# Supplementary material for: A novel one-class SVM based negative data sampling method for reconstructing proteome-wide HTLV-human protein interaction networks
Source: PubMed Central journal article supplement (PMC5379509; doi:10.1038/srep08034), 2015-01-26
Supplement: srep08034-s1.pdf [file srep08034-s1.pdf]

# **A novel one-class SVM based negative data sampling method for reconstructing proteome-wide HTLV-human protein interaction networks**

Suyu Mei<sup>①②\*</sup>, Hao Zhu<sup>②§</sup>

<sup>①</sup>Software College, Shenyang Normal University, Shenyang, 110034, China

<sup>②</sup> Bioinformatics Section, School of Biomedical Sciences, Southern Medical University, Guangzhou, 510515, China

Email addresses: \* [meisygle@gmail.com](mailto:meisygle@gmail.com), § [zhuhao@smu.edu.cn](mailto:zhuhao@smu.edu.cn)

```
1 [SECTION 1] Predicted Interactions
2
3
4 P0C206 Q9UID6 0.67061
5 P0C206 P27695 0.51734
6 P0C206 Q8N5I9 0.68336
7 P0C206 Q9Y536 0.22458
8 P0C206 Q9BZ01 0.2964
9 P0C206 P49589 0.47065
10 P0C206 Q15513 0.45994
11 P0C206 Q9Y234 0.3439
12 P0C206 A7MCY6 0.67345
13 P0C206 O95363 0.57495
14 P0C206 P33316 0.69159
15 P0C206 Q02386 0.28307
16 P0C206 Q96P71 0.64026
17 P0C206 Q9UBW7 0.85719
18 P0C206 Q9BUJ2 1.0681
19 P0C206 Q99990 0.70466
20 P0C206 O15481 0.027659
21 P0C206 Q96HA7 0.93145
22 P0C206 Q8HWS3 0.40281
23 P0C206 Q8N9K5 0.36383
24 P0C206 Q8N6G1 0.45994
25 P0C206 Q13439 1.0269
26 P0C206 Q96MC4 1.0112
27 P0C206 Q8TE85 0.34588
28 P0C206 O95271 0.73353
29 P0C206 Q5VUA4 0.70389
30 P0C206 Q76L83 0.71065
31 P0C206 Q5BJF2 0.43929
32 P0C206 Q9BPU9 0.30493
33 P0C206 Q9UNS1 0.68758
34 P0C206 O75293 0.37461
35 P0C206 P61289 0.73647
36 P0C206 Q96AQ1 0.84842
37 P0C206 Q9H714 0.57011
38 P0C206 Q96NJ1 0.45994
39 P0C206 Q8TCI5 0.73614
40 P0C206 Q53GS7 0.87269
41 P0C206 Q9NQC7 0.28937
42 P0C206 O43598 0.26694
43 P0C206 Q9NUA8 0.27909
44 P0C206 Q8TF30 0.071289
45 P0C206 A6NGQ2 0.42903
46 P0C206 Q7Z3C6 0.41401
47 P0C206 Q4L180 0.39487
48 P0C206 O43829 0.87864
49 P0C206 Q8N720 1.1512
50 P0C206 Q96G28 0.44707
51 P0C206 Q6IEG0 0.4779
52 P0C206 O43679 0.31594
53 P0C206 O43542 0.74222
54 P0C206 Q5TG92 0.65844
55 P0C206 Q96TC7 0.99999
56 P0C206 Q9NY87 0.74123
57 P0C206 Q9BRJ6 0.51679
58 P0C206 O75340 0.48407
59 P0C206 Q5JTW2 0.52138
60 P0C206 Q13112 1.5933
61 P0C206 P06733 0.98293
62 P0C206 Q8N5N7 0.62111
63 P0C206 Q8IWA6 0.18518
64 P0C206 Q6P2C0 0.4657
65 P0C206 O00488 0.38651
66 P0C206 Q9Y3S2 0.36636
67 P0C206 Q9UNN5 0.71115
68 P0C206 P28698 0.89834
69 P0C206 Q9H1K1 1.0692
70 P0C206 Q16763 0.83794
71 P0C206 Q8IXW0 0.55678
72 P0C206 Q9P1G2 0.44026
73 P0C206 Q6NUN9 0.95859
74 P0C206 Q8WY50 0.45994
75 P0C206 Q5SW79 1.0399
76 P0C206 A9UHW6 0.78563
```

|     |        |        |          |
|-----|--------|--------|----------|
| 77  | POC206 | Q9BT56 | 0.37449  |
| 78  | POC206 | Q15072 | 0.41433  |
| 79  | POC206 | P59074 | 0.039144 |
| 80  | POC206 | Q86XA9 | 0.36601  |
| 81  | POC206 | Q9NUC0 | 0.19791  |
| 82  | POC206 | P61572 | 0.80216  |
| 83  | POC206 | Q9C000 | 0.27633  |
| 84  | POC206 | Q92688 | 0.33985  |
| 85  | POC206 | Q96EE3 | 0.67238  |
| 86  | POC206 | Q9BQ66 | 0.72851  |
| 87  | POC206 | Q6PJG2 | 0.93996  |
| 88  | POC206 | Q8IW03 | 0.081664 |
| 89  | POC206 | Q9BYR7 | 1.134    |
| 90  | POC206 | O14604 | 0.69497  |
| 91  | POC206 | Q8TC94 | 0.13938  |
| 92  | POC206 | Q9Y253 | 0.4797   |
| 93  | POC206 | Q96A33 | 0.19594  |
| 94  | POC206 | Q9HBM1 | 0.86714  |
| 95  | POC206 | Q6UXU6 | 1.1632   |
| 96  | POC206 | Q6NXT1 | 0.54531  |
| 97  | POC206 | Q86VD1 | 0.47043  |
| 98  | POC206 | O14964 | 0.8046   |
| 99  | POC206 | Q9BRT6 | 0.35611  |
| 100 | POC206 | Q8IYT1 | 0.53808  |
| 101 | POC206 | O60829 | 0.79463  |
| 102 | POC206 | Q9UNP9 | 0.21623  |
| 103 | POC206 | Q9BRG1 | 1.3028   |
| 104 | POC206 | Q9NQC8 | 0.17507  |
| 105 | POC206 | Q16831 | 0.17485  |
| 106 | POC206 | P46937 | 0.84873  |
| 107 | POC206 | Q16851 | 0.44973  |
| 108 | POC206 | Q8WXE1 | 0.87575  |
| 109 | POC206 | Q9Y468 | 1.0498   |
| 110 | POC206 | Q8TAE8 | 1.0676   |
| 111 | POC206 | P41091 | 0.13888  |
| 112 | POC206 | Q8TAG6 | 0.4246   |
| 113 | POC206 | O14645 | 0.21241  |
| 114 | POC206 | O14662 | 0.65038  |
| 115 | POC206 | Q9BV19 | 0.45122  |
| 116 | POC206 | Q15723 | 1.3012   |
| 117 | POC206 | A0JNW5 | 0.70674  |
| 118 | POC206 | Q9Y2X8 | 0.93071  |
| 119 | POC206 | Q9UKC9 | 0.60052  |
| 120 | POC206 | Q6P1L8 | 0.85532  |
| 121 | POC206 | O15511 | 0.28236  |
| 122 | POC206 | O43502 | 0.41548  |
| 123 | POC206 | P0CJ74 | 0.67101  |
| 124 | POC206 | Q9Y5M1 | 0.19037  |
| 125 | POC206 | Q13875 | 0.6853   |
| 126 | POC206 | Q12982 | 0.30711  |
| 127 | POC206 | Q7L2H7 | 0.68394  |
| 128 | POC206 | P09132 | 0.17852  |
| 129 | POC206 | O60645 | 0.5535   |
| 130 | POC206 | Q6L8H2 | 0.45994  |
| 131 | POC206 | Q13887 | 0.50426  |
| 132 | POC206 | Q02833 | 0.51845  |
| 133 | POC206 | P84022 | 0.57284  |
| 134 | POC206 | Q8WXW3 | 0.79188  |
| 135 | POC206 | P0CG35 | 0.66868  |
| 136 | POC206 | Q15287 | 0.86904  |
| 137 | POC206 | Q9BUE0 | 1.1227   |
| 138 | POC206 | Q9NPI8 | 0.98238  |
| 139 | POC206 | Q9UK61 | 0.64028  |
| 140 | POC206 | Q92597 | 0.68892  |
| 141 | POC206 | Q9H6X5 | 0.028304 |
| 142 | POC206 | Q3T8J9 | 0.81385  |
| 143 | POC206 | Q9Y224 | 1.6016   |
| 144 | POC206 | Q6ZVT0 | 0.012682 |
| 145 | POC206 | Q9UJT9 | 0.57074  |
| 146 | POC206 | P53680 | 0.24304  |
| 147 | POC206 | P40429 | 0.78167  |
| 148 | POC206 | Q2LD37 | 0.18625  |
| 149 | POC206 | Q8IYB0 | 0.45994  |
| 150 | POC206 | Q7Z7H3 | 0.1051   |
| 151 | POC206 | Q9UJ94 | 0.45994  |
| 152 | POC206 | Q9BWH6 | 0.63517  |

|     |        |        |          |
|-----|--------|--------|----------|
| 153 | POC206 | O75486 | 0.71005  |
| 154 | POC206 | Q6L8G4 | 0.45994  |
| 155 | POC206 | Q8IVJ8 | 0.81741  |
| 156 | POC206 | Q9NZ63 | 0.54755  |
| 157 | POC206 | Q8IXH6 | 1.2536   |
| 158 | POC206 | K7EIZ4 | 0.45994  |
| 159 | POC206 | Q9H857 | 0.52334  |
| 160 | POC206 | Q9HCU9 | 1.2682   |
| 161 | POC206 | Q9NQX1 | 0.73127  |
| 162 | POC206 | Q969U7 | 0.69863  |
| 163 | POC206 | Q3KNS6 | 0.2989   |
| 164 | POC206 | Q3KP66 | 1.1831   |
| 165 | POC206 | Q8N6Y0 | 0.75334  |
| 166 | POC206 | Q86W11 | 0.30118  |
| 167 | POC206 | Q8NBJ7 | 0.25999  |
| 168 | POC206 | Q3LI73 | 0.70835  |
| 169 | POC206 | Q9UFF9 | 0.56287  |
| 170 | POC206 | Q96F63 | 0.68336  |
| 171 | POC206 | Q9BZQ8 | 0.69938  |
| 172 | POC206 | Q9Y2X9 | 0.77032  |
| 173 | POC206 | P61313 | 0.8892   |
| 174 | POC206 | P63010 | 0.51511  |
| 175 | POC206 | Q12872 | 0.67104  |
| 176 | POC206 | Q8N9T8 | 1.3412   |
| 177 | POC206 | A8MUQ0 | 1.0377   |
| 178 | POC206 | Q9NQG7 | 0.36962  |
| 179 | POC206 | Q5JQC4 | 0.45994  |
| 180 | POC206 | Q96JL9 | 0.33847  |
| 181 | POC206 | Q9H0S4 | 0.056318 |
| 182 | POC206 | O60716 | 0.56186  |
| 183 | POC206 | Q9H8H0 | 0.32773  |
| 184 | POC206 | Q14320 | 0.078139 |
| 185 | POC206 | P53567 | 0.71762  |
| 186 | POC206 | P78358 | 0.80113  |
| 187 | POC206 | Q9P016 | 0.58204  |
| 188 | POC206 | A8K8V0 | 0.39436  |
| 189 | POC206 | Q6EEV4 | 0.45994  |
| 190 | POC206 | Q99436 | 0.57107  |
| 191 | POC206 | Q5PRF9 | 0.80159  |
| 192 | POC206 | Q9UJZ1 | 0.016446 |
| 193 | POC206 | O15182 | 0.593    |
| 194 | POC206 | P28062 | 0.21946  |
| 195 | POC206 | Q9NPA3 | 1.2846   |
| 196 | POC206 | O75477 | 0.46911  |
| 197 | POC206 | Q9BSB4 | 0.42833  |
| 198 | POC206 | P10144 | 0.41861  |
| 199 | POC206 | Q86Y01 | 0.7533   |
| 200 | POC206 | Q9UFN0 | 0.79252  |
| 201 | POC206 | Q8NOV3 | 0.82504  |
| 202 | POC206 | P0C7V9 | 0.77807  |
| 203 | POC206 | Q9BVM2 | 0.20192  |
| 204 | POC206 | Q07687 | 0.49892  |
| 205 | POC206 | Q2T9F4 | 0.13623  |
| 206 | POC206 | Q68DK2 | 1.156    |
| 207 | POC206 | P0CG34 | 0.66868  |
| 208 | POC206 | B2RV13 | 0.61457  |
| 209 | POC206 | Q96ME1 | 0.19532  |
| 210 | POC206 | Q5T035 | 0.58114  |
| 211 | POC206 | Q8NEG4 | 0.62332  |
| 212 | POC206 | P10588 | 0.35225  |
| 213 | POC206 | Q96RS0 | 0.66212  |
| 214 | POC206 | Q9UK12 | 0.34842  |
| 215 | POC206 | Q6UXP7 | 0.33577  |
| 216 | POC206 | Q8NA77 | 0.81689  |
| 217 | POC206 | Q9BV90 | 0.22007  |
| 218 | POC206 | A6NEM1 | 0.88867  |
| 219 | POC206 | Q8N371 | 0.38891  |
| 220 | POC206 | Q6U949 | 0.45994  |
| 221 | POC206 | K7EJ46 | 0.45994  |
| 222 | POC206 | Q96NT1 | 1.0164   |
| 223 | POC206 | Q9Y3A3 | 0.7485   |
| 224 | POC206 | O75683 | 0.50039  |
| 225 | POC206 | Q2YD98 | 0.33205  |
| 226 | POC206 | P05787 | 1.4502   |
| 227 | POC206 | Q6ZUC2 | 0.32049  |
| 228 | POC206 | Q14789 | 0.34053  |



|     |        |        |          |
|-----|--------|--------|----------|
| 229 | POC206 | O43541 | 0.65635  |
| 230 | POC206 | Q5H9J7 | 0.97135  |
| 231 | POC206 | Q9BW71 | 0.8224   |
| 232 | POC206 | Q96AX9 | 0.29805  |
| 233 | POC206 | Q9P2N7 | 0.23934  |
| 234 | POC206 | Q8TAI1 | 0.40544  |
| 235 | POC206 | O60216 | 0.93424  |
| 236 | POC206 | P24863 | 1.1994   |
| 237 | POC206 | P99999 | 0.755    |
| 238 | POC206 | Q9NPE3 | 0.81368  |
| 239 | POC206 | Q6ZTR5 | 0.27219  |
| 240 | POC206 | Q9UNM6 | 0.13435  |
| 241 | POC206 | Q9NX58 | 0.34631  |
| 242 | POC206 | Q96DG6 | 0.22518  |
| 243 | POC206 | P62324 | 0.77389  |
| 244 | POC206 | Q9Y232 | 0.23072  |
| 245 | POC206 | Q6P9A3 | 0.30987  |
| 246 | POC206 | Q92621 | 1.1527   |
| 247 | POC206 | Q9BUL9 | 1.0131   |
| 248 | POC206 | Q8NG57 | 0.39141  |
| 249 | POC206 | Q5SRI9 | 0.69489  |
| 250 | POC206 | Q9BVK6 | 0.18074  |
| 251 | POC206 | P48643 | 0.16075  |
| 252 | POC206 | P31949 | 0.40998  |
| 253 | POC206 | Q9H765 | 0.2938   |
| 254 | POC206 | Q9NZV6 | 0.10156  |
| 255 | POC206 | Q6P161 | 0.21655  |
| 256 | POC206 | Q8N137 | 1.0638   |
| 257 | POC206 | Q49AG3 | 0.65406  |
| 258 | POC206 | Q86XR8 | 1.1533   |
| 259 | POC206 | A6NKD9 | 1.201    |
| 260 | POC206 | Q99848 | 0.32377  |
| 261 | POC206 | Q8WUF5 | 1.025    |
| 262 | POC206 | P0CJ87 | 0.386    |
| 263 | POC206 | Q9NSE4 | 0.32388  |
| 264 | POC206 | Q9UBW5 | 0.66879  |
| 265 | POC206 | Q15435 | 0.26891  |
| 266 | POC206 | Q8N9M1 | 0.28103  |
| 267 | POC206 | Q4G0F5 | 0.30498  |
| 268 | POC206 | Q9HBL0 | 0.52112  |
| 269 | POC206 | B1APH4 | 0.45983  |
| 270 | POC206 | P07195 | 0.54372  |
| 271 | POC206 | A6NEY8 | 0.32165  |
| 272 | POC206 | Q86VZ6 | 0.29361  |
| 273 | POC206 | Q969F1 | 0.71247  |
| 274 | POC206 | Q9BPX3 | 1.0856   |
| 275 | POC206 | P46939 | 0.83516  |
| 276 | POC206 | Q96A35 | 0.68811  |
| 277 | POC206 | Q9P031 | 1.2277   |
| 278 | POC206 | Q8WXF5 | 0.66636  |
| 279 | POC206 | Q53T94 | 0.53027  |
| 280 | POC206 | P67809 | 0.57066  |
| 281 | POC206 | Q08J23 | 0.77108  |
| 282 | POC206 | Q9NQ87 | 0.53323  |
| 283 | POC206 | Q14188 | 0.87541  |
| 284 | POC206 | P68871 | 0.30606  |
| 285 | POC206 | Q9NSB2 | 0.39837  |
| 286 | POC206 | Q96L92 | 0.83366  |
| 287 | POC206 | Q8N5N4 | 0.69495  |
| 288 | POC206 | Q9NUP9 | 0.37129  |
| 289 | POC206 | Q6NXS1 | 0.91273  |
| 290 | POC206 | Q5XKR9 | 0.77251  |
| 291 | POC206 | Q86V15 | 0.60347  |
| 292 | POC206 | Q969W8 | 0.47516  |
| 293 | POC206 | Q9UJV8 | 0.028716 |
| 294 | POC206 | O43324 | 1.2413   |
| 295 | POC206 | Q9UMS4 | 0.64995  |
| 296 | POC206 | O14579 | 0.55167  |
| 297 | POC206 | Q06190 | 0.17358  |
| 298 | POC206 | P56181 | 0.62825  |
| 299 | POC206 | Q9H4L7 | 0.43906  |
| 300 | POC206 | Q9P1U0 | 0.38439  |
| 301 | POC206 | Q8IX15 | 0.6368   |
| 302 | POC206 | Q16385 | 0.9068   |
| 303 | POC206 | Q96PU5 | 0.26529  |
| 304 | POC206 | O14628 | 0.52463  |

|     |        |        |          |
|-----|--------|--------|----------|
| 305 | POC206 | Q86WH2 | 0.37152  |
| 306 | POC206 | P10914 | 0.43194  |
| 307 | POC206 | P33240 | 0.40851  |
| 308 | POC206 | Q9HCM1 | 0.6667   |
| 309 | POC206 | Q8IXQ5 | 0.41066  |
| 310 | POC206 | Q9Y3E1 | 0.51174  |
| 311 | POC206 | Q13501 | 0.55543  |
| 312 | POC206 | Q13829 | 0.82664  |
| 313 | POC206 | Q8N5M1 | 0.58353  |
| 314 | POC206 | Q92769 | 0.39868  |
| 315 | POC206 | Q13541 | 0.86687  |
| 316 | POC206 | P0CG48 | 0.41704  |
| 317 | POC206 | Q96HY6 | 0.4278   |
| 318 | POC206 | P54278 | 0.49377  |
| 319 | POC206 | Q8WYP5 | 0.77989  |
| 320 | POC206 | Q96NL6 | 0.2748   |
| 321 | POC206 | P07814 | 0.41236  |
| 322 | POC206 | Q5VT33 | 0.12438  |
| 323 | POC206 | Q92539 | 0.66176  |
| 324 | POC206 | P08048 | 0.20949  |
| 325 | POC206 | Q9NS56 | 0.43052  |
| 326 | POC206 | Q5VZQ5 | 0.6703   |
| 327 | POC206 | Q8NF67 | 0.46235  |
| 328 | POC206 | P60002 | 1.0154   |
| 329 | POC206 | P07438 | 0.47357  |
| 330 | POC206 | Q9BZE0 | 0.30232  |
| 331 | POC206 | P13640 | 0.82287  |
| 332 | POC206 | Q16655 | 0.45818  |
| 333 | POC206 | Q6MZT1 | 0.92787  |
| 334 | POC206 | Q7Z4U5 | 0.87009  |
| 335 | POC206 | P0CJ71 | 0.67101  |
| 336 | POC206 | Q63HQ0 | 0.45994  |
| 337 | POC206 | Q96002 | 0.45994  |
| 338 | POC206 | P86479 | 0.45994  |
| 339 | POC206 | Q95081 | 0.35694  |
| 340 | POC206 | Q2M3D2 | 0.28158  |
| 341 | POC206 | Q01082 | 0.53065  |
| 342 | POC206 | Q9P2N5 | 0.23657  |
| 343 | POC206 | Q9NWK9 | 0.59676  |
| 344 | POC206 | Q6IPX3 | 1.1152   |
| 345 | POC206 | Q15131 | 1.2183   |
| 346 | POC206 | Q8NDC0 | 0.63909  |
| 347 | POC206 | Q9Y291 | 0.47102  |
| 348 | POC206 | P78424 | 0.33964  |
| 349 | POC206 | Q8NB25 | 0.1761   |
| 350 | POC206 | Q9NPJ3 | 0.17288  |
| 351 | POC206 | Q9BXL5 | 0.46735  |
| 352 | POC206 | Q14657 | 1.3397   |
| 353 | POC206 | Q9H074 | 0.43198  |
| 354 | POC206 | Q8N0X7 | 0.20408  |
| 355 | POC206 | Q14525 | 0.41992  |
| 356 | POC206 | Q60291 | 0.60906  |
| 357 | POC206 | Q9H5H4 | 0.33269  |
| 358 | POC206 | Q96AJ1 | 1.2845   |
| 359 | POC206 | Q9P0U4 | 0.49775  |
| 360 | POC206 | Q9GZW5 | 0.57424  |
| 361 | POC206 | Q538Z0 | 0.45994  |
| 362 | POC206 | Q16649 | 0.24556  |
| 363 | POC206 | Q9HBQ8 | 0.93098  |
| 364 | POC206 | P0C7M6 | 0.073065 |
| 365 | POC206 | Q8WWL7 | 1.0749   |
| 366 | POC206 | Q43933 | 0.35753  |
| 367 | POC206 | Q96GT9 | 0.71558  |
| 368 | POC206 | Q96KC9 | 0.64013  |
| 369 | POC206 | Q99733 | 0.87369  |
| 370 | POC206 | P58340 | 0.60452  |
| 371 | POC206 | Q8IXW5 | 0.8092   |
| 372 | POC206 | Q43309 | 0.33771  |
| 373 | POC206 | Q6ZNB5 | 0.1866   |
| 374 | POC206 | Q9C005 | 0.78315  |
| 375 | POC206 | P60368 | 0.45515  |
| 376 | POC206 | Q15127 | 0.891    |
| 377 | POC206 | Q8N140 | 1.1101   |
| 378 | POC206 | Q9H8Y1 | 0.52775  |
| 379 | POC206 | P62875 | 0.31128  |
| 380 | POC206 | Q9HB71 | 0.63894  |

|     |        |        |          |
|-----|--------|--------|----------|
| 381 | POC206 | Q03060 | 0.47668  |
| 382 | POC206 | Q5XG87 | 0.30864  |
| 383 | POC206 | Q9NZH5 | 0.53988  |
| 384 | POC206 | Q6ICL3 | 0.099619 |
| 385 | POC206 | O95201 | 0.86737  |
| 386 | POC206 | Q96JM7 | 0.53724  |
| 387 | POC206 | Q15468 | 0.32937  |
| 388 | POC206 | O94915 | 0.28047  |
| 389 | POC206 | Q9UHP9 | 0.20888  |
| 390 | POC206 | A8K010 | 0.25207  |
| 391 | POC206 | Q86TP1 | 0.97074  |
| 392 | POC206 | Q9BZK3 | 0.41367  |
| 393 | POC206 | Q9BSN8 | 0.50345  |
| 394 | POC206 | Q9NR46 | 0.55287  |
| 395 | POC206 | Q9Y2Z0 | 0.54924  |
| 396 | POC206 | Q9UI72 | 0.45994  |
| 397 | POC206 | Q9Y5L4 | 0.016007 |
| 398 | POC206 | Q14019 | 0.28773  |
| 399 | POC206 | Q9BTE3 | 0.90696  |
| 400 | POC206 | Q8TC21 | 0.32989  |
| 401 | POC206 | Q5SZD1 | 0.12872  |
| 402 | POC206 | Q6IQ49 | 0.33063  |
| 403 | POC206 | P62877 | 0.64775  |
| 404 | POC206 | Q9BYE4 | 0.45994  |
| 405 | POC206 | Q9Y3M9 | 0.23915  |
| 406 | POC206 | Q9Y3D5 | 0.61053  |
| 407 | POC206 | P05062 | 0.25346  |
| 408 | POC206 | O95273 | 1.0948   |
| 409 | POC206 | P0DI82 | 0.4905   |
| 410 | POC206 | Q9UN30 | 0.41743  |
| 411 | POC206 | Q9NPD8 | 0.80903  |
| 412 | POC206 | Q69384 | 0.86244  |
| 413 | POC206 | A6NDR6 | 0.31537  |
| 414 | POC206 | Q9NYJ1 | 1.1893   |
| 415 | POC206 | O75698 | 0.45994  |
| 416 | POC206 | Q8N8A2 | 0.44439  |
| 417 | POC206 | A6NHQ2 | 0.23653  |
| 418 | POC206 | O75530 | 0.73632  |
| 419 | POC206 | Q9Y5L0 | 1.1469   |
| 420 | POC206 | Q0VDF9 | 0.39722  |
| 421 | POC206 | Q8N988 | 0.55714  |
| 422 | POC206 | A6NCC3 | 0.41952  |
| 423 | POC206 | P57076 | 0.28612  |
| 424 | POC206 | Q5T1N1 | 1.0121   |
| 425 | POC206 | Q9UKG1 | 0.50509  |
| 426 | POC206 | Q6ZTY9 | 0.28282  |
| 427 | POC206 | P98168 | 0.84163  |
| 428 | POC206 | Q96SE7 | 0.39234  |
| 429 | POC206 | Q9Y678 | 0.72757  |
| 430 | POC206 | P0CB33 | 0.5334   |
| 431 | POC206 | Q8IUR6 | 1.0323   |
| 432 | POC206 | O75528 | 0.71161  |
| 433 | POC206 | Q15437 | 0.52378  |
| 434 | POC206 | P83876 | 1.005    |
| 435 | POC206 | Q9BQM9 | 0.077973 |
| 436 | POC206 | Q14587 | 0.26368  |
| 437 | POC206 | P53805 | 0.69083  |
| 438 | POC206 | Q6B0K9 | 0.40461  |
| 439 | POC206 | Q99613 | 0.74204  |
| 440 | POC206 | Q9H8Q6 | 0.79714  |
| 441 | POC206 | P10746 | 0.3271   |
| 442 | POC206 | P53675 | 0.41261  |
| 443 | POC206 | Q9BQ61 | 0.68336  |
| 444 | POC206 | Q9NQ35 | 0.96274  |
| 445 | POC206 | Q8IXH7 | 1.3016   |
| 446 | POC206 | Q8NAV1 | 0.83314  |
| 447 | POC206 | Q86WZ0 | 0.54693  |
| 448 | POC206 | Q9UI54 | 0.45994  |
| 449 | POC206 | O75952 | 0.090693 |
| 450 | POC206 | Q8N9L7 | 0.23033  |
| 451 | POC206 | A8MZG2 | 0.68336  |
| 452 | POC206 | O00148 | 0.38512  |
| 453 | POC206 | Q96JC4 | 0.38091  |
| 454 | POC206 | Q6JBY9 | 0.39109  |
| 455 | POC206 | Q9P2B4 | 0.38893  |
| 456 | POC206 | Q9Y4H4 | 0.43341  |

|     |        |        |          |
|-----|--------|--------|----------|
| 457 | POC206 | Q96D05 | 0.98342  |
| 458 | POC206 | Q2NKJ3 | 0.58404  |
| 459 | POC206 | Q8N0U7 | 0.34594  |
| 460 | POC206 | Q96S07 | 0.45994  |
| 461 | POC206 | P51854 | 0.2138   |
| 462 | POC206 | Q96Q83 | 0.62022  |
| 463 | POC206 | Q7Z353 | 0.31537  |
| 464 | POC206 | Q9Y3F4 | 0.89589  |
| 465 | POC206 | Q8WUX9 | 0.61766  |
| 466 | POC206 | Q6ZS46 | 0.8224   |
| 467 | POC206 | Q3LI70 | 0.45994  |
| 468 | POC206 | Q9Y6B7 | 0.39937  |
| 469 | POC206 | Q7Z3Y9 | 0.48752  |
| 470 | POC206 | Q6ZMY3 | 0.16639  |
| 471 | POC206 | Q15270 | 0.2532   |
| 472 | POC206 | Q9BTP6 | 0.62062  |
| 473 | POC206 | Q9UN37 | 0.61146  |
| 474 | POC206 | Q9Y399 | 1.0633   |
| 475 | POC206 | Q96M02 | 0.21817  |
| 476 | POC206 | Q05195 | 0.63866  |
| 477 | POC206 | P16383 | 0.87218  |
| 478 | POC206 | Q8IXS0 | 0.68336  |
| 479 | POC206 | Q19AV6 | 1.2692   |
| 480 | POC206 | Q96FZ2 | 1.2242   |
| 481 | POC206 | Q96MP5 | 0.39903  |
| 482 | POC206 | Q9HCK8 | 0.49375  |
| 483 | POC206 | Q8N8E3 | 0.35035  |
| 484 | POC206 | P60709 | 0.17471  |
| 485 | POC206 | Q15329 | 1.3819   |
| 486 | POC206 | P50402 | 0.45303  |
| 487 | POC206 | Q9NQE9 | 0.49508  |
| 488 | POC206 | Q9UKF6 | 0.70266  |
| 489 | POC206 | Q8NHW5 | 0.2549   |
| 490 | POC206 | Q6ZUT1 | 0.45994  |
| 491 | POC206 | Q13601 | 0.47874  |
| 492 | POC206 | Q92575 | 1.0929   |
| 493 | POC206 | Q8N9N2 | 0.42895  |
| 494 | POC206 | Q96T37 | 0.28563  |
| 495 | POC206 | O95359 | 0.48586  |
| 496 | POC206 | O60481 | 0.55928  |
| 497 | POC206 | Q96G21 | 0.99509  |
| 498 | POC206 | O94986 | 1.3638   |
| 499 | POC206 | Q9Y2M0 | 0.52643  |
| 500 | POC206 | Q9HB19 | 0.7107   |
| 501 | POC206 | P28715 | 0.40204  |
| 502 | POC206 | O43159 | 0.95767  |
| 503 | POC206 | Q14103 | 0.73151  |
| 504 | POC206 | P13010 | 0.54323  |
| 505 | POC206 | Q86Y37 | 0.094785 |
| 506 | POC206 | Q9BW61 | 0.66643  |
| 507 | POC206 | Q68DH5 | 0.79899  |
| 508 | POC206 | Q8N187 | 0.77288  |
| 509 | POC206 | Q9NWM3 | 0.2067   |
| 510 | POC206 | Q96L21 | 0.60033  |
| 511 | POC206 | Q00444 | 0.34845  |
| 512 | POC206 | P27635 | 0.63172  |
| 513 | POC206 | Q9BQE6 | 0.52637  |
| 514 | POC206 | Q9H6K5 | 0.68336  |
| 515 | POC206 | P49336 | 0.44785  |
| 516 | POC206 | Q96BV0 | 0.23399  |
| 517 | POC206 | P0CJ90 | 0.386    |
| 518 | POC206 | Q587I9 | 0.46076  |
| 519 | POC206 | Q9NX46 | 0.56967  |
| 520 | POC206 | Q9UM54 | 0.055852 |
| 521 | POC206 | P59991 | 0.86576  |
| 522 | POC206 | Q12988 | 0.52849  |
| 523 | POC206 | Q9NQV6 | 0.20949  |
| 524 | POC206 | P14678 | 0.72003  |
| 525 | POC206 | Q9ULR5 | 0.61475  |
| 526 | POC206 | P17661 | 0.51697  |
| 527 | POC206 | P69208 | 0.45994  |
| 528 | POC206 | Q496M5 | 0.40439  |
| 529 | POC206 | P31483 | 0.28104  |
| 530 | POC206 | P78352 | 0.63814  |
| 531 | POC206 | O95478 | 0.45005  |
| 532 | POC206 | Q9Y295 | 0.27848  |

|     |        |        |           |
|-----|--------|--------|-----------|
| 533 | POC206 | Q32MQ0 | 0.64868   |
| 534 | POC206 | Q49AM1 | 0.50031   |
| 535 | POC206 | Q8WTP9 | 1.1532    |
| 536 | POC206 | P54725 | 0.71405   |
| 537 | POC206 | Q96DB5 | 0.56768   |
| 538 | POC206 | Q6P1M9 | 0.46746   |
| 539 | POC206 | Q9BVI4 | 0.50628   |
| 540 | POC206 | Q9Y2D1 | 1.2663    |
| 541 | POC206 | O15172 | 0.26256   |
| 542 | POC206 | Q8IZD9 | 0.27167   |
| 543 | POC206 | Q8WU58 | 0.21718   |
| 544 | POC206 | P06396 | 0.45927   |
| 545 | POC206 | Q63HK3 | 0.54321   |
| 546 | POC206 | Q9HCK5 | 0.67384   |
| 547 | POC206 | Q7Z7K0 | 0.13369   |
| 548 | POC206 | Q6K0P9 | 0.37056   |
| 549 | POC206 | Q9Y5J6 | 0.47754   |
| 550 | POC206 | Q9BVA0 | 0.35273   |
| 551 | POC206 | Q9UM00 | 1.3473    |
| 552 | POC206 | O60508 | 0.36514   |
| 553 | POC206 | P0C025 | 0.61014   |
| 554 | POC206 | Q7Z2X4 | 0.30391   |
| 555 | POC206 | Q9GZV4 | 0.62652   |
| 556 | POC206 | Q5VU69 | 0.3862    |
| 557 | POC206 | P0CG12 | 1.4208    |
| 558 | POC206 | Q8N9S9 | 0.26884   |
| 559 | POC206 | Q7Z3I7 | 0.30827   |
| 560 | POC206 | Q8TA86 | 0.95792   |
| 561 | POC206 | Q9HAH7 | 0.60808   |
| 562 | POC206 | Q9UHL9 | 0.44636   |
| 563 | POC206 | Q7L0X2 | 0.35135   |
| 564 | POC206 | Q8TAF3 | 0.78763   |
| 565 | POC206 | P50452 | 0.71182   |
| 566 | POC206 | Q8WWH5 | 0.42218   |
| 567 | POC206 | Q9NRH1 | 0.33653   |
| 568 | POC206 | Q9BTK2 | 0.0096923 |
| 569 | POC206 | P62253 | 0.72675   |
| 570 | POC206 | Q96NI8 | 0.47036   |
| 571 | POC206 | Q15466 | 0.68631   |
| 572 | POC206 | Q96LV5 | 0.086646  |
| 573 | POC206 | Q6PCD5 | 0.33805   |
| 574 | POC206 | Q9UJN7 | 0.32372   |
| 575 | POC206 | P82930 | 0.85892   |
| 576 | POC206 | Q5SWW7 | 0.45994   |
| 577 | POC206 | Q9NSG2 | 0.55589   |
| 578 | POC206 | Q96G23 | 0.28723   |
| 579 | POC206 | Q8NA47 | 0.68336   |
| 580 | POC206 | Q9H4A6 | 0.53062   |
| 581 | POC206 | O75934 | 0.72801   |
| 582 | POC206 | Q6PD62 | 0.72652   |
| 583 | POC206 | Q96MW1 | 0.68336   |
| 584 | POC206 | Q9UPV7 | 0.31596   |
| 585 | POC206 | Q17RA5 | 0.45994   |
| 586 | POC206 | P01358 | 0.45994   |
| 587 | POC206 | Q8WU90 | 1.154     |
| 588 | POC206 | O75832 | 0.37767   |
| 589 | POC206 | Q99865 | 0.57702   |
| 590 | POC206 | Q9BZI7 | 0.64865   |
| 591 | POC206 | Q96N22 | 0.53747   |
| 592 | POC206 | Q504Q3 | 0.21137   |
| 593 | POC206 | A8MX4  | 0.4071    |
| 594 | POC206 | Q96AY2 | 0.97003   |
| 595 | POC206 | Q9BUY5 | 0.45613   |
| 596 | POC206 | Q96RY5 | 1.058     |
| 597 | POC206 | P53701 | 0.57953   |
| 598 | POC206 | Q8N9N5 | 0.46538   |
| 599 | POC206 | Q6IPU0 | 0.67548   |
| 600 | POC206 | O15360 | 0.97249   |
| 601 | POC206 | P45973 | 0.81314   |
| 602 | POC206 | Q96RT1 | 0.3785    |
| 603 | POC206 | Q13568 | 1.0643    |
| 604 | POC206 | Q0VDD7 | 1.3978    |
| 605 | POC206 | A3QJZ6 | 0.073657  |
| 606 | POC206 | Q8TB03 | 0.72008   |
| 607 | POC206 | Q96MM3 | 0.2781    |
| 608 | POC206 | O60384 | 0.57495   |

|     |        |        |          |
|-----|--------|--------|----------|
| 609 | POC206 | Q8NAQ8 | 1.3423   |
| 610 | POC206 | P35398 | 0.50244  |
| 611 | POC206 | P23193 | 1.3679   |
| 612 | POC206 | E9PQR5 | 0.08936  |
| 613 | POC206 | Q17RS7 | 0.14099  |
| 614 | POC206 | Q92830 | 0.71513  |
| 615 | POC206 | P20042 | 0.44997  |
| 616 | POC206 | O94842 | 0.78534  |
| 617 | POC206 | Q6NSI4 | 0.15933  |
| 618 | POC206 | Q9UDY4 | 0.92012  |
| 619 | POC206 | P0C841 | 0.45994  |
| 620 | POC206 | Q96RK0 | 1.1504   |
| 621 | POC206 | P83436 | 0.59233  |
| 622 | POC206 | E9PJI5 | 0.72101  |
| 623 | POC206 | O94973 | 0.48509  |
| 624 | POC206 | O75192 | 0.49899  |
| 625 | POC206 | P0CL81 | 0.23762  |
| 626 | POC206 | Q5XKP0 | 0.42743  |
| 627 | POC206 | Q96AB6 | 0.26133  |
| 628 | POC206 | Q96D15 | 0.34601  |
| 629 | POC206 | Q96PG8 | 0.45994  |
| 630 | POC206 | Q96PE7 | 0.11384  |
| 631 | POC206 | Q15365 | 0.9329   |
| 632 | POC206 | P36543 | 0.30358  |
| 633 | POC206 | P09917 | 0.26797  |
| 634 | POC206 | Q14588 | 0.40539  |
| 635 | POC206 | Q9HCK1 | 0.64559  |
| 636 | POC206 | P08779 | 0.80166  |
| 637 | POC206 | Q9UHN1 | 0.23799  |
| 638 | POC206 | Q5SXL2 | 0.44555  |
| 639 | POC206 | P18124 | 0.59832  |
| 640 | POC206 | O00167 | 0.8628   |
| 641 | POC206 | Q96HR3 | 0.83525  |
| 642 | POC206 | P61024 | 0.78423  |
| 643 | POC206 | Q7Z398 | 0.31903  |
| 644 | POC206 | Q8WW35 | 0.44439  |
| 645 | POC206 | Q06546 | 1.3303   |
| 646 | POC206 | Q8NEZ2 | 0.94221  |
| 647 | POC206 | Q13077 | 0.43458  |
| 648 | POC206 | Q96DC7 | 1.4428   |
| 649 | POC206 | P49790 | 1.1523   |
| 650 | POC206 | Q9GZZ1 | 0.53205  |
| 651 | POC206 | Q9BYG3 | 0.28447  |
| 652 | POC206 | Q8WXI4 | 0.017703 |
| 653 | POC206 | Q9NSP4 | 0.22121  |
| 654 | POC206 | Q8TEB1 | 0.37887  |
| 655 | POC206 | Q6IEE7 | 1.0593   |
| 656 | POC206 | Q96ST3 | 0.83196  |
| 657 | POC206 | O14828 | 0.64174  |
| 658 | POC206 | Q9HB65 | 0.67616  |
| 659 | POC206 | Q8WWY6 | 0.58122  |
| 660 | POC206 | P07196 | 0.5814   |
| 661 | POC206 | Q8N2H9 | 0.37097  |
| 662 | POC206 | Q6IS14 | 0.34917  |
| 663 | POC206 | Q9C0C7 | 0.23304  |
| 664 | POC206 | P39687 | 1.4932   |
| 665 | POC206 | Q9NPJ4 | 1.5675   |
| 666 | POC206 | Q03924 | 0.31278  |
| 667 | POC206 | Q15545 | 1.0289   |
| 668 | POC206 | Q495Z4 | 0.32772  |
| 669 | POC206 | P0CJ76 | 0.67101  |
| 670 | POC206 | Q96N21 | 0.71403  |
| 671 | POC206 | Q8WV22 | 0.39066  |
| 672 | POC206 | Q07955 | 0.50015  |
| 673 | POC206 | Q9Y520 | 0.51481  |
| 674 | POC206 | Q9UI43 | 0.78209  |
| 675 | POC206 | O95149 | 0.45696  |
| 676 | POC206 | Q6ZMR3 | 0.52228  |
| 677 | POC206 | Q8NA19 | 0.52448  |
| 678 | POC206 | Q8NEF9 | 0.82072  |
| 679 | POC206 | P40305 | 0.60192  |
| 680 | POC206 | Q9H2F5 | 0.66307  |
| 681 | POC206 | O43711 | 0.4056   |
| 682 | POC206 | Q86TB9 | 0.85038  |
| 683 | POC206 | O14920 | 0.57448  |
| 684 | POC206 | Q7Z6M4 | 0.61351  |

|     |        |        |           |
|-----|--------|--------|-----------|
| 685 | POC206 | Q5MJ09 | 0.21947   |
| 686 | POC206 | Q8IX21 | 0.049865  |
| 687 | POC206 | Q14739 | 0.34408   |
| 688 | POC206 | Q9BUG6 | 0.29094   |
| 689 | POC206 | P17026 | 0.27941   |
| 690 | POC206 | Q6ZW61 | 0.17608   |
| 691 | POC206 | P26447 | 0.3198    |
| 692 | POC206 | P26368 | 0.43622   |
| 693 | POC206 | P52298 | 0.47738   |
| 694 | POC206 | Q14687 | 0.44439   |
| 695 | POC206 | Q8IYM2 | 0.36694   |
| 696 | POC206 | Q9Y296 | 0.34086   |
| 697 | POC206 | Q8NA31 | 0.68632   |
| 698 | POC206 | Q8IXM3 | 0.54106   |
| 699 | POC206 | Q92556 | 0.36733   |
| 700 | POC206 | Q96S65 | 1.0506    |
| 701 | POC206 | Q99828 | 0.26431   |
| 702 | POC206 | Q96EL3 | 0.21655   |
| 703 | POC206 | Q8WUD4 | 0.19077   |
| 704 | POC206 | P35527 | 0.48752   |
| 705 | POC206 | P31269 | 0.71297   |
| 706 | POC206 | Q7Z2W9 | 0.079886  |
| 707 | POC206 | P31314 | 0.66102   |
| 708 | POC206 | Q96IR2 | 0.41874   |
| 709 | POC206 | Q96SN8 | 0.58654   |
| 710 | POC206 | Q9H201 | 0.26258   |
| 711 | POC206 | Q7RTU3 | 0.48008   |
| 712 | POC206 | Q14603 | 0.0072885 |
| 713 | POC206 | Q5U649 | 0.12751   |
| 714 | POC206 | Q16514 | 0.9371    |
| 715 | POC206 | Q8IXM6 | 0.60415   |
| 716 | POC206 | Q9H4P4 | 0.32954   |
| 717 | POC206 | Q9H790 | 0.27405   |
| 718 | POC206 | Q7Z2F6 | 0.4218    |
| 719 | POC206 | Q9GZM3 | 0.15285   |
| 720 | POC206 | Q6IV72 | 0.45163   |
| 721 | POC206 | P0CL82 | 0.23762   |
| 722 | POC206 | Q9BXL8 | 0.30845   |
| 723 | POC206 | P55265 | 0.40497   |
| 724 | POC206 | Q6VMQ6 | 1.0129    |
| 725 | POC206 | Q96HT8 | 1.5614    |
| 726 | POC206 | Q9NQ90 | 0.53974   |
| 727 | POC206 | Q15493 | 0.20555   |
| 728 | POC206 | Q95453 | 0.43914   |
| 729 | POC206 | P55198 | 1.1319    |
| 730 | POC206 | A6NCN8 | 0.68336   |
| 731 | POC206 | Q9P2Y5 | 0.49528   |
| 732 | POC206 | O00221 | 0.27519   |
| 733 | POC206 | P61576 | 0.50359   |
| 734 | POC206 | P38935 | 0.6136    |
| 735 | POC206 | Q6ZW54 | 1.1004    |
| 736 | POC206 | Q96F07 | 0.57279   |
| 737 | POC206 | P07864 | 0.54372   |
| 738 | POC206 | Q9H693 | 0.58133   |
| 739 | POC206 | Q5VWP2 | 0.12024   |
| 740 | POC206 | Q5JNZ3 | 0.39086   |
| 741 | POC206 | Q9Y324 | 0.85222   |
| 742 | POC206 | P55789 | 0.10759   |
| 743 | POC206 | A6NEL3 | 0.022964  |
| 744 | POC206 | Q96GI7 | 0.68336   |
| 745 | POC206 | P06401 | 0.30268   |
| 746 | POC206 | Q5VZL5 | 0.91626   |
| 747 | POC206 | Q86TC9 | 0.51442   |
| 748 | POC206 | Q9ULE0 | 0.12162   |
| 749 | POC206 | Q03701 | 0.54114   |
| 750 | POC206 | Q9H444 | 0.86899   |
| 751 | POC206 | Q06455 | 0.9131    |
| 752 | POC206 | Q9UHA4 | 0.1679    |
| 753 | POC206 | Q92844 | 0.61463   |
| 754 | POC206 | Q9GZU2 | 0.67638   |
| 755 | POC206 | Q9BYJ9 | 0.52927   |
| 756 | POC206 | P31749 | 0.56152   |
| 757 | POC206 | P78537 | 0.9721    |
| 758 | POC206 | Q8N6T3 | 0.15997   |
| 759 | POC206 | Q5T5D7 | 0.33408   |
| 760 | POC206 | Q5JSJ4 | 1.2839    |

|     |        |        |          |
|-----|--------|--------|----------|
| 761 | POC206 | Q92890 | 0.90286  |
| 762 | POC206 | O95251 | 1.0155   |
| 763 | POC206 | Q9Y6K1 | 0.49497  |
| 764 | POC206 | P62854 | 0.85697  |
| 765 | POC206 | O14867 | 0.47326  |
| 766 | POC206 | Q12796 | 1.55     |
| 767 | POC206 | Q5T1B0 | 0.016983 |
| 768 | POC206 | Q9UBI1 | 0.44439  |
| 769 | POC206 | Q8N883 | 0.2859   |
| 770 | POC206 | Q5T754 | 0.45994  |
| 771 | POC206 | Q96CS4 | 0.32718  |
| 772 | POC206 | Q5VWN6 | 0.24601  |
| 773 | POC206 | P27797 | 0.54923  |
| 774 | POC206 | Q7LBR1 | 1.0679   |
| 775 | POC206 | P40306 | 0.31308  |
| 776 | POC206 | O75865 | 0.74928  |
| 777 | POC206 | Q7Z3K6 | 0.75643  |
| 778 | POC206 | Q9UBC1 | 0.59693  |
| 779 | POC206 | O60393 | 0.23761  |
| 780 | POC206 | Q01538 | 0.2152   |
| 781 | POC206 | Q9HA92 | 0.41303  |
| 782 | POC206 | Q6A162 | 0.34578  |
| 783 | POC206 | Q9NWS8 | 0.64495  |
| 784 | POC206 | O75794 | 0.98134  |
| 785 | POC206 | Q9NXH3 | 0.35522  |
| 786 | POC206 | Q9Y2G2 | 0.5242   |
| 787 | POC206 | Q9H0U6 | 0.45345  |
| 788 | POC206 | Q14CS0 | 0.56088  |
| 789 | POC206 | Q8N535 | 0.49689  |
| 790 | POC206 | Q9NPF5 | 1.0678   |
| 791 | POC206 | Q9UHQ1 | 0.80194  |
| 792 | POC206 | Q8WV60 | 0.28447  |
| 793 | POC206 | Q5SY85 | 0.31086  |
| 794 | POC206 | Q96GA3 | 0.87235  |
| 795 | POC206 | P56715 | 0.19423  |
| 796 | POC206 | A6NGH7 | 0.36826  |
| 797 | POC206 | Q9C099 | 1.2464   |
| 798 | POC206 | Q8NC54 | 1.2653   |
| 799 | POC206 | Q5SRE5 | 0.72093  |
| 800 | POC206 | Q68E01 | 0.73664  |
| 801 | POC206 | P17677 | 0.19424  |
| 802 | POC206 | Q86VG3 | 0.7041   |
| 803 | POC206 | Q06330 | 0.60595  |
| 804 | POC206 | Q13469 | 1.1816   |
| 805 | POC206 | Q9UMS5 | 0.81781  |
| 806 | POC206 | Q8TD26 | 0.37272  |
| 807 | POC206 | Q9NP71 | 0.52818  |
| 808 | POC206 | Q86YG4 | 0.51948  |
| 809 | POC206 | P01008 | 0.32425  |
| 810 | POC206 | O75496 | 1.0106   |
| 811 | POC206 | Q9H299 | 0.21036  |
| 812 | POC206 | P49959 | 0.26337  |
| 813 | POC206 | Q9NP97 | 0.77463  |
| 814 | POC206 | Q9Y2Z4 | 0.31227  |
| 815 | POC206 | Q9ULX3 | 0.69101  |
| 816 | POC206 | Q7Z7J5 | 0.91923  |
| 817 | POC206 | Q9BXW4 | 0.41665  |
| 818 | POC206 | P28065 | 0.53911  |
| 819 | POC206 | Q86X60 | 0.39678  |
| 820 | POC206 | Q9HC77 | 0.97753  |
| 821 | POC206 | Q9Y6J3 | 0.45994  |
| 822 | POC206 | P40425 | 0.80071  |
| 823 | POC206 | Q502W6 | 0.050097 |
| 824 | POC206 | Q68DK7 | 0.86262  |
| 825 | POC206 | Q9BSV6 | 0.34842  |
| 826 | POC206 | Q9NYT6 | 0.29385  |
| 827 | POC206 | Q96GS4 | 1.1382   |
| 828 | POC206 | Q9NS18 | 0.27549  |
| 829 | POC206 | Q9UBV8 | 0.24574  |
| 830 | POC206 | Q14997 | 0.40744  |
| 831 | POC206 | Q75L30 | 0.45994  |
| 832 | POC206 | Q9UH92 | 0.97047  |
| 833 | POC206 | Q6UB98 | 0.54755  |
| 834 | POC206 | Q9H305 | 0.15928  |
| 835 | POC206 | P36639 | 0.54269  |
| 836 | POC206 | Q15543 | 1.1135   |



|     |        |        |          |
|-----|--------|--------|----------|
| 837 | POC206 | Q9H7T9 | 0.93227  |
| 838 | POC206 | Q9UBU8 | 0.93011  |
| 839 | POC206 | Q8N1P7 | 0.24644  |
| 840 | POC206 | Q86SQ7 | 1.0758   |
| 841 | POC206 | Q9Y6Q3 | 0.27243  |
| 842 | POC206 | P0CW23 | 0.49733  |
| 843 | POC206 | A8MTB1 | 0.45994  |
| 844 | POC206 | P98182 | 0.30392  |
| 845 | POC206 | Q9H0K4 | 0.74381  |
| 846 | POC206 | Q8NEQ6 | 0.40139  |
| 847 | POC206 | Q14530 | 0.40442  |
| 848 | POC206 | Q14008 | 1.0527   |
| 849 | POC206 | Q99504 | 0.71889  |
| 850 | POC206 | Q9UBP6 | 1.1592   |
| 851 | POC206 | Q9H840 | 0.8946   |
| 852 | POC206 | Q9NUQ3 | 0.8041   |
| 853 | POC206 | Q8N3X6 | 0.61212  |
| 854 | POC206 | Q92567 | 0.43814  |
| 855 | POC206 | Q9Y2A0 | 0.3178   |
| 856 | POC206 | Q9UBB4 | 0.94934  |
| 857 | POC206 | Q9NVN8 | 0.40151  |
| 858 | POC206 | Q9BUP3 | 0.17578  |
| 859 | POC206 | Q14576 | 0.56588  |
| 860 | POC206 | Q96Q89 | 0.65006  |
| 861 | POC206 | Q95260 | 0.21089  |
| 862 | POC206 | Q75396 | 0.39552  |
| 863 | POC206 | Q9NWS6 | 0.83133  |
| 864 | POC206 | Q9UL45 | 0.1916   |
| 865 | POC206 | Q8NFB5 | 0.73463  |
| 866 | POC206 | Q93100 | 0.31573  |
| 867 | POC206 | A8MXV4 | 0.55689  |
| 868 | POC206 | P0C5W0 | 0.27799  |
| 869 | POC206 | Q86UW9 | 1.1102   |
| 870 | POC206 | Q8NB50 | 0.41874  |
| 871 | POC206 | Q9GZQ3 | 1.0456   |
| 872 | POC206 | Q13432 | 0.60193  |
| 873 | POC206 | Q5U5X0 | 0.93861  |
| 874 | POC206 | Q9NRF9 | 0.15056  |
| 875 | POC206 | Q9UJQ4 | 0.26416  |
| 876 | POC206 | Q9Y2V7 | 0.11443  |
| 877 | POC206 | A4D1U4 | 0.39358  |
| 878 | POC206 | Q5VXD3 | 0.13086  |
| 879 | POC206 | Q9HAZ2 | 0.51229  |
| 880 | POC206 | Q9GZL8 | 0.40853  |
| 881 | POC206 | Q7Z4G1 | 1.4614   |
| 882 | POC206 | Q9BQ15 | 0.82136  |
| 883 | POC206 | Q12905 | 1.1105   |
| 884 | POC206 | Q9H4X1 | 0.93504  |
| 885 | POC206 | Q8TDN4 | 0.84469  |
| 886 | POC206 | Q96CB9 | 0.7484   |
| 887 | POC206 | Q9P032 | 0.59748  |
| 888 | POC206 | Q96DX5 | 1.1972   |
| 889 | POC206 | Q00512 | 0.95264  |
| 890 | POC206 | Q9HC52 | 0.92994  |
| 891 | POC206 | Q8N9F8 | 0.35984  |
| 892 | POC206 | P61581 | 0.95266  |
| 893 | POC206 | Q8WW12 | 0.744    |
| 894 | POC206 | P0DKV0 | 0.075957 |
| 895 | POC206 | Q96IZ0 | 0.89949  |
| 896 | POC206 | Q9BSU1 | 0.71197  |
| 897 | POC206 | Q5UIP0 | 0.96233  |
| 898 | POC206 | Q13127 | 0.58578  |
| 899 | POC206 | Q9NRG9 | 1.0109   |
| 900 | POC206 | Q6P575 | 0.10533  |
| 901 | POC206 | Q9BSF8 | 0.54755  |
| 902 | POC206 | Q9UJX3 | 0.85404  |
| 903 | POC206 | Q9NZI5 | 0.6508   |
| 904 | POC206 | Q60504 | 0.81164  |
| 905 | POC206 | Q95780 | 0.56457  |
| 906 | POC206 | P60673 | 0.32917  |
| 907 | POC206 | Q16222 | 0.2834   |
| 908 | POC206 | Q9BQC3 | 1.0327   |
| 909 | POC206 | P13682 | 0.35632  |
| 910 | POC206 | Q9BV47 | 0.50639  |
| 911 | POC206 | Q96ST8 | 1.1272   |
| 912 | POC206 | Q53H82 | 0.1428   |

|     |        |        |          |
|-----|--------|--------|----------|
| 913 | POC206 | Q8TF63 | 0.62813  |
| 914 | POC206 | Q7RTS9 | 1.2509   |
| 915 | POC206 | A6NK44 | 0.096969 |
| 916 | POC206 | Q96EU6 | 0.3161   |
| 917 | POC206 | Q9NUU7 | 0.21206  |
| 918 | POC206 | P50213 | 0.053586 |
| 919 | POC206 | Q9BUX1 | 0.85715  |
| 920 | POC206 | P49848 | 0.83232  |
| 921 | POC206 | Q9NTX9 | 0.14151  |
| 922 | POC206 | Q15397 | 0.17861  |
| 923 | POC206 | Q9Y6K9 | 0.97425  |
| 924 | POC206 | O75251 | 0.16788  |
| 925 | POC206 | Q9UPN9 | 0.6416   |
| 926 | POC206 | Q96EL2 | 0.4343   |
| 927 | POC206 | Q6ZN84 | 0.23342  |
| 928 | POC206 | Q9Y5Q3 | 0.92965  |
| 929 | POC206 | Q8IYN0 | 0.38973  |
| 930 | POC206 | P61326 | 0.84228  |
| 931 | POC206 | P14921 | 0.84886  |
| 932 | POC206 | Q05481 | 0.4071   |
| 933 | POC206 | Q9UQ84 | 0.38843  |
| 934 | POC206 | P78385 | 0.43636  |
| 935 | POC206 | Q15911 | 0.33207  |
| 936 | POC206 | Q9H900 | 0.66357  |
| 937 | POC206 | Q8N228 | 0.49155  |
| 938 | POC206 | Q9BYG7 | 0.32773  |
| 939 | POC206 | Q5U4N7 | 0.45994  |
| 940 | POC206 | Q9NXJ5 | 0.42188  |
| 941 | POC206 | P0C867 | 0.37401  |
| 942 | POC206 | P46976 | 0.51379  |
| 943 | POC206 | P47756 | 0.066274 |
| 944 | POC206 | O75420 | 0.44518  |
| 945 | POC206 | Q9Y6Q5 | 0.49988  |
| 946 | POC206 | P24522 | 0.69876  |
| 947 | POC206 | Q9HAY2 | 0.1174   |
| 948 | POC206 | Q8N815 | 0.010575 |
| 949 | POC206 | Q01081 | 0.51628  |
| 950 | POC206 | P49207 | 0.98382  |
| 951 | POC206 | Q8WZA8 | 0.45994  |
| 952 | POC206 | P78318 | 0.88865  |
| 953 | POC206 | Q9NY43 | 0.49939  |
| 954 | POC206 | Q96AP0 | 0.16702  |
| 955 | POC206 | Q3SY56 | 0.24797  |
| 956 | POC206 | Q9NSU2 | 0.15836  |
| 957 | POC206 | Q96LP2 | 0.12638  |
| 958 | POC206 | Q99766 | 0.70933  |
| 959 | POC206 | Q86Z20 | 1.1206   |
| 960 | POC206 | Q92845 | 0.31085  |
| 961 | POC206 | Q8IWE5 | 0.53434  |
| 962 | POC206 | Q9NSI6 | 0.95353  |
| 963 | POC206 | Q8TF01 | 0.89109  |
| 964 | POC206 | Q0VGE8 | 0.30062  |
| 965 | POC206 | P56278 | 0.18714  |
| 966 | POC206 | P51532 | 0.50506  |
| 967 | POC206 | P26651 | 0.80832  |
| 968 | POC206 | P81274 | 0.65032  |
| 969 | POC206 | Q8IZH2 | 0.20087  |
| 970 | POC206 | Q06416 | 0.43565  |
| 971 | POC206 | Q9NPI1 | 1.0999   |
| 972 | POC206 | O00291 | 0.63072  |
| 973 | POC206 | Q14681 | 0.13145  |
| 974 | POC206 | Q9NZM5 | 0.44224  |
| 975 | POC206 | Q9NV88 | 0.70712  |
| 976 | POC206 | Q9Y4L5 | 0.55355  |
| 977 | POC206 | Q12815 | 0.47407  |
| 978 | POC206 | Q9BQA1 | 1.0734   |
| 979 | POC206 | Q8TCS8 | 0.24059  |
| 980 | POC206 | Q6ZTR7 | 0.069073 |
| 981 | POC206 | P35251 | 0.51174  |
| 982 | POC206 | Q86W50 | 0.47207  |
| 983 | POC206 | O15061 | 0.82205  |
| 984 | POC206 | P60174 | 0.19452  |
| 985 | POC206 | Q96HA9 | 0.55851  |
| 986 | POC206 | Q9P2G1 | 0.49231  |
| 987 | POC206 | Q07627 | 0.4802   |
| 988 | POC206 | O00743 | 0.90805  |

|      |        |        |          |
|------|--------|--------|----------|
| 989  | POC206 | Q5TI25 | 1.4923   |
| 990  | POC206 | Q6PF04 | 0.30822  |
| 991  | POC206 | Q9UBP0 | 0.33163  |
| 992  | POC206 | Q5SNX5 | 0.45994  |
| 993  | POC206 | Q5BJF6 | 0.64643  |
| 994  | POC206 | Q9UMY1 | 1.0385   |
| 995  | POC206 | Q8NCN2 | 0.41273  |
| 996  | POC206 | Q92572 | 0.57581  |
| 997  | POC206 | Q7Z6J0 | 0.43295  |
| 998  | POC206 | Q9NSA3 | 0.86458  |
| 999  | POC206 | Q95684 | 0.9284   |
| 1000 | POC206 | Q8WTX7 | 0.54932  |
| 1001 | POC206 | Q17RN3 | 0.39948  |
| 1002 | POC206 | Q9UBC9 | 0.61185  |
| 1003 | POC206 | Q6V702 | 0.26627  |
| 1004 | POC206 | Q9Y2D5 | 0.25268  |
| 1005 | POC206 | Q9HAW0 | 0.69666  |
| 1006 | POC206 | Q9NZ42 | 0.42733  |
| 1007 | POC206 | Q9Y4A8 | 0.60133  |
| 1008 | POC206 | Q86UU0 | 0.9748   |
| 1009 | POC206 | Q13114 | 0.49486  |
| 1010 | POC206 | Q9Y242 | 0.45995  |
| 1011 | POC206 | P0CB43 | 0.33728  |
| 1012 | POC206 | Q5K130 | 0.068669 |
| 1013 | POC206 | Q9BQ48 | 0.83316  |
| 1014 | POC206 | Q08AG5 | 0.61551  |
| 1015 | POC206 | Q9NV44 | 0.16914  |
| 1016 | POC206 | Q96KR4 | 0.1757   |
| 1017 | POC206 | Q5MJ68 | 0.41741  |
| 1018 | POC206 | Q8WWX9 | 0.66333  |
| 1019 | POC206 | Q9NS25 | 0.86383  |
| 1020 | POC206 | Q9HAA7 | 0.067235 |
| 1021 | POC206 | Q5VY09 | 0.86655  |
| 1022 | POC206 | Q9Y6R9 | 0.70707  |
| 1023 | POC206 | Q16537 | 0.48604  |
| 1024 | POC206 | Q6FI81 | 0.56472  |
| 1025 | POC206 | Q9ULM3 | 0.90573  |
| 1026 | POC206 | Q9NR55 | 0.45577  |
| 1027 | POC206 | Q9H993 | 0.053384 |
| 1028 | POC206 | Q9H6Q3 | 0.33829  |
| 1029 | POC206 | Q9BYE3 | 0.45994  |
| 1030 | POC206 | Q49B96 | 0.49621  |
| 1031 | POC206 | O43592 | 0.44506  |
| 1032 | POC206 | Q9UEU5 | 0.42333  |
| 1033 | POC206 | Q96C86 | 0.9379   |
| 1034 | POC206 | O43791 | 0.64067  |
| 1035 | POC206 | B4DU55 | 0.39689  |
| 1036 | POC206 | Q86U38 | 0.21007  |
| 1037 | POC206 | Q9NVW2 | 0.53706  |
| 1038 | POC206 | O43255 | 0.49319  |
| 1039 | POC206 | Q8TC71 | 0.56135  |
| 1040 | POC206 | Q6NX49 | 0.27546  |
| 1041 | POC206 | Q9UC06 | 0.33909  |
| 1042 | POC206 | Q9NZL9 | 0.15157  |
| 1043 | POC206 | Q8TAK5 | 0.62337  |
| 1044 | POC206 | Q9BV20 | 0.36437  |
| 1045 | POC206 | Q8N8U3 | 0.29451  |
| 1046 | POC206 | O60784 | 0.47803  |
| 1047 | POC206 | P62879 | 0.57557  |
| 1048 | POC206 | Q969F2 | 0.19475  |
| 1049 | POC206 | Q9GZU7 | 0.6601   |
| 1050 | POC206 | Q6L9T8 | 0.43017  |
| 1051 | POC206 | Q16186 | 0.69026  |
| 1052 | POC206 | Q6ZRS4 | 0.65291  |
| 1053 | POC206 | Q641Q2 | 0.92761  |
| 1054 | POC206 | P36954 | 0.31415  |
| 1055 | POC206 | Q9BV86 | 0.45907  |
| 1056 | POC206 | O75123 | 0.29797  |
| 1057 | POC206 | Q9Y3B6 | 0.83813  |
| 1058 | POC206 | Q9NX53 | 0.44439  |
| 1059 | POC206 | Q02078 | 0.47642  |
| 1060 | POC206 | P35325 | 0.45994  |
| 1061 | POC206 | Q147U1 | 0.34723  |
| 1062 | POC206 | Q96N11 | 0.27204  |
| 1063 | POC206 | Q9UDW1 | 0.17374  |
| 1064 | POC206 | Q14586 | 0.29385  |

|      |        |        |          |
|------|--------|--------|----------|
| 1065 | POC206 | O15266 | 0.61793  |
| 1066 | POC206 | P55036 | 0.44751  |
| 1067 | POC206 | Q969W3 | 0.97891  |
| 1068 | POC206 | Q9ULP0 | 0.21086  |
| 1069 | POC206 | Q9UNK9 | 0.25515  |
| 1070 | POC206 | Q8ND56 | 0.79396  |
| 1071 | POC206 | Q99708 | 0.82683  |
| 1072 | POC206 | Q9P086 | 1.1227   |
| 1073 | POC206 | Q96PE6 | 0.29519  |
| 1074 | POC206 | A8MVM7 | 0.45994  |
| 1075 | POC206 | Q9GZN7 | 0.39004  |
| 1076 | POC206 | P43358 | 0.50382  |
| 1077 | POC206 | A6NNA5 | 0.16039  |
| 1078 | POC206 | Q13263 | 0.30807  |
| 1079 | POC206 | Q9UKK6 | 0.82358  |
| 1080 | POC206 | Q8N7L0 | 0.32028  |
| 1081 | POC206 | Q9Y3D8 | 0.2607   |
| 1082 | POC206 | Q8N726 | 0.65143  |
| 1083 | POC206 | Q9BRT2 | 0.51252  |
| 1084 | POC206 | Q13526 | 0.63955  |
| 1085 | POC206 | Q15361 | 0.90031  |
| 1086 | POC206 | A6NKC0 | 0.49928  |
| 1087 | POC206 | Q9UII5 | 0.39483  |
| 1088 | POC206 | P50750 | 0.50326  |
| 1089 | POC206 | Q8WVI7 | 0.15166  |
| 1090 | POC206 | Q15696 | 0.2593   |
| 1091 | POC206 | P0CJ72 | 0.67101  |
| 1092 | POC206 | Q15019 | 0.27956  |
| 1093 | POC206 | Q3LI77 | 0.12421  |
| 1094 | POC206 | Q5TGS1 | 0.59711  |
| 1095 | POC206 | Q8NA96 | 0.15893  |
| 1096 | POC206 | O94864 | 0.6355   |
| 1097 | POC206 | Q8N6I1 | 0.83629  |
| 1098 | POC206 | P52741 | 0.37667  |
| 1099 | POC206 | Q53H64 | 0.13726  |
| 1100 | POC206 | O95602 | 0.82053  |
| 1101 | POC206 | Q8IVM0 | 0.66879  |
| 1102 | POC206 | P30307 | 0.76403  |
| 1103 | POC206 | O75474 | 1.136    |
| 1104 | POC206 | Q9Y2N7 | 0.64748  |
| 1105 | POC206 | P43356 | 1.0607   |
| 1106 | POC206 | Q9H981 | 1.3632   |
| 1107 | POC206 | Q96KS0 | 0.16001  |
| 1108 | POC206 | Q5VUG0 | 0.451    |
| 1109 | POC206 | A6NGD5 | 0.37883  |
| 1110 | POC206 | Q8IYW5 | 0.37874  |
| 1111 | POC206 | Q3C1V9 | 0.41351  |
| 1112 | POC206 | Q9BRQ4 | 0.2872   |
| 1113 | POC206 | Q86Y26 | 0.69223  |
| 1114 | POC206 | Q5TEA3 | 0.2803   |
| 1115 | POC206 | O95376 | 0.50131  |
| 1116 | POC206 | P13533 | 0.26858  |
| 1117 | POC206 | B7Z6K7 | 0.28545  |
| 1118 | POC206 | Q8NAJ2 | 0.11112  |
| 1119 | POC206 | Q9HD34 | 0.66602  |
| 1120 | POC206 | Q9Y3E7 | 0.91701  |
| 1121 | POC206 | Q9BX40 | 0.80798  |
| 1122 | POC206 | Q9NR28 | 0.9096   |
| 1123 | POC206 | Q9BTE1 | 0.3044   |
| 1124 | POC206 | Q8TD86 | 0.41191  |
| 1125 | POC206 | Q14CZ0 | 1.4626   |
| 1126 | POC206 | O96017 | 0.80044  |
| 1127 | POC206 | Q7Z2V1 | 0.45994  |
| 1128 | POC206 | Q9H6F5 | 0.41544  |
| 1129 | POC206 | Q5JQC9 | 0.32566  |
| 1130 | POC206 | Q8IYU4 | 0.053808 |
| 1131 | POC206 | Q9H4I2 | 0.92884  |
| 1132 | POC206 | P02100 | 0.41469  |
| 1133 | POC206 | Q9BT43 | 0.040658 |
| 1134 | POC206 | Q8WUU5 | 0.46223  |
| 1135 | POC206 | B1AL46 | 0.75244  |
| 1136 | POC206 | Q9UNH7 | 0.32572  |
| 1137 | POC206 | P15407 | 0.63396  |
| 1138 | POC206 | Q9BVM4 | 0.37741  |
| 1139 | POC206 | P02538 | 0.77159  |
| 1140 | POC206 | A6NFF2 | 0.18976  |

|      |        |        |          |
|------|--------|--------|----------|
| 1141 | POC206 | P57088 | 0.76745  |
| 1142 | POC206 | Q9Y6Q2 | 0.25026  |
| 1143 | POC206 | P78364 | 0.22691  |
| 1144 | POC206 | Q9BZR8 | 0.52756  |
| 1145 | POC206 | Q8N699 | 0.76264  |
| 1146 | POC206 | Q13309 | 0.54771  |
| 1147 | POC206 | Q9Y5U8 | 0.45702  |
| 1148 | POC206 | P62081 | 0.97133  |
| 1149 | POC206 | P20226 | 0.96825  |
| 1150 | POC206 | P12525 | 0.32741  |
| 1151 | POC206 | P69892 | 0.41469  |
| 1152 | POC206 | Q5TD94 | 0.3165   |
| 1153 | POC206 | A8MTZ7 | 0.29274  |
| 1154 | POC206 | Q8N3V7 | 0.80028  |
| 1155 | POC206 | Q9Y3D3 | 0.74208  |
| 1156 | POC206 | Q9UPM9 | 0.059991 |
| 1157 | POC206 | Q9BT92 | 0.77193  |
| 1158 | POC206 | O00308 | 0.23642  |
| 1159 | POC206 | O75145 | 0.57629  |
| 1160 | POC206 | Q14137 | 0.91295  |
| 1161 | POC206 | Q13642 | 0.57289  |
| 1162 | POC206 | P11161 | 0.53121  |
| 1163 | POC206 | P04156 | 0.59323  |
| 1164 | POC206 | Q8IYX0 | 0.56946  |
| 1165 | POC206 | Q8NDZ9 | 0.45994  |
| 1166 | POC206 | Q9UBB5 | 1.311    |
| 1167 | POC206 | Q8IYN6 | 0.80301  |
| 1168 | POC206 | Q8NC96 | 0.40991  |
| 1169 | POC206 | Q6X4T0 | 0.29568  |
| 1170 | POC206 | O43365 | 0.47977  |
| 1171 | POC206 | P17031 | 0.36831  |
| 1172 | POC206 | Q09161 | 0.69     |
| 1173 | POC206 | Q9P015 | 0.61549  |
| 1174 | POC206 | Q9BXY8 | 0.7721   |
| 1175 | POC206 | Q9HAU4 | 0.39974  |
| 1176 | POC206 | Q86VK4 | 0.20949  |
| 1177 | POC206 | A8MWP4 | 0.1332   |
| 1178 | POC206 | Q9NZT2 | 0.19663  |
| 1179 | POC206 | Q86UT8 | 1.1498   |
| 1180 | POC206 | Q6ZNM6 | 0.85534  |
| 1181 | POC206 | Q9UDY8 | 0.27929  |
| 1182 | POC206 | Q96MT3 | 1.1208   |
| 1183 | POC206 | Q04743 | 0.28418  |
| 1184 | POC206 | P18545 | 0.44613  |
| 1185 | POC206 | P53618 | 0.8281   |
| 1186 | POC206 | Q9P299 | 0.43683  |
| 1187 | POC206 | Q9BVP2 | 0.30254  |
| 1188 | POC206 | O43747 | 0.77238  |
| 1189 | POC206 | O43920 | 0.84323  |
| 1190 | POC206 | Q15544 | 1.1293   |
| 1191 | POC206 | Q5VSL9 | 0.9274   |
| 1192 | POC206 | Q6XQN6 | 0.3036   |
| 1193 | POC206 | Q8IVE0 | 0.19595  |
| 1194 | POC206 | P0CW24 | 0.27799  |
| 1195 | POC206 | Q9HCC9 | 0.61181  |
| 1196 | POC206 | Q9UHQ7 | 0.52631  |
| 1197 | POC206 | Q9BXF6 | 0.77774  |
| 1198 | POC206 | P30050 | 0.67945  |
| 1199 | POC206 | E7EW31 | 0.45994  |
| 1200 | POC206 | P25786 | 0.4628   |
| 1201 | POC206 | Q9H511 | 0.28047  |
| 1202 | POC206 | Q9H9Q2 | 0.35853  |
| 1203 | POC206 | P05114 | 0.40302  |
| 1204 | POC206 | Q9Y287 | 0.32435  |
| 1205 | POC206 | Q9NY12 | 0.3828   |
| 1206 | POC206 | Q9NY30 | 0.36849  |
| 1207 | POC206 | Q9BVC5 | 0.44263  |
| 1208 | POC206 | O60759 | 0.52477  |
| 1209 | POC206 | Q8WY54 | 0.97638  |
| 1210 | POC206 | P18583 | 0.2879   |
| 1211 | POC206 | A2RRD8 | 0.39805  |
| 1212 | POC206 | Q9H9E3 | 0.62136  |
| 1213 | POC206 | P55769 | 0.77565  |
| 1214 | POC206 | P16220 | 0.86516  |
| 1215 | POC206 | Q9P2X8 | 0.16535  |
| 1216 | POC206 | Q9NW07 | 0.32527  |

|      |        |        |          |
|------|--------|--------|----------|
| 1217 | POC206 | Q9Y5T5 | 0.41927  |
| 1218 | POC206 | Q8NEU8 | 0.5843   |
| 1219 | POC206 | O14524 | 0.79548  |
| 1220 | POC206 | Q6P050 | 0.85709  |
| 1221 | POC206 | P17275 | 0.904    |
| 1222 | POC206 | Q9Y5R6 | 0.033891 |
| 1223 | POC206 | Q9P000 | 0.38183  |
| 1224 | POC206 | Q6P6B1 | 0.68336  |
| 1225 | POC206 | Q9H579 | 0.020269 |
| 1226 | POC206 | Q9NVV5 | 0.49977  |
| 1227 | POC206 | O14948 | 0.50862  |
| 1228 | POC206 | Q9GZT9 | 0.314    |
| 1229 | POC206 | O60518 | 1.1138   |
| 1230 | POC206 | Q68DL7 | 0.45994  |
| 1231 | POC206 | O95633 | 0.24449  |
| 1232 | POC206 | P09067 | 0.15039  |
| 1233 | POC206 | Q9UN79 | 1.0245   |
| 1234 | POC206 | Q5PR19 | 0.32463  |
| 1235 | POC206 | P10074 | 0.57889  |
| 1236 | POC206 | Q06787 | 0.8521   |
| 1237 | POC206 | A6NIY4 | 0.51209  |
| 1238 | POC206 | Q1A5X6 | 0.68336  |
| 1239 | POC206 | Q8IYW2 | 0.45994  |
| 1240 | POC206 | O75884 | 1.2258   |
| 1241 | POC206 | O75607 | 0.79643  |
| 1242 | POC206 | O94855 | 0.53122  |
| 1243 | POC206 | P30153 | 0.57027  |
| 1244 | POC206 | Q8TAY7 | 1.6967   |
| 1245 | POC206 | P39656 | 0.389    |
| 1246 | POC206 | Q9UL42 | 0.96895  |
| 1247 | POC206 | O43516 | 0.36421  |
| 1248 | POC206 | Q9NR33 | 0.1454   |
| 1249 | POC206 | Q8IVT2 | 0.87342  |
| 1250 | POC206 | Q3SYG4 | 0.56789  |
| 1251 | POC206 | O14737 | 0.41164  |
| 1252 | POC206 | P62166 | 0.32164  |
| 1253 | POC206 | Q9HD36 | 0.52209  |
| 1254 | POC206 | Q92681 | 0.63372  |
| 1255 | POC206 | A8MS94 | 0.18056  |
| 1256 | POC206 | Q9Y6D9 | 1.0958   |
| 1257 | POC206 | Q9UBT6 | 0.19037  |
| 1258 | POC206 | Q9UK13 | 0.52141  |
| 1259 | POC206 | Q5JXB2 | 0.64704  |
| 1260 | POC206 | E9PB15 | 0.15943  |
| 1261 | POC206 | Q5T3J3 | 1.1546   |
| 1262 | POC206 | O43151 | 0.4893   |
| 1263 | POC206 | Q8TAM2 | 0.27841  |
| 1264 | POC206 | Q15700 | 0.24372  |
| 1265 | POC206 | Q9BTP7 | 1.2326   |
| 1266 | POC206 | Q3ZCV2 | 0.68336  |
| 1267 | POC206 | Q9UHJ9 | 0.74693  |
| 1268 | POC206 | Q9UFV3 | 0.16958  |
| 1269 | POC206 | O43422 | 0.44493  |
| 1270 | POC206 | Q96GX8 | 0.68336  |
| 1271 | POC206 | Q8NI27 | 0.58597  |
| 1272 | POC206 | Q96N23 | 0.57802  |
| 1273 | POC206 | Q9BRA0 | 0.33985  |
| 1274 | POC206 | O14602 | 0.42323  |
| 1275 | POC206 | Q9HAU0 | 0.35046  |
| 1276 | POC206 | P35869 | 0.42108  |
| 1277 | POC206 | Q9UPZ3 | 0.68865  |
| 1278 | POC206 | O15527 | 0.54574  |
| 1279 | POC206 | O14862 | 0.57712  |
| 1280 | POC206 | P0C838 | 0.53888  |
| 1281 | POC206 | O95810 | 0.41061  |
| 1282 | POC206 | Q86WI3 | 0.58204  |
| 1283 | POC206 | P40121 | 0.51931  |
| 1284 | POC206 | Q8NA72 | 0.47201  |
| 1285 | POC206 | Q96SL8 | 0.3695   |
| 1286 | POC206 | Q8WXD5 | 0.89494  |
| 1287 | POC206 | Q14692 | 0.42338  |
| 1288 | POC206 | P17544 | 1.1882   |
| 1289 | POC206 | O75030 | 0.60954  |
| 1290 | POC206 | A6NMK8 | 0.70781  |
| 1291 | POC206 | Q7L1V2 | 1.0651   |
| 1292 | POC206 | Q9H5F2 | 0.39281  |

|      |        |        |          |
|------|--------|--------|----------|
| 1293 | POC206 | Q9UMX1 | 0.83756  |
| 1294 | POC206 | Q96DT7 | 0.23605  |
| 1295 | POC206 | P62736 | 0.17471  |
| 1296 | POC206 | Q17R31 | 0.22442  |
| 1297 | POC206 | Q5TG53 | 0.45994  |
| 1298 | POC206 | Q9H6J7 | 0.33913  |
| 1299 | POC206 | Q9UGU0 | 0.62207  |
| 1300 | POC206 | Q10567 | 0.75369  |
| 1301 | POC206 | Q6DCA0 | 0.056086 |
| 1302 | POC206 | P0C7X5 | 0.37522  |
| 1303 | POC206 | Q8TAD8 | 1.424    |
| 1304 | POC206 | Q86W67 | 0.10662  |
| 1305 | POC206 | Q96C90 | 0.76396  |
| 1306 | POC206 | O75925 | 0.73553  |
| 1307 | POC206 | O94964 | 0.95936  |
| 1308 | POC206 | Q8WUA4 | 0.26386  |
| 1309 | POC206 | P09874 | 0.87324  |
| 1310 | POC206 | Q15744 | 0.38969  |
| 1311 | POC206 | Q6ZW49 | 0.54511  |
| 1312 | POC206 | P25788 | 0.57763  |
| 1313 | POC206 | O43427 | 0.15892  |
| 1314 | POC206 | Q6IN85 | 0.44065  |
| 1315 | POC206 | Q14653 | 0.21863  |
| 1316 | POC206 | Q9NWN3 | 0.47762  |
| 1317 | POC206 | P54920 | 0.50775  |
| 1318 | POC206 | Q86YC2 | 0.82878  |
| 1319 | POC206 | Q9BVV6 | 0.45994  |
| 1320 | POC206 | P20290 | 1.2628   |
| 1321 | POC206 | Q5EBL4 | 0.53363  |
| 1322 | POC206 | Q6NUQ1 | 0.70658  |
| 1323 | POC206 | Q9NVU7 | 0.58422  |
| 1324 | POC206 | Q5TC84 | 0.46292  |
| 1325 | POC206 | Q93008 | 0.5447   |
| 1326 | POC206 | Q96JG6 | 0.1211   |
| 1327 | POC206 | Q8IV20 | 0.37376  |
| 1328 | POC206 | Q5H9R7 | 1.0285   |
| 1329 | POC206 | Q9UDV7 | 0.2761   |
| 1330 | POC206 | Q9ULL0 | 0.56295  |
| 1331 | POC206 | Q92562 | 0.39743  |
| 1332 | POC206 | P51161 | 0.28262  |
| 1333 | POC206 | Q9H4B0 | 0.63438  |
| 1334 | POC206 | Q6ZWJ1 | 0.35408  |
| 1335 | POC206 | P22392 | 0.30386  |
| 1336 | POC206 | P29144 | 0.04937  |
| 1337 | POC206 | Q9Y248 | 0.8092   |
| 1338 | POC206 | P25490 | 0.35169  |
| 1339 | POC206 | Q9BZZ5 | 0.53608  |
| 1340 | POC206 | O43313 | 0.33183  |
| 1341 | POC206 | Q8IY51 | 0.047276 |
| 1342 | POC206 | Q9Y623 | 0.33462  |
| 1343 | POC206 | O75290 | 0.51617  |
| 1344 | POC206 | P15622 | 0.35755  |
| 1345 | POC206 | Q8NEH6 | 0.92279  |
| 1346 | POC206 | Q9BR76 | 0.42234  |
| 1347 | POC206 | Q32M84 | 0.23261  |
| 1348 | POC206 | O43815 | 0.34237  |
| 1349 | POC206 | P68036 | 0.76104  |
| 1350 | POC206 | Q6ICC9 | 0.58561  |
| 1351 | POC206 | Q9H8V8 | 0.45994  |
| 1352 | POC206 | Q9Y5L5 | 1.1565   |
| 1353 | POC206 | O14933 | 0.74262  |
| 1354 | POC206 | P43357 | 0.44439  |
| 1355 | POC206 | Q9BYQ3 | 0.72851  |
| 1356 | POC206 | Q8N9Z0 | 0.4933   |
| 1357 | POC206 | Q9NSD4 | 0.35148  |
| 1358 | POC206 | O60783 | 0.6312   |
| 1359 | POC206 | Q5VXH4 | 0.41864  |
| 1360 | POC206 | Q8NG27 | 0.41186  |
| 1361 | POC206 | Q05D60 | 0.15401  |
| 1362 | POC206 | Q96G03 | 0.60072  |
| 1363 | POC206 | Q9UIC8 | 0.37924  |
| 1364 | POC206 | Q9UJ55 | 0.1174   |
| 1365 | POC206 | Q8IXP5 | 0.68336  |
| 1366 | POC206 | Q8NDL9 | 0.11238  |
| 1367 | POC206 | O75161 | 1.1865   |
| 1368 | POC206 | Q969M7 | 0.5414   |

|      |        |        |          |
|------|--------|--------|----------|
| 1369 | POC206 | Q02446 | 0.24041  |
| 1370 | POC206 | Q86UP8 | 0.23143  |
| 1371 | POC206 | Q8N8Z8 | 0.30186  |
| 1372 | POC206 | Q96I23 | 0.38753  |
| 1373 | POC206 | Q8N6L7 | 1.1172   |
| 1374 | POC206 | P08651 | 0.38651  |
| 1375 | POC206 | Q9ULW0 | 1.0585   |
| 1376 | POC206 | Q9ULD0 | 0.28768  |
| 1377 | POC206 | Q9UNA4 | 0.52035  |
| 1378 | POC206 | Q9BU61 | 0.81398  |
| 1379 | POC206 | P22061 | 0.51562  |
| 1380 | POC206 | Q96RT7 | 0.54231  |
| 1381 | POC206 | Q3SXR2 | 0.23216  |
| 1382 | POC206 | Q04323 | 0.37073  |
| 1383 | POC206 | Q08AD1 | 0.70422  |
| 1384 | POC206 | Q7L5A3 | 0.50914  |
| 1385 | POC206 | O75444 | 0.5264   |
| 1386 | POC206 | Q96PI1 | 0.79757  |
| 1387 | POC206 | Q7Z4W3 | 0.45994  |
| 1388 | POC206 | Q9UK73 | 0.82379  |
| 1389 | POC206 | Q96B49 | 0.82081  |
| 1390 | POC206 | Q9HBE1 | 0.31465  |
| 1391 | POC206 | P82914 | 0.76238  |
| 1392 | POC206 | Q9UJL9 | 0.29335  |
| 1393 | POC206 | Q7Z6I5 | 0.84166  |
| 1394 | POC206 | Q9HCU8 | 0.5684   |
| 1395 | POC206 | Q9UGC7 | 0.45074  |
| 1396 | POC206 | O95424 | 0.54864  |
| 1397 | POC206 | Q5T5A8 | 0.45994  |
| 1398 | POC206 | P79522 | 0.56154  |
| 1399 | POC206 | P18754 | 1.2725   |
| 1400 | POC206 | P02794 | 0.82237  |
| 1401 | POC206 | P18850 | 0.68405  |
| 1402 | POC206 | Q9UL41 | 0.70306  |
| 1403 | POC206 | Q8IY31 | 0.68651  |
| 1404 | POC206 | Q9BPY3 | 0.28704  |
| 1405 | POC206 | Q96HI0 | 0.67507  |
| 1406 | POC206 | Q330K2 | 0.3817   |
| 1407 | POC206 | Q9UHV2 | 1.5855   |
| 1408 | POC206 | O60664 | 0.7902   |
| 1409 | POC206 | O75170 | 0.88321  |
| 1410 | POC206 | Q8IUF8 | 0.62298  |
| 1411 | POC206 | Q07021 | 0.86745  |
| 1412 | POC206 | Q14966 | 0.10912  |
| 1413 | POC206 | Q96F45 | 0.30231  |
| 1414 | POC206 | P49910 | 0.92544  |
| 1415 | POC206 | O43759 | 0.60017  |
| 1416 | POC206 | O95164 | 0.83078  |
| 1417 | POC206 | Q13084 | 1.1842   |
| 1418 | POC206 | Q9H4M3 | 0.35409  |
| 1419 | POC206 | Q8N635 | 0.041279 |
| 1420 | POC206 | Q8NCF5 | 0.64262  |
| 1421 | POC206 | Q7L2Z9 | 0.21203  |
| 1422 | POC206 | O75419 | 0.99746  |
| 1423 | POC206 | Q9UNY4 | 0.64547  |
| 1424 | POC206 | Q96HJ5 | 0.15878  |
| 1425 | POC206 | Q92733 | 0.97586  |
| 1426 | POC206 | Q8IWL8 | 0.90287  |
| 1427 | POC206 | P0C7V6 | 0.7778   |
| 1428 | POC206 | Q9P243 | 0.53273  |
| 1429 | POC206 | P41236 | 0.5748   |
| 1430 | POC206 | Q14690 | 0.54878  |
| 1431 | POC206 | Q9BV29 | 0.1336   |
| 1432 | POC206 | Q96E40 | 0.077606 |
| 1433 | POC206 | O15040 | 0.44439  |
| 1434 | POC206 | O75334 | 0.6677   |
| 1435 | POC206 | Q8NDA8 | 0.64213  |
| 1436 | POC206 | P0C7T7 | 0.45994  |
| 1437 | POC206 | Q9NTU4 | 0.50369  |
| 1438 | POC206 | Q8WUN7 | 0.54755  |
| 1439 | POC206 | Q3SY46 | 0.60142  |
| 1440 | POC206 | Q9NPD3 | 0.29865  |
| 1441 | POC206 | Q86XK2 | 0.91878  |
| 1442 | POC206 | Q92664 | 0.27567  |
| 1443 | POC206 | A1L190 | 0.94073  |
| 1444 | POC206 | Q96PV7 | 0.79661  |



|      |        |        |         |
|------|--------|--------|---------|
| 1445 | POC206 | A5PLL1 | 0.33985 |
| 1446 | POC206 | Q5T686 | 0.6175  |
| 1447 | POC206 | Q5SQN1 | 0.47129 |
| 1448 | POC206 | Q6ZSB9 | 0.28894 |
| 1449 | POC206 | O60225 | 0.26627 |
| 1450 | POC206 | O97980 | 0.15893 |
| 1451 | POC206 | P41252 | 0.70722 |
| 1452 | POC206 | Q9BRU2 | 0.62874 |
| 1453 | POC206 | Q96FX8 | 0.69182 |
| 1454 | POC206 | Q9NRS6 | 0.14736 |
| 1455 | POC206 | P57060 | 0.57309 |
| 1456 | POC206 | Q13156 | 0.30586 |
| 1457 | POC206 | P78395 | 0.84526 |
| 1458 | POC206 | Q8N814 | 0.9729  |
| 1459 | POC206 | Q86YF9 | 0.27052 |
| 1460 | POC206 | Q5T1J5 | 0.95874 |
| 1461 | POC206 | O95721 | 0.52346 |
| 1462 | POC206 | P51955 | 0.37674 |
| 1463 | POC206 | Q7Z5B4 | 0.67867 |
| 1464 | POC206 | Q13023 | 0.69275 |
| 1465 | POC206 | Q8N944 | 1.1573  |
| 1466 | POC206 | Q9BU68 | 0.57426 |
| 1467 | POC206 | Q8N5C8 | 0.61256 |
| 1468 | POC206 | Q8NDZ2 | 0.32649 |
| 1469 | POC206 | Q8N7R0 | 0.43565 |
| 1470 | POC206 | Q96KN1 | 0.54457 |
| 1471 | POC206 | Q08752 | 0.44414 |
| 1472 | POC206 | P86496 | 0.45994 |
| 1473 | POC206 | Q5JTH9 | 0.44558 |
| 1474 | POC206 | O60907 | 0.8609  |
| 1475 | POC206 | Q8N6T0 | 0.37134 |
| 1476 | POC206 | Q56P42 | 0.33985 |
| 1477 | POC206 | P30419 | 0.30553 |
| 1478 | POC206 | P15502 | 0.30878 |
| 1479 | POC206 | Q56P03 | 0.59057 |
| 1480 | POC206 | O43402 | 0.84672 |
| 1481 | POC206 | Q8WYH8 | 0.73603 |
| 1482 | POC206 | Q96N95 | 0.50258 |
| 1483 | POC206 | Q99622 | 0.29006 |
| 1484 | POC206 | O95049 | 0.61011 |
| 1485 | POC206 | Q7L5Y6 | 0.11206 |
| 1486 | POC206 | Q8TB69 | 0.53104 |
| 1487 | POC206 | Q9BT49 | 0.73716 |
| 1488 | POC206 | Q9Y4P1 | 0.41875 |
| 1489 | POC206 | O43812 | 0.43559 |
| 1490 | POC206 | Q14258 | 1.0829  |
| 1491 | POC206 | Q6W2J9 | 0.51593 |
| 1492 | POC206 | A0PJX2 | 0.42503 |
| 1493 | POC206 | Q6PI48 | 0.60863 |
| 1494 | POC206 | O94913 | 0.33916 |
| 1495 | POC206 | Q86XL3 | 0.47179 |
| 1496 | POC206 | Q9Y6N9 | 0.40421 |
| 1497 | POC206 | Q49AA0 | 0.48721 |
| 1498 | POC206 | P41212 | 0.90467 |
| 1499 | POC206 | Q9UD71 | 0.90743 |
| 1500 | POC206 | Q9UGP4 | 0.60355 |
| 1501 | POC206 | Q9C0B9 | 0.25202 |
| 1502 | POC206 | Q6UN15 | 1.0007  |
| 1503 | POC206 | Q9H9T3 | 0.93305 |
| 1504 | POC206 | P62241 | 0.64704 |
| 1505 | POC206 | Q5RKV6 | 0.15456 |
| 1506 | POC206 | Q4U2R6 | 0.9481  |
| 1507 | POC206 | Q7L190 | 0.92378 |
| 1508 | POC206 | Q9BV68 | 0.49231 |
| 1509 | POC206 | Q9NSC2 | 0.36996 |
| 1510 | POC206 | Q8N5R6 | 0.6717  |
| 1511 | POC206 | O75154 | 0.99987 |
| 1512 | POC206 | Q96I27 | 0.28365 |
| 1513 | POC206 | P54105 | 0.94855 |
| 1514 | POC206 | Q96HG1 | 0.45994 |
| 1515 | POC206 | A8MVP8 | 0.10538 |
| 1516 | POC206 | O14521 | 0.55207 |
| 1517 | POC206 | P48382 | 1.0915  |
| 1518 | POC206 | Q96BP3 | 0.26092 |
| 1519 | POC206 | Q5VXU3 | 0.51967 |
| 1520 | POC206 | Q99873 | 0.67475 |

|      |        |        |            |
|------|--------|--------|------------|
| 1521 | POC206 | Q9NRR8 | 0.7446     |
| 1522 | POC206 | Q9NV92 | 0.20038    |
| 1523 | POC206 | P25205 | 0.48836    |
| 1524 | POC206 | A6NNH0 | 0.87489    |
| 1525 | POC206 | Q969F9 | 0.94986    |
| 1526 | POC206 | O75381 | 0.50595    |
| 1527 | POC206 | Q5T871 | 0.45994    |
| 1528 | POC206 | P60371 | 0.72851    |
| 1529 | POC206 | P62304 | 0.62822    |
| 1530 | POC206 | Q9BT04 | 0.59002    |
| 1531 | POC206 | P52701 | 0.11164    |
| 1532 | POC206 | Q9UC07 | 0.37223    |
| 1533 | POC206 | A6NEV1 | 0.6609     |
| 1534 | POC206 | P13489 | 0.58126    |
| 1535 | POC206 | Q05066 | 0.62321    |
| 1536 | POC206 | Q9Y2G0 | 0.45836    |
| 1537 | POC206 | Q9NR11 | 0.28626    |
| 1538 | POC206 | Q9Y6D6 | 0.69685    |
| 1539 | POC206 | Q96BW1 | 0.33985    |
| 1540 | POC206 | O75582 | 0.32125    |
| 1541 | POC206 | Q9BYP8 | 0.45994    |
| 1542 | POC206 | Q9Y2Y9 | 0.97249    |
| 1543 | POC206 | Q8IUI4 | 0.31467    |
| 1544 | POC206 | Q9NVD7 | 0.3458     |
| 1545 | POC206 | Q86WC6 | 0.34507    |
| 1546 | POC206 | Q15697 | 0.66939    |
| 1547 | POC206 | Q8N3X1 | 0.32773    |
| 1548 | POC206 | P62244 | 0.79259    |
| 1549 | POC206 | O14744 | 1.0179     |
| 1550 | POC206 | Q5W0A0 | 0.3226     |
| 1551 | POC206 | Q96EP1 | 0.74911    |
| 1552 | POC206 | Q5HYJ3 | 0.50408    |
| 1553 | POC206 | P25787 | 0.54434    |
| 1554 | POC206 | Q99933 | 0.85789    |
| 1555 | POC206 | Q5CZA5 | 0.39689    |
| 1556 | POC206 | P51587 | 0.2186     |
| 1557 | POC206 | P78414 | 0.31537    |
| 1558 | POC206 | Q05519 | 0.5716     |
| 1559 | POC206 | Q9BYP9 | 0.72851    |
| 1560 | POC206 | Q9Y2M2 | 0.44787    |
| 1561 | POC206 | Q86VP1 | 0.52862    |
| 1562 | POC206 | O75306 | 0.56994    |
| 1563 | POC206 | Q15233 | 0.63651    |
| 1564 | POC206 | A4D161 | 0.0026307  |
| 1565 | POC206 | Q14315 | 0.40431    |
| 1566 | POC206 | P04732 | 0.45193    |
| 1567 | POC206 | A6NDB9 | 0.4627     |
| 1568 | POC206 | Q8IWD4 | 0.68336    |
| 1569 | POC206 | P48634 | 1.0004     |
| 1570 | POC206 | Q5F1R6 | 0.18027    |
| 1571 | POC206 | Q8IYB3 | 0.44399    |
| 1572 | POC206 | Q9C0D2 | 0.86056    |
| 1573 | POC206 | A6NCL1 | 0.33539    |
| 1574 | POC206 | Q8IY85 | 0.43791    |
| 1575 | POC206 | Q8NG48 | 0.079141   |
| 1576 | POC206 | A9QM74 | 0.73044    |
| 1577 | POC206 | Q96AV8 | 0.47687    |
| 1578 | POC206 | Q5T5S1 | 0.59845    |
| 1579 | POC206 | P12074 | 0.33271    |
| 1580 | POC206 | P45984 | 0.38796    |
| 1581 | POC206 | P50914 | 0.92005    |
| 1582 | POC206 | Q15121 | 0.58584    |
| 1583 | POC206 | Q01860 | 0.75656    |
| 1584 | POC206 | Q6ZS72 | 0.19224    |
| 1585 | POC206 | Q32P41 | 0.49726    |
| 1586 | POC206 | Q9H7E2 | 0.58973    |
| 1587 | POC206 | Q8NEP4 | 0.68336    |
| 1588 | POC206 | Q96A04 | 1.0116     |
| 1589 | POC206 | Q7Z7K2 | 0.25189    |
| 1590 | POC206 | O15258 | 0.49144    |
| 1591 | POC206 | Q9Y4Z2 | 0.29028    |
| 1592 | POC206 | Q6P3X8 | 0.61242    |
| 1593 | POC206 | Q9UJX5 | 0.88962    |
| 1594 | POC206 | Q5TZA2 | 0.82286    |
| 1595 | POC206 | A1A4T8 | 0.00048364 |
| 1596 | POC206 | P51531 | 0.75402    |

|      |        |        |           |
|------|--------|--------|-----------|
| 1597 | POC206 | Q96GJ1 | 0.22519   |
| 1598 | POC206 | P56589 | 0.048978  |
| 1599 | POC206 | O75382 | 0.53571   |
| 1600 | POC206 | Q9BYC8 | 0.91791   |
| 1601 | POC206 | Q6P2H3 | 0.79443   |
| 1602 | POC206 | Q8N2G8 | 0.29649   |
| 1603 | POC206 | Q9H091 | 0.456     |
| 1604 | POC206 | A6NE82 | 0.28047   |
| 1605 | POC206 | Q3KRA9 | 0.17778   |
| 1606 | POC206 | Q8N9P6 | 0.45994   |
| 1607 | POC206 | Q96IF1 | 0.51583   |
| 1608 | POC206 | P41182 | 0.26217   |
| 1609 | POC206 | O75638 | 1.3885    |
| 1610 | POC206 | A6NC42 | 0.48726   |
| 1611 | POC206 | P17024 | 0.37336   |
| 1612 | POC206 | Q05516 | 0.84154   |
| 1613 | POC206 | Q7Z3B4 | 0.951     |
| 1614 | POC206 | Q96MF6 | 0.42453   |
| 1615 | POC206 | O43913 | 0.43575   |
| 1616 | POC206 | Q9UPA5 | 0.33875   |
| 1617 | POC206 | P49901 | 0.45994   |
| 1618 | POC206 | Q9NXV2 | 1.385     |
| 1619 | POC206 | Q6V9R5 | 0.53376   |
| 1620 | POC206 | Q9Y2J0 | 0.26895   |
| 1621 | POC206 | Q6ZV56 | 0.45994   |
| 1622 | POC206 | Q13868 | 0.54366   |
| 1623 | POC206 | Q9NQW6 | 0.47917   |
| 1624 | POC206 | Q13615 | 0.19197   |
| 1625 | POC206 | Q9NZN8 | 0.82681   |
| 1626 | POC206 | O95202 | 0.3604    |
| 1627 | POC206 | Q8TD31 | 0.78743   |
| 1628 | POC206 | P08865 | 0.8316    |
| 1629 | POC206 | Q5ST30 | 0.27647   |
| 1630 | POC206 | Q9NQR7 | 0.45994   |
| 1631 | POC206 | P52743 | 0.43791   |
| 1632 | POC206 | P54821 | 0.23679   |
| 1633 | POC206 | Q9UQK1 | 0.42174   |
| 1634 | POC206 | Q86XZ4 | 0.46469   |
| 1635 | POC206 | Q8N1K5 | 0.60143   |
| 1636 | POC206 | O60927 | 0.93006   |
| 1637 | POC206 | P56211 | 0.40024   |
| 1638 | POC206 | Q8TCU4 | 0.13109   |
| 1639 | POC206 | Q08211 | 0.27466   |
| 1640 | POC206 | Q86WV5 | 0.53854   |
| 1641 | POC206 | Q6NS38 | 0.42249   |
| 1642 | POC206 | Q9UIV1 | 1.2546    |
| 1643 | POC206 | P08727 | 0.55133   |
| 1644 | POC206 | Q6AWC8 | 0.54243   |
| 1645 | POC206 | Q96CV9 | 0.65502   |
| 1646 | POC206 | Q9H869 | 1.5805    |
| 1647 | POC206 | Q96FF7 | 0.45994   |
| 1648 | POC206 | Q13228 | 1.3113    |
| 1649 | POC206 | P41219 | 0.33044   |
| 1650 | POC206 | P41227 | 0.43135   |
| 1651 | POC206 | Q9C010 | 0.64319   |
| 1652 | POC206 | Q8NA69 | 0.0016508 |
| 1653 | POC206 | P01858 | 0.45994   |
| 1654 | POC206 | Q9HB03 | 0.65817   |
| 1655 | POC206 | P62750 | 0.7193    |
| 1656 | POC206 | Q5H9J9 | 0.24017   |
| 1657 | POC206 | O60294 | 0.43617   |
| 1658 | POC206 | Q9UJX2 | 0.71399   |
| 1659 | POC206 | Q6ZNA4 | 0.70885   |
| 1660 | POC206 | Q9BTV5 | 0.7262    |
| 1661 | POC206 | C9J6K1 | 0.44531   |
| 1662 | POC206 | P49639 | 0.28345   |
| 1663 | POC206 | Q96CG3 | 0.44734   |
| 1664 | POC206 | Q8N1E6 | 0.47623   |
| 1665 | POC206 | Q9GZL7 | 0.78961   |
| 1666 | POC206 | Q8IY63 | 0.53567   |
| 1667 | POC206 | Q96CW5 | 1.0276    |
| 1668 | POC206 | Q86YA3 | 0.94109   |
| 1669 | POC206 | Q13515 | 0.34311   |
| 1670 | POC206 | Q15554 | 0.59257   |
| 1671 | POC206 | A6NKU9 | 0.51209   |
| 1672 | POC206 | Q9BYQ0 | 0.72851   |

|      |        |        |           |
|------|--------|--------|-----------|
| 1673 | POC206 | Q9H7R0 | 0.50051   |
| 1674 | POC206 | Q9BS31 | 0.23477   |
| 1675 | POC206 | Q13625 | 0.52624   |
| 1676 | POC206 | O75807 | 0.53332   |
| 1677 | POC206 | O75717 | 0.57574   |
| 1678 | POC206 | Q8WUE5 | 0.075006  |
| 1679 | POC206 | Q06323 | 0.70662   |
| 1680 | POC206 | Q9UMX0 | 0.85557   |
| 1681 | POC206 | Q32MH5 | 0.56851   |
| 1682 | POC206 | Q99583 | 0.47898   |
| 1683 | POC206 | O43681 | 0.21936   |
| 1684 | POC206 | Q96B36 | 0.89425   |
| 1685 | POC206 | Q969P5 | 0.26941   |
| 1686 | POC206 | Q9NR00 | 0.43665   |
| 1687 | POC206 | P05204 | 0.53685   |
| 1688 | POC206 | Q2VPB7 | 0.63984   |
| 1689 | POC206 | Q8NAA6 | 0.0029259 |
| 1690 | POC206 | P14317 | 0.32655   |
| 1691 | POC206 | Q2VWA4 | 0.25152   |
| 1692 | POC206 | P18621 | 0.66084   |
| 1693 | POC206 | P09012 | 0.24179   |
| 1694 | POC206 | P62380 | 0.24275   |
| 1695 | POC206 | Q9UHK0 | 0.41216   |
| 1696 | POC206 | Q8N7W2 | 0.63911   |
| 1697 | POC206 | Q96K75 | 0.31949   |
| 1698 | POC206 | Q9UQR0 | 0.37991   |
| 1699 | POC206 | Q9H1E3 | 0.83954   |
| 1700 | POC206 | Q9NQZ8 | 0.32223   |
| 1701 | POC206 | Q96D03 | 0.30884   |
| 1702 | POC206 | Q15327 | 0.48365   |
| 1703 | POC206 | Q7L8S5 | 0.39413   |
| 1704 | POC206 | P52657 | 1.2318    |
| 1705 | POC206 | Q9NR83 | 0.38208   |
| 1706 | POC206 | O14713 | 0.54989   |
| 1707 | POC206 | P50995 | 0.9443    |
| 1708 | POC206 | Q6ZUV0 | 0.03673   |
| 1709 | POC206 | Q7L3S4 | 0.33647   |
| 1710 | POC206 | Q8WTT2 | 0.38413   |
| 1711 | POC206 | Q8N9R6 | 0.029276  |
| 1712 | POC206 | Q7Z5Q5 | 0.11481   |
| 1713 | POC206 | Q9H7N4 | 0.84733   |
| 1714 | POC206 | Q6NZ36 | 0.42986   |
| 1715 | POC206 | Q9H492 | 0.36266   |
| 1716 | POC206 | Q9UH99 | 0.27506   |
| 1717 | POC206 | Q6ZMK1 | 0.21715   |
| 1718 | POC206 | Q15172 | 0.39529   |
| 1719 | POC206 | Q9NXT0 | 0.31562   |
| 1720 | POC206 | Q8TC05 | 0.7679    |
| 1721 | POC206 | Q3KP22 | 0.16813   |
| 1722 | POC206 | Q8TE04 | 0.50374   |
| 1723 | POC206 | Q8IV48 | 0.035121  |
| 1724 | POC206 | Q9BQ65 | 0.47744   |
| 1725 | POC206 | Q8N9E0 | 0.68336   |
| 1726 | POC206 | Q96CX2 | 0.11906   |
| 1727 | POC206 | Q9UKL3 | 1.0696    |
| 1728 | POC206 | Q8NHG7 | 0.76257   |
| 1729 | POC206 | O15382 | 0.1146    |
| 1730 | POC206 | O43752 | 0.40145   |
| 1731 | POC206 | P51861 | 0.44523   |
| 1732 | POC206 | Q99598 | 0.1161    |
| 1733 | POC206 | Q5VVM6 | 0.091009  |
| 1734 | POC206 | P22531 | 0.60746   |
| 1735 | POC206 | Q96LI5 | 0.6228    |
| 1736 | POC206 | P48147 | 0.51163   |
| 1737 | POC206 | Q96T59 | 0.15893   |
| 1738 | POC206 | Q5T5B0 | 0.45994   |
| 1739 | POC206 | O75787 | 0.29734   |
| 1740 | POC206 | O94822 | 0.2338    |
| 1741 | POC206 | Q9NRX3 | 0.81087   |
| 1742 | POC206 | Q14CX7 | 0.47465   |
| 1743 | POC206 | Q6XD76 | 0.40647   |
| 1744 | POC206 | Q9BTE7 | 0.58919   |
| 1745 | POC206 | I3L1E1 | 0.33839   |
| 1746 | POC206 | P46781 | 0.95287   |
| 1747 | POC206 | O14529 | 0.47387   |
| 1748 | POC206 | Q3LI54 | 0.45994   |

|      |        |        |         |
|------|--------|--------|---------|
| 1749 | POC206 | P30279 | 0.82797 |
| 1750 | POC206 | Q8NEE0 | 0.45994 |
| 1751 | POC206 | Q9BQY9 | 0.61178 |
| 1752 | POC206 | Q96B97 | 0.46928 |
| 1753 | POC206 | Q96JE9 | 0.3022  |
| 1754 | POC206 | P78560 | 0.64285 |
| 1755 | POC206 | O95983 | 1.4182  |
| 1756 | POC206 | P62328 | 1.0506  |
| 1757 | POC206 | Q8NE18 | 1.277   |
| 1758 | POC206 | Q00613 | 0.98359 |
| 1759 | POC206 | O00470 | 0.69206 |
| 1760 | POC206 | Q6PII5 | 0.4668  |
| 1761 | POC206 | P35226 | 0.71414 |
| 1762 | POC206 | Q9H0R1 | 0.32484 |
| 1763 | POC206 | Q13111 | 1.1911  |
| 1764 | POC206 | Q9UKL0 | 1.3089  |
| 1765 | POC206 | P0C7T4 | 0.45994 |
| 1766 | POC206 | Q9UBX2 | 0.386   |
| 1767 | POC206 | Q04446 | 0.30624 |
| 1768 | POC206 | O75818 | 0.40502 |
| 1769 | POC206 | Q6ZTZ1 | 0.3899  |
| 1770 | POC206 | Q96DB2 | 0.37553 |
| 1771 | POC206 | O75608 | 0.24089 |
| 1772 | POC206 | Q9UHR5 | 1.3822  |
| 1773 | POC206 | Q9NRG4 | 0.92332 |
| 1774 | POC206 | Q6PJP8 | 0.9054  |
| 1775 | POC206 | Q86X55 | 0.76772 |
| 1776 | POC206 | Q5T0W9 | 0.2538  |
| 1777 | POC206 | O60934 | 0.27105 |
| 1778 | POC206 | Q9Y6G5 | 0.44439 |
| 1779 | POC206 | P14406 | 0.26143 |
| 1780 | POC206 | Q9P2X7 | 0.45994 |
| 1781 | POC206 | Q0D2H9 | 0.38935 |
| 1782 | POC206 | Q8N3F0 | 0.44772 |
| 1783 | POC206 | Q8N0T1 | 0.52163 |
| 1784 | POC206 | O76075 | 0.1568  |
| 1785 | POC206 | Q9C0D7 | 0.55202 |
| 1786 | POC206 | A6H8Y1 | 0.86067 |
| 1787 | POC206 | Q02548 | 0.26612 |
| 1788 | POC206 | Q5T753 | 0.45994 |
| 1789 | POC206 | Q8N1X5 | 0.45994 |
| 1790 | POC206 | O00629 | 0.71595 |
| 1791 | POC206 | Q63HN1 | 0.39628 |
| 1792 | POC206 | Q9P021 | 0.28883 |
| 1793 | POC206 | O75604 | 0.4099  |
| 1794 | POC206 | O60684 | 0.57093 |
| 1795 | POC206 | P52737 | 0.86047 |
| 1796 | POC206 | Q16836 | 0.44334 |
| 1797 | POC206 | O95232 | 0.55195 |
| 1798 | POC206 | P62266 | 0.93565 |
| 1799 | POC206 | P02008 | 0.38521 |
| 1800 | POC206 | Q9Y5M6 | 0.45994 |
| 1801 | POC206 | Q9Y2L5 | 0.14054 |
| 1802 | POC206 | Q02543 | 0.67945 |
| 1803 | POC206 | Q9BUH6 | 0.58209 |
| 1804 | POC206 | Q9Y4I5 | 0.37023 |
| 1805 | POC206 | Q9H8T0 | 0.58791 |
| 1806 | POC206 | Q9UKA1 | 0.34251 |
| 1807 | POC206 | Q9BTW9 | 0.29062 |
| 1808 | POC206 | Q9HB96 | 0.99145 |
| 1809 | POC206 | Q496Y0 | 0.27498 |
| 1810 | POC206 | Q2V2M9 | 0.43519 |
| 1811 | POC206 | Q9P2K1 | 0.34621 |
| 1812 | POC206 | Q14232 | 0.17859 |
| 1813 | POC206 | P49754 | 0.66539 |
| 1814 | POC206 | P60409 | 0.72851 |
| 1815 | POC206 | O43493 | 0.7849  |
| 1816 | POC206 | Q0VDE8 | 0.54291 |
| 1817 | POC206 | O75469 | 0.30603 |
| 1818 | POC206 | Q8WUB2 | 0.34257 |
| 1819 | POC206 | P52565 | 0.1236  |
| 1820 | POC206 | Q9BRP7 | 0.28324 |
| 1821 | POC206 | Q8N1I8 | 0.45994 |
| 1822 | POC206 | Q99615 | 0.92277 |
| 1823 | POC206 | Q9BQ89 | 1.2539  |
| 1824 | POC206 | Q6ZN32 | 0.43565 |

|      |        |        |          |
|------|--------|--------|----------|
| 1825 | POC206 | A2IDD5 | 0.65648  |
| 1826 | POC206 | Q9NR56 | 0.47843  |
| 1827 | POC206 | P63167 | 1.4528   |
| 1828 | POC206 | P59923 | 0.40539  |
| 1829 | POC206 | Q66LE6 | 0.55584  |
| 1830 | POC206 | Q8N5L8 | 0.97801  |
| 1831 | POC206 | E9PAV3 | 0.55374  |
| 1832 | POC206 | Q13057 | 0.28683  |
| 1833 | POC206 | Q8WXB4 | 0.6229   |
| 1834 | POC206 | Q9UK33 | 0.20949  |
| 1835 | POC206 | Q15170 | 1.5389   |
| 1836 | POC206 | Q9Y6K5 | 0.19606  |
| 1837 | POC206 | Q15691 | 0.82927  |
| 1838 | POC206 | P36542 | 0.32021  |
| 1839 | POC206 | P41567 | 0.89126  |
| 1840 | POC206 | Q8IWA0 | 0.32773  |
| 1841 | POC206 | Q8IYI8 | 0.41963  |
| 1842 | POC206 | P0CJ92 | 0.27537  |
| 1843 | POC206 | Q9UMX3 | 0.62011  |
| 1844 | POC206 | O94811 | 0.59525  |
| 1845 | POC206 | Q96DX8 | 0.114    |
| 1846 | POC206 | O60477 | 0.68027  |
| 1847 | POC206 | P09467 | 0.37604  |
| 1848 | POC206 | Q96JI7 | 0.74793  |
| 1849 | POC206 | A5D6W6 | 0.78576  |
| 1850 | POC206 | O75081 | 1.399    |
| 1851 | POC206 | Q9Y2V2 | 0.48246  |
| 1852 | POC206 | Q9H1K0 | 0.14266  |
| 1853 | POC206 | Q96JK9 | 1.0598   |
| 1854 | POC206 | Q8NBR6 | 1.6069   |
| 1855 | POC206 | Q8NE86 | 0.37604  |
| 1856 | POC206 | A8MUA0 | 0.37224  |
| 1857 | POC206 | Q9P2F9 | 0.25557  |
| 1858 | POC206 | Q9BY77 | 0.40469  |
| 1859 | POC206 | Q8WXI9 | 0.73503  |
| 1860 | POC206 | O75533 | 0.27126  |
| 1861 | POC206 | Q5TCQ9 | 0.6571   |
| 1862 | POC206 | Q9H6L5 | 0.76953  |
| 1863 | POC206 | Q86VW0 | 0.32274  |
| 1864 | POC206 | P14866 | 0.40398  |
| 1865 | POC206 | Q8NFW9 | 0.45906  |
| 1866 | POC206 | P34932 | 0.27921  |
| 1867 | POC206 | Q9BXQ6 | 0.45994  |
| 1868 | POC206 | Q9BR77 | 0.48235  |
| 1869 | POC206 | Q9NZY2 | 0.45994  |
| 1870 | POC206 | Q9Y315 | 0.6021   |
| 1871 | POC206 | Q9C0H6 | 0.39455  |
| 1872 | POC206 | C9JE40 | 0.88391  |
| 1873 | POC206 | O60826 | 0.7604   |
| 1874 | POC206 | Q4G0A6 | 1.2081   |
| 1875 | POC206 | Q9NRR3 | 0.69292  |
| 1876 | POC206 | P29374 | 0.29415  |
| 1877 | POC206 | Q9Y2Q1 | 0.54871  |
| 1878 | POC206 | P52655 | 1.1798   |
| 1879 | POC206 | Q9BQP7 | 0.25419  |
| 1880 | POC206 | Q96QR8 | 0.36919  |
| 1881 | POC206 | Q99619 | 0.6544   |
| 1882 | POC206 | Q8N910 | 0.065439 |
| 1883 | POC206 | Q92665 | 0.8929   |
| 1884 | POC206 | Q96CT7 | 0.10345  |
| 1885 | POC206 | Q5HYW2 | 0.77913  |
| 1886 | POC206 | Q8IYD8 | 0.47941  |
| 1887 | POC206 | O00255 | 0.21625  |
| 1888 | POC206 | Q9UL58 | 0.63014  |
| 1889 | POC206 | Q8N0U4 | 0.36673  |
| 1890 | POC206 | Q00536 | 0.096644 |
| 1891 | POC206 | Q9NX55 | 0.33714  |
| 1892 | POC206 | Q96HZ7 | 0.45994  |
| 1893 | POC206 | O95397 | 1.1213   |
| 1894 | POC206 | Q9H9L3 | 0.51143  |
| 1895 | POC206 | Q8N2C7 | 0.86465  |
| 1896 | POC206 | O60732 | 0.44439  |
| 1897 | POC206 | O95997 | 1.029    |
| 1898 | POC206 | P40692 | 0.062407 |
| 1899 | POC206 | Q9H081 | 0.86382  |
| 1900 | POC206 | Q658K8 | 0.61431  |

|      |        |          |          |
|------|--------|----------|----------|
| 1901 | POC206 | Q9Y2D9   | 0.86737  |
| 1902 | POC206 | O95999   | 0.2467   |
| 1903 | POC206 | Q8I WV1  | 0.34164  |
| 1904 | POC206 | Q9HDB8   | 0.419    |
| 1905 | POC206 | Q9BU19   | 0.20949  |
| 1906 | POC206 | Q8TEQ6   | 0.68576  |
| 1907 | POC206 | P61966   | 0.40222  |
| 1908 | POC206 | Q495Y8   | 0.51209  |
| 1909 | POC206 | Q9U I L1 | 0.86178  |
| 1910 | POC206 | Q9H7B4   | 0.23754  |
| 1911 | POC206 | Q6ZVW7   | 0.10428  |
| 1912 | POC206 | Q53G26   | 0.68745  |
| 1913 | POC206 | Q8WTR7   | 0.75727  |
| 1914 | POC206 | Q9H2H0   | 0.32324  |
| 1915 | POC206 | Q9NRI7   | 0.45994  |
| 1916 | POC206 | P60413   | 0.72851  |
| 1917 | POC206 | Q13045   | 1.2968   |
| 1918 | POC206 | Q7Z7H8   | 0.25126  |
| 1919 | POC206 | Q04726   | 1.1484   |
| 1920 | POC206 | Q9Y4C2   | 0.72535  |
| 1921 | POC206 | Q9UHB7   | 1.4275   |
| 1922 | POC206 | Q9UMS6   | 0.73345  |
| 1923 | POC206 | Q9NVD3   | 0.039369 |
| 1924 | POC206 | Q8WXE9   | 0.67857  |
| 1925 | POC206 | Q8N4U5   | 0.10465  |
| 1926 | POC206 | Q9NX40   | 0.5858   |
| 1927 | POC206 | P21980   | 0.36968  |
| 1928 | POC206 | Q99623   | 1.2601   |
| 1929 | POC206 | P49720   | 0.35315  |
| 1930 | POC206 | P61978   | 0.89724  |
| 1931 | POC206 | Q03933   | 0.79318  |
| 1932 | POC206 | P04264   | 0.35707  |
| 1933 | POC206 | Q9Y6H1   | 0.95874  |
| 1934 | POC206 | Q99717   | 0.47756  |
| 1935 | POC206 | Q9H1Z4   | 0.54755  |
| 1936 | POC206 | Q9Y697   | 0.68577  |
| 1937 | POC206 | P15559   | 0.15856  |
| 1938 | POC206 | Q9UMQ3   | 0.82561  |
| 1939 | POC206 | Q9UEE9   | 0.55774  |
| 1940 | POC206 | P17019   | 0.53784  |
| 1941 | POC206 | Q8IWB7   | 0.23807  |
| 1942 | POC206 | Q5VIY5   | 0.53104  |
| 1943 | POC206 | Q5XG85   | 0.45994  |
| 1944 | POC206 | P63162   | 0.61452  |
| 1945 | POC206 | P19388   | 0.70435  |
| 1946 | POC206 | A6NFY7   | 0.59733  |
| 1947 | POC206 | Q3LHN2   | 0.45994  |
| 1948 | POC206 | Q6ZRF7   | 0.23685  |
| 1949 | POC206 | O60870   | 0.66741  |
| 1950 | POC206 | Q9Y676   | 0.71519  |
| 1951 | POC206 | Q6P387   | 0.54755  |
| 1952 | POC206 | Q14602   | 0.40764  |
| 1953 | POC206 | Q7Z4H9   | 0.37786  |
| 1954 | POC206 | Q9NZ32   | 0.15042  |
| 1955 | POC206 | Q5XKK7   | 0.28971  |
| 1956 | POC206 | Q9NPA5   | 0.20949  |
| 1957 | POC206 | Q6STE5   | 0.76489  |
| 1958 | POC206 | O14613   | 0.18896  |
| 1959 | POC206 | Q9P2M1   | 0.66879  |
| 1960 | POC206 | Q9UBS4   | 0.4554   |
| 1961 | POC206 | P61218   | 0.35813  |
| 1962 | POC206 | Q9P266   | 0.52829  |
| 1963 | POC206 | Q9H5P4   | 0.51848  |
| 1964 | POC206 | Q14974   | 1.1443   |
| 1965 | POC206 | Q6P1Q0   | 0.053322 |
| 1966 | POC206 | P05412   | 0.78712  |
| 1967 | POC206 | O95600   | 0.20949  |
| 1968 | POC206 | Q5TFE4   | 0.20214  |
| 1969 | POC206 | Q14777   | 0.7355   |
| 1970 | POC206 | Q8IY22   | 0.21416  |
| 1971 | POC206 | Q9NWU2   | 0.11206  |
| 1972 | POC206 | Q05BQ5   | 0.53112  |
| 1973 | POC206 | Q9P2D1   | 0.26704  |
| 1974 | POC206 | A2RUB6   | 0.18514  |
| 1975 | POC206 | Q9HAV7   | 0.46229  |
| 1976 | POC206 | Q5T1R4   | 0.42473  |

|      |        |        |          |
|------|--------|--------|----------|
| 1977 | POC206 | Q8IYH5 | 0.76632  |
| 1978 | POC206 | O15534 | 0.3538   |
| 1979 | POC206 | Q8IUQ4 | 0.22286  |
| 1980 | POC206 | Q8IYF1 | 0.38657  |
| 1981 | POC206 | Q2M2I5 | 0.48752  |
| 1982 | POC206 | Q9NS64 | 0.5879   |
| 1983 | POC206 | O75940 | 0.60914  |
| 1984 | POC206 | Q8N684 | 0.34567  |
| 1985 | POC206 | O95394 | 0.81167  |
| 1986 | POC206 | Q9UKV0 | 0.54929  |
| 1987 | POC206 | Q8IYE0 | 0.72457  |
| 1988 | POC206 | Q14678 | 0.62714  |
| 1989 | POC206 | Q8WW38 | 0.68378  |
| 1990 | POC206 | P0CJ75 | 0.67101  |
| 1991 | POC206 | P46100 | 0.83537  |
| 1992 | POC206 | Q658T7 | 0.18901  |
| 1993 | POC206 | P09001 | 0.63364  |
| 1994 | POC206 | O43463 | 0.91428  |
| 1995 | POC206 | Q8NBC4 | 0.45994  |
| 1996 | POC206 | P25963 | 0.64644  |
| 1997 | POC206 | Q9BUK6 | 0.17142  |
| 1998 | POC206 | Q8N8E2 | 0.19083  |
| 1999 | POC206 | O95630 | 0.3382   |
| 2000 | POC206 | P46013 | 0.33788  |
| 2001 | POC206 | Q13394 | 0.31811  |
| 2002 | POC206 | Q8N0S6 | 0.46426  |
| 2003 | POC206 | Q9H5L6 | 0.45127  |
| 2004 | POC206 | O00567 | 0.86244  |
| 2005 | POC206 | O43670 | 0.27585  |
| 2006 | POC206 | Q05086 | 0.34569  |
| 2007 | POC206 | Q15185 | 0.55432  |
| 2008 | POC206 | A6NHJ4 | 0.57913  |
| 2009 | POC206 | Q6ZPA2 | 0.45994  |
| 2010 | POC206 | Q8N2W9 | 1.3368   |
| 2011 | POC206 | Q86XF7 | 0.60768  |
| 2012 | POC206 | Q8TBZ0 | 0.52396  |
| 2013 | POC206 | Q9NSI2 | 0.68336  |
| 2014 | POC206 | O94892 | 0.27604  |
| 2015 | POC206 | Q6NSI3 | 0.95158  |
| 2016 | POC206 | Q66PJ3 | 0.71947  |
| 2017 | POC206 | Q6ZV60 | 0.45994  |
| 2018 | POC206 | Q9HC62 | 0.63043  |
| 2019 | POC206 | Q9H4T2 | 0.29094  |
| 2020 | POC206 | O00268 | 1.1101   |
| 2021 | POC206 | P78411 | 0.23995  |
| 2022 | POC206 | O95059 | 0.39967  |
| 2023 | POC206 | Q14146 | 0.45994  |
| 2024 | POC206 | Q86UD1 | 0.27482  |
| 2025 | POC206 | C9JLR9 | 0.52254  |
| 2026 | POC206 | Q96HA1 | 1.0038   |
| 2027 | POC206 | Q9BSQ5 | 0.381    |
| 2028 | POC206 | Q9Y5V3 | 0.86435  |
| 2029 | POC206 | P19429 | 0.074674 |
| 2030 | POC206 | Q8IVF1 | 0.92123  |
| 2031 | POC206 | Q9NXV6 | 0.82838  |
| 2032 | POC206 | O95867 | 0.57591  |
| 2033 | POC206 | A6NI87 | 0.62538  |
| 2034 | POC206 | Q460N5 | 0.53024  |
| 2035 | POC206 | Q8TAV0 | 0.89109  |
| 2036 | POC206 | A6NIX2 | 1.2574   |
| 2037 | POC206 | Q9UPP1 | 0.4974   |
| 2038 | POC206 | Q9Y3Y4 | 0.85487  |
| 2039 | POC206 | Q9HD40 | 0.60789  |
| 2040 | POC206 | Q9UQN3 | 0.59523  |
| 2041 | POC206 | P0DMC3 | 0.45994  |
| 2042 | POC206 | Q86T29 | 0.27283  |
| 2043 | POC206 | P13645 | 0.46879  |
| 2044 | POC206 | Q9C0J9 | 0.22782  |
| 2045 | POC206 | Q9H425 | 0.47978  |
| 2046 | POC206 | Q07020 | 1.0088   |
| 2047 | POC206 | Q9NW08 | 0.13762  |
| 2048 | POC206 | P07311 | 0.70743  |
| 2049 | POC206 | Q96J02 | 0.27072  |
| 2050 | POC206 | Q8N8A8 | 0.24418  |
| 2051 | POC206 | Q13137 | 1.2675   |
| 2052 | POC206 | Q9P0M9 | 0.66322  |



|      |        |        |          |
|------|--------|--------|----------|
| 2053 | POC206 | P19419 | 1.3603   |
| 2054 | POC206 | Q6PI98 | 0.81415  |
| 2055 | POC206 | Q9BWU0 | 0.63741  |
| 2056 | POC206 | Q9NWB6 | 0.68336  |
| 2057 | POC206 | A2A288 | 0.59298  |
| 2058 | POC206 | Q14832 | 0.2659   |
| 2059 | POC206 | Q6PH85 | 0.054344 |
| 2060 | POC206 | Q8NFP0 | 0.35694  |
| 2061 | POC206 | P83881 | 0.78841  |
| 2062 | POC206 | P50221 | 0.64237  |
| 2063 | POC206 | Q96PU8 | 0.24203  |
| 2064 | POC206 | Q9UM63 | 0.43145  |
| 2065 | POC206 | P80303 | 0.26454  |
| 2066 | POC206 | Q3LI83 | 0.82782  |
| 2067 | POC206 | Q8IYD1 | 0.30154  |
| 2068 | POC206 | Q6ZS27 | 0.31657  |
| 2069 | POC206 | P46778 | 0.5404   |
| 2070 | POC206 | Q9Y2P0 | 0.33802  |
| 2071 | POC206 | Q969G5 | 0.49389  |
| 2072 | POC206 | Q8N4M7 | 0.8892   |
| 2073 | POC206 | Q9BRS8 | 0.36917  |
| 2074 | POC206 | Q96MH2 | 1.3957   |
| 2075 | POC206 | Q13951 | 0.72914  |
| 2076 | POC206 | Q52MB2 | 1.1267   |
| 2077 | POC206 | Q9Y2K5 | 0.39535  |
| 2078 | POC206 | P58505 | 0.5238   |
| 2079 | POC206 | Q96MT4 | 0.77288  |
| 2080 | POC206 | P54198 | 1.1704   |
| 2081 | POC206 | Q9UL49 | 0.38073  |
| 2082 | POC206 | A2RTX5 | 0.53365  |
| 2083 | POC206 | Q8N8U2 | 0.5251   |
| 2084 | POC206 | P0CF97 | 0.52929  |
| 2085 | POC206 | Q6ZVD7 | 0.46075  |
| 2086 | POC206 | Q8TBF2 | 0.23628  |
| 2087 | POC206 | Q86VY4 | 0.58242  |
| 2088 | POC206 | P78559 | 0.87252  |
| 2089 | POC206 | Q14011 | 0.2529   |
| 2090 | POC206 | O95561 | 0.69605  |
| 2091 | POC206 | Q96SK3 | 0.38367  |
| 2092 | POC206 | Q8WYK2 | 0.42834  |
| 2093 | POC206 | O75177 | 0.79201  |
| 2094 | POC206 | Q9HAT8 | 0.66492  |
| 2095 | POC206 | Q96MX3 | 0.29643  |
| 2096 | POC206 | O95182 | 0.20428  |
| 2097 | POC206 | Q96SY0 | 0.083767 |
| 2098 | POC206 | Q8NFJ8 | 0.51524  |
| 2099 | POC206 | Q9Y4K1 | 0.85146  |
| 2100 | POC206 | A6NP11 | 0.55334  |
| 2101 | POC206 | A6NJJ6 | 0.68336  |
| 2102 | POC206 | O95070 | 0.31443  |
| 2103 | POC206 | Q8IXR5 | 0.47374  |
| 2104 | POC206 | P59998 | 0.21967  |
| 2105 | POC206 | Q3MIS6 | 0.52141  |
| 2106 | POC206 | Q8WXX7 | 0.38857  |
| 2107 | POC206 | P28838 | 0.63855  |
| 2108 | POC206 | Q15038 | 1.4303   |
| 2109 | POC206 | Q9NQ89 | 0.34123  |
| 2110 | POC206 | P55212 | 0.50915  |
| 2111 | POC206 | Q7Z4H3 | 0.35284  |
| 2112 | POC206 | P51816 | 0.34456  |
| 2113 | POC206 | Q9UL59 | 0.32313  |
| 2114 | POC206 | Q9NUW8 | 0.81815  |
| 2115 | POC206 | Q9H6R7 | 0.13594  |
| 2116 | POC206 | Q96LA8 | 0.78589  |
| 2117 | POC206 | Q9UH90 | 0.55845  |
| 2118 | POC206 | Q6ZUI0 | 0.23887  |
| 2119 | POC206 | Q9NWF9 | 0.95069  |
| 2120 | POC206 | Q3SYF9 | 0.45994  |
| 2121 | POC206 | Q6IA86 | 0.73827  |
| 2122 | POC206 | Q9BZP3 | 0.17085  |
| 2123 | POC206 | Q15173 | 0.41935  |
| 2124 | POC206 | Q9H8Y8 | 0.49329  |
| 2125 | POC206 | Q6NV74 | 0.68336  |
| 2126 | POC206 | P10242 | 0.99475  |
| 2127 | POC206 | Q7Z5K2 | 0.86118  |
| 2128 | POC206 | Q9NRX4 | 0.10285  |

|      |        |        |         |
|------|--------|--------|---------|
| 2129 | POC206 | Q9BZK8 | 0.45994 |
| 2130 | POC206 | P60660 | 0.34028 |
| 2131 | POC206 | Q8NCR6 | 0.44005 |
| 2132 | POC206 | Q9H1A3 | 0.44439 |
| 2133 | POC206 | O00193 | 1.0445  |
| 2134 | POC206 | Q5EBM0 | 0.56883 |
| 2135 | POC206 | Q8N1G0 | 0.41273 |
| 2136 | POC206 | O75764 | 0.44592 |
| 2137 | POC206 | Q09666 | 0.79412 |
| 2138 | POC206 | Q9BYR4 | 0.72851 |
| 2139 | POC206 | Q14442 | 0.20071 |
| 2140 | POC206 | Q5T5Y3 | 0.45536 |
| 2141 | POC206 | Q9Y6Z5 | 0.71488 |
| 2142 | POC206 | Q6ZS17 | 0.57638 |
| 2143 | POC206 | Q6MZN7 | 0.45994 |
| 2144 | POC206 | P42695 | 0.49881 |
| 2145 | POC206 | Q96PS1 | 0.51435 |
| 2146 | POC206 | Q5R3I4 | 0.18354 |
| 2147 | POC206 | Q92791 | 0.15615 |
| 2148 | POC206 | Q96A73 | 1.0191  |
| 2149 | POC206 | Q96QU8 | 1.1459  |
| 2150 | POC206 | Q8NI51 | 0.79718 |
| 2151 | POC206 | Q9H307 | 0.70902 |
| 2152 | POC206 | Q2M238 | 0.12559 |
| 2153 | POC206 | Q9UIF3 | 0.26542 |
| 2154 | POC206 | O14879 | 0.75182 |
| 2155 | POC206 | Q9Y2Z2 | 0.96892 |
| 2156 | POC206 | O00505 | 1.1089  |
| 2157 | POC206 | Q9NXW9 | 0.35992 |
| 2158 | POC206 | Q8TD06 | 0.18407 |
| 2159 | POC206 | Q12768 | 0.11388 |
| 2160 | POC206 | Q9Y614 | 0.13938 |
| 2161 | POC206 | Q75NE6 | 1.1463  |
| 2162 | POC206 | Q9Y448 | 1.0902  |
| 2163 | POC206 | Q9Y462 | 0.84534 |
| 2164 | POC206 | Q1ED39 | 1.0445  |
| 2165 | POC206 | P14651 | 0.27385 |
| 2166 | POC206 | P26196 | 0.55291 |
| 2167 | POC206 | Q9H7H1 | 0.2639  |
| 2168 | POC206 | Q96T51 | 0.37623 |
| 2169 | POC206 | Q92988 | 0.61456 |
| 2170 | POC206 | Q8N196 | 0.81602 |
| 2171 | POC206 | Q9NS39 | 0.17902 |
| 2172 | POC206 | Q0D2K3 | 0.87061 |
| 2173 | POC206 | Q9P278 | 0.90375 |
| 2174 | POC206 | P59942 | 0.67835 |
| 2175 | POC206 | Q9Y3C8 | 0.40369 |
| 2176 | POC206 | Q99618 | 1.1814  |
| 2177 | POC206 | Q16342 | 0.28263 |
| 2178 | POC206 | Q9BT25 | 0.80565 |
| 2179 | POC206 | Q9UGM6 | 0.14938 |
| 2180 | POC206 | Q96EN9 | 0.69097 |
| 2181 | POC206 | Q9BRQ3 | 0.73285 |
| 2182 | POC206 | Q8N1Q8 | 0.60148 |
| 2183 | POC206 | Q9H2L5 | 0.87062 |
| 2184 | POC206 | P08729 | 1.4732  |
| 2185 | POC206 | Q8N661 | 0.64377 |
| 2186 | POC206 | P50749 | 0.89964 |
| 2187 | POC206 | O15499 | 0.2556  |
| 2188 | POC206 | Q8TC90 | 0.79065 |
| 2189 | POC206 | Q6ZMY9 | 0.53257 |
| 2190 | POC206 | Q29RF7 | 1.1672  |
| 2191 | POC206 | P53041 | 0.7766  |
| 2192 | POC206 | Q3SYA9 | 0.51591 |
| 2193 | POC206 | Q9ULJ6 | 0.90636 |
| 2194 | POC206 | Q15637 | 0.42301 |
| 2195 | POC206 | P10073 | 0.44562 |
| 2196 | POC206 | O60220 | 0.64749 |
| 2197 | POC206 | Q03468 | 0.51472 |
| 2198 | POC206 | Q6XXX2 | 0.11382 |
| 2199 | POC206 | Q96K30 | 0.99188 |
| 2200 | POC206 | Q3KNT7 | 0.30509 |
| 2201 | POC206 | Q8N660 | 1.4923  |
| 2202 | POC206 | O60269 | 0.17214 |
| 2203 | POC206 | Q8NFZ5 | 0.99344 |
| 2204 | POC206 | Q9NW81 | 0.10451 |

|      |        |        |          |
|------|--------|--------|----------|
| 2205 | POC206 | Q96KP1 | 0.419    |
| 2206 | POC206 | Q5HYW3 | 1.0332   |
| 2207 | POC206 | Q8WZ33 | 1.0745   |
| 2208 | POC206 | Q52LR7 | 0.64687  |
| 2209 | POC206 | Q53GL7 | 0.60105  |
| 2210 | POC206 | Q94850 | 0.41823  |
| 2211 | POC206 | Q5JXC2 | 0.16439  |
| 2212 | POC206 | Q96BP2 | 1.3466   |
| 2213 | POC206 | B2RUZ4 | 1.2147   |
| 2214 | POC206 | Q96AA8 | 0.49055  |
| 2215 | POC206 | Q15265 | 1.2917   |
| 2216 | POC206 | Q9H9R9 | 0.16163  |
| 2217 | POC206 | Q68EA5 | 0.55028  |
| 2218 | POC206 | Q9BYG5 | 0.79147  |
| 2219 | POC206 | P23409 | 0.087497 |
| 2220 | POC206 | Q96JF6 | 0.27659  |
| 2221 | POC206 | Q9UK59 | 0.053719 |
| 2222 | POC206 | P0C853 | 0.45994  |
| 2223 | POC206 | Q9BPZ2 | 0.59481  |
| 2224 | POC206 | Q7RTT3 | 0.26627  |
| 2225 | POC206 | Q3SY52 | 0.32283  |
| 2226 | POC206 | Q96G75 | 0.076523 |
| 2227 | POC206 | Q9Y383 | 0.62702  |
| 2228 | POC206 | Q6PGQ7 | 1.3886   |
| 2229 | POC206 | Q9HCX3 | 0.26061  |
| 2230 | POC206 | Q86VQ0 | 0.52885  |
| 2231 | POC206 | A6NFQ2 | 0.63765  |
| 2232 | POC206 | Q9NYP9 | 0.53848  |
| 2233 | POC206 | A6NFD8 | 0.32363  |
| 2234 | POC206 | Q16890 | 0.48262  |
| 2235 | POC206 | Q9HCI6 | 0.43332  |
| 2236 | POC206 | Q14457 | 0.67604  |
| 2237 | POC206 | Q43318 | 0.65041  |
| 2238 | POC206 | Q9Y5Z7 | 0.54355  |
| 2239 | POC206 | Q9NVH6 | 0.31804  |
| 2240 | POC206 | P61568 | 0.44044  |
| 2241 | POC206 | P56277 | 0.82577  |
| 2242 | POC206 | P0C852 | 0.45994  |
| 2243 | POC206 | Q8N680 | 0.20949  |
| 2244 | POC206 | Q8WX93 | 0.38321  |
| 2245 | POC206 | Q9NSQ0 | 0.36238  |
| 2246 | POC206 | Q86VN1 | 0.65634  |
| 2247 | POC206 | Q75175 | 1.4632   |
| 2248 | POC206 | Q60493 | 0.22931  |
| 2249 | POC206 | A1L168 | 0.68336  |
| 2250 | POC206 | Q15021 | 1.0189   |
| 2251 | POC206 | Q96PY6 | 0.46267  |
| 2252 | POC206 | Q96JN2 | 0.72128  |
| 2253 | POC206 | Q75586 | 0.83148  |
| 2254 | POC206 | A6NDD8 | 0.90881  |
| 2255 | POC206 | Q8IZW8 | 0.49972  |
| 2256 | POC206 | Q9UBC0 | 0.23085  |
| 2257 | POC206 | P36551 | 0.16535  |
| 2258 | POC206 | Q96EZ4 | 0.45994  |
| 2259 | POC206 | P63151 | 0.43061  |
| 2260 | POC206 | Q60828 | 0.99879  |
| 2261 | POC206 | P59090 | 0.45994  |
| 2262 | POC206 | Q15654 | 1.0726   |
| 2263 | POC206 | Q96P70 | 1.149    |
| 2264 | POC206 | Q16666 | 0.70329  |
| 2265 | POC206 | P15336 | 0.9487   |
| 2266 | POC206 | P19338 | 0.56667  |
| 2267 | POC206 | P53673 | 0.51208  |
| 2268 | POC206 | Q9HC44 | 1.435    |
| 2269 | POC206 | P49755 | 0.19472  |
| 2270 | POC206 | P12980 | 0.96557  |
| 2271 | POC206 | Q86T23 | 0.055708 |
| 2272 | POC206 | Q6PDB4 | 0.58046  |
| 2273 | POC206 | Q8NCU1 | 0.26306  |
| 2274 | POC206 | Q86UD4 | 0.27655  |
| 2275 | POC206 | Q6ECI4 | 0.41273  |
| 2276 | POC206 | Q2VPJ9 | 0.68336  |
| 2277 | POC206 | O00444 | 0.28609  |
| 2278 | POC206 | P62263 | 0.53273  |
| 2279 | POC206 | Q9NP98 | 0.5815   |
| 2280 | POC206 | Q5JPH6 | 0.56976  |

|      |        |        |          |
|------|--------|--------|----------|
| 2281 | POC206 | Q53EQ6 | 0.56891  |
| 2282 | POC206 | P0CJ86 | 0.386    |
| 2283 | POC206 | Q96TA1 | 0.45104  |
| 2284 | POC206 | Q9UJW8 | 0.29181  |
| 2285 | POC206 | Q6UW56 | 0.25807  |
| 2286 | POC206 | Q9NP81 | 0.3615   |
| 2287 | POC206 | Q9GZP4 | 0.02976  |
| 2288 | POC206 | O95886 | 0.57042  |
| 2289 | POC206 | P55327 | 0.40226  |
| 2290 | POC206 | O00232 | 0.092063 |
| 2291 | POC206 | Q9NZJ4 | 0.18688  |
| 2292 | POC206 | Q17RM4 | 0.39376  |
| 2293 | POC206 | Q9NQG5 | 1.2325   |
| 2294 | POC206 | Q6ICB4 | 0.30783  |
| 2295 | POC206 | P26358 | 0.50204  |
| 2296 | POC206 | Q5JRA6 | 0.032758 |
| 2297 | POC206 | Q969H0 | 0.73456  |
| 2298 | POC206 | Q27J81 | 0.29328  |
| 2299 | POC206 | Q9H320 | 0.91525  |
| 2300 | POC206 | Q6WBX8 | 0.56512  |
| 2301 | POC206 | Q13536 | 0.45994  |
| 2302 | POC206 | Q12901 | 0.43551  |
| 2303 | POC206 | Q9UPQ9 | 0.40862  |
| 2304 | POC206 | O75690 | 0.45994  |
| 2305 | POC206 | Q969J2 | 0.32173  |
| 2306 | POC206 | Q86TU7 | 0.36308  |
| 2307 | POC206 | Q8TAB5 | 0.68336  |
| 2308 | POC206 | P60410 | 1.0016   |
| 2309 | POC206 | Q9BUB7 | 0.73128  |
| 2310 | POC206 | Q86WU2 | 0.073055 |
| 2311 | POC206 | P06746 | 0.67989  |
| 2312 | POC206 | P29728 | 0.15181  |
| 2313 | POC206 | P52738 | 0.30066  |
| 2314 | POC206 | Q1W209 | 0.45994  |
| 2315 | POC206 | P30154 | 0.42373  |
| 2316 | POC206 | Q8N7G0 | 0.43565  |
| 2317 | POC206 | Q15653 | 1.0885   |
| 2318 | POC206 | Q96CM4 | 0.23855  |
| 2319 | POC206 | O75157 | 0.36156  |
| 2320 | POC206 | Q9UIH9 | 0.55088  |
| 2321 | POC206 | Q16822 | 0.16136  |
| 2322 | POC206 | Q9UFW8 | 0.55794  |
| 2323 | POC206 | O95848 | 0.65973  |
| 2324 | POC206 | P48553 | 0.1353   |
| 2325 | POC206 | Q13243 | 0.67525  |
| 2326 | POC206 | Q12874 | 0.5154   |
| 2327 | POC206 | Q9Y2J8 | 0.58482  |
| 2328 | POC206 | Q16629 | 0.62748  |
| 2329 | POC206 | Q96RM1 | 0.45994  |
| 2330 | POC206 | Q7KZF4 | 0.96832  |
| 2331 | POC206 | Q92541 | 1.1349   |
| 2332 | POC206 | Q04727 | 0.76896  |
| 2333 | POC206 | Q8TBZ6 | 0.4219   |
| 2334 | POC206 | Q96NU1 | 0.11775  |
| 2335 | POC206 | P62273 | 0.82478  |
| 2336 | POC206 | Q8IU53 | 0.47048  |
| 2337 | POC206 | Q86U42 | 0.58898  |
| 2338 | POC206 | Q92800 | 0.63799  |
| 2339 | POC206 | P0C2Y1 | 0.17444  |
| 2340 | POC206 | Q3LHN0 | 1.0016   |
| 2341 | POC206 | Q6P656 | 0.14473  |
| 2342 | POC206 | Q9BYD5 | 0.108    |
| 2343 | POC206 | Q99698 | 0.29216  |
| 2344 | POC206 | Q2M389 | 0.28525  |
| 2345 | POC206 | Q15572 | 0.80593  |
| 2346 | POC206 | Q709C8 | 0.64944  |
| 2347 | POC206 | Q15631 | 0.75011  |
| 2348 | POC206 | Q9UJY4 | 0.64329  |
| 2349 | POC206 | P55055 | 0.39149  |
| 2350 | POC206 | P17027 | 0.27283  |
| 2351 | POC206 | H3BMG3 | 0.27581  |
| 2352 | POC206 | Q8TF09 | 0.7026   |
| 2353 | POC206 | Q9NWQ4 | 0.60952  |
| 2354 | POC206 | P54098 | 0.51246  |
| 2355 | POC206 | Q8WVV9 | 0.088662 |
| 2356 | POC206 | Q9Y2B5 | 0.31806  |

|      |        |        |          |
|------|--------|--------|----------|
| 2357 | POC206 | P51508 | 0.33397  |
| 2358 | POC206 | P57086 | 0.56824  |
| 2359 | POC206 | Q92670 | 0.31064  |
| 2360 | POC206 | Q9Y2G4 | 0.26133  |
| 2361 | POC206 | Q9UER7 | 1.0211   |
| 2362 | POC206 | Q66K80 | 0.45994  |
| 2363 | POC206 | Q00610 | 0.93224  |
| 2364 | POC206 | Q8N8I6 | 0.45994  |
| 2365 | POC206 | Q9H6U6 | 0.95531  |
| 2366 | POC206 | Q6QNY1 | 0.84053  |
| 2367 | POC206 | Q96MY7 | 1.2292   |
| 2368 | POC206 | P00915 | 0.24082  |
| 2369 | POC206 | Q9Y3C1 | 0.31029  |
| 2370 | POC206 | Q5THK1 | 0.083824 |
| 2371 | POC206 | Q8NFT6 | 0.22346  |
| 2372 | POC206 | Q8N7M2 | 0.55028  |
| 2373 | POC206 | Q96QG7 | 0.39214  |
| 2374 | POC206 | B7Z1M9 | 0.014963 |
| 2375 | POC206 | O60765 | 0.36178  |
| 2376 | POC206 | Q5W1A9 | 0.48572  |
| 2377 | POC206 | Q9BZD4 | 0.90396  |
| 2378 | POC206 | Q9NPI6 | 1.0231   |
| 2379 | POC206 | Q7LBC6 | 0.26783  |
| 2380 | POC206 | P62314 | 0.76079  |
| 2381 | POC206 | Q6ZRS2 | 0.51058  |
| 2382 | POC206 | Q6P2C8 | 1.0826   |
| 2383 | POC206 | Q3SY05 | 0.0422   |
| 2384 | POC206 | P62316 | 0.76246  |
| 2385 | POC206 | P20248 | 1.1559   |
| 2386 | POC206 | Q9P215 | 0.32086  |
| 2387 | POC206 | O96007 | 0.78161  |
| 2388 | POC206 | Q13278 | 0.64714  |
| 2389 | POC206 | A8MUU9 | 0.34884  |
| 2390 | POC206 | Q5SXM1 | 0.41197  |
| 2391 | POC206 | Q8IWE4 | 0.317    |
| 2392 | POC206 | Q5H9B9 | 0.045861 |
| 2393 | POC206 | P19012 | 0.78982  |
| 2394 | POC206 | O43390 | 0.47776  |
| 2395 | POC206 | Q5VWM5 | 0.81386  |
| 2396 | POC206 | Q86U28 | 0.077271 |
| 2397 | POC206 | Q6P597 | 0.27115  |
| 2398 | POC206 | Q8N9R0 | 0.45994  |
| 2399 | POC206 | Q5BKU9 | 0.095875 |
| 2400 | POC206 | A6NKN8 | 0.95298  |
| 2401 | POC206 | Q6ICG6 | 0.18351  |
| 2402 | POC206 | Q8IWZ3 | 1.0245   |
| 2403 | POC206 | Q8IXT1 | 0.32349  |
| 2404 | POC206 | P60900 | 0.32303  |
| 2405 | POC206 | O43734 | 0.68336  |
| 2406 | POC206 | O75618 | 1.3068   |
| 2407 | POC206 | A1A580 | 0.70835  |
| 2408 | POC206 | Q00625 | 0.64288  |
| 2409 | POC206 | Q9Y3C7 | 1.0339   |
| 2410 | POC206 | Q9BRJ7 | 0.71047  |
| 2411 | POC206 | A6NEY3 | 0.93098  |
| 2412 | POC206 | P43268 | 0.55392  |
| 2413 | POC206 | Q96T23 | 0.81684  |
| 2414 | POC206 | Q96LR5 | 0.7632   |
| 2415 | POC206 | Q5TAA0 | 0.040521 |
| 2416 | POC206 | Q8NE31 | 0.17286  |
| 2417 | POC206 | P61201 | 0.62358  |
| 2418 | POC206 | Q9UHC1 | 0.54636  |
| 2419 | POC206 | Q96DE0 | 1.0862   |
| 2420 | POC206 | Q96MG7 | 0.99205  |
| 2421 | POC206 | Q6ZW13 | 0.45994  |
| 2422 | POC206 | Q9UBD5 | 0.64381  |
| 2423 | POC206 | Q9H761 | 0.093689 |
| 2424 | POC206 | I6L9F6 | 0.25827  |
| 2425 | POC206 | Q9HCG1 | 0.42023  |
| 2426 | POC206 | O75467 | 0.28839  |
| 2427 | POC206 | Q8N999 | 0.3399   |
| 2428 | POC206 | Q9NVR7 | 0.28514  |
| 2429 | POC206 | Q9BS34 | 0.28876  |
| 2430 | POC206 | Q96C00 | 0.55449  |
| 2431 | POC206 | Q92922 | 1.0752   |
| 2432 | POC206 | Q8NHZ7 | 0.55385  |

|      |        |        |           |
|------|--------|--------|-----------|
| 2433 | POC206 | Q6UVJ0 | 1.0219    |
| 2434 | POC206 | Q9BSF4 | 0.0023501 |
| 2435 | POC206 | O15397 | 0.98986   |
| 2436 | POC206 | Q9BUI4 | 0.31323   |
| 2437 | POC206 | Q5H9R4 | 1.0721    |
| 2438 | POC206 | Q6KB66 | 0.30526   |
| 2439 | POC206 | Q8IZY5 | 0.21369   |
| 2440 | POC206 | Q9UDY2 | 1.0609    |
| 2441 | POC206 | Q02878 | 1.1159    |
| 2442 | POC206 | Q70EL1 | 0.47204   |
| 2443 | POC206 | P62837 | 0.93071   |
| 2444 | POC206 | O60318 | 0.63092   |
| 2445 | POC206 | Q96JB2 | 0.96883   |
| 2446 | POC206 | Q13895 | 0.92999   |
| 2447 | POC206 | Q9UHY8 | 0.40338   |
| 2448 | POC206 | Q9H9E1 | 0.36017   |
| 2449 | POC206 | Q15306 | 0.88347   |
| 2450 | POC206 | Q9Y5Z9 | 0.39263   |
| 2451 | POC206 | O14531 | 0.24153   |
| 2452 | POC206 | Q7Z7F1 | 0.29253   |
| 2453 | POC206 | Q9UHZ2 | 0.45994   |
| 2454 | POC206 | O60831 | 1.129     |
| 2455 | POC206 | Q8IUD2 | 1.0006    |
| 2456 | POC206 | A8MYP8 | 0.35945   |
| 2457 | POC206 | P21953 | 0.15545   |
| 2458 | POC206 | Q9BZE7 | 0.68336   |
| 2459 | POC206 | P15621 | 0.53327   |
| 2460 | POC206 | Q75626 | 0.33872   |
| 2461 | POC206 | Q05BU3 | 0.45994   |
| 2462 | POC206 | P53804 | 0.84379   |
| 2463 | POC206 | Q9NVH2 | 0.36981   |
| 2464 | POC206 | Q9Y5B9 | 0.42455   |
| 2465 | POC206 | Q9NS91 | 0.39985   |
| 2466 | POC206 | Q5W5X9 | 0.39734   |
| 2467 | POC206 | E9PI22 | 0.69362   |
| 2468 | POC206 | P42771 | 0.59403   |
| 2469 | POC206 | Q9H6Y2 | 0.53407   |
| 2470 | POC206 | P55735 | 0.65456   |
| 2471 | POC206 | Q8N1A6 | 0.019386  |
| 2472 | POC206 | Q9Y5J9 | 0.65827   |
| 2473 | POC206 | Q0VD86 | 0.54755   |
| 2474 | POC206 | Q9HA77 | 0.52634   |
| 2475 | POC206 | Q6ZSR6 | 0.33889   |
| 2476 | POC206 | P09565 | 0.3124    |
| 2477 | POC206 | Q96GG9 | 0.38469   |
| 2478 | POC206 | Q8NHU2 | 0.032616  |
| 2479 | POC206 | Q9Y6Z4 | 0.15001   |
| 2480 | POC206 | A6NLF2 | 0.39141   |
| 2481 | POC206 | Q9P0J6 | 0.68062   |
| 2482 | POC206 | Q9Y5Y2 | 0.44977   |
| 2483 | POC206 | P56555 | 0.69079   |
| 2484 | POC206 | Q9UKV8 | 0.82059   |
| 2485 | POC206 | Q9P2K3 | 1.3927    |
| 2486 | POC206 | P38117 | 0.33071   |
| 2487 | POC206 | Q9P2R7 | 0.40907   |
| 2488 | POC206 | P43360 | 0.50382   |
| 2489 | POC206 | Q9NWU5 | 0.66712   |
| 2490 | POC206 | Q6ZNE5 | 0.49781   |
| 2491 | POC206 | Q8N7K0 | 0.40539   |
| 2492 | POC206 | Q8NDZ0 | 0.20799   |
| 2493 | POC206 | Q8WXQ3 | 1.0819    |
| 2494 | POC206 | Q7Z794 | 0.46471   |
| 2495 | POC206 | O94829 | 1.1898    |
| 2496 | POC206 | Q569K4 | 0.17322   |
| 2497 | POC206 | A8MWP6 | 0.45994   |
| 2498 | POC206 | Q13342 | 0.89721   |
| 2499 | POC206 | A8K8P3 | 0.90776   |
| 2500 | POC206 | Q3LI67 | 0.45994   |
| 2501 | POC206 | Q9ULJ3 | 0.83273   |
| 2502 | POC206 | P51522 | 0.32168   |
| 2503 | POC206 | Q9BZA5 | 0.94725   |
| 2504 | POC206 | Q13316 | 0.34493   |
| 2505 | POC206 | P17535 | 1.0243    |
| 2506 | POC206 | P68543 | 0.32228   |
| 2507 | POC206 | Q99909 | 0.26627   |
| 2508 | POC206 | Q16543 | 0.46836   |

|      |        |        |         |
|------|--------|--------|---------|
| 2509 | POC206 | Q9H098 | 0.82754 |
| 2510 | POC206 | Q9NRL2 | 1.222   |
| 2511 | POC206 | A8MSI8 | 1.3223  |
| 2512 | POC206 | Q9UPV0 | 1.8082  |
| 2513 | POC206 | Q13547 | 0.78569 |
| 2514 | POC206 | Q94777 | 0.52097 |
| 2515 | POC206 | Q96LM6 | 0.11206 |
| 2516 | POC206 | Q8NEK8 | 0.77807 |
| 2517 | POC206 | Q99550 | 0.60888 |
| 2518 | POC206 | P78386 | 0.45381 |
| 2519 | POC206 | Q96Q35 | 0.54627 |
| 2520 | POC206 | P43355 | 1.2455  |
| 2521 | POC206 | Q5T653 | 0.60285 |
| 2522 | POC206 | Q8N0Y2 | 0.29094 |
| 2523 | POC206 | Q86SY8 | 0.45994 |
| 2524 | POC206 | Q9H6V9 | 0.527   |
| 2525 | POC206 | Q86YD7 | 0.42457 |
| 2526 | POC206 | Q8TAF7 | 0.51209 |
| 2527 | POC206 | P34897 | 0.20651 |
| 2528 | POC206 | A6NGG3 | 0.45994 |
| 2529 | POC206 | Q96JN8 | 0.40632 |
| 2530 | POC206 | Q01844 | 0.7475  |
| 2531 | POC206 | Q14186 | 1.3226  |
| 2532 | POC206 | Q6ZP65 | 0.24207 |
| 2533 | POC206 | P13056 | 0.81925 |
| 2534 | POC206 | Q9Y2T2 | 0.69821 |
| 2535 | POC206 | Q99962 | 0.32481 |
| 2536 | POC206 | P04792 | 0.41545 |
| 2537 | POC206 | Q8NHR7 | 0.26593 |
| 2538 | POC206 | Q8IZT6 | 0.54086 |
| 2539 | POC206 | Q96SD1 | 0.17067 |
| 2540 | POC206 | Q13066 | 0.23762 |
| 2541 | POC206 | Q16531 | 0.74861 |
| 2542 | POC206 | Q9UI66 | 0.45994 |
| 2543 | POC206 | Q9BSI4 | 0.50666 |
| 2544 | POC206 | Q7Z624 | 0.20259 |
| 2545 | POC206 | P17023 | 0.29427 |
| 2546 | POC206 | Q9NPC3 | 0.26363 |
| 2547 | POC206 | Q15035 | 0.25162 |
| 2548 | POC206 | Q7LG56 | 0.33395 |
| 2549 | POC206 | Q9P267 | 0.31141 |
| 2550 | POC206 | A7E2V4 | 1.4143  |
| 2551 | POC206 | Q13416 | 0.60613 |
| 2552 | POC206 | Q96KM6 | 0.41956 |
| 2553 | POC206 | P49715 | 0.22832 |
| 2554 | POC206 | Q9H410 | 1.0647  |
| 2555 | POC206 | Q14746 | 0.51887 |
| 2556 | POC206 | Q8N0Z6 | 0.52183 |
| 2557 | POC206 | Q9BWN1 | 0.68336 |
| 2558 | POC206 | Q6ZN30 | 0.42433 |
| 2559 | POC206 | Q9UBX3 | 0.37001 |
| 2560 | POC206 | Q9UKJ5 | 0.42177 |
| 2561 | POC206 | Q95671 | 0.63932 |
| 2562 | POC206 | Q8N729 | 0.35747 |
| 2563 | POC206 | Q8TAT6 | 0.6314  |
| 2564 | POC206 | Q6ZS49 | 0.45994 |
| 2565 | POC206 | Q9C0F0 | 0.58025 |
| 2566 | POC206 | P35754 | 0.42635 |
| 2567 | POC206 | Q03936 | 0.53574 |
| 2568 | POC206 | Q9BQ87 | 0.58122 |
| 2569 | POC206 | Q94776 | 1.177   |
| 2570 | POC206 | Q9ULL5 | 0.45994 |
| 2571 | POC206 | Q9UBZ4 | 0.29883 |
| 2572 | POC206 | Q8N1L1 | 0.45994 |
| 2573 | POC206 | Q96G27 | 0.49089 |
| 2574 | POC206 | P31268 | 0.38707 |
| 2575 | POC206 | P36956 | 0.27605 |
| 2576 | POC206 | Q9UKA2 | 0.59519 |
| 2577 | POC206 | Q13398 | 0.52124 |
| 2578 | POC206 | Q9UGK8 | 0.80995 |
| 2579 | POC206 | Q9H9L7 | 0.40402 |
| 2580 | POC206 | P07320 | 0.93459 |
| 2581 | POC206 | P17483 | 0.16045 |
| 2582 | POC206 | Q9Y4U1 | 0.19633 |
| 2583 | POC206 | Q14140 | 1.5563  |
| 2584 | POC206 | P10072 | 0.3328  |

|      |        |        |          |
|------|--------|--------|----------|
| 2585 | POC206 | P29373 | 0.24027  |
| 2586 | POC206 | Q86TX2 | 0.24718  |
| 2587 | POC206 | A2A368 | 0.039454 |
| 2588 | POC206 | Q6ICG8 | 1.3903   |
| 2589 | POC206 | P42772 | 0.90994  |
| 2590 | POC206 | Q9HCS4 | 0.25075  |
| 2591 | POC206 | Q96MB7 | 0.48821  |
| 2592 | POC206 | Q9H503 | 0.46075  |
| 2593 | POC206 | Q6P1X6 | 0.75667  |
| 2594 | POC206 | P98170 | 0.33575  |
| 2595 | POC206 | Q8N888 | 0.83536  |
| 2596 | POC206 | Q7Z6G3 | 0.54852  |
| 2597 | POC206 | P50991 | 0.411    |
| 2598 | POC206 | Q96DZ1 | 0.35861  |
| 2599 | POC206 | P62495 | 0.55699  |
| 2600 | POC206 | Q6ZTI0 | 0.45994  |
| 2601 | POC206 | A6QL64 | 0.55812  |
| 2602 | POC206 | Q13596 | 0.41023  |
| 2603 | POC206 | P30305 | 0.51785  |
| 2604 | POC206 | O15164 | 0.32369  |
| 2605 | POC206 | Q8IUW3 | 0.85025  |
| 2606 | POC206 | Q93009 | 0.4233   |
| 2607 | POC206 | Q9H668 | 0.3687   |
| 2608 | POC206 | Q5T5F5 | 0.45994  |
| 2609 | POC206 | O75494 | 0.5249   |
| 2610 | POC206 | Q5SVJ3 | 0.2338   |
| 2611 | POC206 | P19484 | 0.6575   |
| 2612 | POC206 | O94952 | 0.6443   |
| 2613 | POC206 | Q9UJ98 | 0.54911  |
| 2614 | POC206 | C9JN71 | 0.39006  |
| 2615 | POC206 | Q5T953 | 0.86655  |
| 2616 | POC206 | Q8NFR7 | 0.64513  |
| 2617 | POC206 | Q9UM07 | 0.58459  |
| 2618 | POC206 | Q9H9L4 | 0.36815  |
| 2619 | POC206 | P0CJ69 | 0.67101  |
| 2620 | POC206 | Q17RH7 | 0.45994  |
| 2621 | POC206 | Q9BYR6 | 1.0016   |
| 2622 | POC206 | Q7RTV3 | 0.56017  |
| 2623 | POC206 | Q14591 | 0.24995  |
| 2624 | POC206 | Q96A22 | 0.45221  |
| 2625 | POC206 | P35237 | 0.42166  |
| 2626 | POC206 | Q6PF18 | 0.15746  |
| 2627 | POC206 | Q13021 | 0.29567  |
| 2628 | POC206 | P49902 | 0.087987 |
| 2629 | POC206 | Q8N9U9 | 0.060157 |
| 2630 | POC206 | Q9UBL0 | 0.2437   |
| 2631 | POC206 | Q6ZUU3 | 0.45994  |
| 2632 | POC206 | Q5VWQ0 | 1.2857   |
| 2633 | POC206 | O60524 | 0.9166   |
| 2634 | POC206 | Q96T92 | 0.42986  |
| 2635 | POC206 | P62826 | 0.67984  |
| 2636 | POC206 | P12524 | 0.32741  |
| 2637 | POC206 | Q9BQE9 | 0.68913  |
| 2638 | POC206 | Q9H816 | 0.70382  |
| 2639 | POC206 | Q99816 | 0.52126  |
| 2640 | POC206 | Q8IUD6 | 0.51069  |
| 2641 | POC206 | Q2TAZ0 | 0.44439  |
| 2642 | POC206 | Q8IXQ6 | 0.92623  |
| 2643 | POC206 | C9JBD0 | 0.58414  |
| 2644 | POC206 | Q5JR59 | 1.3495   |
| 2645 | POC206 | Q9BZS9 | 0.45994  |
| 2646 | POC206 | P82673 | 0.18636  |
| 2647 | POC206 | P0CL83 | 0.68606  |
| 2648 | POC206 | Q2KHM9 | 0.20739  |
| 2649 | POC206 | P41970 | 1.0167   |
| 2650 | POC206 | Q5HYI7 | 1.1742   |
| 2651 | POC206 | Q9H496 | 0.21607  |
| 2652 | POC206 | Q9NWZ5 | 0.11483  |
| 2653 | POC206 | O60813 | 0.38437  |
| 2654 | POC206 | Q9NQX0 | 0.12031  |
| 2655 | POC206 | Q5VWM3 | 0.085585 |
| 2656 | POC206 | Q04760 | 0.06161  |
| 2657 | POC206 | Q86VE0 | 1.2946   |
| 2658 | POC206 | P20962 | 0.60982  |
| 2659 | POC206 | O94888 | 0.55039  |
| 2660 | POC206 | O75437 | 0.51743  |



|      |        |        |          |
|------|--------|--------|----------|
| 2661 | POC206 | Q8TDH9 | 0.27092  |
| 2662 | POC206 | P58512 | 0.61091  |
| 2663 | POC206 | Q9NRX2 | 0.48633  |
| 2664 | POC206 | Q04725 | 0.98146  |
| 2665 | POC206 | Q6AI39 | 0.74106  |
| 2666 | POC206 | Q0P6D6 | 0.03045  |
| 2667 | POC206 | P0CJ73 | 0.67101  |
| 2668 | POC206 | Q9Y3Q8 | 1.3793   |
| 2669 | POC206 | A8MTA8 | 0.24999  |
| 2670 | POC206 | Q9P1Z2 | 0.94589  |
| 2671 | POC206 | Q12968 | 0.74526  |
| 2672 | POC206 | P56693 | 0.63031  |
| 2673 | POC206 | Q6ZUF6 | 0.27483  |
| 2674 | POC206 | Q14590 | 0.29385  |
| 2675 | POC206 | Q04917 | 0.35958  |
| 2676 | POC206 | P51003 | 0.20674  |
| 2677 | POC206 | O95905 | 0.93793  |
| 2678 | POC206 | Q537H7 | 0.069229 |
| 2679 | POC206 | P62280 | 0.84312  |
| 2680 | POC206 | O15524 | 0.25138  |
| 2681 | POC206 | Q9P287 | 0.85041  |
| 2682 | POC206 | O95155 | 0.25947  |
| 2683 | POC206 | Q92993 | 0.98982  |
| 2684 | POC206 | P27348 | 0.43062  |
| 2685 | POC206 | Q8NBZ0 | 1.4644   |
| 2686 | POC206 | Q14699 | 0.47757  |
| 2687 | POC206 | P43490 | 0.30482  |
| 2688 | POC206 | E7ETH6 | 0.32476  |
| 2689 | POC206 | P57740 | 0.8515   |
| 2690 | POC206 | Q96GV9 | 0.56692  |
| 2691 | POC206 | Q86WV6 | 0.13154  |
| 2692 | POC206 | O15205 | 0.60029  |
| 2693 | POC206 | Q9BXT5 | 0.58786  |
| 2694 | POC206 | Q96S94 | 0.47475  |
| 2695 | POC206 | Q6PGN9 | 0.92335  |
| 2696 | POC206 | Q6R2W3 | 0.47807  |
| 2697 | POC206 | O60613 | 0.49346  |
| 2698 | POC206 | Q8N8E1 | 0.36926  |
| 2699 | POC206 | P58004 | 0.46723  |
| 2700 | POC206 | D6RGH6 | 1.3583   |
| 2701 | POC206 | Q12824 | 0.98361  |
| 2702 | POC206 | P43364 | 1.0004   |
| 2703 | POC206 | P49454 | 0.66133  |
| 2704 | POC206 | P18846 | 0.96544  |
| 2705 | POC206 | Q5T1B1 | 1.1299   |
| 2706 | POC206 | P11441 | 0.66463  |
| 2707 | POC206 | A6NN73 | 0.32306  |
| 2708 | POC206 | Q16891 | 0.20144  |
| 2709 | POC206 | Q9HB07 | 0.32821  |
| 2710 | POC206 | Q13158 | 0.44934  |
| 2711 | POC206 | P48380 | 0.45026  |
| 2712 | POC206 | Q8TAE6 | 0.35522  |
| 2713 | POC206 | P49005 | 0.66594  |
| 2714 | POC206 | P0CJ89 | 0.386    |
| 2715 | POC206 | Q9BZW7 | 0.41339  |
| 2716 | POC206 | A6NLC5 | 0.27556  |
| 2717 | POC206 | Q9NRY5 | 1.1724   |
| 2718 | POC206 | Q9UI08 | 0.23113  |
| 2719 | POC206 | Q8WZA9 | 0.68336  |
| 2720 | POC206 | O95678 | 0.37896  |
| 2721 | POC206 | Q68DY1 | 0.53784  |
| 2722 | POC206 | Q9H5V9 | 0.60085  |
| 2723 | POC206 | Q96QE5 | 0.97319  |
| 2724 | POC206 | O14770 | 0.56053  |
| 2725 | POC206 | P22626 | 0.436    |
| 2726 | POC206 | Q9UL03 | 0.99436  |
| 2727 | POC206 | P49321 | 0.83618  |
| 2728 | POC206 | Q9H2U6 | 0.35839  |
| 2729 | POC206 | Q9Y592 | 1.0089   |
| 2730 | POC206 | Q5T0U0 | 0.027102 |
| 2731 | POC206 | O75896 | 0.48326  |
| 2732 | POC206 | Q16589 | 0.55459  |
| 2733 | POC206 | P01009 | 0.37949  |
| 2734 | POC206 | Q9Y376 | 0.27399  |
| 2735 | POC206 | Q96BK5 | 0.65534  |
| 2736 | POC206 | B4DZS4 | 0.30093  |

|      |        |        |            |
|------|--------|--------|------------|
| 2737 | POC206 | O75558 | 0.73039    |
| 2738 | POC206 | A6NFK2 | 0.14453    |
| 2739 | POC206 | D6RB28 | 0.88867    |
| 2740 | POC206 | O15318 | 0.81372    |
| 2741 | POC206 | Q86YP4 | 0.97844    |
| 2742 | POC206 | Q9BXH1 | 0.3776     |
| 2743 | POC206 | P55771 | 0.97535    |
| 2744 | POC206 | Q99996 | 0.68659    |
| 2745 | POC206 | Q5JTJ3 | 0.17879    |
| 2746 | POC206 | P59036 | 0.45994    |
| 2747 | POC206 | Q9HCM7 | 1.1293     |
| 2748 | POC206 | P31939 | 0.38186    |
| 2749 | POC206 | A6NNW6 | 0.58577    |
| 2750 | POC206 | A1A519 | 0.84457    |
| 2751 | POC206 | Q9BZ23 | 0.51497    |
| 2752 | POC206 | Q92542 | 0.37049    |
| 2753 | POC206 | Q2VY69 | 0.37537    |
| 2754 | POC206 | P50453 | 0.69564    |
| 2755 | POC206 | Q9H5L9 | 0.10486    |
| 2756 | POC206 | P41250 | 0.40305    |
| 2757 | POC206 | O15525 | 0.47068    |
| 2758 | POC206 | Q8WYA0 | 0.71247    |
| 2759 | POC206 | P49406 | 0.54712    |
| 2760 | POC206 | P26641 | 0.43345    |
| 2761 | POC206 | Q9Y3R5 | 0.7984     |
| 2762 | POC206 | P54845 | 0.44281    |
| 2763 | POC206 | Q9BX70 | 0.70649    |
| 2764 | POC206 | Q3LI64 | 0.45994    |
| 2765 | POC206 | Q9Y6J9 | 0.92242    |
| 2766 | POC206 | A8K830 | 0.45994    |
| 2767 | POC206 | Q8NE65 | 0.47185    |
| 2768 | POC206 | Q07666 | 0.49311    |
| 2769 | POC206 | P17987 | 0.34931    |
| 2770 | POC206 | Q8TD19 | 0.33775    |
| 2771 | POC206 | Q6ZN06 | 0.52928    |
| 2772 | POC206 | A8MQ11 | 0.27064    |
| 2773 | POC206 | Q9UET6 | 0.78754    |
| 2774 | POC206 | Q9C0B2 | 0.34993    |
| 2775 | POC206 | Q96HE9 | 0.15381    |
| 2776 | POC206 | Q9UI09 | 0.08845    |
| 2777 | POC206 | Q9UNN4 | 0.56845    |
| 2778 | POC206 | Q9H0H0 | 0.2646     |
| 2779 | POC206 | Q8N0U6 | 0.45994    |
| 2780 | POC206 | Q9UI47 | 0.35308    |
| 2781 | POC206 | Q13616 | 0.5787     |
| 2782 | POC206 | Q86WR0 | 0.31338    |
| 2783 | POC206 | Q6NUI1 | 0.78014    |
| 2784 | POC206 | O00716 | 1.1542     |
| 2785 | POC206 | Q8NA57 | 0.986      |
| 2786 | POC206 | Q6ZNB6 | 0.38992    |
| 2787 | POC206 | O95751 | 0.70721    |
| 2788 | POC206 | Q8N9N8 | 0.17369    |
| 2789 | POC206 | Q13330 | 0.73149    |
| 2790 | POC206 | Q6ZVX7 | 0.65428    |
| 2791 | POC206 | Q96A26 | 0.18473    |
| 2792 | POC206 | Q12933 | 0.59313    |
| 2793 | POC206 | P15976 | 0.35432    |
| 2794 | POC206 | Q6P5R6 | 0.30234    |
| 2795 | POC206 | Q6PGP7 | 0.88537    |
| 2796 | POC206 | Q14533 | 0.886      |
| 2797 | POC206 | Q96BQ5 | 0.84515    |
| 2798 | POC206 | Q02040 | 0.4553     |
| 2799 | POC206 | P14621 | 0.017215   |
| 2800 | POC206 | Q8NFR3 | 0.34031    |
| 2801 | POC206 | P34949 | 0.42497    |
| 2802 | POC206 | O60884 | 0.57406    |
| 2803 | POC206 | Q9BTL3 | 0.58488    |
| 2804 | POC206 | Q5TCZ1 | 0.24648    |
| 2805 | POC206 | P10768 | 0.38233    |
| 2806 | POC206 | Q01201 | 1.1864     |
| 2807 | POC206 | Q5W111 | 0.17909    |
| 2808 | POC206 | O60299 | 0.47425    |
| 2809 | POC206 | A6NNF4 | 0.4071     |
| 2810 | POC206 | Q96LT6 | 0.31725    |
| 2811 | POC206 | Q8N3I7 | 0.3313     |
| 2812 | POC206 | Q9H4I3 | 0.00066993 |

|      |        |        |          |
|------|--------|--------|----------|
| 2813 | POC206 | Q92783 | 0.7337   |
| 2814 | POC206 | P49642 | 0.31987  |
| 2815 | POC206 | Q86UE3 | 0.39234  |
| 2816 | POC206 | Q96G04 | 0.067794 |
| 2817 | POC206 | Q99497 | 0.10505  |
| 2818 | POC206 | Q9Y4E1 | 0.63197  |
| 2819 | POC206 | Q8N7B6 | 0.57     |
| 2820 | POC206 | O75529 | 0.67976  |
| 2821 | POC206 | Q92925 | 0.67212  |
| 2822 | POC206 | A1A5D9 | 0.84853  |
| 2823 | POC206 | P61956 | 0.79842  |
| 2824 | POC206 | A6NJI1 | 0.27123  |
| 2825 | POC206 | O43809 | 0.63192  |
| 2826 | POC206 | Q9BYA6 | 0.45994  |
| 2827 | POC206 | Q99829 | 0.3117   |
| 2828 | POC206 | Q86VX2 | 1.0265   |
| 2829 | POC206 | Q9H1H9 | 0.7666   |
| 2830 | POC206 | Q9BQS6 | 0.96806  |
| 2831 | POC206 | Q9H0I3 | 0.61188  |
| 2832 | POC206 | Q86YL5 | 0.33365  |
| 2833 | POC206 | Q86XK3 | 0.85437  |
| 2834 | POC206 | P0C7T5 | 0.45264  |
| 2835 | POC206 | Q86X83 | 0.60104  |
| 2836 | POC206 | Q13287 | 0.62191  |
| 2837 | POC206 | P49116 | 0.70739  |
| 2838 | POC206 | Q9ULX6 | 0.59579  |
| 2839 | POC206 | P67775 | 0.79541  |
| 2840 | POC206 | Q96BZ8 | 0.68336  |
| 2841 | POC206 | O00458 | 0.88505  |
| 2842 | POC206 | Q8TB72 | 0.54766  |
| 2843 | POC206 | Q969E2 | 0.64316  |
| 2844 | POC206 | Q9BWD3 | 0.88264  |
| 2845 | POC206 | P41218 | 0.82589  |
| 2846 | POC206 | Q9H3J6 | 0.90521  |
| 2847 | POC206 | Q96B26 | 0.6731   |
| 2848 | POC206 | O15145 | 0.1868   |
| 2849 | POC206 | Q5HYR2 | 0.85318  |
| 2850 | POC206 | Q15532 | 1.1108   |
| 2851 | POC206 | Q6ICB0 | 0.81632  |
| 2852 | POC206 | Q17RB0 | 0.6858   |
| 2853 | POC206 | Q15050 | 0.79557  |
| 2854 | POC206 | Q9UQF2 | 0.53399  |
| 2855 | POC206 | Q9H0G5 | 0.53064  |
| 2856 | POC206 | Q96KQ4 | 1.0547   |
| 2857 | POC206 | Q6PK04 | 0.99682  |
| 2858 | POC206 | Q6IPT2 | 1.2191   |
| 2859 | POC206 | Q5EBM4 | 0.20949  |
| 2860 | POC206 | Q9HB58 | 0.5606   |
| 2861 | POC206 | P30622 | 0.4145   |
| 2862 | POC206 | P47224 | 0.29706  |
| 2863 | POC206 | Q9HD15 | 0.70263  |
| 2864 | POC206 | P62857 | 0.66383  |
| 2865 | POC206 | Q8N9K7 | 0.45994  |
| 2866 | POC206 | P0DKX0 | 0.477    |
| 2867 | POC206 | O14686 | 0.52308  |
| 2868 | POC206 | Q8IZU1 | 0.66819  |
| 2869 | POC206 | Q8IZ13 | 0.14922  |
| 2870 | POC206 | Q9BSC4 | 0.32773  |
| 2871 | POC206 | Q6P444 | 0.63251  |
| 2872 | POC206 | P22736 | 0.4029   |
| 2873 | POC206 | A1A4V9 | 0.34969  |
| 2874 | POC206 | Q15910 | 0.52586  |
| 2875 | POC206 | Q96HM7 | 0.79714  |
| 2876 | POC206 | Q86YW9 | 0.49467  |
| 2877 | POC206 | Q5VVS0 | 0.98012  |
| 2878 | POC206 | Q15014 | 1.4149   |
| 2879 | POC206 | P62851 | 0.91109  |
| 2880 | POC206 | P0CI01 | 0.51209  |
| 2881 | POC206 | Q9P2H0 | 0.44439  |
| 2882 | POC206 | Q8WY36 | 0.49155  |
| 2883 | POC206 | P43359 | 1.0367   |
| 2884 | POC206 | Q9BYN8 | 0.991    |
| 2885 | POC206 | P11166 | 0.57063  |
| 2886 | POC206 | P30793 | 0.22707  |
| 2887 | POC206 | Q86U86 | 1.2144   |
| 2888 | POC206 | P11055 | 0.31733  |

|      |        |        |          |
|------|--------|--------|----------|
| 2889 | POC206 | Q5TKA1 | 0.53705  |
| 2890 | POC206 | Q9BYQ7 | 0.91057  |
| 2891 | POC206 | Q9NZU7 | 0.48332  |
| 2892 | POC206 | P19367 | 0.31308  |
| 2893 | POC206 | A6NGN4 | 0.29113  |
| 2894 | POC206 | O94818 | 1.0445   |
| 2895 | POC206 | C9J069 | 0.066669 |
| 2896 | POC206 | P29084 | 1.3909   |
| 2897 | POC206 | Q1HG44 | 0.92859  |
| 2898 | POC206 | A8MQ14 | 0.36754  |
| 2899 | POC206 | Q9NZI7 | 0.36759  |
| 2900 | POC206 | P50542 | 0.23937  |
| 2901 | POC206 | Q460N3 | 0.42719  |
| 2902 | POC206 | Q9UHV7 | 0.57714  |
| 2903 | POC206 | Q6W349 | 0.60429  |
| 2904 | POC206 | Q8TDN6 | 0.42946  |
| 2905 | POC206 | Q7Z5W3 | 0.80472  |
| 2906 | POC206 | P19532 | 0.84279  |
| 2907 | POC206 | Q10587 | 0.37088  |
| 2908 | POC206 | Q8N5U6 | 1.3383   |
| 2909 | POC206 | Q7L8W6 | 0.46352  |
| 2910 | POC206 | Q96KG9 | 0.4938   |
| 2911 | POC206 | P41223 | 0.13465  |
| 2912 | POC206 | Q9Y2R2 | 0.24635  |
| 2913 | POC206 | Q5TYX0 | 0.41864  |
| 2914 | POC206 | P78317 | 0.74048  |
| 2915 | POC206 | P78316 | 1.1278   |
| 2916 | POC206 | O43237 | 0.23588  |
| 2917 | POC206 | Q99471 | 0.94754  |
| 2918 | POC206 | Q8WVM0 | 0.68005  |
| 2919 | POC206 | Q96QA6 | 0.32773  |
| 2920 | POC206 | Q8IZ73 | 0.31172  |
| 2921 | POC206 | O43242 | 0.11693  |
| 2922 | POC206 | Q9Y6G3 | 0.32344  |
| 2923 | POC206 | P81877 | 0.58842  |
| 2924 | POC206 | Q15699 | 0.51512  |
| 2925 | POC206 | Q9Y530 | 0.3599   |
| 2926 | POC206 | Q5JTD0 | 1.2792   |
| 2927 | POC206 | O00321 | 0.39625  |
| 2928 | POC206 | Q15796 | 0.66595  |
| 2929 | POC206 | B9A014 | 0.18893  |
| 2930 | POC206 | O95996 | 0.48447  |
| 2931 | POC206 | P62910 | 0.65917  |
| 2932 | POC206 | A8MUZ8 | 0.59145  |
| 2933 | POC206 | Q9Y586 | 0.19007  |
| 2934 | POC206 | Q969I3 | 0.60619  |
| 2935 | POC206 | P04733 | 0.45193  |
| 2936 | POC206 | Q8N8F4 | 0.24913  |
| 2937 | POC206 | Q5JVF3 | 0.24315  |
| 2938 | POC206 | A6NLX3 | 0.24652  |
| 2939 | POC206 | Q9BYQ6 | 0.72851  |
| 2940 | POC206 | O43865 | 0.27662  |
| 2941 | POC206 | P10636 | 0.13016  |
| 2942 | POC206 | P0CV98 | 0.32628  |
| 2943 | POC206 | Q9UBB9 | 0.36928  |
| 2944 | POC206 | Q99741 | 0.6216   |
| 2945 | POC206 | Q9H9A5 | 0.06863  |
| 2946 | POC206 | Q96A56 | 1.0261   |
| 2947 | POC206 | Q96A65 | 0.29127  |
| 2948 | POC206 | Q6ZUT4 | 0.50147  |
| 2949 | POC206 | O95238 | 0.36295  |
| 2950 | POC206 | Q8N4B4 | 0.22172  |
| 2951 | POC206 | Q9BTT0 | 0.34648  |
| 2952 | POC206 | Q8TAQ2 | 1.383    |
| 2953 | POC206 | Q13257 | 0.86876  |
| 2954 | POC206 | P54252 | 0.55534  |
| 2955 | POC206 | Q15326 | 1.4408   |
| 2956 | POC206 | Q96HB5 | 0.39212  |
| 2957 | POC206 | Q13487 | 1.4552   |
| 2958 | POC206 | Q4VC05 | 0.63459  |
| 2959 | POC206 | Q5TYW1 | 0.26368  |
| 2960 | POC206 | Q16829 | 0.34535  |
| 2961 | POC206 | Q9H446 | 0.44439  |
| 2962 | POC206 | Q8N9G6 | 0.92666  |
| 2963 | POC206 | O43257 | 0.47494  |
| 2964 | POC206 | Q96E14 | 0.70969  |

|      |        |        |           |
|------|--------|--------|-----------|
| 2965 | POC206 | Q9Y603 | 1.3379    |
| 2966 | POC206 | Q8WV37 | 0.71616   |
| 2967 | POC206 | Q8NDV7 | 0.23684   |
| 2968 | POC206 | Q86SX3 | 1.4221    |
| 2969 | POC206 | Q5SQ13 | 0.0040292 |
| 2970 | POC206 | P61582 | 1.0517    |
| 2971 | POC206 | Q96H40 | 0.51926   |
| 2972 | POC206 | Q8N9W8 | 1.2191    |
| 2973 | POC206 | Q5CZC0 | 1.1397    |
| 2974 | POC206 | Q9H6K1 | 0.19652   |
| 2975 | POC206 | Q9BX26 | 1.1574    |
| 2976 | POC206 | Q92973 | 1.1311    |
| 2977 | POC206 | Q14596 | 0.33684   |
| 2978 | POC206 | Q00994 | 1.0345    |
| 2979 | POC206 | Q8IZU3 | 0.33176   |
| 2980 | POC206 | Q9Y2G7 | 0.5788    |
| 2981 | POC206 | Q9NXR8 | 0.48153   |
| 2982 | POC206 | P35326 | 0.51897   |
| 2983 | POC206 | P32189 | 0.25082   |
| 2984 | POC206 | A6NCD4 | 0.30056   |
| 2985 | POC206 | Q5T0J3 | 0.10335   |
| 2986 | POC206 | Q92831 | 0.81883   |
| 2987 | POC206 | Q96LC9 | 0.62231   |
| 2988 | POC206 | Q8WY41 | 0.55785   |
| 2989 | POC206 | Q9H0E7 | 0.37764   |
| 2990 | POC206 | Q5T5M9 | 0.11206   |
| 2991 | POC206 | Q96IS3 | 0.33461   |
| 2992 | POC206 | Q9BRH9 | 0.34446   |
| 2993 | POC206 | Q96BN8 | 0.12848   |
| 2994 | POC206 | Q9BQA5 | 0.93949   |
| 2995 | POC206 | O96020 | 1.0743    |
| 2996 | POC206 | Q17RC7 | 0.53082   |
| 2997 | POC206 | Q6PI47 | 0.13145   |
| 2998 | POC206 | Q86TG7 | 0.78905   |
| 2999 | POC206 | Q3MJ62 | 0.29094   |
| 3000 | POC206 | O95476 | 0.37816   |
| 3001 | POC206 | Q8NA92 | 0.61368   |
| 3002 | POC206 | Q9Y4P8 | 0.98447   |
| 3003 | POC206 | Q7L2K0 | 0.20624   |
| 3004 | POC206 | Q86UQ8 | 0.58122   |
| 3005 | POC206 | Q5BKZ1 | 0.61404   |
| 3006 | POC206 | P49354 | 0.37173   |
| 3007 | POC206 | Q8TCJ0 | 1.008     |
| 3008 | POC206 | Q9Y3V2 | 1.0004    |
| 3009 | POC206 | A2RTY3 | 0.32017   |
| 3010 | POC206 | P49427 | 0.79465   |
| 3011 | POC206 | Q9HA90 | 0.68336   |
| 3012 | POC206 | Q3B726 | 0.35438   |
| 3013 | POC206 | Q0VG06 | 0.71215   |
| 3014 | POC206 | Q14669 | 0.4245    |
| 3015 | POC206 | Q9NNW5 | 0.65734   |
| 3016 | POC206 | Q8IV54 | 0.35556   |
| 3017 | POC206 | P33076 | 0.59218   |
| 3018 | POC206 | O15226 | 0.81296   |
| 3019 | POC206 | P26640 | 0.26931   |
| 3020 | POC206 | Q9NX65 | 0.26719   |
| 3021 | POC206 | Q9BU64 | 0.4362    |
| 3022 | POC206 | Q9UIY3 | 0.094029  |
| 3023 | POC206 | Q8WWC4 | 0.70504   |
| 3024 | POC206 | Q9C0D0 | 0.45365   |
| 3025 | POC206 | Q9BQI6 | 0.28621   |
| 3026 | POC206 | P30260 | 1.1408    |
| 3027 | POC206 | Q8WVJ9 | 0.67069   |
| 3028 | POC206 | Q5VTR2 | 0.75166   |
| 3029 | POC206 | Q4VX62 | 0.33955   |
| 3030 | POC206 | Q9H160 | 0.59381   |
| 3031 | POC206 | A2RUQ5 | 0.18342   |
| 3032 | POC206 | O14633 | 0.45994   |
| 3033 | POC206 | Q86XG9 | 0.16288   |
| 3034 | POC206 | Q9BPX7 | 0.45626   |
| 3035 | POC206 | P55145 | 0.48564   |
| 3036 | POC206 | P24855 | 0.14065   |
| 3037 | POC206 | A1L188 | 0.68242   |
| 3038 | POC206 | Q14241 | 0.4043    |
| 3039 | POC206 | Q9P2D3 | 0.79245   |
| 3040 | POC206 | Q5VZR2 | 1.098     |

|      |        |        |          |
|------|--------|--------|----------|
| 3041 | POC206 | P0C879 | 0.45994  |
| 3042 | POC206 | Q6YHU6 | 0.059722 |
| 3043 | POC206 | P80217 | 0.75022  |
| 3044 | POC206 | O00482 | 0.36546  |
| 3045 | POC206 | Q8WTZ3 | 0.56398  |
| 3046 | POC206 | Q15036 | 0.28724  |
| 3047 | POC206 | Q13216 | 0.51634  |
| 3048 | POC206 | Q14141 | 0.2487   |
| 3049 | POC206 | Q9NRN9 | 0.26375  |
| 3050 | POC206 | Q9UPV9 | 0.87548  |
| 3051 | POC206 | O95125 | 0.31582  |
| 3052 | POC206 | P57055 | 0.68169  |
| 3053 | POC206 | Q96HZ4 | 0.27029  |
| 3054 | POC206 | A2BFH1 | 0.28126  |
| 3055 | POC206 | Q03252 | 0.43829  |
| 3056 | POC206 | Q6P3W7 | 0.24933  |
| 3057 | POC206 | O94901 | 0.29372  |
| 3058 | POC206 | Q96FJ8 | 0.45994  |
| 3059 | POC206 | O75791 | 1.1023   |
| 3060 | POC206 | Q9Y6X8 | 0.85674  |
| 3061 | POC206 | Q02241 | 0.83505  |
| 3062 | POC206 | Q13123 | 0.76216  |
| 3063 | POC206 | Q5T8I9 | 0.264    |
| 3064 | POC206 | P27986 | 0.55744  |
| 3065 | POC206 | A1L3X4 | 0.45994  |
| 3066 | POC206 | Q8WZ26 | 0.021157 |
| 3067 | POC206 | Q96IV0 | 0.67741  |
| 3068 | POC206 | Q8N3J9 | 0.31162  |
| 3069 | POC206 | P52740 | 0.26368  |
| 3070 | POC206 | P38646 | 0.64224  |
| 3071 | POC206 | Q8N1G1 | 0.15957  |
| 3072 | POC206 | Q14781 | 0.91292  |
| 3073 | POC206 | Q8N8H1 | 0.49281  |
| 3074 | POC206 | Q8N912 | 0.82784  |
| 3075 | POC206 | Q9P2Y4 | 0.35488  |
| 3076 | POC206 | O00410 | 1.2589   |
| 3077 | POC206 | Q9Y6X9 | 0.50702  |
| 3078 | POC206 | Q8WWQ0 | 0.66188  |
| 3079 | POC206 | A8MT70 | 0.58813  |
| 3080 | POC206 | Q9Y6X3 | 1.1479   |
| 3081 | POC206 | Q9H808 | 0.70051  |
| 3082 | POC206 | Q9Y4Y9 | 0.67158  |
| 3083 | POC206 | Q8NB91 | 0.39748  |
| 3084 | POC206 | Q9BYQ2 | 0.72851  |
| 3085 | POC206 | Q5VYM1 | 0.4654   |
| 3086 | POC206 | Q13233 | 0.57513  |
| 3087 | POC206 | O15519 | 0.31703  |
| 3088 | POC206 | Q9GZM8 | 0.16151  |
| 3089 | POC206 | Q6PB30 | 0.76895  |
| 3090 | POC206 | Q8TC84 | 0.54755  |
| 3091 | POC206 | Q96KH6 | 0.53824  |
| 3092 | POC206 | Q9BRT9 | 0.42774  |
| 3093 | POC206 | Q8NFI3 | 0.32365  |
| 3094 | POC206 | Q6P2D0 | 0.30421  |
| 3095 | POC206 | Q96N16 | 1.0764   |
| 3096 | POC206 | Q6ZUA9 | 0.7285   |
| 3097 | POC206 | Q9BQ69 | 0.56812  |
| 3098 | POC206 | Q9NR50 | 0.5654   |
| 3099 | POC206 | Q13620 | 0.88786  |
| 3100 | POC206 | Q9BZE9 | 0.87399  |
| 3101 | POC206 | Q9Y512 | 0.20006  |
| 3102 | POC206 | Q9UI14 | 0.089521 |
| 3103 | POC206 | A6NH13 | 0.37068  |
| 3104 | POC206 | Q8IZL8 | 1.0083   |
| 3105 | POC206 | Q8IZX4 | 0.43142  |
| 3106 | POC206 | Q13409 | 0.61351  |
| 3107 | POC206 | Q14938 | 0.3111   |
| 3108 | POC206 | O00422 | 1.3793   |
| 3109 | POC206 | Q9UHX1 | 0.60489  |
| 3110 | POC206 | P62993 | 0.25364  |
| 3111 | POC206 | Q16254 | 1.1172   |
| 3112 | POC206 | Q9BW66 | 1.1113   |
| 3113 | POC206 | Q96K62 | 0.29584  |
| 3114 | POC206 | Q96E29 | 0.43518  |
| 3115 | POC206 | P83111 | 0.2185   |
| 3116 | POC206 | Q5ZEY9 | 0.58368  |

|      |        |        |          |
|------|--------|--------|----------|
| 3117 | POC206 | Q6AI08 | 0.59281  |
| 3118 | POC206 | Q9UJG1 | 1.0958   |
| 3119 | POC206 | P46782 | 0.68501  |
| 3120 | POC206 | Q96RU7 | 0.46593  |
| 3121 | POC206 | O95045 | 0.34162  |
| 3122 | POC206 | Q5T870 | 0.784    |
| 3123 | POC206 | O60284 | 0.45026  |
| 3124 | POC206 | Q99551 | 0.79243  |
| 3125 | POC206 | P53801 | 0.76447  |
| 3126 | POC206 | Q8N9B5 | 0.92155  |
| 3127 | POC206 | Q6BDS2 | 0.42287  |
| 3128 | POC206 | Q7Z3D6 | 0.056741 |
| 3129 | POC206 | Q86XN7 | 0.68336  |
| 3130 | POC206 | Q9Y5Q9 | 0.26386  |
| 3131 | POC206 | O43236 | 0.42938  |
| 3132 | POC206 | Q2TAY7 | 0.33985  |
| 3133 | POC206 | Q96HJ3 | 0.68336  |
| 3134 | POC206 | A4QMS7 | 0.24641  |
| 3135 | POC206 | K7EIQ3 | 0.94197  |
| 3136 | POC206 | Q8TAT8 | 0.22504  |
| 3137 | POC206 | O94762 | 0.23216  |
| 3138 | POC206 | Q59F38 | 0.15994  |
| 3139 | POC206 | Q5T7N7 | 0.45994  |
| 3140 | POC206 | O95628 | 0.6848   |
| 3141 | POC206 | Q76KX8 | 0.53394  |
| 3142 | POC206 | Q9ULD9 | 1.1309   |
| 3143 | POC206 | Q9ULE4 | 0.574    |
| 3144 | POC206 | Q8NEL0 | 0.10668  |
| 3145 | POC206 | P02728 | 0.45994  |
| 3146 | POC206 | Q9Y6X2 | 0.92682  |
| 3147 | POC206 | O95153 | 0.77281  |
| 3148 | POC206 | Q8N123 | 0.60181  |
| 3149 | POC206 | H3BU77 | 0.49955  |
| 3150 | POC206 | Q86TJ5 | 0.30287  |
| 3151 | POC206 | Q8N4Q1 | 0.19557  |
| 3152 | POC206 | A5LHX3 | 0.23353  |
| 3153 | POC206 | O43261 | 0.44439  |
| 3154 | POC206 | P07315 | 0.71245  |
| 3155 | POC206 | Q7Z4Q2 | 0.99221  |
| 3156 | POC206 | Q9HAV4 | 1.1601   |
| 3157 | POC206 | P40424 | 0.72465  |
| 3158 | POC206 | Q8WUQ7 | 0.13095  |
| 3159 | POC206 | Q8NBJ4 | 0.46963  |
| 3160 | POC206 | Q9NNW7 | 0.2548   |
| 3161 | POC206 | Q9P2I0 | 0.78001  |
| 3162 | POC206 | Q14738 | 0.84609  |
| 3163 | POC206 | Q8IVM7 | 0.45994  |
| 3164 | POC206 | Q14145 | 1.4501   |
| 3165 | POC206 | Q5RGN0 | 0.90881  |
| 3166 | POC206 | A8MPS7 | 0.093281 |
| 3167 | POC206 | O43299 | 1.3855   |
| 3168 | POC206 | Q9Y5J7 | 0.43284  |
| 3169 | POC206 | Q9Y2D8 | 0.75428  |
| 3170 | POC206 | P50461 | 0.27252  |
| 3171 | POC206 | B4DXR9 | 0.53359  |
| 3172 | POC206 | Q13495 | 1.2196   |
| 3173 | POC206 | P49591 | 0.40511  |
| 3174 | POC206 | Q9NZE8 | 0.76125  |
| 3175 | POC206 | Q8IX90 | 0.8595   |
| 3176 | POC206 | P23786 | 0.11495  |
| 3177 | POC206 | Q9H5Y0 | 0.67091  |
| 3178 | POC206 | Q0VDD5 | 0.45994  |
| 3179 | POC206 | P06730 | 0.50635  |
| 3180 | POC206 | P28749 | 1.4166   |
| 3181 | POC206 | P13984 | 0.65665  |
| 3182 | POC206 | Q5TA31 | 0.66137  |
| 3183 | POC206 | Q969G2 | 0.27874  |
| 3184 | POC206 | A6NJV1 | 0.58232  |
| 3185 | POC206 | A8MYZ0 | 0.73709  |
| 3186 | POC206 | P09496 | 0.33678  |
| 3187 | POC206 | Q6ZUG5 | 0.28595  |
| 3188 | POC206 | Q9UGJ1 | 0.44715  |
| 3189 | POC206 | Q9H706 | 0.44439  |
| 3190 | POC206 | Q5BN46 | 0.15368  |
| 3191 | POC206 | Q9Y4Z0 | 0.61692  |
| 3192 | POC206 | A4GXA9 | 0.80911  |

|      |        |        |           |
|------|--------|--------|-----------|
| 3193 | POC206 | Q9UKJ3 | 0.76689   |
| 3194 | POC206 | Q8N6F7 | 0.51035   |
| 3195 | POC206 | B3EWG3 | 0.68336   |
| 3196 | POC206 | Q5T2W1 | 0.57272   |
| 3197 | POC206 | Q66K74 | 0.24452   |
| 3198 | POC206 | P36952 | 0.27508   |
| 3199 | POC206 | Q8N6N3 | 0.456     |
| 3200 | POC206 | Q8N813 | 0.067618  |
| 3201 | POC206 | P61247 | 1.0558    |
| 3202 | POC206 | Q9Y535 | 0.41794   |
| 3203 | POC206 | Q5SRD1 | 0.3211    |
| 3204 | POC206 | Q6ZSG2 | 0.3943    |
| 3205 | POC206 | P0CJ85 | 0.386     |
| 3206 | POC206 | Q6PF06 | 0.87164   |
| 3207 | POC206 | Q9Y5Q8 | 0.82232   |
| 3208 | POC206 | Q0VG73 | 0.45994   |
| 3209 | POC206 | Q6P589 | 0.50566   |
| 3210 | POC206 | Q9BY32 | 0.51489   |
| 3211 | POC206 | Q8WXC7 | 0.45806   |
| 3212 | POC206 | Q15814 | 0.2472    |
| 3213 | POC206 | Q9H6K4 | 0.40565   |
| 3214 | POC206 | O15405 | 1.0823    |
| 3215 | POC206 | Q9H5J4 | 0.65817   |
| 3216 | POC206 | Q9NVK5 | 0.27133   |
| 3217 | POC206 | Q9HAB8 | 0.67753   |
| 3218 | POC206 | Q8IZQ1 | 0.82634   |
| 3219 | POC206 | P11308 | 0.65659   |
| 3220 | POC206 | Q86VS8 | 0.5236    |
| 3221 | POC206 | Q9UBW8 | 0.55205   |
| 3222 | POC206 | Q8N4S0 | 0.68336   |
| 3223 | POC206 | Q9Y283 | 0.42316   |
| 3224 | POC206 | Q8IY42 | 1.0739    |
| 3225 | POC206 | P48200 | 0.48106   |
| 3226 | POC206 | Q9P2R6 | 1.2624    |
| 3227 | POC206 | Q9NYA3 | 0.33373   |
| 3228 | POC206 | Q7Z340 | 0.30987   |
| 3229 | POC206 | Q6TFL3 | 0.4088    |
| 3230 | POC206 | Q9NP61 | 0.26204   |
| 3231 | POC206 | Q96NM4 | 0.49155   |
| 3232 | POC206 | Q8NC69 | 0.13145   |
| 3233 | POC206 | Q9UGP5 | 0.093393  |
| 3234 | POC206 | O95865 | 0.48643   |
| 3235 | POC206 | Q8ND07 | 1.0516    |
| 3236 | POC206 | Q7L775 | 0.40954   |
| 3237 | POC206 | P57721 | 0.64715   |
| 3238 | POC206 | Q9BWM5 | 0.33811   |
| 3239 | POC206 | P10075 | 0.30021   |
| 3240 | POC206 | P13807 | 0.42624   |
| 3241 | POC206 | Q8TDB6 | 0.63539   |
| 3242 | POC206 | A6NNP5 | 0.063046  |
| 3243 | POC206 | O43504 | 0.27043   |
| 3244 | POC206 | P0DL12 | 0.26658   |
| 3245 | POC206 | Q15124 | 0.10658   |
| 3246 | POC206 | Q7Z3Z0 | 0.48752   |
| 3247 | POC206 | Q9NR77 | 0.60464   |
| 3248 | POC206 | Q15269 | 0.27913   |
| 3249 | POC206 | Q75943 | 0.38337   |
| 3250 | POC206 | Q6ZUT6 | 0.30843   |
| 3251 | POC206 | Q9UJU3 | 0.25472   |
| 3252 | POC206 | Q53HV7 | 0.7954    |
| 3253 | POC206 | Q9NRY2 | 0.9571    |
| 3254 | POC206 | Q9NVI1 | 0.88149   |
| 3255 | POC206 | Q9Y4X0 | 0.24042   |
| 3256 | POC206 | Q9UK41 | 0.85399   |
| 3257 | POC206 | Q96B23 | 0.95954   |
| 3258 | POC206 | Q8TAD7 | 0.68336   |
| 3259 | POC206 | Q9Y5K5 | 0.43453   |
| 3260 | POC206 | Q9P1Q0 | 0.5191    |
| 3261 | POC206 | Q03111 | 1.4734    |
| 3262 | POC206 | Q9Y6F1 | 0.4208    |
| 3263 | POC206 | Q96DM1 | 0.86405   |
| 3264 | POC206 | Q9Y587 | 0.1608    |
| 3265 | POC206 | A6NDZ8 | 0.28047   |
| 3266 | POC206 | Q1A5X7 | 0.0020418 |
| 3267 | POC206 | Q96SQ5 | 0.33635   |
| 3268 | POC206 | P0C7X3 | 0.7077    |



|      |        |        |          |
|------|--------|--------|----------|
| 3269 | POC206 | A8MWS5 | 0.028533 |
| 3270 | POC206 | P18146 | 0.80419  |
| 3271 | POC206 | Q3LI58 | 0.45994  |
| 3272 | POC206 | Q96KN7 | 0.077247 |
| 3273 | POC206 | O14786 | 0.27449  |
| 3274 | POC206 | P07992 | 0.19921  |
| 3275 | POC206 | Q6N069 | 0.3054   |
| 3276 | POC206 | O94929 | 0.31285  |
| 3277 | POC206 | A8MXT2 | 0.088734 |
| 3278 | POC206 | Q86XW9 | 0.10589  |
| 3279 | POC206 | K9M1U5 | 0.45994  |
| 3280 | POC206 | Q92624 | 1.1146   |
| 3281 | POC206 | P83369 | 0.64149  |
| 3282 | POC206 | Q5T124 | 0.13742  |
| 3283 | POC206 | P62633 | 0.79848  |
| 3284 | POC206 | Q8NEF3 | 0.33277  |
| 3285 | POC206 | P12755 | 0.23314  |
| 3286 | POC206 | Q9NZL3 | 0.88507  |
| 3287 | POC206 | Q96MA1 | 0.39399  |
| 3288 | POC206 | O95298 | 0.67505  |
| 3289 | POC206 | Q9NRJ2 | 0.45994  |
| 3290 | POC206 | O75360 | 0.53623  |
| 3291 | POC206 | O75971 | 1.1498   |
| 3292 | POC206 | Q8NEA6 | 0.42268  |
| 3293 | POC206 | Q96ED9 | 0.63032  |
| 3294 | POC206 | Q96JB5 | 0.41139  |
| 3295 | POC206 | Q8NEK5 | 0.33647  |
| 3296 | POC206 | Q6VUC0 | 0.5631   |
| 3297 | POC206 | P30042 | 0.25299  |
| 3298 | POC206 | Q8WYA6 | 0.78514  |
| 3299 | POC206 | Q15386 | 0.29649  |
| 3300 | POC206 | Q9UF83 | 0.43136  |
| 3301 | POC206 | O75475 | 1.432    |
| 3302 | POC206 | P51398 | 1.2847   |
| 3303 | POC206 | Q9HD33 | 0.92802  |
| 3304 | POC206 | O43290 | 0.96369  |
| 3305 | POC206 | O75534 | 0.17344  |
| 3306 | POC206 | P17025 | 0.32223  |
| 3307 | POC206 | Q658L1 | 0.98539  |
| 3308 | POC206 | O96004 | 0.50291  |
| 3309 | POC206 | A6NDV4 | 0.27403  |
| 3310 | POC206 | Q9H9H4 | 0.77542  |
| 3311 | POC206 | P61586 | 0.33654  |
| 3312 | POC206 | Q8N2I2 | 0.34327  |
| 3313 | POC206 | Q9P1Y5 | 0.70647  |
| 3314 | POC206 | Q8TEP8 | 0.94936  |
| 3315 | POC206 | O75069 | 0.1487   |
| 3316 | POC206 | P19447 | 0.21011  |
| 3317 | POC206 | Q9UHV9 | 0.90608  |
| 3318 | POC206 | P22695 | 0.13561  |
| 3319 | POC206 | P31946 | 0.58303  |
| 3320 | POC206 | Q9BYE0 | 0.22822  |
| 3321 | POC206 | Q9HBT7 | 0.37081  |
| 3322 | POC206 | O43776 | 0.61392  |
| 3323 | POC206 | Q92793 | 0.46409  |
| 3324 | POC206 | Q96B18 | 0.29091  |
| 3325 | POC206 | Q3KQV3 | 0.37298  |
| 3326 | POC206 | Q5JVG2 | 0.24088  |
| 3327 | POC206 | Q9UBF6 | 0.93115  |
| 3328 | POC206 | Q0VFX4 | 0.44031  |
| 3329 | POC206 | Q16587 | 0.30577  |
| 3330 | POC206 | Q6EEV6 | 0.12583  |
| 3331 | POC206 | P69891 | 0.41469  |
| 3332 | POC206 | Q13144 | 0.53341  |
| 3333 | POC206 | A6PW82 | 0.62801  |
| 3334 | POC206 | Q9BXW3 | 0.45994  |
| 3335 | POC206 | A6NHU5 | 0.16442  |
| 3336 | POC206 | Q9NVX0 | 1.2823   |
| 3337 | POC206 | O43399 | 0.6701   |
| 3338 | POC206 | Q9UFG5 | 0.44439  |
| 3339 | POC206 | A8MUL3 | 0.45994  |
| 3340 | POC206 | Q3LI81 | 1.0016   |
| 3341 | POC206 | Q8NC56 | 0.43573  |
| 3342 | POC206 | Q9UJJ7 | 0.45729  |
| 3343 | POC206 | Q969H6 | 0.9932   |
| 3344 | POC206 | P25815 | 0.63019  |

|      |        |        |          |
|------|--------|--------|----------|
| 3345 | POC206 | Q7Z6R9 | 0.4536   |
| 3346 | POC206 | P18077 | 0.43517  |
| 3347 | POC206 | P61163 | 0.15677  |
| 3348 | POC206 | O95816 | 0.37663  |
| 3349 | POC206 | Q92616 | 0.2295   |
| 3350 | POC206 | Q96NT3 | 0.4783   |
| 3351 | POC206 | P14653 | 0.41435  |
| 3352 | POC206 | Q96LR2 | 1.0711   |
| 3353 | POC206 | P17861 | 0.73104  |
| 3354 | POC206 | Q8N2M8 | 0.892    |
| 3355 | POC206 | Q9BWK5 | 0.86655  |
| 3356 | POC206 | Q9UL01 | 0.50374  |
| 3357 | POC206 | Q96EZ8 | 0.99627  |
| 3358 | POC206 | Q8N159 | 0.22989  |
| 3359 | POC206 | Q2KHR2 | 0.36338  |
| 3360 | POC206 | Q9NYH9 | 0.11186  |
| 3361 | POC206 | Q8IWC1 | 0.77621  |
| 3362 | POC206 | Q01534 | 0.33807  |
| 3363 | POC206 | Q96LW7 | 0.90031  |
| 3364 | POC206 | A6NJL1 | 0.29094  |
| 3365 | POC206 | O76014 | 0.40644  |
| 3366 | POC206 | P54259 | 0.99992  |
| 3367 | POC206 | Q8N1B3 | 0.69758  |
| 3368 | POC206 | P10589 | 0.47486  |
| 3369 | POC206 | Q9BT81 | 0.50896  |
| 3370 | POC206 | Q8N6T7 | 0.82703  |
| 3371 | POC206 | Q92754 | 0.55569  |
| 3372 | POC206 | Q06730 | 0.22742  |
| 3373 | POC206 | Q14244 | 0.90662  |
| 3374 | POC206 | O95777 | 0.55946  |
| 3375 | POC206 | Q75MW2 | 0.70219  |
| 3376 | POC206 | Q9BZE3 | 0.5378   |
| 3377 | POC206 | P22103 | 0.45994  |
| 3378 | POC206 | Q9C086 | 1.5584   |
| 3379 | POC206 | Q9GZV5 | 1.1088   |
| 3380 | POC206 | Q9H583 | 1.1305   |
| 3381 | POC206 | Q9NX70 | 1.2      |
| 3382 | POC206 | A8MTY0 | 0.55067  |
| 3383 | POC206 | Q32M78 | 0.47573  |
| 3384 | POC206 | Q8IXQ3 | 0.4754   |
| 3385 | POC206 | O60308 | 0.57086  |
| 3386 | POC206 | Q9Y4X5 | 0.55947  |
| 3387 | POC206 | P0CH99 | 0.68153  |
| 3388 | POC206 | Q5TA76 | 0.45994  |
| 3389 | POC206 | O75920 | 1.1722   |
| 3390 | POC206 | O15091 | 0.010182 |
| 3391 | POC206 | Q13769 | 0.60283  |
| 3392 | POC206 | Q15773 | 0.90067  |
| 3393 | POC206 | P0C7Q3 | 0.10108  |
| 3394 | POC206 | Q9NUL5 | 0.22055  |
| 3395 | POC206 | O43513 | 1.2489   |
| 3396 | POC206 | Q8WV41 | 0.22921  |
| 3397 | POC206 | Q86VQ1 | 0.35605  |
| 3398 | POC206 | F5H284 | 0.28126  |
| 3399 | POC206 | A4D997 | 0.61306  |
| 3400 | POC206 | Q6NSZ9 | 0.29094  |
| 3401 | POC206 | Q9H4A5 | 1.1097   |
| 3402 | POC206 | Q86V48 | 1.0919   |
| 3403 | POC206 | P05413 | 0.32866  |
| 3404 | POC206 | Q9BWX5 | 0.53051  |
| 3405 | POC206 | A5PL33 | 0.58899  |
| 3406 | POC206 | Q9NX95 | 0.57667  |
| 3407 | POC206 | Q6ZUJ4 | 0.38058  |
| 3408 | POC206 | O75346 | 0.48795  |
| 3409 | POC206 | Q8N3Y1 | 0.3556   |
| 3410 | POC206 | A6NDU8 | 0.30097  |
| 3411 | POC206 | O75459 | 0.30344  |
| 3412 | POC206 | Q96DU7 | 0.34786  |
| 3413 | POC206 | P51580 | 0.22232  |
| 3414 | POC206 | O95163 | 0.80637  |
| 3415 | POC206 | Q63HK5 | 0.43031  |
| 3416 | POC206 | Q12857 | 0.44611  |
| 3417 | POC206 | E9PIF3 | 0.040509 |
| 3418 | POC206 | Q49AQ9 | 0.26335  |
| 3419 | POC206 | O14561 | 0.39574  |
| 3420 | POC206 | Q9NPC7 | 0.24904  |

|      |        |        |          |
|------|--------|--------|----------|
| 3421 | POC206 | Q9Y421 | 0.46527  |
| 3422 | POC206 | A8MV65 | 0.74461  |
| 3423 | POC206 | P0CG29 | 0.44089  |
| 3424 | POC206 | Q6P280 | 0.58588  |
| 3425 | POC206 | Q69YQ0 | 0.4797   |
| 3426 | POC206 | Q86UT5 | 0.26027  |
| 3427 | POC206 | Q9BRJ2 | 0.46635  |
| 3428 | POC206 | Q92934 | 0.10885  |
| 3429 | POC206 | Q6P1K8 | 0.77891  |
| 3430 | POC206 | Q8IZC7 | 0.28803  |
| 3431 | POC206 | Q9Y316 | 0.62941  |
| 3432 | POC206 | Q16775 | 0.4668   |
| 3433 | POC206 | Q9H0E3 | 0.93882  |
| 3434 | POC206 | Q56VL3 | 0.70283  |
| 3435 | POC206 | Q08999 | 1.5304   |
| 3436 | POC206 | P62913 | 0.98242  |
| 3437 | POC206 | Q8IYI0 | 0.46038  |
| 3438 | POC206 | Q5SW24 | 0.29091  |
| 3439 | POC206 | Q99638 | 0.68626  |
| 3440 | POC206 | Q8NDW8 | 0.10037  |
| 3441 | POC206 | Q9C002 | 0.31135  |
| 3442 | POC206 | Q9Y675 | 0.7095   |
| 3443 | POC206 | Q14135 | 0.58122  |
| 3444 | POC206 | Q9H5J8 | 1.1504   |
| 3445 | POC206 | Q6PCE3 | 0.52623  |
| 3446 | POC206 | P54922 | 0.6632   |
| 3447 | POC206 | Q96AT1 | 0.68336  |
| 3448 | POC206 | Q8N393 | 0.3278   |
| 3449 | POC206 | P30047 | 0.73194  |
| 3450 | POC206 | Q96M61 | 0.44439  |
| 3451 | POC206 | Q5TYW8 | 0.1357   |
| 3452 | POC206 | Q8NEJ9 | 0.35838  |
| 3453 | POC206 | Q8N895 | 0.72557  |
| 3454 | POC206 | P61927 | 0.61873  |
| 3455 | POC206 | P0DI83 | 0.54567  |
| 3456 | POC206 | P25789 | 0.57763  |
| 3457 | POC206 | Q96N58 | 0.36429  |
| 3458 | POC206 | Q9BW04 | 0.16109  |
| 3459 | POC206 | Q16548 | 0.66246  |
| 3460 | POC206 | Q9H0A8 | 0.76825  |
| 3461 | POC206 | Q13867 | 0.37376  |
| 3462 | POC206 | Q9UNQ2 | 0.51306  |
| 3463 | POC206 | Q9C075 | 0.35532  |
| 3464 | POC206 | P32519 | 1.4189   |
| 3465 | POC206 | Q14907 | 0.60884  |
| 3466 | POC206 | P49593 | 0.2686   |
| 3467 | POC206 | A4D263 | 0.34989  |
| 3468 | POC206 | Q14519 | 0.39447  |
| 3469 | POC206 | Q6P1L6 | 0.28459  |
| 3470 | POC206 | A6NCJ1 | 0.22547  |
| 3471 | POC206 | P17022 | 0.29094  |
| 3472 | POC206 | Q9BSG1 | 0.43598  |
| 3473 | POC206 | Q712K3 | 0.7632   |
| 3474 | POC206 | P0DJH9 | 0.07807  |
| 3475 | POC206 | Q6ZR85 | 0.45994  |
| 3476 | POC206 | Q9NQ32 | 0.5516   |
| 3477 | POC206 | Q96FF9 | 0.99884  |
| 3478 | POC206 | Q9Y5B6 | 0.79172  |
| 3479 | POC206 | Q5T7N2 | 0.23296  |
| 3480 | POC206 | Q6Y7W6 | 0.44981  |
| 3481 | POC206 | Q569H4 | 0.68336  |
| 3482 | POC206 | Q6ZRM9 | 0.66705  |
| 3483 | POC206 | Q9NPJ8 | 0.41349  |
| 3484 | POC206 | Q9UJP4 | 0.45214  |
| 3485 | POC206 | Q6ZMW2 | 0.31629  |
| 3486 | POC206 | Q9Y6Y0 | 0.59049  |
| 3487 | POC206 | Q75151 | 0.7155   |
| 3488 | POC206 | Q6ZN17 | 1.3039   |
| 3489 | POC206 | P23610 | 0.45994  |
| 3490 | POC206 | Q9BS18 | 0.59081  |
| 3491 | POC206 | P14649 | 0.28835  |
| 3492 | POC206 | Q9Y333 | 0.58334  |
| 3493 | POC206 | Q95801 | 0.39019  |
| 3494 | POC206 | Q00161 | 0.98449  |
| 3495 | POC206 | Q969R8 | 0.051817 |
| 3496 | POC206 | Q7L4I2 | 1.6549   |

|      |        |        |           |
|------|--------|--------|-----------|
| 3497 | POC206 | O60356 | 0.96334   |
| 3498 | POC206 | Q9H8M2 | 0.24056   |
| 3499 | POC206 | O60248 | 0.63158   |
| 3500 | POC206 | O14974 | 0.44896   |
| 3501 | POC206 | Q9BZE2 | 1.1149    |
| 3502 | POC206 | A1L443 | 1.098     |
| 3503 | POC206 | Q9NQ29 | 0.57287   |
| 3504 | POC206 | Q15853 | 0.65321   |
| 3505 | POC206 | Q9NVX2 | 0.35728   |
| 3506 | POC206 | Q8TBZ9 | 1.1146    |
| 3507 | POC206 | Q9P0W5 | 0.74087   |
| 3508 | POC206 | Q9UJY1 | 0.54865   |
| 3509 | POC206 | Q9HCE1 | 0.75031   |
| 3510 | POC206 | P61353 | 0.65917   |
| 3511 | POC206 | Q9Y608 | 0.43981   |
| 3512 | POC206 | P17029 | 0.45471   |
| 3513 | POC206 | Q9H3K2 | 0.11973   |
| 3514 | POC206 | Q1RMZ1 | 0.42835   |
| 3515 | POC206 | Q8NDX6 | 0.30231   |
| 3516 | POC206 | Q8N655 | 0.45994   |
| 3517 | POC206 | B3EWF7 | 0.45994   |
| 3518 | POC206 | Q9C0C6 | 0.83422   |
| 3519 | POC206 | Q9BWJ2 | 0.15599   |
| 3520 | POC206 | Q96D46 | 0.8006    |
| 3521 | POC206 | Q15003 | 0.94646   |
| 3522 | POC206 | Q5TA82 | 0.45994   |
| 3523 | POC206 | Q96QF7 | 0.28476   |
| 3524 | POC206 | A1L162 | 0.21203   |
| 3525 | POC206 | Q8N365 | 0.68336   |
| 3526 | POC206 | Q9NQV7 | 0.3508    |
| 3527 | POC206 | Q14839 | 0.91153   |
| 3528 | POC206 | Q9HBT8 | 0.2876    |
| 3529 | POC206 | Q15742 | 0.45417   |
| 3530 | POC206 | P30291 | 0.26786   |
| 3531 | POC206 | O76041 | 0.22807   |
| 3532 | POC206 | Q8N7R1 | 0.85189   |
| 3533 | POC206 | Q8TEA1 | 0.41502   |
| 3534 | POC206 | O43918 | 1.1715    |
| 3535 | POC206 | P51965 | 0.7632    |
| 3536 | POC206 | A6NN90 | 0.30716   |
| 3537 | POC206 | P62888 | 0.6716    |
| 3538 | POC206 | Q8NFB8 | 0.53952   |
| 3539 | POC206 | Q6ZN28 | 0.77414   |
| 3540 | POC206 | Q96S66 | 0.35108   |
| 3541 | POC206 | Q99689 | 0.31929   |
| 3542 | POC206 | Q6ZMV8 | 0.57235   |
| 3543 | POC206 | P46020 | 0.1931    |
| 3544 | POC206 | P41134 | 0.40527   |
| 3545 | POC206 | Q8IVN3 | 0.88663   |
| 3546 | POC206 | Q6ZN57 | 0.29438   |
| 3547 | POC206 | P23246 | 0.82752   |
| 3548 | POC206 | P59780 | 0.22404   |
| 3549 | POC206 | Q70Z53 | 0.7674    |
| 3550 | POC206 | O95567 | 0.45994   |
| 3551 | POC206 | Q9H7S9 | 0.89838   |
| 3552 | POC206 | Q96KF2 | 0.45994   |
| 3553 | POC206 | Q8N2H4 | 1.3885    |
| 3554 | POC206 | Q9H0A9 | 1.4579    |
| 3555 | POC206 | P43362 | 0.1174    |
| 3556 | POC206 | O75122 | 0.43077   |
| 3557 | POC206 | P0DMB2 | 0.69504   |
| 3558 | POC206 | Q9NQZ5 | 0.22924   |
| 3559 | POC206 | P57071 | 0.20949   |
| 3560 | POC206 | Q02556 | 0.48286   |
| 3561 | POC206 | Q9H6R4 | 0.39558   |
| 3562 | POC206 | Q96H79 | 0.76613   |
| 3563 | POC206 | P53677 | 0.40499   |
| 3564 | POC206 | Q9NPG2 | 0.20567   |
| 3565 | POC206 | Q12837 | 0.62944   |
| 3566 | POC206 | O60437 | 0.91384   |
| 3567 | POC206 | P14652 | 0.0066297 |
| 3568 | POC206 | Q68CL5 | 0.13637   |
| 3569 | POC206 | O60304 | 0.30116   |
| 3570 | POC206 | Q9NUU6 | 0.081122  |
| 3571 | POC206 | O95292 | 0.13706   |
| 3572 | POC206 | A8MW95 | 0.073918  |

|      |        |        |          |
|------|--------|--------|----------|
| 3573 | POC206 | P68133 | 0.17471  |
| 3574 | POC206 | Q86Y91 | 0.44633  |
| 3575 | POC206 | Q14999 | 1.0127   |
| 3576 | POC206 | Q03989 | 0.43297  |
| 3577 | POC206 | O95954 | 0.2      |
| 3578 | POC206 | Q8TE76 | 0.48497  |
| 3579 | POC206 | O95989 | 0.41535  |
| 3580 | POC206 | G3V211 | 0.80203  |
| 3581 | POC206 | Q9NZD2 | 0.55867  |
| 3582 | POC206 | P49366 | 0.42225  |
| 3583 | POC206 | Q92674 | 0.46463  |
| 3584 | POC206 | Q6NVV1 | 0.37752  |
| 3585 | POC206 | A6NEJ1 | 0.26627  |
| 3586 | POC206 | O14599 | 0.55054  |
| 3587 | POC206 | Q5JUW0 | 0.41139  |
| 3588 | POC206 | A6NK06 | 0.26285  |
| 3589 | POC206 | Q9UM82 | 1.1809   |
| 3590 | POC206 | Q9UJT2 | 0.66399  |
| 3591 | POC206 | Q9HCZ1 | 0.3304   |
| 3592 | POC206 | O14593 | 0.83548  |
| 3593 | POC206 | Q5T0D9 | 0.3764   |
| 3594 | POC206 | Q8N5H3 | 0.68336  |
| 3595 | POC206 | Q92782 | 0.8729   |
| 3596 | POC206 | Q6ZR54 | 0.45994  |
| 3597 | POC206 | Q9Y3C0 | 0.39843  |
| 3598 | POC206 | Q9UK11 | 0.43186  |
| 3599 | POC206 | Q96JB3 | 0.30227  |
| 3600 | POC206 | Q05215 | 0.221    |
| 3601 | POC206 | O00570 | 0.98762  |
| 3602 | POC206 | O95073 | 1.2277   |
| 3603 | POC206 | Q8WUM0 | 0.76248  |
| 3604 | POC206 | Q5SXM2 | 0.73072  |
| 3605 | POC206 | Q9H607 | 0.43129  |
| 3606 | POC206 | Q6PKG0 | 0.42969  |
| 3607 | POC206 | P80294 | 0.95457  |
| 3608 | POC206 | Q14532 | 0.30235  |
| 3609 | POC206 | A6NMD2 | 0.17753  |
| 3610 | POC206 | Q8N5Q1 | 1.2191   |
| 3611 | POC206 | Q9BYK8 | 0.53001  |
| 3612 | POC206 | Q9UBQ0 | 0.58132  |
| 3613 | POC206 | Q6TGC4 | 0.44306  |
| 3614 | POC206 | Q8IXR9 | 0.13021  |
| 3615 | POC206 | Q8TAP6 | 1.1059   |
| 3616 | POC206 | Q16670 | 0.37883  |
| 3617 | POC206 | O75427 | 0.60855  |
| 3618 | POC206 | P21673 | 0.27992  |
| 3619 | POC206 | O75410 | 0.93825  |
| 3620 | POC206 | A8MZ59 | 0.31537  |
| 3621 | POC206 | Q8N3R9 | 0.25809  |
| 3622 | POC206 | Q5SXJ2 | 1.4923   |
| 3623 | POC206 | Q969Q6 | 0.40355  |
| 3624 | POC206 | Q9BY27 | 0.55714  |
| 3625 | POC206 | Q9GZN2 | 0.52547  |
| 3626 | POC206 | Q99426 | 0.29128  |
| 3627 | POC206 | Q7Z3G6 | 0.36074  |
| 3628 | POC206 | Q92785 | 0.88103  |
| 3629 | POC206 | Q8WTV1 | 1.0082   |
| 3630 | POC206 | P69905 | 0.31764  |
| 3631 | POC206 | Q13435 | 0.78478  |
| 3632 | POC206 | Q9UQ35 | 0.55166  |
| 3633 | POC206 | P59091 | 0.36311  |
| 3634 | POC206 | Q9UKT4 | 1.0116   |
| 3635 | POC206 | P23511 | 1.2441   |
| 3636 | POC206 | Q5EE01 | 0.75877  |
| 3637 | POC206 | O14787 | 1.1115   |
| 3638 | POC206 | Q8N6Q8 | 0.62847  |
| 3639 | POC206 | O60930 | 0.40794  |
| 3640 | POC206 | Q3LI72 | 0.45994  |
| 3641 | POC206 | Q9HCD5 | 1.2277   |
| 3642 | POC206 | P51114 | 0.087226 |
| 3643 | POC206 | O15355 | 1.0554   |
| 3644 | POC206 | P54274 | 0.54258  |
| 3645 | POC206 | Q8N7Y1 | 0.45994  |
| 3646 | POC206 | A6NMV5 | 0.10192  |
| 3647 | POC206 | H3BQB6 | 0.98773  |
| 3648 | POC206 | Q15916 | 0.20949  |

|      |        |        |          |
|------|--------|--------|----------|
| 3649 | POC206 | Q6PJG6 | 0.85877  |
| 3650 | POC206 | P42773 | 0.44139  |
| 3651 | POC206 | A6NHX0 | 0.87489  |
| 3652 | POC206 | Q96EY4 | 0.46692  |
| 3653 | POC206 | Q99547 | 0.73329  |
| 3654 | POC206 | Q6MZQ0 | 0.11031  |
| 3655 | POC206 | O00213 | 0.45346  |
| 3656 | POC206 | Q5H9K5 | 0.17993  |
| 3657 | POC206 | O60238 | 0.35843  |
| 3658 | POC206 | P60608 | 0.57003  |
| 3659 | POC206 | Q9NPG3 | 0.89484  |
| 3660 | POC206 | Q32MZ4 | 1.29     |
| 3661 | POC206 | Q8IZ40 | 0.7251   |
| 3662 | POC206 | Q13064 | 0.42498  |
| 3663 | POC206 | O15105 | 0.32356  |
| 3664 | POC206 | Q9NRL3 | 0.57188  |
| 3665 | POC206 | Q8N9H6 | 0.28047  |
| 3666 | POC206 | Q92797 | 0.89236  |
| 3667 | POC206 | Q8TEW0 | 0.28039  |
| 3668 | POC206 | O43615 | 0.28024  |
| 3669 | POC206 | P54840 | 0.51162  |
| 3670 | POC206 | O76013 | 0.41992  |
| 3671 | POC206 | Q9Y247 | 0.11206  |
| 3672 | POC206 | P54277 | 0.16912  |
| 3673 | POC206 | O43715 | 0.73058  |
| 3674 | POC206 | Q8NDW4 | 0.31449  |
| 3675 | POC206 | Q8TEV9 | 0.6528   |
| 3676 | POC206 | Q9Y2H0 | 0.18781  |
| 3677 | POC206 | A6NKD2 | 0.32628  |
| 3678 | POC206 | A6NMN3 | 0.38803  |
| 3679 | POC206 | Q9NWS9 | 0.29094  |
| 3680 | POC206 | Q96SN7 | 0.25003  |
| 3681 | POC206 | Q8N812 | 0.50233  |
| 3682 | POC206 | O75531 | 1.0006   |
| 3683 | POC206 | O00327 | 0.29725  |
| 3684 | POC206 | P23490 | 0.87239  |
| 3685 | POC206 | Q5JQS6 | 0.49067  |
| 3686 | POC206 | O14646 | 0.81068  |
| 3687 | POC206 | Q13610 | 0.24191  |
| 3688 | POC206 | O75394 | 0.50183  |
| 3689 | POC206 | P46060 | 0.35161  |
| 3690 | POC206 | Q8TCY9 | 0.52129  |
| 3691 | POC206 | P63104 | 1.0258   |
| 3692 | POC206 | P11168 | 0.082967 |
| 3693 | POC206 | Q9H7P6 | 1.0834   |
| 3694 | POC206 | Q6P1K2 | 1.3082   |
| 3695 | POC206 | Q9H1A4 | 0.90004  |
| 3696 | POC206 | Q3ZCQ8 | 0.13601  |
| 3697 | POC206 | Q9NQ03 | 0.24705  |
| 3698 | POC206 | Q9BYV9 | 0.43802  |
| 3699 | POC206 | Q96QF0 | 0.69117  |
| 3700 | POC206 | Q99767 | 0.37717  |
| 3701 | POC206 | A8MX80 | 0.83808  |
| 3702 | POC206 | Q9P1D8 | 0.45994  |
| 3703 | POC206 | Q15599 | 0.57017  |
| 3704 | POC206 | Q9Y4J8 | 0.26098  |
| 3705 | POC206 | Q969H9 | 0.45994  |
| 3706 | POC206 | Q9H9Z2 | 0.82694  |
| 3707 | POC206 | P24666 | 0.19923  |
| 3708 | POC206 | Q15061 | 0.32773  |
| 3709 | POC206 | Q9BYE7 | 0.99499  |
| 3710 | POC206 | P43351 | 0.83984  |
| 3711 | POC206 | Q4KMZ1 | 0.30785  |
| 3712 | POC206 | Q96LX8 | 0.33799  |
| 3713 | POC206 | Q9H825 | 0.32074  |
| 3714 | POC206 | Q9UIE0 | 0.34255  |
| 3715 | POC206 | Q9BTY7 | 0.33728  |
| 3716 | POC206 | Q5VVC0 | 0.38386  |
| 3717 | POC206 | Q92610 | 0.30501  |
| 3718 | POC206 | P82664 | 1.0238   |
| 3719 | POC206 | Q13952 | 0.71425  |
| 3720 | POC206 | P20132 | 0.11422  |
| 3721 | POC206 | O95718 | 0.32275  |
| 3722 | POC206 | Q6DKK2 | 1.2526   |
| 3723 | POC206 | D6RF30 | 0.17325  |
| 3724 | POC206 | Q9Y2X3 | 0.78046  |

|      |        |         |          |
|------|--------|---------|----------|
| 3725 | POC206 | P49792  | 0.925    |
| 3726 | POC206 | P78337  | 0.5322   |
| 3727 | POC206 | Q6ZU15  | 0.29437  |
| 3728 | POC206 | Q6ZMZ3  | 0.22893  |
| 3729 | POC206 | Q92622  | 0.13587  |
| 3730 | POC206 | Q15025  | 0.58894  |
| 3731 | POC206 | O14497  | 0.71463  |
| 3732 | POC206 | Q9UPQ4  | 0.38535  |
| 3733 | POC206 | Q5W0V3  | 0.83274  |
| 3734 | POC206 | P11172  | 0.50879  |
| 3735 | POC206 | P51825  | 1.0651   |
| 3736 | POC206 | Q8N2C9  | 0.080872 |
| 3737 | POC206 | P19013  | 0.48846  |
| 3738 | POC206 | Q9UGK3  | 0.87898  |
| 3739 | POC206 | Q9H609  | 0.20949  |
| 3740 | POC206 | O14681  | 0.86069  |
| 3741 | POC206 | Q8IZD4  | 1.0332   |
| 3742 | POC206 | P43897  | 1.2693   |
| 3743 | POC206 | Q7Z7C7  | 0.23185  |
| 3744 | POC206 | P05423  | 0.29885  |
| 3745 | POC206 | Q9NVU0  | 0.46246  |
| 3746 | POC206 | A1L170  | 0.45994  |
| 3747 | POC206 | O60749  | 0.26957  |
| 3748 | POC206 | P0C7V5  | 0.45922  |
| 3749 | POC206 | Q9P2J8  | 0.38367  |
| 3750 | POC206 | Q8TF40  | 1.009    |
| 3751 | POC206 | P12036  | 0.47604  |
| 3752 | POC206 | Q9H0W9  | 0.81787  |
| 3753 | POC206 | P36578  | 1.0247   |
| 3754 | POC206 | Q96B45  | 0.10723  |
| 3755 | POC206 | P60228  | 1.0237   |
| 3756 | POC206 | O96019  | 1.0613   |
| 3757 | POC206 | Q5T7P3  | 0.45994  |
| 3758 | POC206 | P53803  | 0.78876  |
| 3759 | POC206 | Q6UUUV9 | 1.5887   |
| 3760 | POC206 | Q5BKY6  | 0.45994  |
| 3761 | POC206 | Q9HBK9  | 0.22651  |
| 3762 | POC206 | Q96N20  | 0.30524  |
| 3763 | POC206 | P49770  | 0.27956  |
| 3764 | POC206 | Q6ZNG2  | 0.27096  |
| 3765 | POC206 | Q9BWG6  | 0.32077  |
| 3766 | POC206 | Q13522  | 0.2544   |
| 3767 | POC206 | Q13619  | 0.46921  |
| 3768 | POC206 | A6NGY1  | 0.79384  |
| 3769 | POC206 | Q92784  | 0.27867  |
| 3770 | POC206 | Q13884  | 0.65815  |
| 3771 | POC206 | Q12983  | 0.18114  |
| 3772 | POC206 | Q13569  | 0.62463  |
| 3773 | POC206 | P17021  | 0.30568  |
| 3774 | POC206 | O43248  | 0.39474  |
| 3775 | POC206 | Q6ZU80  | 0.2035   |
| 3776 | POC206 | Q13166  | 0.45994  |
| 3777 | POC206 | Q8NBT2  | 0.88733  |
| 3778 | POC206 | O60682  | 0.41086  |
| 3779 | POC206 | Q8TEM1  | 0.3713   |
| 3780 | POC206 | Q9BUZ4  | 0.31045  |
| 3781 | POC206 | Q6P4D5  | 0.83905  |
| 3782 | POC206 | P0CL85  | 0.26555  |
| 3783 | POC206 | Q8IYJ3  | 0.27578  |
| 3784 | POC206 | Q9NRD1  | 0.28324  |
| 3785 | POC206 | Q96FA7  | 0.91329  |
| 3786 | POC206 | P49640  | 0.26603  |
| 3787 | POC206 | Q9BR11  | 0.17619  |
| 3788 | POC206 | P16157  | 0.30313  |
| 3789 | POC206 | Q8NBZ9  | 0.22592  |
| 3790 | POC206 | P11137  | 0.13703  |
| 3791 | POC206 | Q6ZU52  | 0.44439  |
| 3792 | POC206 | Q8N8B7  | 0.13249  |
| 3793 | POC206 | A6NE21  | 0.49928  |
| 3794 | POC206 | O60447  | 0.39058  |
| 3795 | POC206 | Q9H814  | 0.76404  |
| 3796 | POC206 | Q8WV07  | 0.40351  |
| 3797 | POC206 | Q8WUW1  | 0.25164  |
| 3798 | POC206 | A8MVW5  | 1.0311   |
| 3799 | POC206 | Q701N2  | 0.45994  |
| 3800 | POC206 | Q96GC5  | 0.73505  |

|      |        |        |          |
|------|--------|--------|----------|
| 3801 | POC206 | Q14202 | 0.58004  |
| 3802 | POC206 | Q7Z3T8 | 0.23031  |
| 3803 | POC206 | Q14209 | 1.2272   |
| 3804 | POC206 | Q9NX63 | 0.94407  |
| 3805 | POC206 | Q96QU4 | 0.7095   |
| 3806 | POC206 | Q6PJ61 | 1.0107   |
| 3807 | POC206 | Q15651 | 0.85195  |
| 3808 | POC206 | P41162 | 0.43759  |
| 3809 | POC206 | P27816 | 0.64364  |
| 3810 | POC206 | O43345 | 0.39483  |
| 3811 | POC206 | Q9Y605 | 1.5382   |
| 3812 | POC206 | Q9BPX1 | 0.21914  |
| 3813 | POC206 | Q7L3B6 | 0.30964  |
| 3814 | POC206 | Q9BTX9 | 0.91258  |
| 3815 | POC206 | Q96BD8 | 0.8166   |
| 3816 | POC206 | Q1HG43 | 0.74154  |
| 3817 | POC206 | Q9BR46 | 0.77019  |
| 3818 | POC206 | O15151 | 0.3502   |
| 3819 | POC206 | P0C1Z6 | 1.4615   |
| 3820 | POC206 | Q8N865 | 0.30285  |
| 3821 | POC206 | Q9NVS2 | 0.74101  |
| 3822 | POC206 | Q86TJ2 | 0.70579  |
| 3823 | POC206 | Q8IYS8 | 0.6146   |
| 3824 | POC206 | Q92750 | 0.74789  |
| 3825 | POC206 | Q8N6M3 | 0.65899  |
| 3826 | POC206 | Q8NF99 | 0.50258  |
| 3827 | POC206 | Q96EH3 | 0.25114  |
| 3828 | POC206 | P27815 | 0.43145  |
| 3829 | POC206 | Q6VEQ5 | 0.4653   |
| 3830 | POC206 | Q93015 | 0.70967  |
| 3831 | POC206 | Q96HQ2 | 1.043    |
| 3832 | POC206 | Q9BTK6 | 0.58427  |
| 3833 | POC206 | Q8WYR4 | 0.46307  |
| 3834 | POC206 | Q9UK58 | 0.47475  |
| 3835 | POC206 | Q8TD35 | 0.68336  |
| 3836 | POC206 | Q96NS1 | 0.32773  |
| 3837 | POC206 | Q9UKT7 | 0.48901  |
| 3838 | POC206 | O60936 | 0.84415  |
| 3839 | POC206 | Q8N823 | 0.40539  |
| 3840 | POC206 | Q5BKY1 | 0.24014  |
| 3841 | POC206 | Q96DF8 | 0.99071  |
| 3842 | POC206 | Q5VZB9 | 0.25921  |
| 3843 | POC206 | A6NKF1 | 1.1555   |
| 3844 | POC206 | Q9UK28 | 0.57074  |
| 3845 | POC206 | P06744 | 0.64303  |
| 3846 | POC206 | Q8TBN0 | 0.37709  |
| 3847 | POC206 | Q52LA3 | 0.59661  |
| 3848 | POC206 | Q02080 | 0.52004  |
| 3849 | POC206 | P78347 | 0.68534  |
| 3850 | POC206 | Q9NWW0 | 0.33985  |
| 3851 | POC206 | Q9UHL3 | 0.13851  |
| 3852 | POC206 | Q9H0E2 | 0.28195  |
| 3853 | POC206 | Q99457 | 0.57048  |
| 3854 | POC206 | Q9UKX7 | 1.1464   |
| 3855 | POC206 | Q9H3R5 | 0.64137  |
| 3856 | POC206 | P61088 | 0.78602  |
| 3857 | POC206 | Q5T752 | 0.45994  |
| 3858 | POC206 | Q9GZR1 | 0.51748  |
| 3859 | POC206 | Q9P260 | 0.045074 |
| 3860 | POC206 | Q6P587 | 0.12096  |
| 3861 | POC206 | P50502 | 0.67925  |
| 3862 | POC206 | Q9UK45 | 0.65746  |
| 3863 | POC206 | Q49A33 | 0.50284  |
| 3864 | POC206 | Q96MF4 | 0.38328  |
| 3865 | POC206 | Q8NAE3 | 0.43252  |
| 3866 | POC206 | P82970 | 0.81314  |
| 3867 | POC206 | P14324 | 0.38893  |
| 3868 | POC206 | Q9Y3R4 | 0.30627  |
| 3869 | POC206 | Q8N9T2 | 0.45994  |
| 3870 | POC206 | P62861 | 1.0961   |
| 3871 | POC206 | P05198 | 0.64501  |
| 3872 | POC206 | Q8N1V8 | 0.03347  |
| 3873 | POC206 | Q3KNV8 | 1.1858   |
| 3874 | POC206 | Q96NY9 | 0.83894  |
| 3875 | POC206 | Q8TAL5 | 0.31499  |
| 3876 | POC206 | Q93075 | 0.69053  |



|      |        |        |          |
|------|--------|--------|----------|
| 3877 | POC206 | Q12888 | 0.89379  |
| 3878 | POC206 | Q8WYJ6 | 0.3694   |
| 3879 | POC206 | Q9HD47 | 0.32373  |
| 3880 | POC206 | Q2M2Z5 | 0.94169  |
| 3881 | POC206 | O75688 | 0.41466  |
| 3882 | POC206 | P30084 | 0.18542  |
| 3883 | POC206 | Q969S3 | 0.95232  |
| 3884 | POC206 | Q16656 | 0.52242  |
| 3885 | POC206 | Q13617 | 0.65279  |
| 3886 | POC206 | P19838 | 0.76312  |
| 3887 | POC206 | O60443 | 0.073761 |
| 3888 | POC206 | Q96T49 | 0.33015  |
| 3889 | POC206 | Q9ULC6 | 0.88611  |
| 3890 | POC206 | Q9Y285 | 0.66673  |
| 3891 | POC206 | Q9H089 | 0.18286  |
| 3892 | POC206 | Q5T2T1 | 0.26784  |
| 3893 | POC206 | Q96NB3 | 0.73024  |
| 3894 | POC206 | Q8IWS0 | 0.80053  |
| 3895 | POC206 | B1AK76 | 0.94214  |
| 3896 | POC206 | Q9P1F3 | 0.8063   |
| 3897 | POC206 | O75663 | 0.58503  |
| 3898 | POC206 | Q7Z591 | 1.1596   |
| 3899 | POC206 | Q86US8 | 0.66947  |
| 3900 | POC206 | P0C860 | 0.51862  |
| 3901 | POC206 | Q6U7Q0 | 0.42986  |
| 3902 | POC206 | A6NNJ1 | 0.49928  |
| 3903 | POC206 | Q6ZTY8 | 0.17069  |
| 3904 | POC206 | Q5VYV7 | 0.44439  |
| 3905 | POC206 | Q14204 | 0.50882  |
| 3906 | POC206 | Q99743 | 0.47581  |
| 3907 | POC206 | Q86W56 | 0.84003  |
| 3908 | POC206 | A8MQ03 | 0.6472   |
| 3909 | POC206 | Q9H4S2 | 0.32678  |
| 3910 | POC206 | Q16633 | 0.7264   |
| 3911 | POC206 | Q14164 | 0.31474  |
| 3912 | POC206 | Q8NCQ2 | 0.64139  |
| 3913 | POC206 | Q8WWB7 | 0.37884  |
| 3914 | POC206 | O43298 | 0.20949  |
| 3915 | POC206 | Q8NI08 | 0.91921  |
| 3916 | POC206 | Q96SW2 | 0.67981  |
| 3917 | POC206 | Q9H0B6 | 0.78409  |
| 3918 | POC206 | Q6R327 | 0.17256  |
| 3919 | POC206 | P49917 | 0.1787   |
| 3920 | POC206 | O14490 | 0.32645  |
| 3921 | POC206 | P36508 | 0.19173  |
| 3922 | POC206 | Q8IV36 | 0.68651  |
| 3923 | POC206 | Q16526 | 0.533    |
| 3924 | POC206 | O15514 | 0.13893  |
| 3925 | POC206 | Q16082 | 1.0223   |
| 3926 | POC206 | Q8IXT2 | 0.25921  |
| 3927 | POC206 | Q717R9 | 0.52768  |
| 3928 | POC206 | Q8NF91 | 0.65476  |
| 3929 | POC206 | Q6PJW8 | 0.07951  |
| 3930 | POC206 | Q15054 | 0.69615  |
| 3931 | POC206 | Q969V6 | 1.4963   |
| 3932 | POC206 | O60925 | 0.1551   |
| 3933 | POC206 | Q9NVE4 | 0.26125  |
| 3934 | POC206 | Q9UPM8 | 0.41534  |
| 3935 | POC206 | Q9NYG5 | 0.99088  |
| 3936 | POC206 | Q96PQ6 | 0.53155  |
| 3937 | POC206 | Q92979 | 0.4195   |
| 3938 | POC206 | Q99581 | 0.061551 |
| 3939 | POC206 | Q14919 | 0.14894  |
| 3940 | POC206 | Q86SE9 | 1.3222   |
| 3941 | POC206 | Q5T280 | 1.2015   |
| 3942 | POC206 | O60841 | 0.12362  |
| 3943 | POC206 | Q9H9Q4 | 0.61121  |
| 3944 | POC206 | Q9H8S9 | 0.61333  |
| 3945 | POC206 | Q99612 | 0.43369  |
| 3946 | POC206 | Q9H943 | 0.026514 |
| 3947 | POC206 | Q9BW85 | 1.0118   |
| 3948 | POC206 | Q96FX7 | 0.3413   |
| 3949 | POC206 | P05060 | 0.31992  |
| 3950 | POC206 | Q9NVR5 | 0.74813  |
| 3951 | POC206 | P12883 | 0.26858  |
| 3952 | POC206 | Q92843 | 0.51684  |

|      |        |        |          |
|------|--------|--------|----------|
| 3953 | POC206 | P35269 | 1.1729   |
| 3954 | POC206 | Q8ND04 | 0.62314  |
| 3955 | POC206 | O15516 | 0.27011  |
| 3956 | POC206 | Q9NZ81 | 1.1716   |
| 3957 | POC206 | Q96GX2 | 0.7244   |
| 3958 | POC206 | B1AMM8 | 0.19356  |
| 3959 | POC206 | Q9BRR8 | 0.88502  |
| 3960 | POC206 | Q9Y3P8 | 0.51574  |
| 3961 | POC206 | Q9NYF8 | 1.3537   |
| 3962 | POC206 | A6NK53 | 0.41273  |
| 3963 | POC206 | Q7Z5J4 | 0.23444  |
| 3964 | POC206 | Q9BXN6 | 0.33985  |
| 3965 | POC206 | Q6AW86 | 0.2778   |
| 3966 | POC206 | Q86X95 | 1.2736   |
| 3967 | POC206 | P10828 | 0.67234  |
| 3968 | POC206 | Q92686 | 0.25452  |
| 3969 | POC206 | Q0D2I5 | 0.12421  |
| 3970 | POC206 | Q9Y6J0 | 0.27507  |
| 3971 | POC206 | P55854 | 0.68663  |
| 3972 | POC206 | O00483 | 0.20655  |
| 3973 | POC206 | Q13428 | 1.1057   |
| 3974 | POC206 | Q5DJT8 | 0.26814  |
| 3975 | POC206 | Q6ZTQ3 | 0.25131  |
| 3976 | POC206 | Q5T7W7 | 0.68336  |
| 3977 | POC206 | Q9BQE4 | 0.71613  |
| 3978 | POC206 | Q96JZ2 | 0.52286  |
| 3979 | POC206 | Q6ZN04 | 0.30202  |
| 3980 | POC206 | P22415 | 0.4952   |
| 3981 | POC206 | A2RUG3 | 0.82909  |
| 3982 | POC206 | Q9UNH5 | 0.8206   |
| 3983 | POC206 | Q9H4D5 | 0.60011  |
| 3984 | POC206 | Q9H568 | 0.077725 |
| 3985 | POC206 | A0AUZ9 | 0.46107  |
| 3986 | POC206 | Q96FV9 | 0.8212   |
| 3987 | POC206 | Q6ZT77 | 0.35641  |
| 3988 | POC206 | P62508 | 0.65003  |
| 3989 | POC206 | P59037 | 0.74968  |
| 3990 | POC206 | P10244 | 0.71709  |
| 3991 | POC206 | Q8N3L3 | 0.86804  |
| 3992 | POC206 | P05813 | 0.30684  |
| 3993 | POC206 | Q9Y5J1 | 0.25418  |
| 3994 | POC206 | Q15041 | 0.047833 |
| 3995 | POC206 | Q8N6M9 | 0.38811  |
| 3996 | POC206 | Q9Y5B0 | 0.63748  |
| 3997 | POC206 | Q9Y4P9 | 0.31929  |
| 3998 | POC206 | Q8WW59 | 0.29505  |
| 3999 | POC206 | Q6P1N0 | 0.51236  |
| 4000 | POC206 | Q15650 | 1.071    |
| 4001 | POC206 | Q2VPK5 | 0.84919  |
| 4002 | POC206 | Q9BXU3 | 0.63451  |
| 4003 | POC206 | Q3LI66 | 0.45994  |
| 4004 | POC206 | P19387 | 0.59314  |
| 4005 | POC206 | O43379 | 0.34564  |
| 4006 | POC206 | Q6ZWC4 | 0.21522  |
| 4007 | POC206 | Q6PI26 | 1.2398   |
| 4008 | POC206 | P25063 | 0.45994  |
| 4009 | POC206 | Q2TAL8 | 0.78803  |
| 4010 | POC206 | P35711 | 1.0419   |
| 4011 | POC206 | A6NGK3 | 0.31056  |
| 4012 | POC206 | Q96KN4 | 0.079756 |
| 4013 | POC206 | Q9UP83 | 1.416    |
| 4014 | POC206 | A8MX34 | 0.35494  |
| 4015 | POC206 | Q8WW22 | 0.56222  |
| 4016 | POC206 | Q8TA94 | 0.55886  |
| 4017 | POC206 | Q9ULV5 | 0.5032   |
| 4018 | POC206 | Q9H788 | 1.1182   |
| 4019 | POC206 | Q15070 | 0.34006  |
| 4020 | POC206 | Q9UJX4 | 0.87893  |
| 4021 | POC206 | P08238 | 0.56017  |
| 4022 | POC206 | P40426 | 0.40797  |
| 4023 | POC206 | P04053 | 0.39241  |
| 4024 | POC206 | Q7Z333 | 0.29647  |
| 4025 | POC206 | Q13888 | 0.69243  |
| 4026 | POC206 | Q86V59 | 0.51418  |
| 4027 | POC206 | Q13907 | 0.36144  |
| 4028 | POC206 | Q93083 | 0.47357  |

|      |        |        |          |
|------|--------|--------|----------|
| 4029 | POC206 | Q8TAX9 | 0.20719  |
| 4030 | POC206 | Q5JWF8 | 0.097304 |
| 4031 | POC206 | Q6ICG7 | 0.45994  |
| 4032 | POC206 | Q9NX04 | 0.44035  |
| 4033 | POC206 | Q0VFX6 | 0.68336  |
| 4034 | POC206 | Q5H9T9 | 0.4475   |
| 4035 | POC206 | Q96N77 | 0.6229   |
| 4036 | POC206 | P38159 | 0.54139  |
| 4037 | POC206 | Q9NSJ1 | 0.36975  |
| 4038 | POC206 | Q9ULU8 | 0.24483  |
| 4039 | POC206 | P86480 | 0.45994  |
| 4040 | POC206 | Q86XI2 | 0.85207  |
| 4041 | POC206 | Q9NRR5 | 0.76918  |
| 4042 | POC206 | Q05048 | 0.66085  |
| 4043 | POC206 | Q7Z4T9 | 0.84274  |
| 4044 | POC206 | Q9BZQ2 | 0.51444  |
| 4045 | POC206 | A6NKF2 | 0.7984   |
| 4046 | POC206 | Q3I5F7 | 0.17496  |
| 4047 | POC206 | Q6VN20 | 0.47516  |
| 4048 | POC206 | O75446 | 1.289    |
| 4049 | POC206 | Q03112 | 0.3179   |
| 4050 | POC206 | Q6UWF3 | 0.65506  |
| 4051 | POC206 | Q9NWT6 | 0.4872   |
| 4052 | POC206 | A5D8V6 | 0.45627  |
| 4053 | POC206 | Q5TH74 | 0.53815  |
| 4054 | POC206 | P0DM35 | 0.89436  |
| 4055 | POC206 | Q8TCB0 | 0.089889 |
| 4056 | POC206 | Q7Z7G2 | 0.41332  |
| 4057 | POC206 | P53999 | 1.391    |
| 4058 | POC206 | Q9ULW6 | 0.49789  |
| 4059 | POC206 | Q6ULP2 | 0.83282  |
| 4060 | POC206 | P13647 | 0.9048   |
| 4061 | POC206 | Q9BXS1 | 0.31036  |
| 4062 | POC206 | Q96RN5 | 1.4104   |
| 4063 | POC206 | Q15007 | 0.55485  |
| 4064 | POC206 | Q5VTA0 | 0.47258  |
| 4065 | POC206 | Q9UFE4 | 0.27522  |
| 4066 | POC206 | Q8WZ19 | 0.13338  |
| 4067 | POC206 | Q6A163 | 0.40644  |
| 4068 | POC206 | O15287 | 1.0982   |
| 4069 | POC206 | H3BR10 | 0.45994  |
| 4070 | POC206 | Q96M63 | 0.27327  |
| 4071 | POC206 | Q96LJ8 | 0.62286  |
| 4072 | POC206 | O60506 | 0.29091  |
| 4073 | POC206 | P09086 | 0.41071  |
| 4074 | POC206 | E5RJ46 | 0.45994  |
| 4075 | POC206 | O00712 | 0.28945  |
| 4076 | POC206 | Q8IV33 | 0.46021  |
| 4077 | POC206 | Q9UGN5 | 0.34006  |
| 4078 | POC206 | Q5SYE7 | 0.55766  |
| 4079 | POC206 | Q9BXF3 | 0.75752  |
| 4080 | POC206 | Q5MNV8 | 0.50849  |
| 4081 | POC206 | P54368 | 0.098952 |
| 4082 | POC206 | Q9BU76 | 0.66606  |
| 4083 | POC206 | O43361 | 0.30608  |
| 4084 | POC206 | Q8NCT3 | 0.8329   |
| 4085 | POC206 | Q693B1 | 0.096805 |
| 4086 | POC206 | Q8TF20 | 0.39483  |
| 4087 | POC206 | Q9GZX7 | 0.43649  |
| 4088 | POC206 | Q8TF74 | 0.60103  |
| 4089 | POC206 | Q9ULV3 | 0.4487   |
| 4090 | POC206 | Q9BXS5 | 0.83035  |
| 4091 | POC206 | P08133 | 0.76312  |
| 4092 | POC206 | Q96LT7 | 0.74854  |
| 4093 | POC206 | Q9H8G2 | 0.68553  |
| 4094 | POC206 | Q9P0W2 | 0.82375  |
| 4095 | POC206 | Q9Y3D0 | 1.1419   |
| 4096 | POC206 | Q7L5Y9 | 0.31333  |
| 4097 | POC206 | Q99081 | 0.47871  |
| 4098 | POC206 | Q13296 | 0.098113 |
| 4099 | POC206 | P11844 | 0.90346  |
| 4100 | POC206 | P0CW21 | 0.45994  |
| 4101 | POC206 | Q8N5X7 | 0.08823  |
| 4102 | POC206 | Q9H0A6 | 0.66106  |
| 4103 | POC206 | O15155 | 0.27948  |
| 4104 | POC206 | Q5HYK7 | 1.3048   |

|      |        |        |           |
|------|--------|--------|-----------|
| 4105 | POC206 | Q8N4J0 | 1.0032    |
| 4106 | POC206 | P56645 | 0.36894   |
| 4107 | POC206 | Q8IYA8 | 0.68336   |
| 4108 | POC206 | Q96HA8 | 1.0556    |
| 4109 | POC206 | Q8NE22 | 1.0102    |
| 4110 | POC206 | Q6VY07 | 0.63012   |
| 4111 | POC206 | Q8N7H5 | 1.0424    |
| 4112 | POC206 | P35321 | 0.54597   |
| 4113 | POC206 | Q7Z6J8 | 0.40895   |
| 4114 | POC206 | P17035 | 0.28063   |
| 4115 | POC206 | Q96C74 | 0.42051   |
| 4116 | POC206 | Q9UPY8 | 1.185     |
| 4117 | POC206 | Q9NTI7 | 0.64868   |
| 4118 | POC206 | Q9H1I8 | 0.55624   |
| 4119 | POC206 | Q3ZCQ2 | 0.45994   |
| 4120 | POC206 | Q9NVA1 | 0.2674    |
| 4121 | POC206 | Q9UQE7 | 0.29863   |
| 4122 | POC206 | P60604 | 0.93071   |
| 4123 | POC206 | Q16719 | 0.35141   |
| 4124 | POC206 | Q5XKL5 | 0.32773   |
| 4125 | POC206 | Q96M11 | 1.0496    |
| 4126 | POC206 | O76087 | 0.23762   |
| 4127 | POC206 | Q8NF64 | 1.5587    |
| 4128 | POC206 | Q5JVS0 | 0.85409   |
| 4129 | POC206 | Q6RW13 | 0.88595   |
| 4130 | POC206 | O96018 | 0.57378   |
| 4131 | POC206 | Q9UJW0 | 0.69544   |
| 4132 | POC206 | P22681 | 0.44771   |
| 4133 | POC206 | Q9NVM1 | 0.86178   |
| 4134 | POC206 | Q93045 | 0.2812    |
| 4135 | POC206 | Q9NSD9 | 0.84645   |
| 4136 | POC206 | Q6ZRH9 | 0.45994   |
| 4137 | POC206 | Q13542 | 0.49143   |
| 4138 | POC206 | Q13310 | 0.38907   |
| 4139 | POC206 | Q6ZV77 | 0.45994   |
| 4140 | POC206 | P83916 | 0.74095   |
| 4141 | POC206 | O95402 | 1.1604    |
| 4142 | POC206 | Q5QJE6 | 0.99724   |
| 4143 | POC206 | P50613 | 0.25345   |
| 4144 | POC206 | O75153 | 0.19984   |
| 4145 | POC206 | Q9BYC9 | 0.80322   |
| 4146 | POC206 | Q6Q795 | 0.45994   |
| 4147 | POC206 | Q9NR09 | 0.54087   |
| 4148 | POC206 | O00165 | 0.87138   |
| 4149 | POC206 | Q9BQG0 | 0.83305   |
| 4150 | POC206 | Q9H4I8 | 0.2729    |
| 4151 | POC206 | Q68G74 | 0.33607   |
| 4152 | POC206 | Q86Y97 | 0.54552   |
| 4153 | POC206 | Q9BSY9 | 0.36269   |
| 4154 | POC206 | Q13618 | 0.44718   |
| 4155 | POC206 | Q8WYQ3 | 0.68242   |
| 4156 | POC206 | Q9Y3D7 | 0.23277   |
| 4157 | POC206 | Q92917 | 0.92427   |
| 4158 | POC206 | Q9BZR9 | 0.45061   |
| 4159 | POC206 | Q9H147 | 0.47875   |
| 4160 | POC206 | Q9UIS9 | 0.71629   |
| 4161 | POC206 | Q96Q05 | 0.47094   |
| 4162 | POC206 | Q6ZRH3 | 0.35646   |
| 4163 | POC206 | P0CW20 | 0.2511    |
| 4164 | POC206 | P0C7M3 | 0.15893   |
| 4165 | POC206 | P49450 | 0.31234   |
| 4166 | POC206 | Q9HA82 | 0.41229   |
| 4167 | POC206 | P17010 | 0.52855   |
| 4168 | POC206 | Q96S19 | 0.28471   |
| 4169 | POC206 | Q9Y4A5 | 0.9016    |
| 4170 | POC206 | Q6RSH7 | 0.4316    |
| 4171 | POC206 | Q9BUV8 | 0.12291   |
| 4172 | POC206 | Q6NT46 | 0.23762   |
| 4173 | POC206 | Q86XI8 | 0.7572    |
| 4174 | POC206 | O14972 | 0.35924   |
| 4175 | POC206 | P0C2W7 | 0.45994   |
| 4176 | POC206 | Q6XYB7 | 0.43565   |
| 4177 | POC206 | A8MQB3 | 0.0095262 |
| 4178 | POC206 | O75564 | 0.48386   |
| 4179 | POC206 | Q9GZS3 | 1.2793    |
| 4180 | POC206 | O14598 | 0.8605    |

|      |        |        |          |
|------|--------|--------|----------|
| 4181 | POC206 | Q9NVM4 | 0.3253   |
| 4182 | POC206 | P16989 | 0.34645  |
| 4183 | POC206 | A6XGL0 | 0.47098  |
| 4184 | POC206 | P35268 | 0.78274  |
| 4185 | POC206 | O95400 | 0.79279  |
| 4186 | POC206 | P17568 | 0.10093  |
| 4187 | POC206 | O95347 | 0.60197  |
| 4188 | POC206 | Q8N9V7 | 0.7569   |
| 4189 | POC206 | Q15053 | 0.057025 |
| 4190 | POC206 | Q12980 | 0.68791  |
| 4191 | POC206 | Q8IXJ9 | 0.90605  |
| 4192 | POC206 | A6NFQ7 | 0.43565  |
| 4193 | POC206 | Q8NAX2 | 0.68336  |
| 4194 | POC206 | P59047 | 0.36334  |
| 4195 | POC206 | Q5HYN5 | 0.29372  |
| 4196 | POC206 | Q8N344 | 0.75643  |
| 4197 | POC206 | Q8NAF0 | 0.20949  |
| 4198 | POC206 | P23396 | 0.71639  |
| 4199 | POC206 | Q9BVW5 | 1.2168   |
| 4200 | POC206 | O95613 | 0.90754  |
| 4201 | POC206 | P39023 | 0.91777  |
| 4202 | POC206 | Q5T8A7 | 0.82147  |
| 4203 | POC206 | Q75113 | 1.0291   |
| 4204 | POC206 | Q15560 | 1.277    |
| 4205 | POC206 | Q8WXA3 | 0.34631  |
| 4206 | POC206 | Q13068 | 0.11267  |
| 4207 | POC206 | P63000 | 0.54957  |
| 4208 | POC206 | O95257 | 0.42914  |
| 4209 | POC206 | Q9H3M9 | 0.37626  |
| 4210 | POC206 | Q7L0Y3 | 1.0305   |
| 4211 | POC206 | Q14106 | 0.36625  |
| 4212 | POC206 | Q96EP0 | 0.27199  |
| 4213 | POC206 | Q9NSC5 | 0.57     |
| 4214 | POC206 | P42166 | 0.31717  |
| 4215 | POC206 | P62258 | 0.86502  |
| 4216 | POC206 | Q86UQ0 | 0.29395  |
| 4217 | POC206 | Q13835 | 0.29256  |
| 4218 | POC206 | Q7L9B9 | 0.32404  |
| 4219 | POC206 | Q8NHY6 | 0.42368  |
| 4220 | POC206 | Q8IW36 | 0.46793  |
| 4221 | POC206 | Q96HW7 | 0.70712  |
| 4222 | POC206 | Q9BRP1 | 0.86821  |
| 4223 | POC206 | O95486 | 0.53122  |
| 4224 | POC206 | A8MZ97 | 0.84707  |
| 4225 | POC206 | Q5SWL7 | 0.73382  |
| 4226 | POC206 | Q0IIN9 | 0.2444   |
| 4227 | POC206 | P50549 | 0.97475  |
| 4228 | POC206 | Q9UKK3 | 0.79626  |
| 4229 | POC206 | O15083 | 0.69096  |
| 4230 | POC206 | Q92990 | 0.22119  |
| 4231 | POC206 | Q9H0W8 | 0.59647  |
| 4232 | POC206 | Q9UNY5 | 0.49332  |
| 4233 | POC206 | Q8NHY2 | 1.2316   |
| 4234 | POC206 | O95619 | 0.90177  |
| 4235 | POC206 | Q969M3 | 0.32187  |
| 4236 | POC206 | P20618 | 0.57107  |
| 4237 | POC206 | Q96F83 | 0.55795  |
| 4238 | POC206 | Q8N9Z2 | 0.57656  |
| 4239 | POC206 | A8MZF0 | 0.68336  |
| 4240 | POC206 | Q5BKX5 | 0.68336  |
| 4241 | POC206 | Q16658 | 0.18733  |
| 4242 | POC206 | Q86XE5 | 0.7395   |
| 4243 | POC206 | Q9Y543 | 0.46899  |
| 4244 | POC206 | Q13573 | 0.60901  |
| 4245 | POC206 | Q9ULW3 | 0.81591  |
| 4246 | POC206 | Q3LIE5 | 0.46467  |
| 4247 | POC206 | A6NEF3 | 0.93098  |
| 4248 | POC206 | Q9BWT1 | 1.0181   |
| 4249 | POC206 | Q499Z4 | 0.37429  |
| 4250 | POC206 | P32243 | 0.79466  |
| 4251 | POC206 | Q96LQ0 | 0.48832  |
| 4252 | POC206 | Q8IYE1 | 0.030614 |
| 4253 | POC206 | A0PG75 | 0.05827  |
| 4254 | POC206 | Q8N6V4 | 0.30866  |
| 4255 | POC206 | Q8WTW3 | 0.68148  |
| 4256 | POC206 | Q969X6 | 1.3684   |

|      |        |         |          |
|------|--------|---------|----------|
| 4257 | POC206 | Q9P1J3  | 0.45994  |
| 4258 | POC206 | Q9UKN5  | 0.43032  |
| 4259 | POC206 | Q9BZV1  | 1.2326   |
| 4260 | POC206 | Q6RFH5  | 0.36266  |
| 4261 | POC206 | Q9BWJ5  | 0.65271  |
| 4262 | POC206 | Q8IWN7  | 0.30341  |
| 4263 | POC206 | P17676  | 0.85531  |
| 4264 | POC206 | P0DMB1  | 0.69362  |
| 4265 | POC206 | Q99700  | 0.79644  |
| 4266 | POC206 | P78413  | 0.23633  |
| 4267 | POC206 | Q86WP2  | 0.59489  |
| 4268 | POC206 | Q9BVS5  | 0.37686  |
| 4269 | POC206 | O94993  | 0.33056  |
| 4270 | POC206 | P35080  | 0.50559  |
| 4271 | POC206 | Q8N9Z9  | 0.75125  |
| 4272 | POC206 | Q9BUN5  | 0.55751  |
| 4273 | POC206 | O95990  | 0.29101  |
| 4274 | POC206 | Q9Y3C6  | 0.27642  |
| 4275 | POC206 | Q9H322  | 0.68886  |
| 4276 | POC206 | A6NDE8  | 0.23762  |
| 4277 | POC206 | Q53TS8  | 0.43389  |
| 4278 | POC206 | Q3LI68  | 0.87218  |
| 4279 | POC206 | Q5TA79  | 0.45994  |
| 4280 | POC206 | Q6ZVK8  | 0.49905  |
| 4281 | POC206 | Q3BBW0  | 0.20018  |
| 4282 | POC206 | O76011  | 0.48752  |
| 4283 | POC206 | Q5VIR6  | 0.88905  |
| 4284 | POC206 | Q13838  | 0.17632  |
| 4285 | POC206 | A5YM69  | 0.023663 |
| 4286 | POC206 | Q9UPU9  | 0.35081  |
| 4287 | POC206 | O00124  | 0.29443  |
| 4288 | POC206 | Q15973  | 0.30557  |
| 4289 | POC206 | Q8N490  | 0.51873  |
| 4290 | POC206 | Q9XRX5  | 0.44439  |
| 4291 | POC206 | Q6IBW4  | 0.36958  |
| 4292 | POC206 | Q8N769  | 0.17031  |
| 4293 | POC206 | Q6L8G8  | 0.45994  |
| 4294 | POC206 | Q9Y2R9  | 0.98732  |
| 4295 | POC206 | P51397  | 0.50028  |
| 4296 | POC206 | Q8WVB3  | 0.24465  |
| 4297 | POC206 | Q9BZL1  | 0.37783  |
| 4298 | POC206 | Q8I WV7 | 0.43621  |
| 4299 | POC206 | Q9UNE7  | 0.32817  |
| 4300 | POC206 | Q8IUC3  | 0.90014  |
| 4301 | POC206 | P12757  | 0.44888  |
| 4302 | POC206 | Q8WU20  | 0.22549  |
| 4303 | POC206 | Q8IZP0  | 0.31158  |
| 4304 | POC206 | Q6L8G9  | 0.45994  |
| 4305 | POC206 | Q4KN68  | 0.12735  |
| 4306 | POC206 | P32969  | 0.78651  |
| 4307 | POC206 | A6NHS1  | 0.47057  |
| 4308 | POC206 | Q5VSR9  | 0.80268  |
| 4309 | POC206 | Q9Y255  | 0.23374  |
| 4310 | POC206 | A1A4G5  | 0.45994  |
| 4311 | POC206 | Q8NC26  | 0.49425  |
| 4312 | POC206 | O95831  | 0.75591  |
| 4313 | POC206 | Q8N7X2  | 0.45994  |
| 4314 | POC206 | Q06265  | 0.20042  |
| 4315 | POC206 | O14929  | 0.88143  |
| 4316 | POC206 | Q5SZB4  | 0.11191  |
| 4317 | POC206 | Q9ULG1  | 0.48269  |
| 4318 | POC206 | Q5VT98  | 0.077528 |
| 4319 | POC206 | Q9NS69  | 0.18229  |
| 4320 | POC206 | Q13405  | 0.73505  |
| 4321 | POC206 | P60331  | 0.72851  |
| 4322 | POC206 | Q52M93  | 0.30231  |
| 4323 | POC206 | Q9HA58  | 0.45994  |
| 4324 | POC206 | P43487  | 0.44794  |
| 4325 | POC206 | O43296  | 0.36707  |
| 4326 | POC206 | Q14181  | 0.54035  |
| 4327 | POC206 | Q9BXG8  | 0.70375  |
| 4328 | POC206 | Q86WZ6  | 0.28863  |
| 4329 | POC206 | Q6UXR8  | 0.45994  |
| 4330 | POC206 | P15515  | 0.26644  |
| 4331 | POC206 | Q96H20  | 1.1384   |
| 4332 | POC206 | Q6ZVE7  | 0.5365   |

|      |        |        |          |
|------|--------|--------|----------|
| 4333 | POC206 | A6NJ46 | 0.386    |
| 4334 | POC206 | I3L0S3 | 0.4602   |
| 4335 | POC206 | A6NKX1 | 0.45994  |
| 4336 | POC206 | H3BQW9 | 0.5764   |
| 4337 | POC206 | Q6PGQ1 | 0.47181  |
| 4338 | POC206 | Q9NZ52 | 0.62539  |
| 4339 | POC206 | Q13425 | 0.66843  |
| 4340 | POC206 | O95429 | 0.27813  |
| 4341 | POC206 | O94992 | 1.4055   |
| 4342 | POC206 | O75112 | 0.49453  |
| 4343 | POC206 | Q8TF47 | 0.51209  |
| 4344 | POC206 | F5H4B4 | 0.90147  |
| 4345 | POC206 | P63208 | 0.61718  |
| 4346 | POC206 | O14813 | 0.40321  |
| 4347 | POC206 | Q9UI56 | 0.45994  |
| 4348 | POC206 | P48668 | 0.38367  |
| 4349 | POC206 | P09497 | 0.52016  |
| 4350 | POC206 | Q9ULU4 | 0.78479  |
| 4351 | POC206 | Q8IZL2 | 1.014    |
| 4352 | POC206 | P82909 | 0.44136  |
| 4353 | POC206 | Q8IXS2 | 0.18333  |
| 4354 | POC206 | Q9UBU7 | 0.31615  |
| 4355 | POC206 | Q14139 | 0.63217  |
| 4356 | POC206 | P35232 | 0.60748  |
| 4357 | POC206 | O43708 | 0.4337   |
| 4358 | POC206 | Q8IZ20 | 0.20949  |
| 4359 | POC206 | Q9C0F3 | 0.6229   |
| 4360 | POC206 | Q5XUX1 | 0.44439  |
| 4361 | POC206 | Q13200 | 0.38561  |
| 4362 | POC206 | Q05BW5 | 0.29038  |
| 4363 | POC206 | P14136 | 0.36702  |
| 4364 | POC206 | Q9NR48 | 0.58159  |
| 4365 | POC206 | Q13015 | 0.63598  |
| 4366 | POC206 | Q8IV03 | 1.1762   |
| 4367 | POC206 | Q9UBU9 | 0.43356  |
| 4368 | POC206 | O15379 | 0.63598  |
| 4369 | POC206 | Q9H1Y0 | 0.4832   |
| 4370 | POC206 | O00110 | 0.30231  |
| 4371 | POC206 | Q5D0E6 | 0.82901  |
| 4372 | POC206 | Q8TAA3 | 0.26601  |
| 4373 | POC206 | Q92564 | 0.21134  |
| 4374 | POC206 | Q58FF3 | 0.39062  |
| 4375 | POC206 | P0C7W8 | 0.32934  |
| 4376 | POC206 | Q9GZY1 | 0.70629  |
| 4377 | POC206 | Q96CJ1 | 1.3064   |
| 4378 | POC206 | Q53HI1 | 0.59313  |
| 4379 | POC206 | Q9Y6D5 | 0.23125  |
| 4380 | POC206 | Q9BXX3 | 0.33372  |
| 4381 | POC206 | P52742 | 0.36979  |
| 4382 | POC206 | Q5JT18 | 0.45994  |
| 4383 | POC206 | P08047 | 0.82116  |
| 4384 | POC206 | Q9UEG4 | 0.35112  |
| 4385 | POC206 | A8MV72 | 0.36237  |
| 4386 | POC206 | Q9NP66 | 1.1378   |
| 4387 | POC206 | A6NJQ4 | 0.4045   |
| 4388 | POC206 | Q9Y305 | 0.67096  |
| 4389 | POC206 | P17482 | 1.1847   |
| 4390 | POC206 | P24278 | 1.0328   |
| 4391 | POC206 | Q14CW9 | 1.0145   |
| 4392 | POC206 | P18615 | 0.92636  |
| 4393 | POC206 | P51959 | 0.56096  |
| 4394 | POC206 | A6NFI3 | 0.28116  |
| 4395 | POC206 | O14556 | 0.36735  |
| 4396 | POC206 | P52597 | 0.37386  |
| 4397 | POC206 | O76021 | 0.5461   |
| 4398 | POC206 | Q711Q0 | 0.45994  |
| 4399 | POC206 | P80723 | 0.61666  |
| 4400 | POC206 | Q9BVV2 | 0.067231 |
| 4401 | POC206 | Q9BPZ3 | 0.59815  |
| 4402 | POC206 | Q9BWW4 | 0.77466  |
| 4403 | POC206 | Q13427 | 0.49771  |
| 4404 | POC206 | O95373 | 1.1369   |
| 4405 | POC206 | P60372 | 0.72851  |
| 4406 | POC206 | Q96M43 | 0.25901  |
| 4407 | POC206 | Q8IWE2 | 0.77533  |
| 4408 | POC206 | O75330 | 0.2985   |

|      |        |        |          |
|------|--------|--------|----------|
| 4409 | POC206 | Q5VZK9 | 0.28348  |
| 4410 | POC206 | Q9NZM4 | 1.1771   |
| 4411 | POC206 | Q96C23 | 0.026409 |
| 4412 | POC206 | P62701 | 0.41834  |
| 4413 | POC206 | F8W1W9 | 0.35075  |
| 4414 | POC206 | Q8NCD3 | 0.66428  |
| 4415 | POC206 | P28070 | 0.37946  |
| 4416 | POC206 | Q9Y5J3 | 0.37147  |
| 4417 | POC206 | Q96JN0 | 0.6718   |
| 4418 | POC206 | H3BNL8 | 0.93601  |
| 4419 | POC206 | P13349 | 0.35328  |
| 4420 | POC206 | P07900 | 0.52104  |
| 4421 | POC206 | Q3YBM2 | 0.90535  |
| 4422 | POC206 | P49459 | 0.81893  |
| 4423 | POC206 | Q16630 | 0.22232  |
| 4424 | POC206 | Q9Y2S0 | 0.23167  |
| 4425 | POC206 | Q9NZV7 | 0.60776  |
| 4426 | POC206 | P51808 | 0.57153  |
| 4427 | POC206 | Q8IYX7 | 0.8441   |
| 4428 | POC206 | Q8N972 | 0.40539  |
| 4429 | POC206 | Q9UK10 | 0.40539  |
| 4430 | POC206 | Q12986 | 0.41996  |
| 4431 | POC206 | Q3C1V1 | 0.68336  |
| 4432 | POC206 | P29083 | 1.3429   |
| 4433 | POC206 | Q5T319 | 0.45994  |
| 4434 | POC206 | P04731 | 0.47357  |
| 4435 | POC206 | P51610 | 0.55127  |
| 4436 | POC206 | Q9P0M2 | 0.1548   |
| 4437 | POC206 | Q86SG2 | 0.35519  |
| 4438 | POC206 | Q7L4P6 | 0.41634  |
| 4439 | POC206 | Q8N488 | 0.76578  |
| 4440 | POC206 | A8MU93 | 0.68336  |
| 4441 | POC206 | Q7Z7B7 | 0.89864  |
| 4442 | POC206 | Q9UPT5 | 0.7014   |
| 4443 | POC206 | Q13426 | 0.42463  |
| 4444 | POC206 | O75391 | 0.72377  |
| 4445 | POC206 | Q6P087 | 0.29984  |
| 4446 | POC206 | P35606 | 0.53525  |
| 4447 | POC206 | Q8N8D1 | 0.72728  |
| 4448 | POC206 | O00264 | 0.059176 |
| 4449 | POC206 | Q5VYS4 | 0.1855   |
| 4450 | POC206 | Q6ZVQ6 | 1.2094   |
| 4451 | POC206 | Q5JUK9 | 0.22951  |
| 4452 | POC206 | Q9BVC6 | 0.73107  |
| 4453 | POC206 | P55196 | 0.24886  |
| 4454 | POC206 | Q14691 | 0.4      |
| 4455 | POC206 | Q9H3E2 | 0.16337  |
| 4456 | POC206 | Q86SZ2 | 0.88184  |
| 4457 | POC206 | O75694 | 0.74304  |
| 4458 | POC206 | O00159 | 0.1801   |
| 4459 | POC206 | O43900 | 0.48351  |
| 4460 | POC206 | Q9UKN8 | 0.62584  |
| 4461 | POC206 | A6NJG6 | 0.43565  |
| 4462 | POC206 | P0CZ20 | 0.39488  |
| 4463 | POC206 | Q96MN9 | 0.81858  |
| 4464 | POC206 | Q7Z7G8 | 0.096706 |
| 4465 | POC206 | Q9P2K5 | 0.15233  |
| 4466 | POC206 | Q96BR9 | 0.23725  |
| 4467 | POC206 | Q8WXF8 | 1.1552   |
| 4468 | POC206 | Q86XI6 | 0.22895  |
| 4469 | POC206 | Q6PJT7 | 1.081    |
| 4470 | POC206 | Q14683 | 0.55246  |
| 4471 | POC206 | Q8N141 | 0.5435   |
| 4472 | POC206 | Q9UHF7 | 0.67248  |
| 4473 | POC206 | O95922 | 0.019576 |
| 4474 | POC206 | Q86UC2 | 0.56503  |
| 4475 | POC206 | Q9Y6A5 | 0.086982 |
| 4476 | POC206 | Q6P2E9 | 1.1336   |
| 4477 | POC206 | Q5VTH2 | 0.6284   |
| 4478 | POC206 | Q96EV8 | 0.29861  |
| 4479 | POC206 | Q7RTU5 | 0.50915  |
| 4480 | POC206 | Q6NSH3 | 0.59951  |
| 4481 | POC206 | Q9UHY7 | 0.27376  |
| 4482 | POC206 | Q6ZRT6 | 0.68336  |
| 4483 | POC206 | Q9HAP2 | 0.82693  |
| 4484 | POC206 | Q8WVZ9 | 0.50382  |



|      |        |        |          |
|------|--------|--------|----------|
| 4485 | POC206 | Q15906 | 1.0919   |
| 4486 | POC206 | Q9H944 | 1.1305   |
| 4487 | POC206 | Q9HAI6 | 0.69656  |
| 4488 | POC206 | Q9H582 | 0.20949  |
| 4489 | POC206 | Q9H974 | 1.3555   |
| 4490 | POC206 | P61575 | 0.80216  |
| 4491 | POC206 | Q9H171 | 0.22969  |
| 4492 | POC206 | Q5VWI1 | 0.98374  |
| 4493 | POC206 | Q9BTE6 | 0.63156  |
| 4494 | POC206 | P05386 | 1.0234   |
| 4495 | POC206 | P50616 | 0.46387  |
| 4496 | POC206 | Q96KR1 | 0.37318  |
| 4497 | POC206 | Q14593 | 0.5656   |
| 4498 | POC206 | Q9H175 | 1.212    |
| 4499 | POC206 | Q92985 | 0.57902  |
| 4500 | POC206 | Q8N4B5 | 0.68635  |
| 4501 | POC206 | Q969W0 | 0.49937  |
| 4502 | POC206 | Q9HCE0 | 0.30833  |
| 4503 | POC206 | Q6ZQT0 | 0.086017 |
| 4504 | POC206 | Q9UKH3 | 0.82824  |
| 4505 | POC206 | P86478 | 0.45994  |
| 4506 | POC206 | Q8N357 | 0.40828  |
| 4507 | POC206 | Q9P013 | 0.50631  |
| 4508 | POC206 | Q9NWB7 | 0.77896  |
| 4509 | POC206 | A8MPV3 | 0.10664  |
| 4510 | POC206 | P40855 | 0.55025  |
| 4511 | POC206 | Q9Y3B7 | 1.1155   |
| 4512 | POC206 | Q9BRD0 | 0.82072  |
| 4513 | POC206 | Q9H1H1 | 0.40703  |
| 4514 | POC206 | Q7RTU4 | 0.48008  |
| 4515 | POC206 | Q5TEC3 | 0.33372  |
| 4516 | POC206 | P53370 | 0.59716  |
| 4517 | POC206 | Q8N7J2 | 1.1573   |
| 4518 | POC206 | Q99445 | 0.40617  |
| 4519 | POC206 | Q95178 | 0.60375  |
| 4520 | POC206 | Q6NSJ2 | 0.44628  |
| 4521 | POC206 | Q6RFH8 | 0.92562  |
| 4522 | POC206 | Q6IQ32 | 0.5855   |
| 4523 | POC206 | P33947 | 0.4147   |
| 4524 | POC206 | O60888 | 0.51926  |
| 4525 | POC206 | Q53QV2 | 0.59021  |
| 4526 | POC206 | Q8N268 | 0.050805 |
| 4527 | POC206 | O60885 | 0.80666  |
| 4528 | POC206 | Q15011 | 0.63703  |
| 4529 | POC206 | P59051 | 0.16593  |
| 4530 | POC206 | Q4G0N7 | 0.66422  |
| 4531 | POC206 | Q96FW1 | 0.15129  |
| 4532 | POC206 | Q5H9F3 | 0.8047   |
| 4533 | POC206 | Q8N5P1 | 0.36729  |
| 4534 | POC206 | Q95707 | 0.90619  |
| 4535 | POC206 | Q9UBS8 | 0.80297  |
| 4536 | POC206 | Q9UJY5 | 0.65976  |
| 4537 | POC206 | O15049 | 1.084    |
| 4538 | POC206 | Q14149 | 0.36145  |
| 4539 | POC206 | Q7Z5V6 | 0.48543  |
| 4540 | POC206 | Q8WXF1 | 0.96982  |
| 4541 | POC206 | P63261 | 0.17471  |
| 4542 | POC206 | Q6IQ19 | 0.43059  |
| 4543 | POC206 | O95190 | 0.70446  |
| 4544 | POC206 | P48059 | 0.38354  |
| 4545 | POC206 | Q8WUI4 | 0.49694  |
| 4546 | POC206 | Q01658 | 0.60564  |
| 4547 | POC206 | Q17RY6 | 0.82071  |
| 4548 | POC206 | P34896 | 0.28512  |
| 4549 | POC206 | Q14160 | 0.63436  |
| 4550 | POC206 | P28290 | 0.5014   |
| 4551 | POC206 | Q96LK0 | 0.27468  |
| 4552 | POC206 | Q96JE7 | 1.0689   |
| 4553 | POC206 | Q86XT2 | 0.19313  |
| 4554 | POC206 | P22557 | 0.16499  |
| 4555 | POC206 | Q6DHV5 | 0.28137  |
| 4556 | POC206 | Q107X0 | 0.51471  |
| 4557 | POC206 | Q08ER8 | 0.39689  |
| 4558 | POC206 | Q9NPJ6 | 0.92227  |
| 4559 | POC206 | Q99543 | 0.63185  |
| 4560 | POC206 | O00461 | 0.62557  |

|      |        |        |          |
|------|--------|--------|----------|
| 4561 | POC206 | P45381 | 0.19605  |
| 4562 | POC206 | Q14676 | 0.80784  |
| 4563 | POC206 | P17032 | 0.31775  |
| 4564 | POC206 | Q9UHH3 | 0.451    |
| 4565 | POC206 | Q96BJ3 | 0.67235  |
| 4566 | POC206 | Q6ZS52 | 0.45994  |
| 4567 | POC206 | Q99569 | 0.47258  |
| 4568 | POC206 | P35680 | 0.28977  |
| 4569 | POC206 | O60239 | 0.46196  |
| 4570 | POC206 | F7VJQ1 | 0.45994  |
| 4571 | POC206 | Q8N377 | 0.45994  |
| 4572 | POC206 | Q7RTU0 | 0.48008  |
| 4573 | POC206 | P49789 | 0.67985  |
| 4574 | POC206 | Q9Y5A9 | 0.46655  |
| 4575 | POC206 | Q96T88 | 0.42785  |
| 4576 | POC206 | Q15315 | 0.28773  |
| 4577 | POC206 | P49711 | 0.35397  |
| 4578 | POC206 | Q9NWX8 | 0.79881  |
| 4579 | POC206 | P35548 | 0.6867   |
| 4580 | POC206 | Q86TS9 | 0.43447  |
| 4581 | POC206 | P57081 | 1.0426   |
| 4582 | POC206 | Q8TD23 | 0.71907  |
| 4583 | POC206 | Q96EK5 | 0.3185   |
| 4584 | POC206 | Q9HC78 | 0.43624  |
| 4585 | POC206 | Q6NZI2 | 1.142    |
| 4586 | POC206 | Q96IY1 | 1.1014   |
| 4587 | POC206 | Q8N9H9 | 0.45994  |
| 4588 | POC206 | P61571 | 0.61046  |
| 4589 | POC206 | P01100 | 0.52638  |
| 4590 | POC206 | O14656 | 0.28006  |
| 4591 | POC206 | Q96JP2 | 0.30973  |
| 4592 | POC206 | Q96F86 | 0.61752  |
| 4593 | POC206 | Q71F78 | 0.53301  |
| 4594 | POC206 | Q8N7U7 | 0.43471  |
| 4595 | POC206 | P50440 | 0.34045  |
| 4596 | POC206 | P22090 | 0.31567  |
| 4597 | POC206 | Q9H2C1 | 0.27224  |
| 4598 | POC206 | Q04206 | 0.65727  |
| 4599 | POC206 | Q495M9 | 0.37243  |
| 4600 | POC206 | Q06587 | 0.93393  |
| 4601 | POC206 | H3BRN8 | 0.056726 |
| 4602 | POC206 | P0C5Y4 | 0.4802   |
| 4603 | POC206 | O60739 | 0.38675  |
| 4604 | POC206 | Q9NV06 | 0.34724  |
| 4605 | POC206 | Q4LE39 | 1.0669   |
| 4606 | POC206 | Q9P2J3 | 0.37131  |
| 4607 | POC206 | Q9UI12 | 0.15504  |
| 4608 | POC206 | P16415 | 0.38175  |
| 4609 | POC206 | Q86VX9 | 1.0501   |
| 4610 | POC206 | Q9H2K0 | 0.38471  |
| 4611 | POC206 | P49006 | 1.0265   |
| 4612 | POC206 | P53990 | 0.71323  |
| 4613 | POC206 | B5ME19 | 0.28162  |
| 4614 | POC206 | P86452 | 0.67443  |
| 4615 | POC206 | Q7Z4G4 | 0.19214  |
| 4616 | POC206 | Q5VVH5 | 0.79647  |
| 4617 | POC206 | Q75505 | 0.31537  |
| 4618 | POC206 | Q8IYX8 | 0.20337  |
| 4619 | POC206 | P24390 | 0.68011  |
| 4620 | POC206 | B9ZVM9 | 1.1654   |
| 4621 | POC206 | Q6PH81 | 0.24982  |
| 4622 | POC206 | Q9Y5R5 | 0.30099  |
| 4623 | POC206 | P09105 | 0.40461  |
| 4624 | POC206 | Q6P047 | 0.76076  |
| 4625 | POC206 | O95931 | 0.9497   |
| 4626 | POC206 | Q9BYD6 | 0.57035  |
| 4627 | POC206 | Q9NQR1 | 0.82339  |
| 4628 | POC206 | Q9UHU1 | 0.45994  |
| 4629 | POC206 | P32929 | 0.30483  |
| 4630 | POC206 | P49257 | 0.26086  |
| 4631 | POC206 | Q86VP3 | 0.49996  |
| 4632 | POC206 | Q16204 | 0.29906  |
| 4633 | POC206 | Q5HY98 | 0.49074  |
| 4634 | POC206 | Q9UPW6 | 0.85473  |
| 4635 | POC206 | Q92889 | 0.34715  |
| 4636 | POC206 | Q9Y2L8 | 0.55283  |

|      |        |        |          |
|------|--------|--------|----------|
| 4637 | POC206 | Q8IVG9 | 0.18859  |
| 4638 | POC206 | Q8TEX9 | 0.65402  |
| 4639 | POC206 | Q86VI1 | 0.27642  |
| 4640 | POC206 | Q86X51 | 0.44834  |
| 4641 | POC206 | O95487 | 0.84112  |
| 4642 | POC206 | O14508 | 0.34916  |
| 4643 | POC206 | P25800 | 0.36521  |
| 4644 | POC206 | P84098 | 0.61276  |
| 4645 | POC206 | A4D1B5 | 0.11905  |
| 4646 | POC206 | Q86WV1 | 0.71631  |
| 4647 | POC206 | Q96AQ6 | 0.93192  |
| 4648 | POC206 | Q9Y3B8 | 0.1937   |
| 4649 | POC206 | Q9NZL4 | 0.44112  |
| 4650 | POC206 | P09913 | 0.63506  |
| 4651 | POC206 | Q9Y6F6 | 0.12637  |
| 4652 | POC206 | A6NFC5 | 0.51588  |
| 4653 | POC206 | Q7Z589 | 1.0104   |
| 4654 | POC206 | A6NJ88 | 0.90288  |
| 4655 | POC206 | P01215 | 0.29446  |
| 4656 | POC206 | Q8TDQ7 | 0.15216  |
| 4657 | POC206 | Q9HCH0 | 1.4168   |
| 4658 | POC206 | P62945 | 0.67945  |
| 4659 | POC206 | Q8TDG2 | 0.16231  |
| 4660 | POC206 | O60763 | 0.57347  |
| 4661 | POC206 | Q9H4B6 | 0.68876  |
| 4662 | POC206 | Q8TAT5 | 0.2905   |
| 4663 | POC206 | Q69YL0 | 0.45994  |
| 4664 | POC206 | Q9NWW7 | 0.77878  |
| 4665 | POC206 | O94874 | 0.93948  |
| 4666 | POC206 | Q8N8K9 | 0.24842  |
| 4667 | POC206 | O75152 | 0.46784  |
| 4668 | POC206 | O60260 | 0.5197   |
| 4669 | POC206 | P17017 | 0.28063  |
| 4670 | POC206 | Q96CN0 | 0.45994  |
| 4671 | POC206 | Q9UIF8 | 1.155    |
| 4672 | POC206 | Q9UHT4 | 0.45994  |
| 4673 | POC206 | Q8IZ63 | 0.45994  |
| 4674 | POC206 | Q8IZU0 | 0.84618  |
| 4675 | POC206 | Q96MC9 | 1.1153   |
| 4676 | POC206 | Q9BTC0 | 0.51199  |
| 4677 | POC206 | Q9BYD2 | 0.78575  |
| 4678 | POC206 | Q9UG56 | 0.3986   |
| 4679 | POC206 | O75817 | 0.97918  |
| 4680 | POC206 | Q99460 | 0.11513  |
| 4681 | POC206 | P10155 | 0.52106  |
| 4682 | POC206 | Q9Y3D2 | 0.33509  |
| 4683 | POC206 | O75792 | 0.97029  |
| 4684 | POC206 | Q8TDP1 | 0.51919  |
| 4685 | POC206 | Q8TED0 | 0.46792  |
| 4686 | POC206 | Q9H6W3 | 0.46751  |
| 4687 | POC206 | Q8TCD5 | 0.18959  |
| 4688 | POC206 | Q9NQR4 | 0.41447  |
| 4689 | POC206 | O15225 | 0.45994  |
| 4690 | POC206 | Q16740 | 0.41892  |
| 4691 | POC206 | O60268 | 0.30213  |
| 4692 | POC206 | F5GYI3 | 1.0063   |
| 4693 | POC206 | Q9UKI9 | 1.3562   |
| 4694 | POC206 | Q01831 | 0.80848  |
| 4695 | POC206 | Q7KZ85 | 0.41251  |
| 4696 | POC206 | P0CJ88 | 0.386    |
| 4697 | POC206 | Q96CW1 | 0.61226  |
| 4698 | POC206 | O60535 | 0.6725   |
| 4699 | POC206 | Q9POL1 | 0.37443  |
| 4700 | POC206 | Q6ZSR3 | 0.45994  |
| 4701 | POC206 | P0C7P2 | 0.18874  |
| 4702 | POC206 | Q96MK2 | 0.084068 |
| 4703 | POC206 | P52744 | 0.3559   |
| 4704 | POC206 | P15923 | 0.57673  |
| 4705 | POC206 | Q9BTX1 | 0.6462   |
| 4706 | POC206 | P26373 | 0.86825  |
| 4707 | POC206 | Q9H211 | 0.81134  |
| 4708 | POC206 | Q15942 | 0.46789  |
| 4709 | POC206 | Q71UM5 | 0.77074  |
| 4710 | POC206 | Q9Y6G9 | 0.29161  |
| 4711 | POC206 | Q9BQA9 | 0.15915  |
| 4712 | POC206 | Q8TF50 | 0.30966  |

|      |        |        |         |
|------|--------|--------|---------|
| 4713 | POC206 | Q8ND90 | 0.8325  |
| 4714 | POC206 | Q5D1E8 | 0.8771  |
| 4715 | POC206 | O00198 | 0.74072 |
| 4716 | POC206 | Q96RS6 | 0.33985 |
| 4717 | POC206 | Q96PK6 | 0.7538  |
| 4718 | POC206 | Q01094 | 0.82878 |
| 4719 | POC206 | Q3ZCT1 | 0.33566 |
| 4720 | POC206 | Q9NZ72 | 0.12813 |
| 4721 | POC206 | Q9BQK8 | 0.13754 |
| 4722 | POC206 | Q9UIF9 | 0.80454 |
| 4723 | POC206 | Q5T036 | 0.12374 |
| 4724 | POC206 | Q9P219 | 0.54844 |
| 4725 | POC206 | P26998 | 0.85146 |
| 4726 | POC206 | Q14152 | 1.1684  |
| 4727 | POC206 | Q9Y3B9 | 0.49809 |
| 4728 | POC206 | Q15293 | 0.35233 |
| 4729 | POC206 | Q16626 | 0.15499 |
| 4730 | POC206 | Q15102 | 0.28067 |
| 4731 | POC206 | Q9NY33 | 0.29028 |
| 4732 | POC206 | Q0PNE2 | 0.68495 |
| 4733 | POC206 | Q14686 | 0.89247 |
| 4734 | POC206 | Q7Z7K6 | 0.71407 |
| 4735 | POC206 | Q9UJ68 | 0.14179 |
| 4736 | POC206 | Q8TCC3 | 0.27125 |
| 4737 | POC206 | P12882 | 0.33462 |
| 4738 | POC206 | P40925 | 0.54352 |
| 4739 | POC206 | Q5JPI3 | 0.68553 |
| 4740 | POC206 | Q8N8P6 | 0.3568  |
| 4741 | POC206 | Q5SXM8 | 0.22305 |
| 4742 | POC206 | Q96BT3 | 0.69807 |
| 4743 | POC206 | Q969Z0 | 0.39821 |
| 4744 | POC206 | O00204 | 0.50195 |
| 4745 | POC206 | Q5TA77 | 0.45994 |
| 4746 | POC206 | Q9UQR1 | 1.0078  |
| 4747 | POC206 | P35637 | 0.45298 |
| 4748 | POC206 | O60296 | 0.63827 |
| 4749 | POC206 | A0A183 | 0.45994 |
| 4750 | POC206 | O43491 | 0.37085 |
| 4751 | POC206 | Q6ZVN8 | 0.29878 |
| 4752 | POC206 | P60411 | 0.72851 |
| 4753 | POC206 | Q9H4Z2 | 0.86737 |
| 4754 | POC206 | O14908 | 0.24014 |
| 4755 | POC206 | Q6MZP7 | 0.78142 |
| 4756 | POC206 | Q5SV97 | 0.75732 |
| 4757 | POC206 | P61570 | 0.86244 |
| 4758 | POC206 | Q99807 | 0.2134  |
| 4759 | POC206 | Q96P15 | 0.27508 |
| 4760 | POC206 | Q8WUY8 | 0.59761 |
| 4761 | POC206 | O96028 | 0.55939 |
| 4762 | POC206 | P23526 | 0.18456 |
| 4763 | POC206 | P61981 | 0.59939 |
| 4764 | POC206 | Q7Z3K3 | 0.74203 |
| 4765 | POC206 | O00151 | 0.45305 |
| 4766 | POC206 | Q9HCI7 | 0.32211 |
| 4767 | POC206 | O94905 | 0.38987 |
| 4768 | POC206 | A0AVK6 | 0.47791 |
| 4769 | POC206 | Q8TCE6 | 1.1096  |
| 4770 | POC206 | A6NFL8 | 0.93098 |
| 4771 | POC206 | O95361 | 0.26559 |
| 4772 | POC206 | P0C7W0 | 0.68336 |
| 4773 | POC206 | Q8TEV8 | 0.45994 |
| 4774 | POC206 | Q96CX3 | 0.33813 |
| 4775 | POC206 | Q8IZ16 | 0.26251 |
| 4776 | POC206 | P15884 | 0.67008 |
| 4777 | POC206 | O15078 | 0.68377 |
| 4778 | POC206 | Q9H0P0 | 0.44798 |
| 4779 | POC206 | Q9BR84 | 0.57913 |
| 4780 | POC206 | A6NEN9 | 0.05351 |
| 4781 | POC206 | Q9Y692 | 0.93419 |
| 4782 | POC206 | Q9BUN8 | 0.2693  |
| 4783 | POC206 | Q12816 | 0.42409 |
| 4784 | POC206 | O96006 | 0.84028 |
| 4785 | POC206 | Q8TEL6 | 0.50904 |
| 4786 | POC206 | Q96F24 | 0.83436 |
| 4787 | POC206 | O00757 | 0.07202 |
| 4788 | POC206 | O43395 | 0.84755 |

|      |        |        |          |
|------|--------|--------|----------|
| 4789 | POC206 | O15111 | 0.63954  |
| 4790 | POC206 | Q9NRI5 | 0.47613  |
| 4791 | POC206 | Q8WTS6 | 0.57897  |
| 4792 | POC206 | A8MUI8 | 0.46956  |
| 4793 | POC206 | Q9H963 | 0.43883  |
| 4794 | POC206 | P20823 | 0.2487   |
| 4795 | POC206 | Q502W7 | 0.30328  |
| 4796 | POC206 | A6NGY3 | 0.12155  |
| 4797 | POC206 | O14618 | 0.57886  |
| 4798 | POC206 | Q99728 | 0.36906  |
| 4799 | POC206 | P46777 | 1.117    |
| 4800 | POC206 | O14734 | 0.3652   |
| 4801 | POC206 | Q9NUP7 | 0.88757  |
| 4802 | POC206 | O95278 | 0.2662   |
| 4803 | POC206 | Q6ZU67 | 0.4231   |
| 4804 | POC206 | P05388 | 1.1511   |
| 4805 | POC206 | Q9NRX1 | 0.19092  |
| 4806 | POC206 | Q6ZP68 | 0.84164  |
| 4807 | POC206 | Q8WWW0 | 0.60248  |
| 4808 | POC206 | Q9UI10 | 0.37993  |
| 4809 | POC206 | Q5TYM5 | 0.32638  |
| 4810 | POC206 | Q9HD64 | 0.27851  |
| 4811 | POC206 | Q9NWT8 | 0.9571   |
| 4812 | POC206 | O94916 | 0.31431  |
| 4813 | POC206 | O95416 | 0.54207  |
| 4814 | POC206 | Q76FK4 | 0.32789  |
| 4815 | POC206 | P62979 | 0.45057  |
| 4816 | POC206 | P50539 | 0.36072  |
| 4817 | POC206 | Q9GZP9 | 0.23816  |
| 4818 | POC206 | P28347 | 1.1      |
| 4819 | POC206 | Q8NDF8 | 0.55645  |
| 4820 | POC206 | P13073 | 0.37206  |
| 4821 | POC206 | Q8NA54 | 0.24308  |
| 4822 | POC206 | P17020 | 0.25974  |
| 4823 | POC206 | Q99590 | 0.76132  |
| 4824 | POC206 | Q7Z739 | 0.53545  |
| 4825 | POC206 | P78345 | 0.97918  |
| 4826 | POC206 | Q9BWT7 | 0.25208  |
| 4827 | POC206 | P53539 | 0.12219  |
| 4828 | POC206 | P59022 | 0.67301  |
| 4829 | POC206 | Q96NL3 | 0.35755  |
| 4830 | POC206 | Q96MF0 | 0.18409  |
| 4831 | POC206 | Q8N9R8 | 0.80181  |
| 4832 | POC206 | Q96MU7 | 0.74915  |
| 4833 | POC206 | Q8IZS6 | 0.2429   |
| 4834 | POC206 | Q6T4R5 | 0.33364  |
| 4835 | POC206 | P13994 | 0.52156  |
| 4836 | POC206 | Q8NCA9 | 0.20949  |
| 4837 | POC206 | Q92546 | 1.0138   |
| 4838 | POC206 | Q96FH0 | 0.42103  |
| 4839 | POC206 | P58557 | 1.0551   |
| 4840 | POC206 | Q3SY89 | 0.17848  |
| 4841 | POC206 | Q8N616 | 0.45994  |
| 4842 | POC206 | Q9NS37 | 0.94781  |
| 4843 | POC206 | P17039 | 0.27283  |
| 4844 | POC206 | Q8TBC5 | 0.29094  |
| 4845 | POC206 | Q7Z417 | 0.82087  |
| 4846 | POC206 | Q02447 | 0.61327  |
| 4847 | POC206 | Q8TF32 | 0.55334  |
| 4848 | POC206 | Q9Y5N6 | 0.6727   |
| 4849 | POC206 | P16452 | 0.23951  |
| 4850 | POC206 | Q9Y6X0 | 0.028716 |
| 4851 | POC206 | Q06547 | 1.1562   |
| 4852 | POC206 | Q9BTL4 | 0.56161  |
| 4853 | POC206 | Q9H7Z3 | 0.21239  |
| 4854 | POC206 | Q15834 | 1.3154   |
| 4855 | POC206 | Q9P0U1 | 0.49482  |
| 4856 | POC206 | Q8N693 | 0.53418  |
| 4857 | POC206 | Q6P2Q9 | 0.45987  |
| 4858 | POC206 | P05783 | 1.3462   |
| 4859 | POC206 | Q6PUV4 | 0.28156  |
| 4860 | POC206 | Q9UJK0 | 1.0047   |
| 4861 | POC206 | Q9BUV0 | 0.68336  |
| 4862 | POC206 | A6ZKI3 | 0.62913  |
| 4863 | POC206 | O95405 | 0.25716  |
| 4864 | POC206 | P57772 | 0.5566   |

|      |        |         |          |
|------|--------|---------|----------|
| 4865 | POC206 | Q96GY0  | 0.662    |
| 4866 | POC206 | Q5T230  | 1.486    |
| 4867 | POC206 | Q3C1V8  | 0.78154  |
| 4868 | POC206 | A8MXK9  | 0.15499  |
| 4869 | POC206 | Q9BRU9  | 0.39571  |
| 4870 | POC206 | Q86TU6  | 0.9777   |
| 4871 | POC206 | Q5T1C6  | 0.80091  |
| 4872 | POC206 | Q9Y2J4  | 0.39527  |
| 4873 | POC206 | Q6ZQT7  | 0.45994  |
| 4874 | POC206 | P67870  | 0.37114  |
| 4875 | POC206 | Q9BVL4  | 1.3352   |
| 4876 | POC206 | Q6ZSS3  | 0.279    |
| 4877 | POC206 | Q8NI35  | 0.42662  |
| 4878 | POC206 | Q92759  | 0.77192  |
| 4879 | POC206 | Q75VX8  | 1.0064   |
| 4880 | POC206 | P35789  | 0.50318  |
| 4881 | POC206 | Q96JJ3  | 0.32186  |
| 4882 | POC206 | Q96IR3  | 0.72264  |
| 4883 | POC206 | Q8WVC0  | 1.1244   |
| 4884 | POC206 | Q66GS9  | 0.52238  |
| 4885 | POC206 | P55273  | 0.28751  |
| 4886 | POC206 | P30039  | 0.21998  |
| 4887 | POC206 | Q15486  | 0.54467  |
| 4888 | POC206 | Q9Y2B2  | 0.78901  |
| 4889 | POC206 | Q9NYF3  | 0.4064   |
| 4890 | POC206 | Q6J272  | 1.0957   |
| 4891 | POC206 | P46527  | 0.39374  |
| 4892 | POC206 | Q9H1X1  | 0.39988  |
| 4893 | POC206 | O43633  | 0.36151  |
| 4894 | POC206 | O95551  | 0.95904  |
| 4895 | POC206 | Q8N841  | 0.19093  |
| 4896 | POC206 | Q8IXQ4  | 0.68336  |
| 4897 | POC206 | Q8WU49  | 0.45994  |
| 4898 | POC206 | Q8N128  | 0.45994  |
| 4899 | POC206 | Q9BZQ4  | 0.2441   |
| 4900 | POC206 | P28324  | 1.5804   |
| 4901 | POC206 | A6NMX2  | 0.037569 |
| 4902 | POC206 | Q8NFD4  | 0.14704  |
| 4903 | POC206 | O75969  | 0.41249  |
| 4904 | POC206 | Q8IUUC1 | 0.30526  |
| 4905 | POC206 | Q6ZRH4  | 1.5889   |
| 4906 | POC206 | P23284  | 0.39453  |
| 4907 | POC206 | B7ZBB8  | 0.13188  |
| 4908 | POC206 | Q03052  | 0.41024  |
| 4909 | POC206 | O95793  | 0.27497  |
| 4910 | POC206 | Q5T160  | 0.70526  |
| 4911 | POC206 | O15446  | 0.34982  |
| 4912 | POC206 | Q659C4  | 0.56868  |
| 4913 | POC206 | O43768  | 0.32032  |
| 4914 | POC206 | Q96LB3  | 0.78666  |
| 4915 | POC206 | Q9NVP1  | 0.13612  |
| 4916 | POC206 | Q8TBB1  | 0.97989  |
| 4917 | POC206 | Q96CS2  | 0.80565  |
| 4918 | POC206 | Q96LL4  | 0.68336  |
| 4919 | POC206 | Q9H2M3  | 0.03719  |
| 4920 | POC206 | Q8N1D0  | 0.14821  |
| 4921 | POC206 | Q8WU76  | 0.15448  |
| 4922 | POC206 | Q8TDY2  | 0.98617  |
| 4923 | POC206 | O43663  | 1.0607   |
| 4924 | POC206 | Q9Y2W1  | 0.73772  |
| 4925 | POC206 | P62256  | 0.74623  |
| 4926 | POC206 | P04406  | 0.41315  |
| 4927 | POC206 | Q14CN4  | 0.31106  |
| 4928 | POC206 | A8MV24  | 0.50351  |
| 4929 | POC206 | Q96AX1  | 0.22328  |
| 4930 | POC206 | O75956  | 0.29837  |
| 4931 | POC206 | Q96BY2  | 0.56108  |
| 4932 | POC206 | Q8IW35  | 1.3957   |
| 4933 | POC206 | P62318  | 0.72466  |
| 4934 | POC206 | Q8N554  | 0.20949  |
| 4935 | POC206 | Q9UPX8  | 0.42981  |
| 4936 | POC206 | P04198  | 0.81801  |
| 4937 | POC206 | Q96HP8  | 1.1453   |
| 4938 | POC206 | Q5H9L2  | 1.2277   |
| 4939 | POC206 | Q96M60  | 0.29278  |
| 4940 | POC206 | Q9BT78  | 1.1541   |

|      |        |        |          |
|------|--------|--------|----------|
| 4941 | POC206 | Q9H8N7 | 0.42183  |
| 4942 | POC206 | P17030 | 0.33951  |
| 4943 | POC206 | Q5VV17 | 0.17182  |
| 4944 | POC206 | Q14790 | 0.2675   |
| 4945 | POC206 | P48444 | 0.58562  |
| 4946 | POC206 | Q495D7 | 0.32782  |
| 4947 | POC206 | P54727 | 0.8319   |
| 4948 | POC206 | Q6NZY4 | 0.72855  |
| 4949 | POC206 | Q5H9L4 | 0.17749  |
| 4950 | POC206 | Q6ZSA8 | 0.45994  |
| 4951 | POC206 | Q8ND99 | 0.13861  |
| 4952 | POC206 | Q15024 | 0.6489   |
| 4953 | POC206 | Q92558 | 0.47921  |
| 4954 | POC206 | Q14582 | 0.4215   |
| 4955 | POC206 | Q9BW92 | 0.49916  |
| 4956 | POC206 | Q13352 | 0.65877  |
| 4957 | POC206 | Q96IT1 | 0.84723  |
| 4958 | POC206 | Q6ZVL8 | 0.45994  |
| 4959 | POC206 | O15371 | 0.71222  |
| 4960 | POC206 | Q9HCL3 | 0.53058  |
| 4961 | POC206 | Q14771 | 0.63717  |
| 4962 | POC206 | Q6IB77 | 0.35659  |
| 4963 | POC206 | P35749 | 0.33462  |
| 4964 | POC206 | Q7Z4H7 | 1.1466   |
| 4965 | POC206 | Q6PEW1 | 0.28176  |
| 4966 | POC206 | Q5TA45 | 0.37411  |
| 4967 | POC206 | Q96ST2 | 0.3888   |
| 4968 | POC206 | Q8N7Q3 | 0.43586  |
| 4969 | POC206 | Q8IVC4 | 0.36355  |
| 4970 | POC206 | Q15006 | 0.45827  |
| 4971 | POC206 | P40222 | 0.74313  |
| 4972 | POC206 | Q68DY9 | 0.36892  |
| 4973 | POC206 | P0CJ79 | 0.38918  |
| 4974 | POC206 | Q01546 | 0.41667  |
| 4975 | POC206 | Q9UJ04 | 0.31262  |
| 4976 | POC206 | Q7RTV0 | 0.4518   |
| 4977 | POC206 | Q02083 | 0.11846  |
| 4978 | POC206 | Q5FBB7 | 0.94348  |
| 4979 | POC206 | Q9Y4X4 | 0.33478  |
| 4980 | POC206 | P57075 | 0.42682  |
| 4981 | POC206 | Q6PCB5 | 0.23535  |
| 4982 | POC206 | Q15370 | 1.1563   |
| 4983 | POC206 | Q5VZE5 | 0.40518  |
| 4984 | POC206 | H0Y354 | 0.43017  |
| 4985 | POC206 | P40926 | 0.23112  |
| 4986 | POC206 | Q9ULD2 | 0.63661  |
| 4987 | POC206 | Q5T6V5 | 0.22478  |
| 4988 | POC206 | Q5VZT2 | 0.19534  |
| 4989 | POC206 | Q13956 | 0.52038  |
| 4990 | POC206 | A6NK75 | 0.41937  |
| 4991 | POC206 | P10909 | 0.10316  |
| 4992 | POC206 | Q15234 | 0.93284  |
| 4993 | POC206 | Q8WVR3 | 0.68336  |
| 4994 | POC206 | O14893 | 0.63494  |
| 4995 | POC206 | Q8IYB1 | 0.39325  |
| 4996 | POC206 | Q8WW14 | 0.44797  |
| 4997 | POC206 | P78545 | 0.87139  |
| 4998 | POC206 | Q6P9F0 | 0.42526  |
| 4999 | POC206 | P22830 | 0.095865 |
| 5000 | POC206 | Q6PIY2 | 0.42568  |
| 5001 | POC206 | Q64ET8 | 0.85785  |
| 5002 | POC206 | Q2M3G4 | 0.066982 |
| 5003 | POC206 | Q6ZSJ8 | 0.68336  |
| 5004 | POC206 | Q8N9Q2 | 0.41337  |
| 5005 | POC206 | Q9BUL8 | 0.777    |
| 5006 | POC206 | Q8NAB5 | 0.45994  |
| 5007 | POC206 | Q5VT06 | 0.82803  |
| 5008 | POC206 | Q6PD74 | 0.42207  |
| 5009 | POC206 | Q9Y2V0 | 0.17182  |
| 5010 | POC206 | A6NK89 | 0.89922  |
| 5011 | POC206 | Q16143 | 0.4774   |
| 5012 | POC206 | Q08378 | 0.53603  |
| 5013 | POC206 | O14925 | 0.39503  |
| 5014 | POC206 | Q6P1N9 | 0.37     |
| 5015 | POC206 | Q8N157 | 0.24884  |
| 5016 | POC206 | P49916 | 0.31568  |

|      |        |        |          |
|------|--------|--------|----------|
| 5017 | POC206 | Q9H1B4 | 0.41318  |
| 5018 | POC206 | Q9NUL3 | 0.69341  |
| 5019 | POC206 | Q13609 | 0.093667 |
| 5020 | POC206 | P17947 | 0.73132  |
| 5021 | POC206 | Q96HQ0 | 0.33367  |
| 5022 | POC206 | Q8N0Y7 | 0.75109  |
| 5023 | POC206 | Q02930 | 0.9136   |
| 5024 | POC206 | E9PJ23 | 0.10942  |
| 5025 | POC206 | Q8TDR4 | 0.52229  |
| 5026 | POC206 | Q13901 | 1.131    |
| 5027 | POC206 | A6NK39 | 0.34893  |
| 5028 | POC206 | Q9ULN7 | 1.0222   |
| 5029 | POC206 | Q92870 | 0.82209  |
| 5030 | POC206 | Q16534 | 0.30395  |
| 5031 | POC206 | Q8NHM5 | 0.3022   |
| 5032 | POC206 | P28066 | 0.54848  |
| 5033 | POC206 | Q99440 | 0.37966  |
| 5034 | POC206 | Q9NPB6 | 0.8197   |
| 5035 | POC206 | Q9BYV8 | 0.7642   |
| 5036 | POC206 | Q8N9W5 | 0.17026  |
| 5037 | POC206 | Q94903 | 0.65873  |
| 5038 | POC206 | P62899 | 0.66929  |
| 5039 | POC206 | Q76003 | 0.34974  |
| 5040 | POC206 | Q7Z713 | 0.33985  |
| 5041 | POC206 | P17028 | 0.88874  |
| 5042 | POC206 | P38936 | 0.28811  |
| 5043 | POC206 | Q9NQ92 | 1.0672   |
| 5044 | POC206 | Q5VWG9 | 1.0406   |
| 5045 | POC206 | Q9UM11 | 1.2672   |
| 5046 | POC206 | Q96S55 | 0.4012   |
| 5047 | POC206 | Q99608 | 0.24094  |
| 5048 | POC206 | Q86T82 | 0.45754  |
| 5049 | POC206 | Q6UWH4 | 0.98868  |
| 5050 | POC206 | Q96GC6 | 1.3555   |
| 5051 | POC206 | B3EWG5 | 0.68336  |
| 5052 | POC206 | O60921 | 0.98525  |
| 5053 | POC206 | Q9NQ33 | 0.65215  |
| 5054 | POC206 | P31040 | 0.57403  |
| 5055 | POC206 | O75635 | 0.34057  |
| 5056 | POC206 | Q15063 | 0.23321  |
| 5057 | POC206 | P51523 | 0.41273  |
| 5058 | POC206 | Q7L2R6 | 0.53104  |
| 5059 | POC206 | Q8NHW3 | 0.3583   |
| 5060 | POC206 | Q9UI30 | 0.49774  |
| 5061 | POC206 | Q12996 | 0.10267  |
| 5062 | POC206 | Q5C9Z4 | 0.72799  |
| 5063 | POC206 | Q96AQ7 | 0.64324  |
| 5064 | POC206 | P08107 | 0.57013  |
| 5065 | POC206 | A6NLW8 | 0.386    |
| 5066 | POC206 | P24539 | 0.28142  |
| 5067 | POC206 | P35579 | 0.68663  |
| 5068 | POC206 | Q9BPZ7 | 0.71757  |
| 5069 | POC206 | O00401 | 0.69013  |
| 5070 | POC206 | P82933 | 0.68659  |
| 5071 | POC206 | Q9UL16 | 0.26915  |
| 5072 | POC206 | A6NF01 | 1.1841   |
| 5073 | POC206 | Q9UBB6 | 0.602    |
| 5074 | POC206 | Q9H2U2 | 0.54608  |
| 5075 | POC206 | Q15819 | 0.66117  |
| 5076 | POC206 | Q9BUH8 | 0.58757  |
| 5077 | POC206 | Q8N8J6 | 0.20949  |
| 5078 | POC206 | P56182 | 0.7535   |
| 5079 | POC206 | P47813 | 1.0039   |
| 5080 | POC206 | P56537 | 1.2932   |
| 5081 | POC206 | Q9HCN2 | 0.45994  |
| 5082 | POC206 | P17152 | 0.50752  |
| 5083 | POC206 | Q8TAA5 | 0.46229  |
| 5084 | POC206 | Q8TF05 | 0.21502  |
| 5085 | POC206 | Q04864 | 1.2562   |
| 5086 | POC206 | Q969T4 | 0.73274  |
| 5087 | POC206 | Q8N1L9 | 0.9262   |
| 5088 | POC206 | O43167 | 0.86737  |
| 5089 | POC206 | Q9H4Z3 | 0.19866  |
| 5090 | POC206 | Q94927 | 0.80409  |
| 5091 | POC206 | Q9UHT9 | 0.45994  |
| 5092 | POC206 | Q4VC44 | 0.472    |



|      |        |        |          |
|------|--------|--------|----------|
| 5093 | POC206 | Q9NXP7 | 0.30922  |
| 5094 | POC206 | P58317 | 0.35364  |
| 5095 | POC206 | A5YKK6 | 1.1349   |
| 5096 | POC206 | Q6P9G9 | 0.29094  |
| 5097 | POC206 | P49750 | 1.1805   |
| 5098 | POC206 | P62714 | 0.8807   |
| 5099 | POC206 | Q5VU43 | 1.1879   |
| 5100 | POC206 | Q9HAF1 | 1.1977   |
| 5101 | POC206 | P0C5K6 | 0.45994  |
| 5102 | POC206 | Q9BWD1 | 0.28891  |
| 5103 | POC206 | O43294 | 0.23169  |
| 5104 | POC206 | A6NN06 | 0.45994  |
| 5105 | POC206 | Q96DT0 | 0.14972  |
| 5106 | POC206 | P55895 | 0.63515  |
| 5107 | POC206 | Q9NY27 | 1.0073   |
| 5108 | POC206 | A6H8Z2 | 0.29736  |
| 5109 | POC206 | Q9BRV8 | 0.66808  |
| 5110 | POC206 | Q9NYJ8 | 0.65406  |
| 5111 | POC206 | Q9Y6I3 | 0.16013  |
| 5112 | POC206 | Q9P2F5 | 0.36522  |
| 5113 | POC206 | Q15628 | 0.69742  |
| 5114 | POC206 | Q9Y222 | 1.1541   |
| 5115 | POC206 | Q8NBF1 | 0.45387  |
| 5116 | POC206 | Q96S99 | 0.27541  |
| 5117 | POC206 | Q53HL2 | 1.1063   |
| 5118 | POC206 | O15069 | 0.51846  |
| 5119 | POC206 | Q659A1 | 0.2276   |
| 5120 | POC206 | Q6GQQ9 | 0.20086  |
| 5121 | POC206 | O00762 | 0.58324  |
| 5122 | POC206 | Q96NJ3 | 0.30696  |
| 5123 | POC206 | Q92614 | 0.25156  |
| 5124 | POC206 | Q8IWF6 | 0.58929  |
| 5125 | POC206 | Q8N7M0 | 0.43093  |
| 5126 | POC206 | Q92552 | 0.82405  |
| 5127 | POC206 | A6NGU7 | 0.15182  |
| 5128 | POC206 | Q9NRR4 | 0.46332  |
| 5129 | POC206 | Q96A49 | 1.2364   |
| 5130 | POC206 | Q86SE8 | 0.16819  |
| 5131 | POC206 | O60281 | 0.40475  |
| 5132 | POC206 | A1A4F0 | 0.017119 |
| 5133 | POC206 | Q5VWZ2 | 0.088054 |
| 5134 | POC206 | O43482 | 0.61231  |
| 5135 | POC206 | Q9UKX2 | 0.33462  |
| 5136 | POC206 | P83731 | 0.67945  |
| 5137 | POC206 | A0MZ66 | 0.65103  |
| 5138 | POC206 | Q9UHA2 | 0.37687  |
| 5139 | POC206 | Q9HA38 | 0.24465  |
| 5140 | POC206 | Q6ZQV5 | 0.40539  |
| 5141 | POC206 | Q96MF7 | 0.81449  |
| 5142 | POC206 | Q9Y3D9 | 0.51247  |
| 5143 | POC206 | Q9H665 | 0.39633  |
| 5144 | POC206 | P26371 | 0.45994  |
| 5145 | POC206 | Q9NPN8 | 0.041763 |
| 5146 | POC206 | A6NJB7 | 1.103    |
| 5147 | POC206 | Q9Y3A0 | 0.26417  |
| 5148 | POC206 | Q8N998 | 0.33985  |
| 5149 | POC206 | Q96QH2 | 0.22926  |
| 5150 | POC206 | Q9Y2L1 | 0.48028  |
| 5151 | POC206 | Q96ES7 | 0.2939   |
| 5152 | POC206 | H0UI37 | 0.26185  |
| 5153 | POC206 | P42574 | 0.24802  |
| 5154 | POC206 | Q13505 | 0.98825  |
| 5155 | POC206 | P0C5J1 | 0.18753  |
| 5156 | POC206 | Q96JM3 | 0.55848  |
| 5157 | POC206 | Q6NUP7 | 0.57893  |
| 5158 | POC206 | Q9BXM0 | 0.79929  |
| 5159 | POC206 | Q9BZK7 | 0.99877  |
| 5160 | POC206 | Q86XN8 | 0.26288  |
| 5161 | POC206 | Q9H5I1 | 0.72552  |
| 5162 | POC206 | Q9NVF7 | 0.80301  |
| 5163 | POC206 | C9JC47 | 0.45994  |
| 5164 | POC206 | O95900 | 0.73237  |
| 5165 | POC206 | Q96KD3 | 1.2191   |
| 5166 | POC206 | Q92625 | 0.26484  |
| 5167 | POC206 | Q15562 | 0.9138   |
| 5168 | POC206 | Q9BV57 | 0.69553  |

|      |        |        |          |
|------|--------|--------|----------|
| 5169 | POC206 | Q9BZG8 | 0.33933  |
| 5170 | POC206 | O75376 | 0.44226  |
| 5171 | POC206 | Q9HCE5 | 0.20362  |
| 5172 | POC206 | Q12893 | 0.3106   |
| 5173 | POC206 | P82663 | 0.80083  |
| 5174 | POC206 | P42568 | 1.0129   |
| 5175 | POC206 | Q9H8V3 | 0.26916  |
| 5176 | POC206 | P82675 | 0.56522  |
| 5177 | POC206 | A6NI86 | 0.86722  |
| 5178 | POC206 | Q49MG5 | 1.2084   |
| 5179 | POC206 | Q96MU6 | 0.29467  |
| 5180 | POC206 | Q8WWY3 | 0.32455  |
| 5181 | POC206 | Q8TC76 | 1.6967   |
| 5182 | POC206 | Q9BYN7 | 0.41273  |
| 5183 | POC206 | Q9H165 | 0.31682  |
| 5184 | POC206 | Q9BQI5 | 0.32795  |
| 5185 | POC206 | Q7Z3V5 | 0.39234  |
| 5186 | POC206 | Q6ZNK6 | 1.1005   |
| 5187 | POC206 | Q8WWB5 | 0.96709  |
| 5188 | POC206 | Q6ZQR2 | 1.216    |
| 5189 | POC206 | Q9HBH7 | 0.69665  |
| 5190 | POC206 | Q8WUH2 | 0.82203  |
| 5191 | POC206 | Q9BV73 | 0.76716  |
| 5192 | POC206 | Q9NUQ6 | 0.54755  |
| 5193 | POC206 | Q92841 | 0.65876  |
| 5194 | POC206 | Q9Y2P8 | 0.50374  |
| 5195 | POC206 | Q9Y6R6 | 0.40539  |
| 5196 | POC206 | Q96C57 | 0.38994  |
| 5197 | POC206 | Q5SNT6 | 0.83662  |
| 5198 | POC206 | P07902 | 0.63044  |
| 5199 | POC206 | Q9GZX5 | 1.0339   |
| 5200 | POC206 | Q8N205 | 0.56567  |
| 5201 | POC206 | Q8N782 | 0.49209  |
| 5202 | POC206 | Q6X4W1 | 1.3755   |
| 5203 | POC206 | Q6ZNG1 | 0.41874  |
| 5204 | POC206 | P55795 | 0.061802 |
| 5205 | POC206 | O00267 | 1.1387   |
| 5206 | POC206 | Q9Y375 | 0.70603  |
| 5207 | POC206 | A6NEA5 | 0.047385 |
| 5208 | POC206 | A6NNL0 | 0.75244  |
| 5209 | POC206 | Q9NP87 | 0.2423   |
| 5210 | POC206 | P20809 | 0.25253  |
| 5211 | POC206 | P39019 | 0.77233  |
| 5212 | POC206 | Q92901 | 0.5404   |
| 5213 | POC206 | P0CW19 | 0.2511   |
| 5214 | POC206 | P02810 | 0.45994  |
| 5215 | POC206 | Q16533 | 0.62467  |
| 5216 | POC206 | Q5TAQ9 | 0.37887  |
| 5217 | POC206 | Q5MJ10 | 0.80268  |
| 5218 | POC206 | Q5SWA1 | 0.65062  |
| 5219 | POC206 | Q16612 | 0.31     |
| 5220 | POC206 | Q5TBB1 | 0.90435  |
| 5221 | POC206 | P02792 | 0.088351 |
| 5222 | POC206 | Q9NVV4 | 0.58754  |
| 5223 | POC206 | P51826 | 0.53786  |
| 5224 | POC206 | Q5JUQ0 | 0.12271  |
| 5225 | POC206 | P05387 | 0.5404   |
| 5226 | POC206 | Q5TAX3 | 0.86187  |
| 5227 | POC206 | Q92804 | 0.29927  |
| 5228 | POC206 | Q8NHU0 | 0.26814  |
| 5229 | POC206 | P20810 | 0.27082  |
| 5230 | POC206 | Q9H9A7 | 0.69851  |
| 5231 | POC206 | Q5TEZ4 | 0.45994  |
| 5232 | POC206 | Q15424 | 0.78483  |
| 5233 | POC206 | Q9BQY4 | 0.95314  |
| 5234 | POC206 | Q9UNZ5 | 0.68336  |
| 5235 | POC206 | Q15388 | 0.26743  |
| 5236 | POC206 | Q86XU0 | 0.34053  |
| 5237 | POC206 | O60381 | 0.30859  |
| 5238 | POC206 | O43736 | 0.39848  |
| 5239 | POC206 | A6NLC8 | 1.1278   |
| 5240 | POC206 | Q06732 | 0.22742  |
| 5241 | POC206 | Q6IN84 | 0.36757  |
| 5242 | POC206 | Q9BSM1 | 1.3061   |
| 5243 | POC206 | Q8NHV4 | 0.9705   |
| 5244 | POC206 | Q9H3F6 | 0.63936  |

|      |        |        |          |
|------|--------|--------|----------|
| 5245 | POC206 | Q6ZR52 | 0.4071   |
| 5246 | POC206 | P61565 | 0.86244  |
| 5247 | POC206 | Q8N9Y4 | 1.0099   |
| 5248 | POC206 | O60832 | 0.67836  |
| 5249 | POC206 | Q53EL6 | 1.0341   |
| 5250 | POC206 | O14818 | 0.5376   |
| 5251 | POC206 | O75478 | 0.57056  |
| 5252 | POC206 | P46783 | 1.3761   |
| 5253 | POC206 | Q96AN2 | 0.22886  |
| 5254 | POC206 | Q8WU03 | 0.62298  |
| 5255 | POC206 | Q96FI4 | 0.37956  |
| 5256 | POC206 | P37802 | 0.46286  |
| 5257 | POC206 | O00399 | 0.27224  |
| 5258 | POC206 | Q7Z745 | 0.65728  |
| 5259 | POC206 | Q2NKX9 | 0.68336  |
| 5260 | POC206 | Q96H12 | 1.0065   |
| 5261 | POC206 | Q9NRC8 | 1.4412   |
| 5262 | POC206 | Q17RG1 | 0.13145  |
| 5263 | POC206 | Q9H2G4 | 0.83772  |
| 5264 | POC206 | P15036 | 0.85052  |
| 5265 | POC206 | O15392 | 0.36528  |
| 5266 | POC206 | Q5MCW4 | 0.27837  |
| 5267 | POC206 | Q14872 | 0.94021  |
| 5268 | POC206 | O14910 | 0.74759  |
| 5269 | POC206 | B1ATL7 | 0.25409  |
| 5270 | POC206 | O14896 | 0.57992  |
| 5271 | POC206 | Q7Z392 | 0.50298  |
| 5272 | POC206 | Q7Z465 | 0.76165  |
| 5273 | POC206 | Q9C035 | 0.72854  |
| 5274 | POC206 | Q5K131 | 0.17148  |
| 5275 | POC206 | Q6P0N0 | 0.90113  |
| 5276 | POC206 | A6NH52 | 0.98927  |
| 5277 | POC206 | P23327 | 0.41994  |
| 5278 | POC206 | Q5T5N4 | 0.088066 |
| 5279 | POC206 | Q9GZU8 | 0.45233  |
| 5280 | POC206 | Q5FWF6 | 0.54896  |
| 5281 | POC206 | Q4G0G2 | 0.42202  |
| 5282 | POC206 | P40763 | 0.32124  |
| 5283 | POC206 | Q5T8I3 | 0.20991  |
| 5284 | POC206 | P22670 | 0.96129  |
| 5285 | POC206 | Q15573 | 0.62513  |
| 5286 | POC206 | P31941 | 0.11275  |
| 5287 | POC206 | Q9UDV6 | 0.79316  |
| 5288 | POC206 | Q15937 | 0.32658  |
| 5289 | POC206 | Q6NSW5 | 1.0314   |
| 5290 | POC206 | Q6P9A1 | 0.48353  |
| 5291 | POC206 | Q86UN6 | 0.29409  |
| 5292 | POC206 | P60520 | 0.32186  |
| 5293 | POC206 | O43597 | 0.027603 |
| 5294 | POC206 | Q9H2T7 | 0.58364  |
| 5295 | POC206 | Q96AB3 | 0.83949  |
| 5296 | POC206 | Q13485 | 0.64689  |
| 5297 | POC206 | Q6P1L5 | 1.3885   |
| 5298 | POC206 | Q86UZ6 | 0.30231  |
| 5299 | POC206 | Q9NQX7 | 0.33777  |
| 5300 | POC206 | Q9H3P2 | 1.1872   |
| 5301 | POC206 | Q96L14 | 0.64137  |
| 5302 | POC206 | Q9BTA9 | 1.0397   |
| 5303 | POC206 | Q9Y4R8 | 0.32518  |
| 5304 | POC206 | Q496A3 | 0.28657  |
| 5305 | POC206 | Q9BZI1 | 0.26678  |
| 5306 | POC206 | Q8N1N5 | 0.63499  |
| 5307 | POC206 | Q8TAQ5 | 0.40539  |
| 5308 | POC206 | P25208 | 0.72405  |
| 5309 | POC206 | P56192 | 0.35279  |
| 5310 | POC206 | Q9UBZ9 | 0.66141  |
| 5311 | POC206 | Q9Y5A6 | 0.88936  |
| 5312 | POC206 | Q9H707 | 0.36276  |
| 5313 | POC206 | P48454 | 0.22433  |
| 5314 | POC206 | A2RU37 | 0.29388  |
| 5315 | POC206 | P42766 | 0.84165  |
| 5316 | POC206 | Q12840 | 0.39706  |
| 5317 | POC206 | Q96B42 | 0.31701  |
| 5318 | POC206 | P55209 | 0.78425  |
| 5319 | POC206 | P61244 | 0.94789  |
| 5320 | POC206 | Q8IWY8 | 0.31234  |

|      |        |        |          |
|------|--------|--------|----------|
| 5321 | POC206 | Q8N6V9 | 0.061507 |
| 5322 | POC206 | Q9NRJ4 | 0.24757  |
| 5323 | POC206 | P0C7M4 | 0.31537  |
| 5324 | POC206 | Q9UPR3 | 1.0733   |
| 5325 | POC206 | Q6ISU1 | 0.50357  |
| 5326 | POC206 | Q8N3R3 | 0.27794  |
| 5327 | POC206 | Q9H008 | 0.53239  |
| 5328 | POC206 | Q15633 | 0.76556  |
| 5329 | POC206 | Q9H1Q7 | 0.71164  |
| 5330 | POC206 | P61960 | 0.35968  |
| 5331 | POC206 | Q8IWZ8 | 0.17176  |
| 5332 | POC206 | P55072 | 0.27077  |
| 5333 | POC206 | Q96MR7 | 1.2756   |
| 5334 | POC206 | Q08AF8 | 0.55886  |
| 5335 | POC206 | Q8N5J4 | 0.62347  |
| 5336 | POC206 | Q13129 | 0.93322  |
| 5337 | POC206 | Q9UKY0 | 0.21861  |
| 5338 | POC206 | Q9Y5N5 | 0.3844   |
| 5339 | POC206 | P60953 | 0.54053  |
| 5340 | POC206 | Q9NSK0 | 0.17092  |
| 5341 | POC206 | Q8TF45 | 0.27283  |
| 5342 | POC206 | Q8IWV8 | 0.36008  |
| 5343 | POC206 | Q53SZ7 | 0.68336  |
| 5344 | POC206 | P60866 | 0.81082  |
| 5345 | POC206 | Q17RF5 | 1.0753   |
| 5346 | POC206 | Q9NP92 | 1.0328   |
| 5347 | POC206 | Q14240 | 0.093275 |
| 5348 | POC206 | Q9H489 | 0.48222  |
| 5349 | POC206 | P23258 | 0.40823  |
| 5350 | POC206 | Q6UYE1 | 0.88528  |
| 5351 | POC206 | Q8IUR0 | 1.1307   |
| 5352 | POC206 | P0C866 | 0.065582 |
| 5353 | POC206 | O00139 | 0.56662  |
| 5354 | POC206 | P23760 | 0.9378   |
| 5355 | POC206 | Q9UKZ1 | 0.77878  |
| 5356 | POC206 | P23434 | 0.22312  |
| 5357 | POC206 | Q5TG08 | 0.90147  |
| 5358 | POC206 | Q9NTI5 | 1.0334   |
| 5359 | POC206 | Q9BUR4 | 0.84719  |
| 5360 | POC206 | P25791 | 0.62369  |
| 5361 | POC206 | Q9Y657 | 0.23043  |
| 5362 | POC206 | P52435 | 0.69376  |
| 5363 | POC206 | Q9BR09 | 0.17808  |
| 5364 | POC206 | Q92600 | 1.2623   |
| 5365 | POC206 | Q96EK6 | 0.46548  |
| 5366 | POC206 | Q5T5J6 | 0.75438  |
| 5367 | POC206 | Q71SY5 | 1.1863   |
| 5368 | POC206 | Q9BXP5 | 1.2605   |
| 5369 | POC206 | P61962 | 0.81278  |
| 5370 | POC206 | P0CW71 | 0.45994  |
| 5371 | POC206 | Q8TAD1 | 0.33985  |
| 5372 | POC206 | Q86WQ0 | 0.60367  |
| 5373 | POC206 | Q8N0S2 | 0.1779   |
| 5374 | POC206 | Q9BTT4 | 0.74411  |
| 5375 | POC206 | P25440 | 0.62252  |
| 5376 | POC206 | O15535 | 0.29094  |
| 5377 | POC206 | Q95295 | 0.49287  |
| 5378 | POC206 | Q7Z614 | 0.59717  |
| 5379 | POC206 | Q8IXJ6 | 0.53947  |
| 5380 | POC206 | Q9NTK5 | 0.64954  |
| 5381 | POC206 | Q12765 | 0.59428  |
| 5382 | POC206 | Q8IVK1 | 0.45994  |
| 5383 | POC206 | Q96E16 | 0.90187  |
| 5384 | POC206 | Q9BYH8 | 0.47833  |
| 5385 | POC206 | O00463 | 0.50409  |
| 5386 | POC206 | Q13489 | 0.25078  |
| 5387 | POC206 | Q8TF39 | 0.5435   |
| 5388 | POC206 | Q96BU1 | 0.19589  |
| 5389 | POC206 | Q6NXR4 | 0.25501  |
| 5390 | POC206 | O43617 | 0.45329  |
| 5391 | POC206 | Q9NZH4 | 0.76259  |
| 5392 | POC206 | Q9NR22 | 0.42086  |
| 5393 | POC206 | Q8IYJ2 | 0.63187  |
| 5394 | POC206 | Q9NX01 | 0.28951  |
| 5395 | POC206 | O76009 | 0.40644  |
| 5396 | POC206 | Q53FN2 | 0.40198  |

|      |        |        |          |
|------|--------|--------|----------|
| 5397 | POC206 | Q9NZJ0 | 0.89886  |
| 5398 | POC206 | Q9C0H9 | 0.14665  |
| 5399 | POC206 | O14776 | 1.2469   |
| 5400 | POC206 | Q9BSK1 | 0.28383  |
| 5401 | POC206 | P62306 | 0.24949  |
| 5402 | POC206 | Q5VWT5 | 0.76438  |
| 5403 | POC206 | P31150 | 0.20721  |
| 5404 | POC206 | Q86V42 | 0.4846   |
| 5405 | POC206 | Q7Z3Y8 | 0.4284   |
| 5406 | POC206 | Q8WYA1 | 0.4359   |
| 5407 | POC206 | Q9NWS0 | 0.40678  |
| 5408 | POC206 | Q8N612 | 0.69575  |
| 5409 | POC206 | Q9BZE4 | 0.41171  |
| 5410 | POC206 | Q9ULR0 | 0.90098  |
| 5411 | POC206 | Q15022 | 0.80716  |
| 5412 | POC206 | Q5HYK9 | 0.378    |
| 5413 | POC206 | Q9NUD7 | 0.076804 |
| 5414 | POC206 | P04818 | 0.12177  |
| 5415 | POC206 | Q96CF2 | 0.34798  |
| 5416 | POC206 | Q5HYM0 | 0.23217  |
| 5417 | POC206 | Q8TBE0 | 0.93327  |
| 5418 | POC206 | Q9H116 | 0.58093  |
| 5419 | POC206 | Q7L5D6 | 0.95499  |
| 5420 | POC206 | Q5BJE1 | 0.30885  |
| 5421 | POC206 | Q9HB21 | 0.30112  |
| 5422 | POC206 | P62487 | 0.4058   |
| 5423 | POC206 | Q2M1K9 | 0.42585  |
| 5424 | POC206 | Q9NUJ3 | 0.25904  |
| 5425 | POC206 | O95782 | 0.51194  |
| 5426 | POC206 | Q9HB75 | 0.78603  |
| 5427 | POC206 | Q6L8Q7 | 0.29183  |
| 5428 | POC206 | Q96HR8 | 1.1764   |
| 5429 | POC206 | Q701N4 | 0.45994  |
| 5430 | POC206 | Q9H6Z4 | 1.2604   |
| 5431 | POC206 | P28370 | 0.60793  |
| 5432 | POC206 | Q9BXU0 | 0.30982  |
| 5433 | POC206 | P60014 | 0.91057  |
| 5434 | POC206 | O14709 | 0.40539  |
| 5435 | POC206 | O15453 | 0.54639  |
| 5436 | POC206 | Q13148 | 0.46453  |
| 5437 | POC206 | Q8N5F7 | 1.4584   |
| 5438 | POC206 | O43172 | 0.67892  |
| 5439 | POC206 | P98171 | 0.26023  |
| 5440 | POC206 | Q9P258 | 0.86382  |
| 5441 | POC206 | Q9NYP8 | 0.25833  |
| 5442 | POC206 | P45985 | 0.23085  |
| 5443 | POC206 | Q7Z3Y7 | 0.44615  |
| 5444 | POC206 | Q9P0J0 | 0.55505  |
| 5445 | POC206 | Q96CB8 | 0.75073  |
| 5446 | POC206 | Q719I0 | 0.24463  |
| 5447 | POC206 | Q9H0C5 | 0.6808   |
| 5448 | POC206 | Q14527 | 0.47251  |
| 5449 | POC206 | Q156A1 | 0.45994  |
| 5450 | POC206 | Q5T9C2 | 0.68336  |
| 5451 | POC206 | Q96T58 | 0.6259   |
| 5452 | POC206 | Q9BRA2 | 0.59951  |
| 5453 | POC206 | P62841 | 0.67167  |
| 5454 | POC206 | Q15652 | 0.49083  |
| 5455 | POC206 | O60869 | 0.6874   |
| 5456 | POC206 | Q9H7L9 | 0.70678  |
| 5457 | POC206 | Q9H0U9 | 0.50685  |
| 5458 | POC206 | Q8WWM1 | 0.71216  |
| 5459 | POC206 | Q9NQY0 | 0.53062  |
| 5460 | POC206 | A6NNV3 | 0.51209  |
| 5461 | POC206 | Q14677 | 0.60754  |
| 5462 | POC206 | Q9UJ41 | 0.48809  |
| 5463 | POC206 | Q15366 | 0.87971  |
| 5464 | POC206 | O00541 | 0.47847  |
| 5465 | POC206 | Q9NPR9 | 0.93858  |
| 5466 | POC206 | Q99567 | 0.85614  |
| 5467 | POC206 | Q99627 | 0.55205  |
| 5468 | POC206 | Q9H5N1 | 0.59717  |
| 5469 | POC206 | A6NGG8 | 0.64957  |
| 5470 | POC206 | Q8NFG4 | 0.88726  |
| 5471 | POC206 | P62140 | 0.86025  |
| 5472 | POC206 | O75665 | 0.83336  |

|      |        |        |          |
|------|--------|--------|----------|
| 5473 | POC206 | Q9UJX6 | 0.62689  |
| 5474 | POC206 | P32780 | 0.85027  |
| 5475 | POC206 | Q99704 | 0.17371  |
| 5476 | POC206 | Q04724 | 0.95574  |
| 5477 | POC206 | P0CG47 | 0.4264   |
| 5478 | POC206 | Q8NE71 | 0.42015  |
| 5479 | POC206 | A6NH11 | 0.62033  |
| 5480 | POC206 | A6PVY3 | 0.17601  |
| 5481 | POC206 | Q3LI59 | 0.45994  |
| 5482 | POC206 | Q13356 | 0.25029  |
| 5483 | POC206 | O60825 | 0.083956 |
| 5484 | POC206 | Q96H22 | 0.37495  |
| 5485 | POC206 | Q8N7B7 | 0.22959  |
| 5486 | POC206 | Q99459 | 1.1054   |
| 5487 | POC206 | Q99684 | 0.51441  |
| 5488 | POC206 | O60287 | 1.0501   |
| 5489 | POC206 | O15144 | 0.32999  |
| 5490 | POC206 | Q9Y3B2 | 0.75661  |
| 5491 | POC206 | Q9ULD5 | 0.25562  |
| 5492 | POC206 | Q9Y5K8 | 0.072028 |
| 5493 | POC206 | Q5VVP1 | 1.225    |
| 5494 | POC206 | Q8NC38 | 0.10721  |
| 5495 | POC206 | O60551 | 0.25416  |
| 5496 | POC206 | Q9NQ48 | 0.35637  |
| 5497 | POC206 | Q15542 | 1.0287   |
| 5498 | POC206 | Q5T0L3 | 1.2739   |
| 5499 | POC206 | Q8N8L2 | 0.3003   |
| 5500 | POC206 | Q96BN6 | 0.17179  |
| 5501 | POC206 | Q9C0C2 | 0.35815  |
| 5502 | POC206 | Q6NSI8 | 0.59371  |
| 5503 | POC206 | Q92966 | 0.64729  |
| 5504 | POC206 | P61457 | 1.1101   |
| 5505 | POC206 | O75373 | 0.38296  |
| 5506 | POC206 | A8MVJ9 | 0.51937  |
| 5507 | POC206 | Q8N587 | 0.48487  |
| 5508 | POC206 | Q9HAN9 | 0.35216  |
| 5509 | POC206 | Q49AS3 | 0.38116  |
| 5510 | POC206 | Q9HAU5 | 0.85638  |
| 5511 | POC206 | Q9NXE8 | 0.65719  |
| 5512 | POC206 | Q96N38 | 0.52001  |
| 5513 | POC206 | Q14934 | 0.55756  |
| 5514 | POC206 | Q6ZNR8 | 0.45994  |
| 5515 | POC206 | Q9UI32 | 0.38256  |
| 5516 | POC206 | Q9NXK8 | 0.71426  |
| 5517 | POC206 | Q8N336 | 0.3291   |
| 5518 | POC206 | P16333 | 0.67125  |
| 5519 | POC206 | Q9BY31 | 0.22565  |
| 5520 | POC206 | Q13561 | 0.9954   |
| 5521 | POC206 | Q96T76 | 1.0391   |
| 5522 | POC206 | O75909 | 1.2443   |
| 5523 | POC206 | Q8N4W9 | 0.40539  |
| 5524 | POC206 | Q96A00 | 0.35522  |
| 5525 | POC206 | O43447 | 0.624    |
| 5526 | POC206 | P55060 | 1.0108   |
| 5527 | POC206 | Q8NHS9 | 0.25665  |
| 5528 | POC206 | Q96BY7 | 0.22733  |
| 5529 | POC206 | O00472 | 0.72069  |
| 5530 | POC206 | Q8IXS8 | 0.84064  |
| 5531 | POC206 | P17096 | 0.54071  |
| 5532 | POC206 | B1ANY3 | 0.28306  |
| 5533 | POC206 | Q96MR9 | 0.4694   |
| 5534 | POC206 | Q33E94 | 1.0322   |
| 5535 | POC206 | Q9Y5P3 | 0.47228  |
| 5536 | POC206 | O95411 | 0.45994  |
| 5537 | POC206 | O15370 | 0.53383  |
| 5538 | POC206 | Q9BYR3 | 0.72851  |
| 5539 | POC206 | Q76N32 | 0.30141  |
| 5540 | POC206 | E9PKD4 | 0.024608 |
| 5541 | POC206 | Q8N1V2 | 0.63058  |
| 5542 | POC206 | P61580 | 0.95266  |
| 5543 | POC206 | Q9BSH5 | 0.47434  |
| 5544 | POC206 | A6NM28 | 0.30567  |
| 5545 | POC206 | Q9HCG8 | 0.14011  |
| 5546 | POC206 | Q6NTF7 | 0.03419  |
| 5547 | POC206 | Q75QN2 | 0.70712  |
| 5548 | POC206 | Q9UJ78 | 0.23072  |

|      |        |        |            |
|------|--------|--------|------------|
| 5549 | POC206 | O43731 | 0.42686    |
| 5550 | POC206 | Q9H875 | 0.2941     |
| 5551 | POC206 | Q9H2W6 | 0.473      |
| 5552 | POC206 | Q14157 | 0.61857    |
| 5553 | POC206 | Q16864 | 0.079976   |
| 5554 | POC206 | Q13562 | 0.24403    |
| 5555 | POC206 | E9PPG2 | 0.31537    |
| 5556 | POC206 | Q16384 | 0.50903    |
| 5557 | POC206 | P36405 | 0.38968    |
| 5558 | POC206 | Q14592 | 0.34664    |
| 5559 | POC206 | Q9Y3F1 | 0.45994    |
| 5560 | POC206 | B3EWG6 | 0.68336    |
| 5561 | POC206 | Q8TE02 | 1.3787     |
| 5562 | POC206 | Q9H4G8 | 0.43556    |
| 5563 | POC206 | Q9H3H1 | 0.50094    |
| 5564 | POC206 | P23769 | 0.47608    |
| 5565 | POC206 | Q8IXM2 | 0.14791    |
| 5566 | POC206 | Q9H2G9 | 0.54558    |
| 5567 | POC206 | Q6UXP9 | 0.00049604 |
| 5568 | POC206 | Q9Y6B2 | 1.1298     |
| 5569 | POC206 | Q96MP8 | 0.35881    |
| 5570 | POC206 | Q9UH36 | 0.5371     |
| 5571 | POC206 | Q8N0V1 | 0.3691     |
| 5572 | POC206 | A4D1E9 | 0.87529    |
| 5573 | POC206 | Q9NYB0 | 0.82428    |
| 5574 | POC206 | Q8NFH4 | 1.034      |
| 5575 | POC206 | Q99747 | 0.66557    |
| 5576 | POC206 | Q96GX9 | 0.44841    |
| 5577 | POC206 | Q86V71 | 0.42186    |
| 5578 | POC206 | Q03923 | 0.58644    |
| 5579 | POC206 | Q8IVU9 | 0.12683    |
| 5580 | POC206 | Q9H7E9 | 0.68336    |
| 5581 | POC206 | Q8TBR4 | 0.56716    |
| 5582 | POC206 | A6NIH7 | 0.45561    |
| 5583 | POC206 | Q96RK1 | 0.80647    |
| 5584 | POC206 | Q5VYK3 | 0.39485    |
| 5585 | POC206 | P61583 | 0.95202    |
| 5586 | POC206 | Q14264 | 0.41125    |
| 5587 | POC206 | Q8IUC6 | 0.27757    |
| 5588 | POC206 | Q8IYI6 | 0.59555    |
| 5589 | POC206 | Q8NDH3 | 0.56842    |
| 5590 | POC206 | P29474 | 0.59885    |
| 5591 | POC206 | Q9Y2P7 | 0.55762    |
| 5592 | POC206 | Q9BUW7 | 0.68336    |
| 5593 | POC206 | Q8TEK3 | 0.49096    |
| 5594 | POC206 | Q8WUM4 | 1.157      |
| 5595 | POC206 | Q96K17 | 0.56371    |
| 5596 | POC206 | Q15013 | 1.0025     |
| 5597 | POC206 | Q9Y606 | 1.0684     |
| 5598 | POC206 | Q3SY00 | 0.87125    |
| 5599 | POC206 | Q9BX66 | 0.43444    |
| 5600 | POC206 | Q5T440 | 0.31566    |
| 5601 | POC206 | Q5TAB7 | 0.80293    |
| 5602 | POC206 | Q8N584 | 0.90418    |
| 5603 | POC206 | P11831 | 0.62153    |
| 5604 | POC206 | Q96E11 | 0.79488    |
| 5605 | POC206 | Q9BQ67 | 0.54755    |
| 5606 | POC206 | Q9UJM3 | 0.51723    |
| 5607 | POC206 | Q8WU39 | 0.35621    |
| 5608 | POC206 | Q6P2S7 | 0.14335    |
| 5609 | POC206 | Q9ULG3 | 0.45994    |
| 5610 | POC206 | Q9BWG4 | 0.058212   |
| 5611 | POC206 | O96011 | 0.23394    |
| 5612 | POC206 | P62072 | 0.4127     |
| 5613 | POC206 | Q14194 | 0.48609    |
| 5614 | POC206 | Q9H7T3 | 0.32239    |
| 5615 | POC206 | Q08050 | 0.51312    |
| 5616 | POC206 | P86481 | 0.45994    |
| 5617 | POC206 | O60244 | 0.57714    |
| 5618 | POC206 | Q00978 | 1.0615     |
| 5619 | POC206 | P28072 | 0.38948    |
| 5620 | POC206 | P33552 | 0.52981    |
| 5621 | POC206 | Q9H0R8 | 0.36585    |
| 5622 | POC206 | Q13098 | 0.34993    |
| 5623 | POC206 | P0CG08 | 0.61911    |
| 5624 | POC206 | Q494X1 | 0.30517    |

|      |        |        |          |
|------|--------|--------|----------|
| 5625 | POC206 | P15924 | 0.35626  |
| 5626 | POC206 | Q9NV31 | 0.86955  |
| 5627 | POC206 | Q12981 | 0.21756  |
| 5628 | POC206 | Q8IX12 | 1.046    |
| 5629 | POC206 | Q9H379 | 0.65269  |
| 5630 | POC206 | Q15162 | 0.36145  |
| 5631 | POC206 | Q96LI9 | 0.49018  |
| 5632 | POC206 | Q9H9G7 | 0.67384  |
| 5633 | POC206 | P46087 | 0.71128  |
| 5634 | POC206 | Q9BY43 | 0.4232   |
| 5635 | POC206 | Q7L1Q6 | 0.52352  |
| 5636 | POC206 | P06703 | 0.24714  |
| 5637 | POC206 | Q63HM1 | 0.42213  |
| 5638 | POC206 | Q9H7B2 | 0.8349   |
| 5639 | POC206 | Q6ZU65 | 0.36664  |
| 5640 | POC206 | Q9H009 | 0.51846  |
| 5641 | POC206 | Q0D2J5 | 0.35148  |
| 5642 | POC206 | Q59GR2 | 0.31537  |
| 5643 | POC206 | Q9UHP3 | 0.35554  |
| 5644 | POC206 | Q5THR3 | 0.4759   |
| 5645 | POC206 | Q9BYR0 | 0.72851  |
| 5646 | POC206 | Q63ZY3 | 1.066    |
| 5647 | POC206 | Q7Z7L9 | 0.36282  |
| 5648 | POC206 | Q9NVV2 | 0.45994  |
| 5649 | POC206 | Q3MHD2 | 0.44999  |
| 5650 | POC206 | Q95336 | 0.33253  |
| 5651 | POC206 | Q5MJ07 | 0.80268  |
| 5652 | POC206 | Q75368 | 0.28923  |
| 5653 | POC206 | Q8NEG7 | 0.48593  |
| 5654 | POC206 | Q9H6T0 | 0.17804  |
| 5655 | POC206 | P30304 | 0.68947  |
| 5656 | POC206 | Q8N9P0 | 0.083548 |
| 5657 | POC206 | Q43678 | 0.65021  |
| 5658 | POC206 | Q9NX31 | 0.026652 |
| 5659 | POC206 | Q6ZQP7 | 0.45994  |
| 5660 | POC206 | I3L1I5 | 0.50898  |
| 5661 | POC206 | Q96JC9 | 1.1208   |
| 5662 | POC206 | A4D2B0 | 0.64247  |
| 5663 | POC206 | Q96C11 | 0.22864  |
| 5664 | POC206 | Q86YI8 | 0.83653  |
| 5665 | POC206 | Q60315 | 0.4169   |
| 5666 | POC206 | Q6P1X5 | 1.0731   |
| 5667 | POC206 | Q8IZ26 | 0.33954  |
| 5668 | POC206 | Q16520 | 1.0532   |
| 5669 | POC206 | Q9H7C4 | 0.46169  |
| 5670 | POC206 | Q8WVF5 | 0.13145  |
| 5671 | POC206 | Q94868 | 0.44439  |
| 5672 | POC206 | P61574 | 0.80216  |
| 5673 | POC206 | Q96N28 | 0.076529 |
| 5674 | POC206 | Q5T4H9 | 0.45994  |
| 5675 | POC206 | Q6NW29 | 0.22868  |
| 5676 | POC206 | Q9BVG4 | 0.33461  |
| 5677 | POC206 | P42566 | 0.29854  |
| 5678 | POC206 | Q9NS26 | 0.75209  |
| 5679 | POC206 | Q9HC38 | 0.28371  |
| 5680 | POC206 | Q96IZ7 | 1.1313   |
| 5681 | POC206 | Q6IE81 | 1.2953   |
| 5682 | POC206 | Q8IYX3 | 0.90868  |
| 5683 | POC206 | Q8NA42 | 0.42986  |
| 5684 | POC206 | Q15797 | 0.24586  |
| 5685 | POC206 | Q8N6M0 | 0.26612  |
| 5686 | POC206 | Q9UID3 | 0.18775  |
| 5687 | POC206 | Q969S2 | 0.24613  |
| 5688 | POC206 | Q13422 | 0.18062  |
| 5689 | POC206 | Q9BYS1 | 0.4802   |
| 5690 | POC206 | P63241 | 0.44971  |
| 5691 | POC206 | Q53HC0 | 1.151    |
| 5692 | POC206 | Q9UNX3 | 1.1315   |
| 5693 | POC206 | Q01664 | 0.58662  |
| 5694 | POC206 | Q9Y237 | 0.4545   |
| 5695 | POC206 | Q99966 | 0.22705  |
| 5696 | POC206 | Q2NL68 | 0.68336  |
| 5697 | POC206 | Q9NPD7 | 0.54461  |
| 5698 | POC206 | Q09FC8 | 0.53327  |
| 5699 | POC206 | Q8NDQ6 | 0.42986  |
| 5700 | POC206 | Q9UKT8 | 0.37932  |



|      |        |        |         |
|------|--------|--------|---------|
| 5701 | POC206 | Q5T215 | 0.51431 |
| 5702 | POC206 | Q676U5 | 0.80252 |
| 5703 | POC206 | Q5TB30 | 0.3249  |
| 5704 | POC206 | Q569G3 | 0.68336 |
| 5705 | POC206 | Q5VX52 | 0.23748 |
| 5706 | POC206 | Q86W54 | 0.37343 |
| 5707 | POC206 | P43243 | 0.22598 |
| 5708 | POC206 | Q8N859 | 0.53502 |
| 5709 | POC206 | Q9BZE1 | 0.60944 |
| 5710 | POC206 | Q9Y294 | 1.1735  |
| 5711 | POC206 | P02808 | 0.42103 |
| 5712 | POC206 | Q562F6 | 0.90532 |
| 5713 | POC206 | Q9NZI6 | 0.64194 |
| 5714 | POC206 | O75691 | 0.90613 |
| 5715 | POC206 | P54136 | 0.76201 |
| 5716 | POC206 | Q8N1I0 | 0.36338 |
| 5717 | POC206 | Q9H9F9 | 1.4291  |
| 5718 | POC206 | P0CL80 | 0.23762 |
| 5719 | POC206 | Q49AJ0 | 0.2771  |
| 5720 | POC206 | Q9UHD4 | 0.67422 |
| 5721 | POC206 | Q5T4T6 | 1.1113  |
| 5722 | POC206 | Q6P582 | 0.82911 |
| 5723 | POC206 | Q8IV56 | 0.45082 |
| 5724 | POC206 | Q9BXF9 | 0.18718 |
| 5725 | POC206 | Q569K6 | 0.25664 |
| 5726 | POC206 | Q9H0F6 | 0.22803 |
| 5727 | POC206 | Q9UK76 | 1.0797  |
| 5728 | POC206 | Q6NSW7 | 0.43565 |
| 5729 | POC206 | Q15274 | 0.11595 |
| 5730 | POC206 | Q96NL8 | 0.65693 |
| 5731 | POC206 | Q9BQ90 | 0.88905 |
| 5732 | POC206 | Q96N53 | 0.45994 |
| 5733 | POC206 | Q5VT28 | 0.41181 |
| 5734 | POC206 | Q99502 | 0.23615 |
| 5735 | POC206 | P59282 | 0.46083 |
| 5736 | POC206 | P51786 | 0.31995 |
| 5737 | POC206 | Q15928 | 0.55147 |
| 5738 | POC206 | Q8WWR8 | 0.1869  |
| 5739 | POC206 | P0C671 | 0.11018 |
| 5740 | POC206 | O95521 | 0.51099 |
| 5741 | POC206 | O76015 | 0.40644 |
| 5742 | POC206 | Q9GZS1 | 0.59751 |
| 5743 | POC206 | O95218 | 0.56196 |
| 5744 | POC206 | P20749 | 0.43132 |
| 5745 | POC206 | Q6NT89 | 0.96202 |
| 5746 | POC206 | O43823 | 0.44161 |
| 5747 | POC206 | Q9ULK4 | 1.2915  |
| 5748 | POC206 | Q9Y5K6 | 0.39138 |
| 5749 | POC206 | O95639 | 0.44106 |
| 5750 | POC206 | P84103 | 0.48967 |
| 5751 | POC206 | O94925 | 0.55909 |
| 5752 | POC206 | A4D0V7 | 0.91412 |
| 5753 | POC206 | Q14674 | 0.40113 |
| 5754 | POC206 | A1L429 | 0.23762 |
| 5755 | POC206 | Q07157 | 0.74864 |
| 5756 | POC206 | P18847 | 1.2562  |
| 5757 | POC206 | Q75400 | 0.97275 |
| 5758 | POC206 | Q8N5J2 | 1.3101  |
| 5759 | POC206 | O75489 | 0.24981 |
| 5760 | POC206 | O15260 | 0.11494 |
| 5761 | POC206 | Q9H1L0 | 0.62125 |
| 5762 | POC206 | Q8IX07 | 0.4285  |
| 5763 | POC206 | Q9NVR2 | 1.1022  |
| 5764 | POC206 | Q3B820 | 0.69104 |
| 5765 | POC206 | Q9BX82 | 0.51482 |
| 5766 | POC206 | Q86Y25 | 0.34698 |
| 5767 | POC206 | Q9NPF4 | 0.19873 |
| 5768 | POC206 | Q96QD9 | 0.75777 |
| 5769 | POC206 | Q9UL36 | 0.2914  |
| 5770 | POC206 | O75953 | 0.78833 |
| 5771 | POC206 | Q4G112 | 0.43565 |
| 5772 | POC206 | Q9UJA5 | 0.94784 |
| 5773 | POC206 | O94817 | 0.63151 |
| 5774 | POC206 | P02545 | 0.77813 |
| 5775 | POC206 | Q96M91 | 1.1295  |
| 5776 | POC206 | Q8N1G4 | 0.296   |

|      |        |        |          |
|------|--------|--------|----------|
| 5777 | POC206 | Q96BR6 | 0.46795  |
| 5778 | POC206 | Q96M83 | 0.1153   |
| 5779 | POC206 | Q9UBF2 | 0.44806  |
| 5780 | POC206 | P23588 | 0.21065  |
| 5781 | POC206 | P16278 | 0.17823  |
| 5782 | POC206 | Q6SJ96 | 0.3786   |
| 5783 | POC206 | P0DJG4 | 0.85083  |
| 5784 | POC206 | Q9BYR5 | 0.72851  |
| 5785 | POC206 | Q8N6K4 | 0.45994  |
| 5786 | POC206 | A6NNC1 | 1.0312   |
| 5787 | POC206 | P07316 | 0.091647 |
| 5788 | POC206 | Q9UHR6 | 0.9696   |
| 5789 | POC206 | Q13889 | 0.38706  |
| 5790 | POC206 | Q719H9 | 0.91163  |
| 5791 | POC206 | P82650 | 0.3137   |
| 5792 | POC206 | Q4LEZ3 | 1.1799   |
| 5793 | POC206 | O95379 | 0.28736  |
| 5794 | POC206 | Q7Z6J9 | 0.68451  |
| 5795 | POC206 | Q02952 | 0.37037  |
| 5796 | POC206 | Q01850 | 1.0186   |
| 5797 | POC206 | Q8NFK9 | 0.23751  |
| 5798 | POC206 | Q53ET0 | 1.6413   |
| 5799 | POC206 | Q5XKE5 | 0.37714  |
| 5800 | POC206 | F2Z3M2 | 0.45994  |
| 5801 | POC206 | P22532 | 0.45994  |
| 5802 | POC206 | Q9P0V3 | 0.67726  |
| 5803 | POC206 | Q6L8G5 | 0.45994  |
| 5804 | POC206 | Q9BRR0 | 0.52174  |
| 5805 | POC206 | P0DM63 | 0.72101  |
| 5806 | POC206 | P09972 | 0.63008  |
| 5807 | POC206 | Q969Q0 | 0.2329   |
| 5808 | POC206 | Q9H5Q4 | 0.51437  |
| 5809 | POC206 | Q9UBL3 | 0.4968   |
| 5810 | POC206 | Q86WJ1 | 0.54055  |
| 5811 | POC206 | A6NP61 | 0.766    |
| 5812 | POC206 | Q3BBV2 | 0.90881  |
| 5813 | POC206 | O60293 | 0.13539  |
| 5814 | POC206 | Q7Z7A1 | 1.3454   |
| 5815 | POC206 | P61513 | 0.67275  |
| 5816 | POC206 | Q2TAM9 | 1.098    |
| 5817 | POC206 | Q8IXK0 | 0.4634   |
| 5818 | POC206 | O75436 | 0.81866  |
| 5819 | POC206 | Q8WUH1 | 0.038898 |
| 5820 | POC206 | Q8NDH6 | 0.39448  |
| 5821 | POC206 | Q14154 | 0.60088  |
| 5822 | POC206 | Q6PI77 | 0.79872  |
| 5823 | POC206 | P07199 | 0.80823  |
| 5824 | POC206 | A6NDX5 | 0.39585  |
| 5825 | POC206 | P24534 | 0.62337  |
| 5826 | POC206 | Q9UK39 | 0.53831  |
| 5827 | POC206 | P20292 | 0.15203  |
| 5828 | POC206 | A6NI79 | 1.2873   |
| 5829 | POC206 | Q96FA3 | 0.71404  |
| 5830 | POC206 | P49368 | 0.20803  |
| 5831 | POC206 | Q8WXH0 | 0.2635   |
| 5832 | POC206 | Q69YH5 | 1.0042   |
| 5833 | POC206 | Q5TZK3 | 0.12167  |
| 5834 | POC206 | Q96JS3 | 0.43614  |
| 5835 | POC206 | Q8N3S3 | 0.48197  |
| 5836 | POC206 | P49716 | 0.49087  |
| 5837 | POC206 | Q5VSY0 | 0.51783  |
| 5838 | POC206 | Q9HCM9 | 0.5865   |
| 5839 | POC206 | Q6P2D8 | 0.3591   |
| 5840 | POC206 | P42226 | 0.87646  |
| 5841 | POC206 | Q6ZSN7 | 0.30036  |
| 5842 | POC206 | Q9NXG0 | 0.19257  |
| 5843 | POC206 | Q96PQ5 | 0.22398  |
| 5844 | POC206 | Q7Z5D8 | 0.63658  |
| 5845 | POC206 | Q96DE9 | 0.18424  |
| 5846 | POC206 | Q9BSY4 | 0.53355  |
| 5847 | POC206 | B2CW77 | 0.45994  |
| 5848 | POC206 | Q86UB2 | 0.74974  |
| 5849 | POC206 | Q8N7H1 | 0.0296   |
| 5850 | POC206 | Q96C28 | 0.48412  |
| 5851 | POC206 | Q6ZRQ5 | 0.75812  |
| 5852 | POC206 | Q96D09 | 0.1148   |

|      |        |        |          |
|------|--------|--------|----------|
| 5853 | POC206 | Q9BXV9 | 0.45994  |
| 5854 | POC206 | P78396 | 1.0052   |
| 5855 | POC206 | Q08495 | 0.23569  |
| 5856 | POC206 | Q32NC0 | 0.41717  |
| 5857 | POC206 | Q9NU23 | 0.095934 |
| 5858 | POC206 | Q9H7M6 | 0.42061  |
| 5859 | POC206 | Q86TL0 | 0.35004  |
| 5860 | POC206 | Q9BYQ5 | 0.72851  |
| 5861 | POC206 | Q9BY42 | 0.84516  |
| 5862 | POC206 | Q8IY57 | 1.2971   |
| 5863 | POC206 | A6NGB9 | 0.35397  |
| 5864 | POC206 | A6NME0 | 0.24412  |
| 5865 | POC206 | Q6ISB3 | 0.89197  |
| 5866 | POC206 | Q5I0X4 | 0.68336  |
| 5867 | POC206 | Q9BQW3 | 0.17216  |
| 5868 | POC206 | Q5TD97 | 0.29144  |
| 5869 | POC206 | P53672 | 0.90346  |
| 5870 | POC206 | A6NIN4 | 0.45994  |
| 5871 | POC206 | Q9UPN7 | 1.1185   |
| 5872 | POC206 | Q9UKW6 | 0.56907  |
| 5873 | POC206 | Q9H6D7 | 0.80409  |
| 5874 | POC206 | Q8N8R7 | 0.66879  |
| 5875 | POC206 | P78344 | 0.38919  |
| 5876 | POC206 | Q9H7D7 | 0.54755  |
| 5877 | POC206 | Q8NET4 | 0.84911  |
| 5878 | POC206 | Q9HC24 | 0.082903 |
| 5879 | POC206 | P35659 | 0.41263  |
| 5880 | POC206 | Q96D98 | 0.80694  |
| 5881 | POC206 | Q6PIJ6 | 0.86025  |
| 5882 | POC206 | Q8N4B1 | 0.30783  |
| 5883 | POC206 | Q92900 | 0.68059  |
| 5884 | POC206 | Q9H3M7 | 0.86786  |
| 5885 | POC206 | Q8NI29 | 0.39252  |
| 5886 | POC206 | O75390 | 0.20711  |
| 5887 | POC206 | Q9Y2Q9 | 0.58063  |
| 5888 | POC206 | Q9BW11 | 0.50307  |
| 5889 | POC206 | Q9Y613 | 0.71824  |
| 5890 | POC206 | A8MYA2 | 0.31453  |
| 5891 | POC206 | Q6ZR93 | 0.45994  |
| 5892 | POC206 | Q04837 | 0.62883  |
| 5893 | POC206 | Q15058 | 0.52882  |
| 5894 | POC206 | Q9Y3A5 | 0.7692   |
| 5895 | POC206 | Q8IYW4 | 0.21744  |
| 5896 | POC206 | Q9NZC7 | 0.381    |
| 5897 | POC206 | Q9UPP2 | 0.27822  |
| 5898 | POC206 | Q9Y6D0 | 0.50467  |
| 5899 | POC206 | Q8N5T8 | 0.59395  |
| 5900 | POC206 | Q96NJ6 | 0.29991  |
| 5901 | POC206 | P0C7X2 | 0.57532  |
| 5902 | POC206 | Q9H6Z9 | 0.49771  |
| 5903 | POC206 | O75362 | 0.93828  |
| 5904 | POC206 | Q14829 | 0.3866   |
| 5905 | POC206 | O75800 | 0.71565  |
| 5906 | POC206 | Q8IWP9 | 1.0615   |
| 5907 | POC206 | P49458 | 0.65452  |
| 5908 | POC206 | Q96IM9 | 0.13687  |
| 5909 | POC206 | Q86YD1 | 0.82113  |
| 5910 | POC206 | Q7L8J4 | 0.37124  |
| 5911 | POC206 | Q5U5X8 | 0.90106  |
| 5912 | POC206 | P98169 | 0.30392  |
| 5913 | POC206 | Q99871 | 0.80327  |
| 5914 | POC206 | Q969X5 | 0.19171  |
| 5915 | POC206 | Q00653 | 1.287    |
| 5916 | POC206 | Q9BYG8 | 0.21522  |
| 5917 | POC206 | Q6IQ21 | 0.41507  |
| 5918 | POC206 | Q9HCE3 | 0.20949  |
| 5919 | POC206 | P07498 | 0.84702  |
| 5920 | POC206 | A6NCI8 | 1.0758   |
| 5921 | POC206 | Q8N1D5 | 0.29025  |
| 5922 | POC206 | Q86Y79 | 0.61529  |
| 5923 | POC206 | Q13362 | 0.19715  |
| 5924 | POC206 | P28702 | 0.52797  |
| 5925 | POC206 | Q13155 | 0.70753  |
| 5926 | POC206 | P41208 | 0.76585  |
| 5927 | POC206 | Q9Y3C4 | 0.52973  |
| 5928 | POC206 | P16118 | 0.11517  |

|      |        |        |          |
|------|--------|--------|----------|
| 5929 | POC206 | Q5JR98 | 0.83236  |
| 5930 | POC206 | Q8WW01 | 0.35074  |
| 5931 | POC206 | Q5VWM1 | 0.47258  |
| 5932 | POC206 | P05121 | 0.2749   |
| 5933 | POC206 | Q99676 | 0.38367  |
| 5934 | POC206 | Q15596 | 0.71401  |
| 5935 | POC206 | Q9BUA3 | 0.52254  |
| 5936 | POC206 | Q5T5P2 | 0.25936  |
| 5937 | POC206 | Q6P1W5 | 0.68624  |
| 5938 | POC206 | Q8NFC6 | 1.005    |
| 5939 | POC206 | Q969E8 | 1.1776   |
| 5940 | POC206 | P37275 | 0.91126  |
| 5941 | POC206 | Q9BYR9 | 0.23291  |
| 5942 | POC206 | O60671 | 0.6666   |
| 5943 | POC206 | Q969R5 | 0.43599  |
| 5944 | POC206 | Q5T751 | 0.45994  |
| 5945 | POC206 | Q99417 | 1.6432   |
| 5946 | POC206 | Q9H777 | 0.44127  |
| 5947 | POC206 | Q8WX92 | 1.5895   |
| 5948 | POC206 | Q8IYM9 | 0.28712  |
| 5949 | POC206 | P0C880 | 0.45994  |
| 5950 | POC206 | O60678 | 0.057897 |
| 5951 | POC206 | Q8WUB8 | 0.64383  |
| 5952 | POC206 | Q9ULQ0 | 1.0873   |
| 5953 | POC206 | O60810 | 0.71545  |
| 5954 | POC206 | Q49A88 | 0.49706  |
| 5955 | POC206 | Q15059 | 1.2722   |
| 5956 | POC206 | Q16576 | 0.5165   |
| 5957 | POC206 | Q8N7Z2 | 0.53933  |
| 5958 | POC206 | Q5JQF7 | 0.45994  |
| 5959 | POC206 | O95817 | 0.50772  |
| 5960 | POC206 | Q9BXW6 | 0.31289  |
| 5961 | POC206 | O60809 | 0.5053   |
| 5962 | POC206 | Q96M95 | 0.071913 |
| 5963 | POC206 | P06454 | 0.66933  |
| 5964 | POC206 | Q5H9S7 | 0.68257  |
| 5965 | POC206 | Q6ZVT6 | 0.25026  |
| 5966 | POC206 | A4D2H0 | 0.043398 |
| 5967 | POC206 | P35712 | 0.565    |
| 5968 | POC206 | Q86U90 | 0.61213  |
| 5969 | POC206 | Q96M34 | 0.11399  |
| 5970 | POC206 | Q13185 | 0.88492  |
| 5971 | POC206 | A6NG73 | 0.34893  |
| 5972 | POC206 | Q16236 | 0.69062  |
| 5973 | POC206 | Q4V348 | 0.26368  |
| 5974 | POC206 | Q9UKD1 | 1.0193   |
| 5975 | POC206 | P56282 | 0.31184  |
| 5976 | POC206 | Q9BSU3 | 0.65979  |
| 5977 | POC206 | P0CG31 | 0.35064  |
| 5978 | POC206 | P20265 | 0.7055   |
| 5979 | POC206 | O15055 | 0.35446  |
| 5980 | POC206 | P0DKL9 | 0.86213  |
| 5981 | POC206 | P22087 | 0.62026  |
| 5982 | POC206 | P31271 | 0.20386  |
| 5983 | POC206 | O15350 | 0.37909  |
| 5984 | POC206 | Q96GM5 | 0.79497  |
| 5985 | POC206 | Q6ZRC1 | 0.45994  |
| 5986 | POC206 | Q9H7X3 | 0.30447  |
| 5987 | POC206 | P10243 | 0.70714  |
| 5988 | POC206 | Q16621 | 0.53001  |
| 5989 | POC206 | Q6PK81 | 0.35022  |
| 5990 | POC206 | Q13415 | 0.34385  |
| 5991 | POC206 | P26639 | 0.56882  |
| 5992 | POC206 | Q9HBX3 | 0.45994  |
| 5993 | POC206 | Q9UPG8 | 0.46788  |
| 5994 | POC206 | Q01826 | 0.81468  |
| 5995 | POC206 | Q6ZN11 | 0.31071  |
| 5996 | POC206 | Q9H832 | 0.79463  |
| 5997 | POC206 | Q96M85 | 0.45994  |
| 5998 | POC206 | Q7Z2Z1 | 0.8756   |
| 5999 | POC206 | Q8NFQ8 | 0.62913  |
| 6000 | POC206 | Q8IYF3 | 0.51825  |
| 6001 | POC206 | Q9P242 | 0.84349  |
| 6002 | POC206 | Q8N3U4 | 0.83339  |
| 6003 | POC206 | P61758 | 0.72525  |
| 6004 | POC206 | Q00597 | 0.96011  |

|      |        |        |          |
|------|--------|--------|----------|
| 6005 | POC206 | Q96KT6 | 0.45994  |
| 6006 | POC206 | Q53F19 | 1.0037   |
| 6007 | POC206 | P14672 | 0.74417  |
| 6008 | POC206 | Q8N9K3 | 0.68336  |
| 6009 | POC206 | Q8N300 | 0.19405  |
| 6010 | POC206 | P56381 | 0.12451  |
| 6011 | POC206 | Q9UHD1 | 0.36082  |
| 6012 | POC206 | P48378 | 0.49155  |
| 6013 | POC206 | A6NKH3 | 0.39141  |
| 6014 | POC206 | Q99687 | 0.57125  |
| 6015 | POC206 | Q9NQX6 | 0.353    |
| 6016 | POC206 | Q9BVT8 | 0.98737  |
| 6017 | POC206 | Q9NPI7 | 0.19176  |
| 6018 | POC206 | Q8WWL2 | 0.17075  |
| 6019 | POC206 | O43543 | 0.22368  |
| 6020 | POC206 | Q9ULE6 | 0.79252  |
| 6021 | POC206 | Q8WZ82 | 0.038858 |
| 6022 | POC206 | Q03393 | 0.13115  |
| 6023 | POC206 | Q86UW6 | 0.20626  |
| 6024 | POC206 | Q9H2U1 | 0.39759  |
| 6025 | POC206 | Q9BYD1 | 0.9481   |
| 6026 | POC206 | Q9NXF7 | 0.37887  |
| 6027 | POC206 | Q9GZN8 | 0.18863  |
| 6028 | POC206 | P59990 | 0.72851  |
| 6029 | POC206 | Q13465 | 0.13224  |
| 6030 | POC206 | Q96MY1 | 0.73513  |
| 6031 | POC206 | Q6UWZ7 | 0.62329  |
| 6032 | POC206 | Q3BBV0 | 0.38485  |
| 6033 | POC206 | Q96FX2 | 1.0889   |
| 6034 | POC206 | Q96CN9 | 0.70932  |
| 6035 | POC206 | Q96LS8 | 0.28493  |
| 6036 | POC206 | Q5UE93 | 0.62321  |
| 6037 | POC206 | Q9NRZ9 | 0.26071  |
| 6038 | POC206 | A6NFT4 | 0.062842 |
| 6039 | POC206 | Q86WB0 | 1.4098   |
| 6040 | POC206 | Q9HBM6 | 0.7837   |
| 6041 | POC206 | O75164 | 1.1373   |
| 6042 | POC206 | Q86UE4 | 0.74241  |
| 6043 | POC206 | H3BN30 | 0.45994  |
| 6044 | POC206 | Q68CQ4 | 0.16423  |
| 6045 | POC206 | Q5H9I0 | 0.62003  |
| 6046 | POC206 | P11277 | 0.25658  |
| 6047 | POC206 | P0C7I6 | 1.0308   |
| 6048 | POC206 | I3L3R5 | 0.45994  |
| 6049 | POC206 | P07741 | 0.46227  |
| 6050 | POC206 | Q99575 | 0.79836  |
| 6051 | POC206 | Q08379 | 0.46672  |
| 6052 | POC206 | Q5VWM6 | 0.93208  |
| 6053 | POC206 | Q8NCY6 | 0.11206  |
| 6054 | POC206 | Q9Y2B4 | 0.36669  |
| 6055 | POC206 | Q96LW9 | 0.30488  |
| 6056 | POC206 | A6NIE6 | 0.50634  |
| 6057 | POC206 | H0Y7S4 | 0.16577  |
| 6058 | POC206 | Q15629 | 0.48554  |
| 6059 | POC206 | A6NJR5 | 0.51209  |
| 6060 | POC206 | Q8IUB9 | 0.45994  |
| 6061 | POC206 | P0CG13 | 0.10506  |
| 6062 | POC206 | O14617 | 0.18873  |
| 6063 | POC206 | Q9P253 | 0.29516  |
| 6064 | POC206 | O00287 | 0.58044  |
| 6065 | POC206 | Q8N987 | 0.41191  |
| 6066 | POC206 | Q92636 | 0.43377  |
| 6067 | POC206 | O14901 | 0.29778  |
| 6068 | POC206 | Q9NYF0 | 0.31856  |
| 6069 | POC206 | Q96CA5 | 0.34547  |
| 6070 | POC206 | O95198 | 0.5777   |
| 6071 | POC206 | A6NDN3 | 0.22107  |
| 6072 | POC206 | Q96GD0 | 0.13383  |
| 6073 | POC206 | P27540 | 0.46434  |
| 6074 | POC206 | Q14863 | 0.30712  |
| 6075 | POC206 | Q5T6F0 | 0.25095  |
| 6076 | POC206 | P63313 | 0.66868  |
| 6077 | POC206 | Q8NB12 | 0.58141  |
| 6078 | POC206 | Q6TDU7 | 0.42116  |
| 6079 | POC206 | Q2QGD7 | 0.81115  |
| 6080 | POC206 | Q5PSV4 | 0.53614  |

|      |        |        |          |
|------|--------|--------|----------|
| 6081 | POC206 | O75208 | 0.54071  |
| 6082 | POC206 | O95447 | 0.41135  |
| 6083 | POC206 | Q9P2D6 | 0.088668 |
| 6084 | POC206 | Q9ULZ2 | 0.94616  |
| 6085 | POC206 | Q8NEM1 | 0.53784  |
| 6086 | POC206 | Q6ZN79 | 0.5083   |
| 6087 | POC206 | Q9BY44 | 0.48621  |
| 6088 | POC206 | Q96FN9 | 0.64479  |
| 6089 | POC206 | Q86V20 | 0.91316  |
| 6090 | POC206 | Q9Y2G9 | 0.77172  |
| 6091 | POC206 | Q3Y452 | 0.45994  |
| 6092 | POC206 | Q5VZ46 | 0.1103   |
| 6093 | POC206 | Q5TA81 | 0.45994  |
| 6094 | POC206 | P48595 | 0.34057  |
| 6095 | POC206 | C9JFL3 | 0.45994  |
| 6096 | POC206 | P17097 | 0.23993  |
| 6097 | POC206 | Q9GZR5 | 0.36899  |
| 6098 | POC206 | Q6ZRN7 | 0.45994  |
| 6099 | POC206 | Q9BYZ2 | 0.54372  |
| 6100 | POC206 | Q9NVC6 | 0.60612  |
| 6101 | POC206 | Q9P2B7 | 0.68336  |
| 6102 | POC206 | Q8IV53 | 0.10641  |
| 6103 | POC206 | P15172 | 0.35904  |
| 6104 | POC206 | P78406 | 0.59881  |
| 6105 | POC206 | Q9NWX4 | 0.60805  |
| 6106 | POC206 | P20700 | 0.47011  |
| 6107 | POC206 | Q96KW2 | 0.91313  |
| 6108 | POC206 | Q9NV79 | 0.083963 |
| 6109 | POC206 | Q9P2M7 | 0.56726  |
| 6110 | POC206 | Q6RVD6 | 0.45994  |
| 6111 | POC206 | Q9NQ50 | 0.8255   |
| 6112 | POC206 | Q06609 | 0.55026  |
| 6113 | POC206 | Q674X7 | 0.58257  |
| 6114 | POC206 | P17040 | 0.84799  |
| 6115 | POC206 | Q6P9B6 | 0.44439  |
| 6116 | POC206 | Q8N715 | 0.10767  |
| 6117 | POC206 | Q96P63 | 0.34169  |
| 6118 | POC206 | P28074 | 0.45294  |
| 6119 | POC206 | Q96EI5 | 0.82975  |
| 6120 | POC206 | Q9H204 | 1.3865   |
| 6121 | POC206 | Q8TBK2 | 0.62261  |
| 6122 | POC206 | Q3SXZ3 | 0.36975  |
| 6123 | POC206 | Q5SNV9 | 0.44497  |
| 6124 | POC206 | Q14129 | 0.59656  |
| 6125 | POC206 | Q14151 | 0.74266  |
| 6126 | POC206 | P42704 | 1.0155   |
| 6127 | POC206 | Q96PM5 | 0.56595  |
| 6128 | POC206 | Q9BQD3 | 0.49772  |
| 6129 | POC206 | Q969G3 | 1.0879   |
| 6130 | POC206 | Q8NA58 | 0.51585  |
| 6131 | POC206 | Q6ZV80 | 0.060794 |
| 6132 | POC206 | Q95625 | 0.3931   |
| 6133 | POC206 | Q8WXC6 | 0.25526  |
| 6134 | POC206 | P62277 | 1.0873   |
| 6135 | POC206 | Q9BRP4 | 0.50913  |
| 6136 | POC206 | P27469 | 0.73968  |
| 6137 | POC206 | P10412 | 0.071351 |
| 6138 | POC206 | Q14397 | 0.71393  |
| 6139 | POC206 | P46926 | 0.079101 |
| 6140 | POC206 | Q13772 | 0.48432  |
| 6141 | POC206 | Q9BXR0 | 1.3218   |
| 6142 | POC206 | Q9HBD4 | 0.71873  |
| 6143 | POC206 | Q9UKD2 | 0.21339  |
| 6144 | POC206 | Q6S9Z5 | 0.74428  |
| 6145 | POC206 | O94906 | 0.20625  |
| 6146 | POC206 | Q8N0Z3 | 0.77925  |
| 6147 | POC206 | Q5JST6 | 0.45351  |
| 6148 | POC206 | B1AJZ1 | 0.022873 |
| 6149 | POC206 | Q96EB1 | 1.2275   |
| 6150 | POC206 | Q96QC0 | 0.98996  |
| 6151 | POC206 | Q8IUC0 | 0.54406  |
| 6152 | POC206 | Q9BRT7 | 0.45994  |
| 6153 | POC206 | Q9UHB9 | 0.22869  |
| 6154 | POC206 | P57077 | 0.89374  |
| 6155 | POC206 | Q9BYU5 | 0.42567  |
| 6156 | POC206 | Q9UBS3 | 0.68583  |

|      |        |        |          |
|------|--------|--------|----------|
| 6157 | POC206 | A6NEH8 | 0.28073  |
| 6158 | POC206 | Q32M92 | 0.10622  |
| 6159 | POC206 | Q8N573 | 0.15163  |
| 6160 | POC206 | Q92994 | 0.52823  |
| 6161 | POC206 | Q8NDP4 | 0.37513  |
| 6162 | POC206 | Q7L9L4 | 0.91835  |
| 6163 | POC206 | Q8NEY3 | 0.6789   |
| 6164 | POC206 | P63302 | 0.28945  |
| 6165 | POC206 | Q2M3X9 | 0.33397  |
| 6166 | POC206 | P25685 | 0.41874  |
| 6167 | POC206 | O94830 | 0.13946  |
| 6168 | POC206 | Q8TC20 | 0.033297 |
| 6169 | POC206 | P27694 | 0.67305  |
| 6170 | POC206 | A7MD48 | 0.46862  |
| 6171 | POC206 | Q3LI60 | 0.45994  |
| 6172 | POC206 | P20585 | 0.13422  |
| 6173 | POC206 | A4D1E1 | 0.53808  |
| 6174 | POC206 | P42575 | 0.32232  |
| 6175 | POC206 | Q53HM4 | 0.33654  |
| 6176 | POC206 | Q8TDY3 | 0.16231  |
| 6177 | POC206 | Q9UKT9 | 0.60443  |
| 6178 | POC206 | Q8WXS3 | 1.1761   |
| 6179 | POC206 | O95067 | 0.70247  |
| 6180 | POC206 | Q5VTD9 | 0.42414  |
| 6181 | POC206 | A1L020 | 0.35367  |
| 6182 | POC206 | Q9NP64 | 0.42819  |
| 6183 | POC206 | Q9NXR1 | 0.47489  |
| 6184 | POC206 | Q9P270 | 0.62781  |
| 6185 | POC206 | P52747 | 0.9684   |
| 6186 | POC206 | Q9BWF2 | 0.39564  |
| 6187 | POC206 | P56945 | 0.63194  |
| 6188 | POC206 | Q9H910 | 1.0797   |
| 6189 | POC206 | Q00765 | 0.11856  |
| 6190 | POC206 | Q4V328 | 0.59105  |
| 6191 | POC206 | A8K554 | 0.10204  |
| 6192 | POC206 | Q4KMQ1 | 0.65467  |
| 6193 | POC206 | P0C6E6 | 0.044903 |
| 6194 | POC206 | O75843 | 0.75383  |
| 6195 | POC206 | Q9H9S0 | 0.27796  |
| 6196 | POC206 | Q53GI3 | 0.34372  |
| 6197 | POC206 | Q86U70 | 0.28799  |
| 6198 | POC206 | P45877 | 0.28126  |
| 6199 | POC206 | Q9H0M5 | 0.29385  |
| 6200 | POC206 | Q3MJ40 | 0.083875 |
| 6201 | POC206 | Q6ZP82 | 0.44439  |
| 6202 | POC206 | Q96EA4 | 0.9324   |
| 6203 | POC206 | Q9HD42 | 1.1921   |
| 6204 | POC206 | O43364 | 0.27301  |
| 6205 | POC206 | Q14192 | 0.7831   |
| 6206 | POC206 | Q14749 | 0.67188  |
| 6207 | POC206 | Q96T17 | 0.75492  |
| 6208 | POC206 | Q9Y3E5 | 0.61262  |
| 6209 | POC206 | O15255 | 0.45994  |
| 6210 | POC206 | Q9BXX5 | 0.5174   |
| 6211 | POC206 | Q15849 | 0.37628  |
| 6212 | POC206 | Q8N1N4 | 0.42034  |
| 6213 | POC206 | Q9BYQ9 | 0.72851  |
| 6214 | POC206 | Q6ZRV2 | 1.0921   |
| 6215 | POC206 | Q9H501 | 1.1304   |
| 6216 | POC206 | Q96NA2 | 1.2379   |
| 6217 | POC206 | Q09028 | 0.7177   |
| 6218 | POC206 | Q8NDD1 | 0.203    |
| 6219 | POC206 | Q86TS7 | 0.45994  |
| 6220 | POC206 | Q86UD0 | 0.54755  |
| 6221 | POC206 | P49419 | 0.58954  |
| 6222 | POC206 | Q9H6Q4 | 0.45693  |
| 6223 | POC206 | O60346 | 0.28498  |
| 6224 | POC206 | Q9H246 | 0.40295  |
| 6225 | POC206 | Q5MIZ7 | 0.62921  |
| 6226 | POC206 | Q96BN2 | 0.84459  |
| 6227 | POC206 | Q9HC16 | 0.15476  |
| 6228 | POC206 | Q08209 | 0.45481  |
| 6229 | POC206 | Q8N1F1 | 0.45994  |
| 6230 | POC206 | O75448 | 0.5253   |
| 6231 | POC206 | O14639 | 0.80351  |
| 6232 | POC206 | P21127 | 0.29726  |

|      |        |        |          |
|------|--------|--------|----------|
| 6233 | POC206 | Q6PII3 | 0.45773  |
| 6234 | POC206 | Q8TBY8 | 0.73692  |
| 6235 | POC206 | Q9H1K6 | 0.093775 |
| 6236 | POC206 | Q13438 | 0.1496   |
| 6237 | POC206 | Q6ZPB5 | 0.45994  |
| 6238 | POC206 | Q8NEG0 | 0.31434  |
| 6239 | POC206 | Q5T6X4 | 0.98162  |
| 6240 | POC206 | Q14134 | 0.71652  |
| 6241 | POC206 | Q9BR61 | 0.28628  |
| 6242 | POC206 | P0C843 | 0.4733   |
| 6243 | POC206 | Q8WUX2 | 0.20548  |
| 6244 | POC206 | Q8NEM2 | 0.41048  |
| 6245 | POC206 | Q9H9Y2 | 0.2509   |
| 6246 | POC206 | O60573 | 0.54257  |
| 6247 | POC206 | Q15031 | 0.33865  |
| 6248 | POC206 | Q86VF2 | 0.28084  |
| 6249 | POC206 | Q2T9L4 | 0.37411  |
| 6250 | POC206 | Q70YC4 | 0.5291   |
| 6251 | POC206 | Q9C0G0 | 0.20949  |
| 6252 | POC206 | Q5EBL2 | 0.2607   |
| 6253 | POC206 | Q14814 | 0.62059  |
| 6254 | POC206 | Q69YN4 | 0.43664  |
| 6255 | POC206 | Q8N8G6 | 0.29045  |
| 6256 | POC206 | Q5JVX7 | 0.66132  |
| 6257 | POC206 | Q5JY77 | 0.66879  |
| 6258 | POC206 | Q92734 | 0.27403  |
| 6259 | POC206 | Q96BF6 | 0.48933  |
| 6260 | POC206 | Q3SY84 | 0.38429  |
| 6261 | POC206 | Q14197 | 0.10666  |
| 6262 | POC206 | Q96DE5 | 1.1323   |
| 6263 | POC206 | P31274 | 0.18931  |
| 6264 | POC206 | P11388 | 0.28679  |
| 6265 | POC206 | Q14765 | 0.47075  |
| 6266 | POC206 | Q96RQ1 | 0.14614  |
| 6267 | POC206 | Q96EY9 | 0.36031  |
| 6268 | POC206 | B3KS81 | 0.26849  |
| 6269 | POC206 | Q8N801 | 0.04685  |
| 6270 | POC206 | P46776 | 0.8892   |
| 6271 | POC206 | Q9NWA0 | 1.4398   |
| 6272 | POC206 | Q15847 | 0.45994  |
| 6273 | POC206 | Q9HAJ7 | 1.2602   |
| 6274 | POC206 | Q9UBR4 | 0.27435  |
| 6275 | POC206 | O43325 | 1.043    |
| 6276 | POC206 | P51814 | 0.23524  |
| 6277 | POC206 | O60663 | 0.75767  |
| 6278 | POC206 | Q7Z7C8 | 0.53885  |
| 6279 | POC206 | Q6XZF7 | 0.33559  |
| 6280 | POC206 | Q6NYC8 | 0.3069   |
| 6281 | POC206 | Q8ND76 | 0.73249  |
| 6282 | POC206 | P11474 | 0.53404  |
| 6283 | POC206 | P26678 | 0.56779  |
| 6284 | POC206 | Q96B86 | 0.48034  |
| 6285 | POC206 | Q8NFD5 | 1.0068   |
| 6286 | POC206 | Q9NUX5 | 0.17048  |
| 6287 | POC206 | Q8NDN9 | 0.83201  |
| 6288 | POC206 | Q9H9J2 | 0.2124   |
| 6289 | POC206 | Q9Y2M5 | 0.92287  |
| 6290 | POC206 | Q9UN42 | 0.14098  |
| 6291 | POC206 | P84101 | 1.0956   |
| 6292 | POC206 | O75031 | 0.3691   |
| 6293 | POC206 | Q53S33 | 0.85624  |
| 6294 | POC206 | P51815 | 0.2952   |
| 6295 | POC206 | Q9NZ38 | 0.14207  |
| 6296 | POC206 | Q96BW5 | 0.44628  |
| 6297 | POC206 | Q6W0C5 | 0.28179  |
| 6298 | POC206 | Q92530 | 0.53995  |
| 6299 | POC206 | P21506 | 0.36831  |
| 6300 | POC206 | A8MT65 | 0.49384  |
| 6301 | POC206 | P35663 | 0.3756   |
| 6302 | POC206 | Q6ZUL3 | 0.45994  |
| 6303 | POC206 | Q9UHI6 | 0.42604  |
| 6304 | POC206 | P15927 | 0.56848  |
| 6305 | POC206 | Q9UHA3 | 0.40361  |
| 6306 | POC206 | Q9UL33 | 0.43177  |
| 6307 | POC206 | Q6UWI2 | 0.63456  |
| 6308 | POC206 | Q8TAP9 | 1.7307   |



|      |        |        |          |
|------|--------|--------|----------|
| 6309 | POC206 | Q12962 | 1.1539   |
| 6310 | POC206 | Q9ULC4 | 0.51497  |
| 6311 | POC206 | Q9UK99 | 0.45167  |
| 6312 | POC206 | Q96H86 | 0.31076  |
| 6313 | POC206 | O60303 | 0.20166  |
| 6314 | POC206 | P01106 | 0.4567   |
| 6315 | POC206 | Q3LI62 | 0.45994  |
| 6316 | POC206 | Q8NEG2 | 0.59115  |
| 6317 | POC206 | Q9P2T0 | 0.64303  |
| 6318 | POC206 | P0CW01 | 0.32628  |
| 6319 | POC206 | Q71F56 | 0.52218  |
| 6320 | POC206 | Q9GZY8 | 0.33622  |
| 6321 | POC206 | Q8NCX0 | 0.60772  |
| 6322 | POC206 | P24928 | 0.94568  |
| 6323 | POC206 | Q9NZP6 | 1.1841   |
| 6324 | POC206 | Q96M29 | 0.48602  |
| 6325 | POC206 | Q8N983 | 0.59491  |
| 6326 | POC206 | Q8N2Z9 | 0.71743  |
| 6327 | POC206 | Q5TA50 | 0.31353  |
| 6328 | POC206 | P62906 | 0.66333  |
| 6329 | POC206 | A6NHR8 | 0.45994  |
| 6330 | POC206 | Q9UBK9 | 1.1548   |
| 6331 | POC206 | Q5XUX0 | 0.58011  |
| 6332 | POC206 | Q86WR7 | 0.79661  |
| 6333 | POC206 | P62312 | 0.74143  |
| 6334 | POC206 | C9J3V5 | 0.47542  |
| 6335 | POC206 | Q8N831 | 0.5659   |
| 6336 | POC206 | Q8N319 | 1.382    |
| 6337 | POC206 | O15194 | 0.11085  |
| 6338 | POC206 | Q8IYA6 | 0.95624  |
| 6339 | POC206 | Q6ZYL4 | 0.87718  |
| 6340 | POC206 | Q86X67 | 0.031823 |
| 6341 | POC206 | Q5JRK9 | 1.1532   |
| 6342 | POC206 | Q16181 | 0.26738  |
| 6343 | POC206 | Q15555 | 0.33347  |
| 6344 | POC206 | O15504 | 0.72761  |
| 6345 | POC206 | Q9H2H8 | 0.27642  |
| 6346 | POC206 | Q8IW19 | 0.55069  |
| 6347 | POC206 | Q96K80 | 0.46784  |
| 6348 | POC206 | Q9P2Z0 | 0.50669  |
| 6349 | POC206 | P41214 | 0.61479  |
| 6350 | POC206 | Q9BQQ7 | 0.23552  |
| 6351 | POC206 | A6NEW6 | 0.4045   |
| 6352 | POC206 | Q9NX18 | 0.94648  |
| 6353 | POC206 | Q8IZT9 | 0.84618  |
| 6354 | POC206 | Q70YC5 | 0.47911  |
| 6355 | POC206 | Q96AE4 | 0.57915  |
| 6356 | POC206 | Q8WV44 | 0.54702  |
| 6357 | POC206 | Q9H7H0 | 0.76787  |
| 6358 | POC206 | Q04637 | 0.474    |
| 6359 | POC206 | Q07352 | 1.0275   |
| 6360 | POC206 | Q8NCU7 | 0.99021  |
| 6361 | POC206 | Q52M58 | 0.65693  |
| 6362 | POC206 | P61077 | 0.93071  |
| 6363 | POC206 | Q9P209 | 0.95296  |
| 6364 | POC206 | Q68EN5 | 0.13505  |
| 6365 | POC206 | O60756 | 0.45994  |
| 6366 | POC206 | P15121 | 0.24879  |
| 6367 | POC206 | Q8TBZ8 | 0.37111  |
| 6368 | POC206 | Q9BTV7 | 0.15207  |
| 6369 | POC206 | Q15750 | 0.56055  |
| 6370 | POC206 | Q9UQ80 | 1.0727   |
| 6371 | POC206 | Q9NYW8 | 0.32175  |
| 6372 | POC206 | Q3LI76 | 0.77252  |
| 6373 | POC206 | Q15047 | 0.9013   |
| 6374 | POC206 | Q99932 | 0.45994  |
| 6375 | POC206 | P49721 | 0.35805  |
| 6376 | POC206 | Q9UN36 | 0.61235  |
| 6377 | POC206 | Q504T8 | 0.32773  |
| 6378 | POC206 | P52746 | 0.23725  |
| 6379 | POC206 | Q14696 | 0.43554  |
| 6380 | POC206 | Q96LI6 | 0.63282  |
| 6381 | POC206 | Q5HYC2 | 0.13525  |
| 6382 | POC206 | O15042 | 0.25346  |
| 6383 | POC206 | Q9BUK0 | 0.98366  |
| 6384 | POC206 | Q96NL0 | 0.45238  |

|      |        |         |          |
|------|--------|---------|----------|
| 6385 | POC206 | Q5SQS8  | 0.41727  |
| 6386 | POC206 | Q92832  | 0.26572  |
| 6387 | POC206 | P46108  | 0.52473  |
| 6388 | POC206 | Q9NP79  | 0.43758  |
| 6389 | POC206 | P63173  | 0.75582  |
| 6390 | POC206 | A8CG34  | 0.50029  |
| 6391 | POC206 | Q9BXU2  | 0.43609  |
| 6392 | POC206 | Q6L8H1  | 0.45994  |
| 6393 | POC206 | Q2M329  | 0.48256  |
| 6394 | POC206 | Q96QK1  | 0.88722  |
| 6395 | POC206 | Q8IWL3  | 0.66613  |
| 6396 | POC206 | Q96C01  | 0.19081  |
| 6397 | POC206 | Q5JSH3  | 0.3198   |
| 6398 | POC206 | Q9NUP1  | 0.75237  |
| 6399 | POC206 | Q12798  | 0.89844  |
| 6400 | POC206 | Q9NSB4  | 0.32897  |
| 6401 | POC206 | Q9ULM2  | 0.33154  |
| 6402 | POC206 | Q3ZCX4  | 0.3556   |
| 6403 | POC206 | O14595  | 0.37623  |
| 6404 | POC206 | Q58F21  | 0.37232  |
| 6405 | POC206 | Q9UGL9  | 0.45994  |
| 6406 | POC206 | Q9Y6P5  | 0.57951  |
| 6407 | POC206 | P06748  | 0.44383  |
| 6408 | POC206 | Q9UIA9  | 0.63683  |
| 6409 | POC206 | P59797  | 0.89776  |
| 6410 | POC206 | Q8TCH9  | 0.32929  |
| 6411 | POC206 | P0CE67  | 0.45994  |
| 6412 | POC206 | Q9NZZ3  | 1.1099   |
| 6413 | POC206 | P82932  | 0.60985  |
| 6414 | POC206 | O43583  | 0.9911   |
| 6415 | POC206 | Q9H0N5  | 0.88897  |
| 6416 | POC206 | Q6P9B9  | 0.48967  |
| 6417 | POC206 | A6NLIJ0 | 0.91681  |
| 6418 | POC206 | Q9UBC3  | 0.36245  |
| 6419 | POC206 | Q5T6F2  | 0.96758  |
| 6420 | POC206 | P84090  | 0.34419  |
| 6421 | POC206 | Q9C0E2  | 1.0399   |
| 6422 | POC206 | P49756  | 0.4263   |
| 6423 | POC206 | P55199  | 1.1058   |
| 6424 | POC206 | Q99594  | 1.2175   |
| 6425 | POC206 | O75398  | 0.35969  |
| 6426 | POC206 | P0CG24  | 0.30614  |
| 6427 | POC206 | Q14331  | 0.53072  |
| 6428 | POC206 | Q12769  | 1.0706   |
| 6429 | POC206 | Q92796  | 0.39278  |
| 6430 | POC206 | P14635  | 0.34921  |
| 6431 | POC206 | Q9BYD9  | 0.35257  |
| 6432 | POC206 | Q9H8K7  | 0.36064  |
| 6433 | POC206 | O95456  | 0.6156   |
| 6434 | POC206 | Q9UPP5  | 0.58232  |
| 6435 | POC206 | Q96QA5  | 0.29599  |
| 6436 | POC206 | Q96FV2  | 0.69222  |
| 6437 | POC206 | A6NJ64  | 0.43431  |
| 6438 | POC206 | Q93034  | 0.74085  |
| 6439 | POC206 | Q8NFP7  | 0.011653 |
| 6440 | POC206 | Q8TAP4  | 0.3011   |
| 6441 | POC206 | Q92945  | 0.70661  |
| 6442 | POC206 | Q9NY74  | 1.0102   |
| 6443 | POC206 | Q12972  | 0.77509  |
| 6444 | POC206 | Q9UJC3  | 0.17971  |
| 6445 | POC206 | Q8N485  | 0.23713  |
| 6446 | POC206 | B2RXF5  | 0.58935  |
| 6447 | POC206 | Q9BQI9  | 1.069    |
| 6448 | POC206 | Q5TID7  | 0.47352  |
| 6449 | POC206 | P01011  | 0.35973  |
| 6450 | POC206 | P0CF75  | 0.11258  |
| 6451 | POC206 | Q9NZC4  | 0.098612 |
| 6452 | POC206 | Q8NCE0  | 0.67912  |
| 6453 | POC206 | Q96N06  | 0.45285  |
| 6454 | POC206 | Q2M3C7  | 0.64122  |
| 6455 | POC206 | P59103  | 0.20885  |
| 6456 | POC206 | Q96QT6  | 1.1553   |
| 6457 | POC206 | Q8NBB4  | 0.36224  |
| 6458 | POC206 | A6NC62  | 0.1941   |
| 6459 | POC206 | Q9H321  | 0.8605   |
| 6460 | POC206 | Q96A09  | 0.61707  |

|      |        |        |          |
|------|--------|--------|----------|
| 6461 | POC206 | Q7L804 | 0.72079  |
| 6462 | POC206 | O00170 | 0.75924  |
| 6463 | POC206 | Q96DI7 | 0.61153  |
| 6464 | POC206 | Q9H8W5 | 0.30581  |
| 6465 | POC206 | Q14584 | 0.34316  |
| 6466 | POC206 | P60006 | 0.64415  |
| 6467 | POC206 | Q5SRH9 | 1.0084   |
| 6468 | POC206 | Q92466 | 0.7612   |
| 6469 | POC206 | Q7Z6K5 | 0.1517   |
| 6470 | POC206 | Q8N5U0 | 0.45994  |
| 6471 | POC206 | Q6RUI8 | 0.41276  |
| 6472 | POC206 | Q6DD87 | 0.2773   |
| 6473 | POC206 | Q7L266 | 0.3976   |
| 6474 | POC206 | A4D0Y5 | 0.45994  |
| 6475 | POC206 | Q96RL1 | 0.89733  |
| 6476 | POC206 | Q9UMR2 | 0.27502  |
| 6477 | POC206 | Q99814 | 0.41467  |
| 6478 | POC206 | Q9BY41 | 0.60431  |
| 6479 | POC206 | P39880 | 0.69201  |
| 6480 | POC206 | Q8IUM7 | 0.30441  |
| 6481 | POC206 | Q9NYK5 | 0.58209  |
| 6482 | POC206 | Q13503 | 0.77565  |
| 6483 | POC206 | Q15198 | 0.49081  |
| 6484 | POC206 | Q96SC8 | 0.28102  |
| 6485 | POC206 | Q14585 | 0.30439  |
| 6486 | POC206 | Q86V25 | 0.096286 |
| 6487 | POC206 | H0YL14 | 0.51886  |
| 6488 | POC206 | Q96K83 | 0.3294   |
| 6489 | POC206 | Q86X53 | 0.22585  |
| 6490 | POC206 | Q96B67 | 0.44832  |
| 6491 | POC206 | Q7Z2X7 | 0.65491  |
| 6492 | POC206 | P84550 | 0.043882 |
| 6493 | POC206 | Q5T3Y7 | 0.19896  |
| 6494 | POC206 | P09629 | 1.0333   |
| 6495 | POC206 | Q9UPW5 | 0.1184   |
| 6496 | POC206 | Q9P0T4 | 0.48789  |
| 6497 | POC206 | P56279 | 0.7811   |
| 6498 | POC206 | Q7Z6Z7 | 0.38531  |
| 6499 | POC206 | Q8N5W9 | 0.32415  |
| 6500 | POC206 | Q15015 | 0.86737  |
| 6501 | POC206 | F8WFD2 | 0.45121  |
| 6502 | POC206 | P53992 | 1.1277   |
| 6503 | POC206 | Q6QNY0 | 0.70823  |
| 6504 | POC206 | Q96FZ7 | 0.14742  |
| 6505 | POC206 | P08670 | 0.16668  |
| 6506 | POC206 | P60510 | 1.0644   |
| 6507 | POC206 | Q14689 | 0.42652  |
| 6508 | POC206 | P63165 | 1.1007   |
| 6509 | POC206 | Q8WV99 | 0.46731  |
| 6510 | POC206 | Q15363 | 0.19138  |
| 6511 | POC206 | Q3LI61 | 0.45994  |
| 6512 | POC206 | Q95644 | 0.87628  |
| 6513 | POC206 | Q9BXS6 | 0.84359  |
| 6514 | POC206 | Q8N4L8 | 0.33983  |
| 6515 | POC206 | Q6B0B8 | 0.50786  |
| 6516 | POC206 | P0C7H8 | 0.23291  |
| 6517 | POC206 | Q12912 | 0.97062  |
| 6518 | POC206 | Q9NT62 | 0.49786  |
| 6519 | POC206 | Q9P127 | 0.32109  |
| 6520 | POC206 | P09661 | 0.52868  |
| 6521 | POC206 | Q92529 | 0.2918   |
| 6522 | POC206 | Q15084 | 0.87993  |
| 6523 | POC206 | O75179 | 0.29167  |
| 6524 | POC206 | Q9NQ55 | 0.4904   |
| 6525 | POC206 | P55345 | 0.39092  |
| 6526 | POC206 | P11532 | 0.61764  |
| 6527 | POC206 | Q53QW1 | 0.68336  |
| 6528 | POC206 | P11387 | 0.7356   |
| 6529 | POC206 | Q43684 | 0.82289  |
| 6530 | POC206 | Q99798 | 0.12573  |
| 6531 | POC206 | Q8IZS5 | 0.34373  |
| 6532 | POC206 | Q2TAK8 | 0.82177  |
| 6533 | POC206 | Q43660 | 0.31223  |
| 6534 | POC206 | Q9Y483 | 0.28201  |
| 6535 | POC206 | Q86UU5 | 0.65131  |
| 6536 | POC206 | Q9NV70 | 0.52809  |

|      |        |        |          |
|------|--------|--------|----------|
| 6537 | POC206 | B2RD01 | 0.11891  |
| 6538 | POC206 | Q14549 | 0.45255  |
| 6539 | POC206 | Q1MSJ5 | 1.3184   |
| 6540 | POC206 | P62987 | 0.7163   |
| 6541 | POC206 | Q9H8W4 | 0.31555  |
| 6542 | POC206 | Q17R26 | 0.33385  |
| 6543 | POC206 | E9PQ53 | 0.86464  |
| 6544 | POC206 | Q14865 | 0.35928  |
| 6545 | POC206 | Q9NYZ3 | 0.76848  |
| 6546 | POC206 | Q8TAP8 | 0.44537  |
| 6547 | POC206 | Q8N184 | 0.30612  |
| 6548 | POC206 | Q9NQT4 | 0.44347  |
| 6549 | POC206 | Q9H2P0 | 0.29226  |
| 6550 | POC206 | Q9NV56 | 0.75737  |
| 6551 | POC206 | P04259 | 0.28425  |
| 6552 | POC206 | Q86UL8 | 0.36926  |
| 6553 | POC206 | Q9Y2R5 | 0.53087  |
| 6554 | POC206 | Q14257 | 0.39015  |
| 6555 | POC206 | P56524 | 0.38593  |
| 6556 | POC206 | P42167 | 0.33519  |
| 6557 | POC206 | Q9BYX4 | 0.32267  |
| 6558 | POC206 | Q8NFW8 | 0.22808  |
| 6559 | POC206 | Q13033 | 0.77721  |
| 6560 | POC206 | O60583 | 1.1291   |
| 6561 | POC206 | Q16762 | 0.23296  |
| 6562 | POC206 | Q8WXU2 | 0.86726  |
| 6563 | POC206 | Q15018 | 0.26812  |
| 6564 | POC206 | Q75347 | 1.1537   |
| 6565 | POC206 | P61968 | 0.38815  |
| 6566 | POC206 | O43439 | 1.1078   |
| 6567 | POC206 | Q9Y3I1 | 0.96862  |
| 6568 | POC206 | Q13404 | 1.0697   |
| 6569 | POC206 | Q6ZVF9 | 0.63464  |
| 6570 | POC206 | P38919 | 0.17755  |
| 6571 | POC206 | Q9Y5R8 | 0.12241  |
| 6572 | POC206 | Q14526 | 0.74761  |
| 6573 | POC206 | O75335 | 0.2367   |
| 6574 | POC206 | Q7RTT5 | 0.26627  |
| 6575 | POC206 | Q9NV72 | 0.55067  |
| 6576 | POC206 | Q96GE5 | 0.50104  |
| 6577 | POC206 | Q6P435 | 0.38603  |
| 6578 | POC206 | P61086 | 0.72531  |
| 6579 | POC206 | Q53HR8 | 0.15998  |
| 6580 | POC206 | Q9Y2X0 | 0.54557  |
| 6581 | POC206 | P13196 | 0.32491  |
| 6582 | POC206 | P28356 | 0.26688  |
| 6583 | POC206 | Q8N5D0 | 0.62117  |
| 6584 | POC206 | O75821 | 0.45918  |
| 6585 | POC206 | Q7Z6K1 | 0.73741  |
| 6586 | POC206 | Q9Y5U9 | 1.0605   |
| 6587 | POC206 | Q9UFB7 | 0.31909  |
| 6588 | POC206 | Q96PV6 | 0.78664  |
| 6589 | POC206 | Q13094 | 0.65132  |
| 6590 | POC206 | Q16352 | 0.43294  |
| 6591 | POC206 | P41238 | 0.063219 |
| 6592 | POC206 | Q8N1A0 | 0.32596  |
| 6593 | POC206 | Q9Y3B1 | 0.062818 |
| 6594 | POC206 | O75886 | 1.2852   |
| 6595 | POC206 | O00257 | 1.1208   |
| 6596 | POC206 | Q96IT6 | 0.45994  |
| 6597 | POC206 | Q9Y2Y0 | 1.1787   |
| 6598 | POC206 | O60543 | 0.39087  |
| 6599 | POC206 | Q9BWC9 | 0.96503  |
| 6600 | POC206 | Q9BSK0 | 0.96663  |
| 6601 | POC206 | Q96C10 | 0.22842  |
| 6602 | POC206 | P28069 | 0.77043  |
| 6603 | POC206 | Q6NVH7 | 0.73133  |
| 6604 | POC206 | Q7RTS7 | 0.30526  |
| 6605 | POC206 | Q16637 | 0.82328  |
| 6606 | POC206 | Q9UND3 | 0.48024  |
| 6607 | POC206 | P14373 | 0.43527  |
| 6608 | POC206 | Q86WS4 | 0.45994  |
| 6609 | POC206 | Q96S59 | 1.034    |
| 6610 | POC206 | A9YTD3 | 0.42495  |
| 6611 | POC206 | P23297 | 0.65544  |
| 6612 | POC206 | Q96EF9 | 0.36043  |

|      |        |        |         |
|------|--------|--------|---------|
| 6613 | P0C206 | Q6AZW8 | 0.31456 |
| 6614 | P0C206 | Q9NYZ1 | 0.98927 |
| 6615 | P0C206 | Q8WY22 | 0.76544 |
| 6616 | P0C206 | Q9BY65 | 0.59957 |
| 6617 | P0C206 | Q9BXW9 | 0.9612  |
| 6618 | P0C206 | Q9ULW8 | 0.50612 |
| 6619 | P0C206 | P48788 | 0.59844 |
| 6620 | P0C206 | Q7L3T8 | 0.39396 |
| 6621 | P0C206 | P62308 | 0.62822 |
| 6622 | P0C206 | Q00987 | 0.27735 |
| 6623 | P0C206 | Q6ZRP0 | 0.68336 |
| 6624 | P0C206 | Q86V87 | 0.61532 |
| 6625 | P0C206 | Q13106 | 0.31962 |
| 6626 | P0C206 | Q99614 | 0.31625 |
| 6627 | P0C206 | O14965 | 0.40063 |
| 6628 | P0C206 | P02511 | 0.43726 |
| 6629 | P0C206 | Q9BQQ3 | 0.30027 |
| 6630 | P0C206 | P10599 | 0.37568 |
| 6631 | P0C206 | Q9Y473 | 0.50016 |
| 6632 | P0C206 | P62891 | 0.5984  |
| 6633 | P0C206 | Q14980 | 1.2562  |
| 6634 | P0C206 | Q6NX45 | 0.32044 |
| 6635 | P0C206 | Q95873 | 0.68336 |
| 6636 | P0C206 | P49247 | 0.6919  |
| 6637 | P0C206 | Q93062 | 0.79515 |
| 6638 | P0C206 | Q13363 | 0.41786 |
| 6639 | P0C206 | Q7L2J0 | 0.18102 |
| 6640 | P0C206 | P62269 | 0.73801 |
| 6641 | P0C206 | Q9P2J5 | 0.31434 |
| 6642 | P0C206 | Q9NS86 | 0.30362 |
| 6643 | P0C206 | Q8N1B4 | 0.73891 |
| 6644 | P0C206 | P39748 | 0.36792 |
| 6645 | P0C206 | Q9Y4B6 | 0.97175 |
| 6646 | P0C206 | Q9BSH4 | 1.0354  |
| 6647 | P0C206 | Q8NCP5 | 0.20949 |
| 6648 | P0C206 | Q9H5Z6 | 0.68336 |
| 6649 | P0C206 | Q9UHB4 | 0.64815 |
| 6650 | P0C206 | Q92837 | 0.89239 |
| 6651 | P0C206 | O43805 | 0.71176 |
| 6652 | P0C206 | Q8N4C6 | 0.52454 |
| 6653 | P0C206 | Q6ZNH5 | 0.34661 |
| 6654 | P0C206 | Q5T619 | 0.31292 |
| 6655 | P0C206 | Q8WUZ0 | 0.63879 |
| 6656 | P0C206 | Q96AQ9 | 0.43121 |
| 6657 | P0C206 | P61925 | 0.23138 |
| 6658 | P0C206 | Q9HCH5 | 0.72576 |
| 6659 | P0C206 | A8MVA2 | 0.72851 |
| 6660 | P0C206 | P41220 | 0.48624 |
| 6661 | P0C206 | Q52LG2 | 0.25905 |
| 6662 | P0C206 | Q9GZV8 | 0.12332 |
| 6663 | P0C206 | Q96SZ4 | 0.32373 |
| 6664 | P0C206 | P42768 | 0.38933 |
| 6665 | P0C206 | Q9GZR2 | 0.20129 |
| 6666 | P0C206 | P29692 | 0.37183 |
| 6667 | P0C206 | Q9P206 | 0.77913 |
| 6668 | P0C206 | P35244 | 0.67884 |
| 6669 | P0C206 | P07737 | 0.91204 |
| 6670 | P0C206 | Q5SVZ6 | 0.91033 |
| 6671 | P0C206 | Q96GM8 | 0.3686  |
| 6672 | P0C206 | Q7Z2W4 | 0.56336 |
| 6673 | P0C206 | Q5JRC9 | 0.66423 |
| 6674 | P0C206 | Q8N0Z8 | 0.4593  |
| 6675 | P0C206 | A6NGR9 | 0.49792 |
| 6676 | P0C206 | Q8TF68 | 0.34497 |
| 6677 | P0C206 | Q9UM13 | 0.77695 |
| 6678 | P0C206 | Q08AN1 | 0.40539 |
| 6679 | P0C206 | Q86XN6 | 0.40471 |
| 6680 | P0C206 | Q96MT8 | 1.2654  |
| 6681 | P0C206 | P62753 | 0.97999 |
| 6682 | P0C206 | Q7Z3E2 | 0.59105 |
| 6683 | P0C206 | Q96I24 | 0.54083 |
| 6684 | P0C206 | O14512 | 0.59184 |
| 6685 | P0C206 | A6NEQ2 | 0.45994 |
| 6686 | P0C206 | Q86YV9 | 1.1     |
| 6687 | P0C206 | O75525 | 0.78463 |
| 6688 | P0C206 | Q6PEY1 | 0.89197 |

|      |        |        |          |
|------|--------|--------|----------|
| 6689 | POC206 | P08397 | 0.29405  |
| 6690 | POC206 | Q5TA78 | 0.45994  |
| 6691 | POC206 | O75570 | 0.45254  |
| 6692 | POC206 | Q7Z460 | 0.53173  |
| 6693 | POC206 | Q15390 | 0.26256  |
| 6694 | POC206 | A6NF36 | 0.57969  |
| 6695 | POC206 | Q6ZRP5 | 0.45994  |
| 6696 | POC206 | Q9H6B1 | 0.51176  |
| 6697 | POC206 | Q7Z5Y7 | 0.13145  |
| 6698 | POC206 | Q9HBH1 | 0.73255  |
| 6699 | POC206 | Q9NVM9 | 1.3132   |
| 6700 | POC206 | A6NL46 | 0.9591   |
| 6701 | POC206 | A1L3Z2 | 0.15876  |
| 6702 | POC206 | Q02577 | 0.72154  |
| 6703 | POC206 | O76031 | 0.61295  |
| 6704 | POC206 | Q9C0F1 | 0.47609  |
| 6705 | POC206 | Q7Z6E9 | 0.61163  |
| 6706 | POC206 | Q9NTG7 | 0.69813  |
| 6707 | POC206 | P20719 | 0.22596  |
| 6708 | POC206 | Q96B01 | 0.64647  |
| 6709 | POC206 | O75351 | 0.42459  |
| 6710 | POC206 | C9JLW8 | 0.61032  |
| 6711 | POC206 | Q9NTX7 | 0.6529   |
| 6712 | POC206 | Q9NS23 | 0.59524  |
| 6713 | POC206 | O95391 | 0.26739  |
| 6714 | POC206 | Q8N339 | 0.37631  |
| 6715 | POC206 | Q8TCN5 | 0.20949  |
| 6716 | POC206 | Q7Z6B0 | 0.63073  |
| 6717 | POC206 | P08151 | 0.40796  |
| 6718 | POC206 | Q9BZF9 | 0.6052   |
| 6719 | POC206 | P20396 | 0.50987  |
| 6720 | POC206 | Q969T9 | 1.2402   |
| 6721 | POC206 | Q5VZV4 | 0.46953  |
| 6722 | POC206 | O43924 | 0.21637  |
| 6723 | POC206 | A6NES4 | 0.42105  |
| 6724 | POC206 | Q8WWB3 | 0.012471 |
| 6725 | POC206 | Q9Y2W2 | 0.75704  |
| 6726 | POC206 | Q13118 | 0.49748  |
| 6727 | POC206 | Q8NC74 | 0.41707  |
| 6728 | POC206 | Q8TAC9 | 0.64174  |
| 6729 | POC206 | P07738 | 0.78224  |
| 6730 | POC206 | Q8TAU0 | 0.2486   |
| 6731 | POC206 | Q15929 | 0.52526  |
| 6732 | POC206 | Q05877 | 0.84893  |
| 6733 | POC206 | Q13424 | 0.35119  |
| 6734 | POC206 | Q8N668 | 0.93529  |
| 6735 | POC206 | P08621 | 0.251    |
| 6736 | POC206 | Q7L5N1 | 1.1956   |
| 6737 | POC206 | P0CAT3 | 0.016902 |
| 6738 | POC206 | Q8IU81 | 0.44908  |
| 6739 | POC206 | O75143 | 1.1597   |
| 6740 | POC206 | Q8NHX4 | 0.55286  |
| 6741 | POC206 | P02795 | 0.74749  |
| 6742 | POC206 | O95685 | 0.37167  |
| 6743 | POC206 | Q9P2D0 | 0.35201  |
| 6744 | POC206 | P48552 | 0.70134  |
| 6745 | POC206 | Q5TFG8 | 0.38327  |
| 6746 | POC206 | Q6ZMV5 | 0.56283  |
| 6747 | POC206 | Q06250 | 0.45994  |
| 6748 | POC206 | Q49AN0 | 0.27497  |
| 6749 | POC206 | Q5JVG8 | 0.50739  |
| 6750 | POC206 | Q9NUK0 | 0.096735 |
| 6751 | POC206 | P54826 | 0.23919  |
| 6752 | POC206 | Q9UN81 | 0.50318  |
| 6753 | POC206 | Q9Y221 | 0.81213  |
| 6754 | POC206 | Q5VSD8 | 0.14569  |
| 6755 | POC206 | A1L4L8 | 0.64331  |
| 6756 | POC206 | Q96ER9 | 0.2556   |
| 6757 | POC206 | Q9HBF5 | 0.83987  |
| 6758 | POC206 | Q13347 | 0.74204  |
| 6759 | POC206 | P87889 | 0.16645  |
| 6760 | POC206 | P48539 | 0.27078  |
| 6761 | POC206 | Q6ZN55 | 0.30741  |
| 6762 | POC206 | P46779 | 1.0234   |
| 6763 | POC206 | Q9NQS7 | 1.0845   |
| 6764 | POC206 | Q14203 | 1.1036   |

|      |        |        |          |
|------|--------|--------|----------|
| 6765 | POC206 | Q5VV52 | 0.26569  |
| 6766 | POC206 | Q9BQ83 | 0.78748  |
| 6767 | POC206 | Q6ZS94 | 0.45994  |
| 6768 | POC206 | Q9UJ72 | 0.1565   |
| 6769 | POC206 | Q9NTW7 | 0.50505  |
| 6770 | POC206 | Q6ZNG0 | 0.32699  |
| 6771 | POC206 | P17038 | 0.4071   |
| 6772 | POC206 | Q9NPL8 | 0.7007   |
| 6773 | POC206 | Q00403 | 1.2514   |
| 6774 | POC206 | Q59EK9 | 0.55905  |
| 6775 | POC206 | Q96PP4 | 0.13742  |
| 6776 | POC206 | Q9BYM8 | 0.23391  |
| 6777 | POC206 | A6NK58 | 0.35252  |
| 6778 | POC206 | Q8NEZ5 | 0.81499  |
| 6779 | POC206 | Q8WWM7 | 0.627    |
| 6780 | POC206 | Q53G59 | 0.59697  |
| 6781 | POC206 | Q01130 | 0.66096  |
| 6782 | POC206 | P30405 | 0.28126  |
| 6783 | POC206 | A6NN14 | 0.4071   |
| 6784 | POC206 | O15117 | 0.70943  |
| 6785 | POC206 | Q6XCG6 | 0.45994  |
| 6786 | POC206 | Q01469 | 0.29927  |
| 6787 | POC206 | Q8TEE9 | 1.0906   |
| 6788 | POC206 | A6NL82 | 0.3701   |
| 6789 | POC206 | O60675 | 0.54125  |
| 6790 | POC206 | Q5JU67 | 0.13201  |
| 6791 | POC206 | Q86VM9 | 0.35131  |
| 6792 | POC206 | Q14802 | 0.28777  |
| 6793 | POC206 | Q9NQZ2 | 0.19991  |
| 6794 | POC206 | Q8ND61 | 0.90084  |
| 6795 | POC206 | P15822 | 1.1087   |
| 6796 | POC206 | Q9H3H3 | 0.28043  |
| 6797 | POC206 | Q8NB42 | 0.53541  |
| 6798 | POC206 | P07954 | 0.17441  |
| 6799 | POC206 | Q6ZV65 | 0.33241  |
| 6800 | POC206 | A6NEQ9 | 0.45994  |
| 6801 | POC206 | A7E2U8 | 0.48763  |
| 6802 | POC206 | O75935 | 1.0824   |
| 6803 | POC206 | Q9UL46 | 0.31616  |
| 6804 | POC206 | Q9NZD4 | 0.64093  |
| 6805 | POC206 | Q96M53 | 1.1874   |
| 6806 | POC206 | Q9UGB4 | 0.45994  |
| 6807 | POC206 | Q15776 | 0.68852  |
| 6808 | POC206 | Q66K89 | 0.93943  |
| 6809 | POC206 | O43310 | 0.51385  |
| 6810 | POC206 | O60711 | 0.64748  |
| 6811 | POC206 | P31948 | 1.0927   |
| 6812 | POC206 | Q15154 | 0.67339  |
| 6813 | POC206 | Q6Q759 | 0.77148  |
| 6814 | POC206 | Q96PT4 | 0.27096  |
| 6815 | POC206 | Q9BY89 | 0.23834  |
| 6816 | POC206 | Q8NCK3 | 0.37259  |
| 6817 | POC206 | Q96B02 | 0.34952  |
| 6818 | POC206 | O14558 | 0.86766  |
| 6819 | POC206 | Q16613 | 0.26459  |
| 6820 | POC206 | Q8NFB3 | 1.034    |
| 6821 | POC206 | Q92547 | 0.83777  |
| 6822 | POC206 | Q9NX05 | 0.51473  |
| 6823 | POC206 | Q9BYR8 | 1.0016   |
| 6824 | POC206 | P02042 | 0.41469  |
| 6825 | POC206 | P52294 | 1.1214   |
| 6826 | POC206 | Q5VTE6 | 0.091748 |
| 6827 | POC206 | Q8N6H7 | 0.23091  |
| 6828 | POC206 | Q68DI1 | 0.30556  |
| 6829 | POC206 | A5PLN9 | 0.53713  |
| 6830 | POC206 | Q9NXB0 | 0.94993  |
| 6831 | POC206 | Q6PG37 | 0.54509  |
| 6832 | POC206 | Q93073 | 0.73854  |
| 6833 | POC206 | Q15323 | 0.41992  |
| 6834 | POC206 | P21912 | 0.25193  |
| 6835 | POC206 | Q8NA03 | 0.55898  |
| 6836 | POC206 | O15297 | 0.71257  |
| 6837 | POC206 | Q2NL82 | 0.59362  |
| 6838 | POC206 | Q96Q06 | 0.90603  |
| 6839 | POC206 | P63172 | 0.93571  |
| 6840 | POC206 | Q3YBR2 | 0.61709  |

|      |        |        |          |
|------|--------|--------|----------|
| 6841 | POC206 | Q00059 | 0.92652  |
| 6842 | POC206 | Q8IYK2 | 0.75655  |
| 6843 | POC206 | Q13105 | 0.62535  |
| 6844 | POC206 | Q06830 | 0.27731  |
| 6845 | POC206 | P41161 | 0.27295  |
| 6846 | POC206 | Q86WG3 | 0.38408  |
| 6847 | POC206 | Q3KQU3 | 0.79987  |
| 6848 | POC206 | Q5TCM9 | 0.45994  |
| 6849 | POC206 | A0JLT2 | 1.0197   |
| 6850 | POC206 | P63220 | 0.59441  |
| 6851 | POC206 | Q14609 | 0.85783  |
| 6852 | POC206 | P0CG30 | 0.44089  |
| 6853 | POC206 | P36873 | 0.82811  |
| 6854 | POC206 | Q13042 | 1.3754   |
| 6855 | POC206 | H0YKK7 | 0.88867  |
| 6856 | POC206 | Q6NVV0 | 0.72147  |
| 6857 | POC206 | P0CG00 | 0.37883  |
| 6858 | POC206 | Q8N4C0 | 0.097618 |
| 6859 | POC206 | Q8IYB7 | 0.26316  |
| 6860 | POC206 | A8K0S8 | 0.31537  |
| 6861 | POC206 | Q9BRQ6 | 1.2716   |
| 6862 | POC206 | O14513 | 0.65996  |
| 6863 | POC206 | Q9Y252 | 0.57815  |
| 6864 | POC206 | P31249 | 0.58925  |
| 6865 | POC206 | Q6NUR6 | 0.67636  |
| 6866 | POC206 | Q8N443 | 0.40274  |
| 6867 | POC206 | P12035 | 0.4573   |
| 6868 | POC206 | P42224 | 0.23617  |
| 6869 | POC206 | P60412 | 0.72851  |
| 6870 | POC206 | P62310 | 0.57834  |
| 6871 | POC206 | Q5SZD4 | 0.6401   |
| 6872 | POC206 | O15126 | 0.45843  |
| 6873 | POC206 | P47928 | 0.4938   |
| 6874 | POC206 | Q969S8 | 0.90939  |
| 6875 | POC206 | Q9NRP2 | 0.92384  |
| 6876 | POC206 | P60842 | 0.066905 |
| 6877 | POC206 | P02489 | 0.39106  |
| 6878 | POC206 | Q9P2X3 | 0.16346  |
| 6879 | POC206 | P58005 | 0.34143  |
| 6880 | POC206 | Q5RHP9 | 0.43445  |
| 6881 | POC206 | Q9H1B7 | 1.0357   |
| 6882 | POC206 | Q96IU4 | 0.56782  |
| 6883 | POC206 | Q8WV92 | 0.49319  |
| 6884 | POC206 | Q9H4W6 | 0.14295  |
| 6885 | POC206 | Q9UK53 | 0.25193  |
| 6886 | POC206 | Q9Y2Y1 | 0.20983  |
| 6887 | POC206 | P52736 | 0.81752  |
| 6888 | POC206 | Q9H040 | 0.72896  |
| 6889 | POC206 | O95177 | 0.20572  |
| 6890 | POC206 | A8MVS1 | 0.56088  |
| 6891 | POC206 | Q96E09 | 0.80301  |
| 6892 | POC206 | Q3KRA6 | 1.1722   |
| 6893 | POC206 | P50548 | 0.47897  |
| 6894 | POC206 | Q5JNZ5 | 0.62971  |
| 6895 | POC206 | Q6VB84 | 0.52107  |
| 6896 | POC206 | O76064 | 0.40914  |
| 6897 | POC206 | Q9UBX0 | 0.25859  |
| 6898 | POC206 | Q8IYL2 | 0.53639  |
| 6899 | POC206 | Q96PC3 | 0.45645  |
| 6900 | POC206 | Q9Y6I8 | 0.31941  |
| 6901 | POC206 | Q8WXG1 | 0.10013  |
| 6902 | POC206 | Q9HBM0 | 0.61028  |
| 6903 | POC206 | Q96MW7 | 0.44813  |
| 6904 | POC206 | Q9BXD5 | 0.68658  |
| 6905 | POC206 | Q5TC12 | 0.56479  |
| 6906 | POC206 | Q9NPC6 | 0.89755  |
| 6907 | POC206 | Q9Y6C7 | 0.45994  |
| 6908 | POC206 | A3KN83 | 0.95479  |
| 6909 | POC206 | Q9BSW2 | 0.92473  |
| 6910 | POC206 | Q4G163 | 0.12969  |
| 6911 | POC206 | Q0P140 | 0.26483  |
| 6912 | POC206 | A5A3E0 | 0.16333  |
| 6913 | POC206 | Q96A44 | 0.61261  |
| 6914 | POC206 | P52758 | 0.61083  |
| 6915 | POC206 | Q9H469 | 0.34026  |
| 6916 | POC206 | Q9H9Y6 | 0.83436  |



|      |        |        |          |
|------|--------|--------|----------|
| 6917 | POC206 | P0CW26 | 0.39488  |
| 6918 | POC206 | Q8ND83 | 1.195    |
| 6919 | POC206 | Q96DY2 | 0.16979  |
| 6920 | POC206 | P13051 | 1.1504   |
| 6921 | POC206 | Q99576 | 0.57737  |
| 6922 | POC206 | Q92540 | 1.0369   |
| 6923 | POC206 | Q92499 | 0.43934  |
| 6924 | POC206 | A8MUX0 | 0.49553  |
| 6925 | POC206 | Q8NHQ1 | 1.535    |
| 6926 | POC206 | Q8TDC0 | 0.61674  |
| 6927 | POC206 | Q5BKX8 | 0.18463  |
| 6928 | POC206 | Q8NHQ8 | 0.90673  |
| 6929 | POC206 | A6NNA2 | 0.72905  |
| 6930 | POC206 | Q8IY18 | 0.57529  |
| 6931 | POC206 | Q8TB05 | 0.68336  |
| 6932 | POC206 | Q969H4 | 0.26131  |
| 6933 | POC206 | P22033 | 0.51424  |
| 6934 | POC206 | Q9UMS0 | 1.1867   |
| 6935 | POC206 | Q9BXJ9 | 0.7744   |
| 6936 | POC206 | Q99549 | 0.80996  |
| 6937 | POC206 | Q15643 | 1.1636   |
| 6938 | POC206 | Q8TDZ2 | 0.25382  |
| 6939 | POC206 | Q9H8M1 | 0.17829  |
| 6940 | POC206 | Q9BU89 | 0.27007  |
| 6941 | POC206 | P50748 | 0.9594   |
| 6942 | POC206 | P49356 | 0.22985  |
| 6943 | POC206 | O60563 | 1.5947   |
| 6944 | POC206 | Q9BXM8 | 0.45994  |
| 6945 | POC206 | Q5VWK0 | 0.079262 |
| 6946 | POC206 | Q15398 | 1.1239   |
| 6947 | POC206 | Q96EY1 | 0.47406  |
| 6948 | POC206 | Q96K31 | 0.4838   |
| 6949 | POC206 | Q14693 | 0.41629  |
| 6950 | POC206 | Q68DN1 | 0.34873  |
| 6951 | POC206 | Q9BXY0 | 0.32773  |
| 6952 | POC206 | Q9ULK2 | 0.82891  |
| 6953 | POC206 | Q8WUY3 | 0.46383  |
| 6954 | POC206 | Q96IK1 | 0.40745  |
| 6955 | POC206 | Q9BSJ6 | 0.63617  |
| 6956 | POC206 | Q96DM3 | 0.27643  |
| 6957 | POC206 | Q9Y6M1 | 0.34142  |
| 6958 | POC206 | Q9H3C7 | 1.0302   |
| 6959 | POC206 | O43593 | 0.34784  |
| 6960 | POC206 | Q96K58 | 0.28309  |
| 6961 | POC206 | O00423 | 0.64474  |
| 6962 | POC206 | Q5SWL8 | 0.26699  |
| 6963 | POC206 | Q9UGR2 | 0.58324  |
| 6964 | POC206 | Q6GPH4 | 0.62649  |
| 6965 | POC206 | O00479 | 0.68165  |
| 6966 | POC206 | P15880 | 0.87489  |
| 6967 | POC206 | Q53H80 | 0.4795   |
| 6968 | POC206 | B4DX44 | 0.57753  |
| 6969 | POC206 | Q58A44 | 0.45994  |
| 6970 | POC206 | Q96G25 | 1.0597   |
| 6971 | POC206 | Q9Y244 | 0.50774  |
| 6972 | POC206 | Q8WYQ5 | 0.70603  |
| 6973 | POC206 | Q96RE9 | 0.29783  |
| 6974 | POC206 | P35580 | 0.28432  |
| 6975 | POC206 | Q96MD2 | 0.18785  |
| 6976 | POC206 | O15027 | 0.79164  |
| 6977 | POC206 | P12956 | 0.45675  |
| 6978 | POC206 | P55197 | 1.6586   |
| 6979 | POC206 | Q86YS3 | 0.25862  |
| 6980 | POC206 | Q96NB1 | 0.29293  |
| 6981 | POC206 | Q494X3 | 0.55028  |
| 6982 | POC206 | Q96N03 | 0.44439  |
| 6983 | POC206 | Q8IY92 | 0.52473  |
| 6984 | POC206 | Q9P2N6 | 0.36304  |
| 6985 | POC206 | Q9BYQ4 | 0.72851  |
| 6986 | POC206 | Q9HAW4 | 0.58003  |
| 6987 | POC206 | Q13227 | 1.1246   |
| 6988 | POC206 | O43156 | 0.63871  |
| 6989 | POC206 | Q9HAK2 | 0.14295  |
| 6990 | POC206 | Q7RTT6 | 0.47586  |
| 6991 | POC206 | Q9BW19 | 0.39724  |
| 6992 | POC206 | Q96FT9 | 0.11978  |

|      |        |        |           |
|------|--------|--------|-----------|
| 6993 | POC206 | Q8NFV5 | 0.51209   |
| 6994 | POC206 | A7XYQ1 | 0.48467   |
| 6995 | POC206 | Q9NY61 | 0.98927   |
| 6996 | POC206 | O43189 | 0.80238   |
| 6997 | POC206 | Q6P3W6 | 0.80594   |
| 6998 | POC206 | Q8NCN5 | 0.072023  |
| 6999 | POC206 | Q96PM9 | 0.6229    |
| 7000 | POC206 | Q9BU02 | 0.80849   |
| 7001 | POC206 | Q9BQN1 | 1.0776    |
| 7002 | POC206 | Q9Y3X0 | 0.54851   |
| 7003 | POC206 | Q14119 | 0.42428   |
| 7004 | POC206 | P17014 | 0.30003   |
| 7005 | POC206 | Q9NZF1 | 0.33436   |
| 7006 | POC206 | P23528 | 0.76639   |
| 7007 | POC206 | A8K5M9 | 1.1171    |
| 7008 | POC206 | Q9NX20 | 0.54016   |
| 7009 | POC206 | H3BNL1 | 0.54687   |
| 7010 | POC206 | Q00005 | 0.62069   |
| 7011 | POC206 | P00338 | 0.54372   |
| 7012 | POC206 | Q9UBI9 | 0.72448   |
| 7013 | POC206 | Q9NU63 | 0.28849   |
| 7014 | POC206 | Q8NCE8 | 0.66614   |
| 7015 | POC206 | P42025 | 0.5174    |
| 7016 | POC206 | Q00839 | 0.29228   |
| 7017 | POC206 | Q15051 | 0.76707   |
| 7018 | POC206 | Q9Y2T7 | 0.2166    |
| 7019 | POC206 | Q15833 | 0.40791   |
| 7020 | POC206 | P78346 | 0.7873    |
| 7021 | POC206 | Q9NZU5 | 0.51507   |
| 7022 | POC206 | P46379 | 0.28476   |
| 7023 | POC206 | P13535 | 0.26858   |
| 7024 | POC206 | Q96KT0 | 0.0096923 |
| 7025 | POC206 | Q86T03 | 1.0188    |
| 7026 | POC206 | Q6P1R3 | 0.61896   |
| 7027 | POC206 | Q6ZT83 | 0.19163   |
| 7028 | POC206 | P53611 | 0.13549   |
| 7029 | POC206 | Q92618 | 0.20949   |
| 7030 | POC206 | P55210 | 0.28791   |
| 7031 | POC206 | Q96GK7 | 0.50112   |
| 7032 | POC206 | Q9H019 | 0.63251   |
| 7033 | POC206 | Q8NBA8 | 0.24992   |
| 7034 | POC206 | Q14498 | 0.69489   |
| 7035 | POC206 | Q96EH5 | 0.6927    |
| 7036 | POC206 | Q96CS3 | 0.66048   |
| 7037 | POC206 | Q8TAF5 | 0.45994   |
| 7038 | POC206 | Q8NEP9 | 0.51617   |
| 7039 | POC206 | Q9BQ52 | 0.30548   |
| 7040 | POC206 | A6ND36 | 0.024854  |
| 7041 | POC206 | Q8NAV2 | 0.17049   |
| 7042 | POC206 | Q96ME7 | 0.20762   |
| 7043 | POC206 | P0CAP2 | 0.305     |
| 7044 | POC206 | Q95159 | 0.7351    |
| 7045 | POC206 | Q9ULM6 | 1.0473    |
| 7046 | POC206 | Q9C029 | 0.29992   |
| 7047 | POC206 | Q9UI36 | 0.48517   |
| 7048 | POC206 | Q8N1F7 | 0.73489   |
| 7049 | POC206 | Q8TAU3 | 0.33635   |
| 7050 | POC206 | Q96IP4 | 0.61338   |
| 7051 | POC206 | O43148 | 0.87227   |
| 7052 | POC206 | P25398 | 0.68562   |
| 7053 | POC206 | Q9UQB3 | 0.66476   |
| 7054 | POC206 | Q9UQC2 | 0.34024   |
| 7055 | POC206 | O00303 | 0.31117   |
| 7056 | POC206 | Q494R0 | 0.45994   |
| 7057 | POC206 | Q9H094 | 0.016113  |
| 7058 | POC206 | Q8IVS8 | 0.13105   |
| 7059 | POC206 | O75167 | 0.29087   |
| 7060 | POC206 | Q9NPA8 | 0.53241   |
| 7061 | POC206 | Q9Y6Y1 | 0.70375   |
| 7062 | POC206 | Q96CP2 | 0.23934   |
| 7063 | POC206 | Q6ZR03 | 0.34508   |
| 7064 | POC206 | Q9NRD5 | 0.2319    |
| 7065 | POC206 | P61579 | 0.80216   |
| 7066 | POC206 | A5PLN7 | 0.68336   |
| 7067 | POC206 | Q86VP6 | 0.83507   |
| 7068 | POC206 | O94983 | 1.4967    |

|      |        |        |          |
|------|--------|--------|----------|
| 7069 | POC206 | Q68DX3 | 0.61933  |
| 7070 | POC206 | Q71F23 | 0.72431  |
| 7071 | POC206 | Q8IYB9 | 0.42186  |
| 7072 | POC206 | Q96D70 | 0.89679  |
| 7073 | POC206 | Q5JYT7 | 0.028656 |
| 7074 | POC206 | Q8N0Z2 | 0.46229  |
| 7075 | POC206 | Q6ZNA1 | 0.39234  |
| 7076 | POC206 | Q8TF46 | 0.29394  |
| 7077 | POC206 | P20073 | 0.45146  |
| 7078 | POC206 | P08708 | 0.42942  |
| 7079 | POC206 | Q8N3J5 | 0.031269 |
| 7080 | POC206 | Q6NT76 | 0.59309  |
| 7081 | POC206 | O75674 | 0.51498  |
| 7082 | POC206 | Q14153 | 0.66895  |
| 7083 | POC206 | Q6NT04 | 0.36518  |
| 7084 | POC206 | Q14493 | 0.79895  |
| 7085 | POC206 | O75461 | 0.43526  |
| 7086 | POC206 | Q96EF6 | 0.68262  |
| 7087 | POC206 | C9J302 | 0.31078  |
| 7088 | POC206 | Q1RN00 | 0.45994  |
| 7089 | POC206 | Q15935 | 0.59919  |
| 7090 | POC206 | Q15004 | 0.95404  |
| 7091 | POC206 | Q14DG7 | 0.60901  |
| 7092 | POC206 | O95876 | 0.38753  |
| 7093 | POC206 | O43264 | 0.72197  |
| 7094 | POC206 | Q96B54 | 0.75951  |
| 7095 | POC206 | P10515 | 0.4044   |
| 7096 | POC206 | Q7L945 | 0.36636  |
| 7097 | POC206 | Q96NS8 | 0.1544   |
| 7098 | POC206 | Q6IQ23 | 0.4693   |
| 7099 | POC206 | P24864 | 0.65297  |
| 7100 | POC206 | Q7Z3B3 | 0.22639  |
| 7101 | POC206 | Q9HCS7 | 0.50795  |
| 7102 | POC206 | Q9Y5P8 | 0.72052  |
| 7103 | POC206 | Q5T9G4 | 1.2902   |
| 7104 | POC206 | Q01105 | 0.82895  |
| 7105 | POC206 | P09016 | 0.18582  |
| 7106 | POC206 | Q9UL40 | 0.75129  |
| 7107 | POC206 | Q01892 | 0.48285  |
| 7108 | POC206 | P24941 | 0.70518  |
| 7109 | POC206 | P78412 | 0.31537  |
| 7110 | POC206 | Q15369 | 1.4029   |
| 7111 | POC206 | Q15788 | 0.29258  |
| 7112 | POC206 | Q08AG7 | 0.87507  |
| 7113 | POC206 | Q08945 | 1.3558   |
| 7114 | POC206 | Q86YT6 | 0.24726  |
| 7115 | POC206 | Q15759 | 0.30449  |
| 7116 | POC206 | Q9NYV6 | 0.60031  |
| 7117 | POC206 | Q8N3U1 | 0.45994  |
| 7118 | POC206 | O75820 | 0.28063  |
| 7119 | POC206 | Q9Y5A7 | 0.76609  |
| 7120 | POC206 | Q9NZ09 | 0.13763  |
| 7121 | POC206 | Q8TEA8 | 0.9133   |
| 7122 | POC206 | Q96SR6 | 0.33397  |
| 7123 | POC206 | O00189 | 0.50669  |
| 7124 | POC206 | Q8WWK9 | 0.4917   |
| 7125 | POC206 | Q8TDD2 | 0.51466  |
| 7126 | POC206 | Q8TD16 | 0.46378  |
| 7127 | POC206 | Q9BSJ2 | 1.3337   |
| 7128 | POC206 | Q14061 | 0.52057  |
| 7129 | POC206 | Q5T0J7 | 0.271    |
| 7130 | POC206 | Q96MG8 | 0.029555 |
| 7131 | POC206 | O43639 | 0.46023  |
| 7132 | POC206 | Q9UKT5 | 0.4597   |
| 7133 | POC206 | P62937 | 0.66381  |
| 7134 | POC206 | O43765 | 0.70613  |
| 7135 | POC206 | Q1ZZU3 | 0.85437  |
| 7136 | POC206 | Q8TBK6 | 0.46758  |
| 7137 | POC206 | Q9HCI5 | 0.73611  |
| 7138 | POC206 | Q9H1D9 | 0.64115  |
| 7139 | POC206 | Q9UNX4 | 0.42361  |
| 7140 | POC206 | O96000 | 0.47814  |
| 7141 | POC206 | Q13765 | 1.2392   |
| 7142 | POC206 | O43745 | 0.86192  |
| 7143 | POC206 | Q5TBC7 | 0.29189  |
| 7144 | POC206 | A0AUK8 | 0.24246  |

|      |        |         |          |
|------|--------|---------|----------|
| 7145 | POC206 | O95071  | 0.28494  |
| 7146 | POC206 | P60896  | 0.45994  |
| 7147 | POC206 | P13929  | 0.20897  |
| 7148 | POC206 | Q9BUT9  | 1.2905   |
| 7149 | POC206 | Q9BQ95  | 1.2188   |
| 7150 | POC206 | Q2M2W7  | 0.68336  |
| 7151 | POC206 | Q6UUUV7 | 1.6413   |
| 7152 | POC206 | Q9H4R4  | 0.10546  |
| 7153 | POC206 | Q9UBF1  | 0.94092  |
| 7154 | POC206 | P62952  | 0.33364  |
| 7155 | POC206 | Q9UDW3  | 0.4984   |
| 7156 | POC206 | Q5T750  | 0.26479  |
| 7157 | POC206 | P23381  | 0.31867  |
| 7158 | POC206 | P16455  | 0.32127  |
| 7159 | POC206 | P02533  | 0.87109  |
| 7160 | POC206 | O75312  | 0.43373  |
| 7161 | POC206 | Q7Z2E3  | 0.65478  |
| 7162 | POC206 | Q5HY64  | 0.11084  |
| 7163 | POC206 | A8MYR8  | 0.090088 |
| 7164 | POC206 | Q2M218  | 0.33397  |
| 7165 | POC206 | Q93074  | 0.52293  |
| 7166 | POC206 | Q68CZ6  | 0.80409  |
| 7167 | POC206 | Q6NXP2  | 1.0591   |
| 7168 | POC206 | Q14249  | 0.048089 |
| 7169 | POC206 | Q6BDI9  | 0.60054  |
| 7170 | POC206 | P51668  | 0.58319  |
| 7171 | POC206 | Q08AI8  | 0.68336  |
| 7172 | POC206 | Q6ZVN7  | 0.07209  |
| 7173 | POC206 | P0CG33  | 0.3004   |
| 7174 | POC206 | Q9Y3T9  | 1.1777   |
| 7175 | POC206 | Q9ULJ1  | 0.24144  |
| 7176 | POC206 | P36402  | 0.56528  |
| 7177 | POC206 | Q5BIV9  | 0.50729  |
| 7178 | POC206 | Q9H633  | 0.36817  |
| 7179 | POC206 | Q8N163  | 0.76934  |
| 7180 | POC206 | P0CJ68  | 0.67101  |
| 7181 | POC206 | Q15459  | 0.52585  |
| 7182 | POC206 | Q8NCA5  | 0.46522  |
| 7183 | POC206 | Q14929  | 0.32132  |
| 7184 | POC206 | Q8TD17  | 0.26214  |
| 7185 | POC206 | Q9UH77  | 0.69196  |
| 7186 | POC206 | P11940  | 0.28803  |
| 7187 | POC206 | Q9H9C1  | 0.69673  |
| 7188 | POC206 | A8MTZ0  | 0.44326  |
| 7189 | POC206 | Q14566  | 0.28482  |
| 7190 | POC206 | A6NCW3  | 0.63324  |
| 7191 | POC206 | P18848  | 1.1867   |
| 7192 | POC206 | Q8N4H5  | 0.41064  |
| 7193 | POC206 | O15304  | 1.1667   |
| 7194 | POC206 | P11142  | 0.36997  |
| 7195 | POC206 | A6NC78  | 0.33004  |
| 7196 | POC206 | Q6ZTN6  | 0.47738  |
| 7197 | POC206 | Q8N328  | 0.074542 |
| 7198 | POC206 | Q12959  | 0.84297  |
| 7199 | POC206 | Q5QP74  | 0.45994  |
| 7200 | POC206 | Q8WVM7  | 0.94388  |
| 7201 | POC206 | Q0VG99  | 0.32028  |
| 7202 | POC206 | Q9NQ31  | 0.74141  |
| 7203 | POC206 | Q96DP5  | 0.57758  |
| 7204 | POC206 | Q5VZF2  | 0.10158  |
| 7205 | POC206 | Q9NRM2  | 0.16664  |
| 7206 | POC206 | Q96EK4  | 1.4778   |
| 7207 | POC206 | Q8N3F8  | 0.73813  |
| 7208 | POC206 | Q8WVK2  | 0.64617  |
| 7209 | POC206 | Q99732  | 0.3779   |
| 7210 | POC206 | P50135  | 0.20673  |
| 7211 | POC206 | Q9NXZ1  | 0.32773  |
| 7212 | POC206 | Q96KR7  | 0.42467  |
| 7213 | POC206 | Q6ZSN1  | 0.38203  |
| 7214 | POC206 | Q9NTJ3  | 0.30467  |
| 7215 | POC206 | Q2KHT3  | 0.65507  |
| 7216 | POC206 | Q6IPW1  | 0.61883  |
| 7217 | POC206 | Q53FT3  | 0.46399  |
| 7218 | POC206 | A2VDF0  | 0.31063  |
| 7219 | POC206 | Q68CZ2  | 0.46821  |
| 7220 | POC206 | Q6P4R8  | 1.3299   |

|      |        |        |          |
|------|--------|--------|----------|
| 7221 | POC206 | Q969E4 | 0.58122  |
| 7222 | POC206 | Q8IUE0 | 0.43565  |
| 7223 | POC206 | Q8NG31 | 0.76262  |
| 7224 | POC206 | Q14C87 | 0.74524  |
| 7225 | POC206 | Q5T681 | 0.98451  |
| 7226 | POC206 | Q8N5A5 | 1.0366   |
| 7227 | POC206 | P61970 | 0.54135  |
| 7228 | POC206 | Q96RE7 | 1.1985   |
| 7229 | POC206 | Q9Y615 | 0.52493  |
| 7230 | POC206 | Q9H2K2 | 0.49632  |
| 7231 | POC206 | P22735 | 0.25384  |
| 7232 | POC206 | O60422 | 0.40162  |
| 7233 | POC206 | Q68D10 | 0.68336  |
| 7234 | POC206 | Q96EK7 | 0.44019  |
| 7235 | POC206 | Q8NEY8 | 0.93484  |
| 7236 | POC206 | Q96ND8 | 0.54826  |
| 7237 | POC206 | Q86UY8 | 0.1551   |
| 7238 | POC206 | Q8TAB7 | 0.89129  |
| 7239 | POC206 | Q8N1G2 | 0.42617  |
| 7240 | POC206 | Q09MP3 | 0.35354  |
| 7241 | POC206 | Q9UBD0 | 1.2797   |
| 7242 | POC206 | Q6ZQX7 | 0.014649 |
| 7243 | POC206 | Q9Y3A2 | 0.98495  |
| 7244 | POC206 | Q96GN5 | 1.0209   |
| 7245 | POC206 | Q9Y3Y2 | 1.0504   |
| 7246 | POC206 | Q8IWN6 | 0.30824  |
| 7247 | POC206 | Q7Z401 | 0.46846  |
| 7248 | POC206 | Q12830 | 1.1559   |
| 7249 | POC206 | O60516 | 0.35247  |
| 7250 | POC206 | O00273 | 0.34005  |
| 7251 | POC206 | Q9BRX2 | 0.56306  |
| 7252 | POC206 | P06132 | 0.60704  |
| 7253 | POC206 | Q9UBG7 | 0.28382  |
| 7254 | POC206 | Q6ZTI6 | 0.76624  |
| 7255 | POC206 | Q8N945 | 0.1127   |
| 7256 | POC206 | Q15714 | 0.88562  |
| 7257 | POC206 | Q96IU2 | 1.1068   |
| 7258 | POC206 | O43674 | 0.48065  |
| 7259 | POC206 | Q96LR7 | 0.98628  |
| 7260 | POC206 | Q8IZM0 | 0.32852  |
| 7261 | POC206 | Q3LI63 | 0.45994  |
| 7262 | POC206 | Q8NC51 | 0.73761  |
| 7263 | POC206 | Q96LW1 | 0.51209  |
| 7264 | POC206 | Q9Y266 | 1.1081   |
| 7265 | POC206 | P0CL84 | 0.26555  |
| 7266 | POC206 | Q9NP85 | 0.11483  |
| 7267 | POC206 | P41002 | 1.1478   |
| 7268 | POC206 | Q9NVN3 | 0.12215  |
| 7269 | POC206 | H3BTG2 | 0.51403  |
| 7270 | POC206 | Q9HD26 | 1.0106   |
| 7271 | POC206 | Q9NQS1 | 0.27723  |
| 7272 | POC206 | P56385 | 0.29911  |
| 7273 | POC206 | Q92834 | 0.47378  |
| 7274 | POC206 | Q8IU60 | 0.91072  |
| 7275 | POC206 | Q86SQ9 | 0.18473  |
| 7276 | POC206 | Q5T655 | 0.45994  |
| 7277 | POC206 | O60806 | 0.54659  |
| 7278 | POC206 | Q6VVB1 | 0.51083  |
| 7279 | POC206 | Q96IL0 | 0.34485  |
| 7280 | POC206 | Q6EMB2 | 0.28999  |
| 7281 | POC206 | Q9H8M7 | 0.92846  |
| 7282 | POC206 | Q9NYY8 | 0.24182  |
| 7283 | POC206 | O43763 | 0.26881  |
| 7284 | POC206 | Q8N7B1 | 0.71676  |
| 7285 | POC206 | P29372 | 0.60352  |
| 7286 | POC206 | Q3MIV0 | 0.45994  |
| 7287 | POC206 | Q9BTD1 | 0.32681  |
| 7288 | POC206 | P48728 | 0.21514  |
| 7289 | POC206 | Q9Y4W2 | 0.92789  |
| 7290 | POC206 | Q7L2E3 | 0.34196  |
| 7291 | POC206 | O00233 | 0.4967   |
| 7292 | POC206 | P52292 | 1.0256   |
| 7293 | POC206 | O15442 | 0.12895  |
| 7294 | POC206 | Q86T75 | 0.90881  |
| 7295 | POC206 | A2AJT9 | 0.48288  |
| 7296 | POC206 | P38432 | 0.8231   |

|      |        |        |          |
|------|--------|--------|----------|
| 7297 | POC206 | Q7Z7F7 | 0.70285  |
| 7298 | POC206 | Q99750 | 0.52602  |
| 7299 | POC206 | O95571 | 0.66773  |
| 7300 | POC206 | P47914 | 1.1539   |
| 7301 | POC206 | Q13136 | 0.39748  |
| 7302 | POC206 | Q8N5Y2 | 0.1114   |
| 7303 | POC206 | O75150 | 0.64265  |
| 7304 | POC206 | Q86Y46 | 0.31106  |
| 7305 | POC206 | Q8IXQ9 | 0.3695   |
| 7306 | POC206 | P07476 | 0.56872  |
| 7307 | POC206 | Q5TB80 | 1.1356   |
| 7308 | POC206 | Q96CM3 | 0.61779  |
| 7309 | POC206 | Q9Y618 | 1.1671   |
| 7310 | POC206 | Q6EKJ0 | 0.23143  |
| 7311 | POC206 | P11802 | 0.80246  |
| 7312 | POC206 | O95789 | 0.78244  |
| 7313 | POC206 | Q9UIL8 | 0.60244  |
| 7314 | POC206 | P61578 | 0.62585  |
| 7315 | POC206 | O95714 | 0.31135  |
| 7316 | POC206 | Q8WY91 | 0.5773   |
| 7317 | POC206 | P37837 | 0.74472  |
| 7318 | POC206 | Q9P0R6 | 0.40115  |
| 7319 | POC206 | Q6ZRI6 | 0.53109  |
| 7320 | POC206 | Q86TA1 | 0.47492  |
| 7321 | POC206 | Q5U623 | 0.9839   |
| 7322 | POC206 | Q13472 | 0.14748  |
| 7323 | POC206 | Q6P3V2 | 0.30231  |
| 7324 | POC206 | Q86WW8 | 0.49654  |
| 7325 | POC206 | P68104 | 0.78122  |
| 7326 | POC206 | Q9BYI3 | 0.65476  |
| 7327 | POC206 | P14316 | 1.0423   |
| 7328 | POC206 | Q8WW33 | 0.70586  |
| 7329 | POC206 | Q9BYR2 | 0.72851  |
| 7330 | POC206 | O15235 | 0.78804  |
| 7331 | POC206 | O60232 | 1.2019   |
| 7332 | POC206 | Q9Y6X4 | 1.1498   |
| 7333 | POC206 | Q8WTU0 | 0.43611  |
| 7334 | POC206 | O95243 | 0.88402  |
| 7335 | POC206 | Q5T6S3 | 0.60244  |
| 7336 | POC206 | Q15528 | 1.3329   |
| 7337 | POC206 | Q5JSQ8 | 0.23043  |
| 7338 | POC206 | Q9BQC6 | 0.89389  |
| 7339 | POC206 | P48556 | 0.38485  |
| 7340 | POC206 | Q9NV39 | 0.47861  |
| 7341 | POC206 | Q01543 | 0.50578  |
| 7342 | POC206 | Q9H4E7 | 0.23604  |
| 7343 | POC206 | O75901 | 0.52857  |
| 7344 | POC206 | A8MXZ3 | 0.45994  |
| 7345 | POC206 | Q6P1J9 | 0.74607  |
| 7346 | POC206 | Q15257 | 0.51558  |
| 7347 | POC206 | Q5VZ66 | 0.48699  |
| 7348 | POC206 | Q9NYP3 | 0.60429  |
| 7349 | POC206 | Q9NUD5 | 0.3582   |
| 7350 | POC206 | P60602 | 0.50796  |
| 7351 | POC206 | A6NHQ4 | 0.58616  |
| 7352 | POC206 | Q9Y250 | 1.1175   |
| 7353 | POC206 | Q658Y4 | 0.61384  |
| 7354 | POC206 | Q9HBF4 | 0.40682  |
| 7355 | POC206 | Q49AR2 | 0.27105  |
| 7356 | POC206 | P09234 | 0.62568  |
| 7357 | POC206 | Q2M243 | 0.059371 |
| 7358 | POC206 | Q2M1V0 | 0.43565  |
| 7359 | POC206 | Q8TCF1 | 0.23888  |
| 7360 | POC206 | P10124 | 0.37373  |
| 7361 | POC206 | P15408 | 0.66561  |
| 7362 | POC206 | Q92560 | 0.2453   |
| 7363 | POC206 | Q8N398 | 0.69901  |
| 7364 | POC206 | Q12906 | 1.1401   |
| 7365 | POC206 | Q9BVC3 | 0.70103  |
| 7366 | POC206 | Q9Y6Z2 | 0.45994  |
| 7367 | POC206 | Q93052 | 0.62076  |
| 7368 | POC206 | Q9H5X1 | 0.24261  |
| 7369 | POC206 | Q8NCR3 | 0.35438  |
| 7370 | POC206 | Q99607 | 1.207    |
| 7371 | POC206 | P22674 | 0.53432  |
| 7372 | POC206 | Q8IYL3 | 0.91681  |

|      |        |        |          |
|------|--------|--------|----------|
| 7373 | POC206 | P13646 | 0.44369  |
| 7374 | POC206 | Q4W4Y0 | 0.13115  |
| 7375 | POC206 | P51116 | 0.6349   |
| 7376 | POC206 | P11473 | 0.49894  |
| 7377 | POC206 | Q9Y534 | 0.34965  |
| 7378 | POC206 | Q6P1M3 | 1.1225   |
| 7379 | POC206 | O96015 | 0.064731 |
| 7380 | POC206 | P17480 | 1.1505   |
| 7381 | POC206 | Q96DN6 | 0.70974  |
| 7382 | POC206 | Q8NAP3 | 0.56817  |
| 7383 | POC206 | Q13761 | 0.88231  |
| 7384 | POC206 | Q8IY81 | 0.82445  |
| 7385 | POC206 | Q9P1T7 | 1.3961   |
| 7386 | POC206 | Q9P255 | 0.40543  |
| 7387 | POC206 | Q8TAW3 | 0.3367   |
| 7388 | POC206 | P35658 | 1.0465   |
| 7389 | POC206 | Q9UHD9 | 0.95922  |
| 7390 | POC206 | O95868 | 0.67664  |
| 7391 | POC206 | Q9H6S1 | 0.080271 |
| 7392 | POC206 | Q9UJW9 | 1.5012   |
| 7393 | POC206 | Q5VWX1 | 0.74558  |
| 7394 | POC206 | Q7Z699 | 0.41057  |
| 7395 | POC206 | Q12772 | 0.27787  |
| 7396 | POC206 | Q5T0F9 | 0.56148  |
| 7397 | POC206 | Q9H902 | 0.24572  |
| 7398 | POC206 | Q9H2C0 | 0.7263   |
| 7399 | POC206 | Q12789 | 0.9661   |
| 7400 | POC206 | A6NJ08 | 0.17099  |
| 7401 | POC206 | P23025 | 0.34795  |
| 7402 | POC206 | Q8N960 | 0.21305  |
| 7403 | POC206 | Q8IVI9 | 0.36431  |
| 7404 | POC206 | Q5SY13 | 0.45994  |
| 7405 | POC206 | Q9H3H9 | 0.98343  |
| 7406 | POC206 | Q8IVD9 | 0.5348   |
| 7407 | POC206 | Q9BRX8 | 0.069612 |
| 7408 | POC206 | O00534 | 0.34708  |
| 7409 | POC206 | Q5VT03 | 0.75244  |
| 7410 | POC206 | Q2TAC2 | 0.022078 |
| 7411 | POC206 | O94921 | 0.27813  |
| 7412 | POC206 | Q8WYN3 | 0.67724  |
| 7413 | POC206 | Q9BTV4 | 0.57443  |
| 7414 | POC206 | Q5TAP6 | 0.53951  |
| 7415 | POC206 | P47897 | 0.44582  |
| 7416 | POC206 | Q8N6N6 | 0.077688 |
| 7417 | POC206 | Q3LHN1 | 0.45994  |
| 7418 | POC206 | P14868 | 0.69221  |
| 7419 | POC206 | Q14511 | 0.87212  |
| 7420 | POC206 | Q9UII2 | 0.66075  |
| 7421 | POC206 | P62847 | 0.65946  |
| 7422 | POC206 | Q9Y6H5 | 0.88285  |
| 7423 | POC206 | Q8IW40 | 0.18647  |
| 7424 | POC206 | Q9C073 | 0.99714  |
| 7425 | POC206 | Q8N8X9 | 0.42521  |
| 7426 | POC206 | Q6ZTU2 | 0.65823  |
| 7427 | POC206 | Q86Y13 | 0.41345  |
| 7428 | POC206 | P00480 | 0.26043  |
| 7429 | POC206 | A6NDY2 | 0.51817  |
| 7430 | POC206 | Q6L8H4 | 0.45994  |
| 7431 | POC206 | Q9UIF7 | 0.53677  |
| 7432 | POC206 | Q9NS73 | 0.87657  |
| 7433 | POC206 | P47974 | 0.39938  |
| 7434 | POC206 | Q8TC56 | 1.2191   |
| 7435 | POC206 | Q9NZB2 | 0.72508  |
| 7436 | POC206 | Q96RJ6 | 0.50307  |
| 7437 | POC206 | Q96FQ6 | 0.41303  |
| 7438 | POC206 | O95166 | 0.35824  |
| 7439 | POC206 | Q9Y2A4 | 0.53032  |
| 7440 | POC206 | P52630 | 0.76461  |
| 7441 | POC206 | Q9H267 | 0.38606  |
| 7442 | POC206 | Q9Y2G5 | 0.31847  |
| 7443 | POC206 | Q5T200 | 0.82629  |
| 7444 | POC206 | A8MU10 | 0.45994  |
| 7445 | POC206 | P78371 | 0.65283  |
| 7446 | POC206 | Q9Y262 | 0.90247  |
| 7447 | POC206 | O14978 | 0.61557  |
| 7448 | POC206 | Q9H8G1 | 0.5656   |

|      |        |        |          |
|------|--------|--------|----------|
| 7449 | POC206 | P13667 | 0.32609  |
| 7450 | POC206 | Q66K41 | 0.82861  |
| 7451 | POC206 | Q9HBL8 | 0.059505 |
| 7452 | POC206 | Q14159 | 1.423    |
| 7453 | POC206 | Q6TAR4 | 0.28101  |
| 7454 | POC206 | Q9NQP4 | 0.98427  |
| 7455 | POC206 | A8MWA4 | 0.57688  |
| 7456 | POC206 | Q7Z5L9 | 1.0357   |
| 7457 | POC206 | Q9C0I3 | 0.99028  |
| 7458 | POC206 | Q16401 | 0.76743  |
| 7459 | POC206 | Q9H7Y2 | 0.2572   |
| 7460 | POC206 | Q9BRX5 | 0.069799 |
| 7461 | POC206 | P30740 | 0.35971  |
| 7462 | POC206 | Q9NNX9 | 0.97625  |
| 7463 | POC206 | Q86WC4 | 0.99821  |
| 7464 | POC206 | Q9NP50 | 0.61271  |
| 7465 | POC206 | Q9H0A0 | 0.44277  |
| 7466 | POC206 | P35900 | 0.91573  |
| 7467 | POC206 | Q86X02 | 0.36531  |
| 7468 | POC206 | O14990 | 0.47346  |
| 7469 | POC206 | Q8TCZ7 | 0.5171   |
| 7470 | POC206 | Q6ZN08 | 0.52324  |
| 7471 | POC206 | Q8IW50 | 0.68336  |
| 7472 | POC206 | O00471 | 0.38442  |
| 7473 | POC206 | P0CG42 | 0.45994  |
| 7474 | POC206 | Q9BZD3 | 0.33259  |
| 7475 | POC206 | P31943 | 0.31368  |
| 7476 | POC206 | Q12800 | 0.4373   |
| 7477 | POC206 | Q9Y3C5 | 0.66822  |
| 7478 | POC206 | Q12834 | 0.89264  |
| 7479 | POC206 | Q8IWJ2 | 0.81715  |
| 7480 | POC206 | Q9BV97 | 0.34344  |
| 7481 | POC206 | Q5HYK3 | 0.40033  |
| 7482 | POC206 | Q7Z6I8 | 0.062544 |
| 7483 | POC206 | Q9BX63 | 0.34776  |
| 7484 | POC206 | P61254 | 0.96471  |
| 7485 | POC206 | Q8WVK7 | 0.80425  |
| 7486 | POC206 | Q6Q0C0 | 0.38855  |
| 7487 | POC206 | P0CJ70 | 0.67101  |
| 7488 | POC206 | Q8IVP9 | 0.31636  |
| 7489 | POC206 | Q13367 | 0.65647  |
| 7490 | POC206 | P08235 | 0.51164  |
| 7491 | POC206 | Q69YI7 | 1.2573   |
| 7492 | POC206 | P13985 | 0.45994  |
| 7493 | POC206 | Q9H0E9 | 0.37849  |
| 7494 | POC206 | Q9P2W9 | 0.37298  |
| 7495 | POC206 | P0CJ78 | 0.23862  |
| 7496 | POC206 | Q5TAG4 | 0.034477 |
| 7497 | POC206 | Q9H7J1 | 0.59416  |
| 7498 | POC206 | Q8NDH2 | 0.063596 |
| 7499 | POC206 | Q9H3L0 | 0.74782  |
| 7500 | POC206 | Q43316 | 0.30202  |
| 7501 | POC206 | Q5VTL8 | 0.79556  |
| 7502 | POC206 | Q8NG50 | 0.15857  |
| 7503 | POC206 | Q6ZU35 | 0.68336  |
| 7504 | POC206 | P56556 | 0.37777  |
| 7505 | POC206 | A6NHP3 | 0.51209  |
| 7506 | POC206 | Q6NUN7 | 0.45994  |
| 7507 | POC206 | Q96LZ2 | 0.025788 |
| 7508 | POC206 | Q9NTK1 | 0.79765  |
| 7509 | POC206 | P31689 | 0.57168  |
| 7510 | POC206 | Q4W5G0 | 0.59254  |
| 7511 | POC206 | Q9BZL4 | 0.66879  |
| 7512 | POC206 | Q969T7 | 0.08705  |
| 7513 | POC206 | Q6I9Y2 | 0.78098  |
| 7514 | POC206 | O95171 | 0.36572  |
| 7515 | POC206 | Q05084 | 0.47159  |
| 7516 | POC206 | Q9Y6E7 | 0.53604  |
| 7517 | POC206 | A8MUV8 | 0.52256  |
| 7518 | POC206 | Q8IWT0 | 0.083489 |
| 7519 | POC206 | Q02221 | 0.20811  |
| 7520 | POC206 | Q6ZS92 | 0.19782  |
| 7521 | POC206 | Q9BYT5 | 0.17342  |
| 7522 | POC206 | Q5MJ70 | 0.51209  |
| 7523 | POC206 | Q8IXM7 | 0.25551  |
| 7524 | POC206 | Q99456 | 0.48752  |



|      |        |        |          |
|------|--------|--------|----------|
| 7525 | POC206 | Q96S06 | 0.7423   |
| 7526 | POC206 | Q96C03 | 0.47435  |
| 7527 | POC206 | O95677 | 0.27849  |
| 7528 | POC206 | Q8WWM9 | 0.24398  |
| 7529 | POC206 | Q5VT52 | 0.30778  |
| 7530 | POC206 | Q9H467 | 1.188    |
| 7531 | POC206 | P51504 | 0.35271  |
| 7532 | POC206 | Q99856 | 0.7858   |
| 7533 | POC206 | Q96DV4 | 0.36958  |
| 7534 | POC206 | Q9Y2J2 | 0.52127  |
| 7535 | POC206 | A8MU76 | 0.92281  |
| 7536 | POC206 | Q9UI95 | 1.4135   |
| 7537 | POC206 | Q9BYG4 | 0.8455   |
| 7538 | POC206 | Q6P5X5 | 0.88253  |
| 7539 | POC206 | Q9BQJ4 | 0.7933   |
| 7540 | POC206 | Q9BSH3 | 0.2779   |
| 7541 | POC206 | A6NF83 | 0.78844  |
| 7542 | POC206 | Q9UI25 | 0.45994  |
| 7543 | POC206 | Q8NHY5 | 1.0382   |
| 7544 | POC206 | Q969U6 | 0.25122  |
| 7545 | POC206 | P52434 | 0.45663  |
| 7546 | POC206 | P58304 | 0.36091  |
| 7547 | POC206 | Q9BQ70 | 1.5118   |
| 7548 | POC206 | P35638 | 0.81954  |
| 7549 | POC206 | Q6IPR3 | 0.26169  |
| 7550 | POC206 | Q9H0B3 | 0.26921  |
| 7551 | POC206 | Q08AE8 | 0.16393  |
| 7552 | POC206 | Q9NP62 | 0.2104   |
| 7553 | POC206 | P50570 | 0.35824  |
| 7554 | POC206 | Q99496 | 0.61277  |
| 7555 | POC206 | P82912 | 0.57307  |
| 7556 | POC206 | O94805 | 0.78976  |
| 7557 | POC206 | Q5MJ08 | 0.061293 |
| 7558 | POC206 | Q3B7T1 | 0.66571  |
| 7559 | POC206 | Q8N6U2 | 0.43651  |
| 7560 | POC206 | Q96RL7 | 0.92397  |
| 7561 | POC206 | Q6NZ67 | 0.91007  |
| 7562 | POC206 | P17706 | 0.26003  |
| 7563 | POC206 | Q96C34 | 0.9469   |
| 7564 | POC206 | Q86XD5 | 0.25204  |
| 7565 | POC206 | Q15276 | 0.26935  |
| 7566 | POC206 | Q8IWF7 | 0.30996  |
| 7567 | POC206 | O76042 | 0.66938  |
| 7568 | POC206 | Q9NXX6 | 0.57448  |
| 7569 | POC206 | Q8N108 | 1.3095   |
| 7570 | POC206 | Q9UKY7 | 0.92901  |
| 7571 | POC206 | Q3KP31 | 0.50104  |
| 7572 | POC206 | Q8WWR9 | 0.35176  |
| 7573 | POC206 | O15116 | 0.74536  |
| 7574 | POC206 | Q8NBV4 | 0.55902  |
| 7575 | POC206 | P18887 | 0.79679  |
| 7576 | POC206 | Q8TAG9 | 0.1418   |
| 7577 | POC206 | P21399 | 0.3935   |
| 7578 | POC206 | P60369 | 0.72851  |
| 7579 | POC206 | O60224 | 0.26627  |
| 7580 | POC206 | Q5VTQ0 | 0.29677  |
| 7581 | POC206 | P29966 | 1.208    |
| 7582 | POC206 | Q6ZMS7 | 0.38136  |
| 7583 | POC206 | Q8IV32 | 0.57656  |
| 7584 | POC206 | Q99640 | 0.2503   |
| 7585 | POC206 | Q86WX3 | 1.2765   |
| 7586 | POC206 | Q6ZVC0 | 0.84349  |
| 7587 | POC206 | Q0P670 | 1.1394   |
| 7588 | POC206 | Q96EG3 | 0.25958  |
| 7589 | POC206 | Q9BTA0 | 0.68336  |
| 7590 | POC206 | Q5T0Z8 | 0.68336  |
| 7591 | POC206 | Q8N0W5 | 0.29506  |
| 7592 | POC206 | P0CW00 | 0.32628  |
| 7593 | POC206 | Q15561 | 0.94707  |
| 7594 | POC206 | Q8IUG1 | 0.50253  |
| 7595 | POC206 | Q5SVQ8 | 0.38197  |
| 7596 | POC206 | Q9ULH7 | 0.99853  |
| 7597 | POC206 | P17098 | 0.51603  |
| 7598 | POC206 | Q9BVC4 | 0.49528  |
| 7599 | POC206 | P82094 | 1.5566   |
| 7600 | POC206 | Q6ZRV3 | 0.45994  |

|      |        |        |          |
|------|--------|--------|----------|
| 7601 | POC206 | O15372 | 0.7122   |
| 7602 | POC206 | Q9BW27 | 0.86754  |
| 7603 | POC206 | O15160 | 0.20779  |
| 7604 | POC206 | Q14207 | 0.99891  |
| 7605 | POC206 | Q2KJ03 | 0.26385  |
| 7606 | POC206 | Q9BRT3 | 0.24806  |
| 7607 | POC206 | Q96PU4 | 0.50382  |
| 7608 | POC206 | Q7L592 | 0.4683   |
| 7609 | POC206 | Q9BW30 | 0.33786  |
| 7610 | POC206 | Q8N3C0 | 0.48318  |
| 7611 | POC206 | Q92698 | 0.43634  |
| 7612 | POC206 | Q8NHZ8 | 1.3037   |
| 7613 | POC206 | Q9H7U1 | 1.1003   |
| 7614 | POC206 | Q9GZU3 | 1.2197   |
| 7615 | POC206 | Q69383 | 0.80216  |
| 7616 | POC206 | Q6ZN01 | 0.67833  |
| 7617 | POC206 | Q8IX03 | 1.2133   |
| 7618 | POC206 | Q8TAX7 | 0.45994  |
| 7619 | POC206 | Q9BSD3 | 0.37515  |
| 7620 | POC206 | Q969L2 | 0.31372  |
| 7621 | POC206 | P18669 | 0.80366  |
| 7622 | POC206 | A8MT69 | 0.6828   |
| 7623 | POC206 | Q75323 | 0.63277  |
| 7624 | POC206 | Q9NWW4 | 0.66994  |
| 7625 | POC206 | Q96EY5 | 0.61417  |
| 7626 | POC206 | O75182 | 1.2483   |
| 7627 | POC206 | P59052 | 0.41658  |
| 7628 | POC206 | P33992 | 0.34217  |
| 7629 | POC206 | Q9UJW7 | 0.29385  |
| 7630 | POC206 | Q8NCU4 | 0.43511  |
| 7631 | POC206 | Q96GW9 | 0.4341   |
| 7632 | POC206 | A6NJ78 | 0.77807  |
| 7633 | POC206 | Q5VWP3 | 0.9287   |
| 7634 | POC206 | O00522 | 0.29423  |
| 7635 | POC206 | P31260 | 0.37103  |
| 7636 | POC206 | Q9P1A6 | 0.26639  |
| 7637 | POC206 | Q8N402 | 0.12863  |
| 7638 | POC206 | Q5T5A4 | 0.39017  |
| 7639 | POC206 | Q03188 | 0.59556  |
| 7640 | POC206 | Q9UJC5 | 0.53308  |
| 7641 | POC206 | Q9BWX1 | 0.59369  |
| 7642 | POC206 | P0CI00 | 0.67195  |
| 7643 | POC206 | P55957 | 0.49642  |
| 7644 | POC206 | Q5T0B9 | 0.20949  |
| 7645 | POC206 | O60688 | 0.22952  |
| 7646 | POC206 | Q9H1A7 | 0.15285  |
| 7647 | POC206 | Q9UKS6 | 0.3345   |
| 7648 | POC206 | Q5BKY9 | 0.68336  |
| 7649 | POC206 | Q16600 | 0.32332  |
| 7650 | POC206 | O95396 | 0.08442  |
| 7651 | POC206 | P17041 | 0.27985  |
| 7652 | POC206 | Q12904 | 0.1442   |
| 7653 | POC206 | P14618 | 0.2093   |
| 7654 | POC206 | P0C7V0 | 0.45994  |
| 7655 | POC206 | P62136 | 0.72208  |
| 7656 | POC206 | Q2NL98 | 0.89064  |
| 7657 | POC206 | Q9H2J4 | 0.74719  |
| 7658 | POC206 | Q9HCK0 | 0.23725  |
| 7659 | POC206 | Q969G9 | 0.22043  |
| 7660 | POC206 | Q5T6M2 | 0.8434   |
| 7661 | POC206 | Q8WW24 | 0.39786  |
| 7662 | POC206 | Q9H095 | 0.35529  |
| 7663 | POC206 | Q5JWR5 | 0.3562   |
| 7664 | POC206 | Q8N201 | 0.4179   |
| 7665 | POC206 | P0CG20 | 0.23867  |
| 7666 | POC206 | Q9UJW3 | 0.74836  |
| 7667 | POC206 | Q96NG5 | 0.51573  |
| 7668 | POC206 | Q9UNL4 | 0.57235  |
| 7669 | POC206 | Q92585 | 1.0677   |
| 7670 | POC206 | Q9UKA4 | 0.14678  |
| 7671 | POC206 | Q495Y7 | 0.073896 |
| 7672 | POC206 | Q9UGY1 | 0.34343  |
| 7673 | POC206 | Q8N8G2 | 1.0443   |
| 7674 | POC206 | O94763 | 0.84483  |
| 7675 | POC206 | Q9BVL2 | 0.7726   |
| 7676 | POC206 | Q96CW6 | 0.84275  |

|      |        |        |         |
|------|--------|--------|---------|
| 7677 | POC206 | Q10571 | 0.26385 |
| 7678 | POC206 | Q9P2G4 | 0.68336 |
| 7679 | POC206 | Q9NVV9 | 1.3175  |
| 7680 | POC206 | P56377 | 0.48133 |
| 7681 | POC206 | O75822 | 0.74204 |
| 7682 | POC206 | O75425 | 0.75722 |
| 7683 | POC206 | P35908 | 0.4069  |
| 7684 | POC206 | Q9Y2S7 | 0.83144 |
| 7685 | POC206 | Q96JM2 | 0.42182 |
| 7686 | POC206 | Q6H8Q1 | 0.55944 |
| 7687 | POC206 | Q3ZLR7 | 0.7778  |
| 7688 | POC206 | Q92748 | 1.207   |
| 7689 | POC206 | O15014 | 1.0886  |
| 7690 | POC206 | Q15428 | 0.43152 |
| 7691 | POC206 | Q5TBE3 | 0.37602 |
| 7692 | POC206 | Q93050 | 0.26309 |
| 7693 | POC206 | Q8IZD2 | 0.44689 |
| 7694 | POC206 | Q05DH4 | 1.0937  |
| 7695 | POC206 | Q9Y5S9 | 0.60335 |
| 7696 | POC206 | Q9NZQ3 | 0.80319 |
| 7697 | POC206 | Q86V81 | 0.63704 |
| 7698 | POC206 | P0CJ77 | 0.67101 |
| 7699 | POC206 | Q9NW38 | 0.51629 |
| 7700 | POC206 | Q14671 | 0.18798 |
| 7701 | POC206 | P11171 | 0.64506 |
| 7702 | POC206 | Q12873 | 0.87824 |
| 7703 | POC206 | Q99986 | 0.25538 |
| 7704 | POC206 | O60290 | 0.56193 |
| 7705 | POC206 | Q9NSK7 | 0.97842 |
| 7706 | POC206 | Q9UKV3 | 0.64597 |
| 7707 | POC206 | P10827 | 0.34346 |
| 7708 | POC206 | Q6GMV2 | 0.3918  |
| 7709 | POC206 | Q86X76 | 0.17173 |
| 7710 | POC206 | P61604 | 0.84296 |
| 7711 | POC206 | O00566 | 0.6578  |
| 7712 | POC206 | Q14695 | 0.51287 |
| 7713 | POC206 | Q2TAP0 | 0.29426 |
| 7714 | POC206 | Q9UI26 | 0.56175 |
| 7715 | POC206 | Q9HBZ2 | 0.40155 |
| 7716 | POC206 | Q7Z7A3 | 0.63681 |
| 7717 | POC206 | Q9P2W6 | 0.45994 |
| 7718 | POC206 | Q8IXY8 | 0.24731 |
| 7719 | POC206 | Q96T21 | 0.5514  |
| 7720 | POC206 | B3EWG4 | 0.68336 |
| 7721 | POC206 | Q53FD0 | 0.87774 |
| 7722 | POC206 | Q902F8 | 0.8421  |
| 7723 | POC206 | Q8N2N9 | 0.55812 |
| 7724 | POC206 | Q9NTM9 | 0.4297  |
| 7725 | POC206 | Q96GY3 | 0.61356 |
| 7726 | POC206 | Q5JS54 | 0.61395 |
| 7727 | POC206 | O14746 | 0.66943 |
| 7728 | POC206 | Q5JSZ5 | 0.84433 |
| 7729 | POC206 | P0CV99 | 0.32628 |
| 7730 | POC206 | P36871 | 0.25165 |
| 7731 | POC206 | Q96NG8 | 0.35005 |
| 7732 | POC206 | Q6PRD7 | 0.45994 |
| 7733 | POC206 | Q14684 | 0.46932 |
| 7734 | POC206 | Q3BBV1 | 1.4923  |
| 7735 | POC206 | Q96LM1 | 0.81214 |
| 7736 | POC206 | Q9H7Z6 | 0.27502 |
| 7737 | POC206 | Q9UIG0 | 0.26285 |
| 7738 | POC206 | Q9HB09 | 1.2521  |
| 7739 | POC206 | Q9NWZ8 | 0.88007 |
| 7740 | POC206 | Q9Y238 | 0.12607 |
| 7741 | POC206 | P21675 | 0.46893 |
| 7742 | POC206 | Q53TQ3 | 0.79253 |
| 7743 | POC206 | O76095 | 0.43598 |
| 7744 | POC206 | Q96BD5 | 0.76061 |
| 7745 | POC206 | P14859 | 1.2679  |
| 7746 | POC206 | O43505 | 0.6143  |
| 7747 | POC206 | A6NDK9 | 0.1912  |
| 7748 | POC206 | Q9UNS2 | 0.79038 |
| 7749 | POC206 | P56177 | 0.24586 |
| 7750 | POC206 | A6NGS2 | 0.457   |
| 7751 | POC206 | Q4LE28 | 0.96648 |
| 7752 | POC206 | O00231 | 0.35283 |

|      |        |        |          |
|------|--------|--------|----------|
| 7753 | POC206 | Q07866 | 0.78869  |
| 7754 | POC206 | P47944 | 0.41429  |
| 7755 | POC206 | P51946 | 0.66998  |
| 7756 | POC206 | Q8IUE1 | 0.43565  |
| 7757 | POC206 | Q86UB9 | 0.87834  |
| 7758 | POC206 | P15259 | 0.75109  |
| 7759 | POC206 | P35813 | 0.34172  |
| 7760 | POC206 | Q9H079 | 0.49239  |
| 7761 | POC206 | Q9BYQ8 | 0.72851  |
| 7762 | POC206 | Q9GZP8 | 0.45994  |
| 7763 | POC206 | Q6ZQY7 | 0.50777  |
| 7764 | POC206 | Q96AH0 | 0.46009  |
| 7765 | POC206 | Q6P3S1 | 0.10641  |
| 7766 | POC206 | Q8WVP5 | 1.0327   |
| 7767 | POC206 | Q14764 | 1.1836   |
| 7768 | POC206 | Q10586 | 0.48038  |
| 7769 | POC206 | P80297 | 0.47297  |
| 7770 | POC206 | Q5VUE5 | 0.50608  |
| 7771 | POC206 | Q7RTT4 | 0.26627  |
| 7772 | POC206 | P0DI81 | 1.2158   |
| 7773 | POC206 | Q0VF49 | 0.45994  |
| 7774 | POC206 | O75190 | 0.78545  |
| 7775 | POC206 | O60264 | 0.30944  |
| 7776 | POC206 | Q9ULX9 | 0.52864  |
| 7777 | POC206 | Q9NRT5 | 0.22803  |
| 7778 | POC206 | O00186 | 0.82949  |
| 7779 | POC206 | P61923 | 0.5279   |
| 7780 | POC206 | P63272 | 1.129    |
| 7781 | POC206 | Q68CJ9 | 0.86862  |
| 7782 | POC206 | Q04695 | 0.47527  |
| 7783 | POC206 | Q5T749 | 0.81382  |
| 7784 | POC206 | O43790 | 0.45381  |
| 7785 | POC206 | P42677 | 0.93671  |
| 7786 | POC206 | Q9NXR7 | 0.54862  |
| 7787 | POC206 | A1L3X0 | 0.65817  |
| 7788 | POC206 | Q5JTC6 | 1.0895   |
| 7789 | POC206 | Q70IA6 | 0.59819  |
| 7790 | POC206 | O15488 | 0.13013  |
| 7791 | POC206 | Q14978 | 0.7238   |
| 7792 | POC206 | Q9Y312 | 0.35423  |
| 7793 | POC206 | P62829 | 1.1285   |
| 7794 | POC206 | P55822 | 0.58892  |
| 7795 | POC206 | O15037 | 0.61118  |
| 7796 | POC206 | A8MSY0 | 0.34893  |
| 7797 | POC206 | P40337 | 0.91049  |
| 7798 | POC206 | Q13794 | 0.50698  |
| 7799 | POC206 | Q96LZ7 | 0.1497   |
| 7800 | POC206 | Q96CD0 | 0.60244  |
| 7801 | POC206 | Q8NAP1 | 0.68336  |
| 7802 | POC206 | P60370 | 0.72851  |
| 7803 | POC206 | Q5M9Q1 | 0.93939  |
| 7804 | POC206 | Q96I59 | 0.55501  |
| 7805 | POC206 | Q15583 | 0.35857  |
| 7806 | POC206 | Q9Y284 | 0.81956  |
| 7807 | POC206 | Q9H4H8 | 0.63847  |
| 7808 | POC206 | P31350 | 0.37143  |
| 7809 | POC206 | Q9NP77 | 0.34893  |
| 7810 | POC206 | Q9BUE6 | 0.037409 |
| 7811 | POC206 | Q92764 | 0.34578  |
| 7812 | POC206 | Q9UKY1 | 0.55035  |
| 7813 | POC206 | P12270 | 0.75114  |
| 7814 | POC206 | Q9UL18 | 0.97721  |
| 7815 | POC206 | P08697 | 0.37832  |
| 7816 | POC206 | P17036 | 0.50233  |
| 7817 | POC206 | Q9NRA8 | 1.2317   |
| 7818 | POC206 | Q9NRN7 | 0.55779  |
| 7819 | POC206 | Q5VT40 | 0.3416   |
| 7820 | POC206 | Q96GE4 | 0.33507  |
| 7821 | POC206 | Q96NU7 | 0.25655  |
| 7822 | POC206 | Q68CP9 | 0.76285  |
| 7823 | POC206 | Q9UBY9 | 1.0946   |
| 7824 | POC206 | Q9BTC8 | 0.92295  |
| 7825 | POC206 | Q969L4 | 0.6061   |
| 7826 | POC206 | O95503 | 1.082    |
| 7827 | POC206 | Q5JSS6 | 0.23298  |
| 7828 | POC206 | P51948 | 0.57323  |

|      |        |        |          |
|------|--------|--------|----------|
| 7829 | POC206 | Q6P2I7 | 0.060383 |
| 7830 | POC206 | Q86V97 | 0.50382  |
| 7831 | POC206 | Q9BRP8 | 0.92348  |
| 7832 | POC206 | Q9NUS5 | 0.70921  |
| 7833 | POC206 | P23508 | 0.52186  |
| 7834 | POC206 | P61236 | 0.3795   |
| 7835 | POC206 | Q8TBZ5 | 0.34774  |
| 7836 | POC206 | P48443 | 0.29027  |
| 7837 | POC206 | B7ZAQ6 | 0.61911  |
| 7838 | POC206 | Q8N1W2 | 0.22413  |
| 7839 | POC206 | Q01954 | 0.34359  |
| 7840 | POC206 | Q13506 | 0.55295  |
| 7841 | POC206 | Q9Y2H8 | 0.33886  |
| 7842 | POC206 | Q6IPR1 | 0.48502  |
| 7843 | POC206 | Q9Y2I6 | 0.32768  |
| 7844 | POC206 | Q05932 | 0.26108  |
| 7845 | POC206 | Q9H063 | 0.43492  |
| 7846 | POC206 | Q8N3J3 | 0.32175  |
| 7847 | POC206 | P31276 | 0.6341   |
| 7848 | POC206 | Q1W6H9 | 1.3813   |
| 7849 | POC206 | P14625 | 0.30573  |
| 7850 | POC206 | P63146 | 0.81893  |
| 7851 | POC206 | Q9Y2K1 | 0.20949  |
| 7852 | POC206 | P78543 | 0.76838  |
| 7853 | POC206 | P52815 | 0.56666  |
| 7854 | POC206 | Q6ZTC4 | 0.45994  |
| 7855 | POC206 | A6NCS6 | 0.55499  |
| 7856 | POC206 | P24385 | 0.64753  |
| 7857 | POC206 | Q96G01 | 0.23953  |
| 7858 | POC206 | Q8WTW4 | 0.47303  |
| 7859 | POC206 | Q8IWT3 | 0.29825  |
| 7860 | POC206 | Q76KD6 | 0.55246  |
| 7861 | POC206 | Q08AM6 | 0.26509  |
| 7862 | POC206 | Q13360 | 0.33149  |
| 7863 | POC206 | Q00425 | 0.40557  |
| 7864 | POC206 | O95229 | 0.94428  |
| 7865 | POC206 | Q9BSF0 | 0.46311  |
| 7866 | POC206 | P54253 | 1.0008   |
| 7867 | POC206 | P19474 | 0.47762  |
| 7868 | POC206 | Q6ZP98 | 0.39347  |
| 7869 | POC206 | Q9BYD3 | 0.82048  |
| 7870 | POC206 | Q08E93 | 0.45994  |
| 7871 | POC206 | B1AH88 | 0.45994  |
| 7872 | POC206 | Q9NYK6 | 0.45025  |
| 7873 | POC206 | Q12894 | 0.5051   |
| 7874 | POC206 | Q86UY5 | 0.22114  |
| 7875 | POC206 | Q6ZVN6 | 0.051699 |
| 7876 | POC206 | Q8NDT2 | 0.73828  |
| 7877 | POC206 | Q8NFU3 | 0.23177  |
| 7878 | POC206 | A2RUB1 | 0.68336  |
| 7879 | POC206 | Q9NWD9 | 0.4639   |
| 7880 | POC206 | P29401 | 0.068023 |
| 7881 | POC206 | Q9BY60 | 0.13637  |
| 7882 | POC206 | Q15046 | 0.75705  |
| 7883 | POC206 | Q8WXC3 | 0.74589  |
| 7884 | POC206 | Q8WW18 | 0.68336  |
| 7885 | POC206 | Q9BU70 | 0.11493  |
| 7886 | POC206 | Q8IUC2 | 0.90014  |
| 7887 | POC206 | Q96BW9 | 0.55759  |
| 7888 | POC206 | Q9H8X3 | 0.049727 |
| 7889 | POC206 | O15060 | 0.20949  |
| 7890 | POC206 | Q9H3K6 | 0.47487  |
| 7891 | POC206 | P35227 | 0.85901  |
| 7892 | POC206 | Q5H9M0 | 1.0384   |
| 7893 | POC206 | O00411 | 0.61685  |
| 7894 | POC206 | Q10570 | 0.72808  |
| 7895 | POC206 | Q9Y2S6 | 0.45994  |
| 7896 | POC206 | Q5T7V8 | 1.701    |
| 7897 | POC206 | Q75363 | 0.2364   |
| 7898 | POC206 | Q6PIF2 | 0.42768  |
| 7899 | POC206 | Q5T7P2 | 0.45994  |
| 7900 | POC206 | Q9BTM9 | 0.93139  |
| 7901 | POC206 | Q8WTZ4 | 0.021903 |
| 7902 | POC206 | Q9Y281 | 0.62051  |
| 7903 | POC206 | Q00534 | 0.63317  |
| 7904 | POC206 | Q16594 | 0.67631  |

|      |        |        |          |
|------|--------|--------|----------|
| 7905 | POC206 | Q8WV24 | 0.80638  |
| 7906 | POC206 | P62249 | 0.83277  |
| 7907 | POC206 | Q14653 | 0.65527  |
| 7908 | POC206 | Q9BRL7 | 0.67751  |
| 7909 | POC206 | Q2M3W8 | 0.5435   |
| 7910 | POC206 | Q8WVY7 | 0.38205  |
| 7911 | POC206 | Q15527 | 0.17244  |
| 7912 | POC206 | Q86YE8 | 0.40539  |
| 7913 | POC206 | A2RU30 | 0.65291  |
| 7914 | POC206 | Q70EK8 | 0.64437  |
| 7915 | POC206 | P62424 | 0.99094  |
| 7916 | POC206 | Q9BW60 | 0.65817  |
| 7917 | POC206 | P07197 | 0.85912  |
| 7918 | POC206 | P22528 | 0.37258  |
| 7919 | POC206 | Q8NEL9 | 0.06738  |
| 7920 | POC206 | P82921 | 0.74736  |
| 7921 | POC206 | Q6ZQN3 | 0.80621  |
| 7922 | POC206 | Q96PT3 | 0.27096  |
| 7923 | POC206 | Q96GU1 | 0.37431  |
| 7924 | POC206 | Q8WTQ4 | 0.061851 |
| 7925 | POC206 | P09914 | 0.37344  |
| 7926 | POC206 | Q9BVN2 | 0.74957  |
| 7927 | POC206 | Q3L8U1 | 1.0631   |
| 7928 | POC206 | Q9H1J1 | 0.84165  |
| 7929 | POC206 | Q59GN2 | 0.32831  |
| 7930 | POC206 | Q8TDR0 | 0.97778  |
| 7931 | POC206 | P0CG43 | 0.45994  |
| 7932 | POC206 | P16083 | 0.13671  |
| 7933 | POC206 | Q9Y2Y4 | 0.50756  |
| 7934 | POC206 | Q9H7R5 | 0.41874  |
| 7935 | POC206 | Q9BPW8 | 0.64303  |
| 7936 | POC206 | P12004 | 0.28779  |
| 7937 | POC206 | Q92905 | 0.79732  |
| 7938 | POC206 | Q8TDB4 | 0.35332  |
| 7939 | POC206 | P30281 | 0.92974  |
| 7940 | POC206 | P06400 | 0.70731  |
| 7941 | POC206 | Q9H9D4 | 0.79316  |
| 7942 | POC206 | Q9BVJ6 | 0.89511  |
| 7943 | POC206 | Q9H9H5 | 0.72048  |
| 7944 | POC206 | O43303 | 0.99069  |
| 7945 | POC206 | Q8IXF0 | 0.45145  |
| 7946 | POC206 | Q7L590 | 1.2039   |
| 7947 | POC206 | Q9NX08 | 0.44439  |
| 7948 | POC206 | Q6ZN19 | 0.27283  |
| 7949 | POC206 | Q13490 | 0.50533  |
| 7950 | POC206 | Q8NDY6 | 0.62032  |
| 7951 | POC206 | Q00587 | 0.36944  |
| 7952 | POC206 | Q00577 | 0.57911  |
| 7953 | POC206 | Q15029 | 0.28415  |
| 7954 | POC206 | C9J3I9 | 0.51775  |
| 7955 | POC206 | Q6DKI1 | 0.058094 |
| 7956 | POC206 | Q5T6C5 | 0.82891  |
| 7957 | POC206 | Q03938 | 0.53826  |
| 7958 | POC206 | Q96EL1 | 0.64868  |
| 7959 | POC206 | Q96BR5 | 0.078182 |
| 7960 | POC206 | Q02410 | 0.61747  |
| 7961 | POC206 | Q8TAZ6 | 0.5689   |
| 7962 | POC206 | P55347 | 0.51178  |
| 7963 | POC206 | Q9H8W3 | 0.5232   |
| 7964 | POC206 | Q9H2A3 | 0.25121  |
| 7965 | POC206 | Q96LY2 | 0.84842  |
| 7966 | POC206 | P61573 | 0.80216  |
| 7967 | POC206 | Q15181 | 0.38757  |
| 7968 | POC206 | Q14715 | 0.045857 |
| 7969 | POC206 | Q9Y314 | 1.0711   |
| 7970 | POC206 | Q7L8L6 | 0.27276  |
| 7971 | POC206 | Q9Y3U8 | 0.87663  |
| 7972 | POC206 | Q8N8C0 | 0.36333  |
| 7973 | POC206 | P35573 | 0.53448  |
| 7974 | POC206 | O43830 | 0.27592  |
| 7975 | POC206 | Q9UQL6 | 0.57594  |
| 7976 | POC206 | Q96LX7 | 0.094487 |
| 7977 | POC206 | A8MZA4 | 0.53933  |
| 7978 | POC206 | Q96DY7 | 0.41724  |
| 7979 | POC206 | P49918 | 0.77138  |
| 7980 | POC206 | Q9NWS1 | 1.1834   |

|      |        |        |          |
|------|--------|--------|----------|
| 7981 | POC206 | Q7Z7L8 | 1.2381   |
| 7982 | POC206 | Q9Y5U2 | 0.65534  |
| 7983 | POC206 | P50479 | 0.49231  |
| 7984 | POC206 | Q8WYR1 | 0.2995   |
| 7985 | POC206 | Q8N9A8 | 0.72891  |
| 7986 | POC206 | Q5TC04 | 0.082546 |
| 7987 | POC206 | Q9H606 | 0.34636  |
| 7988 | POC206 | P30876 | 0.73679  |
| 7989 | POC206 | Q8NDM7 | 0.6302   |
| 7990 | POC206 | Q8TE69 | 0.44439  |
| 7991 | POC206 | P78549 | 0.42306  |
| 7992 | POC206 | O75132 | 0.42104  |
| 7993 | POC206 | A8MTY7 | 0.72851  |
| 7994 | POC206 | Q9HAH1 | 0.47044  |
| 7995 | POC206 | Q96S95 | 0.61463  |
| 7996 | POC206 | Q8TES7 | 0.76608  |
| 7997 | POC206 | Q8IVV7 | 0.41679  |
| 7998 | POC206 | Q9UBQ5 | 1.0735   |
| 7999 | POC206 | Q6ZV50 | 0.49155  |
| 8000 | POC206 | P62917 | 0.99235  |
| 8001 | POC206 | Q9Y651 | 0.37484  |
| 8002 | POC206 | Q8NDY4 | 0.45994  |
| 8003 | POC206 | Q15436 | 0.78797  |
| 8004 | POC206 | O75155 | 0.8629   |
| 8005 | POC206 | Q9UMX2 | 0.26279  |
| 8006 | POC206 | Q6PEX3 | 0.51229  |
| 8007 | POC206 | Q9H0C8 | 0.57354  |
| 8008 | POC206 | O95948 | 0.44228  |
| 8009 | POC206 | Q01804 | 0.13613  |
| 8010 | POC206 | A6NCN2 | 0.43165  |
| 8011 | POC206 | Q6UX04 | 0.24926  |
| 8012 | POC206 | P50222 | 0.67048  |
| 8013 | POC206 | P56270 | 0.69951  |
| 8014 | POC206 | P57678 | 0.94104  |
| 8015 | P03363 | Q8TDR0 | 0.77173  |
| 8016 | P03363 | Q8N6F7 | 0.39965  |
| 8017 | P03363 | Q1KMD3 | 0.34716  |
| 8018 | P03363 | A2RRD8 | 0.22259  |
| 8019 | P03363 | O60763 | 0.36379  |
| 8020 | P03363 | Q9NWX4 | 0.22504  |
| 8021 | P03363 | Q53FT3 | 0.36587  |
| 8022 | P03363 | P80294 | 0.5938   |
| 8023 | P03363 | Q719H9 | 0.56673  |
| 8024 | P03363 | Q8IZX4 | 0.28062  |
| 8025 | P03363 | Q96B26 | 0.61787  |
| 8026 | P03363 | Q86TJ5 | 0.22259  |
| 8027 | P03363 | Q49AA0 | 0.22259  |
| 8028 | P03363 | A6NGQ2 | 0.23345  |
| 8029 | P03363 | Q86X95 | 1.0271   |
| 8030 | P03363 | Q6IE81 | 0.61757  |
| 8031 | P03363 | Q9BQ89 | 0.75948  |
| 8032 | P03363 | Q4G0X4 | 0.21694  |
| 8033 | P03363 | Q96D46 | 0.61542  |
| 8034 | P03363 | Q14139 | 0.68174  |
| 8035 | P03363 | Q6XQN6 | 0.19021  |
| 8036 | P03363 | Q9Y316 | 0.26634  |
| 8037 | P03363 | O95376 | 0.54308  |
| 8038 | P03363 | Q9P021 | 0.13901  |
| 8039 | P03363 | Q5BJF6 | 0.58545  |
| 8040 | P03363 | Q92886 | 0.26747  |
| 8041 | P03363 | Q16236 | 0.52964  |
| 8042 | P03363 | Q9BSD3 | 0.35801  |
| 8043 | P03363 | Q9NQX1 | 0.50212  |
| 8044 | P03363 | Q16587 | 0.17938  |
| 8045 | P03363 | O95777 | 0.81209  |
| 8046 | P03363 | P22681 | 0.34247  |
| 8047 | P03363 | Q9H5Y0 | 0.042292 |
| 8048 | P03363 | Q6NXP2 | 0.043997 |
| 8049 | P03363 | Q9UJX2 | 0.29071  |
| 8050 | P03363 | Q5H9J7 | 0.24431  |
| 8051 | P03363 | Q9NPF5 | 0.81987  |
| 8052 | P03363 | P56179 | 0.21693  |
| 8053 | P03363 | Q6PRD7 | 0.24431  |
| 8054 | P03363 | Q5TGS1 | 0.4337   |
| 8055 | P03363 | Q6ZMW3 | 0.34776  |
| 8056 | P03363 | Q6WQI6 | 0.24431  |

|      |        |        |          |
|------|--------|--------|----------|
| 8057 | P03363 | O60832 | 0.64303  |
| 8058 | P03363 | Q96ST2 | 0.24232  |
| 8059 | P03363 | Q9Y6N9 | 0.35555  |
| 8060 | P03363 | Q15654 | 0.63493  |
| 8061 | P03363 | Q7RTS1 | 0.2634   |
| 8062 | P03363 | Q86VP1 | 0.42634  |
| 8063 | P03363 | Q8ND83 | 0.086557 |
| 8064 | P03363 | P49754 | 0.36641  |
| 8065 | P03363 | Q9UNN5 | 0.52784  |
| 8066 | P03363 | Q32P41 | 0.37586  |
| 8067 | P03363 | P46379 | 0.33115  |
| 8068 | P03363 | Q08AE8 | 0.27636  |
| 8069 | P03363 | Q3YBR2 | 0.55726  |
| 8070 | P03363 | Q9UBY9 | 0.79824  |
| 8071 | P03363 | Q96S94 | 0.43606  |
| 8072 | P03363 | Q13112 | 0.95197  |
| 8073 | P03363 | Q9NWF9 | 0.63121  |
| 8074 | P03363 | Q504Q3 | 0.2705   |
| 8075 | P03363 | Q5JUW0 | 0.24352  |
| 8076 | P03363 | Q9Y6Y0 | 0.57582  |
| 8077 | P03363 | Q86VE0 | 0.62696  |
| 8078 | P03363 | P78385 | 0.83681  |
| 8079 | P03363 | Q15370 | 0.41953  |
| 8080 | P03363 | Q3Y452 | 0.12519  |
| 8081 | P03363 | Q15020 | 0.68132  |
| 8082 | P03363 | Q92547 | 0.72667  |
| 8083 | P03363 | O75940 | 0.8234   |
| 8084 | P03363 | P17706 | 0.25628  |
| 8085 | P03363 | Q9H8G2 | 0.044835 |
| 8086 | P03363 | P62913 | 0.60272  |
| 8087 | P03363 | O75717 | 0.55486  |
| 8088 | P03363 | P61236 | 0.29721  |
| 8089 | P03363 | O75179 | 0.45455  |
| 8090 | P03363 | Q8IXM2 | 0.29363  |
| 8091 | P03363 | Q6ZTI6 | 0.028146 |
| 8092 | P03363 | Q9UNQ2 | 0.17552  |
| 8093 | P03363 | Q86XU0 | 0.22259  |
| 8094 | P03363 | P05783 | 1.003    |
| 8095 | P03363 | Q9NX24 | 0.27349  |
| 8096 | P03363 | Q8TAK6 | 0.28947  |
| 8097 | P03363 | O75190 | 0.66194  |
| 8098 | P03363 | O75410 | 0.68272  |
| 8099 | P03363 | Q9H816 | 0.46952  |
| 8100 | P03363 | Q9Y2B5 | 0.23937  |
| 8101 | P03363 | Q15911 | 0.28491  |
| 8102 | P03363 | Q9Y5A6 | 0.55289  |
| 8103 | P03363 | Q9Y614 | 0.34579  |
| 8104 | P03363 | Q9NQ4  | 0.44956  |
| 8105 | P03363 | Q9NYG5 | 0.31856  |
| 8106 | P03363 | Q9H160 | 0.26193  |
| 8107 | P03363 | P80297 | 0.1646   |
| 8108 | P03363 | P49918 | 0.5455   |
| 8109 | P03363 | Q5T7N3 | 0.24431  |
| 8110 | P03363 | Q9POL1 | 0.268    |
| 8111 | P03363 | Q14653 | 0.38243  |
| 8112 | P03363 | Q9Y6E7 | 0.25021  |
| 8113 | P03363 | Q96EA4 | 0.50567  |
| 8114 | P03363 | O14734 | 0.068572 |
| 8115 | P03363 | O95926 | 0.3599   |
| 8116 | P03363 | Q14146 | 0.29721  |
| 8117 | P03363 | Q8NB42 | 0.22259  |
| 8118 | P03363 | Q14978 | 0.35752  |
| 8119 | P03363 | O75069 | 0.15709  |
| 8120 | P03363 | Q86VX2 | 0.49242  |
| 8121 | P03363 | Q9Y2Z4 | 0.055714 |
| 8122 | P03363 | Q9Y6J0 | 0.29864  |
| 8123 | P03363 | P82650 | 0.25518  |
| 8124 | P03363 | Q86U70 | 0.1705   |
| 8125 | P03363 | A6NFF2 | 0.15989  |
| 8126 | P03363 | Q8WXW3 | 0.12015  |
| 8127 | P03363 | Q6L8H2 | 0.2934   |
| 8128 | P03363 | P43364 | 0.92347  |
| 8129 | P03363 | A8MQ14 | 0.22259  |
| 8130 | P03363 | Q9UNN4 | 0.43596  |
| 8131 | P03363 | Q53QV2 | 0.36283  |
| 8132 | P03363 | Q9NR55 | 0.61486  |



|      |        |        |          |
|------|--------|--------|----------|
| 8133 | P03363 | Q9Y6K5 | 0.21182  |
| 8134 | P03363 | P62879 | 0.39672  |
| 8135 | P03363 | A8K5M9 | 0.034826 |
| 8136 | P03363 | Q9Y3P8 | 0.064846 |
| 8137 | P03363 | A6NEF3 | 0.019317 |
| 8138 | P03363 | Q5VTD9 | 0.37365  |
| 8139 | P03363 | Q9BUL8 | 0.52554  |
| 8140 | P03363 | Q14789 | 0.1103   |
| 8141 | P03363 | P62314 | 0.84962  |
| 8142 | P03363 | Q12959 | 0.35698  |
| 8143 | P03363 | P41227 | 0.50079  |
| 8144 | P03363 | O43399 | 0.70714  |
| 8145 | P03363 | O75123 | 0.22259  |
| 8146 | P03363 | Q15699 | 0.60924  |
| 8147 | P03363 | P51858 | 0.22813  |
| 8148 | P03363 | Q9C0F3 | 0.44662  |
| 8149 | P03363 | Q92979 | 0.42834  |
| 8150 | P03363 | Q96M53 | 0.14397  |
| 8151 | P03363 | P52630 | 0.58456  |
| 8152 | P03363 | Q9BQ50 | 0.16496  |
| 8153 | P03363 | A6NGY1 | 0.22504  |
| 8154 | P03363 | O95619 | 0.65624  |
| 8155 | P03363 | P12956 | 0.21582  |
| 8156 | P03363 | P23284 | 0.28725  |
| 8157 | P03363 | Q14CX7 | 0.24431  |
| 8158 | P03363 | Q9NPJ3 | 0.18058  |
| 8159 | P03363 | Q9UBC0 | 0.27689  |
| 8160 | P03363 | Q8N9T8 | 0.11913  |
| 8161 | P03363 | Q8NHY6 | 0.22259  |
| 8162 | P03363 | O95990 | 0.21151  |
| 8163 | P03363 | O94762 | 0.2482   |
| 8164 | P03363 | Q9NQG7 | 0.33974  |
| 8165 | P03363 | Q16836 | 0.14818  |
| 8166 | P03363 | Q9BSU1 | 0.39887  |
| 8167 | P03363 | Q5T0B9 | 0.22259  |
| 8168 | P03363 | Q86VS8 | 0.44293  |
| 8169 | P03363 | O75953 | 0.72075  |
| 8170 | P03363 | Q96JP0 | 0.29591  |
| 8171 | P03363 | Q96QT6 | 0.56114  |
| 8172 | P03363 | P13682 | 0.22474  |
| 8173 | P03363 | Q6SJ96 | 0.48044  |
| 8174 | P03363 | O75820 | 0.303    |
| 8175 | P03363 | Q969F1 | 0.61051  |
| 8176 | P03363 | Q96A44 | 0.74302  |
| 8177 | P03363 | Q3KNS6 | 0.22259  |
| 8178 | P03363 | Q9UGK3 | 0.69082  |
| 8179 | P03363 | Q8TEE9 | 0.61357  |
| 8180 | P03363 | Q8TE69 | 0.53508  |
| 8181 | P03363 | Q86Y01 | 0.47894  |
| 8182 | P03363 | Q9Y3C0 | 0.49798  |
| 8183 | P03363 | Q9NW38 | 0.2845   |
| 8184 | P03363 | Q9UFW8 | 0.42068  |
| 8185 | P03363 | O15266 | 0.7583   |
| 8186 | P03363 | Q92845 | 0.30935  |
| 8187 | P03363 | Q99684 | 0.28853  |
| 8188 | P03363 | Q96RS0 | 0.36181  |
| 8189 | P03363 | Q14787 | 0.94307  |
| 8190 | P03363 | P18887 | 0.60263  |
| 8191 | P03363 | Q06547 | 0.91527  |
| 8192 | P03363 | Q3LI72 | 0.27762  |
| 8193 | P03363 | Q52LG2 | 0.27762  |
| 8194 | P03363 | Q16342 | 0.22031  |
| 8195 | P03363 | P31273 | 0.31629  |
| 8196 | P03363 | O43812 | 0.55694  |
| 8197 | P03363 | Q9HAU0 | 0.46098  |
| 8198 | P03363 | Q9H875 | 0.19914  |
| 8199 | P03363 | A4D1E1 | 0.14739  |
| 8200 | P03363 | Q03923 | 0.27255  |
| 8201 | P03363 | Q32MZ4 | 1.0323   |
| 8202 | P03363 | Q9BX63 | 0.32205  |
| 8203 | P03363 | Q15233 | 0.73762  |
| 8204 | P03363 | O60888 | 0.48139  |
| 8205 | P03363 | Q8IUM7 | 0.25313  |
| 8206 | P03363 | P43897 | 0.12704  |
| 8207 | P03363 | Q15528 | 1.0199   |
| 8208 | P03363 | P52758 | 0.35524  |

|      |        |        |           |
|------|--------|--------|-----------|
| 8209 | P03363 | O00411 | 0.42155   |
| 8210 | P03363 | Q9NVI1 | 0.62246   |
| 8211 | P03363 | Q9Y5P8 | 0.55672   |
| 8212 | P03363 | P02533 | 1.0007    |
| 8213 | P03363 | Q9NVR2 | 0.90186   |
| 8214 | P03363 | Q9Y535 | 0.20735   |
| 8215 | P03363 | Q6P9A3 | 0.22259   |
| 8216 | P03363 | G3V211 | 0.050543  |
| 8217 | P03363 | Q99615 | 0.83659   |
| 8218 | P03363 | Q9UKD1 | 0.59277   |
| 8219 | P03363 | Q8NCK3 | 0.22259   |
| 8220 | P03363 | A7MCY6 | 0.5149    |
| 8221 | P03363 | Q9NZ09 | 0.24431   |
| 8222 | P03363 | Q06455 | 0.55471   |
| 8223 | P03363 | Q9Y2R5 | 0.23718   |
| 8224 | P03363 | Q13490 | 0.25842   |
| 8225 | P03363 | Q86SX3 | 0.14849   |
| 8226 | P03363 | Q99829 | 0.25779   |
| 8227 | P03363 | Q6ZMY9 | 0.22259   |
| 8228 | P03363 | P17535 | 0.88492   |
| 8229 | P03363 | Q8TB72 | 0.68055   |
| 8230 | P03363 | Q5T953 | 0.0055957 |
| 8231 | P03363 | Q5SZL2 | 0.38184   |
| 8232 | P03363 | P35789 | 0.24904   |
| 8233 | P03363 | O14901 | 0.2942    |
| 8234 | P03363 | Q9UBW5 | 0.7338    |
| 8235 | P03363 | O43395 | 0.93424   |
| 8236 | P03363 | A8MSY0 | 0.43424   |
| 8237 | P03363 | O60927 | 0.20425   |
| 8238 | P03363 | O75373 | 0.22259   |
| 8239 | P03363 | Q5T681 | 0.53508   |
| 8240 | P03363 | Q5XKR9 | 0.029325  |
| 8241 | P03363 | P62952 | 0.18889   |
| 8242 | P03363 | O60829 | 0.11203   |
| 8243 | P03363 | Q9BZZ5 | 0.537     |
| 8244 | P03363 | Q9Y252 | 0.40938   |
| 8245 | P03363 | Q5SVQ8 | 0.22259   |
| 8246 | P03363 | Q6ZN17 | 0.83575   |
| 8247 | P03363 | P98168 | 0.52218   |
| 8248 | P03363 | Q9GZN2 | 0.54669   |
| 8249 | P03363 | A6NKF1 | 0.75965   |
| 8250 | P03363 | Q9Y2I6 | 0.34634   |
| 8251 | P03363 | Q9H8N7 | 0.26814   |
| 8252 | P03363 | P18848 | 0.85603   |
| 8253 | P03363 | Q8NFX3 | 0.26239   |
| 8254 | P03363 | Q9UIW0 | 0.35761   |
| 8255 | P03363 | Q8TAX9 | 0.24431   |
| 8256 | P03363 | Q7L273 | 0.21694   |
| 8257 | P03363 | Q8N8G2 | 0.70463   |
| 8258 | P03363 | Q8TDB6 | 0.54786   |
| 8259 | P03363 | Q9UDT6 | 0.32715   |
| 8260 | P03363 | Q9BUT9 | 0.10707   |
| 8261 | P03363 | Q96IV0 | 0.52118   |
| 8262 | P03363 | Q9ULW3 | 0.7299    |
| 8263 | P03363 | Q16186 | 0.48564   |
| 8264 | P03363 | O14744 | 0.64958   |
| 8265 | P03363 | Q9UID3 | 0.27045   |
| 8266 | P03363 | O94915 | 0.22927   |
| 8267 | P03363 | O95751 | 0.67606   |
| 8268 | P03363 | Q9BYD2 | 0.19909   |
| 8269 | P03363 | Q69YH5 | 0.60055   |
| 8270 | P03363 | Q8NI29 | 0.43705   |
| 8271 | P03363 | Q15834 | 0.94443   |
| 8272 | P03363 | P11137 | 0.32777   |
| 8273 | P03363 | P08048 | 0.22259   |
| 8274 | P03363 | Q9H9A7 | 0.67327   |
| 8275 | P03363 | O75461 | 0.4772    |
| 8276 | P03363 | Q8IXJ9 | 0.56005   |
| 8277 | P03363 | Q8TC05 | 0.25312   |
| 8278 | P03363 | Q14691 | 0.34898   |
| 8279 | P03363 | O15205 | 0.56926   |
| 8280 | P03363 | A8MWD9 | 0.416     |
| 8281 | P03363 | Q96HM7 | 0.031479  |
| 8282 | P03363 | Q9BYR9 | 0.2934    |
| 8283 | P03363 | P09132 | 0.32763   |
| 8284 | P03363 | Q9Y3E1 | 0.44627   |

|      |        |        |          |
|------|--------|--------|----------|
| 8285 | P03363 | Q9H7Z3 | 0.11203  |
| 8286 | P03363 | Q96JC9 | 0.85391  |
| 8287 | P03363 | Q86TC9 | 0.55008  |
| 8288 | P03363 | Q9BUR4 | 0.796    |
| 8289 | P03363 | O60739 | 0.10419  |
| 8290 | P03363 | O75335 | 0.49568  |
| 8291 | P03363 | P18621 | 0.36446  |
| 8292 | P03363 | Q96H12 | 0.0592   |
| 8293 | P03363 | P20810 | 0.33674  |
| 8294 | P03363 | Q13105 | 0.42796  |
| 8295 | P03363 | A6NKF2 | 0.69559  |
| 8296 | P03363 | Q9NWT8 | 0.64164  |
| 8297 | P03363 | Q8WXQ3 | 0.12034  |
| 8298 | P03363 | Q9BZD4 | 0.47958  |
| 8299 | P03363 | Q06787 | 0.8025   |
| 8300 | P03363 | P35453 | 0.30181  |
| 8301 | P03363 | Q8IZA3 | 0.1173   |
| 8302 | P03363 | Q8IW19 | 0.44756  |
| 8303 | P03363 | Q8N9Z9 | 0.70185  |
| 8304 | P03363 | Q5T5P2 | 0.16099  |
| 8305 | P03363 | P08779 | 0.96299  |
| 8306 | P03363 | Q8IZP0 | 0.34846  |
| 8307 | P03363 | Q13309 | 0.39624  |
| 8308 | P03363 | Q9NZH5 | 0.34548  |
| 8309 | P03363 | P29474 | 0.18845  |
| 8310 | P03363 | P46060 | 0.28934  |
| 8311 | P03363 | Q96JM7 | 0.38209  |
| 8312 | P03363 | O75159 | 0.24017  |
| 8313 | P03363 | P60370 | 0.2934   |
| 8314 | P03363 | Q8IYX3 | 0.018765 |
| 8315 | P03363 | O75081 | 0.63559  |
| 8316 | P03363 | O75347 | 0.2422   |
| 8317 | P03363 | Q9NVN8 | 0.38925  |
| 8318 | P03363 | Q8NFW5 | 0.25249  |
| 8319 | P03363 | Q8IZT9 | 0.22504  |
| 8320 | P03363 | Q68DK7 | 0.2333   |
| 8321 | P03363 | Q9H832 | 0.2068   |
| 8322 | P03363 | Q8N9N2 | 0.46004  |
| 8323 | P03363 | Q01850 | 0.93133  |
| 8324 | P03363 | Q9BRT2 | 0.4199   |
| 8325 | P03363 | P02808 | 0.063181 |
| 8326 | P03363 | Q9BVC4 | 0.49008  |
| 8327 | P03363 | Q5SVZ6 | 0.14658  |
| 8328 | P03363 | P0C7T5 | 0.30512  |
| 8329 | P03363 | Q9H2U2 | 0.2147   |
| 8330 | P03363 | P17027 | 0.22259  |
| 8331 | P03363 | Q15051 | 0.68176  |
| 8332 | P03363 | P62258 | 0.4932   |
| 8333 | P03363 | P49716 | 0.58724  |
| 8334 | P03363 | P13994 | 0.55703  |
| 8335 | P03363 | P0CH99 | 0.22259  |
| 8336 | P03363 | Q3L8U1 | 0.78736  |
| 8337 | P03363 | P55957 | 0.29844  |
| 8338 | P03363 | P05386 | 0.72485  |
| 8339 | P03363 | Q8N3V7 | 0.30129  |
| 8340 | P03363 | Q9Y6H5 | 0.733    |
| 8341 | P03363 | Q13151 | 0.23825  |
| 8342 | P03363 | Q9UJ98 | 0.10034  |
| 8343 | P03363 | Q96IK1 | 0.25402  |
| 8344 | P03363 | Q9Y3F4 | 0.78198  |
| 8345 | P03363 | Q5VUA4 | 0.41122  |
| 8346 | P03363 | Q6N069 | 0.27389  |
| 8347 | P03363 | P43360 | 0.56434  |
| 8348 | P03363 | Q701N2 | 0.2934   |
| 8349 | P03363 | O43493 | 0.26873  |
| 8350 | P03363 | Q6NWX9 | 0.32049  |
| 8351 | P03363 | Q9H2D6 | 0.26372  |
| 8352 | P03363 | Q9NVV4 | 0.29245  |
| 8353 | P03363 | O75363 | 0.24431  |
| 8354 | P03363 | P46939 | 0.40565  |
| 8355 | P03363 | Q9NSD4 | 0.22259  |
| 8356 | P03363 | Q03989 | 0.3494   |
| 8357 | P03363 | Q13595 | 0.23625  |
| 8358 | P03363 | Q16082 | 0.85932  |
| 8359 | P03363 | Q8N9F8 | 0.22259  |
| 8360 | P03363 | O94972 | 0.27187  |

|      |        |        |           |
|------|--------|--------|-----------|
| 8361 | P03363 | Q9HCC9 | 0.39787   |
| 8362 | P03363 | Q13042 | 0.75265   |
| 8363 | P03363 | Q9HD40 | 0.58364   |
| 8364 | P03363 | Q14907 | 0.48893   |
| 8365 | P03363 | Q96RE7 | 0.70724   |
| 8366 | P03363 | Q9Y4Y9 | 0.74947   |
| 8367 | P03363 | Q86V71 | 0.22259   |
| 8368 | P03363 | Q6IQ21 | 0.22259   |
| 8369 | P03363 | Q9BXP5 | 0.93054   |
| 8370 | P03363 | Q16649 | 0.44162   |
| 8371 | P03363 | P49454 | 0.29207   |
| 8372 | P03363 | Q96EP1 | 0.38403   |
| 8373 | P03363 | Q8WUA4 | 0.2357    |
| 8374 | P03363 | Q6VMQ6 | 0.68101   |
| 8375 | P03363 | Q14765 | 0.48469   |
| 8376 | P03363 | Q9Y592 | 0.11203   |
| 8377 | P03363 | P63131 | 0.15425   |
| 8378 | P03363 | Q9H201 | 0.333     |
| 8379 | P03363 | Q12830 | 0.61081   |
| 8380 | P03363 | Q5RKV6 | 0.24352   |
| 8381 | P03363 | Q8NFW8 | 0.18298   |
| 8382 | P03363 | Q8N5U6 | 0.73489   |
| 8383 | P03363 | Q53GS7 | 0.57325   |
| 8384 | P03363 | Q95049 | 0.48007   |
| 8385 | P03363 | Q6P0N0 | 0.24635   |
| 8386 | P03363 | Q9C010 | 0.0080524 |
| 8387 | P03363 | O75638 | 0.14619   |
| 8388 | P03363 | Q9BZE2 | 0.19595   |
| 8389 | P03363 | Q96IY1 | 0.54882   |
| 8390 | P03363 | Q8IYA6 | 0.12015   |
| 8391 | P03363 | Q8N2Y8 | 0.29635   |
| 8392 | P03363 | Q8N5Y2 | 0.30857   |
| 8393 | P03363 | Q7Z3B4 | 0.49492   |
| 8394 | P03363 | Q8NHW5 | 0.37392   |
| 8395 | P03363 | Q99592 | 0.23685   |
| 8396 | P03363 | Q8N1G0 | 0.27378   |
| 8397 | P03363 | Q92973 | 0.8559    |
| 8398 | P03363 | Q9GZV4 | 0.48289   |
| 8399 | P03363 | P10828 | 0.45501   |
| 8400 | P03363 | Q9H963 | 0.22259   |
| 8401 | P03363 | Q15371 | 0.65979   |
| 8402 | P03363 | Q92917 | 0.86194   |
| 8403 | P03363 | P51965 | 0.30868   |
| 8404 | P03363 | Q9Y263 | 0.32134   |
| 8405 | P03363 | Q9UJQ4 | 0.21989   |
| 8406 | P03363 | P63162 | 0.79978   |
| 8407 | P03363 | Q9Y4Z0 | 0.69005   |
| 8408 | P03363 | Q99909 | 0.39008   |
| 8409 | P03363 | P62750 | 0.51408   |
| 8410 | P03363 | Q9BQQ7 | 0.34077   |
| 8411 | P03363 | Q15366 | 0.77583   |
| 8412 | P03363 | Q969J2 | 0.268     |
| 8413 | P03363 | P69905 | 0.19602   |
| 8414 | P03363 | Q9BSH3 | 0.27292   |
| 8415 | P03363 | Q9NVR5 | 0.17684   |
| 8416 | P03363 | Q9Y4Z2 | 0.35277   |
| 8417 | P03363 | Q13427 | 0.45447   |
| 8418 | P03363 | Q9Y5B6 | 0.49974   |
| 8419 | P03363 | Q8N988 | 0.22259   |
| 8420 | P03363 | Q9C0I3 | 0.055685  |
| 8421 | P03363 | Q8N4M7 | 0.085802  |
| 8422 | P03363 | Q96RT1 | 0.35482   |
| 8423 | P03363 | Q4W5G0 | 0.40039   |
| 8424 | P03363 | Q9NSI8 | 0.24098   |
| 8425 | P03363 | Q8WWL7 | 0.71724   |
| 8426 | P03363 | O43736 | 0.15709   |
| 8427 | P03363 | Q9BVJ6 | 0.70473   |
| 8428 | P03363 | O00273 | 0.34077   |
| 8429 | P03363 | Q07666 | 0.47227   |
| 8430 | P03363 | P27348 | 0.54339   |
| 8431 | P03363 | O75161 | 0.51349   |
| 8432 | P03363 | Q96B36 | 0.69436   |
| 8433 | P03363 | Q9UHF7 | 0.5491    |
| 8434 | P03363 | P29374 | 0.39379   |
| 8435 | P03363 | Q6P1K2 | 0.63531   |
| 8436 | P03363 | Q8WTT2 | 0.30989   |

|      |        |        |          |
|------|--------|--------|----------|
| 8437 | P03363 | P23396 | 0.43504  |
| 8438 | P03363 | Q9UL42 | 0.76224  |
| 8439 | P03363 | Q9H825 | 0.41753  |
| 8440 | P03363 | Q8N2I2 | 0.22259  |
| 8441 | P03363 | P63119 | 0.19177  |
| 8442 | P03363 | Q9UHL9 | 0.47756  |
| 8443 | P03363 | Q96LW1 | 0.22259  |
| 8444 | P03363 | P28698 | 0.61204  |
| 8445 | P03363 | P02538 | 0.83203  |
| 8446 | P03363 | Q53ET0 | 0.63393  |
| 8447 | P03363 | Q8IZC7 | 0.22259  |
| 8448 | P03363 | O60543 | 0.25962  |
| 8449 | P03363 | O75368 | 0.33007  |
| 8450 | P03363 | Q96IZ7 | 0.87588  |
| 8451 | P03363 | Q92985 | 0.34525  |
| 8452 | P03363 | Q9H4D5 | 0.52168  |
| 8453 | P03363 | P42677 | 0.38878  |
| 8454 | P03363 | Q9UL16 | 0.21533  |
| 8455 | P03363 | Q8NE65 | 0.36172  |
| 8456 | P03363 | Q9BUP3 | 0.29391  |
| 8457 | P03363 | Q9BWF2 | 0.22842  |
| 8458 | P03363 | Q9UGK8 | 0.71308  |
| 8459 | P03363 | P19338 | 0.82045  |
| 8460 | P03363 | A8MUX0 | 0.2934   |
| 8461 | P03363 | Q8N0X2 | 0.32132  |
| 8462 | P03363 | Q9H7H0 | 0.60932  |
| 8463 | P03363 | Q96AQ7 | 0.42943  |
| 8464 | P03363 | Q96N22 | 0.22259  |
| 8465 | P03363 | Q5JTC6 | 0.49174  |
| 8466 | P03363 | Q9NQZ8 | 0.24904  |
| 8467 | P03363 | P62380 | 0.36957  |
| 8468 | P03363 | Q96DB5 | 0.40339  |
| 8469 | P03363 | Q8N5Z5 | 0.18177  |
| 8470 | P03363 | P62136 | 0.31734  |
| 8471 | P03363 | Q9Y2W2 | 0.88492  |
| 8472 | P03363 | O95948 | 0.45949  |
| 8473 | P03363 | Q9NYP9 | 0.33467  |
| 8474 | P03363 | P63173 | 0.29783  |
| 8475 | P03363 | O60809 | 0.10142  |
| 8476 | P03363 | Q9NXZ1 | 0.29721  |
| 8477 | P03363 | P49419 | 0.35926  |
| 8478 | P03363 | Q8NF91 | 0.44515  |
| 8479 | P03363 | O15287 | 0.73205  |
| 8480 | P03363 | Q14264 | 0.16462  |
| 8481 | P03363 | Q96J01 | 0.3057   |
| 8482 | P03363 | P22531 | 0.74011  |
| 8483 | P03363 | Q6DD87 | 0.22259  |
| 8484 | P03363 | Q9GZS3 | 0.88668  |
| 8485 | P03363 | Q9UHP9 | 0.31355  |
| 8486 | P03363 | Q9H5J4 | 0.080996 |
| 8487 | P03363 | Q9NWH9 | 0.36034  |
| 8488 | P03363 | Q59GR2 | 0.55275  |
| 8489 | P03363 | P19622 | 0.49559  |
| 8490 | P03363 | P08865 | 0.48173  |
| 8491 | P03363 | P23246 | 0.87297  |
| 8492 | P03363 | Q9H902 | 0.24603  |
| 8493 | P03363 | Q99623 | 0.78672  |
| 8494 | P03363 | P29083 | 0.64123  |
| 8495 | P03363 | Q7Z7K6 | 0.24083  |
| 8496 | P03363 | P29084 | 0.9701   |
| 8497 | P03363 | Q13835 | 0.33898  |
| 8498 | P03363 | Q9H9R9 | 0.24431  |
| 8499 | P03363 | Q8TAQ5 | 0.22259  |
| 8500 | P03363 | Q9GZU8 | 0.22504  |
| 8501 | P03363 | Q96D09 | 0.23126  |
| 8502 | P03363 | Q96NU1 | 0.22504  |
| 8503 | P03363 | Q96T58 | 0.64398  |
| 8504 | P03363 | P27694 | 0.31801  |
| 8505 | P03363 | Q8WTV1 | 0.57301  |
| 8506 | P03363 | P07197 | 0.85189  |
| 8507 | P03363 | P62937 | 0.42062  |
| 8508 | P03363 | Q86UA1 | 0.24064  |
| 8509 | P03363 | Q14533 | 0.8697   |
| 8510 | P03363 | Q92766 | 0.24775  |
| 8511 | P03363 | Q9Y2T2 | 0.53121  |
| 8512 | P03363 | P0CL84 | 0.22504  |

|      |        |        |          |
|------|--------|--------|----------|
| 8513 | P03363 | P13807 | 0.35129  |
| 8514 | P03363 | Q03924 | 0.24904  |
| 8515 | P03363 | Q8WVK3 | 0.41574  |
| 8516 | P03363 | Q6ZNA1 | 0.22259  |
| 8517 | P03363 | Q6ZNK6 | 0.076511 |
| 8518 | P03363 | Q43933 | 0.33777  |
| 8519 | P03363 | Q9UGN5 | 0.28899  |
| 8520 | P03363 | P60604 | 0.21521  |
| 8521 | P03363 | Q94818 | 0.29739  |
| 8522 | P03363 | Q6ZYL4 | 0.4604   |
| 8523 | P03363 | Q96GC5 | 0.60871  |
| 8524 | P03363 | Q9UPV9 | 0.65069  |
| 8525 | P03363 | Q9Y2J8 | 0.13873  |
| 8526 | P03363 | Q9HAW4 | 0.45401  |
| 8527 | P03363 | Q15355 | 0.62142  |
| 8528 | P03363 | A5A3E0 | 0.18581  |
| 8529 | P03363 | Q9GZY1 | 0.4314   |
| 8530 | P03363 | Q9BYR6 | 0.42225  |
| 8531 | P03363 | Q9UNH7 | 0.3316   |
| 8532 | P03363 | P47902 | 0.46042  |
| 8533 | P03363 | P31040 | 0.25378  |
| 8534 | P03363 | Q9BRU9 | 0.27944  |
| 8535 | P03363 | P36575 | 0.26926  |
| 8536 | P03363 | Q96S65 | 0.50028  |
| 8537 | P03363 | P35711 | 0.76164  |
| 8538 | P03363 | Q13487 | 0.50615  |
| 8539 | P03363 | Q14244 | 0.14365  |
| 8540 | P03363 | Q99962 | 0.26467  |
| 8541 | P03363 | Q9NZR4 | 0.27714  |
| 8542 | P03363 | Q9H8E8 | 0.71705  |
| 8543 | P03363 | Q9P2I0 | 0.71123  |
| 8544 | P03363 | Q96I24 | 0.50731  |
| 8545 | P03363 | Q9BXM0 | 0.6493   |
| 8546 | P03363 | P69208 | 0.20014  |
| 8547 | P03363 | Q96RJ6 | 0.41504  |
| 8548 | P03363 | P54198 | 0.88754  |
| 8549 | P03363 | Q14929 | 0.24904  |
| 8550 | P03363 | Q8NDY6 | 0.51016  |
| 8551 | P03363 | A2IDD5 | 0.23077  |
| 8552 | P03363 | Q9Y5B0 | 0.2763   |
| 8553 | P03363 | Q9UH92 | 0.63272  |
| 8554 | P03363 | P78415 | 0.39253  |
| 8555 | P03363 | Q9Y5K5 | 0.23815  |
| 8556 | P03363 | Q60443 | 0.1664   |
| 8557 | P03363 | Q7Z333 | 0.29591  |
| 8558 | P03363 | Q6XYB7 | 0.51853  |
| 8559 | P03363 | P54652 | 0.25985  |
| 8560 | P03363 | Q60664 | 0.55695  |
| 8561 | P03363 | Q15527 | 0.26061  |
| 8562 | P03363 | Q6ZVK8 | 0.37697  |
| 8563 | P03363 | Q7Z7A1 | 0.8901   |
| 8564 | P03363 | Q6PIY2 | 0.1102   |
| 8565 | P03363 | P0CJ87 | 0.49158  |
| 8566 | P03363 | Q9H3S7 | 0.29355  |
| 8567 | P03363 | Q9NQX6 | 0.22259  |
| 8568 | P03363 | Q86YD1 | 0.43951  |
| 8569 | P03363 | A6NC42 | 0.1532   |
| 8570 | P03363 | Q9NYP3 | 0.1705   |
| 8571 | P03363 | P0CJ88 | 0.49158  |
| 8572 | P03363 | P38919 | 0.41972  |
| 8573 | P03363 | Q15370 | 0.73225  |
| 8574 | P03363 | Q9BYU1 | 0.40426  |
| 8575 | P03363 | P09067 | 0.34931  |
| 8576 | P03363 | P12525 | 0.49594  |
| 8577 | P03363 | P55771 | 0.67846  |
| 8578 | P03363 | Q9BZR9 | 0.31064  |
| 8579 | P03363 | Q7Z340 | 0.22259  |
| 8580 | P03363 | Q5T8P6 | 0.24134  |
| 8581 | P03363 | Q14938 | 0.49812  |
| 8582 | P03363 | B4DU55 | 0.22259  |
| 8583 | P03363 | Q9H091 | 0.18835  |
| 8584 | P03363 | P41223 | 0.27643  |
| 8585 | P03363 | Q8N859 | 0.22259  |
| 8586 | P03363 | Q92925 | 0.39552  |
| 8587 | P03363 | A8K8P3 | 0.75273  |
| 8588 | P03363 | Q16589 | 0.36692  |

|      |        |        |           |
|------|--------|--------|-----------|
| 8589 | P03363 | Q19AV6 | 0.42825   |
| 8590 | P03363 | Q9UFG5 | 0.53508   |
| 8591 | P03363 | Q6P9B6 | 0.53508   |
| 8592 | P03363 | Q0VDD7 | 0.44617   |
| 8593 | P03363 | Q9NWZ5 | 0.23133   |
| 8594 | P03363 | P0DJD3 | 0.53971   |
| 8595 | P03363 | P11277 | 0.30126   |
| 8596 | P03363 | Q15466 | 0.51197   |
| 8597 | P03363 | O75360 | 0.52419   |
| 8598 | P03363 | P41252 | 0.62668   |
| 8599 | P03363 | P07900 | 0.23771   |
| 8600 | P03363 | Q8TF42 | 0.25571   |
| 8601 | P03363 | Q9Y5J3 | 0.27463   |
| 8602 | P03363 | O14908 | 0.23969   |
| 8603 | P03363 | Q96DF8 | 0.38214   |
| 8604 | P03363 | O14978 | 0.40676   |
| 8605 | P03363 | Q5HYW2 | 0.017352  |
| 8606 | P03363 | Q14CS0 | 0.34779   |
| 8607 | P03363 | Q9Y6X0 | 0.27018   |
| 8608 | P03363 | Q6ZN06 | 0.22259   |
| 8609 | P03363 | Q96GA3 | 0.49651   |
| 8610 | P03363 | Q2TAM9 | 0.051971  |
| 8611 | P03363 | Q04323 | 0.44207   |
| 8612 | P03363 | Q9Y6D9 | 0.51707   |
| 8613 | P03363 | P56715 | 0.27474   |
| 8614 | P03363 | Q4LE28 | 0.47281   |
| 8615 | P03363 | Q2M3G4 | 0.2291    |
| 8616 | P03363 | P63167 | 0.79408   |
| 8617 | P03363 | P54727 | 0.5915    |
| 8618 | P03363 | Q86Y79 | 0.011679  |
| 8619 | P03363 | Q96EU6 | 0.26859   |
| 8620 | P03363 | P13645 | 0.9637    |
| 8621 | P03363 | P46087 | 0.64512   |
| 8622 | P03363 | Q6ZMZ3 | 0.29611   |
| 8623 | P03363 | P53801 | 0.16367   |
| 8624 | P03363 | Q7L804 | 0.41803   |
| 8625 | P03363 | Q86W11 | 0.268     |
| 8626 | P03363 | Q9ULX3 | 0.10525   |
| 8627 | P03363 | P62847 | 0.31092   |
| 8628 | P03363 | Q9Y2X3 | 0.64893   |
| 8629 | P03363 | Q9HC77 | 0.65501   |
| 8630 | P03363 | Q9UNW9 | 0.2354    |
| 8631 | P03363 | Q8NA42 | 0.40237   |
| 8632 | P03363 | Q14865 | 0.24905   |
| 8633 | P03363 | Q9UBB6 | 0.20299   |
| 8634 | P03363 | O75570 | 0.23242   |
| 8635 | P03363 | P11441 | 0.66916   |
| 8636 | P03363 | O60645 | 0.57359   |
| 8637 | P03363 | Q96NS5 | 0.41574   |
| 8638 | P03363 | P18077 | 0.29481   |
| 8639 | P03363 | Q13503 | 0.48177   |
| 8640 | P03363 | Q15360 | 0.78995   |
| 8641 | P03363 | Q8TB45 | 0.2829    |
| 8642 | P03363 | Q14525 | 0.89041   |
| 8643 | P03363 | Q9NZL3 | 0.60385   |
| 8644 | P03363 | P06744 | 0.14552   |
| 8645 | P03363 | O60684 | 0.50939   |
| 8646 | P03363 | Q9NQS1 | 0.28107   |
| 8647 | P03363 | Q9H299 | 0.33548   |
| 8648 | P03363 | Q15438 | 0.241     |
| 8649 | P03363 | Q8NCU1 | 0.0012662 |
| 8650 | P03363 | Q9GZL7 | 0.56282   |
| 8651 | P03363 | Q6EMB2 | 0.34773   |
| 8652 | P03363 | Q6P387 | 0.49651   |
| 8653 | P03363 | P82664 | 0.23424   |
| 8654 | P03363 | Q9UNH5 | 0.50918   |
| 8655 | P03363 | P31274 | 0.38817   |
| 8656 | P03363 | Q14145 | 0.87769   |
| 8657 | P03363 | Q9Y2D9 | 0.63436   |
| 8658 | P03363 | Q96ED9 | 0.6293    |
| 8659 | P03363 | Q8NAP3 | 0.40863   |
| 8660 | P03363 | P17021 | 0.22259   |
| 8661 | P03363 | Q9GZM3 | 0.23378   |
| 8662 | P03363 | Q10570 | 0.7881    |
| 8663 | P03363 | Q16352 | 0.80866   |
| 8664 | P03363 | O14920 | 0.23986   |

|      |        |        |          |
|------|--------|--------|----------|
| 8665 | P03363 | P17010 | 0.27223  |
| 8666 | P03363 | Q08J23 | 0.49967  |
| 8667 | P03363 | Q9H987 | 0.25697  |
| 8668 | P03363 | P62714 | 0.52609  |
| 8669 | P03363 | Q15050 | 0.27594  |
| 8670 | P03363 | A2BFH1 | 0.21453  |
| 8671 | P03363 | Q8IVP9 | 0.22259  |
| 8672 | P03363 | Q5SRE5 | 0.38433  |
| 8673 | P03363 | O43296 | 0.22259  |
| 8674 | P03363 | Q8NA92 | 0.13635  |
| 8675 | P03363 | O14529 | 0.49417  |
| 8676 | P03363 | Q8WWQ0 | 0.50621  |
| 8677 | P03363 | Q04206 | 0.26187  |
| 8678 | P03363 | Q15853 | 0.57955  |
| 8679 | P03363 | O14771 | 0.268    |
| 8680 | P03363 | Q16222 | 0.2413   |
| 8681 | P03363 | Q9H4X1 | 0.27382  |
| 8682 | P03363 | Q9BQ95 | 0.86211  |
| 8683 | P03363 | Q96CV9 | 0.53456  |
| 8684 | P03363 | Q8NAV2 | 0.22504  |
| 8685 | P03363 | P05387 | 0.36325  |
| 8686 | P03363 | Q99598 | 0.23952  |
| 8687 | P03363 | P22532 | 0.22177  |
| 8688 | P03363 | P35237 | 0.32557  |
| 8689 | P03363 | Q9NRA8 | 0.98864  |
| 8690 | P03363 | Q9BR09 | 0.2201   |
| 8691 | P03363 | O15519 | 0.40803  |
| 8692 | P03363 | Q7Z591 | 0.43182  |
| 8693 | P03363 | Q86VQ0 | 0.62215  |
| 8694 | P03363 | O95780 | 0.22259  |
| 8695 | P03363 | O95996 | 0.4124   |
| 8696 | P03363 | Q96K80 | 0.42886  |
| 8697 | P03363 | P51580 | 0.17582  |
| 8698 | P03363 | O14896 | 0.52038  |
| 8699 | P03363 | A6NL28 | 0.25697  |
| 8700 | P03363 | P27540 | 0.34217  |
| 8701 | P03363 | Q66K74 | 0.39693  |
| 8702 | P03363 | Q7RTS9 | 0.67517  |
| 8703 | P03363 | Q86VK4 | 0.22259  |
| 8704 | P03363 | O60356 | 0.16774  |
| 8705 | P03363 | P49848 | 0.65994  |
| 8706 | P03363 | P02795 | 0.43442  |
| 8707 | P03363 | Q9Y383 | 0.18172  |
| 8708 | P03363 | Q86WB0 | 0.58107  |
| 8709 | P03363 | Q96EL2 | 0.31759  |
| 8710 | P03363 | Q8WYR1 | 0.20174  |
| 8711 | P03363 | A6NK75 | 0.22259  |
| 8712 | P03363 | P17676 | 0.57751  |
| 8713 | P03363 | P12270 | 0.42053  |
| 8714 | P03363 | P52738 | 0.24904  |
| 8715 | P03363 | Q9UI47 | 0.59086  |
| 8716 | P03363 | Q9H081 | 0.44958  |
| 8717 | P03363 | Q76N32 | 0.36506  |
| 8718 | P03363 | Q5TA50 | 0.21406  |
| 8719 | P03363 | Q96GG9 | 0.49285  |
| 8720 | P03363 | P35321 | 0.676    |
| 8721 | P03363 | O75683 | 0.35064  |
| 8722 | P03363 | Q92575 | 0.71376  |
| 8723 | P03363 | P18669 | 0.21728  |
| 8724 | P03363 | Q9BXR0 | 0.25034  |
| 8725 | P03363 | Q5T5M9 | 0.22504  |
| 8726 | P03363 | O14829 | 0.27823  |
| 8727 | P03363 | Q8TAM2 | 0.28176  |
| 8728 | P03363 | O75474 | 0.13502  |
| 8729 | P03363 | P49459 | 0.21223  |
| 8730 | P03363 | P10265 | 0.085848 |
| 8731 | P03363 | P52565 | 0.31873  |
| 8732 | P03363 | P06454 | 0.47682  |
| 8733 | P03363 | O75643 | 0.38419  |
| 8734 | P03363 | Q15468 | 0.12981  |
| 8735 | P03363 | Q9NUA8 | 0.19079  |
| 8736 | P03363 | Q96DZ1 | 0.34088  |
| 8737 | P03363 | P59282 | 0.24431  |
| 8738 | P03363 | Q6NSZ9 | 0.268    |
| 8739 | P03363 | Q5C9Z4 | 0.74235  |
| 8740 | P03363 | Q8IY21 | 0.29741  |



|      |        |        |          |
|------|--------|--------|----------|
| 8741 | P03363 | Q8NC51 | 0.72946  |
| 8742 | P03363 | Q12901 | 0.24904  |
| 8743 | P03363 | P26447 | 0.47357  |
| 8744 | P03363 | O60481 | 0.53466  |
| 8745 | P03363 | Q9NSD9 | 0.083221 |
| 8746 | P03363 | P18146 | 0.51399  |
| 8747 | P03363 | Q5JUK2 | 0.22111  |
| 8748 | P03363 | Q9BYV8 | 0.60806  |
| 8749 | P03363 | A6NKD9 | 0.12259  |
| 8750 | P03363 | Q13360 | 0.27693  |
| 8751 | P03363 | P49116 | 0.38593  |
| 8752 | P03363 | Q68DC2 | 0.25197  |
| 8753 | P03363 | Q969Q6 | 0.43063  |
| 8754 | P03363 | Q0VDE8 | 0.063335 |
| 8755 | P03363 | Q8TF40 | 0.70913  |
| 8756 | P03363 | Q9P2Y5 | 0.44785  |
| 8757 | P03363 | O00712 | 0.29943  |
| 8758 | P03363 | Q969U7 | 0.61348  |
| 8759 | P03363 | Q9H981 | 0.72627  |
| 8760 | P03363 | Q9P2G1 | 0.29734  |
| 8761 | P03363 | O95628 | 0.64286  |
| 8762 | P03363 | Q8IVI9 | 0.34885  |
| 8763 | P03363 | Q8WXX7 | 0.11203  |
| 8764 | P03363 | Q9ULG1 | 0.26233  |
| 8765 | P03363 | Q9HCU9 | 0.91248  |
| 8766 | P03363 | Q8NG50 | 0.47954  |
| 8767 | P03363 | A2RU30 | 0.20113  |
| 8768 | P03363 | Q9BX66 | 0.30095  |
| 8769 | P03363 | P0CJ86 | 0.49158  |
| 8770 | P03363 | Q96KD3 | 0.062103 |
| 8771 | P03363 | Q8WXE9 | 0.5718   |
| 8772 | P03363 | P19388 | 0.46556  |
| 8773 | P03363 | O95453 | 0.35973  |
| 8774 | P03363 | O95050 | 0.22135  |
| 8775 | P03363 | Q3LI81 | 0.27762  |
| 8776 | P03363 | Q9H9P5 | 0.41847  |
| 8777 | P03363 | P36873 | 0.24301  |
| 8778 | P03363 | Q2VIQ3 | 0.30945  |
| 8779 | P03363 | Q9BY44 | 0.49154  |
| 8780 | P03363 | Q9BVT8 | 0.17461  |
| 8781 | P03363 | Q6ECI4 | 0.27378  |
| 8782 | P03363 | Q9UBX2 | 0.49158  |
| 8783 | P03363 | Q9UHB4 | 0.543    |
| 8784 | P03363 | P84098 | 0.36325  |
| 8785 | P03363 | Q12972 | 0.65482  |
| 8786 | P03363 | Q9H9C1 | 0.5428   |
| 8787 | P03363 | O15061 | 0.88234  |
| 8788 | P03363 | Q96C01 | 0.23887  |
| 8789 | P03363 | Q7Z624 | 0.23796  |
| 8790 | P03363 | P42766 | 0.48764  |
| 8791 | P03363 | Q6P2D0 | 0.22259  |
| 8792 | P03363 | Q52LA3 | 0.09678  |
| 8793 | P03363 | O75764 | 0.31031  |
| 8794 | P03363 | P24864 | 0.23999  |
| 8795 | P03363 | Q3B820 | 0.3998   |
| 8796 | P03363 | Q8NEK5 | 0.22259  |
| 8797 | P03363 | P14649 | 0.33342  |
| 8798 | P03363 | Q02386 | 0.14923  |
| 8799 | P03363 | Q16851 | 0.26964  |
| 8800 | P03363 | P51784 | 0.37214  |
| 8801 | P03363 | P0C5Y4 | 0.2934   |
| 8802 | P03363 | O15524 | 0.23252  |
| 8803 | P03363 | Q9NQ55 | 0.508    |
| 8804 | P03363 | Q13367 | 0.383    |
| 8805 | P03363 | Q6ICB4 | 0.23681  |
| 8806 | P03363 | Q5VV41 | 0.31906  |
| 8807 | P03363 | Q13148 | 0.72993  |
| 8808 | P03363 | Q8IXV7 | 0.24431  |
| 8809 | P03363 | Q8TBZ9 | 0.083102 |
| 8810 | P03363 | Q16537 | 0.5639   |
| 8811 | P03363 | Q5VT06 | 0.60172  |
| 8812 | P03363 | Q96JS3 | 0.3764   |
| 8813 | P03363 | Q8N5J2 | 0.074921 |
| 8814 | P03363 | Q8N0V3 | 0.071949 |
| 8815 | P03363 | P0C7V9 | 0.062282 |
| 8816 | P03363 | Q3BBV2 | 0.24431  |

|      |        |         |          |
|------|--------|---------|----------|
| 8817 | P03363 | Q969W3  | 0.046013 |
| 8818 | P03363 | Q86UR1  | 0.27764  |
| 8819 | P03363 | Q96JC4  | 0.22259  |
| 8820 | P03363 | Q9P2W6  | 0.24431  |
| 8821 | P03363 | Q8IXQ6  | 0.78228  |
| 8822 | P03363 | P59797  | 0.012359 |
| 8823 | P03363 | Q8NHU6  | 0.42789  |
| 8824 | P03363 | P02549  | 0.24602  |
| 8825 | P03363 | O60315  | 0.32795  |
| 8826 | P03363 | Q6P1K8  | 0.21734  |
| 8827 | P03363 | Q12872  | 0.44323  |
| 8828 | P03363 | Q92674  | 0.33525  |
| 8829 | P03363 | Q8TAB7  | 0.073674 |
| 8830 | P03363 | P83916  | 0.53709  |
| 8831 | P03363 | Q13435  | 0.54284  |
| 8832 | P03363 | P33316  | 0.39249  |
| 8833 | P03363 | Q9HBF5  | 0.032026 |
| 8834 | P03363 | Q8NPFH4 | 0.47201  |
| 8835 | P03363 | Q8WZ33  | 0.71377  |
| 8836 | P03363 | O00221  | 0.27067  |
| 8837 | P03363 | O95411  | 0.29603  |
| 8838 | P03363 | Q6STE5  | 0.42958  |
| 8839 | P03363 | Q02930  | 0.68052  |
| 8840 | P03363 | Q9UHB7  | 0.94778  |
| 8841 | P03363 | Q5PRF9  | 0.61357  |
| 8842 | P03363 | Q9BXW9  | 0.66555  |
| 8843 | P03363 | Q75VX8  | 0.08127  |
| 8844 | P03363 | O95391  | 0.35765  |
| 8845 | P03363 | O60224  | 0.39008  |
| 8846 | P03363 | Q9P0V3  | 0.57295  |
| 8847 | P03363 | Q00597  | 0.7147   |
| 8848 | P03363 | Q8NG57  | 0.19772  |
| 8849 | P03363 | Q99576  | 0.62084  |
| 8850 | P03363 | C9JR72  | 0.24431  |
| 8851 | P03363 | Q969X6  | 0.93113  |
| 8852 | P03363 | Q13428  | 0.83316  |
| 8853 | P03363 | O14682  | 0.35489  |
| 8854 | P03363 | Q8TAF3  | 0.73053  |
| 8855 | P03363 | Q9UND3  | 0.34378  |
| 8856 | P03363 | Q9BSV6  | 0.28865  |
| 8857 | P03363 | A8MTY7  | 0.2934   |
| 8858 | P03363 | Q9NZE8  | 0.19909  |
| 8859 | P03363 | P98169  | 0.19314  |
| 8860 | P03363 | Q9UMS0  | 0.82176  |
| 8861 | P03363 | O75391  | 0.35279  |
| 8862 | P03363 | P13984  | 0.47875  |
| 8863 | P03363 | O43310  | 0.68276  |
| 8864 | P03363 | P02545  | 0.58136  |
| 8865 | P03363 | Q7Z3Z4  | 0.24553  |
| 8866 | P03363 | A2RTX5  | 0.12473  |
| 8867 | P03363 | Q96M43  | 0.24431  |
| 8868 | P03363 | Q8N9A8  | 0.47588  |
| 8869 | P03363 | Q7Z4U5  | 0.024605 |
| 8870 | P03363 | O00762  | 0.29463  |
| 8871 | P03363 | Q9P2J8  | 0.22259  |
| 8872 | P03363 | P60709  | 0.26985  |
| 8873 | P03363 | Q9NZJ4  | 0.18309  |
| 8874 | P03363 | Q15021  | 0.65628  |
| 8875 | P03363 | P62249  | 0.27497  |
| 8876 | P03363 | Q86UP3  | 0.30694  |
| 8877 | P03363 | Q9NXG0  | 0.17396  |
| 8878 | P03363 | P49321  | 0.36663  |
| 8879 | P03363 | Q9UJV8  | 0.27018  |
| 8880 | P03363 | Q9Y468  | 0.47785  |
| 8881 | P03363 | Q9H175  | 0.94514  |
| 8882 | P03363 | Q6NT04  | 0.40039  |
| 8883 | P03363 | Q9UP83  | 0.94879  |
| 8884 | P03363 | P35227  | 0.5687   |
| 8885 | P03363 | Q5K131  | 0.24431  |
| 8886 | P03363 | O95400  | 0.77743  |
| 8887 | P03363 | P52597  | 0.86404  |
| 8888 | P03363 | Q9BYD1  | 0.70406  |
| 8889 | P03363 | Q5U5Q3  | 0.23279  |
| 8890 | P03363 | Q9C000  | 0.31178  |
| 8891 | P03363 | Q7Z353  | 0.55275  |
| 8892 | P03363 | O60563  | 0.85171  |

|      |        |        |          |
|------|--------|--------|----------|
| 8893 | P03363 | Q9HAU4 | 0.31773  |
| 8894 | P03363 | Q96T92 | 0.40237  |
| 8895 | P03363 | Q9NXX6 | 0.48695  |
| 8896 | P03363 | Q92543 | 0.29104  |
| 8897 | P03363 | Q9H321 | 0.29721  |
| 8898 | P03363 | Q02083 | 0.17092  |
| 8899 | P03363 | P0CG31 | 0.22259  |
| 8900 | P03363 | Q99676 | 0.22259  |
| 8901 | P03363 | Q3ZCT1 | 0.33748  |
| 8902 | P03363 | P21127 | 0.25179  |
| 8903 | P03363 | P36543 | 0.25223  |
| 8904 | P03363 | Q92900 | 0.32966  |
| 8905 | P03363 | Q6V9R5 | 0.22259  |
| 8906 | P03363 | P60411 | 0.2934   |
| 8907 | P03363 | Q9BTK6 | 0.61218  |
| 8908 | P03363 | P82921 | 0.20437  |
| 8909 | P03363 | Q96HR3 | 0.45517  |
| 8910 | P03363 | Q9NW13 | 0.26123  |
| 8911 | P03363 | O95229 | 0.53252  |
| 8912 | P03363 | Q9H9Q2 | 0.4189   |
| 8913 | P03363 | Q9Y4W2 | 0.39268  |
| 8914 | P03363 | O60291 | 0.35106  |
| 8915 | P03363 | P48539 | 0.267    |
| 8916 | P03363 | Q99626 | 0.27069  |
| 8917 | P03363 | Q6GQQ9 | 0.23718  |
| 8918 | P03363 | Q9H8M2 | 0.32716  |
| 8919 | P03363 | Q14582 | 0.45529  |
| 8920 | P03363 | Q9NRL2 | 0.57361  |
| 8921 | P03363 | Q13227 | 0.63385  |
| 8922 | P03363 | P53567 | 0.54321  |
| 8923 | P03363 | P48382 | 0.95837  |
| 8924 | P03363 | Q8N5D0 | 0.50445  |
| 8925 | P03363 | P50502 | 0.57965  |
| 8926 | P03363 | Q9C0A1 | 0.30694  |
| 8927 | P03363 | Q96DE5 | 0.57272  |
| 8928 | P03363 | Q14526 | 0.65038  |
| 8929 | P03363 | P05388 | 0.76644  |
| 8930 | P03363 | A6NHJ4 | 0.22259  |
| 8931 | P03363 | P68871 | 0.13772  |
| 8932 | P03363 | Q9BYR7 | 0.42225  |
| 8933 | P03363 | Q8IZP2 | 0.24431  |
| 8934 | P03363 | Q9UMS5 | 0.34258  |
| 8935 | P03363 | Q9BR46 | 0.030925 |
| 8936 | P03363 | Q9UPY6 | 0.23868  |
| 8937 | P03363 | P35080 | 0.5487   |
| 8938 | P03363 | Q8N7R0 | 0.51853  |
| 8939 | P03363 | O43747 | 0.45256  |
| 8940 | P03363 | P33176 | 0.49905  |
| 8941 | P03363 | Q58F21 | 0.24784  |
| 8942 | P03363 | O60535 | 0.58527  |
| 8943 | P03363 | C9J3V5 | 0.19361  |
| 8944 | P03363 | Q9HAV4 | 0.90036  |
| 8945 | P03363 | Q9Y4R8 | 0.45672  |
| 8946 | P03363 | O60841 | 0.35355  |
| 8947 | P03363 | Q9BZF3 | 0.27268  |
| 8948 | P03363 | Q9UN79 | 0.92764  |
| 8949 | P03363 | Q9H9Y6 | 0.46246  |
| 8950 | P03363 | P58004 | 0.40313  |
| 8951 | P03363 | P0CG35 | 0.26541  |
| 8952 | P03363 | P78559 | 0.825    |
| 8953 | P03363 | Q9Y4H4 | 0.18763  |
| 8954 | P03363 | Q9BRK4 | 0.50364  |
| 8955 | P03363 | Q9Y2R2 | 0.28396  |
| 8956 | P03363 | Q96MX3 | 0.22259  |
| 8957 | P03363 | A8MXZ3 | 0.2934   |
| 8958 | P03363 | Q9NZU5 | 0.26504  |
| 8959 | P03363 | Q9BYV9 | 0.52046  |
| 8960 | P03363 | Q9H7U1 | 0.037873 |
| 8961 | P03363 | P16157 | 0.31254  |
| 8962 | P03363 | Q14194 | 0.44229  |
| 8963 | P03363 | Q9HB71 | 0.61939  |
| 8964 | P03363 | Q4G0A6 | 0.0456   |
| 8965 | P03363 | Q92764 | 0.78878  |
| 8966 | P03363 | P60896 | 0.24624  |
| 8967 | P03363 | Q9UJY4 | 0.38848  |
| 8968 | P03363 | P35579 | 0.26808  |

|      |        |        |          |
|------|--------|--------|----------|
| 8969 | P03363 | Q96MC9 | 0.045357 |
| 8970 | P03363 | Q8IU81 | 0.27476  |
| 8971 | P03363 | P61970 | 0.58902  |
| 8972 | P03363 | P14373 | 0.38494  |
| 8973 | P03363 | Q96FC7 | 0.23887  |
| 8974 | P03363 | Q13516 | 0.33206  |
| 8975 | P03363 | Q9UHI6 | 0.56335  |
| 8976 | P03363 | Q15554 | 0.36669  |
| 8977 | P03363 | Q9UJ04 | 0.15989  |
| 8978 | P03363 | Q6NZY4 | 0.70291  |
| 8979 | P03363 | Q96IU4 | 0.45816  |
| 8980 | P03363 | O75340 | 0.36952  |
| 8981 | P03363 | Q14781 | 0.71371  |
| 8982 | P03363 | Q9NZL4 | 0.4488   |
| 8983 | P03363 | Q9NY87 | 0.44815  |
| 8984 | P03363 | Q9H707 | 0.22259  |
| 8985 | P03363 | Q99996 | 0.53613  |
| 8986 | P03363 | P56177 | 0.49327  |
| 8987 | P03363 | Q7L4I2 | 0.15034  |
| 8988 | P03363 | Q9H094 | 0.24431  |
| 8989 | P03363 | Q2KHR2 | 0.46264  |
| 8990 | P03363 | Q3C1V8 | 0.73672  |
| 8991 | P03363 | Q96NG8 | 0.22259  |
| 8992 | P03363 | Q14247 | 0.49424  |
| 8993 | P03363 | Q9NVV9 | 0.76418  |
| 8994 | P03363 | Q9UMX1 | 0.37268  |
| 8995 | P03363 | P31150 | 0.33702  |
| 8996 | P03363 | P36402 | 0.47615  |
| 8997 | P03363 | P36578 | 0.61773  |
| 8998 | P03363 | O75607 | 0.78051  |
| 8999 | P03363 | O14786 | 0.088598 |
| 9000 | P03363 | Q86YA3 | 0.030796 |
| 9001 | P03363 | Q5TID7 | 0.29721  |
| 9002 | P03363 | Q9UC06 | 0.24904  |
| 9003 | P03363 | P78424 | 0.47247  |
| 9004 | P03363 | Q96SE7 | 0.22259  |
| 9005 | P03363 | Q9Y3C5 | 0.4394   |
| 9006 | P03363 | P60412 | 0.2934   |
| 9007 | P03363 | P09012 | 0.73095  |
| 9008 | P03363 | Q9ULR5 | 0.67568  |
| 9009 | P03363 | Q9UPZ3 | 0.24973  |
| 9010 | P03363 | O94811 | 0.60715  |
| 9011 | P03363 | Q96HW7 | 0.66095  |
| 9012 | P03363 | A2A288 | 0.25151  |
| 9013 | P03363 | P12524 | 0.49594  |
| 9014 | P03363 | Q96IZ0 | 0.65086  |
| 9015 | P03363 | P48444 | 0.34934  |
| 9016 | P03363 | Q71SY5 | 0.80211  |
| 9017 | P03363 | Q96T49 | 0.32285  |
| 9018 | P03363 | Q330K2 | 0.26859  |
| 9019 | P03363 | Q86YP4 | 0.51356  |
| 9020 | P03363 | A6NJB7 | 0.010954 |
| 9021 | P03363 | P49406 | 0.39181  |
| 9022 | P03363 | O75886 | 0.82862  |
| 9023 | P03363 | Q9BZQ8 | 0.25578  |
| 9024 | P03363 | Q63HQ0 | 0.2528   |
| 9025 | P03363 | P0CB48 | 0.27018  |
| 9026 | P03363 | Q9ULP0 | 0.20401  |
| 9027 | P03363 | Q6ZS46 | 0.016696 |
| 9028 | P03363 | P54259 | 0.76921  |
| 9029 | P03363 | Q96LW7 | 0.25057  |
| 9030 | P03363 | Q9BRR0 | 0.27601  |
| 9031 | P03363 | Q9Y375 | 0.61766  |
| 9032 | P03363 | Q13347 | 0.68795  |
| 9033 | P03363 | Q4VC05 | 0.091333 |
| 9034 | P03363 | Q8IUE1 | 0.51853  |
| 9035 | P03363 | P78412 | 0.55275  |
| 9036 | P03363 | Q99543 | 0.42213  |
| 9037 | P03363 | P0DI81 | 0.81958  |
| 9038 | P03363 | P08151 | 0.28425  |
| 9039 | P03363 | Q7L3S4 | 0.22259  |
| 9040 | P03363 | Q8N448 | 0.38768  |
| 9041 | P03363 | Q8NEZ5 | 0.52123  |
| 9042 | P03363 | Q3LI68 | 0.27762  |
| 9043 | P03363 | Q9H5I1 | 0.39947  |
| 9044 | P03363 | Q3SY46 | 0.27762  |

|      |        |        |          |
|------|--------|--------|----------|
| 9045 | P03363 | P0CB47 | 0.33983  |
| 9046 | P03363 | Q8N5M1 | 0.52667  |
| 9047 | P03363 | P30154 | 0.51162  |
| 9048 | P03363 | Q9H7D7 | 0.49651  |
| 9049 | P03363 | Q99704 | 0.34472  |
| 9050 | P03363 | P55199 | 0.70266  |
| 9051 | P03363 | Q9H7S9 | 0.53871  |
| 9052 | P03363 | Q96K62 | 0.22259  |
| 9053 | P03363 | P86452 | 0.49815  |
| 9054 | P03363 | P99999 | 0.35094  |
| 9055 | P03363 | Q96L92 | 0.68992  |
| 9056 | P03363 | Q96MT8 | 0.75421  |
| 9057 | P03363 | Q9BY41 | 0.28015  |
| 9058 | P03363 | Q5T7V8 | 0.9515   |
| 9059 | P03363 | Q9HCM1 | 0.031545 |
| 9060 | P03363 | Q9NS39 | 0.22949  |
| 9061 | P03363 | Q96BD8 | 0.47453  |
| 9062 | P03363 | P43378 | 0.30377  |
| 9063 | P03363 | Q9BTE3 | 0.45945  |
| 9064 | P03363 | P11387 | 0.5085   |
| 9065 | P03363 | P53539 | 0.44039  |
| 9066 | P03363 | Q99742 | 0.30683  |
| 9067 | P03363 | Q9NYK6 | 0.026447 |
| 9068 | P03363 | P07316 | 0.30454  |
| 9069 | P03363 | O95059 | 0.23233  |
| 9070 | P03363 | Q9NVQ4 | 0.29642  |
| 9071 | P03363 | Q96JF6 | 0.22259  |
| 9072 | P03363 | Q9UKV3 | 0.64173  |
| 9073 | P03363 | Q14590 | 0.22259  |
| 9074 | P03363 | Q96MU7 | 0.77943  |
| 9075 | P03363 | P60673 | 0.42339  |
| 9076 | P03363 | Q969E4 | 0.40525  |
| 9077 | P03363 | Q9Y2V2 | 0.51161  |
| 9078 | P03363 | Q9H5F2 | 0.24993  |
| 9079 | P03363 | Q9H4L7 | 0.35467  |
| 9080 | P03363 | O95561 | 0.018091 |
| 9081 | P03363 | P62753 | 0.59175  |
| 9082 | P03363 | Q7Z2Z1 | 0.59808  |
| 9083 | P03363 | O15078 | 0.48406  |
| 9084 | P03363 | Q9UHV9 | 0.74496  |
| 9085 | P03363 | Q92539 | 0.24986  |
| 9086 | P03363 | Q7L190 | 0.74576  |
| 9087 | P03363 | Q99848 | 0.23603  |
| 9088 | P03363 | Q9H492 | 0.40967  |
| 9089 | P03363 | Q9H693 | 0.070131 |
| 9090 | P03363 | O94992 | 0.93348  |
| 9091 | P03363 | P22314 | 0.26719  |
| 9092 | P03363 | Q9UJT9 | 0.37794  |
| 9093 | P03363 | Q86UE3 | 0.22259  |
| 9094 | P03363 | Q9BRU2 | 0.40004  |
| 9095 | P03363 | Q8N1B4 | 0.4726   |
| 9096 | P03363 | O43924 | 0.35572  |
| 9097 | P03363 | P62312 | 0.80462  |
| 9098 | P03363 | Q8WX92 | 0.97697  |
| 9099 | P03363 | Q96BK5 | 0.49669  |
| 9100 | P03363 | P17098 | 0.27166  |
| 9101 | P03363 | P62140 | 0.36618  |
| 9102 | P03363 | Q969T7 | 0.25497  |
| 9103 | P03363 | Q9BTP7 | 0.8364   |
| 9104 | P03363 | Q6IA86 | 0.5709   |
| 9105 | P03363 | P24863 | 0.79914  |
| 9106 | P03363 | Q69YI7 | 0.2575   |
| 9107 | P03363 | Q9GZP8 | 0.17372  |
| 9108 | P03363 | Q92530 | 0.12129  |
| 9109 | P03363 | Q96DG6 | 0.27319  |
| 9110 | P03363 | Q9H869 | 1.1148   |
| 9111 | P03363 | Q08AN1 | 0.22259  |
| 9112 | P03363 | P33552 | 0.094086 |
| 9113 | P03363 | Q5TBB1 | 0.26532  |
| 9114 | P03363 | Q14397 | 0.44287  |
| 9115 | P03363 | Q8TBZ0 | 0.3089   |
| 9116 | P03363 | P31267 | 0.38817  |
| 9117 | P03363 | Q86V48 | 0.18393  |
| 9118 | P03363 | Q3LI76 | 0.27762  |
| 9119 | P03363 | Q9BYE4 | 0.22177  |
| 9120 | P03363 | Q9UMY1 | 0.28674  |

|      |        |        |          |
|------|--------|--------|----------|
| 9121 | P03363 | Q15928 | 0.26735  |
| 9122 | P03363 | Q9UHP3 | 0.37382  |
| 9123 | P03363 | Q9NWW0 | 0.4314   |
| 9124 | P03363 | Q8IYK2 | 0.12321  |
| 9125 | P03363 | Q8ND04 | 0.53671  |
| 9126 | P03363 | Q14863 | 0.38392  |
| 9127 | P03363 | Q8WV37 | 0.42268  |
| 9128 | P03363 | Q96JZ2 | 0.37135  |
| 9129 | P03363 | Q02952 | 0.34899  |
| 9130 | P03363 | Q7Z398 | 0.22259  |
| 9131 | P03363 | Q43365 | 0.37669  |
| 9132 | P03363 | Q68EA5 | 0.22259  |
| 9133 | P03363 | Q96AB6 | 0.32272  |
| 9134 | P03363 | Q9H765 | 0.44922  |
| 9135 | P03363 | Q8NHV4 | 0.53181  |
| 9136 | P03363 | Q86WV1 | 0.53054  |
| 9137 | P03363 | Q15015 | 0.63436  |
| 9138 | P03363 | Q9UKN5 | 0.3036   |
| 9139 | P03363 | Q96SR6 | 0.20871  |
| 9140 | P03363 | Q96EP0 | 0.25625  |
| 9141 | P03363 | P62633 | 0.42539  |
| 9142 | P03363 | Q9ULM2 | 0.22259  |
| 9143 | P03363 | P61201 | 0.66158  |
| 9144 | P03363 | Q02447 | 0.27682  |
| 9145 | P03363 | Q9GZS0 | 0.27211  |
| 9146 | P03363 | P08651 | 0.54762  |
| 9147 | P03363 | P62081 | 0.64475  |
| 9148 | P03363 | Q96ND8 | 0.22259  |
| 9149 | P03363 | O60268 | 0.24431  |
| 9150 | P03363 | O43805 | 0.54347  |
| 9151 | P03363 | Q08170 | 0.38525  |
| 9152 | P03363 | P40925 | 0.14545  |
| 9153 | P03363 | A6NKH3 | 0.11974  |
| 9154 | P03363 | Q8N3J9 | 0.21805  |
| 9155 | P03363 | Q8N187 | 0.57185  |
| 9156 | P03363 | Q9NNW7 | 0.2431   |
| 9157 | P03363 | Q969Q5 | 0.30191  |
| 9158 | P03363 | Q96GS4 | 0.095381 |
| 9159 | P03363 | Q9ULJ3 | 0.58154  |
| 9160 | P03363 | P62910 | 0.38002  |
| 9161 | P03363 | P50452 | 0.64767  |
| 9162 | P03363 | Q8TAY7 | 0.16215  |
| 9163 | P03363 | Q96LC9 | 0.48067  |
| 9164 | P03363 | Q15022 | 0.46526  |
| 9165 | P03363 | Q86Y13 | 0.48105  |
| 9166 | P03363 | Q13362 | 0.28025  |
| 9167 | P03363 | Q06546 | 1.0523   |
| 9168 | P03363 | O60308 | 0.34026  |
| 9169 | P03363 | O75794 | 0.30998  |
| 9170 | P03363 | Q9NXH3 | 0.19151  |
| 9171 | P03363 | Q8NBT0 | 0.28241  |
| 9172 | P03363 | Q15562 | 0.65812  |
| 9173 | P03363 | Q9Y324 | 0.27944  |
| 9174 | P03363 | Q63ZY3 | 0.76114  |
| 9175 | P03363 | Q9BSH4 | 0.038259 |
| 9176 | P03363 | A8MTQ0 | 0.32961  |
| 9177 | P03363 | Q13952 | 0.61973  |
| 9178 | P03363 | Q8N1G4 | 0.5108   |
| 9179 | P03363 | O60306 | 0.30211  |
| 9180 | P03363 | Q9BYR3 | 0.2934   |
| 9181 | P03363 | Q9Y3D0 | 0.90135  |
| 9182 | P03363 | Q6P2D8 | 0.43184  |
| 9183 | P03363 | Q92990 | 0.24506  |
| 9184 | P03363 | Q9Y3R5 | 0.07289  |
| 9185 | P03363 | P50539 | 0.44312  |
| 9186 | P03363 | O95232 | 0.61235  |
| 9187 | P03363 | Q6PG37 | 0.22259  |
| 9188 | P03363 | Q9Y2K5 | 0.35279  |
| 9189 | P03363 | Q9BV90 | 0.33749  |
| 9190 | P03363 | P58340 | 0.62882  |
| 9191 | P03363 | Q96I59 | 0.17374  |
| 9192 | P03363 | Q1MSJ5 | 0.36327  |
| 9193 | P03363 | O75618 | 0.91266  |
| 9194 | P03363 | Q96MT3 | 0.52947  |
| 9195 | P03363 | Q9BYQ6 | 0.2934   |
| 9196 | P03363 | P30876 | 0.36417  |

|      |        |        |           |
|------|--------|--------|-----------|
| 9197 | P03363 | Q8TBZ2 | 0.30201   |
| 9198 | P03363 | Q0VG99 | 0.39445   |
| 9199 | P03363 | P30279 | 0.39242   |
| 9200 | P03363 | Q3LI77 | 0.27762   |
| 9201 | P03363 | Q7RTS7 | 0.42225   |
| 9202 | P03363 | Q8IYN6 | 0.0041725 |
| 9203 | P03363 | Q13228 | 0.98041   |
| 9204 | P03363 | Q96PS1 | 0.0029525 |
| 9205 | P03363 | Q5T6F2 | 0.023357  |
| 9206 | P03363 | O76014 | 0.88908   |
| 9207 | P03363 | A9QM74 | 0.55798   |
| 9208 | P03363 | Q69YU3 | 0.24431   |
| 9209 | P03363 | O75112 | 0.38475   |
| 9210 | P03363 | Q8IXM3 | 0.33508   |
| 9211 | P03363 | Q93075 | 0.12345   |
| 9212 | P03363 | A9UHW6 | 0.86014   |
| 9213 | P03363 | O14933 | 0.39987   |
| 9214 | P03363 | Q96LA8 | 0.44816   |
| 9215 | P03363 | P0CG30 | 0.42083   |
| 9216 | P03363 | Q9Y2M0 | 0.31143   |
| 9217 | P03363 | Q99575 | 0.61005   |
| 9218 | P03363 | O43167 | 0.63436   |
| 9219 | P03363 | Q969V4 | 0.26324   |
| 9220 | P03363 | Q6ZR52 | 0.22259   |
| 9221 | P03363 | Q9BW85 | 0.093894  |
| 9222 | P03363 | Q14331 | 0.38135   |
| 9223 | P03363 | Q09028 | 0.43536   |
| 9224 | P03363 | P13010 | 0.2494    |
| 9225 | P03363 | Q02556 | 0.39174   |
| 9226 | P03363 | Q5VY09 | 0.0055957 |
| 9227 | P03363 | Q92831 | 0.35003   |
| 9228 | P03363 | Q03933 | 0.68803   |
| 9229 | P03363 | Q8WYP5 | 0.47412   |
| 9230 | P03363 | Q8WVC0 | 0.73638   |
| 9231 | P03363 | Q3ZLR7 | 0.029024  |
| 9232 | P03363 | Q86WQ0 | 0.59613   |
| 9233 | P03363 | Q9H444 | 0.67311   |
| 9234 | P03363 | Q96EK4 | 1.0421    |
| 9235 | P03363 | P14868 | 0.51439   |
| 9236 | P03363 | Q96RL1 | 0.56654   |
| 9237 | P03363 | P25963 | 0.30951   |
| 9238 | P03363 | Q8IX01 | 0.4444    |
| 9239 | P03363 | O60422 | 0.48374   |
| 9240 | P03363 | Q9HAN9 | 0.27236   |
| 9241 | P03363 | Q9BUH8 | 0.63704   |
| 9242 | P03363 | Q9UKW6 | 0.64663   |
| 9243 | P03363 | P41236 | 0.40351   |
| 9244 | P03363 | P51991 | 0.41079   |
| 9245 | P03363 | Q9NQW6 | 0.3517    |
| 9246 | P03363 | Q96LI6 | 0.69875   |
| 9247 | P03363 | Q15291 | 0.27952   |
| 9248 | P03363 | Q9UD71 | 0.10934   |
| 9249 | P03363 | P12757 | 0.40275   |
| 9250 | P03363 | Q9HCS7 | 0.6116    |
| 9251 | P03363 | O95478 | 0.3856    |
| 9252 | P03363 | P62508 | 0.35502   |
| 9253 | P03363 | Q6ZU65 | 0.29721   |
| 9254 | P03363 | O60232 | 0.59071   |
| 9255 | P03363 | Q9BR76 | 0.60315   |
| 9256 | P03363 | Q14457 | 0.40216   |
| 9257 | P03363 | P14651 | 0.37196   |
| 9258 | P03363 | Q15744 | 0.36578   |
| 9259 | P03363 | Q5EBL2 | 0.24904   |
| 9260 | P03363 | Q9Y2W6 | 0.25348   |
| 9261 | P03363 | Q01831 | 0.62845   |
| 9262 | P03363 | Q66GS9 | 0.40799   |
| 9263 | P03363 | P20248 | 0.68905   |
| 9264 | P03363 | Q9H9Y2 | 0.2976    |
| 9265 | P03363 | Q7Z569 | 0.23048   |
| 9266 | P03363 | O75170 | 0.68162   |
| 9267 | P03363 | Q96GY3 | 0.55814   |
| 9268 | P03363 | O75817 | 0.69177   |
| 9269 | P03363 | P0CG00 | 0.23235   |
| 9270 | P03363 | Q9HC52 | 0.65861   |
| 9271 | P03363 | Q8NEM7 | 0.50162   |
| 9272 | P03363 | Q13561 | 0.59303   |

|      |        |        |          |
|------|--------|--------|----------|
| 9273 | P03363 | Q96NJ6 | 0.23615  |
| 9274 | P03363 | P62328 | 0.4696   |
| 9275 | P03363 | Q86VF2 | 0.39326  |
| 9276 | P03363 | Q8WW12 | 0.71797  |
| 9277 | P03363 | P25205 | 0.31248  |
| 9278 | P03363 | Q03112 | 0.21692  |
| 9279 | P03363 | P61081 | 0.21863  |
| 9280 | P03363 | Q13888 | 0.29944  |
| 9281 | P03363 | P60369 | 0.2934   |
| 9282 | P03363 | Q9UEG4 | 0.22259  |
| 9283 | P03363 | O60663 | 0.52574  |
| 9284 | P03363 | Q8N998 | 0.4314   |
| 9285 | P03363 | Q9NS37 | 0.81551  |
| 9286 | P03363 | Q6UX04 | 0.23513  |
| 9287 | P03363 | O60437 | 0.73932  |
| 9288 | P03363 | O00213 | 0.24302  |
| 9289 | P03363 | Q14657 | 0.11203  |
| 9290 | P03363 | Q86X83 | 0.53508  |
| 9291 | P03363 | Q7L1V2 | 0.53508  |
| 9292 | P03363 | O95568 | 0.23591  |
| 9293 | P03363 | O95219 | 0.27247  |
| 9294 | P03363 | Q9H706 | 0.53508  |
| 9295 | P03363 | P09914 | 0.39272  |
| 9296 | P03363 | Q14258 | 0.71712  |
| 9297 | P03363 | Q96QC0 | 0.12226  |
| 9298 | P03363 | Q8N0U4 | 0.24431  |
| 9299 | P03363 | Q9HAH1 | 0.22259  |
| 9300 | P03363 | Q9BXL5 | 0.53594  |
| 9301 | P03363 | Q6UWZ7 | 0.51381  |
| 9302 | P03363 | Q6IPT2 | 0.062103 |
| 9303 | P03363 | Q92734 | 0.48973  |
| 9304 | P03363 | Q96RY5 | 0.39755  |
| 9305 | P03363 | P53672 | 0.084102 |
| 9306 | P03363 | Q9H7L9 | 0.54776  |
| 9307 | P03363 | Q8IYI6 | 0.58947  |
| 9308 | P03363 | Q9UQF2 | 0.36837  |
| 9309 | P03363 | P41218 | 0.5617   |
| 9310 | P03363 | Q8N7U7 | 0.55275  |
| 9311 | P03363 | Q92783 | 0.54832  |
| 9312 | P03363 | Q9Y606 | 0.31774  |
| 9313 | P03363 | Q15014 | 0.8952   |
| 9314 | P03363 | O43347 | 0.28766  |
| 9315 | P03363 | Q9BWW7 | 0.24904  |
| 9316 | P03363 | Q8WWK9 | 0.40815  |
| 9317 | P03363 | Q8NCE8 | 0.042292 |
| 9318 | P03363 | O95347 | 0.4209   |
| 9319 | P03363 | P56279 | 0.55437  |
| 9320 | P03363 | P02728 | 0.11203  |
| 9321 | P03363 | Q86Y46 | 0.48919  |
| 9322 | P03363 | Q75QN2 | 0.66095  |
| 9323 | P03363 | A6NHS1 | 0.031371 |
| 9324 | P03363 | Q9BQC3 | 0.22979  |
| 9325 | P03363 | Q6NX49 | 0.22259  |
| 9326 | P03363 | P18847 | 0.92731  |
| 9327 | P03363 | Q8NFB3 | 0.47201  |
| 9328 | P03363 | P45973 | 0.50869  |
| 9329 | P03363 | Q13794 | 0.2216   |
| 9330 | P03363 | Q99929 | 0.34906  |
| 9331 | P03363 | P14866 | 0.87459  |
| 9332 | P03363 | Q05048 | 0.7758   |
| 9333 | P03363 | Q9Y2P0 | 0.22259  |
| 9334 | P03363 | Q3LI62 | 0.27762  |
| 9335 | P03363 | Q96HY6 | 0.40763  |
| 9336 | P03363 | P61513 | 0.29453  |
| 9337 | P03363 | P49589 | 0.35416  |
| 9338 | P03363 | P46776 | 0.61631  |
| 9339 | P03363 | Q9UKX2 | 0.2721   |
| 9340 | P03363 | O43303 | 0.76562  |
| 9341 | P03363 | Q96BW1 | 0.4314   |
| 9342 | P03363 | Q9HD15 | 0.5654   |
| 9343 | P03363 | Q9P2N7 | 0.20346  |
| 9344 | P03363 | Q15170 | 0.49089  |
| 9345 | P03363 | Q86XI2 | 0.35534  |
| 9346 | P03363 | Q5U623 | 0.66899  |
| 9347 | P03363 | O75346 | 0.20871  |
| 9348 | P03363 | Q9GZL8 | 0.11203  |



|      |        |        |          |
|------|--------|--------|----------|
| 9349 | P03363 | Q9BYT5 | 0.2934   |
| 9350 | P03363 | P13640 | 0.50003  |
| 9351 | P03363 | Q5VZK9 | 0.32262  |
| 9352 | P03363 | O60281 | 0.33141  |
| 9353 | P03363 | Q13356 | 0.15851  |
| 9354 | P03363 | Q15024 | 0.60038  |
| 9355 | P03363 | Q9HBT8 | 0.22259  |
| 9356 | P03363 | Q10586 | 0.51727  |
| 9357 | P03363 | Q15393 | 0.42415  |
| 9358 | P03363 | P23610 | 0.24993  |
| 9359 | P03363 | Q9UPP2 | 0.30119  |
| 9360 | P03363 | Q9NRF9 | 0.39837  |
| 9361 | P03363 | Q6ZV50 | 0.43182  |
| 9362 | P03363 | O75132 | 0.50836  |
| 9363 | P03363 | O43763 | 0.47248  |
| 9364 | P03363 | Q9UPX8 | 0.39325  |
| 9365 | P03363 | Q92879 | 0.52939  |
| 9366 | P03363 | P60372 | 0.2934   |
| 9367 | P03363 | Q6UWF3 | 0.082721 |
| 9368 | P03363 | Q13405 | 0.60871  |
| 9369 | P03363 | Q14980 | 0.69467  |
| 9370 | P03363 | Q13111 | 0.72587  |
| 9371 | P03363 | Q9NVU7 | 0.41814  |
| 9372 | P03363 | P37275 | 0.67919  |
| 9373 | P03363 | Q9Y266 | 0.36647  |
| 9374 | P03363 | Q96NG3 | 0.24431  |
| 9375 | P03363 | O75604 | 0.26611  |
| 9376 | P03363 | A5YKK6 | 0.81423  |
| 9377 | P03363 | Q9GZQ3 | 0.68145  |
| 9378 | P03363 | Q06330 | 0.34904  |
| 9379 | P03363 | Q8WVE0 | 0.19118  |
| 9380 | P03363 | Q96B97 | 0.41687  |
| 9381 | P03363 | P32780 | 0.48357  |
| 9382 | P03363 | Q969W8 | 0.22259  |
| 9383 | P03363 | Q99547 | 0.71778  |
| 9384 | P03363 | Q9BRX5 | 0.19116  |
| 9385 | P03363 | Q96AB3 | 0.69294  |
| 9386 | P03363 | O14980 | 0.58115  |
| 9387 | P03363 | Q8TDD2 | 0.42044  |
| 9388 | P03363 | Q86US8 | 0.34808  |
| 9389 | P03363 | Q8TAQ2 | 0.8015   |
| 9390 | P03363 | P20700 | 0.38444  |
| 9391 | P03363 | Q8IYF1 | 0.25394  |
| 9392 | P03363 | P37802 | 0.42506  |
| 9393 | P03363 | P0CJ89 | 0.49158  |
| 9394 | P03363 | Q16531 | 0.70295  |
| 9395 | P03363 | Q7L9B9 | 0.16157  |
| 9396 | P03363 | Q3KNV8 | 0.58621  |
| 9397 | P03363 | Q8N1V2 | 0.68162  |
| 9398 | P03363 | Q96GM8 | 0.24981  |
| 9399 | P03363 | Q8WW35 | 0.53508  |
| 9400 | P03363 | P56182 | 0.24032  |
| 9401 | P03363 | O00471 | 0.38182  |
| 9402 | P03363 | Q9Y5R4 | 0.17651  |
| 9403 | P03363 | Q8NDW4 | 0.22259  |
| 9404 | P03363 | Q5TKA1 | 0.32123  |
| 9405 | P03363 | P63313 | 0.26541  |
| 9406 | P03363 | O76003 | 0.34877  |
| 9407 | P03363 | Q8IWA0 | 0.29721  |
| 9408 | P03363 | Q6ZRH4 | 0.21212  |
| 9409 | P03363 | Q969T9 | 0.53819  |
| 9410 | P03363 | Q8NFW9 | 0.24294  |
| 9411 | P03363 | Q9NWZ8 | 0.8766   |
| 9412 | P03363 | P09913 | 0.45875  |
| 9413 | P03363 | Q9Y4A8 | 0.58318  |
| 9414 | P03363 | Q92759 | 0.45965  |
| 9415 | P03363 | Q9P2K1 | 0.12567  |
| 9416 | P03363 | P60368 | 0.2934   |
| 9417 | P03363 | Q9UI10 | 0.33727  |
| 9418 | P03363 | P35637 | 0.58619  |
| 9419 | P03363 | P28356 | 0.36577  |
| 9420 | P03363 | Q12769 | 0.58428  |
| 9421 | P03363 | O00410 | 0.9085   |
| 9422 | P03363 | Q9BYD3 | 0.33395  |
| 9423 | P03363 | O60303 | 0.15233  |
| 9424 | P03363 | O75533 | 0.47189  |

|      |        |        |          |
|------|--------|--------|----------|
| 9425 | P03363 | Q6MZP7 | 0.48905  |
| 9426 | P03363 | Q8WV24 | 0.5738   |
| 9427 | P03363 | P23760 | 0.82864  |
| 9428 | P03363 | P19387 | 0.42829  |
| 9429 | P03363 | Q13283 | 0.35547  |
| 9430 | P03363 | Q2LD37 | 0.32448  |
| 9431 | P03363 | Q6ZRS2 | 0.31456  |
| 9432 | P03363 | Q9BU19 | 0.22259  |
| 9433 | P03363 | Q00005 | 0.51561  |
| 9434 | P03363 | Q9NQ87 | 0.40245  |
| 9435 | P03363 | Q96QK1 | 0.65432  |
| 9436 | P03363 | Q96MR7 | 0.19561  |
| 9437 | P03363 | Q13439 | 0.63397  |
| 9438 | P03363 | Q9ULT8 | 0.40895  |
| 9439 | P03363 | P42167 | 0.38589  |
| 9440 | P03363 | O15111 | 0.26614  |
| 9441 | P03363 | Q9Y3B2 | 0.67734  |
| 9442 | P03363 | Q96DX8 | 0.34077  |
| 9443 | P03363 | P09086 | 0.46646  |
| 9444 | P03363 | P41250 | 0.1205   |
| 9445 | P03363 | Q9H2P0 | 0.23965  |
| 9446 | P03363 | Q96A65 | 0.21524  |
| 9447 | P03363 | Q9NX65 | 0.22259  |
| 9448 | P03363 | P82914 | 0.23236  |
| 9449 | P03363 | P17947 | 0.49636  |
| 9450 | P03363 | Q7RTV3 | 0.46321  |
| 9451 | P03363 | Q8N720 | 0.77042  |
| 9452 | P03363 | Q64ET8 | 0.22504  |
| 9453 | P03363 | O15379 | 0.33766  |
| 9454 | P03363 | Q9H2F5 | 0.35654  |
| 9455 | P03363 | P23490 | 0.81536  |
| 9456 | P03363 | Q9Y678 | 0.44128  |
| 9457 | P03363 | Q9H0G5 | 0.74233  |
| 9458 | P03363 | Q01892 | 0.60294  |
| 9459 | P03363 | P78413 | 0.47984  |
| 9460 | P03363 | Q9NZW5 | 0.25208  |
| 9461 | P03363 | Q9GZR2 | 0.36039  |
| 9462 | P03363 | O15304 | 0.53435  |
| 9463 | P03363 | Q96BP3 | 0.31536  |
| 9464 | P03363 | O95600 | 0.22259  |
| 9465 | P03363 | Q9BXW4 | 0.49972  |
| 9466 | P03363 | Q99750 | 0.5628   |
| 9467 | P03363 | O94888 | 0.51791  |
| 9468 | P03363 | Q96LX8 | 0.22259  |
| 9469 | P03363 | P53677 | 0.25223  |
| 9470 | P03363 | O14910 | 0.51012  |
| 9471 | P03363 | Q86Z20 | 0.23247  |
| 9472 | P03363 | Q9H2T7 | 0.49712  |
| 9473 | P03363 | Q7L592 | 0.065964 |
| 9474 | P03363 | Q9UBI9 | 0.053627 |
| 9475 | P03363 | Q9UBF9 | 0.30651  |
| 9476 | P03363 | P50135 | 0.23356  |
| 9477 | P03363 | Q69383 | 0.55152  |
| 9478 | P03363 | P61254 | 0.30144  |
| 9479 | P03363 | Q6NXT1 | 0.3971   |
| 9480 | P03363 | Q9P0J6 | 0.19909  |
| 9481 | P03363 | Q9NVU0 | 0.20632  |
| 9482 | P03363 | P62273 | 0.27332  |
| 9483 | P03363 | Q9NR46 | 0.62994  |
| 9484 | P03363 | Q6UW56 | 0.27163  |
| 9485 | P03363 | Q6P2E9 | 0.81787  |
| 9486 | P03363 | Q13618 | 0.31323  |
| 9487 | P03363 | Q9HCH0 | 0.078419 |
| 9488 | P03363 | Q9UHC1 | 0.41095  |
| 9489 | P03363 | O00505 | 0.75292  |
| 9490 | P03363 | Q9H9G7 | 0.78857  |
| 9491 | P03363 | Q8IWF6 | 0.18807  |
| 9492 | P03363 | Q9UHB9 | 0.31806  |
| 9493 | P03363 | Q15691 | 0.46332  |
| 9494 | P03363 | O60784 | 0.52557  |
| 9495 | P03363 | P51532 | 0.28719  |
| 9496 | P03363 | Q8N9V7 | 0.18084  |
| 9497 | P03363 | Q99856 | 0.71906  |
| 9498 | P03363 | Q15388 | 0.17197  |
| 9499 | P03363 | Q96AH0 | 0.34766  |
| 9500 | P03363 | Q9P2M1 | 0.7338   |

|      |        |        |           |
|------|--------|--------|-----------|
| 9501 | P03363 | P61218 | 0.21827   |
| 9502 | P03363 | Q16514 | 0.578     |
| 9503 | P03363 | Q6PF06 | 0.076158  |
| 9504 | P03363 | Q3SY84 | 0.67214   |
| 9505 | P03363 | Q9BV86 | 0.37626   |
| 9506 | P03363 | P17024 | 0.22259   |
| 9507 | P03363 | Q96JP2 | 0.34823   |
| 9508 | P03363 | Q15929 | 0.22259   |
| 9509 | P03363 | P20719 | 0.21786   |
| 9510 | P03363 | O95155 | 0.29362   |
| 9511 | P03363 | P09651 | 0.44564   |
| 9512 | P03363 | P59991 | 0.2934    |
| 9513 | P03363 | Q9NX01 | 0.37014   |
| 9514 | P03363 | Q6ZQV5 | 0.22259   |
| 9515 | P03363 | P32969 | 0.49565   |
| 9516 | P03363 | Q9H7C9 | 0.30037   |
| 9517 | P03363 | O15049 | 0.12181   |
| 9518 | P03363 | Q9NRN9 | 0.19118   |
| 9519 | P03363 | Q7RTS3 | 0.23351   |
| 9520 | P03363 | Q8IWP9 | 0.12329   |
| 9521 | P03363 | P78537 | 0.50712   |
| 9522 | P03363 | Q96MY1 | 0.032717  |
| 9523 | P03363 | Q9BWG4 | 0.27432   |
| 9524 | P03363 | Q01082 | 0.40697   |
| 9525 | P03363 | O14925 | 0.2129    |
| 9526 | P03363 | P28347 | 0.84678   |
| 9527 | P03363 | Q14738 | 0.78523   |
| 9528 | P03363 | Q95684 | 0.67602   |
| 9529 | P03363 | Q92901 | 0.36325   |
| 9530 | P03363 | Q8TE02 | 1.0341    |
| 9531 | P03363 | O95257 | 0.44497   |
| 9532 | P03363 | Q56P03 | 0.40055   |
| 9533 | P03363 | Q9NYJ8 | 0.23982   |
| 9534 | P03363 | P31271 | 0.24737   |
| 9535 | P03363 | P08579 | 0.67949   |
| 9536 | P03363 | Q0D2K3 | 0.22914   |
| 9537 | P03363 | P06733 | 0.55389   |
| 9538 | P03363 | Q9NZ63 | 0.49651   |
| 9539 | P03363 | Q9H0N5 | 0.40544   |
| 9540 | P03363 | Q6P582 | 0.36547   |
| 9541 | P03363 | P62736 | 0.16255   |
| 9542 | P03363 | Q7Z2W4 | 0.33493   |
| 9543 | P03363 | Q9P243 | 0.38776   |
| 9544 | P03363 | Q494X3 | 0.22259   |
| 9545 | P03363 | Q15459 | 0.73864   |
| 9546 | P03363 | Q8IZL8 | 0.8314    |
| 9547 | P03363 | Q14093 | 0.13285   |
| 9548 | P03363 | P82970 | 0.43823   |
| 9549 | P03363 | Q9H1D9 | 0.46685   |
| 9550 | P03363 | Q3LI83 | 0.42225   |
| 9551 | P03363 | Q8TE68 | 0.29734   |
| 9552 | P03363 | Q5T8I9 | 0.2648    |
| 9553 | P03363 | Q14160 | 0.33772   |
| 9554 | P03363 | Q8N5N7 | 0.22496   |
| 9555 | P03363 | O75909 | 0.77864   |
| 9556 | P03363 | Q9UJW0 | 0.557     |
| 9557 | P03363 | P78352 | 0.31602   |
| 9558 | P03363 | Q9BQN1 | 0.0077299 |
| 9559 | P03363 | Q7Z6E9 | 0.62903   |
| 9560 | P03363 | Q9NZ52 | 0.38779   |
| 9561 | P03363 | P59022 | 0.11203   |
| 9562 | P03363 | Q9BQG0 | 0.48602   |
| 9563 | P03363 | Q3SXZ3 | 0.22259   |
| 9564 | P03363 | Q969S8 | 0.55005   |
| 9565 | P03363 | Q9H8M7 | 0.71136   |
| 9566 | P03363 | Q9BZK7 | 0.62021   |
| 9567 | P03363 | Q8N1G2 | 0.56339   |
| 9568 | P03363 | Q9NYB0 | 0.48993   |
| 9569 | P03363 | Q9HBH7 | 0.36878   |
| 9570 | P03363 | Q8IY67 | 0.33526   |
| 9571 | P03363 | Q9NX02 | 0.36095   |
| 9572 | P03363 | Q8NHW3 | 0.37255   |
| 9573 | P03363 | Q9NX70 | 0.86967   |
| 9574 | P03363 | Q9Y253 | 0.268     |
| 9575 | P03363 | Q12933 | 0.49134   |
| 9576 | P03363 | Q9GZT8 | 0.67801   |

|      |        |        |          |
|------|--------|--------|----------|
| 9577 | P03363 | Q96BP2 | 0.96284  |
| 9578 | P03363 | Q9ULW0 | 0.6575   |
| 9579 | P03363 | Q86SE9 | 0.6351   |
| 9580 | P03363 | O43439 | 0.6948   |
| 9581 | P03363 | O75818 | 0.27957  |
| 9582 | P03363 | Q96BU1 | 0.15936  |
| 9583 | P03363 | Q9NUU7 | 0.34231  |
| 9584 | P03363 | Q8N8B7 | 0.23135  |
| 9585 | P03363 | P04198 | 0.66142  |
| 9586 | P03363 | Q8IYD1 | 0.3868   |
| 9587 | P03363 | P46778 | 0.36325  |
| 9588 | P03363 | Q96MR9 | 0.22259  |
| 9589 | P03363 | P61583 | 0.22504  |
| 9590 | P03363 | O94925 | 0.34759  |
| 9591 | P03363 | Q15056 | 0.50955  |
| 9592 | P03363 | P18850 | 0.48214  |
| 9593 | P03363 | Q9H2W2 | 0.2434   |
| 9594 | P03363 | Q9H6Z9 | 0.28584  |
| 9595 | P03363 | O95793 | 0.46241  |
| 9596 | P03363 | P51946 | 0.30671  |
| 9597 | P03363 | Q14847 | 0.27755  |
| 9598 | P03363 | Q9ULD0 | 0.21264  |
| 9599 | P03363 | Q9H7T9 | 0.80817  |
| 9600 | P03363 | Q8NCP5 | 0.22259  |
| 9601 | P03363 | Q9H7E2 | 0.49575  |
| 9602 | P03363 | Q70Z53 | 0.71827  |
| 9603 | P03363 | Q13045 | 0.95508  |
| 9604 | P03363 | Q9BXL8 | 0.22504  |
| 9605 | P03363 | Q6IPX3 | 0.40525  |
| 9606 | P03363 | Q5HYK9 | 0.22259  |
| 9607 | P03363 | Q92597 | 0.50818  |
| 9608 | P03363 | Q5T1R4 | 0.30864  |
| 9609 | P03363 | Q8N9U0 | 0.22504  |
| 9610 | P03363 | Q9Y3C6 | 0.16819  |
| 9611 | P03363 | Q9BYG8 | 0.26118  |
| 9612 | P03363 | Q9UL59 | 0.22259  |
| 9613 | P03363 | P25490 | 0.25603  |
| 9614 | P03363 | Q9Y5Q9 | 0.2357   |
| 9615 | P03363 | Q8IUB9 | 0.27762  |
| 9616 | P03363 | Q9NVS2 | 0.20437  |
| 9617 | P03363 | Q6EKJ0 | 0.34087  |
| 9618 | P03363 | O43264 | 0.32891  |
| 9619 | P03363 | Q3SYF9 | 0.27762  |
| 9620 | P03363 | Q01826 | 0.62592  |
| 9621 | P03363 | Q99733 | 0.81107  |
| 9622 | P03363 | Q9NY12 | 0.25742  |
| 9623 | P03363 | Q12988 | 0.48126  |
| 9624 | P03363 | A6NDD8 | 0.24431  |
| 9625 | P03363 | P53805 | 0.74837  |
| 9626 | P03363 | Q8IYH5 | 0.31869  |
| 9627 | P03363 | Q8TCI5 | 0.60829  |
| 9628 | P03363 | Q9NUL3 | 0.69484  |
| 9629 | P03363 | Q9UBC9 | 0.72501  |
| 9630 | P03363 | O95201 | 0.63436  |
| 9631 | P03363 | Q7Z739 | 0.53508  |
| 9632 | P03363 | O14558 | 0.82731  |
| 9633 | P03363 | Q9Y3D5 | 0.20437  |
| 9634 | P03363 | Q3LI70 | 0.27762  |
| 9635 | P03363 | Q8TES7 | 0.71462  |
| 9636 | P03363 | Q96HZ4 | 0.33571  |
| 9637 | P03363 | Q9UKI9 | 1.1092   |
| 9638 | P03363 | Q6PB30 | 0.043362 |
| 9639 | P03363 | Q01469 | 0.50439  |
| 9640 | P03363 | Q5T4T6 | 0.29721  |
| 9641 | P03363 | Q99550 | 0.34285  |
| 9642 | P03363 | Q9H1X1 | 0.12748  |
| 9643 | P03363 | P61927 | 0.30094  |
| 9644 | P03363 | O95397 | 0.21406  |
| 9645 | P03363 | Q9P215 | 0.33341  |
| 9646 | P03363 | Q8NHQ1 | 1.037    |
| 9647 | P03363 | O75436 | 0.60086  |
| 9648 | P03363 | O60765 | 0.25814  |
| 9649 | P03363 | O00463 | 0.36759  |
| 9650 | P03363 | O00399 | 0.32273  |
| 9651 | P03363 | Q8NBT2 | 0.47259  |
| 9652 | P03363 | Q13625 | 0.49183  |

|      |        |        |         |
|------|--------|--------|---------|
| 9653 | P03363 | Q5T5D7 | 0.22259 |
| 9654 | P03363 | Q2YD98 | 0.37765 |
| 9655 | P03363 | Q96BT7 | 0.2333  |
| 9656 | P03363 | O75526 | 0.29576 |
| 9657 | P03363 | O14602 | 0.53394 |
| 9658 | P03363 | Q7Z4V5 | 0.24232 |
| 9659 | P03363 | O95922 | 0.2015  |
| 9660 | P03363 | P82930 | 0.22496 |
| 9661 | P03363 | P17481 | 0.26245 |
| 9662 | P03363 | Q16384 | 0.4106  |
| 9663 | P03363 | Q9HC35 | 0.36243 |
| 9664 | P03363 | Q9Y6X8 | 0.58757 |
| 9665 | P03363 | Q8NDQ6 | 0.40237 |
| 9666 | P03363 | Q9BUX1 | 0.61271 |
| 9667 | P03363 | P50479 | 0.29734 |
| 9668 | P03363 | P09972 | 0.35995 |
| 9669 | P03363 | Q5SXJ2 | 0.24431 |
| 9670 | P03363 | Q9HCL3 | 0.22259 |
| 9671 | P03363 | Q7RTV0 | 0.48831 |
| 9672 | P03363 | P53041 | 0.43173 |
| 9673 | P03363 | Q9UBL3 | 0.41386 |
| 9674 | P03363 | Q14154 | 0.49395 |
| 9675 | P03363 | P78358 | 0.7338  |
| 9676 | P03363 | P50570 | 0.2511  |
| 9677 | P03363 | Q8N140 | 0.78308 |
| 9678 | P03363 | Q9UBQ5 | 0.81189 |
| 9679 | P03363 | Q5VUG0 | 0.43003 |
| 9680 | P03363 | O14497 | 0.39214 |
| 9681 | P03363 | P31946 | 0.36331 |
| 9682 | P03363 | Q9Y2Q9 | 0.23415 |
| 9683 | P03363 | Q52LR7 | 0.37752 |
| 9684 | P03363 | Q9BWD1 | 0.24074 |
| 9685 | P03363 | O75143 | 0.61596 |
| 9686 | P03363 | O75376 | 0.30261 |
| 9687 | P03363 | O60447 | 0.4447  |
| 9688 | P03363 | O60671 | 0.36482 |
| 9689 | P03363 | Q96GN5 | 0.67923 |
| 9690 | P03363 | Q8TCN5 | 0.22259 |
| 9691 | P03363 | Q5JTD0 | 0.78877 |
| 9692 | P03363 | Q6BDS2 | 0.47569 |
| 9693 | P03363 | Q9P2D0 | 0.31387 |
| 9694 | P03363 | O95613 | 0.59348 |
| 9695 | P03363 | Q9H0C5 | 0.75422 |
| 9696 | P03363 | Q9BRR8 | 0.23307 |
| 9697 | P03363 | O60907 | 0.50996 |
| 9698 | P03363 | Q8NHR9 | 0.2591  |
| 9699 | P03363 | Q9UJC5 | 0.21789 |
| 9700 | P03363 | P29558 | 0.55892 |
| 9701 | P03363 | P57723 | 0.41994 |
| 9702 | P03363 | Q9H6U6 | 0.88506 |
| 9703 | P03363 | Q86VQ1 | 0.24431 |
| 9704 | P03363 | Q9UPR3 | 0.81883 |
| 9705 | P03363 | Q8N883 | 0.22259 |
| 9706 | P03363 | Q8N9N5 | 0.23982 |
| 9707 | P03363 | Q16520 | 0.95025 |
| 9708 | P03363 | Q53EQ6 | 0.4261  |
| 9709 | P03363 | Q9NTK5 | 0.50737 |
| 9710 | P03363 | O00425 | 0.64297 |
| 9711 | P03363 | Q9UN36 | 0.48931 |
| 9712 | P03363 | Q16629 | 0.55727 |
| 9713 | P03363 | Q01543 | 0.47995 |
| 9714 | P03363 | Q99456 | 1.0007  |
| 9715 | P03363 | Q9HCK5 | 0.78857 |
| 9716 | P03363 | Q7Z589 | 0.42212 |
| 9717 | P03363 | P62891 | 0.36325 |
| 9718 | P03363 | P42704 | 0.86102 |
| 9719 | P03363 | Q6PJG2 | 0.6171  |
| 9720 | P03363 | Q15398 | 0.84392 |
| 9721 | P03363 | Q9Y2P8 | 0.26821 |
| 9722 | P03363 | Q8IUC3 | 0.27762 |
| 9723 | P03363 | O94986 | 0.94906 |
| 9724 | P03363 | Q9Y462 | 0.59365 |
| 9725 | P03363 | E7ETH6 | 0.20893 |
| 9726 | P03363 | Q9HCD5 | 0.89393 |
| 9727 | P03363 | Q15910 | 0.3586  |
| 9728 | P03363 | P15621 | 0.40375 |

|      |        |        |          |
|------|--------|--------|----------|
| 9729 | P03363 | Q8NBB4 | 0.268    |
| 9730 | P03363 | Q6P9A1 | 0.22259  |
| 9731 | P03363 | P68363 | 0.36174  |
| 9732 | P03363 | Q7Z6K1 | 0.2902   |
| 9733 | P03363 | Q15545 | 0.67254  |
| 9734 | P03363 | Q9UMX0 | 0.64738  |
| 9735 | P03363 | O60902 | 0.30469  |
| 9736 | P03363 | Q9BPX5 | 0.24407  |
| 9737 | P03363 | Q9Y3A5 | 0.60694  |
| 9738 | P03363 | Q9NTX7 | 0.52266  |
| 9739 | P03363 | Q6NUQ1 | 0.52415  |
| 9740 | P03363 | P49354 | 0.38697  |
| 9741 | P03363 | A6NF01 | 0.39059  |
| 9742 | P03363 | Q96FI4 | 0.17657  |
| 9743 | P03363 | Q96P70 | 0.94159  |
| 9744 | P03363 | O94967 | 0.23182  |
| 9745 | P03363 | P17030 | 0.22259  |
| 9746 | P03363 | Q16667 | 0.25565  |
| 9747 | P03363 | Q6NT89 | 0.25225  |
| 9748 | P03363 | Q92889 | 0.24903  |
| 9749 | P03363 | B9ZVM9 | 0.091375 |
| 9750 | P03363 | Q9UC07 | 0.24904  |
| 9751 | P03363 | Q8ND76 | 0.42973  |
| 9752 | P03363 | Q99607 | 0.92871  |
| 9753 | P03363 | Q9UBS3 | 0.54164  |
| 9754 | P03363 | Q96I25 | 0.67233  |
| 9755 | P03363 | Q06190 | 0.26673  |
| 9756 | P03363 | Q8N8C0 | 0.22259  |
| 9757 | P03363 | Q9C0J9 | 0.23878  |
| 9758 | P03363 | O95905 | 0.65638  |
| 9759 | P03363 | Q13568 | 0.84885  |
| 9760 | P03363 | Q9UL33 | 0.13632  |
| 9761 | P03363 | Q13769 | 0.64494  |
| 9762 | P03363 | Q9H3M7 | 0.59742  |
| 9763 | P03363 | Q14204 | 0.35428  |
| 9764 | P03363 | Q9BZE4 | 0.38529  |
| 9765 | P03363 | P35659 | 0.28873  |
| 9766 | P03363 | P31949 | 0.50315  |
| 9767 | P03363 | Q14CM0 | 0.31823  |
| 9768 | P03363 | Q9ULW8 | 0.34389  |
| 9769 | P03363 | Q9Y657 | 0.15856  |
| 9770 | P03363 | Q08AG5 | 0.22259  |
| 9771 | P03363 | Q9Y3Y2 | 0.42825  |
| 9772 | P03363 | P59990 | 0.2934   |
| 9773 | P03363 | Q92791 | 0.23624  |
| 9774 | P03363 | P52815 | 0.49458  |
| 9775 | P03363 | Q08752 | 0.53062  |
| 9776 | P03363 | O00567 | 0.75553  |
| 9777 | P03363 | P62318 | 0.76996  |
| 9778 | P03363 | P78317 | 0.33503  |
| 9779 | P03363 | Q9NPC3 | 0.41199  |
| 9780 | P03363 | O75884 | 0.3872   |
| 9781 | P03363 | P60409 | 0.2934   |
| 9782 | P03363 | P10768 | 0.27408  |
| 9783 | P03363 | Q0D2J5 | 0.22259  |
| 9784 | P03363 | Q15776 | 0.46864  |
| 9785 | P03363 | Q9Y294 | 0.77731  |
| 9786 | P03363 | Q16254 | 0.66991  |
| 9787 | P03363 | Q9UBF1 | 0.84949  |
| 9788 | P03363 | P06132 | 0.14895  |
| 9789 | P03363 | Q8NEH6 | 0.46401  |
| 9790 | P03363 | P54920 | 0.38445  |
| 9791 | P03363 | Q969G9 | 0.25449  |
| 9792 | P03363 | P11474 | 0.3064   |
| 9793 | P03363 | P56545 | 0.26188  |
| 9794 | P03363 | P16220 | 0.42384  |
| 9795 | P03363 | Q10571 | 0.098472 |
| 9796 | P03363 | A6NGD5 | 0.23235  |
| 9797 | P03363 | B2CW77 | 0.27794  |
| 9798 | P03363 | Q9Y2L8 | 0.268    |
| 9799 | P03363 | Q96HQ0 | 0.22259  |
| 9800 | P03363 | Q9H1E3 | 0.22504  |
| 9801 | P03363 | Q8WYA6 | 0.72599  |
| 9802 | P03363 | Q9H9E3 | 0.46061  |
| 9803 | P03363 | Q8WV28 | 0.24808  |
| 9804 | P03363 | Q9H6Q3 | 0.30494  |

|      |        |        |          |
|------|--------|--------|----------|
| 9805 | P03363 | Q9UHK0 | 0.35461  |
| 9806 | P03363 | O95900 | 0.10262  |
| 9807 | P03363 | P35251 | 0.24228  |
| 9808 | P03363 | Q96MU6 | 0.22259  |
| 9809 | P03363 | Q9Y3C1 | 0.26346  |
| 9810 | P03363 | Q9Y2D1 | 1.0697   |
| 9811 | P03363 | Q86WX3 | 0.99156  |
| 9812 | P03363 | Q9BTM9 | 0.6843   |
| 9813 | P03363 | P78414 | 0.55275  |
| 9814 | P03363 | Q9Y295 | 0.41947  |
| 9815 | P03363 | Q68DI1 | 0.22259  |
| 9816 | P03363 | P23025 | 0.29454  |
| 9817 | P03363 | Q9Y605 | 0.9281   |
| 9818 | P03363 | Q9BQD3 | 0.54341  |
| 9819 | P03363 | P42768 | 0.44853  |
| 9820 | P03363 | Q5JVG2 | 0.22259  |
| 9821 | P03363 | Q5SXM1 | 0.22259  |
| 9822 | P03363 | Q8N814 | 0.017063 |
| 9823 | P03363 | Q8N196 | 0.86815  |
| 9824 | P03363 | Q86WV5 | 0.48083  |
| 9825 | P03363 | O96007 | 0.26203  |
| 9826 | P03363 | Q9NPG3 | 0.75431  |
| 9827 | P03363 | Q8N8D1 | 0.25562  |
| 9828 | P03363 | Q8NHZ8 | 0.71803  |
| 9829 | P03363 | Q9NVK5 | 0.2976   |
| 9830 | P03363 | Q9UBF6 | 0.62803  |
| 9831 | P03363 | Q659C4 | 0.065211 |
| 9832 | P03363 | Q15121 | 0.63708  |
| 9833 | P03363 | Q8WV44 | 0.58341  |
| 9834 | P03363 | Q9BRV8 | 0.67647  |
| 9835 | P03363 | Q9UDV7 | 0.20871  |
| 9836 | P03363 | O94864 | 0.36081  |
| 9837 | P03363 | A8MTY0 | 0.22259  |
| 9838 | P03363 | O75558 | 0.53017  |
| 9839 | P03363 | Q8N0X7 | 0.22614  |
| 9840 | P03363 | Q3KP31 | 0.22259  |
| 9841 | P03363 | Q9H307 | 0.76051  |
| 9842 | P03363 | Q13033 | 0.56435  |
| 9843 | P03363 | P17031 | 0.22259  |
| 9844 | P03363 | Q9NXV2 | 1.0701   |
| 9845 | P03363 | Q9H7B2 | 0.29721  |
| 9846 | P03363 | Q8TAV0 | 0.023766 |
| 9847 | P03363 | Q96QU4 | 0.22504  |
| 9848 | P03363 | Q14152 | 0.88084  |
| 9849 | P03363 | Q13342 | 0.51145  |
| 9850 | P03363 | Q53EL6 | 0.83793  |
| 9851 | P03363 | Q9H6D7 | 0.4726   |
| 9852 | P03363 | Q8WWY6 | 0.40525  |
| 9853 | P03363 | Q96I23 | 0.34493  |
| 9854 | P03363 | Q8N680 | 0.22259  |
| 9855 | P03363 | P78543 | 0.54178  |
| 9856 | P03363 | P13051 | 0.1473   |
| 9857 | P03363 | Q96MG8 | 0.22121  |
| 9858 | P03363 | Q6P5R6 | 0.21422  |
| 9859 | P03363 | Q96JK9 | 0.59831  |
| 9860 | P03363 | Q5JT82 | 0.22831  |
| 9861 | P03363 | Q9NV31 | 0.80406  |
| 9862 | P03363 | O43316 | 0.32459  |
| 9863 | P03363 | Q5MJ68 | 0.42926  |
| 9864 | P03363 | Q9Y6K9 | 0.47963  |
| 9865 | P03363 | Q9BT78 | 0.92881  |
| 9866 | P03363 | Q6NSW5 | 0.10199  |
| 9867 | P03363 | Q8NCN2 | 0.27378  |
| 9868 | P03363 | Q02241 | 0.47433  |
| 9869 | P03363 | Q15436 | 0.34477  |
| 9870 | P03363 | Q13901 | 0.83508  |
| 9871 | P03363 | O95602 | 0.33815  |
| 9872 | P03363 | Q16621 | 0.37739  |
| 9873 | P03363 | Q9H063 | 0.38995  |
| 9874 | P03363 | P58304 | 0.44716  |
| 9875 | P03363 | Q3B7T1 | 0.40525  |
| 9876 | P03363 | Q99612 | 0.34587  |
| 9877 | P03363 | Q9Y5M1 | 0.10939  |
| 9878 | P03363 | Q9P0U4 | 0.23883  |
| 9879 | P03363 | Q59GN2 | 0.21422  |
| 9880 | P03363 | Q8N141 | 0.22259  |

|      |        |        |          |
|------|--------|--------|----------|
| 9881 | P03363 | P48200 | 0.33832  |
| 9882 | P03363 | Q7Z713 | 0.4314   |
| 9883 | P03363 | Q9UDY4 | 0.6655   |
| 9884 | P03363 | Q9NPB6 | 0.44395  |
| 9885 | P03363 | O00743 | 0.55761  |
| 9886 | P03363 | Q309B1 | 0.24431  |
| 9887 | P03363 | Q02080 | 0.46629  |
| 9888 | P03363 | Q14C87 | 0.17204  |
| 9889 | P03363 | Q86V15 | 0.29673  |
| 9890 | P03363 | Q9UKV8 | 0.4476   |
| 9891 | P03363 | Q9UJY1 | 0.62296  |
| 9892 | P03363 | P15515 | 0.12501  |
| 9893 | P03363 | Q8N2Z9 | 0.39531  |
| 9894 | P03363 | Q5BKY1 | 0.22798  |
| 9895 | P03363 | Q1ZZU3 | 0.68407  |
| 9896 | P03363 | Q9P258 | 0.40205  |
| 9897 | P03363 | Q9UJX3 | 0.3917   |
| 9898 | P03363 | Q6ZN55 | 0.22259  |
| 9899 | P03363 | Q2M3D2 | 0.11203  |
| 9900 | P03363 | Q5VTR2 | 0.37808  |
| 9901 | P03363 | P80217 | 0.63177  |
| 9902 | P03363 | Q96K30 | 0.83344  |
| 9903 | P03363 | Q8N488 | 0.57768  |
| 9904 | P03363 | Q8IV54 | 0.29551  |
| 9905 | P03363 | Q8TA86 | 0.58014  |
| 9906 | P03363 | O75145 | 0.63823  |
| 9907 | P03363 | Q9BT25 | 0.46589  |
| 9908 | P03363 | P61353 | 0.38002  |
| 9909 | P03363 | Q9NW07 | 0.18862  |
| 9910 | P03363 | Q66K89 | 0.59101  |
| 9911 | P03363 | O95671 | 0.30495  |
| 9912 | P03363 | Q9BRX9 | 0.49849  |
| 9913 | P03363 | Q8N1K5 | 0.27872  |
| 9914 | P03363 | Q96C90 | 0.19151  |
| 9915 | P03363 | Q9NUS5 | 0.51564  |
| 9916 | P03363 | Q8IVW6 | 0.29101  |
| 9917 | P03363 | P63121 | 0.030594 |
| 9918 | P03363 | P47897 | 0.10198  |
| 9919 | P03363 | Q4LE39 | 0.93944  |
| 9920 | P03363 | A6NCN2 | 0.80822  |
| 9921 | P03363 | P57077 | 0.76257  |
| 9922 | P03363 | P24928 | 0.46701  |
| 9923 | P03363 | Q9Y2D8 | 0.66578  |
| 9924 | P03363 | Q96QR8 | 0.28891  |
| 9925 | P03363 | Q9Y3M2 | 0.36765  |
| 9926 | P03363 | Q13536 | 0.22504  |
| 9927 | P03363 | Q8N2G8 | 0.22009  |
| 9928 | P03363 | Q9UL41 | 0.20501  |
| 9929 | P03363 | Q15631 | 0.73486  |
| 9930 | P03363 | P98171 | 0.35591  |
| 9931 | P03363 | P68133 | 0.21742  |
| 9932 | P03363 | O75437 | 0.27693  |
| 9933 | P03363 | P19419 | 0.90573  |
| 9934 | P03363 | Q8IZY5 | 0.23882  |
| 9935 | P03363 | O95456 | 0.58033  |
| 9936 | P03363 | Q9C0F0 | 0.27176  |
| 9937 | P03363 | Q9Y2L5 | 0.15699  |
| 9938 | P03363 | O94983 | 1.034    |
| 9939 | P03363 | Q16630 | 0.59631  |
| 9940 | P03363 | A8CG34 | 0.34646  |
| 9941 | P03363 | P83436 | 0.42245  |
| 9942 | P03363 | Q76KX8 | 0.22259  |
| 9943 | P03363 | Q9UEU5 | 0.50921  |
| 9944 | P03363 | P60328 | 0.2934   |
| 9945 | P03363 | Q9UQL6 | 0.2235   |
| 9946 | P03363 | Q04726 | 0.78359  |
| 9947 | P03363 | O76009 | 0.88908  |
| 9948 | P03363 | Q13617 | 0.50462  |
| 9949 | P03363 | Q13015 | 0.02117  |
| 9950 | P03363 | A6NC98 | 0.30739  |
| 9951 | P03363 | Q3LI66 | 0.27762  |
| 9952 | P03363 | Q96F07 | 0.67612  |
| 9953 | P03363 | Q9C0D0 | 0.21162  |
| 9954 | P03363 | O75475 | 0.79297  |
| 9955 | P03363 | O95153 | 0.67648  |
| 9956 | P03363 | Q96DC7 | 0.11992  |



|       |        |        |          |
|-------|--------|--------|----------|
| 9957  | P03363 | Q96EL3 | 0.22496  |
| 9958  | P03363 | Q9Y597 | 0.21694  |
| 9959  | P03363 | Q9UL40 | 0.64141  |
| 9960  | P03363 | Q5U5X8 | 0.015116 |
| 9961  | P03363 | P46109 | 0.26624  |
| 9962  | P03363 | Q9NQ33 | 0.4568   |
| 9963  | P03363 | Q96SC8 | 0.34884  |
| 9964  | P03363 | Q4G0J3 | 0.50492  |
| 9965  | P03363 | O60293 | 0.31008  |
| 9966  | P03363 | P14921 | 0.55063  |
| 9967  | P03363 | Q9NSV4 | 0.22983  |
| 9968  | P03363 | P54252 | 0.3259   |
| 9969  | P03363 | O75164 | 0.48218  |
| 9970  | P03363 | Q9NYF0 | 0.31155  |
| 9971  | P03363 | Q5EBL4 | 0.38366  |
| 9972  | P03363 | Q9UER7 | 0.45483  |
| 9973  | P03363 | P35548 | 0.37156  |
| 9974  | P03363 | Q9Y6X4 | 0.070219 |
| 9975  | P03363 | Q9HBZ2 | 0.39645  |
| 9976  | P03363 | Q8IWL8 | 0.4314   |
| 9977  | P03363 | Q9H4H8 | 0.42179  |
| 9978  | P03363 | P0DJG4 | 0.045188 |
| 9979  | P03363 | Q96D70 | 0.35279  |
| 9980  | P03363 | O15151 | 0.25574  |
| 9981  | P03363 | Q15427 | 0.64534  |
| 9982  | P03363 | P61580 | 0.22504  |
| 9983  | P03363 | Q96RU3 | 0.24517  |
| 9984  | P03363 | Q99496 | 0.34465  |
| 9985  | P03363 | P49366 | 0.41279  |
| 9986  | P03363 | Q8WU76 | 0.23161  |
| 9987  | P03363 | Q8TEK3 | 0.47984  |
| 9988  | P03363 | Q9C099 | 0.71803  |
| 9989  | P03363 | Q9H1Z4 | 0.49651  |
| 9990  | P03363 | Q53HL2 | 0.57522  |
| 9991  | P03363 | Q5F1R6 | 0.28736  |
| 9992  | P03363 | Q9H9J2 | 0.13567  |
| 9993  | P03363 | Q5JPH6 | 0.06083  |
| 9994  | P03363 | Q156A1 | 0.2609   |
| 9995  | P03363 | Q9BW71 | 0.68952  |
| 9996  | P03363 | Q00610 | 0.36601  |
| 9997  | P03363 | Q460N3 | 0.30552  |
| 9998  | P03363 | Q96A35 | 0.21263  |
| 9999  | P03363 | Q9Y5P3 | 0.53823  |
| 10000 | P03363 | P07741 | 0.20393  |
| 10001 | P03363 | Q9Y613 | 0.75526  |
| 10002 | P03363 | Q9UPN9 | 0.4047   |
| 10003 | P03363 | Q15041 | 0.19521  |
| 10004 | P03363 | P0DI83 | 0.29721  |
| 10005 | P03363 | O43422 | 0.16657  |
| 10006 | P03363 | P13489 | 0.63192  |
| 10007 | P03363 | Q00587 | 0.34945  |
| 10008 | P03363 | Q5VU43 | 0.87894  |
| 10009 | P03363 | Q8WVK7 | 0.48354  |
| 10010 | P03363 | P0C7Q3 | 0.21644  |
| 10011 | P03363 | P61289 | 0.22001  |
| 10012 | P03363 | O00268 | 0.68061  |
| 10013 | P03363 | Q8TAP6 | 0.82432  |
| 10014 | P03363 | Q96JI7 | 0.54269  |
| 10015 | P03363 | Q9BVC3 | 0.59267  |
| 10016 | P03363 | Q8IY63 | 0.52423  |
| 10017 | P03363 | Q9Y6K1 | 0.33384  |
| 10018 | P03363 | Q15532 | 0.78083  |
| 10019 | P03363 | P50548 | 0.59951  |
| 10020 | P03363 | P62304 | 0.68761  |
| 10021 | P03363 | Q96IS3 | 0.43824  |
| 10022 | P03363 | Q9NZZ3 | 0.78062  |
| 10023 | P03363 | Q8N9Z0 | 0.22259  |
| 10024 | P03363 | Q7L3B6 | 0.24431  |
| 10025 | P03363 | O43679 | 0.27836  |
| 10026 | P03363 | Q9UET6 | 0.053192 |
| 10027 | P03363 | Q8TC56 | 0.49651  |
| 10028 | P03363 | Q6FI81 | 0.52141  |
| 10029 | P03363 | P04732 | 0.15112  |
| 10030 | P03363 | O14593 | 0.71769  |
| 10031 | P03363 | Q9BXS6 | 0.44469  |
| 10032 | P03363 | Q9Y467 | 0.25158  |

|       |        |        |          |
|-------|--------|--------|----------|
| 10033 | P03363 | Q9Y603 | 1.0636   |
| 10034 | P03363 | O75530 | 0.52502  |
| 10035 | P03363 | Q6NUN9 | 0.67684  |
| 10036 | P03363 | Q9UK11 | 0.21344  |
| 10037 | P03363 | P49005 | 0.39685  |
| 10038 | P03363 | P78395 | 0.55185  |
| 10039 | P03363 | Q8WUF5 | 0.78467  |
| 10040 | P03363 | Q86T75 | 0.24431  |
| 10041 | P03363 | Q96MB7 | 0.29819  |
| 10042 | P03363 | Q9HB65 | 0.42831  |
| 10043 | P03363 | Q5VZR2 | 0.051971 |
| 10044 | P03363 | O43318 | 0.21707  |
| 10045 | P03363 | Q15700 | 0.27495  |
| 10046 | P03363 | Q3KQV3 | 0.22259  |
| 10047 | P03363 | P11172 | 0.086071 |
| 10048 | P03363 | Q6L8G8 | 0.2934   |
| 10049 | P03363 | Q9UL03 | 0.63748  |
| 10050 | P03363 | Q9UKX7 | 0.66191  |
| 10051 | P03363 | O15069 | 0.52433  |
| 10052 | P03363 | O15105 | 0.15582  |
| 10053 | P03363 | Q96M02 | 0.24601  |
| 10054 | P03363 | Q9BZR8 | 0.52157  |
| 10055 | P03363 | P57060 | 0.11203  |
| 10056 | P03363 | Q9BXM8 | 0.11203  |
| 10057 | P03363 | Q9BV68 | 0.29734  |
| 10058 | P03363 | Q8IXK0 | 0.33109  |
| 10059 | P03363 | Q96M29 | 0.26324  |
| 10060 | P03363 | Q96PQ6 | 0.22259  |
| 10061 | P03363 | Q9Y6B7 | 0.24686  |
| 10062 | P03363 | Q15306 | 0.58598  |
| 10063 | P03363 | Q01130 | 0.85631  |
| 10064 | P03363 | Q86UW6 | 0.40027  |
| 10065 | P03363 | Q0VD86 | 0.49651  |
| 10066 | P03363 | O14579 | 0.33902  |
| 10067 | P03363 | P50453 | 0.57045  |
| 10068 | P03363 | Q8N782 | 0.22259  |
| 10069 | P03363 | Q8TD10 | 0.22504  |
| 10070 | P03363 | A6NDZ8 | 0.22927  |
| 10071 | P03363 | Q9H410 | 0.60941  |
| 10072 | P03363 | Q13522 | 0.35293  |
| 10073 | P03363 | Q6P2Q9 | 0.76331  |
| 10074 | P03363 | Q5TYW1 | 0.22259  |
| 10075 | P03363 | O43776 | 0.18797  |
| 10076 | P03363 | O00267 | 0.6682   |
| 10077 | P03363 | Q9BX70 | 0.74013  |
| 10078 | P03363 | O14713 | 0.48983  |
| 10079 | P03363 | O14746 | 0.38324  |
| 10080 | P03363 | Q9Y2A4 | 0.22558  |
| 10081 | P03363 | Q8IWY8 | 0.268    |
| 10082 | P03363 | P24941 | 0.16657  |
| 10083 | P03363 | P78411 | 0.31264  |
| 10084 | P03363 | Q99417 | 1.0307   |
| 10085 | P03363 | Q96JN0 | 0.57321  |
| 10086 | P03363 | Q96GC6 | 0.9017   |
| 10087 | P03363 | Q9NP98 | 0.49778  |
| 10088 | P03363 | Q8NHY3 | 0.21872  |
| 10089 | P03363 | Q9H467 | 0.97472  |
| 10090 | P03363 | P50748 | 0.53621  |
| 10091 | P03363 | Q9ULL5 | 0.10474  |
| 10092 | P03363 | Q6NT76 | 0.55279  |
| 10093 | P03363 | Q8N5L8 | 0.35279  |
| 10094 | P03363 | Q15797 | 0.17877  |
| 10095 | P03363 | Q7RTT5 | 0.39008  |
| 10096 | P03363 | Q8TF01 | 0.26782  |
| 10097 | P03363 | P04156 | 0.16432  |
| 10098 | P03363 | Q9C0E2 | 0.93943  |
| 10099 | P03363 | Q5TH74 | 0.01442  |
| 10100 | P03363 | O95073 | 0.89393  |
| 10101 | P03363 | Q96LK0 | 0.34008  |
| 10102 | P03363 | Q9UM63 | 0.31517  |
| 10103 | P03363 | Q9Y4P9 | 0.2985   |
| 10104 | P03363 | Q9GZS1 | 0.49488  |
| 10105 | P03363 | Q969V6 | 1.0251   |
| 10106 | P03363 | Q86U44 | 0.25684  |
| 10107 | P03363 | Q14181 | 0.20852  |
| 10108 | P03363 | Q96JN8 | 0.34026  |

|       |        |        |           |
|-------|--------|--------|-----------|
| 10109 | P03363 | Q9NW75 | 0.18926   |
| 10110 | P03363 | Q9Y6M1 | 0.60667   |
| 10111 | P03363 | Q8IYW5 | 0.22759   |
| 10112 | P03363 | Q9HCI6 | 0.18106   |
| 10113 | P03363 | P32243 | 0.56524   |
| 10114 | P03363 | Q96A04 | 0.23268   |
| 10115 | P03363 | Q5TAQ9 | 0.56144   |
| 10116 | P03363 | Q9BZE1 | 0.31668   |
| 10117 | P03363 | Q8TBB1 | 0.70166   |
| 10118 | P03363 | Q9HCK0 | 0.23615   |
| 10119 | P03363 | Q9NPC7 | 0.24904   |
| 10120 | P03363 | Q3ZCQ8 | 0.2116    |
| 10121 | P03363 | O15047 | 0.2542    |
| 10122 | P03363 | Q5T2T1 | 0.27757   |
| 10123 | P03363 | Q8IVS8 | 0.17493   |
| 10124 | P03363 | Q5VWZ2 | 0.23943   |
| 10125 | P03363 | Q9Y2K1 | 0.22259   |
| 10126 | P03363 | Q14201 | 0.16851   |
| 10127 | P03363 | P09234 | 0.58341   |
| 10128 | P03363 | O14867 | 0.50022   |
| 10129 | P03363 | O14948 | 0.46969   |
| 10130 | P03363 | O15446 | 0.25049   |
| 10131 | P03363 | O60479 | 0.36349   |
| 10132 | P03363 | Q96EG3 | 0.22259   |
| 10133 | P03363 | Q9BSQ5 | 0.52781   |
| 10134 | P03363 | P08708 | 0.25253   |
| 10135 | P03363 | Q6ZMV8 | 0.22259   |
| 10136 | P03363 | Q6VVB1 | 0.33251   |
| 10137 | P03363 | Q9NPJ4 | 1.0366    |
| 10138 | P03363 | P35244 | 0.41425   |
| 10139 | P03363 | P36508 | 0.21482   |
| 10140 | P03363 | Q9UKZ1 | 0.1371    |
| 10141 | P03363 | P63146 | 0.1209    |
| 10142 | P03363 | Q6BEB4 | 0.26643   |
| 10143 | P03363 | Q7Z3K6 | 0.56356   |
| 10144 | P03363 | O76011 | 1.0007    |
| 10145 | P03363 | O95231 | 0.42544   |
| 10146 | P03363 | Q3LHN1 | 0.27762   |
| 10147 | P03363 | O60381 | 0.39011   |
| 10148 | P03363 | Q9Y2H8 | 0.22259   |
| 10149 | P03363 | Q9H5P4 | 0.58418   |
| 10150 | P03363 | Q04724 | 0.64458   |
| 10151 | P03363 | Q9BYU5 | 0.2934    |
| 10152 | P03363 | Q9BSI4 | 0.29473   |
| 10153 | P03363 | Q9NQ50 | 0.37844   |
| 10154 | P03363 | P51522 | 0.24904   |
| 10155 | P03363 | Q9UJX5 | 0.38687   |
| 10156 | P03363 | Q15596 | 0.43519   |
| 10157 | P03363 | P49756 | 0.7641    |
| 10158 | P03363 | Q9BYZ2 | 0.30317   |
| 10159 | P03363 | O43309 | 0.268     |
| 10160 | P03363 | Q6PGQ7 | 0.53844   |
| 10161 | P03363 | P01858 | 0.04695   |
| 10162 | P03363 | Q13765 | 0.97013   |
| 10163 | P03363 | Q9BQ66 | 0.2934    |
| 10164 | P03363 | Q9BPZ2 | 0.23489   |
| 10165 | P03363 | Q52MB2 | 0.24431   |
| 10166 | P03363 | O95486 | 0.1923    |
| 10167 | P03363 | Q14839 | 0.51542   |
| 10168 | P03363 | Q8N302 | 0.22812   |
| 10169 | P03363 | P48668 | 0.44563   |
| 10170 | P03363 | Q8NFV5 | 0.0070677 |
| 10171 | P03363 | Q8N336 | 0.29436   |
| 10172 | P03363 | Q8N693 | 0.56714   |
| 10173 | P03363 | Q5TD94 | 0.33113   |
| 10174 | P03363 | Q9P2H0 | 0.53508   |
| 10175 | P03363 | Q9H322 | 0.11203   |
| 10176 | P03363 | P16415 | 0.22259   |
| 10177 | P03363 | Q9HCZ1 | 0.22259   |
| 10178 | P03363 | Q9HCS4 | 0.2454    |
| 10179 | P03363 | P43268 | 0.40069   |
| 10180 | P03363 | Q86UE4 | 0.32137   |
| 10181 | P03363 | Q14695 | 0.0095832 |
| 10182 | P03363 | Q9UBU9 | 0.52842   |
| 10183 | P03363 | Q9NSJ1 | 0.22259   |
| 10184 | P03363 | Q9BX82 | 0.22259   |

|       |        |        |           |
|-------|--------|--------|-----------|
| 10185 | P03363 | Q9UJW7 | 0.22259   |
| 10186 | P03363 | Q14588 | 0.22259   |
| 10187 | P03363 | Q99828 | 0.23833   |
| 10188 | P03363 | P55347 | 0.65493   |
| 10189 | P03363 | P41208 | 0.50154   |
| 10190 | P03363 | P17028 | 0.63369   |
| 10191 | P03363 | O75312 | 0.1438    |
| 10192 | P03363 | Q92558 | 0.5119    |
| 10193 | P03363 | Q14681 | 0.21694   |
| 10194 | P03363 | O43639 | 0.35902   |
| 10195 | P03363 | O43248 | 0.41079   |
| 10196 | P03363 | Q8NEA6 | 0.4515    |
| 10197 | P03363 | P15880 | 0.54899   |
| 10198 | P03363 | Q96CS3 | 0.55664   |
| 10199 | P03363 | Q9NTU4 | 0.17686   |
| 10200 | P03363 | Q7Z3Y8 | 0.88908   |
| 10201 | P03363 | Q49MG5 | 0.65542   |
| 10202 | P03363 | E9PGG2 | 0.55275   |
| 10203 | P03363 | Q9Y3Y4 | 0.48975   |
| 10204 | P03363 | Q8IZ26 | 0.22259   |
| 10205 | P03363 | Q96N20 | 0.21805   |
| 10206 | P03363 | P51161 | 0.24764   |
| 10207 | P03363 | O75506 | 0.32285   |
| 10208 | P03363 | P11940 | 0.56047   |
| 10209 | P03363 | Q96L21 | 0.33428   |
| 10210 | P03363 | Q9Y2X9 | 0.52774   |
| 10211 | P03363 | Q9UBK9 | 0.88149   |
| 10212 | P03363 | Q49AM1 | 0.2456    |
| 10213 | P03363 | Q96KQ4 | 0.77602   |
| 10214 | P03363 | Q86U42 | 0.79381   |
| 10215 | P03363 | Q9H4A6 | 0.24787   |
| 10216 | P03363 | Q9NR56 | 0.52696   |
| 10217 | P03363 | Q8WWY3 | 0.58534   |
| 10218 | P03363 | P25815 | 0.66559   |
| 10219 | P03363 | Q15369 | 0.80802   |
| 10220 | P03363 | Q9NT62 | 0.58163   |
| 10221 | P03363 | Q13526 | 0.44349   |
| 10222 | P03363 | O14893 | 0.69464   |
| 10223 | P03363 | Q13601 | 0.55666   |
| 10224 | P03363 | P53618 | 0.49556   |
| 10225 | P03363 | Q9BSJ6 | 0.59219   |
| 10226 | P03363 | P51826 | 0.39545   |
| 10227 | P03363 | Q68DK2 | 0.61371   |
| 10228 | P03363 | A6NCW3 | 0.0073048 |
| 10229 | P03363 | P49639 | 0.28701   |
| 10230 | P03363 | Q9P209 | 0.75097   |
| 10231 | P03363 | Q5H9I0 | 0.5655    |
| 10232 | P03363 | Q13158 | 0.33944   |
| 10233 | P03363 | O75791 | 0.78839   |
| 10234 | P03363 | P19883 | 0.23163   |
| 10235 | P03363 | Q9HC44 | 0.43182   |
| 10236 | P03363 | Q14686 | 0.29102   |
| 10237 | P03363 | Q8IZD4 | 0.73552   |
| 10238 | P03363 | Q7Z4S6 | 0.47577   |
| 10239 | P03363 | P59923 | 0.268     |
| 10240 | P03363 | Q99569 | 0.37973   |
| 10241 | P03363 | Q16695 | 0.30502   |
| 10242 | P03363 | P15927 | 0.3215    |
| 10243 | P03363 | Q8TBK2 | 0.5604    |
| 10244 | P03363 | O75970 | 0.29245   |
| 10245 | P03363 | Q99471 | 0.84264   |
| 10246 | P03363 | Q8IXW5 | 0.39653   |
| 10247 | P03363 | P60520 | 0.31965   |
| 10248 | P03363 | Q5TBC7 | 0.28678   |
| 10249 | P03363 | P23508 | 0.4691    |
| 10250 | P03363 | Q96MM3 | 0.31703   |
| 10251 | P03363 | Q8WY41 | 0.42368   |
| 10252 | P03363 | O00193 | 0.11203   |
| 10253 | P03363 | P17041 | 0.22259   |
| 10254 | P03363 | Q9BYP8 | 0.27762   |
| 10255 | P03363 | Q9NWS9 | 0.268     |
| 10256 | P03363 | P0C7V6 | 0.029024  |
| 10257 | P03363 | Q8WXS3 | 0.4778    |
| 10258 | P03363 | O95476 | 0.26573   |
| 10259 | P03363 | Q8NI27 | 0.63816   |
| 10260 | P03363 | Q9BYQ7 | 0.2934    |

|       |        |        |          |
|-------|--------|--------|----------|
| 10261 | P03363 | Q9NWX4 | 0.11203  |
| 10262 | P03363 | Q8N4B1 | 0.23681  |
| 10263 | P03363 | Q9BWF3 | 0.27418  |
| 10264 | P03363 | Q32P51 | 0.52567  |
| 10265 | P03363 | Q9Y5R6 | 0.17363  |
| 10266 | P03363 | P23497 | 0.54962  |
| 10267 | P03363 | Q8N2H9 | 0.18345  |
| 10268 | P03363 | Q8TD06 | 0.12523  |
| 10269 | P03363 | P30260 | 0.69054  |
| 10270 | P03363 | P49427 | 0.49514  |
| 10271 | P03363 | A6NLC8 | 0.12118  |
| 10272 | P03363 | P11844 | 0.02649  |
| 10273 | P03363 | Q9UGY1 | 0.32192  |
| 10274 | P03363 | Q8N1N5 | 0.45787  |
| 10275 | P03363 | P06400 | 0.24443  |
| 10276 | P03363 | Q9HAP2 | 0.54903  |
| 10277 | P03363 | P40337 | 0.55377  |
| 10278 | P03363 | Q15327 | 0.35116  |
| 10279 | P03363 | A1L020 | 0.24888  |
| 10280 | P03363 | P57086 | 0.4427   |
| 10281 | P03363 | P48378 | 0.43182  |
| 10282 | P03363 | Q8IUF8 | 0.51925  |
| 10283 | P03363 | Q9HCX3 | 0.22259  |
| 10284 | P03363 | Q8WU90 | 0.77646  |
| 10285 | P03363 | Q14689 | 0.4943   |
| 10286 | P03363 | Q7Z5Y7 | 0.21694  |
| 10287 | P03363 | P61575 | 0.55152  |
| 10288 | P03363 | Q15633 | 0.65091  |
| 10289 | P03363 | Q86YE8 | 0.22259  |
| 10290 | P03363 | Q6ZP82 | 0.53508  |
| 10291 | P03363 | Q96H20 | 0.6477   |
| 10292 | P03363 | Q7Z7F7 | 0.31668  |
| 10293 | P03363 | Q13185 | 0.56447  |
| 10294 | P03363 | Q8TCC3 | 0.22496  |
| 10295 | P03363 | Q43765 | 0.72635  |
| 10296 | P03363 | Q96BV0 | 0.22259  |
| 10297 | P03363 | Q15323 | 0.89041  |
| 10298 | P03363 | Q96NT1 | 0.15989  |
| 10299 | P03363 | Q9BUG6 | 0.268    |
| 10300 | P03363 | Q9BYG4 | 0.5496   |
| 10301 | P03363 | Q9Y6I0 | 0.030594 |
| 10302 | P03363 | Q0P6D6 | 0.12015  |
| 10303 | P03363 | Q9Y697 | 0.41777  |
| 10304 | P03363 | Q8WUY3 | 0.25338  |
| 10305 | P03363 | Q3SY89 | 0.19772  |
| 10306 | P03363 | Q15652 | 0.26986  |
| 10307 | P03363 | Q96FV9 | 0.81434  |
| 10308 | P03363 | P17483 | 0.31803  |
| 10309 | P03363 | P01106 | 0.22789  |
| 10310 | P03363 | Q6L8H1 | 0.2934   |
| 10311 | P03363 | Q6ZNH5 | 0.22259  |
| 10312 | P03363 | Q9UMY4 | 0.32094  |
| 10313 | P03363 | Q9NS26 | 0.35383  |
| 10314 | P03363 | P63000 | 0.18541  |
| 10315 | P03363 | P05787 | 1.1475   |
| 10316 | P03363 | Q5H9M0 | 0.070039 |
| 10317 | P03363 | Q49A88 | 0.12015  |
| 10318 | P03363 | Q5JXB2 | 0.23751  |
| 10319 | P03363 | Q9Y4X4 | 0.43321  |
| 10320 | P03363 | P23381 | 0.40526  |
| 10321 | P03363 | Q8N1L9 | 0.97635  |
| 10322 | P03363 | P0CG24 | 0.22259  |
| 10323 | P03363 | Q96GE4 | 0.37923  |
| 10324 | P03363 | Q8NI51 | 0.53491  |
| 10325 | P03363 | Q6UN15 | 0.29561  |
| 10326 | P03363 | Q7L5A3 | 0.22504  |
| 10327 | P03363 | Q9BQ69 | 0.43298  |
| 10328 | P03363 | Q9UQ80 | 0.90551  |
| 10329 | P03363 | Q96I27 | 0.22259  |
| 10330 | P03363 | Q96T21 | 0.25023  |
| 10331 | P03363 | O14717 | 0.22439  |
| 10332 | P03363 | Q9NZN8 | 0.56747  |
| 10333 | P03363 | Q9H2K2 | 0.25051  |
| 10334 | P03363 | Q9BXS5 | 0.40876  |
| 10335 | P03363 | Q96E29 | 0.2369   |
| 10336 | P03363 | Q14593 | 0.22259  |

|       |        |        |          |
|-------|--------|--------|----------|
| 10337 | P03363 | P50616 | 0.57311  |
| 10338 | P03363 | Q8IXQ9 | 0.23591  |
| 10339 | P03363 | Q96BF6 | 0.37504  |
| 10340 | P03363 | Q9BRJ7 | 0.22637  |
| 10341 | P03363 | P10144 | 0.37527  |
| 10342 | P03363 | Q8NDV7 | 0.21253  |
| 10343 | P03363 | Q9H4S2 | 0.45025  |
| 10344 | P03363 | Q969E8 | 0.48884  |
| 10345 | P03363 | Q9NPD3 | 0.32714  |
| 10346 | P03363 | Q99743 | 0.43106  |
| 10347 | P03363 | P17019 | 0.22259  |
| 10348 | P03363 | Q07157 | 0.47387  |
| 10349 | P03363 | Q7Z3Y9 | 1.0007   |
| 10350 | P03363 | Q9BQE9 | 0.040875 |
| 10351 | P03363 | Q07866 | 0.77456  |
| 10352 | P03363 | A6H8Y1 | 0.57652  |
| 10353 | P03363 | O75691 | 0.71089  |
| 10354 | P03363 | Q7Z7K2 | 0.22259  |
| 10355 | P03363 | B4DXR9 | 0.22259  |
| 10356 | P03363 | A8K0S8 | 0.55275  |
| 10357 | P03363 | Q04727 | 0.52747  |
| 10358 | P03363 | Q96KF2 | 0.22504  |
| 10359 | P03363 | Q14807 | 0.31898  |
| 10360 | P03363 | Q16548 | 0.72895  |
| 10361 | P03363 | O00409 | 0.38702  |
| 10362 | P03363 | Q8NFB8 | 0.62465  |
| 10363 | P03363 | Q92620 | 0.2815   |
| 10364 | P03363 | Q9H0S4 | 0.4151   |
| 10365 | P03363 | Q7KZF4 | 0.55009  |
| 10366 | P03363 | Q12986 | 0.431    |
| 10367 | P03363 | Q9BRP8 | 0.79685  |
| 10368 | P03363 | P06748 | 0.34735  |
| 10369 | P03363 | Q9H5H4 | 0.25992  |
| 10370 | P03363 | Q7L576 | 0.23723  |
| 10371 | P03363 | O00629 | 0.54083  |
| 10372 | P03363 | P40222 | 0.24409  |
| 10373 | P03363 | O94913 | 0.41923  |
| 10374 | P03363 | Q96IG2 | 0.24431  |
| 10375 | P03363 | Q8WYJ6 | 0.47723  |
| 10376 | P03363 | Q9P031 | 0.89393  |
| 10377 | P03363 | O14879 | 0.58966  |
| 10378 | P03363 | O60493 | 0.37151  |
| 10379 | P03363 | Q05086 | 0.36209  |
| 10380 | P03363 | Q8IX90 | 0.56658  |
| 10381 | P03363 | Q9H079 | 0.11503  |
| 10382 | P03363 | Q8WYK2 | 0.50885  |
| 10383 | P03363 | O00423 | 0.70485  |
| 10384 | P03363 | P28749 | 0.85318  |
| 10385 | P03363 | P41002 | 0.85129  |
| 10386 | P03363 | Q9NXF7 | 0.56144  |
| 10387 | P03363 | Q9UNY5 | 0.268    |
| 10388 | P03363 | Q8NFC6 | 0.10474  |
| 10389 | P03363 | P27815 | 0.25226  |
| 10390 | P03363 | Q9Y6R7 | 0.33815  |
| 10391 | P03363 | Q9HD47 | 0.3536   |
| 10392 | P03363 | O94875 | 0.26606  |
| 10393 | P03363 | Q96DV4 | 0.3842   |
| 10394 | P03363 | Q63HM1 | 0.28776  |
| 10395 | P03363 | Q9H489 | 0.15989  |
| 10396 | P03363 | P35326 | 0.17378  |
| 10397 | P03363 | A6NDR6 | 0.55275  |
| 10398 | P03363 | O15372 | 0.65977  |
| 10399 | P03363 | Q9GZW5 | 0.5002   |
| 10400 | P03363 | O43189 | 0.41155  |
| 10401 | P03363 | P20073 | 0.32585  |
| 10402 | P03363 | P0CJ90 | 0.49158  |
| 10403 | P03363 | Q9Y6I7 | 0.40597  |
| 10404 | P03363 | Q96T51 | 0.22334  |
| 10405 | P03363 | P01358 | 0.064654 |
| 10406 | P03363 | P36952 | 0.15608  |
| 10407 | P03363 | Q92890 | 0.77526  |
| 10408 | P03363 | B1APH4 | 0.22259  |
| 10409 | P03363 | Q9HAF1 | 0.81789  |
| 10410 | P03363 | O43447 | 0.74643  |
| 10411 | P03363 | Q9UNY4 | 0.6519   |
| 10412 | P03363 | Q9C040 | 0.35146  |

|       |        |        |           |
|-------|--------|--------|-----------|
| 10413 | P03363 | Q6P3W6 | 0.24431   |
| 10414 | P03363 | P35869 | 0.32434   |
| 10415 | P03363 | Q9P299 | 0.29634   |
| 10416 | P03363 | Q9H0U6 | 0.17909   |
| 10417 | P03363 | Q9BZA5 | 0.035336  |
| 10418 | P03363 | O95260 | 0.32814   |
| 10419 | P03363 | P17275 | 0.55216   |
| 10420 | P03363 | Q93052 | 0.39342   |
| 10421 | P03363 | Q9NVA2 | 0.28202   |
| 10422 | P03363 | Q8TE67 | 0.24431   |
| 10423 | P03363 | Q93045 | 0.24838   |
| 10424 | P03363 | Q6P050 | 0.10575   |
| 10425 | P03363 | P42226 | 0.77381   |
| 10426 | P03363 | Q9Y4G6 | 0.37468   |
| 10427 | P03363 | Q96AP0 | 0.2411    |
| 10428 | P03363 | P41091 | 0.21119   |
| 10429 | P03363 | Q86WC6 | 0.44327   |
| 10430 | P03363 | Q9UJX6 | 0.26157   |
| 10431 | P03363 | Q9UGV2 | 0.13976   |
| 10432 | P03363 | P13349 | 0.38212   |
| 10433 | P03363 | P41567 | 0.23513   |
| 10434 | P03363 | P21673 | 0.32544   |
| 10435 | P03363 | Q96PK6 | 0.65563   |
| 10436 | P03363 | O95571 | 0.22673   |
| 10437 | P03363 | Q8IXH7 | 0.80315   |
| 10438 | P03363 | P17509 | 0.35108   |
| 10439 | P03363 | P31249 | 0.50815   |
| 10440 | P03363 | P23588 | 0.32344   |
| 10441 | P03363 | Q93015 | 0.18401   |
| 10442 | P03363 | Q99729 | 0.40596   |
| 10443 | P03363 | Q3B726 | 0.22236   |
| 10444 | P03363 | Q504T8 | 0.29721   |
| 10445 | P03363 | Q9C005 | 0.51491   |
| 10446 | P03363 | P39687 | 0.92288   |
| 10447 | P03363 | O43504 | 0.40683   |
| 10448 | P03363 | O94973 | 0.26892   |
| 10449 | P03363 | Q96PU8 | 0.49824   |
| 10450 | P03363 | P49711 | 0.21681   |
| 10451 | P03363 | Q9NR77 | 0.29794   |
| 10452 | P03363 | P61923 | 0.31682   |
| 10453 | P03363 | P57772 | 0.073828  |
| 10454 | P03363 | P50995 | 0.57266   |
| 10455 | P03363 | Q96RK1 | 0.46218   |
| 10456 | P03363 | Q7Z4H3 | 0.2525    |
| 10457 | P03363 | Q9P1Q0 | 0.50652   |
| 10458 | P03363 | Q9BTE7 | 0.11203   |
| 10459 | P03363 | Q9NTW7 | 0.22259   |
| 10460 | P03363 | Q9BQ67 | 0.49651   |
| 10461 | P03363 | Q9P2N5 | 0.28371   |
| 10462 | P03363 | Q7L1Q6 | 0.43315   |
| 10463 | P03363 | Q9HD33 | 0.35496   |
| 10464 | P03363 | P62495 | 0.53503   |
| 10465 | P03363 | Q92797 | 0.74212   |
| 10466 | P03363 | Q7L2R6 | 0.22259   |
| 10467 | P03363 | Q6VY07 | 0.41381   |
| 10468 | P03363 | P18615 | 0.67433   |
| 10469 | P03363 | O94900 | 0.27018   |
| 10470 | P03363 | O00198 | 0.15525   |
| 10471 | P03363 | Q08495 | 0.28628   |
| 10472 | P03363 | O43818 | 0.30647   |
| 10473 | P03363 | P61326 | 0.87544   |
| 10474 | P03363 | Q96LL4 | 0.53508   |
| 10475 | P03363 | P56645 | 0.40082   |
| 10476 | P03363 | P54098 | 0.4153    |
| 10477 | P03363 | O75150 | 0.42466   |
| 10478 | P03363 | Q8N0Z2 | 0.26613   |
| 10479 | P03363 | Q8TBC5 | 0.268     |
| 10480 | P03363 | Q5T0L3 | 0.0065104 |
| 10481 | P03363 | Q96TC7 | 0.45915   |
| 10482 | P03363 | A6NK39 | 0.43424   |
| 10483 | P03363 | P54845 | 0.5034    |
| 10484 | P03363 | Q8IWZ8 | 0.56314   |
| 10485 | P03363 | P81274 | 0.58568   |
| 10486 | P03363 | Q5FBB7 | 0.45215   |
| 10487 | P03363 | Q9BYE0 | 0.28014   |
| 10488 | P03363 | P48788 | 0.47932   |

|       |        |        |          |
|-------|--------|--------|----------|
| 10489 | P03363 | Q9UK39 | 0.53489  |
| 10490 | P03363 | Q96IF1 | 0.23636  |
| 10491 | P03363 | Q9UNX4 | 0.33175  |
| 10492 | P03363 | Q8IYL2 | 0.1933   |
| 10493 | P03363 | Q15750 | 0.31356  |
| 10494 | P03363 | Q66LE6 | 0.32388  |
| 10495 | P03363 | Q9HCS5 | 0.34705  |
| 10496 | P03363 | Q15773 | 0.40941  |
| 10497 | P03363 | Q9UM11 | 0.66448  |
| 10498 | P03363 | Q8TEP8 | 0.72943  |
| 10499 | P03363 | Q6ZNA4 | 0.39103  |
| 10500 | P03363 | P0DI82 | 0.3031   |
| 10501 | P03363 | P52657 | 0.69202  |
| 10502 | P03363 | Q9NZV7 | 0.23191  |
| 10503 | P03363 | Q8N668 | 0.63772  |
| 10504 | P03363 | Q8NAQ8 | 0.1891   |
| 10505 | P03363 | Q9HCN2 | 0.068021 |
| 10506 | P03363 | P35754 | 0.2725   |
| 10507 | P03363 | Q9UK10 | 0.22259  |
| 10508 | P03363 | Q8IWE5 | 0.68353  |
| 10509 | P03363 | Q9UJK0 | 0.041588 |
| 10510 | P03363 | O95817 | 0.52882  |
| 10511 | P03363 | P61244 | 0.68282  |
| 10512 | P03363 | Q8NAA4 | 0.30524  |
| 10513 | P03363 | O00488 | 0.22647  |
| 10514 | P03363 | Q13425 | 0.5993   |
| 10515 | P03363 | Q8NCA9 | 0.22259  |
| 10516 | P03363 | O00321 | 0.42668  |
| 10517 | P03363 | P07199 | 0.49301  |
| 10518 | P03363 | Q6ZTU2 | 0.11917  |
| 10519 | P03363 | Q5TYM5 | 0.23887  |
| 10520 | P03363 | P33992 | 0.26734  |
| 10521 | P03363 | Q14019 | 0.52475  |
| 10522 | P03363 | Q9P0M2 | 0.24532  |
| 10523 | P03363 | P62306 | 0.46036  |
| 10524 | P03363 | P05198 | 0.58167  |
| 10525 | P03363 | Q7Z7A3 | 0.5517   |
| 10526 | P03363 | Q8N3H0 | 0.24431  |
| 10527 | P03363 | Q9BX40 | 0.050431 |
| 10528 | P03363 | P15924 | 0.37781  |
| 10529 | P03363 | Q86VZ6 | 0.26271  |
| 10530 | P03363 | Q6NXS1 | 0.035209 |
| 10531 | P03363 | Q49B96 | 0.29635  |
| 10532 | P03363 | P46100 | 0.44851  |
| 10533 | P03363 | Q9BSB4 | 0.54684  |
| 10534 | P03363 | O15116 | 0.81881  |
| 10535 | P03363 | Q7KZ85 | 0.38784  |
| 10536 | P03363 | O60296 | 0.4815   |
| 10537 | P03363 | Q9UN30 | 0.44089  |
| 10538 | P03363 | P14653 | 0.4555   |
| 10539 | P03363 | Q05519 | 0.75142  |
| 10540 | P03363 | Q95707 | 0.54373  |
| 10541 | P03363 | P78314 | 0.25744  |
| 10542 | P03363 | Q9UNL4 | 0.23223  |
| 10543 | P03363 | P50221 | 0.65907  |
| 10544 | P03363 | Q13895 | 0.79124  |
| 10545 | P03363 | Q8IWC1 | 0.59775  |
| 10546 | P03363 | P10588 | 0.29335  |
| 10547 | P03363 | Q9Y3B7 | 0.73363  |
| 10548 | P03363 | Q6ZP65 | 0.3162   |
| 10549 | P03363 | P26373 | 0.59745  |
| 10550 | P03363 | O94850 | 0.2851   |
| 10551 | P03363 | Q8N1B3 | 0.66973  |
| 10552 | P03363 | Q13127 | 0.27517  |
| 10553 | P03363 | Q3I5F7 | 0.26068  |
| 10554 | P03363 | Q96PT4 | 0.52563  |
| 10555 | P03363 | P35269 | 0.6731   |
| 10556 | P03363 | Q8IY57 | 0.61955  |
| 10557 | P03363 | Q9BZE3 | 0.52764  |
| 10558 | P03363 | Q9H0W9 | 0.54311  |
| 10559 | P03363 | Q9Y2Y9 | 0.70748  |
| 10560 | P03363 | Q9C086 | 0.79875  |
| 10561 | P03363 | P35908 | 0.59258  |
| 10562 | P03363 | O60749 | 0.32867  |
| 10563 | P03363 | P11473 | 0.317    |
| 10564 | P03363 | O75920 | 0.11942  |



|       |        |        |          |
|-------|--------|--------|----------|
| 10565 | P03363 | Q8NEY8 | 0.4758   |
| 10566 | P03363 | Q8IYE0 | 0.054376 |
| 10567 | P03363 | Q53G26 | 0.2491   |
| 10568 | P03363 | Q16666 | 0.43511  |
| 10569 | P03363 | O75792 | 0.1628   |
| 10570 | P03363 | Q9UJ41 | 0.35909  |
| 10571 | P03363 | P50991 | 0.31156  |
| 10572 | P03363 | Q8N3Z6 | 0.39128  |
| 10573 | P03363 | Q8N8R7 | 0.7338   |
| 10574 | P03363 | Q9BS18 | 0.39867  |
| 10575 | P03363 | Q86UA6 | 0.46277  |
| 10576 | P03363 | P52272 | 0.57335  |
| 10577 | P03363 | Q6ZMV9 | 0.47577  |
| 10578 | P03363 | A6NNF4 | 0.22259  |
| 10579 | P03363 | Q07021 | 0.51413  |
| 10580 | P03363 | P54105 | 0.73448  |
| 10581 | P03363 | Q7Z6J8 | 0.31103  |
| 10582 | P03363 | Q13155 | 0.66249  |
| 10583 | P03363 | P40425 | 0.66358  |
| 10584 | P03363 | Q3YBM2 | 0.090985 |
| 10585 | P03363 | Q6ZVD7 | 0.52533  |
| 10586 | P03363 | Q3BBV1 | 0.24431  |
| 10587 | P03363 | Q8NG27 | 0.4694   |
| 10588 | P03363 | P83369 | 0.67349  |
| 10589 | P03363 | Q3LHN0 | 0.27762  |
| 10590 | P03363 | Q96BD5 | 0.3323   |
| 10591 | P03363 | Q9C0G0 | 0.22259  |
| 10592 | P03363 | Q13495 | 0.39509  |
| 10593 | P03363 | Q99608 | 0.20603  |
| 10594 | P03363 | Q4U2R6 | 0.70406  |
| 10595 | P03363 | Q9UJX4 | 0.38375  |
| 10596 | P03363 | Q6ZN11 | 0.22259  |
| 10597 | P03363 | Q96017 | 0.21455  |
| 10598 | P03363 | Q7Z6Z7 | 0.53226  |
| 10599 | P03363 | Q8N9W6 | 0.32386  |
| 10600 | P03363 | Q96QD9 | 0.7642   |
| 10601 | P03363 | P0C7X5 | 0.22259  |
| 10602 | P03363 | P17029 | 0.24401  |
| 10603 | P03363 | Q9BXN6 | 0.4314   |
| 10604 | P03363 | Q15029 | 0.60753  |
| 10605 | P03363 | Q9Y3Q8 | 1.057    |
| 10606 | P03363 | Q9NX07 | 0.32936  |
| 10607 | P03363 | Q9H633 | 0.26638  |
| 10608 | P03363 | O60264 | 0.2266   |
| 10609 | P03363 | Q15287 | 0.82994  |
| 10610 | P03363 | Q96CD0 | 0.53508  |
| 10611 | P03363 | P61088 | 0.45707  |
| 10612 | P03363 | Q12800 | 0.46404  |
| 10613 | P03363 | Q9H7C4 | 0.50887  |
| 10614 | P03363 | Q14746 | 0.37633  |
| 10615 | P03363 | Q15435 | 0.36379  |
| 10616 | P03363 | P06396 | 0.25407  |
| 10617 | P03363 | Q6L8G5 | 0.2934   |
| 10618 | P03363 | Q9NWB7 | 0.64239  |
| 10619 | P03363 | O75663 | 0.65848  |
| 10620 | P03363 | P25791 | 0.34242  |
| 10621 | P03363 | Q92529 | 0.32948  |
| 10622 | P03363 | O75351 | 0.24984  |
| 10623 | P03363 | Q9BQI6 | 0.2946   |
| 10624 | P03363 | Q9UPN7 | 0.90864  |
| 10625 | P03363 | Q9H1A7 | 0.23378  |
| 10626 | P03363 | Q5JR59 | 0.84049  |
| 10627 | P03363 | Q9UM07 | 0.29502  |
| 10628 | P03363 | Q96BR6 | 0.22259  |
| 10629 | P03363 | Q9H900 | 0.34933  |
| 10630 | P03363 | A4D263 | 0.11203  |
| 10631 | P03363 | Q8IZS6 | 0.31738  |
| 10632 | P03363 | Q9P2Z0 | 0.13635  |
| 10633 | P03363 | Q9BYQ9 | 0.2934   |
| 10634 | P03363 | O60813 | 0.10142  |
| 10635 | P03363 | P57678 | 0.79503  |
| 10636 | P03363 | Q9P2W9 | 0.19804  |
| 10637 | P03363 | P60331 | 0.2934   |
| 10638 | P03363 | Q6P1L6 | 0.22259  |
| 10639 | P03363 | Q5BKZ1 | 0.37781  |
| 10640 | P03363 | A6NK53 | 0.27378  |

|       |        |        |          |
|-------|--------|--------|----------|
| 10641 | P03363 | Q6IV72 | 0.38353  |
| 10642 | P03363 | Q9BTL3 | 0.67638  |
| 10643 | P03363 | O60282 | 0.59438  |
| 10644 | P03363 | Q9BQA1 | 0.72345  |
| 10645 | P03363 | P83881 | 0.49029  |
| 10646 | P03363 | C9JE40 | 0.92739  |
| 10647 | P03363 | P51786 | 0.303    |
| 10648 | P03363 | Q9BYP9 | 0.2934   |
| 10649 | P03363 | Q9Y2J4 | 0.35586  |
| 10650 | P03363 | Q96EH5 | 0.19237  |
| 10651 | P03363 | Q8TF45 | 0.22259  |
| 10652 | P03363 | Q96RM1 | 0.22177  |
| 10653 | P03363 | P30304 | 0.34481  |
| 10654 | P03363 | Q9H320 | 0.30058  |
| 10655 | P03363 | P10072 | 0.11993  |
| 10656 | P03363 | Q96P63 | 0.16116  |
| 10657 | P03363 | Q8WV41 | 0.43009  |
| 10658 | P03363 | P29372 | 0.41431  |
| 10659 | P03363 | Q9H1A3 | 0.53508  |
| 10660 | P03363 | B3EWF7 | 0.22504  |
| 10661 | P03363 | Q14159 | 0.063244 |
| 10662 | P03363 | Q8NEU8 | 0.4687   |
| 10663 | P03363 | O76021 | 0.22585  |
| 10664 | P03363 | Q96QF7 | 0.22504  |
| 10665 | P03363 | Q12962 | 0.71656  |
| 10666 | P03363 | O75157 | 0.29405  |
| 10667 | P03363 | P10911 | 0.25109  |
| 10668 | P03363 | P48728 | 0.16724  |
| 10669 | P03363 | Q3MIV0 | 0.27762  |
| 10670 | P03363 | Q8IWZ3 | 0.95224  |
| 10671 | P03363 | Q96BW9 | 0.11388  |
| 10672 | P03363 | Q8N684 | 0.66975  |
| 10673 | P03363 | Q9BXF3 | 0.62564  |
| 10674 | P03363 | Q9NZN9 | 0.24048  |
| 10675 | P03363 | O75400 | 0.74099  |
| 10676 | P03363 | Q9Y608 | 0.50498  |
| 10677 | P03363 | O95405 | 0.22359  |
| 10678 | P03363 | Q9Y6X2 | 0.60612  |
| 10679 | P03363 | Q03936 | 0.30118  |
| 10680 | P03363 | Q9BZF9 | 0.46732  |
| 10681 | P03363 | Q9H4M3 | 0.4625   |
| 10682 | P03363 | Q9H9F9 | 0.91748  |
| 10683 | P03363 | P63151 | 0.39317  |
| 10684 | P03363 | Q5TCZ1 | 0.47607  |
| 10685 | P03363 | Q92572 | 0.38332  |
| 10686 | P03363 | Q9NQ03 | 0.29518  |
| 10687 | P03363 | Q5VV67 | 0.36049  |
| 10688 | P03363 | Q6NZ36 | 0.28746  |
| 10689 | P03363 | O43524 | 0.3249   |
| 10690 | P03363 | Q03252 | 0.44084  |
| 10691 | P03363 | O14599 | 0.56913  |
| 10692 | P03363 | Q5TZA2 | 0.7381   |
| 10693 | P03363 | Q9C075 | 0.79043  |
| 10694 | P03363 | Q96EX3 | 0.24431  |
| 10695 | P03363 | Q56P42 | 0.4314   |
| 10696 | P03363 | P15923 | 0.34925  |
| 10697 | P03363 | Q9NVV5 | 0.15709  |
| 10698 | P03363 | P35900 | 1.0007   |
| 10699 | P03363 | Q96RE9 | 0.22259  |
| 10700 | P03363 | O60287 | 0.3193   |
| 10701 | P03363 | Q9UGP4 | 0.32931  |
| 10702 | P03363 | Q6ZN19 | 0.22259  |
| 10703 | P03363 | P15336 | 0.44309  |
| 10704 | P03363 | Q9BPX1 | 0.31201  |
| 10705 | P03363 | O60885 | 0.68229  |
| 10706 | P03363 | O75334 | 0.69923  |
| 10707 | P03363 | Q15326 | 0.75237  |
| 10708 | P03363 | Q8NDN9 | 0.58738  |
| 10709 | P03363 | A6NF36 | 0.08959  |
| 10710 | P03363 | Q9UD57 | 0.42544  |
| 10711 | P03363 | Q13951 | 0.71046  |
| 10712 | P03363 | P63104 | 0.61146  |
| 10713 | P03363 | Q9BQ90 | 0.76096  |
| 10714 | P03363 | Q2M1K9 | 0.35777  |
| 10715 | P03363 | Q6A162 | 0.78878  |
| 10716 | P03363 | Q8TDY3 | 0.29593  |

|       |        |        |           |
|-------|--------|--------|-----------|
| 10717 | P03363 | Q8TDC0 | 0.69364   |
| 10718 | P03363 | Q6PGP7 | 0.83401   |
| 10719 | P03363 | Q13748 | 0.31729   |
| 10720 | P03363 | Q96T23 | 0.28845   |
| 10721 | P03363 | P43358 | 0.56434   |
| 10722 | P03363 | Q9H379 | 0.025527  |
| 10723 | P03363 | Q9H305 | 0.21411   |
| 10724 | P03363 | A6NFL8 | 0.019317  |
| 10725 | P03363 | Q9Y3B4 | 0.28046   |
| 10726 | P03363 | Q6AI39 | 0.0011991 |
| 10727 | P03363 | Q9H0R8 | 0.31711   |
| 10728 | P03363 | Q9P2T0 | 0.44317   |
| 10729 | P03363 | Q14684 | 0.24799   |
| 10730 | P03363 | P17023 | 0.24904   |
| 10731 | P03363 | Q14690 | 0.65118   |
| 10732 | P03363 | Q86T29 | 0.22259   |
| 10733 | P03363 | Q9UK58 | 0.43606   |
| 10734 | P03363 | Q9BRJ2 | 0.31882   |
| 10735 | P03363 | Q00534 | 0.25413   |
| 10736 | P03363 | P07196 | 0.67178   |
| 10737 | P03363 | Q9BSN8 | 0.24352   |
| 10738 | P03363 | P20749 | 0.27272   |
| 10739 | P03363 | Q6RSH7 | 0.35546   |
| 10740 | P03363 | Q9HBK9 | 0.21159   |
| 10741 | P03363 | Q9UKA2 | 0.49193   |
| 10742 | P03363 | Q96EF6 | 0.43705   |
| 10743 | P03363 | Q5EE01 | 0.44556   |
| 10744 | P03363 | Q92636 | 0.56781   |
| 10745 | P03363 | Q96D15 | 0.34375   |
| 10746 | P03363 | Q9HD36 | 0.39797   |
| 10747 | P03363 | Q9NX08 | 0.53508   |
| 10748 | P03363 | Q13867 | 0.37978   |
| 10749 | P03363 | Q969L2 | 0.15277   |
| 10750 | P03363 | Q16543 | 0.51436   |
| 10751 | P03363 | Q9ULM6 | 0.57285   |
| 10752 | P03363 | Q00403 | 0.55093   |
| 10753 | P03363 | Q8NAF0 | 0.22259   |
| 10754 | P03363 | A6NFY7 | 0.056662  |
| 10755 | P03363 | Q9UBV8 | 0.42868   |
| 10756 | P03363 | Q96DT7 | 0.27693   |
| 10757 | P03363 | P61578 | 0.55152   |
| 10758 | P03363 | Q13609 | 0.13506   |
| 10759 | P03363 | Q15937 | 0.21805   |
| 10760 | P03363 | Q92560 | 0.23439   |
| 10761 | P03363 | Q9NRR5 | 0.59731   |
| 10762 | P03363 | O15499 | 0.51754   |
| 10763 | P03363 | Q8TAT6 | 0.33231   |
| 10764 | P03363 | Q15424 | 0.77447   |
| 10765 | P03363 | Q9UBI1 | 0.53508   |
| 10766 | P03363 | Q9Y2G9 | 0.20898   |
| 10767 | P03363 | O15117 | 0.5325    |
| 10768 | P03363 | Q5VYS4 | 0.24287   |
| 10769 | P03363 | Q8NEF9 | 0.6258    |
| 10770 | P03363 | Q9NWU5 | 0.20117   |
| 10771 | P03363 | Q96LY2 | 0.0079666 |
| 10772 | P03363 | Q15653 | 0.67783   |
| 10773 | P03363 | Q8TE85 | 0.29363   |
| 10774 | P03363 | Q13619 | 0.40627   |
| 10775 | P03363 | Q9ULU4 | 0.48315   |
| 10776 | P03363 | Q9BXY0 | 0.29721   |
| 10777 | P03363 | Q9Y4E1 | 0.11      |
| 10778 | P03363 | Q9HB75 | 0.75004   |
| 10779 | P03363 | P0CL85 | 0.22504   |
| 10780 | P03363 | Q9P1T7 | 0.79648   |
| 10781 | P03363 | Q96P71 | 0.46738   |
| 10782 | P03363 | P55212 | 0.28431   |
| 10783 | P03363 | Q9BWJ5 | 0.41785   |
| 10784 | P03363 | O75446 | 0.7982    |
| 10785 | P03363 | O43615 | 0.24579   |
| 10786 | P03363 | Q9NRG9 | 0.52135   |
| 10787 | P03363 | Q8NCR6 | 0.33932   |
| 10788 | P03363 | Q16204 | 0.28924   |
| 10789 | P03363 | Q495Y8 | 0.0070677 |
| 10790 | P03363 | P08727 | 1.0007    |
| 10791 | P03363 | O75031 | 0.10433   |
| 10792 | P03363 | P22090 | 0.24437   |

|       |        |        |         |
|-------|--------|--------|---------|
| 10793 | P03363 | Q5JTW2 | 0.42673 |
| 10794 | P03363 | Q96FH0 | 0.47935 |
| 10795 | P03363 | Q92904 | 0.34172 |
| 10796 | P03363 | Q15144 | 0.50442 |
| 10797 | P03363 | P32519 | 1.0963  |
| 10798 | P03363 | P15822 | 0.82045 |
| 10799 | P03363 | Q6P2S7 | 0.24431 |
| 10800 | P03363 | Q14140 | 0.47223 |
| 10801 | P03363 | Q07352 | 0.70109 |
| 10802 | P03363 | Q9C0C7 | 0.40869 |
| 10803 | P03363 | P61163 | 0.16655 |
| 10804 | P03363 | P04053 | 0.30509 |
| 10805 | P03363 | Q9H112 | 0.30292 |
| 10806 | P03363 | Q9P032 | 0.49115 |
| 10807 | P03363 | P48552 | 0.38968 |
| 10808 | P03363 | Q9Y3I1 | 0.84782 |
| 10809 | P03363 | Q9UBU8 | 0.5822  |
| 10810 | P03363 | Q8IZU1 | 0.29721 |
| 10811 | P03363 | P0C7V5 | 0.22259 |
| 10812 | P03363 | Q6PGN9 | 0.57388 |
| 10813 | P03363 | Q9BSF8 | 0.49651 |
| 10814 | P03363 | Q9Y333 | 0.70799 |
| 10815 | P03363 | Q8WY36 | 0.43182 |
| 10816 | P03363 | Q9H0U9 | 0.47026 |
| 10817 | P03363 | Q14562 | 0.49856 |
| 10818 | P03363 | O43593 | 0.2562  |
| 10819 | P03363 | A8MUZ8 | 0.22259 |
| 10820 | P03363 | Q5JY77 | 0.7338  |
| 10821 | P03363 | P62861 | 0.31766 |
| 10822 | P03363 | Q92832 | 0.3351  |
| 10823 | P03363 | Q2M1V0 | 0.51853 |
| 10824 | P03363 | Q05066 | 0.59554 |
| 10825 | P03363 | Q8N228 | 0.43182 |
| 10826 | P03363 | Q9NVM4 | 0.21835 |
| 10827 | P03363 | Q9BSU3 | 0.42889 |
| 10828 | P03363 | Q8N7G0 | 0.51853 |
| 10829 | P03363 | Q8N6M9 | 0.20313 |
| 10830 | P03363 | Q2VY69 | 0.22259 |
| 10831 | P03363 | Q06250 | 0.11203 |
| 10832 | P03363 | P62841 | 0.40736 |
| 10833 | P03363 | Q9Y5Z7 | 0.48522 |
| 10834 | P03363 | Q6ZQR2 | 0.11822 |
| 10835 | P03363 | P62316 | 0.76043 |
| 10836 | P03363 | Q8WXI9 | 0.31644 |
| 10837 | P03363 | A8MTZ0 | 0.53376 |
| 10838 | P03363 | Q3SYA9 | 0.11203 |
| 10839 | P03363 | Q8WUM0 | 0.37921 |
| 10840 | P03363 | P61457 | 0.69157 |
| 10841 | P03363 | Q13242 | 0.37397 |
| 10842 | P03363 | Q5JSS6 | 0.1103  |
| 10843 | P03363 | Q9UNX3 | 0.33188 |
| 10844 | P03363 | A8MVW5 | 0.52788 |
| 10845 | P03363 | Q9BVL2 | 0.35837 |
| 10846 | P03363 | Q9NR50 | 0.47896 |
| 10847 | P03363 | Q9BW30 | 0.23412 |
| 10848 | P03363 | O94952 | 0.13521 |
| 10849 | P03363 | P08133 | 0.61836 |
| 10850 | P03363 | Q96Q83 | 0.30015 |
| 10851 | P03363 | Q9H0B6 | 0.89545 |
| 10852 | P03363 | Q96QU8 | 0.84819 |
| 10853 | P03363 | Q8N456 | 0.24431 |
| 10854 | P03363 | Q96JM2 | 0.32823 |
| 10855 | P03363 | Q96J87 | 0.3157  |
| 10856 | P03363 | A6NEJ1 | 0.39008 |
| 10857 | P03363 | Q99549 | 0.44189 |
| 10858 | P03363 | Q9UBP6 | 0.75027 |
| 10859 | P03363 | A3KN83 | 0.11203 |
| 10860 | P03363 | Q99708 | 0.43769 |
| 10861 | P03363 | O43830 | 0.24904 |
| 10862 | P03363 | Q8TC84 | 0.49651 |
| 10863 | P03363 | Q5VSR9 | 0.01487 |
| 10864 | P03363 | Q96E66 | 0.24431 |
| 10865 | P03363 | Q9BRP1 | 0.2724  |
| 10866 | P03363 | Q99567 | 0.42724 |
| 10867 | P03363 | Q14602 | 0.43052 |
| 10868 | P03363 | Q9BTC8 | 0.59842 |

|       |        |        |          |
|-------|--------|--------|----------|
| 10869 | P03363 | O75529 | 0.46553  |
| 10870 | P03363 | Q96EW2 | 0.24431  |
| 10871 | P03363 | O95218 | 0.57228  |
| 10872 | P03363 | P10155 | 0.57953  |
| 10873 | P03363 | Q96JM3 | 0.39133  |
| 10874 | P03363 | C9JN71 | 0.18593  |
| 10875 | P03363 | Q96SI1 | 0.21694  |
| 10876 | P03363 | Q08050 | 0.36749  |
| 10877 | P03363 | Q96LW9 | 0.268    |
| 10878 | P03363 | P13378 | 0.34195  |
| 10879 | P03363 | Q96F86 | 0.64897  |
| 10880 | P03363 | P22103 | 0.09071  |
| 10881 | P03363 | A6NNW6 | 0.094981 |
| 10882 | P03363 | Q92688 | 0.4314   |
| 10883 | P03363 | P30622 | 0.27264  |
| 10884 | P03363 | A6NH11 | 0.21406  |
| 10885 | P03363 | Q9HCU8 | 0.34626  |
| 10886 | P03363 | Q99457 | 0.17795  |
| 10887 | P03363 | Q9NSA3 | 0.66163  |
| 10888 | P03363 | Q8IYB9 | 0.22259  |
| 10889 | P03363 | P20585 | 0.16363  |
| 10890 | P03363 | P07320 | 0.64176  |
| 10891 | P03363 | Q14669 | 0.52045  |
| 10892 | P03363 | P0CJ85 | 0.49158  |
| 10893 | P03363 | Q8N660 | 0.24431  |
| 10894 | P03363 | Q8IY85 | 0.43013  |
| 10895 | P03363 | Q9NX18 | 0.71457  |
| 10896 | P03363 | P11831 | 0.23254  |
| 10897 | P03363 | Q8TDR4 | 0.22504  |
| 10898 | P03363 | Q6ZNG9 | 0.24806  |
| 10899 | P03363 | Q8WYN3 | 0.54964  |
| 10900 | P03363 | P29373 | 0.27109  |
| 10901 | P03363 | Q96D03 | 0.22969  |
| 10902 | P03363 | Q9P0W5 | 0.66638  |
| 10903 | P03363 | O75394 | 0.21263  |
| 10904 | P03363 | O15226 | 0.8115   |
| 10905 | P03363 | P54136 | 0.56811  |
| 10906 | P03363 | Q8TF39 | 0.268    |
| 10907 | P03363 | Q9UPY8 | 0.80134  |
| 10908 | P03363 | Q9NSC5 | 0.47705  |
| 10909 | P03363 | Q9BS31 | 0.22259  |
| 10910 | P03363 | Q4L180 | 0.3983   |
| 10911 | P03363 | Q9NY61 | 0.64304  |
| 10912 | P03363 | O75208 | 0.026987 |
| 10913 | P03363 | Q969H4 | 0.31643  |
| 10914 | P03363 | Q9Y3V2 | 0.92347  |
| 10915 | P03363 | Q9H4I8 | 0.24704  |
| 10916 | P03363 | Q13129 | 0.5599   |
| 10917 | P03363 | Q8TC71 | 0.43623  |
| 10918 | P03363 | Q9NX46 | 0.32461  |
| 10919 | P03363 | Q9HCK8 | 0.33941  |
| 10920 | P03363 | Q5JWR5 | 0.14787  |
| 10921 | P03363 | Q8N972 | 0.22259  |
| 10922 | P03363 | Q9UN37 | 0.37697  |
| 10923 | P03363 | Q8IYM1 | 0.24247  |
| 10924 | P03363 | P84101 | 0.30086  |
| 10925 | P03363 | Q3LI60 | 0.27762  |
| 10926 | P03363 | Q96MA1 | 0.31718  |
| 10927 | P03363 | P30050 | 0.42896  |
| 10928 | P03363 | P46937 | 0.53533  |
| 10929 | P03363 | Q9H0A8 | 0.7338   |
| 10930 | P03363 | Q7L266 | 0.33581  |
| 10931 | P03363 | Q15293 | 0.33053  |
| 10932 | P03363 | Q96A56 | 0.66694  |
| 10933 | P03363 | Q5T752 | 0.23311  |
| 10934 | P03363 | Q14872 | 0.52543  |
| 10935 | P03363 | Q8N3S3 | 0.32756  |
| 10936 | P03363 | Q9HBQ8 | 0.042292 |
| 10937 | P03363 | Q16576 | 0.42351  |
| 10938 | P03363 | P56693 | 0.49625  |
| 10939 | P03363 | P27816 | 0.53996  |
| 10940 | P03363 | Q8IV36 | 0.46465  |
| 10941 | P03363 | Q9NNX9 | 0.22583  |
| 10942 | P03363 | Q53HC0 | 0.80091  |
| 10943 | P03363 | Q9H0W8 | 0.39142  |
| 10944 | P03363 | Q8WUQ7 | 0.37398  |

|       |        |        |          |
|-------|--------|--------|----------|
| 10945 | P03363 | Q13426 | 0.26346  |
| 10946 | P03363 | Q717R9 | 0.32795  |
| 10947 | P03363 | P28702 | 0.29444  |
| 10948 | P03363 | Q8IWE2 | 0.24431  |
| 10949 | P03363 | O60925 | 0.18144  |
| 10950 | P03363 | Q9BPY8 | 0.36235  |
| 10951 | P03363 | Q8IYB3 | 0.51074  |
| 10952 | P03363 | Q86XK3 | 0.68407  |
| 10953 | P03363 | P60014 | 0.2934   |
| 10954 | P03363 | Q7Z699 | 0.33709  |
| 10955 | P03363 | Q9BYD5 | 0.21723  |
| 10956 | P03363 | Q9BYR5 | 0.2934   |
| 10957 | P03363 | Q13416 | 0.46231  |
| 10958 | P03363 | Q9P0K7 | 0.27299  |
| 10959 | P03363 | Q6P1M3 | 0.8156   |
| 10960 | P03363 | P35325 | 0.22177  |
| 10961 | P03363 | P82912 | 0.1927   |
| 10962 | P03363 | Q5SYE7 | 0.032049 |
| 10963 | P03363 | Q9NUL7 | 0.22885  |
| 10964 | P03363 | P60329 | 0.2934   |
| 10965 | P03363 | Q96FX2 | 0.74445  |
| 10966 | P03363 | Q9NWA0 | 0.82851  |
| 10967 | P03363 | Q8N7B1 | 0.043481 |
| 10968 | P03363 | Q9Y3C8 | 0.48888  |
| 10969 | P03363 | Q96R06 | 0.64985  |
| 10970 | P03363 | Q9BYN7 | 0.27378  |
| 10971 | P03363 | O43790 | 0.8697   |
| 10972 | P03363 | P20264 | 0.24711  |
| 10973 | P03363 | Q8NBC4 | 0.24431  |
| 10974 | P03363 | P28069 | 0.52262  |
| 10975 | P03363 | Q8IXQ5 | 0.40887  |
| 10976 | P03363 | Q8N5X7 | 0.26992  |
| 10977 | P03363 | Q5T6F0 | 0.40243  |
| 10978 | P03363 | P61960 | 0.41113  |
| 10979 | P03363 | Q96N58 | 0.22259  |
| 10980 | P03363 | Q7Z4W3 | 0.27762  |
| 10981 | P03363 | Q9ULZ0 | 0.4314   |
| 10982 | P03363 | Q9UI36 | 0.52779  |
| 10983 | P03363 | O60583 | 0.57505  |
| 10984 | P03363 | O96019 | 0.52589  |
| 10985 | P03363 | Q5T124 | 0.29593  |
| 10986 | P03363 | Q53EZ4 | 0.50864  |
| 10987 | P03363 | Q9H4T2 | 0.268    |
| 10988 | P03363 | P59998 | 0.46393  |
| 10989 | P03363 | Q49AN0 | 0.26972  |
| 10990 | P03363 | Q6PI26 | 0.89836  |
| 10991 | P03363 | Q9UDW3 | 0.47296  |
| 10992 | P03363 | P60006 | 0.061076 |
| 10993 | P03363 | P14859 | 0.94584  |
| 10994 | P03363 | Q9P127 | 0.22504  |
| 10995 | P03363 | Q8IUC1 | 0.42225  |
| 10996 | P03363 | P28358 | 0.3466   |
| 10997 | P03363 | Q9Y4X5 | 0.46926  |
| 10998 | P03363 | Q68CZ6 | 0.4726   |
| 10999 | P03363 | Q68D10 | 0.11203  |
| 11000 | P03363 | O76013 | 0.89041  |
| 11001 | P03363 | O43809 | 0.56693  |
| 11002 | P03363 | Q2VPK5 | 0.67538  |
| 11003 | P03363 | P62829 | 0.55259  |
| 11004 | P03363 | Q9BUE0 | 0.82851  |
| 11005 | P03363 | Q13616 | 0.35757  |
| 11006 | P03363 | Q9ULZ2 | 0.65184  |
| 11007 | P03363 | Q9NVX2 | 0.29739  |
| 11008 | P03363 | Q8TF09 | 0.37563  |
| 11009 | P03363 | Q14119 | 0.31074  |
| 11010 | P03363 | Q53T94 | 0.26789  |
| 11011 | P03363 | O43684 | 0.31759  |
| 11012 | P03363 | O95067 | 0.31835  |
| 11013 | P03363 | Q92622 | 0.18255  |
| 11014 | P03363 | Q8NB91 | 0.29751  |
| 11015 | P03363 | Q9BXF9 | 0.26324  |
| 11016 | P03363 | Q6ZNG2 | 0.52563  |
| 11017 | P03363 | Q16829 | 0.2428   |
| 11018 | P03363 | O96020 | 0.64535  |
| 11019 | P03363 | Q8N393 | 0.22259  |
| 11020 | P03363 | A1A580 | 0.27762  |

|       |        |        |           |
|-------|--------|--------|-----------|
| 11021 | P03363 | Q12798 | 0.66176   |
| 11022 | P03363 | P63165 | 0.66291   |
| 11023 | P03363 | Q00444 | 0.44984   |
| 11024 | P03363 | Q96HT8 | 0.20852   |
| 11025 | P03363 | P56915 | 0.32408   |
| 11026 | P03363 | P38159 | 0.66016   |
| 11027 | P03363 | Q12906 | 0.84401   |
| 11028 | P03363 | Q9NZ32 | 0.23974   |
| 11029 | P03363 | P18583 | 0.62069   |
| 11030 | P03363 | Q9NSI6 | 0.64894   |
| 11031 | P03363 | Q8N5P1 | 0.2936    |
| 11032 | P03363 | P57076 | 0.27961   |
| 11033 | P03363 | Q5MJ10 | 0.01487   |
| 11034 | P03363 | P52737 | 0.73638   |
| 11035 | P03363 | Q6ULP2 | 0.53098   |
| 11036 | P03363 | Q96MC4 | 0.11297   |
| 11037 | P03363 | P13647 | 0.86201   |
| 11038 | P03363 | Q00653 | 0.75738   |
| 11039 | P03363 | Q14999 | 0.77037   |
| 11040 | P03363 | Q15544 | 0.62617   |
| 11041 | P03363 | Q92599 | 0.41076   |
| 11042 | P03363 | Q9BZD3 | 0.10174   |
| 11043 | P03363 | Q96QA5 | 0.27678   |
| 11044 | P03363 | Q96T76 | 0.62917   |
| 11045 | P03363 | Q5VWJ9 | 0.24351   |
| 11046 | P03363 | Q9Y5J1 | 0.25488   |
| 11047 | P03363 | Q96AE4 | 0.56465   |
| 11048 | P03363 | P11308 | 0.79075   |
| 11049 | P03363 | Q9BY77 | 0.69105   |
| 11050 | P03363 | P08107 | 0.40894   |
| 11051 | P03363 | Q96IR2 | 0.22259   |
| 11052 | P03363 | Q9UPG8 | 0.42837   |
| 11053 | P03363 | Q9BSM1 | 0.60454   |
| 11054 | P03363 | Q8N8Z8 | 0.22259   |
| 11055 | P03363 | A8MZ59 | 0.55275   |
| 11056 | P03363 | Q8N157 | 0.22801   |
| 11057 | P03363 | Q8TF20 | 0.22259   |
| 11058 | P03363 | Q03111 | 1.119     |
| 11059 | P03363 | Q6PIF2 | 0.32732   |
| 11060 | P03363 | Q94927 | 0.4726    |
| 11061 | P03363 | Q92841 | 0.57857   |
| 11062 | P03363 | Q9ULD5 | 0.23615   |
| 11063 | P03363 | Q96002 | 0.11203   |
| 11064 | P03363 | Q6DKK2 | 0.72037   |
| 11065 | P03363 | P26368 | 0.68828   |
| 11066 | P03363 | P26641 | 0.4444    |
| 11067 | P03363 | Q9NRG4 | 0.48819   |
| 11068 | P03363 | Q3SYG4 | 0.47757   |
| 11069 | P03363 | Q9H974 | 0.0644    |
| 11070 | P03363 | P42772 | 0.55312   |
| 11071 | P03363 | Q9BPZ3 | 0.65229   |
| 11072 | P03363 | Q8WUM4 | 0.79557   |
| 11073 | P03363 | Q0D2I5 | 0.27762   |
| 11074 | P03363 | Q5XKL5 | 0.29721   |
| 11075 | P03363 | Q659A1 | 0.22504   |
| 11076 | P03363 | Q8IX15 | 0.57774   |
| 11077 | P03363 | Q95238 | 0.4984    |
| 11078 | P03363 | Q9H0R1 | 0.2221    |
| 11079 | P03363 | Q9H7N4 | 0.3261    |
| 11080 | P03363 | Q8WW33 | 0.13038   |
| 11081 | P03363 | P81877 | 0.6488    |
| 11082 | P03363 | Q13415 | 0.2793    |
| 11083 | P03363 | P62877 | 0.32778   |
| 11084 | P03363 | Q9GZU2 | 0.45752   |
| 11085 | P03363 | Q14532 | 0.69887   |
| 11086 | P03363 | Q9GZZ0 | 0.39652   |
| 11087 | P03363 | Q9NR09 | 0.32745   |
| 11088 | P03363 | Q96FA3 | 0.21998   |
| 11089 | P03363 | Q75030 | 0.48406   |
| 11090 | P03363 | Q96KN3 | 0.49161   |
| 11091 | P03363 | Q9Y5B9 | 0.22708   |
| 11092 | P03363 | P08235 | 0.32091   |
| 11093 | P03363 | A6NNV3 | 0.0070677 |
| 11094 | P03363 | Q9BZP3 | 0.11203   |
| 11095 | P03363 | Q86WG3 | 0.49522   |
| 11096 | P03363 | Q86VN1 | 0.41511   |

|       |        |        |           |
|-------|--------|--------|-----------|
| 11097 | P03363 | P63172 | 0.54912   |
| 11098 | P03363 | P82663 | 0.49416   |
| 11099 | P03363 | Q17RP2 | 0.40039   |
| 11100 | P03363 | Q14240 | 0.23712   |
| 11101 | P03363 | P46063 | 0.32259   |
| 11102 | P03363 | Q9GZT3 | 0.30241   |
| 11103 | P03363 | Q15149 | 0.29248   |
| 11104 | P03363 | O75635 | 0.18824   |
| 11105 | P03363 | Q9H425 | 0.24431   |
| 11106 | P03363 | Q6K0P9 | 0.33619   |
| 11107 | P03363 | P46782 | 0.28822   |
| 11108 | P03363 | Q8N0T1 | 0.0086443 |
| 11109 | P03363 | Q9P2S5 | 0.3171    |
| 11110 | P03363 | Q8IY31 | 0.57998   |
| 11111 | P03363 | Q96BZ8 | 0.11203   |
| 11112 | P03363 | Q6ZW54 | 0.074527  |
| 11113 | P03363 | Q96PU5 | 0.28634   |
| 11114 | P03363 | Q8TAD1 | 0.4314    |
| 11115 | P03363 | Q9UPU9 | 0.14013   |
| 11116 | P03363 | Q92945 | 0.65944   |
| 11117 | P03363 | P35268 | 0.41414   |
| 11118 | P03363 | Q96BN2 | 0.3793    |
| 11119 | P03363 | Q9NRX2 | 0.19275   |
| 11120 | P03363 | Q9UHY8 | 0.44508   |
| 11121 | P03363 | Q96HJ5 | 0.32523   |
| 11122 | P03363 | Q86V25 | 0.22123   |
| 11123 | P03363 | Q99627 | 0.47926   |
| 11124 | P03363 | P51504 | 0.24904   |
| 11125 | P03363 | P17480 | 0.75546   |
| 11126 | P03363 | Q9P1Y5 | 0.28234   |
| 11127 | P03363 | Q92902 | 0.25554   |
| 11128 | P03363 | P34932 | 0.25526   |
| 11129 | P03363 | Q9Y250 | 0.64604   |
| 11130 | P03363 | Q9NZ81 | 0.4684    |
| 11131 | P03363 | Q6P1J9 | 0.50312   |
| 11132 | P03363 | Q9BQ15 | 0.72926   |
| 11133 | P03363 | Q8IYB7 | 0.22518   |
| 11134 | P03363 | Q9UI08 | 0.38396   |
| 11135 | P03363 | Q9BQS6 | 0.89306   |
| 11136 | P03363 | P21506 | 0.22259   |
| 11137 | P03363 | Q6ZN32 | 0.51853   |
| 11138 | P03363 | Q14241 | 0.29991   |
| 11139 | P03363 | Q99698 | 0.25554   |
| 11140 | P03363 | Q8WW59 | 0.24079   |
| 11141 | P03363 | O75113 | 0.76346   |
| 11142 | P03363 | Q8N5F7 | 0.98185   |
| 11143 | P03363 | P24278 | 0.80384   |
| 11144 | P03363 | O75800 | 0.48488   |
| 11145 | P03363 | Q9Y3C4 | 0.4225    |
| 11146 | P03363 | Q9HBT7 | 0.16475   |
| 11147 | P03363 | Q12894 | 0.56551   |
| 11148 | P03363 | Q86TA1 | 0.412     |
| 11149 | P03363 | Q8IW36 | 0.20893   |
| 11150 | P03363 | Q12874 | 0.56425   |
| 11151 | P03363 | Q9UHV2 | 0.58342   |
| 11152 | P03363 | Q8IYN2 | 0.40525   |
| 11153 | P03363 | Q15717 | 0.3629    |
| 11154 | P03363 | Q9NSK0 | 0.46429   |
| 11155 | P03363 | Q8IY81 | 0.66179   |
| 11156 | P03363 | Q8WUN7 | 0.49651   |
| 11157 | P03363 | Q9Y2M5 | 0.71336   |
| 11158 | P03363 | Q9GZV5 | 0.70713   |
| 11159 | P03363 | Q99426 | 0.52756   |
| 11160 | P03363 | Q9BXW6 | 0.40437   |
| 11161 | P03363 | Q14814 | 0.48835   |
| 11162 | P03363 | Q8N6T7 | 0.33344   |
| 11163 | P03363 | Q13156 | 0.26132   |
| 11164 | P03363 | Q9UPN6 | 0.26998   |
| 11165 | P03363 | O95433 | 0.53316   |
| 11166 | P03363 | Q9NR28 | 0.62667   |
| 11167 | P03363 | A6NJT0 | 0.27589   |
| 11168 | P03363 | P29692 | 0.37027   |
| 11169 | P03363 | Q9NZC4 | 0.22479   |
| 11170 | P03363 | P20962 | 0.24602   |
| 11171 | P03363 | P61571 | 0.55152   |
| 11172 | P03363 | P54278 | 0.31322   |



|       |        |        |          |
|-------|--------|--------|----------|
| 11173 | P03363 | P49450 | 0.22902  |
| 11174 | P03363 | Q8TEB1 | 0.56144  |
| 11175 | P03363 | Q6XZF7 | 0.42513  |
| 11176 | P03363 | Q8N1I0 | 0.37078  |
| 11177 | P03363 | Q6VB84 | 0.61062  |
| 11178 | P03363 | P78545 | 0.69055  |
| 11179 | P03363 | P31943 | 0.81135  |
| 11180 | P03363 | Q9P255 | 0.22259  |
| 11181 | P03363 | Q13506 | 0.31719  |
| 11182 | P03363 | Q9NZI8 | 0.34705  |
| 11183 | P03363 | Q08999 | 0.96354  |
| 11184 | P03363 | Q9BRG1 | 0.6809   |
| 11185 | P03363 | Q86UU5 | 0.074044 |
| 11186 | P03363 | Q9BTE6 | 0.096938 |
| 11187 | P03363 | Q86WP2 | 0.52295  |
| 11188 | P03363 | Q43172 | 0.76006  |
| 11189 | P03363 | P05423 | 0.15972  |
| 11190 | P03363 | Q9NYV6 | 0.27605  |
| 11191 | P03363 | Q13480 | 0.23095  |
| 11192 | P03363 | Q9P0J0 | 0.30229  |
| 11193 | P03363 | Q9NR22 | 0.35192  |
| 11194 | P03363 | Q14549 | 0.51582  |
| 11195 | P03363 | Q9UK99 | 0.59082  |
| 11196 | P03363 | Q9NWX8 | 0.66031  |
| 11197 | P03363 | Q9BX46 | 0.28073  |
| 11198 | P03363 | Q32MQ0 | 0.14777  |
| 11199 | P03363 | P0CG13 | 0.24693  |
| 11200 | P03363 | Q9BW66 | 0.74837  |
| 11201 | P03363 | P17039 | 0.22259  |
| 11202 | P03363 | Q5UE93 | 0.43138  |
| 11203 | P03363 | P62324 | 0.63653  |
| 11204 | P03363 | Q6P161 | 0.22496  |
| 11205 | P03363 | Q95721 | 0.38663  |
| 11206 | P03363 | Q8IXT2 | 0.26821  |
| 11207 | P03363 | Q6PF04 | 0.22259  |
| 11208 | P03363 | Q8TAF7 | 0.22259  |
| 11209 | P03363 | B7ZBB8 | 0.15493  |
| 11210 | P03363 | Q9H267 | 0.35841  |
| 11211 | P03363 | P04259 | 0.47869  |
| 11212 | P03363 | Q76G19 | 0.23169  |
| 11213 | P03363 | Q96H40 | 0.22259  |
| 11214 | P03363 | Q14CN4 | 0.48919  |
| 11215 | P03363 | Q15035 | 0.25211  |
| 11216 | P03363 | Q9H2G4 | 0.42108  |
| 11217 | P03363 | P31749 | 0.15315  |
| 11218 | P03363 | Q92830 | 0.38536  |
| 11219 | P03363 | Q6T4R5 | 0.17199  |
| 11220 | P03363 | Q15318 | 0.11633  |
| 11221 | P03363 | Q5VIY5 | 0.22259  |
| 11222 | P03363 | Q9UDV6 | 0.60224  |
| 11223 | P03363 | Q9UKK3 | 0.68565  |
| 11224 | P03363 | Q5JNZ3 | 0.22259  |
| 11225 | P03363 | Q9NZI6 | 0.49765  |
| 11226 | P03363 | Q86WZ6 | 0.22259  |
| 11227 | P03363 | Q14511 | 0.60301  |
| 11228 | P03363 | Q9BQ87 | 0.40525  |
| 11229 | P03363 | Q8NB16 | 0.26356  |
| 11230 | P03363 | Q96BY2 | 0.62128  |
| 11231 | P03363 | Q7Z2E3 | 0.28348  |
| 11232 | P03363 | Q3LI59 | 0.27762  |
| 11233 | P03363 | Q96C28 | 0.22259  |
| 11234 | P03363 | Q13077 | 0.41034  |
| 11235 | P03363 | Q96E14 | 0.41993  |
| 11236 | P03363 | P17032 | 0.24904  |
| 11237 | P03363 | Q5T1B1 | 0.14412  |
| 11238 | P03363 | P17096 | 0.26684  |
| 11239 | P03363 | Q9P1Z2 | 0.64061  |
| 11240 | P03363 | Q9H808 | 0.62588  |
| 11241 | P03363 | Q8IYJ2 | 0.058413 |
| 11242 | P03363 | Q8NB12 | 0.31648  |
| 11243 | P03363 | Q9ULR0 | 0.40296  |
| 11244 | P03363 | Q14979 | 0.53548  |
| 11245 | P03363 | Q9Y6G3 | 0.19217  |
| 11246 | P03363 | P54274 | 0.33359  |
| 11247 | P03363 | Q9C0C2 | 0.27161  |
| 11248 | P03363 | C9JLW8 | 0.016606 |

|       |        |        |           |
|-------|--------|--------|-----------|
| 11249 | P03363 | Q5TI25 | 0.24431   |
| 11250 | P03363 | Q8IZ20 | 0.22259   |
| 11251 | P03363 | Q9BXX1 | 0.23523   |
| 11252 | P03363 | Q5SWL7 | 0.10142   |
| 11253 | P03363 | Q14677 | 0.48599   |
| 11254 | P03363 | Q66PJ3 | 0.72935   |
| 11255 | P03363 | Q9BWT7 | 0.45387   |
| 11256 | P03363 | Q96NM4 | 0.43182   |
| 11257 | P03363 | Q9H609 | 0.22259   |
| 11258 | P03363 | Q13432 | 0.58787   |
| 11259 | P03363 | Q8NEY3 | 0.21346   |
| 11260 | P03363 | Q13588 | 0.24874   |
| 11261 | P03363 | Q96KP1 | 0.40586   |
| 11262 | P03363 | P55209 | 0.60352   |
| 11263 | P03363 | P63124 | 0.099877  |
| 11264 | P03363 | Q13489 | 0.23965   |
| 11265 | P03363 | Q8NEK8 | 0.0035228 |
| 11266 | P03363 | Q9UJU3 | 0.22259   |
| 11267 | P03363 | O15453 | 0.11203   |
| 11268 | P03363 | P14316 | 0.76247   |
| 11269 | P03363 | Q96EK7 | 0.34757   |
| 11270 | P03363 | P51003 | 0.20068   |
| 11271 | P03363 | Q14527 | 0.38762   |
| 11272 | P03363 | P32242 | 0.33211   |
| 11273 | P03363 | Q9H3P2 | 0.77008   |
| 11274 | P03363 | Q9UKT5 | 0.54396   |
| 11275 | P03363 | Q9UHR5 | 0.89911   |
| 11276 | P03363 | P18846 | 0.57283   |
| 11277 | P03363 | Q9BVW5 | 0.67344   |
| 11278 | P03363 | Q9H0C8 | 0.42123   |
| 11279 | P03363 | Q01094 | 0.5611    |
| 11280 | P03363 | Q96QE5 | 0.73645   |
| 11281 | P03363 | Q8WYA1 | 0.48735   |
| 11282 | P03363 | Q8NA77 | 0.22504   |
| 11283 | P03363 | Q9UIF9 | 0.40808   |
| 11284 | P03363 | Q96JY0 | 0.16472   |
| 11285 | P03363 | Q8N6Y0 | 0.68643   |
| 11286 | P03363 | Q3T8J9 | 0.64238   |
| 11287 | P03363 | P35226 | 0.38228   |
| 11288 | P03363 | P16333 | 0.43959   |
| 11289 | P03363 | Q86WI3 | 0.52902   |
| 11290 | P03363 | Q05DH4 | 0.065239  |
| 11291 | P03363 | O75901 | 0.35789   |
| 11292 | P03363 | Q8IZD9 | 0.47663   |
| 11293 | P03363 | O60826 | 0.11203   |
| 11294 | P03363 | Q9Y5R5 | 0.29458   |
| 11295 | P03363 | Q6IQ19 | 0.076765  |
| 11296 | P03363 | Q6PI48 | 0.58987   |
| 11297 | P03363 | Q9NQS7 | 0.58105   |
| 11298 | P03363 | Q8TAE8 | 0.7254    |
| 11299 | P03363 | Q8NDF8 | 0.3187    |
| 11300 | P03363 | Q5T1N1 | 0.24431   |
| 11301 | P03363 | Q92552 | 0.68391   |
| 11302 | P03363 | Q9BYC8 | 0.3019    |
| 11303 | P03363 | O75444 | 0.58734   |
| 11304 | P03363 | Q8N1G1 | 0.18666   |
| 11305 | P03363 | P35527 | 1.0007    |
| 11306 | P03363 | A6NDX5 | 0.22259   |
| 11307 | P03363 | O00148 | 0.66406   |
| 11308 | P03363 | Q9NXT0 | 0.22259   |
| 11309 | P03363 | Q9UKV0 | 0.26446   |
| 11310 | P03363 | Q9Y3D8 | 0.2817    |
| 11311 | P03363 | P06746 | 0.41962   |
| 11312 | P03363 | P43487 | 0.3315    |
| 11313 | P03363 | Q9NVC6 | 0.22577   |
| 11314 | P03363 | P27797 | 0.16611   |
| 11315 | P03363 | P14652 | 0.19159   |
| 11316 | P03363 | O14709 | 0.268     |
| 11317 | P03363 | O75505 | 0.55275   |
| 11318 | P03363 | Q6NX45 | 0.22259   |
| 11319 | P03363 | Q9BSH5 | 0.4099    |
| 11320 | P03363 | Q9NP08 | 0.375     |
| 11321 | P03363 | Q99741 | 0.30597   |
| 11322 | P03363 | Q9HC62 | 0.41709   |
| 11323 | P03363 | Q9HBL8 | 0.26606   |
| 11324 | P03363 | P61024 | 0.49464   |

|       |        |        |           |
|-------|--------|--------|-----------|
| 11325 | P03363 | Q13472 | 0.25813   |
| 11326 | P03363 | P04731 | 0.15112   |
| 11327 | P03363 | Q6ZNB5 | 0.20567   |
| 11328 | P03363 | Q5VSL9 | 0.85425   |
| 11329 | P03363 | P20042 | 0.39855   |
| 11330 | P03363 | P0CG29 | 0.42083   |
| 11331 | P03363 | Q8IY51 | 0.40039   |
| 11332 | P03363 | P61925 | 0.35153   |
| 11333 | P03363 | Q5JVS0 | 0.63973   |
| 11334 | P03363 | P11532 | 0.29899   |
| 11335 | P03363 | Q86VY4 | 0.5449    |
| 11336 | P03363 | Q969G3 | 0.71292   |
| 11337 | P03363 | O95678 | 0.68108   |
| 11338 | P03363 | O00522 | 0.30335   |
| 11339 | P03363 | I6L9F6 | 0.41155   |
| 11340 | P03363 | O00327 | 0.33812   |
| 11341 | P03363 | Q8N0Y7 | 0.083337  |
| 11342 | P03363 | O43186 | 0.7455    |
| 11343 | P03363 | Q9UBB4 | 0.57799   |
| 11344 | P03363 | Q7Z3C6 | 0.26795   |
| 11345 | P03363 | Q9H4Z2 | 0.63436   |
| 11346 | P03363 | P46781 | 0.61784   |
| 11347 | P03363 | Q6L8G9 | 0.2934    |
| 11348 | P03363 | Q9H668 | 0.46393   |
| 11349 | P03363 | A6NE82 | 0.22927   |
| 11350 | P03363 | Q9BWH6 | 0.24301   |
| 11351 | P03363 | P51814 | 0.24904   |
| 11352 | P03363 | Q02410 | 0.48053   |
| 11353 | P03363 | Q8NC69 | 0.21694   |
| 11354 | P03363 | O94763 | 0.62608   |
| 11355 | P03363 | P47813 | 0.13095   |
| 11356 | P03363 | Q96RT8 | 0.45782   |
| 11357 | P03363 | Q7Z4H9 | 0.22504   |
| 11358 | P03363 | O75534 | 0.57125   |
| 11359 | P03363 | P50914 | 0.65577   |
| 11360 | P03363 | Q6PCD5 | 0.23534   |
| 11361 | P03363 | Q71F56 | 0.37738   |
| 11362 | P03363 | Q9BSK1 | 0.22259   |
| 11363 | P03363 | Q92837 | 0.24396   |
| 11364 | P03363 | Q6ZNE5 | 0.47547   |
| 11365 | P03363 | Q9UIF8 | 0.6288    |
| 11366 | P03363 | Q9UNE7 | 0.26366   |
| 11367 | P03363 | O15525 | 0.44404   |
| 11368 | P03363 | Q9BVV6 | 0.11277   |
| 11369 | P03363 | Q9H2W6 | 0.25735   |
| 11370 | P03363 | Q9NVX0 | 0.61815   |
| 11371 | P03363 | Q8ND23 | 0.24431   |
| 11372 | P03363 | Q6H8Q1 | 0.23825   |
| 11373 | P03363 | O60688 | 0.19397   |
| 11374 | P03363 | Q9UBS4 | 0.23859   |
| 11375 | P03363 | Q86UW9 | 0.76637   |
| 11376 | P03363 | Q15637 | 0.35924   |
| 11377 | P03363 | O14645 | 0.2446    |
| 11378 | P03363 | P38646 | 0.56027   |
| 11379 | P03363 | P31260 | 0.55603   |
| 11380 | P03363 | Q13123 | 0.54406   |
| 11381 | P03363 | H3BTG2 | 0.0053627 |
| 11382 | P03363 | Q32P44 | 0.34776   |
| 11383 | P03363 | P19474 | 0.47789   |
| 11384 | P03363 | Q9BSW2 | 0.7235    |
| 11385 | P03363 | Q9NP64 | 0.35933   |
| 11386 | P03363 | Q96DE0 | 0.19761   |
| 11387 | P03363 | Q9HCE1 | 0.61927   |
| 11388 | P03363 | Q5VWX1 | 0.67115   |
| 11389 | P03363 | Q14134 | 0.59644   |
| 11390 | P03363 | Q9NQG5 | 0.86713   |
| 11391 | P03363 | Q7L5N1 | 0.92823   |
| 11392 | P03363 | Q5TCQ9 | 0.40391   |
| 11393 | P03363 | Q96LT9 | 0.24492   |
| 11394 | P03363 | Q17RG1 | 0.21694   |
| 11395 | P03363 | Q13310 | 0.77257   |
| 11396 | P03363 | Q16670 | 0.23235   |
| 11397 | P03363 | P52736 | 0.65117   |
| 11398 | P03363 | O75155 | 0.61616   |
| 11399 | P03363 | Q9Y5J7 | 0.14446   |
| 11400 | P03363 | Q9NZR1 | 0.23426   |

|       |        |        |           |
|-------|--------|--------|-----------|
| 11401 | P03363 | Q86T82 | 0.25891   |
| 11402 | P03363 | A6NMT0 | 0.40177   |
| 11403 | P03363 | P28290 | 0.062739  |
| 11404 | P03363 | Q5T6M2 | 0.0066151 |
| 11405 | P03363 | Q8WVY7 | 0.27775   |
| 11406 | P03363 | Q9POU1 | 0.202     |
| 11407 | P03363 | Q8NE18 | 0.094198  |
| 11408 | P03363 | Q96ST3 | 0.51436   |
| 11409 | P03363 | Q9HBD4 | 0.39255   |
| 11410 | P03363 | O60318 | 0.24746   |
| 11411 | P03363 | O76075 | 0.21428   |
| 11412 | P03363 | Q9BPU9 | 0.2763    |
| 11413 | P03363 | P0C1Z6 | 0.98096   |
| 11414 | P03363 | Q6A163 | 0.88908   |
| 11415 | P03363 | Q6TGC4 | 0.29467   |
| 11416 | P03363 | Q9UHQ1 | 0.17275   |
| 11417 | P03363 | Q7Z5Q5 | 0.25024   |
| 11418 | P03363 | P07998 | 0.2405    |
| 11419 | P03363 | Q5VYV7 | 0.53508   |
| 11420 | P03363 | Q99732 | 0.21901   |
| 11421 | P03363 | Q13395 | 0.2962    |
| 11422 | P03363 | P22528 | 0.29708   |
| 11423 | P03363 | Q5CZA5 | 0.22259   |
| 11424 | P03363 | Q9H939 | 0.25665   |
| 11425 | P03363 | Q8N7M2 | 0.22259   |
| 11426 | P03363 | P78396 | 0.57502   |
| 11427 | P03363 | Q9UH90 | 0.30704   |
| 11428 | P03363 | O00512 | 0.81126   |
| 11429 | P03363 | Q7Z7C8 | 0.48883   |
| 11430 | P03363 | P08670 | 0.34789   |
| 11431 | P03363 | Q5T230 | 0.89155   |
| 11432 | P03363 | Q06416 | 0.51853   |
| 11433 | P03363 | Q96AQ1 | 0.0079666 |
| 11434 | P03363 | Q96AQ6 | 0.75093   |
| 11435 | P03363 | Q92843 | 0.40398   |
| 11436 | P03363 | O43541 | 0.48322   |
| 11437 | P03363 | Q9UK41 | 0.50017   |
| 11438 | P03363 | Q14749 | 0.54323   |
| 11439 | P03363 | O43815 | 0.33268   |
| 11440 | P03363 | Q9UGR2 | 0.48055   |
| 11441 | P03363 | Q9Y6Q3 | 0.16808   |
| 11442 | P03363 | Q7RTU0 | 0.43142   |
| 11443 | P03363 | Q96EB1 | 0.89686   |
| 11444 | P03363 | P17022 | 0.268     |
| 11445 | P03363 | O60870 | 0.17498   |
| 11446 | P03363 | Q96FX7 | 0.19261   |
| 11447 | P03363 | O95379 | 0.24003   |
| 11448 | P03363 | Q9BZV1 | 0.99442   |
| 11449 | P03363 | Q8WZ82 | 0.21103   |
| 11450 | P03363 | O14633 | 0.12558   |
| 11451 | P03363 | Q6B0B8 | 0.40039   |
| 11452 | P03363 | Q14966 | 0.3115    |
| 11453 | P03363 | Q96E16 | 0.17461   |
| 11454 | P03363 | O15056 | 0.24567   |
| 11455 | P03363 | P17661 | 0.63425   |
| 11456 | P03363 | Q15814 | 0.21923   |
| 11457 | P03363 | Q8N5A5 | 0.74446   |
| 11458 | P03363 | Q9NPI1 | 0.68399   |
| 11459 | P03363 | O75381 | 0.18391   |
| 11460 | P03363 | Q8TEX9 | 0.55047   |
| 11461 | P03363 | Q8NFI3 | 0.22667   |
| 11462 | P03363 | P17036 | 0.48218   |
| 11463 | P03363 | P02766 | 0.22692   |
| 11464 | P03363 | Q9BW11 | 0.41504   |
| 11465 | P03363 | Q8TD86 | 0.39052   |
| 11466 | P03363 | Q9NPE3 | 0.69429   |
| 11467 | P03363 | Q13243 | 0.80333   |
| 11468 | P03363 | Q9ULH7 | 0.83512   |
| 11469 | P03363 | A6NMX2 | 0.26182   |
| 11470 | P03363 | Q14320 | 0.17735   |
| 11471 | P03363 | Q63HK3 | 0.36165   |
| 11472 | P03363 | Q92870 | 0.59929   |
| 11473 | P03363 | Q86VX9 | 0.12352   |
| 11474 | P03363 | Q15004 | 0.65004   |
| 11475 | P03363 | Q9NSP4 | 0.19999   |
| 11476 | P03363 | P17861 | 0.56539   |

|       |        |        |          |
|-------|--------|--------|----------|
| 11477 | P03363 | Q9HBG6 | 0.34362  |
| 11478 | P03363 | Q4G112 | 0.51853  |
| 11479 | P03363 | Q14919 | 0.42661  |
| 11480 | P03363 | Q9H147 | 0.22504  |
| 11481 | P03363 | Q9H211 | 0.56092  |
| 11482 | P03363 | Q5VVH5 | 0.60207  |
| 11483 | P03363 | Q9Y3M9 | 0.22259  |
| 11484 | P03363 | Q8WVM7 | 0.5108   |
| 11485 | P03363 | Q9P0M9 | 0.19909  |
| 11486 | P03363 | P56537 | 0.98218  |
| 11487 | P03363 | Q96RN5 | 0.94634  |
| 11488 | P03363 | Q8N3R9 | 0.27855  |
| 11489 | P03363 | Q8IYD8 | 0.46389  |
| 11490 | P03363 | O60477 | 0.64338  |
| 11491 | P03363 | O95931 | 0.72934  |
| 11492 | P03363 | P78318 | 0.51032  |
| 11493 | P03363 | Q8WXD5 | 0.82639  |
| 11494 | P03363 | Q5MJ70 | 0.18365  |
| 11495 | P03363 | Q86WG5 | 0.29059  |
| 11496 | P03363 | Q9BYR8 | 0.42225  |
| 11497 | P03363 | Q9Y2R9 | 0.19514  |
| 11498 | P03363 | Q86UP8 | 0.34087  |
| 11499 | P03363 | O96006 | 0.26902  |
| 11500 | P03363 | Q86V81 | 0.82032  |
| 11501 | P03363 | P54277 | 0.16968  |
| 11502 | P03363 | Q8NFG4 | 0.74558  |
| 11503 | P03363 | Q9BTW9 | 0.16995  |
| 11504 | P03363 | Q9Y2N7 | 0.52726  |
| 11505 | P03363 | P41134 | 0.36117  |
| 11506 | P03363 | Q9BQA5 | 0.41287  |
| 11507 | P03363 | Q99504 | 0.40695  |
| 11508 | P03363 | P37837 | 0.11626  |
| 11509 | P03363 | Q9UHV7 | 0.20989  |
| 11510 | P03363 | P52744 | 0.24904  |
| 11511 | P03363 | P22087 | 0.60885  |
| 11512 | P03363 | P11171 | 0.46074  |
| 11513 | P03363 | Q7Z3B3 | 0.3562   |
| 11514 | P03363 | Q3KP66 | 0.090729 |
| 11515 | P03363 | Q96KG9 | 0.34216  |
| 11516 | P03363 | Q9UNS1 | 0.42135  |
| 11517 | P03363 | Q96SK3 | 0.22259  |
| 11518 | P03363 | P05413 | 0.4057   |
| 11519 | P03363 | Q8IZ40 | 0.58877  |
| 11520 | P03363 | Q2M218 | 0.22259  |
| 11521 | P03363 | A0JLT2 | 0.37738  |
| 11522 | P03363 | Q9UHQ7 | 0.071702 |
| 11523 | P03363 | Q5SQN1 | 0.5492   |
| 11524 | P03363 | O75586 | 0.50834  |
| 11525 | P03363 | P10412 | 0.36021  |
| 11526 | P03363 | P20265 | 0.60065  |
| 11527 | P03363 | Q9H040 | 0.52834  |
| 11528 | P03363 | Q9HAU5 | 0.76925  |
| 11529 | P03363 | Q96C03 | 0.12094  |
| 11530 | P03363 | Q15796 | 0.28988  |
| 11531 | P03363 | O95983 | 1.0203   |
| 11532 | P03363 | Q15723 | 1.0136   |
| 11533 | P03363 | P63010 | 0.25055  |
| 11534 | P03363 | P07910 | 0.71205  |
| 11535 | P03363 | P31268 | 0.4288   |
| 11536 | P03363 | Q96ST8 | 0.24408  |
| 11537 | P03363 | Q9H9L3 | 0.51067  |
| 11538 | P03363 | Q6XD76 | 0.39705  |
| 11539 | P03363 | O75674 | 0.37445  |
| 11540 | P03363 | Q15270 | 0.48609  |
| 11541 | P03363 | O75935 | 0.53887  |
| 11542 | P03363 | P57081 | 0.87845  |
| 11543 | P03363 | Q9NWB1 | 0.69376  |
| 11544 | P03363 | Q9UKL3 | 0.80242  |
| 11545 | P03363 | Q8NAV1 | 0.32159  |
| 11546 | P03363 | Q9Y3E7 | 0.54538  |
| 11547 | P03363 | Q8IZU0 | 0.29721  |
| 11548 | P03363 | Q5TAP6 | 0.049953 |
| 11549 | P03363 | Q9NUW8 | 0.55833  |
| 11550 | P03363 | Q9NQ48 | 0.48958  |
| 11551 | P03363 | Q8N108 | 0.95791  |
| 11552 | P03363 | Q9NPJ8 | 0.40588  |

|       |        |        |          |
|-------|--------|--------|----------|
| 11553 | P03363 | Q08AG7 | 0.75438  |
| 11554 | P03363 | P63220 | 0.36768  |
| 11555 | P03363 | P57721 | 0.57544  |
| 11556 | P03363 | P84022 | 0.16941  |
| 11557 | P03363 | Q9BRQ6 | 0.37558  |
| 11558 | P03363 | Q05084 | 0.30862  |
| 11559 | P03363 | Q3SY00 | 0.031525 |
| 11560 | P03363 | Q9HBM1 | 0.45189  |
| 11561 | P03363 | Q5T7B8 | 0.47577  |
| 11562 | P03363 | Q5UIP0 | 0.28073  |
| 11563 | P03363 | A0AVK6 | 0.40803  |
| 11564 | P03363 | Q9Y215 | 0.26418  |
| 11565 | P03363 | Q7L5Y6 | 0.22504  |
| 11566 | P03363 | Q15847 | 0.11203  |
| 11567 | P03363 | Q01167 | 0.31333  |
| 11568 | P03363 | Q7LBR1 | 0.71737  |
| 11569 | P03363 | P17987 | 0.20985  |
| 11570 | P03363 | Q7L0Y3 | 0.69278  |
| 11571 | P03363 | Q96C00 | 0.25368  |
| 11572 | P03363 | Q96KE9 | 0.26454  |
| 11573 | P03363 | Q86WZ0 | 0.032462 |
| 11574 | P03363 | Q8WXC3 | 0.64926  |
| 11575 | P03363 | Q9H9E1 | 0.39383  |
| 11576 | P03363 | A6NCL1 | 0.29088  |
| 11577 | P03363 | P04406 | 0.25025  |
| 11578 | P03363 | Q9NZU7 | 0.32263  |
| 11579 | P03363 | P31314 | 0.75369  |
| 11580 | P03363 | Q6PCB5 | 0.22504  |
| 11581 | P03363 | Q8N5J4 | 0.62924  |
| 11582 | P03363 | P14136 | 0.64676  |
| 11583 | P03363 | O15265 | 0.79346  |
| 11584 | P03363 | Q13620 | 0.58413  |
| 11585 | P03363 | Q7L2H7 | 0.69123  |
| 11586 | P03363 | Q9UKT8 | 0.59118  |
| 11587 | P03363 | P98170 | 0.26333  |
| 11588 | P03363 | Q7Z6R9 | 0.35245  |
| 11589 | P03363 | Q7Z460 | 0.24055  |
| 11590 | P03363 | Q9Y2L1 | 0.34087  |
| 11591 | P03363 | Q9H6F5 | 0.32511  |
| 11592 | P03363 | Q6U7Q0 | 0.40237  |
| 11593 | P03363 | Q96PE6 | 0.22259  |
| 11594 | P03363 | Q16656 | 0.4671   |
| 11595 | P03363 | Q8N2M8 | 0.274    |
| 11596 | P03363 | Q9Y4K1 | 0.095959 |
| 11597 | P03363 | P41161 | 0.38908  |
| 11598 | P03363 | Q6PEX3 | 0.27762  |
| 11599 | P03363 | Q8N895 | 0.56235  |
| 11600 | P03363 | Q5TAG4 | 0.24431  |
| 11601 | P03363 | Q8N163 | 0.73695  |
| 11602 | P03363 | O14613 | 0.25403  |
| 11603 | P03363 | O75934 | 0.75964  |
| 11604 | P03363 | Q92782 | 0.37674  |
| 11605 | P03363 | Q9BQ83 | 0.39973  |
| 11606 | P03363 | P49750 | 0.89851  |
| 11607 | P03363 | P48634 | 0.92347  |
| 11608 | P03363 | Q9Y6Z5 | 0.11203  |
| 11609 | P03363 | O00204 | 0.36986  |
| 11610 | P03363 | Q9BYR2 | 0.2934   |
| 11611 | P03363 | Q9UKT4 | 0.42028  |
| 11612 | P03363 | O43768 | 0.23577  |
| 11613 | P03363 | O95163 | 0.58459  |
| 11614 | P03363 | Q68CJ9 | 0.71234  |
| 11615 | P03363 | Q5T619 | 0.22259  |
| 11616 | P03363 | O94916 | 0.41489  |
| 11617 | P03363 | Q8N3L3 | 0.70383  |
| 11618 | P03363 | A8MVA2 | 0.2934   |
| 11619 | P03363 | Q86UD0 | 0.49651  |
| 11620 | P03363 | Q8TCY9 | 0.3478   |
| 11621 | P03363 | Q9NZI7 | 0.42206  |
| 11622 | P03363 | Q9BRH9 | 0.22259  |
| 11623 | P03363 | Q6ICG8 | 0.071287 |
| 11624 | P03363 | Q9HCC6 | 0.28032  |
| 11625 | P03363 | Q8IVC4 | 0.22259  |
| 11626 | P03363 | Q8WW01 | 0.32896  |
| 11627 | P03363 | O95271 | 0.25867  |
| 11628 | P03363 | P31942 | 0.41191  |

|       |        |        |          |
|-------|--------|--------|----------|
| 11629 | P03363 | Q7RTT3 | 0.39008  |
| 11630 | P03363 | Q7Z465 | 0.63937  |
| 11631 | P03363 | Q9H1L0 | 0.00248  |
| 11632 | P03363 | Q99619 | 0.75321  |
| 11633 | P03363 | Q9UKY1 | 0.52619  |
| 11634 | P03363 | Q8NI08 | 0.73807  |
| 11635 | P03363 | P47928 | 0.49309  |
| 11636 | P03363 | Q9Y3D9 | 0.34462  |
| 11637 | P03363 | O75564 | 0.4261   |
| 11638 | P03363 | P10244 | 0.5401   |
| 11639 | P03363 | Q9BPX3 | 0.74209  |
| 11640 | P03363 | Q8TF68 | 0.23246  |
| 11641 | P03363 | Q9NZI5 | 0.4611   |
| 11642 | P03363 | Q9BT92 | 0.52816  |
| 11643 | P03363 | Q6ZRV2 | 0.073127 |
| 11644 | P03363 | Q6ZN57 | 0.22259  |
| 11645 | P03363 | O96004 | 0.34521  |
| 11646 | P03363 | P61313 | 0.61631  |
| 11647 | P03363 | Q9H1A4 | 0.41779  |
| 11648 | P03363 | Q8IZW8 | 0.64715  |
| 11649 | P03363 | Q96HA1 | 0.045852 |
| 11650 | P03363 | Q9H2Z4 | 0.429    |
| 11651 | P03363 | P26358 | 0.26093  |
| 11652 | P03363 | Q5JR98 | 0.53508  |
| 11653 | P03363 | A6NLJ0 | 0.28558  |
| 11654 | P03363 | Q9UHD8 | 0.38882  |
| 11655 | P03363 | P24522 | 0.48776  |
| 11656 | P03363 | Q9Y618 | 0.75212  |
| 11657 | P03363 | Q8IXF0 | 0.33708  |
| 11658 | P03363 | Q92556 | 0.30691  |
| 11659 | P03363 | Q8NBR6 | 0.11203  |
| 11660 | P03363 | Q92499 | 0.42211  |
| 11661 | P03363 | P49336 | 0.26361  |
| 11662 | P03363 | Q9UI95 | 0.78445  |
| 11663 | P03363 | Q00056 | 0.36024  |
| 11664 | P03363 | P31948 | 0.80249  |
| 11665 | P03363 | P39019 | 0.4863   |
| 11666 | P03363 | Q96AY2 | 0.49253  |
| 11667 | P03363 | P49792 | 0.38546  |
| 11668 | P03363 | Q9H9Z2 | 0.57841  |
| 11669 | P03363 | Q9BTX9 | 0.14001  |
| 11670 | P03363 | Q3LI64 | 0.32806  |
| 11671 | P03363 | Q5VVS0 | 0.070767 |
| 11672 | P03363 | O43290 | 0.8287   |
| 11673 | P03363 | Q8N841 | 0.388    |
| 11674 | P03363 | Q96I34 | 0.27257  |
| 11675 | P03363 | Q96N77 | 0.44662  |
| 11676 | P03363 | Q14011 | 0.50279  |
| 11677 | P03363 | Q9H788 | 0.90491  |
| 11678 | P03363 | Q9NYZ3 | 0.30866  |
| 11679 | P03363 | Q86SG2 | 0.37252  |
| 11680 | P03363 | Q6ZUI0 | 0.24431  |
| 11681 | P03363 | P35638 | 0.5441   |
| 11682 | P03363 | Q86U86 | 0.80348  |
| 11683 | P03363 | Q15542 | 0.63526  |
| 11684 | P03363 | Q12929 | 0.27012  |
| 11685 | P03363 | Q96PM5 | 0.47576  |
| 11686 | P03363 | P13985 | 0.11203  |
| 11687 | P03363 | Q92624 | 0.92878  |
| 11688 | P03363 | Q15742 | 0.28433  |
| 11689 | P03363 | Q9H0E2 | 0.34443  |
| 11690 | P03363 | Q9Y3B6 | 0.22979  |
| 11691 | P03363 | Q9H9L7 | 0.2977   |
| 11692 | P03363 | Q6P1W5 | 0.53508  |
| 11693 | P03363 | Q969H0 | 0.46091  |
| 11694 | P03363 | Q12796 | 0.89393  |
| 11695 | P03363 | Q9NX20 | 0.36981  |
| 11696 | P03363 | O94805 | 0.45924  |
| 11697 | P03363 | Q8TDY2 | 0.6987   |
| 11698 | P03363 | Q9UIF7 | 0.19724  |
| 11699 | P03363 | P10914 | 0.26559  |
| 11700 | P03363 | P62256 | 0.31119  |
| 11701 | P03363 | Q86UT5 | 0.24986  |
| 11702 | P03363 | Q9C0C6 | 0.020717 |
| 11703 | P03363 | O14929 | 0.62701  |
| 11704 | P03363 | Q5QJ74 | 0.29593  |

|       |        |        |           |
|-------|--------|--------|-----------|
| 11705 | P03363 | Q674X7 | 0.47976   |
| 11706 | P03363 | Q13573 | 0.59104   |
| 11707 | P03363 | Q6QNY1 | 0.59359   |
| 11708 | P03363 | Q6ZNG0 | 0.22259   |
| 11709 | P03363 | Q8TCG1 | 0.21828   |
| 11710 | P03363 | P52298 | 0.44819   |
| 11711 | P03363 | Q96IR3 | 0.02369   |
| 11712 | P03363 | P26196 | 0.53484   |
| 11713 | P03363 | Q9NRN7 | 0.38717   |
| 11714 | P03363 | Q2V2M9 | 0.42326   |
| 11715 | P03363 | Q13838 | 0.43706   |
| 11716 | P03363 | Q86XN6 | 0.22259   |
| 11717 | P03363 | O60732 | 0.53508   |
| 11718 | P03363 | Q9C035 | 0.4846    |
| 11719 | P03363 | O43148 | 0.7064    |
| 11720 | P03363 | Q96PQ7 | 0.27402   |
| 11721 | P03363 | Q9Y2G7 | 0.22259   |
| 11722 | P03363 | P35658 | 0.57718   |
| 11723 | P03363 | O15143 | 0.26488   |
| 11724 | P03363 | Q6ZN08 | 0.22259   |
| 11725 | P03363 | Q6ZVN8 | 0.21794   |
| 11726 | P03363 | P54840 | 0.10901   |
| 11727 | P03363 | P54253 | 0.74876   |
| 11728 | P03363 | Q6P9B9 | 0.32557   |
| 11729 | P03363 | Q9UHX1 | 0.85121   |
| 11730 | P03363 | Q96I76 | 0.17736   |
| 11731 | P03363 | Q9BQY9 | 0.69103   |
| 11732 | P03363 | Q14137 | 0.70594   |
| 11733 | P03363 | A6NIY4 | 0.0070677 |
| 11734 | P03363 | O95171 | 0.23254   |
| 11735 | P03363 | Q92826 | 0.31355   |
| 11736 | P03363 | Q86XG9 | 0.24431   |
| 11737 | P03363 | O75167 | 0.43971   |
| 11738 | P03363 | Q02040 | 0.54979   |
| 11739 | P03363 | O00566 | 0.54688   |
| 11740 | P03363 | Q96IT1 | 0.55174   |
| 11741 | P03363 | O75323 | 0.25879   |
| 11742 | P03363 | P57075 | 0.43577   |
| 11743 | P03363 | Q9BT04 | 0.20462   |
| 11744 | P03363 | Q92618 | 0.22259   |
| 11745 | P03363 | Q9Y615 | 0.57453   |
| 11746 | P03363 | Q96NS1 | 0.29721   |
| 11747 | P03363 | O75153 | 0.24431   |
| 11748 | P03363 | O00479 | 0.25389   |
| 11749 | P03363 | P08621 | 0.7591    |
| 11750 | P03363 | Q6ISB3 | 0.68056   |
| 11751 | P03363 | Q9BYK8 | 0.26055   |
| 11752 | P03363 | Q03188 | 0.21389   |
| 11753 | P03363 | Q2NL82 | 0.30585   |
| 11754 | P03363 | P55265 | 0.35208   |
| 11755 | P03363 | Q5T200 | 0.42886   |
| 11756 | P03363 | Q8NG31 | 0.31138   |
| 11757 | P03363 | Q53G59 | 0.68046   |
| 11758 | P03363 | O00470 | 0.64321   |
| 11759 | P03363 | P46779 | 0.72485   |
| 11760 | P03363 | Q6P2H3 | 0.597     |
| 11761 | P03363 | Q96EK5 | 0.41206   |
| 11762 | P03363 | Q96MY7 | 0.081768  |
| 11763 | P03363 | Q9NSB2 | 0.77457   |
| 11764 | P03363 | Q6IN85 | 0.48938   |
| 11765 | P03363 | P49789 | 0.48829   |
| 11766 | P03363 | Q08378 | 0.33305   |
| 11767 | P03363 | Q14106 | 0.32633   |
| 11768 | P03363 | Q9NPA8 | 0.26086   |
| 11769 | P03363 | Q5TAB7 | 0.061488  |
| 11770 | P03363 | Q5T653 | 0.21263   |
| 11771 | P03363 | Q02543 | 0.42896   |
| 11772 | P03363 | Q8WXU2 | 0.76997   |
| 11773 | P03363 | P0CG34 | 0.26541   |
| 11774 | P03363 | P46777 | 0.71398   |
| 11775 | P03363 | Q05925 | 0.2677    |
| 11776 | P03363 | Q9H840 | 0.82585   |
| 11777 | P03363 | Q96G21 | 0.82618   |
| 11778 | P03363 | Q9NRR4 | 0.30094   |
| 11779 | P03363 | Q8TAA5 | 0.1978    |
| 11780 | P03363 | Q15583 | 0.35787   |



|       |        |        |          |
|-------|--------|--------|----------|
| 11781 | P03363 | Q9H9Q4 | 0.52549  |
| 11782 | P03363 | Q9NYF8 | 0.92881  |
| 11783 | P03363 | Q9BUK0 | 0.034826 |
| 11784 | P03363 | Q06732 | 0.24904  |
| 11785 | P03363 | P59047 | 0.261    |
| 11786 | P03363 | P62987 | 0.049544 |
| 11787 | P03363 | Q9UNS2 | 0.73971  |
| 11788 | P03363 | Q3LI58 | 0.27762  |
| 11789 | P03363 | Q5VWM6 | 0.10142  |
| 11790 | P03363 | P57055 | 0.22179  |
| 11791 | P03363 | P35398 | 0.34882  |
| 11792 | P03363 | Q8WUW1 | 0.30174  |
| 11793 | P03363 | Q9BQW3 | 0.17892  |
| 11794 | P03363 | Q9Y2Z0 | 0.43495  |
| 11795 | P03363 | Q13257 | 0.45897  |
| 11796 | P03363 | Q9XRX5 | 0.53508  |
| 11797 | P03363 | Q8N983 | 0.31668  |
| 11798 | P03363 | Q9H0M5 | 0.22259  |
| 11799 | P03363 | O75925 | 0.36781  |
| 11800 | P03363 | P0C860 | 0.36704  |
| 11801 | P03363 | A6NJ64 | 0.22504  |
| 11802 | P03363 | Q86UU0 | 0.45758  |
| 11803 | P03363 | Q14209 | 0.78201  |
| 11804 | P03363 | Q9Y6P5 | 0.17036  |
| 11805 | P03363 | Q7Z7H8 | 0.21901  |
| 11806 | P03363 | O95243 | 0.58423  |
| 11807 | P03363 | Q92600 | 0.87487  |
| 11808 | P03363 | Q5QJE6 | 0.4684   |
| 11809 | P03363 | Q5XKR4 | 0.27772  |
| 11810 | P03363 | O95198 | 0.67026  |
| 11811 | P03363 | Q8NCD3 | 0.53406  |
| 11812 | P03363 | Q9Y283 | 0.50274  |
| 11813 | P03363 | Q9H2J4 | 0.73078  |
| 11814 | P03363 | P51114 | 0.25648  |
| 11815 | P03363 | Q00059 | 0.56641  |
| 11816 | P03363 | P43243 | 0.39446  |
| 11817 | P03363 | Q14974 | 0.59164  |
| 11818 | P03363 | Q92664 | 0.25777  |
| 11819 | P03363 | Q8NEP9 | 0.22259  |
| 11820 | P03363 | Q15173 | 0.39394  |
| 11821 | P03363 | Q96S95 | 0.4239   |
| 11822 | P03363 | Q96C74 | 0.54542  |
| 11823 | P03363 | P17025 | 0.22259  |
| 11824 | P03363 | P23528 | 0.4481   |
| 11825 | P03363 | Q9BWT1 | 0.38642  |
| 11826 | P03363 | Q969T4 | 0.14574  |
| 11827 | P03363 | Q7Z3I7 | 0.22259  |
| 11828 | P03363 | Q3LHN2 | 0.27762  |
| 11829 | P03363 | P50549 | 0.80772  |
| 11830 | P03363 | Q92966 | 0.49756  |
| 11831 | P03363 | Q33E94 | 0.72595  |
| 11832 | P03363 | Q9H582 | 0.22259  |
| 11833 | P03363 | Q9UK13 | 0.22259  |
| 11834 | P03363 | Q8WX93 | 0.57142  |
| 11835 | P03363 | O95363 | 0.049142 |
| 11836 | P03363 | Q9ULE6 | 0.77561  |
| 11837 | P03363 | P55198 | 0.64433  |
| 11838 | P03363 | P46108 | 0.34081  |
| 11839 | P03363 | Q14592 | 0.22259  |
| 11840 | P03363 | Q8ND90 | 0.75168  |
| 11841 | P03363 | P15407 | 0.55222  |
| 11842 | P03363 | Q9Y4F5 | 0.34776  |
| 11843 | P03363 | Q96CX3 | 0.22259  |
| 11844 | P03363 | Q9UPS6 | 0.2806   |
| 11845 | P03363 | Q8WTW3 | 0.48225  |
| 11846 | P03363 | Q8N0Z3 | 0.45369  |
| 11847 | P03363 | P51508 | 0.24904  |
| 11848 | P03363 | O60783 | 0.22724  |
| 11849 | P03363 | Q6ZU52 | 0.53508  |
| 11850 | P03363 | Q6WBX8 | 0.49219  |
| 11851 | P03363 | P22415 | 0.41931  |
| 11852 | P03363 | Q6ZWJ1 | 0.35374  |
| 11853 | P03363 | Q8N184 | 0.22259  |
| 11854 | P03363 | Q9H503 | 0.52533  |
| 11855 | P03363 | P20290 | 0.935    |
| 11856 | P03363 | P61758 | 0.70658  |

|       |        |        |           |
|-------|--------|--------|-----------|
| 11857 | P03363 | O00287 | 0.20089   |
| 11858 | P03363 | A6NFQ7 | 0.51853   |
| 11859 | P03363 | O94868 | 0.53508   |
| 11860 | P03363 | Q3KRA6 | 0.036373  |
| 11861 | P03363 | Q9H8T0 | 0.36693   |
| 11862 | P03363 | P63279 | 0.49811   |
| 11863 | P03363 | Q9NVH2 | 0.41297   |
| 11864 | P03363 | P54821 | 0.35308   |
| 11865 | P03363 | Q96NK8 | 0.25557   |
| 11866 | P03363 | Q6ZSB9 | 0.22259   |
| 11867 | P03363 | Q9NVR7 | 0.23873   |
| 11868 | P03363 | Q9H008 | 0.28402   |
| 11869 | P03363 | Q86XZ4 | 0.24431   |
| 11870 | P03363 | Q8N7K0 | 0.22259   |
| 11871 | P03363 | A9YTQ3 | 0.47432   |
| 11872 | P03363 | Q9P206 | 0.017352  |
| 11873 | P03363 | P0CB33 | 0.22259   |
| 11874 | P03363 | Q96EZ8 | 0.62402   |
| 11875 | P03363 | Q9Y3T9 | 0.78887   |
| 11876 | P03363 | Q9NVF7 | 0.0041725 |
| 11877 | P03363 | Q9BUY5 | 0.22259   |
| 11878 | P03363 | Q86XW9 | 0.1526    |
| 11879 | P03363 | Q9H7R0 | 0.22259   |
| 11880 | P03363 | Q9Y512 | 0.25803   |
| 11881 | P03363 | Q9BV57 | 0.24146   |
| 11882 | P03363 | Q7Z6G3 | 0.65694   |
| 11883 | P03363 | Q9UKA1 | 0.43978   |
| 11884 | P03363 | Q14591 | 0.22259   |
| 11885 | P03363 | Q6UUU9 | 1.0224    |
| 11886 | P03363 | Q6NZI2 | 0.61979   |
| 11887 | P03363 | Q9HCE5 | 0.181     |
| 11888 | P03363 | Q12905 | 0.85759   |
| 11889 | P03363 | Q5TC12 | 0.4931    |
| 11890 | P03363 | Q96LI5 | 0.39848   |
| 11891 | P03363 | Q13547 | 0.35455   |
| 11892 | P03363 | Q9BWK5 | 0.24431   |
| 11893 | P03363 | O75807 | 0.37629   |
| 11894 | P03363 | P60510 | 0.60177   |
| 11895 | P03363 | Q86UQ0 | 0.25099   |
| 11896 | P03363 | P23759 | 0.3282    |
| 11897 | P03363 | Q14584 | 0.22259   |
| 11898 | P03363 | Q9Y376 | 0.3912    |
| 11899 | P03363 | Q9NXX8 | 0.71731   |
| 11900 | P03363 | Q9NUQ6 | 0.49651   |
| 11901 | P03363 | Q9Y2G2 | 0.54237   |
| 11902 | P03363 | Q9BS34 | 0.22259   |
| 11903 | P03363 | Q8NE22 | 0.0558    |
| 11904 | P03363 | Q7Z4T9 | 0.72349   |
| 11905 | P03363 | Q13868 | 0.54367   |
| 11906 | P03363 | Q00994 | 0.59855   |
| 11907 | P03363 | O43379 | 0.41589   |
| 11908 | P03363 | Q8N8L2 | 0.22259   |
| 11909 | P03363 | Q9NP87 | 0.16899   |
| 11910 | P03363 | Q9BYQ2 | 0.2934    |
| 11911 | P03363 | Q4G0Z9 | 0.027938  |
| 11912 | P03363 | Q92750 | 0.54358   |
| 11913 | P03363 | O43865 | 0.22837   |
| 11914 | P03363 | Q96SL8 | 0.29641   |
| 11915 | P03363 | Q9P2K5 | 0.25142   |
| 11916 | P03363 | Q9ULV3 | 0.41329   |
| 11917 | P03363 | Q9UM82 | 0.20119   |
| 11918 | P03363 | Q9BY27 | 0.22504   |
| 11919 | P03363 | P25398 | 0.44263   |
| 11920 | P03363 | Q9BZE9 | 0.43501   |
| 11921 | P03363 | Q9Y3Z3 | 0.29896   |
| 11922 | P03363 | Q9BYR0 | 0.2934    |
| 11923 | P03363 | O43542 | 0.62304   |
| 11924 | P03363 | O75694 | 0.33849   |
| 11925 | P03363 | Q14674 | 0.32319   |
| 11926 | P03363 | Q9UDY2 | 0.70595   |
| 11927 | P03363 | Q9H3F6 | 0.57454   |
| 11928 | P03363 | Q96T37 | 0.46888   |
| 11929 | P03363 | Q9Y4P8 | 0.69589   |
| 11930 | P03363 | Q96NB1 | 0.33038   |
| 11931 | P03363 | Q9NP92 | 0.33492   |
| 11932 | P03363 | Q9NUX5 | 0.23566   |

|       |        |        |           |
|-------|--------|--------|-----------|
| 11933 | P03363 | Q8WYR4 | 0.46602   |
| 11934 | P03363 | Q8NCU7 | 0.22504   |
| 11935 | P03363 | Q9UKK6 | 0.77042   |
| 11936 | P03363 | P49790 | 0.48128   |
| 11937 | P03363 | Q96EH3 | 0.24308   |
| 11938 | P03363 | Q96CS2 | 0.46589   |
| 11939 | P03363 | Q9P270 | 0.63055   |
| 11940 | P03363 | Q9BWD3 | 0.014834  |
| 11941 | P03363 | O43396 | 0.26327   |
| 11942 | P03363 | A8MUV8 | 0.22259   |
| 11943 | P03363 | Q13884 | 0.53443   |
| 11944 | P03363 | P08729 | 1.0179    |
| 11945 | P03363 | Q9HB31 | 0.35028   |
| 11946 | P03363 | B5ME19 | 0.25857   |
| 11947 | P03363 | P78560 | 0.5775    |
| 11948 | P03363 | Q9Y2A0 | 0.23115   |
| 11949 | P03363 | Q8TCB0 | 0.2675    |
| 11950 | P03363 | Q8TBY8 | 0.24431   |
| 11951 | P03363 | Q9H8Y8 | 0.38615   |
| 11952 | P03363 | P22626 | 0.84386   |
| 11953 | P03363 | O00189 | 0.2517    |
| 11954 | P03363 | P19838 | 0.39647   |
| 11955 | P03363 | Q9BQ65 | 0.25994   |
| 11956 | P03363 | Q96FZ2 | 0.01261   |
| 11957 | P03363 | Q76L83 | 0.3602    |
| 11958 | P03363 | Q16626 | 0.43971   |
| 11959 | P03363 | Q8IX06 | 0.31703   |
| 11960 | P03363 | Q7Z3K3 | 0.52918   |
| 11961 | P03363 | Q86UN6 | 0.16256   |
| 11962 | P03363 | P54257 | 0.27523   |
| 11963 | P03363 | Q9Y6H1 | 0.034826  |
| 11964 | P03363 | Q8TEV9 | 0.29721   |
| 11965 | P03363 | P42025 | 0.54147   |
| 11966 | P03363 | O95071 | 0.26628   |
| 11967 | P03363 | Q7L9L4 | 0.64089   |
| 11968 | P03363 | O76031 | 0.1314    |
| 11969 | P03363 | Q5T0J7 | 0.18182   |
| 11970 | P03363 | Q99814 | 0.36347   |
| 11971 | P03363 | Q8WVZ9 | 0.56434   |
| 11972 | P03363 | P09001 | 0.19838   |
| 11973 | P03363 | Q71F23 | 0.37225   |
| 11974 | P03363 | Q8IWL3 | 0.4839    |
| 11975 | P03363 | Q6NSW7 | 0.51853   |
| 11976 | P03363 | Q99871 | 0.3839    |
| 11977 | P03363 | Q9Y5L0 | 0.91007   |
| 11978 | P03363 | Q6ZW61 | 0.33499   |
| 11979 | P03363 | A6NKU9 | 0.0070677 |
| 11980 | P03363 | A1A5D9 | 0.014743  |
| 11981 | P03363 | Q13409 | 0.45033   |
| 11982 | P03363 | Q14129 | 0.16602   |
| 11983 | P03363 | P82675 | 0.2119    |
| 11984 | P03363 | P61572 | 0.55152   |
| 11985 | P03363 | Q9HB19 | 0.56019   |
| 11986 | P03363 | O14964 | 0.39384   |
| 11987 | P03363 | P83876 | 0.78843   |
| 11988 | P03363 | Q8N0Z6 | 0.47303   |
| 11989 | P03363 | Q6PJP8 | 0.38887   |
| 11990 | P03363 | Q6ZMW2 | 0.22259   |
| 11991 | P03363 | Q8IY92 | 0.39952   |
| 11992 | P03363 | Q93074 | 0.183     |
| 11993 | P03363 | O00186 | 0.54342   |
| 11994 | P03363 | O43345 | 0.22259   |
| 11995 | P03363 | Q6RFH8 | 0.83979   |
| 11996 | P03363 | P41219 | 0.57067   |
| 11997 | P03363 | Q96SW2 | 0.61519   |
| 11998 | P03363 | Q96S55 | 0.20318   |
| 11999 | P03363 | Q9UI30 | 0.50862   |
| 12000 | P03363 | A8MV65 | 0.40525   |
| 12001 | P03363 | Q9UBS8 | 0.36751   |
| 12002 | P03363 | P41220 | 0.26781   |
| 12003 | P03363 | Q495M9 | 0.38263   |
| 12004 | P03363 | Q8TAK5 | 0.44697   |
| 12005 | P03363 | Q96SZ4 | 0.30749   |
| 12006 | P03363 | Q86UQ8 | 0.40525   |
| 12007 | P03363 | Q9UJA5 | 0.22076   |
| 12008 | P03363 | P29966 | 0.066515  |

|       |        |        |           |
|-------|--------|--------|-----------|
| 12009 | P03363 | Q8IY22 | 0.35675   |
| 12010 | P03363 | Q58A44 | 0.24431   |
| 12011 | P03363 | Q96EY5 | 0.3759    |
| 12012 | P03363 | Q86XK2 | 0.55714   |
| 12013 | P03363 | Q02833 | 0.36286   |
| 12014 | P03363 | P09016 | 0.37923   |
| 12015 | P03363 | Q9Y692 | 0.56136   |
| 12016 | P03363 | Q9BYG5 | 0.50038   |
| 12017 | P03363 | P51808 | 0.30789   |
| 12018 | P03363 | P53999 | 0.90494   |
| 12019 | P03363 | Q6ZU80 | 0.34008   |
| 12020 | P03363 | O00422 | 0.97467   |
| 12021 | P03363 | Q29RF7 | 0.66352   |
| 12022 | P03363 | Q92793 | 0.11303   |
| 12023 | P03363 | Q86Y25 | 0.22259   |
| 12024 | P03363 | P0C5W0 | 0.24431   |
| 12025 | P03363 | Q9BTY7 | 0.11203   |
| 12026 | P03363 | Q99618 | 0.48956   |
| 12027 | P03363 | P05114 | 0.35468   |
| 12028 | P03363 | Q5TAX3 | 0.50478   |
| 12029 | P03363 | Q16633 | 0.49895   |
| 12030 | P03363 | O60812 | 0.24924   |
| 12031 | P03363 | A6NEY3 | 0.019317  |
| 12032 | P03363 | Q9H4P4 | 0.25167   |
| 12033 | P03363 | Q5JNZ5 | 0.21422   |
| 12034 | P03363 | P50402 | 0.15913   |
| 12035 | P03363 | B4DX44 | 0.22259   |
| 12036 | P03363 | O76095 | 0.12847   |
| 12037 | P03363 | P57071 | 0.22259   |
| 12038 | P03363 | Q9Y5N5 | 0.53953   |
| 12039 | P03363 | O75154 | 0.5706    |
| 12040 | P03363 | O75971 | 0.50698   |
| 12041 | P03363 | P82979 | 0.53751   |
| 12042 | P03363 | Q9BRS8 | 0.35289   |
| 12043 | P03363 | O15066 | 0.31899   |
| 12044 | P03363 | Q15365 | 0.98789   |
| 12045 | P03363 | P0CW71 | 0.15599   |
| 12046 | P03363 | Q9C0H6 | 0.41814   |
| 12047 | P03363 | P54725 | 0.52677   |
| 12048 | P03363 | Q9BXU7 | 0.27877   |
| 12049 | P03363 | Q8IV03 | 0.0803    |
| 12050 | P03363 | O95295 | 0.30046   |
| 12051 | P03363 | Q4LEZ3 | 0.033323  |
| 12052 | P03363 | Q7Z614 | 0.50547   |
| 12053 | P03363 | Q8N7A1 | 0.24431   |
| 12054 | P03363 | Q15651 | 0.58732   |
| 12055 | P03363 | Q9NS23 | 0.28667   |
| 12056 | P03363 | Q6ZNG1 | 0.22259   |
| 12057 | P03363 | Q8TF65 | 0.24431   |
| 12058 | P03363 | Q01954 | 0.28329   |
| 12059 | P03363 | Q8IWX8 | 0.21985   |
| 12060 | P03363 | O95848 | 0.50863   |
| 12061 | P03363 | Q15697 | 0.4482    |
| 12062 | P03363 | Q8IUC0 | 0.27762   |
| 12063 | P03363 | Q15185 | 0.47311   |
| 12064 | P03363 | P31276 | 0.70409   |
| 12065 | P03363 | Q16533 | 0.45861   |
| 12066 | P03363 | Q9H1B7 | 0.12844   |
| 12067 | P03363 | Q9NZD4 | 0.16129   |
| 12068 | P03363 | A6NI87 | 0.0036666 |
| 12069 | P03363 | D6RGH6 | 0.88438   |
| 12070 | P03363 | P14317 | 0.28713   |
| 12071 | P03363 | Q6ZN79 | 0.22259   |
| 12072 | P03363 | Q9Y5Z4 | 0.23887   |
| 12073 | P03363 | Q6ZPB5 | 0.14276   |
| 12074 | P03363 | O95125 | 0.32797   |
| 12075 | P03363 | Q9H1K1 | 0.6491    |
| 12076 | P03363 | O14974 | 0.4007    |
| 12077 | P03363 | Q68CQ4 | 0.17603   |
| 12078 | P03363 | P61574 | 0.55152   |
| 12079 | P03363 | O75448 | 0.17119   |
| 12080 | P03363 | Q68CZ2 | 0.52193   |
| 12081 | P03363 | P40855 | 0.21267   |
| 12082 | P03363 | Q6ZN28 | 0.57825   |
| 12083 | P03363 | P05060 | 0.1282    |
| 12084 | P03363 | P26599 | 0.49801   |

|       |        |        |          |
|-------|--------|--------|----------|
| 12085 | P03363 | Q8N823 | 0.22259  |
| 12086 | P03363 | P07476 | 0.24146  |
| 12087 | P03363 | Q9H0H0 | 0.23754  |
| 12088 | P03363 | Q7RTT4 | 0.39008  |
| 12089 | P03363 | Q3LI67 | 0.27762  |
| 12090 | P03363 | Q14530 | 0.50056  |
| 12091 | P03363 | Q5XUX1 | 0.53508  |
| 12092 | P03363 | Q96NL8 | 0.24431  |
| 12093 | P03363 | O75382 | 0.34145  |
| 12094 | P03363 | P62487 | 0.20921  |
| 12095 | P03363 | P28289 | 0.27132  |
| 12096 | P03363 | Q15386 | 0.54692  |
| 12097 | P03363 | Q701N4 | 0.2934   |
| 12098 | P03363 | Q9NUG6 | 0.19359  |
| 12099 | P03363 | O60936 | 0.69707  |
| 12100 | P03363 | Q6ZSS3 | 0.22259  |
| 12101 | P03363 | Q96QH2 | 0.40274  |
| 12102 | P03363 | Q9UPV0 | 1.0193   |
| 12103 | P03363 | P82933 | 0.56481  |
| 12104 | P03363 | Q8NC26 | 0.22259  |
| 12105 | P03363 | P57740 | 0.4346   |
| 12106 | P03363 | P50222 | 0.81345  |
| 12107 | P03363 | P51668 | 0.36543  |
| 12108 | P03363 | Q9NX53 | 0.53508  |
| 12109 | P03363 | Q92614 | 0.45799  |
| 12110 | P03363 | Q86V97 | 0.56434  |
| 12111 | P03363 | Q9BRA2 | 0.62805  |
| 12112 | P03363 | Q7Z7M0 | 0.25777  |
| 12113 | P03363 | Q9UI56 | 0.11265  |
| 12114 | P03363 | O60869 | 0.61801  |
| 12115 | P03363 | Q9NRL3 | 0.56491  |
| 12116 | P03363 | Q9BYG3 | 0.59314  |
| 12117 | P03363 | Q0VAK6 | 0.27981  |
| 12118 | P03363 | Q5M9Q1 | 0.10113  |
| 12119 | P03363 | Q92748 | 0.5883   |
| 12120 | P03363 | P60413 | 0.2934   |
| 12121 | P03363 | Q96HA8 | 0.80846  |
| 12122 | P03363 | Q6PI47 | 0.21694  |
| 12123 | P03363 | Q9H3J6 | 0.078783 |
| 12124 | P03363 | Q9UBE0 | 0.27007  |
| 12125 | P03363 | P24385 | 0.25302  |
| 12126 | P03363 | Q9UPQ9 | 0.13348  |
| 12127 | P03363 | Q9UI32 | 0.22851  |
| 12128 | P03363 | Q13469 | 0.8528   |
| 12129 | P03363 | P49770 | 0.28599  |
| 12130 | P03363 | Q9BXF6 | 0.51855  |
| 12131 | P03363 | Q52M58 | 0.01229  |
| 12132 | P03363 | Q9UBQ0 | 0.098776 |
| 12133 | P03363 | Q9GZN1 | 0.29593  |
| 12134 | P03363 | Q8WTW4 | 0.56352  |
| 12135 | P03363 | Q99638 | 0.40053  |
| 12136 | P03363 | Q15361 | 0.52843  |
| 12137 | P03363 | P21675 | 0.20523  |
| 12138 | P03363 | Q9NR48 | 0.23885  |
| 12139 | P03363 | P60228 | 0.74873  |
| 12140 | P03363 | Q13829 | 0.64246  |
| 12141 | P03363 | Q14585 | 0.31124  |
| 12142 | P03363 | O14646 | 0.75147  |
| 12143 | P03363 | P33076 | 0.39518  |
| 12144 | P03363 | Q9UQK1 | 0.39074  |
| 12145 | P03363 | Q14CW9 | 0.49538  |
| 12146 | P03363 | P52740 | 0.24904  |
| 12147 | P03363 | Q92988 | 0.82126  |
| 12148 | P03363 | Q5JPI3 | 0.044835 |
| 12149 | P03363 | Q8IUD6 | 0.45207  |
| 12150 | P03363 | Q14103 | 0.77746  |
| 12151 | P03363 | Q6I9Y2 | 0.83256  |
| 12152 | P03363 | Q13023 | 0.5311   |
| 12153 | P03363 | Q9UIC8 | 0.4315   |
| 12154 | P03363 | Q8IWI9 | 0.40835  |
| 12155 | P03363 | P51523 | 0.27378  |
| 12156 | P03363 | O96028 | 0.25839  |
| 12157 | P03363 | Q5VIR6 | 0.45107  |
| 12158 | P03363 | Q6FIF0 | 0.29766  |
| 12159 | P03363 | P43357 | 0.53508  |
| 12160 | P03363 | Q9BWX5 | 0.23548  |

|       |        |        |          |
|-------|--------|--------|----------|
| 12161 | P03363 | Q8WVF5 | 0.21694  |
| 12162 | P03363 | P23193 | 0.63941  |
| 12163 | P03363 | Q9HBL0 | 0.64192  |
| 12164 | P03363 | Q9UMR2 | 0.3566   |
| 12165 | P03363 | Q14587 | 0.24904  |
| 12166 | P03363 | Q9H4B6 | 0.58274  |
| 12167 | P03363 | Q96M91 | 0.11203  |
| 12168 | P03363 | Q14CZ0 | 0.14757  |
| 12169 | P03363 | P83731 | 0.42896  |
| 12170 | P03363 | P62851 | 0.47802  |
| 12171 | P03363 | Q2TAK8 | 0.669    |
| 12172 | P03363 | Q9P2J3 | 0.23328  |
| 12173 | P03363 | P62280 | 0.32668  |
| 12174 | P03363 | Q8IW40 | 0.14536  |
| 12175 | P03363 | Q01201 | 0.96392  |
| 12176 | P03363 | Q3LI54 | 0.27762  |
| 12177 | P03363 | Q0PNE2 | 0.25736  |
| 12178 | P03363 | P56270 | 0.57707  |
| 12179 | P03363 | Q5T280 | 0.11203  |
| 12180 | P03363 | O14862 | 0.38968  |
| 12181 | P03363 | O95782 | 0.24736  |
| 12182 | P03363 | Q969P5 | 0.45137  |
| 12183 | P03363 | Q92466 | 0.61033  |
| 12184 | P03363 | Q9BTX1 | 0.10384  |
| 12185 | P03363 | Q9NPA5 | 0.22259  |
| 12186 | P03363 | P35712 | 0.46009  |
| 12187 | P03363 | Q9UKS6 | 0.37666  |
| 12188 | P03363 | Q08379 | 0.39688  |
| 12189 | P03363 | Q99990 | 0.41169  |
| 12190 | P03363 | Q9NV56 | 0.32165  |
| 12191 | P03363 | Q9H2G9 | 0.44931  |
| 12192 | P03363 | Q01844 | 0.57819  |
| 12193 | P03363 | Q8N9Y4 | 0.043615 |
| 12194 | P03363 | O94829 | 0.97697  |
| 12195 | P03363 | O43491 | 0.30002  |
| 12196 | P03363 | O60393 | 0.44123  |
| 12197 | P03363 | P42695 | 0.28166  |
| 12198 | P03363 | Q3LI61 | 0.27762  |
| 12199 | P03363 | Q96NG5 | 0.22755  |
| 12200 | P03363 | O75496 | 0.7062   |
| 12201 | P03363 | Q15628 | 0.58345  |
| 12202 | P03363 | P55795 | 0.50613  |
| 12203 | P03363 | Q96C92 | 0.24431  |
| 12204 | P03363 | Q8N9R8 | 0.70558  |
| 12205 | P03363 | Q8NEA9 | 0.48189  |
| 12206 | P03363 | Q13569 | 0.41717  |
| 12207 | P03363 | A6NIH7 | 0.35582  |
| 12208 | P03363 | Q96PI1 | 0.20545  |
| 12209 | P03363 | Q9Y5K8 | 0.21508  |
| 12210 | P03363 | P0DM35 | 0.037977 |
| 12211 | P03363 | Q13875 | 0.44887  |
| 12212 | P03363 | Q9P2J5 | 0.44186  |
| 12213 | P03363 | Q01534 | 0.4875   |
| 12214 | P03363 | O00308 | 0.33065  |
| 12215 | P03363 | Q9BV20 | 0.16722  |
| 12216 | P03363 | Q9BUW7 | 0.11203  |
| 12217 | P03363 | Q9BYG7 | 0.29721  |
| 12218 | P03363 | Q92844 | 0.50744  |
| 12219 | P03363 | Q9UQR0 | 0.41196  |
| 12220 | P03363 | O60682 | 0.49092  |
| 12221 | P03363 | O43711 | 0.57916  |
| 12222 | P03363 | Q71UM5 | 0.51557  |
| 12223 | P03363 | Q92665 | 0.68642  |
| 12224 | P03363 | Q9HBM6 | 0.69595  |
| 12225 | P03363 | Q9H583 | 0.81031  |
| 12226 | P03363 | Q96BT3 | 0.39909  |
| 12227 | P03363 | Q9BY60 | 0.34776  |
| 12228 | P03363 | P59037 | 0.023125 |
| 12229 | P03363 | A6NJ78 | 0.062282 |
| 12230 | P03363 | P07438 | 0.15627  |
| 12231 | P03363 | Q9Y651 | 0.40599  |
| 12232 | P03363 | Q96LT7 | 0.46197  |
| 12233 | P03363 | Q9Y3U8 | 0.50863  |
| 12234 | P03363 | Q12923 | 0.31295  |
| 12235 | P03363 | Q7RTU5 | 0.4492   |
| 12236 | P03363 | Q00978 | 0.8348   |

|       |        |        |          |
|-------|--------|--------|----------|
| 12237 | P03363 | P62888 | 0.47273  |
| 12238 | P03363 | Q9P2K3 | 1.0151   |
| 12239 | P03363 | Q13438 | 0.25746  |
| 12240 | P03363 | Q8NI35 | 0.37896  |
| 12241 | P03363 | Q7Z3Z0 | 1.0007   |
| 12242 | P03363 | Q86UT8 | 0.070219 |
| 12243 | P03363 | P10242 | 0.66836  |
| 12244 | P03363 | Q96RS6 | 0.4314   |
| 12245 | P03363 | Q8WV92 | 0.40542  |
| 12246 | P03363 | P49458 | 0.16375  |
| 12247 | P03363 | Q8N3J2 | 0.15445  |
| 12248 | P03363 | O14531 | 0.25586  |
| 12249 | P03363 | Q9UL18 | 0.87595  |
| 12250 | P03363 | Q9H0I3 | 0.51115  |
| 12251 | P03363 | P20226 | 0.59431  |
| 12252 | P03363 | Q5THR3 | 0.34387  |
| 12253 | P03363 | Q9UHQ3 | 0.43003  |
| 12254 | P03363 | Q92681 | 0.24801  |
| 12255 | P03363 | Q96F24 | 0.59284  |
| 12256 | P03363 | Q9UM13 | 0.32272  |
| 12257 | P03363 | O15040 | 0.53508  |
| 12258 | P03363 | Q16526 | 0.46425  |
| 12259 | P03363 | Q9H171 | 0.4182   |
| 12260 | P03363 | Q8WUI4 | 0.22486  |
| 12261 | P03363 | P49910 | 0.64392  |
| 12262 | P03363 | Q6AZW8 | 0.22259  |
| 12263 | P03363 | Q3B8N5 | 0.29628  |
| 12264 | P03363 | O60239 | 0.4511   |
| 12265 | P03363 | Q6ZP68 | 0.073689 |
| 12266 | P03363 | Q9BVN2 | 0.4649   |
| 12267 | P03363 | Q9UQ13 | 0.30233  |
| 12268 | P03363 | P52655 | 0.70936  |
| 12269 | P03363 | Q7Z3Y7 | 0.65474  |
| 12270 | P03363 | Q8ND56 | 0.23589  |
| 12271 | P03363 | Q9NV79 | 0.22121  |
| 12272 | P03363 | Q9NY27 | 0.84618  |
| 12273 | P03363 | Q5JU85 | 0.25286  |
| 12274 | P03363 | Q5TB30 | 0.35941  |
| 12275 | P03363 | P56945 | 0.35759  |
| 12276 | P03363 | P17014 | 0.20871  |
| 12277 | P03363 | Q9UPA5 | 0.30845  |
| 12278 | P03363 | Q9NX58 | 0.17708  |
| 12279 | P03363 | P41214 | 0.2808   |
| 12280 | P03363 | Q9UK76 | 0.22504  |
| 12281 | P03363 | Q96GE5 | 0.22259  |
| 12282 | P03363 | Q5VWK0 | 0.24431  |
| 12283 | P03363 | Q9Y2Y4 | 0.38119  |
| 12284 | P03363 | Q9Y237 | 0.36637  |
| 12285 | P03363 | Q96CG3 | 0.5243   |
| 12286 | P03363 | Q04725 | 0.70207  |
| 12287 | P03363 | Q7RTU4 | 0.43142  |
| 12288 | P03363 | Q9BYS1 | 0.33409  |
| 12289 | P03363 | Q8IWI2 | 0.59425  |
| 12290 | P03363 | P63241 | 0.34344  |
| 12291 | P03363 | Q5H9L2 | 0.89393  |
| 12292 | P03363 | O75362 | 0.62378  |
| 12293 | P03363 | Q9BYQ0 | 0.2934   |
| 12294 | P03363 | Q92670 | 0.27054  |
| 12295 | P03363 | Q15013 | 0.88674  |
| 12296 | P03363 | Q15172 | 0.4087   |
| 12297 | P03363 | Q8IW35 | 1.0452   |
| 12298 | P03363 | O75956 | 0.021196 |
| 12299 | P03363 | Q5HYI7 | 0.023789 |
| 12300 | P03363 | Q8TDN4 | 0.48562  |
| 12301 | P03363 | Q8WVM0 | 0.4758   |
| 12302 | P03363 | Q9UL58 | 0.268    |
| 12303 | P03363 | P43351 | 0.63576  |
| 12304 | P03363 | Q13485 | 0.29511  |
| 12305 | P03363 | O75175 | 1.0107   |
| 12306 | P03363 | Q9NXR7 | 0.4789   |
| 12307 | P03363 | Q8NA19 | 0.30439  |
| 12308 | P03363 | Q460N5 | 0.37207  |
| 12309 | P03363 | Q9BTT4 | 0.49306  |
| 12310 | P03363 | Q9NZQ3 | 0.69416  |
| 12311 | P03363 | P12035 | 0.67214  |
| 12312 | P03363 | Q96HI0 | 0.4342   |

|       |        |        |          |
|-------|--------|--------|----------|
| 12313 | P03363 | Q15072 | 0.42508  |
| 12314 | P03363 | Q8N726 | 0.33343  |
| 12315 | P03363 | P62310 | 0.76438  |
| 12316 | P03363 | Q7Z5V6 | 0.54021  |
| 12317 | P03363 | O95076 | 0.29537  |
| 12318 | P03363 | O95402 | 0.78581  |
| 12319 | P03363 | P10074 | 0.46642  |
| 12320 | P03363 | Q96RK0 | 0.8985   |
| 12321 | P03363 | Q92804 | 0.46805  |
| 12322 | P03363 | Q9UBW7 | 0.2386   |
| 12323 | P03363 | P60842 | 0.19996  |
| 12324 | P03363 | P27469 | 0.50459  |
| 12325 | P03363 | Q86XP3 | 0.55398  |
| 12326 | P03363 | Q92625 | 0.36338  |
| 12327 | P03363 | Q2NKJ3 | 0.42938  |
| 12328 | P03363 | Q6ZVQ6 | 0.14324  |
| 12329 | P03363 | O15126 | 0.28745  |
| 12330 | P03363 | Q9UIF3 | 0.32276  |
| 12331 | P03363 | Q9NQT5 | 0.31593  |
| 12332 | P03363 | Q9H0F6 | 0.21856  |
| 12333 | P03363 | O15182 | 0.38948  |
| 12334 | P03363 | P35606 | 0.34688  |
| 12335 | P03363 | Q12968 | 0.49693  |
| 12336 | P03363 | Q05195 | 0.53035  |
| 12337 | P03363 | P26651 | 0.50315  |
| 12338 | P03363 | Q9ULV5 | 0.61831  |
| 12339 | P03363 | P17482 | 0.8726   |
| 12340 | P03363 | O95865 | 0.40526  |
| 12341 | P03363 | Q9NPD8 | 0.16808  |
| 12342 | P03363 | P52951 | 0.24794  |
| 12343 | P03363 | P49335 | 0.35962  |
| 12344 | P03363 | Q9UIV1 | 0.9484   |
| 12345 | P03363 | O75969 | 0.33657  |
| 12346 | P03363 | Q8TD23 | 0.48719  |
| 12347 | P03363 | O60806 | 0.50965  |
| 12348 | P03363 | Q9H0A6 | 0.38916  |
| 12349 | P03363 | Q9Y6R6 | 0.22259  |
| 12350 | P03363 | Q86TB9 | 0.69351  |
| 12351 | P03363 | P51959 | 0.47101  |
| 12352 | P03363 | Q96RT7 | 0.45782  |
| 12353 | P03363 | O95714 | 0.31204  |
| 12354 | P03363 | Q76KD6 | 0.35651  |
| 12355 | P03363 | P23409 | 0.18783  |
| 12356 | P03363 | Q03468 | 0.30282  |
| 12357 | P03363 | Q96RL7 | 0.39162  |
| 12358 | P03363 | Q9UKM9 | 0.37106  |
| 12359 | P03363 | Q9Y4A5 | 0.51575  |
| 12360 | P03363 | Q8NEZ2 | 0.47197  |
| 12361 | P03363 | P50749 | 0.8152   |
| 12362 | P03363 | P63272 | 0.58817  |
| 12363 | P03363 | O15083 | 0.767    |
| 12364 | P03363 | Q9UJN7 | 0.22259  |
| 12365 | P03363 | P25685 | 0.39037  |
| 12366 | P03363 | Q9UJP4 | 0.36163  |
| 12367 | P03363 | Q969Q0 | 0.38572  |
| 12368 | P03363 | Q70YC4 | 0.06635  |
| 12369 | P03363 | O43402 | 0.40514  |
| 12370 | P03363 | O95319 | 0.38409  |
| 12371 | P03363 | Q9BW92 | 0.12031  |
| 12372 | P03363 | Q5VXH4 | 0.10142  |
| 12373 | P03363 | Q8WUH2 | 0.69578  |
| 12374 | P03363 | P10515 | 0.27213  |
| 12375 | P03363 | P50750 | 0.22939  |
| 12376 | P03363 | Q16890 | 0.51761  |
| 12377 | P03363 | Q6PI77 | 0.4314   |
| 12378 | P03363 | O00167 | 0.4342   |
| 12379 | P03363 | P78367 | 0.34532  |
| 12380 | P03363 | A6NI79 | 0.004542 |
| 12381 | P03363 | Q96GV9 | 0.62752  |
| 12382 | P03363 | Q08945 | 0.85312  |
| 12383 | P03363 | Q9NQE9 | 0.33537  |
| 12384 | P03363 | Q9GZZ1 | 0.60152  |
| 12385 | P03363 | P13196 | 0.18391  |
| 12386 | P03363 | O00570 | 0.8366   |
| 12387 | P03363 | Q14186 | 0.78593  |
| 12388 | P03363 | P98182 | 0.19314  |



|       |        |        |          |
|-------|--------|--------|----------|
| 12389 | P03363 | P31269 | 0.75772  |
| 12390 | P03363 | Q8IX12 | 0.89636  |
| 12391 | P03363 | Q6ZS27 | 0.22259  |
| 12392 | P03363 | Q63HK5 | 0.23928  |
| 12393 | P03363 | Q6ZN01 | 0.62829  |
| 12394 | P03363 | Q8TC76 | 0.47966  |
| 12395 | P03363 | Q92616 | 0.31446  |
| 12396 | P03363 | O15131 | 0.93497  |
| 12397 | P03363 | Q5T8A7 | 0.6655   |
| 12398 | P03363 | O60921 | 0.60678  |
| 12399 | P03363 | Q9UBL0 | 0.41678  |
| 12400 | P03363 | Q5TA31 | 0.48916  |
| 12401 | P03363 | Q6PIJ6 | 0.4314   |
| 12402 | P03363 | Q9NVM9 | 0.90094  |
| 12403 | P03363 | Q15269 | 0.34251  |
| 12404 | P03363 | O14662 | 0.45977  |
| 12405 | P03363 | Q6ZQN3 | 0.074184 |
| 12406 | P03363 | Q9Y5V3 | 0.5181   |
| 12407 | P03363 | Q5HY98 | 0.22259  |
| 12408 | P03363 | Q6IQ16 | 0.27676  |
| 12409 | P03363 | P12980 | 0.69667  |
| 12410 | P03363 | Q7Z6J0 | 0.39958  |
| 12411 | P03363 | Q04837 | 0.53767  |
| 12412 | P03363 | Q8IUZ0 | 0.34776  |
| 12413 | P03363 | O60225 | 0.39008  |
| 12414 | P03363 | Q6ISU1 | 0.14526  |
| 12415 | P03363 | A8K8V0 | 0.22259  |
| 12416 | P03363 | Q6P9F0 | 0.35262  |
| 12417 | P03363 | Q09666 | 0.72229  |
| 12418 | P03363 | O76042 | 0.10081  |
| 12419 | P03363 | Q9Y676 | 0.20437  |
| 12420 | P03363 | P19484 | 0.53828  |
| 12421 | P03363 | Q86WH2 | 0.50767  |
| 12422 | P03363 | Q9UQR1 | 0.68399  |
| 12423 | P03363 | Q2QGD7 | 0.50181  |
| 12424 | P03363 | Q9Y3B9 | 0.28674  |
| 12425 | P03363 | Q99687 | 0.67172  |
| 12426 | P03363 | P61981 | 0.5116   |
| 12427 | P03363 | Q8TC94 | 0.29593  |
| 12428 | P03363 | Q8IYN0 | 0.22259  |
| 12429 | P03363 | O00401 | 0.41334  |
| 12430 | P03363 | Q8IY42 | 0.06377  |
| 12431 | P03363 | Q8TD26 | 0.34857  |
| 12432 | P03363 | A6NK89 | 0.26133  |
| 12433 | P03363 | Q15257 | 0.29122  |
| 12434 | P03363 | Q68CL5 | 0.34776  |
| 12435 | P03363 | P84550 | 0.26183  |
| 12436 | P03363 | Q92541 | 0.76626  |
| 12437 | P03363 | Q8TB69 | 0.22259  |
| 12438 | P03363 | Q9H8Y1 | 0.08571  |
| 12439 | P03363 | Q07820 | 0.25185  |
| 12440 | P03363 | Q15599 | 0.45117  |
| 12441 | P03363 | Q16385 | 0.84976  |
| 12442 | P03363 | Q9NRI5 | 0.29758  |
| 12443 | P03363 | Q9UH77 | 0.79491  |
| 12444 | P03363 | Q8N0Z8 | 0.06171  |
| 12445 | P03363 | Q96JL9 | 0.22259  |
| 12446 | P03363 | Q70YC5 | 0.52064  |
| 12447 | P03363 | Q96P15 | 0.18824  |
| 12448 | P03363 | Q07955 | 0.76673  |
| 12449 | P03363 | O00625 | 0.45101  |
| 12450 | P03363 | Q9C056 | 0.23338  |
| 12451 | P03363 | O43159 | 0.61258  |
| 12452 | P03363 | Q8TAD8 | 1.0852   |
| 12453 | P03363 | Q2VPB7 | 0.60824  |
| 12454 | P03363 | Q6P3S1 | 0.22564  |
| 12455 | P03363 | P53804 | 0.46     |
| 12456 | P03363 | Q9NYT6 | 0.22259  |
| 12457 | P03363 | O95551 | 0.51829  |
| 12458 | P03363 | Q96JJ3 | 0.40838  |
| 12459 | P03363 | Q13114 | 0.24073  |
| 12460 | P03363 | Q13136 | 0.55314  |
| 12461 | P03363 | O43660 | 0.68062  |
| 12462 | P03363 | Q5BJF2 | 0.22246  |
| 12463 | P03363 | Q9BYQ3 | 0.2934   |
| 12464 | P03363 | Q8IZQ1 | 0.55659  |

|       |        |        |           |
|-------|--------|--------|-----------|
| 12465 | P03363 | O14737 | 0.45851   |
| 12466 | P03363 | Q9UIL1 | 0.57437   |
| 12467 | P03363 | Q5VTL8 | 0.32159   |
| 12468 | P03363 | P17020 | 0.22259   |
| 12469 | P03363 | Q96NW4 | 0.28324   |
| 12470 | P03363 | Q9HCI5 | 0.62782   |
| 12471 | P03363 | P63261 | 0.20454   |
| 12472 | P03363 | P07315 | 0.75368   |
| 12473 | P03363 | Q8N5Q1 | 0.062103  |
| 12474 | P03363 | O43463 | 0.46679   |
| 12475 | P03363 | Q8WWW0 | 0.54249   |
| 12476 | P03363 | P49591 | 0.089672  |
| 12477 | P03363 | Q14188 | 0.51268   |
| 12478 | P03363 | Q92733 | 0.70925   |
| 12479 | P03363 | O95336 | 0.22961   |
| 12480 | P03363 | P62244 | 0.38923   |
| 12481 | P03363 | Q8WUJ3 | 0.24431   |
| 12482 | P03363 | Q8WV07 | 0.11203   |
| 12483 | P03363 | P51816 | 0.18328   |
| 12484 | P03363 | Q9UGJ1 | 0.40977   |
| 12485 | P03363 | P62277 | 0.6463    |
| 12486 | P03363 | O75531 | 0.7423    |
| 12487 | P03363 | O60506 | 0.71028   |
| 12488 | P03363 | Q9NPJ6 | 0.51717   |
| 12489 | P03363 | Q3MIS6 | 0.22259   |
| 12490 | P03363 | Q9Y483 | 0.23888   |
| 12491 | P03363 | Q8N3X1 | 0.29721   |
| 12492 | P03363 | Q9BR84 | 0.22259   |
| 12493 | P03363 | P60660 | 0.34508   |
| 12494 | P03363 | Q9H6Z4 | 0.98955   |
| 12495 | P03363 | Q9HCM9 | 0.39171   |
| 12496 | P03363 | Q6TFL4 | 0.099712  |
| 12497 | P03363 | P14672 | 0.29355   |
| 12498 | P03363 | A5PLL1 | 0.4314    |
| 12499 | P03363 | O94901 | 0.29825   |
| 12500 | P03363 | P15884 | 0.56657   |
| 12501 | P03363 | P0CI01 | 0.0070677 |
| 12502 | P03363 | O43583 | 0.5384    |
| 12503 | P03363 | P62906 | 0.32344   |
| 12504 | P03363 | P41162 | 0.55069   |
| 12505 | P03363 | Q96E39 | 0.28697   |
| 12506 | P03363 | Q5T9G4 | 0.03308   |
| 12507 | P03363 | Q92540 | 0.78922   |
| 12508 | P03363 | O75398 | 0.30749   |
| 12509 | P03363 | Q01081 | 0.55564   |
| 12510 | P03363 | Q8TF47 | 0.13014   |
| 12511 | P03363 | O94842 | 0.71614   |
| 12512 | P03363 | P56211 | 0.20098   |
| 12513 | P03363 | Q15025 | 0.54917   |
| 12514 | P03363 | Q9NQY0 | 0.52246   |
| 12515 | P03363 | Q5VZF2 | 0.36191   |
| 12516 | P03363 | Q95644 | 0.69067   |
| 12517 | P03363 | Q8N635 | 0.28771   |
| 12518 | P03363 | A6NP11 | 0.22259   |
| 12519 | P03363 | Q7Z5H3 | 0.26886   |
| 12520 | P03363 | Q8TCJ0 | 0.57351   |
| 12521 | P03363 | Q9Y285 | 0.43016   |
| 12522 | P03363 | Q14671 | 0.34392   |
| 12523 | P03363 | Q3SY52 | 0.22259   |
| 12524 | P03363 | Q96A72 | 0.31301   |
| 12525 | P03363 | A6NIX2 | 0.68819   |
| 12526 | P03363 | Q9BTE1 | 0.35815   |
| 12527 | P03363 | P78371 | 0.59894   |
| 12528 | P03363 | Q8N954 | 0.18106   |
| 12529 | P03363 | Q7Z5W3 | 0.26003   |
| 12530 | P03363 | P25440 | 0.50012   |
| 12531 | P03363 | Q9UMS6 | 0.73011   |
| 12532 | P03363 | Q96T88 | 0.27894   |
| 12533 | P03363 | Q5BKX8 | 0.29913   |
| 12534 | P03363 | O60294 | 0.50547   |
| 12535 | P03363 | Q9C0F1 | 0.40866   |
| 12536 | P03363 | A6NJR5 | 0.0070677 |
| 12537 | P03363 | O43361 | 0.22259   |
| 12538 | P03363 | A6NLW8 | 0.49158   |
| 12539 | P03363 | Q96NA2 | 0.13367   |
| 12540 | P03363 | Q8IUR6 | 0.9194    |

|       |        |        |          |
|-------|--------|--------|----------|
| 12541 | P03363 | Q9UK45 | 0.74542  |
| 12542 | P03363 | Q8NFI4 | 0.24431  |
| 12543 | P03363 | Q96CA5 | 0.34766  |
| 12544 | P03363 | Q969H6 | 0.67389  |
| 12545 | P03363 | Q8NE71 | 0.38278  |
| 12546 | P03363 | Q9NYL9 | 0.24205  |
| 12547 | P03363 | Q9H7X3 | 0.22259  |
| 12548 | P03363 | Q9UKJ5 | 0.28361  |
| 12549 | P03363 | Q9BSG1 | 0.22259  |
| 12550 | P03363 | Q9P267 | 0.225    |
| 12551 | P03363 | Q9H2L5 | 0.44261  |
| 12552 | P03363 | Q09FC8 | 0.40375  |
| 12553 | P03363 | Q9UK12 | 0.22259  |
| 12554 | P03363 | O60810 | 0.10142  |
| 12555 | P03363 | Q9BQY4 | 0.99479  |
| 12556 | P03363 | Q86UL8 | 0.26618  |
| 12557 | P03363 | Q9H0A9 | 0.14142  |
| 12558 | P03363 | Q9UBF2 | 0.31552  |
| 12559 | P03363 | Q15714 | 0.75131  |
| 12560 | P03363 | Q8IVG9 | 0.28675  |
| 12561 | P03363 | Q96SN7 | 0.15709  |
| 12562 | P03363 | P35232 | 0.40944  |
| 12563 | P03363 | Q8IYX8 | 0.35721  |
| 12564 | P03363 | Q15973 | 0.22259  |
| 12565 | P03363 | P62266 | 0.59224  |
| 12566 | P03363 | Q9BYX4 | 0.24806  |
| 12567 | P03363 | Q9BZI1 | 0.48292  |
| 12568 | P03363 | Q96QS3 | 0.22216  |
| 12569 | P03363 | Q9BVP2 | 0.36688  |
| 12570 | P03363 | P78406 | 0.44082  |
| 12571 | P03363 | Q9BZI7 | 0.62634  |
| 12572 | P03363 | Q86UB2 | 0.4314   |
| 12573 | P03363 | Q94993 | 0.4347   |
| 12574 | P03363 | P61978 | 0.86794  |
| 12575 | P03363 | Q86XF7 | 0.22259  |
| 12576 | P03363 | P62945 | 0.42896  |
| 12577 | P03363 | Q8IUE0 | 0.51853  |
| 12578 | P03363 | P05412 | 0.31618  |
| 12579 | P03363 | Q96MN9 | 0.56241  |
| 12580 | P03363 | Q3LI73 | 0.27762  |
| 12581 | P03363 | Q8N612 | 0.49078  |
| 12582 | P03363 | Q6IQ32 | 0.44194  |
| 12583 | P03363 | Q96PV6 | 0.53508  |
| 12584 | P03363 | Q9Y536 | 0.21453  |
| 12585 | P03363 | Q6PD74 | 0.33766  |
| 12586 | P03363 | P17017 | 0.22259  |
| 12587 | P03363 | Q2VWA4 | 0.41305  |
| 12588 | P03363 | A6NLX3 | 0.010789 |
| 12589 | P03363 | Q9H3R5 | 0.37269  |
| 12590 | P03363 | Q9P0R6 | 0.24431  |
| 12591 | P03363 | Q9NTI5 | 0.64019  |
| 12592 | P03363 | Q92834 | 0.43627  |
| 12593 | P03363 | Q96K58 | 0.22259  |
| 12594 | P03363 | P40424 | 0.55274  |
| 12595 | P03363 | Q9BZL4 | 0.7338   |
| 12596 | P03363 | Q9H1Q7 | 0.031479 |
| 12597 | P03363 | Q15054 | 0.31633  |
| 12598 | P03363 | Q96AV8 | 0.42523  |
| 12599 | P03363 | Q96G23 | 0.32208  |
| 12600 | P03363 | O94906 | 0.44142  |
| 12601 | P03363 | Q9BT49 | 0.26761  |
| 12602 | P03363 | Q9H116 | 0.38321  |
| 12603 | P03363 | Q9BRX2 | 0.25364  |
| 12604 | P03363 | P53992 | 0.57256  |
| 12605 | P03363 | P78345 | 0.69177  |
| 12606 | P03363 | O14618 | 0.30554  |
| 12607 | P03363 | Q96DX5 | 0.91138  |
| 12608 | P03363 | Q969M7 | 0.20987  |
| 12609 | P03363 | O60304 | 0.268    |
| 12610 | P03363 | Q9Y5Y2 | 0.44657  |
| 12611 | P03363 | Q8TAU3 | 0.22259  |
| 12612 | P03363 | O15055 | 0.38336  |
| 12613 | P03363 | Q8IWT3 | 0.24371  |
| 12614 | P03363 | P0CAP2 | 0.1315   |
| 12615 | P03363 | Q9Y4L5 | 0.52237  |
| 12616 | P03363 | Q96AJ1 | 0.71827  |

|       |        |        |          |
|-------|--------|--------|----------|
| 12617 | P03363 | Q9H3C7 | 0.16934  |
| 12618 | P03363 | P49207 | 0.36325  |
| 12619 | P03363 | Q7Z401 | 0.41049  |
| 12620 | P03363 | C9JBD0 | 0.24352  |
| 12621 | P03363 | P62241 | 0.41763  |
| 12622 | P03363 | P78386 | 0.8697   |
| 12623 | P03363 | Q9HCG8 | 0.55843  |
| 12624 | P03363 | Q04741 | 0.2805   |
| 12625 | P03363 | Q5D1E8 | 0.37769  |
| 12626 | P03363 | Q969L4 | 0.6894   |
| 12627 | P03363 | A6NCI8 | 0.039743 |
| 12628 | P03363 | Q13247 | 0.37397  |
| 12629 | P03363 | Q9BU61 | 0.58137  |
| 12630 | P03363 | B1AK76 | 0.01759  |
| 12631 | P03363 | A2RU54 | 0.2553   |
| 12632 | P03363 | Q5H9K5 | 0.14309  |
| 12633 | P03363 | Q15428 | 0.1968   |
| 12634 | P03363 | O75843 | 0.40738  |
| 12635 | P03363 | Q8IWN7 | 0.42615  |
| 12636 | P03363 | Q9BVS5 | 0.43988  |
| 12637 | P03363 | Q00613 | 0.74975  |
| 12638 | P03363 | Q86W56 | 0.4782   |
| 12639 | P03363 | Q6PJG6 | 0.66092  |
| 12640 | P03363 | Q13398 | 0.22259  |
| 12641 | P03363 | Q9UKT9 | 0.5062   |
| 12642 | P03363 | Q96LM6 | 0.22504  |
| 12643 | P03363 | Q53GI3 | 0.268    |
| 12644 | P03363 | Q9UMX2 | 0.25995  |
| 12645 | P03363 | Q9NRR3 | 0.57601  |
| 12646 | P03363 | Q13642 | 0.31863  |
| 12647 | P03363 | O75386 | 0.24483  |
| 12648 | P03363 | O15405 | 0.73803  |
| 12649 | P03363 | P04733 | 0.15112  |
| 12650 | P03363 | Q9Y3E5 | 0.41303  |
| 12651 | P03363 | Q96J94 | 0.3644   |
| 12652 | P03363 | Q8WWH5 | 0.10262  |
| 12653 | P03363 | Q7Z4G4 | 0.20167  |
| 12654 | P03363 | Q96CJ1 | 0.79963  |
| 12655 | P03363 | Q5SXM2 | 0.55321  |
| 12656 | P03363 | Q7Z2F6 | 0.24352  |
| 12657 | P03363 | O60675 | 0.53218  |
| 12658 | P03363 | Q86VP6 | 0.72009  |
| 12659 | P03363 | O75771 | 0.35575  |
| 12660 | P03363 | Q8WV22 | 0.29586  |
| 12661 | P03363 | Q86UD4 | 0.22259  |
| 12662 | P03363 | Q14934 | 0.43984  |
| 12663 | P03363 | Q2NL98 | 0.24431  |
| 12664 | P03363 | Q12873 | 0.48465  |
| 12665 | P03363 | B2RXF5 | 0.48261  |
| 12666 | P03363 | Q7L590 | 0.71305  |
| 12667 | P03363 | Q9C002 | 0.21533  |
| 12668 | P03363 | Q9UKF7 | 0.28709  |
| 12669 | P03363 | P80723 | 0.37714  |
| 12670 | P03363 | O43900 | 0.30217  |
| 12671 | P03363 | Q9H6R4 | 0.16652  |
| 12672 | P03363 | Q9HAJ7 | 0.35822  |
| 12673 | P03363 | Q8WU39 | 0.19888  |
| 12674 | P03363 | Q8IYL3 | 0.22504  |
| 12675 | P03363 | P05455 | 0.23785  |
| 12676 | P03363 | Q9BQC6 | 0.31668  |
| 12677 | P03363 | P42568 | 0.75154  |
| 12678 | P03363 | P62424 | 0.61255  |
| 12679 | P03363 | P28370 | 0.42638  |
| 12680 | P03363 | Q147U1 | 0.22259  |
| 12681 | P03363 | P0C7M4 | 0.55275  |
| 12682 | P03363 | Q9NR11 | 0.22259  |
| 12683 | P03363 | P0C7H8 | 0.2934   |
| 12684 | P03363 | O60930 | 0.2671   |
| 12685 | P03363 | Q96G27 | 0.099585 |
| 12686 | P03363 | Q9BZW7 | 0.51788  |
| 12687 | P03363 | Q99581 | 0.23127  |
| 12688 | P03363 | Q9UI26 | 0.51245  |
| 12689 | P03363 | P58317 | 0.22259  |
| 12690 | P03363 | O95359 | 0.3305   |
| 12691 | P03363 | O43516 | 0.46209  |
| 12692 | P03363 | Q04864 | 0.92162  |

|       |        |        |          |
|-------|--------|--------|----------|
| 12693 | P03363 | Q6ZU15 | 0.46585  |
| 12694 | P03363 | O95886 | 0.20686  |
| 12695 | P03363 | O60524 | 0.47529  |
| 12696 | P03363 | Q9H3K2 | 0.19865  |
| 12697 | P03363 | P19532 | 0.62113  |
| 12698 | P03363 | Q9BY42 | 0.11203  |
| 12699 | P03363 | Q6DN90 | 0.24257  |
| 12700 | P03363 | O95487 | 0.42611  |
| 12701 | P03363 | Q8WVB3 | 0.27247  |
| 12702 | P03363 | Q99816 | 0.23686  |
| 12703 | P03363 | Q9BZL1 | 0.26643  |
| 12704 | P03363 | Q9UFM2 | 0.22504  |
| 12705 | P03363 | Q9NUQ3 | 0.48883  |
| 12706 | P03363 | P55769 | 0.81889  |
| 12707 | P03363 | P67870 | 0.22932  |
| 12708 | P03363 | Q15058 | 0.63857  |
| 12709 | P03363 | O43325 | 0.21533  |
| 12710 | P03363 | O95373 | 0.7861   |
| 12711 | P03363 | P19013 | 0.75224  |
| 12712 | P03363 | Q5T7W7 | 0.11203  |
| 12713 | P03363 | Q9UKD2 | 0.22133  |
| 12714 | P03363 | Q9UJW3 | 0.56806  |
| 12715 | P03363 | Q9H568 | 0.29593  |
| 12716 | P03363 | Q9H511 | 0.22927  |
| 12717 | P03363 | Q15059 | 0.90513  |
| 12718 | P03363 | Q9Y6F6 | 0.23726  |
| 12719 | P03363 | P52948 | 0.47957  |
| 12720 | P03363 | Q5SZQ8 | 0.28629  |
| 12721 | P03363 | Q06609 | 0.3721   |
| 12722 | P03363 | O14519 | 0.4024   |
| 12723 | P03363 | Q13596 | 0.3043   |
| 12724 | P03363 | Q9HB96 | 0.74351  |
| 12725 | P03363 | Q6P1N0 | 0.52113  |
| 12726 | P03363 | Q8WVK2 | 0.41806  |
| 12727 | P03363 | Q8N7F7 | 0.24431  |
| 12728 | P03363 | Q8N3U4 | 0.43798  |
| 12729 | P03363 | Q6AW86 | 0.22259  |
| 12730 | P03363 | Q9UKL0 | 0.83738  |
| 12731 | P03363 | Q9C004 | 0.23788  |
| 12732 | P03363 | Q8IYX0 | 0.22259  |
| 12733 | P03363 | Q7L3T8 | 0.071322 |
| 12734 | P03363 | O60244 | 0.20989  |
| 12735 | P03363 | Q8IZE3 | 0.2968   |
| 12736 | P03363 | Q6VN20 | 0.43002  |
| 12737 | P03363 | Q9ULC4 | 0.44183  |
| 12738 | P03363 | O14777 | 0.34744  |
| 12739 | P03363 | O75427 | 0.58649  |
| 12740 | P03363 | Q9NZP6 | 0.024881 |
| 12741 | P03363 | Q9NQR1 | 0.50815  |
| 12742 | P03363 | Q5VZB9 | 0.26821  |
| 12743 | P03363 | O96000 | 0.30838  |
| 12744 | P03363 | Q9H213 | 0.23743  |
| 12745 | P03363 | Q9Y296 | 0.27876  |
| 12746 | P03363 | Q96IU2 | 0.096262 |
| 12747 | P03363 | Q6L8G4 | 0.2934   |
| 12748 | P03363 | Q27J81 | 0.27268  |
| 12749 | P03363 | P0CG12 | 0.22504  |
| 12750 | P03363 | Q9ULJ6 | 0.39728  |
| 12751 | P03363 | P47974 | 0.49687  |
| 12752 | P03363 | Q8TEA8 | 0.24584  |
| 12753 | P03363 | Q5JRK9 | 0.085053 |
| 12754 | P03363 | Q86XR8 | 0.76681  |
| 12755 | P03363 | Q9NTG7 | 0.26064  |
| 12756 | P03363 | P60866 | 0.42203  |
| 12757 | P03363 | Q04917 | 0.32515  |
| 12758 | P03363 | P61579 | 0.55152  |
| 12759 | P03363 | A6NDE4 | 0.51018  |
| 12760 | P03363 | Q6P280 | 0.22259  |
| 12761 | P03363 | O60759 | 0.55729  |
| 12762 | P03363 | O15127 | 0.49033  |
| 12763 | P03363 | Q8NDP4 | 0.22259  |
| 12764 | P03363 | Q96GX9 | 0.34533  |
| 12765 | P03363 | O15259 | 0.27142  |
| 12766 | P03363 | Q8NFJ8 | 0.34062  |
| 12767 | P03363 | Q9Y262 | 0.72494  |
| 12768 | P03363 | Q9Y244 | 0.27538  |

|       |        |         |           |
|-------|--------|---------|-----------|
| 12769 | P03363 | P61247  | 0.71156   |
| 12770 | P03363 | Q14739  | 0.22881   |
| 12771 | P03363 | O43745  | 0.68315   |
| 12772 | P03363 | Q6NVH7  | 0.58111   |
| 12773 | P03363 | P24534  | 0.55237   |
| 12774 | P03363 | P61077  | 0.23776   |
| 12775 | P03363 | Q9BYD9  | 0.45837   |
| 12776 | P03363 | Q8I WV8 | 0.21751   |
| 12777 | P03363 | Q96Q89  | 0.33378   |
| 12778 | P03363 | Q9H446  | 0.53508   |
| 12779 | P03363 | Q9UKY7  | 0.30665   |
| 12780 | P03363 | Q5HYJ3  | 0.26782   |
| 12781 | P03363 | O95997  | 0.66287   |
| 12782 | P03363 | O75486  | 0.2853    |
| 12783 | P03363 | Q7L945  | 0.22259   |
| 12784 | P03363 | Q9H204  | 0.98273   |
| 12785 | P03363 | O60573  | 0.58503   |
| 12786 | P03363 | Q96CM3  | 0.44973   |
| 12787 | P03363 | P55210  | 0.23354   |
| 12788 | P03363 | Q9NVW2  | 0.37543   |
| 12789 | P03363 | Q12789  | 0.69239   |
| 12790 | P03363 | Q5EBM4  | 0.22259   |
| 12791 | P03363 | O75146  | 0.32732   |
| 12792 | P03363 | Q8TEQ6  | 0.74111   |
| 12793 | P03363 | Q9UHN1  | 0.31143   |
| 12794 | P03363 | Q9Y6B2  | 0.90497   |
| 12795 | P03363 | Q16612  | 0.38228   |
| 12796 | P03363 | Q9Y4P1  | 0.37377   |
| 12797 | P03363 | Q9NQ92  | 0.77935   |
| 12798 | P03363 | O14776  | 0.90325   |
| 12799 | P03363 | Q9Y224  | 1.1094    |
| 12800 | P03363 | Q96QG7  | 0.52966   |
| 12801 | P03363 | O60333  | 0.29903   |
| 12802 | P03363 | Q14157  | 0.45007   |
| 12803 | P03363 | Q5HYW3  | 0.011573  |
| 12804 | P03363 | Q5T3J3  | 0.83137   |
| 12805 | P03363 | Q4VC44  | 0.40225   |
| 12806 | P03363 | Q9H0E3  | 0.39856   |
| 12807 | P03363 | Q13144  | 0.39774   |
| 12808 | P03363 | Q9BWW4  | 0.37873   |
| 12809 | P03363 | P58005  | 0.20341   |
| 12810 | P03363 | Q9NQZ3  | 0.49367   |
| 12811 | P03363 | O43918  | 0.56516   |
| 12812 | P03363 | Q9Y3A2  | 0.76005   |
| 12813 | P03363 | Q96DN6  | 0.28998   |
| 12814 | P03363 | Q9UNA4  | 0.37734   |
| 12815 | P03363 | P61956  | 0.69241   |
| 12816 | P03363 | P09629  | 0.92482   |
| 12817 | P03363 | Q8TC21  | 0.22259   |
| 12818 | P03363 | Q3BBW0  | 0.24431   |
| 12819 | P03363 | A8MXY4  | 0.22259   |
| 12820 | P03363 | Q9H8W4  | 0.31671   |
| 12821 | P03363 | Q93034  | 0.55543   |
| 12822 | P03363 | Q9P1A6  | 0.26594   |
| 12823 | P03363 | Q7L2E3  | 0.50781   |
| 12824 | P03363 | Q96HQ2  | 0.0038652 |
| 12825 | P03363 | O00165  | 0.54533   |
| 12826 | P03363 | P55895  | 0.26818   |
| 12827 | P03363 | P16989  | 0.55082   |
| 12828 | P03363 | Q9P015  | 0.3187    |
| 12829 | P03363 | Q5VWI1  | 0.031634  |
| 12830 | P03363 | Q8NB50  | 0.18593   |
| 12831 | P03363 | Q9NVP1  | 0.40607   |
| 12832 | P03363 | Q96EN9  | 0.53508   |
| 12833 | P03363 | Q9BQI9  | 0.51838   |
| 12834 | P03363 | Q9BZG8  | 0.39566   |
| 12835 | P03363 | Q9UFF9  | 0.5574    |
| 12836 | P03363 | Q15031  | 0.062031  |
| 12837 | P03363 | Q2M3C7  | 0.70423   |
| 12838 | P03363 | Q52M93  | 0.18593   |
| 12839 | P03363 | O14508  | 0.39251   |
| 12840 | P03363 | Q9Y3D3  | 0.6142    |
| 12841 | P03363 | P02489  | 0.29342   |
| 12842 | P03363 | Q00839  | 0.81952   |
| 12843 | P03363 | Q15573  | 0.43222   |
| 12844 | P03363 | Q8N9K5  | 0.22259   |

|       |        |        |          |
|-------|--------|--------|----------|
| 12845 | P03363 | O43617 | 0.28542  |
| 12846 | P03363 | Q9Y543 | 0.36143  |
| 12847 | P03363 | Q96LR2 | 0.21483  |
| 12848 | P03363 | Q8N729 | 0.079775 |
| 12849 | P03363 | P61962 | 0.83225  |
| 12850 | P03363 | Q12834 | 0.45194  |
| 12851 | P03363 | P55197 | 0.97102  |
| 12852 | P03363 | P40426 | 0.41162  |
| 12853 | P03363 | Q9UHA3 | 0.32292  |
| 12854 | P03363 | Q9Y6Z2 | 0.11203  |
| 12855 | P03363 | Q66K41 | 0.033479 |
| 12856 | P03363 | Q14008 | 0.58936  |
| 12857 | P03363 | Q96N95 | 0.43055  |
| 12858 | P03363 | P09874 | 0.34208  |
| 12859 | P03363 | P35452 | 0.26023  |
| 12860 | P03363 | Q9Y664 | 0.1993   |
| 12861 | P03363 | Q13084 | 0.90434  |
| 12862 | P03363 | Q96FT9 | 0.29611  |
| 12863 | P03363 | Q13330 | 0.49663  |
| 12864 | P03363 | P62308 | 0.68761  |
| 12865 | P03363 | Q8TDH9 | 0.3085   |
| 12866 | P03363 | Q9NQ31 | 0.69149  |
| 12867 | P03363 | Q8WXB4 | 0.44662  |
| 12868 | P03363 | Q96SQ7 | 0.26493  |
| 12869 | P03363 | Q9NP71 | 0.30256  |
| 12870 | P03363 | Q9NRJ4 | 0.4612   |
| 12871 | P03363 | Q96A49 | 0.22504  |
| 12872 | P03363 | Q95343 | 0.3194   |
| 12873 | P03363 | Q7Z4G1 | 0.88629  |
| 12874 | P03363 | Q9UQN3 | 0.3447   |
| 12875 | P03363 | Q14687 | 0.53508  |
| 12876 | P03363 | Q02548 | 0.44099  |
| 12877 | P03363 | Q8IYA7 | 0.37366  |
| 12878 | P03363 | Q9UJM3 | 0.39471  |
| 12879 | P03363 | P78316 | 0.17411  |
| 12880 | P03363 | P52741 | 0.30118  |
| 12881 | P03363 | O14972 | 0.22067  |
| 12882 | P03363 | Q6PK04 | 0.04946  |
| 12883 | P03363 | P62899 | 0.36325  |
| 12884 | P03363 | P41970 | 0.74566  |
| 12885 | P03363 | Q9NR33 | 0.42841  |
| 12886 | P03363 | Q8N699 | 0.22504  |
| 12887 | P03363 | Q9P013 | 0.75599  |
| 12888 | P03363 | Q16637 | 0.79874  |
| 12889 | P03363 | Q9GZU7 | 0.43159  |
| 12890 | P03363 | Q8WTR7 | 0.626    |
| 12891 | P03363 | Q14207 | 0.65126  |
| 12892 | P03363 | Q12765 | 0.36006  |
| 12893 | P03363 | Q9HCG1 | 0.22314  |
| 12894 | P03363 | Q9UKF6 | 0.50214  |
| 12895 | P03363 | Q96MG7 | 0.76997  |
| 12896 | P03363 | Q86XI8 | 0.53508  |
| 12897 | P03363 | Q5VWP3 | 0.29948  |
| 12898 | P03363 | Q9Y2Y0 | 0.73892  |
| 12899 | P03363 | Q8NHY2 | 0.77911  |
| 12900 | P03363 | P62857 | 0.29099  |
| 12901 | P03363 | Q9Y3A3 | 0.52622  |
| 12902 | P03363 | Q9NZD8 | 0.50271  |
| 12903 | P03363 | O14490 | 0.28911  |
| 12904 | P03363 | P13646 | 0.92986  |
| 12905 | P03363 | Q9NS25 | 0.41309  |
| 12906 | P03363 | P24855 | 0.19997  |
| 12907 | P03363 | Q658L1 | 0.04776  |
| 12908 | P03363 | Q13363 | 0.29899  |
| 12909 | P03363 | Q9Y2Q1 | 0.22259  |
| 12910 | P03363 | Q8WW38 | 0.39042  |
| 12911 | P03363 | Q9Y534 | 0.75432  |
| 12912 | P03363 | Q86SE8 | 0.21962  |
| 12913 | P03363 | Q9Y448 | 0.67547  |
| 12914 | P03363 | P84103 | 0.74707  |
| 12915 | P03363 | Q5T3I0 | 0.18106  |
| 12916 | P03363 | Q06587 | 0.57159  |
| 12917 | P03363 | Q9GZR1 | 0.4395   |
| 12918 | P03363 | Q8IVM0 | 0.7338   |
| 12919 | P03363 | Q9P086 | 0.82851  |
| 12920 | P03363 | Q99728 | 0.34661  |

|       |        |        |           |
|-------|--------|--------|-----------|
| 12921 | P03363 | Q3BBV0 | 0.24431   |
| 12922 | P03363 | O43482 | 0.39489   |
| 12923 | P03363 | Q499Z4 | 0.22259   |
| 12924 | P03363 | O15504 | 0.23055   |
| 12925 | P03363 | Q99700 | 0.59003   |
| 12926 | P03363 | O95273 | 0.93062   |
| 12927 | P03363 | Q9P278 | 0.67696   |
| 12928 | P03363 | Q13404 | 0.7045    |
| 12929 | P03363 | Q96FF9 | 0.57945   |
| 12930 | P03363 | Q9BY31 | 0.22259   |
| 12931 | P03363 | Q9UMS4 | 0.77227   |
| 12932 | P03363 | P30047 | 0.46806   |
| 12933 | P03363 | Q8NA72 | 0.43147   |
| 12934 | P03363 | O94822 | 0.32272   |
| 12935 | P03363 | Q2TAL8 | 0.11203   |
| 12936 | P03363 | Q8NFD5 | 0.67729   |
| 12937 | P03363 | Q96NJ3 | 0.22259   |
| 12938 | P03363 | Q14498 | 0.85175   |
| 12939 | P03363 | O95416 | 0.52849   |
| 12940 | P03363 | Q96S59 | 0.81715   |
| 12941 | P03363 | Q9HAT8 | 0.60875   |
| 12942 | P03363 | Q8NFZ5 | 0.68494   |
| 12943 | P03363 | P42773 | 0.31133   |
| 12944 | P03363 | A7MD48 | 0.19954   |
| 12945 | P03363 | Q99614 | 0.45209   |
| 12946 | P03363 | Q13216 | 0.37994   |
| 12947 | P03363 | O75478 | 0.38437   |
| 12948 | P03363 | P16383 | 0.44678   |
| 12949 | P03363 | Q68DY9 | 0.22259   |
| 12950 | P03363 | Q02878 | 0.49207   |
| 12951 | P03363 | P52743 | 0.24904   |
| 12952 | P03363 | Q9BV47 | 0.37643   |
| 12953 | P03363 | Q8TAW3 | 0.22259   |
| 12954 | P03363 | Q9UBG7 | 0.24729   |
| 12955 | P03363 | Q96AC1 | 0.30391   |
| 12956 | P03363 | Q9H910 | 0.28624   |
| 12957 | P03363 | Q9BXT5 | 0.084222  |
| 12958 | P03363 | Q9NPI8 | 0.73918   |
| 12959 | P03363 | Q96GM5 | 0.59296   |
| 12960 | P03363 | O43364 | 0.29966   |
| 12961 | P03363 | Q9ULK4 | 0.82362   |
| 12962 | P03363 | Q9H7P6 | 0.011299  |
| 12963 | P03363 | Q03828 | 0.44461   |
| 12964 | P03363 | O60662 | 0.27871   |
| 12965 | P03363 | Q8TEC5 | 0.29112   |
| 12966 | P03363 | A6NHP3 | 0.0070677 |
| 12967 | P03363 | Q9H1H9 | 0.38731   |
| 12968 | P03363 | P08047 | 0.39108   |
| 12969 | P03363 | Q53TQ3 | 0.45161   |
| 12970 | P03363 | P52594 | 0.40715   |
| 12971 | P03363 | Q5JSZ5 | 0.53508   |
| 12972 | P03363 | O60248 | 0.69944   |
| 12973 | P03363 | O76015 | 0.88908   |
| 12974 | P03363 | O15084 | 0.74904   |
| 12975 | P03363 | Q8N4C6 | 0.4239    |
| 12976 | P03363 | Q96ES7 | 0.23155   |
| 12977 | P03363 | Q8IVF1 | 0.019164  |
| 12978 | P03363 | Q9HCH5 | 0.42242   |
| 12979 | P03363 | Q6ZW49 | 0.351     |
| 12980 | P03363 | Q96KN1 | 0.57804   |
| 12981 | P03363 | Q8WTZ3 | 0.3286    |
| 12982 | P03363 | P16452 | 0.32473   |
| 12983 | P03363 | Q9Y2X8 | 0.2284    |
| 12984 | P03363 | P78346 | 0.2171    |
| 12985 | P03363 | Q9NQ29 | 0.08554   |
| 12986 | P03363 | P82909 | 0.32206   |
| 12987 | P03363 | Q9UMQ3 | 0.72461   |
| 12988 | P03363 | Q92796 | 0.3526    |
| 12989 | P03363 | Q99633 | 0.35202   |
| 12990 | P03363 | P62837 | 0.43505   |
| 12991 | P03363 | Q9NQP4 | 0.75596   |
| 12992 | P03363 | Q9Y6X3 | 0.71418   |
| 12993 | P03363 | Q9NPP4 | 0.23566   |
| 12994 | P03363 | Q68E01 | 0.57064   |
| 12995 | P03363 | P31483 | 0.63144   |
| 12996 | P03363 | Q8N8E3 | 0.38184   |



|       |        |        |          |
|-------|--------|--------|----------|
| 12997 | P03363 | Q9HB09 | 0.044835 |
| 12998 | P03363 | O76041 | 0.38624  |
| 12999 | P03363 | Q5TEC3 | 0.23615  |
| 13000 | P03363 | O14512 | 0.57066  |
| 13001 | P03363 | O15297 | 0.38496  |
| 13002 | P03363 | Q7Z6J9 | 0.31286  |
| 13003 | P03363 | Q86Y26 | 0.4314   |
| 13004 | P03363 | P11802 | 0.32709  |
| 13005 | P03363 | A8MVS1 | 0.22259  |
| 13006 | P03363 | Q8IYX7 | 0.053015 |
| 13007 | P03363 | P46013 | 0.27959  |
| 13008 | P03363 | Q9H2U1 | 0.55144  |
| 13009 | P03363 | H3BNL8 | 0.037194 |
| 13010 | P03363 | O00472 | 0.43114  |
| 13011 | P03363 | Q9NVD7 | 0.32871  |
| 13012 | P03363 | Q9UKJ3 | 0.32728  |
| 13013 | P03363 | Q9NV88 | 0.66095  |
| 13014 | P03363 | Q6IS14 | 0.26226  |
| 13015 | P03363 | Q9HB07 | 0.25151  |
| 13016 | P03363 | Q9UI46 | 0.2645   |
| 13017 | P03363 | Q9H8S9 | 0.45     |
| 13018 | P03363 | Q5HYK7 | 0.79351  |
| 13019 | P03363 | Q53GT1 | 0.19518  |
| 13020 | P03363 | Q96PT3 | 0.52563  |
| 13021 | P03363 | Q96FN9 | 0.25667  |
| 13022 | P03363 | Q6P2P2 | 0.23591  |
| 13023 | P03363 | Q6PCE3 | 0.093399 |
| 13024 | P03363 | Q99081 | 0.45032  |
| 13025 | P03363 | Q969U6 | 0.47011  |
| 13026 | P03363 | Q6P1L5 | 0.12937  |
| 13027 | P03363 | Q9H0M0 | 0.24824  |
| 13028 | P03363 | O00192 | 0.42505  |
| 13029 | P03363 | Q9HC78 | 0.31813  |
| 13030 | P03363 | Q8WXE0 | 0.26643  |
| 13031 | P03363 | Q8N5R6 | 0.53508  |
| 13032 | P03363 | O00161 | 0.58595  |
| 13033 | P03363 | Q9NY43 | 0.4782   |
| 13034 | P03363 | Q9BXH1 | 0.23261  |
| 13035 | P03363 | Q8TAU0 | 0.26483  |
| 13036 | P03363 | Q96M11 | 0.41674  |
| 13037 | P03363 | P55060 | 0.85184  |
| 13038 | P03363 | Q9NX63 | 0.71974  |
| 13039 | P03363 | P51513 | 0.27739  |
| 13040 | P03363 | Q9UKT7 | 0.61675  |
| 13041 | P03363 | P12036 | 0.42252  |
| 13042 | P03363 | P82094 | 1.054    |
| 13043 | P03363 | Q2M3X9 | 0.22259  |
| 13044 | P03363 | P15622 | 0.22259  |
| 13045 | P03363 | O43156 | 0.53508  |
| 13046 | P03363 | Q13541 | 0.62233  |
| 13047 | P03363 | Q9NP97 | 0.72876  |
| 13048 | P03363 | Q75821 | 0.70424  |
| 13049 | P03363 | Q1W6H9 | 0.36026  |
| 13050 | P03363 | Q0VG06 | 0.56075  |
| 13051 | P03363 | A4GXA9 | 0.2719   |
| 13052 | P03363 | Q86YW9 | 0.35717  |
| 13053 | P03363 | O43663 | 0.68937  |
| 13054 | P03363 | Q86YF9 | 0.37882  |
| 13055 | P03363 | Q9H501 | 0.51136  |
| 13056 | P03363 | Q96N03 | 0.53508  |
| 13057 | P03363 | P51116 | 0.75943  |
| 13058 | P03363 | Q9H009 | 0.52433  |
| 13059 | P03363 | Q7Z6B0 | 0.29865  |
| 13060 | P03363 | Q562F6 | 0.48426  |
| 13061 | P03363 | Q8IX03 | 0.7082   |
| 13062 | P03363 | Q9NP79 | 0.30348  |
| 13063 | P03363 | P22674 | 0.29314  |
| 13064 | P03363 | Q9H6Y2 | 0.49095  |
| 13065 | P03363 | Q8N5C8 | 0.21456  |
| 13066 | P03363 | O75152 | 0.42886  |
| 13067 | P03363 | O60290 | 0.30921  |
| 13068 | P03363 | Q9UKN8 | 0.45793  |
| 13069 | P03363 | Q9NS69 | 0.19479  |
| 13070 | P03363 | Q93083 | 0.15627  |
| 13071 | P03363 | Q6NVV1 | 0.32513  |
| 13072 | P03363 | Q15560 | 0.71459  |

|       |        |        |          |
|-------|--------|--------|----------|
| 13073 | P03363 | Q6W2J9 | 0.40674  |
| 13074 | P03363 | Q86VW0 | 0.35565  |
| 13075 | P03363 | Q5T1J5 | 0.034826 |
| 13076 | P03363 | Q9H2C0 | 0.80731  |
| 13077 | P03363 | Q8WZ19 | 0.23565  |
| 13078 | P03363 | Q9NRY5 | 0.065007 |
| 13079 | P03363 | Q6KB66 | 0.42225  |
| 13080 | P03363 | Q96KR7 | 0.14324  |
| 13081 | P03363 | Q14676 | 0.54093  |
| 13082 | P03363 | Q9Y6D6 | 0.44932  |
| 13083 | P03363 | Q8IWS0 | 0.22834  |
| 13084 | P03363 | Q43390 | 0.91192  |
| 13085 | P03363 | Q9ULM3 | 0.79052  |
| 13086 | P03363 | P07814 | 0.30997  |
| 13087 | P03363 | Q9BU02 | 0.19179  |
| 13088 | P03363 | P78344 | 0.44614  |
| 13089 | P03363 | Q9NPA3 | 0.34242  |
| 13090 | P03363 | Q9BQ13 | 0.21694  |
| 13091 | P03363 | Q9BUZ4 | 0.24901  |
| 13092 | P03363 | Q9BTP6 | 0.084117 |
| 13093 | P03363 | P48380 | 0.37128  |
| 13094 | P03363 | Q9H6J7 | 0.29721  |
| 13095 | P03363 | Q96KR1 | 0.58479  |
| 13096 | P03363 | Q9Y238 | 0.23377  |
| 13097 | P03363 | Q75626 | 0.36786  |
| 13098 | P03363 | Q00716 | 0.72482  |
| 13099 | P03363 | Q03701 | 0.49774  |
| 13100 | P03363 | Q8NFJ9 | 0.1645   |
| 13101 | P03363 | Q01546 | 0.75224  |
| 13102 | P03363 | P0C7X2 | 0.23615  |
| 13103 | P03363 | Q13761 | 0.70976  |
| 13104 | P03363 | Q9NZT2 | 0.26513  |
| 13105 | P03363 | P52742 | 0.26255  |
| 13106 | P03363 | Q07020 | 0.47273  |
| 13107 | P03363 | Q6ZRF7 | 0.22259  |
| 13108 | P03363 | Q9NXR1 | 0.26162  |
| 13109 | P03363 | P0C6E6 | 0.21422  |
| 13110 | P03363 | Q9BYR4 | 0.2934   |
| 13111 | P03363 | Q8N6W0 | 0.36052  |
| 13112 | P03363 | Q9Y6Y1 | 0.62874  |
| 13113 | P03363 | Q9H9D4 | 0.60224  |
| 13114 | P03363 | Q6P3V2 | 0.18593  |
| 13115 | P03363 | Q9Y248 | 0.63593  |
| 13116 | P03363 | Q2M3W8 | 0.22259  |
| 13117 | P03363 | Q5MCW4 | 0.22259  |
| 13118 | P03363 | Q9NXB0 | 0.524    |
| 13119 | P03363 | Q7Z7J5 | 0.54625  |
| 13120 | P03363 | P39023 | 0.57487  |
| 13121 | P03363 | Q15935 | 0.43658  |
| 13122 | P03363 | Q8IUC2 | 0.27762  |
| 13123 | P03363 | Q96PU4 | 0.38047  |
| 13124 | P03363 | Q95521 | 0.10142  |
| 13125 | P03363 | Q96EI5 | 0.40525  |
| 13126 | P03363 | Q96NY9 | 0.41488  |
| 13127 | P03363 | Q8WXF1 | 0.9479   |
| 13128 | P03363 | A6NFI3 | 0.22259  |
| 13129 | P03363 | Q9Y6R0 | 0.34162  |
| 13130 | P03363 | Q43298 | 0.22259  |
| 13131 | P03363 | Q01105 | 0.54131  |
| 13132 | P03363 | Q9UKC9 | 0.52838  |
| 13133 | P03363 | Q9BWM5 | 0.22259  |
| 13134 | P03363 | Q9C0D2 | 0.38184  |
| 13135 | P03363 | Q14604 | 0.25193  |
| 13136 | P03363 | Q43261 | 0.53508  |
| 13137 | P03363 | P82932 | 0.39573  |
| 13138 | P03363 | P61581 | 0.22504  |
| 13139 | P03363 | P62995 | 0.51319  |
| 13140 | P03363 | Q9NUP9 | 0.21936  |
| 13141 | P03363 | Q14493 | 0.75879  |
| 13142 | P03363 | Q14141 | 0.24031  |
| 13143 | P03363 | Q96TA1 | 0.49024  |
| 13144 | P03363 | Q8TDM0 | 0.24431  |
| 13145 | P03363 | Q95429 | 0.22725  |
| 13146 | P03363 | Q8WTP9 | 0.085053 |
| 13147 | P03363 | Q5CZC0 | 0.098446 |
| 13148 | P03363 | Q9NQ39 | 0.23375  |

|       |        |         |          |
|-------|--------|---------|----------|
| 13149 | P03363 | P23258  | 0.47001  |
| 13150 | P03363 | O00139  | 0.33072  |
| 13151 | P03363 | Q9NPC6  | 0.49541  |
| 13152 | P03363 | P0CL83  | 0.22504  |
| 13153 | P03363 | Q9BQ48  | 0.19909  |
| 13154 | P03363 | P37198  | 0.47683  |
| 13155 | P03363 | Q86TS9  | 0.31668  |
| 13156 | P03363 | Q96A00  | 0.19151  |
| 13157 | P03363 | Q8WVP5  | 0.072815 |
| 13158 | P03363 | Q93073  | 0.054582 |
| 13159 | P03363 | O43829  | 0.67709  |
| 13160 | P03363 | Q8N1W2  | 0.22259  |
| 13161 | P03363 | Q01658  | 0.67537  |
| 13162 | P03363 | Q96C86  | 0.51308  |
| 13163 | P03363 | O43255  | 0.44265  |
| 13164 | P03363 | Q8TE76  | 0.25603  |
| 13165 | P03363 | Q9BQI5  | 0.21856  |
| 13166 | P03363 | Q9UBD5  | 0.51986  |
| 13167 | P03363 | Q9BWU0  | 0.72594  |
| 13168 | P03363 | O60284  | 0.27705  |
| 13169 | P03363 | Q107X0  | 0.4314   |
| 13170 | P03363 | O15225  | 0.11203  |
| 13171 | P03363 | P51531  | 0.41063  |
| 13172 | P03363 | Q9NZM4  | 0.53508  |
| 13173 | P03363 | Q6L8H4  | 0.2934   |
| 13174 | P03363 | O95475  | 0.40942  |
| 13175 | P03363 | Q5XUX0  | 0.062023 |
| 13176 | P03363 | P30153  | 0.31477  |
| 13177 | P03363 | Q9BR61  | 0.35778  |
| 13178 | P03363 | Q9Y4B6  | 0.93214  |
| 13179 | P03363 | Q8N8J6  | 0.22259  |
| 13180 | P03363 | P60410  | 0.2934   |
| 13181 | P03363 | Q8N587  | 0.22259  |
| 13182 | P03363 | Q8TF46  | 0.33423  |
| 13183 | P03363 | P18754  | 0.72173  |
| 13184 | P03363 | Q92922  | 0.66176  |
| 13185 | P03363 | P14678  | 0.76728  |
| 13186 | P03363 | P43355  | 0.92943  |
| 13187 | P03363 | Q96JB8  | 0.22798  |
| 13188 | P03363 | Q9H329  | 0.3437   |
| 13189 | P03363 | Q8WTS6  | 0.44832  |
| 13190 | P03363 | Q9NQV6  | 0.22259  |
| 13191 | P03363 | P43359  | 0.11203  |
| 13192 | P03363 | Q96L03  | 0.27393  |
| 13193 | P03363 | Q86WJ1  | 0.48182  |
| 13194 | P03363 | Q16560  | 0.24492  |
| 13195 | P03363 | Q99719  | 0.24477  |
| 13196 | P03363 | Q96QA6  | 0.29721  |
| 13197 | P03363 | Q9NWS1  | 0.92718  |
| 13198 | P03363 | O14556  | 0.30488  |
| 13199 | P03363 | Q9P219  | 0.50754  |
| 13200 | P03363 | Q15543  | 0.74835  |
| 13201 | P03363 | O60299  | 0.3514   |
| 13202 | P03363 | Q12980  | 0.11203  |
| 13203 | P03363 | Q9UL36  | 0.23315  |
| 13204 | P03363 | Q8N1N4  | 0.77889  |
| 13205 | P03363 | P53803  | 0.098796 |
| 13206 | P03363 | P17544  | 0.80704  |
| 13207 | P03363 | Q9P2R6  | 0.64952  |
| 13208 | P03363 | P52435  | 0.49287  |
| 13209 | P03363 | Q9UBZ9  | 0.40573  |
| 13210 | P03363 | Q00577  | 0.51258  |
| 13211 | P03363 | Q9NWK9  | 0.35256  |
| 13212 | P03363 | P04264  | 0.50788  |
| 13213 | P03363 | Q6UUUV7 | 0.64653  |
| 13214 | P03363 | Q6NZ67  | 0.78554  |
| 13215 | P03363 | Q8IYI8  | 0.22259  |
| 13216 | P03363 | P30307  | 0.3953   |
| 13217 | P03363 | Q96EY1  | 0.23213  |
| 13218 | P03363 | P36639  | 0.22095  |
| 13219 | P03363 | P09630  | 0.39137  |
| 13220 | P03363 | P48553  | 0.25092  |
| 13221 | P03363 | Q96D98  | 0.22782  |
| 13222 | P03363 | P49006  | 0.078291 |
| 13223 | P03363 | P17040  | 0.38048  |
| 13224 | P03363 | Q13287  | 0.6671   |

|       |        |        |          |
|-------|--------|--------|----------|
| 13225 | P03363 | O94892 | 0.22259  |
| 13226 | P03363 | Q8TBC3 | 0.21694  |
| 13227 | P03363 | Q7Z5K2 | 0.52565  |
| 13228 | P03363 | Q2TAZ0 | 0.53508  |
| 13229 | P03363 | Q9H8H0 | 0.29721  |
| 13230 | P03363 | Q0VGE8 | 0.22259  |
| 13231 | P03363 | Q9HCE3 | 0.22259  |
| 13232 | P03363 | O60828 | 0.67652  |
| 13233 | P03363 | Q6ZS17 | 0.24431  |
| 13234 | P03363 | Q49MI3 | 0.3087   |
| 13235 | P03363 | Q9NZJ0 | 0.66204  |
| 13236 | P03363 | Q8N3F8 | 0.52874  |
| 13237 | P03363 | Q15572 | 0.45238  |
| 13238 | P03363 | Q676U5 | 0.69217  |
| 13239 | P03363 | Q96BR9 | 0.23615  |
| 13240 | P03363 | Q8N2W9 | 0.7911   |
| 13241 | P03363 | P30281 | 0.65084  |
| 13242 | P03363 | Q2KHM9 | 0.3171   |
| 13243 | P03363 | O75943 | 0.27622  |
| 13244 | P03363 | Q99811 | 0.30564  |
| 13245 | P03363 | Q05481 | 0.24904  |
| 13246 | P03363 | Q9P0W2 | 0.65997  |
| 13247 | P03363 | P26371 | 0.32636  |
| 13248 | P03363 | P62854 | 0.54204  |
| 13249 | P03363 | P35573 | 0.28017  |
| 13250 | P03363 | Q96CB8 | 0.4254   |
| 13251 | P03363 | O94874 | 0.74841  |
| 13252 | P03363 | Q86SQ7 | 0.8101   |
| 13253 | P03363 | P0CJ78 | 0.22259  |
| 13254 | P03363 | O15060 | 0.22259  |
| 13255 | P03363 | Q86W54 | 0.4211   |
| 13256 | P03363 | O95810 | 0.31677  |
| 13257 | P03363 | Q8N6I1 | 0.45159  |
| 13258 | P03363 | Q96PM9 | 0.44662  |
| 13259 | P03363 | Q7Z5L9 | 0.47747  |
| 13260 | P03363 | Q6Q759 | 0.50006  |
| 13261 | P03363 | Q68CP9 | 0.45575  |
| 13262 | P03363 | O95503 | 0.82559  |
| 13263 | P03363 | Q9BYQ4 | 0.2934   |
| 13264 | P03363 | Q8N1E6 | 0.60465  |
| 13265 | P03363 | P09661 | 0.77494  |
| 13266 | P03363 | Q9Y399 | 0.24078  |
| 13267 | P03363 | Q9Y6R9 | 0.12015  |
| 13268 | P03363 | Q96JB5 | 0.50614  |
| 13269 | P03363 | P62826 | 0.27618  |
| 13270 | P03363 | Q08211 | 0.45628  |
| 13271 | P03363 | Q6NYC8 | 0.27474  |
| 13272 | P03363 | Q8TF05 | 0.34607  |
| 13273 | P03363 | O95625 | 0.26857  |
| 13274 | P03363 | P52434 | 0.19607  |
| 13275 | P03363 | Q92800 | 0.40679  |
| 13276 | P03363 | A8MU46 | 0.29974  |
| 13277 | P03363 | P63302 | 0.19041  |
| 13278 | P03363 | O14641 | 0.32983  |
| 13279 | P03363 | P05204 | 0.58429  |
| 13280 | P03363 | Q9H9H4 | 0.075639 |
| 13281 | P03363 | Q8NHV9 | 0.31812  |
| 13282 | P03363 | O43592 | 0.46664  |
| 13283 | P03363 | Q9NS91 | 0.43031  |
| 13284 | P03363 | Q9UBC3 | 0.24345  |
| 13285 | P03363 | P52292 | 0.75293  |
| 13286 | P03363 | Q16534 | 0.35945  |
| 13287 | P03363 | Q9P2F9 | 0.22259  |
| 13288 | P03363 | O15235 | 0.62222  |
| 13289 | P03363 | Q8IVN3 | 0.24985  |
| 13290 | P03363 | Q9H1I8 | 0.22927  |
| 13291 | P03363 | P48595 | 0.33089  |
| 13292 | P03363 | P49901 | 0.093349 |
| 13293 | P03363 | P41212 | 0.87033  |
| 13294 | P03363 | Q86V20 | 0.040739 |
| 13295 | P03363 | P19429 | 0.17467  |
| 13296 | P03363 | Q96K75 | 0.22259  |
| 13297 | P03363 | Q8N1F7 | 0.3503   |
| 13298 | P03363 | Q9NRD1 | 0.38844  |
| 13299 | P03363 | Q9UI43 | 0.17834  |
| 13300 | P03363 | Q9NR12 | 0.22726  |

|       |        |        |         |
|-------|--------|--------|---------|
| 13301 | P03363 | Q9UJY5 | 0.42207 |
| 13302 | P03363 | Q9UQB3 | 0.61252 |
| 13303 | P03363 | P09017 | 0.32102 |
| 13304 | P03363 | Q9UJU5 | 0.35214 |
| 13305 | P03363 | Q9P287 | 0.62948 |
| 13306 | P03363 | Q9H9T3 | 0.52902 |
| 13307 | P03363 | O15522 | 0.29325 |
| 13308 | P03363 | Q5FWF6 | 0.22259 |
| 13309 | P03363 | Q9UJG1 | 0.39625 |
| 13310 | P03363 | Q9UFN0 | 0.77561 |
| 13311 | P03363 | Q8N7W2 | 0.53508 |
| 13312 | P03363 | O43734 | 0.30887 |
| 13313 | P03363 | P09497 | 0.42771 |
| 13314 | P03363 | Q8NF64 | 0.68096 |
| 13315 | P03363 | O43752 | 0.1242  |
| 13316 | P03363 | P39880 | 0.64442 |
| 13317 | P03363 | P62917 | 0.46425 |
| 13318 | P03363 | Q13813 | 0.29173 |
| 13319 | P03363 | Q5XKE5 | 0.65787 |
| 13320 | P03363 | Q99590 | 0.48559 |
| 13321 | P03363 | Q53H80 | 0.33522 |
| 13322 | P03363 | Q9UK73 | 0.6976  |
| 13323 | P03363 | Q7Z2W9 | 0.2119  |
| 13324 | P03363 | Q9ULD2 | 0.31132 |
| 13325 | P03363 | Q7Z794 | 0.90158 |
| 13326 | P03363 | Q9NS73 | 0.76076 |
| 13327 | P03363 | Q9H9S0 | 0.40597 |
| 13328 | P03363 | Q9ULX9 | 0.51783 |
| 13329 | P03363 | P55884 | 0.51787 |
| 13330 | P03363 | Q13137 | 0.84776 |
| 13331 | P03363 | Q9Y2B4 | 0.41006 |
| 13332 | P03363 | Q96N16 | 0.51531 |
| 13333 | P03363 | Q07687 | 0.64458 |
| 13334 | P03363 | O43715 | 0.63234 |
| 13335 | P03363 | Q0VDF9 | 0.50689 |
| 13336 | P03363 | O15042 | 0.66586 |
| 13337 | P03363 | Q96LB3 | 0.6548  |
| 13338 | P03363 | Q9UIH9 | 0.29867 |
| 13339 | P03363 | Q6P2C8 | 0.64203 |
| 13340 | P03363 | Q8IY18 | 0.31609 |
| 13341 | P03363 | O43708 | 0.31204 |
| 13342 | P03363 | O43237 | 0.24633 |
| 13343 | P03363 | Q9BT81 | 0.47576 |
| 13344 | P03363 | Q9UJT2 | 0.70814 |
| 13345 | P03363 | Q9NYW8 | 0.17268 |
| 13346 | P03363 | Q9H6S0 | 0.26854 |
| 13347 | P03363 | A6NJG6 | 0.51853 |
| 13348 | P03363 | Q92621 | 0.65948 |
| 13349 | P03363 | Q8HWS3 | 0.37777 |
| 13350 | P03363 | O95251 | 0.46651 |
| 13351 | P03363 | Q99459 | 1.0535  |
| 13352 | P03363 | Q13352 | 0.23791 |
| 13353 | P03363 | P78337 | 0.51121 |
| 13354 | P03363 | P51815 | 0.268   |
| 13355 | P03363 | Q8TD16 | 0.44017 |
| 13356 | P03363 | P15172 | 0.24598 |
| 13357 | P03363 | Q8WV99 | 0.17191 |
| 13358 | P03363 | Q7Z4H7 | 0.63714 |
| 13359 | P03363 | Q14764 | 1.0618  |
| 13360 | P03363 | Q9UID6 | 0.47546 |
| 13361 | P03363 | Q96MH2 | 0.99868 |
| 13362 | P03363 | Q96CS4 | 0.22259 |
| 13363 | P03363 | Q99666 | 0.28553 |
| 13364 | P03363 | Q3MJ62 | 0.268   |
| 13365 | P03363 | Q05516 | 0.41153 |
| 13366 | P03363 | Q5MIZ7 | 0.54637 |
| 13367 | P03363 | Q12837 | 0.51688 |
| 13368 | P03363 | A6NJL1 | 0.268   |
| 13369 | P03363 | Q96HA7 | 0.72035 |
| 13370 | P03363 | Q7Z417 | 0.87684 |
| 13371 | P03363 | Q9P2B4 | 0.50461 |
| 13372 | P03363 | O43513 | 0.79537 |
| 13373 | P03363 | Q9BUJ2 | 1.0421  |
| 13374 | P03363 | P51398 | 0.83776 |
| 13375 | P03363 | O15534 | 0.31525 |
| 13376 | P03363 | Q8WXF8 | 0.65788 |

|       |        |        |           |
|-------|--------|--------|-----------|
| 13377 | P03363 | P33240 | 0.62659   |
| 13378 | P03363 | Q16658 | 0.34407   |
| 13379 | P03363 | O75688 | 0.25599   |
| 13380 | P03363 | Q8N987 | 0.39052   |
| 13381 | P03363 | Q00765 | 0.20987   |
| 13382 | P03363 | Q3ZCX4 | 0.22259   |
| 13383 | P03363 | Q8TBZ5 | 0.22259   |
| 13384 | P03363 | Q15561 | 0.70373   |
| 13385 | P03363 | A8MSI8 | 0.12911   |
| 13386 | P03363 | Q8NFH5 | 0.26529   |
| 13387 | P03363 | O60518 | 0.9934    |
| 13388 | P03363 | A8MT65 | 0.22259   |
| 13389 | P03363 | P60953 | 0.17567   |
| 13390 | P03363 | F5GYI3 | 0.02512   |
| 13391 | P03363 | Q9Y675 | 0.24993   |
| 13392 | P03363 | Q9BVG4 | 0.11203   |
| 13393 | P03363 | Q8N9W8 | 0.49651   |
| 13394 | P03363 | Q05BV3 | 0.34776   |
| 13395 | P03363 | P50219 | 0.25404   |
| 13396 | P03363 | Q13106 | 0.24904   |
| 13397 | P03363 | Q8TDG2 | 0.29593   |
| 13398 | P03363 | Q9GZX5 | 0.61933   |
| 13399 | P03363 | A6NLF2 | 0.19772   |
| 13400 | P03363 | Q6ICB0 | 0.20296   |
| 13401 | P03363 | O00541 | 0.33864   |
| 13402 | P03363 | Q9Y5N6 | 0.54462   |
| 13403 | P03363 | Q99717 | 0.35932   |
| 13404 | P03363 | Q9BYC9 | 0.6324    |
| 13405 | P03363 | Q8TF50 | 0.22259   |
| 13406 | P03363 | P08238 | 0.28927   |
| 13407 | P03363 | O60238 | 0.14493   |
| 13408 | P03363 | Q9UBC1 | 0.55395   |
| 13409 | P03363 | Q15527 | 0.11203   |
| 13410 | P03363 | Q9H098 | 0.0016695 |
| 13411 | P03363 | Q96G25 | 0.81214   |
| 13412 | P03363 | Q9UQ35 | 0.36183   |
| 13413 | P03363 | Q5T2W1 | 0.54182   |
| 13414 | P03363 | P17038 | 0.22259   |
| 13415 | P03363 | Q99865 | 0.12371   |
| 13416 | P03363 | O96018 | 0.52835   |
| 13417 | P03363 | P0CJ79 | 0.22259   |
| 13418 | P03363 | Q5H9L4 | 0.26712   |
| 13419 | P03363 | Q6P9G9 | 0.268     |
| 13420 | P03363 | O60716 | 0.36172   |
| 13421 | P03363 | P56555 | 0.12476   |
| 13422 | P03363 | Q8N319 | 0.1747    |
| 13423 | P03363 | P25208 | 0.66066   |
| 13424 | P03363 | P43356 | 0.78388   |
| 13425 | P03363 | P53675 | 0.30447   |
| 13426 | P03363 | Q9BRT9 | 0.38324   |
| 13427 | P03363 | Q6R2W3 | 0.55123   |
| 13428 | P03363 | K7EIQ3 | 0.070921  |
| 13429 | P03363 | Q9BZE7 | 0.11203   |
| 13430 | P03363 | P48643 | 0.20189   |
| 13431 | P03363 | O00170 | 0.48148   |
| 13432 | P03363 | Q8WWL2 | 0.27306   |
| 13433 | P03363 | Q8IUD2 | 0.7241    |
| 13434 | P03363 | Q06520 | 0.27446   |
| 13435 | P03363 | Q8TBN0 | 0.4622    |
| 13436 | P03363 | O43598 | 0.26315   |
| 13437 | P03363 | Q9UPW6 | 0.65322   |
| 13438 | P03363 | O00257 | 0.84381   |
| 13439 | P03363 | Q9P2Q2 | 0.26982   |
| 13440 | P03363 | Q66K64 | 0.10575   |
| 13441 | P03363 | Q5T890 | 0.33561   |
| 13442 | P03363 | Q15047 | 0.49371   |
| 13443 | P03363 | P24666 | 0.32124   |
| 13444 | P03363 | Q15154 | 0.4928    |
| 13445 | P03363 | Q12857 | 0.38777   |
| 13446 | P03363 | Q96NI8 | 0.22259   |
| 13447 | P03363 | Q5TB80 | 0.57001   |
| 13448 | P03363 | Q96NB3 | 0.34423   |
| 13449 | P03363 | Q8TF32 | 0.22259   |
| 13450 | P03363 | Q6NSI3 | 0.22504   |
| 13451 | P03363 | Q9BXX3 | 0.49858   |
| 13452 | P03363 | Q15181 | 0.20621   |

|       |        |        |          |
|-------|--------|--------|----------|
| 13453 | P03363 | Q6ZMS7 | 0.42681  |
| 13454 | P03363 | Q9BYH8 | 0.34409  |
| 13455 | P03363 | Q9Y2T7 | 0.47616  |
| 13456 | P03363 | Q9P0T4 | 0.22259  |
| 13457 | P03363 | Q9UBD0 | 1.1447   |
| 13458 | P03363 | Q8N7H5 | 0.64243  |
| 13459 | P03363 | Q96B67 | 0.58976  |
| 13460 | P03363 | Q969F9 | 0.21578  |
| 13461 | P03363 | P46976 | 0.27747  |
| 13462 | P03363 | Q5VWQ0 | 0.22504  |
| 13463 | P03363 | Q6ZTQ3 | 0.38875  |
| 13464 | P03363 | Q9NRC8 | 0.80769  |
| 13465 | P03363 | Q8WYQ5 | 0.58753  |
| 13466 | P03363 | P60002 | 0.27176  |
| 13467 | P03363 | Q6NUP7 | 0.62814  |
| 13468 | P03363 | Q8N653 | 0.28329  |
| 13469 | P03363 | Q7L5D6 | 0.28064  |
| 13470 | P03363 | O75525 | 0.69963  |
| 13471 | P03363 | Q15643 | 0.83748  |
| 13472 | P03363 | P18124 | 0.36127  |
| 13473 | P03363 | Q9H4I2 | 0.63426  |
| 13474 | P03363 | Q9BTA9 | 0.69637  |
| 13475 | P03363 | Q58WW2 | 0.34775  |
| 13476 | P03363 | Q9NWX5 | 0.27846  |
| 13477 | P03363 | P40121 | 0.36894  |
| 13478 | P03363 | Q9H3H9 | 0.40525  |
| 13479 | P03363 | Q969S2 | 0.24863  |
| 13480 | P03363 | Q8TF74 | 0.72001  |
| 13481 | P03363 | Q9P2M7 | 0.51141  |
| 13482 | P03363 | Q8TDP1 | 0.19753  |
| 13483 | P03363 | Q8NEJ9 | 0.20394  |
| 13484 | P03363 | Q9NWB6 | 0.40525  |
| 13485 | P03363 | P51825 | 0.9464   |
| 13486 | P03363 | Q9NV06 | 0.40953  |
| 13487 | P03363 | P27986 | 0.17125  |
| 13488 | P03363 | P40429 | 0.43077  |
| 13489 | P03363 | Q96MF7 | 0.30832  |
| 13490 | P03363 | O95166 | 0.3038   |
| 13491 | P03363 | Q5H9R7 | 0.8598   |
| 13492 | P03363 | Q12926 | 0.59156  |
| 13493 | P03363 | A6NNA2 | 0.026912 |
| 13494 | P03363 | Q9NP66 | 0.87177  |
| 13495 | P03363 | Q76FK4 | 0.67725  |
| 13496 | P03363 | Q5T160 | 0.064482 |
| 13497 | P03363 | Q00536 | 0.1203   |
| 13498 | P03363 | Q32M78 | 0.22259  |
| 13499 | P03363 | Q9BV97 | 0.24352  |
| 13500 | P03363 | Q86Y97 | 0.41908  |
| 13501 | P03363 | P67775 | 0.32433  |
| 13502 | P03363 | P10589 | 0.3223   |
| 13503 | P03363 | Q92817 | 0.3367   |
| 13504 | P03363 | Q6P1X5 | 0.64855  |
| 13505 | P03363 | Q969S3 | 0.60428  |
| 13506 | P03363 | P15408 | 0.56795  |
| 13507 | P03363 | Q6RFH5 | 0.30305  |
| 13508 | P03363 | Q6IQ23 | 0.42436  |
| 13509 | P03363 | Q9Y6G5 | 0.53508  |
| 13510 | P03363 | P27635 | 0.302    |
| 13511 | P03363 | Q9H6T0 | 0.37848  |
| 13512 | P03363 | Q6QNY0 | 0.40867  |
| 13513 | P03363 | P63208 | 0.38146  |
| 13514 | P03363 | Q96E11 | 0.07112  |
| 13515 | P03363 | O15198 | 0.31421  |
| 13516 | P03363 | Q8NBZ0 | 0.87386  |
| 13517 | P03363 | Q9BWT6 | 0.28707  |
| 13518 | P03363 | P63129 | 0.098653 |
| 13519 | P03363 | Q8TBE0 | 0.7005   |
| 13520 | P03363 | P06730 | 0.42114  |
| 13521 | P03363 | P62263 | 0.25136  |
| 13522 | P03363 | Q96NL3 | 0.22259  |
| 13523 | P03363 | Q9Y473 | 0.39402  |
| 13524 | P03363 | P13056 | 0.48822  |
| 13525 | P03363 | Q8TD31 | 0.19742  |
| 13526 | P03363 | Q8NCY6 | 0.22504  |
| 13527 | P03363 | Q96A73 | 0.04356  |
| 13528 | P03363 | Q96N21 | 0.26764  |

|       |        |        |          |
|-------|--------|--------|----------|
| 13529 | P03363 | Q96FJ2 | 0.51708  |
| 13530 | P03363 | Q9BTD8 | 0.33526  |
| 13531 | P03363 | Q5SRH9 | 0.11203  |
| 13532 | P03363 | P61582 | 0.22504  |
| 13533 | P03363 | Q8WYH8 | 0.29448  |
| 13534 | P03363 | Q9GZN7 | 0.15119  |
| 13535 | P03363 | Q5VWM5 | 0.10142  |
| 13536 | P03363 | Q99594 | 0.90448  |
| 13537 | P03363 | Q14678 | 0.43592  |
| 13538 | P03363 | Q70EL1 | 0.51026  |
| 13539 | P03363 | Q8NCF5 | 0.60774  |
| 13540 | P03363 | Q9NTM9 | 0.27113  |
| 13541 | P03363 | O43324 | 0.91013  |
| 13542 | P03363 | Q17R26 | 0.24352  |
| 13543 | P03363 | Q9BWC9 | 0.22504  |
| 13544 | P03363 | Q5VWG9 | 0.55039  |
| 13545 | P03363 | Q9ULQ0 | 0.25955  |
| 13546 | P03363 | Q5PSV4 | 0.37593  |
| 13547 | P03363 | Q8IZU3 | 0.30733  |
| 13548 | P03363 | Q9Y247 | 0.22504  |
| 13549 | P03363 | Q93008 | 0.27395  |
| 13550 | P03363 | P15259 | 0.16402  |
| 13551 | P03363 | Q86XL3 | 0.25136  |
| 13552 | P03363 | Q5JSJ4 | 0.10096  |
| 13553 | P03363 | Q8TCE6 | 0.12059  |
| 13554 | P03363 | Q96LS8 | 0.006384 |
| 13555 | P03363 | Q2M2I5 | 1.0007   |
| 13556 | P03363 | Q8NEM1 | 0.27378  |
| 13557 | P03363 | Q5HYR2 | 0.22927  |
| 13558 | P03363 | Q15329 | 0.91866  |
| 13559 | P03363 | Q9H0E9 | 0.21474  |
| 13560 | P03363 | Q8IZT6 | 0.28947  |
| 13561 | P03363 | Q95149 | 0.42815  |
| 13562 | P03363 | Q9UMX3 | 0.48456  |
| 13563 | P03363 | Q9ULW6 | 0.17795  |
| 13564 | P03363 | Q9NUP1 | 0.62353  |
| 13565 | P03363 | Q99933 | 0.64344  |
| 13566 | P03363 | Q9UL49 | 0.2311   |
| 13567 | P03363 | Q99583 | 0.46421  |
| 13568 | P03363 | P55735 | 0.38237  |
| 13569 | P03363 | Q14683 | 0.28377  |
| 13570 | P03363 | Q3KNW1 | 0.23148  |
| 13571 | P03363 | Q9NPC8 | 0.30758  |
| 13572 | P03363 | Q9BYQ8 | 0.2934   |
| 13573 | P03363 | Q9NXV6 | 0.4894   |
| 13574 | P03363 | Q6MZT1 | 0.15359  |
| 13575 | P03363 | Q14203 | 0.731    |
| 13576 | P03363 | P78347 | 0.70612  |
| 13577 | P03363 | Q9UJW9 | 0.7479   |
| 13578 | P03363 | Q9H069 | 0.24431  |
| 13579 | P03363 | Q9Y5Q3 | 0.75653  |
| 13580 | P03363 | Q5T0F9 | 0.43172  |
| 13581 | P03363 | Q9UBW8 | 0.47926  |
| 13582 | P03363 | Q9Y5K6 | 0.38782  |
| 13583 | P03363 | Q8N9B5 | 0.69743  |
| 13584 | P03363 | Q13233 | 0.18382  |
| 13585 | P03363 | P04792 | 0.29143  |
| 13586 | P03363 | Q15696 | 0.55348  |
| 13587 | P03363 | Q9BVC5 | 0.065472 |
| 13588 | P03363 | Q01664 | 0.39145  |
| 13589 | P03363 | Q8IXH6 | 0.83727  |
| 13590 | P03363 | A6NP61 | 0.24431  |
| 13591 | P03363 | Q96HR8 | 0.87117  |
| 13592 | P03363 | Q8WVJ9 | 0.61395  |
| 13593 | P03363 | Q12982 | 0.40824  |
| 13594 | P03363 | Q99767 | 0.35665  |
| 13595 | P03363 | Q15006 | 0.28768  |
| 13596 | P03363 | Q99747 | 0.48069  |
| 13597 | P03363 | P52746 | 0.23615  |
| 13598 | P03363 | Q9ULX6 | 0.49591  |
| 13599 | P03363 | Q9Y5Q8 | 0.62918  |
| 13600 | P03363 | Q9BVI4 | 0.42405  |
| 13601 | P03363 | Q86SH2 | 0.12519  |
| 13602 | P03363 | O75182 | 0.84655  |
| 13603 | P03363 | Q9HCJ3 | 0.33526  |
| 13604 | P03363 | Q8IV53 | 0.22564  |



|       |        |        |          |
|-------|--------|--------|----------|
| 13605 | P03363 | A6NNA5 | 0.38788  |
| 13606 | P03363 | Q05215 | 0.26008  |
| 13607 | P03363 | P55327 | 0.42882  |
| 13608 | P03363 | Q2M2Z5 | 0.78468  |
| 13609 | P03363 | Q9UII4 | 0.39935  |
| 13610 | P03363 | A6NDB9 | 0.22055  |
| 13611 | P03363 | Q9BYE7 | 0.56246  |
| 13612 | P03363 | O43236 | 0.39301  |
| 13613 | P03363 | Q9BSJ2 | 0.9002   |
| 13614 | P03363 | Q86TP1 | 0.68082  |
| 13615 | P03363 | Q8IZL2 | 0.54669  |
| 13616 | P03363 | P47914 | 0.31082  |
| 13617 | P03363 | Q9Y2S7 | 0.25668  |
| 13618 | P03363 | Q9BRD0 | 0.11208  |
| 13619 | P03363 | P15036 | 0.82576  |
| 13620 | P03363 | Q9NPI6 | 0.74315  |
| 13621 | P03363 | Q9UII5 | 0.23615  |
| 13622 | P03363 | Q9HD26 | 0.58672  |
| 13623 | P03363 | O95833 | 0.27115  |
| 13624 | P03363 | Q15007 | 0.41824  |
| 13625 | P03363 | Q9NSN8 | 0.27961  |
| 13626 | P03363 | A6NG73 | 0.43424  |
| 13627 | P03363 | P0C2Y1 | 0.24431  |
| 13628 | P03363 | Q9Y2J2 | 0.53933  |
| 13629 | P03363 | P42166 | 0.29819  |
| 13630 | P03363 | Q5TYX0 | 0.10142  |
| 13631 | P03363 | Q9BZE0 | 0.29534  |
| 13632 | P03363 | Q8TF63 | 0.22504  |
| 13633 | P03363 | Q5VZE5 | 0.33478  |
| 13634 | P03363 | Q9UKG1 | 0.35575  |
| 13635 | P03363 | Q9Y291 | 0.32206  |
| 13636 | P03363 | Q70IA6 | 0.39271  |
| 13637 | P03363 | Q9BTV5 | 0.49632  |
| 13638 | P03363 | Q92993 | 0.41148  |
| 13639 | P03363 | P02794 | 0.33155  |
| 13640 | P03363 | P38935 | 0.36762  |
| 13641 | P03363 | P62701 | 0.31253  |
| 13642 | P03363 | P11166 | 0.2353   |
| 13643 | P03363 | Q96FA7 | 0.099667 |
| 13644 | P03363 | Q9Y6J9 | 0.6506   |
| 13645 | P03363 | Q1ED39 | 0.29721  |
| 13646 | P03363 | Q9NWD9 | 0.4314   |
| 13647 | P03363 | P0CF97 | 0.18106  |
| 13648 | P03363 | Q96B42 | 0.16939  |
| 13649 | P03363 | Q9Y2S0 | 0.19483  |
| 13650 | P03363 | Q01860 | 0.58063  |
| 13651 | P03363 | Q9Y5S9 | 0.77535  |
| 13652 | P03363 | Q6ZSQ5 | 0.60256  |
| 13653 | P03363 | Q8WWX9 | 0.38699  |
| 13654 | P03363 | O94817 | 0.6208   |
| 13655 | P03363 | Q9H074 | 0.53714  |
| 13656 | P03363 | Q8NCE0 | 0.46774  |
| 13657 | P03363 | Q9P2Y4 | 0.3932   |
| 13658 | P03363 | Q9BXJ9 | 0.61626  |
| 13659 | P03363 | Q9ULC6 | 0.13873  |
| 13660 | P03363 | Q9NSB4 | 0.62301  |
| 13661 | P03363 | Q9H5Z6 | 0.53508  |
| 13662 | P03363 | Q8N831 | 0.15989  |
| 13663 | P03363 | Q6R327 | 0.23355  |
| 13664 | P03363 | Q15003 | 0.68401  |
| 13665 | P03363 | Q5MJ07 | 0.01487  |
| 13666 | P03363 | P31275 | 0.38788  |
| 13667 | P03363 | O14813 | 0.41395  |
| 13668 | P03363 | Q9H814 | 0.37252  |
| 13669 | P03363 | Q08ER8 | 0.22259  |
| 13670 | P03363 | Q9BUL9 | 0.76681  |
| 13671 | P03363 | Q14315 | 0.39258  |
| 13672 | P03363 | P35663 | 0.22859  |
| 13673 | P03363 | Q16143 | 0.26552  |
| 13674 | P03363 | Q9BYN8 | 0.19094  |
| 13675 | P03363 | Q12824 | 0.52055  |
| 13676 | P03363 | Q8N3X6 | 0.49104  |
| 13677 | P03363 | P42771 | 0.35067  |
| 13678 | P03363 | Q53HV7 | 0.53099  |
| 13679 | P03363 | Q86TG7 | 0.69497  |
| 13680 | P03363 | Q8WVV9 | 0.63544  |

|       |        |        |          |
|-------|--------|--------|----------|
| 13681 | P03363 | Q9BV73 | 0.55748  |
| 13682 | P03363 | Q03060 | 0.46404  |
| 13683 | P03363 | Q4V348 | 0.22259  |
| 13684 | P03363 | Q9UJL9 | 0.24904  |
| 13685 | P03363 | Q9Y5L5 | 0.10386  |
| 13686 | P03363 | Q14627 | 0.33705  |
| 13687 | P03363 | Q86X55 | 0.33071  |
| 13688 | P03363 | Q96FS4 | 0.22821  |
| 13689 | P03363 | Q9H3U1 | 0.24425  |
| 13690 | P03363 | Q94855 | 0.1923   |
| 13691 | P03363 | Q8IZH2 | 0.27258  |
| 13692 | P03363 | Q9BSK0 | 0.051703 |
| 13693 | P03363 | P38432 | 0.63626  |
| 13694 | P03363 | Q9BQ70 | 1.0964   |
| 13695 | P03363 | Q49A33 | 0.22259  |
| 13696 | P03363 | P23297 | 0.54214  |
| 13697 | P03363 | Q9NV72 | 0.22259  |
| 13698 | P03363 | Q8WUX9 | 0.51119  |
| 13699 | P03363 | Q96N38 | 0.22259  |
| 13700 | P03363 | Q15942 | 0.3202   |
| 13701 | P03363 | Q9H469 | 0.51687  |
| 13702 | P03363 | Q9BXG8 | 0.62874  |
| 13703 | P03363 | Q6PJ61 | 0.53508  |
| 13704 | P03363 | Q5T749 | 0.24431  |
| 13705 | P03363 | Q96LM1 | 0.029897 |
| 13706 | P03363 | O00291 | 0.47405  |
| 13707 | P03363 | Q658K8 | 0.10602  |
| 13708 | P03363 | Q06730 | 0.24904  |
| 13709 | P03363 | O60516 | 0.41516  |
| 13710 | P03363 | Q15276 | 0.23226  |
| 13711 | P03363 | Q9UIE0 | 0.22259  |
| 13712 | P03363 | Q14151 | 0.98254  |
| 13713 | P03363 | Q03052 | 0.38455  |
| 13714 | P03363 | Q693B1 | 0.21411  |
| 13715 | P03363 | Q7Z7E8 | 0.2603   |
| 13716 | P03363 | Q9H8G1 | 0.22259  |
| 13717 | P03363 | Q9H944 | 0.81188  |
| 13718 | P03363 | O15145 | 0.51674  |
| 13719 | P03363 | Q99551 | 0.53453  |
| 13720 | P03363 | Q14153 | 0.11203  |
| 13721 | P03363 | O14576 | 0.54499  |
| 13722 | P03363 | O60711 | 0.34167  |
| 13723 | P03363 | Q9NQR4 | 0.29079  |
| 13724 | P03363 | Q12996 | 0.35346  |
| 13725 | P03363 | Q9H1Y0 | 0.43753  |
| 13726 | P03363 | Q92905 | 0.44644  |
| 13727 | P03363 | Q8N1A0 | 0.68396  |
| 13728 | P03363 | P58107 | 0.4029   |
| 13729 | P03363 | Q02446 | 0.22685  |
| 13730 | P03363 | Q10567 | 0.4047   |
| 13731 | P03363 | Q96MP8 | 0.25324  |
| 13732 | P03363 | Q9H1B4 | 0.60402  |
| 13733 | P03363 | Q9BW27 | 0.45035  |
| 13734 | P03363 | Q8NEM0 | 0.31179  |
| 13735 | P03363 | Q9Y6F1 | 0.37163  |
| 13736 | P03363 | Q9UJW8 | 0.22259  |
| 13737 | P03363 | Q9NQC8 | 0.33416  |
| 13738 | P03363 | Q2TAY7 | 0.4314   |
| 13739 | P03363 | O75419 | 0.66883  |
| 13740 | P03363 | O43257 | 0.412    |
| 13741 | P03363 | P68104 | 0.66236  |
| 13742 | P03363 | Q5H9F3 | 0.49766  |
| 13743 | P03363 | Q9H2H8 | 0.54488  |
| 13744 | P03363 | Q5VYK3 | 0.14949  |
| 13745 | P03363 | Q9BX26 | 0.31127  |
| 13746 | P03363 | Q9Y573 | 0.23634  |
| 13747 | P03363 | Q12840 | 0.53918  |
| 13748 | P03363 | O95190 | 0.14608  |
| 13749 | P03363 | Q8TC44 | 0.27533  |
| 13750 | P03363 | Q9BWG6 | 0.20839  |
| 13751 | P03363 | Q9UIA9 | 0.52563  |
| 13752 | P03363 | O14628 | 0.22259  |
| 13753 | P03363 | O43251 | 0.6143   |
| 13754 | P03363 | Q8NBF1 | 0.35396  |
| 13755 | P03363 | Q6P4R8 | 0.84298  |
| 13756 | P03363 | Q15061 | 0.29721  |

|       |        |        |           |
|-------|--------|--------|-----------|
| 13757 | P03363 | A6NN14 | 0.22259   |
| 13758 | P03363 | O14503 | 0.6052    |
| 13759 | P03363 | A5PL33 | 0.11203   |
| 13760 | P03363 | A8MUQ0 | 0.01942   |
| 13761 | P03363 | Q8TD47 | 0.25149   |
| 13762 | P03363 | Q9UNP9 | 0.70716   |
| 13763 | P03363 | Q96FW1 | 0.23208   |
| 13764 | P03363 | O14686 | 0.29541   |
| 13765 | P03363 | Q10587 | 0.47884   |
| 13766 | P03363 | Q96MN5 | 0.24232   |
| 13767 | P03363 | O75528 | 0.46046   |
| 13768 | P03363 | Q9NZM5 | 0.16103   |
| 13769 | P03363 | Q8WW24 | 0.33022   |
| 13770 | P03363 | P11142 | 0.27299   |
| 13771 | P03363 | P55854 | 0.68874   |
| 13772 | P03363 | Q9NRY2 | 0.69845   |
| 13773 | P03363 | Q9HBU1 | 0.2298    |
| 13774 | P03363 | Q13465 | 0.29551   |
| 13775 | P03363 | P58557 | 0.086474  |
| 13776 | P03363 | A6NJ46 | 0.49158   |
| 13777 | P03363 | Q68DY1 | 0.22259   |
| 13778 | P03363 | Q12888 | 0.56502   |
| 13779 | P03363 | Q15906 | 0.86005   |
| 13780 | P03363 | Q9BYD6 | 0.20041   |
| 13781 | P03363 | Q8IXT5 | 0.42442   |
| 13782 | P03363 | Q92585 | 0.6335    |
| 13783 | P03363 | P10243 | 0.44683   |
| 13784 | P03363 | P61573 | 0.55152   |
| 13785 | P03363 | Q92698 | 0.42      |
| 13786 | P03363 | P07737 | 0.67822   |
| 13787 | P03363 | O14639 | 0.5245    |
| 13788 | P03363 | Q96CW6 | 0.52433   |
| 13789 | P03363 | Q13278 | 0.018951  |
| 13790 | P03363 | Q13094 | 0.6011    |
| 13791 | P03363 | O75822 | 0.68795   |
| 13792 | P03363 | Q49AG3 | 0.13635   |
| 13793 | P03363 | Q5T447 | 0.513     |
| 13794 | P03363 | P22670 | 0.77823   |
| 13795 | P03363 | Q99873 | 0.54284   |
| 13796 | P03363 | Q86TJ2 | 0.28524   |
| 13797 | P03363 | Q96B01 | 0.64218   |
| 13798 | P03363 | Q9NX40 | 0.4412    |
| 13799 | P03363 | Q9NNW5 | 0.60619   |
| 13800 | P03363 | Q8WXE1 | 0.65448   |
| 13801 | P03363 | Q12815 | 0.63398   |
| 13802 | P03363 | Q7Z3V5 | 0.22259   |
| 13803 | P03363 | Q9Y222 | 0.81976   |
| 13804 | P03363 | O75177 | 0.032636  |
| 13805 | P03363 | P61576 | 0.55152   |
| 13806 | P03363 | Q8N7Q3 | 0.22259   |
| 13807 | P03363 | A8MT69 | 0.46399   |
| 13808 | P03363 | Q96CN9 | 0.50545   |
| 13809 | P03363 | O43791 | 0.75806   |
| 13810 | P03363 | Q9BZJ0 | 0.48014   |
| 13811 | P03363 | O95789 | 0.12425   |
| 13812 | P03363 | Q8TBZ8 | 0.22259   |
| 13813 | P03363 | Q15555 | 0.33478   |
| 13814 | P03363 | P61604 | 0.62214   |
| 13815 | P03363 | Q96JE9 | 0.39761   |
| 13816 | P03363 | O75494 | 0.79425   |
| 13817 | P03363 | Q15650 | 0.39446   |
| 13818 | P03363 | P10073 | 0.25836   |
| 13819 | P03363 | Q8WY54 | 0.56992   |
| 13820 | P03363 | Q8NF99 | 0.43055   |
| 13821 | P03363 | Q13515 | 0.70788   |
| 13822 | P03363 | Q14135 | 0.40525   |
| 13823 | P03363 | O75290 | 0.22259   |
| 13824 | P03363 | Q9HD42 | 0.61978   |
| 13825 | P03363 | A0AVT1 | 0.41251   |
| 13826 | P03363 | Q96E09 | 0.0041725 |
| 13827 | P03363 | Q9BRA0 | 0.4314    |
| 13828 | P03363 | Q7Z5D8 | 0.55275   |
| 13829 | P03363 | Q15038 | 0.92781   |
| 13830 | P03363 | P62269 | 0.46744   |
| 13831 | P03363 | A1L190 | 0.16621   |
| 13832 | P03363 | Q3YEC7 | 0.38317   |

|       |        |        |          |
|-------|--------|--------|----------|
| 13833 | P03363 | Q15102 | 0.38322  |
| 13834 | P03363 | Q9Y315 | 0.09767  |
| 13835 | P03363 | Q9NRX1 | 0.29739  |
| 13836 | P03363 | Q04743 | 0.49367  |
| 13837 | P03363 | B2RD01 | 0.27018  |
| 13838 | P03363 | Q6IEG0 | 0.45402  |
| 13839 | P03363 | A8MX34 | 0.27762  |
| 13840 | P03363 | Q9Y2G4 | 0.37246  |
| 13841 | P03363 | Q6ZUV0 | 0.2016   |
| 13842 | P03363 | Q9HD34 | 0.21533  |
| 13843 | P03363 | O75569 | 0.29179  |
| 13844 | P03363 | Q9Y421 | 0.33514  |
| 13845 | P03363 | Q9NQ94 | 0.38656  |
| 13846 | P03363 | P51610 | 0.42671  |
| 13847 | P03363 | P67809 | 0.67419  |
| 13848 | P03363 | P10916 | 0.28796  |
| 13849 | P03363 | P05937 | 0.3385   |
| 13850 | P03363 | Q9NUK0 | 0.21542  |
| 13851 | P03363 | O15511 | 0.55333  |
| 13852 | P03363 | O14595 | 0.15746  |
| 13853 | P03363 | A1L443 | 0.051971 |
| 13854 | P03363 | Q8NA31 | 0.23109  |
| 13855 | P03363 | Q8IU60 | 0.58358  |
| 13856 | P03363 | Q96DI7 | 0.8044   |
| 13857 | P03363 | Q9BUN5 | 0.55913  |
| 13858 | P03363 | Q69YN4 | 0.274    |
| 13859 | P03363 | O94776 | 0.69857  |
| 13860 | P03363 | Q04695 | 0.93272  |
| 13861 | P03363 | Q9NR83 | 0.42101  |
| 13862 | P03363 | Q86YC2 | 0.65618  |
| 13863 | P03363 | Q8N9W5 | 0.23743  |
| 13864 | P03363 | O15535 | 0.268    |
| 13865 | P03363 | Q6ZT77 | 0.22259  |
| 13866 | P03363 | Q9NZH4 | 0.32962  |
| 13867 | P03363 | Q9Y5A7 | 0.71597  |
| 13868 | P03363 | Q9NY74 | 0.49651  |
| 13869 | P03363 | A8MWA4 | 0.22259  |
| 13870 | P03363 | Q13098 | 0.34641  |
| 13871 | P03363 | O15397 | 0.86251  |
| 13872 | P03363 | Q96AX9 | 0.33828  |
| 13873 | P03363 | Q9UPT5 | 0.54118  |
| 13874 | P03363 | O43719 | 0.32426  |
| 13875 | P03363 | Q8N3C0 | 0.47575  |
| 13876 | P03363 | Q96KN7 | 0.27379  |
| 13877 | P03363 | Q9P2A4 | 0.45594  |
| 13878 | P03363 | O75467 | 0.22259  |
| 13879 | P03363 | Q13424 | 0.40247  |
| 13880 | P03363 | Q13542 | 0.40792  |
| 13881 | P03363 | Q13166 | 0.11203  |
| 13882 | P03363 | Q6PJT7 | 0.83465  |
| 13883 | P03363 | Q96QF0 | 0.65358  |
| 13884 | P03363 | O15160 | 0.18179  |
| 13885 | P03363 | Q9UHD9 | 0.78869  |
| 13886 | P03363 | Q9H0H3 | 0.24431  |
| 13887 | P03363 | P52747 | 0.6445   |
| 13888 | P03363 | Q9NP77 | 0.43424  |
| 13889 | P03363 | Q9Y221 | 0.73071  |
| 13890 | P03363 | P56181 | 0.13823  |
| 13891 | P03363 | O75928 | 0.45276  |
| 13892 | P03363 | O60508 | 0.49788  |
| 13893 | P03363 | P68036 | 0.57691  |
| 13894 | P03363 | Q6PD62 | 0.54878  |
| 13895 | P03363 | Q8TAP9 | 1.0723   |
| 13896 | P03363 | P28324 | 1.2136   |
| 13897 | P03363 | Q8N344 | 0.56356  |
| 13898 | P03363 | Q13118 | 0.42794  |
| 13899 | P03363 | Q8N8A2 | 0.53508  |
| 13900 | P03363 | Q96SQ5 | 0.22259  |
| 13901 | P03363 | Q9UH99 | 0.20414  |
| 13902 | P03363 | P60371 | 0.2934   |
| 13903 | P03363 | P23511 | 0.96171  |
| 13904 | P03363 | Q6UB98 | 0.49651  |
| 13905 | P03363 | P17035 | 0.22259  |
| 13906 | P03363 | P49368 | 0.35114  |
| 13907 | P03363 | Q68DX3 | 0.5469   |
| 13908 | P03363 | Q96AA8 | 0.096513 |

|       |        |        |          |
|-------|--------|--------|----------|
| 13909 | P03363 | Q96CW1 | 0.27956  |
| 13910 | P03363 | Q9BTT0 | 0.40587  |
| 13911 | P03363 | O60216 | 0.41548  |
| 13912 | P03363 | Q09161 | 0.59112  |
| 13913 | P03363 | Q6UVJ0 | 0.79883  |
| 13914 | P03363 | Q8WUU5 | 0.28924  |
| 13915 | P03363 | O43502 | 0.36889  |
| 13916 | P03363 | Q96MW7 | 0.40039  |
| 13917 | P03363 | O95831 | 0.47278  |
| 13918 | P03363 | Q15833 | 0.33681  |
| 13919 | P03363 | Q6W0C5 | 0.2477   |
| 13920 | P03363 | Q8TDN6 | 0.34102  |
| 13921 | P03363 | Q8TED0 | 0.44861  |
| 13922 | P03363 | O43299 | 0.98559  |
| 13923 | P03363 | O75665 | 0.58954  |
| 13924 | P03363 | Q8N7J2 | 0.12705  |
| 13925 | P03363 | Q8N0Y2 | 0.268    |
| 13926 | P03363 | Q6TAR4 | 0.16157  |
| 13927 | P03363 | Q05BW5 | 0.39755  |
| 13928 | P03363 | Q8N4W9 | 0.22259  |
| 13929 | P03363 | P46783 | 0.85675  |
| 13930 | P03363 | A6NM28 | 0.22259  |
| 13931 | P03363 | Q99689 | 0.26142  |
| 13932 | P03363 | Q96CW5 | 0.76847  |
| 13933 | P03363 | Q92785 | 0.4411   |
| 13934 | P03363 | Q69YQ0 | 0.39803  |
| 13935 | P03363 | Q9P016 | 0.22504  |
| 13936 | P03363 | Q9UBB5 | 0.89944  |
| 13937 | P03363 | Q02577 | 0.63356  |
| 13938 | P03363 | Q96G03 | 0.10754  |
| 13939 | P03363 | Q96BD6 | 0.27846  |
| 13940 | P03363 | Q92754 | 0.44511  |
| 13941 | P03363 | A6NHQ2 | 0.35733  |
| 13942 | P03363 | Q9NWU2 | 0.22504  |
| 13943 | P03363 | Q7RTU3 | 0.43142  |
| 13944 | P03363 | A6NFD8 | 0.35123  |
| 13945 | P03363 | Q3LI63 | 0.27762  |
| 13946 | P03363 | Q9UI15 | 0.25602  |
| 13947 | P03363 | Q9UIS9 | 0.51842  |
| 13948 | P03363 | Q16594 | 0.40905  |
| 13949 | P03363 | Q15319 | 0.31465  |
| 13950 | P03363 | Q6VUC0 | 0.53054  |
| 13951 | P03363 | Q96SN8 | 0.39128  |
| 13952 | P03363 | Q8N9N8 | 0.22978  |
| 13953 | P03363 | Q6PK81 | 0.22259  |
| 13954 | P03363 | Q08AD1 | 0.83885  |
| 13955 | P03363 | Q9C0H9 | 0.20957  |
| 13956 | P03363 | Q8IVT2 | 0.030013 |
| 13957 | P03363 | Q9GZY8 | 0.22099  |
| 13958 | P03363 | Q3KQU3 | 0.30182  |
| 13959 | P03363 | Q99613 | 0.68795  |
| 13960 | P03363 | Q8TEL6 | 0.58519  |
| 13961 | P03363 | Q9BSC4 | 0.29721  |
| 13962 | P03363 | Q13401 | 0.26537  |
| 13963 | P03363 | Q86VM9 | 0.20896  |
| 13964 | P03363 | Q9H5Q4 | 0.073178 |
| 13965 | P03363 | Q04637 | 0.463    |
| 13966 | P03363 | Q9H1J1 | 0.53477  |
| 13967 | P03363 | Q9H5J8 | 0.8985   |
| 13968 | P03363 | Q6PI98 | 0.43091  |
| 13969 | P03363 | Q9UFB7 | 0.22259  |
| 13970 | P03363 | Q9HAZ2 | 0.32234  |
| 13971 | P03363 | O00303 | 0.36721  |
| 13972 | P03363 | Q9UQC2 | 0.31148  |
| 13973 | P03363 | Q9BXD5 | 0.11131  |
| 13974 | P03363 | O15315 | 0.35572  |
| 13975 | P03363 | Q9H9H5 | 0.27265  |
| 13976 | P03363 | P01100 | 0.31771  |
| 13977 | P03363 | Q96H86 | 0.22259  |
| 13978 | P03363 | Q96M61 | 0.53508  |
| 13979 | P03363 | Q9UGC7 | 0.24702  |
| 13980 | P03363 | P52294 | 0.72787  |
| 13981 | P03363 | Q8TA94 | 0.22259  |
| 13982 | P03363 | Q5JVG8 | 0.27378  |
| 13983 | P03363 | Q9UBX0 | 0.35667  |
| 13984 | P03363 | Q5TA45 | 0.40402  |

|       |        |        |          |
|-------|--------|--------|----------|
| 13985 | P03363 | Q03938 | 0.25023  |
| 13986 | P03363 | P42285 | 0.40028  |
| 13987 | P03363 | Q7RTT6 | 0.39008  |
| 13988 | P03363 | O15234 | 0.73699  |
| 13989 | P03363 | O14757 | 0.30829  |
| 13990 | P03363 | Q6P1L8 | 0.33395  |
| 13991 | P03363 | Q16600 | 0.25101  |
| 13992 | P03363 | O43913 | 0.40629  |
| 13993 | P03363 | Q9H2A3 | 0.29962  |
| 13994 | P03363 | Q15032 | 0.18106  |
| 13995 | P03363 | Q8IXT1 | 0.32208  |
| 13996 | P03363 | O00534 | 0.29721  |
| 13997 | P03363 | Q8N137 | 0.77238  |
| 13998 | P03363 | Q9Y314 | 0.80886  |
| 13999 | P03363 | P49640 | 0.5343   |
| 14000 | P03363 | P53370 | 0.42069  |
| 14001 | P03363 | Q8N8U2 | 0.57152  |
| 14002 | P03363 | Q86TU6 | 0.04981  |
| 14003 | P03363 | Q8N812 | 0.025469 |
| 14004 | P03363 | Q9NX95 | 0.41379  |
| 14005 | P03363 | Q12816 | 0.48215  |
| 14006 | P03363 | Q8N960 | 0.23757  |
| 14007 | P03363 | Q15819 | 0.6248   |
| 14008 | P03363 | Q5T5Y3 | 0.4097   |
| 14009 | P03363 | Q9UPM8 | 0.32323  |
| 14010 | P03363 | Q14192 | 0.27255  |
| 14011 | P03363 | Q6DKI1 | 0.23375  |
| 14012 | P03363 | Q96CF2 | 0.26785  |
| 14013 | P03363 | Q6QHK4 | 0.29768  |
| 14014 | P03363 | Q4G0F5 | 0.27629  |
| 14015 | P03363 | P11161 | 0.36896  |
| 14016 | P03363 | Q96Q35 | 0.27491  |
| 14017 | P03363 | Q8NDT2 | 0.75825  |
| 14018 | P03363 | P53990 | 0.54448  |
| 14019 | P03363 | Q8N3Y1 | 0.45445  |
| 14020 | P03363 | Q9BYQ5 | 0.2934   |
| 14021 | P03363 | Q9Y2P7 | 0.52009  |
| 14022 | P03363 | O00482 | 0.26447  |
| 14023 | P03363 | Q8TDQ7 | 0.22167  |
| 14024 | P03363 | A5D8V6 | 0.20881  |
| 14025 | P03363 | Q5SW79 | 0.87339  |
| 14026 | P03363 | P52756 | 0.39924  |
| 14027 | P03363 | Q9BRP4 | 0.5264   |
| 14028 | P03363 | Q9Y281 | 0.73075  |
| 14029 | P03363 | Q9BXY8 | 0.40665  |
| 14030 | P03363 | Q9UJC3 | 0.40039  |
| 14031 | P03363 | P05813 | 0.31329  |
| 14032 | P03363 | Q53GL7 | 0.53012  |
| 14033 | P03363 | Q9H7R5 | 0.22259  |
| 14034 | P03363 | Q02078 | 0.30521  |
| 14035 | P03363 | Q96JB2 | 0.60271  |
| 14036 | P03363 | Q9Y3C7 | 0.71555  |
| 14037 | P03410 | Q3ZCQ2 | 1.6653   |
| 14038 | P03410 | Q9BRP7 | 0.43532  |
| 14039 | P03410 | Q96RL1 | 0.7601   |
| 14040 | P03410 | Q6MZT1 | 1.5766   |
| 14041 | P03410 | Q9NSD4 | 0.79187  |
| 14042 | P03410 | Q32P41 | 0.44444  |
| 14043 | P03410 | O60711 | 0.52089  |
| 14044 | P03410 | Q8N9H9 | 1.6653   |
| 14045 | P03410 | Q6ZUU3 | 1.6653   |
| 14046 | P03410 | P78358 | 1.6157   |
| 14047 | P03410 | Q92546 | 1.6713   |
| 14048 | P03410 | Q3B820 | 1.4264   |
| 14049 | P03410 | Q9UDY4 | 0.90548  |
| 14050 | P03410 | Q96LL4 | 1.4883   |
| 14051 | P03410 | Q15650 | 0.72057  |
| 14052 | P03410 | Q96EG3 | 0.56657  |
| 14053 | P03410 | Q86UW9 | 0.72009  |
| 14054 | P03410 | Q96MF0 | 0.35216  |
| 14055 | P03410 | Q9HAW0 | 0.52152  |
| 14056 | P03410 | P84022 | 0.84973  |
| 14057 | P03410 | Q8WVR3 | 1.4883   |
| 14058 | P03410 | A6NL05 | 0.85205  |
| 14059 | P03410 | Q92830 | 0.77857  |
| 14060 | P03410 | Q8N4H5 | 1.2194   |

|       |        |         |         |
|-------|--------|---------|---------|
| 14061 | P03410 | Q9Y2P7  | 0.77238 |
| 14062 | P03410 | Q96QF7  | 0.6088  |
| 14063 | P03410 | Q8N3J3  | 0.76134 |
| 14064 | P03410 | Q96AJ1  | 1.9234  |
| 14065 | P03410 | Q9H354  | 1.4411  |
| 14066 | P03410 | Q96LI5  | 0.5418  |
| 14067 | P03410 | Q14202  | 0.91496 |
| 14068 | P03410 | O15511  | 0.55592 |
| 14069 | P03410 | Q03188  | 0.93611 |
| 14070 | P03410 | P15559  | 0.1864  |
| 14071 | P03410 | O75192  | 1.0406  |
| 14072 | P03410 | Q8WUQ7  | 0.13247 |
| 14073 | P03410 | Q400G9  | 0.81031 |
| 14074 | P03410 | Q8N9Q2  | 0.6018  |
| 14075 | P03410 | O75505  | 0.2823  |
| 14076 | P03410 | P30039  | 0.44555 |
| 14077 | P03410 | Q99567  | 0.90084 |
| 14078 | P03410 | O60287  | 1.892   |
| 14079 | P03410 | Q9BWH6  | 0.97135 |
| 14080 | P03410 | Q8N3F0  | 1.0259  |
| 14081 | P03410 | Q14687  | 0.6999  |
| 14082 | P03410 | Q96LI6  | 0.39336 |
| 14083 | P03410 | Q9HCG1  | 0.80974 |
| 14084 | P03410 | A1L3X0  | 0.86335 |
| 14085 | P03410 | Q00610  | 1.0178  |
| 14086 | P03410 | Q9UJT2  | 1.6197  |
| 14087 | P03410 | Q8WV99  | 0.55966 |
| 14088 | P03410 | Q9Y305  | 1.2495  |
| 14089 | P03410 | Q96AQ6  | 1.3301  |
| 14090 | P03410 | P0C875  | 0.11805 |
| 14091 | P03410 | Q9BVN2  | 0.83898 |
| 14092 | P03410 | Q6PD74  | 0.85503 |
| 14093 | P03410 | Q9H3H9  | 1.2936  |
| 14094 | P03410 | P54803  | 0.37394 |
| 14095 | P03410 | Q7RTT6  | 0.78181 |
| 14096 | P03410 | Q99594  | 1.0689  |
| 14097 | P03410 | Q9UKT4  | 1.0387  |
| 14098 | P03410 | Q8I WV8 | 0.3815  |
| 14099 | P03410 | Q96NI8  | 0.94589 |
| 14100 | P03410 | Q9BY65  | 0.88539 |
| 14101 | P03410 | Q99700  | 0.94016 |
| 14102 | P03410 | O14813  | 0.33989 |
| 14103 | P03410 | Q9P1A6  | 0.54979 |
| 14104 | P03410 | P69849  | 0.63371 |
| 14105 | P03410 | Q6IED9  | 0.27727 |
| 14106 | P03410 | Q9BS18  | 1.1327  |
| 14107 | P03410 | Q8TDI8  | 0.66146 |
| 14108 | P03410 | P26447  | 0.48591 |
| 14109 | P03410 | Q96M02  | 0.57832 |
| 14110 | P03410 | A8K8V0  | 0.7107  |
| 14111 | P03410 | Q96HP8  | 1.616   |
| 14112 | P03410 | Q6AW86  | 0.67458 |
| 14113 | P03410 | Q7L8W6  | 0.8348  |
| 14114 | P03410 | Q9HC07  | 0.48975 |
| 14115 | P03410 | Q08AI8  | 1.4883  |
| 14116 | P03410 | Q9BRT3  | 0.40927 |
| 14117 | P03410 | Q9Y6G9  | 0.26727 |
| 14118 | P03410 | P78385  | 0.88374 |
| 14119 | P03410 | Q9NQG5  | 1.1818  |
| 14120 | P03410 | Q5CZA5  | 0.89343 |
| 14121 | P03410 | O14786  | 0.11616 |
| 14122 | P03410 | A6NH Y6 | 0.74904 |
| 14123 | P03410 | Q2M3D2  | 0.40336 |
| 14124 | P03410 | Q71F56  | 0.48253 |
| 14125 | P03410 | P83876  | 1.0688  |
| 14126 | P03410 | Q2KHR2  | 0.38817 |
| 14127 | P03410 | Q14397  | 0.74379 |
| 14128 | P03410 | P49750  | 0.96915 |
| 14129 | P03410 | Q9H4K7  | 0.98316 |
| 14130 | P03410 | O95684  | 1.0561  |
| 14131 | P03410 | Q9H0Y0  | 0.25541 |
| 14132 | P03410 | Q30KP8  | 0.98563 |
| 14133 | P03410 | Q9NQG7  | 0.49866 |
| 14134 | P03410 | P57086  | 0.6523  |
| 14135 | P03410 | Q9H0M5  | 0.6829  |
| 14136 | P03410 | P13645  | 0.96632 |

|       |        |        |         |
|-------|--------|--------|---------|
| 14137 | P03410 | Q86UP9 | 1.2023  |
| 14138 | P03410 | Q0PNE2 | 0.86985 |
| 14139 | P03410 | Q99933 | 0.93393 |
| 14140 | P03410 | O75648 | 0.97394 |
| 14141 | P03410 | Q9BVC5 | 1.1526  |
| 14142 | P03410 | Q8IXH6 | 1.2066  |
| 14143 | P03410 | Q99743 | 0.23397 |
| 14144 | P03410 | Q8TAG6 | 0.89222 |
| 14145 | P03410 | Q92540 | 1.0004  |
| 14146 | P03410 | Q3KRA9 | 0.54924 |
| 14147 | P03410 | Q92831 | 0.90658 |
| 14148 | P03410 | Q96BY7 | 0.32852 |
| 14149 | P03410 | Q7L592 | 0.81526 |
| 14150 | P03410 | Q96LZ7 | 0.22565 |
| 14151 | P03410 | Q9BZZ5 | 0.52042 |
| 14152 | P03410 | Q13838 | 0.63849 |
| 14153 | P03410 | Q00613 | 0.78473 |
| 14154 | P03410 | P20749 | 0.27142 |
| 14155 | P03410 | Q96M15 | 0.34492 |
| 14156 | P03410 | Q8NC96 | 0.78505 |
| 14157 | P03410 | Q96M11 | 1.85    |
| 14158 | P03410 | Q8IV20 | 0.79056 |
| 14159 | P03410 | Q9Y2Q9 | 1.0797  |
| 14160 | P03410 | Q9Y2W6 | 0.27425 |
| 14161 | P03410 | A6NGH7 | 0.72994 |
| 14162 | P03410 | Q9Y5J3 | 0.22822 |
| 14163 | P03410 | Q8NHY2 | 0.96889 |
| 14164 | P03410 | Q9BQK8 | 0.18871 |
| 14165 | P03410 | Q5JTH9 | 0.68261 |
| 14166 | P03410 | O95168 | 0.42389 |
| 14167 | P03410 | Q8WTT2 | 0.52183 |
| 14168 | P03410 | Q9BWE0 | 0.43787 |
| 14169 | P03410 | Q9UKV0 | 0.38319 |
| 14170 | P03410 | Q9NUP1 | 0.88781 |
| 14171 | P03410 | P09496 | 0.37863 |
| 14172 | P03410 | Q8WV41 | 0.52619 |
| 14173 | P03410 | Q99848 | 0.59147 |
| 14174 | P03410 | Q9NQ90 | 0.73338 |
| 14175 | P03410 | Q8IVS8 | 0.14558 |
| 14176 | P03410 | Q9UHF7 | 0.45683 |
| 14177 | P03410 | Q9UBW5 | 0.83836 |
| 14178 | P03410 | Q14CM0 | 0.30418 |
| 14179 | P03410 | Q86VV8 | 0.87395 |
| 14180 | P03410 | Q8IX90 | 0.89034 |
| 14181 | P03410 | P62258 | 1.0163  |
| 14182 | P03410 | Q68DN1 | 0.89246 |
| 14183 | P03410 | Q96FW1 | 0.13782 |
| 14184 | P03410 | O75665 | 0.97716 |
| 14185 | P03410 | Q53S58 | 1.0913  |
| 14186 | P03410 | Q9Y2M2 | 0.78525 |
| 14187 | P03410 | Q9BSM1 | 0.99002 |
| 14188 | P03410 | P40426 | 0.2953  |
| 14189 | P03410 | Q4G163 | 0.19124 |
| 14190 | P03410 | Q96QT6 | 0.92188 |
| 14191 | P03410 | Q15726 | 0.52888 |
| 14192 | P03410 | Q8N377 | 1.6653  |
| 14193 | P03410 | Q5SNT6 | 1.3129  |
| 14194 | P03410 | Q7Z460 | 0.57658 |
| 14195 | P03410 | Q9HC24 | 0.23142 |
| 14196 | P03410 | Q8NBC4 | 1.6653  |
| 14197 | P03410 | P0DI82 | 0.51688 |
| 14198 | P03410 | Q92562 | 0.53453 |
| 14199 | P03410 | Q04206 | 0.8605  |
| 14200 | P03410 | O60583 | 1.2158  |
| 14201 | P03410 | A8K554 | 0.29261 |
| 14202 | P03410 | Q9Y2W1 | 1.0862  |
| 14203 | P03410 | Q13536 | 1.6653  |
| 14204 | P03410 | Q08945 | 1.0479  |
| 14205 | P03410 | Q9NXF1 | 0.3416  |
| 14206 | P03410 | O43674 | 0.84059 |
| 14207 | P03410 | P08048 | 0.32429 |
| 14208 | P03410 | Q5T870 | 1.2381  |
| 14209 | P03410 | Q9H875 | 0.67578 |
| 14210 | P03410 | O75949 | 1.0913  |
| 14211 | P03410 | P62714 | 0.91955 |
| 14212 | P03410 | A8MZF0 | 1.4883  |



|       |        |        |         |
|-------|--------|--------|---------|
| 14213 | P03410 | O14771 | 1.0622  |
| 14214 | P03410 | Q9Y6Q5 | 0.70597 |
| 14215 | P03410 | P46976 | 0.37877 |
| 14216 | P03410 | O43399 | 0.84625 |
| 14217 | P03410 | Q5JY77 | 0.95766 |
| 14218 | P03410 | Q8NAS9 | 0.35226 |
| 14219 | P03410 | Q8NBR0 | 1.15    |
| 14220 | P03410 | Q7L4P6 | 1.0537  |
| 14221 | P03410 | O14569 | 0.7603  |
| 14222 | P03410 | Q9UQC2 | 0.47564 |
| 14223 | P03410 | P28069 | 0.52679 |
| 14224 | P03410 | Q9UI54 | 1.6653  |
| 14225 | P03410 | A0PJX8 | 1.0913  |
| 14226 | P03410 | Q92917 | 0.91095 |
| 14227 | P03410 | Q5SRD1 | 0.56619 |
| 14228 | P03410 | Q9BZI1 | 0.23668 |
| 14229 | P03410 | P62861 | 2.0352  |
| 14230 | P03410 | Q709C8 | 1.0189  |
| 14231 | P03410 | Q86Y91 | 0.35664 |
| 14232 | P03410 | Q14204 | 0.60988 |
| 14233 | P03410 | Q9Y2L8 | 0.91229 |
| 14234 | P03410 | Q96DP5 | 1.3142  |
| 14235 | P03410 | Q9UH77 | 0.86996 |
| 14236 | P03410 | O95292 | 0.32041 |
| 14237 | P03410 | P84157 | 1.0913  |
| 14238 | P03410 | P49321 | 1.1509  |
| 14239 | P03410 | Q96T21 | 1.2624  |
| 14240 | P03410 | Q96TC7 | 1.464   |
| 14241 | P03410 | Q53SF7 | 0.3227  |
| 14242 | P03410 | A4FU28 | 0.66737 |
| 14243 | P03410 | Q9BV68 | 0.50973 |
| 14244 | P03410 | Q8N6U2 | 1.0381  |
| 14245 | P03410 | Q5TA50 | 0.52554 |
| 14246 | P03410 | Q96M66 | 0.51493 |
| 14247 | P03410 | B4DYI2 | 0.29038 |
| 14248 | P03410 | Q96LP4 | 0.54498 |
| 14249 | P03410 | Q9HC78 | 0.28202 |
| 14250 | P03410 | A6NF36 | 1.0965  |
| 14251 | P03410 | Q5TA45 | 0.33522 |
| 14252 | P03410 | Q9H3M9 | 0.59117 |
| 14253 | P03410 | Q9ULU4 | 0.74393 |
| 14254 | P03410 | Q8N1W2 | 0.546   |
| 14255 | P03410 | Q96JB3 | 0.31748 |
| 14256 | P03410 | Q5HYJ3 | 1.1164  |
| 14257 | P03410 | P13994 | 0.72872 |
| 14258 | P03410 | O60224 | 0.35308 |
| 14259 | P03410 | Q86V20 | 1.4696  |
| 14260 | P03410 | Q9HCH5 | 0.82011 |
| 14261 | P03410 | E9PQR5 | 0.13356 |
| 14262 | P03410 | P05386 | 1.3686  |
| 14263 | P03410 | Q8IWF9 | 0.33195 |
| 14264 | P03410 | Q96DY7 | 0.85133 |
| 14265 | P03410 | Q7L5A3 | 1.1241  |
| 14266 | P03410 | Q9NVN8 | 0.42532 |
| 14267 | P03410 | Q96E09 | 1.465   |
| 14268 | P03410 | Q6ZNG0 | 0.74636 |
| 14269 | P03410 | Q9BUK0 | 1.7325  |
| 14270 | P03410 | O14901 | 0.21728 |
| 14271 | P03410 | Q5SZD1 | 0.89888 |
| 14272 | P03410 | Q86UT5 | 0.34586 |
| 14273 | P03410 | O00472 | 0.62801 |
| 14274 | P03410 | Q3SY00 | 1.3604  |
| 14275 | P03410 | Q6ZNA1 | 0.78793 |
| 14276 | P03410 | A8MWD9 | 0.20788 |
| 14277 | P03410 | Q9P2R7 | 0.63158 |
| 14278 | P03410 | O15392 | 0.24443 |
| 14279 | P03410 | Q9NS86 | 0.51178 |
| 14280 | P03410 | P35712 | 0.58902 |
| 14281 | P03410 | Q9H305 | 0.22734 |
| 14282 | P03410 | Q6UUU7 | 2.0967  |
| 14283 | P03410 | P17031 | 0.85712 |
| 14284 | P03410 | P59942 | 1.3648  |
| 14285 | P03410 | A6NJ78 | 1.414   |
| 14286 | P03410 | Q8NHR9 | 0.29401 |
| 14287 | P03410 | Q9HC47 | 1.6653  |
| 14288 | P03410 | P22670 | 0.83668 |

|       |        |        |          |
|-------|--------|--------|----------|
| 14289 | P03410 | Q9NZM5 | 0.77089  |
| 14290 | P03410 | Q9Y2Q5 | 0.42193  |
| 14291 | P03410 | Q96QG7 | 0.51301  |
| 14292 | P03410 | Q29RF7 | 1.1692   |
| 14293 | P03410 | Q5HY98 | 1.0047   |
| 14294 | P03410 | Q5TB30 | 0.24856  |
| 14295 | P03410 | Q9NPH2 | 0.58057  |
| 14296 | P03410 | Q9NVR2 | 1.179    |
| 14297 | P03410 | Q9UPM8 | 0.69845  |
| 14298 | P03410 | Q9NW81 | 0.14012  |
| 14299 | P03410 | Q8NDC0 | 1.3254   |
| 14300 | P03410 | Q86VE9 | 0.86137  |
| 14301 | P03410 | Q7Z3B4 | 1.0674   |
| 14302 | P03410 | Q8NHW5 | 0.50686  |
| 14303 | P03410 | Q5SVZ6 | 1.3943   |
| 14304 | P03410 | P47944 | 1.5031   |
| 14305 | P03410 | Q8IXJ6 | 0.44506  |
| 14306 | P03410 | Q9HD34 | 0.93512  |
| 14307 | P03410 | Q9NQ89 | 0.60311  |
| 14308 | P03410 | P23025 | 0.58476  |
| 14309 | P03410 | A6NMK8 | 1.1122   |
| 14310 | P03410 | P42771 | 0.64112  |
| 14311 | P03410 | P61576 | 0.6793   |
| 14312 | P03410 | Q8IZ63 | 1.6653   |
| 14313 | P03410 | Q9BXU2 | 1.0049   |
| 14314 | P03410 | O43309 | 0.71177  |
| 14315 | P03410 | Q969E8 | 1.6826   |
| 14316 | P03410 | P02810 | 1.6653   |
| 14317 | P03410 | Q9UI36 | 0.21677  |
| 14318 | P03410 | Q6ECI4 | 0.78354  |
| 14319 | P03410 | P49069 | 0.47007  |
| 14320 | P03410 | P13646 | 0.93405  |
| 14321 | P03410 | Q9UI56 | 1.6653   |
| 14322 | P03410 | Q9BT56 | 1.207    |
| 14323 | P03410 | Q9H9Q2 | 0.36002  |
| 14324 | P03410 | Q7L4I2 | 2.2377   |
| 14325 | P03410 | Q8IU60 | 0.90743  |
| 14326 | P03410 | Q15714 | 0.67657  |
| 14327 | P03410 | Q9BSU3 | 0.53903  |
| 14328 | P03410 | Q9UPP1 | 0.33887  |
| 14329 | P03410 | Q6UXR6 | 1.6653   |
| 14330 | P03410 | Q4G0N0 | 0.88221  |
| 14331 | P03410 | P28070 | 0.81054  |
| 14332 | P03410 | Q8NEL0 | 0.23565  |
| 14333 | P03410 | Q9NVT9 | 0.21689  |
| 14334 | P03410 | O95563 | 0.75265  |
| 14335 | P03410 | P49959 | 0.23937  |
| 14336 | P03410 | Q8IYU4 | 0.14628  |
| 14337 | P03410 | O00203 | 0.1318   |
| 14338 | P03410 | Q96DS6 | 1.0913   |
| 14339 | P03410 | A6NJI1 | 0.89572  |
| 14340 | P03410 | Q96RE9 | 0.75746  |
| 14341 | P03410 | Q86SE8 | 0.10611  |
| 14342 | P03410 | Q96BF6 | 0.55259  |
| 14343 | P03410 | Q8TF63 | 1.8261   |
| 14344 | P03410 | P23409 | 0.013282 |
| 14345 | P03410 | Q9H496 | 0.71684  |
| 14346 | P03410 | Q5T0J3 | 0.4002   |
| 14347 | P03410 | Q9Y573 | 0.20429  |
| 14348 | P03410 | P63302 | 1.1452   |
| 14349 | P03410 | Q96QH2 | 0.47127  |
| 14350 | P03410 | O95619 | 0.70105  |
| 14351 | P03410 | Q5JSH3 | 0.37798  |
| 14352 | P03410 | Q6V9R5 | 0.97066  |
| 14353 | P03410 | Q9BW27 | 0.98828  |
| 14354 | P03410 | Q96EK5 | 0.37361  |
| 14355 | P03410 | P04141 | 0.30449  |
| 14356 | P03410 | Q9BWJ2 | 0.67641  |
| 14357 | P03410 | Q5T5S1 | 0.85193  |
| 14358 | P03410 | Q96KX2 | 0.064758 |
| 14359 | P03410 | Q5JVG2 | 0.61459  |
| 14360 | P03410 | Q8N3U1 | 1.6653   |
| 14361 | P03410 | Q6B0K9 | 0.83359  |
| 14362 | P03410 | Q8WUZ0 | 1.4765   |
| 14363 | P03410 | Q71RC2 | 0.71331  |
| 14364 | P03410 | Q9H6W3 | 0.68013  |

|       |        |        |            |
|-------|--------|--------|------------|
| 14365 | P03410 | Q9H469 | 0.28881    |
| 14366 | P03410 | Q96Q11 | 0.6019     |
| 14367 | P03410 | Q7L775 | 0.70678    |
| 14368 | P03410 | O96018 | 0.75993    |
| 14369 | P03410 | Q96NL8 | 1.8247     |
| 14370 | P03410 | P11831 | 0.86184    |
| 14371 | P03410 | O60281 | 0.27871    |
| 14372 | P03410 | Q7L804 | 0.83848    |
| 14373 | P03410 | B1AJZ1 | 0.094763   |
| 14374 | P03410 | P53602 | 0.73646    |
| 14375 | P03410 | H0Y7S4 | 0.34826    |
| 14376 | P03410 | Q30KR1 | 0.87928    |
| 14377 | P03410 | Q5H9J7 | 1.3365     |
| 14378 | P03410 | Q9UNX4 | 0.4605     |
| 14379 | P03410 | Q8NBF1 | 0.32566    |
| 14380 | P03410 | O43439 | 0.90799    |
| 14381 | P03410 | Q9UBK5 | 1.6741     |
| 14382 | P03410 | Q9NWX4 | 0.90965    |
| 14383 | P03410 | Q9Y2L1 | 0.44742    |
| 14384 | P03410 | Q9NS37 | 0.81015    |
| 14385 | P03410 | O75781 | 0.31951    |
| 14386 | P03410 | Q5U5X8 | 1.6186     |
| 14387 | P03410 | Q8N5L8 | 1.4457     |
| 14388 | P03410 | O15063 | 1.2124     |
| 14389 | P03410 | P49354 | 0.42777    |
| 14390 | P03410 | Q14588 | 0.79465    |
| 14391 | P03410 | Q9H6X4 | 1.0913     |
| 14392 | P03410 | Q8NA54 | 0.31002    |
| 14393 | P03410 | Q96PV4 | 0.065808   |
| 14394 | P03410 | Q2M2E5 | 1.2126     |
| 14395 | P03410 | Q8WXF8 | 1.8238     |
| 14396 | P03410 | Q9P2N6 | 0.78572    |
| 14397 | P03410 | P78537 | 1.6519     |
| 14398 | P03410 | P0C7M6 | 0.16458    |
| 14399 | P03410 | Q717R9 | 1.2427     |
| 14400 | P03410 | Q96HJ5 | 0.41595    |
| 14401 | P03410 | Q96FX2 | 1.1194     |
| 14402 | P03410 | Q9Y5L4 | 0.11097    |
| 14403 | P03410 | Q6ZT52 | 0.00041981 |
| 14404 | P03410 | P40692 | 0.23205    |
| 14405 | P03410 | B3EWG4 | 1.4883     |
| 14406 | P03410 | Q96HD9 | 0.42649    |
| 14407 | P03410 | Q6NZI2 | 1.1945     |
| 14408 | P03410 | A6NI86 | 1.2571     |
| 14409 | P03410 | Q96BR6 | 0.91714    |
| 14410 | P03410 | Q9Y2S7 | 1.3757     |
| 14411 | P03410 | Q14159 | 2.0264     |
| 14412 | P03410 | Q9H981 | 1.0849     |
| 14413 | P03410 | Q5EBM4 | 0.36       |
| 14414 | P03410 | Q9HB07 | 0.47998    |
| 14415 | P03410 | P22087 | 0.74114    |
| 14416 | P03410 | O75290 | 0.92179    |
| 14417 | P03410 | A6NDU8 | 0.70433    |
| 14418 | P03410 | Q8IZS6 | 0.40593    |
| 14419 | P03410 | Q5VT52 | 0.49167    |
| 14420 | P03410 | O95782 | 0.74682    |
| 14421 | P03410 | Q8N4H0 | 0.17123    |
| 14422 | P03410 | B2RXF5 | 0.42339    |
| 14423 | P03410 | Q9Y399 | 1.8787     |
| 14424 | P03410 | B7ZBB8 | 0.28228    |
| 14425 | P03410 | Q7Z7F7 | 0.97539    |
| 14426 | P03410 | Q9ULE6 | 0.92813    |
| 14427 | P03410 | P60371 | 1.9984     |
| 14428 | P03410 | A4D1U4 | 0.58542    |
| 14429 | P03410 | O95045 | 0.59666    |
| 14430 | P03410 | Q9BYN7 | 0.55314    |
| 14431 | P03410 | A1L4L8 | 0.83255    |
| 14432 | P03410 | P0CJ87 | 0.27528    |
| 14433 | P03410 | O71037 | 0.76316    |
| 14434 | P03410 | P30047 | 0.77385    |
| 14435 | P03410 | Q9BYZ2 | 0.69158    |
| 14436 | P03410 | Q17RF5 | 1.5113     |
| 14437 | P03410 | Q92945 | 0.62477    |
| 14438 | P03410 | Q9GZP8 | 1.6653     |
| 14439 | P03410 | Q9BZA5 | 1.287      |
| 14440 | P03410 | Q96EF9 | 0.9228     |

|       |        |        |         |
|-------|--------|--------|---------|
| 14441 | P03410 | Q9Y4R7 | 0.19354 |
| 14442 | P03410 | Q53HR8 | 0.2247  |
| 14443 | P03410 | Q17R31 | 0.42815 |
| 14444 | P03410 | Q15274 | 0.41189 |
| 14445 | P03410 | Q96AV8 | 0.29157 |
| 14446 | P03410 | Q02543 | 1.009   |
| 14447 | P03410 | Q8IV32 | 1.4051  |
| 14448 | P03410 | Q674R7 | 0.95477 |
| 14449 | P03410 | Q6ZRH9 | 1.6653  |
| 14450 | P03410 | Q9Y512 | 0.30999 |
| 14451 | P03410 | Q8IZU0 | 1.9262  |
| 14452 | P03410 | P18887 | 0.97644 |
| 14453 | P03410 | Q5JNZ3 | 0.85796 |
| 14454 | P03410 | Q13227 | 1.8666  |
| 14455 | P03410 | Q8IZ73 | 0.41855 |
| 14456 | P03410 | Q9UPQ9 | 0.70858 |
| 14457 | P03410 | O75934 | 0.80554 |
| 14458 | P03410 | P23246 | 0.73983 |
| 14459 | P03410 | Q8TAU3 | 0.82084 |
| 14460 | P03410 | Q8IYN0 | 0.86116 |
| 14461 | P03410 | Q0D2K0 | 1.0846  |
| 14462 | P03410 | Q05877 | 1.4773  |
| 14463 | P03410 | Q8IZX4 | 0.24689 |
| 14464 | P03410 | Q8N9E0 | 1.4883  |
| 14465 | P03410 | Q7Z7B7 | 1.4445  |
| 14466 | P03410 | P43320 | 0.40006 |
| 14467 | P03410 | Q15041 | 0.14054 |
| 14468 | P03410 | Q9HAJ7 | 1.7105  |
| 14469 | P03410 | Q9NPR9 | 1.4518  |
| 14470 | P03410 | P82094 | 1.3823  |
| 14471 | P03410 | Q6IEE7 | 1.3458  |
| 14472 | P03410 | P61247 | 1.2501  |
| 14473 | P03410 | O75335 | 0.44317 |
| 14474 | P03410 | P19838 | 0.86983 |
| 14475 | P03410 | Q8WVI7 | 0.22086 |
| 14476 | P03410 | Q96PC3 | 0.65802 |
| 14477 | P03410 | Q9UHV2 | 2.2085  |
| 14478 | P03410 | Q68CJ9 | 0.6317  |
| 14479 | P03410 | Q96P26 | 0.60157 |
| 14480 | P03410 | P13489 | 0.73904 |
| 14481 | P03410 | Q494R0 | 1.6653  |
| 14482 | P03410 | Q8TB03 | 1.2765  |
| 14483 | P03410 | Q96Q89 | 0.60414 |
| 14484 | P03410 | O00519 | 0.61487 |
| 14485 | P03410 | P0CI01 | 1.0907  |
| 14486 | P03410 | P62241 | 0.82472 |
| 14487 | P03410 | Q9Y285 | 1.1511  |
| 14488 | P03410 | O95801 | 0.30087 |
| 14489 | P03410 | Q71RC9 | 1.0992  |
| 14490 | P03410 | P17987 | 0.29434 |
| 14491 | P03410 | Q9BYR7 | 1.5889  |
| 14492 | P03410 | Q5QGS0 | 0.19068 |
| 14493 | P03410 | Q6ZTN6 | 0.84824 |
| 14494 | P03410 | P30084 | 0.32907 |
| 14495 | P03410 | Q13094 | 0.7731  |
| 14496 | P03410 | Q96TA1 | 0.491   |
| 14497 | P03410 | P36956 | 0.25734 |
| 14498 | P03410 | Q8ND61 | 1.3781  |
| 14499 | P03410 | A6NNP5 | 0.14039 |
| 14500 | P03410 | Q86SZ2 | 1.1902  |
| 14501 | P03410 | Q8WVJ2 | 0.41335 |
| 14502 | P03410 | Q53G59 | 0.58824 |
| 14503 | P03410 | O75154 | 1.0323  |
| 14504 | P03410 | Q9UHR6 | 1.3243  |
| 14505 | P03410 | P46527 | 0.50255 |
| 14506 | P03410 | Q9NYW8 | 0.66484 |
| 14507 | P03410 | Q96CW1 | 0.8409  |
| 14508 | P03410 | Q86VQ0 | 0.8051  |
| 14509 | P03410 | P0DMC3 | 1.6653  |
| 14510 | P03410 | Q5BKY9 | 1.4883  |
| 14511 | P03410 | Q96IU2 | 1.8044  |
| 14512 | P03410 | Q5TC12 | 0.82555 |
| 14513 | P03410 | Q8N715 | 0.92384 |
| 14514 | P03410 | P0C7V5 | 0.86747 |
| 14515 | P03410 | Q00839 | 0.31601 |
| 14516 | P03410 | Q9ULR0 | 1.354   |

|       |        |        |         |
|-------|--------|--------|---------|
| 14517 | P03410 | Q9H6K1 | 0.38408 |
| 14518 | P03410 | Q96RL7 | 1.2844  |
| 14519 | P03410 | Q16589 | 0.62157 |
| 14520 | P03410 | Q8N960 | 0.35507 |
| 14521 | P03410 | Q9H4X1 | 1.3941  |
| 14522 | P03410 | Q92529 | 0.39946 |
| 14523 | P03410 | P52655 | 1.6033  |
| 14524 | P03410 | Q14157 | 1.2671  |
| 14525 | P03410 | Q9UPV7 | 0.5065  |
| 14526 | P03410 | Q9H213 | 0.1839  |
| 14527 | P03410 | Q17RM4 | 0.88262 |
| 14528 | P03410 | P35244 | 0.77231 |
| 14529 | P03410 | P55854 | 0.83208 |
| 14530 | P03410 | O75461 | 0.22622 |
| 14531 | P03410 | P53999 | 1.19    |
| 14532 | P03410 | P62829 | 1.6473  |
| 14533 | P03410 | Q99457 | 0.60635 |
| 14534 | P03410 | P25205 | 0.39489 |
| 14535 | P03410 | A6NHP3 | 1.0907  |
| 14536 | P03410 | Q0VFX4 | 1.0954  |
| 14537 | P03410 | E9PJ23 | 0.15432 |
| 14538 | P03410 | P49207 | 1.7586  |
| 14539 | P03410 | A2VDF0 | 0.55156 |
| 14540 | P03410 | Q9NUX5 | 0.20888 |
| 14541 | P03410 | P51610 | 0.56291 |
| 14542 | P03410 | Q9HBM0 | 1.2184  |
| 14543 | P03410 | A8MU10 | 1.6653  |
| 14544 | P03410 | Q17RC7 | 0.80906 |
| 14545 | P03410 | Q9BW72 | 0.6859  |
| 14546 | P03410 | Q86WB0 | 2.0376  |
| 14547 | P03410 | Q15427 | 0.37696 |
| 14548 | P03410 | A6NFA0 | 1.0913  |
| 14549 | P03410 | Q9HA77 | 1.1146  |
| 14550 | P03410 | P07498 | 1.4844  |
| 14551 | P03410 | Q9H040 | 0.57286 |
| 14552 | P03410 | Q8WXJ9 | 0.71362 |
| 14553 | P03410 | Q9BQN1 | 1.4984  |
| 14554 | P03410 | P10768 | 0.21718 |
| 14555 | P03410 | Q7L0L9 | 1.6653  |
| 14556 | P03410 | Q13137 | 1.3737  |
| 14557 | P03410 | Q8WTP8 | 0.14525 |
| 14558 | P03410 | Q8IX21 | 0.52303 |
| 14559 | P03410 | Q9UPP5 | 1.2147  |
| 14560 | P03410 | Q5T4T6 | 1.6188  |
| 14561 | P03410 | Q12767 | 1.0913  |
| 14562 | P03410 | Q9BZE9 | 1.1351  |
| 14563 | P03410 | Q92564 | 0.31885 |
| 14564 | P03410 | Q96FI4 | 0.61981 |
| 14565 | P03410 | A1A580 | 1.9939  |
| 14566 | P03410 | O75794 | 1.5266  |
| 14567 | P03410 | Q9UKT7 | 0.2927  |
| 14568 | P03410 | Q6ZVU0 | 0.29892 |
| 14569 | P03410 | Q8IYA8 | 1.4883  |
| 14570 | P03410 | P0CL81 | 0.508   |
| 14571 | P03410 | Q16822 | 0.44449 |
| 14572 | P03410 | Q5JR59 | 1.641   |
| 14573 | P03410 | Q8N5Q1 | 1.9055  |
| 14574 | P03410 | O94763 | 1.0315  |
| 14575 | P03410 | Q8IWZ3 | 1.1572  |
| 14576 | P03410 | Q13829 | 0.68602 |
| 14577 | P03410 | Q9UI95 | 1.2465  |
| 14578 | P03410 | Q9UHP9 | 0.32187 |
| 14579 | P03410 | P26373 | 1.2457  |
| 14580 | P03410 | Q6NYC8 | 0.85899 |
| 14581 | P03410 | Q96H79 | 1.0932  |
| 14582 | P03410 | P0C2Y1 | 0.45252 |
| 14583 | P03410 | A6NKU9 | 1.0907  |
| 14584 | P03410 | Q96HZ7 | 1.6653  |
| 14585 | P03410 | P61578 | 0.83286 |
| 14586 | P03410 | O75690 | 1.6653  |
| 14587 | P03410 | P60002 | 1.4361  |
| 14588 | P03410 | Q9UNN4 | 0.49139 |
| 14589 | P03410 | Q86SZ3 | 0.34438 |
| 14590 | P03410 | P27986 | 0.86162 |
| 14591 | P03410 | Q9NZN8 | 0.64583 |
| 14592 | P03410 | Q9H0C3 | 1.0848  |

|       |        |        |          |
|-------|--------|--------|----------|
| 14593 | P03410 | Q969F2 | 0.16453  |
| 14594 | P03410 | P61165 | 0.94538  |
| 14595 | P03410 | O15480 | 0.039069 |
| 14596 | P03410 | Q9Y6J0 | 0.15044  |
| 14597 | P03410 | Q9P219 | 0.56375  |
| 14598 | P03410 | O14910 | 1.0937   |
| 14599 | P03410 | Q9NNX9 | 1.5909   |
| 14600 | P03410 | Q96PT3 | 0.25012  |
| 14601 | P03410 | Q6ZMW3 | 0.3132   |
| 14602 | P03410 | Q9UBL0 | 0.41974  |
| 14603 | P03410 | Q8WYH8 | 0.44615  |
| 14604 | P03410 | Q9H267 | 0.54115  |
| 14605 | P03410 | Q5TA78 | 1.6653   |
| 14606 | P03410 | P56556 | 0.67399  |
| 14607 | P03410 | P82663 | 1.3257   |
| 14608 | P03410 | Q9C0B2 | 0.69128  |
| 14609 | P03410 | Q8IWB1 | 0.44681  |
| 14610 | P03410 | P48539 | 0.58258  |
| 14611 | P03410 | P05121 | 0.19789  |
| 14612 | P03410 | Q6RUI8 | 1.2987   |
| 14613 | P03410 | Q7Z4B0 | 1.6653   |
| 14614 | P03410 | O75925 | 0.46371  |
| 14615 | P03410 | Q14CN4 | 0.71041  |
| 14616 | P03410 | Q93073 | 1.3349   |
| 14617 | P03410 | Q96GN5 | 0.94188  |
| 14618 | P03410 | Q86XT9 | 0.99712  |
| 14619 | P03410 | O14960 | 0.93617  |
| 14620 | P03410 | Q8IXK0 | 0.17094  |
| 14621 | P03410 | P55036 | 0.96841  |
| 14622 | P03410 | P0C852 | 1.6653   |
| 14623 | P03410 | Q96RS0 | 0.4925   |
| 14624 | P03410 | Q6PI47 | 0.32577  |
| 14625 | P03410 | O43929 | 0.13106  |
| 14626 | P03410 | Q96KJ9 | 0.43776  |
| 14627 | P03410 | Q9H2G9 | 0.45957  |
| 14628 | P03410 | P22732 | 0.37302  |
| 14629 | P03410 | Q9HB71 | 0.69496  |
| 14630 | P03410 | O75330 | 0.80205  |
| 14631 | P03410 | Q9BWJ5 | 0.79175  |
| 14632 | P03410 | Q9Y4Y9 | 0.89934  |
| 14633 | P03410 | Q9NQG1 | 1.0992   |
| 14634 | P03410 | Q8TAB7 | 1.2626   |
| 14635 | P03410 | Q96KW9 | 1.3202   |
| 14636 | P03410 | Q5VVM6 | 0.17971  |
| 14637 | P03410 | Q8TDQ7 | 0.18407  |
| 14638 | P03410 | I3L273 | 0.28713  |
| 14639 | P03410 | Q9BU89 | 0.46369  |
| 14640 | P03410 | Q6ZNA4 | 0.30066  |
| 14641 | P03410 | Q9Y315 | 1.2213   |
| 14642 | P03410 | Q9UMS6 | 0.8702   |
| 14643 | P03410 | Q9HD33 | 1.6306   |
| 14644 | P03410 | Q96QR1 | 1.2989   |
| 14645 | P03410 | Q9P0P8 | 0.37525  |
| 14646 | P03410 | Q12873 | 0.47674  |
| 14647 | P03410 | Q5SNX5 | 1.6653   |
| 14648 | P03410 | Q2TBE0 | 0.83779  |
| 14649 | P03410 | Q99733 | 0.85122  |
| 14650 | P03410 | Q8NA61 | 0.18013  |
| 14651 | P03410 | P23490 | 1.3783   |
| 14652 | P03410 | A4D263 | 0.54573  |
| 14653 | P03410 | Q15572 | 1.3426   |
| 14654 | P03410 | P61513 | 0.80463  |
| 14655 | P03410 | Q9Y6Z5 | 1.4536   |
| 14656 | P03410 | Q6N075 | 0.91205  |
| 14657 | P03410 | Q6PH81 | 0.6346   |
| 14658 | P03410 | P0C7X5 | 0.89166  |
| 14659 | P03410 | Q96PE3 | 0.12081  |
| 14660 | P03410 | Q8NEB7 | 1.1503   |
| 14661 | P03410 | Q8IWC1 | 0.7994   |
| 14662 | P03410 | Q96ST2 | 0.49519  |
| 14663 | P03410 | P50479 | 0.50973  |
| 14664 | P03410 | P02794 | 0.80963  |
| 14665 | P03410 | Q15121 | 0.79441  |
| 14666 | P03410 | Q6P9G4 | 0.93127  |
| 14667 | P03410 | Q9UDW3 | 0.32462  |
| 14668 | P03410 | A8MUA0 | 0.53532  |

|       |        |        |         |
|-------|--------|--------|---------|
| 14669 | P03410 | Q8WXD5 | 0.90847 |
| 14670 | P03410 | Q9HAH1 | 0.88582 |
| 14671 | P03410 | Q68CL5 | 0.3132  |
| 14672 | P03410 | A4D161 | 0.22013 |
| 14673 | P03410 | A8MVJ9 | 0.91979 |
| 14674 | P03410 | P0CW27 | 1.0218  |
| 14675 | P03410 | Q02221 | 0.82617 |
| 14676 | P03410 | O60675 | 0.43674 |
| 14677 | P03410 | Q6ZN01 | 0.67312 |
| 14678 | P03410 | Q5T619 | 0.71942 |
| 14679 | P03410 | Q9UL41 | 0.89247 |
| 14680 | P03410 | Q9NTG7 | 0.62907 |
| 14681 | P03410 | O75663 | 0.74167 |
| 14682 | P03410 | P02533 | 1.0155  |
| 14683 | P03410 | O00512 | 0.969   |
| 14684 | P03410 | Q01081 | 0.46371 |
| 14685 | P03410 | Q5W0B7 | 1.0031  |
| 14686 | P03410 | P59052 | 0.73015 |
| 14687 | P03410 | Q9UL16 | 0.57415 |
| 14688 | P03410 | Q7RTS9 | 1.7119  |
| 14689 | P03410 | P10599 | 0.24501 |
| 14690 | P03410 | Q5I0X4 | 1.4883  |
| 14691 | P03410 | P31350 | 0.35235 |
| 14692 | P03410 | Q03112 | 0.21009 |
| 14693 | P03410 | Q9UK39 | 0.55555 |
| 14694 | P03410 | Q12893 | 0.80674 |
| 14695 | P03410 | Q9UGB4 | 1.6653  |
| 14696 | P03410 | Q719I0 | 0.34927 |
| 14697 | P03410 | Q6ZMY9 | 1.0051  |
| 14698 | P03410 | P49368 | 0.26446 |
| 14699 | P03410 | Q96KC9 | 1.1963  |
| 14700 | P03410 | P0CG48 | 0.59087 |
| 14701 | P03410 | Q8N9K7 | 1.6653  |
| 14702 | P03410 | Q6ZV77 | 1.6653  |
| 14703 | P03410 | O75127 | 0.22177 |
| 14704 | P03410 | Q8NFP7 | 0.31411 |
| 14705 | P03410 | Q9BUB7 | 1.4776  |
| 14706 | P03410 | Q6PGP7 | 0.93413 |
| 14707 | P03410 | O15205 | 0.54898 |
| 14708 | P03410 | Q9Y6H5 | 0.88816 |
| 14709 | P03410 | Q86UF4 | 0.17228 |
| 14710 | P03410 | Q96LW4 | 0.31275 |
| 14711 | P03410 | Q9BTE7 | 0.95321 |
| 14712 | P03410 | Q96NM4 | 0.41575 |
| 14713 | P03410 | P51606 | 0.58709 |
| 14714 | P03410 | Q9BZ97 | 1.6653  |
| 14715 | P03410 | P49901 | 1.6653  |
| 14716 | P03410 | Q9H8Y1 | 1.3062  |
| 14717 | P03410 | O95218 | 0.55436 |
| 14718 | P03410 | Q8WXU2 | 0.92515 |
| 14719 | P03410 | A0PJW8 | 0.12285 |
| 14720 | P03410 | Q30KP9 | 0.85264 |
| 14721 | P03410 | Q53QW1 | 1.4883  |
| 14722 | P03410 | Q9UJC3 | 0.22411 |
| 14723 | P03410 | Q8N2N9 | 0.77288 |
| 14724 | P03410 | P15924 | 0.57495 |
| 14725 | P03410 | Q8IXF0 | 0.27524 |
| 14726 | P03410 | Q9BYQ5 | 1.9984  |
| 14727 | P03410 | O15355 | 0.88104 |
| 14728 | P03410 | A6NNJ1 | 0.71133 |
| 14729 | P03410 | P0DMB2 | 0.90112 |
| 14730 | P03410 | Q5JU67 | 0.24319 |
| 14731 | P03410 | A8MVP8 | 0.34795 |
| 14732 | P03410 | Q6V702 | 0.39603 |
| 14733 | P03410 | O95639 | 0.54154 |
| 14734 | P03410 | Q96B33 | 0.7982  |
| 14735 | P03410 | P61550 | 0.77303 |
| 14736 | P03410 | Q3SY89 | 0.38    |
| 14737 | P03410 | Q96EY4 | 0.86554 |
| 14738 | P03410 | P0C7P2 | 0.93301 |
| 14739 | P03410 | A6NN14 | 0.79552 |
| 14740 | P03410 | Q68EN5 | 0.61594 |
| 14741 | P03410 | Q52LA3 | 0.79076 |
| 14742 | P03410 | Q32M78 | 0.93665 |
| 14743 | P03410 | E7ETH6 | 0.71345 |
| 14744 | P03410 | P60608 | 0.84218 |

|       |        |        |         |
|-------|--------|--------|---------|
| 14745 | P03410 | P61565 | 1.1647  |
| 14746 | P03410 | Q5SY13 | 1.6653  |
| 14747 | P03410 | Q9Y2R0 | 1.093   |
| 14748 | P03410 | Q9Y3C0 | 0.57389 |
| 14749 | P03410 | Q13394 | 0.45332 |
| 14750 | P03410 | Q9UNY4 | 0.37375 |
| 14751 | P03410 | Q9NR50 | 0.70127 |
| 14752 | P03410 | Q9UGK3 | 0.8372  |
| 14753 | P03410 | Q9Y2D5 | 0.44068 |
| 14754 | P03410 | Q9NP64 | 0.42584 |
| 14755 | P03410 | Q53FD0 | 1.2996  |
| 14756 | P03410 | P51808 | 0.48959 |
| 14757 | P03410 | Q9Y2Y9 | 0.80875 |
| 14758 | P03410 | Q6NSX1 | 0.98261 |
| 14759 | P03410 | Q9NXR7 | 0.7359  |
| 14760 | P03410 | Q7Z6G3 | 0.7262  |
| 14761 | P03410 | Q99832 | 0.23898 |
| 14762 | P03410 | Q6ZTR5 | 0.67643 |
| 14763 | P03410 | Q15293 | 0.59211 |
| 14764 | P03410 | P82909 | 0.76966 |
| 14765 | P03410 | Q8NCS4 | 1.0913  |
| 14766 | P03410 | P0DJI8 | 0.78091 |
| 14767 | P03410 | P29374 | 0.23516 |
| 14768 | P03410 | Q9Y675 | 1.8316  |
| 14769 | P03410 | Q9NZH5 | 0.69617 |
| 14770 | P03410 | Q4QY38 | 0.87928 |
| 14771 | P03410 | Q14129 | 1.0381  |
| 14772 | P03410 | Q4G0N4 | 0.42752 |
| 14773 | P03410 | Q9HCH0 | 1.9367  |
| 14774 | P03410 | Q9NSP4 | 0.31287 |
| 14775 | P03410 | Q13106 | 0.79191 |
| 14776 | P03410 | Q32M84 | 0.29589 |
| 14777 | P03410 | A8MYR8 | 0.13857 |
| 14778 | P03410 | P51161 | 0.22411 |
| 14779 | P03410 | Q8N9T2 | 1.6653  |
| 14780 | P03410 | Q8N9Z0 | 0.9607  |
| 14781 | P03410 | A5D6W6 | 1.1822  |
| 14782 | P03410 | Q96DU7 | 0.65665 |
| 14783 | P03410 | Q5T6M2 | 1.3218  |
| 14784 | P03410 | Q14893 | 0.67134 |
| 14785 | P03410 | O15255 | 1.6653  |
| 14786 | P03410 | O75865 | 0.96211 |
| 14787 | P03410 | Q8N5J4 | 0.49711 |
| 14788 | P03410 | A1L170 | 1.6653  |
| 14789 | P03410 | O95405 | 0.32477 |
| 14790 | P03410 | Q96AB3 | 0.91885 |
| 14791 | P03410 | Q9H4M3 | 0.588   |
| 14792 | P03410 | Q8NDW4 | 0.81544 |
| 14793 | P03410 | P02808 | 1.3129  |
| 14794 | P03410 | Q5VTH2 | 1.0132  |
| 14795 | P03410 | Q96T76 | 0.97011 |
| 14796 | P03410 | Q6ZW13 | 1.6653  |
| 14797 | P03410 | Q9NZL3 | 0.78211 |
| 14798 | P03410 | Q6UXU1 | 1.6653  |
| 14799 | P03410 | Q9BU02 | 1.6294  |
| 14800 | P03410 | Q16666 | 0.56485 |
| 14801 | P03410 | Q5VSY0 | 0.57842 |
| 14802 | P03410 | Q5UE93 | 1.0212  |
| 14803 | P03410 | Q8NAA4 | 0.25908 |
| 14804 | P03410 | Q969W9 | 0.95154 |
| 14805 | P03410 | Q8NHU2 | 0.27443 |
| 14806 | P03410 | Q8WY91 | 0.79167 |
| 14807 | P03410 | Q15058 | 0.59889 |
| 14808 | P03410 | A6NEQ2 | 1.6653  |
| 14809 | P03410 | Q9Y2G2 | 0.67192 |
| 14810 | P03410 | Q7L8L6 | 0.6541  |
| 14811 | P03410 | Q7Z4U5 | 1.4445  |
| 14812 | P03410 | O14681 | 1.3     |
| 14813 | P03410 | A6XGL0 | 0.68302 |
| 14814 | P03410 | Q9HDB8 | 0.62824 |
| 14815 | P03410 | Q5HYK7 | 1.3011  |
| 14816 | P03410 | Q9UFF9 | 0.43881 |
| 14817 | P03410 | Q96N53 | 1.6653  |
| 14818 | P03410 | Q99708 | 0.82298 |
| 14819 | P03410 | Q5T3Y7 | 0.54971 |
| 14820 | P03410 | Q9UDV7 | 0.58281 |



|       |        |        |          |
|-------|--------|--------|----------|
| 14821 | P03410 | P17568 | 0.17949  |
| 14822 | P03410 | Q8IWE5 | 0.69666  |
| 14823 | P03410 | O75638 | 2.1063   |
| 14824 | P03410 | Q14593 | 0.98893  |
| 14825 | P03410 | O43402 | 1.4965   |
| 14826 | P03410 | Q9UNN5 | 0.82046  |
| 14827 | P03410 | Q3SYF9 | 1.6653   |
| 14828 | P03410 | A1L188 | 1.6264   |
| 14829 | P03410 | Q8WW14 | 0.69454  |
| 14830 | P03410 | Q96EY9 | 0.57319  |
| 14831 | P03410 | Q27J81 | 0.35512  |
| 14832 | P03410 | Q9HBK9 | 0.23304  |
| 14833 | P03410 | Q6ZVM7 | 0.051615 |
| 14834 | P03410 | Q9H1M0 | 0.27236  |
| 14835 | P03410 | Q5T7P2 | 1.6653   |
| 14836 | P03410 | Q8IWY9 | 0.76789  |
| 14837 | P03410 | Q9UKH3 | 1.1199   |
| 14838 | P03410 | P02008 | 0.801    |
| 14839 | P03410 | P10144 | 0.3424   |
| 14840 | P03410 | P52594 | 0.35876  |
| 14841 | P03410 | A4D2B0 | 1.005    |
| 14842 | P03410 | P35638 | 0.64365  |
| 14843 | P03410 | Q5GH73 | 0.63672  |
| 14844 | P03410 | O14920 | 0.84168  |
| 14845 | P03410 | Q14526 | 0.37859  |
| 14846 | P03410 | Q9GZR2 | 0.13563  |
| 14847 | P03410 | P26368 | 0.63265  |
| 14848 | P03410 | P68104 | 0.66271  |
| 14849 | P03410 | O95359 | 0.49049  |
| 14850 | P03410 | Q8WWF3 | 1.1105   |
| 14851 | P03410 | O95238 | 0.2185   |
| 14852 | P03410 | Q9H3R5 | 0.6754   |
| 14853 | P03410 | Q10570 | 0.99849  |
| 14854 | P03410 | Q6Q759 | 1.5523   |
| 14855 | P03410 | O14828 | 0.86361  |
| 14856 | P03410 | Q8N8D7 | 1.0629   |
| 14857 | P03410 | Q59GR2 | 0.2823   |
| 14858 | P03410 | Q9H869 | 1.9546   |
| 14859 | P03410 | Q02833 | 0.75696  |
| 14860 | P03410 | Q9UK13 | 0.98524  |
| 14861 | P03410 | Q8N1F1 | 1.6653   |
| 14862 | P03410 | Q9Y3B8 | 0.36641  |
| 14863 | P03410 | Q8N8E2 | 0.16637  |
| 14864 | P03410 | Q9BVI4 | 0.66394  |
| 14865 | P03410 | O00470 | 0.5084   |
| 14866 | P03410 | Q96N58 | 0.88535  |
| 14867 | P03410 | Q5SXM8 | 0.43009  |
| 14868 | P03410 | Q8N2C7 | 1.3358   |
| 14869 | P03410 | Q8IWA6 | 0.52172  |
| 14870 | P03410 | Q2M3W8 | 1.0409   |
| 14871 | P03410 | O76011 | 1.0001   |
| 14872 | P03410 | Q14257 | 0.30163  |
| 14873 | P03410 | Q8N813 | 0.57909  |
| 14874 | P03410 | A6PVL3 | 0.64661  |
| 14875 | P03410 | A6NH52 | 1.3876   |
| 14876 | P03410 | Q86WI0 | 0.88488  |
| 14877 | P03410 | Q14974 | 1.3655   |
| 14878 | P03410 | Q9NV12 | 1.0913   |
| 14879 | P03410 | Q13155 | 0.63529  |
| 14880 | P03410 | Q5T0L3 | 1.491    |
| 14881 | P03410 | Q8N4M7 | 1.7052   |
| 14882 | P03410 | O60293 | 0.26461  |
| 14883 | P03410 | Q8TCS8 | 0.4721   |
| 14884 | P03410 | Q8N0X7 | 0.29524  |
| 14885 | P03410 | P56279 | 1.695    |
| 14886 | P03410 | Q8WXA3 | 0.25041  |
| 14887 | P03410 | O14556 | 0.24877  |
| 14888 | P03410 | P61326 | 1.0202   |
| 14889 | P03410 | Q8N8Z8 | 0.67652  |
| 14890 | P03410 | Q9H4L7 | 0.33285  |
| 14891 | P03410 | P62072 | 0.4928   |
| 14892 | P03410 | Q9HB75 | 0.86     |
| 14893 | P03410 | O75683 | 1.3065   |
| 14894 | P03410 | O60613 | 0.89556  |
| 14895 | P03410 | Q8N5S3 | 0.044999 |
| 14896 | P03410 | A9QM74 | 0.76759  |

|       |        |        |         |
|-------|--------|--------|---------|
| 14897 | P03410 | Q9GZZ1 | 0.58511 |
| 14898 | P03410 | Q6ZVN7 | 0.6805  |
| 14899 | P03410 | Q9NUU6 | 0.68053 |
| 14900 | P03410 | Q8WUX2 | 0.31547 |
| 14901 | P03410 | Q8IV54 | 0.60985 |
| 14902 | P03410 | Q8WVC0 | 1.001   |
| 14903 | P03410 | P19387 | 0.87939 |
| 14904 | P03410 | Q96K17 | 0.79439 |
| 14905 | P03410 | Q86YD7 | 0.69342 |
| 14906 | P03410 | Q9GZR5 | 0.62505 |
| 14907 | P03410 | A1A4T8 | 0.22378 |
| 14908 | P03410 | A1A5D9 | 1.433   |
| 14909 | P03410 | P11137 | 0.36133 |
| 14910 | P03410 | Q14103 | 0.59979 |
| 14911 | P03410 | O96006 | 1.3083  |
| 14912 | P03410 | A6NKD9 | 1.6212  |
| 14913 | P03410 | P62304 | 0.81849 |
| 14914 | P03410 | P59797 | 1.6199  |
| 14915 | P03410 | Q13296 | 0.53793 |
| 14916 | P03410 | Q96NR7 | 0.23692 |
| 14917 | P03410 | O95567 | 1.6653  |
| 14918 | P03410 | P02144 | 0.36975 |
| 14919 | P03410 | P59022 | 0.80508 |
| 14920 | P03410 | P20585 | 0.16925 |
| 14921 | P03410 | Q3SYA9 | 0.6931  |
| 14922 | P03410 | P62899 | 1.3249  |
| 14923 | P03410 | Q96RT1 | 0.45077 |
| 14924 | P03410 | P16415 | 0.83424 |
| 14925 | P03410 | Q96N22 | 1.004   |
| 14926 | P03410 | Q08AD1 | 0.9191  |
| 14927 | P03410 | Q15833 | 0.54584 |
| 14928 | P03410 | P35813 | 0.24469 |
| 14929 | P03410 | Q96HT8 | 2.3056  |
| 14930 | P03410 | Q13772 | 0.42127 |
| 14931 | P03410 | Q9NSE4 | 0.84507 |
| 14932 | P03410 | Q8TC05 | 1.8748  |
| 14933 | P03410 | Q17RA5 | 1.6653  |
| 14934 | P03410 | P78316 | 1.598   |
| 14935 | P03410 | Q6P6C2 | 0.636   |
| 14936 | P03410 | Q8TCF1 | 0.38332 |
| 14937 | P03410 | Q96LA8 | 0.71557 |
| 14938 | P03410 | Q13360 | 0.71265 |
| 14939 | P03410 | Q8N7R0 | 0.30793 |
| 14940 | P03410 | A6NE21 | 0.71133 |
| 14941 | P03410 | P06454 | 1.4377  |
| 14942 | P03410 | Q9NX01 | 0.32076 |
| 14943 | P03410 | Q8N7G0 | 0.30793 |
| 14944 | P03410 | Q9H7Y2 | 1.2162  |
| 14945 | P03410 | Q9C0H6 | 0.30816 |
| 14946 | P03410 | P80303 | 0.22498 |
| 14947 | P03410 | P56192 | 0.87459 |
| 14948 | P03410 | Q96B49 | 1.6165  |
| 14949 | P03410 | Q9UPY6 | 0.27504 |
| 14950 | P03410 | Q96DZ9 | 0.75695 |
| 14951 | P03410 | Q14739 | 0.36471 |
| 14952 | P03410 | Q15697 | 0.50183 |
| 14953 | P03410 | Q5VZ72 | 0.8618  |
| 14954 | P03410 | Q8IYX3 | 1.4058  |
| 14955 | P03410 | Q9BRP9 | 0.20722 |
| 14956 | P03410 | Q8NDW8 | 0.17645 |
| 14957 | P03410 | Q9NX38 | 0.3488  |
| 14958 | P03410 | Q6P9B6 | 0.6999  |
| 14959 | P03410 | Q15323 | 0.89153 |
| 14960 | P03410 | Q0VDG4 | 0.51138 |
| 14961 | P03410 | Q96BW1 | 0.44945 |
| 14962 | P03410 | Q6ZTK2 | 0.24455 |
| 14963 | P03410 | P0C671 | 0.13891 |
| 14964 | P03410 | O15234 | 1.6569  |
| 14965 | P03410 | Q15042 | 0.35518 |
| 14966 | P03410 | Q9H825 | 0.43842 |
| 14967 | P03410 | Q14C87 | 1.1594  |
| 14968 | P03410 | Q7Z6I5 | 1.5232  |
| 14969 | P03410 | Q9BZL4 | 0.83836 |
| 14970 | P03410 | Q3LHN0 | 1.9066  |
| 14971 | P03410 | Q8N0S6 | 0.67869 |
| 14972 | P03410 | Q6ZRS4 | 1.3104  |

|       |        |        |          |
|-------|--------|--------|----------|
| 14973 | P03410 | Q6L8Q7 | 0.40592  |
| 14974 | P03410 | Q9BZL1 | 0.56087  |
| 14975 | P03410 | Q9Y2G0 | 0.79662  |
| 14976 | P03410 | Q14353 | 0.18485  |
| 14977 | P03410 | O43633 | 0.46675  |
| 14978 | P03410 | Q96T23 | 0.57172  |
| 14979 | P03410 | Q9P015 | 1.2694   |
| 14980 | P03410 | Q9H147 | 1.4311   |
| 14981 | P03410 | P49184 | 0.51372  |
| 14982 | P03410 | Q8IX12 | 1.0743   |
| 14983 | P03410 | Q4VC05 | 1.4988   |
| 14984 | P03410 | Q5T7R7 | 1.0913   |
| 14985 | P03410 | Q96GC9 | 0.63773  |
| 14986 | P03410 | Q13889 | 0.26536  |
| 14987 | P03410 | Q14061 | 1.2278   |
| 14988 | P03410 | Q15172 | 0.61382  |
| 14989 | P03410 | Q6A163 | 0.88723  |
| 14990 | P03410 | Q8NCG7 | 1.2968   |
| 14991 | P03410 | Q6PCB5 | 0.73589  |
| 14992 | P03410 | Q8WXX7 | 1.4474   |
| 14993 | P03410 | Q8TF08 | 1.0078   |
| 14994 | P03410 | Q6ZV65 | 0.61842  |
| 14995 | P03410 | Q8WYK2 | 0.37328  |
| 14996 | P03410 | P22531 | 1.6653   |
| 14997 | P03410 | O00505 | 1.2956   |
| 14998 | P03410 | O75373 | 0.81868  |
| 14999 | P03410 | P62736 | 0.24431  |
| 15000 | P03410 | Q9NV56 | 1.3355   |
| 15001 | P03410 | Q8IXP5 | 1.4883   |
| 15002 | P03410 | Q96PK6 | 0.74209  |
| 15003 | P03410 | Q8NEE0 | 1.6653   |
| 15004 | P03410 | Q8TD31 | 1.3634   |
| 15005 | P03410 | P13804 | 0.09967  |
| 15006 | P03410 | Q99496 | 0.28112  |
| 15007 | P03410 | Q96A04 | 1.7311   |
| 15008 | P03410 | A1L4M7 | 0.078888 |
| 15009 | P03410 | P48634 | 1.0663   |
| 15010 | P03410 | Q9H5J8 | 1.5503   |
| 15011 | P03410 | Q9P2T0 | 0.92315  |
| 15012 | P03410 | Q14525 | 0.89153  |
| 15013 | P03410 | Q9UI08 | 0.3599   |
| 15014 | P03410 | A6PVY3 | 0.91041  |
| 15015 | P03410 | O95780 | 1.0456   |
| 15016 | P03410 | A8K0R7 | 1.0151   |
| 15017 | P03410 | Q5VUA4 | 0.4411   |
| 15018 | P03410 | Q86VQ1 | 0.60267  |
| 15019 | P03410 | Q8N3J5 | 0.044314 |
| 15020 | P03410 | A8K830 | 1.6653   |
| 15021 | P03410 | P0CG30 | 0.30366  |
| 15022 | P03410 | Q5RGN0 | 1.289    |
| 15023 | P03410 | A6NL28 | 0.22746  |
| 15024 | P03410 | Q8N5J2 | 1.8333   |
| 15025 | P03410 | Q9NRL3 | 0.72585  |
| 15026 | P03410 | B1ATL7 | 0.60462  |
| 15027 | P03410 | P0C854 | 1.6653   |
| 15028 | P03410 | Q5VWM4 | 0.16455  |
| 15029 | P03410 | Q86VM9 | 0.27021  |
| 15030 | P03410 | O43684 | 0.88695  |
| 15031 | P03410 | A6NF01 | 1.4336   |
| 15032 | P03410 | Q69YW0 | 0.38254  |
| 15033 | P03410 | Q765I0 | 1.0305   |
| 15034 | P03410 | Q8IYK2 | 1.5147   |
| 15035 | P03410 | Q9UKX2 | 0.28865  |
| 15036 | P03410 | P0CJ79 | 0.85175  |
| 15037 | P03410 | Q9P000 | 0.53492  |
| 15038 | P03410 | Q8N7Q3 | 0.78964  |
| 15039 | P03410 | Q8N511 | 0.77232  |
| 15040 | P03410 | Q7Z614 | 0.75291  |
| 15041 | P03410 | Q6PEY1 | 1.5675   |
| 15042 | P03410 | Q16658 | 0.40914  |
| 15043 | P03410 | Q2T9F4 | 0.44202  |
| 15044 | P03410 | Q6W349 | 1.7021   |
| 15045 | P03410 | Q96P11 | 0.23202  |
| 15046 | P03410 | Q9HCM9 | 0.35652  |
| 15047 | P03410 | Q14929 | 0.79749  |
| 15048 | P03410 | Q96HY6 | 0.68732  |

|       |        |        |         |
|-------|--------|--------|---------|
| 15049 | P03410 | Q9NZ43 | 0.12755 |
| 15050 | P03410 | Q9BY41 | 0.35229 |
| 15051 | P03410 | P17482 | 1.0161  |
| 15052 | P03410 | Q7Z6J9 | 1.0797  |
| 15053 | P03410 | Q8TF68 | 0.34093 |
| 15054 | P03410 | Q05BW5 | 0.43826 |
| 15055 | P03410 | P06744 | 0.8875  |
| 15056 | P03410 | Q9BXU0 | 0.57168 |
| 15057 | P03410 | Q5T5N4 | 0.505   |
| 15058 | P03410 | P47710 | 0.82017 |
| 15059 | P03410 | Q96NU1 | 0.25632 |
| 15060 | P03410 | Q8NE71 | 0.47764 |
| 15061 | P03410 | Q9Y534 | 0.40869 |
| 15062 | P03410 | Q9H3H3 | 0.49649 |
| 15063 | P03410 | P54198 | 1.0457  |
| 15064 | P03410 | A6NHN6 | 0.80973 |
| 15065 | P03410 | Q96C34 | 1.1513  |
| 15066 | P03410 | Q9H0V9 | 0.40711 |
| 15067 | P03410 | P0CW22 | 0.39375 |
| 15068 | P03410 | Q969T9 | 1.6505  |
| 15069 | P03410 | Q5BIV9 | 1.3058  |
| 15070 | P03410 | Q96H22 | 0.75254 |
| 15071 | P03410 | Q60508 | 0.43839 |
| 15072 | P03410 | Q86WV1 | 0.83768 |
| 15073 | P03410 | Q5SWL7 | 1.0219  |
| 15074 | P03410 | A8MQ03 | 0.97401 |
| 15075 | P03410 | Q49AS3 | 1.3612  |
| 15076 | P03410 | P17861 | 0.88386 |
| 15077 | P03410 | Q15329 | 1.1562  |
| 15078 | P03410 | Q15038 | 1.9891  |
| 15079 | P03410 | Q6W2J9 | 0.33187 |
| 15080 | P03410 | Q9UJK0 | 1.6739  |
| 15081 | P03410 | P59282 | 0.66076 |
| 15082 | P03410 | Q9P0M9 | 1.662   |
| 15083 | P03410 | P59861 | 0.87928 |
| 15084 | P03410 | P01858 | 1.6653  |
| 15085 | P03410 | Q9UEY8 | 0.32763 |
| 15086 | P03410 | Q8NFI3 | 0.59389 |
| 15087 | P03410 | O75293 | 0.67742 |
| 15088 | P03410 | P07315 | 0.80389 |
| 15089 | P03410 | Q86WS4 | 1.6653  |
| 15090 | P03410 | P12036 | 0.7491  |
| 15091 | P03410 | Q14749 | 0.61675 |
| 15092 | P03410 | Q9Y2L5 | 0.40443 |
| 15093 | P03410 | Q7L266 | 0.43315 |
| 15094 | P03410 | Q8NBN3 | 0.87668 |
| 15095 | P03410 | P78346 | 1.0744  |
| 15096 | P03410 | Q9Y239 | 0.24128 |
| 15097 | P03410 | Q9Y3B1 | 0.20886 |
| 15098 | P03410 | Q9NQR7 | 1.6653  |
| 15099 | P03410 | Q9BTE6 | 1.1442  |
| 15100 | P03410 | Q9UPT5 | 0.88479 |
| 15101 | P03410 | Q17RN3 | 0.8269  |
| 15102 | P03410 | Q9NRD1 | 0.12221 |
| 15103 | P03410 | Q6PCE3 | 0.91504 |
| 15104 | P03410 | Q9UKV8 | 0.78335 |
| 15105 | P03410 | Q8N3C0 | 0.24254 |
| 15106 | P03410 | Q5VSG8 | 0.61939 |
| 15107 | P03410 | Q9Y5Q9 | 0.30191 |
| 15108 | P03410 | B3EWG3 | 1.4883  |
| 15109 | P03410 | O75698 | 1.6653  |
| 15110 | P03410 | Q15633 | 0.9658  |
| 15111 | P03410 | P0CH99 | 1.1006  |
| 15112 | P03410 | Q9Y2S6 | 1.6653  |
| 15113 | P03410 | Q9H1C7 | 1.0913  |
| 15114 | P03410 | P17040 | 0.74761 |
| 15115 | P03410 | Q99497 | 0.11108 |
| 15116 | P03410 | Q8NFG4 | 1.354   |
| 15117 | P03410 | Q9H974 | 1.9791  |
| 15118 | P03410 | Q8TD10 | 0.20917 |
| 15119 | P03410 | Q8N9P6 | 1.6653  |
| 15120 | P03410 | Q07866 | 0.95045 |
| 15121 | P03410 | Q8NCU4 | 0.95044 |
| 15122 | P03410 | O14599 | 1.6653  |
| 15123 | P03410 | O95628 | 0.30652 |
| 15124 | P03410 | P48643 | 0.19074 |

|       |        |        |          |
|-------|--------|--------|----------|
| 15125 | P03410 | Q96NB1 | 0.42123  |
| 15126 | P03410 | Q8TCN5 | 0.10142  |
| 15127 | P03410 | Q15050 | 1.0724   |
| 15128 | P03410 | Q7Z7L8 | 1.7857   |
| 15129 | P03410 | Q96D15 | 0.57887  |
| 15130 | P03410 | Q13409 | 0.8747   |
| 15131 | P03410 | P04066 | 0.45659  |
| 15132 | P03410 | Q8NG41 | 0.70327  |
| 15133 | P03410 | P61925 | 0.24268  |
| 15134 | P03410 | Q9UBC9 | 0.79049  |
| 15135 | P03410 | Q9UHB9 | 0.48065  |
| 15136 | P03410 | P62328 | 1.8163   |
| 15137 | P03410 | P30622 | 0.51523  |
| 15138 | P03410 | Q8IYN6 | 1.465    |
| 15139 | P03410 | O95503 | 1.0306   |
| 15140 | P03410 | Q8NHS1 | 0.87187  |
| 15141 | P03410 | Q9NRI7 | 1.6653   |
| 15142 | P03410 | Q96QC0 | 1.4118   |
| 15143 | P03410 | Q16851 | 0.27495  |
| 15144 | P03410 | C9JH25 | 1.0913   |
| 15145 | P03410 | Q96H86 | 0.77496  |
| 15146 | P03410 | Q8WWY3 | 0.4713   |
| 15147 | P03410 | Q99766 | 0.94222  |
| 15148 | P03410 | A8MX80 | 1.0341   |
| 15149 | P03410 | P15621 | 0.97247  |
| 15150 | P03410 | Q9BYQ2 | 1.9984   |
| 15151 | P03410 | Q8WY50 | 1.6653   |
| 15152 | P03410 | Q8TDG2 | 0.23477  |
| 15153 | P03410 | Q6PJ61 | 1.3908   |
| 15154 | P03410 | A6ZKI3 | 0.93458  |
| 15155 | P03410 | Q5GH77 | 1.1084   |
| 15156 | P03410 | Q8TC90 | 1.5218   |
| 15157 | P03410 | Q8N1N4 | 0.8445   |
| 15158 | P03410 | Q9NX08 | 0.6999   |
| 15159 | P03410 | P08397 | 0.5653   |
| 15160 | P03410 | Q9H6D7 | 0.81017  |
| 15161 | P03410 | P18615 | 0.97781  |
| 15162 | P03410 | P35754 | 0.31596  |
| 15163 | P03410 | P02100 | 0.81619  |
| 15164 | P03410 | Q9NPA5 | 0.33939  |
| 15165 | P03410 | Q9BZ98 | 0.32566  |
| 15166 | P03410 | Q8IV03 | 1.8055   |
| 15167 | P03410 | Q8TEA8 | 1.5292   |
| 15168 | P03410 | O94915 | 0.38071  |
| 15169 | P03410 | Q5VXH5 | 0.16455  |
| 15170 | P03410 | Q96M27 | 0.14694  |
| 15171 | P03410 | Q8WYR1 | 0.4302   |
| 15172 | P03410 | Q9Y614 | 0.23236  |
| 15173 | P03410 | Q6QNY1 | 0.94845  |
| 15174 | P03410 | Q53G26 | 0.88198  |
| 15175 | P03410 | A6NGB9 | 0.54408  |
| 15176 | P03410 | Q9BXS5 | 1.1578   |
| 15177 | P03410 | P37275 | 0.61433  |
| 15178 | P03410 | Q15637 | 0.27399  |
| 15179 | P03410 | Q93062 | 0.79424  |
| 15180 | P03410 | Q8N6Q3 | 0.62689  |
| 15181 | P03410 | Q9NX77 | 0.76651  |
| 15182 | P03410 | Q96KF7 | 1.0913   |
| 15183 | P03410 | Q53R41 | 0.2112   |
| 15184 | P03410 | Q96L92 | 0.92808  |
| 15185 | P03410 | Q9HCE5 | 0.38209  |
| 15186 | P03410 | Q8TEP8 | 1.1976   |
| 15187 | P03410 | Q2TAC2 | 0.040425 |
| 15188 | P03410 | Q8NI08 | 0.96682  |
| 15189 | P03410 | P62244 | 1.364    |
| 15190 | P03410 | Q9P2B7 | 1.4883   |
| 15191 | P03410 | P36954 | 0.20146  |
| 15192 | P03410 | Q13190 | 0.27453  |
| 15193 | P03410 | Q8IZE3 | 0.24386  |
| 15194 | P03410 | Q8N660 | 2.3694   |
| 15195 | P03410 | Q99442 | 0.62154  |
| 15196 | P03410 | Q9NVI1 | 0.98716  |
| 15197 | P03410 | Q5TAB7 | 1.1098   |
| 15198 | P03410 | P30279 | 0.93158  |
| 15199 | P03410 | Q93015 | 1.4431   |
| 15200 | P03410 | Q6ZVC0 | 1.4996   |

|       |        |        |         |
|-------|--------|--------|---------|
| 15201 | P03410 | P13682 | 0.80547 |
| 15202 | P03410 | Q8TAZ6 | 1.0218  |
| 15203 | P03410 | Q8N688 | 0.73641 |
| 15204 | P03410 | Q9H7H0 | 1.0021  |
| 15205 | P03410 | P41162 | 0.20834 |
| 15206 | P03410 | O43504 | 0.40881 |
| 15207 | P03410 | P0C880 | 1.6653  |
| 15208 | P03410 | Q9BT43 | 0.34816 |
| 15209 | P03410 | Q96JM3 | 0.46478 |
| 15210 | P03410 | Q9H0U9 | 0.54058 |
| 15211 | P03410 | P12018 | 0.74569 |
| 15212 | P03410 | Q9BYQ9 | 1.9984  |
| 15213 | P03410 | P35080 | 0.77053 |
| 15214 | P03410 | Q9H4T2 | 0.53429 |
| 15215 | P03410 | Q9HAI6 | 0.97927 |
| 15216 | P03410 | Q9BU70 | 0.44524 |
| 15217 | P03410 | Q9NZ81 | 1.8834  |
| 15218 | P03410 | Q9H3P2 | 1.4092  |
| 15219 | P03410 | Q8N587 | 0.95607 |
| 15220 | P03410 | Q5T7N8 | 0.78129 |
| 15221 | P03410 | Q8WUN7 | 0.49184 |
| 15222 | P03410 | Q9UL59 | 0.74466 |
| 15223 | P03410 | Q96AB6 | 0.23238 |
| 15224 | P03410 | Q9NPJ4 | 2.3089  |
| 15225 | P03410 | A8MV24 | 0.75601 |
| 15226 | P03410 | O00268 | 0.96617 |
| 15227 | P03410 | Q69384 | 1.1647  |
| 15228 | P03410 | Q96AY2 | 1.1599  |
| 15229 | P03410 | Q6PRD7 | 1.6653  |
| 15230 | P03410 | Q12983 | 0.311   |
| 15231 | P03410 | Q8NEP4 | 1.4883  |
| 15232 | P03410 | Q8NFX5 | 0.97203 |
| 15233 | P03410 | Q15047 | 0.46641 |
| 15234 | P03410 | A6PW82 | 1.3071  |
| 15235 | P03410 | Q9NWT6 | 0.31349 |
| 15236 | P03410 | Q9H816 | 0.68476 |
| 15237 | P03410 | Q8N8Y2 | 0.13015 |
| 15238 | P03410 | Q86WR7 | 1.5141  |
| 15239 | P03410 | Q3V5L5 | 0.64904 |
| 15240 | P03410 | O43903 | 0.23201 |
| 15241 | P03410 | Q6PI98 | 0.80969 |
| 15242 | P03410 | Q8N4J0 | 1.5656  |
| 15243 | P03410 | P36508 | 0.41637 |
| 15244 | P03410 | Q5VWG9 | 0.79815 |
| 15245 | P03410 | Q12996 | 0.24888 |
| 15246 | P03410 | Q9P2Y5 | 0.67393 |
| 15247 | P03410 | P58317 | 0.815   |
| 15248 | P03410 | A1A4G5 | 1.6653  |
| 15249 | P03410 | Q9UJ41 | 0.37672 |
| 15250 | P03410 | Q9BQQ3 | 0.55074 |
| 15251 | P03410 | O94964 | 1.2494  |
| 15252 | P03410 | Q2M3G4 | 0.2529  |
| 15253 | P03410 | Q5MIZ7 | 0.6468  |
| 15254 | P03410 | Q9UBF9 | 0.39612 |
| 15255 | P03410 | Q6ZS46 | 1.7008  |
| 15256 | P03410 | Q96C28 | 0.8602  |
| 15257 | P03410 | Q8TBZ6 | 0.56812 |
| 15258 | P03410 | Q3KNV8 | 0.9101  |
| 15259 | P03410 | Q8WTP9 | 1.879   |
| 15260 | P03410 | Q8IYH5 | 0.53109 |
| 15261 | P03410 | Q8N5H3 | 1.4883  |
| 15262 | P03410 | Q9UKA4 | 0.29208 |
| 15263 | P03410 | Q9BWD3 | 1.3085  |
| 15264 | P03410 | Q8N7M2 | 0.96545 |
| 15265 | P03410 | Q8N6I4 | 1.0913  |
| 15266 | P03410 | Q96N38 | 1.0111  |
| 15267 | P03410 | Q13072 | 1.0723  |
| 15268 | P03410 | Q15388 | 0.40298 |
| 15269 | P03410 | P53680 | 0.40491 |
| 15270 | P03410 | P50995 | 1.0497  |
| 15271 | P03410 | Q9BRH9 | 0.82588 |
| 15272 | P03410 | P10916 | 0.28203 |
| 15273 | P03410 | Q96N03 | 0.6999  |
| 15274 | P03410 | O00442 | 0.6626  |
| 15275 | P03410 | Q15029 | 0.39046 |
| 15276 | P03410 | Q96S99 | 0.18531 |

|       |        |        |          |
|-------|--------|--------|----------|
| 15277 | P03410 | Q5VUG0 | 0.51441  |
| 15278 | P03410 | Q969H9 | 1.6653   |
| 15279 | P03410 | O60841 | 0.60822  |
| 15280 | P03410 | Q9BQS6 | 1.018    |
| 15281 | P03410 | Q86SY8 | 1.6653   |
| 15282 | P03410 | Q5TG92 | 1.2048   |
| 15283 | P03410 | Q9H5P4 | 0.69162  |
| 15284 | P03410 | Q52LR7 | 0.48407  |
| 15285 | P03410 | Q9UJ04 | 0.37927  |
| 15286 | P03410 | Q96G75 | 0.16544  |
| 15287 | P03410 | Q9BPX1 | 0.34464  |
| 15288 | P03410 | Q96SW2 | 0.60084  |
| 15289 | P03410 | Q86XF7 | 1.0598   |
| 15290 | P03410 | Q9HBQ8 | 1.594    |
| 15291 | P03410 | Q13495 | 1.7282   |
| 15292 | P03410 | Q8NFJ9 | 0.50538  |
| 15293 | P03410 | O75787 | 0.45805  |
| 15294 | P03410 | Q8N0T1 | 1.2581   |
| 15295 | P03410 | Q15696 | 0.29969  |
| 15296 | P03410 | Q8N7P3 | 0.64164  |
| 15297 | P03410 | Q8N616 | 1.6653   |
| 15298 | P03410 | Q9Y3A0 | 0.52963  |
| 15299 | P03410 | Q6ZRZ4 | 1.8399   |
| 15300 | P03410 | P49915 | 0.69581  |
| 15301 | P03410 | Q16520 | 0.9338   |
| 15302 | P03410 | Q9H1Y0 | 0.80342  |
| 15303 | P03410 | Q9NYY8 | 0.53766  |
| 15304 | P03410 | Q3MJ62 | 0.62675  |
| 15305 | P03410 | Q8N6L1 | 0.86881  |
| 15306 | P03410 | P37837 | 1.1572   |
| 15307 | P03410 | P98169 | 0.2893   |
| 15308 | P03410 | Q5VUB5 | 1.0285   |
| 15309 | P03410 | Q96G30 | 0.82066  |
| 15310 | P03410 | Q8TC76 | 2.3386   |
| 15311 | P03410 | O75943 | 0.31307  |
| 15312 | P03410 | Q15014 | 1.1962   |
| 15313 | P03410 | Q9NP97 | 1.0254   |
| 15314 | P03410 | A6NDX5 | 0.7891   |
| 15315 | P03410 | Q8TAB5 | 1.4883   |
| 15316 | P03410 | Q8N7N1 | 0.032704 |
| 15317 | P03410 | Q13561 | 1.0928   |
| 15318 | P03410 | Q8N729 | 0.73366  |
| 15319 | P03410 | Q5T5M9 | 0.20917  |
| 15320 | P03410 | Q9UNK9 | 0.33766  |
| 15321 | P03410 | Q9H5Q3 | 0.67155  |
| 15322 | P03410 | P47756 | 0.26252  |
| 15323 | P03410 | Q9ULD0 | 0.43976  |
| 15324 | P03410 | Q8N3V7 | 1.2102   |
| 15325 | P03410 | Q86Z20 | 1.4804   |
| 15326 | P03410 | Q8N1Y9 | 1.6653   |
| 15327 | P03410 | P27816 | 0.80944  |
| 15328 | P03410 | E5RJ46 | 1.6653   |
| 15329 | P03410 | Q8NBT3 | 1.0913   |
| 15330 | P03410 | P62913 | 1.3147   |
| 15331 | P03410 | Q6ZVT0 | 0.088381 |
| 15332 | P03410 | Q7L5D6 | 1.4965   |
| 15333 | P03410 | Q96CB8 | 0.67054  |
| 15334 | P03410 | P17661 | 0.81625  |
| 15335 | P03410 | Q86TY3 | 1.0913   |
| 15336 | P03410 | P26998 | 1.2726   |
| 15337 | P03410 | Q8TEL6 | 0.7587   |
| 15338 | P03410 | Q8WTZ3 | 0.92147  |
| 15339 | P03410 | Q8WTR7 | 0.72741  |
| 15340 | P03410 | Q701N2 | 1.6653   |
| 15341 | P03410 | Q6UXP9 | 0.22981  |
| 15342 | P03410 | Q9BRV3 | 0.28344  |
| 15343 | P03410 | Q96JB2 | 1.0773   |
| 15344 | P03410 | Q96CS4 | 0.78404  |
| 15345 | P03410 | Q14CZ0 | 2.0397   |
| 15346 | P03410 | Q8WVJ9 | 0.48134  |
| 15347 | P03410 | Q92804 | 0.20186  |
| 15348 | P03410 | P36871 | 0.096746 |
| 15349 | P03410 | P61978 | 0.87726  |
| 15350 | P03410 | Q6ZVN6 | 0.47834  |
| 15351 | P03410 | O60610 | 0.30593  |
| 15352 | P03410 | O43597 | 0.14039  |

|       |        |        |          |
|-------|--------|--------|----------|
| 15353 | P03410 | Q9BY89 | 0.40714  |
| 15354 | P03410 | Q5T953 | 1.6468   |
| 15355 | P03410 | Q9Y3A4 | 0.71264  |
| 15356 | P03410 | Q9BYQ6 | 1.9984   |
| 15357 | P03410 | P0C7T5 | 0.71318  |
| 15358 | P03410 | P78560 | 0.89703  |
| 15359 | P03410 | Q6ZU67 | 0.51397  |
| 15360 | P03410 | Q8TAC9 | 0.86361  |
| 15361 | P03410 | O60535 | 0.86704  |
| 15362 | P03410 | Q96NF6 | 1.0723   |
| 15363 | P03410 | Q9UK99 | 0.33697  |
| 15364 | P03410 | Q9HC36 | 0.11904  |
| 15365 | P03410 | Q8IV48 | 0.17755  |
| 15366 | P03410 | Q9H7P6 | 1.738    |
| 15367 | P03410 | Q9UDV6 | 0.6439   |
| 15368 | P03410 | Q9UP83 | 1.5062   |
| 15369 | P03410 | Q8NBJ7 | 0.60048  |
| 15370 | P03410 | O75822 | 1.1167   |
| 15371 | P03410 | O15327 | 0.081297 |
| 15372 | P03410 | Q9BU76 | 1.1731   |
| 15373 | P03410 | P07438 | 0.83308  |
| 15374 | P03410 | Q9H1A4 | 1.0872   |
| 15375 | P03410 | Q8NFF5 | 0.77602  |
| 15376 | P03410 | Q8WZ55 | 1.028    |
| 15377 | P03410 | Q9H902 | 0.36984  |
| 15378 | P03410 | Q96NB3 | 0.47186  |
| 15379 | P03410 | Q9UPW5 | 0.20932  |
| 15380 | P03410 | Q9H115 | 0.28958  |
| 15381 | P03410 | O14929 | 1.0148   |
| 15382 | P03410 | Q9H0B6 | 0.95827  |
| 15383 | P03410 | Q04864 | 0.98902  |
| 15384 | P03410 | P61583 | 1.6763   |
| 15385 | P03410 | A6NM66 | 0.50136  |
| 15386 | P03410 | Q5SSG8 | 1.1653   |
| 15387 | P03410 | Q86XT2 | 0.45231  |
| 15388 | P03410 | Q9GZY8 | 0.53425  |
| 15389 | P03410 | Q8WYQ3 | 1.6264   |
| 15390 | P03410 | Q9NWB1 | 0.33761  |
| 15391 | P03410 | Q86T03 | 1.4569   |
| 15392 | P03410 | Q6PJE2 | 0.1152   |
| 15393 | P03410 | H3BNL1 | 0.89561  |
| 15394 | P03410 | Q5BKU9 | 0.23031  |
| 15395 | P03410 | Q96DB5 | 0.77425  |
| 15396 | P03410 | Q2KJ03 | 0.4757   |
| 15397 | P03410 | Q9HAZ2 | 0.37055  |
| 15398 | P03410 | Q99676 | 0.78354  |
| 15399 | P03410 | Q9BYQ8 | 1.9984   |
| 15400 | P03410 | Q96F05 | 1.001    |
| 15401 | P03410 | Q9BQ15 | 1.0864   |
| 15402 | P03410 | Q92994 | 0.37847  |
| 15403 | P03410 | O43612 | 0.7241   |
| 15404 | P03410 | Q9BVC6 | 1.1514   |
| 15405 | P03410 | Q9Y2I6 | 0.51745  |
| 15406 | P03410 | Q6ZRH4 | 2.4261   |
| 15407 | P03410 | O00139 | 0.51114  |
| 15408 | P03410 | I3L3R5 | 1.6653   |
| 15409 | P03410 | Q8TCC3 | 0.49843  |
| 15410 | P03410 | Q9BYU5 | 0.84455  |
| 15411 | P03410 | Q9P2D3 | 1.0123   |
| 15412 | P03410 | Q9NPA0 | 0.79002  |
| 15413 | P03410 | Q9NQ60 | 0.87407  |
| 15414 | P03410 | Q8TE04 | 0.89332  |
| 15415 | P03410 | O43303 | 1.2375   |
| 15416 | P03410 | Q9NVV9 | 1.2804   |
| 15417 | P03410 | Q9UGY1 | 0.54188  |
| 15418 | P03410 | Q9UKX7 | 1.4032   |
| 15419 | P03410 | O60896 | 0.19139  |
| 15420 | P03410 | Q15773 | 1.3291   |
| 15421 | P03410 | O60885 | 0.82633  |
| 15422 | P03410 | Q16540 | 0.44122  |
| 15423 | P03410 | Q9GZM3 | 0.26848  |
| 15424 | P03410 | P15822 | 0.85015  |
| 15425 | P03410 | Q8NA19 | 0.29677  |
| 15426 | P03410 | Q3BBV1 | 2.3694   |
| 15427 | P03410 | Q5SWL8 | 0.38376  |
| 15428 | P03410 | Q9Y3F1 | 1.6653   |



|       |        |        |         |
|-------|--------|--------|---------|
| 15429 | P03410 | Q3C1V1 | 1.4883  |
| 15430 | P03410 | Q15010 | 0.39311 |
| 15431 | P03410 | P55822 | 0.86291 |
| 15432 | P03410 | O95990 | 0.63273 |
| 15433 | P03410 | P02729 | 1.6653  |
| 15434 | P03410 | Q9Y2Z0 | 0.50424 |
| 15435 | P03410 | Q6UXV1 | 0.65923 |
| 15436 | P03410 | Q96B86 | 0.85292 |
| 15437 | P03410 | Q9H7R0 | 0.91401 |
| 15438 | P03410 | P60468 | 0.62368 |
| 15439 | P03410 | Q96K80 | 0.5219  |
| 15440 | P03410 | Q7Z5B4 | 0.96234 |
| 15441 | P03410 | Q9H8G2 | 1.5224  |
| 15442 | P03410 | O96002 | 1.6653  |
| 15443 | P03410 | O15151 | 0.37083 |
| 15444 | P03410 | Q05048 | 0.90639 |
| 15445 | P03410 | Q3LI60 | 1.6653  |
| 15446 | P03410 | Q96FM1 | 0.79299 |
| 15447 | P03410 | P49257 | 0.34484 |
| 15448 | P03410 | P50502 | 0.79061 |
| 15449 | P03410 | P38646 | 0.57084 |
| 15450 | P03410 | Q9UI25 | 1.6653  |
| 15451 | P03410 | P52738 | 0.72414 |
| 15452 | P03410 | Q9Y2G9 | 1.0847  |
| 15453 | P03410 | O95178 | 1.3025  |
| 15454 | P03410 | Q14181 | 0.94877 |
| 15455 | P03410 | Q8TBQ9 | 1.0378  |
| 15456 | P03410 | Q14896 | 0.28026 |
| 15457 | P03410 | Q5T2W1 | 0.76729 |
| 15458 | P03410 | Q96MB7 | 0.86177 |
| 15459 | P03410 | O96004 | 0.35414 |
| 15460 | P03410 | Q658Y4 | 1.0762  |
| 15461 | P03410 | Q96M91 | 1.7161  |
| 15462 | P03410 | A6NCS6 | 0.94764 |
| 15463 | P03410 | Q9BSD3 | 0.53424 |
| 15464 | P03410 | P31274 | 0.10955 |
| 15465 | P03410 | Q9HBT8 | 0.74683 |
| 15466 | P03410 | Q9Y2J0 | 0.27846 |
| 15467 | P03410 | Q96A57 | 1.0913  |
| 15468 | P03410 | Q00534 | 0.85559 |
| 15469 | P03410 | Q16543 | 0.5628  |
| 15470 | P03410 | Q9BQE9 | 1.5004  |
| 15471 | P03410 | Q49AM1 | 0.63971 |
| 15472 | P03410 | Q92698 | 0.33441 |
| 15473 | P03410 | Q96B23 | 1.1296  |
| 15474 | P03410 | Q86VP3 | 1.066   |
| 15475 | P03410 | Q9NSA3 | 0.97242 |
| 15476 | P03410 | Q15543 | 0.96536 |
| 15477 | P03410 | Q9BWW4 | 1.1221  |
| 15478 | P03410 | P25786 | 0.87265 |
| 15479 | P03410 | Q16629 | 0.63071 |
| 15480 | P03410 | Q13416 | 0.85468 |
| 15481 | P03410 | Q66GS9 | 0.73254 |
| 15482 | P03410 | Q9Y4R8 | 0.55327 |
| 15483 | P03410 | P19419 | 1.3419  |
| 15484 | P03410 | P20963 | 0.20197 |
| 15485 | P03410 | Q9NR46 | 0.50565 |
| 15486 | P03410 | Q3B7T3 | 0.64555 |
| 15487 | P03410 | Q15973 | 0.67495 |
| 15488 | P03410 | Q8N365 | 1.4883  |
| 15489 | P03410 | P52740 | 0.65413 |
| 15490 | P03410 | Q969Q6 | 0.49883 |
| 15491 | P03410 | Q6UE05 | 1.0913  |
| 15492 | P03410 | Q6PIZ9 | 0.90719 |
| 15493 | P03410 | Q15652 | 0.41874 |
| 15494 | P03410 | P35325 | 1.6653  |
| 15495 | P03410 | P60328 | 0.53228 |
| 15496 | P03410 | O95473 | 0.78861 |
| 15497 | P03410 | Q8WU43 | 0.52536 |
| 15498 | P03410 | Q9H9H4 | 1.3059  |
| 15499 | P03410 | Q6NXP2 | 1.6336  |
| 15500 | P03410 | Q9H840 | 0.90799 |
| 15501 | P03410 | Q04726 | 1.0627  |
| 15502 | P03410 | Q9NZF1 | 0.38834 |
| 15503 | P03410 | Q6UX68 | 0.97104 |
| 15504 | P03410 | Q96PY0 | 0.78737 |

|       |        |        |          |
|-------|--------|--------|----------|
| 15505 | P03410 | A6NFY7 | 1.4792   |
| 15506 | P03410 | P42772 | 0.95387  |
| 15507 | P03410 | Q6P1L5 | 2.1063   |
| 15508 | P03410 | P36542 | 0.48635  |
| 15509 | P03410 | O15061 | 1.2197   |
| 15510 | P03410 | Q99618 | 1.7432   |
| 15511 | P03410 | Q8IYD8 | 0.41427  |
| 15512 | P03410 | P12755 | 0.26969  |
| 15513 | P03410 | Q9NW97 | 1.0913   |
| 15514 | P03410 | Q6ZP82 | 0.6999   |
| 15515 | P03410 | P60059 | 0.50214  |
| 15516 | P03410 | Q8IYM0 | 0.24331  |
| 15517 | P03410 | Q8N319 | 2.273    |
| 15518 | P03410 | Q14684 | 0.80234  |
| 15519 | P03410 | P0C866 | 0.26267  |
| 15520 | P03410 | Q9H379 | 1.7569   |
| 15521 | P03410 | Q8N910 | 0.27664  |
| 15522 | P03410 | P78345 | 1.8345   |
| 15523 | P03410 | Q9NXR1 | 0.45367  |
| 15524 | P03410 | A8MVM7 | 1.6653   |
| 15525 | P03410 | Q96FV2 | 1.1687   |
| 15526 | P03410 | B3EWF7 | 1.6653   |
| 15527 | P03410 | P29728 | 0.25262  |
| 15528 | P03410 | Q96CP7 | 1.0913   |
| 15529 | P03410 | Q9NVH6 | 0.7563   |
| 15530 | P03410 | Q9H6K4 | 0.96244  |
| 15531 | P03410 | Q9BZK3 | 0.56945  |
| 15532 | P03410 | Q5JSQ8 | 0.34702  |
| 15533 | P03410 | Q9Y4P9 | 0.56121  |
| 15534 | P03410 | Q02083 | 0.3674   |
| 15535 | P03410 | Q9BYT5 | 0.58088  |
| 15536 | P03410 | Q6UX71 | 0.068298 |
| 15537 | P03410 | Q15554 | 0.59493  |
| 15538 | P03410 | Q9NYA3 | 0.61239  |
| 15539 | P03410 | Q96G25 | 0.96855  |
| 15540 | P03410 | Q9NV72 | 0.97478  |
| 15541 | P03410 | Q15398 | 1.168    |
| 15542 | P03410 | Q6PD62 | 0.65737  |
| 15543 | P03410 | P31276 | 0.46104  |
| 15544 | P03410 | Q02878 | 1.6855   |
| 15545 | P03410 | Q8N7H1 | 0.10491  |
| 15546 | P03410 | Q6IPX3 | 1.3164   |
| 15547 | P03410 | P82970 | 0.95761  |
| 15548 | P03410 | Q9NYK6 | 0.78456  |
| 15549 | P03410 | Q8TEW8 | 0.26507  |
| 15550 | P03410 | Q71RG6 | 1.6653   |
| 15551 | P03410 | Q8NDH3 | 0.75002  |
| 15552 | P03410 | Q9BXM0 | 0.77108  |
| 15553 | P03410 | Q14549 | 0.32945  |
| 15554 | P03410 | Q9P2R6 | 0.88795  |
| 15555 | P03410 | P07741 | 0.86231  |
| 15556 | P03410 | Q8N3X6 | 1.2763   |
| 15557 | P03410 | Q76KX8 | 0.99306  |
| 15558 | P03410 | O76003 | 0.32469  |
| 15559 | P03410 | Q9UN79 | 0.84021  |
| 15560 | P03410 | Q5T0B9 | 0.10461  |
| 15561 | P03410 | Q9NWV8 | 0.85054  |
| 15562 | P03410 | Q66K89 | 0.59436  |
| 15563 | P03410 | Q08209 | 0.41487  |
| 15564 | P03410 | Q9NX20 | 1.4557   |
| 15565 | P03410 | Q9UL03 | 1.3822   |
| 15566 | P03410 | A4D1B5 | 0.32371  |
| 15567 | P03410 | Q15008 | 0.39544  |
| 15568 | P03410 | Q8N865 | 0.60459  |
| 15569 | P03410 | Q9HC77 | 1.1995   |
| 15570 | P03410 | O75879 | 0.96664  |
| 15571 | P03410 | Q99666 | 0.29442  |
| 15572 | P03410 | Q9HAA7 | 0.31122  |
| 15573 | P03410 | Q8TF09 | 1.0749   |
| 15574 | P03410 | P63000 | 0.86861  |
| 15575 | P03410 | Q5K130 | 0.70496  |
| 15576 | P03410 | P17676 | 0.86593  |
| 15577 | P03410 | Q13596 | 0.59117  |
| 15578 | P03410 | P23511 | 1.0591   |
| 15579 | P03410 | Q9BPZ3 | 0.88053  |
| 15580 | P03410 | Q8IWE4 | 0.50682  |

|       |        |        |           |
|-------|--------|--------|-----------|
| 15581 | P03410 | Q92901 | 0.8783    |
| 15582 | P03410 | Q7Z699 | 0.38598   |
| 15583 | P03410 | Q8IZD9 | 0.31978   |
| 15584 | P03410 | Q96KS0 | 0.24653   |
| 15585 | P03410 | Q9Y6I3 | 0.18535   |
| 15586 | P03410 | Q9H410 | 1.0047    |
| 15587 | P03410 | Q96SZ4 | 0.68122   |
| 15588 | P03410 | Q92900 | 0.45137   |
| 15589 | P03410 | Q6ZN84 | 0.52485   |
| 15590 | P03410 | Q8IUB9 | 1.6653    |
| 15591 | P03410 | Q9BQ50 | 0.2384    |
| 15592 | P03410 | Q9H7T9 | 1.1894    |
| 15593 | P03410 | Q8NA57 | 1.5021    |
| 15594 | P03410 | Q8WUB8 | 0.41999   |
| 15595 | P03410 | Q580R0 | 0.25572   |
| 15596 | P03410 | Q96AP0 | 0.52672   |
| 15597 | P03410 | Q8N1N5 | 0.70821   |
| 15598 | P03410 | P11166 | 0.55614   |
| 15599 | P03410 | P22626 | 0.50625   |
| 15600 | P03410 | Q9P016 | 1.1568    |
| 15601 | P03410 | Q8IY42 | 1.5982    |
| 15602 | P03410 | Q5T230 | 1.855     |
| 15603 | P03410 | P49006 | 1.7584    |
| 15604 | P03410 | Q16401 | 1.1541    |
| 15605 | P03410 | Q5TDH0 | 0.27885   |
| 15606 | P03410 | Q99996 | 0.96358   |
| 15607 | P03410 | Q9Y2J4 | 0.44132   |
| 15608 | P03410 | Q9NPD7 | 1.111     |
| 15609 | P03410 | O76087 | 0.508     |
| 15610 | P03410 | Q8IUC2 | 1.7887    |
| 15611 | P03410 | Q9P0U4 | 0.23904   |
| 15612 | P03410 | Q9GZL8 | 1.3756    |
| 15613 | P03410 | P98182 | 0.6124    |
| 15614 | P03410 | Q96LK0 | 0.45408   |
| 15615 | P03410 | Q6ICL3 | 0.26159   |
| 15616 | P03410 | O60895 | 0.18635   |
| 15617 | P03410 | Q107X0 | 0.84432   |
| 15618 | P03410 | Q1HG43 | 1.0805    |
| 15619 | P03410 | O75380 | 0.0048409 |
| 15620 | P03410 | Q8TD86 | 0.34414   |
| 15621 | P03410 | Q9UI17 | 0.27046   |
| 15622 | P03410 | Q9BXF9 | 0.40166   |
| 15623 | P03410 | Q6ZUL3 | 1.6653    |
| 15624 | P03410 | Q96LQ0 | 1.2113    |
| 15625 | P03410 | Q9NRR5 | 0.7643    |
| 15626 | P03410 | Q8TDD2 | 0.31472   |
| 15627 | P03410 | Q6PGQ1 | 1.1769    |
| 15628 | P03410 | Q9BQA9 | 0.27209   |
| 15629 | P03410 | Q86TL2 | 0.99628   |
| 15630 | P03410 | Q96ER9 | 0.45401   |
| 15631 | P03410 | Q6ZWC4 | 1.0579    |
| 15632 | P03410 | Q8N228 | 0.41575   |
| 15633 | P03410 | Q8N726 | 0.849     |
| 15634 | P03410 | Q6P3X8 | 1.3309    |
| 15635 | P03410 | Q8WWB5 | 1.3651    |
| 15636 | P03410 | O94855 | 0.64668   |
| 15637 | P03410 | Q9BYV9 | 0.3558    |
| 15638 | P03410 | Q5SXJ2 | 2.3694    |
| 15639 | P03410 | Q8N159 | 0.49322   |
| 15640 | P03410 | Q9BUT9 | 1.9652    |
| 15641 | P03410 | Q96N11 | 0.80932   |
| 15642 | P03410 | Q59EK9 | 0.72684   |
| 15643 | P03410 | Q8N7B7 | 0.34276   |
| 15644 | P03410 | Q9Y615 | 0.6605    |
| 15645 | P03410 | O60806 | 0.39165   |
| 15646 | P03410 | O75153 | 0.25148   |
| 15647 | P03410 | O43678 | 1.0337    |
| 15648 | P03410 | Q9P2X7 | 1.6653    |
| 15649 | P03410 | Q96LK8 | 0.71076   |
| 15650 | P03410 | P57077 | 1.0112    |
| 15651 | P03410 | O96005 | 0.64556   |
| 15652 | P03410 | Q5VYS4 | 0.31844   |
| 15653 | P03410 | Q15233 | 0.52875   |
| 15654 | P03410 | P54840 | 0.86524   |
| 15655 | P03410 | Q8IY22 | 0.22065   |
| 15656 | P03410 | Q8WVP5 | 1.626     |

|       |        |        |          |
|-------|--------|--------|----------|
| 15657 | P03410 | Q8NG31 | 1.1392   |
| 15658 | P03410 | Q9Y4P1 | 0.75491  |
| 15659 | P03410 | P08238 | 0.47171  |
| 15660 | P03410 | Q9UHU1 | 1.6653   |
| 15661 | P03410 | Q9GZM8 | 0.17264  |
| 15662 | P03410 | Q7Z5L0 | 0.92287  |
| 15663 | P03410 | P0CJ75 | 1.4876   |
| 15664 | P03410 | Q8IUB3 | 0.80669  |
| 15665 | P03410 | Q8N680 | 0.10142  |
| 15666 | P03410 | Q8N699 | 1.3203   |
| 15667 | P03410 | P80297 | 0.83277  |
| 15668 | P03410 | Q9NRF8 | 0.68083  |
| 15669 | P03410 | Q9H329 | 0.31872  |
| 15670 | P03410 | P11940 | 0.34797  |
| 15671 | P03410 | P49589 | 1.0003   |
| 15672 | P03410 | Q56VL3 | 1.1553   |
| 15673 | P03410 | Q5T440 | 0.54984  |
| 15674 | P03410 | P61568 | 0.65575  |
| 15675 | P03410 | Q9H9D4 | 0.73955  |
| 15676 | P03410 | Q504T8 | 0.5033   |
| 15677 | P03410 | A6NGG3 | 1.6653   |
| 15678 | P03410 | Q96SQ5 | 0.82084  |
| 15679 | P03410 | Q96CP2 | 0.26697  |
| 15680 | P03410 | A4GXA9 | 1.1455   |
| 15681 | P03410 | Q15390 | 0.71733  |
| 15682 | P03410 | Q5ST30 | 0.72956  |
| 15683 | P03410 | Q96D09 | 0.23502  |
| 15684 | P03410 | Q9NP98 | 1.1686   |
| 15685 | P03410 | Q9UMQ3 | 0.75669  |
| 15686 | P03410 | O94916 | 0.1711   |
| 15687 | P03410 | P36639 | 0.36647  |
| 15688 | P03410 | Q9NWW5 | 0.3631   |
| 15689 | P03410 | Q9H4I2 | 0.53752  |
| 15690 | P03410 | Q96JL9 | 0.83729  |
| 15691 | P03410 | P18847 | 1.1497   |
| 15692 | P03410 | Q8TDW5 | 0.24331  |
| 15693 | P03410 | Q96N19 | 0.67663  |
| 15694 | P03410 | Q9H6Z9 | 0.46485  |
| 15695 | P03410 | Q9UI66 | 1.6653   |
| 15696 | P03410 | Q9UJG1 | 1.3924   |
| 15697 | P03410 | Q8N9R6 | 0.59251  |
| 15698 | P03410 | P01106 | 0.38996  |
| 15699 | P03410 | Q96PZ2 | 0.76712  |
| 15700 | P03410 | Q9NZ52 | 0.97916  |
| 15701 | P03410 | Q02447 | 0.56428  |
| 15702 | P03410 | Q8NFP0 | 1.217    |
| 15703 | P03410 | Q15527 | 0.64058  |
| 15704 | P03410 | Q9UJ55 | 0.2347   |
| 15705 | P03410 | Q9H607 | 0.63705  |
| 15706 | P03410 | P16989 | 0.18141  |
| 15707 | P03410 | Q8IZ21 | 0.57664  |
| 15708 | P03410 | Q9NVP1 | 0.11218  |
| 15709 | P03410 | F2Z333 | 1.0913   |
| 15710 | P03410 | Q5T1N1 | 1.6465   |
| 15711 | P03410 | Q9GZZ8 | 1.6653   |
| 15712 | P03410 | O60551 | 0.51091  |
| 15713 | P03410 | Q9BUJ2 | 1.2006   |
| 15714 | P03410 | Q6PJT7 | 0.99776  |
| 15715 | P03410 | Q5VZT2 | 0.67718  |
| 15716 | P03410 | Q5H9B9 | 0.50578  |
| 15717 | P03410 | Q8N4B1 | 0.42412  |
| 15718 | P03410 | Q969X5 | 0.39597  |
| 15719 | P03410 | Q8N661 | 1.1598   |
| 15720 | P03410 | A6NGQ2 | 0.90395  |
| 15721 | P03410 | Q9NVZ3 | 0.64276  |
| 15722 | P03410 | P49427 | 0.44581  |
| 15723 | P03410 | P63165 | 1.0266   |
| 15724 | P03410 | Q5GH72 | 1.1702   |
| 15725 | P03410 | Q5T4H9 | 1.6653   |
| 15726 | P03410 | O95251 | 0.68851  |
| 15727 | P03410 | Q08752 | 0.51764  |
| 15728 | P03410 | Q92750 | 0.63486  |
| 15729 | P03410 | B5ME19 | 0.46717  |
| 15730 | P03410 | Q9Y2Z2 | 1.6429   |
| 15731 | P03410 | Q96NJ1 | 1.6653   |
| 15732 | P03410 | Q969J3 | 0.031951 |

|       |        |        |          |
|-------|--------|--------|----------|
| 15733 | P03410 | Q96N68 | 1.6653   |
| 15734 | P03410 | Q9C0D7 | 0.70642  |
| 15735 | P03410 | Q13015 | 0.9647   |
| 15736 | P03410 | Q15372 | 0.86947  |
| 15737 | P03410 | P07992 | 0.14252  |
| 15738 | P03410 | P15880 | 1.2326   |
| 15739 | P03410 | Q9H3K6 | 0.80253  |
| 15740 | P03410 | Q15154 | 1.1201   |
| 15741 | P03410 | Q96C11 | 0.40354  |
| 15742 | P03410 | Q5CZC0 | 2.0654   |
| 15743 | P03410 | Q99814 | 0.24787  |
| 15744 | P03410 | Q9BTL3 | 1.5769   |
| 15745 | P03410 | P25705 | 0.17437  |
| 15746 | P03410 | Q9NV06 | 0.34567  |
| 15747 | P03410 | Q8N1V2 | 0.76548  |
| 15748 | P03410 | Q8NI27 | 1.1794   |
| 15749 | P03410 | Q9NXW9 | 0.66131  |
| 15750 | P03410 | Q9UI46 | 0.34897  |
| 15751 | P03410 | P0DMB1 | 1.2368   |
| 15752 | P03410 | O00267 | 1.1511   |
| 15753 | P03410 | Q52MB2 | 1.4367   |
| 15754 | P03410 | A1L3X4 | 1.6653   |
| 15755 | P03410 | P17947 | 0.881    |
| 15756 | P03410 | Q9Y5B9 | 0.32163  |
| 15757 | P03410 | P0C860 | 0.43433  |
| 15758 | P03410 | P62306 | 0.36164  |
| 15759 | P03410 | Q16600 | 0.7557   |
| 15760 | P03410 | P63272 | 0.9664   |
| 15761 | P03410 | P60510 | 1.038    |
| 15762 | P03410 | Q53HL2 | 1.0759   |
| 15763 | P03410 | Q8N7Y1 | 1.6653   |
| 15764 | P03410 | Q86W33 | 1.0992   |
| 15765 | P03410 | Q9H5J4 | 0.86335  |
| 15766 | P03410 | Q12968 | 0.50118  |
| 15767 | P03410 | Q6ZS72 | 0.8493   |
| 15768 | P03410 | Q9NP79 | 0.57928  |
| 15769 | P03410 | P46777 | 1.3528   |
| 15770 | P03410 | O95125 | 0.73036  |
| 15771 | P03410 | Q9H606 | 1.1381   |
| 15772 | P03410 | Q9BTV7 | 0.29155  |
| 15773 | P03410 | Q06330 | 0.50244  |
| 15774 | P03410 | O15315 | 0.20578  |
| 15775 | P03410 | O60481 | 0.24427  |
| 15776 | P03410 | P56378 | 1.1049   |
| 15777 | P03410 | Q702N8 | 0.61236  |
| 15778 | P03410 | O76042 | 1.0076   |
| 15779 | P03410 | P46776 | 1.2786   |
| 15780 | P03410 | Q6ZR03 | 0.97282  |
| 15781 | P03410 | Q99502 | 0.078262 |
| 15782 | P03410 | Q6UXV3 | 1.6653   |
| 15783 | P03410 | P04264 | 0.72175  |
| 15784 | P03410 | Q14746 | 1.0439   |
| 15785 | P03410 | Q9BXP5 | 1.1077   |
| 15786 | P03410 | A2RUQ5 | 0.50889  |
| 15787 | P03410 | Q96MT0 | 0.09736  |
| 15788 | P03410 | Q9NZ32 | 0.22107  |
| 15789 | P03410 | Q9HBH1 | 1.3262   |
| 15790 | P03410 | O75409 | 1.1228   |
| 15791 | P03410 | Q99575 | 0.85479  |
| 15792 | P03410 | Q99549 | 0.57968  |
| 15793 | P03410 | Q17RQ9 | 0.75648  |
| 15794 | P03410 | Q7Z392 | 0.82325  |
| 15795 | P03410 | Q06730 | 0.59461  |
| 15796 | P03410 | Q5VSD8 | 0.72567  |
| 15797 | P03410 | Q8NG48 | 0.18095  |
| 15798 | P03410 | P98171 | 0.24532  |
| 15799 | P03410 | Q96IR3 | 1.7067   |
| 15800 | P03410 | Q9NUS5 | 0.84772  |
| 15801 | P03410 | A6NGN4 | 0.44804  |
| 15802 | P03410 | P62841 | 1.1141   |
| 15803 | P03410 | P19429 | 0.18583  |
| 15804 | P03410 | Q3LI54 | 1.6653   |
| 15805 | P03410 | Q9BSB4 | 0.5304   |
| 15806 | P03410 | Q96GE9 | 0.78116  |
| 15807 | P03410 | P61567 | 0.94016  |
| 15808 | P03410 | Q96BT1 | 0.11141  |

|       |        |        |          |
|-------|--------|--------|----------|
| 15809 | P03410 | Q86X60 | 0.90046  |
| 15810 | P03410 | P82675 | 1.4181   |
| 15811 | P03410 | P52294 | 1.3605   |
| 15812 | P03410 | Q08E93 | 1.6653   |
| 15813 | P03410 | Q13057 | 0.56984  |
| 15814 | P03410 | Q04837 | 0.83448  |
| 15815 | P03410 | Q92670 | 0.61398  |
| 15816 | P03410 | Q86U86 | 1.0888   |
| 15817 | P03410 | Q5JNZ5 | 0.85912  |
| 15818 | P03410 | Q5JUK9 | 0.51383  |
| 15819 | P03410 | O15060 | 0.37181  |
| 15820 | P03410 | Q13445 | 0.090673 |
| 15821 | P03410 | Q96GM5 | 0.94885  |
| 15822 | P03410 | Q9BSG1 | 0.87552  |
| 15823 | P03410 | O14948 | 0.38434  |
| 15824 | P03410 | Q6ZWJ1 | 0.31852  |
| 15825 | P03410 | Q70EL1 | 0.67234  |
| 15826 | P03410 | Q569K4 | 0.28241  |
| 15827 | P03410 | Q9NWD9 | 0.77162  |
| 15828 | P03410 | P54105 | 1.4195   |
| 15829 | P03410 | Q9P217 | 0.25864  |
| 15830 | P03410 | O15259 | 0.39162  |
| 15831 | P03410 | P0C7Q5 | 1.1631   |
| 15832 | P03410 | Q8NFB4 | 1.1317   |
| 15833 | P03410 | O75251 | 0.49782  |
| 15834 | P03410 | Q17RP2 | 0.11139  |
| 15835 | P03410 | O60682 | 0.28848  |
| 15836 | P03410 | Q8N1W0 | 1.6653   |
| 15837 | P03410 | Q8N8C0 | 0.74317  |
| 15838 | P03410 | H3BNL8 | 1.4409   |
| 15839 | P03410 | P17812 | 0.62555  |
| 15840 | P03410 | Q8WV60 | 0.48337  |
| 15841 | P03410 | P30050 | 1.009    |
| 15842 | P03410 | Q01860 | 0.54121  |
| 15843 | P03410 | B7ZAQ6 | 0.86829  |
| 15844 | P03410 | Q8N344 | 0.71946  |
| 15845 | P03410 | Q8N9P0 | 0.92452  |
| 15846 | P03410 | Q96F24 | 0.73973  |
| 15847 | P03410 | P0CG23 | 0.62281  |
| 15848 | P03410 | Q6AZW8 | 0.71108  |
| 15849 | P03410 | Q9NR28 | 1.0739   |
| 15850 | P03410 | P78318 | 1.3325   |
| 15851 | P03410 | Q9BZD3 | 0.69628  |
| 15852 | P03410 | Q96K30 | 1.1139   |
| 15853 | P03410 | Q4L180 | 0.29921  |
| 15854 | P03410 | Q86UW1 | 1.0785   |
| 15855 | P03410 | Q5TYW8 | 0.22356  |
| 15856 | P03410 | A6NC98 | 0.17347  |
| 15857 | P03410 | O43736 | 0.69585  |
| 15858 | P03410 | Q6ZMW2 | 0.75901  |
| 15859 | P03410 | O75351 | 0.40027  |
| 15860 | P03410 | Q6P3V2 | 0.6269   |
| 15861 | P03410 | Q32P44 | 0.3132   |
| 15862 | P03410 | P05413 | 0.47132  |
| 15863 | P03410 | Q13077 | 0.59066  |
| 15864 | P03410 | P24928 | 0.69868  |
| 15865 | P03410 | Q16548 | 0.88202  |
| 15866 | P03410 | Q9NRP2 | 1.5413   |
| 15867 | P03410 | Q2M2W7 | 1.4883   |
| 15868 | P03410 | O14548 | 0.15302  |
| 15869 | P03410 | Q9NQ39 | 0.32994  |
| 15870 | P03410 | Q6IPU0 | 1.3008   |
| 15871 | P03410 | Q8N1I8 | 1.6653   |
| 15872 | P03410 | Q902F9 | 0.82741  |
| 15873 | P03410 | P53992 | 1.2356   |
| 15874 | P03410 | Q8IVD9 | 0.8639   |
| 15875 | P03410 | Q9BUW7 | 1.4883   |
| 15876 | P03410 | Q9NS93 | 1.0003   |
| 15877 | P03410 | P41218 | 0.54188  |
| 15878 | P03410 | Q63ZY6 | 0.25335  |
| 15879 | P03410 | Q96B42 | 0.83053  |
| 15880 | P03410 | Q9Y2V7 | 0.35585  |
| 15881 | P03410 | Q8N7X4 | 0.10775  |
| 15882 | P03410 | Q9H1H9 | 0.91525  |
| 15883 | P03410 | Q6ZMZ3 | 0.40445  |
| 15884 | P03410 | Q6PF05 | 0.67321  |

|       |        |        |          |
|-------|--------|--------|----------|
| 15885 | P03410 | O14497 | 0.63023  |
| 15886 | P03410 | Q96PE7 | 0.19368  |
| 15887 | P03410 | O14656 | 0.22634  |
| 15888 | P03410 | A6NLJ0 | 1.6608   |
| 15889 | P03410 | Q08AE8 | 0.40708  |
| 15890 | P03410 | Q9BXH1 | 0.58528  |
| 15891 | P03410 | Q15287 | 0.87701  |
| 15892 | P03410 | Q53GL7 | 0.63163  |
| 15893 | P03410 | Q5HYC2 | 0.31264  |
| 15894 | P03410 | Q96MU5 | 1.3886   |
| 15895 | P03410 | P15954 | 0.81885  |
| 15896 | P03410 | Q8IX03 | 1.0815   |
| 15897 | P03410 | Q9P260 | 0.27417  |
| 15898 | P03410 | Q9UC06 | 0.71433  |
| 15899 | P03410 | Q16517 | 1.1188   |
| 15900 | P03410 | Q8N8G2 | 0.92657  |
| 15901 | P03410 | Q8NB16 | 0.23158  |
| 15902 | P03410 | Q8WTX7 | 1.0258   |
| 15903 | P03410 | P49356 | 0.22025  |
| 15904 | P03410 | Q8TCJ0 | 1.6171   |
| 15905 | P03410 | Q9P299 | 0.59646  |
| 15906 | P03410 | Q9UII5 | 0.77805  |
| 15907 | P03410 | Q8N1B3 | 0.90855  |
| 15908 | P03410 | B3EWG6 | 1.4883   |
| 15909 | P03410 | Q8N8A8 | 0.68737  |
| 15910 | P03410 | Q6IEG0 | 0.65992  |
| 15911 | P03410 | A6NFI3 | 0.69737  |
| 15912 | P03410 | Q15776 | 0.65578  |
| 15913 | P03410 | Q8N6F8 | 0.042244 |
| 15914 | P03410 | P60900 | 0.67235  |
| 15915 | P03410 | Q8N8J7 | 0.72796  |
| 15916 | P03410 | Q8NB50 | 0.81411  |
| 15917 | P03410 | Q495Y7 | 0.24594  |
| 15918 | P03410 | Q2NL98 | 1.5976   |
| 15919 | P03410 | Q9UM07 | 0.76428  |
| 15920 | P03410 | Q8WV44 | 0.24744  |
| 15921 | P03410 | Q0JRZ9 | 0.31497  |
| 15922 | P03410 | Q14264 | 0.61204  |
| 15923 | P03410 | Q8WV07 | 0.63805  |
| 15924 | P03410 | O96019 | 1.0085   |
| 15925 | P03410 | Q9Y3C8 | 0.64371  |
| 15926 | P03410 | P16118 | 0.2157   |
| 15927 | P03410 | P0CW20 | 0.43173  |
| 15928 | P03410 | A1L162 | 1.1749   |
| 15929 | P03410 | Q8N292 | 0.96448  |
| 15930 | P03410 | Q3SYG4 | 0.68671  |
| 15931 | P03410 | Q2NL68 | 1.4883   |
| 15932 | P03410 | Q8TDZ2 | 0.3052   |
| 15933 | P03410 | Q6ZRP0 | 1.4883   |
| 15934 | P03410 | P54274 | 0.56081  |
| 15935 | P03410 | Q9UKD1 | 0.62603  |
| 15936 | P03410 | P54845 | 0.34319  |
| 15937 | P03410 | O43427 | 0.47959  |
| 15938 | P03410 | P62310 | 0.71644  |
| 15939 | P03410 | O75674 | 0.63971  |
| 15940 | P03410 | P04733 | 0.80043  |
| 15941 | P03410 | A6NCN8 | 1.4883   |
| 15942 | P03410 | Q6TFL3 | 0.58949  |
| 15943 | P03410 | Q96SA4 | 0.86137  |
| 15944 | P03410 | P46020 | 0.49088  |
| 15945 | P03410 | Q9UHD4 | 1.1026   |
| 15946 | P03410 | O60811 | 0.10172  |
| 15947 | P03410 | P55060 | 1.1746   |
| 15948 | P03410 | Q5T3J3 | 1.1012   |
| 15949 | P03410 | Q13011 | 0.13262  |
| 15950 | P03410 | Q9UBP6 | 1.5947   |
| 15951 | P03410 | Q9C0G0 | 0.23716  |
| 15952 | P03410 | Q8WY22 | 1.3585   |
| 15953 | P03410 | Q9BYR5 | 1.9984   |
| 15954 | P03410 | A8MVW0 | 1.0285   |
| 15955 | P03410 | P12035 | 0.892    |
| 15956 | P03410 | Q9NY30 | 0.60299  |
| 15957 | P03410 | O75419 | 1.1564   |
| 15958 | P03410 | P25791 | 0.54942  |
| 15959 | P03410 | O96020 | 1.2925   |
| 15960 | P03410 | O75382 | 0.52435  |

|       |        |        |          |
|-------|--------|--------|----------|
| 15961 | P03410 | Q96BN8 | 0.36541  |
| 15962 | P03410 | Q9Y6Q3 | 0.67613  |
| 15963 | P03410 | A6NC62 | 0.44221  |
| 15964 | P03410 | Q15172 | 0.43604  |
| 15965 | P03410 | Q9P2B4 | 0.65805  |
| 15966 | P03410 | Q96S59 | 1.043    |
| 15967 | P03410 | Q9ULH7 | 0.8542   |
| 15968 | P03410 | O43747 | 0.96634  |
| 15969 | P03410 | Q04917 | 0.48919  |
| 15970 | P03410 | Q6UWT2 | 0.95938  |
| 15971 | P03410 | P10073 | 0.86204  |
| 15972 | P03410 | Q8IUE0 | 0.30793  |
| 15973 | P03410 | Q92902 | 0.21402  |
| 15974 | P03410 | Q8IYI0 | 0.78314  |
| 15975 | P03410 | O95299 | 0.091218 |
| 15976 | P03410 | P41220 | 0.3727   |
| 15977 | P03410 | Q9UL18 | 1.1302   |
| 15978 | P03410 | A9YTQ3 | 0.31758  |
| 15979 | P03410 | Q495M9 | 0.58456  |
| 15980 | P03410 | Q0D2J5 | 0.67869  |
| 15981 | P03410 | P05388 | 1.5215   |
| 15982 | P03410 | Q8NC69 | 0.32577  |
| 15983 | P03410 | Q9BXF3 | 0.89154  |
| 15984 | P03410 | Q9H0P7 | 0.58008  |
| 15985 | P03410 | Q9ULK2 | 0.99972  |
| 15986 | P03410 | Q96FT9 | 0.32977  |
| 15987 | P03410 | Q6UXD1 | 1.0913   |
| 15988 | P03410 | O76041 | 0.3686   |
| 15989 | P03410 | P46013 | 0.60376  |
| 15990 | P03410 | Q86UB2 | 1.2764   |
| 15991 | P03410 | Q12962 | 1.2361   |
| 15992 | P03410 | Q4KMX7 | 0.35337  |
| 15993 | P03410 | Q9BW92 | 0.7115   |
| 15994 | P03410 | Q9BQA5 | 0.76958  |
| 15995 | P03410 | Q9Y316 | 0.80629  |
| 15996 | P03410 | Q96G21 | 1.1399   |
| 15997 | P03410 | Q8N983 | 0.78893  |
| 15998 | P03410 | Q9UBT6 | 0.33408  |
| 15999 | P03410 | Q9H2M3 | 0.1382   |
| 16000 | P03410 | Q96MC2 | 0.39121  |
| 16001 | P03410 | Q9BTP6 | 1.0837   |
| 16002 | P03410 | Q6ZW61 | 0.39625  |
| 16003 | P03410 | Q5U5X0 | 1.5911   |
| 16004 | P03410 | Q5H9J9 | 0.5404   |
| 16005 | P03410 | P21675 | 0.32436  |
| 16006 | P03410 | Q9BXW9 | 1.0458   |
| 16007 | P03410 | Q9GZU2 | 0.69118  |
| 16008 | P03410 | Q9Y4I5 | 0.52394  |
| 16009 | P03410 | Q8IXS2 | 0.28981  |
| 16010 | P03410 | Q6QNY0 | 1.3541   |
| 16011 | P03410 | Q9BYE7 | 0.61517  |
| 16012 | P03410 | Q14997 | 0.65997  |
| 16013 | P03410 | Q8IWF6 | 0.97346  |
| 16014 | P03410 | Q13620 | 0.76257  |
| 16015 | P03410 | O75031 | 1.223    |
| 16016 | P03410 | O43516 | 0.51962  |
| 16017 | P03410 | Q9BYG7 | 0.36709  |
| 16018 | P03410 | P41212 | 0.69006  |
| 16019 | P03410 | Q3ZCX4 | 0.83596  |
| 16020 | P03410 | P16157 | 0.41861  |
| 16021 | P03410 | A8MUX0 | 0.89429  |
| 16022 | P03410 | Q03989 | 0.38374  |
| 16023 | P03410 | Q9UQE7 | 0.24841  |
| 16024 | P03410 | Q7Z7A1 | 1.5367   |
| 16025 | P03410 | P09629 | 0.74143  |
| 16026 | P03410 | Q14149 | 0.21803  |
| 16027 | P03410 | O15235 | 1.1934   |
| 16028 | P03410 | Q9Y5J7 | 0.51539  |
| 16029 | P03410 | Q15111 | 0.86614  |
| 16030 | P03410 | Q9ULZ2 | 0.97937  |
| 16031 | P03410 | Q6UX46 | 1.0597   |
| 16032 | P03410 | Q8N1L1 | 1.6653   |
| 16033 | P03410 | Q8NFV5 | 1.0907   |
| 16034 | P03410 | P29083 | 1.2676   |
| 16035 | P03410 | Q9NQZ2 | 0.38228  |
| 16036 | P03410 | P06730 | 0.77526  |



|       |        |        |          |
|-------|--------|--------|----------|
| 16037 | P03410 | Q96IL0 | 0.50222  |
| 16038 | P03410 | Q8N5U0 | 1.6653   |
| 16039 | P03410 | Q5SY85 | 1.3881   |
| 16040 | P03410 | Q6NZY4 | 0.57507  |
| 16041 | P03410 | Q9NVV5 | 0.899    |
| 16042 | P03410 | Q96K31 | 1.1734   |
| 16043 | P03410 | Q6ZN03 | 0.65094  |
| 16044 | P03410 | Q9UHD9 | 0.99639  |
| 16045 | P03410 | Q10571 | 1.0543   |
| 16046 | P03410 | O95867 | 0.78494  |
| 16047 | P03410 | P15941 | 0.37593  |
| 16048 | P03410 | O75334 | 0.82568  |
| 16049 | P03410 | Q14686 | 1.3181   |
| 16050 | P03410 | P0CG35 | 1.2621   |
| 16051 | P03410 | Q70J99 | 0.3049   |
| 16052 | P03410 | Q9Y2B2 | 1.3624   |
| 16053 | P03410 | Q14938 | 0.20768  |
| 16054 | P03410 | A2RUB1 | 1.4883   |
| 16055 | P03410 | Q8TAW3 | 0.81318  |
| 16056 | P03410 | Q8WTW4 | 0.57619  |
| 16057 | P03410 | H7BZ55 | 0.014642 |
| 16058 | P03410 | Q9NQ87 | 0.35773  |
| 16059 | P03410 | Q9ULM6 | 0.84085  |
| 16060 | P03410 | Q9BU23 | 1.1144   |
| 16061 | P03410 | Q9NQX6 | 0.8415   |
| 16062 | P03410 | Q17RH7 | 1.6653   |
| 16063 | P03410 | Q6ZQY7 | 1.5078   |
| 16064 | P03410 | Q9H3E2 | 0.31388  |
| 16065 | P03410 | Q12765 | 1.0127   |
| 16066 | P03410 | Q8N4W9 | 0.79465  |
| 16067 | P03410 | Q9NWF9 | 0.71965  |
| 16068 | P03410 | Q8IUZ0 | 0.3132   |
| 16069 | P03410 | Q96BT3 | 0.66857  |
| 16070 | P03410 | O00198 | 1.5526   |
| 16071 | P03410 | Q8N4C9 | 1.0913   |
| 16072 | P03410 | Q9BT09 | 0.329    |
| 16073 | P03410 | Q13098 | 0.32552  |
| 16074 | P03410 | Q8NCR6 | 0.80692  |
| 16075 | P03410 | P18848 | 1.1106   |
| 16076 | P03410 | Q8N0X2 | 0.3845   |
| 16077 | P03410 | Q0VFX6 | 1.4883   |
| 16078 | P03410 | Q1ZZU3 | 0.93128  |
| 16079 | P03410 | Q8N138 | 0.61153  |
| 16080 | P03410 | Q567V2 | 0.49581  |
| 16081 | P03410 | Q69YN2 | 0.396    |
| 16082 | P03410 | A7E2U8 | 0.70026  |
| 16083 | P03410 | Q6ISU1 | 0.677    |
| 16084 | P03410 | P42575 | 0.34318  |
| 16085 | P03410 | Q8NAX2 | 1.4883   |
| 16086 | P03410 | P25685 | 0.32461  |
| 16087 | P03410 | Q9UPR3 | 1.0333   |
| 16088 | P03410 | Q9UQ80 | 0.93301  |
| 16089 | P03410 | Q8IVJ8 | 1.4391   |
| 16090 | P03410 | Q5T871 | 1.6653   |
| 16091 | P03410 | Q86SX3 | 1.8247   |
| 16092 | P03410 | Q8N3J2 | 0.37536  |
| 16093 | P03410 | Q9H0A0 | 0.68929  |
| 16094 | P03410 | Q8NDY4 | 1.6653   |
| 16095 | P03410 | P36402 | 0.44373  |
| 16096 | P03410 | Q5H9L2 | 1.1794   |
| 16097 | P03410 | Q6UWW9 | 0.70288  |
| 16098 | P03410 | Q5TAX3 | 0.71877  |
| 16099 | P03410 | Q9NQ35 | 1.1788   |
| 16100 | P03410 | P51970 | 0.12508  |
| 16101 | P03410 | P0DI80 | 1.0029   |
| 16102 | P03410 | P22528 | 1.0668   |
| 16103 | P03410 | O75427 | 0.86318  |
| 16104 | P03410 | A6NIY4 | 1.0907   |
| 16105 | P03410 | Q92614 | 0.29095  |
| 16106 | P03410 | Q9UHK0 | 0.45838  |
| 16107 | P03410 | Q96KR1 | 0.66409  |
| 16108 | P03410 | A3KN83 | 1.3611   |
| 16109 | P03410 | P35998 | 0.47844  |
| 16110 | P03410 | P50222 | 0.46372  |
| 16111 | P03410 | Q5VWM1 | 0.62283  |
| 16112 | P03410 | O60502 | 0.14816  |

|       |        |        |          |
|-------|--------|--------|----------|
| 16113 | P03410 | Q8TAQ5 | 0.79465  |
| 16114 | P03410 | Q6P2C0 | 0.66607  |
| 16115 | P03410 | Q14242 | 1.1851   |
| 16116 | P03410 | Q6YHU6 | 0.11156  |
| 16117 | P03410 | A5A3E0 | 0.23109  |
| 16118 | P03410 | Q96RY7 | 0.053425 |
| 16119 | P03410 | Q15750 | 0.87426  |
| 16120 | P03410 | Q86Y97 | 0.3482   |
| 16121 | P03410 | Q49B96 | 0.77301  |
| 16122 | P03410 | Q9UJ78 | 0.37759  |
| 16123 | P03410 | Q75843 | 1.0744   |
| 16124 | P03410 | Q9Y3M2 | 0.90455  |
| 16125 | P03410 | Q95777 | 0.81336  |
| 16126 | P03410 | Q9NVM9 | 1.2985   |
| 16127 | P03410 | A8MXZ1 | 0.13951  |
| 16128 | P03410 | P0C2S0 | 0.96395  |
| 16129 | P03410 | Q6NXT1 | 0.45927  |
| 16130 | P03410 | Q6T4R5 | 0.73414  |
| 16131 | P03410 | Q96GX2 | 1.1594   |
| 16132 | P03410 | Q96A33 | 0.38444  |
| 16133 | P03410 | P51965 | 0.4251   |
| 16134 | P03410 | O43920 | 1.2113   |
| 16135 | P03410 | Q8N6I1 | 1.3174   |
| 16136 | P03410 | Q6AWC8 | 1.3597   |
| 16137 | P03410 | Q96FA3 | 0.87342  |
| 16138 | P03410 | P06396 | 0.82816  |
| 16139 | P03410 | Q8NEX6 | 0.89879  |
| 16140 | P03410 | Q9NPI6 | 1.0308   |
| 16141 | P03410 | Q7Z7B8 | 0.73641  |
| 16142 | P03410 | Q05682 | 0.2945   |
| 16143 | P03410 | Q3LI70 | 1.6653   |
| 16144 | P03410 | Q96AQ7 | 0.95426  |
| 16145 | P03410 | Q9H1A7 | 0.26848  |
| 16146 | P03410 | P61421 | 0.18179  |
| 16147 | P03410 | Q9NVD3 | 0.07018  |
| 16148 | P03410 | Q14692 | 0.54593  |
| 16149 | P03410 | Q9BQM9 | 1.0029   |
| 16150 | P03410 | Q9H1E3 | 1.5238   |
| 16151 | P03410 | P0CG34 | 1.2621   |
| 16152 | P03410 | Q8N6M5 | 0.48736  |
| 16153 | P03410 | Q7Z3Z0 | 1.0001   |
| 16154 | P03410 | Q96S95 | 1.2466   |
| 16155 | P03410 | A1L168 | 1.4883   |
| 16156 | P03410 | Q13526 | 0.64818  |
| 16157 | P03410 | P46781 | 1.2398   |
| 16158 | P03410 | Q68D91 | 0.10995  |
| 16159 | P03410 | A8MTA8 | 0.46415  |
| 16160 | P03410 | Q15393 | 0.14305  |
| 16161 | P03410 | Q12959 | 0.98743  |
| 16162 | P03410 | P54277 | 0.14347  |
| 16163 | P03410 | Q9UI09 | 0.1603   |
| 16164 | P03410 | P86481 | 1.6653   |
| 16165 | P03410 | Q7Z739 | 0.9812   |
| 16166 | P03410 | Q32Q52 | 0.71412  |
| 16167 | P03410 | Q96M43 | 0.65891  |
| 16168 | P03410 | Q9ULV0 | 0.22368  |
| 16169 | P03410 | P50221 | 0.38688  |
| 16170 | P03410 | Q15173 | 0.53955  |
| 16171 | P03410 | Q9Y3C1 | 0.32112  |
| 16172 | P03410 | Q8IYT2 | 0.87583  |
| 16173 | P03410 | Q86U90 | 1.2732   |
| 16174 | P03410 | Q9BUL8 | 0.95728  |
| 16175 | P03410 | Q9Y2N7 | 0.45563  |
| 16176 | P03410 | Q13503 | 0.76004  |
| 16177 | P03410 | Q9Y536 | 0.1777   |
| 16178 | P03410 | Q6NSI8 | 0.90597  |
| 16179 | P03410 | O15266 | 0.40545  |
| 16180 | P03410 | P60412 | 1.9984   |
| 16181 | P03410 | Q9C0D0 | 0.62535  |
| 16182 | P03410 | Q0IIN9 | 1.1125   |
| 16183 | P03410 | Q14019 | 0.46734  |
| 16184 | P03410 | Q9Y2D1 | 0.99797  |
| 16185 | P03410 | Q13609 | 0.21536  |
| 16186 | P03410 | Q9P1Y5 | 1.0348   |
| 16187 | P03410 | Q9UBI1 | 0.6999   |
| 16188 | P03410 | A0PG75 | 0.13955  |

|       |        |        |         |
|-------|--------|--------|---------|
| 16189 | P03410 | Q8WUU5 | 0.25665 |
| 16190 | P03410 | Q9UH99 | 0.35444 |
| 16191 | P03410 | Q9H857 | 0.82263 |
| 16192 | P03410 | O75446 | 1.752   |
| 16193 | P03410 | Q5T4T1 | 0.78097 |
| 16194 | P03410 | Q12815 | 0.73038 |
| 16195 | P03410 | Q9Y255 | 0.51635 |
| 16196 | P03410 | Q6PJG2 | 0.83412 |
| 16197 | P03410 | Q2M3A8 | 0.73916 |
| 16198 | P03410 | Q99460 | 0.6072  |
| 16199 | P03410 | Q9UGP4 | 0.4184  |
| 16200 | P03410 | P48553 | 0.30529 |
| 16201 | P03410 | Q52LJ0 | 0.66632 |
| 16202 | P03410 | Q8N9M1 | 0.6542  |
| 16203 | P03410 | Q0VF96 | 0.27972 |
| 16204 | P03410 | Q16655 | 1.5299  |
| 16205 | P03410 | P18124 | 0.99049 |
| 16206 | P03410 | Q14153 | 1.2127  |
| 16207 | P03410 | Q9H1F0 | 0.77619 |
| 16208 | P03410 | Q96B45 | 0.18078 |
| 16209 | P03410 | O60749 | 0.47783 |
| 16210 | P03410 | O76027 | 0.02554 |
| 16211 | P03410 | O43542 | 0.579   |
| 16212 | P03410 | Q4LEZ3 | 1.6298  |
| 16213 | P03410 | Q8TD17 | 0.75838 |
| 16214 | P03410 | Q13505 | 1.431   |
| 16215 | P03410 | Q2VPJ9 | 1.4883  |
| 16216 | P03410 | Q8IV36 | 0.8986  |
| 16217 | P03410 | Q9NS73 | 0.89881 |
| 16218 | P03410 | O60282 | 0.38415 |
| 16219 | P03410 | Q8NHU6 | 0.28898 |
| 16220 | P03410 | A8MUU9 | 0.45106 |
| 16221 | P03410 | O15069 | 0.54734 |
| 16222 | P03410 | Q8N3J9 | 0.74326 |
| 16223 | P03410 | Q9BVG4 | 0.60889 |
| 16224 | P03410 | Q2T9K0 | 0.9489  |
| 16225 | P03410 | Q9NWW0 | 0.34399 |
| 16226 | P03410 | Q7Z7N9 | 0.98082 |
| 16227 | P03410 | Q9NSK7 | 1.1852  |
| 16228 | P03410 | Q9BXW7 | 0.24652 |
| 16229 | P03410 | Q6UVJ0 | 1.2095  |
| 16230 | P03410 | Q3KP31 | 0.94919 |
| 16231 | P03410 | Q9Y2B4 | 0.53496 |
| 16232 | P03410 | O00400 | 0.73352 |
| 16233 | P03410 | Q9BYK8 | 0.37024 |
| 16234 | P03410 | P49588 | 0.30881 |
| 16235 | P03410 | A6NNH2 | 0.12769 |
| 16236 | P03410 | Q9Y224 | 1.5835  |
| 16237 | P03410 | Q9Y5S9 | 0.67953 |
| 16238 | P03410 | Q9BR09 | 0.25726 |
| 16239 | P03410 | Q969E1 | 1.0339  |
| 16240 | P03410 | Q7L190 | 1.5508  |
| 16241 | P03410 | P13667 | 0.43994 |
| 16242 | P03410 | Q16831 | 0.31141 |
| 16243 | P03410 | Q96QU8 | 1.1982  |
| 16244 | P03410 | Q96N77 | 0.62157 |
| 16245 | P03410 | Q8N6T7 | 0.72532 |
| 16246 | P03410 | Q9P0V3 | 0.63011 |
| 16247 | P03410 | Q5VW36 | 0.16654 |
| 16248 | P03410 | P60520 | 0.46677 |
| 16249 | P03410 | Q96Q45 | 0.82848 |
| 16250 | P03410 | Q8WW34 | 0.63587 |
| 16251 | P03410 | Q6PG37 | 1.0232  |
| 16252 | P03410 | Q7Z5K2 | 0.81966 |
| 16253 | P03410 | Q8NCN2 | 0.2267  |
| 16254 | P03410 | Q9Y3C4 | 0.90083 |
| 16255 | P03410 | Q6PI26 | 1.5078  |
| 16256 | P03410 | P00374 | 0.2008  |
| 16257 | P03410 | O75528 | 0.6475  |
| 16258 | P03410 | O94905 | 0.45871 |
| 16259 | P03410 | Q06265 | 0.30953 |
| 16260 | P03410 | Q8N8U3 | 0.44889 |
| 16261 | P03410 | Q5JXX7 | 1.0691  |
| 16262 | P03410 | Q9UJX4 | 0.98786 |
| 16263 | P03410 | P14651 | 0.18795 |
| 16264 | P03410 | P04053 | 0.19005 |

|       |        |        |          |
|-------|--------|--------|----------|
| 16265 | P03410 | Q96L16 | 0.084763 |
| 16266 | P03410 | Q9H579 | 0.097446 |
| 16267 | P03410 | Q9BUU2 | 0.20599  |
| 16268 | P03410 | Q7KZ85 | 0.51779  |
| 16269 | P03410 | P0C6T2 | 0.7621   |
| 16270 | P03410 | P54136 | 1.1302   |
| 16271 | P03410 | Q8NB91 | 0.47243  |
| 16272 | P03410 | Q96A35 | 1.3245   |
| 16273 | P03410 | Q53GA4 | 0.19863  |
| 16274 | P03410 | Q9NTK5 | 1.1396   |
| 16275 | P03410 | P10242 | 0.92961  |
| 16276 | P03410 | Q8IYB9 | 0.81404  |
| 16277 | P03410 | Q8WWA1 | 1.0913   |
| 16278 | P03410 | Q9NPF4 | 0.36893  |
| 16279 | P03410 | P53567 | 0.53566  |
| 16280 | P03410 | C9JLR9 | 1.2834   |
| 16281 | P03410 | Q8N5N4 | 0.96443  |
| 16282 | P03410 | Q9UIF8 | 0.8153   |
| 16283 | P03410 | Q147U7 | 0.72853  |
| 16284 | P03410 | Q9NYG5 | 0.86822  |
| 16285 | P03410 | Q9Y228 | 0.068298 |
| 16286 | P03410 | Q9NPF5 | 1.0498   |
| 16287 | P03410 | Q4G0G5 | 0.74176  |
| 16288 | P03410 | Q96DX5 | 1.088    |
| 16289 | P03410 | O43639 | 0.55832  |
| 16290 | P03410 | Q8WV15 | 1.0913   |
| 16291 | P03410 | Q9BWT1 | 1.584    |
| 16292 | P03410 | Q86YW9 | 0.45739  |
| 16293 | P03410 | Q9BWX1 | 0.3184   |
| 16294 | P03410 | Q9NR11 | 0.68927  |
| 16295 | P03410 | A6NEA5 | 0.83701  |
| 16296 | P03410 | Q9H1H1 | 0.65282  |
| 16297 | P03410 | Q6ZQX7 | 0.036031 |
| 16298 | P03410 | Q5SRE5 | 0.89906  |
| 16299 | P03410 | P54802 | 0.68395  |
| 16300 | P03410 | Q8N3X1 | 0.54319  |
| 16301 | P03410 | Q9Y605 | 2.2462   |
| 16302 | P03410 | Q8N6F7 | 0.97837  |
| 16303 | P03410 | Q5T6V5 | 0.93562  |
| 16304 | P03410 | P05141 | 0.26861  |
| 16305 | P03410 | Q69YI7 | 1.7589   |
| 16306 | P03410 | O96000 | 0.81371  |
| 16307 | P03410 | A1L020 | 0.26003  |
| 16308 | P03410 | Q9NXH3 | 1.0879   |
| 16309 | P03410 | O15405 | 1.0064   |
| 16310 | P03410 | O14646 | 0.51397  |
| 16311 | P03410 | Q9H8S9 | 0.66853  |
| 16312 | P03410 | Q9BZP3 | 0.72658  |
| 16313 | P03410 | O43759 | 0.90984  |
| 16314 | P03410 | O60299 | 0.67935  |
| 16315 | P03410 | Q96BP3 | 0.20771  |
| 16316 | P03410 | Q9BYE4 | 1.6653   |
| 16317 | P03410 | O14810 | 0.5354   |
| 16318 | P03410 | Q92688 | 0.34399  |
| 16319 | P03410 | Q7Z4S6 | 0.34531  |
| 16320 | P03410 | Q8NFB8 | 0.7367   |
| 16321 | P03410 | Q9H2K0 | 1.1107   |
| 16322 | P03410 | Q9HBL7 | 1.1105   |
| 16323 | P03410 | O75152 | 0.5219   |
| 16324 | P03410 | H3BR10 | 1.6653   |
| 16325 | P03410 | Q9H0W9 | 0.77228  |
| 16326 | P03410 | P24522 | 0.76114  |
| 16327 | P03410 | Q9NTM9 | 0.25524  |
| 16328 | P03410 | Q9UL33 | 0.61893  |
| 16329 | P03410 | Q8NA70 | 0.16338  |
| 16330 | P03410 | P48147 | 0.67095  |
| 16331 | P03410 | Q9UHL9 | 0.69214  |
| 16332 | P03410 | Q14493 | 1.0337   |
| 16333 | P03410 | Q6NUI1 | 1.3557   |
| 16334 | P03410 | Q15013 | 1.1327   |
| 16335 | P03410 | O00165 | 1.1538   |
| 16336 | P03410 | Q30KQ1 | 0.87928  |
| 16337 | P03410 | Q19AV6 | 1.9595   |
| 16338 | P03410 | P35789 | 0.90214  |
| 16339 | P03410 | P14859 | 1.1389   |
| 16340 | P03410 | Q96LC9 | 0.84797  |

|       |        |        |          |
|-------|--------|--------|----------|
| 16341 | P03410 | Q8NCQ2 | 1.2436   |
| 16342 | P03410 | Q8IYW2 | 1.6653   |
| 16343 | P03410 | O95751 | 0.86625  |
| 16344 | P03410 | O75582 | 0.28392  |
| 16345 | P03410 | Q4AC94 | 0.25756  |
| 16346 | P03410 | Q8N5I9 | 1.4883   |
| 16347 | P03410 | P0C841 | 1.6653   |
| 16348 | P03410 | P48444 | 0.74592  |
| 16349 | P03410 | Q96P70 | 1.2762   |
| 16350 | P03410 | Q9NVC6 | 0.59766  |
| 16351 | P03410 | Q9GZU7 | 0.66586  |
| 16352 | P03410 | P27348 | 0.55889  |
| 16353 | P03410 | Q76FK4 | 0.3166   |
| 16354 | P03410 | P10124 | 0.95282  |
| 16355 | P03410 | A6NEW6 | 0.6566   |
| 16356 | P03410 | O43561 | 0.29152  |
| 16357 | P03410 | Q6IB77 | 0.55374  |
| 16358 | P03410 | Q6ZSN1 | 0.91891  |
| 16359 | P03410 | Q99717 | 0.41977  |
| 16360 | P03410 | Q9NVK5 | 0.40492  |
| 16361 | P03410 | Q8WXI9 | 0.76216  |
| 16362 | P03410 | P20042 | 0.63452  |
| 16363 | P03410 | Q9H0G5 | 0.79509  |
| 16364 | P03410 | P52948 | 1.2269   |
| 16365 | P03410 | Q5JSZ5 | 1.4047   |
| 16366 | P03410 | Q12800 | 0.23677  |
| 16367 | P03410 | Q8NF99 | 0.69684  |
| 16368 | P03410 | Q9H649 | 0.23292  |
| 16369 | P03410 | Q14814 | 0.37704  |
| 16370 | P03410 | Q7Z4L9 | 0.28755  |
| 16371 | P03410 | Q7Z4T9 | 1.0177   |
| 16372 | P03410 | Q16352 | 0.86974  |
| 16373 | P03410 | P57723 | 0.16083  |
| 16374 | P03410 | P02686 | 0.64727  |
| 16375 | P03410 | P78545 | 0.55398  |
| 16376 | P03410 | Q99608 | 0.26816  |
| 16377 | P03410 | Q6ZRR9 | 0.39083  |
| 16378 | P03410 | Q96CB9 | 0.96335  |
| 16379 | P03410 | P35527 | 1.0001   |
| 16380 | P03410 | Q96AW1 | 0.83916  |
| 16381 | P03410 | Q8IYX0 | 1.0067   |
| 16382 | P03410 | Q9UH64 | 0.7135   |
| 16383 | P03410 | Q96RP9 | 1.0302   |
| 16384 | P03410 | Q96MK2 | 0.29951  |
| 16385 | P03410 | Q8N6V4 | 0.5111   |
| 16386 | P03410 | Q86V87 | 0.83059  |
| 16387 | P03410 | B5MD39 | 0.085776 |
| 16388 | P03410 | Q9HAU0 | 0.48727  |
| 16389 | P03410 | Q6NSJ2 | 1.6045   |
| 16390 | P03410 | Q86WW8 | 0.94546  |
| 16391 | P03410 | Q9UL49 | 1.1621   |
| 16392 | P03410 | Q9Y3I1 | 0.85007  |
| 16393 | P03410 | Q9H7E9 | 1.4883   |
| 16394 | P03410 | Q8TBB1 | 0.57663  |
| 16395 | P03410 | Q5VZF2 | 0.20449  |
| 16396 | P03410 | P41238 | 0.10794  |
| 16397 | P03410 | Q8N9N5 | 0.68102  |
| 16398 | P03410 | Q16719 | 0.27624  |
| 16399 | P03410 | Q8IVF1 | 1.4622   |
| 16400 | P03410 | Q7L2R6 | 0.96412  |
| 16401 | P03410 | Q6P9F0 | 0.62782  |
| 16402 | P03410 | P11532 | 0.60408  |
| 16403 | P03410 | Q6P1N9 | 0.60747  |
| 16404 | P03410 | Q8WZA9 | 1.4883   |
| 16405 | P03410 | Q16222 | 0.17511  |
| 16406 | P03410 | Q14410 | 0.87046  |
| 16407 | P03410 | O00233 | 0.86116  |
| 16408 | P03410 | Q9P2F5 | 0.67541  |
| 16409 | P03410 | Q9C0C2 | 0.49081  |
| 16410 | P03410 | Q99614 | 0.53164  |
| 16411 | P03410 | B9EJG8 | 0.75535  |
| 16412 | P03410 | Q8WWL7 | 1.146    |
| 16413 | P03410 | O76075 | 0.3507   |
| 16414 | P03410 | O60756 | 1.6653   |
| 16415 | P03410 | Q7L1V2 | 1.4967   |
| 16416 | P03410 | Q8N998 | 0.45518  |

|       |        |        |          |
|-------|--------|--------|----------|
| 16417 | P03410 | O75030 | 0.42376  |
| 16418 | P03410 | Q96K62 | 0.53003  |
| 16419 | P03410 | Q9NZC7 | 0.37395  |
| 16420 | P03410 | Q96P63 | 0.25437  |
| 16421 | P03410 | Q8TAM2 | 0.47766  |
| 16422 | P03410 | Q8WWK9 | 0.6388   |
| 16423 | P03410 | Q96PQ6 | 1.0175   |
| 16424 | P03410 | Q8IWT0 | 0.26593  |
| 16425 | P03410 | O15504 | 0.65938  |
| 16426 | P03410 | Q8IXQ5 | 0.25815  |
| 16427 | P03410 | Q96HG1 | 1.6653   |
| 16428 | P03410 | Q14008 | 1.2036   |
| 16429 | P03410 | Q6P444 | 1.3102   |
| 16430 | P03410 | P35637 | 0.40119  |
| 16431 | P03410 | Q05BU3 | 1.6653   |
| 16432 | P03410 | Q8TEE9 | 1.4571   |
| 16433 | P03410 | Q53TQ3 | 0.64817  |
| 16434 | P03410 | Q9BWH2 | 0.1757   |
| 16435 | P03410 | Q5TCQ9 | 0.93922  |
| 16436 | P03410 | Q7Z5G4 | 0.1687   |
| 16437 | P03410 | Q86WZ6 | 0.68442  |
| 16438 | P03410 | Q96SN8 | 0.74077  |
| 16439 | P03410 | Q9UPG8 | 0.33286  |
| 16440 | P03410 | P61604 | 1.3561   |
| 16441 | P03410 | Q9NRQ2 | 0.47014  |
| 16442 | P03410 | Q9BSE2 | 1.0913   |
| 16443 | P03410 | P15884 | 0.53384  |
| 16444 | P03410 | O14862 | 0.59209  |
| 16445 | P03410 | O75792 | 1.6645   |
| 16446 | P03410 | Q8N6N3 | 0.87287  |
| 16447 | P03410 | Q6ZN11 | 0.72473  |
| 16448 | P03410 | Q15257 | 0.94039  |
| 16449 | P03410 | Q8TD35 | 1.4883   |
| 16450 | P03410 | Q9BV29 | 0.2208   |
| 16451 | P03410 | Q9H8U3 | 0.32044  |
| 16452 | P03410 | Q9NYT6 | 0.6829   |
| 16453 | P03410 | Q7Z5L9 | 1.2718   |
| 16454 | P03410 | Q9UJV8 | 0.10622  |
| 16455 | P03410 | Q75VX8 | 1.5415   |
| 16456 | P03410 | Q14653 | 0.65317  |
| 16457 | P03410 | Q9BZE7 | 1.4883   |
| 16458 | P03410 | P51946 | 0.69495  |
| 16459 | P03410 | P11844 | 1.3539   |
| 16460 | P03410 | Q9Y6X9 | 0.2349   |
| 16461 | P03410 | Q5TZJ5 | 1.4013   |
| 16462 | P03410 | Q96AN2 | 0.6062   |
| 16463 | P03410 | Q8N1B4 | 1.0521   |
| 16464 | P03410 | O75444 | 0.36108  |
| 16465 | P03410 | Q8IYT3 | 0.027411 |
| 16466 | P03410 | A6NNX1 | 0.43421  |
| 16467 | P03410 | Q9BPZ7 | 1.0058   |
| 16468 | P03410 | P68543 | 0.5483   |
| 16469 | P03410 | Q8N3L3 | 1.2202   |
| 16470 | P03410 | Q14207 | 0.8428   |
| 16471 | P03410 | Q9H773 | 1.0193   |
| 16472 | P03410 | Q5VSL9 | 1.356    |
| 16473 | P03410 | Q5VVC0 | 0.5928   |
| 16474 | P03410 | P32929 | 0.33674  |
| 16475 | P03410 | P51861 | 1.0228   |
| 16476 | P03410 | Q92610 | 0.14227  |
| 16477 | P03410 | Q9NTX9 | 1.0744   |
| 16478 | P03410 | Q8NBB4 | 0.61733  |
| 16479 | P03410 | Q6P1Q0 | 0.16303  |
| 16480 | P03410 | Q9NRR3 | 0.77651  |
| 16481 | P03410 | Q86Y79 | 1.4975   |
| 16482 | P03410 | Q8TEK3 | 0.48891  |
| 16483 | P03410 | Q9NWU2 | 0.20917  |
| 16484 | P03410 | Q9BYR0 | 1.9984   |
| 16485 | P03410 | Q96Q06 | 1.4352   |
| 16486 | P03410 | O43187 | 0.29     |
| 16487 | P03410 | Q9Y5Y5 | 0.55303  |
| 16488 | P03410 | Q8WY54 | 0.83229  |
| 16489 | P03410 | Q9Y3P4 | 1.1052   |
| 16490 | P03410 | Q3LI83 | 2.1124   |
| 16491 | P03410 | Q8N1A6 | 0.065434 |
| 16492 | P03410 | P28324 | 1.3623   |

|       |        |        |          |
|-------|--------|--------|----------|
| 16493 | P03410 | Q8WZA0 | 0.33117  |
| 16494 | P03410 | Q9UNA4 | 0.39191  |
| 16495 | P03410 | P19013 | 0.93738  |
| 16496 | P03410 | Q9BVW5 | 1.1029   |
| 16497 | P03410 | Q5RKV6 | 0.13996  |
| 16498 | P03410 | Q12857 | 0.23948  |
| 16499 | P03410 | Q2T9L4 | 0.65133  |
| 16500 | P03410 | Q5H9I0 | 0.33183  |
| 16501 | P03410 | Q8TF50 | 0.77149  |
| 16502 | P03410 | P57055 | 1.001    |
| 16503 | P03410 | P49406 | 1.1457   |
| 16504 | P03410 | Q16254 | 0.90249  |
| 16505 | P03410 | O75167 | 0.56973  |
| 16506 | P03410 | P17017 | 0.66045  |
| 16507 | P03410 | Q8NBT0 | 0.30502  |
| 16508 | P03410 | Q8TEQ6 | 0.78524  |
| 16509 | P03410 | Q9UM13 | 0.9681   |
| 16510 | P03410 | Q496H8 | 1.2423   |
| 16511 | P03410 | Q5JUX0 | 0.26652  |
| 16512 | P03410 | P57060 | 0.7544   |
| 16513 | P03410 | Q8TF45 | 0.66065  |
| 16514 | P03410 | Q6F5E7 | 0.38564  |
| 16515 | P03410 | P10645 | 0.67306  |
| 16516 | P03410 | O94811 | 1.0055   |
| 16517 | P03410 | Q16612 | 0.57157  |
| 16518 | P03410 | Q86V59 | 0.82274  |
| 16519 | P03410 | Q8TCY9 | 1.0174   |
| 16520 | P03410 | Q15365 | 1.0744   |
| 16521 | P03410 | Q9NPB0 | 1.0017   |
| 16522 | P03410 | Q9Y5U4 | 0.27822  |
| 16523 | P03410 | Q9NRN9 | 0.57023  |
| 16524 | P03410 | P53367 | 0.15567  |
| 16525 | P03410 | Q92558 | 0.74927  |
| 16526 | P03410 | Q6ZRM9 | 1.3824   |
| 16527 | P03410 | Q8WUE5 | 0.3445   |
| 16528 | P03410 | Q08AF8 | 0.93642  |
| 16529 | P03410 | Q16236 | 0.51089  |
| 16530 | P03410 | Q96KN7 | 0.34187  |
| 16531 | P03410 | A6NP61 | 1.1579   |
| 16532 | P03410 | Q9BQE6 | 1.3642   |
| 16533 | P03410 | O75474 | 1.7179   |
| 16534 | P03410 | Q5VV11 | 0.2232   |
| 16535 | P03410 | Q8WXF5 | 0.9994   |
| 16536 | P03410 | Q5T5A8 | 1.6653   |
| 16537 | P03410 | D6RGH6 | 1.2671   |
| 16538 | P03410 | Q8IWA0 | 0.36709  |
| 16539 | P03410 | Q9BTE3 | 0.82434  |
| 16540 | P03410 | Q14210 | 0.57968  |
| 16541 | P03410 | Q9NPC3 | 0.068285 |
| 16542 | P03410 | Q9H9K5 | 0.79444  |
| 16543 | P03410 | Q3C1V8 | 0.54546  |
| 16544 | P03410 | P07902 | 0.97267  |
| 16545 | P03410 | Q8TF46 | 0.37675  |
| 16546 | P03410 | O15519 | 0.52788  |
| 16547 | P03410 | Q9UKK9 | 0.74717  |
| 16548 | P03410 | Q9P287 | 0.87165  |
| 16549 | P03410 | Q10567 | 1.0029   |
| 16550 | P03410 | Q12830 | 0.77497  |
| 16551 | P03410 | Q9H841 | 1.0846   |
| 16552 | P03410 | O14713 | 1.6418   |
| 16553 | P03410 | P30040 | 0.14125  |
| 16554 | P03410 | Q9BY42 | 1.1233   |
| 16555 | P03410 | Q8TEA1 | 0.56813  |
| 16556 | P03410 | Q8NEG2 | 1.0771   |
| 16557 | P03410 | Q5T750 | 0.63747  |
| 16558 | P03410 | Q8NFT6 | 0.30027  |
| 16559 | P03410 | Q9BV81 | 1.0583   |
| 16560 | P03410 | Q8WVZ9 | 0.54253  |
| 16561 | P03410 | Q9NZW5 | 0.44034  |
| 16562 | P03410 | P14625 | 0.2371   |
| 16563 | P03410 | Q2M1V0 | 0.30793  |
| 16564 | P03410 | Q96HH4 | 0.83382  |
| 16565 | P03410 | Q5VIY5 | 0.96412  |
| 16566 | P03410 | Q15468 | 0.94078  |
| 16567 | P03410 | Q969S3 | 0.85336  |
| 16568 | P03410 | Q9BZE3 | 0.46674  |

|       |        |        |          |
|-------|--------|--------|----------|
| 16569 | P03410 | O95954 | 0.65043  |
| 16570 | P03410 | Q9Y312 | 0.50977  |
| 16571 | P03410 | Q9BRA0 | 0.34399  |
| 16572 | P03410 | Q6WBX8 | 0.81676  |
| 16573 | P03410 | Q9H7T3 | 1.3157   |
| 16574 | P03410 | Q96ND8 | 1.038    |
| 16575 | P03410 | O95816 | 0.62931  |
| 16576 | P03410 | Q14978 | 1.2719   |
| 16577 | P03410 | P11168 | 0.30155  |
| 16578 | P03410 | P23381 | 0.61419  |
| 16579 | P03410 | Q9NUB4 | 1.6653   |
| 16580 | P03410 | Q9H0I3 | 0.59946  |
| 16581 | P03410 | P46199 | 0.91911  |
| 16582 | P03410 | Q6NSH3 | 1.0088   |
| 16583 | P03410 | Q9NPJ6 | 1.0146   |
| 16584 | P03410 | Q5JYT7 | 0.25643  |
| 16585 | P03410 | P04424 | 0.20822  |
| 16586 | P03410 | Q701N4 | 1.6653   |
| 16587 | P03410 | Q9GZN1 | 0.23477  |
| 16588 | P03410 | Q5BKU6 | 0.44351  |
| 16589 | P03410 | O00501 | 0.55833  |
| 16590 | P03410 | Q5T8I3 | 0.85705  |
| 16591 | P03410 | Q9BTC8 | 0.56106  |
| 16592 | P03410 | P0CL85 | 0.45056  |
| 16593 | P03410 | Q04446 | 0.59731  |
| 16594 | P03410 | Q9P2S5 | 0.32809  |
| 16595 | P03410 | Q13490 | 0.30968  |
| 16596 | P03410 | Q6IEE8 | 0.69139  |
| 16597 | P03410 | O60870 | 0.94642  |
| 16598 | P03410 | Q92665 | 1.2242   |
| 16599 | P03410 | Q8IYI8 | 0.84198  |
| 16600 | P03410 | Q96FZ2 | 1.7028   |
| 16601 | P03410 | A6NGR9 | 1.0935   |
| 16602 | P03410 | O75324 | 1.1749   |
| 16603 | P03410 | Q5W0A0 | 0.52132  |
| 16604 | P03410 | Q9UPQ4 | 0.23772  |
| 16605 | P03410 | Q5T699 | 0.17304  |
| 16606 | P03410 | Q8WZ19 | 0.043784 |
| 16607 | P03410 | Q5JRC9 | 1.2691   |
| 16608 | P03410 | Q9UNL4 | 0.52364  |
| 16609 | P03410 | Q00059 | 0.8426   |
| 16610 | P03410 | Q8TAT8 | 1.1422   |
| 16611 | P03410 | Q969E2 | 0.8202   |
| 16612 | P03410 | Q9UEU5 | 0.67218  |
| 16613 | P03410 | Q8IW36 | 0.88144  |
| 16614 | P03410 | P62136 | 0.57639  |
| 16615 | P03410 | O94868 | 0.6999   |
| 16616 | P03410 | Q92905 | 0.62977  |
| 16617 | P03410 | Q86X83 | 0.82654  |
| 16618 | P03410 | Q9BYD2 | 1.7377   |
| 16619 | P03410 | Q8IWV1 | 0.68585  |
| 16620 | P03410 | P35606 | 0.71606  |
| 16621 | P03410 | P24278 | 0.68641  |
| 16622 | P03410 | Q7Z6B0 | 1.0913   |
| 16623 | P03410 | Q53EQ6 | 0.76506  |
| 16624 | P03410 | Q86UA6 | 1.6889   |
| 16625 | P03410 | Q8NCR3 | 0.46557  |
| 16626 | P03410 | O75143 | 1.8748   |
| 16627 | P03410 | Q9HCJ0 | 0.62684  |
| 16628 | P03410 | O95931 | 0.91143  |
| 16629 | P03410 | Q5JQC9 | 0.50708  |
| 16630 | P03410 | Q9BQ13 | 0.32577  |
| 16631 | P03410 | Q9NXX8 | 0.84102  |
| 16632 | P03410 | Q9Y333 | 0.76454  |
| 16633 | P03410 | Q8WV28 | 0.36143  |
| 16634 | P03410 | Q9UBI9 | 1.4354   |
| 16635 | P03410 | Q5VZQ5 | 1.2619   |
| 16636 | P03410 | Q2M218 | 0.82417  |
| 16637 | P03410 | Q14533 | 1.329    |
| 16638 | P03410 | O60716 | 0.41173  |
| 16639 | P03410 | P06733 | 0.56726  |
| 16640 | P03410 | Q8TAA5 | 1.0396   |
| 16641 | P03410 | Q9Y543 | 0.26176  |
| 16642 | P03410 | Q96B18 | 0.46891  |
| 16643 | P03410 | Q6P2D0 | 0.76665  |
| 16644 | P03410 | Q9Y2H0 | 0.24203  |



|       |        |        |          |
|-------|--------|--------|----------|
| 16645 | P03410 | Q5SQN1 | 0.63061  |
| 16646 | P03410 | Q9P0W2 | 0.55824  |
| 16647 | P03410 | A6NEV1 | 1.3289   |
| 16648 | P03410 | Q8WXE1 | 1.0035   |
| 16649 | P03410 | Q9UMS5 | 1.4113   |
| 16650 | P03410 | Q9BUX1 | 0.95667  |
| 16651 | P03410 | O00232 | 0.60013  |
| 16652 | P03410 | Q4G112 | 0.30793  |
| 16653 | P03410 | O43679 | 0.41848  |
| 16654 | P03410 | Q5T8I9 | 0.40226  |
| 16655 | P03410 | Q9NRA8 | 1.2977   |
| 16656 | P03410 | Q5T215 | 0.6145   |
| 16657 | P03410 | Q9BSK0 | 1.4953   |
| 16658 | P03410 | O75182 | 1.1521   |
| 16659 | P03410 | P42695 | 0.51865  |
| 16660 | P03410 | Q8WTS6 | 0.38764  |
| 16661 | P03410 | Q96PV6 | 0.97166  |
| 16662 | P03410 | P0CF75 | 0.56656  |
| 16663 | P03410 | Q6PJG6 | 1.3248   |
| 16664 | P03410 | Q15513 | 1.6653   |
| 16665 | P03410 | A0AVF1 | 0.28197  |
| 16666 | P03410 | P58107 | 0.30536  |
| 16667 | P03410 | P36405 | 0.34328  |
| 16668 | P03410 | O15182 | 0.6714   |
| 16669 | P03410 | Q9BYX4 | 0.31295  |
| 16670 | P03410 | Q5JRM2 | 1.1653   |
| 16671 | P03410 | Q13867 | 0.36976  |
| 16672 | P03410 | Q14CW9 | 1.0222   |
| 16673 | P03410 | Q08ER8 | 0.89343  |
| 16674 | P03410 | Q8N339 | 0.19611  |
| 16675 | P03410 | Q9NV79 | 0.18038  |
| 16676 | P03410 | O15198 | 0.4362   |
| 16677 | P03410 | Q8TF39 | 1.0409   |
| 16678 | P03410 | Q9Y6R9 | 1.658    |
| 16679 | P03410 | P13985 | 1.6653   |
| 16680 | P03410 | Q9NRX3 | 1.2747   |
| 16681 | P03410 | Q5FWF6 | 0.91808  |
| 16682 | P03410 | Q9NXZ1 | 0.41837  |
| 16683 | P03410 | Q9H6J7 | 0.64244  |
| 16684 | P03410 | Q99627 | 0.4974   |
| 16685 | P03410 | Q9HAB3 | 1.0772   |
| 16686 | P03410 | A8MS94 | 0.65699  |
| 16687 | P03410 | Q9P2K5 | 0.22349  |
| 16688 | P03410 | Q9NY61 | 0.94965  |
| 16689 | P03410 | Q8N307 | 1.0867   |
| 16690 | P03410 | P12694 | 0.053256 |
| 16691 | P03410 | Q6NXN4 | 0.8698   |
| 16692 | P03410 | Q14457 | 0.81958  |
| 16693 | P03410 | Q9NPJ3 | 0.24898  |
| 16694 | P03410 | Q9UK11 | 0.89291  |
| 16695 | P03410 | Q75L30 | 1.6653   |
| 16696 | P03410 | Q5BKY1 | 0.41169  |
| 16697 | P03410 | Q9ULG1 | 0.35758  |
| 16698 | P03410 | Q17R26 | 0.70451  |
| 16699 | P03410 | E7EW31 | 1.6653   |
| 16700 | P03410 | Q8NHP7 | 0.48044  |
| 16701 | P03410 | A8MT65 | 0.97734  |
| 16702 | P03410 | P62269 | 1.1903   |
| 16703 | P03410 | Q9HCI7 | 0.46639  |
| 16704 | P03410 | Q9Y586 | 0.31897  |
| 16705 | P03410 | Q6ZVD7 | 0.37111  |
| 16706 | P03410 | Q8N1X5 | 1.6653   |
| 16707 | P03410 | Q86WG3 | 0.54734  |
| 16708 | P03410 | P59090 | 1.6653   |
| 16709 | P03410 | Q13425 | 1.0054   |
| 16710 | P03410 | P28289 | 0.33651  |
| 16711 | P03410 | Q92572 | 0.8158   |
| 16712 | P03410 | A6NCN2 | 0.86808  |
| 16713 | P03410 | P63172 | 1.1077   |
| 16714 | P03410 | Q5JQC4 | 1.6653   |
| 16715 | P03410 | O95273 | 1.1536   |
| 16716 | P03410 | Q8IVI9 | 0.42076  |
| 16717 | P03410 | P07919 | 0.32504  |
| 16718 | P03410 | Q8NG50 | 0.29422  |
| 16719 | P03410 | Q4G0A6 | 1.5332   |
| 16720 | P03410 | O15544 | 0.0528   |

|       |        |        |          |
|-------|--------|--------|----------|
| 16721 | P03410 | O15145 | 0.48094  |
| 16722 | P03410 | A6NC51 | 0.75535  |
| 16723 | P03410 | Q92545 | 1.0913   |
| 16724 | P03410 | Q9H9L4 | 0.7221   |
| 16725 | P03410 | P23610 | 1.6653   |
| 16726 | P03410 | Q5VYK3 | 0.47282  |
| 16727 | P03410 | Q8TDY2 | 0.83213  |
| 16728 | P03410 | Q9BTX9 | 1.6849   |
| 16729 | P03410 | Q6H8Q1 | 0.39108  |
| 16730 | P03410 | Q9NSK0 | 0.36592  |
| 16731 | P03410 | A6NHQ2 | 0.30626  |
| 16732 | P03410 | Q9BQ52 | 0.50848  |
| 16733 | P03410 | O96011 | 0.38137  |
| 16734 | P03410 | Q8NDV7 | 0.43059  |
| 16735 | P03410 | Q01534 | 0.43746  |
| 16736 | P03410 | P20700 | 0.81811  |
| 16737 | P03410 | Q96RS6 | 0.34399  |
| 16738 | P03410 | O95050 | 0.06765  |
| 16739 | P03410 | Q9NZY2 | 1.6653   |
| 16740 | P03410 | Q5JTB6 | 1.0723   |
| 16741 | P03410 | Q7Z465 | 0.95377  |
| 16742 | P03410 | Q9UBU8 | 0.75956  |
| 16743 | P03410 | Q8N4S0 | 1.4883   |
| 16744 | P03410 | Q92845 | 0.41584  |
| 16745 | P03410 | O00273 | 0.45406  |
| 16746 | P03410 | Q8IV33 | 1.1305   |
| 16747 | P03410 | O43918 | 0.87258  |
| 16748 | P03410 | O00401 | 0.61634  |
| 16749 | P03410 | Q7Z4G4 | 0.32816  |
| 16750 | P03410 | Q5TD94 | 0.63308  |
| 16751 | P03410 | O43325 | 1.4003   |
| 16752 | P03410 | P35573 | 0.45649  |
| 16753 | P03410 | O00159 | 0.1671   |
| 16754 | P03410 | P55273 | 0.2967   |
| 16755 | P03410 | Q9H4B0 | 1.1029   |
| 16756 | P03410 | Q8N9T8 | 1.9303   |
| 16757 | P03410 | A6NHJ4 | 1.0268   |
| 16758 | P03410 | Q8IYA6 | 1.6361   |
| 16759 | P03410 | Q8N5W8 | 0.95938  |
| 16760 | P03410 | Q68DU8 | 0.25004  |
| 16761 | P03410 | Q9BXD5 | 1.1494   |
| 16762 | P03410 | Q9ULJ3 | 0.66168  |
| 16763 | P03410 | Q5HYM0 | 0.27658  |
| 16764 | P03410 | P50748 | 0.97172  |
| 16765 | P03410 | O75969 | 0.64883  |
| 16766 | P03410 | Q13515 | 0.74132  |
| 16767 | P03410 | O97980 | 1.1653   |
| 16768 | P03410 | Q13956 | 0.84351  |
| 16769 | P03410 | Q5C9Z4 | 0.79437  |
| 16770 | P03410 | Q6XLA1 | 0.034477 |
| 16771 | P03410 | Q3LI62 | 1.6653   |
| 16772 | P03410 | Q2M238 | 0.31905  |
| 16773 | P03410 | P33947 | 0.64571  |
| 16774 | P03410 | Q14657 | 1.5883   |
| 16775 | P03410 | Q8N7X2 | 1.6653   |
| 16776 | P03410 | A6NCI8 | 1.461    |
| 16777 | P03410 | Q8WWR9 | 1.0332   |
| 16778 | P03410 | Q9NVM4 | 0.16796  |
| 16779 | P03410 | Q9Y6F6 | 0.80953  |
| 16780 | P03410 | Q9BX70 | 0.89382  |
| 16781 | P03410 | P0CB33 | 0.95014  |
| 16782 | P03410 | Q8WW27 | 0.4304   |
| 16783 | P03410 | Q9BYI3 | 1.4747   |
| 16784 | P03410 | P20809 | 0.98812  |
| 16785 | P03410 | Q9NXT0 | 0.67571  |
| 16786 | P03410 | Q9NRY5 | 1.6349   |
| 16787 | P03410 | Q9NYP9 | 0.65218  |
| 16788 | P03410 | Q99732 | 0.63137  |
| 16789 | P03410 | P60409 | 1.9984   |
| 16790 | P03410 | P60370 | 1.9984   |
| 16791 | P03410 | Q8NDZ0 | 0.43175  |
| 16792 | P03410 | P31249 | 0.45931  |
| 16793 | P03410 | Q9BWG4 | 0.12952  |
| 16794 | P03410 | Q53RY4 | 1.0913   |
| 16795 | P03410 | Q9BYQ7 | 1.7937   |
| 16796 | P03410 | Q9BU19 | 0.10142  |

|       |        |        |         |
|-------|--------|--------|---------|
| 16797 | P03410 | Q6ZMR3 | 0.66514 |
| 16798 | P03410 | Q86SE9 | 1.0443  |
| 16799 | P03410 | Q9H5X1 | 0.33473 |
| 16800 | P03410 | Q9H813 | 0.80118 |
| 16801 | P03410 | Q8N0U4 | 0.77029 |
| 16802 | P03410 | Q9Y6X2 | 0.64093 |
| 16803 | P03410 | Q96JM2 | 0.30084 |
| 16804 | P03410 | Q96BY2 | 0.78244 |
| 16805 | P03410 | Q15847 | 1.6653  |
| 16806 | P03410 | Q9Y692 | 0.48369 |
| 16807 | P03410 | Q7L1Q6 | 0.50635 |
| 16808 | P03410 | Q9ULD9 | 1.5656  |
| 16809 | P03410 | Q86YG4 | 0.8036  |
| 16810 | P03410 | P34949 | 0.7248  |
| 16811 | P03410 | Q9UFM2 | 0.3682  |
| 16812 | P03410 | Q9H478 | 0.68629 |
| 16813 | P03410 | Q14765 | 0.26221 |
| 16814 | P03410 | Q6ICG8 | 1.9166  |
| 16815 | P03410 | Q13145 | 0.42718 |
| 16816 | P03410 | Q5SNT2 | 0.60438 |
| 16817 | P03410 | F8WFD2 | 0.70956 |
| 16818 | P03410 | P57075 | 0.39534 |
| 16819 | P03410 | Q86Y27 | 1.0723  |
| 16820 | P03410 | Q07020 | 1.3689  |
| 16821 | P03410 | Q9Y4M8 | 0.24874 |
| 16822 | P03410 | Q86X55 | 0.8938  |
| 16823 | P03410 | Q5T0W9 | 0.31506 |
| 16824 | P03410 | Q460N3 | 0.31893 |
| 16825 | P03410 | Q13868 | 0.56789 |
| 16826 | P03410 | O60813 | 0.64157 |
| 16827 | P03410 | P59646 | 0.90175 |
| 16828 | P03410 | Q07021 | 1.2034  |
| 16829 | P03410 | Q9UHD1 | 0.30238 |
| 16830 | P03410 | Q9NX00 | 0.57992 |
| 16831 | P03410 | Q8NHZ8 | 1.6254  |
| 16832 | P03410 | Q8NCU1 | 0.92031 |
| 16833 | P03410 | O00148 | 0.63849 |
| 16834 | P03410 | Q99445 | 0.74303 |
| 16835 | P03410 | Q9NS23 | 0.45449 |
| 16836 | P03410 | Q96LX8 | 0.67607 |
| 16837 | P03410 | P49459 | 0.47809 |
| 16838 | P03410 | Q08378 | 0.55884 |
| 16839 | P03410 | Q9NR56 | 0.53556 |
| 16840 | P03410 | P43355 | 1.1216  |
| 16841 | P03410 | P57721 | 0.62413 |
| 16842 | P03410 | O95685 | 0.55009 |
| 16843 | P03410 | P16278 | 0.19768 |
| 16844 | P03410 | Q9NWZ5 | 0.25685 |
| 16845 | P03410 | Q9UIH9 | 0.30419 |
| 16846 | P03410 | Q86XU0 | 0.83124 |
| 16847 | P03410 | P63220 | 0.77267 |
| 16848 | P03410 | Q7L3T8 | 1.1534  |
| 16849 | P03410 | O14639 | 0.9014  |
| 16850 | P03410 | Q8N812 | 1.4309  |
| 16851 | P03410 | P62380 | 0.19641 |
| 16852 | P03410 | Q2TAK8 | 0.8863  |
| 16853 | P03410 | Q86WR0 | 0.66275 |
| 16854 | P03410 | O60645 | 0.82771 |
| 16855 | P03410 | Q5M9Q1 | 1.3344  |
| 16856 | P03410 | Q6UW49 | 1.0039  |
| 16857 | P03410 | Q2M389 | 0.65616 |
| 16858 | P03410 | Q04724 | 0.75085 |
| 16859 | P03410 | Q8N1A0 | 0.722   |
| 16860 | P03410 | Q9P2W9 | 0.62548 |
| 16861 | P03410 | Q53HM4 | 0.3747  |
| 16862 | P03410 | Q5JVX7 | 1.0995  |
| 16863 | P03410 | O43776 | 1.0793  |
| 16864 | P03410 | Q8IZ13 | 0.39624 |
| 16865 | P03410 | P55769 | 1.0207  |
| 16866 | P03410 | Q6ZUC2 | 1.1137  |
| 16867 | P03410 | Q2VY69 | 0.83577 |
| 16868 | P03410 | Q9H4Z2 | 0.68989 |
| 16869 | P03410 | Q6N021 | 0.73424 |
| 16870 | P03410 | Q9H3L0 | 1.5301  |
| 16871 | P03410 | Q6IQ21 | 0.80917 |
| 16872 | P03410 | Q9H5L9 | 0.56022 |

|       |        |        |         |
|-------|--------|--------|---------|
| 16873 | P03410 | Q8IZT9 | 1.9262  |
| 16874 | P03410 | E9PJI5 | 1.0659  |
| 16875 | P03410 | Q8N6G1 | 1.6653  |
| 16876 | P03410 | Q9H8W2 | 0.70325 |
| 16877 | P03410 | Q6ZTY8 | 0.25826 |
| 16878 | P03410 | Q9NQG6 | 0.15505 |
| 16879 | P03410 | Q9P2G4 | 1.4883  |
| 16880 | P03410 | Q9NZI5 | 0.39673 |
| 16881 | P03410 | P62910 | 0.91415 |
| 16882 | P03410 | P43359 | 1.2552  |
| 16883 | P03410 | O95678 | 0.76165 |
| 16884 | P03410 | Q92764 | 0.78893 |
| 16885 | P03410 | Q9HCI6 | 0.76231 |
| 16886 | P03410 | O95456 | 0.78804 |
| 16887 | P03410 | A8MXK9 | 1.1295  |
| 16888 | P03410 | P05787 | 1.837   |
| 16889 | P03410 | O95379 | 0.48671 |
| 16890 | P03410 | Q5H9F3 | 0.54513 |
| 16891 | P03410 | Q9ULR5 | 0.77415 |
| 16892 | P03410 | Q9UBB5 | 1.2797  |
| 16893 | P03410 | Q96GC6 | 0.97903 |
| 16894 | P03410 | P12525 | 0.31642 |
| 16895 | P03410 | Q9GZY4 | 0.60631 |
| 16896 | P03410 | Q14689 | 0.36607 |
| 16897 | P03410 | Q494V2 | 0.11896 |
| 16898 | P03410 | Q6NSW7 | 0.30793 |
| 16899 | P03410 | P59998 | 0.48941 |
| 16900 | P03410 | Q9NS64 | 1.1679  |
| 16901 | P03410 | B1AMM8 | 0.72268 |
| 16902 | P03410 | Q9H939 | 0.2883  |
| 16903 | P03410 | Q16143 | 0.44511 |
| 16904 | P03410 | Q5W5X9 | 0.81817 |
| 16905 | P03410 | O75928 | 0.64196 |
| 16906 | P03410 | A2RU30 | 1.3104  |
| 16907 | P03410 | Q9P2X8 | 0.6532  |
| 16908 | P03410 | A6NC78 | 0.47976 |
| 16909 | P03410 | P82650 | 0.53602 |
| 16910 | P03410 | Q9HCK1 | 0.94868 |
| 16911 | P03410 | Q13501 | 0.45962 |
| 16912 | P03410 | Q9H8T0 | 0.69111 |
| 16913 | P03410 | Q9BZX4 | 0.41509 |
| 16914 | P03410 | P25686 | 0.27881 |
| 16915 | P03410 | P62847 | 1.0869  |
| 16916 | P03410 | Q59GN2 | 0.86055 |
| 16917 | P03410 | A2RRL7 | 0.7694  |
| 16918 | P03410 | Q9NPL8 | 0.94433 |
| 16919 | P03410 | Q9HA58 | 1.6653  |
| 16920 | P03410 | Q96S07 | 1.6653  |
| 16921 | P03410 | P20674 | 0.14213 |
| 16922 | P03410 | A8K010 | 0.87666 |
| 16923 | P03410 | O43294 | 0.14919 |
| 16924 | P03410 | P09912 | 0.25091 |
| 16925 | P03410 | P22674 | 0.62052 |
| 16926 | P03410 | P0C5J1 | 0.34014 |
| 16927 | P03410 | Q96HI0 | 0.52738 |
| 16928 | P03410 | Q9NPC7 | 0.69482 |
| 16929 | P03410 | Q9BXN6 | 0.34399 |
| 16930 | P03410 | Q3SY84 | 0.76952 |
| 16931 | P03410 | P62906 | 0.9243  |
| 16932 | P03410 | Q96T37 | 0.5064  |
| 16933 | P03410 | O95067 | 0.80732 |
| 16934 | P03410 | Q5T754 | 1.6653  |
| 16935 | P03410 | P0CJ70 | 1.4876  |
| 16936 | P03410 | P51826 | 0.50263 |
| 16937 | P03410 | P0DM63 | 1.0659  |
| 16938 | P03410 | Q86UQ0 | 0.57767 |
| 16939 | P03410 | P0CB43 | 0.56375 |
| 16940 | P03410 | Q8N2U0 | 0.8809  |
| 16941 | P03410 | A8MWC7 | 0.01077 |
| 16942 | P03410 | O14908 | 0.33002 |
| 16943 | P03410 | Q7L2K0 | 0.47889 |
| 16944 | P03410 | O43830 | 0.73824 |
| 16945 | P03410 | Q05D60 | 0.28476 |
| 16946 | P03410 | Q8NEY8 | 1.452   |
| 16947 | P03410 | Q9BRU2 | 0.60643 |
| 16948 | P03410 | Q8N7M0 | 0.62751 |

|       |        |        |          |
|-------|--------|--------|----------|
| 16949 | P03410 | Q9NYH9 | 0.22649  |
| 16950 | P03410 | Q9HCM7 | 1.5125   |
| 16951 | P03410 | Q9C0F3 | 0.71128  |
| 16952 | P03410 | Q9Y6Y0 | 0.82702  |
| 16953 | P03410 | Q9UKT5 | 0.36407  |
| 16954 | P03410 | P11142 | 0.29549  |
| 16955 | P03410 | O95865 | 0.5487   |
| 16956 | P03410 | Q4G0Z9 | 0.75539  |
| 16957 | P03410 | Q9HD47 | 0.51526  |
| 16958 | P03410 | Q96P16 | 0.23474  |
| 16959 | P03410 | P84090 | 0.64286  |
| 16960 | P03410 | O75694 | 0.85413  |
| 16961 | P03410 | Q9C0D2 | 1.4655   |
| 16962 | P03410 | Q9P0J6 | 1.6155   |
| 16963 | P03410 | O14662 | 0.78389  |
| 16964 | P03410 | Q93050 | 0.20836  |
| 16965 | P03410 | Q7L2H7 | 0.86673  |
| 16966 | P03410 | P39687 | 1.3343   |
| 16967 | P03410 | Q9HD36 | 0.6146   |
| 16968 | P03410 | Q8NAB5 | 1.6653   |
| 16969 | P03410 | Q2M1K9 | 0.37497  |
| 16970 | P03410 | Q9NZV7 | 0.97856  |
| 16971 | P03410 | P78414 | 0.2823   |
| 16972 | P03410 | P59074 | 0.19924  |
| 16973 | P03410 | Q8N2B8 | 0.84055  |
| 16974 | P03410 | O00399 | 0.30844  |
| 16975 | P03410 | P35321 | 1.0668   |
| 16976 | P03410 | P57071 | 0.5128   |
| 16977 | P03410 | Q8IYS2 | 1.0913   |
| 16978 | P03410 | Q9NRX1 | 0.29734  |
| 16979 | P03410 | Q8TAA3 | 0.54062  |
| 16980 | P03410 | Q8N0U6 | 1.6653   |
| 16981 | P03410 | Q6ZYL4 | 1.4152   |
| 16982 | P03410 | Q92843 | 0.74162  |
| 16983 | P03410 | Q96CW6 | 1.5137   |
| 16984 | P03410 | O00204 | 0.33927  |
| 16985 | P03410 | Q92783 | 0.97031  |
| 16986 | P03410 | P45381 | 0.31063  |
| 16987 | P03410 | P85299 | 0.077818 |
| 16988 | P03410 | Q6PCB6 | 0.12864  |
| 16989 | P03410 | P41134 | 0.36415  |
| 16990 | P03410 | Q9BY43 | 0.67907  |
| 16991 | P03410 | Q86TJ2 | 0.48473  |
| 16992 | P03410 | P11172 | 0.86054  |
| 16993 | P03410 | P31749 | 0.85409  |
| 16994 | P03410 | Q0VGE8 | 0.65458  |
| 16995 | P03410 | P17096 | 0.90016  |
| 16996 | P03410 | Q9H963 | 0.82125  |
| 16997 | P03410 | Q86UN6 | 0.56066  |
| 16998 | P03410 | Q8IXQ4 | 1.4883   |
| 16999 | P03410 | P16452 | 0.41378  |
| 17000 | P03410 | Q96N95 | 0.35193  |
| 17001 | P03410 | P58511 | 1.0913   |
| 17002 | P03410 | P09105 | 0.83359  |
| 17003 | P03410 | Q99767 | 0.59748  |
| 17004 | P03410 | O14579 | 0.79483  |
| 17005 | P03410 | Q9Y5A7 | 0.77719  |
| 17006 | P03410 | Q6EBC2 | 0.77249  |
| 17007 | P03410 | Q69YQ0 | 0.62041  |
| 17008 | P03410 | Q96QK1 | 1.0582   |
| 17009 | P03410 | Q5T7N7 | 1.6653   |
| 17010 | P03410 | A6NES4 | 0.62749  |
| 17011 | P03410 | Q9UBX2 | 0.27528  |
| 17012 | P03410 | O75420 | 0.62164  |
| 17013 | P03410 | Q9H7H1 | 1.0154   |
| 17014 | P03410 | P0C7N4 | 0.99267  |
| 17015 | P03410 | Q96N23 | 1.6225   |
| 17016 | P03410 | Q9H8V8 | 1.6653   |
| 17017 | P03410 | Q99440 | 0.81767  |
| 17018 | P03410 | Q8N114 | 1.1058   |
| 17019 | P03410 | P35579 | 0.59808  |
| 17020 | P03410 | Q6NSZ9 | 0.52498  |
| 17021 | P03410 | P52815 | 0.99623  |
| 17022 | P03410 | Q9NZQ3 | 0.94767  |
| 17023 | P03410 | H3BSY2 | 0.14694  |
| 17024 | P03410 | Q9Y2K1 | 0.10142  |

|       |        |        |         |
|-------|--------|--------|---------|
| 17025 | P03410 | Q96DM3 | 0.64718 |
| 17026 | P03410 | Q53TS8 | 0.79346 |
| 17027 | P03410 | Q9Y5Z9 | 0.70324 |
| 17028 | P03410 | Q9NP92 | 1.6627  |
| 17029 | P03410 | Q5TEV5 | 1.1405  |
| 17030 | P03410 | Q96N35 | 1.6653  |
| 17031 | P03410 | Q96GX8 | 1.4883  |
| 17032 | P03410 | Q5T7P3 | 1.6653  |
| 17033 | P03410 | P04792 | 0.43562 |
| 17034 | P03410 | P59047 | 0.28375 |
| 17035 | P03410 | Q9HAW4 | 0.62406 |
| 17036 | P03410 | Q7L9L4 | 0.77376 |
| 17037 | P03410 | Q6L8G5 | 1.6653  |
| 17038 | P03410 | Q9Y3Q8 | 1.1649  |
| 17039 | P03410 | Q6ZUG5 | 0.96856 |
| 17040 | P03410 | A2A288 | 0.85857 |
| 17041 | P03410 | Q969F1 | 1.0878  |
| 17042 | P03410 | Q5DJT8 | 0.37182 |
| 17043 | P03410 | Q9UKI2 | 0.32962 |
| 17044 | P03410 | P23396 | 0.93111 |
| 17045 | P03410 | Q9H3M7 | 0.7808  |
| 17046 | P03410 | O94777 | 1.044   |
| 17047 | P03410 | Q15124 | 0.12998 |
| 17048 | P03410 | Q9UK76 | 1.645   |
| 17049 | P03410 | Q9BUV8 | 0.19189 |
| 17050 | P03410 | Q7RTS1 | 0.2539  |
| 17051 | P03410 | O75161 | 2.12    |
| 17052 | P03410 | Q14232 | 0.32337 |
| 17053 | P03410 | P10412 | 0.16413 |
| 17054 | P03410 | Q8TCU4 | 0.53621 |
| 17055 | P03410 | Q9NYP8 | 0.50393 |
| 17056 | P03410 | Q8TCZ7 | 1.1695  |
| 17057 | P03410 | Q15003 | 1.2813  |
| 17058 | P03410 | Q96LJ8 | 1.3374  |
| 17059 | P03410 | Q63HN1 | 0.71274 |
| 17060 | P03410 | Q3MHD2 | 0.73141 |
| 17061 | P03410 | O75437 | 0.9221  |
| 17062 | P03410 | Q96DN6 | 1.4619  |
| 17063 | P03410 | Q96Q80 | 0.44732 |
| 17064 | P03410 | A6NJV1 | 1.2147  |
| 17065 | P03410 | Q8NDY3 | 0.30588 |
| 17066 | P03410 | Q6ZSB9 | 0.80359 |
| 17067 | P03410 | O00213 | 0.37465 |
| 17068 | P03410 | Q8TBR5 | 0.49919 |
| 17069 | P03410 | Q8N3S3 | 0.41708 |
| 17070 | P03410 | Q92934 | 0.18005 |
| 17071 | P03410 | Q68DH5 | 1.3563  |
| 17072 | P03410 | Q5XKR9 | 1.3654  |
| 17073 | P03410 | P55895 | 0.94911 |
| 17074 | P03410 | Q99687 | 0.59411 |
| 17075 | P03410 | Q9NXV6 | 1.3513  |
| 17076 | P03410 | O43299 | 1.4565  |
| 17077 | P03410 | Q5T5W8 | 1.1467  |
| 17078 | P03410 | Q9HBX3 | 1.6653  |
| 17079 | P03410 | Q8N2W9 | 0.87434 |
| 17080 | P03410 | Q9UL58 | 1.0283  |
| 17081 | P03410 | Q96B67 | 0.58931 |
| 17082 | P03410 | P78406 | 0.65568 |
| 17083 | P03410 | P06746 | 0.47328 |
| 17084 | P03410 | Q69YU5 | 0.95938 |
| 17085 | P03410 | Q6P1M3 | 1.2113  |
| 17086 | P03410 | O14709 | 0.79465 |
| 17087 | P03410 | P30419 | 0.53878 |
| 17088 | P03410 | Q9BUA3 | 1.2834  |
| 17089 | P03410 | Q969S9 | 1.0704  |
| 17090 | P03410 | Q9H668 | 0.35195 |
| 17091 | P03410 | Q9BYR2 | 1.9984  |
| 17092 | P03410 | Q8N6F1 | 0.14287 |
| 17093 | P03410 | A6NFD8 | 0.26279 |
| 17094 | P03410 | P45973 | 0.94984 |
| 17095 | P03410 | Q9UNZ5 | 1.4883  |
| 17096 | P03410 | P18621 | 0.97975 |
| 17097 | P03410 | P48556 | 0.67204 |
| 17098 | P03410 | Q99633 | 0.14118 |
| 17099 | P03410 | Q562F6 | 1.0548  |
| 17100 | P03410 | Q9H972 | 0.95938 |

|       |        |        |         |
|-------|--------|--------|---------|
| 17101 | P03410 | Q6RVD6 | 1.6653  |
| 17102 | P03410 | P30876 | 0.54899 |
| 17103 | P03410 | P63167 | 1.4146  |
| 17104 | P03410 | Q03060 | 0.57306 |
| 17105 | P03410 | Q9NWA0 | 2.0609  |
| 17106 | P03410 | Q12798 | 1.0001  |
| 17107 | P03410 | Q86WQ0 | 0.7568  |
| 17108 | P03410 | P26599 | 0.27659 |
| 17109 | P03410 | Q96K75 | 0.75596 |
| 17110 | P03410 | Q96SN7 | 0.45689 |
| 17111 | P03410 | Q9Y2B5 | 0.58806 |
| 17112 | P03410 | Q9P209 | 1.2054  |
| 17113 | P03410 | Q9UFV3 | 0.28967 |
| 17114 | P03410 | Q9Y2V2 | 0.7026  |
| 17115 | P03410 | O76015 | 0.88723 |
| 17116 | P03410 | Q9NP77 | 0.32982 |
| 17117 | P03410 | Q5T8R8 | 0.11242 |
| 17118 | P03410 | P20132 | 0.16349 |
| 17119 | P03410 | Q8N0V1 | 1.223   |
| 17120 | P03410 | P0CJ85 | 0.27528 |
| 17121 | P03410 | Q6PKG0 | 0.6999  |
| 17122 | P03410 | P42768 | 0.62193 |
| 17123 | P03410 | Q92785 | 0.65206 |
| 17124 | P03410 | Q86V97 | 0.54253 |
| 17125 | P03410 | Q8TB68 | 1.0297  |
| 17126 | P03410 | Q96CG3 | 0.70742 |
| 17127 | P03410 | A8MYZ0 | 1.0367  |
| 17128 | P03410 | Q7L5Y6 | 0.20917 |
| 17129 | P03410 | Q6ZUT6 | 0.90371 |
| 17130 | P03410 | Q9H8Y5 | 0.26328 |
| 17131 | P03410 | P49721 | 0.74834 |
| 17132 | P03410 | Q8N720 | 0.77051 |
| 17133 | P03410 | Q2PZI1 | 0.88883 |
| 17134 | P03410 | Q96C57 | 0.98341 |
| 17135 | P03410 | O95167 | 0.67883 |
| 17136 | P03410 | Q9Y287 | 0.80036 |
| 17137 | P03410 | Q96HE9 | 0.26411 |
| 17138 | P03410 | Q92674 | 0.47859 |
| 17139 | P03410 | Q8NDH6 | 0.61533 |
| 17140 | P03410 | P62266 | 1.1668  |
| 17141 | P03410 | Q15653 | 1.2056  |
| 17142 | P03410 | Q9NS69 | 0.36968 |
| 17143 | P03410 | Q8N7B6 | 0.79466 |
| 17144 | P03410 | Q96A00 | 1.0879  |
| 17145 | P03410 | O95260 | 0.1147  |
| 17146 | P03410 | O60268 | 0.5477  |
| 17147 | P03410 | O95190 | 1.2715  |
| 17148 | P03410 | P54252 | 0.41435 |
| 17149 | P03410 | Q8N1E6 | 0.4896  |
| 17150 | P03410 | Q9HD87 | 0.71182 |
| 17151 | P03410 | Q9Y3X0 | 1.168   |
| 17152 | P03410 | Q7L3B6 | 0.51425 |
| 17153 | P03410 | Q9UEE9 | 1.0757  |
| 17154 | P03410 | Q9NWU5 | 1.4739  |
| 17155 | P03410 | Q6NVY1 | 0.1345  |
| 17156 | P03410 | O94929 | 0.29282 |
| 17157 | P03410 | Q5T292 | 1.0946  |
| 17158 | P03410 | Q9H6S1 | 0.18234 |
| 17159 | P03410 | P40855 | 0.79635 |
| 17160 | P03410 | P56385 | 0.86334 |
| 17161 | P03410 | O60832 | 0.79468 |
| 17162 | P03410 | Q96S19 | 0.46681 |
| 17163 | P03410 | Q9NUP9 | 0.62406 |
| 17164 | P03410 | P52741 | 0.74365 |
| 17165 | P03410 | A8MWP4 | 0.70723 |
| 17166 | P03410 | P50570 | 0.39378 |
| 17167 | P03410 | Q659A1 | 0.90967 |
| 17168 | P03410 | Q92889 | 0.36279 |
| 17169 | P03410 | P19532 | 0.5967  |
| 17170 | P03410 | Q9BPZ2 | 1.0729  |
| 17171 | P03410 | Q8NBA8 | 0.72692 |
| 17172 | P03410 | Q9HC38 | 0.41276 |
| 17173 | P03410 | P07900 | 0.46176 |
| 17174 | P03410 | Q00587 | 0.56046 |
| 17175 | P03410 | Q8N9N2 | 0.49931 |
| 17176 | P03410 | Q5VTR2 | 0.36235 |

|       |        |        |          |
|-------|--------|--------|----------|
| 17177 | P03410 | P02766 | 0.04114  |
| 17178 | P03410 | Q8N0U2 | 1.6653   |
| 17179 | P03410 | Q8N443 | 0.80291  |
| 17180 | P03410 | Q6DCA0 | 0.35117  |
| 17181 | P03410 | P31358 | 1.3712   |
| 17182 | P03410 | Q9H063 | 0.86351  |
| 17183 | P03410 | Q9BQA1 | 1.0464   |
| 17184 | P03410 | Q93075 | 1.0913   |
| 17185 | P03410 | Q08999 | 1.2601   |
| 17186 | P03410 | P10243 | 0.64615  |
| 17187 | P03410 | Q5THR3 | 0.46163  |
| 17188 | P03410 | A8MU93 | 1.4883   |
| 17189 | P03410 | Q9Y468 | 0.8472   |
| 17190 | P03410 | A6NJG6 | 0.30793  |
| 17191 | P03410 | A6NNA5 | 0.15036  |
| 17192 | P03410 | Q9H211 | 0.91693  |
| 17193 | P03410 | Q96EK6 | 0.83855  |
| 17194 | P03410 | Q53FT3 | 0.77549  |
| 17195 | P03410 | Q96S55 | 0.61744  |
| 17196 | P03410 | Q6ZV60 | 1.6653   |
| 17197 | P03410 | Q59F38 | 0.22612  |
| 17198 | P03410 | Q7Z7A3 | 0.82652  |
| 17199 | P03410 | Q6ZSR3 | 1.6653   |
| 17200 | P03410 | Q9NPP4 | 0.28816  |
| 17201 | P03410 | P16333 | 0.71338  |
| 17202 | P03410 | A6NDV4 | 0.2885   |
| 17203 | P03410 | Q5D862 | 0.095248 |
| 17204 | P03410 | Q9BRT6 | 0.776    |
| 17205 | P03410 | Q1HG44 | 1.3169   |
| 17206 | P03410 | Q9BTL4 | 1.1718   |
| 17207 | P03410 | Q9UJW0 | 0.72838  |
| 17208 | P03410 | Q8TAD1 | 0.59063  |
| 17209 | P03410 | Q7Z794 | 0.93858  |
| 17210 | P03410 | P20226 | 0.83912  |
| 17211 | P03410 | P82979 | 0.45162  |
| 17212 | P03410 | O75953 | 0.87141  |
| 17213 | P03410 | Q8TDN6 | 0.42808  |
| 17214 | P03410 | Q96MU7 | 0.9812   |
| 17215 | P03410 | Q0VDD7 | 1.9711   |
| 17216 | P03410 | Q9P013 | 0.92202  |
| 17217 | P03410 | Q96N16 | 1.4898   |
| 17218 | P03410 | Q9H6L5 | 0.94236  |
| 17219 | P03410 | O43583 | 1.73     |
| 17220 | P03410 | Q15366 | 0.9666   |
| 17221 | P03410 | Q9BWG6 | 0.89228  |
| 17222 | P03410 | Q96J86 | 1.0913   |
| 17223 | P03410 | P0DKV0 | 0.25623  |
| 17224 | P03410 | Q96AN5 | 0.81715  |
| 17225 | P03410 | Q9GZR1 | 0.36562  |
| 17226 | P03410 | Q5SZD4 | 1.1275   |
| 17227 | P03410 | Q8N137 | 1.2123   |
| 17228 | P03410 | Q15370 | 1.0596   |
| 17229 | P03410 | Q92844 | 0.63019  |
| 17230 | P03410 | P62249 | 1.269    |
| 17231 | P03410 | Q86YP4 | 0.71129  |
| 17232 | P03410 | O60239 | 0.49437  |
| 17233 | P03410 | Q86TP1 | 1.0277   |
| 17234 | P03410 | Q7Z4M0 | 0.50186  |
| 17235 | P03410 | Q6IPR1 | 0.71035  |
| 17236 | P03410 | Q6ZQP7 | 1.6653   |
| 17237 | P03410 | Q8NI35 | 0.5915   |
| 17238 | P03410 | O15225 | 1.6653   |
| 17239 | P03410 | P13640 | 0.97224  |
| 17240 | P03410 | Q01105 | 0.75991  |
| 17241 | P03410 | Q9UK59 | 0.13416  |
| 17242 | P03410 | O95948 | 0.30796  |
| 17243 | P03410 | Q9HAT2 | 0.97111  |
| 17244 | P03410 | Q86VS8 | 0.69552  |
| 17245 | P03410 | A5PLN7 | 1.4883   |
| 17246 | P03410 | Q6P1M9 | 0.6784   |
| 17247 | P03410 | Q86VE0 | 1.7014   |
| 17248 | P03410 | Q5T751 | 1.6653   |
| 17249 | P03410 | P10828 | 0.46983  |
| 17250 | P03410 | Q8IXS0 | 1.4883   |
| 17251 | P03410 | Q9C000 | 0.33224  |
| 17252 | P03410 | P48668 | 0.79891  |



|       |        |        |           |
|-------|--------|--------|-----------|
| 17253 | P03410 | O60732 | 0.6999    |
| 17254 | P03410 | Q6NX45 | 0.7597    |
| 17255 | P03410 | P27544 | 0.73217   |
| 17256 | P03410 | Q9UHA2 | 0.52786   |
| 17257 | P03410 | A6NCC3 | 0.62012   |
| 17258 | P03410 | Q6PEX7 | 0.88877   |
| 17259 | P03410 | Q9Y5Q8 | 0.84563   |
| 17260 | P03410 | Q5TA31 | 0.22235   |
| 17261 | P03410 | O00321 | 0.35954   |
| 17262 | P03410 | O60524 | 1.5936    |
| 17263 | P03410 | A6H8Y1 | 0.8595    |
| 17264 | P03410 | Q92791 | 0.28431   |
| 17265 | P03410 | Q3B7T1 | 1.1948    |
| 17266 | P03410 | Q15651 | 1.3768    |
| 17267 | P03410 | Q6ZS62 | 1.218     |
| 17268 | P03410 | Q9NSC5 | 0.74876   |
| 17269 | P03410 | P0C7X3 | 0.80944   |
| 17270 | P03410 | Q9NRG0 | 0.26854   |
| 17271 | P03410 | Q5TA79 | 1.6653    |
| 17272 | P03410 | Q9H175 | 1.0653    |
| 17273 | P03410 | Q15004 | 1.0744    |
| 17274 | P03410 | Q15906 | 0.97447   |
| 17275 | P03410 | Q5TKA1 | 0.59312   |
| 17276 | P03410 | Q9Y2B1 | 1.0913    |
| 17277 | P03410 | Q9Y6A5 | 0.16267   |
| 17278 | P03410 | Q96M63 | 0.40375   |
| 17279 | P03410 | Q9UJL9 | 0.75781   |
| 17280 | P03410 | P63151 | 0.57015   |
| 17281 | P03410 | A4QMS7 | 0.37877   |
| 17282 | P03410 | P21953 | 0.24962   |
| 17283 | P03410 | P0C7M3 | 1.1653    |
| 17284 | P03410 | Q8TC20 | 0.1081    |
| 17285 | P03410 | Q9UF83 | 0.65157   |
| 17286 | P03410 | Q9UBU6 | 0.97881   |
| 17287 | P03410 | Q9UIF3 | 0.57152   |
| 17288 | P03410 | Q13794 | 0.89949   |
| 17289 | P03410 | Q9NSJ1 | 0.86213   |
| 17290 | P03410 | Q9Y283 | 0.4101    |
| 17291 | P03410 | Q6PF04 | 0.79263   |
| 17292 | P03410 | P62308 | 0.81849   |
| 17293 | P03410 | Q9BT49 | 1.0572    |
| 17294 | P03410 | P50749 | 0.89663   |
| 17295 | P03410 | Q9Y6J3 | 1.6653    |
| 17296 | P03410 | P14678 | 0.86186   |
| 17297 | P03410 | Q15814 | 0.47722   |
| 17298 | P03410 | Q8IYB1 | 0.53966   |
| 17299 | P03410 | Q96Q83 | 0.63632   |
| 17300 | P03410 | P63173 | 1.2562    |
| 17301 | P03410 | P61581 | 1.7423    |
| 17302 | P03410 | Q5T6F2 | 1.6144    |
| 17303 | P03410 | Q8N814 | 1.4065    |
| 17304 | P03410 | A6ND36 | 0.12419   |
| 17305 | P03410 | O00291 | 0.63192   |
| 17306 | P03410 | A8MQT2 | 0.066261  |
| 17307 | P03410 | Q3SXP7 | 0.6452    |
| 17308 | P03410 | Q9GZP9 | 0.44732   |
| 17309 | P03410 | Q96FJ8 | 1.6653    |
| 17310 | P03410 | P62316 | 0.86567   |
| 17311 | P03410 | Q9UNF1 | 0.0070625 |
| 17312 | P03410 | Q9Y3T9 | 1.1771    |
| 17313 | P03410 | P50914 | 1.2309    |
| 17314 | P03410 | A5PLN9 | 0.9903    |
| 17315 | P03410 | Q96F63 | 1.4883    |
| 17316 | P03410 | O75764 | 0.23577   |
| 17317 | P03410 | Q969Q0 | 0.49891   |
| 17318 | P03410 | Q12980 | 1.3993    |
| 17319 | P03410 | P31949 | 0.48414   |
| 17320 | P03410 | O15037 | 0.80101   |
| 17321 | P03410 | Q96DV4 | 0.57901   |
| 17322 | P03410 | O94892 | 0.73      |
| 17323 | P03410 | Q32MZ4 | 1.1477    |
| 17324 | P03410 | Q9HAU5 | 0.85696   |
| 17325 | P03410 | Q9UBB9 | 0.22401   |
| 17326 | P03410 | Q13835 | 0.37509   |
| 17327 | P03410 | B1AH88 | 1.6653    |
| 17328 | P03410 | P39748 | 0.27094   |

|       |        |        |          |
|-------|--------|--------|----------|
| 17329 | P03410 | Q8N336 | 0.57167  |
| 17330 | P03410 | A8MXV6 | 0.65961  |
| 17331 | P03410 | Q9NYZ3 | 1.9316   |
| 17332 | P03410 | Q8WUH2 | 0.97907  |
| 17333 | P03410 | P06748 | 0.59486  |
| 17334 | P03410 | Q9Y3F4 | 0.99905  |
| 17335 | P03410 | P47897 | 0.70671  |
| 17336 | P03410 | Q8TCX1 | 0.024806 |
| 17337 | P03410 | A6NKX1 | 1.6653   |
| 17338 | P03410 | Q9HCE0 | 0.44777  |
| 17339 | P03410 | O75368 | 0.56593  |
| 17340 | P03410 | P60022 | 0.80017  |
| 17341 | P03410 | Q9UBK9 | 1.1536   |
| 17342 | P03410 | Q24JP5 | 0.72863  |
| 17343 | P03410 | Q969I3 | 0.86773  |
| 17344 | P03410 | O75381 | 0.89355  |
| 17345 | P03410 | P48378 | 0.41575  |
| 17346 | P03410 | Q6PIJ6 | 1.5729   |
| 17347 | P03410 | P06400 | 0.87382  |
| 17348 | P03410 | Q6PF06 | 1.2136   |
| 17349 | P03410 | Q5VWX1 | 0.74868  |
| 17350 | P03410 | Q9BXY8 | 1.0951   |
| 17351 | P03410 | Q9ULJ6 | 0.45786  |
| 17352 | P03410 | Q16633 | 0.65543  |
| 17353 | P03410 | Q5ZEY9 | 0.92021  |
| 17354 | P03410 | Q6DKK2 | 1.3838   |
| 17355 | P03410 | Q8TBC3 | 0.32577  |
| 17356 | P03410 | Q86VN1 | 0.60018  |
| 17357 | P03410 | Q14137 | 1.0821   |
| 17358 | P03410 | A8MV72 | 0.93328  |
| 17359 | P03410 | Q99865 | 1.0829   |
| 17360 | P03410 | Q96IZ7 | 1.8934   |
| 17361 | P03410 | Q8TF01 | 1.6158   |
| 17362 | P03410 | Q6UUU9 | 1.5402   |
| 17363 | P03410 | P62280 | 1.2837   |
| 17364 | P03410 | Q9Y366 | 0.38626  |
| 17365 | P03410 | O60809 | 0.74583  |
| 17366 | P03410 | Q6NVH7 | 1.439    |
| 17367 | P03410 | Q9UBS3 | 0.69303  |
| 17368 | P03410 | Q15040 | 0.6999   |
| 17369 | P03410 | Q9BSI4 | 1.1436   |
| 17370 | P03410 | Q9NQ40 | 1.0772   |
| 17371 | P03410 | Q6ZQT7 | 1.6653   |
| 17372 | P03410 | Q969X0 | 0.066434 |
| 17373 | P03410 | P06132 | 1.1055   |
| 17374 | P03410 | Q9Y3M9 | 0.62099  |
| 17375 | P03410 | Q6P4F2 | 0.092151 |
| 17376 | P03410 | Q5F1R6 | 0.21841  |
| 17377 | P03410 | O14530 | 0.49477  |
| 17378 | P03410 | Q5JR98 | 0.99799  |
| 17379 | P03410 | A6NM28 | 0.70851  |
| 17380 | P03410 | Q9BTD3 | 1.0913   |
| 17381 | P03410 | Q9UJY1 | 0.55598  |
| 17382 | P03410 | Q9H116 | 0.82427  |
| 17383 | P03410 | Q03923 | 1.0223   |
| 17384 | P03410 | Q9Y5Y2 | 0.33483  |
| 17385 | P03410 | Q0VG73 | 1.6653   |
| 17386 | P03410 | O15049 | 1.1911   |
| 17387 | P03410 | Q96CT7 | 0.2096   |
| 17388 | P03410 | Q6PK81 | 0.81024  |
| 17389 | P03410 | Q96EH5 | 1.5427   |
| 17390 | P03410 | Q9NU23 | 0.79402  |
| 17391 | P03410 | P19484 | 0.4625   |
| 17392 | P03410 | Q9H9T3 | 0.56685  |
| 17393 | P03410 | Q96M95 | 0.18819  |
| 17394 | P03410 | Q9UIY3 | 0.36413  |
| 17395 | P03410 | Q9H3H1 | 1.2091   |
| 17396 | P03410 | P56282 | 0.52958  |
| 17397 | P03410 | A6NMP4 | 0.54655  |
| 17398 | P03410 | A6NH11 | 1.1087   |
| 17399 | P03410 | Q15018 | 0.45903  |
| 17400 | P03410 | Q9H1X1 | 0.74063  |
| 17401 | P03410 | P55157 | 0.38089  |
| 17402 | P03410 | A6NJ69 | 1.0723   |
| 17403 | P03410 | Q8IVT2 | 1.4357   |
| 17404 | P03410 | A6NGB0 | 1.0913   |

|       |        |         |          |
|-------|--------|---------|----------|
| 17405 | P03410 | Q9NYF3  | 0.83743  |
| 17406 | P03410 | Q9HC44  | 1.9744   |
| 17407 | P03410 | Q9Y697  | 0.63491  |
| 17408 | P03410 | Q9BQC6  | 1.9496   |
| 17409 | P03410 | Q53H82  | 0.21735  |
| 17410 | P03410 | O60260  | 0.29031  |
| 17411 | P03410 | Q9NQ32  | 1.0129   |
| 17412 | P03410 | Q5VYM1  | 1.0913   |
| 17413 | P03410 | A6NJ08  | 0.37086  |
| 17414 | P03410 | Q9ULM3  | 0.99888  |
| 17415 | P03410 | A8MZG2  | 1.4883   |
| 17416 | P03410 | Q96H12  | 1.2806   |
| 17417 | P03410 | O75376  | 0.38731  |
| 17418 | P03410 | Q8I WV7 | 0.5606   |
| 17419 | P03410 | Q6P2I3  | 0.596    |
| 17420 | P03410 | Q9P243  | 0.30908  |
| 17421 | P03410 | Q9BWK5  | 1.6468   |
| 17422 | P03410 | Q9P055  | 0.86518  |
| 17423 | P03410 | Q9UNH5  | 0.73719  |
| 17424 | P03410 | F8W1W9  | 0.4749   |
| 17425 | P03410 | Q96LY2  | 1.4946   |
| 17426 | P03410 | Q86UQ8  | 0.67552  |
| 17427 | P03410 | Q9ULL5  | 1.6653   |
| 17428 | P03410 | P31314  | 0.58198  |
| 17429 | P03410 | Q9BQB4  | 0.36228  |
| 17430 | P03410 | Q0P140  | 0.73414  |
| 17431 | P03410 | P57738  | 1.0992   |
| 17432 | P03410 | Q96CD0  | 0.85383  |
| 17433 | P03410 | Q9HCL3  | 1.0202   |
| 17434 | P03410 | Q9NV44  | 0.86476  |
| 17435 | P03410 | P0DKL9  | 1.5155   |
| 17436 | P03410 | Q6UWF5  | 1.6653   |
| 17437 | P03410 | Q9NYK5  | 0.77631  |
| 17438 | P03410 | O15239  | 0.71696  |
| 17439 | P03410 | P49716  | 0.39957  |
| 17440 | P03410 | Q6L9T8  | 1.0087   |
| 17441 | P03410 | Q15025  | 0.71641  |
| 17442 | P03410 | O00110  | 0.20557  |
| 17443 | P03410 | Q68DY1  | 1.0122   |
| 17444 | P03410 | Q04323  | 0.43313  |
| 17445 | P03410 | Q9UPX6  | 1.0913   |
| 17446 | P03410 | Q9P2A4  | 0.39754  |
| 17447 | P03410 | A8MTB1  | 1.6653   |
| 17448 | P03410 | Q9Y6U3  | 0.076836 |
| 17449 | P03410 | Q8TAX7  | 1.6653   |
| 17450 | P03410 | Q53FN2  | 0.9535   |
| 17451 | P03410 | P0C7I6  | 1.287    |
| 17452 | P03410 | P05060  | 0.7014   |
| 17453 | P03410 | Q9BUV0  | 1.4883   |
| 17454 | P03410 | Q9H0A8  | 1.2337   |
| 17455 | P03410 | Q06547  | 1.0818   |
| 17456 | P03410 | Q9NSU2  | 0.17716  |
| 17457 | P03410 | Q9HB21  | 0.30851  |
| 17458 | P03410 | P68036  | 0.4436   |
| 17459 | P03410 | O14490  | 0.51846  |
| 17460 | P03410 | Q8NEJ9  | 0.70932  |
| 17461 | P03410 | Q96ES7  | 0.33895  |
| 17462 | P03410 | Q70YC4  | 1.0766   |
| 17463 | P03410 | Q9P253  | 0.45101  |
| 17464 | P03410 | Q8N0W5  | 0.96474  |
| 17465 | P03410 | Q9H7X2  | 1.0913   |
| 17466 | P03410 | Q9UBF1  | 1.0247   |
| 17467 | P03410 | Q8TAV0  | 1.6158   |
| 17468 | P03410 | Q32NC0  | 0.72217  |
| 17469 | P03410 | Q86VI4  | 0.49943  |
| 17470 | P03410 | Q8WZ71  | 1.1282   |
| 17471 | P03410 | P14868  | 1.2148   |
| 17472 | P03410 | Q6UXQ8  | 1.6653   |
| 17473 | P03410 | Q9H7X3  | 0.7207   |
| 17474 | P03410 | Q5JT18  | 1.6653   |
| 17475 | P03410 | A2A368  | 0.14589  |
| 17476 | P03410 | Q9BYN8  | 1.8888   |
| 17477 | P03410 | Q7Z713  | 0.34399  |
| 17478 | P03410 | Q6DKI1  | 0.32994  |
| 17479 | P03410 | Q9BTP7  | 1.2671   |
| 17480 | P03410 | Q8IVG9  | 1.2391   |

|       |        |        |          |
|-------|--------|--------|----------|
| 17481 | P03410 | Q9H0S4 | 0.16299  |
| 17482 | P03410 | Q6P988 | 0.73584  |
| 17483 | P03410 | Q6GMV2 | 0.54619  |
| 17484 | P03410 | A2RU49 | 0.38121  |
| 17485 | P03410 | Q9BRA2 | 0.67374  |
| 17486 | P03410 | Q5SVJ3 | 0.46096  |
| 17487 | P03410 | Q9GZL7 | 0.92032  |
| 17488 | P03410 | Q9BVC4 | 0.64339  |
| 17489 | P03410 | Q9H987 | 0.22746  |
| 17490 | P03410 | Q6ZR85 | 1.6653   |
| 17491 | P03410 | P61088 | 0.87157  |
| 17492 | P03410 | Q9H808 | 0.71114  |
| 17493 | P03410 | Q6YFQ2 | 0.15652  |
| 17494 | P03410 | Q86VY9 | 0.6506   |
| 17495 | P03410 | Q15059 | 1.1181   |
| 17496 | P03410 | Q96N21 | 1.2545   |
| 17497 | P03410 | O43432 | 0.037359 |
| 17498 | P03410 | Q13233 | 0.8169   |
| 17499 | P03410 | Q8WVH0 | 0.40446  |
| 17500 | P03410 | Q96R06 | 1.1024   |
| 17501 | P03410 | Q14160 | 0.9251   |
| 17502 | P03410 | Q14442 | 0.25994  |
| 17503 | P03410 | Q96KQ4 | 1.109    |
| 17504 | P03410 | Q3KP66 | 1.9117   |
| 17505 | P03410 | Q96SD1 | 0.25421  |
| 17506 | P03410 | Q9P1G2 | 1.2464   |
| 17507 | P03410 | Q5JST6 | 1.0891   |
| 17508 | P03410 | Q14972 | 0.6124   |
| 17509 | P03410 | Q99684 | 0.46927  |
| 17510 | P03410 | P01215 | 0.70445  |
| 17511 | P03410 | Q9H3Q1 | 0.38207  |
| 17512 | P03410 | P43351 | 0.88252  |
| 17513 | P03410 | Q9H6Q4 | 0.61944  |
| 17514 | P03410 | O60664 | 0.99544  |
| 17515 | P03410 | Q9H9G7 | 0.99596  |
| 17516 | P03410 | Q6L8G8 | 1.6653   |
| 17517 | P03410 | Q15327 | 0.48698  |
| 17518 | P03410 | Q8NDZ6 | 0.7168   |
| 17519 | P03410 | Q7Z3B0 | 1.0913   |
| 17520 | P03410 | Q49AJ0 | 0.42506  |
| 17521 | P03410 | O95997 | 0.83887  |
| 17522 | P03410 | P32519 | 1.1117   |
| 17523 | P03410 | Q9H2U2 | 0.43253  |
| 17524 | P03410 | Q9BYH8 | 0.47263  |
| 17525 | P03410 | Q8N7U7 | 0.66689  |
| 17526 | P03410 | Q96HA1 | 1.4495   |
| 17527 | P03410 | A6NEN9 | 0.15313  |
| 17528 | P03410 | Q9UIE0 | 0.80131  |
| 17529 | P03410 | Q6A162 | 0.78893  |
| 17530 | P03410 | P23193 | 1.0872   |
| 17531 | P03410 | Q96JE9 | 0.47689  |
| 17532 | P03410 | Q9NXP7 | 0.52722  |
| 17533 | P03410 | P30793 | 0.21418  |
| 17534 | P03410 | A3QJZ6 | 0.1568   |
| 17535 | P03410 | P19623 | 0.32786  |
| 17536 | P03410 | Q53GI3 | 0.71499  |
| 17537 | P03410 | Q96PS1 | 0.89048  |
| 17538 | P03410 | Q1AE95 | 0.79088  |
| 17539 | P03410 | Q9UKI3 | 0.44305  |
| 17540 | P03410 | Q96NU7 | 0.75529  |
| 17541 | P03410 | Q03468 | 0.36037  |
| 17542 | P03410 | Q5VWM6 | 1.3613   |
| 17543 | P03410 | Q8N7Q2 | 1.6653   |
| 17544 | P03410 | P30042 | 0.40104  |
| 17545 | P03410 | Q99829 | 0.38296  |
| 17546 | P03410 | Q8NB42 | 1.0264   |
| 17547 | P03410 | Q9Y4P8 | 1.0367   |
| 17548 | P03410 | Q6XQN6 | 0.32468  |
| 17549 | P03410 | P55265 | 0.38821  |
| 17550 | P03410 | Q8WWC4 | 1.1379   |
| 17551 | P03410 | Q86X76 | 0.18627  |
| 17552 | P03410 | O60304 | 0.69672  |
| 17553 | P03410 | Q9BQ83 | 0.81602  |
| 17554 | P03410 | A6NEH8 | 0.89394  |
| 17555 | P03410 | Q9BT78 | 1.1584   |
| 17556 | P03410 | A5LHX3 | 0.53245  |

|       |        |        |          |
|-------|--------|--------|----------|
| 17557 | P03410 | Q6U7Q0 | 0.74466  |
| 17558 | P03410 | P15923 | 0.5101   |
| 17559 | P03410 | Q9HBV2 | 1.0913   |
| 17560 | P03410 | A5YM69 | 0.87102  |
| 17561 | P03410 | P22090 | 0.55816  |
| 17562 | P03410 | Q8N1V8 | 0.76081  |
| 17563 | P03410 | P26651 | 0.84783  |
| 17564 | P03410 | Q8IV31 | 0.777    |
| 17565 | P03410 | O00411 | 0.82595  |
| 17566 | P03410 | Q6UB98 | 0.49184  |
| 17567 | P03410 | Q9Y2V0 | 0.35545  |
| 17568 | P03410 | P05062 | 0.22209  |
| 17569 | P03410 | Q09FC8 | 0.80544  |
| 17570 | P03410 | Q06732 | 0.59461  |
| 17571 | P03410 | Q9Y3E0 | 0.50315  |
| 17572 | P03410 | Q9UMY4 | 0.44123  |
| 17573 | P03410 | Q6ZN19 | 0.66065  |
| 17574 | P03410 | Q8N808 | 1.1631   |
| 17575 | P03410 | Q9BVV6 | 1.6653   |
| 17576 | P03410 | P13639 | 0.32577  |
| 17577 | P03410 | Q6NUQ1 | 0.88935  |
| 17578 | P03410 | P0CW26 | 0.55606  |
| 17579 | P03410 | Q6ZU15 | 0.33506  |
| 17580 | P03410 | Q99607 | 1.0411   |
| 17581 | P03410 | Q4VC44 | 0.97898  |
| 17582 | P03410 | Q14DG7 | 0.87365  |
| 17583 | P03410 | P17025 | 0.80606  |
| 17584 | P03410 | Q03052 | 0.30956  |
| 17585 | P03410 | P52788 | 0.25489  |
| 17586 | P03410 | Q8N2H4 | 1.8136   |
| 17587 | P03410 | Q3LI72 | 1.6653   |
| 17588 | P03410 | Q9Y617 | 0.79003  |
| 17589 | P03410 | Q13045 | 1.1384   |
| 17590 | P03410 | Q8WWM7 | 0.8855   |
| 17591 | P03410 | Q6ZMV5 | 0.86077  |
| 17592 | P03410 | P0CJ90 | 0.27528  |
| 17593 | P03410 | Q17RG1 | 0.32577  |
| 17594 | P03410 | Q9BYD6 | 1.5139   |
| 17595 | P03410 | P02538 | 1.1258   |
| 17596 | P03410 | Q52M93 | 0.63446  |
| 17597 | P03410 | O94850 | 0.87296  |
| 17598 | P03410 | A6NNL0 | 1.3673   |
| 17599 | P03410 | Q6ZVX7 | 0.92118  |
| 17600 | P03410 | Q9Y530 | 0.70929  |
| 17601 | P03410 | Q8NHR7 | 0.40073  |
| 17602 | P03410 | P61313 | 1.2786   |
| 17603 | P03410 | Q9NP85 | 0.32251  |
| 17604 | P03410 | B1AK76 | 1.4544   |
| 17605 | P03410 | Q69383 | 1.1462   |
| 17606 | P03410 | Q6NZY7 | 0.38207  |
| 17607 | P03410 | Q8WYQ5 | 0.75145  |
| 17608 | P03410 | Q9NXX6 | 0.55117  |
| 17609 | P03410 | Q9UIV1 | 1.0641   |
| 17610 | P03410 | Q5JTJ3 | 0.4075   |
| 17611 | P03410 | Q9Y3C7 | 0.99391  |
| 17612 | P03410 | A6NMN3 | 0.78976  |
| 17613 | P03410 | Q13113 | 0.68286  |
| 17614 | P03410 | O00193 | 1.757    |
| 17615 | P03410 | Q99615 | 0.97471  |
| 17616 | P03410 | Q9BXS6 | 1.4071   |
| 17617 | P03410 | Q5MJ68 | 0.58696  |
| 17618 | P03410 | Q9NSB4 | 0.69023  |
| 17619 | P03410 | Q8TD16 | 0.58607  |
| 17620 | P03410 | P62979 | 0.72365  |
| 17621 | P03410 | Q5XUX0 | 0.94144  |
| 17622 | P03410 | Q1ED39 | 1.757    |
| 17623 | P03410 | Q96EB1 | 1.1033   |
| 17624 | P03410 | Q8TBK2 | 0.70168  |
| 17625 | P03410 | Q9BY14 | 0.42963  |
| 17626 | P03410 | P54725 | 0.86083  |
| 17627 | P03410 | Q9UPW6 | 0.65473  |
| 17628 | P03410 | A6NDP7 | 0.69362  |
| 17629 | P03410 | Q9Y6M9 | 0.042124 |
| 17630 | P03410 | Q6ZSV7 | 0.60541  |
| 17631 | P03410 | P28715 | 0.31251  |
| 17632 | P03410 | Q99613 | 0.90431  |

|       |        |        |          |
|-------|--------|--------|----------|
| 17633 | P03410 | Q8TAT5 | 0.55004  |
| 17634 | P03410 | Q8NG57 | 0.63451  |
| 17635 | P03410 | Q96MZ4 | 0.061799 |
| 17636 | P03410 | P86791 | 0.60221  |
| 17637 | P03410 | Q9NPG3 | 1.0527   |
| 17638 | P03410 | C9JXX5 | 0.95938  |
| 17639 | P03410 | Q8TB33 | 0.74904  |
| 17640 | P03410 | Q9H4A6 | 0.8709   |
| 17641 | P03410 | Q9UKF7 | 0.076697 |
| 17642 | P03410 | Q9NV92 | 0.57573  |
| 17643 | P03410 | P38117 | 0.54149  |
| 17644 | P03410 | Q9NQW6 | 0.51301  |
| 17645 | P03410 | Q9H322 | 1.5696   |
| 17646 | P03410 | Q9NWS9 | 0.24502  |
| 17647 | P03410 | Q6NS38 | 0.68305  |
| 17648 | P03410 | Q9BSV6 | 0.6079   |
| 17649 | P03410 | P43364 | 1.0663   |
| 17650 | P03410 | Q12840 | 0.46876  |
| 17651 | P03410 | Q8TAP9 | 1.9329   |
| 17652 | P03410 | O43159 | 0.76327  |
| 17653 | P03410 | P47813 | 1.5459   |
| 17654 | P03410 | Q9NVV4 | 0.43132  |
| 17655 | P03410 | Q8NEF3 | 0.5561   |
| 17656 | P03410 | Q8TAD8 | 1.3792   |
| 17657 | P03410 | Q86VX2 | 1.3459   |
| 17658 | P03410 | Q96LT6 | 0.69563  |
| 17659 | P03410 | P86479 | 1.6653   |
| 17660 | P03410 | Q9NVM1 | 1.3818   |
| 17661 | P03410 | P23786 | 0.04383  |
| 17662 | P03410 | Q53FE4 | 0.40822  |
| 17663 | P03410 | P78549 | 0.34458  |
| 17664 | P03410 | Q9H7J1 | 0.87827  |
| 17665 | P03410 | Q969H4 | 0.44455  |
| 17666 | P03410 | O95817 | 0.59973  |
| 17667 | P03410 | O60397 | 0.46884  |
| 17668 | P03410 | Q8TCH9 | 1.0163   |
| 17669 | P03410 | P35227 | 0.55266  |
| 17670 | P03410 | P62508 | 0.41298  |
| 17671 | P03410 | P0CF97 | 0.8849   |
| 17672 | P03410 | Q96MH7 | 0.20888  |
| 17673 | P03410 | Q6P597 | 0.41192  |
| 17674 | P03410 | P0CJ71 | 1.4876   |
| 17675 | P03410 | Q4LE39 | 0.74912  |
| 17676 | P03410 | Q8NDZ9 | 1.6653   |
| 17677 | P03410 | P23327 | 1.5556   |
| 17678 | P03410 | Q96KN1 | 0.68391  |
| 17679 | P03410 | Q96S52 | 0.35154  |
| 17680 | P03410 | C9JFL3 | 1.6653   |
| 17681 | P03410 | Q92748 | 1.674    |
| 17682 | P03410 | Q8IYX8 | 0.32471  |
| 17683 | P03410 | Q8NEM1 | 1.0122   |
| 17684 | P03410 | Q9NVE4 | 0.54247  |
| 17685 | P03410 | Q9Y3D5 | 1.5971   |
| 17686 | P03410 | Q8TDP1 | 1.159    |
| 17687 | P03410 | Q8TF30 | 0.16757  |
| 17688 | P03410 | P09467 | 0.2582   |
| 17689 | P03410 | Q9H9J2 | 0.42547  |
| 17690 | P03410 | P02549 | 0.3258   |
| 17691 | P03410 | Q8TEX9 | 0.68714  |
| 17692 | P03410 | Q9UBX3 | 0.31887  |
| 17693 | P03410 | Q6P0N0 | 1.1067   |
| 17694 | P03410 | Q8N6C7 | 0.15287  |
| 17695 | P03410 | O75146 | 0.37209  |
| 17696 | P03410 | Q14596 | 0.22939  |
| 17697 | P03410 | Q6ZUV0 | 0.18836  |
| 17698 | P03410 | Q5VUD6 | 0.8763   |
| 17699 | P03410 | Q9Y5R8 | 0.32637  |
| 17700 | P03410 | P0C1Z6 | 1.4435   |
| 17701 | P03410 | Q86WP2 | 0.86628  |
| 17702 | P03410 | Q30KQ6 | 0.87928  |
| 17703 | P03410 | P52657 | 1.2495   |
| 17704 | P03410 | E5RQL4 | 0.67509  |
| 17705 | P03410 | Q8NCD3 | 0.85902  |
| 17706 | P03410 | Q92466 | 0.66082  |
| 17707 | P03410 | A6NP81 | 0.26797  |
| 17708 | P03410 | Q06190 | 0.35582  |

|       |        |        |          |
|-------|--------|--------|----------|
| 17709 | P03410 | C9JQI7 | 0.71116  |
| 17710 | P03410 | Q9BYV8 | 1.0447   |
| 17711 | P03410 | Q9NVN3 | 0.3101   |
| 17712 | P03410 | Q8WTU0 | 0.58896  |
| 17713 | P03410 | P56747 | 0.44906  |
| 17714 | P03410 | P51523 | 0.61902  |
| 17715 | P03410 | Q8IWS0 | 0.49071  |
| 17716 | P03410 | Q14188 | 0.67578  |
| 17717 | P03410 | A6NGC4 | 1.0913   |
| 17718 | P03410 | Q96ST3 | 0.66265  |
| 17719 | P03410 | F5H4B4 | 1.5219   |
| 17720 | P03410 | Q8TDM0 | 0.13077  |
| 17721 | P03410 | Q9Y4X0 | 0.55972  |
| 17722 | P03410 | O00461 | 1.0194   |
| 17723 | P03410 | Q8IYS4 | 0.012308 |
| 17724 | P03410 | Q05084 | 0.41189  |
| 17725 | P03410 | Q8NFD5 | 0.86497  |
| 17726 | P03410 | Q3LI61 | 1.6653   |
| 17727 | P03410 | Q9H171 | 0.46722  |
| 17728 | P03410 | Q8NC60 | 0.080306 |
| 17729 | P03410 | Q16617 | 1.0029   |
| 17730 | P03410 | Q9NR22 | 0.48022  |
| 17731 | P03410 | Q9H374 | 0.54655  |
| 17732 | P03410 | O43761 | 0.94894  |
| 17733 | P03410 | Q6ZN55 | 0.71696  |
| 17734 | P03410 | O15514 | 0.32685  |
| 17735 | P03410 | Q9UJW9 | 2.3231   |
| 17736 | P03410 | A6NFK2 | 0.38823  |
| 17737 | P03410 | Q9BRT9 | 0.65102  |
| 17738 | P03410 | P02812 | 0.93955  |
| 17739 | P03410 | Q6ZT77 | 0.67857  |
| 17740 | P03410 | Q5TH74 | 0.99777  |
| 17741 | P03410 | Q7Z2F6 | 0.79625  |
| 17742 | P03410 | Q8IYE1 | 0.11759  |
| 17743 | P03410 | P0DM35 | 1.4683   |
| 17744 | P03410 | Q6DHV5 | 0.64295  |
| 17745 | P03410 | Q13541 | 0.92434  |
| 17746 | P03410 | P07195 | 0.69158  |
| 17747 | P03410 | Q9Y295 | 0.59345  |
| 17748 | P03410 | O60216 | 0.95374  |
| 17749 | P03410 | Q7Z7F0 | 0.034663 |
| 17750 | P03410 | O14617 | 0.36833  |
| 17751 | P03410 | Q15306 | 0.56407  |
| 17752 | P03410 | Q13568 | 0.78071  |
| 17753 | P03410 | Q6U949 | 1.6653   |
| 17754 | P03410 | Q8IYL2 | 0.99258  |
| 17755 | P03410 | P50613 | 0.17188  |
| 17756 | P03410 | P33241 | 0.69996  |
| 17757 | P03410 | Q96HQ0 | 0.79946  |
| 17758 | P03410 | O75177 | 1.0407   |
| 17759 | P03410 | Q9H1J1 | 1.4762   |
| 17760 | P03410 | O94817 | 0.83859  |
| 17761 | P03410 | Q68CZ6 | 0.81017  |
| 17762 | P03410 | P14866 | 0.57706  |
| 17763 | P03410 | Q5HYW3 | 1.4025   |
| 17764 | P03410 | A0MZ66 | 0.9728   |
| 17765 | P03410 | Q15055 | 0.23774  |
| 17766 | P03410 | Q9UHA4 | 0.43374  |
| 17767 | P03410 | Q9BQE4 | 0.91617  |
| 17768 | P03410 | A8MU46 | 0.23355  |
| 17769 | P03410 | Q9P2N5 | 0.36961  |
| 17770 | P03410 | Q9H204 | 1.3512   |
| 17771 | P03410 | Q03933 | 0.50252  |
| 17772 | P03410 | Q96BW9 | 0.85224  |
| 17773 | P03410 | Q5H9R7 | 1.5434   |
| 17774 | P03410 | Q14152 | 1.2306   |
| 17775 | P03410 | K7EIQ3 | 1.54     |
| 17776 | P03410 | Q96EK4 | 1.673    |
| 17777 | P03410 | Q14674 | 0.32258  |
| 17778 | P03410 | Q5VZB9 | 0.19656  |
| 17779 | P03410 | Q9H9A5 | 0.20797  |
| 17780 | P03410 | P61163 | 0.21475  |
| 17781 | P03410 | Q5D0E6 | 1.2452   |
| 17782 | P03410 | Q5H9K5 | 0.25933  |
| 17783 | P03410 | Q6ZRH3 | 0.76596  |
| 17784 | P03410 | Q9UJY5 | 0.95911  |

|       |        |        |          |
|-------|--------|--------|----------|
| 17785 | P03410 | Q14258 | 0.6584   |
| 17786 | P03410 | Q9BYD3 | 1.8908   |
| 17787 | P03410 | Q96SC8 | 0.18733  |
| 17788 | P03410 | Q96T49 | 0.45542  |
| 17789 | P03410 | Q5T742 | 1.6653   |
| 17790 | P03410 | Q9Y587 | 0.42276  |
| 17791 | P03410 | Q5TAP6 | 0.96881  |
| 17792 | P03410 | Q96EH3 | 0.51112  |
| 17793 | P03410 | Q9NRR4 | 0.53101  |
| 17794 | P03410 | P41214 | 0.9481   |
| 17795 | P03410 | O60688 | 0.36773  |
| 17796 | P03410 | Q99436 | 1.0314   |
| 17797 | P03410 | Q86UQ5 | 1.6653   |
| 17798 | P03410 | Q5JT78 | 0.23883  |
| 17799 | P03410 | Q9Y6B7 | 0.66244  |
| 17800 | P03410 | Q92832 | 0.25793  |
| 17801 | P03410 | P28838 | 1.1121   |
| 17802 | P03410 | Q8NAV1 | 1.4814   |
| 17803 | P03410 | O00712 | 0.30034  |
| 17804 | P03410 | P56278 | 0.37474  |
| 17805 | P03410 | O15318 | 1.4071   |
| 17806 | P03410 | Q6UXQ6 | 1.6653   |
| 17807 | P03410 | O95521 | 0.70932  |
| 17808 | P03410 | Q7LBC6 | 0.20901  |
| 17809 | P03410 | Q3LI68 | 1.7978   |
| 17810 | P03410 | P09012 | 0.45881  |
| 17811 | P03410 | Q13895 | 0.92375  |
| 17812 | P03410 | P59091 | 1.0268   |
| 17813 | P03410 | Q7Z3Z2 | 0.4954   |
| 17814 | P03410 | P62701 | 0.60347  |
| 17815 | P03410 | Q9NS71 | 0.88356  |
| 17816 | P03410 | Q92585 | 1.0125   |
| 17817 | P03410 | Q9BQC3 | 1.5523   |
| 17818 | P03410 | Q9Y6X4 | 1.7604   |
| 17819 | P03410 | A5D8V7 | 0.085551 |
| 17820 | P03410 | Q9H7M6 | 0.5569   |
| 17821 | P03410 | Q13065 | 0.26031  |
| 17822 | P03410 | Q96I85 | 1.6653   |
| 17823 | P03410 | Q01831 | 0.85182  |
| 17824 | P03410 | A8MWS5 | 0.12996  |
| 17825 | P03410 | Q15819 | 0.57656  |
| 17826 | P03410 | Q9UKW6 | 0.35387  |
| 17827 | P03410 | Q96T58 | 0.63216  |
| 17828 | P03410 | Q8WW38 | 0.46682  |
| 17829 | P03410 | P36551 | 0.5235   |
| 17830 | P03410 | Q9UBV8 | 0.46375  |
| 17831 | P03410 | Q3MJ40 | 0.20311  |
| 17832 | P03410 | Q9Y535 | 0.41003  |
| 17833 | P03410 | A8MXZ3 | 1.6653   |
| 17834 | P03410 | Q92541 | 0.98043  |
| 17835 | P03410 | Q16585 | 0.9042   |
| 17836 | P03410 | O95760 | 0.37402  |
| 17837 | P03410 | Q01201 | 0.92611  |
| 17838 | P03410 | Q8TAX9 | 0.34857  |
| 17839 | P03410 | P25490 | 0.2003   |
| 17840 | P03410 | Q537H7 | 0.63816  |
| 17841 | P03410 | P01100 | 0.5948   |
| 17842 | P03410 | Q96CS2 | 0.82264  |
| 17843 | P03410 | P18846 | 0.97953  |
| 17844 | P03410 | Q0D2K3 | 1.231    |
| 17845 | P03410 | Q96LW1 | 0.99815  |
| 17846 | P03410 | Q53HV7 | 0.90061  |
| 17847 | P03410 | O94925 | 0.56382  |
| 17848 | P03410 | Q8N609 | 0.67545  |
| 17849 | P03410 | Q02410 | 0.71589  |
| 17850 | P03410 | P52746 | 0.51659  |
| 17851 | P03410 | Q5QJE6 | 1.6338   |
| 17852 | P03410 | Q00577 | 0.26204  |
| 17853 | P03410 | Q8WVV9 | 0.29764  |
| 17854 | P03410 | Q9H1K1 | 0.94858  |
| 17855 | P03410 | Q86VP1 | 0.82179  |
| 17856 | P03410 | P49770 | 0.34608  |
| 17857 | P03410 | Q96MP5 | 0.54647  |
| 17858 | P03410 | Q9BV87 | 0.81108  |
| 17859 | P03410 | Q5TA81 | 1.6653   |
| 17860 | P03410 | Q9UFE4 | 0.38122  |



|       |        |        |         |
|-------|--------|--------|---------|
| 17861 | P03410 | Q86WC6 | 0.55998 |
| 17862 | P03410 | Q8N9W5 | 0.29249 |
| 17863 | P03410 | P0C867 | 1.2861  |
| 17864 | P03410 | P61244 | 0.7983  |
| 17865 | P03410 | P0C879 | 1.6653  |
| 17866 | P03410 | Q6NVV7 | 0.43519 |
| 17867 | P03410 | P41236 | 1.2137  |
| 17868 | P03410 | Q7RTU4 | 0.44898 |
| 17869 | P03410 | Q0ZLH3 | 0.64335 |
| 17870 | P03410 | P41002 | 1.0932  |
| 17871 | P03410 | Q56P42 | 0.34399 |
| 17872 | P03410 | Q9BV20 | 0.71477 |
| 17873 | P03410 | Q9H0C8 | 0.54945 |
| 17874 | P03410 | O14933 | 0.42429 |
| 17875 | P03410 | A8MTZ0 | 1.4607  |
| 17876 | P03410 | P07320 | 1.4001  |
| 17877 | P03410 | Q9BZI7 | 1.086   |
| 17878 | P03410 | Q15424 | 0.78813 |
| 17879 | P03410 | Q9H910 | 1.645   |
| 17880 | P03410 | Q8NFW9 | 0.40637 |
| 17881 | P03410 | Q9H009 | 0.54734 |
| 17882 | P03410 | A6NNC1 | 1.2342  |
| 17883 | P03410 | Q8IXM7 | 0.62596 |
| 17884 | P03410 | Q6P2D8 | 0.29129 |
| 17885 | P03410 | O15226 | 0.88702 |
| 17886 | P03410 | O15258 | 0.72221 |
| 17887 | P03410 | Q07666 | 0.45187 |
| 17888 | P03410 | A6NK58 | 0.52398 |
| 17889 | P03410 | Q5T1J6 | 0.3943  |
| 17890 | P03410 | Q8WVG1 | 0.18515 |
| 17891 | P03410 | Q15560 | 0.94504 |
| 17892 | P03410 | Q7Z4V5 | 0.15765 |
| 17893 | P03410 | Q9Y6F1 | 0.40319 |
| 17894 | P03410 | Q7Z434 | 0.37026 |
| 17895 | P03410 | Q9H7B2 | 1.2313  |
| 17896 | P03410 | Q9HCC9 | 0.62556 |
| 17897 | P03410 | Q9H8X3 | 0.16142 |
| 17898 | P03410 | Q5EE01 | 1.066   |
| 17899 | P03410 | Q9NRY6 | 0.4419  |
| 17900 | P03410 | Q6IV72 | 0.67818 |
| 17901 | P03410 | Q8N912 | 1.3285  |
| 17902 | P03410 | P17036 | 0.70939 |
| 17903 | P03410 | Q6IPM2 | 0.1757  |
| 17904 | P03410 | Q9NPC6 | 1.6965  |
| 17905 | P03410 | Q6UXQ4 | 1.6653  |
| 17906 | P03410 | Q96FV9 | 0.80949 |
| 17907 | P03410 | Q5T0J7 | 0.94526 |
| 17908 | P03410 | Q8N490 | 0.6871  |
| 17909 | P03410 | P07196 | 0.90636 |
| 17910 | P03410 | Q9BTV5 | 0.72316 |
| 17911 | P03410 | O00757 | 0.17306 |
| 17912 | P03410 | Q9H1A3 | 0.6999  |
| 17913 | P03410 | P53990 | 0.85462 |
| 17914 | P03410 | Q5QP74 | 1.6653  |
| 17915 | P03410 | Q8TC21 | 0.75121 |
| 17916 | P03410 | Q9BZL3 | 1.1007  |
| 17917 | P03410 | Q13884 | 1.0234  |
| 17918 | P03410 | Q8IXQ9 | 0.55452 |
| 17919 | P03410 | P60014 | 1.7937  |
| 17920 | P03410 | Q8N3R3 | 0.49283 |
| 17921 | P03410 | Q9NXE4 | 0.4885  |
| 17922 | P03410 | Q12904 | 0.17442 |
| 17923 | P03410 | Q6P387 | 0.9976  |
| 17924 | P03410 | Q8N6M3 | 1.0157  |
| 17925 | P03410 | Q96HQ2 | 1.7028  |
| 17926 | P03410 | O15273 | 0.14201 |
| 17927 | P03410 | O60826 | 1.2657  |
| 17928 | P03410 | Q9NX53 | 0.6999  |
| 17929 | P03410 | P38432 | 1.5493  |
| 17930 | P03410 | A6NFQ7 | 0.30793 |
| 17931 | P03410 | Q8N1K5 | 0.84709 |
| 17932 | P03410 | Q96NS8 | 0.45287 |
| 17933 | P03410 | P15408 | 0.53011 |
| 17934 | P03410 | Q9H1I8 | 0.78432 |
| 17935 | P03410 | Q86T23 | 0.17249 |
| 17936 | P03410 | Q53ET0 | 2.0967  |

|       |        |        |          |
|-------|--------|--------|----------|
| 17937 | P03410 | Q86SG4 | 0.14238  |
| 17938 | P03410 | P06703 | 0.2441   |
| 17939 | P03410 | Q96LV5 | 0.31671  |
| 17940 | P03410 | Q9UL45 | 0.26527  |
| 17941 | P03410 | Q8N2C9 | 0.6577   |
| 17942 | P03410 | O60303 | 0.52604  |
| 17943 | P03410 | P0CL80 | 0.508    |
| 17944 | P03410 | P55957 | 0.82178  |
| 17945 | P03410 | Q9HBL8 | 0.13602  |
| 17946 | P03410 | H3BQB6 | 1.5946   |
| 17947 | P03410 | Q5VYP0 | 1.0269   |
| 17948 | P03410 | A8K0S8 | 0.2823   |
| 17949 | P03410 | Q9NTW7 | 0.98837  |
| 17950 | P03410 | Q8WXE9 | 0.79736  |
| 17951 | P03410 | Q9BVV8 | 0.88922  |
| 17952 | P03410 | Q2M385 | 0.80955  |
| 17953 | P03410 | O60663 | 0.41362  |
| 17954 | P03410 | Q96G23 | 0.21761  |
| 17955 | P03410 | O75069 | 0.33166  |
| 17956 | P03410 | P51508 | 0.82417  |
| 17957 | P03410 | Q3MIS6 | 0.98524  |
| 17958 | P03410 | Q9H707 | 0.81641  |
| 17959 | P03410 | Q9H9R9 | 0.22861  |
| 17960 | P03410 | P23508 | 0.53339  |
| 17961 | P03410 | Q8WU76 | 0.1621   |
| 17962 | P03410 | A8MUI8 | 0.73891  |
| 17963 | P03410 | P33992 | 0.35737  |
| 17964 | P03410 | P0C7V6 | 1.2614   |
| 17965 | P03410 | F8WBI6 | 0.14694  |
| 17966 | P03410 | Q6PII5 | 0.65159  |
| 17967 | P03410 | Q7Z401 | 0.39495  |
| 17968 | P03410 | Q9H7C4 | 0.68581  |
| 17969 | P03410 | Q8ND83 | 1.8112   |
| 17970 | P03410 | Q9BRT2 | 0.54535  |
| 17971 | P03410 | A6NHX0 | 1.3563   |
| 17972 | P03410 | Q5VU69 | 0.96422  |
| 17973 | P03410 | Q96SR6 | 0.82417  |
| 17974 | P03410 | Q5TEC3 | 0.78521  |
| 17975 | P03410 | Q9Y2X3 | 0.77343  |
| 17976 | P03410 | Q8IVU9 | 0.27185  |
| 17977 | P03410 | Q9UMZ2 | 0.27806  |
| 17978 | P03410 | Q9NP66 | 0.84708  |
| 17979 | P03410 | Q9BYR4 | 1.9984   |
| 17980 | P03410 | Q8N9R0 | 1.6653   |
| 17981 | P03410 | Q13158 | 0.64287  |
| 17982 | P03410 | Q6UWF9 | 0.79568  |
| 17983 | P03410 | Q96QD9 | 1.0676   |
| 17984 | P03410 | Q9UQ35 | 1.0784   |
| 17985 | P03410 | B4DXR9 | 0.99633  |
| 17986 | P03410 | O43264 | 0.82453  |
| 17987 | P03410 | Q9NUG6 | 0.14771  |
| 17988 | P03410 | Q6ZP98 | 1.1863   |
| 17989 | P03410 | Q8NEP9 | 0.92179  |
| 17990 | P03410 | Q9UJJ7 | 0.63983  |
| 17991 | P03410 | Q14693 | 0.27668  |
| 17992 | P03410 | P23919 | 0.87227  |
| 17993 | P03410 | Q6UWD8 | 0.65315  |
| 17994 | P03410 | Q6VMQ6 | 1.5572   |
| 17995 | P03410 | M0R1G4 | 0.062582 |
| 17996 | P03410 | O15231 | 0.15515  |
| 17997 | P03410 | Q9BZV1 | 1.1401   |
| 17998 | P03410 | Q8TCG1 | 0.096673 |
| 17999 | P03410 | Q8N1F7 | 0.8551   |
| 18000 | P03410 | Q8WUW1 | 0.50232  |
| 18001 | P03410 | Q156A1 | 1.6653   |
| 18002 | P03410 | P62750 | 0.98685  |
| 18003 | P03410 | O75569 | 0.35504  |
| 18004 | P03410 | Q8N112 | 0.96496  |
| 18005 | P03410 | P42765 | 0.20318  |
| 18006 | P03410 | P81408 | 1.0975   |
| 18007 | P03410 | P0CG29 | 0.30366  |
| 18008 | P03410 | P13073 | 0.78062  |
| 18009 | P03410 | O75486 | 1.019    |
| 18010 | P03410 | Q96A22 | 0.68816  |
| 18011 | P03410 | O95171 | 0.31636  |
| 18012 | P03410 | Q96GT9 | 1.2681   |

|       |        |        |           |
|-------|--------|--------|-----------|
| 18013 | P03410 | Q92575 | 1.1213    |
| 18014 | P03410 | Q9BQ66 | 1.9984    |
| 18015 | P03410 | A6NIH7 | 0.79853   |
| 18016 | P03410 | Q8WUI4 | 0.40267   |
| 18017 | P03410 | Q5JUW0 | 0.87221   |
| 18018 | P03410 | O00559 | 0.48712   |
| 18019 | P03410 | P17544 | 0.9359    |
| 18020 | P03410 | Q6PP77 | 1.2132    |
| 18021 | P03410 | Q9NZ42 | 0.73376   |
| 18022 | P03410 | Q96MF7 | 0.56334   |
| 18023 | P03410 | P0C7T8 | 1.0913    |
| 18024 | P03410 | Q5SVQ8 | 0.88499   |
| 18025 | P03410 | Q16670 | 0.6841    |
| 18026 | P03410 | P35659 | 0.6684    |
| 18027 | P03410 | Q9NSD9 | 1.1997    |
| 18028 | P03410 | Q9H074 | 0.52909   |
| 18029 | P03410 | Q2M329 | 0.60792   |
| 18030 | P03410 | Q9C005 | 0.62928   |
| 18031 | P03410 | O95249 | 0.014043  |
| 18032 | P03410 | Q8IZT6 | 0.47914   |
| 18033 | P03410 | Q8NAP1 | 1.4883    |
| 18034 | P03410 | P46926 | 0.087604  |
| 18035 | P03410 | P50452 | 0.74091   |
| 18036 | P03410 | Q6ZV50 | 0.41575   |
| 18037 | P03410 | Q96EY7 | 0.1972    |
| 18038 | P03410 | Q969W3 | 1.7716    |
| 18039 | P03410 | Q16576 | 0.33111   |
| 18040 | P03410 | O60381 | 0.24596   |
| 18041 | P03410 | Q6ZRN7 | 1.6653    |
| 18042 | P03410 | O60930 | 0.73641   |
| 18043 | P03410 | Q96BJ3 | 0.957     |
| 18044 | P03410 | O60783 | 1.3376    |
| 18045 | P03410 | Q9BY32 | 0.84651   |
| 18046 | P03410 | P50549 | 0.77266   |
| 18047 | P03410 | Q8WXI4 | 0.098298  |
| 18048 | P03410 | Q7Z7K0 | 0.46284   |
| 18049 | P03410 | H0YKK7 | 1.5003    |
| 18050 | P03410 | Q5T089 | 0.0039504 |
| 18051 | P03410 | O14841 | 0.81206   |
| 18052 | P03410 | Q96JB5 | 0.59297   |
| 18053 | P03410 | Q9GZS3 | 1.0663    |
| 18054 | P03410 | Q9BWF2 | 0.36107   |
| 18055 | P03410 | Q86UW6 | 0.35971   |
| 18056 | P03410 | Q6ZR93 | 1.6653    |
| 18057 | P03410 | Q9Y5P3 | 0.56835   |
| 18058 | P03410 | Q5EBL2 | 0.65248   |
| 18059 | P03410 | Q7Z7K6 | 1.2052    |
| 18060 | P03410 | P25815 | 0.70001   |
| 18061 | P03410 | P82664 | 1.7659    |
| 18062 | P03410 | Q9HAP6 | 0.38174   |
| 18063 | P03410 | P49454 | 0.62279   |
| 18064 | P03410 | Q15700 | 0.40919   |
| 18065 | P03410 | Q9H8W3 | 0.80585   |
| 18066 | P03410 | Q2M2I3 | 0.062703  |
| 18067 | P03410 | Q8N6S5 | 1.1813    |
| 18068 | P03410 | Q8NEW7 | 0.93824   |
| 18069 | P03410 | Q9NQY0 | 0.52525   |
| 18070 | P03410 | Q9NXJ5 | 0.7708    |
| 18071 | P03410 | A6NN79 | 0.85968   |
| 18072 | P03410 | Q96M42 | 0.58484   |
| 18073 | P03410 | Q9H8M2 | 0.19609   |
| 18074 | P03410 | Q9P1Z9 | 0.86734   |
| 18075 | P03410 | O75503 | 0.57206   |
| 18076 | P03410 | Q2TAZ0 | 0.6999    |
| 18077 | P03410 | P22234 | 0.49121   |
| 18078 | P03410 | P17010 | 0.36309   |
| 18079 | P03410 | Q969K4 | 0.28073   |
| 18080 | P03410 | Q8N1G0 | 0.2267    |
| 18081 | P03410 | Q8N6Y0 | 1.0134    |
| 18082 | P03410 | Q5HYL7 | 1.1653    |
| 18083 | P03410 | Q96I34 | 0.46939   |
| 18084 | P03410 | Q9Y5K6 | 0.4484    |
| 18085 | P03410 | Q96E11 | 1.715     |
| 18086 | P03410 | Q9GZV5 | 0.99275   |
| 18087 | P03410 | Q9UH36 | 0.80829   |
| 18088 | P03410 | Q969U7 | 0.90149   |

|       |        |        |          |
|-------|--------|--------|----------|
| 18089 | P03410 | Q8N7L0 | 0.46295  |
| 18090 | P03410 | Q8N8K9 | 0.3976   |
| 18091 | P03410 | Q9H0E3 | 1.5338   |
| 18092 | P03410 | Q8N442 | 0.60782  |
| 18093 | P03410 | O60759 | 0.66849  |
| 18094 | P03410 | Q5JXB2 | 0.3533   |
| 18095 | P03410 | Q9UQR1 | 0.75339  |
| 18096 | P03410 | P11473 | 0.36299  |
| 18097 | P03410 | P0CZ25 | 0.62862  |
| 18098 | P03410 | Q9NRP4 | 0.16416  |
| 18099 | P03410 | Q9BQJ4 | 1.3329   |
| 18100 | P03410 | Q659C4 | 0.94114  |
| 18101 | P03410 | Q9BSE4 | 0.75272  |
| 18102 | P03410 | Q6NW29 | 0.62614  |
| 18103 | P03410 | Q9UQL6 | 0.44046  |
| 18104 | P03410 | Q02556 | 0.33564  |
| 18105 | P03410 | Q96MG7 | 0.83653  |
| 18106 | P03410 | P51825 | 1.069    |
| 18107 | P03410 | O95295 | 0.56823  |
| 18108 | P03410 | Q96D70 | 1.6471   |
| 18109 | P03410 | O95347 | 0.4395   |
| 18110 | P03410 | Q6ZWB6 | 0.25004  |
| 18111 | P03410 | Q8NHQ8 | 1.3276   |
| 18112 | P03410 | A6NKC0 | 0.71133  |
| 18113 | P03410 | P51003 | 0.40883  |
| 18114 | P03410 | Q6XD76 | 0.31824  |
| 18115 | P03410 | Q8IVG5 | 0.069293 |
| 18116 | P03410 | Q9H2F5 | 0.60148  |
| 18117 | P03410 | Q8NHX4 | 1.3572   |
| 18118 | P03410 | O75363 | 0.92806  |
| 18119 | P03410 | P43366 | 0.042291 |
| 18120 | P03410 | Q9NVR5 | 1.467    |
| 18121 | P03410 | Q96QE5 | 1.0723   |
| 18122 | P03410 | O95219 | 0.27154  |
| 18123 | P03410 | Q5JPF3 | 0.16362  |
| 18124 | P03410 | Q9HBZ2 | 0.24779  |
| 18125 | P03410 | Q9Y592 | 1.7348   |
| 18126 | P03410 | Q5RL73 | 0.43332  |
| 18127 | P03410 | Q9NX55 | 0.60065  |
| 18128 | P03410 | Q96A49 | 1.5941   |
| 18129 | P03410 | Q9H7N4 | 1.591    |
| 18130 | P03410 | Q6ZMK1 | 0.15938  |
| 18131 | P03410 | P78396 | 1.1282   |
| 18132 | P03410 | Q9BRU9 | 0.69127  |
| 18133 | P03410 | Q9GZV8 | 0.17454  |
| 18134 | P03410 | I3L0S3 | 1.6271   |
| 18135 | P03410 | Q9UI30 | 0.76097  |
| 18136 | P03410 | Q9P2Z0 | 0.71531  |
| 18137 | P03410 | A5D8V6 | 0.63199  |
| 18138 | P03410 | Q9BW11 | 0.46522  |
| 18139 | P03410 | Q15006 | 0.48825  |
| 18140 | P03410 | Q9UJ72 | 0.22773  |
| 18141 | P03410 | Q9NUQ9 | 0.083991 |
| 18142 | P03410 | O14965 | 0.30163  |
| 18143 | P03410 | P43490 | 0.6455   |
| 18144 | P03410 | Q96EA4 | 0.94348  |
| 18145 | P03410 | Q9Y603 | 1.1064   |
| 18146 | P03410 | Q15654 | 0.92477  |
| 18147 | P03410 | O75688 | 0.41342  |
| 18148 | P03410 | Q9BZK8 | 1.6653   |
| 18149 | P03410 | Q9H2X8 | 0.97393  |
| 18150 | P03410 | Q8TC56 | 1.9055   |
| 18151 | P03410 | Q13148 | 0.37028  |
| 18152 | P03410 | Q9P2J5 | 0.67283  |
| 18153 | P03410 | Q14587 | 0.65413  |
| 18154 | P03410 | Q9UBQ0 | 0.97375  |
| 18155 | P03410 | Q8WWB3 | 0.11361  |
| 18156 | P03410 | Q5SRI9 | 0.97453  |
| 18157 | P03410 | Q96EL1 | 1.429    |
| 18158 | P03410 | Q96PE6 | 0.6823   |
| 18159 | P03410 | Q15928 | 1.0336   |
| 18160 | P03410 | Q5TAG4 | 0.95923  |
| 18161 | P03410 | Q8N7H5 | 0.94981  |
| 18162 | P03410 | Q9BRR0 | 0.64978  |
| 18163 | P03410 | Q6ZRC1 | 1.6653   |
| 18164 | P03410 | P08621 | 0.47843  |

|       |        |        |         |
|-------|--------|--------|---------|
| 18165 | P03410 | P41567 | 1.4907  |
| 18166 | P03410 | A8MV65 | 0.96876 |
| 18167 | P03410 | Q05BQ5 | 0.25175 |
| 18168 | P03410 | Q6ZV56 | 1.6653  |
| 18169 | P03410 | Q9UNH7 | 0.44265 |
| 18170 | P03410 | Q9NZJ9 | 0.32773 |
| 18171 | P03410 | O95243 | 0.79474 |
| 18172 | P03410 | Q8NDY6 | 0.58505 |
| 18173 | P03410 | Q9HD26 | 1.2429  |
| 18174 | P03410 | Q92925 | 0.62989 |
| 18175 | P03410 | Q8IX19 | 0.82606 |
| 18176 | P03410 | Q96NL0 | 0.5948  |
| 18177 | P03410 | P55884 | 0.35076 |
| 18178 | P03410 | O14925 | 0.54181 |
| 18179 | P03410 | P41219 | 0.66988 |
| 18180 | P03410 | Q6ZNG2 | 0.25012 |
| 18181 | P03410 | A6NJ46 | 0.27528 |
| 18182 | P03410 | Q5VTQ0 | 0.42546 |
| 18183 | P03410 | P08865 | 0.95771 |
| 18184 | P03410 | Q8TAF7 | 0.99815 |
| 18185 | P03410 | Q969V6 | 1.39    |
| 18186 | P03410 | Q96L21 | 0.85317 |
| 18187 | P03410 | Q8N2H9 | 0.58989 |
| 18188 | P03410 | Q6RFH5 | 0.25989 |
| 18189 | P03410 | Q8N8L2 | 0.68881 |
| 18190 | P03410 | Q9Y5M1 | 0.78672 |
| 18191 | P03410 | A7XYQ1 | 0.7579  |
| 18192 | P03410 | Q9NRX4 | 0.2915  |
| 18193 | P03410 | K7EJ46 | 1.6653  |
| 18194 | P03410 | Q92896 | 0.8182  |
| 18195 | P03410 | P08779 | 1.2234  |
| 18196 | P03410 | P49591 | 0.95868 |
| 18197 | P03410 | Q9UHT4 | 1.6653  |
| 18198 | P03410 | O43809 | 0.86167 |
| 18199 | P03410 | Q96NG8 | 0.78499 |
| 18200 | P03410 | O43708 | 0.41969 |
| 18201 | P03410 | Q86T29 | 0.66065 |
| 18202 | P03410 | Q96CM3 | 0.783   |
| 18203 | P03410 | P37802 | 0.65045 |
| 18204 | P03410 | Q7Z2E3 | 0.51786 |
| 18205 | P03410 | Q9ULD5 | 0.61208 |
| 18206 | P03410 | O95644 | 0.65482 |
| 18207 | P03410 | Q8N9L7 | 0.72592 |
| 18208 | P03410 | A8MXJ8 | 0.13951 |
| 18209 | P03410 | Q96FC7 | 0.31479 |
| 18210 | P03410 | Q9BQY4 | 0.91039 |
| 18211 | P03410 | P58340 | 0.32089 |
| 18212 | P03410 | Q9GZT9 | 0.2249  |
| 18213 | P03410 | Q8NCF5 | 0.60453 |
| 18214 | P03410 | Q7RTU0 | 0.44898 |
| 18215 | P03410 | Q96HB5 | 0.76904 |
| 18216 | P03410 | Q8N6K4 | 1.6653  |
| 18217 | P03410 | Q9H4D5 | 0.9951  |
| 18218 | P03410 | Q96IF1 | 0.46191 |
| 18219 | P03410 | Q99595 | 0.27364 |
| 18220 | P03410 | Q8WWM9 | 0.53232 |
| 18221 | P03410 | Q8N987 | 0.34414 |
| 18222 | P03410 | Q9ULC6 | 1.4202  |
| 18223 | P03410 | Q96GX1 | 0.47229 |
| 18224 | P03410 | O75952 | 0.56948 |
| 18225 | P03410 | A4D0V7 | 1.4366  |
| 18226 | P03410 | O95166 | 0.52224 |
| 18227 | P03410 | Q8TBK6 | 0.93451 |
| 18228 | P03410 | Q9HD64 | 0.72206 |
| 18229 | P03410 | O15162 | 0.49333 |
| 18230 | P03410 | Q02930 | 0.74696 |
| 18231 | P03410 | Q9P1Z2 | 0.95006 |
| 18232 | P03410 | Q6RFH8 | 0.79357 |
| 18233 | P03410 | Q96MA1 | 0.2145  |
| 18234 | P03410 | P50750 | 0.28169 |
| 18235 | P03410 | P56381 | 0.53616 |
| 18236 | P03410 | Q9Y2T3 | 0.46153 |
| 18237 | P03410 | O95789 | 1.0468  |
| 18238 | P03410 | Q96LP6 | 0.13811 |
| 18239 | P03410 | Q96SI1 | 0.32577 |
| 18240 | P03410 | Q96MN9 | 0.65208 |

|       |        |        |         |
|-------|--------|--------|---------|
| 18241 | P03410 | P11171 | 0.86526 |
| 18242 | P03410 | Q13356 | 0.19963 |
| 18243 | P03410 | P10072 | 0.81334 |
| 18244 | P03410 | P20930 | 0.23157 |
| 18245 | P03410 | P40306 | 0.70857 |
| 18246 | P03410 | P0CJ74 | 1.4876  |
| 18247 | P03410 | Q8N888 | 1.0793  |
| 18248 | P03410 | Q9P127 | 0.86602 |
| 18249 | P03410 | Q9NX58 | 0.52503 |
| 18250 | P03410 | Q8WV48 | 1.0913  |
| 18251 | P03410 | Q9H0V1 | 1.0612  |
| 18252 | P03410 | P0C838 | 0.99629 |
| 18253 | P03410 | Q96FF7 | 1.6653  |
| 18254 | P03410 | Q8N111 | 0.80098 |
| 18255 | P03410 | P52209 | 0.4266  |
| 18256 | P03410 | Q96NL6 | 0.59303 |
| 18257 | P03410 | P40123 | 0.28797 |
| 18258 | P03410 | Q96FG2 | 0.59182 |
| 18259 | P03410 | Q8N831 | 0.59269 |
| 18260 | P03410 | Q9UBF6 | 0.65338 |
| 18261 | P03410 | Q0VDF9 | 0.42045 |
| 18262 | P03410 | P61981 | 0.73411 |
| 18263 | P03410 | Q96GD0 | 0.16404 |
| 18264 | P03410 | Q13336 | 1.0345  |
| 18265 | P03410 | Q5VWQ0 | 2.1784  |
| 18266 | P03410 | Q9UII2 | 0.97437 |
| 18267 | P03410 | Q6ZSN7 | 1.2928  |
| 18268 | P03410 | Q00994 | 1.4249  |
| 18269 | P03410 | Q9P2J3 | 0.24616 |
| 18270 | P03410 | Q93099 | 0.40518 |
| 18271 | P03410 | Q92979 | 0.44156 |
| 18272 | P03410 | Q9Y5Q3 | 0.70505 |
| 18273 | P03410 | Q9H1Z4 | 0.49184 |
| 18274 | P03410 | P10746 | 0.57532 |
| 18275 | P03410 | Q5SWH9 | 1.0913  |
| 18276 | P03410 | Q92800 | 0.47264 |
| 18277 | P03410 | P26358 | 0.29496 |
| 18278 | P03410 | P27540 | 0.27991 |
| 18279 | P03410 | Q6IPR3 | 0.52345 |
| 18280 | P03410 | Q15535 | 0.57148 |
| 18281 | P03410 | A6NNV3 | 1.0907  |
| 18282 | P03410 | O60384 | 0.967   |
| 18283 | P03410 | P67809 | 0.52366 |
| 18284 | P03410 | A8MX19 | 0.13085 |
| 18285 | P03410 | Q6GPH4 | 0.43664 |
| 18286 | P03410 | Q5T5Y3 | 0.73957 |
| 18287 | P03410 | Q8WYA6 | 0.91102 |
| 18288 | P03410 | Q86WI3 | 0.60263 |
| 18289 | P03410 | Q5SRH9 | 1.5131  |
| 18290 | P03410 | Q53HI1 | 1.1628  |
| 18291 | P03410 | Q96D03 | 0.46495 |
| 18292 | P03410 | Q9NYV6 | 0.57856 |
| 18293 | P03410 | Q86WV5 | 0.73197 |
| 18294 | P03410 | Q99081 | 0.28473 |
| 18295 | P03410 | Q6ZUF6 | 1.1327  |
| 18296 | P03410 | Q9UNX3 | 1.6046  |
| 18297 | P03410 | Q5T2T1 | 0.52641 |
| 18298 | P03410 | Q63HM2 | 0.67427 |
| 18299 | P03410 | Q9Y2G4 | 0.24495 |
| 18300 | P03410 | O43805 | 0.82366 |
| 18301 | P03410 | Q99816 | 0.52481 |
| 18302 | P03410 | O14598 | 1.4395  |
| 18303 | P03410 | Q9GZY1 | 1.0952  |
| 18304 | P03410 | Q6ZQR2 | 1.7643  |
| 18305 | P03410 | Q9UBP8 | 0.97973 |
| 18306 | P03410 | Q9ULC4 | 0.48697 |
| 18307 | P03410 | P58505 | 0.92353 |
| 18308 | P03410 | O00625 | 0.90708 |
| 18309 | P03410 | Q9NR09 | 0.40808 |
| 18310 | P03410 | Q96KT7 | 1.1631  |
| 18311 | P03410 | Q9UM54 | 0.11455 |
| 18312 | P03410 | Q8N8Z3 | 0.52862 |
| 18313 | P03410 | P33316 | 0.74831 |
| 18314 | P03410 | Q9H790 | 0.44399 |
| 18315 | P03410 | Q15599 | 0.66395 |
| 18316 | P03410 | Q5K131 | 0.52932 |

|       |        |        |          |
|-------|--------|--------|----------|
| 18317 | P03410 | Q6ZN06 | 0.95938  |
| 18318 | P03410 | Q9UHT9 | 1.6653   |
| 18319 | P03410 | A8MQB3 | 0.49035  |
| 18320 | P03410 | Q9UHB7 | 1.2457   |
| 18321 | P03410 | Q96BV0 | 0.59395  |
| 18322 | P03410 | Q14590 | 0.6829   |
| 18323 | P03410 | O95158 | 0.87371  |
| 18324 | P03410 | O75151 | 0.48575  |
| 18325 | P03410 | Q9UHJ9 | 1.0193   |
| 18326 | P03410 | Q96B36 | 1.6774   |
| 18327 | P03410 | Q15628 | 0.81071  |
| 18328 | P03410 | Q9HC16 | 0.20325  |
| 18329 | P03410 | Q9H2H8 | 0.33677  |
| 18330 | P03410 | Q902F8 | 1.1446   |
| 18331 | P03410 | A6NCW3 | 1.2555   |
| 18332 | P03410 | Q06323 | 1.3685   |
| 18333 | P03410 | Q9UK10 | 0.79465  |
| 18334 | P03410 | Q9BRT7 | 1.6653   |
| 18335 | P03410 | Q5TZK3 | 0.2149   |
| 18336 | P03410 | Q9BUG6 | 0.52321  |
| 18337 | P03410 | O95425 | 0.085959 |
| 18338 | P03410 | P62277 | 1.2546   |
| 18339 | P03410 | Q15371 | 0.86949  |
| 18340 | P03410 | Q8IZH2 | 0.29331  |
| 18341 | P03410 | Q7L8J4 | 0.77627  |
| 18342 | P03410 | Q5T0F9 | 0.55712  |
| 18343 | P03410 | O60563 | 1.5585   |
| 18344 | P03410 | Q8NEK8 | 1.414    |
| 18345 | P03410 | Q13127 | 0.39916  |
| 18346 | P03410 | Q8N1N2 | 1.4135   |
| 18347 | P03410 | Q3ZCV2 | 1.4883   |
| 18348 | P03410 | Q8WXB4 | 0.67112  |
| 18349 | P03410 | Q8NHV4 | 1.0774   |
| 18350 | P03410 | Q96MW5 | 0.38858  |
| 18351 | P03410 | Q8NI28 | 0.75446  |
| 18352 | P03410 | O60308 | 0.83152  |
| 18353 | P03410 | Q9NX24 | 0.25964  |
| 18354 | P03410 | P0CG42 | 1.6653   |
| 18355 | P03410 | Q86YS3 | 0.39181  |
| 18356 | P03410 | P17022 | 0.46379  |
| 18357 | P03410 | Q96GE5 | 0.94919  |
| 18358 | P03410 | O60333 | 0.26312  |
| 18359 | P03410 | Q5SXM1 | 0.88569  |
| 18360 | P03410 | Q9NWD8 | 0.67444  |
| 18361 | P03410 | O43318 | 0.84996  |
| 18362 | P03410 | Q86TU6 | 1.8796   |
| 18363 | P03410 | Q8NEH6 | 1.4517   |
| 18364 | P03410 | O00716 | 0.9755   |
| 18365 | P03410 | Q9UKT9 | 0.39189  |
| 18366 | P03410 | Q9H1L0 | 1.7243   |
| 18367 | P03410 | A6NKF7 | 1.0913   |
| 18368 | P03410 | Q0VAF6 | 0.13502  |
| 18369 | P03410 | Q15032 | 0.46946  |
| 18370 | P03410 | O15525 | 0.40117  |
| 18371 | P03410 | Q7Z5Q5 | 0.38414  |
| 18372 | P03410 | Q16829 | 0.52002  |
| 18373 | P03410 | Q4VXA5 | 0.85912  |
| 18374 | P03410 | P25800 | 0.29844  |
| 18375 | P03410 | Q8N4B4 | 0.31319  |
| 18376 | P03410 | P08651 | 0.39144  |
| 18377 | P03410 | P60673 | 0.48082  |
| 18378 | P03410 | Q92624 | 1.3796   |
| 18379 | P03410 | Q9Y4H4 | 1.4726   |
| 18380 | P03410 | O75970 | 0.4156   |
| 18381 | P03410 | Q9HCS7 | 0.50089  |
| 18382 | P03410 | Q7Z5V6 | 0.86197  |
| 18383 | P03410 | Q86WZ0 | 1.3768   |
| 18384 | P03410 | Q6ZMS7 | 0.74848  |
| 18385 | P03410 | Q9NTU4 | 1.3117   |
| 18386 | P03410 | Q8N0Z3 | 0.87824  |
| 18387 | P03410 | P00480 | 0.49118  |
| 18388 | P03410 | Q9Y2X9 | 0.55127  |
| 18389 | P03410 | P22695 | 0.11679  |
| 18390 | P03410 | A2IDD5 | 0.9548   |
| 18391 | P03410 | O94906 | 0.32494  |
| 18392 | P03410 | Q8IZL2 | 0.9995   |

|       |        |        |           |
|-------|--------|--------|-----------|
| 18393 | P03410 | Q13136 | 0.5178    |
| 18394 | P03410 | O95848 | 1.3672    |
| 18395 | P03410 | Q93100 | 0.82983   |
| 18396 | P03410 | Q15583 | 0.32143   |
| 18397 | P03410 | Q7L5N1 | 1.3176    |
| 18398 | P03410 | Q9GZU3 | 1.6533    |
| 18399 | P03410 | P0CW21 | 1.6653    |
| 18400 | P03410 | Q6ZMS4 | 0.75415   |
| 18401 | P03410 | Q08AN1 | 0.79465   |
| 18402 | P03410 | Q5VWP2 | 0.4146    |
| 18403 | P03410 | Q9BUK6 | 0.306     |
| 18404 | P03410 | Q70IA8 | 0.18173   |
| 18405 | P03410 | Q9Y676 | 1.4249    |
| 18406 | P03410 | Q8NE86 | 0.64139   |
| 18407 | P03410 | P36578 | 1.2011    |
| 18408 | P03410 | Q9UGP5 | 0.2934    |
| 18409 | P03410 | Q9UMX0 | 1.0238    |
| 18410 | P03410 | B7ZAP0 | 0.0064086 |
| 18411 | P03410 | Q8N1G4 | 0.62496   |
| 18412 | P03410 | Q9BYD1 | 1.7652    |
| 18413 | P03410 | Q8N201 | 0.68895   |
| 18414 | P03410 | O43715 | 0.99196   |
| 18415 | P03410 | Q8WU49 | 1.6653    |
| 18416 | P03410 | Q86X02 | 0.44597   |
| 18417 | P03410 | P41161 | 0.25951   |
| 18418 | P03410 | P61573 | 1.1462    |
| 18419 | P03410 | Q8IYE0 | 1.4251    |
| 18420 | P03410 | P17029 | 0.84739   |
| 18421 | P03410 | Q7L3S4 | 0.77956   |
| 18422 | P03410 | Q96M85 | 1.6653    |
| 18423 | P03410 | Q8IVP9 | 0.63916   |
| 18424 | P03410 | Q9UBZ9 | 0.48531   |
| 18425 | P03410 | P22557 | 0.21335   |
| 18426 | P03410 | Q86TL0 | 0.55652   |
| 18427 | P03410 | Q9UMR2 | 0.30975   |
| 18428 | P03410 | P18077 | 0.72038   |
| 18429 | P03410 | A6NIX2 | 1.0319    |
| 18430 | P03410 | O75600 | 0.11663   |
| 18431 | P03410 | Q86XI6 | 0.30851   |
| 18432 | P03410 | Q9BT04 | 1.118     |
| 18433 | P03410 | Q8WYR4 | 0.43881   |
| 18434 | P03410 | O95571 | 0.65159   |
| 18435 | P03410 | Q92988 | 0.50842   |
| 18436 | P03410 | Q3MIV0 | 1.6653    |
| 18437 | P03410 | Q8N614 | 0.70848   |
| 18438 | P03410 | Q9BSF4 | 0.52164   |
| 18439 | P03410 | Q5MJ10 | 1.5851    |
| 18440 | P03410 | Q9BYD9 | 0.42594   |
| 18441 | P03410 | Q9NS25 | 1.6831    |
| 18442 | P03410 | Q7Z7J5 | 1.2102    |
| 18443 | P03410 | Q9UNQ2 | 0.9588    |
| 18444 | P03410 | Q9UJA5 | 1.604     |
| 18445 | P03410 | Q0P670 | 1.5437    |
| 18446 | P03410 | P12956 | 0.31552   |
| 18447 | P03410 | Q6VN20 | 0.48403   |
| 18448 | P03410 | A0ZSE6 | 0.9149    |
| 18449 | P03410 | Q92556 | 0.52541   |
| 18450 | P03410 | Q96LM1 | 1.2185    |
| 18451 | P03410 | Q9C0B9 | 0.24486   |
| 18452 | P03410 | O76031 | 1.043     |
| 18453 | P03410 | Q96MC4 | 1.9477    |
| 18454 | P03410 | O95866 | 1.1982    |
| 18455 | P03410 | Q8N999 | 1.0924    |
| 18456 | P03410 | Q96AT1 | 1.4883    |
| 18457 | P03410 | Q96A59 | 1.2078    |
| 18458 | P03410 | Q9NPA8 | 0.48411   |
| 18459 | P03410 | Q9C035 | 0.56963   |
| 18460 | P03410 | Q9UNE7 | 0.23018   |
| 18461 | P03410 | Q8N823 | 0.79465   |
| 18462 | P03410 | Q5T7W7 | 1.4883    |
| 18463 | P03410 | Q12986 | 0.21125   |
| 18464 | P03410 | Q8N766 | 0.7443    |
| 18465 | P03410 | P24385 | 0.88552   |
| 18466 | P03410 | Q9Y3E7 | 1.062     |
| 18467 | P03410 | Q9Y3P8 | 0.97135   |
| 18468 | P03410 | Q9UDY2 | 1.2863    |



|       |        |         |          |
|-------|--------|---------|----------|
| 18469 | P03410 | Q8IZN7  | 0.92904  |
| 18470 | P03410 | Q92628  | 0.8309   |
| 18471 | P03410 | Q99990  | 0.67767  |
| 18472 | P03410 | Q9Y2W2  | 1.5564   |
| 18473 | P03410 | Q5VWM5  | 1.1303   |
| 18474 | P03410 | Q8WWY6  | 0.54613  |
| 18475 | P03410 | P0DI81  | 1.1051   |
| 18476 | P03410 | Q9BTV4  | 0.85342  |
| 18477 | P03410 | P07910  | 0.3269   |
| 18478 | P03410 | Q9Y4W2  | 1.5928   |
| 18479 | P03410 | Q9H3F6  | 0.39138  |
| 18480 | P03410 | A8MUQ0  | 1.3804   |
| 18481 | P03410 | Q7Z340  | 0.75755  |
| 18482 | P03410 | Q9UBZ4  | 0.036616 |
| 18483 | P03410 | Q8TB69  | 0.96412  |
| 18484 | P03410 | Q86UD1  | 0.51339  |
| 18485 | P03410 | Q5H9L4  | 0.33768  |
| 18486 | P03410 | P42166  | 0.51669  |
| 18487 | P03410 | Q13492  | 0.28663  |
| 18488 | P03410 | P08579  | 0.30045  |
| 18489 | P03410 | Q96IY1  | 0.99342  |
| 18490 | P03410 | P55199  | 1.1084   |
| 18491 | P03410 | Q96JK9  | 1.0005   |
| 18492 | P03410 | Q8WZ33  | 0.88066  |
| 18493 | P03410 | Q9Y6Z4  | 0.76299  |
| 18494 | P03410 | Q07687  | 0.40973  |
| 18495 | P03410 | Q6ZRS2  | 0.36515  |
| 18496 | P03410 | Q96H40  | 0.92169  |
| 18497 | P03410 | Q86UT6  | 0.36123  |
| 18498 | P03410 | O95551  | 0.71399  |
| 18499 | P03410 | P41227  | 0.41987  |
| 18500 | P03410 | Q9BW61  | 1.1536   |
| 18501 | P03410 | Q99471  | 0.9321   |
| 18502 | P03410 | P35548  | 0.87103  |
| 18503 | P03410 | Q13618  | 0.4296   |
| 18504 | P03410 | Q9P0M2  | 0.21976  |
| 18505 | P03410 | P0CJ76  | 1.4876   |
| 18506 | P03410 | Q15436  | 1.0652   |
| 18507 | P03410 | Q5VT33  | 0.78403  |
| 18508 | P03410 | Q9BXI3  | 0.41616  |
| 18509 | P03410 | Q8NEK5  | 0.82883  |
| 18510 | P03410 | Q8IZD4  | 0.98285  |
| 18511 | P03410 | A5PL33  | 1.0654   |
| 18512 | P03410 | Q7RTT5  | 0.38119  |
| 18513 | P03410 | Q5GH76  | 1.1702   |
| 18514 | P03410 | Q8IZW8  | 0.85052  |
| 18515 | P03410 | Q93052  | 0.51414  |
| 18516 | P03410 | O14734  | 0.72324  |
| 18517 | P03410 | Q6R2W3  | 0.56406  |
| 18518 | P03410 | Q3KQV3  | 0.81355  |
| 18519 | P03410 | Q9P031  | 1.6162   |
| 18520 | P03410 | Q14715  | 0.20843  |
| 18521 | P03410 | Q9NPNB8 | 0.062492 |
| 18522 | P03410 | Q8WV24  | 1.0917   |
| 18523 | P03410 | Q6ZVS7  | 0.053959 |
| 18524 | P03410 | O00154  | 0.015886 |
| 18525 | P03410 | Q96MP8  | 0.42699  |
| 18526 | P03410 | Q9BWT6  | 0.14926  |
| 18527 | P03410 | Q86V42  | 1.056    |
| 18528 | P03410 | P17098  | 1.0155   |
| 18529 | P03410 | Q8WUX9  | 0.6478   |
| 18530 | P03410 | Q96LL3  | 1.297    |
| 18531 | P03410 | Q92793  | 0.34151  |
| 18532 | P03410 | O95905  | 0.79594  |
| 18533 | P03410 | C9JLW8  | 0.97389  |
| 18534 | P03410 | P25398  | 0.81758  |
| 18535 | P03410 | Q9NQ4   | 0.32899  |
| 18536 | P03410 | P63208  | 0.79472  |
| 18537 | P03410 | Q9BVK6  | 0.36156  |
| 18538 | P03410 | Q14966  | 0.2755   |
| 18539 | P03410 | Q9NWQ4  | 1.3622   |
| 18540 | P03410 | Q15486  | 0.83308  |
| 18541 | P03410 | Q13472  | 0.055772 |
| 18542 | P03410 | P59991  | 1.8484   |
| 18543 | P03410 | P08133  | 1.0371   |
| 18544 | P03410 | P53674  | 0.51352  |

|       |        |        |         |
|-------|--------|--------|---------|
| 18545 | P03410 | Q969S8 | 0.86863 |
| 18546 | P03410 | Q6B0B8 | 0.80441 |
| 18547 | P03410 | Q16537 | 0.62959 |
| 18548 | P03410 | O00567 | 0.9701  |
| 18549 | P03410 | Q8TBZ5 | 0.83916 |
| 18550 | P03410 | Q13510 | 0.66314 |
| 18551 | P03410 | P38935 | 0.31455 |
| 18552 | P03410 | Q6P1R3 | 0.77205 |
| 18553 | P03410 | O95707 | 1.587   |
| 18554 | P03410 | P29474 | 0.87542 |
| 18555 | P03410 | Q8IYF1 | 0.56341 |
| 18556 | P03410 | Q8N3F8 | 0.74226 |
| 18557 | P03410 | H0YL14 | 1.4551  |
| 18558 | P03410 | Q8NA96 | 1.1653  |
| 18559 | P03410 | Q9H0H0 | 0.43228 |
| 18560 | P03410 | P0C843 | 0.77013 |
| 18561 | P03410 | P35251 | 0.74454 |
| 18562 | P03410 | P49756 | 0.4575  |
| 18563 | P03410 | Q9BR11 | 0.30472 |
| 18564 | P03410 | C9J6K1 | 0.86271 |
| 18565 | P03410 | Q8TEV8 | 1.6653  |
| 18566 | P03410 | Q86Y01 | 0.357   |
| 18567 | P03410 | Q14576 | 0.68396 |
| 18568 | P03410 | Q8N205 | 1.0045  |
| 18569 | P03410 | Q8N9Y4 | 1.3862  |
| 18570 | P03410 | Q9H6F2 | 0.66965 |
| 18571 | P03410 | O60936 | 1.7285  |
| 18572 | P03410 | Q2KHM9 | 0.73201 |
| 18573 | P03410 | Q719H9 | 0.68638 |
| 18574 | P03410 | Q8IYT1 | 0.85747 |
| 18575 | P03410 | Q8NEZ2 | 1.0419  |
| 18576 | P03410 | Q6ZVF9 | 1.0264  |
| 18577 | P03410 | Q15573 | 0.92412 |
| 18578 | P03410 | Q9H9H5 | 1.6134  |
| 18579 | P03410 | Q86YF9 | 0.26238 |
| 18580 | P03410 | O60763 | 0.77225 |
| 18581 | P03410 | Q6ZTR7 | 0.16187 |
| 18582 | P03410 | Q9Y3B6 | 1.4005  |
| 18583 | P03410 | Q96B26 | 0.62639 |
| 18584 | P03410 | Q96JC9 | 1.0364  |
| 18585 | P03410 | Q14677 | 0.71392 |
| 18586 | P03410 | Q5T6S3 | 0.36494 |
| 18587 | P03410 | Q63HM1 | 0.71422 |
| 18588 | P03410 | Q8N0U7 | 0.90509 |
| 18589 | P03410 | Q9NRD5 | 0.2719  |
| 18590 | P03410 | Q8TDX5 | 0.36255 |
| 18591 | P03410 | Q13200 | 0.88024 |
| 18592 | P03410 | Q99828 | 0.39012 |
| 18593 | P03410 | Q96KR4 | 0.39217 |
| 18594 | P03410 | Q8NDN9 | 0.59228 |
| 18595 | P03410 | Q9BWM5 | 0.81377 |
| 18596 | P03410 | B6SEH8 | 0.64028 |
| 18597 | P03410 | Q9Y5L0 | 1.1904  |
| 18598 | P03410 | O60810 | 1.0571  |
| 18599 | P03410 | P43307 | 0.63287 |
| 18600 | P03410 | Q8NCT3 | 1.5891  |
| 18601 | P03410 | P49790 | 1.1617  |
| 18602 | P03410 | Q8IY85 | 0.39612 |
| 18603 | P03410 | Q6NUN9 | 0.72582 |
| 18604 | P03410 | Q8IX07 | 0.28638 |
| 18605 | P03410 | Q05519 | 0.9699  |
| 18606 | P03410 | Q9UJ68 | 0.41053 |
| 18607 | P03410 | Q9P2D6 | 0.17758 |
| 18608 | P03410 | Q8N8A2 | 0.6999  |
| 18609 | P03410 | O43818 | 0.24723 |
| 18610 | P03410 | Q92552 | 1.1461  |
| 18611 | P03410 | Q8IXH7 | 1.3177  |
| 18612 | P03410 | Q8TE85 | 0.24982 |
| 18613 | P03410 | Q8IY57 | 0.9455  |
| 18614 | P03410 | Q9ULK4 | 1.2708  |
| 18615 | P03410 | P41223 | 0.17863 |
| 18616 | P03410 | P48775 | 0.50581 |
| 18617 | P03410 | B1ANY3 | 0.77616 |
| 18618 | P03410 | Q9H8Y8 | 0.77637 |
| 18619 | P03410 | Q96DR8 | 0.9256  |
| 18620 | P03410 | A6NJY4 | 1.6653  |

|       |        |        |          |
|-------|--------|--------|----------|
| 18621 | P03410 | Q9Y6X1 | 0.41543  |
| 18622 | P03410 | Q53QV2 | 0.81206  |
| 18623 | P03410 | Q13287 | 0.61024  |
| 18624 | P03410 | Q9Y2F5 | 0.32464  |
| 18625 | P03410 | Q9BXV9 | 1.6653   |
| 18626 | P03410 | Q9BT92 | 1.0528   |
| 18627 | P03410 | Q9Y448 | 1.071    |
| 18628 | P03410 | Q9H8M1 | 0.52423  |
| 18629 | P03410 | Q9Y234 | 0.60574  |
| 18630 | P03410 | A8MWA4 | 0.98395  |
| 18631 | P03410 | P09972 | 0.66718  |
| 18632 | P03410 | Q3KNT7 | 0.35754  |
| 18633 | P03410 | Q9H814 | 1.7104   |
| 18634 | P03410 | Q9NRX5 | 0.55074  |
| 18635 | P03410 | Q495D7 | 0.57134  |
| 18636 | P03410 | O95402 | 1.0753   |
| 18637 | P03410 | Q9BSJ6 | 0.84617  |
| 18638 | P03410 | Q14764 | 1.4282   |
| 18639 | P03410 | Q7Z7H3 | 0.34786  |
| 18640 | P03410 | H3BMG3 | 1.2869   |
| 18641 | P03410 | Q6ZSA8 | 1.6653   |
| 18642 | P03410 | Q6N069 | 0.24586  |
| 18643 | P03410 | Q9Y2Q1 | 0.98093  |
| 18644 | P03410 | O75150 | 0.25684  |
| 18645 | P03410 | Q3KNS6 | 0.70364  |
| 18646 | P03410 | Q9NXE8 | 1.0349   |
| 18647 | P03410 | Q6ZS49 | 1.6653   |
| 18648 | P03410 | Q9UQN3 | 0.72751  |
| 18649 | P03410 | P48382 | 0.91742  |
| 18650 | P03410 | Q8WX92 | 1.4734   |
| 18651 | P03410 | P51814 | 0.59861  |
| 18652 | P03410 | P63098 | 0.22805  |
| 18653 | P03410 | Q6IQ32 | 0.28172  |
| 18654 | P03410 | O94986 | 1.4919   |
| 18655 | P03410 | Q9Y6P5 | 0.70469  |
| 18656 | P03410 | P10074 | 0.63529  |
| 18657 | P03410 | O14531 | 0.2534   |
| 18658 | P03410 | Q15561 | 0.79171  |
| 18659 | P03410 | Q5XG85 | 1.6653   |
| 18660 | P03410 | P50552 | 0.28895  |
| 18661 | P03410 | Q9Y3D2 | 0.49742  |
| 18662 | P03410 | P62937 | 0.62271  |
| 18663 | P03410 | Q14315 | 0.60687  |
| 18664 | P03410 | O60269 | 0.6081   |
| 18665 | P03410 | Q96F86 | 0.84487  |
| 18666 | P03410 | P03886 | 0.38326  |
| 18667 | P03410 | Q96MG8 | 0.14701  |
| 18668 | P03410 | Q53H64 | 0.57718  |
| 18669 | P03410 | Q9UKV3 | 0.66568  |
| 18670 | P03410 | Q9GZY6 | 0.66052  |
| 18671 | P03410 | Q6P2H8 | 1.2245   |
| 18672 | P03410 | Q2M243 | 0.16032  |
| 18673 | P03410 | Q5H9S7 | 1.2538   |
| 18674 | P03410 | P10244 | 0.63753  |
| 18675 | P03410 | P25787 | 0.92998  |
| 18676 | P03410 | Q7Z7G2 | 0.86666  |
| 18677 | P03410 | Q14980 | 1.2895   |
| 18678 | P03410 | P61927 | 1.2706   |
| 18679 | P03410 | P52701 | 0.087944 |
| 18680 | P03410 | Q6IQ19 | 1.0684   |
| 18681 | P03410 | Q8NHY5 | 1.4367   |
| 18682 | P03410 | Q99619 | 0.50055  |
| 18683 | P03410 | Q53F19 | 1.4563   |
| 18684 | P03410 | Q96KN4 | 0.20978  |
| 18685 | P03410 | P15036 | 0.79217  |
| 18686 | P03410 | Q9NUN5 | 0.68093  |
| 18687 | P03410 | Q1W209 | 1.6653   |
| 18688 | P03410 | Q96DT0 | 0.2656   |
| 18689 | P03410 | Q08AM6 | 0.4267   |
| 18690 | P03410 | O00570 | 0.79738  |
| 18691 | P03410 | Q969G3 | 1.1708   |
| 18692 | P03410 | Q6ZNH5 | 0.80188  |
| 18693 | P03410 | Q8TCE6 | 1.6077   |
| 18694 | P03410 | Q9UL40 | 0.77638  |
| 18695 | P03410 | Q8IUD2 | 1.1217   |
| 18696 | P03410 | Q8WVK2 | 1.3513   |

|       |        |        |          |
|-------|--------|--------|----------|
| 18697 | P03410 | Q9HC62 | 0.58607  |
| 18698 | P03410 | P49789 | 0.59998  |
| 18699 | P03410 | Q8IU81 | 0.20863  |
| 18700 | P03410 | O15297 | 0.65996  |
| 18701 | P03410 | Q2M3C7 | 0.80557  |
| 18702 | P03410 | Q8WXW3 | 1.2908   |
| 18703 | P03410 | P84098 | 1.0096   |
| 18704 | P03410 | Q9NQV7 | 0.79278  |
| 18705 | P03410 | P29084 | 1.6055   |
| 18706 | P03410 | Q8N485 | 0.53775  |
| 18707 | P03410 | A9UHW6 | 0.89546  |
| 18708 | P03410 | Q7Z6I8 | 0.092558 |
| 18709 | P03410 | Q09028 | 0.60898  |
| 18710 | P03410 | Q9UI72 | 1.6653   |
| 18711 | P03410 | Q4U2R6 | 1.4261   |
| 18712 | P03410 | O00483 | 0.31682  |
| 18713 | P03410 | P68871 | 0.98234  |
| 18714 | P03410 | Q9UM82 | 1.6745   |
| 18715 | P03410 | O15084 | 1.0885   |
| 18716 | P03410 | Q9BTK6 | 0.68172  |
| 18717 | P03410 | Q96BN2 | 1.4176   |
| 18718 | P03410 | P61571 | 0.89339  |
| 18719 | P03410 | Q9NW08 | 0.14142  |
| 18720 | P03410 | Q96P15 | 0.19809  |
| 18721 | P03410 | Q15369 | 1.4183   |
| 18722 | P03410 | Q9BV97 | 0.66822  |
| 18723 | P03410 | Q99623 | 1.2029   |
| 18724 | P03410 | Q5VX52 | 0.34433  |
| 18725 | P03410 | P0CW24 | 0.38853  |
| 18726 | P03410 | Q8WZ26 | 0.6634   |
| 18727 | P03410 | Q6ZRT6 | 1.4883   |
| 18728 | P03410 | Q6NUJ2 | 1.0913   |
| 18729 | P03410 | P62854 | 1.2189   |
| 18730 | P03410 | Q8TAP6 | 1.4102   |
| 18731 | P03410 | Q96AA8 | 0.71164  |
| 18732 | P03410 | P61236 | 0.58798  |
| 18733 | P03410 | O14523 | 0.96804  |
| 18734 | P03410 | Q8TEB1 | 0.51567  |
| 18735 | P03410 | Q6ZMV9 | 0.34531  |
| 18736 | P03410 | Q6UWT4 | 0.95938  |
| 18737 | P03410 | Q9P1T7 | 1.2143   |
| 18738 | P03410 | Q9UER7 | 1.3112   |
| 18739 | P03410 | P33552 | 0.87864  |
| 18740 | P03410 | O95453 | 0.67318  |
| 18741 | P03410 | Q2TAY7 | 0.34399  |
| 18742 | P03410 | P17026 | 0.66742  |
| 18743 | P03410 | Q9HAT0 | 0.25424  |
| 18744 | P03410 | Q9NZJ4 | 0.18996  |
| 18745 | P03410 | P14635 | 0.44479  |
| 18746 | P03410 | Q4VX62 | 0.66088  |
| 18747 | P03410 | P0CG43 | 1.6653   |
| 18748 | P03410 | Q6P2E9 | 1.0467   |
| 18749 | P03410 | Q6UWI2 | 1.2671   |
| 18750 | P03410 | Q5VZ66 | 0.72989  |
| 18751 | P03410 | Q9NWS0 | 0.58595  |
| 18752 | P03410 | Q8NHV5 | 0.15421  |
| 18753 | P03410 | A6NL82 | 0.90091  |
| 18754 | P03410 | Q69YN4 | 0.67519  |
| 18755 | P03410 | Q01538 | 0.36781  |
| 18756 | P03410 | Q8IUC1 | 0.71041  |
| 18757 | P03410 | Q96KR7 | 0.76037  |
| 18758 | P03410 | A8MZ59 | 0.2823   |
| 18759 | P03410 | P07951 | 0.033227 |
| 18760 | P03410 | O75396 | 0.66007  |
| 18761 | P03410 | O95999 | 0.3175   |
| 18762 | P03410 | P51397 | 1.1643   |
| 18763 | P03410 | Q96BY9 | 0.32265  |
| 18764 | P03410 | F2Z3M2 | 1.6653   |
| 18765 | P03410 | P61570 | 1.1647   |
| 18766 | P03410 | Q8NAJ2 | 0.30819  |
| 18767 | P03410 | Q9UKS6 | 0.48305  |
| 18768 | P03410 | P15502 | 1.0012   |
| 18769 | P03410 | Q92782 | 0.57539  |
| 18770 | P03410 | I3L1E1 | 0.95928  |
| 18771 | P03410 | Q8IXM2 | 0.27311  |
| 18772 | P03410 | Q8NF67 | 0.90864  |

|       |        |        |          |
|-------|--------|--------|----------|
| 18773 | P03410 | P49773 | 0.076205 |
| 18774 | P03410 | Q8TAT2 | 0.77064  |
| 18775 | P03410 | Q9BX26 | 1.749    |
| 18776 | P03410 | Q9NTJ4 | 0.32717  |
| 18777 | P03410 | Q9BS31 | 0.64747  |
| 18778 | P03410 | Q99459 | 0.93726  |
| 18779 | P03410 | Q15555 | 0.36411  |
| 18780 | P03410 | Q9NQ55 | 0.61669  |
| 18781 | P03410 | Q9Y608 | 0.46744  |
| 18782 | P03410 | Q9UM11 | 1.2975   |
| 18783 | P03410 | Q8NFC6 | 1.5331   |
| 18784 | P03410 | Q14511 | 0.9975   |
| 18785 | P03410 | O75400 | 1.0061   |
| 18786 | P03410 | O95298 | 1.2759   |
| 18787 | P03410 | Q16649 | 0.20401  |
| 18788 | P03410 | P12270 | 0.79365  |
| 18789 | P03410 | Q8WWQ0 | 0.71769  |
| 18790 | P03410 | P21399 | 0.46199  |
| 18791 | P03410 | Q9HBM6 | 0.72949  |
| 18792 | P03410 | P38936 | 0.32885  |
| 18793 | P03410 | Q9ULE4 | 0.90822  |
| 18794 | P03410 | Q5MJ09 | 0.51657  |
| 18795 | P03410 | Q6ICB0 | 1.3348   |
| 18796 | P03410 | Q6EKJ0 | 0.22671  |
| 18797 | P03410 | Q9UN36 | 0.36858  |
| 18798 | P03410 | Q9UIL8 | 0.36494  |
| 18799 | P03410 | Q6P2H3 | 0.83781  |
| 18800 | P03410 | Q92769 | 0.38722  |
| 18801 | P03410 | Q9HCE3 | 0.10142  |
| 18802 | P03410 | O43513 | 1.2205   |
| 18803 | P03410 | Q9NWS6 | 1.0302   |
| 18804 | P03410 | Q96FX8 | 1.2551   |
| 18805 | P03410 | Q02386 | 0.66023  |
| 18806 | P03410 | C9JDP6 | 0.64164  |
| 18807 | P03410 | Q8NEA6 | 0.24335  |
| 18808 | P03410 | P12882 | 0.25332  |
| 18809 | P03410 | Q9Y4A5 | 0.76754  |
| 18810 | P03410 | Q9BPY3 | 0.40016  |
| 18811 | P03410 | Q96KG9 | 0.32145  |
| 18812 | P03410 | Q9NRL2 | 0.96912  |
| 18813 | P03410 | Q9H4K1 | 1.0034   |
| 18814 | P03410 | Q9Y376 | 0.31567  |
| 18815 | P03410 | Q15691 | 0.92112  |
| 18816 | P03410 | Q9BWX5 | 0.26495  |
| 18817 | P03410 | Q68CZ2 | 0.73803  |
| 18818 | P03410 | O94805 | 0.6915   |
| 18819 | P03410 | P58512 | 1.4669   |
| 18820 | P03410 | P0CG31 | 0.75111  |
| 18821 | P03410 | P43243 | 0.26114  |
| 18822 | P03410 | P0DJ07 | 1.1965   |
| 18823 | P03410 | Q8NEV8 | 0.30879  |
| 18824 | P03410 | Q9BU61 | 0.98757  |
| 18825 | P03410 | P04731 | 0.83308  |
| 18826 | P03410 | Q499Z3 | 0.71071  |
| 18827 | P03410 | Q5T3I0 | 0.20674  |
| 18828 | P03410 | Q96JM7 | 0.37631  |
| 18829 | P03410 | Q13042 | 1.5455   |
| 18830 | P03410 | O43172 | 0.6895   |
| 18831 | P03410 | Q96E40 | 0.16794  |
| 18832 | P03410 | Q9UK12 | 0.81145  |
| 18833 | P03410 | Q96GY3 | 0.95273  |
| 18834 | P03410 | Q9NVR7 | 0.53954  |
| 18835 | P03410 | Q8N9Z9 | 0.95539  |
| 18836 | P03410 | Q9HOR8 | 0.56661  |
| 18837 | P03410 | Q6ZVN8 | 0.52961  |
| 18838 | P03410 | P52737 | 0.79497  |
| 18839 | P03410 | Q9BW85 | 1.5317   |
| 18840 | P03410 | Q9NSG2 | 1.2047   |
| 18841 | P03410 | P48454 | 0.27842  |
| 18842 | P03410 | P26038 | 0.31592  |
| 18843 | P03410 | P0CG13 | 0.30063  |
| 18844 | P03410 | A0PK05 | 0.78375  |
| 18845 | P03410 | Q969M3 | 0.44427  |
| 18846 | P03410 | Q96NT3 | 0.72838  |
| 18847 | P03410 | Q96I27 | 0.71807  |
| 18848 | P03410 | Q7Z398 | 0.76183  |

|       |        |         |         |
|-------|--------|---------|---------|
| 18849 | P03410 | Q5TGP6  | 0.12523 |
| 18850 | P03410 | P35908  | 0.68428 |
| 18851 | P03410 | Q9BSH3  | 0.36374 |
| 18852 | P03410 | Q13342  | 0.54581 |
| 18853 | P03410 | O43236  | 0.40738 |
| 18854 | P03410 | O95996  | 0.59067 |
| 18855 | P03410 | Q68D10  | 1.4883  |
| 18856 | P03410 | Q9Y6B2  | 0.8933  |
| 18857 | P03410 | Q15437  | 0.78628 |
| 18858 | P03410 | Q9UIL1  | 1.038   |
| 18859 | P03410 | Q8WXX3  | 0.25857 |
| 18860 | P03410 | Q5VTU8  | 0.48502 |
| 18861 | P03410 | O75915  | 0.84732 |
| 18862 | P03410 | P52435  | 0.67527 |
| 18863 | P03410 | Q9P1J3  | 1.6653  |
| 18864 | P03410 | Q9NRJ2  | 1.6653  |
| 18865 | P03410 | P45985  | 0.24504 |
| 18866 | P03410 | Q86T75  | 1.289   |
| 18867 | P03410 | Q5SQS8  | 1.344   |
| 18868 | P03410 | Q96EL3  | 0.49843 |
| 18869 | P03410 | Q8NA58  | 0.76206 |
| 18870 | P03410 | O14508  | 0.34854 |
| 18871 | P03410 | Q8N5A5  | 0.72086 |
| 18872 | P03410 | O75438  | 0.35317 |
| 18873 | P03410 | Q9NPI0  | 0.87881 |
| 18874 | P03410 | Q92797  | 1.0213  |
| 18875 | P03410 | Q8N2Y8  | 0.22961 |
| 18876 | P03410 | Q13309  | 0.67045 |
| 18877 | P03410 | Q9NUU7  | 0.3254  |
| 18878 | P03410 | Q5TGS1  | 0.52912 |
| 18879 | P03410 | Q13522  | 0.40628 |
| 18880 | P03410 | Q17RB0  | 0.97842 |
| 18881 | P03410 | Q6ZUJ8  | 0.25365 |
| 18882 | P03410 | Q96G27  | 1.0975  |
| 18883 | P03410 | P43362  | 0.2347  |
| 18884 | P03410 | P62826  | 0.7585  |
| 18885 | P03410 | Q9H489  | 0.53274 |
| 18886 | P03410 | Q9C010  | 1.4108  |
| 18887 | P03410 | Q7Z2X4  | 0.30261 |
| 18888 | P03410 | O60225  | 0.35782 |
| 18889 | P03410 | Q6PEV8  | 0.15039 |
| 18890 | P03410 | A6NCD4  | 0.86954 |
| 18891 | P03410 | P62273  | 1.619   |
| 18892 | P03410 | O00629  | 0.75029 |
| 18893 | P03410 | A6NFC5  | 1.1445  |
| 18894 | P03410 | P26639  | 0.76571 |
| 18895 | P03410 | Q96E16  | 1.2321  |
| 18896 | P03410 | Q8IY92  | 0.5773  |
| 18897 | P03410 | P59051  | 1.0799  |
| 18898 | P03410 | O95602  | 0.58115 |
| 18899 | P03410 | Q9UPZ3  | 1.0299  |
| 18900 | P03410 | Q8TAG9  | 0.19462 |
| 18901 | P03410 | Q86XN7  | 1.4883  |
| 18902 | P03410 | Q8NEQ5  | 0.66098 |
| 18903 | P03410 | O60684  | 0.58714 |
| 18904 | P03410 | Q8NBD8  | 1.154   |
| 18905 | P03410 | P17535  | 0.94697 |
| 18906 | P03410 | Q9NRX2  | 1.23    |
| 18907 | P03410 | Q9UDW1  | 0.39761 |
| 18908 | P03410 | Q496A3  | 0.616   |
| 18909 | P03410 | O94913  | 0.47462 |
| 18910 | P03410 | Q13278  | 1.4864  |
| 18911 | P03410 | Q96GM8  | 0.49394 |
| 18912 | P03410 | O14558  | 0.95729 |
| 18913 | P03410 | Q8N972  | 0.79465 |
| 18914 | P03410 | Q96B70  | 0.50384 |
| 18915 | P03410 | I6L899  | 0.2002  |
| 18916 | P03410 | Q5J TZ5 | 0.26947 |
| 18917 | P03410 | Q3ZCQ8  | 0.2571  |
| 18918 | P03410 | O43261  | 0.6999  |
| 18919 | P03410 | Q8IUR0  | 1.5692  |
| 18920 | P03410 | Q49AG3  | 1.0618  |
| 18921 | P03410 | A6NLC8  | 1.4469  |
| 18922 | P03410 | Q4W5G0  | 0.70588 |
| 18923 | P03410 | Q96HH6  | 1.0913  |
| 18924 | P03410 | Q9H492  | 0.46119 |

|       |        |        |          |
|-------|--------|--------|----------|
| 18925 | P03410 | Q9UHQ1 | 1.1243   |
| 18926 | P03410 | O43502 | 0.26421  |
| 18927 | P03410 | Q9P0R6 | 0.64384  |
| 18928 | P03410 | P62140 | 0.73592  |
| 18929 | P03410 | P35663 | 0.60562  |
| 18930 | P03410 | P07738 | 0.96581  |
| 18931 | P03410 | Q9BQ49 | 1.0913   |
| 18932 | P03410 | P09132 | 0.44689  |
| 18933 | P03410 | C9JC47 | 1.6653   |
| 18934 | P03410 | O43491 | 0.51481  |
| 18935 | P03410 | Q9Y294 | 1.0544   |
| 18936 | P03410 | O94842 | 0.80528  |
| 18937 | P03410 | Q9BYC8 | 1.3965   |
| 18938 | P03410 | P02489 | 0.36572  |
| 18939 | P03410 | Q9BS40 | 0.49241  |
| 18940 | P03410 | Q7Z3I7 | 0.78003  |
| 18941 | P03410 | Q6ZN79 | 0.88895  |
| 18942 | P03410 | O00264 | 0.073859 |
| 18943 | P03410 | Q96N76 | 0.41754  |
| 18944 | P03410 | Q15170 | 2.0626   |
| 18945 | P03410 | P15170 | 0.33604  |
| 18946 | P03410 | Q9P2D1 | 0.18629  |
| 18947 | P03410 | Q60739 | 0.6164   |
| 18948 | P03410 | Q9NPE6 | 0.24758  |
| 18949 | P03410 | Q6P9G9 | 0.70056  |
| 18950 | P03410 | E9PQ53 | 1.3979   |
| 18951 | P03410 | P50990 | 0.097111 |
| 18952 | P03410 | P0C6E6 | 0.39375  |
| 18953 | P03410 | Q8WYN3 | 0.97715  |
| 18954 | P03410 | Q96CX2 | 0.25004  |
| 18955 | P03410 | Q8N163 | 0.84404  |
| 18956 | P03410 | Q8IU53 | 1.4849   |
| 18957 | P03410 | Q96DE9 | 0.31121  |
| 18958 | P03410 | Q5T280 | 1.7826   |
| 18959 | P03410 | Q9UGK8 | 0.79193  |
| 18960 | P03410 | Q9Y2G1 | 0.34424  |
| 18961 | P03410 | Q2VWA4 | 0.10041  |
| 18962 | P03410 | O75323 | 0.91229  |
| 18963 | P03410 | P18545 | 0.6307   |
| 18964 | P03410 | P0CG08 | 0.86829  |
| 18965 | P03410 | Q6PDB4 | 1.0114   |
| 18966 | P03410 | Q9UPV9 | 0.91397  |
| 18967 | P03410 | Q969H0 | 0.67477  |
| 18968 | P03410 | Q969W8 | 0.91156  |
| 18969 | P03410 | P51959 | 0.59922  |
| 18970 | P03410 | Q96CM4 | 0.31355  |
| 18971 | P03410 | P17028 | 0.70249  |
| 18972 | P03410 | Q8N883 | 0.73633  |
| 18973 | P03410 | Q96G28 | 0.63309  |
| 18974 | P03410 | Q8WWZ8 | 0.24073  |
| 18975 | P03410 | Q49A33 | 0.98227  |
| 18976 | P03410 | Q8NCK3 | 0.7682   |
| 18977 | P03410 | Q7L4S7 | 0.72156  |
| 18978 | P03410 | A6NI87 | 0.90573  |
| 18979 | P03410 | Q9NYU1 | 0.40331  |
| 18980 | P03410 | Q9NQM4 | 0.21587  |
| 18981 | P03410 | Q9BUN8 | 0.47491  |
| 18982 | P03410 | Q86YV9 | 1.5915   |
| 18983 | P03410 | Q8N4P2 | 0.3808   |
| 18984 | P03410 | Q6SJ96 | 0.33706  |
| 18985 | P03410 | Q9BW30 | 0.51121  |
| 18986 | P03410 | Q9BXM8 | 1.6653   |
| 18987 | P03410 | Q8N5N7 | 1.2448   |
| 18988 | P03410 | Q5T1C6 | 1.1824   |
| 18989 | P03410 | Q6P5X5 | 1.3579   |
| 18990 | P03410 | Q6UN15 | 1.8819   |
| 18991 | P03410 | P56181 | 1.3932   |
| 18992 | P03410 | P53370 | 0.45183  |
| 18993 | P03410 | Q86X53 | 0.36456  |
| 18994 | P03410 | Q9BPU9 | 0.43241  |
| 18995 | P03410 | O15287 | 1.1881   |
| 18996 | P03410 | Q9UKN5 | 0.25782  |
| 18997 | P03410 | Q6L8G9 | 1.6653   |
| 18998 | P03410 | Q3B7S5 | 1.6653   |
| 18999 | P03410 | P61586 | 0.3747   |
| 19000 | P03410 | P17019 | 1.0122   |

|       |        |        |          |
|-------|--------|--------|----------|
| 19001 | P03410 | A6NLW8 | 0.27528  |
| 19002 | P03410 | Q9BQI6 | 0.39549  |
| 19003 | P03410 | Q5SZL2 | 0.57417  |
| 19004 | P03410 | Q07955 | 0.61539  |
| 19005 | P03410 | Q15942 | 0.48297  |
| 19006 | P03410 | P52597 | 0.44027  |
| 19007 | P03410 | Q96C00 | 0.3566   |
| 19008 | P03410 | P53805 | 0.57697  |
| 19009 | P03410 | O95424 | 1.0102   |
| 19010 | P03410 | Q9BWC9 | 1.6911   |
| 19011 | P03410 | Q9H4G8 | 0.66015  |
| 19012 | P03410 | A4D2H0 | 0.094755 |
| 19013 | P03410 | Q8IZM0 | 0.89104  |
| 19014 | P03410 | Q8NAP3 | 0.3043   |
| 19015 | P03410 | Q3LI59 | 1.6653   |
| 19016 | P03410 | Q9UNY5 | 0.79031  |
| 19017 | P03410 | A6NIN4 | 1.6653   |
| 19018 | P03410 | Q03924 | 0.7518   |
| 19019 | P03410 | Q5TA82 | 1.6653   |
| 19020 | P03410 | C9JVV0 | 1.6653   |
| 19021 | P03410 | Q96RQ1 | 0.20035  |
| 19022 | P03410 | O75132 | 0.28581  |
| 19023 | P03410 | Q8TAE6 | 1.0879   |
| 19024 | P03410 | Q6NUR6 | 1.2302   |
| 19025 | P03410 | Q9BZ68 | 0.10086  |
| 19026 | P03410 | Q7Z5L2 | 0.76737  |
| 19027 | P03410 | P35658 | 1.1708   |
| 19028 | P03410 | Q5VWN6 | 0.57234  |
| 19029 | P03410 | Q96GE4 | 0.54722  |
| 19030 | P03410 | P08107 | 0.53363  |
| 19031 | P03410 | Q9Y3S2 | 0.75928  |
| 19032 | P03410 | P52298 | 0.62417  |
| 19033 | P03410 | Q9H9Y2 | 0.39424  |
| 19034 | P03410 | P62081 | 1.1988   |
| 19035 | P03410 | Q9Y3C5 | 0.39359  |
| 19036 | P03410 | B2RXF0 | 0.48219  |
| 19037 | P03410 | Q13395 | 0.14994  |
| 19038 | P03410 | Q16514 | 0.74395  |
| 19039 | P03410 | Q96JN2 | 0.9877   |
| 19040 | P03410 | P28347 | 0.94682  |
| 19041 | P03410 | P0CL82 | 0.508    |
| 19042 | P03410 | Q9HA82 | 0.63139  |
| 19043 | P03410 | Q9NV29 | 0.97067  |
| 19044 | P03410 | Q16637 | 0.97209  |
| 19045 | P03410 | P46783 | 1.4523   |
| 19046 | P03410 | Q9H9F9 | 1.1697   |
| 19047 | P03410 | Q7Z6J0 | 0.24798  |
| 19048 | P03410 | O75608 | 0.22444  |
| 19049 | P03410 | Q86XK2 | 0.49701  |
| 19050 | P03410 | Q9NPI8 | 1.4292   |
| 19051 | P03410 | P78395 | 1.1776   |
| 19052 | P03410 | Q9BXL7 | 0.24032  |
| 19053 | P03410 | Q6PJP8 | 0.76554  |
| 19054 | P03410 | Q9H0I2 | 0.10748  |
| 19055 | P03410 | Q5SZB4 | 1.0328   |
| 19056 | P03410 | Q7Z353 | 0.2823   |
| 19057 | P03410 | Q32MQ0 | 1.0532   |
| 19058 | P03410 | Q8N357 | 0.72253  |
| 19059 | P03410 | Q9H6F5 | 0.57933  |
| 19060 | P03410 | P60368 | 1.1232   |
| 19061 | P03410 | Q8IY31 | 0.94343  |
| 19062 | P03410 | Q9BSH5 | 0.70164  |
| 19063 | P03410 | Q86UY8 | 0.18748  |
| 19064 | P03410 | Q6ZSB3 | 0.12409  |
| 19065 | P03410 | P25063 | 1.6653   |
| 19066 | P03410 | Q68DY9 | 0.85321  |
| 19067 | P03410 | Q5VT40 | 0.94825  |
| 19068 | P03410 | P61574 | 1.1462   |
| 19069 | P03410 | Q0VD67 | 0.30412  |
| 19070 | P03410 | P11686 | 0.084724 |
| 19071 | P03410 | Q96GL9 | 0.7782   |
| 19072 | P03410 | Q9BRJ7 | 1.1725   |
| 19073 | P03410 | Q03252 | 0.5945   |
| 19074 | P03410 | P17030 | 0.78811  |
| 19075 | P03410 | O75534 | 0.43869  |
| 19076 | P03410 | O75190 | 0.74666  |



|       |        |        |         |
|-------|--------|--------|---------|
| 19077 | P03410 | Q9BS34 | 0.68818 |
| 19078 | P03410 | P04818 | 0.27616 |
| 19079 | P03410 | Q9BUL9 | 1.5656  |
| 19080 | P03410 | P62495 | 0.74828 |
| 19081 | P03410 | Q9H094 | 0.15079 |
| 19082 | P03410 | Q8IXQ6 | 0.87264 |
| 19083 | P03410 | Q99439 | 0.27798 |
| 19084 | P03410 | Q8NC54 | 1.6503  |
| 19085 | P03410 | Q9NYL9 | 0.21344 |
| 19086 | P03410 | Q96ED9 | 0.84724 |
| 19087 | P03410 | P52743 | 0.90046 |
| 19088 | P03410 | Q9P0L1 | 0.8261  |
| 19089 | P03410 | A6NGG8 | 0.90581 |
| 19090 | P03410 | P27469 | 0.84367 |
| 19091 | P03410 | P30304 | 0.77525 |
| 19092 | P03410 | Q9BPX5 | 0.21769 |
| 19093 | P03410 | Q3LHN1 | 1.6653  |
| 19094 | P03410 | Q9UBS8 | 0.40176 |
| 19095 | P03410 | A6NCI5 | 1.7191  |
| 19096 | P03410 | P24941 | 0.83473 |
| 19097 | P03410 | Q8TBZ9 | 1.6684  |
| 19098 | P03410 | P00156 | 0.82715 |
| 19099 | P03410 | Q96I59 | 0.97231 |
| 19100 | P03410 | Q8TAI1 | 1.3774  |
| 19101 | P03410 | Q9P2I0 | 1.0052  |
| 19102 | P03410 | O75525 | 0.70767 |
| 19103 | P03410 | Q96I23 | 0.58423 |
| 19104 | P03410 | Q07157 | 0.91456 |
| 19105 | P03410 | P08697 | 0.22524 |
| 19106 | P03410 | O14513 | 0.92154 |
| 19107 | P03410 | Q8NEZ5 | 0.60575 |
| 19108 | P03410 | Q6IN84 | 0.62379 |
| 19109 | P03410 | Q8TD47 | 0.45192 |
| 19110 | P03410 | Q9UK28 | 1.1582  |
| 19111 | P03410 | P31943 | 0.38337 |
| 19112 | P03410 | Q96QU4 | 1.8316  |
| 19113 | P03410 | Q8N8E1 | 1.1862  |
| 19114 | P03410 | Q8TB05 | 1.4883  |
| 19115 | P03410 | Q969P5 | 0.17249 |
| 19116 | P03410 | P17275 | 0.85287 |
| 19117 | P03410 | P62256 | 0.40985 |
| 19118 | P03410 | Q9UKZ1 | 1.5859  |
| 19119 | P03410 | Q99638 | 0.76218 |
| 19120 | P03410 | Q8TBY8 | 1.1358  |
| 19121 | P03410 | O00170 | 0.65266 |
| 19122 | P03410 | Q8IY50 | 0.96368 |
| 19123 | P03410 | Q6L8H2 | 1.6653  |
| 19124 | P03410 | Q13129 | 0.74555 |
| 19125 | P03410 | Q5SW24 | 0.46891 |
| 19126 | P03410 | Q00597 | 0.99689 |
| 19127 | P03410 | O15527 | 0.56065 |
| 19128 | P03410 | Q9NQR1 | 0.57625 |
| 19129 | P03410 | Q92499 | 0.30858 |
| 19130 | P03410 | Q9NWB7 | 0.88004 |
| 19131 | P03410 | Q12772 | 0.23752 |
| 19132 | P03410 | Q8IZS5 | 0.8956  |
| 19133 | P03410 | Q9BYP9 | 1.9984  |
| 19134 | P03410 | A6NLX4 | 1.0913  |
| 19135 | P03410 | Q969E4 | 0.54613 |
| 19136 | P03410 | C9J302 | 0.8204  |
| 19137 | P03410 | O15155 | 0.51035 |
| 19138 | P03410 | P62314 | 0.89985 |
| 19139 | P03410 | Q9BYJ9 | 0.88339 |
| 19140 | P03410 | Q68G75 | 0.49347 |
| 19141 | P03410 | Q13330 | 0.4019  |
| 19142 | P03410 | Q3KRA6 | 1.8909  |
| 19143 | P03410 | Q2KHT3 | 1.4353  |
| 19144 | P03410 | Q9UMX3 | 0.74117 |
| 19145 | P03410 | Q9ULV3 | 0.47566 |
| 19146 | P03410 | Q75NE6 | 2.0731  |
| 19147 | P03410 | Q969G5 | 0.7377  |
| 19148 | P03410 | Q16621 | 0.31461 |
| 19149 | P03410 | Q9BTW9 | 0.47157 |
| 19150 | P03410 | P60896 | 1.6653  |
| 19151 | P03410 | Q9BSU1 | 1.0188  |
| 19152 | P03410 | Q9Y253 | 0.25192 |

|       |        |        |          |
|-------|--------|--------|----------|
| 19153 | P03410 | Q16762 | 0.42993  |
| 19154 | P03410 | Q7Z591 | 1.7798   |
| 19155 | P03410 | Q96JX3 | 0.53671  |
| 19156 | P03410 | P0CW71 | 1.6653   |
| 19157 | P03410 | O00463 | 0.37285  |
| 19158 | P03410 | P60369 | 1.9984   |
| 19159 | P03410 | Q86WC4 | 1.5232   |
| 19160 | P03410 | Q5VU36 | 1.0269   |
| 19161 | P03410 | Q86SQ9 | 0.23906  |
| 19162 | P03410 | Q92990 | 0.61399  |
| 19163 | P03410 | P49848 | 0.65209  |
| 19164 | P03410 | Q8WZ82 | 0.096948 |
| 19165 | P03410 | P52736 | 0.6971   |
| 19166 | P03410 | Q5T681 | 1.4895   |
| 19167 | P03410 | O43660 | 0.31092  |
| 19168 | P03410 | Q92973 | 1.3067   |
| 19169 | P03410 | Q9UPA5 | 0.49769  |
| 19170 | P03410 | Q9BUH8 | 0.79738  |
| 19171 | P03410 | P07954 | 0.20725  |
| 19172 | P03410 | Q9BW60 | 0.86335  |
| 19173 | P03410 | Q86UR1 | 0.30829  |
| 19174 | P03410 | A6NGD5 | 0.57102  |
| 19175 | P03410 | Q9UGR2 | 0.71172  |
| 19176 | P03410 | Q8N655 | 1.6653   |
| 19177 | P03410 | B2CW77 | 1.6653   |
| 19178 | P03410 | Q9NYJ8 | 0.88304  |
| 19179 | P03410 | Q7Z745 | 1.0105   |
| 19180 | P03410 | Q9HD42 | 1.0746   |
| 19181 | P03410 | P0CI00 | 1.093    |
| 19182 | P03410 | Q9UHV3 | 0.51441  |
| 19183 | P03410 | Q7RTU9 | 0.3193   |
| 19184 | P03410 | Q96L03 | 0.23126  |
| 19185 | P03410 | A8MV81 | 0.99677  |
| 19186 | P03410 | Q6NT04 | 0.58789  |
| 19187 | P03410 | O14561 | 0.67201  |
| 19188 | P03410 | Q96D71 | 0.30953  |
| 19189 | P03410 | Q96BN6 | 0.57197  |
| 19190 | P03410 | Q9UBC1 | 0.73881  |
| 19191 | P03410 | O95429 | 0.55909  |
| 19192 | P03410 | Q96LT7 | 1.2395   |
| 19193 | P03410 | O14787 | 1.2524   |
| 19194 | P03410 | Q5JXC2 | 0.32364  |
| 19195 | P03410 | A6NGY1 | 1.5377   |
| 19196 | P03410 | P83369 | 0.95129  |
| 19197 | P03410 | P0CJ89 | 0.27528  |
| 19198 | P03410 | Q7Z2W4 | 0.60114  |
| 19199 | P03410 | Q9ULD2 | 0.7268   |
| 19200 | P03410 | Q14558 | 0.2615   |
| 19201 | P03410 | Q96I36 | 1.1637   |
| 19202 | P03410 | Q969D9 | 0.77674  |
| 19203 | P03410 | O75800 | 0.64825  |
| 19204 | P03410 | Q86XF0 | 0.32623  |
| 19205 | P03410 | Q9UKY0 | 0.34442  |
| 19206 | P03410 | Q8IVN3 | 1.6658   |
| 19207 | P03410 | Q5T5J6 | 1.0312   |
| 19208 | P03410 | Q9ULG3 | 1.6653   |
| 19209 | P03410 | Q9Y5Z7 | 0.63037  |
| 19210 | P03410 | Q8TDC0 | 0.87815  |
| 19211 | P03410 | Q9BRX2 | 0.3575   |
| 19212 | P03410 | Q8TAK5 | 0.62448  |
| 19213 | P03410 | Q9NWX4 | 1.1417   |
| 19214 | P03410 | P25208 | 0.70711  |
| 19215 | P03410 | Q6NVV1 | 0.77524  |
| 19216 | P03410 | Q8N187 | 1.3223   |
| 19217 | P03410 | Q6ZR62 | 0.22127  |
| 19218 | P03410 | Q96BZ8 | 1.4883   |
| 19219 | P03410 | Q9Y2T2 | 1.0019   |
| 19220 | P03410 | Q8N9S7 | 0.78333  |
| 19221 | P03410 | Q9BXX3 | 0.27664  |
| 19222 | P03410 | Q9NP61 | 0.10013  |
| 19223 | P03410 | Q9HBF5 | 1.4094   |
| 19224 | P03410 | P62324 | 0.76299  |
| 19225 | P03410 | P14927 | 0.16084  |
| 19226 | P03410 | Q86UY6 | 0.364    |
| 19227 | P03410 | Q96AH0 | 0.83956  |
| 19228 | P03410 | Q9UHZ2 | 1.6653   |

|       |        |        |         |
|-------|--------|--------|---------|
| 19229 | P03410 | Q9UGN5 | 0.29173 |
| 19230 | P03410 | P51815 | 0.57594 |
| 19231 | P03410 | Q6ZW54 | 1.6327  |
| 19232 | P03410 | P60602 | 1.0371  |
| 19233 | P03410 | Q86YA3 | 1.746   |
| 19234 | P03410 | O96007 | 1.2991  |
| 19235 | P03410 | P00338 | 0.69158 |
| 19236 | P03410 | P60329 | 0.53228 |
| 19237 | P03410 | Q9NXR8 | 0.23713 |
| 19238 | P03410 | P0CJ68 | 1.4876  |
| 19239 | P03410 | Q9H9L7 | 0.41305 |
| 19240 | P03410 | P04553 | 1.6653  |
| 19241 | P03410 | O14613 | 0.38117 |
| 19242 | P03410 | A1L429 | 0.508   |
| 19243 | P03410 | Q5TZA2 | 1.0274  |
| 19244 | P03410 | Q13371 | 0.53771 |
| 19245 | P03410 | Q9UN37 | 0.64014 |
| 19246 | P03410 | O95163 | 0.59964 |
| 19247 | P03410 | A6NK53 | 0.84221 |
| 19248 | P03410 | O95271 | 0.6782  |
| 19249 | P03410 | Q14D33 | 0.80531 |
| 19250 | P03410 | Q9BQW3 | 0.15485 |
| 19251 | P03410 | Q96A65 | 0.34371 |
| 19252 | P03410 | Q5D1E8 | 0.98922 |
| 19253 | P03410 | Q5T8A7 | 1.7091  |
| 19254 | P03410 | Q9BR77 | 0.72855 |
| 19255 | P03410 | Q9Y678 | 0.83283 |
| 19256 | P03410 | Q8NFB5 | 0.78283 |
| 19257 | P03410 | P51587 | 0.17316 |
| 19258 | P03410 | Q15056 | 0.48873 |
| 19259 | P03410 | O14604 | 1.3071  |
| 19260 | P03410 | A0PJW6 | 1.2071  |
| 19261 | P03410 | Q96M19 | 1.6653  |
| 19262 | P03410 | O43482 | 0.77488 |
| 19263 | P03410 | Q14872 | 0.69271 |
| 19264 | P03410 | Q8N5W9 | 0.8007  |
| 19265 | P03410 | P11802 | 0.88014 |
| 19266 | P03410 | O75362 | 0.77062 |
| 19267 | P03410 | Q86SH4 | 1.6653  |
| 19268 | P03410 | Q9UJW8 | 0.70757 |
| 19269 | P03410 | Q96K83 | 0.65426 |
| 19270 | P03410 | Q9Y2J2 | 0.75367 |
| 19271 | P03410 | Q86UE4 | 1.0499  |
| 19272 | P03410 | O14633 | 1.6653  |
| 19273 | P03410 | Q86Y26 | 1.2725  |
| 19274 | P03410 | Q9BSR8 | 0.91008 |
| 19275 | P03410 | P56645 | 0.2465  |
| 19276 | P03410 | Q9BTE1 | 0.3429  |
| 19277 | P03410 | P0CG39 | 0.23109 |
| 19278 | P03410 | Q9H5L6 | 0.77657 |
| 19279 | P03410 | Q6P1K2 | 1.1576  |
| 19280 | P03410 | Q16775 | 0.65159 |
| 19281 | P03410 | Q9BW04 | 0.28715 |
| 19282 | P03410 | Q6ISB3 | 0.62845 |
| 19283 | P03410 | Q9NRR1 | 0.9328  |
| 19284 | P03410 | Q8N0Z8 | 1.3742  |
| 19285 | P03410 | Q96BU1 | 0.85654 |
| 19286 | P03410 | P78317 | 0.28112 |
| 19287 | P03410 | Q9BSF8 | 0.49184 |
| 19288 | P03410 | Q9UMS0 | 1.2234  |
| 19289 | P03410 | Q9BRJ2 | 0.78159 |
| 19290 | P03410 | A1A4V9 | 0.5745  |
| 19291 | P03410 | Q9H6R4 | 0.72933 |
| 19292 | P03410 | Q8WY36 | 0.41575 |
| 19293 | P03410 | Q674X7 | 0.60865 |
| 19294 | P03410 | Q9UPU9 | 0.62609 |
| 19295 | P03410 | P05937 | 0.28026 |
| 19296 | P03410 | Q96BR5 | 0.15917 |
| 19297 | P03410 | Q9UHF0 | 0.88122 |
| 19298 | P03410 | Q6IPW1 | 0.90492 |
| 19299 | P03410 | Q5JX71 | 1.1653  |
| 19300 | P03410 | Q5HYK9 | 0.77289 |
| 19301 | P03410 | Q8WWM1 | 1.2709  |
| 19302 | P03410 | Q9BWU0 | 0.73767 |
| 19303 | P03410 | Q8N8M0 | 0.70423 |
| 19304 | P03410 | O94829 | 1.3202  |

|       |        |        |          |
|-------|--------|--------|----------|
| 19305 | P03410 | Q9HA92 | 0.59814  |
| 19306 | P03410 | O75531 | 1.1009   |
| 19307 | P03410 | Q8N8R7 | 0.98145  |
| 19308 | P03410 | O43734 | 1.4883   |
| 19309 | P03410 | Q8IVM7 | 1.6653   |
| 19310 | P03410 | P43363 | 0.044177 |
| 19311 | P03410 | Q16873 | 0.38059  |
| 19312 | P03410 | Q6UW32 | 0.70628  |
| 19313 | P03410 | P02511 | 0.36911  |
| 19314 | P03410 | P55198 | 0.97091  |
| 19315 | P03410 | Q66K66 | 0.95154  |
| 19316 | P03410 | O15382 | 0.20626  |
| 19317 | P03410 | O43310 | 0.68955  |
| 19318 | P03410 | O75956 | 0.62218  |
| 19319 | P03410 | Q5VZL5 | 1.3743   |
| 19320 | P03410 | Q8IXS8 | 1.4066   |
| 19321 | P03410 | Q58FF3 | 0.30901  |
| 19322 | P03410 | O95198 | 0.88966  |
| 19323 | P03410 | Q15024 | 0.63293  |
| 19324 | P03410 | Q96NS1 | 0.36709  |
| 19325 | P03410 | A8MZ97 | 1.2394   |
| 19326 | P03410 | O15379 | 0.56278  |
| 19327 | P03410 | B2RV13 | 1.0975   |
| 19328 | P03410 | P56524 | 0.32251  |
| 19329 | P03410 | P22830 | 0.30782  |
| 19330 | P03410 | Q9NZ09 | 0.25201  |
| 19331 | P03410 | Q9BXW4 | 0.55195  |
| 19332 | P03410 | Q6EEV6 | 0.21002  |
| 19333 | P03410 | Q9Y6N9 | 0.53336  |
| 19334 | P03410 | Q9BYG3 | 0.31783  |
| 19335 | P03410 | Q9BTK2 | 0.98322  |
| 19336 | P03410 | Q9UL12 | 0.24891  |
| 19337 | P03410 | Q9HBH7 | 1.1086   |
| 19338 | P03410 | Q6AI08 | 0.85748  |
| 19339 | P03410 | Q9Y520 | 0.74604  |
| 19340 | P03410 | Q5VU43 | 1.3212   |
| 19341 | P03410 | Q13111 | 1.901    |
| 19342 | P03410 | Q99704 | 0.23697  |
| 19343 | P03410 | P61758 | 0.77029  |
| 19344 | P03410 | P53701 | 1.1346   |
| 19345 | P03410 | P17014 | 0.75447  |
| 19346 | P03410 | Q6TAR4 | 0.46638  |
| 19347 | P03410 | P23434 | 0.6035   |
| 19348 | P03410 | Q96CD2 | 0.19879  |
| 19349 | P03410 | Q6URK8 | 1.0586   |
| 19350 | P03410 | P48728 | 0.60504  |
| 19351 | P03410 | Q12905 | 0.91841  |
| 19352 | P03410 | Q16613 | 0.51207  |
| 19353 | P03410 | Q8IXJ9 | 0.73348  |
| 19354 | P03410 | Q2TB18 | 0.046596 |
| 19355 | P03410 | C9JN71 | 0.80184  |
| 19356 | P03410 | Q86VY4 | 0.62264  |
| 19357 | P03410 | Q9NQX7 | 0.5088   |
| 19358 | P03410 | Q9UBB6 | 0.82193  |
| 19359 | P03410 | Q96CV9 | 0.79361  |
| 19360 | P03410 | O14836 | 0.79879  |
| 19361 | P03410 | Q641Q2 | 1.2477   |
| 19362 | P03410 | Q9HCE1 | 0.70553  |
| 19363 | P03410 | P0CG24 | 0.71093  |
| 19364 | P03410 | Q92837 | 1.3123   |
| 19365 | P03410 | P46939 | 0.8574   |
| 19366 | P03410 | Q92796 | 0.48624  |
| 19367 | P03410 | Q9NZ63 | 0.88139  |
| 19368 | P03410 | P33240 | 0.58195  |
| 19369 | P03410 | P56555 | 1.3773   |
| 19370 | P03410 | Q8IZU3 | 0.34657  |
| 19371 | P03410 | Q8IWL3 | 0.59994  |
| 19372 | P03410 | Q9UND3 | 0.61572  |
| 19373 | P03410 | Q9NY74 | 1.8629   |
| 19374 | P03410 | Q9NWT8 | 1.0163   |
| 19375 | P03410 | P49366 | 0.55426  |
| 19376 | P03410 | Q16082 | 1.0294   |
| 19377 | P03410 | P30566 | 0.076591 |
| 19378 | P03410 | P02795 | 0.9907   |
| 19379 | P03410 | Q96A26 | 0.3817   |
| 19380 | P03410 | Q9Y3A3 | 0.83026  |

|       |        |        |         |
|-------|--------|--------|---------|
| 19381 | P03410 | Q9NVX0 | 1.2129  |
| 19382 | P03410 | Q68EA5 | 0.96545 |
| 19383 | P03410 | Q96SE7 | 0.78793 |
| 19384 | P03410 | Q5JVF3 | 0.41762 |
| 19385 | P03410 | Q9UIG4 | 0.95938 |
| 19386 | P03410 | Q9H706 | 0.6999  |
| 19387 | P03410 | Q8N157 | 0.41354 |
| 19388 | P03410 | Q5JVS0 | 0.81301 |
| 19389 | P03410 | Q99550 | 0.74388 |
| 19390 | P03410 | Q8N1G2 | 0.37881 |
| 19391 | P03410 | Q15629 | 0.68561 |
| 19392 | P03410 | Q9NV88 | 0.85092 |
| 19393 | P03410 | Q9UBU7 | 0.34898 |
| 19394 | P03410 | Q9NZM4 | 1.7978  |
| 19395 | P03410 | A1A4F0 | 0.14807 |
| 19396 | P03410 | O75818 | 0.43383 |
| 19397 | P03410 | Q7Z4G1 | 2.0374  |
| 19398 | P03410 | Q9BPX7 | 0.88973 |
| 19399 | P03410 | Q8N535 | 0.96727 |
| 19400 | P03410 | Q5VT98 | 0.21632 |
| 19401 | P03410 | Q9UNS2 | 0.85902 |
| 19402 | P03410 | Q8IWE2 | 1.4763  |
| 19403 | P03410 | Q5VUM1 | 0.57969 |
| 19404 | P03410 | Q96NY9 | 0.85464 |
| 19405 | P03410 | Q9H5I1 | 0.56229 |
| 19406 | P03410 | Q12988 | 0.49339 |
| 19407 | P03410 | Q9UGC7 | 1.2628  |
| 19408 | P03410 | Q9BYQ3 | 1.9984  |
| 19409 | P03410 | Q9UPP2 | 0.33808 |
| 19410 | P03410 | Q6NUP7 | 0.73212 |
| 19411 | P03410 | Q9UHL3 | 0.5957  |
| 19412 | P03410 | Q5VUE5 | 1.0682  |
| 19413 | P03410 | Q9NTI5 | 0.95877 |
| 19414 | P03410 | P53803 | 1.2345  |
| 19415 | P03410 | P02545 | 0.985   |
| 19416 | P03410 | Q13569 | 1.0947  |
| 19417 | P03410 | Q14532 | 0.70244 |
| 19418 | P03410 | Q8NA42 | 0.83606 |
| 19419 | P03410 | Q08722 | 0.46219 |
| 19420 | P03410 | Q9H321 | 1.4395  |
| 19421 | P03410 | Q9Y3U8 | 1.0346  |
| 19422 | P03410 | P43487 | 0.53806 |
| 19423 | P03410 | Q9P0N5 | 0.95894 |
| 19424 | P03410 | P28062 | 0.55374 |
| 19425 | P03410 | Q13033 | 0.93646 |
| 19426 | P03410 | Q86UT8 | 1.7604  |
| 19427 | P03410 | Q9Y3V2 | 1.0663  |
| 19428 | P03410 | Q8NE18 | 1.7149  |
| 19429 | P03410 | P0DL12 | 0.93991 |
| 19430 | P03410 | A6NMA1 | 0.78421 |
| 19431 | P03410 | Q93083 | 0.83308 |
| 19432 | P03410 | P79522 | 0.81366 |
| 19433 | P03410 | Q14CS0 | 0.53674 |
| 19434 | P03410 | P16083 | 0.29361 |
| 19435 | P03410 | Q9P2X3 | 0.3681  |
| 19436 | P03410 | Q9H3C7 | 1.4603  |
| 19437 | P03410 | Q9H6R7 | 0.34061 |
| 19438 | P03410 | Q9NWM3 | 0.48529 |
| 19439 | P03410 | Q9UHX1 | 0.65752 |
| 19440 | P03410 | Q6P280 | 1.0521  |
| 19441 | P03410 | Q15797 | 0.29727 |
| 19442 | P03410 | Q9BXQ6 | 1.6653  |
| 19443 | P03410 | P62952 | 1.2353  |
| 19444 | P03410 | Q52LG2 | 1.1302  |
| 19445 | P03410 | O43615 | 0.42065 |
| 19446 | P03410 | Q3LI73 | 1.9939  |
| 19447 | P03410 | Q96KR6 | 1.1338  |
| 19448 | P03410 | Q71F23 | 0.63523 |
| 19449 | P03410 | Q9ULP0 | 0.36161 |
| 19450 | P03410 | Q92922 | 1.0049  |
| 19451 | P03410 | Q6P1X5 | 0.99431 |
| 19452 | P03410 | Q96AZ6 | 0.26481 |
| 19453 | P03410 | P09497 | 0.74339 |
| 19454 | P03410 | Q6PJW8 | 0.18641 |
| 19455 | P03410 | Q96KP6 | 0.16235 |
| 19456 | P03410 | Q14789 | 0.69104 |

|       |        |        |          |
|-------|--------|--------|----------|
| 19457 | P03410 | P45877 | 0.22741  |
| 19458 | P03410 | Q9H5V9 | 1.2616   |
| 19459 | P03410 | C9J3V5 | 1.0143   |
| 19460 | P03410 | Q9BRQ4 | 0.99563  |
| 19461 | P03410 | Q6ZUB0 | 1.0913   |
| 19462 | P03410 | Q2NKX9 | 1.4883   |
| 19463 | P03410 | P17024 | 0.81277  |
| 19464 | P03410 | Q02383 | 0.77602  |
| 19465 | P03410 | Q9BYC2 | 0.10122  |
| 19466 | P03410 | Q96HJ9 | 0.41785  |
| 19467 | P03410 | O95486 | 0.64668  |
| 19468 | P03410 | Q6P4R8 | 1.075    |
| 19469 | P03410 | Q5VV41 | 0.36046  |
| 19470 | P03410 | Q6UX65 | 0.75535  |
| 19471 | P03410 | Q8N5C8 | 0.82932  |
| 19472 | P03410 | Q01826 | 0.80263  |
| 19473 | P03410 | Q9C075 | 0.79493  |
| 19474 | P03410 | P42704 | 1.148    |
| 19475 | P03410 | Q14140 | 2.0362   |
| 19476 | P03410 | Q6ZNR8 | 1.6653   |
| 19477 | P03410 | Q9H609 | 0.10555  |
| 19478 | P03410 | Q9BXT5 | 0.99872  |
| 19479 | P03410 | Q9ULE0 | 0.24399  |
| 19480 | P03410 | Q13112 | 1.3637   |
| 19481 | P03410 | Q8TEM1 | 0.54239  |
| 19482 | P03410 | P31040 | 0.65666  |
| 19483 | P03410 | Q13084 | 1.4681   |
| 19484 | P03410 | Q96BJ8 | 0.080131 |
| 19485 | P03410 | Q9Y6X0 | 0.10622  |
| 19486 | P03410 | Q9UKC9 | 0.69598  |
| 19487 | P03410 | O15127 | 1.0685   |
| 19488 | P03410 | Q969G9 | 0.29107  |
| 19489 | P03410 | Q8N7K0 | 0.79465  |
| 19490 | P03410 | F5GYI3 | 1.802    |
| 19491 | P03410 | Q86U70 | 0.35625  |
| 19492 | P03410 | Q5T5D7 | 0.64731  |
| 19493 | P03410 | Q9UF72 | 1.3231   |
| 19494 | P03410 | Q96MT4 | 1.6063   |
| 19495 | P03410 | Q5HYI7 | 1.6237   |
| 19496 | P03410 | Q5VT28 | 1.4596   |
| 19497 | P03410 | Q9H160 | 0.3602   |
| 19498 | P03410 | Q8IUI8 | 0.26067  |
| 19499 | P03410 | Q9NP71 | 0.32674  |
| 19500 | P03410 | O43395 | 0.80832  |
| 19501 | P03410 | Q15049 | 0.14453  |
| 19502 | P03410 | Q14847 | 0.30771  |
| 19503 | P03410 | A6NN06 | 1.6653   |
| 19504 | P03410 | Q8NA56 | 0.014907 |
| 19505 | P03410 | Q14119 | 0.24382  |
| 19506 | P03410 | Q8WYA0 | 1.0417   |
| 19507 | P03410 | P26678 | 1.2728   |
| 19508 | P03410 | P49788 | 0.8634   |
| 19509 | P03410 | P43268 | 0.58516  |
| 19510 | P03410 | O75909 | 1.2189   |
| 19511 | P03410 | A6NEF3 | 1.594    |
| 19512 | P03410 | Q8N1D5 | 0.54506  |
| 19513 | P03410 | Q5U3C3 | 1.0913   |
| 19514 | P03410 | Q15428 | 1.0372   |
| 19515 | P03410 | Q2YD98 | 1.0515   |
| 19516 | P03410 | Q8IX06 | 0.085922 |
| 19517 | P03410 | Q9NUC0 | 0.61757  |
| 19518 | P03410 | Q6ZS27 | 0.75478  |
| 19519 | P03410 | A6NK89 | 1.266    |
| 19520 | P03410 | P0CG33 | 0.4493   |
| 19521 | P03410 | O75145 | 0.71254  |
| 19522 | P03410 | Q9HBL0 | 0.8399   |
| 19523 | P03410 | Q15326 | 1.0583   |
| 19524 | P03410 | Q14602 | 0.32902  |
| 19525 | P03410 | P31269 | 0.48712  |
| 19526 | P03410 | Q96S65 | 1.6793   |
| 19527 | P03410 | O15534 | 0.27754  |
| 19528 | P03410 | P03928 | 0.45607  |
| 19529 | P03410 | Q9NZG7 | 1.0124   |
| 19530 | P03410 | Q8WV92 | 0.76187  |
| 19531 | P03410 | Q8WXC6 | 0.81324  |
| 19532 | P03410 | P16455 | 0.5868   |

|       |        |        |          |
|-------|--------|--------|----------|
| 19533 | P03410 | Q08495 | 0.3778   |
| 19534 | P03410 | Q96JG6 | 0.28725  |
| 19535 | P03410 | Q8NHW6 | 1.1508   |
| 19536 | P03410 | P51665 | 0.66381  |
| 19537 | P03410 | O75204 | 1.1092   |
| 19538 | P03410 | O95983 | 1.3189   |
| 19539 | P03410 | Q9C0I3 | 1.5263   |
| 19540 | P03410 | Q8N801 | 0.15808  |
| 19541 | P03410 | Q5TFE4 | 0.29108  |
| 19542 | P03410 | Q3BBV0 | 0.62379  |
| 19543 | P03410 | E9PAV3 | 0.71712  |
| 19544 | P03410 | Q6P656 | 0.22771  |
| 19545 | P03410 | P62877 | 0.44499  |
| 19546 | P03410 | P19447 | 0.14712  |
| 19547 | P03410 | Q8N9U0 | 0.20917  |
| 19548 | P03410 | Q8IW19 | 0.34925  |
| 19549 | P03410 | Q9BUH6 | 1.1125   |
| 19550 | P03410 | Q9Y4X5 | 0.19561  |
| 19551 | P03410 | Q12796 | 2.3311   |
| 19552 | P03410 | Q7Z7C7 | 0.94854  |
| 19553 | P03410 | Q3I5F7 | 0.20625  |
| 19554 | P03410 | P63146 | 0.47809  |
| 19555 | P03410 | Q9P215 | 0.58357  |
| 19556 | P03410 | Q9Y613 | 0.8835   |
| 19557 | P03410 | A6QL64 | 0.77288  |
| 19558 | P03410 | Q15363 | 0.30088  |
| 19559 | P03410 | Q9H0C5 | 0.7983   |
| 19560 | P03410 | P11387 | 0.87694  |
| 19561 | P03410 | A0AUZ9 | 0.72494  |
| 19562 | P03410 | O60927 | 1.302    |
| 19563 | P03410 | P17020 | 0.65335  |
| 19564 | P03410 | Q9BXF6 | 0.91991  |
| 19565 | P03410 | Q14683 | 0.53721  |
| 19566 | P03410 | Q9Y2Y6 | 1.1019   |
| 19567 | P03410 | Q99909 | 0.47959  |
| 19568 | P03410 | P05408 | 1.0959   |
| 19569 | P03410 | Q5T2E6 | 0.97411  |
| 19570 | P03410 | P41250 | 0.63401  |
| 19571 | P03410 | O14907 | 0.63397  |
| 19572 | P03410 | O60232 | 1.539    |
| 19573 | P03410 | Q9H246 | 0.75802  |
| 19574 | P03410 | P42167 | 0.614    |
| 19575 | P03410 | Q01658 | 0.5085   |
| 19576 | P03410 | Q14197 | 0.25415  |
| 19577 | P03410 | P09661 | 0.74611  |
| 19578 | P03410 | Q9Y284 | 1.3759   |
| 19579 | P03410 | P47928 | 0.57099  |
| 19580 | P03410 | P48380 | 0.49177  |
| 19581 | P03410 | Q6P1L8 | 1.8139   |
| 19582 | P03410 | P22415 | 0.37035  |
| 19583 | P03410 | Q9BV44 | 0.46335  |
| 19584 | P03410 | Q8WXF1 | 0.93488  |
| 19585 | P03410 | Q9ULX6 | 0.78496  |
| 19586 | P03410 | Q5T7V8 | 2.3991   |
| 19587 | P03410 | Q8N0X4 | 0.34575  |
| 19588 | P03410 | Q9Y291 | 0.90306  |
| 19589 | P03410 | Q8N4K4 | 0.65043  |
| 19590 | P03410 | Q1RN00 | 1.6653   |
| 19591 | P03410 | O43379 | 0.39139  |
| 19592 | P03410 | Q13485 | 0.84756  |
| 19593 | P03410 | P0CW19 | 0.43173  |
| 19594 | P03410 | P12883 | 0.19684  |
| 19595 | P03410 | Q9UI12 | 0.27644  |
| 19596 | P03410 | Q6ZRK6 | 0.026761 |
| 19597 | P03410 | P13807 | 0.37846  |
| 19598 | P03410 | O15067 | 0.85399  |
| 19599 | P03410 | Q13156 | 0.65499  |
| 19600 | P03410 | Q3BBW0 | 0.49912  |
| 19601 | P03410 | Q9NZT2 | 0.23249  |
| 19602 | P03410 | Q6XXX2 | 0.41026  |
| 19603 | P03410 | Q8NC74 | 0.61032  |
| 19604 | P03410 | Q8NEG4 | 0.84146  |
| 19605 | P03410 | Q96I24 | 0.4417   |
| 19606 | P03410 | Q9H2U6 | 0.92468  |
| 19607 | P03410 | O43765 | 0.92437  |
| 19608 | P03410 | Q3YBR2 | 0.67546  |

|       |        |        |          |
|-------|--------|--------|----------|
| 19609 | P03410 | Q15036 | 0.37022  |
| 19610 | P03410 | Q8TAP8 | 1.4123   |
| 19611 | P03410 | O15078 | 0.84489  |
| 19612 | P03410 | Q9HCN2 | 1.6653   |
| 19613 | P03410 | Q8IYS8 | 0.98327  |
| 19614 | P03410 | Q9NUW8 | 0.7616   |
| 19615 | P03410 | Q9Y3D7 | 0.37372  |
| 19616 | P03410 | Q96LB4 | 0.43472  |
| 19617 | P03410 | P10914 | 0.36489  |
| 19618 | P03410 | Q96GS4 | 1.9727   |
| 19619 | P03410 | A6NEQ9 | 1.6653   |
| 19620 | P03410 | Q96DE0 | 1.708    |
| 19621 | P03410 | Q9NY12 | 0.88095  |
| 19622 | P03410 | Q9BUY5 | 0.95151  |
| 19623 | P03410 | Q8IW70 | 1.0913   |
| 19624 | P03410 | Q9H8K7 | 0.84571  |
| 19625 | P03410 | Q96IP4 | 0.95458  |
| 19626 | P03410 | Q6ZW35 | 0.22374  |
| 19627 | P03410 | Q9P2G1 | 0.50973  |
| 19628 | P03410 | P49419 | 0.52921  |
| 19629 | P03410 | Q06250 | 1.6653   |
| 19630 | P03410 | Q6UWN0 | 0.58341  |
| 19631 | P03410 | Q96A44 | 0.63637  |
| 19632 | P03410 | Q5H9R4 | 1.4129   |
| 19633 | P03410 | Q9Y6I8 | 0.60238  |
| 19634 | P03410 | Q8N2G8 | 0.22809  |
| 19635 | P03410 | O75506 | 0.18913  |
| 19636 | P03410 | Q96IR2 | 0.81411  |
| 19637 | P03410 | Q5T013 | 0.24826  |
| 19638 | P03410 | Q9ULX9 | 0.43171  |
| 19639 | P03410 | Q6L8H4 | 1.6653   |
| 19640 | P03410 | O94864 | 0.63626  |
| 19641 | P03410 | Q9Y3B9 | 0.76419  |
| 19642 | P03410 | Q9H098 | 1.5179   |
| 19643 | P03410 | O60356 | 1.3816   |
| 19644 | P03410 | Q99583 | 0.36663  |
| 19645 | P03410 | P61580 | 1.7423   |
| 19646 | P03410 | Q15185 | 0.51194  |
| 19647 | P03410 | Q8N8D0 | 1.6653   |
| 19648 | P03410 | Q15459 | 0.62584  |
| 19649 | P03410 | Q66K80 | 1.6653   |
| 19650 | P03410 | Q96B54 | 1.57     |
| 19651 | P03410 | Q96G01 | 0.41375  |
| 19652 | P03410 | Q8NEY3 | 1.1155   |
| 19653 | P03410 | A7E2F4 | 0.066261 |
| 19654 | P03410 | Q68CQ4 | 0.27334  |
| 19655 | P03410 | A6NF83 | 1.071    |
| 19656 | P03410 | Q96HJ3 | 1.4883   |
| 19657 | P03410 | Q13952 | 0.68308  |
| 19658 | P03410 | P22736 | 0.3074   |
| 19659 | P03410 | Q6IN85 | 0.65434  |
| 19660 | P03410 | P55809 | 0.025504 |
| 19661 | P03410 | Q5S7W7 | 1.6653   |
| 19662 | P03410 | Q8N7W2 | 0.81853  |
| 19663 | P03410 | Q96IZ0 | 0.89853  |
| 19664 | P03410 | Q7L2E3 | 0.46787  |
| 19665 | P03410 | Q04727 | 0.60516  |
| 19666 | P03410 | Q8IWL8 | 1.9897   |
| 19667 | P03410 | Q8WXC7 | 0.86902  |
| 19668 | P03410 | Q8IZ26 | 0.81355  |
| 19669 | P03410 | Q9H299 | 0.36617  |
| 19670 | P03410 | Q14186 | 1.1197   |
| 19671 | P03410 | Q9H7L9 | 0.75522  |
| 19672 | P03410 | Q9BYE3 | 1.6653   |
| 19673 | P03410 | Q9BUP3 | 0.29019  |
| 19674 | P03410 | O75489 | 0.62567  |
| 19675 | P03410 | A6NDK9 | 0.3132   |
| 19676 | P03410 | P24539 | 0.40159  |
| 19677 | P03410 | P42898 | 0.41552  |
| 19678 | P03410 | Q8NEV9 | 0.98858  |
| 19679 | P03410 | Q12912 | 1.3126   |
| 19680 | P03410 | Q8N0Y7 | 0.92904  |
| 19681 | P03410 | Q8IXT1 | 0.76442  |
| 19682 | P03410 | Q5SWA1 | 1.3211   |
| 19683 | P03410 | Q9Y371 | 0.28941  |
| 19684 | P03410 | Q8N3I7 | 0.93995  |



|       |        |        |          |
|-------|--------|--------|----------|
| 19685 | P03410 | Q96EK7 | 0.33708  |
| 19686 | P03410 | Q9P2K1 | 0.63931  |
| 19687 | P03410 | O75533 | 0.40854  |
| 19688 | P03410 | Q676U5 | 1.0091   |
| 19689 | P03410 | H0Y354 | 1.0087   |
| 19690 | P03410 | O95989 | 0.87375  |
| 19691 | P03410 | Q14106 | 0.60126  |
| 19692 | P03410 | P13693 | 0.1775   |
| 19693 | P03410 | Q969J2 | 0.68469  |
| 19694 | P03410 | Q96DE5 | 1.9365   |
| 19695 | P03410 | Q9Y2S0 | 0.27259  |
| 19696 | P03410 | Q8NDT2 | 0.91688  |
| 19697 | P03410 | Q9H444 | 1.0984   |
| 19698 | P03410 | Q9HCK5 | 0.99596  |
| 19699 | P03410 | Q86V81 | 0.83348  |
| 19700 | P03410 | P07311 | 1.1782   |
| 19701 | P03410 | Q9BZD4 | 0.85714  |
| 19702 | P03410 | Q9H9A7 | 0.81112  |
| 19703 | P03410 | Q8TAF3 | 0.91518  |
| 19704 | P03410 | Q8TBE0 | 0.7953   |
| 19705 | P03410 | Q9UKJ5 | 0.42668  |
| 19706 | P03410 | P81172 | 0.96348  |
| 19707 | P03410 | Q9NWF4 | 1.0772   |
| 19708 | P03410 | O60784 | 0.71062  |
| 19709 | P03410 | O14974 | 0.54614  |
| 19710 | P03410 | Q9H8Q6 | 1.7181   |
| 19711 | P03410 | Q8N9R8 | 1.1868   |
| 19712 | P03410 | Q96MX3 | 0.72744  |
| 19713 | P03410 | Q9P1F3 | 1.1904   |
| 19714 | P03410 | P62875 | 0.75835  |
| 19715 | P03410 | Q9H7R5 | 0.81411  |
| 19716 | P03410 | O14776 | 1.2238   |
| 19717 | P03410 | P05423 | 0.53013  |
| 19718 | P03410 | Q2VPK5 | 1.0539   |
| 19719 | P03410 | O60447 | 0.29475  |
| 19720 | P03410 | Q9GZS1 | 0.47239  |
| 19721 | P03410 | Q8WVK7 | 0.83375  |
| 19722 | P03410 | Q15054 | 0.92921  |
| 19723 | P03410 | Q8IYN2 | 1.5618   |
| 19724 | P03410 | Q9BY31 | 0.62791  |
| 19725 | P03410 | Q9UPM9 | 0.18547  |
| 19726 | P03410 | Q9UN42 | 0.2401   |
| 19727 | P03410 | Q9HCK8 | 0.28739  |
| 19728 | P03410 | Q8TC84 | 0.49184  |
| 19729 | P03410 | Q15849 | 0.68559  |
| 19730 | P03410 | Q9BVC3 | 0.85786  |
| 19731 | P03410 | Q6XZF7 | 0.49504  |
| 19732 | P03410 | Q9NZZ3 | 1.2571   |
| 19733 | P03410 | Q9Y2X8 | 0.53543  |
| 19734 | P03410 | Q8NE65 | 0.86984  |
| 19735 | P03410 | Q96N28 | 0.23773  |
| 19736 | P03410 | O95415 | 1.1653   |
| 19737 | P03410 | Q16378 | 1.6653   |
| 19738 | P03410 | Q5T1B0 | 0.099693 |
| 19739 | P03410 | P31483 | 0.43272  |
| 19740 | P03410 | Q69YH5 | 1.4184   |
| 19741 | P03410 | P78386 | 0.91465  |
| 19742 | P03410 | Q76L83 | 0.69739  |
| 19743 | P03410 | Q9ULX3 | 1.0715   |
| 19744 | P03410 | Q3C1V9 | 0.56707  |
| 19745 | P03410 | Q9P266 | 1.4179   |
| 19746 | P03410 | Q86VP6 | 0.64977  |
| 19747 | P03410 | P28702 | 0.36929  |
| 19748 | P03410 | Q92834 | 0.69212  |
| 19749 | P03410 | Q12789 | 0.95908  |
| 19750 | P03410 | Q9H201 | 0.36287  |
| 19751 | P03410 | Q56UQ5 | 0.028138 |
| 19752 | P03410 | Q9Y6D6 | 0.80124  |
| 19753 | P03410 | Q9BRB3 | 0.83565  |
| 19754 | P03410 | O94830 | 0.08532  |
| 19755 | P03410 | Q9Y4E1 | 0.99187  |
| 19756 | P03410 | Q96MY1 | 1.285    |
| 19757 | P03410 | Q13064 | 0.31691  |
| 19758 | P03410 | P19338 | 0.68443  |
| 19759 | P03410 | Q9Y5V0 | 1.414    |
| 19760 | P03410 | P55327 | 0.56719  |

|       |        |        |          |
|-------|--------|--------|----------|
| 19761 | P03410 | Q13023 | 0.81244  |
| 19762 | P03410 | O43924 | 0.44939  |
| 19763 | P03410 | Q9H089 | 0.34479  |
| 19764 | P03410 | Q9Y6H1 | 1.6853   |
| 19765 | P03410 | Q9P1U0 | 0.18726  |
| 19766 | P03410 | Q9NRF9 | 0.20972  |
| 19767 | P03410 | Q147U1 | 0.83595  |
| 19768 | P03410 | Q9H1K6 | 0.19778  |
| 19769 | P03410 | Q9H1K0 | 0.16404  |
| 19770 | P03410 | Q96M83 | 0.45197  |
| 19771 | P03410 | P52272 | 0.23493  |
| 19772 | P03410 | Q9GZP4 | 0.099149 |
| 19773 | P03410 | Q6K0P9 | 0.45017  |
| 19774 | P03410 | Q8IYJ3 | 0.49477  |
| 19775 | P03410 | Q9UM63 | 0.43972  |
| 19776 | P03410 | Q8N1G1 | 0.31201  |
| 19777 | P03410 | P04156 | 0.81343  |
| 19778 | P03410 | Q8N9S9 | 0.48798  |
| 19779 | P03410 | P43357 | 0.6999   |
| 19780 | P03410 | P08708 | 0.63171  |
| 19781 | P03410 | P09874 | 0.56356  |
| 19782 | P03410 | P0C7W9 | 0.18282  |
| 19783 | P03410 | Q9NTK1 | 1.4336   |
| 19784 | P03410 | Q53EL6 | 1.1801   |
| 19785 | P03410 | Q5HY64 | 0.19655  |
| 19786 | P03410 | Q86Y39 | 1.2475   |
| 19787 | P03410 | Q9BRR8 | 1.3289   |
| 19788 | P03410 | Q16526 | 0.37294  |
| 19789 | P03410 | Q8NC38 | 0.38258  |
| 19790 | P03410 | Q9BTC0 | 0.28588  |
| 19791 | P03410 | P15259 | 0.92904  |
| 19792 | P03410 | P86434 | 0.40084  |
| 19793 | P03410 | Q95876 | 0.52498  |
| 19794 | P03410 | Q12933 | 0.52114  |
| 19795 | P03410 | Q9BSA9 | 1.0913   |
| 19796 | P03410 | Q8TC71 | 0.6449   |
| 19797 | P03410 | Q8WZB0 | 0.07912  |
| 19798 | P03410 | Q9H0E2 | 0.33788  |
| 19799 | P03410 | Q9Y2R9 | 1.8713   |
| 19800 | P03410 | Q9BVV2 | 0.17293  |
| 19801 | P03410 | Q8N5P1 | 0.28605  |
| 19802 | P03410 | A6NKN8 | 1.6655   |
| 19803 | P03410 | P36952 | 0.19809  |
| 19804 | P03410 | Q9H788 | 1.1308   |
| 19805 | P03410 | Q8WYJ6 | 0.41113  |
| 19806 | P03410 | P46782 | 0.9404   |
| 19807 | P03410 | Q9ULU8 | 0.32395  |
| 19808 | P03410 | Q5PRF9 | 0.65956  |
| 19809 | P03410 | Q13066 | 0.508    |
| 19810 | P03410 | P16220 | 0.9305   |
| 19811 | P03410 | Q96EN9 | 1.2795   |
| 19812 | P03410 | Q15466 | 0.48947  |
| 19813 | P03410 | Q9NVU7 | 1.0178   |
| 19814 | P03410 | P32969 | 1.1682   |
| 19815 | P03410 | Q96SK3 | 0.78354  |
| 19816 | P03410 | Q15834 | 1.4139   |
| 19817 | P03410 | P56693 | 0.49868  |
| 19818 | P03410 | Q00403 | 1.0032   |
| 19819 | P03410 | Q658K8 | 1.0771   |
| 19820 | P03410 | P0CAP2 | 0.61884  |
| 19821 | P03410 | P21506 | 0.85712  |
| 19822 | P03410 | Q9NUQ3 | 0.62859  |
| 19823 | P03410 | Q5TBE3 | 0.77429  |
| 19824 | P03410 | Q96C23 | 0.057075 |
| 19825 | P03410 | P02728 | 1.6653   |
| 19826 | P03410 | O95831 | 0.71264  |
| 19827 | P03410 | Q9BVA1 | 0.12768  |
| 19828 | P03410 | Q96ST8 | 1.5205   |
| 19829 | P03410 | Q7RTV3 | 0.21317  |
| 19830 | P03410 | Q9BXL5 | 0.45765  |
| 19831 | P03410 | Q9NV64 | 1.0758   |
| 19832 | P03410 | O14818 | 0.95721  |
| 19833 | P03410 | Q86Y37 | 0.23047  |
| 19834 | P03410 | Q4W4Y0 | 0.21555  |
| 19835 | P03410 | Q9BYQ4 | 1.9984   |
| 19836 | P03410 | P12757 | 0.43608  |

|       |        |        |         |
|-------|--------|--------|---------|
| 19837 | P03410 | O96017 | 0.8354  |
| 19838 | P03410 | O43296 | 0.7974  |
| 19839 | P03410 | Q9H1B7 | 1.2718  |
| 19840 | P03410 | A8MXV4 | 1.2137  |
| 19841 | P03410 | Q5EBM0 | 1.2577  |
| 19842 | P03410 | H3BTG2 | 1.2588  |
| 19843 | P03410 | P53618 | 1.0852  |
| 19844 | P03410 | Q2M2I5 | 1.0001  |
| 19845 | P03410 | Q9UBU9 | 0.61968 |
| 19846 | P03410 | Q6P1L6 | 0.7485  |
| 19847 | P03410 | Q96PI1 | 1.5415  |
| 19848 | P03410 | Q9H777 | 0.70307 |
| 19849 | P03410 | Q3SY05 | 0.25672 |
| 19850 | P03410 | P84101 | 1.8026  |
| 19851 | P03410 | Q9NT62 | 0.40453 |
| 19852 | P03410 | A6NFU8 | 0.87472 |
| 19853 | P03410 | P18583 | 0.43141 |
| 19854 | P03410 | O75436 | 1.0027  |
| 19855 | P03410 | P36873 | 0.68122 |
| 19856 | P03410 | P86452 | 0.5839  |
| 19857 | P03410 | Q8N4C6 | 0.99776 |
| 19858 | P03410 | Q9HBM1 | 0.86866 |
| 19859 | P03410 | Q5XG87 | 0.15306 |
| 19860 | P03410 | Q9UKD2 | 0.32328 |
| 19861 | P03410 | Q9BQ61 | 1.4883  |
| 19862 | P03410 | Q5RGS2 | 1.4013  |
| 19863 | P03410 | Q86SQ7 | 1.3609  |
| 19864 | P03410 | Q96S94 | 0.42123 |
| 19865 | P03410 | O95744 | 0.12378 |
| 19866 | P03410 | A8MVW5 | 1.1293  |
| 19867 | P03410 | P61923 | 0.66521 |
| 19868 | P03410 | Q9BTT4 | 0.74761 |
| 19869 | P03410 | Q9Y6D5 | 0.34831 |
| 19870 | P03410 | Q9Y6X8 | 0.56498 |
| 19871 | P03410 | Q8WWX9 | 0.62692 |
| 19872 | P03410 | Q9BZE2 | 1.5823  |
| 19873 | P03410 | Q6ZUI0 | 0.5323  |
| 19874 | P03410 | Q5TGY1 | 0.63468 |
| 19875 | P03410 | P17032 | 0.79703 |
| 19876 | P03410 | A6NGS2 | 0.95877 |
| 19877 | P03410 | P53041 | 0.56422 |
| 19878 | P03410 | Q7Z7J9 | 0.75253 |
| 19879 | P03410 | Q5TYM5 | 0.75636 |
| 19880 | P03410 | Q8WWB7 | 1.0145  |
| 19881 | P03410 | O15014 | 1.5081  |
| 19882 | P03410 | Q8N6K0 | 1.0913  |
| 19883 | P03410 | Q6PGQ7 | 2.0038  |
| 19884 | P03410 | Q5XUX1 | 0.6999  |
| 19885 | P03410 | Q8IYW4 | 0.30289 |
| 19886 | P03410 | Q2VYF4 | 0.70563 |
| 19887 | P03410 | Q9H0R6 | 0.89482 |
| 19888 | P03410 | Q96EE3 | 0.70702 |
| 19889 | P03410 | O14757 | 0.84086 |
| 19890 | P03410 | Q15046 | 1.3441  |
| 19891 | P03410 | P30154 | 0.67137 |
| 19892 | P03410 | O60671 | 0.96489 |
| 19893 | P03410 | Q6PII3 | 1.0776  |
| 19894 | P03410 | Q6IQ49 | 0.52374 |
| 19895 | P03410 | Q92734 | 0.41442 |
| 19896 | P03410 | P17027 | 0.66065 |
| 19897 | P03410 | Q9H5Q4 | 0.95609 |
| 19898 | P03410 | P47974 | 0.2178  |
| 19899 | P03410 | O75170 | 1.2108  |
| 19900 | P03410 | Q9H7E2 | 0.65574 |
| 19901 | P03410 | Q8TAY7 | 2.3386  |
| 19902 | P03410 | Q5VXH4 | 0.67757 |
| 19903 | P03410 | Q9H173 | 0.24644 |
| 19904 | P03410 | Q9BR76 | 0.70629 |
| 19905 | P03410 | Q9NSI2 | 1.4883  |
| 19906 | P03410 | Q9NQV6 | 0.10142 |
| 19907 | P03410 | Q9Y6G3 | 0.61591 |
| 19908 | P03410 | P51668 | 0.48162 |
| 19909 | P03410 | Q9HAT8 | 0.91747 |
| 19910 | P03410 | Q96JE7 | 1.3841  |
| 19911 | P03410 | Q6NVV0 | 1.2236  |
| 19912 | P03410 | P0CG20 | 0.72807 |

|       |        |         |          |
|-------|--------|---------|----------|
| 19913 | P03410 | Q8NI29  | 0.55816  |
| 19914 | P03410 | Q52LD8  | 0.8062   |
| 19915 | P03410 | O14602  | 0.76444  |
| 19916 | P03410 | Q3SY52  | 0.744    |
| 19917 | P03410 | P0CJ72  | 1.4876   |
| 19918 | P03410 | Q14585  | 0.68833  |
| 19919 | P03410 | Q9BRG1  | 1.2646   |
| 19920 | P03410 | Q86XI8  | 0.90265  |
| 19921 | P03410 | A8MUV8  | 1.0058   |
| 19922 | P03410 | Q9P0W5  | 1.4674   |
| 19923 | P03410 | P15515  | 1.0127   |
| 19924 | P03410 | A6NHR8  | 1.6653   |
| 19925 | P03410 | Q6UWH6  | 0.62829  |
| 19926 | P03410 | Q8NFIJ8 | 0.5354   |
| 19927 | P03410 | Q9UL15  | 0.20044  |
| 19928 | P03410 | Q6UWF3  | 1.4002   |
| 19929 | P03410 | Q9UJ98  | 0.83466  |
| 19930 | P03410 | Q53H80  | 0.6116   |
| 19931 | P03410 | Q5VWI1  | 1.3352   |
| 19932 | P03410 | P46937  | 0.78233  |
| 19933 | P03410 | P78412  | 0.2823   |
| 19934 | P03410 | Q9NZD2  | 0.8043   |
| 19935 | P03410 | Q8N196  | 0.52638  |
| 19936 | P03410 | P20290  | 1.2273   |
| 19937 | P03410 | Q13542  | 0.79039  |
| 19938 | P03410 | Q06455  | 0.55148  |
| 19939 | P03410 | Q68D20  | 0.27658  |
| 19940 | P03410 | Q6P3S1  | 0.096873 |
| 19941 | P03410 | Q6P1J9  | 0.68508  |
| 19942 | P03410 | Q9H4Z3  | 0.22904  |
| 19943 | P03410 | O43364  | 0.15271  |
| 19944 | P03410 | Q9Y5P2  | 0.23754  |
| 19945 | P03410 | P31939  | 0.76851  |
| 19946 | P03410 | Q7Z5M5  | 0.75414  |
| 19947 | P03410 | Q86XG9  | 0.3881   |
| 19948 | P03410 | Q9BQ48  | 1.6536   |
| 19949 | P03410 | O60443  | 0.49319  |
| 19950 | P03410 | Q8WU39  | 0.83862  |
| 19951 | P03410 | Q6P2C8  | 0.92438  |
| 19952 | P03410 | Q9NQ50  | 1.7302   |
| 19953 | P03410 | Q8IXM3  | 1.0766   |
| 19954 | P03410 | Q14118  | 0.21254  |
| 19955 | P03410 | Q9GZX5  | 0.80611  |
| 19956 | P03410 | Q13118  | 0.37372  |
| 19957 | P03410 | Q96FQ7  | 0.34557  |
| 19958 | P03410 | P68133  | 0.24431  |
| 19959 | P03410 | Q6ZS17  | 0.70981  |
| 19960 | P03410 | Q15699  | 0.3321   |
| 19961 | P03410 | O75410  | 0.98238  |
| 19962 | P03410 | Q8N2G4  | 0.45712  |
| 19963 | P03410 | Q86WX3  | 1.3403   |
| 19964 | P03410 | Q9NTI7  | 1.429    |
| 19965 | P03410 | P47224  | 0.59781  |
| 19966 | P03410 | Q6P1X6  | 1.5089   |
| 19967 | P03410 | P81274  | 0.67331  |
| 19968 | P03410 | P49910  | 0.70955  |
| 19969 | P03410 | A8MVA2  | 1.9984   |
| 19970 | P03410 | P46100  | 0.59793  |
| 19971 | P03410 | Q86XE5  | 1.356    |
| 19972 | P03410 | Q8IUW3  | 1.2333   |
| 19973 | P03410 | Q9UJX5  | 1.0131   |
| 19974 | P03410 | Q6NSI3  | 1.6547   |
| 19975 | P03410 | Q8N9V7  | 1.124    |
| 19976 | P03410 | Q8WTW3  | 1.3468   |
| 19977 | P03410 | Q49AN0  | 0.12488  |
| 19978 | P03410 | P60842  | 0.38568  |
| 19979 | P03410 | Q86Y56  | 0.057612 |
| 19980 | P03410 | A2AJT9  | 0.70042  |
| 19981 | P03410 | P21912  | 0.20356  |
| 19982 | P03410 | P35269  | 1.058    |
| 19983 | P03410 | Q6UWQ7  | 0.92929  |
| 19984 | P03410 | Q92618  | 0.46225  |
| 19985 | P03410 | Q8N9H6  | 1.0932   |
| 19986 | P03410 | Q14320  | 0.29128  |
| 19987 | P03410 | Q9NRN7  | 0.80081  |
| 19988 | P03410 | Q9Y4G6  | 0.45333  |

|       |        |        |         |
|-------|--------|--------|---------|
| 19989 | P03410 | Q9Y6J9 | 0.81871 |
| 19990 | P03410 | Q8WWW0 | 0.67069 |
| 19991 | P03410 | P61962 | 0.61061 |
| 19992 | P03410 | P55771 | 0.82039 |
| 19993 | P03410 | Q5T6F0 | 0.33445 |
| 19994 | P03410 | P42568 | 0.992   |
| 19995 | P03410 | O43324 | 1.2634  |
| 19996 | P03410 | P0DJH9 | 0.28632 |
| 19997 | P03410 | Q86XN6 | 0.80654 |
| 19998 | P03410 | Q13185 | 0.84092 |
| 19999 | P03410 | Q8N5D0 | 0.70101 |
| 20000 | P03410 | Q6P050 | 1.0828  |
| 20001 | P03410 | Q5VV52 | 0.69851 |
| 20002 | P03410 | O14832 | 0.59697 |
| 20003 | P03410 | Q96GJ1 | 0.51466 |
| 20004 | P03410 | Q5BJF6 | 0.7694  |
| 20005 | P03410 | Q8NEM7 | 0.42776 |
| 20006 | P03410 | Q9Y244 | 0.5856  |
| 20007 | P03410 | Q96RM1 | 1.6653  |
| 20008 | P03410 | Q9HB96 | 1.6653  |
| 20009 | P03410 | Q5T5A4 | 0.95652 |
| 20010 | P03410 | P21673 | 0.40727 |
| 20011 | P03410 | A6NDN3 | 0.39823 |
| 20012 | P03410 | P51786 | 0.81473 |
| 20013 | P03410 | Q9GZX7 | 0.31381 |
| 20014 | P03410 | Q9NY87 | 1.6618  |
| 20015 | P03410 | O75935 | 1.0776  |
| 20016 | P03410 | O75175 | 1.2905  |
| 20017 | P03410 | Q8N612 | 1.3242  |
| 20018 | P03410 | Q9H1B4 | 0.34116 |
| 20019 | P03410 | O75807 | 0.9908  |
| 20020 | P03410 | Q96A98 | 0.85606 |
| 20021 | P03410 | Q13469 | 0.96378 |
| 20022 | P03410 | B1APH4 | 0.83595 |
| 20023 | P03410 | Q6UWZ7 | 0.62046 |
| 20024 | P03410 | Q9BUN5 | 0.80381 |
| 20025 | P03410 | A0AUK8 | 0.48307 |
| 20026 | P03410 | Q9UPY8 | 1.2482  |
| 20027 | P03410 | Q5BJE1 | 0.64176 |
| 20028 | P03410 | Q15910 | 0.42818 |
| 20029 | P03410 | Q9BYT9 | 0.92935 |
| 20030 | P03410 | Q14093 | 1.2218  |
| 20031 | P03410 | Q9NZ20 | 0.59838 |
| 20032 | P03410 | P0C5W0 | 0.38853 |
| 20033 | P03410 | P82673 | 0.44539 |
| 20034 | P03410 | Q9NRS6 | 0.21436 |
| 20035 | P03410 | P41182 | 0.1763  |
| 20036 | P03410 | Q6UW10 | 1.0723  |
| 20037 | P03410 | Q8N3U4 | 0.9221  |
| 20038 | P03410 | O14990 | 1.0127  |
| 20039 | P03410 | Q13769 | 0.65626 |
| 20040 | P03410 | Q60921 | 0.97019 |
| 20041 | P03410 | P43365 | 0.15517 |
| 20042 | P03410 | P0CJ92 | 0.43504 |
| 20043 | P03410 | Q9Y375 | 0.86783 |
| 20044 | P03410 | Q99504 | 0.39031 |
| 20045 | P03410 | Q95670 | 0.26922 |
| 20046 | P03410 | Q9Y6C7 | 1.6653  |
| 20047 | P03410 | Q9UHD8 | 0.25227 |
| 20048 | P03410 | P61572 | 1.1462  |
| 20049 | P03410 | Q14011 | 0.3292  |
| 20050 | P03410 | Q6ZPA2 | 1.6653  |
| 20051 | P03410 | Q5W111 | 0.28696 |
| 20052 | P03410 | Q8IYB3 | 1.122   |
| 20053 | P03410 | P51532 | 0.38165 |
| 20054 | P03410 | O00303 | 0.30315 |
| 20055 | P03410 | Q9NZU7 | 0.57914 |
| 20056 | P03410 | P0CG00 | 0.54521 |
| 20057 | P03410 | Q8IVE0 | 0.39445 |
| 20058 | P03410 | Q53EZ4 | 1.0076  |
| 20059 | P03410 | Q5T653 | 1.5829  |
| 20060 | P03410 | O15015 | 0.68989 |
| 20061 | P03410 | Q9HBT7 | 0.85194 |
| 20062 | P03410 | Q6ZU80 | 0.42068 |
| 20063 | P03410 | P38919 | 0.25107 |
| 20064 | P03410 | P0CH98 | 0.35337 |

|       |        |        |          |
|-------|--------|--------|----------|
| 20065 | P03410 | Q68D51 | 0.051672 |
| 20066 | P03410 | Q96BW5 | 0.71925  |
| 20067 | P03410 | P59089 | 0.23979  |
| 20068 | P03410 | Q09MP3 | 1.2868   |
| 20069 | P03410 | O60256 | 0.31439  |
| 20070 | P03410 | P49754 | 0.62461  |
| 20071 | P03410 | Q16594 | 0.62066  |
| 20072 | P03410 | Q9BQG0 | 0.46972  |
| 20073 | P03410 | Q9NPI7 | 0.38942  |
| 20074 | P03410 | Q6VEQ5 | 0.81442  |
| 20075 | P03410 | B4DJY2 | 0.6834   |
| 20076 | P03410 | Q96FZ7 | 0.30873  |
| 20077 | P03410 | Q5JQF7 | 1.6653   |
| 20078 | P03410 | Q15853 | 0.52023  |
| 20079 | P03410 | Q9NQ92 | 0.97602  |
| 20080 | P03410 | Q9NQT4 | 0.38501  |
| 20081 | P03410 | Q7Z2Z1 | 1.5711   |
| 20082 | P03410 | Q7RTS7 | 0.71041  |
| 20083 | P03410 | Q9ULQ0 | 1.6685   |
| 20084 | P03410 | P0DKX0 | 0.93715  |
| 20085 | P03410 | Q6ICG7 | 1.6653   |
| 20086 | P03410 | P87889 | 0.085143 |
| 20087 | P03410 | Q86WH2 | 0.54998  |
| 20088 | P03410 | Q6ZSR6 | 0.55512  |
| 20089 | P03410 | Q8NCY6 | 0.20917  |
| 20090 | P03410 | P61218 | 0.45568  |
| 20091 | P03410 | Q5VWT5 | 1.1236   |
| 20092 | P03410 | Q13398 | 0.96662  |
| 20093 | P03410 | P82912 | 1.5291   |
| 20094 | P03410 | P04259 | 0.7024   |
| 20095 | P03410 | Q5JVG8 | 0.97401  |
| 20096 | P03410 | Q6PUV4 | 0.75127  |
| 20097 | P03410 | Q9BSF0 | 0.72649  |
| 20098 | P03410 | Q16531 | 0.70286  |
| 20099 | P03410 | Q9BT22 | 0.98402  |
| 20100 | P03410 | P86480 | 1.6653   |
| 20101 | P03410 | Q2V2M9 | 0.49388  |
| 20102 | P03410 | Q9NYF0 | 0.49165  |
| 20103 | P03410 | Q96LI9 | 0.85967  |
| 20104 | P03410 | Q5VSR9 | 1.5851   |
| 20105 | P03410 | Q9NRW3 | 0.34944  |
| 20106 | P03410 | O75346 | 0.94731  |
| 20107 | P03410 | Q8NCA5 | 1.0321   |
| 20108 | P03410 | O95810 | 0.51495  |
| 20109 | P03410 | O95785 | 0.30744  |
| 20110 | P03410 | P48788 | 0.72969  |
| 20111 | P03410 | Q9H693 | 0.92211  |
| 20112 | P03410 | Q5T036 | 0.93671  |
| 20113 | P03410 | P13349 | 0.29624  |
| 20114 | P03410 | Q9H008 | 0.70645  |
| 20115 | P03410 | P48230 | 0.67855  |
| 20116 | P03410 | P61566 | 0.77894  |
| 20117 | P03410 | Q5JTD0 | 1.8557   |
| 20118 | P03410 | Q8IZP0 | 0.40699  |
| 20119 | P03410 | Q8N945 | 0.21192  |
| 20120 | P03410 | O00534 | 0.607    |
| 20121 | P03410 | Q6ZRF7 | 0.56084  |
| 20122 | P03410 | Q9H0R1 | 0.48628  |
| 20123 | P03410 | Q96N06 | 0.97209  |
| 20124 | P03410 | Q6ZNM6 | 1.2549   |
| 20125 | P03410 | Q9NR33 | 0.22636  |
| 20126 | P03410 | Q96GX9 | 0.43819  |
| 20127 | P03410 | Q13610 | 0.26546  |
| 20128 | P03410 | Q5BKZ1 | 0.96876  |
| 20129 | P03410 | Q96S06 | 1.1144   |
| 20130 | P03410 | Q66K74 | 0.2771   |
| 20131 | P03410 | Q8N5I3 | 0.252    |
| 20132 | P03410 | Q9UJZ1 | 0.20913  |
| 20133 | P03410 | O60296 | 0.67889  |
| 20134 | P03410 | Q13426 | 0.42743  |
| 20135 | P03410 | Q4LE28 | 1.0271   |
| 20136 | P03410 | Q3LI76 | 1.7519   |
| 20137 | P03410 | Q5TGY3 | 0.37597  |
| 20138 | P03410 | Q6NSW5 | 1.4093   |
| 20139 | P03410 | Q13642 | 0.25216  |
| 20140 | P03410 | Q6ICB4 | 0.42412  |

|       |        |        |         |
|-------|--------|--------|---------|
| 20141 | P03410 | A2A2V5 | 1.0913  |
| 20142 | P03410 | Q8TBR4 | 0.83887 |
| 20143 | P03410 | Q96KT6 | 1.6653  |
| 20144 | P03410 | P0C7Q6 | 1.1631  |
| 20145 | P03410 | P48059 | 0.44608 |
| 20146 | P03410 | O60504 | 0.87275 |
| 20147 | P03410 | Q2KHR3 | 0.18992 |
| 20148 | P03410 | Q9BQ89 | 1.9749  |
| 20149 | P03410 | Q9Y281 | 0.84246 |
| 20150 | P03410 | Q9BSJ2 | 1.4623  |
| 20151 | P03410 | P05412 | 0.73184 |
| 20152 | P03410 | O00522 | 0.49407 |
| 20153 | P03410 | D6RB28 | 1.5003  |
| 20154 | P03410 | Q96HA9 | 1.0798  |
| 20155 | P03410 | Q96FB5 | 1.0111  |
| 20156 | P03410 | Q8IYB7 | 0.28448 |
| 20157 | P03410 | Q96IM9 | 0.22979 |
| 20158 | P03410 | Q5T6L9 | 1.1653  |
| 20159 | P03410 | Q8IUR6 | 1.0398  |
| 20160 | P03410 | Q9Y5U8 | 0.93283 |
| 20161 | P03410 | Q86X95 | 1.6166  |
| 20162 | P03410 | A8MSI8 | 1.8647  |
| 20163 | P03410 | Q8N3T6 | 0.74592 |
| 20164 | P03410 | Q92616 | 0.39208 |
| 20165 | P03410 | O43541 | 0.63416 |
| 20166 | P03410 | O75964 | 0.42204 |
| 20167 | P03410 | Q8IVV7 | 0.51659 |
| 20168 | P03410 | Q96MR9 | 0.92459 |
| 20169 | P03410 | Q8N488 | 0.50034 |
| 20170 | P03410 | P04406 | 0.30127 |
| 20171 | P03410 | Q99598 | 0.3626  |
| 20172 | P03410 | Q9BZ23 | 0.96617 |
| 20173 | P03410 | P49336 | 0.27042 |
| 20174 | P03410 | Q6ZT83 | 0.77419 |
| 20175 | P03410 | P50453 | 0.62885 |
| 20176 | P03410 | Q86XZ4 | 0.87011 |
| 20177 | P03410 | P39880 | 0.43972 |
| 20178 | P03410 | Q6PK04 | 1.334   |
| 20179 | P03410 | P49639 | 0.22873 |
| 20180 | P03410 | Q8WWL2 | 0.29642 |
| 20181 | P03410 | Q96KH6 | 1.3023  |
| 20182 | P03410 | O94927 | 0.81017 |
| 20183 | P03410 | Q7L590 | 1.197   |
| 20184 | P03410 | Q6RW13 | 1.3101  |
| 20185 | P03410 | Q9BQI5 | 0.68036 |
| 20186 | P03410 | Q3T8J9 | 0.82581 |
| 20187 | P03410 | Q9NQ33 | 0.5093  |
| 20188 | P03410 | Q04695 | 0.95379 |
| 20189 | P03410 | Q495Y8 | 1.0907  |
| 20190 | P03410 | Q5XKE5 | 0.75104 |
| 20191 | P03410 | P20248 | 1.2412  |
| 20192 | P03410 | Q9H7Z3 | 0.42378 |
| 20193 | P03410 | P04844 | 0.80183 |
| 20194 | P03410 | Q96GU1 | 0.69691 |
| 20195 | P03410 | P99999 | 0.68139 |
| 20196 | P03410 | Q0VD86 | 0.49184 |
| 20197 | P03410 | Q6ZU52 | 0.6999  |
| 20198 | P03410 | P86790 | 0.60221 |
| 20199 | P03410 | P50402 | 0.70722 |
| 20200 | P03410 | Q8IWN6 | 1.3633  |
| 20201 | P03410 | Q00765 | 0.16406 |
| 20202 | P03410 | O15360 | 1.0095  |
| 20203 | P03410 | Q7Z2V1 | 1.6653  |
| 20204 | P03410 | P20962 | 1.5216  |
| 20205 | P03410 | A2RRD8 | 0.84515 |
| 20206 | P03410 | Q9UNW9 | 0.15008 |
| 20207 | P03410 | Q5HYN5 | 0.41446 |
| 20208 | P03410 | Q9BRQ3 | 1.4619  |
| 20209 | P03410 | Q9Y2Y1 | 0.15074 |
| 20210 | P03410 | Q9UK61 | 0.91515 |
| 20211 | P03410 | O95400 | 1.0687  |
| 20212 | P03410 | Q9NX63 | 1.0754  |
| 20213 | P03410 | Q5T686 | 0.87539 |
| 20214 | P03410 | Q8N8B7 | 0.13575 |
| 20215 | P03410 | Q8WWH5 | 1.2635  |
| 20216 | P03410 | O76013 | 0.89153 |

|       |        |        |         |
|-------|--------|--------|---------|
| 20217 | P03410 | Q10586 | 0.39516 |
| 20218 | P03410 | Q12888 | 0.69329 |
| 20219 | P03410 | Q9Y334 | 0.76554 |
| 20220 | P03410 | Q6XYB7 | 0.30793 |
| 20221 | P03410 | Q9Y3Y2 | 1.7714  |
| 20222 | P03410 | Q96F45 | 0.20557 |
| 20223 | P03410 | O60294 | 0.59649 |
| 20224 | P03410 | P31948 | 1.1672  |
| 20225 | P03410 | P53677 | 0.68002 |
| 20226 | P03410 | O43196 | 0.87569 |
| 20227 | P03410 | Q96HR3 | 0.8202  |
| 20228 | P03410 | Q14409 | 0.87046 |
| 20229 | P03410 | Q8IVF2 | 0.20917 |
| 20230 | P03410 | Q9NW07 | 0.84019 |
| 20231 | P03410 | Q9BTT0 | 0.31129 |
| 20232 | P03410 | Q15438 | 0.35224 |
| 20233 | P03410 | P49711 | 0.25454 |
| 20234 | P03410 | Q69YW2 | 0.82637 |
| 20235 | P03410 | P23526 | 0.15451 |
| 20236 | P03410 | Q9UHB4 | 0.67729 |
| 20237 | P03410 | A6NDR6 | 0.2823  |
| 20238 | P03410 | Q5TBC7 | 0.38997 |
| 20239 | P03410 | Q7Z4H9 | 0.86705 |
| 20240 | P03410 | Q5JTC6 | 1.4625  |
| 20241 | P03410 | Q9Y6R6 | 0.79465 |
| 20242 | P03410 | Q9BZW7 | 0.33846 |
| 20243 | P03410 | Q75MW2 | 1.0189  |
| 20244 | P03410 | Q96C90 | 1.0173  |
| 20245 | P03410 | Q6UX04 | 0.19834 |
| 20246 | P03410 | B2RUZ4 | 1.7276  |
| 20247 | P03410 | A8MT70 | 0.88504 |
| 20248 | P03410 | P18669 | 1.0057  |
| 20249 | P03410 | Q15051 | 0.98848 |
| 20250 | P03410 | Q96CJ1 | 1.2681  |
| 20251 | P03410 | P02042 | 0.81619 |
| 20252 | P03410 | Q5SRD0 | 0.59409 |
| 20253 | P03410 | O00231 | 0.76493 |
| 20254 | P03410 | Q8IYX7 | 1.314   |
| 20255 | P03410 | Q9UKY7 | 1.6342  |
| 20256 | P03410 | Q15488 | 0.14631 |
| 20257 | P03410 | Q8N6Q8 | 0.77934 |
| 20258 | P03410 | Q9NQ29 | 1.0774  |
| 20259 | P03410 | Q86W56 | 0.73896 |
| 20260 | P03410 | Q6GV28 | 1.0448  |
| 20261 | P03410 | Q6ZTB9 | 0.82426 |
| 20262 | P03410 | Q96G03 | 1.0184  |
| 20263 | P03410 | Q9UGL9 | 1.6653  |
| 20264 | P03410 | Q9Y222 | 0.81774 |
| 20265 | P03410 | O43768 | 0.36323 |
| 20266 | P03410 | Q8NFU3 | 0.35638 |
| 20267 | P03410 | P08670 | 0.48204 |
| 20268 | P03410 | Q9H6B1 | 0.77834 |
| 20269 | P03410 | P05813 | 0.64324 |
| 20270 | P03410 | Q8TBN0 | 0.59709 |
| 20271 | P03410 | Q8N988 | 0.95629 |
| 20272 | P03410 | Q86SG2 | 0.3327  |
| 20273 | P03410 | Q9Y4K1 | 1.2726  |
| 20274 | P03410 | Q86WJ1 | 0.29577 |
| 20275 | P03410 | Q14678 | 0.57173 |
| 20276 | P03410 | Q9NUL3 | 0.87648 |
| 20277 | P03410 | Q6FI81 | 0.56799 |
| 20278 | P03410 | Q7Z4W3 | 1.6653  |
| 20279 | P03410 | Q8ND04 | 0.72542 |
| 20280 | P03410 | P09234 | 0.69272 |
| 20281 | P03410 | Q99576 | 0.49906 |
| 20282 | P03410 | O43151 | 0.90025 |
| 20283 | P03410 | Q8N1Q8 | 1.0135  |
| 20284 | P03410 | Q96MR7 | 1.7296  |
| 20285 | P03410 | Q9UNM6 | 0.5761  |
| 20286 | P03410 | Q8NA92 | 0.9828  |
| 20287 | P03410 | O75558 | 1.0616  |
| 20288 | P03410 | Q16625 | 0.31301 |
| 20289 | P03410 | B9A014 | 0.36028 |
| 20290 | P03410 | P98168 | 0.63733 |
| 20291 | P03410 | P53611 | 0.10315 |
| 20292 | P03410 | Q9H3J6 | 1.5945  |



|       |        |        |           |
|-------|--------|--------|-----------|
| 20293 | P03410 | A6NI79 | 1.594     |
| 20294 | P03410 | Q5MCW4 | 0.66013   |
| 20295 | P03410 | P54257 | 0.1777    |
| 20296 | P03410 | Q9Y263 | 0.36046   |
| 20297 | P03410 | P30281 | 1.0284    |
| 20298 | P03410 | Q9UKL3 | 1.5802    |
| 20299 | P03410 | Q9UK73 | 0.75718   |
| 20300 | P03410 | Q0D2H9 | 0.71749   |
| 20301 | P03410 | Q12834 | 1.0367    |
| 20302 | P03410 | Q86V71 | 0.81404   |
| 20303 | P03410 | Q9NQZ5 | 0.38118   |
| 20304 | P03410 | Q6R327 | 0.27258   |
| 20305 | P03410 | Q6PI97 | 0.39468   |
| 20306 | P03410 | Q8NBT2 | 0.89001   |
| 20307 | P03410 | O95447 | 0.60497   |
| 20308 | P03410 | P09669 | 0.68988   |
| 20309 | P03410 | O95232 | 0.60708   |
| 20310 | P03410 | Q92547 | 0.80047   |
| 20311 | P03410 | Q569G3 | 1.4883    |
| 20312 | P03410 | Q8ND99 | 0.90013   |
| 20313 | P03410 | A6NIJ5 | 0.18282   |
| 20314 | P03410 | Q96T51 | 0.38267   |
| 20315 | P03410 | Q96ME1 | 0.33295   |
| 20316 | P03410 | Q6TGC4 | 0.6804    |
| 20317 | P03410 | Q5JPH6 | 0.94019   |
| 20318 | P03410 | A6NFL8 | 1.594     |
| 20319 | P03410 | P80217 | 0.87267   |
| 20320 | P03410 | Q15105 | 0.32518   |
| 20321 | P03410 | P78559 | 1.0935    |
| 20322 | P03410 | Q9HA90 | 1.4883    |
| 20323 | P03410 | Q8WW18 | 1.4883    |
| 20324 | P03410 | Q6URH7 | 0.051752  |
| 20325 | P03410 | P54368 | 0.2531    |
| 20326 | P03410 | O95625 | 0.59267   |
| 20327 | P03410 | Q8NEM2 | 0.66984   |
| 20328 | P03410 | O60828 | 0.74173   |
| 20329 | P03410 | Q96CN7 | 0.45946   |
| 20330 | P03410 | Q00G26 | 0.0095964 |
| 20331 | P03410 | Q8WW12 | 1.5871    |
| 20332 | P03410 | P56182 | 1.3107    |
| 20333 | P03410 | O95476 | 0.40084   |
| 20334 | P03410 | P09565 | 1.352     |
| 20335 | P03410 | Q86SH2 | 0.33627   |
| 20336 | P03410 | Q16836 | 0.31168   |
| 20337 | P03410 | O43422 | 0.70112   |
| 20338 | P03410 | Q5VW32 | 0.17601   |
| 20339 | P03410 | P30260 | 1.2912    |
| 20340 | P03410 | P42226 | 0.67385   |
| 20341 | P03410 | P46779 | 1.3686    |
| 20342 | P03410 | Q9NVV2 | 1.6653    |
| 20343 | P03410 | Q504U0 | 0.24044   |
| 20344 | P03410 | P51114 | 0.20893   |
| 20345 | P03410 | F7VJQ1 | 1.6653    |
| 20346 | P03410 | A6NHU5 | 1.1779    |
| 20347 | P03410 | P10636 | 0.19351   |
| 20348 | P03410 | Q86US8 | 0.39414   |
| 20349 | P03410 | Q14628 | 0.95344   |
| 20350 | P03410 | Q9HAN9 | 0.6449    |
| 20351 | P03410 | Q96AQ9 | 0.52783   |
| 20352 | P03410 | Q6EEV4 | 1.6653    |
| 20353 | P03410 | Q5VZE5 | 0.39197   |
| 20354 | P03410 | Q7Z6R9 | 0.2562    |
| 20355 | P03410 | Q09666 | 0.94422   |
| 20356 | P03410 | Q6ZQQ2 | 0.68301   |
| 20357 | P03410 | Q9HCU5 | 0.23039   |
| 20358 | P03410 | Q9BTD1 | 0.64757   |
| 20359 | P03410 | Q3KQU3 | 1.0152    |
| 20360 | P03410 | Q8NA72 | 0.62802   |
| 20361 | P03410 | P11388 | 0.30471   |
| 20362 | P03410 | P24390 | 0.93248   |
| 20363 | P03410 | O15305 | 0.29228   |
| 20364 | P03410 | P63104 | 1.0576    |
| 20365 | P03410 | Q9NYP3 | 1.0027    |
| 20366 | P03410 | Q9UBC3 | 0.27363   |
| 20367 | P03410 | O94901 | 0.38431   |
| 20368 | P03410 | Q15596 | 0.72317   |

|       |        |        |          |
|-------|--------|--------|----------|
| 20369 | P03410 | Q13216 | 0.42751  |
| 20370 | P03410 | Q9P086 | 1.0723   |
| 20371 | P03410 | O15117 | 1.1994   |
| 20372 | P03410 | Q5U649 | 0.56732  |
| 20373 | P03410 | Q66K64 | 0.41023  |
| 20374 | P03410 | Q8TCD5 | 0.39724  |
| 20375 | P03410 | Q86TA1 | 0.57776  |
| 20376 | P03410 | Q9Y5J6 | 0.68397  |
| 20377 | P03410 | Q6ZV70 | 0.44977  |
| 20378 | P03410 | P27635 | 0.88618  |
| 20379 | P03410 | P61201 | 0.63582  |
| 20380 | P03410 | Q8N108 | 1.1141   |
| 20381 | P03410 | Q9NQP4 | 1.0405   |
| 20382 | P03410 | P51948 | 0.48509  |
| 20383 | P03410 | Q8NI51 | 0.52878  |
| 20384 | P03410 | Q9NVS9 | 0.89231  |
| 20385 | P03410 | Q13875 | 0.96048  |
| 20386 | P03410 | Q9BQ69 | 0.76677  |
| 20387 | P03410 | O15160 | 0.27865  |
| 20388 | P03410 | Q5TEA3 | 0.68988  |
| 20389 | P03410 | O60884 | 0.69534  |
| 20390 | P03410 | P54826 | 0.52152  |
| 20391 | P03410 | Q8IV56 | 1.1713   |
| 20392 | P03410 | Q96JN0 | 1.3825   |
| 20393 | P03410 | Q6ZTI6 | 1.0412   |
| 20394 | P03410 | Q9UIC8 | 0.47383  |
| 20395 | P03410 | Q6UWK7 | 1.6653   |
| 20396 | P03410 | Q4G0U5 | 0.37289  |
| 20397 | P03410 | Q8N8I6 | 1.6653   |
| 20398 | P03410 | Q96KA5 | 0.61505  |
| 20399 | P03410 | Q8IW35 | 1.5161   |
| 20400 | P03410 | Q96RU7 | 0.36677  |
| 20401 | P03410 | Q7Z7K2 | 0.66403  |
| 20402 | P03410 | Q96EL2 | 0.61222  |
| 20403 | P03410 | A0JLT2 | 1.4736   |
| 20404 | P03410 | P51531 | 0.64729  |
| 20405 | P03410 | Q8IYL3 | 1.6608   |
| 20406 | P03410 | Q5JPI3 | 1.5224   |
| 20407 | P03410 | Q6P047 | 0.97539  |
| 20408 | P03410 | Q70EK8 | 0.84166  |
| 20409 | P03410 | Q86UD0 | 0.72698  |
| 20410 | P03410 | Q9HAP2 | 0.68873  |
| 20411 | P03410 | Q9UKA2 | 0.51025  |
| 20412 | P03410 | Q5JWF8 | 0.15343  |
| 20413 | P03410 | Q7Z4H3 | 0.47358  |
| 20414 | P03410 | H3BU77 | 1.2502   |
| 20415 | P03410 | Q9UN81 | 0.78267  |
| 20416 | P03410 | E9PIF3 | 0.091657 |
| 20417 | P03410 | P24863 | 1.2361   |
| 20418 | P03410 | Q9Y5B0 | 0.74633  |
| 20419 | P03410 | Q6RSH7 | 0.54741  |
| 20420 | P03410 | P59894 | 1.0174   |
| 20421 | P03410 | Q99547 | 1.4361   |
| 20422 | P03410 | A6NK06 | 0.9057   |
| 20423 | P03410 | P49450 | 0.3655   |
| 20424 | P03410 | Q7Z3E2 | 1.3304   |
| 20425 | P03410 | Q9P2W6 | 1.6653   |
| 20426 | P03410 | Q6IAA8 | 0.28527  |
| 20427 | P03410 | A8MPS7 | 0.23867  |
| 20428 | P03410 | Q9NZE8 | 1.5601   |
| 20429 | P03410 | Q9P1Q0 | 0.76993  |
| 20430 | P03410 | Q96CN0 | 1.6653   |
| 20431 | P03410 | Q9Y6K5 | 0.3123   |
| 20432 | P03410 | Q99643 | 0.49086  |
| 20433 | P03410 | P28749 | 1.3793   |
| 20434 | P03410 | Q9BW71 | 1.7008   |
| 20435 | P03410 | Q8N8P6 | 0.8951   |
| 20436 | P03410 | Q8TE02 | 1.4886   |
| 20437 | P03410 | Q5T6C5 | 0.99972  |
| 20438 | P03410 | Q9H7C9 | 0.18704  |
| 20439 | P03410 | Q8N8F7 | 1.0913   |
| 20440 | P03410 | Q8N1L9 | 0.92962  |
| 20441 | P03410 | Q6UWP8 | 0.73644  |
| 20442 | P03410 | Q9NWN3 | 0.72644  |
| 20443 | P03410 | Q92636 | 0.57406  |
| 20444 | P03410 | Q9NSI6 | 0.70003  |

|       |        |        |          |
|-------|--------|--------|----------|
| 20445 | P03410 | Q96IV0 | 0.65469  |
| 20446 | P03410 | Q9Y3E5 | 0.76681  |
| 20447 | P03410 | Q7Z3D6 | 0.058407 |
| 20448 | P03410 | Q9H568 | 0.23477  |
| 20449 | P03410 | P25789 | 1.0054   |
| 20450 | P03410 | Q9UKI9 | 1.1131   |
| 20451 | P03410 | Q96JN8 | 0.50771  |
| 20452 | P03410 | Q5FBB7 | 1.4376   |
| 20453 | P03410 | Q9NQ76 | 0.53387  |
| 20454 | P03410 | Q15544 | 1.421    |
| 20455 | P03410 | Q96S66 | 0.76126  |
| 20456 | P03410 | Q9H8N7 | 0.16095  |
| 20457 | P03410 | Q9Y606 | 1.5147   |
| 20458 | P03410 | Q9BT30 | 1.0143   |
| 20459 | P03410 | Q6VUC0 | 0.42484  |
| 20460 | P03410 | Q9Y3E1 | 0.43876  |
| 20461 | P03410 | P24666 | 0.11404  |
| 20462 | P03410 | P51854 | 0.29468  |
| 20463 | P03410 | P49720 | 0.7856   |
| 20464 | P03410 | P12980 | 0.88875  |
| 20465 | P03410 | Q9NUJ3 | 0.59727  |
| 20466 | P03410 | P0CJ88 | 0.27528  |
| 20467 | P03410 | Q86TX2 | 0.2809   |
| 20468 | P03410 | P63010 | 0.70352  |
| 20469 | P03410 | O75157 | 0.55393  |
| 20470 | P03410 | Q8IYD1 | 0.30223  |
| 20471 | P03410 | A6NN90 | 0.64029  |
| 20472 | P03410 | P58005 | 0.49927  |
| 20473 | P03410 | Q6ZTZ1 | 0.75508  |
| 20474 | P03410 | Q8TC94 | 0.23477  |
| 20475 | P03410 | Q96IT1 | 0.63738  |
| 20476 | P03410 | P57772 | 1.2258   |
| 20477 | P03410 | B4DX44 | 1.0058   |
| 20478 | P03410 | Q9P2H0 | 0.6999   |
| 20479 | P03410 | Q15643 | 1.3403   |
| 20480 | P03410 | Q86UY5 | 0.4095   |
| 20481 | P03410 | Q9UMY1 | 1.8848   |
| 20482 | P03410 | Q08J23 | 0.75891  |
| 20483 | P03410 | Q8IWD4 | 1.4883   |
| 20484 | P03410 | Q7Z5W3 | 1.1412   |
| 20485 | P03410 | Q9NPJ8 | 0.61963  |
| 20486 | P03410 | Q8NDA8 | 0.98374  |
| 20487 | P03410 | Q13901 | 1.0089   |
| 20488 | P03410 | Q6ZSG2 | 0.86592  |
| 20489 | P03410 | Q9H2T7 | 0.71856  |
| 20490 | P03410 | Q6ZW34 | 1.6653   |
| 20491 | P03410 | Q9ULM2 | 0.66931  |
| 20492 | P03410 | Q13888 | 0.53293  |
| 20493 | P03410 | Q8N7R1 | 1.0081   |
| 20494 | P03410 | P50539 | 0.32954  |
| 20495 | P03410 | O60318 | 0.84695  |
| 20496 | P03410 | Q2M3R5 | 0.99099  |
| 20497 | P03410 | Q15102 | 0.25454  |
| 20498 | P03410 | Q4G0F5 | 0.44515  |
| 20499 | P03410 | Q8NA47 | 1.4883   |
| 20500 | P03410 | Q8N402 | 0.2919   |
| 20501 | P03410 | Q8WYQ9 | 0.48976  |
| 20502 | P03410 | Q96QF0 | 0.80335  |
| 20503 | P03410 | Q9BTY7 | 0.56375  |
| 20504 | P03410 | O42043 | 0.91525  |
| 20505 | P03410 | Q86TG7 | 0.58815  |
| 20506 | P03410 | Q9Y6Y9 | 0.4136   |
| 20507 | P03410 | P55347 | 0.3769   |
| 20508 | P03410 | P60953 | 0.86143  |
| 20509 | P03410 | Q8N9G6 | 1.0986   |
| 20510 | P03410 | Q9Y6Z2 | 1.6653   |
| 20511 | P03410 | Q9BYG8 | 0.30396  |
| 20512 | P03410 | P42025 | 0.58211  |
| 20513 | P03410 | O60244 | 0.58395  |
| 20514 | P03410 | Q8TDR4 | 0.75634  |
| 20515 | P03410 | Q502W7 | 0.93668  |
| 20516 | P03410 | Q9UJC5 | 0.77229  |
| 20517 | P03410 | Q8IUE1 | 0.30793  |
| 20518 | P03410 | O00479 | 1.5441   |
| 20519 | P03410 | Q5TI25 | 2.3694   |
| 20520 | P03410 | P03897 | 0.22566  |

|       |        |        |          |
|-------|--------|--------|----------|
| 20521 | P03410 | Q01130 | 0.8947   |
| 20522 | P03410 | P09913 | 0.76802  |
| 20523 | P03410 | Q96D46 | 1.3482   |
| 20524 | P03410 | Q9ULL0 | 0.85706  |
| 20525 | P03410 | A8MYV0 | 0.31374  |
| 20526 | P03410 | P78543 | 0.84541  |
| 20527 | P03410 | O43677 | 1.0318   |
| 20528 | P03410 | P13929 | 0.090738 |
| 20529 | P03410 | Q0VGL1 | 0.36832  |
| 20530 | P03410 | P46087 | 0.81762  |
| 20531 | P03410 | O60573 | 0.76203  |
| 20532 | P03410 | Q7Z624 | 0.45391  |
| 20533 | P03410 | A6NG73 | 0.40828  |
| 20534 | P03410 | Q9Y2Y4 | 0.38605  |
| 20535 | P03410 | Q9C093 | 0.31404  |
| 20536 | P03410 | P0CZ20 | 0.55606  |
| 20537 | P03410 | P40926 | 0.19264  |
| 20538 | P03410 | Q9BZS9 | 1.6653   |
| 20539 | P03410 | O75347 | 1.8555   |
| 20540 | P03410 | Q9UHV7 | 0.58395  |
| 20541 | P03410 | Q8N328 | 0.52041  |
| 20542 | P03410 | C9JDV5 | 0.1196   |
| 20543 | P03410 | Q14738 | 0.92883  |
| 20544 | P03410 | Q9H8W4 | 0.42123  |
| 20545 | P03410 | Q15742 | 0.3104   |
| 20546 | P03410 | P35580 | 0.2103   |
| 20547 | P03410 | O75477 | 0.88775  |
| 20548 | P03410 | Q8IXQ3 | 0.5852   |
| 20549 | P03410 | Q9BVP2 | 0.35561  |
| 20550 | P03410 | Q9NRI5 | 0.55268  |
| 20551 | P03410 | Q969U6 | 0.2744   |
| 20552 | P03410 | O15091 | 0.22218  |
| 20553 | P03410 | Q9Y5J9 | 0.96796  |
| 20554 | P03410 | Q6ZU35 | 1.4883   |
| 20555 | P03410 | Q8WV37 | 1.0058   |
| 20556 | P03410 | Q9BQ95 | 1.2613   |
| 20557 | P03410 | Q5VY09 | 1.6468   |
| 20558 | P03410 | Q13616 | 0.85429  |
| 20559 | P03410 | Q9H0K4 | 1.4247   |
| 20560 | P03410 | Q8NC26 | 0.92854  |
| 20561 | P03410 | P32243 | 0.70968  |
| 20562 | P03410 | Q8IVK1 | 1.6653   |
| 20563 | P03410 | Q9NX31 | 0.046431 |
| 20564 | P03410 | P0CJ73 | 1.4876   |
| 20565 | P03410 | Q13951 | 0.73419  |
| 20566 | P03410 | Q0VDE8 | 1.2697   |
| 20567 | P03410 | Q8NCU7 | 1.6974   |
| 20568 | P03410 | Q969L4 | 0.9119   |
| 20569 | P03410 | Q8WVM0 | 1.002    |
| 20570 | P03410 | P28290 | 0.8142   |
| 20571 | P03410 | A4D1E9 | 1.4713   |
| 20572 | P03410 | P15516 | 1.0472   |
| 20573 | P03410 | Q9Y4Z0 | 0.83083  |
| 20574 | P03410 | O96033 | 0.38572  |
| 20575 | P03410 | P11474 | 0.32587  |
| 20576 | P03410 | A4D997 | 1.5115   |
| 20577 | P03410 | P45984 | 0.33288  |
| 20578 | P03410 | Q49A88 | 1.0455   |
| 20579 | P03410 | P50542 | 0.30689  |
| 20580 | P03410 | Q14746 | 0.79212  |
| 20581 | P03410 | Q92664 | 0.31995  |
| 20582 | P03410 | O75821 | 0.59742  |
| 20583 | P03410 | Q9BZ01 | 0.56978  |
| 20584 | P03410 | Q96FH0 | 0.86134  |
| 20585 | P03410 | Q9Y5V3 | 1.0392   |
| 20586 | P03410 | Q8TBP5 | 1.0913   |
| 20587 | P03410 | Q96C01 | 0.31479  |
| 20588 | P03410 | Q6ZTI0 | 1.6653   |
| 20589 | P03410 | P0CJ86 | 0.27528  |
| 20590 | P03410 | Q14699 | 0.72512  |
| 20591 | P03410 | Q9Y6G5 | 0.6999   |
| 20592 | P03410 | Q9HD40 | 0.61333  |
| 20593 | P03410 | A8MWP6 | 1.6653   |
| 20594 | P03410 | Q96RK0 | 1.0254   |
| 20595 | P03410 | Q14681 | 0.32577  |
| 20596 | P03410 | Q8WVX3 | 1.0913   |

|       |        |        |            |
|-------|--------|--------|------------|
| 20597 | P03410 | Q6NVV3 | 1.0846     |
| 20598 | P03410 | P0CJ69 | 1.4876     |
| 20599 | P03410 | P30153 | 0.64348    |
| 20600 | P03410 | Q96DZ7 | 0.91619    |
| 20601 | P03410 | A6NJL1 | 0.46682    |
| 20602 | P03410 | Q96FX7 | 0.52089    |
| 20603 | P03410 | Q4G0X4 | 0.32577    |
| 20604 | P03410 | A4UGR9 | 0.35443    |
| 20605 | P03410 | P57081 | 1.1796     |
| 20606 | P03410 | Q9UC07 | 0.79881    |
| 20607 | P03410 | O95868 | 1.0602     |
| 20608 | P03410 | Q9UJX3 | 1.0325     |
| 20609 | P03410 | A6NLI3 | 0.20243    |
| 20610 | P03410 | Q9Y248 | 1.0275     |
| 20611 | P03410 | Q9ULW3 | 0.75001    |
| 20612 | P03410 | P0CG12 | 2.1127     |
| 20613 | P03410 | O14593 | 0.61251    |
| 20614 | P03410 | Q9UKF6 | 0.79938    |
| 20615 | P03410 | Q96M61 | 0.6999     |
| 20616 | P03410 | Q6ZU69 | 1.1006     |
| 20617 | P03410 | Q96RT8 | 0.72993    |
| 20618 | P03410 | Q9HBF4 | 0.43703    |
| 20619 | P03410 | Q8IXW0 | 0.77092    |
| 20620 | P03410 | Q9BZF9 | 0.535      |
| 20621 | P03410 | Q5T1B1 | 2.1304     |
| 20622 | P03410 | Q8TC44 | 0.34176    |
| 20623 | P03410 | P52434 | 0.40771    |
| 20624 | P03410 | Q86VG3 | 1.1886     |
| 20625 | P03410 | Q5VTE6 | 0.15173    |
| 20626 | P03410 | Q9HA38 | 0.25854    |
| 20627 | P03410 | Q8IW40 | 0.50868    |
| 20628 | P03410 | Q9BQQ7 | 0.47911    |
| 20629 | P03410 | Q8NCN5 | 0.24003    |
| 20630 | P03410 | Q8TCI5 | 0.71409    |
| 20631 | P03410 | Q8TEF2 | 1.3387     |
| 20632 | P03410 | Q9H6T0 | 0.35313    |
| 20633 | P03410 | P20073 | 0.53873    |
| 20634 | P03410 | P23769 | 0.34136    |
| 20635 | P03410 | Q8IZA0 | 0.0592     |
| 20636 | P03410 | Q6ZNB5 | 0.42319    |
| 20637 | P03410 | Q2NL67 | 0.32721    |
| 20638 | P03410 | Q12799 | 0.11071    |
| 20639 | P03410 | Q13761 | 0.67845    |
| 20640 | P03410 | O95169 | 0.51228    |
| 20641 | P03410 | P31941 | 0.39595    |
| 20642 | P03410 | Q96JI7 | 0.79349    |
| 20643 | P03410 | P63135 | 0.11835    |
| 20644 | P03410 | Q6I9Y2 | 1.438      |
| 20645 | P03410 | B7Z1M9 | 0.11374    |
| 20646 | P03410 | A4FU69 | 0.28407    |
| 20647 | P03410 | Q6ZP80 | 1.0913     |
| 20648 | P03410 | Q9HAH7 | 1.3038     |
| 20649 | P03410 | Q9UI43 | 1.444      |
| 20650 | P03410 | Q2LD37 | 0.3533     |
| 20651 | P03410 | O60346 | 0.26792    |
| 20652 | P03410 | O94854 | 0.12345    |
| 20653 | P03410 | F5H4A9 | 1.0913     |
| 20654 | P03410 | Q5T7N2 | 0.39625    |
| 20655 | P03410 | Q5XKP0 | 0.65097    |
| 20656 | P03410 | Q05DH4 | 1.6962     |
| 20657 | P03410 | Q9NPD8 | 0.45095    |
| 20658 | P03410 | Q96EZ8 | 0.77433    |
| 20659 | P03410 | O43189 | 0.41833    |
| 20660 | P03410 | Q14586 | 0.6829     |
| 20661 | P03410 | Q9NWW7 | 1.5859     |
| 20662 | P03410 | Q15940 | 0.90727    |
| 20663 | P03410 | Q96MC9 | 1.9869     |
| 20664 | P03410 | P46108 | 0.55182    |
| 20665 | P03410 | Q3B726 | 0.35464    |
| 20666 | P03410 | Q9BTA9 | 0.95495    |
| 20667 | P03410 | Q00005 | 0.88281    |
| 20668 | P03410 | Q96MC5 | 0.00065626 |
| 20669 | P03410 | P52630 | 0.62894    |
| 20670 | P03410 | Q7L8S5 | 0.54772    |
| 20671 | P03410 | Q8NCQ7 | 0.54579    |
| 20672 | P03410 | Q3L8U1 | 0.70318    |

|       |        |        |         |
|-------|--------|--------|---------|
| 20673 | P03410 | Q96C10 | 0.23974 |
| 20674 | P03410 | P23258 | 0.56175 |
| 20675 | P03410 | Q8NHS9 | 0.56184 |
| 20676 | P03410 | Q8NFU4 | 1.6653  |
| 20677 | P03410 | P62987 | 1.1948  |
| 20678 | P03410 | Q330K2 | 0.63636 |
| 20679 | P03410 | Q14201 | 0.16477 |
| 20680 | P03410 | Q9UIS9 | 0.31582 |
| 20681 | P03410 | Q8N9B5 | 1.0442  |
| 20682 | P03410 | Q8ND56 | 1.2356  |
| 20683 | P03410 | Q96KP1 | 0.64622 |
| 20684 | P03410 | Q86Y28 | 1.0723  |
| 20685 | P03410 | Q9ULW0 | 1.8578  |
| 20686 | P03410 | Q9HB03 | 0.86335 |
| 20687 | P03410 | P69208 | 1.6653  |
| 20688 | P03410 | Q9BPW8 | 0.96226 |
| 20689 | P03410 | Q9NPG2 | 0.34399 |
| 20690 | P03410 | Q9H467 | 1.195   |
| 20691 | P03410 | Q96PS6 | 1.0895  |
| 20692 | P03410 | O75081 | 1.2054  |
| 20693 | P03410 | P60413 | 1.9984  |
| 20694 | P03410 | Q9UGM6 | 0.32264 |
| 20695 | P03410 | Q9UBS4 | 0.61157 |
| 20696 | P03410 | Q6WQI6 | 0.44669 |
| 20697 | P03410 | P41252 | 0.79834 |
| 20698 | P03410 | Q66K41 | 1.2915  |
| 20699 | P03410 | Q96LS8 | 1.0967  |
| 20700 | P03410 | Q9NQE9 | 0.44051 |
| 20701 | P03410 | Q9BY44 | 0.61161 |
| 20702 | P03410 | P56945 | 0.89379 |
| 20703 | P03410 | Q5T749 | 1.5479  |
| 20704 | P03410 | Q9P0S9 | 1.0946  |
| 20705 | P03410 | Q9BSY4 | 0.86871 |
| 20706 | P03410 | Q8NHW3 | 0.22147 |
| 20707 | P03410 | Q5TCM9 | 1.6653  |
| 20708 | P03410 | Q14166 | 0.26872 |
| 20709 | P03410 | Q9Y3D9 | 0.82744 |
| 20710 | P03410 | Q9UNS1 | 0.52289 |
| 20711 | P03410 | A0PJX2 | 0.64771 |
| 20712 | P03410 | Q96EZ4 | 1.6653  |
| 20713 | P03410 | P53779 | 0.22985 |
| 20714 | P03410 | O94776 | 1.0212  |
| 20715 | P03410 | Q9HCS4 | 0.12816 |
| 20716 | P03410 | P27695 | 0.37092 |
| 20717 | P03410 | Q8NCA9 | 0.52846 |
| 20718 | P03410 | B4DS77 | 0.74687 |
| 20719 | P03410 | A0A183 | 1.6653  |
| 20720 | P03410 | Q6ZTQ3 | 0.52583 |
| 20721 | P03410 | Q7Z2W9 | 0.49961 |
| 20722 | P03410 | Q96D96 | 0.88775 |
| 20723 | P03410 | Q6BDS2 | 0.65073 |
| 20724 | P03410 | Q96Q05 | 0.73085 |
| 20725 | P03410 | O00425 | 0.49465 |
| 20726 | P03410 | Q13547 | 0.87911 |
| 20727 | P03410 | A6NLE4 | 1.0913  |
| 20728 | P03410 | Q9Y6D0 | 1.1722  |
| 20729 | P03410 | Q8IXS6 | 0.43892 |
| 20730 | P03410 | O00762 | 0.59208 |
| 20731 | P03410 | Q9HCI5 | 0.82061 |
| 20732 | P03410 | Q9P206 | 1.462   |
| 20733 | P03410 | Q9H0A9 | 2.1879  |
| 20734 | P03410 | P68363 | 0.31103 |
| 20735 | P03410 | Q01664 | 0.56543 |
| 20736 | P03410 | Q15397 | 0.29436 |
| 20737 | P03410 | Q494X1 | 0.59242 |
| 20738 | P03410 | Q9C0F0 | 0.51683 |
| 20739 | P03410 | Q6XCG6 | 1.6653  |
| 20740 | P03410 | O75496 | 1.0949  |
| 20741 | P03410 | A6NMC2 | 0.16455 |
| 20742 | P03410 | Q9P2F9 | 0.65886 |
| 20743 | P03410 | P0C7W0 | 1.4883  |
| 20744 | P03410 | Q16864 | 0.19957 |
| 20745 | P03410 | Q2M2Z5 | 1.4376  |
| 20746 | P03410 | Q9Y471 | 0.3723  |
| 20747 | P03410 | Q9NVH2 | 0.83476 |
| 20748 | P03410 | Q96CS3 | 0.80511 |

|       |        |        |         |
|-------|--------|--------|---------|
| 20749 | P03410 | Q96A56 | 1.4629  |
| 20750 | P03410 | Q9BZR6 | 0.24744 |
| 20751 | P03410 | Q86TB9 | 1.1985  |
| 20752 | P03410 | Q9UJN7 | 0.68956 |
| 20753 | P03410 | Q6ZMY3 | 0.31228 |
| 20754 | P03410 | Q6ZSS7 | 0.72976 |
| 20755 | P03410 | Q5TA77 | 1.6653  |
| 20756 | P03410 | G3V211 | 1.8079  |
| 20757 | P03410 | Q8WUM0 | 0.84061 |
| 20758 | P03410 | Q6ZPB5 | 1.6653  |
| 20759 | P03410 | Q96G04 | 0.16925 |
| 20760 | P03410 | Q01094 | 0.68669 |
| 20761 | P03410 | Q9NPE3 | 1.1541  |
| 20762 | P03410 | O75717 | 0.53891 |
| 20763 | P03410 | Q9Y426 | 0.41817 |
| 20764 | P03410 | P35680 | 0.22877 |
| 20765 | P03410 | P04279 | 0.25894 |
| 20766 | P03410 | Q96M60 | 0.72188 |
| 20767 | P03410 | Q5TB80 | 1.0535  |
| 20768 | P03410 | Q9NWK9 | 0.99832 |
| 20769 | P03410 | O60869 | 0.41141 |
| 20770 | P03410 | Q96PV7 | 1.5141  |
| 20771 | P03410 | Q8NBJ4 | 0.71496 |
| 20772 | P03410 | Q7L2J0 | 0.28308 |
| 20773 | P03410 | Q9BY77 | 0.39144 |
| 20774 | P03410 | Q96RK1 | 0.65101 |
| 20775 | P03410 | Q9Y2Z4 | 0.95851 |
| 20776 | P03410 | A6NEJ1 | 0.35308 |
| 20777 | P03410 | Q9H0P0 | 0.55339 |
| 20778 | P03410 | P23297 | 0.65    |
| 20779 | P03410 | Q9BZG8 | 0.40946 |
| 20780 | P03410 | Q3Y452 | 1.6653  |
| 20781 | P03410 | P57088 | 0.93989 |
| 20782 | P03410 | Q7RTV0 | 0.31774 |
| 20783 | P03410 | Q70IA6 | 0.41206 |
| 20784 | P03410 | Q969N2 | 0.42327 |
| 20785 | P03410 | O00167 | 0.491   |
| 20786 | P03410 | Q14151 | 0.69216 |
| 20787 | P03410 | Q9Y5U9 | 1.3374  |
| 20788 | P03410 | Q6UXP7 | 0.49335 |
| 20789 | P03410 | Q8TCB0 | 0.22221 |
| 20790 | P03410 | P28698 | 0.76936 |
| 20791 | P03410 | Q7Z7L9 | 0.80173 |
| 20792 | P03410 | Q13619 | 0.60936 |
| 20793 | P03410 | P49116 | 0.41432 |
| 20794 | P03410 | Q9Y5Z4 | 0.31479 |
| 20795 | P03410 | Q9NV96 | 0.18599 |
| 20796 | P03410 | B2RD01 | 0.20899 |
| 20797 | P03410 | Q86TS9 | 0.75992 |
| 20798 | P03410 | A6NNA2 | 1.2142  |
| 20799 | P03410 | Q8NB12 | 0.24861 |
| 20800 | P03410 | Q8WVB3 | 0.20746 |
| 20801 | P03410 | P17035 | 0.66045 |
| 20802 | P03410 | Q6ZUT4 | 1.4703  |
| 20803 | P03410 | Q8WUB2 | 0.74434 |
| 20804 | P03410 | P57678 | 0.92634 |
| 20805 | P03410 | A8MUZ8 | 1.0149  |
| 20806 | P03410 | Q99698 | 0.37867 |
| 20807 | P03410 | Q8N6V9 | 0.14714 |
| 20808 | P03410 | Q96ES6 | 0.96838 |
| 20809 | P03410 | O00287 | 1.6987  |
| 20810 | P03410 | Q9BVJ6 | 0.99979 |
| 20811 | P03410 | O00541 | 0.63009 |
| 20812 | P03410 | Q8WTQ4 | 0.58393 |
| 20813 | P03410 | O43790 | 0.91465 |
| 20814 | P03410 | Q8IYJ0 | 0.8198  |
| 20815 | P03410 | Q6NSI4 | 0.31948 |
| 20816 | P03410 | Q53T94 | 0.4414  |
| 20817 | P03410 | Q9UMS4 | 0.48912 |
| 20818 | P03410 | P54922 | 1.0717  |
| 20819 | P03410 | Q8TAQ2 | 1.2433  |
| 20820 | P03410 | Q96BQ5 | 1.3053  |
| 20821 | P03410 | K7EIZ4 | 1.6653  |
| 20822 | P03410 | Q8IY18 | 0.44934 |
| 20823 | P03410 | O43181 | 0.11683 |
| 20824 | P03410 | Q8NAA6 | 0.1245  |

|       |        |        |          |
|-------|--------|--------|----------|
| 20825 | P03410 | Q6P6B1 | 1.4883   |
| 20826 | P03410 | Q969W0 | 0.79781  |
| 20827 | P03410 | O75920 | 1.8909   |
| 20828 | P03410 | O15481 | 0.15414  |
| 20829 | P03410 | P13010 | 0.31191  |
| 20830 | P03410 | Q9BUR4 | 0.94494  |
| 20831 | P03410 | Q8WXC3 | 0.77302  |
| 20832 | P03410 | O95671 | 0.93406  |
| 20833 | P03410 | Q4G0S7 | 0.048766 |
| 20834 | P03410 | Q6X4T0 | 0.63567  |
| 20835 | P03410 | Q8NBR6 | 2.2078   |
| 20836 | P03410 | Q9NZ38 | 0.60678  |
| 20837 | P03410 | O14978 | 0.67474  |
| 20838 | P03410 | P24534 | 0.86197  |
| 20839 | P03410 | O43543 | 0.18664  |
| 20840 | P03410 | Q99932 | 1.6653   |
| 20841 | P03410 | Q12982 | 0.34114  |
| 20842 | P03410 | Q8WW43 | 0.34794  |
| 20843 | P03410 | Q9Y5K5 | 0.23792  |
| 20844 | P03410 | Q96EU6 | 0.73366  |
| 20845 | P03410 | Q8N4L1 | 1.0913   |
| 20846 | P03410 | Q9UI47 | 0.5898   |
| 20847 | P03410 | P59923 | 0.79465  |
| 20848 | P03410 | Q496Y0 | 0.24877  |
| 20849 | P03410 | Q86VX9 | 1.4597   |
| 20850 | P03410 | O60925 | 0.36989  |
| 20851 | P03410 | Q8WW33 | 0.95793  |
| 20852 | P03410 | O75112 | 0.50274  |
| 20853 | P03410 | P63279 | 0.61479  |
| 20854 | P03410 | Q9BQI9 | 1.2702   |
| 20855 | P03410 | Q3ZLR7 | 1.2614   |
| 20856 | P03410 | Q9H8E8 | 0.86564  |
| 20857 | P03410 | Q9H943 | 0.34725  |
| 20858 | P03410 | P13984 | 0.51972  |
| 20859 | P03410 | Q96IS3 | 0.26295  |
| 20860 | P03410 | A6NDZ8 | 0.38071  |
| 20861 | P03410 | P62857 | 1.219    |
| 20862 | P03410 | Q8NA77 | 1.1273   |
| 20863 | P03410 | Q0D2I5 | 0.46908  |
| 20864 | P03410 | Q13465 | 0.23246  |
| 20865 | P03410 | P49593 | 0.29605  |
| 20866 | P03410 | Q5R3I4 | 0.36462  |
| 20867 | P03410 | P54259 | 1.2905   |
| 20868 | P03410 | O95522 | 0.15707  |
| 20869 | P03410 | Q96MF4 | 1.3669   |
| 20870 | P03410 | P26640 | 0.7316   |
| 20871 | P03410 | Q8N5X7 | 0.23683  |
| 20872 | P03410 | Q6Y7W6 | 0.62885  |
| 20873 | P03410 | P10589 | 0.33186  |
| 20874 | P03410 | Q6UXB1 | 0.87557  |
| 20875 | P03410 | P0CL84 | 0.45056  |
| 20876 | P03410 | P78371 | 0.55193  |
| 20877 | P03410 | Q9NWS1 | 1.0605   |
| 20878 | P03410 | Q14695 | 1.1402   |
| 20879 | P03410 | Q9Y3C6 | 0.22157  |
| 20880 | P03410 | Q56P03 | 1.233    |
| 20881 | P03410 | Q9Y2H8 | 0.82386  |
| 20882 | P03410 | Q63HQ0 | 1.6653   |
| 20883 | P03410 | Q86VD1 | 0.66498  |
| 20884 | P03410 | Q9BYR8 | 1.9066   |
| 20885 | P03410 | O95793 | 0.56437  |
| 20886 | P03410 | Q7Z7G8 | 0.1866   |
| 20887 | P03410 | A7MD48 | 1.1372   |
| 20888 | P03410 | Q6ZNB6 | 0.49838  |
| 20889 | P03410 | Q5BLP8 | 0.95938  |
| 20890 | P03410 | P14649 | 0.4316   |
| 20891 | P03410 | Q8N9N8 | 0.28601  |
| 20892 | P03410 | Q8N8G6 | 0.90599  |
| 20893 | P03410 | P31689 | 0.66321  |
| 20894 | P03410 | Q8WTY6 | 0.43867  |
| 20895 | P03410 | A6NHQ4 | 1.2992   |
| 20896 | P03410 | Q92966 | 1.3125   |
| 20897 | P03410 | Q12768 | 0.57582  |
| 20898 | P03410 | O75901 | 0.81184  |
| 20899 | P03410 | Q96QA6 | 0.36709  |
| 20900 | P03410 | Q3SY46 | 1.3983   |



|       |        |        |         |
|-------|--------|--------|---------|
| 20901 | P03410 | Q9HBG6 | 0.26147 |
| 20902 | P03410 | Q9BYC9 | 1.6633  |
| 20903 | P03410 | P20933 | 0.46015 |
| 20904 | P03410 | O75064 | 0.13432 |
| 20905 | P03410 | Q5SQH8 | 0.43105 |
| 20906 | P03410 | Q8N8W4 | 0.26149 |
| 20907 | P03410 | Q6ULP2 | 0.9246  |
| 20908 | P03410 | Q9NVF7 | 1.465   |
| 20909 | P03410 | P56270 | 0.65635 |
| 20910 | P03410 | P01358 | 1.6653  |
| 20911 | P03410 | Q8N104 | 0.87928 |
| 20912 | P03410 | Q9H8M7 | 1.0674  |
| 20913 | P03410 | Q02577 | 0.53562 |
| 20914 | P03410 | P26371 | 1.6653  |
| 20915 | P03410 | Q00LT1 | 1.1529  |
| 20916 | P03410 | Q5T0D9 | 0.72692 |
| 20917 | P03410 | Q9NZ72 | 0.24615 |
| 20918 | P03410 | P17677 | 0.29152 |
| 20919 | P03410 | O95411 | 1.6653  |
| 20920 | P03410 | Q9P2J8 | 0.78354 |
| 20921 | P03410 | Q10587 | 0.26954 |
| 20922 | P03410 | P61024 | 1.0772  |
| 20923 | P03410 | Q8IUG1 | 1.2843  |
| 20924 | P03410 | Q99456 | 1.0001  |
| 20925 | P03410 | O14521 | 1.0344  |
| 20926 | P03410 | Q5T655 | 1.6653  |
| 20927 | P03410 | Q08AG7 | 1.1492  |
| 20928 | P03410 | Q12972 | 0.61907 |
| 20929 | P03410 | Q01546 | 0.83067 |
| 20930 | P03410 | P61582 | 2.0038  |
| 20931 | P03410 | Q9BY60 | 0.3132  |
| 20932 | P03410 | Q13428 | 1.924   |
| 20933 | P03410 | Q9Y6Y1 | 0.51107 |
| 20934 | P03410 | Q86TE4 | 0.76568 |
| 20935 | P03410 | Q9BQP7 | 0.49385 |
| 20936 | P03410 | Q96HV5 | 1.0394  |
| 20937 | P03410 | Q1MSJ5 | 2.2487  |
| 20938 | P03410 | P0C7U9 | 1.1653  |
| 20939 | P03410 | Q9HB09 | 1.8956  |
| 20940 | P03410 | Q02078 | 0.48319 |
| 20941 | P03410 | Q9UIF9 | 0.63479 |
| 20942 | P03410 | Q04118 | 1.6653  |
| 20943 | P03410 | Q5TC04 | 0.92569 |
| 20944 | P03410 | Q92542 | 0.54116 |
| 20945 | P03410 | Q5VYV7 | 0.6999  |
| 20946 | P03410 | P11441 | 0.75314 |
| 20947 | P03410 | Q5J5C9 | 0.73641 |
| 20948 | P03410 | Q96BP2 | 1.3668  |
| 20949 | P03410 | Q9Y2J8 | 1.0671  |
| 20950 | P03410 | Q9GZN8 | 0.67771 |
| 20951 | P03410 | Q69YZ2 | 0.96134 |
| 20952 | P03410 | Q9BRX5 | 0.27618 |
| 20953 | P03410 | Q6P2S7 | 0.24079 |
| 20954 | P03410 | Q6UWH4 | 1.1688  |
| 20955 | P03410 | Q6P589 | 0.74847 |
| 20956 | P03410 | Q6PIF2 | 0.46984 |
| 20957 | P03410 | Q7Z6J8 | 0.75406 |
| 20958 | P03410 | Q96B97 | 0.58777 |
| 20959 | P03410 | Q8N268 | 0.11189 |
| 20960 | P03410 | Q8TEW0 | 0.41041 |
| 20961 | P03410 | P83916 | 0.93328 |
| 20962 | P03410 | Q8TE69 | 0.6999  |
| 20963 | P03410 | Q86XK3 | 1.7054  |
| 20964 | P03410 | Q3LIE5 | 0.71001 |
| 20965 | P03410 | Q96GW9 | 1.0445  |
| 20966 | P03410 | Q5TYW1 | 0.65413 |
| 20967 | P03410 | O95886 | 0.77537 |
| 20968 | P03410 | Q8IZU1 | 1.1496  |
| 20969 | P03410 | Q16718 | 0.15831 |
| 20970 | P03410 | Q92686 | 0.61247 |
| 20971 | P03410 | Q6X4W1 | 1.9095  |
| 20972 | P03410 | O43815 | 0.50147 |
| 20973 | P03410 | Q9UHQ7 | 0.94184 |
| 20974 | P03410 | Q9H2C0 | 0.73232 |
| 20975 | P03410 | P35900 | 1.2722  |
| 20976 | P03410 | Q8IUC6 | 0.49763 |

|       |        |        |           |
|-------|--------|--------|-----------|
| 20977 | P03410 | Q5T9Z0 | 0.83021   |
| 20978 | P03410 | Q9Y296 | 0.51038   |
| 20979 | P03410 | Q8WVY7 | 0.38484   |
| 20980 | P03410 | O75113 | 1.1305    |
| 20981 | P03410 | Q15542 | 0.95119   |
| 20982 | P03410 | Q14CZ7 | 0.30076   |
| 20983 | P03410 | Q494U1 | 0.41701   |
| 20984 | P03410 | A8MTW9 | 1.6653    |
| 20985 | P03410 | A8MT69 | 0.53976   |
| 20986 | P03410 | Q9UNW1 | 0.41455   |
| 20987 | P03410 | O43752 | 0.79543   |
| 20988 | P03410 | Q8N684 | 0.57839   |
| 20989 | P03410 | A6NK39 | 0.42281   |
| 20990 | P03410 | Q9NUQ6 | 0.49184   |
| 20991 | P03410 | P55209 | 0.79541   |
| 20992 | P03410 | Q9NPB6 | 0.88426   |
| 20993 | P03410 | Q9Y5A9 | 0.84029   |
| 20994 | P03410 | Q0VD83 | 0.87318   |
| 20995 | P03410 | Q16534 | 0.54311   |
| 20996 | P03410 | P23284 | 0.53304   |
| 20997 | P03410 | Q86V25 | 0.41938   |
| 20998 | P03410 | A8MQ14 | 0.78951   |
| 20999 | P03410 | P63241 | 0.64182   |
| 21000 | P03410 | Q8WU58 | 0.72808   |
| 21001 | P03410 | O95397 | 1.2748    |
| 21002 | P03410 | Q16890 | 0.67233   |
| 21003 | P03410 | Q6IBW4 | 0.7657    |
| 21004 | P03410 | Q5SV97 | 1.3622    |
| 21005 | P03410 | O15350 | 0.23658   |
| 21006 | P03410 | Q96NG5 | 0.90928   |
| 21007 | P03410 | A6NGK3 | 0.72331   |
| 21008 | P03410 | A6NJ64 | 0.64742   |
| 21009 | P03410 | Q9UBW8 | 0.4974    |
| 21010 | P03410 | Q8N5Z5 | 0.25044   |
| 21011 | P03410 | Q9H799 | 1.5787    |
| 21012 | P03410 | Q7Z3K3 | 0.51198   |
| 21013 | P03410 | Q8N8Q9 | 1.0846    |
| 21014 | P03410 | Q49AQ9 | 0.46283   |
| 21015 | P03410 | P07199 | 0.96468   |
| 21016 | P03410 | Q96HR8 | 1.9313    |
| 21017 | P03410 | Q9UHV9 | 0.98886   |
| 21018 | P03410 | Q8IYG6 | 0.0065311 |
| 21019 | P03410 | Q13347 | 0.90431   |
| 21020 | P03410 | Q9UNP9 | 0.27027   |
| 21021 | P03410 | Q5T5F5 | 1.6653    |
| 21022 | P03410 | P41970 | 0.8024    |
| 21023 | P03410 | Q13068 | 0.26031   |
| 21024 | P03410 | Q2QGD7 | 0.57189   |
| 21025 | P03410 | Q6ZSS3 | 0.62537   |
| 21026 | P03410 | A4D250 | 0.32679   |
| 21027 | P03410 | P80723 | 1.4047    |
| 21028 | P03410 | Q8N140 | 0.94417   |
| 21029 | P03410 | Q6TDU7 | 0.77969   |
| 21030 | P03410 | O94818 | 1.757     |
| 21031 | P03410 | Q16186 | 0.6992    |
| 21032 | P03410 | Q9UBY8 | 0.26093   |
| 21033 | P03410 | Q9NZI6 | 0.44919   |
| 21034 | P03410 | P62487 | 0.66087   |
| 21035 | P03410 | Q9H1D9 | 0.68421   |
| 21036 | P03410 | Q9H6P5 | 0.63558   |
| 21037 | P03410 | Q9H9Z2 | 0.73884   |
| 21038 | P03410 | Q8IXR9 | 0.35337   |
| 21039 | P03410 | P62263 | 0.80348   |
| 21040 | P03410 | A4D0Y5 | 1.6653    |
| 21041 | P03410 | Q96E14 | 1.2317    |
| 21042 | P03410 | Q7Z422 | 0.14274   |
| 21043 | P03410 | Q9UPV0 | 1.8244    |
| 21044 | P03410 | P10163 | 1.6653    |
| 21045 | P03410 | Q6ZN08 | 0.93658   |
| 21046 | P03410 | Q5W1A9 | 0.57481   |
| 21047 | P03410 | F5H284 | 0.22741   |
| 21048 | P03410 | Q8WVM7 | 1.0651    |
| 21049 | P03410 | P22532 | 1.6653    |
| 21050 | P03410 | P07316 | 0.10294   |
| 21051 | P03410 | Q9BZK7 | 0.87387   |
| 21052 | P03410 | P41091 | 0.29955   |

|       |        |        |          |
|-------|--------|--------|----------|
| 21053 | P03410 | P63316 | 0.2756   |
| 21054 | P03410 | Q5TG08 | 1.5219   |
| 21055 | P03410 | Q8N8U2 | 0.69471  |
| 21056 | P03410 | Q8IZQ5 | 0.41515  |
| 21057 | P03410 | P24310 | 0.65031  |
| 21058 | P03410 | A6NH13 | 0.92022  |
| 21059 | P03410 | O95159 | 0.76078  |
| 21060 | P03410 | H3BPM6 | 0.018954 |
| 21061 | P03410 | Q99590 | 0.63469  |
| 21062 | P03410 | Q3LI66 | 1.6653   |
| 21063 | P03410 | Q9H091 | 0.49344  |
| 21064 | P03410 | Q15631 | 0.80813  |
| 21065 | P03410 | Q9Y383 | 1.0374   |
| 21066 | P03410 | P14136 | 0.74327  |
| 21067 | P03410 | Q96LX7 | 0.25839  |
| 21068 | P03410 | O95922 | 0.039274 |
| 21069 | P03410 | A8CG34 | 0.73923  |
| 21070 | P03410 | O14519 | 0.66803  |
| 21071 | P03410 | Q96GV9 | 0.80299  |
| 21072 | P03410 | A6NKL6 | 1.0913   |
| 21073 | P03410 | Q5VT03 | 1.3673   |
| 21074 | P03410 | Q9H8G1 | 0.98893  |
| 21075 | P03410 | Q5SNV9 | 0.92638  |
| 21076 | P03410 | Q07627 | 1.2381   |
| 21077 | P03410 | Q7KZF4 | 0.98422  |
| 21078 | P03410 | Q99962 | 0.44531  |
| 21079 | P03410 | Q9GZN2 | 0.47625  |
| 21080 | P03410 | P05204 | 1.4992   |
| 21081 | P03410 | Q9Y2P0 | 0.8384   |
| 21082 | P03410 | Q30KQ9 | 0.84486  |
| 21083 | P03410 | Q86WV6 | 0.25932  |
| 21084 | P03410 | O75306 | 0.75554  |
| 21085 | P03410 | Q9P0U1 | 0.99708  |
| 21086 | P03410 | Q14498 | 0.73214  |
| 21087 | P03410 | Q8NEU8 | 0.60386  |
| 21088 | P03410 | A6NJR5 | 1.0907   |
| 21089 | P03410 | Q9UKK3 | 0.77455  |
| 21090 | P03410 | Q969M7 | 0.31298  |
| 21091 | P03410 | Q8ND90 | 0.84562  |
| 21092 | P03410 | Q8IYB0 | 1.6653   |
| 21093 | P03410 | Q5JSJ4 | 1.8663   |
| 21094 | P03410 | Q8N7C4 | 1.6653   |
| 21095 | P03410 | Q9NQ48 | 0.61414  |
| 21096 | P03410 | Q13907 | 0.49014  |
| 21097 | P03410 | Q6ZRI6 | 1.0689   |
| 21098 | P03410 | Q86XD5 | 0.50931  |
| 21099 | P03410 | Q969S2 | 0.49845  |
| 21100 | P03410 | A8K5M9 | 1.6435   |
| 21101 | P03410 | P09917 | 0.26281  |
| 21102 | P03410 | P62424 | 1.3754   |
| 21103 | P03410 | Q7Z3Y8 | 0.88723  |
| 21104 | P03410 | Q6ZS92 | 0.76694  |
| 21105 | P03410 | Q8N8X6 | 0.15204  |
| 21106 | P03410 | Q16204 | 0.28346  |
| 21107 | P03410 | O43812 | 0.31534  |
| 21108 | P03410 | A8MXT2 | 0.19519  |
| 21109 | P03410 | Q8IWP9 | 1.9877   |
| 21110 | P03410 | O15027 | 1.0091   |
| 21111 | P03410 | Q587I9 | 1.3623   |
| 21112 | P03410 | Q9UQB3 | 0.55316  |
| 21113 | P03410 | O60220 | 0.95186  |
| 21114 | P03410 | Q9H1Q7 | 1.4587   |
| 21115 | P03410 | Q9Y462 | 0.68657  |
| 21116 | P03410 | Q7L273 | 0.32577  |
| 21117 | P03410 | Q13362 | 0.28004  |
| 21118 | P03410 | Q6MZP7 | 0.71596  |
| 21119 | P03410 | O94874 | 0.89517  |
| 21120 | P03410 | Q86V48 | 1.7271   |
| 21121 | P03410 | Q3SXZ3 | 0.7873   |
| 21122 | P03410 | O75052 | 0.3191   |
| 21123 | P03410 | P63261 | 0.24431  |
| 21124 | P03410 | Q9H425 | 1.0786   |
| 21125 | P03410 | Q9Y250 | 0.9418   |
| 21126 | P03410 | Q86UE3 | 0.78793  |
| 21127 | P03410 | Q32MH5 | 0.92601  |
| 21128 | P03410 | Q6ZNE5 | 0.64088  |

|       |        |        |          |
|-------|--------|--------|----------|
| 21129 | P03410 | Q9Y2D4 | 0.17046  |
| 21130 | P03410 | P33176 | 0.24123  |
| 21131 | P03410 | Q9NVD7 | 0.52314  |
| 21132 | P03410 | O60543 | 0.49618  |
| 21133 | P03410 | Q9H5Y0 | 1.1435   |
| 21134 | P03410 | Q5RHP9 | 0.91384  |
| 21135 | P03410 | Q8WVF5 | 0.32577  |
| 21136 | P03410 | Q9NYZ1 | 1.3876   |
| 21137 | P03410 | Q12816 | 0.40169  |
| 21138 | P03410 | Q8NAE3 | 1.2155   |
| 21139 | P03410 | Q8WV74 | 0.056785 |
| 21140 | P03410 | Q7RTU5 | 0.27116  |
| 21141 | P03410 | P08047 | 0.82621  |
| 21142 | P03410 | Q8WXQ3 | 1.9485   |
| 21143 | P03410 | P60606 | 0.96395  |
| 21144 | P03410 | Q06587 | 0.48708  |
| 21145 | P03410 | Q8NFR7 | 1.3798   |
| 21146 | P03410 | Q96LP2 | 0.28516  |
| 21147 | P03410 | P49005 | 0.63795  |
| 21148 | P03410 | P27694 | 0.65028  |
| 21149 | P03410 | Q96G79 | 0.68062  |
| 21150 | P03410 | P62888 | 0.96158  |
| 21151 | P03410 | A8MQ11 | 0.45008  |
| 21152 | P03410 | P46695 | 0.15327  |
| 21153 | P03410 | P50548 | 0.30273  |
| 21154 | P03410 | Q9H9C1 | 0.54371  |
| 21155 | P03410 | Q9Y3Y4 | 0.71683  |
| 21156 | P03410 | A6NML5 | 1.0913   |
| 21157 | P03410 | Q8TB45 | 0.32299  |
| 21158 | P03410 | P13533 | 0.19684  |
| 21159 | P03410 | P0C7H8 | 0.67361  |
| 21160 | P03410 | Q96AQ1 | 1.4946   |
| 21161 | P03410 | P00403 | 0.65997  |
| 21162 | P03410 | O00115 | 0.59008  |
| 21163 | P03410 | O60506 | 0.449    |
| 21164 | P03410 | Q96FC9 | 0.26974  |
| 21165 | P03410 | Q9P255 | 0.88814  |
| 21166 | P03410 | Q8IXB3 | 0.89437  |
| 21167 | P03410 | Q8IUC0 | 0.94971  |
| 21168 | P03410 | Q5PR19 | 0.44794  |
| 21169 | P03410 | P07864 | 0.69158  |
| 21170 | P03410 | Q6ICC9 | 0.73265  |
| 21171 | P03410 | A6NLF2 | 0.63451  |
| 21172 | P03410 | Q13487 | 1.7977   |
| 21173 | P03410 | Q8IY81 | 0.93229  |
| 21174 | P03410 | Q12872 | 0.98479  |
| 21175 | P03410 | Q9H900 | 0.73867  |
| 21176 | P03410 | P61254 | 1.3028   |
| 21177 | P03410 | Q15011 | 0.98164  |
| 21178 | P03410 | Q09161 | 0.87583  |
| 21179 | P03410 | O60248 | 0.51398  |
| 21180 | P03410 | Q9BRP4 | 0.88248  |
| 21181 | P03410 | O15446 | 0.68467  |
| 21182 | P03410 | Q9NXB0 | 1.5026   |
| 21183 | P03410 | Q8IXR5 | 0.74018  |
| 21184 | P03410 | Q6UYE1 | 1.3002   |
| 21185 | P03410 | Q6ZSJ8 | 1.4883   |
| 21186 | P03410 | Q6L8H1 | 1.6653   |
| 21187 | P03410 | Q9H2W6 | 0.75616  |
| 21188 | P03410 | Q8N769 | 0.44013  |
| 21189 | P03410 | Q96QA5 | 0.64006  |
| 21190 | P03410 | P55197 | 1.0828   |
| 21191 | P03410 | P17039 | 0.66065  |
| 21192 | P03410 | Q9BYA6 | 1.6653   |
| 21193 | P03410 | Q14139 | 0.54101  |
| 21194 | P03410 | Q9NZL4 | 0.88134  |
| 21195 | P03410 | Q6NV74 | 1.4883   |
| 21196 | P03410 | Q8NCQ5 | 0.22943  |
| 21197 | P03410 | Q9Y4C2 | 1.163    |
| 21198 | P03410 | C9JBD0 | 0.9567   |
| 21199 | P03410 | O15265 | 1.2567   |
| 21200 | P03410 | Q92597 | 0.74977  |
| 21201 | P03410 | Q01082 | 0.62286  |
| 21202 | P03410 | P10109 | 0.20345  |
| 21203 | P03410 | Q96JZ2 | 0.50436  |
| 21204 | P03410 | P23760 | 0.75322  |

|       |        |        |         |
|-------|--------|--------|---------|
| 21205 | P03410 | Q9Y266 | 1.4353  |
| 21206 | P03410 | Q9Y657 | 0.42034 |
| 21207 | P03410 | O43711 | 0.30188 |
| 21208 | P03410 | O60291 | 0.22805 |
| 21209 | P03410 | Q99856 | 0.6678  |
| 21210 | P03410 | Q9UBD0 | 1.0049  |
| 21211 | P03410 | O14653 | 0.42157 |
| 21212 | P03410 | Q9NV70 | 0.65981 |
| 21213 | P03410 | Q9BYP8 | 1.6653  |
| 21214 | P03410 | Q9H0N5 | 1.1621  |
| 21215 | P03410 | Q9NUR3 | 0.68021 |
| 21216 | P03410 | Q8N0Z2 | 0.52405 |
| 21217 | P03410 | Q8IZ40 | 0.57022 |
| 21218 | P03410 | Q00653 | 1.1876  |
| 21219 | P03410 | Q96T59 | 1.1653  |
| 21220 | P03410 | O95873 | 1.4883  |
| 21221 | P03410 | Q8IWB4 | 1.0269  |
| 21222 | P03410 | Q8NCX0 | 0.7996  |
| 21223 | P03410 | P46778 | 0.8783  |
| 21224 | P03410 | Q9H7D7 | 0.49184 |
| 21225 | P03410 | Q86U28 | 0.32184 |
| 21226 | P03410 | P21980 | 0.30891 |
| 21227 | P03410 | Q9BRQ6 | 1.983   |
| 21228 | P03410 | Q9BV86 | 0.38162 |
| 21229 | P03410 | Q9UPX8 | 0.49909 |
| 21230 | P03410 | Q8NC56 | 0.70891 |
| 21231 | P03410 | Q6ZRV3 | 1.6653  |
| 21232 | P03410 | P43360 | 0.54253 |
| 21233 | P03410 | Q9BVM4 | 0.94487 |
| 21234 | P03410 | A6NKH3 | 0.77445 |
| 21235 | P03410 | Q13617 | 0.84038 |
| 21236 | P03410 | Q92600 | 1.2562  |
| 21237 | P03410 | P52758 | 0.51748 |
| 21238 | P03410 | Q3YBM2 | 1.7019  |
| 21239 | P03410 | P51816 | 0.73113 |
| 21240 | P03410 | P28072 | 0.80329 |
| 21241 | P03410 | Q9UBW7 | 1.2096  |
| 21242 | P03410 | Q6ZVW7 | 0.16595 |
| 21243 | P03410 | A6NGB7 | 1.0913  |
| 21244 | P03410 | O43676 | 0.99844 |
| 21245 | P03410 | Q8IWX6 | 0.26968 |
| 21246 | P03410 | O14949 | 0.1488  |
| 21247 | P03410 | O95229 | 0.90999 |
| 21248 | P03410 | P54278 | 0.46795 |
| 21249 | P03410 | Q86XW9 | 0.29877 |
| 21250 | P03410 | O43148 | 1.1329  |
| 21251 | P03410 | O15144 | 0.61163 |
| 21252 | P03410 | Q96RE7 | 0.9667  |
| 21253 | P03410 | Q99417 | 1.4681  |
| 21254 | P03410 | Q14247 | 0.43105 |
| 21255 | P03410 | Q68DL7 | 1.6653  |
| 21256 | P03410 | Q8N0Z6 | 0.45627 |
| 21257 | P03410 | Q8N3Y1 | 0.5744  |
| 21258 | P03410 | Q9UJU3 | 0.64079 |
| 21259 | P03410 | Q9P2M7 | 0.82126 |
| 21260 | P03410 | Q8NFW8 | 0.58469 |
| 21261 | P03410 | Q92567 | 0.90839 |
| 21262 | P03410 | Q9BVK8 | 0.94893 |
| 21263 | P03410 | A6NM45 | 0.64164 |
| 21264 | P03410 | A6NMD2 | 0.31483 |
| 21265 | P03410 | Q5H9T9 | 1.271   |
| 21266 | P03410 | P83111 | 0.29437 |
| 21267 | P03410 | O43687 | 0.93665 |
| 21268 | P03410 | P62945 | 1.6653  |
| 21269 | P03410 | Q8ND07 | 1.3719  |
| 21270 | P03410 | Q658T7 | 0.36301 |
| 21271 | P03410 | A6NJJ6 | 1.4883  |
| 21272 | P03410 | Q9UFW8 | 0.37602 |
| 21273 | P03410 | Q86YD1 | 0.97874 |
| 21274 | P03410 | A8MVS5 | 0.65173 |
| 21275 | P03410 | Q96A72 | 0.13493 |
| 21276 | P03410 | O95900 | 1.3035  |
| 21277 | P03410 | Q494X3 | 0.96545 |
| 21278 | P03410 | Q9H081 | 0.86498 |
| 21279 | P03410 | Q9UI32 | 0.47324 |
| 21280 | P03410 | Q86Y46 | 0.71041 |

|       |        |        |           |
|-------|--------|--------|-----------|
| 21281 | P03410 | Q460N5 | 0.31993   |
| 21282 | P03410 | P0C864 | 0.12692   |
| 21283 | P03410 | Q9BRD0 | 1.0435    |
| 21284 | P03410 | Q8IVY1 | 1.0992    |
| 21285 | P03410 | Q5MJ70 | 1.0907    |
| 21286 | P03410 | P56277 | 1.6853    |
| 21287 | P03410 | P05387 | 0.8783    |
| 21288 | P03410 | Q969R8 | 0.12624   |
| 21289 | P03410 | Q8TBC5 | 0.28882   |
| 21290 | P03410 | Q6Q795 | 1.6653    |
| 21291 | P03410 | Q8N7J2 | 1.5275    |
| 21292 | P03410 | O95336 | 0.28487   |
| 21293 | P03410 | Q6NZ67 | 1.2292    |
| 21294 | P03410 | O75352 | 1.0724    |
| 21295 | P03410 | Q9P2M1 | 0.83836   |
| 21296 | P03410 | P07814 | 0.83607   |
| 21297 | P03410 | Q711Q0 | 1.6653    |
| 21298 | P03410 | A6NK75 | 0.85017   |
| 21299 | P03410 | Q9Y3R4 | 0.42833   |
| 21300 | P03410 | Q8N9K5 | 0.86892   |
| 21301 | P03410 | Q9NYF8 | 1.1182    |
| 21302 | P03410 | Q8NET4 | 1.227     |
| 21303 | P03410 | Q1RMZ1 | 0.93126   |
| 21304 | P03410 | Q86UL8 | 0.4506    |
| 21305 | P03410 | Q7RTP0 | 1.0547    |
| 21306 | P03410 | O95201 | 0.73326   |
| 21307 | P03410 | P61960 | 0.78174   |
| 21308 | P03410 | A6NP11 | 1.0344    |
| 21309 | P03410 | Q16656 | 0.67506   |
| 21310 | P03410 | Q9BTM9 | 1.2893    |
| 21311 | P03410 | Q9Y324 | 1.3729    |
| 21312 | P03410 | Q8TF05 | 0.40888   |
| 21313 | P03410 | Q9NPD3 | 0.22942   |
| 21314 | P03410 | Q14676 | 0.81198   |
| 21315 | P03410 | Q9NVU0 | 0.83257   |
| 21316 | P03410 | Q8NDM7 | 0.79245   |
| 21317 | P03410 | Q9P267 | 0.45826   |
| 21318 | P03410 | P13051 | 1.9284    |
| 21319 | P03410 | Q9H7S9 | 0.74778   |
| 21320 | P03410 | A8MTY0 | 0.97478   |
| 21321 | P03410 | Q9BSC4 | 0.36709   |
| 21322 | P03410 | Q8TE76 | 0.45876   |
| 21323 | P03410 | Q8IXY8 | 0.20053   |
| 21324 | P03410 | Q6UXB3 | 0.52515   |
| 21325 | P03410 | Q8TF20 | 0.77805   |
| 21326 | P03410 | Q6ZVK1 | 1.0913    |
| 21327 | P03410 | Q9NUG4 | 0.4182    |
| 21328 | P03410 | Q86TN4 | 0.49663   |
| 21329 | P03410 | Q96NR2 | 0.39437   |
| 21330 | P03410 | Q96F83 | 0.7879    |
| 21331 | P03410 | Q96F07 | 0.75565   |
| 21332 | P03410 | Q6ZQT0 | 0.23161   |
| 21333 | P03410 | A1A519 | 1.4661    |
| 21334 | P03410 | Q9UJP4 | 0.32401   |
| 21335 | P03410 | Q9NX46 | 0.47221   |
| 21336 | P03410 | Q9HAV7 | 1.0396    |
| 21337 | P03410 | Q9H0H9 | 0.0041282 |
| 21338 | P03410 | P49753 | 0.22306   |
| 21339 | P03410 | Q5VWK0 | 0.21953   |
| 21340 | P03410 | P48200 | 0.56181   |
| 21341 | P03410 | Q86VR2 | 1.0011    |
| 21342 | P03410 | Q00987 | 0.21283   |
| 21343 | P03410 | Q6ZP65 | 0.36828   |
| 21344 | P03410 | Q6UXU6 | 1.6737    |
| 21345 | P03410 | P35326 | 1.5188    |
| 21346 | P03410 | Q8IZL8 | 1.7147    |
| 21347 | P03410 | P60604 | 0.53543   |
| 21348 | P03410 | Q5JXM2 | 0.85152   |
| 21349 | P03410 | Q8N1D0 | 0.21055   |
| 21350 | P03410 | O00631 | 1.3016    |
| 21351 | P03410 | Q13601 | 0.5704    |
| 21352 | P03410 | Q9NX65 | 0.71271   |
| 21353 | P03410 | Q96FF9 | 1.2108    |
| 21354 | P03410 | P42766 | 1.0003    |
| 21355 | P03410 | Q5U623 | 0.97082   |
| 21356 | P03410 | Q0VF49 | 1.6653    |

|       |        |        |          |
|-------|--------|--------|----------|
| 21357 | P03410 | Q16384 | 0.86512  |
| 21358 | P03410 | Q6KB66 | 0.71041  |
| 21359 | P03410 | Q8TCE9 | 0.18375  |
| 21360 | P03410 | O15442 | 0.18927  |
| 21361 | P03410 | Q969F9 | 1.8526   |
| 21362 | P03410 | Q9NQZ8 | 0.80606  |
| 21363 | P03410 | P56589 | 0.13583  |
| 21364 | P03410 | P14854 | 0.18174  |
| 21365 | P03410 | A6NCJ1 | 0.41375  |
| 21366 | P03410 | Q5BN46 | 0.36308  |
| 21367 | P03410 | P35241 | 0.3332   |
| 21368 | P03410 | Q9UJW3 | 0.63494  |
| 21369 | P03410 | Q9H7U1 | 1.7701   |
| 21370 | P03410 | P30414 | 0.20053  |
| 21371 | P03410 | Q01469 | 0.39138  |
| 21372 | P03410 | Q02952 | 1.3031   |
| 21373 | P03410 | Q53GL0 | 0.12933  |
| 21374 | P03410 | Q13228 | 1.4192   |
| 21375 | P03410 | P0C5K6 | 1.6653   |
| 21376 | P03410 | P15927 | 0.61985  |
| 21377 | P03410 | O14512 | 0.38468  |
| 21378 | P03410 | Q9H2K2 | 0.3463   |
| 21379 | P03410 | Q6ZN68 | 0.68951  |
| 21380 | P03410 | O15453 | 0.94419  |
| 21381 | P03410 | Q569K6 | 0.36566  |
| 21382 | P03410 | Q68CP9 | 0.50782  |
| 21383 | P03410 | Q13404 | 1.1325   |
| 21384 | P03410 | O75626 | 0.20023  |
| 21385 | P03410 | Q5TID7 | 0.97355  |
| 21386 | P03410 | Q96DF8 | 1.3349   |
| 21387 | P03410 | Q9Y5L5 | 1.8762   |
| 21388 | P03410 | Q9Y2X0 | 0.55052  |
| 21389 | P03410 | Q96DX8 | 0.232    |
| 21390 | P03410 | Q96EY5 | 1.1774   |
| 21391 | P03410 | O95561 | 1.2516   |
| 21392 | P03410 | O75340 | 0.56035  |
| 21393 | P03410 | P49918 | 0.76772  |
| 21394 | P03410 | Q14CX5 | 1.0913   |
| 21395 | P03410 | Q8TF32 | 1.0344   |
| 21396 | P03410 | O76095 | 0.75424  |
| 21397 | P03410 | Q5VZK9 | 0.23712  |
| 21398 | P03410 | Q86UD4 | 0.69928  |
| 21399 | P03410 | Q5THK1 | 0.13223  |
| 21400 | P03410 | Q14691 | 0.62528  |
| 21401 | P03410 | P0CAT3 | 0.23586  |
| 21402 | P03410 | Q96Q35 | 0.93904  |
| 21403 | P03410 | P12524 | 0.31642  |
| 21404 | P03410 | Q6J272 | 1.5909   |
| 21405 | P03410 | Q63HK3 | 0.74461  |
| 21406 | P03410 | Q06416 | 0.30793  |
| 21407 | P03410 | Q9BZQ8 | 1.3954   |
| 21408 | P03410 | O75475 | 1.3973   |
| 21409 | P03410 | A7E2V4 | 1.819    |
| 21410 | P03410 | Q06787 | 1.0983   |
| 21411 | P03410 | Q9H3K2 | 0.22079  |
| 21412 | P03410 | Q1A5X7 | 0.051403 |
| 21413 | P03410 | Q9ULJ1 | 0.27892  |
| 21414 | P03410 | P40925 | 0.62227  |
| 21415 | P03410 | Q15937 | 0.73882  |
| 21416 | P03410 | Q92629 | 0.35364  |
| 21417 | P03410 | Q8NI32 | 0.58108  |
| 21418 | P03410 | O75478 | 0.38587  |
| 21419 | P03410 | Q96AQ2 | 1.0913   |
| 21420 | P03410 | P58004 | 0.76115  |
| 21421 | P03410 | Q96BK5 | 0.63858  |
| 21422 | P03410 | Q6P9A3 | 0.75755  |
| 21423 | P03410 | O95478 | 0.93819  |
| 21424 | P03410 | Q8WW35 | 0.6999   |
| 21425 | P03410 | Q5T200 | 1.1558   |
| 21426 | P03410 | O43829 | 0.72248  |
| 21427 | P03410 | A8MYP8 | 0.97182  |
| 21428 | P03410 | Q9C099 | 1.2136   |
| 21429 | P03410 | P17152 | 1.0823   |
| 21430 | P03410 | P78347 | 0.42625  |
| 21431 | P03410 | Q5VXU3 | 0.69813  |
| 21432 | P03410 | O43463 | 0.93544  |

|       |        |        |          |
|-------|--------|--------|----------|
| 21433 | P03410 | Q6ZRP5 | 1.6653   |
| 21434 | P03410 | Q6ZN17 | 1.1352   |
| 21435 | P03410 | Q9NX94 | 0.8599   |
| 21436 | P03410 | Q99807 | 0.28322  |
| 21437 | P03410 | Q15035 | 0.44735  |
| 21438 | P03410 | Q53SZ7 | 1.4883   |
| 21439 | P03410 | Q9HB19 | 0.84948  |
| 21440 | P03410 | O00410 | 1.4472   |
| 21441 | P03410 | Q9NQC8 | 0.183    |
| 21442 | P03410 | Q14194 | 0.56899  |
| 21443 | P03410 | Q9Y3A2 | 0.98848  |
| 21444 | P03410 | O75223 | 0.38657  |
| 21445 | P03410 | Q15070 | 0.61182  |
| 21446 | P03410 | Q96FA7 | 1.8195   |
| 21447 | P03410 | O96001 | 1.4734   |
| 21448 | P03410 | Q6NVU6 | 0.4286   |
| 21449 | P03410 | Q6P2Q9 | 0.61333  |
| 21450 | P03410 | Q9NV31 | 1.1431   |
| 21451 | P03410 | Q8WU03 | 0.92954  |
| 21452 | P03410 | Q9NVA1 | 0.75083  |
| 21453 | P03410 | Q96RY5 | 1.2213   |
| 21454 | P03410 | P60006 | 1.5796   |
| 21455 | P03410 | Q9Y4A0 | 0.098279 |
| 21456 | P03410 | Q6ZQN3 | 1.7727   |
| 21457 | P03410 | Q9H8H0 | 0.36709  |
| 21458 | P03410 | O14744 | 0.90413  |
| 21459 | P03410 | P80294 | 0.83308  |
| 21460 | P03410 | P0C7X0 | 0.18282  |
| 21461 | P03410 | Q9H4B6 | 0.71023  |
| 21462 | P03410 | Q66LE6 | 0.61554  |
| 21463 | P03410 | Q8N9K3 | 1.4883   |
| 21464 | P03410 | Q63HK5 | 0.28089  |
| 21465 | P03410 | Q8N8H1 | 0.89197  |
| 21466 | P03410 | Q9HAY2 | 0.2347   |
| 21467 | P03410 | O75123 | 0.75546  |
| 21468 | P03410 | O95073 | 1.1794   |
| 21469 | P03410 | Q8N8J6 | 0.51034  |
| 21470 | P03410 | Q7RTT4 | 0.35308  |
| 21471 | P03410 | P59780 | 0.40393  |
| 21472 | P03410 | Q9P021 | 0.5078   |
| 21473 | P03410 | Q6P087 | 0.3973   |
| 21474 | P03410 | Q9BZR8 | 0.7226   |
| 21475 | P03410 | Q86TA4 | 0.56865  |
| 21476 | P03410 | P26641 | 0.7105   |
| 21477 | P03410 | A6NL46 | 1.1861   |
| 21478 | P03410 | A6NIE6 | 0.92581  |
| 21479 | P03410 | Q8N693 | 0.33306  |
| 21480 | P03410 | Q8NE31 | 0.2998   |
| 21481 | P03410 | Q92805 | 0.25235  |
| 21482 | P03410 | Q3ZCT1 | 0.76363  |
| 21483 | P03410 | P35250 | 0.17332  |
| 21484 | P03410 | Q8N782 | 0.99836  |
| 21485 | P03410 | A6NLX3 | 0.63366  |
| 21486 | P03410 | A4D0T7 | 0.98472  |
| 21487 | P03410 | Q96L11 | 0.76686  |
| 21488 | P03410 | Q93074 | 0.53794  |
| 21489 | P03410 | Q9NX18 | 1.1608   |
| 21490 | P03410 | O15116 | 0.88983  |
| 21491 | P03410 | Q99622 | 0.4581   |
| 21492 | P03410 | Q8N5M1 | 0.8072   |
| 21493 | P03410 | Q9UI26 | 0.61101  |
| 21494 | P03410 | P0DJG4 | 1.3184   |
| 21495 | P03410 | Q9NRM1 | 0.95531  |
| 21496 | P03410 | Q96DM1 | 1.3674   |
| 21497 | P03410 | Q5TCZ1 | 0.47368  |
| 21498 | P03410 | P83436 | 0.89552  |
| 21499 | P03410 | P59990 | 1.9984   |
| 21500 | P03410 | Q8IXW5 | 0.96701  |
| 21501 | P03410 | Q9NUD5 | 0.18656  |
| 21502 | P03410 | Q9H0K6 | 0.33286  |
| 21503 | P03410 | Q96LW9 | 0.65456  |
| 21504 | P03410 | O43745 | 1.0121   |
| 21505 | P03410 | P32189 | 0.7713   |
| 21506 | P03410 | H3BN30 | 1.6653   |
| 21507 | P03410 | Q9BQ70 | 1.1754   |
| 21508 | P03410 | Q6ZQV5 | 0.79465  |



|       |        |        |         |
|-------|--------|--------|---------|
| 21509 | P03410 | Q86VI1 | 0.39523 |
| 21510 | P03410 | Q9BXS4 | 0.50277 |
| 21511 | P03410 | A6NDE8 | 0.508   |
| 21512 | P03410 | P09001 | 1.3893  |
| 21513 | P03410 | Q96CW5 | 1.296   |
| 21514 | P03410 | Q8TF47 | 0.99815 |
| 21515 | P03410 | P18754 | 1.2863  |
| 21516 | P03410 | Q9ULV5 | 0.3744  |
| 21517 | P03410 | A6NC05 | 0.21289 |
| 21518 | P03410 | O00422 | 1.1693  |
| 21519 | P03410 | Q9NWB6 | 1.4883  |
| 21520 | P03410 | Q96DZ1 | 0.55354 |
| 21521 | P03410 | P03901 | 0.70239 |
| 21522 | P03410 | Q9NSB2 | 0.82869 |
| 21523 | P03410 | Q6P575 | 0.59546 |
| 21524 | P03410 | Q5TBB1 | 1.6907  |
| 21525 | P03410 | Q5TAQ9 | 0.51567 |
| 21526 | P03410 | Q6P4D5 | 1.5181  |
| 21527 | P03410 | P84103 | 0.70018 |
| 21528 | P03410 | Q5UIP0 | 1.5908  |
| 21529 | P03410 | Q96M34 | 0.39672 |
| 21530 | P03410 | Q5FWE3 | 1.0913  |
| 21531 | P03410 | P15407 | 0.64859 |
| 21532 | P03410 | Q12901 | 0.92885 |
| 21533 | P03410 | Q629K1 | 0.94906 |
| 21534 | P03410 | Q9NRC8 | 1.1236  |
| 21535 | P03410 | P39019 | 1.1277  |
| 21536 | P03410 | E9PGG2 | 0.2823  |
| 21537 | P03410 | Q9H8V3 | 0.29546 |
| 21538 | P03410 | P62312 | 0.89016 |
| 21539 | P03410 | P47914 | 1.9853  |
| 21540 | P03410 | Q9UH92 | 0.62927 |
| 21541 | P03410 | Q8NE00 | 1.0935  |
| 21542 | P03410 | O43791 | 0.69603 |
| 21543 | P03410 | O00151 | 0.3918  |
| 21544 | P03410 | Q5TA76 | 1.6653  |
| 21545 | P03410 | Q14584 | 0.75519 |
| 21546 | P03410 | Q8WVE6 | 1.1767  |
| 21547 | P03410 | Q14146 | 1.6653  |
| 21548 | P03410 | Q8N141 | 1.0409  |
| 21549 | P03410 | Q9Y4A8 | 0.51127 |
| 21550 | P03410 | Q8WU20 | 0.4284  |
| 21551 | P03410 | Q9BYR3 | 1.9984  |
| 21552 | P03410 | Q6ZR54 | 1.6653  |
| 21553 | P03410 | Q9UQF2 | 0.55679 |
| 21554 | P03410 | Q6P3W6 | 1.1275  |
| 21555 | P03410 | P01009 | 0.28671 |
| 21556 | P03410 | Q8N300 | 0.77005 |
| 21557 | P03410 | Q13123 | 1.6965  |
| 21558 | P03410 | P86478 | 1.6653  |
| 21559 | P03410 | Q9NP87 | 0.33026 |
| 21560 | P03410 | Q9Y2B0 | 0.3524  |
| 21561 | P03410 | Q969H6 | 1.0882  |
| 21562 | P03410 | O00257 | 0.88522 |
| 21563 | P03410 | Q86XA9 | 0.62062 |
| 21564 | P03410 | Q13105 | 0.73269 |
| 21565 | P03410 | A1E959 | 0.87201 |
| 21566 | P03410 | Q9UQ84 | 0.25766 |
| 21567 | P03410 | Q5VIR6 | 1.2921  |
| 21568 | P03410 | Q96C03 | 1.0938  |
| 21569 | P03410 | P81277 | 0.59391 |
| 21570 | P03410 | Q49AA0 | 0.97448 |
| 21571 | P03410 | Q9C0H9 | 0.42525 |
| 21572 | P03410 | Q6PGN9 | 1.4207  |
| 21573 | P03410 | Q8IUI4 | 0.60145 |
| 21574 | P03410 | Q9XRX5 | 0.81587 |
| 21575 | P03410 | A5YKK6 | 1.3262  |
| 21576 | P03410 | Q6NT46 | 0.508   |
| 21577 | P03410 | Q6ZN57 | 0.69998 |
| 21578 | P03410 | Q03701 | 0.45445 |
| 21579 | P03410 | A6NKF1 | 1.2626  |
| 21580 | P03410 | Q9H4W6 | 0.18756 |
| 21581 | P03410 | Q5HYW2 | 1.462   |
| 21582 | P03410 | Q9UL01 | 0.74631 |
| 21583 | P03410 | Q9P270 | 0.82137 |
| 21584 | P03410 | P08729 | 1.7329  |

|       |        |        |           |
|-------|--------|--------|-----------|
| 21585 | P03410 | C9J069 | 0.13512   |
| 21586 | P03410 | Q9C0B1 | 0.31837   |
| 21587 | P03410 | Q99871 | 0.80444   |
| 21588 | P03410 | Q96BD8 | 0.84645   |
| 21589 | P03410 | A6NFQ2 | 1.3107    |
| 21590 | P03410 | Q8NAQ8 | 2.127     |
| 21591 | P03410 | Q9P0J0 | 0.59436   |
| 21592 | P03410 | Q9P0I2 | 0.71965   |
| 21593 | P03410 | Q8TD26 | 0.17285   |
| 21594 | P03410 | O43731 | 0.64272   |
| 21595 | P03410 | P56750 | 0.53505   |
| 21596 | P03410 | P0C7W8 | 0.55466   |
| 21597 | P03410 | Q86U44 | 0.24115   |
| 21598 | P03410 | O75691 | 0.96133   |
| 21599 | P03410 | Q6UXP8 | 1.6653    |
| 21600 | P03410 | Q96A09 | 0.9649    |
| 21601 | P03410 | P14316 | 0.84711   |
| 21602 | P03410 | P82933 | 1.2812    |
| 21603 | P03410 | Q96BD5 | 0.55398   |
| 21604 | P03410 | Q6NZ36 | 0.30005   |
| 21605 | P03410 | Q8N815 | 0.10204   |
| 21606 | P03410 | Q5T0Z8 | 1.4883    |
| 21607 | P03410 | Q6ZN28 | 0.91467   |
| 21608 | P03410 | O75360 | 0.55727   |
| 21609 | P03410 | Q9BZ67 | 0.10086   |
| 21610 | P03410 | Q8TDR0 | 1.8222    |
| 21611 | P03410 | O95257 | 0.6831    |
| 21612 | P03410 | A2RU37 | 0.63128   |
| 21613 | P03410 | Q8TD23 | 1.0889    |
| 21614 | P03410 | A8MSY0 | 0.40711   |
| 21615 | P03410 | Q9Y2M0 | 0.88069   |
| 21616 | P03410 | Q9NP81 | 0.88682   |
| 21617 | P03410 | Q01518 | 0.18792   |
| 21618 | P03410 | P20810 | 1.2323    |
| 21619 | P03410 | Q7Z4Q2 | 1.4154    |
| 21620 | P03410 | Q5SQI0 | 0.4805    |
| 21621 | P03410 | Q13326 | 0.49183   |
| 21622 | P03410 | Q9UKL0 | 1.3185    |
| 21623 | P03410 | Q9UQR0 | 0.20579   |
| 21624 | P03410 | Q96PQ5 | 0.42821   |
| 21625 | P03410 | Q15929 | 0.88      |
| 21626 | P03410 | Q32M88 | 0.17864   |
| 21627 | P03410 | P43358 | 0.54253   |
| 21628 | P03410 | P17041 | 0.70233   |
| 21629 | P03410 | Q14209 | 0.99932   |
| 21630 | P03410 | Q502X0 | 0.0039504 |
| 21631 | P03410 | A1L4Q6 | 0.55701   |
| 21632 | P03410 | Q96LZ2 | 0.096866  |
| 21633 | P03410 | Q9Y693 | 0.93757   |
| 21634 | P03410 | P23528 | 0.7389    |
| 21635 | P03410 | Q16630 | 0.37673   |
| 21636 | P03410 | Q5JUQ0 | 0.65688   |
| 21637 | P03410 | Q15283 | 0.22406   |
| 21638 | P03410 | Q9BQ65 | 0.77493   |
| 21639 | P03410 | O75564 | 0.61042   |
| 21640 | P03410 | Q9Y6K9 | 1.076     |
| 21641 | P03410 | Q9GZV4 | 0.81614   |
| 21642 | P03410 | P03923 | 0.78406   |
| 21643 | P03410 | Q86U42 | 0.78283   |
| 21644 | P03410 | Q5GJ75 | 0.066391  |
| 21645 | P03410 | Q9NP84 | 0.63042   |
| 21646 | P03410 | O75618 | 1.0922    |
| 21647 | P03410 | Q6STE5 | 0.6343    |
| 21648 | P03410 | Q9NZI7 | 0.20287   |
| 21649 | P03410 | Q6ZS52 | 1.6653    |
| 21650 | P03410 | Q5VZR2 | 1.8193    |
| 21651 | P03410 | P27105 | 0.13933   |
| 21652 | P03410 | Q9Y5N6 | 0.87326   |
| 21653 | P03410 | Q6GMR7 | 1.0665    |
| 21654 | P03410 | Q96SY0 | 0.21003   |
| 21655 | P03410 | A6NK44 | 0.20498   |
| 21656 | P03410 | Q2VPB7 | 0.98862   |
| 21657 | P03410 | O95153 | 0.87956   |
| 21658 | P03410 | Q9H0W8 | 1.1169    |
| 21659 | P03410 | B1ANH7 | 0.17542   |
| 21660 | P03410 | P40429 | 1.0721    |

|       |        |        |           |
|-------|--------|--------|-----------|
| 21661 | P03410 | Q04637 | 0.66515   |
| 21662 | P03410 | Q9NXG0 | 0.39593   |
| 21663 | P03410 | P55808 | 1.7008    |
| 21664 | P03410 | Q14781 | 0.77625   |
| 21665 | P03410 | Q96P71 | 0.69139   |
| 21666 | P03410 | Q9P032 | 0.86652   |
| 21667 | P03410 | O75529 | 0.57431   |
| 21668 | P03410 | Q9NW38 | 0.83761   |
| 21669 | P03410 | P40222 | 1.0179    |
| 21670 | P03410 | O60516 | 0.55938   |
| 21671 | P03410 | Q8IU99 | 1.0913    |
| 21672 | P03410 | Q6ZVE7 | 0.89307   |
| 21673 | P03410 | Q76N32 | 0.48513   |
| 21674 | P03410 | Q538Z0 | 1.6653    |
| 21675 | P03410 | Q9NX40 | 0.82766   |
| 21676 | P03410 | Q8N3Z6 | 0.38493   |
| 21677 | P03410 | Q5MNV8 | 0.75573   |
| 21678 | P03410 | Q6PEW1 | 0.21526   |
| 21679 | P03410 | O14524 | 1.244     |
| 21680 | P03410 | Q86X51 | 0.79802   |
| 21681 | P03410 | P25963 | 0.89229   |
| 21682 | P03410 | Q8N183 | 0.26191   |
| 21683 | P03410 | Q9Y2T7 | 0.27326   |
| 21684 | P03410 | P57740 | 0.93836   |
| 21685 | P03410 | Q96KW2 | 1.1151    |
| 21686 | P03410 | Q8NEG7 | 0.71266   |
| 21687 | P03410 | Q5T4I8 | 0.0013396 |
| 21688 | P03410 | P55735 | 0.82391   |
| 21689 | P03410 | P54253 | 0.89544   |
| 21690 | P03410 | O14618 | 0.41982   |
| 21691 | P03410 | Q8NEQ6 | 0.78305   |
| 21692 | P03410 | Q16891 | 0.38563   |
| 21693 | P03410 | P0C7V9 | 1.414     |
| 21694 | P03410 | Q96HW7 | 0.87298   |
| 21695 | P03410 | Q9HD15 | 0.66288   |
| 21696 | P03410 | Q9BV90 | 0.27196   |
| 21697 | P03410 | Q13424 | 0.71534   |
| 21698 | P03410 | O15370 | 0.44962   |
| 21699 | P03410 | P17707 | 0.20676   |
| 21700 | P03410 | Q15744 | 0.30596   |
| 21701 | P03410 | Q8WW22 | 0.70309   |
| 21702 | P03410 | Q5JTV8 | 0.61541   |
| 21703 | P03410 | Q15361 | 0.85921   |
| 21704 | P03410 | P49458 | 1.5729    |
| 21705 | P03410 | Q96MU6 | 0.71894   |
| 21706 | P03410 | Q14582 | 0.3903    |
| 21707 | P03410 | O94993 | 0.25711   |
| 21708 | P03410 | P30305 | 0.55281   |
| 21709 | P03410 | Q9Y3Z3 | 0.25389   |
| 21710 | P03410 | O00423 | 0.86429   |
| 21711 | P03410 | Q14696 | 1.0224    |
| 21712 | P03410 | P60411 | 1.9984    |
| 21713 | P03410 | P16930 | 0.24435   |
| 21714 | P03410 | Q9H944 | 1.1159    |
| 21715 | P03410 | Q9Y618 | 1.0766    |
| 21716 | P03410 | Q96DY2 | 0.41301   |
| 21717 | P03410 | Q0VDD5 | 1.6653    |
| 21718 | P03410 | Q02080 | 0.37765   |
| 21719 | P03410 | A1L190 | 1.688     |
| 21720 | P03410 | Q8NE22 | 1.8629    |
| 21721 | P03410 | Q92985 | 0.51996   |
| 21722 | P03410 | Q8NCE0 | 0.99546   |
| 21723 | P03410 | O60829 | 1.242     |
| 21724 | P03410 | Q96N20 | 0.7133    |
| 21725 | P03410 | Q9H5N1 | 0.9886    |
| 21726 | P03410 | P20265 | 0.6048    |
| 21727 | P03410 | Q6DD87 | 0.65198   |
| 21728 | P03410 | Q8NBZ9 | 1.0294    |
| 21729 | P03410 | O43290 | 0.86474   |
| 21730 | P03410 | O00178 | 0.76998   |
| 21731 | P03410 | O14879 | 0.74746   |
| 21732 | P03410 | A6NKF2 | 0.7397    |
| 21733 | P03410 | Q9NY33 | 0.53229   |
| 21734 | P03410 | O60765 | 0.85876   |
| 21735 | P03410 | O00186 | 0.87753   |
| 21736 | P03410 | Q6ZUJ4 | 1.1003    |

|       |        |        |          |
|-------|--------|--------|----------|
| 21737 | P03410 | Q8TCD1 | 1.2873   |
| 21738 | P03410 | P69892 | 0.81619  |
| 21739 | P03410 | Q96GI7 | 1.4883   |
| 21740 | P03410 | Q8IZ16 | 0.69017  |
| 21741 | P03410 | Q3LI81 | 1.9066   |
| 21742 | P03410 | Q96QR8 | 0.56524  |
| 21743 | P03410 | P39023 | 1.116    |
| 21744 | P03410 | Q16626 | 1.1295   |
| 21745 | P03410 | Q86YE8 | 0.79465  |
| 21746 | P03410 | P55795 | 0.16337  |
| 21747 | P03410 | P53675 | 0.53956  |
| 21748 | P03410 | Q86YL5 | 0.53486  |
| 21749 | P03410 | Q7RTU3 | 0.44898  |
| 21750 | P03410 | Q9H583 | 1.2869   |
| 21751 | P03410 | O14603 | 0.30118  |
| 21752 | P03410 | Q7Z6K1 | 0.98195  |
| 21753 | P03410 | Q6MZM9 | 1.6653   |
| 21754 | P03410 | A8MUL3 | 1.6653   |
| 21755 | P03410 | Q8NHZ7 | 0.8377   |
| 21756 | P03410 | Q8TDB4 | 0.58222  |
| 21757 | P03410 | Q9Y2P8 | 0.78098  |
| 21758 | P03410 | Q96JP2 | 0.23178  |
| 21759 | P03410 | Q14671 | 0.351    |
| 21760 | P03410 | Q13439 | 1.4156   |
| 21761 | P03410 | Q9UJT9 | 0.44726  |
| 21762 | P03410 | P02792 | 0.07098  |
| 21763 | P03410 | O94952 | 0.95306  |
| 21764 | P03410 | Q8NDH2 | 0.18963  |
| 21765 | P03410 | Q8NFK8 | 1.06     |
| 21766 | P03410 | Q9UK58 | 0.42123  |
| 21767 | P03410 | O60264 | 0.26802  |
| 21768 | P03410 | Q8NEF9 | 0.67906  |
| 21769 | P03410 | Q8TEV9 | 1.088    |
| 21770 | P03410 | O15260 | 0.32379  |
| 21771 | P03410 | Q71F78 | 0.9249   |
| 21772 | P03410 | Q9P2D0 | 0.36087  |
| 21773 | P03410 | Q9H320 | 1.5796   |
| 21774 | P03410 | P25788 | 1.0054   |
| 21775 | P03410 | Q12837 | 0.60381  |
| 21776 | P03410 | Q8NDP4 | 0.78104  |
| 21777 | P03410 | Q12981 | 0.3431   |
| 21778 | P03410 | O95721 | 0.55162  |
| 21779 | P03410 | Q9BRR3 | 0.74224  |
| 21780 | P03410 | Q8TA94 | 1.0016   |
| 21781 | P03410 | Q6ZRV2 | 1.661    |
| 21782 | P03410 | Q96L14 | 0.8074   |
| 21783 | P03410 | Q13367 | 0.70912  |
| 21784 | P03410 | Q8WY41 | 0.66394  |
| 21785 | P03410 | Q6ZNK6 | 1.794    |
| 21786 | P03410 | P67870 | 0.17101  |
| 21787 | P03410 | Q9NWR8 | 1.0717   |
| 21788 | P03410 | Q8IY51 | 0.11807  |
| 21789 | P03410 | Q96LR7 | 1.3389   |
| 21790 | P03410 | Q9H6K5 | 1.4883   |
| 21791 | P03410 | Q99935 | 0.84459  |
| 21792 | P03410 | Q96MF6 | 0.90048  |
| 21793 | P03410 | Q9BPX3 | 1.0421   |
| 21794 | P03410 | P11308 | 0.39231  |
| 21795 | P03410 | E2RYF6 | 1.6653   |
| 21796 | P03410 | Q8N398 | 0.90765  |
| 21797 | P03410 | Q14CX7 | 0.71742  |
| 21798 | P03410 | Q96RT7 | 0.72993  |
| 21799 | P03410 | P60410 | 1.9066   |
| 21800 | P03410 | Q96LM5 | 0.084742 |
| 21801 | P03410 | Q5VVS0 | 1.6731   |
| 21802 | P03410 | P0C7V4 | 0.13951  |
| 21803 | P03410 | Q86UU5 | 1.1636   |
| 21804 | P03410 | Q6ZUA9 | 1.0412   |
| 21805 | P03410 | Q9NVX2 | 0.40561  |
| 21806 | P03410 | Q15149 | 0.4003   |
| 21807 | P03410 | Q9NSC2 | 0.27198  |
| 21808 | P03410 | Q96LB3 | 0.81032  |
| 21809 | P03410 | Q9UBB4 | 1.3896   |
| 21810 | P03410 | Q9Y4F5 | 0.3132   |
| 21811 | P03410 | Q86UC2 | 1.0711   |
| 21812 | P03410 | O94983 | 1.303    |

|       |        |        |         |
|-------|--------|--------|---------|
| 21813 | P03410 | Q9BYS1 | 1.2381  |
| 21814 | P03410 | O95433 | 0.72928 |
| 21815 | P03410 | Q9UHY8 | 0.66524 |
| 21816 | P03410 | Q8TAL5 | 1.2666  |
| 21817 | P03410 | Q04760 | 0.17707 |
| 21818 | P03410 | Q8IYF3 | 0.71106 |
| 21819 | P03410 | A2RTX5 | 0.76394 |
| 21820 | P03410 | Q9P2L0 | 0.30029 |
| 21821 | P03410 | Q96NA2 | 1.5713  |
| 21822 | P03410 | Q9BVS5 | 0.53925 |
| 21823 | P03410 | Q4V328 | 1.3304  |
| 21824 | P03410 | Q8N371 | 0.25122 |
| 21825 | P03410 | Q9Y314 | 1.0779  |
| 21826 | P03410 | O43493 | 1.1978  |
| 21827 | P03410 | P13805 | 0.15239 |
| 21828 | P03410 | Q8N9U9 | 0.69112 |
| 21829 | P03410 | Q99543 | 0.41666 |
| 21830 | P03410 | Q5TG53 | 1.6653  |
| 21831 | P03410 | O60831 | 1.5556  |
| 21832 | P03410 | Q6ZUX7 | 0.88488 |
| 21833 | P03410 | A6NFT4 | 0.27556 |
| 21834 | P03410 | Q9NY43 | 0.41478 |
| 21835 | P03410 | Q14507 | 0.9686  |
| 21836 | P03410 | Q9Y664 | 0.72049 |
| 21837 | P03410 | Q6ZTY9 | 0.85402 |
| 21838 | P03410 | Q2NKJ3 | 0.97956 |
| 21839 | P03410 | Q9BR84 | 1.0268  |
| 21840 | P03410 | P35232 | 0.65261 |
| 21841 | P03410 | Q9Y238 | 0.35665 |
| 21842 | P03410 | Q9UID6 | 0.47086 |
| 21843 | P03410 | P0CW23 | 0.9344  |
| 21844 | P03410 | Q2TAL8 | 1.272   |
| 21845 | P03410 | Q9Y6K1 | 0.38475 |
| 21846 | P03410 | Q9Y5N5 | 0.58259 |
| 21847 | P03410 | Q03936 | 0.94346 |
| 21848 | P03410 | O75425 | 0.94999 |
| 21849 | P03410 | O43257 | 0.64738 |
| 21850 | P03410 | Q5VTL8 | 1.4945  |
| 21851 | P03410 | Q13765 | 1.2949  |
| 21852 | P03410 | Q5T319 | 1.6653  |
| 21853 | P03410 | Q86XI2 | 1.2449  |
| 21854 | P03410 | Q96C86 | 0.8795  |
| 21855 | P03410 | O75940 | 0.78274 |
| 21856 | P03410 | A6NMV5 | 0.24589 |
| 21857 | P03410 | A8MYA2 | 0.4308  |
| 21858 | P03410 | O43617 | 0.58984 |
| 21859 | P03410 | P39656 | 0.70553 |
| 21860 | P03410 | Q9BUE0 | 1.2612  |
| 21861 | P03410 | P18146 | 0.80929 |
| 21862 | P03410 | P29692 | 0.59554 |
| 21863 | P03410 | Q96PG8 | 1.6653  |
| 21864 | P03410 | Q9H633 | 0.66183 |
| 21865 | P03410 | A1L443 | 1.8193  |
| 21866 | P03410 | Q49A92 | 0.52662 |
| 21867 | P03410 | Q9NZH4 | 1.0107  |
| 21868 | P03410 | Q7Z2X7 | 1.4365  |
| 21869 | P03410 | Q9H4H8 | 0.72223 |
| 21870 | P03410 | Q96GG9 | 0.54985 |
| 21871 | P03410 | Q9BQD3 | 0.75906 |
| 21872 | P03410 | Q9BX69 | 0.22756 |
| 21873 | P03410 | D6RF30 | 0.2977  |
| 21874 | P03410 | O60477 | 0.76342 |
| 21875 | P03410 | Q9NYB0 | 1.4134  |
| 21876 | P03410 | B9ZVM9 | 1.8172  |
| 21877 | P03410 | Q5SW79 | 1.2857  |
| 21878 | P03410 | Q96K58 | 0.75894 |
| 21879 | P03410 | P53804 | 0.46349 |
| 21880 | P03410 | Q8N5U6 | 0.94049 |
| 21881 | P03410 | Q7L0X2 | 0.75911 |
| 21882 | P03410 | P60660 | 0.46127 |
| 21883 | P03410 | Q8IX15 | 0.44901 |
| 21884 | P03410 | O76021 | 0.7306  |
| 21885 | P03410 | Q5T035 | 1.6329  |
| 21886 | P03410 | Q96SK2 | 0.64038 |
| 21887 | P03410 | P62166 | 0.4072  |
| 21888 | P03410 | Q9NP74 | 0.26546 |

|       |        |        |         |
|-------|--------|--------|---------|
| 21889 | P03410 | Q8N841 | 0.22854 |
| 21890 | P03410 | Q5T6X4 | 1.4742  |
| 21891 | P03410 | Q9H0R3 | 0.95723 |
| 21892 | P03410 | P31150 | 0.17674 |
| 21893 | P03410 | P17021 | 0.64448 |
| 21894 | P03410 | Q6PI77 | 1.0268  |
| 21895 | P03410 | P57076 | 0.60386 |
| 21896 | P03410 | Q6P161 | 0.49843 |
| 21897 | P03410 | Q569H4 | 1.4883  |
| 21898 | P03410 | Q68CZ1 | 0.35557 |
| 21899 | P03410 | P55789 | 0.39153 |
| 21900 | P03410 | Q8WUD4 | 0.377   |
| 21901 | P03410 | O75164 | 0.92822 |
| 21902 | P03410 | Q86W50 | 0.83413 |
| 21903 | P03410 | A8MZA4 | 0.75591 |
| 21904 | P03410 | A6PVC2 | 0.2131  |
| 21905 | P03410 | P15622 | 0.85653 |
| 21906 | P03410 | Q4KMZ1 | 0.56477 |
| 21907 | P03410 | P62633 | 0.3727  |
| 21908 | P03410 | Q86UB9 | 1.4081  |
| 21909 | P03410 | P52744 | 0.75611 |
| 21910 | P03410 | P13647 | 1.1375  |
| 21911 | P03410 | B3KS81 | 0.55147 |
| 21912 | P03410 | P51522 | 0.75477 |
| 21913 | P03410 | Q658L1 | 1.6511  |
| 21914 | P03410 | Q4KN68 | 0.16385 |
| 21915 | P03410 | P17023 | 0.71552 |
| 21916 | P03410 | Q7Z6Z6 | 0.54729 |
| 21917 | P03410 | Q9Y5M6 | 1.6653  |
| 21918 | P03410 | O75820 | 0.66045 |
| 21919 | P03410 | Q12769 | 1.2264  |
| 21920 | P03410 | Q9GZQ3 | 1.5402  |
| 21921 | P03410 | Q8N895 | 0.69209 |
| 21922 | P03410 | Q8WUA4 | 0.30191 |
| 21923 | P03410 | Q01850 | 1.0107  |
| 21924 | P03410 | Q3LI64 | 1.6653  |
| 21925 | P03410 | Q9H5F2 | 0.96209 |
| 21926 | P03410 | Q7Z3C6 | 0.76285 |
| 21927 | P03410 | Q15181 | 0.27282 |
| 21928 | P03410 | Q16740 | 0.84368 |
| 21929 | P03410 | Q9Y262 | 1.0652  |
| 21930 | P03410 | O14645 | 0.3784  |
| 21931 | P03410 | Q5MJ08 | 0.77592 |
| 21932 | P03410 | Q6ZTU2 | 1.4449  |
| 21933 | P03410 | O95613 | 1.1614  |
| 21934 | P03410 | Q5VTD9 | 0.22437 |
| 21935 | P03410 | P0C853 | 1.6653  |
| 21936 | P03410 | Q12824 | 0.94877 |
| 21937 | P03410 | P52292 | 1.2233  |
| 21938 | P03410 | Q9Y2A0 | 1.0503  |
| 21939 | P03410 | Q69YL0 | 1.6653  |
| 21940 | P03410 | Q86W67 | 0.23056 |
| 21941 | P03410 | Q8N6M0 | 0.34317 |
| 21942 | P03410 | Q9ULZ0 | 0.34399 |
| 21943 | P03410 | Q13432 | 0.81604 |
| 21944 | P03410 | P69905 | 0.66878 |
| 21945 | P03410 | Q96LR2 | 1.9365  |
| 21946 | P03410 | Q96E29 | 1.0174  |
| 21947 | P03410 | Q9HAV4 | 1.387   |
| 21948 | P03410 | Q9Y2G5 | 0.62814 |
| 21949 | P03410 | Q8NDZ2 | 1.0289  |
| 21950 | P03410 | P35226 | 0.4944  |
| 21951 | P03410 | O43913 | 0.47503 |
| 21952 | P03410 | P40937 | 0.14937 |
| 21953 | P03410 | Q99426 | 0.33    |
| 21954 | P03410 | Q9C0F1 | 0.6494  |
| 21955 | P03410 | Q9H6X5 | 0.19294 |
| 21956 | P03410 | Q96H20 | 0.95804 |
| 21957 | P03410 | Q96JC4 | 0.86338 |
| 21958 | P03410 | Q9H501 | 1.7408  |
| 21959 | P03410 | Q96MT3 | 0.85946 |
| 21960 | P03410 | Q495Z4 | 1.0172  |
| 21961 | P03410 | P20292 | 0.33119 |
| 21962 | P03410 | Q9H488 | 0.0718  |
| 21963 | P03410 | Q96EI5 | 1.1127  |
| 21964 | P03410 | Q9Y247 | 0.23724 |

|       |        |        |          |
|-------|--------|--------|----------|
| 21965 | P03410 | Q8TBZ8 | 0.76976  |
| 21966 | P03410 | Q8N9A8 | 0.97209  |
| 21967 | P03410 | Q8N7Z2 | 0.75591  |
| 21968 | P03410 | Q8NAV2 | 0.8048   |
| 21969 | P03410 | Q96D05 | 1.5748   |
| 21970 | P03410 | Q95202 | 0.53304  |
| 21971 | P03410 | Q9H019 | 1.3102   |
| 21972 | P03410 | Q96JS3 | 0.49009  |
| 21973 | P03410 | Q9BT81 | 0.31201  |
| 21974 | P03410 | Q14865 | 0.34887  |
| 21975 | P03410 | Q13243 | 0.78749  |
| 21976 | P03410 | Q13449 | 0.23516  |
| 21977 | P03410 | Q6S9Z5 | 1.3361   |
| 21978 | P03410 | Q9NX70 | 1.1518   |
| 21979 | P03410 | Q6ZRU5 | 1.6653   |
| 21980 | P03410 | Q6P2I7 | 0.62401  |
| 21981 | P03410 | Q63ZY3 | 1.0986   |
| 21982 | P03410 | Q8NA03 | 0.86553  |
| 21983 | P03410 | Q8N6N6 | 0.14568  |
| 21984 | P03410 | A6H8Z2 | 0.65109  |
| 21985 | P03410 | Q9Y2Y0 | 1.2804   |
| 21986 | P03410 | P82914 | 1.4495   |
| 21987 | P03410 | Q75570 | 1.2642   |
| 21988 | P03410 | Q8N0V3 | 1.7167   |
| 21989 | P03410 | Q96NJ3 | 0.76878  |
| 21990 | P03410 | Q6NXR4 | 0.49127  |
| 21991 | P03410 | A6NKF9 | 0.76462  |
| 21992 | P03410 | Q5VTA0 | 0.62283  |
| 21993 | P03410 | Q8N584 | 1.3223   |
| 21994 | P03410 | Q8N852 | 0.75274  |
| 21995 | P03410 | Q6L8G4 | 1.6653   |
| 21996 | P03410 | Q9BU68 | 1.1435   |
| 21997 | P03410 | Q8NDD1 | 0.27147  |
| 21998 | P03410 | Q8TES7 | 1.0552   |
| 21999 | P03410 | Q95416 | 0.44592  |
| 22000 | P03410 | Q05481 | 0.79552  |
| 22001 | P03410 | A6NMX2 | 0.21144  |
| 22002 | P03410 | Q96B01 | 1.5143   |
| 22003 | P03410 | A6NEM1 | 1.5003   |
| 22004 | P03410 | Q9HAB8 | 1.0742   |
| 22005 | P03410 | Q6ZVQ6 | 2.0012   |
| 22006 | P03410 | Q8IXU6 | 0.63604  |
| 22007 | P03410 | Q9BWT7 | 0.44756  |
| 22008 | P03410 | Q96GA3 | 1.1689   |
| 22009 | P03410 | P62917 | 1.3937   |
| 22010 | P03410 | Q9P242 | 1.4996   |
| 22011 | P03410 | Q68DX3 | 0.92534  |
| 22012 | P03410 | O43592 | 0.56513  |
| 22013 | P03410 | Q2NL82 | 0.87064  |
| 22014 | P03410 | P16383 | 1.7978   |
| 22015 | P03410 | Q9BYR6 | 1.9066   |
| 22016 | P03410 | P78352 | 0.92755  |
| 22017 | P03410 | P52565 | 0.18221  |
| 22018 | P03410 | P62851 | 1.7358   |
| 22019 | P03410 | Q8N859 | 1.0068   |
| 22020 | P03410 | Q9BX82 | 0.97452  |
| 22021 | P03410 | A1L3Z2 | 0.22406  |
| 22022 | P03410 | Q12874 | 0.43662  |
| 22023 | P03410 | Q9HBD4 | 0.90233  |
| 22024 | P03410 | Q5BKY6 | 1.6653   |
| 22025 | P03410 | Q5VVP1 | 1.9538   |
| 22026 | P03410 | O15503 | 0.43296  |
| 22027 | P03410 | Q9Y3T6 | 0.92474  |
| 22028 | P03410 | P51811 | 0.25054  |
| 22029 | P03410 | Q9UM00 | 1.8322   |
| 22030 | P03410 | Q7Z7H8 | 0.61341  |
| 22031 | P03410 | Q6IA86 | 0.51756  |
| 22032 | P03410 | A6NI56 | 0.051542 |
| 22033 | P03410 | Q9UHA3 | 0.47761  |
| 22034 | P03410 | P67775 | 0.92215  |
| 22035 | P03410 | Q14566 | 0.25348  |
| 22036 | P03410 | Q6ICG6 | 0.5005   |
| 22037 | P03410 | Q14145 | 1.2923   |
| 22038 | P03410 | Q7L945 | 0.78091  |
| 22039 | P03410 | A0JNW5 | 1.1352   |
| 22040 | P03410 | Q9Y3D0 | 1.2046   |

|       |        |        |          |
|-------|--------|--------|----------|
| 22041 | P03410 | H3BRN8 | 0.25538  |
| 22042 | P03410 | Q9H2L5 | 1.308    |
| 22043 | P03410 | Q6ZMI0 | 0.28418  |
| 22044 | P03410 | Q33E94 | 1.1291   |
| 22045 | P03410 | Q8NFD4 | 0.74556  |
| 22046 | P03410 | Q14154 | 0.8864   |
| 22047 | P03410 | Q7Z388 | 0.68951  |
| 22048 | P03410 | Q8IWN7 | 0.53969  |
| 22049 | P03410 | P82921 | 1.582    |
| 22050 | P03410 | Q92539 | 0.49814  |
| 22051 | P03410 | Q9NVS2 | 1.6004   |
| 22052 | P03410 | Q14592 | 0.84951  |
| 22053 | P03410 | Q9GZU0 | 1.3669   |
| 22054 | P03410 | Q13427 | 0.4438   |
| 22055 | P03410 | Q96MW7 | 0.6932   |
| 22056 | P03410 | Q8IWF7 | 0.15917  |
| 22057 | P03410 | P40121 | 0.54989  |
| 22058 | P03410 | Q86X59 | 0.058243 |
| 22059 | P03410 | P83731 | 1.009    |
| 22060 | P03410 | Q9C0C6 | 1.1683   |
| 22061 | P03410 | P48552 | 0.69355  |
| 22062 | P03410 | Q13625 | 0.50992  |
| 22063 | P03410 | Q9Y5K8 | 0.2199   |
| 22064 | P03410 | P56537 | 1.46     |
| 22065 | P03410 | Q5SQ13 | 0.45171  |
| 22066 | P03410 | Q6UXR8 | 1.6653   |
| 22067 | P03410 | Q6P9A1 | 0.89709  |
| 22068 | P03410 | P61966 | 0.59124  |
| 22069 | P03410 | Q9UKN8 | 0.7568   |
| 22070 | P03410 | O00255 | 0.32069  |
| 22071 | P03410 | Q96MD2 | 0.34138  |
| 22072 | P03410 | P78364 | 0.056237 |
| 22073 | P03410 | Q9GZS0 | 0.32205  |
| 22074 | P03410 | Q96JF6 | 0.66816  |
| 22075 | P03410 | Q86V15 | 0.6473   |
| 22076 | P03410 | O43823 | 0.65038  |
| 22077 | P03410 | Q6ZS94 | 1.6653   |
| 22078 | P03410 | O14867 | 0.37137  |
| 22079 | P03410 | Q9NQX5 | 0.97136  |
| 22080 | P03410 | P40424 | 0.42159  |
| 22081 | P03410 | Q96CX3 | 0.78894  |
| 22082 | P03410 | Q8IZY5 | 0.4687   |
| 22083 | P03410 | Q8TED0 | 0.39481  |
| 22084 | P03410 | A8MXY4 | 0.79552  |
| 22085 | P03410 | Q5SYE7 | 0.99621  |
| 22086 | P03410 | Q9H490 | 0.81273  |
| 22087 | P03410 | O95394 | 1.273    |
| 22088 | P03410 | Q6NXS1 | 1.4617   |
| 22089 | P03410 | Q8IVP5 | 0.054461 |
| 22090 | P03410 | Q9H4R4 | 0.19498  |
| 22091 | P03410 | P82930 | 1.7924   |
| 22092 | P03410 | Q7Z3U7 | 0.31557  |
| 22093 | P03410 | Q9H2G4 | 0.64322  |
| 22094 | P03410 | Q9UIA9 | 0.81283  |
| 22095 | P03410 | P78424 | 0.2507   |
| 22096 | P03410 | Q6ZU65 | 0.639    |
| 22097 | P03410 | Q8N7R7 | 0.18379  |
| 22098 | P03410 | P13535 | 0.19684  |
| 22099 | P03410 | Q96NS5 | 0.25857  |
| 22100 | P03410 | A8MUN3 | 1.6653   |
| 22101 | P03410 | Q12887 | 0.74957  |
| 22102 | P03410 | Q6VY07 | 1.1546   |
| 22103 | P03410 | Q4VC31 | 0.1757   |
| 22104 | P03410 | Q4ADV7 | 0.75421  |
| 22105 | P03410 | P40305 | 1.0917   |
| 22106 | P03410 | O94772 | 0.13812  |
| 22107 | P03410 | P38159 | 0.71813  |
| 22108 | P03410 | Q04743 | 0.31618  |
| 22109 | P03410 | Q6JBY9 | 1.0034   |
| 22110 | P03410 | A6NJB7 | 1.7603   |
| 22111 | P03410 | Q9H4I3 | 0.093185 |
| 22112 | P03410 | P0C7V0 | 1.6653   |
| 22113 | P03410 | O15126 | 0.73702  |
| 22114 | P03410 | P0C2W7 | 1.6653   |
| 22115 | P03410 | Q9H0E9 | 0.18228  |
| 22116 | P03410 | Q15796 | 0.84874  |



|       |        |        |         |
|-------|--------|--------|---------|
| 22117 | P03410 | P55212 | 0.52169 |
| 22118 | P03410 | A6NGU7 | 1.0029  |
| 22119 | P03410 | P10075 | 0.70885 |
| 22120 | P03410 | Q13166 | 1.6653  |
| 22121 | P03410 | Q96I76 | 0.24444 |
| 22122 | P03410 | Q8IY63 | 0.58031 |
| 22123 | P03410 | P0C7X2 | 0.92552 |
| 22124 | P03410 | Q6P582 | 1.3605  |
| 22125 | P03410 | Q9UJQ4 | 0.17593 |
| 22126 | P03410 | A6NJ88 | 1.2986  |
| 22127 | P03410 | Q8IWZ8 | 0.28308 |
| 22128 | P03410 | Q8TF40 | 1.3067  |
| 22129 | P03410 | P22061 | 1.0562  |
| 22130 | P03410 | P60228 | 1.1356  |
| 22131 | P03410 | Q96CF2 | 0.48873 |
| 22132 | P03410 | A2RUT3 | 0.972   |
| 22133 | P03410 | A5PLL1 | 0.34399 |
| 22134 | P03410 | Q8TA86 | 1.2159  |
| 22135 | P03410 | Q96LM6 | 0.20917 |
| 22136 | P03410 | Q13813 | 0.39958 |
| 22137 | P03410 | P0C7Q3 | 0.29902 |
| 22138 | P03410 | Q15532 | 1.1335  |
| 22139 | P03410 | P35237 | 0.45007 |
| 22140 | P03410 | P61579 | 1.1462  |
| 22141 | P03410 | Q6UWS5 | 0.67765 |
| 22142 | P03410 | Q9P258 | 0.75255 |
| 22143 | P03410 | Q8N1I0 | 0.39163 |
| 22144 | P03410 | Q5U4N7 | 1.6653  |
| 22145 | P03410 | Q9UD71 | 1.3279  |
| 22146 | P03410 | Q8WV19 | 0.61118 |
| 22147 | P03410 | A6NNW6 | 1.3176  |
| 22148 | P03410 | Q9UL36 | 0.6599  |
| 22149 | P03410 | Q95562 | 0.40382 |
| 22150 | P03410 | Q9Y3A5 | 0.86309 |
| 22151 | P03410 | P27352 | 0.91414 |
| 22152 | P03410 | Q9Y237 | 0.33391 |
| 22153 | P03410 | Q5SXM2 | 0.66095 |
| 22154 | P03410 | A5D8W1 | 0.1242  |
| 22155 | P03410 | P23921 | 0.15793 |
| 22156 | P03410 | Q75459 | 0.52028 |
| 22157 | P03410 | Q5BJF2 | 0.8544  |
| 22158 | P03410 | Q05932 | 0.53943 |
| 22159 | P03410 | Q9BSH4 | 1.6943  |
| 22160 | P03410 | Q1W6H9 | 1.7693  |
| 22161 | P03410 | A6NLC5 | 0.79041 |
| 22162 | P03410 | Q8IXM6 | 1.2515  |
| 22163 | P03410 | E9PI22 | 1.2368  |
| 22164 | P03410 | Q9BWN1 | 1.4883  |
| 22165 | P03410 | Q9NRG9 | 0.90416 |
| 22166 | P03410 | Q5T5B0 | 1.6653  |
| 22167 | P03410 | P41208 | 0.78451 |
| 22168 | P03410 | Q14839 | 0.46557 |
| 22169 | P03410 | P08235 | 0.28743 |
| 22170 | P03410 | Q8N4C0 | 0.67307 |
| 22171 | P03410 | P62993 | 0.2937  |
| 22172 | P03410 | P60331 | 1.9984  |
| 22173 | P03410 | Q9UHN1 | 0.36384 |
| 22174 | P03410 | Q8N8F4 | 0.59849 |
| 22175 | P03410 | P15336 | 0.89217 |
| 22176 | P03410 | Q9UEG4 | 0.85618 |
| 22177 | P03410 | Q9NQX1 | 0.63142 |
| 22178 | P03410 | Q9BXW3 | 1.6653  |
| 22179 | P03410 | P11161 | 0.37317 |
| 22180 | P03410 | Q9NXF7 | 0.5172  |
| 22181 | P03410 | Q9Y4B6 | 1.0474  |
| 22182 | P03410 | Q9UHI6 | 0.49357 |
| 22183 | P03410 | Q92993 | 0.72733 |
| 22184 | P03410 | Q8WUM4 | 1.4685  |
| 22185 | P03410 | Q15723 | 0.98652 |
| 22186 | P03410 | Q9H6Z4 | 1.384   |
| 22187 | P03410 | A8MPV3 | 0.22827 |
| 22188 | P03410 | Q5JRK9 | 1.879   |
| 22189 | P03410 | Q9BXL8 | 0.44969 |
| 22190 | P03410 | A8MW95 | 0.24357 |
| 22191 | P03410 | Q5JS54 | 1.2322  |
| 22192 | P03410 | Q9BRX8 | 0.22086 |

|       |        |        |          |
|-------|--------|--------|----------|
| 22193 | P03410 | P19388 | 0.75145  |
| 22194 | P03410 | P28066 | 0.91596  |
| 22195 | P03410 | P59036 | 1.6653   |
| 22196 | P03410 | Q8N8D9 | 0.75233  |
| 22197 | P03410 | O43447 | 0.6121   |
| 22198 | P03410 | P81877 | 0.58269  |
| 22199 | P03410 | Q14244 | 1.2247   |
| 22200 | P03410 | Q6UW78 | 0.95938  |
| 22201 | P03410 | Q68DK2 | 1.064    |
| 22202 | P03410 | Q9NR55 | 0.34363  |
| 22203 | P03410 | Q3MIT2 | 0.33552  |
| 22204 | P03410 | O60422 | 0.24545  |
| 22205 | P03410 | Q15562 | 0.73616  |
| 22206 | P03410 | Q92817 | 0.28389  |
| 22207 | P03410 | Q8TDN4 | 1.3634   |
| 22208 | P03410 | Q8WZA8 | 1.6653   |
| 22209 | P03410 | Q9BV57 | 0.53855  |
| 22210 | P03410 | O75635 | 0.25305  |
| 22211 | P03410 | Q5VWP3 | 1.7495   |
| 22212 | P03410 | P50440 | 0.72695  |
| 22213 | P03410 | Q96IX5 | 0.46968  |
| 22214 | P03410 | Q9Y5J1 | 0.27328  |
| 22215 | P03410 | Q969L2 | 0.4281   |
| 22216 | P03410 | Q8IV53 | 0.096873 |
| 22217 | P03410 | Q7Z6K5 | 0.29881  |
| 22218 | P03410 | Q9H269 | 0.53313  |
| 22219 | P03410 | Q9NUP7 | 1.2464   |
| 22220 | P03410 | Q9NP50 | 1.367    |
| 22221 | P03410 | Q9NZB2 | 0.98452  |
| 22222 | P03410 | Q3KNT9 | 1.1255   |
| 22223 | P03410 | Q9HCM1 | 1.2543   |
| 22224 | P03410 | Q8N2I2 | 0.80632  |
| 22225 | P03410 | Q96PT4 | 0.25012  |
| 22226 | P03410 | Q15493 | 0.090614 |
| 22227 | P03410 | O15131 | 1.34     |
| 22228 | P03410 | Q5T0U0 | 0.074171 |
| 22229 | P03410 | Q9NR00 | 0.70319  |
| 22230 | P03410 | Q9C086 | 2.0934   |
| 22231 | P03410 | P35268 | 1.189    |
| 22232 | P03410 | Q08211 | 0.27224  |
| 22233 | P03410 | Q9BSN7 | 1.4048   |
| 22234 | P03410 | A8MX34 | 0.82177  |
| 22235 | P03410 | O14609 | 1.2808   |
| 22236 | P03410 | P24864 | 0.71408  |
| 22237 | P03410 | P0CJ78 | 0.66136  |
| 22238 | P03410 | P12004 | 0.27694  |
| 22239 | P03410 | P0C7U1 | 0.084981 |
| 22240 | P03410 | Q14761 | 1.4547   |
| 22241 | P03410 | B1AL88 | 1.0913   |
| 22242 | P03410 | P56211 | 0.63237  |
| 22243 | P03410 | Q8WZ69 | 0.1404   |
| 22244 | P03410 | A8MVS1 | 0.95078  |
| 22245 | P03410 | Q9NR77 | 0.94214  |
| 22246 | P03410 | Q96HM7 | 1.2927   |
| 22247 | P03410 | Q9H511 | 0.38071  |
| 22248 | P03410 | Q9BZW4 | 1.1698   |
| 22249 | P03410 | Q8WYP5 | 0.65733  |
| 22250 | P03410 | P0C7Q2 | 0.28158  |
| 22251 | P03410 | Q9NWS8 | 0.94643  |
| 22252 | P03410 | Q8N5Y2 | 0.13653  |
| 22253 | P03410 | P63313 | 1.2621   |
| 22254 | P03410 | Q14241 | 0.63661  |
| 22255 | P03410 | Q5BKX5 | 1.4883   |
| 22256 | P03410 | Q96LM9 | 0.17311  |
| 22257 | P03410 | Q64ET8 | 1.5698   |
| 22258 | P03410 | Q8TB72 | 0.81525  |
| 22259 | P03410 | Q9Y2R5 | 1.126    |
| 22260 | P03410 | Q68DQ2 | 0.12197  |
| 22261 | P03410 | Q03393 | 0.24951  |
| 22262 | P03410 | P61803 | 0.92574  |
| 22263 | P03410 | Q8TDY3 | 0.23477  |
| 22264 | P03410 | Q86YH6 | 0.18129  |
| 22265 | P03410 | O43681 | 0.42328  |
| 22266 | P03410 | P40763 | 0.28766  |
| 22267 | P03410 | Q86XR2 | 0.23867  |
| 22268 | P03410 | Q8WUY8 | 1.01     |

|       |        |        |          |
|-------|--------|--------|----------|
| 22269 | P03410 | Q5VZ46 | 1.0679   |
| 22270 | P03410 | Q6IA69 | 0.59514  |
| 22271 | P03410 | P32780 | 0.81648  |
| 22272 | P03410 | Q8WXS3 | 1.9993   |
| 22273 | P03410 | P0CG38 | 0.24431  |
| 22274 | P03410 | Q9BTE0 | 0.16565  |
| 22275 | P03410 | Q8TDH9 | 0.47267  |
| 22276 | P03410 | P61956 | 0.94132  |
| 22277 | P03410 | B1AL46 | 1.3673   |
| 22278 | P03410 | O75122 | 0.47513  |
| 22279 | P03410 | Q9NU63 | 0.62279  |
| 22280 | P03410 | I6L9F6 | 0.65009  |
| 22281 | P03410 | Q8NFB3 | 1.1317   |
| 22282 | P03410 | A6NNF4 | 0.79552  |
| 22283 | P03410 | Q68DI1 | 0.67541  |
| 22284 | P03410 | P09914 | 0.6265   |
| 22285 | P03410 | Q8NCE8 | 0.99565  |
| 22286 | P03410 | Q15053 | 0.52558  |
| 22287 | P03410 | Q9UBD5 | 0.83809  |
| 22288 | P03410 | Q8TAD7 | 1.4883   |
| 22289 | P03410 | P54098 | 0.76597  |
| 22290 | P03410 | Q8N123 | 1.1392   |
| 22291 | P03410 | Q8TBF2 | 0.49953  |
| 22292 | P03410 | Q969V4 | 0.32837  |
| 22293 | P03410 | Q9NWX6 | 0.79212  |
| 22294 | P03410 | Q504Q3 | 0.14482  |
| 22295 | P03410 | O43361 | 0.6323   |
| 22296 | P03410 | Q96AE4 | 0.46724  |
| 22297 | P03410 | Q8WW59 | 0.26078  |
| 22298 | P03410 | Q9BZQ4 | 0.40724  |
| 22299 | P03410 | Q9UMX2 | 0.25601  |
| 22300 | P03410 | O76014 | 0.88723  |
| 22301 | P03410 | P14621 | 0.16042  |
| 22302 | P03410 | A6NDB9 | 1.184    |
| 22303 | P03410 | Q8NDQ6 | 0.76374  |
| 22304 | P03410 | Q969Z0 | 0.82024  |
| 22305 | P03410 | Q9NZ45 | 0.7033   |
| 22306 | P03410 | Q9Y2D9 | 0.72404  |
| 22307 | P03410 | A8MU76 | 1.0965   |
| 22308 | P03410 | Q5EBL4 | 0.68948  |
| 22309 | P03410 | Q9UKY1 | 0.28447  |
| 22310 | P03410 | P61353 | 0.91415  |
| 22311 | P03410 | B4DU55 | 0.89343  |
| 22312 | P03410 | Q96GY0 | 1.3776   |
| 22313 | P03410 | Q9BRP1 | 1.1279   |
| 22314 | P03410 | Q9NX09 | 0.48621  |
| 22315 | P03410 | P04732 | 0.80043  |
| 22316 | P03410 | C9JI98 | 1.0913   |
| 22317 | P03410 | P13196 | 0.19646  |
| 22318 | P03410 | O75817 | 1.1364   |
| 22319 | P03410 | Q9NVL8 | 0.19497  |
| 22320 | P03410 | Q68E01 | 1.2088   |
| 22321 | P03410 | Q9UK45 | 0.84686  |
| 22322 | P03410 | Q9UN30 | 0.24371  |
| 22323 | P03410 | P07737 | 0.99006  |
| 22324 | P03410 | Q58F21 | 0.32176  |
| 22325 | P03410 | Q96SL8 | 0.65654  |
| 22326 | P03410 | Q86YC2 | 0.82963  |
| 22327 | P03410 | Q9UMX1 | 1.3649   |
| 22328 | P03410 | P50135 | 0.078297 |
| 22329 | P03410 | Q7L5Y9 | 0.48222  |
| 22330 | P03410 | Q52M58 | 1.8247   |
| 22331 | P03410 | P42566 | 0.37811  |
| 22332 | P03410 | Q9UKJ3 | 1.3152   |
| 22333 | P03410 | P0C7T4 | 1.6653   |
| 22334 | P03410 | P42773 | 0.51059  |
| 22335 | P03410 | Q9UGU0 | 0.35705  |
| 22336 | P03410 | P18850 | 0.66709  |
| 22337 | P03410 | O95164 | 1.0505   |
| 22338 | P03410 | P56715 | 0.36138  |
| 22339 | P03410 | Q9ULW6 | 0.51552  |
| 22340 | P03410 | Q75QN2 | 1.5645   |
| 22341 | P03410 | O00471 | 0.49824  |
| 22342 | P03410 | Q13310 | 0.53017  |
| 22343 | P03410 | Q9NRT5 | 1.1623   |
| 22344 | P03410 | Q5T753 | 1.6653   |

|       |        |        |          |
|-------|--------|--------|----------|
| 22345 | P03410 | Q9HCD5 | 1.1794   |
| 22346 | P03410 | Q8WXH0 | 0.39008  |
| 22347 | P03410 | Q9BRV8 | 0.81199  |
| 22348 | P03410 | Q86X67 | 0.13271  |
| 22349 | P03410 | O75880 | 0.22271  |
| 22350 | P03410 | Q8NFM7 | 0.95673  |
| 22351 | P03410 | Q93034 | 0.80373  |
| 22352 | P03410 | O95363 | 1.0343   |
| 22353 | P03410 | Q15517 | 1.0365   |
| 22354 | P03410 | O75179 | 0.50359  |
| 22355 | P03410 | Q8N635 | 0.15091  |
| 22356 | P03410 | Q5XKK7 | 0.5134   |
| 22357 | P03410 | Q9P2K3 | 1.3086   |
| 22358 | P03410 | Q8NFR9 | 1.1256   |
| 22359 | P03410 | Q6W0C5 | 0.48998  |
| 22360 | P03410 | Q9P2X0 | 0.19655  |
| 22361 | P03410 | Q494R4 | 0.013354 |
| 22362 | P03410 | P08727 | 1.0001   |
| 22363 | P03410 | P63162 | 0.90302  |
| 22364 | P03410 | O75391 | 1.0722   |
| 22365 | P03410 | A8MTY7 | 1.9984   |
| 22366 | P03410 | A6NEL3 | 0.12972  |
| 22367 | P03410 | Q96HA7 | 0.86419  |
| 22368 | P03410 | Q99551 | 0.73502  |
| 22369 | P03410 | O75971 | 1.7604   |
| 22370 | P03410 | O94992 | 2.1024   |
| 22371 | P03410 | Q9P1C3 | 1.0553   |
| 22372 | P03410 | Q5J8X5 | 1.0913   |
| 22373 | P03410 | Q9H095 | 0.56752  |
| 22374 | P03410 | B4DZS4 | 0.6374   |
| 22375 | P03410 | Q9NYJ1 | 1.7803   |
| 22376 | P03410 | Q4V348 | 0.65413  |
| 22377 | P03410 | Q9UBY9 | 1.125    |
| 22378 | P03410 | O75467 | 0.76893  |
| 22379 | P03410 | Q6UX82 | 0.53937  |
| 22380 | P03410 | P0C5K7 | 0.13951  |
| 22381 | P03410 | P62879 | 0.81791  |
| 22382 | P03410 | P46109 | 0.32066  |
| 22383 | P03410 | Q9UI14 | 0.14259  |
| 22384 | P03410 | P10515 | 0.43936  |
| 22385 | P03410 | Q3KP22 | 0.43829  |
| 22386 | P03410 | Q96M29 | 0.87211  |
| 22387 | P03410 | P22914 | 0.3743   |
| 22388 | P03410 | Q8IXX5 | 0.79088  |
| 22389 | P03410 | O60907 | 0.77663  |
| 22390 | P03410 | Q6ICL7 | 0.70807  |
| 22391 | P03410 | Q969R5 | 0.32618  |
| 22392 | P03410 | P62891 | 1.4119   |
| 22393 | P03410 | Q2TAM9 | 1.8193   |
| 22394 | P03410 | P05783 | 1.5647   |
| 22395 | P03410 | Q9BV73 | 0.98688  |
| 22396 | P03410 | Q96MY7 | 1.9534   |
| 22397 | P03410 | Q76KD6 | 0.83742  |
| 22398 | P03410 | Q8TAT6 | 0.51753  |
| 22399 | P03410 | P33076 | 0.53348  |
| 22400 | P03410 | O00161 | 1.1445   |
| 22401 | P03410 | P61575 | 1.1462   |
| 22402 | P03410 | P43356 | 1.0701   |
| 22403 | P03410 | Q96JJ3 | 0.5356   |
| 22404 | P03410 | Q9Y5A6 | 0.66309  |
| 22405 | P03410 | Q8N6T0 | 1.2441   |
| 22406 | P03410 | Q96G61 | 0.34631  |
| 22407 | P03410 | Q6PI48 | 1.28     |
| 22408 | P03410 | Q8N668 | 0.8854   |
| 22409 | P03410 | Q9UG56 | 0.72812  |
| 22410 | P03410 | A6NN73 | 0.71504  |
| 22411 | P03410 | A6NNH0 | 1.3563   |
| 22412 | P03410 | Q13438 | 0.19378  |
| 22413 | P03410 | Q6ZN32 | 0.30793  |
| 22414 | P03410 | P28065 | 0.98244  |
| 22415 | P03410 | Q86U38 | 0.38771  |
| 22416 | P03410 | E9PB15 | 0.40292  |
| 22417 | P03410 | Q8ND76 | 0.78859  |
| 22418 | P03410 | Q15042 | 0.69717  |
| 22419 | P03410 | Q9Y221 | 1.0399   |
| 22420 | P03410 | Q96KT0 | 0.98322  |

|       |        |        |          |
|-------|--------|--------|----------|
| 22421 | P03410 | Q9BVL2 | 0.87917  |
| 22422 | P03410 | Q96B96 | 0.95154  |
| 22423 | P03410 | Q9NRJ3 | 0.88121  |
| 22424 | P03410 | P58557 | 1.6858   |
| 22425 | P03410 | Q9BV47 | 0.44822  |
| 22426 | P03410 | Q5T160 | 1.1545   |
| 22427 | P03410 | Q92681 | 0.5953   |
| 22428 | P03410 | Q7RTX8 | 0.044788 |
| 22429 | P03410 | Q7LBR1 | 1.2457   |
| 22430 | P03410 | Q14934 | 0.30406  |
| 22431 | P03410 | Q6AZY7 | 0.74793  |
| 22432 | P03410 | Q5T1J5 | 1.6853   |
| 22433 | P03410 | Q9BQY9 | 0.76463  |
| 22434 | P03410 | Q92890 | 0.86321  |
| 22435 | P03410 | A1A5B4 | 0.92935  |
| 22436 | P03410 | Q9BWQ6 | 0.7513   |
| 22437 | P03410 | O14802 | 0.35498  |
| 22438 | P03410 | Q8N8D1 | 1.8323   |
| 22439 | P03410 | Q5JWR5 | 0.38787  |
| 22440 | P03410 | Q4LDR2 | 0.96395  |
| 22441 | P03410 | Q9BXU3 | 1.1058   |
| 22442 | P03410 | Q9NQS1 | 1.2991   |
| 22443 | P03410 | O43242 | 0.62103  |
| 22444 | P03410 | Q5T9C2 | 1.4883   |
| 22445 | P03410 | P27815 | 0.36817  |
| 22446 | P03410 | E9PQX1 | 0.49868  |
| 22447 | P03410 | Q6ZMV8 | 1.0173   |
| 22448 | P03410 | Q8WVT3 | 0.12951  |
| 22449 | P03410 | Q9BT25 | 1.0037   |
| 22450 | P03410 | Q9NQA3 | 0.43138  |
| 22451 | P03410 | B3EWG5 | 1.4883   |
| 22452 | P03410 | Q96DG6 | 0.34674  |
| 22453 | P03410 | Q12906 | 1.0923   |
| 22454 | P03410 | Q9Y5B6 | 1.2191   |
| 22455 | P03410 | Q9UPR6 | 0.52978  |
| 22456 | P03410 | O94973 | 0.67136  |
| 22457 | P03410 | Q9H9E3 | 0.93796  |
| 22458 | P03410 | Q9Y2K5 | 0.61162  |
| 22459 | P03410 | Q9BRK5 | 0.23443  |
| 22460 | P03410 | Q96EF6 | 0.88333  |
| 22461 | P03410 | P35611 | 0.1792   |
| 22462 | P03410 | O43865 | 0.43055  |
| 22463 | P03410 | Q6AI39 | 1.3918   |
| 22464 | P03410 | Q9Y421 | 0.36202  |
| 22465 | P03410 | P04198 | 0.79462  |
| 22466 | P03410 | Q00978 | 0.79415  |
| 22467 | P03410 | Q30KQ7 | 0.87928  |
| 22468 | P03410 | Q5HYK3 | 0.9978   |
| 22469 | P03410 | P47874 | 0.50871  |
| 22470 | P03410 | Q96HS1 | 0.52338  |
| 22471 | P03410 | Q14591 | 0.64587  |
| 22472 | P03410 | Q8NF64 | 1.242    |
| 22473 | P03410 | Q9BRS8 | 0.62236  |
| 22474 | P03410 | O43345 | 0.77805  |
| 22475 | P03410 | Q9P1D8 | 1.6653   |
| 22476 | P03410 | Q9H0A6 | 0.58631  |
| 22477 | P03410 | Q8WU90 | 0.95178  |
| 22478 | P03410 | Q6BDI9 | 0.8359   |
| 22479 | P03410 | Q86UU0 | 1.3666   |
| 22480 | P03410 | Q8IXT2 | 0.15686  |
| 22481 | P03410 | P56377 | 0.69547  |
| 22482 | P03410 | Q9NRR8 | 1.2004   |
| 22483 | P03410 | O94903 | 0.96793  |
| 22484 | P03410 | Q969X6 | 1.1211   |
| 22485 | P03410 | Q9HCZ1 | 0.71705  |
| 22486 | P03410 | Q9H079 | 0.81748  |
| 22487 | P03410 | O75448 | 0.60744  |
| 22488 | P03410 | Q6PH85 | 0.12422  |
| 22489 | P03410 | P0DI83 | 1.168    |
| 22490 | P03410 | Q96EV8 | 0.29829  |
| 22491 | P03410 | Q3LHN2 | 1.6653   |
| 22492 | P03410 | Q96RN5 | 1.3009   |
| 22493 | P03410 | O75896 | 1.4921   |
| 22494 | P03410 | Q96M53 | 1.9188   |
| 22495 | P03410 | P30307 | 0.88835  |
| 22496 | P03410 | Q5TYX0 | 0.67757  |

|       |        |        |          |
|-------|--------|--------|----------|
| 22497 | P03410 | Q9NPA3 | 1.7336   |
| 22498 | P03410 | Q8N4Q1 | 0.37886  |
| 22499 | P03410 | Q6ZNG1 | 0.81411  |
| 22500 | P03410 | Q95177 | 0.51921  |
| 22501 | P03410 | P18859 | 0.15693  |
| 22502 | P03410 | K9M1U5 | 1.6653   |
| 22503 | P03410 | Q8N6L7 | 1.3271   |
| 22504 | P03410 | Q92733 | 1.6653   |
| 22505 | P03410 | Q8IWD5 | 0.98964  |
| 22506 | P03410 | Q5VVH5 | 0.66707  |
| 22507 | P03410 | Q9BYR9 | 0.67361  |
| 22508 | P03410 | Q8WX93 | 0.65578  |
| 22509 | P03410 | Q7Z3B3 | 0.43038  |
| 22510 | P03410 | Q6ZV80 | 0.60764  |
| 22511 | P03410 | Q6NTF7 | 0.21418  |
| 22512 | P03410 | P04280 | 0.92241  |
| 22513 | P03410 | Q9C002 | 0.43842  |
| 22514 | P03410 | Q12929 | 0.35931  |
| 22515 | P03410 | Q86XL3 | 0.5246   |
| 22516 | P03410 | Q96T17 | 1.0054   |
| 22517 | P03410 | Q95568 | 0.074364 |
| 22518 | P03410 | Q6ZW49 | 0.39462  |
| 22519 | P03410 | Q00743 | 0.83887  |
| 22520 | P03410 | Q99750 | 0.87169  |
| 22521 | P03410 | Q14192 | 0.54526  |
| 22522 | P03410 | Q9Y5R4 | 0.27036  |
| 22523 | P03410 | O60888 | 1.1061   |
| 22524 | P03410 | Q9UJX6 | 0.67742  |
| 22525 | P03410 | Q9BV19 | 1.0263   |
| 22526 | P03410 | Q9P278 | 1.3816   |
| 22527 | P03410 | Q9UFG5 | 0.6999   |
| 22528 | P03410 | Q9Y2G7 | 1.0676   |
| 22529 | P03410 | Q96EP1 | 0.36686  |
| 22530 | P03410 | Q9BQ87 | 0.54613  |
| 22531 | P03410 | Q96EY1 | 0.60413  |
| 22532 | P03410 | O15397 | 1.1291   |
| 22533 | P03410 | Q49MG5 | 1.616    |
| 22534 | P03410 | O43365 | 0.33473  |
| 22535 | P03410 | O43167 | 0.84197  |
| 22536 | P03410 | Q96D98 | 1.4336   |
| 22537 | P03410 | A2RUB6 | 0.33445  |
| 22538 | P03410 | Q587J8 | 0.1935   |
| 22539 | P03410 | Q9UID3 | 0.24129  |
| 22540 | P03410 | O75348 | 0.31469  |
| 22541 | P03410 | Q96A73 | 1.4476   |
| 22542 | P03410 | Q8NHY0 | 0.555    |
| 22543 | P03410 | P49247 | 1.3317   |
| 22544 | P03410 | Q9UKK6 | 0.95222  |
| 22545 | P03410 | Q16533 | 0.81172  |
| 22546 | P03410 | A6NC42 | 0.78081  |
| 22547 | P03410 | Q2WJ8  | 1.7637   |
| 22548 | P03410 | P60372 | 1.9984   |
| 22549 | P03410 | Q9Y215 | 0.31652  |
| 22550 | P03410 | A2RUG3 | 1.2052   |
| 22551 | P03410 | P15976 | 0.26444  |
| 22552 | P03410 | Q15012 | 0.94801  |
| 22553 | P03410 | P11277 | 0.49396  |
| 22554 | P03410 | Q6S8J3 | 0.23109  |
| 22555 | P03410 | Q6P9B9 | 1.2973   |
| 22556 | P03410 | Q9UET6 | 1.0876   |
| 22557 | P03410 | P0CE67 | 1.6653   |
| 22558 | P03410 | P05114 | 0.5542   |
| 22559 | P03410 | Q9NZL9 | 0.16097  |
| 22560 | P03410 | Q99747 | 0.9904   |
| 22561 | P03410 | Q9UKG1 | 0.54328  |
| 22562 | P03410 | P59103 | 1.2602   |
| 22563 | P03410 | Q14236 | 0.86438  |
| 22564 | P03410 | O60437 | 1.1368   |
| 22565 | P03410 | Q93045 | 0.38186  |
| 22566 | P03410 | Q9UFN0 | 0.92813  |
| 22567 | P03410 | Q96PM9 | 0.3238   |
| 22568 | P03410 | P29372 | 1.2707   |
| 22569 | P03410 | P30405 | 0.22741  |
| 22570 | P03410 | Q9H2D6 | 0.25029  |
| 22571 | P03410 | Q92543 | 0.34827  |
| 22572 | P03410 | Q8N573 | 0.13822  |

|       |        |        |         |
|-------|--------|--------|---------|
| 22573 | P03410 | Q9BTX1 | 0.91955 |
| 22574 | P03410 | P22103 | 1.6653  |
| 22575 | P03410 | P30740 | 0.26959 |
| 22576 | P03410 | P51580 | 0.6869  |
| 22577 | P03410 | A6NEY8 | 0.55629 |
| 22578 | P03410 | Q14770 | 0.51709 |
| 22579 | P03410 | Q6IE81 | 1.0407  |
| 22580 | P03410 | Q5XKL5 | 0.36709 |
| 22581 | P03410 | Q6P1K8 | 0.45857 |
| 22582 | P03410 | P29966 | 2.0787  |
| 22583 | P03410 | Q7LG56 | 0.13852 |
| 22584 | P03410 | Q9GZU8 | 0.67831 |
| 22585 | P03410 | Q86TC9 | 0.52365 |
| 22586 | P03410 | A6NE82 | 0.38071 |
| 22587 | P03410 | Q15072 | 0.71849 |
| 22588 | P03410 | Q95471 | 0.15894 |
| 22589 | P03410 | Q86UP8 | 0.30478 |
| 22590 | P03410 | Q75312 | 0.80461 |
| 22591 | P03410 | Q9Y5U2 | 1.4355  |
| 22592 | P03410 | A6NEY3 | 1.594   |
| 22593 | P03410 | P0CG47 | 0.60541 |
| 22594 | P03410 | Q05BV3 | 0.3132  |
| 22595 | P03410 | Q96IT6 | 1.6653  |
| 22596 | P03410 | Q9N2J8 | 0.71368 |
| 22597 | P03410 | Q8TF74 | 0.89895 |
| 22598 | P03410 | Q9BZE4 | 0.37573 |
| 22599 | P03410 | Q9BX66 | 0.56147 |
| 22600 | P03410 | Q9BYD5 | 0.17388 |
| 22601 | P03410 | Q0VAK6 | 0.22052 |
| 22602 | P03410 | Q8N5T8 | 1.5759  |
| 22603 | P03410 | Q06830 | 0.26137 |
| 22604 | P03410 | Q9H4A5 | 1.5438  |
| 22605 | P03410 | Q8IYM2 | 0.50774 |
| 22606 | P03410 | Q5JSS6 | 0.66533 |
| 22607 | P03410 | Q70YC5 | 0.87199 |
| 22608 | P03410 | Q13442 | 1.5044  |
| 22609 | P03410 | Q07352 | 0.761   |
| 22610 | P03410 | Q9BZA0 | 0.03112 |
| 22611 | P03410 | P34897 | 0.27685 |
| 22612 | P03410 | Q9NUA8 | 0.72587 |
| 22613 | P03410 | P86496 | 1.6653  |
| 22614 | P03410 | Q86TJ5 | 0.79659 |
| 22615 | P03410 | P36543 | 0.40503 |
| 22616 | P03410 | A6NFF2 | 0.37831 |
| 22617 | P03410 | Q3BBV2 | 1.289   |
| 22618 | P03410 | Q5VWM3 | 0.16422 |
| 22619 | P03410 | Q14683 | 1.0122  |
| 22620 | P03410 | Q9BQ90 | 1.1293  |
| 22621 | P03410 | Q92759 | 0.69419 |
| 22622 | P03410 | Q9Y2A4 | 0.9961  |
| 22623 | P03410 | Q8IWJ2 | 0.98846 |
| 22624 | P03410 | Q92615 | 0.97127 |
| 22625 | P03410 | A2RRP1 | 0.46154 |
| 22626 | P03410 | Q9UJM3 | 0.59185 |
| 22627 | P03410 | Q9H6V9 | 0.90652 |
| 22628 | P03410 | Q5JQS6 | 0.94898 |
| 22629 | P03410 | Q6P1N0 | 0.53118 |
| 22630 | P03410 | Q9UL42 | 1.1055  |
| 22631 | P03410 | Q96SZ5 | 0.38363 |
| 22632 | P03410 | O60518 | 1.2414  |
| 22633 | P03410 | Q9BXY0 | 0.36709 |
| 22634 | P03410 | Q9H9E1 | 0.3902  |
| 22635 | P03410 | Q9BRQ5 | 0.31678 |
| 22636 | P03410 | Q7Z4H7 | 1.0428  |
| 22637 | P03410 | Q86TS7 | 1.6653  |
| 22638 | P03410 | Q9UGJ1 | 0.65497 |
| 22639 | P03410 | P52742 | 0.76906 |
| 22640 | P03410 | Q92621 | 1.3554  |
| 22641 | P03410 | Q7Z3T8 | 0.28114 |
| 22642 | P03410 | P24588 | 0.21864 |
| 22643 | P03410 | Q96PP4 | 0.40435 |
| 22644 | P03410 | Q3LI67 | 1.6653  |
| 22645 | P03410 | O60934 | 0.26237 |
| 22646 | P03410 | O00458 | 1.2877  |
| 22647 | P03410 | Q9BVW6 | 1.6653  |
| 22648 | P03410 | Q4G0N7 | 1.0749  |

|       |        |        |         |
|-------|--------|--------|---------|
| 22649 | P03410 | Q9UJW7 | 0.6829  |
| 22650 | P03410 | Q9NRY2 | 1.3839  |
| 22651 | P03410 | O00124 | 0.59898 |
| 22652 | P03410 | Q5QFB9 | 1.3692  |
| 22653 | P03410 | P24855 | 0.22922 |
| 22654 | P03410 | Q9C0E2 | 1.1472  |
| 22655 | P03410 | Q8IYI6 | 0.87605 |
| 22656 | P03410 | P59037 | 1.5752  |
| 22657 | P03410 | Q6NT89 | 1.67    |
| 22658 | P03410 | Q6P587 | 0.16314 |
| 22659 | P03410 | Q86V85 | 0.75362 |
| 22660 | P03410 | P34896 | 0.36406 |
| 22661 | P03410 | A2BFH1 | 0.22741 |
| 22662 | P03410 | Q9H9L3 | 0.57508 |
| 22663 | P03410 | Q30KQ8 | 0.87928 |
| 22664 | P03410 | Q5T5P2 | 0.47842 |
| 22665 | P03410 | Q70Z53 | 1.2338  |
| 22666 | P03410 | Q7L9B9 | 0.55863 |
| 22667 | P03410 | Q5JRA6 | 0.23659 |
| 22668 | P03410 | Q9BUI4 | 0.31997 |
| 22669 | P03410 | P29459 | 0.46541 |
| 22670 | P03410 | Q8N7S6 | 1.6653  |
| 22671 | P03410 | O60238 | 0.61398 |
| 22672 | P03410 | Q6ZR52 | 0.79552 |
| 22673 | P03410 | Q9NUD7 | 0.15354 |
| 22674 | P03410 | Q502W6 | 0.18199 |
| 22675 | P03410 | O43598 | 0.55422 |
| 22676 | P03410 | Q96NT1 | 1.1873  |
| 22677 | P03410 | P81534 | 1.0067  |
| 22678 | P03410 | Q9Y6Q2 | 0.65793 |
| 22679 | P03410 | A6NCL1 | 0.41744 |
| 22680 | P03410 | P17038 | 0.79552 |
| 22681 | P03410 | P0C7M4 | 0.2823  |
| 22682 | P03410 | A6NDY2 | 0.74411 |
| 22683 | P03410 | Q9BSQ5 | 0.60127 |
| 22684 | P03410 | O75884 | 1.7438  |
| 22685 | P03410 | Q06546 | 1.2018  |
| 22686 | P03410 | O00221 | 0.33736 |
| 22687 | P03410 | Q9ULN7 | 1.4297  |
| 22688 | P03410 | Q96IU4 | 0.46912 |
| 22689 | P03410 | Q9Y2M5 | 0.87162 |
| 22690 | P03410 | O15263 | 1.0066  |
| 22691 | P03410 | P62753 | 1.0886  |
| 22692 | P03410 | Q9BZQ2 | 0.66899 |
| 22693 | P03410 | O14737 | 0.65142 |
| 22694 | P03410 | P78344 | 0.64224 |
| 22695 | P03410 | O43237 | 0.22066 |
| 22696 | P03410 | O60290 | 0.96695 |
| 22697 | P03410 | Q7RTT3 | 0.37833 |
| 22698 | P03410 | Q13352 | 0.46517 |
| 22699 | P03410 | O95822 | 0.35538 |
| 22700 | P03410 | Q5TC84 | 0.71223 |
| 22701 | P03410 | Q6EMB2 | 0.18824 |
| 22702 | P03410 | Q49AR2 | 0.8029  |
| 22703 | P03410 | A4QN01 | 0.41466 |
| 22704 | P03410 | Q6P5R6 | 0.54581 |
| 22705 | P03410 | O14829 | 0.45562 |
| 22706 | P03410 | O75886 | 1.4395  |
| 22707 | P03410 | Q15022 | 0.67854 |
| 22708 | P03410 | Q96KF2 | 1.6653  |
| 22709 | P03410 | Q8NEG0 | 0.50372 |
| 22710 | P03410 | Q9GZW5 | 0.70458 |
| 22711 | P03410 | Q9NZP6 | 1.4336  |
| 22712 | P03410 | O15194 | 0.16212 |
| 22713 | P03410 | Q6ZVL8 | 1.6653  |
| 22714 | P03410 | P17097 | 0.626   |
| 22715 | P03410 | Q9C073 | 1.4667  |
| 22716 | P03410 | A6NME0 | 0.62739 |
| 22717 | P03410 | A0AVK6 | 0.29891 |
| 22718 | P03410 | Q96I25 | 0.30489 |
| 22719 | P03410 | Q8N3Z3 | 0.87997 |
| 22720 | P03410 | Q9UJY4 | 0.98958 |
| 22721 | P03410 | Q9UBQ5 | 1.0971  |
| 22722 | P03410 | P23588 | 0.46323 |
| 22723 | P03410 | Q15545 | 0.83915 |
| 22724 | P03410 | Q9NPI1 | 0.80101 |



|       |        |        |         |
|-------|--------|--------|---------|
| 22725 | P03410 | P17405 | 0.32757 |
| 22726 | P03410 | Q8TBZ0 | 0.41912 |
| 22727 | P03410 | H3BQW9 | 1.1237  |
| 22728 | P03410 | Q9HB58 | 0.34429 |
| 22729 | P03410 | I3L1I5 | 0.65174 |
| 22730 | P03410 | Q5JTW2 | 0.7191  |
| 22731 | P03410 | O60493 | 0.38472 |
| 22732 | P03410 | Q8N8A4 | 0.27319 |
| 22733 | P03410 | P56134 | 0.58768 |
| 22734 | P03410 | Q32M92 | 0.22963 |
| 22735 | P03410 | P46060 | 0.32749 |
| 22736 | P03410 | Q14135 | 0.54613 |
| 22737 | P03410 | O95070 | 0.43428 |
| 22738 | P03410 | Q8NC51 | 0.90147 |
| 22739 | P03410 | A8K8P3 | 1.2295  |
| 22740 | P03410 | Q8N6M9 | 0.18606 |
| 22741 | P03410 | O94888 | 0.68381 |
| 22742 | P03410 | Q8NA31 | 0.82068 |
| 22743 | P03410 | Q6IQ23 | 0.59859 |
| 22744 | P03410 | Q6IPT2 | 1.9055  |
| 22745 | P03410 | Q8TAF5 | 1.6653  |
| 22746 | P03410 | Q3LI63 | 1.6653  |
| 22747 | P03410 | Q9UI10 | 0.48853 |
| 22748 | P03410 | Q9BXW6 | 0.3591  |
| 22749 | P03410 | O75208 | 0.95091 |
| 22750 | P03410 | Q9BYG4 | 0.96675 |
| 22751 | P03410 | Q9NY27 | 1.6339  |
| 22752 | P03410 | P17980 | 0.52941 |
| 22753 | P03410 | Q5TIA1 | 0.12185 |
| 22754 | P03410 | Q9H446 | 0.6999  |
| 22755 | P03410 | Q5TFG8 | 0.76532 |
| 22756 | P03410 | Q5HYR2 | 1.3763  |
| 22757 | P03410 | Q13405 | 1.1191  |
| 22758 | P03410 | Q8N3R9 | 0.39906 |
| 22759 | P03410 | Q7Z5D8 | 1.0068  |
| 22760 | P03410 | Q7Z3Y9 | 1.0001  |
| 22761 | P03410 | Q8IYJ2 | 1.6077  |
| 22762 | P03410 | A8K0Z3 | 0.32624 |
| 22763 | P03410 | Q86TU7 | 0.27953 |
| 22764 | P03410 | Q5W0V3 | 1.2824  |
| 22765 | P03410 | Q8NB25 | 0.35216 |
| 22766 | P03410 | Q5T7B8 | 0.34531 |
| 22767 | P03410 | Q9UPN9 | 0.31696 |
| 22768 | P03410 | O95994 | 0.13248 |
| 22769 | P03410 | O43593 | 0.12793 |
| 22770 | P03410 | P0CL83 | 1.0182  |
| 22771 | P03410 | Q8WWR8 | 0.30058 |
| 22772 | P03410 | P60709 | 0.24431 |
| 22773 | P03410 | Q71UM5 | 0.88777 |
| 22774 | P03410 | Q99873 | 0.65978 |
| 22775 | P03410 | Q8NHY6 | 0.84049 |
| 22776 | P03410 | Q9UIF7 | 0.51165 |
| 22777 | P03410 | Q7L2Z9 | 0.45065 |
| 22778 | P03410 | Q9NX95 | 0.8285  |
| 22779 | P03410 | Q5VZV4 | 0.91931 |
| 22780 | P03410 | Q9H5H4 | 0.76436 |
| 22781 | P03410 | Q8N944 | 1.5275  |
| 22782 | P03410 | Q0VG06 | 0.89588 |
| 22783 | P03410 | Q9BVT8 | 1.4584  |
| 22784 | P03410 | Q9BYQ0 | 1.9984  |
| 22785 | P03410 | Q9H2J4 | 1.0701  |
| 22786 | P03410 | Q7Z3V5 | 0.78793 |
| 22787 | P03410 | O00566 | 1.1279  |
| 22788 | P03410 | P49411 | 0.84144 |
| 22789 | P03410 | P31946 | 0.61076 |
| 22790 | P03410 | Q9H6Y2 | 0.28878 |
| 22791 | P03410 | Q9BQ67 | 0.49184 |
| 22792 | P03410 | Q8N4B5 | 1.4567  |
| 22793 | P03410 | Q9BVL4 | 1.8288  |
| 22794 | P03410 | Q5T9G4 | 1.5627  |
| 22795 | P03410 | Q6ZNG9 | 0.15559 |
| 22796 | P03410 | P53672 | 1.3539  |
| 22797 | P03410 | Q96PB1 | 1.0984  |
| 22798 | P03410 | Q9NS26 | 1.3238  |
| 22799 | P03410 | Q6NUN7 | 1.6653  |
| 22800 | P03410 | E0CX11 | 1.6653  |

|       |        |        |          |
|-------|--------|--------|----------|
| 22801 | P03410 | Q8NA69 | 0.79917  |
| 22802 | P03410 | O75832 | 0.65782  |
| 22803 | P03410 | Q9HC52 | 0.78119  |
| 22804 | P03410 | Q9UHC1 | 0.60231  |
| 22805 | P03410 | Q8N7B1 | 1.0719   |
| 22806 | P03410 | O14980 | 1.2917   |
| 22807 | P03410 | P20618 | 1.0314   |
| 22808 | P03410 | Q8NEA5 | 0.65542  |
| 22809 | P03410 | Q9H761 | 0.96997  |
| 22810 | P03410 | P78524 | 0.051672 |
| 22811 | P03410 | O95391 | 0.34578  |
| 22812 | P03410 | Q01543 | 0.36839  |
| 22813 | P03410 | O43156 | 1.0743   |
| 22814 | P03410 | Q9NX04 | 0.61094  |
| 22815 | P03410 | Q86W11 | 0.6702   |
| 22816 | P03410 | O43505 | 0.93885  |
| 22817 | P03410 | Q13114 | 0.43561  |
| 22818 | P03410 | P78337 | 0.27362  |
| 22819 | P03410 | Q9BVA0 | 0.33607  |
| 22820 | P03410 | P49902 | 0.088294 |
| 22821 | P03410 | Q9P0K7 | 0.38538  |
| 22822 | P03410 | Q8N8E3 | 0.56173  |
| 22823 | P03410 | P40337 | 0.7402   |
| 22824 | P03410 | P49642 | 0.50624  |
| 22825 | P03410 | Q9HCU8 | 1.0644   |
| 22826 | P03410 | Q92754 | 0.46107  |
| 22827 | P03410 | P14324 | 0.23025  |
| 22828 | P03410 | Q9H9Q4 | 0.6189   |
| 22829 | P03410 | Q5SZJ8 | 0.13501  |
| 22830 | P03410 | Q6MZN7 | 1.6653   |
| 22831 | P03410 | Q86Y25 | 0.81906  |
| 22832 | P03410 | Q96FN9 | 0.877    |
| 22833 | P03410 | Q499Z4 | 0.80936  |
| 22834 | P03410 | Q9NRQ5 | 1.6653   |
| 22835 | P03410 | Q8IVM0 | 0.83836  |
| 22836 | P03410 | P28370 | 0.44228  |
| 22837 | P03410 | Q6ZTC4 | 1.6653   |
| 22838 | P03410 | Q96KD3 | 1.9055   |
| 22839 | P03410 | Q8IW50 | 1.4883   |
| 22840 | P03410 | Q9Y4U1 | 0.51341  |
| 22841 | P03410 | P22033 | 1.0003   |
| 22842 | P03410 | P50991 | 0.33921  |
| 22843 | P03410 | O75390 | 0.18749  |
| 22844 | P03410 | Q3LI77 | 0.46908  |
| 22845 | P03410 | Q9HB65 | 0.56643  |
| 22846 | P03410 | Q9HBE1 | 0.55581  |
| 22847 | P03410 | O76009 | 0.88723  |
| 22848 | P03410 | Q9Y5P8 | 0.98025  |
| 22849 | P03410 | Q8N393 | 0.81273  |
| 22850 | P03410 | P48595 | 0.25305  |
| 22851 | P03410 | Q13506 | 0.39317  |
| 22852 | P03410 | P61077 | 0.53543  |
| 22853 | P03410 | Q0P6D6 | 0.19775  |
| 22854 | P03410 | Q2M3X9 | 0.82417  |
| 22855 | P03410 | Q03111 | 1.1722   |
| 22856 | P03410 | P07197 | 1.2446   |
| 22857 | P03410 | P10606 | 0.27069  |
| 22858 | P03410 | O14777 | 0.74555  |
| 22859 | P03410 | Q9Y4J8 | 0.30618  |
| 22860 | P03410 | Q4G0G2 | 1.1197   |
| 22861 | P03410 | O96015 | 0.18613  |
| 22862 | P03410 | Q8NEL9 | 0.097892 |
| 22863 | P03410 | Q9UPN7 | 1.1342   |
| 22864 | P03410 | Q13573 | 0.67263  |
| 22865 | P03410 | O95373 | 1.3485   |
| 22866 | P03410 | Q14203 | 1.3045   |
| 22867 | P03410 | Q9BZE1 | 1.009    |
| 22868 | P03410 | C9JE40 | 1.1194   |
| 22869 | P03410 | Q9NNW5 | 0.79318  |
| 22870 | P03410 | Q6B9Z1 | 1.0868   |
| 22871 | P03410 | O95487 | 1.0642   |
| 22872 | P03410 | P62837 | 0.53543  |
| 22873 | P03410 | Q5QJ74 | 0.23477  |
| 22874 | P03410 | P05814 | 1.3964   |
| 22875 | P03410 | O95156 | 1.1068   |
| 22876 | P03410 | Q96LD1 | 0.57553  |

|       |        |        |          |
|-------|--------|--------|----------|
| 22877 | P03410 | Q5MJ07 | 1.5851   |
| 22878 | P03410 | O60284 | 0.14332  |
| 22879 | P03410 | Q5VV17 | 0.23523  |
| 22880 | P03410 | Q9BX40 | 1.1703   |
| 22881 | P03410 | Q05195 | 0.32774  |
| 22882 | P03410 | Q1T7F1 | 0.54271  |
| 22883 | P03410 | P49792 | 0.94507  |
| 22884 | P03410 | Q9NX05 | 0.771    |
| 22885 | P03410 | Q8NFR3 | 0.67623  |
| 22886 | P03410 | Q06609 | 0.48907  |
| 22887 | P03410 | P0C7T7 | 1.6653   |
| 22888 | P03410 | Q15061 | 0.36709  |
| 22889 | P03410 | Q96MW1 | 1.4883   |
| 22890 | P03410 | Q9GZN7 | 1.0471   |
| 22891 | P03410 | Q8NEM0 | 0.31479  |
| 22892 | P03410 | Q15276 | 0.62758  |
| 22893 | P03410 | Q01892 | 0.26519  |
| 22894 | P03410 | Q8NBV4 | 0.98316  |
| 22895 | P03410 | Q9BYG5 | 0.85202  |
| 22896 | P03410 | O43819 | 0.41662  |
| 22897 | P03410 | A7MCY6 | 1.1015   |
| 22898 | P03410 | Q7Z5Y7 | 0.32577  |
| 22899 | P03410 | Q8NHG7 | 1.3877   |
| 22900 | P03410 | Q96MH2 | 1.2184   |
| 22901 | P03410 | Q3SXR2 | 1.2658   |
| 22902 | P03410 | Q8N184 | 0.68671  |
| 22903 | P03410 | Q14240 | 0.48093  |
| 22904 | P03410 | Q5T752 | 1.6653   |
| 22905 | P03410 | Q7Z4Y8 | 0.36834  |
| 22906 | P03410 | Q12894 | 0.61598  |
| 22907 | P03410 | Q8HWS3 | 0.17943  |
| 22908 | P03410 | Q14249 | 0.12251  |
| 22909 | P03410 | Q9BSY9 | 0.56365  |
| 22910 | P03410 | O75586 | 0.67422  |
| 22911 | P03410 | Q8IZQ1 | 0.99732  |
| 22912 | P03410 | P43897 | 1.9953   |
| 22913 | P03410 | Q9HBU9 | 0.84707  |
| 22914 | P03410 | Q9UL46 | 0.6925   |
| 22915 | P03410 | Q13323 | 0.40236  |
| 22916 | P03410 | Q02241 | 0.81019  |
| 22917 | P03410 | P55345 | 0.41528  |
| 22918 | P03410 | Q9BU64 | 0.61202  |
| 22919 | P03410 | Q5TEZ4 | 1.6653   |
| 22920 | P03410 | Q53S33 | 1.4703   |
| 22921 | P03410 | Q9NQ31 | 1.2575   |
| 22922 | P03410 | A6NJQ4 | 0.6566   |
| 22923 | P03410 | P28074 | 0.88827  |
| 22924 | P03410 | P0C221 | 0.18227  |
| 22925 | P03410 | Q9BQ08 | 1.0699   |
| 22926 | P03410 | P14921 | 0.89095  |
| 22927 | P03410 | P10909 | 0.047769 |
| 22928 | P03410 | O95059 | 0.75727  |
| 22929 | P03410 | Q9BVM2 | 0.56932  |
| 22930 | P03410 | Q15021 | 0.92904  |
| 22931 | P03410 | Q2TAP0 | 0.6587   |
| 22932 | P03410 | Q4KMQ1 | 1.4181   |
| 22933 | P03410 | O43663 | 1.0617   |
| 22934 | P03410 | Q7Z417 | 1.0018   |
| 22935 | P03410 | Q8WYA1 | 0.26092  |
| 22936 | P03410 | Q8N2Z9 | 0.64189  |
| 22937 | P03410 | P61289 | 1.0914   |
| 22938 | P03410 | O75530 | 0.66038  |
| 22939 | P03410 | Q9NV39 | 1.6481   |
| 22940 | P03410 | Q6PF18 | 0.2215   |
| 22941 | P03410 | P55210 | 0.23771  |
| 22942 | P03410 | Q8N128 | 1.6653   |
| 22943 | P03410 | Q96RJ6 | 0.46522  |
| 22944 | P03410 | A6NGY3 | 0.44154  |
| 22945 | P03410 | Q9H9Y6 | 0.59027  |
| 22946 | P03410 | Q9Y473 | 0.79126  |
| 22947 | P03410 | O75791 | 1.0938   |
| 22948 | P03410 | Q6PB30 | 1.675    |
| 22949 | P03410 | Q9ULW8 | 0.75553  |
| 22950 | P03410 | Q6ZP68 | 1.7919   |
| 22951 | P03410 | Q9Y5X2 | 0.39503  |
| 22952 | P03410 | Q8WVI0 | 1.1965   |

|       |        |        |         |
|-------|--------|--------|---------|
| 22953 | P03410 | Q8N0S2 | 0.14863 |
| 22954 | P03410 | O75394 | 1.0615  |
| 22955 | P03410 | Q9NYU2 | 0.38775 |
| 22956 | P03410 | O15083 | 0.90676 |
| 22957 | P03410 | P12074 | 0.60877 |
| 22958 | P03410 | P52747 | 0.83357 |
| 22959 | P03410 | P0C025 | 1.2441  |
| 22960 | P03410 | Q96DC7 | 1.7039  |
| 22961 | P03410 | Q96NJ6 | 0.76936 |
| 22962 | P03410 | Q5MNZ9 | 0.23052 |
| 22963 | P03410 | Q9H503 | 0.67504 |
| 22964 | P03410 | Q9UHR5 | 1.3414  |
| 22965 | P03410 | P83881 | 0.98486 |
| 22966 | P03410 | Q9H665 | 0.59272 |
| 22967 | P03410 | P21695 | 0.21613 |
| 22968 | P03410 | Q8IVC4 | 0.80657 |
| 22969 | P03410 | Q9NQ88 | 0.45586 |
| 22970 | P03410 | P17480 | 1.0259  |
| 22971 | P03410 | Q9HCX3 | 0.66571 |
| 22972 | P03410 | A8MTZ7 | 0.37547 |
| 22973 | P03410 | Q9H0U6 | 0.97273 |
| 22974 | P03410 | Q9Y6M1 | 0.39793 |
| 22975 | P03410 | Q13435 | 1.1443  |
| 22976 | P03410 | Q5VXD3 | 0.19886 |
| 22977 | P03410 | Q8N9W8 | 1.9055  |
| 22978 | P03410 | Q14690 | 0.59798 |
| 22979 | P03410 | Q8WUY3 | 0.50071 |
| 22980 | P03410 | Q8N1P7 | 0.40164 |
| 22981 | P03410 | Q969T7 | 0.15166 |
| 22982 | P03410 | Q86UK5 | 0.52718 |
| 22983 | P03410 | Q68DK7 | 1.2419  |
| 22984 | P03410 | Q12788 | 0.23584 |
| 22985 | P03410 | P60866 | 1.2925  |
| 22986 | P03410 | O43390 | 0.55171 |
| 22987 | P03410 | Q8WTZ4 | 0.11325 |
| 22988 | P03410 | P51398 | 1.4811  |
| 22989 | P03410 | Q04725 | 0.8562  |
| 22990 | P03410 | Q9UBF2 | 0.62725 |
| 22991 | P03410 | O95149 | 0.6512  |
| 22992 | P03410 | A4D1E1 | 0.97809 |
| 22993 | P03410 | P01011 | 0.21139 |
| 22994 | P03410 | Q9H0F6 | 0.41624 |
| 22995 | P03410 | Q96AX1 | 0.40908 |
| 22996 | P03410 | Q7Z589 | 1.6148  |
| 22997 | P03410 | Q8IV50 | 0.18395 |
| 22998 | P03410 | E9PKD4 | 0.14598 |
| 22999 | P03410 | A6NHS1 | 1.0305  |
| 23000 | P03410 | Q9UQK1 | 0.57887 |
| 23001 | P03410 | Q9BW66 | 1.3201  |
| 23002 | P03410 | P51504 | 0.77383 |
| 23003 | P03410 | A2RTY3 | 0.57739 |
| 23004 | P03410 | B7Z6K7 | 0.68283 |
| 23005 | P03410 | Q9H307 | 1.4016  |
| 23006 | P03410 | O95182 | 0.53398 |
| 23007 | P03410 | Q9UJ94 | 1.6653  |
| 23008 | P03410 | A6NGA9 | 0.87187 |
| 23009 | P03410 | Q7Z6M4 | 1.4517  |
| 23010 | P03410 | Q8N9F8 | 0.83665 |
| 23011 | P03410 | P69891 | 0.81619 |
| 23012 | P03410 | Q86WG5 | 0.33798 |
| 23013 | P03410 | Q6ZVT6 | 0.45507 |
| 23014 | P03410 | Q3LI58 | 1.6653  |
| 23015 | P03410 | O75494 | 0.58073 |
| 23016 | P03410 | P13056 | 0.61719 |
| 23017 | P03410 | A4D174 | 0.21624 |
| 23018 | P03410 | Q8WW01 | 0.73597 |
| 23019 | P03410 | O75431 | 0.21269 |
| 23020 | P03410 | Q5PSV4 | 0.48948 |
| 23021 | P03410 | Q15007 | 0.88868 |
| 23022 | P03410 | Q6P499 | 1.0846  |
| 23023 | P03410 | O75155 | 0.87623 |
| 23024 | P03410 | Q5VT06 | 0.8539  |
| 23025 | P03410 | Q9NRG4 | 0.58731 |
| 23026 | P03410 | Q13021 | 0.40115 |
| 23027 | P03410 | Q3MIW9 | 0.77766 |
| 23028 | P03410 | Q9H6Q3 | 0.38715 |

|       |        |        |          |
|-------|--------|--------|----------|
| 23029 | P03410 | Q8NBZ0 | 1.9071   |
| 23030 | P03410 | O95049 | 0.83082  |
| 23031 | P03410 | Q96NL3 | 0.85653  |
| 23032 | P03410 | Q13257 | 0.95804  |
| 23033 | P03410 | Q99569 | 0.66553  |
| 23034 | P03410 | Q3MIR4 | 0.0592   |
| 23035 | P03410 | Q14331 | 0.8185   |
| 23036 | P03410 | Q9NQS7 | 1.3531   |
| 23037 | P03410 | Q9NZJ0 | 0.79948  |
| 23038 | P03410 | Q13415 | 0.31159  |
| 23039 | P03410 | Q8N4U5 | 0.22946  |
| 23040 | P03410 | P13232 | 0.065134 |
| 23041 | P03410 | O75607 | 0.89706  |
| 23042 | P03410 | C9J3I9 | 1.0363   |
| 23043 | P03410 | O14641 | 0.61499  |
| 23044 | P03410 | Q8N0W7 | 0.83104  |
| 23045 | P03410 | Q9H6U6 | 1.0239   |
| 23046 | P03410 | Q96GK7 | 0.77695  |
| 23047 | P03410 | Q13144 | 0.52201  |
| 23048 | P03410 | O43900 | 0.37924  |
| 23049 | P03410 | Q9H5Z6 | 1.4883   |
| 23050 | P03410 | Q9Y597 | 0.32577  |
| 23051 | P03410 | Q9UBG7 | 0.12181  |
| 23052 | P03410 | Q9BUE6 | 0.15687  |
| 23053 | P03410 | Q15528 | 1.1884   |
| 23054 | P03410 | Q96DB2 | 0.24163  |
| 23055 | P03410 | Q13316 | 1.0318   |
| 23056 | P03410 | Q08379 | 0.74329  |
| 23057 | P03410 | P07476 | 1.5535   |
| 23058 | P03410 | P42677 | 1.1427   |
| 23059 | P03410 | Q9BRL7 | 0.92069  |
| 23060 | P03410 | Q6MZQ0 | 0.3474   |
| 23061 | P03410 | Q9Y3D3 | 1.2073   |
| 23062 | P03410 | Q9HCG8 | 0.29064  |
| 23063 | P03410 | O15304 | 1.2593   |
| 23064 | P03410 | Q8NHU0 | 0.37182  |
| 23065 | P03410 | P61970 | 0.6849   |
| 23066 | P03410 | Q9BXJ9 | 0.47362  |
| 23067 | P03410 | Q9Y3B2 | 0.76191  |
| 23068 | P03410 | Q58A44 | 1.6653   |
| 23069 | P03410 | P54920 | 0.71845  |
| 23070 | P03410 | Q1A5X6 | 1.4883   |
| 23071 | P03410 | Q96LW7 | 1.3469   |
| 23072 | P03410 | Q8IWy8 | 0.74816  |
| 23073 | P03410 | Q96IK1 | 0.4097   |
| 23074 | P03410 | Q9BXG8 | 0.51107  |
| 23075 | P03410 | Q99741 | 0.68802  |
| 23076 | P03410 | Q99689 | 0.54415  |
| 23077 | P03410 | P20396 | 1.0655   |
| 23078 | P03410 | P61457 | 0.91383  |
| 23079 | P03410 | Q6IS14 | 0.49272  |
| 23080 | P03410 | Q8N2M8 | 1.479    |
| 23081 | P03410 | Q8IZC7 | 0.59155  |
| 23082 | P03410 | Q9NZD4 | 1.3236   |
| 23083 | P03410 | P10155 | 1.243    |
| 23084 | P03410 | Q8N0Y2 | 0.53744  |
| 23085 | P03410 | Q16587 | 0.72858  |
| 23086 | P03410 | Q6PJI1 | 0.25743  |
| 23087 | P03410 | Q96GC5 | 1.1191   |
| 23088 | P03410 | O15499 | 0.20614  |
| 23089 | P03410 | P50616 | 0.59326  |
| 23090 | P03410 | Q7Z3Y7 | 0.74827  |
| 23091 | P03410 | Q5TAA0 | 0.16864  |
| 23092 | P03410 | Q08AG5 | 1.0612   |
| 23093 | P03410 | Q96MG2 | 0.9117   |
| 23094 | P03410 | Q7L0Y3 | 1.1609   |
| 23095 | P03410 | Q9UFB7 | 0.76365  |
| 23096 | P03410 | Q8WUF5 | 0.84007  |
| 23097 | P03410 | Q7Z309 | 0.42449  |
| 23098 | P03410 | Q9BRP8 | 1.5249   |
| 23099 | P03410 | Q5T124 | 0.26902  |
| 23100 | P03410 | Q8WTV1 | 1.3528   |
| 23101 | P03410 | Q9NZV5 | 0.76667  |
| 23102 | P03410 | Q9H0W7 | 0.073    |
| 23103 | P03410 | Q15935 | 0.80479  |
| 23104 | P03410 | P22735 | 0.23914  |

|       |        |        |           |
|-------|--------|--------|-----------|
| 23105 | P03410 | Q96BM0 | 1.05      |
| 23106 | P03410 | Q53GS7 | 1.1709    |
| 23107 | P03410 | Q03938 | 0.89555   |
| 23108 | P03410 | Q6NW34 | 1.1653    |
| 23109 | P03410 | Q99966 | 0.16214   |
| 23110 | P03410 | Q86YI8 | 0.7804    |
| 23111 | P03410 | Q16385 | 0.98678   |
| 23112 | P03410 | Q6NX49 | 0.68529   |
| 23113 | P03410 | Q86VW0 | 0.56561   |
| 23114 | P03410 | O75616 | 0.68791   |
| 23115 | P03410 | Q16635 | 0.50578   |
| 23116 | P03410 | Q8NF91 | 0.76517   |
| 23117 | P03410 | Q9NNW7 | 0.36996   |
| 23118 | P03410 | Q9NXV2 | 1.5329    |
| 23119 | P03410 | Q5H9M0 | 1.4995    |
| 23120 | P03410 | P05198 | 0.83154   |
| 23121 | P03410 | P27797 | 0.83569   |
| 23122 | P03410 | Q8NCQ3 | 1.6653    |
| 23123 | P03410 | P25440 | 0.42091   |
| 23124 | P03410 | P14406 | 0.63257   |
| 23125 | P03410 | Q9BSK1 | 0.70444   |
| 23126 | P03410 | Q9NWZ8 | 0.87788   |
| 23127 | P03410 | Q9BXS1 | 0.64369   |
| 23128 | P03410 | Q71SY5 | 1.1007    |
| 23129 | P03410 | Q02040 | 1.0931    |
| 23130 | P03410 | Q16559 | 0.23876   |
| 23131 | P03410 | Q9H2U1 | 0.29094   |
| 23132 | P03410 | P54727 | 0.78219   |
| 23133 | P03410 | Q9BTA0 | 1.4883    |
| 23134 | P03410 | Q8IUC3 | 1.7887    |
| 23135 | P03410 | Q8NBF4 | 0.017924  |
| 23136 | P03410 | Q8TD06 | 0.31787   |
| 23137 | P03410 | Q9H714 | 0.67886   |
| 23138 | P03410 | P53801 | 1.4534    |
| 23139 | P03410 | Q15048 | 0.0052673 |
| 23140 | P03410 | P0CJ77 | 1.4876    |
| 23141 | P03410 | O14529 | 0.35837   |
| 23142 | P03410 | Q7Z7F1 | 0.43268   |
| 23143 | P03410 | Q8N5R6 | 0.8406    |
| 23144 | P03410 | Q9NRH1 | 0.62046   |
| 23145 | P03410 | Q6ZRQ5 | 0.82817   |
| 23146 | P03410 | P0C5Y4 | 1.2381    |
| 23147 | P03410 | A6NDD8 | 1.289     |
| 23148 | P03410 | Q96HE8 | 0.79384   |
| 23149 | P03410 | Q9Y3B7 | 1.8132    |
| 23150 | P03410 | Q9NSQ0 | 0.57606   |
| 23151 | P03410 | P62318 | 0.85746   |
| 23152 | P03410 | Q86WU2 | 0.24446   |
| 23153 | P03410 | Q92870 | 0.7775    |
| 23154 | P14075 | Q9Y2Z4 | 0.40331   |
| 23155 | P14075 | P60953 | 0.34615   |
| 23156 | P14075 | Q6L8G5 | 0.63821   |
| 23157 | P14075 | P60331 | 0.78356   |
| 23158 | P14075 | Q04727 | 0.4978    |
| 23159 | P14075 | O43674 | 0.61283   |
| 23160 | P14075 | P43351 | 0.3676    |
| 23161 | P14075 | Q5BIV9 | 0.71971   |
| 23162 | P14075 | Q8N3J3 | 0.45789   |
| 23163 | P14075 | A6NJB7 | 0.59774   |
| 23164 | P14075 | P11169 | 0.24848   |
| 23165 | P14075 | Q96GX8 | 0.94025   |
| 23166 | P14075 | Q8N490 | 0.33948   |
| 23167 | P14075 | Q96QA6 | 0.097001  |
| 23168 | P14075 | Q5T319 | 0.63821   |
| 23169 | P14075 | P49321 | 0.62535   |
| 23170 | P14075 | P53673 | 0.4432    |
| 23171 | P14075 | P0CG20 | 0.2916    |
| 23172 | P14075 | Q9NVU0 | 0.30728   |
| 23173 | P14075 | Q9H307 | 0.68199   |
| 23174 | P14075 | Q14146 | 0.63821   |
| 23175 | P14075 | Q16633 | 0.3299    |
| 23176 | P14075 | Q9BQI5 | 0.25248   |
| 23177 | P14075 | K7EIQ3 | 0.69807   |
| 23178 | P14075 | Q14457 | 0.33128   |
| 23179 | P14075 | Q9H974 | 0.87529   |
| 23180 | P14075 | Q86TU6 | 0.78299   |

|       |        |        |           |
|-------|--------|--------|-----------|
| 23181 | P14075 | Q8WWB3 | 0.062646  |
| 23182 | P14075 | Q9Y6R9 | 0.86566   |
| 23183 | P14075 | A6NH13 | 0.3214    |
| 23184 | P14075 | Q9H6Z4 | 0.84571   |
| 23185 | P14075 | Q9NQ33 | 0.26096   |
| 23186 | P14075 | Q5VWM1 | 0.33501   |
| 23187 | P14075 | P28069 | 0.46079   |
| 23188 | P14075 | P42704 | 0.69626   |
| 23189 | P14075 | Q8N196 | 0.50855   |
| 23190 | P14075 | Q9HAY2 | 0.02175   |
| 23191 | P14075 | Q6L8G4 | 0.63821   |
| 23192 | P14075 | Q96EB1 | 0.8575    |
| 23193 | P14075 | Q8IYN6 | 0.8608    |
| 23194 | P14075 | Q3L8U1 | 0.62011   |
| 23195 | P14075 | Q5VWX1 | 0.50571   |
| 23196 | P14075 | Q0D2J5 | 0.21195   |
| 23197 | P14075 | Q00059 | 0.66782   |
| 23198 | P14075 | O95453 | 0.30002   |
| 23199 | P14075 | Q9P2Y5 | 0.22      |
| 23200 | P14075 | Q8N0Z8 | 0.54386   |
| 23201 | P14075 | Q8WZA9 | 0.94025   |
| 23202 | P14075 | Q13278 | 0.57763   |
| 23203 | P14075 | Q92764 | 0.62407   |
| 23204 | P14075 | Q9NZL3 | 0.44945   |
| 23205 | P14075 | Q9Y2M2 | 0.42677   |
| 23206 | P14075 | Q69383 | 0.589     |
| 23207 | P14075 | Q8TB05 | 0.94025   |
| 23208 | P14075 | Q92797 | 0.50381   |
| 23209 | P14075 | A1L170 | 0.63821   |
| 23210 | P14075 | Q9C0F3 | 0.12672   |
| 23211 | P14075 | Q9P0V3 | 0.47168   |
| 23212 | P14075 | P13051 | 0.91006   |
| 23213 | P14075 | P52630 | 0.46295   |
| 23214 | P14075 | P0C838 | 0.52542   |
| 23215 | P14075 | Q4G0A6 | 0.82564   |
| 23216 | P14075 | P48668 | 0.22406   |
| 23217 | P14075 | Q9P000 | 0.25196   |
| 23218 | P14075 | B1AJZ1 | 0.0073782 |
| 23219 | P14075 | Q96MT8 | 0.70621   |
| 23220 | P14075 | Q9NQG7 | 0.14398   |
| 23221 | P14075 | Q9BSU1 | 0.49793   |
| 23222 | P14075 | O75953 | 0.45785   |
| 23223 | P14075 | Q5VSD8 | 0.34021   |
| 23224 | P14075 | H0Y354 | 0.43864   |
| 23225 | P14075 | Q5VTR2 | 0.50457   |
| 23226 | P14075 | Q969F1 | 0.52887   |
| 23227 | P14075 | Q8NCT3 | 0.94288   |
| 23228 | P14075 | Q86UU0 | 0.78342   |
| 23229 | P14075 | Q86WW8 | 0.47604   |
| 23230 | P14075 | Q6P2E9 | 0.71817   |
| 23231 | P14075 | Q96IP4 | 0.52552   |
| 23232 | P14075 | P53804 | 0.47131   |
| 23233 | P14075 | A6NFC5 | 0.58806   |
| 23234 | P14075 | Q14781 | 0.55159   |
| 23235 | P14075 | Q9H246 | 0.29763   |
| 23236 | P14075 | P59990 | 0.78356   |
| 23237 | P14075 | Q494X3 | 0.30057   |
| 23238 | P14075 | Q8WXC6 | 0.46749   |
| 23239 | P14075 | A8MT69 | 0.2372    |
| 23240 | P14075 | Q9BY41 | 0.23775   |
| 23241 | P14075 | Q9Y5P8 | 0.37386   |
| 23242 | P14075 | P11387 | 0.46055   |
| 23243 | P14075 | A8MYA2 | 0.27688   |
| 23244 | P14075 | Q9UI26 | 0.15562   |
| 23245 | P14075 | Q9UN30 | 0.12072   |
| 23246 | P14075 | Q6P4R8 | 0.78412   |
| 23247 | P14075 | Q9BZZ5 | 0.15662   |
| 23248 | P14075 | A1A4V9 | 0.19565   |
| 23249 | P14075 | P17480 | 0.76479   |
| 23250 | P14075 | Q5BXX5 | 0.94025   |
| 23251 | P14075 | P17029 | 0.24572   |
| 23252 | P14075 | Q9UBW5 | 0.31745   |
| 23253 | P14075 | O76014 | 0.70708   |
| 23254 | P14075 | P49336 | 0.48027   |
| 23255 | P14075 | Q9P2W6 | 0.63821   |
| 23256 | P14075 | O95561 | 0.56893   |

|       |        |        |         |
|-------|--------|--------|---------|
| 23257 | P14075 | Q6ZVN7 | 0.34062 |
| 23258 | P14075 | Q8N6K4 | 0.63821 |
| 23259 | P14075 | Q96RL7 | 0.6898  |
| 23260 | P14075 | P06733 | 0.62724 |
| 23261 | P14075 | P05204 | 0.52983 |
| 23262 | P14075 | Q7Z3Z0 | 0.80046 |
| 23263 | P14075 | Q96BY2 | 0.28506 |
| 23264 | P14075 | Q68DY1 | 0.2938  |
| 23265 | P14075 | Q2TAZ0 | 0.1668  |
| 23266 | P14075 | Q9NVH6 | 0.32307 |
| 23267 | P14075 | Q8N0U6 | 0.63821 |
| 23268 | P14075 | P60604 | 0.19221 |
| 23269 | P14075 | Q96F07 | 0.27332 |
| 23270 | P14075 | Q6ZR03 | 0.28496 |
| 23271 | P14075 | Q9NTW7 | 0.28182 |
| 23272 | P14075 | P78560 | 0.33407 |
| 23273 | P14075 | Q92545 | 0.76323 |
| 23274 | P14075 | Q99871 | 0.30651 |
| 23275 | P14075 | Q6PI97 | 0.45007 |
| 23276 | P14075 | Q15059 | 0.98657 |
| 23277 | P14075 | Q15297 | 0.35567 |
| 23278 | P14075 | Q6ZV77 | 0.63821 |
| 23279 | P14075 | Q3SYG4 | 0.36769 |
| 23280 | P14075 | Q6ZTI0 | 0.63821 |
| 23281 | P14075 | Q9BTM9 | 0.68115 |
| 23282 | P14075 | Q9P0U1 | 0.47429 |
| 23283 | P14075 | Q9BQE4 | 0.40794 |
| 23284 | P14075 | Q9UBS3 | 0.38908 |
| 23285 | P14075 | Q9P1G2 | 0.45695 |
| 23286 | P14075 | P29474 | 0.38259 |
| 23287 | P14075 | A6NFT4 | 0.26322 |
| 23288 | P14075 | P82979 | 0.14848 |
| 23289 | P14075 | Q5H9L2 | 0.79563 |
| 23290 | P14075 | P68871 | 0.3284  |
| 23291 | P14075 | Q49AS3 | 0.48488 |
| 23292 | P14075 | E9PI22 | 0.65129 |
| 23293 | P14075 | P42766 | 0.54689 |
| 23294 | P14075 | Q96AQ6 | 0.67534 |
| 23295 | P14075 | Q7Z2E3 | 0.2593  |
| 23296 | P14075 | P54136 | 0.57345 |
| 23297 | P14075 | P78537 | 0.6991  |
| 23298 | P14075 | Q6TFL3 | 0.14968 |
| 23299 | P14075 | Q15257 | 0.28209 |
| 23300 | P14075 | Q9UI66 | 0.63821 |
| 23301 | P14075 | Q8NI51 | 0.4334  |
| 23302 | P14075 | Q5SWL7 | 0.50336 |
| 23303 | P14075 | P52292 | 0.66519 |
| 23304 | P14075 | Q9Y5U2 | 0.90432 |
| 23305 | P14075 | O14530 | 0.24124 |
| 23306 | P14075 | Q9HAB8 | 0.59031 |
| 23307 | P14075 | O43617 | 0.20877 |
| 23308 | P14075 | Q96M11 | 0.94876 |
| 23309 | P14075 | Q5JQF7 | 0.63821 |
| 23310 | P14075 | A8MX34 | 0.49576 |
| 23311 | P14075 | Q8NB91 | 0.2161  |
| 23312 | P14075 | A6NLC8 | 0.81665 |
| 23313 | P14075 | Q96FQ7 | 0.11439 |
| 23314 | P14075 | H3BU77 | 0.46379 |
| 23315 | P14075 | Q5H9M0 | 0.79841 |
| 23316 | P14075 | Q99933 | 0.51804 |
| 23317 | P14075 | Q9Y6J9 | 0.60448 |
| 23318 | P14075 | Q96ST3 | 0.58189 |
| 23319 | P14075 | Q9HBH1 | 0.56624 |
| 23320 | P14075 | P51003 | 0.1449  |
| 23321 | P14075 | Q9NSC2 | 0.2035  |
| 23322 | P14075 | Q8TEV8 | 0.63821 |
| 23323 | P14075 | Q1W209 | 0.63821 |
| 23324 | P14075 | P22626 | 0.42497 |
| 23325 | P14075 | O00566 | 0.58419 |
| 23326 | P14075 | Q52LJ0 | 0.60059 |
| 23327 | P14075 | Q96PI1 | 0.90865 |
| 23328 | P14075 | O00213 | 0.25006 |
| 23329 | P14075 | P08729 | 1.0616  |
| 23330 | P14075 | Q16576 | 0.31899 |
| 23331 | P14075 | Q14511 | 0.49027 |
| 23332 | P14075 | Q92585 | 0.75404 |



|       |        |        |          |
|-------|--------|--------|----------|
| 23333 | P14075 | Q15572 | 0.67745  |
| 23334 | P14075 | A8MV65 | 0.63967  |
| 23335 | P14075 | O15131 | 0.76685  |
| 23336 | P14075 | A6NLJ0 | 1.0292   |
| 23337 | P14075 | Q6ZNM6 | 0.62405  |
| 23338 | P14075 | Q8TEQ6 | 0.54295  |
| 23339 | P14075 | O14925 | 0.22989  |
| 23340 | P14075 | Q9NVA1 | 0.44327  |
| 23341 | P14075 | Q6IPU0 | 0.85167  |
| 23342 | P14075 | Q15366 | 0.6477   |
| 23343 | P14075 | Q12789 | 0.57691  |
| 23344 | P14075 | P84101 | 1.0669   |
| 23345 | P14075 | P61575 | 0.589    |
| 23346 | P14075 | P43355 | 0.79804  |
| 23347 | P14075 | Q96IU2 | 0.94459  |
| 23348 | P14075 | Q96EZ4 | 0.63821  |
| 23349 | P14075 | Q9BS18 | 0.62224  |
| 23350 | P14075 | Q7L1V2 | 0.73083  |
| 23351 | P14075 | A6NEH8 | 0.24216  |
| 23352 | P14075 | Q52LD8 | 0.61594  |
| 23353 | P14075 | O14646 | 0.45593  |
| 23354 | P14075 | Q9UHL9 | 0.40974  |
| 23355 | P14075 | Q9UK73 | 0.5162   |
| 23356 | P14075 | P35869 | 0.27055  |
| 23357 | P14075 | Q8IZU1 | 0.52558  |
| 23358 | P14075 | Q3T8J9 | 0.38766  |
| 23359 | P14075 | Q9BRP1 | 0.59532  |
| 23360 | P14075 | Q9BUP3 | 0.14059  |
| 23361 | P14075 | Q8NC74 | 0.27214  |
| 23362 | P14075 | Q15819 | 0.41139  |
| 23363 | P14075 | Q9H7H0 | 0.49088  |
| 23364 | P14075 | Q6NUR6 | 0.60388  |
| 23365 | P14075 | Q09666 | 0.45383  |
| 23366 | P14075 | O60663 | 0.37128  |
| 23367 | P14075 | P49207 | 0.63103  |
| 23368 | P14075 | P40925 | 0.29894  |
| 23369 | P14075 | Q8N1G2 | 0.16359  |
| 23370 | P14075 | Q5T7P2 | 0.63821  |
| 23371 | P14075 | Q9H425 | 0.47857  |
| 23372 | P14075 | B3EWG5 | 0.94025  |
| 23373 | P14075 | Q8TB33 | 0.15748  |
| 23374 | P14075 | Q9Y6X4 | 1.1439   |
| 23375 | P14075 | Q96GX9 | 0.20394  |
| 23376 | P14075 | O15234 | 0.77358  |
| 23377 | P14075 | Q8TAD1 | 0.43632  |
| 23378 | P14075 | P09132 | 0.10466  |
| 23379 | P14075 | Q9NQE9 | 0.053464 |
| 23380 | P14075 | Q8TAQ5 | 0.2118   |
| 23381 | P14075 | Q9P266 | 0.71234  |
| 23382 | P14075 | Q8TB72 | 0.33442  |
| 23383 | P14075 | Q9H6R7 | 0.1474   |
| 23384 | P14075 | Q9BQS6 | 0.54344  |
| 23385 | P14075 | P63165 | 0.64365  |
| 23386 | P14075 | Q9BWN1 | 0.94025  |
| 23387 | P14075 | Q56VL3 | 0.69389  |
| 23388 | P14075 | Q9HB96 | 0.63821  |
| 23389 | P14075 | O43156 | 0.65951  |
| 23390 | P14075 | Q8N6T7 | 0.40256  |
| 23391 | P14075 | Q8IXS0 | 0.94025  |
| 23392 | P14075 | P51815 | 0.14594  |
| 23393 | P14075 | Q9UGC7 | 0.51551  |
| 23394 | P14075 | Q13505 | 0.64016  |
| 23395 | P14075 | Q969W3 | 0.64762  |
| 23396 | P14075 | Q9BUA3 | 0.71853  |
| 23397 | P14075 | A6NJI1 | 0.68888  |
| 23398 | P14075 | Q92990 | 0.29294  |
| 23399 | P14075 | A6NHQ4 | 0.88236  |
| 23400 | P14075 | P62857 | 0.40577  |
| 23401 | P14075 | Q96CS3 | 0.33097  |
| 23402 | P14075 | Q96S65 | 0.89467  |
| 23403 | P14075 | P62304 | 0.521    |
| 23404 | P14075 | P09497 | 0.23249  |
| 23405 | P14075 | Q9GZV5 | 0.7949   |
| 23406 | P14075 | P51825 | 0.7714   |
| 23407 | P14075 | Q8NDM7 | 0.3781   |
| 23408 | P14075 | Q9NTU4 | 0.74711  |

|       |        |        |          |
|-------|--------|--------|----------|
| 23409 | P14075 | P52815 | 0.37416  |
| 23410 | P14075 | Q5W0V3 | 0.68538  |
| 23411 | P14075 | P0CG34 | 0.49457  |
| 23412 | P14075 | P46781 | 0.78039  |
| 23413 | P14075 | O95049 | 0.24992  |
| 23414 | P14075 | Q96QR8 | 0.35229  |
| 23415 | P14075 | Q15643 | 0.5604   |
| 23416 | P14075 | Q969S3 | 0.47367  |
| 23417 | P14075 | Q96GM8 | 0.19151  |
| 23418 | P14075 | Q9BRJ2 | 0.21714  |
| 23419 | P14075 | Q9C0E2 | 0.6423   |
| 23420 | P14075 | Q8TAT6 | 0.18071  |
| 23421 | P14075 | P61580 | 0.65433  |
| 23422 | P14075 | H3BR10 | 0.63821  |
| 23423 | P14075 | P63220 | 0.35782  |
| 23424 | P14075 | Q15929 | 0.25516  |
| 23425 | P14075 | Q5T5N4 | 0.20453  |
| 23426 | P14075 | P53801 | 0.73364  |
| 23427 | P14075 | Q96NR2 | 0.15164  |
| 23428 | P14075 | Q99607 | 0.81303  |
| 23429 | P14075 | Q8IXW5 | 0.51167  |
| 23430 | P14075 | Q5HYK3 | 0.45041  |
| 23431 | P14075 | Q14129 | 0.37166  |
| 23432 | P14075 | Q16543 | 0.21074  |
| 23433 | P14075 | Q6V9R5 | 0.30288  |
| 23434 | P14075 | P0C7H8 | 0.49168  |
| 23435 | P14075 | Q68DX3 | 0.2663   |
| 23436 | P14075 | Q3KNV8 | 0.65799  |
| 23437 | P14075 | A6NM66 | 0.2179   |
| 23438 | P14075 | Q96GA3 | 0.55491  |
| 23439 | P14075 | P54105 | 0.6983   |
| 23440 | P14075 | Q7RTT5 | 0.12652  |
| 23441 | P14075 | Q8ND83 | 0.93223  |
| 23442 | P14075 | Q9UJY4 | 0.2736   |
| 23443 | P14075 | Q96N21 | 0.65863  |
| 23444 | P14075 | Q02410 | 0.32958  |
| 23445 | P14075 | Q9NZQ3 | 0.49337  |
| 23446 | P14075 | O75564 | 0.23985  |
| 23447 | P14075 | Q9ULX3 | 0.5545   |
| 23448 | P14075 | Q14746 | 0.20122  |
| 23449 | P14075 | Q96HJ5 | 0.21617  |
| 23450 | P14075 | P54253 | 0.70476  |
| 23451 | P14075 | Q9BTK2 | 0.27476  |
| 23452 | P14075 | Q05519 | 0.54111  |
| 23453 | P14075 | Q9H788 | 0.67868  |
| 23454 | P14075 | Q9H5J4 | 0.40775  |
| 23455 | P14075 | O76021 | 0.23148  |
| 23456 | P14075 | Q8WUB2 | 0.33058  |
| 23457 | P14075 | Q9BSY4 | 0.48129  |
| 23458 | P14075 | A8MWP4 | 0.27115  |
| 23459 | P14075 | P32969 | 0.58612  |
| 23460 | P14075 | A6NFY7 | 0.70357  |
| 23461 | P14075 | P61960 | 0.31428  |
| 23462 | P14075 | Q5T3Y7 | 0.074952 |
| 23463 | P14075 | Q9NXV6 | 0.76248  |
| 23464 | P14075 | Q9HAV7 | 0.39522  |
| 23465 | P14075 | O43303 | 0.52394  |
| 23466 | P14075 | Q16352 | 0.65268  |
| 23467 | P14075 | Q8N6V4 | 0.32313  |
| 23468 | P14075 | Q96E14 | 0.62693  |
| 23469 | P14075 | A6NDU8 | 0.47307  |
| 23470 | P14075 | P0DJG4 | 0.84631  |
| 23471 | P14075 | Q9UHL3 | 0.25426  |
| 23472 | P14075 | Q7Z2V1 | 0.63821  |
| 23473 | P14075 | Q8TDR4 | 0.25641  |
| 23474 | P14075 | Q8NEJ9 | 0.39451  |
| 23475 | P14075 | A6NDD8 | 0.455    |
| 23476 | P14075 | Q9H4X1 | 0.63637  |
| 23477 | P14075 | Q9UGY1 | 0.13296  |
| 23478 | P14075 | Q4KN68 | 0.28851  |
| 23479 | P14075 | B4DYI2 | 0.094299 |
| 23480 | P14075 | Q6TDU7 | 0.31935  |
| 23481 | P14075 | Q5T0Z8 | 0.94025  |
| 23482 | P14075 | Q9NP97 | 0.32727  |
| 23483 | P14075 | Q14602 | 0.15038  |
| 23484 | P14075 | Q5MNV8 | 0.4108   |

|       |        |        |          |
|-------|--------|--------|----------|
| 23485 | P14075 | Q8IYA8 | 0.94025  |
| 23486 | P14075 | Q5TA82 | 0.63821  |
| 23487 | P14075 | Q7L592 | 0.44831  |
| 23488 | P14075 | O43402 | 0.75836  |
| 23489 | P14075 | P14866 | 0.37348  |
| 23490 | P14075 | Q06250 | 0.63821  |
| 23491 | P14075 | O60239 | 0.16812  |
| 23492 | P14075 | Q96EL2 | 0.20824  |
| 23493 | P14075 | Q9UK45 | 0.51929  |
| 23494 | P14075 | Q6XCG6 | 0.63821  |
| 23495 | P14075 | Q5SZD4 | 0.50589  |
| 23496 | P14075 | Q7Z3Y9 | 0.80046  |
| 23497 | P14075 | P35321 | 0.35546  |
| 23498 | P14075 | Q86WG3 | 0.2259   |
| 23499 | P14075 | Q8NE31 | 0.073086 |
| 23500 | P14075 | Q9BYD1 | 0.63111  |
| 23501 | P14075 | Q9BRV8 | 0.24391  |
| 23502 | P14075 | P06454 | 0.626    |
| 23503 | P14075 | Q9H5Q4 | 0.51608  |
| 23504 | P14075 | Q9BYD6 | 0.52518  |
| 23505 | P14075 | Q12962 | 0.86379  |
| 23506 | P14075 | Q9H2G9 | 0.24296  |
| 23507 | P14075 | B4DZS4 | 0.32924  |
| 23508 | P14075 | Q6XLA1 | 0.008971 |
| 23509 | P14075 | Q86SY8 | 0.63821  |
| 23510 | P14075 | Q9BYV8 | 0.40034  |
| 23511 | P14075 | Q09161 | 0.58293  |
| 23512 | P14075 | I3L273 | 0.33358  |
| 23513 | P14075 | Q9H5Z6 | 0.94025  |
| 23514 | P14075 | Q12983 | 0.026812 |
| 23515 | P14075 | O94811 | 0.42858  |
| 23516 | P14075 | P35813 | 0.081222 |
| 23517 | P14075 | Q02577 | 0.41162  |
| 23518 | P14075 | Q9H583 | 0.72238  |
| 23519 | P14075 | P62316 | 0.54936  |
| 23520 | P14075 | P59022 | 0.49323  |
| 23521 | P14075 | O95232 | 0.29947  |
| 23522 | P14075 | P31689 | 0.26121  |
| 23523 | P14075 | P0CB43 | 0.33592  |
| 23524 | P14075 | Q5T1J6 | 0.10016  |
| 23525 | P14075 | Q96MT3 | 0.52328  |
| 23526 | P14075 | Q9ULC6 | 0.78762  |
| 23527 | P14075 | Q96JB2 | 0.56494  |
| 23528 | P14075 | Q8N616 | 0.63821  |
| 23529 | P14075 | Q8TAD8 | 0.97899  |
| 23530 | P14075 | P60006 | 0.72395  |
| 23531 | P14075 | Q9GZY1 | 0.64373  |
| 23532 | P14075 | Q96EY5 | 0.47733  |
| 23533 | P14075 | P56181 | 0.72296  |
| 23534 | P14075 | Q86U70 | 0.17054  |
| 23535 | P14075 | Q53SZ7 | 0.94025  |
| 23536 | P14075 | Q9H814 | 0.70865  |
| 23537 | P14075 | A4QN01 | 0.11113  |
| 23538 | P14075 | Q9NRX2 | 0.41264  |
| 23539 | P14075 | A6NNA2 | 0.79777  |
| 23540 | P14075 | Q96PM5 | 0.29113  |
| 23541 | P14075 | Q53FT3 | 0.38549  |
| 23542 | P14075 | Q16719 | 0.070377 |
| 23543 | P14075 | P62495 | 0.41268  |
| 23544 | P14075 | Q6PGQ1 | 0.45992  |
| 23545 | P14075 | O94777 | 0.39535  |
| 23546 | P14075 | Q6RVD6 | 0.63821  |
| 23547 | P14075 | Q6Q759 | 0.63414  |
| 23548 | P14075 | P55036 | 0.42319  |
| 23549 | P14075 | Q9BYD2 | 0.78361  |
| 23550 | P14075 | Q6RFH8 | 0.61677  |
| 23551 | P14075 | Q8WXF1 | 0.7775   |
| 23552 | P14075 | Q9HAI6 | 0.57505  |
| 23553 | P14075 | Q08AF8 | 0.40982  |
| 23554 | P14075 | P62952 | 0.58214  |
| 23555 | P14075 | P25788 | 0.48239  |
| 23556 | P14075 | Q7Z3Y7 | 0.52023  |
| 23557 | P14075 | Q8N814 | 0.70051  |
| 23558 | P14075 | Q9Y5B6 | 0.64112  |
| 23559 | P14075 | Q5XG85 | 0.63821  |
| 23560 | P14075 | B1AH88 | 0.63821  |

|       |        |        |          |
|-------|--------|--------|----------|
| 23561 | P14075 | Q8ND61 | 0.78015  |
| 23562 | P14075 | Q14764 | 0.78817  |
| 23563 | P14075 | Q8TAV0 | 1.0059   |
| 23564 | P14075 | P11532 | 0.24507  |
| 23565 | P14075 | Q8NG48 | 0.064034 |
| 23566 | P14075 | P54098 | 0.28289  |
| 23567 | P14075 | Q14690 | 0.34017  |
| 23568 | P14075 | Q9BSV6 | 0.22471  |
| 23569 | P14075 | Q00005 | 0.22943  |
| 23570 | P14075 | P42677 | 0.60427  |
| 23571 | P14075 | O75391 | 0.5586   |
| 23572 | P14075 | P13984 | 0.39456  |
| 23573 | P14075 | Q658Y4 | 0.66101  |
| 23574 | P14075 | Q99608 | 0.042971 |
| 23575 | P14075 | Q9Y266 | 0.6542   |
| 23576 | P14075 | Q8N8R7 | 0.4614   |
| 23577 | P14075 | Q86X95 | 0.8897   |
| 23578 | P14075 | Q13155 | 0.4049   |
| 23579 | P14075 | Q9Y5A6 | 0.48168  |
| 23580 | P14075 | P19338 | 0.37907  |
| 23581 | P14075 | Q9BY65 | 0.45737  |
| 23582 | P14075 | Q9GZT8 | 0.76042  |
| 23583 | P14075 | Q99932 | 0.63821  |
| 23584 | P14075 | Q9Y6K1 | 0.25404  |
| 23585 | P14075 | Q969J2 | 0.14215  |
| 23586 | P14075 | A6NMA1 | 0.27691  |
| 23587 | P14075 | Q9Y375 | 0.38186  |
| 23588 | P14075 | P62913 | 0.79736  |
| 23589 | P14075 | Q9UHD4 | 0.50756  |
| 23590 | P14075 | Q9GZP4 | 0.075614 |
| 23591 | P14075 | Q9H175 | 0.80214  |
| 23592 | P14075 | Q86SE9 | 0.75358  |
| 23593 | P14075 | Q08752 | 0.20569  |
| 23594 | P14075 | Q9Y5J9 | 0.35889  |
| 23595 | P14075 | P35659 | 0.42726  |
| 23596 | P14075 | Q8N9R6 | 0.54858  |
| 23597 | P14075 | Q9H211 | 0.47015  |
| 23598 | P14075 | Q2NKX9 | 0.94025  |
| 23599 | P14075 | Q9NPJ6 | 0.74375  |
| 23600 | P14075 | Q8N9N5 | 0.37973  |
| 23601 | P14075 | Q92900 | 0.3582   |
| 23602 | P14075 | O15111 | 0.44973  |
| 23603 | P14075 | P82921 | 0.72617  |
| 23604 | P14075 | P22532 | 0.63821  |
| 23605 | P14075 | O75698 | 0.63821  |
| 23606 | P14075 | Q9NQR4 | 0.20681  |
| 23607 | P14075 | A8MTY0 | 0.29359  |
| 23608 | P14075 | P22090 | 0.20339  |
| 23609 | P14075 | Q99504 | 0.25141  |
| 23610 | P14075 | Q9Y2J2 | 0.26573  |
| 23611 | P14075 | Q86XD5 | 0.31912  |
| 23612 | P14075 | Q6NZ67 | 0.50987  |
| 23613 | P14075 | Q9UBY9 | 0.68878  |
| 23614 | P14075 | Q7L5A3 | 0.61924  |
| 23615 | P14075 | Q96N23 | 0.60487  |
| 23616 | P14075 | Q8WZ26 | 0.22458  |
| 23617 | P14075 | Q96GE5 | 0.2763   |
| 23618 | P14075 | Q9BVC6 | 0.66466  |
| 23619 | P14075 | Q3LI59 | 0.63821  |
| 23620 | P14075 | O60841 | 0.2388   |
| 23621 | P14075 | Q14264 | 0.27724  |
| 23622 | P14075 | Q9P0M9 | 0.59136  |
| 23623 | P14075 | Q6L8H2 | 0.63821  |
| 23624 | P14075 | Q9H7H1 | 0.38606  |
| 23625 | P14075 | Q6ZN32 | 0.11658  |
| 23626 | P14075 | Q9NYK5 | 0.28734  |
| 23627 | P14075 | Q9H7U1 | 1.0364   |
| 23628 | P14075 | Q00613 | 0.68448  |
| 23629 | P14075 | Q9GZU2 | 0.29226  |
| 23630 | P14075 | Q96JE7 | 0.58747  |
| 23631 | P14075 | Q5SVZ6 | 0.70207  |
| 23632 | P14075 | Q01850 | 0.64365  |
| 23633 | P14075 | Q86UC2 | 0.44488  |
| 23634 | P14075 | Q6ZNE5 | 0.19597  |
| 23635 | P14075 | P23497 | 0.64407  |
| 23636 | P14075 | Q6ZTZ1 | 0.32845  |

|       |        |        |          |
|-------|--------|--------|----------|
| 23637 | P14075 | P55327 | 0.15253  |
| 23638 | P14075 | Q9BW60 | 0.40775  |
| 23639 | P14075 | Q3LI54 | 0.63821  |
| 23640 | P14075 | P55957 | 0.29833  |
| 23641 | P14075 | P59052 | 0.39796  |
| 23642 | P14075 | Q92681 | 0.21735  |
| 23643 | P14075 | P23246 | 0.57366  |
| 23644 | P14075 | Q92759 | 0.52313  |
| 23645 | P14075 | P41227 | 0.21017  |
| 23646 | P14075 | C9J069 | 0.040248 |
| 23647 | P14075 | Q9HAP2 | 0.32458  |
| 23648 | P14075 | Q32M84 | 0.10677  |
| 23649 | P14075 | Q8N187 | 0.56873  |
| 23650 | P14075 | Q9ULL5 | 0.63821  |
| 23651 | P14075 | Q9UHR6 | 0.65251  |
| 23652 | P14075 | Q9Y3C8 | 0.14292  |
| 23653 | P14075 | Q9H2F5 | 0.33686  |
| 23654 | P14075 | Q96KS0 | 0.049218 |
| 23655 | P14075 | Q99990 | 0.32173  |
| 23656 | P14075 | P12956 | 0.11131  |
| 23657 | P14075 | P56537 | 0.90223  |
| 23658 | P14075 | Q14207 | 0.77173  |
| 23659 | P14075 | P50548 | 0.1789   |
| 23660 | P14075 | Q13042 | 0.93887  |
| 23661 | P14075 | Q8NBJ4 | 0.42008  |
| 23662 | P14075 | Q7Z2Z1 | 0.70643  |
| 23663 | P14075 | P11142 | 0.31373  |
| 23664 | P14075 | Q9BWH6 | 0.6074   |
| 23665 | P14075 | Q9Y3F4 | 0.55991  |
| 23666 | P14075 | P20042 | 0.26771  |
| 23667 | P14075 | Q4V326 | 0.079883 |
| 23668 | P14075 | Q86SZ3 | 0.18668  |
| 23669 | P14075 | O00534 | 0.23851  |
| 23670 | P14075 | Q96IV0 | 0.29817  |
| 23671 | P14075 | Q9NVI1 | 0.44901  |
| 23672 | P14075 | Q96B49 | 0.8303   |
| 23673 | P14075 | Q9BYQ2 | 0.78356  |
| 23674 | P14075 | P0DMB2 | 0.46262  |
| 23675 | P14075 | Q96D46 | 0.72978  |
| 23676 | P14075 | Q9BPY3 | 0.2397   |
| 23677 | P14075 | Q6L8G8 | 0.63821  |
| 23678 | P14075 | Q02878 | 0.63717  |
| 23679 | P14075 | Q8IXT1 | 0.22967  |
| 23680 | P14075 | Q8WXD5 | 0.62462  |
| 23681 | P14075 | Q6P1X6 | 0.90539  |
| 23682 | P14075 | Q16533 | 0.46517  |
| 23683 | P14075 | Q8N3Z6 | 0.064392 |
| 23684 | P14075 | Q9UBC9 | 0.3509   |
| 23685 | P14075 | Q9BRU2 | 0.26009  |
| 23686 | P14075 | Q96FX8 | 0.54479  |
| 23687 | P14075 | Q5SRI9 | 0.71216  |
| 23688 | P14075 | Q00273 | 0.075974 |
| 23689 | P14075 | B4DXR9 | 0.28702  |
| 23690 | P14075 | P09496 | 0.1163   |
| 23691 | P14075 | P24863 | 0.86352  |
| 23692 | P14075 | Q9GZT9 | 0.10047  |
| 23693 | P14075 | Q15102 | 0.07777  |
| 23694 | P14075 | Q86V48 | 0.89537  |
| 23695 | P14075 | Q8N141 | 0.31207  |
| 23696 | P14075 | P31350 | 0.19742  |
| 23697 | P14075 | B1ATL7 | 0.36209  |
| 23698 | P14075 | Q13105 | 0.32112  |
| 23699 | P14075 | P28066 | 0.47523  |
| 23700 | P14075 | P58557 | 0.95017  |
| 23701 | P14075 | Q9BY89 | 0.21492  |
| 23702 | P14075 | P07320 | 0.72901  |
| 23703 | P14075 | P82912 | 0.52506  |
| 23704 | P14075 | Q8WV07 | 0.29148  |
| 23705 | P14075 | P55198 | 0.63466  |
| 23706 | P14075 | O15360 | 0.51258  |
| 23707 | P14075 | Q04206 | 0.45926  |
| 23708 | P14075 | A6NHU5 | 0.43301  |
| 23709 | P14075 | Q96GS4 | 1.0749   |
| 23710 | P14075 | Q8IXP5 | 0.94025  |
| 23711 | P14075 | Q9BSW2 | 0.50609  |
| 23712 | P14075 | Q9NUJ3 | 0.46467  |

|       |        |         |          |
|-------|--------|---------|----------|
| 23713 | P14075 | Q8IUC3  | 1.0403   |
| 23714 | P14075 | Q5T0L3  | 0.83393  |
| 23715 | P14075 | Q156A1  | 0.63821  |
| 23716 | P14075 | O43809  | 0.51092  |
| 23717 | P14075 | Q9Y2V0  | 0.24358  |
| 23718 | P14075 | Q63ZY3  | 0.66332  |
| 23719 | P14075 | P21675  | 0.34161  |
| 23720 | P14075 | P58512  | 0.61032  |
| 23721 | P14075 | Q9H1H9  | 0.33736  |
| 23722 | P14075 | Q8IVM0  | 0.31745  |
| 23723 | P14075 | Q8NEY3  | 0.49185  |
| 23724 | P14075 | Q6ZN08  | 0.27123  |
| 23725 | P14075 | Q6ZP98  | 0.46362  |
| 23726 | P14075 | P17482  | 0.82933  |
| 23727 | P14075 | O14681  | 0.63203  |
| 23728 | P14075 | Q86YD1  | 0.64598  |
| 23729 | P14075 | Q8IXR5  | 0.40244  |
| 23730 | P14075 | B9A014  | 0.28267  |
| 23731 | P14075 | Q96KQ4  | 0.63481  |
| 23732 | P14075 | Q9H4I2  | 0.558    |
| 23733 | P14075 | Q9UKJ3  | 0.53482  |
| 23734 | P14075 | Q3KRA6  | 1.0791   |
| 23735 | P14075 | Q6P9F0  | 0.21887  |
| 23736 | P14075 | Q9H322  | 0.69734  |
| 23737 | P14075 | A6NIE6  | 0.39396  |
| 23738 | P14075 | Q9P2I0  | 0.6188   |
| 23739 | P14075 | Q9NRQ5  | 0.63821  |
| 23740 | P14075 | Q9P0W5  | 0.60952  |
| 23741 | P14075 | Q96EH3  | 0.25205  |
| 23742 | P14075 | Q6P1M9  | 0.26239  |
| 23743 | P14075 | Q9NWB6  | 0.94025  |
| 23744 | P14075 | A4QMS7  | 0.23508  |
| 23745 | P14075 | Q5RHP9  | 0.39673  |
| 23746 | P14075 | Q96LP4  | 0.21923  |
| 23747 | P14075 | Q969R5  | 0.11228  |
| 23748 | P14075 | Q9Y5R5  | 0.15761  |
| 23749 | P14075 | Q14442  | 0.19434  |
| 23750 | P14075 | Q969E8  | 0.92816  |
| 23751 | P14075 | O95067  | 0.30592  |
| 23752 | P14075 | Q75QN2  | 0.75559  |
| 23753 | P14075 | Q15750  | 0.28889  |
| 23754 | P14075 | Q15528  | 0.95395  |
| 23755 | P14075 | Q8I WV1 | 0.32472  |
| 23756 | P14075 | Q9BUK0  | 0.90115  |
| 23757 | P14075 | A1L4Q6  | 0.16575  |
| 23758 | P14075 | O15265  | 0.77973  |
| 23759 | P14075 | Q9UM63  | 0.098535 |
| 23760 | P14075 | Q8N5L8  | 0.75301  |
| 23761 | P14075 | Q8IYW4  | 0.023025 |
| 23762 | P14075 | Q9BUL8  | 0.39232  |
| 23763 | P14075 | P06132  | 0.4431   |
| 23764 | P14075 | Q569G3  | 0.94025  |
| 23765 | P14075 | Q495Y7  | 0.045435 |
| 23766 | P14075 | Q96L21  | 0.31227  |
| 23767 | P14075 | Q9Y2S7  | 0.79854  |
| 23768 | P14075 | Q8N3V7  | 0.56776  |
| 23769 | P14075 | Q7Z591  | 1.0947   |
| 23770 | P14075 | Q9BSF8  | 0.11945  |
| 23771 | P14075 | Q96H12  | 0.78141  |
| 23772 | P14075 | Q969Z0  | 0.37795  |
| 23773 | P14075 | P09913  | 0.33595  |
| 23774 | P14075 | Q9NX63  | 0.49245  |
| 23775 | P14075 | P0CAP2  | 0.38257  |
| 23776 | P14075 | C9JLR9  | 0.71853  |
| 23777 | P14075 | P51523  | 0.071849 |
| 23778 | P14075 | P78337  | 0.2673   |
| 23779 | P14075 | P20810  | 0.44662  |
| 23780 | P14075 | Q9BQ83  | 0.48227  |
| 23781 | P14075 | Q96DE0  | 0.82122  |
| 23782 | P14075 | O00512  | 0.54229  |
| 23783 | P14075 | P24941  | 0.48998  |
| 23784 | P14075 | Q5VWI1  | 0.79226  |
| 23785 | P14075 | Q9H1I8  | 0.36816  |
| 23786 | P14075 | Q8WU39  | 0.40535  |
| 23787 | P14075 | P81274  | 0.3495   |
| 23788 | P14075 | Q8NEE0  | 0.63821  |

|       |        |        |           |
|-------|--------|--------|-----------|
| 23789 | P14075 | Q13573 | 0.49357   |
| 23790 | P14075 | J3KSC0 | 0.0026735 |
| 23791 | P14075 | O14603 | 0.055327  |
| 23792 | P14075 | O60645 | 0.30682   |
| 23793 | P14075 | Q8WWQ0 | 0.41685   |
| 23794 | P14075 | Q9Y6H5 | 0.53745   |
| 23795 | P14075 | Q8N9A8 | 0.543     |
| 23796 | P14075 | Q9H2C0 | 0.47824   |
| 23797 | P14075 | Q9GZS1 | 0.1198    |
| 23798 | P14075 | Q5TGS1 | 0.24395   |
| 23799 | P14075 | Q8N5H3 | 0.94025   |
| 23800 | P14075 | Q1W6H9 | 0.91459   |
| 23801 | P14075 | E9PQX1 | 0.20371   |
| 23802 | P14075 | Q96HJ3 | 0.94025   |
| 23803 | P14075 | Q9HBD4 | 0.40643   |
| 23804 | P14075 | P40424 | 0.4857    |
| 23805 | P14075 | Q9BPX7 | 0.62242   |
| 23806 | P14075 | Q9NPC6 | 0.70639   |
| 23807 | P14075 | Q9BYR0 | 0.78356   |
| 23808 | P14075 | Q14526 | 0.41751   |
| 23809 | P14075 | Q9H8W2 | 0.27351   |
| 23810 | P14075 | Q99865 | 0.61132   |
| 23811 | P14075 | Q969S8 | 0.59012   |
| 23812 | P14075 | Q5VZR2 | 1.0753    |
| 23813 | P14075 | Q8N9W8 | 1.1182    |
| 23814 | P14075 | Q8N5W9 | 0.58672   |
| 23815 | P14075 | P51816 | 0.41631   |
| 23816 | P14075 | P49902 | 0.15275   |
| 23817 | P14075 | Q8N7X2 | 0.63821   |
| 23818 | P14075 | A6NEQ2 | 0.63821   |
| 23819 | P14075 | Q9UBZ9 | 0.25924   |
| 23820 | P14075 | Q13951 | 0.49259   |
| 23821 | P14075 | P16989 | 0.13163   |
| 23822 | P14075 | P52737 | 0.40586   |
| 23823 | P14075 | O15069 | 0.10449   |
| 23824 | P14075 | P0C7X2 | 0.38596   |
| 23825 | P14075 | A2RU37 | 0.27235   |
| 23826 | P14075 | Q8NHY5 | 0.6945    |
| 23827 | P14075 | Q9UMS0 | 0.65276   |
| 23828 | P14075 | Q8N0V3 | 0.90198   |
| 23829 | P14075 | A1L4L8 | 0.40582   |
| 23830 | P14075 | Q7Z5V6 | 0.50401   |
| 23831 | P14075 | Q99687 | 0.28185   |
| 23832 | P14075 | Q86X60 | 0.41791   |
| 23833 | P14075 | Q2M2W7 | 0.94025   |
| 23834 | P14075 | P05783 | 1.046     |
| 23835 | P14075 | Q9Y3D9 | 0.16984   |
| 23836 | P14075 | P49006 | 0.64261   |
| 23837 | P14075 | Q5JUQ0 | 0.55957   |
| 23838 | P14075 | O75030 | 0.41538   |
| 23839 | P14075 | Q13067 | 0.079883  |
| 23840 | P14075 | Q9NV72 | 0.29359   |
| 23841 | P14075 | Q14683 | 0.30907   |
| 23842 | P14075 | Q96KR1 | 0.26905   |
| 23843 | P14075 | P41250 | 0.22793   |
| 23844 | P14075 | Q8N9E0 | 0.94025   |
| 23845 | P14075 | Q8IXR9 | 0.19947   |
| 23846 | P14075 | Q9BSB4 | 0.18194   |
| 23847 | P14075 | Q13884 | 0.22686   |
| 23848 | P14075 | Q9HAJ7 | 0.92333   |
| 23849 | P14075 | Q96GM5 | 0.63021   |
| 23850 | P14075 | Q5MJ09 | 0.30202   |
| 23851 | P14075 | Q5D0E6 | 0.63823   |
| 23852 | P14075 | D6RB28 | 0.66953   |
| 23853 | P14075 | O96018 | 0.26831   |
| 23854 | P14075 | Q9H0A9 | 1.1155    |
| 23855 | P14075 | O60248 | 0.34844   |
| 23856 | P14075 | Q96N11 | 0.70128   |
| 23857 | P14075 | Q9UBU8 | 0.51404   |
| 23858 | P14075 | Q96BY7 | 0.1178    |
| 23859 | P14075 | Q92966 | 0.5471    |
| 23860 | P14075 | Q8N813 | 0.15887   |
| 23861 | P14075 | P62277 | 0.7914    |
| 23862 | P14075 | P25440 | 0.32341   |
| 23863 | P14075 | Q96LT6 | 0.40406   |
| 23864 | P14075 | Q96QT6 | 0.70192   |

|       |        |        |           |
|-------|--------|--------|-----------|
| 23865 | P14075 | P55265 | 0.24512   |
| 23866 | P14075 | Q9UQR1 | 0.61182   |
| 23867 | P14075 | Q8NEM1 | 0.2938    |
| 23868 | P14075 | Q96IM9 | 0.10219   |
| 23869 | P14075 | Q9NQ32 | 0.6778    |
| 23870 | P14075 | P53990 | 0.40002   |
| 23871 | P14075 | O95684 | 0.53555   |
| 23872 | P14075 | Q9H706 | 0.1668    |
| 23873 | P14075 | Q08999 | 1.0658    |
| 23874 | P14075 | P08727 | 0.80046   |
| 23875 | P14075 | P06744 | 0.44457   |
| 23876 | P14075 | O97980 | 0.41629   |
| 23877 | P14075 | Q6P582 | 0.64529   |
| 23878 | P14075 | Q7Z6J9 | 0.58774   |
| 23879 | P14075 | P0C880 | 0.63821   |
| 23880 | P14075 | Q9H8Q6 | 0.63939   |
| 23881 | P14075 | Q96E09 | 0.8608    |
| 23882 | P14075 | H0Y7S4 | 0.10476   |
| 23883 | P14075 | Q9BQN1 | 0.74487   |
| 23884 | P14075 | Q6NVV7 | 0.52478   |
| 23885 | P14075 | Q8TD31 | 0.60534   |
| 23886 | P14075 | Q6ZW61 | 0.034149  |
| 23887 | P14075 | Q8N5J4 | 0.26526   |
| 23888 | P14075 | Q15006 | 0.032464  |
| 23889 | P14075 | Q96SY0 | 0.0065646 |
| 23890 | P14075 | Q9NX70 | 0.79367   |
| 23891 | P14075 | Q9NXZ1 | 0.11619   |
| 23892 | P14075 | Q8N1B4 | 0.33566   |
| 23893 | P14075 | B3EWG6 | 0.94025   |
| 23894 | P14075 | Q8N371 | 0.15051   |
| 23895 | P14075 | P52657 | 0.88878   |
| 23896 | P14075 | Q9UHT4 | 0.63821   |
| 23897 | P14075 | Q8WWB5 | 0.66335   |
| 23898 | P14075 | Q0IIN9 | 0.3557    |
| 23899 | P14075 | Q8IXJ9 | 0.54504   |
| 23900 | P14075 | Q5T036 | 0.38061   |
| 23901 | P14075 | Q17RA5 | 0.63821   |
| 23902 | P14075 | Q96MT4 | 0.81829   |
| 23903 | P14075 | Q6EEV6 | 0.033983  |
| 23904 | P14075 | Q9H1L0 | 0.65526   |
| 23905 | P14075 | Q6DHV5 | 0.16016   |
| 23906 | P14075 | Q9Y6D9 | 0.64542   |
| 23907 | P14075 | Q92844 | 0.2321    |
| 23908 | P14075 | Q15051 | 0.36344   |
| 23909 | P14075 | A8MTA8 | 0.30488   |
| 23910 | P14075 | O14746 | 0.42529   |
| 23911 | P14075 | P08621 | 0.28377   |
| 23912 | P14075 | Q9NZ38 | 0.17505   |
| 23913 | P14075 | O15372 | 0.42218   |
| 23914 | P14075 | O75607 | 0.47046   |
| 23915 | P14075 | O75323 | 0.47282   |
| 23916 | P14075 | Q60888 | 0.41355   |
| 23917 | P14075 | Q3SYF9 | 0.63821   |
| 23918 | P14075 | P23025 | 0.18394   |
| 23919 | P14075 | Q6ZS46 | 0.93918   |
| 23920 | P14075 | Q9BXQ6 | 0.63821   |
| 23921 | P14075 | Q96JS3 | 0.1371    |
| 23922 | P14075 | Q9NUL3 | 0.38096   |
| 23923 | P14075 | Q9BYQ7 | 1.0211    |
| 23924 | P14075 | Q8WU90 | 0.60099   |
| 23925 | P14075 | Q9UK76 | 0.81714   |
| 23926 | P14075 | Q9NVL1 | 0.014284  |
| 23927 | P14075 | Q8WXE1 | 0.43207   |
| 23928 | P14075 | Q5SWW7 | 0.63821   |
| 23929 | P14075 | Q02241 | 0.46526   |
| 23930 | P14075 | Q2TAK8 | 0.36693   |
| 23931 | P14075 | Q5T4T6 | 0.77873   |
| 23932 | P14075 | Q96LW7 | 0.69199   |
| 23933 | P14075 | Q96GC5 | 0.4211    |
| 23934 | P14075 | Q9UBF1 | 0.52695   |
| 23935 | P14075 | Q3LI61 | 0.63821   |
| 23936 | P14075 | Q7L2H7 | 0.36435   |
| 23937 | P14075 | O43663 | 0.64493   |
| 23938 | P14075 | Q4VX62 | 0.41744   |
| 23939 | P14075 | Q9UI54 | 0.63821   |
| 23940 | P14075 | F2Z3M2 | 0.63821   |



|       |        |        |          |
|-------|--------|--------|----------|
| 23941 | P14075 | Q9NR46 | 0.22021  |
| 23942 | P14075 | Q9Y2Q9 | 0.45911  |
| 23943 | P14075 | Q9Y295 | 0.31414  |
| 23944 | P14075 | Q9BVT8 | 0.82247  |
| 23945 | P14075 | O94973 | 0.23894  |
| 23946 | P14075 | P23381 | 0.23214  |
| 23947 | P14075 | O95424 | 0.71944  |
| 23948 | P14075 | Q5PR19 | 0.17132  |
| 23949 | P14075 | O15083 | 0.34697  |
| 23950 | P14075 | P0C875 | 0.088228 |
| 23951 | P14075 | Q52LR7 | 0.16942  |
| 23952 | P14075 | Q8IXQ6 | 0.53775  |
| 23953 | P14075 | P62072 | 0.14262  |
| 23954 | P14075 | Q6ZTY8 | 0.074477 |
| 23955 | P14075 | Q8NHZ7 | 0.29476  |
| 23956 | P14075 | O75347 | 0.78284  |
| 23957 | P14075 | P23284 | 0.20142  |
| 23958 | P14075 | Q8NFR7 | 0.84611  |
| 23959 | P14075 | Q9BU68 | 0.73388  |
| 23960 | P14075 | P68036 | 0.61168  |
| 23961 | P14075 | Q8NC26 | 0.26464  |
| 23962 | P14075 | Q8N2H4 | 0.78049  |
| 23963 | P14075 | Q13495 | 1.038    |
| 23964 | P14075 | Q658K8 | 0.44005  |
| 23965 | P14075 | Q8WZ69 | 0.25441  |
| 23966 | P14075 | Q9UPR3 | 0.66239  |
| 23967 | P14075 | Q9NPI1 | 0.80791  |
| 23968 | P14075 | Q5TG53 | 0.63821  |
| 23969 | P14075 | P05412 | 0.62726  |
| 23970 | P14075 | Q16385 | 0.56798  |
| 23971 | P14075 | P62851 | 0.6785   |
| 23972 | P14075 | Q5T6V5 | 0.53707  |
| 23973 | P14075 | Q9BXL5 | 0.20683  |
| 23974 | P14075 | Q9H6X5 | 0.041407 |
| 23975 | P14075 | Q15542 | 0.7286   |
| 23976 | P14075 | Q07021 | 0.56709  |
| 23977 | P14075 | Q8N488 | 0.33785  |
| 23978 | P14075 | Q9H3H1 | 0.42261  |
| 23979 | P14075 | Q92979 | 0.18514  |
| 23980 | P14075 | Q04725 | 0.64787  |
| 23981 | P14075 | Q96MC9 | 0.99635  |
| 23982 | P14075 | Q9Y2G0 | 0.42533  |
| 23983 | P14075 | Q6PRD7 | 0.63821  |
| 23984 | P14075 | P04733 | 0.28594  |
| 23985 | P14075 | Q13542 | 0.40394  |
| 23986 | P14075 | P18615 | 0.79738  |
| 23987 | P14075 | Q9NTX7 | 0.26925  |
| 23988 | P14075 | Q8N0W5 | 0.32825  |
| 23989 | P14075 | Q96NJ6 | 0.1238   |
| 23990 | P14075 | Q86WI3 | 0.2859   |
| 23991 | P14075 | Q5MJ70 | 0.53769  |
| 23992 | P14075 | P11802 | 0.62371  |
| 23993 | P14075 | P42226 | 0.55597  |
| 23994 | P14075 | O95503 | 0.6738   |
| 23995 | P14075 | Q5BKZ1 | 0.42458  |
| 23996 | P14075 | P54922 | 0.68799  |
| 23997 | P14075 | Q96A26 | 0.24069  |
| 23998 | P14075 | P40425 | 0.4202   |
| 23999 | P14075 | Q06323 | 0.52434  |
| 24000 | P14075 | Q2NL82 | 0.44922  |
| 24001 | P14075 | O94874 | 0.54708  |
| 24002 | P14075 | Q12800 | 0.21097  |
| 24003 | P14075 | Q5VZE5 | 0.24345  |
| 24004 | P14075 | O96000 | 0.5329   |
| 24005 | P14075 | O75832 | 0.31384  |
| 24006 | P14075 | Q96FA7 | 0.79359  |
| 24007 | P14075 | Q9C075 | 0.62642  |
| 24008 | P14075 | K9M1U5 | 0.63821  |
| 24009 | P14075 | Q14938 | 0.036706 |
| 24010 | P14075 | P11474 | 0.26794  |
| 24011 | P14075 | Q9HB75 | 0.39046  |
| 24012 | P14075 | Q6NUP7 | 0.26534  |
| 24013 | P14075 | Q96J86 | 0.76323  |
| 24014 | P14075 | Q93034 | 0.46522  |
| 24015 | P14075 | Q8NFG4 | 0.74899  |
| 24016 | P14075 | Q9H9E3 | 0.27809  |

|       |        |        |          |
|-------|--------|--------|----------|
| 24017 | P14075 | Q9Y2D1 | 0.92854  |
| 24018 | P14075 | Q6ZVL8 | 0.63821  |
| 24019 | P14075 | Q2M3W8 | 0.31207  |
| 24020 | P14075 | Q9H081 | 0.46073  |
| 24021 | P14075 | P68104 | 0.53926  |
| 24022 | P14075 | Q92734 | 0.033865 |
| 24023 | P14075 | P01358 | 0.63821  |
| 24024 | P14075 | Q9BRA2 | 0.2604   |
| 24025 | P14075 | Q96CW1 | 0.31134  |
| 24026 | P14075 | Q01543 | 0.1906   |
| 24027 | P14075 | Q9UMX3 | 0.36409  |
| 24028 | P14075 | Q9H6R4 | 0.37906  |
| 24029 | P14075 | O75558 | 0.32299  |
| 24030 | P14075 | Q9UQR0 | 0.096658 |
| 24031 | P14075 | Q8NDF8 | 0.24397  |
| 24032 | P14075 | Q53H64 | 0.13122  |
| 24033 | P14075 | Q5VT06 | 0.31889  |
| 24034 | P14075 | Q8NDD1 | 0.076154 |
| 24035 | P14075 | Q9NWZ5 | 0.085298 |
| 24036 | P14075 | Q9UM07 | 0.43602  |
| 24037 | P14075 | Q15759 | 0.25235  |
| 24038 | P14075 | Q9HCK5 | 0.4624   |
| 24039 | P14075 | Q9BQA5 | 0.62247  |
| 24040 | P14075 | Q14103 | 0.63907  |
| 24041 | P14075 | Q59GN2 | 0.2931   |
| 24042 | P14075 | Q6ZN01 | 0.36943  |
| 24043 | P14075 | Q9BPZ2 | 0.64073  |
| 24044 | P14075 | O75886 | 0.72414  |
| 24045 | P14075 | O75648 | 0.57886  |
| 24046 | P14075 | A6NGS2 | 0.57869  |
| 24047 | P14075 | O60809 | 0.4843   |
| 24048 | P14075 | Q07627 | 0.78379  |
| 24049 | P14075 | Q9ULM6 | 0.76784  |
| 24050 | P14075 | Q15928 | 0.31812  |
| 24051 | P14075 | Q6ZVS7 | 0.13677  |
| 24052 | P14075 | Q86V81 | 0.60787  |
| 24053 | P14075 | Q9H6F5 | 0.15854  |
| 24054 | P14075 | P57772 | 0.51273  |
| 24055 | P14075 | P62324 | 0.53048  |
| 24056 | P14075 | O75475 | 0.96677  |
| 24057 | P14075 | Q8WYR1 | 0.076478 |
| 24058 | P14075 | Q9BVC5 | 0.65631  |
| 24059 | P14075 | Q9H079 | 0.41759  |
| 24060 | P14075 | A6NG73 | 0.19029  |
| 24061 | P14075 | Q2NL68 | 0.94025  |
| 24062 | P14075 | Q86VS3 | 0.047905 |
| 24063 | P14075 | O95182 | 0.28219  |
| 24064 | P14075 | P61024 | 0.5264   |
| 24065 | P14075 | P0DM35 | 0.61343  |
| 24066 | P14075 | P35325 | 0.63821  |
| 24067 | P14075 | Q9NYV6 | 0.35839  |
| 24068 | P14075 | Q4LE39 | 0.78473  |
| 24069 | P14075 | O00186 | 0.48359  |
| 24070 | P14075 | Q6P6B1 | 0.94025  |
| 24071 | P14075 | Q9NR22 | 0.19732  |
| 24072 | P14075 | P05060 | 0.34509  |
| 24073 | P14075 | Q13243 | 0.58708  |
| 24074 | P14075 | Q16656 | 0.3168   |
| 24075 | P14075 | Q8IY57 | 0.83561  |
| 24076 | P14075 | Q9C0F0 | 0.28197  |
| 24077 | P14075 | Q13166 | 0.63821  |
| 24078 | P14075 | Q9UEU5 | 0.15388  |
| 24079 | P14075 | Q14160 | 0.41994  |
| 24080 | P14075 | Q9NX08 | 0.1668   |
| 24081 | P14075 | Q9UI30 | 0.27896  |
| 24082 | P14075 | A4D161 | 0.2661   |
| 24083 | P14075 | A6NKX1 | 0.63821  |
| 24084 | P14075 | Q14593 | 0.30184  |
| 24085 | P14075 | P62837 | 0.38919  |
| 24086 | P14075 | Q3LI66 | 0.63821  |
| 24087 | P14075 | Q96P70 | 0.72362  |
| 24088 | P14075 | P23588 | 0.15722  |
| 24089 | P14075 | P08865 | 0.51556  |
| 24090 | P14075 | Q5U5X8 | 0.99622  |
| 24091 | P14075 | Q9BQA1 | 0.70732  |
| 24092 | P14075 | P14859 | 0.91563  |

|       |        |        |          |
|-------|--------|--------|----------|
| 24093 | P14075 | Q13618 | 0.27705  |
| 24094 | P14075 | Q6ZUT1 | 0.63821  |
| 24095 | P14075 | Q8N4B5 | 0.90467  |
| 24096 | P14075 | Q5SZJ8 | 0.089095 |
| 24097 | P14075 | A6NCJ1 | 0.24575  |
| 24098 | P14075 | O60828 | 0.50747  |
| 24099 | P14075 | Q6ZUT6 | 0.66194  |
| 24100 | P14075 | P61576 | 0.23178  |
| 24101 | P14075 | P60411 | 0.78356  |
| 24102 | P14075 | Q5VYM1 | 0.76323  |
| 24103 | P14075 | P22670 | 0.54891  |
| 24104 | P14075 | Q9Y4C2 | 0.80726  |
| 24105 | P14075 | Q5VU43 | 0.61008  |
| 24106 | P14075 | Q9UM82 | 0.80393  |
| 24107 | P14075 | Q92831 | 0.60514  |
| 24108 | P14075 | Q16186 | 0.31754  |
| 24109 | P14075 | P0CI00 | 0.43974  |
| 24110 | P14075 | A6NHJ4 | 0.33283  |
| 24111 | P14075 | Q93015 | 0.79846  |
| 24112 | P14075 | Q7Z4H7 | 0.6011   |
| 24113 | P14075 | Q9UKX2 | 0.10299  |
| 24114 | P14075 | A6PVY3 | 0.25454  |
| 24115 | P14075 | P80297 | 0.30195  |
| 24116 | P14075 | P11831 | 0.41708  |
| 24117 | P14075 | C9J6K1 | 0.57291  |
| 24118 | P14075 | Q562F6 | 0.51577  |
| 24119 | P14075 | O60481 | 0.30069  |
| 24120 | P14075 | Q13769 | 0.40194  |
| 24121 | P14075 | O75410 | 0.56765  |
| 24122 | P14075 | P52747 | 0.59231  |
| 24123 | P14075 | Q9BZD3 | 0.27999  |
| 24124 | P14075 | Q8TAD7 | 0.94025  |
| 24125 | P14075 | A6NN06 | 0.63821  |
| 24126 | P14075 | Q96BW9 | 0.46055  |
| 24127 | P14075 | P11172 | 0.31747  |
| 24128 | P14075 | O95295 | 0.25777  |
| 24129 | P14075 | Q8TAA3 | 0.17908  |
| 24130 | P14075 | A1L443 | 1.0753   |
| 24131 | P14075 | A6NF83 | 0.56442  |
| 24132 | P14075 | Q8IV20 | 0.55317  |
| 24133 | P14075 | Q96MR7 | 0.87186  |
| 24134 | P14075 | Q8N5D0 | 0.26263  |
| 24135 | P14075 | A6NCD4 | 0.32932  |
| 24136 | P14075 | A6NEN9 | 0.023262 |
| 24137 | P14075 | Q13522 | 0.057511 |
| 24138 | P14075 | P0C866 | 0.11385  |
| 24139 | P14075 | O43236 | 0.25348  |
| 24140 | P14075 | Q9Y3C4 | 0.4918   |
| 24141 | P14075 | O43395 | 0.58591  |
| 24142 | P14075 | P62328 | 0.75046  |
| 24143 | P14075 | Q9BWW4 | 0.66352  |
| 24144 | P14075 | O43677 | 0.57816  |
| 24145 | P14075 | Q15554 | 0.30613  |
| 24146 | P14075 | Q9NYP3 | 0.72139  |
| 24147 | P14075 | Q6ZST8 | 0.0159   |
| 24148 | P14075 | Q5TG92 | 0.52419  |
| 24149 | P14075 | Q15906 | 0.62244  |
| 24150 | P14075 | Q8N1L9 | 0.63615  |
| 24151 | P14075 | P61970 | 0.22584  |
| 24152 | P14075 | Q8N612 | 0.7903   |
| 24153 | P14075 | Q9NPJ4 | 1.2096   |
| 24154 | P14075 | P10828 | 0.38764  |
| 24155 | P14075 | Q9UKZ1 | 0.96867  |
| 24156 | P14075 | Q96C90 | 0.47474  |
| 24157 | P14075 | Q9BXJ9 | 0.50918  |
| 24158 | P14075 | Q96QC0 | 0.82998  |
| 24159 | P14075 | Q8NEF3 | 0.21834  |
| 24160 | P14075 | Q9BSI4 | 0.33936  |
| 24161 | P14075 | Q6P050 | 0.59526  |
| 24162 | P14075 | Q13296 | 0.34912  |
| 24163 | P14075 | P49756 | 0.29207  |
| 24164 | P14075 | Q8N4B4 | 0.083567 |
| 24165 | P14075 | Q96BZ8 | 0.94025  |
| 24166 | P14075 | Q13506 | 0.19422  |
| 24167 | P14075 | Q5TD94 | 0.23479  |
| 24168 | P14075 | Q9P2H0 | 0.33171  |

|       |        |        |          |
|-------|--------|--------|----------|
| 24169 | P14075 | Q07157 | 0.41446  |
| 24170 | P14075 | Q8NA42 | 0.14434  |
| 24171 | P14075 | Q99615 | 0.54599  |
| 24172 | P14075 | P78545 | 0.63651  |
| 24173 | P14075 | Q86UE4 | 0.41789  |
| 24174 | P14075 | A6NJR5 | 0.53769  |
| 24175 | P14075 | O60308 | 0.34839  |
| 24176 | P14075 | Q14588 | 0.2118   |
| 24177 | P14075 | Q99619 | 0.50366  |
| 24178 | P14075 | Q8N9P6 | 0.63821  |
| 24179 | P14075 | Q13064 | 0.10937  |
| 24180 | P14075 | A6NGY1 | 0.68261  |
| 24181 | P14075 | P78395 | 0.67348  |
| 24182 | P14075 | A6NGG3 | 0.63821  |
| 24183 | P14075 | Q96Q83 | 0.33236  |
| 24184 | P14075 | Q9NRJ2 | 0.63821  |
| 24185 | P14075 | Q49MG5 | 0.75766  |
| 24186 | P14075 | A6NP61 | 0.63255  |
| 24187 | P14075 | Q92782 | 0.36251  |
| 24188 | P14075 | O76095 | 0.24162  |
| 24189 | P14075 | Q6ZVC0 | 0.6106   |
| 24190 | P14075 | Q9H2T7 | 0.21275  |
| 24191 | P14075 | Q8N6T0 | 0.3752   |
| 24192 | P14075 | Q6ZUT4 | 0.54705  |
| 24193 | P14075 | Q8N9R8 | 0.56349  |
| 24194 | P14075 | A6NHY6 | 0.15748  |
| 24195 | P14075 | O14787 | 0.70074  |
| 24196 | P14075 | Q9UKT4 | 0.66892  |
| 24197 | P14075 | Q8WXF5 | 0.50859  |
| 24198 | P14075 | Q86XF7 | 0.36328  |
| 24199 | P14075 | Q6ZVQ6 | 0.9999   |
| 24200 | P14075 | Q9BRT7 | 0.63821  |
| 24201 | P14075 | Q15697 | 0.28011  |
| 24202 | P14075 | O75791 | 0.68547  |
| 24203 | P14075 | Q8NB50 | 0.22707  |
| 24204 | P14075 | Q9NPD3 | 0.18534  |
| 24205 | P14075 | Q6EEV4 | 0.63821  |
| 24206 | P14075 | Q8TC05 | 0.76127  |
| 24207 | P14075 | O43752 | 0.21412  |
| 24208 | P14075 | Q10571 | 0.42008  |
| 24209 | P14075 | P60900 | 0.30442  |
| 24210 | P14075 | P17861 | 0.42949  |
| 24211 | P14075 | Q15014 | 0.87304  |
| 24212 | P14075 | O60732 | 0.1668   |
| 24213 | P14075 | O60765 | 0.18055  |
| 24214 | P14075 | Q8N9P0 | 0.35585  |
| 24215 | P14075 | Q7L0Y3 | 0.68031  |
| 24216 | P14075 | Q8NBB4 | 0.14747  |
| 24217 | P14075 | Q08945 | 0.8172   |
| 24218 | P14075 | P49427 | 0.36945  |
| 24219 | P14075 | Q86XE5 | 0.53312  |
| 24220 | P14075 | P34896 | 0.083289 |
| 24221 | P14075 | Q92845 | 0.050097 |
| 24222 | P14075 | Q9NT62 | 0.27157  |
| 24223 | P14075 | Q9NQS7 | 0.60238  |
| 24224 | P14075 | O95397 | 0.6834   |
| 24225 | P14075 | Q5T749 | 0.93733  |
| 24226 | P14075 | Q9Y6X3 | 0.74592  |
| 24227 | P14075 | Q8NBA8 | 0.46089  |
| 24228 | P14075 | Q15562 | 0.63425  |
| 24229 | P14075 | Q6ZNG1 | 0.22707  |
| 24230 | P14075 | Q7Z465 | 0.39554  |
| 24231 | P14075 | Q9HD34 | 0.46303  |
| 24232 | P14075 | A1L3X4 | 0.63821  |
| 24233 | P14075 | Q9Y224 | 1.1048   |
| 24234 | P14075 | O00470 | 0.44899  |
| 24235 | P14075 | P27695 | 0.32257  |
| 24236 | P14075 | Q9Y2A4 | 0.30068  |
| 24237 | P14075 | Q8N140 | 0.59535  |
| 24238 | P14075 | O43427 | 0.25412  |
| 24239 | P14075 | Q8IWZ3 | 0.69844  |
| 24240 | P14075 | Q9UFG5 | 0.39241  |
| 24241 | P14075 | P51532 | 0.33786  |
| 24242 | P14075 | Q8IXQ4 | 0.94025  |
| 24243 | P14075 | P62244 | 0.47929  |
| 24244 | P14075 | Q96HP8 | 0.95192  |

|       |        |        |          |
|-------|--------|--------|----------|
| 24245 | P14075 | Q68E01 | 0.42113  |
| 24246 | P14075 | Q6U7Q0 | 0.12954  |
| 24247 | P14075 | P28347 | 0.76954  |
| 24248 | P14075 | Q8WVM7 | 0.55807  |
| 24249 | P14075 | O75143 | 0.96811  |
| 24250 | P14075 | Q96HT8 | 1.1974   |
| 24251 | P14075 | A6NEM1 | 0.66953  |
| 24252 | P14075 | Q6ZS49 | 0.63821  |
| 24253 | P14075 | Q8WTT2 | 0.23511  |
| 24254 | P14075 | O60516 | 0.20884  |
| 24255 | P14075 | P51959 | 0.36837  |
| 24256 | P14075 | Q9Y3Y2 | 1.0326   |
| 24257 | P14075 | Q9H7T9 | 0.45354  |
| 24258 | P14075 | P30876 | 0.45925  |
| 24259 | P14075 | Q9H0S4 | 0.021822 |
| 24260 | P14075 | Q9BRP8 | 0.81265  |
| 24261 | P14075 | P49406 | 0.37802  |
| 24262 | P14075 | P40222 | 0.46758  |
| 24263 | P14075 | Q15532 | 0.73327  |
| 24264 | P14075 | Q9UMS5 | 0.86655  |
| 24265 | P14075 | Q8IWD4 | 0.94025  |
| 24266 | P14075 | A8MYZ0 | 0.58271  |
| 24267 | P14075 | P53567 | 0.49768  |
| 24268 | P14075 | Q9BQC6 | 0.71027  |
| 24269 | P14075 | Q96PG8 | 0.63821  |
| 24270 | P14075 | Q9Y2R5 | 0.47713  |
| 24271 | P14075 | Q9GZW5 | 0.45626  |
| 24272 | P14075 | Q12901 | 0.23554  |
| 24273 | P14075 | Q5BN46 | 0.3115   |
| 24274 | P14075 | Q9UNY4 | 0.33152  |
| 24275 | P14075 | Q8TD23 | 0.45366  |
| 24276 | P14075 | O15127 | 0.37333  |
| 24277 | P14075 | Q2LD37 | 0.20013  |
| 24278 | P14075 | A6NK89 | 0.53976  |
| 24279 | P14075 | Q96GY0 | 0.80893  |
| 24280 | P14075 | Q9H1Y0 | 0.3016   |
| 24281 | P14075 | Q9UHR5 | 0.93707  |
| 24282 | P14075 | P40855 | 0.32755  |
| 24283 | P14075 | Q07666 | 0.31705  |
| 24284 | P14075 | Q8NAE3 | 0.39536  |
| 24285 | P14075 | Q9NX20 | 0.48896  |
| 24286 | P14075 | Q3LI81 | 1.0514   |
| 24287 | P14075 | Q53FD0 | 0.78008  |
| 24288 | P14075 | A6NCN8 | 0.94025  |
| 24289 | P14075 | P61579 | 0.589    |
| 24290 | P14075 | P14635 | 0.18458  |
| 24291 | P14075 | Q9GZP8 | 0.63821  |
| 24292 | P14075 | Q9GZU8 | 0.32705  |
| 24293 | P14075 | Q8N699 | 0.81722  |
| 24294 | P14075 | Q96E11 | 0.77832  |
| 24295 | P14075 | Q96HR3 | 0.61322  |
| 24296 | P14075 | Q86VG3 | 0.64223  |
| 24297 | P14075 | Q76L83 | 0.41695  |
| 24298 | P14075 | Q6PJT7 | 0.66778  |
| 24299 | P14075 | P62879 | 0.29199  |
| 24300 | P14075 | P61326 | 0.75649  |
| 24301 | P14075 | P25208 | 0.42791  |
| 24302 | P14075 | Q7LBR1 | 0.61902  |
| 24303 | P14075 | O15162 | 0.1639   |
| 24304 | P14075 | Q12815 | 0.36597  |
| 24305 | P14075 | P38432 | 0.63017  |
| 24306 | P14075 | Q56P03 | 0.5678   |
| 24307 | P14075 | Q9H2L5 | 0.54134  |
| 24308 | P14075 | Q8NHS9 | 0.28241  |
| 24309 | P14075 | P0CB33 | 0.28156  |
| 24310 | P14075 | Q8N5I9 | 0.94025  |
| 24311 | P14075 | Q9UM11 | 0.83486  |
| 24312 | P14075 | Q86WX3 | 0.80821  |
| 24313 | P14075 | O43598 | 0.24449  |
| 24314 | P14075 | A6NNH0 | 0.76395  |
| 24315 | P14075 | O00233 | 0.45875  |
| 24316 | P14075 | P08708 | 0.2332   |
| 24317 | P14075 | P52736 | 0.42046  |
| 24318 | P14075 | Q4G0G2 | 0.3059   |
| 24319 | P14075 | Q96MR9 | 0.25355  |
| 24320 | P14075 | Q9P2G4 | 0.94025  |

|       |        |        |          |
|-------|--------|--------|----------|
| 24321 | P14075 | Q9UHQ7 | 0.51551  |
| 24322 | P14075 | Q9P2X8 | 0.30742  |
| 24323 | P14075 | O43541 | 0.42624  |
| 24324 | P14075 | P07199 | 0.53219  |
| 24325 | P14075 | P47944 | 0.55106  |
| 24326 | P14075 | Q15937 | 0.13498  |
| 24327 | P14075 | Q6ZTU2 | 0.72639  |
| 24328 | P14075 | A8MVJ9 | 0.48581  |
| 24329 | P14075 | Q96SZ4 | 0.084617 |
| 24330 | P14075 | Q9NQM4 | 0.005535 |
| 24331 | P14075 | Q9BT78 | 0.7127   |
| 24332 | P14075 | Q5MIZ7 | 0.2151   |
| 24333 | P14075 | Q6ZU67 | 0.3676   |
| 24334 | P14075 | Q9H444 | 0.44196  |
| 24335 | P14075 | Q8NCQ2 | 0.46388  |
| 24336 | P14075 | Q9H9G7 | 0.4624   |
| 24337 | P14075 | Q8IYB0 | 0.63821  |
| 24338 | P14075 | Q9BXM0 | 0.49265  |
| 24339 | P14075 | Q9UKN5 | 0.066988 |
| 24340 | P14075 | Q8N1B3 | 0.43901  |
| 24341 | P14075 | Q9BY42 | 0.527    |
| 24342 | P14075 | Q9C086 | 1.1042   |
| 24343 | P14075 | Q01831 | 0.3875   |
| 24344 | P14075 | Q9NWX8 | 0.36308  |
| 24345 | P14075 | A8CG34 | 0.40877  |
| 24346 | P14075 | Q9UHP9 | 0.1942   |
| 24347 | P14075 | Q8N5F7 | 1.02     |
| 24348 | P14075 | Q9NSD9 | 0.63522  |
| 24349 | P14075 | O14713 | 0.58143  |
| 24350 | P14075 | P0CW23 | 0.35516  |
| 24351 | P14075 | Q86YC2 | 0.37917  |
| 24352 | P14075 | Q96LL4 | 0.94025  |
| 24353 | P14075 | Q96KH6 | 0.55297  |
| 24354 | P14075 | Q02083 | 0.26097  |
| 24355 | P14075 | Q2NKJ3 | 0.336    |
| 24356 | P14075 | Q53TS8 | 0.27223  |
| 24357 | P14075 | Q14686 | 0.71482  |
| 24358 | P14075 | P0C841 | 0.63821  |
| 24359 | P14075 | Q0D2K3 | 0.78689  |
| 24360 | P14075 | Q96AQ9 | 0.26592  |
| 24361 | P14075 | Q9H7B2 | 0.686    |
| 24362 | P14075 | Q96R06 | 0.64689  |
| 24363 | P14075 | Q14493 | 0.60878  |
| 24364 | P14075 | Q9BUT9 | 1.1254   |
| 24365 | P14075 | O75582 | 0.24908  |
| 24366 | P14075 | Q8IYW2 | 0.63821  |
| 24367 | P14075 | Q9ULL0 | 0.56193  |
| 24368 | P14075 | Q9UHX1 | 0.49221  |
| 24369 | P14075 | P61088 | 0.48813  |
| 24370 | P14075 | Q01201 | 0.72389  |
| 24371 | P14075 | Q92674 | 0.16565  |
| 24372 | P14075 | Q6IN84 | 0.23178  |
| 24373 | P14075 | Q9UL46 | 0.25426  |
| 24374 | P14075 | Q6ZS94 | 0.63821  |
| 24375 | P14075 | Q5BKY6 | 0.63821  |
| 24376 | P14075 | Q08E93 | 0.63821  |
| 24377 | P14075 | Q01658 | 0.22066  |
| 24378 | P14075 | P57678 | 0.66507  |
| 24379 | P14075 | Q96GV9 | 0.28379  |
| 24380 | P14075 | Q96N16 | 0.5701   |
| 24381 | P14075 | O96002 | 0.63821  |
| 24382 | P14075 | Q9BV57 | 0.36728  |
| 24383 | P14075 | Q9Y6Z5 | 0.72764  |
| 24384 | P14075 | P53672 | 0.70051  |
| 24385 | P14075 | Q8IVE0 | 0.01114  |
| 24386 | P14075 | Q8N715 | 0.40568  |
| 24387 | P14075 | Q6L8H4 | 0.63821  |
| 24388 | P14075 | O76087 | 0.45588  |
| 24389 | P14075 | Q9BVN2 | 0.27902  |
| 24390 | P14075 | O95391 | 0.17079  |
| 24391 | P14075 | P80723 | 0.55155  |
| 24392 | P14075 | Q5HY64 | 0.13457  |
| 24393 | P14075 | Q8NAS9 | 0.15481  |
| 24394 | P14075 | E5RJ46 | 0.63821  |
| 24395 | P14075 | P51808 | 0.099736 |
| 24396 | P14075 | Q8WVK7 | 0.38776  |

|       |        |        |          |
|-------|--------|--------|----------|
| 24397 | P14075 | Q9H1A3 | 0.19916  |
| 24398 | P14075 | O75444 | 0.24378  |
| 24399 | P14075 | Q96MH2 | 0.94679  |
| 24400 | P14075 | Q6ZU65 | 0.2882   |
| 24401 | P14075 | Q2M3D2 | 0.16481  |
| 24402 | P14075 | Q9Y4Z0 | 0.4705   |
| 24403 | P14075 | P78406 | 0.31283  |
| 24404 | P14075 | Q17RH7 | 0.63821  |
| 24405 | P14075 | O94888 | 0.22759  |
| 24406 | P14075 | Q70YC4 | 0.5725   |
| 24407 | P14075 | Q5T8A7 | 0.7274   |
| 24408 | P14075 | Q96IR3 | 0.70627  |
| 24409 | P14075 | P26196 | 0.33622  |
| 24410 | P14075 | Q8IVS8 | 0.037129 |
| 24411 | P14075 | Q8IXQ3 | 0.28211  |
| 24412 | P14075 | Q9H7R5 | 0.22707  |
| 24413 | P14075 | Q3LI76 | 0.70941  |
| 24414 | P14075 | Q53T94 | 0.24105  |
| 24415 | P14075 | P57740 | 0.56936  |
| 24416 | P14075 | Q9H116 | 0.15245  |
| 24417 | P14075 | Q08AG7 | 0.51304  |
| 24418 | P14075 | P17275 | 0.70702  |
| 24419 | P14075 | Q9Y5N6 | 0.34658  |
| 24420 | P14075 | Q9NVR2 | 0.66555  |
| 24421 | P14075 | Q96KP1 | 0.22249  |
| 24422 | P14075 | Q9Y4A8 | 0.31044  |
| 24423 | P14075 | Q9H6J7 | 0.34852  |
| 24424 | P14075 | Q00403 | 0.76117  |
| 24425 | P14075 | P30281 | 0.53622  |
| 24426 | P14075 | Q6ZYL4 | 0.78708  |
| 24427 | P14075 | K7EIZ4 | 0.63821  |
| 24428 | P14075 | P30279 | 0.44411  |
| 24429 | P14075 | Q8WUX9 | 0.20428  |
| 24430 | P14075 | Q7L2R6 | 0.27773  |
| 24431 | P14075 | Q96C03 | 0.57578  |
| 24432 | P14075 | Q96DM3 | 0.225    |
| 24433 | P14075 | P82094 | 0.90424  |
| 24434 | P14075 | Q9UET6 | 0.48052  |
| 24435 | P14075 | A6NDZ8 | 0.030285 |
| 24436 | P14075 | Q13901 | 0.85934  |
| 24437 | P14075 | Q6ZSN7 | 0.42835  |
| 24438 | P14075 | Q5EE01 | 0.54667  |
| 24439 | P14075 | P43487 | 0.088624 |
| 24440 | P14075 | Q8WUM4 | 0.76561  |
| 24441 | P14075 | Q14C87 | 0.705    |
| 24442 | P14075 | Q8WTY6 | 0.064004 |
| 24443 | P14075 | Q15459 | 0.47234  |
| 24444 | P14075 | Q9UHJ3 | 0.1228   |
| 24445 | P14075 | P53675 | 0.17038  |
| 24446 | P14075 | A4D997 | 0.82178  |
| 24447 | P14075 | Q6ZRI6 | 0.62498  |
| 24448 | P14075 | Q6P9B6 | 0.1668   |
| 24449 | P14075 | Q96JE9 | 0.15104  |
| 24450 | P14075 | Q8N7L0 | 0.26215  |
| 24451 | P14075 | Q15388 | 0.14074  |
| 24452 | P14075 | Q13425 | 0.201    |
| 24453 | P14075 | P61572 | 0.589    |
| 24454 | P14075 | P57086 | 0.33527  |
| 24455 | P14075 | Q8TE85 | 0.093429 |
| 24456 | P14075 | Q8WUE5 | 0.17571  |
| 24457 | P14075 | Q12816 | 0.08609  |
| 24458 | P14075 | Q5VZQ5 | 0.56438  |
| 24459 | P14075 | Q96HW7 | 0.40543  |
| 24460 | P14075 | Q71F56 | 0.24931  |
| 24461 | P14075 | O75362 | 0.54868  |
| 24462 | P14075 | P32189 | 0.28499  |
| 24463 | P14075 | Q6UXR8 | 0.63821  |
| 24464 | P14075 | Q9NVL8 | 0.2707   |
| 24465 | P14075 | P55212 | 0.2848   |
| 24466 | P14075 | Q6X4W1 | 0.98138  |
| 24467 | P14075 | O75446 | 1.0442   |
| 24468 | P14075 | Q06546 | 0.9726   |
| 24469 | P14075 | P0C1Z6 | 0.8408   |
| 24470 | P14075 | O94818 | 1.074    |
| 24471 | P14075 | Q6NUN9 | 0.50812  |
| 24472 | P14075 | Q5QP74 | 0.63821  |

|       |        |        |         |
|-------|--------|--------|---------|
| 24473 | P14075 | Q6ZVF9 | 0.59739 |
| 24474 | P14075 | P49720 | 0.26471 |
| 24475 | P14075 | Q8TCZ7 | 0.47655 |
| 24476 | P14075 | Q9UKT7 | 0.24312 |
| 24477 | P14075 | P61254 | 0.51033 |
| 24478 | P14075 | O60563 | 1.1739  |
| 24479 | P14075 | A8MSI8 | 1.0107  |
| 24480 | P14075 | Q8NAV2 | 0.53579 |
| 24481 | P14075 | Q9Y252 | 0.27113 |
| 24482 | P14075 | Q96DY7 | 0.3469  |
| 24483 | P14075 | A4D1E9 | 0.776   |
| 24484 | P14075 | Q3LI68 | 0.85226 |
| 24485 | P14075 | O14776 | 0.8463  |
| 24486 | P14075 | Q9Y2T2 | 0.35672 |
| 24487 | P14075 | Q9Y3Y4 | 0.37452 |
| 24488 | P14075 | Q5VTH2 | 0.49405 |
| 24489 | P14075 | P43268 | 0.23554 |
| 24490 | P14075 | Q5VT40 | 0.70918 |
| 24491 | P14075 | Q9NVV4 | 0.41596 |
| 24492 | P14075 | Q9P2R6 | 0.81949 |
| 24493 | P14075 | Q9Y5B0 | 0.33773 |
| 24494 | P14075 | Q6P4D5 | 0.90484 |
| 24495 | P14075 | P86479 | 0.63821 |
| 24496 | P14075 | Q8WWR8 | 0.07912 |
| 24497 | P14075 | Q86XI2 | 0.54195 |
| 24498 | P14075 | Q8WYP5 | 0.47295 |
| 24499 | P14075 | P46778 | 0.38311 |
| 24500 | P14075 | P29083 | 0.88411 |
| 24501 | P14075 | Q86SQ7 | 0.61546 |
| 24502 | P14075 | Q96LV5 | 0.09127 |
| 24503 | P14075 | O75971 | 1.1439  |
| 24504 | P14075 | A8MVW5 | 0.45516 |
| 24505 | P14075 | Q6UN15 | 0.90539 |
| 24506 | P14075 | P23769 | 0.26778 |
| 24507 | P14075 | P08133 | 0.41841 |
| 24508 | P14075 | Q9NRL2 | 0.74014 |
| 24509 | P14075 | Q9UL16 | 0.25079 |
| 24510 | P14075 | P61244 | 0.65792 |
| 24511 | P14075 | P49459 | 0.16118 |
| 24512 | P14075 | Q9UKL0 | 0.89777 |
| 24513 | P14075 | Q9NSI6 | 0.6037  |
| 24514 | P14075 | Q9UID6 | 0.32141 |
| 24515 | P14075 | Q8N365 | 0.94025 |
| 24516 | P14075 | P50613 | 0.15891 |
| 24517 | P14075 | Q8WW12 | 0.74465 |
| 24518 | P14075 | Q13287 | 0.35088 |
| 24519 | P14075 | Q9UBF2 | 0.10613 |
| 24520 | P14075 | Q6ZV56 | 0.63821 |
| 24521 | P14075 | Q9Y2G7 | 0.33777 |
| 24522 | P14075 | P59923 | 0.2118  |
| 24523 | P14075 | Q86TS7 | 0.63821 |
| 24524 | P14075 | P61604 | 0.55836 |
| 24525 | P14075 | Q99457 | 0.34187 |
| 24526 | P14075 | Q9BRQ3 | 0.83225 |
| 24527 | P14075 | Q8IUW3 | 0.552   |
| 24528 | P14075 | Q9NX18 | 0.70599 |
| 24529 | P14075 | Q16822 | 0.16326 |
| 24530 | P14075 | Q96T58 | 0.51242 |
| 24531 | P14075 | Q5T750 | 0.30695 |
| 24532 | P14075 | P59037 | 0.65279 |
| 24533 | P14075 | Q6NUQ1 | 0.35214 |
| 24534 | P14075 | Q2KJ03 | 0.17658 |
| 24535 | P14075 | O75394 | 0.50018 |
| 24536 | P14075 | Q495Y8 | 0.53769 |
| 24537 | P14075 | Q8NHV4 | 0.39395 |
| 24538 | P14075 | Q6PH81 | 0.55787 |
| 24539 | P14075 | P41218 | 0.30049 |
| 24540 | P14075 | Q7Z460 | 0.24206 |
| 24541 | P14075 | Q9P1D8 | 0.63821 |
| 24542 | P14075 | Q68D10 | 0.94025 |
| 24543 | P14075 | Q8IUC1 | 0.31219 |
| 24544 | P14075 | Q9BX26 | 0.88482 |
| 24545 | P14075 | Q8N2B8 | 0.22782 |
| 24546 | P14075 | P19419 | 0.99837 |
| 24547 | P14075 | H3BMG3 | 0.4407  |
| 24548 | P14075 | Q3ZCQ2 | 0.63821 |



|       |        |        |          |
|-------|--------|--------|----------|
| 24549 | P14075 | Q5H9F3 | 0.37218  |
| 24550 | P14075 | P41212 | 0.58689  |
| 24551 | P14075 | Q9Y312 | 0.26928  |
| 24552 | P14075 | Q9H467 | 0.72315  |
| 24553 | P14075 | Q9NSB4 | 0.48911  |
| 24554 | P14075 | P26651 | 0.44287  |
| 24555 | P14075 | Q8IV36 | 0.27729  |
| 24556 | P14075 | Q12905 | 0.83992  |
| 24557 | P14075 | Q8TCE6 | 0.99766  |
| 24558 | P14075 | Q14241 | 0.28948  |
| 24559 | P14075 | Q9H446 | 0.1668   |
| 24560 | P14075 | Q9GZL7 | 0.51425  |
| 24561 | P14075 | Q92600 | 0.85246  |
| 24562 | P14075 | Q52LA3 | 0.55313  |
| 24563 | P14075 | Q6P9A1 | 0.24912  |
| 24564 | P14075 | Q6P1M3 | 0.65729  |
| 24565 | P14075 | Q9H019 | 0.81172  |
| 24566 | P14075 | Q9Y6Z4 | 0.16405  |
| 24567 | P14075 | P18847 | 0.94154  |
| 24568 | P14075 | Q8WVC0 | 0.75365  |
| 24569 | P14075 | P78559 | 0.3121   |
| 24570 | P14075 | Q01860 | 0.50318  |
| 24571 | P14075 | Q9BYU5 | 0.43615  |
| 24572 | P14075 | Q9UPP1 | 0.31544  |
| 24573 | P14075 | Q9UBD5 | 0.32816  |
| 24574 | P14075 | Q9BRX2 | 0.18454  |
| 24575 | P14075 | H3BN30 | 0.63821  |
| 24576 | P14075 | P36639 | 0.11394  |
| 24577 | P14075 | A1A5D9 | 0.68819  |
| 24578 | P14075 | Q9Y6F6 | 0.24907  |
| 24579 | P14075 | Q5H9J7 | 0.6992   |
| 24580 | P14075 | Q6ZW49 | 0.2232   |
| 24581 | P14075 | Q9HCM7 | 0.69266  |
| 24582 | P14075 | Q14139 | 0.38268  |
| 24583 | P14075 | Q86TU7 | 0.12512  |
| 24584 | P14075 | P28698 | 0.4992   |
| 24585 | P14075 | Q5T7N7 | 0.63821  |
| 24586 | P14075 | Q9ULU4 | 0.30061  |
| 24587 | P14075 | Q6PI26 | 0.77654  |
| 24588 | P14075 | Q96BR5 | 0.025572 |
| 24589 | P14075 | Q6ZSJ8 | 0.94025  |
| 24590 | P14075 | Q9NY61 | 0.61425  |
| 24591 | P14075 | Q96G28 | 0.19421  |
| 24592 | P14075 | Q8NCX0 | 0.28286  |
| 24593 | P14075 | Q95177 | 0.19524  |
| 24594 | P14075 | Q9Y468 | 0.71776  |
| 24595 | P14075 | Q9NS64 | 0.7393   |
| 24596 | P14075 | Q9UI25 | 0.63821  |
| 24597 | P14075 | Q96M34 | 0.15487  |
| 24598 | P14075 | P61201 | 0.34381  |
| 24599 | P14075 | Q8N782 | 0.2846   |
| 24600 | P14075 | P09234 | 0.35616  |
| 24601 | P14075 | Q9BQ15 | 0.55694  |
| 24602 | P14075 | P38159 | 0.47278  |
| 24603 | P14075 | Q9H7R0 | 0.26082  |
| 24604 | P14075 | P13985 | 0.63821  |
| 24605 | P14075 | Q14598 | 0.89699  |
| 24606 | P14075 | Q8TAA5 | 0.39522  |
| 24607 | P14075 | Q3LHN1 | 0.63821  |
| 24608 | P14075 | Q9NX46 | 0.31407  |
| 24609 | P14075 | Q75MW2 | 0.49693  |
| 24610 | P14075 | P38935 | 0.31016  |
| 24611 | P14075 | Q6ZSR9 | 0.023467 |
| 24612 | P14075 | Q9HBX3 | 0.63821  |
| 24613 | P14075 | Q96SL8 | 0.080621 |
| 24614 | P14075 | P60510 | 0.55807  |
| 24615 | P14075 | Q86UW6 | 0.12834  |
| 24616 | P14075 | Q96M91 | 0.92896  |
| 24617 | P14075 | Q6ICG8 | 1.0799   |
| 24618 | P14075 | A5PLN9 | 0.65916  |
| 24619 | P14075 | Q95886 | 0.70937  |
| 24620 | P14075 | Q6ZQR2 | 0.80198  |
| 24621 | P14075 | Q96GU1 | 0.35213  |
| 24622 | P14075 | Q9UGP4 | 0.31554  |
| 24623 | P14075 | Q15037 | 0.36462  |
| 24624 | P14075 | Q14839 | 0.36782  |

|       |        |        |           |
|-------|--------|--------|-----------|
| 24625 | P14075 | Q6ZS92 | 0.25823   |
| 24626 | P14075 | Q9UBD0 | 0.85108   |
| 24627 | P14075 | Q8N6L1 | 0.62109   |
| 24628 | P14075 | Q03933 | 0.49752   |
| 24629 | P14075 | A8K554 | 0.051629  |
| 24630 | P14075 | Q9BX40 | 0.59986   |
| 24631 | P14075 | Q9HC44 | 1.2608    |
| 24632 | P14075 | Q9UHT9 | 0.63821   |
| 24633 | P14075 | Q9NPI8 | 0.61201   |
| 24634 | P14075 | Q6NSH3 | 0.49813   |
| 24635 | P14075 | P48380 | 0.33335   |
| 24636 | P14075 | P34949 | 0.35538   |
| 24637 | P14075 | Q5TAB7 | 0.58995   |
| 24638 | P14075 | Q9BQD3 | 0.18389   |
| 24639 | P14075 | Q9UH64 | 0.21723   |
| 24640 | P14075 | P59090 | 0.63821   |
| 24641 | P14075 | P42768 | 0.12831   |
| 24642 | P14075 | Q96KT6 | 0.63821   |
| 24643 | P14075 | Q8IZM0 | 0.33898   |
| 24644 | P14075 | Q92945 | 0.52477   |
| 24645 | P14075 | Q53GS7 | 0.41936   |
| 24646 | P14075 | Q5GJ75 | 0.0031367 |
| 24647 | P14075 | Q5TG08 | 0.83777   |
| 24648 | P14075 | P51610 | 0.30974   |
| 24649 | P14075 | P62633 | 0.31576   |
| 24650 | P14075 | Q13561 | 0.44947   |
| 24651 | P14075 | Q9Y2Y0 | 0.73213   |
| 24652 | P14075 | Q33E94 | 0.61509   |
| 24653 | P14075 | Q86SZ2 | 0.49499   |
| 24654 | P14075 | Q5JTJ3 | 0.16981   |
| 24655 | P14075 | O15527 | 0.2933    |
| 24656 | P14075 | Q14153 | 0.73401   |
| 24657 | P14075 | Q9BSU3 | 0.24483   |
| 24658 | P14075 | Q9HBT7 | 0.18018   |
| 24659 | P14075 | Q92973 | 0.78332   |
| 24660 | P14075 | Q8IY31 | 0.29249   |
| 24661 | P14075 | Q6ZU52 | 0.22045   |
| 24662 | P14075 | Q15652 | 0.2875    |
| 24663 | P14075 | O75419 | 0.65396   |
| 24664 | P14075 | Q9NTI7 | 0.90131   |
| 24665 | P14075 | Q93100 | 0.30788   |
| 24666 | P14075 | Q86WB0 | 0.99021   |
| 24667 | P14075 | O15015 | 0.39205   |
| 24668 | P14075 | P35548 | 0.45448   |
| 24669 | P14075 | P20700 | 0.19332   |
| 24670 | P14075 | Q96C28 | 0.27983   |
| 24671 | P14075 | P11161 | 0.31021   |
| 24672 | P14075 | Q969H9 | 0.63821   |
| 24673 | P14075 | Q8NC51 | 0.48148   |
| 24674 | P14075 | Q12837 | 0.33374   |
| 24675 | P14075 | Q15561 | 0.69234   |
| 24676 | P14075 | Q6ZQV5 | 0.2118    |
| 24677 | P14075 | H0UI37 | 0.25405   |
| 24678 | P14075 | Q7Z3B3 | 0.32225   |
| 24679 | P14075 | Q9NYP8 | 0.44152   |
| 24680 | P14075 | Q5VV17 | 0.064158  |
| 24681 | P14075 | P61573 | 0.589     |
| 24682 | P14075 | Q9NTX9 | 0.38163   |
| 24683 | P14075 | Q9NVN8 | 0.17744   |
| 24684 | P14075 | Q53HV7 | 0.35759   |
| 24685 | P14075 | Q6DCA0 | 0.17539   |
| 24686 | P14075 | P15172 | 0.2416    |
| 24687 | P14075 | A4D2B0 | 0.63106   |
| 24688 | P14075 | Q15428 | 0.39384   |
| 24689 | P14075 | Q6PGP7 | 0.48277   |
| 24690 | P14075 | Q96ND8 | 0.3005    |
| 24691 | P14075 | Q6P1X5 | 0.65017   |
| 24692 | P14075 | O00541 | 0.29851   |
| 24693 | P14075 | P49792 | 0.63219   |
| 24694 | P14075 | Q5VXH4 | 0.2982    |
| 24695 | P14075 | Q969T9 | 0.87844   |
| 24696 | P14075 | Q9Y2D8 | 0.38331   |
| 24697 | P14075 | P17096 | 0.37621   |
| 24698 | P14075 | Q92783 | 0.34279   |
| 24699 | P14075 | Q49A88 | 0.55434   |
| 24700 | P14075 | Q15327 | 0.2371    |

|       |        |        |          |
|-------|--------|--------|----------|
| 24701 | P14075 | Q9NWN3 | 0.29485  |
| 24702 | P14075 | Q9Y606 | 0.76998  |
| 24703 | P14075 | Q9Y4P1 | 0.35818  |
| 24704 | P14075 | P56524 | 0.21228  |
| 24705 | P14075 | Q96MH7 | 0.059526 |
| 24706 | P14075 | Q9H8V8 | 0.63821  |
| 24707 | P14075 | Q96PU4 | 0.24131  |
| 24708 | P14075 | P05813 | 0.31048  |
| 24709 | P14075 | Q5JT18 | 0.63821  |
| 24710 | P14075 | A5PLN7 | 0.94025  |
| 24711 | P14075 | Q00994 | 0.75094  |
| 24712 | P14075 | Q2M329 | 0.39103  |
| 24713 | P14075 | O60813 | 0.28377  |
| 24714 | P14075 | Q9BV20 | 0.28082  |
| 24715 | P14075 | Q9UK11 | 0.23581  |
| 24716 | P14075 | Q3LI60 | 0.63821  |
| 24717 | P14075 | Q8N1F7 | 0.39819  |
| 24718 | P14075 | Q9NTM9 | 0.027251 |
| 24719 | P14075 | Q96HQ2 | 0.92508  |
| 24720 | P14075 | O43918 | 0.74097  |
| 24721 | P14075 | Q9NP79 | 0.015904 |
| 24722 | P14075 | P17036 | 0.24165  |
| 24723 | P14075 | Q92917 | 0.66601  |
| 24724 | P14075 | Q99747 | 0.31774  |
| 24725 | P14075 | O00422 | 0.97042  |
| 24726 | P14075 | P51965 | 0.30957  |
| 24727 | P14075 | Q01844 | 0.41741  |
| 24728 | P14075 | Q96IZ7 | 0.9523   |
| 24729 | P14075 | A8K8P3 | 0.49059  |
| 24730 | P14075 | O14709 | 0.2118   |
| 24731 | P14075 | Q8NDZ9 | 0.63821  |
| 24732 | P14075 | P05388 | 0.9333   |
| 24733 | P14075 | Q96IY1 | 0.64831  |
| 24734 | P14075 | Q08050 | 0.32541  |
| 24735 | P14075 | Q9NSB2 | 0.62301  |
| 24736 | P14075 | Q15714 | 0.60287  |
| 24737 | P14075 | Q49AJ0 | 0.25585  |
| 24738 | P14075 | Q13257 | 0.50877  |
| 24739 | P14075 | Q53G59 | 0.36399  |
| 24740 | P14075 | Q9H9Z2 | 0.53732  |
| 24741 | P14075 | H3BQW9 | 0.6611   |
| 24742 | P14075 | Q5T681 | 0.83544  |
| 24743 | P14075 | Q8TF01 | 1.0059   |
| 24744 | P14075 | O43186 | 0.57798  |
| 24745 | P14075 | Q68CZ6 | 0.32838  |
| 24746 | P14075 | P0CW21 | 0.63821  |
| 24747 | P14075 | Q5PSV4 | 0.16676  |
| 24748 | P14075 | P18146 | 0.50432  |
| 24749 | P14075 | Q13015 | 0.55637  |
| 24750 | P14075 | O60930 | 0.11949  |
| 24751 | P14075 | Q13442 | 0.57373  |
| 24752 | P14075 | Q2VPJ9 | 0.94025  |
| 24753 | P14075 | P41252 | 0.46193  |
| 24754 | P14075 | Q5VWN6 | 0.19175  |
| 24755 | P14075 | Q9UJW3 | 0.40918  |
| 24756 | P14075 | Q9BXR0 | 0.94409  |
| 24757 | P14075 | Q9NYW8 | 0.12763  |
| 24758 | P14075 | Q00534 | 0.46937  |
| 24759 | P14075 | A8K5M9 | 0.81159  |
| 24760 | P14075 | Q9HC77 | 0.45995  |
| 24761 | P14075 | P19484 | 0.31253  |
| 24762 | P14075 | Q9NRP2 | 0.75196  |
| 24763 | P14075 | Q9HCE1 | 0.49809  |
| 24764 | P14075 | Q9NQG5 | 0.82645  |
| 24765 | P14075 | P26641 | 0.22842  |
| 24766 | P14075 | Q9NRT5 | 0.40716  |
| 24767 | P14075 | P78344 | 0.21212  |
| 24768 | P14075 | Q8IZQ1 | 0.38418  |
| 24769 | P14075 | Q8NE18 | 1.0009   |
| 24770 | P14075 | A6NN90 | 0.38936  |
| 24771 | P14075 | O95257 | 0.2591   |
| 24772 | P14075 | P18669 | 0.55532  |
| 24773 | P14075 | Q96EZ8 | 0.44529  |
| 24774 | P14075 | Q9Y3D3 | 0.58858  |
| 24775 | P14075 | P0C7T5 | 0.43125  |
| 24776 | P14075 | Q8N159 | 0.23016  |

|       |        |        |          |
|-------|--------|--------|----------|
| 24777 | P14075 | Q9H761 | 0.29335  |
| 24778 | P14075 | Q15047 | 0.45186  |
| 24779 | P14075 | Q7L4I2 | 1.2359   |
| 24780 | P14075 | O75312 | 0.28294  |
| 24781 | P14075 | P02810 | 0.63821  |
| 24782 | P14075 | Q16384 | 0.39489  |
| 24783 | P14075 | Q9P1T7 | 0.98115  |
| 24784 | P14075 | O60675 | 0.22573  |
| 24785 | P14075 | Q9BZK3 | 0.24811  |
| 24786 | P14075 | O95521 | 0.36986  |
| 24787 | P14075 | O95625 | 0.067017 |
| 24788 | P14075 | A6NER3 | 0.079883 |
| 24789 | P14075 | P06746 | 0.24382  |
| 24790 | P14075 | Q96TC7 | 0.63083  |
| 24791 | P14075 | A1L429 | 0.45588  |
| 24792 | P14075 | Q99576 | 0.29258  |
| 24793 | P14075 | Q14320 | 0.21912  |
| 24794 | P14075 | P29084 | 0.94701  |
| 24795 | P14075 | Q86VX9 | 0.72338  |
| 24796 | P14075 | Q96T21 | 0.5623   |
| 24797 | P14075 | Q969U7 | 0.37862  |
| 24798 | P14075 | P80217 | 0.36639  |
| 24799 | P14075 | Q8N3U1 | 0.63821  |
| 24800 | P14075 | O95619 | 0.59117  |
| 24801 | P14075 | A1L190 | 0.81328  |
| 24802 | P14075 | Q96RK0 | 0.68205  |
| 24803 | P14075 | Q16520 | 0.70259  |
| 24804 | P14075 | O95931 | 0.57698  |
| 24805 | P14075 | Q9NZ52 | 0.25406  |
| 24806 | P14075 | Q3LI73 | 0.78906  |
| 24807 | P14075 | Q6ECI4 | 0.19334  |
| 24808 | P14075 | Q9Y6J3 | 0.63821  |
| 24809 | P14075 | Q6IA86 | 0.35266  |
| 24810 | P14075 | Q86VE0 | 0.95874  |
| 24811 | P14075 | Q70EL1 | 0.30278  |
| 24812 | P14075 | Q86X02 | 0.1853   |
| 24813 | P14075 | Q9HD33 | 0.69348  |
| 24814 | P14075 | Q9Y2N7 | 0.32444  |
| 24815 | P14075 | Q8N336 | 0.31174  |
| 24816 | P14075 | Q8TE76 | 0.078671 |
| 24817 | P14075 | P0CF75 | 0.19965  |
| 24818 | P14075 | O43790 | 0.70038  |
| 24819 | P14075 | P42771 | 0.41785  |
| 24820 | P14075 | P41220 | 0.25232  |
| 24821 | P14075 | Q6ZRM9 | 0.66314  |
| 24822 | P14075 | Q5T5A8 | 0.63821  |
| 24823 | P14075 | Q7LBC6 | 0.021314 |
| 24824 | P14075 | B2RV13 | 0.55755  |
| 24825 | P14075 | P20265 | 0.49382  |
| 24826 | P14075 | Q9UBQ0 | 0.32751  |
| 24827 | P14075 | P33076 | 0.33116  |
| 24828 | P14075 | Q5TZK3 | 0.040278 |
| 24829 | P14075 | Q9HCH0 | 0.98719  |
| 24830 | P14075 | Q5T870 | 0.72916  |
| 24831 | P14075 | Q6RSH7 | 0.22583  |
| 24832 | P14075 | Q8WWX9 | 0.19414  |
| 24833 | P14075 | F7VJQ1 | 0.63821  |
| 24834 | P14075 | P0C2W7 | 0.63821  |
| 24835 | P14075 | Q9UH92 | 0.61766  |
| 24836 | P14075 | Q9BW61 | 0.56727  |
| 24837 | P14075 | Q53H80 | 0.30627  |
| 24838 | P14075 | P83881 | 0.49283  |
| 24839 | P14075 | P17661 | 0.28304  |
| 24840 | P14075 | P04156 | 0.31096  |
| 24841 | P14075 | Q5VV11 | 0.16221  |
| 24842 | P14075 | Q96LI9 | 0.43263  |
| 24843 | P14075 | O00629 | 0.26492  |
| 24844 | P14075 | Q9NPJ8 | 0.2275   |
| 24845 | P14075 | Q5UE93 | 0.42549  |
| 24846 | P14075 | Q8TDC0 | 0.43925  |
| 24847 | P14075 | Q86WS4 | 0.63821  |
| 24848 | P14075 | O14734 | 0.41379  |
| 24849 | P14075 | P82650 | 0.13041  |
| 24850 | P14075 | Q9H374 | 0.29603  |
| 24851 | P14075 | Q16613 | 0.19918  |
| 24852 | P14075 | Q92922 | 0.89023  |

|       |        |        |          |
|-------|--------|--------|----------|
| 24853 | P14075 | P54920 | 0.2117   |
| 24854 | P14075 | Q16537 | 0.12467  |
| 24855 | P14075 | Q8WTX7 | 0.69586  |
| 24856 | P14075 | O15226 | 0.58315  |
| 24857 | P14075 | Q8N268 | 0.058695 |
| 24858 | P14075 | Q86VN1 | 0.23581  |
| 24859 | P14075 | Q8NDN9 | 0.41146  |
| 24860 | P14075 | Q676U5 | 0.42455  |
| 24861 | P14075 | Q9BWK5 | 0.98003  |
| 24862 | P14075 | P14136 | 0.60184  |
| 24863 | P14075 | A6NME0 | 0.34001  |
| 24864 | P14075 | Q9BYG4 | 0.43699  |
| 24865 | P14075 | Q13620 | 0.52852  |
| 24866 | P14075 | Q99613 | 0.44281  |
| 24867 | P14075 | P19388 | 0.4328   |
| 24868 | P14075 | Q3MIS6 | 0.29291  |
| 24869 | P14075 | O75363 | 0.41785  |
| 24870 | P14075 | Q7KZ85 | 0.27839  |
| 24871 | P14075 | Q92870 | 0.47417  |
| 24872 | P14075 | Q9H321 | 0.89699  |
| 24873 | P14075 | Q9Y603 | 0.94184  |
| 24874 | P14075 | Q9HCH5 | 0.34293  |
| 24875 | P14075 | Q13515 | 0.90592  |
| 24876 | P14075 | O95400 | 0.52621  |
| 24877 | P14075 | P49750 | 0.88422  |
| 24878 | P14075 | P48634 | 0.55947  |
| 24879 | P14075 | Q9BZK8 | 0.63821  |
| 24880 | P14075 | Q9P086 | 0.80648  |
| 24881 | P14075 | O94776 | 0.76878  |
| 24882 | P14075 | B2CW77 | 0.63821  |
| 24883 | P14075 | Q6MZT1 | 0.68144  |
| 24884 | P14075 | Q01130 | 0.55543  |
| 24885 | P14075 | O75925 | 0.38281  |
| 24886 | P14075 | Q5TBB1 | 0.74061  |
| 24887 | P14075 | Q5VZL5 | 0.70403  |
| 24888 | P14075 | Q9BRQ4 | 0.32208  |
| 24889 | P14075 | Q86V42 | 0.74242  |
| 24890 | P14075 | Q9BXS6 | 0.56934  |
| 24891 | P14075 | O60232 | 0.81451  |
| 24892 | P14075 | Q9HAH1 | 0.24135  |
| 24893 | P14075 | Q6ZRH4 | 1.0495   |
| 24894 | P14075 | Q9Y244 | 0.23153  |
| 24895 | P14075 | P10244 | 0.35059  |
| 24896 | P14075 | Q96MY1 | 0.79149  |
| 24897 | P14075 | Q8N0V1 | 0.39925  |
| 24898 | P14075 | P61218 | 0.1659   |
| 24899 | P14075 | Q5T753 | 0.63821  |
| 24900 | P14075 | Q5HYK7 | 0.81116  |
| 24901 | P14075 | Q9NQR1 | 0.50973  |
| 24902 | P14075 | Q6L8G9 | 0.63821  |
| 24903 | P14075 | Q6ZRQ5 | 0.33602  |
| 24904 | P14075 | A6NMK8 | 0.67019  |
| 24905 | P14075 | Q6ZNO3 | 0.21077  |
| 24906 | P14075 | Q5DJT8 | 0.15736  |
| 24907 | P14075 | Q9Y2V2 | 0.27962  |
| 24908 | P14075 | Q09MP3 | 0.57095  |
| 24909 | P14075 | P17019 | 0.2938   |
| 24910 | P14075 | Q8N128 | 0.63821  |
| 24911 | P14075 | P0C5Y4 | 0.78379  |
| 24912 | P14075 | Q96RK1 | 0.39475  |
| 24913 | P14075 | Q6L8H1 | 0.63821  |
| 24914 | P14075 | P35638 | 0.57906  |
| 24915 | P14075 | Q9Y3F1 | 0.63821  |
| 24916 | P14075 | Q9NP50 | 0.8627   |
| 24917 | P14075 | Q719H9 | 0.44577  |
| 24918 | P14075 | Q8TDY2 | 0.63031  |
| 24919 | P14075 | P13073 | 0.30766  |
| 24920 | P14075 | Q96PY0 | 0.28748  |
| 24921 | P14075 | P50750 | 0.36746  |
| 24922 | P14075 | P15822 | 0.59407  |
| 24923 | P14075 | Q8IYX7 | 0.95729  |
| 24924 | P14075 | Q15070 | 0.23197  |
| 24925 | P14075 | Q8TD35 | 0.94025  |
| 24926 | P14075 | Q16548 | 0.34185  |
| 24927 | P14075 | O15117 | 0.6328   |
| 24928 | P14075 | P19367 | 0.1965   |

|       |        |        |           |
|-------|--------|--------|-----------|
| 24929 | P14075 | P41236 | 0.75956   |
| 24930 | P14075 | Q5VZV4 | 0.56584   |
| 24931 | P14075 | Q6AWC8 | 0.73023   |
| 24932 | P14075 | Q49AR2 | 0.63362   |
| 24933 | P14075 | A6NL46 | 0.63038   |
| 24934 | P14075 | O75821 | 0.35351   |
| 24935 | P14075 | O95218 | 0.41487   |
| 24936 | P14075 | A7E2U8 | 0.35674   |
| 24937 | P14075 | Q9Y4K1 | 0.65175   |
| 24938 | P14075 | O95777 | 0.41529   |
| 24939 | P14075 | Q7Z7F1 | 0.0074033 |
| 24940 | P14075 | O60583 | 0.75127   |
| 24941 | P14075 | P42568 | 0.64816   |
| 24942 | P14075 | Q9UIF7 | 0.13311   |
| 24943 | P14075 | Q92994 | 0.15885   |
| 24944 | P14075 | Q9UN81 | 0.38778   |
| 24945 | P14075 | H3BNL1 | 0.40897   |
| 24946 | P14075 | Q7L5Y9 | 0.19304   |
| 24947 | P14075 | Q53EQ6 | 0.37896   |
| 24948 | P14075 | Q9Y2Z2 | 0.86548   |
| 24949 | P14075 | Q96KT0 | 0.27476   |
| 24950 | P14075 | P31249 | 0.34283   |
| 24951 | P14075 | Q9Y2A0 | 0.42494   |
| 24952 | P14075 | Q9BT04 | 0.36123   |
| 24953 | P14075 | Q96FN9 | 0.48553   |
| 24954 | P14075 | A8MUI8 | 0.43821   |
| 24955 | P14075 | Q9UNP9 | 0.27182   |
| 24956 | P14075 | A8MT65 | 0.25328   |
| 24957 | P14075 | Q6ISB3 | 0.3936    |
| 24958 | P14075 | O00287 | 0.61425   |
| 24959 | P14075 | Q8TEA8 | 0.81979   |
| 24960 | P14075 | Q96NA2 | 0.78891   |
| 24961 | P14075 | P47928 | 0.30232   |
| 24962 | P14075 | O95363 | 0.44767   |
| 24963 | P14075 | Q5T653 | 0.57634   |
| 24964 | P14075 | P46777 | 0.90651   |
| 24965 | P14075 | Q9H840 | 0.62438   |
| 24966 | P14075 | O95997 | 0.68588   |
| 24967 | P14075 | Q9Y250 | 0.7391    |
| 24968 | P14075 | Q7Z4G1 | 1.1566    |
| 24969 | P14075 | P0C7W0 | 0.94025   |
| 24970 | P14075 | Q8N9Z2 | 0.84554   |
| 24971 | P14075 | Q02080 | 0.22249   |
| 24972 | P14075 | O60671 | 0.36574   |
| 24973 | P14075 | A6PW82 | 0.47064   |
| 24974 | P14075 | Q8NA69 | 0.27242   |
| 24975 | P14075 | Q9GZQ3 | 0.85723   |
| 24976 | P14075 | Q9ULX9 | 0.25153   |
| 24977 | P14075 | O75170 | 0.59982   |
| 24978 | P14075 | Q6ZS72 | 0.48817   |
| 24979 | P14075 | Q86VQ0 | 0.1928    |
| 24980 | P14075 | Q8WZA8 | 0.63821   |
| 24981 | P14075 | P22732 | 0.47499   |
| 24982 | P14075 | Q96PS1 | 0.6406    |
| 24983 | P14075 | Q5T440 | 0.27295   |
| 24984 | P14075 | Q96H22 | 0.51352   |
| 24985 | P14075 | Q96EF9 | 0.51137   |
| 24986 | P14075 | Q96G03 | 0.50128   |
| 24987 | P14075 | Q9NX53 | 0.1668    |
| 24988 | P14075 | Q5SRH9 | 0.8321    |
| 24989 | P14075 | O43172 | 0.51544   |
| 24990 | P14075 | Q5H9J9 | 0.4382    |
| 24991 | P14075 | Q6P1L8 | 0.7383    |
| 24992 | P14075 | P19012 | 0.80046   |
| 24993 | P14075 | Q13510 | 0.54162   |
| 24994 | P14075 | Q9NQ31 | 0.47065   |
| 24995 | P14075 | Q96QA5 | 0.39977   |
| 24996 | P14075 | Q1T7F1 | 0.20116   |
| 24997 | P14075 | Q93062 | 0.64132   |
| 24998 | P14075 | Q8TF40 | 0.5836    |
| 24999 | P14075 | Q9H825 | 0.14495   |
| 25000 | P14075 | Q15910 | 0.32146   |
| 25001 | P14075 | Q5JS54 | 0.71048   |
| 25002 | P14075 | Q6NV74 | 0.94025   |
| 25003 | P14075 | Q96IT1 | 0.44189   |
| 25004 | P14075 | Q9HB03 | 0.40775   |

|       |        |        |         |
|-------|--------|--------|---------|
| 25005 | P14075 | Q86TA1 | 0.14228 |
| 25006 | P14075 | P11844 | 0.70051 |
| 25007 | P14075 | Q9UKX7 | 0.81795 |
| 25008 | P14075 | P29692 | 0.15807 |
| 25009 | P14075 | Q96EY4 | 0.50916 |
| 25010 | P14075 | Q9HD26 | 0.68559 |
| 25011 | P14075 | O95433 | 0.32774 |
| 25012 | P14075 | O15453 | 0.44013 |
| 25013 | P14075 | O43684 | 0.47946 |
| 25014 | P14075 | O60296 | 0.38217 |
| 25015 | P14075 | Q9GZV4 | 0.41834 |
| 25016 | P14075 | P57076 | 0.4436  |
| 25017 | P14075 | Q96A04 | 0.73048 |
| 25018 | P14075 | Q9BTP7 | 0.63438 |
| 25019 | P14075 | A6NL82 | 0.64102 |
| 25020 | P14075 | Q4W4Y0 | 0.2985  |
| 25021 | P14075 | P0CL81 | 0.45588 |
| 25022 | P14075 | Q9Y3U8 | 0.57095 |
| 25023 | P14075 | Q9BVG4 | 0.32131 |
| 25024 | P14075 | P04792 | 0.25246 |
| 25025 | P14075 | Q53ET0 | 1.1714  |
| 25026 | P14075 | Q96SN8 | 0.24433 |
| 25027 | P14075 | Q9NVF7 | 0.8608  |
| 25028 | P14075 | Q96LM1 | 0.61964 |
| 25029 | P14075 | P04280 | 0.70558 |
| 25030 | P14075 | Q6UVJ0 | 0.57357 |
| 25031 | P14075 | Q8N1Q8 | 0.44137 |
| 25032 | P14075 | P56182 | 0.53883 |
| 25033 | P14075 | P02728 | 0.63821 |
| 25034 | P14075 | P78347 | 0.45062 |
| 25035 | P14075 | Q92988 | 0.38762 |
| 25036 | P14075 | O43167 | 0.39205 |
| 25037 | P14075 | Q8N9H6 | 0.28265 |
| 25038 | P14075 | Q9NUQ6 | 0.11945 |
| 25039 | P14075 | P31943 | 0.35146 |
| 25040 | P14075 | P40926 | 0.17722 |
| 25041 | P14075 | Q8NEP4 | 0.94025 |
| 25042 | P14075 | Q5SWA1 | 0.46203 |
| 25043 | P14075 | P62249 | 0.47832 |
| 25044 | P14075 | Q8IVG9 | 0.45022 |
| 25045 | P14075 | Q9BYQ8 | 0.78356 |
| 25046 | P14075 | Q9BZG8 | 0.17374 |
| 25047 | P14075 | Q8TF09 | 0.41524 |
| 25048 | P14075 | Q8NHV5 | 0.15877 |
| 25049 | P14075 | Q9H7E9 | 0.94025 |
| 25050 | P14075 | P63162 | 0.419   |
| 25051 | P14075 | Q7Z7C8 | 0.32582 |
| 25052 | P14075 | Q92890 | 0.47291 |
| 25053 | P14075 | O14933 | 0.13004 |
| 25054 | P14075 | P59051 | 0.37169 |
| 25055 | P14075 | Q9BYP9 | 0.78356 |
| 25056 | P14075 | Q16082 | 0.60379 |
| 25057 | P14075 | A6NLX3 | 0.32941 |
| 25058 | P14075 | Q96CT7 | 0.15766 |
| 25059 | P14075 | Q12906 | 0.85928 |
| 25060 | P14075 | Q92800 | 0.34835 |
| 25061 | P14075 | Q13216 | 0.24422 |
| 25062 | P14075 | P23490 | 0.56784 |
| 25063 | P14075 | Q9H2W6 | 0.3418  |
| 25064 | P14075 | Q8WUY3 | 0.11724 |
| 25065 | P14075 | Q99543 | 0.25247 |
| 25066 | P14075 | Q75NE6 | 1.0062  |
| 25067 | P14075 | Q13601 | 0.17716 |
| 25068 | P14075 | O15397 | 0.59793 |
| 25069 | P14075 | Q86UF4 | 0.21375 |
| 25070 | P14075 | Q5VUE5 | 0.37558 |
| 25071 | P14075 | A6NFL8 | 0.71412 |
| 25072 | P14075 | Q9H7N4 | 0.71076 |
| 25073 | P14075 | Q9P242 | 0.6106  |
| 25074 | P14075 | Q8WY50 | 0.63821 |
| 25075 | P14075 | Q86U90 | 0.50384 |
| 25076 | P14075 | P39687 | 1.0796  |
| 25077 | P14075 | O75175 | 1.0079  |
| 25078 | P14075 | Q6PK04 | 0.80319 |
| 25079 | P14075 | Q05DH4 | 0.95406 |
| 25080 | P14075 | Q5TAX3 | 0.48697 |

|       |        |        |          |
|-------|--------|--------|----------|
| 25081 | P14075 | Q8NCN5 | 0.074286 |
| 25082 | P14075 | Q9H074 | 0.23874  |
| 25083 | P14075 | O00625 | 0.40069  |
| 25084 | P14075 | Q5SXM2 | 0.42766  |
| 25085 | P14075 | Q9NYK6 | 0.54402  |
| 25086 | P14075 | Q8N5N7 | 0.65854  |
| 25087 | P14075 | Q9BSJ6 | 0.33335  |
| 25088 | P14075 | Q15544 | 0.86031  |
| 25089 | P14075 | Q9H091 | 0.2858   |
| 25090 | P14075 | P49005 | 0.34268  |
| 25091 | P14075 | Q8WUF5 | 0.61688  |
| 25092 | P14075 | Q7Z614 | 0.25113  |
| 25093 | P14075 | Q3LI58 | 0.63821  |
| 25094 | P14075 | F8W1W9 | 0.20092  |
| 25095 | P14075 | P78371 | 0.33257  |
| 25096 | P14075 | Q6P444 | 0.81172  |
| 25097 | P14075 | Q8IUD2 | 0.60791  |
| 25098 | P14075 | P45973 | 0.48918  |
| 25099 | P14075 | O95159 | 0.40377  |
| 25100 | P14075 | Q93075 | 0.57894  |
| 25101 | P14075 | Q9HAW0 | 0.24595  |
| 25102 | P14075 | Q02040 | 0.5432   |
| 25103 | P14075 | Q86UB2 | 0.72124  |
| 25104 | P14075 | Q9NNX9 | 0.96999  |
| 25105 | P14075 | Q6IPT2 | 1.1182   |
| 25106 | P14075 | Q53G26 | 0.35989  |
| 25107 | P14075 | Q9UK41 | 0.447    |
| 25108 | P14075 | P0C853 | 0.63821  |
| 25109 | P14075 | Q9UFW8 | 0.155    |
| 25110 | P14075 | O15027 | 0.42474  |
| 25111 | P14075 | Q0VD67 | 0.019594 |
| 25112 | P14075 | Q14157 | 0.64801  |
| 25113 | P14075 | Q8TAF7 | 0.28409  |
| 25114 | P14075 | C9J3I9 | 0.45142  |
| 25115 | P14075 | P0DL12 | 0.40859  |
| 25116 | P14075 | Q99717 | 0.25517  |
| 25117 | P14075 | Q8N769 | 0.084911 |
| 25118 | P14075 | Q9P2X3 | 0.18986  |
| 25119 | P14075 | Q13200 | 0.34505  |
| 25120 | P14075 | P13645 | 0.77038  |
| 25121 | P14075 | P08397 | 0.20355  |
| 25122 | P14075 | O75448 | 0.34135  |
| 25123 | P14075 | P12035 | 0.54544  |
| 25124 | P14075 | Q5VWP3 | 0.91018  |
| 25125 | P14075 | Q9UJY1 | 0.30769  |
| 25126 | P14075 | Q9BXU2 | 0.27696  |
| 25127 | P14075 | Q96BU1 | 0.48442  |
| 25128 | P14075 | A8MXV4 | 0.47666  |
| 25129 | P14075 | F5H4B4 | 0.83777  |
| 25130 | P14075 | Q9HA58 | 0.63821  |
| 25131 | P14075 | Q5TZA2 | 0.52358  |
| 25132 | P14075 | A0JNW5 | 0.57632  |
| 25133 | P14075 | P0DJH9 | 0.022662 |
| 25134 | P14075 | P48556 | 0.24186  |
| 25135 | P14075 | A1A580 | 0.78906  |
| 25136 | P14075 | P19387 | 0.32256  |
| 25137 | P14075 | Q5H9R7 | 0.8243   |
| 25138 | P14075 | P06730 | 0.34871  |
| 25139 | P14075 | Q2KHT3 | 0.90422  |
| 25140 | P14075 | Q9NX05 | 0.35454  |
| 25141 | P14075 | Q12798 | 0.46103  |
| 25142 | P14075 | P01009 | 0.13314  |
| 25143 | P14075 | P62140 | 0.56315  |
| 25144 | P14075 | Q8N5M1 | 0.29228  |
| 25145 | P14075 | O00167 | 0.37813  |
| 25146 | P14075 | Q9Y4A5 | 0.62155  |
| 25147 | P14075 | Q2NL98 | 0.8181   |
| 25148 | P14075 | Q9UKV0 | 0.29475  |
| 25149 | P14075 | A2AJT9 | 0.4283   |
| 25150 | P14075 | O00716 | 0.87253  |
| 25151 | P14075 | P62306 | 0.16265  |
| 25152 | P14075 | Q9ULE4 | 0.28008  |
| 25153 | P14075 | P56693 | 0.48567  |
| 25154 | P14075 | Q8IY81 | 0.52227  |
| 25155 | P14075 | Q9H9C1 | 0.43862  |
| 25156 | P14075 | Q9H040 | 0.2357   |



|       |        |        |          |
|-------|--------|--------|----------|
| 25157 | P14075 | A3KN83 | 0.86576  |
| 25158 | P14075 | Q16401 | 0.53057  |
| 25159 | P14075 | Q9NPI6 | 0.65599  |
| 25160 | P14075 | P62081 | 0.75519  |
| 25161 | P14075 | Q9NQR7 | 0.63821  |
| 25162 | P14075 | P86481 | 0.63821  |
| 25163 | P14075 | Q96FW1 | 0.12174  |
| 25164 | P14075 | Q5TBC7 | 0.15381  |
| 25165 | P14075 | O75494 | 0.48129  |
| 25166 | P14075 | Q7Z6J8 | 0.54735  |
| 25167 | P14075 | Q96JB5 | 0.20395  |
| 25168 | P14075 | Q9UK61 | 0.62266  |
| 25169 | P14075 | Q86VI4 | 0.42335  |
| 25170 | P14075 | Q7RTU5 | 0.28657  |
| 25171 | P14075 | Q9BW66 | 0.77701  |
| 25172 | P14075 | Q00978 | 0.67184  |
| 25173 | P14075 | Q8WW38 | 0.3599   |
| 25174 | P14075 | Q8N668 | 0.5618   |
| 25175 | P14075 | Q12980 | 0.83634  |
| 25176 | P14075 | P0CW24 | 0.1745   |
| 25177 | P14075 | Q96DY2 | 0.15212  |
| 25178 | P14075 | Q8IX12 | 0.80164  |
| 25179 | P14075 | P20226 | 0.71928  |
| 25180 | P14075 | Q5TCQ9 | 0.37905  |
| 25181 | P14075 | Q9BT49 | 0.55001  |
| 25182 | P14075 | P15336 | 0.67994  |
| 25183 | P14075 | P04198 | 0.61684  |
| 25184 | P14075 | Q95045 | 0.25968  |
| 25185 | P14075 | Q15629 | 0.30277  |
| 25186 | P14075 | Q9NRX3 | 0.74879  |
| 25187 | P14075 | Q9H9J2 | 0.21221  |
| 25188 | P14075 | Q13111 | 1.0393   |
| 25189 | P14075 | A6NMN3 | 0.40888  |
| 25190 | P14075 | Q9GZY8 | 0.23913  |
| 25191 | P14075 | Q9UHV2 | 1.3021   |
| 25192 | P14075 | Q15653 | 0.6727   |
| 25193 | P14075 | Q8NEU8 | 0.25909  |
| 25194 | P14075 | P63241 | 0.30624  |
| 25195 | P14075 | Q69YL0 | 0.63821  |
| 25196 | P14075 | Q96BQ5 | 0.59938  |
| 25197 | P14075 | Q8N2W9 | 0.80963  |
| 25198 | P14075 | Q8NHQ1 | 0.92796  |
| 25199 | P14075 | Q9Y2X8 | 0.19221  |
| 25200 | P14075 | O15061 | 0.54102  |
| 25201 | P14075 | Q14929 | 0.52616  |
| 25202 | P14075 | A0AUZ9 | 0.4549   |
| 25203 | P14075 | Q9NRI7 | 0.63821  |
| 25204 | P14075 | Q96AQ1 | 0.72258  |
| 25205 | P14075 | P48595 | 0.1105   |
| 25206 | P14075 | Q9UL58 | 0.40635  |
| 25207 | P14075 | Q9NXR7 | 0.19519  |
| 25208 | P14075 | P62308 | 0.521    |
| 25209 | P14075 | P15559 | 0.066893 |
| 25210 | P14075 | Q8IYB1 | 0.30464  |
| 25211 | P14075 | O43734 | 0.94025  |
| 25212 | P14075 | Q5T1C6 | 0.53004  |
| 25213 | P14075 | P62750 | 0.61236  |
| 25214 | P14075 | Q3KP22 | 0.31313  |
| 25215 | P14075 | A6NCN2 | 0.65232  |
| 25216 | P14075 | O15126 | 0.1059   |
| 25217 | P14075 | A6XGL0 | 0.33219  |
| 25218 | P14075 | O00567 | 0.58869  |
| 25219 | P14075 | P18621 | 0.3873   |
| 25220 | P14075 | A8MZG2 | 0.94025  |
| 25221 | P14075 | Q9UBB5 | 0.8746   |
| 25222 | P14075 | Q5VVH5 | 0.35212  |
| 25223 | P14075 | Q8WWY6 | 0.19547  |
| 25224 | P14075 | Q92754 | 0.39189  |
| 25225 | P14075 | Q9ULQ0 | 0.88258  |
| 25226 | P14075 | Q9UHB4 | 0.39729  |
| 25227 | P14075 | P13489 | 0.26715  |
| 25228 | P14075 | Q9NZI7 | 0.1437   |
| 25229 | P14075 | Q96LI5 | 0.36623  |
| 25230 | P14075 | Q8IU60 | 0.61306  |
| 25231 | P14075 | P15927 | 0.25179  |
| 25232 | P14075 | Q5SQS8 | 0.49119  |

|       |        |        |          |
|-------|--------|--------|----------|
| 25233 | P14075 | Q6ZTR5 | 0.44227  |
| 25234 | P14075 | Q96BD8 | 0.39487  |
| 25235 | P14075 | Q969Q0 | 0.12743  |
| 25236 | P14075 | Q9NZD8 | 0.38826  |
| 25237 | P14075 | Q9Y613 | 0.31796  |
| 25238 | P14075 | Q96BN6 | 0.44125  |
| 25239 | P14075 | Q9UI95 | 0.96469  |
| 25240 | P14075 | Q68DN1 | 0.64837  |
| 25241 | P14075 | Q15560 | 0.77498  |
| 25242 | P14075 | Q6NUI1 | 0.50348  |
| 25243 | P14075 | P35658 | 0.811    |
| 25244 | P14075 | Q6ZU35 | 0.94025  |
| 25245 | P14075 | A6NKU9 | 0.53769  |
| 25246 | P14075 | Q9Y3D5 | 0.55505  |
| 25247 | P14075 | Q86TL2 | 0.68398  |
| 25248 | P14075 | Q9NZN8 | 0.49364  |
| 25249 | P14075 | Q9NWS8 | 0.4565   |
| 25250 | P14075 | P0C5K6 | 0.63821  |
| 25251 | P14075 | P63279 | 0.60239  |
| 25252 | P14075 | P31040 | 0.48166  |
| 25253 | P14075 | Q9BYA6 | 0.63821  |
| 25254 | P14075 | Q6PIJ6 | 0.81808  |
| 25255 | P14075 | Q96020 | 0.6921   |
| 25256 | P14075 | A6NJ88 | 0.7048   |
| 25257 | P14075 | Q9BRR0 | 0.14156  |
| 25258 | P14075 | Q9Y6D6 | 0.37276  |
| 25259 | P14075 | P10242 | 0.71564  |
| 25260 | P14075 | Q16666 | 0.44428  |
| 25261 | P14075 | P12270 | 0.47328  |
| 25262 | P14075 | O43390 | 0.46611  |
| 25263 | P14075 | Q9H6Y2 | 0.30057  |
| 25264 | P14075 | O94983 | 1.002    |
| 25265 | P14075 | O94903 | 0.38452  |
| 25266 | P14075 | Q15796 | 0.45037  |
| 25267 | P14075 | Q96BN2 | 0.72756  |
| 25268 | P14075 | Q9NYJ1 | 0.94346  |
| 25269 | P14075 | Q9NZY2 | 0.63821  |
| 25270 | P14075 | Q01105 | 0.53308  |
| 25271 | P14075 | P58505 | 0.46631  |
| 25272 | P14075 | O95801 | 0.13564  |
| 25273 | P14075 | Q02543 | 0.49535  |
| 25274 | P14075 | Q08AN1 | 0.2118   |
| 25275 | P14075 | Q96N95 | 0.086077 |
| 25276 | P14075 | Q9UJG1 | 0.67678  |
| 25277 | P14075 | Q53HC0 | 0.99151  |
| 25278 | P14075 | P0DM63 | 0.67697  |
| 25279 | P14075 | Q9UI10 | 0.19153  |
| 25280 | P14075 | Q5MJ68 | 0.30571  |
| 25281 | P14075 | A8MVA2 | 0.78356  |
| 25282 | P14075 | P46976 | 0.28792  |
| 25283 | P14075 | Q9Y3I1 | 0.60115  |
| 25284 | P14075 | Q9NV44 | 0.24324  |
| 25285 | P14075 | Q86W67 | 0.035852 |
| 25286 | P14075 | Q5T0D9 | 0.45056  |
| 25287 | P14075 | P78385 | 0.67347  |
| 25288 | P14075 | Q9BYQ3 | 0.78356  |
| 25289 | P14075 | Q9NWA0 | 1.2517   |
| 25290 | P14075 | Q6P5X5 | 0.60136  |
| 25291 | P14075 | Q9Y2J8 | 0.60448  |
| 25292 | P14075 | Q5TYM5 | 0.35444  |
| 25293 | P14075 | Q9NQ87 | 0.31389  |
| 25294 | P14075 | Q7Z6I5 | 0.62644  |
| 25295 | P14075 | Q8WWC4 | 0.64556  |
| 25296 | P14075 | Q9HAV4 | 0.88809  |
| 25297 | P14075 | Q9UMY1 | 1.0264   |
| 25298 | P14075 | Q86UD1 | 0.37734  |
| 25299 | P14075 | Q96KF2 | 0.63821  |
| 25300 | P14075 | Q9H2U6 | 0.35033  |
| 25301 | P14075 | Q6NXR4 | 0.36683  |
| 25302 | P14075 | P0CH99 | 0.45305  |
| 25303 | P14075 | Q96A00 | 0.45019  |
| 25304 | P14075 | Q9UDY4 | 0.56219  |
| 25305 | P14075 | Q8IVF1 | 0.71985  |
| 25306 | P14075 | P63172 | 0.56221  |
| 25307 | P14075 | P54840 | 0.32613  |
| 25308 | P14075 | Q6NSW5 | 0.90658  |

|       |        |        |          |
|-------|--------|--------|----------|
| 25309 | P14075 | Q8WWH5 | 0.5865   |
| 25310 | P14075 | Q8NHY6 | 0.22775  |
| 25311 | P14075 | P08238 | 0.44916  |
| 25312 | P14075 | Q6ZVK8 | 0.16893  |
| 25313 | P14075 | O15304 | 0.68178  |
| 25314 | P14075 | Q03936 | 0.27718  |
| 25315 | P14075 | P28070 | 0.28158  |
| 25316 | P14075 | Q9BYC9 | 0.58789  |
| 25317 | P14075 | Q5JY77 | 0.57349  |
| 25318 | P14075 | A8MVP8 | 0.061133 |
| 25319 | P14075 | Q8TBK2 | 0.35382  |
| 25320 | P14075 | Q9NZB2 | 0.54362  |
| 25321 | P14075 | Q7Z5W3 | 0.59114  |
| 25322 | P14075 | A6NF01 | 0.71739  |
| 25323 | P14075 | Q9UHA2 | 0.21084  |
| 25324 | P14075 | Q9UQ35 | 0.64831  |
| 25325 | P14075 | Q86V87 | 0.36967  |
| 25326 | P14075 | O43920 | 0.54823  |
| 25327 | P14075 | Q13148 | 0.42776  |
| 25328 | P14075 | A8MXK9 | 0.48682  |
| 25329 | P14075 | Q15010 | 0.074578 |
| 25330 | P14075 | Q9P2X7 | 0.63821  |
| 25331 | P14075 | Q9BXD5 | 0.48959  |
| 25332 | P14075 | Q96ST8 | 0.73612  |
| 25333 | P14075 | E7EW31 | 0.63821  |
| 25334 | P14075 | P15923 | 0.42348  |
| 25335 | P14075 | Q6ZMV8 | 0.31444  |
| 25336 | P14075 | P63313 | 0.49457  |
| 25337 | P14075 | Q9UD71 | 0.73731  |
| 25338 | P14075 | O75794 | 0.8294   |
| 25339 | P14075 | P18124 | 0.36949  |
| 25340 | P14075 | Q9UNX3 | 0.65058  |
| 25341 | P14075 | Q66PJ3 | 0.5778   |
| 25342 | P14075 | Q96AP0 | 0.10495  |
| 25343 | P14075 | Q9BYJ9 | 0.56264  |
| 25344 | P14075 | P15408 | 0.38203  |
| 25345 | P14075 | O94906 | 0.19898  |
| 25346 | P14075 | Q5JST6 | 0.66876  |
| 25347 | P14075 | P53992 | 0.65956  |
| 25348 | P14075 | O60294 | 0.21847  |
| 25349 | P14075 | Q8N319 | 1.1383   |
| 25350 | P14075 | P20073 | 0.19718  |
| 25351 | P14075 | P63302 | 0.4331   |
| 25352 | P14075 | P25398 | 0.45256  |
| 25353 | P14075 | P58004 | 0.46741  |
| 25354 | P14075 | Q9HCG8 | 0.11136  |
| 25355 | P14075 | A6NCI8 | 0.76197  |
| 25356 | P14075 | P0CG43 | 0.63821  |
| 25357 | P14075 | Q96LC9 | 0.47654  |
| 25358 | P14075 | P50402 | 0.34092  |
| 25359 | P14075 | Q9BT92 | 0.33446  |
| 25360 | P14075 | Q14691 | 0.2155   |
| 25361 | P14075 | Q4V328 | 0.84195  |
| 25362 | P14075 | Q6PJG6 | 0.57558  |
| 25363 | P14075 | Q13398 | 0.2886   |
| 25364 | P14075 | Q9Y6H1 | 0.87053  |
| 25365 | P14075 | Q53GI3 | 0.14795  |
| 25366 | P14075 | Q86W11 | 0.12192  |
| 25367 | P14075 | Q96JI7 | 0.3865   |
| 25368 | P14075 | Q9Y3E5 | 0.38545  |
| 25369 | P14075 | Q6NSI8 | 0.44121  |
| 25370 | P14075 | Q9BQ48 | 0.81752  |
| 25371 | P14075 | Q5BJE1 | 0.32108  |
| 25372 | P14075 | O75901 | 0.41442  |
| 25373 | P14075 | Q8N7Q3 | 0.2122   |
| 25374 | P14075 | Q9NZ63 | 0.49071  |
| 25375 | P14075 | A8MTB1 | 0.63821  |
| 25376 | P14075 | Q6NXS1 | 0.87443  |
| 25377 | P14075 | Q5JTD0 | 0.93278  |
| 25378 | P14075 | Q8NEG0 | 0.28028  |
| 25379 | P14075 | Q9P016 | 0.63632  |
| 25380 | P14075 | Q9H2G4 | 0.48519  |
| 25381 | P14075 | Q9NYF8 | 0.89517  |
| 25382 | P14075 | Q14585 | 0.14625  |
| 25383 | P14075 | Q7Z3K6 | 0.29481  |
| 25384 | P14075 | Q6ZSR6 | 0.18567  |

|       |        |        |          |
|-------|--------|--------|----------|
| 25385 | P14075 | Q9UBB4 | 0.72646  |
| 25386 | P14075 | Q12872 | 0.62151  |
| 25387 | P14075 | Q5JVX7 | 0.67543  |
| 25388 | P14075 | Q86YW9 | 0.22989  |
| 25389 | P14075 | Q13057 | 0.2898   |
| 25390 | P14075 | Q14209 | 0.86926  |
| 25391 | P14075 | Q8IY63 | 0.26129  |
| 25392 | P14075 | Q9NVU7 | 0.58688  |
| 25393 | P14075 | Q8IYI0 | 0.37634  |
| 25394 | P14075 | Q13952 | 0.50221  |
| 25395 | P14075 | P25963 | 0.43081  |
| 25396 | P14075 | Q9ULJ3 | 0.39559  |
| 25397 | P14075 | Q17RY6 | 0.57247  |
| 25398 | P14075 | C9J302 | 0.64724  |
| 25399 | P14075 | Q9BYE7 | 0.56066  |
| 25400 | P14075 | Q96CB9 | 0.48307  |
| 25401 | P14075 | Q9BRU9 | 0.36436  |
| 25402 | P14075 | O43365 | 0.28091  |
| 25403 | P14075 | O75306 | 0.34276  |
| 25404 | P14075 | O14777 | 0.38318  |
| 25405 | P14075 | Q9NWD9 | 0.35916  |
| 25406 | P14075 | Q9NZP6 | 0.71739  |
| 25407 | P14075 | Q92621 | 0.81266  |
| 25408 | P14075 | P43358 | 0.39464  |
| 25409 | P14075 | P61981 | 0.30327  |
| 25410 | P14075 | A8MYX2 | 0.017615 |
| 25411 | P14075 | O75182 | 0.89553  |
| 25412 | P14075 | P38646 | 0.40891  |
| 25413 | P14075 | Q13547 | 0.5713   |
| 25414 | P14075 | A6NNV3 | 0.53769  |
| 25415 | P14075 | Q9BXV9 | 0.63821  |
| 25416 | P14075 | A6NHX0 | 0.76395  |
| 25417 | P14075 | Q9UJX2 | 0.40006  |
| 25418 | P14075 | I3L1I5 | 0.32393  |
| 25419 | P14075 | Q9ULR0 | 0.7354   |
| 25420 | P14075 | Q5VVS0 | 0.73697  |
| 25421 | P14075 | Q6K0P9 | 0.1006   |
| 25422 | P14075 | Q9BT25 | 0.40911  |
| 25423 | P14075 | Q6W349 | 0.64769  |
| 25424 | P14075 | Q04323 | 0.17216  |
| 25425 | P14075 | P61077 | 0.33202  |
| 25426 | P14075 | Q13642 | 0.26638  |
| 25427 | P14075 | Q5TBE3 | 0.27693  |
| 25428 | P14075 | A1L168 | 0.94025  |
| 25429 | P14075 | Q99856 | 0.40423  |
| 25430 | P14075 | O00570 | 0.63291  |
| 25431 | P14075 | Q9BXY0 | 0.099562 |
| 25432 | P14075 | Q496A3 | 0.40546  |
| 25433 | P14075 | Q05195 | 0.35209  |
| 25434 | P14075 | Q16594 | 0.40955  |
| 25435 | P14075 | Q8IV33 | 0.69551  |
| 25436 | P14075 | P54198 | 0.86027  |
| 25437 | P14075 | O94763 | 0.60294  |
| 25438 | P14075 | P55854 | 0.32737  |
| 25439 | P14075 | P49721 | 0.27455  |
| 25440 | P14075 | Q96GW9 | 0.40413  |
| 25441 | P14075 | A8MVM7 | 0.63821  |
| 25442 | P14075 | Q8TCH9 | 0.43328  |
| 25443 | P14075 | O95571 | 0.30626  |
| 25444 | P14075 | Q96GE4 | 0.16524  |
| 25445 | P14075 | Q8N9G6 | 0.55134  |
| 25446 | P14075 | P26358 | 0.26352  |
| 25447 | P14075 | Q5W1A9 | 0.17547  |
| 25448 | P14075 | Q9BYQ9 | 0.78356  |
| 25449 | P14075 | Q8NEZ2 | 0.3987   |
| 25450 | P14075 | O15511 | 0.045069 |
| 25451 | P14075 | Q6SJ96 | 0.094341 |
| 25452 | P14075 | P07195 | 0.32299  |
| 25453 | P14075 | Q9Y5M6 | 0.63821  |
| 25454 | P14075 | Q9H0A0 | 0.48909  |
| 25455 | P14075 | Q8N8H1 | 0.26226  |
| 25456 | P14075 | A6NF36 | 0.53493  |
| 25457 | P14075 | Q9BQI9 | 0.63787  |
| 25458 | P14075 | Q6PEX3 | 0.45447  |
| 25459 | P14075 | Q8IYN2 | 0.9329   |
| 25460 | P14075 | Q86Y46 | 0.39857  |

|       |        |        |          |
|-------|--------|--------|----------|
| 25461 | P14075 | Q6A163 | 0.70708  |
| 25462 | P14075 | Q96AQ2 | 0.76323  |
| 25463 | P14075 | Q9UQK1 | 0.20881  |
| 25464 | P14075 | Q8NA31 | 0.35313  |
| 25465 | P14075 | A2RUB6 | 0.11425  |
| 25466 | P14075 | Q9BZE1 | 0.5173   |
| 25467 | P14075 | P20962 | 0.62036  |
| 25468 | P14075 | A8MZF0 | 0.94025  |
| 25469 | P14075 | Q13084 | 0.74772  |
| 25470 | P14075 | Q8N0Z2 | 0.13252  |
| 25471 | P14075 | Q96IZ0 | 0.52334  |
| 25472 | P14075 | P13056 | 0.46703  |
| 25473 | P14075 | Q9Y2L1 | 0.3447   |
| 25474 | P14075 | Q8ND90 | 0.49786  |
| 25475 | P14075 | Q8IVD9 | 0.38573  |
| 25476 | P14075 | O75638 | 1.2136   |
| 25477 | P14075 | P55735 | 0.35851  |
| 25478 | P14075 | P01106 | 0.31329  |
| 25479 | P14075 | Q6PCE3 | 0.44801  |
| 25480 | P14075 | Q8N8E1 | 0.49045  |
| 25481 | P14075 | Q9UBI9 | 0.73677  |
| 25482 | P14075 | O14561 | 0.28348  |
| 25483 | P14075 | Q92750 | 0.44127  |
| 25484 | P14075 | Q96EL1 | 0.90131  |
| 25485 | P14075 | Q8IWT0 | 0.14797  |
| 25486 | P14075 | P39880 | 0.37897  |
| 25487 | P14075 | Q9NSI2 | 0.94025  |
| 25488 | P14075 | Q9BR46 | 0.69628  |
| 25489 | P14075 | Q8WVJ9 | 0.48493  |
| 25490 | P14075 | Q86XI8 | 0.37331  |
| 25491 | P14075 | P43359 | 0.64711  |
| 25492 | P14075 | Q9BYI3 | 0.71815  |
| 25493 | P14075 | A9UHW6 | 0.5282   |
| 25494 | P14075 | Q8N2C9 | 0.15845  |
| 25495 | P14075 | P47813 | 0.80853  |
| 25496 | P14075 | A6QL64 | 0.42835  |
| 25497 | P14075 | Q8WU03 | 0.44716  |
| 25498 | P14075 | P78316 | 0.86927  |
| 25499 | P14075 | Q9H478 | 0.21732  |
| 25500 | P14075 | O00471 | 0.058576 |
| 25501 | P14075 | Q92993 | 0.72836  |
| 25502 | P14075 | Q15185 | 0.27733  |
| 25503 | P14075 | Q9UKV3 | 0.40663  |
| 25504 | P14075 | O95900 | 0.77918  |
| 25505 | P14075 | Q96H20 | 0.63722  |
| 25506 | P14075 | Q9NRI5 | 0.18718  |
| 25507 | P14075 | Q8N6N3 | 0.55449  |
| 25508 | P14075 | Q8N163 | 0.49598  |
| 25509 | P14075 | A6H8Y1 | 0.43466  |
| 25510 | P14075 | Q9HA77 | 0.43149  |
| 25511 | P14075 | P0C879 | 0.63821  |
| 25512 | P14075 | Q96FF9 | 0.59963  |
| 25513 | P14075 | Q86Y79 | 0.6389   |
| 25514 | P14075 | A6H8Z2 | 0.4937   |
| 25515 | P14075 | Q70EK8 | 0.56735  |
| 25516 | P14075 | Q8NFX5 | 0.62672  |
| 25517 | P14075 | P53805 | 0.42528  |
| 25518 | P14075 | P36873 | 0.52145  |
| 25519 | P14075 | Q9Y618 | 0.8438   |
| 25520 | P14075 | O14497 | 0.58459  |
| 25521 | P14075 | Q9UI43 | 0.61979  |
| 25522 | P14075 | Q8TAL5 | 0.47308  |
| 25523 | P14075 | Q96KW2 | 0.58453  |
| 25524 | P14075 | B3EWF7 | 0.63821  |
| 25525 | P14075 | Q96HR8 | 0.87102  |
| 25526 | P14075 | Q9NP81 | 0.37995  |
| 25527 | P14075 | Q96GI7 | 0.94025  |
| 25528 | P14075 | O95229 | 0.53556  |
| 25529 | P14075 | O75290 | 0.2718   |
| 25530 | P14075 | Q5VWG9 | 0.56068  |
| 25531 | P14075 | Q13868 | 0.38965  |
| 25532 | P14075 | Q9UHV9 | 0.55068  |
| 25533 | P14075 | Q15029 | 0.21794  |
| 25534 | P14075 | O75081 | 0.865    |
| 25535 | P14075 | Q8TEP8 | 0.49613  |
| 25536 | P14075 | P61574 | 0.589    |

|       |        |        |          |
|-------|--------|--------|----------|
| 25537 | P14075 | O95402 | 0.87263  |
| 25538 | P14075 | Q07687 | 0.34755  |
| 25539 | P14075 | P05198 | 0.44758  |
| 25540 | P14075 | Q8WV24 | 0.40809  |
| 25541 | P14075 | P22103 | 0.63821  |
| 25542 | P14075 | O95347 | 0.25266  |
| 25543 | P14075 | Q86Y26 | 0.78213  |
| 25544 | P14075 | O75400 | 0.68175  |
| 25545 | P14075 | O14503 | 0.67128  |
| 25546 | P14075 | O75132 | 0.075083 |
| 25547 | P14075 | Q6JBY9 | 0.53945  |
| 25548 | P14075 | Q5JSJ4 | 1.1042   |
| 25549 | P14075 | Q9UPV9 | 0.52079  |
| 25550 | P14075 | Q6IPW1 | 0.41792  |
| 25551 | P14075 | A8MU93 | 0.94025  |
| 25552 | P14075 | Q9BVW5 | 0.70152  |
| 25553 | P14075 | Q96A09 | 0.50797  |
| 25554 | P14075 | O15371 | 0.42219  |
| 25555 | P14075 | A7E2V4 | 1.106    |
| 25556 | P14075 | O76031 | 0.57356  |
| 25557 | P14075 | P49366 | 0.22692  |
| 25558 | P14075 | Q9Y255 | 0.24038  |
| 25559 | P14075 | P56279 | 0.67704  |
| 25560 | P14075 | Q8TEL6 | 0.26075  |
| 25561 | P14075 | P62312 | 0.57169  |
| 25562 | P14075 | Q9Y2Q1 | 0.28992  |
| 25563 | P14075 | P17040 | 0.3919   |
| 25564 | P14075 | Q9Y248 | 0.46992  |
| 25565 | P14075 | Q8N1I8 | 0.63821  |
| 25566 | P14075 | P82909 | 0.31371  |
| 25567 | P14075 | Q86V97 | 0.39464  |
| 25568 | P14075 | Q9Y3B7 | 0.77418  |
| 25569 | P14075 | P54252 | 0.3268   |
| 25570 | P14075 | Q9BYR9 | 0.49168  |
| 25571 | P14075 | Q7Z392 | 0.47968  |
| 25572 | P14075 | Q6PF06 | 0.70187  |
| 25573 | P14075 | P31269 | 0.44115  |
| 25574 | P14075 | Q96LJ8 | 0.8371   |
| 25575 | P14075 | O00231 | 0.29204  |
| 25576 | P14075 | P07737 | 0.63382  |
| 25577 | P14075 | Q8N5C8 | 0.26097  |
| 25578 | P14075 | O75376 | 0.31391  |
| 25579 | P14075 | Q5SQ13 | 0.046528 |
| 25580 | P14075 | Q9C010 | 0.6114   |
| 25581 | P14075 | Q92748 | 0.85129  |
| 25582 | P14075 | Q9Y316 | 0.36542  |
| 25583 | P14075 | A6NEQ9 | 0.63821  |
| 25584 | P14075 | Q01826 | 0.54789  |
| 25585 | P14075 | Q5JR59 | 0.75582  |
| 25586 | P14075 | Q4G112 | 0.11658  |
| 25587 | P14075 | P46527 | 0.21953  |
| 25588 | P14075 | Q96D70 | 1.0023   |
| 25589 | P14075 | Q92785 | 0.32033  |
| 25590 | P14075 | Q9Y4P8 | 0.52438  |
| 25591 | P14075 | Q5TEA3 | 0.55421  |
| 25592 | P14075 | Q32P41 | 0.18019  |
| 25593 | P14075 | Q9HCN2 | 0.63821  |
| 25594 | P14075 | Q504T8 | 0.16891  |
| 25595 | P14075 | Q16670 | 0.11191  |
| 25596 | P14075 | Q96AQ7 | 0.44478  |
| 25597 | P14075 | Q8IYX3 | 0.89363  |
| 25598 | P14075 | Q9BV19 | 0.67075  |
| 25599 | P14075 | P15515 | 0.37094  |
| 25600 | P14075 | Q8IV03 | 1.0128   |
| 25601 | P14075 | Q5T6C5 | 0.48825  |
| 25602 | P14075 | Q8WV37 | 0.28249  |
| 25603 | P14075 | Q8TEE9 | 0.84255  |
| 25604 | P14075 | Q9HAZ2 | 0.24056  |
| 25605 | P14075 | Q96TA1 | 0.096957 |
| 25606 | P14075 | Q16637 | 0.63691  |
| 25607 | P14075 | Q8WW33 | 0.46771  |
| 25608 | P14075 | Q0VFX6 | 0.94025  |
| 25609 | P14075 | Q8IZ16 | 0.26921  |
| 25610 | P14075 | P27540 | 0.29639  |
| 25611 | P14075 | Q9BZ01 | 0.31426  |
| 25612 | P14075 | Q6UWZ7 | 0.27578  |

|       |        |        |          |
|-------|--------|--------|----------|
| 25613 | P14075 | P51398 | 0.85912  |
| 25614 | P14075 | Q5HYI7 | 0.74769  |
| 25615 | P14075 | Q05877 | 0.76903  |
| 25616 | P14075 | O43255 | 0.24298  |
| 25617 | P14075 | O75381 | 0.30763  |
| 25618 | P14075 | Q8NCU4 | 0.24599  |
| 25619 | P14075 | Q96MF0 | 0.26557  |
| 25620 | P14075 | Q69YH5 | 0.75612  |
| 25621 | P14075 | A6NJ64 | 0.35621  |
| 25622 | P14075 | Q9Y3E7 | 0.52809  |
| 25623 | P14075 | Q15390 | 0.54807  |
| 25624 | P14075 | P0C671 | 0.12542  |
| 25625 | P14075 | A1L188 | 0.87504  |
| 25626 | P14075 | Q9Y2B4 | 0.12823  |
| 25627 | P14075 | Q5VUG0 | 0.1228   |
| 25628 | P14075 | Q00587 | 0.18572  |
| 25629 | P14075 | Q9HCM9 | 0.35128  |
| 25630 | P14075 | H0YKK7 | 0.66953  |
| 25631 | P14075 | Q8NCU1 | 0.38453  |
| 25632 | P14075 | Q92624 | 0.51476  |
| 25633 | P14075 | Q9BUN5 | 0.24424  |
| 25634 | P14075 | A8MZA4 | 0.36542  |
| 25635 | P14075 | P23528 | 0.54779  |
| 25636 | P14075 | Q9H7C4 | 0.20078  |
| 25637 | P14075 | O95298 | 0.54966  |
| 25638 | P14075 | Q9H714 | 0.31443  |
| 25639 | P14075 | O60269 | 0.56642  |
| 25640 | P14075 | Q96A44 | 0.30187  |
| 25641 | P14075 | P62136 | 0.46451  |
| 25642 | P14075 | Q9BVV6 | 0.63821  |
| 25643 | P14075 | Q7Z4U5 | 0.81189  |
| 25644 | P14075 | P55347 | 0.28459  |
| 25645 | P14075 | Q9Y2R9 | 0.71259  |
| 25646 | P14075 | Q86Z20 | 0.78594  |
| 25647 | P14075 | Q9NW38 | 0.40008  |
| 25648 | P14075 | Q8WTW4 | 0.23679  |
| 25649 | P14075 | O75586 | 0.515    |
| 25650 | P14075 | Q8IXM7 | 0.48907  |
| 25651 | P14075 | Q3YBR2 | 0.33615  |
| 25652 | P14075 | Q9H0E3 | 0.70823  |
| 25653 | P14075 | Q71F78 | 0.35662  |
| 25654 | P14075 | C9J3V5 | 0.56972  |
| 25655 | P14075 | Q9C073 | 0.80583  |
| 25656 | P14075 | O75940 | 0.44461  |
| 25657 | P14075 | Q4LEZ3 | 0.736    |
| 25658 | P14075 | Q8NI27 | 0.57773  |
| 25659 | P14075 | O00461 | 0.47807  |
| 25660 | P14075 | Q9UPN7 | 0.67833  |
| 25661 | P14075 | P78396 | 0.65319  |
| 25662 | P14075 | Q8IVU9 | 0.17021  |
| 25663 | P14075 | Q9BSH5 | 0.18271  |
| 25664 | P14075 | Q9UJX6 | 0.35911  |
| 25665 | P14075 | Q76KD6 | 0.34431  |
| 25666 | P14075 | Q7RTV3 | 0.19614  |
| 25667 | P14075 | Q9H9H4 | 0.51296  |
| 25668 | P14075 | O43592 | 0.12467  |
| 25669 | P14075 | Q9BTX1 | 0.58741  |
| 25670 | P14075 | Q8N5A5 | 0.6163   |
| 25671 | P14075 | O00505 | 0.66305  |
| 25672 | P14075 | A6NHR8 | 0.63821  |
| 25673 | P14075 | Q96B23 | 0.69556  |
| 25674 | P14075 | Q13875 | 0.32906  |
| 25675 | P14075 | Q6ZUG5 | 0.31389  |
| 25676 | P14075 | Q9UQB3 | 0.37117  |
| 25677 | P14075 | Q99459 | 0.94122  |
| 25678 | P14075 | C9JBD0 | 0.36365  |
| 25679 | P14075 | Q9BTT4 | 0.48467  |
| 25680 | P14075 | Q8IVK1 | 0.63821  |
| 25681 | P14075 | Q13405 | 0.4211   |
| 25682 | P14075 | O43516 | 0.060347 |
| 25683 | P14075 | Q8N2Z9 | 0.30313  |
| 25684 | P14075 | Q02556 | 0.23215  |
| 25685 | P14075 | Q13137 | 0.71812  |
| 25686 | P14075 | Q9Y676 | 0.63887  |
| 25687 | P14075 | O00743 | 0.49196  |
| 25688 | P14075 | Q96BJ3 | 0.48193  |

|       |        |        |          |
|-------|--------|--------|----------|
| 25689 | P14075 | Q5HYC2 | 0.035575 |
| 25690 | P14075 | P12757 | 0.20749  |
| 25691 | P14075 | Q9H8S9 | 0.22592  |
| 25692 | P14075 | Q9BYR6 | 1.0514   |
| 25693 | P14075 | Q8TEV9 | 0.49599  |
| 25694 | P14075 | P41219 | 0.46091  |
| 25695 | P14075 | Q9NPD8 | 0.13309  |
| 25696 | P14075 | P62487 | 0.24929  |
| 25697 | P14075 | Q6ICB0 | 0.85156  |
| 25698 | P14075 | Q9UFN0 | 0.38432  |
| 25699 | P14075 | Q9BYR8 | 1.0514   |
| 25700 | P14075 | Q9Y2M0 | 0.37379  |
| 25701 | P14075 | Q9NUQ3 | 0.35508  |
| 25702 | P14075 | Q03468 | 0.25014  |
| 25703 | P14075 | Q9Y5P3 | 0.41736  |
| 25704 | P14075 | Q9H4A5 | 0.64232  |
| 25705 | P14075 | P0CW27 | 0.35926  |
| 25706 | P14075 | P0CL80 | 0.45588  |
| 25707 | P14075 | Q6P435 | 0.18558  |
| 25708 | P14075 | Q5T7N2 | 0.10711  |
| 25709 | P14075 | Q9ULD5 | 0.10499  |
| 25710 | P14075 | Q8NHZ8 | 0.88202  |
| 25711 | P14075 | P35711 | 0.71013  |
| 25712 | P14075 | Q96QD9 | 0.5305   |
| 25713 | P14075 | O15225 | 0.63821  |
| 25714 | P14075 | Q9BWJ2 | 0.27732  |
| 25715 | P14075 | O43583 | 0.89307  |
| 25716 | P14075 | Q86UU5 | 0.61859  |
| 25717 | P14075 | P41162 | 0.23395  |
| 25718 | P14075 | P57077 | 0.46601  |
| 25719 | P14075 | Q5T9G4 | 0.76943  |
| 25720 | P14075 | Q8WV99 | 0.2404   |
| 25721 | P14075 | Q96DI7 | 0.46061  |
| 25722 | P14075 | Q8IUI4 | 0.18934  |
| 25723 | P14075 | Q9H0C8 | 0.19352  |
| 25724 | P14075 | Q92530 | 0.49745  |
| 25725 | P14075 | Q15847 | 0.63821  |
| 25726 | P14075 | Q9NV39 | 0.60703  |
| 25727 | P14075 | Q8N1F1 | 0.63821  |
| 25728 | P14075 | A1L3X0 | 0.40775  |
| 25729 | P14075 | Q5XKK7 | 0.16522  |
| 25730 | P14075 | P07438 | 0.30226  |
| 25731 | P14075 | O00257 | 0.74948  |
| 25732 | P14075 | P55209 | 0.4873   |
| 25733 | P14075 | Q96DX5 | 0.76416  |
| 25734 | P14075 | O96004 | 0.34936  |
| 25735 | P14075 | Q96NI8 | 0.25704  |
| 25736 | P14075 | Q9UKT5 | 0.25945  |
| 25737 | P14075 | Q96MD2 | 0.24266  |
| 25738 | P14075 | Q9Y285 | 0.55658  |
| 25739 | P14075 | Q96HA8 | 0.79957  |
| 25740 | P14075 | P16333 | 0.39254  |
| 25741 | P14075 | Q9BU89 | 0.14863  |
| 25742 | P14075 | Q13568 | 0.65406  |
| 25743 | P14075 | Q6ZPA2 | 0.63821  |
| 25744 | P14075 | P17098 | 0.29968  |
| 25745 | P14075 | Q96EF6 | 0.4455   |
| 25746 | P14075 | Q96MN9 | 0.38989  |
| 25747 | P14075 | Q9BTE3 | 0.46531  |
| 25748 | P14075 | O00291 | 0.23843  |
| 25749 | P14075 | O43678 | 0.4604   |
| 25750 | P14075 | Q8WU49 | 0.63821  |
| 25751 | P14075 | Q6ICG7 | 0.63821  |
| 25752 | P14075 | Q8TAI1 | 0.48874  |
| 25753 | P14075 | A6NI86 | 0.60332  |
| 25754 | P14075 | Q8NA96 | 0.41629  |
| 25755 | P14075 | Q96BK5 | 0.3204   |
| 25756 | P14075 | Q52M58 | 0.70371  |
| 25757 | P14075 | Q13485 | 0.46037  |
| 25758 | P14075 | P35232 | 0.33603  |
| 25759 | P14075 | Q5T871 | 0.63821  |
| 25760 | P14075 | O94992 | 1.1267   |
| 25761 | P14075 | Q9UHK0 | 0.1809   |
| 25762 | P14075 | A8MUZ8 | 0.34491  |
| 25763 | P14075 | Q9NXV2 | 0.84521  |
| 25764 | P14075 | Q96QR1 | 0.85349  |



|       |        |        |          |
|-------|--------|--------|----------|
| 25765 | P14075 | Q99638 | 0.36204  |
| 25766 | P14075 | Q8NA77 | 0.55098  |
| 25767 | P14075 | O60870 | 0.47503  |
| 25768 | P14075 | O00255 | 0.10019  |
| 25769 | P14075 | Q9H777 | 0.42468  |
| 25770 | P14075 | Q96AA8 | 0.32934  |
| 25771 | P14075 | Q502W7 | 0.61279  |
| 25772 | P14075 | Q8N7H5 | 0.68429  |
| 25773 | P14075 | P60368 | 0.45591  |
| 25774 | P14075 | Q9UPV0 | 1.1101   |
| 25775 | P14075 | Q86WV1 | 0.32371  |
| 25776 | P14075 | P09629 | 0.71226  |
| 25777 | P14075 | P69208 | 0.63821  |
| 25778 | P14075 | Q8N8I6 | 0.63821  |
| 25779 | P14075 | P63208 | 0.39296  |
| 25780 | P14075 | P17152 | 0.70107  |
| 25781 | P14075 | Q6P047 | 0.45747  |
| 25782 | P14075 | Q93074 | 0.35402  |
| 25783 | P14075 | Q9BVC3 | 0.37979  |
| 25784 | P14075 | O75817 | 0.70981  |
| 25785 | P14075 | O75969 | 0.29831  |
| 25786 | P14075 | Q9BVV2 | 0.11413  |
| 25787 | P14075 | Q7Z4W3 | 0.63821  |
| 25788 | P14075 | Q5TKA1 | 0.20805  |
| 25789 | P14075 | P60371 | 0.78356  |
| 25790 | P14075 | P61582 | 0.89322  |
| 25791 | P14075 | O94864 | 0.36766  |
| 25792 | P14075 | Q9ULN7 | 0.71723  |
| 25793 | P14075 | P07900 | 0.45459  |
| 25794 | P14075 | Q9NQT4 | 0.29639  |
| 25795 | P14075 | Q6P1J9 | 0.47678  |
| 25796 | P14075 | Q9NX04 | 0.42582  |
| 25797 | P14075 | O75691 | 0.54622  |
| 25798 | P14075 | Q9C0B2 | 0.33923  |
| 25799 | P14075 | Q9P206 | 0.93609  |
| 25800 | P14075 | Q96SW2 | 0.33517  |
| 25801 | P14075 | Q8TAF3 | 0.37153  |
| 25802 | P14075 | Q9H3R5 | 0.29147  |
| 25803 | P14075 | Q5MJ10 | 0.88201  |
| 25804 | P14075 | Q9Y6E7 | 0.28574  |
| 25805 | P14075 | Q3LI64 | 0.63821  |
| 25806 | P14075 | Q8WTR7 | 0.44801  |
| 25807 | P14075 | Q9NP71 | 0.32571  |
| 25808 | P14075 | A6NEY3 | 0.71412  |
| 25809 | P14075 | Q8N535 | 0.36259  |
| 25810 | P14075 | Q13156 | 0.19899  |
| 25811 | P14075 | Q9NR28 | 0.54678  |
| 25812 | P14075 | Q9H6K1 | 0.16122  |
| 25813 | P14075 | Q6PJ61 | 0.85575  |
| 25814 | P14075 | Q92499 | 0.29853  |
| 25815 | P14075 | P11940 | 0.27979  |
| 25816 | P14075 | P24278 | 0.61836  |
| 25817 | P14075 | Q8TAX7 | 0.63821  |
| 25818 | P14075 | Q9UFV3 | 0.053239 |
| 25819 | P14075 | P10155 | 0.48861  |
| 25820 | P14075 | A4D1E1 | 0.46672  |
| 25821 | P14075 | Q14186 | 1.0451   |
| 25822 | P14075 | Q96HA1 | 0.75131  |
| 25823 | P14075 | Q9UII2 | 0.37035  |
| 25824 | P14075 | A5PL33 | 0.81     |
| 25825 | P14075 | Q6NZI2 | 0.74978  |
| 25826 | P14075 | A6NMP4 | 0.29603  |
| 25827 | P14075 | Q86XN6 | 0.2168   |
| 25828 | P14075 | Q9Y238 | 0.26743  |
| 25829 | P14075 | A6NHP3 | 0.53769  |
| 25830 | P14075 | Q09028 | 0.47743  |
| 25831 | P14075 | Q9Y315 | 0.48099  |
| 25832 | P14075 | Q3SYA9 | 0.33853  |
| 25833 | P14075 | O60831 | 0.72604  |
| 25834 | P14075 | Q9BPZ7 | 0.51151  |
| 25835 | P14075 | Q10586 | 0.22552  |
| 25836 | P14075 | Q9NPF5 | 0.69054  |
| 25837 | P14075 | Q969Q6 | 0.094409 |
| 25838 | P14075 | P15036 | 0.54347  |
| 25839 | P14075 | Q9Y2J4 | 0.13623  |
| 25840 | P14075 | Q9UNZ5 | 0.94025  |

|       |        |        |          |
|-------|--------|--------|----------|
| 25841 | P14075 | Q9ULW0 | 0.74248  |
| 25842 | P14075 | Q86TA4 | 0.21569  |
| 25843 | P14075 | Q5TEC3 | 0.14883  |
| 25844 | P14075 | Q96HI0 | 0.37799  |
| 25845 | P14075 | Q14999 | 0.64454  |
| 25846 | P14075 | Q14980 | 0.79458  |
| 25847 | P14075 | P60228 | 0.67286  |
| 25848 | P14075 | Q9NTK5 | 0.53678  |
| 25849 | P14075 | Q86VM9 | 0.1522   |
| 25850 | P14075 | P63173 | 0.57968  |
| 25851 | P14075 | Q96MB7 | 0.55903  |
| 25852 | P14075 | Q7Z7L8 | 0.88464  |
| 25853 | P14075 | Q86WR7 | 0.92041  |
| 25854 | P14075 | Q15365 | 0.68953  |
| 25855 | P14075 | Q9BRT6 | 0.49501  |
| 25856 | P14075 | Q9H204 | 0.78879  |
| 25857 | P14075 | Q5T5A4 | 0.62555  |
| 25858 | P14075 | Q6ZVX7 | 0.47604  |
| 25859 | P14075 | Q96B36 | 0.65677  |
| 25860 | P14075 | Q2M2I3 | 0.093036 |
| 25861 | P14075 | Q8N999 | 0.79097  |
| 25862 | P14075 | Q00839 | 0.26692  |
| 25863 | P14075 | Q14920 | 0.3884   |
| 25864 | P14075 | Q86XA9 | 0.33398  |
| 25865 | P14075 | Q8IYI8 | 0.23053  |
| 25866 | P14075 | Q15853 | 0.45782  |
| 25867 | P14075 | P55822 | 0.50388  |
| 25868 | P14075 | Q8N5R6 | 0.37778  |
| 25869 | P14075 | Q6F5E7 | 0.2246   |
| 25870 | P14075 | Q9H9Q4 | 0.20084  |
| 25871 | P14075 | Q8WW18 | 0.94025  |
| 25872 | P14075 | Q8N1N5 | 0.27589  |
| 25873 | P14075 | Q8N5U6 | 0.77047  |
| 25874 | P14075 | Q9NQ89 | 0.21127  |
| 25875 | P14075 | Q9BQ70 | 1.0273   |
| 25876 | P14075 | P49116 | 0.45552  |
| 25877 | P14075 | Q9NWS1 | 0.60675  |
| 25878 | P14075 | Q12857 | 0.13416  |
| 25879 | P14075 | O95628 | 0.49535  |
| 25880 | P14075 | P16118 | 0.059968 |
| 25881 | P14075 | Q9UKL3 | 0.89702  |
| 25882 | P14075 | Q9UJ98 | 0.35629  |
| 25883 | P14075 | Q16655 | 0.53872  |
| 25884 | P14075 | Q86VP3 | 0.3942   |
| 25885 | P14075 | A8MTY7 | 0.78356  |
| 25886 | P14075 | P12036 | 0.32592  |
| 25887 | P14075 | Q9NWF9 | 0.53377  |
| 25888 | P14075 | P58005 | 0.30277  |
| 25889 | P14075 | P50995 | 0.6136   |
| 25890 | P14075 | Q68DK2 | 0.58167  |
| 25891 | P14075 | Q9NWU5 | 0.64706  |
| 25892 | P14075 | Q9NRY5 | 0.7971   |
| 25893 | P14075 | O96019 | 0.73385  |
| 25894 | P14075 | Q15323 | 0.70903  |
| 25895 | P14075 | Q9HAW4 | 0.32669  |
| 25896 | P14075 | Q8WW01 | 0.46314  |
| 25897 | P14075 | Q9BW27 | 0.55424  |
| 25898 | P14075 | Q6T4R5 | 0.29416  |
| 25899 | P14075 | P46100 | 0.3706   |
| 25900 | P14075 | P35244 | 0.34149  |
| 25901 | P14075 | P54274 | 0.27775  |
| 25902 | P14075 | Q9BXL8 | 0.2419   |
| 25903 | P14075 | P30050 | 0.49535  |
| 25904 | P14075 | O75865 | 0.45808  |
| 25905 | P14075 | Q9HCL3 | 0.28807  |
| 25906 | P14075 | Q92541 | 0.72873  |
| 25907 | P14075 | Q6ZVD7 | 0.35278  |
| 25908 | P14075 | Q9H606 | 0.45914  |
| 25909 | P14075 | O43493 | 0.63581  |
| 25910 | P14075 | Q8NBZ0 | 0.9324   |
| 25911 | P14075 | P0DKV0 | 0.21272  |
| 25912 | P14075 | Q9HCC9 | 0.17246  |
| 25913 | P14075 | Q9H7Y2 | 0.43766  |
| 25914 | P14075 | A2RRP1 | 0.118    |
| 25915 | P14075 | O00189 | 0.094461 |
| 25916 | P14075 | P52294 | 0.75349  |

|       |        |        |          |
|-------|--------|--------|----------|
| 25917 | P14075 | Q6IE81 | 0.71347  |
| 25918 | P14075 | P56378 | 0.61809  |
| 25919 | P14075 | Q96D05 | 0.96877  |
| 25920 | P14075 | Q9H2K0 | 0.40421  |
| 25921 | P14075 | Q04726 | 0.75722  |
| 25922 | P14075 | Q14770 | 0.28309  |
| 25923 | P14075 | Q8IWS0 | 0.2729   |
| 25924 | P14075 | Q9UHI6 | 0.21451  |
| 25925 | P14075 | A6NGU7 | 0.35107  |
| 25926 | P14075 | P23327 | 0.58648  |
| 25927 | P14075 | A6NCS6 | 0.37212  |
| 25928 | P14075 | P25791 | 0.24972  |
| 25929 | P14075 | Q8N9K3 | 0.94025  |
| 25930 | P14075 | Q06587 | 0.59897  |
| 25931 | P14075 | Q5VIY5 | 0.27773  |
| 25932 | P14075 | P31749 | 0.38022  |
| 25933 | P14075 | Q9Y6Y0 | 0.23784  |
| 25934 | P14075 | Q95487 | 0.43206  |
| 25935 | P14075 | Q9H5I1 | 0.44662  |
| 25936 | P14075 | Q9H4B6 | 0.34891  |
| 25937 | P14075 | P07902 | 0.41518  |
| 25938 | P14075 | Q9Y6G5 | 0.23554  |
| 25939 | P14075 | Q9NXB0 | 0.50295  |
| 25940 | P14075 | Q3B726 | 0.054527 |
| 25941 | P14075 | Q2M3C7 | 0.30068  |
| 25942 | P14075 | Q9H910 | 0.81714  |
| 25943 | P14075 | P57721 | 0.20649  |
| 25944 | P14075 | P02545 | 0.58109  |
| 25945 | P14075 | Q19AV6 | 0.84912  |
| 25946 | P14075 | Q95810 | 0.22772  |
| 25947 | P14075 | Q75478 | 0.16888  |
| 25948 | P14075 | Q8TAB5 | 0.94025  |
| 25949 | P14075 | Q5JT78 | 0.30904  |
| 25950 | P14075 | Q8ND07 | 0.50837  |
| 25951 | P14075 | Q8TAE6 | 0.45019  |
| 25952 | P14075 | P0CG48 | 0.27172  |
| 25953 | P14075 | Q5VXD3 | 0.048221 |
| 25954 | P14075 | Q15631 | 0.45197  |
| 25955 | P14075 | Q9BYQ5 | 0.78356  |
| 25956 | P14075 | Q96I23 | 0.13749  |
| 25957 | P14075 | Q8WXS3 | 0.98542  |
| 25958 | P14075 | Q96JC9 | 0.73062  |
| 25959 | P14075 | Q9UPY8 | 0.70489  |
| 25960 | P14075 | Q8N7U7 | 0.39001  |
| 25961 | P14075 | Q04695 | 0.74795  |
| 25962 | P14075 | Q15235 | 0.46341  |
| 25963 | P14075 | K7EJ46 | 0.63821  |
| 25964 | P14075 | Q8IUC0 | 0.43324  |
| 25965 | P14075 | Q9BTE6 | 0.59992  |
| 25966 | P14075 | P04406 | 0.28286  |
| 25967 | P14075 | A8MUA0 | 0.2376   |
| 25968 | P14075 | Q5T655 | 0.63821  |
| 25969 | P14075 | Q96EN9 | 0.72211  |
| 25970 | P14075 | Q86US8 | 0.29353  |
| 25971 | P14075 | Q8N9T2 | 0.63821  |
| 25972 | P14075 | Q8IZD4 | 0.595    |
| 25973 | P14075 | Q9BYR3 | 0.78356  |
| 25974 | P14075 | Q66GS9 | 0.070043 |
| 25975 | P14075 | Q9BQG0 | 0.38348  |
| 25976 | P14075 | Q9Y221 | 0.55046  |
| 25977 | P14075 | Q02952 | 0.40767  |
| 25978 | P14075 | Q9NY43 | 0.25252  |
| 25979 | P14075 | Q9C0F1 | 0.087371 |
| 25980 | P14075 | P35908 | 0.47755  |
| 25981 | P14075 | Q5VUA4 | 0.23115  |
| 25982 | P14075 | Q5T7N8 | 0.22856  |
| 25983 | P14075 | Q6I9Y2 | 0.64551  |
| 25984 | P14075 | Q92539 | 0.30339  |
| 25985 | P14075 | Q96DE5 | 0.92673  |
| 25986 | P14075 | A2RUB1 | 0.94025  |
| 25987 | P14075 | Q6ZS17 | 0.33313  |
| 25988 | P14075 | P62979 | 0.2116   |
| 25989 | P14075 | Q5T752 | 0.63821  |
| 25990 | P14075 | Q9ULV5 | 0.21875  |
| 25991 | P14075 | P28324 | 1.1064   |
| 25992 | P14075 | Q96KC9 | 0.45762  |

|       |        |        |          |
|-------|--------|--------|----------|
| 25993 | P14075 | P49419 | 0.37172  |
| 25994 | P14075 | Q12986 | 0.072161 |
| 25995 | P14075 | Q6ZNA4 | 0.4212   |
| 25996 | P14075 | Q8N108 | 0.84816  |
| 25997 | P14075 | Q9Y692 | 0.48781  |
| 25998 | P14075 | Q96MF6 | 0.52792  |
| 25999 | P14075 | O75920 | 1.0791   |
| 26000 | P14075 | Q13435 | 0.60858  |
| 26001 | P14075 | P43897 | 0.81602  |
| 26002 | P14075 | Q6IQ49 | 0.22837  |
| 26003 | P14075 | Q99996 | 0.31831  |
| 26004 | P14075 | O00762 | 0.40178  |
| 26005 | P14075 | Q6ZNR8 | 0.63821  |
| 26006 | P14075 | Q5T699 | 0.033413 |
| 26007 | P14075 | Q96S95 | 0.53948  |
| 26008 | P14075 | Q86UY5 | 0.181    |
| 26009 | P14075 | Q8N7J2 | 0.82301  |
| 26010 | P14075 | Q9Y253 | 0.05997  |
| 26011 | P14075 | Q6ZUF6 | 0.26951  |
| 26012 | P14075 | O00401 | 0.41938  |
| 26013 | P14075 | Q9H8T0 | 0.28398  |
| 26014 | P14075 | Q5JPI3 | 0.90615  |
| 26015 | P14075 | Q17RM4 | 0.58215  |
| 26016 | P14075 | Q9NY27 | 0.78293  |
| 26017 | P14075 | Q96M60 | 0.56488  |
| 26018 | P14075 | O15078 | 0.38763  |
| 26019 | P14075 | Q96A49 | 0.61166  |
| 26020 | P14075 | Q8NCE0 | 0.382    |
| 26021 | P14075 | P0C7X3 | 0.40378  |
| 26022 | P14075 | Q6ZVN8 | 0.26223  |
| 26023 | P14075 | Q8N344 | 0.29481  |
| 26024 | P14075 | P57081 | 0.63456  |
| 26025 | P14075 | Q13310 | 0.2729   |
| 26026 | P14075 | Q9Y399 | 0.73211  |
| 26027 | P14075 | Q92670 | 0.16167  |
| 26028 | P14075 | P59797 | 0.61946  |
| 26029 | P14075 | Q96CG3 | 0.29412  |
| 26030 | P14075 | O60573 | 0.31482  |
| 26031 | P14075 | Q9H5J8 | 0.96753  |
| 26032 | P14075 | Q9Y2P8 | 0.42303  |
| 26033 | P14075 | O14964 | 0.36216  |
| 26034 | P14075 | Q15326 | 0.92206  |
| 26035 | P14075 | P61236 | 0.27189  |
| 26036 | P14075 | O75618 | 0.88774  |
| 26037 | P14075 | Q9H9H5 | 0.54045  |
| 26038 | P14075 | Q86XN7 | 0.94025  |
| 26039 | P14075 | Q14CW9 | 0.6362   |
| 26040 | P14075 | Q9NPE3 | 0.64046  |
| 26041 | P14075 | Q8TA94 | 0.31311  |
| 26042 | P14075 | Q6ZTN6 | 0.48582  |
| 26043 | P14075 | Q5JU67 | 0.03075  |
| 26044 | P14075 | P83731 | 0.49535  |
| 26045 | P14075 | Q08379 | 0.11649  |
| 26046 | P14075 | Q8NC38 | 0.090643 |
| 26047 | P14075 | O75556 | 0.29237  |
| 26048 | P14075 | Q9H8G2 | 0.90615  |
| 26049 | P14075 | Q9H6K4 | 0.58861  |
| 26050 | P14075 | O14604 | 0.51575  |
| 26051 | P14075 | Q107X0 | 0.59777  |
| 26052 | P14075 | Q9BU64 | 0.3547   |
| 26053 | P14075 | Q8N8D1 | 0.69126  |
| 26054 | P14075 | Q9BU61 | 0.40067  |
| 26055 | P14075 | P51397 | 0.68026  |
| 26056 | P14075 | Q9BYQ4 | 0.78356  |
| 26057 | P14075 | Q96EA4 | 0.47865  |
| 26058 | P14075 | O60756 | 0.63821  |
| 26059 | P14075 | P49458 | 0.6215   |
| 26060 | P14075 | Q15013 | 0.58225  |
| 26061 | P14075 | Q5SW79 | 0.52568  |
| 26062 | P14075 | Q9BXY8 | 0.4678   |
| 26063 | P14075 | P84098 | 0.38311  |
| 26064 | P14075 | Q9Y2W2 | 0.72939  |
| 26065 | P14075 | Q9NX55 | 0.29666  |
| 26066 | P14075 | Q9Y3C7 | 0.73677  |
| 26067 | P14075 | Q96BW1 | 0.16677  |
| 26068 | P14075 | Q8TDR0 | 0.68599  |

|       |        |        |          |
|-------|--------|--------|----------|
| 26069 | P14075 | Q8NAP1 | 0.94025  |
| 26070 | P14075 | Q8N4U5 | 0.10299  |
| 26071 | P14075 | O00139 | 0.24681  |
| 26072 | P14075 | P60602 | 0.51691  |
| 26073 | P14075 | Q5BJF6 | 0.28164  |
| 26074 | P14075 | O43505 | 0.53711  |
| 26075 | P14075 | Q9NQX1 | 0.33997  |
| 26076 | P14075 | Q9NZV7 | 0.33849  |
| 26077 | P14075 | Q8WUD4 | 0.24684  |
| 26078 | P14075 | Q86V20 | 0.73725  |
| 26079 | P14075 | P32519 | 1.0104   |
| 26080 | P14075 | Q9UP83 | 0.90273  |
| 26081 | P14075 | A4D250 | 0.091626 |
| 26082 | P14075 | Q4LE28 | 0.51806  |
| 26083 | P14075 | Q9Y512 | 0.074531 |
| 26084 | P14075 | Q8IXQ9 | 0.2129   |
| 26085 | P14075 | Q86VP1 | 0.19477  |
| 26086 | P14075 | P49754 | 0.27442  |
| 26087 | P14075 | Q9UNN5 | 0.41708  |
| 26088 | P14075 | A6NEY8 | 0.31238  |
| 26089 | P14075 | Q6IN85 | 0.16905  |
| 26090 | P14075 | O14948 | 0.21686  |
| 26091 | P14075 | Q96NS8 | 0.29819  |
| 26092 | P14075 | Q9C0I3 | 0.82824  |
| 26093 | P14075 | Q6ZUL3 | 0.63821  |
| 26094 | P14075 | P59036 | 0.63821  |
| 26095 | P14075 | O60613 | 0.42923  |
| 26096 | P14075 | O00170 | 0.43858  |
| 26097 | P14075 | Q8TAY7 | 1.2058   |
| 26098 | P14075 | Q96GG9 | 0.24793  |
| 26099 | P14075 | Q3YBM2 | 0.75144  |
| 26100 | P14075 | Q8NEF9 | 0.39175  |
| 26101 | P14075 | P14406 | 0.52052  |
| 26102 | P14075 | P49918 | 0.49547  |
| 26103 | P14075 | Q14653 | 0.41071  |
| 26104 | P14075 | A6NGD5 | 0.14392  |
| 26105 | P14075 | P62318 | 0.59235  |
| 26106 | P14075 | Q96S59 | 0.56496  |
| 26107 | P14075 | Q9Y5A7 | 0.45161  |
| 26108 | P14075 | Q8WXW3 | 0.61938  |
| 26109 | P14075 | Q9BZ98 | 0.036759 |
| 26110 | P14075 | Q9UPW6 | 0.52299  |
| 26111 | P14075 | P28062 | 0.15077  |
| 26112 | P14075 | Q06455 | 0.5031   |
| 26113 | P14075 | Q9UGL9 | 0.63821  |
| 26114 | P14075 | Q8N983 | 0.3008   |
| 26115 | P14075 | Q86T75 | 0.455    |
| 26116 | P14075 | Q96RM1 | 0.63821  |
| 26117 | P14075 | Q96HA7 | 0.4926   |
| 26118 | P14075 | Q96FJ2 | 0.33082  |
| 26119 | P14075 | Q96M53 | 0.94474  |
| 26120 | P14075 | Q9UGK3 | 0.42667  |
| 26121 | P14075 | P83369 | 0.49375  |
| 26122 | P14075 | Q2KHM9 | 0.3621   |
| 26123 | P14075 | Q96D98 | 0.74783  |
| 26124 | P14075 | Q6P1R3 | 0.35942  |
| 26125 | P14075 | Q5JQC4 | 0.63821  |
| 26126 | P14075 | Q92546 | 0.96574  |
| 26127 | P14075 | Q8N1K5 | 0.46495  |
| 26128 | P14075 | Q15370 | 0.82592  |
| 26129 | P14075 | Q8NCF5 | 0.257    |
| 26130 | P14075 | O15116 | 0.56711  |
| 26131 | P14075 | Q9NVM1 | 0.87155  |
| 26132 | P14075 | O14641 | 0.47021  |
| 26133 | P14075 | Q06547 | 0.84001  |
| 26134 | P14075 | Q01664 | 0.38423  |
| 26135 | P14075 | Q7Z3Y8 | 0.70708  |
| 26136 | P14075 | Q7Z6K1 | 0.49089  |
| 26137 | P14075 | Q7L3T8 | 0.49952  |
| 26138 | P14075 | Q8NDZ0 | 0.11256  |
| 26139 | P14075 | O43768 | 0.029362 |
| 26140 | P14075 | O00411 | 0.3939   |
| 26141 | P14075 | Q9HBH7 | 0.45839  |
| 26142 | P14075 | Q5VSL9 | 0.69209  |
| 26143 | P14075 | Q9UBC1 | 0.28293  |
| 26144 | P14075 | P99999 | 0.44997  |

|       |        |        |          |
|-------|--------|--------|----------|
| 26145 | P14075 | Q12874 | 0.32955  |
| 26146 | P14075 | Q14532 | 0.55056  |
| 26147 | P14075 | O60287 | 0.9966   |
| 26148 | P14075 | P26371 | 0.63821  |
| 26149 | P14075 | Q8TBZ0 | 0.026295 |
| 26150 | P14075 | Q13490 | 0.29607  |
| 26151 | P14075 | Q86SX3 | 1.1716   |
| 26152 | P14075 | Q8TCC3 | 0.15452  |
| 26153 | P14075 | Q9P258 | 0.32428  |
| 26154 | P14075 | O75683 | 0.48545  |
| 26155 | P14075 | Q14106 | 0.25138  |
| 26156 | P14075 | Q2TAL8 | 0.73919  |
| 26157 | P14075 | O76013 | 0.70903  |
| 26158 | P14075 | P22674 | 0.16711  |
| 26159 | P14075 | O95983 | 0.92085  |
| 26160 | P14075 | P51116 | 0.37914  |
| 26161 | P14075 | Q53TQ3 | 0.37441  |
| 26162 | P14075 | O60739 | 0.27865  |
| 26163 | P14075 | P55769 | 0.65348  |
| 26164 | P14075 | B2RUZ4 | 0.98812  |
| 26165 | P14075 | Q9UHD9 | 0.53294  |
| 26166 | P14075 | P28074 | 0.38808  |
| 26167 | P14075 | O75935 | 0.61351  |
| 26168 | P14075 | O14744 | 0.72312  |
| 26169 | P14075 | O95865 | 0.21008  |
| 26170 | P14075 | P54845 | 0.11975  |
| 26171 | P14075 | Q14232 | 0.079623 |
| 26172 | P14075 | Q9UHB7 | 1.0522   |
| 26173 | P14075 | Q6ZTC4 | 0.63821  |
| 26174 | P14075 | Q5VY09 | 0.98003  |
| 26175 | P14075 | Q9HAF1 | 0.73244  |
| 26176 | P14075 | P23193 | 0.92383  |
| 26177 | P14075 | Q52MB2 | 0.67938  |
| 26178 | P14075 | Q17RC7 | 0.5225   |
| 26179 | P14075 | Q5T0W9 | 0.14797  |
| 26180 | P14075 | Q8TES7 | 0.37934  |
| 26181 | P14075 | Q58F21 | 0.15004  |
| 26182 | P14075 | A6NK39 | 0.13209  |
| 26183 | P14075 | Q9BSH4 | 1.0016   |
| 26184 | P14075 | P08779 | 0.7693   |
| 26185 | P14075 | P22033 | 0.41913  |
| 26186 | P14075 | Q96HB5 | 0.42705  |
| 26187 | P14075 | Q9NZH5 | 0.34269  |
| 26188 | P14075 | Q96JM7 | 0.22447  |
| 26189 | P14075 | Q8IWE5 | 0.22009  |
| 26190 | P14075 | P29966 | 0.74258  |
| 26191 | P14075 | O75161 | 0.79378  |
| 26192 | P14075 | Q6ZT83 | 0.25192  |
| 26193 | P14075 | Q8IX21 | 0.43121  |
| 26194 | P14075 | A8MU10 | 0.63821  |
| 26195 | P14075 | Q9NR56 | 0.30118  |
| 26196 | P14075 | Q05481 | 0.20657  |
| 26197 | P14075 | A6NES4 | 0.38275  |
| 26198 | P14075 | Q96LA8 | 0.48808  |
| 26199 | P14075 | Q96LB3 | 0.32655  |
| 26200 | P14075 | A6NH11 | 0.62505  |
| 26201 | P14075 | Q15437 | 0.11814  |
| 26202 | P14075 | O75208 | 0.54354  |
| 26203 | P14075 | Q9C0C6 | 0.78532  |
| 26204 | P14075 | Q9NUC0 | 0.4044   |
| 26205 | P14075 | Q2VPK5 | 0.47373  |
| 26206 | P14075 | P33240 | 0.37946  |
| 26207 | P14075 | Q8NHG7 | 0.79071  |
| 26208 | P14075 | Q9HD40 | 0.31488  |
| 26209 | P14075 | Q9BZQ8 | 0.59777  |
| 26210 | P14075 | Q96RE7 | 0.66502  |
| 26211 | P14075 | Q9UJX5 | 0.52601  |
| 26212 | P14075 | Q9UHV7 | 0.39358  |
| 26213 | P14075 | P56192 | 0.31844  |
| 26214 | P14075 | Q9UNY5 | 0.31491  |
| 26215 | P14075 | O75528 | 0.54533  |
| 26216 | P14075 | Q96DF8 | 0.8246   |
| 26217 | P14075 | Q8NA47 | 0.94025  |
| 26218 | P14075 | Q7Z6B0 | 0.33317  |
| 26219 | P14075 | Q96NL0 | 0.251    |
| 26220 | P14075 | Q12830 | 0.70532  |

|       |        |        |          |
|-------|--------|--------|----------|
| 26221 | P14075 | Q8N0T1 | 0.52497  |
| 26222 | P14075 | P52746 | 0.018679 |
| 26223 | P14075 | Q93083 | 0.30226  |
| 26224 | P14075 | Q96PV7 | 0.92041  |
| 26225 | P14075 | Q8N7B1 | 0.56549  |
| 26226 | P14075 | Q12933 | 0.47554  |
| 26227 | P14075 | A5D8W1 | 0.040252 |
| 26228 | P14075 | P26678 | 0.46314  |
| 26229 | P14075 | P61247 | 0.85171  |
| 26230 | P14075 | Q8N4W9 | 0.2118   |
| 26231 | P14075 | Q9NRL3 | 0.25577  |
| 26232 | P14075 | Q495Z4 | 0.40532  |
| 26233 | P14075 | Q96BP2 | 0.8499   |
| 26234 | P14075 | O60783 | 0.51419  |
| 26235 | P14075 | Q9P1J3 | 0.63821  |
| 26236 | P14075 | Q9P0L1 | 0.18226  |
| 26237 | P14075 | Q99909 | 0.17003  |
| 26238 | P14075 | Q9H4I3 | 0.044635 |
| 26239 | P14075 | Q9BUY5 | 0.26869  |
| 26240 | P14075 | O14910 | 0.48326  |
| 26241 | P14075 | Q99873 | 0.40061  |
| 26242 | P14075 | O14519 | 0.28501  |
| 26243 | P14075 | P62753 | 0.70555  |
| 26244 | P14075 | Q8N228 | 0.073272 |
| 26245 | P14075 | Q9NXH3 | 0.45019  |
| 26246 | P14075 | Q86XR8 | 0.64015  |
| 26247 | P14075 | Q9H0N5 | 0.6457   |
| 26248 | P14075 | Q9NP98 | 0.55296  |
| 26249 | P14075 | Q9Y6B2 | 0.76799  |
| 26250 | P14075 | A8K830 | 0.63821  |
| 26251 | P14075 | Q5HYR2 | 0.84601  |
| 26252 | P14075 | P46782 | 0.33404  |
| 26253 | P14075 | Q14676 | 0.40023  |
| 26254 | P14075 | Q6IQ19 | 0.49027  |
| 26255 | P14075 | Q96M42 | 0.1478   |
| 26256 | P14075 | Q9NTG7 | 0.28032  |
| 26257 | P14075 | P50221 | 0.4937   |
| 26258 | P14075 | Q32M78 | 0.25506  |
| 26259 | P14075 | P62891 | 0.49305  |
| 26260 | P14075 | Q13469 | 0.81845  |
| 26261 | P14075 | Q9H0A8 | 0.64522  |
| 26262 | P14075 | Q9BWD3 | 0.65902  |
| 26263 | P14075 | Q7L266 | 0.27278  |
| 26264 | P14075 | O96017 | 0.54675  |
| 26265 | P14075 | Q96N22 | 0.31321  |
| 26266 | P14075 | Q5T751 | 0.63821  |
| 26267 | P14075 | Q8IXS8 | 0.73255  |
| 26268 | P14075 | O60299 | 0.18552  |
| 26269 | P14075 | Q15650 | 0.52908  |
| 26270 | P14075 | P13640 | 0.38669  |
| 26271 | P14075 | Q9UJM3 | 0.25034  |
| 26272 | P14075 | Q96PK6 | 0.56411  |
| 26273 | P14075 | P22531 | 0.63821  |
| 26274 | P14075 | Q8N0U7 | 0.55833  |
| 26275 | P14075 | Q5TEZ4 | 0.63821  |
| 26276 | P14075 | Q5T5J6 | 0.64221  |
| 26277 | P14075 | Q5T1N1 | 1.0433   |
| 26278 | P14075 | Q9Y2T7 | 0.075014 |
| 26279 | P14075 | Q9UHC1 | 0.26268  |
| 26280 | P14075 | O95373 | 0.71773  |
| 26281 | P14075 | Q96B45 | 0.083005 |
| 26282 | P14075 | P62861 | 0.8238   |
| 26283 | P14075 | Q6W2J9 | 0.27366  |
| 26284 | P14075 | Q9H943 | 0.15822  |
| 26285 | P14075 | Q8WTP9 | 1.1259   |
| 26286 | P14075 | A6NIN4 | 0.63821  |
| 26287 | P14075 | Q9HB07 | 0.25622  |
| 26288 | P14075 | Q13889 | 0.17389  |
| 26289 | P14075 | Q58A44 | 0.63821  |
| 26290 | P14075 | O15350 | 0.22465  |
| 26291 | P14075 | P52742 | 0.18341  |
| 26292 | P14075 | Q16254 | 0.80743  |
| 26293 | P14075 | Q9H8E8 | 0.44481  |
| 26294 | P14075 | Q8NCA5 | 0.63165  |
| 26295 | P14075 | Q9UL49 | 0.54288  |
| 26296 | P14075 | Q8N7M2 | 0.30057  |

|       |        |        |          |
|-------|--------|--------|----------|
| 26297 | P14075 | Q13526 | 0.40586  |
| 26298 | P14075 | Q99684 | 0.22965  |
| 26299 | P14075 | Q14684 | 0.38392  |
| 26300 | P14075 | P04264 | 0.18692  |
| 26301 | P14075 | Q9UBK9 | 0.73755  |
| 26302 | P14075 | Q13066 | 0.45588  |
| 26303 | P14075 | Q6PI98 | 0.41256  |
| 26304 | P14075 | Q8N693 | 0.2727   |
| 26305 | P14075 | Q9BYN7 | 0.048821 |
| 26306 | P14075 | Q8N3J9 | 0.12173  |
| 26307 | P14075 | A6NEV1 | 0.69847  |
| 26308 | P14075 | Q15038 | 1.066    |
| 26309 | P14075 | Q92769 | 0.27146  |
| 26310 | P14075 | P0CL82 | 0.45588  |
| 26311 | P14075 | Q9UHQ9 | 0.50858  |
| 26312 | P14075 | Q7L804 | 0.38086  |
| 26313 | P14075 | Q9HCG1 | 0.23304  |
| 26314 | P14075 | Q01892 | 0.20165  |
| 26315 | P14075 | Q12904 | 0.073534 |
| 26316 | P14075 | Q6AI08 | 0.45209  |
| 26317 | P14075 | A6NGH7 | 0.31016  |
| 26318 | P14075 | Q86U86 | 0.76916  |
| 26319 | P14075 | Q6ZV65 | 0.29059  |
| 26320 | P14075 | P0CW71 | 0.63821  |
| 26321 | P14075 | Q0VDD5 | 0.63821  |
| 26322 | P14075 | Q2YD98 | 0.3943   |
| 26323 | P14075 | Q96A35 | 0.63295  |
| 26324 | P14075 | Q95456 | 0.26513  |
| 26325 | P14075 | O14862 | 0.30873  |
| 26326 | P14075 | P25205 | 0.21969  |
| 26327 | P14075 | Q7Z5K2 | 0.46092  |
| 26328 | P14075 | A6NNL0 | 0.72275  |
| 26329 | P14075 | Q75145 | 0.25515  |
| 26330 | P14075 | P28065 | 0.44968  |
| 26331 | P14075 | P0C860 | 0.1397   |
| 26332 | P14075 | P13646 | 0.84455  |
| 26333 | P14075 | P48378 | 0.22921  |
| 26334 | P14075 | Q9BV29 | 0.14717  |
| 26335 | P14075 | Q6NZY4 | 0.43599  |
| 26336 | P14075 | Q95990 | 0.43183  |
| 26337 | P14075 | Q8NC54 | 0.88741  |
| 26338 | P14075 | Q9C005 | 0.42237  |
| 26339 | P14075 | P61571 | 0.41774  |
| 26340 | P14075 | O60518 | 0.69697  |
| 26341 | P14075 | Q9H8W3 | 0.43285  |
| 26342 | P14075 | Q9H8G1 | 0.30184  |
| 26343 | P14075 | Q8N1L1 | 0.63821  |
| 26344 | P14075 | Q9BUJ2 | 0.90159  |
| 26345 | P14075 | Q9BYR5 | 0.78356  |
| 26346 | P14075 | Q63HM1 | 0.26027  |
| 26347 | P14075 | Q6ZN17 | 0.8843   |
| 26348 | P14075 | Q9P1F3 | 0.57845  |
| 26349 | P14075 | Q9NZF1 | 0.157    |
| 26350 | P14075 | Q9UPQ9 | 0.37369  |
| 26351 | P14075 | Q96RY5 | 0.73692  |
| 26352 | P14075 | P37802 | 0.20936  |
| 26353 | P14075 | P18077 | 0.30461  |
| 26354 | P14075 | O14965 | 0.24225  |
| 26355 | P14075 | Q3C1V1 | 0.94025  |
| 26356 | P14075 | Q05048 | 0.54949  |
| 26357 | P14075 | Q8N7B6 | 0.21625  |
| 26358 | P14075 | Q75525 | 0.62552  |
| 26359 | P14075 | Q05BU3 | 0.63821  |
| 26360 | P14075 | Q96NB1 | 0.13763  |
| 26361 | P14075 | Q96M66 | 0.18632  |
| 26362 | P14075 | Q9H963 | 0.24855  |
| 26363 | P14075 | P11441 | 0.33676  |
| 26364 | P14075 | A8MQ03 | 0.39347  |
| 26365 | P14075 | Q96K30 | 0.51932  |
| 26366 | P14075 | Q9NVS9 | 0.39668  |
| 26367 | P14075 | P82664 | 0.84967  |
| 26368 | P14075 | Q7Z309 | 0.47411  |
| 26369 | P14075 | Q8NCR3 | 0.21329  |
| 26370 | P14075 | P78543 | 0.45785  |
| 26371 | P14075 | Q9Y5B9 | 0.085568 |
| 26372 | P14075 | Q9NPA3 | 0.91989  |



|       |        |        |          |
|-------|--------|--------|----------|
| 26373 | P14075 | Q9NSA3 | 0.49265  |
| 26374 | P14075 | Q9Y5N5 | 0.19647  |
| 26375 | P14075 | Q9NQS1 | 0.52502  |
| 26376 | P14075 | Q69YN4 | 0.41977  |
| 26377 | P14075 | Q5HYW3 | 0.65019  |
| 26378 | P14075 | Q99623 | 0.77482  |
| 26379 | P14075 | Q8TEM1 | 0.2089   |
| 26380 | P14075 | Q9BQ65 | 0.48955  |
| 26381 | P14075 | Q8N7R1 | 0.49026  |
| 26382 | P14075 | Q9Y5Q3 | 0.64368  |
| 26383 | P14075 | Q95780 | 0.31244  |
| 26384 | P14075 | Q7RTS9 | 0.87311  |
| 26385 | P14075 | Q9NVH2 | 0.4411   |
| 26386 | P14075 | Q15834 | 0.82568  |
| 26387 | P14075 | P49848 | 0.54584  |
| 26388 | P14075 | Q9BZP3 | 0.23756  |
| 26389 | P14075 | Q15424 | 0.58052  |
| 26390 | P14075 | Q9NV31 | 0.61102  |
| 26391 | P14075 | Q8IZS5 | 0.6087   |
| 26392 | P14075 | Q68CP9 | 0.30872  |
| 26393 | P14075 | P46779 | 0.83108  |
| 26394 | P14075 | Q6UW32 | 0.47672  |
| 26395 | P14075 | Q5XKE5 | 0.52312  |
| 26396 | P14075 | Q8NDQ6 | 0.1983   |
| 26397 | P14075 | Q96AB3 | 0.49037  |
| 26398 | P14075 | Q86X55 | 0.50814  |
| 26399 | P14075 | Q6IPX3 | 0.71383  |
| 26400 | P14075 | P35712 | 0.36276  |
| 26401 | P14075 | Q92665 | 0.53398  |
| 26402 | P14075 | P62917 | 0.59151  |
| 26403 | P14075 | Q9BXT5 | 0.42111  |
| 26404 | P14075 | Q2TAP0 | 0.46003  |
| 26405 | P14075 | P53618 | 0.49657  |
| 26406 | P14075 | A5YM69 | 0.23692  |
| 26407 | P14075 | Q95831 | 0.4711   |
| 26408 | P14075 | Q9HCU9 | 0.84768  |
| 26409 | P14075 | A6NEF3 | 0.71412  |
| 26410 | P14075 | Q13185 | 0.61997  |
| 26411 | P14075 | P60370 | 0.78356  |
| 26412 | P14075 | Q9UBB9 | 0.23589  |
| 26413 | P14075 | Q6ZP68 | 0.74887  |
| 26414 | P14075 | Q6MZP7 | 0.36433  |
| 26415 | P14075 | Q3B7T1 | 0.82917  |
| 26416 | P14075 | Q7L8W6 | 0.55312  |
| 26417 | P14075 | Q8WXC3 | 0.38336  |
| 26418 | P14075 | Q15637 | 0.22598  |
| 26419 | P14075 | Q6ZVT6 | 0.29054  |
| 26420 | P14075 | Q9ULX6 | 0.35176  |
| 26421 | P14075 | Q9NSC5 | 0.31519  |
| 26422 | P14075 | Q3KQU3 | 0.49936  |
| 26423 | P14075 | Q9Y2D9 | 0.39205  |
| 26424 | P14075 | Q86SG4 | 0.009084 |
| 26425 | P14075 | Q96LM9 | 0.061456 |
| 26426 | P14075 | Q9BUW7 | 0.94025  |
| 26427 | P14075 | Q9NWT8 | 0.52302  |
| 26428 | P14075 | Q9BQ52 | 0.28087  |
| 26429 | P14075 | Q5T686 | 0.38848  |
| 26430 | P14075 | Q14523 | 0.68914  |
| 26431 | P14075 | Q9UQN3 | 0.2346   |
| 26432 | P14075 | Q9H2J4 | 0.4136   |
| 26433 | P14075 | P0CI01 | 0.53769  |
| 26434 | P14075 | Q43679 | 0.12111  |
| 26435 | P14075 | P39023 | 0.68268  |
| 26436 | P14075 | Q3KP66 | 0.98706  |
| 26437 | P14075 | P86452 | 0.25931  |
| 26438 | P14075 | Q8TE69 | 0.1668   |
| 26439 | P14075 | Q9NQ29 | 0.52501  |
| 26440 | P14075 | Q9H1D9 | 0.31845  |
| 26441 | P14075 | Q9BVM2 | 0.41096  |
| 26442 | P14075 | P55771 | 0.59989  |
| 26443 | P14075 | Q6VMQ6 | 0.89013  |
| 26444 | P14075 | Q6QNY1 | 0.50307  |
| 26445 | P14075 | Q9HB09 | 0.96006  |
| 26446 | P14075 | Q9BW85 | 0.91878  |
| 26447 | P14075 | Q96E29 | 0.46529  |
| 26448 | P14075 | Q9Y3X0 | 0.70218  |

|       |        |        |          |
|-------|--------|--------|----------|
| 26449 | P14075 | Q9UND3 | 0.20858  |
| 26450 | P14075 | Q9NZE8 | 0.71767  |
| 26451 | P14075 | Q9BQ66 | 0.78356  |
| 26452 | P14075 | A2RTX5 | 0.30111  |
| 26453 | P14075 | Q6PD62 | 0.44218  |
| 26454 | P14075 | Q49AM1 | 0.21026  |
| 26455 | P14075 | Q9H9D4 | 0.3617   |
| 26456 | P14075 | P41214 | 0.46601  |
| 26457 | P14075 | Q96NY9 | 0.45566  |
| 26458 | P14075 | Q0VG73 | 0.63821  |
| 26459 | P14075 | Q6R327 | 0.033757 |
| 26460 | P14075 | Q15287 | 0.71913  |
| 26461 | P14075 | Q3ZCV2 | 0.94025  |
| 26462 | P14075 | Q04637 | 0.30689  |
| 26463 | P14075 | Q9UIS9 | 0.34267  |
| 26464 | P14075 | P46939 | 0.32312  |
| 26465 | P14075 | Q5TCM9 | 0.63821  |
| 26466 | P14075 | P51504 | 0.1745   |
| 26467 | P14075 | A1L162 | 0.42481  |
| 26468 | P14075 | Q6Q795 | 0.63821  |
| 26469 | P14075 | Q7Z5L9 | 0.68681  |
| 26470 | P14075 | Q9H7Z3 | 0.2684   |
| 26471 | P14075 | Q96N06 | 0.61962  |
| 26472 | P14075 | Q9H944 | 0.88349  |
| 26473 | P14075 | P52744 | 0.17201  |
| 26474 | P14075 | Q9BYT5 | 0.42224  |
| 26475 | P14075 | Q9HC62 | 0.31179  |
| 26476 | P14075 | Q9BTK6 | 0.24046  |
| 26477 | P14075 | O60543 | 0.20654  |
| 26478 | P14075 | Q3SY46 | 0.70449  |
| 26479 | P14075 | Q9HCK8 | 0.21616  |
| 26480 | P14075 | P50502 | 0.37205  |
| 26481 | P14075 | Q701N2 | 0.63821  |
| 26482 | P14075 | Q9UNQ2 | 0.43608  |
| 26483 | P14075 | Q15014 | 0.7795   |
| 26484 | P14075 | Q9UPN9 | 0.31725  |
| 26485 | P14075 | Q86WH2 | 0.016985 |
| 26486 | P14075 | Q8WXE9 | 0.327    |
| 26487 | P14075 | Q8WWL7 | 0.69486  |
| 26488 | P14075 | Q9BYG8 | 0.14817  |
| 26489 | P14075 | Q9UN79 | 0.68845  |
| 26490 | P14075 | P50914 | 0.74903  |
| 26491 | P14075 | Q5TGP6 | 0.35732  |
| 26492 | P14075 | Q15007 | 0.47573  |
| 26493 | P14075 | Q15370 | 0.23243  |
| 26494 | P14075 | O00472 | 0.33296  |
| 26495 | P14075 | Q5JVS0 | 0.54996  |
| 26496 | P14075 | Q13765 | 0.78923  |
| 26497 | P14075 | Q99732 | 0.34646  |
| 26498 | P14075 | Q8IUR0 | 0.72771  |
| 26499 | P14075 | Q8NE22 | 0.99467  |
| 26500 | P14075 | Q16890 | 0.26245  |
| 26501 | P14075 | P24928 | 0.66013  |
| 26502 | P14075 | Q8NAP3 | 0.15666  |
| 26503 | P14075 | Q86WV5 | 0.45027  |
| 26504 | P14075 | Q8TE04 | 0.47723  |
| 26505 | P14075 | Q05BQ5 | 0.04253  |
| 26506 | P14075 | Q15691 | 0.44742  |
| 26507 | P14075 | P61956 | 0.43665  |
| 26508 | P14075 | A2RUQ5 | 0.1322   |
| 26509 | P14075 | Q9UHF7 | 0.32061  |
| 26510 | P14075 | P67870 | 0.14371  |
| 26511 | P14075 | P50616 | 0.20701  |
| 26512 | P14075 | Q9H6K5 | 0.94025  |
| 26513 | P14075 | Q6NVV1 | 0.27332  |
| 26514 | P14075 | Q1A5X6 | 0.94025  |
| 26515 | P14075 | P62269 | 0.48985  |
| 26516 | P14075 | P62847 | 0.41024  |
| 26517 | P14075 | Q6PG37 | 0.308    |
| 26518 | P14075 | Q330K2 | 0.36714  |
| 26519 | P14075 | Q9BW92 | 0.34641  |
| 26520 | P14075 | Q5TA79 | 0.63821  |
| 26521 | P14075 | Q8N655 | 0.63821  |
| 26522 | P14075 | A4D0Y5 | 0.63821  |
| 26523 | P14075 | Q99733 | 0.5089   |
| 26524 | P14075 | Q14696 | 0.47736  |

|       |        |        |          |
|-------|--------|--------|----------|
| 26525 | P14075 | Q8IW19 | 0.1378   |
| 26526 | P14075 | O75251 | 0.12061  |
| 26527 | P14075 | Q63HQ0 | 0.63821  |
| 26528 | P14075 | Q8N6N6 | 0.096162 |
| 26529 | P14075 | Q3LI72 | 0.63821  |
| 26530 | P14075 | P62910 | 0.4006   |
| 26531 | P14075 | Q9H320 | 0.99246  |
| 26532 | P14075 | Q9BXH1 | 0.21388  |
| 26533 | P14075 | Q8TCJ0 | 0.79786  |
| 26534 | P14075 | Q9Y421 | 0.24093  |
| 26535 | P14075 | O43776 | 0.47166  |
| 26536 | P14075 | Q96C11 | 0.17383  |
| 26537 | P14075 | P0DI81 | 0.7535   |
| 26538 | P14075 | Q53FE4 | 0.182    |
| 26539 | P14075 | O60238 | 0.17673  |
| 26540 | P14075 | O43189 | 0.27035  |
| 26541 | P14075 | O95671 | 0.47891  |
| 26542 | P14075 | P0CG12 | 1.1051   |
| 26543 | P14075 | Q5SY13 | 0.63821  |
| 26544 | P14075 | P62273 | 0.60336  |
| 26545 | P14075 | Q8N6I1 | 0.75342  |
| 26546 | P14075 | Q9BV73 | 0.41414  |
| 26547 | P14075 | Q7Z7A3 | 0.42839  |
| 26548 | P14075 | Q86TB9 | 0.55702  |
| 26549 | P14075 | Q9NUL5 | 0.28665  |
| 26550 | P14075 | Q96HA9 | 0.50685  |
| 26551 | P14075 | Q5T7V8 | 1.3037   |
| 26552 | P14075 | Q9ULM3 | 0.54938  |
| 26553 | P14075 | Q15025 | 0.29174  |
| 26554 | P14075 | Q9BVM4 | 0.66303  |
| 26555 | P14075 | H3BNL8 | 0.69256  |
| 26556 | P14075 | O95782 | 0.22651  |
| 26557 | P14075 | Q96ST2 | 0.29867  |
| 26558 | P14075 | Q96MU7 | 0.53716  |
| 26559 | P14075 | Q9NYP9 | 0.30915  |
| 26560 | P14075 | P27797 | 0.34638  |
| 26561 | P14075 | Q14154 | 0.29562  |
| 26562 | P14075 | Q9H5F2 | 0.52238  |
| 26563 | P14075 | Q96IT6 | 0.63821  |
| 26564 | P14075 | O43318 | 0.42025  |
| 26565 | P14075 | Q3LI63 | 0.63821  |
| 26566 | P14075 | P0C7T7 | 0.63821  |
| 26567 | P14075 | Q08AI8 | 0.94025  |
| 26568 | P14075 | O75150 | 0.3266   |
| 26569 | P14075 | Q8IVV7 | 0.26331  |
| 26570 | P14075 | Q15723 | 0.97999  |
| 26571 | P14075 | Q99848 | 0.21098  |
| 26572 | P14075 | Q9NS25 | 0.92895  |
| 26573 | P14075 | Q96S07 | 0.63821  |
| 26574 | P14075 | O75663 | 0.25995  |
| 26575 | P14075 | P51531 | 0.50379  |
| 26576 | P14075 | Q5T8I9 | 0.032127 |
| 26577 | P14075 | Q9BTA9 | 0.69069  |
| 26578 | P14075 | Q9HAT8 | 0.36899  |
| 26579 | P14075 | P86480 | 0.63821  |
| 26580 | P14075 | Q6ZQN3 | 0.74168  |
| 26581 | P14075 | Q5TB80 | 0.58135  |
| 26582 | P14075 | P30047 | 0.41211  |
| 26583 | P14075 | Q9BTD3 | 0.76323  |
| 26584 | P14075 | Q8IY42 | 1.0932   |
| 26585 | P14075 | Q14738 | 0.4796   |
| 26586 | P14075 | Q5T0J7 | 0.6278   |
| 26587 | P14075 | Q16836 | 0.34785  |
| 26588 | P14075 | Q9Y535 | 0.033137 |
| 26589 | P14075 | Q9H808 | 0.31176  |
| 26590 | P14075 | P04259 | 0.22406  |
| 26591 | P14075 | Q6P2H3 | 0.25173  |
| 26592 | P14075 | Q8WXC7 | 0.31812  |
| 26593 | P14075 | Q13069 | 0.079883 |
| 26594 | P14075 | Q9Y6D0 | 0.71741  |
| 26595 | P14075 | Q6ZRV3 | 0.63821  |
| 26596 | P14075 | Q9Y608 | 0.26634  |
| 26597 | P14075 | Q96LS8 | 0.45184  |
| 26598 | P14075 | Q9P015 | 0.31111  |
| 26599 | P14075 | Q9NZM5 | 0.40191  |
| 26600 | P14075 | Q14934 | 0.2798   |

|       |        |         |          |
|-------|--------|---------|----------|
| 26601 | P14075 | Q9BXN6  | 0.25576  |
| 26602 | P14075 | Q6ZRT6  | 0.94025  |
| 26603 | P14075 | Q5T5Y3  | 0.28778  |
| 26604 | P14075 | Q96AJ1  | 1.1609   |
| 26605 | P14075 | Q8WYQ3  | 0.87504  |
| 26606 | P14075 | Q6UUUV9 | 1.1049   |
| 26607 | P14075 | Q15573  | 0.45023  |
| 26608 | P14075 | Q8NEY8  | 0.65763  |
| 26609 | P14075 | P02794  | 0.5652   |
| 26610 | P14075 | Q8IYX0  | 0.30419  |
| 26611 | P14075 | Q9UKT9  | 0.34846  |
| 26612 | P14075 | Q8TC56  | 1.1182   |
| 26613 | P14075 | Q8IZT9  | 0.83666  |
| 26614 | P14075 | Q13158  | 0.25336  |
| 26615 | P14075 | Q92837  | 0.82737  |
| 26616 | P14075 | P0CG00  | 0.065088 |
| 26617 | P14075 | P35269  | 0.85762  |
| 26618 | P14075 | Q8N5N4  | 0.55562  |
| 26619 | P14075 | Q5T7W7  | 0.94025  |
| 26620 | P14075 | Q96N53  | 0.63821  |
| 26621 | P14075 | Q9NPA8  | 0.22164  |
| 26622 | P14075 | P27986  | 0.35683  |
| 26623 | P14075 | B9ZVM9  | 0.77798  |
| 26624 | P14075 | Q8N5U0  | 0.63821  |
| 26625 | P14075 | O15198  | 0.25698  |
| 26626 | P14075 | P11473  | 0.24448  |
| 26627 | P14075 | Q14CS0  | 0.12242  |
| 26628 | P14075 | Q99594  | 0.91047  |
| 26629 | P14075 | Q8IZU0  | 0.83666  |
| 26630 | P14075 | P60410  | 1.0514   |
| 26631 | P14075 | Q14657  | 1.0068   |
| 26632 | P14075 | Q5VWM5  | 0.51701  |
| 26633 | P14075 | Q14677  | 0.22346  |
| 26634 | P14075 | Q9BUN8  | 0.223    |
| 26635 | P14075 | Q5TID7  | 0.4227   |
| 26636 | P14075 | Q659A1  | 0.31489  |
| 26637 | P14075 | Q6NXP2  | 0.96178  |
| 26638 | P14075 | Q5TH74  | 0.47439  |
| 26639 | P14075 | P86478  | 0.63821  |
| 26640 | P14075 | Q8N443  | 0.53937  |
| 26641 | P14075 | Q6ZSA8  | 0.63821  |
| 26642 | P14075 | A6NFQ2  | 0.82659  |
| 26643 | P14075 | Q86VP6  | 0.53372  |
| 26644 | P14075 | O60244  | 0.39358  |
| 26645 | P14075 | Q96EE3  | 0.39009  |
| 26646 | P14075 | Q9Y6X8  | 0.53068  |
| 26647 | P14075 | Q96CJ1  | 0.93618  |
| 26648 | P14075 | Q3MHD2  | 0.38538  |
| 26649 | P14075 | Q9Y3B9  | 0.46901  |
| 26650 | P14075 | Q9H008  | 0.22499  |
| 26651 | P14075 | Q96MF4  | 0.71296  |
| 26652 | P14075 | Q6P2Q9  | 0.40791  |
| 26653 | P14075 | Q9BQE6  | 0.54537  |
| 26654 | P14075 | P14324  | 0.10623  |
| 26655 | P14075 | Q3SY00  | 0.7534   |
| 26656 | P14075 | A8MUX0  | 0.57913  |
| 26657 | P14075 | Q14558  | 0.50268  |
| 26658 | P14075 | Q5RKV6  | 0.062262 |
| 26659 | P14075 | Q7Z7H3  | 0.2552   |
| 26660 | P14075 | Q9NZ81  | 1.1204   |
| 26661 | P14075 | P49842  | 0.70226  |
| 26662 | P14075 | Q86TS9  | 0.21705  |
| 26663 | P14075 | Q96GT9  | 0.90785  |
| 26664 | P14075 | O75928  | 0.55074  |
| 26665 | P14075 | Q8IWJ2  | 0.45549  |
| 26666 | P14075 | Q9HC52  | 0.59783  |
| 26667 | P14075 | Q9ULW3  | 0.67036  |
| 26668 | P14075 | Q5VX52  | 0.059261 |
| 26669 | P14075 | Q92925  | 0.40621  |
| 26670 | P14075 | Q86YV9  | 0.79813  |
| 26671 | P14075 | P37198  | 0.70223  |
| 26672 | P14075 | P40429  | 0.49673  |
| 26673 | P14075 | P54727  | 0.4705   |
| 26674 | P14075 | O75807  | 0.28231  |
| 26675 | P14075 | Q9UN36  | 0.36355  |
| 26676 | P14075 | Q9H6W3  | 0.25057  |

|       |        |        |          |
|-------|--------|--------|----------|
| 26677 | P14075 | Q6NYC8 | 0.38535  |
| 26678 | P14075 | Q9NQ50 | 0.87505  |
| 26679 | P14075 | P59091 | 0.34253  |
| 26680 | P14075 | Q96Q35 | 0.37828  |
| 26681 | P14075 | Q6IV72 | 0.1193   |
| 26682 | P14075 | P0C025 | 0.56067  |
| 26683 | P14075 | Q96BT1 | 0.037151 |
| 26684 | P14075 | Q8N587 | 0.26731  |
| 26685 | P14075 | A6NNW6 | 0.48155  |
| 26686 | P14075 | F8WFD2 | 0.27544  |
| 26687 | P14075 | Q5VWQ0 | 1.1172   |
| 26688 | P14075 | Q8N137 | 0.62294  |
| 26689 | P14075 | Q8N895 | 0.30058  |
| 26690 | P14075 | Q9H816 | 0.23652  |
| 26691 | P14075 | Q96FA3 | 0.34174  |
| 26692 | P14075 | P82663 | 0.57474  |
| 26693 | P14075 | Q96IR2 | 0.22707  |
| 26694 | P14075 | P26368 | 0.38796  |
| 26695 | P14075 | Q7Z417 | 0.51882  |
| 26696 | P14075 | Q9BZL1 | 0.34705  |
| 26697 | P14075 | P23396 | 0.53921  |
| 26698 | P14075 | Q9C099 | 0.63532  |
| 26699 | P14075 | P48382 | 0.69203  |
| 26700 | P14075 | Q9BRD0 | 0.54064  |
| 26701 | P14075 | Q8IWF9 | 0.38345  |
| 26702 | P14075 | Q6ZUU3 | 0.63821  |
| 26703 | P14075 | Q9H095 | 0.30581  |
| 26704 | P14075 | Q14907 | 0.24783  |
| 26705 | P14075 | Q5TYX0 | 0.2982   |
| 26706 | P14075 | P20248 | 0.79525  |
| 26707 | P14075 | P53999 | 0.98547  |
| 26708 | P14075 | O60220 | 0.34863  |
| 26709 | P14075 | P19474 | 0.27673  |
| 26710 | P14075 | P57060 | 0.46915  |
| 26711 | P14075 | Q15255 | 0.63821  |
| 26712 | P14075 | Q8NDX9 | 0.60984  |
| 26713 | P14075 | Q5VVC0 | 0.31067  |
| 26714 | P14075 | Q8WXF8 | 0.96456  |
| 26715 | P14075 | P22087 | 0.45233  |
| 26716 | P14075 | P62241 | 0.38457  |
| 26717 | P14075 | P35251 | 0.41499  |
| 26718 | P14075 | Q9Y6K5 | 0.05805  |
| 26719 | P14075 | Q8N584 | 0.71876  |
| 26720 | P14075 | Q9UK39 | 0.30277  |
| 26721 | P14075 | P52655 | 0.87542  |
| 26722 | P14075 | Q7Z4H9 | 0.46956  |
| 26723 | P14075 | P25786 | 0.43914  |
| 26724 | P14075 | Q8NET4 | 0.45399  |
| 26725 | P14075 | Q9Y291 | 0.43358  |
| 26726 | P14075 | Q8TAP6 | 0.58298  |
| 26727 | P14075 | Q9UJJ7 | 0.21639  |
| 26728 | P14075 | Q01081 | 0.40307  |
| 26729 | P14075 | Q15306 | 0.55864  |
| 26730 | P14075 | P56555 | 0.6934   |
| 26731 | P14075 | Q16531 | 0.37503  |
| 26732 | P14075 | Q8WVR3 | 0.94025  |
| 26733 | P14075 | Q8IXM6 | 0.66346  |
| 26734 | P14075 | Q96NJ1 | 0.63821  |
| 26735 | P14075 | Q8TF74 | 0.33429  |
| 26736 | P14075 | Q92575 | 0.60086  |
| 26737 | P14075 | Q711Q0 | 0.63821  |
| 26738 | P14075 | A6NDE8 | 0.45588  |
| 26739 | P14075 | P07864 | 0.32299  |
| 26740 | P14075 | Q96GN5 | 0.56091  |
| 26741 | P14075 | Q5SNX5 | 0.63821  |
| 26742 | P14075 | O75474 | 1.0515   |
| 26743 | P14075 | O43745 | 0.47425  |
| 26744 | P14075 | O00410 | 0.85473  |
| 26745 | P14075 | P0C7T4 | 0.63821  |
| 26746 | P14075 | Q969X6 | 1.0329   |
| 26747 | P14075 | Q9Y2G5 | 0.34198  |
| 26748 | P14075 | Q8N5S3 | 0.26819  |
| 26749 | P14075 | Q6AI39 | 0.91344  |
| 26750 | P14075 | Q658L1 | 0.82868  |
| 26751 | P14075 | Q99456 | 0.80046  |
| 26752 | P14075 | Q5SRE5 | 0.42425  |

|       |        |        |          |
|-------|--------|--------|----------|
| 26753 | P14075 | P15880 | 0.72412  |
| 26754 | P14075 | Q5SV97 | 0.85113  |
| 26755 | P14075 | Q96FH0 | 0.49119  |
| 26756 | P14075 | Q6QNY0 | 0.54284  |
| 26757 | P14075 | Q15173 | 0.15245  |
| 26758 | P14075 | Q15405 | 0.70668  |
| 26759 | P14075 | P17947 | 0.53178  |
| 26760 | P14075 | Q9UIF9 | 0.50176  |
| 26761 | P14075 | Q9UKD1 | 0.50783  |
| 26762 | P14075 | Q96RS0 | 0.41012  |
| 26763 | P14075 | Q6RUI8 | 0.62867  |
| 26764 | P14075 | Q8NE71 | 0.2197   |
| 26765 | P14075 | P78345 | 0.85283  |
| 26766 | P14075 | Q32NC0 | 0.52579  |
| 26767 | P14075 | P62826 | 0.5054   |
| 26768 | P14075 | Q9UKC9 | 0.31334  |
| 26769 | P14075 | Q14818 | 0.45704  |
| 26770 | P14075 | Q15054 | 0.40821  |
| 26771 | P14075 | Q99750 | 0.41376  |
| 26772 | P14075 | Q14CX7 | 0.31736  |
| 26773 | P14075 | Q14687 | 0.1668   |
| 26774 | P14075 | A6NIX2 | 0.75949  |
| 26775 | P14075 | Q8TBE0 | 0.5084   |
| 26776 | P14075 | P11308 | 0.41605  |
| 26777 | P14075 | Q8IYJ2 | 0.69053  |
| 26778 | P14075 | Q9H8Y8 | 0.1482   |
| 26779 | P14075 | Q9BSF4 | 0.47147  |
| 26780 | P14075 | Q9NZZ3 | 0.62406  |
| 26781 | P14075 | Q5SNV9 | 0.33245  |
| 26782 | P14075 | Q8TE02 | 0.90336  |
| 26783 | P14075 | Q6ZMV5 | 0.36255  |
| 26784 | P14075 | Q9P2M1 | 0.31745  |
| 26785 | P14075 | Q95336 | 0.04456  |
| 26786 | P14075 | P46087 | 0.53233  |
| 26787 | P14075 | Q16514 | 0.64862  |
| 26788 | P14075 | Q95251 | 0.63624  |
| 26789 | P14075 | Q6R2W3 | 0.2543   |
| 26790 | P14075 | P86434 | 0.070635 |
| 26791 | P14075 | P82930 | 0.91004  |
| 26792 | P14075 | Q96BT3 | 0.29531  |
| 26793 | P14075 | Q9NQP4 | 0.59299  |
| 26794 | P14075 | Q96CS2 | 0.33094  |
| 26795 | P14075 | P49770 | 0.11101  |
| 26796 | P14075 | Q5QJE6 | 0.94955  |
| 26797 | P14075 | Q5THK1 | 0.16891  |
| 26798 | P14075 | Q9NUP1 | 0.4215   |
| 26799 | P14075 | Q14613 | 0.052977 |
| 26800 | P14075 | Q5JR98 | 0.41004  |
| 26801 | P14075 | P0CG42 | 0.63821  |
| 26802 | P14075 | P82970 | 0.44612  |
| 26803 | P14075 | Q8TAQ2 | 1.1845   |
| 26804 | P14075 | Q9NR77 | 0.44537  |
| 26805 | P14075 | Q8N9M1 | 0.28921  |
| 26806 | P14075 | P78318 | 0.63972  |
| 26807 | P14075 | P62987 | 0.41742  |
| 26808 | P14075 | P0DMC3 | 0.63821  |
| 26809 | P14075 | Q14628 | 0.26779  |
| 26810 | P14075 | Q9Y4P9 | 0.35159  |
| 26811 | P14075 | Q0VF49 | 0.63821  |
| 26812 | P14075 | Q14151 | 0.51347  |
| 26813 | P14075 | B3EWG4 | 0.94025  |
| 26814 | P14075 | P78346 | 0.49556  |
| 26815 | P14075 | O76015 | 0.70708  |
| 26816 | P14075 | P67809 | 0.47023  |
| 26817 | P14075 | O43257 | 0.30389  |
| 26818 | P14075 | O14490 | 0.46604  |
| 26819 | P14075 | Q8IYD1 | 0.18807  |
| 26820 | P14075 | Q8IX15 | 0.28947  |
| 26821 | P14075 | Q13309 | 0.38792  |
| 26822 | P14075 | Q8WUY8 | 0.70967  |
| 26823 | P14075 | Q8IYK2 | 0.89928  |
| 26824 | P14075 | O60907 | 0.57097  |
| 26825 | P14075 | O60290 | 0.36407  |
| 26826 | P14075 | Q06787 | 0.64068  |
| 26827 | P14075 | Q96K31 | 0.67811  |
| 26828 | P14075 | Q9BPU9 | 0.1003   |

|       |        |        |          |
|-------|--------|--------|----------|
| 26829 | P14075 | Q8WXQ3 | 0.97015  |
| 26830 | P14075 | A8MQB3 | 0.12021  |
| 26831 | P14075 | P63104 | 0.71855  |
| 26832 | P14075 | Q9P1Z2 | 0.55575  |
| 26833 | P14075 | P06396 | 0.18832  |
| 26834 | P14075 | Q9UH77 | 0.33388  |
| 26835 | P14075 | Q8IZ63 | 0.63821  |
| 26836 | P14075 | Q9BR84 | 0.33283  |
| 26837 | P14075 | P0C7V0 | 0.63821  |
| 26838 | P14075 | Q99417 | 1.151    |
| 26839 | P14075 | Q8NB42 | 0.30624  |
| 26840 | P14075 | Q9Y3P8 | 0.55445  |
| 26841 | P14075 | P60412 | 0.78356  |
| 26842 | P14075 | Q9C035 | 0.35674  |
| 26843 | P14075 | Q8IYB9 | 0.21527  |
| 26844 | P14075 | Q8TCI5 | 0.37598  |
| 26845 | P14075 | A2RU30 | 0.7363   |
| 26846 | P14075 | Q9HB19 | 0.29954  |
| 26847 | P14075 | Q9Y3S2 | 0.29071  |
| 26848 | P14075 | O43747 | 0.44917  |
| 26849 | P14075 | Q13114 | 0.23734  |
| 26850 | P14075 | Q9NWT6 | 0.28842  |
| 26851 | P14075 | A8MXZ3 | 0.63821  |
| 26852 | P14075 | Q96LR7 | 0.64624  |
| 26853 | P14075 | Q05D60 | 0.013653 |
| 26854 | P14075 | Q9UIA9 | 0.25244  |
| 26855 | P14075 | Q6ZR54 | 0.63821  |
| 26856 | P14075 | Q1HG44 | 0.76733  |
| 26857 | P14075 | O14602 | 0.30134  |
| 26858 | P14075 | Q8N865 | 0.25616  |
| 26859 | P14075 | A0JLT2 | 0.95001  |
| 26860 | P14075 | O00458 | 0.67695  |
| 26861 | P14075 | Q9BRS8 | 0.28334  |
| 26862 | P14075 | P13994 | 0.28631  |
| 26863 | P14075 | Q9HD47 | 0.12137  |
| 26864 | P14075 | Q5W0A0 | 0.30266  |
| 26865 | P14075 | P53041 | 0.35295  |
| 26866 | P14075 | P21127 | 0.36636  |
| 26867 | P14075 | P35579 | 0.55765  |
| 26868 | P14075 | P08697 | 0.090477 |
| 26869 | P14075 | P78358 | 0.95806  |
| 26870 | P14075 | Q96DC7 | 0.78327  |
| 26871 | P14075 | Q96KX1 | 0.068553 |
| 26872 | P14075 | Q9P031 | 0.99645  |
| 26873 | P14075 | Q99551 | 0.49491  |
| 26874 | P14075 | Q9BZA5 | 0.59445  |
| 26875 | P14075 | Q9H063 | 0.42981  |
| 26876 | P14075 | Q01534 | 0.23578  |
| 26877 | P14075 | P14868 | 0.56002  |
| 26878 | P14075 | P01858 | 0.63821  |
| 26879 | P14075 | Q9Y5L5 | 1.0211   |
| 26880 | P14075 | Q8NEZ5 | 0.48866  |
| 26881 | P14075 | Q9HAU5 | 0.57266  |
| 26882 | P14075 | Q9NWW7 | 0.96867  |
| 26883 | P14075 | Q9BZQ2 | 0.36033  |
| 26884 | P14075 | Q9HBQ8 | 0.71412  |
| 26885 | P14075 | Q8TAT8 | 0.38078  |
| 26886 | P14075 | Q5JUK9 | 0.34451  |
| 26887 | P14075 | P06748 | 0.29207  |
| 26888 | P14075 | Q5MJ08 | 0.30868  |
| 26889 | P14075 | Q6PJG2 | 0.45794  |
| 26890 | P14075 | P82914 | 0.61828  |
| 26891 | P14075 | Q8N8A8 | 0.59424  |
| 26892 | P14075 | Q86YI8 | 0.33367  |
| 26893 | P14075 | Q3ZCT1 | 0.14871  |
| 26894 | P14075 | Q5T160 | 0.59948  |
| 26895 | P14075 | Q8TBK6 | 0.54985  |
| 26896 | P14075 | Q8IW50 | 0.94025  |
| 26897 | P14075 | Q15545 | 0.72977  |
| 26898 | P14075 | Q96BD5 | 0.2455   |
| 26899 | P14075 | P23511 | 0.86355  |
| 26900 | P14075 | Q6PF05 | 0.23361  |
| 26901 | P14075 | O60303 | 0.36658  |
| 26902 | P14075 | Q96LQ0 | 0.53383  |
| 26903 | P14075 | Q5TA76 | 0.63821  |
| 26904 | P14075 | Q96DB5 | 0.3246   |

|       |        |        |          |
|-------|--------|--------|----------|
| 26905 | P14075 | P61457 | 0.78196  |
| 26906 | P14075 | A6ND36 | 0.015696 |
| 26907 | P14075 | Q52LG2 | 0.43451  |
| 26908 | P14075 | Q9H3M7 | 0.57553  |
| 26909 | P14075 | P57055 | 0.47254  |
| 26910 | P14075 | Q7L1Q6 | 0.16628  |
| 26911 | P14075 | Q13227 | 0.88372  |
| 26912 | P14075 | Q8WVZ9 | 0.39464  |
| 26913 | P14075 | O15442 | 0.11311  |
| 26914 | P14075 | Q9BSF0 | 0.28219  |
| 26915 | P14075 | P35573 | 0.30864  |
| 26916 | P14075 | Q8N9U9 | 0.26393  |
| 26917 | P14075 | P28072 | 0.2964   |
| 26918 | P14075 | Q5T035 | 0.59825  |
| 26919 | P14075 | Q9NWX4 | 0.69265  |
| 26920 | P14075 | Q86VX2 | 0.70598  |
| 26921 | P14075 | Q9P2F5 | 0.39889  |
| 26922 | P14075 | P55197 | 1.0537   |
| 26923 | P14075 | Q9UJK0 | 0.97908  |
| 26924 | P14075 | P78317 | 0.45463  |
| 26925 | P14075 | A6NEA5 | 0.27516  |
| 26926 | P14075 | Q5FBB7 | 0.58759  |
| 26927 | P14075 | P0CG35 | 0.49457  |
| 26928 | P14075 | P18848 | 0.81675  |
| 26929 | P14075 | O75360 | 0.28149  |
| 26930 | P14075 | Q9P2J5 | 0.25341  |
| 26931 | P14075 | O43711 | 0.22878  |
| 26932 | P14075 | Q5VZT2 | 0.15467  |
| 26933 | P14075 | Q969F9 | 0.84309  |
| 26934 | P14075 | Q9UBP6 | 0.84663  |
| 26935 | P14075 | Q53EL6 | 0.7158   |
| 26936 | P14075 | P80294 | 0.46119  |
| 26937 | P14075 | Q9NWQ4 | 0.86088  |
| 26938 | P14075 | Q9NRR4 | 0.30512  |
| 26939 | P14075 | Q9UMQ3 | 0.44155  |
| 26940 | P14075 | Q9H147 | 0.49027  |
| 26941 | P14075 | Q99549 | 0.46349  |
| 26942 | P14075 | Q96B26 | 0.50891  |
| 26943 | P14075 | Q13123 | 0.8566   |
| 26944 | P14075 | A6NKF2 | 0.33062  |
| 26945 | P14075 | Q6ZSV7 | 0.15192  |
| 26946 | P14075 | O14737 | 0.35973  |
| 26947 | P14075 | Q9H8H0 | 0.17936  |
| 26948 | P14075 | P51580 | 0.18635  |
| 26949 | P14075 | Q9BTA0 | 0.94025  |
| 26950 | P14075 | Q9UMS4 | 0.41661  |
| 26951 | P14075 | B3EWG3 | 0.94025  |
| 26952 | P14075 | Q96JK9 | 0.69611  |
| 26953 | P14075 | Q9ULW8 | 0.40915  |
| 26954 | P14075 | Q86UT8 | 1.1439   |
| 26955 | P14075 | Q969V6 | 1.0558   |
| 26956 | P14075 | Q6ZSN1 | 0.54871  |
| 26957 | P14075 | P09661 | 0.45549  |
| 26958 | P14075 | O60356 | 0.80509  |
| 26959 | P14075 | Q96LP2 | 0.070363 |
| 26960 | P14075 | Q9UIG4 | 0.73547  |
| 26961 | P14075 | Q6ZVN6 | 0.2034   |
| 26962 | P14075 | Q15436 | 0.3937   |
| 26963 | P14075 | Q8IYB3 | 0.54511  |
| 26964 | P14075 | Q8NAB5 | 0.63821  |
| 26965 | P14075 | Q92796 | 0.20297  |
| 26966 | P14075 | Q9Y5M1 | 0.31541  |
| 26967 | P14075 | Q01094 | 0.62848  |
| 26968 | P14075 | Q4V321 | 0.079883 |
| 26969 | P14075 | Q5XKR9 | 0.91245  |
| 26970 | P14075 | O14639 | 0.28571  |
| 26971 | P14075 | Q6ZN79 | 0.28942  |
| 26972 | P14075 | Q9UKV8 | 0.60319  |
| 26973 | P14075 | Q9BTL3 | 0.63721  |
| 26974 | P14075 | Q5RGN0 | 0.455    |
| 26975 | P14075 | P15502 | 0.40048  |
| 26976 | P14075 | O14978 | 0.21808  |
| 26977 | P14075 | P28370 | 0.27924  |
| 26978 | P14075 | Q9BWJ5 | 0.33329  |
| 26979 | P14075 | Q8TA86 | 0.52105  |
| 26980 | P14075 | Q96LY2 | 0.72258  |



|       |        |        |           |
|-------|--------|--------|-----------|
| 26981 | P14075 | Q8NEQ6 | 0.16681   |
| 26982 | P14075 | P61586 | 1.0001    |
| 26983 | P14075 | Q9NZM4 | 1.0553    |
| 26984 | P14075 | Q5D1E8 | 0.52531   |
| 26985 | P14075 | Q9NRR5 | 0.39086   |
| 26986 | P14075 | Q14258 | 0.72809   |
| 26987 | P14075 | Q13536 | 0.63821   |
| 26988 | P14075 | Q9NU23 | 0.4651    |
| 26989 | P14075 | Q5VU69 | 0.66421   |
| 26990 | P14075 | Q9BUX1 | 0.5045    |
| 26991 | P14075 | P62841 | 0.46093   |
| 26992 | P14075 | Q15773 | 0.88418   |
| 26993 | P14075 | Q96AH0 | 0.34548   |
| 26994 | P14075 | H0YL14 | 0.58154   |
| 26995 | P14075 | Q9Y333 | 0.49091   |
| 26996 | P14075 | Q6PB30 | 0.69844   |
| 26997 | P14075 | P10515 | 0.24735   |
| 26998 | P14075 | Q5VTE6 | 0.020626  |
| 26999 | P14075 | Q8IYS4 | 0.064867  |
| 27000 | P14075 | O96007 | 0.68574   |
| 27001 | P14075 | Q86X83 | 0.44051   |
| 27002 | P14075 | P36578 | 0.76792   |
| 27003 | P14075 | Q5JNZ5 | 0.33115   |
| 27004 | P14075 | A0AUK8 | 0.19993   |
| 27005 | P14075 | Q9BUR4 | 0.56535   |
| 27006 | P14075 | Q8N4H0 | 0.38083   |
| 27007 | P14075 | Q9BVS5 | 0.18618   |
| 27008 | P14075 | P22061 | 0.40874   |
| 27009 | P14075 | Q13487 | 1.2523    |
| 27010 | P14075 | Q8NHY2 | 0.71553   |
| 27011 | P14075 | P08651 | 0.10543   |
| 27012 | P14075 | Q5VT33 | 0.25759   |
| 27013 | P14075 | Q9H0U9 | 0.27969   |
| 27014 | P14075 | P43364 | 0.55947   |
| 27015 | P14075 | P61978 | 0.74749   |
| 27016 | P14075 | O15105 | 0.19166   |
| 27017 | P14075 | Q9Y3A3 | 0.31251   |
| 27018 | P14075 | P14921 | 0.60432   |
| 27019 | P14075 | P0CW26 | 0.28911   |
| 27020 | P14075 | Q8NAV1 | 0.87308   |
| 27021 | P14075 | O95999 | 0.093946  |
| 27022 | P14075 | P62266 | 0.71048   |
| 27023 | P14075 | Q9BQ95 | 0.77137   |
| 27024 | P14075 | Q9GZS3 | 0.85774   |
| 27025 | P14075 | P50452 | 0.37761   |
| 27026 | P14075 | Q9H4H8 | 0.21261   |
| 27027 | P14075 | Q14397 | 0.48039   |
| 27028 | P14075 | Q9H4R4 | 0.0080065 |
| 27029 | P14075 | Q99496 | 0.28868   |
| 27030 | P14075 | P36402 | 0.37945   |
| 27031 | P14075 | P48728 | 0.17209   |
| 27032 | P14075 | Q92572 | 0.25661   |
| 27033 | P14075 | Q9Y2L8 | 0.35147   |
| 27034 | P14075 | P30304 | 0.3727    |
| 27035 | P14075 | Q9GZL8 | 0.49705   |
| 27036 | P14075 | Q8N831 | 0.33384   |
| 27037 | P14075 | Q3MIV0 | 0.63821   |
| 27038 | P14075 | P06400 | 0.50919   |
| 27039 | P14075 | Q13794 | 0.38625   |
| 27040 | P14075 | Q8N801 | 0.031357  |
| 27041 | P14075 | Q8N485 | 0.17163   |
| 27042 | P14075 | P83916 | 0.50876   |
| 27043 | P14075 | Q07352 | 0.66288   |
| 27044 | P14075 | P33316 | 0.41306   |
| 27045 | P14075 | O43542 | 0.30374   |
| 27046 | P14075 | Q8N402 | 0.0054577 |
| 27047 | P14075 | A8MWA4 | 0.38483   |
| 27048 | P14075 | Q7Z422 | 0.20644   |
| 27049 | P14075 | Q9BRT9 | 0.38643   |
| 27050 | P14075 | Q494R0 | 0.63821   |
| 27051 | P14075 | Q5M9Q1 | 0.72201   |
| 27052 | P14075 | Q8N9Z0 | 0.26879   |
| 27053 | P14075 | Q96EU6 | 0.32      |
| 27054 | P14075 | Q5VSR9 | 0.88201   |
| 27055 | P14075 | O14593 | 0.43088   |
| 27056 | P14075 | Q9NWZ8 | 0.58104   |

|       |        |        |          |
|-------|--------|--------|----------|
| 27057 | P14075 | P02511 | 0.21985  |
| 27058 | P14075 | Q66K41 | 0.54693  |
| 27059 | P14075 | Q9BSG1 | 0.23704  |
| 27060 | P14075 | Q8NBR6 | 1.2358   |
| 27061 | P14075 | Q3LI67 | 0.63821  |
| 27062 | P14075 | Q5VWT5 | 0.54983  |
| 27063 | P14075 | E9PB15 | 0.11311  |
| 27064 | P14075 | Q9UBI1 | 0.1668   |
| 27065 | P14075 | P82932 | 0.23783  |
| 27066 | P14075 | Q9BZ23 | 0.60255  |
| 27067 | P14075 | P50453 | 0.40718  |
| 27068 | P14075 | Q9NVR5 | 0.68945  |
| 27069 | P14075 | Q5TC12 | 0.31993  |
| 27070 | P14075 | Q9NWB7 | 0.39036  |
| 27071 | P14075 | Q8N7Y1 | 0.63821  |
| 27072 | P14075 | Q9Y5Q8 | 0.43554  |
| 27073 | P14075 | A8MTZ7 | 0.21366  |
| 27074 | P14075 | P0C7P2 | 0.28438  |
| 27075 | P14075 | Q9H0P7 | 0.22583  |
| 27076 | P14075 | Q6IQ32 | 0.35268  |
| 27077 | P14075 | Q8N6G1 | 0.63821  |
| 27078 | P14075 | Q15935 | 0.22477  |
| 27079 | P14075 | Q494V2 | 0.18051  |
| 27080 | P14075 | Q9UIL1 | 0.36264  |
| 27081 | P14075 | Q8IVT2 | 0.86866  |
| 27082 | P14075 | P0C867 | 0.43947  |
| 27083 | P14075 | Q13625 | 0.28966  |
| 27084 | P14075 | Q69YW0 | 0.35419  |
| 27085 | P14075 | Q9H6U6 | 0.52644  |
| 27086 | P14075 | Q99766 | 0.51761  |
| 27087 | P14075 | O15287 | 0.623    |
| 27088 | P14075 | Q9H410 | 0.5989   |
| 27089 | P14075 | Q96AV8 | 0.20687  |
| 27090 | P14075 | Q8NEL0 | 0.096144 |
| 27091 | P14075 | Q6ZQT7 | 0.63821  |
| 27092 | P14075 | Q8WU58 | 0.49328  |
| 27093 | P14075 | O95149 | 0.25249  |
| 27094 | P14075 | Q9NV29 | 0.62601  |
| 27095 | P14075 | Q13867 | 0.12873  |
| 27096 | P14075 | Q15053 | 0.1524   |
| 27097 | P14075 | A0PJX2 | 0.41618  |
| 27098 | P14075 | Q15654 | 0.57212  |
| 27099 | P14075 | Q03112 | 0.15085  |
| 27100 | P14075 | Q02078 | 0.30731  |
| 27101 | P14075 | Q13426 | 0.15347  |
| 27102 | P14075 | P55789 | 0.091278 |
| 27103 | P14075 | Q15633 | 0.60568  |
| 27104 | P14075 | Q5U649 | 0.23425  |
| 27105 | P14075 | Q9UBB6 | 0.41786  |
| 27106 | P14075 | Q9Y4W2 | 0.82098  |
| 27107 | P14075 | Q8NDH2 | 0.029727 |
| 27108 | P14075 | Q9Y3R5 | 0.46883  |
| 27109 | P14075 | Q5TA81 | 0.63821  |
| 27110 | P14075 | O94986 | 0.80035  |
| 27111 | P14075 | Q9NP66 | 0.75338  |
| 27112 | P14075 | P52743 | 0.23429  |
| 27113 | P14075 | Q8N4L8 | 0.23535  |
| 27114 | P14075 | P62714 | 0.41756  |
| 27115 | P14075 | Q5TI25 | 1.0145   |
| 27116 | P14075 | Q9BTD1 | 0.20194  |
| 27117 | P14075 | Q5JTC6 | 0.81782  |
| 27118 | P14075 | Q9UK28 | 0.72793  |
| 27119 | P14075 | B1AMM8 | 0.24609  |
| 27120 | P14075 | Q8N988 | 0.34111  |
| 27121 | P14075 | Q9BZE2 | 0.80363  |
| 27122 | P14075 | P61758 | 0.35409  |
| 27123 | P14075 | O60832 | 0.4935   |
| 27124 | P14075 | Q6ZN28 | 0.60732  |
| 27125 | P14075 | P24539 | 0.1252   |
| 27126 | P14075 | Q9Y262 | 0.56261  |
| 27127 | P14075 | A8MUV8 | 0.28249  |
| 27128 | P14075 | O43913 | 0.27382  |
| 27129 | P14075 | A8MVS1 | 0.32244  |
| 27130 | P14075 | P27348 | 0.19417  |
| 27131 | P14075 | Q9UPZ3 | 0.44634  |
| 27132 | P14075 | Q9NRR3 | 0.29123  |

|       |        |        |          |
|-------|--------|--------|----------|
| 27133 | P14075 | Q8IXH6 | 0.82345  |
| 27134 | P14075 | A6NGQ2 | 0.31936  |
| 27135 | P14075 | Q8IV56 | 0.85155  |
| 27136 | P14075 | P41208 | 0.36431  |
| 27137 | P14075 | P17028 | 0.50392  |
| 27138 | P14075 | Q9H9Y2 | 0.025203 |
| 27139 | P14075 | P27694 | 0.36152  |
| 27140 | P14075 | Q12824 | 0.80995  |
| 27141 | P14075 | Q9NTK1 | 0.68952  |
| 27142 | P14075 | Q7L0X2 | 0.48992  |
| 27143 | P14075 | Q6ZUA9 | 0.64233  |
| 27144 | P14075 | P14316 | 0.6874   |
| 27145 | P14075 | Q6UWF3 | 0.54696  |
| 27146 | P14075 | P0DKL9 | 0.74444  |
| 27147 | P14075 | P50549 | 0.69326  |
| 27148 | P14075 | Q15628 | 0.3684   |
| 27149 | P14075 | Q13228 | 0.78166  |
| 27150 | P14075 | P26998 | 0.65175  |
| 27151 | P14075 | O14896 | 0.30465  |
| 27152 | P14075 | Q9NXX6 | 0.13588  |
| 27153 | P14075 | Q15742 | 0.18237  |
| 27154 | P14075 | P43356 | 0.67054  |
| 27155 | P14075 | Q06330 | 0.39658  |
| 27156 | P14075 | Q9NX40 | 0.26588  |
| 27157 | P14075 | Q15233 | 0.44501  |
| 27158 | P14075 | Q9Y2G9 | 0.64817  |
| 27159 | P14075 | Q9Y324 | 0.77973  |
| 27160 | P14075 | Q9UIF8 | 0.57965  |
| 27161 | P14075 | P0C7M3 | 0.41629  |
| 27162 | P14075 | P67775 | 0.45886  |
| 27163 | P14075 | Q8NEM7 | 0.14882  |
| 27164 | P14075 | Q9H2U2 | 0.238    |
| 27165 | P14075 | Q8NEG4 | 0.43563  |
| 27166 | P14075 | Q5VIR6 | 0.47909  |
| 27167 | P14075 | Q8N4M7 | 0.90788  |
| 27168 | P14075 | Q5H9L4 | 0.18315  |
| 27169 | P14075 | Q6ZR85 | 0.63821  |
| 27170 | P14075 | Q5T2W1 | 0.27497  |
| 27171 | P14075 | Q6ICG6 | 0.41123  |
| 27172 | P14075 | Q8WY41 | 0.2842   |
| 27173 | P14075 | P60328 | 0.17004  |
| 27174 | P14075 | Q9H9Y6 | 0.49609  |
| 27175 | P14075 | O94805 | 0.55123  |
| 27176 | P14075 | P0C7V6 | 0.54549  |
| 27177 | P14075 | O95073 | 0.79563  |
| 27178 | P14075 | Q5VWP2 | 0.27983  |
| 27179 | P14075 | A8MX80 | 0.51179  |
| 27180 | P14075 | O94829 | 0.75093  |
| 27181 | P14075 | Q96G21 | 0.61496  |
| 27182 | P14075 | Q13347 | 0.44281  |
| 27183 | P14075 | P08670 | 0.10218  |
| 27184 | P14075 | P60896 | 0.63821  |
| 27185 | P14075 | P22528 | 0.35546  |
| 27186 | P14075 | Q9BVL4 | 0.97036  |
| 27187 | P14075 | Q13094 | 0.33414  |
| 27188 | P14075 | Q5BKU6 | 0.17117  |
| 27189 | P14075 | A8MYP8 | 0.74097  |
| 27190 | P14075 | P30153 | 0.2989   |
| 27191 | P14075 | P51946 | 0.48539  |
| 27192 | P14075 | Q96FZ2 | 0.7675   |
| 27193 | P14075 | E9PQ53 | 0.65415  |
| 27194 | P14075 | Q8IYA6 | 0.73454  |
| 27195 | P14075 | Q9BQY9 | 0.27791  |
| 27196 | P14075 | P53370 | 0.27623  |
| 27197 | P14075 | Q9C002 | 0.1514   |
| 27198 | P14075 | Q3C1V8 | 0.39708  |
| 27199 | P14075 | Q9NS26 | 0.91631  |
| 27200 | P14075 | P63000 | 0.35269  |
| 27201 | P14075 | Q8N7Z2 | 0.36542  |
| 27202 | P14075 | Q8N1V8 | 0.22537  |
| 27203 | P14075 | Q96A22 | 0.45185  |
| 27204 | P14075 | O60826 | 0.5817   |
| 27205 | P14075 | Q9NUP7 | 0.67342  |
| 27206 | P14075 | Q6NVU6 | 0.27079  |
| 27207 | P14075 | Q14997 | 0.48236  |
| 27208 | P14075 | Q9BQ69 | 0.27782  |

|       |        |        |          |
|-------|--------|--------|----------|
| 27209 | P14075 | Q9UQ80 | 0.8544   |
| 27210 | P14075 | Q9H3J6 | 0.91546  |
| 27211 | P14075 | Q7Z2W4 | 0.26036  |
| 27212 | P14075 | Q8IYL3 | 1.0292   |
| 27213 | P14075 | Q6NSI4 | 0.26844  |
| 27214 | P14075 | Q8WVIO | 0.78884  |
| 27215 | P14075 | Q969E4 | 0.21325  |
| 27216 | P14075 | Q9BX70 | 0.34768  |
| 27217 | P14075 | H3BTG2 | 0.56675  |
| 27218 | P14075 | Q96RU7 | 0.30587  |
| 27219 | P14075 | P52594 | 0.26061  |
| 27220 | P14075 | Q9HAA7 | 0.061461 |
| 27221 | P14075 | Q8IUC6 | 0.093042 |
| 27222 | P14075 | Q6ZVH6 | 0.035295 |
| 27223 | P14075 | O75436 | 0.42111  |
| 27224 | P14075 | P61513 | 0.38314  |
| 27225 | P14075 | Q9ULD0 | 0.16037  |
| 27226 | P14075 | O75822 | 0.68574  |
| 27227 | P14075 | O60477 | 0.37929  |
| 27228 | P14075 | Q8N2N9 | 0.42835  |
| 27229 | P14075 | Q8NEM2 | 0.50133  |
| 27230 | P14075 | Q15154 | 0.40968  |
| 27231 | P14075 | Q9NV56 | 0.72379  |
| 27232 | P14075 | Q9NZI6 | 0.30061  |
| 27233 | P14075 | O14879 | 0.51645  |
| 27234 | P14075 | Q8IX90 | 0.40584  |
| 27235 | P14075 | Q6PCB5 | 0.39752  |
| 27236 | P14075 | P28749 | 1.0231   |
| 27237 | P14075 | P32780 | 0.55006  |
| 27238 | P14075 | Q9GZR5 | 0.29572  |
| 27239 | P14075 | O00161 | 0.62814  |
| 27240 | P14075 | O95163 | 0.51443  |
| 27241 | P14075 | Q96PV6 | 0.41358  |
| 27242 | P14075 | P09012 | 0.25914  |
| 27243 | P14075 | Q9Y6P5 | 0.31389  |
| 27244 | P14075 | O75896 | 0.68355  |
| 27245 | P14075 | P55199 | 0.78301  |
| 27246 | P14075 | O15379 | 0.40605  |
| 27247 | P14075 | Q8ND99 | 0.36191  |
| 27248 | P14075 | Q9UK10 | 0.2118   |
| 27249 | P14075 | Q1RN00 | 0.63821  |
| 27250 | P14075 | P78386 | 0.70038  |
| 27251 | P14075 | Q6ZRP5 | 0.63821  |
| 27252 | P14075 | Q8WWM7 | 0.39699  |
| 27253 | P14075 | Q66K89 | 0.65026  |
| 27254 | P14075 | Q68CJ9 | 0.44894  |
| 27255 | P14075 | Q6ZMS7 | 0.17594  |
| 27256 | P14075 | O43504 | 0.19466  |
| 27257 | P14075 | P61313 | 0.72715  |
| 27258 | P14075 | P98168 | 0.48913  |
| 27259 | P14075 | Q8NF99 | 0.13223  |
| 27260 | P14075 | Q9P1Q0 | 0.269    |
| 27261 | P14075 | Q7Z7K6 | 0.52554  |
| 27262 | P14075 | Q8TC71 | 0.30708  |
| 27263 | P14075 | Q9Y3C0 | 0.18353  |
| 27264 | P14075 | Q9H9L3 | 0.21939  |
| 27265 | P14075 | P27635 | 0.36773  |
| 27266 | P14075 | A6NKF1 | 0.68578  |
| 27267 | P14075 | Q9ULK4 | 1.0144   |
| 27268 | P14075 | Q8TEK3 | 0.19405  |
| 27269 | P14075 | Q5VYV7 | 0.1668   |
| 27270 | P14075 | P01100 | 0.4089   |
| 27271 | P14075 | P02812 | 0.59508  |
| 27272 | P14075 | Q9BRQ6 | 0.92739  |
| 27273 | P14075 | Q8TDB4 | 0.22267  |
| 27274 | P14075 | A8K8V0 | 0.24018  |
| 27275 | P14075 | C9JC47 | 0.63821  |
| 27276 | P14075 | Q8IYL2 | 0.52238  |
| 27277 | P14075 | Q8NFH3 | 0.74228  |
| 27278 | P14075 | O60921 | 0.54578  |
| 27279 | P14075 | P17010 | 0.084994 |
| 27280 | P14075 | Q96DM1 | 0.61563  |
| 27281 | P14075 | A7MD48 | 0.73002  |
| 27282 | P14075 | Q9ULE6 | 0.38432  |
| 27283 | P14075 | Q86Y97 | 0.28151  |
| 27284 | P14075 | Q8NI29 | 0.26079  |

|       |        |        |          |
|-------|--------|--------|----------|
| 27285 | P14075 | Q14134 | 0.40861  |
| 27286 | P14075 | Q9GZU7 | 0.29175  |
| 27287 | P14075 | O00268 | 0.83526  |
| 27288 | P14075 | P14678 | 0.58821  |
| 27289 | P14075 | Q14789 | 0.2567   |
| 27290 | P14075 | Q96MC4 | 0.81412  |
| 27291 | P14075 | Q8NDT2 | 0.6864   |
| 27292 | P14075 | Q9BRJ6 | 0.61711  |
| 27293 | P14075 | A6NK44 | 0.036782 |
| 27294 | P14075 | B1AL46 | 0.72275  |
| 27295 | P14075 | Q96LX7 | 0.024215 |
| 27296 | P14075 | Q9UNL4 | 0.22766  |
| 27297 | P14075 | Q02447 | 0.34602  |
| 27298 | P14075 | Q9HD64 | 0.21489  |
| 27299 | P14075 | Q8IWC1 | 0.29733  |
| 27300 | P14075 | Q6ZWC4 | 0.36956  |
| 27301 | P14075 | P0C7V9 | 0.86595  |
| 27302 | P14075 | Q96A73 | 0.86895  |
| 27303 | P14075 | Q9UNN4 | 0.20958  |
| 27304 | P14075 | P0DJ07 | 0.78884  |
| 27305 | P14075 | Q15525 | 0.19127  |
| 27306 | P14075 | O95602 | 0.42171  |
| 27307 | P14075 | Q75792 | 0.79225  |
| 27308 | P14075 | Q86YG4 | 0.48126  |
| 27309 | P14075 | Q9BYQ0 | 0.78356  |
| 27310 | P14075 | Q5U4N7 | 0.63821  |
| 27311 | P14075 | Q9Y222 | 0.7218   |
| 27312 | P14075 | Q95059 | 0.41724  |
| 27313 | P14075 | Q9BQ89 | 0.99111  |
| 27314 | P14075 | Q9BZE7 | 0.94025  |
| 27315 | P14075 | Q8NDY4 | 0.63821  |
| 27316 | P14075 | Q5PRF9 | 0.34964  |
| 27317 | P14075 | Q9UEE9 | 0.56241  |
| 27318 | P14075 | Q9UJX4 | 0.51501  |
| 27319 | P14075 | O43447 | 0.4168   |
| 27320 | P14075 | Q9NSG2 | 0.57186  |
| 27321 | P14075 | Q6B0B8 | 0.39689  |
| 27322 | P14075 | Q8IWP9 | 0.96625  |
| 27323 | P14075 | O75190 | 0.52682  |
| 27324 | P14075 | Q3BBV2 | 0.455    |
| 27325 | P14075 | Q6ZRS4 | 0.7363   |
| 27326 | P14075 | Q9H633 | 0.19873  |
| 27327 | P14075 | P63010 | 0.21045  |
| 27328 | P14075 | Q5T1B1 | 0.91576  |
| 27329 | P14075 | Q5H9B9 | 0.29235  |
| 27330 | P14075 | P60369 | 0.78356  |
| 27331 | P14075 | Q9H009 | 0.15804  |
| 27332 | P14075 | Q9H900 | 0.31244  |
| 27333 | P14075 | Q5EBL4 | 0.22683  |
| 27334 | P14075 | Q53EZ4 | 0.42969  |
| 27335 | P14075 | Q8NF67 | 0.57736  |
| 27336 | P14075 | Q9UHQ1 | 0.55643  |
| 27337 | P14075 | Q6UXP9 | 0.073276 |
| 27338 | P14075 | Q0VDE8 | 0.59765  |
| 27339 | P14075 | Q8WY54 | 0.53107  |
| 27340 | P14075 | Q9Y534 | 0.13189  |
| 27341 | P14075 | O94925 | 0.29495  |
| 27342 | P14075 | Q9BZE4 | 0.1772   |
| 27343 | P14075 | P62888 | 0.48349  |
| 27344 | P14075 | Q8TDH9 | 0.085214 |
| 27345 | P14075 | O76009 | 0.70708  |
| 27346 | P14075 | Q3BBV1 | 1.0145   |
| 27347 | P14075 | O43310 | 0.28379  |
| 27348 | P14075 | Q13439 | 0.56939  |
| 27349 | P14075 | Q6P1L5 | 1.2136   |
| 27350 | P14075 | Q8TCS8 | 0.13476  |
| 27351 | P14075 | Q86YE8 | 0.2118   |
| 27352 | P14075 | O94952 | 0.64941  |
| 27353 | P14075 | Q9H4M3 | 0.11282  |
| 27354 | P14075 | Q96Q06 | 0.53449  |
| 27355 | P14075 | Q9HCS7 | 0.26169  |
| 27356 | P14075 | Q5HYN5 | 0.20293  |
| 27357 | P14075 | Q5T5F5 | 0.63821  |
| 27358 | P14075 | Q96QU8 | 0.75112  |
| 27359 | P14075 | Q9Y4R8 | 0.22617  |
| 27360 | P14075 | P23508 | 0.20328  |

|       |        |        |          |
|-------|--------|--------|----------|
| 27361 | P14075 | Q96BR6 | 0.26816  |
| 27362 | P14075 | Q9BRK4 | 0.32004  |
| 27363 | P14075 | P02795 | 0.41477  |
| 27364 | P14075 | Q96H79 | 0.49406  |
| 27365 | P14075 | Q9UHN1 | 0.052572 |
| 27366 | P14075 | Q4KMZ1 | 0.26664  |
| 27367 | P14075 | Q5HY98 | 0.26969  |
| 27368 | P14075 | O60885 | 0.46831  |
| 27369 | P14075 | Q53HL2 | 0.67058  |
| 27370 | P14075 | P00338 | 0.32299  |
| 27371 | P14075 | P20290 | 0.8435   |
| 27372 | P14075 | Q9UHY8 | 0.22525  |
| 27373 | P14075 | Q9Y2X9 | 0.44825  |
| 27374 | P14075 | P15621 | 0.28266  |
| 27375 | P14075 | O95751 | 0.45927  |
| 27376 | P14075 | O94817 | 0.31618  |
| 27377 | P14075 | Q9UFF9 | 0.29692  |
| 27378 | P14075 | Q9H9T3 | 0.59427  |
| 27379 | P14075 | Q9H7E2 | 0.18883  |
| 27380 | P14075 | Q05084 | 0.17836  |
| 27381 | P14075 | Q29RF7 | 0.74862  |
| 27382 | P14075 | Q6ZV50 | 0.073272 |
| 27383 | P14075 | Q9UK58 | 0.16372  |
| 27384 | P14075 | A6NE82 | 0.030285 |
| 27385 | P14075 | Q7L2K0 | 0.21061  |
| 27386 | P14075 | Q9Y3T9 | 0.81422  |
| 27387 | P14075 | O15063 | 0.45435  |
| 27388 | P14075 | Q9HAH7 | 0.85055  |
| 27389 | P14075 | Q9ULZ2 | 0.49589  |
| 27390 | P14075 | Q9Y678 | 0.3122   |
| 27391 | P14075 | Q5T1J5 | 0.87053  |
| 27392 | P14075 | Q6ZPB5 | 0.63821  |
| 27393 | P14075 | Q9P2T0 | 0.50109  |
| 27394 | P14075 | Q15513 | 0.63821  |
| 27395 | P14075 | Q5H9S7 | 0.73839  |
| 27396 | P14075 | Q6P2C8 | 0.74735  |
| 27397 | P14075 | Q9H693 | 0.51711  |
| 27398 | P14075 | Q49AA0 | 0.26988  |
| 27399 | P14075 | Q9NRD1 | 0.050819 |
| 27400 | P14075 | Q9H0U6 | 0.35582  |
| 27401 | P14075 | Q9UKY7 | 0.94894  |
| 27402 | P14075 | Q9H3H3 | 0.27954  |
| 27403 | P14075 | O43159 | 0.66304  |
| 27404 | P14075 | Q9P1A6 | 0.137    |
| 27405 | P14075 | Q92901 | 0.38311  |
| 27406 | P14075 | P24522 | 0.36696  |
| 27407 | P14075 | A2IDD5 | 0.45258  |
| 27408 | P14075 | A4D263 | 0.38686  |
| 27409 | P14075 | Q13342 | 0.41477  |
| 27410 | P14075 | P20809 | 0.36992  |
| 27411 | P14075 | Q7L190 | 0.77412  |
| 27412 | P14075 | Q96EV8 | 0.11719  |
| 27413 | P14075 | Q9NZI5 | 0.25118  |
| 27414 | P14075 | Q5T9C2 | 0.94025  |
| 27415 | P14075 | Q9H5L9 | 0.18644  |
| 27416 | P14075 | Q9NV92 | 0.12533  |
| 27417 | P14075 | P0CG47 | 0.27823  |
| 27418 | P14075 | Q5SYE7 | 0.66542  |
| 27419 | P14075 | Q8NEK8 | 0.86595  |
| 27420 | P14075 | Q9UNS2 | 0.42101  |
| 27421 | P14075 | Q9H098 | 0.94799  |
| 27422 | P14075 | O95394 | 0.57725  |
| 27423 | P14075 | Q9BXF6 | 0.38603  |
| 27424 | P14075 | Q9H1E3 | 0.76615  |
| 27425 | P14075 | P62937 | 0.45262  |
| 27426 | P14075 | Q7Z4T9 | 0.45364  |
| 27427 | P14075 | P98182 | 0.056799 |
| 27428 | P14075 | Q9BRR8 | 0.72435  |
| 27429 | P14075 | P0C7V5 | 0.22798  |
| 27430 | P14075 | Q6PGN9 | 0.62615  |
| 27431 | P14075 | P07197 | 0.66016  |
| 27432 | P14075 | Q8NAJ2 | 0.027144 |
| 27433 | P14075 | Q13330 | 0.25779  |
| 27434 | P14075 | Q96B01 | 0.57446  |
| 27435 | P14075 | P58511 | 0.76323  |
| 27436 | P14075 | A9QM74 | 0.27061  |

|       |        |        |          |
|-------|--------|--------|----------|
| 27437 | P14075 | Q6ZRH3 | 0.37498  |
| 27438 | P14075 | Q5T6M2 | 0.85677  |
| 27439 | P14075 | P61583 | 0.66896  |
| 27440 | P14075 | Q6P2I7 | 0.18724  |
| 27441 | P14075 | Q8IWL8 | 0.83317  |
| 27442 | P14075 | O95478 | 0.48791  |
| 27443 | P14075 | P42772 | 0.58894  |
| 27444 | P14075 | O15504 | 0.31888  |
| 27445 | P14075 | Q9BSQ5 | 0.26604  |
| 27446 | P14075 | Q494X1 | 0.17209  |
| 27447 | P14075 | Q9BXG8 | 0.22712  |
| 27448 | P14075 | Q9ULG3 | 0.63821  |
| 27449 | P14075 | Q8N6M0 | 0.10757  |
| 27450 | P14075 | Q8NCD3 | 0.34757  |
| 27451 | P14075 | Q5T230 | 1.043    |
| 27452 | P14075 | Q8IXM3 | 0.46453  |
| 27453 | P14075 | Q9UL42 | 0.57654  |
| 27454 | P14075 | A6NEL3 | 0.042213 |
| 27455 | P14075 | Q9NVX0 | 0.68544  |
| 27456 | P14075 | Q9H7P6 | 0.75985  |
| 27457 | P14075 | P12980 | 0.58625  |
| 27458 | P14075 | P09972 | 0.37476  |
| 27459 | P14075 | Q6P387 | 0.39937  |
| 27460 | P14075 | P49711 | 0.13498  |
| 27461 | P14075 | Q9Y383 | 0.46142  |
| 27462 | P14075 | P49789 | 0.24993  |
| 27463 | P14075 | Q96LR2 | 0.92375  |
| 27464 | P14075 | P25787 | 0.46127  |
| 27465 | P14075 | Q13428 | 0.93619  |
| 27466 | P14075 | Q96LW9 | 0.11557  |
| 27467 | P14075 | Q9BZK7 | 0.71351  |
| 27468 | P14075 | P15259 | 0.50609  |
| 27469 | P14075 | Q9P2D6 | 0.050567 |
| 27470 | P14075 | Q96H40 | 0.28445  |
| 27471 | P14075 | Q96T23 | 0.48513  |
| 27472 | P14075 | Q00577 | 0.39835  |
| 27473 | P14075 | Q99547 | 0.70398  |
| 27474 | P14075 | Q8TBY8 | 0.41375  |
| 27475 | P14075 | Q32MQ0 | 0.44828  |
| 27476 | P14075 | P26639 | 0.31923  |
| 27477 | P14075 | Q9BWC9 | 1.0184   |
| 27478 | P14075 | Q5C9Z4 | 0.48053  |
| 27479 | P14075 | A6NGY3 | 0.34057  |
| 27480 | P14075 | Q96QF0 | 0.34856  |
| 27481 | P14075 | O00712 | 0.080964 |
| 27482 | P14075 | Q96N20 | 0.11815  |
| 27483 | P14075 | Q8WZ33 | 0.52502  |
| 27484 | P14075 | Q92793 | 0.31292  |
| 27485 | P14075 | Q9UDY2 | 0.59211  |
| 27486 | P14075 | Q7RTS7 | 0.23689  |
| 27487 | P14075 | Q9BYE4 | 0.63821  |
| 27488 | P14075 | P08107 | 0.38424  |
| 27489 | P14075 | Q9BYE3 | 0.63821  |
| 27490 | P14075 | Q96LI6 | 0.25802  |
| 27491 | P14075 | P28702 | 0.26666  |
| 27492 | P14075 | P15884 | 0.45264  |
| 27493 | P14075 | Q9BTY7 | 0.33592  |
| 27494 | P14075 | Q69YI7 | 0.94197  |
| 27495 | P14075 | Q8N7W2 | 0.46184  |
| 27496 | P14075 | Q96MK2 | 0.25765  |
| 27497 | P14075 | O14832 | 0.41074  |
| 27498 | P14075 | Q7L5N1 | 0.77003  |
| 27499 | P14075 | P54725 | 0.3493   |
| 27500 | P14075 | Q717R9 | 0.56424  |
| 27501 | P14075 | O60925 | 0.12972  |
| 27502 | P14075 | Q9NVC6 | 0.42932  |
| 27503 | P14075 | Q9H6V9 | 0.45108  |
| 27504 | P14075 | Q9UNS1 | 0.41276  |
| 27505 | P14075 | E9PJ23 | 0.025923 |
| 27506 | P14075 | Q13416 | 0.34229  |
| 27507 | P14075 | P0CL83 | 0.45967  |
| 27508 | P14075 | A8MUL3 | 0.63821  |
| 27509 | P14075 | Q8WYA6 | 0.52564  |
| 27510 | P14075 | Q9UKW6 | 0.27014  |
| 27511 | P14075 | Q92841 | 0.47154  |
| 27512 | P14075 | A6NJ08 | 0.030285 |

|       |        |         |          |
|-------|--------|---------|----------|
| 27513 | P14075 | Q8N6M3  | 0.5651   |
| 27514 | P14075 | P50748  | 0.5426   |
| 27515 | P14075 | Q5SZD1  | 0.32465  |
| 27516 | P14075 | Q9Y5S9  | 0.59226  |
| 27517 | P14075 | O95447  | 0.15403  |
| 27518 | P14075 | P35268  | 0.51122  |
| 27519 | P14075 | P78352  | 0.41926  |
| 27520 | P14075 | Q9UI36  | 0.31977  |
| 27521 | P14075 | Q86YA3  | 0.92208  |
| 27522 | P14075 | Q9BVI4  | 0.35384  |
| 27523 | P14075 | Q13772  | 0.15379  |
| 27524 | P14075 | Q5TA78  | 0.63821  |
| 27525 | P14075 | Q86WR0  | 0.43671  |
| 27526 | P14075 | Q9BYN8  | 0.92056  |
| 27527 | P14075 | Q8TC90  | 0.90896  |
| 27528 | P14075 | P0C843  | 0.37873  |
| 27529 | P14075 | Q14695  | 0.46496  |
| 27530 | P14075 | O43463  | 0.60668  |
| 27531 | P14075 | Q6ULP2  | 0.49883  |
| 27532 | P14075 | O95376  | 0.23609  |
| 27533 | P14075 | P13647  | 0.63715  |
| 27534 | P14075 | Q8TF63  | 0.6364   |
| 27535 | P14075 | Q8N0U4  | 0.40571  |
| 27536 | P14075 | P0CZ25  | 0.32866  |
| 27537 | P14075 | Q9UH99  | 0.065692 |
| 27538 | P14075 | Q6UUV7  | 1.1714   |
| 27539 | P14075 | Q14674  | 0.14354  |
| 27540 | P14075 | Q8N8P6  | 0.31752  |
| 27541 | P14075 | Q16526  | 0.23693  |
| 27542 | P14075 | Q9Y3B6  | 0.70595  |
| 27543 | P14075 | Q5R3I4  | 0.26896  |
| 27544 | P14075 | Q8TF47  | 0.28409  |
| 27545 | P14075 | P38117  | 0.25804  |
| 27546 | P14075 | P18754  | 0.83802  |
| 27547 | P14075 | Q13404  | 0.77988  |
| 27548 | P14075 | Q14137  | 0.60882  |
| 27549 | P14075 | Q9NWM3  | 0.25521  |
| 27550 | P14075 | Q5U5X0  | 0.79949  |
| 27551 | P14075 | P16383  | 0.85226  |
| 27552 | P14075 | Q8N4C0  | 0.2228   |
| 27553 | P14075 | Q15468  | 0.42874  |
| 27554 | P14075 | Q9NR09  | 0.28303  |
| 27555 | P14075 | Q96PQ6  | 0.32094  |
| 27556 | P14075 | Q9UGK8  | 0.44438  |
| 27557 | P14075 | O75843  | 0.40756  |
| 27558 | P14075 | Q15699  | 0.31828  |
| 27559 | P14075 | P35080  | 0.19009  |
| 27560 | P14075 | Q6ZR93  | 0.63821  |
| 27561 | P14075 | O95243  | 0.42565  |
| 27562 | P14075 | Q96KN1  | 0.22673  |
| 27563 | P14075 | P49247  | 0.55775  |
| 27564 | P14075 | Q96C86  | 0.58927  |
| 27565 | P14075 | Q8TAC9  | 0.31211  |
| 27566 | P14075 | Q6ZW54  | 0.92676  |
| 27567 | P14075 | Q8IUUG1 | 0.81551  |
| 27568 | P14075 | P46937  | 0.61607  |
| 27569 | P14075 | Q6P9G9  | 0.11305  |
| 27570 | P14075 | Q8ND76  | 0.38174  |
| 27571 | P14075 | Q2T9L4  | 0.37832  |
| 27572 | P14075 | Q96HZ7  | 0.63821  |
| 27573 | P14075 | Q53QW1  | 0.94025  |
| 27574 | P14075 | Q8N8D9  | 0.22202  |
| 27575 | P14075 | Q13127  | 0.35437  |
| 27576 | P14075 | Q9UBS8  | 0.48333  |
| 27577 | P14075 | O75113  | 0.60994  |
| 27578 | P14075 | Q86UD0  | 0.35269  |
| 27579 | P14075 | Q5CZC0  | 1.0153   |
| 27580 | P14075 | Q8IW36  | 0.28368  |
| 27581 | P14075 | P35226  | 0.41368  |
| 27582 | P14075 | Q9UF83  | 0.27185  |
| 27583 | P14075 | Q96PY6  | 0.26661  |
| 27584 | P14075 | Q9Y294  | 0.73443  |
| 27585 | P14075 | Q8IWA6  | 0.37633  |
| 27586 | P14075 | Q3LHN2  | 0.63821  |
| 27587 | P14075 | Q9H3M9  | 0.36872  |
| 27588 | P14075 | Q9HD42  | 0.73346  |



|       |        |        |          |
|-------|--------|--------|----------|
| 27589 | P14075 | Q9NR50 | 0.33026  |
| 27590 | P14075 | Q8N5J2 | 1.0048   |
| 27591 | P14075 | P31314 | 0.43238  |
| 27592 | P14075 | Q9UKN8 | 0.45968  |
| 27593 | P14075 | Q32MZ4 | 0.8333   |
| 27594 | P14075 | O75192 | 0.46979  |
| 27595 | P14075 | Q96B67 | 0.14837  |
| 27596 | P14075 | Q3MJ62 | 0.10668  |
| 27597 | P14075 | Q9BYZ2 | 0.32299  |
| 27598 | P14075 | A6NIH7 | 0.27782  |
| 27599 | P14075 | Q8N398 | 0.32487  |
| 27600 | P14075 | Q9BRG1 | 0.74081  |
| 27601 | P14075 | Q9Y2P7 | 0.25605  |
| 27602 | P14075 | Q5SY85 | 0.48498  |
| 27603 | P14075 | Q96RN5 | 1.0418   |
| 27604 | P14075 | Q9BZS9 | 0.63821  |
| 27605 | P14075 | P48552 | 0.48956  |
| 27606 | P14075 | Q6ZSG2 | 0.59415  |
| 27607 | P14075 | Q99590 | 0.38222  |
| 27608 | P14075 | Q14533 | 0.70038  |
| 27609 | P14075 | Q9UDV6 | 0.3617   |
| 27610 | P14075 | O75486 | 0.49901  |
| 27611 | P14075 | Q96HG1 | 0.63821  |
| 27612 | P14075 | P61581 | 0.65433  |
| 27613 | P14075 | Q13503 | 0.45634  |
| 27614 | P14075 | Q8TF39 | 0.31207  |
| 27615 | P14075 | Q5BKY9 | 0.94025  |
| 27616 | P14075 | Q9UHB9 | 0.13838  |
| 27617 | P14075 | Q6ICC9 | 0.45104  |
| 27618 | P14075 | Q969I3 | 0.36669  |
| 27619 | P14075 | Q7L5D6 | 0.78768  |
| 27620 | P14075 | Q9NXF7 | 0.19062  |
| 27621 | P14075 | P60409 | 0.78356  |
| 27622 | P14075 | Q96CN0 | 0.63821  |
| 27623 | P14075 | Q6TGC4 | 0.38586  |
| 27624 | P14075 | O43439 | 0.70908  |
| 27625 | P14075 | P31276 | 0.41428  |
| 27626 | P14075 | Q8WWK9 | 0.26363  |
| 27627 | P14075 | P62945 | 0.63821  |
| 27628 | P14075 | E9PJI5 | 0.67697  |
| 27629 | P14075 | Q3LI70 | 0.63821  |
| 27630 | P14075 | Q99567 | 0.54894  |
| 27631 | P14075 | O43715 | 0.61947  |
| 27632 | P14075 | Q05516 | 0.52347  |
| 27633 | P14075 | Q8N6Y0 | 0.38695  |
| 27634 | P14075 | Q96CV9 | 0.30502  |
| 27635 | P14075 | Q6ZRP0 | 0.94025  |
| 27636 | P14075 | Q9NP64 | 0.046073 |
| 27637 | P14075 | O43325 | 0.78056  |
| 27638 | P14075 | P56377 | 0.12861  |
| 27639 | P14075 | P35637 | 0.25922  |
| 27640 | P14075 | Q6PI48 | 0.57509  |
| 27641 | P14075 | Q4VC05 | 0.83555  |
| 27642 | P14075 | Q8N9V7 | 0.52936  |
| 27643 | P14075 | Q9Y5L0 | 0.69192  |
| 27644 | P14075 | Q9HBM0 | 0.55609  |
| 27645 | P14075 | A6NKD9 | 0.94766  |
| 27646 | P14075 | Q9H0C5 | 0.35261  |
| 27647 | P14075 | O60524 | 0.84128  |
| 27648 | P14075 | Q15022 | 0.43419  |
| 27649 | P14075 | O60711 | 0.2555   |
| 27650 | P14075 | O75884 | 0.99402  |
| 27651 | P14075 | Q6ZRH9 | 0.63821  |
| 27652 | P14075 | Q9NRC8 | 0.94914  |
| 27653 | P14075 | Q9Y2S6 | 0.63821  |
| 27654 | P14075 | Q9BYG5 | 0.41654  |
| 27655 | P14075 | P04731 | 0.30226  |
| 27656 | P14075 | Q9Y5J7 | 0.11634  |
| 27657 | P14075 | Q8WUH2 | 0.43141  |
| 27658 | P14075 | Q6NW29 | 0.42739  |
| 27659 | P14075 | Q9BZF9 | 0.37662  |
| 27660 | P14075 | P46776 | 0.72715  |
| 27661 | P14075 | I6L9F6 | 0.056889 |
| 27662 | P14075 | Q9UG56 | 0.20649  |
| 27663 | P14075 | Q15466 | 0.41869  |
| 27664 | P14075 | Q8N998 | 0.099575 |

|       |        |        |          |
|-------|--------|--------|----------|
| 27665 | P14075 | P19838 | 0.55066  |
| 27666 | P14075 | P0CZ20 | 0.28911  |
| 27667 | P14075 | Q96F63 | 0.94025  |
| 27668 | P14075 | Q9H9F9 | 0.85732  |
| 27669 | P14075 | Q8NHR7 | 0.16132  |
| 27670 | P14075 | Q96AY2 | 0.63042  |
| 27671 | P14075 | B1ANH7 | 0.030093 |
| 27672 | P14075 | Q96HY6 | 0.32038  |
| 27673 | P14075 | Q5SXJ2 | 1.0145   |
| 27674 | P14075 | Q9BYR4 | 0.78356  |
| 27675 | P14075 | Q86XK2 | 0.47966  |
| 27676 | P14075 | P60014 | 1.0211   |
| 27677 | P14075 | O60504 | 0.38345  |
| 27678 | P14075 | Q7Z7J5 | 0.7988   |
| 27679 | P14075 | Q9UQL6 | 0.33004  |
| 27680 | P14075 | O95873 | 0.94025  |
| 27681 | P14075 | Q3KNT7 | 0.10425  |
| 27682 | P14075 | Q12769 | 0.78318  |
| 27683 | P14075 | Q6ZS52 | 0.63821  |
| 27684 | P14075 | P60002 | 0.85228  |
| 27685 | P14075 | Q03060 | 0.19283  |
| 27686 | P14075 | Q04724 | 0.6551   |
| 27687 | P14075 | Q9H8K7 | 0.47403  |
| 27688 | P14075 | Q9H3C7 | 1.022    |
| 27689 | P14075 | Q8NBC4 | 0.63821  |
| 27690 | P14075 | Q2VPB7 | 0.47631  |
| 27691 | P14075 | Q53QV2 | 0.35613  |
| 27692 | P14075 | Q6ZN06 | 0.28445  |
| 27693 | P14075 | Q99741 | 0.39368  |
| 27694 | P14075 | P11168 | 0.20732  |
| 27695 | P14075 | P07196 | 0.54521  |
| 27696 | P14075 | Q96F24 | 0.44871  |
| 27697 | P14075 | Q15011 | 0.63315  |
| 27698 | P14075 | Q8IUF8 | 0.18723  |
| 27699 | P14075 | Q96GC6 | 0.85282  |
| 27700 | P14075 | Q96EH5 | 0.53684  |
| 27701 | P14075 | P09001 | 0.46738  |
| 27702 | P14075 | P10074 | 0.16061  |
| 27703 | P14075 | O94927 | 0.32838  |
| 27704 | P14075 | Q7RTT6 | 0.37226  |
| 27705 | P14075 | Q86UA6 | 0.85283  |
| 27706 | P14075 | Q9H0W8 | 0.4582   |
| 27707 | P14075 | Q9HCD5 | 0.79563  |
| 27708 | P14075 | Q9Y3Q8 | 1.0044   |
| 27709 | P14075 | P27469 | 0.56985  |
| 27710 | P14075 | Q14749 | 0.38716  |
| 27711 | P14075 | Q96FX7 | 0.17082  |
| 27712 | P14075 | Q9NQ48 | 0.12647  |
| 27713 | P14075 | Q3Y452 | 0.63821  |
| 27714 | P14075 | Q8NFD5 | 0.62335  |
| 27715 | P14075 | Q8IYI6 | 0.40827  |
| 27716 | P14075 | Q9GZZ8 | 0.63821  |
| 27717 | P14075 | P48788 | 0.19778  |
| 27718 | P14075 | Q9UJA5 | 0.87023  |
| 27719 | P14075 | Q8IYS8 | 0.47573  |
| 27720 | P14075 | Q9NY74 | 0.99467  |
| 27721 | P14075 | Q9UL40 | 0.40862  |
| 27722 | P14075 | O95273 | 0.68254  |
| 27723 | P14075 | P83876 | 0.73141  |
| 27724 | P14075 | A2RTY3 | 0.1312   |
| 27725 | P14075 | Q12888 | 0.47997  |
| 27726 | P14075 | Q13129 | 0.47987  |
| 27727 | P14075 | Q96EI5 | 0.56374  |
| 27728 | P14075 | Q09FC8 | 0.16686  |
| 27729 | P14075 | Q9BYD3 | 0.72005  |
| 27730 | P14075 | Q8NFC6 | 0.8161   |
| 27731 | P14075 | Q8N377 | 0.63821  |
| 27732 | P14075 | Q9UL18 | 0.74231  |
| 27733 | P14075 | Q96T59 | 0.41629  |
| 27734 | P14075 | Q8TBR4 | 0.30467  |
| 27735 | P14075 | O60810 | 0.44462  |
| 27736 | P14075 | Q8NA03 | 0.62891  |
| 27737 | P14075 | Q9H981 | 0.78119  |
| 27738 | P14075 | P54259 | 0.66314  |
| 27739 | P14075 | Q9BZW7 | 0.20797  |
| 27740 | P14075 | Q8IWE2 | 0.82308  |

|       |        |        |            |
|-------|--------|--------|------------|
| 27741 | P14075 | Q14678 | 0.3233     |
| 27742 | P14075 | O75665 | 0.43032    |
| 27743 | P14075 | Q15024 | 0.46092    |
| 27744 | P14075 | P56270 | 0.37206    |
| 27745 | P14075 | Q99502 | 0.027493   |
| 27746 | P14075 | Q9Y2H0 | 0.23671    |
| 27747 | P14075 | P35789 | 0.24999    |
| 27748 | P14075 | O15266 | 0.35951    |
| 27749 | P14075 | Q00653 | 0.90917    |
| 27750 | P14075 | Q8IU53 | 0.56554    |
| 27751 | P14075 | Q6IC83 | 0.066774   |
| 27752 | P14075 | Q9P260 | 0.24968    |
| 27753 | P14075 | Q9H379 | 0.67365    |
| 27754 | P14075 | Q6ZSR3 | 0.63821    |
| 27755 | P14075 | Q13427 | 0.20514    |
| 27756 | P14075 | O60304 | 0.13387    |
| 27757 | P14075 | A8MUQ0 | 0.74791    |
| 27758 | P14075 | Q8WW14 | 0.18927    |
| 27759 | P14075 | Q96N38 | 0.28795    |
| 27760 | P14075 | Q9HBM1 | 0.46352    |
| 27761 | P14075 | P16220 | 0.66491    |
| 27762 | P14075 | Q5UIP0 | 0.74341    |
| 27763 | P14075 | Q0VD86 | 0.11945    |
| 27764 | P14075 | Q93073 | 0.6126     |
| 27765 | P14075 | Q5T0J3 | 0.24794    |
| 27766 | P14075 | Q15361 | 0.51853    |
| 27767 | P14075 | P31946 | 0.38879    |
| 27768 | P14075 | Q53FN2 | 0.045219   |
| 27769 | P14075 | Q92558 | 0.1575     |
| 27770 | P14075 | P40305 | 0.58798    |
| 27771 | P14075 | O43791 | 0.36452    |
| 27772 | P14075 | Q32M92 | 0.00033455 |
| 27773 | P14075 | P17022 | 0.088158   |
| 27774 | P14075 | Q5MJ07 | 0.88201    |
| 27775 | P14075 | Q8NDA8 | 0.58658    |
| 27776 | P14075 | O75934 | 0.47359    |
| 27777 | P14075 | Q92597 | 0.25557    |
| 27778 | P14075 | Q9ULE0 | 0.057317   |
| 27779 | P14075 | Q6ZRC1 | 0.63821    |
| 27780 | P14075 | Q9HBF5 | 0.73711    |
| 27781 | P14075 | Q5JXC2 | 0.25426    |
| 27782 | P14075 | P84103 | 0.43188    |
| 27783 | P14075 | Q96I59 | 0.41523    |
| 27784 | P14075 | Q5JQS6 | 0.33667    |
| 27785 | P14075 | P54278 | 0.17177    |
| 27786 | P14075 | P20618 | 0.47769    |
| 27787 | P14075 | Q9BQC3 | 0.7718     |
| 27788 | P14075 | Q7RTT3 | 0.049323   |
| 27789 | P14075 | Q96HE9 | 0.11378    |
| 27790 | P14075 | Q8NE00 | 0.75184    |
| 27791 | P14075 | Q9HCU8 | 0.46416    |
| 27792 | P14075 | Q5SQH8 | 0.34642    |
| 27793 | P14075 | A8MUU9 | 0.11715    |
| 27794 | P14075 | Q9H1A4 | 0.49416    |
| 27795 | P14075 | Q7KZF4 | 0.5742     |
| 27796 | P14075 | Q5VWM6 | 0.83358    |
| 27797 | P14075 | P56211 | 0.32858    |
| 27798 | P14075 | G3V211 | 0.75421    |
| 27799 | P14075 | Q96M85 | 0.63821    |
| 27800 | P14075 | O76042 | 0.50855    |
| 27801 | P14075 | Q969W0 | 0.43049    |
| 27802 | P14075 | Q8N448 | 0.24944    |
| 27803 | P14075 | Q86VS8 | 0.23067    |
| 27804 | P14075 | Q6P1K2 | 0.86928    |
| 27805 | P14075 | Q99700 | 0.54587    |
| 27806 | P14075 | Q8NCR6 | 0.45483    |
| 27807 | P14075 | Q9Y6K9 | 0.61734    |
| 27808 | P14075 | P13807 | 0.21003    |
| 27809 | P14075 | P56385 | 0.30705    |
| 27810 | P14075 | F5GYI3 | 0.9288     |
| 27811 | P14075 | Q969W8 | 0.25517    |
| 27812 | P14075 | Q569K6 | 0.046082   |
| 27813 | P14075 | Q9GZZ1 | 0.28076    |
| 27814 | P14075 | P24385 | 0.39817    |
| 27815 | P14075 | Q9BXP5 | 0.82064    |
| 27816 | P14075 | A6NLC5 | 0.61887    |

|       |        |        |          |
|-------|--------|--------|----------|
| 27817 | P14075 | O43261 | 0.17224  |
| 27818 | P14075 | Q6P1W5 | 0.46868  |
| 27819 | P14075 | Q9NS71 | 0.63238  |
| 27820 | P14075 | Q49A33 | 0.27331  |
| 27821 | P14075 | Q13363 | 0.31544  |
| 27822 | P14075 | O94855 | 0.1654   |
| 27823 | P14075 | P62256 | 0.11125  |
| 27824 | P14075 | P63146 | 0.16118  |
| 27825 | P14075 | Q8WUZ0 | 0.82681  |
| 27826 | P14075 | Q7Z794 | 0.72566  |
| 27827 | P14075 | Q6ZV80 | 0.2813   |
| 27828 | P14075 | Q9UKI9 | 0.99687  |
| 27829 | P14075 | O43148 | 0.72694  |
| 27830 | P14075 | Q8WVK2 | 0.85021  |
| 27831 | P14075 | Q8NHX4 | 0.84807  |
| 27832 | P14075 | Q9H4K1 | 0.66429  |
| 27833 | P14075 | P0DI83 | 0.46369  |
| 27834 | P14075 | Q86W56 | 0.33308  |
| 27835 | P14075 | Q9BXS5 | 0.46153  |
| 27836 | P14075 | O75154 | 0.5128   |
| 27837 | P14075 | O95678 | 0.53972  |
| 27838 | P14075 | Q6NUN7 | 0.63821  |
| 27839 | P14075 | Q9HB65 | 0.3402   |
| 27840 | P14075 | Q7Z745 | 0.35465  |
| 27841 | P14075 | Q5TA31 | 0.30561  |
| 27842 | P14075 | Q9H3P2 | 0.85132  |
| 27843 | P14075 | P56277 | 0.86523  |
| 27844 | P14075 | Q9Y473 | 0.13982  |
| 27845 | P14075 | P52758 | 0.21757  |
| 27846 | P14075 | Q6P9B9 | 0.61175  |
| 27847 | P14075 | Q9BQE9 | 0.896    |
| 27848 | P14075 | O76011 | 0.80046  |
| 27849 | P14075 | Q9ULJ6 | 0.27776  |
| 27850 | P14075 | A6NJJ6 | 0.94025  |
| 27851 | P14075 | Q8TB69 | 0.27773  |
| 27852 | P14075 | Q8N1D5 | 0.33525  |
| 27853 | P14075 | Q9ULK2 | 0.48825  |
| 27854 | P14075 | Q8IWN6 | 0.45146  |
| 27855 | P14075 | P10124 | 0.40275  |
| 27856 | P14075 | Q9NPB6 | 0.43672  |
| 27857 | P14075 | Q9Y6Z2 | 0.63821  |
| 27858 | P14075 | Q96LW1 | 0.28409  |
| 27859 | P14075 | P13010 | 0.20384  |
| 27860 | P14075 | P61962 | 0.47179  |
| 27861 | P14075 | Q9NRA8 | 0.71859  |
| 27862 | P14075 | Q03923 | 0.31975  |
| 27863 | P14075 | Q9UBU9 | 0.28899  |
| 27864 | P14075 | P35900 | 0.80046  |
| 27865 | P14075 | P46783 | 1.0088   |
| 27866 | P14075 | Q75L30 | 0.63821  |
| 27867 | P14075 | Q9BXW3 | 0.63821  |
| 27868 | P14075 | P41970 | 0.65558  |
| 27869 | P14075 | Q7Z7H8 | 0.091521 |
| 27870 | P14075 | Q8WVM0 | 0.41095  |
| 27871 | P14075 | Q12894 | 0.34215  |
| 27872 | P14075 | Q96GX2 | 0.75906  |
| 27873 | P14075 | Q15329 | 0.97588  |
| 27874 | P14075 | P48200 | 0.19927  |
| 27875 | P14075 | Q9P287 | 0.44431  |
| 27876 | P14075 | Q8IVN3 | 0.73981  |
| 27877 | P14075 | Q14974 | 0.75038  |
| 27878 | P14075 | O95613 | 0.45845  |
| 27879 | P14075 | O75529 | 0.39315  |
| 27880 | P14075 | O95685 | 0.23444  |
| 27881 | P14075 | P0C852 | 0.63821  |
| 27882 | P14075 | Q9BYR7 | 0.91867  |
| 27883 | P14075 | Q5TA77 | 0.63821  |
| 27884 | P14075 | Q9P209 | 0.49555  |
| 27885 | P14075 | Q14203 | 0.62011  |
| 27886 | P14075 | Q9GZN7 | 0.53989  |
| 27887 | P14075 | Q96DZ1 | 0.13728  |
| 27888 | P14075 | P81877 | 0.30497  |
| 27889 | P14075 | O95125 | 0.13203  |
| 27890 | P14075 | P56282 | 0.24219  |
| 27891 | P14075 | P22415 | 0.35483  |
| 27892 | P14075 | Q8NFI3 | 0.36773  |

|       |        |        |          |
|-------|--------|--------|----------|
| 27893 | P14075 | Q96M29 | 0.42716  |
| 27894 | P14075 | Q96NS1 | 0.15812  |
| 27895 | P14075 | Q4U2R6 | 0.68898  |
| 27896 | P14075 | Q5VZ46 | 0.37083  |
| 27897 | P14075 | Q9UBS4 | 0.21941  |
| 27898 | P14075 | P62701 | 0.29185  |
| 27899 | P14075 | Q86WP2 | 0.54598  |
| 27900 | P14075 | Q92985 | 0.37021  |
| 27901 | P14075 | Q9UMS6 | 0.34709  |
| 27902 | P14075 | Q0VG06 | 0.31138  |
| 27903 | P14075 | P0C5J1 | 0.049779 |
| 27904 | P14075 | Q9H607 | 0.24482  |
| 27905 | P14075 | Q8NBZ9 | 0.44967  |
| 27906 | P14075 | Q96DE9 | 0.04993  |
| 27907 | P14075 | P07741 | 0.35148  |
| 27908 | P14075 | A6NDB9 | 0.63116  |
| 27909 | P14075 | P84022 | 0.37919  |
| 27910 | P14075 | Q9BVL2 | 0.43872  |
| 27911 | P14075 | Q86V71 | 0.21527  |
| 27912 | P14075 | Q8NFP0 | 0.7202   |
| 27913 | P14075 | Q6NVH7 | 0.52696  |
| 27914 | P14075 | Q5HYJ3 | 0.54061  |
| 27915 | P14075 | P59998 | 0.14134  |
| 27916 | P14075 | Q13144 | 0.33322  |
| 27917 | P14075 | Q15003 | 0.6329   |
| 27918 | P14075 | Q96JG6 | 0.10058  |
| 27919 | P14075 | Q96AT1 | 0.94025  |
| 27920 | P14075 | P21980 | 0.14167  |
| 27921 | P14075 | Q5XKP0 | 0.31005  |
| 27922 | P14075 | P60372 | 0.78356  |
| 27923 | P14075 | Q6ZUJ4 | 0.79138  |
| 27924 | P14075 | Q9HAN9 | 0.20588  |
| 27925 | P14075 | Q8N3X6 | 0.62135  |
| 27926 | P14075 | Q8NI08 | 0.56609  |
| 27927 | P14075 | Q96E40 | 0.019759 |
| 27928 | P14075 | Q9H3F6 | 0.24788  |
| 27929 | P14075 | Q9H3H9 | 0.7023   |
| 27930 | P14075 | Q9NP92 | 0.85025  |
| 27931 | P14075 | Q13070 | 0.079883 |
| 27932 | P14075 | Q53HI1 | 0.49328  |
| 27933 | P14075 | Q96AN2 | 0.30215  |
| 27934 | P14075 | Q9BYP8 | 0.63821  |
| 27935 | P14075 | P25815 | 0.29241  |
| 27936 | P14075 | P49790 | 0.77638  |
| 27937 | P14075 | Q9NVV5 | 0.62263  |
| 27938 | P14075 | Q86VY4 | 0.30246  |
| 27939 | P14075 | Q9UER7 | 0.68243  |
| 27940 | P14075 | Q6ZQP7 | 0.63821  |
| 27941 | P14075 | Q99816 | 0.28392  |
| 27942 | P14075 | O60437 | 0.46214  |
| 27943 | P14075 | Q96DN6 | 0.74462  |
| 27944 | P14075 | P15407 | 0.45471  |
| 27945 | P14075 | Q13352 | 0.24109  |
| 27946 | P14075 | Q8IZL8 | 0.9411   |
| 27947 | P14075 | Q16621 | 0.38174  |
| 27948 | P14075 | Q9UL33 | 0.24845  |
| 27949 | P14075 | Q9BYR2 | 0.78356  |
| 27950 | P14075 | Q9H4B0 | 0.6929   |
| 27951 | P14075 | Q5JRC9 | 0.78694  |
| 27952 | P14075 | Q9Y3M2 | 0.57583  |
| 27953 | P14075 | Q96S55 | 0.27999  |
| 27954 | P14075 | Q9H1B4 | 0.23695  |
| 27955 | P14075 | Q9H7S9 | 0.53442  |
| 27956 | P14075 | Q9BZV1 | 0.8729   |
| 27957 | P14075 | P23760 | 0.61384  |
| 27958 | P14075 | Q9BYC8 | 0.51798  |
| 27959 | P14075 | Q6J272 | 0.85481  |
| 27960 | P14075 | Q07866 | 0.29704  |
| 27961 | P14075 | Q9H0G5 | 0.40519  |
| 27962 | P14075 | Q496H8 | 0.58096  |
| 27963 | P14075 | O43309 | 0.1558   |
| 27964 | P14075 | P62875 | 0.2924   |
| 27965 | P14075 | Q14008 | 0.6109   |
| 27966 | P14075 | Q02833 | 0.46054  |
| 27967 | P14075 | O14599 | 0.63821  |
| 27968 | P14075 | Q12972 | 0.62573  |

|       |        |        |          |
|-------|--------|--------|----------|
| 27969 | P14075 | Q9H5V9 | 0.87411  |
| 27970 | P14075 | Q99583 | 0.24278  |
| 27971 | P14075 | P49589 | 0.38017  |
| 27972 | P14075 | Q9P2M7 | 0.26775  |
| 27973 | P14075 | O00479 | 0.63115  |
| 27974 | P14075 | Q5VTQ0 | 0.19586  |
| 27975 | P14075 | Q6V702 | 0.16586  |
| 27976 | P14075 | Q14525 | 0.70903  |
| 27977 | P14075 | Q6RW13 | 0.5653   |
| 27978 | P14075 | P62899 | 0.44977  |
| 27979 | P14075 | Q99618 | 1.0342   |
| 27980 | P14075 | P52597 | 0.39889  |
| 27981 | P14075 | O75534 | 0.15538  |
| 27982 | P14075 | Q8N3S3 | 0.095447 |
| 27983 | P14075 | Q8N720 | 0.70518  |
| 27984 | P14075 | Q8N2M8 | 0.94059  |
| 27985 | P14075 | Q7L9L4 | 0.46714  |
| 27986 | P14075 | Q15050 | 0.55141  |
| 27987 | P14075 | Q9Y2M5 | 0.55532  |
| 27988 | P14075 | Q8NAX2 | 0.94025  |
| 27989 | P14075 | Q8N4C6 | 0.39895  |
| 27990 | P14075 | O00425 | 0.26392  |
| 27991 | P14075 | Q9BRJ7 | 0.57597  |
| 27992 | P14075 | Q502W6 | 0.11532  |
| 27993 | P14075 | P17676 | 0.58407  |
| 27994 | P14075 | O43324 | 0.81388  |
| 27995 | P14075 | P37275 | 0.64771  |
| 27996 | P14075 | P0DKX0 | 0.24892  |
| 27997 | P14075 | P01215 | 0.45771  |
| 27998 | P14075 | Q0VFX4 | 0.50179  |
| 27999 | P14075 | P59991 | 0.93909  |
| 28000 | P14075 | Q9BZL4 | 0.31745  |
| 28001 | P14075 | Q8N4S0 | 0.94025  |
| 28002 | P14075 | P30793 | 0.033565 |
| 28003 | P14075 | Q5VT03 | 0.72275  |
| 28004 | P14075 | P41002 | 0.70331  |
| 28005 | P14075 | Q8NDZ2 | 0.37212  |
| 28006 | P14075 | Q5T7P3 | 0.63821  |
| 28007 | P14075 | Q14CN4 | 0.39857  |
| 28008 | P14075 | Q9P2D3 | 0.54261  |
| 28009 | P14075 | Q96MF7 | 0.33532  |
| 28010 | P14075 | A6NCW3 | 0.52011  |
| 28011 | P14075 | Q5JPH6 | 0.34954  |
| 28012 | P14075 | Q96KN4 | 0.032039 |
| 28013 | P14075 | Q8WUM0 | 0.50316  |
| 28014 | P14075 | Q8WUI4 | 0.22588  |
| 28015 | P14075 | Q6ZRN7 | 0.63821  |
| 28016 | P14075 | Q9C0C2 | 0.21408  |
| 28017 | P14075 | P07476 | 0.5819   |
| 28018 | P14075 | A8MSY0 | 0.17062  |
| 28019 | P14075 | Q8TAB7 | 0.52683  |
| 28020 | P14075 | Q16236 | 0.37668  |
| 28021 | P14075 | O60936 | 0.75037  |
| 28022 | P14075 | Q9NWX4 | 0.48167  |
| 28023 | P14075 | P82933 | 0.44272  |
| 28024 | P14075 | Q64ET8 | 0.67892  |
| 28025 | P14075 | Q537H7 | 0.49703  |
| 28026 | P14075 | Q13360 | 0.2042   |
| 28027 | P14075 | Q13569 | 0.3594   |
| 28028 | P14075 | O60869 | 0.48542  |
| 28029 | P14075 | Q08J23 | 0.47773  |
| 28030 | P14075 | Q6ZVU0 | 0.080742 |
| 28031 | P14075 | Q86X53 | 0.3775   |
| 28032 | P14075 | A6NJV1 | 0.75174  |
| 28033 | P14075 | P59103 | 0.46885  |
| 28034 | P14075 | Q9H0B6 | 0.33771  |
| 28035 | P14075 | P47914 | 0.83754  |
| 28036 | P14075 | Q6P3X8 | 0.53685  |
| 28037 | P14075 | Q9NYZ3 | 0.64912  |
| 28038 | P14075 | O14512 | 0.33688  |
| 28039 | P14075 | A8MPV3 | 0.052971 |
| 28040 | P14075 | Q8TDP1 | 0.57225  |
| 28041 | P14075 | Q9Y6C7 | 0.63821  |
| 28042 | P14075 | O75489 | 0.12945  |
| 28043 | P14075 | Q13068 | 0.27499  |
| 28044 | P14075 | Q96S19 | 0.16092  |

|       |        |        |          |
|-------|--------|--------|----------|
| 28045 | P14075 | Q8WYH8 | 0.32765  |
| 28046 | P14075 | Q8NAQ8 | 0.97086  |
| 28047 | P14075 | Q8IXH7 | 0.93682  |
| 28048 | P14075 | Q9C0H9 | 0.22133  |
| 28049 | P14075 | Q6FI81 | 0.15832  |
| 28050 | P14075 | Q13829 | 0.51517  |
| 28051 | P14075 | Q9BUH6 | 0.63401  |
| 28052 | P14075 | O75330 | 0.16615  |
| 28053 | P14075 | Q9H501 | 1.1048   |
| 28054 | P14075 | P23610 | 0.63821  |
| 28055 | P14075 | O95153 | 0.45253  |
| 28056 | P14075 | Q9UNM6 | 0.085308 |
| 28057 | P14075 | P21673 | 0.17147  |
| 28058 | P14075 | Q9Y605 | 1.2323   |
| 28059 | P14075 | Q7Z2X7 | 0.90347  |
| 28060 | P14075 | Q9UHU1 | 0.63821  |
| 28061 | P14075 | Q96JN0 | 0.70228  |
| 28062 | P14075 | Q6NT89 | 1.0629   |
| 28063 | P14075 | Q9BXF3 | 0.38685  |
| 28064 | P14075 | Q6L9T8 | 0.43864  |
| 28065 | P14075 | Q8WTZ3 | 0.28331  |
| 28066 | P14075 | A6NK53 | 0.17629  |
| 28067 | P14075 | Q7Z589 | 0.79441  |
| 28068 | P14075 | O14893 | 0.42948  |
| 28069 | P14075 | Q5HYW2 | 0.93609  |
| 28070 | P14075 | Q86UQ8 | 0.19547  |
| 28071 | P14075 | Q5T5B0 | 0.63821  |
| 28072 | P14075 | P07738 | 0.52942  |
| 28073 | P14075 | Q92466 | 0.37352  |
| 28074 | P14075 | P62906 | 0.43312  |
| 28075 | P14075 | Q2M1K9 | 0.15978  |
| 28076 | P14075 | O43264 | 0.37077  |
| 28077 | P14075 | Q6STE5 | 0.63782  |
| 28078 | P14075 | Q9UJ94 | 0.63821  |
| 28079 | P14075 | Q8IV32 | 0.84554  |
| 28080 | P14075 | Q8TAP9 | 1.0726   |
| 28081 | P14075 | Q9H2H8 | 0.14372  |
| 28082 | P14075 | Q13616 | 0.39304  |
| 28083 | P14075 | O75496 | 0.65885  |
| 28084 | P14075 | O94842 | 0.39331  |
| 28085 | P14075 | Q71SY5 | 0.80368  |
| 28086 | P14075 | Q15121 | 0.27798  |
| 28087 | P14075 | Q96K17 | 0.44417  |
| 28088 | P14075 | Q9Y287 | 0.25837  |
| 28089 | P14075 | Q9NZJ0 | 0.46678  |
| 28090 | P14075 | Q1ED39 | 1.074    |
| 28091 | P14075 | O60716 | 0.28319  |
| 28092 | P14075 | Q96CD0 | 0.55958  |
| 28093 | P14075 | Q14331 | 0.38928  |
| 28094 | P14075 | Q00597 | 0.49231  |
| 28095 | P14075 | Q6ZNK6 | 1.0575   |
| 28096 | P14075 | P62314 | 0.62088  |
| 28097 | P14075 | O95271 | 0.39028  |
| 28098 | P14075 | P28290 | 0.48722  |
| 28099 | P14075 | Q8N9L7 | 0.22473  |
| 28100 | P14075 | Q8N328 | 0.14386  |
| 28101 | P14075 | Q13112 | 1.0919   |
| 28102 | P14075 | Q86WZ0 | 0.46922  |
| 28103 | P14075 | Q8IZL2 | 0.61793  |
| 28104 | P14075 | Q9H0I3 | 0.31658  |
| 28105 | P14075 | Q9NVV2 | 0.63821  |
| 28106 | P14075 | Q9UI72 | 0.63821  |
| 28107 | P14075 | Q86Y01 | 0.3628   |
| 28108 | P14075 | Q1ZZU3 | 0.39132  |
| 28109 | P14075 | O15040 | 0.1668   |
| 28110 | P14075 | Q5T3J3 | 0.74704  |
| 28111 | P14075 | Q9BRP4 | 0.25575  |
| 28112 | P14075 | Q6PII3 | 0.65761  |
| 28113 | P14075 | Q9BUB7 | 0.60076  |
| 28114 | P14075 | O75800 | 0.23613  |
| 28115 | P14075 | Q5TC04 | 0.28117  |
| 28116 | P14075 | P41567 | 0.71356  |
| 28117 | P14075 | O95848 | 0.63845  |
| 28118 | P14075 | O43823 | 0.25586  |
| 28119 | P14075 | Q13233 | 0.37975  |
| 28120 | P14075 | Q9BVJ6 | 0.53608  |

|       |        |         |          |
|-------|--------|---------|----------|
| 28121 | P14075 | Q9UPA5  | 0.08854  |
| 28122 | P14075 | P04732  | 0.28594  |
| 28123 | P14075 | Q6UYE1  | 0.86718  |
| 28124 | P14075 | P38919  | 0.14204  |
| 28125 | P14075 | Q9UK13  | 0.29291  |
| 28126 | P14075 | Q15046  | 0.57543  |
| 28127 | P14075 | Q8IZY5  | 0.14549  |
| 28128 | P14075 | Q9BYS1  | 0.78379  |
| 28129 | P14075 | Q8N684  | 0.32421  |
| 28130 | P14075 | Q9UM13  | 0.44572  |
| 28131 | P14075 | Q9NX95  | 0.31578  |
| 28132 | P14075 | Q9UJW0  | 0.30262  |
| 28133 | P14075 | Q2M238  | 0.056147 |
| 28134 | P14075 | Q5JYT7  | 0.037403 |
| 28135 | P14075 | P10914  | 0.27111  |
| 28136 | P14075 | Q7Z7F7  | 0.50361  |
| 28137 | P14075 | Q96G25  | 0.83155  |
| 28138 | P14075 | Q6XQN6  | 0.045954 |
| 28139 | P14075 | Q9BUL9  | 0.97916  |
| 28140 | P14075 | Q8WUQ7  | 0.042906 |
| 28141 | P14075 | Q8NEG2  | 0.41175  |
| 28142 | P14075 | Q9H4D5  | 0.35883  |
| 28143 | P14075 | Q8TBB1  | 0.51142  |
| 28144 | P14075 | Q8TDN6  | 0.12802  |
| 28145 | P14075 | Q14181  | 0.36134  |
| 28146 | P14075 | Q5JSZ5  | 0.86894  |
| 28147 | P14075 | Q6ZTI6  | 0.74099  |
| 28148 | P14075 | Q14980  | 0.77533  |
| 28149 | P14075 | Q9Y4Y9  | 0.51576  |
| 28150 | P14075 | O94921  | 0.22444  |
| 28151 | P14075 | Q6ZW13  | 0.63821  |
| 28152 | P14075 | Q96NG5  | 0.30146  |
| 28153 | P14075 | Q1RMZ1  | 0.56636  |
| 28154 | P14075 | Q6IEG0  | 0.41447  |
| 28155 | P14075 | Q96FV9  | 0.68149  |
| 28156 | P14075 | Q6ZRV2  | 0.84788  |
| 28157 | P14075 | Q9Y592  | 0.89371  |
| 28158 | P14075 | Q8NFD4  | 0.23896  |
| 28159 | P14075 | Q9UBQ5  | 0.70638  |
| 28160 | P14075 | Q9UIV1  | 0.91432  |
| 28161 | P14075 | Q8N9K7  | 0.63821  |
| 28162 | P14075 | Q9UQ88  | 0.12529  |
| 28163 | P14075 | O75155  | 0.52483  |
| 28164 | P14075 | Q9BW71  | 0.93918  |
| 28165 | P14075 | P59942  | 0.54235  |
| 28166 | P14075 | Q9BU02  | 0.73128  |
| 28167 | P14075 | P40337  | 0.56071  |
| 28168 | P14075 | O75909  | 0.85254  |
| 28169 | P14075 | P14625  | 0.10895  |
| 28170 | P14075 | Q6BDS2  | 0.41457  |
| 28171 | P14075 | Q1MSJ5  | 0.88582  |
| 28172 | P14075 | P17544  | 0.7483   |
| 28173 | P14075 | Q5VTA0  | 0.33501  |
| 28174 | P14075 | Q2KHR2  | 0.14646  |
| 28175 | P14075 | A1A519  | 0.7862   |
| 28176 | P14075 | Q8N6C7  | 0.049674 |
| 28177 | P14075 | O43290  | 0.68951  |
| 28178 | P14075 | Q9BQM9  | 0.37807  |
| 28179 | P14075 | Q96M83  | 0.10592  |
| 28180 | P14075 | Q03188  | 0.36274  |
| 28181 | P14075 | Q8N1N4  | 0.62841  |
| 28182 | P14075 | P30260  | 0.79986  |
| 28183 | P14075 | Q8TAF5  | 0.63821  |
| 28184 | P14075 | Q6PI77  | 0.59544  |
| 28185 | P14075 | P61289  | 0.65687  |
| 28186 | P14075 | P05386  | 0.83108  |
| 28187 | P14075 | Q9UKF6  | 0.52969  |
| 28188 | P14075 | Q9Y3A2  | 0.62937  |
| 28189 | P14075 | Q14061  | 0.45625  |
| 28190 | P14075 | Q9NVE4  | 0.30764  |
| 28191 | P14075 | Q8N8F4  | 0.12996  |
| 28192 | P14075 | Q9NY12  | 0.30668  |
| 28193 | P14075 | A8MTZ0  | 0.51834  |
| 28194 | P14075 | Q8IUUC2 | 1.0403   |
| 28195 | P14075 | Q7Z3K3  | 0.27719  |
| 28196 | P14075 | Q3SXR2  | 0.31842  |



|       |        |        |          |
|-------|--------|--------|----------|
| 28197 | P14075 | Q96ES7 | 0.10368  |
| 28198 | P14075 | A1A4F0 | 0.030182 |
| 28199 | P14075 | Q8NG31 | 0.55517  |
| 28200 | P14075 | Q7L590 | 0.74964  |
| 28201 | P14075 | Q9UJX3 | 0.46355  |
| 28202 | P14075 | O60927 | 0.63447  |
| 28203 | P14075 | Q99081 | 0.34951  |
| 28204 | P14075 | Q92905 | 0.48979  |
| 28205 | P14075 | Q96KD3 | 1.1182   |
| 28206 | P14075 | O43482 | 0.35164  |
| 28207 | P14075 | Q9UII5 | 0.19195  |
| 28208 | P14075 | Q9NVM9 | 0.83518  |
| 28209 | P14075 | O00267 | 0.86242  |
| 28210 | P14075 | Q8TDN4 | 0.60369  |
| 28211 | P14075 | Q9Y5V3 | 0.5984   |
| 28212 | P14075 | Q8WXX7 | 0.56678  |
| 28213 | P14075 | Q04837 | 0.29877  |
| 28214 | P14075 | Q9BSD3 | 0.1893   |
| 28215 | P14075 | Q9H1B7 | 0.68681  |
| 28216 | P14075 | Q5EBM0 | 0.59634  |
| 28217 | P14075 | Q4G0N7 | 0.59127  |
| 28218 | P14075 | Q8WVV9 | 0.041936 |
| 28219 | P14075 | Q2QGD7 | 0.51283  |
| 28220 | P14075 | Q5K130 | 0.33082  |
| 28221 | P14075 | Q8N8E3 | 0.18663  |
| 28222 | P14075 | Q99622 | 0.13611  |
| 28223 | P14075 | P07311 | 0.68515  |
| 28224 | P14075 | Q9Y2W1 | 0.62119  |
| 28225 | P14075 | Q9NNW5 | 0.36237  |
| 28226 | P14075 | Q8NA57 | 0.83513  |
| 28227 | P14075 | Q13838 | 0.093144 |
| 28228 | P14075 | Q9H160 | 0.30114  |
| 28229 | P14075 | Q7L8J4 | 0.38519  |
| 28230 | P14075 | Q86U42 | 0.53946  |
| 28231 | P14075 | Q9Y296 | 0.11583  |
| 28232 | P14075 | Q6ZMY9 | 0.28491  |
| 28233 | P14075 | Q9NTI5 | 0.62668  |
| 28234 | P14075 | Q9P270 | 0.26596  |
| 28235 | P14075 | Q68DK7 | 0.67067  |
| 28236 | P14075 | Q8IXW0 | 0.30783  |
| 28237 | P14075 | Q70Z53 | 0.76604  |
| 28238 | P14075 | A6NC62 | 0.096061 |
| 28239 | P14075 | Q9UL03 | 0.78716  |
| 28240 | P14075 | P55895 | 0.41836  |
| 28241 | P14075 | O95707 | 0.76291  |
| 28242 | P14075 | Q9BTE7 | 0.46489  |
| 28243 | P14075 | Q9NYF0 | 0.17057  |
| 28244 | P14075 | P0DMB1 | 0.65129  |
| 28245 | P14075 | Q6NVV0 | 0.75874  |
| 28246 | P14075 | P40306 | 0.23061  |
| 28247 | P14075 | P02538 | 0.5808   |
| 28248 | P14075 | Q9NQ55 | 0.38794  |
| 28249 | P14075 | O43399 | 0.36869  |
| 28250 | P14075 | P86496 | 0.63821  |
| 28251 | P14075 | P07315 | 0.32863  |
| 28252 | P14075 | P17535 | 0.72717  |
| 28253 | P14075 | Q9BX82 | 0.28313  |
| 28254 | P14075 | Q14188 | 0.5583   |
| 28255 | P14075 | O14633 | 0.63821  |
| 28256 | P14075 | Q96EK6 | 0.23299  |
| 28257 | P14075 | P61353 | 0.4006   |
| 28258 | P14075 | P0CE67 | 0.63821  |
| 28259 | P14075 | P51668 | 0.43503  |
| 28260 | P14075 | Q9NYG5 | 0.49821  |
| 28261 | P14075 | O60260 | 0.27859  |
| 28262 | P14075 | Q969H0 | 0.49575  |
| 28263 | P14075 | P14672 | 0.54871  |
| 28264 | P14075 | Q8N660 | 1.0145   |
| 28265 | P14075 | P31948 | 0.64947  |
| 28266 | P14075 | P49454 | 0.42034  |
| 28267 | P14075 | P37837 | 0.54905  |
| 28268 | P14075 | Q5T8R8 | 0.10036  |
| 28269 | P14075 | O15446 | 0.20727  |
| 28270 | P14075 | B4DX44 | 0.3121   |
| 28271 | P14075 | Q6X4T0 | 0.15919  |
| 28272 | P14075 | Q9Y4M8 | 0.078022 |

|       |        |        |          |
|-------|--------|--------|----------|
| 28273 | P14075 | Q9H9A7 | 0.3518   |
| 28274 | P14075 | Q9NZD4 | 0.45382  |
| 28275 | P14075 | Q8N859 | 0.28029  |
| 28276 | P14075 | Q8N9Y4 | 0.7067   |
| 28277 | P14075 | P29372 | 0.56693  |
| 28278 | P14075 | P39019 | 0.62034  |
| 28279 | P14075 | Q5W5X9 | 0.47304  |
| 28280 | P14075 | Q5JSQ8 | 0.099695 |
| 28281 | P14075 | Q5SZB4 | 0.34274  |
| 28282 | P14075 | Q9BXM8 | 0.63821  |
| 28283 | P14075 | Q6NSI3 | 1.0154   |
| 28284 | P14075 | P28838 | 0.6616   |
| 28285 | P14075 | Q92830 | 0.55645  |
| 28286 | P14075 | A6NFK2 | 0.21819  |
| 28287 | P14075 | Q9GZX5 | 0.58898  |
| 28288 | P14075 | Q9NXW9 | 0.24107  |
| 28289 | P14075 | Q9P032 | 0.29696  |
| 28290 | P14075 | Q9H9L7 | 0.17135  |
| 28291 | P14075 | O15205 | 0.33427  |
| 28292 | P14075 | Q9NX58 | 0.25431  |
| 28293 | P14075 | Q13617 | 0.411    |
| 28294 | P14075 | Q6P0N0 | 0.66395  |
| 28295 | P14075 | Q6PJP8 | 0.36547  |
| 28296 | P14075 | Q13432 | 0.28207  |
| 28297 | P14075 | O95178 | 0.66538  |
| 28298 | P14075 | Q86V15 | 0.30772  |
| 28299 | P14075 | Q9BSJ2 | 0.73739  |
| 28300 | P14075 | Q15369 | 1.0539   |
| 28301 | P14075 | D6RGH6 | 0.97549  |
| 28302 | P14075 | Q99708 | 0.45985  |
| 28303 | P14075 | Q86V59 | 0.32013  |
| 28304 | P14075 | Q92552 | 0.46751  |
| 28305 | P14075 | P60413 | 0.78356  |
| 28306 | P14075 | P62424 | 0.74     |
| 28307 | P14075 | O43513 | 1.0006   |
| 28308 | P14075 | P49901 | 0.63821  |
| 28309 | P14075 | Q5FWF6 | 0.28987  |
| 28310 | P14075 | Q99436 | 0.47769  |
| 28311 | P14075 | Q92540 | 0.63783  |
| 28312 | P14075 | P49910 | 0.50266  |
| 28313 | P14075 | Q9NYV4 | 0.049103 |
| 28314 | P14075 | Q96N77 | 0.19576  |
| 28315 | P14075 | Q96IK1 | 0.053558 |
| 28316 | P14075 | P42167 | 0.24126  |
| 28317 | P14075 | P43360 | 0.39464  |
| 28318 | P14075 | Q16626 | 0.48682  |
| 28319 | P14075 | Q14159 | 0.98848  |
| 28320 | P14075 | P60608 | 0.41324  |
| 28321 | P14075 | Q8TAP8 | 0.64135  |
| 28322 | P14075 | Q92547 | 0.26808  |
| 28323 | P14075 | O75694 | 0.42839  |
| 28324 | P14075 | P35527 | 0.80046  |
| 28325 | P14075 | Q9NRG9 | 0.65908  |
| 28326 | P14075 | Q8IXS2 | 0.14679  |
| 28327 | P14075 | Q12765 | 0.65669  |
| 28328 | P14075 | Q12873 | 0.38325  |
| 28329 | P14075 | Q9NXE8 | 0.65177  |
| 28330 | P14075 | Q9UHZ2 | 0.63821  |
| 28331 | P14075 | O75151 | 0.43849  |
| 28332 | P14075 | A6NI87 | 0.55767  |
| 28333 | P14075 | Q9NSE4 | 0.31993  |
| 28334 | P14075 | H3BRN8 | 0.025654 |
| 28335 | P14075 | Q9BPZ3 | 0.43825  |
| 28336 | P14075 | Q96G27 | 0.7527   |
| 28337 | P14075 | Q9UKJ5 | 0.26065  |
| 28338 | P14075 | P09467 | 0.12878  |
| 28339 | P14075 | Q13033 | 0.45038  |
| 28340 | P14075 | Q3LI62 | 0.63821  |
| 28341 | P14075 | Q01546 | 0.60884  |
| 28342 | P14075 | Q96ME1 | 0.0969   |
| 28343 | P14075 | Q16629 | 0.45766  |
| 28344 | P14075 | A5YKK6 | 0.7659   |
| 28345 | P14075 | Q9UNH5 | 0.32734  |
| 28346 | P14075 | O60225 | 0.10346  |
| 28347 | P14075 | P52434 | 0.17958  |
| 28348 | P14075 | Q06265 | 0.15992  |

|       |        |        |          |
|-------|--------|--------|----------|
| 28349 | P14075 | Q9GZU0 | 0.71296  |
| 28350 | P14075 | Q96NL8 | 0.70371  |
| 28351 | P14075 | Q96EK4 | 0.93454  |
| 28352 | P14075 | Q9BSM1 | 0.77687  |
| 28353 | P14075 | Q96AE4 | 0.34412  |
| 28354 | P14075 | Q8WWM1 | 0.82672  |
| 28355 | P14075 | Q5W111 | 0.020857 |
| 28356 | P14075 | Q9ULC4 | 0.25603  |
| 28357 | P14075 | O15049 | 0.56085  |
| 28358 | P14075 | Q9BPX3 | 0.61283  |
| 28359 | P14075 | O75427 | 0.30737  |
| 28360 | P14075 | P32243 | 0.65127  |
| 28361 | P14075 | P46013 | 0.18924  |
| 28362 | P14075 | Q96MC2 | 0.25236  |
| 28363 | P14075 | Q641Q2 | 0.6299   |
| 28364 | P14075 | Q8N0Y2 | 0.1488   |
| 28365 | P14075 | Q5JRK9 | 1.1259   |
| 28366 | P14075 | Q32Q52 | 0.23864  |
| 28367 | P14075 | Q9H6D7 | 0.32838  |
| 28368 | P14075 | Q8WXI9 | 0.30718  |
| 28369 | P14075 | O15355 | 0.58165  |
| 28370 | P14075 | Q2M3A8 | 0.29301  |
| 28371 | P14075 | Q63HK3 | 0.29246  |
| 28372 | P14075 | Q9NRR8 | 0.49387  |
| 28373 | P14075 | Q9C0D2 | 0.69661  |
| 28374 | P14075 | Q99627 | 0.18172  |
| 28375 | P14075 | Q9NUU6 | 0.64509  |
| 28376 | P14075 | Q96Q89 | 0.27282  |
| 28377 | P14075 | Q86XK3 | 0.79656  |
| 28378 | P14075 | O95486 | 0.1654   |
| 28379 | P14075 | Q9H4A6 | 0.35893  |
| 28380 | P14075 | Q8WYN3 | 0.41114  |
| 28381 | P14075 | Q8IUR6 | 0.7543   |
| 28382 | P14075 | Q96CM3 | 0.3399   |
| 28383 | P14075 | A6ZKI3 | 0.47267  |
| 28384 | P14075 | B3KS81 | 0.15488  |
| 28385 | P14075 | P27816 | 0.21386  |
| 28386 | P14075 | Q7Z3B4 | 0.59189  |
| 28387 | P14075 | Q9P2B7 | 0.94025  |
| 28388 | P14075 | P30307 | 0.44229  |
| 28389 | P14075 | Q96FX2 | 0.62066  |
| 28390 | P14075 | Q14814 | 0.40792  |
| 28391 | P14075 | Q03111 | 0.9661   |
| 28392 | P14075 | Q9BY44 | 0.24886  |
| 28393 | P14075 | Q9ULV3 | 0.085347 |
| 28394 | P14075 | A6NCL2 | 0.02177  |
| 28395 | P14075 | Q6WBX8 | 0.24728  |
| 28396 | P14075 | Q9BWT1 | 0.81687  |
| 28397 | P14075 | P84090 | 0.49989  |
| 28398 | P14075 | Q8N8G6 | 0.21733  |
| 28399 | P14075 | Q6ZUC2 | 0.37143  |
| 28400 | P14075 | Q86YF9 | 0.073537 |
| 28401 | P14075 | Q96BN8 | 0.35901  |
| 28402 | P14075 | Q8N9B5 | 0.48259  |
| 28403 | P14075 | Q9UBW8 | 0.14526  |
| 28404 | P14075 | O00165 | 0.45931  |
| 28405 | P14075 | Q6P1N0 | 0.23025  |
| 28406 | P14075 | Q15031 | 0.42445  |
| 28407 | P14075 | Q9UMX1 | 0.5348   |
| 28408 | P14075 | Q96RL1 | 0.50747  |
| 28409 | P14075 | P51861 | 0.33993  |
| 28410 | P14075 | P50440 | 0.27281  |
| 28411 | P14075 | Q6UWI2 | 0.48976  |
| 28412 | P14075 | Q7Z7A1 | 0.7888   |
| 28413 | P14075 | Q9P0J0 | 0.24454  |
| 28414 | P14075 | O75818 | 0.061121 |
| 28415 | P14075 | Q9NRG4 | 0.51566  |
| 28416 | P14075 | P43357 | 0.1668   |
| 28417 | P14075 | Q86X51 | 0.24041  |
| 28418 | P14075 | Q9Y2X3 | 0.44885  |
| 28419 | P14075 | P24534 | 0.37167  |
| 28420 | P14075 | Q71F23 | 0.31743  |
| 28421 | P14075 | B1AK76 | 0.81406  |
| 28422 | P14075 | Q9Y5J6 | 0.23313  |
| 28423 | P14075 | Q9H3K6 | 0.45887  |
| 28424 | P14075 | Q86XZ4 | 0.36207  |

|       |        |        |           |
|-------|--------|--------|-----------|
| 28425 | P14075 | Q96LT7 | 0.65263   |
| 28426 | P14075 | Q99471 | 0.65124   |
| 28427 | P14075 | Q6P1K8 | 0.15655   |
| 28428 | P14075 | Q8NFB4 | 0.74228   |
| 28429 | P14075 | Q8WXB4 | 0.12672   |
| 28430 | P14075 | Q9NS37 | 0.64587   |
| 28431 | P14075 | Q9ULR5 | 0.2846    |
| 28432 | P14075 | Q9XR55 | 0.33705   |
| 28433 | P14075 | P54826 | 0.1922    |
| 28434 | P14075 | Q5TA50 | 0.28232   |
| 28435 | P14075 | Q9UKK6 | 0.46151   |
| 28436 | P14075 | Q9UQF2 | 0.27664   |
| 28437 | P14075 | O14972 | 0.21616   |
| 28438 | P14075 | Q9P013 | 0.62503   |
| 28439 | P14075 | Q12796 | 1.2352    |
| 28440 | P14075 | A8MWP6 | 0.63821   |
| 28441 | P14075 | P62829 | 0.8288    |
| 28442 | P14075 | Q8WTV1 | 0.72991   |
| 28443 | P14075 | Q9ULD9 | 0.78999   |
| 28444 | P14075 | Q9Y6X2 | 0.54936   |
| 28445 | P14075 | Q504U0 | 0.24573   |
| 28446 | P14075 | O75368 | 0.33408   |
| 28447 | P14075 | P62280 | 0.54778   |
| 28448 | P14075 | Q16851 | 0.2473    |
| 28449 | P14075 | Q10567 | 0.4048    |
| 28450 | P14075 | Q96C57 | 0.71417   |
| 28451 | P14075 | Q92567 | 0.65422   |
| 28452 | P14075 | Q9P1Y5 | 0.48832   |
| 28453 | P14075 | Q9Y448 | 0.54541   |
| 28454 | P14075 | O75461 | 0.13662   |
| 28455 | P14075 | Q6ZQY7 | 0.53427   |
| 28456 | P14075 | P02533 | 0.80046   |
| 28457 | P14075 | Q5VTL8 | 0.94592   |
| 28458 | P14075 | Q9NVV9 | 0.79362   |
| 28459 | P14075 | O60216 | 0.55893   |
| 28460 | P14075 | Q96NT1 | 0.82122   |
| 28461 | P14075 | Q86WQ0 | 0.3119    |
| 28462 | P14075 | Q8NFB8 | 0.20595   |
| 28463 | P14075 | Q9P278 | 0.69108   |
| 28464 | P14075 | Q8TAG6 | 0.60459   |
| 28465 | P14075 | Q6P3W6 | 0.48727   |
| 28466 | P14075 | P63167 | 0.94058   |
| 28467 | P14075 | Q96QE5 | 0.66358   |
| 28468 | P14075 | I3L0S3 | 0.63121   |
| 28469 | P14075 | Q96CN9 | 0.29119   |
| 28470 | P14075 | Q6A162 | 0.62407   |
| 28471 | P14075 | Q8TCY9 | 0.50334   |
| 28472 | P14075 | Q8IWL3 | 0.38447   |
| 28473 | P14075 | P63272 | 0.78776   |
| 28474 | P14075 | Q92733 | 0.63821   |
| 28475 | P14075 | Q12968 | 0.45125   |
| 28476 | P14075 | P02808 | 0.52302   |
| 28477 | P14075 | Q8NE65 | 0.26405   |
| 28478 | P14075 | P49591 | 0.41447   |
| 28479 | P14075 | P42025 | 0.1461    |
| 28480 | P14075 | A8MXT2 | 0.0024234 |
| 28481 | P14075 | Q9NS73 | 0.48729   |
| 28482 | P14075 | C9JFL3 | 0.63821   |
| 28483 | P14075 | A6NGR9 | 0.75184   |
| 28484 | P14075 | Q8WY22 | 0.80341   |
| 28485 | P14075 | Q15170 | 1.3033    |
| 28486 | P14075 | Q6PGQ7 | 1.0444    |
| 28487 | P14075 | Q9Y3B2 | 0.54335   |
| 28488 | P14075 | Q15004 | 0.56663   |
| 28489 | P14075 | O15084 | 0.50313   |
| 28490 | P14075 | Q9HB71 | 0.34483   |
| 28491 | P14075 | Q9NRY2 | 0.65099   |
| 28492 | P14075 | Q9UBW7 | 0.65842   |
| 28493 | P14075 | P19532 | 0.46963   |
| 28494 | P14075 | Q8N9Z9 | 0.42932   |
| 28495 | P14075 | Q70YC5 | 0.3723    |
| 28496 | P14075 | Q9BXW9 | 0.54308   |
| 28497 | P14075 | Q53S33 | 0.87205   |
| 28498 | P14075 | Q9Y4H4 | 0.49203   |
| 28499 | P14075 | Q8IY92 | 0.19978   |
| 28500 | P14075 | Q96C74 | 0.1368    |

|       |        |        |          |
|-------|--------|--------|----------|
| 28501 | P14075 | Q0VDD7 | 1.0468   |
| 28502 | P14075 | Q6NT76 | 0.24624  |
| 28503 | P14075 | Q9P0J6 | 0.55862  |
| 28504 | P14075 | Q9H0F6 | 0.072988 |
| 28505 | P14075 | Q96MG7 | 0.51318  |
| 28506 | P14075 | Q14872 | 0.63102  |
| 28507 | P14075 | O60829 | 0.78504  |
| 28508 | P14075 | P83436 | 0.25922  |
| 28509 | P14075 | C9JLW8 | 0.56271  |
| 28510 | P14075 | Q6KB66 | 0.28852  |
| 28511 | P14075 | Q9NV88 | 0.3608   |
| 28512 | P14075 | Q68EA5 | 0.30057  |
| 28513 | P14075 | Q8N9R0 | 0.63821  |
| 28514 | P14075 | P55060 | 0.65876  |
| 28515 | P14075 | Q96MW1 | 0.94025  |
| 28516 | P14075 | Q9BPW8 | 0.51558  |
| 28517 | P14075 | Q8NBT2 | 0.47096  |
| 28518 | P14075 | Q96F86 | 0.42698  |
| 28519 | P14075 | Q9NZL4 | 0.38826  |
| 28520 | P14075 | Q9BZD4 | 0.5349   |
| 28521 | P14075 | Q7Z5D8 | 0.34234  |
| 28522 | P14075 | P18583 | 0.23587  |
| 28523 | P14075 | O75570 | 0.51646  |
| 28524 | P14075 | Q15776 | 0.24641  |
| 28525 | P14075 | Q10570 | 0.59078  |
| 28526 | P14075 | Q14192 | 0.5256   |
| 28527 | P14075 | Q9NZH4 | 0.53275  |
| 28528 | P14075 | A0AVK6 | 0.2637   |
| 28529 | P14075 | Q13541 | 0.55486  |
| 28530 | P14075 | A6NI79 | 0.75061  |
| 28531 | P14075 | Q9NPI7 | 0.15513  |
| 28532 | P14075 | Q8TAE8 | 0.70789  |
| 28533 | P14075 | Q9HD15 | 0.36293  |
| 28534 | P14075 | Q8HWS3 | 0.16579  |
| 28535 | P14075 | Q17RN3 | 0.51178  |
| 28536 | P14075 | P35237 | 0.1327   |
| 28537 | P14075 | O75437 | 0.26696  |
| 28538 | P14075 | Q9BYK8 | 0.27681  |
| 28539 | P14075 | Q9NS69 | 0.081256 |
| 28540 | P14075 | Q9ULW6 | 0.25402  |
| 28541 | P14075 | Q8ND04 | 0.48924  |
| 28542 | P14075 | Q96A56 | 0.77198  |
| 28543 | P14075 | O14802 | 0.072694 |
| 28544 | P14075 | Q9Y305 | 0.52998  |
| 28545 | P14075 | Q9UBF6 | 0.48463  |
| 28546 | P14075 | Q495D7 | 0.085154 |
| 28547 | P14075 | Q9NQ92 | 0.66876  |
| 28548 | P14075 | Q9UI56 | 0.63821  |
| 28549 | P14075 | A6NJ78 | 0.86595  |
| 28550 | P14075 | Q9Y462 | 0.39201  |
| 28551 | P14075 | Q07020 | 0.55712  |
| 28552 | P14075 | Q8IWF6 | 0.50906  |
| 28553 | P14075 | Q8N5T8 | 0.59539  |
| 28554 | P14075 | Q9Y2F5 | 0.075517 |
| 28555 | P14075 | O75477 | 0.39786  |
| 28556 | P14075 | Q3SY84 | 0.54544  |
| 28557 | P14075 | Q8N1X5 | 0.63821  |
| 28558 | P14075 | Q9H0W9 | 0.39601  |
| 28559 | P14075 | Q7Z6K5 | 0.14756  |
| 28560 | P14075 | Q02930 | 0.56517  |
| 28561 | P14075 | Q96FF7 | 0.63821  |
| 28562 | P14075 | P10073 | 0.22972  |
| 28563 | P14075 | O95411 | 0.63821  |
| 28564 | P14075 | C9JE40 | 0.58209  |
| 28565 | P14075 | O00148 | 0.1599   |
| 28566 | P14075 | Q8WWY3 | 0.2278   |
| 28567 | P14075 | O94850 | 0.48497  |
| 28568 | P14075 | Q8NCE8 | 0.55079  |
| 28569 | P14075 | Q9Y4E1 | 0.52568  |
| 28570 | P14075 | Q8NHU0 | 0.15736  |
| 28571 | P14075 | Q5JVG8 | 0.27372  |
| 28572 | P14075 | A7MCY6 | 0.49256  |
| 28573 | P14075 | Q96NU7 | 0.2725   |
| 28574 | P14075 | Q8NFH5 | 0.38809  |
| 28575 | P14075 | P62508 | 0.33984  |
| 28576 | P14075 | Q5VT28 | 0.57471  |

|       |        |        |          |
|-------|--------|--------|----------|
| 28577 | P14075 | Q8NDC0 | 0.79783  |
| 28578 | P14075 | O43829 | 0.39345  |
| 28579 | P14075 | Q9Y281 | 0.21294  |
| 28580 | P14075 | Q8WXU2 | 0.50325  |
| 28581 | P14075 | Q9BWU0 | 0.2928   |
| 28582 | P14075 | Q5T6F2 | 0.79864  |
| 28583 | P14075 | O14757 | 0.43158  |
| 28584 | P14075 | Q8N8Z3 | 0.063746 |
| 28585 | P14075 | Q5XUX0 | 0.67487  |
| 28586 | P14075 | Q9H171 | 0.13547  |
| 28587 | P14075 | Q9BTC8 | 0.39335  |
| 28588 | P14075 | Q96E16 | 0.59931  |
| 28589 | P14075 | Q96M63 | 0.10081  |
| 28590 | P14075 | Q8N3X1 | 0.16679  |
| 28591 | P14075 | Q9NUS5 | 0.2762   |
| 28592 | P14075 | P62263 | 0.32522  |
| 28593 | P14075 | Q8NEP9 | 0.2718   |
| 28594 | P14075 | Q0P140 | 0.54739  |
| 28595 | P14075 | O14556 | 0.29723  |
| 28596 | P14075 | Q5U623 | 0.50965  |
| 28597 | P14075 | P0C7I6 | 0.59659  |
| 28598 | P14075 | Q5T280 | 0.97394  |
| 28599 | P14075 | Q12834 | 0.60316  |
| 28600 | P14075 | Q96CW5 | 0.58999  |
| 28601 | P14075 | Q9NUW8 | 0.43989  |
| 28602 | P14075 | O14513 | 0.3611   |
| 28603 | P14075 | P22392 | 0.20977  |
| 28604 | P14075 | Q14978 | 0.704    |
| 28605 | P14075 | Q9Y3V2 | 0.55947  |
| 28606 | P14075 | Q96EY1 | 0.27751  |
| 28607 | P14075 | A4D174 | 0.090536 |
| 28608 | P14075 | Q969L4 | 0.4873   |
| 28609 | P14075 | Q96006 | 0.64678  |
| 28610 | P14075 | Q0P641 | 0.024697 |
| 28611 | P14075 | Q8N661 | 0.75144  |
| 28612 | P14075 | O15318 | 0.79117  |
| 28613 | P14075 | Q9P2K3 | 0.88369  |
| 28614 | P14075 | Q9Y2B5 | 0.32713  |
| 28615 | P14075 | Q08AG5 | 0.43767  |
| 28616 | P14075 | Q9UBL0 | 0.22318  |
| 28617 | P14075 | Q8WU43 | 0.0902   |
| 28618 | P14075 | Q00610 | 0.61561  |
| 28619 | P14075 | P50222 | 0.44098  |
| 28620 | P14075 | Q96QU4 | 0.76082  |
| 28621 | P14075 | Q96DP5 | 0.47958  |
| 28622 | P14075 | P19013 | 0.60884  |
| 28623 | P14075 | Q9P0W2 | 0.50666  |
| 28624 | P14075 | Q6MZN7 | 0.63821  |
| 28625 | P14075 | P11171 | 0.25534  |
| 28626 | P14075 | P62854 | 0.61345  |
| 28627 | P14075 | Q8NFV5 | 0.53769  |
| 28628 | P14075 | Q96CB8 | 0.28213  |
| 28629 | P14075 | Q6ZTY9 | 0.34215  |
| 28630 | P14075 | Q8IYE0 | 0.63147  |
| 28631 | P14075 | A0A183 | 0.63821  |
| 28632 | P14075 | Q6VY07 | 0.3376   |
| 28633 | P14075 | Q8N6F7 | 0.32417  |
| 28634 | P14075 | P60866 | 0.48566  |
| 28635 | P14075 | Q8IYW8 | 0.12197  |
| 28636 | P14075 | Q0PNE2 | 0.5206   |
| 28637 | P14075 | Q8IZ40 | 0.38482  |
| 28638 | P14075 | C9JN71 | 0.18615  |
| 28639 | P14075 | Q569H4 | 0.94025  |
| 28640 | P14075 | Q2M2Z5 | 0.64889  |
| 28641 | P14075 | Q8N0Y7 | 0.50609  |
| 28642 | P14075 | Q14145 | 0.96268  |
| 28643 | P14075 | Q9H7L9 | 0.46336  |
| 28644 | P14075 | Q9UJY5 | 0.32552  |
| 28645 | P14075 | Q8N7M0 | 0.20837  |
| 28646 | P14075 | Q8NF64 | 0.97699  |
| 28647 | P14075 | Q8NEH6 | 0.79921  |
| 28648 | P14075 | P09565 | 0.48035  |
| 28649 | P14075 | Q8ND56 | 0.65962  |
| 28650 | P14075 | O95644 | 0.57261  |
| 28651 | P14075 | Q8N9H9 | 0.63821  |
| 28652 | P14075 | A8MV24 | 0.30403  |

|       |        |         |          |
|-------|--------|---------|----------|
| 28653 | P14075 | P82675  | 0.47204  |
| 28654 | P14075 | Q9BQY4  | 0.64001  |
| 28655 | P14075 | Q15651  | 0.71508  |
| 28656 | P14075 | Q2TAM9  | 1.0753   |
| 28657 | P14075 | Q96FV2  | 0.58341  |
| 28658 | P14075 | Q95201  | 0.39205  |
| 28659 | P14075 | Q76KX8  | 0.3048   |
| 28660 | P14075 | Q9Y2Y9  | 0.54713  |
| 28661 | P14075 | Q9UJT2  | 0.57314  |
| 28662 | P14075 | Q06609  | 0.26727  |
| 28663 | P14075 | Q8WTQ4  | 0.23412  |
| 28664 | P14075 | Q13501  | 0.26256  |
| 28665 | P14075 | Q5SVJ3  | 0.27226  |
| 28666 | P14075 | Q701N4  | 0.63821  |
| 28667 | P14075 | Q8N8G2  | 0.57276  |
| 28668 | P14075 | Q15181  | 0.067245 |
| 28669 | P14075 | A6NIY4  | 0.53769  |
| 28670 | P14075 | Q8N944  | 0.82301  |
| 28671 | P14075 | Q8N726  | 0.44178  |
| 28672 | P14075 | Q96T17  | 0.40055  |
| 28673 | P14075 | P26373  | 0.71018  |
| 28674 | P14075 | P51826  | 0.23271  |
| 28675 | P14075 | P07814  | 0.30327  |
| 28676 | P14075 | Q9H7T3  | 0.47839  |
| 28677 | P14075 | P50749  | 0.5281   |
| 28678 | P14075 | Q13367  | 0.26011  |
| 28679 | P14075 | Q8TB03  | 0.64017  |
| 28680 | P14075 | Q15021  | 0.60878  |
| 28681 | P14075 | P81408  | 0.7527   |
| 28682 | P14075 | P09874  | 0.48966  |
| 28683 | P14075 | Q5J TZ5 | 0.27794  |
| 28684 | P14075 | Q9BUV0  | 0.94025  |
| 28685 | P14075 | Q9Y2X0  | 0.36423  |
| 28686 | P14075 | Q8N823  | 0.2118   |
| 28687 | P14075 | Q9BTX9  | 0.65143  |
| 28688 | P14075 | A6NLI3  | 0.062068 |
| 28689 | P14075 | P62877  | 0.33197  |
| 28690 | P14075 | Q15527  | 0.51836  |
| 28691 | P14075 | O75956  | 0.34753  |
| 28692 | P14075 | Q7Z3C6  | 0.25742  |
| 28693 | P14075 | Q8IYT1  | 0.39362  |
| 28694 | P14075 | Q9HCI5  | 0.42527  |
| 28695 | P14075 | O43615  | 0.11289  |
| 28696 | P14075 | Q8NHU2  | 0.12281  |
| 28697 | P14075 | Q8N972  | 0.2118   |
| 28698 | P14075 | Q8IYF3  | 0.30354  |
| 28699 | P14075 | Q7Z7C7  | 0.3347   |
| 28700 | P14075 | P0DI82  | 0.17671  |
| 28701 | P14075 | Q8TBN0  | 0.1389   |
| 28702 | P14075 | Q96NB3  | 0.26605  |
| 28703 | P14075 | O00198  | 0.60346  |
| 28704 | P14075 | Q16775  | 0.30626  |
| 28705 | P14075 | Q14498  | 0.61618  |
| 28706 | P14075 | O60664  | 0.2766   |
| 28707 | P14075 | Q96HM7  | 0.66139  |
| 28708 | P14075 | P35227  | 0.52285  |
| 28709 | P14075 | O60784  | 0.15708  |
| 28710 | P14075 | Q96T76  | 0.662    |
| 28711 | P14075 | O95567  | 0.63821  |
| 28712 | P14075 | Q5T8I3  | 0.6496   |
| 28713 | P14075 | O00193  | 1.074    |
| 28714 | P14075 | Q13045  | 0.76394  |
| 28715 | P14075 | Q9NRH1  | 0.33685  |
| 28716 | P14075 | B1ANY3  | 0.5577   |
| 28717 | P14075 | Q3ZLR7  | 0.54549  |
| 28718 | P14075 | P61578  | 0.45541  |
| 28719 | P14075 | P05387  | 0.38311  |
| 28720 | P14075 | O95429  | 0.17251  |
| 28721 | P14075 | Q6DKK2  | 0.6845   |
| 28722 | P14075 | O75346  | 0.25665  |
| 28723 | P14075 | Q96MY7  | 0.99153  |
| 28724 | P14075 | Q9GZN8  | 0.45783  |
| 28725 | P14075 | P33552  | 0.35453  |
| 28726 | P14075 | Q6VUC0  | 0.21924  |
| 28727 | P14075 | Q9H1K1  | 0.56759  |
| 28728 | P14075 | O75164  | 0.74494  |

|       |        |        |          |
|-------|--------|--------|----------|
| 28729 | P14075 | Q9H875 | 0.36066  |
| 28730 | P14075 | O43676 | 0.55791  |
| 28731 | P14075 | Q99575 | 0.48668  |
| 28732 | P14075 | Q9UM00 | 0.84599  |
| 28733 | P14075 | Q7Z739 | 0.53716  |
| 28734 | P14075 | Q15596 | 0.48625  |
| 28735 | P14075 | Q03252 | 0.25322  |
| 28736 | P14075 | Q9BWG6 | 0.38085  |
| 28737 | P14075 | Q86UW9 | 0.61649  |
| 28738 | P14075 | Q9BTL4 | 0.66602  |
| 28739 | P14075 | P20749 | 0.25855  |
| 28740 | P14075 | Q8TC76 | 1.2058   |
| 28741 | P14075 | Q53GL7 | 0.3282   |
| 28742 | P14075 | A6NP11 | 0.31228  |
| 28743 | P14075 | Q9H8Y1 | 0.78019  |
| 28744 | P14075 | O94913 | 0.13499  |
| 28745 | P14075 | Q4KMQ1 | 0.68828  |
| 28746 | P14075 | Q9H3L0 | 0.93187  |
| 28747 | P14075 | P56945 | 0.37783  |
| 28748 | P14075 | Q4VC44 | 0.58427  |
| 28749 | P14075 | Q9Y6G3 | 0.14172  |
| 28750 | P14075 | Q96P71 | 0.24351  |
| 28751 | P14075 | Q9NRN7 | 0.28341  |
| 28752 | P14075 | Q14152 | 0.82125  |
| 28753 | P14075 | P18887 | 0.3963   |
| 28754 | P14075 | Q8N7K0 | 0.2118   |
| 28755 | P14075 | Q96GY3 | 0.60102  |
| 28756 | P14075 | Q9NYF3 | 0.60037  |
| 28757 | P14075 | O43765 | 0.42702  |
| 28758 | P14075 | Q32MH5 | 0.56973  |
| 28759 | P14075 | O95905 | 0.51549  |
| 28760 | P14075 | Q2M2I5 | 0.80046  |
| 28761 | P14075 | Q96ED9 | 0.28138  |
| 28762 | P14075 | A6NKH3 | 0.32368  |
| 28763 | P14075 | Q6MZQ0 | 0.35701  |
| 28764 | P14075 | Q8N3L3 | 0.53095  |
| 28765 | P14075 | O75690 | 0.63821  |
| 28766 | P14075 | Q8NA72 | 0.058739 |
| 28767 | P14075 | Q7Z6M4 | 0.57896  |
| 28768 | P14075 | Q68EN5 | 0.3247   |
| 28769 | P14075 | Q5T5S1 | 0.37205  |
| 28770 | P14075 | Q9UJW9 | 1.2384   |
| 28771 | P14075 | Q8N0Z3 | 0.36924  |
| 28772 | P14075 | Q96FJ8 | 0.63821  |
| 28773 | P14075 | Q5T0F9 | 0.18125  |
| 28774 | P14075 | A8MU76 | 0.54875  |
| 28775 | P14075 | Q2KHR3 | 0.043139 |
| 28776 | P14075 | O14990 | 0.64925  |
| 28777 | P14075 | Q8WTW3 | 0.58033  |
| 28778 | P14075 | P23297 | 0.31285  |
| 28779 | P14075 | Q9BUE0 | 0.84633  |
| 28780 | P14075 | Q9UPP5 | 0.75174  |
| 28781 | P14075 | Q6P280 | 0.33703  |
| 28782 | P14075 | A6NKN8 | 0.96685  |
| 28783 | P14075 | P62310 | 0.47978  |
| 28784 | P14075 | Q6P656 | 0.15022  |
| 28785 | P14075 | Q8N7B7 | 0.14264  |
| 28786 | P14075 | Q96EP1 | 0.41472  |
| 28787 | P14075 | O95190 | 0.62712  |
| 28788 | P14075 | Q96NT3 | 0.35734  |
| 28789 | P14075 | Q9BVP2 | 0.14349  |
| 28790 | P14075 | B1APH4 | 0.23684  |
| 28791 | P14075 | Q68DL7 | 0.63821  |
| 28792 | P14075 | Q9BY77 | 0.21626  |
| 28793 | P14075 | Q86YP4 | 0.63879  |
| 28794 | P14075 | Q6PD74 | 0.41451  |
| 28795 | P14075 | O60535 | 0.24348  |
| 28796 | P14075 | Q9NSQ0 | 0.26322  |
| 28797 | P14075 | Q66K80 | 0.63821  |
| 28798 | P14075 | Q9NVS2 | 0.71424  |
| 28799 | P14075 | Q9GZR1 | 0.23528  |
| 28800 | P14075 | Q8IVM7 | 0.63821  |
| 28801 | P14075 | Q8N8X9 | 0.20592  |
| 28802 | P14075 | O95989 | 0.28692  |
| 28803 | P14075 | A6NHS1 | 0.65093  |
| 28804 | P14075 | Q8TF32 | 0.31228  |



|       |        |         |         |
|-------|--------|---------|---------|
| 28805 | P14075 | P18846  | 0.63447 |
| 28806 | P14075 | Q9Y5K5  | 0.1725  |
| 28807 | P14075 | Q63HN1  | 0.48314 |
| 28808 | P14075 | Q9H7J1  | 0.46414 |
| 28809 | P14075 | Q9P2R7  | 0.3009  |
| 28810 | P14075 | Q14244  | 0.58704 |
| 28811 | P14075 | Q9UN37  | 0.32278 |
| 28812 | P14075 | Q9ULH7  | 0.68993 |
| 28813 | P14075 | Q6S9Z5  | 0.71351 |
| 28814 | P14075 | Q07955  | 0.44556 |
| 28815 | P14075 | Q14135  | 0.19547 |
| 28816 | P14075 | P52948  | 0.70774 |
| 28817 | P14075 | O75157  | 0.48009 |
| 28818 | P14075 | Q75VX8  | 1.0319  |
| 28819 | P14075 | P51948  | 0.36569 |
| 28820 | P14075 | Q8WTS6  | 0.30884 |
| 28821 | P14075 | E9PAV3  | 0.31079 |
| 28822 | P14075 | Q9UMX0  | 0.51106 |
| 28823 | P14075 | O75530  | 0.43437 |
| 28824 | P14075 | Q9BZE9  | 0.55735 |
| 28825 | P14075 | Q8N812  | 0.43721 |
| 28826 | P14075 | Q9H503  | 0.22264 |
| 28827 | P14075 | Q9NXX8  | 0.37695 |
| 28828 | P14075 | Q6U949  | 0.63821 |
| 28829 | P14075 | P62258  | 0.57796 |
| 28830 | P14075 | Q9BYQ6  | 0.78356 |
| 28831 | P14075 | Q86TG7  | 0.29009 |
| 28832 | P14075 | Q96L92  | 0.48375 |
| 28833 | P14075 | Q9UGB4  | 0.63821 |
| 28834 | P14075 | Q9BY27  | 0.32697 |
| 28835 | P14075 | Q9Y6R6  | 0.2118  |
| 28836 | P14075 | Q04864  | 0.85778 |
| 28837 | P14075 | Q5T953  | 0.98003 |
| 28838 | P14075 | A1A4G5  | 0.63821 |
| 28839 | P14075 | Q15072  | 0.13307 |
| 28840 | P14075 | P48539  | 0.46205 |
| 28841 | P14075 | Q9BSK0  | 0.85698 |
| 28842 | P14075 | Q9NY87  | 0.82289 |
| 28843 | P14075 | Q9Y2G2  | 0.26668 |
| 28844 | P14075 | O75177  | 0.64704 |
| 28845 | P14075 | P55808  | 0.93918 |
| 28846 | P14075 | Q8N6U2  | 0.31618 |
| 28847 | P14075 | Q15276  | 0.23447 |
| 28848 | P14075 | O75334  | 0.32542 |
| 28849 | P14075 | A4GXA9  | 0.64924 |
| 28850 | P14075 | Q8N3U4  | 0.48005 |
| 28851 | P14075 | P52298  | 0.43776 |
| 28852 | P14075 | Q8WWR9  | 0.79845 |
| 28853 | P14075 | O00321  | 0.16138 |
| 28854 | P14075 | Q8TAK5  | 0.24671 |
| 28855 | P14075 | Q96C34  | 0.50317 |
| 28856 | P14075 | Q6UXP7  | 0.15942 |
| 28857 | P14075 | P18850  | 0.38769 |
| 28858 | P14075 | Q9HA90  | 0.94025 |
| 28859 | P14075 | Q6ZV60  | 0.63821 |
| 28860 | P14075 | Q9Y2K5  | 0.31665 |
| 28861 | P14075 | Q96LK8  | 0.16665 |
| 28862 | P14075 | Q5T200  | 0.65413 |
| 28863 | P14075 | Q3SY05  | 0.13569 |
| 28864 | P14075 | A2A288  | 0.41634 |
| 28865 | P14075 | Q8TBZ9  | 0.88187 |
| 28866 | P14075 | Q3MJ40  | 0.13808 |
| 28867 | P14075 | Q5T4H9  | 0.63821 |
| 28868 | P14075 | Q96EK5  | 0.13098 |
| 28869 | P14075 | Q7L4P6  | 0.56946 |
| 28870 | P14075 | O75152  | 0.20455 |
| 28871 | P14075 | Q8IX03  | 0.73049 |
| 28872 | P14075 | Q9UJC5  | 0.4588  |
| 28873 | P14075 | Q5H9I0  | 0.22463 |
| 28874 | P14075 | Q9H6Z9  | 0.29335 |
| 28875 | P14075 | O43299  | 0.8756  |
| 28876 | P14075 | Q8IW35  | 0.82645 |
| 28877 | P14075 | Q5BJF2  | 0.4504  |
| 28878 | P14075 | Q8I WV8 | 0.14158 |
| 28879 | P14075 | Q96CW6  | 0.85637 |
| 28880 | P14075 | O75531  | 0.50359 |

|       |        |        |          |
|-------|--------|--------|----------|
| 28881 | P14075 | Q9UKK3 | 0.42491  |
| 28882 | P14075 | Q9NYB0 | 0.64456  |
| 28883 | P14075 | Q8WX92 | 1.1625   |
| 28884 | P14075 | Q5VYK3 | 0.12263  |
| 28885 | P14075 | Q8IZX4 | 0.23099  |
| 28886 | P14075 | A8MV72 | 0.53375  |
| 28887 | P14075 | Q6GMV2 | 0.25209  |
| 28888 | P14075 | Q9BQ90 | 0.4948   |
| 28889 | P14075 | Q9UL41 | 0.49713  |
| 28890 | P14075 | Q17RB0 | 0.49014  |
| 28891 | P14075 | Q9BU76 | 0.90542  |
| 28892 | P14075 | Q9Y4B6 | 0.5966   |
| 28893 | P14075 | Q3C1V9 | 0.26466  |
| 28894 | P14075 | P58340 | 0.27539  |
| 28895 | P14075 | Q9Y697 | 0.40956  |
| 28896 | P14075 | O95551 | 0.48589  |
| 28897 | P14075 | P05787 | 1.0818   |
| 28898 | P14075 | Q9H5Y0 | 0.56988  |
| 28899 | P14075 | P52435 | 0.40938  |
| 28900 | P14075 | Q3KP31 | 0.2763   |
| 28901 | P14075 | Q14771 | 0.46087  |
| 28902 | P14075 | P10243 | 0.25954  |
| 28903 | P14075 | Q96F83 | 0.30753  |
| 28904 | P14075 | Q9H8M7 | 0.53501  |
| 28905 | P14075 | A4D1U4 | 0.3796   |
| 28906 | P14075 | Q5I0X4 | 0.94025  |
| 28907 | P14075 | Q8N888 | 0.65442  |
| 28908 | P14075 | O75031 | 0.39925  |
| 28909 | P14075 | A6NGK3 | 0.50458  |
| 28910 | P14075 | Q9Y3D0 | 0.70685  |
| 28911 | P14075 | Q8IUB9 | 0.63821  |
| 28912 | P14075 | Q9BUG6 | 0.14433  |
| 28913 | P14075 | Q8N4J0 | 0.8714   |
| 28914 | P14075 | Q9H668 | 0.021488 |
| 28915 | P14075 | P53803 | 0.53073  |
| 28916 | P14075 | Q15543 | 0.79809  |
| 28917 | P14075 | Q8WYQ5 | 0.46294  |
| 28918 | P14075 | Q7Z3E2 | 0.84195  |
| 28919 | P14075 | Q9UIC8 | 0.18887  |
| 28920 | P14075 | Q9HBE1 | 0.08421  |
| 28921 | P14075 | P52741 | 0.10726  |
| 28922 | P14075 | P25063 | 0.63821  |
| 28923 | P14075 | Q8N9W5 | 0.27819  |
| 28924 | P14075 | Q9UPT5 | 0.33615  |
| 28925 | P14075 | Q6XXX2 | 0.047706 |
| 28926 | P14075 | Q538Z0 | 0.63821  |
| 28927 | P14075 | Q6NT46 | 0.45588  |
| 28928 | P14075 | Q13023 | 0.37428  |
| 28929 | P14075 | Q2T9F4 | 0.15501  |
| 28930 | P14075 | Q14693 | 0.18961  |
| 28931 | P14075 | Q8WVP5 | 0.89587  |
| 28932 | P14075 | Q9Y675 | 0.76082  |
| 28933 | P14075 | P15924 | 0.22698  |
| 28934 | P14075 | Q3LI83 | 0.84358  |
| 28935 | P14075 | Q9NWK9 | 0.53928  |
| 28936 | P14075 | Q7L8S5 | 0.25321  |
| 28937 | P14075 | Q14140 | 1.2688   |
| 28938 | P14075 | Q9UC07 | 0.18107  |
| 28939 | P14075 | Q6ZN84 | 0.3483   |
| 28940 | P14075 | I3L3R5 | 0.63821  |
| 28941 | P14075 | Q9UNK9 | 0.14325  |
| 28942 | P14075 | P25789 | 0.48239  |
| 28943 | P14075 | Q7Z4Q2 | 0.68445  |
| 28944 | P14075 | Q86TP1 | 0.52789  |
| 28945 | P14075 | Q8TBR5 | 0.18133  |
| 28946 | P14075 | Q96M15 | 0.043605 |
| 28947 | P14075 | Q13761 | 0.6078   |
| 28948 | P14075 | Q3LHN0 | 1.0514   |
| 28949 | P14075 | P24864 | 0.45881  |
| 28950 | P14075 | Q9H869 | 1.0792   |
| 28951 | P14075 | O75167 | 0.10962  |
| 28952 | P14075 | P10599 | 0.269    |
| 28953 | P14075 | Q99689 | 0.14367  |
| 28954 | P14075 | Q969H6 | 0.62526  |
| 28955 | P14075 | Q8N9T8 | 1.1422   |
| 28956 | P14075 | Q71UM5 | 0.36106  |

|       |        |        |           |
|-------|--------|--------|-----------|
| 28957 | P14075 | Q96PP4 | 0.37914   |
| 28958 | P14075 | Q9H6T0 | 0.14984   |
| 28959 | P14075 | Q49B96 | 0.37179   |
| 28960 | P14075 | Q9HBM6 | 0.46726   |
| 28961 | P14075 | Q08AD1 | 0.34415   |
| 28962 | P14075 | Q96QK1 | 0.38775   |
| 28963 | P14075 | P05114 | 0.32618   |
| 28964 | P14075 | Q8N8K9 | 0.15669   |
| 28965 | P14075 | Q9BZI7 | 0.56865   |
| 28966 | P14075 | P36543 | 0.084738  |
| 28967 | P14075 | Q14579 | 0.29675   |
| 28968 | P14075 | Q9H1J1 | 0.7589    |
| 28969 | P14075 | Q5TAP6 | 0.65111   |
| 28970 | P14075 | Q16534 | 0.23441   |
| 28971 | P14075 | P45984 | 0.25614   |
| 28972 | P14075 | Q96M61 | 0.1668    |
| 28973 | P14075 | Q9HCM1 | 0.89407   |
| 28974 | P14075 | Q14CZ0 | 1.1739    |
| 28975 | P14075 | A4D0V7 | 0.74595   |
| 28976 | P14075 | Q03938 | 0.29644   |
| 28977 | P14075 | Q8TD19 | 0.25459   |
| 28978 | P14075 | Q3B820 | 0.84358   |
| 28979 | P14075 | Q9UIY3 | 0.29794   |
| 28980 | P14075 | Q9Y314 | 0.65943   |
| 28981 | P14075 | Q13895 | 0.4515    |
| 28982 | P14075 | P69905 | 0.21852   |
| 28983 | P14075 | Q9NUD7 | 0.02377   |
| 28984 | P14075 | Q9NPG3 | 0.58938   |
| 28985 | P14075 | Q9NYJ8 | 0.27222   |
| 28986 | P14075 | Q9BQ61 | 0.94025   |
| 28987 | P14075 | Q8N5Q1 | 1.1182    |
| 28988 | P14075 | Q5T754 | 0.63821   |
| 28989 | P14075 | P61927 | 0.411     |
| 28990 | P14075 | Q7RTV0 | 0.28589   |
| 28991 | P14075 | Q13888 | 0.42488   |
| 28992 | P14075 | Q9Y3A5 | 0.48976   |
| 28993 | P14075 | Q9Y5U8 | 0.45274   |
| 28994 | P14075 | P08047 | 0.57709   |
| 28995 | P14075 | Q8NCU7 | 1.0195    |
| 28996 | P14075 | Q8N3F0 | 0.6285    |
| 28997 | P0C214 | P41970 | 0.83566   |
| 28998 | P0C214 | P0C2W7 | 0.086276  |
| 28999 | P0C214 | Q8N5I9 | 0.24937   |
| 29000 | P0C214 | Q9Y536 | 0.66154   |
| 29001 | P0C214 | Q9NWB7 | 0.46867   |
| 29002 | P0C214 | Q9HD33 | 0.68023   |
| 29003 | P0C214 | P62861 | 1.3088    |
| 29004 | P0C214 | P80217 | 0.76809   |
| 29005 | P0C214 | Q9BQ67 | 0.35391   |
| 29006 | P0C214 | Q9Y5A9 | 0.46237   |
| 29007 | P0C214 | P43351 | 0.53357   |
| 29008 | P0C214 | P22681 | 0.44491   |
| 29009 | P0C214 | Q9BSH5 | 0.43767   |
| 29010 | P0C214 | A6NP61 | 0.43883   |
| 29011 | P0C214 | Q9Y316 | 0.53655   |
| 29012 | P0C214 | O00198 | 0.34319   |
| 29013 | P0C214 | Q9Y3Q8 | 1.2112    |
| 29014 | P0C214 | Q6ZRN7 | 0.086276  |
| 29015 | P0C214 | Q9Y2B5 | 0.11609   |
| 29016 | P0C214 | Q9P1F3 | 0.52933   |
| 29017 | P0C214 | P40424 | 0.57258   |
| 29018 | P0C214 | Q8IW19 | 0.47263   |
| 29019 | P0C214 | Q8WWR8 | 0.17154   |
| 29020 | P0C214 | Q9BY77 | 0.41689   |
| 29021 | P0C214 | Q7Z3E2 | 0.15134   |
| 29022 | P0C214 | P27469 | 0.77114   |
| 29023 | P0C214 | Q96BN6 | 0.060302  |
| 29024 | P0C214 | Q86UD4 | 0.22841   |
| 29025 | P0C214 | P50440 | 0.0096668 |
| 29026 | P0C214 | P06132 | 0.59558   |
| 29027 | P0C214 | Q05086 | 0.61844   |
| 29028 | P0C214 | Q16795 | 0.17322   |
| 29029 | P0C214 | Q14457 | 0.42616   |
| 29030 | P0C214 | P61236 | 0.16769   |
| 29031 | P0C214 | P41250 | 0.47671   |
| 29032 | P0C214 | Q9Y6R9 | 0.30221   |

|       |        |        |          |
|-------|--------|--------|----------|
| 29033 | P0C214 | Q9H7E9 | 0.24937  |
| 29034 | P0C214 | O14933 | 0.81891  |
| 29035 | P0C214 | A6NDX5 | 0.37134  |
| 29036 | P0C214 | Q9H147 | 0.083812 |
| 29037 | P0C214 | Q9UGP4 | 0.34962  |
| 29038 | P0C214 | Q6ZN55 | 0.29588  |
| 29039 | P0C214 | Q6X4W1 | 0.89219  |
| 29040 | P0C214 | Q04446 | 0.22793  |
| 29041 | P0C214 | Q9H7C4 | 0.39304  |
| 29042 | P0C214 | Q9BPZ7 | 0.56272  |
| 29043 | P0C214 | Q92993 | 1.0045   |
| 29044 | P0C214 | P60520 | 0.24638  |
| 29045 | P0C214 | Q96BW9 | 0.34568  |
| 29046 | P0C214 | Q5BKZ1 | 0.57723  |
| 29047 | P0C214 | Q02833 | 0.44676  |
| 29048 | P0C214 | Q6NX49 | 0.22763  |
| 29049 | P0C214 | Q6PDB4 | 0.49464  |
| 29050 | P0C214 | Q12996 | 0.19159  |
| 29051 | P0C214 | Q8TAG6 | 0.047621 |
| 29052 | P0C214 | O00470 | 0.45318  |
| 29053 | P0C214 | Q9BZI7 | 0.80125  |
| 29054 | P0C214 | O75683 | 0.3769   |
| 29055 | P0C214 | Q8N616 | 0.086276 |
| 29056 | P0C214 | Q8NCT3 | 0.39893  |
| 29057 | P0C214 | Q13310 | 0.45338  |
| 29058 | P0C214 | P84098 | 0.86977  |
| 29059 | P0C214 | O95551 | 0.73003  |
| 29060 | P0C214 | Q96B02 | 0.43148  |
| 29061 | P0C214 | Q9NQG7 | 0.29213  |
| 29062 | P0C214 | A8MPV3 | 0.072472 |
| 29063 | P0C214 | Q9BSU1 | 0.4882   |
| 29064 | P0C214 | O00170 | 0.79955  |
| 29065 | P0C214 | O00268 | 1.0617   |
| 29066 | P0C214 | P29474 | 0.52724  |
| 29067 | P0C214 | Q9UKW6 | 0.35156  |
| 29068 | P0C214 | O94829 | 0.90472  |
| 29069 | P0C214 | Q9NZL4 | 0.33549  |
| 29070 | P0C214 | Q96LL4 | 0.2675   |
| 29071 | P0C214 | Q9UJX6 | 0.60201  |
| 29072 | P0C214 | Q14997 | 0.24254  |
| 29073 | P0C214 | Q96CW1 | 0.56335  |
| 29074 | P0C214 | Q8TEX9 | 0.31926  |
| 29075 | P0C214 | Q92618 | 0.17436  |
| 29076 | P0C214 | Q6NZY4 | 0.58023  |
| 29077 | P0C214 | O43768 | 0.05135  |
| 29078 | P0C214 | B2RV13 | 0.53982  |
| 29079 | P0C214 | Q15833 | 0.31101  |
| 29080 | P0C214 | Q96S94 | 0.31702  |
| 29081 | P0C214 | P55822 | 0.59487  |
| 29082 | P0C214 | Q9Y2M2 | 0.32232  |
| 29083 | P0C214 | Q6ZTC4 | 0.086276 |
| 29084 | P0C214 | Q9UI26 | 0.25812  |
| 29085 | P0C214 | Q14410 | 0.58072  |
| 29086 | P0C214 | Q6NUQ1 | 0.41213  |
| 29087 | P0C214 | Q9BVJ6 | 0.76722  |
| 29088 | P0C214 | Q9NRR3 | 0.40332  |
| 29089 | P0C214 | P53567 | 0.59995  |
| 29090 | P0C214 | Q14CN4 | 0.34216  |
| 29091 | P0C214 | Q5SZL2 | 0.29706  |
| 29092 | P0C214 | Q9UBW5 | 0.45292  |
| 29093 | P0C214 | Q8N1V2 | 0.3743   |
| 29094 | P0C214 | Q06732 | 0.19269  |
| 29095 | P0C214 | Q8NCU1 | 0.034403 |
| 29096 | P0C214 | Q9UM00 | 1.1233   |
| 29097 | P0C214 | Q3LI64 | 0.21795  |
| 29098 | P0C214 | Q96A35 | 0.60091  |
| 29099 | P0C214 | Q9BZL4 | 0.45292  |
| 29100 | P0C214 | Q8NEK5 | 0.30414  |
| 29101 | P0C214 | O75444 | 0.29835  |
| 29102 | P0C214 | O95243 | 0.67454  |
| 29103 | P0C214 | Q8TB72 | 0.49531  |
| 29104 | P0C214 | Q9H081 | 0.70879  |
| 29105 | P0C214 | O15078 | 0.55969  |
| 29106 | P0C214 | Q6ICB4 | 0.12739  |
| 29107 | P0C214 | Q9NQZ8 | 0.28926  |
| 29108 | P0C214 | Q6RFH5 | 0.28606  |

|       |        |        |          |
|-------|--------|--------|----------|
| 29109 | P0C214 | Q9HA82 | 0.28631  |
| 29110 | P0C214 | Q07866 | 0.60572  |
| 29111 | P0C214 | Q14526 | 0.45005  |
| 29112 | P0C214 | Q8N163 | 0.66659  |
| 29113 | P0C214 | P35080 | 0.33738  |
| 29114 | P0C214 | Q9Y3E1 | 0.38879  |
| 29115 | P0C214 | Q03052 | 0.24412  |
| 29116 | P0C214 | P82979 | 0.35477  |
| 29117 | P0C214 | Q9UKA1 | 0.2671   |
| 29118 | P0C214 | P61247 | 1.3687   |
| 29119 | P0C214 | P51665 | 0.4302   |
| 29120 | P0C214 | Q9BPX3 | 0.80148  |
| 29121 | P0C214 | Q8IY18 | 0.3217   |
| 29122 | P0C214 | P60228 | 1.051    |
| 29123 | P0C214 | Q9BTM9 | 0.89975  |
| 29124 | P0C214 | P49406 | 0.51314  |
| 29125 | P0C214 | B3EWG6 | 0.24937  |
| 29126 | P0C214 | Q9NRP2 | 0.61231  |
| 29127 | P0C214 | Q8TAI1 | 0.022733 |
| 29128 | P0C214 | P18850 | 0.55201  |
| 29129 | P0C214 | P53990 | 0.45014  |
| 29130 | P0C214 | Q96HJ3 | 0.24937  |
| 29131 | P0C214 | Q9BWW4 | 0.59458  |
| 29132 | P0C214 | Q96P26 | 0.14583  |
| 29133 | P0C214 | O15198 | 0.50374  |
| 29134 | P0C214 | Q15742 | 0.3131   |
| 29135 | P0C214 | O43684 | 0.71048  |
| 29136 | P0C214 | Q5VU69 | 0.22498  |
| 29137 | P0C214 | Q9BW11 | 0.29396  |
| 29138 | P0C214 | Q8NFW9 | 0.28853  |
| 29139 | P0C214 | Q9Y6P5 | 0.43066  |
| 29140 | P0C214 | Q16637 | 1.0072   |
| 29141 | P0C214 | Q5MIZ7 | 0.37536  |
| 29142 | P0C214 | Q9Y5L0 | 0.87747  |
| 29143 | P0C214 | Q96J02 | 0.4187   |
| 29144 | P0C214 | Q8NI51 | 0.5141   |
| 29145 | P0C214 | Q5H9R7 | 1.1614   |
| 29146 | P0C214 | Q9UI08 | 0.21797  |
| 29147 | P0C214 | Q9UHZ2 | 0.086276 |
| 29148 | P0C214 | P02794 | 0.98278  |
| 29149 | P0C214 | P54198 | 0.94998  |
| 29150 | P0C214 | P61923 | 0.32617  |
| 29151 | P0C214 | P08697 | 0.85505  |
| 29152 | P0C214 | Q5JQF7 | 0.086276 |
| 29153 | P0C214 | Q96GM8 | 0.35092  |
| 29154 | P0C214 | Q03989 | 0.28774  |
| 29155 | P0C214 | Q9HAJ7 | 0.98806  |
| 29156 | P0C214 | Q9Y6X2 | 0.71423  |
| 29157 | P0C214 | Q6IQ32 | 0.36931  |
| 29158 | P0C214 | H3BU77 | 0.3362   |
| 29159 | P0C214 | O14490 | 0.27756  |
| 29160 | P0C214 | D6RGH6 | 1.1673   |
| 29161 | P0C214 | Q8IY42 | 0.79876  |
| 29162 | P0C214 | Q9Y2W2 | 0.67038  |
| 29163 | P0C214 | A6NIE6 | 0.56712  |
| 29164 | P0C214 | Q7Z3K3 | 0.40675  |
| 29165 | P0C214 | A6NCW3 | 0.53828  |
| 29166 | P0C214 | P51114 | 0.014757 |
| 29167 | P0C214 | Q96C28 | 0.39613  |
| 29168 | P0C214 | Q9UHB7 | 1.3515   |
| 29169 | P0C214 | Q9HBH1 | 0.62943  |
| 29170 | P0C214 | Q96B67 | 0.25112  |
| 29171 | P0C214 | Q9Y399 | 0.9174   |
| 29172 | P0C214 | Q96BK5 | 0.52218  |
| 29173 | P0C214 | O15287 | 0.90254  |
| 29174 | P0C214 | Q96FV9 | 0.76691  |
| 29175 | P0C214 | O76011 | 0.58756  |
| 29176 | P0C214 | Q9Y6X4 | 0.84223  |
| 29177 | P0C214 | Q9GZZ9 | 0.19711  |
| 29178 | P0C214 | P30084 | 0.405    |
| 29179 | P0C214 | P62312 | 0.95657  |
| 29180 | P0C214 | O00213 | 0.33321  |
| 29181 | P0C214 | Q8N5N7 | 0.47684  |
| 29182 | P0C214 | P08729 | 1.3356   |
| 29183 | P0C214 | Q9BUH8 | 0.33709  |
| 29184 | P0C214 | Q8NHW5 | 0.27701  |

|       |        |        |          |
|-------|--------|--------|----------|
| 29185 | P0C214 | Q92585 | 0.91574  |
| 29186 | P0C214 | Q96T66 | 0.29901  |
| 29187 | P0C214 | Q8IWJ2 | 0.54945  |
| 29188 | P0C214 | Q05BW5 | 0.10665  |
| 29189 | P0C214 | P35754 | 0.57477  |
| 29190 | P0C214 | Q14527 | 0.39627  |
| 29191 | P0C214 | Q8N371 | 0.32832  |
| 29192 | P0C214 | O75608 | 0.43666  |
| 29193 | P0C214 | P55735 | 0.56882  |
| 29194 | P0C214 | Q96MU6 | 0.25117  |
| 29195 | P0C214 | Q8IYB1 | 0.12874  |
| 29196 | P0C214 | Q9P255 | 0.37249  |
| 29197 | P0C214 | Q9NQR7 | 0.086276 |
| 29198 | P0C214 | Q6B0B8 | 0.34167  |
| 29199 | P0C214 | O75865 | 0.64403  |
| 29200 | P0C214 | Q9Y3T9 | 0.92832  |
| 29201 | P0C214 | Q9H9Q4 | 0.36028  |
| 29202 | P0C214 | Q15007 | 0.37377  |
| 29203 | P0C214 | Q9BUK0 | 0.78076  |
| 29204 | P0C214 | Q3LI81 | 0.6322   |
| 29205 | P0C214 | Q8ND07 | 0.85883  |
| 29206 | P0C214 | Q8ND76 | 0.4883   |
| 29207 | P0C214 | Q32M92 | 0.055577 |
| 29208 | P0C214 | O94927 | 0.37012  |
| 29209 | P0C214 | P20248 | 0.94664  |
| 29210 | P0C214 | Q96NL8 | 0.27067  |
| 29211 | P0C214 | Q9H825 | 0.17526  |
| 29212 | P0C214 | A8MQ11 | 0.2972   |
| 29213 | P0C214 | O14813 | 0.20519  |
| 29214 | P0C214 | Q9UHL9 | 0.26807  |
| 29215 | P0C214 | Q17RB0 | 0.17928  |
| 29216 | P0C214 | O95671 | 0.5976   |
| 29217 | P0C214 | Q3MIT2 | 0.30179  |
| 29218 | P0C214 | P82930 | 0.57625  |
| 29219 | P0C214 | P51946 | 0.52977  |
| 29220 | P0C214 | P24863 | 1.0391   |
| 29221 | P0C214 | Q8IVV7 | 0.15553  |
| 29222 | P0C214 | Q8WTX7 | 0.19098  |
| 29223 | P0C214 | P48728 | 0.089107 |
| 29224 | P0C214 | P49354 | 0.33544  |
| 29225 | P0C214 | Q8WX92 | 1.4696   |
| 29226 | P0C214 | Q9H832 | 0.85583  |
| 29227 | P0C214 | Q8IX04 | 0.28316  |
| 29228 | P0C214 | Q8TAP9 | 1.2581   |
| 29229 | P0C214 | Q9UKN5 | 0.31779  |
| 29230 | P0C214 | Q96FX7 | 0.37753  |
| 29231 | P0C214 | P49419 | 0.93156  |
| 29232 | P0C214 | Q8N9A8 | 0.27409  |
| 29233 | P0C214 | Q9UDY4 | 0.95057  |
| 29234 | P0C214 | Q14532 | 0.38807  |
| 29235 | P0C214 | O15083 | 0.43551  |
| 29236 | P0C214 | Q96CJ1 | 1.1288   |
| 29237 | P0C214 | O15234 | 0.97002  |
| 29238 | P0C214 | Q58F21 | 0.24157  |
| 29239 | P0C214 | Q9P278 | 0.76403  |
| 29240 | P0C214 | Q13619 | 0.36567  |
| 29241 | P0C214 | O75306 | 0.42396  |
| 29242 | P0C214 | Q96RE9 | 0.26948  |
| 29243 | P0C214 | P35226 | 0.52263  |
| 29244 | P0C214 | Q58FG0 | 0.8863   |
| 29245 | P0C214 | Q13907 | 0.37342  |
| 29246 | P0C214 | Q9H5Z6 | 0.2675   |
| 29247 | P0C214 | Q9UBB6 | 0.37249  |
| 29248 | P0C214 | Q13617 | 0.7745   |
| 29249 | P0C214 | Q8NA19 | 0.24078  |
| 29250 | P0C214 | A9QM74 | 0.5537   |
| 29251 | P0C214 | Q13761 | 0.67793  |
| 29252 | P0C214 | Q96KH6 | 0.20081  |
| 29253 | P0C214 | Q9NZT2 | 0.023023 |
| 29254 | P0C214 | Q9NZN8 | 0.91198  |
| 29255 | P0C214 | O15116 | 0.9542   |
| 29256 | P0C214 | Q8IX03 | 1.1126   |
| 29257 | P0C214 | Q8N1G1 | 0.23781  |
| 29258 | P0C214 | Q96M61 | 0.2675   |
| 29259 | P0C214 | Q13405 | 0.68937  |
| 29260 | P0C214 | Q969S3 | 0.70039  |

|       |        |         |          |
|-------|--------|---------|----------|
| 29261 | P0C214 | Q9UGC7  | 0.27126  |
| 29262 | P0C214 | Q14739  | 0.28956  |
| 29263 | P0C214 | Q5TEZ4  | 0.086276 |
| 29264 | P0C214 | Q969W3  | 0.58117  |
| 29265 | P0C214 | Q17RN3  | 0.12146  |
| 29266 | P0C214 | P26368  | 0.5254   |
| 29267 | P0C214 | Q9Y3D5  | 0.54478  |
| 29268 | P0C214 | A6NCL1  | 0.13382  |
| 29269 | P0C214 | Q96NS1  | 0.16769  |
| 29270 | P0C214 | P0DI83  | 0.35283  |
| 29271 | P0C214 | P09417  | 0.1646   |
| 29272 | P0C214 | Q8I WV8 | 0.33188  |
| 29273 | P0C214 | Q96S65  | 0.89872  |
| 29274 | P0C214 | P60709  | 0.10604  |
| 29275 | P0C214 | Q13257  | 0.72411  |
| 29276 | P0C214 | Q15327  | 0.46509  |
| 29277 | P0C214 | Q56P42  | 0.12649  |
| 29278 | P0C214 | Q96QA6  | 0.16769  |
| 29279 | P0C214 | Q86V59  | 0.28996  |
| 29280 | P0C214 | Q8WTP9  | 0.80497  |
| 29281 | P0C214 | Q86XI2  | 0.876    |
| 29282 | P0C214 | Q8NAX2  | 0.24937  |
| 29283 | P0C214 | Q5JTD0  | 0.93134  |
| 29284 | P0C214 | Q7Z2F6  | 0.41504  |
| 29285 | P0C214 | A8MUV8  | 0.48694  |
| 29286 | P0C214 | A6H8Y1  | 0.61356  |
| 29287 | P0C214 | Q05195  | 0.51295  |
| 29288 | P0C214 | Q9NWK9  | 0.50182  |
| 29289 | P0C214 | O75818  | 0.2805   |
| 29290 | P0C214 | Q9NWW7  | 0.45005  |
| 29291 | P0C214 | P41220  | 0.50727  |
| 29292 | P0C214 | Q9H6T0  | 0.16429  |
| 29293 | P0C214 | Q15059  | 1.1239   |
| 29294 | P0C214 | P0CG43  | 0.086276 |
| 29295 | P0C214 | O75935  | 0.82408  |
| 29296 | P0C214 | Q9Y3I1  | 0.90072  |
| 29297 | P0C214 | P08294  | 0.23094  |
| 29298 | P0C214 | O14910  | 0.46813  |
| 29299 | P0C214 | O43296  | 0.30224  |
| 29300 | P0C214 | P49006  | 0.77848  |
| 29301 | P0C214 | Q9Y615  | 0.22353  |
| 29302 | P0C214 | Q6ZQT0  | 0.035153 |
| 29303 | P0C214 | Q969F9  | 0.72059  |
| 29304 | P0C214 | Q6ZN17  | 1.166    |
| 29305 | P0C214 | Q9UHA2  | 0.21221  |
| 29306 | P0C214 | P59036  | 0.086276 |
| 29307 | P0C214 | P07315  | 0.5283   |
| 29308 | P0C214 | Q16543  | 0.51688  |
| 29309 | P0C214 | Q9HBK9  | 0.26451  |
| 29310 | P0C214 | Q8WV28  | 0.23792  |
| 29311 | P0C214 | Q14264  | 0.35694  |
| 29312 | P0C214 | Q96GA3  | 0.83325  |
| 29313 | P0C214 | P35237  | 0.78945  |
| 29314 | P0C214 | Q9Y617  | 0.18141  |
| 29315 | P0C214 | Q5XUX1  | 0.2675   |
| 29316 | P0C214 | P62316  | 0.86673  |
| 29317 | P0C214 | Q2M2I5  | 0.58756  |
| 29318 | P0C214 | Q9NS37  | 0.75851  |
| 29319 | P0C214 | Q9ULX3  | 0.73115  |
| 29320 | P0C214 | Q96PQ5  | 0.31698  |
| 29321 | P0C214 | Q14746  | 0.23069  |
| 29322 | P0C214 | O60346  | 0.23914  |
| 29323 | P0C214 | Q16254  | 0.91568  |
| 29324 | P0C214 | O75161  | 0.79218  |
| 29325 | P0C214 | Q9BU02  | 0.63896  |
| 29326 | P0C214 | Q9BYD2  | 0.65728  |
| 29327 | P0C214 | P49589  | 0.59731  |
| 29328 | P0C214 | Q9BSY4  | 0.49121  |
| 29329 | P0C214 | P52209  | 0.25295  |
| 29330 | P0C214 | A6ZKI3  | 0.037258 |
| 29331 | P0C214 | Q9NXB9  | 0.18079  |
| 29332 | P0C214 | A7E2Y1  | 0.89031  |
| 29333 | P0C214 | Q16864  | 0.041016 |
| 29334 | P0C214 | O00411  | 0.58296  |
| 29335 | P0C214 | O00534  | 0.28903  |
| 29336 | P0C214 | Q8TBZ8  | 0.30731  |

|       |        |        |          |
|-------|--------|--------|----------|
| 29337 | P0C214 | Q96QE5 | 0.90707  |
| 29338 | P0C214 | P25789 | 0.80504  |
| 29339 | P0C214 | Q8IZC7 | 0.18328  |
| 29340 | P0C214 | Q9H633 | 0.43118  |
| 29341 | P0C214 | Q96LV5 | 0.032037 |
| 29342 | P0C214 | O75467 | 0.25256  |
| 29343 | P0C214 | Q9HCS7 | 0.42757  |
| 29344 | P0C214 | Q6ZN11 | 0.28997  |
| 29345 | P0C214 | O14529 | 0.23676  |
| 29346 | P0C214 | Q5JQC4 | 0.086276 |
| 29347 | P0C214 | Q96A49 | 1.0901   |
| 29348 | P0C214 | Q9H4X1 | 0.76162  |
| 29349 | P0C214 | Q8N9V7 | 0.18802  |
| 29350 | P0C214 | O75691 | 0.72324  |
| 29351 | P0C214 | Q6TDU7 | 0.16831  |
| 29352 | P0C214 | Q96LW9 | 0.25728  |
| 29353 | P0C214 | A0PG75 | 0.072794 |
| 29354 | P0C214 | Q86TA1 | 0.24065  |
| 29355 | P0C214 | P60014 | 0.5539   |
| 29356 | P0C214 | Q9UNZ5 | 0.24937  |
| 29357 | P0C214 | Q9UID6 | 0.43062  |
| 29358 | P0C214 | P20290 | 1.083    |
| 29359 | P0C214 | P11308 | 0.40685  |
| 29360 | P0C214 | O15117 | 0.64132  |
| 29361 | P0C214 | Q00653 | 1.188    |
| 29362 | P0C214 | P27695 | 0.56236  |
| 29363 | P0C214 | Q9BXY0 | 0.16769  |
| 29364 | P0C214 | Q96LI9 | 0.075677 |
| 29365 | P0C214 | Q8IXQ6 | 0.92806  |
| 29366 | P0C214 | Q8N573 | 0.14574  |
| 29367 | P0C214 | P05937 | 0.27333  |
| 29368 | P0C214 | Q9BUL9 | 1.0716   |
| 29369 | P0C214 | Q14159 | 0.99264  |
| 29370 | P0C214 | P32243 | 0.73208  |
| 29371 | P0C214 | O60239 | 0.36513  |
| 29372 | P0C214 | Q96EL2 | 0.36621  |
| 29373 | P0C214 | P09917 | 0.32454  |
| 29374 | P0C214 | P49754 | 0.39069  |
| 29375 | P0C214 | Q8N228 | 0.242    |
| 29376 | P0C214 | P35321 | 0.32578  |
| 29377 | P0C214 | Q5T035 | 0.11107  |
| 29378 | P0C214 | Q05932 | 0.29432  |
| 29379 | P0C214 | Q9BYD1 | 0.84108  |
| 29380 | P0C214 | O43365 | 0.33513  |
| 29381 | P0C214 | Q6ZTI0 | 0.086276 |
| 29382 | P0C214 | Q68DX3 | 0.33652  |
| 29383 | P0C214 | Q9NVH2 | 0.1981   |
| 29384 | P0C214 | P35813 | 0.35275  |
| 29385 | P0C214 | Q6ZNA1 | 0.37033  |
| 29386 | P0C214 | Q00597 | 0.80726  |
| 29387 | P0C214 | Q9ULR0 | 0.9001   |
| 29388 | P0C214 | Q9UGY1 | 0.20534  |
| 29389 | P0C214 | P83369 | 0.64813  |
| 29390 | P0C214 | P38432 | 0.66832  |
| 29391 | P0C214 | Q9H9J2 | 0.3993   |
| 29392 | P0C214 | P63000 | 0.50445  |
| 29393 | P0C214 | Q09161 | 0.82825  |
| 29394 | P0C214 | Q75MW2 | 0.67518  |
| 29395 | P0C214 | Q16537 | 0.24755  |
| 29396 | P0C214 | O75874 | 0.20064  |
| 29397 | P0C214 | Q9P0T4 | 0.47613  |
| 29398 | P0C214 | O43805 | 0.53033  |
| 29399 | P0C214 | Q8N377 | 0.086276 |
| 29400 | P0C214 | Q7Z6J0 | 0.36493  |
| 29401 | P0C214 | P35789 | 0.43494  |
| 29402 | P0C214 | Q16763 | 0.92173  |
| 29403 | P0C214 | Q96NT3 | 0.14522  |
| 29404 | P0C214 | O75486 | 0.8041   |
| 29405 | P0C214 | P12035 | 0.44022  |
| 29406 | P0C214 | Q8NDQ6 | 0.35056  |
| 29407 | P0C214 | Q9UJK0 | 0.69155  |
| 29408 | P0C214 | Q9H5I1 | 0.4967   |
| 29409 | P0C214 | Q96PM5 | 0.52843  |
| 29410 | P0C214 | Q13887 | 0.25691  |
| 29411 | P0C214 | Q9NSE4 | 0.42675  |
| 29412 | P0C214 | Q9H0A6 | 0.28844  |



|       |        |        |          |
|-------|--------|--------|----------|
| 29413 | P0C214 | Q59F38 | 0.09337  |
| 29414 | P0C214 | Q96C86 | 1.1084   |
| 29415 | P0C214 | P35227 | 0.6041   |
| 29416 | P0C214 | O95817 | 0.51725  |
| 29417 | P0C214 | O14786 | 0.38641  |
| 29418 | P0C214 | P49639 | 0.19275  |
| 29419 | P0C214 | O43678 | 0.60373  |
| 29420 | P0C214 | P26196 | 0.68172  |
| 29421 | P0C214 | Q9BQS6 | 0.78784  |
| 29422 | P0C214 | P14625 | 0.8256   |
| 29423 | P0C214 | Q8IX12 | 0.92762  |
| 29424 | P0C214 | Q9BQ65 | 0.10652  |
| 29425 | P0C214 | P15880 | 1.1747   |
| 29426 | P0C214 | Q6IS14 | 0.22733  |
| 29427 | P0C214 | Q8ND56 | 0.55079  |
| 29428 | P0C214 | Q96T58 | 0.66293  |
| 29429 | P0C214 | P55036 | 0.72371  |
| 29430 | P0C214 | Q5XKP0 | 0.46184  |
| 29431 | P0C214 | O76013 | 0.51477  |
| 29432 | P0C214 | Q96HI0 | 0.48359  |
| 29433 | P0C214 | P17032 | 0.28667  |
| 29434 | P0C214 | P61244 | 0.78256  |
| 29435 | P0C214 | Q12894 | 0.39711  |
| 29436 | P0C214 | Q9ULE6 | 0.74795  |
| 29437 | P0C214 | O14595 | 0.1896   |
| 29438 | P0C214 | Q06609 | 0.41319  |
| 29439 | P0C214 | Q5H9M0 | 0.93308  |
| 29440 | P0C214 | O75663 | 0.38021  |
| 29441 | P0C214 | P62081 | 1.2121   |
| 29442 | P0C214 | P42766 | 1.0598   |
| 29443 | P0C214 | Q9H040 | 0.39826  |
| 29444 | P0C214 | P11413 | 0.15753  |
| 29445 | P0C214 | Q12904 | 0.35796  |
| 29446 | P0C214 | Q14593 | 0.4838   |
| 29447 | P0C214 | B1AH88 | 0.086276 |
| 29448 | P0C214 | Q15697 | 0.41118  |
| 29449 | P0C214 | Q8WW12 | 0.58979  |
| 29450 | P0C214 | Q9NV31 | 0.84485  |
| 29451 | P0C214 | A6NGD5 | 0.22448  |
| 29452 | P0C214 | A8MVS1 | 0.48315  |
| 29453 | P0C214 | Q6U949 | 0.086276 |
| 29454 | P0C214 | Q7L8S5 | 0.37727  |
| 29455 | P0C214 | Q9Y5Z7 | 0.32801  |
| 29456 | P0C214 | Q9HCZ1 | 0.27075  |
| 29457 | P0C214 | Q9UI10 | 0.43653  |
| 29458 | P0C214 | P30307 | 0.78514  |
| 29459 | P0C214 | P19474 | 0.45316  |
| 29460 | P0C214 | Q14CX7 | 0.42462  |
| 29461 | P0C214 | P84101 | 0.75796  |
| 29462 | P0C214 | Q9H606 | 0.07667  |
| 29463 | P0C214 | Q02930 | 0.69066  |
| 29464 | P0C214 | Q04727 | 0.55649  |
| 29465 | P0C214 | Q9H875 | 0.31171  |
| 29466 | P0C214 | Q6P0N0 | 0.93317  |
| 29467 | P0C214 | P56270 | 0.51272  |
| 29468 | P0C214 | Q7L3T8 | 0.33602  |
| 29469 | P0C214 | Q9Y2S7 | 0.66839  |
| 29470 | P0C214 | Q7Z4Q2 | 0.80089  |
| 29471 | P0C214 | P62913 | 1.2981   |
| 29472 | P0C214 | O43829 | 0.52796  |
| 29473 | P0C214 | Q92546 | 0.81442  |
| 29474 | P0C214 | Q9HAU4 | 0.52804  |
| 29475 | P0C214 | Q29RF7 | 0.94319  |
| 29476 | P0C214 | P48788 | 0.61356  |
| 29477 | P0C214 | Q9UK99 | 0.39219  |
| 29478 | P0C214 | P29966 | 0.81427  |
| 29479 | P0C214 | Q5HYW3 | 0.33636  |
| 29480 | P0C214 | Q9NVH6 | 0.33741  |
| 29481 | P0C214 | O15111 | 0.54262  |
| 29482 | P0C214 | Q969Z0 | 0.42597  |
| 29483 | P0C214 | Q15022 | 0.53566  |
| 29484 | P0C214 | P68133 | 0.10604  |
| 29485 | P0C214 | O95810 | 0.30566  |
| 29486 | P0C214 | A0AVK6 | 0.29381  |
| 29487 | P0C214 | P22090 | 0.586    |
| 29488 | P0C214 | Q969G5 | 0.44153  |

|       |        |        |          |
|-------|--------|--------|----------|
| 29489 | P0C214 | Q8IUC1 | 0.16924  |
| 29490 | P0C214 | Q8WXF8 | 1.0814   |
| 29491 | P0C214 | Q9NPP4 | 0.25268  |
| 29492 | P0C214 | Q00613 | 0.78198  |
| 29493 | P0C214 | Q9H3H3 | 0.067003 |
| 29494 | P0C214 | Q9BSJ2 | 1.0983   |
| 29495 | P0C214 | Q6NZ67 | 0.57701  |
| 29496 | P0C214 | P35869 | 0.31809  |
| 29497 | P0C214 | Q7L5A3 | 0.4476   |
| 29498 | P0C214 | Q9Y5V3 | 0.67422  |
| 29499 | P0C214 | P51508 | 0.3048   |
| 29500 | P0C214 | Q13469 | 1.131    |
| 29501 | P0C214 | Q15024 | 0.87089  |
| 29502 | P0C214 | Q7Z398 | 0.26542  |
| 29503 | P0C214 | O95363 | 0.56206  |
| 29504 | P0C214 | Q15154 | 0.55287  |
| 29505 | P0C214 | B9ZVM9 | 1.1928   |
| 29506 | P0C214 | P22695 | 0.10746  |
| 29507 | P0C214 | Q06787 | 0.81438  |
| 29508 | P0C214 | Q9UIA9 | 0.46163  |
| 29509 | P0C214 | Q8IWN6 | 0.13362  |
| 29510 | P0C214 | Q8TAY7 | 1.3916   |
| 29511 | P0C214 | Q9NZY2 | 0.086276 |
| 29512 | P0C214 | Q13573 | 0.61319  |
| 29513 | P0C214 | Q96MC4 | 0.65403  |
| 29514 | P0C214 | O95045 | 0.38549  |
| 29515 | P0C214 | Q9UGB4 | 0.086276 |
| 29516 | P0C214 | Q9NWN3 | 0.36372  |
| 29517 | P0C214 | P53672 | 0.65733  |
| 29518 | P0C214 | Q99643 | 0.35424  |
| 29519 | P0C214 | Q8NCN5 | 0.31705  |
| 29520 | P0C214 | O60663 | 0.37105  |
| 29521 | P0C214 | Q96M53 | 1.0978   |
| 29522 | P0C214 | Q8N0Z2 | 0.24219  |
| 29523 | P0C214 | Q14409 | 0.58072  |
| 29524 | P0C214 | Q9NRL2 | 0.91961  |
| 29525 | P0C214 | Q9BVC4 | 0.42312  |
| 29526 | P0C214 | Q5JVS0 | 0.99479  |
| 29527 | P0C214 | P42166 | 0.15838  |
| 29528 | P0C214 | P04818 | 0.19652  |
| 29529 | P0C214 | Q32M84 | 0.14741  |
| 29530 | P0C214 | Q8WUX2 | 0.27044  |
| 29531 | P0C214 | Q14331 | 0.51198  |
| 29532 | P0C214 | Q99832 | 0.16168  |
| 29533 | P0C214 | P24522 | 0.47492  |
| 29534 | P0C214 | O14787 | 0.84428  |
| 29535 | P0C214 | Q9P299 | 0.080403 |
| 29536 | P0C214 | O43172 | 0.68299  |
| 29537 | P0C214 | Q8WUX9 | 0.48809  |
| 29538 | P0C214 | P16989 | 0.16959  |
| 29539 | P0C214 | O95260 | 0.063476 |
| 29540 | P0C214 | Q15061 | 0.54813  |
| 29541 | P0C214 | Q8N335 | 0.20341  |
| 29542 | P0C214 | Q14207 | 0.85255  |
| 29543 | P0C214 | Q9C002 | 0.18383  |
| 29544 | P0C214 | P51610 | 0.40738  |
| 29545 | P0C214 | P60369 | 0.43378  |
| 29546 | P0C214 | P11474 | 0.24379  |
| 29547 | P0C214 | O14681 | 0.40999  |
| 29548 | P0C214 | Q9H4A6 | 0.48128  |
| 29549 | P0C214 | Q96M95 | 0.070287 |
| 29550 | P0C214 | Q9H6Y2 | 0.44497  |
| 29551 | P0C214 | Q9UGM6 | 0.069137 |
| 29552 | P0C214 | O75528 | 0.69428  |
| 29553 | P0C214 | Q9NPE3 | 0.68813  |
| 29554 | P0C214 | Q58FF7 | 0.49678  |
| 29555 | P0C214 | O60841 | 0.3278   |
| 29556 | P0C214 | Q9BU76 | 0.43827  |
| 29557 | P0C214 | A8MQ14 | 0.29081  |
| 29558 | P0C214 | Q8NEF3 | 0.3475   |
| 29559 | P0C214 | Q15047 | 0.6366   |
| 29560 | P0C214 | Q13330 | 0.34035  |
| 29561 | P0C214 | Q8NFH5 | 0.58641  |
| 29562 | P0C214 | Q5T752 | 0.086276 |
| 29563 | P0C214 | Q96CF2 | 0.146    |
| 29564 | P0C214 | O14746 | 0.58345  |

|       |        |        |          |
|-------|--------|--------|----------|
| 29565 | P0C214 | Q8IZP0 | 0.29899  |
| 29566 | P0C214 | Q8IY31 | 0.39164  |
| 29567 | P0C214 | Q9H788 | 0.93554  |
| 29568 | P0C214 | Q86V87 | 0.41473  |
| 29569 | P0C214 | Q8N2H4 | 1.1044   |
| 29570 | P0C214 | Q71SY5 | 0.97172  |
| 29571 | P0C214 | Q96BT3 | 0.48483  |
| 29572 | P0C214 | P52743 | 0.39773  |
| 29573 | P0C214 | Q99728 | 0.29377  |
| 29574 | P0C214 | Q13620 | 0.75087  |
| 29575 | P0C214 | P35637 | 0.43023  |
| 29576 | P0C214 | O75896 | 0.24882  |
| 29577 | P0C214 | P55060 | 0.73489  |
| 29578 | P0C214 | Q8WY50 | 0.086276 |
| 29579 | P0C214 | Q8N6F7 | 0.37404  |
| 29580 | P0C214 | O94868 | 0.2675   |
| 29581 | P0C214 | Q9BRU2 | 0.45356  |
| 29582 | P0C214 | A6NF83 | 0.55397  |
| 29583 | P0C214 | Q13156 | 0.35739  |
| 29584 | P0C214 | O95238 | 0.080499 |
| 29585 | P0C214 | O95153 | 0.65701  |
| 29586 | P0C214 | Q13952 | 0.60666  |
| 29587 | P0C214 | Q08AD1 | 0.35925  |
| 29588 | P0C214 | Q9BQ83 | 0.54619  |
| 29589 | P0C214 | Q9Y5L5 | 0.93784  |
| 29590 | P0C214 | Q8TBZ0 | 0.27704  |
| 29591 | P0C214 | Q9Y6K9 | 0.95733  |
| 29592 | P0C214 | Q9BT49 | 0.54815  |
| 29593 | P0C214 | Q9BU89 | 0.36654  |
| 29594 | P0C214 | P31350 | 0.51661  |
| 29595 | P0C214 | Q8TD31 | 0.45369  |
| 29596 | P0C214 | Q8IV54 | 0.37495  |
| 29597 | P0C214 | Q5TYX0 | 0.402    |
| 29598 | P0C214 | Q17R26 | 0.35498  |
| 29599 | P0C214 | O94913 | 0.27156  |
| 29600 | P0C214 | P82912 | 0.50373  |
| 29601 | P0C214 | Q06546 | 1.0429   |
| 29602 | P0C214 | Q92901 | 0.86977  |
| 29603 | P0C214 | Q9Y5Q8 | 0.61983  |
| 29604 | P0C214 | P0C7V0 | 0.086276 |
| 29605 | P0C214 | Q8WUY3 | 0.26085  |
| 29606 | P0C214 | Q96P70 | 0.87382  |
| 29607 | P0C214 | Q5HYN5 | 0.22704  |
| 29608 | P0C214 | P62140 | 0.80138  |
| 29609 | P0C214 | O95456 | 0.44945  |
| 29610 | P0C214 | A6NK39 | 0.25676  |
| 29611 | P0C214 | Q13363 | 0.47716  |
| 29612 | P0C214 | P28062 | 0.40103  |
| 29613 | P0C214 | Q14008 | 0.77212  |
| 29614 | P0C214 | Q9UK55 | 0.85505  |
| 29615 | P0C214 | Q4VC44 | 0.16987  |
| 29616 | P0C214 | Q6ZU35 | 0.24937  |
| 29617 | P0C214 | Q5UIP0 | 0.8131   |
| 29618 | P0C214 | Q53QW1 | 0.24937  |
| 29619 | P0C214 | P05783 | 1.1509   |
| 29620 | P0C214 | Q9Y6J9 | 0.72238  |
| 29621 | P0C214 | P62249 | 0.85445  |
| 29622 | P0C214 | Q6RVD6 | 0.086276 |
| 29623 | P0C214 | Q9Y3D9 | 0.41291  |
| 29624 | P0C214 | O75461 | 0.11465  |
| 29625 | P0C214 | P13489 | 0.38968  |
| 29626 | P0C214 | Q8N6T0 | 0.010672 |
| 29627 | P0C214 | Q9P0L1 | 0.2988   |
| 29628 | P0C214 | Q9UKX2 | 0.89031  |
| 29629 | P0C214 | Q0VFX4 | 0.2635   |
| 29630 | P0C214 | Q86YD1 | 0.63582  |
| 29631 | P0C214 | Q9H0A8 | 0.48513  |
| 29632 | P0C214 | P35527 | 0.58756  |
| 29633 | P0C214 | A6NFL8 | 0.49852  |
| 29634 | P0C214 | Q8N8F4 | 0.14839  |
| 29635 | P0C214 | P17010 | 0.25573  |
| 29636 | P0C214 | P61956 | 0.65288  |
| 29637 | P0C214 | O43257 | 0.44843  |
| 29638 | P0C214 | O95633 | 0.27116  |
| 29639 | P0C214 | Q3LHN0 | 0.6322   |
| 29640 | P0C214 | O95478 | 0.40314  |

|       |        |        |          |
|-------|--------|--------|----------|
| 29641 | P0C214 | Q63HK3 | 0.34481  |
| 29642 | P0C214 | Q9Y2G9 | 0.62332  |
| 29643 | P0C214 | Q9ULD5 | 0.23038  |
| 29644 | P0C214 | P55347 | 0.3198   |
| 29645 | P0C214 | Q9Y376 | 0.20674  |
| 29646 | P0C214 | Q6P2E9 | 1.1785   |
| 29647 | P0C214 | Q99747 | 0.42413  |
| 29648 | P0C214 | A8K8V0 | 0.24946  |
| 29649 | P0C214 | F8WFD2 | 0.13188  |
| 29650 | P0C214 | P49368 | 0.26453  |
| 29651 | P0C214 | P23919 | 0.39245  |
| 29652 | P0C214 | Q15388 | 0.18724  |
| 29653 | P0C214 | Q6NXS1 | 0.68669  |
| 29654 | P0C214 | Q86WR0 | 0.037552 |
| 29655 | P0C214 | Q495Z4 | 0.27196  |
| 29656 | P0C214 | Q9UHF7 | 0.34568  |
| 29657 | P0C214 | P49901 | 0.086276 |
| 29658 | P0C214 | Q9H4I8 | 0.27316  |
| 29659 | P0C214 | P09914 | 0.47805  |
| 29660 | P0C214 | O75934 | 0.66077  |
| 29661 | P0C214 | Q8N9N2 | 0.31448  |
| 29662 | P0C214 | P00480 | 0.30825  |
| 29663 | P0C214 | O95198 | 0.32036  |
| 29664 | P0C214 | Q8IYT1 | 0.32585  |
| 29665 | P0C214 | Q969E8 | 1.1057   |
| 29666 | P0C214 | Q1MSJ5 | 0.92214  |
| 29667 | P0C214 | Q8WV44 | 0.36895  |
| 29668 | P0C214 | Q6AWC8 | 0.13764  |
| 29669 | P0C214 | Q9Y4A8 | 0.38157  |
| 29670 | P0C214 | O94986 | 1.1951   |
| 29671 | P0C214 | P62899 | 0.86977  |
| 29672 | P0C214 | O75764 | 0.11999  |
| 29673 | P0C214 | O95453 | 0.63718  |
| 29674 | P0C214 | Q17RA5 | 0.086276 |
| 29675 | P0C214 | Q8IV03 | 0.85366  |
| 29676 | P0C214 | Q9BV47 | 0.42756  |
| 29677 | P0C214 | Q15651 | 0.71738  |
| 29678 | P0C214 | O43830 | 0.22082  |
| 29679 | P0C214 | A5LHX3 | 0.44255  |
| 29680 | P0C214 | Q96S55 | 0.30457  |
| 29681 | P0C214 | Q7Z591 | 0.85227  |
| 29682 | P0C214 | Q9BSF8 | 0.35391  |
| 29683 | P0C214 | Q13547 | 0.77379  |
| 29684 | P0C214 | A8K830 | 0.086276 |
| 29685 | P0C214 | Q12988 | 0.39692  |
| 29686 | P0C214 | Q9BS34 | 0.20002  |
| 29687 | P0C214 | Q9Y2A4 | 0.4876   |
| 29688 | P0C214 | Q14865 | 0.25184  |
| 29689 | P0C214 | Q86Y46 | 0.34216  |
| 29690 | P0C214 | Q9BS18 | 0.35101  |
| 29691 | P0C214 | Q8TEA8 | 0.91447  |
| 29692 | P0C214 | Q8WWW0 | 0.24574  |
| 29693 | P0C214 | P60002 | 0.68831  |
| 29694 | P0C214 | Q8NFI3 | 0.10738  |
| 29695 | P0C214 | Q6PEW1 | 0.069529 |
| 29696 | P0C214 | A7E2U8 | 0.55347  |
| 29697 | P0C214 | P78337 | 0.32964  |
| 29698 | P0C214 | Q6NUI1 | 0.37122  |
| 29699 | P0C214 | Q96KD3 | 0.907    |
| 29700 | P0C214 | Q9HAN9 | 0.49203  |
| 29701 | P0C214 | Q7Z3Y8 | 0.5102   |
| 29702 | P0C214 | Q9HAH7 | 0.32226  |
| 29703 | P0C214 | Q12815 | 0.23856  |
| 29704 | P0C214 | Q9HCD5 | 1.0428   |
| 29705 | P0C214 | Q6IPW1 | 0.43494  |
| 29706 | P0C214 | Q8NEE0 | 0.086276 |
| 29707 | P0C214 | P0CI00 | 0.5624   |
| 29708 | P0C214 | P49959 | 0.1603   |
| 29709 | P0C214 | P35558 | 0.58613  |
| 29710 | P0C214 | P16157 | 0.23817  |
| 29711 | P0C214 | Q8NCR6 | 0.2723   |
| 29712 | P0C214 | P02538 | 0.57271  |
| 29713 | P0C214 | Q12824 | 0.90821  |
| 29714 | P0C214 | Q86VG3 | 0.22321  |
| 29715 | P0C214 | O00762 | 0.66402  |
| 29716 | P0C214 | Q66PJ3 | 0.57695  |

|       |        |        |           |
|-------|--------|--------|-----------|
| 29717 | P0C214 | Q5SNX5 | 0.086276  |
| 29718 | P0C214 | P04264 | 0.20757   |
| 29719 | P0C214 | Q9UPX8 | 0.29151   |
| 29720 | P0C214 | P09913 | 0.62802   |
| 29721 | P0C214 | Q8TE04 | 0.60862   |
| 29722 | P0C214 | Q9H2L5 | 0.5203    |
| 29723 | P0C214 | Q14872 | 0.79      |
| 29724 | P0C214 | Q53EQ6 | 0.31376   |
| 29725 | P0C214 | P11177 | 0.19907   |
| 29726 | P0C214 | Q8IXK0 | 0.13893   |
| 29727 | P0C214 | Q6ZR54 | 0.086276  |
| 29728 | P0C214 | Q96DV4 | 0.22263   |
| 29729 | P0C214 | O00148 | 0.35223   |
| 29730 | P0C214 | Q9HAB8 | 0.44729   |
| 29731 | P0C214 | Q8N7Q3 | 0.37857   |
| 29732 | P0C214 | Q13490 | 0.51641   |
| 29733 | P0C214 | Q13772 | 0.36732   |
| 29734 | P0C214 | Q86SE9 | 0.97022   |
| 29735 | P0C214 | P31249 | 0.39784   |
| 29736 | P0C214 | Q6XCG6 | 0.086276  |
| 29737 | P0C214 | P38159 | 0.60754   |
| 29738 | P0C214 | Q9H816 | 0.42744   |
| 29739 | P0C214 | Q92624 | 0.67383   |
| 29740 | P0C214 | Q6ZRS4 | 0.25438   |
| 29741 | P0C214 | Q16775 | 0.44639   |
| 29742 | P0C214 | Q8IYN0 | 0.36263   |
| 29743 | P0C214 | Q5QP74 | 0.086276  |
| 29744 | P0C214 | P56556 | 0.41917   |
| 29745 | P0C214 | P49902 | 0.26606   |
| 29746 | P0C214 | Q14929 | 0.25251   |
| 29747 | P0C214 | Q9UKF6 | 0.69101   |
| 29748 | P0C214 | Q8NHY5 | 1.0288    |
| 29749 | P0C214 | Q96KR1 | 0.29373   |
| 29750 | P0C214 | Q96C34 | 0.64272   |
| 29751 | P0C214 | Q6IEG0 | 0.31423   |
| 29752 | P0C214 | Q8NF64 | 1.3134    |
| 29753 | P0C214 | P28838 | 0.34249   |
| 29754 | P0C214 | A8MVA2 | 0.43378   |
| 29755 | P0C214 | P17023 | 0.25564   |
| 29756 | P0C214 | Q9NRR8 | 0.49591   |
| 29757 | P0C214 | Q9BX82 | 0.48724   |
| 29758 | P0C214 | Q9BR77 | 0.27061   |
| 29759 | P0C214 | P12757 | 0.26208   |
| 29760 | P0C214 | O75909 | 0.95913   |
| 29761 | P0C214 | A8MV72 | 0.012015  |
| 29762 | P0C214 | Q53HL2 | 0.91805   |
| 29763 | P0C214 | C9JE40 | 0.8012    |
| 29764 | P0C214 | Q8NDD1 | 0.0062454 |
| 29765 | P0C214 | Q5SWL7 | 0.58313   |
| 29766 | P0C214 | Q00005 | 0.38259   |
| 29767 | P0C214 | Q6R2W3 | 0.38236   |
| 29768 | P0C214 | P62854 | 1.0548    |
| 29769 | P0C214 | Q9NWD9 | 0.41726   |
| 29770 | P0C214 | Q6PJ61 | 0.96206   |
| 29771 | P0C214 | P78318 | 0.88955   |
| 29772 | P0C214 | Q9Y2D9 | 0.56957   |
| 29773 | P0C214 | O00321 | 0.20656   |
| 29774 | P0C214 | Q6RW13 | 0.66383   |
| 29775 | P0C214 | P07864 | 1.0002    |
| 29776 | P0C214 | Q6VMQ6 | 0.94906   |
| 29777 | P0C214 | P56945 | 0.54264   |
| 29778 | P0C214 | Q9Y4C2 | 0.2489    |
| 29779 | P0C214 | Q9H201 | 0.20521   |
| 29780 | P0C214 | Q13505 | 0.78974   |
| 29781 | P0C214 | Q14591 | 0.22636   |
| 29782 | P0C214 | P30876 | 0.56203   |
| 29783 | P0C214 | Q16740 | 0.32252   |
| 29784 | P0C214 | Q96JN0 | 0.42574   |
| 29785 | P0C214 | O75351 | 0.2885    |
| 29786 | P0C214 | Q9Y5A6 | 0.65582   |
| 29787 | P0C214 | Q86W67 | 0.060555  |
| 29788 | P0C214 | P53992 | 0.96757   |
| 29789 | P0C214 | O43264 | 0.49313   |
| 29790 | P0C214 | Q8NI35 | 0.24774   |
| 29791 | P0C214 | Q5T9C2 | 0.24937   |
| 29792 | P0C214 | P28065 | 0.76068   |

|       |        |         |          |
|-------|--------|---------|----------|
| 29793 | P0C214 | O15194  | 0.074564 |
| 29794 | P0C214 | P39019  | 1.0557   |
| 29795 | P0C214 | O96033  | 0.20122  |
| 29796 | P0C214 | Q6ZN57  | 0.22955  |
| 29797 | P0C214 | P62263  | 0.72831  |
| 29798 | P0C214 | Q9HAV7  | 0.49939  |
| 29799 | P0C214 | Q8NDF8  | 0.29572  |
| 29800 | P0C214 | Q9P2B7  | 0.24937  |
| 29801 | P0C214 | Q8N5D0  | 0.56789  |
| 29802 | P0C214 | Q8IWP9  | 0.81347  |
| 29803 | P0C214 | P51814  | 0.20378  |
| 29804 | P0C214 | O75347  | 1.1235   |
| 29805 | P0C214 | P02042  | 0.3641   |
| 29806 | P0C214 | Q5T5D7  | 0.20437  |
| 29807 | P0C214 | O95684  | 0.85563  |
| 29808 | P0C214 | Q9H706  | 0.2675   |
| 29809 | P0C214 | Q08999  | 1.2333   |
| 29810 | P0C214 | Q86Y79  | 0.49873  |
| 29811 | P0C214 | Q9BRP8  | 1.0545   |
| 29812 | P0C214 | P60842  | 0.30637  |
| 29813 | P0C214 | Q8N7X2  | 0.086276 |
| 29814 | P0C214 | P19838  | 0.66343  |
| 29815 | P0C214 | Q05481  | 0.38021  |
| 29816 | P0C214 | Q6UUUV7 | 1.6697   |
| 29817 | P0C214 | P46087  | 0.75649  |
| 29818 | P0C214 | Q6ZP68  | 0.62598  |
| 29819 | P0C214 | P82675  | 0.52012  |
| 29820 | P0C214 | P14921  | 0.70892  |
| 29821 | P0C214 | P0C843  | 0.020304 |
| 29822 | P0C214 | Q15628  | 0.59177  |
| 29823 | P0C214 | A6NHJ4  | 0.49186  |
| 29824 | P0C214 | A1L190  | 0.69814  |
| 29825 | P0C214 | O94842  | 0.58949  |
| 29826 | P0C214 | Q96SQ5  | 0.30462  |
| 29827 | P0C214 | Q9H9E3  | 0.31755  |
| 29828 | P0C214 | P57721  | 0.70133  |
| 29829 | P0C214 | Q86XF0  | 0.1818   |
| 29830 | P0C214 | P49770  | 0.35447  |
| 29831 | P0C214 | Q9Y3F1  | 0.086276 |
| 29832 | P0C214 | Q9UI12  | 0.056885 |
| 29833 | P0C214 | Q8WUF5  | 0.74194  |
| 29834 | P0C214 | Q6ZU67  | 0.3852   |
| 29835 | P0C214 | Q92664  | 0.10599  |
| 29836 | P0C214 | Q96MT4  | 0.53987  |
| 29837 | P0C214 | Q0VG73  | 0.086276 |
| 29838 | P0C214 | Q6ZRH4  | 1.1176   |
| 29839 | P0C214 | Q15486  | 0.40142  |
| 29840 | P0C214 | Q9Y3C4  | 0.53551  |
| 29841 | P0C214 | Q9H079  | 0.33626  |
| 29842 | P0C214 | Q9NRI5  | 0.27882  |
| 29843 | P0C214 | Q9Y262  | 0.74286  |
| 29844 | P0C214 | P0CB33  | 0.44927  |
| 29845 | P0C214 | Q86XA9  | 0.26755  |
| 29846 | P0C214 | P41227  | 0.37556  |
| 29847 | P0C214 | Q9UL59  | 0.31247  |
| 29848 | P0C214 | Q8IVF1  | 0.91547  |
| 29849 | P0C214 | Q15013  | 0.76378  |
| 29850 | P0C214 | Q3SYF9  | 0.086276 |
| 29851 | P0C214 | Q8N402  | 0.074324 |
| 29852 | P0C214 | P15259  | 1.128    |
| 29853 | P0C214 | P30153  | 0.56538  |
| 29854 | P0C214 | P78371  | 0.76281  |
| 29855 | P0C214 | O75925  | 0.49633  |
| 29856 | P0C214 | Q7Z4H3  | 0.28632  |
| 29857 | P0C214 | P52744  | 0.30614  |
| 29858 | P0C214 | P41002  | 0.87346  |
| 29859 | P0C214 | Q9UJW0  | 0.4826   |
| 29860 | P0C214 | Q9BSB4  | 0.2423   |
| 29861 | P0C214 | Q8N584  | 0.55956  |
| 29862 | P0C214 | Q8WXE1  | 0.62091  |
| 29863 | P0C214 | Q96IV0  | 0.45469  |
| 29864 | P0C214 | Q9UPV9  | 0.77336  |
| 29865 | P0C214 | Q02241  | 0.61714  |
| 29866 | P0C214 | Q6ZNH5  | 0.28971  |
| 29867 | P0C214 | Q75NE6  | 1.0342   |
| 29868 | P0C214 | P13646  | 0.55013  |

|       |        |        |          |
|-------|--------|--------|----------|
| 29869 | P0C214 | Q9BRV8 | 0.57768  |
| 29870 | P0C214 | Q96JI7 | 0.64328  |
| 29871 | P0C214 | Q9Y6C7 | 0.086276 |
| 29872 | P0C214 | Q9NQ35 | 0.59129  |
| 29873 | P0C214 | Q15573 | 0.40209  |
| 29874 | P0C214 | Q6ZUG5 | 0.020415 |
| 29875 | P0C214 | Q9H9Y6 | 0.67702  |
| 29876 | P0C214 | Q96IZ0 | 0.64959  |
| 29877 | P0C214 | Q5SXJ2 | 1.2293   |
| 29878 | P0C214 | Q9Y2J4 | 0.34989  |
| 29879 | P0C214 | Q3KNT7 | 0.2308   |
| 29880 | P0C214 | Q14497 | 0.67251  |
| 29881 | P0C214 | Q6AI08 | 0.48229  |
| 29882 | P0C214 | Q7Z5D8 | 0.40657  |
| 29883 | P0C214 | Q9NXZ1 | 0.16769  |
| 29884 | P0C214 | Q52LR7 | 0.36197  |
| 29885 | P0C214 | Q9NXX6 | 0.3376   |
| 29886 | P0C214 | P0C6E6 | 0.13509  |
| 29887 | P0C214 | Q9H0U6 | 0.42926  |
| 29888 | P0C214 | P62993 | 0.25958  |
| 29889 | P0C214 | P02533 | 0.86902  |
| 29890 | P0C214 | Q5T5J6 | 0.81315  |
| 29891 | P0C214 | P59780 | 0.07925  |
| 29892 | P0C214 | Q6BDS2 | 0.20101  |
| 29893 | P0C214 | Q5JVG8 | 0.46355  |
| 29894 | P0C214 | Q96BY2 | 0.40263  |
| 29895 | P0C214 | Q8N699 | 0.1459   |
| 29896 | P0C214 | Q9UJJ7 | 0.43032  |
| 29897 | P0C214 | Q9BU68 | 0.20005  |
| 29898 | P0C214 | A6NJV1 | 0.17012  |
| 29899 | P0C214 | Q8IWI8 | 0.30132  |
| 29900 | P0C214 | Q8NC26 | 0.41325  |
| 29901 | P0C214 | P49789 | 0.69453  |
| 29902 | P0C214 | Q5SYE7 | 0.33359  |
| 29903 | P0C214 | Q9UJY5 | 0.39473  |
| 29904 | P0C214 | Q9P0V3 | 0.56008  |
| 29905 | P0C214 | Q0VF49 | 0.086276 |
| 29906 | P0C214 | Q5TG53 | 0.086276 |
| 29907 | P0C214 | Q9BY44 | 0.35213  |
| 29908 | P0C214 | Q96I59 | 0.73781  |
| 29909 | P0C214 | Q75586 | 0.62749  |
| 29910 | P0C214 | Q9NYK5 | 0.6721   |
| 29911 | P0C214 | Q7Z3Y7 | 0.38714  |
| 29912 | P0C214 | Q8N5A5 | 0.68783  |
| 29913 | P0C214 | Q14829 | 0.30127  |
| 29914 | P0C214 | P15336 | 0.78122  |
| 29915 | P0C214 | Q9UFW8 | 0.34832  |
| 29916 | P0C214 | Q96MC9 | 0.93983  |
| 29917 | P0C214 | Q969Q6 | 0.20171  |
| 29918 | P0C214 | Q969S8 | 0.72963  |
| 29919 | P0C214 | Q9BUI4 | 0.16748  |
| 29920 | P0C214 | Q9P086 | 0.98887  |
| 29921 | P0C214 | Q96M91 | 0.56431  |
| 29922 | P0C214 | Q75390 | 0.37778  |
| 29923 | P0C214 | P78543 | 0.55792  |
| 29924 | P0C214 | Q7Z6G3 | 0.37391  |
| 29925 | P0C214 | Q9Y473 | 0.3031   |
| 29926 | P0C214 | Q06547 | 0.9729   |
| 29927 | P0C214 | Q13568 | 1.0042   |
| 29928 | P0C214 | Q86Y56 | 0.016653 |
| 29929 | P0C214 | Q6V702 | 0.093126 |
| 29930 | P0C214 | Q9NRR5 | 0.82926  |
| 29931 | P0C214 | P52657 | 1.1526   |
| 29932 | P0C214 | Q92889 | 0.19799  |
| 29933 | P0C214 | Q96LW1 | 0.47199  |
| 29934 | P0C214 | P54922 | 0.46105  |
| 29935 | P0C214 | P13010 | 0.3707   |
| 29936 | P0C214 | Q8IZL2 | 0.81561  |
| 29937 | P0C214 | P06746 | 0.40937  |
| 29938 | P0C214 | P02489 | 0.26511  |
| 29939 | P0C214 | Q9BYQ5 | 0.43378  |
| 29940 | P0C214 | Q9NS23 | 0.23376  |
| 29941 | P0C214 | Q8IUC6 | 0.23121  |
| 29942 | P0C214 | Q9P016 | 0.13404  |
| 29943 | P0C214 | Q43913 | 0.37394  |
| 29944 | P0C214 | Q15051 | 0.46852  |

|       |        |        |          |
|-------|--------|--------|----------|
| 29945 | P0C214 | A6NP11 | 0.50756  |
| 29946 | P0C214 | Q5SVZ6 | 0.71154  |
| 29947 | P0C214 | C9J302 | 0.14467  |
| 29948 | P0C214 | Q16540 | 0.28646  |
| 29949 | P0C214 | Q99698 | 0.24147  |
| 29950 | P0C214 | Q9BUT9 | 0.93811  |
| 29951 | P0C214 | P54253 | 0.88897  |
| 29952 | P0C214 | Q6P1X6 | 0.47099  |
| 29953 | P0C214 | Q9NQ55 | 0.32844  |
| 29954 | P0C214 | P54098 | 0.437    |
| 29955 | P0C214 | Q15003 | 0.79975  |
| 29956 | P0C214 | Q9UH90 | 0.34482  |
| 29957 | P0C214 | Q9NQ89 | 0.22796  |
| 29958 | P0C214 | O14879 | 0.8085   |
| 29959 | P0C214 | Q969H6 | 0.89618  |
| 29960 | P0C214 | Q6ZS17 | 0.4149   |
| 29961 | P0C214 | I3L1I5 | 0.33801  |
| 29962 | P0C214 | Q9UHQ7 | 0.51847  |
| 29963 | P0C214 | Q9H9F9 | 1.1324   |
| 29964 | P0C214 | Q96I27 | 0.22501  |
| 29965 | P0C214 | Q7L0Y3 | 0.98738  |
| 29966 | P0C214 | Q9BRA2 | 0.58224  |
| 29967 | P0C214 | Q9U1L8 | 0.25884  |
| 29968 | P0C214 | Q96G75 | 0.079678 |
| 29969 | P0C214 | Q96S95 | 0.40139  |
| 29970 | P0C214 | Q9NP81 | 0.52517  |
| 29971 | P0C214 | Q8WXC7 | 0.42083  |
| 29972 | P0C214 | Q9BYP8 | 0.086276 |
| 29973 | P0C214 | Q6UX04 | 0.65778  |
| 29974 | P0C214 | Q16186 | 0.54822  |
| 29975 | P0C214 | P21675 | 0.38579  |
| 29976 | P0C214 | Q7L266 | 0.25538  |
| 29977 | P0C214 | O15535 | 0.21155  |
| 29978 | P0C214 | O00159 | 0.073424 |
| 29979 | P0C214 | P53803 | 0.78265  |
| 29980 | P0C214 | Q9BRK4 | 0.64956  |
| 29981 | P0C214 | Q9H8S9 | 0.54429  |
| 29982 | P0C214 | Q9H175 | 0.92208  |
| 29983 | P0C214 | Q9BXS1 | 0.41641  |
| 29984 | P0C214 | P84103 | 0.57542  |
| 29985 | P0C214 | Q15361 | 0.69493  |
| 29986 | P0C214 | A2BFH1 | 0.77514  |
| 29987 | P0C214 | Q96QR8 | 0.33811  |
| 29988 | P0C214 | Q8TD17 | 0.22145  |
| 29989 | P0C214 | Q6PG37 | 0.50814  |
| 29990 | P0C214 | P12081 | 0.02571  |
| 29991 | P0C214 | P46379 | 0.25015  |
| 29992 | P0C214 | O43159 | 0.85111  |
| 29993 | P0C214 | Q8N0Z6 | 0.22269  |
| 29994 | P0C214 | Q6L8H1 | 0.086276 |
| 29995 | P0C214 | Q5I0G3 | 0.40746  |
| 29996 | P0C214 | Q6PJG6 | 0.63046  |
| 29997 | P0C214 | O60716 | 0.51615  |
| 29998 | P0C214 | Q7Z699 | 0.2397   |
| 29999 | P0C214 | Q9NPI6 | 1.1088   |
| 30000 | P0C214 | Q99865 | 0.14921  |
| 30001 | P0C214 | Q96GK7 | 0.48674  |
| 30002 | P0C214 | Q96ED9 | 0.28421  |
| 30003 | P0C214 | Q9NVU0 | 0.41567  |
| 30004 | P0C214 | Q53TQ3 | 0.50282  |
| 30005 | P0C214 | P07476 | 0.21182  |
| 30006 | P0C214 | Q9BTX9 | 0.63452  |
| 30007 | P0C214 | Q86V81 | 0.91689  |
| 30008 | P0C214 | P43360 | 0.41816  |
| 30009 | P0C214 | A6NHQ4 | 0.1985   |
| 30010 | P0C214 | Q96LI6 | 0.36475  |
| 30011 | P0C214 | P57772 | 0.70618  |
| 30012 | P0C214 | Q9UJ94 | 0.086276 |
| 30013 | P0C214 | Q2NL68 | 0.24937  |
| 30014 | P0C214 | Q6P161 | 0.12426  |
| 30015 | P0C214 | P22735 | 0.1359   |
| 30016 | P0C214 | Q9NTW7 | 0.46536  |
| 30017 | P0C214 | P02511 | 0.47097  |
| 30018 | P0C214 | Q8TF45 | 0.25925  |
| 30019 | P0C214 | Q04917 | 0.23645  |
| 30020 | P0C214 | O76015 | 0.5102   |



|       |        |        |          |
|-------|--------|--------|----------|
| 30021 | P0C214 | P0C7V9 | 0.37656  |
| 30022 | P0C214 | Q9BSI4 | 0.10549  |
| 30023 | P0C214 | O60759 | 0.32417  |
| 30024 | P0C214 | P48643 | 0.13685  |
| 30025 | P0C214 | Q9Y2K3 | 0.89031  |
| 30026 | P0C214 | O60826 | 0.7296   |
| 30027 | P0C214 | O94811 | 0.35929  |
| 30028 | P0C214 | Q9UBB4 | 1.0936   |
| 30029 | P0C214 | Q08379 | 0.22202  |
| 30030 | P0C214 | O43186 | 0.73974  |
| 30031 | P0C214 | P48552 | 0.62283  |
| 30032 | P0C214 | Q9BWC9 | 0.70657  |
| 30033 | P0C214 | A8MZF0 | 0.24937  |
| 30034 | P0C214 | B3EWG5 | 0.24937  |
| 30035 | P0C214 | Q9BSM1 | 0.99405  |
| 30036 | P0C214 | P86479 | 0.086276 |
| 30037 | P0C214 | Q96A44 | 0.46359  |
| 30038 | P0C214 | Q9NWS8 | 0.64205  |
| 30039 | P0C214 | Q8NG57 | 0.31331  |
| 30040 | P0C214 | P62380 | 0.11343  |
| 30041 | P0C214 | Q9Y676 | 0.61883  |
| 30042 | P0C214 | Q16656 | 0.3444   |
| 30043 | P0C214 | A8MTY7 | 0.43378  |
| 30044 | P0C214 | Q9UKJ5 | 0.27919  |
| 30045 | P0C214 | Q14164 | 0.26145  |
| 30046 | P0C214 | Q9C0F0 | 0.34036  |
| 30047 | P0C214 | P61758 | 0.61963  |
| 30048 | P0C214 | O75820 | 0.26437  |
| 30049 | P0C214 | Q9UPT5 | 0.49502  |
| 30050 | P0C214 | Q96F24 | 0.65072  |
| 30051 | P0C214 | Q9BPZ2 | 0.1626   |
| 30052 | P0C214 | Q6DKK2 | 0.85131  |
| 30053 | P0C214 | Q5VTL8 | 0.49481  |
| 30054 | P0C214 | Q14203 | 0.8963   |
| 30055 | P0C214 | P53396 | 0.24387  |
| 30056 | P0C214 | Q9BWM5 | 0.30522  |
| 30057 | P0C214 | Q8TAQ5 | 0.3804   |
| 30058 | P0C214 | Q9Y281 | 0.46018  |
| 30059 | P0C214 | Q92934 | 0.070743 |
| 30060 | P0C214 | P31314 | 0.44717  |
| 30061 | P0C214 | Q9UDW3 | 0.25982  |
| 30062 | P0C214 | P23381 | 0.50782  |
| 30063 | P0C214 | Q96N21 | 0.38524  |
| 30064 | P0C214 | Q9BYR7 | 0.92503  |
| 30065 | P0C214 | Q9UNX4 | 0.28317  |
| 30066 | P0C214 | Q86TS9 | 0.31815  |
| 30067 | P0C214 | P52742 | 0.34248  |
| 30068 | P0C214 | Q13625 | 0.38016  |
| 30069 | P0C214 | Q9Y5S9 | 0.85649  |
| 30070 | P0C214 | Q5TB30 | 0.33549  |
| 30071 | P0C214 | P07741 | 0.39871  |
| 30072 | P0C214 | Q6ZTU2 | 0.5536   |
| 30073 | P0C214 | Q9BZK3 | 0.53566  |
| 30074 | P0C214 | Q8NCR3 | 0.17761  |
| 30075 | P0C214 | O94888 | 0.33185  |
| 30076 | P0C214 | Q96DB2 | 0.23087  |
| 30077 | P0C214 | Q8IU53 | 0.16193  |
| 30078 | P0C214 | A6NFY7 | 0.5047   |
| 30079 | P0C214 | P61571 | 0.36767  |
| 30080 | P0C214 | Q96FJ8 | 0.086276 |
| 30081 | P0C214 | P01011 | 0.8218   |
| 30082 | P0C214 | O60543 | 0.36354  |
| 30083 | P0C214 | P51003 | 0.22844  |
| 30084 | P0C214 | Q93015 | 0.43723  |
| 30085 | P0C214 | P27348 | 0.28134  |
| 30086 | P0C214 | Q7Z4H7 | 0.73887  |
| 30087 | P0C214 | Q8NET4 | 0.50063  |
| 30088 | P0C214 | Q8TC56 | 0.907    |
| 30089 | P0C214 | Q14645 | 0.14089  |
| 30090 | P0C214 | G3V211 | 0.5062   |
| 30091 | P0C214 | P62273 | 0.92915  |
| 30092 | P0C214 | P81274 | 0.51145  |
| 30093 | P0C214 | Q13769 | 0.53429  |
| 30094 | P0C214 | Q14587 | 0.24611  |
| 30095 | P0C214 | Q8WTW4 | 0.23352  |
| 30096 | P0C214 | Q5TCQ9 | 0.53213  |

|       |        |        |          |
|-------|--------|--------|----------|
| 30097 | POC214 | O60739 | 0.2439   |
| 30098 | POC214 | Q12873 | 0.56405  |
| 30099 | POC214 | P15407 | 0.62436  |
| 30100 | POC214 | O95295 | 0.47055  |
| 30101 | POC214 | Q9NPC7 | 0.20138  |
| 30102 | POC214 | Q9NP92 | 0.8541   |
| 30103 | POC214 | A4D0Y5 | 0.086276 |
| 30104 | POC214 | Q86U90 | 0.61031  |
| 30105 | POC214 | P51825 | 0.92592  |
| 30106 | POC214 | Q9BYR5 | 0.43378  |
| 30107 | POC214 | P52655 | 1.1378   |
| 30108 | POC214 | A6NCD4 | 0.1624   |
| 30109 | POC214 | Q5VWN6 | 0.13677  |
| 30110 | POC214 | P06748 | 0.41808  |
| 30111 | POC214 | O60508 | 0.29893  |
| 30112 | POC214 | Q9P209 | 0.77758  |
| 30113 | POC214 | Q96GT9 | 0.32396  |
| 30114 | POC214 | O95628 | 0.91542  |
| 30115 | POC214 | Q96LC9 | 0.58124  |
| 30116 | POC214 | Q6ZUT1 | 0.086276 |
| 30117 | POC214 | Q13829 | 0.71584  |
| 30118 | POC214 | Q8WYN3 | 0.48016  |
| 30119 | POC214 | Q9Y3C0 | 0.2517   |
| 30120 | POC214 | Q6K0P9 | 0.18039  |
| 30121 | POC214 | P35269 | 1.0799   |
| 30122 | POC214 | Q15554 | 0.41032  |
| 30123 | POC214 | P50750 | 0.312    |
| 30124 | POC214 | Q96LT6 | 0.17118  |
| 30125 | POC214 | Q86UE3 | 0.37033  |
| 30126 | POC214 | P60371 | 0.43378  |
| 30127 | POC214 | Q659A1 | 0.079957 |
| 30128 | POC214 | P26599 | 0.31298  |
| 30129 | POC214 | Q8NHQ1 | 1.3814   |
| 30130 | POC214 | Q9UIH9 | 0.31943  |
| 30131 | POC214 | P58505 | 0.17054  |
| 30132 | POC214 | P23396 | 0.92076  |
| 30133 | POC214 | P27815 | 0.43999  |
| 30134 | POC214 | Q92900 | 0.62181  |
| 30135 | POC214 | Q6ZQR2 | 0.9143   |
| 30136 | POC214 | O00458 | 0.7619   |
| 30137 | POC214 | Q9Y255 | 0.09056  |
| 30138 | POC214 | Q9H1E3 | 0.53076  |
| 30139 | POC214 | Q7L590 | 0.9859   |
| 30140 | POC214 | P18077 | 0.75023  |
| 30141 | POC214 | Q9UI25 | 0.086276 |
| 30142 | POC214 | Q9HD15 | 0.45833  |
| 30143 | POC214 | Q8TBC5 | 0.067802 |
| 30144 | POC214 | P19484 | 0.44689  |
| 30145 | POC214 | P25208 | 0.53526  |
| 30146 | POC214 | Q2TAK8 | 0.58259  |
| 30147 | POC214 | Q99081 | 0.3787   |
| 30148 | POC214 | Q00987 | 0.31125  |
| 30149 | POC214 | O15235 | 0.73233  |
| 30150 | POC214 | A6NJR5 | 0.28575  |
| 30151 | POC214 | O95567 | 0.086276 |
| 30152 | POC214 | Q96FX2 | 0.86903  |
| 30153 | POC214 | Q9GZU2 | 0.45087  |
| 30154 | POC214 | Q9GZV4 | 0.71056  |
| 30155 | POC214 | O15037 | 0.17626  |
| 30156 | POC214 | Q8NDP4 | 0.30705  |
| 30157 | POC214 | O00267 | 0.97958  |
| 30158 | POC214 | Q3LI54 | 0.086276 |
| 30159 | POC214 | Q96CX3 | 0.32018  |
| 30160 | POC214 | P33316 | 0.702    |
| 30161 | POC214 | Q96NJ3 | 0.27255  |
| 30162 | POC214 | Q9UHT9 | 0.086276 |
| 30163 | POC214 | Q8N693 | 0.34369  |
| 30164 | POC214 | Q16222 | 0.36887  |
| 30165 | POC214 | P52738 | 0.26578  |
| 30166 | POC214 | P50613 | 0.21354  |
| 30167 | POC214 | Q9Y4E1 | 0.35898  |
| 30168 | POC214 | P43487 | 0.36849  |
| 30169 | POC214 | Q92841 | 0.6965   |
| 30170 | POC214 | P05388 | 1.5805   |
| 30171 | POC214 | P28331 | 0.188    |
| 30172 | POC214 | Q6ZUT4 | 0.26672  |

|       |        |        |           |
|-------|--------|--------|-----------|
| 30173 | P0C214 | O95400 | 0.74605   |
| 30174 | P0C214 | Q96G04 | 0.069093  |
| 30175 | P0C214 | A8MU93 | 0.24937   |
| 30176 | P0C214 | A8MSI8 | 1.0139    |
| 30177 | P0C214 | P60410 | 0.6322    |
| 30178 | P0C214 | Q6L8G4 | 0.086276  |
| 30179 | P0C214 | Q3T8J9 | 0.57316   |
| 30180 | P0C214 | Q9NTK1 | 0.54594   |
| 30181 | P0C214 | Q6NXR4 | 0.04166   |
| 30182 | P0C214 | P55212 | 0.48642   |
| 30183 | P0C214 | Q8TEM1 | 0.17016   |
| 30184 | P0C214 | Q9H3M7 | 0.80797   |
| 30185 | P0C214 | Q13309 | 0.70546   |
| 30186 | P0C214 | O75190 | 0.86176   |
| 30187 | P0C214 | Q8TAD8 | 1.2548    |
| 30188 | P0C214 | Q9H814 | 0.47665   |
| 30189 | P0C214 | Q7KZ85 | 0.43529   |
| 30190 | P0C214 | Q8TC05 | 0.46462   |
| 30191 | P0C214 | Q9BU61 | 0.69929   |
| 30192 | P0C214 | Q13112 | 1.4717    |
| 30193 | P0C214 | O43920 | 0.75168   |
| 30194 | P0C214 | Q9H171 | 0.2696    |
| 30195 | P0C214 | P40121 | 0.39842   |
| 30196 | P0C214 | Q92796 | 0.26968   |
| 30197 | P0C214 | Q15014 | 1.1553    |
| 30198 | P0C214 | Q5MJ07 | 0.46567   |
| 30199 | P0C214 | A6NHP3 | 0.28575   |
| 30200 | P0C214 | P49427 | 0.85585   |
| 30201 | P0C214 | O15372 | 0.79591   |
| 30202 | P0C214 | Q9Y2L1 | 0.66363   |
| 30203 | P0C214 | P33076 | 0.4123    |
| 30204 | P0C214 | Q5VT03 | 0.39603   |
| 30205 | P0C214 | Q9Y2X0 | 0.48556   |
| 30206 | P0C214 | Q09666 | 0.65215   |
| 30207 | P0C214 | Q0VFX6 | 0.24937   |
| 30208 | P0C214 | Q9H6J7 | 0.16769   |
| 30209 | P0C214 | Q96RK0 | 0.90001   |
| 30210 | P0C214 | Q5VWT5 | 0.41817   |
| 30211 | P0C214 | Q9H246 | 0.2193    |
| 30212 | P0C214 | P29084 | 1.1704    |
| 30213 | P0C214 | Q5T0Z8 | 0.24937   |
| 30214 | P0C214 | Q5JVG2 | 0.21855   |
| 30215 | P0C214 | Q7Z465 | 0.68406   |
| 30216 | P0C214 | P0CG31 | 0.29774   |
| 30217 | P0C214 | Q8N8H1 | 0.46577   |
| 30218 | P0C214 | P49590 | 0.055572  |
| 30219 | P0C214 | P12694 | 0.2372    |
| 30220 | P0C214 | P23025 | 0.19847   |
| 30221 | P0C214 | Q2NL82 | 0.46222   |
| 30222 | P0C214 | A6NCI8 | 0.80356   |
| 30223 | P0C214 | Q7Z6R9 | 0.24424   |
| 30224 | P0C214 | Q9BW71 | 0.57163   |
| 30225 | P0C214 | Q9NR56 | 0.41397   |
| 30226 | P0C214 | Q96QK1 | 0.6366    |
| 30227 | P0C214 | P07814 | 0.55922   |
| 30228 | P0C214 | Q96K62 | 0.27834   |
| 30229 | P0C214 | P62847 | 0.7392    |
| 30230 | P0C214 | O75618 | 1.0596    |
| 30231 | P0C214 | Q96BR6 | 0.40332   |
| 30232 | P0C214 | Q9HBE1 | 0.18816   |
| 30233 | P0C214 | P29622 | 0.96136   |
| 30234 | P0C214 | Q96C90 | 0.67014   |
| 30235 | P0C214 | Q8TAC9 | 0.47471   |
| 30236 | P0C214 | Q8NCA9 | 0.18456   |
| 30237 | P0C214 | Q8TAT8 | 0.0036186 |
| 30238 | P0C214 | Q9BYD3 | 0.73176   |
| 30239 | P0C214 | Q8WTT2 | 0.34352   |
| 30240 | P0C214 | Q8NEH6 | 0.80476   |
| 30241 | P0C214 | P23588 | 0.41622   |
| 30242 | P0C214 | Q9HBF5 | 0.55347   |
| 30243 | P0C214 | P42226 | 0.7832    |
| 30244 | P0C214 | Q6ZW54 | 0.96495   |
| 30245 | P0C214 | Q5H9I0 | 0.3453    |
| 30246 | P0C214 | Q96GC5 | 0.68937   |
| 30247 | P0C214 | Q9UM54 | 0.31733   |
| 30248 | P0C214 | P43358 | 0.41816   |

|       |        |        |           |
|-------|--------|--------|-----------|
| 30249 | P0C214 | P42898 | 0.18698   |
| 30250 | P0C214 | Q7L2R6 | 0.44782   |
| 30251 | P0C214 | Q460N5 | 0.41142   |
| 30252 | P0C214 | P51959 | 0.45004   |
| 30253 | P0C214 | Q7RTU4 | 0.25688   |
| 30254 | P0C214 | Q9Y2S6 | 0.086276  |
| 30255 | P0C214 | P15884 | 0.48509   |
| 30256 | P0C214 | O76021 | 0.53502   |
| 30257 | P0C214 | Q6ZMV5 | 0.38023   |
| 30258 | P0C214 | Q13158 | 0.44609   |
| 30259 | P0C214 | Q6ZRP5 | 0.086276  |
| 30260 | P0C214 | Q5SW79 | 0.67949   |
| 30261 | P0C214 | Q9BYA6 | 0.086276  |
| 30262 | P0C214 | Q96EI5 | 0.75796   |
| 30263 | P0C214 | Q8NHW3 | 0.15678   |
| 30264 | P0C214 | Q7Z794 | 0.54908   |
| 30265 | P0C214 | Q9H0S4 | 0.16164   |
| 30266 | P0C214 | Q9BQ61 | 0.24937   |
| 30267 | P0C214 | Q96MF6 | 0.45028   |
| 30268 | P0C214 | P36952 | 0.78972   |
| 30269 | P0C214 | Q5JS54 | 0.20558   |
| 30270 | P0C214 | Q9NS56 | 0.27185   |
| 30271 | P0C214 | Q75478 | 0.26803   |
| 30272 | P0C214 | Q8TD23 | 0.5619    |
| 30273 | P0C214 | Q538Z0 | 0.086276  |
| 30274 | P0C214 | O14818 | 0.76226   |
| 30275 | P0C214 | O60907 | 0.72309   |
| 30276 | P0C214 | O14579 | 0.57465   |
| 30277 | P0C214 | Q9NV39 | 0.25186   |
| 30278 | P0C214 | Q9UJP4 | 0.21649   |
| 30279 | P0C214 | B1AL46 | 0.39603   |
| 30280 | P0C214 | Q9P2F9 | 0.22643   |
| 30281 | P0C214 | Q96M85 | 0.086276  |
| 30282 | P0C214 | O15350 | 0.27346   |
| 30283 | P0C214 | Q8TBN0 | 0.21579   |
| 30284 | P0C214 | P13349 | 0.23151   |
| 30285 | P0C214 | P40855 | 0.33636   |
| 30286 | P0C214 | Q9C035 | 0.63635   |
| 30287 | P0C214 | Q9NP79 | 0.22499   |
| 30288 | P0C214 | Q9NX20 | 0.44456   |
| 30289 | P0C214 | Q8N587 | 0.44914   |
| 30290 | P0C214 | P15924 | 0.23748   |
| 30291 | P0C214 | Q53FD0 | 0.50333   |
| 30292 | P0C214 | A6NGN4 | 0.28595   |
| 30293 | P0C214 | P14678 | 0.88416   |
| 30294 | P0C214 | Q99856 | 0.61144   |
| 30295 | P0C214 | Q9NY27 | 0.81775   |
| 30296 | P0C214 | Q14764 | 0.9427    |
| 30297 | P0C214 | Q8TAU3 | 0.30462   |
| 30298 | P0C214 | Q96EA4 | 0.66963   |
| 30299 | P0C214 | Q8WWM1 | 0.43185   |
| 30300 | P0C214 | Q9BUA3 | 0.028204  |
| 30301 | P0C214 | P86496 | 0.086276  |
| 30302 | P0C214 | Q9C0C2 | 0.24762   |
| 30303 | P0C214 | O00167 | 0.66455   |
| 30304 | P0C214 | Q8N2W9 | 1.0035    |
| 30305 | P0C214 | Q14119 | 0.19264   |
| 30306 | P0C214 | Q9BYR8 | 0.6322    |
| 30307 | P0C214 | Q14CW9 | 0.83329   |
| 30308 | P0C214 | Q03112 | 0.17412   |
| 30309 | P0C214 | Q9UJN7 | 0.25959   |
| 30310 | P0C214 | Q86UB2 | 0.46036   |
| 30311 | P0C214 | Q9Y2D8 | 0.53321   |
| 30312 | P0C214 | Q9BTW9 | 0.26811   |
| 30313 | P0C214 | P17019 | 0.49815   |
| 30314 | P0C214 | P60412 | 0.43378   |
| 30315 | P0C214 | Q9BWH6 | 0.58277   |
| 30316 | P0C214 | Q8WWX9 | 0.51521   |
| 30317 | P0C214 | Q13015 | 0.47824   |
| 30318 | P0C214 | Q6PH85 | 0.0027648 |
| 30319 | P0C214 | Q9BQ87 | 0.39389   |
| 30320 | P0C214 | Q8N0Y2 | 0.21909   |
| 30321 | P0C214 | Q9P1Y5 | 0.61168   |
| 30322 | P0C214 | Q9Y285 | 0.66461   |
| 30323 | P0C214 | Q8IVP9 | 0.17344   |
| 30324 | P0C214 | Q9UC06 | 0.2912    |

|       |        |        |          |
|-------|--------|--------|----------|
| 30325 | P0C214 | O60927 | 0.74413  |
| 30326 | P0C214 | P62829 | 1.3176   |
| 30327 | P0C214 | P83916 | 0.60402  |
| 30328 | P0C214 | Q6ZV60 | 0.086276 |
| 30329 | P0C214 | C9JN71 | 0.33203  |
| 30330 | P0C214 | O75157 | 0.37294  |
| 30331 | P0C214 | Q504Q3 | 0.38884  |
| 30332 | P0C214 | O75530 | 0.57202  |
| 30333 | P0C214 | P61580 | 0.37639  |
| 30334 | P0C214 | Q96BW1 | 0.19776  |
| 30335 | P0C214 | Q02080 | 0.35413  |
| 30336 | P0C214 | A6NGH7 | 0.15258  |
| 30337 | P0C214 | Q13023 | 0.54093  |
| 30338 | P0C214 | O75807 | 0.51146  |
| 30339 | P0C214 | O75496 | 0.90344  |
| 30340 | P0C214 | Q9H444 | 0.67645  |
| 30341 | P0C214 | Q9Y2V2 | 0.46934  |
| 30342 | P0C214 | Q53HC0 | 0.71663  |
| 30343 | P0C214 | P41252 | 0.90389  |
| 30344 | P0C214 | Q96SN8 | 0.42625  |
| 30345 | P0C214 | P07954 | 0.27316  |
| 30346 | P0C214 | Q15029 | 0.38426  |
| 30347 | P0C214 | P26373 | 1.2111   |
| 30348 | P0C214 | Q8N1B3 | 0.52979  |
| 30349 | P0C214 | Q5T230 | 1.448    |
| 30350 | P0C214 | Q14765 | 0.29286  |
| 30351 | P0C214 | Q9BZE3 | 0.32752  |
| 30352 | P0C214 | Q9C086 | 1.4268   |
| 30353 | P0C214 | P0CG30 | 0.29858  |
| 30354 | P0C214 | O60220 | 0.49725  |
| 30355 | P0C214 | Q9BQ66 | 0.43378  |
| 30356 | P0C214 | Q9HB09 | 0.89831  |
| 30357 | P0C214 | Q495M9 | 0.33188  |
| 30358 | P0C214 | O00541 | 0.35725  |
| 30359 | P0C214 | Q8N5F7 | 1.245    |
| 30360 | P0C214 | Q96SD1 | 0.11392  |
| 30361 | P0C214 | Q86WW8 | 0.37663  |
| 30362 | P0C214 | Q9BYQ2 | 0.43378  |
| 30363 | P0C214 | Q68DY1 | 0.49815  |
| 30364 | P0C214 | Q495Y8 | 0.28575  |
| 30365 | P0C214 | Q9UDY8 | 0.33479  |
| 30366 | P0C214 | Q8NDY6 | 0.39843  |
| 30367 | P0C214 | Q4LEZ3 | 0.92572  |
| 30368 | P0C214 | Q6ZSA8 | 0.086276 |
| 30369 | P0C214 | Q86UW6 | 0.21915  |
| 30370 | P0C214 | Q8TF09 | 0.45551  |
| 30371 | P0C214 | Q5TAA0 | 0.021619 |
| 30372 | P0C214 | Q16621 | 0.43533  |
| 30373 | P0C214 | Q96R06 | 0.81127  |
| 30374 | P0C214 | Q5MCW4 | 0.25059  |
| 30375 | P0C214 | Q8N183 | 0.29742  |
| 30376 | P0C214 | P62306 | 0.41319  |
| 30377 | P0C214 | Q9Y2T2 | 0.40315  |
| 30378 | P0C214 | Q8NA72 | 0.11376  |
| 30379 | P0C214 | Q13867 | 0.43888  |
| 30380 | P0C214 | P01100 | 0.49211  |
| 30381 | P0C214 | Q7Z4G1 | 1.2595   |
| 30382 | P0C214 | Q9H227 | 0.23355  |
| 30383 | P0C214 | Q969L4 | 0.63275  |
| 30384 | P0C214 | Q16384 | 0.2686   |
| 30385 | P0C214 | Q14152 | 1.2231   |
| 30386 | P0C214 | Q15599 | 0.31638  |
| 30387 | P0C214 | Q5W111 | 0.1545   |
| 30388 | P0C214 | Q96GV9 | 0.29058  |
| 30389 | P0C214 | Q9HCM7 | 0.84135  |
| 30390 | P0C214 | Q9P2N5 | 0.19497  |
| 30391 | P0C214 | Q9BV57 | 0.82436  |
| 30392 | P0C214 | Q9BXS6 | 0.537    |
| 30393 | P0C214 | Q99676 | 0.36207  |
| 30394 | P0C214 | P11844 | 0.65733  |
| 30395 | P0C214 | Q9HCI6 | 0.47696  |
| 30396 | P0C214 | Q6NT89 | 0.59295  |
| 30397 | P0C214 | Q9NPA3 | 1.2057   |
| 30398 | P0C214 | Q3LI83 | 0.51364  |
| 30399 | P0C214 | Q8NCK3 | 0.33303  |
| 30400 | P0C214 | O43261 | 0.2675   |

|       |        |         |          |
|-------|--------|---------|----------|
| 30401 | P0C214 | Q86TS7  | 0.086276 |
| 30402 | P0C214 | A6QL64  | 0.2654   |
| 30403 | P0C214 | Q9NR55  | 0.2181   |
| 30404 | P0C214 | Q14145  | 1.267    |
| 30405 | P0C214 | Q96D46  | 0.7903   |
| 30406 | P0C214 | Q6PF06  | 0.92931  |
| 30407 | P0C214 | P41236  | 0.29577  |
| 30408 | P0C214 | Q93074  | 0.45437  |
| 30409 | P0C214 | O75698  | 0.086276 |
| 30410 | P0C214 | A6NJ78  | 0.37656  |
| 30411 | P0C214 | P0CW01  | 0.69286  |
| 30412 | P0C214 | O60829  | 0.26319  |
| 30413 | P0C214 | P11055  | 0.85592  |
| 30414 | P0C214 | P78406  | 0.53001  |
| 30415 | P0C214 | O95299  | 0.04047  |
| 30416 | P0C214 | Q96BP2  | 1.2308   |
| 30417 | P0C214 | Q92560  | 0.17908  |
| 30418 | P0C214 | A6NH11  | 0.27027  |
| 30419 | P0C214 | P52435  | 0.50364  |
| 30420 | P0C214 | A4QMS7  | 0.15979  |
| 30421 | P0C214 | Q86WI3  | 0.60916  |
| 30422 | P0C214 | P05204  | 0.28171  |
| 30423 | P0C214 | Q9BSQ5  | 0.1795   |
| 30424 | P0C214 | Q5VTE6  | 0.076574 |
| 30425 | P0C214 | Q8IXQ3  | 0.48672  |
| 30426 | P0C214 | P55265  | 0.40908  |
| 30427 | P0C214 | P17568  | 0.077953 |
| 30428 | P0C214 | O95678  | 0.43311  |
| 30429 | P0C214 | O15266  | 0.34608  |
| 30430 | P0C214 | P57740  | 0.8195   |
| 30431 | P0C214 | P17275  | 0.82061  |
| 30432 | P0C214 | Q5J TZ9 | 0.17573  |
| 30433 | P0C214 | Q8N823  | 0.3804   |
| 30434 | P0C214 | Q9NVM4  | 0.2947   |
| 30435 | P0C214 | Q92750  | 0.56338  |
| 30436 | P0C214 | Q8N5L8  | 1.134    |
| 30437 | P0C214 | Q96EU6  | 0.3397   |
| 30438 | P0C214 | Q9UNY5  | 0.42258  |
| 30439 | P0C214 | Q6ZRH9  | 0.086276 |
| 30440 | P0C214 | P62166  | 0.27277  |
| 30441 | P0C214 | Q8N814  | 0.72928  |
| 30442 | P0C214 | O00189  | 0.37202  |
| 30443 | P0C214 | Q5EE01  | 0.53507  |
| 30444 | P0C214 | Q8NEP9  | 0.44452  |
| 30445 | P0C214 | Q8NA77  | 0.71592  |
| 30446 | P0C214 | Q13367  | 0.37437  |
| 30447 | P0C214 | Q9HD42  | 0.82012  |
| 30448 | P0C214 | Q9Y4P1  | 0.24814  |
| 30449 | P0C214 | Q08AN1  | 0.3804   |
| 30450 | P0C214 | Q8N7Y1  | 0.086276 |
| 30451 | P0C214 | P11802  | 0.66449  |
| 30452 | P0C214 | Q9Y6K5  | 0.27557  |
| 30453 | P0C214 | P17022  | 0.17565  |
| 30454 | P0C214 | Q7Z417  | 0.74845  |
| 30455 | P0C214 | P53370  | 0.56787  |
| 30456 | P0C214 | Q12800  | 0.28267  |
| 30457 | P0C214 | A8K8P3  | 0.78551  |
| 30458 | P0C214 | Q9HBD4  | 0.5105   |
| 30459 | P0C214 | Q9H7H0  | 0.70491  |
| 30460 | P0C214 | A6NHQ2  | 0.21519  |
| 30461 | P0C214 | P63313  | 0.72737  |
| 30462 | P0C214 | P27635  | 0.87273  |
| 30463 | P0C214 | Q69YN4  | 0.19759  |
| 30464 | P0C214 | Q9ULK2  | 0.74718  |
| 30465 | P0C214 | Q6NT04  | 0.32238  |
| 30466 | P0C214 | Q5VTH2  | 0.71913  |
| 30467 | P0C214 | Q99567  | 0.87474  |
| 30468 | P0C214 | O15056  | 0.24072  |
| 30469 | P0C214 | Q9Y305  | 0.71928  |
| 30470 | P0C214 | A6NCN8  | 0.24937  |
| 30471 | P0C214 | O75362  | 0.64081  |
| 30472 | P0C214 | O14929  | 0.72161  |
| 30473 | P0C214 | P57678  | 1.0501   |
| 30474 | P0C214 | Q3BBV2  | 0.51029  |
| 30475 | P0C214 | Q86WS4  | 0.086276 |
| 30476 | P0C214 | Q13111  | 1.1121   |

|       |        |        |           |
|-------|--------|--------|-----------|
| 30477 | P0C214 | P32519 | 1.2372    |
| 30478 | P0C214 | Q6ZRH3 | 0.02249   |
| 30479 | P0C214 | Q9NPJ4 | 1.619     |
| 30480 | P0C214 | P08133 | 0.62935   |
| 30481 | P0C214 | Q5T7N7 | 0.086276  |
| 30482 | P0C214 | Q5VZQ5 | 0.34703   |
| 30483 | P0C214 | P31150 | 0.19906   |
| 30484 | P0C214 | Q9C099 | 0.84614   |
| 30485 | P0C214 | Q9NUA8 | 0.24858   |
| 30486 | P0C214 | P61572 | 0.39132   |
| 30487 | P0C214 | Q5SRH9 | 0.64735   |
| 30488 | P0C214 | Q9Y6H1 | 0.75974   |
| 30489 | P0C214 | Q9H6B1 | 0.43512   |
| 30490 | P0C214 | I3L0S3 | 0.10358   |
| 30491 | P0C214 | P53618 | 0.71295   |
| 30492 | P0C214 | Q14513 | 0.37354   |
| 30493 | P0C214 | P34932 | 0.4293    |
| 30494 | P0C214 | Q8TC20 | 0.0047744 |
| 30495 | P0C214 | Q9BQC3 | 1.0084    |
| 30496 | P0C214 | O60224 | 0.17331   |
| 30497 | P0C214 | O43242 | 0.37699   |
| 30498 | P0C214 | Q9UPP5 | 0.17012   |
| 30499 | P0C214 | Q13526 | 0.53532   |
| 30500 | P0C214 | Q9Y3B2 | 0.98343   |
| 30501 | P0C214 | Q8N9P6 | 0.086276  |
| 30502 | P0C214 | Q9BQG0 | 0.61948   |
| 30503 | P0C214 | Q6ZT83 | 0.14432   |
| 30504 | P0C214 | Q53HV7 | 0.58539   |
| 30505 | P0C214 | Q6P4D5 | 0.41177   |
| 30506 | P0C214 | P47813 | 1.1223    |
| 30507 | P0C214 | Q8WYP5 | 0.61323   |
| 30508 | P0C214 | P46778 | 0.86977   |
| 30509 | P0C214 | Q9P0M2 | 0.21728   |
| 30510 | P0C214 | Q8N5J2 | 1.1916    |
| 30511 | P0C214 | O94921 | 0.17504   |
| 30512 | P0C214 | P50748 | 0.72842   |
| 30513 | P0C214 | A8MVW5 | 0.49923   |
| 30514 | P0C214 | P30405 | 0.77514   |
| 30515 | P0C214 | Q99743 | 0.51557   |
| 30516 | P0C214 | Q15233 | 0.60956   |
| 30517 | P0C214 | P23769 | 0.29993   |
| 30518 | P0C214 | Q9BRX2 | 0.31856   |
| 30519 | P0C214 | P41219 | 0.37466   |
| 30520 | P0C214 | Q5T6S3 | 0.25884   |
| 30521 | P0C214 | Q92793 | 0.43346   |
| 30522 | P0C214 | Q8N9E0 | 0.24937   |
| 30523 | P0C214 | Q16587 | 0.23738   |
| 30524 | P0C214 | P50548 | 0.12318   |
| 30525 | P0C214 | O60888 | 0.27846   |
| 30526 | P0C214 | Q5TH74 | 0.24104   |
| 30527 | P0C214 | Q96FA3 | 0.64025   |
| 30528 | P0C214 | Q9Y6N9 | 0.36196   |
| 30529 | P0C214 | P51580 | 0.16583   |
| 30530 | P0C214 | Q8WYR4 | 0.41814   |
| 30531 | P0C214 | Q9BTE6 | 0.61173   |
| 30532 | P0C214 | Q9UJX5 | 0.85073   |
| 30533 | P0C214 | Q8NA47 | 0.24937   |
| 30534 | P0C214 | Q7Z7K2 | 0.20212   |
| 30535 | P0C214 | Q8TBZ9 | 1.151     |
| 30536 | P0C214 | P61604 | 0.94241   |
| 30537 | P0C214 | Q5BKY9 | 0.24937   |
| 30538 | P0C214 | Q99457 | 0.98315   |
| 30539 | P0C214 | Q9Y5J3 | 0.25721   |
| 30540 | P0C214 | Q96HG1 | 0.086276  |
| 30541 | P0C214 | Q504T8 | 0.16769   |
| 30542 | P0C214 | Q8N5X7 | 0.15496   |
| 30543 | P0C214 | Q9UBY9 | 1.0572    |
| 30544 | P0C214 | Q969W8 | 0.42978   |
| 30545 | P0C214 | Q15637 | 0.35465   |
| 30546 | P0C214 | Q96NY9 | 0.64461   |
| 30547 | P0C214 | Q9BXU2 | 0.10625   |
| 30548 | P0C214 | Q00994 | 0.90054   |
| 30549 | P0C214 | Q8NHV4 | 0.66105   |
| 30550 | P0C214 | Q96KS0 | 0.22798   |
| 30551 | P0C214 | Q86TX2 | 0.28311   |
| 30552 | P0C214 | P35711 | 0.82798   |

|       |        |        |          |
|-------|--------|--------|----------|
| 30553 | P0C214 | Q8IZL8 | 0.77311  |
| 30554 | P0C214 | Q9UIF8 | 0.75803  |
| 30555 | P0C214 | O43865 | 0.19587  |
| 30556 | P0C214 | P19419 | 1.1966   |
| 30557 | P0C214 | Q9HBH7 | 0.49377  |
| 30558 | P0C214 | Q6ZTI6 | 0.59314  |
| 30559 | P0C214 | P56693 | 0.55492  |
| 30560 | P0C214 | Q6ZP82 | 0.2675   |
| 30561 | P0C214 | Q92797 | 0.64217  |
| 30562 | P0C214 | Q5VYV7 | 0.2675   |
| 30563 | P0C214 | Q86V20 | 0.7813   |
| 30564 | P0C214 | P67809 | 0.54355  |
| 30565 | P0C214 | Q8N7M0 | 0.28482  |
| 30566 | P0C214 | Q499Z4 | 0.36523  |
| 30567 | P0C214 | Q9NNW7 | 0.38708  |
| 30568 | P0C214 | Q6P5R6 | 0.46387  |
| 30569 | P0C214 | P61024 | 0.57531  |
| 30570 | P0C214 | A6NMX2 | 0.086411 |
| 30571 | P0C214 | Q5T200 | 0.86928  |
| 30572 | P0C214 | Q9H1L0 | 0.25298  |
| 30573 | P0C214 | Q8IV36 | 0.42159  |
| 30574 | P0C214 | Q8IYS8 | 0.076506 |
| 30575 | P0C214 | Q7Z7A1 | 1.0741   |
| 30576 | P0C214 | Q99613 | 0.8284   |
| 30577 | P0C214 | Q9UJ98 | 0.43733  |
| 30578 | P0C214 | P15408 | 0.48161  |
| 30579 | P0C214 | Q6PGP7 | 0.69929  |
| 30580 | P0C214 | Q9BUE0 | 0.98887  |
| 30581 | P0C214 | Q16352 | 0.50462  |
| 30582 | P0C214 | P61586 | 0.37861  |
| 30583 | P0C214 | Q9BWN1 | 0.24937  |
| 30584 | P0C214 | Q96GE5 | 0.46805  |
| 30585 | P0C214 | Q9GZL7 | 0.68654  |
| 30586 | P0C214 | Q9NVR5 | 0.60202  |
| 30587 | P0C214 | Q6P1M3 | 0.74349  |
| 30588 | P0C214 | Q4U2R6 | 0.84108  |
| 30589 | P0C214 | O15446 | 0.24028  |
| 30590 | P0C214 | Q9Y295 | 0.29929  |
| 30591 | P0C214 | P53999 | 1.2011   |
| 30592 | P0C214 | Q8N9N5 | 0.2548   |
| 30593 | P0C214 | P46937 | 0.81079  |
| 30594 | P0C214 | P31483 | 0.28798  |
| 30595 | P0C214 | P40261 | 0.18224  |
| 30596 | P0C214 | A1L188 | 0.37228  |
| 30597 | P0C214 | Q86WX3 | 1.0691   |
| 30598 | P0C214 | Q6PI26 | 1.1996   |
| 30599 | P0C214 | Q9NX70 | 1.0224   |
| 30600 | P0C214 | O95625 | 0.18766  |
| 30601 | P0C214 | P79522 | 0.58083  |
| 30602 | P0C214 | Q13033 | 0.53625  |
| 30603 | P0C214 | P61201 | 0.47496  |
| 30604 | P0C214 | Q9NWX8 | 0.55017  |
| 30605 | P0C214 | Q86XU0 | 0.30697  |
| 30606 | P0C214 | Q9BW85 | 0.86463  |
| 30607 | P0C214 | O60684 | 0.25408  |
| 30608 | P0C214 | A6NL46 | 0.65621  |
| 30609 | P0C214 | P61457 | 1.1839   |
| 30610 | P0C214 | Q05048 | 0.71345  |
| 30611 | P0C214 | Q7Z4T9 | 0.69752  |
| 30612 | P0C214 | P42695 | 0.2446   |
| 30613 | P0C214 | Q9H2J4 | 0.57428  |
| 30614 | P0C214 | Q8NFX8 | 0.35715  |
| 30615 | P0C214 | Q9BSH3 | 0.27367  |
| 30616 | P0C214 | P35606 | 0.32691  |
| 30617 | P0C214 | Q9NXF7 | 0.25402  |
| 30618 | P0C214 | Q5JNZ5 | 0.63692  |
| 30619 | P0C214 | Q9HBX3 | 0.086276 |
| 30620 | P0C214 | Q9Y375 | 0.61004  |
| 30621 | P0C214 | Q8N8G2 | 0.83156  |
| 30622 | P0C214 | Q9BXW4 | 0.11332  |
| 30623 | P0C214 | Q96QT6 | 0.84859  |
| 30624 | P0C214 | Q99708 | 0.55872  |
| 30625 | P0C214 | Q7Z5L9 | 0.9375   |
| 30626 | P0C214 | Q9UND3 | 0.15833  |
| 30627 | P0C214 | Q8TF20 | 0.37211  |
| 30628 | P0C214 | Q5VYK3 | 0.4      |



|       |        |        |           |
|-------|--------|--------|-----------|
| 30629 | P0C214 | Q9UBZ9 | 0.40656   |
| 30630 | P0C214 | P63208 | 0.71247   |
| 30631 | P0C214 | A5PLN9 | 0.14824   |
| 30632 | P0C214 | O43167 | 0.56957   |
| 30633 | P0C214 | Q96GU1 | 0.11884   |
| 30634 | P0C214 | P0CW21 | 0.086276  |
| 30635 | P0C214 | Q9NSB2 | 0.47593   |
| 30636 | P0C214 | Q6P2Q9 | 0.54168   |
| 30637 | P0C214 | Q8NE22 | 0.64942   |
| 30638 | P0C214 | P04792 | 0.5119    |
| 30639 | P0C214 | Q6P9A1 | 0.41035   |
| 30640 | P0C214 | Q16082 | 1.0784    |
| 30641 | P0C214 | Q86Y37 | 0.13425   |
| 30642 | P0C214 | Q8WU49 | 0.086276  |
| 30643 | P0C214 | P81877 | 0.34419   |
| 30644 | P0C214 | P84022 | 0.46043   |
| 30645 | P0C214 | P48594 | 0.92397   |
| 30646 | P0C214 | Q9H1A7 | 0.13654   |
| 30647 | P0C214 | Q9NWU5 | 0.54771   |
| 30648 | P0C214 | Q8WW35 | 0.2675    |
| 30649 | P0C214 | Q86VW0 | 0.18057   |
| 30650 | P0C214 | Q4G0A6 | 1.0377    |
| 30651 | P0C214 | Q969H9 | 0.086276  |
| 30652 | P0C214 | P14649 | 0.29298   |
| 30653 | P0C214 | O00186 | 0.777     |
| 30654 | P0C214 | O75437 | 0.4434    |
| 30655 | P0C214 | Q9UMS6 | 0.5793    |
| 30656 | P0C214 | P23246 | 0.75015   |
| 30657 | P0C214 | Q6ZRS2 | 0.36071   |
| 30658 | P0C214 | Q6ZYL4 | 0.77282   |
| 30659 | P0C214 | Q12906 | 1.2124    |
| 30660 | P0C214 | Q9BRX8 | 0.10261   |
| 30661 | P0C214 | Q9ULP0 | 0.1228    |
| 30662 | P0C214 | Q6PK81 | 0.26609   |
| 30663 | P0C214 | Q9H4G8 | 0.44813   |
| 30664 | P0C214 | Q6P1L6 | 0.24918   |
| 30665 | P0C214 | Q9Y512 | 0.069639  |
| 30666 | P0C214 | P48444 | 0.3669    |
| 30667 | P0C214 | O00567 | 0.83219   |
| 30668 | P0C214 | Q15172 | 0.21147   |
| 30669 | P0C214 | Q9UL58 | 0.60167   |
| 30670 | P0C214 | Q5VV17 | 0.17374   |
| 30671 | P0C214 | Q9BVW5 | 0.91895   |
| 30672 | P0C214 | Q9BYV8 | 0.55734   |
| 30673 | P0C214 | Q8N9K7 | 0.086276  |
| 30674 | P0C214 | Q8WW24 | 0.39532   |
| 30675 | P0C214 | Q9BRQ3 | 0.65924   |
| 30676 | P0C214 | O14602 | 0.43736   |
| 30677 | P0C214 | P29401 | 0.16655   |
| 30678 | P0C214 | P54725 | 0.58072   |
| 30679 | P0C214 | Q9BYQ8 | 0.43378   |
| 30680 | P0C214 | Q5TBC7 | 0.26771   |
| 30681 | P0C214 | Q9BQD3 | 0.31888   |
| 30682 | P0C214 | Q5SQS8 | 0.070215  |
| 30683 | P0C214 | Q8IXM3 | 0.56202   |
| 30684 | P0C214 | Q9UKN8 | 0.50781   |
| 30685 | P0C214 | Q5T749 | 0.37631   |
| 30686 | P0C214 | P17096 | 0.53242   |
| 30687 | P0C214 | Q5U623 | 0.85059   |
| 30688 | P0C214 | Q86WB0 | 1.1605    |
| 30689 | P0C214 | Q9BWJ5 | 0.54133   |
| 30690 | P0C214 | Q96EH5 | 0.60578   |
| 30691 | P0C214 | Q8N6F8 | 0.0042177 |
| 30692 | P0C214 | P29728 | 0.084579  |
| 30693 | P0C214 | Q8IWZ8 | 0.26346   |
| 30694 | P0C214 | Q8NFG4 | 0.68203   |
| 30695 | P0C214 | P34897 | 0.22569   |
| 30696 | P0C214 | Q6IQ49 | 0.39346   |
| 30697 | P0C214 | O43156 | 0.40847   |
| 30698 | P0C214 | P61962 | 0.66714   |
| 30699 | P0C214 | O95125 | 0.29867   |
| 30700 | P0C214 | Q14689 | 0.2927    |
| 30701 | P0C214 | P61573 | 0.39132   |
| 30702 | P0C214 | Q9NWA0 | 1.2889    |
| 30703 | P0C214 | Q9NZI5 | 0.44546   |
| 30704 | P0C214 | Q96DP5 | 0.40853   |

|       |        |        |          |
|-------|--------|--------|----------|
| 30705 | P0C214 | Q5TYW1 | 0.24611  |
| 30706 | P0C214 | Q9H1D9 | 0.48407  |
| 30707 | P0C214 | Q9NTX7 | 0.64211  |
| 30708 | P0C214 | Q3SY84 | 0.44022  |
| 30709 | P0C214 | P15172 | 0.27688  |
| 30710 | P0C214 | Q6PII3 | 0.060194 |
| 30711 | P0C214 | Q15428 | 0.25165  |
| 30712 | P0C214 | Q9BSU3 | 0.46316  |
| 30713 | P0C214 | Q6PF04 | 0.28202  |
| 30714 | P0C214 | P78345 | 0.85867  |
| 30715 | P0C214 | Q76L83 | 0.47663  |
| 30716 | P0C214 | Q9BYH8 | 0.29156  |
| 30717 | P0C214 | Q86WZ6 | 0.26904  |
| 30718 | P0C214 | Q15397 | 0.15439  |
| 30719 | P0C214 | Q5PR19 | 0.23594  |
| 30720 | P0C214 | P17947 | 0.61473  |
| 30721 | P0C214 | P46527 | 0.34799  |
| 30722 | P0C214 | Q6PII5 | 0.44639  |
| 30723 | P0C214 | Q969T9 | 0.91873  |
| 30724 | P0C214 | Q9GZR5 | 0.68356  |
| 30725 | P0C214 | Q9Y244 | 0.42707  |
| 30726 | P0C214 | Q9P2R6 | 0.94251  |
| 30727 | P0C214 | Q9H808 | 0.49536  |
| 30728 | P0C214 | Q9H3H9 | 0.90731  |
| 30729 | P0C214 | Q6NZ36 | 0.17985  |
| 30730 | P0C214 | Q9BX66 | 0.31092  |
| 30731 | P0C214 | P56524 | 0.28762  |
| 30732 | P0C214 | Q96PU4 | 0.36674  |
| 30733 | P0C214 | Q16533 | 0.51016  |
| 30734 | P0C214 | O95229 | 0.77729  |
| 30735 | P0C214 | Q96F07 | 0.3845   |
| 30736 | P0C214 | Q9GZV5 | 1.066    |
| 30737 | P0C214 | Q9UK11 | 0.3951   |
| 30738 | P0C214 | Q7Z7C8 | 0.45767  |
| 30739 | P0C214 | Q8N1F7 | 0.57626  |
| 30740 | P0C214 | Q6W2J9 | 0.36427  |
| 30741 | P0C214 | Q86YE8 | 0.3804   |
| 30742 | P0C214 | P55957 | 0.42812  |
| 30743 | P0C214 | Q96MW1 | 0.24937  |
| 30744 | P0C214 | Q99623 | 1.0844   |
| 30745 | P0C214 | P23258 | 0.31254  |
| 30746 | P0C214 | Q9NR11 | 0.22197  |
| 30747 | P0C214 | Q96CS4 | 0.24682  |
| 30748 | P0C214 | Q8NBR6 | 1.4967   |
| 30749 | P0C214 | Q9NUS5 | 0.45967  |
| 30750 | P0C214 | Q9Y6Y1 | 0.43561  |
| 30751 | P0C214 | Q9BW61 | 0.60035  |
| 30752 | P0C214 | Q9Y6K1 | 0.30976  |
| 30753 | P0C214 | Q5TBB1 | 0.85488  |
| 30754 | P0C214 | Q14709 | 0.3804   |
| 30755 | P0C214 | P17029 | 0.43208  |
| 30756 | P0C214 | A4D1U4 | 0.10335  |
| 30757 | P0C214 | Q14907 | 0.37183  |
| 30758 | P0C214 | Q9H501 | 1.1533   |
| 30759 | P0C214 | O00425 | 0.58953  |
| 30760 | P0C214 | O75884 | 1.0884   |
| 30761 | P0C214 | Q6NT76 | 0.36403  |
| 30762 | P0C214 | Q8IYX3 | 0.64779  |
| 30763 | P0C214 | Q99576 | 0.37515  |
| 30764 | P0C214 | H3BQW9 | 0.076415 |
| 30765 | P0C214 | Q5T681 | 0.53221  |
| 30766 | P0C214 | O75821 | 0.76555  |
| 30767 | P0C214 | Q3LI66 | 0.086276 |
| 30768 | P0C214 | Q9H6V9 | 0.14201  |
| 30769 | P0C214 | O75694 | 0.59078  |
| 30770 | P0C214 | P42704 | 0.90103  |
| 30771 | P0C214 | P60660 | 0.37617  |
| 30772 | P0C214 | Q14678 | 0.46777  |
| 30773 | P0C214 | P12277 | 0.09917  |
| 30774 | P0C214 | Q5HYW2 | 0.38939  |
| 30775 | P0C214 | Q6ICG8 | 1.354    |
| 30776 | P0C214 | Q5JXB2 | 0.68236  |
| 30777 | P0C214 | P17544 | 0.94644  |
| 30778 | P0C214 | P41218 | 0.54737  |
| 30779 | P0C214 | Q12986 | 0.13244  |
| 30780 | P0C214 | O43715 | 0.63264  |

|       |        |        |          |
|-------|--------|--------|----------|
| 30781 | P0C214 | Q5T6C5 | 0.74718  |
| 30782 | P0C214 | Q96NA2 | 1.0494   |
| 30783 | P0C214 | P11831 | 0.50308  |
| 30784 | P0C214 | Q9Y2Y9 | 0.68564  |
| 30785 | P0C214 | Q96BD5 | 0.32391  |
| 30786 | P0C214 | Q00403 | 0.99261  |
| 30787 | P0C214 | Q15906 | 0.75224  |
| 30788 | P0C214 | Q96AQ9 | 0.32933  |
| 30789 | P0C214 | Q96SR6 | 0.3048   |
| 30790 | P0C214 | Q5JUW0 | 0.43784  |
| 30791 | P0C214 | Q8NI29 | 0.35888  |
| 30792 | P0C214 | Q8TCI5 | 0.52975  |
| 30793 | P0C214 | Q8NAP3 | 0.30406  |
| 30794 | P0C214 | Q9UJM3 | 0.37353  |
| 30795 | P0C214 | Q9HC77 | 0.72932  |
| 30796 | P0C214 | Q9UK13 | 0.48849  |
| 30797 | P0C214 | Q96HR3 | 0.77393  |
| 30798 | P0C214 | Q9UPU9 | 0.3579   |
| 30799 | P0C214 | Q96ST2 | 0.12533  |
| 30800 | P0C214 | P61513 | 0.85748  |
| 30801 | P0C214 | Q641Q2 | 0.71414  |
| 30802 | P0C214 | Q9UL40 | 0.60161  |
| 30803 | P0C214 | Q5JTW2 | 0.31925  |
| 30804 | P0C214 | Q9H0F6 | 0.1637   |
| 30805 | P0C214 | A8MXT2 | 0.048798 |
| 30806 | P0C214 | Q99417 | 1.4991   |
| 30807 | P0C214 | P78344 | 0.54113  |
| 30808 | P0C214 | A1L3Z2 | 0.092734 |
| 30809 | P0C214 | Q13515 | 0.4805   |
| 30810 | P0C214 | P11172 | 0.49565  |
| 30811 | P0C214 | Q58FG1 | 0.85371  |
| 30812 | P0C214 | O60318 | 0.68612  |
| 30813 | P0C214 | Q9UNN4 | 0.33106  |
| 30814 | P0C214 | Q9H095 | 0.18967  |
| 30815 | P0C214 | Q5H9F3 | 0.61791  |
| 30816 | P0C214 | Q9BXM0 | 0.64324  |
| 30817 | P0C214 | Q99990 | 0.52075  |
| 30818 | P0C214 | Q53EL6 | 1.0884   |
| 30819 | P0C214 | P17026 | 0.26221  |
| 30820 | P0C214 | Q96MN9 | 0.5523   |
| 30821 | P0C214 | Q8IUD6 | 0.49152  |
| 30822 | P0C214 | O14530 | 0.30198  |
| 30823 | P0C214 | Q8NCF5 | 0.45436  |
| 30824 | P0C214 | Q6ICC9 | 0.18129  |
| 30825 | P0C214 | Q3LI70 | 0.086276 |
| 30826 | P0C214 | Q96SK3 | 0.36207  |
| 30827 | P0C214 | Q6TFL3 | 0.26817  |
| 30828 | P0C214 | Q04206 | 0.59287  |
| 30829 | P0C214 | Q8TAB5 | 0.24937  |
| 30830 | P0C214 | Q86VX9 | 0.94747  |
| 30831 | P0C214 | Q9UNQ2 | 0.45694  |
| 30832 | P0C214 | Q96AH0 | 0.60677  |
| 30833 | P0C214 | Q9NPC6 | 0.67933  |
| 30834 | P0C214 | Q6PK04 | 0.92744  |
| 30835 | P0C214 | Q9NW07 | 0.29044  |
| 30836 | P0C214 | O60516 | 0.20994  |
| 30837 | P0C214 | O14639 | 0.46609  |
| 30838 | P0C214 | Q9NRI7 | 0.086276 |
| 30839 | P0C214 | Q9NVC6 | 0.54759  |
| 30840 | P0C214 | Q8N1E6 | 0.35254  |
| 30841 | P0C214 | Q9Y315 | 0.36919  |
| 30842 | P0C214 | C9JFL3 | 0.086276 |
| 30843 | P0C214 | Q7Z2W9 | 0.11747  |
| 30844 | P0C214 | Q9BVI4 | 0.36603  |
| 30845 | P0C214 | P29692 | 0.45242  |
| 30846 | P0C214 | Q16520 | 0.8217   |
| 30847 | P0C214 | O95931 | 0.70796  |
| 30848 | P0C214 | Q9UNL4 | 0.24408  |
| 30849 | P0C214 | Q9UHU1 | 0.086276 |
| 30850 | P0C214 | Q5HY98 | 0.43572  |
| 30851 | P0C214 | Q3L8U1 | 0.90741  |
| 30852 | P0C214 | P48735 | 0.36921  |
| 30853 | P0C214 | Q2M1K9 | 0.18771  |
| 30854 | P0C214 | Q7Z589 | 0.69748  |
| 30855 | P0C214 | Q63HK5 | 0.26189  |
| 30856 | P0C214 | P0DKX0 | 0.44604  |

|       |        |        |          |
|-------|--------|--------|----------|
| 30857 | P0C214 | Q5RGN0 | 0.51029  |
| 30858 | P0C214 | P83436 | 0.29425  |
| 30859 | P0C214 | Q7L2K0 | 0.082505 |
| 30860 | P0C214 | Q9NSI2 | 0.24937  |
| 30861 | P0C214 | Q7L2E3 | 0.38557  |
| 30862 | P0C214 | Q53S33 | 0.69639  |
| 30863 | P0C214 | Q8TCD5 | 0.14851  |
| 30864 | P0C214 | O43402 | 0.68113  |
| 30865 | P0C214 | Q6STE5 | 0.74523  |
| 30866 | P0C214 | Q96GX9 | 0.44769  |
| 30867 | P0C214 | Q12962 | 1.0451   |
| 30868 | P0C214 | Q9H307 | 0.81129  |
| 30869 | P0C214 | Q9H3L0 | 0.4292   |
| 30870 | P0C214 | P69905 | 0.29612  |
| 30871 | P0C214 | Q66LE6 | 0.38105  |
| 30872 | P0C214 | Q8NCE8 | 0.35221  |
| 30873 | P0C214 | O75123 | 0.27035  |
| 30874 | P0C214 | O60535 | 0.37038  |
| 30875 | P0C214 | Q96EE3 | 0.57683  |
| 30876 | P0C214 | Q53H80 | 0.35354  |
| 30877 | P0C214 | P83881 | 1.0069   |
| 30878 | P0C214 | Q2M3W8 | 0.50227  |
| 30879 | P0C214 | Q15121 | 0.34094  |
| 30880 | P0C214 | Q9NP98 | 0.3766   |
| 30881 | P0C214 | Q9Y3B6 | 0.73626  |
| 30882 | P0C214 | Q15056 | 0.52538  |
| 30883 | P0C214 | O14964 | 0.51922  |
| 30884 | P0C214 | P63279 | 0.95701  |
| 30885 | P0C214 | Q06455 | 0.59962  |
| 30886 | P0C214 | P05787 | 1.3053   |
| 30887 | P0C214 | Q9NSG2 | 0.28533  |
| 30888 | P0C214 | Q9Y5Q3 | 0.7422   |
| 30889 | P0C214 | Q16613 | 0.19615  |
| 30890 | P0C214 | Q6ZTZ1 | 0.30254  |
| 30891 | P0C214 | Q9UHK0 | 0.35939  |
| 30892 | P0C214 | Q96G21 | 0.84614  |
| 30893 | P0C214 | Q6XQN6 | 0.36146  |
| 30894 | P0C214 | P60953 | 0.43984  |
| 30895 | P0C214 | P42224 | 0.23761  |
| 30896 | P0C214 | Q676U5 | 0.48338  |
| 30897 | P0C214 | Q9HAT8 | 0.65292  |
| 30898 | P0C214 | Q02386 | 0.2717   |
| 30899 | P0C214 | O75607 | 0.68938  |
| 30900 | P0C214 | P14136 | 0.42785  |
| 30901 | P0C214 | O75394 | 0.53548  |
| 30902 | P0C214 | Q15973 | 0.2007   |
| 30903 | P0C214 | Q6ZRI6 | 0.18738  |
| 30904 | P0C214 | O00423 | 0.33752  |
| 30905 | P0C214 | Q12816 | 0.27301  |
| 30906 | P0C214 | P49459 | 0.91374  |
| 30907 | P0C214 | Q13404 | 1.1206   |
| 30908 | P0C214 | P48556 | 0.54378  |
| 30909 | P0C214 | Q3MJ62 | 0.2507   |
| 30910 | P0C214 | O14656 | 0.28049  |
| 30911 | P0C214 | Q86WD7 | 0.88936  |
| 30912 | P0C214 | Q9HCH5 | 0.53703  |
| 30913 | P0C214 | O75208 | 0.39794  |
| 30914 | P0C214 | Q9H777 | 0.38657  |
| 30915 | P0C214 | Q96MT8 | 0.95523  |
| 30916 | P0C214 | P42568 | 0.84549  |
| 30917 | P0C214 | P37275 | 0.69456  |
| 30918 | P0C214 | Q68CJ9 | 0.67704  |
| 30919 | P0C214 | Q96S19 | 0.025122 |
| 30920 | P0C214 | Q8WVR3 | 0.24937  |
| 30921 | P0C214 | Q9Y2S0 | 0.1585   |
| 30922 | P0C214 | P28347 | 0.89544  |
| 30923 | P0C214 | Q3KP31 | 0.46805  |
| 30924 | P0C214 | Q7Z739 | 0.46322  |
| 30925 | P0C214 | Q96A73 | 1.0632   |
| 30926 | P0C214 | Q6NZI2 | 1.2071   |
| 30927 | P0C214 | P10914 | 0.39484  |
| 30928 | P0C214 | O60232 | 0.97261  |
| 30929 | P0C214 | Q14204 | 0.33053  |
| 30930 | P0C214 | Q96FH0 | 0.21105  |
| 30931 | P0C214 | Q8NI08 | 0.80979  |
| 30932 | P0C214 | Q6PJT7 | 0.89877  |

|       |        |        |          |
|-------|--------|--------|----------|
| 30933 | P0C214 | Q92734 | 0.091404 |
| 30934 | P0C214 | Q96MY1 | 0.62472  |
| 30935 | P0C214 | P78537 | 0.97573  |
| 30936 | P0C214 | P61218 | 0.2029   |
| 30937 | P0C214 | Q5HYK7 | 1.2812   |
| 30938 | P0C214 | Q70IA6 | 0.39765  |
| 30939 | P0C214 | Q5T5S1 | 0.60526  |
| 30940 | P0C214 | Q9P1A6 | 0.14636  |
| 30941 | P0C214 | Q8N8C0 | 0.33766  |
| 30942 | P0C214 | Q9NZ81 | 0.93949  |
| 30943 | P0C214 | Q8TBR4 | 0.41631  |
| 30944 | P0C214 | Q8N5Q1 | 0.907    |
| 30945 | P0C214 | Q9HAV4 | 1.2386   |
| 30946 | P0C214 | Q16666 | 0.52251  |
| 30947 | P0C214 | Q96NM4 | 0.242    |
| 30948 | P0C214 | Q9NPJ8 | 0.38275  |
| 30949 | P0C214 | Q13427 | 0.69288  |
| 30950 | P0C214 | Q8N128 | 0.086276 |
| 30951 | P0C214 | Q15928 | 0.50859  |
| 30952 | P0C214 | Q9UI32 | 0.46921  |
| 30953 | P0C214 | Q5VVS0 | 0.95859  |
| 30954 | P0C214 | P0C7W0 | 0.24937  |
| 30955 | P0C214 | Q8N448 | 0.75722  |
| 30956 | P0C214 | A6H8Z2 | 0.15822  |
| 30957 | P0C214 | Q8N5H3 | 0.24937  |
| 30958 | P0C214 | P17482 | 0.98819  |
| 30959 | P0C214 | O60299 | 0.30795  |
| 30960 | P0C214 | O43493 | 0.53748  |
| 30961 | P0C214 | Q17RC7 | 0.41178  |
| 30962 | P0C214 | Q8TDY2 | 0.91964  |
| 30963 | P0C214 | Q8IXW5 | 0.65864  |
| 30964 | P0C214 | O43745 | 0.6522   |
| 30965 | P0C214 | O95721 | 0.24622  |
| 30966 | P0C214 | Q8NHY2 | 1.0913   |
| 30967 | P0C214 | Q8WVB5 | 0.64222  |
| 30968 | P0C214 | P49792 | 0.91022  |
| 30969 | P0C214 | P35270 | 0.24586  |
| 30970 | P0C214 | Q5SXM2 | 0.53443  |
| 30971 | P0C214 | Q8IYW2 | 0.086276 |
| 30972 | P0C214 | O75381 | 0.24388  |
| 30973 | P0C214 | A8MYA2 | 0.067192 |
| 30974 | P0C214 | O75886 | 1.0515   |
| 30975 | P0C214 | Q96BN2 | 0.77665  |
| 30976 | P0C214 | Q9ULJ6 | 0.47098  |
| 30977 | P0C214 | Q9ULG1 | 0.24582  |
| 30978 | P0C214 | O95503 | 0.83199  |
| 30979 | P0C214 | Q9GZZ1 | 0.38322  |
| 30980 | P0C214 | O96018 | 0.35583  |
| 30981 | P0C214 | Q86TJ2 | 0.3055   |
| 30982 | P0C214 | Q86YV9 | 0.80588  |
| 30983 | P0C214 | Q8TDH9 | 0.14522  |
| 30984 | P0C214 | Q9UPG8 | 0.1622   |
| 30985 | P0C214 | Q96K58 | 0.23938  |
| 30986 | P0C214 | Q7L8W6 | 0.48256  |
| 30987 | P0C214 | Q9BYX4 | 0.34679  |
| 30988 | P0C214 | P54920 | 0.3857   |
| 30989 | P0C214 | Q5JVF3 | 0.3641   |
| 30990 | P0C214 | O43395 | 0.79068  |
| 30991 | P0C214 | Q05DH4 | 0.7199   |
| 30992 | P0C214 | Q9Y2Z2 | 0.92021  |
| 30993 | P0C214 | Q8NG27 | 0.23741  |
| 30994 | P0C214 | Q13618 | 0.4111   |
| 30995 | P0C214 | P57075 | 0.38497  |
| 30996 | P0C214 | Q9Y5B6 | 0.76615  |
| 30997 | P0C214 | P22087 | 0.63201  |
| 30998 | P0C214 | A0MZ66 | 0.6129   |
| 30999 | P0C214 | P23284 | 0.65781  |
| 31000 | P0C214 | O15127 | 0.47822  |
| 31001 | P0C214 | A8MT65 | 0.45792  |
| 31002 | P0C214 | Q9Y3C5 | 0.35592  |
| 31003 | P0C214 | Q6ISB3 | 0.6434   |
| 31004 | P0C214 | Q9UKI9 | 1.1671   |
| 31005 | P0C214 | Q9BUL8 | 0.67837  |
| 31006 | P0C214 | Q9UKX7 | 1.0112   |
| 31007 | P0C214 | Q08378 | 0.27173  |
| 31008 | P0C214 | Q9BWD3 | 0.16623  |

|       |        |        |          |
|-------|--------|--------|----------|
| 31009 | P0C214 | Q9BYQ9 | 0.43378  |
| 31010 | P0C214 | Q5T653 | 0.54353  |
| 31011 | P0C214 | P40306 | 0.51422  |
| 31012 | P0C214 | Q93034 | 0.8311   |
| 31013 | P0C214 | Q3ZCQ2 | 0.086276 |
| 31014 | P0C214 | Q9H869 | 1.3951   |
| 31015 | P0C214 | Q49AM1 | 0.44086  |
| 31016 | P0C214 | Q96HQ2 | 0.92792  |
| 31017 | P0C214 | Q9BTA0 | 0.24937  |
| 31018 | P0C214 | Q96JC4 | 0.35746  |
| 31019 | P0C214 | Q86W56 | 0.78558  |
| 31020 | P0C214 | P62701 | 0.68068  |
| 31021 | P0C214 | Q9HA92 | 0.48254  |
| 31022 | P0C214 | Q99608 | 0.17134  |
| 31023 | P0C214 | Q9GZQ3 | 1.0619   |
| 31024 | P0C214 | Q9BZK8 | 0.086276 |
| 31025 | P0C214 | Q71UM5 | 0.86958  |
| 31026 | P0C214 | P36543 | 0.28827  |
| 31027 | P0C214 | Q6IPU0 | 0.24794  |
| 31028 | P0C214 | P49207 | 0.89116  |
| 31029 | P0C214 | Q06330 | 0.4863   |
| 31030 | P0C214 | Q99873 | 0.66953  |
| 31031 | P0C214 | P11940 | 0.54638  |
| 31032 | P0C214 | P98168 | 0.65832  |
| 31033 | P0C214 | P05813 | 0.19081  |
| 31034 | P0C214 | Q9NYK6 | 0.37781  |
| 31035 | P0C214 | Q12905 | 1.1009   |
| 31036 | P0C214 | P35251 | 0.52965  |
| 31037 | P0C214 | Q99497 | 0.18325  |
| 31038 | P0C214 | Q969T4 | 0.79024  |
| 31039 | P0C214 | Q7Z3I7 | 0.26874  |
| 31040 | P0C214 | Q15910 | 0.38814  |
| 31041 | P0C214 | P14635 | 0.2499   |
| 31042 | P0C214 | Q15370 | 1.2248   |
| 31043 | P0C214 | Q14232 | 0.22281  |
| 31044 | P0C214 | P0CW26 | 0.16767  |
| 31045 | P0C214 | P63220 | 0.76824  |
| 31046 | P0C214 | Q9Y296 | 0.1947   |
| 31047 | P0C214 | Q15257 | 0.49741  |
| 31048 | P0C214 | Q96HZ7 | 0.086276 |
| 31049 | P0C214 | Q99607 | 0.97771  |
| 31050 | P0C214 | O60296 | 0.55482  |
| 31051 | P0C214 | Q96IL0 | 0.17552  |
| 31052 | P0C214 | A6NJJ6 | 0.24937  |
| 31053 | P0C214 | Q0VDD7 | 1.0809   |
| 31054 | P0C214 | Q7Z7F1 | 0.2436   |
| 31055 | P0C214 | Q32MZ4 | 1.0281   |
| 31056 | P0C214 | A2RU30 | 0.25438  |
| 31057 | P0C214 | Q5JWF8 | 0.041938 |
| 31058 | P0C214 | O00716 | 0.97278  |
| 31059 | P0C214 | Q8NBT2 | 0.73405  |
| 31060 | P0C214 | Q8IZ26 | 0.3115   |
| 31061 | P0C214 | Q92529 | 0.32272  |
| 31062 | P0C214 | Q10570 | 0.75988  |
| 31063 | P0C214 | H3BNL1 | 0.19015  |
| 31064 | P0C214 | Q15050 | 0.76213  |
| 31065 | P0C214 | Q75030 | 0.47179  |
| 31066 | P0C214 | Q9NSI6 | 0.83245  |
| 31067 | P0C214 | Q8N726 | 0.51863  |
| 31068 | P0C214 | Q9NVF7 | 0.3662   |
| 31069 | P0C214 | Q3BBV0 | 0.42949  |
| 31070 | P0C214 | Q9UBS3 | 0.71286  |
| 31071 | P0C214 | Q9Y2A0 | 0.20991  |
| 31072 | P0C214 | B3EWG3 | 0.24937  |
| 31073 | P0C214 | P78395 | 0.65692  |
| 31074 | P0C214 | Q6WBX8 | 0.34094  |
| 31075 | P0C214 | Q6ZV77 | 0.086276 |
| 31076 | P0C214 | Q8N9F8 | 0.33108  |
| 31077 | P0C214 | Q8N668 | 0.75466  |
| 31078 | P0C214 | Q9Y6Q2 | 0.25454  |
| 31079 | P0C214 | Q6ZUA9 | 0.21138  |
| 31080 | P0C214 | Q5RKV6 | 0.35397  |
| 31081 | P0C214 | P48200 | 0.56075  |
| 31082 | P0C214 | Q9Y613 | 0.51813  |
| 31083 | P0C214 | Q9NUQ6 | 0.35391  |
| 31084 | P0C214 | Q9NRD1 | 0.21063  |

|       |        |        |          |
|-------|--------|--------|----------|
| 31085 | POC214 | Q9Y2M0 | 0.3016   |
| 31086 | POC214 | Q5SWA1 | 0.67395  |
| 31087 | POC214 | O43617 | 0.38421  |
| 31088 | POC214 | P17024 | 0.31548  |
| 31089 | POC214 | Q9Y232 | 0.21984  |
| 31090 | POC214 | Q9Y2Q1 | 0.47209  |
| 31091 | POC214 | Q8NC74 | 0.34205  |
| 31092 | POC214 | Q9BZS9 | 0.086276 |
| 31093 | POC214 | Q6ZUL3 | 0.086276 |
| 31094 | POC214 | Q6ZR52 | 0.38021  |
| 31095 | POC214 | Q9NXV2 | 1.4022   |
| 31096 | POC214 | O75340 | 0.43798  |
| 31097 | POC214 | P20585 | 0.030835 |
| 31098 | POC214 | P68402 | 0.099086 |
| 31099 | POC214 | P26641 | 0.61424  |
| 31100 | POC214 | Q8NCU7 | 0.65252  |
| 31101 | POC214 | P69208 | 0.098385 |
| 31102 | POC214 | P06396 | 0.40971  |
| 31103 | POC214 | Q3LI76 | 0.50329  |
| 31104 | POC214 | Q7L9L4 | 0.83762  |
| 31105 | POC214 | Q5T870 | 0.70223  |
| 31106 | POC214 | Q9NQ29 | 0.81084  |
| 31107 | POC214 | Q14771 | 0.58933  |
| 31108 | POC214 | Q9H6Q4 | 0.48571  |
| 31109 | POC214 | Q96CT7 | 0.054683 |
| 31110 | POC214 | Q9BXQ6 | 0.086276 |
| 31111 | POC214 | Q96DN6 | 0.23587  |
| 31112 | POC214 | Q12901 | 0.40317  |
| 31113 | POC214 | Q92540 | 1.0915   |
| 31114 | POC214 | Q96NG5 | 0.40737  |
| 31115 | POC214 | O60813 | 0.36259  |
| 31116 | POC214 | Q8WVZ9 | 0.41816  |
| 31117 | POC214 | Q14599 | 0.41813  |
| 31118 | POC214 | Q8N819 | 0.40985  |
| 31119 | POC214 | Q8NFU3 | 0.12809  |
| 31120 | POC214 | O60437 | 0.69749  |
| 31121 | POC214 | Q96N77 | 0.3338   |
| 31122 | POC214 | Q9NSC5 | 0.37717  |
| 31123 | POC214 | P20700 | 0.2073   |
| 31124 | POC214 | Q75164 | 1.093    |
| 31125 | POC214 | Q9H910 | 0.78406  |
| 31126 | POC214 | Q86SQ9 | 0.10075  |
| 31127 | POC214 | P61575 | 0.39132  |
| 31128 | POC214 | P55198 | 0.80901  |
| 31129 | POC214 | P40939 | 0.36045  |
| 31130 | POC214 | O60477 | 0.43754  |
| 31131 | POC214 | P05413 | 0.23094  |
| 31132 | POC214 | P55345 | 0.40618  |
| 31133 | POC214 | Q8NCQ2 | 0.48343  |
| 31134 | POC214 | Q8N5J4 | 0.36351  |
| 31135 | POC214 | Q9NX18 | 0.87889  |
| 31136 | POC214 | Q9H6R4 | 0.39322  |
| 31137 | POC214 | P24385 | 0.51418  |
| 31138 | POC214 | Q6ZU52 | 0.2675   |
| 31139 | POC214 | P51808 | 0.18397  |
| 31140 | POC214 | Q86WZ0 | 0.159    |
| 31141 | POC214 | Q96SE7 | 0.37033  |
| 31142 | POC214 | O75151 | 0.64715  |
| 31143 | POC214 | P60411 | 0.43378  |
| 31144 | POC214 | O00139 | 0.29899  |
| 31145 | POC214 | Q9NVM9 | 1.0327   |
| 31146 | POC214 | Q04724 | 0.82698  |
| 31147 | POC214 | Q9BUR4 | 0.80799  |
| 31148 | POC214 | Q9UQN3 | 0.50704  |
| 31149 | POC214 | Q13875 | 0.59529  |
| 31150 | POC214 | Q14676 | 0.52841  |
| 31151 | POC214 | P08865 | 0.93163  |
| 31152 | POC214 | Q96JG6 | 0.018603 |
| 31153 | POC214 | Q9H091 | 0.17354  |
| 31154 | POC214 | Q9BTT4 | 0.61448  |
| 31155 | POC214 | P49005 | 0.49437  |
| 31156 | POC214 | Q14999 | 1.1197   |
| 31157 | POC214 | Q7Z614 | 0.29301  |
| 31158 | POC214 | Q9Y2Q9 | 0.54217  |
| 31159 | POC214 | Q96CW5 | 0.78446  |
| 31160 | POC214 | Q9H0A9 | 1.0231   |

|       |        |        |          |
|-------|--------|--------|----------|
| 31161 | POC214 | P05121 | 0.78952  |
| 31162 | POC214 | Q8WXD5 | 0.99045  |
| 31163 | POC214 | Q14194 | 0.45535  |
| 31164 | POC214 | Q9UBU7 | 0.026052 |
| 31165 | POC214 | Q6ZMS7 | 0.37171  |
| 31166 | POC214 | Q15691 | 0.54855  |
| 31167 | POC214 | Q9NZI8 | 0.26202  |
| 31168 | POC214 | P32969 | 1.1125   |
| 31169 | POC214 | Q5VZR2 | 0.72088  |
| 31170 | POC214 | Q6IPT2 | 0.907    |
| 31171 | POC214 | Q9NNX9 | 0.70144  |
| 31172 | POC214 | Q9UK41 | 0.69211  |
| 31173 | POC214 | Q3KRA6 | 0.9744   |
| 31174 | POC214 | Q13884 | 0.30716  |
| 31175 | POC214 | Q86WP2 | 0.37729  |
| 31176 | POC214 | Q5JPH6 | 0.42695  |
| 31177 | POC214 | Q9H4L7 | 0.32241  |
| 31178 | POC214 | Q5U5X8 | 0.52883  |
| 31179 | POC214 | Q7Z2X4 | 0.23431  |
| 31180 | POC214 | P35908 | 0.38324  |
| 31181 | POC214 | Q02543 | 0.97266  |
| 31182 | POC214 | Q8NEQ6 | 0.11647  |
| 31183 | POC214 | Q6ZN19 | 0.25925  |
| 31184 | POC214 | Q13200 | 0.60989  |
| 31185 | POC214 | Q9UL41 | 0.53311  |
| 31186 | POC214 | P07199 | 0.669    |
| 31187 | POC214 | Q9UK61 | 0.46209  |
| 31188 | POC214 | O43776 | 0.81413  |
| 31189 | POC214 | Q9Y3R4 | 0.19396  |
| 31190 | POC214 | Q13901 | 1.0659   |
| 31191 | POC214 | Q92733 | 0.75083  |
| 31192 | POC214 | P62266 | 1.1544   |
| 31193 | POC214 | Q14129 | 0.51831  |
| 31194 | POC214 | P17038 | 0.38021  |
| 31195 | POC214 | Q8NEK8 | 0.37656  |
| 31196 | POC214 | Q9UJX2 | 0.67236  |
| 31197 | POC214 | F5H4B4 | 0.54789  |
| 31198 | POC214 | A6NNH0 | 0.63857  |
| 31199 | POC214 | Q6ZMR3 | 0.96724  |
| 31200 | POC214 | Q9Y297 | 0.41858  |
| 31201 | POC214 | Q9Y468 | 0.81485  |
| 31202 | POC214 | Q9UC07 | 0.30617  |
| 31203 | POC214 | Q68E01 | 0.54302  |
| 31204 | POC214 | Q8NEY3 | 0.31433  |
| 31205 | POC214 | Q9Y3D8 | 0.21653  |
| 31206 | POC214 | Q2KHT3 | 0.23452  |
| 31207 | POC214 | Q9HAU5 | 1.0073   |
| 31208 | POC214 | Q9NXX8 | 0.56048  |
| 31209 | POC214 | Q14686 | 0.82256  |
| 31210 | POC214 | P30414 | 0.69592  |
| 31211 | POC214 | Q8IXP5 | 0.24937  |
| 31212 | POC214 | A8MZG2 | 0.24937  |
| 31213 | POC214 | O94864 | 0.46776  |
| 31214 | POC214 | Q9NYP3 | 0.37563  |
| 31215 | POC214 | Q9Y6I3 | 0.052121 |
| 31216 | POC214 | Q99807 | 0.2924   |
| 31217 | POC214 | P31948 | 0.88552  |
| 31218 | POC214 | Q99962 | 0.31397  |
| 31219 | POC214 | A6NGG3 | 0.086276 |
| 31220 | POC214 | O95149 | 0.4992   |
| 31221 | POC214 | Q8NEJ9 | 0.29361  |
| 31222 | POC214 | Q15545 | 0.84241  |
| 31223 | POC214 | Q96EK7 | 0.24855  |
| 31224 | POC214 | P38935 | 0.42249  |
| 31225 | POC214 | Q9HAW4 | 0.28615  |
| 31226 | POC214 | Q96HT8 | 1.28     |
| 31227 | POC214 | Q8N7B7 | 0.22927  |
| 31228 | POC214 | A8MSY0 | 0.23803  |
| 31229 | POC214 | Q8WV60 | 0.25451  |
| 31230 | POC214 | O95396 | 0.23505  |
| 31231 | POC214 | Q8N2H9 | 0.32414  |
| 31232 | POC214 | Q7L3B6 | 0.25373  |
| 31233 | POC214 | Q494X3 | 0.47643  |
| 31234 | POC214 | P0CG35 | 0.72737  |
| 31235 | POC214 | Q99547 | 0.70904  |
| 31236 | POC214 | Q14938 | 0.12315  |



|       |        |        |          |
|-------|--------|--------|----------|
| 31237 | POC214 | Q9BXT5 | 0.39984  |
| 31238 | POC214 | O75420 | 0.48436  |
| 31239 | POC214 | Q96MR9 | 0.43328  |
| 31240 | POC214 | Q9Y2P0 | 0.29953  |
| 31241 | POC214 | Q9H0R1 | 0.10687  |
| 31242 | POC214 | O60244 | 0.51898  |
| 31243 | POC214 | Q7RTU5 | 0.38179  |
| 31244 | POC214 | Q00978 | 0.96962  |
| 31245 | POC214 | Q86Z20 | 1.0729   |
| 31246 | POC214 | Q8N612 | 0.23781  |
| 31247 | POC214 | Q6EEV4 | 0.086276 |
| 31248 | POC214 | Q15170 | 1.3647   |
| 31249 | POC214 | Q9GZU7 | 0.53839  |
| 31250 | POC214 | Q9H379 | 0.30078  |
| 31251 | POC214 | Q8N5T8 | 0.18531  |
| 31252 | POC214 | Q96K75 | 0.28618  |
| 31253 | POC214 | Q8N6Q8 | 0.44451  |
| 31254 | POC214 | Q1W209 | 0.086276 |
| 31255 | POC214 | Q9BYR0 | 0.43378  |
| 31256 | POC214 | Q9BQN1 | 0.67458  |
| 31257 | POC214 | P40926 | 0.75212  |
| 31258 | POC214 | P16083 | 0.17757  |
| 31259 | POC214 | P09001 | 0.59874  |
| 31260 | POC214 | P62877 | 0.67169  |
| 31261 | POC214 | Q2VPB7 | 0.6712   |
| 31262 | POC214 | Q5MJ68 | 0.15857  |
| 31263 | POC214 | Q6ZQP7 | 0.086276 |
| 31264 | POC214 | P32189 | 0.34829  |
| 31265 | POC214 | Q9NPB8 | 0.13242  |
| 31266 | POC214 | O96006 | 0.61822  |
| 31267 | POC214 | O75330 | 0.072932 |
| 31268 | POC214 | O60551 | 0.2092   |
| 31269 | POC214 | Q569H4 | 0.24937  |
| 31270 | POC214 | Q9UII5 | 0.37211  |
| 31271 | POC214 | Q49B96 | 0.6344   |
| 31272 | POC214 | O00308 | 0.299    |
| 31273 | POC214 | Q6P1K2 | 1.1361   |
| 31274 | POC214 | Q5T4H9 | 0.086276 |
| 31275 | POC214 | Q15653 | 1.0113   |
| 31276 | POC214 | Q4V348 | 0.24611  |
| 31277 | POC214 | Q9NY12 | 0.35369  |
| 31278 | POC214 | P22557 | 0.29461  |
| 31279 | POC214 | P59090 | 0.086276 |
| 31280 | POC214 | O43463 | 0.72156  |
| 31281 | POC214 | O75794 | 1.2143   |
| 31282 | POC214 | Q9BT81 | 0.26441  |
| 31283 | POC214 | Q7KZF4 | 0.96346  |
| 31284 | POC214 | P63241 | 0.50103  |
| 31285 | POC214 | Q9UKG1 | 0.35374  |
| 31286 | POC214 | P46060 | 0.26181  |
| 31287 | POC214 | Q9UNS2 | 0.6335   |
| 31288 | POC214 | Q96SZ4 | 0.22695  |
| 31289 | POC214 | A6NLF2 | 0.31331  |
| 31290 | POC214 | Q9H063 | 0.4638   |
| 31291 | POC214 | Q15031 | 0.29999  |
| 31292 | POC214 | P62308 | 0.80392  |
| 31293 | POC214 | Q6IV72 | 0.27217  |
| 31294 | POC214 | Q562F6 | 0.78356  |
| 31295 | POC214 | Q96LT7 | 0.55173  |
| 31296 | POC214 | Q9NY61 | 0.77078  |
| 31297 | POC214 | Q96GX8 | 0.24937  |
| 31298 | POC214 | Q9BXR0 | 1.3921   |
| 31299 | POC214 | O14556 | 0.80401  |
| 31300 | POC214 | P51854 | 0.14233  |
| 31301 | POC214 | Q9H489 | 0.85642  |
| 31302 | POC214 | Q8N141 | 0.50227  |
| 31303 | POC214 | Q3KP22 | 0.089033 |
| 31304 | POC214 | Q86UY8 | 0.17404  |
| 31305 | POC214 | Q15436 | 0.6379   |
| 31306 | POC214 | Q96TC7 | 0.46291  |
| 31307 | POC214 | Q9NWT8 | 0.84438  |
| 31308 | POC214 | Q9Y4Z0 | 0.8311   |
| 31309 | POC214 | Q8TBE0 | 0.67207  |
| 31310 | POC214 | P51786 | 0.2833   |
| 31311 | POC214 | Q5VVH5 | 0.58787  |
| 31312 | POC214 | Q9BY31 | 0.20165  |

|       |        |        |             |
|-------|--------|--------|-------------|
| 31313 | POC214 | Q3B7T1 | 0.39389     |
| 31314 | POC214 | Q13094 | 0.7069      |
| 31315 | POC214 | Q96T17 | 0.55877     |
| 31316 | POC214 | Q658Y4 | 0.39128     |
| 31317 | POC214 | Q8TAQ2 | 1.2801      |
| 31318 | POC214 | Q75VX8 | 0.74501     |
| 31319 | POC214 | Q9Y266 | 0.86844     |
| 31320 | POC214 | Q96Q05 | 0.33859     |
| 31321 | POC214 | Q69YH5 | 0.72707     |
| 31322 | POC214 | Q8IWE5 | 0.3113      |
| 31323 | POC214 | Q9UET6 | 0.86401     |
| 31324 | POC214 | P35573 | 0.71008     |
| 31325 | POC214 | Q9UK45 | 0.89284     |
| 31326 | POC214 | Q9C0C6 | 0.64982     |
| 31327 | POC214 | Q969Q0 | 0.095792    |
| 31328 | POC214 | F8W1W9 | 0.043236    |
| 31329 | POC214 | Q01844 | 0.64756     |
| 31330 | POC214 | Q9HCU8 | 0.46207     |
| 31331 | POC214 | Q8NDH6 | 0.39171     |
| 31332 | POC214 | Q9UI95 | 1.1515      |
| 31333 | POC214 | Q15560 | 0.96142     |
| 31334 | POC214 | Q9H2F5 | 0.48541     |
| 31335 | POC214 | O43318 | 0.47939     |
| 31336 | POC214 | Q96GI7 | 0.24937     |
| 31337 | POC214 | Q9UHR6 | 0.98757     |
| 31338 | POC214 | P14868 | 0.98867     |
| 31339 | POC214 | P13196 | 0.47245     |
| 31340 | POC214 | O43148 | 0.92061     |
| 31341 | POC214 | Q6ZSJ8 | 0.24937     |
| 31342 | POC214 | P52565 | 0.13808     |
| 31343 | POC214 | Q96BV0 | 0.16136     |
| 31344 | POC214 | P13640 | 0.56842     |
| 31345 | POC214 | Q7RTX8 | 9.3936e-005 |
| 31346 | POC214 | Q6ZQR5 | 0.53551     |
| 31347 | POC214 | P29508 | 0.96136     |
| 31348 | POC214 | P08579 | 0.28881     |
| 31349 | POC214 | Q6P1K8 | 0.35545     |
| 31350 | POC214 | P38936 | 0.233       |
| 31351 | POC214 | O60287 | 0.96041     |
| 31352 | POC214 | A6NEJ1 | 0.17331     |
| 31353 | POC214 | Q6PIJ6 | 0.5958      |
| 31354 | POC214 | Q8NAV1 | 0.70342     |
| 31355 | POC214 | Q5SVQ8 | 0.35429     |
| 31356 | POC214 | Q6ZS94 | 0.086276    |
| 31357 | POC214 | Q6IA86 | 0.54942     |
| 31358 | POC214 | O76042 | 0.46927     |
| 31359 | POC214 | O43390 | 0.63499     |
| 31360 | POC214 | Q92541 | 0.88848     |
| 31361 | POC214 | P36542 | 0.18202     |
| 31362 | POC214 | Q13542 | 0.57944     |
| 31363 | POC214 | P60331 | 0.43378     |
| 31364 | POC214 | Q16594 | 0.51174     |
| 31365 | POC214 | Q8N883 | 0.26062     |
| 31366 | POC214 | O00232 | 0.36835     |
| 31367 | POC214 | Q9Y5N6 | 0.48445     |
| 31368 | POC214 | Q5T447 | 0.38666     |
| 31369 | POC214 | Q5T655 | 0.086276    |
| 31370 | POC214 | Q99750 | 0.37406     |
| 31371 | POC214 | Q8N6I1 | 0.64762     |
| 31372 | POC214 | Q96MT3 | 0.8875      |
| 31373 | POC214 | Q15366 | 1.0133      |
| 31374 | POC214 | Q9Y2S2 | 0.079191    |
| 31375 | POC214 | Q96FF9 | 0.76515     |
| 31376 | POC214 | O15131 | 1.0779      |
| 31377 | POC214 | O95232 | 0.42145     |
| 31378 | POC214 | O95347 | 0.33998     |
| 31379 | POC214 | Q8NDC0 | 0.13629     |
| 31380 | POC214 | Q3SXZ3 | 0.30182     |
| 31381 | POC214 | Q9GZX5 | 0.78655     |
| 31382 | POC214 | O60810 | 0.69314     |
| 31383 | POC214 | Q8WW22 | 0.97466     |
| 31384 | POC214 | P05423 | 0.177       |
| 31385 | POC214 | Q8IWL3 | 0.60647     |
| 31386 | POC214 | Q7L592 | 0.4323      |
| 31387 | POC214 | Q16890 | 0.38258     |
| 31388 | POC214 | Q9H1A3 | 0.26948     |

|       |        |        |          |
|-------|--------|--------|----------|
| 31389 | P0C214 | P82664 | 1.0017   |
| 31390 | P0C214 | Q9BYQ3 | 0.43378  |
| 31391 | P0C214 | Q8N684 | 0.45735  |
| 31392 | P0C214 | Q8NCX0 | 0.33472  |
| 31393 | P0C214 | Q9NXT0 | 0.25251  |
| 31394 | P0C214 | Q6P5X5 | 0.72991  |
| 31395 | P0C214 | Q7Z6M4 | 0.44484  |
| 31396 | P0C214 | Q9UKD1 | 0.73823  |
| 31397 | P0C214 | Q13064 | 0.19885  |
| 31398 | P0C214 | P78316 | 1.0604   |
| 31399 | P0C214 | P51523 | 0.20866  |
| 31400 | P0C214 | P49591 | 0.55377  |
| 31401 | P0C214 | Q7Z6I5 | 0.76405  |
| 31402 | P0C214 | Q86UE4 | 0.49292  |
| 31403 | P0C214 | O95049 | 0.389    |
| 31404 | P0C214 | Q9P2T0 | 0.29541  |
| 31405 | P0C214 | Q6ZQY7 | 0.37777  |
| 31406 | P0C214 | P82914 | 0.71396  |
| 31407 | P0C214 | P0CV99 | 0.69286  |
| 31408 | P0C214 | Q9H4I2 | 0.65925  |
| 31409 | P0C214 | Q9BYD9 | 0.095747 |
| 31410 | P0C214 | Q8IZU0 | 0.60323  |
| 31411 | P0C214 | Q86VP3 | 0.59786  |
| 31412 | P0C214 | Q8IUR0 | 0.92167  |
| 31413 | P0C214 | Q5XKE5 | 0.42688  |
| 31414 | P0C214 | Q147U1 | 0.3168   |
| 31415 | P0C214 | Q12789 | 0.77767  |
| 31416 | P0C214 | Q8N3F0 | 0.21779  |
| 31417 | P0C214 | Q86XZ4 | 0.44203  |
| 31418 | P0C214 | Q9HCE1 | 0.85944  |
| 31419 | P0C214 | Q8WXG1 | 0.089621 |
| 31420 | P0C214 | Q96BQ5 | 0.55913  |
| 31421 | P0C214 | Q9BSK1 | 0.23356  |
| 31422 | P0C214 | P51965 | 0.82252  |
| 31423 | P0C214 | Q9H3C7 | 0.68258  |
| 31424 | P0C214 | O60524 | 1.056    |
| 31425 | P0C214 | P17676 | 0.68498  |
| 31426 | P0C214 | O43639 | 0.45849  |
| 31427 | P0C214 | Q96EN9 | 0.30252  |
| 31428 | P0C214 | Q9BTE1 | 0.18177  |
| 31429 | P0C214 | P24278 | 0.80252  |
| 31430 | P0C214 | Q96T88 | 0.24021  |
| 31431 | P0C214 | P17031 | 0.34363  |
| 31432 | P0C214 | Q9UBS4 | 0.77743  |
| 31433 | P0C214 | P15170 | 0.66928  |
| 31434 | P0C214 | Q9P242 | 0.78573  |
| 31435 | P0C214 | Q9UD71 | 0.89278  |
| 31436 | P0C214 | Q5SWW7 | 0.086276 |
| 31437 | P0C214 | O75792 | 0.97602  |
| 31438 | P0C214 | Q5PSV4 | 0.359    |
| 31439 | P0C214 | Q9BZQ2 | 0.54279  |
| 31440 | P0C214 | Q9BPZ3 | 0.4756   |
| 31441 | P0C214 | A8MV65 | 0.61461  |
| 31442 | P0C214 | P43355 | 1.0247   |
| 31443 | P0C214 | Q01105 | 0.92207  |
| 31444 | P0C214 | Q9BXD5 | 0.56488  |
| 31445 | P0C214 | Q9UKT7 | 0.45991  |
| 31446 | P0C214 | P46976 | 0.66221  |
| 31447 | P0C214 | Q9HCX3 | 0.23454  |
| 31448 | P0C214 | Q99700 | 0.7552   |
| 31449 | P0C214 | Q96AT1 | 0.24937  |
| 31450 | P0C214 | Q16718 | 0.01924  |
| 31451 | P0C214 | Q13057 | 0.2186   |
| 31452 | P0C214 | Q16630 | 0.29385  |
| 31453 | P0C214 | P55789 | 0.15201  |
| 31454 | P0C214 | P78317 | 0.62333  |
| 31455 | P0C214 | Q15542 | 0.93003  |
| 31456 | P0C214 | Q16385 | 0.81218  |
| 31457 | P0C214 | P62277 | 1.3005   |
| 31458 | P0C214 | P14651 | 0.047469 |
| 31459 | P0C214 | O94906 | 0.31677  |
| 31460 | P0C214 | Q86UT8 | 0.84223  |
| 31461 | P0C214 | Q92562 | 0.28119  |
| 31462 | P0C214 | Q9H503 | 0.21051  |
| 31463 | P0C214 | Q8N336 | 0.16714  |
| 31464 | P0C214 | P48147 | 0.24366  |

|       |        |        |          |
|-------|--------|--------|----------|
| 31465 | POC214 | Q9H0M0 | 0.36125  |
| 31466 | POC214 | Q99615 | 0.83605  |
| 31467 | POC214 | A0PJX2 | 0.48763  |
| 31468 | POC214 | Q5I0X4 | 0.24937  |
| 31469 | POC214 | Q9UIV1 | 1.327    |
| 31470 | POC214 | Q3LI60 | 0.086276 |
| 31471 | POC214 | Q9Y248 | 0.64298  |
| 31472 | POC214 | Q03933 | 0.63006  |
| 31473 | POC214 | Q9Y3Z3 | 0.1586   |
| 31474 | POC214 | Q96RT7 | 0.27841  |
| 31475 | POC214 | Q9UGJ1 | 0.1994   |
| 31476 | POC214 | Q5VTD9 | 0.16919  |
| 31477 | POC214 | Q7Z2W4 | 0.42133  |
| 31478 | POC214 | O95619 | 0.70453  |
| 31479 | POC214 | O75843 | 0.53015  |
| 31480 | POC214 | Q13398 | 0.43651  |
| 31481 | POC214 | P25205 | 0.32901  |
| 31482 | POC214 | Q53GI3 | 0.29263  |
| 31483 | POC214 | Q8NF67 | 0.21396  |
| 31484 | POC214 | P05062 | 0.35674  |
| 31485 | POC214 | A8CG34 | 0.22124  |
| 31486 | POC214 | Q9Y3E5 | 0.65763  |
| 31487 | POC214 | Q94874 | 0.85034  |
| 31488 | POC214 | Q09028 | 0.54881  |
| 31489 | POC214 | Q5JR59 | 0.99982  |
| 31490 | POC214 | P0C879 | 0.086276 |
| 31491 | POC214 | Q8TF46 | 0.26371  |
| 31492 | POC214 | Q6ZSG2 | 0.088984 |
| 31493 | POC214 | Q9HBT8 | 0.25299  |
| 31494 | POC214 | Q8NEG0 | 0.007562 |
| 31495 | POC214 | P55854 | 0.45883  |
| 31496 | POC214 | Q9BR46 | 0.48404  |
| 31497 | POC214 | P86452 | 0.39917  |
| 31498 | POC214 | Q9NWS0 | 0.39274  |
| 31499 | POC214 | Q8N7U7 | 0.30483  |
| 31500 | POC214 | Q96C11 | 0.28531  |
| 31501 | POC214 | Q8TDN6 | 0.30115  |
| 31502 | POC214 | Q93008 | 0.44942  |
| 31503 | POC214 | O60732 | 0.2675   |
| 31504 | POC214 | Q96JZ2 | 0.54427  |
| 31505 | POC214 | Q6PCE3 | 0.62358  |
| 31506 | POC214 | Q9Y4Y9 | 0.89957  |
| 31507 | POC214 | Q8N365 | 0.24937  |
| 31508 | POC214 | Q9UI30 | 0.35517  |
| 31509 | POC214 | Q5M9Q1 | 0.91393  |
| 31510 | POC214 | A8MTZ7 | 0.12874  |
| 31511 | POC214 | Q99909 | 0.17331  |
| 31512 | POC214 | O14776 | 1.0264   |
| 31513 | POC214 | Q01082 | 0.47635  |
| 31514 | POC214 | O43248 | 0.2349   |
| 31515 | POC214 | Q8IYI0 | 0.041094 |
| 31516 | POC214 | Q9BSF0 | 0.33507  |
| 31517 | POC214 | Q8N9N8 | 0.20832  |
| 31518 | POC214 | P08779 | 0.61981  |
| 31519 | POC214 | Q6ZVX7 | 0.58901  |
| 31520 | POC214 | P27816 | 0.3152   |
| 31521 | POC214 | Q9C0I3 | 0.85525  |
| 31522 | POC214 | Q86UC2 | 0.35413  |
| 31523 | POC214 | Q8NA31 | 0.62725  |
| 31524 | POC214 | Q9UK58 | 0.31702  |
| 31525 | POC214 | Q5VWM6 | 0.73225  |
| 31526 | POC214 | Q8NE18 | 1.2768   |
| 31527 | POC214 | P23490 | 0.66191  |
| 31528 | POC214 | Q9Y2G5 | 0.18365  |
| 31529 | POC214 | Q9NZP6 | 0.91744  |
| 31530 | POC214 | P20810 | 0.16103  |
| 31531 | POC214 | Q01534 | 0.68814  |
| 31532 | POC214 | Q8N983 | 0.54328  |
| 31533 | POC214 | Q9NWF9 | 0.78845  |
| 31534 | POC214 | Q5VZB9 | 0.068143 |
| 31535 | POC214 | Q6ZNM6 | 0.58553  |
| 31536 | POC214 | Q68CZ2 | 0.28749  |
| 31537 | POC214 | Q9UMS4 | 0.57638  |
| 31538 | POC214 | Q06830 | 0.40417  |
| 31539 | POC214 | Q6UYE1 | 0.80116  |
| 31540 | POC214 | P50914 | 1.2566   |

|       |        |        |          |
|-------|--------|--------|----------|
| 31541 | P0C214 | Q9HB03 | 0.9999   |
| 31542 | P0C214 | O95257 | 0.26971  |
| 31543 | P0C214 | Q8IWE4 | 0.31901  |
| 31544 | P0C214 | Q5VSL9 | 0.75774  |
| 31545 | P0C214 | Q5TAQ9 | 0.25402  |
| 31546 | P0C214 | P61077 | 1.0001   |
| 31547 | P0C214 | Q9BZV1 | 1.0203   |
| 31548 | P0C214 | O60290 | 0.53162  |
| 31549 | P0C214 | Q96IZ7 | 1.0576   |
| 31550 | P0C214 | Q86W50 | 0.48706  |
| 31551 | P0C214 | Q9NUQ3 | 0.65808  |
| 31552 | P0C214 | P49716 | 0.26665  |
| 31553 | P0C214 | P78386 | 0.53378  |
| 31554 | P0C214 | Q1RMZ1 | 0.23275  |
| 31555 | P0C214 | Q9H089 | 0.22125  |
| 31556 | P0C214 | Q9NWQ4 | 0.18973  |
| 31557 | P0C214 | Q96DC7 | 1.168    |
| 31558 | P0C214 | Q6ZW49 | 0.37607  |
| 31559 | P0C214 | Q8WTV1 | 0.77682  |
| 31560 | P0C214 | Q10587 | 0.20601  |
| 31561 | P0C214 | Q9UPQ9 | 0.44757  |
| 31562 | P0C214 | P32929 | 0.34673  |
| 31563 | P0C214 | Q8NAE3 | 0.15056  |
| 31564 | P0C214 | Q8N5U6 | 0.9957   |
| 31565 | P0C214 | Q9BXW3 | 0.086276 |
| 31566 | P0C214 | P62072 | 0.19607  |
| 31567 | P0C214 | A8MVM7 | 0.086276 |
| 31568 | P0C214 | O95571 | 0.69606  |
| 31569 | P0C214 | Q07955 | 0.58056  |
| 31570 | P0C214 | Q5T6F2 | 0.70773  |
| 31571 | P0C214 | P10244 | 0.47271  |
| 31572 | P0C214 | Q8N344 | 0.47392  |
| 31573 | P0C214 | Q5VTA0 | 0.36894  |
| 31574 | P0C214 | P11166 | 0.57008  |
| 31575 | P0C214 | P49450 | 0.23893  |
| 31576 | P0C214 | P54368 | 0.057821 |
| 31577 | P0C214 | P53701 | 0.45284  |
| 31578 | P0C214 | P50749 | 0.66582  |
| 31579 | P0C214 | P18615 | 1.0761   |
| 31580 | P0C214 | Q9H0W9 | 0.61831  |
| 31581 | P0C214 | Q7Z5V6 | 0.29952  |
| 31582 | P0C214 | E9PAV3 | 0.53901  |
| 31583 | P0C214 | Q96BF6 | 0.31209  |
| 31584 | P0C214 | Q9BQI9 | 0.62503  |
| 31585 | P0C214 | Q9BY27 | 0.46777  |
| 31586 | P0C214 | P17030 | 0.27117  |
| 31587 | P0C214 | Q10586 | 0.30727  |
| 31588 | P0C214 | Q9UH99 | 0.13541  |
| 31589 | P0C214 | Q7L804 | 0.49951  |
| 31590 | P0C214 | Q9H098 | 0.47683  |
| 31591 | P0C214 | Q96QU8 | 0.93058  |
| 31592 | P0C214 | Q9Y534 | 0.27362  |
| 31593 | P0C214 | Q9NZC7 | 0.55894  |
| 31594 | P0C214 | Q13794 | 0.57147  |
| 31595 | P0C214 | O95359 | 0.24586  |
| 31596 | P0C214 | Q6VUC0 | 0.33775  |
| 31597 | P0C214 | Q9BT92 | 0.51152  |
| 31598 | P0C214 | Q9BWG6 | 0.13248  |
| 31599 | P0C214 | Q13428 | 0.86117  |
| 31600 | P0C214 | Q9Y250 | 0.84989  |
| 31601 | P0C214 | Q6QNY0 | 0.70421  |
| 31602 | P0C214 | A7MCY6 | 0.58714  |
| 31603 | P0C214 | E9PB15 | 0.046414 |
| 31604 | P0C214 | O75564 | 0.35016  |
| 31605 | P0C214 | Q03936 | 0.46545  |
| 31606 | P0C214 | Q5QJE6 | 0.8248   |
| 31607 | P0C214 | O14561 | 0.37539  |
| 31608 | P0C214 | Q8TBF2 | 0.31124  |
| 31609 | P0C214 | Q6ZNK6 | 0.77451  |
| 31610 | P0C214 | Q96CN9 | 0.43634  |
| 31611 | P0C214 | Q96NL3 | 0.32443  |
| 31612 | P0C214 | Q99798 | 0.16285  |
| 31613 | P0C214 | P0C1Z6 | 1.048    |
| 31614 | P0C214 | O60828 | 0.75495  |
| 31615 | P0C214 | Q8TF68 | 0.095757 |
| 31616 | P0C214 | Q701N2 | 0.086276 |

|       |        |        |           |
|-------|--------|--------|-----------|
| 31617 | P0C214 | Q9Y5P3 | 0.37134   |
| 31618 | P0C214 | O14974 | 0.28369   |
| 31619 | P0C214 | Q9H944 | 1.0186    |
| 31620 | P0C214 | P60510 | 0.79389   |
| 31621 | P0C214 | Q9UKJ3 | 0.70309   |
| 31622 | P0C214 | Q9BYK8 | 0.47916   |
| 31623 | P0C214 | Q5T2W1 | 0.29107   |
| 31624 | P0C214 | Q9NR46 | 0.38819   |
| 31625 | P0C214 | Q96CS2 | 0.36456   |
| 31626 | P0C214 | Q14315 | 0.30044   |
| 31627 | P0C214 | Q9NZI7 | 0.19846   |
| 31628 | P0C214 | P80297 | 0.39508   |
| 31629 | P0C214 | P57086 | 0.44629   |
| 31630 | P0C214 | P22061 | 0.48968   |
| 31631 | P0C214 | Q5SQN1 | 0.28546   |
| 31632 | P0C214 | Q9Y5K5 | 0.44134   |
| 31633 | P0C214 | Q2VWA4 | 0.08379   |
| 31634 | P0C214 | Q9BSV6 | 0.34808   |
| 31635 | P0C214 | Q9UK39 | 0.38387   |
| 31636 | P0C214 | Q9BTE3 | 0.6417    |
| 31637 | P0C214 | O75800 | 0.33839   |
| 31638 | P0C214 | P48382 | 0.80578   |
| 31639 | P0C214 | P0CB43 | 0.012852  |
| 31640 | P0C214 | Q9H4R4 | 0.049355  |
| 31641 | P0C214 | Q9BRU9 | 0.45151   |
| 31642 | P0C214 | Q9HBZ2 | 0.26766   |
| 31643 | P0C214 | P20265 | 0.56656   |
| 31644 | P0C214 | Q96LM1 | 0.32623   |
| 31645 | P0C214 | Q9P2R7 | 0.53453   |
| 31646 | P0C214 | B3EWF7 | 0.086276  |
| 31647 | P0C214 | Q13216 | 0.43088   |
| 31648 | P0C214 | Q14980 | 1.0131    |
| 31649 | P0C214 | Q7RTT4 | 0.17331   |
| 31650 | P0C214 | Q5VWG9 | 0.7059    |
| 31651 | P0C214 | Q2NL98 | 0.67135   |
| 31652 | P0C214 | Q53QV2 | 0.37961   |
| 31653 | P0C214 | Q52M58 | 0.27067   |
| 31654 | P0C214 | Q02078 | 0.30804   |
| 31655 | P0C214 | Q9ULL0 | 0.21184   |
| 31656 | P0C214 | Q8WUN7 | 0.35391   |
| 31657 | P0C214 | Q8TEP8 | 0.7999    |
| 31658 | P0C214 | O15481 | 0.011836  |
| 31659 | P0C214 | O75223 | 0.079485  |
| 31660 | P0C214 | Q96FA7 | 0.69995   |
| 31661 | P0C214 | O75830 | 0.96136   |
| 31662 | P0C214 | Q9BW66 | 0.79069   |
| 31663 | P0C214 | Q86XN6 | 0.37855   |
| 31664 | P0C214 | Q658L1 | 0.51235   |
| 31665 | P0C214 | Q9UBX3 | 0.38415   |
| 31666 | P0C214 | Q53FT3 | 0.29392   |
| 31667 | P0C214 | Q86Y26 | 0.49983   |
| 31668 | P0C214 | Q14503 | 0.78183   |
| 31669 | P0C214 | P11532 | 0.44053   |
| 31670 | P0C214 | O95059 | 0.28385   |
| 31671 | P0C214 | Q9UPV0 | 1.521     |
| 31672 | P0C214 | Q9HCE7 | 0.23016   |
| 31673 | P0C214 | Q9C0F1 | 0.13056   |
| 31674 | P0C214 | A4D997 | 0.16667   |
| 31675 | P0C214 | Q8NHU0 | 0.19717   |
| 31676 | P0C214 | Q92665 | 0.76286   |
| 31677 | P0C214 | Q9H2H8 | 0.7118    |
| 31678 | P0C214 | Q13501 | 0.43183   |
| 31679 | P0C214 | O76031 | 0.5296    |
| 31680 | P0C214 | Q8IZH2 | 0.32895   |
| 31681 | P0C214 | P49366 | 0.52586   |
| 31682 | P0C214 | A6NES4 | 0.0089829 |
| 31683 | P0C214 | Q7RTT5 | 0.17331   |
| 31684 | P0C214 | Q15561 | 0.80827   |
| 31685 | P0C214 | Q9H8Q6 | 0.56305   |
| 31686 | P0C214 | Q969F1 | 0.62253   |
| 31687 | P0C214 | O15519 | 0.23423   |
| 31688 | P0C214 | P82094 | 1.1667    |
| 31689 | P0C214 | Q9BZE9 | 0.65022   |
| 31690 | P0C214 | Q9BT78 | 0.999     |
| 31691 | P0C214 | Q86V97 | 0.41816   |
| 31692 | P0C214 | P46779 | 1.371     |

|       |        |        |          |
|-------|--------|--------|----------|
| 31693 | POC214 | Q9H0B6 | 0.5921   |
| 31694 | POC214 | Q07352 | 0.95883  |
| 31695 | POC214 | P62714 | 0.75714  |
| 31696 | POC214 | O95989 | 0.44549  |
| 31697 | POC214 | Q5TAB7 | 0.62088  |
| 31698 | POC214 | O60921 | 0.72112  |
| 31699 | POC214 | Q8N5C8 | 0.51528  |
| 31700 | POC214 | Q8TDN4 | 0.8069   |
| 31701 | POC214 | O60825 | 0.35115  |
| 31702 | POC214 | P55795 | 0.16029  |
| 31703 | POC214 | Q9NYP7 | 0.17897  |
| 31704 | POC214 | Q8N3C0 | 0.38152  |
| 31705 | POC214 | Q8N2Z9 | 0.48239  |
| 31706 | POC214 | A6NEQ9 | 0.086276 |
| 31707 | POC214 | Q8TAD7 | 0.24937  |
| 31708 | POC214 | P10746 | 0.28818  |
| 31709 | POC214 | Q16548 | 0.45556  |
| 31710 | POC214 | P08397 | 0.23293  |
| 31711 | POC214 | O95201 | 0.56957  |
| 31712 | POC214 | Q6PGN9 | 0.76428  |
| 31713 | POC214 | Q9BY42 | 0.41397  |
| 31714 | POC214 | Q9P0R6 | 0.28951  |
| 31715 | POC214 | Q8TC21 | 0.26163  |
| 31716 | POC214 | Q969E4 | 0.39389  |
| 31717 | POC214 | Q96D70 | 0.53651  |
| 31718 | POC214 | A6NMK8 | 0.23055  |
| 31719 | POC214 | Q9NX05 | 0.37248  |
| 31720 | POC214 | Q9UJ68 | 0.16036  |
| 31721 | POC214 | P23786 | 0.17719  |
| 31722 | POC214 | Q6P3W6 | 0.50532  |
| 31723 | POC214 | O95707 | 0.94567  |
| 31724 | POC214 | Q8N1A0 | 0.47439  |
| 31725 | POC214 | P28698 | 0.64714  |
| 31726 | POC214 | O75525 | 0.8226   |
| 31727 | POC214 | Q00059 | 0.88237  |
| 31728 | POC214 | Q15633 | 0.94028  |
| 31729 | POC214 | P78352 | 0.49376  |
| 31730 | POC214 | Q8IXW0 | 0.43438  |
| 31731 | POC214 | Q9NWS9 | 0.054703 |
| 31732 | POC214 | Q96ST8 | 0.88046  |
| 31733 | POC214 | P15121 | 0.59032  |
| 31734 | POC214 | Q70EK8 | 0.5502   |
| 31735 | POC214 | Q14258 | 1.1824   |
| 31736 | POC214 | Q9GZS1 | 0.32027  |
| 31737 | POC214 | Q9Y3C7 | 0.86837  |
| 31738 | POC214 | Q9H0N5 | 1.0214   |
| 31739 | POC214 | P50747 | 0.18494  |
| 31740 | POC214 | Q6PJP8 | 0.58883  |
| 31741 | POC214 | Q14197 | 0.082977 |
| 31742 | POC214 | Q9BY43 | 0.38623  |
| 31743 | POC214 | Q9UJ04 | 0.65767  |
| 31744 | POC214 | Q03188 | 0.26574  |
| 31745 | POC214 | Q92922 | 0.99249  |
| 31746 | POC214 | Q9ULE4 | 0.40212  |
| 31747 | POC214 | Q8IXF0 | 0.2763   |
| 31748 | POC214 | Q9BWU0 | 0.5206   |
| 31749 | POC214 | Q7L4I2 | 1.5753   |
| 31750 | POC214 | Q9H3H1 | 0.44088  |
| 31751 | POC214 | Q8NFR7 | 0.26461  |
| 31752 | POC214 | Q6ZW13 | 0.086276 |
| 31753 | POC214 | O43303 | 0.85151  |
| 31754 | POC214 | Q9H299 | 0.15826  |
| 31755 | POC214 | P15622 | 0.32443  |
| 31756 | POC214 | Q86UD0 | 0.43557  |
| 31757 | POC214 | Q6ECI4 | 0.36207  |
| 31758 | POC214 | Q5VUG0 | 0.28639  |
| 31759 | POC214 | Q9BZ01 | 0.25786  |
| 31760 | POC214 | A6NEF3 | 0.49852  |
| 31761 | POC214 | Q15102 | 0.31496  |
| 31762 | POC214 | Q8IW35 | 1.0727   |
| 31763 | POC214 | O95397 | 0.7      |
| 31764 | POC214 | Q9UM07 | 0.58567  |
| 31765 | POC214 | Q9Y333 | 0.79467  |
| 31766 | POC214 | O43299 | 1.0911   |
| 31767 | POC214 | A6NNA2 | 0.60967  |
| 31768 | POC214 | Q9BXH1 | 0.40266  |

|       |        |        |          |
|-------|--------|--------|----------|
| 31769 | P0C214 | O75312 | 0.42947  |
| 31770 | P0C214 | Q6ZSS3 | 0.21588  |
| 31771 | P0C214 | Q9NSA3 | 0.74772  |
| 31772 | P0C214 | Q9BRR0 | 0.24903  |
| 31773 | P0C214 | Q14696 | 0.25402  |
| 31774 | P0C214 | Q5TG08 | 0.54789  |
| 31775 | P0C214 | Q9H7P6 | 0.58195  |
| 31776 | P0C214 | Q59GN2 | 0.33359  |
| 31777 | P0C214 | Q9HB19 | 0.42017  |
| 31778 | P0C214 | Q6ZN08 | 0.44278  |
| 31779 | P0C214 | Q8N859 | 0.50853  |
| 31780 | P0C214 | Q9NWX4 | 0.18463  |
| 31781 | P0C214 | Q8IV32 | 0.10061  |
| 31782 | P0C214 | P63010 | 0.43366  |
| 31783 | P0C214 | Q99460 | 0.36592  |
| 31784 | P0C214 | D6RB28 | 0.48478  |
| 31785 | P0C214 | Q9H1K1 | 1.0355   |
| 31786 | P0C214 | A6NI86 | 0.64941  |
| 31787 | P0C214 | Q13129 | 0.68518  |
| 31788 | P0C214 | O95298 | 0.31685  |
| 31789 | P0C214 | Q15049 | 0.85067  |
| 31790 | P0C214 | Q96NJ1 | 0.086276 |
| 31791 | P0C214 | P52298 | 0.66769  |
| 31792 | P0C214 | Q9UK76 | 0.78406  |
| 31793 | P0C214 | Q8N8U2 | 0.44816  |
| 31794 | P0C214 | Q13642 | 0.46105  |
| 31795 | P0C214 | Q9GZT8 | 1.0197   |
| 31796 | P0C214 | P13056 | 0.4401   |
| 31797 | P0C214 | Q9Y3X0 | 0.39895  |
| 31798 | P0C214 | P48668 | 0.25397  |
| 31799 | P0C214 | Q9UIS9 | 0.42099  |
| 31800 | P0C214 | Q9H9A7 | 0.54312  |
| 31801 | P0C214 | Q10567 | 0.5889   |
| 31802 | P0C214 | P52272 | 0.30317  |
| 31803 | P0C214 | Q76KD6 | 0.28434  |
| 31804 | P0C214 | P28066 | 0.75435  |
| 31805 | P0C214 | A6NFQ2 | 0.10906  |
| 31806 | P0C214 | Q9Y421 | 0.3032   |
| 31807 | P0C214 | Q99966 | 0.22334  |
| 31808 | P0C214 | Q9HC78 | 0.11201  |
| 31809 | P0C214 | Q969P5 | 0.10974  |
| 31810 | P0C214 | Q96N23 | 0.25246  |
| 31811 | P0C214 | Q9NZJ4 | 0.15507  |
| 31812 | P0C214 | A6NKX1 | 0.086276 |
| 31813 | P0C214 | Q9NPG2 | 0.23272  |
| 31814 | P0C214 | Q9Y237 | 0.40702  |
| 31815 | P0C214 | Q8TE85 | 0.22002  |
| 31816 | P0C214 | Q9UQB3 | 0.48416  |
| 31817 | P0C214 | P28715 | 0.24773  |
| 31818 | P0C214 | O00303 | 0.40309  |
| 31819 | P0C214 | Q96MB7 | 0.24623  |
| 31820 | P0C214 | P10243 | 0.45378  |
| 31821 | P0C214 | Q12968 | 0.7288   |
| 31822 | P0C214 | Q01094 | 0.62832  |
| 31823 | P0C214 | O75832 | 0.5213   |
| 31824 | P0C214 | Q14814 | 0.48112  |
| 31825 | P0C214 | Q9H467 | 1.0022   |
| 31826 | P0C214 | Q96GX2 | 0.5369   |
| 31827 | P0C214 | Q8WUE5 | 0.12778  |
| 31828 | P0C214 | H3BN30 | 0.086276 |
| 31829 | P0C214 | Q9ULQ0 | 0.89614  |
| 31830 | P0C214 | O75446 | 1.0452   |
| 31831 | P0C214 | O43516 | 0.16196  |
| 31832 | P0C214 | Q7LBR1 | 0.80255  |
| 31833 | P0C214 | Q99614 | 0.25893  |
| 31834 | P0C214 | Q8NCD3 | 0.44894  |
| 31835 | P0C214 | P0DJG4 | 0.53898  |
| 31836 | P0C214 | Q86VE0 | 0.81683  |
| 31837 | P0C214 | Q13137 | 1.0386   |
| 31838 | P0C214 | Q9Y2P8 | 0.52746  |
| 31839 | P0C214 | Q9H7D7 | 0.35391  |
| 31840 | P0C214 | Q9Y6Z5 | 0.53008  |
| 31841 | P0C214 | Q9Y2N7 | 0.62955  |
| 31842 | P0C214 | Q5T9G4 | 0.86255  |
| 31843 | P0C214 | P45877 | 0.77514  |
| 31844 | P0C214 | Q05BU3 | 0.086276 |



|       |        |        |          |
|-------|--------|--------|----------|
| 31845 | P0C214 | Q9UHY8 | 0.25255  |
| 31846 | P0C214 | Q9HC16 | 0.24104  |
| 31847 | P0C214 | O75969 | 0.44509  |
| 31848 | P0C214 | Q8N3U1 | 0.086276 |
| 31849 | P0C214 | Q9UHQ1 | 0.76741  |
| 31850 | P0C214 | P11168 | 0.095236 |
| 31851 | P0C214 | B1APH4 | 0.38062  |
| 31852 | P0C214 | Q9UL36 | 0.27688  |
| 31853 | P0C214 | P18848 | 0.95416  |
| 31854 | P0C214 | P00374 | 0.13432  |
| 31855 | P0C214 | Q6P9F0 | 0.26011  |
| 31856 | P0C214 | Q92966 | 0.4412   |
| 31857 | P0C214 | P62253 | 0.80576  |
| 31858 | P0C214 | O95685 | 0.14802  |
| 31859 | P0C214 | P62487 | 0.40566  |
| 31860 | P0C214 | O75122 | 0.2187   |
| 31861 | P0C214 | O43482 | 0.52726  |
| 31862 | P0C214 | O00273 | 0.33598  |
| 31863 | P0C214 | Q9ULJ3 | 0.55998  |
| 31864 | P0C214 | O14925 | 0.18528  |
| 31865 | P0C214 | Q92681 | 0.34102  |
| 31866 | P0C214 | P13929 | 0.37846  |
| 31867 | P0C214 | Q96RN5 | 1.2391   |
| 31868 | P0C214 | Q16633 | 0.50381  |
| 31869 | P0C214 | Q86WH2 | 0.097721 |
| 31870 | P0C214 | P78358 | 0.45292  |
| 31871 | P0C214 | Q8N6G1 | 0.086276 |
| 31872 | P0C214 | Q9NRX3 | 0.64599  |
| 31873 | P0C214 | Q9UHV9 | 0.89845  |
| 31874 | P0C214 | Q6P435 | 0.33737  |
| 31875 | P0C214 | Q8N6K4 | 0.086276 |
| 31876 | P0C214 | Q86WV5 | 0.50542  |
| 31877 | P0C214 | P18545 | 0.27444  |
| 31878 | P0C214 | P40429 | 0.96028  |
| 31879 | P0C214 | Q96HW7 | 0.54729  |
| 31880 | P0C214 | Q9P0J6 | 0.55115  |
| 31881 | P0C214 | Q9ULM6 | 1.2067   |
| 31882 | P0C214 | Q9Y3C6 | 0.7118   |
| 31883 | P0C214 | Q99575 | 0.70386  |
| 31884 | P0C214 | Q03393 | 0.23815  |
| 31885 | P0C214 | O14867 | 0.35877  |
| 31886 | P0C214 | Q14566 | 0.1817   |
| 31887 | P0C214 | Q674X7 | 0.31558  |
| 31888 | P0C214 | Q5VSR9 | 0.46567  |
| 31889 | P0C214 | Q8WVK2 | 0.39398  |
| 31890 | P0C214 | P17535 | 0.8271   |
| 31891 | P0C214 | Q92597 | 0.5098   |
| 31892 | P0C214 | A6NIX2 | 0.94363  |
| 31893 | P0C214 | Q9UI17 | 0.11908  |
| 31894 | P0C214 | Q13506 | 0.36859  |
| 31895 | P0C214 | P62314 | 0.95805  |
| 31896 | P0C214 | P41091 | 0.20726  |
| 31897 | P0C214 | Q99732 | 0.19016  |
| 31898 | P0C214 | Q96DX5 | 1.1421   |
| 31899 | P0C214 | Q3KNV8 | 0.85785  |
| 31900 | P0C214 | Q8TF63 | 0.4422   |
| 31901 | P0C214 | Q53GL7 | 0.53245  |
| 31902 | P0C214 | A2A288 | 0.23636  |
| 31903 | P0C214 | P98170 | 0.32805  |
| 31904 | P0C214 | Q8N655 | 0.086276 |
| 31905 | P0C214 | O43734 | 0.24937  |
| 31906 | P0C214 | P30793 | 0.27452  |
| 31907 | P0C214 | A8MWS5 | 0.027571 |
| 31908 | P0C214 | O00479 | 0.38875  |
| 31909 | P0C214 | Q7Z7J5 | 0.50721  |
| 31910 | P0C214 | Q96KW2 | 0.61951  |
| 31911 | P0C214 | Q86US8 | 0.6676   |
| 31912 | P0C214 | Q96G03 | 0.62745  |
| 31913 | P0C214 | Q6ICG7 | 0.086276 |
| 31914 | P0C214 | Q86VS8 | 0.26595  |
| 31915 | P0C214 | P07910 | 0.29319  |
| 31916 | P0C214 | Q71F78 | 0.17488  |
| 31917 | P0C214 | Q14493 | 0.91816  |
| 31918 | P0C214 | Q8IYB3 | 0.44767  |
| 31919 | P0C214 | Q9NX53 | 0.2675   |
| 31920 | P0C214 | Q9Y6R6 | 0.3804   |

|       |        |        |          |
|-------|--------|--------|----------|
| 31921 | P0C214 | Q49AA0 | 0.46445  |
| 31922 | P0C214 | Q8N3S3 | 0.27569  |
| 31923 | P0C214 | Q92754 | 0.45241  |
| 31924 | P0C214 | Q92572 | 0.28657  |
| 31925 | P0C214 | Q92698 | 0.21281  |
| 31926 | P0C214 | Q9NRY5 | 0.7859   |
| 31927 | P0C214 | Q15834 | 1.0154   |
| 31928 | P0C214 | Q969G3 | 0.95813  |
| 31929 | P0C214 | O60870 | 0.79865  |
| 31930 | P0C214 | Q92674 | 0.42941  |
| 31931 | P0C214 | P47914 | 1.1278   |
| 31932 | P0C214 | Q9H1B4 | 0.33488  |
| 31933 | P0C214 | Q8TAT6 | 0.5626   |
| 31934 | P0C214 | O43439 | 0.82635  |
| 31935 | P0C214 | Q8TF40 | 0.83638  |
| 31936 | P0C214 | Q9UMS0 | 1.1751   |
| 31937 | P0C214 | Q15819 | 0.65313  |
| 31938 | P0C214 | P53675 | 0.23642  |
| 31939 | P0C214 | P37837 | 0.58253  |
| 31940 | P0C214 | Q00534 | 0.488    |
| 31941 | P0C214 | Q8TCC3 | 0.088153 |
| 31942 | P0C214 | O43809 | 0.69184  |
| 31943 | P0C214 | Q8N8I6 | 0.086276 |
| 31944 | P0C214 | O00712 | 0.16344  |
| 31945 | P0C214 | Q9NPB6 | 0.64293  |
| 31946 | P0C214 | P09467 | 0.53181  |
| 31947 | P0C214 | Q8N9R0 | 0.086276 |
| 31948 | P0C214 | O75817 | 0.85867  |
| 31949 | P0C214 | Q8NE71 | 0.36056  |
| 31950 | P0C214 | Q15528 | 1.1754   |
| 31951 | P0C214 | Q9HB96 | 0.75471  |
| 31952 | P0C214 | Q8WY36 | 0.242    |
| 31953 | P0C214 | Q13045 | 0.98457  |
| 31954 | P0C214 | Q9UHX1 | 0.6153   |
| 31955 | P0C214 | Q14533 | 0.64234  |
| 31956 | P0C214 | P0CG34 | 0.72737  |
| 31957 | P0C214 | Q9NTM9 | 0.21776  |
| 31958 | P0C214 | Q5BKX5 | 0.24937  |
| 31959 | P0C214 | Q9NX04 | 0.12396  |
| 31960 | P0C214 | Q13233 | 0.44297  |
| 31961 | P0C214 | Q9Y2T7 | 0.13545  |
| 31962 | P0C214 | Q92844 | 0.5426   |
| 31963 | P0C214 | P49790 | 1.0748   |
| 31964 | P0C214 | P35580 | 0.79029  |
| 31965 | P0C214 | O75635 | 0.92397  |
| 31966 | P0C214 | B3EWG4 | 0.24937  |
| 31967 | P0C214 | Q8IXR9 | 0.014912 |
| 31968 | P0C214 | Q5MJ10 | 0.46567  |
| 31969 | P0C214 | Q13011 | 0.11336  |
| 31970 | P0C214 | Q2TAM9 | 0.72088  |
| 31971 | P0C214 | Q96EY5 | 0.36006  |
| 31972 | P0C214 | O43681 | 0.20652  |
| 31973 | P0C214 | Q7Z340 | 0.2834   |
| 31974 | P0C214 | Q96Q89 | 0.35453  |
| 31975 | P0C214 | Q12798 | 0.54982  |
| 31976 | P0C214 | Q9BUP3 | 0.27801  |
| 31977 | P0C214 | Q9UKA2 | 0.46131  |
| 31978 | P0C214 | Q6ZNG1 | 0.38935  |
| 31979 | P0C214 | A6NF01 | 0.91744  |
| 31980 | P0C214 | Q9BYQ4 | 0.43378  |
| 31981 | P0C214 | Q8IVI9 | 0.24275  |
| 31982 | P0C214 | A6NNW6 | 0.25592  |
| 31983 | P0C214 | P18583 | 0.32536  |
| 31984 | P0C214 | Q96AT9 | 0.10981  |
| 31985 | P0C214 | Q8IXJ9 | 0.65515  |
| 31986 | P0C214 | Q15696 | 0.22266  |
| 31987 | P0C214 | Q14186 | 1.1233   |
| 31988 | P0C214 | Q9UII2 | 0.3722   |
| 31989 | P0C214 | Q96EZ4 | 0.086276 |
| 31990 | P0C214 | Q9H8Y8 | 0.33912  |
| 31991 | P0C214 | P63173 | 0.74586  |
| 31992 | P0C214 | P50213 | 0.36996  |
| 31993 | P0C214 | P56211 | 0.31513  |
| 31994 | P0C214 | Q9UIF9 | 0.62049  |
| 31995 | P0C214 | Q9Y3V2 | 0.79434  |
| 31996 | P0C214 | Q8IYH5 | 0.34015  |

|       |        |        |          |
|-------|--------|--------|----------|
| 31997 | P0C214 | P13639 | 0.26858  |
| 31998 | P0C214 | Q12837 | 0.40216  |
| 31999 | P0C214 | P55895 | 0.64784  |
| 32000 | P0C214 | Q6PI98 | 0.59548  |
| 32001 | P0C214 | P49116 | 0.43538  |
| 32002 | P0C214 | Q01201 | 1.0054   |
| 32003 | P0C214 | A6NEQ2 | 0.086276 |
| 32004 | P0C214 | P21127 | 0.13913  |
| 32005 | P0C214 | Q9BRR8 | 0.95536  |
| 32006 | P0C214 | Q6R327 | 0.13569  |
| 32007 | P0C214 | A4D1E9 | 1.0277   |
| 32008 | P0C214 | Q6NVV0 | 0.21808  |
| 32009 | P0C214 | Q16881 | 0.31814  |
| 32010 | P0C214 | Q9UHR5 | 1.1504   |
| 32011 | P0C214 | Q92985 | 0.56445  |
| 32012 | P0C214 | Q14980 | 1.0715   |
| 32013 | P0C214 | Q07687 | 0.27929  |
| 32014 | P0C214 | Q8NF91 | 0.41576  |
| 32015 | P0C214 | Q9H1A4 | 0.79143  |
| 32016 | P0C214 | Q9H6Z9 | 0.60969  |
| 32017 | P0C214 | P47928 | 0.38525  |
| 32018 | P0C214 | Q8N831 | 0.99971  |
| 32019 | P0C214 | Q6PGQ1 | 0.28671  |
| 32020 | P0C214 | P37198 | 0.8857   |
| 32021 | P0C214 | Q9H5P4 | 0.35415  |
| 32022 | P0C214 | Q9HAF1 | 0.97362  |
| 32023 | P0C214 | Q99622 | 0.03893  |
| 32024 | P0C214 | Q9NPD3 | 0.49059  |
| 32025 | P0C214 | P22033 | 0.43563  |
| 32026 | P0C214 | Q00536 | 0.19271  |
| 32027 | P0C214 | P61960 | 0.1156   |
| 32028 | P0C214 | P49750 | 1.0633   |
| 32029 | P0C214 | Q8WW18 | 0.24937  |
| 32030 | P0C214 | Q9ULC6 | 0.78554  |
| 32031 | P0C214 | P36871 | 0.40644  |
| 32032 | P0C214 | Q3LI58 | 0.086276 |
| 32033 | P0C214 | Q9BQ70 | 1.2921   |
| 32034 | P0C214 | Q9P1G2 | 0.13455  |
| 32035 | P0C214 | A0JLT2 | 0.87283  |
| 32036 | P0C214 | Q8IZQ1 | 0.5198   |
| 32037 | P0C214 | Q9BWT1 | 0.63845  |
| 32038 | P0C214 | Q53ET0 | 1.6697   |
| 32039 | P0C214 | A6NJ88 | 0.73332  |
| 32040 | P0C214 | P41134 | 0.23252  |
| 32041 | P0C214 | Q9UKL3 | 1.1465   |
| 32042 | P0C214 | Q8TF74 | 0.33545  |
| 32043 | P0C214 | Q8IYB0 | 0.086276 |
| 32044 | P0C214 | Q96IT1 | 0.56958  |
| 32045 | P0C214 | P08621 | 0.39732  |
| 32046 | P0C214 | Q3MHD2 | 0.57472  |
| 32047 | P0C214 | Q9Y224 | 1.4745   |
| 32048 | P0C214 | Q75143 | 1.0375   |
| 32049 | P0C214 | P10124 | 0.11785  |
| 32050 | P0C214 | Q6ZR85 | 0.086276 |
| 32051 | P0C214 | H0YKK7 | 0.48478  |
| 32052 | P0C214 | Q13487 | 1.2391   |
| 32053 | P0C214 | Q96PS1 | 0.29049  |
| 32054 | P0C214 | Q2T9F4 | 0.072545 |
| 32055 | P0C214 | O60765 | 0.32997  |
| 32056 | P0C214 | Q15124 | 0.033126 |
| 32057 | P0C214 | Q13426 | 0.35313  |
| 32058 | P0C214 | P68871 | 0.26239  |
| 32059 | P0C214 | Q13084 | 1.0442   |
| 32060 | P0C214 | Q9BW27 | 0.77719  |
| 32061 | P0C214 | Q15173 | 0.38209  |
| 32062 | P0C214 | P15923 | 0.47982  |
| 32063 | P0C214 | Q06730 | 0.19269  |
| 32064 | P0C214 | Q9UJU3 | 0.22811  |
| 32065 | P0C214 | Q86UQ8 | 0.39389  |
| 32066 | P0C214 | Q5T319 | 0.086276 |
| 32067 | P0C214 | Q8N184 | 0.22977  |
| 32068 | P0C214 | P56192 | 0.37873  |
| 32069 | P0C214 | Q71F56 | 0.38743  |
| 32070 | P0C214 | Q9Y6H5 | 0.76013  |
| 32071 | P0C214 | P46783 | 1.5586   |
| 32072 | P0C214 | Q9UGU0 | 0.23348  |

|       |        |        |          |
|-------|--------|--------|----------|
| 32073 | P0C214 | Q8N8D1 | 0.43609  |
| 32074 | P0C214 | Q86Y25 | 0.31387  |
| 32075 | P0C214 | Q13425 | 0.29742  |
| 32076 | P0C214 | Q9HBL8 | 0.099501 |
| 32077 | P0C214 | Q03252 | 0.23127  |
| 32078 | P0C214 | Q6ZTY9 | 0.070546 |
| 32079 | P0C214 | Q6NS38 | 0.50418  |
| 32080 | P0C214 | P52294 | 1.0413   |
| 32081 | P0C214 | Q16831 | 0.014036 |
| 32082 | P0C214 | B4DXR9 | 0.5084   |
| 32083 | P0C214 | Q96QU4 | 0.39389  |
| 32084 | P0C214 | P14618 | 0.45048  |
| 32085 | P0C214 | O14613 | 0.1375   |
| 32086 | P0C214 | Q04726 | 0.94979  |
| 32087 | P0C214 | Q3LI72 | 0.086276 |
| 32088 | P0C214 | P57060 | 0.72659  |
| 32089 | P0C214 | Q9UBF2 | 0.22879  |
| 32090 | P0C214 | Q8IWS0 | 0.47654  |
| 32091 | P0C214 | P51948 | 0.38741  |
| 32092 | P0C214 | P25791 | 0.31334  |
| 32093 | P0C214 | Q8WXF1 | 1.0169   |
| 32094 | P0C214 | O75132 | 0.17062  |
| 32095 | P0C214 | Q6ZVF9 | 0.31356  |
| 32096 | P0C214 | P69892 | 0.3641   |
| 32097 | P0C214 | Q9Y6Y0 | 0.41558  |
| 32098 | P0C214 | Q5JY77 | 0.45292  |
| 32099 | P0C214 | Q9Y697 | 0.90092  |
| 32100 | P0C214 | Q6P6B1 | 0.24937  |
| 32101 | P0C214 | O95416 | 0.28328  |
| 32102 | P0C214 | O95487 | 0.66828  |
| 32103 | P0C214 | Q8N9Z2 | 0.10061  |
| 32104 | P0C214 | P99999 | 0.83707  |
| 32105 | P0C214 | Q8N319 | 1.1361   |
| 32106 | P0C214 | Q5VU43 | 0.83199  |
| 32107 | P0C214 | Q9H4B6 | 0.65874  |
| 32108 | P0C214 | Q53G59 | 0.41283  |
| 32109 | P0C214 | P12074 | 0.10088  |
| 32110 | P0C214 | Q9NXB0 | 0.71119  |
| 32111 | P0C214 | P51398 | 1.1597   |
| 32112 | P0C214 | Q14695 | 0.53664  |
| 32113 | P0C214 | Q96MH2 | 1.1907   |
| 32114 | P0C214 | Q96PV7 | 0.33967  |
| 32115 | P0C214 | O75373 | 0.3186   |
| 32116 | P0C214 | Q2M3C7 | 0.43199  |
| 32117 | P0C214 | Q5HYR2 | 0.48846  |
| 32118 | P0C214 | Q8TDB4 | 0.45177  |
| 32119 | P0C214 | Q8IYU4 | 0.01136  |
| 32120 | P0C214 | Q8WWC4 | 0.6804   |
| 32121 | P0C214 | Q8WTZ3 | 0.51532  |
| 32122 | P0C214 | Q8NEF9 | 0.65691  |
| 32123 | P0C214 | P61086 | 0.81164  |
| 32124 | P0C214 | Q9NZD4 | 0.31661  |
| 32125 | P0C214 | Q14103 | 0.98536  |
| 32126 | P0C214 | Q9NVV9 | 0.8539   |
| 32127 | P0C214 | P28370 | 0.4318   |
| 32128 | P0C214 | P62310 | 0.8299   |
| 32129 | P0C214 | Q1A5X6 | 0.24937  |
| 32130 | P0C214 | Q8N1Q8 | 0.54764  |
| 32131 | P0C214 | Q9UER7 | 0.93564  |
| 32132 | P0C214 | O94776 | 0.82888  |
| 32133 | P0C214 | Q04695 | 0.5582   |
| 32134 | P0C214 | O96017 | 0.51576  |
| 32135 | P0C214 | Q68DL7 | 0.086276 |
| 32136 | P0C214 | Q12980 | 0.46024  |
| 32137 | P0C214 | O14531 | 0.27125  |
| 32138 | P0C214 | Q14978 | 0.76981  |
| 32139 | P0C214 | Q96BD8 | 0.54859  |
| 32140 | P0C214 | Q96DM1 | 0.54955  |
| 32141 | P0C214 | Q92905 | 0.67954  |
| 32142 | P0C214 | Q6TGC4 | 0.16665  |
| 32143 | P0C214 | Q9BYR3 | 0.43378  |
| 32144 | P0C214 | Q66GS9 | 0.35321  |
| 32145 | P0C214 | Q14687 | 0.2675   |
| 32146 | P0C214 | Q9UHT4 | 0.086276 |
| 32147 | P0C214 | Q9Y221 | 0.78884  |
| 32148 | P0C214 | Q6ICB0 | 0.5964   |

|       |        |        |          |
|-------|--------|--------|----------|
| 32149 | P0C214 | Q96FV2 | 0.63341  |
| 32150 | P0C214 | Q14749 | 0.69988  |
| 32151 | P0C214 | Q92539 | 0.77275  |
| 32152 | P0C214 | O43542 | 0.57658  |
| 32153 | P0C214 | Q96AY2 | 0.71699  |
| 32154 | P0C214 | Q7Z5W3 | 0.69175  |
| 32155 | P0C214 | Q96KC9 | 0.5266   |
| 32156 | P0C214 | Q2VPK5 | 0.69192  |
| 32157 | P0C214 | Q9Y2H8 | 0.308    |
| 32158 | P0C214 | Q15929 | 0.47837  |
| 32159 | P0C214 | P49257 | 0.20014  |
| 32160 | P0C214 | F5H284 | 0.77514  |
| 32161 | P0C214 | P0CW24 | 0.1016   |
| 32162 | P0C214 | A1L168 | 0.24937  |
| 32163 | P0C214 | Q8IXT1 | 0.13103  |
| 32164 | P0C214 | P43897 | 1.0755   |
| 32165 | P0C214 | Q9UL42 | 0.77759  |
| 32166 | P0C214 | Q08AM6 | 0.21101  |
| 32167 | P0C214 | Q9NQR4 | 0.35124  |
| 32168 | P0C214 | Q07666 | 0.39649  |
| 32169 | P0C214 | Q8N4W9 | 0.3804   |
| 32170 | P0C214 | Q9BQ48 | 0.69281  |
| 32171 | P0C214 | A8MXY4 | 0.38021  |
| 32172 | P0C214 | O60756 | 0.086276 |
| 32173 | P0C214 | Q8TDR0 | 0.51273  |
| 32174 | P0C214 | Q14151 | 0.71493  |
| 32175 | P0C214 | Q96ME1 | 0.14478  |
| 32176 | P0C214 | A1L3X0 | 0.9999   |
| 32177 | P0C214 | Q9H8T0 | 0.34683  |
| 32178 | P0C214 | P49720 | 0.57213  |
| 32179 | P0C214 | P63165 | 0.83585  |
| 32180 | P0C214 | Q9UJY4 | 0.36629  |
| 32181 | P0C214 | Q9NZD8 | 0.8246   |
| 32182 | P0C214 | P82663 | 0.95947  |
| 32183 | P0C214 | Q86SX3 | 1.2405   |
| 32184 | P0C214 | Q6UXP7 | 0.19654  |
| 32185 | P0C214 | O95071 | 0.35618  |
| 32186 | P0C214 | P49336 | 0.31139  |
| 32187 | P0C214 | Q96PE6 | 0.22476  |
| 32188 | P0C214 | P28074 | 0.67951  |
| 32189 | P0C214 | Q3ZCX4 | 0.32628  |
| 32190 | P0C214 | Q96M63 | 0.16801  |
| 32191 | P0C214 | O43837 | 0.19359  |
| 32192 | P0C214 | Q9H6U6 | 0.74897  |
| 32193 | P0C214 | O00165 | 0.74454  |
| 32194 | P0C214 | Q68DI1 | 0.18003  |
| 32195 | P0C214 | Q9P0W2 | 0.58109  |
| 32196 | P0C214 | Q8N3L3 | 0.63311  |
| 32197 | P0C214 | O60225 | 0.17331  |
| 32198 | P0C214 | Q7Z6E9 | 0.38765  |
| 32199 | P0C214 | Q9HBM1 | 0.71266  |
| 32200 | P0C214 | Q8IYX8 | 0.1813   |
| 32201 | P0C214 | P59797 | 0.77906  |
| 32202 | P0C214 | O95865 | 0.46062  |
| 32203 | P0C214 | P21953 | 0.26948  |
| 32204 | P0C214 | Q8N488 | 0.36179  |
| 32205 | P0C214 | Q9HB07 | 0.28565  |
| 32206 | P0C214 | Q9H5H4 | 0.30495  |
| 32207 | P0C214 | Q6ZR03 | 0.040838 |
| 32208 | P0C214 | Q02556 | 0.42879  |
| 32209 | P0C214 | P34896 | 0.26602  |
| 32210 | P0C214 | Q9H9H5 | 0.3253   |
| 32211 | P0C214 | Q06587 | 0.79989  |
| 32212 | P0C214 | P17861 | 0.51955  |
| 32213 | P0C214 | Q8N9T2 | 0.086276 |
| 32214 | P0C214 | Q8N9R8 | 0.51525  |
| 32215 | P0C214 | Q00577 | 0.51347  |
| 32216 | P0C214 | Q9H0A0 | 0.37176  |
| 32217 | P0C214 | P26639 | 0.65617  |
| 32218 | P0C214 | Q9Y2Z0 | 0.50268  |
| 32219 | P0C214 | Q6P280 | 0.49708  |
| 32220 | P0C214 | Q9HCC9 | 0.44211  |
| 32221 | P0C214 | Q5VUA4 | 0.4662   |
| 32222 | P0C214 | Q16600 | 0.31013  |
| 32223 | P0C214 | P17014 | 0.26248  |
| 32224 | P0C214 | P56277 | 0.53705  |

|       |        |        |          |
|-------|--------|--------|----------|
| 32225 | P0C214 | Q9Y2X8 | 1.0001   |
| 32226 | P0C214 | Q9NR50 | 0.64197  |
| 32227 | P0C214 | Q14244 | 0.68304  |
| 32228 | P0C214 | Q8WYR1 | 0.35514  |
| 32229 | P0C214 | Q6RFH8 | 0.68558  |
| 32230 | P0C214 | O15453 | 0.54417  |
| 32231 | P0C214 | O15126 | 0.25478  |
| 32232 | P0C214 | Q9Y4B6 | 0.90852  |
| 32233 | P0C214 | Q9NTG7 | 0.51724  |
| 32234 | P0C214 | Q9NZF1 | 0.083641 |
| 32235 | P0C214 | C9J3I9 | 0.292    |
| 32236 | P0C214 | Q8WXQ3 | 0.83978  |
| 32237 | P0C214 | O95983 | 1.1043   |
| 32238 | P0C214 | Q9BTL4 | 0.15301  |
| 32239 | P0C214 | Q8N9K5 | 0.32792  |
| 32240 | P0C214 | P55769 | 0.84992  |
| 32241 | P0C214 | Q7Z2V1 | 0.086276 |
| 32242 | P0C214 | Q99933 | 0.87286  |
| 32243 | P0C214 | P82921 | 0.57295  |
| 32244 | P0C214 | Q6RUI8 | 0.09521  |
| 32245 | P0C214 | Q99459 | 1.0939   |
| 32246 | P0C214 | Q53GS7 | 0.78409  |
| 32247 | P0C214 | Q8NF99 | 0.27602  |
| 32248 | P0C214 | P62280 | 0.80437  |
| 32249 | P0C214 | Q9UHD4 | 0.73159  |
| 32250 | P0C214 | Q14137 | 0.78404  |
| 32251 | P0C214 | Q9P0J0 | 0.43829  |
| 32252 | P0C214 | Q9BPU9 | 0.15674  |
| 32253 | P0C214 | Q9UJW7 | 0.27328  |
| 32254 | P0C214 | Q96F83 | 0.58353  |
| 32255 | P0C214 | P0CG42 | 0.086276 |
| 32256 | P0C214 | Q8TBZ5 | 0.31075  |
| 32257 | P0C214 | Q9HBM6 | 0.57117  |
| 32258 | P0C214 | P61326 | 1.0616   |
| 32259 | P0C214 | Q9UNN5 | 0.65828  |
| 32260 | P0C214 | Q5XG85 | 0.086276 |
| 32261 | P0C214 | Q49A33 | 0.45025  |
| 32262 | P0C214 | P09104 | 0.068334 |
| 32263 | P0C214 | O14948 | 0.30761  |
| 32264 | P0C214 | A5YKK6 | 1.1794   |
| 32265 | P0C214 | Q9Y3M2 | 0.24311  |
| 32266 | P0C214 | Q99549 | 0.64513  |
| 32267 | P0C214 | Q9P2G4 | 0.24937  |
| 32268 | P0C214 | O15162 | 0.27629  |
| 32269 | P0C214 | Q8N2I2 | 0.32928  |
| 32270 | P0C214 | Q14139 | 0.65756  |
| 32271 | P0C214 | Q9HCH0 | 0.96081  |
| 32272 | P0C214 | O14604 | 0.75331  |
| 32273 | P0C214 | O75290 | 0.44452  |
| 32274 | P0C214 | P49918 | 0.59486  |
| 32275 | P0C214 | P49356 | 0.047482 |
| 32276 | P0C214 | Q5HYC2 | 0.069564 |
| 32277 | P0C214 | Q16851 | 0.57773  |
| 32278 | P0C214 | Q9BV19 | 0.019474 |
| 32279 | P0C214 | Q8TEQ6 | 0.87388  |
| 32280 | P0C214 | Q9BZE2 | 1.2832   |
| 32281 | P0C214 | Q9UNX3 | 1.2318   |
| 32282 | P0C214 | Q86U70 | 0.17927  |
| 32283 | P0C214 | Q96S59 | 0.99641  |
| 32284 | P0C214 | Q8WXW3 | 0.73126  |
| 32285 | P0C214 | Q8NAQ8 | 1.1012   |
| 32286 | P0C214 | Q92979 | 0.38504  |
| 32287 | P0C214 | Q9Y543 | 0.25442  |
| 32288 | P0C214 | O14832 | 0.13158  |
| 32289 | P0C214 | P52788 | 0.086363 |
| 32290 | P0C214 | P18887 | 0.57762  |
| 32291 | P0C214 | P13535 | 0.75898  |
| 32292 | P0C214 | Q8IWZ3 | 0.97786  |
| 32293 | P0C214 | Q96JF6 | 0.26157  |
| 32294 | P0C214 | Q9BRS8 | 0.53148  |
| 32295 | P0C214 | Q9BRG1 | 1.132    |
| 32296 | P0C214 | Q2KJ03 | 0.20944  |
| 32297 | P0C214 | Q9BZQ8 | 0.59087  |
| 32298 | P0C214 | Q96D98 | 0.63965  |
| 32299 | P0C214 | Q13356 | 0.65916  |
| 32300 | P0C214 | Q9GZW5 | 0.52081  |

|       |        |        |          |
|-------|--------|--------|----------|
| 32301 | P0C214 | P0CG48 | 0.39957  |
| 32302 | P0C214 | Q96DE9 | 0.022936 |
| 32303 | P0C214 | P53677 | 0.086155 |
| 32304 | P0C214 | P46100 | 0.52614  |
| 32305 | P0C214 | Q86TC9 | 0.36735  |
| 32306 | P0C214 | Q9UL46 | 0.5756   |
| 32307 | P0C214 | Q9NWW0 | 0.12649  |
| 32308 | P0C214 | Q9Y324 | 0.87996  |
| 32309 | P0C214 | P38919 | 0.3714   |
| 32310 | P0C214 | Q96RJ6 | 0.29396  |
| 32311 | P0C214 | Q9NX08 | 0.2675   |
| 32312 | P0C214 | O14641 | 0.68583  |
| 32313 | P0C214 | Q9UJT2 | 0.3824   |
| 32314 | P0C214 | Q63HM1 | 0.45642  |
| 32315 | P0C214 | O75570 | 0.27476  |
| 32316 | P0C214 | Q9BUX1 | 0.81568  |
| 32317 | P0C214 | Q9UKK6 | 0.59849  |
| 32318 | P0C214 | Q9UHA3 | 0.24199  |
| 32319 | P0C214 | A6NDZ8 | 0.086276 |
| 32320 | P0C214 | P61576 | 0.52497  |
| 32321 | P0C214 | Q08E93 | 0.086276 |
| 32322 | P0C214 | Q9BQK8 | 0.086627 |
| 32323 | P0C214 | O75901 | 0.59185  |
| 32324 | P0C214 | P0C7T5 | 0.40717  |
| 32325 | P0C214 | Q8IVM7 | 0.086276 |
| 32326 | P0C214 | Q9NWM0 | 0.26168  |
| 32327 | P0C214 | Q6P9A3 | 0.2834   |
| 32328 | P0C214 | Q6AW86 | 0.19987  |
| 32329 | P0C214 | O43513 | 1.1329   |
| 32330 | P0C214 | Q9Y3U8 | 1.0997   |
| 32331 | P0C214 | Q9UHC1 | 0.39429  |
| 32332 | P0C214 | Q9H321 | 0.57136  |
| 32333 | P0C214 | Q9P258 | 0.60363  |
| 32334 | P0C214 | Q86XR8 | 0.94766  |
| 32335 | P0C214 | Q9BQ52 | 0.2598   |
| 32336 | P0C214 | P60409 | 0.43378  |
| 32337 | P0C214 | P50402 | 0.19811  |
| 32338 | P0C214 | Q9UNA4 | 0.25785  |
| 32339 | P0C214 | Q9NSK7 | 0.73715  |
| 32340 | P0C214 | Q86VP1 | 0.46648  |
| 32341 | P0C214 | Q3LI62 | 0.086276 |
| 32342 | P0C214 | Q9BYN8 | 0.78465  |
| 32343 | P0C214 | O15488 | 0.24938  |
| 32344 | P0C214 | Q9UKL0 | 1.1364   |
| 32345 | P0C214 | Q6P050 | 0.61871  |
| 32346 | P0C214 | Q96L92 | 0.74625  |
| 32347 | P0C214 | Q5VZE5 | 0.24511  |
| 32348 | P0C214 | Q8TDR4 | 0.51912  |
| 32349 | P0C214 | P56377 | 0.31911  |
| 32350 | P0C214 | Q6P587 | 0.19481  |
| 32351 | P0C214 | Q9Y2H0 | 0.13406  |
| 32352 | P0C214 | P26358 | 0.31533  |
| 32353 | P0C214 | Q8NHS4 | 0.024185 |
| 32354 | P0C214 | O43812 | 0.16797  |
| 32355 | P0C214 | Q6ZS46 | 0.45901  |
| 32356 | P0C214 | P78396 | 0.89181  |
| 32357 | P0C214 | Q9NYP9 | 0.33435  |
| 32358 | P0C214 | Q8TCZ7 | 0.28363  |
| 32359 | P0C214 | Q6ZMW2 | 0.26428  |
| 32360 | P0C214 | Q15386 | 0.4942   |
| 32361 | P0C214 | Q9UNY4 | 0.4918   |
| 32362 | P0C214 | P25440 | 0.46691  |
| 32363 | P0C214 | Q5ZEY9 | 0.57641  |
| 32364 | P0C214 | Q15398 | 0.93536  |
| 32365 | P0C214 | Q8TF47 | 0.47199  |
| 32366 | P0C214 | P51826 | 0.33701  |
| 32367 | P0C214 | Q96KF2 | 0.086276 |
| 32368 | P0C214 | Q6MZT1 | 0.3594   |
| 32369 | P0C214 | O95336 | 0.45925  |
| 32370 | P0C214 | Q6NSI3 | 0.57744  |
| 32371 | P0C214 | Q92994 | 0.30174  |
| 32372 | P0C214 | Q9H074 | 0.55734  |
| 32373 | P0C214 | Q52MB2 | 0.97215  |
| 32374 | P0C214 | Q6P1L8 | 0.80978  |
| 32375 | P0C214 | Q9Y4R8 | 0.25003  |
| 32376 | P0C214 | Q6DD87 | 0.25423  |

|       |        |        |          |
|-------|--------|--------|----------|
| 32377 | POC214 | Q9BVL4 | 1.2159   |
| 32378 | POC214 | P04732 | 0.37691  |
| 32379 | POC214 | Q9NZH5 | 0.42405  |
| 32380 | POC214 | Q96JM7 | 0.36513  |
| 32381 | POC214 | O43189 | 0.3567   |
| 32382 | POC214 | Q12982 | 0.32043  |
| 32383 | POC214 | Q6P1J9 | 0.54427  |
| 32384 | POC214 | Q6ZNE5 | 0.35932  |
| 32385 | POC214 | Q86TU6 | 0.58851  |
| 32386 | POC214 | P30050 | 0.97266  |
| 32387 | POC214 | Q8TCY9 | 0.15908  |
| 32388 | POC214 | O95376 | 0.46582  |
| 32389 | POC214 | Q08J23 | 0.6249   |
| 32390 | POC214 | Q9NRX1 | 0.1273   |
| 32391 | POC214 | Q9BT25 | 0.36456  |
| 32392 | POC214 | Q15437 | 0.24217  |
| 32393 | POC214 | Q5VY09 | 0.41881  |
| 32394 | POC214 | P14653 | 0.23444  |
| 32395 | POC214 | P59990 | 0.43378  |
| 32396 | POC214 | Q9Y6B2 | 0.86293  |
| 32397 | POC214 | P51504 | 0.24105  |
| 32398 | POC214 | Q6MZP7 | 0.46638  |
| 32399 | POC214 | Q00422 | 1.2352   |
| 32400 | POC214 | Q7Z2E3 | 0.43113  |
| 32401 | POC214 | Q96N95 | 0.2319   |
| 32402 | POC214 | Q659C4 | 0.71354  |
| 32403 | POC214 | Q8WWQ0 | 0.60209  |
| 32404 | POC214 | Q9NRG9 | 0.94911  |
| 32405 | POC214 | O95999 | 0.19354  |
| 32406 | POC214 | P78385 | 0.51338  |
| 32407 | POC214 | E7EW31 | 0.086276 |
| 32408 | POC214 | Q8TF39 | 0.50227  |
| 32409 | POC214 | Q9BTP6 | 0.61393  |
| 32410 | POC214 | A6NLC8 | 1.1422   |
| 32411 | POC214 | O43615 | 0.24278  |
| 32412 | POC214 | Q68D10 | 0.24937  |
| 32413 | POC214 | Q86XE5 | 0.62026  |
| 32414 | POC214 | Q12933 | 0.55435  |
| 32415 | POC214 | P30281 | 0.63134  |
| 32416 | POC214 | Q9NVW2 | 0.36077  |
| 32417 | POC214 | Q9NVE4 | 0.009953 |
| 32418 | POC214 | P78347 | 0.51798  |
| 32419 | POC214 | Q9XRX5 | 0.5881   |
| 32420 | POC214 | Q8IZ40 | 0.4761   |
| 32421 | POC214 | O75145 | 0.36608  |
| 32422 | POC214 | Q9NZM4 | 0.89875  |
| 32423 | POC214 | P24539 | 0.28573  |
| 32424 | POC214 | O43791 | 0.55583  |
| 32425 | POC214 | Q9BX40 | 0.6527   |
| 32426 | POC214 | Q96MF7 | 0.45874  |
| 32427 | POC214 | P46939 | 0.51957  |
| 32428 | POC214 | Q6NSW5 | 0.97462  |
| 32429 | POC214 | Q86YP4 | 0.75439  |
| 32430 | POC214 | Q96SW2 | 0.51678  |
| 32431 | POC214 | Q6P2D0 | 0.24987  |
| 32432 | POC214 | P57081 | 0.84065  |
| 32433 | POC214 | Q13485 | 0.55872  |
| 32434 | POC214 | A8MUU9 | 0.19558  |
| 32435 | POC214 | Q9H6W3 | 0.49376  |
| 32436 | POC214 | P62753 | 1.143    |
| 32437 | POC214 | A8MV23 | 0.88945  |
| 32438 | POC214 | P62910 | 0.88548  |
| 32439 | POC214 | Q9Y2M5 | 0.8459   |
| 32440 | POC214 | Q9Y4P8 | 0.88383  |
| 32441 | POC214 | Q6UXR8 | 0.086276 |
| 32442 | POC214 | Q96LJ8 | 0.28315  |
| 32443 | POC214 | Q8ND04 | 0.74653  |
| 32444 | POC214 | Q13144 | 0.64546  |
| 32445 | POC214 | Q96B36 | 0.83413  |
| 32446 | POC214 | A6XGL0 | 0.54838  |
| 32447 | POC214 | Q9Y2G0 | 0.10244  |
| 32448 | POC214 | Q9UIF7 | 0.42042  |
| 32449 | POC214 | Q6PKG0 | 0.5625   |
| 32450 | POC214 | P62891 | 0.86977  |
| 32451 | POC214 | Q5JR98 | 0.55193  |
| 32452 | POC214 | Q9C0F3 | 0.3338   |



|       |        |        |          |
|-------|--------|--------|----------|
| 32453 | P0C214 | Q4W5G0 | 0.30991  |
| 32454 | P0C214 | Q56VL3 | 0.30515  |
| 32455 | P0C214 | Q96LW7 | 0.47944  |
| 32456 | P0C214 | O00154 | 0.12417  |
| 32457 | P0C214 | Q9H7X3 | 0.27785  |
| 32458 | P0C214 | Q5JTJ3 | 0.14014  |
| 32459 | P0C214 | Q96N22 | 0.49442  |
| 32460 | P0C214 | Q8NEU8 | 0.30745  |
| 32461 | P0C214 | H0UI37 | 0.25201  |
| 32462 | P0C214 | P61574 | 0.39132  |
| 32463 | P0C214 | A6NE82 | 0.086276 |
| 32464 | P0C214 | Q8NHZ8 | 1.2017   |
| 32465 | P0C214 | Q9UQC2 | 0.28399  |
| 32466 | P0C214 | Q9UI54 | 0.086276 |
| 32467 | P0C214 | P22531 | 0.37988  |
| 32468 | P0C214 | P0C841 | 0.086276 |
| 32469 | P0C214 | Q9BZQ4 | 0.21067  |
| 32470 | P0C214 | Q9NVP1 | 0.1915   |
| 32471 | P0C214 | Q9H1K6 | 0.015845 |
| 32472 | P0C214 | Q5BKY6 | 0.086276 |
| 32473 | P0C214 | Q15369 | 1.5991   |
| 32474 | P0C214 | Q8NBJ7 | 0.3156   |
| 32475 | P0C214 | Q6L9T8 | 0.38992  |
| 32476 | P0C214 | A9UHW6 | 0.6666   |
| 32477 | P0C214 | P55197 | 1.2877   |
| 32478 | P0C214 | Q9BWD1 | 0.35932  |
| 32479 | P0C214 | Q9NUL3 | 0.63665  |
| 32480 | P0C214 | Q9HCK1 | 0.55061  |
| 32481 | P0C214 | Q6VY07 | 0.64589  |
| 32482 | P0C214 | Q16658 | 0.15774  |
| 32483 | P0C214 | Q93073 | 0.88098  |
| 32484 | P0C214 | Q9NXE8 | 0.18174  |
| 32485 | P0C214 | Q86XL3 | 0.22216  |
| 32486 | P0C214 | P35658 | 1.1125   |
| 32487 | P0C214 | Q9NYT6 | 0.27328  |
| 32488 | P0C214 | Q96DM3 | 0.16532  |
| 32489 | P0C214 | Q03924 | 0.25652  |
| 32490 | P0C214 | Q9H8M7 | 0.79196  |
| 32491 | P0C214 | Q92917 | 0.83846  |
| 32492 | P0C214 | Q15572 | 0.8098   |
| 32493 | P0C214 | Q969X6 | 1.2587   |
| 32494 | P0C214 | Q86YW9 | 0.35832  |
| 32495 | P0C214 | Q9NX63 | 0.73816  |
| 32496 | P0C214 | Q5FWF6 | 0.47154  |
| 32497 | P0C214 | O43310 | 0.45248  |
| 32498 | P0C214 | Q6NW29 | 0.14187  |
| 32499 | P0C214 | Q96DF8 | 0.93067  |
| 32500 | P0C214 | Q8NEG4 | 0.33915  |
| 32501 | P0C214 | Q08209 | 0.44765  |
| 32502 | P0C214 | Q96MP8 | 0.23659  |
| 32503 | P0C214 | P18847 | 1.0913   |
| 32504 | P0C214 | Q9HD36 | 0.51734  |
| 32505 | P0C214 | Q9Y242 | 0.21761  |
| 32506 | P0C214 | Q9NYW8 | 0.25528  |
| 32507 | P0C214 | Q96QA5 | 0.18643  |
| 32508 | P0C214 | Q92556 | 0.28027  |
| 32509 | P0C214 | Q08AG5 | 0.49158  |
| 32510 | P0C214 | Q9BYE7 | 0.66866  |
| 32511 | P0C214 | H3BR10 | 0.086276 |
| 32512 | P0C214 | Q8N1N4 | 0.48861  |
| 32513 | P0C214 | Q92769 | 0.32455  |
| 32514 | P0C214 | Q12834 | 0.73852  |
| 32515 | P0C214 | Q6UWZ7 | 0.39658  |
| 32516 | P0C214 | Q6ZV65 | 0.42412  |
| 32517 | P0C214 | P0CW71 | 0.086276 |
| 32518 | P0C214 | Q8NEY8 | 0.67041  |
| 32519 | P0C214 | Q86TJ5 | 0.27573  |
| 32520 | P0C214 | Q9C073 | 0.53087  |
| 32521 | P0C214 | Q8TEV8 | 0.086276 |
| 32522 | P0C214 | Q96K31 | 0.088201 |
| 32523 | P0C214 | Q93100 | 0.31572  |
| 32524 | P0C214 | A8MUA0 | 0.22102  |
| 32525 | P0C214 | O15105 | 0.29711  |
| 32526 | P0C214 | Q14671 | 0.23385  |
| 32527 | P0C214 | P55199 | 0.99346  |
| 32528 | P0C214 | P60608 | 0.42865  |

|       |        |        |          |
|-------|--------|--------|----------|
| 32529 | POC214 | O60583 | 0.97467  |
| 32530 | POC214 | Q9ULW0 | 0.68923  |
| 32531 | POC214 | Q13243 | 0.76067  |
| 32532 | POC214 | Q9NZJ0 | 0.72961  |
| 32533 | POC214 | P0DMB2 | 0.47185  |
| 32534 | POC214 | Q9C005 | 0.59728  |
| 32535 | POC214 | Q14240 | 0.35167  |
| 32536 | POC214 | Q9H8G1 | 0.4838   |
| 32537 | POC214 | Q8N1L1 | 0.086276 |
| 32538 | POC214 | Q8IYL2 | 0.30768  |
| 32539 | POC214 | Q15468 | 0.17667  |
| 32540 | POC214 | P08670 | 0.14426  |
| 32541 | POC214 | Q86UP8 | 0.07874  |
| 32542 | POC214 | Q3LI67 | 0.086276 |
| 32543 | POC214 | P63151 | 0.54163  |
| 32544 | POC214 | Q8N6M9 | 0.092547 |
| 32545 | POC214 | Q9UPR3 | 1.1303   |
| 32546 | POC214 | Q9UH92 | 0.8561   |
| 32547 | POC214 | O94817 | 0.43971  |
| 32548 | POC214 | Q9UII4 | 0.52698  |
| 32549 | POC214 | Q9UBU8 | 0.68808  |
| 32550 | POC214 | Q8TAF3 | 0.60491  |
| 32551 | POC214 | Q8TD47 | 0.059237 |
| 32552 | POC214 | Q7L2H7 | 0.52441  |
| 32553 | POC214 | Q13522 | 0.15955  |
| 32554 | POC214 | Q5T0L3 | 1.1526   |
| 32555 | POC214 | Q13352 | 0.4324   |
| 32556 | POC214 | Q8N398 | 0.62513  |
| 32557 | POC214 | O43592 | 0.23888  |
| 32558 | POC214 | Q6GMV2 | 0.24139  |
| 32559 | POC214 | Q15427 | 0.32826  |
| 32560 | POC214 | P05543 | 0.85337  |
| 32561 | POC214 | Q5SW24 | 0.18476  |
| 32562 | POC214 | Q8N108 | 1.0706   |
| 32563 | POC214 | P63272 | 0.87661  |
| 32564 | POC214 | Q15544 | 1.0982   |
| 32565 | POC214 | P20749 | 0.36341  |
| 32566 | POC214 | Q9HAZ2 | 0.28646  |
| 32567 | POC214 | Q96AQ1 | 0.46157  |
| 32568 | POC214 | P83876 | 0.87357  |
| 32569 | POC214 | Q9H8X3 | 0.11647  |
| 32570 | POC214 | Q14691 | 0.35182  |
| 32571 | POC214 | Q53TS8 | 0.35248  |
| 32572 | POC214 | Q9P2I0 | 0.81636  |
| 32573 | POC214 | Q8N7M2 | 0.47643  |
| 32574 | POC214 | F5GYI3 | 0.83956  |
| 32575 | POC214 | P17028 | 0.61459  |
| 32576 | POC214 | Q9P2J8 | 0.36207  |
| 32577 | POC214 | O95780 | 0.52994  |
| 32578 | POC214 | P0CH99 | 0.56767  |
| 32579 | POC214 | Q7RTS9 | 0.84346  |
| 32580 | POC214 | Q99590 | 0.53845  |
| 32581 | POC214 | P98169 | 0.1226   |
| 32582 | POC214 | Q9UMX3 | 0.5209   |
| 32583 | POC214 | Q8N3X6 | 0.39103  |
| 32584 | POC214 | P49848 | 0.62685  |
| 32585 | POC214 | O43663 | 0.76155  |
| 32586 | POC214 | Q86WU2 | 0.2912   |
| 32587 | POC214 | Q15643 | 0.77327  |
| 32588 | POC214 | Q15329 | 1.1328   |
| 32589 | POC214 | Q8N490 | 0.56141  |
| 32590 | POC214 | Q8TAE8 | 1.0095   |
| 32591 | POC214 | Q8WZA8 | 0.086276 |
| 32592 | POC214 | P50222 | 0.47948  |
| 32593 | POC214 | Q53EZ4 | 0.55287  |
| 32594 | POC214 | Q9BUK6 | 0.13252  |
| 32595 | POC214 | Q6ZRV2 | 0.54636  |
| 32596 | POC214 | P0CL83 | 0.5567   |
| 32597 | POC214 | P28324 | 1.2626   |
| 32598 | POC214 | Q3MIS6 | 0.48849  |
| 32599 | POC214 | Q6P4R8 | 1.0423   |
| 32600 | POC214 | P54577 | 0.097249 |
| 32601 | POC214 | Q9GZY1 | 0.75882  |
| 32602 | POC214 | Q9UMS5 | 0.6044   |
| 32603 | POC214 | Q6P1N9 | 0.14098  |
| 32604 | POC214 | P16383 | 0.78534  |

|       |        |        |          |
|-------|--------|--------|----------|
| 32605 | P0C214 | Q9UKV0 | 0.39097  |
| 32606 | P0C214 | Q9HCU9 | 1.0349   |
| 32607 | P0C214 | Q6Q795 | 0.086276 |
| 32608 | P0C214 | P52597 | 0.54206  |
| 32609 | P0C214 | Q8WW38 | 0.48189  |
| 32610 | P0C214 | Q96G23 | 0.22158  |
| 32611 | P0C214 | O95067 | 0.56103  |
| 32612 | P0C214 | O00257 | 0.92826  |
| 32613 | P0C214 | Q9Y5J9 | 0.51271  |
| 32614 | P0C214 | Q8WU03 | 0.61009  |
| 32615 | P0C214 | Q15652 | 0.54348  |
| 32616 | P0C214 | Q8WXC3 | 0.71927  |
| 32617 | P0C214 | Q9UL45 | 0.19436  |
| 32618 | P0C214 | P82909 | 0.33048  |
| 32619 | P0C214 | Q9H0E2 | 0.26572  |
| 32620 | P0C214 | O60356 | 0.78098  |
| 32621 | P0C214 | Q9NVI1 | 0.55104  |
| 32622 | P0C214 | B4DU55 | 0.36913  |
| 32623 | P0C214 | Q9NQG5 | 1.0891   |
| 32624 | P0C214 | Q9BUW7 | 0.24937  |
| 32625 | P0C214 | Q9UF83 | 0.09009  |
| 32626 | P0C214 | Q9BZE7 | 0.24937  |
| 32627 | P0C214 | P15927 | 0.38459  |
| 32628 | P0C214 | Q9H8H0 | 0.16769  |
| 32629 | P0C214 | Q8NDW8 | 0.12047  |
| 32630 | P0C214 | Q9H160 | 0.40381  |
| 32631 | P0C214 | Q8TCS8 | 0.22468  |
| 32632 | P0C214 | Q9H2G9 | 0.31818  |
| 32633 | P0C214 | Q96A09 | 0.53384  |
| 32634 | P0C214 | Q9NQX6 | 0.31277  |
| 32635 | P0C214 | Q8IVM0 | 0.45292  |
| 32636 | P0C214 | Q5T8I9 | 0.23774  |
| 32637 | P0C214 | Q96LK0 | 0.13923  |
| 32638 | P0C214 | O43679 | 0.16536  |
| 32639 | P0C214 | Q96MG7 | 0.75044  |
| 32640 | P0C214 | O75152 | 0.36483  |
| 32641 | P0C214 | Q12872 | 0.75888  |
| 32642 | P0C214 | Q96RK1 | 0.64028  |
| 32643 | P0C214 | P25788 | 0.80504  |
| 32644 | P0C214 | Q3B726 | 0.1779   |
| 32645 | P0C214 | Q9UNS1 | 0.4393   |
| 32646 | P0C214 | P05546 | 0.92489  |
| 32647 | P0C214 | P0CW23 | 0.34056  |
| 32648 | P0C214 | O43502 | 0.30429  |
| 32649 | P0C214 | Q96E29 | 0.4175   |
| 32650 | P0C214 | P51815 | 0.23111  |
| 32651 | P0C214 | Q9NPA8 | 0.337    |
| 32652 | P0C214 | Q6ZS27 | 0.30372  |
| 32653 | P0C214 | Q86XN7 | 0.24937  |
| 32654 | P0C214 | Q9ULW8 | 0.35572  |
| 32655 | P0C214 | P62136 | 0.76937  |
| 32656 | P0C214 | Q9NZE8 | 0.5902   |
| 32657 | P0C214 | O14896 | 0.52071  |
| 32658 | P0C214 | P02100 | 0.3641   |
| 32659 | P0C214 | A2RTX5 | 0.6462   |
| 32660 | P0C214 | P51522 | 0.29177  |
| 32661 | P0C214 | P26998 | 0.63292  |
| 32662 | P0C214 | A6NFF2 | 0.28016  |
| 32663 | P0C214 | Q8N393 | 0.27688  |
| 32664 | P0C214 | Q9H9G7 | 0.77466  |
| 32665 | P0C214 | O43823 | 0.14904  |
| 32666 | P0C214 | P62495 | 0.78293  |
| 32667 | P0C214 | Q6ZN28 | 0.60837  |
| 32668 | P0C214 | Q8NDM7 | 0.41893  |
| 32669 | P0C214 | Q96TA1 | 0.35642  |
| 32670 | P0C214 | P24941 | 0.55321  |
| 32671 | P0C214 | O15382 | 0.19682  |
| 32672 | P0C214 | Q14157 | 0.26923  |
| 32673 | P0C214 | O15060 | 0.10637  |
| 32674 | P0C214 | O75334 | 0.44893  |
| 32675 | P0C214 | P40337 | 0.94418  |
| 32676 | P0C214 | Q86TP1 | 0.73946  |
| 32677 | P0C214 | Q9NXG0 | 0.058823 |
| 32678 | P0C214 | Q05519 | 0.68138  |
| 32679 | P0C214 | P0DL12 | 0.029386 |
| 32680 | P0C214 | P53804 | 0.82808  |

|       |        |        |          |
|-------|--------|--------|----------|
| 32681 | P0C214 | Q9BRJ6 | 0.38521  |
| 32682 | P0C214 | A6NCN2 | 0.50374  |
| 32683 | P0C214 | Q9BUG6 | 0.20198  |
| 32684 | P0C214 | Q9Y603 | 1.0981   |
| 32685 | P0C214 | Q5W0A0 | 0.22181  |
| 32686 | P0C214 | Q9UBS8 | 0.69228  |
| 32687 | P0C214 | P49321 | 0.61984  |
| 32688 | P0C214 | Q8WZ19 | 0.062476 |
| 32689 | P0C214 | P19623 | 0.20013  |
| 32690 | P0C214 | Q9Y5N5 | 0.26165  |
| 32691 | P0C214 | Q15714 | 0.7487   |
| 32692 | P0C214 | O14519 | 0.13753  |
| 32693 | P0C214 | I3L3R5 | 0.086276 |
| 32694 | P0C214 | Q99689 | 0.18776  |
| 32695 | P0C214 | Q8TDC0 | 0.41241  |
| 32696 | P0C214 | Q7RTV0 | 0.39038  |
| 32697 | P0C214 | Q2M238 | 0.028619 |
| 32698 | P0C214 | Q76FK4 | 0.38816  |
| 32699 | P0C214 | Q9HCK8 | 0.35227  |
| 32700 | P0C214 | Q0VG06 | 0.36754  |
| 32701 | P0C214 | P0C7V6 | 0.82922  |
| 32702 | P0C214 | Q15654 | 0.7055   |
| 32703 | P0C214 | Q8WVY7 | 0.27037  |
| 32704 | P0C214 | Q6ZMY9 | 0.49442  |
| 32705 | P0C214 | O95278 | 0.33927  |
| 32706 | P0C214 | O15014 | 1.0105   |
| 32707 | P0C214 | Q96IM9 | 0.087625 |
| 32708 | P0C214 | P02795 | 0.62734  |
| 32709 | P0C214 | Q9GZT9 | 0.38692  |
| 32710 | P0C214 | O95900 | 0.60201  |
| 32711 | P0C214 | E9PKD4 | 0.030304 |
| 32712 | P0C214 | Q9UN79 | 0.78384  |
| 32713 | P0C214 | Q9BQQ3 | 0.090327 |
| 32714 | P0C214 | Q13765 | 1.0401   |
| 32715 | P0C214 | Q96PC3 | 0.29607  |
| 32716 | P0C214 | Q9UIL1 | 0.69023  |
| 32717 | P0C214 | Q92925 | 0.50962  |
| 32718 | P0C214 | Q3SYG4 | 0.30863  |
| 32719 | P0C214 | P38646 | 0.72307  |
| 32720 | P0C214 | P58557 | 0.82995  |
| 32721 | P0C214 | Q8WXI9 | 0.41939  |
| 32722 | P0C214 | Q9ULD2 | 0.28916  |
| 32723 | P0C214 | P42574 | 0.24109  |
| 32724 | P0C214 | Q9UI43 | 0.70784  |
| 32725 | P0C214 | Q05BQ5 | 0.17355  |
| 32726 | P0C214 | P17480 | 0.98161  |
| 32727 | P0C214 | Q8N7H5 | 0.90526  |
| 32728 | P0C214 | Q6ZS52 | 0.086276 |
| 32729 | P0C214 | Q9BY65 | 0.091496 |
| 32730 | P0C214 | E7ETH6 | 0.30272  |
| 32731 | P0C214 | Q99618 | 0.93313  |
| 32732 | P0C214 | Q8IXQ4 | 0.24937  |
| 32733 | P0C214 | Q04323 | 0.29466  |
| 32734 | P0C214 | Q14019 | 0.16863  |
| 32735 | P0C214 | Q9Y6G3 | 0.23359  |
| 32736 | P0C214 | P50616 | 0.32981  |
| 32737 | P0C214 | Q9H6K5 | 0.24937  |
| 32738 | P0C214 | P36639 | 0.4373   |
| 32739 | P0C214 | P62269 | 0.93216  |
| 32740 | P0C214 | P19367 | 0.57747  |
| 32741 | P0C214 | Q13185 | 0.74369  |
| 32742 | P0C214 | Q9NVU7 | 0.35426  |
| 32743 | P0C214 | P63162 | 0.58486  |
| 32744 | P0C214 | Q16576 | 0.36325  |
| 32745 | P0C214 | P0C880 | 0.086276 |
| 32746 | P0C214 | O95886 | 0.49546  |
| 32747 | P0C214 | Q9BVC3 | 0.45439  |
| 32748 | P0C214 | Q2QGD7 | 0.66011  |
| 32749 | P0C214 | O15226 | 0.81227  |
| 32750 | P0C214 | O75376 | 0.34123  |
| 32751 | P0C214 | Q9BZZ5 | 0.35381  |
| 32752 | P0C214 | Q96AB3 | 0.8061   |
| 32753 | P0C214 | Q70Z53 | 0.59726  |
| 32754 | P0C214 | Q49AN0 | 0.15892  |
| 32755 | P0C214 | Q9Y4W2 | 0.77226  |
| 32756 | P0C214 | Q9Y6X9 | 0.28491  |

|       |        |         |          |
|-------|--------|---------|----------|
| 32757 | POC214 | Q96N58  | 0.32351  |
| 32758 | POC214 | P30043  | 0.25939  |
| 32759 | POC214 | A8MZA4  | 0.37738  |
| 32760 | POC214 | P0DI81  | 1.0612   |
| 32761 | POC214 | Q9UNM6  | 0.35179  |
| 32762 | POC214 | Q99550  | 0.2475   |
| 32763 | POC214 | Q9BYR2  | 0.43378  |
| 32764 | POC214 | Q96M11  | 0.69033  |
| 32765 | POC214 | P17020  | 0.23797  |
| 32766 | POC214 | Q8TE69  | 0.2675   |
| 32767 | POC214 | P19429  | 0.05525  |
| 32768 | POC214 | Q96KT6  | 0.086276 |
| 32769 | POC214 | Q9ULD0  | 0.55106  |
| 32770 | POC214 | P0CW00  | 0.69286  |
| 32771 | POC214 | Q9BRT7  | 0.086276 |
| 32772 | POC214 | Q15025  | 0.48785  |
| 32773 | POC214 | Q9ULX9  | 0.3337   |
| 32774 | POC214 | P04733  | 0.37691  |
| 32775 | POC214 | Q76KX8  | 0.50034  |
| 32776 | POC214 | P67775  | 0.72514  |
| 32777 | POC214 | A6NEV1  | 0.41187  |
| 32778 | POC214 | Q5UE93  | 0.61634  |
| 32779 | POC214 | Q6ZN01  | 0.54531  |
| 32780 | POC214 | Q86TB9  | 0.93199  |
| 32781 | POC214 | Q8NFB3  | 0.97357  |
| 32782 | POC214 | Q96MR7  | 1.1597   |
| 32783 | POC214 | P10809  | 0.22074  |
| 32784 | POC214 | Q9BUJ2  | 1.1245   |
| 32785 | POC214 | Q15459  | 0.63881  |
| 32786 | POC214 | P0C7T7  | 0.086276 |
| 32787 | POC214 | Q08AI8  | 0.24937  |
| 32788 | POC214 | Q9NRJ2  | 0.086276 |
| 32789 | POC214 | Q99848  | 0.21813  |
| 32790 | POC214 | Q9BZW7  | 0.24633  |
| 32791 | POC214 | O00231  | 0.61566  |
| 32792 | POC214 | P41567  | 0.87517  |
| 32793 | POC214 | O60264  | 0.22187  |
| 32794 | POC214 | Q9BPX1  | 0.45612  |
| 32795 | POC214 | P19532  | 0.67715  |
| 32796 | POC214 | Q15796  | 0.55508  |
| 32797 | POC214 | P48634  | 0.79434  |
| 32798 | POC214 | Q9NZ52  | 0.34155  |
| 32799 | POC214 | Q6NVH7  | 0.48272  |
| 32800 | POC214 | P42771  | 0.54051  |
| 32801 | POC214 | Q56P03  | 0.47093  |
| 32802 | POC214 | Q9H019  | 0.32651  |
| 32803 | POC214 | Q9NSC2  | 0.26183  |
| 32804 | POC214 | Q96I24  | 0.41501  |
| 32805 | POC214 | Q9Y5J6  | 0.36952  |
| 32806 | POC214 | Q9UHI6  | 0.43781  |
| 32807 | POC214 | Q9H0G5  | 0.56828  |
| 32808 | POC214 | Q8TE76  | 0.14739  |
| 32809 | POC214 | Q69YI7  | 0.81041  |
| 32810 | POC214 | P61579  | 0.39132  |
| 32811 | POC214 | Q969J2  | 0.25668  |
| 32812 | POC214 | Q9P0W5  | 0.53306  |
| 32813 | POC214 | Q9ULM2  | 0.19723  |
| 32814 | POC214 | P51816  | 0.38179  |
| 32815 | POC214 | P12882  | 0.89031  |
| 32816 | POC214 | Q96T21  | 0.60665  |
| 32817 | POC214 | P11441  | 0.62536  |
| 32818 | POC214 | Q9H9L3  | 0.45919  |
| 32819 | POC214 | Q14192  | 0.66464  |
| 32820 | POC214 | P62324  | 0.65354  |
| 32821 | POC214 | O15318  | 0.5551   |
| 32822 | POC214 | O00204  | 0.62852  |
| 32823 | POC214 | Q6UUUV9 | 1.5188   |
| 32824 | POC214 | O60930  | 0.33473  |
| 32825 | POC214 | O75717  | 0.30282  |
| 32826 | POC214 | Q6L8G9  | 0.086276 |
| 32827 | POC214 | P0C5Y4  | 0.081911 |
| 32828 | POC214 | P41223  | 0.09131  |
| 32829 | POC214 | Q6P2H3  | 0.44208  |
| 32830 | POC214 | P62318  | 0.89139  |
| 32831 | POC214 | Q9NRF8  | 0.33618  |
| 32832 | POC214 | O43593  | 0.1174   |

|       |        |        |            |
|-------|--------|--------|------------|
| 32833 | P0C214 | O15525 | 0.26634    |
| 32834 | P0C214 | Q86V71 | 0.39888    |
| 32835 | P0C214 | Q8NDV7 | 0.2895     |
| 32836 | P0C214 | Q9UMY1 | 0.8529     |
| 32837 | P0C214 | Q96CS3 | 0.55353    |
| 32838 | P0C214 | Q9Y3M9 | 0.21809    |
| 32839 | P0C214 | P22674 | 0.25109    |
| 32840 | P0C214 | Q7Z6B0 | 0.51616    |
| 32841 | P0C214 | P17027 | 0.25925    |
| 32842 | P0C214 | Q9BRP1 | 0.81409    |
| 32843 | P0C214 | Q86TU7 | 0.25096    |
| 32844 | P0C214 | Q9BYQ0 | 0.43378    |
| 32845 | P0C214 | P25963 | 0.61404    |
| 32846 | P0C214 | Q5VSD8 | 0.00049291 |
| 32847 | P0C214 | Q86UQ0 | 0.27943    |
| 32848 | P0C214 | A8MQ03 | 0.67894    |
| 32849 | P0C214 | Q96KN1 | 0.35932    |
| 32850 | P0C214 | Q8IY85 | 0.28537    |
| 32851 | P0C214 | A6NLX3 | 0.10536    |
| 32852 | P0C214 | Q01543 | 0.29355    |
| 32853 | P0C214 | O60381 | 0.16353    |
| 32854 | P0C214 | O43598 | 0.19551    |
| 32855 | P0C214 | Q95411 | 0.086276   |
| 32856 | P0C214 | Q96RL7 | 0.91327    |
| 32857 | P0C214 | P59998 | 0.17995    |
| 32858 | P0C214 | Q96GC6 | 1.0332     |
| 32859 | P0C214 | Q99687 | 0.3352     |
| 32860 | P0C214 | Q99594 | 1.0319     |
| 32861 | P0C214 | E5RJ46 | 0.086276   |
| 32862 | P0C214 | P41182 | 0.1413     |
| 32863 | P0C214 | Q9Y6X8 | 0.59208    |
| 32864 | P0C214 | P35244 | 0.50116    |
| 32865 | P0C214 | O95429 | 0.31074    |
| 32866 | P0C214 | Q96K30 | 0.67982    |
| 32867 | P0C214 | Q8N0U6 | 0.086276   |
| 32868 | P0C214 | O60711 | 0.35812    |
| 32869 | P0C214 | Q6P9G9 | 0.23921    |
| 32870 | P0C214 | O15360 | 0.70005    |
| 32871 | P0C214 | Q03923 | 0.52248    |
| 32872 | P0C214 | O60294 | 0.31329    |
| 32873 | P0C214 | P14324 | 0.52869    |
| 32874 | P0C214 | Q3SY00 | 0.61615    |
| 32875 | P0C214 | Q5SV97 | 0.41108    |
| 32876 | P0C214 | Q9H1B7 | 0.9375     |
| 32877 | P0C214 | P07311 | 0.36285    |
| 32878 | P0C214 | Q9BXJ9 | 0.6323     |
| 32879 | P0C214 | Q5VZL5 | 0.78761    |
| 32880 | P0C214 | P07093 | 0.85514    |
| 32881 | P0C214 | Q96FF7 | 0.086276   |
| 32882 | P0C214 | Q8TAV0 | 0.53941    |
| 32883 | P0C214 | Q99504 | 0.48251    |
| 32884 | P0C214 | Q9NRR4 | 0.49796    |
| 32885 | P0C214 | Q9Y5B9 | 0.27318    |
| 32886 | P0C214 | Q06323 | 1.1025     |
| 32887 | P0C214 | Q5VX52 | 0.086185   |
| 32888 | P0C214 | Q9UMX2 | 0.35692    |
| 32889 | P0C214 | Q86SG2 | 0.23549    |
| 32890 | P0C214 | Q9NP71 | 0.50949    |
| 32891 | P0C214 | Q9UQR0 | 0.17965    |
| 32892 | P0C214 | Q8N972 | 0.3804     |
| 32893 | P0C214 | Q9P206 | 0.38939    |
| 32894 | P0C214 | P59037 | 0.35211    |
| 32895 | P0C214 | Q9NS73 | 0.6955     |
| 32896 | P0C214 | Q9NQ50 | 0.55152    |
| 32897 | P0C214 | Q9H3J6 | 0.66547    |
| 32898 | P0C214 | P11388 | 0.1662     |
| 32899 | P0C214 | Q9BQY4 | 0.72354    |
| 32900 | P0C214 | Q9BVT8 | 0.21352    |
| 32901 | P0C214 | Q9HCN2 | 0.086276   |
| 32902 | P0C214 | P17098 | 0.48478    |
| 32903 | P0C214 | Q8IV48 | 0.032814   |
| 32904 | P0C214 | Q6ZT77 | 0.34811    |
| 32905 | P0C214 | Q9H446 | 0.2675     |
| 32906 | P0C214 | Q8NI27 | 0.45307    |
| 32907 | P0C214 | P21506 | 0.34363    |
| 32908 | P0C214 | Q8IY81 | 0.72951    |

|       |        |        |          |
|-------|--------|--------|----------|
| 32909 | P0C214 | P46781 | 1.2594   |
| 32910 | P0C214 | Q93009 | 0.38099  |
| 32911 | P0C214 | Q9Y608 | 0.31299  |
| 32912 | P0C214 | P61578 | 0.35559  |
| 32913 | P0C214 | Q96KQ4 | 0.85509  |
| 32914 | P0C214 | O43541 | 0.648    |
| 32915 | P0C214 | Q6ZUU3 | 0.086276 |
| 32916 | P0C214 | Q96P71 | 0.50392  |
| 32917 | P0C214 | Q5SY13 | 0.086276 |
| 32918 | P0C214 | Q13868 | 0.77531  |
| 32919 | P0C214 | P30305 | 0.36614  |
| 32920 | P0C214 | Q9Y291 | 0.32421  |
| 32921 | P0C214 | Q3SYA9 | 0.26303  |
| 32922 | P0C214 | Q7L1Q6 | 0.33495  |
| 32923 | P0C214 | Q86X83 | 0.31698  |
| 32924 | P0C214 | Q5VVC0 | 0.20454  |
| 32925 | P0C214 | Q8IYB9 | 0.39888  |
| 32926 | P0C214 | Q5T5Y3 | 0.32395  |
| 32927 | P0C214 | Q8TD16 | 0.15813  |
| 32928 | P0C214 | Q3LI63 | 0.086276 |
| 32929 | P0C214 | Q69YL0 | 0.086276 |
| 32930 | P0C214 | O15379 | 0.50392  |
| 32931 | P0C214 | Q9UN30 | 0.20918  |
| 32932 | P0C214 | P25786 | 0.68368  |
| 32933 | P0C214 | Q8TAP6 | 0.90358  |
| 32934 | P0C214 | Q8NEZ2 | 0.58758  |
| 32935 | P0C214 | P06733 | 0.99403  |
| 32936 | P0C214 | Q01081 | 0.52298  |
| 32937 | P0C214 | Q96RL1 | 0.68581  |
| 32938 | P0C214 | Q5BJE1 | 0.20816  |
| 32939 | P0C214 | P60372 | 0.43378  |
| 32940 | P0C214 | Q9NZU7 | 0.33704  |
| 32941 | P0C214 | Q9HB75 | 0.56561  |
| 32942 | P0C214 | Q01892 | 0.26437  |
| 32943 | P0C214 | Q96PK6 | 0.73985  |
| 32944 | P0C214 | Q0PNE2 | 0.6967   |
| 32945 | P0C214 | C9J6K1 | 0.15595  |
| 32946 | P0C214 | Q9Y2R9 | 0.89012  |
| 32947 | P0C214 | Q96DB5 | 0.46336  |
| 32948 | P0C214 | Q6P1X5 | 0.81819  |
| 32949 | P0C214 | O15205 | 0.51248  |
| 32950 | P0C214 | Q9P1T7 | 1.3609   |
| 32951 | P0C214 | A4GXA9 | 0.72268  |
| 32952 | P0C214 | Q96RT8 | 0.27841  |
| 32953 | P0C214 | Q96JK9 | 0.91321  |
| 32954 | P0C214 | Q8WW14 | 0.17012  |
| 32955 | P0C214 | P43268 | 0.37639  |
| 32956 | P0C214 | O75533 | 0.22879  |
| 32957 | P0C214 | Q6AI39 | 0.34291  |
| 32958 | P0C214 | Q96B01 | 0.4585   |
| 32959 | P0C214 | Q96KR7 | 0.21557  |
| 32960 | P0C214 | P19012 | 0.58756  |
| 32961 | P0C214 | Q99619 | 0.59086  |
| 32962 | P0C214 | O14508 | 0.3583   |
| 32963 | P0C214 | Q53G26 | 0.70167  |
| 32964 | P0C214 | Q15004 | 0.85109  |
| 32965 | P0C214 | Q9Y2D1 | 1.0656   |
| 32966 | P0C214 | Q96RS0 | 0.76948  |
| 32967 | P0C214 | Q96MY7 | 0.88594  |
| 32968 | P0C214 | Q96CM4 | 0.18195  |
| 32969 | P0C214 | Q5T4T6 | 0.89936  |
| 32970 | P0C214 | Q9Y2G2 | 0.44567  |
| 32971 | P0C214 | Q9UHY7 | 0.3744   |
| 32972 | P0C214 | Q8N6T7 | 0.59621  |
| 32973 | P0C214 | Q8TC76 | 1.3916   |
| 32974 | P0C214 | Q96DI7 | 0.6329   |
| 32975 | P0C214 | Q9P1D8 | 0.086276 |
| 32976 | P0C214 | O75167 | 0.13415  |
| 32977 | P0C214 | Q969U7 | 0.52781  |
| 32978 | P0C214 | Q9UBW7 | 0.70238  |
| 32979 | P0C214 | Q8IVD9 | 0.35289  |
| 32980 | P0C214 | H3BTG2 | 0.36066  |
| 32981 | P0C214 | Q9H322 | 0.45745  |
| 32982 | P0C214 | O75475 | 1.4309   |
| 32983 | P0C214 | Q14690 | 0.73547  |
| 32984 | P0C214 | Q16829 | 0.31349  |

|       |        |        |          |
|-------|--------|--------|----------|
| 32985 | P0C214 | Q5XKK7 | 0.091777 |
| 32986 | P0C214 | O43324 | 1.2876   |
| 32987 | P0C214 | Q9NRF9 | 0.06667  |
| 32988 | P0C214 | Q9NX95 | 0.30869  |
| 32989 | P0C214 | Q9Y5U2 | 0.2347   |
| 32990 | P0C214 | P13073 | 0.1999   |
| 32991 | P0C214 | Q3LHN2 | 0.086276 |
| 32992 | P0C214 | Q9NYV6 | 0.54205  |
| 32993 | P0C214 | Q5T440 | 0.082247 |
| 32994 | P0C214 | Q9UNH5 | 0.5993   |
| 32995 | P0C214 | Q8TE02 | 1.1782   |
| 32996 | P0C214 | Q8TAA5 | 0.49939  |
| 32997 | P0C214 | Q9P2M1 | 0.45292  |
| 32998 | P0C214 | P01008 | 0.88945  |
| 32999 | P0C214 | P33240 | 0.53033  |
| 33000 | P0C214 | Q16514 | 0.74487  |
| 33001 | P0C214 | Q9UKC9 | 0.55612  |
| 33002 | P0C214 | Q9BXF6 | 0.48768  |
| 33003 | P0C214 | O95251 | 0.8289   |
| 33004 | P0C214 | Q96EV8 | 0.28489  |
| 33005 | P0C214 | Q9H211 | 0.71816  |
| 33006 | P0C214 | Q2M3D2 | 0.23707  |
| 33007 | P0C214 | Q4LE28 | 0.70372  |
| 33008 | P0C214 | P25063 | 0.086276 |
| 33009 | P0C214 | Q9Y3F4 | 0.92514  |
| 33010 | P0C214 | Q8IXH6 | 1.2435   |
| 33011 | P0C214 | Q7RTU3 | 0.25688  |
| 33012 | P0C214 | Q8WYA1 | 0.26709  |
| 33013 | P0C214 | P17035 | 0.26437  |
| 33014 | P0C214 | Q9HA77 | 0.57449  |
| 33015 | P0C214 | P62736 | 0.10604  |
| 33016 | P0C214 | P82970 | 0.56739  |
| 33017 | P0C214 | Q13616 | 0.61705  |
| 33018 | P0C214 | Q2M2W7 | 0.24937  |
| 33019 | P0C214 | Q9NR77 | 0.30831  |
| 33020 | P0C214 | Q9HCM9 | 0.61615  |
| 33021 | P0C214 | Q17R31 | 0.23495  |
| 33022 | P0C214 | O14618 | 0.54518  |
| 33023 | P0C214 | Q8TBB1 | 0.75447  |
| 33024 | P0C214 | A3KN83 | 0.78325  |
| 33025 | P0C214 | Q8NDN9 | 0.55976  |
| 33026 | P0C214 | P0DMC3 | 0.086276 |
| 33027 | P0C214 | Q5EBL4 | 0.52769  |
| 33028 | P0C214 | Q8WVP5 | 0.73452  |
| 33029 | P0C214 | P0C7X5 | 0.33639  |
| 33030 | P0C214 | Q7Z7K6 | 0.39311  |
| 33031 | P0C214 | Q9NW08 | 0.090663 |
| 33032 | P0C214 | Q9Y3B9 | 0.38699  |
| 33033 | P0C214 | Q6NVY1 | 0.14712  |
| 33034 | P0C214 | Q66K80 | 0.086276 |
| 33035 | P0C214 | O95202 | 0.18935  |
| 33036 | P0C214 | P04259 | 0.25397  |
| 33037 | P0C214 | Q9P2B4 | 0.23817  |
| 33038 | P0C214 | Q8IYD1 | 0.59363  |
| 33039 | P0C214 | Q8IX07 | 0.28951  |
| 33040 | P0C214 | Q96CV9 | 0.41465  |
| 33041 | P0C214 | Q58FF3 | 0.99507  |
| 33042 | P0C214 | Q9ULX6 | 0.49779  |
| 33043 | P0C214 | Q58FF6 | 0.8863   |
| 33044 | P0C214 | P78559 | 0.63761  |
| 33045 | P0C214 | Q96CN0 | 0.086276 |
| 33046 | P0C214 | I6L9F6 | 0.15831  |
| 33047 | P0C214 | Q8WTP8 | 0.099752 |
| 33048 | P0C214 | Q9H607 | 0.43421  |
| 33049 | P0C214 | Q8WXU2 | 0.71941  |
| 33050 | P0C214 | A6NIN4 | 0.086276 |
| 33051 | P0C214 | Q6ZVC0 | 0.78573  |
| 33052 | P0C214 | P48378 | 0.242    |
| 33053 | P0C214 | P38117 | 0.25913  |
| 33054 | P0C214 | Q9UJL9 | 0.24964  |
| 33055 | P0C214 | Q8N5M1 | 0.48453  |
| 33056 | P0C214 | O43752 | 0.083834 |
| 33057 | P0C214 | Q3ZCV2 | 0.24937  |
| 33058 | P0C214 | Q8TES7 | 0.46846  |
| 33059 | P0C214 | Q86X51 | 0.11224  |
| 33060 | P0C214 | Q9BRT3 | 0.11128  |



|       |        |        |          |
|-------|--------|--------|----------|
| 33061 | P0C214 | Q9H4B0 | 0.26979  |
| 33062 | P0C214 | A2RUB1 | 0.24937  |
| 33063 | P0C214 | Q9NV56 | 0.6156   |
| 33064 | P0C214 | P49588 | 0.17539  |
| 33065 | P0C214 | Q9H9Z2 | 0.66934  |
| 33066 | P0C214 | O00193 | 0.73154  |
| 33067 | P0C214 | P12755 | 0.13003  |
| 33068 | P0C214 | Q6U7Q0 | 0.31247  |
| 33069 | P0C214 | A4D1E1 | 0.39345  |
| 33070 | P0C214 | P62879 | 0.47369  |
| 33071 | P0C214 | A6NKH3 | 0.50471  |
| 33072 | P0C214 | O94850 | 0.2103   |
| 33073 | P0C214 | Q13127 | 0.48619  |
| 33074 | P0C214 | A8MU10 | 0.086276 |
| 33075 | P0C214 | Q9ULZ2 | 0.76617  |
| 33076 | P0C214 | Q9C075 | 0.44878  |
| 33077 | P0C214 | P0DKL9 | 0.63546  |
| 33078 | P0C214 | Q96GW9 | 0.43891  |
| 33079 | P0C214 | Q14934 | 0.48123  |
| 33080 | P0C214 | Q9NX55 | 0.41348  |
| 33081 | P0C214 | Q4LE39 | 0.96843  |
| 33082 | P0C214 | Q9UBF1 | 0.74972  |
| 33083 | P0C214 | Q8NDW4 | 0.2817   |
| 33084 | P0C214 | Q9UG56 | 0.32034  |
| 33085 | P0C214 | P13994 | 0.38384  |
| 33086 | P0C214 | P23921 | 0.22202  |
| 33087 | P0C214 | Q9BSG1 | 0.38137  |
| 33088 | P0C214 | P53041 | 0.73417  |
| 33089 | P0C214 | Q8IU60 | 1.0385   |
| 33090 | P0C214 | Q6P1M9 | 0.27253  |
| 33091 | P0C214 | Q01850 | 0.84761  |
| 33092 | P0C214 | O75940 | 0.57763  |
| 33093 | P0C214 | Q9BYC9 | 0.74818  |
| 33094 | P0C214 | O75155 | 0.78447  |
| 33095 | P0C214 | Q7Z4U5 | 0.90801  |
| 33096 | P0C214 | Q8N1B4 | 0.3943   |
| 33097 | P0C214 | Q8WV99 | 0.17284  |
| 33098 | P0C214 | Q9NXW9 | 0.27869  |
| 33099 | P0C214 | Q15650 | 0.71783  |
| 33100 | P0C214 | Q96LR7 | 0.60714  |
| 33101 | P0C214 | P62875 | 0.30567  |
| 33102 | P0C214 | P28069 | 0.60416  |
| 33103 | P0C214 | Q8TB05 | 0.24937  |
| 33104 | P0C214 | P30740 | 0.96136  |
| 33105 | P0C214 | Q9NSQ0 | 0.45677  |
| 33106 | P0C214 | Q2VY69 | 0.35336  |
| 33107 | P0C214 | O60763 | 0.3319   |
| 33108 | P0C214 | Q96P63 | 0.92484  |
| 33109 | P0C214 | Q8WUW1 | 0.2436   |
| 33110 | P0C214 | Q9Y252 | 0.45847  |
| 33111 | P0C214 | A8MU76 | 0.6505   |
| 33112 | P0C214 | O75346 | 0.44074  |
| 33113 | P0C214 | Q86YI8 | 0.4013   |
| 33114 | P0C214 | A2RRD8 | 0.32699  |
| 33115 | P0C214 | Q5W1A9 | 0.52643  |
| 33116 | P0C214 | Q96BP3 | 0.68301  |
| 33117 | P0C214 | Q8NDZ9 | 0.086276 |
| 33118 | P0C214 | Q4G0N7 | 0.42506  |
| 33119 | P0C214 | P43359 | 0.84363  |
| 33120 | P0C214 | Q6ZNG0 | 0.29348  |
| 33121 | P0C214 | Q5RHP9 | 0.29767  |
| 33122 | P0C214 | P13984 | 0.59207  |
| 33123 | P0C214 | Q15072 | 0.21906  |
| 33124 | P0C214 | P20226 | 0.89918  |
| 33125 | P0C214 | Q93075 | 0.65392  |
| 33126 | P0C214 | Q969H0 | 0.70874  |
| 33127 | P0C214 | A6NJB7 | 0.81462  |
| 33128 | P0C214 | Q96JS3 | 0.2637   |
| 33129 | P0C214 | P13682 | 0.33929  |
| 33130 | P0C214 | Q12959 | 0.83302  |
| 33131 | P0C214 | Q9H2G4 | 0.65596  |
| 33132 | P0C214 | Q99871 | 0.39644  |
| 33133 | P0C214 | Q9BTC8 | 0.49724  |
| 33134 | P0C214 | Q96D03 | 0.26939  |
| 33135 | P0C214 | Q9UHV2 | 1.4859   |
| 33136 | P0C214 | P61254 | 1.219    |

|       |        |        |          |
|-------|--------|--------|----------|
| 33137 | P0C214 | Q96AQ6 | 0.55892  |
| 33138 | P0C214 | Q5SZD4 | 0.48517  |
| 33139 | P0C214 | Q15424 | 0.76988  |
| 33140 | P0C214 | Q86W11 | 0.22221  |
| 33141 | P0C214 | Q1W6H9 | 1.1281   |
| 33142 | P0C214 | Q13227 | 1.0011   |
| 33143 | P0C214 | Q12874 | 0.46832  |
| 33144 | P0C214 | Q8N443 | 0.13274  |
| 33145 | P0C214 | Q6NSZ9 | 0.17892  |
| 33146 | P0C214 | Q14511 | 0.55715  |
| 33147 | P0C214 | P28072 | 0.61611  |
| 33148 | P0C214 | A6NL82 | 0.029641 |
| 33149 | P0C214 | O95777 | 0.57804  |
| 33150 | P0C214 | Q75QN2 | 0.54729  |
| 33151 | P0C214 | Q92890 | 0.90679  |
| 33152 | P0C214 | Q3YBR2 | 0.41251  |
| 33153 | P0C214 | A8MTA8 | 0.078024 |
| 33154 | P0C214 | Q86V42 | 0.28965  |
| 33155 | P0C214 | A8MWA4 | 0.46621  |
| 33156 | P0C214 | Q14160 | 0.46978  |
| 33157 | P0C214 | O75534 | 0.11145  |
| 33158 | P0C214 | Q14653 | 0.60616  |
| 33159 | P0C214 | Q5TC12 | 0.43922  |
| 33160 | P0C214 | Q8IZX4 | 0.28016  |
| 33161 | P0C214 | Q86Y97 | 0.42516  |
| 33162 | P0C214 | Q9NVK5 | 0.22364  |
| 33163 | P0C214 | Q8N4B4 | 0.26516  |
| 33164 | P0C214 | O00505 | 1.024    |
| 33165 | P0C214 | Q9UI36 | 0.36065  |
| 33166 | P0C214 | Q9Y4X0 | 0.33461  |
| 33167 | P0C214 | Q9UBP6 | 1.0762   |
| 33168 | P0C214 | Q6P2C8 | 0.94853  |
| 33169 | P0C214 | Q8IXQ5 | 0.31982  |
| 33170 | P0C214 | Q5SXM1 | 0.37755  |
| 33171 | P0C214 | Q9P2Y5 | 0.34574  |
| 33172 | P0C214 | O75494 | 0.62892  |
| 33173 | P0C214 | P09972 | 0.76774  |
| 33174 | P0C214 | O75531 | 0.96435  |
| 33175 | P0C214 | Q96ND8 | 0.51762  |
| 33176 | P0C214 | Q5TA31 | 0.56978  |
| 33177 | P0C214 | Q9H7B2 | 0.95185  |
| 33178 | P0C214 | P54727 | 0.65065  |
| 33179 | P0C214 | O75529 | 0.52768  |
| 33180 | P0C214 | Q6NXT1 | 0.30992  |
| 33181 | P0C214 | Q9BSJ6 | 0.54635  |
| 33182 | P0C214 | Q8IVT2 | 0.58821  |
| 33183 | P0C214 | Q32MH5 | 0.23755  |
| 33184 | P0C214 | Q9H2K2 | 0.35441  |
| 33185 | P0C214 | O75943 | 0.20224  |
| 33186 | P0C214 | Q9BSD3 | 0.17731  |
| 33187 | P0C214 | Q86UU0 | 0.97844  |
| 33188 | P0C214 | Q9UDY2 | 0.87332  |
| 33189 | P0C214 | Q6ZNA4 | 0.63005  |
| 33190 | P0C214 | Q14397 | 0.78708  |
| 33191 | P0C214 | Q96D15 | 0.29312  |
| 33192 | P0C214 | Q9H4T2 | 0.18742  |
| 33193 | P0C214 | P25815 | 0.52999  |
| 33194 | P0C214 | P32780 | 0.67521  |
| 33195 | P0C214 | Q9Y4A5 | 0.75689  |
| 33196 | P0C214 | Q7Z7A3 | 0.80015  |
| 33197 | P0C214 | Q8TED0 | 0.298    |
| 33198 | P0C214 | Q5JTH9 | 0.3548   |
| 33199 | P0C214 | Q9UQF2 | 0.54982  |
| 33200 | P0C214 | Q9UKV8 | 0.88366  |
| 33201 | P0C214 | P41208 | 0.61173  |
| 33202 | P0C214 | O75360 | 0.29152  |
| 33203 | P0C214 | P60413 | 0.43378  |
| 33204 | P0C214 | Q7L5D6 | 0.93611  |
| 33205 | P0C214 | Q9H5X1 | 0.17854  |
| 33206 | P0C214 | A6NJ08 | 0.064098 |
| 33207 | P0C214 | P17040 | 0.62728  |
| 33208 | P0C214 | Q96NB3 | 0.3826   |
| 33209 | P0C214 | P51116 | 0.54062  |
| 33210 | P0C214 | O95639 | 0.39073  |
| 33211 | P0C214 | Q9H0E9 | 0.33017  |
| 33212 | P0C214 | Q5TAP6 | 0.35516  |

|       |        |        |           |
|-------|--------|--------|-----------|
| 33213 | P0C214 | Q6GPH4 | 0.46674   |
| 33214 | P0C214 | P16455 | 0.21681   |
| 33215 | P0C214 | Q8N7W2 | 0.43958   |
| 33216 | P0C214 | Q6V9R5 | 0.42705   |
| 33217 | P0C214 | P62841 | 0.9238    |
| 33218 | P0C214 | Q9P0J1 | 0.13574   |
| 33219 | P0C214 | Q8N9Z9 | 0.50158   |
| 33220 | P0C214 | O00512 | 0.75022   |
| 33221 | P0C214 | Q6PB30 | 0.46641   |
| 33222 | P0C214 | Q8TAA3 | 0.4743    |
| 33223 | P0C214 | Q8WVC0 | 0.97947   |
| 33224 | P0C214 | Q9H840 | 0.99018   |
| 33225 | P0C214 | O96007 | 0.7898    |
| 33226 | P0C214 | Q9Y2X9 | 0.53258   |
| 33227 | P0C214 | P11387 | 0.60677   |
| 33228 | P0C214 | Q14140 | 1.4757    |
| 33229 | P0C214 | P12883 | 0.75898   |
| 33230 | P0C214 | Q9BTE7 | 0.60234   |
| 33231 | P0C214 | P58317 | 0.27826   |
| 33232 | P0C214 | Q9UDV6 | 0.51321   |
| 33233 | P0C214 | Q96C00 | 0.33732   |
| 33234 | P0C214 | P10074 | 0.31788   |
| 33235 | P0C214 | Q92845 | 0.26055   |
| 33236 | P0C214 | Q15287 | 1.0845    |
| 33237 | P0C214 | Q8WXS3 | 0.69946   |
| 33238 | P0C214 | Q13536 | 0.086276  |
| 33239 | P0C214 | P24928 | 0.77244   |
| 33240 | P0C214 | Q86YC2 | 0.54164   |
| 33241 | P0C214 | Q9P1J3 | 0.086276  |
| 33242 | P0C214 | O43918 | 0.95958   |
| 33243 | P0C214 | P0C5K6 | 0.086276  |
| 33244 | P0C214 | O94903 | 0.47486   |
| 33245 | P0C214 | Q68EA5 | 0.47643   |
| 33246 | P0C214 | Q99496 | 0.45512   |
| 33247 | P0C214 | A8MTZ0 | 0.1603    |
| 33248 | P0C214 | P36402 | 0.42047   |
| 33249 | P0C214 | Q9Y3E7 | 0.64729   |
| 33250 | P0C214 | P62244 | 0.98797   |
| 33251 | P0C214 | Q8N535 | 0.088172  |
| 33252 | P0C214 | Q8NAB5 | 0.086276  |
| 33253 | P0C214 | Q9NP64 | 0.21669   |
| 33254 | P0C214 | Q9HD26 | 0.77018   |
| 33255 | P0C214 | Q8TAK5 | 0.42006   |
| 33256 | P0C214 | Q9C0D0 | 0.39152   |
| 33257 | P0C214 | P59022 | 0.3707    |
| 33258 | P0C214 | P52747 | 0.73937   |
| 33259 | P0C214 | Q8IYX0 | 0.48999   |
| 33260 | P0C214 | Q9NRX2 | 0.44761   |
| 33261 | P0C214 | Q9BRT2 | 0.37704   |
| 33262 | P0C214 | O75582 | 0.24024   |
| 33263 | P0C214 | P26651 | 0.67734   |
| 33264 | P0C214 | O60784 | 0.36937   |
| 33265 | P0C214 | Q9BQI5 | 0.10759   |
| 33266 | P0C214 | P10242 | 0.8584    |
| 33267 | P0C214 | Q494R0 | 0.086276  |
| 33268 | P0C214 | Q9UHV7 | 0.51898   |
| 33269 | P0C214 | Q8N9Z0 | 0.44153   |
| 33270 | P0C214 | P62987 | 0.79237   |
| 33271 | P0C214 | P09622 | 0.28034   |
| 33272 | P0C214 | Q6XD76 | 0.25897   |
| 33273 | P0C214 | O14593 | 0.61102   |
| 33274 | P0C214 | Q9NPI8 | 0.76317   |
| 33275 | P0C214 | Q14135 | 0.39389   |
| 33276 | P0C214 | Q8N0U4 | 0.21899   |
| 33277 | P0C214 | Q9NV72 | 0.46031   |
| 33278 | P0C214 | P57077 | 0.888     |
| 33279 | P0C214 | Q9ULV5 | 0.27177   |
| 33280 | P0C214 | P16333 | 0.72469   |
| 33281 | P0C214 | Q9BXF3 | 0.56161   |
| 33282 | P0C214 | P86480 | 0.086276  |
| 33283 | P0C214 | P62826 | 0.78322   |
| 33284 | P0C214 | Q6ZU65 | 0.23697   |
| 33285 | P0C214 | Q6IN85 | 0.32771   |
| 33286 | P0C214 | A8MYR8 | 0.0043805 |
| 33287 | P0C214 | Q5VIY5 | 0.44782   |
| 33288 | P0C214 | Q6P3X8 | 0.15946   |

|       |        |        |          |
|-------|--------|--------|----------|
| 33289 | P0C214 | Q5W5X9 | 0.14652  |
| 33290 | P0C214 | Q9BZ23 | 0.48441  |
| 33291 | P0C214 | Q12983 | 0.11502  |
| 33292 | P0C214 | P50453 | 0.86267  |
| 33293 | P0C214 | Q5THR3 | 0.33132  |
| 33294 | P0C214 | Q8N9K3 | 0.24937  |
| 33295 | P0C214 | Q8WUB8 | 0.33863  |
| 33296 | P0C214 | Q5XKR9 | 0.41022  |
| 33297 | P0C214 | Q9Y462 | 0.5484   |
| 33298 | P0C214 | A2RUQ5 | 0.040743 |
| 33299 | P0C214 | P08727 | 0.58756  |
| 33300 | P0C214 | Q9UEG4 | 0.31744  |
| 33301 | P0C214 | Q6ZSR6 | 0.21846  |
| 33302 | P0C214 | Q9H410 | 0.87927  |
| 33303 | P0C214 | Q15935 | 0.37571  |
| 33304 | P0C214 | P22670 | 0.76033  |
| 33305 | P0C214 | Q9H9T3 | 0.81439  |
| 33306 | P0C214 | P39880 | 0.54376  |
| 33307 | P0C214 | P42773 | 0.33019  |
| 33308 | P0C214 | Q6NUP7 | 0.38579  |
| 33309 | P0C214 | P59991 | 0.51868  |
| 33310 | P0C214 | O60806 | 0.37581  |
| 33311 | P0C214 | Q9UBD0 | 1.0077   |
| 33312 | P0C214 | Q96LR2 | 0.81251  |
| 33313 | P0C214 | Q2TAZ0 | 0.27384  |
| 33314 | P0C214 | P62633 | 0.67853  |
| 33315 | P0C214 | Q15750 | 0.52154  |
| 33316 | P0C214 | Q9UKT9 | 0.41654  |
| 33317 | P0C214 | P36508 | 0.084997 |
| 33318 | P0C214 | Q92558 | 0.34547  |
| 33319 | P0C214 | P43243 | 0.16507  |
| 33320 | P0C214 | Q7L945 | 0.29427  |
| 33321 | P0C214 | O60671 | 0.48918  |
| 33322 | P0C214 | P54687 | 0.026156 |
| 33323 | P0C214 | Q15532 | 0.96198  |
| 33324 | P0C214 | O14598 | 0.57136  |
| 33325 | P0C214 | Q07343 | 0.23506  |
| 33326 | P0C214 | Q7Z7F7 | 0.67358  |
| 33327 | P0C214 | Q6ZRC1 | 0.086276 |
| 33328 | P0C214 | Q04637 | 0.65365  |
| 33329 | P0C214 | O60832 | 0.68238  |
| 33330 | P0C214 | A6NHR8 | 0.086276 |
| 33331 | P0C214 | A6NEY8 | 0.093148 |
| 33332 | P0C214 | O43345 | 0.37211  |
| 33333 | P0C214 | P31943 | 0.48963  |
| 33334 | P0C214 | O60563 | 1.4294   |
| 33335 | P0C214 | Q9BYQ7 | 0.5539   |
| 33336 | P0C214 | Q9H4P4 | 0.34154  |
| 33337 | P0C214 | Q96A04 | 0.62777  |
| 33338 | P0C214 | Q9Y294 | 0.9473   |
| 33339 | P0C214 | P23497 | 0.83367  |
| 33340 | P0C214 | Q96LY2 | 0.46157  |
| 33341 | P0C214 | Q8IUR6 | 0.8769   |
| 33342 | P0C214 | O96000 | 0.48484  |
| 33343 | P0C214 | Q5TBE3 | 0.31838  |
| 33344 | P0C214 | O94992 | 1.2742   |
| 33345 | P0C214 | Q92843 | 0.52171  |
| 33346 | P0C214 | Q6IE81 | 0.95387  |
| 33347 | P0C214 | P26447 | 0.3001   |
| 33348 | P0C214 | Q9BX26 | 1.0938   |
| 33349 | P0C214 | Q99816 | 0.36203  |
| 33350 | P0C214 | O75665 | 0.69877  |
| 33351 | P0C214 | O15392 | 0.24338  |
| 33352 | P0C214 | Q9Y2R5 | 0.49263  |
| 33353 | P0C214 | Q32P41 | 0.46131  |
| 33354 | P0C214 | Q2M2Z5 | 0.50871  |
| 33355 | P0C214 | Q8IWD4 | 0.24937  |
| 33356 | P0C214 | Q5T8A7 | 0.68461  |
| 33357 | P0C214 | Q9Y6G5 | 0.2675   |
| 33358 | P0C214 | Q9NXV6 | 0.9208   |
| 33359 | P0C214 | O43747 | 0.63335  |
| 33360 | P0C214 | Q92499 | 0.41382  |
| 33361 | P0C214 | Q6IPR1 | 0.3532   |
| 33362 | P0C214 | P43356 | 0.85082  |
| 33363 | P0C214 | Q96NL0 | 0.065242 |
| 33364 | P0C214 | Q96E11 | 0.6058   |

|       |        |        |          |
|-------|--------|--------|----------|
| 33365 | P0C214 | O75920 | 0.9744   |
| 33366 | P0C214 | P05412 | 0.79058  |
| 33367 | P0C214 | P62304 | 0.80392  |
| 33368 | P0C214 | Q9H8M2 | 0.10184  |
| 33369 | P0C214 | Q9H1Y0 | 0.45363  |
| 33370 | P0C214 | Q8N9B5 | 0.68432  |
| 33371 | P0C214 | Q6P444 | 0.32651  |
| 33372 | P0C214 | Q8WU90 | 0.83217  |
| 33373 | P0C214 | Q9UMQ3 | 0.48029  |
| 33374 | P0C214 | Q9Y2G7 | 0.54106  |
| 33375 | P0C214 | Q07020 | 1.0005   |
| 33376 | P0C214 | Q8WY41 | 0.3771   |
| 33377 | P0C214 | Q8N5R6 | 0.4662   |
| 33378 | P0C214 | Q9H6D7 | 0.37012  |
| 33379 | P0C214 | P17041 | 0.21141  |
| 33380 | P0C214 | O95476 | 0.26252  |
| 33381 | P0C214 | Q8NB50 | 0.38935  |
| 33382 | P0C214 | O95073 | 1.0428   |
| 33383 | P0C214 | Q99456 | 0.58756  |
| 33384 | P0C214 | Q9UPY8 | 0.85326  |
| 33385 | P0C214 | Q96I25 | 0.30011  |
| 33386 | P0C214 | A8MX80 | 0.64099  |
| 33387 | P0C214 | Q14669 | 0.46506  |
| 33388 | P0C214 | Q9NYB0 | 0.69582  |
| 33389 | P0C214 | Q5JU67 | 0.040911 |
| 33390 | P0C214 | Q96HQ0 | 0.29646  |
| 33391 | P0C214 | Q9BY89 | 0.020693 |
| 33392 | P0C214 | Q8WVJ9 | 0.48352  |
| 33393 | P0C214 | Q5T5A4 | 0.31123  |
| 33394 | P0C214 | O00442 | 0.44231  |
| 33395 | P0C214 | Q96CG3 | 0.27276  |
| 33396 | P0C214 | Q96B23 | 0.81535  |
| 33397 | P0C214 | Q9H3R5 | 0.55279  |
| 33398 | P0C214 | Q86WV1 | 0.49754  |
| 33399 | P0C214 | Q9NV92 | 0.055995 |
| 33400 | P0C214 | Q96E09 | 0.3662   |
| 33401 | P0C214 | Q6NX45 | 0.30702  |
| 33402 | P0C214 | E9PQ53 | 0.63248  |
| 33403 | P0C214 | P49711 | 0.16868  |
| 33404 | P0C214 | Q86YA3 | 0.59896  |
| 33405 | P0C214 | Q6PF05 | 0.36663  |
| 33406 | P0C214 | Q9NQE9 | 0.49557  |
| 33407 | P0C214 | Q15323 | 0.51477  |
| 33408 | P0C214 | Q5MNV8 | 0.28354  |
| 33409 | P0C214 | Q14781 | 0.63654  |
| 33410 | P0C214 | Q9NV88 | 0.54729  |
| 33411 | P0C214 | Q9HD47 | 0.23677  |
| 33412 | P0C214 | Q8N7Z2 | 0.37738  |
| 33413 | P0C214 | K7EIQ3 | 0.79811  |
| 33414 | P0C214 | Q49A88 | 0.27024  |
| 33415 | P0C214 | Q8NFZ5 | 0.87411  |
| 33416 | P0C214 | Q01826 | 0.58294  |
| 33417 | P0C214 | Q7Z5K2 | 0.68035  |
| 33418 | P0C214 | Q13106 | 0.23468  |
| 33419 | P0C214 | P0C853 | 0.086276 |
| 33420 | P0C214 | Q9NUP7 | 0.87683  |
| 33421 | P0C214 | Q9BQ69 | 0.49304  |
| 33422 | P0C214 | Q02447 | 0.45465  |
| 33423 | P0C214 | Q709C8 | 0.57595  |
| 33424 | P0C214 | Q99766 | 0.51027  |
| 33425 | P0C214 | Q12857 | 0.27602  |
| 33426 | P0C214 | Q15297 | 0.59744  |
| 33427 | P0C214 | Q69383 | 0.39132  |
| 33428 | P0C214 | Q8N2G8 | 0.23317  |
| 33429 | P0C214 | Q9BX70 | 0.48486  |
| 33430 | P0C214 | Q9NZM5 | 0.44348  |
| 33431 | P0C214 | O75410 | 0.64976  |
| 33432 | P0C214 | Q96RU7 | 0.45509  |
| 33433 | P0C214 | P42677 | 0.98345  |
| 33434 | P0C214 | P12036 | 0.38243  |
| 33435 | P0C214 | P62945 | 0.97266  |
| 33436 | P0C214 | Q9HBL0 | 0.24053  |
| 33437 | P0C214 | Q9Y2J8 | 0.54022  |
| 33438 | P0C214 | Q8N8E1 | 0.20727  |
| 33439 | P0C214 | O75436 | 0.62502  |
| 33440 | P0C214 | O15160 | 0.12842  |

|       |        |        |           |
|-------|--------|--------|-----------|
| 33441 | P0C214 | Q9H2U1 | 0.32166   |
| 33442 | P0C214 | O60291 | 0.57788   |
| 33443 | P0C214 | Q9UFV3 | 0.033817  |
| 33444 | P0C214 | O95182 | 0.079041  |
| 33445 | P0C214 | Q9P000 | 0.24456   |
| 33446 | P0C214 | Q96IR3 | 0.54568   |
| 33447 | P0C214 | O75822 | 0.8284    |
| 33448 | P0C214 | Q9NVD3 | 0.045664  |
| 33449 | P0C214 | Q6NVV1 | 0.67347   |
| 33450 | P0C214 | Q9BXW9 | 0.68317   |
| 33451 | P0C214 | Q8IXR5 | 0.053772  |
| 33452 | P0C214 | O75474 | 0.87479   |
| 33453 | P0C214 | Q14738 | 0.67984   |
| 33454 | P0C214 | Q9NZI6 | 0.44388   |
| 33455 | P0C214 | Q5VIR6 | 0.74498   |
| 33456 | P0C214 | P06454 | 0.45843   |
| 33457 | P0C214 | Q8IX90 | 0.49546   |
| 33458 | P0C214 | P28749 | 1.2273    |
| 33459 | P0C214 | Q7Z7L8 | 0.96197   |
| 33460 | P0C214 | A6NEY3 | 0.49852   |
| 33461 | P0C214 | O95273 | 0.84805   |
| 33462 | P0C214 | P09012 | 0.37897   |
| 33463 | P0C214 | Q14683 | 0.37808   |
| 33464 | P0C214 | Q92831 | 0.74541   |
| 33465 | P0C214 | O75419 | 0.79388   |
| 33466 | P0C214 | Q8N8Z8 | 0.27596   |
| 33467 | P0C214 | Q9Y535 | 0.22129   |
| 33468 | P0C214 | P42025 | 0.39308   |
| 33469 | P0C214 | O95793 | 0.24773   |
| 33470 | P0C214 | A8MTB1 | 0.086276  |
| 33471 | P0C214 | Q53H82 | 0.18546   |
| 33472 | P0C214 | P17021 | 0.25339   |
| 33473 | P0C214 | Q8N9Y4 | 0.92562   |
| 33474 | P0C214 | Q5VT40 | 0.0082096 |
| 33475 | P0C214 | Q9P0M9 | 0.52504   |
| 33476 | P0C214 | Q6A162 | 0.44438   |
| 33477 | P0C214 | O75448 | 0.46602   |
| 33478 | P0C214 | Q719H9 | 0.6512    |
| 33479 | P0C214 | P18146 | 0.57844   |
| 33480 | P0C214 | Q8N3U4 | 0.56999   |
| 33481 | P0C214 | Q16534 | 0.19934   |
| 33482 | P0C214 | P46776 | 1.2375    |
| 33483 | P0C214 | P05198 | 0.80304   |
| 33484 | P0C214 | O43504 | 0.18781   |
| 33485 | P0C214 | O94973 | 0.42066   |
| 33486 | P0C214 | Q9NUU7 | 0.034031  |
| 33487 | P0C214 | Q96NT1 | 1.1026    |
| 33488 | P0C214 | Q8TEE9 | 1.0506    |
| 33489 | P0C214 | Q9P1Q0 | 0.28478   |
| 33490 | P0C214 | Q9HC44 | 1.2873    |
| 33491 | P0C214 | Q15631 | 0.62458   |
| 33492 | P0C214 | Q96JL9 | 0.30874   |
| 33493 | P0C214 | Q9H204 | 1.0798    |
| 33494 | P0C214 | P0C867 | 0.11824   |
| 33495 | P0C214 | P0C7X2 | 0.5413    |
| 33496 | P0C214 | K9M1U5 | 0.086276  |
| 33497 | P0C214 | Q8WTR7 | 0.56686   |
| 33498 | P0C214 | Q8N187 | 0.5916    |
| 33499 | P0C214 | Q9UL12 | 0.098104  |
| 33500 | P0C214 | Q6ZVN8 | 0.21759   |
| 33501 | P0C214 | Q8TEL6 | 0.41567   |
| 33502 | P0C214 | Q9H4A5 | 0.9562    |
| 33503 | P0C214 | Q8IXQ9 | 0.425     |
| 33504 | P0C214 | Q9NS25 | 0.51904   |
| 33505 | P0C214 | Q8IU81 | 0.26741   |
| 33506 | P0C214 | Q96IU4 | 0.40636   |
| 33507 | P0C214 | P07327 | 0.20793   |
| 33508 | P0C214 | Q9P2M7 | 0.38406   |
| 33509 | P0C214 | A6PW82 | 0.47991   |
| 33510 | P0C214 | P0CG00 | 0.1961    |
| 33511 | P0C214 | Q9H9E1 | 0.25458   |
| 33512 | P0C214 | O15164 | 0.29774   |
| 33513 | P0C214 | Q96G01 | 0.20196   |
| 33514 | P0C214 | P58340 | 0.30689   |
| 33515 | P0C214 | P15621 | 0.48541   |
| 33516 | P0C214 | Q99436 | 0.79871   |

|       |        |        |         |
|-------|--------|--------|---------|
| 33517 | P0C214 | Q13126 | 0.22518 |
| 33518 | P0C214 | Q8IWC1 | 0.50827 |
| 33519 | P0C214 | Q0D2J5 | 0.20334 |
| 33520 | P0C214 | P0CJ78 | 0.2154  |
| 33521 | P0C214 | Q13114 | 0.4559  |
| 33522 | P0C214 | O43447 | 0.71554 |
| 33523 | P0C214 | Q9GZM3 | 0.13654 |
| 33524 | P0C214 | O95602 | 0.58036 |
| 33525 | P0C214 | Q9Y6Q5 | 0.32439 |
| 33526 | P0C214 | Q02577 | 0.51259 |
| 33527 | P0C214 | Q66K41 | 0.84301 |
| 33528 | P0C214 | Q15773 | 0.73775 |
| 33529 | P0C214 | Q9ULN7 | 0.73395 |
| 33530 | P0C214 | Q8WVM7 | 0.64167 |
| 33531 | P0C214 | Q9NPI1 | 0.92568 |
| 33532 | P0C214 | Q2VPJ9 | 0.24937 |
| 33533 | P0C214 | Q9BVN2 | 0.45737 |
| 33534 | P0C214 | Q8NG31 | 0.6456  |
| 33535 | P0C214 | P24864 | 0.61261 |
| 33536 | P0C214 | Q5PRF9 | 0.59004 |
| 33537 | P0C214 | Q8N196 | 0.54042 |
| 33538 | P0C214 | P30279 | 0.69011 |
| 33539 | P0C214 | Q9UJX4 | 0.84553 |
| 33540 | P0C214 | Q9NZ63 | 0.35391 |
| 33541 | P0C214 | Q9BZA5 | 0.69161 |
| 33542 | P0C214 | P04156 | 0.43564 |
| 33543 | P0C214 | Q8IVC4 | 0.28452 |
| 33544 | P0C214 | P20962 | 0.26936 |
| 33545 | P0C214 | P10909 | 0.20397 |
| 33546 | P0C214 | Q8N3J5 | 0.33472 |
| 33547 | P0C214 | A0JNW5 | 0.39623 |
| 33548 | P0C214 | Q8N2N9 | 0.2654  |
| 33549 | P0C214 | Q6ZRP0 | 0.24937 |
| 33550 | P0C214 | P63172 | 0.7201  |
| 33551 | P0C214 | Q96MX3 | 0.28348 |
| 33552 | P0C214 | Q01831 | 0.54984 |
| 33553 | P0C214 | Q9H9Q2 | 0.17821 |
| 33554 | P0C214 | Q14584 | 0.28722 |
| 33555 | P0C214 | Q9H009 | 0.36249 |
| 33556 | P0C214 | P05120 | 0.96136 |
| 33557 | P0C214 | Q9UBQ0 | 0.48492 |
| 33558 | P0C214 | O75391 | 0.63212 |
| 33559 | P0C214 | Q96T23 | 0.62292 |
| 33560 | P0C214 | Q15629 | 0.32243 |
| 33561 | P0C214 | O75489 | 0.3365  |
| 33562 | P0C214 | Q5T7V8 | 1.5025  |
| 33563 | P0C214 | Q3SY52 | 0.21984 |
| 33564 | P0C214 | Q8WY54 | 0.89464 |
| 33565 | P0C214 | Q16822 | 0.25585 |
| 33566 | P0C214 | Q14576 | 0.34084 |
| 33567 | P0C214 | Q9NQX1 | 0.40468 |
| 33568 | P0C214 | Q9P013 | 0.45853 |
| 33569 | P0C214 | O94925 | 0.70937 |
| 33570 | P0C214 | P27797 | 0.4823  |
| 33571 | P0C214 | Q8TC84 | 0.35391 |
| 33572 | P0C214 | P07438 | 0.39612 |
| 33573 | P0C214 | Q15853 | 0.54331 |
| 33574 | P0C214 | Q5VZ66 | 0.35824 |
| 33575 | P0C214 | A6NK75 | 0.34824 |
| 33576 | P0C214 | Q96CB8 | 0.43122 |
| 33577 | P0C214 | P0DMB1 | 0.26625 |
| 33578 | P0C214 | Q86U86 | 0.8966  |
| 33579 | P0C214 | Q9C0D7 | 0.42931 |
| 33580 | P0C214 | O15504 | 0.59018 |
| 33581 | P0C214 | Q3KQU3 | 0.61269 |
| 33582 | P0C214 | Q8IYA8 | 0.24937 |
| 33583 | P0C214 | Q6ZN06 | 0.45138 |
| 33584 | P0C214 | Q9H1I8 | 0.36007 |
| 33585 | P0C214 | Q13439 | 0.90077 |
| 33586 | P0C214 | Q99574 | 0.88947 |
| 33587 | P0C214 | Q6P1L5 | 1.0139  |
| 33588 | P0C214 | Q9NQ48 | 0.19586 |
| 33589 | P0C214 | Q6UB98 | 0.35391 |
| 33590 | P0C214 | O94952 | 0.42549 |
| 33591 | P0C214 | Q9H7E2 | 0.34443 |
| 33592 | P0C214 | P31949 | 0.32709 |

|       |        |        |          |
|-------|--------|--------|----------|
| 33593 | P0C214 | Q9Y312 | 0.091507 |
| 33594 | P0C214 | Q03060 | 0.52776  |
| 33595 | P0C214 | Q7Z401 | 0.22663  |
| 33596 | P0C214 | Q8IWE2 | 0.49223  |
| 33597 | P0C214 | Q7Z460 | 0.34361  |
| 33598 | P0C214 | Q9BVC6 | 0.19331  |
| 33599 | P0C214 | Q9GZR2 | 0.21122  |
| 33600 | P0C214 | P57071 | 0.14964  |
| 33601 | P0C214 | Q6ZRV3 | 0.086276 |
| 33602 | P0C214 | Q15759 | 0.33133  |
| 33603 | P0C214 | Q96H79 | 0.6144   |
| 33604 | P0C214 | Q9NPC3 | 0.16311  |
| 33605 | P0C214 | O60885 | 0.66225  |
| 33606 | P0C214 | Q8N7B6 | 0.59464  |
| 33607 | P0C214 | Q8IVN3 | 0.71798  |
| 33608 | P0C214 | Q6IQ21 | 0.40859  |
| 33609 | P0C214 | Q9UM82 | 0.80665  |
| 33610 | P0C214 | Q9P031 | 1.0428   |
| 33611 | P0C214 | Q8N0T1 | 0.53577  |
| 33612 | P0C214 | P34949 | 0.14413  |
| 33613 | P0C214 | Q9BUH6 | 0.19108  |
| 33614 | P0C214 | Q9UFN0 | 0.74795  |
| 33615 | P0C214 | Q6ZSN1 | 0.13871  |
| 33616 | P0C214 | Q96JB3 | 0.073138 |
| 33617 | P0C214 | O95751 | 0.50209  |
| 33618 | P0C214 | P40425 | 0.51924  |
| 33619 | P0C214 | Q9BV73 | 0.56883  |
| 33620 | P0C214 | P07902 | 0.533    |
| 33621 | P0C214 | Q96EY4 | 0.34484  |
| 33622 | P0C214 | Q6ZV50 | 0.242    |
| 33623 | P0C214 | Q16526 | 0.37801  |
| 33624 | P0C214 | Q6P589 | 0.50014  |
| 33625 | P0C214 | Q8IYJ2 | 0.36021  |
| 33626 | P0C214 | Q9UHB4 | 0.85387  |
| 33627 | P0C214 | Q9UKD2 | 0.14212  |
| 33628 | P0C214 | Q04725 | 0.79823  |
| 33629 | P0C214 | Q5T1J5 | 0.75974  |
| 33630 | P0C214 | Q14592 | 0.3116   |
| 33631 | P0C214 | Q156A1 | 0.086276 |
| 33632 | P0C214 | P68543 | 0.26781  |
| 33633 | P0C214 | Q13895 | 0.71328  |
| 33634 | P0C214 | O60238 | 0.28581  |
| 33635 | P0C214 | P17036 | 0.27059  |
| 33636 | P0C214 | O43309 | 0.25555  |
| 33637 | P0C214 | Q9BYG5 | 0.62295  |
| 33638 | P0C214 | P54840 | 0.585    |
| 33639 | P0C214 | P39748 | 0.28328  |
| 33640 | P0C214 | P09497 | 0.32443  |
| 33641 | P0C214 | Q6PF18 | 0.083408 |
| 33642 | P0C214 | P61981 | 0.58197  |
| 33643 | P0C214 | Q9BQC6 | 0.77055  |
| 33644 | P0C214 | Q9HCI5 | 0.6102   |
| 33645 | P0C214 | P17039 | 0.25925  |
| 33646 | P0C214 | Q02410 | 0.39461  |
| 33647 | P0C214 | Q2V2M9 | 0.2235   |
| 33648 | P0C214 | O60506 | 0.40216  |
| 33649 | P0C214 | A2IDD5 | 0.43955  |
| 33650 | P0C214 | Q3ZCQ8 | 0.082079 |
| 33651 | P0C214 | Q6J272 | 0.68201  |
| 33652 | P0C214 | Q1ZZU3 | 0.61065  |
| 33653 | P0C214 | Q9NX65 | 0.25006  |
| 33654 | P0C214 | Q86SY8 | 0.086276 |
| 33655 | P0C214 | Q6PEX3 | 0.19225  |
| 33656 | P0C214 | Q99440 | 0.32966  |
| 33657 | P0C214 | Q6ZTN6 | 0.096911 |
| 33658 | P0C214 | P0CG47 | 0.40707  |
| 33659 | P0C214 | P52815 | 0.64719  |
| 33660 | P0C214 | Q8N1I0 | 0.27762  |
| 33661 | P0C214 | Q8N4M7 | 0.69839  |
| 33662 | P0C214 | O95394 | 0.98672  |
| 33663 | P0C214 | Q9Y5J7 | 0.20935  |
| 33664 | P0C214 | P04053 | 0.20376  |
| 33665 | P0C214 | P60370 | 0.43378  |
| 33666 | P0C214 | Q107X0 | 0.37948  |
| 33667 | P0C214 | Q8TAF7 | 0.47199  |
| 33668 | P0C214 | P98182 | 0.24118  |



|       |        |        |          |
|-------|--------|--------|----------|
| 33669 | P0C214 | P0C7V5 | 0.36588  |
| 33670 | P0C214 | Q9UDV7 | 0.25203  |
| 33671 | P0C214 | P25787 | 0.73413  |
| 33672 | P0C214 | O14521 | 0.33686  |
| 33673 | P0C214 | Q9NYZ3 | 0.26785  |
| 33674 | P0C214 | P55327 | 0.33348  |
| 33675 | P0C214 | Q99814 | 0.33962  |
| 33676 | P0C214 | P09086 | 0.23659  |
| 33677 | P0C214 | Q86TG7 | 0.37712  |
| 33678 | P0C214 | P61583 | 0.49709  |
| 33679 | P0C214 | Q9BTL3 | 0.51487  |
| 33680 | P0C214 | P62241 | 0.85239  |
| 33681 | P0C214 | Q99471 | 0.88113  |
| 33682 | P0C214 | Q96IU2 | 0.87705  |
| 33683 | P0C214 | O76009 | 0.5102   |
| 33684 | P0C214 | P36873 | 0.82274  |
| 33685 | P0C214 | Q86XI8 | 0.53004  |
| 33686 | P0C214 | Q86XK2 | 0.81636  |
| 33687 | P0C214 | P46777 | 1.4465   |
| 33688 | P0C214 | P82932 | 0.47259  |
| 33689 | P0C214 | Q9NZZ3 | 0.92422  |
| 33690 | P0C214 | Q14154 | 0.4753   |
| 33691 | P0C214 | P60673 | 0.11573  |
| 33692 | P0C214 | P21980 | 0.28109  |
| 33693 | P0C214 | Q8TEA1 | 0.5372   |
| 33694 | P0C214 | Q6P387 | 0.35391  |
| 33695 | P0C214 | Q8NB42 | 0.49679  |
| 33696 | P0C214 | Q9NZQ3 | 0.656    |
| 33697 | P0C214 | Q460N3 | 0.30706  |
| 33698 | P0C214 | Q9UKK3 | 0.54991  |
| 33699 | P0C214 | Q01658 | 0.28533  |
| 33700 | P0C214 | Q6PJG2 | 0.67589  |
| 33701 | P0C214 | Q9BZK7 | 0.86112  |
| 33702 | P0C214 | Q9HCG8 | 0.15326  |
| 33703 | P0C214 | Q12765 | 0.21681  |
| 33704 | P0C214 | Q8NAP1 | 0.24937  |
| 33705 | P0C214 | Q9H900 | 0.51187  |
| 33706 | P0C214 | Q96H40 | 0.50851  |
| 33707 | P0C214 | Q15010 | 0.48251  |
| 33708 | P0C214 | A6NKF1 | 0.74013  |
| 33709 | P0C214 | Q96I99 | 0.41969  |
| 33710 | P0C214 | Q92830 | 0.71186  |
| 33711 | P0C214 | Q15006 | 0.36193  |
| 33712 | P0C214 | Q9H0U9 | 0.89424  |
| 33713 | P0C214 | Q13956 | 0.56758  |
| 33714 | P0C214 | Q96FJ2 | 0.77617  |
| 33715 | P0C214 | Q58FF8 | 0.99507  |
| 33716 | P0C214 | Q9GZR1 | 0.38815  |
| 33717 | P0C214 | O14893 | 0.78947  |
| 33718 | P0C214 | Q6ZRT6 | 0.24937  |
| 33719 | P0C214 | Q6NXP2 | 0.75769  |
| 33720 | P0C214 | Q9BSW2 | 0.71253  |
| 33721 | P0C214 | Q9H469 | 0.2627   |
| 33722 | P0C214 | Q52M93 | 0.22841  |
| 33723 | P0C214 | Q5FBB7 | 0.68952  |
| 33724 | P0C214 | O14734 | 0.35552  |
| 33725 | P0C214 | Q96GN5 | 0.86356  |
| 33726 | P0C214 | O14558 | 0.74433  |
| 33727 | P0C214 | Q9UP83 | 1.2351   |
| 33728 | P0C214 | Q8IXJ6 | 0.28155  |
| 33729 | P0C214 | Q53SZ7 | 0.24937  |
| 33730 | P0C214 | Q9BRD0 | 0.62937  |
| 33731 | P0C214 | P61582 | 0.79382  |
| 33732 | P0C214 | Q12796 | 1.43     |
| 33733 | P0C214 | Q15054 | 0.61668  |
| 33734 | P0C214 | A1A4G5 | 0.086276 |
| 33735 | P0C214 | Q13615 | 0.23774  |
| 33736 | P0C214 | Q9NQ31 | 0.62755  |
| 33737 | P0C214 | Q96ST3 | 0.68028  |
| 33738 | P0C214 | Q96LQ0 | 0.46952  |
| 33739 | P0C214 | A5PLN7 | 0.24937  |
| 33740 | P0C214 | P23526 | 0.3058   |
| 33741 | P0C214 | Q8NEG2 | 0.35192  |
| 33742 | P0C214 | Q8IYX7 | 0.57704  |
| 33743 | P0C214 | Q9UBL0 | 0.24413  |
| 33744 | P0C214 | Q96HB5 | 0.19033  |

|       |        |        |          |
|-------|--------|--------|----------|
| 33745 | P0C214 | Q75L30 | 0.086276 |
| 33746 | P0C214 | O60925 | 0.037262 |
| 33747 | P0C214 | P55884 | 0.41809  |
| 33748 | P0C214 | Q96N06 | 0.30206  |
| 33749 | P0C214 | P0C860 | 0.30774  |
| 33750 | P0C214 | Q13416 | 0.45245  |
| 33751 | P0C214 | P09629 | 0.79789  |
| 33752 | P0C214 | Q96NU7 | 0.1987   |
| 33753 | P0C214 | Q8N8L2 | 0.22593  |
| 33754 | P0C214 | Q86Y13 | 0.37241  |
| 33755 | P0C214 | A6NNF4 | 0.38021  |
| 33756 | P0C214 | P10599 | 0.56097  |
| 33757 | P0C214 | Q9H9Y2 | 0.20342  |
| 33758 | P0C214 | Q9HB58 | 0.248    |
| 33759 | P0C214 | P02792 | 0.19676  |
| 33760 | P0C214 | Q9BTV5 | 0.31057  |
| 33761 | P0C214 | P60006 | 0.31033  |
| 33762 | P0C214 | Q8N0Y7 | 1.128    |
| 33763 | P0C214 | Q5DJT8 | 0.19717  |
| 33764 | P0C214 | Q96IT6 | 0.086276 |
| 33765 | P0C214 | Q59GR2 | 0.086281 |
| 33766 | P0C214 | A6NG73 | 0.22305  |
| 33767 | P0C214 | Q8N4S0 | 0.24937  |
| 33768 | P0C214 | O75396 | 0.14369  |
| 33769 | P0C214 | Q9Y2Y0 | 0.95835  |
| 33770 | P0C214 | Q8IYA6 | 0.50029  |
| 33771 | P0C214 | Q6NUR6 | 0.57378  |
| 33772 | P0C214 | Q96SL8 | 0.2298   |
| 33773 | P0C214 | Q8WW33 | 0.46486  |
| 33774 | P0C214 | Q8IUI4 | 0.20131  |
| 33775 | P0C214 | Q9NUP1 | 0.72531  |
| 33776 | P0C214 | Q9Y5B0 | 0.56063  |
| 33777 | P0C214 | P24534 | 0.75105  |
| 33778 | P0C214 | Q9Y6M1 | 0.49792  |
| 33779 | P0C214 | P0CG12 | 0.99949  |
| 33780 | P0C214 | Q9BTD1 | 0.21386  |
| 33781 | P0C214 | P11161 | 0.42026  |
| 33782 | P0C214 | Q9NVR2 | 0.92769  |
| 33783 | P0C214 | O00399 | 0.15703  |
| 33784 | P0C214 | Q3ZLR7 | 0.82922  |
| 33785 | P0C214 | Q2NKK9 | 0.24937  |
| 33786 | P0C214 | Q13888 | 0.49337  |
| 33787 | P0C214 | Q9BQ95 | 1.1318   |
| 33788 | P0C214 | Q6ZRF7 | 0.19865  |
| 33789 | P0C214 | Q9HAY2 | 0.071673 |
| 33790 | P0C214 | Q96Q06 | 0.6385   |
| 33791 | P0C214 | O75150 | 0.54618  |
| 33792 | P0C214 | Q86X02 | 0.30705  |
| 33793 | P0C214 | Q9UJW8 | 0.22359  |
| 33794 | P0C214 | P83731 | 0.97266  |
| 33795 | P0C214 | Q96JM3 | 0.32627  |
| 33796 | P0C214 | Q9Y6X3 | 0.87223  |
| 33797 | P0C214 | Q6ULP2 | 0.63782  |
| 33798 | P0C214 | P13647 | 0.90353  |
| 33799 | P0C214 | Q15038 | 1.2759   |
| 33800 | P0C214 | Q8IW50 | 0.24937  |
| 33801 | P0C214 | A8MWP6 | 0.086276 |
| 33802 | P0C214 | Q8WZA9 | 0.24937  |
| 33803 | P0C214 | Q9NQS7 | 0.81933  |
| 33804 | P0C214 | A6NKN8 | 0.76896  |
| 33805 | P0C214 | Q8IXM2 | 0.17121  |
| 33806 | P0C214 | P42765 | 0.25069  |
| 33807 | P0C214 | Q9Y6D6 | 0.61115  |
| 33808 | P0C214 | Q9NZH4 | 0.87884  |
| 33809 | P0C214 | Q9GZX7 | 0.26206  |
| 33810 | P0C214 | P09661 | 0.60157  |
| 33811 | P0C214 | Q5VWP3 | 0.58342  |
| 33812 | P0C214 | Q9UKZ1 | 0.45005  |
| 33813 | P0C214 | Q969M7 | 0.58719  |
| 33814 | P0C214 | Q5SNT6 | 0.66607  |
| 33815 | P0C214 | Q9UHJ9 | 0.37191  |
| 33816 | P0C214 | Q96L21 | 0.68931  |
| 33817 | P0C214 | O75251 | 0.33116  |
| 33818 | P0C214 | P45973 | 0.7101   |
| 33819 | P0C214 | Q9UMR2 | 0.082082 |
| 33820 | P0C214 | Q9UQ35 | 0.37275  |

|       |        |        |          |
|-------|--------|--------|----------|
| 33821 | P0C214 | Q8IYN6 | 0.3662   |
| 33822 | P0C214 | Q6ZMV8 | 0.48577  |
| 33823 | P0C214 | Q5VTQ0 | 0.17233  |
| 33824 | P0C214 | Q5T619 | 0.30008  |
| 33825 | P0C214 | Q92973 | 1.2214   |
| 33826 | P0C214 | Q96AE4 | 0.49652  |
| 33827 | P0C214 | H0Y354 | 0.38992  |
| 33828 | P0C214 | Q9NR09 | 0.36631  |
| 33829 | P0C214 | Q8IYE1 | 0.053963 |
| 33830 | P0C214 | O15265 | 1.0319   |
| 33831 | P0C214 | Q96PQ6 | 0.48657  |
| 33832 | P0C214 | Q7Z406 | 0.69922  |
| 33833 | P0C214 | Q9UGK8 | 0.6542   |
| 33834 | P0C214 | O43290 | 1.0049   |
| 33835 | P0C214 | Q7RTT3 | 0.17331  |
| 33836 | P0C214 | Q16143 | 0.3927   |
| 33837 | P0C214 | Q9ULE0 | 0.091717 |
| 33838 | P0C214 | Q6ZR93 | 0.086276 |
| 33839 | P0C214 | A1L4L8 | 0.4125   |
| 33840 | P0C214 | Q9UI09 | 0.070267 |
| 33841 | P0C214 | A1L443 | 0.72088  |
| 33842 | P0C214 | Q9UFF9 | 0.66635  |
| 33843 | P0C214 | P35268 | 0.88053  |
| 33844 | P0C214 | O15305 | 0.26421  |
| 33845 | P0C214 | Q12888 | 0.67522  |
| 33846 | P0C214 | Q9NSD4 | 0.31357  |
| 33847 | P0C214 | Q9BYJ9 | 0.55796  |
| 33848 | P0C214 | Q9UJX3 | 0.75025  |
| 33849 | P0C214 | Q86VY4 | 0.50415  |
| 33850 | P0C214 | P23511 | 1.0642   |
| 33851 | P0C214 | Q9UKY7 | 0.56233  |
| 33852 | P0C214 | Q7Z6Z7 | 0.43158  |
| 33853 | P0C214 | Q8N4J0 | 0.50031  |
| 33854 | P0C214 | O75113 | 0.85053  |
| 33855 | P0C214 | Q68CZ6 | 0.37012  |
| 33856 | P0C214 | Q7RTS7 | 0.26387  |
| 33857 | P0C214 | Q8NHY6 | 0.39171  |
| 33858 | P0C214 | Q8IW36 | 0.46372  |
| 33859 | P0C214 | Q9NP97 | 0.39635  |
| 33860 | P0C214 | P45984 | 0.35917  |
| 33861 | P0C214 | Q9HCK5 | 0.77466  |
| 33862 | P0C214 | Q8N7J2 | 0.89019  |
| 33863 | P0C214 | Q14684 | 0.4878   |
| 33864 | P0C214 | Q8WWY6 | 0.39389  |
| 33865 | P0C214 | Q8TF01 | 0.53941  |
| 33866 | P0C214 | Q5JSJ4 | 1.0959   |
| 33867 | P0C214 | Q9ULW3 | 0.83291  |
| 33868 | P0C214 | Q3LIE5 | 0.52579  |
| 33869 | P0C214 | Q8N8K9 | 0.06839  |
| 33870 | P0C214 | Q14585 | 0.2817   |
| 33871 | P0C214 | Q5T160 | 1.0723   |
| 33872 | P0C214 | P80294 | 0.66345  |
| 33873 | P0C214 | Q96DZ1 | 0.27989  |
| 33874 | P0C214 | Q6Y7W6 | 0.48252  |
| 33875 | P0C214 | Q8NC51 | 0.72853  |
| 33876 | P0C214 | A6NIH7 | 0.27271  |
| 33877 | P0C214 | Q5BJF6 | 0.3726   |
| 33878 | P0C214 | P78549 | 0.27508  |
| 33879 | P0C214 | Q8N7B1 | 0.49032  |
| 33880 | P0C214 | Q03111 | 1.2388   |
| 33881 | P0C214 | Q99717 | 0.4478   |
| 33882 | P0C214 | P47897 | 0.4361   |
| 33883 | P0C214 | O60664 | 0.39961  |
| 33884 | P0C214 | P49593 | 0.28002  |
| 33885 | P0C214 | Q86WV6 | 0.074115 |
| 33886 | P0C214 | Q4KN68 | 0.24284  |
| 33887 | P0C214 | O14978 | 0.37861  |
| 33888 | P0C214 | P56182 | 0.75131  |
| 33889 | P0C214 | O75956 | 0.11463  |
| 33890 | P0C214 | P15036 | 0.6608   |
| 33891 | P0C214 | P17987 | 0.26979  |
| 33892 | P0C214 | Q9BYR4 | 0.43378  |
| 33893 | P0C214 | P16415 | 0.35861  |
| 33894 | P0C214 | Q6ZQV5 | 0.3804   |
| 33895 | P0C214 | Q9HC62 | 0.39405  |
| 33896 | P0C214 | Q8TAB7 | 0.51977  |

|       |        |        |          |
|-------|--------|--------|----------|
| 33897 | POC214 | Q9UIE0 | 0.28997  |
| 33898 | POC214 | Q2M218 | 0.3048   |
| 33899 | POC214 | Q9UHB9 | 0.51262  |
| 33900 | POC214 | Q0D2K3 | 0.6528   |
| 33901 | POC214 | O95155 | 0.27231  |
| 33902 | POC214 | Q711Q0 | 0.086276 |
| 33903 | POC214 | Q5T1B1 | 0.866    |
| 33904 | POC214 | Q9UI56 | 0.086276 |
| 33905 | POC214 | Q969I3 | 0.52792  |
| 33906 | POC214 | Q8IXS2 | 0.047977 |
| 33907 | POC214 | Q9BW92 | 0.57851  |
| 33908 | POC214 | A6NK58 | 0.28219  |
| 33909 | POC214 | Q9NR48 | 0.26481  |
| 33910 | POC214 | Q8N0Z3 | 0.41835  |
| 33911 | POC214 | Q8N1G2 | 0.33067  |
| 33912 | POC214 | Q53FN2 | 0.37462  |
| 33913 | POC214 | Q8WWK9 | 0.22913  |
| 33914 | POC214 | O15144 | 0.1299   |
| 33915 | POC214 | Q9HCE5 | 0.18808  |
| 33916 | POC214 | P78560 | 0.52187  |
| 33917 | POC214 | A8MVJ9 | 0.30033  |
| 33918 | POC214 | Q96AJ1 | 1.0229   |
| 33919 | POC214 | Q9BW60 | 0.9999   |
| 33920 | POC214 | Q8N6Y0 | 0.5159   |
| 33921 | POC214 | Q5T1N1 | 0.68629  |
| 33922 | POC214 | P62424 | 1.203    |
| 33923 | POC214 | P29372 | 0.38038  |
| 33924 | POC214 | P52434 | 0.27719  |
| 33925 | POC214 | O43325 | 0.96582  |
| 33926 | POC214 | Q08945 | 1.1115   |
| 33927 | POC214 | P46013 | 0.14105  |
| 33928 | POC214 | Q969V6 | 1.4006   |
| 33929 | POC214 | Q8IXH7 | 1.1808   |
| 33930 | POC214 | Q6PI48 | 0.79471  |
| 33931 | POC214 | O14862 | 0.56155  |
| 33932 | POC214 | Q8N7K0 | 0.3804   |
| 33933 | POC214 | Q04864 | 1.2118   |
| 33934 | POC214 | Q9HCG1 | 0.38886  |
| 33935 | POC214 | P80723 | 0.1826   |
| 33936 | POC214 | Q8WXE9 | 0.48082  |
| 33937 | POC214 | P51861 | 0.10702  |
| 33938 | POC214 | Q08211 | 0.32001  |
| 33939 | POC214 | Q9NSP4 | 0.13336  |
| 33940 | POC214 | Q6PD74 | 0.19238  |
| 33941 | POC214 | Q9NZV7 | 0.57377  |
| 33942 | POC214 | O95905 | 0.75523  |
| 33943 | POC214 | P61966 | 0.26698  |
| 33944 | POC214 | Q9NS26 | 0.43141  |
| 33945 | POC214 | Q8IYN2 | 1.1271   |
| 33946 | POC214 | P04731 | 0.39612  |
| 33947 | POC214 | Q5TEC3 | 0.31024  |
| 33948 | POC214 | O60293 | 0.080137 |
| 33949 | POC214 | O14972 | 0.33957  |
| 33950 | POC214 | Q9BZF9 | 0.67138  |
| 33951 | POC214 | Q8IY63 | 0.47091  |
| 33952 | POC214 | Q8IYW4 | 0.15062  |
| 33953 | POC214 | P30419 | 0.34909  |
| 33954 | POC214 | P60866 | 0.88422  |
| 33955 | POC214 | A6NI87 | 0.50529  |
| 33956 | POC214 | P40763 | 0.32555  |
| 33957 | POC214 | P0CZ20 | 0.16767  |
| 33958 | POC214 | O00401 | 0.73048  |
| 33959 | POC214 | Q9H9D4 | 0.51321  |
| 33960 | POC214 | A8MUZ8 | 0.49972  |
| 33961 | POC214 | O60260 | 0.58967  |
| 33962 | POC214 | Q8WZ33 | 0.82382  |
| 33963 | POC214 | Q8WU39 | 0.24933  |
| 33964 | POC214 | Q9UQ84 | 0.21716  |
| 33965 | POC214 | Q8WVM0 | 0.57741  |
| 33966 | POC214 | Q9H2W6 | 0.29728  |
| 33967 | POC214 | O60504 | 0.62137  |
| 33968 | POC214 | Q0VGE8 | 0.25018  |
| 33969 | POC214 | Q96IP4 | 0.52367  |
| 33970 | POC214 | O96004 | 0.37455  |
| 33971 | POC214 | Q12972 | 0.80624  |
| 33972 | POC214 | Q8WYA6 | 0.67674  |

|       |        |        |          |
|-------|--------|--------|----------|
| 33973 | P0C214 | Q9H668 | 0.19446  |
| 33974 | P0C214 | C9JBD0 | 0.54414  |
| 33975 | P0C214 | Q6VN20 | 0.42327  |
| 33976 | P0C214 | Q9Y5A7 | 0.71298  |
| 33977 | P0C214 | Q96BT7 | 0.46992  |
| 33978 | P0C214 | Q9UIV8 | 0.72749  |
| 33979 | P0C214 | Q5TG92 | 0.1367   |
| 33980 | P0C214 | Q86SQ7 | 0.92082  |
| 33981 | P0C214 | O76083 | 0.25757  |
| 33982 | P0C214 | P13533 | 0.75898  |
| 33983 | P0C214 | Q9H5J8 | 0.90001  |
| 33984 | P0C214 | Q9BYC8 | 0.87415  |
| 33985 | P0C214 | Q8N6M0 | 0.26013  |
| 33986 | P0C214 | Q08ER8 | 0.36913  |
| 33987 | P0C214 | O00472 | 0.55977  |
| 33988 | P0C214 | O95218 | 0.51588  |
| 33989 | P0C214 | O95190 | 0.77645  |
| 33990 | P0C214 | Q7RTT6 | 0.22639  |
| 33991 | P0C214 | Q8N4Q1 | 0.041166 |
| 33992 | P0C214 | P62857 | 0.70631  |
| 33993 | P0C214 | Q9Y675 | 0.39389  |
| 33994 | P0C214 | Q9UHJ3 | 0.28639  |
| 33995 | P0C214 | Q9NWB6 | 0.39389  |
| 33996 | P0C214 | Q7RTU0 | 0.25688  |
| 33997 | P0C214 | P27540 | 0.35413  |
| 33998 | P0C214 | P49910 | 0.65862  |
| 33999 | P0C214 | Q8IYB7 | 0.076374 |
| 34000 | P0C214 | A2A368 | 0.019596 |
| 34001 | P0C214 | Q5VT06 | 0.50552  |
| 34002 | P0C214 | Q9UJA5 | 0.86333  |
| 34003 | P0C214 | P09496 | 0.33182  |
| 34004 | P0C214 | Q9BR84 | 0.49186  |
| 34005 | P0C214 | Q9GZN7 | 0.21691  |
| 34006 | P0C214 | Q86V15 | 0.37778  |
| 34007 | P0C214 | Q8WWM7 | 0.62701  |
| 34008 | P0C214 | O95997 | 0.90513  |
| 34009 | P0C214 | P52292 | 1.001    |
| 34010 | P0C214 | Q9H2K0 | 0.3468   |
| 34011 | P0C214 | Q8N0V3 | 0.56001  |
| 34012 | P0C214 | Q15274 | 0.097524 |
| 34013 | P0C214 | P12270 | 0.6247   |
| 34014 | P0C214 | O00743 | 0.85609  |
| 34015 | P0C214 | Q14602 | 0.27801  |
| 34016 | P0C214 | Q9NWZ5 | 0.12733  |
| 34017 | P0C214 | Q5MJ70 | 0.28575  |
| 34018 | P0C214 | Q9NRH1 | 0.24733  |
| 34019 | P0C214 | Q8TB69 | 0.44782  |
| 34020 | P0C214 | O60884 | 0.96549  |
| 34021 | P0C214 | Q9NVN8 | 0.46564  |
| 34022 | P0C214 | Q96GD0 | 0.13483  |
| 34023 | P0C214 | P50221 | 0.47943  |
| 34024 | P0C214 | Q6GYQ0 | 0.20884  |
| 34025 | P0C214 | Q8NA03 | 0.14126  |
| 34026 | P0C214 | P27694 | 0.4952   |
| 34027 | P0C214 | Q99543 | 0.58019  |
| 34028 | P0C214 | Q9NUW8 | 0.6285   |
| 34029 | P0C214 | Q8NDT2 | 0.93649  |
| 34030 | P0C214 | Q9NXR7 | 0.31845  |
| 34031 | P0C214 | Q9HA58 | 0.086276 |
| 34032 | P0C214 | Q9H0B3 | 0.30112  |
| 34033 | P0C214 | Q68DK2 | 0.66508  |
| 34034 | P0C214 | Q7L8J4 | 0.14927  |
| 34035 | P0C214 | O75971 | 0.84223  |
| 34036 | P0C214 | Q6KB66 | 0.23837  |
| 34037 | P0C214 | Q9UK73 | 0.73148  |
| 34038 | P0C214 | Q5D0E6 | 1.0107   |
| 34039 | P0C214 | A6NKD9 | 0.94604  |
| 34040 | P0C214 | O15069 | 0.20112  |
| 34041 | P0C214 | Q8WXF5 | 0.49301  |
| 34042 | P0C214 | P52758 | 0.53837  |
| 34043 | P0C214 | Q71F23 | 0.67257  |
| 34044 | P0C214 | Q96N03 | 0.2675   |
| 34045 | P0C214 | Q9NPJ3 | 0.062823 |
| 34046 | P0C214 | O95848 | 0.43378  |
| 34047 | P0C214 | Q9NWV4 | 0.61671  |
| 34048 | P0C214 | Q9H707 | 0.28531  |

|       |        |        |          |
|-------|--------|--------|----------|
| 34049 | P0C214 | Q92600 | 1.3113   |
| 34050 | P0C214 | Q9HD40 | 0.56404  |
| 34051 | P0C214 | Q6P1R3 | 0.59757  |
| 34052 | P0C214 | Q96N38 | 0.47128  |
| 34053 | P0C214 | Q9H8V8 | 0.086276 |
| 34054 | P0C214 | Q9HBT7 | 0.34442  |
| 34055 | P0C214 | Q68CP9 | 0.44846  |
| 34056 | P0C214 | Q8WWL7 | 0.8534   |
| 34057 | P0C214 | Q9HAW0 | 0.40164  |
| 34058 | P0C214 | Q9UPW6 | 0.58435  |
| 34059 | P0C214 | P08151 | 0.32768  |
| 34060 | P0C214 | Q9BTA9 | 0.88855  |
| 34061 | P0C214 | P16118 | 0.25574  |
| 34062 | P0C214 | Q92804 | 0.19205  |
| 34063 | P0C214 | Q96SY0 | 0.020266 |
| 34064 | P0C214 | A4D2B0 | 0.41379  |
| 34065 | P0C214 | Q96B49 | 0.30985  |
| 34066 | P0C214 | Q9UFB7 | 0.27102  |
| 34067 | P0C214 | Q5U5X0 | 0.60065  |
| 34068 | P0C214 | P07197 | 0.60517  |
| 34069 | P0C214 | Q6P1N0 | 0.14168  |
| 34070 | P0C214 | O15040 | 0.2675   |
| 34071 | P0C214 | Q9UKV3 | 0.70183  |
| 34072 | P0C214 | Q13435 | 0.73695  |
| 34073 | P0C214 | Q92614 | 0.055196 |
| 34074 | P0C214 | Q8IXS0 | 0.24937  |
| 34075 | P0C214 | Q9NYJ1 | 1.0119   |
| 34076 | P0C214 | O14727 | 0.29522  |
| 34077 | P0C214 | O94916 | 0.12024  |
| 34078 | P0C214 | P23508 | 0.32816  |
| 34079 | P0C214 | Q3B820 | 0.30618  |
| 34080 | P0C214 | Q9BRJ7 | 0.50589  |
| 34081 | P0C214 | Q712K3 | 0.82252  |
| 34082 | P0C214 | Q9HA90 | 0.24937  |
| 34083 | P0C214 | Q96H20 | 0.93314  |
| 34084 | P0C214 | Q86X55 | 0.76531  |
| 34085 | P0C214 | Q14974 | 1.0028   |
| 34086 | P0C214 | Q00839 | 0.34975  |
| 34087 | P0C214 | P50570 | 0.33082  |
| 34088 | P0C214 | P49458 | 0.69236  |
| 34089 | P0C214 | O00625 | 0.63383  |
| 34090 | P0C214 | Q7Z3Z0 | 0.58756  |
| 34091 | P0C214 | O75688 | 0.5004   |
| 34092 | P0C214 | Q9H0I3 | 0.39064  |
| 34093 | P0C214 | P54278 | 0.32562  |
| 34094 | P0C214 | A6NM28 | 0.21148  |
| 34095 | P0C214 | Q8NA57 | 0.22683  |
| 34096 | P0C214 | P48380 | 0.33881  |
| 34097 | P0C214 | Q96A56 | 0.99489  |
| 34098 | P0C214 | Q86V48 | 0.60038  |
| 34099 | P0C214 | Q5T1C6 | 0.67768  |
| 34100 | P0C214 | Q9UIC8 | 0.30552  |
| 34101 | P0C214 | Q16698 | 0.4198   |
| 34102 | P0C214 | Q9ULU4 | 0.41257  |
| 34103 | P0C214 | Q52LA3 | 0.21564  |
| 34104 | P0C214 | Q9H008 | 0.62309  |
| 34105 | P0C214 | Q96PV6 | 0.66871  |
| 34106 | P0C214 | Q5TKA1 | 0.32511  |
| 34107 | P0C214 | O95782 | 0.42098  |
| 34108 | P0C214 | Q93083 | 0.39612  |
| 34109 | P0C214 | Q9BV90 | 0.054611 |
| 34110 | P0C214 | P09234 | 0.50737  |
| 34111 | P0C214 | P35998 | 0.46218  |
| 34112 | P0C214 | P60900 | 0.54202  |
| 34113 | P0C214 | Q9HD34 | 0.72382  |
| 34114 | P0C214 | Q86UD1 | 0.16266  |
| 34115 | P0C214 | Q569K6 | 0.14592  |
| 34116 | P0C214 | A5D8V6 | 0.12906  |
| 34117 | P0C214 | Q53T94 | 0.35578  |
| 34118 | P0C214 | P78545 | 0.70536  |
| 34119 | P0C214 | P61313 | 1.2375   |
| 34120 | P0C214 | Q15181 | 0.5141   |
| 34121 | P0C214 | Q99684 | 0.30684  |
| 34122 | P0C214 | Q9Y623 | 0.89031  |
| 34123 | P0C214 | P62256 | 0.73939  |
| 34124 | P0C214 | P08708 | 0.63412  |

|       |        |        |          |
|-------|--------|--------|----------|
| 34125 | P0C214 | Q5T215 | 0.29512  |
| 34126 | P0C214 | Q6ZNR8 | 0.086276 |
| 34127 | P0C214 | A6NDD8 | 0.51029  |
| 34128 | P0C214 | Q6H8Q1 | 0.30057  |
| 34129 | P0C214 | P04424 | 0.019079 |
| 34130 | P0C214 | Q5H9L4 | 0.20645  |
| 34131 | P0C214 | Q9Y4L5 | 0.52003  |
| 34132 | P0C214 | Q05084 | 0.39934  |
| 34133 | P0C214 | Q9H3P2 | 1.0297   |
| 34134 | P0C214 | P50549 | 0.84925  |
| 34135 | P0C214 | Q8IY92 | 0.34028  |
| 34136 | P0C214 | Q9HCL3 | 0.49249  |
| 34137 | P0C214 | Q9ULH7 | 0.84471  |
| 34138 | P0C214 | Q08752 | 0.38976  |
| 34139 | P0C214 | O14770 | 0.2773   |
| 34140 | P0C214 | Q6NUN9 | 0.68141  |
| 34141 | P0C214 | Q9NWS1 | 0.87145  |
| 34142 | P0C214 | A6NNV3 | 0.28575  |
| 34143 | P0C214 | Q9P243 | 0.38293  |
| 34144 | P0C214 | Q9NVD7 | 0.24338  |
| 34145 | P0C214 | Q92988 | 0.35875  |
| 34146 | P0C214 | E9PI22 | 0.26625  |
| 34147 | P0C214 | Q86VX2 | 0.55172  |
| 34148 | P0C214 | O60645 | 0.27848  |
| 34149 | P0C214 | Q96LX7 | 0.13616  |
| 34150 | P0C214 | Q96MU7 | 0.6466   |
| 34151 | P0C214 | C9JC47 | 0.086276 |
| 34152 | P0C214 | Q9P015 | 0.36099  |
| 34153 | P0C214 | Q9H320 | 0.58589  |
| 34154 | P0C214 | P22392 | 0.36166  |
| 34155 | P0C214 | Q9Y5P8 | 0.61346  |
| 34156 | P0C214 | Q9P0U1 | 0.026927 |
| 34157 | P0C214 | Q9P2D3 | 0.84633  |
| 34158 | P0C214 | Q9BSN8 | 0.46879  |
| 34159 | P0C214 | P52594 | 0.39215  |
| 34160 | P0C214 | P41162 | 0.20115  |
| 34161 | P0C214 | Q92945 | 0.87102  |
| 34162 | P0C214 | Q96LS8 | 0.039873 |
| 34163 | P0C214 | Q8NAJ2 | 0.028151 |
| 34164 | P0C214 | Q8NEP4 | 0.24937  |
| 34165 | P0C214 | Q14011 | 0.27112  |
| 34166 | P0C214 | Q9NNW5 | 0.3899   |
| 34167 | P0C214 | Q9H2T7 | 0.45878  |
| 34168 | P0C214 | Q6NUN7 | 0.086276 |
| 34169 | P0C214 | Q13342 | 0.52812  |
| 34170 | P0C214 | Q9UN37 | 0.45057  |
| 34171 | P0C214 | Q13278 | 0.29289  |
| 34172 | P0C214 | Q92575 | 0.95616  |
| 34173 | P0C214 | Q9Y3A3 | 0.40733  |
| 34174 | P0C214 | Q9Y3D0 | 0.92139  |
| 34175 | P0C214 | Q8N865 | 0.17987  |
| 34176 | P0C214 | Q92547 | 0.40837  |
| 34177 | P0C214 | P60174 | 0.50715  |
| 34178 | P0C214 | Q7Z2X7 | 0.23416  |
| 34179 | P0C214 | Q9P287 | 0.59087  |
| 34180 | P0C214 | Q9BZE4 | 0.36797  |
| 34181 | P0C214 | Q95613 | 0.66877  |
| 34182 | P0C214 | O75558 | 0.39219  |
| 34183 | P0C214 | Q8IUF8 | 0.42793  |
| 34184 | P0C214 | Q8WV24 | 0.57007  |
| 34185 | P0C214 | Q9BUY5 | 0.41895  |
| 34186 | P0C214 | Q86UA6 | 0.59002  |
| 34187 | P0C214 | O00566 | 0.809    |
| 34188 | P0C214 | P56555 | 0.47457  |
| 34189 | P0C214 | Q8TC71 | 0.37432  |
| 34190 | P0C214 | Q9HB65 | 0.54131  |
| 34191 | P0C214 | Q8N3J9 | 0.29462  |
| 34192 | P0C214 | B5ME19 | 0.31422  |
| 34193 | P0C214 | Q9HBQ8 | 0.49852  |
| 34194 | P0C214 | Q92636 | 0.24223  |
| 34195 | P0C214 | P21673 | 0.42011  |
| 34196 | P0C214 | Q9BQA5 | 0.7492   |
| 34197 | P0C214 | P20042 | 0.60232  |
| 34198 | P0C214 | Q9HCJ0 | 0.37187  |
| 34199 | P0C214 | P0C5J1 | 0.21724  |
| 34200 | P0C214 | P08651 | 0.18251  |

|       |        |        |          |
|-------|--------|--------|----------|
| 34201 | P0C214 | Q5CZC0 | 0.9131   |
| 34202 | P0C214 | Q96M83 | 0.047906 |
| 34203 | P0C214 | A6NFI3 | 0.2567   |
| 34204 | P0C214 | Q9BZG8 | 0.19561  |
| 34205 | P0C214 | Q15776 | 0.43247  |
| 34206 | P0C214 | P02545 | 0.64272  |
| 34207 | P0C214 | Q13601 | 0.40118  |
| 34208 | P0C214 | P22415 | 0.42816  |
| 34209 | P0C214 | Q9BYN7 | 0.17348  |
| 34210 | P0C214 | A6NEM1 | 0.48478  |
| 34211 | P0C214 | Q8IYF1 | 0.24806  |
| 34212 | P0C214 | Q9H9C1 | 0.4529   |
| 34213 | P0C214 | Q9UM63 | 0.18441  |
| 34214 | P0C214 | P0CG20 | 0.076114 |
| 34215 | P0C214 | P19387 | 0.64095  |
| 34216 | P0C214 | Q96EK6 | 0.36964  |
| 34217 | P0C214 | Q8N782 | 0.43239  |
| 34218 | P0C214 | Q9NP87 | 0.16513  |
| 34219 | P0C214 | Q9UQ80 | 1.0425   |
| 34220 | P0C214 | Q16612 | 0.22832  |
| 34221 | P0C214 | A2RTY3 | 0.30773  |
| 34222 | P0C214 | P05387 | 0.86977  |
| 34223 | P0C214 | P50991 | 0.40261  |
| 34224 | P0C214 | Q86WG3 | 0.25974  |
| 34225 | P0C214 | O14646 | 0.63859  |
| 34226 | P0C214 | P25398 | 0.90921  |
| 34227 | P0C214 | Q9P1Z2 | 0.71131  |
| 34228 | P0C214 | Q6IN84 | 0.23997  |
| 34229 | P0C214 | Q99996 | 0.54452  |
| 34230 | P0C214 | Q9H3F6 | 0.52568  |
| 34231 | P0C214 | Q96AN2 | 0.095412 |
| 34232 | P0C214 | Q96QD9 | 0.65643  |
| 34233 | P0C214 | Q96H12 | 0.60135  |
| 34234 | P0C214 | Q9NRC8 | 1.1932   |
| 34235 | P0C214 | Q13148 | 0.53171  |
| 34236 | P0C214 | Q9UBB5 | 1.0442   |
| 34237 | P0C214 | Q96LB3 | 0.52515  |
| 34238 | P0C214 | Q8NFB4 | 0.97357  |
| 34239 | P0C214 | P22626 | 0.58362  |
| 34240 | P0C214 | P10828 | 0.35304  |
| 34241 | P0C214 | Q7RTV3 | 0.33161  |
| 34242 | P0C214 | Q8NHQ8 | 0.74321  |
| 34243 | P0C214 | Q5H9J7 | 0.85403  |
| 34244 | P0C214 | P23193 | 1.1525   |
| 34245 | P0C214 | Q9HAI6 | 0.47018  |
| 34246 | P0C214 | Q8N1W2 | 0.21165  |
| 34247 | P0C214 | Q70EL1 | 0.38153  |
| 34248 | P0C214 | P35520 | 0.25143  |
| 34249 | P0C214 | Q15596 | 0.62658  |
| 34250 | P0C214 | Q6ZVL8 | 0.086276 |
| 34251 | P0C214 | Q9H7R0 | 0.43344  |
| 34252 | P0C214 | Q13503 | 0.62916  |
| 34253 | P0C214 | Q8WYH8 | 0.45393  |
| 34254 | P0C214 | Q15797 | 0.21031  |
| 34255 | P0C214 | Q5T7W7 | 0.24937  |
| 34256 | P0C214 | O43708 | 0.67107  |
| 34257 | P0C214 | Q5T280 | 1.1308   |
| 34258 | P0C214 | O00233 | 0.74614  |
| 34259 | P0C214 | Q86XK3 | 0.61065  |
| 34260 | P0C214 | O75791 | 1.0687   |
| 34261 | P0C214 | Q9UM11 | 1.1668   |
| 34262 | P0C214 | Q8IXY8 | 0.69592  |
| 34263 | P0C214 | P19388 | 0.57589  |
| 34264 | P0C214 | Q96FQ6 | 0.41816  |
| 34265 | P0C214 | Q9BVL2 | 0.63318  |
| 34266 | P0C214 | Q8IYL3 | 0.53881  |
| 34267 | P0C214 | Q9NY74 | 0.64942  |
| 34268 | P0C214 | P52736 | 0.54639  |
| 34269 | P0C214 | Q15527 | 0.49974  |
| 34270 | P0C214 | B3KS81 | 0.24287  |
| 34271 | P0C214 | A8K554 | 0.04885  |
| 34272 | P0C214 | Q9H0W8 | 0.48666  |
| 34273 | P0C214 | Q8N4C6 | 0.38694  |
| 34274 | P0C214 | Q6ZRM9 | 0.36484  |
| 34275 | P0C214 | Q6L8G5 | 0.086276 |
| 34276 | P0C214 | Q8N3V7 | 0.47869  |



|       |        |        |          |
|-------|--------|--------|----------|
| 34277 | P0C214 | Q9UBQ5 | 1.1694   |
| 34278 | P0C214 | Q8NDZ0 | 0.13374  |
| 34279 | P0C214 | Q9H2C0 | 0.55562  |
| 34280 | P0C214 | P67870 | 0.31549  |
| 34281 | P0C214 | O95644 | 0.81365  |
| 34282 | P0C214 | Q96P15 | 0.78972  |
| 34283 | P0C214 | Q13409 | 0.39224  |
| 34284 | P0C214 | Q8NFB8 | 0.35117  |
| 34285 | P0C214 | Q15543 | 0.91711  |
| 34286 | P0C214 | Q9Y651 | 0.24449  |
| 34287 | P0C214 | Q8TD35 | 0.24937  |
| 34288 | P0C214 | Q8IVE0 | 0.075175 |
| 34289 | P0C214 | Q8WUI4 | 0.31744  |
| 34290 | P0C214 | Q5C9Z4 | 0.68187  |
| 34291 | P0C214 | Q6QNY1 | 0.66538  |
| 34292 | P0C214 | P07738 | 1.1711   |
| 34293 | P0C214 | Q8TA86 | 0.59053  |
| 34294 | P0C214 | P40692 | 0.056254 |
| 34295 | P0C214 | Q9BQY9 | 0.50131  |
| 34296 | P0C214 | P51668 | 0.81042  |
| 34297 | P0C214 | P16220 | 0.83463  |
| 34298 | P0C214 | C9JLW8 | 0.60203  |
| 34299 | P0C214 | Q5TD94 | 0.2222   |
| 34300 | P0C214 | O43251 | 0.39696  |
| 34301 | P0C214 | Q13360 | 0.2224   |
| 34302 | P0C214 | Q96NJ6 | 0.25699  |
| 34303 | P0C214 | Q13569 | 0.42904  |
| 34304 | P0C214 | O60869 | 0.5756   |
| 34305 | P0C214 | Q5VWI1 | 1.0442   |
| 34306 | P0C214 | Q8NFW8 | 0.11525  |
| 34307 | P0C214 | P36551 | 0.21379  |
| 34308 | P0C214 | P14373 | 0.28034  |
| 34309 | P0C214 | O14757 | 0.45674  |
| 34310 | P0C214 | O14512 | 0.50347  |
| 34311 | P0C214 | Q92783 | 0.53195  |
| 34312 | P0C214 | Q9H4D5 | 0.61202  |
| 34313 | P0C214 | Q8IV33 | 0.052525 |
| 34314 | P0C214 | Q8TDP1 | 0.50411  |
| 34315 | P0C214 | O95948 | 0.26001  |
| 34316 | P0C214 | Q13228 | 1.1452   |
| 34317 | P0C214 | Q9NSD9 | 0.86786  |
| 34318 | P0C214 | Q9P2K3 | 1.1097   |
| 34319 | P0C214 | Q9UJG1 | 0.74174  |
| 34320 | P0C214 | Q99627 | 0.38964  |
| 34321 | P0C214 | O94763 | 0.82016  |
| 34322 | P0C214 | P35232 | 0.47377  |
| 34323 | P0C214 | Q8WTS6 | 0.45773  |
| 34324 | P0C214 | Q3KQV3 | 0.30056  |
| 34325 | P0C214 | Q9H5V9 | 0.21939  |
| 34326 | P0C214 | Q14146 | 0.16769  |
| 34327 | P0C214 | P23610 | 0.086276 |
| 34328 | P0C214 | Q9NRN7 | 0.62429  |
| 34329 | P0C214 | Q9BYZ2 | 1.0002   |
| 34330 | P0C214 | Q8NB25 | 0.22041  |
| 34331 | P0C214 | Q9Y605 | 1.32     |
| 34332 | P0C214 | H0Y7S4 | 0.17424  |
| 34333 | P0C214 | Q9NQ92 | 0.87307  |
| 34334 | P0C214 | O43633 | 0.30631  |
| 34335 | P0C214 | O00463 | 0.29081  |
| 34336 | P0C214 | P26640 | 0.27612  |
| 34337 | P0C214 | Q9BZE1 | 0.31815  |
| 34338 | P0C214 | P17017 | 0.26437  |
| 34339 | P0C214 | Q8NHZ7 | 0.42069  |
| 34340 | P0C214 | Q96LI5 | 0.70614  |
| 34341 | P0C214 | A6NHX0 | 0.63857  |
| 34342 | P0C214 | Q9NQR1 | 0.58974  |
| 34343 | P0C214 | Q92466 | 0.59924  |
| 34344 | P0C214 | O95391 | 0.12811  |
| 34345 | P0C214 | Q9P219 | 0.24212  |
| 34346 | P0C214 | O75674 | 0.32935  |
| 34347 | P0C214 | Q8N0S6 | 0.10605  |
| 34348 | P0C214 | P55210 | 0.24819  |
| 34349 | P0C214 | Q08AG7 | 0.55226  |
| 34350 | P0C214 | Q96FN9 | 0.47161  |
| 34351 | P0C214 | O14628 | 0.44727  |
| 34352 | P0C214 | Q9Y3B7 | 1.183    |

|       |        |        |          |
|-------|--------|--------|----------|
| 34353 | P0C214 | Q9BQE4 | 0.3807   |
| 34354 | P0C214 | Q9H9H4 | 0.65641  |
| 34355 | P0C214 | P53805 | 0.53845  |
| 34356 | P0C214 | Q9Y3Y4 | 0.53429  |
| 34357 | P0C214 | Q9BV97 | 0.31995  |
| 34358 | P0C214 | Q9H974 | 1.3718   |
| 34359 | P0C214 | P46108 | 0.50771  |
| 34360 | P0C214 | Q9NXR1 | 0.2821   |
| 34361 | P0C214 | Q5F1R6 | 0.14055  |
| 34362 | P0C214 | Q5VWM5 | 0.81925  |
| 34363 | P0C214 | P05114 | 0.3519   |
| 34364 | P0C214 | Q15046 | 0.85313  |
| 34365 | P0C214 | Q9BWK5 | 0.41881  |
| 34366 | P0C214 | Q8NFD5 | 0.82876  |
| 34367 | P0C214 | P17812 | 0.3312   |
| 34368 | P0C214 | Q9H0C8 | 0.6432   |
| 34369 | P0C214 | P69891 | 0.3641   |
| 34370 | P0C214 | Q5HYI7 | 0.95494  |
| 34371 | P0C214 | P30047 | 0.76042  |
| 34372 | P0C214 | Q3ZCT1 | 0.25449  |
| 34373 | P0C214 | Q9Y3R5 | 0.55431  |
| 34374 | P0C214 | Q6L8Q7 | 0.35958  |
| 34375 | P0C214 | Q9NQP4 | 1.1153   |
| 34376 | P0C214 | Q9H3K6 | 0.38958  |
| 34377 | P0C214 | O95271 | 0.4807   |
| 34378 | P0C214 | Q15293 | 0.30055  |
| 34379 | P0C214 | Q92800 | 0.45887  |
| 34380 | P0C214 | Q9NVV2 | 0.086276 |
| 34381 | P0C214 | Q96C74 | 0.23585  |
| 34382 | P0C214 | Q86Y01 | 0.68057  |
| 34383 | P0C214 | Q5JQS6 | 0.11688  |
| 34384 | P0C214 | Q5T3J3 | 0.98876  |
| 34385 | P0C214 | Q8NFB5 | 0.28575  |
| 34386 | P0C214 | Q8NA42 | 0.32046  |
| 34387 | P0C214 | Q7LG56 | 0.37894  |
| 34388 | P0C214 | A6NKF2 | 0.57314  |
| 34389 | P0C214 | P22830 | 0.082794 |
| 34390 | P0C214 | Q86YF9 | 0.15972  |
| 34391 | P0C214 | Q15562 | 0.75596  |
| 34392 | P0C214 | Q6FI81 | 0.36676  |
| 34393 | P0C214 | Q9Y606 | 1.2348   |
| 34394 | P0C214 | Q96G28 | 0.26852  |
| 34395 | P0C214 | F2Z3M2 | 0.086276 |
| 34396 | P0C214 | Q8TBY8 | 0.66758  |
| 34397 | P0C214 | Q99638 | 0.53935  |
| 34398 | P0C214 | Q96H86 | 0.29809  |
| 34399 | P0C214 | Q9BZL1 | 0.39346  |
| 34400 | P0C214 | Q9BYS1 | 0.12997  |
| 34401 | P0C214 | Q8N9H9 | 0.086276 |
| 34402 | P0C214 | Q8N159 | 0.2515   |
| 34403 | P0C214 | Q6P047 | 0.26803  |
| 34404 | P0C214 | Q60315 | 0.2406   |
| 34405 | P0C214 | P0C7X3 | 0.32642  |
| 34406 | P0C214 | Q5SWL8 | 0.27649  |
| 34407 | P0C214 | Q9BWX1 | 0.22491  |
| 34408 | P0C214 | Q5VWQ0 | 1.026    |
| 34409 | P0C214 | P48454 | 0.16926  |
| 34410 | P0C214 | Q9Y4X5 | 0.56995  |
| 34411 | P0C214 | P61927 | 0.88621  |
| 34412 | P0C214 | Q96G25 | 0.98533  |
| 34413 | P0C214 | Q8N895 | 0.418    |
| 34414 | P0C214 | Q8N3F8 | 0.30669  |
| 34415 | P0C214 | P31946 | 0.61588  |
| 34416 | P0C214 | Q02040 | 0.23584  |
| 34417 | P0C214 | Q9Y3D2 | 0.21251  |
| 34418 | P0C214 | P62750 | 1.0892   |
| 34419 | P0C214 | Q9Y383 | 0.6544   |
| 34420 | P0C214 | Q63HQ0 | 0.092351 |
| 34421 | P0C214 | Q7Z3Y9 | 0.58756  |
| 34422 | P0C214 | O95521 | 0.30244  |
| 34423 | P0C214 | Q14568 | 0.99507  |
| 34424 | P0C214 | Q96IY1 | 0.95151  |
| 34425 | P0C214 | A6NGY1 | 0.73438  |
| 34426 | P0C214 | Q9ULK4 | 1.1657   |
| 34427 | P0C214 | O15370 | 0.35159  |
| 34428 | P0C214 | P51531 | 0.60383  |

|       |        |        |          |
|-------|--------|--------|----------|
| 34429 | POC214 | Q8N5U0 | 0.086276 |
| 34430 | POC214 | P62979 | 0.49628  |
| 34431 | POC214 | Q9NR28 | 0.88425  |
| 34432 | POC214 | A4D0V7 | 0.53574  |
| 34433 | POC214 | Q07157 | 0.61324  |
| 34434 | POC214 | Q14CZ0 | 1.3453   |
| 34435 | POC214 | Q32M78 | 0.44702  |
| 34436 | POC214 | O94818 | 0.73154  |
| 34437 | POC214 | Q5T5F5 | 0.086276 |
| 34438 | POC214 | P52630 | 0.801    |
| 34439 | POC214 | P82673 | 0.060152 |
| 34440 | POC214 | P59942 | 0.326    |
| 34441 | POC214 | O95561 | 0.70381  |
| 34442 | POC214 | Q5VTR2 | 0.76361  |
| 34443 | POC214 | Q16762 | 0.28129  |
| 34444 | POC214 | Q96AQ7 | 0.65368  |
| 34445 | POC214 | O94805 | 0.66732  |
| 34446 | POC214 | Q9UBW8 | 0.38964  |
| 34447 | POC214 | Q96S07 | 0.086276 |
| 34448 | POC214 | Q9UI72 | 0.086276 |
| 34449 | POC214 | Q8N5N4 | 0.23926  |
| 34450 | POC214 | Q7Z6K1 | 0.59482  |
| 34451 | POC214 | Q96K17 | 0.53349  |
| 34452 | POC214 | Q19AV6 | 1.129    |
| 34453 | POC214 | Q6ZPA2 | 0.086276 |
| 34454 | POC214 | P42768 | 0.3659   |
| 34455 | POC214 | Q5VXH4 | 0.402    |
| 34456 | POC214 | Q5VWX1 | 0.67813  |
| 34457 | POC214 | Q8NB12 | 0.21654  |
| 34458 | POC214 | Q3BBV1 | 1.2293   |
| 34459 | POC214 | P30260 | 1.1311   |
| 34460 | POC214 | Q8TDB6 | 0.42826  |
| 34461 | POC214 | Q6PI77 | 0.38622  |
| 34462 | POC214 | Q9BRQ6 | 1.0674   |
| 34463 | POC214 | P05386 | 1.371    |
| 34464 | POC214 | P49454 | 0.52394  |
| 34465 | POC214 | Q14061 | 0.51617  |
| 34466 | POC214 | Q06265 | 0.26578  |
| 34467 | POC214 | P48163 | 0.23099  |
| 34468 | POC214 | Q8NDY4 | 0.086276 |
| 34469 | POC214 | Q6ZN32 | 0.18216  |
| 34470 | POC214 | Q96JE7 | 0.95654  |
| 34471 | POC214 | P21912 | 0.47081  |
| 34472 | POC214 | Q8IUD2 | 0.64885  |
| 34473 | POC214 | Q9ULG3 | 0.086276 |
| 34474 | POC214 | Q5VZK9 | 0.30279  |
| 34475 | POC214 | P09132 | 0.52578  |
| 34476 | POC214 | P0CJ79 | 0.31307  |
| 34477 | POC214 | Q9UNP9 | 0.41667  |
| 34478 | POC214 | Q96NG8 | 0.30833  |
| 34479 | POC214 | Q6ZQN3 | 0.5165   |
| 34480 | POC214 | Q5JRC9 | 0.26194  |
| 34481 | POC214 | Q01546 | 0.48019  |
| 34482 | POC214 | P21399 | 0.47054  |
| 34483 | POC214 | Q14657 | 1.2574   |
| 34484 | POC214 | Q14106 | 0.35581  |
| 34485 | POC214 | P53680 | 0.15238  |
| 34486 | POC214 | Q9UPN7 | 0.94164  |
| 34487 | POC214 | Q9Y678 | 0.5134   |
| 34488 | POC214 | P08107 | 0.7759   |
| 34489 | POC214 | P54845 | 0.15357  |
| 34490 | POC214 | Q04837 | 0.46138  |
| 34491 | POC214 | Q9Y3A5 | 0.59568  |
| 34492 | POC214 | Q96JC9 | 0.95714  |
| 34493 | POC214 | Q15326 | 1.139    |
| 34494 | POC214 | Q5EBM0 | 0.64097  |
| 34495 | POC214 | Q9UQR1 | 0.69685  |
| 34496 | POC214 | Q6P3V2 | 0.21705  |
| 34497 | POC214 | A6NN90 | 0.041555 |
| 34498 | POC214 | P62851 | 1.0316   |
| 34499 | POC214 | Q8IYW5 | 0.25447  |
| 34500 | POC214 | Q8IX15 | 0.39856  |
| 34501 | POC214 | Q8TCE6 | 0.96481  |
| 34502 | POC214 | Q6ZSB9 | 0.25987  |
| 34503 | POC214 | Q9Y2W1 | 0.83275  |
| 34504 | POC214 | Q8TAF5 | 0.086276 |

|       |        |        |          |
|-------|--------|--------|----------|
| 34505 | P0C214 | Q13123 | 0.52798  |
| 34506 | P0C214 | Q96RE7 | 0.97825  |
| 34507 | P0C214 | Q5D1E8 | 0.44924  |
| 34508 | P0C214 | Q3MIV0 | 0.086276 |
| 34509 | P0C214 | Q92748 | 1.116    |
| 34510 | P0C214 | Q96EB1 | 1.0872   |
| 34511 | P0C214 | O15499 | 0.080357 |
| 34512 | P0C214 | Q8NDA8 | 0.291    |
| 34513 | P0C214 | Q969R5 | 0.094082 |
| 34514 | P0C214 | P10515 | 0.55021  |
| 34515 | P0C214 | Q86U42 | 0.74503  |
| 34516 | P0C214 | Q9UBK9 | 0.91012  |
| 34517 | P0C214 | Q99733 | 0.79371  |
| 34518 | P0C214 | Q9NVX0 | 0.982    |
| 34519 | P0C214 | Q9P270 | 0.36609  |
| 34520 | P0C214 | P63261 | 0.10604  |
| 34521 | P0C214 | Q6AZW8 | 0.28423  |
| 34522 | P0C214 | P61970 | 0.41599  |
| 34523 | P0C214 | P0C852 | 0.086276 |
| 34524 | P0C214 | Q9UL03 | 0.65124  |
| 34525 | P0C214 | Q8IUB9 | 0.086276 |
| 34526 | P0C214 | Q96EZ8 | 0.66561  |
| 34527 | P0C214 | Q9H902 | 0.074155 |
| 34528 | P0C214 | P19013 | 0.48019  |
| 34529 | P0C214 | P50452 | 0.96136  |
| 34530 | P0C214 | Q8TCJ0 | 1.0171   |
| 34531 | P0C214 | Q14590 | 0.27328  |
| 34532 | P0C214 | Q9H5F2 | 0.31831  |
| 34533 | P0C214 | Q5SRE5 | 0.59971  |
| 34534 | P0C214 | Q1ED39 | 0.73154  |
| 34535 | P0C214 | P40222 | 0.50478  |
| 34536 | P0C214 | Q9NVV4 | 0.66801  |
| 34537 | P0C214 | Q6P582 | 0.63949  |
| 34538 | P0C214 | Q9NWZ8 | 0.79329  |
| 34539 | P0C214 | P06730 | 0.6776   |
| 34540 | P0C214 | O43255 | 0.47682  |
| 34541 | P0C214 | P19338 | 0.51964  |
| 34542 | P0C214 | Q5ST30 | 0.29762  |
| 34543 | P0C214 | P0CE67 | 0.086276 |
| 34544 | P0C214 | Q9NT62 | 0.51256  |
| 34545 | P0C214 | Q9NZL3 | 0.60856  |
| 34546 | P0C214 | P18754 | 1.0027   |
| 34547 | P0C214 | P14672 | 0.57271  |
| 34548 | P0C214 | Q8N660 | 1.2293   |
| 34549 | P0C214 | Q96JJ3 | 0.21071  |
| 34550 | P0C214 | Q96Q83 | 0.61861  |
| 34551 | P0C214 | O60308 | 0.56639  |
| 34552 | P0C214 | P20073 | 0.52658  |
| 34553 | P0C214 | Q9Y5Y2 | 0.17775  |
| 34554 | P0C214 | Q9UJ78 | 0.2378   |
| 34555 | P0C214 | Q96JB2 | 0.71187  |
| 34556 | P0C214 | Q9NTI5 | 0.73965  |
| 34557 | P0C214 | Q6X4T0 | 0.23053  |
| 34558 | P0C214 | Q86XF7 | 0.59266  |
| 34559 | P0C214 | Q9UNE7 | 0.40852  |
| 34560 | P0C214 | Q9BYQ6 | 0.43378  |
| 34561 | P0C214 | Q9NQ87 | 0.37412  |
| 34562 | P0C214 | Q9BYG3 | 0.27723  |
| 34563 | P0C214 | A1L170 | 0.086276 |
| 34564 | P0C214 | O43236 | 0.33347  |
| 34565 | P0C214 | P98171 | 0.33185  |
| 34566 | P0C214 | Q9Y618 | 1.0048   |
| 34567 | P0C214 | Q8IUC3 | 0.52687  |
| 34568 | P0C214 | Q96CA5 | 0.28393  |
| 34569 | P0C214 | O15524 | 0.23763  |
| 34570 | P0C214 | Q15185 | 0.65159  |
| 34571 | P0C214 | Q13838 | 0.18558  |
| 34572 | P0C214 | Q8NFF5 | 0.35668  |
| 34573 | P0C214 | Q6P9B6 | 0.2675   |
| 34574 | P0C214 | Q7L1V2 | 0.85823  |
| 34575 | P0C214 | P62508 | 0.33715  |
| 34576 | P0C214 | Q8IZT6 | 0.27936  |
| 34577 | P0C214 | Q9NRG4 | 0.74098  |
| 34578 | P0C214 | Q5TI25 | 1.2293   |
| 34579 | P0C214 | Q9P032 | 0.49352  |
| 34580 | P0C214 | Q9Y448 | 0.70423  |

|       |        |        |          |
|-------|--------|--------|----------|
| 34581 | P0C214 | Q8IZ73 | 0.22666  |
| 34582 | P0C214 | O76064 | 0.29751  |
| 34583 | P0C214 | A8MYZ0 | 0.29668  |
| 34584 | P0C214 | P30304 | 0.66014  |
| 34585 | P0C214 | Q96FZ2 | 0.98722  |
| 34586 | P0C214 | Q96EK4 | 1.2067   |
| 34587 | P0C214 | Q96EG3 | 0.21487  |
| 34588 | P0C214 | A6NN06 | 0.086276 |
| 34589 | P0C214 | P33552 | 0.52759  |
| 34590 | P0C214 | Q8WUH2 | 0.58328  |
| 34591 | P0C214 | Q9H963 | 0.43256  |
| 34592 | P0C214 | Q9UBI1 | 0.2675   |
| 34593 | P0C214 | P50995 | 0.7626   |
| 34594 | P0C214 | Q5SNV9 | 0.24382  |
| 34595 | P0C214 | Q92782 | 0.55057  |
| 34596 | P0C214 | Q96BY7 | 0.24463  |
| 34597 | P0C214 | Q9NPD8 | 0.80175  |
| 34598 | P0C214 | Q01664 | 0.45251  |
| 34599 | P0C214 | P56282 | 0.3173   |
| 34600 | P0C214 | Q8N3R3 | 0.23672  |
| 34601 | P0C214 | Q96Q35 | 0.42134  |
| 34602 | P0C214 | Q13561 | 0.70344  |
| 34603 | P0C214 | Q99704 | 0.16228  |
| 34604 | P0C214 | Q9H7N4 | 0.76033  |
| 34605 | P0C214 | Q5TB80 | 0.74228  |
| 34606 | P0C214 | Q9UPN9 | 0.47305  |
| 34607 | P0C214 | P27986 | 0.47638  |
| 34608 | P0C214 | Q15365 | 0.91306  |
| 34609 | P0C214 | Q6ZS49 | 0.086276 |
| 34610 | P0C214 | Q53HM4 | 0.37861  |
| 34611 | P0C214 | Q6PD62 | 0.56023  |
| 34612 | P0C214 | Q8TB03 | 0.29443  |
| 34613 | P0C214 | O43765 | 0.58409  |
| 34614 | P0C214 | Q8WYQ3 | 0.37228  |
| 34615 | P0C214 | Q8N7R1 | 0.56659  |
| 34616 | P0C214 | O75177 | 0.68232  |
| 34617 | P0C214 | Q8IWL8 | 0.59004  |
| 34618 | P0C214 | O95373 | 0.91195  |
| 34619 | P0C214 | Q14498 | 0.77553  |
| 34620 | P0C214 | Q5T871 | 0.086276 |
| 34621 | P0C214 | Q9NY87 | 0.45586  |
| 34622 | P0C214 | A8MXZ3 | 0.086276 |
| 34623 | P0C214 | P46782 | 0.71074  |
| 34624 | P0C214 | Q9UI66 | 0.086276 |
| 34625 | P0C214 | P43490 | 0.20422  |
| 34626 | P0C214 | O75175 | 1.5103   |
| 34627 | P0C214 | Q8WV07 | 0.44053  |
| 34628 | P0C214 | Q9UJY1 | 0.44566  |
| 34629 | P0C214 | Q9NP66 | 0.91644  |
| 34630 | P0C214 | Q9BS31 | 0.1962   |
| 34631 | P0C214 | Q5EBL2 | 0.24669  |
| 34632 | P0C214 | Q8WYQ5 | 0.7018   |
| 34633 | P0C214 | Q9C0E2 | 0.77357  |
| 34634 | P0C214 | O43790 | 0.53378  |
| 34635 | P0C214 | Q17RY6 | 0.56722  |
| 34636 | P0C214 | Q96PE7 | 0.22382  |
| 34637 | P0C214 | Q86WR7 | 0.33967  |
| 34638 | P0C214 | Q569G3 | 0.24937  |
| 34639 | P0C214 | Q96CB9 | 0.82406  |
| 34640 | P0C214 | A8MUL3 | 0.086276 |
| 34641 | P0C214 | P59282 | 0.36817  |
| 34642 | P0C214 | Q8IYF3 | 0.36978  |
| 34643 | P0C214 | Q9BRP4 | 0.39882  |
| 34644 | P0C214 | Q6NSH3 | 0.55315  |
| 34645 | P0C214 | P39687 | 1.4878   |
| 34646 | P0C214 | Q92530 | 0.79407  |
| 34647 | P0C214 | Q6L8H4 | 0.086276 |
| 34648 | P0C214 | P26678 | 0.19666  |
| 34649 | P0C214 | Q9UL33 | 0.41975  |
| 34650 | P0C214 | Q8IZ63 | 0.086276 |
| 34651 | P0C214 | Q9ULC4 | 0.38118  |
| 34652 | P0C214 | Q8IYI6 | 0.436    |
| 34653 | P0C214 | Q8NE65 | 0.42468  |
| 34654 | P0C214 | Q5CZA5 | 0.36913  |
| 34655 | P0C214 | P61081 | 0.043552 |
| 34656 | P0C214 | O95163 | 0.61101  |

|       |        |        |          |
|-------|--------|--------|----------|
| 34657 | P0C214 | Q9GZY8 | 0.20718  |
| 34658 | P0C214 | Q96QF0 | 0.53902  |
| 34659 | P0C214 | P15822 | 0.76081  |
| 34660 | P0C214 | Q96HA7 | 0.71339  |
| 34661 | P0C214 | Q96LX8 | 0.28195  |
| 34662 | P0C214 | P07320 | 0.68261  |
| 34663 | P0C214 | Q9NTK5 | 0.75098  |
| 34664 | P0C214 | Q6A163 | 0.5102   |
| 34665 | P0C214 | P46020 | 0.28008  |
| 34666 | P0C214 | Q3LI59 | 0.086276 |
| 34667 | P0C214 | Q5VVM6 | 0.14036  |
| 34668 | P0C214 | Q9NYF0 | 0.19829  |
| 34669 | P0C214 | Q5JRK9 | 0.80497  |
| 34670 | P0C214 | Q9UJT9 | 0.34612  |
| 34671 | P0C214 | P78346 | 0.71492  |
| 34672 | P0C214 | P56537 | 1.155    |
| 34673 | P0C214 | Q7L190 | 0.73259  |
| 34674 | P0C214 | Q9UBC9 | 0.38624  |
| 34675 | P0C214 | O60284 | 0.030112 |
| 34676 | P0C214 | Q8NG50 | 0.20723  |
| 34677 | P0C214 | Q9H3K2 | 0.035737 |
| 34678 | P0C214 | Q9NQ33 | 0.44481  |
| 34679 | P0C214 | Q9C0D2 | 0.50735  |
| 34680 | P0C214 | Q8WV37 | 0.48694  |
| 34681 | P0C214 | Q8N9G6 | 0.66203  |
| 34682 | P0C214 | Q13287 | 0.54139  |
| 34683 | P0C214 | Q8N1K5 | 0.17664  |
| 34684 | P0C214 | Q15699 | 0.28048  |
| 34685 | P0C214 | Q9UN36 | 0.57869  |
| 34686 | P0C214 | Q96GS4 | 0.77019  |
| 34687 | P0C214 | P52746 | 0.13336  |
| 34688 | P0C214 | Q96CM3 | 0.57601  |
| 34689 | P0C214 | Q9H0M5 | 0.27328  |
| 34690 | P0C214 | O15042 | 0.32876  |
| 34691 | P0C214 | O00757 | 0.29035  |
| 34692 | P0C214 | Q5HYK3 | 0.22257  |
| 34693 | P0C214 | Q9H6Z4 | 1.0268   |
| 34694 | P0C214 | P14859 | 1.0484   |
| 34695 | P0C214 | Q9NSJ1 | 0.33466  |
| 34696 | P0C214 | Q7L5Y9 | 0.25486  |
| 34697 | P0C214 | Q7Z3B4 | 0.79585  |
| 34698 | P0C214 | Q9UK12 | 0.29235  |
| 34699 | P0C214 | Q9Y6E7 | 0.53395  |
| 34700 | P0C214 | Q9H492 | 0.19282  |
| 34701 | P0C214 | Q9Y2T3 | 0.21315  |
| 34702 | P0C214 | Q96LR5 | 0.82252  |
| 34703 | P0C214 | Q9ULV3 | 0.23177  |
| 34704 | P0C214 | P13807 | 0.63099  |
| 34705 | P0C214 | P31939 | 0.46332  |
| 34706 | P0C214 | Q96ES7 | 0.085513 |
| 34707 | P0C214 | Q9H693 | 0.72474  |
| 34708 | P0C214 | Q9NYG5 | 0.80367  |
| 34709 | P0C214 | Q96M29 | 0.41792  |
| 34710 | P0C214 | Q5JSZ5 | 0.63719  |
| 34711 | P0C214 | Q8WW01 | 0.24525  |
| 34712 | P0C214 | Q96E14 | 0.45974  |
| 34713 | P0C214 | Q5JTC6 | 0.69549  |
| 34714 | P0C214 | Q96N20 | 0.2932   |
| 34715 | P0C214 | A6NKU9 | 0.28575  |
| 34716 | P0C214 | H3BNL8 | 1.014    |
| 34717 | P0C214 | Q5TID7 | 0.3716   |
| 34718 | P0C214 | Q9Y3Y2 | 0.85151  |
| 34719 | P0C214 | P82933 | 0.64427  |
| 34720 | P0C214 | Q9UMX1 | 0.6684   |
| 34721 | P0C214 | Q16531 | 0.58143  |
| 34722 | P0C214 | Q9H7T9 | 0.55989  |
| 34723 | P0C214 | Q9Y692 | 0.67311  |
| 34724 | P0C214 | P15559 | 0.40127  |
| 34725 | P0C214 | Q8ND83 | 0.81906  |
| 34726 | P0C214 | O14920 | 0.45388  |
| 34727 | P0C214 | Q15008 | 0.20541  |
| 34728 | P0C214 | O15304 | 0.94115  |
| 34729 | P0C214 | Q9BXS5 | 0.72815  |
| 34730 | P0C214 | P23297 | 0.47678  |
| 34731 | P0C214 | O00161 | 0.73139  |
| 34732 | P0C214 | P56279 | 0.62665  |

|       |        |        |          |
|-------|--------|--------|----------|
| 34733 | P0C214 | Q8WXB4 | 0.3338   |
| 34734 | P0C214 | Q99583 | 0.24468  |
| 34735 | P0C214 | Q9ULR5 | 0.41189  |
| 34736 | P0C214 | A6NK89 | 0.5294   |
| 34737 | P0C214 | Q9UBC1 | 0.43978  |
| 34738 | P0C214 | Q6P1W5 | 0.27899  |
| 34739 | P0C214 | Q86X95 | 1.0371   |
| 34740 | P0C214 | Q9Y253 | 0.21032  |
| 34741 | P0C214 | P18124 | 0.78028  |
| 34742 | P0C214 | Q5VWM1 | 0.36894  |
| 34743 | P0C214 | Q14209 | 0.87576  |
| 34744 | P0C214 | Q93062 | 0.83774  |
| 34745 | P0C214 | Q9H3M9 | 0.35519  |
| 34746 | P0C214 | Q9UHD9 | 0.77198  |
| 34747 | P0C214 | Q9Y2P7 | 0.3005   |
| 34748 | P0C214 | Q9ULD9 | 1.0498   |
| 34749 | P0C214 | Q6ZVQ6 | 1.0379   |
| 34750 | P0C214 | P86478 | 0.086276 |
| 34751 | P0C214 | P59047 | 0.42985  |
| 34752 | P0C214 | O75368 | 0.16541  |
| 34753 | P0C214 | Q9NQT4 | 0.66135  |
| 34754 | P0C214 | P04406 | 0.66395  |
| 34755 | P0C214 | Q75323 | 0.6159   |
| 34756 | P0C214 | Q14CS0 | 0.50612  |
| 34757 | P0C214 | Q3LI68 | 0.78534  |
| 34758 | P0C214 | Q92837 | 0.77586  |
| 34759 | P0C214 | Q01860 | 0.6334   |
| 34760 | P0C214 | Q96BZ8 | 0.24937  |
| 34761 | P0C214 | Q9Y2L8 | 0.52865  |
| 34762 | P0C214 | O60216 | 0.62671  |
| 34763 | P0C214 | Q2M3X9 | 0.3048   |
| 34764 | P0C214 | P26371 | 0.086276 |
| 34765 | P0C214 | Q86WQ0 | 0.46466  |
| 34766 | P0C214 | P56181 | 0.40343  |
| 34767 | P0C214 | Q6UVJ0 | 0.63845  |
| 34768 | P0C214 | Q86UW9 | 0.89507  |
| 34769 | P0C214 | Q86U38 | 0.23018  |
| 34770 | P0C214 | Q8WVV9 | 0.15201  |
| 34771 | P0C214 | Q6ZQT7 | 0.086276 |
| 34772 | P0C214 | P82650 | 0.19627  |
| 34773 | P0C214 | P57076 | 0.23809  |
| 34774 | P0C214 | Q9NY33 | 0.21123  |
| 34775 | P0C214 | Q6ZTY8 | 0.042339 |
| 34776 | P0C214 | O95178 | 0.28096  |
| 34777 | P0C214 | Q6NV74 | 0.24937  |
| 34778 | P0C214 | Q96GM5 | 0.6875   |
| 34779 | P0C214 | O15155 | 0.036955 |
| 34780 | P0C214 | P49247 | 0.70324  |
| 34781 | P0C214 | Q8NCU4 | 0.19057  |
| 34782 | P0C214 | Q9NP77 | 0.22305  |
| 34783 | P0C214 | Q9UMX0 | 0.71248  |
| 34784 | P0C214 | Q6PGQ7 | 1.198    |
| 34785 | P0C214 | Q9BSH4 | 0.7665   |
| 34786 | P0C214 | Q66K89 | 0.76818  |
| 34787 | P0C214 | Q96NI8 | 0.41788  |
| 34788 | P0C214 | Q86VP6 | 0.72005  |
| 34789 | P0C214 | A8MV24 | 0.33628  |
| 34790 | P0C214 | O14713 | 0.35606  |
| 34791 | P0C214 | Q9UBD5 | 0.46169  |
| 34792 | P0C214 | Q5TGS1 | 0.37222  |
| 34793 | P0C214 | Q8IYD8 | 0.27057  |
| 34794 | P0C214 | P01106 | 0.37804  |
| 34795 | P0C214 | Q96RY5 | 0.77018  |
| 34796 | P0C214 | Q92785 | 0.54905  |
| 34797 | P0C214 | A1A4V9 | 0.17641  |
| 34798 | P0C214 | Q3C1V8 | 0.52302  |
| 34799 | P0C214 | O43660 | 0.25592  |
| 34800 | P0C214 | Q9UM13 | 0.73291  |
| 34801 | P0C214 | Q05639 | 0.72864  |
| 34802 | P0C214 | O15027 | 0.61328  |
| 34803 | P0C214 | O95402 | 0.98938  |
| 34804 | P0C214 | O75400 | 0.83371  |
| 34805 | P0C214 | P11586 | 0.13354  |
| 34806 | P0C214 | Q8N9W8 | 0.907    |
| 34807 | P0C214 | Q8TC90 | 0.43024  |
| 34808 | P0C214 | Q9NW81 | 0.019055 |

|       |        |        |          |
|-------|--------|--------|----------|
| 34809 | P0C214 | Q5T6M2 | 0.57802  |
| 34810 | P0C214 | O43361 | 0.25678  |
| 34811 | P0C214 | Q6L8G8 | 0.086276 |
| 34812 | P0C214 | Q96F86 | 0.78074  |
| 34813 | P0C214 | P00558 | 0.17616  |
| 34814 | P0C214 | O60675 | 0.30336  |
| 34815 | P0C214 | Q9HB71 | 0.51263  |
| 34816 | P0C214 | Q9BZD4 | 0.76692  |
| 34817 | P0C214 | P14316 | 0.94613  |
| 34818 | P0C214 | Q8N888 | 0.70115  |
| 34819 | P0C214 | Q9BQ89 | 0.85578  |
| 34820 | P0C214 | Q86WJ1 | 0.37942  |
| 34821 | P0C214 | Q99551 | 0.73714  |
| 34822 | P0C214 | Q9UL18 | 1.0786   |
| 34823 | P0C214 | O76014 | 0.5102   |
| 34824 | P0C214 | Q8NEM1 | 0.49815  |
| 34825 | P0C214 | A6NI79 | 0.78682  |
| 34826 | P0C214 | Q2KHR2 | 0.1604   |
| 34827 | P0C214 | O76075 | 0.15147  |
| 34828 | P0C214 | P10155 | 0.42326  |
| 34829 | P0C214 | O75081 | 1.039    |
| 34830 | P0C214 | Q5TA45 | 0.19207  |
| 34831 | P0C214 | Q70YC5 | 0.1894   |
| 34832 | P0C214 | Q92764 | 0.44438  |
| 34833 | P0C214 | O60518 | 0.83797  |
| 34834 | P0C214 | Q6ZS92 | 0.12973  |
| 34835 | P0C214 | O60248 | 0.39387  |
| 34836 | P0C214 | Q9P2J9 | 0.18697  |
| 34837 | P0C214 | Q9ULW6 | 0.81783  |
| 34838 | P0C214 | Q8WUM0 | 0.73135  |
| 34839 | P0C214 | Q03468 | 0.36114  |
| 34840 | P0C214 | O14802 | 0.22983  |
| 34841 | P0C214 | Q96EF6 | 0.68225  |
| 34842 | P0C214 | A6NK53 | 0.34099  |
| 34843 | P0C214 | Q9UBF6 | 0.68998  |
| 34844 | P0C214 | P59052 | 0.16928  |
| 34845 | P0C214 | Q9H7U1 | 0.77515  |
| 34846 | P0C214 | P35712 | 0.39219  |
| 34847 | P0C214 | O96019 | 0.86192  |
| 34848 | P0C214 | Q13495 | 1.0366   |
| 34849 | P0C214 | Q3C1V1 | 0.24937  |
| 34850 | P0C214 | O60304 | 0.27193  |
| 34851 | P0C214 | Q9ULM3 | 0.6861   |
| 34852 | P0C214 | Q8IYE0 | 0.4921   |
| 34853 | P0C214 | P07196 | 0.52469  |
| 34854 | P0C214 | Q14188 | 0.62021  |
| 34855 | P0C214 | Q9H7R5 | 0.38935  |
| 34856 | P0C214 | O95433 | 0.67963  |
| 34857 | P0C214 | Q8TEV9 | 0.38792  |
| 34858 | P0C214 | Q7LBC6 | 0.27492  |
| 34859 | P0C214 | Q9NPJ6 | 0.90274  |
| 34860 | P0C214 | Q9UH77 | 0.59108  |
| 34861 | P0C214 | Q9UQL6 | 0.4864   |
| 34862 | P0C214 | Q7L5N1 | 1.1297   |
| 34863 | P0C214 | A7E2V4 | 1.1075   |
| 34864 | P0C214 | Q9UPP1 | 0.44538  |
| 34865 | P0C214 | Q9NYJ8 | 0.49528  |
| 34866 | P0C214 | O95486 | 0.38305  |
| 34867 | P0C214 | Q13105 | 0.38834  |
| 34868 | P0C214 | P35749 | 0.89031  |
| 34869 | P0C214 | Q86VN1 | 0.44507  |
| 34870 | P0C214 | P41161 | 0.10416  |
| 34871 | P0C214 | P28070 | 0.57615  |
| 34872 | P0C214 | Q9UBB9 | 0.30927  |
| 34873 | P0C214 | P13804 | 0.1443   |
| 34874 | P0C214 | P06400 | 0.59903  |
| 34875 | P0C214 | Q4VC05 | 0.19839  |
| 34876 | P0C214 | O43583 | 0.8367   |
| 34877 | P0C214 | Q8IZU1 | 0.53036  |
| 34878 | P0C214 | Q9BXY8 | 0.56284  |
| 34879 | P0C214 | Q9BV86 | 0.31939  |
| 34880 | P0C214 | O75953 | 0.92441  |
| 34881 | P0C214 | Q92759 | 0.60748  |
| 34882 | P0C214 | Q16798 | 0.33328  |
| 34883 | P0C214 | Q5XUX0 | 0.35622  |
| 34884 | P0C214 | P35548 | 0.50891  |



|       |        |        |           |
|-------|--------|--------|-----------|
| 34885 | P0C214 | Q7Z2Z1 | 0.76582   |
| 34886 | P0C214 | Q96T37 | 0.38304   |
| 34887 | P0C214 | P57055 | 0.55775   |
| 34888 | P0C214 | P08047 | 0.72112   |
| 34889 | P0C214 | O00291 | 0.35682   |
| 34890 | P0C214 | Q96B97 | 0.33971   |
| 34891 | P0C214 | P0C7I6 | 0.83125   |
| 34892 | P0C214 | Q0VDD5 | 0.086276  |
| 34893 | P0C214 | Q09FC8 | 0.28669   |
| 34894 | P0C214 | K7EJ46 | 0.086276  |
| 34895 | P0C214 | P49756 | 0.42896   |
| 34896 | P0C214 | Q14966 | 0.14786   |
| 34897 | P0C214 | A6NLJ0 | 0.53881   |
| 34898 | P0C214 | Q8IYI8 | 0.34605   |
| 34899 | P0C214 | Q96EY1 | 0.43074   |
| 34900 | P0C214 | Q9UKT4 | 0.85268   |
| 34901 | P0C214 | Q8TA94 | 0.47555   |
| 34902 | P0C214 | Q05516 | 0.6169    |
| 34903 | P0C214 | P42575 | 0.37079   |
| 34904 | P0C214 | Q9HC52 | 0.77904   |
| 34905 | P0C214 | P63146 | 0.91374   |
| 34906 | P0C214 | Q96B26 | 0.90296   |
| 34907 | P0C214 | Q7Z3K6 | 0.47392   |
| 34908 | P0C214 | P12956 | 0.29095   |
| 34909 | P0C214 | Q3LHN1 | 0.086276  |
| 34910 | P0C214 | Q8HWS3 | 0.21572   |
| 34911 | P0C214 | Q9GZS3 | 1.12      |
| 34912 | P0C214 | P11171 | 0.3732    |
| 34913 | P0C214 | O00255 | 0.15633   |
| 34914 | P0C214 | P0CI01 | 0.28575   |
| 34915 | P0C214 | Q12830 | 0.8393    |
| 34916 | P0C214 | Q8ND90 | 0.6469    |
| 34917 | P0C214 | Q96PM9 | 0.3338    |
| 34918 | P0C214 | Q9Y6D9 | 0.89676   |
| 34919 | P0C214 | P52948 | 0.99825   |
| 34920 | P0C214 | Q96DG6 | 0.2058    |
| 34921 | P0C214 | Q8N815 | 0.0040258 |
| 34922 | P0C214 | Q96JB5 | 0.26914   |
| 34923 | P0C214 | Q92870 | 0.64553   |
| 34924 | P0C214 | Q6VVB1 | 0.50123   |
| 34925 | P0C214 | Q5VTE0 | 0.95695   |
| 34926 | P0C214 | P12980 | 0.79946   |
| 34927 | P0C214 | B4DX44 | 0.49065   |
| 34928 | P0C214 | Q96NB1 | 0.24274   |
| 34929 | P0C214 | Q16629 | 0.61013   |
| 34930 | P0C214 | P42772 | 0.83022   |
| 34931 | P0C214 | Q70YC4 | 0.25805   |
| 34932 | P0C214 | P52737 | 0.50904   |
| 34933 | P0C214 | Q92621 | 1.0383    |
| 34934 | P0C214 | Q3KP66 | 0.76386   |
| 34935 | P0C214 | P31749 | 0.46181   |
| 34936 | P0C214 | Q8NCE0 | 0.53844   |
| 34937 | P0C214 | Q9BYG4 | 0.66658   |
| 34938 | P0C214 | O95447 | 0.11921   |
| 34939 | P0C214 | Q9NRY2 | 0.74038   |
| 34940 | P0C214 | Q14839 | 0.53135   |
| 34941 | P0C214 | P61581 | 0.37639   |
| 34942 | P0C214 | Q8N3X1 | 0.31799   |
| 34943 | P0C214 | Q8N2M8 | 0.73728   |
| 34944 | P0C214 | Q8TF50 | 0.30903   |
| 34945 | P0C214 | P61353 | 0.88548   |
| 34946 | P0C214 | Q9BXP5 | 1.017     |
| 34947 | P0C214 | Q1RN00 | 0.086276  |
| 34948 | P0C214 | Q63ZY3 | 0.80636   |
| 34949 | P0C214 | Q9Y2X3 | 0.65357   |
| 34950 | P0C214 | Q9H583 | 1.043     |
| 34951 | P0C214 | Q9Y3B8 | 0.23108   |
| 34952 | P0C214 | Q9BRA0 | 0.12649   |
| 34953 | P0C214 | Q9BVS5 | 0.32106   |
| 34954 | P0C214 | Q8N1L9 | 0.722     |
| 34955 | P0C214 | P61088 | 0.76035   |
| 34956 | P0C214 | Q9NR22 | 0.29505   |
| 34957 | P0C214 | Q8N8R7 | 0.45292   |
| 34958 | P0C214 | P54252 | 0.46048   |
| 34959 | P0C214 | Q701N4 | 0.086276  |
| 34960 | P0C214 | Q5JVX7 | 0.46482   |

|       |        |        |          |
|-------|--------|--------|----------|
| 34961 | P0C214 | A6NIY4 | 0.28575  |
| 34962 | P0C214 | Q9BYD6 | 0.51065  |
| 34963 | P0C214 | Q96EH3 | 0.16728  |
| 34964 | P0C214 | P14866 | 0.5049   |
| 34965 | P0C214 | Q96N53 | 0.086276 |
| 34966 | P0C214 | P0CG24 | 0.21769  |
| 34967 | P0C214 | O15397 | 0.72169  |
| 34968 | P0C214 | Q68DY9 | 0.28571  |
| 34969 | P0C214 | O15405 | 0.88415  |
| 34970 | P0C214 | P36578 | 1.3257   |
| 34971 | P0C214 | Q8N8A2 | 0.2675   |
| 34972 | P0C214 | O60384 | 0.50652  |
| 34973 | P0C214 | A6NJL1 | 0.16744  |
| 34974 | P0C214 | Q9NQV7 | 0.27381  |
| 34975 | P0C214 | Q17RH7 | 0.086276 |
| 34976 | P0C214 | Q5VZF2 | 0.13979  |
| 34977 | P0C214 | Q13155 | 0.68293  |
| 34978 | P0C214 | Q5JUK9 | 0.034609 |
| 34979 | P0C214 | Q9NY43 | 0.31825  |
| 34980 | P0C214 | O60936 | 0.89984  |
| 34981 | P0C214 | Q8N1I8 | 0.086276 |
| 34982 | P0C214 | Q15021 | 0.7874   |
| 34983 | P0C214 | P30154 | 0.25227  |
| 34984 | P0C214 | P35638 | 0.68749  |
| 34985 | P0C214 | P20618 | 0.79871  |
| 34986 | P0C214 | Q4G0F5 | 0.22528  |
| 34987 | P0C214 | Q9BUV0 | 0.24937  |
| 34988 | P0C214 | Q5HYK9 | 0.35008  |
| 34989 | P0C214 | P13051 | 1.1636   |
| 34990 | P0C214 | Q3LI61 | 0.086276 |
| 34991 | P0C214 | Q8N812 | 0.050468 |
| 34992 | P0C214 | Q9BVG4 | 0.30917  |
| 34993 | P0C214 | Q9NV06 | 0.23606  |
| 34994 | P0C214 | Q5TZA2 | 0.52811  |
| 34995 | P0C214 | Q96HA8 | 1.0883   |
| 34996 | P0C214 | Q9HAH1 | 0.38993  |
| 34997 | P0C214 | P62328 | 1.0459   |
| 34998 | P0C214 | Q14588 | 0.3804   |
| 34999 | P0C214 | P29083 | 1.1183   |
| 35000 | P0C214 | Q6EEV6 | 0.11408  |
| 35001 | P0C214 | Q8N8E3 | 0.22381  |
| 35002 | P0C214 | P31276 | 0.40585  |
| 35003 | P0C214 | Q14677 | 0.52453  |
| 35004 | P0C214 | Q2TAL8 | 0.8592   |
| 35005 | P0C214 | O00287 | 0.22107  |
| 35006 | P0C214 | Q33E94 | 0.79523  |
| 35007 | P0C214 | Q06520 | 0.35067  |
| 35008 | P0C214 | Q6ZVK8 | 0.43837  |
| 35009 | P0C214 | Q9UGK3 | 0.66653  |
| 35010 | P0C214 | Q0VD86 | 0.35391  |
| 35011 | P0C214 | Q49MG5 | 0.79446  |
| 35012 | P0C214 | Q6IPX3 | 0.76306  |
| 35013 | P0C214 | Q9Y5R5 | 0.13859  |
| 35014 | P0C214 | Q15466 | 0.46017  |
| 35015 | P0C214 | Q8IUW3 | 0.73186  |
| 35016 | P0C214 | Q96T76 | 0.86536  |
| 35017 | P0C214 | Q9BU64 | 0.30428  |
| 35018 | P0C214 | P07195 | 1.0002   |
| 35019 | P0C214 | Q6L8H2 | 0.086276 |
| 35020 | P0C214 | Q96JN8 | 0.26982  |
| 35021 | P0C214 | O60613 | 0.52503  |
| 35022 | P0C214 | B1ANY3 | 0.045761 |
| 35023 | P0C214 | Q96QC0 | 0.85674  |
| 35024 | P0C214 | Q96PU5 | 0.40479  |
| 35025 | P0C214 | Q9BRQ4 | 0.039288 |
| 35026 | P0C214 | P04198 | 0.75262  |
| 35027 | P0C214 | A6NNL0 | 0.39603  |
| 35028 | P0C214 | Q9BQ15 | 0.5807   |
| 35029 | P0C214 | Q9H8E8 | 0.62823  |
| 35030 | P0C214 | Q7Z3V5 | 0.37033  |
| 35031 | P0C214 | P36957 | 0.21972  |
| 35032 | P0C214 | P80303 | 0.29411  |
| 35033 | P0C214 | Q66K74 | 0.19923  |
| 35034 | P0C214 | Q8NBZ0 | 1.2037   |
| 35035 | P0C214 | P0DI82 | 0.34572  |
| 35036 | P0C214 | A8MTY0 | 0.46031  |

|       |        |         |          |
|-------|--------|---------|----------|
| 35037 | P0C214 | P51553  | 0.39563  |
| 35038 | P0C214 | Q9Y6J0  | 0.10946  |
| 35039 | P0C214 | Q9UBU9  | 0.60026  |
| 35040 | P0C214 | Q12769  | 1.0576   |
| 35041 | P0C214 | Q9NW38  | 0.65653  |
| 35042 | P0C214 | Q9UN81  | 0.23599  |
| 35043 | P0C214 | Q9UK10  | 0.3804   |
| 35044 | P0C214 | Q86SZ2  | 0.70507  |
| 35045 | P0C214 | P54274  | 0.34341  |
| 35046 | P0C214 | O95873  | 0.24937  |
| 35047 | P0C214 | Q8TDD2  | 0.26644  |
| 35048 | P0C214 | O00629  | 0.5405   |
| 35049 | P0C214 | Q96EF9  | 0.025247 |
| 35050 | P0C214 | Q6NSI8  | 0.72849  |
| 35051 | P0C214 | Q7Z4H9  | 0.40259  |
| 35052 | P0C214 | P0CV98  | 0.69286  |
| 35053 | P0C214 | Q9UGL9  | 0.086276 |
| 35054 | P0C214 | Q8N944  | 0.89019  |
| 35055 | P0C214 | Q7Z745  | 0.45172  |
| 35056 | P0C214 | Q5T953  | 0.41881  |
| 35057 | P0C214 | Q16719  | 0.53883  |
| 35058 | P0C214 | O75154  | 0.65705  |
| 35059 | P0C214 | Q8TEB1  | 0.25402  |
| 35060 | P0C214 | Q9H7S9  | 0.72848  |
| 35061 | P0C214 | Q8I WV7 | 0.33505  |
| 35062 | P0C214 | Q8IZT9  | 0.60323  |
| 35063 | P0C214 | Q9NPF5  | 0.8302   |
| 35064 | P0C214 | Q13432  | 0.3279   |
| 35065 | P0C214 | Q8TAW3  | 0.30069  |
| 35066 | P0C214 | Q9UJW9  | 1.4211   |
| 35067 | P0C214 | Q9Y2Z4  | 0.32373  |
| 35068 | P0C214 | P09874  | 0.59145  |
| 35069 | P0C214 | P49721  | 0.57107  |
| 35070 | P0C214 | Q5JNZ3  | 0.36568  |
| 35071 | P0C214 | Q5T0F9  | 0.32658  |
| 35072 | P0C214 | Q9NX46  | 0.36247  |
| 35073 | P0C214 | O15015  | 0.56957  |
| 35074 | P0C214 | Q8WTW3  | 0.69685  |
| 35075 | P0C214 | Q6ZN79  | 0.42302  |
| 35076 | P0C214 | Q9BR76  | 0.23574  |
| 35077 | P0C214 | P58004  | 0.092801 |
| 35078 | P0C214 | Q5VT28  | 0.033188 |
| 35079 | P0C214 | Q9BRJ2  | 0.36156  |
| 35080 | P0C214 | P17025  | 0.28926  |
| 35081 | P0C214 | Q96CD0  | 0.2675   |
| 35082 | P0C214 | Q96EP1  | 0.64336  |
| 35083 | P0C214 | P51532  | 0.39256  |
| 35084 | P0C214 | P47974  | 0.194    |
| 35085 | P0C214 | A1A580  | 0.39837  |
| 35086 | P0C214 | Q9HAP2  | 0.63034  |
| 35087 | P0C214 | Q64ET8  | 0.47428  |
| 35088 | P0C214 | Q6UN15  | 1.0398   |
| 35089 | P0C214 | Q9BVP2  | 0.3075   |
| 35090 | P0C214 | Q8TBK2  | 0.51061  |
| 35091 | P0C214 | Q9BQ90  | 0.80878  |
| 35092 | P0C214 | Q99741  | 0.52308  |
| 35093 | P0C214 | Q9H981  | 1.0055   |
| 35094 | P0C214 | A1A5D9  | 0.45563  |
| 35095 | P0C214 | Q8IUC2  | 0.52687  |
| 35096 | P0C214 | Q16401  | 0.80987  |
| 35097 | P0C214 | Q92552  | 0.69067  |
| 35098 | P0C214 | Q9BXV9  | 0.086276 |
| 35099 | P0C214 | Q15937  | 0.31537  |
| 35100 | P0C214 | Q9UQK1  | 0.35407  |
| 35101 | P0C214 | Q8N8X9  | 0.18819  |
| 35102 | P0C214 | A6NHS1  | 0.12567  |
| 35103 | P0C214 | Q9Y3D3  | 0.69558  |
| 35104 | P0C214 | P18846  | 0.75675  |
| 35105 | P0C214 | Q86T75  | 0.51029  |
| 35106 | P0C214 | Q8WVK7  | 0.54854  |
| 35107 | P0C214 | O15371  | 0.79592  |
| 35108 | P0C214 | Q7Z3C6  | 0.10248  |
| 35109 | P0C214 | Q7Z6J9  | 0.7215   |
| 35110 | P0C214 | Q9P2W9  | 0.068198 |
| 35111 | P0C214 | B1AK76  | 0.93393  |
| 35112 | P0C214 | Q5T7N2  | 0.25309  |

|       |        |        |           |
|-------|--------|--------|-----------|
| 35113 | POC214 | Q9NYF8 | 1.1468    |
| 35114 | POC214 | Q9Y4K1 | 0.63292   |
| 35115 | POC214 | Q9NSB4 | 0.38419   |
| 35116 | POC214 | P0DM35 | 0.69409   |
| 35117 | POC214 | P30566 | 0.087289  |
| 35118 | POC214 | P50502 | 0.66138   |
| 35119 | POC214 | Q0VDF9 | 0.44255   |
| 35120 | POC214 | O94993 | 0.14039   |
| 35121 | POC214 | P86481 | 0.086276  |
| 35122 | POC214 | P43364 | 0.79434   |
| 35123 | POC214 | Q6I9Y2 | 0.766     |
| 35124 | POC214 | Q9NWM3 | 0.090278  |
| 35125 | POC214 | Q8N3Z6 | 0.46382   |
| 35126 | POC214 | Q8N140 | 0.8463    |
| 35127 | POC214 | P23760 | 0.67312   |
| 35128 | POC214 | P18621 | 0.86057   |
| 35129 | POC214 | Q9UPZ3 | 0.71268   |
| 35130 | POC214 | Q8NHR7 | 0.24424   |
| 35131 | POC214 | Q6SJ96 | 0.18905   |
| 35132 | POC214 | Q17RM4 | 0.12352   |
| 35133 | POC214 | Q8N1X5 | 0.086276  |
| 35134 | POC214 | Q9NTI7 | 0.22737   |
| 35135 | POC214 | Q13541 | 0.92175   |
| 35136 | POC214 | A2AJT9 | 0.6136    |
| 35137 | POC214 | P0C838 | 0.26818   |
| 35138 | POC214 | Q8IZD2 | 0.26786   |
| 35139 | POC214 | Q9P1U0 | 0.082848  |
| 35140 | POC214 | P54259 | 0.83533   |
| 35141 | POC214 | P10073 | 0.39344   |
| 35142 | POC214 | Q8N6U2 | 0.28966   |
| 35143 | POC214 | Q9BTP7 | 0.8667    |
| 35144 | POC214 | Q86XD5 | 0.030246  |
| 35145 | POC214 | P36404 | 0.24677   |
| 35146 | POC214 | Q05877 | 0.52681   |
| 35147 | POC214 | Q8WW59 | 0.24079   |
| 35148 | POC214 | P52740 | 0.24611   |
| 35149 | POC214 | O96020 | 0.96219   |
| 35150 | POC214 | Q5EBM4 | 0.13091   |
| 35151 | POC214 | P55072 | 0.28502   |
| 35152 | POC214 | Q9H857 | 0.62076   |
| 35153 | POC214 | P63167 | 1.3679    |
| 35154 | POC214 | Q13951 | 0.58909   |
| 35155 | POC214 | Q9H2P0 | 0.22077   |
| 35156 | POC214 | Q96LA8 | 0.68372   |
| 35157 | POC214 | Q9H5Q4 | 0.62028   |
| 35158 | POC214 | Q9H0E3 | 0.52382   |
| 35159 | POC214 | Q9H0P0 | 0.35109   |
| 35160 | POC214 | Q8IY57 | 1.1019    |
| 35161 | POC214 | Q86T29 | 0.25925   |
| 35162 | POC214 | P18054 | 0.30229   |
| 35163 | POC214 | Q9BYR6 | 0.6322    |
| 35164 | POC214 | Q15723 | 1.1579    |
| 35165 | POC214 | O75182 | 1.1313    |
| 35166 | POC214 | Q96DE0 | 0.7047    |
| 35167 | POC214 | O00471 | 0.22108   |
| 35168 | POC214 | Q01130 | 0.69396   |
| 35169 | POC214 | Q9UJC5 | 0.52015   |
| 35170 | POC214 | P17980 | 0.4214    |
| 35171 | POC214 | A5D8V7 | 0.0016201 |
| 35172 | POC214 | Q8NBB4 | 0.29585   |
| 35173 | POC214 | O60783 | 0.55594   |
| 35174 | POC214 | O94892 | 0.2499    |
| 35175 | POC214 | O00570 | 0.77933   |
| 35176 | POC214 | Q6ZV56 | 0.086276  |
| 35177 | POC214 | Q9UJW3 | 0.70755   |
| 35178 | POC214 | Q16670 | 0.23889   |
| 35179 | POC214 | Q32MQ0 | 0.42743   |
| 35180 | POC214 | Q96CW6 | 0.56494   |
| 35181 | POC214 | Q13415 | 0.35275   |
| 35182 | POC214 | Q14181 | 0.56737   |
| 35183 | POC214 | Q5TAX3 | 0.65147   |
| 35184 | POC214 | P13645 | 0.56529   |
| 35185 | POC214 | Q9BXG8 | 0.43561   |
| 35186 | POC214 | Q8WWY3 | 0.33639   |
| 35187 | POC214 | Q8NE31 | 0.078699  |
| 35188 | POC214 | P43357 | 0.2675    |

|       |        |        |          |
|-------|--------|--------|----------|
| 35189 | P0C214 | Q658K8 | 0.45829  |
| 35190 | P0C214 | Q6W349 | 0.24108  |
| 35191 | P0C214 | A6NME0 | 0.047773 |
| 35192 | P0C214 | O75928 | 0.74882  |
| 35193 | P0C214 | Q9H4M3 | 0.20121  |
| 35194 | P0C214 | Q8TEK3 | 0.29571  |
| 35195 | P0C214 | Q7L3S4 | 0.30122  |
| 35196 | P0C214 | Q86YG4 | 0.5761   |
| 35197 | P0C214 | Q9BV20 | 0.22595  |
| 35198 | P0C214 | Q13347 | 0.8284   |
| 35199 | P0C214 | Q9BPW8 | 0.45234  |
| 35200 | P0C214 | K7EIZ4 | 0.086276 |
| 35201 | P0C214 | Q68DK7 | 0.5989   |
| 35202 | P0C214 | P62906 | 0.92893  |
| 35203 | P0C214 | O96028 | 0.26345  |
| 35204 | P0C214 | P0C7M6 | 0.060206 |
| 35205 | P0C214 | Q6RSH7 | 0.46226  |
| 35206 | P0C214 | O75638 | 1.0139   |
| 35207 | P0C214 | Q9BYP9 | 0.43378  |
| 35208 | P0C214 | Q5W0V3 | 0.66142  |
| 35209 | P0C214 | Q16236 | 0.64074  |
| 35210 | P0C214 | Q92670 | 0.2331   |
| 35211 | P0C214 | O94855 | 0.38305  |
| 35212 | P0C214 | Q8IZD4 | 1.0907   |
| 35213 | P0C214 | Q9H7L9 | 0.56618  |
| 35214 | P0C214 | Q96HR8 | 1.167    |
| 35215 | P0C214 | O75170 | 0.82705  |
| 35216 | P0C214 | P48595 | 0.92397  |
| 35217 | P0C214 | Q330K2 | 0.25672  |
| 35218 | P0C214 | P13667 | 0.33737  |
| 35219 | P0C214 | O94983 | 1.228    |
| 35220 | P0C214 | Q9H1Z4 | 0.35391  |
| 35221 | P0C214 | Q9UKT5 | 0.52047  |
| 35222 | P0C214 | O60573 | 0.63408  |
| 35223 | P0C214 | A6NKD2 | 0.69286  |
| 35224 | P0C214 | P11142 | 0.62486  |
| 35225 | P0C214 | Q96E16 | 0.61668  |
| 35226 | P0C214 | Q9NVN3 | 0.074523 |
| 35227 | P0C214 | P52741 | 0.2289   |
| 35228 | P0C214 | Q9NX40 | 0.46318  |
| 35229 | P0C214 | Q9NS39 | 0.24578  |
| 35230 | P0C214 | O15084 | 0.6866   |
| 35231 | P0C214 | Q9UKT8 | 0.33409  |
| 35232 | P0C214 | Q96F63 | 0.24937  |
| 35233 | P0C214 | Q9Y592 | 0.50132  |
| 35234 | P0C214 | Q3LI73 | 0.39837  |
| 35235 | P0C214 | Q14693 | 0.46935  |
| 35236 | P0C214 | A8MUQ0 | 0.8399   |
| 35237 | P0C214 | Q6Q759 | 0.50185  |
| 35238 | P0C214 | P60604 | 1.0001   |
| 35239 | P0C214 | Q96IR2 | 0.38935  |
| 35240 | P0C214 | Q16773 | 0.27839  |
| 35241 | P0C214 | Q9NRA8 | 1.0593   |
| 35242 | P0C214 | Q96GG9 | 0.35026  |
| 35243 | P0C214 | O43399 | 0.54427  |
| 35244 | P0C214 | Q9UHN1 | 0.14485  |
| 35245 | P0C214 | Q8N988 | 0.43475  |
| 35246 | P0C214 | Q6IB77 | 0.28275  |
| 35247 | P0C214 | Q9UNK9 | 0.24543  |
| 35248 | P0C214 | O15511 | 0.12637  |
| 35249 | P0C214 | Q96DE5 | 0.87198  |
| 35250 | P0C214 | Q14790 | 0.27072  |
| 35251 | P0C214 | Q9H116 | 0.27612  |
| 35252 | P0C214 | Q9C000 | 0.365    |
| 35253 | P0C214 | P0C7T4 | 0.086276 |
| 35254 | P0C214 | Q96NN9 | 0.30568  |
| 35255 | P0C214 | Q96PI1 | 0.38078  |
| 35256 | P0C214 | P55771 | 0.79826  |
| 35257 | P0C214 | P35900 | 0.6674   |
| 35258 | P0C214 | Q13042 | 1.1962   |
| 35259 | P0C214 | O14777 | 0.59584  |
| 35260 | P0C214 | Q9H7J1 | 0.2661   |
| 35261 | P0C214 | Q9BY41 | 0.36813  |
| 35262 | P0C214 | Q2NKJ3 | 0.42084  |
| 35263 | P0C214 | Q8N9T8 | 1.1831   |
| 35264 | P0C214 | Q7Z4W3 | 0.086276 |

|       |        |        |          |
|-------|--------|--------|----------|
| 35265 | P0C214 | Q02878 | 1.2069   |
| 35266 | P0C214 | Q8TF32 | 0.50756  |
| 35267 | P0C214 | Q8N8J6 | 0.15486  |
| 35268 | P0C214 | P31269 | 0.47447  |
| 35269 | P0C214 | Q9P2J5 | 0.50318  |
| 35270 | P0C214 | Q16589 | 0.22865  |
| 35271 | P0C214 | Q9H9L7 | 0.22197  |
| 35272 | P0C214 | Q15306 | 0.8414   |
| 35273 | P0C214 | P59923 | 0.3804   |
| 35274 | P0C214 | Q9H0C5 | 0.48074  |
| 35275 | P0C214 | Q5H9L2 | 1.0428   |
| 35276 | P0C214 | Q9NWT6 | 0.58393  |
| 35277 | P0C214 | Q9H714 | 0.40832  |
| 35278 | P0C214 | Q14241 | 0.34304  |
| 35279 | P0C214 | Q9NPG3 | 0.70205  |
| 35280 | P0C214 | Q86VM9 | 0.09871  |
| 35281 | P0C214 | O14737 | 0.268    |
| 35282 | P0C214 | Q9H1J1 | 1.2315   |
| 35283 | P0C214 | Q9NRL3 | 0.34365  |
| 35284 | P0C214 | Q96MW7 | 0.27837  |
| 35285 | P0C214 | P21695 | 0.34998  |
| 35286 | P0C214 | P25685 | 0.46384  |
| 35287 | P0C214 | P41212 | 0.65651  |
| 35288 | P0C214 | P16278 | 0.21674  |
| 35289 | P0C214 | O75427 | 0.42038  |
| 35290 | P0C214 | Q9BRT9 | 0.44262  |
| 35291 | P0C214 | Q96AV8 | 0.20486  |
| 35292 | P0C214 | Q9NZL9 | 0.40083  |
| 35293 | P0C214 | Q9HCM1 | 0.26865  |
| 35294 | P0C214 | P0CG29 | 0.29858  |
| 35295 | P0C214 | Q3I5F7 | 0.1505   |
| 35296 | P0C214 | Q9BZR8 | 0.43141  |
| 35297 | P0C214 | Q03938 | 0.51306  |
| 35298 | P0C214 | P17661 | 0.4509   |
| 35299 | P0C214 | Q4G112 | 0.18216  |
| 35300 | P0C214 | O60481 | 0.33449  |
| 35301 | P0C214 | Q9NVS2 | 0.62561  |
| 35302 | P0C214 | Q03701 | 0.2973   |
| 35303 | P0C214 | Q9Y314 | 1.1352   |
| 35304 | P0C214 | Q9Y222 | 0.86552  |
| 35305 | P0C214 | Q14525 | 0.51477  |
| 35306 | P0C214 | Q99502 | 0.12995  |
| 35307 | P0C214 | Q9Y3A2 | 0.92069  |
| 35308 | P0C214 | Q3KNS6 | 0.22926  |
| 35309 | P0C214 | Q8N720 | 0.90465  |
| 35310 | P0C214 | A8K5M9 | 0.71934  |
| 35311 | P0C214 | Q8IYK2 | 0.30734  |
| 35312 | P0C214 | Q96N16 | 0.9322   |
| 35313 | P0C214 | Q8NHM5 | 0.27376  |
| 35314 | P0C214 | P41214 | 0.62821  |
| 35315 | P0C214 | A6NN14 | 0.38021  |
| 35316 | P0C214 | Q8N137 | 0.71836  |
| 35317 | P0C214 | Q9BRH9 | 0.30964  |
| 35318 | P0C214 | Q9UGR2 | 0.39864  |
| 35319 | P0C214 | Q14674 | 0.26913  |
| 35320 | P0C214 | Q8WUM4 | 0.97897  |
| 35321 | P0C214 | Q96HA1 | 0.57849  |
| 35322 | P03383 | A6NN06 | 0.33834  |
| 35323 | P03383 | Q96BW9 | 0.35954  |
| 35324 | P03383 | Q969W8 | 0.27462  |
| 35325 | P03383 | Q5JQC4 | 0.33834  |
| 35326 | P03383 | Q5VUE5 | 0.17241  |
| 35327 | P03383 | Q6NSI4 | 0.079255 |
| 35328 | P03383 | Q14244 | 0.5153   |
| 35329 | P03383 | Q96LX8 | 0.21369  |
| 35330 | P03383 | P43351 | 0.3676   |
| 35331 | P03383 | Q6P3W6 | 0.38692  |
| 35332 | P03383 | Q9UD71 | 0.67767  |
| 35333 | P03383 | Q9UQR1 | 0.61182  |
| 35334 | P03383 | Q17RY6 | 0.52165  |
| 35335 | P03383 | Q8N3J3 | 0.19143  |
| 35336 | P03383 | Q7Z7A1 | 0.7888   |
| 35337 | P03383 | Q5BKU6 | 0.031284 |
| 35338 | P03383 | P35227 | 0.52285  |
| 35339 | P03383 | O75323 | 0.35152  |
| 35340 | P03383 | Q96MH2 | 0.94679  |

|       |        |        |          |
|-------|--------|--------|----------|
| 35341 | P03383 | Q86UA6 | 0.57753  |
| 35342 | P03383 | P08107 | 0.38424  |
| 35343 | P03383 | Q9Y618 | 0.8438   |
| 35344 | P03383 | Q7Z7J5 | 0.67519  |
| 35345 | P03383 | O95678 | 0.51989  |
| 35346 | P03383 | Q14683 | 0.30907  |
| 35347 | P03383 | Q8NEF3 | 0.16565  |
| 35348 | P03383 | Q6AI39 | 0.68802  |
| 35349 | P03383 | O14628 | 0.29029  |
| 35350 | P03383 | Q9BVL2 | 0.43872  |
| 35351 | P03383 | O95402 | 0.87263  |
| 35352 | P03383 | Q0VDD7 | 0.93007  |
| 35353 | P03383 | Q9BRK4 | 0.34086  |
| 35354 | P03383 | P78345 | 0.64395  |
| 35355 | P03383 | Q86U86 | 0.76916  |
| 35356 | P03383 | Q9UNSL | 0.41276  |
| 35357 | P03383 | Q13573 | 0.49357  |
| 35358 | P03383 | Q14457 | 0.33128  |
| 35359 | P03383 | Q92681 | 0.19856  |
| 35360 | P03383 | Q8IXJ9 | 0.54504  |
| 35361 | P03383 | Q9H1B4 | 0.23695  |
| 35362 | P03383 | Q9Y6R9 | 0.56422  |
| 35363 | P03383 | Q7Z2E3 | 0.2593   |
| 35364 | P03383 | P02545 | 0.58109  |
| 35365 | P03383 | O96018 | 0.26831  |
| 35366 | P03383 | A1A4G5 | 0.33834  |
| 35367 | P03383 | Q96EE3 | 0.39009  |
| 35368 | P03383 | P23490 | 0.56784  |
| 35369 | P03383 | A8MVA2 | 0.5733   |
| 35370 | P03383 | Q06330 | 0.39658  |
| 35371 | P03383 | O15504 | 0.31888  |
| 35372 | P03383 | Q8N9W8 | 0.87506  |
| 35373 | P03383 | O14519 | 0.13334  |
| 35374 | P03383 | Q13761 | 0.6078   |
| 35375 | P03383 | P59037 | 0.45203  |
| 35376 | P03383 | O43167 | 0.39205  |
| 35377 | P03383 | Q9NYV4 | 0.021814 |
| 35378 | P03383 | Q5VSL9 | 0.5724   |
| 35379 | P03383 | P42766 | 0.54689  |
| 35380 | P03383 | Q9BZS9 | 0.33834  |
| 35381 | P03383 | A6NGH7 | 0.20342  |
| 35382 | P03383 | P43357 | 0.1668   |
| 35383 | P03383 | Q9H8V8 | 0.33834  |
| 35384 | P03383 | Q13257 | 0.50877  |
| 35385 | P03383 | Q13228 | 0.78166  |
| 35386 | P03383 | Q96CW1 | 0.31134  |
| 35387 | P03383 | Q5VYM1 | 0.37766  |
| 35388 | P03383 | Q15329 | 0.97588  |
| 35389 | P03383 | Q5TGP6 | 0.018727 |
| 35390 | P03383 | O14879 | 0.51645  |
| 35391 | P03383 | Q9BQE6 | 0.36701  |
| 35392 | P03383 | Q56VL3 | 0.47239  |
| 35393 | P03383 | Q15723 | 0.97999  |
| 35394 | P03383 | Q6IPT2 | 0.87506  |
| 35395 | P03383 | Q9NQG7 | 0.14398  |
| 35396 | P03383 | Q9BSU1 | 0.43443  |
| 35397 | P03383 | P15924 | 0.22698  |
| 35398 | P03383 | Q9P2D3 | 0.63377  |
| 35399 | P03383 | O75167 | 0.059351 |
| 35400 | P03383 | P41002 | 0.70331  |
| 35401 | P03383 | P10244 | 0.35059  |
| 35402 | P03383 | Q5T953 | 0.67106  |
| 35403 | P03383 | Q16612 | 0.088023 |
| 35404 | P03383 | O76087 | 0.17372  |
| 35405 | P03383 | A6NG73 | 0.078213 |
| 35406 | P03383 | Q8N3F0 | 0.37725  |
| 35407 | P03383 | Q9Y3X0 | 0.45373  |
| 35408 | P03383 | P30307 | 0.44229  |
| 35409 | P03383 | Q0VFZ6 | 0.60341  |
| 35410 | P03383 | Q8N1X5 | 0.33834  |
| 35411 | P03383 | Q8WUM0 | 0.50316  |
| 35412 | P03383 | Q9NVV4 | 0.41596  |
| 35413 | P03383 | Q9H7R0 | 0.28794  |
| 35414 | P03383 | Q02577 | 0.41162  |
| 35415 | P03383 | Q8TAG6 | 0.31585  |
| 35416 | P03383 | Q9UI26 | 0.15562  |

|       |        |        |          |
|-------|--------|--------|----------|
| 35417 | P03383 | Q9H5V9 | 0.5605   |
| 35418 | P03383 | Q9Y2Y0 | 0.73213  |
| 35419 | P03383 | P53803 | 0.51687  |
| 35420 | P03383 | Q9UBW5 | 0.31745  |
| 35421 | P03383 | P59091 | 0.085124 |
| 35422 | P03383 | Q9BZ01 | 0.22807  |
| 35423 | P03383 | Q9UJY4 | 0.2736   |
| 35424 | P03383 | Q8NHZ8 | 0.88202  |
| 35425 | P03383 | A6NH11 | 0.40074  |
| 35426 | P03383 | Q9NRR4 | 0.30512  |
| 35427 | P03383 | Q6ZVK8 | 0.18902  |
| 35428 | P03383 | Q96JG6 | 0.081923 |
| 35429 | P03383 | Q8NOV1 | 0.11058  |
| 35430 | P03383 | P51398 | 0.85912  |
| 35431 | P03383 | Q8WTW4 | 0.21054  |
| 35432 | P03383 | Q9BYQ7 | 0.7585   |
| 35433 | P03383 | Q68CJ9 | 0.44894  |
| 35434 | P03383 | Q7L5D6 | 0.72394  |
| 35435 | P03383 | P48378 | 0.21863  |
| 35436 | P03383 | O60927 | 0.50934  |
| 35437 | P03383 | P36578 | 0.76792  |
| 35438 | P03383 | Q8N8X9 | 0.16676  |
| 35439 | P03383 | Q9NQS7 | 0.60238  |
| 35440 | P03383 | Q9BQG0 | 0.38348  |
| 35441 | P03383 | Q96GI7 | 0.60341  |
| 35442 | P03383 | O60716 | 0.28319  |
| 35443 | P03383 | Q6ZU52 | 0.1668   |
| 35444 | P03383 | Q09028 | 0.47743  |
| 35445 | P03383 | Q9Y6J9 | 0.60448  |
| 35446 | P03383 | Q8NE22 | 0.73146  |
| 35447 | P03383 | Q9HD47 | 0.10256  |
| 35448 | P03383 | P13073 | 0.1147   |
| 35449 | P03383 | Q8WTZ3 | 0.31327  |
| 35450 | P03383 | Q9BYE4 | 0.33834  |
| 35451 | P03383 | Q9UKN8 | 0.38183  |
| 35452 | P03383 | Q8NA47 | 0.60341  |
| 35453 | P03383 | P27986 | 0.35683  |
| 35454 | P03383 | P0C860 | 0.1397   |
| 35455 | P03383 | Q8N2M8 | 0.79445  |
| 35456 | P03383 | O15198 | 0.25698  |
| 35457 | P03383 | P02794 | 0.5652   |
| 35458 | P03383 | Q8IX15 | 0.28947  |
| 35459 | P03383 | A4QMS7 | 0.1104   |
| 35460 | P03383 | Q13616 | 0.39304  |
| 35461 | P03383 | Q99504 | 0.25141  |
| 35462 | P03383 | Q03188 | 0.26025  |
| 35463 | P03383 | Q4KN68 | 0.39984  |
| 35464 | P03383 | O75182 | 0.89553  |
| 35465 | P03383 | Q8N319 | 0.99505  |
| 35466 | P03383 | Q8NI51 | 0.4334   |
| 35467 | P03383 | P62140 | 0.56315  |
| 35468 | P03383 | O00470 | 0.44899  |
| 35469 | P03383 | Q719H9 | 0.44577  |
| 35470 | P03383 | Q9Y253 | 0.05997  |
| 35471 | P03383 | Q06265 | 0.12267  |
| 35472 | P03383 | Q6P435 | 0.19612  |
| 35473 | P03383 | Q8TC76 | 1.0726   |
| 35474 | P03383 | Q9UHN1 | 0.033725 |
| 35475 | P03383 | P78358 | 0.64765  |
| 35476 | P03383 | Q8TB05 | 0.60341  |
| 35477 | P03383 | H3BU77 | 0.27914  |
| 35478 | P03383 | Q5FWF6 | 0.30166  |
| 35479 | P03383 | Q12872 | 0.61847  |
| 35480 | P03383 | Q7L804 | 0.38086  |
| 35481 | P03383 | B1AL46 | 0.5011   |
| 35482 | P03383 | P05388 | 0.9333   |
| 35483 | P03383 | Q2NL68 | 0.60341  |
| 35484 | P03383 | Q9HBH1 | 0.45975  |
| 35485 | P03383 | Q5JVG8 | 0.29857  |
| 35486 | P03383 | Q8IVU9 | 0.030538 |
| 35487 | P03383 | P62266 | 0.71048  |
| 35488 | P03383 | Q9Y285 | 0.446    |
| 35489 | P03383 | Q6P1R3 | 0.39321  |
| 35490 | P03383 | O95478 | 0.35581  |
| 35491 | P03383 | Q14978 | 0.64911  |
| 35492 | P03383 | A6NNF4 | 0.2288   |



|       |        |        |           |
|-------|--------|--------|-----------|
| 35493 | P03383 | P43359 | 0.60145   |
| 35494 | P03383 | P60371 | 0.5733    |
| 35495 | P03383 | O00213 | 0.25006   |
| 35496 | P03383 | P16989 | 0.13163   |
| 35497 | P03383 | Q9UBU9 | 0.28899   |
| 35498 | P03383 | P08729 | 1.0616    |
| 35499 | P03383 | Q8NHW5 | 0.067223  |
| 35500 | P03383 | Q9NY61 | 0.61425   |
| 35501 | P03383 | Q92585 | 0.75404   |
| 35502 | P03383 | Q8IWJ2 | 0.45549   |
| 35503 | P03383 | Q15935 | 0.22477   |
| 35504 | P03383 | P39019 | 0.62034   |
| 35505 | P03383 | Q96LC9 | 0.46025   |
| 35506 | P03383 | Q07955 | 0.44556   |
| 35507 | P03383 | Q15014 | 0.87304   |
| 35508 | P03383 | Q8N5J2 | 0.84524   |
| 35509 | P03383 | Q9Y2M2 | 0.25578   |
| 35510 | P03383 | Q6QNY0 | 0.48358   |
| 35511 | P03383 | P49454 | 0.42034   |
| 35512 | P03383 | P50995 | 0.6136    |
| 35513 | P03383 | O75920 | 0.82324   |
| 35514 | P03383 | Q9Y3C8 | 0.14292   |
| 35515 | P03383 | Q13601 | 0.17716   |
| 35516 | P03383 | P55199 | 0.78301   |
| 35517 | P03383 | Q12830 | 0.70532   |
| 35518 | P03383 | Q6RW13 | 0.45566   |
| 35519 | P03383 | Q9UHL9 | 0.35564   |
| 35520 | P03383 | Q96EN9 | 0.44541   |
| 35521 | P03383 | Q8NBB4 | 0.17074   |
| 35522 | P03383 | O00458 | 0.55491   |
| 35523 | P03383 | Q9BRJ7 | 0.42836   |
| 35524 | P03383 | Q05DH4 | 0.87614   |
| 35525 | P03383 | P19474 | 0.27673   |
| 35526 | P03383 | Q8N1N4 | 0.60058   |
| 35527 | P03383 | P10914 | 0.27111   |
| 35528 | P03383 | Q8N3L3 | 0.56434   |
| 35529 | P03383 | Q96N23 | 0.35687   |
| 35530 | P03383 | O75925 | 0.38281   |
| 35531 | P03383 | Q9NQ31 | 0.4154    |
| 35532 | P03383 | P34949 | 0.17216   |
| 35533 | P03383 | Q8TF74 | 0.24787   |
| 35534 | P03383 | P26373 | 0.71018   |
| 35535 | P03383 | O14737 | 0.2801    |
| 35536 | P03383 | Q9NYW8 | 0.14944   |
| 35537 | P03383 | Q9H7Z3 | 0.21221   |
| 35538 | P03383 | O15234 | 0.80806   |
| 35539 | P03383 | Q969F9 | 0.69872   |
| 35540 | P03383 | Q9Y5J7 | 0.11634   |
| 35541 | P03383 | P84101 | 0.811     |
| 35542 | P03383 | Q63HK3 | 0.29246   |
| 35543 | P03383 | Q9BUK0 | 0.6964    |
| 35544 | P03383 | Q5TAB7 | 0.55677   |
| 35545 | P03383 | Q7Z739 | 0.42872   |
| 35546 | P03383 | P62879 | 0.29199   |
| 35547 | P03383 | Q6PJG6 | 0.52478   |
| 35548 | P03383 | Q8IVD9 | 0.30819   |
| 35549 | P03383 | Q502W6 | 0.0067479 |
| 35550 | P03383 | Q8N888 | 0.59132   |
| 35551 | P03383 | Q2M238 | 0.0031475 |
| 35552 | P03383 | P56945 | 0.37783   |
| 35553 | P03383 | A6NNV3 | 0.38945   |
| 35554 | P03383 | Q8TA86 | 0.45984   |
| 35555 | P03383 | Q9BXW3 | 0.33834   |
| 35556 | P03383 | P14316 | 0.6874    |
| 35557 | P03383 | Q969W3 | 0.54692   |
| 35558 | P03383 | Q15561 | 0.69234   |
| 35559 | P03383 | Q9Y2L1 | 0.3447    |
| 35560 | P03383 | Q96S65 | 0.89028   |
| 35561 | P03383 | Q6P047 | 0.3175    |
| 35562 | P03383 | Q86Y46 | 0.39317   |
| 35563 | P03383 | Q8N344 | 0.29481   |
| 35564 | P03383 | Q5TG92 | 0.37335   |
| 35565 | P03383 | Q9BWJ2 | 0.093306  |
| 35566 | P03383 | Q9P1A6 | 0.137     |
| 35567 | P03383 | E7EW31 | 0.33834   |
| 35568 | P03383 | Q9BXU2 | 0.098116  |

|       |        |        |           |
|-------|--------|--------|-----------|
| 35569 | P03383 | O15266 | 0.35951   |
| 35570 | P03383 | P09661 | 0.45549   |
| 35571 | P03383 | Q9BU76 | 0.65528   |
| 35572 | P03383 | P56377 | 0.12861   |
| 35573 | P03383 | Q5BKX5 | 0.60341   |
| 35574 | P03383 | Q92831 | 0.60514   |
| 35575 | P03383 | O15126 | 0.1059    |
| 35576 | P03383 | Q9Y2S7 | 0.6308    |
| 35577 | P03383 | Q8N0Z3 | 0.32932   |
| 35578 | P03383 | Q8IXT1 | 0.072039  |
| 35579 | P03383 | Q9Y3I1 | 0.60115   |
| 35580 | P03383 | Q86XR8 | 0.64015   |
| 35581 | P03383 | Q330K2 | 0.20775   |
| 35582 | P03383 | Q96FJ8 | 0.33834   |
| 35583 | P03383 | Q5JR59 | 0.68091   |
| 35584 | P03383 | Q8NBR6 | 1.0587    |
| 35585 | P03383 | Q96NL0 | 0.18106   |
| 35586 | P03383 | Q9UBD5 | 0.32816   |
| 35587 | P03383 | O75794 | 0.80164   |
| 35588 | P03383 | Q5JVS0 | 0.54996   |
| 35589 | P03383 | Q92621 | 0.81266   |
| 35590 | P03383 | Q9H3J6 | 0.68731   |
| 35591 | P03383 | Q16543 | 0.21074   |
| 35592 | P03383 | Q8IWF9 | 0.051817  |
| 35593 | P03383 | Q9BVV6 | 0.33834   |
| 35594 | P03383 | Q9UHV9 | 0.55068   |
| 35595 | P03383 | Q96GA3 | 0.6131    |
| 35596 | P03383 | Q12888 | 0.47997   |
| 35597 | P03383 | Q96BR6 | 0.27836   |
| 35598 | P03383 | Q32MZ4 | 0.8333    |
| 35599 | P03383 | Q9H974 | 0.82188   |
| 35600 | P03383 | Q6ZTI6 | 0.66283   |
| 35601 | P03383 | Q6UXR8 | 0.33834   |
| 35602 | P03383 | Q8N8E1 | 0.25057   |
| 35603 | P03383 | Q9BZE7 | 0.60341   |
| 35604 | P03383 | Q99547 | 0.55896   |
| 35605 | P03383 | Q9ULX3 | 0.44693   |
| 35606 | P03383 | Q86UU5 | 0.48946   |
| 35607 | P03383 | Q14746 | 0.20122   |
| 35608 | P03383 | P60608 | 0.46353   |
| 35609 | P03383 | Q7Z4W3 | 0.33834   |
| 35610 | P03383 | P11831 | 0.41708   |
| 35611 | P03383 | P49792 | 0.63219   |
| 35612 | P03383 | O14757 | 0.43158   |
| 35613 | P03383 | B9ZVM9 | 0.8045    |
| 35614 | P03383 | Q15287 | 0.71913   |
| 35615 | P03383 | Q8WZ33 | 0.52502   |
| 35616 | P03383 | Q8N2Z9 | 0.30313   |
| 35617 | P03383 | K7EIQ3 | 0.67516   |
| 35618 | P03383 | Q4G0G2 | 0.077779  |
| 35619 | P03383 | Q8NFB4 | 0.74228   |
| 35620 | P03383 | Q53EL6 | 0.7158    |
| 35621 | P03383 | Q9H8X3 | 0.0057033 |
| 35622 | P03383 | Q15047 | 0.45186   |
| 35623 | P03383 | Q9H019 | 0.51712   |
| 35624 | P03383 | Q6W349 | 0.39604   |
| 35625 | P03383 | Q96T76 | 0.662     |
| 35626 | P03383 | Q17RB0 | 0.33511   |
| 35627 | P03383 | Q16352 | 0.62256   |
| 35628 | P03383 | Q5T6M2 | 0.67642   |
| 35629 | P03383 | Q5T871 | 0.33834   |
| 35630 | P03383 | Q8NHR7 | 0.14018   |
| 35631 | P03383 | Q8N6V4 | 0.091287  |
| 35632 | P03383 | Q8N535 | 0.18021   |
| 35633 | P03383 | Q8ND04 | 0.39513   |
| 35634 | P03383 | Q9BQA1 | 0.70732   |
| 35635 | P03383 | Q15010 | 0.15471   |
| 35636 | P03383 | Q9H4X1 | 0.55549   |
| 35637 | P03383 | Q7Z417 | 0.51882   |
| 35638 | P03383 | Q06609 | 0.26727   |
| 35639 | P03383 | O95625 | 0.08798   |
| 35640 | P03383 | Q9UH92 | 0.61766   |
| 35641 | P03383 | Q6TDU7 | 0.16829   |
| 35642 | P03383 | Q5TYX0 | 0.28378   |
| 35643 | P03383 | Q5TC12 | 0.26368   |
| 35644 | P03383 | Q6ZV56 | 0.33834   |

|       |        |        |          |
|-------|--------|--------|----------|
| 35645 | P03383 | P86480 | 0.33834  |
| 35646 | P03383 | P04733 | 0.2243   |
| 35647 | P03383 | Q9UBB6 | 0.33752  |
| 35648 | P03383 | Q96G03 | 0.39338  |
| 35649 | P03383 | Q96A22 | 0.23718  |
| 35650 | P03383 | Q7Z460 | 0.24206  |
| 35651 | P03383 | Q96SK3 | 0.22485  |
| 35652 | P03383 | Q14839 | 0.36782  |
| 35653 | P03383 | O75534 | 0.11033  |
| 35654 | P03383 | Q96JK9 | 0.69611  |
| 35655 | P03383 | Q96LI9 | 0.19446  |
| 35656 | P03383 | Q8NFC6 | 0.59341  |
| 35657 | P03383 | A6NFI7 | 0.49529  |
| 35658 | P03383 | Q96EL2 | 0.20824  |
| 35659 | P03383 | P15036 | 0.54347  |
| 35660 | P03383 | P35321 | 0.29773  |
| 35661 | P03383 | Q6UVJ0 | 0.57357  |
| 35662 | P03383 | Q9BYD1 | 0.58692  |
| 35663 | P03383 | Q0D2K3 | 0.69429  |
| 35664 | P03383 | Q9Y281 | 0.21294  |
| 35665 | P03383 | Q86UW9 | 0.61649  |
| 35666 | P03383 | O75582 | 0.24908  |
| 35667 | P03383 | Q9BTL4 | 0.38163  |
| 35668 | P03383 | H3BTG2 | 0.41986  |
| 35669 | P03383 | P62913 | 0.79736  |
| 35670 | P03383 | Q6ZN08 | 0.29071  |
| 35671 | P03383 | Q8NI27 | 0.52524  |
| 35672 | P03383 | Q05048 | 0.54949  |
| 35673 | P03383 | Q8WWY6 | 0.19547  |
| 35674 | P03383 | P80294 | 0.46119  |
| 35675 | P03383 | Q86XD5 | 0.17389  |
| 35676 | P03383 | P35080 | 0.19009  |
| 35677 | P03383 | Q9Y3V2 | 0.55947  |
| 35678 | P03383 | Q12894 | 0.34215  |
| 35679 | P03383 | Q14497 | 0.58459  |
| 35680 | P03383 | Q9BX40 | 0.54274  |
| 35681 | P03383 | P35712 | 0.36276  |
| 35682 | P03383 | P50549 | 0.69326  |
| 35683 | P03383 | P62945 | 0.49535  |
| 35684 | P03383 | Q95602 | 0.42171  |
| 35685 | P03383 | Q01105 | 0.53308  |
| 35686 | P03383 | O60671 | 0.29839  |
| 35687 | P03383 | Q9UK58 | 0.16372  |
| 35688 | P03383 | P06746 | 0.24382  |
| 35689 | P03383 | Q5VZQ5 | 0.39512  |
| 35690 | P03383 | Q8IWT0 | 0.03876  |
| 35691 | P03383 | Q6PJT7 | 0.66778  |
| 35692 | P03383 | Q9NQR7 | 0.33834  |
| 35693 | P03383 | Q02080 | 0.22249  |
| 35694 | P03383 | P55036 | 0.42319  |
| 35695 | P03383 | Q96N21 | 0.42098  |
| 35696 | P03383 | P61024 | 0.5264   |
| 35697 | P03383 | Q13485 | 0.46037  |
| 35698 | P03383 | Q969Q6 | 0.075182 |
| 35699 | P03383 | Q9H2U2 | 0.30173  |
| 35700 | P03383 | Q9UJW0 | 0.16716  |
| 35701 | P03383 | Q9Y4B6 | 0.5966   |
| 35702 | P03383 | Q6P1J9 | 0.47678  |
| 35703 | P03383 | P02533 | 0.75254  |
| 35704 | P03383 | Q96SZ4 | 0.12019  |
| 35705 | P03383 | Q56P03 | 0.37695  |
| 35706 | P03383 | Q9Y6Z5 | 0.56716  |
| 35707 | P03383 | Q9BYG8 | 0.021759 |
| 35708 | P03383 | Q12904 | 0.073534 |
| 35709 | P03383 | Q15369 | 1.0539   |
| 35710 | P03383 | Q9HBD4 | 0.40643  |
| 35711 | P03383 | Q9P1J3 | 0.33834  |
| 35712 | P03383 | Q9Y324 | 0.66545  |
| 35713 | P03383 | Q8NFI8 | 0.20595  |
| 35714 | P03383 | P61574 | 0.43317  |
| 35715 | P03383 | P63272 | 0.78776  |
| 35716 | P03383 | Q9NQ92 | 0.66876  |
| 35717 | P03383 | Q9UHV2 | 1.2488   |
| 35718 | P03383 | Q6IPU0 | 0.52894  |
| 35719 | P03383 | Q9BSG1 | 0.25293  |
| 35720 | P03383 | Q14653 | 0.41071  |

|       |        |        |          |
|-------|--------|--------|----------|
| 35721 | P03383 | Q5SVZ6 | 0.57792  |
| 35722 | P03383 | Q9BSJ2 | 0.73739  |
| 35723 | P03383 | O75494 | 0.48129  |
| 35724 | P03383 | P20290 | 0.8435   |
| 35725 | P03383 | Q9BZL4 | 0.31745  |
| 35726 | P03383 | Q9UK10 | 0.24149  |
| 35727 | P03383 | Q9BVW5 | 0.70152  |
| 35728 | P03383 | Q86XI2 | 0.52687  |
| 35729 | P03383 | Q06455 | 0.5031   |
| 35730 | P03383 | Q6PI97 | 0.083393 |
| 35731 | P03383 | Q04864 | 0.85778  |
| 35732 | P03383 | Q96A56 | 0.78643  |
| 35733 | P03383 | O14862 | 0.30873  |
| 35734 | P03383 | A6NK75 | 0.21999  |
| 35735 | P03383 | A6NNW6 | 0.34097  |
| 35736 | P03383 | Q7Z3C6 | 0.19473  |
| 35737 | P03383 | Q9NTU4 | 0.45558  |
| 35738 | P03383 | P0DI83 | 0.29972  |
| 35739 | P03383 | O95163 | 0.51443  |
| 35740 | P03383 | P33076 | 0.33116  |
| 35741 | P03383 | Q96I23 | 0.13749  |
| 35742 | P03383 | Q64ET8 | 0.56042  |
| 35743 | P03383 | Q96TC7 | 0.48855  |
| 35744 | P03383 | O00716 | 0.87253  |
| 35745 | P03383 | Q86WP2 | 0.40115  |
| 35746 | P03383 | O60809 | 0.34634  |
| 35747 | P03383 | Q9BYA6 | 0.33834  |
| 35748 | P03383 | Q75791 | 0.68547  |
| 35749 | P03383 | Q15366 | 0.6477   |
| 35750 | P03383 | P08047 | 0.57709  |
| 35751 | P03383 | Q9UPW6 | 0.52299  |
| 35752 | P03383 | Q9H6U6 | 0.52644  |
| 35753 | P03383 | P19013 | 0.58419  |
| 35754 | P03383 | Q8HWS3 | 0.16579  |
| 35755 | P03383 | Q569H4 | 0.60341  |
| 35756 | P03383 | Q9UKL3 | 0.91729  |
| 35757 | P03383 | Q7L5A3 | 0.39277  |
| 35758 | P03383 | O96019 | 0.73385  |
| 35759 | P03383 | P07311 | 0.42451  |
| 35760 | P03383 | A6NK39 | 0.12558  |
| 35761 | P03383 | Q9NWT6 | 0.28842  |
| 35762 | P03383 | Q6P050 | 0.45471  |
| 35763 | P03383 | Q9NTK1 | 0.50934  |
| 35764 | P03383 | P51003 | 0.1295   |
| 35765 | P03383 | Q9P2J5 | 0.15735  |
| 35766 | P03383 | Q9H3P2 | 0.85132  |
| 35767 | P03383 | O94925 | 0.29495  |
| 35768 | P03383 | Q9BSH4 | 0.78971  |
| 35769 | P03383 | Q9UIA9 | 0.27412  |
| 35770 | P03383 | Q9NYV6 | 0.35839  |
| 35771 | P03383 | Q9BTC8 | 0.39335  |
| 35772 | P03383 | P06748 | 0.29207  |
| 35773 | P03383 | Q68E01 | 0.32765  |
| 35774 | P03383 | Q5T749 | 0.63707  |
| 35775 | P03383 | Q1MSJ5 | 0.80221  |
| 35776 | P03383 | O43148 | 0.72694  |
| 35777 | P03383 | P0C7T4 | 0.33834  |
| 35778 | P03383 | P13010 | 0.20384  |
| 35779 | P03383 | P62854 | 0.61345  |
| 35780 | P03383 | Q32M84 | 0.069626 |
| 35781 | P03383 | Q9H3H3 | 0.098584 |
| 35782 | P03383 | Q9ULM3 | 0.54938  |
| 35783 | P03383 | Q14209 | 0.86926  |
| 35784 | P03383 | P25815 | 0.29241  |
| 35785 | P03383 | Q96BD8 | 0.39487  |
| 35786 | P03383 | Q6ZU35 | 0.60341  |
| 35787 | P03383 | Q6NW29 | 0.27433  |
| 35788 | P03383 | A6NKU9 | 0.38945  |
| 35789 | P03383 | Q00610 | 0.61561  |
| 35790 | P03383 | P29084 | 0.94701  |
| 35791 | P03383 | P29474 | 0.38259  |
| 35792 | P03383 | Q969L4 | 0.4873   |
| 35793 | P03383 | Q96ES7 | 0.044807 |
| 35794 | P03383 | Q4G0A6 | 0.77565  |
| 35795 | P03383 | P40926 | 0.17722  |
| 35796 | P03383 | Q9H9E3 | 0.27809  |

|       |        |        |          |
|-------|--------|--------|----------|
| 35797 | P03383 | Q9GZW5 | 0.45626  |
| 35798 | P03383 | O75528 | 0.54533  |
| 35799 | P03383 | A6NJB7 | 0.60137  |
| 35800 | P03383 | F8W1W9 | 0.14207  |
| 35801 | P03383 | O75143 | 0.8233   |
| 35802 | P03383 | O14933 | 0.25293  |
| 35803 | P03383 | P82930 | 0.65601  |
| 35804 | P03383 | O95865 | 0.21008  |
| 35805 | P03383 | Q9Y305 | 0.42946  |
| 35806 | P03383 | P55212 | 0.2848   |
| 35807 | P03383 | A2RTY3 | 0.15528  |
| 35808 | P03383 | Q99607 | 0.81303  |
| 35809 | P03383 | Q9BR84 | 0.35536  |
| 35810 | P03383 | Q5T0Z8 | 0.60341  |
| 35811 | P03383 | A5PLN9 | 0.39297  |
| 35812 | P03383 | P53804 | 0.47131  |
| 35813 | P03383 | O60543 | 0.18123  |
| 35814 | P03383 | A6NJI1 | 0.37614  |
| 35815 | P03383 | Q9BPY3 | 0.086229 |
| 35816 | P03383 | P17096 | 0.32758  |
| 35817 | P03383 | A8K554 | 0.024989 |
| 35818 | P03383 | Q9BPZ2 | 0.42693  |
| 35819 | P03383 | Q5TBE3 | 0.22214  |
| 35820 | P03383 | Q8TBB1 | 0.51142  |
| 35821 | P03383 | O75478 | 0.16888  |
| 35822 | P03383 | P40429 | 0.49673  |
| 35823 | P03383 | Q9H0F6 | 0.030294 |
| 35824 | P03383 | Q5JUQ0 | 0.27367  |
| 35825 | P03383 | P0C7X3 | 0.2823   |
| 35826 | P03383 | Q9BRU2 | 0.26009  |
| 35827 | P03383 | Q9H8S9 | 0.22592  |
| 35828 | P03383 | Q9UKI9 | 0.99687  |
| 35829 | P03383 | Q9NXX6 | 0.13588  |
| 35830 | P03383 | Q86SX3 | 1.0823   |
| 35831 | P03383 | O15397 | 0.59793  |
| 35832 | P03383 | Q9Y244 | 0.15616  |
| 35833 | P03383 | Q9Y5L5 | 0.83646  |
| 35834 | P03383 | P16220 | 0.66491  |
| 35835 | P03383 | Q9UHZ2 | 0.33834  |
| 35836 | P03383 | P08727 | 0.75254  |
| 35837 | P03383 | Q9P206 | 0.64276  |
| 35838 | P03383 | Q9NZV7 | 0.37043  |
| 35839 | P03383 | Q9HCU8 | 0.32381  |
| 35840 | P03383 | Q9BYR3 | 0.5733   |
| 35841 | P03383 | Q9H7R5 | 0.25401  |
| 35842 | P03383 | Q96M63 | 0.057716 |
| 35843 | P03383 | Q5SV97 | 0.5684   |
| 35844 | P03383 | P82912 | 0.39604  |
| 35845 | P03383 | Q9BVJ6 | 0.53608  |
| 35846 | P03383 | P27540 | 0.29639  |
| 35847 | P03383 | Q9NWS1 | 0.60675  |
| 35848 | P03383 | A6PW82 | 0.39629  |
| 35849 | P03383 | O14579 | 0.33042  |
| 35850 | P03383 | Q96DE5 | 0.78343  |
| 35851 | P03383 | O00167 | 0.37813  |
| 35852 | P03383 | Q5SZB4 | 0.044355 |
| 35853 | P03383 | Q15562 | 0.63425  |
| 35854 | P03383 | Q9Y2P7 | 0.25605  |
| 35855 | P03383 | Q8N0W5 | 0.073244 |
| 35856 | P03383 | Q9BYD2 | 0.59283  |
| 35857 | P03383 | Q8N1L9 | 0.63615  |
| 35858 | P03383 | O75251 | 0.03063  |
| 35859 | P03383 | Q68DK2 | 0.58167  |
| 35860 | P03383 | P58505 | 0.3294   |
| 35861 | P03383 | Q8NCF5 | 0.257    |
| 35862 | P03383 | Q9BQD3 | 0.18389  |
| 35863 | P03383 | P14868 | 0.56496  |
| 35864 | P03383 | Q7Z6K1 | 0.44437  |
| 35865 | P03383 | Q8WW33 | 0.43519  |
| 35866 | P03383 | A6NJV1 | 0.46487  |
| 35867 | P03383 | Q9H0S4 | 0.029572 |
| 35868 | P03383 | O43390 | 0.46611  |
| 35869 | P03383 | Q9Y2P8 | 0.41192  |
| 35870 | P03383 | Q15051 | 0.36344  |
| 35871 | P03383 | Q96S19 | 0.052759 |
| 35872 | P03383 | A6NDB9 | 0.33536  |

|       |        |        |          |
|-------|--------|--------|----------|
| 35873 | P03383 | B9A014 | 0.11208  |
| 35874 | P03383 | P28069 | 0.46079  |
| 35875 | P03383 | Q02241 | 0.46526  |
| 35876 | P03383 | P54278 | 0.17177  |
| 35877 | P03383 | Q8NBT2 | 0.47096  |
| 35878 | P03383 | A6NNH0 | 0.52445  |
| 35879 | P03383 | Q9Y6K9 | 0.61734  |
| 35880 | P03383 | Q9BV19 | 0.38343  |
| 35881 | P03383 | Q6ZSN7 | 0.21126  |
| 35882 | P03383 | Q49A33 | 0.29837  |
| 35883 | P03383 | Q8WXS3 | 0.73927  |
| 35884 | P03383 | Q93083 | 0.23866  |
| 35885 | P03383 | Q15544 | 0.83827  |
| 35886 | P03383 | Q8IYN6 | 0.58513  |
| 35887 | P03383 | O60756 | 0.33834  |
| 35888 | P03383 | Q5U649 | 0.011095 |
| 35889 | P03383 | Q14678 | 0.3233   |
| 35890 | P03383 | Q92844 | 0.2321   |
| 35891 | P03383 | Q5T752 | 0.33834  |
| 35892 | P03383 | Q9H4K1 | 0.36465  |
| 35893 | P03383 | Q8TF01 | 0.71733  |
| 35894 | P03383 | Q92572 | 0.25661  |
| 35895 | P03383 | Q9UQK1 | 0.20881  |
| 35896 | P03383 | Q9H0C8 | 0.19352  |
| 35897 | P03383 | Q8N8H1 | 0.28301  |
| 35898 | P03383 | Q9H8H0 | 0.050323 |
| 35899 | P03383 | Q96A35 | 0.49411  |
| 35900 | P03383 | Q8N3U4 | 0.48005  |
| 35901 | P03383 | Q63HN1 | 0.19935  |
| 35902 | P03383 | Q8TAD8 | 0.97899  |
| 35903 | P03383 | Q8IUC1 | 0.23053  |
| 35904 | P03383 | Q6ZYL4 | 0.6634   |
| 35905 | P03383 | Q94986 | 0.80035  |
| 35906 | P03383 | Q8IWL8 | 0.60533  |
| 35907 | P03383 | Q13469 | 0.81845  |
| 35908 | P03383 | Q9H9Z2 | 0.53732  |
| 35909 | P03383 | Q52LG2 | 0.22016  |
| 35910 | P03383 | Q8NBZ9 | 0.28513  |
| 35911 | P03383 | Q7Z591 | 0.88263  |
| 35912 | P03383 | P62987 | 0.43829  |
| 35913 | P03383 | Q9BSF8 | 0.11945  |
| 35914 | P03383 | Q13515 | 0.78461  |
| 35915 | P03383 | Q9NWB7 | 0.39036  |
| 35916 | P03383 | P17544 | 0.7483   |
| 35917 | P03383 | Q6ZUT1 | 0.33834  |
| 35918 | P03383 | P56270 | 0.37206  |
| 35919 | P03383 | Q8N6T7 | 0.40256  |
| 35920 | P03383 | Q96B67 | 0.14837  |
| 35921 | P03383 | Q5TI25 | 0.95616  |
| 35922 | P03383 | Q8IUR6 | 0.7543   |
| 35923 | P03383 | Q9NPA8 | 0.22164  |
| 35924 | P03383 | P62891 | 0.4221   |
| 35925 | P03383 | Q12824 | 0.80995  |
| 35926 | P03383 | Q9NVN8 | 0.17744  |
| 35927 | P03383 | P25398 | 0.45256  |
| 35928 | P03383 | B1AMM8 | 0.087817 |
| 35929 | P03383 | Q9H4B0 | 0.52021  |
| 35930 | P03383 | Q9NSB4 | 0.46889  |
| 35931 | P03383 | Q5BN46 | 0.087099 |
| 35932 | P03383 | Q16633 | 0.3299   |
| 35933 | P03383 | P35269 | 0.85762  |
| 35934 | P03383 | Q8IUC6 | 0.093042 |
| 35935 | P03383 | Q8NEE0 | 0.33834  |
| 35936 | P03383 | P27469 | 0.56985  |
| 35937 | P03383 | Q96JI7 | 0.27719  |
| 35938 | P03383 | O95397 | 0.70573  |
| 35939 | P03383 | Q8WV99 | 0.086122 |
| 35940 | P03383 | Q14008 | 0.6109   |
| 35941 | P03383 | P0C7T5 | 0.39679  |
| 35942 | P03383 | Q8N7Y1 | 0.33834  |
| 35943 | P03383 | Q9H777 | 0.31808  |
| 35944 | P03383 | P51808 | 0.099736 |
| 35945 | P03383 | Q86V20 | 0.59763  |
| 35946 | P03383 | Q7Z6B0 | 0.36611  |
| 35947 | P03383 | Q86VY4 | 0.30246  |
| 35948 | P03383 | Q14160 | 0.41994  |

|       |        |        |           |
|-------|--------|--------|-----------|
| 35949 | P03383 | Q8TAK5 | 0.24671   |
| 35950 | P03383 | Q9NZJ0 | 0.46678   |
| 35951 | P03383 | Q13216 | 0.24422   |
| 35952 | P03383 | P32243 | 0.65127   |
| 35953 | P03383 | Q9NSB2 | 0.59286   |
| 35954 | P03383 | Q9UP83 | 0.90273   |
| 35955 | P03383 | Q9H900 | 0.31244   |
| 35956 | P03383 | Q15691 | 0.44742   |
| 35957 | P03383 | A6NFL8 | 0.5567    |
| 35958 | P03383 | Q9HD40 | 0.31488   |
| 35959 | P03383 | P61572 | 0.43317   |
| 35960 | P03383 | P62324 | 0.53048   |
| 35961 | P03383 | Q9Y3C0 | 0.18353   |
| 35962 | P03383 | Q32MQ0 | 0.38248   |
| 35963 | P03383 | P83876 | 0.73141   |
| 35964 | P03383 | P56277 | 0.61063   |
| 35965 | P03383 | Q8NH5  | 0.66864   |
| 35966 | P03383 | Q9NX63 | 0.49245   |
| 35967 | P03383 | Q96AJ1 | 0.96594   |
| 35968 | P03383 | A6NF01 | 0.71685   |
| 35969 | P03383 | Q5H9I0 | 0.22463   |
| 35970 | P03383 | Q86WZ0 | 0.26246   |
| 35971 | P03383 | P19338 | 0.37907   |
| 35972 | P03383 | Q16626 | 0.1798    |
| 35973 | P03383 | Q13884 | 0.22686   |
| 35974 | P03383 | P51948 | 0.36569   |
| 35975 | P03383 | Q02040 | 0.37365   |
| 35976 | P03383 | Q60287 | 0.77282   |
| 35977 | P03383 | Q13233 | 0.37975   |
| 35978 | P03383 | Q9H4I2 | 0.558     |
| 35979 | P03383 | Q13084 | 0.74772   |
| 35980 | P03383 | P11844 | 0.58659   |
| 35981 | P03383 | Q00472 | 0.33296   |
| 35982 | P03383 | Q9NP64 | 0.046073  |
| 35983 | P03383 | P13640 | 0.38669   |
| 35984 | P03383 | A4D1U4 | 0.24382   |
| 35985 | P03383 | Q9NYG5 | 0.49821   |
| 35986 | P03383 | Q9H840 | 0.62438   |
| 35987 | P03383 | Q9HBE1 | 0.10931   |
| 35988 | P03383 | Q00653 | 0.90917   |
| 35989 | P03383 | Q3ZLR7 | 0.60338   |
| 35990 | P03383 | P0CZ25 | 0.0052814 |
| 35991 | P03383 | C9JFL3 | 0.33834   |
| 35992 | P03383 | Q75896 | 0.41602   |
| 35993 | P03383 | Q8WUY3 | 0.077409  |
| 35994 | P03383 | Q9UL18 | 0.74231   |
| 35995 | P03383 | Q15459 | 0.47234   |
| 35996 | P03383 | Q658K8 | 0.32506   |
| 35997 | P03383 | Q96LR2 | 0.78859   |
| 35998 | P03383 | Q00567 | 0.58869   |
| 35999 | P03383 | P62280 | 0.46333   |
| 36000 | P03383 | Q60765 | 0.20784   |
| 36001 | P03383 | P82664 | 0.76771   |
| 36002 | P03383 | Q9H2J4 | 0.4136    |
| 36003 | P03383 | P62318 | 0.59235   |
| 36004 | P03383 | Q9BYR2 | 0.5733    |
| 36005 | P03383 | Q96IZ7 | 0.90379   |
| 36006 | P03383 | Q8WTV1 | 0.67872   |
| 36007 | P03383 | P55735 | 0.35851   |
| 36008 | P03383 | Q8IYB0 | 0.33834   |
| 36009 | P03383 | Q13356 | 0.14348   |
| 36010 | P03383 | Q96QF0 | 0.34856   |
| 36011 | P03383 | P26371 | 0.33834   |
| 36012 | P03383 | P0CG20 | 0.18629   |
| 36013 | P03383 | Q95684 | 0.53555   |
| 36014 | P03383 | Q96DY2 | 0.045709  |
| 36015 | P03383 | Q9H706 | 0.1668    |
| 36016 | P03383 | Q08999 | 1.0658    |
| 36017 | P03383 | A8MVS1 | 0.33178   |
| 36018 | P03383 | Q5VZE5 | 0.13755   |
| 36019 | P03383 | H0YKK7 | 0.52432   |
| 36020 | P03383 | Q07020 | 0.52506   |
| 36021 | P03383 | Q9H8G1 | 0.3213    |
| 36022 | P03383 | Q8IYL3 | 0.72583   |
| 36023 | P03383 | A0PJX2 | 0.34313   |
| 36024 | P03383 | Q94805 | 0.55123   |

|       |        |         |         |
|-------|--------|---------|---------|
| 36025 | P03383 | Q14129  | 0.40337 |
| 36026 | P03383 | Q9UNP9  | 0.27182 |
| 36027 | P03383 | O94829  | 0.75093 |
| 36028 | P03383 | Q8IU60  | 0.61306 |
| 36029 | P03383 | Q8IY31  | 0.29249 |
| 36030 | P03383 | Q8N6I1  | 0.72988 |
| 36031 | P03383 | Q9BTA9  | 0.69069 |
| 36032 | P03383 | Q13166  | 0.33834 |
| 36033 | P03383 | Q14139  | 0.38268 |
| 36034 | P03383 | Q93075  | 0.43172 |
| 36035 | P03383 | Q96M60  | 0.22794 |
| 36036 | P03383 | Q5UIP0  | 0.68691 |
| 36037 | P03383 | P51965  | 0.30957 |
| 36038 | P03383 | P25440  | 0.32341 |
| 36039 | P03383 | O95433  | 0.27961 |
| 36040 | P03383 | Q6UUUV9 | 1.1049  |
| 36041 | P03383 | P0C7H8  | 0.23605 |
| 36042 | P03383 | P49458  | 0.48548 |
| 36043 | P03383 | Q8WWK9  | 0.20952 |
| 36044 | P03383 | Q86UE4  | 0.37292 |
| 36045 | P03383 | Q9NTX9  | 0.11309 |
| 36046 | P03383 | Q9NWS8  | 0.39185 |
| 36047 | P03383 | Q96MT4  | 0.59664 |
| 36048 | P03383 | P06454  | 0.38233 |
| 36049 | P03383 | Q9GZZ1  | 0.28076 |
| 36050 | P03383 | O14639  | 0.28571 |
| 36051 | P03383 | A8MWA4  | 0.36598 |
| 36052 | P03383 | Q9C075  | 0.58667 |
| 36053 | P03383 | P53618  | 0.49657 |
| 36054 | P03383 | Q9P2G4  | 0.60341 |
| 36055 | P03383 | Q96HA9  | 0.35459 |
| 36056 | P03383 | O43290  | 0.68951 |
| 36057 | P03383 | O60248  | 0.34844 |
| 36058 | P03383 | Q9UJX6  | 0.35911 |
| 36059 | P03383 | Q9H944  | 0.88349 |
| 36060 | P03383 | P0CW23  | 0.23459 |
| 36061 | P03383 | O94776  | 0.76878 |
| 36062 | P03383 | Q3SYF9  | 0.33834 |
| 36063 | P03383 | Q3T8J9  | 0.38766 |
| 36064 | P03383 | P40337  | 0.56071 |
| 36065 | P03383 | P62312  | 0.57169 |
| 36066 | P03383 | P25789  | 0.48239 |
| 36067 | P03383 | O15040  | 0.1668  |
| 36068 | P03383 | P62750  | 0.61236 |
| 36069 | P03383 | Q8N1I8  | 0.33834 |
| 36070 | P03383 | Q9NZD8  | 0.41322 |
| 36071 | P03383 | Q5VTL8  | 0.68292 |
| 36072 | P03383 | Q8WXE1  | 0.43207 |
| 36073 | P03383 | P49711  | 0.13498 |
| 36074 | P03383 | Q9H4D5  | 0.39853 |
| 36075 | P03383 | Q32MH5  | 0.31194 |
| 36076 | P03383 | Q0VD86  | 0.11945 |
| 36077 | P03383 | A8MYP8  | 0.42146 |
| 36078 | P03383 | Q96M91  | 0.68468 |
| 36079 | P03383 | P54105  | 0.59709 |
| 36080 | P03383 | Q8WUX9  | 0.20428 |
| 36081 | P03383 | Q9BSK0  | 0.55613 |
| 36082 | P03383 | Q5D0E6  | 0.56706 |
| 36083 | P03383 | P53370  | 0.27623 |
| 36084 | P03383 | P17022  | 0.09884 |
| 36085 | P03383 | P22626  | 0.42497 |
| 36086 | P03383 | P62072  | 0.11076 |
| 36087 | P03383 | P0CL83  | 0.44986 |
| 36088 | P03383 | Q5T5J6  | 0.55995 |
| 36089 | P03383 | Q9BUX1  | 0.5045  |
| 36090 | P03383 | I3L3R5  | 0.33834 |
| 36091 | P03383 | Q9BTA0  | 0.60341 |
| 36092 | P03383 | Q107X0  | 0.4565  |
| 36093 | P03383 | Q8N1A0  | 0.79565 |
| 36094 | P03383 | Q9BUN5  | 0.24424 |
| 36095 | P03383 | Q14106  | 0.26787 |
| 36096 | P03383 | P83436  | 0.25922 |
| 36097 | P03383 | Q86V71  | 0.24064 |
| 36098 | P03383 | Q8TD19  | 0.25459 |
| 36099 | P03383 | Q8N163  | 0.49598 |
| 36100 | P03383 | Q9Y678  | 0.3122  |



|       |        |        |          |
|-------|--------|--------|----------|
| 36101 | P03383 | P60409 | 0.5733   |
| 36102 | P03383 | A6H8Z2 | 0.30181  |
| 36103 | P03383 | Q52LR7 | 0.16942  |
| 36104 | P03383 | P08670 | 0.11869  |
| 36105 | P03383 | Q9BRJ2 | 0.17835  |
| 36106 | P03383 | P60900 | 0.30442  |
| 36107 | P03383 | Q15596 | 0.48625  |
| 36108 | P03383 | Q6P4R8 | 0.78412  |
| 36109 | P03383 | P15172 | 0.2416   |
| 36110 | P03383 | Q01094 | 0.62848  |
| 36111 | P03383 | P49789 | 0.24993  |
| 36112 | P03383 | Q96GE5 | 0.30771  |
| 36113 | P03383 | Q9BSJ6 | 0.33335  |
| 36114 | P03383 | Q9H5H4 | 0.18821  |
| 36115 | P03383 | Q8N128 | 0.33834  |
| 36116 | P03383 | Q5TG53 | 0.33834  |
| 36117 | P03383 | Q96HB5 | 0.27198  |
| 36118 | P03383 | Q8TAF3 | 0.37153  |
| 36119 | P03383 | Q96SL8 | 0.10704  |
| 36120 | P03383 | Q15013 | 0.58225  |
| 36121 | P03383 | P04156 | 0.27973  |
| 36122 | P03383 | B2RV13 | 0.42591  |
| 36123 | P03383 | Q6ZRH3 | 0.26503  |
| 36124 | P03383 | Q96RL7 | 0.72398  |
| 36125 | P03383 | Q5HYK7 | 0.81116  |
| 36126 | P03383 | Q8N1B4 | 0.33566  |
| 36127 | P03383 | P14866 | 0.37348  |
| 36128 | P03383 | P36639 | 0.11394  |
| 36129 | P03383 | Q5HY98 | 0.28894  |
| 36130 | P03383 | Q96MC9 | 0.76829  |
| 36131 | P03383 | A6NEA5 | 0.03148  |
| 36132 | P03383 | Q3KP31 | 0.30771  |
| 36133 | P03383 | Q5VZR2 | 0.80122  |
| 36134 | P03383 | O15371 | 0.42219  |
| 36135 | P03383 | Q9NYB0 | 0.6077   |
| 36136 | P03383 | Q9H869 | 1.0792   |
| 36137 | P03383 | O15511 | 0.028469 |
| 36138 | P03383 | P05387 | 0.38311  |
| 36139 | P03383 | Q9BQ48 | 0.62313  |
| 36140 | P03383 | Q9BTK6 | 0.24046  |
| 36141 | P03383 | P14921 | 0.60432  |
| 36142 | P03383 | Q15937 | 0.177    |
| 36143 | P03383 | Q15029 | 0.21794  |
| 36144 | P03383 | P55771 | 0.59989  |
| 36145 | P03383 | P62249 | 0.50761  |
| 36146 | P03383 | P54922 | 0.47345  |
| 36147 | P03383 | Q15072 | 0.14988  |
| 36148 | P03383 | O75376 | 0.31391  |
| 36149 | P03383 | Q8WVJ9 | 0.48493  |
| 36150 | P03383 | P0DMB1 | 0.37274  |
| 36151 | P03383 | Q8WU58 | 0.26427  |
| 36152 | P03383 | Q15572 | 0.66739  |
| 36153 | P03383 | Q9H1K1 | 0.56759  |
| 36154 | P03383 | Q8N7R1 | 0.46463  |
| 36155 | P03383 | O75486 | 0.53787  |
| 36156 | P03383 | Q14CN4 | 0.39317  |
| 36157 | P03383 | P60331 | 0.5733   |
| 36158 | P03383 | Q6NZI2 | 0.74978  |
| 36159 | P03383 | Q96KF2 | 0.33834  |
| 36160 | P03383 | P02728 | 0.33834  |
| 36161 | P03383 | Q9BU02 | 0.52786  |
| 36162 | P03383 | Q9ULK4 | 1.0144   |
| 36163 | P03383 | Q5VYV7 | 0.1668   |
| 36164 | P03383 | Q3SXR2 | 0.067839 |
| 36165 | P03383 | Q14526 | 0.41751  |
| 36166 | P03383 | P54920 | 0.2117   |
| 36167 | P03383 | Q96G27 | 0.38631  |
| 36168 | P03383 | Q96EH3 | 0.072976 |
| 36169 | P03383 | Q9UQL6 | 0.33004  |
| 36170 | P03383 | P17029 | 0.28158  |
| 36171 | P03383 | P17661 | 0.28304  |
| 36172 | P03383 | Q9NXZ1 | 0.072501 |
| 36173 | P03383 | Q07687 | 0.34755  |
| 36174 | P03383 | Q7Z3E2 | 0.51034  |
| 36175 | P03383 | Q9BRA2 | 0.2604   |
| 36176 | P03383 | P38646 | 0.40891  |

|       |        |        |          |
|-------|--------|--------|----------|
| 36177 | P03383 | Q9NVX0 | 0.68544  |
| 36178 | P03383 | Q6ZS72 | 0.28574  |
| 36179 | P03383 | Q9H0C5 | 0.35261  |
| 36180 | P03383 | P58340 | 0.27539  |
| 36181 | P03383 | Q96F24 | 0.44871  |
| 36182 | P03383 | Q5BJE1 | 0.14485  |
| 36183 | P03383 | Q6ZR85 | 0.33834  |
| 36184 | P03383 | Q4VC05 | 0.51645  |
| 36185 | P03383 | Q3ZCQ2 | 0.33834  |
| 36186 | P03383 | Q3MIV0 | 0.33834  |
| 36187 | P03383 | Q14713 | 0.33997  |
| 36188 | P03383 | Q9Y5Q3 | 0.64368  |
| 36189 | P03383 | Q7Z4Q2 | 0.61986  |
| 36190 | P03383 | Q96NT1 | 0.81027  |
| 36191 | P03383 | P0CG00 | 0.086869 |
| 36192 | P03383 | Q5TAP6 | 0.50339  |
| 36193 | P03383 | Q9P2W6 | 0.33834  |
| 36194 | P03383 | A4D0V7 | 0.63209  |
| 36195 | P03383 | A8MX34 | 0.27495  |
| 36196 | P03383 | Q96H20 | 0.63722  |
| 36197 | P03383 | Q96RL1 | 0.50747  |
| 36198 | P03383 | P62888 | 0.48349  |
| 36199 | P03383 | Q96H12 | 0.67645  |
| 36200 | P03383 | Q96BN6 | 0.24623  |
| 36201 | P03383 | A6NHQ4 | 0.54577  |
| 36202 | P03383 | Q9H981 | 0.78119  |
| 36203 | P03383 | Q8N4H0 | 0.11295  |
| 36204 | P03383 | Q8IYJ2 | 0.49962  |
| 36205 | P03383 | Q9H4T2 | 0.079859 |
| 36206 | P03383 | Q9NWZ5 | 0.027697 |
| 36207 | P03383 | Q96MD2 | 0.071182 |
| 36208 | P03383 | O95487 | 0.43206  |
| 36209 | P03383 | P57772 | 0.45101  |
| 36210 | P03383 | Q12815 | 0.2894   |
| 36211 | P03383 | A6NKD9 | 0.88164  |
| 36212 | P03383 | O00287 | 0.34246  |
| 36213 | P03383 | Q8NAE3 | 0.1833   |
| 36214 | P03383 | P62899 | 0.40319  |
| 36215 | P03383 | Q6ZS94 | 0.33834  |
| 36216 | P03383 | Q15650 | 0.52908  |
| 36217 | P03383 | Q7Z4T9 | 0.45364  |
| 36218 | P03383 | Q9UBB4 | 0.70582  |
| 36219 | P03383 | Q6NUP7 | 0.26534  |
| 36220 | P03383 | O15162 | 0.10979  |
| 36221 | P03383 | Q96JS3 | 0.1371   |
| 36222 | P03383 | Q5PSV4 | 0.16676  |
| 36223 | P03383 | Q9UHB4 | 0.39729  |
| 36224 | P03383 | P19484 | 0.31253  |
| 36225 | P03383 | Q9UBQ5 | 0.70638  |
| 36226 | P03383 | P50502 | 0.37205  |
| 36227 | P03383 | Q9NWK9 | 0.39625  |
| 36228 | P03383 | Q16656 | 0.2146   |
| 36229 | P03383 | Q5TID7 | 0.28688  |
| 36230 | P03383 | O43264 | 0.37077  |
| 36231 | P03383 | Q9C0F0 | 0.25509  |
| 36232 | P03383 | Q49A88 | 0.34899  |
| 36233 | P03383 | P61571 | 0.3072   |
| 36234 | P03383 | P12270 | 0.47328  |
| 36235 | P03383 | Q03111 | 0.9661   |
| 36236 | P03383 | B1ATL7 | 0.12825  |
| 36237 | P03383 | Q8NA96 | 0.034227 |
| 36238 | P03383 | Q9BQ61 | 0.60341  |
| 36239 | P03383 | O14920 | 0.3884   |
| 36240 | P03383 | P31946 | 0.38879  |
| 36241 | P03383 | Q9Y5R5 | 0.15761  |
| 36242 | P03383 | O75792 | 0.73677  |
| 36243 | P03383 | Q8TDB4 | 0.21421  |
| 36244 | P03383 | O95503 | 0.6738   |
| 36245 | P03383 | Q9UPQ9 | 0.35791  |
| 36246 | P03383 | Q5FBB7 | 0.49055  |
| 36247 | P03383 | Q969H6 | 0.62526  |
| 36248 | P03383 | Q9HCL3 | 0.31749  |
| 36249 | P03383 | P01106 | 0.31329  |
| 36250 | P03383 | Q9BU61 | 0.40067  |
| 36251 | P03383 | Q13439 | 0.6471   |
| 36252 | P03383 | Q9UK73 | 0.5162   |

|       |        |        |           |
|-------|--------|--------|-----------|
| 36253 | P03383 | A6NDE8 | 0.17372   |
| 36254 | P03383 | Q15173 | 0.15245   |
| 36255 | P03383 | O43172 | 0.51544   |
| 36256 | P03383 | Q9Y675 | 0.49935   |
| 36257 | P03383 | Q8WW38 | 0.3599    |
| 36258 | P03383 | O75437 | 0.28415   |
| 36259 | P03383 | Q96FJ2 | 0.37554   |
| 36260 | P03383 | Q86YP4 | 0.63879   |
| 36261 | P03383 | Q96CJ1 | 0.93618   |
| 36262 | P03383 | Q86U70 | 0.17039   |
| 36263 | P03383 | Q6PD62 | 0.44218   |
| 36264 | P03383 | Q96MB7 | 0.3355    |
| 36265 | P03383 | P19367 | 0.1965    |
| 36266 | P03383 | Q9H633 | 0.14165   |
| 36267 | P03383 | Q5T2W1 | 0.27497   |
| 36268 | P03383 | O43257 | 0.24286   |
| 36269 | P03383 | P60228 | 0.67286   |
| 36270 | P03383 | Q6ZR54 | 0.33834   |
| 36271 | P03383 | Q15257 | 0.2659    |
| 36272 | P03383 | Q06547 | 0.84001   |
| 36273 | P03383 | Q93015 | 0.54925   |
| 36274 | P03383 | Q13487 | 1.1651    |
| 36275 | P03383 | O60613 | 0.41636   |
| 36276 | P03383 | O95251 | 0.63624   |
| 36277 | P03383 | P0C852 | 0.33834   |
| 36278 | P03383 | Q8NDM7 | 0.37477   |
| 36279 | P03383 | Q8TAV0 | 0.71733   |
| 36280 | P03383 | Q13769 | 0.40194   |
| 36281 | P03383 | P61927 | 0.411     |
| 36282 | P03383 | Q96GN5 | 0.56091   |
| 36283 | P03383 | Q9UHR5 | 0.93707   |
| 36284 | P03383 | Q7L590 | 0.74964   |
| 36285 | P03383 | P40424 | 0.4857    |
| 36286 | P03383 | O95295 | 0.25777   |
| 36287 | P03383 | Q7L592 | 0.33857   |
| 36288 | P03383 | Q6ZNR8 | 0.33834   |
| 36289 | P03383 | O00534 | 0.22715   |
| 36290 | P03383 | A8MXY4 | 0.2288    |
| 36291 | P03383 | Q9GZN8 | 0.17672   |
| 36292 | P03383 | Q8TC05 | 0.51935   |
| 36293 | P03383 | Q96MU7 | 0.48818   |
| 36294 | P03383 | Q9UL33 | 0.24743   |
| 36295 | P03383 | A6NEN9 | 0.0027008 |
| 36296 | P03383 | A6NIX2 | 0.75949   |
| 36297 | P03383 | Q5DJT8 | 0.069402  |
| 36298 | P03383 | P41220 | 0.25232   |
| 36299 | P03383 | Q12986 | 0.072161  |
| 36300 | P03383 | O15304 | 0.68178   |
| 36301 | P03383 | Q13838 | 0.093144  |
| 36302 | P03383 | P24534 | 0.37167   |
| 36303 | P03383 | P78347 | 0.45062   |
| 36304 | P03383 | Q04727 | 0.4978    |
| 36305 | P03383 | Q6NT76 | 0.24624   |
| 36306 | P03383 | Q9H0W8 | 0.30636   |
| 36307 | P03383 | Q7Z5L9 | 0.66613   |
| 36308 | P03383 | Q6AWC8 | 0.43254   |
| 36309 | P03383 | Q6ZTY9 | 0.18473   |
| 36310 | P03383 | Q9HD26 | 0.68559   |
| 36311 | P03383 | Q6NVH7 | 0.34096   |
| 36312 | P03383 | Q15554 | 0.30613   |
| 36313 | P03383 | Q8TDH9 | 0.085214  |
| 36314 | P03383 | Q9UKD1 | 0.50783   |
| 36315 | P03383 | Q9UJW3 | 0.40918   |
| 36316 | P03383 | P00338 | 0.38442   |
| 36317 | P03383 | Q96GY3 | 0.31789   |
| 36318 | P03383 | Q9H7E2 | 0.18883   |
| 36319 | P03383 | Q96NI8 | 0.28926   |
| 36320 | P03383 | O00541 | 0.28415   |
| 36321 | P03383 | Q5XKE5 | 0.50629   |
| 36322 | P03383 | Q9HCS7 | 0.26169   |
| 36323 | P03383 | O15527 | 0.2933    |
| 36324 | P03383 | Q6ZUA9 | 0.36908   |
| 36325 | P03383 | Q9H379 | 0.43004   |
| 36326 | P03383 | Q9NRI5 | 0.18718   |
| 36327 | P03383 | A8CG34 | 0.33372   |
| 36328 | P03383 | Q3YBM2 | 0.5469    |

|       |        |         |          |
|-------|--------|---------|----------|
| 36329 | P03383 | A6NKH3  | 0.27174  |
| 36330 | P03383 | O15037  | 0.27014  |
| 36331 | P03383 | Q9UPN9  | 0.31725  |
| 36332 | P03383 | P41227  | 0.21017  |
| 36333 | P03383 | Q8NE71  | 0.2197   |
| 36334 | P03383 | Q99608  | 0.032897 |
| 36335 | P03383 | Q9UI95  | 0.96469  |
| 36336 | P03383 | P53990  | 0.40002  |
| 36337 | P03383 | Q9ULR0  | 0.66178  |
| 36338 | P03383 | Q13888  | 0.42488  |
| 36339 | P03383 | Q8I WV8 | 0.14158  |
| 36340 | P03383 | Q9P2H0  | 0.1668   |
| 36341 | P03383 | Q9BW60  | 0.41347  |
| 36342 | P03383 | Q14181  | 0.35271  |
| 36343 | P03383 | Q6ZT83  | 0.080212 |
| 36344 | P03383 | O96006  | 0.52569  |
| 36345 | P03383 | A6NJR5  | 0.38945  |
| 36346 | P03383 | Q9BXQ6  | 0.33834  |
| 36347 | P03383 | Q9NRX3  | 0.55604  |
| 36348 | P03383 | P46777  | 0.90651  |
| 36349 | P03383 | Q96FH0  | 0.31354  |
| 36350 | P03383 | P0C7M3  | 0.034227 |
| 36351 | P03383 | Q86WG3  | 0.2259   |
| 36352 | P03383 | P49116  | 0.45552  |
| 36353 | P03383 | Q9P2R6  | 0.81949  |
| 36354 | P03383 | Q7Z7A3  | 0.41144  |
| 36355 | P03383 | Q96DZ1  | 0.10352  |
| 36356 | P03383 | Q9Y5S9  | 0.59226  |
| 36357 | P03383 | Q92670  | 0.1717   |
| 36358 | P03383 | Q99575  | 0.48668  |
| 36359 | P03383 | Q5JXB2  | 0.19426  |
| 36360 | P03383 | Q9BYZ2  | 0.38442  |
| 36361 | P03383 | Q9Y5B6  | 0.54757  |
| 36362 | P03383 | P23511  | 0.86355  |
| 36363 | P03383 | P05204  | 0.26701  |
| 36364 | P03383 | O75362  | 0.54868  |
| 36365 | P03383 | Q9UL49  | 0.31887  |
| 36366 | P03383 | Q6ZUT4  | 0.33629  |
| 36367 | P03383 | Q5VZT2  | 0.001272 |
| 36368 | P03383 | P51815  | 0.15789  |
| 36369 | P03383 | Q9HAW0  | 0.24595  |
| 36370 | P03383 | Q96C34  | 0.41523  |
| 36371 | P03383 | P14859  | 0.91563  |
| 36372 | P03383 | Q8IWA6  | 0.23861  |
| 36373 | P03383 | Q8TAC9  | 0.30848  |
| 36374 | P03383 | P23193  | 0.92383  |
| 36375 | P03383 | Q9NTK5  | 0.43647  |
| 36376 | P03383 | Q13875  | 0.24985  |
| 36377 | P03383 | P46779  | 0.83108  |
| 36378 | P03383 | B3EWG5  | 0.60341  |
| 36379 | P03383 | Q8N668  | 0.5618   |
| 36380 | P03383 | Q9UKW6  | 0.27014  |
| 36381 | P03383 | Q9ULN7  | 0.58421  |
| 36382 | P03383 | P49427  | 0.36945  |
| 36383 | P03383 | P23297  | 0.31285  |
| 36384 | P03383 | Q9HAY2  | 0.013612 |
| 36385 | P03383 | Q53FE4  | 0.024361 |
| 36386 | P03383 | Q19AV6  | 0.76361  |
| 36387 | P03383 | Q8IWN6  | 0.23641  |
| 36388 | P03383 | A6NGG3  | 0.33834  |
| 36389 | P03383 | Q8N7M2  | 0.32673  |
| 36390 | P03383 | Q86YW9  | 0.22989  |
| 36391 | P03383 | Q5J TZ5 | 0.078901 |
| 36392 | P03383 | Q9BYP8  | 0.33834  |
| 36393 | P03383 | P52948  | 0.70774  |
| 36394 | P03383 | P41567  | 0.60077  |
| 36395 | P03383 | Q96C90  | 0.49589  |
| 36396 | P03383 | Q9BRR0  | 0.15978  |
| 36397 | P03383 | Q9GZN7  | 0.32178  |
| 36398 | P03383 | P49207  | 0.54942  |
| 36399 | P03383 | Q7Z465  | 0.39554  |
| 36400 | P03383 | Q13360  | 0.19829  |
| 36401 | P03383 | Q6DHV5  | 0.04737  |
| 36402 | P03383 | O00570  | 0.63291  |
| 36403 | P03383 | Q8WXE9  | 0.327    |
| 36404 | P03383 | A6NLC8  | 0.82598  |

|       |        |        |          |
|-------|--------|--------|----------|
| 36405 | P03383 | Q9NP66 | 0.75338  |
| 36406 | P03383 | P61956 | 0.43665  |
| 36407 | P03383 | P07902 | 0.31814  |
| 36408 | P03383 | Q86VG3 | 0.44286  |
| 36409 | P03383 | Q9H8W3 | 0.28426  |
| 36410 | P03383 | P27694 | 0.36152  |
| 36411 | P03383 | Q9ULQ0 | 0.78362  |
| 36412 | P03383 | Q3SYA9 | 0.33037  |
| 36413 | P03383 | A8MTY0 | 0.31091  |
| 36414 | P03383 | Q9P0J6 | 0.40518  |
| 36415 | P03383 | Q9Y4A5 | 0.62155  |
| 36416 | P03383 | O60244 | 0.39358  |
| 36417 | P03383 | Q5JSZ5 | 0.69687  |
| 36418 | P03383 | Q9BWW4 | 0.61839  |
| 36419 | P03383 | P12036 | 0.31459  |
| 36420 | P03383 | A6NMN3 | 0.15305  |
| 36421 | P03383 | Q9NYJ1 | 0.74004  |
| 36422 | P03383 | Q8WTT2 | 0.23189  |
| 36423 | P03383 | Q7Z3K6 | 0.29481  |
| 36424 | P03383 | Q9H7P6 | 0.65778  |
| 36425 | P03383 | P31749 | 0.38022  |
| 36426 | P03383 | Q96BD5 | 0.2455   |
| 36427 | P03383 | Q8TDR0 | 0.51674  |
| 36428 | P03383 | Q969F1 | 0.45519  |
| 36429 | P03383 | P55795 | 0.017956 |
| 36430 | P03383 | Q9GZR5 | 0.27533  |
| 36431 | P03383 | Q5SXJ2 | 0.95616  |
| 36432 | P03383 | P31040 | 0.48166  |
| 36433 | P03383 | Q9NRG4 | 0.51566  |
| 36434 | P03383 | Q96FX2 | 0.62066  |
| 36435 | P03383 | Q53HV7 | 0.35759  |
| 36436 | P03383 | Q5VTQ0 | 0.073768 |
| 36437 | P03383 | Q9P258 | 0.32428  |
| 36438 | P03383 | Q9P1G2 | 0.21097  |
| 36439 | P03383 | Q9H7U1 | 0.79193  |
| 36440 | P03383 | P36952 | 0.18062  |
| 36441 | P03383 | O43236 | 0.25348  |
| 36442 | P03383 | G3V211 | 0.5348   |
| 36443 | P03383 | Q9H6Y2 | 0.30057  |
| 36444 | P03383 | Q5VYK3 | 0.18547  |
| 36445 | P03383 | Q8TD23 | 0.44163  |
| 36446 | P03383 | Q3LI70 | 0.33834  |
| 36447 | P03383 | Q05481 | 0.2288   |
| 36448 | P03383 | Q9BPZ7 | 0.41201  |
| 36449 | P03383 | O60907 | 0.57097  |
| 36450 | P03383 | Q9ULE6 | 0.38432  |
| 36451 | P03383 | Q53TQ3 | 0.26935  |
| 36452 | P03383 | Q96M85 | 0.33834  |
| 36453 | P03383 | P62316 | 0.54936  |
| 36454 | P03383 | Q99456 | 0.75254  |
| 36455 | P03383 | Q13023 | 0.37428  |
| 36456 | P03383 | Q9NX20 | 0.33546  |
| 36457 | P03383 | P42025 | 0.1461   |
| 36458 | P03383 | Q53FD0 | 0.5752   |
| 36459 | P03383 | O43791 | 0.36452  |
| 36460 | P03383 | Q9Y295 | 0.19206  |
| 36461 | P03383 | Q5JPH6 | 0.25617  |
| 36462 | P03383 | Q9Y2Y9 | 0.54713  |
| 36463 | P03383 | O15111 | 0.44973  |
| 36464 | P03383 | P55198 | 0.63466  |
| 36465 | P03383 | P07864 | 0.38442  |
| 36466 | P03383 | Q9BXS6 | 0.46067  |
| 36467 | P03383 | P34896 | 0.075194 |
| 36468 | P03383 | Q6ZPA2 | 0.33834  |
| 36469 | P03383 | Q9BUA3 | 0.37104  |
| 36470 | P03383 | Q96BZ8 | 0.60341  |
| 36471 | P03383 | Q3ZCV2 | 0.60341  |
| 36472 | P03383 | P63172 | 0.56221  |
| 36473 | P03383 | O96000 | 0.2889   |
| 36474 | P03383 | Q9BXW9 | 0.54308  |
| 36475 | P03383 | P48382 | 0.69203  |
| 36476 | P03383 | O75360 | 0.28149  |
| 36477 | P03383 | A9UHW6 | 0.46058  |
| 36478 | P03383 | Q9Y535 | 0.057169 |
| 36479 | P03383 | Q8IXR5 | 0.21792  |
| 36480 | P03383 | Q8N1Q8 | 0.34162  |

|       |        |        |           |
|-------|--------|--------|-----------|
| 36481 | P03383 | Q14203 | 0.62011   |
| 36482 | P03383 | Q9BZL1 | 0.30164   |
| 36483 | P03383 | Q96A73 | 0.72236   |
| 36484 | P03383 | A1L4L8 | 0.30872   |
| 36485 | P03383 | Q96H40 | 0.30584   |
| 36486 | P03383 | Q8N9K3 | 0.60341   |
| 36487 | P03383 | A8MUU9 | 0.095415  |
| 36488 | P03383 | Q2M3W8 | 0.34707   |
| 36489 | P03383 | Q6NZ67 | 0.48044   |
| 36490 | P03383 | P22674 | 0.16711   |
| 36491 | P03383 | Q93034 | 0.46522   |
| 36492 | P03383 | Q7Z3Z0 | 0.75254   |
| 36493 | P03383 | Q5VXD3 | 0.018444  |
| 36494 | P03383 | Q9Y2X8 | 0.3359    |
| 36495 | P03383 | Q9NUC0 | 0.153     |
| 36496 | P03383 | Q8N4W9 | 0.24149   |
| 36497 | P03383 | Q9BYQ9 | 0.5733    |
| 36498 | P03383 | Q96SN8 | 0.24433   |
| 36499 | P03383 | Q8IVM0 | 0.31745   |
| 36500 | P03383 | Q00005 | 0.22943   |
| 36501 | P03383 | Q8N1B3 | 0.43901   |
| 36502 | P03383 | P56537 | 0.90223   |
| 36503 | P03383 | Q9UJM3 | 0.25034   |
| 36504 | P03383 | Q9C086 | 1.0482    |
| 36505 | P03383 | Q6ZTZ1 | 0.25245   |
| 36506 | P03383 | O43463 | 0.60668   |
| 36507 | P03383 | Q99700 | 0.54587   |
| 36508 | P03383 | Q8N377 | 0.33834   |
| 36509 | P03383 | Q9UMS6 | 0.34709   |
| 36510 | P03383 | A8MSI8 | 0.88257   |
| 36511 | P03383 | O75410 | 0.56765   |
| 36512 | P03383 | O43734 | 0.60341   |
| 36513 | P03383 | Q8N5F7 | 1.02      |
| 36514 | P03383 | Q96LX7 | 0.037576  |
| 36515 | P03383 | Q9UHU1 | 0.33834   |
| 36516 | P03383 | P49589 | 0.25929   |
| 36517 | P03383 | P17482 | 0.82933   |
| 36518 | P03383 | O60290 | 0.36381   |
| 36519 | P03383 | Q6ZSR6 | 0.098428  |
| 36520 | P03383 | P83731 | 0.49535   |
| 36521 | P03383 | Q9BTX9 | 0.55213   |
| 36522 | P03383 | O94864 | 0.29053   |
| 36523 | P03383 | Q5JT78 | 0.022329  |
| 36524 | P03383 | Q3LI60 | 0.33834   |
| 36525 | P03383 | Q9H2U6 | 0.23457   |
| 36526 | P03383 | P62424 | 0.74      |
| 36527 | P03383 | Q9Y3E7 | 0.52809   |
| 36528 | P03383 | Q9BUN8 | 0.15571   |
| 36529 | P03383 | Q6ZN06 | 0.31056   |
| 36530 | P03383 | Q9H9Y6 | 0.49609   |
| 36531 | P03383 | A4GXA9 | 0.51267   |
| 36532 | P03383 | Q6ECI4 | 0.22485   |
| 36533 | P03383 | Q6ZUT6 | 0.26594   |
| 36534 | P03383 | P53999 | 0.98547   |
| 36535 | P03383 | Q9HAH7 | 0.55102   |
| 36536 | P03383 | Q7Z4H7 | 0.6011    |
| 36537 | P03383 | Q9NV56 | 0.62673   |
| 36538 | P03383 | P40306 | 0.23061   |
| 36539 | P03383 | Q96DE0 | 0.62439   |
| 36540 | P03383 | Q9UJ98 | 0.3465    |
| 36541 | P03383 | Q15038 | 1.0585    |
| 36542 | P03383 | Q9H2W6 | 0.25393   |
| 36543 | P03383 | Q5VVM6 | 0.0052024 |
| 36544 | P03383 | P31948 | 0.64947   |
| 36545 | P03383 | Q96AQ6 | 0.54191   |
| 36546 | P03383 | Q5T160 | 0.61098   |
| 36547 | P03383 | A8MUA0 | 0.2302    |
| 36548 | P03383 | Q8IYB1 | 0.2071    |
| 36549 | P03383 | Q9UMQ3 | 0.44155   |
| 36550 | P03383 | P78406 | 0.31283   |
| 36551 | P03383 | O95644 | 0.57261   |
| 36552 | P03383 | Q9UFN0 | 0.38432   |
| 36553 | P03383 | Q6P3V2 | 0.10773   |
| 36554 | P03383 | P0CAP2 | 0.24217   |
| 36555 | P03383 | Q9Y4C2 | 0.55062   |
| 36556 | P03383 | Q2VPJ9 | 0.60341   |

|       |        |        |           |
|-------|--------|--------|-----------|
| 36557 | P03383 | Q8IXQ3 | 0.26631   |
| 36558 | P03383 | Q71F78 | 0.26367   |
| 36559 | P03383 | Q9BRP4 | 0.25575   |
| 36560 | P03383 | Q96LJ8 | 0.53077   |
| 36561 | P03383 | O75618 | 0.88774   |
| 36562 | P03383 | Q96GG9 | 0.22983   |
| 36563 | P03383 | Q6ZQP7 | 0.33834   |
| 36564 | P03383 | Q8N4M7 | 0.77454   |
| 36565 | P03383 | P57740 | 0.56936   |
| 36566 | P03383 | Q9H8Q6 | 0.47239   |
| 36567 | P03383 | A8MV24 | 0.23146   |
| 36568 | P03383 | O95886 | 0.70207   |
| 36569 | P03383 | Q9UI54 | 0.33834   |
| 36570 | P03383 | Q9H7L9 | 0.46336   |
| 36571 | P03383 | Q9NRP2 | 0.54123   |
| 36572 | P03383 | Q8IYW4 | 0.023122  |
| 36573 | P03383 | Q92905 | 0.48979   |
| 36574 | P03383 | P49406 | 0.30622   |
| 36575 | P03383 | Q8N0V3 | 0.64039   |
| 36576 | P03383 | Q3SY46 | 0.45194   |
| 36577 | P03383 | Q9UHC1 | 0.26268   |
| 36578 | P03383 | Q9NUQ3 | 0.35508   |
| 36579 | P03383 | Q5EE01 | 0.51663   |
| 36580 | P03383 | Q9UI10 | 0.19153   |
| 36581 | P03383 | Q9Y4P1 | 0.32814   |
| 36582 | P03383 | Q5JY77 | 0.42898   |
| 36583 | P03383 | H3BN30 | 0.33834   |
| 36584 | P03383 | A6NJ08 | 0.0088503 |
| 36585 | P03383 | O00233 | 0.45875   |
| 36586 | P03383 | Q86UT8 | 0.91463   |
| 36587 | P03383 | Q96SW2 | 0.33517   |
| 36588 | P03383 | Q9BQ65 | 0.33056   |
| 36589 | P03383 | Q9H8G2 | 0.5885    |
| 36590 | P03383 | Q8NHZ7 | 0.29315   |
| 36591 | P03383 | Q96M61 | 0.1668    |
| 36592 | P03383 | I3L1I5 | 0.26907   |
| 36593 | P03383 | Q86U90 | 0.39677   |
| 36594 | P03383 | A6NLX3 | 0.20459   |
| 36595 | P03383 | Q5RGN0 | 0.34297   |
| 36596 | P03383 | O14972 | 0.21828   |
| 36597 | P03383 | Q9Y3B6 | 0.54326   |
| 36598 | P03383 | O43678 | 0.39878   |
| 36599 | P03383 | Q9P000 | 0.15659   |
| 36600 | P03383 | Q96G28 | 0.13804   |
| 36601 | P03383 | Q8WWL7 | 0.69486   |
| 36602 | P03383 | Q4LE28 | 0.51806   |
| 36603 | P03383 | Q9BZK8 | 0.33834   |
| 36604 | P03383 | O94811 | 0.37291   |
| 36605 | P03383 | P18847 | 0.94154   |
| 36606 | P03383 | Q92966 | 0.38137   |
| 36607 | P03383 | Q15031 | 0.25815   |
| 36608 | P03383 | Q9NR56 | 0.30118   |
| 36609 | P03383 | O60299 | 0.19718   |
| 36610 | P03383 | Q99689 | 0.10209   |
| 36611 | P03383 | Q9BZF9 | 0.37662   |
| 36612 | P03383 | Q8NEU8 | 0.25909   |
| 36613 | P03383 | Q15004 | 0.56663   |
| 36614 | P03383 | Q10567 | 0.4048    |
| 36615 | P03383 | Q8NFH5 | 0.38809   |
| 36616 | P03383 | Q96P70 | 0.72362   |
| 36617 | P03383 | Q99576 | 0.29258   |
| 36618 | P03383 | Q96CW5 | 0.58999   |
| 36619 | P03383 | Q9BYR4 | 0.5733    |
| 36620 | P03383 | Q5SQH8 | 0.03858   |
| 36621 | P03383 | Q9BUR4 | 0.56535   |
| 36622 | P03383 | O14925 | 0.21086   |
| 36623 | P03383 | A6NCW3 | 0.44499   |
| 36624 | P03383 | O43303 | 0.52394   |
| 36625 | P03383 | Q5SRH9 | 0.57418   |
| 36626 | P03383 | Q5RHP9 | 0.22798   |
| 36627 | P03383 | P25205 | 0.21969   |
| 36628 | P03383 | P60953 | 0.34615   |
| 36629 | P03383 | Q9H5J4 | 0.41347   |
| 36630 | P03383 | P18124 | 0.36949   |
| 36631 | P03383 | Q9UBW8 | 0.14526   |
| 36632 | P03383 | P82933 | 0.38972   |

|       |        |        |          |
|-------|--------|--------|----------|
| 36633 | P03383 | A8MWP6 | 0.33834  |
| 36634 | P03383 | Q6P4D5 | 0.71616  |
| 36635 | P03383 | Q9UK13 | 0.32573  |
| 36636 | P03383 | Q86X55 | 0.50814  |
| 36637 | P03383 | Q7Z6J9 | 0.53223  |
| 36638 | P03383 | P17861 | 0.42949  |
| 36639 | P03383 | Q9UBC1 | 0.28293  |
| 36640 | P03383 | P51508 | 0.17681  |
| 36641 | P03383 | Q8WYP5 | 0.47295  |
| 36642 | P03383 | P46778 | 0.38311  |
| 36643 | P03383 | O95218 | 0.41487  |
| 36644 | P03383 | Q3LHN2 | 0.33834  |
| 36645 | P03383 | Q9NZZ3 | 0.62406  |
| 36646 | P03383 | A8MVW5 | 0.45516  |
| 36647 | P03383 | Q96KQ4 | 0.63481  |
| 36648 | P03383 | O43920 | 0.48907  |
| 36649 | P03383 | Q9BRQ6 | 0.85069  |
| 36650 | P03383 | P41208 | 0.36431  |
| 36651 | P03383 | P46013 | 0.12822  |
| 36652 | P03383 | Q8IZL2 | 0.61793  |
| 36653 | P03383 | Q96CN0 | 0.33834  |
| 36654 | P03383 | Q01826 | 0.54789  |
| 36655 | P03383 | Q8NEG2 | 0.27707  |
| 36656 | P03383 | P22670 | 0.54891  |
| 36657 | P03383 | A3KN83 | 0.73701  |
| 36658 | P03383 | Q8NEY3 | 0.35531  |
| 36659 | P03383 | Q5H9L4 | 0.20107  |
| 36660 | P03383 | P20749 | 0.25855  |
| 36661 | P03383 | Q96BP3 | 0.15257  |
| 36662 | P03383 | P61604 | 0.55836  |
| 36663 | P03383 | Q99457 | 0.42712  |
| 36664 | P03383 | Q96FZ2 | 0.75514  |
| 36665 | P03383 | Q9BYN7 | 0.077529 |
| 36666 | P03383 | Q8IYL2 | 0.33865  |
| 36667 | P03383 | Q5JTD0 | 0.78434  |
| 36668 | P03383 | Q9NUU6 | 0.28313  |
| 36669 | P03383 | Q6VY07 | 0.31703  |
| 36670 | P03383 | Q8WY50 | 0.33834  |
| 36671 | P03383 | Q9NS73 | 0.48729  |
| 36672 | P03383 | Q53TS8 | 0.16652  |
| 36673 | P03383 | O00257 | 0.74948  |
| 36674 | P03383 | Q8IW19 | 0.1378   |
| 36675 | P03383 | Q6J272 | 0.66879  |
| 36676 | P03383 | Q8NHV4 | 0.39395  |
| 36677 | P03383 | Q9UF83 | 0.19776  |
| 36678 | P03383 | O43615 | 0.11289  |
| 36679 | P03383 | Q8N3J9 | 0.16372  |
| 36680 | P03383 | P62328 | 0.69335  |
| 36681 | P03383 | Q13490 | 0.29607  |
| 36682 | P03383 | Q96MY7 | 0.8473   |
| 36683 | P03383 | Q16836 | 0.34785  |
| 36684 | P03383 | P19419 | 0.99837  |
| 36685 | P03383 | Q6ZNI7 | 0.8843   |
| 36686 | P03383 | P52744 | 0.19314  |
| 36687 | P03383 | P18669 | 0.53186  |
| 36688 | P03383 | Q96M34 | 0.024067 |
| 36689 | P03383 | Q9BTE3 | 0.46531  |
| 36690 | P03383 | Q9BWT1 | 0.65396  |
| 36691 | P03383 | Q14686 | 0.71323  |
| 36692 | P03383 | Q9BSF0 | 0.24104  |
| 36693 | P03383 | Q6STE5 | 0.63782  |
| 36694 | P03383 | Q8IV36 | 0.27729  |
| 36695 | P03383 | P28370 | 0.27924  |
| 36696 | P03383 | B4DX44 | 0.33034  |
| 36697 | P03383 | P55957 | 0.23746  |
| 36698 | P03383 | Q96FV9 | 0.68149  |
| 36699 | P03383 | Q9UBS8 | 0.48333  |
| 36700 | P03383 | Q75VX8 | 0.80888  |
| 36701 | P03383 | Q8NEP9 | 0.29751  |
| 36702 | P03383 | Q8N2N9 | 0.28525  |
| 36703 | P03383 | Q9H2H8 | 0.16461  |
| 36704 | P03383 | Q6ZQR2 | 0.75492  |
| 36705 | P03383 | Q5CZC0 | 0.8457   |
| 36706 | P03383 | Q6P1M3 | 0.65729  |
| 36707 | P03383 | P08697 | 0.2068   |
| 36708 | P03383 | Q96CG3 | 0.1727   |



|       |        |        |          |
|-------|--------|--------|----------|
| 36709 | P03383 | Q06787 | 0.64068  |
| 36710 | P03383 | Q9HAV7 | 0.30962  |
| 36711 | P03383 | Q12972 | 0.62573  |
| 36712 | P03383 | Q92901 | 0.38311  |
| 36713 | P03383 | Q96BY7 | 0.12901  |
| 36714 | P03383 | Q10570 | 0.59078  |
| 36715 | P03383 | P62753 | 0.70555  |
| 36716 | P03383 | P02511 | 0.21985  |
| 36717 | P03383 | Q9UH99 | 0.053022 |
| 36718 | P03383 | P52655 | 0.90538  |
| 36719 | P03383 | Q6PI26 | 0.77654  |
| 36720 | P03383 | Q96B01 | 0.35757  |
| 36721 | P03383 | O75489 | 0.057326 |
| 36722 | P03383 | O00186 | 0.48359  |
| 36723 | P03383 | Q86WV1 | 0.32371  |
| 36724 | P03383 | P62304 | 0.521    |
| 36725 | P03383 | P25063 | 0.33834  |
| 36726 | P03383 | O95177 | 0.19708  |
| 36727 | P03383 | P30304 | 0.3727   |
| 36728 | P03383 | Q9NX95 | 0.2591   |
| 36729 | P03383 | Q9H9Q4 | 0.20084  |
| 36730 | P03383 | P61201 | 0.34381  |
| 36731 | P03383 | P48380 | 0.3329   |
| 36732 | P03383 | Q9NX55 | 0.33805  |
| 36733 | P03383 | Q96ME1 | 0.048887 |
| 36734 | P03383 | Q9H9C1 | 0.43862  |
| 36735 | P03383 | Q15714 | 0.54694  |
| 36736 | P03383 | Q6ZS49 | 0.33834  |
| 36737 | P03383 | Q6MZT1 | 0.46489  |
| 36738 | P03383 | P62937 | 0.45262  |
| 36739 | P03383 | Q9BQC6 | 0.57653  |
| 36740 | P03383 | Q96LI6 | 0.25802  |
| 36741 | P03383 | Q9BV73 | 0.41414  |
| 36742 | P03383 | Q9UBP6 | 0.78333  |
| 36743 | P03383 | P62714 | 0.41756  |
| 36744 | P03383 | P0CE67 | 0.33834  |
| 36745 | P03383 | Q9P2R7 | 0.24203  |
| 36746 | P03383 | Q5CZA5 | 0.2372   |
| 36747 | P03383 | Q8TF20 | 0.21702  |
| 36748 | P03383 | P23769 | 0.26778  |
| 36749 | P03383 | Q6A162 | 0.58359  |
| 36750 | P03383 | Q8NEK8 | 0.59219  |
| 36751 | P03383 | Q5R3I4 | 0.1052   |
| 36752 | P03383 | P50222 | 0.44098  |
| 36753 | P03383 | Q5D1E8 | 0.40665  |
| 36754 | P03383 | O43399 | 0.36869  |
| 36755 | P03383 | Q6ZR03 | 0.11308  |
| 36756 | P03383 | P22392 | 0.20977  |
| 36757 | P03383 | Q9H503 | 0.13703  |
| 36758 | P03383 | Q92797 | 0.50381  |
| 36759 | P03383 | P69905 | 0.18426  |
| 36760 | P03383 | P13807 | 0.21003  |
| 36761 | P03383 | P09467 | 0.12878  |
| 36762 | P03383 | Q9H825 | 0.061199 |
| 36763 | P03383 | Q6MZP7 | 0.36433  |
| 36764 | P03383 | Q9NYP9 | 0.2669   |
| 36765 | P03383 | Q00059 | 0.66782  |
| 36766 | P03383 | Q9NP81 | 0.27091  |
| 36767 | P03383 | Q8WYQ5 | 0.46294  |
| 36768 | P03383 | Q76KX8 | 0.33683  |
| 36769 | P03383 | Q8TBY8 | 0.41274  |
| 36770 | P03383 | Q9Y262 | 0.56261  |
| 36771 | P03383 | Q9BRQ3 | 0.5578   |
| 36772 | P03383 | O75474 | 0.88927  |
| 36773 | P03383 | Q92841 | 0.47154  |
| 36774 | P03383 | Q9H204 | 0.78879  |
| 36775 | P03383 | A6NCD4 | 0.20841  |
| 36776 | P03383 | Q9GZT8 | 0.74675  |
| 36777 | P03383 | Q9NVM9 | 0.83518  |
| 36778 | P03383 | Q96AQ7 | 0.45562  |
| 36779 | P03383 | P49006 | 0.5551   |
| 36780 | P03383 | H0Y354 | 0.27608  |
| 36781 | P03383 | Q9BYR6 | 0.81527  |
| 36782 | P03383 | P61326 | 0.75649  |
| 36783 | P03383 | Q9BQS6 | 0.54344  |
| 36784 | P03383 | Q6ZRV3 | 0.33834  |

|       |        |        |          |
|-------|--------|--------|----------|
| 36785 | P03383 | Q9GZV4 | 0.41834  |
| 36786 | P03383 | Q86WH2 | 0.016985 |
| 36787 | P03383 | Q2M2I5 | 0.75254  |
| 36788 | P03383 | Q9HCM1 | 0.62509  |
| 36789 | P03383 | Q9UHI6 | 0.21451  |
| 36790 | P03383 | A6NCJ1 | 0.067006 |
| 36791 | P03383 | Q9UMY1 | 0.78956  |
| 36792 | P03383 | Q9Y6X4 | 0.91463  |
| 36793 | P03383 | Q9UMX3 | 0.36409  |
| 36794 | P03383 | Q9NWT8 | 0.52302  |
| 36795 | P03383 | P42677 | 0.60427  |
| 36796 | P03383 | A8MUX0 | 0.39509  |
| 36797 | P03383 | Q8N443 | 0.30053  |
| 36798 | P03383 | Q96IZ0 | 0.52334  |
| 36799 | P03383 | Q0PNE2 | 0.43907  |
| 36800 | P03383 | Q86WB0 | 0.90759  |
| 36801 | P03383 | Q96LS8 | 0.20661  |
| 36802 | P03383 | P37275 | 0.64771  |
| 36803 | P03383 | Q9BZV1 | 0.8729   |
| 36804 | P03383 | Q8NDQ6 | 0.22425  |
| 36805 | P03383 | Q75886 | 0.72414  |
| 36806 | P03383 | Q9Y3Q8 | 1.0044   |
| 36807 | P03383 | Q9BQ95 | 0.77137  |
| 36808 | P03383 | Q8WTQ4 | 0.014525 |
| 36809 | P03383 | Q86X83 | 0.34832  |
| 36810 | P03383 | Q7Z4U5 | 0.74733  |
| 36811 | P03383 | Q96MT3 | 0.52328  |
| 36812 | P03383 | P61573 | 0.43317  |
| 36813 | P03383 | Q5SNV9 | 0.21633  |
| 36814 | P03383 | P09972 | 0.37476  |
| 36815 | P03383 | Q9NWU5 | 0.48445  |
| 36816 | P03383 | Q9NQ87 | 0.31389  |
| 36817 | P03383 | P31276 | 0.41428  |
| 36818 | P03383 | A8MTZ0 | 0.25726  |
| 36819 | P03383 | Q96N77 | 0.19192  |
| 36820 | P03383 | O60810 | 0.44567  |
| 36821 | P03383 | O95831 | 0.4711   |
| 36822 | P03383 | Q9HC52 | 0.59783  |
| 36823 | P03383 | P60368 | 0.23779  |
| 36824 | P03383 | Q6PII3 | 0.37959  |
| 36825 | P03383 | Q9UL58 | 0.42296  |
| 36826 | P03383 | Q9H2F5 | 0.33686  |
| 36827 | P03383 | Q70Z53 | 0.5491   |
| 36828 | P03383 | Q8WXD5 | 0.62462  |
| 36829 | P03383 | Q96B23 | 0.61774  |
| 36830 | P03383 | Q969T9 | 0.71639  |
| 36831 | P03383 | Q9ULD5 | 0.12698  |
| 36832 | P03383 | Q9UMS5 | 0.6867   |
| 36833 | P03383 | P0DL12 | 0.18124  |
| 36834 | P03383 | Q75030 | 0.41538  |
| 36835 | P03383 | Q8IYT1 | 0.35017  |
| 36836 | P03383 | Q9ULU4 | 0.30061  |
| 36837 | P03383 | Q9BZE9 | 0.46446  |
| 36838 | P03383 | P80297 | 0.23827  |
| 36839 | P03383 | Q8WWM7 | 0.3757   |
| 36840 | P03383 | P0DMB2 | 0.36961  |
| 36841 | P03383 | Q96PU4 | 0.24131  |
| 36842 | P03383 | Q5JT18 | 0.33834  |
| 36843 | P03383 | Q06587 | 0.59897  |
| 36844 | P03383 | Q86V59 | 0.19876  |
| 36845 | P03383 | Q8N1F7 | 0.39819  |
| 36846 | P03383 | Q15542 | 0.7286   |
| 36847 | P03383 | Q9P2F5 | 0.24307  |
| 36848 | P03383 | Q9UFG5 | 0.1668   |
| 36849 | P03383 | Q9BZW7 | 0.20797  |
| 36850 | P03383 | Q9H9L7 | 0.12396  |
| 36851 | P03383 | B3KS81 | 0.16526  |
| 36852 | P03383 | P24522 | 0.36696  |
| 36853 | P03383 | Q6RFH8 | 0.61677  |
| 36854 | P03383 | O94983 | 1.002    |
| 36855 | P03383 | O00193 | 0.80264  |
| 36856 | P03383 | Q96BK5 | 0.3204   |
| 36857 | P03383 | O14709 | 0.24149  |
| 36858 | P03383 | Q8ND83 | 0.77489  |
| 36859 | P03383 | Q15742 | 0.18237  |
| 36860 | P03383 | Q9Y2S6 | 0.33834  |

|       |        |        |          |
|-------|--------|--------|----------|
| 36861 | P03383 | P48200 | 0.19927  |
| 36862 | P03383 | Q6ZRH9 | 0.33834  |
| 36863 | P03383 | Q5U5X0 | 0.65386  |
| 36864 | P03383 | Q96KH6 | 0.36187  |
| 36865 | P03383 | P63000 | 0.35269  |
| 36866 | P03383 | H3BQW9 | 0.36947  |
| 36867 | P03383 | Q5T681 | 0.66417  |
| 36868 | P03383 | P61247 | 0.85171  |
| 36869 | P03383 | Q9UEU5 | 0.15388  |
| 36870 | P03383 | Q5T036 | 0.11528  |
| 36871 | P03383 | O00712 | 0.080964 |
| 36872 | P03383 | Q9H6V9 | 0.23371  |
| 36873 | P03383 | P40925 | 0.32848  |
| 36874 | P03383 | A6NP61 | 0.5008   |
| 36875 | P03383 | Q92733 | 0.56939  |
| 36876 | P03383 | D6RGH6 | 0.97549  |
| 36877 | P03383 | Q96A26 | 0.12191  |
| 36878 | P03383 | Q9BYC9 | 0.47531  |
| 36879 | P03383 | Q569G3 | 0.60341  |
| 36880 | P03383 | Q96GX8 | 0.60341  |
| 36881 | P03383 | Q6VMQ6 | 0.78527  |
| 36882 | P03383 | Q8NEP4 | 0.60341  |
| 36883 | P03383 | P52630 | 0.46295  |
| 36884 | P03383 | P35638 | 0.57906  |
| 36885 | P03383 | Q9HC77 | 0.45253  |
| 36886 | P03383 | Q8IXW5 | 0.45782  |
| 36887 | P03383 | O00762 | 0.40178  |
| 36888 | P03383 | Q2M2W7 | 0.60341  |
| 36889 | P03383 | O75461 | 0.13662  |
| 36890 | P03383 | O43365 | 0.28091  |
| 36891 | P03383 | Q06250 | 0.33834  |
| 36892 | P03383 | Q63HM1 | 0.15893  |
| 36893 | P03383 | Q9UNQ2 | 0.36918  |
| 36894 | P03383 | Q5TD94 | 0.14074  |
| 36895 | P03383 | O60318 | 0.45099  |
| 36896 | P03383 | Q9HBM6 | 0.46726  |
| 36897 | P03383 | Q96JB2 | 0.56494  |
| 36898 | P03383 | Q9BXM0 | 0.49265  |
| 36899 | P03383 | Q9NS26 | 0.62663  |
| 36900 | P03383 | P15923 | 0.42348  |
| 36901 | P03383 | Q6P2Q9 | 0.40791  |
| 36902 | P03383 | Q8IZL8 | 0.69234  |
| 36903 | P03383 | Q3MJ62 | 0.13447  |
| 36904 | P03383 | A8MQ03 | 0.41323  |
| 36905 | P03383 | Q15468 | 0.25475  |
| 36906 | P03383 | Q9ULW3 | 0.67036  |
| 36907 | P03383 | Q9NQ55 | 0.21665  |
| 36908 | P03383 | Q9BWU0 | 0.2928   |
| 36909 | P03383 | Q6NVV0 | 0.47044  |
| 36910 | P03383 | Q9H2G9 | 0.24296  |
| 36911 | P03383 | P68871 | 0.16142  |
| 36912 | P03383 | Q6ZSG2 | 0.28836  |
| 36913 | P03383 | Q5XKK7 | 0.088594 |
| 36914 | P03383 | Q5H9L2 | 0.79563  |
| 36915 | P03383 | Q9NS25 | 0.66241  |
| 36916 | P03383 | Q8IUC3 | 0.76208  |
| 36917 | P03383 | P53805 | 0.42528  |
| 36918 | P03383 | Q5JSJ4 | 0.94404  |
| 36919 | P03383 | Q6PJP8 | 0.36547  |
| 36920 | P03383 | Q14146 | 0.33834  |
| 36921 | P03383 | Q9BXV9 | 0.33834  |
| 36922 | P03383 | Q9BZZ5 | 0.15662  |
| 36923 | P03383 | Q8NCE0 | 0.38328  |
| 36924 | P03383 | P61582 | 0.77258  |
| 36925 | P03383 | Q86VX9 | 0.79916  |
| 36926 | P03383 | O95347 | 0.25266  |
| 36927 | P03383 | P0CL81 | 0.17372  |
| 36928 | P03383 | P38919 | 0.14204  |
| 36929 | P03383 | Q12798 | 0.46103  |
| 36930 | P03383 | Q96KR1 | 0.30486  |
| 36931 | P03383 | Q16520 | 0.70259  |
| 36932 | P03383 | O95931 | 0.57698  |
| 36933 | P03383 | Q9UBU8 | 0.51404  |
| 36934 | P03383 | Q9Y4Y9 | 0.51576  |
| 36935 | P03383 | Q8WXF5 | 0.41881  |
| 36936 | P03383 | Q86Y97 | 0.28151  |

|       |        |        |          |
|-------|--------|--------|----------|
| 36937 | P03383 | Q86UD1 | 0.24802  |
| 36938 | P03383 | Q86TG7 | 0.29009  |
| 36939 | P03383 | Q5JNZ5 | 0.363    |
| 36940 | P03383 | Q1RN00 | 0.33834  |
| 36941 | P03383 | Q6L8G5 | 0.33834  |
| 36942 | P03383 | Q05BU3 | 0.33834  |
| 36943 | P03383 | O75155 | 0.52483  |
| 36944 | P03383 | P28838 | 0.42245  |
| 36945 | P03383 | O14490 | 0.45403  |
| 36946 | P03383 | Q12901 | 0.2662   |
| 36947 | P03383 | Q14738 | 0.4796   |
| 36948 | P03383 | Q8N4J0 | 0.57862  |
| 36949 | P03383 | Q6ZRM9 | 0.49037  |
| 36950 | P03383 | Q5VY09 | 0.67106  |
| 36951 | P03383 | O95400 | 0.53005  |
| 36952 | P03383 | Q00536 | 0.68884  |
| 36953 | P03383 | Q9C0F3 | 0.12684  |
| 36954 | P03383 | A4D1E1 | 0.31015  |
| 36955 | P03383 | P49721 | 0.27455  |
| 36956 | P03383 | Q06323 | 0.61001  |
| 36957 | P03383 | O60936 | 0.68818  |
| 36958 | P03383 | Q3KQU3 | 0.46689  |
| 36959 | P03383 | Q15532 | 0.73327  |
| 36960 | P03383 | Q8NEZ2 | 0.3987   |
| 36961 | P03383 | P83881 | 0.49283  |
| 36962 | P03383 | Q15121 | 0.27798  |
| 36963 | P03383 | Q2TAZ0 | 0.1668   |
| 36964 | P03383 | Q6ZNM6 | 0.4997   |
| 36965 | P03383 | Q8IXP5 | 0.60341  |
| 36966 | P03383 | Q9NTX7 | 0.26925  |
| 36967 | P03383 | O43402 | 0.56557  |
| 36968 | P03383 | Q8TAB7 | 0.47353  |
| 36969 | P03383 | O00170 | 0.43858  |
| 36970 | P03383 | Q9UK39 | 0.30277  |
| 36971 | P03383 | Q8NDF8 | 0.24397  |
| 36972 | P03383 | P35789 | 0.2708   |
| 36973 | P03383 | Q9NZM5 | 0.31075  |
| 36974 | P03383 | Q16613 | 0.16013  |
| 36975 | P03383 | Q6ZMV5 | 0.3037   |
| 36976 | P03383 | P37837 | 0.37012  |
| 36977 | P03383 | Q99816 | 0.28392  |
| 36978 | P03383 | Q9NX18 | 0.67703  |
| 36979 | P03383 | Q96G25 | 0.83155  |
| 36980 | P03383 | P63313 | 0.45586  |
| 36981 | P03383 | Q86VP1 | 0.19477  |
| 36982 | P03383 | P14136 | 0.52684  |
| 36983 | P03383 | Q9NXE8 | 0.41307  |
| 36984 | P03383 | Q8N6K4 | 0.33834  |
| 36985 | P03383 | Q9BZE4 | 0.1772   |
| 36986 | P03383 | Q96P71 | 0.24351  |
| 36987 | P03383 | Q9H0B6 | 0.33771  |
| 36988 | P03383 | Q9UNL4 | 0.22766  |
| 36989 | P03383 | Q6IPX3 | 0.59137  |
| 36990 | P03383 | Q9UFF9 | 0.29692  |
| 36991 | P03383 | Q12874 | 0.32955  |
| 36992 | P03383 | O95486 | 0.1654   |
| 36993 | P03383 | Q8TB72 | 0.33442  |
| 36994 | P03383 | O14646 | 0.45593  |
| 36995 | P03383 | P0C671 | 0.014048 |
| 36996 | P03383 | Q9HCH5 | 0.34293  |
| 36997 | P03383 | Q6ZNA4 | 0.4212   |
| 36998 | P03383 | Q5TKA1 | 0.20805  |
| 36999 | P03383 | Q8NA31 | 0.43439  |
| 37000 | P03383 | Q5MJ10 | 0.61942  |
| 37001 | P03383 | Q5T8I9 | 0.070767 |
| 37002 | P03383 | P13645 | 0.72432  |
| 37003 | P03383 | Q32NC0 | 0.34182  |
| 37004 | P03383 | Q86YA3 | 0.67549  |
| 37005 | P03383 | O95059 | 0.25196  |
| 37006 | P03383 | A6NEY3 | 0.5567   |
| 37007 | P03383 | P59991 | 0.72344  |
| 37008 | P03383 | Q5SWW7 | 0.33834  |
| 37009 | P03383 | O60232 | 0.70062  |
| 37010 | P03383 | P52434 | 0.17958  |
| 37011 | P03383 | Q96MY1 | 0.60498  |
| 37012 | P03383 | Q3BBV2 | 0.34297  |

|       |        |        |          |
|-------|--------|--------|----------|
| 37013 | P03383 | P24385 | 0.39817  |
| 37014 | P03383 | Q6PJG2 | 0.45794  |
| 37015 | P03383 | P61218 | 0.12454  |
| 37016 | P03383 | Q9Y2G0 | 0.2485   |
| 37017 | P03383 | A8MSY0 | 0.094808 |
| 37018 | P03383 | Q9Y6X3 | 0.74592  |
| 37019 | P03383 | Q9NWN3 | 0.20112  |
| 37020 | P03383 | Q01850 | 0.64365  |
| 37021 | P03383 | P26368 | 0.38796  |
| 37022 | P03383 | Q13243 | 0.58708  |
| 37023 | P03383 | Q9HCK5 | 0.4624   |
| 37024 | P03383 | Q8N1N5 | 0.24722  |
| 37025 | P03383 | Q04323 | 0.17216  |
| 37026 | P03383 | Q96HJ3 | 0.60341  |
| 37027 | P03383 | Q8NA42 | 0.17925  |
| 37028 | P03383 | Q6PK04 | 0.75992  |
| 37029 | P03383 | Q14503 | 0.67128  |
| 37030 | P03383 | P35573 | 0.30864  |
| 37031 | P03383 | Q8TDY2 | 0.63031  |
| 37032 | P03383 | Q6P9G9 | 0.13995  |
| 37033 | P03383 | P17019 | 0.32025  |
| 37034 | P03383 | P09001 | 0.38653  |
| 37035 | P03383 | Q8N8A8 | 0.28521  |
| 37036 | P03383 | Q8WW14 | 0.12385  |
| 37037 | P03383 | Q5T0J3 | 0.066153 |
| 37038 | P03383 | P63162 | 0.419    |
| 37039 | P03383 | O00165 | 0.45883  |
| 37040 | P03383 | Q9H5Q4 | 0.50456  |
| 37041 | P03383 | Q96M29 | 0.33927  |
| 37042 | P03383 | Q9UKT4 | 0.66892  |
| 37043 | P03383 | Q9BRP1 | 0.56999  |
| 37044 | P03383 | Q86WR7 | 0.59867  |
| 37045 | P03383 | Q8IYI6 | 0.40155  |
| 37046 | P03383 | Q9H1Q7 | 0.65475  |
| 37047 | P03383 | Q6NSW5 | 0.83081  |
| 37048 | P03383 | O43598 | 0.11298  |
| 37049 | P03383 | Q96FA7 | 0.66251  |
| 37050 | P03383 | Q8TCS8 | 0.12686  |
| 37051 | P03383 | Q96QT6 | 0.70192  |
| 37052 | P03383 | P30153 | 0.2989   |
| 37053 | P03383 | Q6IQ21 | 0.23434  |
| 37054 | P03383 | Q14814 | 0.40792  |
| 37055 | P03383 | Q8WWB5 | 0.6086   |
| 37056 | P03383 | Q9Y2Z2 | 0.7176   |
| 37057 | P03383 | Q9BRX2 | 0.18454  |
| 37058 | P03383 | P26641 | 0.22842  |
| 37059 | P03383 | Q8NI29 | 0.14951  |
| 37060 | P03383 | Q5T5A4 | 0.35878  |
| 37061 | P03383 | Q96N20 | 0.14779  |
| 37062 | P03383 | Q9Y2Q1 | 0.311    |
| 37063 | P03383 | Q01860 | 0.50318  |
| 37064 | P03383 | Q8NA57 | 0.54492  |
| 37065 | P03383 | Q9Y2B5 | 0.19401  |
| 37066 | P03383 | Q9BYD3 | 0.59079  |
| 37067 | P03383 | Q86XK2 | 0.47966  |
| 37068 | P03383 | Q6ISB3 | 0.3936   |
| 37069 | P03383 | Q8IYW2 | 0.33834  |
| 37070 | P03383 | P78317 | 0.45463  |
| 37071 | P03383 | P47914 | 0.7479   |
| 37072 | P03383 | Q8IZX4 | 0.23099  |
| 37073 | P03383 | Q08945 | 0.8172   |
| 37074 | P03383 | Q76011 | 0.75254  |
| 37075 | P03383 | Q5T653 | 0.43403  |
| 37076 | P03383 | Q8WYH8 | 0.32765  |
| 37077 | P03383 | Q9GZL8 | 0.24095  |
| 37078 | P03383 | P04792 | 0.25246  |
| 37079 | P03383 | Q8TEV8 | 0.33834  |
| 37080 | P03383 | Q9C0C2 | 0.17812  |
| 37081 | P03383 | Q13536 | 0.33834  |
| 37082 | P03383 | Q96IU2 | 0.80307  |
| 37083 | P03383 | Q9GZQ3 | 0.78235  |
| 37084 | P03383 | Q96BN2 | 0.61543  |
| 37085 | P03383 | Q5HYC2 | 0.035851 |
| 37086 | P03383 | O60841 | 0.073454 |
| 37087 | P03383 | Q15797 | 0.11504  |
| 37088 | P03383 | Q96FF7 | 0.33834  |

|       |        |        |          |
|-------|--------|--------|----------|
| 37089 | P03383 | Q5W0V3 | 0.63733  |
| 37090 | P03383 | Q9P0M9 | 0.434    |
| 37091 | P03383 | Q71UM5 | 0.36106  |
| 37092 | P03383 | Q8TAD1 | 0.12615  |
| 37093 | P03383 | P42226 | 0.55597  |
| 37094 | P03383 | Q15773 | 0.80511  |
| 37095 | P03383 | Q8IVV7 | 0.23537  |
| 37096 | P03383 | Q96H22 | 0.26437  |
| 37097 | P03383 | O75638 | 1.0032   |
| 37098 | P03383 | Q86X53 | 0.19721  |
| 37099 | P03383 | Q9P013 | 0.4475   |
| 37100 | P03383 | Q14997 | 0.34172  |
| 37101 | P03383 | O60826 | 0.49497  |
| 37102 | P03383 | P69208 | 0.33834  |
| 37103 | P03383 | Q9Y2R9 | 0.65677  |
| 37104 | P03383 | Q9H1A4 | 0.49416  |
| 37105 | P03383 | P10599 | 0.269    |
| 37106 | P03383 | P67775 | 0.45886  |
| 37107 | P03383 | P61978 | 0.74749  |
| 37108 | P03383 | Q9BYE7 | 0.56066  |
| 37109 | P03383 | Q8WXF1 | 0.7775   |
| 37110 | P03383 | Q9Y296 | 0.11583  |
| 37111 | P03383 | Q9H2C0 | 0.47824  |
| 37112 | P03383 | Q96JB5 | 0.20395  |
| 37113 | P03383 | Q9Y6D6 | 0.37276  |
| 37114 | P03383 | Q96A09 | 0.4388   |
| 37115 | P03383 | Q9UN36 | 0.36355  |
| 37116 | P03383 | A2RUQ5 | 0.082563 |
| 37117 | P03383 | Q9NRN7 | 0.28269  |
| 37118 | P03383 | Q9NT62 | 0.27157  |
| 37119 | P03383 | O75691 | 0.54622  |
| 37120 | P03383 | Q9NVF7 | 0.58513  |
| 37121 | P03383 | Q7Z7H3 | 0.0546   |
| 37122 | P03383 | Q96T21 | 0.48002  |
| 37123 | P03383 | Q8NAB5 | 0.33834  |
| 37124 | P03383 | Q96N95 | 0.086077 |
| 37125 | P03383 | P11387 | 0.46055  |
| 37126 | P03383 | P26196 | 0.33622  |
| 37127 | P03383 | Q9P2K3 | 0.88369  |
| 37128 | P03383 | P86481 | 0.33834  |
| 37129 | P03383 | O75177 | 0.59109  |
| 37130 | P03383 | Q75QN2 | 0.49915  |
| 37131 | P03383 | Q03923 | 0.34049  |
| 37132 | P03383 | Q96LM1 | 0.41221  |
| 37133 | P03383 | B4DZS4 | 0.11576  |
| 37134 | P03383 | Q96RK1 | 0.39475  |
| 37135 | P03383 | Q9NUQ6 | 0.11945  |
| 37136 | P03383 | Q8N988 | 0.32881  |
| 37137 | P03383 | Q7Z3Y8 | 0.66284  |
| 37138 | P03383 | Q8WYN3 | 0.40328  |
| 37139 | P03383 | Q14331 | 0.34388  |
| 37140 | P03383 | P18846 | 0.63447  |
| 37141 | P03383 | Q5SWA1 | 0.46372  |
| 37142 | P03383 | Q9NVE4 | 0.13332  |
| 37143 | P03383 | O43189 | 0.27035  |
| 37144 | P03383 | O76014 | 0.66284  |
| 37145 | P03383 | O15405 | 0.70668  |
| 37146 | P03383 | Q96B36 | 0.50844  |
| 37147 | P03383 | Q8N999 | 0.42086  |
| 37148 | P03383 | P11940 | 0.27979  |
| 37149 | P03383 | P51816 | 0.38786  |
| 37150 | P03383 | Q14152 | 0.82125  |
| 37151 | P03383 | Q9GZS1 | 0.1198   |
| 37152 | P03383 | Q9BVS5 | 0.17863  |
| 37153 | P03383 | P31943 | 0.35146  |
| 37154 | P03383 | P63208 | 0.39296  |
| 37155 | P03383 | Q6ZP68 | 0.57381  |
| 37156 | P03383 | Q9NPE3 | 0.49875  |
| 37157 | P03383 | Q495Z4 | 0.19554  |
| 37158 | P03383 | O00505 | 0.66305  |
| 37159 | P03383 | P62917 | 0.63174  |
| 37160 | P03383 | Q92993 | 0.72836  |
| 37161 | P03383 | Q86V15 | 0.30117  |
| 37162 | P03383 | Q8N9G6 | 0.56973  |
| 37163 | P03383 | Q9UI43 | 0.50668  |
| 37164 | P03383 | Q9UQF2 | 0.27664  |

|       |        |        |          |
|-------|--------|--------|----------|
| 37165 | P03383 | Q9ULR5 | 0.2846   |
| 37166 | P03383 | Q9NP92 | 0.69228  |
| 37167 | P03383 | Q9NWV4 | 0.50558  |
| 37168 | P03383 | O75400 | 0.68175  |
| 37169 | P03383 | Q3MIS6 | 0.32573  |
| 37170 | P03383 | Q99459 | 0.94122  |
| 37171 | P03383 | O75151 | 0.43849  |
| 37172 | P03383 | Q96SE7 | 0.23295  |
| 37173 | P03383 | Q1W209 | 0.33834  |
| 37174 | P03383 | Q58A44 | 0.33834  |
| 37175 | P03383 | A6NIN4 | 0.33834  |
| 37176 | P03383 | Q969V6 | 1.0558   |
| 37177 | P03383 | P49321 | 0.61021  |
| 37178 | P03383 | P61575 | 0.43317  |
| 37179 | P03383 | Q9BYT5 | 0.15594  |
| 37180 | P03383 | P49005 | 0.34268  |
| 37181 | P03383 | Q7Z614 | 0.25113  |
| 37182 | P03383 | Q86XF7 | 0.39973  |
| 37183 | P03383 | Q9Y592 | 0.62396  |
| 37184 | P03383 | Q05516 | 0.52347  |
| 37185 | P03383 | Q96DM3 | 0.069471 |
| 37186 | P03383 | Q96K30 | 0.51932  |
| 37187 | P03383 | A6QL64 | 0.28525  |
| 37188 | P03383 | P82914 | 0.5175   |
| 37189 | P03383 | P28698 | 0.4992   |
| 37190 | P03383 | Q9GZX5 | 0.58898  |
| 37191 | P03383 | P49247 | 0.46088  |
| 37192 | P03383 | Q9Y4R8 | 0.14749  |
| 37193 | P03383 | Q13405 | 0.4211   |
| 37194 | P03383 | P12980 | 0.58625  |
| 37195 | P03383 | Q8N693 | 0.2727   |
| 37196 | P03383 | Q8N402 | 0.027281 |
| 37197 | P03383 | P62273 | 0.51119  |
| 37198 | P03383 | Q8TB69 | 0.29921  |
| 37199 | P03383 | A6NIE6 | 0.36825  |
| 37200 | P03383 | Q07352 | 0.66288  |
| 37201 | P03383 | Q86V81 | 0.60787  |
| 37202 | P03383 | Q8TEM1 | 0.15551  |
| 37203 | P03383 | Q86V87 | 0.32142  |
| 37204 | P03383 | O94888 | 0.22759  |
| 37205 | P03383 | Q86VE0 | 0.86884  |
| 37206 | P03383 | Q15306 | 0.55864  |
| 37207 | P03383 | Q5U623 | 0.5513   |
| 37208 | P03383 | P0CG12 | 0.91651  |
| 37209 | P03383 | P0C7X2 | 0.38684  |
| 37210 | P03383 | Q6NVV7 | 0.15634  |
| 37211 | P03383 | O15297 | 0.35567  |
| 37212 | P03383 | Q8NDZ2 | 0.16291  |
| 37213 | P03383 | O14734 | 0.36864  |
| 37214 | P03383 | Q9P0L1 | 0.20528  |
| 37215 | P03383 | Q9NPJ6 | 0.74375  |
| 37216 | P03383 | O60220 | 0.33471  |
| 37217 | P03383 | Q96K17 | 0.47518  |
| 37218 | P03383 | P53675 | 0.17038  |
| 37219 | P03383 | Q15651 | 0.66382  |
| 37220 | P03383 | P17038 | 0.2288   |
| 37221 | P03383 | Q9Y4E1 | 0.34908  |
| 37222 | P03383 | O60573 | 0.31482  |
| 37223 | P03383 | P07900 | 0.45459  |
| 37224 | P03383 | Q2KHT3 | 0.57772  |
| 37225 | P03383 | Q6ZW49 | 0.2232   |
| 37226 | P03383 | Q6P9B6 | 0.1668   |
| 37227 | P03383 | Q92782 | 0.36251  |
| 37228 | P03383 | Q9NUS5 | 0.2762   |
| 37229 | P03383 | Q7Z7K6 | 0.38795  |
| 37230 | P03383 | Q5VV17 | 0.023322 |
| 37231 | P03383 | Q8IYE0 | 0.57342  |
| 37232 | P03383 | Q6PGQ1 | 0.33684  |
| 37233 | P03383 | Q14690 | 0.34017  |
| 37234 | P03383 | Q5JR98 | 0.39103  |
| 37235 | P03383 | Q96T23 | 0.48513  |
| 37236 | P03383 | P49754 | 0.27442  |
| 37237 | P03383 | Q96DX5 | 0.76416  |
| 37238 | P03383 | Q96S55 | 0.21327  |
| 37239 | P03383 | Q15847 | 0.33834  |
| 37240 | P03383 | P05783 | 1.046    |

|       |        |        |          |
|-------|--------|--------|----------|
| 37241 | P03383 | O14990 | 0.4616   |
| 37242 | P03383 | B1AH88 | 0.33834  |
| 37243 | P03383 | Q86TU7 | 0.12512  |
| 37244 | P03383 | Q8N655 | 0.33834  |
| 37245 | P03383 | Q9H6R4 | 0.34438  |
| 37246 | P03383 | Q13352 | 0.24109  |
| 37247 | P03383 | Q13435 | 0.51868  |
| 37248 | P03383 | Q96PS1 | 0.41538  |
| 37249 | P03383 | Q15050 | 0.52164  |
| 37250 | P03383 | O43493 | 0.50117  |
| 37251 | P03383 | Q7RTU5 | 0.28657  |
| 37252 | P03383 | Q92597 | 0.25557  |
| 37253 | P03383 | Q00978 | 0.67184  |
| 37254 | P03383 | Q9BZA5 | 0.52191  |
| 37255 | P03383 | Q13330 | 0.25779  |
| 37256 | P03383 | Q5T200 | 0.6202   |
| 37257 | P03383 | Q92546 | 0.71084  |
| 37258 | P03383 | Q5SY85 | 0.18846  |
| 37259 | P03383 | P61457 | 0.78196  |
| 37260 | P03383 | Q969X6 | 1.0329   |
| 37261 | P03383 | Q53GS7 | 0.45144  |
| 37262 | P03383 | Q5JQS6 | 0.22395  |
| 37263 | P03383 | P30740 | 0.24939  |
| 37264 | P03383 | P15621 | 0.31671  |
| 37265 | P03383 | Q00534 | 0.46937  |
| 37266 | P03383 | A6NK53 | 0.20961  |
| 37267 | P03383 | Q96KS0 | 0.049218 |
| 37268 | P03383 | Q15631 | 0.45197  |
| 37269 | P03383 | Q8N865 | 0.13476  |
| 37270 | P03383 | Q15653 | 0.6727   |
| 37271 | P03383 | Q86YE8 | 0.24149  |
| 37272 | P03383 | Q9UNX3 | 0.69662  |
| 37273 | P03383 | Q9BZE1 | 0.31874  |
| 37274 | P03383 | Q8NFV5 | 0.38945  |
| 37275 | P03383 | Q8WV37 | 0.31046  |
| 37276 | P03383 | O15061 | 0.54102  |
| 37277 | P03383 | Q9HAH1 | 0.26656  |
| 37278 | P03383 | Q7L0Y3 | 0.68031  |
| 37279 | P03383 | Q08752 | 0.20569  |
| 37280 | P03383 | P63241 | 0.30624  |
| 37281 | P03383 | A6NF83 | 0.46548  |
| 37282 | P03383 | Q96L21 | 0.33605  |
| 37283 | P03383 | Q3LI76 | 0.57432  |
| 37284 | P03383 | Q9ULW8 | 0.25286  |
| 37285 | P03383 | Q8N2W9 | 0.80963  |
| 37286 | P03383 | Q96EA4 | 0.47865  |
| 37287 | P03383 | Q9Y2W2 | 0.59296  |
| 37288 | P03383 | P35813 | 0.081222 |
| 37289 | P03383 | P20618 | 0.47769  |
| 37290 | P03383 | O43324 | 0.81388  |
| 37291 | P03383 | O95567 | 0.33834  |
| 37292 | P03383 | Q6NZY4 | 0.43599  |
| 37293 | P03383 | Q9H1Y0 | 0.32604  |
| 37294 | P03383 | Q9NQP4 | 0.59299  |
| 37295 | P03383 | P51504 | 0.18444  |
| 37296 | P03383 | Q04724 | 0.6551   |
| 37297 | P03383 | Q8N587 | 0.3011   |
| 37298 | P03383 | Q96PI1 | 0.61945  |
| 37299 | P03383 | Q9H7N4 | 0.63339  |
| 37300 | P03383 | P15408 | 0.38203  |
| 37301 | P03383 | Q9H6W3 | 0.28134  |
| 37302 | P03383 | P78337 | 0.2673   |
| 37303 | P03383 | Q9H321 | 0.66758  |
| 37304 | P03383 | Q9UHD4 | 0.51266  |
| 37305 | P03383 | Q9BUH6 | 0.36337  |
| 37306 | P03383 | Q8NAV1 | 0.65788  |
| 37307 | P03383 | Q5VVH5 | 0.35212  |
| 37308 | P03383 | Q6ZR52 | 0.2288   |
| 37309 | P03383 | O00189 | 0.13687  |
| 37310 | P03383 | Q96NT3 | 0.21382  |
| 37311 | P03383 | Q8TAI1 | 0.21185  |
| 37312 | P03383 | Q96EK4 | 0.93454  |
| 37313 | P03383 | Q3LI73 | 0.56255  |
| 37314 | P03383 | P09132 | 0.10466  |
| 37315 | P03383 | Q13064 | 0.10937  |
| 37316 | P03383 | O60216 | 0.55893  |



|       |        |        |          |
|-------|--------|--------|----------|
| 37317 | P03383 | Q969Q0 | 0.08152  |
| 37318 | P03383 | Q8NAV2 | 0.22192  |
| 37319 | P03383 | Q9UKT7 | 0.24312  |
| 37320 | P03383 | Q9Y5Q8 | 0.43554  |
| 37321 | P03383 | Q8N9R6 | 0.22617  |
| 37322 | P03383 | Q8TE85 | 0.093429 |
| 37323 | P03383 | Q15560 | 0.77498  |
| 37324 | P03383 | Q8TD31 | 0.46193  |
| 37325 | P03383 | Q13158 | 0.25336  |
| 37326 | P03383 | Q96MF7 | 0.33532  |
| 37327 | P03383 | Q43156 | 0.48625  |
| 37328 | P03383 | Q6ZSJ8 | 0.60341  |
| 37329 | P03383 | Q5VWQ0 | 0.95004  |
| 37330 | P03383 | Q495Y8 | 0.38945  |
| 37331 | P03383 | Q92665 | 0.53398  |
| 37332 | P03383 | Q6P1K8 | 0.15655  |
| 37333 | P03383 | P78537 | 0.69407  |
| 37334 | P03383 | Q13625 | 0.28966  |
| 37335 | P03383 | Q13042 | 0.93887  |
| 37336 | P03383 | Q6PIJ6 | 0.61158  |
| 37337 | P03383 | A1A580 | 0.56255  |
| 37338 | P03383 | P31689 | 0.36356  |
| 37339 | P03383 | Q75683 | 0.35845  |
| 37340 | P03383 | Q9H1D9 | 0.31845  |
| 37341 | P03383 | Q93074 | 0.35402  |
| 37342 | P03383 | P02795 | 0.3404   |
| 37343 | P03383 | Q96LV5 | 0.03132  |
| 37344 | P03383 | Q9Y248 | 0.46992  |
| 37345 | P03383 | Q9BYP9 | 0.5733   |
| 37346 | P03383 | P07737 | 0.63382  |
| 37347 | P03383 | Q8N5U6 | 0.77047  |
| 37348 | P03383 | Q5XG85 | 0.33834  |
| 37349 | P03383 | Q6P1W5 | 0.36078  |
| 37350 | P03383 | P59923 | 0.24149  |
| 37351 | P03383 | P17098 | 0.33436  |
| 37352 | P03383 | Q13155 | 0.4049   |
| 37353 | P03383 | Q8NCU4 | 0.084955 |
| 37354 | P03383 | Q9UKF6 | 0.52969  |
| 37355 | P03383 | Q9BYR7 | 0.7963   |
| 37356 | P03383 | Q9H175 | 0.80214  |
| 37357 | P03383 | Q96LR7 | 0.54842  |
| 37358 | P03383 | Q9NUP1 | 0.4215   |
| 37359 | P03383 | Q01831 | 0.3875   |
| 37360 | P03383 | Q96KP1 | 0.22249  |
| 37361 | P03383 | O00321 | 0.16138  |
| 37362 | P03383 | O15117 | 0.50336  |
| 37363 | P03383 | Q9NRX2 | 0.29849  |
| 37364 | P03383 | P55209 | 0.4873   |
| 37365 | P03383 | O00267 | 0.86242  |
| 37366 | P03383 | Q9NQX1 | 0.33997  |
| 37367 | P03383 | Q9BYQ3 | 0.5733   |
| 37368 | P03383 | Q6P5X5 | 0.48525  |
| 37369 | P03383 | Q6L8G9 | 0.33834  |
| 37370 | P03383 | P38432 | 0.50932  |
| 37371 | P03383 | Q13432 | 0.27384  |
| 37372 | P03383 | Q5TYM5 | 0.15914  |
| 37373 | P03383 | Q5SYE7 | 0.45597  |
| 37374 | P03383 | Q9Y2A0 | 0.23318  |
| 37375 | P03383 | Q7Z6I5 | 0.60689  |
| 37376 | P03383 | Q14684 | 0.34203  |
| 37377 | P03383 | Q96GX2 | 0.64555  |
| 37378 | P03383 | Q6X4W1 | 0.79373  |
| 37379 | P03383 | Q9H2L5 | 0.44518  |
| 37380 | P03383 | Q6ZQY7 | 0.30824  |
| 37381 | P03383 | P14635 | 0.18458  |
| 37382 | P03383 | P0C853 | 0.33834  |
| 37383 | P03383 | Q15022 | 0.43419  |
| 37384 | P03383 | P59052 | 0.21884  |
| 37385 | P03383 | Q9H693 | 0.5298   |
| 37386 | P03383 | Q9UHT9 | 0.33834  |
| 37387 | P03383 | B4DU55 | 0.2372   |
| 37388 | P03383 | Q12983 | 0.026812 |
| 37389 | P03383 | Q9P278 | 0.58795  |
| 37390 | P03383 | Q8N5U0 | 0.33834  |
| 37391 | P03383 | Q9BZE2 | 0.80152  |
| 37392 | P03383 | P53677 | 0.033782 |

|       |        |        |          |
|-------|--------|--------|----------|
| 37393 | P03383 | Q9Y3D0 | 0.70685  |
| 37394 | P03383 | Q6NSZ9 | 0.088669 |
| 37395 | P03383 | Q9BRS8 | 0.27809  |
| 37396 | P03383 | Q6PI98 | 0.40379  |
| 37397 | P03383 | A6NEH8 | 0.046454 |
| 37398 | P03383 | Q3KP66 | 0.79785  |
| 37399 | P03383 | Q8TDC0 | 0.28435  |
| 37400 | P03383 | P0CI00 | 0.43604  |
| 37401 | P03383 | Q6NUR6 | 0.48593  |
| 37402 | P03383 | Q32P41 | 0.18019  |
| 37403 | P03383 | P30050 | 0.49535  |
| 37404 | P03383 | Q86UU0 | 0.83827  |
| 37405 | P03383 | Q5VT06 | 0.31889  |
| 37406 | P03383 | Q5VUG0 | 0.1228   |
| 37407 | P03383 | Q9Y3F1 | 0.33834  |
| 37408 | P03383 | Q9Y3B2 | 0.54335  |
| 37409 | P03383 | Q9NWQ4 | 0.54249  |
| 37410 | P03383 | Q9Y692 | 0.48781  |
| 37411 | P03383 | Q9BXM8 | 0.33834  |
| 37412 | P03383 | Q96MT8 | 0.70621  |
| 37413 | P03383 | Q17RM4 | 0.33496  |
| 37414 | P03383 | Q16385 | 0.56798  |
| 37415 | P03383 | P11802 | 0.62371  |
| 37416 | P03383 | P06400 | 0.50919  |
| 37417 | P03383 | P46939 | 0.32312  |
| 37418 | P03383 | O14744 | 0.72312  |
| 37419 | P03383 | O43318 | 0.42025  |
| 37420 | P03383 | O75190 | 0.52682  |
| 37421 | P03383 | F5H4B4 | 0.59139  |
| 37422 | P03383 | P18146 | 0.50432  |
| 37423 | P03383 | Q08AG7 | 0.45866  |
| 37424 | P03383 | Q7L1V2 | 0.70883  |
| 37425 | P03383 | Q6RSH7 | 0.21988  |
| 37426 | P03383 | Q9NX08 | 0.1668   |
| 37427 | P03383 | O94906 | 0.19898  |
| 37428 | P03383 | O75306 | 0.25446  |
| 37429 | P03383 | Q13522 | 0.057511 |
| 37430 | P03383 | P41162 | 0.23395  |
| 37431 | P03383 | Q9BTY7 | 0.17715  |
| 37432 | P03383 | P48147 | 0.31542  |
| 37433 | P03383 | P10155 | 0.28038  |
| 37434 | P03383 | Q92558 | 0.1575   |
| 37435 | P03383 | Q96EV8 | 0.11719  |
| 37436 | P03383 | Q52M58 | 0.43574  |
| 37437 | P03383 | Q9NTW7 | 0.31457  |
| 37438 | P03383 | Q9UIL1 | 0.36264  |
| 37439 | P03383 | Q15436 | 0.3937   |
| 37440 | P03383 | Q6L8G4 | 0.33834  |
| 37441 | P03383 | Q8N9H9 | 0.33834  |
| 37442 | P03383 | A6ZKI3 | 0.27506  |
| 37443 | P03383 | P84098 | 0.38311  |
| 37444 | P03383 | P31350 | 0.19742  |
| 37445 | P03383 | Q4V328 | 0.51034  |
| 37446 | P03383 | P49750 | 0.88422  |
| 37447 | P03383 | Q13398 | 0.31353  |
| 37448 | P03383 | Q66K89 | 0.65026  |
| 37449 | P03383 | Q53GI3 | 0.1769   |
| 37450 | P03383 | Q9UK11 | 0.25101  |
| 37451 | P03383 | Q8WW12 | 0.51673  |
| 37452 | P03383 | O15525 | 0.19127  |
| 37453 | P03383 | Q8NAQ8 | 1.1544   |
| 37454 | P03383 | Q9Y3E5 | 0.29843  |
| 37455 | P03383 | Q9H9F9 | 0.85732  |
| 37456 | P03383 | Q96BT3 | 0.29531  |
| 37457 | P03383 | A6NJ78 | 0.59219  |
| 37458 | P03383 | Q9UBB5 | 0.8746   |
| 37459 | P03383 | Q9Y697 | 0.40956  |
| 37460 | P03383 | Q13618 | 0.27705  |
| 37461 | P03383 | Q8IZU1 | 0.47691  |
| 37462 | P03383 | P78396 | 0.65319  |
| 37463 | P03383 | Q9Y2T7 | 0.075014 |
| 37464 | P03383 | Q8NEG0 | 0.10277  |
| 37465 | P03383 | P38159 | 0.47278  |
| 37466 | P03383 | Q9NP71 | 0.32571  |
| 37467 | P03383 | A2A288 | 0.28208  |
| 37468 | P03383 | A6NJJ6 | 0.60341  |

|       |        |        |          |
|-------|--------|--------|----------|
| 37469 | P03383 | O95178 | 0.42264  |
| 37470 | P03383 | Q49AA0 | 0.30761  |
| 37471 | P03383 | Q9NQ29 | 0.55324  |
| 37472 | P03383 | Q96D46 | 0.6757   |
| 37473 | P03383 | Q14525 | 0.66522  |
| 37474 | P03383 | P78386 | 0.66532  |
| 37475 | P03383 | A8MUQ0 | 0.6925   |
| 37476 | P03383 | E5RJ46 | 0.33834  |
| 37477 | P03383 | Q9Y6G3 | 0.05576  |
| 37478 | P03383 | Q12769 | 0.78318  |
| 37479 | P03383 | Q6IQ32 | 0.35268  |
| 37480 | P03383 | A8MV72 | 0.27727  |
| 37481 | P03383 | Q8N2H4 | 0.82018  |
| 37482 | P03383 | Q9NYF3 | 0.32241  |
| 37483 | P03383 | Q8TAF7 | 0.31865  |
| 37484 | P03383 | Q8WUD4 | 0.062356 |
| 37485 | P03383 | Q96R06 | 0.64689  |
| 37486 | P03383 | A4D161 | 0.055158 |
| 37487 | P03383 | O75663 | 0.25995  |
| 37488 | P03383 | A8MZA4 | 0.32695  |
| 37489 | P03383 | Q8N612 | 0.60978  |
| 37490 | P03383 | Q9BQ89 | 0.76967  |
| 37491 | P03383 | Q75394 | 0.38425  |
| 37492 | P03383 | Q8IWE4 | 0.22547  |
| 37493 | P03383 | Q537H7 | 0.17814  |
| 37494 | P03383 | Q9Y3A2 | 0.62937  |
| 37495 | P03383 | Q6ZV60 | 0.33834  |
| 37496 | P03383 | Q9NZP6 | 0.71685  |
| 37497 | P03383 | Q6ZWC4 | 0.11527  |
| 37498 | P03383 | O60535 | 0.24348  |
| 37499 | P03383 | Q96DB5 | 0.2776   |
| 37500 | P03383 | Q01664 | 0.38423  |
| 37501 | P03383 | Q9NX46 | 0.19736  |
| 37502 | P03383 | O95049 | 0.24992  |
| 37503 | P03383 | Q5T4H9 | 0.33834  |
| 37504 | P03383 | Q9NVU0 | 0.23883  |
| 37505 | P03383 | Q9BY44 | 0.24886  |
| 37506 | P03383 | O60921 | 0.54578  |
| 37507 | P03383 | Q96CN9 | 0.303    |
| 37508 | P03383 | Q9UK76 | 0.60274  |
| 37509 | P03383 | P31249 | 0.34283  |
| 37510 | P03383 | A9QM74 | 0.27061  |
| 37511 | P03383 | Q6ZPB5 | 0.33834  |
| 37512 | P03383 | Q8N7M0 | 0.19257  |
| 37513 | P03383 | Q9BV57 | 0.36728  |
| 37514 | P03383 | Q9C0F1 | 0.041184 |
| 37515 | P03383 | Q92870 | 0.47417  |
| 37516 | P03383 | Q9NSQ0 | 0.26288  |
| 37517 | P03383 | P61077 | 0.3359   |
| 37518 | P03383 | Q5BKY9 | 0.60341  |
| 37519 | P03383 | Q15654 | 0.57212  |
| 37520 | P03383 | Q96002 | 0.33834  |
| 37521 | P03383 | Q8TES7 | 0.37934  |
| 37522 | P03383 | Q96B49 | 0.63601  |
| 37523 | P03383 | Q96N53 | 0.33834  |
| 37524 | P03383 | Q9HCH0 | 0.9661   |
| 37525 | P03383 | Q9NZY2 | 0.33834  |
| 37526 | P03383 | Q6PCE3 | 0.33313  |
| 37527 | P03383 | Q86X02 | 0.1999   |
| 37528 | P03383 | P21127 | 0.36636  |
| 37529 | P03383 | Q6UYE1 | 0.67868  |
| 37530 | P03383 | A6NKF1 | 0.68578  |
| 37531 | P03383 | Q8IYI8 | 0.24216  |
| 37532 | P03383 | Q96HR3 | 0.61322  |
| 37533 | P03383 | Q9BQ52 | 0.20607  |
| 37534 | P03383 | P60014 | 0.7585   |
| 37535 | P03383 | Q5W0A0 | 0.15929  |
| 37536 | P03383 | Q8TCH9 | 0.12087  |
| 37537 | P03383 | Q7Z7L8 | 0.7036   |
| 37538 | P03383 | Q14872 | 0.63102  |
| 37539 | P03383 | Q969Z0 | 0.39666  |
| 37540 | P03383 | Q9NTI7 | 0.57392  |
| 37541 | P03383 | O14602 | 0.25537  |
| 37542 | P03383 | O75164 | 0.74494  |
| 37543 | P03383 | Q96IR3 | 0.50694  |
| 37544 | P03383 | Q9H1H9 | 0.33736  |

|       |        |        |          |
|-------|--------|--------|----------|
| 37545 | P03383 | Q69YN4 | 0.27841  |
| 37546 | P03383 | Q658L1 | 0.59283  |
| 37547 | P03383 | Q00403 | 0.76117  |
| 37548 | P03383 | P36873 | 0.52145  |
| 37549 | P03383 | Q96G21 | 0.61496  |
| 37550 | P03383 | Q13542 | 0.35475  |
| 37551 | P03383 | Q8NDZ9 | 0.33834  |
| 37552 | P03383 | Q9BQI9 | 0.6172   |
| 37553 | P03383 | P62826 | 0.5054   |
| 37554 | P03383 | Q49AS3 | 0.13592  |
| 37555 | P03383 | P55347 | 0.28459  |
| 37556 | P03383 | Q9BSU3 | 0.24483  |
| 37557 | P03383 | Q9HAJ7 | 0.84446  |
| 37558 | P03383 | A8K8P3 | 0.52817  |
| 37559 | P03383 | Q07157 | 0.41446  |
| 37560 | P03383 | P32969 | 0.58612  |
| 37561 | P03383 | Q99618 | 0.81447  |
| 37562 | P03383 | Q96LL4 | 0.60341  |
| 37563 | P03383 | O43913 | 0.27382  |
| 37564 | P03383 | Q6PGP7 | 0.48277  |
| 37565 | P03383 | Q9BW71 | 0.64499  |
| 37566 | P03383 | Q9UKJ3 | 0.47389  |
| 37567 | P03383 | A6NI87 | 0.46078  |
| 37568 | P03383 | P11168 | 0.23327  |
| 37569 | P03383 | Q14533 | 0.66532  |
| 37570 | P03383 | Q8ND99 | 0.012509 |
| 37571 | P03383 | Q9BYN8 | 0.72117  |
| 37572 | P03383 | Q9Y2L8 | 0.37583  |
| 37573 | P03383 | Q8N6M0 | 0.076041 |
| 37574 | P03383 | Q8WTW3 | 0.53753  |
| 37575 | P03383 | P30279 | 0.44411  |
| 37576 | P03383 | Q8NBC4 | 0.33834  |
| 37577 | P03383 | Q9NVS2 | 0.54418  |
| 37578 | P03383 | Q09161 | 0.58293  |
| 37579 | P03383 | O95628 | 0.49535  |
| 37580 | P03383 | Q9BTD1 | 0.14691  |
| 37581 | P03383 | P0C7V9 | 0.59219  |
| 37582 | P03383 | O43447 | 0.4168   |
| 37583 | P03383 | Q6PD74 | 0.27213  |
| 37584 | P03383 | Q9BXL5 | 0.20683  |
| 37585 | P03383 | Q6ZRC1 | 0.33834  |
| 37586 | P03383 | P41218 | 0.30049  |
| 37587 | P03383 | Q16629 | 0.45766  |
| 37588 | P03383 | Q9ULD0 | 0.16037  |
| 37589 | P03383 | P01358 | 0.33834  |
| 37590 | P03383 | Q6ZUG5 | 0.12609  |
| 37591 | P03383 | Q6ZVL8 | 0.33834  |
| 37592 | P03383 | Q8NHG7 | 0.48924  |
| 37593 | P03383 | P17014 | 0.17144  |
| 37594 | P03383 | Q14588 | 0.24149  |
| 37595 | P03383 | P33552 | 0.37959  |
| 37596 | P03383 | P83916 | 0.50876  |
| 37597 | P03383 | Q9HB65 | 0.3402   |
| 37598 | P03383 | Q7Z7F1 | 0.067937 |
| 37599 | P03383 | P25208 | 0.42791  |
| 37600 | P03383 | Q14CW9 | 0.6362   |
| 37601 | P03383 | Q8IXQ6 | 0.53775  |
| 37602 | P03383 | Q9NRJ2 | 0.33834  |
| 37603 | P03383 | Q8N228 | 0.073272 |
| 37604 | P03383 | Q8N9L7 | 0.055996 |
| 37605 | P03383 | B3EWF7 | 0.33834  |
| 37606 | P03383 | Q7Z3V5 | 0.23295  |
| 37607 | P03383 | Q9NQG5 | 0.82645  |
| 37608 | P03383 | Q86WR0 | 0.18037  |
| 37609 | P03383 | Q9Y6C7 | 0.33834  |
| 37610 | P03383 | P59036 | 0.33834  |
| 37611 | P03383 | Q5VWG9 | 0.56068  |
| 37612 | P03383 | P13985 | 0.33834  |
| 37613 | P03383 | H3BNL1 | 0.223    |
| 37614 | P03383 | Q5TAX3 | 0.48697  |
| 37615 | P03383 | Q8TEP8 | 0.49613  |
| 37616 | P03383 | Q96E09 | 0.58513  |
| 37617 | P03383 | Q9H0E9 | 0.17681  |
| 37618 | P03383 | Q9NV39 | 0.33261  |
| 37619 | P03383 | Q6WBX8 | 0.24728  |
| 37620 | P03383 | P20042 | 0.26771  |

|       |        |        |          |
|-------|--------|--------|----------|
| 37621 | P03383 | Q86Y26 | 0.53361  |
| 37622 | P03383 | Q9BZQ8 | 0.43039  |
| 37623 | P03383 | Q71F23 | 0.31743  |
| 37624 | P03383 | Q96LW9 | 0.14737  |
| 37625 | P03383 | P61581 | 0.5351   |
| 37626 | P03383 | Q9Y3T9 | 0.81422  |
| 37627 | P03383 | Q9H0A8 | 0.49238  |
| 37628 | P03383 | P20226 | 0.71928  |
| 37629 | P03383 | Q8TAF5 | 0.33834  |
| 37630 | P03383 | P49366 | 0.22692  |
| 37631 | P03383 | Q8N365 | 0.60341  |
| 37632 | P03383 | Q9NYK6 | 0.42497  |
| 37633 | P03383 | A6NJ64 | 0.27451  |
| 37634 | P03383 | Q8TE76 | 0.078671 |
| 37635 | P03383 | Q96A04 | 0.68207  |
| 37636 | P03383 | P09913 | 0.33311  |
| 37637 | P03383 | Q9ULK2 | 0.48392  |
| 37638 | P03383 | O43159 | 0.66304  |
| 37639 | P03383 | Q8IUF8 | 0.23162  |
| 37640 | P03383 | A8MUV8 | 0.31046  |
| 37641 | P03383 | A6NKX1 | 0.33834  |
| 37642 | P03383 | A8K8V0 | 0.22149  |
| 37643 | P03383 | Q8IVN3 | 0.64611  |
| 37644 | P03383 | Q9UBS4 | 0.29819  |
| 37645 | P03383 | Q96EB1 | 0.8575   |
| 37646 | P03383 | Q9HBF5 | 0.62314  |
| 37647 | P03383 | Q8TF47 | 0.31865  |
| 37648 | P03383 | Q8N5C8 | 0.26097  |
| 37649 | P03383 | Q33E94 | 0.61509  |
| 37650 | P03383 | Q5VU43 | 0.61008  |
| 37651 | P03383 | Q6ZVD7 | 0.095456 |
| 37652 | P03383 | Q8IWP9 | 0.81539  |
| 37653 | P03383 | P62136 | 0.46451  |
| 37654 | P03383 | Q99567 | 0.54894  |
| 37655 | P03383 | A6NEQ9 | 0.33834  |
| 37656 | P03383 | Q9UBW7 | 0.57722  |
| 37657 | P03383 | O95201 | 0.39205  |
| 37658 | P03383 | Q9NXF7 | 0.14284  |
| 37659 | P03383 | Q96D70 | 0.71373  |
| 37660 | P03383 | Q9UPR3 | 0.66239  |
| 37661 | P03383 | O95707 | 0.72937  |
| 37662 | P03383 | P82675 | 0.37909  |
| 37663 | P03383 | Q5SWL7 | 0.44316  |
| 37664 | P03383 | Q14687 | 0.1668   |
| 37665 | P03383 | Q8NCT3 | 0.64342  |
| 37666 | P03383 | P61088 | 0.48813  |
| 37667 | P03383 | Q8IXH6 | 0.82345  |
| 37668 | P03383 | Q8N9E0 | 0.60341  |
| 37669 | P03383 | Q8NFG4 | 0.47549  |
| 37670 | P03383 | O75800 | 0.23613  |
| 37671 | P03383 | Q12834 | 0.60316  |
| 37672 | P03383 | Q8IYX7 | 0.75608  |
| 37673 | P03383 | Q8IZT9 | 0.61185  |
| 37674 | P03383 | Q13895 | 0.4515   |
| 37675 | P03383 | Q4KMZ1 | 0.048304 |
| 37676 | P03383 | P52758 | 0.21757  |
| 37677 | P03383 | Q9HC44 | 1.1511   |
| 37678 | P03383 | O75901 | 0.3802   |
| 37679 | P03383 | Q6IPW1 | 0.36194  |
| 37680 | P03383 | P35527 | 0.75254  |
| 37681 | P03383 | Q9HAZ2 | 0.24056  |
| 37682 | P03383 | A6NLC5 | 0.24946  |
| 37683 | P03383 | Q6P1N0 | 0.17733  |
| 37684 | P03383 | A6NEF3 | 0.5567   |
| 37685 | P03383 | Q9BWD3 | 0.44385  |
| 37686 | P03383 | Q16719 | 0.070377 |
| 37687 | P03383 | Q5VWX1 | 0.50571  |
| 37688 | P03383 | Q96GX9 | 0.20394  |
| 37689 | P03383 | O14770 | 0.28309  |
| 37690 | P03383 | Q9Y5P8 | 0.37386  |
| 37691 | P03383 | P56282 | 0.22758  |
| 37692 | P03383 | Q96L92 | 0.48375  |
| 37693 | P03383 | Q66PJ3 | 0.39841  |
| 37694 | P03383 | Q9NZH4 | 0.55015  |
| 37695 | P03383 | Q6W2J9 | 0.27366  |
| 37696 | P03383 | Q8N485 | 0.072429 |

|       |        |        |          |
|-------|--------|--------|----------|
| 37697 | P03383 | Q9Y6Z2 | 0.33834  |
| 37698 | P03383 | Q7Z589 | 0.74898  |
| 37699 | P03383 | Q9UQR0 | 0.096658 |
| 37700 | P03383 | P57077 | 0.46601  |
| 37701 | P03383 | Q4G112 | 0.11658  |
| 37702 | P03383 | Q13495 | 0.93169  |
| 37703 | P03383 | Q9H9A7 | 0.3518   |
| 37704 | P03383 | Q13287 | 0.35088  |
| 37705 | P03383 | Q08E93 | 0.33834  |
| 37706 | P03383 | Q5JPI3 | 0.5885   |
| 37707 | P03383 | P08651 | 0.088024 |
| 37708 | P03383 | Q76KD6 | 0.24027  |
| 37709 | P03383 | O75832 | 0.31384  |
| 37710 | P03383 | Q9HCG1 | 0.25769  |
| 37711 | P03383 | O75427 | 0.30737  |
| 37712 | P03383 | P52657 | 0.88878  |
| 37713 | P03383 | Q53H80 | 0.22324  |
| 37714 | P03383 | Q3BBV1 | 0.95616  |
| 37715 | P03383 | O14530 | 0.24124  |
| 37716 | P03383 | A1A4V9 | 0.15604  |
| 37717 | P03383 | Q6PGN9 | 0.5903   |
| 37718 | P03383 | P52746 | 0.047743 |
| 37719 | P03383 | Q15006 | 0.032464 |
| 37720 | P03383 | Q504T8 | 0.13465  |
| 37721 | P03383 | A6NJ88 | 0.59022  |
| 37722 | P03383 | Q9UQB3 | 0.37117  |
| 37723 | P03383 | Q9UBC9 | 0.3509   |
| 37724 | P03383 | Q14934 | 0.2798   |
| 37725 | P03383 | P43360 | 0.39464  |
| 37726 | P03383 | Q9H6J7 | 0.20788  |
| 37727 | P03383 | P08779 | 0.72283  |
| 37728 | P03383 | Q5VWT5 | 0.3937   |
| 37729 | P03383 | Q9UI66 | 0.33834  |
| 37730 | P03383 | O43516 | 0.060347 |
| 37731 | P03383 | Q8TCI5 | 0.37598  |
| 37732 | P03383 | Q8IYF3 | 0.30354  |
| 37733 | P03383 | Q13137 | 0.71812  |
| 37734 | P03383 | Q13506 | 0.19422  |
| 37735 | P03383 | Q0VF49 | 0.33834  |
| 37736 | P03383 | Q499Z4 | 0.21286  |
| 37737 | P03383 | Q8N831 | 0.42364  |
| 37738 | P03383 | Q96RN5 | 1.0418   |
| 37739 | P03383 | A6NDX5 | 0.23283  |
| 37740 | P03383 | Q7L2R6 | 0.29921  |
| 37741 | P03383 | Q99733 | 0.5089   |
| 37742 | P03383 | O60308 | 0.36695  |
| 37743 | P03383 | O75448 | 0.34135  |
| 37744 | P03383 | Q96N06 | 0.45388  |
| 37745 | P03383 | P62277 | 0.7914   |
| 37746 | P03383 | Q96GM5 | 0.63021  |
| 37747 | P03383 | Q8N8G2 | 0.57276  |
| 37748 | P03383 | Q75NE6 | 0.93016  |
| 37749 | P03383 | Q9BTE6 | 0.48531  |
| 37750 | P03383 | Q6RUI8 | 0.37989  |
| 37751 | P03383 | O00401 | 0.41938  |
| 37752 | P03383 | O96004 | 0.34936  |
| 37753 | P03383 | Q8WTS6 | 0.30884  |
| 37754 | P03383 | Q92552 | 0.46751  |
| 37755 | P03383 | P62487 | 0.2499   |
| 37756 | P03383 | O15069 | 0.10449  |
| 37757 | P03383 | O75529 | 0.39315  |
| 37758 | P03383 | Q99871 | 0.30651  |
| 37759 | P03383 | Q6ZSN1 | 0.29008  |
| 37760 | P03383 | Q14397 | 0.48039  |
| 37761 | P03383 | Q7L266 | 0.12118  |
| 37762 | P03383 | P07738 | 0.52163  |
| 37763 | P03383 | Q86WQ0 | 0.3119   |
| 37764 | P03383 | Q8NFR7 | 0.55416  |
| 37765 | P03383 | Q15643 | 0.5604   |
| 37766 | P03383 | Q5TZA2 | 0.52358  |
| 37767 | P03383 | P46100 | 0.3706   |
| 37768 | P03383 | Q6ZV77 | 0.33834  |
| 37769 | P03383 | Q05084 | 0.17836  |
| 37770 | P03383 | Q9Y613 | 0.31796  |
| 37771 | P03383 | O75570 | 0.3023   |
| 37772 | P03383 | Q13144 | 0.33322  |

|       |        |        |          |
|-------|--------|--------|----------|
| 37773 | P03383 | Q86TS7 | 0.33834  |
| 37774 | P03383 | Q8WTP9 | 0.8942   |
| 37775 | P03383 | Q9H0A9 | 0.94531  |
| 37776 | P03383 | Q5SY13 | 0.33834  |
| 37777 | P03383 | Q15326 | 0.92206  |
| 37778 | P03383 | Q9Y5A7 | 0.45161  |
| 37779 | P03383 | P29372 | 0.33973  |
| 37780 | P03383 | A6NFQ2 | 0.48647  |
| 37781 | P03383 | Q8N9U9 | 0.056707 |
| 37782 | P03383 | P78560 | 0.33407  |
| 37783 | P03383 | Q9BYD6 | 0.39651  |
| 37784 | P03383 | Q16822 | 0.049138 |
| 37785 | P03383 | P11473 | 0.24448  |
| 37786 | P03383 | P18077 | 0.30461  |
| 37787 | P03383 | Q8IUR0 | 0.68231  |
| 37788 | P03383 | Q15105 | 0.19166  |
| 37789 | P03383 | Q96NB1 | 0.11192  |
| 37790 | P03383 | P0DM63 | 0.50049  |
| 37791 | P03383 | Q15003 | 0.54458  |
| 37792 | P03383 | Q8N684 | 0.32421  |
| 37793 | P03383 | Q9HD34 | 0.41203  |
| 37794 | P03383 | Q9H6Q4 | 0.27335  |
| 37795 | P03383 | Q6ICG7 | 0.33834  |
| 37796 | P03383 | Q14558 | 0.50268  |
| 37797 | P03383 | Q43395 | 0.58591  |
| 37798 | P03383 | P51610 | 0.30974  |
| 37799 | P03383 | Q6ZRQ5 | 0.33602  |
| 37800 | P03383 | Q12796 | 1.235    |
| 37801 | P03383 | Q14C87 | 0.44686  |
| 37802 | P03383 | P01009 | 0.26512  |
| 37803 | P03383 | Q1A5X6 | 0.60341  |
| 37804 | P03383 | Q96E16 | 0.48696  |
| 37805 | P03383 | Q6ZS46 | 0.64499  |
| 37806 | P03383 | Q9BSM1 | 0.77687  |
| 37807 | P03383 | Q6P3X8 | 0.30823  |
| 37808 | P03383 | O60870 | 0.51016  |
| 37809 | P03383 | Q6P1L8 | 0.65678  |
| 37810 | P03383 | Q94913 | 0.13499  |
| 37811 | P03383 | Q9NQ89 | 0.21458  |
| 37812 | P03383 | P23588 | 0.19825  |
| 37813 | P03383 | Q17RH7 | 0.33834  |
| 37814 | P03383 | Q6PF05 | 0.24529  |
| 37815 | P03383 | P06730 | 0.34871  |
| 37816 | P03383 | P63173 | 0.45875  |
| 37817 | P03383 | Q9Y3D9 | 0.16984  |
| 37818 | P03383 | Q8IYB3 | 0.48669  |
| 37819 | P03383 | Q8N8I6 | 0.33834  |
| 37820 | P03383 | Q5VUA4 | 0.23115  |
| 37821 | P03383 | P41161 | 0.013187 |
| 37822 | P03383 | P11474 | 0.26794  |
| 37823 | P03383 | Q9NR50 | 0.33026  |
| 37824 | P03383 | Q9UBS3 | 0.38908  |
| 37825 | P03383 | Q75817 | 0.59897  |
| 37826 | P03383 | Q16533 | 0.38015  |
| 37827 | P03383 | Q6ZNA1 | 0.23295  |
| 37828 | P03383 | Q99549 | 0.46349  |
| 37829 | P03383 | Q496A3 | 0.15899  |
| 37830 | P03383 | Q86UD0 | 0.33711  |
| 37831 | P03383 | Q16851 | 0.2473   |
| 37832 | P03383 | Q03112 | 0.15085  |
| 37833 | P03383 | P49336 | 0.48027  |
| 37834 | P03383 | Q14978 | 0.21808  |
| 37835 | P03383 | Q96NS8 | 0.094778 |
| 37836 | P03383 | Q9NX04 | 0.26022  |
| 37837 | P03383 | Q6TFL3 | 0.18306  |
| 37838 | P03383 | O00291 | 0.23843  |
| 37839 | P03383 | Q95243 | 0.42565  |
| 37840 | P03383 | Q86TA1 | 0.14228  |
| 37841 | P03383 | Q9H8M7 | 0.53501  |
| 37842 | P03383 | Q9HAN9 | 0.23402  |
| 37843 | P03383 | Q2NL82 | 0.33677  |
| 37844 | P03383 | Q9NSA3 | 0.49265  |
| 37845 | P03383 | Q13952 | 0.50221  |
| 37846 | P03383 | Q16594 | 0.40955  |
| 37847 | P03383 | Q5TB80 | 0.58135  |
| 37848 | P03383 | Q01892 | 0.20165  |

|       |        |        |             |
|-------|--------|--------|-------------|
| 37849 | P03383 | Q8WU49 | 0.33834     |
| 37850 | P03383 | P01008 | 0.22058     |
| 37851 | P03383 | O15015 | 0.39205     |
| 37852 | P03383 | Q12873 | 0.38325     |
| 37853 | P03383 | Q5W111 | 0.016307    |
| 37854 | P03383 | Q92985 | 0.37021     |
| 37855 | P03383 | P86478 | 0.33834     |
| 37856 | P03383 | Q9C0B2 | 0.17117     |
| 37857 | P03383 | O60296 | 0.38217     |
| 37858 | P03383 | Q14186 | 1.0451      |
| 37859 | P03383 | Q96EZ4 | 0.33834     |
| 37860 | P03383 | Q9UII2 | 0.30026     |
| 37861 | P03383 | Q13428 | 0.81935     |
| 37862 | P03383 | Q9BSV6 | 0.18903     |
| 37863 | P03383 | Q96CS2 | 0.33094     |
| 37864 | P03383 | Q8NHX4 | 0.5308      |
| 37865 | P03383 | Q6P2C8 | 0.74735     |
| 37866 | P03383 | P60006 | 0.48631     |
| 37867 | P03383 | Q6PH81 | 0.22249     |
| 37868 | P03383 | Q9Y606 | 0.76709     |
| 37869 | P03383 | Q2M2Z5 | 0.44549     |
| 37870 | P03383 | Q8IYX0 | 0.3204      |
| 37871 | P03383 | Q9UET6 | 0.47258     |
| 37872 | P03383 | P0C843 | 0.21302     |
| 37873 | P03383 | Q5W5X9 | 0.29678     |
| 37874 | P03383 | Q9H816 | 0.23652     |
| 37875 | P03383 | Q8N1K5 | 0.37572     |
| 37876 | P03383 | P06744 | 0.4751      |
| 37877 | P03383 | P54252 | 0.3268      |
| 37878 | P03383 | Q9GZP8 | 0.33834     |
| 37879 | P03383 | P27816 | 0.21386     |
| 37880 | P03383 | Q15629 | 0.27984     |
| 37881 | P03383 | Q7L2K0 | 0.045303    |
| 37882 | P03383 | Q53HL2 | 0.67058     |
| 37883 | P03383 | A8MXT2 | 4.9042e-005 |
| 37884 | P03383 | Q8IXH7 | 0.93682     |
| 37885 | P03383 | Q9H3H9 | 0.6782      |
| 37886 | P03383 | Q68DK7 | 0.55012     |
| 37887 | P03383 | Q9Y316 | 0.33206     |
| 37888 | P03383 | Q16637 | 0.63691     |
| 37889 | P03383 | O94763 | 0.60294     |
| 37890 | P03383 | P0C867 | 0.15988     |
| 37891 | P03383 | Q13427 | 0.20514     |
| 37892 | P03383 | Q8NB50 | 0.25401     |
| 37893 | P03383 | P59998 | 0.094996    |
| 37894 | P03383 | Q16621 | 0.38174     |
| 37895 | P03383 | Q8NAP1 | 0.60341     |
| 37896 | P03383 | O94927 | 0.32838     |
| 37897 | P03383 | Q9BQ66 | 0.5733      |
| 37898 | P03383 | P78543 | 0.45785     |
| 37899 | P03383 | Q96T17 | 0.41995     |
| 37900 | P03383 | Q96RM1 | 0.33834     |
| 37901 | P03383 | Q9NVI1 | 0.42473     |
| 37902 | P03383 | O95777 | 0.41529     |
| 37903 | P03383 | Q5U4N7 | 0.33834     |
| 37904 | P03383 | Q7L9L4 | 0.46714     |
| 37905 | P03383 | Q8WW18 | 0.60341     |
| 37906 | P03383 | P54845 | 0.13359     |
| 37907 | P03383 | P15927 | 0.25179     |
| 37908 | P03383 | O60783 | 0.4007      |
| 37909 | P03383 | Q9BQ70 | 1.0273      |
| 37910 | P03383 | Q6NXP2 | 0.75233     |
| 37911 | P03383 | B3EWG4 | 0.60341     |
| 37912 | P03383 | Q9Y3R5 | 0.44747     |
| 37913 | P03383 | Q13185 | 0.61997     |
| 37914 | P03383 | P62081 | 0.75519     |
| 37915 | P03383 | P41219 | 0.44705     |
| 37916 | P03383 | Q9P260 | 0.0039245   |
| 37917 | P03383 | P86452 | 0.25315     |
| 37918 | P03383 | Q96PG8 | 0.33834     |
| 37919 | P03383 | O75607 | 0.47046     |
| 37920 | P03383 | A7MD48 | 0.48773     |
| 37921 | P03383 | Q8WUZ0 | 0.52012     |
| 37922 | P03383 | Q5T6F2 | 0.74962     |
| 37923 | P03383 | O95229 | 0.53556     |
| 37924 | P03383 | Q9BVC6 | 0.40061     |



|       |        |        |          |
|-------|--------|--------|----------|
| 37925 | P03383 | Q9H963 | 0.27909  |
| 37926 | P03383 | Q1ED39 | 0.80264  |
| 37927 | P03383 | Q9BW27 | 0.55424  |
| 37928 | P03383 | P45973 | 0.48918  |
| 37929 | P03383 | Q96MR9 | 0.28623  |
| 37930 | P03383 | P49639 | 0.17743  |
| 37931 | P03383 | Q8IZS5 | 0.31126  |
| 37932 | P03383 | Q9UHX1 | 0.49221  |
| 37933 | P03383 | P55060 | 0.65876  |
| 37934 | P03383 | P84022 | 0.37919  |
| 37935 | P03383 | Q9BU64 | 0.26217  |
| 37936 | P03383 | O75956 | 0.19022  |
| 37937 | P03383 | Q96AB3 | 0.40163  |
| 37938 | P03383 | Q8TEL6 | 0.26075  |
| 37939 | P03383 | P98168 | 0.48913  |
| 37940 | P03383 | B4DXR9 | 0.31563  |
| 37941 | P03383 | Q5HY64 | 0.019547 |
| 37942 | P03383 | Q9UHQ1 | 0.50701  |
| 37943 | P03383 | Q9NV44 | 0.014553 |
| 37944 | P03383 | Q8IYX3 | 0.71415  |
| 37945 | P03383 | Q92994 | 0.15885  |
| 37946 | P03383 | Q9H160 | 0.30114  |
| 37947 | P03383 | Q04726 | 0.75722  |
| 37948 | P03383 | Q1RMZ1 | 0.37483  |
| 37949 | P03383 | Q8IWS0 | 0.2729   |
| 37950 | P03383 | Q8N895 | 0.30058  |
| 37951 | P03383 | Q86SE9 | 0.75358  |
| 37952 | P03383 | O75081 | 0.865    |
| 37953 | P03383 | P25791 | 0.24972  |
| 37954 | P03383 | P52292 | 0.66519  |
| 37955 | P03383 | A6NDD8 | 0.34297  |
| 37956 | P03383 | B1AK76 | 0.74678  |
| 37957 | P03383 | P52747 | 0.59231  |
| 37958 | P03383 | Q9Y6Y0 | 0.23784  |
| 37959 | P03383 | Q8IXS0 | 0.60341  |
| 37960 | P03383 | P46976 | 0.28792  |
| 37961 | P03383 | P19387 | 0.35386  |
| 37962 | P03383 | Q5H9J9 | 0.1699   |
| 37963 | P03383 | Q66K80 | 0.33834  |
| 37964 | P03383 | Q9NXB0 | 0.54995  |
| 37965 | P03383 | P33240 | 0.37946  |
| 37966 | P03383 | Q9Y2Q9 | 0.35355  |
| 37967 | P03383 | Q9HB71 | 0.34483  |
| 37968 | P03383 | Q2M3C7 | 0.30068  |
| 37969 | P03383 | Q15928 | 0.35013  |
| 37970 | P03383 | P11308 | 0.41605  |
| 37971 | P03383 | Q9HD15 | 0.36293  |
| 37972 | P03383 | P81274 | 0.3495   |
| 37973 | P03383 | P62314 | 0.62088  |
| 37974 | P03383 | Q8IWE2 | 0.5911   |
| 37975 | P03383 | Q9H489 | 0.32581  |
| 37976 | P03383 | Q96PK6 | 0.56411  |
| 37977 | P03383 | Q6ZTC4 | 0.33834  |
| 37978 | P03383 | O60238 | 0.17849  |
| 37979 | P03383 | Q9UJK0 | 0.73592  |
| 37980 | P03383 | Q9Y4K1 | 0.54734  |
| 37981 | P03383 | Q8WZA8 | 0.33834  |
| 37982 | P03383 | Q9NVV9 | 0.79362  |
| 37983 | P03383 | Q9H583 | 0.72238  |
| 37984 | P03383 | P62310 | 0.47978  |
| 37985 | P03383 | Q9BY65 | 0.21793  |
| 37986 | P03383 | P05787 | 1.0818   |
| 37987 | P03383 | Q9H808 | 0.31176  |
| 37988 | P03383 | Q04695 | 0.70649  |
| 37989 | P03383 | Q15361 | 0.51853  |
| 37990 | P03383 | Q86WS4 | 0.33834  |
| 37991 | P03383 | P18583 | 0.23587  |
| 37992 | P03383 | A6NEM1 | 0.52432  |
| 37993 | P03383 | O60563 | 1.1739   |
| 37994 | P03383 | A6NGD5 | 0.15179  |
| 37995 | P03383 | Q96ND8 | 0.32972  |
| 37996 | P03383 | Q9UDV6 | 0.3617   |
| 37997 | P03383 | A4D0Y5 | 0.33834  |
| 37998 | P03383 | Q9H7B2 | 0.62437  |
| 37999 | P03383 | Q99747 | 0.31774  |
| 38000 | P03383 | B1ANY3 | 0.26752  |

|       |        |        |          |
|-------|--------|--------|----------|
| 38001 | P03383 | Q9BT78 | 0.7127   |
| 38002 | P03383 | Q66GS9 | 0.070043 |
| 38003 | P03383 | Q9C035 | 0.35674  |
| 38004 | P03383 | Q7Z2Z1 | 0.64538  |
| 38005 | P03383 | Q9Y221 | 0.55046  |
| 38006 | P03383 | Q8WVC0 | 0.75365  |
| 38007 | P03383 | Q00994 | 0.69539  |
| 38008 | P03383 | P0C841 | 0.33834  |
| 38009 | P03383 | Q53EQ6 | 0.32213  |
| 38010 | P03383 | P61580 | 0.5351   |
| 38011 | P03383 | Q13111 | 1.0167   |
| 38012 | P03383 | Q9NXX8 | 0.37695  |
| 38013 | P03383 | Q6NV74 | 0.60341  |
| 38014 | P03383 | P84103 | 0.43188  |
| 38015 | P03383 | Q9UID6 | 0.32141  |
| 38016 | P03383 | Q75558 | 0.32299  |
| 38017 | P03383 | Q9BTM9 | 0.58685  |
| 38018 | P03383 | A6NJL1 | 0.084369 |
| 38019 | P03383 | P06132 | 0.39824  |
| 38020 | P03383 | Q6ZN28 | 0.4839   |
| 38021 | P03383 | Q8NEM1 | 0.32025  |
| 38022 | P03383 | Q96BQ5 | 0.44531  |
| 38023 | P03383 | Q8WUE5 | 0.16657  |
| 38024 | P03383 | Q96A49 | 0.68833  |
| 38025 | P03383 | Q9NV72 | 0.31091  |
| 38026 | P03383 | Q9NTG7 | 0.28032  |
| 38027 | P03383 | Q96N16 | 0.62616  |
| 38028 | P03383 | Q86UY5 | 0.064539 |
| 38029 | P03383 | Q8N4B4 | 0.053608 |
| 38030 | P03383 | Q5QJE6 | 0.79773  |
| 38031 | P03383 | Q9H8T0 | 0.28398  |
| 38032 | P03383 | Q5JNZ3 | 0.2283   |
| 38033 | P03383 | Q9Y2R5 | 0.37779  |
| 38034 | P03383 | Q96N38 | 0.31271  |
| 38035 | P03383 | Q86SQ7 | 0.61546  |
| 38036 | P03383 | Q8IVE0 | 0.018533 |
| 38037 | P03383 | Q9Y2J4 | 0.13623  |
| 38038 | P03383 | Q92945 | 0.52477  |
| 38039 | P03383 | Q9ULG3 | 0.33834  |
| 38040 | P03383 | Q9UK41 | 0.447    |
| 38041 | P03383 | Q96AQ9 | 0.25258  |
| 38042 | P03383 | Q97980 | 0.034227 |
| 38043 | P03383 | Q7LBR1 | 0.61902  |
| 38044 | P03383 | Q15652 | 0.2875   |
| 38045 | P03383 | Q12857 | 0.13416  |
| 38046 | P03383 | P17010 | 0.084994 |
| 38047 | P03383 | P50613 | 0.15891  |
| 38048 | P03383 | Q75L30 | 0.33834  |
| 38049 | P03383 | A8MVM7 | 0.33834  |
| 38050 | P03383 | Q9UHK0 | 0.18971  |
| 38051 | P03383 | Q8NHU0 | 0.069402 |
| 38052 | P03383 | Q9BXY8 | 0.39095  |
| 38053 | P03383 | P13984 | 0.39456  |
| 38054 | P03383 | Q96KN1 | 0.22673  |
| 38055 | P03383 | Q9UNY5 | 0.31738  |
| 38056 | P03383 | Q8IYA6 | 0.57502  |
| 38057 | P03383 | Q9H9H5 | 0.35518  |
| 38058 | P03383 | Q32M78 | 0.28869  |
| 38059 | P03383 | Q8N9N5 | 0.27636  |
| 38060 | P03383 | Q96FN9 | 0.33484  |
| 38061 | P03383 | Q96MK2 | 0.081085 |
| 38062 | P03383 | Q9UI72 | 0.33834  |
| 38063 | P03383 | Q86UC2 | 0.30443  |
| 38064 | P03383 | Q9P031 | 0.81631  |
| 38065 | P03383 | P39687 | 1.0796   |
| 38066 | P03383 | Q96MF4 | 0.36489  |
| 38067 | P03383 | Q60260 | 0.27859  |
| 38068 | P03383 | P42772 | 0.58894  |
| 38069 | P03383 | Q8TAY7 | 1.0726   |
| 38070 | P03383 | P23381 | 0.22013  |
| 38071 | P03383 | Q6P9F0 | 0.19357  |
| 38072 | P03383 | Q86VQ0 | 0.1928   |
| 38073 | P03383 | P20962 | 0.33415  |
| 38074 | P03383 | Q99551 | 0.49491  |
| 38075 | P03383 | Q9H6T0 | 0.10107  |
| 38076 | P03383 | Q49B96 | 0.29801  |

|       |        |        |          |
|-------|--------|--------|----------|
| 38077 | P03383 | Q969G3 | 1.0006   |
| 38078 | P03383 | Q8NDZ0 | 0.097553 |
| 38079 | P03383 | Q5MJ07 | 0.61942  |
| 38080 | P03383 | Q9BXJ9 | 0.50918  |
| 38081 | P03383 | Q9H2T7 | 0.24576  |
| 38082 | P03383 | Q96TA1 | 0.030285 |
| 38083 | P03383 | O00273 | 0.059795 |
| 38084 | P03383 | Q5BKY6 | 0.33834  |
| 38085 | P03383 | O75843 | 0.40756  |
| 38086 | P03383 | Q86W56 | 0.33308  |
| 38087 | P03383 | Q9Y6B2 | 0.76799  |
| 38088 | P03383 | Q5T655 | 0.33834  |
| 38089 | P03383 | Q8NF64 | 0.97699  |
| 38090 | P03383 | K7EJ46 | 0.33834  |
| 38091 | P03383 | P63104 | 0.71855  |
| 38092 | P03383 | Q9H4R4 | 0.01399  |
| 38093 | P03383 | Q8NCE8 | 0.4177   |
| 38094 | P03383 | P20700 | 0.19332  |
| 38095 | P03383 | Q5H9J7 | 0.64999  |
| 38096 | P03383 | Q9HAU5 | 0.57266  |
| 38097 | P03383 | P35548 | 0.45448  |
| 38098 | P03383 | Q9UNN5 | 0.41708  |
| 38099 | P03383 | A6NGQ2 | 0.27962  |
| 38100 | P03383 | O14948 | 0.21686  |
| 38101 | P03383 | Q9UM13 | 0.44572  |
| 38102 | P03383 | Q99873 | 0.40061  |
| 38103 | P03383 | O75157 | 0.4046   |
| 38104 | P03383 | Q14674 | 0.14354  |
| 38105 | P03383 | Q96MN9 | 0.38989  |
| 38106 | P03383 | Q02447 | 0.34602  |
| 38107 | P03383 | Q9H063 | 0.32604  |
| 38108 | P03383 | A8MU93 | 0.60341  |
| 38109 | P03383 | B3EWG3 | 0.60341  |
| 38110 | P03383 | P60604 | 0.3359   |
| 38111 | P03383 | O75347 | 0.72807  |
| 38112 | P03383 | Q9Y3C7 | 0.73677  |
| 38113 | P03383 | P43487 | 0.14402  |
| 38114 | P03383 | A6NNA2 | 0.63671  |
| 38115 | P03383 | O14556 | 0.29723  |
| 38116 | P03383 | O43633 | 0.17708  |
| 38117 | P03383 | Q9NNX9 | 0.74489  |
| 38118 | P03383 | Q6ZVN8 | 0.12842  |
| 38119 | P03383 | Q6VUC0 | 0.21924  |
| 38120 | P03383 | P60412 | 0.5733   |
| 38121 | P03383 | Q5JSQ8 | 0.037193 |
| 38122 | P03383 | P80217 | 0.36639  |
| 38123 | P03383 | Q96MC2 | 0.010675 |
| 38124 | P03383 | P54098 | 0.28289  |
| 38125 | P03383 | Q9HCM7 | 0.64528  |
| 38126 | P03383 | Q9ULL0 | 0.37195  |
| 38127 | P03383 | Q8TEQ6 | 0.54295  |
| 38128 | P03383 | Q8IZ16 | 0.081599 |
| 38129 | P03383 | Q96S59 | 0.56496  |
| 38130 | P03383 | Q8WXW3 | 0.57582  |
| 38131 | P03383 | P07195 | 0.38442  |
| 38132 | P03383 | Q96HI0 | 0.37799  |
| 38133 | P03383 | Q96EL1 | 0.57392  |
| 38134 | P03383 | Q8N3Z6 | 0.12898  |
| 38135 | P03383 | Q9Y6K1 | 0.25404  |
| 38136 | P03383 | Q8WWC4 | 0.45612  |
| 38137 | P03383 | Q7RTT5 | 0.10215  |
| 38138 | P03383 | A8MTY7 | 0.5733   |
| 38139 | P03383 | Q13105 | 0.32112  |
| 38140 | P03383 | Q6ZMR3 | 0.36755  |
| 38141 | P03383 | Q8WVZ9 | 0.39464  |
| 38142 | P03383 | O14893 | 0.42948  |
| 38143 | P03383 | P28324 | 1.1064   |
| 38144 | P03383 | Q9Y5J6 | 0.23619  |
| 38145 | P03383 | Q9H1I8 | 0.30774  |
| 38146 | P03383 | Q96A44 | 0.30187  |
| 38147 | P03383 | Q96D98 | 0.68968  |
| 38148 | P03383 | Q9Y2T2 | 0.35672  |
| 38149 | P03383 | A6NLJ0 | 0.72583  |
| 38150 | P03383 | Q8N488 | 0.33785  |
| 38151 | P03383 | Q9H040 | 0.2357   |
| 38152 | P03383 | Q9H0W9 | 0.39601  |

|       |        |         |           |
|-------|--------|---------|-----------|
| 38153 | P03383 | Q5TH74  | 0.30138   |
| 38154 | P03383 | Q99990  | 0.32173   |
| 38155 | P03383 | Q71F56  | 0.24931   |
| 38156 | P03383 | P61586  | 0.75858   |
| 38157 | P03383 | Q8NCX0  | 0.27856   |
| 38158 | P03383 | Q95125  | 0.16948   |
| 38159 | P03383 | Q9H147  | 0.23662   |
| 38160 | P03383 | Q9Y3B7  | 0.80436   |
| 38161 | P03383 | Q92973  | 0.78332   |
| 38162 | P03383 | Q9BPX7  | 0.31692   |
| 38163 | P03383 | Q14641  | 0.47021   |
| 38164 | P03383 | C9JC47  | 0.33834   |
| 38165 | P03383 | Q6UUUV7 | 1.1517    |
| 38166 | P03383 | Q9NV31  | 0.61102   |
| 38167 | P03383 | Q96QA6  | 0.033288  |
| 38168 | P03383 | Q9H0I3  | 0.17169   |
| 38169 | P03383 | Q13951  | 0.49259   |
| 38170 | P03383 | Q8N159  | 0.17023   |
| 38171 | P03383 | Q9H8E8  | 0.44481   |
| 38172 | P03383 | Q9BQE4  | 0.31483   |
| 38173 | P03383 | P48595  | 0.23418   |
| 38174 | P03383 | Q9HA90  | 0.60341   |
| 38175 | P03383 | Q8IZ63  | 0.33834   |
| 38176 | P03383 | Q9Y6H1  | 0.67327   |
| 38177 | P03383 | Q9NVV5  | 0.36296   |
| 38178 | P03383 | Q12816  | 0.084371  |
| 38179 | P03383 | Q14896  | 0.30465   |
| 38180 | P03383 | Q14929  | 0.52616   |
| 38181 | P03383 | Q9UHD9  | 0.53294   |
| 38182 | P03383 | Q9Y5N6  | 0.34658   |
| 38183 | P03383 | Q13541  | 0.55486   |
| 38184 | P03383 | Q6ZNK6  | 0.8446    |
| 38185 | P03383 | A6NFK2  | 0.068039  |
| 38186 | P03383 | Q9ULV5  | 0.21875   |
| 38187 | P03383 | Q9NZQ3  | 0.49337   |
| 38188 | P03383 | Q08AN1  | 0.24149   |
| 38189 | P03383 | Q6ZTY8  | 0.0071301 |
| 38190 | P03383 | P28347  | 0.76954   |
| 38191 | P03383 | P63010  | 0.21045   |
| 38192 | P03383 | P35637  | 0.25922   |
| 38193 | P03383 | P51946  | 0.48539   |
| 38194 | P03383 | Q9BSW2  | 0.50609   |
| 38195 | P03383 | Q43768  | 0.029362  |
| 38196 | P03383 | Q60732  | 0.1668    |
| 38197 | P03383 | Q15265  | 0.77973   |
| 38198 | P03383 | Q7L8W6  | 0.37589   |
| 38199 | P03383 | Q9UDY4  | 0.56219   |
| 38200 | P03383 | Q15819  | 0.41139   |
| 38201 | P03383 | P24928  | 0.66013   |
| 38202 | P03383 | Q9H7Y2  | 0.093929  |
| 38203 | P03383 | Q9BRT7  | 0.33834   |
| 38204 | P03383 | P61313  | 0.72715   |
| 38205 | P03383 | Q9UKV3  | 0.40663   |
| 38206 | P03383 | P60372  | 0.5733    |
| 38207 | P03383 | Q53QV2  | 0.20496   |
| 38208 | P03383 | Q13068  | 0.11815   |
| 38209 | P03383 | Q53G59  | 0.36399   |
| 38210 | P03383 | Q13015  | 0.41969   |
| 38211 | P03383 | Q13123  | 0.62364   |
| 38212 | P03383 | P59990  | 0.5733    |
| 38213 | P03383 | Q9NZH5  | 0.31304   |
| 38214 | P03383 | Q96JM7  | 0.22447   |
| 38215 | P03383 | P48539  | 0.21316   |
| 38216 | P03383 | Q14192  | 0.5256    |
| 38217 | P03383 | P46527  | 0.21953   |
| 38218 | P03383 | Q03468  | 0.25014   |
| 38219 | P03383 | Q8WXC7  | 0.33142   |
| 38220 | P03383 | Q14980  | 0.79458   |
| 38221 | P03383 | Q9NPF5  | 0.69054   |
| 38222 | P03383 | Q9HAW4  | 0.24033   |
| 38223 | P03383 | P08865  | 0.51556   |
| 38224 | P03383 | Q8IU53  | 0.33779   |
| 38225 | P03383 | Q43747  | 0.44917   |
| 38226 | P03383 | Q5TA31  | 0.30561   |
| 38227 | P03383 | Q15437  | 0.1396    |
| 38228 | P03383 | P42568  | 0.64816   |

|       |        |        |           |
|-------|--------|--------|-----------|
| 38229 | P03383 | Q8N8F4 | 0.10316   |
| 38230 | P03383 | Q01130 | 0.55543   |
| 38231 | P03383 | Q8WVV9 | 0.041936  |
| 38232 | P03383 | Q9GZU2 | 0.29226   |
| 38233 | P03383 | P51959 | 0.36837   |
| 38234 | P03383 | Q15287 | 0.623     |
| 38235 | P03383 | Q8IUC0 | 0.23416   |
| 38236 | P03383 | Q96F07 | 0.27332   |
| 38237 | P03383 | Q5JTJ3 | 0.051745  |
| 38238 | P03383 | Q9HAV4 | 0.88809   |
| 38239 | P03383 | Q9BZK3 | 0.30745   |
| 38240 | P03383 | P60410 | 0.81527   |
| 38241 | P03383 | Q6ZV65 | 0.31187   |
| 38242 | P03383 | Q9BQA5 | 0.62247   |
| 38243 | P03383 | P17040 | 0.3919    |
| 38244 | P03383 | Q96BW1 | 0.086196  |
| 38245 | P03383 | P0DM35 | 0.529     |
| 38246 | P03383 | Q9GZU7 | 0.29175   |
| 38247 | P03383 | O94855 | 0.1654    |
| 38248 | P03383 | Q01546 | 0.58419   |
| 38249 | P03383 | O75290 | 0.29751   |
| 38250 | P03383 | Q96I59 | 0.4042    |
| 38251 | P03383 | P51861 | 0.15095   |
| 38252 | P03383 | Q9NPD3 | 0.18534   |
| 38253 | P03383 | Q15528 | 0.95395   |
| 38254 | P03383 | Q12933 | 0.47554   |
| 38255 | P03383 | O43684 | 0.47946   |
| 38256 | P03383 | Q969E8 | 0.80519   |
| 38257 | P03383 | Q05195 | 0.35209   |
| 38258 | P03383 | Q8NCA5 | 0.33039   |
| 38259 | P03383 | P82909 | 0.30581   |
| 38260 | P03383 | A1L3X0 | 0.41347   |
| 38261 | P03383 | Q9BQE9 | 0.5908    |
| 38262 | P03383 | P52742 | 0.21483   |
| 38263 | P03383 | Q9H607 | 0.24274   |
| 38264 | P03383 | Q8TC56 | 0.87506   |
| 38265 | P03383 | O00471 | 0.058576  |
| 38266 | P03383 | Q9Y383 | 0.46684   |
| 38267 | P03383 | Q8IV03 | 0.83788   |
| 38268 | P03383 | Q15078 | 0.38763   |
| 38269 | P03383 | P82663 | 0.46869   |
| 38270 | P03383 | Q9NWX4 | 0.31757   |
| 38271 | P03383 | P24941 | 0.48998   |
| 38272 | P03383 | Q9BUT9 | 0.92766   |
| 38273 | P03383 | O94818 | 0.80264   |
| 38274 | P03383 | Q96MW1 | 0.60341   |
| 38275 | P03383 | Q13568 | 0.65406   |
| 38276 | P03383 | O60269 | 0.20864   |
| 38277 | P03383 | Q9BVI4 | 0.33042   |
| 38278 | P03383 | Q9UJY5 | 0.32552   |
| 38279 | P03383 | Q8NAX2 | 0.60341   |
| 38280 | P03383 | P62851 | 0.60908   |
| 38281 | P03383 | Q8N9H6 | 0.039412  |
| 38282 | P03383 | Q9H0P7 | 0.0038799 |
| 38283 | P03383 | Q8IYK2 | 0.58597   |
| 38284 | P03383 | Q9UPP5 | 0.46487   |
| 38285 | P03383 | P55854 | 0.32737   |
| 38286 | P03383 | Q7Z794 | 0.6878    |
| 38287 | P03383 | P17032 | 0.18442   |
| 38288 | P03383 | Q8IUW3 | 0.56391   |
| 38289 | P03383 | Q6NUN7 | 0.33834   |
| 38290 | P03383 | P0CH99 | 0.44628   |
| 38291 | P03383 | Q9NSG2 | 0.32643   |
| 38292 | P03383 | Q96N22 | 0.32458   |
| 38293 | P03383 | Q99687 | 0.28185   |
| 38294 | P03383 | Q8N859 | 0.31314   |
| 38295 | P03383 | Q9NR22 | 0.19732   |
| 38296 | P03383 | Q13426 | 0.15347   |
| 38297 | P03383 | P62495 | 0.41268   |
| 38298 | P03383 | Q9BYR8 | 0.81527   |
| 38299 | P03383 | Q8N7B7 | 0.065873  |
| 38300 | P03383 | Q6P1X6 | 0.63405   |
| 38301 | P03383 | Q9Y294 | 0.73443   |
| 38302 | P03383 | O75884 | 0.85965   |
| 38303 | P03383 | A6NCS6 | 0.12952   |
| 38304 | P03383 | P22531 | 0.34656   |

|       |        |        |          |
|-------|--------|--------|----------|
| 38305 | P03383 | O43261 | 0.1668   |
| 38306 | P03383 | A8MUL3 | 0.33834  |
| 38307 | P03383 | Q86US8 | 0.29353  |
| 38308 | P03383 | Q9BYR5 | 0.5733   |
| 38309 | P03383 | Q9Y2G7 | 0.3713   |
| 38310 | P03383 | P17036 | 0.24165  |
| 38311 | P03383 | Q9BYG5 | 0.41654  |
| 38312 | P03383 | P24278 | 0.61836  |
| 38313 | P03383 | P18754 | 0.83802  |
| 38314 | P03383 | Q9ULE0 | 0.031365 |
| 38315 | P03383 | Q9NQT4 | 0.29639  |
| 38316 | P03383 | Q9H943 | 0.017    |
| 38317 | P03383 | Q13404 | 0.77988  |
| 38318 | P03383 | Q15388 | 0.15212  |
| 38319 | P03383 | Q96LW1 | 0.31865  |
| 38320 | P03383 | Q13066 | 0.17372  |
| 38321 | P03383 | Q6PG37 | 0.34108  |
| 38322 | P03383 | Q9BXF6 | 0.38603  |
| 38323 | P03383 | Q96HT8 | 1.0626   |
| 38324 | P03383 | Q12765 | 0.41223  |
| 38325 | P03383 | Q6ZTR5 | 0.17844  |
| 38326 | P03383 | Q6ZSA8 | 0.33834  |
| 38327 | P03383 | Q8NF67 | 0.37798  |
| 38328 | P03383 | O43345 | 0.21702  |
| 38329 | P03383 | Q9BX82 | 0.31686  |
| 38330 | P03383 | Q8IY81 | 0.52227  |
| 38331 | P03383 | O60294 | 0.21847  |
| 38332 | P03383 | A8MVJ9 | 0.32866  |
| 38333 | P03383 | Q8N3S3 | 0.085327 |
| 38334 | P03383 | O43617 | 0.2123   |
| 38335 | P03383 | Q7KZF4 | 0.5742   |
| 38336 | P03383 | Q4VX62 | 0.25987  |
| 38337 | P03383 | P0CW24 | 0.090604 |
| 38338 | P03383 | Q92769 | 0.27146  |
| 38339 | P03383 | P0CL82 | 0.17372  |
| 38340 | P03383 | Q9H444 | 0.44196  |
| 38341 | P03383 | Q6ICB0 | 0.60011  |
| 38342 | P03383 | Q9ULZ2 | 0.49589  |
| 38343 | P03383 | Q6TGC4 | 0.20799  |
| 38344 | P03383 | Q52M93 | 0.11565  |
| 38345 | P03383 | Q9UBF6 | 0.48463  |
| 38346 | P03383 | Q8N8R7 | 0.31745  |
| 38347 | P03383 | P0CW71 | 0.33834  |
| 38348 | P03383 | Q76L83 | 0.36282  |
| 38349 | P03383 | P51825 | 0.7714   |
| 38350 | P03383 | Q9H171 | 0.14275  |
| 38351 | P03383 | Q9BYQ8 | 0.5733   |
| 38352 | P03383 | Q96AY2 | 0.52689  |
| 38353 | P03383 | O75865 | 0.41075  |
| 38354 | P03383 | Q3LI54 | 0.33834  |
| 38355 | P03383 | O95801 | 0.26879  |
| 38356 | P03383 | Q68CP9 | 0.30872  |
| 38357 | P03383 | Q9ULE4 | 0.28147  |
| 38358 | P03383 | Q16537 | 0.12467  |
| 38359 | P03383 | Q13342 | 0.41477  |
| 38360 | P03383 | Q92830 | 0.55645  |
| 38361 | P03383 | P47813 | 0.80256  |
| 38362 | P03383 | Q8NCQ2 | 0.37327  |
| 38363 | P03383 | Q969H9 | 0.33834  |
| 38364 | P03383 | O43715 | 0.49747  |
| 38365 | P03383 | Q9NRR3 | 0.29123  |
| 38366 | P03383 | Q6ZN32 | 0.11658  |
| 38367 | P03383 | A6NHJ4 | 0.35536  |
| 38368 | P03383 | Q9NP97 | 0.32727  |
| 38369 | P03383 | Q9C005 | 0.42237  |
| 38370 | P03383 | Q9BY27 | 0.35851  |
| 38371 | P03383 | P53672 | 0.58659  |
| 38372 | P03383 | Q86UB2 | 0.51534  |
| 38373 | P03383 | Q8N1L1 | 0.33834  |
| 38374 | P03383 | O00625 | 0.34345  |
| 38375 | P03383 | Q9UPV9 | 0.52079  |
| 38376 | P03383 | Q70YC4 | 0.37105  |
| 38377 | P03383 | Q3C1V9 | 0.067916 |
| 38378 | P03383 | Q6PF06 | 0.64619  |
| 38379 | P03383 | Q99717 | 0.25517  |
| 38380 | P03383 | P12035 | 0.52727  |

|       |        |        |           |
|-------|--------|--------|-----------|
| 38381 | P03383 | P43358 | 0.39464   |
| 38382 | P03383 | Q99590 | 0.38222   |
| 38383 | P03383 | Q9UKT5 | 0.25945   |
| 38384 | P03383 | Q9Y5M1 | 0.17876   |
| 38385 | P03383 | Q9NXV2 | 0.84521   |
| 38386 | P03383 | Q8TBZ9 | 0.80758   |
| 38387 | P03383 | P60370 | 0.5733    |
| 38388 | P03383 | Q6ZRT6 | 0.60341   |
| 38389 | P03383 | Q6PGQ7 | 0.98189   |
| 38390 | P03383 | O60663 | 0.37128   |
| 38391 | P03383 | Q8TAT6 | 0.18071   |
| 38392 | P03383 | Q9UNH5 | 0.32734   |
| 38393 | P03383 | Q9UGP4 | 0.31554   |
| 38394 | P03383 | P17676 | 0.58407   |
| 38395 | P03383 | Q6ZRN7 | 0.33834   |
| 38396 | P03383 | P09874 | 0.48966   |
| 38397 | P03383 | Q9XRX5 | 0.331     |
| 38398 | P03383 | Q7Z422 | 0.012871  |
| 38399 | P03383 | Q9H322 | 0.50808   |
| 38400 | P03383 | Q93073 | 0.6134    |
| 38401 | P03383 | Q9NPI6 | 0.65599   |
| 38402 | P03383 | Q14511 | 0.49027   |
| 38403 | P03383 | P23025 | 0.1741    |
| 38404 | P03383 | Q9BZD4 | 0.5349    |
| 38405 | P03383 | Q14493 | 0.60878   |
| 38406 | P03383 | P49901 | 0.33834   |
| 38407 | P03383 | Q6EEV6 | 0.047771  |
| 38408 | P03383 | Q04725 | 0.64787   |
| 38409 | P03383 | Q9P2J8 | 0.22485   |
| 38410 | P03383 | O95780 | 0.34017   |
| 38411 | P03383 | Q7RTS9 | 0.71058   |
| 38412 | P03383 | P49848 | 0.54584   |
| 38413 | P03383 | O00422 | 0.97042   |
| 38414 | P03383 | O60304 | 0.16017   |
| 38415 | P03383 | Q3LHN1 | 0.33834   |
| 38416 | P03383 | O60711 | 0.2555    |
| 38417 | P03383 | Q86VP3 | 0.34738   |
| 38418 | P03383 | P46782 | 0.33652   |
| 38419 | P03383 | E9PJI5 | 0.50049   |
| 38420 | P03383 | Q5T0J7 | 0.28813   |
| 38421 | P03383 | Q9P1Y5 | 0.44528   |
| 38422 | P03383 | Q9UKX2 | 0.22419   |
| 38423 | P03383 | Q6ZUL3 | 0.33834   |
| 38424 | P03383 | Q15046 | 0.49854   |
| 38425 | P03383 | Q9Y2N7 | 0.32444   |
| 38426 | P03383 | Q9HCU9 | 0.84768   |
| 38427 | P03383 | Q9Y5N5 | 0.19647   |
| 38428 | P03383 | P59051 | 0.077725  |
| 38429 | P03383 | Q17RN3 | 0.26192   |
| 38430 | P03383 | Q8IXS2 | 0.10452   |
| 38431 | P03383 | Q9BSI4 | 0.15335   |
| 38432 | P03383 | Q13867 | 0.12873   |
| 38433 | P03383 | P0DI82 | 0.17585   |
| 38434 | P03383 | P78395 | 0.54941   |
| 38435 | P03383 | Q14103 | 0.63907   |
| 38436 | P03383 | Q8WXC3 | 0.38336   |
| 38437 | P03383 | Q9BRQ4 | 0.12905   |
| 38438 | P03383 | Q8IZQ1 | 0.38418   |
| 38439 | P03383 | Q96DE9 | 0.0034526 |
| 38440 | P03383 | Q9UM11 | 0.83486   |
| 38441 | P03383 | Q9Y5V3 | 0.5984    |
| 38442 | P03383 | Q16548 | 0.34185   |
| 38443 | P03383 | P07197 | 0.60855   |
| 38444 | P03383 | Q9BUW7 | 0.60341   |
| 38445 | P03383 | Q7Z3K3 | 0.27719   |
| 38446 | P03383 | Q9H9L3 | 0.21939   |
| 38447 | P03383 | Q9NYF8 | 0.89517   |
| 38448 | P03383 | Q6SJ96 | 0.094341  |
| 38449 | P03383 | P54725 | 0.3493    |
| 38450 | P03383 | O43679 | 0.10996   |
| 38451 | P03383 | O43711 | 0.22878   |
| 38452 | P03383 | Q14696 | 0.29032   |
| 38453 | P03383 | Q9H501 | 1.0262    |
| 38454 | P03383 | Q9UMX0 | 0.51106   |
| 38455 | P03383 | Q5QP74 | 0.33834   |
| 38456 | P03383 | A2RUB6 | 0.026922  |

|       |        |        |          |
|-------|--------|--------|----------|
| 38457 | P03383 | Q8N6F7 | 0.13976  |
| 38458 | P03383 | Q5JXC2 | 0.026721 |
| 38459 | P03383 | Q6ZNG1 | 0.25401  |
| 38460 | P03383 | Q9HBH7 | 0.3609   |
| 38461 | P03383 | Q99081 | 0.34951  |
| 38462 | P03383 | P0C7V6 | 0.60338  |
| 38463 | P03383 | Q9ULH7 | 0.68993  |
| 38464 | P03383 | Q96E29 | 0.3962   |
| 38465 | P03383 | Q9Y3B9 | 0.30359  |
| 38466 | P03383 | Q9HD33 | 0.57229  |
| 38467 | P03383 | Q8N4S0 | 0.60341  |
| 38468 | P03383 | Q8ND07 | 0.54713  |
| 38469 | P03383 | Q8N7L0 | 0.091739 |
| 38470 | P03383 | Q9NZE8 | 0.53403  |
| 38471 | P03383 | Q9UM07 | 0.42743  |
| 38472 | P03383 | Q8NEF9 | 0.39175  |
| 38473 | P03383 | I3L0S3 | 0.34646  |
| 38474 | P03383 | A2RTX5 | 0.26646  |
| 38475 | P03383 | Q6ZTN6 | 0.27322  |
| 38476 | P03383 | Q8N3X6 | 0.51199  |
| 38477 | P03383 | Q96CS3 | 0.33097  |
| 38478 | P03383 | A2AJT9 | 0.40206  |
| 38479 | P03383 | Q9UJT2 | 0.34727  |
| 38480 | P03383 | Q99417 | 1.151    |
| 38481 | P03383 | Q9H6Z9 | 0.29335  |
| 38482 | P03383 | Q96QD9 | 0.5305   |
| 38483 | P03383 | O95376 | 0.23609  |
| 38484 | P03383 | Q14159 | 0.83364  |
| 38485 | P03383 | Q9NX70 | 0.79367  |
| 38486 | P03383 | Q53GL7 | 0.3282   |
| 38487 | P03383 | P07476 | 0.38136  |
| 38488 | P03383 | Q2TAK8 | 0.36693  |
| 38489 | P03383 | Q9NSC2 | 0.2035   |
| 38490 | P03383 | Q5JUK9 | 0.21911  |
| 38491 | P03383 | Q15466 | 0.41869  |
| 38492 | P03383 | Q16254 | 0.80743  |
| 38493 | P03383 | Q8N398 | 0.36393  |
| 38494 | P03383 | Q5MJ68 | 0.16377  |
| 38495 | P03383 | A6NKF2 | 0.33062  |
| 38496 | P03383 | Q5HYI7 | 0.73558  |
| 38497 | P03383 | Q09MP3 | 0.34414  |
| 38498 | P03383 | P57081 | 0.63456  |
| 38499 | P03383 | O75381 | 0.25639  |
| 38500 | P03383 | K9M1U5 | 0.33834  |
| 38501 | P03383 | Q14CZ0 | 1.0299   |
| 38502 | P03383 | P41214 | 0.43794  |
| 38503 | P03383 | P55145 | 0.31721  |
| 38504 | P03383 | A5PL33 | 0.55938  |
| 38505 | P03383 | Q96LY2 | 0.57292  |
| 38506 | P03383 | Q08J23 | 0.47773  |
| 38507 | P03383 | Q8N7J2 | 0.6722   |
| 38508 | P03383 | Q9H9H4 | 0.4919   |
| 38509 | P03383 | A6NGS2 | 0.2932   |
| 38510 | P03383 | O15014 | 0.77702  |
| 38511 | P03383 | Q14657 | 0.95856  |
| 38512 | P03383 | O43541 | 0.42624  |
| 38513 | P03383 | P60002 | 0.66149  |
| 38514 | P03383 | Q6DKK2 | 0.6845   |
| 38515 | P03383 | Q9H2K0 | 0.24465  |
| 38516 | P03383 | Q9UN79 | 0.68845  |
| 38517 | P03383 | A6NF36 | 0.3503   |
| 38518 | P03383 | A5YKK6 | 0.7659   |
| 38519 | P03383 | P52743 | 0.2567   |
| 38520 | P03383 | Q6IQ49 | 0.21138  |
| 38521 | P03383 | Q13765 | 0.78923  |
| 38522 | P03383 | O75909 | 0.85254  |
| 38523 | P03383 | Q9UL46 | 0.25243  |
| 38524 | P03383 | Q9UH77 | 0.33388  |
| 38525 | P03383 | O14746 | 0.39177  |
| 38526 | P03383 | Q8IUB9 | 0.33834  |
| 38527 | P03383 | Q8N1D5 | 0.15646  |
| 38528 | P03383 | Q6NXS1 | 0.69184  |
| 38529 | P03383 | P78316 | 0.78507  |
| 38530 | P03383 | P49756 | 0.29207  |
| 38531 | P03383 | Q05BQ5 | 0.04253  |
| 38532 | P03383 | P63165 | 0.64365  |



|       |        |        |          |
|-------|--------|--------|----------|
| 38533 | P03383 | Q5SZD1 | 0.023403 |
| 38534 | P03383 | O95149 | 0.19276  |
| 38535 | P03383 | P0DKL9 | 0.5828   |
| 38536 | P03383 | P15407 | 0.45471  |
| 38537 | P03383 | Q6P9B9 | 0.28942  |
| 38538 | P03383 | Q9H6K5 | 0.60341  |
| 38539 | P03383 | Q9HB03 | 0.41347  |
| 38540 | P03383 | P62269 | 0.49042  |
| 38541 | P03383 | Q9Y2K5 | 0.23073  |
| 38542 | P03383 | Q8NF99 | 0.16408  |
| 38543 | P03383 | Q9Y6X2 | 0.54936  |
| 38544 | P03383 | O95190 | 0.55572  |
| 38545 | P03383 | O60225 | 0.079455 |
| 38546 | P03383 | Q8WXQ3 | 0.83891  |
| 38547 | P03383 | Q96LT6 | 0.22347  |
| 38548 | P03383 | C9J3I9 | 0.38038  |
| 38549 | P03383 | Q99732 | 0.19792  |
| 38550 | P03383 | Q9P015 | 0.1606   |
| 38551 | P03383 | Q68CZ6 | 0.32838  |
| 38552 | P03383 | P57721 | 0.20649  |
| 38553 | P03383 | Q8IV20 | 0.29543  |
| 38554 | P03383 | P28702 | 0.26666  |
| 38555 | P03383 | Q9HCM9 | 0.35128  |
| 38556 | P03383 | P0DI81 | 0.7535   |
| 38557 | P03383 | Q6UWF3 | 0.36323  |
| 38558 | P03383 | Q9NY87 | 0.57852  |
| 38559 | P03383 | P68104 | 0.53926  |
| 38560 | P03383 | Q9UNM6 | 0.085308 |
| 38561 | P03383 | Q9ULJ3 | 0.39559  |
| 38562 | P03383 | Q5T7N2 | 0.091723 |
| 38563 | P03383 | Q9H3K6 | 0.35317  |
| 38564 | P03383 | Q9GZY1 | 0.65021  |
| 38565 | P03383 | Q15025 | 0.29174  |
| 38566 | P03383 | Q49AR2 | 0.31993  |
| 38567 | P03383 | P63220 | 0.35782  |
| 38568 | P03383 | O95411 | 0.33834  |
| 38569 | P03383 | Q9HCD5 | 0.79563  |
| 38570 | P03383 | Q6IV72 | 0.1508   |
| 38571 | P03383 | Q9BS18 | 0.40269  |
| 38572 | P03383 | Q9BQI5 | 0.16211  |
| 38573 | P03383 | Q96MF0 | 0.11716  |
| 38574 | P03383 | P50750 | 0.36746  |
| 38575 | P03383 | Q6P1M9 | 0.17996  |
| 38576 | P03383 | P0C7T7 | 0.33834  |
| 38577 | P03383 | Q08AI8 | 0.60341  |
| 38578 | P03383 | Q8N4B5 | 0.57747  |
| 38579 | P03383 | P05198 | 0.44758  |
| 38580 | P03383 | Q99848 | 0.15555  |
| 38581 | P03383 | Q8N5A5 | 0.6163   |
| 38582 | P03383 | Q9NPB6 | 0.43672  |
| 38583 | P03383 | Q9BZQ2 | 0.29028  |
| 38584 | P03383 | Q96BP2 | 0.8499   |
| 38585 | P03383 | P04406 | 0.28286  |
| 38586 | P03383 | Q7L190 | 0.64766  |
| 38587 | P03383 | Q9P2M7 | 0.26775  |
| 38588 | P03383 | Q99471 | 0.65124  |
| 38589 | P03383 | Q9UIY3 | 0.095238 |
| 38590 | P03383 | Q86VP6 | 0.53372  |
| 38591 | P03383 | P02538 | 0.5808   |
| 38592 | P03383 | Q9H467 | 0.72315  |
| 38593 | P03383 | D6RB28 | 0.52432  |
| 38594 | P03383 | Q9UHQ7 | 0.43355  |
| 38595 | P03383 | Q9Y5U2 | 0.57785  |
| 38596 | P03383 | O75971 | 0.91463  |
| 38597 | P03383 | Q12837 | 0.33374  |
| 38598 | P03383 | Q5ZEY9 | 0.48598  |
| 38599 | P03383 | Q12968 | 0.45125  |
| 38600 | P03383 | Q02543 | 0.49535  |
| 38601 | P03383 | P62244 | 0.47642  |
| 38602 | P03383 | P0CG35 | 0.45586  |
| 38603 | P03383 | A8MTB1 | 0.33834  |
| 38604 | P03383 | Q15154 | 0.33178  |
| 38605 | P03383 | Q9UFW8 | 0.155    |
| 38606 | P03383 | O43745 | 0.47425  |
| 38607 | P03383 | Q9NZ81 | 0.9346   |
| 38608 | P03383 | Q01201 | 0.72389  |

|       |        |        |          |
|-------|--------|--------|----------|
| 38609 | P03383 | Q5VSR9 | 0.61942  |
| 38610 | P03383 | Q70YC5 | 0.13971  |
| 38611 | P03383 | O95067 | 0.30592  |
| 38612 | P03383 | Q96PM5 | 0.29113  |
| 38613 | P03383 | Q8TCJ0 | 0.74263  |
| 38614 | P03383 | P29966 | 0.62444  |
| 38615 | P03383 | P35711 | 0.71013  |
| 38616 | P03383 | Q6NXR4 | 0.16118  |
| 38617 | P03383 | Q676U5 | 0.42455  |
| 38618 | P03383 | Q15697 | 0.28011  |
| 38619 | P03383 | Q9UGY1 | 0.12505  |
| 38620 | P03383 | P14678 | 0.58821  |
| 38621 | P03383 | Q02878 | 0.66087  |
| 38622 | P03383 | Q8N7K0 | 0.24149  |
| 38623 | P03383 | Q01543 | 0.1906   |
| 38624 | P03383 | Q9H7T3 | 0.12096  |
| 38625 | P03383 | Q86UE3 | 0.23295  |
| 38626 | P03383 | Q9NSI6 | 0.6037   |
| 38627 | P03383 | Q8NBZ0 | 0.90397  |
| 38628 | P03383 | Q8ND56 | 0.55511  |
| 38629 | P03383 | Q9Y2Z4 | 0.26198  |
| 38630 | P03383 | Q68DY1 | 0.32025  |
| 38631 | P03383 | Q9Y6X8 | 0.53068  |
| 38632 | P03383 | Q7Z2V1 | 0.33834  |
| 38633 | P03383 | O95363 | 0.37014  |
| 38634 | P03383 | P0CW27 | 0.018055 |
| 38635 | P03383 | Q9NQ48 | 0.12647  |
| 38636 | P03383 | P14324 | 0.10623  |
| 38637 | P03383 | Q3SY00 | 0.62841  |
| 38638 | P03383 | Q9BT92 | 0.33446  |
| 38639 | P03383 | Q9NY12 | 0.22737  |
| 38640 | P03383 | Q6ZRP0 | 0.60341  |
| 38641 | P03383 | Q8IXR9 | 0.10045  |
| 38642 | P03383 | Q9UKN5 | 0.066988 |
| 38643 | P03383 | P0CW21 | 0.33834  |
| 38644 | P03383 | Q96N11 | 0.34587  |
| 38645 | P03383 | Q8IZ40 | 0.38482  |
| 38646 | P03383 | Q9Y333 | 0.49091  |
| 38647 | P03383 | Q5VX52 | 0.019872 |
| 38648 | P03383 | P51531 | 0.50379  |
| 38649 | P03383 | P14625 | 0.20262  |
| 38650 | P03383 | Q7L2H7 | 0.36435  |
| 38651 | P03383 | Q9BVL4 | 0.82218  |
| 38652 | P03383 | O75818 | 0.061121 |
| 38653 | P03383 | A0AUK8 | 0.10717  |
| 38654 | P03383 | Q156A1 | 0.33834  |
| 38655 | P03383 | Q99615 | 0.54599  |
| 38656 | P03383 | Q9UNN4 | 0.20958  |
| 38657 | P03383 | P42768 | 0.12831  |
| 38658 | P03383 | P35244 | 0.34149  |
| 38659 | P03383 | P15822 | 0.59407  |
| 38660 | P03383 | Q8WVK7 | 0.38776  |
| 38661 | P03383 | O15379 | 0.40605  |
| 38662 | P03383 | P53801 | 0.42574  |
| 38663 | P03383 | O00268 | 0.83526  |
| 38664 | P03383 | P60411 | 0.5733   |
| 38665 | P03383 | Q9Y5P3 | 0.32297  |
| 38666 | P03383 | Q9HD64 | 0.023529 |
| 38667 | P03383 | O15350 | 0.22465  |
| 38668 | P03383 | A0JNW5 | 0.53349  |
| 38669 | P03383 | P07196 | 0.52671  |
| 38670 | P03383 | Q9UIV1 | 0.91432  |
| 38671 | P03383 | Q6ZUU3 | 0.33834  |
| 38672 | P03383 | Q13278 | 0.34871  |
| 38673 | P03383 | C9JBD0 | 0.36886  |
| 38674 | P03383 | Q9UGK3 | 0.42667  |
| 38675 | P03383 | P11532 | 0.24507  |
| 38676 | P03383 | Q8WW24 | 0.17817  |
| 38677 | P03383 | Q9Y6E7 | 0.28574  |
| 38678 | P03383 | Q8IXM7 | 0.24929  |
| 38679 | P03383 | Q5VTH2 | 0.45383  |
| 38680 | P03383 | Q9NQ33 | 0.26096  |
| 38681 | P03383 | Q9UER7 | 0.7258   |
| 38682 | P03383 | A6NDU8 | 0.15103  |
| 38683 | P03383 | Q5VVC0 | 0.2007   |
| 38684 | P03383 | Q96Q89 | 0.27282  |

|       |        |        |          |
|-------|--------|--------|----------|
| 38685 | P03383 | O60828 | 0.50747  |
| 38686 | P03383 | Q5JTC6 | 0.65271  |
| 38687 | P03383 | P25786 | 0.43914  |
| 38688 | P03383 | O75698 | 0.33834  |
| 38689 | P03383 | Q99460 | 0.1055   |
| 38690 | P03383 | Q6ZV50 | 0.073272 |
| 38691 | P03383 | Q01081 | 0.40307  |
| 38692 | P03383 | P20810 | 0.16572  |
| 38693 | P03383 | O00479 | 0.43416  |
| 38694 | P03383 | P55895 | 0.41682  |
| 38695 | P03383 | A8MT69 | 0.2372   |
| 38696 | P03383 | Q9BRT9 | 0.30017  |
| 38697 | P03383 | O95782 | 0.22651  |
| 38698 | P03383 | P62837 | 0.38919  |
| 38699 | P03383 | Q0VFX4 | 0.35784  |
| 38700 | P03383 | P07814 | 0.2144   |
| 38701 | P03383 | C9J3V5 | 0.32123  |
| 38702 | P03383 | Q9BYV8 | 0.40034  |
| 38703 | P03383 | Q3LI63 | 0.33834  |
| 38704 | P03383 | Q8N1V8 | 0.025816 |
| 38705 | P03383 | Q75MW2 | 0.45257  |
| 38706 | P03383 | A6NNL0 | 0.5011   |
| 38707 | P03383 | O94842 | 0.39331  |
| 38708 | P03383 | A6NI86 | 0.52225  |
| 38709 | P03383 | Q15759 | 0.25235  |
| 38710 | P03383 | Q86V97 | 0.39464  |
| 38711 | P03383 | P49770 | 0.11101  |
| 38712 | P03383 | Q8N8K9 | 0.026573 |
| 38713 | P03383 | Q9BTX1 | 0.43961  |
| 38714 | P03383 | Q96RS0 | 0.41012  |
| 38715 | P03383 | Q8IZU0 | 0.61185  |
| 38716 | P03383 | Q8N6T0 | 0.12265  |
| 38717 | P03383 | O96020 | 0.6921   |
| 38718 | P03383 | A6XGL0 | 0.27902  |
| 38719 | P03383 | Q9UI25 | 0.33834  |
| 38720 | P03383 | H0Y7S4 | 0.089818 |
| 38721 | P03383 | Q96DN6 | 0.45082  |
| 38722 | P03383 | Q9BT25 | 0.33094  |
| 38723 | P03383 | Q96PV7 | 0.59867  |
| 38724 | P03383 | Q68EN5 | 0.11292  |
| 38725 | P03383 | Q8WU39 | 0.26769  |
| 38726 | P03383 | Q8N9Y4 | 0.72845  |
| 38727 | P03383 | Q5VIY5 | 0.29921  |
| 38728 | P03383 | Q9NX40 | 0.26588  |
| 38729 | P03383 | Q68D10 | 0.60341  |
| 38730 | P03383 | Q15185 | 0.27733  |
| 38731 | P03383 | Q49AJ0 | 0.12503  |
| 38732 | P03383 | Q8N699 | 0.49772  |
| 38733 | P03383 | Q9UGC7 | 0.30099  |
| 38734 | P03383 | P99999 | 0.44997  |
| 38735 | P03383 | Q8TE02 | 0.90336  |
| 38736 | P03383 | Q9P2M1 | 0.31745  |
| 38737 | P03383 | A5PLN7 | 0.60341  |
| 38738 | P03383 | Q16514 | 0.64862  |
| 38739 | P03383 | Q7Z2X7 | 0.57687  |
| 38740 | P03383 | Q9UIF9 | 0.50176  |
| 38741 | P03383 | Q9NZL4 | 0.30695  |
| 38742 | P03383 | Q86TB9 | 0.56068  |
| 38743 | P03383 | Q9BRR8 | 0.66731  |
| 38744 | P03383 | O14513 | 0.30893  |
| 38745 | P03383 | Q5BJF2 | 0.1819   |
| 38746 | P03383 | Q9Y3F4 | 0.55991  |
| 38747 | P03383 | Q52LA3 | 0.44013  |
| 38748 | P03383 | Q562F6 | 0.51577  |
| 38749 | P03383 | Q9Y3D5 | 0.42407  |
| 38750 | P03383 | P22033 | 0.29932  |
| 38751 | P03383 | Q8NDA8 | 0.37817  |
| 38752 | P03383 | P10074 | 0.16061  |
| 38753 | P03383 | P82970 | 0.4306   |
| 38754 | P03383 | Q86VS8 | 0.23067  |
| 38755 | P03383 | Q9NR77 | 0.31354  |
| 38756 | P03383 | Q00613 | 0.68448  |
| 38757 | P03383 | Q07627 | 0.52964  |
| 38758 | P03383 | Q9UMS0 | 0.65276  |
| 38759 | P03383 | Q8TEE9 | 0.81598  |
| 38760 | P03383 | Q9C0E2 | 0.6423   |

|       |        |        |          |
|-------|--------|--------|----------|
| 38761 | P03383 | Q8N9V7 | 0.33466  |
| 38762 | P03383 | Q9Y3M2 | 0.37923  |
| 38763 | P03383 | Q9H7J1 | 0.32188  |
| 38764 | P03383 | Q8IX21 | 0.17159  |
| 38765 | P03383 | P0DMC3 | 0.33834  |
| 38766 | P03383 | Q8N448 | 0.40792  |
| 38767 | P03383 | O00255 | 0.10637  |
| 38768 | P03383 | Q9NYZ3 | 0.38517  |
| 38769 | P03383 | P26678 | 0.30292  |
| 38770 | P03383 | Q2TAL8 | 0.64496  |
| 38771 | P03383 | P10073 | 0.25729  |
| 38772 | P03383 | Q8IYD1 | 0.19644  |
| 38773 | P03383 | A8MYA2 | 0.14933  |
| 38774 | P03383 | Q96F63 | 0.60341  |
| 38775 | P03383 | A6NCI8 | 0.68034  |
| 38776 | P03383 | Q5H9R7 | 0.76548  |
| 38777 | P03383 | E9PAV3 | 0.36041  |
| 38778 | P03383 | A8MWP4 | 0.02634  |
| 38779 | P03383 | Q9HB07 | 0.14231  |
| 38780 | P03383 | O75475 | 0.96677  |
| 38781 | P03383 | Q86YV9 | 0.62559  |
| 38782 | P03383 | A6NES4 | 0.1852   |
| 38783 | P03383 | Q12800 | 0.21097  |
| 38784 | P03383 | P11142 | 0.31373  |
| 38785 | P03383 | Q9UBF2 | 0.10613  |
| 38786 | P03383 | P40222 | 0.39468  |
| 38787 | P03383 | Q569K6 | 0.050766 |
| 38788 | P03383 | O60813 | 0.26448  |
| 38789 | P03383 | Q16666 | 0.44428  |
| 38790 | P03383 | P0C1Z6 | 0.8408   |
| 38791 | P03383 | Q96HA8 | 0.73105  |
| 38792 | P03383 | Q6XCG6 | 0.33834  |
| 38793 | P03383 | Q6U7Q0 | 0.17247  |
| 38794 | P03383 | Q7Z5D8 | 0.24968  |
| 38795 | P03383 | Q9H788 | 0.67868  |
| 38796 | P03383 | Q86WX3 | 0.80821  |
| 38797 | P03383 | Q9BRG1 | 0.74081  |
| 38798 | P03383 | P25963 | 0.43081  |
| 38799 | P03383 | Q9BVG4 | 0.18737  |
| 38800 | P03383 | Q96GW9 | 0.22684  |
| 38801 | P03383 | Q8N9K7 | 0.33834  |
| 38802 | P03383 | Q96C28 | 0.27882  |
| 38803 | P03383 | P13994 | 0.28631  |
| 38804 | P03383 | Q7L8J4 | 0.23172  |
| 38805 | P03383 | Q92600 | 0.85246  |
| 38806 | P03383 | P53041 | 0.35295  |
| 38807 | P03383 | A8MUZ8 | 0.35121  |
| 38808 | P03383 | Q9NRY5 | 0.68478  |
| 38809 | P03383 | Q9Y5K5 | 0.1725   |
| 38810 | P03383 | Q53QW1 | 0.60341  |
| 38811 | P03383 | O75935 | 0.61351  |
| 38812 | P03383 | Q03936 | 0.29806  |
| 38813 | P03383 | Q6ZS52 | 0.33834  |
| 38814 | P03383 | Q9NPG3 | 0.58938  |
| 38815 | P03383 | Q86TS9 | 0.099869 |
| 38816 | P03383 | Q9Y375 | 0.38186  |
| 38817 | P03383 | Q9NX05 | 0.29797  |
| 38818 | P03383 | Q07666 | 0.31705  |
| 38819 | P03383 | Q5T319 | 0.33834  |
| 38820 | P03383 | O15453 | 0.48981  |
| 38821 | P03383 | A6NL82 | 0.35039  |
| 38822 | P03383 | Q9P0W5 | 0.51431  |
| 38823 | P03383 | Q86V48 | 0.65901  |
| 38824 | P03383 | Q8IWF6 | 0.31346  |
| 38825 | P03383 | Q8N0Y7 | 0.49853  |
| 38826 | P03383 | A8MU76 | 0.56454  |
| 38827 | P03383 | Q86YI8 | 0.33367  |
| 38828 | P03383 | P82921 | 0.53195  |
| 38829 | P03383 | P82979 | 0.14848  |
| 38830 | P03383 | Q5XKR9 | 0.64516  |
| 38831 | P03383 | Q96RE7 | 0.66502  |
| 38832 | P03383 | Q9NZM4 | 0.89349  |
| 38833 | P03383 | Q8TDN4 | 0.59602  |
| 38834 | P03383 | P78344 | 0.21888  |
| 38835 | P03383 | P22061 | 0.30864  |
| 38836 | P03383 | Q8N140 | 0.59535  |

|       |        |        |          |
|-------|--------|--------|----------|
| 38837 | P03383 | P61962 | 0.47179  |
| 38838 | P03383 | Q8IVF1 | 0.67157  |
| 38839 | P03383 | Q86TU6 | 0.61687  |
| 38840 | P03383 | Q9HCN2 | 0.33834  |
| 38841 | P03383 | Q9Y2M0 | 0.24593  |
| 38842 | P03383 | Q9Y462 | 0.39201  |
| 38843 | P03383 | Q07866 | 0.29704  |
| 38844 | P03383 | P28072 | 0.2964   |
| 38845 | P03383 | A8K5M9 | 0.63163  |
| 38846 | P03383 | O43255 | 0.24298  |
| 38847 | P03383 | Q15929 | 0.28672  |
| 38848 | P03383 | A7E2U8 | 0.31496  |
| 38849 | P03383 | Q96B26 | 0.50891  |
| 38850 | P03383 | Q9NRY2 | 0.49     |
| 38851 | P03383 | Q8ND76 | 0.38174  |
| 38852 | P03383 | Q9H095 | 0.22042  |
| 38853 | P03383 | O15084 | 0.50313  |
| 38854 | P03383 | Q8N0Z2 | 0.13252  |
| 38855 | P03383 | A1L443 | 0.80122  |
| 38856 | P03383 | Q9H7S9 | 0.53442  |
| 38857 | P03383 | P54727 | 0.4705   |
| 38858 | P03383 | Q9BY77 | 0.21626  |
| 38859 | P03383 | Q14787 | 0.70074  |
| 38860 | P03383 | Q8NE65 | 0.28409  |
| 38861 | P03383 | Q9HBM1 | 0.46352  |
| 38862 | P03383 | Q96HQ2 | 0.79184  |
| 38863 | P03383 | Q13094 | 0.33414  |
| 38864 | P03383 | Q96EI5 | 0.57633  |
| 38865 | P03383 | Q9UBZ9 | 0.25924  |
| 38866 | P03383 | Q9C0I3 | 0.76631  |
| 38867 | P03383 | P62910 | 0.4006   |
| 38868 | P03383 | Q7L5N1 | 0.77003  |
| 38869 | P03383 | A1L162 | 0.074582 |
| 38870 | P03383 | O15370 | 0.23243  |
| 38871 | P03383 | Q96GM8 | 0.18467  |
| 38872 | P03383 | Q8N8C0 | 0.2132   |
| 38873 | P03383 | Q15365 | 0.68953  |
| 38874 | P03383 | Q9NV88 | 0.3608   |
| 38875 | P03383 | Q6P1X5 | 0.65017  |
| 38876 | P03383 | P27635 | 0.36773  |
| 38877 | P03383 | O15355 | 0.58165  |
| 38878 | P03383 | O95810 | 0.19964  |
| 38879 | P03383 | A8MXK9 | 0.1798   |
| 38880 | P03383 | O43829 | 0.39345  |
| 38881 | P03383 | Q8N4L8 | 0.024786 |
| 38882 | P03383 | Q14974 | 0.75038  |
| 38883 | P03383 | Q9BXR0 | 0.86318  |
| 38884 | P03383 | O94921 | 0.22444  |
| 38885 | P03383 | Q9UKV8 | 0.60319  |
| 38886 | P03383 | Q92759 | 0.52313  |
| 38887 | P03383 | P50749 | 0.5281   |
| 38888 | P03383 | Q14776 | 0.8463   |
| 38889 | P03383 | P48788 | 0.19778  |
| 38890 | P03383 | Q13200 | 0.34505  |
| 38891 | P03383 | O94850 | 0.19052  |
| 38892 | P03383 | Q9ULM6 | 0.76784  |
| 38893 | P03383 | Q12905 | 0.83992  |
| 38894 | P03383 | Q8WVM0 | 0.41095  |
| 38895 | P03383 | Q15054 | 0.40821  |
| 38896 | P03383 | Q5BJF6 | 0.28164  |
| 38897 | P03383 | Q9UKY7 | 0.68859  |
| 38898 | P03383 | Q8IWL3 | 0.38447  |
| 38899 | P03383 | Q9H0U9 | 0.38701  |
| 38900 | P03383 | Q86XN7 | 0.60341  |
| 38901 | P03383 | Q12980 | 0.55996  |
| 38902 | P03383 | Q92925 | 0.40621  |
| 38903 | P03383 | Q5VSD8 | 0.12912  |
| 38904 | P03383 | Q6ZU67 | 0.32714  |
| 38905 | P03383 | P22532 | 0.33834  |
| 38906 | P03383 | A6NKN8 | 0.7048   |
| 38907 | P03383 | Q13569 | 0.27749  |
| 38908 | P03383 | Q6IEG0 | 0.28212  |
| 38909 | P03383 | Q96ED9 | 0.28138  |
| 38910 | P03383 | O00512 | 0.54229  |
| 38911 | P03383 | Q6PB30 | 0.54188  |
| 38912 | P03383 | A4D997 | 0.49427  |

|       |        |        |           |
|-------|--------|--------|-----------|
| 38913 | P03383 | O96007 | 0.54696   |
| 38914 | P03383 | Q96LB3 | 0.32655   |
| 38915 | P03383 | Q9H074 | 0.23874   |
| 38916 | P03383 | P12883 | 0.17113   |
| 38917 | P03383 | Q9P0W2 | 0.50666   |
| 38918 | P03383 | Q9BYQ0 | 0.5733    |
| 38919 | P03383 | Q9UJG1 | 0.55561   |
| 38920 | P03383 | Q6ZW54 | 0.74611   |
| 38921 | P03383 | Q9BYQ5 | 0.5733    |
| 38922 | P03383 | Q96IT1 | 0.44189   |
| 38923 | P03383 | P31269 | 0.44115   |
| 38924 | P03383 | Q96IM9 | 0.088354  |
| 38925 | P03383 | Q9Y312 | 0.16389   |
| 38926 | P03383 | O43299 | 0.8756    |
| 38927 | P03383 | Q6P1L5 | 1.0032    |
| 38928 | P03383 | Q9BQN1 | 0.61131   |
| 38929 | P03383 | Q8IVT2 | 0.68155   |
| 38930 | P03383 | Q3LI72 | 0.33834   |
| 38931 | P03383 | Q9Y6K5 | 0.023755  |
| 38932 | P03383 | Q3LI62 | 0.33834   |
| 38933 | P03383 | Q9H4H8 | 0.21261   |
| 38934 | P03383 | Q6IN85 | 0.18293   |
| 38935 | P03383 | Q8WWB3 | 0.02676   |
| 38936 | P03383 | Q9Y266 | 0.57784   |
| 38937 | P03383 | Q8IY63 | 0.26129   |
| 38938 | P03383 | Q3ZCT1 | 0.17115   |
| 38939 | P03383 | Q99496 | 0.28868   |
| 38940 | P03383 | Q9H8W2 | 0.091024  |
| 38941 | P03383 | P36402 | 0.37945   |
| 38942 | P03383 | Q8TAQ2 | 1.1845    |
| 38943 | P03383 | Q9Y2J8 | 0.45638   |
| 38944 | P03383 | Q3SY05 | 0.059202  |
| 38945 | P03383 | Q8N5J4 | 0.26526   |
| 38946 | P03383 | P58004 | 0.25823   |
| 38947 | P03383 | Q8IXM3 | 0.42103   |
| 38948 | P03383 | Q15573 | 0.34054   |
| 38949 | P03383 | Q9Y3A5 | 0.48976   |
| 38950 | P03383 | Q02833 | 0.37246   |
| 38951 | P03383 | Q68DL7 | 0.33834   |
| 38952 | P03383 | P35232 | 0.33603   |
| 38953 | P03383 | P0CG42 | 0.33834   |
| 38954 | P03383 | Q96E14 | 0.47326   |
| 38955 | P03383 | Q494R0 | 0.33834   |
| 38956 | P03383 | Q7Z4H9 | 0.34923   |
| 38957 | P03383 | Q8N9Z0 | 0.29224   |
| 38958 | P03383 | Q9UBF1 | 0.52695   |
| 38959 | P03383 | O14593 | 0.43088   |
| 38960 | P03383 | Q3SY84 | 0.52727   |
| 38961 | P03383 | Q8TDR4 | 0.25085   |
| 38962 | P03383 | Q96NL8 | 0.43574   |
| 38963 | P03383 | Q6L9T8 | 0.27608   |
| 38964 | P03383 | Q96HR8 | 0.88286   |
| 38965 | P03383 | O95999 | 0.093946  |
| 38966 | P03383 | Q9H4A6 | 0.33732   |
| 38967 | P03383 | Q99543 | 0.25247   |
| 38968 | P03383 | Q9HD42 | 0.73346   |
| 38969 | P03383 | Q6K0P9 | 0.10263   |
| 38970 | P03383 | Q9BZ23 | 0.46115   |
| 38971 | P03383 | P50453 | 0.40718   |
| 38972 | P03383 | Q5TCQ9 | 0.37905   |
| 38973 | P03383 | Q9UHJ3 | 0.1228    |
| 38974 | P03383 | P28065 | 0.44968   |
| 38975 | P03383 | Q13501 | 0.26256   |
| 38976 | P03383 | Q9Y4H4 | 0.2416    |
| 38977 | P03383 | E9PB15 | 0.0042209 |
| 38978 | P03383 | P0CI01 | 0.38945   |
| 38979 | P03383 | P04264 | 0.19973   |
| 38980 | P03383 | P48668 | 0.24286   |
| 38981 | P03383 | Q8N972 | 0.24149   |
| 38982 | P03383 | Q9C0C6 | 0.65221   |
| 38983 | P03383 | Q5VVS0 | 0.67676   |
| 38984 | P03383 | C9JLW8 | 0.44588   |
| 38985 | P03383 | Q16775 | 0.22145   |
| 38986 | P03383 | Q9P016 | 0.37222   |
| 38987 | P03383 | Q69YW0 | 0.093457  |
| 38988 | P03383 | O43918 | 0.74097   |

|       |        |        |          |
|-------|--------|--------|----------|
| 38989 | P03383 | Q9HB96 | 0.57356  |
| 38990 | P03383 | Q9HA77 | 0.28305  |
| 38991 | P03383 | Q9H410 | 0.5989   |
| 38992 | P03383 | Q9P0U1 | 0.32612  |
| 38993 | P03383 | Q5T7W7 | 0.60341  |
| 38994 | P03383 | Q15027 | 0.42307  |
| 38995 | P03383 | Q5VWI1 | 0.80294  |
| 38996 | P03383 | Q8N5R6 | 0.33122  |
| 38997 | P03383 | P51116 | 0.37914  |
| 38998 | P03383 | Q96FX7 | 0.18355  |
| 38999 | P03383 | O60784 | 0.15708  |
| 39000 | P03383 | Q5T870 | 0.5587   |
| 39001 | P03383 | Q5MIZ7 | 0.23902  |
| 39002 | P03383 | P22528 | 0.26317  |
| 39003 | P03383 | Q29RF7 | 0.74862  |
| 39004 | P03383 | Q9P1F3 | 0.52931  |
| 39005 | P03383 | Q8IZD4 | 0.595    |
| 39006 | P03383 | O60829 | 0.5376   |
| 39007 | P03383 | Q8IX12 | 0.80164  |
| 39008 | P03383 | Q5VXH4 | 0.28378  |
| 39009 | P03383 | Q96NS1 | 0.10471  |
| 39010 | P03383 | P41212 | 0.58689  |
| 39011 | P03383 | Q9NWV8 | 0.36308  |
| 39012 | P03383 | Q9BSH5 | 0.18271  |
| 39013 | P03383 | Q16236 | 0.37668  |
| 39014 | P03383 | Q9BW85 | 0.79054  |
| 39015 | P03383 | Q8TAA5 | 0.30962  |
| 39016 | P03383 | O94992 | 1.1343   |
| 39017 | P03383 | Q8TF32 | 0.33501  |
| 39018 | P03383 | P07741 | 0.21298  |
| 39019 | P03383 | Q68EA5 | 0.32673  |
| 39020 | P03383 | Q5SRE5 | 0.42425  |
| 39021 | P03383 | P50402 | 0.23574  |
| 39022 | P03383 | Q15170 | 1.2006   |
| 39023 | P03383 | Q96KT6 | 0.33834  |
| 39024 | P03383 | Q5T8A7 | 0.51715  |
| 39025 | P03383 | P57076 | 0.25301  |
| 39026 | P03383 | P43897 | 0.76286  |
| 39027 | P03383 | Q969H0 | 0.49575  |
| 39028 | P03383 | Q58F21 | 0.15004  |
| 39029 | P03383 | Q9NQR4 | 0.20681  |
| 39030 | P03383 | P42771 | 0.41785  |
| 39031 | P03383 | Q96JN0 | 0.57939  |
| 39032 | P03383 | Q96T58 | 0.51242  |
| 39033 | P03383 | P62857 | 0.35554  |
| 39034 | P03383 | Q9H832 | 0.26971  |
| 39035 | P03383 | Q99684 | 0.22965  |
| 39036 | P03383 | Q9NY74 | 0.73146  |
| 39037 | P03383 | Q9Y2G2 | 0.26668  |
| 39038 | P03383 | Q8WVK2 | 0.59398  |
| 39039 | P03383 | Q8WUF5 | 0.61688  |
| 39040 | P03383 | Q8WY41 | 0.25604  |
| 39041 | P03383 | P04732 | 0.2243   |
| 39042 | P03383 | P28066 | 0.47523  |
| 39043 | P03383 | P31314 | 0.43238  |
| 39044 | P03383 | O15131 | 0.76685  |
| 39045 | P03383 | O95751 | 0.34413  |
| 39046 | P03383 | Q502W7 | 0.2968   |
| 39047 | P03383 | Q5VWP2 | 0.057688 |
| 39048 | P03383 | A8MX80 | 0.53208  |
| 39049 | P03383 | Q6PJ61 | 0.72639  |
| 39050 | P03383 | Q13547 | 0.5713   |
| 39051 | P03383 | P26651 | 0.44287  |
| 39052 | P03383 | Q15853 | 0.45782  |
| 39053 | P03383 | O43809 | 0.51092  |
| 39054 | P03383 | Q14207 | 0.77173  |
| 39055 | P03383 | Q92783 | 0.34279  |
| 39056 | P03383 | P35580 | 0.18378  |
| 39057 | P03383 | P52298 | 0.43776  |
| 39058 | P03383 | Q9ULX6 | 0.3111   |
| 39059 | P03383 | Q9UI56 | 0.33834  |
| 39060 | P03383 | Q8IXQ9 | 0.20816  |
| 39061 | P03383 | Q99613 | 0.44281  |
| 39062 | P03383 | Q5VTR2 | 0.50457  |
| 39063 | P03383 | P78371 | 0.33257  |
| 39064 | P03383 | E9PQ53 | 0.5252   |

|       |        |        |          |
|-------|--------|--------|----------|
| 39065 | P03383 | Q8N812 | 0.19828  |
| 39066 | P03383 | Q9P2T0 | 0.36611  |
| 39067 | P03383 | Q9H098 | 0.66204  |
| 39068 | P03383 | Q6ZQN3 | 0.54278  |
| 39069 | P03383 | P10124 | 0.27303  |
| 39070 | P03383 | Q8N7Z2 | 0.32695  |
| 39071 | P03383 | P52737 | 0.40586  |
| 39072 | P03383 | P50616 | 0.21797  |
| 39073 | P03383 | Q15323 | 0.66522  |
| 39074 | P03383 | Q8WUQ7 | 0.042906 |
| 39075 | P03383 | Q96IR2 | 0.25401  |
| 39076 | P03383 | O14965 | 0.24225  |
| 39077 | P03383 | Q9NUP7 | 0.61226  |
| 39078 | P03383 | Q96C57 | 0.33532  |
| 39079 | P03383 | Q9BQ69 | 0.27782  |
| 39080 | P03383 | Q12906 | 0.85928  |
| 39081 | P03383 | Q99933 | 0.51804  |
| 39082 | P03383 | Q99583 | 0.24278  |
| 39083 | P03383 | Q14264 | 0.34957  |
| 39084 | P03383 | Q3SYG4 | 0.20599  |
| 39085 | P03383 | A8MXZ3 | 0.33834  |
| 39086 | P03383 | Q9Y3C4 | 0.41635  |
| 39087 | P03383 | Q9UGL9 | 0.33834  |
| 39088 | P03383 | Q9BX70 | 0.34768  |
| 39089 | P03383 | Q9UHB7 | 1.0522   |
| 39090 | P03383 | Q8IYI0 | 0.22035  |
| 39091 | P03383 | Q96RU7 | 0.30587  |
| 39092 | P03383 | Q8IV33 | 0.39065  |
| 39093 | P03383 | P82932 | 0.23783  |
| 39094 | P03383 | Q8TCY9 | 0.24999  |
| 39095 | P03383 | Q15628 | 0.3684   |
| 39096 | P03383 | O75436 | 0.42111  |
| 39097 | P03383 | P17152 | 0.37345  |
| 39098 | P03383 | Q9H081 | 0.46073  |
| 39099 | P03383 | A6NN14 | 0.2288   |
| 39100 | P03383 | Q52MB2 | 0.6604   |
| 39101 | P03383 | Q5I0X4 | 0.60341  |
| 39102 | P03383 | Q9BY41 | 0.23775  |
| 39103 | P03383 | O75822 | 0.55465  |
| 39104 | P03383 | O76042 | 0.39704  |
| 39105 | P03383 | Q96PV6 | 0.46167  |
| 39106 | P03383 | O75446 | 0.93217  |
| 39107 | P03383 | Q8WYQ3 | 0.57124  |
| 39108 | P03383 | Q6ZMS7 | 0.20364  |
| 39109 | P03383 | Q9NZI6 | 0.30061  |
| 39110 | P03383 | Q8IX90 | 0.40584  |
| 39111 | P03383 | Q5JQF7 | 0.33834  |
| 39112 | P03383 | P28749 | 1.0231   |
| 39113 | P03383 | Q09666 | 0.45383  |
| 39114 | P03383 | P35908 | 0.4615   |
| 39115 | P03383 | P46087 | 0.53233  |
| 39116 | P03383 | Q92748 | 0.81329  |
| 39117 | P03383 | P09012 | 0.25914  |
| 39118 | P03383 | Q9UKL0 | 0.89777  |
| 39119 | P03383 | Q15007 | 0.43222  |
| 39120 | P03383 | Q9UIC8 | 0.18887  |
| 39121 | P03383 | Q5JRC9 | 0.4877   |
| 39122 | P03383 | P35658 | 0.811    |
| 39123 | P03383 | P62906 | 0.43312  |
| 39124 | P03383 | Q9BRU9 | 0.28158  |
| 39125 | P03383 | Q9UKC9 | 0.31334  |
| 39126 | P03383 | Q5SVQ8 | 0.22267  |
| 39127 | P03383 | Q96FF9 | 0.59963  |
| 39128 | P03383 | Q16670 | 0.14422  |
| 39129 | P03383 | A6NP11 | 0.33501  |
| 39130 | P03383 | Q7L8S5 | 0.19313  |
| 39131 | P03383 | O43504 | 0.026914 |
| 39132 | P03383 | P13489 | 0.26715  |
| 39133 | P03383 | Q9BWG6 | 0.26493  |
| 39134 | P03383 | Q9Y4Z0 | 0.4705   |
| 39135 | P03383 | Q96IY1 | 0.64831  |
| 39136 | P03383 | Q8IY92 | 0.19978  |
| 39137 | P03383 | Q9P1Q0 | 0.269    |
| 39138 | P03383 | Q8N616 | 0.33834  |
| 39139 | P03383 | P46783 | 1.0088   |
| 39140 | P03383 | Q6ZS17 | 0.29798  |



|       |        |        |          |
|-------|--------|--------|----------|
| 39141 | P03383 | Q8ND90 | 0.49786  |
| 39142 | P03383 | Q14980 | 0.77533  |
| 39143 | P03383 | Q9BV20 | 0.14274  |
| 39144 | P03383 | Q5H9F3 | 0.37218  |
| 39145 | P03383 | Q9BRV8 | 0.24391  |
| 39146 | P03383 | Q3L8U1 | 0.62011  |
| 39147 | P03383 | Q9H307 | 0.65403  |
| 39148 | P03383 | Q71SY5 | 0.80368  |
| 39149 | P03383 | Q9NP50 | 0.54395  |
| 39150 | P03383 | Q16082 | 0.60379  |
| 39151 | P03383 | Q9NSC5 | 0.31519  |
| 39152 | P03383 | Q9H7H0 | 0.49088  |
| 39153 | P03383 | Q9NZN8 | 0.49364  |
| 39154 | P03383 | Q8IX03 | 0.73049  |
| 39155 | P03383 | P54253 | 0.70476  |
| 39156 | P03383 | Q96IP4 | 0.44958  |
| 39157 | P03383 | O75525 | 0.62552  |
| 39158 | P03383 | Q5SNX5 | 0.33834  |
| 39159 | P03383 | Q99708 | 0.45985  |
| 39160 | P03383 | A2RUB1 | 0.60341  |
| 39161 | P03383 | Q9Y3U8 | 0.57095  |
| 39162 | P03383 | O95232 | 0.29947  |
| 39163 | P03383 | P10242 | 0.71564  |
| 39164 | P03383 | P67870 | 0.14371  |
| 39165 | P03383 | P23497 | 0.64407  |
| 39166 | P03383 | Q96HY6 | 0.13806  |
| 39167 | P03383 | Q9H116 | 0.16326  |
| 39168 | P03383 | Q96ST8 | 0.77507  |
| 39169 | P03383 | Q5T5Y3 | 0.22747  |
| 39170 | P03383 | Q9UKJ5 | 0.26065  |
| 39171 | P03383 | Q9Y252 | 0.27113  |
| 39172 | P03383 | Q8IWC1 | 0.29733  |
| 39173 | P03383 | P60866 | 0.48492  |
| 39174 | P03383 | Q7L4I2 | 1.14     |
| 39175 | P03383 | A1L429 | 0.17372  |
| 39176 | P03383 | Q04637 | 0.30689  |
| 39177 | P03383 | Q8N3U1 | 0.33834  |
| 39178 | P03383 | A6NL46 | 0.61919  |
| 39179 | P03383 | P52815 | 0.37416  |
| 39180 | P03383 | O75419 | 0.65396  |
| 39181 | P03383 | Q9UK45 | 0.51929  |
| 39182 | P03383 | Q5RKV6 | 0.041133 |
| 39183 | P03383 | Q13617 | 0.411    |
| 39184 | P03383 | Q9BVT8 | 0.63008  |
| 39185 | P03383 | Q6P582 | 0.51933  |
| 39186 | P03383 | Q9P086 | 0.80648  |
| 39187 | P03383 | Q8TE69 | 0.1668   |
| 39188 | P03383 | Q96C86 | 0.58927  |
| 39189 | P03383 | Q86WI3 | 0.2859   |
| 39190 | P03383 | Q9BYQ4 | 0.5733   |
| 39191 | P03383 | Q15181 | 0.067245 |
| 39192 | P03383 | Q9P2Y5 | 0.19572  |
| 39193 | P03383 | Q96GC6 | 0.85282  |
| 39194 | P03383 | Q15327 | 0.2371   |
| 39195 | P03383 | Q9HCI5 | 0.42527  |
| 39196 | P03383 | Q9H9D4 | 0.3617   |
| 39197 | P03383 | Q5EBL4 | 0.20122  |
| 39198 | P03383 | Q99638 | 0.36204  |
| 39199 | P03383 | Q96EK5 | 0.13098  |
| 39200 | P03383 | Q9UJX4 | 0.51501  |
| 39201 | P03383 | O15535 | 0.093676 |
| 39202 | P03383 | Q9UKK3 | 0.42491  |
| 39203 | P03383 | P37802 | 0.26911  |
| 39204 | P03383 | O95238 | 0.093715 |
| 39205 | P03383 | P61254 | 0.58611  |
| 39206 | P03383 | O15127 | 0.37333  |
| 39207 | P03383 | Q9HCK8 | 0.21616  |
| 39208 | P03383 | P0DKX0 | 0.27416  |
| 39209 | P03383 | Q8WZA9 | 0.60341  |
| 39210 | P03383 | Q14188 | 0.5583   |
| 39211 | P03383 | Q8TF63 | 0.44746  |
| 39212 | P03383 | Q9H009 | 0.19735  |
| 39213 | P03383 | Q7Z6M4 | 0.44417  |
| 39214 | P03383 | Q9UPV0 | 1.1101   |
| 39215 | P03383 | Q9H2G4 | 0.48519  |
| 39216 | P03383 | P62633 | 0.31576  |

|       |        |        |         |
|-------|--------|--------|---------|
| 39217 | P03383 | Q494X3 | 0.32673 |
| 39218 | P03383 | Q16401 | 0.59805 |
| 39219 | P03383 | O14633 | 0.33834 |
| 39220 | P03383 | Q8TAP6 | 0.58298 |
| 39221 | P03383 | Q8WY54 | 0.53107 |
| 39222 | P03383 | P01100 | 0.4089  |
| 39223 | P03383 | Q3KP22 | 0.14005 |
| 39224 | P03383 | Q9H3L0 | 0.62879 |
| 39225 | P03383 | P04198 | 0.61684 |
| 39226 | P03383 | Q6ZRI6 | 0.35258 |
| 39227 | P03383 | Q86XN6 | 0.24483 |
| 39228 | P03383 | Q9UC06 | 0.17256 |
| 39229 | P03383 | Q4LE39 | 0.78473 |
| 39230 | P03383 | Q5T7V8 | 1.1857  |
| 39231 | P03383 | P43268 | 0.23554 |
| 39232 | P03383 | Q8WXF8 | 0.96255 |
| 39233 | P03383 | Q8NCD3 | 0.32508 |
| 39234 | P03383 | Q9UGB4 | 0.33834 |
| 39235 | P03383 | Q2KHR2 | 0.14678 |
| 39236 | P03383 | P11161 | 0.31021 |
| 39237 | P03383 | Q8N9R0 | 0.33834 |
| 39238 | P03383 | Q9UQ80 | 0.8544  |
| 39239 | P03383 | Q05519 | 0.50389 |
| 39240 | P03383 | O95983 | 0.92085 |
| 39241 | P03383 | A8MZF0 | 0.60341 |
| 39242 | P03383 | Q9P1D8 | 0.33834 |
| 39243 | P03383 | Q8NA77 | 0.51555 |
| 39244 | P03383 | P05114 | 0.33615 |
| 39245 | P03383 | Q9H7C4 | 0.20078 |
| 39246 | P03383 | O43765 | 0.42702 |
| 39247 | P03383 | P62979 | 0.20176 |
| 39248 | P03383 | Q86Y79 | 0.47859 |
| 39249 | P03383 | Q0VDD5 | 0.33834 |
| 39250 | P03383 | Q8N0Y2 | 0.14388 |
| 39251 | P03383 | Q96H79 | 0.40071 |
| 39252 | P03383 | A6NEV1 | 0.43652 |
| 39253 | P03383 | Q6RVD6 | 0.33834 |
| 39254 | P03383 | Q5T280 | 0.81192 |
| 39255 | P03383 | O60885 | 0.46831 |
| 39256 | P03383 | Q96Q35 | 0.2841  |
| 39257 | P03383 | P10515 | 0.24735 |
| 39258 | P03383 | Q8NG31 | 0.42866 |
| 39259 | P03383 | Q92750 | 0.44127 |
| 39260 | P03383 | Q96P63 | 0.23476 |
| 39261 | P03383 | Q92754 | 0.39189 |
| 39262 | P03383 | O00231 | 0.29204 |
| 39263 | P03383 | Q96HA1 | 0.66909 |
| 39264 | P03383 | A7E2V4 | 0.96614 |
| 39265 | P03383 | Q9UKV0 | 0.29475 |
| 39266 | P03383 | Q96CD0 | 0.38267 |
| 39267 | P03383 | Q14153 | 0.40492 |
| 39268 | P03383 | O43186 | 0.57798 |
| 39269 | P03383 | Q00597 | 0.49231 |
| 39270 | P03383 | P61981 | 0.30327 |
| 39271 | P03383 | Q14145 | 0.96268 |
| 39272 | P03383 | P39880 | 0.37897 |
| 39273 | P03383 | Q8N108 | 0.84816 |
| 39274 | P03383 | Q5T1J5 | 0.67327 |
| 39275 | P03383 | P23760 | 0.61384 |
| 39276 | P03383 | P61579 | 0.43317 |
| 39277 | P03383 | Q9UIF8 | 0.57965 |
| 39278 | P03383 | Q5HYK9 | 0.22259 |
| 39279 | P03383 | Q86XK3 | 0.56269 |
| 39280 | P03383 | Q9NRL3 | 0.25577 |
| 39281 | P03383 | Q5TEZ4 | 0.33834 |
| 39282 | P03383 | Q9HBX3 | 0.33834 |
| 39283 | P03383 | A2IDD5 | 0.38446 |
| 39284 | P03383 | A4D263 | 0.16655 |
| 39285 | P03383 | A6NHU5 | 0.13506 |
| 39286 | P03383 | Q96AT1 | 0.60341 |
| 39287 | P03383 | Q9NY27 | 0.68362 |
| 39288 | P03383 | Q15906 | 0.62244 |
| 39289 | P03383 | Q9H7E9 | 0.60341 |
| 39290 | P03383 | Q9HAI6 | 0.45603 |
| 39291 | P03383 | Q9NYF0 | 0.13727 |
| 39292 | P03383 | Q9NQ32 | 0.42486 |

|       |        |        |           |
|-------|--------|--------|-----------|
| 39293 | P03383 | Q96DP5 | 0.32423   |
| 39294 | P03383 | P0CG47 | 0.27823   |
| 39295 | P03383 | Q3LI81 | 0.81527   |
| 39296 | P03383 | Q9UHA2 | 0.20459   |
| 39297 | P03383 | Q9NZI7 | 0.1437    |
| 39298 | P03383 | Q95394 | 0.55605   |
| 39299 | P03383 | Q96QK1 | 0.38775   |
| 39300 | P03383 | A6H8Y1 | 0.43466   |
| 39301 | P03383 | Q8N715 | 0.037095  |
| 39302 | P03383 | Q96QC0 | 0.734     |
| 39303 | P03383 | Q8N782 | 0.31389   |
| 39304 | P03383 | Q9BSY4 | 0.33299   |
| 39305 | P03383 | P49918 | 0.49547   |
| 39306 | P03383 | P0C7V5 | 0.24415   |
| 39307 | P03383 | Q99750 | 0.39987   |
| 39308 | P03383 | O60524 | 0.75313   |
| 39309 | P03383 | Q6P6B1 | 0.60341   |
| 39310 | P03383 | Q5MJ08 | 0.037487  |
| 39311 | P03383 | Q9BUJ2 | 0.90159   |
| 39312 | P03383 | Q96HW7 | 0.3608    |
| 39313 | P03383 | Q8N3X1 | 0.17267   |
| 39314 | P03383 | P62875 | 0.21466   |
| 39315 | P03383 | Q9H6Z4 | 0.84571   |
| 39316 | P03383 | Q96PY6 | 0.26661   |
| 39317 | P03383 | P58557 | 0.71751   |
| 39318 | P03383 | P0CB43 | 0.17715   |
| 39319 | P03383 | Q5T9G4 | 0.74659   |
| 39320 | P03383 | Q9BYR9 | 0.23605   |
| 39321 | P03383 | Q8N4U5 | 0.01334   |
| 39322 | P03383 | Q9Y4P8 | 0.52438   |
| 39323 | P03383 | Q96RK0 | 0.68205   |
| 39324 | P03383 | Q5TEC3 | 0.185     |
| 39325 | P03383 | Q15796 | 0.45037   |
| 39326 | P03383 | Q99594 | 0.91047   |
| 39327 | P03383 | Q9NYP3 | 0.52454   |
| 39328 | P03383 | Q53SZ7 | 0.60341   |
| 39329 | P03383 | P62241 | 0.38457   |
| 39330 | P03383 | P21675 | 0.34161   |
| 39331 | P03383 | Q9P209 | 0.49555   |
| 39332 | P03383 | Q9H0N5 | 0.66646   |
| 39333 | P03383 | Q96MG7 | 0.51318   |
| 39334 | P03383 | Q15059 | 0.98657   |
| 39335 | P03383 | Q3LI61 | 0.33834   |
| 39336 | P03383 | Q96NB3 | 0.26605   |
| 39337 | P03383 | Q9BZK7 | 0.71351   |
| 39338 | P03383 | P56555 | 0.50968   |
| 39339 | P03383 | P56524 | 0.21228   |
| 39340 | P03383 | Q9BUL8 | 0.39232   |
| 39341 | P03383 | Q6ZVN6 | 0.0075334 |
| 39342 | P03383 | Q9BUP3 | 0.14059   |
| 39343 | P03383 | Q96CB8 | 0.28213   |
| 39344 | P03383 | Q96JE7 | 0.63447   |
| 39345 | P03383 | Q9Y6G5 | 0.1668    |
| 39346 | P03383 | A6NGY3 | 0.13371   |
| 39347 | P03383 | C9JE40 | 0.58209   |
| 39348 | P03383 | Q8WU03 | 0.38754   |
| 39349 | P03383 | Q92541 | 0.72873   |
| 39350 | P03383 | Q86YF9 | 0.056738  |
| 39351 | P03383 | Q13367 | 0.26011   |
| 39352 | P03383 | Q9UHY8 | 0.17098   |
| 39353 | P03383 | Q96FA3 | 0.31129   |
| 39354 | P03383 | Q6P280 | 0.3549    |
| 39355 | P03383 | Q9NRH1 | 0.2503    |
| 39356 | P03383 | Q9UPN7 | 0.67833   |
| 39357 | P03383 | A1L190 | 0.7148    |
| 39358 | P03383 | Q8TC71 | 0.15245   |
| 39359 | P03383 | Q7Z7F7 | 0.51384   |
| 39360 | P03383 | Q9H5Y0 | 0.37892   |
| 39361 | P03383 | Q9NWM3 | 0.12111   |
| 39362 | P03383 | Q9BVC5 | 0.39716   |
| 39363 | P03383 | H3BNL8 | 0.71002   |
| 39364 | P03383 | Q6ZMY9 | 0.3136    |
| 39365 | P03383 | P46781 | 0.78039   |
| 39366 | P03383 | Q8N584 | 0.4957    |
| 39367 | P03383 | Q14232 | 0.054278  |
| 39368 | P03383 | Q9NUW8 | 0.40409   |

|       |        |        |           |
|-------|--------|--------|-----------|
| 39369 | P03383 | O75208 | 0.40882   |
| 39370 | P03383 | P35237 | 0.26449   |
| 39371 | P03383 | Q717R9 | 0.27302   |
| 39372 | P03383 | Q8WWY3 | 0.2278    |
| 39373 | P03383 | O60925 | 0.013876  |
| 39374 | P03383 | Q53FT3 | 0.28086   |
| 39375 | P03383 | Q86TP1 | 0.52789   |
| 39376 | P03383 | P41970 | 0.65558   |
| 39377 | P03383 | Q13416 | 0.34229   |
| 39378 | P03383 | Q6Q759 | 0.48806   |
| 39379 | P03383 | Q86W67 | 0.015086  |
| 39380 | P03383 | O43309 | 0.17727   |
| 39381 | P03383 | Q96GU1 | 0.2309    |
| 39382 | P03383 | Q9NRG9 | 0.65908   |
| 39383 | P03383 | P0C866 | 0.0011014 |
| 39384 | P03383 | Q9BYJ9 | 0.52267   |
| 39385 | P03383 | P48634 | 0.55947   |
| 39386 | P03383 | Q96EH5 | 0.4722    |
| 39387 | P03383 | P32519 | 1.0104    |
| 39388 | P03383 | Q9UQ35 | 0.48386   |
| 39389 | P03383 | Q13347 | 0.44281   |
| 39390 | P03383 | Q6NSI8 | 0.40149   |
| 39391 | P03383 | Q00577 | 0.39835   |
| 39392 | P03383 | Q9HBT7 | 0.21449   |
| 39393 | P03383 | Q96NJ6 | 0.15714   |
| 39394 | P03383 | Q5HYN5 | 0.098536  |
| 39395 | P03383 | P68036 | 0.61168   |
| 39396 | P03383 | Q8NAP3 | 0.15666   |
| 39397 | P03383 | A8MT65 | 0.28416   |
| 39398 | P03383 | Q5VZV4 | 0.24248   |
| 39399 | P03383 | Q15527 | 0.19114   |
| 39400 | P03383 | Q8NEG4 | 0.32956   |
| 39401 | P03383 | Q09FC8 | 0.19011   |
| 39402 | P03383 | E9PI22 | 0.37274   |
| 39403 | P03383 | Q14677 | 0.22346   |
| 39404 | P03383 | Q6P1K2 | 0.86928   |
| 39405 | P03383 | Q5JS54 | 0.43101   |
| 39406 | P03383 | O95153 | 0.45253   |
| 39407 | P03383 | Q96AE4 | 0.34412   |
| 39408 | P03383 | Q8N9A8 | 0.36433   |
| 39409 | P03383 | Q6ULP2 | 0.34344   |
| 39410 | P03383 | P13647 | 0.63715   |
| 39411 | P03383 | Q8WWQ0 | 0.41685   |
| 39412 | P03383 | Q03252 | 0.25322   |
| 39413 | P03383 | Q9UJX5 | 0.52601   |
| 39414 | P03383 | P62877 | 0.33197   |
| 39415 | P03383 | Q17RC7 | 0.48787   |
| 39416 | P03383 | Q9P0V3 | 0.47168   |
| 39417 | P03383 | Q9Y4A8 | 0.31044   |
| 39418 | P03383 | Q5SQS8 | 0.24635   |
| 39419 | P03383 | P23508 | 0.17481   |
| 39420 | P03383 | Q9P255 | 0.22586   |
| 39421 | P03383 | Q99909 | 0.13592   |
| 39422 | P03383 | O75161 | 0.71865   |
| 39423 | P03383 | Q2NKX9 | 0.60341   |
| 39424 | P03383 | Q8IWY8 | 0.16661   |
| 39425 | P03383 | P52435 | 0.40938   |
| 39426 | P03383 | Q5VT03 | 0.5011    |
| 39427 | P03383 | Q9H9J2 | 0.25343   |
| 39428 | P03383 | Q9HB09 | 0.78652   |
| 39429 | P03383 | Q15910 | 0.32146   |
| 39430 | P03383 | Q63ZY3 | 0.66332   |
| 39431 | P03383 | Q8N9T2 | 0.33834   |
| 39432 | P03383 | Q9NR09 | 0.28303   |
| 39433 | P03383 | Q13309 | 0.38792   |
| 39434 | P03383 | Q9UND3 | 0.13958   |
| 39435 | P03383 | Q9UFV3 | 0.026251  |
| 39436 | P03383 | Q96E11 | 0.57964   |
| 39437 | P03383 | Q9GZL7 | 0.51425   |
| 39438 | P03383 | Q9UGK8 | 0.44438   |
| 39439 | P03383 | Q5T230 | 1.0147    |
| 39440 | P03383 | Q9UII5 | 0.21702   |
| 39441 | P03383 | Q08AD1 | 0.28837   |
| 39442 | P03383 | P22103 | 0.33834   |
| 39443 | P03383 | P32189 | 0.13278   |
| 39444 | P03383 | Q6NSH3 | 0.37918   |

|       |        |        |          |
|-------|--------|--------|----------|
| 39445 | P03383 | P51522 | 0.18615  |
| 39446 | P03383 | Q9H3M7 | 0.57553  |
| 39447 | P03383 | Q8N9B5 | 0.48259  |
| 39448 | P03383 | Q9NRL2 | 0.74014  |
| 39449 | P03383 | P82650 | 0.041862 |
| 39450 | P03383 | P23284 | 0.20142  |
| 39451 | P03383 | Q04206 | 0.45926  |
| 39452 | P03383 | A8MZG2 | 0.60341  |
| 39453 | P03383 | Q7RTV3 | 0.19614  |
| 39454 | P03383 | Q9Y2X3 | 0.44885  |
| 39455 | P03383 | Q9HC62 | 0.31179  |
| 39456 | P03383 | Q8IZM0 | 0.13626  |
| 39457 | P03383 | P39023 | 0.68268  |
| 39458 | P03383 | P53992 | 0.65956  |
| 39459 | P03383 | Q10586 | 0.22552  |
| 39460 | P03383 | Q8TF40 | 0.48661  |
| 39461 | P03383 | O95997 | 0.68588  |
| 39462 | P03383 | P78318 | 0.6148   |
| 39463 | P03383 | O75113 | 0.60994  |
| 39464 | P03383 | Q07021 | 0.52426  |
| 39465 | P03383 | P49910 | 0.50266  |
| 39466 | P03383 | P55265 | 0.24512  |
| 39467 | P03383 | Q9Y2D9 | 0.39205  |
| 39468 | P03383 | Q9H910 | 0.60274  |
| 39469 | P03383 | Q8IW36 | 0.29344  |
| 39470 | P03383 | Q96QU8 | 0.75112  |
| 39471 | P03383 | O43776 | 0.4574   |
| 39472 | P03383 | Q8N9Z2 | 0.50098  |
| 39473 | P03383 | P17535 | 0.72717  |
| 39474 | P03383 | F5GYI3 | 0.69867  |
| 39475 | P03383 | Q8WWR8 | 0.05437  |
| 39476 | P03383 | Q6L8H1 | 0.33834  |
| 39477 | P03383 | Q8WTR7 | 0.44801  |
| 39478 | P03383 | O15360 | 0.51258  |
| 39479 | P03383 | Q9H606 | 0.22955  |
| 39480 | P03383 | Q8N0U6 | 0.33834  |
| 39481 | P03383 | Q9BQ15 | 0.37707  |
| 39482 | P03383 | Q2T9L4 | 0.19224  |
| 39483 | P03383 | P78545 | 0.63651  |
| 39484 | P03383 | Q6ZRH4 | 1.0364   |
| 39485 | P03383 | P11169 | 0.25174  |
| 39486 | P03383 | P56182 | 0.45419  |
| 39487 | P03383 | A6NIH7 | 0.27233  |
| 39488 | P03383 | P57678 | 0.66507  |
| 39489 | P03383 | Q9NQ50 | 0.62883  |
| 39490 | P03383 | Q6NUN9 | 0.50812  |
| 39491 | P03383 | Q8IWD4 | 0.60341  |
| 39492 | P03383 | Q99865 | 0.40873  |
| 39493 | P03383 | O43583 | 0.71662  |
| 39494 | P03383 | P08397 | 0.16632  |
| 39495 | P03383 | O15318 | 0.59734  |
| 39496 | P03383 | Q9NRR5 | 0.39086  |
| 39497 | P03383 | Q3LI66 | 0.33834  |
| 39498 | P03383 | Q9BU89 | 0.074609 |
| 39499 | P03383 | Q9NY43 | 0.25252  |
| 39500 | P03383 | P55769 | 0.65348  |
| 39501 | P03383 | Q8IY57 | 0.83561  |
| 39502 | P03383 | Q8NCU1 | 0.16243  |
| 39503 | P03383 | O60930 | 0.071947 |
| 39504 | P03383 | Q5T5N4 | 0.090165 |
| 39505 | P03383 | F8WFD2 | 0.22014  |
| 39506 | P03383 | Q68DX3 | 0.2663   |
| 39507 | P03383 | Q8WXI9 | 0.33862  |
| 39508 | P03383 | Q9Y448 | 0.54541  |
| 39509 | P03383 | Q3B820 | 0.55921  |
| 39510 | P03383 | P49459 | 0.29496  |
| 39511 | P03383 | Q9UHB9 | 0.15677  |
| 39512 | P03383 | P45984 | 0.25614  |
| 39513 | P03383 | P82094 | 0.90424  |
| 39514 | P03383 | Q5VWM6 | 0.71279  |
| 39515 | P03383 | P51532 | 0.33786  |
| 39516 | P03383 | O95671 | 0.35781  |
| 39517 | P03383 | Q96SR6 | 0.17681  |
| 39518 | P03383 | Q92567 | 0.31531  |
| 39519 | P03383 | Q14602 | 0.15038  |
| 39520 | P03383 | Q9BW66 | 0.61252  |

|       |        |        |           |
|-------|--------|--------|-----------|
| 39521 | P03383 | Q8N137 | 0.62294   |
| 39522 | P03383 | Q86X60 | 0.21591   |
| 39523 | P03383 | Q8WYR1 | 0.10013   |
| 39524 | P03383 | P42704 | 0.69626   |
| 39525 | P03383 | Q96GT9 | 0.64111   |
| 39526 | P03383 | Q9BTL3 | 0.43479   |
| 39527 | P03383 | Q5SVJ3 | 0.11806   |
| 39528 | P03383 | Q9P2I0 | 0.6188    |
| 39529 | P03383 | O60645 | 0.30682   |
| 39530 | P03383 | Q96S95 | 0.35731   |
| 39531 | P03383 | Q8N5T8 | 0.34583   |
| 39532 | P03383 | A8MUI8 | 0.30294   |
| 39533 | P03383 | Q6ZU65 | 0.2453    |
| 39534 | P03383 | Q9NWB6 | 0.60341   |
| 39535 | P03383 | Q8N6Y0 | 0.38695   |
| 39536 | P03383 | Q6EEV4 | 0.33834   |
| 39537 | P03383 | Q9UBI1 | 0.1668    |
| 39538 | P03383 | O43325 | 0.64944   |
| 39539 | P03383 | Q9UPZ3 | 0.37045   |
| 39540 | P03383 | Q96IT6 | 0.33834   |
| 39541 | P03383 | Q02556 | 0.23215   |
| 39542 | P03383 | Q6PI48 | 0.46193   |
| 39543 | P03383 | A6NGY1 | 0.57958   |
| 39544 | P03383 | Q86SY8 | 0.33834   |
| 39545 | P03383 | O00198 | 0.43239   |
| 39546 | P03383 | Q8WUM4 | 0.76561   |
| 39547 | P03383 | Q9Y222 | 0.7218    |
| 39548 | P03383 | O43752 | 0.13627   |
| 39549 | P03383 | P04731 | 0.23866   |
| 39550 | P03383 | Q6AI08 | 0.40514   |
| 39551 | P03383 | Q8WUY8 | 0.41154   |
| 39552 | P03383 | Q9UKZ1 | 0.65596   |
| 39553 | P03383 | Q9Y5B0 | 0.33773   |
| 39554 | P03383 | O76031 | 0.43026   |
| 39555 | P03383 | A0JLT2 | 0.93294   |
| 39556 | P03383 | P80723 | 0.32172   |
| 39557 | P03383 | Q8N9P6 | 0.33834   |
| 39558 | P03383 | Q96QU4 | 0.49935   |
| 39559 | P03383 | P0CZ20 | 0.18349   |
| 39560 | P03383 | Q96F83 | 0.33291   |
| 39561 | P03383 | P53567 | 0.49768   |
| 39562 | P03383 | Q53S33 | 0.65701   |
| 39563 | P03383 | Q9UKT9 | 0.34846   |
| 39564 | P03383 | Q9H6D7 | 0.32838   |
| 39565 | P03383 | Q6ZVC0 | 0.52986   |
| 39566 | P03383 | Q5UE93 | 0.39242   |
| 39567 | P03383 | A6NEQ2 | 0.33834   |
| 39568 | P03383 | O60504 | 0.38345   |
| 39569 | P03383 | Q9NPI1 | 0.80791   |
| 39570 | P03383 | O76015 | 0.66284   |
| 39571 | P03383 | O60518 | 0.69697   |
| 39572 | P03383 | Q5T5F5 | 0.33834   |
| 39573 | P03383 | Q9UJY1 | 0.30769   |
| 39574 | P03383 | P50452 | 0.37761   |
| 39575 | P03383 | Q8N5S3 | 0.0067398 |
| 39576 | P03383 | O14771 | 0.46597   |
| 39577 | P03383 | Q86YC2 | 0.37917   |
| 39578 | P03383 | P0DJG4 | 0.64266   |
| 39579 | P03383 | Q8NDT2 | 0.6864    |
| 39580 | P03383 | O14907 | 0.24783   |
| 39581 | P03383 | Q8TCC3 | 0.11199   |
| 39582 | P03383 | P78385 | 0.6399    |
| 39583 | P03383 | Q8TAB5 | 0.60341   |
| 39584 | P03383 | Q5SW79 | 0.52568   |
| 39585 | P03383 | Q9NRA8 | 0.71859   |
| 39586 | P03383 | Q15370 | 0.82592   |
| 39587 | P03383 | P52736 | 0.42046   |
| 39588 | P03383 | Q7RTT6 | 0.29227   |
| 39589 | P03383 | Q9Y2M5 | 0.55532   |
| 39590 | P03383 | Q96RY5 | 0.65414   |
| 39591 | P03383 | Q6ZQT7 | 0.33834   |
| 39592 | P03383 | A6NHP3 | 0.38945   |
| 39593 | P03383 | P0CW26 | 0.18349   |
| 39594 | P03383 | Q96EU6 | 0.28289   |
| 39595 | P03383 | Q9H3M9 | 0.32342   |
| 39596 | P03383 | Q02410 | 0.32958   |

|       |        |        |           |
|-------|--------|--------|-----------|
| 39597 | P03383 | Q96NJ1 | 0.33834   |
| 39598 | P03383 | Q96MR7 | 0.95681   |
| 39599 | P03383 | Q96KD3 | 0.87506   |
| 39600 | P03383 | Q92979 | 0.18514   |
| 39601 | P03383 | Q99996 | 0.31835   |
| 39602 | P03383 | Q8N7W2 | 0.43631   |
| 39603 | P03383 | Q15233 | 0.44501   |
| 39604 | P03383 | Q9UJA5 | 0.75168   |
| 39605 | P03383 | A6NHX0 | 0.52445   |
| 39606 | P03383 | Q9UM63 | 0.10894   |
| 39607 | P03383 | Q8N9P0 | 0.079313  |
| 39608 | P03383 | P12757 | 0.20749   |
| 39609 | P03383 | Q9UBY9 | 0.68878   |
| 39610 | P03383 | Q13227 | 0.79551   |
| 39611 | P03383 | Q2TAM9 | 0.80122   |
| 39612 | P03383 | Q13772 | 0.15379   |
| 39613 | P03383 | Q9BR46 | 0.5087    |
| 39614 | P03383 | P0CG48 | 0.27172   |
| 39615 | P03383 | P54840 | 0.29116   |
| 39616 | P03383 | Q12962 | 0.86379   |
| 39617 | P03383 | O60675 | 0.22573   |
| 39618 | P03383 | O95373 | 0.71773   |
| 39619 | P03383 | Q6ZUC2 | 0.085584  |
| 39620 | P03383 | O43310 | 0.28379   |
| 39621 | P03383 | P35579 | 0.55765   |
| 39622 | P03383 | Q969E4 | 0.19547   |
| 39623 | P03383 | Q8NA03 | 0.38694   |
| 39624 | P03383 | A8MU10 | 0.33834   |
| 39625 | P03383 | Q9NPD8 | 0.25572   |
| 39626 | P03383 | Q9H320 | 0.7165    |
| 39627 | P03383 | P33316 | 0.41306   |
| 39628 | P03383 | Q96ST3 | 0.58189   |
| 39629 | P03383 | Q3LI64 | 0.33834   |
| 39630 | P03383 | Q6ZSR3 | 0.33834   |
| 39631 | P03383 | A6NGK3 | 0.21377   |
| 39632 | P03383 | Q13310 | 0.2729    |
| 39633 | P03383 | O43542 | 0.30374   |
| 39634 | P03383 | P38935 | 0.31016   |
| 39635 | P03383 | Q9Y5A6 | 0.48168   |
| 39636 | P03383 | Q6L8H2 | 0.33834   |
| 39637 | P03383 | Q96EF9 | 0.25158   |
| 39638 | P03383 | Q6Q795 | 0.33834   |
| 39639 | P03383 | P07199 | 0.48297   |
| 39640 | P03383 | P43356 | 0.67054   |
| 39641 | P03383 | H0UI37 | 0.078684  |
| 39642 | P03383 | Q8NDC0 | 0.51506   |
| 39643 | P03383 | O75807 | 0.21431   |
| 39644 | P03383 | P62952 | 0.2467    |
| 39645 | P03383 | Q9BTT4 | 0.48467   |
| 39646 | P03383 | Q5MJ09 | 0.1039    |
| 39647 | P03383 | Q6ZN84 | 0.19012   |
| 39648 | P03383 | Q9Y2G9 | 0.54468   |
| 39649 | P03383 | Q92845 | 0.050097  |
| 39650 | P03383 | A8MYZ0 | 0.45898   |
| 39651 | P03383 | Q9UK61 | 0.4612    |
| 39652 | P03383 | Q8NDD1 | 0.0058186 |
| 39653 | P03383 | O75635 | 0.23418   |
| 39654 | P03383 | O94817 | 0.31618   |
| 39655 | P03383 | O00411 | 0.34286   |
| 39656 | P03383 | Q14691 | 0.22301   |
| 39657 | P03383 | P21980 | 0.14167   |
| 39658 | P03383 | Q8TBE0 | 0.5084    |
| 39659 | P03383 | P28074 | 0.38808   |
| 39660 | P03383 | Q5M9Q1 | 0.76137   |
| 39661 | P03383 | Q92796 | 0.20297   |
| 39662 | P03383 | Q6ZW13 | 0.33834   |
| 39663 | P03383 | Q14258 | 0.72809   |
| 39664 | P03383 | O95456 | 0.26513   |
| 39665 | P03383 | Q6R2W3 | 0.2543    |
| 39666 | P03383 | Q96HA7 | 0.4926    |
| 39667 | P03383 | Q9BXP5 | 0.82064   |
| 39668 | P03383 | Q9HAP2 | 0.32458   |
| 39669 | P03383 | Q8IYN0 | 0.21305   |
| 39670 | P03383 | Q5T9C2 | 0.60341   |
| 39671 | P03383 | Q2T9F4 | 0.089617  |
| 39672 | P03383 | Q86XA9 | 0.29995   |

|       |        |        |           |
|-------|--------|--------|-----------|
| 39673 | P03383 | Q3LI67 | 0.33834   |
| 39674 | P03383 | Q14151 | 0.51347   |
| 39675 | P03383 | P62841 | 0.50687   |
| 39676 | P03383 | Q9HA58 | 0.33834   |
| 39677 | P03383 | Q96DF8 | 0.8466    |
| 39678 | P03383 | Q92785 | 0.32033   |
| 39679 | P03383 | Q8N0T1 | 0.38321   |
| 39680 | P03383 | P78559 | 0.3121    |
| 39681 | P03383 | Q96M53 | 0.98701   |
| 39682 | P03383 | P50221 | 0.4937    |
| 39683 | P03383 | Q9H1B7 | 0.66613   |
| 39684 | P03383 | P18887 | 0.3963    |
| 39685 | P03383 | Q9UM00 | 0.87216   |
| 39686 | P03383 | Q96F86 | 0.42698   |
| 39687 | P03383 | O00425 | 0.26392   |
| 39688 | P03383 | Q9Y6H5 | 0.53745   |
| 39689 | P03383 | Q8N3V7 | 0.45087   |
| 39690 | P03383 | Q69383 | 0.43317   |
| 39691 | P03383 | O14681 | 0.44173   |
| 39692 | P03383 | P62308 | 0.521     |
| 39693 | P03383 | Q9NR46 | 0.22021   |
| 39694 | P03383 | P50548 | 0.1789    |
| 39695 | P03383 | Q8TBN0 | 0.1389    |
| 39696 | P03383 | Q8TF09 | 0.37653   |
| 39697 | P03383 | Q8N7U7 | 0.3704    |
| 39698 | P03383 | P62256 | 0.22644   |
| 39699 | P03383 | P27695 | 0.32257   |
| 39700 | P03383 | Q6NUQ1 | 0.35214   |
| 39701 | P03383 | P61236 | 0.16286   |
| 39702 | P03383 | O95551 | 0.48589   |
| 39703 | P03383 | A8MTA8 | 0.1877    |
| 39704 | P03383 | P0CG43 | 0.33834   |
| 39705 | P03383 | Q99676 | 0.22485   |
| 39706 | P03383 | Q92530 | 0.47952   |
| 39707 | P03383 | P63146 | 0.29496   |
| 39708 | P03383 | B1APH4 | 0.25856   |
| 39709 | P03383 | C9JN71 | 0.21181   |
| 39710 | P03383 | P57086 | 0.33527   |
| 39711 | P03383 | Q96JC9 | 0.73062   |
| 39712 | P03383 | Q9UL42 | 0.57654   |
| 39713 | P03383 | Q96LP2 | 0.0016313 |
| 39714 | P03383 | Q9UC07 | 0.19712   |
| 39715 | P03383 | P23246 | 0.57366   |
| 39716 | P03383 | P0DKV0 | 0.05412   |
| 39717 | P03383 | Q9HAF1 | 0.73244   |
| 39718 | P03383 | P07320 | 0.61117   |
| 39719 | P03383 | P51397 | 0.43563   |
| 39720 | P03383 | Q86VX2 | 0.59004   |
| 39721 | P03383 | Q8NA72 | 0.067357  |
| 39722 | P03383 | P51786 | 0.1696    |
| 39723 | P03383 | P19388 | 0.4328    |
| 39724 | P03383 | P23528 | 0.54779   |
| 39725 | P03383 | P49720 | 0.26471   |
| 39726 | P03383 | P59797 | 0.50117   |
| 39727 | P03383 | Q01534 | 0.29298   |
| 39728 | P03383 | Q969J2 | 0.16398   |
| 39729 | P03383 | Q5TGS1 | 0.24395   |
| 39730 | P03383 | Q8N371 | 0.15051   |
| 39731 | P03383 | Q8WTX7 | 0.44915   |
| 39732 | P03383 | Q6ZVQ6 | 0.88532   |
| 39733 | P03383 | Q16531 | 0.37503   |
| 39734 | P03383 | Q14140 | 1.2027    |
| 39735 | P03383 | Q13148 | 0.42776   |
| 39736 | P03383 | Q9ULW0 | 0.63067   |
| 39737 | P03383 | Q9UHR6 | 0.59324   |
| 39738 | P03383 | Q9UBB9 | 0.23589   |
| 39739 | P03383 | Q6NVV1 | 0.266     |
| 39740 | P03383 | Q8TAQ5 | 0.24149   |
| 39741 | P03383 | H3BR10 | 0.33834   |
| 39742 | P03383 | Q3LI59 | 0.33834   |
| 39743 | P03383 | P48552 | 0.48956   |
| 39744 | P03383 | Q8WU90 | 0.60099   |
| 39745 | P03383 | Q8N5H3 | 0.60341   |
| 39746 | P03383 | Q9UHV7 | 0.39358   |
| 39747 | P03383 | Q96CB9 | 0.48676   |
| 39748 | P03383 | Q96Q83 | 0.33236   |



|       |        |        |          |
|-------|--------|--------|----------|
| 39749 | P03383 | Q9P287 | 0.44431  |
| 39750 | P03383 | Q8TAA3 | 0.17908  |
| 39751 | P03383 | O95613 | 0.45845  |
| 39752 | P03383 | Q3MHD2 | 0.33225  |
| 39753 | P03383 | Q15424 | 0.58052  |
| 39754 | P03383 | Q13561 | 0.44947  |
| 39755 | P03383 | A6NN90 | 0.2413   |
| 39756 | P03383 | P61289 | 0.65687  |
| 39757 | P03383 | Q8TAL5 | 0.16618  |
| 39758 | P03383 | O76009 | 0.66284  |
| 39759 | P03383 | Q9C099 | 0.63532  |
| 39760 | P03383 | Q8IY42 | 0.8882   |
| 39761 | P03383 | O60831 | 0.62817  |
| 39762 | P03383 | O14777 | 0.38318  |
| 39763 | P03383 | Q5U5X8 | 0.70465  |
| 39764 | P03383 | P55197 | 1.0537   |
| 39765 | P03383 | Q8TAD7 | 0.60341  |
| 39766 | P03383 | Q9BSD3 | 0.077499 |
| 39767 | P03383 | Q9Y2X9 | 0.44825  |
| 39768 | P03383 | Q6P0N0 | 0.66671  |
| 39769 | P03383 | Q96CV9 | 0.30502  |
| 39770 | P03383 | P22090 | 0.20339  |
| 39771 | P03383 | Q96KW2 | 0.57575  |
| 39772 | P03383 | P29083 | 0.88411  |
| 39773 | P03383 | P24863 | 0.86352  |
| 39774 | P03383 | Q96GS4 | 0.85276  |
| 39775 | P03383 | Q5HYJ3 | 0.24176  |
| 39776 | P03383 | O75152 | 0.20165  |
| 39777 | P03383 | Q96C03 | 0.31806  |
| 39778 | P03383 | A1L188 | 0.57124  |
| 39779 | P03383 | Q96AQ1 | 0.57292  |
| 39780 | P03383 | Q9P1T7 | 0.98115  |
| 39781 | P03383 | Q969R5 | 0.065552 |
| 39782 | P03383 | Q8TAE8 | 0.70789  |
| 39783 | P03383 | Q13156 | 0.19831  |
| 39784 | P03383 | P0C5J1 | 0.035146 |
| 39785 | P03383 | Q8NFD5 | 0.62335  |
| 39786 | P03383 | Q70EK8 | 0.46224  |
| 39787 | P03383 | Q96EP1 | 0.41472  |
| 39788 | P03383 | Q8N187 | 0.4555   |
| 39789 | P03383 | Q13033 | 0.45038  |
| 39790 | P03383 | Q8NFP0 | 0.38993  |
| 39791 | P03383 | Q68DN1 | 0.33889  |
| 39792 | P03383 | P61970 | 0.22584  |
| 39793 | P03383 | Q9NVR5 | 0.53329  |
| 39794 | P03383 | A1L168 | 0.60341  |
| 39795 | P03383 | Q5T1B1 | 0.80124  |
| 39796 | P03383 | Q9P242 | 0.52986  |
| 39797 | P03383 | O75132 | 0.02568  |
| 39798 | P03383 | Q13045 | 0.76394  |
| 39799 | P03383 | O94952 | 0.49926  |
| 39800 | P03383 | Q9H7T9 | 0.45354  |
| 39801 | P03383 | Q92922 | 0.89023  |
| 39802 | P03383 | Q00587 | 0.036885 |
| 39803 | P03383 | Q66K41 | 0.63353  |
| 39804 | P03383 | Q9H3F6 | 0.24788  |
| 39805 | P03383 | O43592 | 0.12467  |
| 39806 | P03383 | O43663 | 0.64493  |
| 39807 | P03383 | Q5JU67 | 0.018214 |
| 39808 | P03383 | Q8TEK3 | 0.19405  |
| 39809 | P03383 | Q96AN2 | 0.2119   |
| 39810 | P03383 | Q49MG5 | 0.66114  |
| 39811 | P03383 | Q92990 | 0.16186  |
| 39812 | P03383 | Q9BYR0 | 0.5733   |
| 39813 | P03383 | P0CF75 | 0.025095 |
| 39814 | P03383 | Q12789 | 0.57691  |
| 39815 | P03383 | O95447 | 0.10784  |
| 39816 | P03383 | P15336 | 0.67994  |
| 39817 | P03383 | Q13794 | 0.36699  |
| 39818 | P03383 | P10828 | 0.38764  |
| 39819 | P03383 | Q9NXV6 | 0.72795  |
| 39820 | P03383 | Q8TBK2 | 0.35382  |
| 39821 | P03383 | Q9H1A3 | 0.1668   |
| 39822 | P03383 | Q9NZI5 | 0.25118  |
| 39823 | P03383 | Q9NUL5 | 0.1608   |
| 39824 | P03383 | Q92540 | 0.63783  |

|       |        |        |          |
|-------|--------|--------|----------|
| 39825 | P03383 | Q9NRD1 | 0.050819 |
| 39826 | P03383 | Q92837 | 0.70389  |
| 39827 | P03383 | P41250 | 0.20077  |
| 39828 | P03383 | P16383 | 0.68909  |
| 39829 | P03383 | Q8IW50 | 0.60341  |
| 39830 | P03383 | Q92499 | 0.29853  |
| 39831 | P03383 | P36543 | 0.082084 |
| 39832 | P03383 | Q96HZ7 | 0.33834  |
| 39833 | P03383 | Q99856 | 0.40423  |
| 39834 | P03383 | Q9H446 | 0.1668   |
| 39835 | P03383 | A1L170 | 0.33834  |
| 39836 | P03383 | Q9NS37 | 0.64587  |
| 39837 | P03383 | P47928 | 0.30232  |
| 39838 | P03383 | A6NH13 | 0.14464  |
| 39839 | P03383 | P37198 | 0.70223  |
| 39840 | P03383 | Q9UKX7 | 0.81795  |
| 39841 | P03383 | P18848 | 0.81675  |
| 39842 | P03383 | Q8N4C6 | 0.28996  |
| 39843 | P03383 | Q9UJX2 | 0.40006  |
| 39844 | P03383 | P62701 | 0.29185  |
| 39845 | P03383 | P11441 | 0.33676  |
| 39846 | P03383 | Q8N5M1 | 0.29228  |
| 39847 | P03383 | P01215 | 0.26568  |
| 39848 | P03383 | Q9NVC6 | 0.42932  |
| 39849 | P03383 | Q2M1K9 | 0.15978  |
| 39850 | P03383 | Q86X51 | 0.11818  |
| 39851 | P03383 | P18850 | 0.38769  |
| 39852 | P03383 | A1A5D9 | 0.56415  |
| 39853 | P03383 | P62829 | 0.91388  |
| 39854 | P03383 | P56211 | 0.2556   |
| 39855 | P03383 | O76095 | 0.085457 |
| 39856 | P03383 | O60481 | 0.30069  |
| 39857 | P03383 | Q9UI30 | 0.28127  |
| 39858 | P03383 | Q7Z5W3 | 0.52716  |
| 39859 | P03383 | Q8WXU2 | 0.50325  |
| 39860 | P03383 | Q8WUI4 | 0.22588  |
| 39861 | P03383 | Q8NCR3 | 0.16762  |
| 39862 | P03383 | P11172 | 0.26135  |
| 39863 | P03383 | P62508 | 0.33984  |
| 39864 | P03383 | Q01844 | 0.41741  |
| 39865 | P03383 | P0C2W7 | 0.33834  |
| 39866 | P03383 | Q92547 | 0.26808  |
| 39867 | P03383 | O15116 | 0.56711  |
| 39868 | P03383 | Q6UXP7 | 0.10116  |
| 39869 | P03383 | O95873 | 0.60341  |
| 39870 | P03383 | O00161 | 0.62814  |
| 39871 | P03383 | Q8IUC2 | 0.76208  |
| 39872 | P03383 | P61583 | 0.61783  |
| 39873 | P03383 | O60869 | 0.48542  |
| 39874 | P03383 | Q14676 | 0.40023  |
| 39875 | P03383 | P41236 | 0.48557  |
| 39876 | P03383 | Q8IXW0 | 0.26755  |
| 39877 | P03383 | Q9H0G5 | 0.40519  |
| 39878 | P03383 | P86479 | 0.33834  |
| 39879 | P03383 | Q86X95 | 0.86137  |
| 39880 | P03383 | O14512 | 0.33688  |
| 39881 | P03383 | Q9UNS2 | 0.42101  |
| 39882 | P03383 | Q96T59 | 0.034227 |
| 39883 | P03383 | Q8TDP1 | 0.3969   |
| 39884 | P03383 | Q9H1E3 | 0.56493  |
| 39885 | P03383 | Q6P2H3 | 0.25173  |
| 39886 | P03383 | Q9Y534 | 0.13189  |
| 39887 | P03383 | Q6NSI3 | 0.72771  |
| 39888 | P03383 | Q9UNZ5 | 0.60341  |
| 39889 | P03383 | Q9NZL3 | 0.44945  |
| 39890 | P03383 | P23610 | 0.33834  |
| 39891 | P03383 | O95619 | 0.59117  |
| 39892 | P03383 | Q9BXG8 | 0.22712  |
| 39893 | P03383 | Q6P387 | 0.23895  |
| 39894 | P03383 | Q96EF6 | 0.40407  |
| 39895 | P03383 | Q8N196 | 0.50855  |
| 39896 | P03383 | Q8NHY2 | 0.71553  |
| 39897 | P03383 | Q96BJ3 | 0.46736  |
| 39898 | P03383 | P83369 | 0.49375  |
| 39899 | P03383 | Q8N8E3 | 0.14243  |
| 39900 | P03383 | Q5T035 | 0.30869  |

|       |        |        |          |
|-------|--------|--------|----------|
| 39901 | P03383 | Q6IE81 | 0.71347  |
| 39902 | P03383 | Q5TEA3 | 0.2382   |
| 39903 | P03383 | P13646 | 0.72519  |
| 39904 | P03383 | Q15776 | 0.24641  |
| 39905 | P03383 | Q9BXH1 | 0.16385  |
| 39906 | P03383 | Q5T0L3 | 0.80426  |
| 39907 | P03383 | Q92466 | 0.37352  |
| 39908 | P03383 | P0C7W0 | 0.60341  |
| 39909 | P03383 | Q96DM1 | 0.54439  |
| 39910 | P03383 | Q9Y676 | 0.50728  |
| 39911 | P03383 | Q9BQC3 | 0.68193  |
| 39912 | P03383 | P30876 | 0.45925  |
| 39913 | P03383 | Q6ZRV2 | 0.64385  |
| 39914 | P03383 | Q9NPC6 | 0.59651  |
| 39915 | P03383 | O75586 | 0.515    |
| 39916 | P03383 | Q9BY89 | 0.12716  |
| 39917 | P03383 | P29692 | 0.14503  |
| 39918 | P03383 | Q99622 | 0.10044  |
| 39919 | P03383 | Q5SXM1 | 0.23242  |
| 39920 | P03383 | Q7Z309 | 0.11605  |
| 39921 | P03383 | Q6ZTI0 | 0.33834  |
| 39922 | P03383 | O95900 | 0.57942  |
| 39923 | P03383 | Q9BXS5 | 0.46153  |
| 39924 | P03383 | P62263 | 0.32522  |
| 39925 | P03383 | Q5H9B9 | 0.10099  |
| 39926 | P03383 | Q3YBR2 | 0.33615  |
| 39927 | P03383 | Q8NET4 | 0.38451  |
| 39928 | P03383 | Q5VWM5 | 0.52376  |
| 39929 | P03383 | Q9H4M3 | 0.11282  |
| 39930 | P03383 | P28062 | 0.15077  |
| 39931 | P03383 | P62847 | 0.34538  |
| 39932 | P03383 | P04259 | 0.24286  |
| 39933 | P03383 | Q9BUL9 | 0.72257  |
| 39934 | P03383 | P09629 | 0.71226  |
| 39935 | P03383 | Q9NW38 | 0.36461  |
| 39936 | P03383 | Q9P0J0 | 0.24454  |
| 39937 | P03383 | Q711Q0 | 0.33834  |
| 39938 | P03383 | Q6ZRS4 | 0.45556  |
| 39939 | P03383 | O95271 | 0.39028  |
| 39940 | P03383 | C9J6K1 | 0.351    |
| 39941 | P03383 | Q9BY42 | 0.45623  |
| 39942 | P03383 | Q9Y2A4 | 0.33127  |
| 39943 | P03383 | Q02930 | 0.56517  |
| 39944 | P03383 | P24864 | 0.45881  |
| 39945 | P03383 | Q9NVV2 | 0.33834  |
| 39946 | P03383 | P60896 | 0.33834  |
| 39947 | P03383 | Q08ER8 | 0.2372   |
| 39948 | P03383 | Q86Y01 | 0.3628   |
| 39949 | P03383 | Q15545 | 0.72977  |
| 39950 | P03383 | Q5T3J3 | 0.74704  |
| 39951 | P03383 | Q9NTI5 | 0.62668  |
| 39952 | P03383 | Q9BXF3 | 0.38685  |
| 39953 | P03383 | Q7L1Q6 | 0.16628  |
| 39954 | P03383 | P19012 | 0.75254  |
| 39955 | P03383 | Q9UHT4 | 0.33834  |
| 39956 | P03383 | Q6ZN01 | 0.36943  |
| 39957 | P03383 | Q9BYS1 | 0.52964  |
| 39958 | P03383 | Q8IYA8 | 0.60341  |
| 39959 | P03383 | P35268 | 0.42577  |
| 39960 | P03383 | Q9NWZ8 | 0.58104  |
| 39961 | P03383 | Q969U7 | 0.37862  |
| 39962 | P03383 | Q7LBC6 | 0.021314 |
| 39963 | P03383 | Q9H8Y8 | 0.1482   |
| 39964 | P03383 | Q96IV0 | 0.29817  |
| 39965 | P03383 | Q8TC90 | 0.62063  |
| 39966 | P03383 | P30281 | 0.53622  |
| 39967 | P03383 | Q6A163 | 0.66284  |
| 39968 | P03383 | Q8NEL0 | 0.054273 |
| 39969 | P03383 | Q4U2R6 | 0.58692  |
| 39970 | P03383 | P41252 | 0.46193  |
| 39971 | P03383 | O15049 | 0.60222  |
| 39972 | P03383 | Q8IUD2 | 0.60791  |
| 39973 | P03383 | Q9Y2D8 | 0.38331  |
| 39974 | P03383 | Q9H5J8 | 0.72651  |
| 39975 | P03383 | P13051 | 0.8419   |
| 39976 | P03383 | P0C7P2 | 0.077152 |

|       |        |        |           |
|-------|--------|--------|-----------|
| 39977 | P03383 | Q2VPK5 | 0.47373   |
| 39978 | P03383 | Q13642 | 0.26638   |
| 39979 | P03383 | Q9Y2D1 | 0.92854   |
| 39980 | P03383 | Q9UI36 | 0.31977   |
| 39981 | P03383 | Q9UJC5 | 0.40469   |
| 39982 | P03383 | Q53ET0 | 1.1517    |
| 39983 | P03383 | O95989 | 0.22572   |
| 39984 | P03383 | Q658Y4 | 0.45972   |
| 39985 | P03383 | P59942 | 0.35729   |
| 39986 | P03383 | Q8N7B6 | 0.2481    |
| 39987 | P03383 | Q9BV29 | 0.0053471 |
| 39988 | P03383 | Q13829 | 0.51517   |
| 39989 | P03383 | P09497 | 0.23249   |
| 39990 | P03383 | Q9HAB8 | 0.36005   |
| 39991 | P03383 | Q9Y2V2 | 0.32069   |
| 39992 | P03383 | Q9NYP8 | 0.2149    |
| 39993 | P03383 | Q9UBQ0 | 0.3071    |
| 39994 | P03383 | P54136 | 0.57141   |
| 39995 | P03383 | Q53HM4 | 0.75858   |
| 39996 | P03383 | P10243 | 0.25954   |
| 39997 | P03383 | Q15699 | 0.31828   |
| 39998 | P03383 | Q86W11 | 0.14286   |
| 39999 | P03383 | P30260 | 0.79986   |
| 40000 | P03383 | Q8NEZ5 | 0.48866   |
| 40001 | P03383 | Q6PI77 | 0.43647   |
| 40002 | P03383 | P05386 | 0.83108   |
| 40003 | P03383 | A6NIY4 | 0.38945   |
| 40004 | P03383 | Q86WV5 | 0.43069   |
| 40005 | P03383 | Q92624 | 0.51476   |
| 40006 | P03383 | Q9ULC6 | 0.6469    |
| 40007 | P03383 | Q08AG5 | 0.429     |
| 40008 | P03383 | O15083 | 0.34697   |
| 40009 | P03383 | Q9BU68 | 0.48239   |
| 40010 | P03383 | Q8N490 | 0.2646    |
| 40011 | P03383 | Q9NUL3 | 0.38096   |
| 40012 | P03383 | Q8TDN6 | 0.12802   |
| 40013 | P03383 | Q6ICG6 | 0.13747   |
| 40014 | P03383 | Q92674 | 0.16565   |
| 40015 | P03383 | P50914 | 0.74903   |
| 40016 | P03383 | Q5SXM2 | 0.42766   |
| 40017 | P03383 | Q2QGD7 | 0.51283   |
| 40018 | P03383 | Q9HCE1 | 0.49809   |
| 40019 | P03383 | Q9UPT5 | 0.33615   |
| 40020 | P03383 | P17275 | 0.70702   |
| 40021 | P03383 | Q04837 | 0.29877   |
| 40022 | P03383 | Q9UM82 | 0.77742   |
| 40023 | P03383 | O15235 | 0.46341   |
| 40024 | P03383 | Q7RTS7 | 0.25546   |
| 40025 | P03383 | Q8NDY4 | 0.33834   |
| 40026 | P03383 | Q5EBM0 | 0.49695   |
| 40027 | P03383 | P20265 | 0.49382   |
| 40028 | P03383 | Q9UN81 | 0.28638   |
| 40029 | P03383 | Q9NYJ8 | 0.27222   |
| 40030 | P03383 | O95273 | 0.68254   |
| 40031 | P03383 | Q9BWK5 | 0.67106   |
| 40032 | P03383 | Q9Y2W1 | 0.70149   |
| 40033 | P03383 | A6NMK8 | 0.53188   |
| 40034 | P03383 | Q9BRJ6 | 0.41832   |
| 40035 | P03383 | O95453 | 0.30002   |
| 40036 | P03383 | Q86U42 | 0.53946   |
| 40037 | P03383 | Q9UBK9 | 0.73755   |
| 40038 | P03383 | O75444 | 0.24378   |
| 40039 | P03383 | Q9Y291 | 0.31007   |
| 40040 | P03383 | Q9P270 | 0.26596   |
| 40041 | P03383 | Q92764 | 0.58359   |
| 40042 | P03383 | Q6ZVF9 | 0.43912   |
| 40043 | P03383 | Q96Q06 | 0.48545   |
| 40044 | P03383 | Q4G0N7 | 0.46758   |
| 40045 | P03383 | Q9UL03 | 0.55394   |
| 40046 | P03383 | Q96EZ8 | 0.44529   |
| 40047 | P03383 | Q3C1V1 | 0.60341   |
| 40048 | P03383 | Q6ZRP5 | 0.33834   |
| 40049 | P03383 | Q4LEZ3 | 0.77425   |
| 40050 | P03383 | P0CL80 | 0.17372   |
| 40051 | P03383 | Q9GZS3 | 0.85774   |
| 40052 | P03383 | O75145 | 0.25515   |

|       |        |        |          |
|-------|--------|--------|----------|
| 40053 | P03383 | O60437 | 0.46214  |
| 40054 | P03383 | O15225 | 0.33834  |
| 40055 | P03383 | Q8N6N3 | 0.24489  |
| 40056 | P03383 | O95571 | 0.29682  |
| 40057 | P03383 | P17480 | 0.76479  |
| 40058 | P03383 | Q5T4T6 | 0.78981  |
| 40059 | P03383 | Q9UL41 | 0.41465  |
| 40060 | P03383 | Q9BTE7 | 0.41033  |
| 40061 | P03383 | P14672 | 0.54871  |
| 40062 | P03383 | Q8N660 | 0.95616  |
| 40063 | P03383 | Q9Y4P9 | 0.17688  |
| 40064 | P03383 | P61576 | 0.18741  |
| 40065 | P03383 | Q14585 | 0.17124  |
| 40066 | P03383 | P51523 | 0.10563  |
| 40067 | P03383 | Q96AH0 | 0.29923  |
| 40068 | P03383 | Q6X4T0 | 0.085921 |
| 40069 | P03383 | Q9Y3A3 | 0.31251  |
| 40070 | P03383 | Q8N5L8 | 0.69525  |
| 40071 | P03383 | Q96HM7 | 0.44198  |
| 40072 | P03383 | Q8TCE6 | 0.86291  |
| 40073 | P03383 | Q6PEX3 | 0.30943  |
| 40074 | P03383 | O95561 | 0.53065  |
| 40075 | P03383 | P16333 | 0.39254  |
| 40076 | P03383 | Q8N7X2 | 0.33834  |
| 40077 | P03383 | P06733 | 0.62724  |
| 40078 | P03383 | Q0IIN9 | 0.055387 |
| 40079 | P03383 | O60664 | 0.2766   |
| 40080 | P03383 | O75150 | 0.3266   |
| 40081 | P03383 | Q5T0W9 | 0.020767 |
| 40082 | P03383 | Q8N720 | 0.70518  |
| 40083 | P03383 | O94973 | 0.23894  |
| 40084 | P03383 | Q8IUI4 | 0.1539   |
| 40085 | P03383 | Q8N9Z9 | 0.42932  |
| 40086 | P03383 | P48556 | 0.24186  |
| 40087 | P03383 | Q9NWF9 | 0.53377  |
| 40088 | P03383 | Q9H3R5 | 0.29147  |
| 40089 | P03383 | Q9P032 | 0.29696  |
| 40090 | P03383 | Q14135 | 0.19547  |
| 40091 | P03383 | O95073 | 0.79563  |
| 40092 | P03383 | P63167 | 0.94058  |
| 40093 | P03383 | Q6NUI1 | 0.33433  |
| 40094 | P03383 | Q8NC51 | 0.48148  |
| 40095 | P03383 | Q2M3D2 | 0.17048  |
| 40096 | P03383 | P61244 | 0.65792  |
| 40097 | P03383 | Q9GZY8 | 0.18472  |
| 40098 | P03383 | O00743 | 0.49196  |
| 40099 | P03383 | P19838 | 0.55066  |
| 40100 | P03383 | Q3KNT7 | 0.094537 |
| 40101 | P03383 | P07438 | 0.23866  |
| 40102 | P03383 | Q8NBA8 | 0.20328  |
| 40103 | P03383 | Q96AV8 | 0.20687  |
| 40104 | P03383 | Q9Y5L0 | 0.69192  |
| 40105 | P03383 | O00629 | 0.26492  |
| 40106 | P03383 | Q5T7N7 | 0.33834  |
| 40107 | P03383 | Q9Y421 | 0.24093  |
| 40108 | P03383 | Q9NRI7 | 0.33834  |
| 40109 | P03383 | Q96QR8 | 0.32564  |
| 40110 | P03383 | A8MV65 | 0.58845  |
| 40111 | P03383 | P35869 | 0.27055  |
| 40112 | P03383 | Q6ZN79 | 0.28972  |
| 40113 | P03383 | Q9BWC9 | 0.74742  |
| 40114 | P03383 | Q9H3C7 | 0.83227  |
| 40115 | P03383 | Q8IWZ3 | 0.69844  |
| 40116 | P03383 | Q9Y5J9 | 0.34955  |
| 40117 | P03383 | Q9ULJ6 | 0.27776  |
| 40118 | P03383 | P05813 | 0.28704  |
| 40119 | P03383 | Q8N9R8 | 0.51743  |
| 40120 | P03383 | Q8N7Q3 | 0.23279  |
| 40121 | P03383 | Q8N141 | 0.34707  |
| 40122 | P03383 | Q8TA94 | 0.32002  |
| 40123 | P03383 | Q9NPI8 | 0.61201  |
| 40124 | P03383 | Q9BRT6 | 0.30048  |
| 40125 | P03383 | O14964 | 0.36216  |
| 40126 | P03383 | Q14CS0 | 0.078793 |
| 40127 | P03383 | P56693 | 0.48567  |
| 40128 | P03383 | Q1ZZU3 | 0.39132  |

|       |        |        |          |
|-------|--------|--------|----------|
| 40129 | P03383 | P22087 | 0.45233  |
| 40130 | P03383 | Q9C0H9 | 0.092425 |
| 40131 | P03383 | Q9NSD9 | 0.55166  |
| 40132 | P03383 | O14818 | 0.45704  |
| 40133 | P03383 | Q5TBB1 | 0.57757  |
| 40134 | P03383 | P17028 | 0.50392  |
| 40135 | P03383 | P49591 | 0.29513  |
| 40136 | P03383 | Q8WUB2 | 0.15218  |
| 40137 | P03383 | Q9BVC3 | 0.37979  |
| 40138 | P03383 | P67809 | 0.47023  |
| 40139 | P03383 | Q8N8D1 | 0.48736  |
| 40140 | P03383 | O75175 | 1.0079   |
| 40141 | P03383 | Q9H079 | 0.28591  |
| 40142 | P03383 | Q8WV24 | 0.40809  |
| 40143 | P03383 | Q8NCR6 | 0.27922  |
| 40144 | P03383 | Q9H875 | 0.30582  |
| 40145 | P03383 | Q9UBD0 | 0.85108  |
| 40146 | P03383 | Q96CT7 | 0.10045  |
| 40147 | P03383 | Q16534 | 0.24365  |
| 40148 | P03383 | K7EIZ4 | 0.33834  |
| 40149 | P03383 | A2RU30 | 0.45556  |
| 40150 | P03383 | Q9UL40 | 0.40862  |
| 40151 | P03383 | Q15637 | 0.22598  |
| 40152 | P03383 | Q9HBQ8 | 0.5567   |
| 40153 | P03383 | P0C880 | 0.33834  |
| 40154 | P03383 | Q49AM1 | 0.22075  |
| 40155 | P03383 | O14599 | 0.33834  |
| 40156 | P03383 | Q14137 | 0.60882  |
| 40157 | P03383 | Q6KB66 | 0.28291  |
| 40158 | P03383 | A6NCN2 | 0.622    |
| 40159 | P03383 | P0C7V0 | 0.33834  |
| 40160 | P03383 | P60369 | 0.5733   |
| 40161 | P03383 | P07315 | 0.32863  |
| 40162 | P03383 | Q9ULC4 | 0.25603  |
| 40163 | P03383 | O15205 | 0.33427  |
| 40164 | P03383 | Q99627 | 0.14526  |
| 40165 | P03383 | Q5VZ46 | 0.11631  |
| 40166 | P03383 | Q9NNW5 | 0.36237  |
| 40167 | P03383 | Q9Y399 | 0.66904  |
| 40168 | P03383 | Q9HCG8 | 0.071642 |
| 40169 | P03383 | Q9Y3Y2 | 0.84736  |
| 40170 | P03383 | Q9UJX3 | 0.46355  |
| 40171 | P03383 | P20073 | 0.19718  |
| 40172 | P03383 | P46937 | 0.61607  |
| 40173 | P03383 | Q63HQ0 | 0.33834  |
| 40174 | P03383 | P61578 | 0.33986  |
| 40175 | P03383 | Q5JRK9 | 0.8942   |
| 40176 | P03383 | Q9Y603 | 0.94184  |
| 40177 | P03383 | O15446 | 0.063531 |
| 40178 | P03383 | F2Z3M2 | 0.33834  |
| 40179 | P03383 | Q9C0D2 | 0.50284  |
| 40180 | P03383 | P0C838 | 0.40411  |
| 40181 | P03383 | A8K830 | 0.33834  |
| 40182 | P03383 | Q9NX53 | 0.1668   |
| 40183 | P03383 | O75665 | 0.43032  |
| 40184 | P03383 | Q14241 | 0.28613  |
| 40185 | P03383 | P61758 | 0.35409  |
| 40186 | P03383 | Q8IYS8 | 0.30521  |
| 40187 | P03383 | Q8WXX7 | 0.29903  |
| 40188 | P03383 | Q96CM3 | 0.27181  |
| 40189 | P03383 | Q96PQ6 | 0.3432   |
| 40190 | P03383 | Q9NSJ1 | 0.2137   |
| 40191 | P03383 | Q7Z3B4 | 0.59189  |
| 40192 | P03383 | Q9NR28 | 0.54678  |
| 40193 | P03383 | Q8NC74 | 0.24254  |
| 40194 | P03383 | Q8NAJ2 | 0.048061 |
| 40195 | P03383 | P0C5Y4 | 0.52964  |
| 40196 | P03383 | A6NGU7 | 0.085404 |
| 40197 | P03383 | Q5VTE6 | 0.011966 |
| 40198 | P03383 | Q6ZVN7 | 0.047161 |
| 40199 | P03383 | Q6UN15 | 0.79589  |
| 40200 | P03383 | P84090 | 0.33439  |
| 40201 | P03383 | P56279 | 0.49934  |
| 40202 | P03383 | Q8WYA6 | 0.52564  |
| 40203 | P03383 | Q9Y608 | 0.26634  |
| 40204 | P03383 | P62258 | 0.57796  |

|       |        |        |          |
|-------|--------|--------|----------|
| 40205 | P03383 | P09234 | 0.35616  |
| 40206 | P03383 | P13056 | 0.46703  |
| 40207 | P03383 | Q01658 | 0.22066  |
| 40208 | P03383 | Q9GZV5 | 0.7949   |
| 40209 | P03383 | Q02952 | 0.14657  |
| 40210 | P03383 | Q9BUY5 | 0.30703  |
| 40211 | P03383 | Q9BT04 | 0.25186  |
| 40212 | P03383 | Q9ULX9 | 0.25153  |
| 40213 | P03383 | P78346 | 0.4462   |
| 40214 | P03383 | Q9UMX1 | 0.5766   |
| 40215 | P03383 | Q8NG48 | 0.022385 |
| 40216 | P03383 | Q86VN1 | 0.23581  |
| 40217 | P03383 | Q5T1C6 | 0.41228  |
| 40218 | P03383 | Q6ZUJ4 | 0.43143  |
| 40219 | P03383 | Q6P9A1 | 0.27634  |
| 40220 | P03383 | Q9HB19 | 0.29954  |
| 40221 | P03383 | Q6IA86 | 0.35266  |
| 40222 | P03383 | O60583 | 0.75127  |
| 40223 | P03383 | Q9UN37 | 0.32278  |
| 40224 | P03383 | P54198 | 0.86027  |
| 40225 | P03383 | Q9UHF7 | 0.32061  |
| 40226 | P03383 | Q17RA5 | 0.33834  |
| 40227 | P03383 | Q8N8P6 | 0.036386 |
| 40228 | P03383 | Q8WXB4 | 0.14384  |
| 40229 | P03383 | O75564 | 0.20431  |
| 40230 | P03383 | Q6U949 | 0.33834  |
| 40231 | P03383 | O43439 | 0.70908  |
| 40232 | P03383 | Q9BYU5 | 0.28322  |
| 40233 | P03383 | Q15834 | 0.82568  |
| 40234 | P03383 | Q9BW61 | 0.45738  |
| 40235 | P03383 | Q92900 | 0.3582   |
| 40236 | P03383 | Q6ZR93 | 0.33834  |
| 40237 | P03383 | Q9NVH2 | 0.19157  |
| 40238 | P03383 | Q86Z20 | 0.76454  |
| 40239 | P03383 | Q06546 | 0.9726   |
| 40240 | P03383 | Q86V42 | 0.53184  |
| 40241 | P03383 | P62861 | 0.77961  |
| 40242 | P03383 | O75368 | 0.18084  |
| 40243 | P03383 | O75334 | 0.32542  |
| 40244 | P03383 | Q9H5I1 | 0.44662  |
| 40245 | P03383 | Q7Z5V6 | 0.23858  |
| 40246 | P03383 | Q7L0X2 | 0.20916  |
| 40247 | P03383 | Q3LI68 | 0.68909  |
| 40248 | P03383 | P56181 | 0.44714  |
| 40249 | P03383 | Q9BWN1 | 0.60341  |
| 40250 | P03383 | Q9NWA0 | 1.2342   |
| 40251 | P03383 | O14604 | 0.47502  |
| 40252 | P03383 | Q3C1V8 | 0.39708  |
| 40253 | P03383 | Q7L3T8 | 0.30705  |
| 40254 | P03383 | P08133 | 0.41841  |
| 40255 | P03383 | Q9H091 | 0.18718  |
| 40256 | P03383 | Q9H714 | 0.2377   |
| 40257 | P03383 | P08238 | 0.44916  |
| 40258 | P03383 | O75391 | 0.47817  |
| 40259 | P03383 | O75953 | 0.45785  |
| 40260 | P03383 | O75969 | 0.26527  |
| 40261 | P03383 | P59022 | 0.36474  |
| 40262 | P03383 | A6NME0 | 0.20361  |
| 40263 | P03383 | Q14532 | 0.51386  |
| 40264 | P03383 | Q92917 | 0.66601  |
| 40265 | P03383 | P30047 | 0.41211  |
| 40266 | P03383 | Q13868 | 0.38965  |
| 40267 | P03383 | P24539 | 0.1252   |
| 40268 | P03383 | A6NEY8 | 0.15789  |
| 40269 | P03383 | Q00839 | 0.26692  |
| 40270 | P03383 | Q92988 | 0.38762  |
| 40271 | P03383 | A6NHR8 | 0.33834  |
| 40272 | P03383 | Q9BRD0 | 0.45385  |
| 40273 | P03383 | P78352 | 0.45     |
| 40274 | P03383 | Q99436 | 0.47769  |
| 40275 | P03383 | Q5T1N1 | 0.80145  |
| 40276 | P03383 | P43364 | 0.55947  |
| 40277 | P03383 | Q9UPP1 | 0.31544  |
| 40278 | P03383 | Q2NL98 | 0.68038  |
| 40279 | P03383 | Q3KNV8 | 0.65799  |
| 40280 | P03383 | Q8NC26 | 0.27721  |

|       |        |        |          |
|-------|--------|--------|----------|
| 40281 | P03383 | Q9NZ63 | 0.25487  |
| 40282 | P03383 | Q5MNV8 | 0.27322  |
| 40283 | P03383 | Q86UQ8 | 0.19547  |
| 40284 | P03383 | Q16186 | 0.31754  |
| 40285 | P03383 | Q8IUG1 | 0.55334  |
| 40286 | P03383 | P18621 | 0.3873   |
| 40287 | P03383 | Q9P2B7 | 0.60341  |
| 40288 | P03383 | P52294 | 0.75349  |
| 40289 | P03383 | P52594 | 0.26061  |
| 40290 | P03383 | O94874 | 0.54708  |
| 40291 | P03383 | Q16890 | 0.26245  |
| 40292 | P03383 | Q5PRF9 | 0.34964  |
| 40293 | P03383 | Q13112 | 1.0919   |
| 40294 | P03383 | O15372 | 0.42218  |
| 40295 | P03383 | Q9BVP2 | 0.14349  |
| 40296 | P03383 | O60516 | 0.14018  |
| 40297 | P03383 | Q92539 | 0.30339  |
| 40298 | P03383 | Q92890 | 0.47291  |
| 40299 | P03383 | Q9Y5B9 | 0.085568 |
| 40300 | P03383 | P08621 | 0.28377  |
| 40301 | P03383 | Q8TBR4 | 0.2797   |
| 40302 | P03383 | Q2NKJ3 | 0.24593  |
| 40303 | P03383 | Q3LHN0 | 0.81527  |
| 40304 | P03383 | Q9H0A0 | 0.40968  |
| 40305 | P03383 | Q8WWM1 | 0.57601  |
| 40306 | P03383 | Q96LI5 | 0.36623  |
| 40307 | P03383 | Q9NQR1 | 0.50973  |
| 40308 | P03383 | Q6V9R5 | 0.30957  |
| 40309 | P03383 | Q9Y3Y4 | 0.37452  |
| 40310 | P03383 | P21673 | 0.12322  |
| 40311 | P03383 | Q6I9Y2 | 0.59899  |
| 40312 | P03383 | A6NI79 | 0.61902  |
| 40313 | P03383 | O75346 | 0.28211  |
| 40314 | P03383 | Q701N2 | 0.33834  |
| 40315 | P03383 | Q9BT49 | 0.49456  |
| 40316 | P03383 | Q96DC7 | 0.84226  |
| 40317 | P03383 | Q13114 | 0.23734  |
| 40318 | P03383 | Q96C74 | 0.1368   |
| 40319 | P03383 | Q96HG1 | 0.33834  |
| 40320 | P03383 | Q9BYK8 | 0.27681  |
| 40321 | P03383 | P49790 | 0.77638  |
| 40322 | P03383 | Q5JVX7 | 0.55335  |
| 40323 | P03383 | Q86T75 | 0.34297  |
| 40324 | P03383 | O14802 | 0.077041 |
| 40325 | P03383 | P46776 | 0.72715  |
| 40326 | P03383 | O95990 | 0.18414  |
| 40327 | P03383 | Q9UNY4 | 0.33152  |
| 40328 | P03383 | O75170 | 0.51242  |
| 40329 | P03383 | Q8NE31 | 0.019715 |
| 40330 | P03383 | Q03060 | 0.29081  |
| 40331 | P03383 | Q9Y2X0 | 0.36423  |
| 40332 | P03383 | Q96GC5 | 0.4211   |
| 40333 | P03383 | O75821 | 0.35351  |
| 40334 | P03383 | Q6L8H4 | 0.33834  |
| 40335 | P03383 | Q2YD98 | 0.12777  |
| 40336 | P03383 | Q3LI58 | 0.33834  |
| 40337 | P03383 | Q14764 | 0.78817  |
| 40338 | P03383 | Q9BPZ3 | 0.34312  |
| 40339 | P03383 | Q6ZTU2 | 0.59553  |
| 40340 | P03383 | P57060 | 0.45777  |
| 40341 | P03383 | P26358 | 0.26352  |
| 40342 | P03383 | Q96EY5 | 0.39343  |
| 40343 | P03383 | P32780 | 0.55006  |
| 40344 | P03383 | Q8NFZ5 | 0.62672  |
| 40345 | P03383 | O75694 | 0.42839  |
| 40346 | P03383 | Q14154 | 0.29562  |
| 40347 | P03383 | Q8NHS9 | 0.15019  |
| 40348 | P03383 | Q8WVP5 | 0.74227  |
| 40349 | P03383 | Q7Z3Y9 | 0.75254  |
| 40350 | P03383 | Q9NQS1 | 0.21242  |
| 40351 | P03383 | A6NK89 | 0.41636  |
| 40352 | P03383 | Q9H211 | 0.47015  |
| 40353 | P03383 | Q8IV54 | 0.76835  |
| 40354 | P03383 | Q9NPA3 | 0.88605  |
| 40355 | P03383 | Q53EZ4 | 0.42969  |
| 40356 | P03383 | Q8NDN9 | 0.41146  |



|       |        |        |          |
|-------|--------|--------|----------|
| 40357 | P03383 | P52597 | 0.39889  |
| 40358 | P03383 | Q9NXR7 | 0.19519  |
| 40359 | P03383 | Q9UPY8 | 0.70489  |
| 40360 | P03383 | P60413 | 0.5733   |
| 40361 | P03383 | Q9Y2H0 | 0.22666  |
| 40362 | P03383 | Q5W1A9 | 0.29393  |
| 40363 | P03383 | P15880 | 0.72412  |
| 40364 | P03383 | Q53HC0 | 0.7977   |
| 40365 | P03383 | Q5XUX0 | 0.4668   |
| 40366 | P03383 | O60832 | 0.4935   |
| 40367 | P03383 | P0C5K6 | 0.33834  |
| 40368 | P03383 | P23396 | 0.53921  |
| 40369 | P03383 | Q16384 | 0.323    |
| 40370 | P03383 | Q05877 | 0.57894  |
| 40371 | P03383 | Q8N5N7 | 0.4543   |
| 40372 | P03383 | Q0P140 | 0.19547  |
| 40373 | P03383 | Q9UBL0 | 0.20448  |
| 40374 | P03383 | P0C7I6 | 0.54338  |
| 40375 | P03383 | Q8IWE5 | 0.22009  |
| 40376 | P03383 | Q5T8I3 | 0.33705  |
| 40377 | P03383 | Q14749 | 0.38716  |
| 40378 | P03383 | Q8N983 | 0.29487  |
| 40379 | P03383 | Q96EY1 | 0.27751  |
| 40380 | P03383 | P19532 | 0.46963  |
| 40381 | P03383 | Q8N5D0 | 0.26263  |
| 40382 | P03383 | Q8N5Q1 | 0.87506  |
| 40383 | P03383 | Q96K31 | 0.38845  |
| 40384 | P03383 | P15259 | 0.49853  |
| 40385 | P03383 | B2CW77 | 0.33834  |
| 40386 | P03383 | Q969I3 | 0.32527  |
| 40387 | P03383 | O95391 | 0.11021  |
| 40388 | P03383 | O75312 | 0.22144  |
| 40389 | P03383 | Q53FN2 | 0.14523  |
| 40390 | P03383 | O95424 | 0.44228  |
| 40391 | P03383 | Q6ICC9 | 0.32778  |
| 40392 | P03383 | Q9H4B6 | 0.34891  |
| 40393 | P03383 | Q8NHY6 | 0.25927  |
| 40394 | P03383 | Q9H246 | 0.21235  |
| 40395 | P03383 | H3BMG3 | 0.16197  |
| 40396 | P03383 | P16415 | 0.22428  |
| 40397 | P03383 | Q3B7T1 | 0.57625  |
| 40398 | P03383 | Q3LI83 | 0.66338  |
| 40399 | P03383 | Q9Y3D3 | 0.43447  |
| 40400 | P03383 | Q9Y6R6 | 0.24149  |
| 40401 | P03383 | O75154 | 0.5128   |
| 40402 | P03383 | Q9BQ90 | 0.4948   |
| 40403 | P03383 | Q4VC44 | 0.29426  |
| 40404 | P03383 | Q9BQ83 | 0.42206  |
| 40405 | P03383 | Q9NWW7 | 0.65596  |
| 40406 | P03383 | Q15024 | 0.46092  |
| 40407 | P03383 | P17947 | 0.53178  |
| 40408 | P03383 | Q8N5N4 | 0.35339  |
| 40409 | P03383 | Q9BTP7 | 0.63438  |
| 40410 | P03383 | Q5HYR2 | 0.62578  |
| 40411 | P03383 | Q9UN30 | 0.12072  |
| 40412 | P03383 | Q9NPJ4 | 1.237    |
| 40413 | P03383 | Q59GR2 | 0.053806 |
| 40414 | P03383 | Q6UWZ7 | 0.23542  |
| 40415 | P03383 | Q9Y4W2 | 0.65114  |
| 40416 | P03383 | Q5VT40 | 0.41221  |
| 40417 | P03383 | O14910 | 0.48326  |
| 40418 | P03383 | Q5VWN6 | 0.075959 |
| 40419 | P03383 | Q8WVR3 | 0.60341  |
| 40420 | P03383 | P63279 | 0.60239  |
| 40421 | P03383 | Q69YH5 | 0.6495   |
| 40422 | P03383 | P20248 | 0.79525  |
| 40423 | P03383 | O95521 | 0.26217  |
| 40424 | P03383 | I6L9F6 | 0.086838 |
| 40425 | P03383 | Q9H9T3 | 0.59427  |
| 40426 | P03383 | Q6ZS92 | 0.151    |
| 40427 | P03383 | Q701N4 | 0.33834  |
| 40428 | P03383 | Q86UW6 | 0.098585 |
| 40429 | P03383 | Q3KRA6 | 0.82324  |
| 40430 | P03383 | Q9BYQ2 | 0.5733   |
| 40431 | P03383 | P18615 | 0.79738  |
| 40432 | P03383 | Q96LA8 | 0.48808  |

|       |        |        |          |
|-------|--------|--------|----------|
| 40433 | P03383 | Q9Y2V0 | 0.088446 |
| 40434 | P03383 | O43482 | 0.31204  |
| 40435 | P03383 | O95429 | 0.12642  |
| 40436 | P03383 | Q9Y473 | 0.17739  |
| 40437 | P03383 | Q8IVG9 | 0.13904  |
| 40438 | P03383 | A0AVK6 | 0.2637   |
| 40439 | P03383 | Q9BPX3 | 0.61283  |
| 40440 | P03383 | Q9BPW8 | 0.37403  |
| 40441 | P03383 | Q8N6G1 | 0.33834  |
| 40442 | P03383 | P60510 | 0.55807  |
| 40443 | P03383 | P15502 | 0.25979  |
| 40444 | P03383 | Q7Z4G1 | 1.0239   |
| 40445 | P03383 | Q8N7H5 | 0.68429  |
| 40446 | P03383 | Q86XI8 | 0.38298  |
| 40447 | P03383 | P28070 | 0.28158  |
| 40448 | P03383 | Q15021 | 0.60878  |
| 40449 | P03383 | O15226 | 0.58315  |
| 40450 | P03383 | Q9BUG6 | 0.1454   |
| 40451 | P03383 | Q2M329 | 0.18862  |
| 40452 | P03383 | Q9BUV0 | 0.60341  |
| 40453 | P03383 | Q9UHL3 | 0.083517 |
| 40454 | P03383 | P51826 | 0.17522  |
| 40455 | P03383 | P81877 | 0.27942  |
| 40456 | P03383 | Q9Y615 | 0.07375  |
| 40457 | P03383 | Q9BUE0 | 0.84937  |
| 40458 | P03383 | Q5T5S1 | 0.29034  |
| 40459 | P03383 | Q6ZP98 | 0.17879  |
| 40460 | P03383 | A7MCY6 | 0.38891  |
| 40461 | P03383 | P61513 | 0.38314  |
| 40462 | P03383 | Q9BSF4 | 0.2089   |
| 40463 | P03383 | P98182 | 0.094431 |
| 40464 | P03383 | Q9ULD9 | 0.78579  |
| 40465 | P03383 | O75934 | 0.47359  |
| 40466 | P03383 | Q9H9G7 | 0.4624   |
| 40467 | P03383 | Q59GN2 | 0.22152  |
| 40468 | P03383 | Q9P1Z2 | 0.55575  |
| 40469 | P03383 | P40425 | 0.4202   |
| 40470 | P03383 | Q8TCZ7 | 0.30898  |
| 40471 | P03383 | Q6L8G8 | 0.33834  |
| 40472 | P03383 | O14598 | 0.66758  |
| 40473 | P03383 | Q9Y605 | 1.0963   |
| 40474 | P03383 | Q9UMS4 | 0.41661  |
| 40475 | P03383 | Q8WXC6 | 0.1709   |
| 40476 | P03383 | Q13363 | 0.31544  |
| 40477 | P03383 | Q96QA5 | 0.2505   |
| 40478 | P03383 | O95257 | 0.22134  |
| 40479 | P03383 | Q9NPJ8 | 0.22619  |
| 40480 | P03383 | Q16576 | 0.31899  |
| 40481 | P03383 | Q8WW01 | 0.26231  |
| 40482 | P03383 | P49419 | 0.37172  |
| 40483 | P03383 | Q6ZMV8 | 0.33306  |
| 40484 | P03383 | Q8IVM7 | 0.33834  |
| 40485 | P03383 | Q7Z3Y7 | 0.4922   |
| 40486 | P03383 | O60477 | 0.37929  |
| 40487 | P03383 | Q92793 | 0.31292  |
| 40488 | P03383 | Q5VU69 | 0.40297  |
| 40489 | P03383 | Q13901 | 0.85934  |
| 40490 | P03383 | Q96ST2 | 0.27084  |
| 40491 | P03383 | Q8N823 | 0.24149  |
| 40492 | P03383 | O75531 | 0.50359  |
| 40493 | P03383 | A6NGR9 | 0.38389  |
| 40494 | P03383 | P40855 | 0.30349  |
| 40495 | P03383 | Q96GV9 | 0.28379  |
| 40496 | P03383 | Q7RTV0 | 0.28589  |
| 40497 | P03383 | Q96LT7 | 0.43861  |
| 40498 | P03383 | O15063 | 0.17059  |
| 40499 | P03383 | Q96QE5 | 0.66358  |
| 40500 | P03383 | Q9UQN3 | 0.27881  |
| 40501 | P03383 | Q86SZ2 | 0.51344  |
| 40502 | P03383 | Q8TF39 | 0.34707  |
| 40503 | P03383 | Q13526 | 0.40586  |
| 40504 | P03383 | P54274 | 0.27775  |
| 40505 | P03383 | Q9BRP8 | 0.73991  |
| 40506 | P03383 | Q9BZG8 | 0.10311  |
| 40507 | P03383 | O00566 | 0.5726   |
| 40508 | P03383 | P35325 | 0.33834  |

|       |        |        |          |
|-------|--------|--------|----------|
| 40509 | P03383 | Q02078 | 0.30731  |
| 40510 | P03383 | P61960 | 0.088472 |
| 40511 | P03383 | P59090 | 0.33834  |
| 40512 | P03383 | Q6ZNE5 | 0.19597  |
| 40513 | P03383 | Q6FI81 | 0.15832  |
| 40514 | P03383 | Q96NA2 | 0.78804  |
| 40515 | P03383 | C9J302 | 0.38282  |
| 40516 | P03383 | Q9Y224 | 1.1048   |
| 40517 | P03383 | Q0VG06 | 0.15273  |
| 40518 | P03383 | Q8NFB3 | 0.74228  |
| 40519 | P03383 | Q8NHQ1 | 0.92796  |
| 40520 | P03383 | O00410 | 0.85473  |
| 40521 | P03383 | P35226 | 0.41368  |
| 40522 | P03383 | Q99623 | 0.77482  |
| 40523 | P03383 | Q4W4Y0 | 0.040186 |
| 40524 | P03383 | A2RU37 | 0.1006   |
| 40525 | P03383 | Q9BQY9 | 0.27791  |
| 40526 | P03383 | Q8N1G2 | 0.16359  |
| 40527 | P03383 | Q92800 | 0.34835  |
| 40528 | P03383 | Q9GZR1 | 0.23528  |
| 40529 | P03383 | Q969S8 | 0.59012  |
| 40530 | P03383 | Q9UJW9 | 1.2242   |
| 40531 | P03383 | Q2KJ03 | 0.15382  |
| 40532 | P03383 | Q5T0F9 | 0.18125  |
| 40533 | P03383 | P35900 | 0.75254  |
| 40534 | P03383 | Q2VPB7 | 0.53313  |
| 40535 | P03383 | P14651 | 0.079085 |
| 40536 | P03383 | Q9NRC8 | 0.94914  |
| 40537 | P03383 | Q2VY69 | 0.21802  |
| 40538 | P03383 | Q8WX92 | 1.1625   |
| 40539 | P03383 | O75940 | 0.44461  |
| 40540 | P03383 | Q5VT28 | 0.24723  |
| 40541 | P03383 | Q6NT89 | 0.78152  |
| 40542 | P03383 | Q9BYC8 | 0.49054  |
| 40543 | P03383 | Q86YD1 | 0.61892  |
| 40544 | P03383 | P54259 | 0.69345  |
| 40545 | P03383 | Q92575 | 0.60086  |
| 40546 | P03383 | Q5T6V5 | 0.23045  |
| 40547 | P03383 | P51668 | 0.43503  |
| 40548 | P03383 | Q9BWH6 | 0.47227  |
| 40549 | P03383 | Q8TD35 | 0.60341  |
| 40550 | P03383 | Q5T6C5 | 0.48392  |
| 40551 | P03383 | O43790 | 0.66532  |
| 40552 | P03383 | Q8TAT8 | 0.094744 |
| 40553 | P03383 | Q9H6R7 | 0.029377 |
| 40554 | P03383 | Q53G26 | 0.35989  |
| 40555 | P03383 | Q9UDY2 | 0.59211  |
| 40556 | P03383 | A6NHS1 | 0.38808  |
| 40557 | P03383 | P13682 | 0.19989  |
| 40558 | P03383 | Q9NVR2 | 0.66555  |
| 40559 | P03383 | Q8NEQ6 | 0.14092  |
| 40560 | P03383 | Q14999 | 0.64454  |
| 40561 | P03383 | Q99619 | 0.50366  |
| 40562 | P03383 | Q9UIS9 | 0.34267  |
| 40563 | P03383 | Q8NI08 | 0.56609  |
| 40564 | P03383 | Q08379 | 0.11649  |
| 40565 | P03383 | Q9Y468 | 0.71776  |
| 40566 | P03383 | O75496 | 0.65885  |
| 40567 | P03383 | P57055 | 0.4885   |
| 40568 | P03383 | Q96PP4 | 0.12627  |
| 40569 | P03383 | Q14157 | 0.50646  |
| 40570 | P03383 | Q99741 | 0.39368  |
| 40571 | P03383 | Q7Z5K2 | 0.46092  |
| 40572 | P03383 | P12956 | 0.11131  |
| 40573 | P03383 | A6NFT4 | 0.026209 |
| 40574 | P03383 | Q69YL0 | 0.33834  |
| 40575 | P03383 | Q9NZF1 | 0.095817 |
| 40576 | P03383 | Q9BWJ5 | 0.34648  |
| 40577 | P03383 | Q8N6U2 | 0.19399  |
| 40578 | P03383 | Q13127 | 0.35437  |
| 40579 | P03383 | Q15276 | 0.11138  |
| 40580 | P03383 | P86496 | 0.33834  |
| 40581 | P03383 | Q15633 | 0.60568  |
| 40582 | P03383 | Q9ULV3 | 0.085347 |
| 40583 | P03383 | O75530 | 0.43437  |
| 40584 | P03383 | Q5VIR6 | 0.56009  |

|       |        |        |           |
|-------|--------|--------|-----------|
| 40585 | P03383 | Q8WWR9 | 0.44518   |
| 40586 | P03383 | Q3B726 | 0.033171  |
| 40587 | P03383 | Q9NWD9 | 0.31004   |
| 40588 | P03383 | Q13425 | 0.201     |
| 40589 | P03383 | Q6ZQV5 | 0.24149   |
| 40590 | P03383 | Q8TEA8 | 0.66314   |
| 40591 | P03383 | O00148 | 0.1599    |
| 40592 | P03383 | Q9ULW6 | 0.32897   |
| 40593 | P03383 | Q8N814 | 0.58007   |
| 40594 | P03383 | Q9BVN2 | 0.27902   |
| 40595 | P03383 | Q9UUK6 | 0.46151   |
| 40596 | P03383 | Q96M11 | 0.69408   |
| 40597 | P03383 | Q8TAP9 | 1.0726    |
| 40598 | P03383 | P43355 | 0.79804   |
| 40599 | P03383 | A6NCN8 | 0.60341   |
| 40600 | P03383 | Q1W6H9 | 0.82495   |
| 40601 | P03383 | Q96NG5 | 0.29714   |
| 40602 | P03383 | Q5TC04 | 0.0065078 |
| 40603 | P03383 | Q9H814 | 0.62051   |
| 40604 | P03383 | P0C879 | 0.33834   |
| 40605 | P03383 | Q53T94 | 0.24105   |
| 40606 | P03383 | Q14593 | 0.3213    |
| 40607 | P03383 | Q8IV32 | 0.50098   |
| 40608 | P03383 | Q8N726 | 0.44178   |
| 40609 | P03383 | Q8N1F1 | 0.33834   |
| 40610 | P03383 | Q9H4A5 | 0.65546   |
| 40611 | P03383 | Q96S07 | 0.33834   |
| 40612 | P03383 | P25787 | 0.46127   |
| 40613 | P03383 | Q9NVU7 | 0.51028   |
| 40614 | P03383 | Q9P0T4 | 0.22614   |
| 40615 | P03383 | Q96BN8 | 0.14638   |
| 40616 | P03383 | Q96CW6 | 0.7392    |
| 40617 | P03383 | A4D1E9 | 0.67382   |
| 40618 | P03383 | Q9H1L0 | 0.40361   |
| 40619 | P03383 | Q8WWX9 | 0.19414   |
| 40620 | P03383 | Q5C9Z4 | 0.48053   |
| 40621 | P03383 | Q9BSQ5 | 0.13673   |
| 40622 | P03383 | P62306 | 0.16265   |
| 40623 | P03383 | Q6ZUF6 | 0.024215  |
| 40624 | P03383 | Q5TG08 | 0.59139   |
| 40625 | P03383 | Q6ICG8 | 0.96018   |
| 40626 | P03383 | P22415 | 0.35483   |
| 40627 | P03383 | Q6PRD7 | 0.33834   |
| 40628 | P03383 | Q6BDS2 | 0.18949   |
| 40629 | P03383 | O76021 | 0.21301   |
| 40630 | P03383 | Q969S3 | 0.47367   |
| 40631 | P03383 | Q96BY2 | 0.28506   |
| 40632 | P03383 | Q9HB75 | 0.39046   |
| 40633 | P03383 | Q9UJ94 | 0.33834   |
| 40634 | P03383 | Q14695 | 0.34419   |
| 40635 | P03383 | P27797 | 0.34638   |
| 40636 | P03383 | Q9H0U6 | 0.28972   |
| 40637 | P03383 | O76013 | 0.66522   |
| 40638 | P03383 | Q8TEV9 | 0.35738   |
| 40639 | P03383 | Q9UBI9 | 0.58216   |
| 40640 | P03383 | O96017 | 0.54675   |
| 40641 | P03383 | O95905 | 0.51549   |
| 40642 | P03383 | Q8NEH6 | 0.71611   |
| 40643 | P03383 | Q5PR19 | 0.20649   |
| 40644 | P03383 | P08708 | 0.2332    |
| 40645 | P03383 | Q8TB03 | 0.42059   |
| 40646 | P03383 | P06396 | 0.18832   |
| 40647 | P03383 | Q8IYN2 | 0.88219   |
| 40648 | P03383 | Q9HAT8 | 0.35059   |
| 40649 | P03383 | Q6NT46 | 0.17372   |
| 40650 | P03383 | B3EWG6 | 0.60341   |
| 40651 | P03383 | Q13503 | 0.45634   |
| 40652 | P03383 | A8MPV3 | 0.041445  |
| 40653 | P03383 | P52741 | 0.13841   |
| 40654 | P03383 | Q6P444 | 0.51712   |
| 40655 | P03383 | Q8NB42 | 0.33974   |
| 40656 | P03383 | P22732 | 0.49099   |
| 40657 | P03383 | Q9HCC9 | 0.17246   |
| 40658 | P03383 | Q14693 | 0.18961   |
| 40659 | P03383 | Q6ZVT6 | 0.028692  |
| 40660 | P03383 | Q8WUH2 | 0.43141   |

|       |        |        |          |
|-------|--------|--------|----------|
| 40661 | P03383 | Q5BKZ1 | 0.38344  |
| 40662 | P03383 | Q9Y6D9 | 0.64542  |
| 40663 | P03383 | P0CG34 | 0.45586  |
| 40664 | P03383 | A8MTZ7 | 0.11288  |
| 40665 | P03383 | P35251 | 0.37025  |
| 40666 | P03383 | Q96EY4 | 0.35359  |
| 40667 | P03383 | Q7Z2W4 | 0.26036  |
| 40668 | P03383 | Q9UNK9 | 0.12333  |
| 40669 | P03383 | Q6QNY1 | 0.50307  |
| 40670 | P03383 | O95848 | 0.37768  |
| 40671 | P03383 | Q9BSB4 | 0.16174  |
| 40672 | P03383 | Q5SZD4 | 0.36008  |
| 40673 | P03383 | P25788 | 0.48239  |
| 40674 | P03383 | Q96LW7 | 0.53237  |
| 40675 | P03383 | Q9H0E3 | 0.53499  |
| 40676 | P03383 | P0CB33 | 0.29965  |
| 40677 | P03383 | Q8IW35 | 0.82645  |
| 40678 | P03383 | Q15750 | 0.28889  |
| 40679 | P03383 | Q5HYW2 | 0.64276  |
| 40680 | P03383 | Q9BQY4 | 0.64001  |
| 40681 | P03383 | Q9BPX1 | 0.037316 |
| 40682 | P03383 | Q9Y3P8 | 0.33854  |
| 40683 | P03383 | Q13620 | 0.52852  |
| 40684 | P03383 | Q9NP98 | 0.40695  |
| 40685 | P03383 | Q3MJ40 | 0.011001 |
| 40686 | P03383 | Q5MJ70 | 0.38945  |
| 40687 | P03383 | Q9BX26 | 0.96283  |
| 40688 | P03383 | Q8N9T8 | 0.99314  |
| 40689 | P03383 | Q9H008 | 0.19277  |
| 40690 | P03383 | Q8NEY8 | 0.5278   |
| 40691 | P03383 | Q6V702 | 0.095248 |
| 40692 | P03383 | O75928 | 0.55074  |
| 40693 | P03383 | Q9NZ52 | 0.25406  |
| 40694 | P03383 | Q9BZI7 | 0.53402  |
| 40695 | P03383 | Q9NZD4 | 0.34818  |
| 40696 | P03383 | Q5HYW3 | 0.55535  |
| 40697 | P03383 | Q9NSI2 | 0.60341  |
| 40698 | P03383 | Q15543 | 0.79809  |
| 40699 | P03383 | Q8WV07 | 0.3024   |
| 40700 | P03383 | Q0VG73 | 0.33834  |
| 40701 | P03383 | Q9Y250 | 0.7391   |
| 40702 | P03383 | Q9BYQ6 | 0.5733   |
| 40703 | P03383 | Q9H1J1 | 0.88747  |
| 40704 | P03383 | P50748 | 0.5426   |
| 40705 | P03383 | Q96NY9 | 0.39182  |
| 40706 | P03383 | Q14781 | 0.55159  |
| 40707 | P03383 | Q14498 | 0.61618  |
| 40708 | P03383 | Q8NCU7 | 0.75185  |
| 40709 | P03383 | Q9BW92 | 0.25837  |
| 40710 | P03383 | Q8NE18 | 0.96124  |
| 40711 | P03383 | Q8WVM7 | 0.55807  |
| 40712 | P03383 | P61353 | 0.4006   |
| 40713 | P03383 | Q6P2E9 | 0.71817  |
| 40714 | P03383 | O60356 | 0.69051  |
| 40715 | P03383 | Q9H5F2 | 0.42331  |
| 40716 | P03383 | Q03938 | 0.31143  |
| 40717 | P03383 | Q93062 | 0.64132  |
| 40718 | P03383 | Q8IXQ4 | 0.60341  |
| 40719 | P03383 | Q538Z0 | 0.33834  |
| 40720 | P03383 | Q03933 | 0.49752  |
| 40721 | P03383 | Q13505 | 0.6163   |
| 40722 | P03383 | P05412 | 0.62726  |
| 40723 | P03383 | Q7Z745 | 0.25846  |
| 40724 | P03383 | Q9Y314 | 0.65943  |
| 40725 | P03383 | Q96DI7 | 0.46061  |
| 40726 | P03383 | Q16526 | 0.23693  |
| 40727 | P03383 | Q9BYG4 | 0.43699  |
| 40728 | P03383 | Q8N9M1 | 0.16327  |
| 40729 | P03383 | Q8IYB9 | 0.24064  |
| 40730 | P03383 | Q70EL1 | 0.26939  |
| 40731 | P03383 | Q96MC4 | 0.62518  |
| 40732 | P03383 | Q9C073 | 0.65824  |
| 40733 | P03383 | Q5H9M0 | 0.70277  |
| 40734 | P03383 | Q7KZ85 | 0.27839  |
| 40735 | P03383 | O60888 | 0.25416  |
| 40736 | P03383 | Q8N5I9 | 0.60341  |

|       |        |        |         |
|-------|--------|--------|---------|
| 40737 | P03383 | Q69YI7 | 0.87175 |
| 40738 | P03383 | P27348 | 0.19417 |
| 40739 | P03383 | Q9H5Z6 | 0.60341 |
| 40740 | P03383 | Q13129 | 0.47987 |
| 40741 | P14079 | Q9Y3C0 | 0.41839 |
| 40742 | P14079 | Q15255 | 1.1715  |
| 40743 | P14079 | P31751 | 0.16487 |
| 40744 | P14079 | Q96AQ9 | 0.73088 |
| 40745 | P14079 | Q6ZQY7 | 1.1125  |
| 40746 | P14079 | Q969J2 | 0.56913 |
| 40747 | P14079 | A6NNH0 | 1.4681  |
| 40748 | P14079 | Q5VV42 | 1.0005  |
| 40749 | P14079 | Q9H6X5 | 0.31805 |
| 40750 | P14079 | P04083 | 0.43219 |
| 40751 | P14079 | Q96DC7 | 1.6464  |
| 40752 | P14079 | Q9H0U9 | 0.51138 |
| 40753 | P14079 | P0DM35 | 1.3448  |
| 40754 | P14079 | P36543 | 0.39776 |
| 40755 | P14079 | Q96M91 | 1.8372  |
| 40756 | P14079 | Q6ZRN7 | 1.1715  |
| 40757 | P14079 | Q14CX7 | 0.84768 |
| 40758 | P14079 | O14776 | 1.1822  |
| 40759 | P14079 | Q5SRI9 | 1.3902  |
| 40760 | P14079 | Q63HN1 | 1.1198  |
| 40761 | P14079 | Q96LP4 | 0.73938 |
| 40762 | P14079 | Q5TC84 | 0.7178  |
| 40763 | P14079 | Q5EBL4 | 0.73509 |
| 40764 | P14079 | P02808 | 1.1392  |
| 40765 | P14079 | Q5TAQ9 | 0.37638 |
| 40766 | P14079 | Q13228 | 1.3362  |
| 40767 | P14079 | Q9UQL6 | 0.46344 |
| 40768 | P14079 | O60671 | 0.96695 |
| 40769 | P14079 | Q15629 | 0.79113 |
| 40770 | P14079 | Q9NQ39 | 0.23329 |
| 40771 | P14079 | P51854 | 0.47389 |
| 40772 | P14079 | Q6P1M9 | 0.81288 |
| 40773 | P14079 | Q96JN0 | 1.4954  |
| 40774 | P14079 | A8MUM7 | 0.12848 |
| 40775 | P14079 | Q9Y2S0 | 0.29856 |
| 40776 | P14079 | Q15637 | 0.25535 |
| 40777 | P14079 | Q8IV31 | 0.97018 |
| 40778 | P14079 | Q16655 | 1.2149  |
| 40779 | P14079 | O94923 | 0.49546 |
| 40780 | P14079 | Q8NDH6 | 0.73756 |
| 40781 | P14079 | Q7L2K0 | 0.59878 |
| 40782 | P14079 | F5H4A9 | 1.2485  |
| 40783 | P14079 | Q5VZR2 | 1.8285  |
| 40784 | P14079 | P0CH98 | 0.42881 |
| 40785 | P14079 | Q15916 | 0.1949  |
| 40786 | P14079 | Q70EL1 | 0.69532 |
| 40787 | P14079 | Q9NZ81 | 1.8162  |
| 40788 | P14079 | Q8NFB5 | 0.66106 |
| 40789 | P14079 | O00625 | 0.97985 |
| 40790 | P14079 | P28838 | 1.3197  |
| 40791 | P14079 | Q8N6M3 | 1.0833  |
| 40792 | P14079 | Q96SC8 | 0.29941 |
| 40793 | P14079 | Q3T8J9 | 0.82292 |
| 40794 | P14079 | Q9BWM5 | 0.60552 |
| 40795 | P14079 | Q9BXW6 | 0.33207 |
| 40796 | P14079 | Q9BRP4 | 0.81334 |
| 40797 | P14079 | P98168 | 0.74722 |
| 40798 | P14079 | P59894 | 0.80039 |
| 40799 | P14079 | O43809 | 0.85007 |
| 40800 | P14079 | Q5JTD0 | 1.8485  |
| 40801 | P14079 | O75031 | 1.0577  |
| 40802 | P14079 | Q6P4F2 | 0.24347 |
| 40803 | P14079 | Q8TCE6 | 1.6459  |
| 40804 | P14079 | Q8N4C0 | 0.91852 |
| 40805 | P14079 | Q9UH36 | 0.93836 |
| 40806 | P14079 | C9J302 | 1.1223  |
| 40807 | P14079 | O60225 | 0.42957 |
| 40808 | P14079 | Q49AS3 | 1.3238  |
| 40809 | P14079 | Q494U1 | 0.5073  |
| 40810 | P14079 | P01215 | 0.90315 |
| 40811 | P14079 | Q9NY59 | 0.42209 |
| 40812 | P14079 | Q2TAM9 | 1.8285  |

|       |        |        |          |
|-------|--------|--------|----------|
| 40813 | P14079 | A0A183 | 1.1715   |
| 40814 | P14079 | Q96QK1 | 0.98148  |
| 40815 | P14079 | P07199 | 1.1986   |
| 40816 | P14079 | Q6VY07 | 0.92802  |
| 40817 | P14079 | A0JNW5 | 1.2177   |
| 40818 | P14079 | Q8IYX0 | 1.0042   |
| 40819 | P14079 | Q7Z7L8 | 1.8351   |
| 40820 | P14079 | Q96NU1 | 0.4352   |
| 40821 | P14079 | Q8N7L0 | 0.86339  |
| 40822 | P14079 | Q8NHY6 | 0.81594  |
| 40823 | P14079 | Q9Y3U8 | 1.0283   |
| 40824 | P14079 | A8MZ97 | 1.6986   |
| 40825 | P14079 | Q8IYW9 | 1.0075   |
| 40826 | P14079 | Q6P1N9 | 0.79526  |
| 40827 | P14079 | Q9NRJ2 | 1.1715   |
| 40828 | P14079 | Q9NQG7 | 0.39655  |
| 40829 | P14079 | Q9BQC6 | 1.4778   |
| 40830 | P14079 | Q5XUX0 | 1.0485   |
| 40831 | P14079 | Q5TGZ0 | 0.83596  |
| 40832 | P14079 | Q9NV72 | 1.0073   |
| 40833 | P14079 | Q9H9H4 | 1.269    |
| 40834 | P14079 | O15442 | 0.48908  |
| 40835 | P14079 | A7E2V4 | 1.9641   |
| 40836 | P14079 | Q02952 | 1.0846   |
| 40837 | P14079 | P56181 | 1.239    |
| 40838 | P14079 | P27635 | 0.87172  |
| 40839 | P14079 | Q92664 | 0.42258  |
| 40840 | P14079 | A6NH13 | 1.0855   |
| 40841 | P14079 | Q9BQD7 | 0.82293  |
| 40842 | P14079 | Q32M92 | 0.23551  |
| 40843 | P14079 | Q8IXM3 | 1.0197   |
| 40844 | P14079 | Q15691 | 0.89408  |
| 40845 | P14079 | Q8N9N8 | 0.29399  |
| 40846 | P14079 | Q14585 | 0.57154  |
| 40847 | P14079 | Q6AW86 | 0.51329  |
| 40848 | P14079 | P48552 | 0.73066  |
| 40849 | P14079 | B3KS81 | 0.45711  |
| 40850 | P14079 | Q6NUQ1 | 0.7997   |
| 40851 | P14079 | O95373 | 1.3001   |
| 40852 | P14079 | P15622 | 0.62309  |
| 40853 | P14079 | Q6R327 | 0.33379  |
| 40854 | P14079 | P52738 | 0.54251  |
| 40855 | P14079 | Q8N377 | 1.1715   |
| 40856 | P14079 | Q96BQ5 | 1.416    |
| 40857 | P14079 | Q96EK7 | 0.28299  |
| 40858 | P14079 | P22695 | 0.12658  |
| 40859 | P14079 | Q3SXP7 | 1.095    |
| 40860 | P14079 | Q4VC31 | 0.033046 |
| 40861 | P14079 | Q96C00 | 0.42501  |
| 40862 | P14079 | Q7Z5D8 | 1.2576   |
| 40863 | P14079 | Q9UKA4 | 0.38977  |
| 40864 | P14079 | Q5SXM2 | 0.72564  |
| 40865 | P14079 | O43292 | 0.53737  |
| 40866 | P14079 | Q8NEQ5 | 0.85625  |
| 40867 | P14079 | Q14980 | 1.3058   |
| 40868 | P14079 | P0CG08 | 1.0766   |
| 40869 | P14079 | Q5XUX1 | 0.56221  |
| 40870 | P14079 | Q9Y5Y5 | 0.71972  |
| 40871 | P14079 | Q8IYW4 | 0.30078  |
| 40872 | P14079 | Q13952 | 0.77627  |
| 40873 | P14079 | O60284 | 0.22779  |
| 40874 | P14079 | Q7Z4L0 | 0.67613  |
| 40875 | P14079 | Q9H1X1 | 0.82265  |
| 40876 | P14079 | Q9UHU1 | 1.1715   |
| 40877 | P14079 | Q96M15 | 0.39576  |
| 40878 | P14079 | Q8WYA0 | 1.2527   |
| 40879 | P14079 | Q6PF06 | 1.2773   |
| 40880 | P14079 | Q5TBE3 | 0.82065  |
| 40881 | P14079 | A8MPS7 | 0.3767   |
| 40882 | P14079 | Q9UJN7 | 0.57015  |
| 40883 | P14079 | P52815 | 0.96821  |
| 40884 | P14079 | Q9BYG7 | 0.27853  |
| 40885 | P14079 | O15194 | 0.44063  |
| 40886 | P14079 | Q9H3L0 | 1.3222   |
| 40887 | P14079 | A6NF36 | 1.0589   |
| 40888 | P14079 | P84098 | 0.86734  |

|       |        |        |         |
|-------|--------|--------|---------|
| 40889 | P14079 | P46779 | 1.3548  |
| 40890 | P14079 | Q9UQR1 | 0.83709 |
| 40891 | P14079 | P28065 | 1.1615  |
| 40892 | P14079 | Q8N9K3 | 1.3222  |
| 40893 | P14079 | Q9GZN8 | 0.79115 |
| 40894 | P14079 | Q15379 | 0.59534 |
| 40895 | P14079 | Q8NBV4 | 1.3093  |
| 40896 | P14079 | O75886 | 1.3933  |
| 40897 | P14079 | Q6ZNR8 | 1.1715  |
| 40898 | P14079 | Q0D2J5 | 0.69509 |
| 40899 | P14079 | Q8NDD1 | 0.47656 |
| 40900 | P14079 | A6NFL8 | 1.4427  |
| 40901 | P14079 | Q9HBX3 | 1.1715  |
| 40902 | P14079 | Q5RI15 | 0.74516 |
| 40903 | P14079 | Q96CS4 | 0.5913  |
| 40904 | P14079 | Q96E40 | 0.38943 |
| 40905 | P14079 | Q658L1 | 1.501   |
| 40906 | P14079 | Q8IWP9 | 1.6301  |
| 40907 | P14079 | Q8NA92 | 1.2179  |
| 40908 | P14079 | A7XYQ1 | 0.98473 |
| 40909 | P14079 | Q9BZP3 | 0.92288 |
| 40910 | P14079 | P07320 | 1.3894  |
| 40911 | P14079 | Q9UPW6 | 0.68145 |
| 40912 | P14079 | Q9UGB4 | 1.1715  |
| 40913 | P14079 | Q8NI29 | 0.76269 |
| 40914 | P14079 | Q9UK12 | 0.63029 |
| 40915 | P14079 | Q9H204 | 1.3275  |
| 40916 | P14079 | Q6P0N0 | 1.2835  |
| 40917 | P14079 | Q8TF09 | 1.049   |
| 40918 | P14079 | Q9BXU3 | 1.1938  |
| 40919 | P14079 | A6NKH3 | 0.95372 |
| 40920 | P14079 | Q7L2H7 | 0.76803 |
| 40921 | P14079 | Q9H1C7 | 1.2485  |
| 40922 | P14079 | Q9UHB4 | 0.63776 |
| 40923 | P14079 | Q9UDX5 | 0.57616 |
| 40924 | P14079 | Q86XF0 | 0.35153 |
| 40925 | P14079 | Q2M2Z5 | 1.5377  |
| 40926 | P14079 | Q13492 | 0.28001 |
| 40927 | P14079 | A6NMK8 | 1.3357  |
| 40928 | P14079 | Q9BQ08 | 1.0741  |
| 40929 | P14079 | Q04837 | 0.76111 |
| 40930 | P14079 | Q9BYD6 | 1.1168  |
| 40931 | P14079 | Q14525 | 0.89111 |
| 40932 | P14079 | Q9NSD4 | 0.66428 |
| 40933 | P14079 | Q9BW72 | 0.83563 |
| 40934 | P14079 | Q15560 | 1.0059  |
| 40935 | P14079 | Q9NUR3 | 0.90496 |
| 40936 | P14079 | O75556 | 0.70904 |
| 40937 | P14079 | Q9Y296 | 0.39562 |
| 40938 | P14079 | Q9H8S5 | 0.3842  |
| 40939 | P14079 | E9PIF3 | 0.30565 |
| 40940 | P14079 | Q96CW1 | 0.68662 |
| 40941 | P14079 | Q8WUH1 | 0.37459 |
| 40942 | P14079 | O95070 | 0.70185 |
| 40943 | P14079 | Q8N944 | 1.6794  |
| 40944 | P14079 | Q99436 | 1.2175  |
| 40945 | P14079 | Q96A56 | 1.4257  |
| 40946 | P14079 | Q8TD35 | 1.3222  |
| 40947 | P14079 | P00374 | 0.21736 |
| 40948 | P14079 | Q8N402 | 0.27494 |
| 40949 | P14079 | H0UI37 | 0.85048 |
| 40950 | P14079 | P15259 | 0.86177 |
| 40951 | P14079 | O95159 | 1.099   |
| 40952 | P14079 | Q9Y5B9 | 0.30282 |
| 40953 | P14079 | Q8N2W9 | 0.90686 |
| 40954 | P14079 | P07316 | 0.12389 |
| 40955 | P14079 | Q32MQ0 | 1.1263  |
| 40956 | P14079 | H3BPM6 | 0.25199 |
| 40957 | P14079 | Q8N1Y9 | 1.1715  |
| 40958 | P14079 | Q86VS3 | 0.45687 |
| 40959 | P14079 | Q8N9N2 | 0.39914 |
| 40960 | P14079 | Q6ZWC4 | 0.86514 |
| 40961 | P14079 | Q7Z2T5 | 0.46995 |
| 40962 | P14079 | Q7L8J4 | 0.9745  |
| 40963 | P14079 | O43516 | 0.46823 |
| 40964 | P14079 | Q8IXQ4 | 1.3222  |



|       |        |        |          |
|-------|--------|--------|----------|
| 40965 | P14079 | Q96KP6 | 0.15225  |
| 40966 | P14079 | Q9HBT8 | 0.51539  |
| 40967 | P14079 | Q96AB6 | 0.2333   |
| 40968 | P14079 | P52741 | 0.53765  |
| 40969 | P14079 | Q9HAK2 | 0.16611  |
| 40970 | P14079 | Q5THR3 | 0.37892  |
| 40971 | P14079 | A2VDF0 | 0.88775  |
| 40972 | P14079 | Q9NVL8 | 0.63386  |
| 40973 | P14079 | Q9UHY8 | 0.66549  |
| 40974 | P14079 | O75192 | 0.99163  |
| 40975 | P14079 | P17707 | 0.29124  |
| 40976 | P14079 | Q9P0N5 | 1.1594   |
| 40977 | P14079 | Q9BW11 | 0.43586  |
| 40978 | P14079 | Q8WWM9 | 0.471    |
| 40979 | P14079 | O75112 | 0.5035   |
| 40980 | P14079 | Q12986 | 0.33329  |
| 40981 | P14079 | O14519 | 0.886    |
| 40982 | P14079 | Q5VZT2 | 0.81383  |
| 40983 | P14079 | Q92844 | 0.66016  |
| 40984 | P14079 | Q6P6B1 | 1.3222   |
| 40985 | P14079 | A6NNJ1 | 0.57067  |
| 40986 | P14079 | Q96FX2 | 1.161    |
| 40987 | P14079 | Q8IZC7 | 0.61073  |
| 40988 | P14079 | Q3ZCQ8 | 0.28227  |
| 40989 | P14079 | O14810 | 0.59511  |
| 40990 | P14079 | Q04725 | 0.78858  |
| 40991 | P14079 | Q6VN20 | 0.4612   |
| 40992 | P14079 | P51959 | 0.48417  |
| 40993 | P14079 | P52565 | 0.18799  |
| 40994 | P14079 | Q9BXL7 | 0.24486  |
| 40995 | P14079 | P35711 | 0.96546  |
| 40996 | P14079 | Q96D03 | 0.5216   |
| 40997 | P14079 | Q3LIE5 | 0.892    |
| 40998 | P14079 | Q9H668 | 0.31154  |
| 40999 | P14079 | Q8IZU0 | 1.532    |
| 41000 | P14079 | Q7Z4U5 | 1.5349   |
| 41001 | P14079 | Q9BPZ2 | 1.3481   |
| 41002 | P14079 | Q9NRQ2 | 0.48833  |
| 41003 | P14079 | Q99623 | 1.1241   |
| 41004 | P14079 | P22528 | 1.0119   |
| 41005 | P14079 | Q9NQX1 | 0.72452  |
| 41006 | P14079 | P54274 | 0.56024  |
| 41007 | P14079 | P52758 | 0.39559  |
| 41008 | P14079 | Q8IUC0 | 1.1516   |
| 41009 | P14079 | C9JC47 | 1.1715   |
| 41010 | P14079 | Q5GJ75 | 0.27108  |
| 41011 | P14079 | Q9BUV8 | 0.62727  |
| 41012 | P14079 | O43261 | 0.67208  |
| 41013 | P14079 | P05937 | 0.28807  |
| 41014 | P14079 | P36542 | 0.49027  |
| 41015 | P14079 | Q3SY52 | 0.62154  |
| 41016 | P14079 | Q8TE04 | 0.90801  |
| 41017 | P14079 | P16452 | 0.34774  |
| 41018 | P14079 | Q8IYJ2 | 1.5051   |
| 41019 | P14079 | O43674 | 1.2573   |
| 41020 | P14079 | A6NMX2 | 0.17668  |
| 41021 | P14079 | E9PGG2 | 0.24936  |
| 41022 | P14079 | Q9Y4P9 | 0.97187  |
| 41023 | P14079 | O43615 | 0.30925  |
| 41024 | P14079 | Q9Y4G2 | 0.13146  |
| 41025 | P14079 | Q96ST2 | 0.72145  |
| 41026 | P14079 | B1ATL7 | 0.81221  |
| 41027 | P14079 | O00463 | 0.43789  |
| 41028 | P14079 | Q12929 | 0.30285  |
| 41029 | P14079 | Q9H320 | 1.5357   |
| 41030 | P14079 | Q9BZ68 | 0.025392 |
| 41031 | P14079 | Q9NQW6 | 0.4981   |
| 41032 | P14079 | Q86YV9 | 1.5691   |
| 41033 | P14079 | Q14CX5 | 1.2485   |
| 41034 | P14079 | Q9NR46 | 0.47374  |
| 41035 | P14079 | Q5K130 | 0.88918  |
| 41036 | P14079 | A8MUX0 | 1.1313   |
| 41037 | P14079 | A6NCX1 | 0.11595  |
| 41038 | P14079 | O75324 | 1.0428   |
| 41039 | P14079 | A8MUN3 | 1.1715   |
| 41040 | P14079 | Q92552 | 1.0019   |

|       |        |        |         |
|-------|--------|--------|---------|
| 41041 | P14079 | Q8N5M1 | 0.91708 |
| 41042 | P14079 | P62875 | 0.84581 |
| 41043 | P14079 | Q4G0U5 | 0.52697 |
| 41044 | P14079 | Q09MP3 | 1.014   |
| 41045 | P14079 | Q8IV48 | 0.20094 |
| 41046 | P14079 | P0CW19 | 0.54513 |
| 41047 | P14079 | Q14CS0 | 0.48019 |
| 41048 | P14079 | Q8N831 | 0.55345 |
| 41049 | P14079 | P80297 | 0.77432 |
| 41050 | P14079 | Q13772 | 0.49546 |
| 41051 | P14079 | P51504 | 0.65804 |
| 41052 | P14079 | Q96FV2 | 1.1957  |
| 41053 | P14079 | Q96G79 | 0.72618 |
| 41054 | P14079 | A6NC05 | 0.66693 |
| 41055 | P14079 | Q9H0E3 | 1.6465  |
| 41056 | P14079 | O00422 | 1.0835  |
| 41057 | P14079 | Q8NHW6 | 1.031   |
| 41058 | P14079 | P48454 | 0.33441 |
| 41059 | P14079 | Q8N9P6 | 1.1715  |
| 41060 | P14079 | O75161 | 1.6782  |
| 41061 | P14079 | Q9UHZ2 | 1.1715  |
| 41062 | P14079 | Q0VF49 | 1.1715  |
| 41063 | P14079 | Q13362 | 0.25213 |
| 41064 | P14079 | Q9NVR5 | 1.3841  |
| 41065 | P14079 | Q8N9Z0 | 0.9663  |
| 41066 | P14079 | A5PLL7 | 1.1359  |
| 41067 | P14079 | Q3C1V9 | 1.0392  |
| 41068 | P14079 | P78346 | 1.0339  |
| 41069 | P14079 | O60244 | 0.67177 |
| 41070 | P14079 | O43196 | 1.0274  |
| 41071 | P14079 | Q8NG48 | 0.32738 |
| 41072 | P14079 | P11388 | 0.33994 |
| 41073 | P14079 | Q9H446 | 0.56221 |
| 41074 | P14079 | Q8NA72 | 0.59252 |
| 41075 | P14079 | Q3LI67 | 1.1715  |
| 41076 | P14079 | P48775 | 0.53275 |
| 41077 | P14079 | O15069 | 0.45685 |
| 41078 | P14079 | Q8N895 | 0.68858 |
| 41079 | P14079 | Q12894 | 0.46041 |
| 41080 | P14079 | Q49B96 | 0.79923 |
| 41081 | P14079 | Q9Y2J2 | 0.70726 |
| 41082 | P14079 | P0CJ70 | 1.3031  |
| 41083 | P14079 | P35579 | 0.52374 |
| 41084 | P14079 | Q96MU7 | 1.1366  |
| 41085 | P14079 | Q86V20 | 1.3863  |
| 41086 | P14079 | Q6ZUT6 | 1.1354  |
| 41087 | P14079 | Q99459 | 0.89078 |
| 41088 | P14079 | Q9BXS1 | 0.57049 |
| 41089 | P14079 | Q9Y333 | 0.70283 |
| 41090 | P14079 | P41218 | 0.54682 |
| 41091 | P14079 | Q8N573 | 0.12814 |
| 41092 | P14079 | Q96IY1 | 0.9337  |
| 41093 | P14079 | Q9Y285 | 1.3002  |
| 41094 | P14079 | Q7Z7F7 | 1.1265  |
| 41095 | P14079 | P13164 | 0.46117 |
| 41096 | P14079 | Q9NPI1 | 0.77888 |
| 41097 | P14079 | O95402 | 1.1194  |
| 41098 | P14079 | Q68DK7 | 1.5005  |
| 41099 | P14079 | O75223 | 0.57322 |
| 41100 | P14079 | Q3LI70 | 1.1715  |
| 41101 | P14079 | Q9BTW9 | 0.47394 |
| 41102 | P14079 | Q9Y5P2 | 0.51712 |
| 41103 | P14079 | O60260 | 0.29068 |
| 41104 | P14079 | Q8NEY3 | 1.1006  |
| 41105 | P14079 | Q9H857 | 0.92807 |
| 41106 | P14079 | Q8N9Q2 | 0.5594  |
| 41107 | P14079 | P17098 | 1.018   |
| 41108 | P14079 | Q15014 | 1.1185  |
| 41109 | P14079 | Q9H061 | 0.81101 |
| 41110 | P14079 | Q9UGV2 | 0.38162 |
| 41111 | P14079 | P0C879 | 1.1715  |
| 41112 | P14079 | Q9H7T9 | 1.1553  |
| 41113 | P14079 | Q01105 | 0.769   |
| 41114 | P14079 | Q8N159 | 0.55845 |
| 41115 | P14079 | P48643 | 0.17096 |
| 41116 | P14079 | Q8IX12 | 1.0226  |

|       |        |        |          |
|-------|--------|--------|----------|
| 41117 | P14079 | O43447 | 0.58067  |
| 41118 | P14079 | P08151 | 0.33613  |
| 41119 | P14079 | Q8IVE0 | 0.34895  |
| 41120 | P14079 | Q15293 | 0.47116  |
| 41121 | P14079 | Q6PIY5 | 0.22596  |
| 41122 | P14079 | Q8N8B7 | 0.11388  |
| 41123 | P14079 | Q14166 | 0.42822  |
| 41124 | P14079 | Q9Y5K8 | 0.32936  |
| 41125 | P14079 | P20042 | 0.61176  |
| 41126 | P14079 | O94830 | 0.041402 |
| 41127 | P14079 | P15036 | 0.8325   |
| 41128 | P14079 | Q03188 | 0.96724  |
| 41129 | P14079 | Q5JVS0 | 0.96656  |
| 41130 | P14079 | Q8TC94 | 0.89007  |
| 41131 | P14079 | O60397 | 0.78471  |
| 41132 | P14079 | P0CJ74 | 1.3031   |
| 41133 | P14079 | Q9GZM3 | 0.23838  |
| 41134 | P14079 | O95166 | 0.41166  |
| 41135 | P14079 | P59036 | 1.1715   |
| 41136 | P14079 | P30042 | 0.72377  |
| 41137 | P14079 | Q5SNV9 | 0.87733  |
| 41138 | P14079 | Q8N7U7 | 0.88134  |
| 41139 | P14079 | P0C7V0 | 1.1715   |
| 41140 | P14079 | P62333 | 0.42583  |
| 41141 | P14079 | P59052 | 1.1149   |
| 41142 | P14079 | Q8NA69 | 0.81719  |
| 41143 | P14079 | Q9BQ95 | 1.1691   |
| 41144 | P14079 | P13056 | 0.7453   |
| 41145 | P14079 | P53804 | 0.40464  |
| 41146 | P14079 | Q9NXE8 | 1.356    |
| 41147 | P14079 | O43677 | 1.0705   |
| 41148 | P14079 | A1E959 | 0.8216   |
| 41149 | P14079 | Q8TEA8 | 1.4439   |
| 41150 | P14079 | P0C6T2 | 1.0481   |
| 41151 | P14079 | Q96GG9 | 0.60775  |
| 41152 | P14079 | O76087 | 0.99818  |
| 41153 | P14079 | O15164 | 0.23504  |
| 41154 | P14079 | Q9BQN1 | 1.4166   |
| 41155 | P14079 | Q8NEM7 | 0.53886  |
| 41156 | P14079 | Q569G3 | 1.3222   |
| 41157 | P14079 | Q9Y2X0 | 0.63179  |
| 41158 | P14079 | Q6ZVX7 | 1.0333   |
| 41159 | P14079 | Q8IXQ6 | 0.81644  |
| 41160 | P14079 | Q7L804 | 0.72066  |
| 41161 | P14079 | Q9BW27 | 0.94376  |
| 41162 | P14079 | O43513 | 1.2063   |
| 41163 | P14079 | Q9C010 | 1.3204   |
| 41164 | P14079 | P13805 | 0.1876   |
| 41165 | P14079 | O95816 | 0.56144  |
| 41166 | P14079 | Q8WYK2 | 0.37431  |
| 41167 | P14079 | P07498 | 1.4033   |
| 41168 | P14079 | Q9BRX2 | 0.30835  |
| 41169 | P14079 | P35237 | 0.43296  |
| 41170 | P14079 | Q96HZ7 | 1.1715   |
| 41171 | P14079 | P48668 | 0.96294  |
| 41172 | P14079 | Q96JI7 | 1.2962   |
| 41173 | P14079 | Q8N4H5 | 1.0895   |
| 41174 | P14079 | Q9H374 | 0.73811  |
| 41175 | P14079 | Q6ZS52 | 1.1715   |
| 41176 | P14079 | P0C864 | 0.32955  |
| 41177 | P14079 | Q86Y56 | 0.080836 |
| 41178 | P14079 | P0CJ89 | 0.25626  |
| 41179 | P14079 | Q9UKT5 | 0.27782  |
| 41180 | P14079 | Q96M27 | 0.15484  |
| 41181 | P14079 | O75123 | 0.52714  |
| 41182 | P14079 | Q9NXP7 | 0.45857  |
| 41183 | P14079 | Q14004 | 0.34877  |
| 41184 | P14079 | O15315 | 0.1968   |
| 41185 | P14079 | Q14789 | 0.69539  |
| 41186 | P14079 | Q8IWL8 | 1.7013   |
| 41187 | P14079 | Q8N443 | 1.087    |
| 41188 | P14079 | Q8N3T6 | 0.97751  |
| 41189 | P14079 | O14746 | 1.0055   |
| 41190 | P14079 | Q13416 | 0.87997  |
| 41191 | P14079 | Q3MIW9 | 1.2698   |
| 41192 | P14079 | Q3SY00 | 1.3865   |

|       |        |        |           |
|-------|--------|--------|-----------|
| 41193 | P14079 | O14773 | 0.042998  |
| 41194 | P14079 | Q5XKL5 | 0.27853   |
| 41195 | P14079 | Q14C87 | 1.3386    |
| 41196 | P14079 | P02042 | 0.65657   |
| 41197 | P14079 | Q9UGL9 | 1.1715    |
| 41198 | P14079 | Q92979 | 0.45711   |
| 41199 | P14079 | P0C7U1 | 0.12476   |
| 41200 | P14079 | Q30KQ8 | 0.91101   |
| 41201 | P14079 | Q6P587 | 0.40659   |
| 41202 | P14079 | Q6ZVE7 | 0.95713   |
| 41203 | P14079 | Q9HAZ2 | 0.48833   |
| 41204 | P14079 | O14867 | 0.40037   |
| 41205 | P14079 | O95425 | 0.17769   |
| 41206 | P14079 | Q9H0P0 | 0.62321   |
| 41207 | P14079 | Q14746 | 0.63652   |
| 41208 | P14079 | P0CJ88 | 0.25626   |
| 41209 | P14079 | Q8N9K7 | 1.1715    |
| 41210 | P14079 | P0CL85 | 0.46781   |
| 41211 | P14079 | O75467 | 0.52324   |
| 41212 | P14079 | Q68DY9 | 0.63518   |
| 41213 | P14079 | Q9NWS1 | 1.0741    |
| 41214 | P14079 | B1ANH7 | 0.65518   |
| 41215 | P14079 | Q96NA2 | 1.6417    |
| 41216 | P14079 | Q9BWK5 | 1.566     |
| 41217 | P14079 | P25800 | 0.3426    |
| 41218 | P14079 | A8MZF0 | 1.3222    |
| 41219 | P14079 | Q8WTP9 | 1.7294    |
| 41220 | P14079 | Q9GZT9 | 0.24991   |
| 41221 | P14079 | Q5VU69 | 1.152     |
| 41222 | P14079 | Q5T2E6 | 1.3019    |
| 41223 | P14079 | Q15007 | 1.0081    |
| 41224 | P14079 | O00442 | 0.74447   |
| 41225 | P14079 | Q6PGP7 | 0.85169   |
| 41226 | P14079 | P23381 | 0.57992   |
| 41227 | P14079 | P20585 | 0.22468   |
| 41228 | P14079 | P55199 | 1.1282    |
| 41229 | P14079 | Q9UL40 | 0.8525    |
| 41230 | P14079 | Q5SVJ3 | 0.97165   |
| 41231 | P14079 | Q9BRT9 | 0.79212   |
| 41232 | P14079 | Q8NCY6 | 0.23265   |
| 41233 | P14079 | Q9NQ50 | 1.3792    |
| 41234 | P14079 | Q96FN9 | 1.0146    |
| 41235 | P14079 | O95628 | 0.32427   |
| 41236 | P14079 | P61581 | 1.7166    |
| 41237 | P14079 | Q9Y5U4 | 0.38197   |
| 41238 | P14079 | Q8NAJ2 | 0.36546   |
| 41239 | P14079 | Q86XD5 | 0.80645   |
| 41240 | P14079 | Q68DX3 | 0.85142   |
| 41241 | P14079 | P26639 | 0.84387   |
| 41242 | P14079 | Q8NEB7 | 0.9829    |
| 41243 | P14079 | Q658T7 | 0.3152    |
| 41244 | P14079 | P0C7M4 | 0.24936   |
| 41245 | P14079 | P10243 | 0.70969   |
| 41246 | P14079 | Q9H7R0 | 0.94651   |
| 41247 | P14079 | Q8WWX9 | 0.53016   |
| 41248 | P14079 | Q56A73 | 0.56501   |
| 41249 | P14079 | Q9H094 | 0.22747   |
| 41250 | P14079 | P09565 | 0.94741   |
| 41251 | P14079 | Q9UKV8 | 0.79383   |
| 41252 | P14079 | Q53S99 | 0.38401   |
| 41253 | P14079 | Q53FE4 | 0.6778    |
| 41254 | P14079 | A0AUZ9 | 1.0404    |
| 41255 | P14079 | Q99743 | 0.27677   |
| 41256 | P14079 | P59282 | 0.77614   |
| 41257 | P14079 | Q96HA1 | 1.6792    |
| 41258 | P14079 | O95873 | 1.3222    |
| 41259 | P14079 | Q96F85 | 0.0057309 |
| 41260 | P14079 | Q06730 | 0.44092   |
| 41261 | P14079 | Q9H295 | 0.49105   |
| 41262 | P14079 | Q9BQ15 | 1.2691    |
| 41263 | P14079 | Q9BZL1 | 0.7837    |
| 41264 | P14079 | Q8N0W5 | 1.0178    |
| 41265 | P14079 | P26373 | 1.2212    |
| 41266 | P14079 | Q9NQG1 | 1.1823    |
| 41267 | P14079 | Q8N4P2 | 0.63873   |
| 41268 | P14079 | Q53GI3 | 0.56951   |

|       |        |        |          |
|-------|--------|--------|----------|
| 41269 | P14079 | O75346 | 0.9499   |
| 41270 | P14079 | O95561 | 1.2016   |
| 41271 | P14079 | P37802 | 0.48303  |
| 41272 | P14079 | P60002 | 1.5351   |
| 41273 | P14079 | Q9Y3E5 | 0.8605   |
| 41274 | P14079 | P57678 | 0.91795  |
| 41275 | P14079 | Q86VN1 | 0.56277  |
| 41276 | P14079 | Q15513 | 1.1715   |
| 41277 | P14079 | Q6P3S1 | 0.12095  |
| 41278 | P14079 | Q9UNH7 | 0.3908   |
| 41279 | P14079 | B1AL88 | 1.2485   |
| 41280 | P14079 | P16383 | 1.6908   |
| 41281 | P14079 | P62508 | 0.58284  |
| 41282 | P14079 | Q6T4R5 | 0.78774  |
| 41283 | P14079 | A8MZA4 | 0.89121  |
| 41284 | P14079 | Q5TZA2 | 0.96552  |
| 41285 | P14079 | Q8WZ33 | 0.81071  |
| 41286 | P14079 | Q92562 | 0.44774  |
| 41287 | P14079 | Q9ULD9 | 1.781    |
| 41288 | P14079 | Q6NSI8 | 1.0503   |
| 41289 | P14079 | P33076 | 0.59991  |
| 41290 | P14079 | Q3ZCQ2 | 1.1715   |
| 41291 | P14079 | Q9GZU0 | 1.1689   |
| 41292 | P14079 | P09327 | 0.088626 |
| 41293 | P14079 | Q8IXS6 | 0.57042  |
| 41294 | P14079 | Q8IYU4 | 0.24849  |
| 41295 | P14079 | O95415 | 1.0613   |
| 41296 | P14079 | P86479 | 1.1715   |
| 41297 | P14079 | O43156 | 1.2265   |
| 41298 | P14079 | Q9HBT7 | 0.68829  |
| 41299 | P14079 | Q8N4S0 | 1.3222   |
| 41300 | P14079 | P60409 | 1.3698   |
| 41301 | P14079 | P49753 | 0.23623  |
| 41302 | P14079 | P05114 | 0.72086  |
| 41303 | P14079 | Q9UL33 | 0.74375  |
| 41304 | P14079 | P22531 | 1.1715   |
| 41305 | P14079 | Q8TAT5 | 0.61766  |
| 41306 | P14079 | Q96HA9 | 0.99552  |
| 41307 | P14079 | Q6IEE8 | 1.0684   |
| 41308 | P14079 | Q93083 | 0.77468  |
| 41309 | P14079 | P57076 | 0.85644  |
| 41310 | P14079 | A9UHW6 | 1.1067   |
| 41311 | P14079 | P0CL82 | 0.99818  |
| 41312 | P14079 | P15502 | 0.84493  |
| 41313 | P14079 | Q4G112 | 0.28169  |
| 41314 | P14079 | B3EWF7 | 1.1715   |
| 41315 | P14079 | Q9Y3B8 | 0.48217  |
| 41316 | P14079 | Q6ZUJ4 | 1.2201   |
| 41317 | P14079 | Q99627 | 0.57354  |
| 41318 | P14079 | O43759 | 0.97807  |
| 41319 | P14079 | Q86UY5 | 0.59525  |
| 41320 | P14079 | Q96I25 | 0.21549  |
| 41321 | P14079 | P09874 | 0.64919  |
| 41322 | P14079 | Q96JB3 | 0.21516  |
| 41323 | P14079 | Q8N1B3 | 0.80199  |
| 41324 | P14079 | Q8WVV9 | 0.24192  |
| 41325 | P14079 | Q9HAT8 | 0.97187  |
| 41326 | P14079 | O15225 | 1.1715   |
| 41327 | P14079 | P78543 | 0.82071  |
| 41328 | P14079 | Q7Z5L0 | 0.94645  |
| 41329 | P14079 | Q5HYI7 | 1.6457   |
| 41330 | P14079 | Q969M3 | 0.55727  |
| 41331 | P14079 | C9JVV0 | 1.1715   |
| 41332 | P14079 | P49257 | 0.34868  |
| 41333 | P14079 | Q5T7N2 | 0.46109  |
| 41334 | P14079 | Q96DY7 | 0.94061  |
| 41335 | P14079 | O43181 | 0.18274  |
| 41336 | P14079 | A4D161 | 0.65781  |
| 41337 | P14079 | P05813 | 0.67475  |
| 41338 | P14079 | Q15287 | 0.8967   |
| 41339 | P14079 | Q9Y4A5 | 0.69381  |
| 41340 | P14079 | Q9NPH2 | 0.67527  |
| 41341 | P14079 | Q8IWE2 | 1.4569   |
| 41342 | P14079 | P16278 | 0.084402 |
| 41343 | P14079 | Q9NPG2 | 0.48318  |
| 41344 | P14079 | Q12982 | 0.30725  |

|       |        |        |         |
|-------|--------|--------|---------|
| 41345 | P14079 | Q9BQK8 | 0.26903 |
| 41346 | P14079 | A8MYZ0 | 1.1773  |
| 41347 | P14079 | Q5MCW4 | 0.53925 |
| 41348 | P14079 | P35900 | 1.2514  |
| 41349 | P14079 | Q9NQ48 | 0.48044 |
| 41350 | P14079 | P27216 | 0.65206 |
| 41351 | P14079 | Q5TIA1 | 0.36808 |
| 41352 | P14079 | Q4KMZ1 | 0.95475 |
| 41353 | P14079 | Q9H0S4 | 0.13736 |
| 41354 | P14079 | Q8N6Q3 | 0.79631 |
| 41355 | P14079 | O14841 | 1.0995  |
| 41356 | P14079 | Q5T0L3 | 1.6329  |
| 41357 | P14079 | Q96RJ6 | 0.43586 |
| 41358 | P14079 | Q96K30 | 1.1041  |
| 41359 | P14079 | A8MTY0 | 1.0073  |
| 41360 | P14079 | P52742 | 0.73618 |
| 41361 | P14079 | Q9NTX9 | 0.77499 |
| 41362 | P14079 | Q86XZ4 | 0.96374 |
| 41363 | P14079 | Q96QH2 | 0.35123 |
| 41364 | P14079 | Q16890 | 0.63143 |
| 41365 | P14079 | Q96T23 | 0.60807 |
| 41366 | P14079 | Q8TD23 | 1.2643  |
| 41367 | P14079 | Q6PGQ7 | 1.7845  |
| 41368 | P14079 | Q9P0P8 | 0.61851 |
| 41369 | P14079 | P61923 | 0.54358 |
| 41370 | P14079 | Q8TDR4 | 0.63132 |
| 41371 | P14079 | Q8NHY5 | 1.3476  |
| 41372 | P14079 | P48556 | 0.83362 |
| 41373 | P14079 | Q6IQ49 | 0.58942 |
| 41374 | P14079 | Q8IXH6 | 1.2325  |
| 41375 | P14079 | Q5HYK9 | 0.74415 |
| 41376 | P14079 | Q9BVC5 | 1.1409  |
| 41377 | P14079 | Q6XYB7 | 0.28169 |
| 41378 | P14079 | Q9Y6G5 | 0.85111 |
| 41379 | P14079 | Q4U2R6 | 1.3251  |
| 41380 | P14079 | A1A4V9 | 0.55177 |
| 41381 | P14079 | Q5T5N4 | 0.53769 |
| 41382 | P14079 | Q8IXS2 | 0.47209 |
| 41383 | P14079 | P42357 | 0.1472  |
| 41384 | P14079 | P57088 | 0.92113 |
| 41385 | P14079 | Q9BQ90 | 1.1205  |
| 41386 | P14079 | A6NDN3 | 0.71479 |
| 41387 | P14079 | E9PJI5 | 1.3504  |
| 41388 | P14079 | Q9BQS6 | 0.94018 |
| 41389 | P14079 | P0C874 | 0.94399 |
| 41390 | P14079 | P35326 | 1.2047  |
| 41391 | P14079 | O75618 | 1.143   |
| 41392 | P14079 | O95447 | 0.72979 |
| 41393 | P14079 | Q96IR2 | 0.80079 |
| 41394 | P14079 | P55327 | 0.44376 |
| 41395 | P14079 | Q9UPY8 | 1.1846  |
| 41396 | P14079 | Q76075 | 0.35669 |
| 41397 | P14079 | Q9BTD3 | 1.2485  |
| 41398 | P14079 | Q9P2X8 | 0.93707 |
| 41399 | P14079 | Q08945 | 1.0986  |
| 41400 | P14079 | O15027 | 1.0124  |
| 41401 | P14079 | Q8NCA5 | 1.1911  |
| 41402 | P14079 | Q96LW7 | 1.5173  |
| 41403 | P14079 | Q9BRQ6 | 1.881   |
| 41404 | P14079 | Q13506 | 0.53082 |
| 41405 | P14079 | P51965 | 0.49344 |
| 41406 | P14079 | P61970 | 0.61239 |
| 41407 | P14079 | Q9NQ35 | 1.3448  |
| 41408 | P14079 | Q13442 | 1.0786  |
| 41409 | P14079 | O15162 | 0.53829 |
| 41410 | P14079 | O95169 | 0.74645 |
| 41411 | P14079 | P41227 | 0.37402 |
| 41412 | P14079 | P09132 | 0.50763 |
| 41413 | P14079 | Q6XZF7 | 0.44458 |
| 41414 | P14079 | P69891 | 0.65657 |
| 41415 | P14079 | P10155 | 1.2695  |
| 41416 | P14079 | Q96C01 | 0.55719 |
| 41417 | P14079 | Q5TA31 | 0.28231 |
| 41418 | P14079 | Q05BQ5 | 0.30577 |
| 41419 | P14079 | P57723 | 0.13109 |
| 41420 | P14079 | P27469 | 0.84264 |

|       |        |        |         |
|-------|--------|--------|---------|
| 41421 | P14079 | Q9UPP2 | 0.35301 |
| 41422 | P14079 | Q96RS0 | 0.50917 |
| 41423 | P14079 | Q9H8S9 | 0.62679 |
| 41424 | P14079 | Q9NVQ4 | 0.15625 |
| 41425 | P14079 | O75151 | 0.47904 |
| 41426 | P14079 | Q96HE9 | 0.50707 |
| 41427 | P14079 | Q8WTR7 | 0.8622  |
| 41428 | P14079 | Q8NAN2 | 0.91801 |
| 41429 | P14079 | P31948 | 1.0892  |
| 41430 | P14079 | Q99807 | 0.43248 |
| 41431 | P14079 | Q53H80 | 0.80325 |
| 41432 | P14079 | Q86SZ2 | 1.2865  |
| 41433 | P14079 | Q9UL36 | 0.5268  |
| 41434 | P14079 | Q9NV88 | 0.75135 |
| 41435 | P14079 | Q96CF2 | 0.41173 |
| 41436 | P14079 | Q9H579 | 0.20109 |
| 41437 | P14079 | A8MV81 | 1.0498  |
| 41438 | P14079 | Q9Y6Q5 | 0.59076 |
| 41439 | P14079 | Q8WXC3 | 0.76159 |
| 41440 | P14079 | Q9UD71 | 1.3139  |
| 41441 | P14079 | P60842 | 0.15808 |
| 41442 | P14079 | Q9H8W4 | 0.37877 |
| 41443 | P14079 | Q86UY6 | 0.47127 |
| 41444 | P14079 | Q86UT8 | 1.8063  |
| 41445 | P14079 | Q96EY5 | 1.1716  |
| 41446 | P14079 | P12755 | 0.31378 |
| 41447 | P14079 | Q9Y3B2 | 0.79466 |
| 41448 | P14079 | Q9UPP5 | 1.3341  |
| 41449 | P14079 | P55055 | 0.35388 |
| 41450 | P14079 | Q8WXW3 | 1.2364  |
| 41451 | P14079 | A6NEJ1 | 0.31443 |
| 41452 | P14079 | Q5MJ70 | 1.092   |
| 41453 | P14079 | Q8TBK6 | 1.2549  |
| 41454 | P14079 | Q8N8L2 | 0.56276 |
| 41455 | P14079 | P21953 | 0.20869 |
| 41456 | P14079 | O14602 | 0.82748 |
| 41457 | P14079 | P0CG31 | 0.57343 |
| 41458 | P14079 | Q9GZL8 | 1.2337  |
| 41459 | P14079 | Q96EV2 | 0.9364  |
| 41460 | P14079 | Q7Z745 | 0.9485  |
| 41461 | P14079 | Q15036 | 0.30662 |
| 41462 | P14079 | Q6UB98 | 0.42364 |
| 41463 | P14079 | Q9NR22 | 0.39456 |
| 41464 | P14079 | Q9BRP7 | 0.56797 |
| 41465 | P14079 | P61966 | 0.49388 |
| 41466 | P14079 | P23396 | 0.97849 |
| 41467 | P14079 | Q86V97 | 0.36435 |
| 41468 | P14079 | Q5JUX0 | 0.46837 |
| 41469 | P14079 | Q9Y4E1 | 1.2     |
| 41470 | P14079 | Q7L590 | 1.2535  |
| 41471 | P14079 | O60925 | 0.57051 |
| 41472 | P14079 | Q5T1R4 | 0.35952 |
| 41473 | P14079 | P0C5K6 | 1.1715  |
| 41474 | P14079 | Q9BUK0 | 1.6151  |
| 41475 | P14079 | Q5VZQ5 | 1.4808  |
| 41476 | P14079 | H3BMG3 | 0.92587 |
| 41477 | P14079 | P13196 | 0.10985 |
| 41478 | P14079 | Q8NEH6 | 1.4228  |
| 41479 | P14079 | O14613 | 0.3825  |
| 41480 | P14079 | Q5D1E8 | 1.3043  |
| 41481 | P14079 | Q9ULG1 | 0.31063 |
| 41482 | P14079 | Q6ZR03 | 0.92183 |
| 41483 | P14079 | O00291 | 0.66182 |
| 41484 | P14079 | O60293 | 0.22157 |
| 41485 | P14079 | Q96GW9 | 1.1889  |
| 41486 | P14079 | O95544 | 0.91121 |
| 41487 | P14079 | O95416 | 0.41359 |
| 41488 | P14079 | Q08495 | 0.35996 |
| 41489 | P14079 | Q6ULP2 | 1.2139  |
| 41490 | P14079 | Q9P2J5 | 0.77353 |
| 41491 | P14079 | Q3LHN0 | 1.5617  |
| 41492 | P14079 | O60294 | 0.4659  |
| 41493 | P14079 | Q05084 | 0.29232 |
| 41494 | P14079 | P63261 | 0.99952 |
| 41495 | P14079 | Q15038 | 2.1029  |
| 41496 | P14079 | Q8N5C8 | 0.92672 |

|       |        |        |         |
|-------|--------|--------|---------|
| 41497 | P14079 | Q9UIF7 | 0.49377 |
| 41498 | P14079 | Q8WUN7 | 0.42364 |
| 41499 | P14079 | Q14242 | 1.2018  |
| 41500 | P14079 | Q92994 | 0.47821 |
| 41501 | P14079 | Q8IZD4 | 0.90557 |
| 41502 | P14079 | Q7Z7K0 | 0.68154 |
| 41503 | P14079 | Q15056 | 0.4775  |
| 41504 | P14079 | Q5EE01 | 1.2058  |
| 41505 | P14079 | Q8N9T2 | 1.1715  |
| 41506 | P14079 | Q86WV1 | 0.85187 |
| 41507 | P14079 | Q8N4B5 | 1.3431  |
| 41508 | P14079 | Q9BTX9 | 1.4993  |
| 41509 | P14079 | Q9Y614 | 0.89007 |
| 41510 | P14079 | Q86V25 | 0.68606 |
| 41511 | P14079 | Q9Y664 | 0.72704 |
| 41512 | P14079 | Q9H0I3 | 0.76395 |
| 41513 | P14079 | Q96B67 | 0.51322 |
| 41514 | P14079 | Q8N307 | 1.0124  |
| 41515 | P14079 | Q7Z3J2 | 0.78469 |
| 41516 | P14079 | P11142 | 0.29537 |
| 41517 | P14079 | Q8N7P3 | 0.63456 |
| 41518 | P14079 | Q3SY84 | 0.98252 |
| 41519 | P14079 | Q6PRD7 | 1.1715  |
| 41520 | P14079 | Q86WP2 | 1.2469  |
| 41521 | P14079 | Q96KR4 | 0.66234 |
| 41522 | P14079 | P54922 | 1.228   |
| 41523 | P14079 | P56134 | 0.72976 |
| 41524 | P14079 | P10412 | 0.38825 |
| 41525 | P14079 | A8MUQ0 | 1.5165  |
| 41526 | P14079 | Q9P2M1 | 0.72622 |
| 41527 | P14079 | Q8WY41 | 0.73767 |
| 41528 | P14079 | Q6ZVM7 | 0.05613 |
| 41529 | P14079 | A8K8V0 | 0.75186 |
| 41530 | P14079 | Q10587 | 0.22589 |
| 41531 | P14079 | C9JDP6 | 0.63456 |
| 41532 | P14079 | Q9HAJ7 | 1.9201  |
| 41533 | P14079 | Q9Y5Q3 | 0.67148 |
| 41534 | P14079 | Q9BXS5 | 1.0724  |
| 41535 | P14079 | Q569K6 | 0.37266 |
| 41536 | P14079 | P0C880 | 1.1715  |
| 41537 | P14079 | P55039 | 0.86784 |
| 41538 | P14079 | O60381 | 0.18393 |
| 41539 | P14079 | Q6NVV1 | 0.64056 |
| 41540 | P14079 | Q9BYK8 | 0.44847 |
| 41541 | P14079 | Q9BTV5 | 0.68921 |
| 41542 | P14079 | P57077 | 0.94124 |
| 41543 | P14079 | Q9UDV6 | 0.72847 |
| 41544 | P14079 | E2RYF6 | 1.1715  |
| 41545 | P14079 | Q9NWB6 | 1.3222  |
| 41546 | P14079 | Q58A44 | 1.1715  |
| 41547 | P14079 | P0CB43 | 0.83392 |
| 41548 | P14079 | Q8WXB4 | 0.51635 |
| 41549 | P14079 | Q8N6C7 | 0.41577 |
| 41550 | P14079 | Q9NPB8 | 0.10397 |
| 41551 | P14079 | P63279 | 0.69239 |
| 41552 | P14079 | Q16873 | 0.45461 |
| 41553 | P14079 | Q15561 | 0.81859 |
| 41554 | P14079 | Q30KQ9 | 0.87535 |
| 41555 | P14079 | Q8WWF1 | 0.88143 |
| 41556 | P14079 | P17677 | 0.26824 |
| 41557 | P14079 | Q9Y2Y4 | 0.52332 |
| 41558 | P14079 | Q9BZK7 | 0.93873 |
| 41559 | P14079 | Q5TGP6 | 0.63072 |
| 41560 | P14079 | Q86VE9 | 0.98083 |
| 41561 | P14079 | Q6UW32 | 0.85692 |
| 41562 | P14079 | P56556 | 0.71399 |
| 41563 | P14079 | E9PKD4 | 0.12445 |
| 41564 | P14079 | Q71F56 | 0.40818 |
| 41565 | P14079 | P60014 | 1.4903  |
| 41566 | P14079 | P41238 | 0.14213 |
| 41567 | P14079 | Q8N365 | 1.3222  |
| 41568 | P14079 | O75146 | 0.30687 |
| 41569 | P14079 | Q15573 | 1.2092  |
| 41570 | P14079 | Q8IZX4 | 0.24398 |
| 41571 | P14079 | Q8WV41 | 0.41619 |
| 41572 | P14079 | Q12815 | 1.0178  |



|       |        |        |         |
|-------|--------|--------|---------|
| 41573 | P14079 | P14373 | 0.25587 |
| 41574 | P14079 | P07954 | 0.2358  |
| 41575 | P14079 | Q9UKG1 | 0.58027 |
| 41576 | P14079 | O75934 | 0.69605 |
| 41577 | P14079 | Q8N655 | 1.1715  |
| 41578 | P14079 | Q15532 | 1.2692  |
| 41579 | P14079 | Q9H0A6 | 0.59058 |
| 41580 | P14079 | Q8N123 | 1.4748  |
| 41581 | P14079 | Q6UVJ0 | 1.1557  |
| 41582 | P14079 | Q8N9W7 | 0.90704 |
| 41583 | P14079 | Q68DL7 | 1.1715  |
| 41584 | P14079 | Q92686 | 0.61384 |
| 41585 | P14079 | P17152 | 1.1879  |
| 41586 | P14079 | O43364 | 0.15306 |
| 41587 | P14079 | Q9NV31 | 1.0402  |
| 41588 | P14079 | Q8TB68 | 1.1717  |
| 41589 | P14079 | Q96LW1 | 0.9897  |
| 41590 | P14079 | Q9HCJ5 | 0.34113 |
| 41591 | P14079 | H3BRN8 | 0.40745 |
| 41592 | P14079 | Q9UC06 | 0.57224 |
| 41593 | P14079 | Q5JQC9 | 0.55956 |
| 41594 | P14079 | Q9BVP2 | 0.30172 |
| 41595 | P14079 | P60468 | 0.68789 |
| 41596 | P14079 | Q9H8V8 | 1.1715  |
| 41597 | P14079 | P35869 | 0.31034 |
| 41598 | P14079 | Q8IZ16 | 0.91367 |
| 41599 | P14079 | Q8IVK1 | 1.1715  |
| 41600 | P14079 | Q8N999 | 1.1486  |
| 41601 | P14079 | P57086 | 0.84274 |
| 41602 | P14079 | Q96T37 | 0.47325 |
| 41603 | P14079 | Q8WV24 | 1.0483  |
| 41604 | P14079 | Q969X6 | 0.99815 |
| 41605 | P14079 | Q8N8E1 | 1.3146  |
| 41606 | P14079 | Q3ZQA7 | 0.95523 |
| 41607 | P14079 | Q8TEQ6 | 0.76521 |
| 41608 | P14079 | Q02078 | 0.79005 |
| 41609 | P14079 | Q8IXB3 | 1.1369  |
| 41610 | P14079 | Q8NFF5 | 1.0819  |
| 41611 | P14079 | Q3KQU3 | 1.1169  |
| 41612 | P14079 | Q8NEV8 | 0.33125 |
| 41613 | P14079 | Q9Y2G7 | 1.0764  |
| 41614 | P14079 | Q9Y3D7 | 0.46528 |
| 41615 | P14079 | Q9H7J1 | 0.95313 |
| 41616 | P14079 | Q5T124 | 0.37346 |
| 41617 | P14079 | O95125 | 0.53302 |
| 41618 | P14079 | P0C7P3 | 1.2416  |
| 41619 | P14079 | Q99814 | 0.30944 |
| 41620 | P14079 | P60413 | 1.3698  |
| 41621 | P14079 | Q8WU39 | 1.0429  |
| 41622 | P14079 | Q7Z340 | 0.55626 |
| 41623 | P14079 | A1A4T8 | 0.5247  |
| 41624 | P14079 | A6NL28 | 0.2068  |
| 41625 | P14079 | Q9UK13 | 0.98685 |
| 41626 | P14079 | Q9Y375 | 0.74179 |
| 41627 | P14079 | O75817 | 1.3924  |
| 41628 | P14079 | Q9Y4U1 | 0.92442 |
| 41629 | P14079 | Q9NYV6 | 0.6093  |
| 41630 | P14079 | Q9UIS9 | 0.35612 |
| 41631 | P14079 | Q8TBY8 | 0.96371 |
| 41632 | P14079 | A6NM66 | 0.86222 |
| 41633 | P14079 | O14828 | 1.0112  |
| 41634 | P14079 | Q14241 | 0.75851 |
| 41635 | P14079 | Q5VW32 | 0.31881 |
| 41636 | P14079 | Q9BXT5 | 1.1014  |
| 41637 | P14079 | Q8N5D0 | 0.68102 |
| 41638 | P14079 | Q96P71 | 0.5988  |
| 41639 | P14079 | Q8NDQ6 | 0.77193 |
| 41640 | P14079 | Q96LL4 | 1.3222  |
| 41641 | P14079 | Q96DY2 | 0.53316 |
| 41642 | P14079 | P86434 | 0.77823 |
| 41643 | P14079 | Q96B01 | 1.4144  |
| 41644 | P14079 | P0C5J1 | 0.30613 |
| 41645 | P14079 | Q3KP22 | 0.69231 |
| 41646 | P14079 | P0CG48 | 0.66704 |
| 41647 | P14079 | Q06413 | 0.30045 |
| 41648 | P14079 | Q1RN00 | 1.1715  |

|       |        |        |           |
|-------|--------|--------|-----------|
| 41649 | P14079 | P19429 | 0.16965   |
| 41650 | P14079 | P40855 | 0.90544   |
| 41651 | P14079 | O95793 | 0.50535   |
| 41652 | P14079 | Q0VDE8 | 1.4165    |
| 41653 | P14079 | Q9BWX5 | 0.40622   |
| 41654 | P14079 | Q86WG3 | 0.41677   |
| 41655 | P14079 | Q9BRT2 | 0.46164   |
| 41656 | P14079 | Q9H799 | 1.2549    |
| 41657 | P14079 | Q13609 | 0.41572   |
| 41658 | P14079 | Q8NDP4 | 0.69818   |
| 41659 | P14079 | Q6STE5 | 0.66394   |
| 41660 | P14079 | P08779 | 1.1852    |
| 41661 | P14079 | Q9C073 | 1.5622    |
| 41662 | P14079 | Q9NSI6 | 0.66017   |
| 41663 | P14079 | Q9H3H3 | 0.75427   |
| 41664 | P14079 | Q9UNA4 | 0.49052   |
| 41665 | P14079 | Q8N196 | 0.51722   |
| 41666 | P14079 | P49069 | 0.63552   |
| 41667 | P14079 | Q6ZT83 | 0.71401   |
| 41668 | P14079 | Q8TBZ6 | 0.65786   |
| 41669 | P14079 | P02728 | 1.1715    |
| 41670 | P14079 | Q6PP77 | 1.4324    |
| 41671 | P14079 | Q9NXF7 | 0.71704   |
| 41672 | P14079 | Q86SG4 | 0.65928   |
| 41673 | P14079 | Q99502 | 0.12944   |
| 41674 | P14079 | Q8NEG2 | 1.0466    |
| 41675 | P14079 | Q9C0D0 | 0.71812   |
| 41676 | P14079 | Q8NB91 | 0.73511   |
| 41677 | P14079 | O60826 | 1.3091    |
| 41678 | P14079 | Q00610 | 0.88852   |
| 41679 | P14079 | Q8IZ21 | 0.6781    |
| 41680 | P14079 | Q5QGS0 | 0.43573   |
| 41681 | P14079 | Q6PH81 | 0.98617   |
| 41682 | P14079 | P63172 | 1.0265    |
| 41683 | P14079 | Q96N68 | 1.1715    |
| 41684 | P14079 | Q5TYM5 | 0.86671   |
| 41685 | P14079 | P54257 | 0.07946   |
| 41686 | P14079 | Q9NPE3 | 1.1297    |
| 41687 | P14079 | O60811 | 0.0080986 |
| 41688 | P14079 | P13073 | 1.0584    |
| 41689 | P14079 | Q76L83 | 0.92146   |
| 41690 | P14079 | Q96KP4 | 0.73984   |
| 41691 | P14079 | Q9NYY8 | 0.60942   |
| 41692 | P14079 | Q53RY4 | 1.2485    |
| 41693 | P14079 | Q9NUQ7 | 0.55033   |
| 41694 | P14079 | Q8IUE1 | 0.28169   |
| 41695 | P14079 | O75419 | 1.171     |
| 41696 | P14079 | O15370 | 0.42902   |
| 41697 | P14079 | Q9UI43 | 1.305     |
| 41698 | P14079 | Q8N693 | 0.33196   |
| 41699 | P14079 | P40429 | 0.9726    |
| 41700 | P14079 | O43482 | 0.78379   |
| 41701 | P14079 | Q9BU23 | 1.2107    |
| 41702 | P14079 | Q8N8G2 | 1.0419    |
| 41703 | P14079 | Q9BYX4 | 0.41472   |
| 41704 | P14079 | O75400 | 0.93033   |
| 41705 | P14079 | Q9NWB7 | 0.96516   |
| 41706 | P14079 | Q14738 | 0.89663   |
| 41707 | P14079 | O95876 | 0.56473   |
| 41708 | P14079 | O75879 | 0.88097   |
| 41709 | P14079 | Q5T1J5 | 1.571     |
| 41710 | P14079 | Q5VT28 | 1.2112    |
| 41711 | P14079 | Q5EBM0 | 1.2111    |
| 41712 | P14079 | Q15596 | 0.77366   |
| 41713 | P14079 | Q96LJ8 | 1.245     |
| 41714 | P14079 | Q9BYR8 | 1.5617    |
| 41715 | P14079 | Q68DK2 | 1.0429    |
| 41716 | P14079 | Q6ICB0 | 1.5046    |
| 41717 | P14079 | Q9BTL4 | 1.243     |
| 41718 | P14079 | Q7L3T8 | 1.1106    |
| 41719 | P14079 | Q15047 | 0.38885   |
| 41720 | P14079 | Q8NEE0 | 1.1715    |
| 41721 | P14079 | P0C7V5 | 0.8885    |
| 41722 | P14079 | Q8N9R0 | 1.1715    |
| 41723 | P14079 | Q86V15 | 0.84563   |
| 41724 | P14079 | P10072 | 0.59229   |

|       |        |        |         |
|-------|--------|--------|---------|
| 41725 | P14079 | Q08AD1 | 0.84231 |
| 41726 | P14079 | A6NKL6 | 1.2485  |
| 41727 | P14079 | Q8N141 | 1.0323  |
| 41728 | P14079 | Q8TEL6 | 0.74472 |
| 41729 | P14079 | Q16222 | 0.1375  |
| 41730 | P14079 | Q8IZU1 | 1.0534  |
| 41731 | P14079 | O14609 | 1.5015  |
| 41732 | P14079 | P28715 | 0.31259 |
| 41733 | P14079 | O75363 | 0.92052 |
| 41734 | P14079 | Q9ULC4 | 0.40191 |
| 41735 | P14079 | Q05BU3 | 1.1715  |
| 41736 | P14079 | Q92600 | 1.3891  |
| 41737 | P14079 | P35908 | 0.88485 |
| 41738 | P14079 | P52630 | 0.7232  |
| 41739 | P14079 | P49593 | 0.26988 |
| 41740 | P14079 | Q9UL18 | 1.0951  |
| 41741 | P14079 | Q9BTE6 | 1.2376  |
| 41742 | P14079 | Q494R0 | 1.1715  |
| 41743 | P14079 | Q9NRX4 | 0.48645 |
| 41744 | P14079 | O00303 | 0.23897 |
| 41745 | P14079 | Q96MF7 | 0.53004 |
| 41746 | P14079 | O43505 | 1.0174  |
| 41747 | P14079 | Q8NHR7 | 0.4649  |
| 41748 | P14079 | O94906 | 0.28087 |
| 41749 | P14079 | Q96K62 | 0.57002 |
| 41750 | P14079 | Q9C005 | 0.53986 |
| 41751 | P14079 | Q9UJW7 | 0.54706 |
| 41752 | P14079 | Q8NHX4 | 1.2387  |
| 41753 | P14079 | Q86XR2 | 0.35469 |
| 41754 | P14079 | Q7Z794 | 1.0155  |
| 41755 | P14079 | P30307 | 0.95271 |
| 41756 | P14079 | P59089 | 0.45231 |
| 41757 | P14079 | Q6ZTQ3 | 0.48021 |
| 41758 | P14079 | Q14566 | 0.23491 |
| 41759 | P14079 | Q8N4B4 | 0.37775 |
| 41760 | P14079 | A6NMA1 | 0.58408 |
| 41761 | P14079 | Q96H86 | 0.50353 |
| 41762 | P14079 | Q8N5I9 | 1.3222  |
| 41763 | P14079 | Q5XG85 | 1.1715  |
| 41764 | P14079 | Q7Z7N9 | 1.2446  |
| 41765 | P14079 | Q8N1A6 | 0.19994 |
| 41766 | P14079 | O43745 | 0.90835 |
| 41767 | P14079 | Q99996 | 0.87981 |
| 41768 | P14079 | O94888 | 0.5471  |
| 41769 | P14079 | A8MUL3 | 1.1715  |
| 41770 | P14079 | P21506 | 0.68126 |
| 41771 | P14079 | Q9NT62 | 0.41298 |
| 41772 | P14079 | P0CZ20 | 0.86237 |
| 41773 | P14079 | Q96EZ4 | 1.1715  |
| 41774 | P14079 | Q9H939 | 0.25016 |
| 41775 | P14079 | Q9NQV6 | 0.1949  |
| 41776 | P14079 | Q14761 | 1.5544  |
| 41777 | P14079 | Q96AB3 | 1.1702  |
| 41778 | P14079 | Q9BZE2 | 1.5894  |
| 41779 | P14079 | Q107X0 | 1.1597  |
| 41780 | P14079 | Q13106 | 0.58453 |
| 41781 | P14079 | Q7Z7K2 | 0.49873 |
| 41782 | P14079 | Q9BW92 | 0.85063 |
| 41783 | P14079 | Q5K131 | 0.77137 |
| 41784 | P14079 | O43716 | 0.77503 |
| 41785 | P14079 | Q9BUH8 | 0.66771 |
| 41786 | P14079 | Q8N490 | 0.70533 |
| 41787 | P14079 | Q9UJY4 | 0.87676 |
| 41788 | P14079 | A2RUQ5 | 0.44491 |
| 41789 | P14079 | Q96CB8 | 0.66734 |
| 41790 | P14079 | O14771 | 1.2088  |
| 41791 | P14079 | Q5TZJ5 | 1.6988  |
| 41792 | P14079 | Q9BYQ4 | 1.3698  |
| 41793 | P14079 | Q9Y6Q3 | 0.51814 |
| 41794 | P14079 | Q9H9G7 | 0.95157 |
| 41795 | P14079 | O75072 | 0.49794 |
| 41796 | P14079 | Q14442 | 0.80231 |
| 41797 | P14079 | Q86VI1 | 0.48787 |
| 41798 | P14079 | P20962 | 1.1914  |
| 41799 | P14079 | Q9Y2X3 | 0.69706 |
| 41800 | P14079 | Q8IY31 | 0.87967 |

|       |        |        |         |
|-------|--------|--------|---------|
| 41801 | P14079 | Q6PCB5 | 1.1238  |
| 41802 | P14079 | Q8IV50 | 0.2678  |
| 41803 | P14079 | Q9H0R6 | 0.8855  |
| 41804 | P14079 | Q9UJC3 | 0.18135 |
| 41805 | P14079 | Q9NYV7 | 0.50252 |
| 41806 | P14079 | Q92681 | 0.83528 |
| 41807 | P14079 | Q9GZV5 | 1.0387  |
| 41808 | P14079 | Q9NWT8 | 0.91301 |
| 41809 | P14079 | Q9BQE4 | 1.1093  |
| 41810 | P14079 | Q9NUX5 | 0.19586 |
| 41811 | P14079 | Q9NS23 | 0.47237 |
| 41812 | P14079 | Q9BT81 | 0.32722 |
| 41813 | P14079 | Q96H20 | 0.89403 |
| 41814 | P14079 | Q06546 | 1.239   |
| 41815 | P14079 | Q9HC36 | 0.09247 |
| 41816 | P14079 | Q9H0P7 | 0.59843 |
| 41817 | P14079 | P14859 | 1.1592  |
| 41818 | P14079 | P83436 | 0.74896 |
| 41819 | P14079 | Q96SY0 | 0.28916 |
| 41820 | P14079 | C9JBD0 | 1.0571  |
| 41821 | P14079 | P04279 | 0.56503 |
| 41822 | P14079 | Q96FC7 | 0.19405 |
| 41823 | P14079 | Q15305 | 0.29029 |
| 41824 | P14079 | Q5VWQ0 | 1.9447  |
| 41825 | P14079 | P29728 | 0.341   |
| 41826 | P14079 | O75663 | 0.6545  |
| 41827 | P14079 | P53041 | 0.58079 |
| 41828 | P14079 | Q8WZ82 | 0.16561 |
| 41829 | P14079 | Q9H7C4 | 0.66835 |
| 41830 | P14079 | P0CG34 | 1.1711  |
| 41831 | P14079 | P02795 | 0.95509 |
| 41832 | P14079 | Q49AG3 | 1.4353  |
| 41833 | P14079 | Q9UNK9 | 0.42612 |
| 41834 | P14079 | Q5T292 | 1.223   |
| 41835 | P14079 | Q9Y6J9 | 0.78137 |
| 41836 | P14079 | Q6IQ23 | 0.61352 |
| 41837 | P14079 | Q9NPA3 | 1.7237  |
| 41838 | P14079 | Q8TF50 | 0.47167 |
| 41839 | P14079 | Q8WV99 | 0.84628 |
| 41840 | P14079 | Q96MU6 | 0.55888 |
| 41841 | P14079 | Q9UKT4 | 1.1181  |
| 41842 | P14079 | Q86U38 | 0.40311 |
| 41843 | P14079 | Q8N6N6 | 0.41835 |
| 41844 | P14079 | Q9UID3 | 0.12946 |
| 41845 | P14079 | Q1HG44 | 1.5402  |
| 41846 | P14079 | O43187 | 0.3158  |
| 41847 | P14079 | Q16851 | 0.21408 |
| 41848 | P14079 | A6NJ64 | 0.86845 |
| 41849 | P14079 | Q9NRR3 | 0.72073 |
| 41850 | P14079 | Q9Y2W2 | 1.3966  |
| 41851 | P14079 | Q96QC0 | 1.6153  |
| 41852 | P14079 | Q6UXB0 | 0.82486 |
| 41853 | P14079 | Q9P2G4 | 1.3222  |
| 41854 | P14079 | Q96NL6 | 0.54529 |
| 41855 | P14079 | Q9BQ66 | 1.3698  |
| 41856 | P14079 | Q96AT1 | 1.3222  |
| 41857 | P14079 | Q8TEP8 | 1.2206  |
| 41858 | P14079 | A6PW82 | 1.236   |
| 41859 | P14079 | Q5SWA1 | 1.0244  |
| 41860 | P14079 | P10073 | 0.87381 |
| 41861 | P14079 | Q86V42 | 1.1526  |
| 41862 | P14079 | Q96DX7 | 0.28018 |
| 41863 | P14079 | P31150 | 0.12563 |
| 41864 | P14079 | Q96E11 | 1.3811  |
| 41865 | P14079 | Q14236 | 0.83653 |
| 41866 | P14079 | Q7Z7L9 | 0.59666 |
| 41867 | P14079 | O75821 | 0.5665  |
| 41868 | P14079 | Q9UHT9 | 1.1715  |
| 41869 | P14079 | O60508 | 0.38573 |
| 41870 | P14079 | O43768 | 0.26752 |
| 41871 | P14079 | Q16526 | 0.37901 |
| 41872 | P14079 | Q8N163 | 0.7911  |
| 41873 | P14079 | P47224 | 0.94181 |
| 41874 | P14079 | P35637 | 0.51105 |
| 41875 | P14079 | Q96PT4 | 0.2245  |
| 41876 | P14079 | Q8IXY8 | 0.1778  |

|       |        |        |         |
|-------|--------|--------|---------|
| 41877 | P14079 | Q9UL42 | 1.0327  |
| 41878 | P14079 | Q5VZF2 | 0.24368 |
| 41879 | P14079 | A8K0S8 | 0.24936 |
| 41880 | P14079 | Q969J3 | 0.14536 |
| 41881 | P14079 | Q9HC44 | 2.2309  |
| 41882 | P14079 | B1AK76 | 1.3892  |
| 41883 | P14079 | Q6NT04 | 0.80396 |
| 41884 | P14079 | Q08752 | 0.47353 |
| 41885 | P14079 | Q8WXS3 | 1.9264  |
| 41886 | P14079 | Q9Y2Q5 | 0.50149 |
| 41887 | P14079 | Q969H0 | 0.69853 |
| 41888 | P14079 | Q9H8M2 | 0.36383 |
| 41889 | P14079 | Q7L592 | 0.88813 |
| 41890 | P14079 | P11532 | 0.63173 |
| 41891 | P14079 | Q01518 | 0.38158 |
| 41892 | P14079 | P62324 | 0.73396 |
| 41893 | P14079 | Q8TC90 | 1.4784  |
| 41894 | P14079 | Q6P9B6 | 0.56221 |
| 41895 | P14079 | O14990 | 1.207   |
| 41896 | P14079 | Q8N535 | 1.1512  |
| 41897 | P14079 | P53779 | 0.26368 |
| 41898 | P14079 | Q14693 | 0.26309 |
| 41899 | P14079 | Q60828 | 0.741   |
| 41900 | P14079 | Q96A04 | 1.4641  |
| 41901 | P14079 | Q9UBU8 | 0.67553 |
| 41902 | P14079 | Q9ULV3 | 0.5185  |
| 41903 | P14079 | P28749 | 1.4057  |
| 41904 | P14079 | Q9H4K7 | 1.0731  |
| 41905 | P14079 | Q86X59 | 0.23765 |
| 41906 | P14079 | Q86XA9 | 0.742   |
| 41907 | P14079 | Q9Y316 | 1.0269  |
| 41908 | P14079 | Q5T035 | 1.5169  |
| 41909 | P14079 | Q9NPI0 | 0.94686 |
| 41910 | P14079 | P50452 | 0.66779 |
| 41911 | P14079 | P61201 | 0.62622 |
| 41912 | P14079 | P78337 | 0.25261 |
| 41913 | P14079 | D6RGH6 | 1.1858  |
| 41914 | P14079 | Q6ZVD7 | 0.61606 |
| 41915 | P14079 | O43422 | 0.87128 |
| 41916 | P14079 | Q96LA8 | 0.69561 |
| 41917 | P14079 | P41219 | 0.88585 |
| 41918 | P14079 | Q5VSG8 | 0.96159 |
| 41919 | P14079 | Q4LDR2 | 1.1353  |
| 41920 | P14079 | Q9BYG5 | 0.79225 |
| 41921 | P14079 | Q5TH74 | 1.2507  |
| 41922 | P14079 | P13349 | 0.30705 |
| 41923 | P14079 | Q01534 | 0.40864 |
| 41924 | P14079 | Q7Z460 | 0.55256 |
| 41925 | P14079 | Q9UNY5 | 0.93026 |
| 41926 | P14079 | Q16649 | 0.22274 |
| 41927 | P14079 | Q96BN6 | 0.95486 |
| 41928 | P14079 | Q14653 | 0.73832 |
| 41929 | P14079 | Q9NZM5 | 0.93273 |
| 41930 | P14079 | Q8NEU8 | 0.58432 |
| 41931 | P14079 | A1L3X0 | 0.77014 |
| 41932 | P14079 | P61570 | 1.0384  |
| 41933 | P14079 | A8MS94 | 0.93955 |
| 41934 | P14079 | A2A368 | 0.22377 |
| 41935 | P14079 | Q99633 | 0.11627 |
| 41936 | P14079 | Q02383 | 0.96444 |
| 41937 | P14079 | A6NK53 | 0.6845  |
| 41938 | P14079 | Q9UL59 | 0.54351 |
| 41939 | P14079 | Q96NY9 | 0.99331 |
| 41940 | P14079 | Q8N587 | 0.92278 |
| 41941 | P14079 | P51808 | 0.37527 |
| 41942 | P14079 | Q9H321 | 1.445   |
| 41943 | P14079 | P06730 | 0.74779 |
| 41944 | P14079 | Q8WY36 | 0.38002 |
| 41945 | P14079 | Q8N1D5 | 0.84703 |
| 41946 | P14079 | Q8IX90 | 0.80052 |
| 41947 | P14079 | Q6PIJ6 | 1.5141  |
| 41948 | P14079 | P59990 | 1.3698  |
| 41949 | P14079 | Q8IWT0 | 0.48847 |
| 41950 | P14079 | A8K554 | 0.37211 |
| 41951 | P14079 | Q6P1R3 | 0.90321 |
| 41952 | P14079 | Q6ZNA1 | 0.76643 |

|       |        |        |          |
|-------|--------|--------|----------|
| 41953 | P14079 | Q8IYM2 | 0.67206  |
| 41954 | P14079 | Q6QNY0 | 1.0943   |
| 41955 | P14079 | Q96HB5 | 0.93563  |
| 41956 | P14079 | Q86WV5 | 0.89225  |
| 41957 | P14079 | Q96A33 | 0.67268  |
| 41958 | P14079 | Q8TAI1 | 1.2677   |
| 41959 | P14079 | Q96KW9 | 1.545    |
| 41960 | P14079 | Q7Z4H9 | 1.0038   |
| 41961 | P14079 | Q5VSY0 | 0.53731  |
| 41962 | P14079 | Q13765 | 1.3112   |
| 41963 | P14079 | Q96JN2 | 0.90922  |
| 41964 | P14079 | Q92917 | 0.77713  |
| 41965 | P14079 | Q9UHV2 | 2.2067   |
| 41966 | P14079 | Q9Y2D5 | 0.57695  |
| 41967 | P14079 | O15553 | 0.26879  |
| 41968 | P14079 | P19387 | 0.7484   |
| 41969 | P14079 | O75691 | 0.93512  |
| 41970 | P14079 | Q5H9L4 | 0.48573  |
| 41971 | P14079 | Q9UGK8 | 0.74716  |
| 41972 | P14079 | Q6ZVN8 | 0.72783  |
| 41973 | P14079 | Q9Y3A2 | 0.91905  |
| 41974 | P14079 | Q96BT3 | 0.7047   |
| 41975 | P14079 | Q8N9F8 | 0.6406   |
| 41976 | P14079 | P02100 | 0.65657  |
| 41977 | P14079 | Q5TEV5 | 1.1002   |
| 41978 | P14079 | Q99704 | 0.30536  |
| 41979 | P14079 | O75437 | 0.96899  |
| 41980 | P14079 | O60739 | 0.81433  |
| 41981 | P14079 | A8MQ03 | 1.0699   |
| 41982 | P14079 | O95139 | 0.31524  |
| 41983 | P14079 | A6NIH7 | 0.77774  |
| 41984 | P14079 | P40222 | 1.1093   |
| 41985 | P14079 | Q6NUJ2 | 1.2485   |
| 41986 | P14079 | P52747 | 0.97966  |
| 41987 | P14079 | Q24JP5 | 1.0649   |
| 41988 | P14079 | Q9NZJ4 | 0.19373  |
| 41989 | P14079 | Q6EEV4 | 1.1715   |
| 41990 | P14079 | Q16548 | 0.82894  |
| 41991 | P14079 | Q9UI25 | 1.1715   |
| 41992 | P14079 | F8WBI6 | 0.082129 |
| 41993 | P14079 | P25705 | 0.21212  |
| 41994 | P14079 | Q9C035 | 0.62353  |
| 41995 | P14079 | Q8N9W5 | 0.76332  |
| 41996 | P14079 | Q5D862 | 0.017627 |
| 41997 | P14079 | Q8NCQ3 | 1.1715   |
| 41998 | P14079 | P61421 | 0.25563  |
| 41999 | P14079 | A5PLL1 | 0.28036  |
| 42000 | P14079 | Q96FA7 | 1.7459   |
| 42001 | P14079 | O75928 | 0.73206  |
| 42002 | P14079 | P09914 | 0.62351  |
| 42003 | P14079 | Q9UHQ1 | 1.2216   |
| 42004 | P14079 | Q9Y5B0 | 0.76158  |
| 42005 | P14079 | Q12887 | 0.80021  |
| 42006 | P14079 | Q52LR7 | 0.40154  |
| 42007 | P14079 | P35269 | 1.3001   |
| 42008 | P14079 | P57721 | 0.6273   |
| 42009 | P14079 | Q5T751 | 1.1715   |
| 42010 | P14079 | Q15776 | 0.54371  |
| 42011 | P14079 | Q56P03 | 1.1865   |
| 42012 | P14079 | Q14186 | 1.1612   |
| 42013 | P14079 | Q6ZNG9 | 0.11264  |
| 42014 | P14079 | Q13118 | 0.4961   |
| 42015 | P14079 | A3QJZ6 | 0.097036 |
| 42016 | P14079 | P20809 | 0.87321  |
| 42017 | P14079 | P61583 | 1.7501   |
| 42018 | P14079 | P11171 | 0.8731   |
| 42019 | P14079 | Q9H009 | 0.53185  |
| 42020 | P14079 | Q9Y255 | 0.74486  |
| 42021 | P14079 | Q96IU2 | 1.9492   |
| 42022 | P14079 | Q9Y519 | 0.80647  |
| 42023 | P14079 | Q96GY0 | 1.3053   |
| 42024 | P14079 | Q9ULQ0 | 1.6049   |
| 42025 | P14079 | Q9UHA3 | 0.38116  |
| 42026 | P14079 | Q9UI10 | 0.4593   |
| 42027 | P14079 | O75528 | 0.68178  |
| 42028 | P14079 | P54136 | 1.114    |

|       |        |         |         |
|-------|--------|---------|---------|
| 42029 | P14079 | Q86UQ0  | 0.53928 |
| 42030 | P14079 | Q2M1V0  | 0.28169 |
| 42031 | P14079 | Q6UX01  | 1.0651  |
| 42032 | P14079 | Q9NRG7  | 0.80677 |
| 42033 | P14079 | Q7L273  | 0.18591 |
| 42034 | P14079 | Q8TF05  | 0.31551 |
| 42035 | P14079 | Q6ZMV9  | 0.31989 |
| 42036 | P14079 | P43366  | 0.09333 |
| 42037 | P14079 | Q9GZQ3  | 1.5397  |
| 42038 | P14079 | P49336  | 0.27274 |
| 42039 | P14079 | Q8N112  | 0.95946 |
| 42040 | P14079 | Q8N755  | 0.91861 |
| 42041 | P14079 | Q6ZNG0  | 0.5775  |
| 42042 | P14079 | Q9H869  | 1.8819  |
| 42043 | P14079 | A8MTW9  | 1.1715  |
| 42044 | P14079 | Q9BZA5  | 1.3646  |
| 42045 | P14079 | Q3LI60  | 1.1715  |
| 42046 | P14079 | Q9Y4P8  | 1.0017  |
| 42047 | P14079 | Q9ULC6  | 1.4646  |
| 42048 | P14079 | Q96DB2  | 0.14369 |
| 42049 | P14079 | O15063  | 1.1789  |
| 42050 | P14079 | Q13148  | 0.36558 |
| 42051 | P14079 | Q30KR1  | 0.91101 |
| 42052 | P14079 | Q8IU53  | 1.3031  |
| 42053 | P14079 | P51946  | 0.75089 |
| 42054 | P14079 | Q9UDY2  | 1.2932  |
| 42055 | P14079 | P08048  | 0.1949  |
| 42056 | P14079 | Q9H2U6  | 1.2197  |
| 42057 | P14079 | Q9NRG4  | 0.62518 |
| 42058 | P14079 | P17019  | 1.0245  |
| 42059 | P14079 | Q96MC2  | 0.60242 |
| 42060 | P14079 | E9PQR5  | 0.30744 |
| 42061 | P14079 | A6NL46  | 1.3045  |
| 42062 | P14079 | P11844  | 1.342   |
| 42063 | P14079 | Q9P0R6  | 0.65799 |
| 42064 | P14079 | A6NI79  | 1.5826  |
| 42065 | P14079 | O95999  | 0.3544  |
| 42066 | P14079 | Q9P055  | 1.0304  |
| 42067 | P14079 | Q9Y305  | 1.1225  |
| 42068 | P14079 | Q8I WV8 | 0.56167 |
| 42069 | P14079 | Q7L4P6  | 0.98184 |
| 42070 | P14079 | Q6ZMY9  | 0.99738 |
| 42071 | P14079 | Q9UKF7  | 0.24922 |
| 42072 | P14079 | Q8TDZ2  | 0.37623 |
| 42073 | P14079 | Q15853  | 0.52962 |
| 42074 | P14079 | Q2NL82  | 1.0476  |
| 42075 | P14079 | Q6ZN84  | 0.83414 |
| 42076 | P14079 | A3KN83  | 1.4154  |
| 42077 | P14079 | P14621  | 0.59147 |
| 42078 | P14079 | O00321  | 1.0851  |
| 42079 | P14079 | Q5JVX7  | 1.3448  |
| 42080 | P14079 | A8MXU0  | 0.79509 |
| 42081 | P14079 | Q96P70  | 1.1722  |
| 42082 | P14079 | Q8NFM7  | 0.94035 |
| 42083 | P14079 | Q9Y3A4  | 0.83861 |
| 42084 | P14079 | Q8NBR6  | 2.2522  |
| 42085 | P14079 | P0C221  | 0.18221 |
| 42086 | P14079 | Q14532  | 0.70212 |
| 42087 | P14079 | O15297  | 0.60224 |
| 42088 | P14079 | Q8NEQ6  | 0.71391 |
| 42089 | P14079 | Q9H2K0  | 0.87449 |
| 42090 | P14079 | P18621  | 0.8975  |
| 42091 | P14079 | Q8NDY3  | 0.55665 |
| 42092 | P14079 | Q96ER9  | 0.67368 |
| 42093 | P14079 | Q9NVU7  | 1.0675  |
| 42094 | P14079 | Q9BVN2  | 0.76693 |
| 42095 | P14079 | Q86WI0  | 1.089   |
| 42096 | P14079 | O60481  | 0.40625 |
| 42097 | P14079 | A8MTB1  | 1.1715  |
| 42098 | P14079 | P12074  | 0.93065 |
| 42099 | P14079 | Q9H5V9  | 1.1738  |
| 42100 | P14079 | Q8NAX2  | 1.3222  |
| 42101 | P14079 | Q13415  | 0.35264 |
| 42102 | P14079 | Q7Z2W4  | 0.60073 |
| 42103 | P14079 | Q9HBM1  | 0.8164  |
| 42104 | P14079 | Q9UHL3  | 0.78875 |

|       |        |        |          |
|-------|--------|--------|----------|
| 42105 | P14079 | O95487 | 0.98564  |
| 42106 | P14079 | Q9UM82 | 1.6847   |
| 42107 | P14079 | Q9Y3X0 | 1.1621   |
| 42108 | P14079 | Q6ZTR7 | 0.30187  |
| 42109 | P14079 | Q07866 | 0.92144  |
| 42110 | P14079 | Q3ZCX4 | 0.66611  |
| 42111 | P14079 | P68036 | 0.4218   |
| 42112 | P14079 | Q6ZVK1 | 1.2485   |
| 42113 | P14079 | Q9BVM2 | 0.84298  |
| 42114 | P14079 | A8MTZ7 | 0.66624  |
| 42115 | P14079 | O95684 | 1.0837   |
| 42116 | P14079 | Q7L2J0 | 0.27713  |
| 42117 | P14079 | Q7L0X2 | 1.0551   |
| 42118 | P14079 | Q9P209 | 1.2138   |
| 42119 | P14079 | Q9Y6K1 | 0.43784  |
| 42120 | P14079 | Q6ZT77 | 0.64204  |
| 42121 | P14079 | Q8NBQ7 | 0.56109  |
| 42122 | P14079 | O15535 | 0.43752  |
| 42123 | P14079 | O95359 | 0.43228  |
| 42124 | P14079 | Q6NVV3 | 1.288    |
| 42125 | P14079 | Q8N8P6 | 1.0612   |
| 42126 | P14079 | Q8IXJ9 | 0.73836  |
| 42127 | P14079 | P04066 | 0.66068  |
| 42128 | P14079 | C9J069 | 0.41561  |
| 42129 | P14079 | Q5T5W8 | 1.2159   |
| 42130 | P14079 | P00338 | 0.60641  |
| 42131 | P14079 | Q16594 | 0.6586   |
| 42132 | P14079 | Q49AJ0 | 0.62528  |
| 42133 | P14079 | P22735 | 0.14639  |
| 42134 | P14079 | Q9UPR6 | 0.66974  |
| 42135 | P14079 | Q9C0B1 | 0.50743  |
| 42136 | P14079 | Q96S52 | 0.69967  |
| 42137 | P14079 | P61576 | 0.722    |
| 42138 | P14079 | Q9BYR2 | 1.3698   |
| 42139 | P14079 | Q9GZU2 | 0.67038  |
| 42140 | P14079 | Q13309 | 0.67451  |
| 42141 | P14079 | Q6ZS72 | 0.94472  |
| 42142 | P14079 | Q658K8 | 1.0629   |
| 42143 | P14079 | A6NIJ5 | 0.13295  |
| 42144 | P14079 | Q16517 | 0.96502  |
| 42145 | P14079 | Q6ZW54 | 1.7187   |
| 42146 | P14079 | Q8IZA3 | 0.67228  |
| 42147 | P14079 | Q9H4H8 | 0.64779  |
| 42148 | P14079 | Q2VYF4 | 0.85052  |
| 42149 | P14079 | O14893 | 0.68092  |
| 42150 | P14079 | Q9Y6X2 | 0.64352  |
| 42151 | P14079 | Q9H0A0 | 0.94511  |
| 42152 | P14079 | P47813 | 1.5452   |
| 42153 | P14079 | Q92734 | 0.36397  |
| 42154 | P14079 | Q8N339 | 0.22441  |
| 42155 | P14079 | Q3MIV0 | 1.1715   |
| 42156 | P14079 | Q96IV0 | 0.58554  |
| 42157 | P14079 | P56589 | 0.33421  |
| 42158 | P14079 | Q9HCG1 | 0.80718  |
| 42159 | P14079 | Q96A22 | 1.1507   |
| 42160 | P14079 | P17035 | 0.52589  |
| 42161 | P14079 | Q8WWL2 | 0.3662   |
| 42162 | P14079 | P23409 | 0.081192 |
| 42163 | P14079 | Q14192 | 0.63959  |
| 42164 | P14079 | Q9Y5N5 | 0.47676  |
| 42165 | P14079 | Q9UHF0 | 1.1527   |
| 42166 | P14079 | A6NCL1 | 0.35299  |
| 42167 | P14079 | Q9BQI9 | 1.5012   |
| 42168 | P14079 | Q99581 | 0.68313  |
| 42169 | P14079 | Q92830 | 0.8197   |
| 42170 | P14079 | Q6NT46 | 0.99818  |
| 42171 | P14079 | Q9Y2P0 | 0.59897  |
| 42172 | P14079 | Q9H3M9 | 0.71083  |
| 42173 | P14079 | P07951 | 0.04123  |
| 42174 | P14079 | O43736 | 0.77936  |
| 42175 | P14079 | Q9H0U6 | 0.91496  |
| 42176 | P14079 | Q8IYK2 | 1.3214   |
| 42177 | P14079 | Q8N660 | 1.9823   |
| 42178 | P14079 | Q15173 | 0.5288   |
| 42179 | P14079 | O75312 | 0.92205  |
| 42180 | P14079 | Q5TFG8 | 1.0613   |



|       |        |        |          |
|-------|--------|--------|----------|
| 42181 | P14079 | Q9BT09 | 0.5292   |
| 42182 | P14079 | A6NCI8 | 1.3951   |
| 42183 | P14079 | A6ZKI3 | 1.3539   |
| 42184 | P14079 | Q6ZSN7 | 0.96683  |
| 42185 | P14079 | Q9H7Y0 | 0.94831  |
| 42186 | P14079 | Q9H5J8 | 1.6642   |
| 42187 | P14079 | Q1HG43 | 1.3179   |
| 42188 | P14079 | Q96DZ9 | 1.0706   |
| 42189 | P14079 | Q8N0S6 | 0.86275  |
| 42190 | P14079 | Q7Z4Q2 | 1.4682   |
| 42191 | P14079 | Q8N865 | 0.73181  |
| 42192 | P14079 | P83881 | 0.98326  |
| 42193 | P14079 | A6NKX1 | 1.1715   |
| 42194 | P14079 | Q96SZ5 | 0.51989  |
| 42195 | P14079 | Q9BWH6 | 1.3299   |
| 42196 | P14079 | Q9NVR2 | 1.3668   |
| 42197 | P14079 | Q6UXV3 | 1.1715   |
| 42198 | P14079 | P22234 | 0.76842  |
| 42199 | P14079 | Q9Y2G0 | 0.95185  |
| 42200 | P14079 | Q9P266 | 1.1634   |
| 42201 | P14079 | O75626 | 0.31558  |
| 42202 | P14079 | O75368 | 0.8004   |
| 42203 | P14079 | Q8IVF1 | 1.6599   |
| 42204 | P14079 | O60664 | 0.86191  |
| 42205 | P14079 | Q96PV6 | 1.0191   |
| 42206 | P14079 | Q969E4 | 0.73922  |
| 42207 | P14079 | P62072 | 0.52408  |
| 42208 | P14079 | Q9C0B9 | 0.18006  |
| 42209 | P14079 | A6NP81 | 0.28495  |
| 42210 | P14079 | Q9NSI2 | 1.3222   |
| 42211 | P14079 | P52564 | 0.24996  |
| 42212 | P14079 | A4UGR9 | 0.48781  |
| 42213 | P14079 | Q6MZQ0 | 0.86038  |
| 42214 | P14079 | O15519 | 0.5452   |
| 42215 | P14079 | P20132 | 0.041198 |
| 42216 | P14079 | Q5VXH5 | 0.23582  |
| 42217 | P14079 | Q96P26 | 0.70913  |
| 42218 | P14079 | Q6P161 | 0.376    |
| 42219 | P14079 | F7VJQ1 | 1.1715   |
| 42220 | P14079 | Q711Q0 | 1.1715   |
| 42221 | P14079 | Q6IPR3 | 0.80916  |
| 42222 | P14079 | Q8IXH7 | 1.3135   |
| 42223 | P14079 | Q9Y2Y9 | 0.92235  |
| 42224 | P14079 | Q96R06 | 1.0472   |
| 42225 | P14079 | Q8N6L1 | 1.0688   |
| 42226 | P14079 | Q6P9G9 | 0.48299  |
| 42227 | P14079 | Q8N7P7 | 0.46867  |
| 42228 | P14079 | O43597 | 0.15013  |
| 42229 | P14079 | Q8TA94 | 1.0284   |
| 42230 | P14079 | Q15700 | 0.29077  |
| 42231 | P14079 | O43309 | 0.60694  |
| 42232 | P14079 | Q52MB2 | 1.4444   |
| 42233 | P14079 | Q99456 | 0.99997  |
| 42234 | P14079 | Q14938 | 0.29792  |
| 42235 | P14079 | Q86TN4 | 0.67801  |
| 42236 | P14079 | Q8ND56 | 1.2179   |
| 42237 | P14079 | Q9BU76 | 1.4935   |
| 42238 | P14079 | Q3MIT2 | 0.44242  |
| 42239 | P14079 | Q96N06 | 1.084    |
| 42240 | P14079 | Q92614 | 0.26709  |
| 42241 | P14079 | Q330K2 | 0.86555  |
| 42242 | P14079 | Q9H4D5 | 0.98562  |
| 42243 | P14079 | Q15911 | 0.22908  |
| 42244 | P14079 | Q96QR8 | 0.73843  |
| 42245 | P14079 | Q8NDC0 | 1.3459   |
| 42246 | P14079 | Q9BYR9 | 0.94393  |
| 42247 | P14079 | O75362 | 0.91716  |
| 42248 | P14079 | Q96M43 | 0.82478  |
| 42249 | P14079 | Q9NTK1 | 1.6309   |
| 42250 | P14079 | Q5JXB2 | 0.44562  |
| 42251 | P14079 | Q96HI0 | 0.40396  |
| 42252 | P14079 | Q9UF83 | 0.83787  |
| 42253 | P14079 | Q8TCD5 | 0.50544  |
| 42254 | P14079 | P17010 | 0.43648  |
| 42255 | P14079 | Q68CJ9 | 0.58529  |
| 42256 | P14079 | Q15723 | 1.0851   |

|       |        |        |          |
|-------|--------|--------|----------|
| 42257 | P14079 | Q9UGP5 | 0.25585  |
| 42258 | P14079 | Q9HCI6 | 0.93349  |
| 42259 | P14079 | P20292 | 0.39129  |
| 42260 | P14079 | Q9Y2N7 | 0.54053  |
| 42261 | P14079 | B2RD01 | 0.38266  |
| 42262 | P14079 | Q9Y6A5 | 0.095896 |
| 42263 | P14079 | Q9Y2Q1 | 1.0266   |
| 42264 | P14079 | P35398 | 0.46957  |
| 42265 | P14079 | Q5T6L9 | 1.0613   |
| 42266 | P14079 | P17812 | 0.80501  |
| 42267 | P14079 | Q9UKF6 | 0.80097  |
| 42268 | P14079 | Q6UWF5 | 1.1715   |
| 42269 | P14079 | Q96GQ5 | 0.79956  |
| 42270 | P14079 | A4FU69 | 0.53508  |
| 42271 | P14079 | Q6UX68 | 1.3388   |
| 42272 | P14079 | Q9BV87 | 0.84473  |
| 42273 | P14079 | Q9BRL7 | 0.97088  |
| 42274 | P14079 | Q9NXE4 | 0.77887  |
| 42275 | P14079 | Q9H0W8 | 1.4129   |
| 42276 | P14079 | Q8NA34 | 0.13538  |
| 42277 | P14079 | Q9UKN8 | 0.86685  |
| 42278 | P14079 | Q8NHU2 | 0.48655  |
| 42279 | P14079 | Q0D2K0 | 1.288    |
| 42280 | P14079 | P0CI01 | 1.092    |
| 42281 | P14079 | Q9UBW8 | 0.42871  |
| 42282 | P14079 | Q5TAG4 | 0.88477  |
| 42283 | P14079 | Q01082 | 0.61605  |
| 42284 | P14079 | Q5T3J3 | 1.0064   |
| 42285 | P14079 | Q8N9T8 | 1.8629   |
| 42286 | P14079 | P0CB33 | 0.98083  |
| 42287 | P14079 | P78396 | 1.1467   |
| 42288 | P14079 | Q9HB09 | 1.8408   |
| 42289 | P14079 | P30040 | 0.059223 |
| 42290 | P14079 | A1A519 | 1.7332   |
| 42291 | P14079 | O75896 | 1.1268   |
| 42292 | P14079 | P09912 | 0.6358   |
| 42293 | P14079 | Q5VX52 | 0.34135  |
| 42294 | P14079 | Q8N3Z3 | 0.94396  |
| 42295 | P14079 | Q96CD0 | 1.1399   |
| 42296 | P14079 | Q9BVM4 | 0.9671   |
| 42297 | P14079 | A6QL64 | 1.0803   |
| 42298 | P14079 | O95271 | 0.64615  |
| 42299 | P14079 | O14896 | 0.34791  |
| 42300 | P14079 | Q8NFW8 | 0.65981  |
| 42301 | P14079 | P53567 | 0.49685  |
| 42302 | P14079 | Q16537 | 0.58533  |
| 42303 | P14079 | Q86VI4 | 0.76981  |
| 42304 | P14079 | P0C5Y4 | 1.1219   |
| 42305 | P14079 | P56750 | 0.54752  |
| 42306 | P14079 | Q9UKD1 | 0.69547  |
| 42307 | P14079 | Q9NX95 | 0.90674  |
| 42308 | P14079 | Q9UJ70 | 0.48917  |
| 42309 | P14079 | Q8N888 | 1.2821   |
| 42310 | P14079 | Q96M53 | 1.8704   |
| 42311 | P14079 | Q9Y5N6 | 0.90431  |
| 42312 | P14079 | A6NJJ6 | 1.3222   |
| 42313 | P14079 | Q9BYR6 | 1.5617   |
| 42314 | P14079 | Q9H9C1 | 0.65932  |
| 42315 | P14079 | Q9BR84 | 1.07     |
| 42316 | P14079 | Q15031 | 0.97261  |
| 42317 | P14079 | Q14103 | 0.66896  |
| 42318 | P14079 | P23434 | 0.51168  |
| 42319 | P14079 | Q9UFG5 | 0.7692   |
| 42320 | P14079 | P67809 | 0.56575  |
| 42321 | P14079 | Q13505 | 1.5024   |
| 42322 | P14079 | Q5T6M2 | 1.5841   |
| 42323 | P14079 | Q8TF01 | 1.5675   |
| 42324 | P14079 | Q7LFL8 | 0.075161 |
| 42325 | P14079 | Q8IYD8 | 0.39328  |
| 42326 | P14079 | P80217 | 0.806    |
| 42327 | P14079 | Q9UGN5 | 0.2987   |
| 42328 | P14079 | P0C7H8 | 0.94393  |
| 42329 | P14079 | P47974 | 0.29099  |
| 42330 | P14079 | Q6Q795 | 1.1715   |
| 42331 | P14079 | P0C7N4 | 1.0429   |
| 42332 | P14079 | Q8N8D1 | 1.4368   |

|       |        |        |          |
|-------|--------|--------|----------|
| 42333 | P14079 | Q12799 | 0.028939 |
| 42334 | P14079 | Q4VC05 | 1.3208   |
| 42335 | P14079 | Q9Y5M6 | 1.1715   |
| 42336 | P14079 | Q6ZTY9 | 1.1354   |
| 42337 | P14079 | Q1A5X7 | 0.11054  |
| 42338 | P14079 | Q8NFD4 | 0.90722  |
| 42339 | P14079 | Q9BWU0 | 0.70821  |
| 42340 | P14079 | O95817 | 0.53436  |
| 42341 | P14079 | Q5VTT2 | 0.94348  |
| 42342 | P14079 | Q96RQ1 | 0.29997  |
| 42343 | P14079 | P68104 | 0.64261  |
| 42344 | P14079 | Q5SW24 | 0.47276  |
| 42345 | P14079 | P53999 | 1.1513   |
| 42346 | P14079 | Q9UPN7 | 1.0595   |
| 42347 | P14079 | Q96FJ2 | 0.89172  |
| 42348 | P14079 | P50995 | 1.038    |
| 42349 | P14079 | Q15714 | 0.82485  |
| 42350 | P14079 | Q6RVD6 | 1.1715   |
| 42351 | P14079 | Q8TAG9 | 0.3082   |
| 42352 | P14079 | Q502W6 | 0.54949  |
| 42353 | P14079 | Q9UKJ5 | 0.62929  |
| 42354 | P14079 | Q9NWF4 | 1.2062   |
| 42355 | P14079 | Q8NDN9 | 0.49523  |
| 42356 | P14079 | Q6GV28 | 1.1349   |
| 42357 | P14079 | Q9H1L0 | 1.3598   |
| 42358 | P14079 | Q8TCC3 | 0.57577  |
| 42359 | P14079 | Q96LI6 | 0.39223  |
| 42360 | P14079 | A6NDV4 | 0.14017  |
| 42361 | P14079 | Q96DS6 | 1.2485   |
| 42362 | P14079 | Q8WWF3 | 1.3357   |
| 42363 | P14079 | P24864 | 0.78621  |
| 42364 | P14079 | Q86YH6 | 0.2216   |
| 42365 | P14079 | Q8IU60 | 0.86612  |
| 42366 | P14079 | Q5T160 | 1.1272   |
| 42367 | P14079 | Q2VPB7 | 0.87242  |
| 42368 | P14079 | P41567 | 1.3714   |
| 42369 | P14079 | Q8N108 | 1.1708   |
| 42370 | P14079 | Q96KT6 | 1.1715   |
| 42371 | P14079 | P62487 | 0.60253  |
| 42372 | P14079 | Q9NUJ7 | 0.5661   |
| 42373 | P14079 | Q8IZW8 | 0.85412  |
| 42374 | P14079 | P10244 | 0.65854  |
| 42375 | P14079 | Q86VS8 | 0.63276  |
| 42376 | P14079 | Q9HB07 | 0.72844  |
| 42377 | P14079 | Q9Y237 | 0.33327  |
| 42378 | P14079 | Q9BVC6 | 1.4292   |
| 42379 | P14079 | Q8N782 | 0.97319  |
| 42380 | P14079 | Q9BY44 | 0.52452  |
| 42381 | P14079 | Q86VY9 | 1.0007   |
| 42382 | P14079 | Q99700 | 0.87687  |
| 42383 | P14079 | O95503 | 0.95514  |
| 42384 | P14079 | P49842 | 1.1278   |
| 42385 | P14079 | Q9UJM3 | 0.52961  |
| 42386 | P14079 | O15258 | 0.76541  |
| 42387 | P14079 | Q15155 | 0.97149  |
| 42388 | P14079 | Q9NW08 | 0.1289   |
| 42389 | P14079 | Q14146 | 1.1715   |
| 42390 | P14079 | Q9NUA8 | 0.51237  |
| 42391 | P14079 | Q96CP7 | 1.2485   |
| 42392 | P14079 | Q96KH6 | 1.2843   |
| 42393 | P14079 | Q8N9E0 | 1.3222   |
| 42394 | P14079 | Q9ULX6 | 0.88269  |
| 42395 | P14079 | Q6F5E7 | 0.68744  |
| 42396 | P14079 | O43439 | 0.91536  |
| 42397 | P14079 | Q7Z6K1 | 1.182    |
| 42398 | P14079 | Q9UHR6 | 1.4363   |
| 42399 | P14079 | Q6WRX3 | 0.027675 |
| 42400 | P14079 | Q68DH5 | 1.4936   |
| 42401 | P14079 | O15304 | 1.3809   |
| 42402 | P14079 | P43360 | 0.36435  |
| 42403 | P14079 | O95789 | 1.2437   |
| 42404 | P14079 | Q8TDY2 | 0.82542  |
| 42405 | P14079 | Q9UNX3 | 1.3864   |
| 42406 | P14079 | P82664 | 1.5725   |
| 42407 | P14079 | P31939 | 0.67507  |
| 42408 | P14079 | Q9BUE0 | 1.3926   |

|       |        |        |         |
|-------|--------|--------|---------|
| 42409 | P14079 | Q9UNQ2 | 0.93114 |
| 42410 | P14079 | Q5SVZ6 | 1.6391  |
| 42411 | P14079 | O43924 | 0.36055 |
| 42412 | P14079 | Q9NSK7 | 1.4847  |
| 42413 | P14079 | Q96MY7 | 1.6715  |
| 42414 | P14079 | Q4VX62 | 0.77043 |
| 42415 | P14079 | P86790 | 0.80083 |
| 42416 | P14079 | Q96CJ1 | 1.3323  |
| 42417 | P14079 | P46781 | 1.2432  |
| 42418 | P14079 | Q8NEX6 | 1.1226  |
| 42419 | P14079 | P36873 | 0.69438 |
| 42420 | P14079 | Q9NP66 | 0.79349 |
| 42421 | P14079 | Q0VFX4 | 1.0286  |
| 42422 | P14079 | Q9NX70 | 1.0559  |
| 42423 | P14079 | Q5T4T1 | 1.025   |
| 42424 | P14079 | Q6NUP7 | 0.63548 |
| 42425 | P14079 | Q9UJY5 | 0.83465 |
| 42426 | P14079 | Q16658 | 0.42094 |
| 42427 | P14079 | Q52LA3 | 1.152   |
| 42428 | P14079 | Q9UFB7 | 0.59641 |
| 42429 | P14079 | Q7RTT3 | 0.49064 |
| 42430 | P14079 | P26998 | 1.2574  |
| 42431 | P14079 | P17022 | 0.41703 |
| 42432 | P14079 | Q8N1W0 | 1.1715  |
| 42433 | P14079 | P82979 | 0.43303 |
| 42434 | P14079 | Q96GE4 | 0.76753 |
| 42435 | P14079 | Q92966 | 1.2303  |
| 42436 | P14079 | P49354 | 0.38653 |
| 42437 | P14079 | P05408 | 0.98291 |
| 42438 | P14079 | P11473 | 0.48733 |
| 42439 | P14079 | Q8NDA8 | 1.4027  |
| 42440 | P14079 | Q9H0M5 | 0.54706 |
| 42441 | P14079 | Q9Y6I3 | 0.23461 |
| 42442 | P14079 | Q96G30 | 0.92676 |
| 42443 | P14079 | P57740 | 0.85714 |
| 42444 | P14079 | Q3KP31 | 0.95434 |
| 42445 | P14079 | Q8N9B5 | 1.0575  |
| 42446 | P14079 | Q96NT3 | 1.0164  |
| 42447 | P14079 | P17041 | 0.55842 |
| 42448 | P14079 | O60493 | 0.30428 |
| 42449 | P14079 | Q14210 | 0.59903 |
| 42450 | P14079 | Q9UBL3 | 0.25994 |
| 42451 | P14079 | Q96BN8 | 0.71631 |
| 42452 | P14079 | Q96CM3 | 0.81637 |
| 42453 | P14079 | Q13021 | 0.54171 |
| 42454 | P14079 | Q8IVL6 | 0.65898 |
| 42455 | P14079 | Q9BW85 | 1.5305  |
| 42456 | P14079 | P83731 | 0.96995 |
| 42457 | P14079 | O15453 | 1.1598  |
| 42458 | P14079 | Q9XRX5 | 0.79394 |
| 42459 | P14079 | A6NGR9 | 1.2633  |
| 42460 | P14079 | Q99873 | 0.64066 |
| 42461 | P14079 | C9JE40 | 1.0499  |
| 42462 | P14079 | P43357 | 0.56221 |
| 42463 | P14079 | O75781 | 0.50667 |
| 42464 | P14079 | Q8TEV8 | 1.1715  |
| 42465 | P14079 | A2RU30 | 1.2979  |
| 42466 | P14079 | Q9H9Q4 | 0.60485 |
| 42467 | P14079 | Q9UBS3 | 0.62663 |
| 42468 | P14079 | Q8WVR3 | 1.3222  |
| 42469 | P14079 | Q8N1F7 | 0.71107 |
| 42470 | P14079 | Q4KN68 | 0.15711 |
| 42471 | P14079 | P10109 | 0.28702 |
| 42472 | P14079 | O60290 | 1.1175  |
| 42473 | P14079 | Q8N393 | 0.60102 |
| 42474 | P14079 | P41223 | 0.31565 |
| 42475 | P14079 | Q9H492 | 0.40057 |
| 42476 | P14079 | P61513 | 0.83081 |
| 42477 | P14079 | Q96F63 | 1.3222  |
| 42478 | P14079 | P20396 | 1.0221  |
| 42479 | P14079 | P59103 | 0.93007 |
| 42480 | P14079 | P35680 | 0.2541  |
| 42481 | P14079 | O60682 | 0.27989 |
| 42482 | P14079 | O75533 | 0.37271 |
| 42483 | P14079 | O15446 | 0.88073 |
| 42484 | P14079 | P20265 | 0.60535 |

|       |        |        |          |
|-------|--------|--------|----------|
| 42485 | P14079 | P40937 | 0.173    |
| 42486 | P14079 | Q8N8F4 | 0.64849  |
| 42487 | P14079 | Q8IXT2 | 0.29941  |
| 42488 | P14079 | Q6IA86 | 0.51675  |
| 42489 | P14079 | Q96GX1 | 0.79662  |
| 42490 | P14079 | P0C838 | 1.0064   |
| 42491 | P14079 | Q15006 | 0.39633  |
| 42492 | P14079 | Q5TEC3 | 0.5681   |
| 42493 | P14079 | Q7L5D6 | 1.6747   |
| 42494 | P14079 | P50479 | 0.47474  |
| 42495 | P14079 | Q9Y617 | 0.7317   |
| 42496 | P14079 | Q9NY61 | 0.98029  |
| 42497 | P14079 | Q6UWS5 | 0.86323  |
| 42498 | P14079 | Q7Z3Z0 | 0.99997  |
| 42499 | P14079 | P62847 | 1.0406   |
| 42500 | P14079 | Q5T0B9 | 0.1949   |
| 42501 | P14079 | P0CZ25 | 0.81101  |
| 42502 | P14079 | P13010 | 0.30948  |
| 42503 | P14079 | Q96ST3 | 0.67754  |
| 42504 | P14079 | Q8N7N1 | 0.050966 |
| 42505 | P14079 | Q8WUF5 | 0.81309  |
| 42506 | P14079 | Q13023 | 0.77871  |
| 42507 | P14079 | Q6ZQP7 | 1.1715   |
| 42508 | P14079 | O00193 | 1.6655   |
| 42509 | P14079 | P56378 | 1.1272   |
| 42510 | P14079 | Q9NXW9 | 0.83947  |
| 42511 | P14079 | Q15819 | 0.53821  |
| 42512 | P14079 | O60543 | 0.58255  |
| 42513 | P14079 | P15515 | 0.88262  |
| 42514 | P14079 | Q6IS14 | 0.39345  |
| 42515 | P14079 | Q86W33 | 1.1823   |
| 42516 | P14079 | P41091 | 0.31388  |
| 42517 | P14079 | Q15024 | 0.52739  |
| 42518 | P14079 | Q99676 | 0.75812  |
| 42519 | P14079 | Q5T7W7 | 1.3222   |
| 42520 | P14079 | Q701N2 | 1.1715   |
| 42521 | P14079 | Q9NRG0 | 0.44007  |
| 42522 | P14079 | P40306 | 0.88237  |
| 42523 | P14079 | Q92782 | 0.61704  |
| 42524 | P14079 | Q6P087 | 0.39241  |
| 42525 | P14079 | Q96FF7 | 1.1715   |
| 42526 | P14079 | O76011 | 0.99997  |
| 42527 | P14079 | Q92558 | 0.71767  |
| 42528 | P14079 | P55347 | 0.37147  |
| 42529 | P14079 | Q6W349 | 1.3323   |
| 42530 | P14079 | Q9UKS6 | 0.3323   |
| 42531 | P14079 | Q5T742 | 1.1715   |
| 42532 | P14079 | P09086 | 0.26326  |
| 42533 | P14079 | P31941 | 0.30542  |
| 42534 | P14079 | Q8N8W4 | 0.45174  |
| 42535 | P14079 | Q9BTD1 | 0.77186  |
| 42536 | P14079 | Q9NQ31 | 1.273    |
| 42537 | P14079 | P13498 | 0.31245  |
| 42538 | P14079 | A6NKN8 | 1.5961   |
| 42539 | P14079 | Q7Z7H3 | 0.71638  |
| 42540 | P14079 | Q75VX8 | 1.5373   |
| 42541 | P14079 | Q9NP84 | 0.95443  |
| 42542 | P14079 | Q9NR12 | 0.16103  |
| 42543 | P14079 | Q96RK0 | 0.98143  |
| 42544 | P14079 | Q96CS3 | 0.69587  |
| 42545 | P14079 | A6NER3 | 0.33792  |
| 42546 | P14079 | P39656 | 0.79564  |
| 42547 | P14079 | Q9NZ32 | 0.92536  |
| 42548 | P14079 | A8MT65 | 0.96521  |
| 42549 | P14079 | O75582 | 0.3381   |
| 42550 | P14079 | Q96JK9 | 1.0237   |
| 42551 | P14079 | Q8NCP5 | 0.1949   |
| 42552 | P14079 | Q16254 | 0.91448  |
| 42553 | P14079 | Q71F78 | 1.0181   |
| 42554 | P14079 | Q9UK45 | 0.75543  |
| 42555 | P14079 | Q96L14 | 0.84394  |
| 42556 | P14079 | O95229 | 0.88917  |
| 42557 | P14079 | Q08AN1 | 0.77845  |
| 42558 | P14079 | A6NJG6 | 0.28169  |
| 42559 | P14079 | O14641 | 0.52079  |
| 42560 | P14079 | P07476 | 1.2019   |

|       |        |        |          |
|-------|--------|--------|----------|
| 42561 | P14079 | Q6XD76 | 0.2791   |
| 42562 | P14079 | Q86VX9 | 1.5384   |
| 42563 | P14079 | Q8NB42 | 1.0252   |
| 42564 | P14079 | P10828 | 0.58522  |
| 42565 | P14079 | Q92541 | 0.99479  |
| 42566 | P14079 | Q16829 | 0.52653  |
| 42567 | P14079 | Q49AM1 | 0.70694  |
| 42568 | P14079 | P0CW27 | 0.75981  |
| 42569 | P14079 | Q9BSU1 | 1.2168   |
| 42570 | P14079 | Q9BY42 | 1.2722   |
| 42571 | P14079 | Q9BXU0 | 0.69749  |
| 42572 | P14079 | Q15053 | 0.79083  |
| 42573 | P14079 | Q14151 | 0.6755   |
| 42574 | P14079 | A6NDU8 | 1.1192   |
| 42575 | P14079 | P62753 | 1.1043   |
| 42576 | P14079 | Q9BVL4 | 1.8084   |
| 42577 | P14079 | O43679 | 0.39526  |
| 42578 | P14079 | Q86Y79 | 1.1862   |
| 42579 | P14079 | Q6WQI6 | 0.66064  |
| 42580 | P14079 | Q5VVH5 | 0.80142  |
| 42581 | P14079 | Q8TE85 | 0.26702  |
| 42582 | P14079 | Q96JC9 | 0.9657   |
| 42583 | P14079 | Q9Y5Z4 | 0.19405  |
| 42584 | P14079 | Q9NPJ8 | 0.7173   |
| 42585 | P14079 | Q58F21 | 0.44466  |
| 42586 | P14079 | Q8IVM7 | 1.1715   |
| 42587 | P14079 | Q9BYH8 | 0.40073  |
| 42588 | P14079 | Q9UBF6 | 0.65728  |
| 42589 | P14079 | Q8WVX3 | 1.2485   |
| 42590 | P14079 | A6NCL2 | 0.18105  |
| 42591 | P14079 | Q96NU7 | 0.75964  |
| 42592 | P14079 | Q8NBT2 | 0.83496  |
| 42593 | P14079 | Q96IR3 | 1.3298   |
| 42594 | P14079 | Q02083 | 0.66334  |
| 42595 | P14079 | Q9NVM4 | 0.16757  |
| 42596 | P14079 | Q13907 | 0.48508  |
| 42597 | P14079 | A8MXV4 | 1.2061   |
| 42598 | P14079 | P16083 | 0.40879  |
| 42599 | P14079 | Q5W0V3 | 1.5066   |
| 42600 | P14079 | Q5MJ07 | 1.5871   |
| 42601 | P14079 | Q13620 | 0.65427  |
| 42602 | P14079 | Q92542 | 0.6773   |
| 42603 | P14079 | I3L0S3 | 1.1511   |
| 42604 | P14079 | Q9H4G8 | 0.83309  |
| 42605 | P14079 | Q6BDI9 | 1.029    |
| 42606 | P14079 | Q969T7 | 0.39521  |
| 42607 | P14079 | A6NK89 | 1.2971   |
| 42608 | P14079 | Q12840 | 0.42294  |
| 42609 | P14079 | P56537 | 1.4076   |
| 42610 | P14079 | P82933 | 1.0084   |
| 42611 | P14079 | Q499Z3 | 1.1457   |
| 42612 | P14079 | Q9BRU9 | 0.83891  |
| 42613 | P14079 | Q14410 | 0.88589  |
| 42614 | P14079 | Q08722 | 0.64962  |
| 42615 | P14079 | Q14157 | 1.2871   |
| 42616 | P14079 | Q13323 | 0.72882  |
| 42617 | P14079 | Q9UJX3 | 1.0375   |
| 42618 | P14079 | Q2QGD7 | 0.66216  |
| 42619 | P14079 | Q9BSI4 | 1.3216   |
| 42620 | P14079 | Q86XT2 | 0.39477  |
| 42621 | P14079 | Q3B7S5 | 1.1715   |
| 42622 | P14079 | P08235 | 0.41817  |
| 42623 | P14079 | Q6YFQ2 | 0.037428 |
| 42624 | P14079 | Q9BYQ9 | 1.3698   |
| 42625 | P14079 | Q10570 | 0.9768   |
| 42626 | P14079 | P98171 | 0.30249  |
| 42627 | P14079 | Q8IV33 | 1.0467   |
| 42628 | P14079 | A6NC78 | 0.5943   |
| 42629 | P14079 | P52434 | 0.57715  |
| 42630 | P14079 | P02511 | 0.32211  |
| 42631 | P14079 | Q9UI47 | 0.56042  |
| 42632 | P14079 | A8MU93 | 1.3222   |
| 42633 | P14079 | Q8IVG5 | 0.31741  |
| 42634 | P14079 | Q9NZ42 | 0.85424  |
| 42635 | P14079 | P48634 | 1.1122   |
| 42636 | P14079 | Q8IUC6 | 0.52952  |

|       |        |        |          |
|-------|--------|--------|----------|
| 42637 | P14079 | H3BNL1 | 1.181    |
| 42638 | P14079 | Q92985 | 0.61377  |
| 42639 | P14079 | A6NFK2 | 0.62696  |
| 42640 | P14079 | Q32M78 | 0.93128  |
| 42641 | P14079 | Q6PDB4 | 1.0584   |
| 42642 | P14079 | Q9BQ48 | 1.4448   |
| 42643 | P14079 | Q9UNY4 | 0.3458   |
| 42644 | P14079 | Q86WT1 | 0.27301  |
| 42645 | P14079 | P15924 | 0.55556  |
| 42646 | P14079 | Q96KN4 | 0.38904  |
| 42647 | P14079 | P17039 | 0.51784  |
| 42648 | P14079 | Q13404 | 1.2576   |
| 42649 | P14079 | Q9NRR8 | 1.2613   |
| 42650 | P14079 | Q9BUW7 | 1.3222   |
| 42651 | P14079 | Q8IYN2 | 1.7066   |
| 42652 | P14079 | O60832 | 0.76493  |
| 42653 | P14079 | Q9HBM0 | 1.2946   |
| 42654 | P14079 | Q8IYX3 | 1.4597   |
| 42655 | P14079 | P52298 | 0.61677  |
| 42656 | P14079 | P04156 | 0.77254  |
| 42657 | P14079 | Q9UMX0 | 0.98861  |
| 42658 | P14079 | Q8N0X2 | 0.34708  |
| 42659 | P14079 | P55036 | 1.1063   |
| 42660 | P14079 | Q6V702 | 0.58571  |
| 42661 | P14079 | Q6ZQX7 | 0.27848  |
| 42662 | P14079 | P35658 | 1.0771   |
| 42663 | P14079 | Q9H1K0 | 0.12567  |
| 42664 | P14079 | O94986 | 1.5399   |
| 42665 | P14079 | Q9UHP9 | 0.66609  |
| 42666 | P14079 | Q9BPY3 | 0.89702  |
| 42667 | P14079 | P13985 | 1.1715   |
| 42668 | P14079 | Q96HY6 | 0.79795  |
| 42669 | P14079 | O76095 | 0.81226  |
| 42670 | P14079 | P35606 | 0.61982  |
| 42671 | P14079 | Q92564 | 0.31874  |
| 42672 | P14079 | O15231 | 0.21523  |
| 42673 | P14079 | Q5EBM4 | 0.27146  |
| 42674 | P14079 | Q86UT5 | 0.24885  |
| 42675 | P14079 | F5H4B4 | 1.5912   |
| 42676 | P14079 | Q9NTI7 | 1.2694   |
| 42677 | P14079 | P40692 | 0.28054  |
| 42678 | P14079 | Q32MH5 | 1.1967   |
| 42679 | P14079 | A6NKCO | 0.57067  |
| 42680 | P14079 | A6NM45 | 0.63456  |
| 42681 | P14079 | Q9P0M2 | 0.22734  |
| 42682 | P14079 | P84157 | 1.2485   |
| 42683 | P14079 | Q9HCK1 | 0.96374  |
| 42684 | P14079 | Q9NPI6 | 0.94005  |
| 42685 | P14079 | Q5JQF7 | 1.1715   |
| 42686 | P14079 | Q6P988 | 1.0653   |
| 42687 | P14079 | P47756 | 0.27258  |
| 42688 | P14079 | Q92804 | 0.35586  |
| 42689 | P14079 | Q14207 | 0.83595  |
| 42690 | P14079 | Q9Y314 | 1.0221   |
| 42691 | P14079 | Q9UBZ4 | 0.061983 |
| 42692 | P14079 | P43359 | 1.4995   |
| 42693 | P14079 | Q9UQF2 | 0.52746  |
| 42694 | P14079 | Q99871 | 0.71672  |
| 42695 | P14079 | Q3MIR4 | 0.18288  |
| 42696 | P14079 | A6NEM1 | 1.3415   |
| 42697 | P14079 | Q9BY43 | 0.656    |
| 42698 | P14079 | P52209 | 0.55917  |
| 42699 | P14079 | Q8N2C7 | 1.5254   |
| 42700 | P14079 | Q9BV20 | 0.77897  |
| 42701 | P14079 | Q63HQ0 | 1.1715   |
| 42702 | P14079 | Q5T230 | 2.0479   |
| 42703 | P14079 | Q7Z739 | 1.1366   |
| 42704 | P14079 | Q96DF8 | 1.3968   |
| 42705 | P14079 | Q9BRQ4 | 1.052    |
| 42706 | P14079 | Q13098 | 0.26348  |
| 42707 | P14079 | Q8IYJ3 | 0.32436  |
| 42708 | P14079 | P0CH99 | 1.1929   |
| 42709 | P14079 | Q92793 | 0.69945  |
| 42710 | P14079 | O00170 | 0.61744  |
| 42711 | P14079 | Q7Z5Y7 | 0.30585  |
| 42712 | P14079 | Q5JTZ5 | 0.57367  |

|       |        |        |         |
|-------|--------|--------|---------|
| 42713 | P14079 | Q9P0U1 | 1.0078  |
| 42714 | P14079 | Q05D60 | 0.36147 |
| 42715 | P14079 | Q6NUN9 | 0.84305 |
| 42716 | P14079 | Q9HAY2 | 0.30704 |
| 42717 | P14079 | Q13033 | 0.92252 |
| 42718 | P14079 | Q9HCE1 | 0.60781 |
| 42719 | P14079 | P51522 | 0.58766 |
| 42720 | P14079 | Q496A3 | 0.83405 |
| 42721 | P14079 | Q8N5T8 | 1.2255  |
| 42722 | P14079 | P28074 | 1.0683  |
| 42723 | P14079 | Q30KQ7 | 0.91101 |
| 42724 | P14079 | Q9ULM2 | 0.69526 |
| 42725 | P14079 | P27352 | 0.9562  |
| 42726 | P14079 | Q92545 | 1.2485  |
| 42727 | P14079 | Q9H521 | 0.03933 |
| 42728 | P14079 | Q5BN46 | 0.88669 |
| 42729 | P14079 | Q96ED9 | 0.7747  |
| 42730 | P14079 | Q7Z388 | 1.1385  |
| 42731 | P14079 | Q8N9H9 | 1.1715  |
| 42732 | P14079 | Q99733 | 0.73466 |
| 42733 | P14079 | Q9HC52 | 0.7351  |
| 42734 | P14079 | Q9NRL2 | 0.97252 |
| 42735 | P14079 | Q5JVG8 | 0.96469 |
| 42736 | P14079 | P12524 | 0.29305 |
| 42737 | P14079 | Q15172 | 0.38732 |
| 42738 | P14079 | Q07157 | 0.88597 |
| 42739 | P14079 | Q9UPM8 | 0.56649 |
| 42740 | P14079 | Q8WVT3 | 0.18584 |
| 42741 | P14079 | Q6PK04 | 1.4147  |
| 42742 | P14079 | Q0VG73 | 1.1715  |
| 42743 | P14079 | Q8NFR7 | 1.2417  |
| 42744 | P14079 | Q6WBX8 | 0.76703 |
| 42745 | P14079 | Q9Y675 | 1.4627  |
| 42746 | P14079 | Q96I76 | 0.27735 |
| 42747 | P14079 | Q96LB4 | 0.43194 |
| 42748 | P14079 | Q5JXM2 | 1.0967  |
| 42749 | P14079 | Q9UBB5 | 1.3761  |
| 42750 | P14079 | Q5PSV4 | 0.42468 |
| 42751 | P14079 | Q9H171 | 0.49486 |
| 42752 | P14079 | Q9BZK3 | 0.67171 |
| 42753 | P14079 | Q70IA6 | 0.40175 |
| 42754 | P14079 | Q6GMV2 | 0.74886 |
| 42755 | P14079 | Q13618 | 0.35148 |
| 42756 | P14079 | Q9BT56 | 1.1875  |
| 42757 | P14079 | Q5GH72 | 1.3596  |
| 42758 | P14079 | P57772 | 1.1669  |
| 42759 | P14079 | A6NHJ4 | 1.07    |
| 42760 | P14079 | Q8NDZ2 | 0.96935 |
| 42761 | P14079 | Q9BPX7 | 1.063   |
| 42762 | P14079 | Q9BWC9 | 1.5875  |
| 42763 | P14079 | Q9BYQ3 | 1.3698  |
| 42764 | P14079 | Q13166 | 1.1715  |
| 42765 | P14079 | Q9NZ45 | 0.78861 |
| 42766 | P14079 | Q15013 | 1.0954  |
| 42767 | P14079 | P26641 | 0.68239 |
| 42768 | P14079 | Q8N4H0 | 0.59278 |
| 42769 | P14079 | Q95948 | 0.30148 |
| 42770 | P14079 | Q5SQH8 | 0.51999 |
| 42771 | P14079 | P21399 | 0.42352 |
| 42772 | P14079 | Q99549 | 0.48218 |
| 42773 | P14079 | P61582 | 1.7865  |
| 42774 | P14079 | Q9NSB4 | 0.85949 |
| 42775 | P14079 | A1A4F0 | 0.35675 |
| 42776 | P14079 | P50135 | 0.12281 |
| 42777 | P14079 | Q16633 | 0.64909 |
| 42778 | P14079 | Q9UNS2 | 0.81255 |
| 42779 | P14079 | Q9Y5R5 | 0.19688 |
| 42780 | P14079 | Q8N157 | 0.39687 |
| 42781 | P14079 | P39023 | 1.1266  |
| 42782 | P14079 | A6NLE4 | 1.2485  |
| 42783 | P14079 | Q9H1J1 | 1.3524  |
| 42784 | P14079 | Q9BXJ9 | 0.4684  |
| 42785 | P14079 | Q8TE76 | 0.42635 |
| 42786 | P14079 | Q8WX93 | 0.69097 |
| 42787 | P14079 | C9J3I9 | 1.0315  |
| 42788 | P14079 | A8MSI8 | 1.9145  |



|       |        |        |         |
|-------|--------|--------|---------|
| 42789 | P14079 | Q66K74 | 0.28039 |
| 42790 | P14079 | Q96CT7 | 0.43999 |
| 42791 | P14079 | Q15528 | 1.1926  |
| 42792 | P14079 | P48728 | 0.53448 |
| 42793 | P14079 | O00232 | 0.72906 |
| 42794 | P14079 | Q99622 | 0.54599 |
| 42795 | P14079 | P49006 | 1.4773  |
| 42796 | P14079 | Q12874 | 0.44491 |
| 42797 | P14079 | Q9BWF2 | 0.37163 |
| 42798 | P14079 | Q9NX08 | 0.56221 |
| 42799 | P14079 | Q9BWT6 | 0.10992 |
| 42800 | P14079 | Q8N3Y1 | 0.45433 |
| 42801 | P14079 | Q9H0Y0 | 0.34298 |
| 42802 | P14079 | Q4G0N0 | 0.89158 |
| 42803 | P14079 | P28370 | 0.43832 |
| 42804 | P14079 | P62273 | 1.4589  |
| 42805 | P14079 | Q9NTW7 | 0.95408 |
| 42806 | P14079 | P61457 | 0.87863 |
| 42807 | P14079 | Q49AN0 | 0.12712 |
| 42808 | P14079 | O14604 | 1.2142  |
| 42809 | P14079 | Q6ZVN7 | 0.91226 |
| 42810 | P14079 | O75290 | 0.96033 |
| 42811 | P14079 | Q8NCQ2 | 1.3772  |
| 42812 | P14079 | Q49A88 | 1.1401  |
| 42813 | P14079 | Q99607 | 1.0899  |
| 42814 | P14079 | Q8IYT1 | 1.1067  |
| 42815 | P14079 | P07311 | 1.298   |
| 42816 | P14079 | Q96FF9 | 1.3051  |
| 42817 | P14079 | Q9UI56 | 1.1715  |
| 42818 | P14079 | Q6P9F0 | 0.67688 |
| 42819 | P14079 | O43823 | 0.895   |
| 42820 | P14079 | Q9Y586 | 0.59822 |
| 42821 | P14079 | A6NI86 | 1.2306  |
| 42822 | P14079 | Q9P2Y4 | 0.24294 |
| 42823 | P14079 | P52746 | 0.28961 |
| 42824 | P14079 | P01225 | 0.24756 |
| 42825 | P14079 | Q7L2E3 | 0.33056 |
| 42826 | P14079 | Q6ZN57 | 0.52984 |
| 42827 | P14079 | Q93052 | 0.48737 |
| 42828 | P14079 | Q02410 | 0.57606 |
| 42829 | P14079 | Q9Y468 | 0.8985  |
| 42830 | P14079 | Q9BTA9 | 0.95712 |
| 42831 | P14079 | Q96DT0 | 0.20961 |
| 42832 | P14079 | Q86VG3 | 1.2723  |
| 42833 | P14079 | Q8IWF7 | 0.19124 |
| 42834 | P14079 | Q9NVV9 | 1.3799  |
| 42835 | P14079 | Q14696 | 0.97916 |
| 42836 | P14079 | Q99829 | 0.28784 |
| 42837 | P14079 | Q8TB05 | 1.3222  |
| 42838 | P14079 | Q86WQ0 | 0.732   |
| 42839 | P14079 | O75792 | 1.5397  |
| 42840 | P14079 | P14672 | 0.73088 |
| 42841 | P14079 | P20933 | 0.66957 |
| 42842 | P14079 | Q86WR0 | 1.1509  |
| 42843 | P14079 | Q9P016 | 1.4961  |
| 42844 | P14079 | Q9NPI8 | 1.2203  |
| 42845 | P14079 | O00165 | 1.1457  |
| 42846 | P14079 | Q69YU5 | 0.98371 |
| 42847 | P14079 | A8MSY0 | 0.52653 |
| 42848 | P14079 | Q13094 | 0.70726 |
| 42849 | P14079 | Q9Y2R9 | 1.5019  |
| 42850 | P14079 | Q9BYE4 | 1.1715  |
| 42851 | P14079 | Q8N3R3 | 0.63877 |
| 42852 | P14079 | O75564 | 0.76486 |
| 42853 | P14079 | Q96HJ9 | 0.76722 |
| 42854 | P14079 | Q9H7H1 | 0.93329 |
| 42855 | P14079 | A6NNA2 | 1.4206  |
| 42856 | P14079 | Q69YH5 | 1.495   |
| 42857 | P14079 | Q9P0W8 | 0.65242 |
| 42858 | P14079 | Q5T2T1 | 0.40771 |
| 42859 | P14079 | Q9BYD2 | 1.4448  |
| 42860 | P14079 | Q8WYQ3 | 1.3165  |
| 42861 | P14079 | Q13129 | 0.88416 |
| 42862 | P14079 | D6RB28 | 1.3415  |
| 42863 | P14079 | Q6ZRH9 | 1.1715  |
| 42864 | P14079 | Q5ST30 | 0.73419 |

|       |        |        |          |
|-------|--------|--------|----------|
| 42865 | P14079 | Q9BX73 | 0.80563  |
| 42866 | P14079 | Q9NYZ3 | 1.4915   |
| 42867 | P14079 | Q9H4L7 | 0.29307  |
| 42868 | P14079 | Q9NW81 | 0.20584  |
| 42869 | P14079 | Q0D2I5 | 0.38733  |
| 42870 | P14079 | Q96A73 | 1.5724   |
| 42871 | P14079 | Q96S07 | 1.1715   |
| 42872 | P14079 | Q9BXQ6 | 1.1715   |
| 42873 | P14079 | A6NF01 | 1.4294   |
| 42874 | P14079 | Q75QN2 | 1.3543   |
| 42875 | P14079 | Q9NYK6 | 1.0802   |
| 42876 | P14079 | Q92556 | 0.53639  |
| 42877 | P14079 | O00400 | 1.0907   |
| 42878 | P14079 | Q969S8 | 0.86466  |
| 42879 | P14079 | P47944 | 1.0978   |
| 42880 | P14079 | Q9H1A4 | 1.0939   |
| 42881 | P14079 | O95429 | 0.61714  |
| 42882 | P14079 | Q8IUW3 | 1.3401   |
| 42883 | P14079 | Q9BYC9 | 1.2139   |
| 42884 | P14079 | Q6ZPB5 | 1.1715   |
| 42885 | P14079 | Q13243 | 0.79526  |
| 42886 | P14079 | O00471 | 0.43582  |
| 42887 | P14079 | Q9BVK6 | 0.20815  |
| 42888 | P14079 | Q14677 | 0.58936  |
| 42889 | P14079 | Q10567 | 0.87114  |
| 42890 | P14079 | Q6ZN03 | 0.8632   |
| 42891 | P14079 | Q8IVD9 | 0.89721  |
| 42892 | P14079 | Q5T0U0 | 0.12918  |
| 42893 | P14079 | Q8IWL3 | 0.54202  |
| 42894 | P14079 | Q8N1G2 | 0.33729  |
| 42895 | P14079 | Q2KJ03 | 0.48688  |
| 42896 | P14079 | Q9BX51 | 0.13772  |
| 42897 | P14079 | Q8IVG9 | 1.0761   |
| 42898 | P14079 | Q14CW9 | 1.2118   |
| 42899 | P14079 | Q63HK3 | 0.56445  |
| 42900 | P14079 | Q9NZV6 | 0.3781   |
| 42901 | P14079 | Q9HCK5 | 0.95157  |
| 42902 | P14079 | Q8IXQ3 | 0.63452  |
| 42903 | P14079 | Q9UGJ1 | 0.67425  |
| 42904 | P14079 | A8CG34 | 0.99979  |
| 42905 | P14079 | Q9H8E8 | 0.80361  |
| 42906 | P14079 | Q68CZ1 | 0.33637  |
| 42907 | P14079 | Q15397 | 0.20375  |
| 42908 | P14079 | Q9H777 | 0.79325  |
| 42909 | P14079 | P39880 | 0.51723  |
| 42910 | P14079 | Q2NL68 | 1.3222   |
| 42911 | P14079 | Q9NUP7 | 1.3353   |
| 42912 | P14079 | Q15583 | 0.39164  |
| 42913 | P14079 | O60524 | 1.4972   |
| 42914 | P14079 | Q9UMX2 | 0.3138   |
| 42915 | P14079 | A8MZ25 | 0.17307  |
| 42916 | P14079 | B1AMM8 | 0.875    |
| 42917 | P14079 | Q6P3X8 | 1.3375   |
| 42918 | P14079 | Q9Y5S9 | 0.62732  |
| 42919 | P14079 | Q9H040 | 0.60908  |
| 42920 | P14079 | Q9GZS1 | 0.47349  |
| 42921 | P14079 | Q15041 | 0.26406  |
| 42922 | P14079 | Q13522 | 0.30425  |
| 42923 | P14079 | P24588 | 0.25947  |
| 42924 | P14079 | Q7Z3K3 | 0.58103  |
| 42925 | P14079 | Q96DU7 | 0.70156  |
| 42926 | P14079 | P13807 | 0.27639  |
| 42927 | P14079 | O43592 | 0.50074  |
| 42928 | P14079 | P55771 | 0.76605  |
| 42929 | P14079 | Q13835 | 0.35082  |
| 42930 | P14079 | P46109 | 0.24549  |
| 42931 | P14079 | Q8WUI4 | 0.43655  |
| 42932 | P14079 | P12036 | 0.68291  |
| 42933 | P14079 | Q6ZR52 | 0.78684  |
| 42934 | P14079 | Q13901 | 0.97749  |
| 42935 | P14079 | Q7Z6G3 | 0.62006  |
| 42936 | P14079 | Q9NPD8 | 0.58328  |
| 42937 | P14079 | O43432 | 0.045908 |
| 42938 | P14079 | O14639 | 0.974    |
| 42939 | P14079 | Q02241 | 0.83353  |
| 42940 | P14079 | Q9UJX5 | 1.0125   |

|       |        |        |          |
|-------|--------|--------|----------|
| 42941 | P14079 | P0C852 | 1.1715   |
| 42942 | P14079 | P25398 | 0.81839  |
| 42943 | P14079 | P48382 | 0.90797  |
| 42944 | P14079 | O96000 | 1.0374   |
| 42945 | P14079 | O15405 | 1.0664   |
| 42946 | P14079 | O75475 | 1.5027   |
| 42947 | P14079 | A6NCJ1 | 0.96733  |
| 42948 | P14079 | P50991 | 0.35526  |
| 42949 | P14079 | Q8N910 | 0.31556  |
| 42950 | P14079 | Q2T9K0 | 0.95549  |
| 42951 | P14079 | Q16531 | 0.76901  |
| 42952 | P14079 | Q9NXH3 | 1.0405   |
| 42953 | P14079 | Q9UKH3 | 1.0034   |
| 42954 | P14079 | P0C867 | 1.07     |
| 42955 | P14079 | Q66K80 | 1.1715   |
| 42956 | P14079 | Q8NG50 | 0.39061  |
| 42957 | P14079 | Q2M329 | 1.1403   |
| 42958 | P14079 | Q9BZE9 | 1.1965   |
| 42959 | P14079 | Q902F9 | 0.80727  |
| 42960 | P14079 | Q9ULG3 | 1.1715   |
| 42961 | P14079 | Q8N336 | 0.81684  |
| 42962 | P14079 | Q9Y6D5 | 0.30397  |
| 42963 | P14079 | P49005 | 0.6571   |
| 42964 | P14079 | Q6PJT7 | 1.0148   |
| 42965 | P14079 | O95167 | 0.87638  |
| 42966 | P14079 | Q9NP79 | 0.50253  |
| 42967 | P14079 | Q96GX8 | 1.3222   |
| 42968 | P14079 | P13489 | 0.64259  |
| 42969 | P14079 | Q8WV74 | 0.13921  |
| 42970 | P14079 | Q8NDH3 | 0.79089  |
| 42971 | P14079 | Q2TAZ0 | 0.56221  |
| 42972 | P14079 | A6NNH2 | 0.4243   |
| 42973 | P14079 | Q9UBS4 | 0.54784  |
| 42974 | P14079 | Q05DH4 | 1.6004   |
| 42975 | P14079 | Q9ULU8 | 0.26624  |
| 42976 | P14079 | Q6P6C2 | 0.8109   |
| 42977 | P14079 | Q86U70 | 0.45678  |
| 42978 | P14079 | O15198 | 1.0002   |
| 42979 | P14079 | Q9UKZ1 | 1.3714   |
| 42980 | P14079 | Q9BUJ2 | 1.1339   |
| 42981 | P14079 | Q9UL41 | 1.1987   |
| 42982 | P14079 | P16298 | 0.14687  |
| 42983 | P14079 | Q9BSW2 | 0.86098  |
| 42984 | P14079 | O14974 | 0.55966  |
| 42985 | P14079 | Q9BUT9 | 1.8779   |
| 42986 | P14079 | P0CJ75 | 1.3031   |
| 42987 | P14079 | Q7Z422 | 0.53146  |
| 42988 | P14079 | Q6RW13 | 1.4172   |
| 42989 | P14079 | A8MXT2 | 0.24809  |
| 42990 | P14079 | Q8NA47 | 1.3222   |
| 42991 | P14079 | Q9BYR3 | 1.3698   |
| 42992 | P14079 | Q6NZY4 | 0.49573  |
| 42993 | P14079 | Q9BXL8 | 0.81186  |
| 42994 | P14079 | Q8NEK5 | 0.59459  |
| 42995 | P14079 | Q6P444 | 1.1992   |
| 42996 | P14079 | Q63HM1 | 0.83146  |
| 42997 | P14079 | Q9UII2 | 0.85704  |
| 42998 | P14079 | Q8NET4 | 1.2144   |
| 42999 | P14079 | Q9UPU9 | 0.75918  |
| 43000 | P14079 | Q9NVX0 | 1.1964   |
| 43001 | P14079 | Q8TBN0 | 0.53748  |
| 43002 | P14079 | Q8N5A5 | 0.76853  |
| 43003 | P14079 | Q96Q45 | 0.88585  |
| 43004 | P14079 | Q7Z3K6 | 0.71985  |
| 43005 | P14079 | O94901 | 0.30168  |
| 43006 | P14079 | Q14204 | 0.57736  |
| 43007 | P14079 | Q9UQR0 | 0.22401  |
| 43008 | P14079 | Q5SWH9 | 1.2485   |
| 43009 | P14079 | P48147 | 0.81974  |
| 43010 | P14079 | Q96HR3 | 0.88621  |
| 43011 | P14079 | P04080 | 0.066209 |
| 43012 | P14079 | Q7Z6I5 | 1.4881   |
| 43013 | P14079 | Q12906 | 1.1561   |
| 43014 | P14079 | Q2VWA4 | 0.1063   |
| 43015 | P14079 | Q8IYB9 | 0.8029   |
| 43016 | P14079 | Q9H707 | 0.64158  |

|       |        |        |          |
|-------|--------|--------|----------|
| 43017 | P14079 | Q9NUB4 | 1.1715   |
| 43018 | P14079 | Q495Z4 | 1.0931   |
| 43019 | P14079 | Q96SR6 | 0.58948  |
| 43020 | P14079 | Q6ZTN6 | 1.1646   |
| 43021 | P14079 | Q96PM9 | 0.43669  |
| 43022 | P14079 | Q15048 | 0.055376 |
| 43023 | P14079 | Q9BW04 | 0.95175  |
| 43024 | P14079 | O15514 | 0.3771   |
| 43025 | P14079 | P62495 | 0.69372  |
| 43026 | P14079 | Q9C000 | 0.36747  |
| 43027 | P14079 | Q9BRJ2 | 0.67129  |
| 43028 | P14079 | Q9NXG0 | 0.35976  |
| 43029 | P14079 | Q8NHU6 | 0.27285  |
| 43030 | P14079 | Q96D15 | 0.44757  |
| 43031 | P14079 | Q6ZS49 | 1.1715   |
| 43032 | P14079 | Q9H910 | 1.6397   |
| 43033 | P14079 | Q15329 | 1.1949   |
| 43034 | P14079 | Q9NP81 | 0.83172  |
| 43035 | P14079 | Q9NQ29 | 1.0637   |
| 43036 | P14079 | Q8WVI7 | 0.36001  |
| 43037 | P14079 | Q16656 | 1.0213   |
| 43038 | P14079 | P33240 | 0.56345  |
| 43039 | P14079 | Q96BW9 | 1.0735   |
| 43040 | P14079 | Q15276 | 0.83777  |
| 43041 | P14079 | Q6L8H2 | 1.1715   |
| 43042 | P14079 | Q99576 | 0.46533  |
| 43043 | P14079 | P31949 | 0.45643  |
| 43044 | P14079 | Q9BSV6 | 0.61691  |
| 43045 | P14079 | P54802 | 0.84279  |
| 43046 | P14079 | Q6ZT21 | 0.79459  |
| 43047 | P14079 | Q6P1L5 | 2.0085   |
| 43048 | P14079 | Q9GZL7 | 0.86736  |
| 43049 | P14079 | P26038 | 0.3053   |
| 43050 | P14079 | Q99594 | 1.1158   |
| 43051 | P14079 | Q5JST6 | 0.97105  |
| 43052 | P14079 | Q9H8X3 | 0.16445  |
| 43053 | P14079 | Q5JTW2 | 0.73566  |
| 43054 | P14079 | Q9NX46 | 0.75116  |
| 43055 | P14079 | Q8N987 | 0.29425  |
| 43056 | P14079 | Q9H7P6 | 1.674    |
| 43057 | P14079 | P52737 | 0.77875  |
| 43058 | P14079 | Q8N5J2 | 1.8829   |
| 43059 | P14079 | O43913 | 0.4804   |
| 43060 | P14079 | Q92834 | 0.63009  |
| 43061 | P14079 | P35789 | 0.94578  |
| 43062 | P14079 | Q68D20 | 0.37324  |
| 43063 | P14079 | Q9H1K1 | 0.94316  |
| 43064 | P14079 | Q8TB33 | 0.83592  |
| 43065 | P14079 | Q6P3W6 | 1.236    |
| 43066 | P14079 | Q9NWX4 | 1.2343   |
| 43067 | P14079 | A0MZ66 | 1.1072   |
| 43068 | P14079 | Q4G0N4 | 0.75561  |
| 43069 | P14079 | Q7RTS7 | 0.97433  |
| 43070 | P14079 | P60604 | 0.61533  |
| 43071 | P14079 | A6NEL3 | 0.35845  |
| 43072 | P14079 | Q6ZUU3 | 1.1715   |
| 43073 | P14079 | P0CJ86 | 0.25626  |
| 43074 | P14079 | P51815 | 0.54104  |
| 43075 | P14079 | Q6IBW4 | 0.73692  |
| 43076 | P14079 | Q9H3J6 | 1.4447   |
| 43077 | P14079 | Q15699 | 0.35511  |
| 43078 | P14079 | P54252 | 0.41508  |
| 43079 | P14079 | Q13330 | 0.53548  |
| 43080 | P14079 | A6NLJ0 | 1.6012   |
| 43081 | P14079 | P57054 | 0.94337  |
| 43082 | P14079 | Q8NEP4 | 1.3222   |
| 43083 | P14079 | Q99932 | 1.1715   |
| 43084 | P14079 | Q9Y315 | 1.1491   |
| 43085 | P14079 | Q24JQ0 | 0.78375  |
| 43086 | P14079 | Q6ZRM9 | 1.2464   |
| 43087 | P14079 | Q86VZ6 | 0.25394  |
| 43088 | P14079 | Q9Y6H5 | 0.82135  |
| 43089 | P14079 | O94874 | 0.82023  |
| 43090 | P14079 | Q1T7F1 | 0.78783  |
| 43091 | P14079 | O75306 | 0.89958  |
| 43092 | P14079 | Q5JUR7 | 0.21199  |

|       |        |        |          |
|-------|--------|--------|----------|
| 43093 | P14079 | Q6ZNB5 | 0.53147  |
| 43094 | P14079 | B3EWG4 | 1.3222   |
| 43095 | P14079 | O43247 | 0.068981 |
| 43096 | P14079 | P28347 | 0.98943  |
| 43097 | P14079 | Q86TB9 | 1.0695   |
| 43098 | P14079 | Q8NEK8 | 1.5082   |
| 43099 | P14079 | Q8TAG6 | 1.1924   |
| 43100 | P14079 | Q9UKY0 | 0.34626  |
| 43101 | P14079 | Q8N0U7 | 1.012    |
| 43102 | P14079 | Q3LI63 | 1.1715   |
| 43103 | P14079 | P17096 | 0.98345  |
| 43104 | P14079 | O14715 | 0.13526  |
| 43105 | P14079 | P42566 | 0.30899  |
| 43106 | P14079 | Q8N9L7 | 0.70752  |
| 43107 | P14079 | P47897 | 0.779    |
| 43108 | P14079 | P30876 | 0.61683  |
| 43109 | P14079 | P0CG42 | 1.1715   |
| 43110 | P14079 | Q9BUK6 | 0.3151   |
| 43111 | P14079 | Q14691 | 0.72478  |
| 43112 | P14079 | Q8IY22 | 0.1864   |
| 43113 | P14079 | A8MYR8 | 0.16234  |
| 43114 | P14079 | Q14591 | 0.45328  |
| 43115 | P14079 | Q96LI5 | 0.49925  |
| 43116 | P14079 | Q5SWW7 | 1.1715   |
| 43117 | P14079 | Q15018 | 0.64332  |
| 43118 | P14079 | P00395 | 0.34144  |
| 43119 | P14079 | B2CW77 | 1.1715   |
| 43120 | P14079 | Q03060 | 0.95697  |
| 43121 | P14079 | Q96GL9 | 1.1789   |
| 43122 | P14079 | Q9BZD3 | 0.94785  |
| 43123 | P14079 | P56377 | 0.57164  |
| 43124 | P14079 | Q8N9S7 | 0.84839  |
| 43125 | P14079 | Q9BYS1 | 1.1219   |
| 43126 | P14079 | P11474 | 0.48913  |
| 43127 | P14079 | Q92922 | 1.0778   |
| 43128 | P14079 | Q96F24 | 0.75767  |
| 43129 | P14079 | Q6P5X5 | 1.3795   |
| 43130 | P14079 | Q9Y2Y0 | 1.2551   |
| 43131 | P14079 | Q16831 | 0.49326  |
| 43132 | P14079 | Q8IWD4 | 1.3222   |
| 43133 | P14079 | Q6ISU1 | 0.69075  |
| 43134 | P14079 | Q92621 | 1.1991   |
| 43135 | P14079 | Q6UXU1 | 1.1715   |
| 43136 | P14079 | Q8WWA1 | 1.2485   |
| 43137 | P14079 | Q70YC5 | 1.0991   |
| 43138 | P14079 | A6NL05 | 1.005    |
| 43139 | P14079 | Q96NB3 | 0.51682  |
| 43140 | P14079 | O43815 | 0.43783  |
| 43141 | P14079 | Q6ZN32 | 0.72221  |
| 43142 | P14079 | Q6ZRF7 | 0.39965  |
| 43143 | P14079 | Q8TBZ8 | 0.69402  |
| 43144 | P14079 | Q75865 | 1.0842   |
| 43145 | P14079 | Q9Y2Z2 | 1.5239   |
| 43146 | P14079 | Q5W0A0 | 0.70163  |
| 43147 | P14079 | Q70EK8 | 1.0551   |
| 43148 | P14079 | Q8TDQ7 | 0.053375 |
| 43149 | P14079 | Q95251 | 0.6797   |
| 43150 | P14079 | P43490 | 0.69748  |
| 43151 | P14079 | Q04118 | 1.1715   |
| 43152 | P14079 | Q6Y7W6 | 0.65293  |
| 43153 | P14079 | P48380 | 0.98409  |
| 43154 | P14079 | Q6ZQR2 | 1.5458   |
| 43155 | P14079 | O95363 | 1.0136   |
| 43156 | P14079 | Q96EP0 | 0.20558  |
| 43157 | P14079 | Q14320 | 0.46585  |
| 43158 | P14079 | O95990 | 1.0831   |
| 43159 | P14079 | Q9BZD4 | 0.80134  |
| 43160 | P14079 | P52294 | 1.4023   |
| 43161 | P14079 | Q8N2H9 | 0.65175  |
| 43162 | P14079 | Q86V87 | 0.99816  |
| 43163 | P14079 | P00403 | 0.76541  |
| 43164 | P14079 | Q9H993 | 0.37056  |
| 43165 | P14079 | Q9Y3C8 | 0.51437  |
| 43166 | P14079 | Q14264 | 0.60504  |
| 43167 | P14079 | P51532 | 0.79012  |
| 43168 | P14079 | Q9H211 | 0.95809  |

|       |        |        |          |
|-------|--------|--------|----------|
| 43169 | P14079 | Q00597 | 1.0419   |
| 43170 | P14079 | Q5XG87 | 0.15525  |
| 43171 | P14079 | Q8NE00 | 1.2633   |
| 43172 | P14079 | Q8NCA9 | 0.335    |
| 43173 | P14079 | P09105 | 0.67533  |
| 43174 | P14079 | O60518 | 1.1388   |
| 43175 | P14079 | A8MUV8 | 1.0106   |
| 43176 | P14079 | Q14164 | 0.25232  |
| 43177 | P14079 | Q8N7B6 | 0.73941  |
| 43178 | P14079 | Q6NV74 | 1.3222   |
| 43179 | P14079 | P40123 | 0.4194   |
| 43180 | P14079 | Q9Y2T2 | 0.84417  |
| 43181 | P14079 | Q9Y678 | 0.75494  |
| 43182 | P14079 | Q9BV86 | 0.33293  |
| 43183 | P14079 | Q6P1X6 | 1.3103   |
| 43184 | P14079 | P49591 | 0.92101  |
| 43185 | P14079 | Q9HC24 | 0.27402  |
| 43186 | P14079 | Q96N76 | 0.65909  |
| 43187 | P14079 | Q9NP50 | 1.2152   |
| 43188 | P14079 | Q9UQB3 | 0.52048  |
| 43189 | P14079 | Q96I36 | 1.0946   |
| 43190 | P14079 | Q6UWZ7 | 0.84272  |
| 43191 | P14079 | Q96NM4 | 0.38002  |
| 43192 | P14079 | Q8WVP5 | 1.5386   |
| 43193 | P14079 | O95644 | 0.76684  |
| 43194 | P14079 | Q5VZ66 | 0.75883  |
| 43195 | P14079 | P21980 | 0.21313  |
| 43196 | P14079 | Q96S90 | 0.2718   |
| 43197 | P14079 | Q6VEQ5 | 0.84005  |
| 43198 | P14079 | Q9BXX5 | 0.80335  |
| 43199 | P14079 | Q5SWL7 | 1.1083   |
| 43200 | P14079 | Q9UGK3 | 0.76661  |
| 43201 | P14079 | P61218 | 0.59036  |
| 43202 | P14079 | P17024 | 0.68453  |
| 43203 | P14079 | Q99497 | 0.091308 |
| 43204 | P14079 | Q8WYR1 | 0.39037  |
| 43205 | P14079 | Q9P255 | 0.74045  |
| 43206 | P14079 | Q9UNL4 | 0.50807  |
| 43207 | P14079 | Q92783 | 0.9133   |
| 43208 | P14079 | Q14592 | 0.60546  |
| 43209 | P14079 | Q9BTK6 | 0.84306  |
| 43210 | P14079 | Q9BRA0 | 0.28036  |
| 43211 | P14079 | P49788 | 0.78916  |
| 43212 | P14079 | Q8N0U4 | 0.81511  |
| 43213 | P14079 | Q9GZX5 | 0.86826  |
| 43214 | P14079 | Q7Z4G4 | 0.35527  |
| 43215 | P14079 | Q12980 | 1.2391   |
| 43216 | P14079 | Q8WXE1 | 0.99045  |
| 43217 | P14079 | Q15742 | 0.46925  |
| 43218 | P14079 | Q96K49 | 0.79282  |
| 43219 | P14079 | O75800 | 0.6398   |
| 43220 | P14079 | Q3MJ62 | 0.48579  |
| 43221 | P14079 | C9J3V5 | 1.0795   |
| 43222 | P14079 | P0C5K7 | 0.33379  |
| 43223 | P14079 | P43307 | 0.80429  |
| 43224 | P14079 | Q7Z417 | 1.1629   |
| 43225 | P14079 | P54278 | 0.43186  |
| 43226 | P14079 | Q15170 | 2.1047   |
| 43227 | P14079 | Q9P013 | 1.2265   |
| 43228 | P14079 | P17568 | 0.19329  |
| 43229 | P14079 | Q8WTT2 | 0.59924  |
| 43230 | P14079 | P26368 | 0.60822  |
| 43231 | P14079 | Q9H5L6 | 0.77013  |
| 43232 | P14079 | Q2M389 | 0.74498  |
| 43233 | P14079 | P35475 | 0.52971  |
| 43234 | P14079 | Q6P2C8 | 0.93744  |
| 43235 | P14079 | Q9NSJ1 | 0.68895  |
| 43236 | P14079 | Q5U5X8 | 1.5594   |
| 43237 | P14079 | Q86U86 | 1.0804   |
| 43238 | P14079 | Q92540 | 0.96552  |
| 43239 | P14079 | A6NNL0 | 1.8041   |
| 43240 | P14079 | P56385 | 0.77685  |
| 43241 | P14079 | O95405 | 0.30299  |
| 43242 | P14079 | Q9Y6B7 | 0.49688  |
| 43243 | P14079 | Q8NFJ9 | 0.63134  |
| 43244 | P14079 | Q96BW5 | 0.8897   |

|       |        |        |         |
|-------|--------|--------|---------|
| 43245 | P14079 | Q96NG8 | 0.6166  |
| 43246 | P14079 | Q01538 | 0.45954 |
| 43247 | P14079 | Q9Y3C7 | 0.97429 |
| 43248 | P14079 | Q96MU5 | 1.2549  |
| 43249 | P14079 | O14646 | 0.44836 |
| 43250 | P14079 | Q9BSF4 | 0.74338 |
| 43251 | P14079 | Q5SYE7 | 1.2838  |
| 43252 | P14079 | Q9NXV6 | 1.5226  |
| 43253 | P14079 | P58005 | 0.84857 |
| 43254 | P14079 | Q6ZN79 | 0.94289 |
| 43255 | P14079 | Q5T0J7 | 1.1691  |
| 43256 | P14079 | P0C866 | 0.51483 |
| 43257 | P14079 | P0C7M6 | 0.17064 |
| 43258 | P14079 | Q96DD7 | 0.78072 |
| 43259 | P14079 | Q01804 | 0.2747  |
| 43260 | P14079 | Q5VVC0 | 0.76785 |
| 43261 | P14079 | P49247 | 1.1377  |
| 43262 | P14079 | Q96S94 | 0.35751 |
| 43263 | P14079 | Q6PI77 | 1.283   |
| 43264 | P14079 | Q14865 | 0.37582 |
| 43265 | P14079 | Q66GS9 | 0.76582 |
| 43266 | P14079 | Q8TED0 | 0.31573 |
| 43267 | P14079 | Q60675 | 0.44679 |
| 43268 | P14079 | Q9BRP9 | 0.50849 |
| 43269 | P14079 | Q8NEM2 | 0.92809 |
| 43270 | P14079 | P10606 | 0.47904 |
| 43271 | P14079 | Q9Y6G3 | 0.55627 |
| 43272 | P14079 | Q9BTP6 | 1.3429  |
| 43273 | P14079 | Q5BKU9 | 0.51526 |
| 43274 | P14079 | Q8NG57 | 0.80003 |
| 43275 | P14079 | Q629K1 | 1.0399  |
| 43276 | P14079 | O60688 | 0.68732 |
| 43277 | P14079 | B5MD39 | 0.28751 |
| 43278 | P14079 | Q9UDY4 | 0.78805 |
| 43279 | P14079 | Q9P1F3 | 1.2801  |
| 43280 | P14079 | P29372 | 1.2326  |
| 43281 | P14079 | Q2PZI1 | 1.5121  |
| 43282 | P14079 | Q96B49 | 1.4739  |
| 43283 | P14079 | Q99684 | 0.54469 |
| 43284 | P14079 | Q8IV56 | 1.1456  |
| 43285 | P14079 | Q8N2C9 | 0.64619 |
| 43286 | P14079 | Q8TEM1 | 0.72143 |
| 43287 | P14079 | Q6PCB6 | 0.34355 |
| 43288 | P14079 | O15392 | 0.28548 |
| 43289 | P14079 | Q86TP1 | 1.2008  |
| 43290 | P14079 | Q9NTM9 | 0.3112  |
| 43291 | P14079 | Q92610 | 0.24729 |
| 43292 | P14079 | P83876 | 0.97112 |
| 43293 | P14079 | Q6ZRS4 | 1.2979  |
| 43294 | P14079 | O43598 | 0.7687  |
| 43295 | P14079 | Q93099 | 0.48608 |
| 43296 | P14079 | Q7L4I2 | 2.1207  |
| 43297 | P14079 | Q66K64 | 0.86207 |
| 43298 | P14079 | Q9BR77 | 0.76763 |
| 43299 | P14079 | A2RTX5 | 0.81576 |
| 43300 | P14079 | Q01826 | 0.87441 |
| 43301 | P14079 | Q96N20 | 0.52472 |
| 43302 | P14079 | O60907 | 0.80857 |
| 43303 | P14079 | Q9ULP0 | 0.47958 |
| 43304 | P14079 | Q9NRX2 | 0.96926 |
| 43305 | P14079 | Q8IW70 | 1.2485  |
| 43306 | P14079 | Q13070 | 0.33792 |
| 43307 | P14079 | A6NJV1 | 1.3341  |
| 43308 | P14079 | O75420 | 0.63989 |
| 43309 | P14079 | P13646 | 0.92977 |
| 43310 | P14079 | P61579 | 1.355   |
| 43311 | P14079 | Q7Z6K5 | 0.68728 |
| 43312 | P14079 | Q8TEV9 | 1.2636  |
| 43313 | P14079 | Q6PEW1 | 0.19064 |
| 43314 | P14079 | Q9H3P2 | 1.4894  |
| 43315 | P14079 | Q9H8H0 | 0.68182 |
| 43316 | P14079 | Q16585 | 0.9149  |
| 43317 | P14079 | Q8IXF0 | 0.37081 |
| 43318 | P14079 | Q5JT78 | 0.69382 |
| 43319 | P14079 | P18077 | 0.69763 |
| 43320 | P14079 | P49720 | 0.97585 |

|       |        |        |         |
|-------|--------|--------|---------|
| 43321 | P14079 | P35712 | 0.52518 |
| 43322 | P14079 | Q8TB03 | 1.2104  |
| 43323 | P14079 | Q969T9 | 1.7449  |
| 43324 | P14079 | Q9NXL6 | 0.76249 |
| 43325 | P14079 | Q9UID6 | 0.55199 |
| 43326 | P14079 | A4D174 | 0.52953 |
| 43327 | P14079 | Q7LBR1 | 1.1214  |
| 43328 | P14079 | O95163 | 0.62066 |
| 43329 | P14079 | O75529 | 0.5236  |
| 43330 | P14079 | Q9BU70 | 0.64125 |
| 43331 | P14079 | Q86Z20 | 1.4841  |
| 43332 | P14079 | Q9Y291 | 1.0294  |
| 43333 | P14079 | Q5T0F9 | 0.50026 |
| 43334 | P14079 | Q93062 | 0.71903 |
| 43335 | P14079 | Q8WV48 | 1.2485  |
| 43336 | P14079 | A8K5M9 | 1.6201  |
| 43337 | P14079 | A4D1E9 | 1.5514  |
| 43338 | P14079 | Q8NBZ9 | 0.83085 |
| 43339 | P14079 | Q9ULK4 | 1.2555  |
| 43340 | P14079 | Q8NE01 | 0.53036 |
| 43341 | P14079 | O75807 | 0.69313 |
| 43342 | P14079 | Q13536 | 1.1715  |
| 43343 | P14079 | Q6ZSR3 | 1.1715  |
| 43344 | P14079 | Q6ZUJ8 | 0.32152 |
| 43345 | P14079 | Q86TU7 | 0.36324 |
| 43346 | P14079 | P0C875 | 0.56468 |
| 43347 | P14079 | O00487 | 0.28065 |
| 43348 | P14079 | Q0D2H9 | 0.84738 |
| 43349 | P14079 | O75570 | 1.0993  |
| 43350 | P14079 | O95867 | 0.96241 |
| 43351 | P14079 | H3BN30 | 1.1715  |
| 43352 | P14079 | Q9H008 | 0.65524 |
| 43353 | P14079 | Q9UMX1 | 1.2224  |
| 43354 | P14079 | P09972 | 0.5915  |
| 43355 | P14079 | A6NE82 | 0.44102 |
| 43356 | P14079 | Q8WVJ9 | 0.53667 |
| 43357 | P14079 | Q6IPX3 | 1.543   |
| 43358 | P14079 | Q9H8T0 | 0.57128 |
| 43359 | P14079 | O95190 | 1.2189  |
| 43360 | P14079 | O95931 | 0.85285 |
| 43361 | P14079 | Q6B9Z1 | 1.1517  |
| 43362 | P14079 | Q68DI1 | 0.66003 |
| 43363 | P14079 | Q9NQ4  | 0.27269 |
| 43364 | P14079 | Q495Y8 | 1.092   |
| 43365 | P14079 | Q9Y250 | 0.9211  |
| 43366 | P14079 | Q13428 | 1.7521  |
| 43367 | P14079 | Q13487 | 2.0772  |
| 43368 | P14079 | Q52LG2 | 0.95677 |
| 43369 | P14079 | Q8N9A8 | 1.2716  |
| 43370 | P14079 | Q16891 | 0.65831 |
| 43371 | P14079 | Q717R9 | 1.3143  |
| 43372 | P14079 | Q6ZUF6 | 1.0905  |
| 43373 | P14079 | Q93100 | 0.704   |
| 43374 | P14079 | Q9BXS4 | 0.83033 |
| 43375 | P14079 | Q9BPX5 | 0.19716 |
| 43376 | P14079 | Q9NWZ5 | 0.342   |
| 43377 | P14079 | Q9UPA5 | 0.58904 |
| 43378 | P14079 | Q16186 | 0.63176 |
| 43379 | P14079 | P62136 | 0.5688  |
| 43380 | P14079 | P11172 | 0.81083 |
| 43381 | P14079 | Q86TL0 | 0.73221 |
| 43382 | P14079 | Q3BBW0 | 0.51084 |
| 43383 | P14079 | Q3KNT7 | 0.41165 |
| 43384 | P14079 | Q9UDW1 | 0.6875  |
| 43385 | P14079 | Q7L5Y6 | 0.1664  |
| 43386 | P14079 | Q9C0C6 | 1.3481  |
| 43387 | P14079 | P25787 | 1.0803  |
| 43388 | P14079 | Q5VTU8 | 0.49269 |
| 43389 | P14079 | Q658Y4 | 1.0917  |
| 43390 | P14079 | Q00994 | 1.5182  |
| 43391 | P14079 | Q92902 | 0.34412 |
| 43392 | P14079 | Q9P260 | 0.80964 |
| 43393 | P14079 | P0DI83 | 1.1422  |
| 43394 | P14079 | Q9UKK9 | 0.83288 |
| 43395 | P14079 | Q92698 | 0.28319 |
| 43396 | P14079 | Q9NTJ4 | 0.44561 |



|       |        |         |          |
|-------|--------|---------|----------|
| 43397 | P14079 | P51587  | 0.20732  |
| 43398 | P14079 | O60216  | 0.94366  |
| 43399 | P14079 | Q5GH76  | 1.3596   |
| 43400 | P14079 | Q6ICG7  | 1.1715   |
| 43401 | P14079 | Q8N0Y2  | 0.55847  |
| 43402 | P14079 | Q8N720  | 0.86517  |
| 43403 | P14079 | P80294  | 0.83367  |
| 43404 | P14079 | Q1MSJ5  | 1.7629   |
| 43405 | P14079 | Q8IYT3  | 0.26344  |
| 43406 | P14079 | Q6UWF3  | 1.3655   |
| 43407 | P14079 | Q8IUUC3 | 1.497    |
| 43408 | P14079 | O60684  | 0.50025  |
| 43409 | P14079 | P07438  | 0.77468  |
| 43410 | P14079 | Q75L30  | 1.1715   |
| 43411 | P14079 | Q5JRV8  | 1.1449   |
| 43412 | P14079 | Q8N8X6  | 0.22668  |
| 43413 | P14079 | Q6NXN4  | 1.2737   |
| 43414 | P14079 | Q8IV20  | 1.0931   |
| 43415 | P14079 | Q14966  | 0.30514  |
| 43416 | P14079 | Q9NXJ5  | 1.0009   |
| 43417 | P14079 | Q15070  | 0.62543  |
| 43418 | P14079 | A6NCN2  | 0.99362  |
| 43419 | P14079 | Q08AI8  | 1.3222   |
| 43420 | P14079 | P22557  | 0.074483 |
| 43421 | P14079 | Q6ZNA4  | 0.40493  |
| 43422 | P14079 | P69208  | 1.1715   |
| 43423 | P14079 | P29401  | 0.31202  |
| 43424 | P14079 | Q8N7Z2  | 0.89121  |
| 43425 | P14079 | Q6ZRI6  | 1.185    |
| 43426 | P14079 | Q8N769  | 0.83516  |
| 43427 | P14079 | Q8IX15  | 0.42798  |
| 43428 | P14079 | Q9NVC6  | 0.67274  |
| 43429 | P14079 | O75179  | 0.50099  |
| 43430 | P14079 | P07737  | 0.96923  |
| 43431 | P14079 | Q99966  | 0.19704  |
| 43432 | P14079 | Q8WV83  | 0.82384  |
| 43433 | P14079 | Q96N19  | 0.97467  |
| 43434 | P14079 | Q13868  | 0.52815  |
| 43435 | P14079 | Q32NC0  | 0.97877  |
| 43436 | P14079 | Q8IWZ3  | 1.074    |
| 43437 | P14079 | P49184  | 0.71019  |
| 43438 | P14079 | Q8NI27  | 1.2149   |
| 43439 | P14079 | P54198  | 0.99196  |
| 43440 | P14079 | Q9H7X3  | 0.52651  |
| 43441 | P14079 | P59780  | 0.2355   |
| 43442 | P14079 | P32189  | 0.87601  |
| 43443 | P14079 | Q9ULN7  | 1.5833   |
| 43444 | P14079 | Q96JG6  | 0.43687  |
| 43445 | P14079 | P58304  | 0.27651  |
| 43446 | P14079 | P0CJ68  | 1.3031   |
| 43447 | P14079 | Q9HC16  | 0.22442  |
| 43448 | P14079 | Q9UNX4  | 0.3761   |
| 43449 | P14079 | Q9H773  | 1.0021   |
| 43450 | P14079 | O94855  | 0.61526  |
| 43451 | P14079 | O00189  | 0.66338  |
| 43452 | P14079 | Q5H9I0  | 0.3082   |
| 43453 | P14079 | Q9P1Q0  | 0.6474   |
| 43454 | P14079 | Q9BTV7  | 0.37606  |
| 43455 | P14079 | Q9UHC1  | 0.56898  |
| 43456 | P14079 | Q96ST8  | 1.6547   |
| 43457 | P14079 | Q6IEG0  | 0.9684   |
| 43458 | P14079 | P51531  | 0.75882  |
| 43459 | P14079 | P42704  | 1.1178   |
| 43460 | P14079 | Q96SE7  | 0.76643  |
| 43461 | P14079 | Q96MF0  | 0.64425  |
| 43462 | P14079 | Q14209  | 1.0257   |
| 43463 | P14079 | Q8N8G6  | 0.94062  |
| 43464 | P14079 | Q96M89  | 0.13861  |
| 43465 | P14079 | Q8IZ13  | 0.8753   |
| 43466 | P14079 | Q9UKV0  | 0.3861   |
| 43467 | P14079 | O43813  | 0.45058  |
| 43468 | P14079 | Q96DZ7  | 1.0346   |
| 43469 | P14079 | O75832  | 0.75652  |
| 43470 | P14079 | O94919  | 0.97046  |
| 43471 | P14079 | Q96MI9  | 0.55521  |
| 43472 | P14079 | Q9GZN2  | 0.55411  |

|       |        |        |          |
|-------|--------|--------|----------|
| 43473 | P14079 | Q9HCH5 | 0.71118  |
| 43474 | P14079 | Q5VIY5 | 0.99996  |
| 43475 | P14079 | A6NCD4 | 0.90661  |
| 43476 | P14079 | O43167 | 0.77928  |
| 43477 | P14079 | M0R1G4 | 0.21851  |
| 43478 | P14079 | P14866 | 0.54303  |
| 43479 | P14079 | Q9BUB7 | 1.4714   |
| 43480 | P14079 | P14868 | 1.2294   |
| 43481 | P14079 | Q5T200 | 1.2419   |
| 43482 | P14079 | Q8N726 | 0.80782  |
| 43483 | P14079 | Q9Y266 | 1.364    |
| 43484 | P14079 | Q6P1Q0 | 0.25792  |
| 43485 | P14079 | Q86U28 | 0.4127   |
| 43486 | P14079 | A8MZ59 | 0.24936  |
| 43487 | P14079 | Q05516 | 0.99655  |
| 43488 | P14079 | Q96QG7 | 0.40511  |
| 43489 | P14079 | Q4LE39 | 0.73183  |
| 43490 | P14079 | Q3KP66 | 1.7957   |
| 43491 | P14079 | Q9HA82 | 0.68895  |
| 43492 | P14079 | P23246 | 0.77175  |
| 43493 | P14079 | Q8N8E3 | 0.69938  |
| 43494 | P14079 | Q16540 | 0.37584  |
| 43495 | P14079 | Q96KA5 | 1.0112   |
| 43496 | P14079 | Q587I9 | 1.2345   |
| 43497 | P14079 | Q8TAK5 | 0.5385   |
| 43498 | P14079 | O75446 | 1.929    |
| 43499 | P14079 | O95153 | 0.72374  |
| 43500 | P14079 | P46783 | 1.4322   |
| 43501 | P14079 | Q96LW4 | 0.35518  |
| 43502 | P14079 | P46060 | 0.33495  |
| 43503 | P14079 | Q86US8 | 0.46056  |
| 43504 | P14079 | Q16143 | 0.35228  |
| 43505 | P14079 | Q9HAP2 | 0.63552  |
| 43506 | P14079 | Q9H9K5 | 0.73996  |
| 43507 | P14079 | A6NC42 | 0.96687  |
| 43508 | P14079 | Q12988 | 0.42367  |
| 43509 | P14079 | Q9P2H0 | 0.88941  |
| 43510 | P14079 | P07910 | 0.2461   |
| 43511 | P14079 | Q32Q52 | 0.7102   |
| 43512 | P14079 | Q9UI14 | 0.22227  |
| 43513 | P14079 | P0CG23 | 0.45067  |
| 43514 | P14079 | Q8NI08 | 0.9496   |
| 43515 | P14079 | Q9UBU9 | 0.67562  |
| 43516 | P14079 | Q5T3I0 | 0.20547  |
| 43517 | P14079 | Q9Y5A6 | 0.82264  |
| 43518 | P14079 | P14927 | 0.27613  |
| 43519 | P14079 | O60287 | 1.6757   |
| 43520 | P14079 | Q9UFW8 | 0.46096  |
| 43521 | P14079 | Q9NPD3 | 0.13667  |
| 43522 | P14079 | B4DYI2 | 0.49735  |
| 43523 | P14079 | Q13310 | 0.44313  |
| 43524 | P14079 | Q96KW2 | 1.2257   |
| 43525 | P14079 | Q9NRN9 | 0.64839  |
| 43526 | P14079 | Q8NBZ0 | 1.6903   |
| 43527 | P14079 | Q9BYQ2 | 1.3698   |
| 43528 | P14079 | O96004 | 0.41837  |
| 43529 | P14079 | Q92748 | 1.6473   |
| 43530 | P14079 | Q8IYL3 | 1.6012   |
| 43531 | P14079 | Q96PG8 | 1.1715   |
| 43532 | P14079 | Q86XG9 | 0.38249  |
| 43533 | P14079 | Q9BXF9 | 0.33138  |
| 43534 | P14079 | P22736 | 0.44583  |
| 43535 | P14079 | A6NKD9 | 1.72     |
| 43536 | P14079 | P52594 | 0.30341  |
| 43537 | P14079 | Q8TCJ0 | 1.4931   |
| 43538 | P14079 | P0CG20 | 0.8917   |
| 43539 | P14079 | Q9HD42 | 0.98983  |
| 43540 | P14079 | Q13838 | 0.082615 |
| 43541 | P14079 | Q13573 | 0.62856  |
| 43542 | P14079 | O75674 | 0.58471  |
| 43543 | P14079 | Q9GZR2 | 0.048668 |
| 43544 | P14079 | Q6Q759 | 1.4707   |
| 43545 | P14079 | O60645 | 0.68687  |
| 43546 | P14079 | Q8N328 | 0.76641  |
| 43547 | P14079 | Q8NEG4 | 0.89733  |
| 43548 | P14079 | Q08E93 | 1.1715   |

|       |        |        |         |
|-------|--------|--------|---------|
| 43549 | P14079 | Q14D33 | 1.0632  |
| 43550 | P14079 | Q9P1Z9 | 0.9124  |
| 43551 | P14079 | P57075 | 0.36784 |
| 43552 | P14079 | Q6L9T8 | 1.1532  |
| 43553 | P14079 | Q8NI32 | 0.75465 |
| 43554 | P14079 | Q8NFU3 | 0.23838 |
| 43555 | P14079 | Q99856 | 0.73161 |
| 43556 | P14079 | Q92800 | 0.41299 |
| 43557 | P14079 | Q9H305 | 0.19119 |
| 43558 | P14079 | E9PJ23 | 0.4201  |
| 43559 | P14079 | Q14106 | 0.58466 |
| 43560 | P14079 | O95067 | 0.80974 |
| 43561 | P14079 | P78371 | 0.51582 |
| 43562 | P14079 | Q08378 | 0.45708 |
| 43563 | P14079 | Q96C23 | 0.46173 |
| 43564 | P14079 | O60303 | 0.80894 |
| 43565 | P14079 | Q8IZD9 | 0.21699 |
| 43566 | P14079 | Q92624 | 1.3212  |
| 43567 | P14079 | Q9NVM9 | 1.1999  |
| 43568 | P14079 | O75208 | 1.1847  |
| 43569 | P14079 | A4QN01 | 0.64657 |
| 43570 | P14079 | Q76KX8 | 0.99887 |
| 43571 | P14079 | A6H8Z2 | 0.8266  |
| 43572 | P14079 | P05198 | 0.81886 |
| 43573 | P14079 | Q6NZ36 | 0.28311 |
| 43574 | P14079 | Q8NAB5 | 1.1715  |
| 43575 | P14079 | Q9P2T0 | 1.356   |
| 43576 | P14079 | A6NNW6 | 1.1882  |
| 43577 | P14079 | Q12816 | 0.41253 |
| 43578 | P14079 | O95922 | 0.12368 |
| 43579 | P14079 | P31358 | 1.1139  |
| 43580 | P14079 | Q9H840 | 0.88413 |
| 43581 | P14079 | Q9NU23 | 1.0186  |
| 43582 | P14079 | Q96D70 | 1.6528  |
| 43583 | P14079 | Q9UBF9 | 0.32155 |
| 43584 | P14079 | Q5SRE7 | 0.62533 |
| 43585 | P14079 | Q8IZP0 | 0.42014 |
| 43586 | P14079 | Q9BWE0 | 0.33127 |
| 43587 | P14079 | P51606 | 0.5246  |
| 43588 | P14079 | P61254 | 1.0605  |
| 43589 | P14079 | P26371 | 1.1715  |
| 43590 | P14079 | Q9NRI5 | 0.47052 |
| 43591 | P14079 | O60613 | 0.96726 |
| 43592 | P14079 | O95433 | 0.96673 |
| 43593 | P14079 | Q6P582 | 1.3632  |
| 43594 | P14079 | Q6ZUL3 | 1.1715  |
| 43595 | P14079 | Q02447 | 0.66539 |
| 43596 | P14079 | O43812 | 0.30975 |
| 43597 | P14079 | O60268 | 0.79172 |
| 43598 | P14079 | Q8WW01 | 0.99028 |
| 43599 | P14079 | Q6K0P9 | 0.40896 |
| 43600 | P14079 | Q6P9B9 | 1.3385  |
| 43601 | P14079 | Q8NE86 | 0.79398 |
| 43602 | P14079 | O94929 | 0.33346 |
| 43603 | P14079 | Q5T8A7 | 1.3731  |
| 43604 | P14079 | Q8N3I7 | 0.94544 |
| 43605 | P14079 | Q9BSA9 | 1.2485  |
| 43606 | P14079 | Q96EH3 | 0.76524 |
| 43607 | P14079 | Q13105 | 0.60915 |
| 43608 | P14079 | Q969P5 | 0.21276 |
| 43609 | P14079 | O00213 | 0.37999 |
| 43610 | P14079 | Q8NCQ7 | 0.75172 |
| 43611 | P14079 | Q96MC4 | 1.558   |
| 43612 | P14079 | Q7Z4S6 | 0.31989 |
| 43613 | P14079 | Q8N9V7 | 1.5263  |
| 43614 | P14079 | Q5MJ68 | 0.76554 |
| 43615 | P14079 | Q9Y383 | 1.1069  |
| 43616 | P14079 | Q15750 | 0.90695 |
| 43617 | P14079 | Q9BUE6 | 0.20081 |
| 43618 | P14079 | Q13394 | 0.66081 |
| 43619 | P14079 | Q5JRK9 | 1.7294  |
| 43620 | P14079 | Q9H503 | 0.77392 |
| 43621 | P14079 | Q5SZB4 | 0.82206 |
| 43622 | P14079 | Q8N9S9 | 0.4892  |
| 43623 | P14079 | O15481 | 0.23019 |
| 43624 | P14079 | P15976 | 0.30224 |

|       |        |         |         |
|-------|--------|---------|---------|
| 43625 | P14079 | P08729  | 1.7444  |
| 43626 | P14079 | Q9BSH4  | 1.7221  |
| 43627 | P14079 | P50914  | 1.21    |
| 43628 | P14079 | Q5T5D7  | 0.67256 |
| 43629 | P14079 | P35232  | 0.68511 |
| 43630 | P14079 | Q9NVH6  | 0.76017 |
| 43631 | P14079 | Q9BWG6  | 1.1358  |
| 43632 | P14079 | P60410  | 1.5617  |
| 43633 | P14079 | Q9BWT1  | 1.6581  |
| 43634 | P14079 | P10916  | 0.25533 |
| 43635 | P14079 | Q8IYB0  | 1.1715  |
| 43636 | P14079 | A0JLT2  | 1.5977  |
| 43637 | P14079 | Q8TEE9  | 1.4836  |
| 43638 | P14079 | Q6P1N0  | 0.67818 |
| 43639 | P14079 | O60895  | 0.24754 |
| 43640 | P14079 | Q3MIS6  | 0.98685 |
| 43641 | P14079 | P68363  | 0.2946  |
| 43642 | P14079 | Q9BYN7  | 0.38904 |
| 43643 | P14079 | A6NGY3  | 0.82059 |
| 43644 | P14079 | Q659C4  | 0.91879 |
| 43645 | P14079 | Q5VWM3  | 0.12466 |
| 43646 | P14079 | Q5SQI0  | 0.54911 |
| 43647 | P14079 | P30084  | 0.15203 |
| 43648 | P14079 | Q9BV73  | 0.99643 |
| 43649 | P14079 | Q99442  | 0.907   |
| 43650 | P14079 | Q14244  | 1.2344  |
| 43651 | P14079 | Q6ZRS2  | 0.32378 |
| 43652 | P14079 | Q9UILL1 | 0.95034 |
| 43653 | P14079 | O43708  | 0.29226 |
| 43654 | P14079 | Q9BRX8  | 0.40568 |
| 43655 | P14079 | Q8NEL9  | 0.20189 |
| 43656 | P14079 | O60346  | 0.30386 |
| 43657 | P14079 | P06744  | 0.85028 |
| 43658 | P14079 | Q96G61  | 0.56413 |
| 43659 | P14079 | Q8TE69  | 0.56221 |
| 43660 | P14079 | Q7Z2W9  | 0.43647 |
| 43661 | P14079 | Q9BT22  | 1.2204  |
| 43662 | P14079 | Q96KX1  | 0.24242 |
| 43663 | P14079 | Q96GI7  | 1.3222  |
| 43664 | P14079 | Q9NP85  | 0.20471 |
| 43665 | P14079 | Q9HCU8  | 1.0744  |
| 43666 | P14079 | Q96D46  | 1.4726  |
| 43667 | P14079 | Q9P086  | 0.9883  |
| 43668 | P14079 | Q9Y5L5  | 1.743   |
| 43669 | P14079 | Q9C002  | 0.56818 |
| 43670 | P14079 | Q8WWQ0  | 0.6998  |
| 43671 | P14079 | Q9GZS3  | 1.0011  |
| 43672 | P14079 | Q8NC26  | 0.93222 |
| 43673 | P14079 | Q86YS3  | 0.23475 |
| 43674 | P14079 | Q92785  | 0.77591 |
| 43675 | P14079 | Q9H246  | 0.85015 |
| 43676 | P14079 | Q96C11  | 0.44737 |
| 43677 | P14079 | Q8IZL2  | 1.0038  |
| 43678 | P14079 | Q86XK2  | 0.5155  |
| 43679 | P14079 | Q9BXW3  | 1.1715  |
| 43680 | P14079 | Q92636  | 0.50157 |
| 43681 | P14079 | P59037  | 1.5616  |
| 43682 | P14079 | Q9NY27  | 1.5413  |
| 43683 | P14079 | Q6NVV0  | 1.3468  |
| 43684 | P14079 | A1A5B4  | 1.1778  |
| 43685 | P14079 | Q5T5J6  | 1.2751  |
| 43686 | P14079 | Q9NR83  | 0.21799 |
| 43687 | P14079 | A6NH11  | 1.2086  |
| 43688 | P14079 | Q9NPC6  | 1.559   |
| 43689 | P14079 | Q5SZJ8  | 0.47375 |
| 43690 | P14079 | Q9Y5Q9  | 0.32842 |
| 43691 | P14079 | Q8NG31  | 1.1993  |
| 43692 | P14079 | G3V211  | 1.553   |
| 43693 | P14079 | Q9P2J8  | 0.75812 |
| 43694 | P14079 | P53805  | 0.58085 |
| 43695 | P14079 | Q96Q80  | 0.51059 |
| 43696 | P14079 | Q14739  | 0.28071 |
| 43697 | P14079 | Q6P387  | 1.0782  |
| 43698 | P14079 | A8MVW5  | 1.0122  |
| 43699 | P14079 | Q9POL1  | 0.70737 |
| 43700 | P14079 | Q9UHV9  | 0.89957 |

|       |        |        |          |
|-------|--------|--------|----------|
| 43701 | P14079 | P35080 | 0.76298  |
| 43702 | P14079 | Q32MZ4 | 1.3755   |
| 43703 | P14079 | Q9C0I3 | 1.5139   |
| 43704 | P14079 | P19237 | 0.010469 |
| 43705 | P14079 | Q9BSK0 | 1.741    |
| 43706 | P14079 | Q5SZD4 | 0.97827  |
| 43707 | P14079 | Q9UPW5 | 0.45198  |
| 43708 | P14079 | Q9NRS6 | 0.11399  |
| 43709 | P14079 | P13804 | 0.32947  |
| 43710 | P14079 | Q6ZSV7 | 0.79071  |
| 43711 | P14079 | Q15059 | 1.0258   |
| 43712 | P14079 | Q86Y39 | 1.1345   |
| 43713 | P14079 | O14497 | 0.68722  |
| 43714 | P14079 | Q969X0 | 0.064522 |
| 43715 | P14079 | Q6ZUT1 | 1.1715   |
| 43716 | P14079 | P29144 | 0.19686  |
| 43717 | P14079 | Q96C86 | 0.77799  |
| 43718 | P14079 | P46199 | 0.88888  |
| 43719 | P14079 | Q9HCC9 | 0.6116   |
| 43720 | P14079 | Q6UWK7 | 1.1715   |
| 43721 | P14079 | Q9UBZ9 | 0.52647  |
| 43722 | P14079 | P10909 | 0.1271   |
| 43723 | P14079 | Q9BRB3 | 0.90835  |
| 43724 | P14079 | Q8TBZ9 | 1.6989   |
| 43725 | P14079 | Q9H0R3 | 1.1069   |
| 43726 | P14079 | Q14596 | 0.22452  |
| 43727 | P14079 | Q9UH64 | 0.53764  |
| 43728 | P14079 | A6NJY4 | 1.1715   |
| 43729 | P14079 | Q9UBC1 | 0.66379  |
| 43730 | P14079 | O75157 | 0.72881  |
| 43731 | P14079 | Q1W6H9 | 1.6505   |
| 43732 | P14079 | P56278 | 0.45678  |
| 43733 | P14079 | O94913 | 0.45689  |
| 43734 | P14079 | Q5T2P8 | 0.1776   |
| 43735 | P14079 | Q15050 | 1.0316   |
| 43736 | P14079 | Q9BWG4 | 0.22967  |
| 43737 | P14079 | Q8ND76 | 0.9309   |
| 43738 | P14079 | Q02221 | 0.73241  |
| 43739 | P14079 | Q9P2D3 | 1.0385   |
| 43740 | P14079 | Q6L8H4 | 1.1715   |
| 43741 | P14079 | Q15527 | 0.9502   |
| 43742 | P14079 | A5LHX3 | 0.65923  |
| 43743 | P14079 | O75569 | 0.34121  |
| 43744 | P14079 | Q5VT98 | 0.22339  |
| 43745 | P14079 | Q86SG2 | 0.28073  |
| 43746 | P14079 | O15116 | 0.83104  |
| 43747 | P14079 | Q96M63 | 0.46897  |
| 43748 | P14079 | Q9BY14 | 0.69311  |
| 43749 | P14079 | Q96MG8 | 0.21329  |
| 43750 | P14079 | P86791 | 0.80083  |
| 43751 | P14079 | Q9NS39 | 0.055104 |
| 43752 | P14079 | Q96LM9 | 0.32354  |
| 43753 | P14079 | Q8N344 | 0.71985  |
| 43754 | P14079 | P53992 | 1.1942   |
| 43755 | P14079 | A4D2H0 | 0.10259  |
| 43756 | P14079 | Q13439 | 1.3598   |
| 43757 | P14079 | Q8TCF1 | 0.51234  |
| 43758 | P14079 | O95639 | 0.60733  |
| 43759 | P14079 | Q9BUL8 | 0.85643  |
| 43760 | P14079 | P04844 | 0.97025  |
| 43761 | P14079 | Q9H2K2 | 0.28681  |
| 43762 | P14079 | Q5VUD6 | 1.2163   |
| 43763 | P14079 | Q96EB1 | 1.0525   |
| 43764 | P14079 | Q5TA79 | 1.1715   |
| 43765 | P14079 | Q9UKC9 | 0.64648  |
| 43766 | P14079 | Q14674 | 0.27943  |
| 43767 | P14079 | Q9Y303 | 0.17963  |
| 43768 | P14079 | Q86UQ8 | 0.63496  |
| 43769 | P14079 | Q5T699 | 0.61046  |
| 43770 | P14079 | Q96NL0 | 0.83201  |
| 43771 | P14079 | Q587J8 | 0.46134  |
| 43772 | P14079 | Q9Y615 | 0.89007  |
| 43773 | P14079 | Q9Y3F4 | 0.94613  |
| 43774 | P14079 | Q9ULW0 | 1.5087   |
| 43775 | P14079 | O60437 | 1.0513   |
| 43776 | P14079 | Q8WUH6 | 0.84704  |

|       |        |        |          |
|-------|--------|--------|----------|
| 43777 | P14079 | Q9H8Q6 | 1.6831   |
| 43778 | P14079 | P20810 | 0.99226  |
| 43779 | P14079 | Q8NAV2 | 0.9261   |
| 43780 | P14079 | Q9HAF1 | 0.98895  |
| 43781 | P14079 | Q4VC44 | 1.297    |
| 43782 | P14079 | Q6NTE8 | 0.36355  |
| 43783 | P14079 | Q9UHA4 | 0.50155  |
| 43784 | P14079 | Q5VY09 | 1.566    |
| 43785 | P14079 | P69905 | 0.53063  |
| 43786 | P14079 | Q9H074 | 0.51819  |
| 43787 | P14079 | Q8N3F8 | 0.77086  |
| 43788 | P14079 | Q9NY43 | 0.419    |
| 43789 | P14079 | O60281 | 0.37848  |
| 43790 | P14079 | Q8WXJ9 | 1.0423   |
| 43791 | P14079 | P32519 | 1.1905   |
| 43792 | P14079 | Q13112 | 1.3877   |
| 43793 | P14079 | Q969E8 | 1.6789   |
| 43794 | P14079 | Q9Y2J4 | 0.3248   |
| 43795 | P14079 | Q13216 | 0.39771  |
| 43796 | P14079 | Q96H12 | 1.6347   |
| 43797 | P14079 | P62312 | 0.83144  |
| 43798 | P14079 | Q6X4T0 | 0.70052  |
| 43799 | P14079 | Q9Y3D0 | 1.1644   |
| 43800 | P14079 | Q8NA70 | 0.55769  |
| 43801 | P14079 | Q96CP2 | 0.65195  |
| 43802 | P14079 | P0DKL9 | 1.5322   |
| 43803 | P14079 | A1L168 | 1.3222   |
| 43804 | P14079 | Q15029 | 0.38767  |
| 43805 | P14079 | Q8N859 | 0.98344  |
| 43806 | P14079 | P16455 | 0.67096  |
| 43807 | P14079 | Q9Y5J7 | 0.4127   |
| 43808 | P14079 | Q9H6F5 | 0.85408  |
| 43809 | P14079 | Q59EK9 | 0.9842   |
| 43810 | P14079 | Q13045 | 1.1348   |
| 43811 | P14079 | Q13889 | 0.40699  |
| 43812 | P14079 | P50990 | 0.071366 |
| 43813 | P14079 | Q9Y4F9 | 0.34592  |
| 43814 | P14079 | Q6UYE1 | 1.4032   |
| 43815 | P14079 | Q8N1E6 | 0.40123  |
| 43816 | P14079 | Q6NSI4 | 0.76853  |
| 43817 | P14079 | Q8NHM5 | 0.27773  |
| 43818 | P14079 | O95848 | 1.225    |
| 43819 | P14079 | Q9UK11 | 0.78948  |
| 43820 | P14079 | Q6ZV65 | 0.69358  |
| 43821 | P14079 | O60504 | 0.8812   |
| 43822 | P14079 | Q9BQ65 | 1.1766   |
| 43823 | P14079 | P81408 | 1.2303   |
| 43824 | P14079 | Q8N5I3 | 0.11285  |
| 43825 | P14079 | P57679 | 0.79923  |
| 43826 | P14079 | Q8N128 | 1.1715   |
| 43827 | P14079 | Q9BXW9 | 1.0072   |
| 43828 | P14079 | Q8N9M1 | 0.79582  |
| 43829 | P14079 | P10746 | 0.62307  |
| 43830 | P14079 | P16157 | 0.38856  |
| 43831 | P14079 | Q8TAQ2 | 1.2834   |
| 43832 | P14079 | Q9Y6Z2 | 1.1715   |
| 43833 | P14079 | Q8N7M2 | 1.0057   |
| 43834 | P14079 | Q8N7J2 | 1.6794   |
| 43835 | P14079 | P53803 | 1.1396   |
| 43836 | P14079 | O95905 | 0.95491  |
| 43837 | P14079 | Q8WXF5 | 1.0104   |
| 43838 | P14079 | Q96K83 | 0.61785  |
| 43839 | P14079 | Q6IPU0 | 1.3681   |
| 43840 | P14079 | O95954 | 0.67229  |
| 43841 | P14079 | Q13472 | 0.087376 |
| 43842 | P14079 | P19484 | 0.52387  |
| 43843 | P14079 | Q13111 | 1.779    |
| 43844 | P14079 | Q9GZU8 | 0.96939  |
| 43845 | P14079 | Q6PG37 | 1.0311   |
| 43846 | P14079 | Q7L5Y9 | 0.61353  |
| 43847 | P14079 | Q8N883 | 0.52115  |
| 43848 | P14079 | O60732 | 0.56221  |
| 43849 | P14079 | Q12968 | 0.61307  |
| 43850 | P14079 | Q03923 | 1.0696   |
| 43851 | P14079 | Q9Y3A5 | 0.85961  |
| 43852 | P14079 | Q15025 | 0.72057  |

|       |        |        |          |
|-------|--------|--------|----------|
| 43853 | P14079 | Q96B97 | 0.55402  |
| 43854 | P14079 | P62937 | 0.62826  |
| 43855 | P14079 | Q9NV29 | 1.0526   |
| 43856 | P14079 | Q6UWW9 | 1.0014   |
| 43857 | P14079 | Q9BQM9 | 0.99732  |
| 43858 | P14079 | Q8TF74 | 0.85926  |
| 43859 | P14079 | P34897 | 0.26877  |
| 43860 | P14079 | Q86SQ9 | 0.27371  |
| 43861 | P14079 | A8MTA8 | 0.76595  |
| 43862 | P14079 | Q9UJ41 | 0.38879  |
| 43863 | P14079 | Q1A5X6 | 1.3222   |
| 43864 | P14079 | O60759 | 0.58466  |
| 43865 | P14079 | Q9NP98 | 1.3248   |
| 43866 | P14079 | Q9UKX2 | 0.25261  |
| 43867 | P14079 | Q53R41 | 0.29361  |
| 43868 | P14079 | Q14847 | 0.32409  |
| 43869 | P14079 | Q9NQP4 | 0.98366  |
| 43870 | P14079 | Q9UJK0 | 1.6736   |
| 43871 | P14079 | O00423 | 0.79677  |
| 43872 | P14079 | Q15323 | 0.89111  |
| 43873 | P14079 | Q8NCU4 | 1.0613   |
| 43874 | P14079 | Q99747 | 0.82614  |
| 43875 | P14079 | P41220 | 0.29412  |
| 43876 | P14079 | Q9NVH2 | 1.0693   |
| 43877 | P14079 | A6H8Y1 | 0.96775  |
| 43878 | P14079 | Q9BZV1 | 1.0515   |
| 43879 | P14079 | Q5TC12 | 0.81304  |
| 43880 | P14079 | Q15124 | 0.13543  |
| 43881 | P14079 | Q13427 | 0.47033  |
| 43882 | P14079 | Q7Z7C7 | 0.78102  |
| 43883 | P14079 | Q96MK2 | 0.64279  |
| 43884 | P14079 | Q96NI8 | 0.92549  |
| 43885 | P14079 | Q9Y2B2 | 1.6276   |
| 43886 | P14079 | Q9NVR7 | 0.66419  |
| 43887 | P14079 | Q5M9Q1 | 1.3529   |
| 43888 | P14079 | Q8N0V3 | 1.5081   |
| 43889 | P14079 | Q9H2P0 | 0.18683  |
| 43890 | P14079 | Q6ZMS7 | 0.77037  |
| 43891 | P14079 | Q9H1B4 | 0.22239  |
| 43892 | P14079 | Q9NZU5 | 0.25726  |
| 43893 | P14079 | Q8IYI8 | 0.766    |
| 43894 | P14079 | Q14129 | 1.0354   |
| 43895 | P14079 | O43900 | 0.30548  |
| 43896 | P14079 | P62979 | 0.66459  |
| 43897 | P14079 | O00399 | 0.28193  |
| 43898 | P14079 | Q5VWP3 | 1.5594   |
| 43899 | P14079 | Q06732 | 0.44092  |
| 43900 | P14079 | Q9H900 | 0.65763  |
| 43901 | P14079 | P46937 | 0.85047  |
| 43902 | P14079 | Q5SVQ8 | 0.68319  |
| 43903 | P14079 | Q75MW2 | 1.1965   |
| 43904 | P14079 | Q10571 | 1.1224   |
| 43905 | P14079 | O43829 | 0.83122  |
| 43906 | P14079 | A8K8P3 | 1.1714   |
| 43907 | P14079 | P18615 | 0.94191  |
| 43908 | P14079 | Q9Y6J3 | 1.1715   |
| 43909 | P14079 | Q5HYJ3 | 1.4627   |
| 43910 | P14079 | Q5T089 | 0.40977  |
| 43911 | P14079 | Q86YC2 | 0.82173  |
| 43912 | P14079 | P60022 | 0.81621  |
| 43913 | P14079 | A6NCW3 | 1.4194   |
| 43914 | P14079 | Q9UGY1 | 0.49318  |
| 43915 | P14079 | Q9GZP9 | 0.51059  |
| 43916 | P14079 | O71037 | 0.70023  |
| 43917 | P14079 | Q71RG6 | 1.1715   |
| 43918 | P14079 | Q9H0A8 | 1.3776   |
| 43919 | P14079 | Q96MR9 | 0.91481  |
| 43920 | P14079 | Q9UIG4 | 0.98371  |
| 43921 | P14079 | O14907 | 0.53101  |
| 43922 | P14079 | Q6ZN55 | 0.52025  |
| 43923 | P14079 | Q86UD1 | 0.73326  |
| 43924 | P14079 | P60608 | 0.79007  |
| 43925 | P14079 | Q56UQ5 | 0.045291 |
| 43926 | P14079 | Q86YP4 | 0.73315  |
| 43927 | P14079 | Q6ZNK6 | 1.6477   |
| 43928 | P14079 | A6NHQ2 | 0.22433  |

|       |        |        |          |
|-------|--------|--------|----------|
| 43929 | P14079 | Q9BYE3 | 1.1715   |
| 43930 | P14079 | Q8TCD1 | 0.99803  |
| 43931 | P14079 | O60869 | 0.51876  |
| 43932 | P14079 | Q96HR8 | 1.6353   |
| 43933 | P14079 | O00151 | 0.41523  |
| 43934 | P14079 | F5GYI3 | 1.7166   |
| 43935 | P14079 | Q96M29 | 1.0096   |
| 43936 | P14079 | Q6P2D0 | 0.57947  |
| 43937 | P14079 | Q96GS4 | 1.7191   |
| 43938 | P14079 | A0PJX2 | 0.89539  |
| 43939 | P14079 | O95182 | 0.84392  |
| 43940 | P14079 | O43715 | 1.192    |
| 43941 | P14079 | Q32P41 | 0.35438  |
| 43942 | P14079 | Q32NB8 | 1.019    |
| 43943 | P14079 | Q6XXX2 | 0.49812  |
| 43944 | P14079 | Q01546 | 0.99979  |
| 43945 | P14079 | Q96S99 | 0.23133  |
| 43946 | P14079 | Q96G27 | 1.2303   |
| 43947 | P14079 | Q86YL5 | 0.48973  |
| 43948 | P14079 | A6ND36 | 0.27984  |
| 43949 | P14079 | A6NKF2 | 0.81531  |
| 43950 | P14079 | Q13625 | 0.50585  |
| 43951 | P14079 | Q9UM54 | 0.098001 |
| 43952 | P14079 | Q9Y2P7 | 0.61408  |
| 43953 | P14079 | Q9Y3Y2 | 1.7668   |
| 43954 | P14079 | Q86UK5 | 0.6607   |
| 43955 | P14079 | Q8N1N5 | 0.59017  |
| 43956 | P14079 | A6PVY3 | 0.94424  |
| 43957 | P14079 | O00233 | 0.99093  |
| 43958 | P14079 | Q15526 | 0.6834   |
| 43959 | P14079 | Q9NUU6 | 0.95719  |
| 43960 | P14079 | O94864 | 0.89436  |
| 43961 | P14079 | O60784 | 0.63709  |
| 43962 | P14079 | A5PLN7 | 1.3222   |
| 43963 | P14079 | Q6ZMV5 | 0.94057  |
| 43964 | P14079 | Q8N5N4 | 1.2303   |
| 43965 | P14079 | Q4G0I0 | 0.77839  |
| 43966 | P14079 | Q04917 | 0.45795  |
| 43967 | P14079 | Q9P2R7 | 0.68729  |
| 43968 | P14079 | Q9NUQ6 | 0.42364  |
| 43969 | P14079 | Q8TAP6 | 1.3822   |
| 43970 | P14079 | P41161 | 1.0851   |
| 43971 | P14079 | Q6UXQ8 | 1.1715   |
| 43972 | P14079 | Q96NL3 | 0.62309  |
| 43973 | P14079 | O60934 | 0.26668  |
| 43974 | P14079 | P60673 | 0.50523  |
| 43975 | P14079 | Q96B18 | 0.47276  |
| 43976 | P14079 | O75190 | 0.6652   |
| 43977 | P14079 | Q5JS54 | 1.24     |
| 43978 | P14079 | Q8IXX5 | 1.1391   |
| 43979 | P14079 | Q8TDN6 | 0.39237  |
| 43980 | P14079 | Q5T7P2 | 1.1715   |
| 43981 | P14079 | Q6P2Q9 | 0.51943  |
| 43982 | P14079 | P35527 | 0.99997  |
| 43983 | P14079 | Q7Z2X7 | 1.2734   |
| 43984 | P14079 | Q9UJW0 | 0.90456  |
| 43985 | P14079 | Q12796 | 2.1537   |
| 43986 | P14079 | C9J6K1 | 1.249    |
| 43987 | P14079 | Q8TF46 | 0.22934  |
| 43988 | P14079 | Q9NX53 | 0.56221  |
| 43989 | P14079 | Q6ZMI0 | 0.47971  |
| 43990 | P14079 | Q96JJ3 | 0.55099  |
| 43991 | P14079 | Q8NFI3 | 0.94184  |
| 43992 | P14079 | Q9BSD3 | 0.82042  |
| 43993 | P14079 | Q969I3 | 0.80477  |
| 43994 | P14079 | Q86XL3 | 0.40214  |
| 43995 | P14079 | P49918 | 0.76867  |
| 43996 | P14079 | Q9Y3Q8 | 1.1047   |
| 43997 | P14079 | Q9BXU2 | 1.2057   |
| 43998 | P14079 | Q6P2E9 | 0.96279  |
| 43999 | P14079 | P62841 | 0.96768  |
| 44000 | P14079 | Q96E29 | 0.99002  |
| 44001 | P14079 | P31350 | 0.36248  |
| 44002 | P14079 | Q9H213 | 0.12669  |
| 44003 | P14079 | Q5RHP9 | 0.89479  |
| 44004 | P14079 | Q92597 | 0.70112  |



|       |        |        |          |
|-------|--------|--------|----------|
| 44005 | P14079 | Q8IUD2 | 0.976    |
| 44006 | P14079 | Q76KD6 | 0.88636  |
| 44007 | P14079 | Q3LI59 | 1.1715   |
| 44008 | P14079 | Q8N4J0 | 1.7729   |
| 44009 | P14079 | O94777 | 1.0624   |
| 44010 | P14079 | P18124 | 0.87813  |
| 44011 | P14079 | Q8NCE0 | 0.96602  |
| 44012 | P14079 | O15527 | 0.52768  |
| 44013 | P14079 | Q96L92 | 0.92912  |
| 44014 | P14079 | P61758 | 0.71861  |
| 44015 | P14079 | Q7RTX8 | 0.045609 |
| 44016 | P14079 | B4DJY2 | 0.80886  |
| 44017 | P14079 | Q3SXZ3 | 0.64025  |
| 44018 | P14079 | Q96RM1 | 1.1715   |
| 44019 | P14079 | Q15003 | 1.3818   |
| 44020 | P14079 | A6NN73 | 0.94914  |
| 44021 | P14079 | Q9UPT5 | 0.76117  |
| 44022 | P14079 | Q7Z7F0 | 0.13988  |
| 44023 | P14079 | Q14444 | 0.38828  |
| 44024 | P14079 | Q8TC20 | 0.10229  |
| 44025 | P14079 | Q8NEV9 | 0.84969  |
| 44026 | P14079 | P63165 | 0.97935  |
| 44027 | P14079 | P15559 | 0.43313  |
| 44028 | P14079 | Q5R3K3 | 0.84874  |
| 44029 | P14079 | Q8NE22 | 1.7829   |
| 44030 | P14079 | Q8NEF3 | 0.71138  |
| 44031 | P14079 | Q99828 | 0.36198  |
| 44032 | P14079 | Q76N32 | 0.45191  |
| 44033 | P14079 | P62380 | 0.38349  |
| 44034 | P14079 | Q9H3C7 | 1.7286   |
| 44035 | P14079 | Q6XCG6 | 1.1715   |
| 44036 | P14079 | Q9UHI6 | 0.39976  |
| 44037 | P14079 | Q9H706 | 0.56221  |
| 44038 | P14079 | Q9BTE3 | 0.74284  |
| 44039 | P14079 | Q96MT4 | 1.4367   |
| 44040 | P14079 | P57738 | 1.1823   |
| 44041 | P14079 | Q8N6T0 | 1.0901   |
| 44042 | P14079 | Q14240 | 0.17377  |
| 44043 | P14079 | Q96A49 | 1.4058   |
| 44044 | P14079 | F5H284 | 0.18124  |
| 44045 | P14079 | Q8N6F8 | 0.080393 |
| 44046 | P14079 | Q86YA3 | 1.6718   |
| 44047 | P14079 | A6NGD5 | 0.53786  |
| 44048 | P14079 | Q5MJ10 | 1.5871   |
| 44049 | P14079 | Q9Y448 | 1.0095   |
| 44050 | P14079 | O00115 | 0.72547  |
| 44051 | P14079 | Q7Z6J8 | 1.1093   |
| 44052 | P14079 | Q569H4 | 1.3222   |
| 44053 | P14079 | Q7Z591 | 1.9627   |
| 44054 | P14079 | Q9H9H5 | 1.2353   |
| 44055 | P14079 | Q8N9R6 | 0.97965  |
| 44056 | P14079 | Q7Z4G1 | 2.0433   |
| 44057 | P14079 | P0C7Q5 | 1.2643   |
| 44058 | P14079 | O43379 | 0.3613   |
| 44059 | P14079 | Q9Y371 | 0.228    |
| 44060 | P14079 | Q9BVC4 | 0.61906  |
| 44061 | P14079 | P35998 | 0.63119  |
| 44062 | P14079 | O60711 | 0.53235  |
| 44063 | P14079 | Q14118 | 0.25133  |
| 44064 | P14079 | Q96SZ4 | 0.44187  |
| 44065 | P14079 | Q96RE9 | 0.53783  |
| 44066 | P14079 | P07919 | 0.68913  |
| 44067 | P14079 | Q8TEA1 | 0.54929  |
| 44068 | P14079 | Q5T319 | 1.1715   |
| 44069 | P14079 | A5YKK6 | 1.4411   |
| 44070 | P14079 | Q7Z3C6 | 0.65483  |
| 44071 | P14079 | Q9P217 | 0.55614  |
| 44072 | P14079 | P78549 | 0.34831  |
| 44073 | P14079 | Q9NZL9 | 0.10783  |
| 44074 | P14079 | Q9BQA5 | 0.93959  |
| 44075 | P14079 | Q9H147 | 1.2474   |
| 44076 | P14079 | Q8WY91 | 1.0053   |
| 44077 | P14079 | Q96NG5 | 0.96114  |
| 44078 | P14079 | Q9H0C3 | 1.218    |
| 44079 | P14079 | Q14159 | 1.9029   |
| 44080 | P14079 | Q6UW78 | 0.98371  |

|       |        |        |         |
|-------|--------|--------|---------|
| 44081 | P14079 | Q8NA31 | 0.87435 |
| 44082 | P14079 | Q9H3E2 | 0.46526 |
| 44083 | P14079 | O15155 | 0.35634 |
| 44084 | P14079 | Q9P215 | 0.61985 |
| 44085 | P14079 | Q7L3S4 | 0.51366 |
| 44086 | P14079 | O75461 | 0.18838 |
| 44087 | P14079 | P31271 | 0.14603 |
| 44088 | P14079 | P56211 | 0.75629 |
| 44089 | P14079 | Q9UBW7 | 1.3567  |
| 44090 | P14079 | Q6ZMK1 | 0.17701 |
| 44091 | P14079 | A6NHR8 | 1.1715  |
| 44092 | P14079 | P15923 | 0.58496 |
| 44093 | P14079 | Q8WWC4 | 1.2532  |
| 44094 | P14079 | Q15306 | 0.60977 |
| 44095 | P14079 | Q9NR56 | 0.54694 |
| 44096 | P14079 | Q8NAS9 | 0.6576  |
| 44097 | P14079 | Q96M61 | 0.56221 |
| 44098 | P14079 | Q9NS37 | 0.78193 |
| 44099 | P14079 | Q14409 | 0.88589 |
| 44100 | P14079 | K7EJ46 | 1.1715  |
| 44101 | P14079 | Q9NRX5 | 0.74001 |
| 44102 | P14079 | Q9Y4H4 | 1.1527  |
| 44103 | P14079 | Q9BTE0 | 0.43728 |
| 44104 | P14079 | O75352 | 1.2722  |
| 44105 | P14079 | Q0P670 | 1.7191  |
| 44106 | P14079 | Q9HAU4 | 0.23799 |
| 44107 | P14079 | P48443 | 0.25311 |
| 44108 | P14079 | Q9BVV6 | 1.1715  |
| 44109 | P14079 | Q9UHK0 | 0.52879 |
| 44110 | P14079 | Q13424 | 0.70828 |
| 44111 | P14079 | Q96HT8 | 2.1833  |
| 44112 | P14079 | O60870 | 0.95651 |
| 44113 | P14079 | O43830 | 0.53511 |
| 44114 | P14079 | P62314 | 0.8634  |
| 44115 | P14079 | Q9HD64 | 0.9953  |
| 44116 | P14079 | Q96LX8 | 0.66944 |
| 44117 | P14079 | Q8IYY4 | 0.27964 |
| 44118 | P14079 | P54253 | 0.90763 |
| 44119 | P14079 | Q69YQ0 | 0.54795 |
| 44120 | P14079 | P14324 | 0.24032 |
| 44121 | P14079 | Q6UX82 | 0.91704 |
| 44122 | P14079 | Q13156 | 0.61476 |
| 44123 | P14079 | Q8IWN6 | 1.1275  |
| 44124 | P14079 | O94905 | 0.60901 |
| 44125 | P14079 | P11166 | 0.37256 |
| 44126 | P14079 | Q14498 | 0.7153  |
| 44127 | P14079 | Q9NX94 | 1.0941  |
| 44128 | P14079 | P05413 | 0.39416 |
| 44129 | P14079 | Q9BYU5 | 1.1584  |
| 44130 | P14079 | O95707 | 1.4609  |
| 44131 | P14079 | Q9ULM3 | 0.93081 |
| 44132 | P14079 | Q496H8 | 1.12    |
| 44133 | P14079 | Q9HCS7 | 0.44872 |
| 44134 | P14079 | Q9H9A7 | 0.69474 |
| 44135 | P14079 | Q9BYR7 | 1.5936  |
| 44136 | P14079 | P42766 | 1.0052  |
| 44137 | P14079 | Q9Y4G6 | 0.44373 |
| 44138 | P14079 | Q06547 | 1.0213  |
| 44139 | P14079 | Q5VYK3 | 0.48581 |
| 44140 | P14079 | Q8TDX5 | 0.43148 |
| 44141 | P14079 | Q9Y2T3 | 0.53879 |
| 44142 | P14079 | Q5BJF2 | 1.2205  |
| 44143 | P14079 | Q9C0H9 | 0.61126 |
| 44144 | P14079 | Q9NUQ3 | 0.56526 |
| 44145 | P14079 | Q86YG4 | 0.97848 |
| 44146 | P14079 | Q14258 | 0.76727 |
| 44147 | P14079 | Q8N7G0 | 0.28169 |
| 44148 | P14079 | Q15797 | 0.5408  |
| 44149 | P14079 | Q96HJ3 | 1.3222  |
| 44150 | P14079 | Q9BQI6 | 0.33298 |
| 44151 | P14079 | Q6ZRR5 | 0.89497 |
| 44152 | P14079 | O75608 | 0.10553 |
| 44153 | P14079 | Q8WW18 | 1.3222  |
| 44154 | P14079 | P06733 | 0.56239 |
| 44155 | P14079 | Q16600 | 0.55492 |
| 44156 | P14079 | Q9H299 | 0.50824 |

|       |        |        |         |
|-------|--------|--------|---------|
| 44157 | P14079 | Q96BJ3 | 1.1899  |
| 44158 | P14079 | O43298 | 0.1949  |
| 44159 | P14079 | P79522 | 0.91702 |
| 44160 | P14079 | P30793 | 0.22948 |
| 44161 | P14079 | Q6YHU6 | 0.25993 |
| 44162 | P14079 | Q9H9Q2 | 0.29546 |
| 44163 | P14079 | P02489 | 0.36722 |
| 44164 | P14079 | Q8TBC5 | 0.24971 |
| 44165 | P14079 | Q969V6 | 1.4144  |
| 44166 | P14079 | Q15427 | 0.321   |
| 44167 | P14079 | P33316 | 0.65589 |
| 44168 | P14079 | O60678 | 0.23621 |
| 44169 | P14079 | Q96NT0 | 0.25118 |
| 44170 | P14079 | Q13065 | 0.5777  |
| 44171 | P14079 | Q03933 | 0.51906 |
| 44172 | P14079 | Q9NWA0 | 2.057   |
| 44173 | P14079 | P61077 | 0.61533 |
| 44174 | P14079 | Q6ZRV3 | 1.1715  |
| 44175 | P14079 | Q5TA82 | 1.1715  |
| 44176 | P14079 | Q08211 | 0.26295 |
| 44177 | P14079 | P25685 | 0.25982 |
| 44178 | P14079 | Q14765 | 0.30746 |
| 44179 | P14079 | Q7RTT4 | 0.31443 |
| 44180 | P14079 | O75155 | 0.89589 |
| 44181 | P14079 | Q9H9Z2 | 0.79628 |
| 44182 | P14079 | A5YM69 | 0.7896  |
| 44183 | P14079 | Q5TAP6 | 1.1972  |
| 44184 | P14079 | Q9Y2F5 | 0.88463 |
| 44185 | P14079 | Q04695 | 1.0011  |
| 44186 | P14079 | Q96BN2 | 1.3084  |
| 44187 | P14079 | Q8N326 | 0.88101 |
| 44188 | P14079 | Q16385 | 0.93972 |
| 44189 | P14079 | Q96DZ1 | 0.70787 |
| 44190 | P14079 | Q9NYW8 | 0.5383  |
| 44191 | P14079 | Q9NU63 | 0.52862 |
| 44192 | P14079 | Q6IE81 | 1.0678  |
| 44193 | P14079 | Q969N2 | 0.70065 |
| 44194 | P14079 | P10827 | 0.24351 |
| 44195 | P14079 | Q9HBV2 | 1.2485  |
| 44196 | P14079 | Q9H175 | 1.0756  |
| 44197 | P14079 | Q5T1Q4 | 0.84328 |
| 44198 | P14079 | Q12837 | 0.64088 |
| 44199 | P14079 | Q4G0F5 | 0.48942 |
| 44200 | P14079 | Q9UHX1 | 0.66392 |
| 44201 | P14079 | Q9UNZ5 | 1.3222  |
| 44202 | P14079 | Q8NCT3 | 1.5108  |
| 44203 | P14079 | Q9Y6H1 | 1.571   |
| 44204 | P14079 | A8MUI8 | 1.2005  |
| 44205 | P14079 | P57081 | 1.1625  |
| 44206 | P14079 | Q96NT5 | 0.67651 |
| 44207 | P14079 | Q9UKK3 | 0.78568 |
| 44208 | P14079 | Q95822 | 0.4559  |
| 44209 | P14079 | Q96AH0 | 0.95705 |
| 44210 | P14079 | P62952 | 1.1848  |
| 44211 | P14079 | F2Z3M2 | 1.1715  |
| 44212 | P14079 | Q5SNT2 | 0.92098 |
| 44213 | P14079 | P61289 | 1.1936  |
| 44214 | P14079 | A6NFF2 | 0.47338 |
| 44215 | P14079 | Q6PD62 | 0.61691 |
| 44216 | P14079 | O95453 | 0.77496 |
| 44217 | P14079 | Q96JM2 | 0.39971 |
| 44218 | P14079 | Q9HB03 | 0.77014 |
| 44219 | P14079 | Q96JC4 | 0.70617 |
| 44220 | P14079 | O14925 | 0.64638 |
| 44221 | P14079 | Q96N23 | 1.3057  |
| 44222 | P14079 | Q5H9R4 | 1.3529  |
| 44223 | P14079 | Q8IY81 | 0.83501 |
| 44224 | P14079 | Q3MHD2 | 0.82906 |
| 44225 | P14079 | I3L1E1 | 0.84303 |
| 44226 | P14079 | Q6ZN06 | 0.99755 |
| 44227 | P14079 | A2RUB1 | 1.3222  |
| 44228 | P14079 | Q6ISB3 | 0.61927 |
| 44229 | P14079 | Q0VD83 | 1.004   |
| 44230 | P14079 | P02008 | 0.64778 |
| 44231 | P14079 | Q9BRQ5 | 0.42266 |
| 44232 | P14079 | Q96AY2 | 1.2341  |

|       |        |         |          |
|-------|--------|---------|----------|
| 44233 | P14079 | Q9NS69  | 0.44141  |
| 44234 | P14079 | Q9NWS0  | 0.70909  |
| 44235 | P14079 | P23025  | 0.73853  |
| 44236 | P14079 | A8MQT2  | 0.1307   |
| 44237 | P14079 | O75143  | 1.7072   |
| 44238 | P14079 | P63151  | 0.53142  |
| 44239 | P14079 | P29084  | 1.6054   |
| 44240 | P14079 | Q49A92  | 0.71812  |
| 44241 | P14079 | P0C7Q6  | 1.2643   |
| 44242 | P14079 | A6NGN4  | 0.46494  |
| 44243 | P14079 | A6NFC5  | 1.2954   |
| 44244 | P14079 | Q7Z465  | 0.93837  |
| 44245 | P14079 | Q3SYF9  | 1.1715   |
| 44246 | P14079 | Q8N8A8  | 1.1755   |
| 44247 | P14079 | Q8N5S3  | 0.37841  |
| 44248 | P14079 | P0CJ77  | 1.3031   |
| 44249 | P14079 | Q9H1Y0  | 0.73969  |
| 44250 | P14079 | Q03989  | 0.39249  |
| 44251 | P14079 | Q8IVB5  | 0.48967  |
| 44252 | P14079 | Q86UN6  | 0.69432  |
| 44253 | P14079 | P23497  | 1.0002   |
| 44254 | P14079 | P62266  | 1.1503   |
| 44255 | P14079 | Q9BVV2  | 0.52084  |
| 44256 | P14079 | P0C7V9  | 1.5082   |
| 44257 | P14079 | Q9Y4R7  | 0.31229  |
| 44258 | P14079 | P14649  | 0.34468  |
| 44259 | P14079 | Q16740  | 0.84796  |
| 44260 | P14079 | Q9BYP9  | 1.3698   |
| 44261 | P14079 | Q96BJ8  | 0.10685  |
| 44262 | P14079 | Q5JSS6  | 0.98355  |
| 44263 | P14079 | P30304  | 0.83486  |
| 44264 | P14079 | Q6NUR6  | 1.3372   |
| 44265 | P14079 | Q86TJ5  | 0.55217  |
| 44266 | P14079 | Q9C093  | 0.36672  |
| 44267 | P14079 | Q9NQZ5  | 0.57079  |
| 44268 | P14079 | Q6P2C0  | 0.86568  |
| 44269 | P14079 | Q99608  | 0.34667  |
| 44270 | P14079 | Q5VVM6  | 0.20167  |
| 44271 | P14079 | P61956  | 0.84136  |
| 44272 | P14079 | P52744  | 0.71839  |
| 44273 | P14079 | P57071  | 0.31932  |
| 44274 | P14079 | Q8IWIY8 | 0.51176  |
| 44275 | P14079 | Q6ZU80  | 0.39441  |
| 44276 | P14079 | Q14249  | 0.22309  |
| 44277 | P14079 | Q9NQ90  | 1.0151   |
| 44278 | P14079 | Q5QFB9  | 1.0092   |
| 44279 | P14079 | Q05048  | 0.86149  |
| 44280 | P14079 | Q15652  | 0.44538  |
| 44281 | P14079 | Q9NQZ8  | 0.5751   |
| 44282 | P14079 | Q9Y2R5  | 0.94541  |
| 44283 | P14079 | P60006  | 1.2213   |
| 44284 | P14079 | Q5T8R8  | 0.41994  |
| 44285 | P14079 | Q9UI72  | 1.1715   |
| 44286 | P14079 | Q8NA19  | 0.23227  |
| 44287 | P14079 | P61550  | 0.72581  |
| 44288 | P14079 | Q3KQV3  | 0.64419  |
| 44289 | P14079 | Q9NQ94  | 0.28459  |
| 44290 | P14079 | Q9H2X8  | 1.0754   |
| 44291 | P14079 | Q6ZP98  | 1.0541   |
| 44292 | P14079 | Q96LV5  | 0.39499  |
| 44293 | P14079 | Q96HA8  | 1.5033   |
| 44294 | P14079 | P59942  | 1.2711   |
| 44295 | P14079 | Q8TF40  | 1.3397   |
| 44296 | P14079 | Q9H307  | 1.4123   |
| 44297 | P14079 | P17027  | 0.51784  |
| 44298 | P14079 | Q6ZT52  | 0.049457 |
| 44299 | P14079 | Q95149  | 0.81211  |
| 44300 | P14079 | Q9NRQ5  | 1.1715   |
| 44301 | P14079 | A6NGQ2  | 1.0186   |
| 44302 | P14079 | Q8N1A0  | 0.69249  |
| 44303 | P14079 | P51610  | 0.5922   |
| 44304 | P14079 | Q7Z3E2  | 1.1859   |
| 44305 | P14079 | Q6EKJ0  | 0.26649  |
| 44306 | P14079 | A8MY62  | 0.27841  |
| 44307 | P14079 | Q9P2W6  | 1.1715   |
| 44308 | P14079 | P54845  | 0.41009  |

|       |        |        |          |
|-------|--------|--------|----------|
| 44309 | P14079 | Q9UL16 | 0.56417  |
| 44310 | P14079 | Q9NPI7 | 0.76351  |
| 44311 | P14079 | Q92890 | 0.83702  |
| 44312 | P14079 | Q5T5F5 | 1.1715   |
| 44313 | P14079 | O14683 | 1.1295   |
| 44314 | P14079 | Q3LI66 | 1.1715   |
| 44315 | P14079 | Q7Z4B0 | 1.1715   |
| 44316 | P14079 | Q92539 | 0.436    |
| 44317 | P14079 | P29692 | 0.58882  |
| 44318 | P14079 | O15371 | 0.81333  |
| 44319 | P14079 | Q96N53 | 1.1715   |
| 44320 | P14079 | Q9NYA3 | 0.72864  |
| 44321 | P14079 | P0CW20 | 0.54513  |
| 44322 | P14079 | Q9UN81 | 1.0571   |
| 44323 | P14079 | Q9HCI5 | 0.69862  |
| 44324 | P14079 | Q7L8L6 | 0.72738  |
| 44325 | P14079 | Q9BUZ4 | 0.27148  |
| 44326 | P14079 | Q13136 | 0.45245  |
| 44327 | P14079 | O15350 | 0.31808  |
| 44328 | P14079 | P46782 | 0.8451   |
| 44329 | P14079 | Q96HQ2 | 1.6816   |
| 44330 | P14079 | Q8IWN7 | 0.48356  |
| 44331 | P14079 | Q00839 | 0.27353  |
| 44332 | P14079 | Q71RC9 | 1.1823   |
| 44333 | P14079 | Q9BY77 | 0.34837  |
| 44334 | P14079 | Q5XG99 | 0.93632  |
| 44335 | P14079 | Q8TB72 | 0.70579  |
| 44336 | P14079 | P62877 | 0.52443  |
| 44337 | P14079 | Q6PJG2 | 0.83796  |
| 44338 | P14079 | Q4J6C6 | 0.54478  |
| 44339 | P14079 | Q15744 | 0.27386  |
| 44340 | P14079 | Q3Y452 | 1.1715   |
| 44341 | P14079 | Q9Y2H0 | 0.22171  |
| 44342 | P14079 | Q96JX3 | 0.62386  |
| 44343 | P14079 | Q9BXH1 | 0.54203  |
| 44344 | P14079 | P23327 | 1.0913   |
| 44345 | P14079 | Q9NWN3 | 0.86464  |
| 44346 | P14079 | P09629 | 0.73332  |
| 44347 | P14079 | O94892 | 0.5223   |
| 44348 | P14079 | Q9NVF7 | 1.3798   |
| 44349 | P14079 | P62987 | 1.0384   |
| 44350 | P14079 | O00501 | 0.57185  |
| 44351 | P14079 | Q16576 | 0.25211  |
| 44352 | P14079 | Q15032 | 0.73413  |
| 44353 | P14079 | B9EJG8 | 0.91469  |
| 44354 | P14079 | Q9H665 | 1.1206   |
| 44355 | P14079 | Q96JE7 | 1.3153   |
| 44356 | P14079 | P07196 | 0.97456  |
| 44357 | P14079 | Q96JG8 | 0.043255 |
| 44358 | P14079 | Q6L8Q7 | 0.49212  |
| 44359 | P14079 | Q9Y4P1 | 0.8741   |
| 44360 | P14079 | Q719H9 | 0.55294  |
| 44361 | P14079 | Q8IVV7 | 0.74153  |
| 44362 | P14079 | Q6ZRT6 | 1.3222   |
| 44363 | P14079 | Q3SYA9 | 0.86812  |
| 44364 | P14079 | Q03252 | 0.51891  |
| 44365 | P14079 | Q9P0V3 | 0.43707  |
| 44366 | P14079 | Q9UIL8 | 0.37434  |
| 44367 | P14079 | Q5TAA0 | 0.14963  |
| 44368 | P14079 | Q99612 | 0.31129  |
| 44369 | P14079 | P22087 | 0.66443  |
| 44370 | P14079 | Q9BXS6 | 1.2375   |
| 44371 | P14079 | P42568 | 0.90662  |
| 44372 | P14079 | P02533 | 1.0536   |
| 44373 | P14079 | Q8WXU2 | 0.85597  |
| 44374 | P14079 | Q9H6V9 | 1.0786   |
| 44375 | P14079 | Q8TCH9 | 1.1515   |
| 44376 | P14079 | Q96N16 | 1.3344   |
| 44377 | P14079 | Q6ZSS7 | 0.86195  |
| 44378 | P14079 | Q16670 | 0.53459  |
| 44379 | P14079 | Q8N1F1 | 1.1715   |
| 44380 | P14079 | Q5T870 | 1.4015   |
| 44381 | P14079 | O94903 | 1.0085   |
| 44382 | P14079 | Q5JNZ5 | 0.79675  |
| 44383 | P14079 | Q9BYD5 | 0.23156  |
| 44384 | P14079 | Q8WTX7 | 1.2077   |

|       |        |        |          |
|-------|--------|--------|----------|
| 44385 | P14079 | P58511 | 1.2485   |
| 44386 | P14079 | Q15072 | 0.57676  |
| 44387 | P14079 | O60315 | 0.26707  |
| 44388 | P14079 | Q6N021 | 0.94383  |
| 44389 | P14079 | Q9BTE7 | 0.98667  |
| 44390 | P14079 | Q9H1A7 | 0.23838  |
| 44391 | P14079 | Q8IUR0 | 1.5031   |
| 44392 | P14079 | Q6XLA1 | 0.32486  |
| 44393 | P14079 | Q9H5N1 | 1.0409   |
| 44394 | P14079 | Q15572 | 1.3255   |
| 44395 | P14079 | O43290 | 0.89931  |
| 44396 | P14079 | P50552 | 0.27886  |
| 44397 | P14079 | Q9H3K6 | 0.98123  |
| 44398 | P14079 | Q96L16 | 0.13422  |
| 44399 | P14079 | Q8IUG1 | 1.1644   |
| 44400 | P14079 | Q13077 | 0.62358  |
| 44401 | P14079 | Q8N6M5 | 0.78164  |
| 44402 | P14079 | Q9H269 | 0.59263  |
| 44403 | P14079 | Q5FBB7 | 1.2398   |
| 44404 | P14079 | Q9HCM9 | 0.36754  |
| 44405 | P14079 | Q0VGL1 | 0.4952   |
| 44406 | P14079 | P46939 | 0.89555  |
| 44407 | P14079 | Q6PIF2 | 0.37075  |
| 44408 | P14079 | Q9NYU1 | 0.43806  |
| 44409 | P14079 | P33947 | 0.66737  |
| 44410 | P14079 | P55197 | 1.1806   |
| 44411 | P14079 | Q9H410 | 0.96888  |
| 44412 | P14079 | Q7Z4Y8 | 0.38719  |
| 44413 | P14079 | Q7LG56 | 0.12279  |
| 44414 | P14079 | Q9BVJ6 | 0.91584  |
| 44415 | P14079 | Q9NPD7 | 1.089    |
| 44416 | P14079 | Q8TAP8 | 1.0838   |
| 44417 | P14079 | Q9Y4I5 | 0.69139  |
| 44418 | P14079 | Q9HA90 | 1.3222   |
| 44419 | P14079 | H0Y7S4 | 0.37503  |
| 44420 | P14079 | P61604 | 1.0876   |
| 44421 | P14079 | Q96S65 | 1.6551   |
| 44422 | P14079 | Q8WU49 | 1.1715   |
| 44423 | P14079 | Q96GD0 | 0.13011  |
| 44424 | P14079 | P55212 | 0.54133  |
| 44425 | P14079 | A6NIN4 | 1.1715   |
| 44426 | P14079 | Q9BTA0 | 1.3222   |
| 44427 | P14079 | Q49AA0 | 0.94973  |
| 44428 | P14079 | Q6PJG6 | 1.2253   |
| 44429 | P14079 | Q9P2X0 | 0.50934  |
| 44430 | P14079 | Q8TAP4 | 0.18002  |
| 44431 | P14079 | Q9BQ50 | 0.4146   |
| 44432 | P14079 | O60783 | 1.112    |
| 44433 | P14079 | Q92572 | 0.63271  |
| 44434 | P14079 | Q9H5X1 | 0.38202  |
| 44435 | P14079 | O00178 | 0.83011  |
| 44436 | P14079 | A2RUG3 | 1.418    |
| 44437 | P14079 | Q96NR7 | 0.40403  |
| 44438 | P14079 | Q9HA77 | 1.1015   |
| 44439 | P14079 | P07738 | 0.89643  |
| 44440 | P14079 | Q96LK0 | 0.39441  |
| 44441 | P14079 | Q7L266 | 0.67908  |
| 44442 | P14079 | P36402 | 0.44564  |
| 44443 | P14079 | Q03938 | 0.98563  |
| 44444 | P14079 | P06280 | 0.3167   |
| 44445 | P14079 | Q96MN9 | 0.72987  |
| 44446 | P14079 | Q8IXR9 | 0.55044  |
| 44447 | P14079 | Q5VTQ0 | 0.67352  |
| 44448 | P14079 | Q12873 | 0.50601  |
| 44449 | P14079 | P40121 | 0.53166  |
| 44450 | P14079 | Q96FA3 | 0.8877   |
| 44451 | P14079 | Q03111 | 1.1707   |
| 44452 | P14079 | Q5TBK1 | 0.035613 |
| 44453 | P14079 | A1L020 | 0.28856  |
| 44454 | P14079 | Q8TF32 | 1.0501   |
| 44455 | P14079 | A6NDY2 | 0.59627  |
| 44456 | P14079 | Q7Z434 | 0.41064  |
| 44457 | P14079 | P11308 | 0.42552  |
| 44458 | P14079 | Q9Y6Z5 | 1.441    |
| 44459 | P14079 | Q8NB25 | 0.3504   |
| 44460 | P14079 | Q6ZUT4 | 1.2318   |

|       |        |         |          |
|-------|--------|---------|----------|
| 44461 | P14079 | Q9BV97  | 0.67917  |
| 44462 | P14079 | Q8I WV7 | 0.72796  |
| 44463 | P14079 | Q69YN2  | 0.64603  |
| 44464 | P14079 | O14513  | 0.93274  |
| 44465 | P14079 | Q9Y613  | 0.86683  |
| 44466 | P14079 | Q9HCE5  | 0.43344  |
| 44467 | P14079 | Q9BSB4  | 0.68557  |
| 44468 | P14079 | Q9GZS0  | 0.25984  |
| 44469 | P14079 | Q13144  | 0.50055  |
| 44470 | P14079 | A1XBS5  | 0.074633 |
| 44471 | P14079 | Q9H5I1  | 0.55804  |
| 44472 | P14079 | P09913  | 0.75749  |
| 44473 | P14079 | P55273  | 0.2963   |
| 44474 | P14079 | Q86VV8  | 0.78529  |
| 44475 | P14079 | Q96NS8  | 0.73949  |
| 44476 | P14079 | Q9NZ52  | 0.86788  |
| 44477 | P14079 | Q96EF6  | 0.92113  |
| 44478 | P14079 | Q9UHQ7  | 1.1915   |
| 44479 | P14079 | B3EWG3  | 1.3222   |
| 44480 | P14079 | O95059  | 1.0077   |
| 44481 | P14079 | Q5T753  | 1.1715   |
| 44482 | P14079 | Q96KP1  | 0.49194  |
| 44483 | P14079 | Q5SQN1  | 0.48855  |
| 44484 | P14079 | O95718  | 0.23819  |
| 44485 | P14079 | P50570  | 0.36503  |
| 44486 | P14079 | Q14CZ7  | 0.40762  |
| 44487 | P14079 | Q49AR2  | 0.98686  |
| 44488 | P14079 | Q9UF72  | 1.3258   |
| 44489 | P14079 | Q14588  | 0.77845  |
| 44490 | P14079 | A6NP11  | 1.0501   |
| 44491 | P14079 | Q8WWY3  | 0.40412  |
| 44492 | P14079 | Q86WH2  | 0.47946  |
| 44493 | P14079 | Q9BUA3  | 1.2541   |
| 44494 | P14079 | P0DMB1  | 1.3036   |
| 44495 | P14079 | B9ZVM9  | 1.4988   |
| 44496 | P14079 | Q9NPJ3  | 0.30142  |
| 44497 | P14079 | Q7L9B9  | 0.60572  |
| 44498 | P14079 | Q96FV9  | 0.82757  |
| 44499 | P14079 | O96005  | 0.98364  |
| 44500 | P14079 | P62241  | 0.8316   |
| 44501 | P14079 | P83369  | 0.95787  |
| 44502 | P14079 | Q6MZN7  | 1.1715   |
| 44503 | P14079 | A4GXA9  | 1.2907   |
| 44504 | P14079 | Q8NEA5  | 1.0212   |
| 44505 | P14079 | P51665  | 0.78963  |
| 44506 | P14079 | P55822  | 0.95323  |
| 44507 | P14079 | O14949  | 0.31603  |
| 44508 | P14079 | Q01201  | 0.96113  |
| 44509 | P14079 | Q9Y2S6  | 1.1715   |
| 44510 | P14079 | Q9H6R7  | 0.48409  |
| 44511 | P14079 | Q9BVV7  | 0.49594  |
| 44512 | P14079 | Q4G0P3  | 0.24567  |
| 44513 | P14079 | Q16613  | 0.44581  |
| 44514 | P14079 | Q14667  | 0.91315  |
| 44515 | P14079 | Q6UXB3  | 0.79381  |
| 44516 | P14079 | Q9BXM8  | 1.1715   |
| 44517 | P14079 | O15037  | 1.0666   |
| 44518 | P14079 | Q9HB19  | 0.78288  |
| 44519 | P14079 | Q5TI25  | 1.9823   |
| 44520 | P14079 | Q99618  | 1.6305   |
| 44521 | P14079 | Q5TD94  | 0.76333  |
| 44522 | P14079 | P0CW71  | 1.1715   |
| 44523 | P14079 | P41236  | 1.0885   |
| 44524 | P14079 | Q5T681  | 1.5158   |
| 44525 | P14079 | Q6NW29  | 0.79179  |
| 44526 | P14079 | Q9NP97  | 0.97526  |
| 44527 | P14079 | Q15459  | 0.50818  |
| 44528 | P14079 | Q9BZL4  | 0.72622  |
| 44529 | P14079 | Q9H6J7  | 0.91838  |
| 44530 | P14079 | A6NDB9  | 1.385    |
| 44531 | P14079 | Q8N960  | 0.32405  |
| 44532 | P14079 | O60477  | 0.6465   |
| 44533 | P14079 | Q86V71  | 0.8029   |
| 44534 | P14079 | O00461  | 1.2045   |
| 44535 | P14079 | Q9UKX7  | 1.2856   |
| 44536 | P14079 | Q3KNS6  | 0.53219  |

|       |        |        |          |
|-------|--------|--------|----------|
| 44537 | P14079 | Q5T4H9 | 1.1715   |
| 44538 | P14079 | Q9BVI4 | 0.81672  |
| 44539 | P14079 | Q8N2N9 | 1.0803   |
| 44540 | P14079 | Q8WVY7 | 0.27553  |
| 44541 | P14079 | O95671 | 1.0293   |
| 44542 | P14079 | P07195 | 0.60641  |
| 44543 | P14079 | Q13541 | 0.91488  |
| 44544 | P14079 | Q9UHB7 | 1.1536   |
| 44545 | P14079 | O75167 | 0.47647  |
| 44546 | P14079 | P0C2Y1 | 0.49952  |
| 44547 | P14079 | Q9NR09 | 0.37622  |
| 44548 | P14079 | P02686 | 0.91228  |
| 44549 | P14079 | Q8IYD1 | 0.18892  |
| 44550 | P14079 | Q9Y592 | 1.5792   |
| 44551 | P14079 | Q8N5W8 | 0.98371  |
| 44552 | P14079 | P35611 | 0.21245  |
| 44553 | P14079 | Q6FI81 | 0.53098  |
| 44554 | P14079 | P20618 | 1.2175   |
| 44555 | P14079 | A6PVL3 | 0.92959  |
| 44556 | P14079 | Q15363 | 0.17564  |
| 44557 | P14079 | P78344 | 0.59165  |
| 44558 | P14079 | Q9NTI5 | 0.94266  |
| 44559 | P14079 | Q8WU43 | 0.73407  |
| 44560 | P14079 | O00567 | 0.88056  |
| 44561 | P14079 | P14854 | 0.42713  |
| 44562 | P14079 | Q15388 | 0.54628  |
| 44563 | P14079 | Q9NWD9 | 0.94672  |
| 44564 | P14079 | Q00987 | 0.29204  |
| 44565 | P14079 | Q6BEB4 | 0.22313  |
| 44566 | P14079 | P23588 | 0.42521  |
| 44567 | P14079 | Q9BUP3 | 0.38528  |
| 44568 | P14079 | Q5SRH9 | 1.7006   |
| 44569 | P14079 | P45984 | 0.35311  |
| 44570 | P14079 | P0CF97 | 1.273    |
| 44571 | P14079 | Q86XI6 | 0.35396  |
| 44572 | P14079 | P55198 | 0.9649   |
| 44573 | P14079 | Q8N292 | 0.95817  |
| 44574 | P14079 | Q9NPR9 | 1.7731   |
| 44575 | P14079 | Q9H841 | 1.288    |
| 44576 | P14079 | Q9UKI2 | 0.47727  |
| 44577 | P14079 | Q92797 | 0.98743  |
| 44578 | P14079 | Q52LJ0 | 0.98433  |
| 44579 | P14079 | O75843 | 0.96568  |
| 44580 | P14079 | Q9Y421 | 0.70864  |
| 44581 | P14079 | O75069 | 0.59555  |
| 44582 | P14079 | Q96RY5 | 1.5217   |
| 44583 | P14079 | Q68DQ2 | 0.2639   |
| 44584 | P14079 | Q6ZUS5 | 0.040449 |
| 44585 | P14079 | P0C7W9 | 0.13295  |
| 44586 | P14079 | Q6ZUG5 | 0.95453  |
| 44587 | P14079 | O95198 | 0.83219  |
| 44588 | P14079 | Q2TAK8 | 0.806    |
| 44589 | P14079 | Q9BSU3 | 0.45791  |
| 44590 | P14079 | A4D1E1 | 1.2076   |
| 44591 | P14079 | Q8TBB1 | 0.513    |
| 44592 | P14079 | P25815 | 0.62908  |
| 44593 | P14079 | Q2LD37 | 0.77064  |
| 44594 | P14079 | Q9BVT8 | 1.7428   |
| 44595 | P14079 | O95394 | 1.1793   |
| 44596 | P14079 | Q9Y3D3 | 1.0485   |
| 44597 | P14079 | Q9BUN8 | 0.57935  |
| 44598 | P14079 | Q96I34 | 0.28276  |
| 44599 | P14079 | Q96FH0 | 1.1631   |
| 44600 | P14079 | Q9BZE4 | 0.29449  |
| 44601 | P14079 | P32969 | 1.0531   |
| 44602 | P14079 | Q5HYR2 | 1.6896   |
| 44603 | P14079 | Q6NXR4 | 0.80597  |
| 44604 | P14079 | Q5I0X4 | 1.3222   |
| 44605 | P14079 | P0CL83 | 0.91322  |
| 44606 | P14079 | Q8NHU0 | 0.62582  |
| 44607 | P14079 | P63104 | 1.0496   |
| 44608 | P14079 | Q96ND8 | 1.0454   |
| 44609 | P14079 | Q3B7T1 | 1.4937   |
| 44610 | P14079 | A8MQ11 | 0.5869   |
| 44611 | P14079 | Q6NVH7 | 1.2735   |
| 44612 | P14079 | Q5VYS4 | 0.48941  |



|       |        |        |          |
|-------|--------|--------|----------|
| 44613 | P14079 | Q9Y3B1 | 0.36724  |
| 44614 | P14079 | Q9NRF8 | 0.81536  |
| 44615 | P14079 | P08651 | 0.53484  |
| 44616 | P14079 | Q2TAY7 | 0.28036  |
| 44617 | P14079 | Q9NS71 | 0.86894  |
| 44618 | P14079 | Q6ZNE5 | 0.5363   |
| 44619 | P14079 | O75558 | 0.87411  |
| 44620 | P14079 | Q9BV68 | 0.47474  |
| 44621 | P14079 | Q96RT1 | 0.41236  |
| 44622 | P14079 | Q9NYF8 | 1.1071   |
| 44623 | P14079 | P22090 | 0.55529  |
| 44624 | P14079 | Q9H808 | 0.67196  |
| 44625 | P14079 | P46100 | 0.62901  |
| 44626 | P14079 | Q9NVD3 | 0.11081  |
| 44627 | P14079 | P62306 | 0.32606  |
| 44628 | P14079 | Q9UJH9 | 1.1646   |
| 44629 | P14079 | Q15012 | 1.1547   |
| 44630 | P14079 | Q9H813 | 1.0447   |
| 44631 | P14079 | Q9NWS9 | 0.24097  |
| 44632 | P14079 | O00534 | 0.7489   |
| 44633 | P14079 | Q86U44 | 0.23701  |
| 44634 | P14079 | Q9Y244 | 0.84802  |
| 44635 | P14079 | Q6NSW5 | 1.5252   |
| 44636 | P14079 | Q8N4M7 | 1.5903   |
| 44637 | P14079 | Q8IZ73 | 0.51974  |
| 44638 | P14079 | Q9P0M9 | 1.1844   |
| 44639 | P14079 | Q9ULW8 | 1.052    |
| 44640 | P14079 | Q9BPW8 | 1.1413   |
| 44641 | P14079 | O95156 | 1.1843   |
| 44642 | P14079 | Q96HH6 | 1.2485   |
| 44643 | P14079 | P0CI00 | 1.1722   |
| 44644 | P14079 | Q5JPE7 | 0.72609  |
| 44645 | P14079 | Q5SZL2 | 0.56972  |
| 44646 | P14079 | Q9BRR0 | 0.5625   |
| 44647 | P14079 | Q08AG7 | 1.0522   |
| 44648 | P14079 | P51814 | 0.45498  |
| 44649 | P14079 | O43776 | 1.0409   |
| 44650 | P14079 | Q7RTU9 | 0.52936  |
| 44651 | P14079 | P43243 | 0.30287  |
| 44652 | P14079 | Q9NVI1 | 1.1205   |
| 44653 | P14079 | A8MUZ8 | 1.0642   |
| 44654 | P14079 | A2RU49 | 0.64761  |
| 44655 | P14079 | Q6ZW35 | 0.596    |
| 44656 | P14079 | Q15061 | 0.27853  |
| 44657 | P14079 | Q96EI5 | 1.1389   |
| 44658 | P14079 | Q9NPF4 | 0.71304  |
| 44659 | P14079 | Q52M58 | 1.4283   |
| 44660 | P14079 | Q8N104 | 0.91101  |
| 44661 | P14079 | Q15078 | 0.1434   |
| 44662 | P14079 | A8K010 | 0.92514  |
| 44663 | P14079 | P28698 | 0.81871  |
| 44664 | P14079 | Q5JPH6 | 1.063    |
| 44665 | P14079 | Q9BRJ7 | 1.3311   |
| 44666 | P14079 | P62829 | 1.4392   |
| 44667 | P14079 | O94763 | 1.1768   |
| 44668 | P14079 | Q9NYG5 | 0.95074  |
| 44669 | P14079 | Q9UJ55 | 0.30704  |
| 44670 | P14079 | O75396 | 0.50227  |
| 44671 | P14079 | Q96GU1 | 0.89414  |
| 44672 | P14079 | Q99614 | 0.40602  |
| 44673 | P14079 | Q8TF68 | 0.25526  |
| 44674 | P14079 | Q5T749 | 1.4932   |
| 44675 | P14079 | Q5VWI1 | 1.3201   |
| 44676 | P14079 | Q4G0S7 | 0.12109  |
| 44677 | P14079 | Q96GE5 | 0.95434  |
| 44678 | P14079 | P35813 | 0.29917  |
| 44679 | P14079 | P28069 | 0.60944  |
| 44680 | P14079 | O75448 | 0.72924  |
| 44681 | P14079 | Q9BVL2 | 0.72857  |
| 44682 | P14079 | Q6ZSJ9 | 1.0234   |
| 44683 | P14079 | Q6PI98 | 1.0226   |
| 44684 | P14079 | Q96FJ8 | 1.1715   |
| 44685 | P14079 | Q96BV0 | 0.51144  |
| 44686 | P14079 | O75431 | 0.050619 |
| 44687 | P14079 | P51825 | 0.9706   |
| 44688 | P14079 | Q9NRR5 | 0.71397  |

|       |        |        |         |
|-------|--------|--------|---------|
| 44689 | P14079 | P14678 | 0.84518 |
| 44690 | P14079 | Q8IWZ6 | 0.19332 |
| 44691 | P14079 | O15061 | 1.2156  |
| 44692 | P14079 | Q8NDY4 | 1.1715  |
| 44693 | P14079 | Q9Y2V7 | 0.20729 |
| 44694 | P14079 | Q9BWD3 | 1.7375  |
| 44695 | P14079 | Q7Z7G8 | 0.28765 |
| 44696 | P14079 | Q9NNX9 | 1.5627  |
| 44697 | P14079 | P10911 | 0.27185 |
| 44698 | P14079 | Q9Y2J8 | 1.2762  |
| 44699 | P14079 | O60573 | 0.69872 |
| 44700 | P14079 | Q96MB7 | 1.1449  |
| 44701 | P14079 | B5ME19 | 0.50682 |
| 44702 | P14079 | Q8TEW0 | 0.37859 |
| 44703 | P14079 | O96007 | 1.4477  |
| 44704 | P14079 | Q12772 | 0.26867 |
| 44705 | P14079 | Q9NTU4 | 1.2888  |
| 44706 | P14079 | O75506 | 0.15891 |
| 44707 | P14079 | O95073 | 1.0823  |
| 44708 | P14079 | Q9Y6P5 | 0.90727 |
| 44709 | P14079 | Q17RY6 | 1.484   |
| 44710 | P14079 | Q9UL58 | 1.1491  |
| 44711 | P14079 | P60369 | 1.3698  |
| 44712 | P14079 | A8MX80 | 1.1299  |
| 44713 | P14079 | Q13769 | 0.6592  |
| 44714 | P14079 | Q8TAA3 | 0.91638 |
| 44715 | P14079 | P0C671 | 0.44627 |
| 44716 | P14079 | O15145 | 0.4636  |
| 44717 | P14079 | Q9HBL0 | 0.82262 |
| 44718 | P14079 | Q9UKY1 | 0.39442 |
| 44719 | P14079 | P31276 | 0.4231  |
| 44720 | P14079 | Q92990 | 0.84171 |
| 44721 | P14079 | Q8N815 | 0.13928 |
| 44722 | P14079 | Q9H0E9 | 0.11285 |
| 44723 | P14079 | Q5W0B7 | 1.1542  |
| 44724 | P14079 | P55081 | 1.1105  |
| 44725 | P14079 | P53673 | 0.94815 |
| 44726 | P14079 | Q16204 | 0.32856 |
| 44727 | P14079 | B2RV13 | 1.2612  |
| 44728 | P14079 | P0CJ90 | 0.25626 |
| 44729 | P14079 | P33552 | 0.77421 |
| 44730 | P14079 | Q96PZ0 | 0.12922 |
| 44731 | P14079 | Q86UB2 | 1.2809  |
| 44732 | P14079 | Q14061 | 1.0165  |
| 44733 | P14079 | Q96EL1 | 1.2694  |
| 44734 | P14079 | Q9H488 | 0.22705 |
| 44735 | P14079 | Q8IXW5 | 1.0306  |
| 44736 | P14079 | Q99687 | 0.59222 |
| 44737 | P14079 | A6NDP7 | 0.94614 |
| 44738 | P14079 | P0C7X2 | 1.0371  |
| 44739 | P14079 | O95400 | 1.1922  |
| 44740 | P14079 | Q8TBR5 | 0.58032 |
| 44741 | P14079 | Q14149 | 0.25848 |
| 44742 | P14079 | P62256 | 0.53416 |
| 44743 | P14079 | P24390 | 0.9834  |
| 44744 | P14079 | Q8WUX2 | 0.36883 |
| 44745 | P14079 | P60866 | 1.0559  |
| 44746 | P14079 | Q5TYX0 | 0.68944 |
| 44747 | P14079 | Q9BRP1 | 1.2971  |
| 44748 | P14079 | Q5TA50 | 0.84036 |
| 44749 | P14079 | Q8N7H1 | 0.53011 |
| 44750 | P14079 | Q8IYB3 | 1.2715  |
| 44751 | P14079 | Q12905 | 0.96198 |
| 44752 | P14079 | P43356 | 1.031   |
| 44753 | P14079 | Q8TCN5 | 0.1949  |
| 44754 | P14079 | Q9BUR4 | 0.88017 |
| 44755 | P14079 | Q3B7I2 | 0.1824  |
| 44756 | P14079 | C9JFL3 | 1.1715  |
| 44757 | P14079 | Q8WY22 | 1.4889  |
| 44758 | P14079 | Q5HY64 | 0.52163 |
| 44759 | P14079 | Q96JF6 | 0.52044 |
| 44760 | P14079 | Q9BV19 | 1.1882  |
| 44761 | P14079 | Q8N0X4 | 0.54037 |
| 44762 | P14079 | Q96DG6 | 0.43529 |
| 44763 | P14079 | P43897 | 1.8224  |
| 44764 | P14079 | Q96RP9 | 1.0527  |

|       |        |        |         |
|-------|--------|--------|---------|
| 44765 | P14079 | Q9ULD5 | 0.47863 |
| 44766 | P14079 | O94915 | 0.26737 |
| 44767 | P14079 | Q9UC07 | 0.68484 |
| 44768 | P14079 | O75648 | 1.1759  |
| 44769 | P14079 | Q9ULR0 | 1.3405  |
| 44770 | P14079 | Q8NBB4 | 0.60394 |
| 44771 | P14079 | Q6W2J9 | 0.27232 |
| 44772 | P14079 | Q96HH4 | 1.3522  |
| 44773 | P14079 | Q9H2G9 | 0.41667 |
| 44774 | P14079 | P45973 | 0.99593 |
| 44775 | P14079 | Q6NT76 | 0.40548 |
| 44776 | P14079 | Q86TC9 | 0.48381 |
| 44777 | P14079 | Q3SX64 | 0.09154 |
| 44778 | P14079 | Q9Y3E1 | 0.37664 |
| 44779 | P14079 | P60370 | 1.3698  |
| 44780 | P14079 | Q9H9L7 | 0.58072 |
| 44781 | P14079 | Q6ZVU0 | 0.55869 |
| 44782 | P14079 | Q3I5F7 | 0.12114 |
| 44783 | P14079 | A6NHU5 | 0.85652 |
| 44784 | P14079 | Q9NWK9 | 1.255   |
| 44785 | P14079 | Q6P1X5 | 0.98042 |
| 44786 | P14079 | A6NCS6 | 1.2758  |
| 44787 | P14079 | A8K830 | 1.1715  |
| 44788 | P14079 | Q12802 | 0.269   |
| 44789 | P14079 | Q9HD87 | 0.84093 |
| 44790 | P14079 | Q502X0 | 0.40977 |
| 44791 | P14079 | Q9NQX5 | 0.92489 |
| 44792 | P14079 | P19338 | 0.7119  |
| 44793 | P14079 | Q3SY46 | 1.2482  |
| 44794 | P14079 | Q96M02 | 0.53371 |
| 44795 | P14079 | P42226 | 0.76161 |
| 44796 | P14079 | A6NIE6 | 0.85556 |
| 44797 | P14079 | Q6X4W1 | 1.8433  |
| 44798 | P14079 | Q9C075 | 0.80279 |
| 44799 | P14079 | Q9P1C3 | 1.1899  |
| 44800 | P14079 | Q06330 | 0.54534 |
| 44801 | P14079 | O15504 | 0.59803 |
| 44802 | P14079 | Q9BUH6 | 1.2831  |
| 44803 | P14079 | Q14695 | 1.2555  |
| 44804 | P14079 | B4DS77 | 0.97599 |
| 44805 | P14079 | Q96T59 | 1.0613  |
| 44806 | P14079 | Q9BR46 | 1.448   |
| 44807 | P14079 | A4D2B0 | 1.3155  |
| 44808 | P14079 | Q9UBL0 | 0.55969 |
| 44809 | P14079 | Q9UIC8 | 0.50935 |
| 44810 | P14079 | P0C7P2 | 0.90286 |
| 44811 | P14079 | Q6V9R5 | 0.987   |
| 44812 | P14079 | Q9UL01 | 1.0608  |
| 44813 | P14079 | Q6ZVF9 | 1.2818  |
| 44814 | P14079 | K7EIZ4 | 1.1715  |
| 44815 | P14079 | Q9ULL5 | 1.1715  |
| 44816 | P14079 | Q8WU90 | 0.95226 |
| 44817 | P14079 | P0C7M3 | 1.0613  |
| 44818 | P14079 | Q69YL0 | 1.1715  |
| 44819 | P14079 | O00186 | 0.7869  |
| 44820 | P14079 | Q8WTZ4 | 0.12175 |
| 44821 | P14079 | Q75323 | 1.0629  |
| 44822 | P14079 | A8K0R7 | 1.2883  |
| 44823 | P14079 | P80303 | 0.19054 |
| 44824 | P14079 | Q96NR2 | 0.688   |
| 44825 | P14079 | Q9HD26 | 1.0965  |
| 44826 | P14079 | Q6NZY7 | 0.53442 |
| 44827 | P14079 | A6NJ78 | 1.5082  |
| 44828 | P14079 | Q9NWZ8 | 0.80912 |
| 44829 | P14079 | Q9H1Q7 | 1.3583  |
| 44830 | P14079 | Q9H8M9 | 1.169   |
| 44831 | P14079 | Q15149 | 0.39369 |
| 44832 | P14079 | Q8NHS1 | 1.0004  |
| 44833 | P14079 | Q8N4L1 | 1.2485  |
| 44834 | P14079 | Q8N3S3 | 0.39438 |
| 44835 | P14079 | Q0VDF9 | 0.34958 |
| 44836 | P14079 | Q9H095 | 0.7243  |
| 44837 | P14079 | O43427 | 0.77608 |
| 44838 | P14079 | Q9NRL3 | 0.60903 |
| 44839 | P14079 | Q6ZS46 | 1.5495  |
| 44840 | P14079 | Q96IK1 | 0.38817 |

|       |        |        |          |
|-------|--------|--------|----------|
| 44841 | P14079 | O75503 | 0.60263  |
| 44842 | P14079 | O15511 | 0.53121  |
| 44843 | P14079 | P14136 | 0.94033  |
| 44844 | P14079 | O43148 | 1.1556   |
| 44845 | P14079 | Q96DE9 | 0.41522  |
| 44846 | P14079 | Q53FD0 | 1.5129   |
| 44847 | P14079 | Q8N1G1 | 0.32911  |
| 44848 | P14079 | Q9BQ61 | 1.3222   |
| 44849 | P14079 | Q8N3L3 | 1.2496   |
| 44850 | P14079 | P0C025 | 1.3144   |
| 44851 | P14079 | Q9H9E1 | 0.36204  |
| 44852 | P14079 | P82094 | 1.3476   |
| 44853 | P14079 | P45983 | 0.24729  |
| 44854 | P14079 | Q99741 | 0.72973  |
| 44855 | P14079 | Q8N0W7 | 1.0639   |
| 44856 | P14079 | P20674 | 0.34266  |
| 44857 | P14079 | Q9NUP9 | 0.49899  |
| 44858 | P14079 | Q9UK73 | 0.7431   |
| 44859 | P14079 | Q8NAE3 | 1.1394   |
| 44860 | P14079 | Q9BW61 | 1.1259   |
| 44861 | P14079 | Q9HB71 | 0.62657  |
| 44862 | P14079 | P82970 | 1.0915   |
| 44863 | P14079 | Q9NV12 | 1.2485   |
| 44864 | P14079 | Q6ICG6 | 0.83419  |
| 44865 | P14079 | Q3V5L5 | 0.85429  |
| 44866 | P14079 | Q96KD3 | 1.8805   |
| 44867 | P14079 | Q8TAW3 | 0.62703  |
| 44868 | P14079 | Q96NT1 | 1.3882   |
| 44869 | P14079 | Q92670 | 0.57881  |
| 44870 | P14079 | P68032 | 0.99952  |
| 44871 | P14079 | Q8N6I4 | 1.2485   |
| 44872 | P14079 | Q96PP4 | 0.92434  |
| 44873 | P14079 | H3BSY2 | 0.07102  |
| 44874 | P14079 | Q8IXT1 | 0.77095  |
| 44875 | P14079 | Q9NPC3 | 0.021896 |
| 44876 | P14079 | O15066 | 0.33973  |
| 44877 | P14079 | Q8N3U4 | 0.89599  |
| 44878 | P14079 | Q16629 | 0.67266  |
| 44879 | P14079 | P50613 | 0.24652  |
| 44880 | P14079 | Q8IZY5 | 0.51993  |
| 44881 | P14079 | Q9H6W3 | 0.7174   |
| 44882 | P14079 | Q5VYP0 | 1.3668   |
| 44883 | P14079 | Q86UU5 | 1.2973   |
| 44884 | P14079 | Q9NZC4 | 0.39793  |
| 44885 | P14079 | Q9H2U2 | 0.3195   |
| 44886 | P14079 | Q86VX2 | 1.5462   |
| 44887 | P14079 | Q9Y2T7 | 0.31313  |
| 44888 | P14079 | A6NN90 | 0.87359  |
| 44889 | P14079 | Q9H8Y8 | 0.62123  |
| 44890 | P14079 | Q9H0N5 | 1.1395   |
| 44891 | P14079 | Q9H981 | 0.9744   |
| 44892 | P14079 | Q5VUE5 | 1.2887   |
| 44893 | P14079 | Q99865 | 1.3384   |
| 44894 | P14079 | Q9H6R4 | 0.82647  |
| 44895 | P14079 | Q9P2D1 | 0.15498  |
| 44896 | P14079 | Q5H9J9 | 1.0898   |
| 44897 | P14079 | Q5T752 | 1.1715   |
| 44898 | P14079 | Q1W209 | 1.1715   |
| 44899 | P14079 | P68871 | 0.76311  |
| 44900 | P14079 | O14633 | 1.1715   |
| 44901 | P14079 | A6NDZ8 | 0.44102  |
| 44902 | P14079 | Q8TD26 | 0.10076  |
| 44903 | P14079 | O95721 | 0.43633  |
| 44904 | P14079 | P62854 | 1.1257   |
| 44905 | P14079 | Q8TDY3 | 0.96178  |
| 44906 | P14079 | Q6PUV4 | 0.71466  |
| 44907 | P14079 | Q9NZI7 | 0.16767  |
| 44908 | P14079 | Q8IVJ8 | 1.2831   |
| 44909 | P14079 | Q8WVZ9 | 0.36435  |
| 44910 | P14079 | P40337 | 0.88275  |
| 44911 | P14079 | P27544 | 0.8101   |
| 44912 | P14079 | Q9BTE1 | 0.31466  |
| 44913 | P14079 | Q08AE8 | 0.48468  |
| 44914 | P14079 | A1A4G5 | 1.1715   |
| 44915 | P14079 | O43865 | 0.2975   |
| 44916 | P14079 | Q3C1V8 | 0.54     |

|       |        |        |          |
|-------|--------|--------|----------|
| 44917 | P14079 | Q15631 | 0.92882  |
| 44918 | P14079 | Q9NSG2 | 1.182    |
| 44919 | P14079 | Q9Y247 | 0.4291   |
| 44920 | P14079 | Q6ZRR9 | 0.45757  |
| 44921 | P14079 | A6NDX4 | 0.92092  |
| 44922 | P14079 | Q9NR50 | 0.66897  |
| 44923 | P14079 | Q8N7R1 | 1.0757   |
| 44924 | P14079 | Q5H9F3 | 0.43239  |
| 44925 | P14079 | P56715 | 0.31796  |
| 44926 | P14079 | Q9Y5Z7 | 0.62451  |
| 44927 | P14079 | Q5BKZ1 | 1.0705   |
| 44928 | P14079 | O95831 | 0.65528  |
| 44929 | P14079 | Q9GZX7 | 0.32685  |
| 44930 | P14079 | Q8NA57 | 1.7137   |
| 44931 | P14079 | A6PVC2 | 0.2361   |
| 44932 | P14079 | Q5JWR5 | 0.60911  |
| 44933 | P14079 | O43189 | 0.46078  |
| 44934 | P14079 | Q15651 | 1.5605   |
| 44935 | P14079 | Q13888 | 0.59917  |
| 44936 | P14079 | Q8N319 | 1.9946   |
| 44937 | P14079 | Q96CW6 | 1.7588   |
| 44938 | P14079 | Q5TCM9 | 1.1715   |
| 44939 | P14079 | Q9Y5U9 | 1.376    |
| 44940 | P14079 | Q7Z5M5 | 0.93546  |
| 44941 | P14079 | Q15929 | 0.90924  |
| 44942 | P14079 | Q07020 | 1.2846   |
| 44943 | P14079 | Q86X02 | 0.50286  |
| 44944 | P14079 | Q9BQE9 | 1.3407   |
| 44945 | P14079 | P78364 | 0.18156  |
| 44946 | P14079 | Q9UG56 | 0.72943  |
| 44947 | P14079 | Q00613 | 0.82136  |
| 44948 | P14079 | P39019 | 1.0313   |
| 44949 | P14079 | Q86XN7 | 1.3222   |
| 44950 | P14079 | Q8N6M0 | 0.40602  |
| 44951 | P14079 | Q01892 | 0.68463  |
| 44952 | P14079 | Q3LI83 | 1.4471   |
| 44953 | P14079 | Q9UKL3 | 1.686    |
| 44954 | P14079 | Q9NZ09 | 0.33973  |
| 44955 | P14079 | Q7L9L4 | 0.79088  |
| 44956 | P14079 | Q15060 | 0.30232  |
| 44957 | P14079 | P78559 | 1.078    |
| 44958 | P14079 | Q9NQX7 | 0.71384  |
| 44959 | P14079 | Q13084 | 1.3625   |
| 44960 | P14079 | Q86Y25 | 0.6138   |
| 44961 | P14079 | Q8IVM0 | 0.72622  |
| 44962 | P14079 | Q9NQT6 | 0.071756 |
| 44963 | P14079 | Q8N205 | 0.90243  |
| 44964 | P14079 | Q14202 | 1.1727   |
| 44965 | P14079 | Q96LZ2 | 0.14781  |
| 44966 | P14079 | Q8N357 | 0.82787  |
| 44967 | P14079 | P18545 | 0.67049  |
| 44968 | P14079 | Q9NYZ1 | 1.4268   |
| 44969 | P14079 | A4D997 | 1.2383   |
| 44970 | P14079 | P17480 | 1.043    |
| 44971 | P14079 | Q99583 | 0.40346  |
| 44972 | P14079 | Q8TAB5 | 1.3222   |
| 44973 | P14079 | Q96KR7 | 0.9137   |
| 44974 | P14079 | Q9HCM7 | 1.515    |
| 44975 | P14079 | Q0P6H9 | 1.0503   |
| 44976 | P14079 | P26599 | 0.2307   |
| 44977 | P14079 | Q5TFE4 | 0.34779  |
| 44978 | P14079 | Q6ZN19 | 0.51784  |
| 44979 | P14079 | Q8IY85 | 0.33142  |
| 44980 | P14079 | Q8N813 | 0.62194  |
| 44981 | P14079 | Q9BSQ5 | 0.78928  |
| 44982 | P14079 | Q15833 | 0.48634  |
| 44983 | P14079 | Q8IVI9 | 0.25791  |
| 44984 | P14079 | P36405 | 0.28417  |
| 44985 | P14079 | Q8TE02 | 1.4987   |
| 44986 | P14079 | O95571 | 0.68487  |
| 44987 | P14079 | A6NGA9 | 1.0004   |
| 44988 | P14079 | Q99543 | 0.49041  |
| 44989 | P14079 | Q9NSP4 | 0.54738  |
| 44990 | P14079 | Q9NUG6 | 0.29625  |
| 44991 | P14079 | Q5VV52 | 0.52674  |
| 44992 | P14079 | Q8HWS3 | 0.51885  |

|       |        |        |         |
|-------|--------|--------|---------|
| 44993 | P14079 | A6NLX3 | 0.80081 |
| 44994 | P14079 | Q9Y6I8 | 0.81598 |
| 44995 | P14079 | B4DU55 | 0.72218 |
| 44996 | P14079 | Q96MW7 | 0.82405 |
| 44997 | P14079 | O95868 | 1.2124  |
| 44998 | P14079 | Q9NZL3 | 0.79328 |
| 44999 | P14079 | Q15054 | 0.9847  |
| 45000 | P14079 | Q9BTT0 | 0.23819 |
| 45001 | P14079 | Q8WV60 | 0.44713 |
| 45002 | P14079 | Q86XI8 | 1.0472  |
| 45003 | P14079 | Q6ZP68 | 1.5444  |
| 45004 | P14079 | Q8IYB7 | 0.14651 |
| 45005 | P14079 | Q9Y3A3 | 0.71248 |
| 45006 | P14079 | P0C854 | 1.1715  |
| 45007 | P14079 | Q8TDN4 | 1.2268  |
| 45008 | P14079 | Q8WY54 | 0.80255 |
| 45009 | P14079 | P55795 | 0.24397 |
| 45010 | P14079 | Q9NWS8 | 0.98358 |
| 45011 | P14079 | Q9UBU6 | 1.1193  |
| 45012 | P14079 | O96033 | 0.54587 |
| 45013 | P14079 | Q9BXG8 | 0.50059 |
| 45014 | P14079 | O75152 | 0.61803 |
| 45015 | P14079 | Q5VYM1 | 1.2485  |
| 45016 | P14079 | Q13568 | 0.79764 |
| 45017 | P14079 | O75940 | 0.7643  |
| 45018 | P14079 | P59091 | 1.113   |
| 45019 | P14079 | Q9UJW9 | 2.1908  |
| 45020 | P14079 | P0CF75 | 0.67683 |
| 45021 | P14079 | Q9BZE1 | 1.0353  |
| 45022 | P14079 | P61981 | 0.68167 |
| 45023 | P14079 | A6NDE8 | 0.99818 |
| 45024 | P14079 | Q00059 | 0.85382 |
| 45025 | P14079 | Q7KZ85 | 0.52203 |
| 45026 | P14079 | Q93045 | 0.25895 |
| 45027 | P14079 | Q9C0C2 | 0.63477 |
| 45028 | P14079 | Q92629 | 0.66506 |
| 45029 | P14079 | P12956 | 0.33182 |
| 45030 | P14079 | Q8IYN6 | 1.3798  |
| 45031 | P14079 | O75952 | 0.64274 |
| 45032 | P14079 | Q9ULZ2 | 0.95768 |
| 45033 | P14079 | H0YKK7 | 1.3415  |
| 45034 | P14079 | P61572 | 1.355   |
| 45035 | P14079 | Q9NWU2 | 0.12251 |
| 45036 | P14079 | P08758 | 0.56919 |
| 45037 | P14079 | P61236 | 0.90931 |
| 45038 | P14079 | Q9H4W6 | 0.36867 |
| 45039 | P14079 | Q96D05 | 1.6764  |
| 45040 | P14079 | Q9BWJ5 | 0.85207 |
| 45041 | P14079 | Q9BZR8 | 0.69338 |
| 45042 | P14079 | P55345 | 0.46639 |
| 45043 | P14079 | O15117 | 1.2772  |
| 45044 | P14079 | Q96QT6 | 0.94011 |
| 45045 | P14079 | Q8WUD4 | 0.8243  |
| 45046 | P14079 | Q9P0W2 | 0.50933 |
| 45047 | P14079 | Q70IA8 | 0.20252 |
| 45048 | P14079 | Q9Y3T9 | 1.2149  |
| 45049 | P14079 | P06132 | 0.95455 |
| 45050 | P14079 | Q9ULW3 | 0.72955 |
| 45051 | P14079 | Q6ZVS7 | 0.47122 |
| 45052 | P14079 | Q96D98 | 1.4727  |
| 45053 | P14079 | Q93073 | 1.1565  |
| 45054 | P14079 | Q96MC9 | 1.8592  |
| 45055 | P14079 | Q9HAW4 | 0.78774 |
| 45056 | P14079 | Q9Y534 | 0.40345 |
| 45057 | P14079 | O94805 | 0.96175 |
| 45058 | P14079 | Q14390 | 0.20497 |
| 45059 | P14079 | P54368 | 0.38938 |
| 45060 | P14079 | O14744 | 0.92957 |
| 45061 | P14079 | Q99661 | 0.29013 |
| 45062 | P14079 | Q8N9N5 | 0.96378 |
| 45063 | P14079 | A0PG75 | 0.20822 |
| 45064 | P14079 | Q6NXT1 | 0.35734 |
| 45065 | P14079 | Q96LT7 | 1.3317  |
| 45066 | P14079 | Q9NQ32 | 1.2126  |
| 45067 | P14079 | P46976 | 0.41076 |
| 45068 | P14079 | Q9Y5V3 | 1.0387  |

|       |        |        |          |
|-------|--------|--------|----------|
| 45069 | P14079 | A1L162 | 1.0428   |
| 45070 | P14079 | Q537H7 | 0.79141  |
| 45071 | P14079 | Q6I9Y2 | 1.365    |
| 45072 | P14079 | A0AVF1 | 0.36572  |
| 45073 | P14079 | Q96BP2 | 1.256    |
| 45074 | P14079 | Q9BWJ2 | 0.7594   |
| 45075 | P14079 | P48230 | 0.98482  |
| 45076 | P14079 | P61580 | 1.7166   |
| 45077 | P14079 | Q03924 | 0.59749  |
| 45078 | P14079 | Q3LI61 | 1.1715   |
| 45079 | P14079 | Q8NCN2 | 0.31886  |
| 45080 | P14079 | Q96T21 | 1.0749   |
| 45081 | P14079 | Q96N22 | 1.0179   |
| 45082 | P14079 | P54826 | 0.45368  |
| 45083 | P14079 | Q8N6F1 | 0.22769  |
| 45084 | P14079 | Q9BUN5 | 0.69047  |
| 45085 | P14079 | Q9BQW3 | 0.29586  |
| 45086 | P14079 | A7E2U8 | 0.76175  |
| 45087 | P14079 | P50542 | 0.24729  |
| 45088 | P14079 | Q5U3C3 | 1.2485   |
| 45089 | P14079 | Q9Y6A4 | 0.48066  |
| 45090 | P14079 | Q7Z699 | 0.32085  |
| 45091 | P14079 | P63220 | 0.83236  |
| 45092 | P14079 | Q5HYC2 | 0.39011  |
| 45093 | P14079 | Q8IV03 | 1.709    |
| 45094 | P14079 | P61326 | 0.96739  |
| 45095 | P14079 | P41182 | 0.23898  |
| 45096 | P14079 | O43663 | 0.99252  |
| 45097 | P14079 | P31274 | 0.75378  |
| 45098 | P14079 | Q8WYJ6 | 0.29185  |
| 45099 | P14079 | P78385 | 0.98262  |
| 45100 | P14079 | Q5BJF6 | 0.79943  |
| 45101 | P14079 | Q7Z6E9 | 0.19372  |
| 45102 | P14079 | Q86UE3 | 0.76643  |
| 45103 | P14079 | Q9GZY1 | 1.1764   |
| 45104 | P14079 | Q6ZMR3 | 0.58195  |
| 45105 | P14079 | O75880 | 0.29315  |
| 45106 | P14079 | Q9UNF1 | 0.046188 |
| 45107 | P14079 | O00566 | 1.1497   |
| 45108 | P14079 | Q8NAP3 | 0.41224  |
| 45109 | P14079 | Q9P0I2 | 0.97942  |
| 45110 | P14079 | Q9UL49 | 1.2574   |
| 45111 | P14079 | Q6NUI1 | 1.5018   |
| 45112 | P14079 | Q460N3 | 0.2217   |
| 45113 | P14079 | Q9NV06 | 0.24751  |
| 45114 | P14079 | P12525 | 0.29305  |
| 45115 | P14079 | Q8NFR3 | 0.93734  |
| 45116 | P14079 | Q8N609 | 0.7313   |
| 45117 | P14079 | Q01543 | 0.83392  |
| 45118 | P14079 | O60239 | 0.4009   |
| 45119 | P14079 | P35250 | 0.20223  |
| 45120 | P14079 | Q15263 | 1.1399   |
| 45121 | P14079 | Q8N5J4 | 0.48256  |
| 45122 | P14079 | Q8IZH2 | 0.22273  |
| 45123 | P14079 | Q9NUW8 | 1.1062   |
| 45124 | P14079 | P0DJG4 | 1.5851   |
| 45125 | P14079 | Q96IM9 | 0.35026  |
| 45126 | P14079 | Q8IVU9 | 0.55942  |
| 45127 | P14079 | Q96GA3 | 1.2663   |
| 45128 | P14079 | P10074 | 0.5376   |
| 45129 | P14079 | A6NN06 | 1.1715   |
| 45130 | P14079 | Q96RL7 | 1.3294   |
| 45131 | P14079 | P0CJ87 | 0.25626  |
| 45132 | P14079 | Q5MIZ7 | 0.61214  |
| 45133 | P14079 | P23919 | 0.94023  |
| 45134 | P14079 | Q8WW12 | 1.3332   |
| 45135 | P14079 | Q5TC04 | 0.75706  |
| 45136 | P14079 | Q15814 | 0.54636  |
| 45137 | P14079 | Q6ZUA9 | 1.3848   |
| 45138 | P14079 | Q9NXR7 | 0.91094  |
| 45139 | P14079 | Q16637 | 0.98417  |
| 45140 | P14079 | Q0P5P2 | 0.90696  |
| 45141 | P14079 | Q9UPG8 | 0.45023  |
| 45142 | P14079 | Q71F23 | 0.69873  |
| 45143 | P14079 | Q9BZA0 | 0.23312  |
| 45144 | P14079 | Q5VWM6 | 1.6075   |

|       |        |        |          |
|-------|--------|--------|----------|
| 45145 | P14079 | A6NDD2 | 1.0712   |
| 45146 | P14079 | O95801 | 0.09332  |
| 45147 | P14079 | A5PLN9 | 1.101    |
| 45148 | P14079 | Q96CX3 | 0.56288  |
| 45149 | P14079 | Q86Y01 | 0.42034  |
| 45150 | P14079 | Q8WUM0 | 0.76637  |
| 45151 | P14079 | Q6MZP7 | 0.72859  |
| 45152 | P14079 | Q9HAU0 | 0.35708  |
| 45153 | P14079 | Q14997 | 1.0328   |
| 45154 | P14079 | Q7Z4M0 | 0.89884  |
| 45155 | P14079 | Q9H790 | 0.73546  |
| 45156 | P14079 | Q96AE4 | 0.45339  |
| 45157 | P14079 | Q14549 | 0.30496  |
| 45158 | P14079 | O75791 | 1.0679   |
| 45159 | P14079 | Q86V59 | 1.0304   |
| 45160 | P14079 | Q9NRF9 | 0.53556  |
| 45161 | P14079 | Q13642 | 0.27178  |
| 45162 | P14079 | Q96GC9 | 0.81438  |
| 45163 | P14079 | Q96Q35 | 0.86213  |
| 45164 | P14079 | Q9BSH3 | 0.55309  |
| 45165 | P14079 | Q8NCG7 | 1.293    |
| 45166 | P14079 | Q96BR5 | 0.36349  |
| 45167 | P14079 | A6NMV5 | 0.28074  |
| 45168 | P14079 | Q3ZCT1 | 0.6038   |
| 45169 | P14079 | Q8IUX1 | 0.80739  |
| 45170 | P14079 | Q9BXM0 | 0.63894  |
| 45171 | P14079 | Q7RTV5 | 0.050638 |
| 45172 | P14079 | P17097 | 0.43535  |
| 45173 | P14079 | Q8N5U6 | 1.0923   |
| 45174 | P14079 | Q7Z7J9 | 0.90726  |
| 45175 | P14079 | Q6ZU35 | 1.3222   |
| 45176 | P14079 | Q2M385 | 0.81442  |
| 45177 | P14079 | Q14656 | 0.15543  |
| 45178 | P14079 | P54803 | 0.58834  |
| 45179 | P14079 | Q7RTS6 | 0.94685  |
| 45180 | P14079 | Q86UP8 | 0.3466   |
| 45181 | P14079 | Q5TAX3 | 0.73893  |
| 45182 | P14079 | Q17RC7 | 1.0395   |
| 45183 | P14079 | Q96LL3 | 1.1127   |
| 45184 | P14079 | A6NJ88 | 1.4096   |
| 45185 | P14079 | Q0P6D6 | 0.48323  |
| 45186 | P14079 | P49207 | 1.4205   |
| 45187 | P14079 | Q9P1U0 | 0.19978  |
| 45188 | P14079 | Q15906 | 0.95509  |
| 45189 | P14079 | Q16586 | 0.55426  |
| 45190 | P14079 | A6NEV1 | 1.2542   |
| 45191 | P14079 | Q9BV29 | 0.67808  |
| 45192 | P14079 | Q13185 | 0.77531  |
| 45193 | P14079 | Q8NC60 | 0.098938 |
| 45194 | P14079 | Q9Y5K5 | 0.27156  |
| 45195 | P14079 | Q99496 | 0.29928  |
| 45196 | P14079 | Q96BU1 | 0.9129   |
| 45197 | P14079 | Q6VMQ6 | 1.6647   |
| 45198 | P14079 | P19388 | 0.81968  |
| 45199 | P14079 | P58317 | 0.62405  |
| 45200 | P14079 | Q5VWX1 | 0.66843  |
| 45201 | P14079 | Q96EG3 | 0.4409   |
| 45202 | P14079 | P38117 | 0.70226  |
| 45203 | P14079 | Q96NJ1 | 1.1715   |
| 45204 | P14079 | Q495Y7 | 0.36123  |
| 45205 | P14079 | P22103 | 1.1715   |
| 45206 | P14079 | P13645 | 0.97141  |
| 45207 | P14079 | O95926 | 0.19344  |
| 45208 | P14079 | Q9NSQ0 | 0.66878  |
| 45209 | P14079 | Q8WYQ9 | 0.55015  |
| 45210 | P14079 | P49756 | 0.45254  |
| 45211 | P14079 | Q96L21 | 0.72151  |
| 45212 | P14079 | P49589 | 0.99558  |
| 45213 | P14079 | P62244 | 1.2179   |
| 45214 | P14079 | Q9UBC3 | 0.31539  |
| 45215 | P14079 | P51668 | 0.502    |
| 45216 | P14079 | Q9Y3T6 | 0.92801  |
| 45217 | P14079 | A6NDD8 | 1.2315   |
| 45218 | P14079 | A6NK75 | 0.75103  |
| 45219 | P14079 | P14635 | 0.49197  |
| 45220 | P14079 | Q8NHZ8 | 1.5354   |



|       |        |        |          |
|-------|--------|--------|----------|
| 45221 | P14079 | Q14749 | 0.59156  |
| 45222 | P14079 | Q8N614 | 1.131    |
| 45223 | P14079 | Q9P2F9 | 0.46223  |
| 45224 | P14079 | Q00403 | 1.1581   |
| 45225 | P14079 | Q9UMS4 | 0.49925  |
| 45226 | P14079 | Q7Z3Y9 | 0.99997  |
| 45227 | P14079 | A6NLI3 | 0.34873  |
| 45228 | P14079 | Q3C1V1 | 1.3222   |
| 45229 | P14079 | Q68DN1 | 1.1943   |
| 45230 | P14079 | Q03936 | 0.98917  |
| 45231 | P14079 | O96011 | 0.51649  |
| 45232 | P14079 | Q8ND61 | 1.5489   |
| 45233 | P14079 | Q8N8Q3 | 0.20702  |
| 45234 | P14079 | Q14315 | 0.54236  |
| 45235 | P14079 | Q9BZE3 | 0.47376  |
| 45236 | P14079 | Q14692 | 0.77951  |
| 45237 | P14079 | Q9Y287 | 0.87366  |
| 45238 | P14079 | Q9H7Z3 | 0.62919  |
| 45239 | P14079 | Q9UK39 | 0.54004  |
| 45240 | P14079 | Q9H2C0 | 0.64711  |
| 45241 | P14079 | Q8NHG7 | 1.375    |
| 45242 | P14079 | P82921 | 1.2984   |
| 45243 | P14079 | Q9HC62 | 0.469    |
| 45244 | P14079 | Q147U1 | 0.61199  |
| 45245 | P14079 | I3L3R5 | 1.1715   |
| 45246 | P14079 | Q9UPM9 | 0.19246  |
| 45247 | P14079 | Q86YW9 | 0.39009  |
| 45248 | P14079 | Q6A162 | 0.78763  |
| 45249 | P14079 | Q08ER8 | 0.72218  |
| 45250 | P14079 | Q13875 | 0.97863  |
| 45251 | P14079 | P60520 | 0.37067  |
| 45252 | P14079 | P51955 | 0.24531  |
| 45253 | P14079 | Q6P2H8 | 1.3091   |
| 45254 | P14079 | P35754 | 0.23843  |
| 45255 | P14079 | Q8NBR0 | 1.4416   |
| 45256 | P14079 | Q9UMS0 | 1.1857   |
| 45257 | P14079 | O15172 | 0.65795  |
| 45258 | P14079 | Q13356 | 0.17368  |
| 45259 | P14079 | O95782 | 0.65716  |
| 45260 | P14079 | O75943 | 0.2888   |
| 45261 | P14079 | Q9H7N4 | 1.5448   |
| 45262 | P14079 | Q86WU2 | 0.087118 |
| 45263 | P14079 | A6NCI5 | 1.2481   |
| 45264 | P14079 | Q14657 | 1.8479   |
| 45265 | P14079 | O00257 | 0.8391   |
| 45266 | P14079 | Q7L0L9 | 1.1715   |
| 45267 | P14079 | O75586 | 0.71708  |
| 45268 | P14079 | Q9H7D7 | 0.42364  |
| 45269 | P14079 | P15516 | 0.87818  |
| 45270 | P14079 | Q8TA86 | 1.291    |
| 45271 | P14079 | O75690 | 1.1715   |
| 45272 | P14079 | Q9NNW7 | 0.24978  |
| 45273 | P14079 | Q14790 | 0.35647  |
| 45274 | P14079 | Q99689 | 0.62791  |
| 45275 | P14079 | Q9NPB0 | 1.2018   |
| 45276 | P14079 | Q2M243 | 0.31618  |
| 45277 | P14079 | A6NGH7 | 0.80962  |
| 45278 | P14079 | Q5T215 | 0.71032  |
| 45279 | P14079 | O95379 | 0.64942  |
| 45280 | P14079 | Q14781 | 0.80275  |
| 45281 | P14079 | P12270 | 0.70631  |
| 45282 | P14079 | P55209 | 0.66293  |
| 45283 | P14079 | Q9H6U6 | 0.94819  |
| 45284 | P14079 | Q9BZ23 | 1.1264   |
| 45285 | P14079 | Q9NX40 | 0.68136  |
| 45286 | P14079 | Q9UNN5 | 0.84116  |
| 45287 | P14079 | Q9UJ98 | 0.74687  |
| 45288 | P14079 | O94925 | 0.45483  |
| 45289 | P14079 | Q9UK58 | 0.35751  |
| 45290 | P14079 | Q14353 | 0.22335  |
| 45291 | P14079 | Q8NHV4 | 1.0586   |
| 45292 | P14079 | Q8N661 | 1.3556   |
| 45293 | P14079 | Q53GS7 | 1.1123   |
| 45294 | P14079 | Q14DG7 | 1.1754   |
| 45295 | P14079 | Q5BJE1 | 0.86779  |
| 45296 | P14079 | Q9BX82 | 0.97753  |

|       |        |        |         |
|-------|--------|--------|---------|
| 45297 | P14079 | P03928 | 0.60053 |
| 45298 | P14079 | O75145 | 0.60174 |
| 45299 | P14079 | P45877 | 0.18124 |
| 45300 | P14079 | Q8NBJ4 | 1.0755  |
| 45301 | P14079 | A6NES4 | 0.95229 |
| 45302 | P14079 | Q9NXT0 | 0.55972 |
| 45303 | P14079 | Q01860 | 0.5811  |
| 45304 | P14079 | O95685 | 0.60785 |
| 45305 | P14079 | O14929 | 1.0578  |
| 45306 | P14079 | O00512 | 1.023   |
| 45307 | P14079 | Q8N1N4 | 0.98699 |
| 45308 | P14079 | Q9H2D6 | 0.2848  |
| 45309 | P14079 | O75530 | 0.57509 |
| 45310 | P14079 | Q9Y6C7 | 1.1715  |
| 45311 | P14079 | Q9H0A3 | 0.82534 |
| 45312 | P14079 | Q9BSY4 | 0.95493 |
| 45313 | P14079 | Q9UND3 | 0.67903 |
| 45314 | P14079 | P63302 | 1.0039  |
| 45315 | P14079 | Q9H6T0 | 0.55969 |
| 45316 | P14079 | P30154 | 0.53791 |
| 45317 | P14079 | Q04760 | 0.27522 |
| 45318 | P14079 | A7MD48 | 1.2814  |
| 45319 | P14079 | Q15046 | 1.3379  |
| 45320 | P14079 | Q9Y2Y6 | 1.3455  |
| 45321 | P14079 | Q8WTW3 | 1.4067  |
| 45322 | P14079 | Q8TF39 | 1.0323  |
| 45323 | P14079 | Q53FT3 | 1.0059  |
| 45324 | P14079 | Q9BVK8 | 1.1904  |
| 45325 | P14079 | Q96HA7 | 0.8125  |
| 45326 | P14079 | O75373 | 0.69686 |
| 45327 | P14079 | Q9Y3Z3 | 0.24133 |
| 45328 | P14079 | Q2M3A8 | 0.71184 |
| 45329 | P14079 | Q6P575 | 0.56923 |
| 45330 | P14079 | Q15543 | 1.0149  |
| 45331 | P14079 | Q86UW1 | 1.1986  |
| 45332 | P14079 | Q9H943 | 0.55564 |
| 45333 | P14079 | Q6ZYL4 | 1.5087  |
| 45334 | P14079 | Q66PJ3 | 1.065   |
| 45335 | P14079 | Q5T036 | 0.96534 |
| 45336 | P14079 | P28062 | 0.71967 |
| 45337 | P14079 | O75764 | 0.28681 |
| 45338 | P14079 | P30408 | 1.0411  |
| 45339 | P14079 | A8MU10 | 1.1715  |
| 45340 | P14079 | Q8IZM0 | 0.968   |
| 45341 | P14079 | Q5VTD9 | 0.28561 |
| 45342 | P14079 | A6NLF2 | 0.80003 |
| 45343 | P14079 | A6NI87 | 1.1145  |
| 45344 | P14079 | P57055 | 1.08    |
| 45345 | P14079 | Q8N0Z8 | 1.106   |
| 45346 | P14079 | Q7L8W6 | 1.1185  |
| 45347 | P14079 | P60900 | 0.7803  |
| 45348 | P14079 | Q9NP64 | 0.42003 |
| 45349 | P14079 | Q8NFW9 | 0.37464 |
| 45350 | P14079 | Q96HD9 | 0.62934 |
| 45351 | P14079 | P19532 | 0.68988 |
| 45352 | P14079 | Q9Y5X2 | 0.28587 |
| 45353 | P14079 | Q13066 | 0.99818 |
| 45354 | P14079 | P82650 | 0.65514 |
| 45355 | P14079 | Q69384 | 1.0384  |
| 45356 | P14079 | B1APH4 | 0.85237 |
| 45357 | P14079 | Q05481 | 0.78684 |
| 45358 | P14079 | Q14145 | 1.2409  |
| 45359 | P14079 | Q15345 | 0.34598 |
| 45360 | P14079 | A6NGB7 | 1.2485  |
| 45361 | P14079 | Q8N114 | 1.132   |
| 45362 | P14079 | Q9UBI9 | 1.3392  |
| 45363 | P14079 | P42167 | 0.83206 |
| 45364 | P14079 | Q9H425 | 1.2653  |
| 45365 | P14079 | A5D8V7 | 0.11596 |
| 45366 | P14079 | Q5RGS2 | 1.6988  |
| 45367 | P14079 | Q9P2D6 | 0.45631 |
| 45368 | P14079 | Q9ULX3 | 1.1096  |
| 45369 | P14079 | Q5JTV8 | 0.68961 |
| 45370 | P14079 | Q9BXY0 | 0.33547 |
| 45371 | P14079 | Q9BYA6 | 1.1715  |
| 45372 | P14079 | Q9BSF8 | 0.42364 |

|       |        |        |         |
|-------|--------|--------|---------|
| 45373 | P14079 | P17026 | 0.47783 |
| 45374 | P14079 | Q7Z3Y8 | 0.88619 |
| 45375 | P14079 | Q8IX03 | 0.9903  |
| 45376 | P14079 | Q9BU89 | 0.62336 |
| 45377 | P14079 | Q96BD5 | 0.66508 |
| 45378 | P14079 | Q00519 | 0.9038  |
| 45379 | P14079 | P16989 | 0.18479 |
| 45380 | P14079 | Q8NC51 | 1.0584  |
| 45381 | P14079 | Q9Y238 | 0.68281 |
| 45382 | P14079 | A8MTY7 | 1.3698  |
| 45383 | P14079 | Q02040 | 1.2762  |
| 45384 | P14079 | Q56P42 | 0.28036 |
| 45385 | P14079 | Q9UIH9 | 0.45238 |
| 45386 | P14079 | Q00005 | 0.84748 |
| 45387 | P14079 | A6NN14 | 0.78684 |
| 45388 | P14079 | Q9Y6U3 | 0.27235 |
| 45389 | P14079 | P12980 | 0.9272  |
| 45390 | P14079 | Q9BXF6 | 0.80664 |
| 45391 | P14079 | Q9UPN9 | 0.44425 |
| 45392 | P14079 | Q9UPZ3 | 0.99242 |
| 45393 | P14079 | Q9H0W9 | 0.71518 |
| 45394 | P14079 | Q9HCE3 | 0.1949  |
| 45395 | P14079 | Q9NP74 | 0.35849 |
| 45396 | P14079 | P11161 | 0.49685 |
| 45397 | P14079 | P09001 | 1.1324  |
| 45398 | P14079 | Q5T6V5 | 1.0403  |
| 45399 | P14079 | Q9BVG4 | 0.82295 |
| 45400 | P14079 | Q9NWD8 | 0.99267 |
| 45401 | P14079 | P22392 | 0.16005 |
| 45402 | P14079 | Q0VDD7 | 2.2404  |
| 45403 | P14079 | O00482 | 0.33627 |
| 45404 | P14079 | Q9Y2S7 | 1.4739  |
| 45405 | P14079 | Q6ICL7 | 0.80869 |
| 45406 | P14079 | Q08AG5 | 1.1741  |
| 45407 | P14079 | Q8N5Y2 | 0.24586 |
| 45408 | P14079 | P0CW21 | 1.1715  |
| 45409 | P14079 | Q96LP2 | 0.38694 |
| 45410 | P14079 | Q96A35 | 1.1692  |
| 45411 | P14079 | Q9H9T3 | 0.58525 |
| 45412 | P14079 | Q2M3G4 | 0.27638 |
| 45413 | P14079 | O75425 | 0.98175 |
| 45414 | P14079 | Q96BY2 | 0.70274 |
| 45415 | P14079 | Q8N4C6 | 0.97685 |
| 45416 | P14079 | Q9UJW3 | 0.65947 |
| 45417 | P14079 | Q9BQ89 | 1.8375  |
| 45418 | P14079 | Q8NF64 | 1.2388  |
| 45419 | P14079 | Q969L2 | 0.57199 |
| 45420 | P14079 | Q9NZC7 | 0.3179  |
| 45421 | P14079 | Q9NWF9 | 0.78835 |
| 45422 | P14079 | Q96T51 | 0.35609 |
| 45423 | P14079 | Q9NX05 | 0.98744 |
| 45424 | P14079 | P24534 | 0.78141 |
| 45425 | P14079 | A1L3X4 | 1.1715  |
| 45426 | P14079 | Q9GZU3 | 1.6442  |
| 45427 | P14079 | P20930 | 0.37813 |
| 45428 | P14079 | Q86U90 | 1.3652  |
| 45429 | P14079 | Q99732 | 0.89019 |
| 45430 | P14079 | H3BR10 | 1.1715  |
| 45431 | P14079 | Q32M88 | 0.56045 |
| 45432 | P14079 | Q9NV56 | 1.3349  |
| 45433 | P14079 | Q96C34 | 1.2557  |
| 45434 | P14079 | A6NGS2 | 1.238   |
| 45435 | P14079 | Q16644 | 0.25069 |
| 45436 | P14079 | O94829 | 1.2132  |
| 45437 | P14079 | Q6N075 | 1.0464  |
| 45438 | P14079 | Q86UC2 | 1.077   |
| 45439 | P14079 | A6NCC3 | 0.85082 |
| 45440 | P14079 | Q13956 | 0.93145 |
| 45441 | P14079 | Q9H761 | 0.82736 |
| 45442 | P14079 | Q96K75 | 0.56807 |
| 45443 | P14079 | Q6ZU67 | 0.82529 |
| 45444 | P14079 | O60318 | 0.88482 |
| 45445 | P14079 | Q9H6Q4 | 0.6494  |
| 45446 | P14079 | Q6NSJ2 | 1.2749  |
| 45447 | P14079 | Q9UEE9 | 1.2615  |
| 45448 | P14079 | Q8NC96 | 1.0646  |

|       |        |        |         |
|-------|--------|--------|---------|
| 45449 | P14079 | Q86YE8 | 0.77845 |
| 45450 | P14079 | P62263 | 0.76983 |
| 45451 | P14079 | Q8N972 | 0.77845 |
| 45452 | P14079 | Q9UKV3 | 0.69341 |
| 45453 | P14079 | Q9Y3C1 | 0.24848 |
| 45454 | P14079 | Q969R5 | 0.53184 |
| 45455 | P14079 | Q12962 | 1.2315  |
| 45456 | P14079 | Q8N5R6 | 0.9716  |
| 45457 | P14079 | Q9NZQ3 | 0.92902 |
| 45458 | P14079 | Q9H963 | 0.81093 |
| 45459 | P14079 | Q6DD87 | 0.50185 |
| 45460 | P14079 | Q9UER7 | 1.3594  |
| 45461 | P14079 | Q8ND90 | 0.813   |
| 45462 | P14079 | Q02543 | 0.96995 |
| 45463 | P14079 | Q3SY05 | 0.4211  |
| 45464 | P14079 | Q6ZVH6 | 0.45051 |
| 45465 | P14079 | P19474 | 0.27566 |
| 45466 | P14079 | O95521 | 1.0333  |
| 45467 | P14079 | Q9ULH7 | 0.79925 |
| 45468 | P14079 | P62424 | 1.3062  |
| 45469 | P14079 | Q9Y4M8 | 0.48845 |
| 45470 | P14079 | P60331 | 1.3698  |
| 45471 | P14079 | Q6UXU6 | 1.8529  |
| 45472 | P14079 | P55265 | 0.43572 |
| 45473 | P14079 | Q16719 | 0.34392 |
| 45474 | P14079 | Q92901 | 0.86734 |
| 45475 | P14079 | Q8TAC9 | 1.0112  |
| 45476 | P14079 | P36639 | 0.37336 |
| 45477 | P14079 | A6NGB9 | 0.6828  |
| 45478 | P14079 | P17544 | 1.1167  |
| 45479 | P14079 | Q9Y6Z4 | 0.7477  |
| 45480 | P14079 | Q9NPF5 | 1.0618  |
| 45481 | P14079 | Q9NYU2 | 0.47772 |
| 45482 | P14079 | Q8WYP5 | 0.67014 |
| 45483 | P14079 | A6NFY7 | 1.1151  |
| 45484 | P14079 | Q6UWN0 | 0.78423 |
| 45485 | P14079 | Q9BV81 | 1.1389  |
| 45486 | P14079 | Q6RFH8 | 0.78747 |
| 45487 | P14079 | Q9BR11 | 0.44257 |
| 45488 | P14079 | P62277 | 1.2662  |
| 45489 | P14079 | O00631 | 1.16    |
| 45490 | P14079 | Q9NX09 | 0.55018 |
| 45491 | P14079 | O75427 | 0.72931 |
| 45492 | P14079 | Q96AQ7 | 0.91714 |
| 45493 | P14079 | Q9UH90 | 0.11619 |
| 45494 | P14079 | Q17RH7 | 1.1715  |
| 45495 | P14079 | A6NML5 | 1.2485  |
| 45496 | P14079 | O95238 | 0.80426 |
| 45497 | P14079 | Q9HCJ0 | 0.68872 |
| 45498 | P14079 | Q92769 | 0.43128 |
| 45499 | P14079 | A8MQB3 | 0.73576 |
| 45500 | P14079 | Q86T23 | 0.18173 |
| 45501 | P14079 | P31040 | 0.49604 |
| 45502 | P14079 | Q9UBD5 | 0.8681  |
| 45503 | P14079 | Q8IUH2 | 0.9891  |
| 45504 | P14079 | Q9UK28 | 1.2329  |
| 45505 | P14079 | Q9BXR0 | 1.7865  |
| 45506 | P14079 | O43681 | 0.43543 |
| 45507 | P14079 | Q96T17 | 1.0096  |
| 45508 | P14079 | Q96LK8 | 0.75056 |
| 45509 | P14079 | P56277 | 1.47    |
| 45510 | P14079 | Q8IZS5 | 1.2271  |
| 45511 | P14079 | Q96HJ5 | 0.59183 |
| 45512 | P14079 | Q9BXX3 | 0.24143 |
| 45513 | P14079 | Q8N2B8 | 0.99123 |
| 45514 | P14079 | Q9UL45 | 0.2088  |
| 45515 | P14079 | Q8N9W8 | 1.8805  |
| 45516 | P14079 | Q96I24 | 0.49296 |
| 45517 | P14079 | Q2M3R5 | 1.2951  |
| 45518 | P14079 | O75822 | 1.2752  |
| 45519 | P14079 | Q5W150 | 0.11821 |
| 45520 | P14079 | Q9BZI7 | 1.2214  |
| 45521 | P14079 | A6NKF7 | 1.2485  |
| 45522 | P14079 | Q9NQA3 | 0.59718 |
| 45523 | P14079 | Q6UXQ6 | 1.1715  |
| 45524 | P14079 | Q96ILO | 0.61574 |

|       |        |        |         |
|-------|--------|--------|---------|
| 45525 | P14079 | Q9P2Z0 | 1.0623  |
| 45526 | P14079 | Q9H467 | 1.1846  |
| 45527 | P14079 | O00716 | 1.0617  |
| 45528 | P14079 | Q8N8X9 | 0.67081 |
| 45529 | P14079 | Q2M2I5 | 0.99997 |
| 45530 | P14079 | Q9NVV2 | 1.1715  |
| 45531 | P14079 | Q8IY57 | 1.0615  |
| 45532 | P14079 | Q8N9U9 | 0.89899 |
| 45533 | P14079 | Q96IF1 | 0.50574 |
| 45534 | P14079 | Q6ZMV8 | 1.0592  |
| 45535 | P14079 | A8MV65 | 1.1698  |
| 45536 | P14079 | Q499Y3 | 0.2506  |
| 45537 | P14079 | O95347 | 0.34394 |
| 45538 | P14079 | Q969E2 | 0.96757 |
| 45539 | P14079 | Q9BW66 | 1.3996  |
| 45540 | P14079 | Q8IVS8 | 0.44393 |
| 45541 | P14079 | Q5SXM1 | 0.74708 |
| 45542 | P14079 | O00410 | 1.4057  |
| 45543 | P14079 | Q96EN9 | 1.3553  |
| 45544 | P14079 | O14737 | 0.97695 |
| 45545 | P14079 | Q9NYH9 | 0.25824 |
| 45546 | P14079 | Q9H4T2 | 0.43151 |
| 45547 | P14079 | Q9BZ01 | 0.75211 |
| 45548 | P14079 | Q969X5 | 0.3649  |
| 45549 | P14079 | P23528 | 0.65212 |
| 45550 | P14079 | Q9UM11 | 1.3244  |
| 45551 | P14079 | Q9H2W6 | 0.92173 |
| 45552 | P14079 | O14829 | 0.37625 |
| 45553 | P14079 | Q9UL15 | 0.29243 |
| 45554 | P14079 | Q86VP3 | 0.95374 |
| 45555 | P14079 | P53674 | 0.49183 |
| 45556 | P14079 | P11940 | 0.2929  |
| 45557 | P14079 | Q92934 | 0.17174 |
| 45558 | P14079 | Q3SY89 | 0.56053 |
| 45559 | P14079 | P29374 | 0.25779 |
| 45560 | P14079 | Q8NCK3 | 0.58663 |
| 45561 | P14079 | Q9BZQ4 | 0.48014 |
| 45562 | P14079 | O43711 | 0.2521  |
| 45563 | P14079 | P0CG43 | 1.1715  |
| 45564 | P14079 | P62750 | 0.99345 |
| 45565 | P14079 | O75200 | 0.81659 |
| 45566 | P14079 | Q8IZU3 | 0.29489 |
| 45567 | P14079 | P0CAT3 | 0.23996 |
| 45568 | P14079 | O96018 | 0.63426 |
| 45569 | P14079 | A6NMN3 | 1.2214  |
| 45570 | P14079 | Q7Z5Q5 | 0.61952 |
| 45571 | P14079 | Q96Q89 | 0.62544 |
| 45572 | P14079 | Q5H9S7 | 1.4076  |
| 45573 | P14079 | Q8NDM7 | 0.90986 |
| 45574 | P14079 | Q5VWM5 | 1.1205  |
| 45575 | P14079 | O43633 | 0.46163 |
| 45576 | P14079 | Q8WV28 | 0.30471 |
| 45577 | P14079 | Q9UN42 | 0.30061 |
| 45578 | P14079 | Q9UBB6 | 1.0186  |
| 45579 | P14079 | Q8TF20 | 0.76639 |
| 45580 | P14079 | O14548 | 0.62161 |
| 45581 | P14079 | Q96EX1 | 0.79946 |
| 45582 | P14079 | P29966 | 1.7407  |
| 45583 | P14079 | Q5T6C5 | 1.0973  |
| 45584 | P14079 | Q9BY32 | 0.9955  |
| 45585 | P14079 | Q6P2I7 | 0.67609 |
| 45586 | P14079 | Q8NCU7 | 1.6087  |
| 45587 | P14079 | Q96MD2 | 0.64753 |
| 45588 | P14079 | Q9H8W3 | 1.2295  |
| 45589 | P14079 | P62910 | 0.90311 |
| 45590 | P14079 | Q86TS9 | 0.85626 |
| 45591 | P14079 | Q538Z0 | 1.1715  |
| 45592 | P14079 | O95522 | 0.15504 |
| 45593 | P14079 | Q8IV53 | 0.15996 |
| 45594 | P14079 | Q9UBB4 | 1.407   |
| 45595 | P14079 | Q6XQN6 | 0.47877 |
| 45596 | P14079 | Q15121 | 0.71584 |
| 45597 | P14079 | Q8N201 | 0.87137 |
| 45598 | P14079 | Q96EK5 | 0.63167 |
| 45599 | P14079 | Q9UHV7 | 0.67177 |
| 45600 | P14079 | Q96PU9 | 1.0259  |

|       |        |        |          |
|-------|--------|--------|----------|
| 45601 | P14079 | Q9H583 | 1.1507   |
| 45602 | P14079 | Q9GZZ1 | 0.46034  |
| 45603 | P14079 | A6NKW6 | 0.85881  |
| 45604 | P14079 | Q5VT06 | 0.84095  |
| 45605 | P14079 | O75915 | 0.96664  |
| 45606 | P14079 | Q63ZY6 | 0.33428  |
| 45607 | P14079 | Q6ZQT7 | 1.1715   |
| 45608 | P14079 | Q5H9T9 | 1.0155   |
| 45609 | P14079 | P49755 | 0.17088  |
| 45610 | P14079 | Q9BQA1 | 1.0204   |
| 45611 | P14079 | Q9P299 | 0.43366  |
| 45612 | P14079 | Q8IV36 | 0.72395  |
| 45613 | P14079 | O43676 | 1.0337   |
| 45614 | P14079 | Q9NX00 | 0.72411  |
| 45615 | P14079 | P63173 | 1.1886   |
| 45616 | P14079 | Q4G163 | 0.16561  |
| 45617 | P14079 | Q8NBT0 | 0.27372  |
| 45618 | P14079 | Q5VTR2 | 0.37549  |
| 45619 | P14079 | Q86XJ0 | 0.80503  |
| 45620 | P14079 | Q9UPP1 | 0.37708  |
| 45621 | P14079 | Q86XW9 | 0.36002  |
| 45622 | P14079 | Q5SQS8 | 1.188    |
| 45623 | P14079 | O94818 | 1.6655   |
| 45624 | P14079 | P07197 | 1.248    |
| 45625 | P14079 | Q9Y4Z0 | 0.76478  |
| 45626 | P14079 | P17032 | 0.57645  |
| 45627 | P14079 | Q9H6D3 | 0.95618  |
| 45628 | P14079 | B7ZBB8 | 0.4603   |
| 45629 | P14079 | P26196 | 0.55329  |
| 45630 | P14079 | Q8IZQ5 | 0.78892  |
| 45631 | P14079 | Q5TID7 | 1.0479   |
| 45632 | P14079 | A6NFT4 | 0.76001  |
| 45633 | P14079 | P31946 | 0.59287  |
| 45634 | P14079 | Q9BQY9 | 0.6537   |
| 45635 | P14079 | Q7RTS1 | 0.27975  |
| 45636 | P14079 | O75787 | 0.69314  |
| 45637 | P14079 | Q8N6T7 | 0.74001  |
| 45638 | P14079 | O60248 | 0.59198  |
| 45639 | P14079 | Q12912 | 1.4366   |
| 45640 | P14079 | Q8NI35 | 0.46824  |
| 45641 | P14079 | Q9Y5P3 | 0.85942  |
| 45642 | P14079 | Q86WV6 | 0.088286 |
| 45643 | P14079 | Q9BUI4 | 0.35187  |
| 45644 | P14079 | O95989 | 0.72871  |
| 45645 | P14079 | Q86T03 | 1.6002   |
| 45646 | P14079 | Q5JY77 | 1.1759   |
| 45647 | P14079 | Q02930 | 0.91651  |
| 45648 | P14079 | Q08379 | 0.57496  |
| 45649 | P14079 | Q6ZSN1 | 0.98894  |
| 45650 | P14079 | Q8NFX5 | 1.0315   |
| 45651 | P14079 | Q9H1I8 | 0.86323  |
| 45652 | P14079 | Q5VTA0 | 0.88502  |
| 45653 | P14079 | Q8TEK3 | 0.65182  |
| 45654 | P14079 | Q2KHM9 | 0.91677  |
| 45655 | P14079 | Q8WUM4 | 1.4497   |
| 45656 | P14079 | Q9NQ33 | 0.49163  |
| 45657 | P14079 | Q53FP2 | 1.0739   |
| 45658 | P14079 | Q99708 | 0.84588  |
| 45659 | P14079 | Q969U7 | 0.85985  |
| 45660 | P14079 | O95567 | 1.1715   |
| 45661 | P14079 | O95049 | 0.71329  |
| 45662 | P14079 | O75949 | 1.2485   |
| 45663 | P14079 | O00264 | 0.14082  |
| 45664 | P14079 | Q5VXU3 | 0.84086  |
| 45665 | P14079 | Q9H2G4 | 0.59002  |
| 45666 | P14079 | P43363 | 0.10847  |
| 45667 | P14079 | Q6ZP80 | 1.2485   |
| 45668 | P14079 | O95397 | 1.5333   |
| 45669 | P14079 | Q9Y6X1 | 0.77793  |
| 45670 | P14079 | A4D250 | 0.62096  |
| 45671 | P14079 | Q6P4D5 | 1.4309   |
| 45672 | P14079 | O75409 | 1.0453   |
| 45673 | P14079 | Q14093 | 1.0715   |
| 45674 | P14079 | P49458 | 1.3997   |
| 45675 | P14079 | Q8WVC0 | 0.92483  |
| 45676 | P14079 | Q9NWT6 | 0.32871  |

|       |        |        |           |
|-------|--------|--------|-----------|
| 45677 | P14079 | P55210 | 0.24934   |
| 45678 | P14079 | P0C5W0 | 0.63681   |
| 45679 | P14079 | Q8N823 | 0.77845   |
| 45680 | P14079 | Q9BQ49 | 1.2485    |
| 45681 | P14079 | P03973 | 0.3624    |
| 45682 | P14079 | Q8ND04 | 1.0448    |
| 45683 | P14079 | P49715 | 0.23854   |
| 45684 | P14079 | Q8NFX4 | 1.1715    |
| 45685 | P14079 | P69849 | 1.0231    |
| 45686 | P14079 | Q96PY0 | 0.94038   |
| 45687 | P14079 | E0CX11 | 1.1715    |
| 45688 | P14079 | Q6DKI1 | 0.23329   |
| 45689 | P14079 | Q96G23 | 0.13657   |
| 45690 | P14079 | Q8N8J6 | 0.44884   |
| 45691 | P14079 | Q9BWW4 | 1.3763    |
| 45692 | P14079 | Q9BQ67 | 0.42364   |
| 45693 | P14079 | Q96GC5 | 1.0375    |
| 45694 | P14079 | O75334 | 0.71038   |
| 45695 | P14079 | O60663 | 0.46789   |
| 45696 | P14079 | Q9NW97 | 1.2485    |
| 45697 | P14079 | O14709 | 0.77845   |
| 45698 | P14079 | Q9BSH5 | 0.51284   |
| 45699 | P14079 | Q9BZ97 | 1.1715    |
| 45700 | P14079 | Q8NFX8 | 0.65078   |
| 45701 | P14079 | O94772 | 0.35716   |
| 45702 | P14079 | O15266 | 0.38579   |
| 45703 | P14079 | Q8N6Y0 | 0.85637   |
| 45704 | P14079 | Q8IYQ7 | 0.28389   |
| 45705 | P14079 | Q5DJT8 | 0.62582   |
| 45706 | P14079 | Q14934 | 0.36514   |
| 45707 | P14079 | Q96QA5 | 0.71705   |
| 45708 | P14079 | Q96RN5 | 1.2947    |
| 45709 | P14079 | A1L188 | 1.3165    |
| 45710 | P14079 | Q5TA81 | 1.1715    |
| 45711 | P14079 | Q8IUC1 | 0.72906   |
| 45712 | P14079 | Q9NR11 | 0.50553   |
| 45713 | P14079 | A8MT66 | 0.14551   |
| 45714 | P14079 | P23508 | 0.61978   |
| 45715 | P14079 | Q0VG06 | 0.97034   |
| 45716 | P14079 | Q15102 | 0.1791    |
| 45717 | P14079 | Q9BXY8 | 1.2199    |
| 45718 | P14079 | O60610 | 0.25774   |
| 45719 | P14079 | O14603 | 0.50091   |
| 45720 | P14079 | Q07666 | 0.45448   |
| 45721 | P14079 | O14530 | 0.31165   |
| 45722 | P14079 | P05423 | 0.58691   |
| 45723 | P14079 | Q8WXC7 | 0.9837    |
| 45724 | P14079 | Q9BPZ3 | 0.85879   |
| 45725 | P14079 | Q5MJ08 | 0.73098   |
| 45726 | P14079 | Q9UI46 | 0.27197   |
| 45727 | P14079 | B2RXF0 | 0.72996   |
| 45728 | P14079 | Q9NZI6 | 0.44289   |
| 45729 | P14079 | A6NFQ7 | 0.28169   |
| 45730 | P14079 | Q5JWF8 | 0.75964   |
| 45731 | P14079 | O43678 | 1.1063    |
| 45732 | P14079 | P56182 | 1.3247    |
| 45733 | P14079 | Q96S55 | 0.70711   |
| 45734 | P14079 | P28289 | 0.35676   |
| 45735 | P14079 | Q6U7Q0 | 0.54351   |
| 45736 | P14079 | Q6ZRZ4 | 1.4968    |
| 45737 | P14079 | Q9BVW6 | 1.1715    |
| 45738 | P14079 | Q05BV3 | 0.25965   |
| 45739 | P14079 | Q7L3V2 | 0.0063456 |
| 45740 | P14079 | Q9BYI3 | 1.4237    |
| 45741 | P14079 | Q6IB77 | 0.48859   |
| 45742 | P14079 | P61573 | 1.355     |
| 45743 | P14079 | Q05519 | 1.1047    |
| 45744 | P14079 | P60372 | 1.3698    |
| 45745 | P14079 | Q92764 | 0.78763   |
| 45746 | P14079 | O75340 | 0.45542   |
| 45747 | P14079 | Q8N4U5 | 0.46663   |
| 45748 | P14079 | Q5RKV6 | 0.20073   |
| 45749 | P14079 | Q92560 | 0.083849  |
| 45750 | P14079 | P38936 | 0.36882   |
| 45751 | P14079 | P22914 | 0.55859   |
| 45752 | P14079 | A8MVM7 | 1.1715    |

|       |        |        |          |
|-------|--------|--------|----------|
| 45753 | P14079 | Q5GH73 | 0.88059  |
| 45754 | P14079 | P41252 | 0.99288  |
| 45755 | P14079 | Q15759 | 0.23499  |
| 45756 | P14079 | P55808 | 1.5495   |
| 45757 | P14079 | Q9H1E3 | 1.6422   |
| 45758 | P14079 | A6NL88 | 0.85881  |
| 45759 | P14079 | O15205 | 0.49629  |
| 45760 | P14079 | Q96MH7 | 0.39154  |
| 45761 | P14079 | Q8N680 | 0.1949   |
| 45762 | P14079 | Q99426 | 0.2821   |
| 45763 | P14079 | Q6ZQQ2 | 1.1718   |
| 45764 | P14079 | Q8WTZ3 | 0.97414  |
| 45765 | P14079 | O60282 | 0.35541  |
| 45766 | P14079 | Q53SF7 | 0.44726  |
| 45767 | P14079 | Q9UM13 | 0.94638  |
| 45768 | P14079 | Q9H8M1 | 0.75511  |
| 45769 | P14079 | Q15599 | 0.5811   |
| 45770 | P14079 | O14832 | 0.80945  |
| 45771 | P14079 | O60384 | 1.1388   |
| 45772 | P14079 | Q8NC54 | 1.7237   |
| 45773 | P14079 | Q0VDG4 | 0.76695  |
| 45774 | P14079 | P46776 | 1.2548   |
| 45775 | P14079 | Q8NCR3 | 0.47989  |
| 45776 | P14079 | Q7Z3Y7 | 0.77408  |
| 45777 | P14079 | Q9Y6K9 | 1.2353   |
| 45778 | P14079 | Q6P280 | 1.0605   |
| 45779 | P14079 | Q5PRF9 | 0.8663   |
| 45780 | P14079 | Q68EA5 | 1.0057   |
| 45781 | P14079 | O43345 | 0.76639  |
| 45782 | P14079 | Q15075 | 0.2045   |
| 45783 | P14079 | P0C881 | 0.12268  |
| 45784 | P14079 | Q8N7X2 | 1.1715   |
| 45785 | P14079 | P08238 | 0.37052  |
| 45786 | P14079 | Q9BRT3 | 0.50482  |
| 45787 | P14079 | Q7RTV0 | 0.38484  |
| 45788 | P14079 | Q641Q2 | 1.4354   |
| 45789 | P14079 | Q7Z5L9 | 1.4672   |
| 45790 | P14079 | Q9Y473 | 0.58331  |
| 45791 | P14079 | Q15726 | 0.5041   |
| 45792 | P14079 | Q5JSH3 | 0.29068  |
| 45793 | P14079 | Q9Y6D0 | 1.0631   |
| 45794 | P14079 | Q9GZN7 | 1.1722   |
| 45795 | P14079 | Q9BYD3 | 1.3663   |
| 45796 | P14079 | O60809 | 1.2246   |
| 45797 | P14079 | Q5T3Y7 | 0.5671   |
| 45798 | P14079 | Q9HD36 | 0.55738  |
| 45799 | P14079 | Q7Z4L9 | 0.28346  |
| 45800 | P14079 | O75477 | 1.0949   |
| 45801 | P14079 | Q9NUL3 | 0.80622  |
| 45802 | P14079 | P84101 | 1.8065   |
| 45803 | P14079 | Q8IWC1 | 0.79085  |
| 45804 | P14079 | Q9BRP8 | 1.5411   |
| 45805 | P14079 | Q9Y6K5 | 0.49461  |
| 45806 | P14079 | Q9H511 | 0.26737  |
| 45807 | P14079 | Q96RT8 | 0.73313  |
| 45808 | P14079 | Q6NS38 | 0.8108   |
| 45809 | P14079 | P09525 | 0.40375  |
| 45810 | P14079 | P61158 | 0.028439 |
| 45811 | P14079 | Q68CZ2 | 0.64219  |
| 45812 | P14079 | Q9BQI5 | 0.66039  |
| 45813 | P14079 | P0C7U9 | 1.0613   |
| 45814 | P14079 | O75469 | 0.28991  |
| 45815 | P14079 | Q6ZRV2 | 1.5118   |
| 45816 | P14079 | Q969F1 | 1.1362   |
| 45817 | P14079 | Q9Y6D6 | 0.76772  |
| 45818 | P14079 | Q9H8G2 | 1.3459   |
| 45819 | P14079 | Q969M7 | 0.35218  |
| 45820 | P14079 | Q9NQZ2 | 0.48602  |
| 45821 | P14079 | Q6ZRX8 | 0.11952  |
| 45822 | P14079 | P17017 | 0.52589  |
| 45823 | P14079 | Q9NY12 | 0.79306  |
| 45824 | P14079 | Q7Z392 | 0.85098  |
| 45825 | P14079 | P17987 | 0.27692  |
| 45826 | P14079 | Q9NPG3 | 1.1001   |
| 45827 | P14079 | O60829 | 1.3718   |
| 45828 | P14079 | P31269 | 0.4413   |



|       |        |        |         |
|-------|--------|--------|---------|
| 45829 | P14079 | Q9BRR8 | 1.3746  |
| 45830 | P14079 | Q99933 | 0.92972 |
| 45831 | P14079 | O95996 | 0.45858 |
| 45832 | P14079 | Q92832 | 0.25766 |
| 45833 | P14079 | Q13278 | 1.3096  |
| 45834 | P14079 | Q96F86 | 0.74381 |
| 45835 | P14079 | O60502 | 0.32385 |
| 45836 | P14079 | P08107 | 0.4926  |
| 45837 | P14079 | P0CG40 | 0.10657 |
| 45838 | P14079 | Q12798 | 0.94464 |
| 45839 | P14079 | P24863 | 1.257   |
| 45840 | P14079 | Q3KRA9 | 0.89437 |
| 45841 | P14079 | A5A3E0 | 0.96316 |
| 45842 | P14079 | Q9BYT9 | 1.1778  |
| 45843 | P14079 | P25791 | 0.60085 |
| 45844 | P14079 | P82912 | 1.1271  |
| 45845 | P14079 | P08621 | 0.44427 |
| 45846 | P14079 | Q5T9C2 | 1.3222  |
| 45847 | P14079 | Q96SN7 | 0.50831 |
| 45848 | P14079 | P45985 | 0.31811 |
| 45849 | P14079 | I6L899 | 0.28471 |
| 45850 | P14079 | Q9HAB3 | 1.2062  |
| 45851 | P14079 | P08397 | 0.50902 |
| 45852 | P14079 | O76021 | 0.71123 |
| 45853 | P14079 | P49848 | 0.70597 |
| 45854 | P14079 | Q9UI26 | 0.5192  |
| 45855 | P14079 | Q13042 | 1.5935  |
| 45856 | P14079 | Q9UBI1 | 0.56221 |
| 45857 | P14079 | Q99567 | 0.7654  |
| 45858 | P14079 | Q13057 | 0.77511 |
| 45859 | P14079 | P48681 | 0.13875 |
| 45860 | P14079 | P51508 | 0.58948 |
| 45861 | P14079 | A8MZG2 | 1.3222  |
| 45862 | P14079 | Q6NVV7 | 0.85905 |
| 45863 | P14079 | Q5T1C6 | 1.2284  |
| 45864 | P14079 | Q9H2H8 | 0.21079 |
| 45865 | P14079 | Q5H9M0 | 1.4965  |
| 45866 | P14079 | O00139 | 0.5218  |
| 45867 | P14079 | Q16587 | 0.5585  |
| 45868 | P14079 | Q9H1B7 | 1.4672  |
| 45869 | P14079 | Q15773 | 1.5911  |
| 45870 | P14079 | Q6UWF9 | 1.2175  |
| 45871 | P14079 | P0CJ69 | 1.3031  |
| 45872 | P14079 | Q6UXQ4 | 1.1715  |
| 45873 | P14079 | Q9NZ72 | 0.40316 |
| 45874 | P14079 | O15049 | 1.0342  |
| 45875 | P14079 | O43765 | 0.85034 |
| 45876 | P14079 | Q96GT9 | 1.3702  |
| 45877 | P14079 | Q5HYL7 | 1.0613  |
| 45878 | P14079 | P0C7X5 | 0.64981 |
| 45879 | P14079 | Q8WWM1 | 1.45    |
| 45880 | P14079 | P61571 | 1.1454  |
| 45881 | P14079 | Q9NVZ3 | 0.88008 |
| 45882 | P14079 | Q4VXA5 | 0.99171 |
| 45883 | P14079 | Q8NC56 | 0.78731 |
| 45884 | P14079 | A6NDK9 | 0.49605 |
| 45885 | P14079 | Q6P050 | 1.3018  |
| 45886 | P14079 | Q92945 | 0.63893 |
| 45887 | P14079 | Q9NRY5 | 1.8974  |
| 45888 | P14079 | P35321 | 1.0119  |
| 45889 | P14079 | Q9NWX8 | 1.0675  |
| 45890 | P14079 | Q2VPK5 | 0.95238 |
| 45891 | P14079 | O75820 | 0.52589 |
| 45892 | P14079 | Q6ZS27 | 0.51682 |
| 45893 | P14079 | O14558 | 0.87489 |
| 45894 | P14079 | Q2M1K9 | 0.32182 |
| 45895 | P14079 | Q96A00 | 1.0405  |
| 45896 | P14079 | Q8N684 | 0.562   |
| 45897 | P14079 | Q15555 | 0.30864 |
| 45898 | P14079 | Q9UNM6 | 0.70091 |
| 45899 | P14079 | Q9UQ35 | 1.1966  |
| 45900 | P14079 | O15160 | 0.31145 |
| 45901 | P14079 | A6NHX0 | 1.4681  |
| 45902 | P14079 | Q9NQ76 | 0.67406 |
| 45903 | P14079 | Q13867 | 0.46971 |
| 45904 | P14079 | Q8N6M9 | 0.27176 |

|       |        |        |         |
|-------|--------|--------|---------|
| 45905 | P14079 | A2RU37 | 0.81816 |
| 45906 | P14079 | O95243 | 0.81026 |
| 45907 | P14079 | P16333 | 0.65633 |
| 45908 | P14079 | P58557 | 1.6877  |
| 45909 | P14079 | P51970 | 0.13406 |
| 45910 | P14079 | P56282 | 0.60822 |
| 45911 | P14079 | Q8NE71 | 0.46893 |
| 45912 | P14079 | O14734 | 0.81677 |
| 45913 | P14079 | Q15058 | 0.60399 |
| 45914 | P14079 | Q9BYG4 | 0.84627 |
| 45915 | P14079 | Q4ADV7 | 0.8519  |
| 45916 | P14079 | Q9Y3B6 | 1.4159  |
| 45917 | P14079 | O60256 | 0.37508 |
| 45918 | P14079 | Q9NY33 | 0.59952 |
| 45919 | P14079 | Q96JM7 | 0.26348 |
| 45920 | P14079 | P27540 | 0.35056 |
| 45921 | P14079 | Q9BQG0 | 0.44584 |
| 45922 | P14079 | Q8TCI5 | 0.60789 |
| 45923 | P14079 | P61960 | 1.0085  |
| 45924 | P14079 | A6NHQ4 | 1.4327  |
| 45925 | P14079 | C9JN71 | 0.69781 |
| 45926 | P14079 | Q8IVN3 | 1.4296  |
| 45927 | P14079 | P0CG12 | 1.936   |
| 45928 | P14079 | Q96J86 | 1.2485  |
| 45929 | P14079 | Q9H4Z2 | 0.77928 |
| 45930 | P14079 | P13640 | 0.90692 |
| 45931 | P14079 | A8MVW0 | 1.245   |
| 45932 | P14079 | Q9NZM4 | 1.8643  |
| 45933 | P14079 | Q9NUC0 | 0.80312 |
| 45934 | P14079 | Q8TAY7 | 2.1949  |
| 45935 | P14079 | Q6ZUV0 | 0.47365 |
| 45936 | P14079 | O95866 | 1.3136  |
| 45937 | P14079 | Q96GX9 | 0.43987 |
| 45938 | P14079 | Q6IAA8 | 0.38754 |
| 45939 | P14079 | Q86X24 | 0.48081 |
| 45940 | P14079 | Q8N1P7 | 0.56124 |
| 45941 | P14079 | Q96DE5 | 1.6566  |
| 45942 | P14079 | P52435 | 0.71425 |
| 45943 | P14079 | Q93034 | 0.83601 |
| 45944 | P14079 | P08708 | 0.62102 |
| 45945 | P14079 | Q6ZNB6 | 0.68329 |
| 45946 | P14079 | Q9Y263 | 0.28589 |
| 45947 | P14079 | Q3B726 | 0.38785 |
| 45948 | P14079 | Q702N8 | 0.73043 |
| 45949 | P14079 | Q6NXS1 | 1.3737  |
| 45950 | P14079 | Q9UIF9 | 0.67475 |
| 45951 | P14079 | Q8IVT2 | 1.3499  |
| 45952 | P14079 | Q96JZ2 | 0.45652 |
| 45953 | P14079 | P63272 | 1.0579  |
| 45954 | P14079 | O75525 | 0.6624  |
| 45955 | P14079 | Q6UWT2 | 0.98371 |
| 45956 | P14079 | O75534 | 0.56195 |
| 45957 | P14079 | Q400G9 | 1.0217  |
| 45958 | P14079 | Q9BXF3 | 0.81098 |
| 45959 | P14079 | Q8WUX9 | 0.59817 |
| 45960 | P14079 | Q9H0H9 | 0.15091 |
| 45961 | P14079 | O95178 | 1.1931  |
| 45962 | P14079 | Q8N1V8 | 0.76662 |
| 45963 | P14079 | Q5BKY6 | 1.1715  |
| 45964 | P14079 | Q12830 | 0.8409  |
| 45965 | P14079 | P63267 | 0.99952 |
| 45966 | P14079 | Q66K89 | 0.70835 |
| 45967 | P14079 | P41002 | 1.0512  |
| 45968 | P14079 | Q6A163 | 0.88619 |
| 45969 | P14079 | Q9H1M4 | 0.83271 |
| 45970 | P14079 | Q9BVV8 | 1.1037  |
| 45971 | P14079 | Q8N2Z9 | 0.63901 |
| 45972 | P14079 | O95177 | 0.59394 |
| 45973 | P14079 | P17031 | 0.68126 |
| 45974 | P14079 | Q7Z6J9 | 1.1476  |
| 45975 | P14079 | Q9Y520 | 1.138   |
| 45976 | P14079 | Q5JRA6 | 0.10792 |
| 45977 | P14079 | Q5QP74 | 1.1715  |
| 45978 | P14079 | Q6ZS92 | 0.79499 |
| 45979 | P14079 | Q9UET6 | 0.90634 |
| 45980 | P14079 | Q9UEG4 | 0.60348 |

|       |        |        |          |
|-------|--------|--------|----------|
| 45981 | P14079 | Q6IPT2 | 1.8805   |
| 45982 | P14079 | Q9Y478 | 0.10932  |
| 45983 | P14079 | Q13257 | 0.95912  |
| 45984 | P14079 | Q9H8Y1 | 1.2172   |
| 45985 | P14079 | Q8N6G1 | 1.1715   |
| 45986 | P14079 | A6NME0 | 0.77837  |
| 45987 | P14079 | O75251 | 0.50305  |
| 45988 | P14079 | Q7Z5S9 | 0.7849   |
| 45989 | P14079 | P62328 | 1.5892   |
| 45990 | P14079 | Q14974 | 1.4203   |
| 45991 | P14079 | Q9UI54 | 1.1715   |
| 45992 | P14079 | O15195 | 0.084452 |
| 45993 | P14079 | Q8N2U0 | 1.1601   |
| 45994 | P14079 | Q96AA8 | 0.85897  |
| 45995 | P14079 | Q8WZA9 | 1.3222   |
| 45996 | P14079 | Q9HC47 | 1.1715   |
| 45997 | P14079 | O14561 | 0.64566  |
| 45998 | P14079 | Q6ZSK4 | 0.28022  |
| 45999 | P14079 | Q96EA4 | 0.94267  |
| 46000 | P14079 | Q9NS64 | 1.3845   |
| 46001 | P14079 | Q8TAM2 | 0.38681  |
| 46002 | P14079 | Q86UW6 | 0.47658  |
| 46003 | P14079 | P0DMC3 | 1.1715   |
| 46004 | P14079 | P18887 | 0.97031  |
| 46005 | P14079 | P55060 | 1.1172   |
| 46006 | P14079 | Q8IYS8 | 1.0549   |
| 46007 | P14079 | Q96I85 | 1.1715   |
| 46008 | P14079 | Q9P2R6 | 0.95177  |
| 46009 | P14079 | Q3LI62 | 1.1715   |
| 46010 | P14079 | O60888 | 1.0206   |
| 46011 | P14079 | P50549 | 0.80368  |
| 46012 | P14079 | A8MUA0 | 0.71632  |
| 46013 | P14079 | Q92973 | 1.2878   |
| 46014 | P14079 | Q9UKJ3 | 1.3031   |
| 46015 | P14079 | Q99569 | 0.5909   |
| 46016 | P14079 | A6NLW8 | 0.25626  |
| 46017 | P14079 | Q99613 | 0.84637  |
| 46018 | P14079 | P17029 | 0.84533  |
| 46019 | P14079 | P34949 | 1.0045   |
| 46020 | P14079 | Q68CQ4 | 0.50567  |
| 46021 | P14079 | Q9BYE7 | 0.66054  |
| 46022 | P14079 | Q9BRS8 | 0.61714  |
| 46023 | P14079 | Q96SK3 | 0.75812  |
| 46024 | P14079 | Q5JUK9 | 0.87986  |
| 46025 | P14079 | Q7L190 | 1.4904   |
| 46026 | P14079 | P22670 | 1.0037   |
| 46027 | P14079 | Q9HBH1 | 1.064    |
| 46028 | P14079 | Q8NFG4 | 1.6036   |
| 46029 | P14079 | Q9NQR1 | 0.4705   |
| 46030 | P14079 | Q8NB12 | 0.31465  |
| 46031 | P14079 | Q8NFP7 | 0.5433   |
| 46032 | P14079 | P35251 | 0.93369  |
| 46033 | P14079 | Q562F6 | 0.93548  |
| 46034 | P14079 | P49459 | 0.56404  |
| 46035 | P14079 | Q8WUY3 | 0.51418  |
| 46036 | P14079 | Q0P641 | 0.34652  |
| 46037 | P14079 | Q9H6Z9 | 0.51436  |
| 46038 | P14079 | Q9Y5J3 | 0.23832  |
| 46039 | P14079 | P41250 | 0.61106  |
| 46040 | P14079 | Q6NSI3 | 1.5847   |
| 46041 | P14079 | Q9H4B6 | 0.69755  |
| 46042 | P14079 | A6NC62 | 0.79041  |
| 46043 | P14079 | Q9BVC3 | 0.92553  |
| 46044 | P14079 | A6NIX2 | 1.0681   |
| 46045 | P14079 | Q9HCE0 | 0.66463  |
| 46046 | P14079 | Q9HC38 | 0.56644  |
| 46047 | P14079 | Q96QF0 | 0.78792  |
| 46048 | P14079 | P17275 | 0.86989  |
| 46049 | P14079 | P17021 | 0.63301  |
| 46050 | P14079 | P60328 | 0.4643   |
| 46051 | P14079 | Q5T655 | 1.1715   |
| 46052 | P14079 | Q9UJZ1 | 0.13043  |
| 46053 | P14079 | Q8WVK7 | 0.79555  |
| 46054 | P14079 | P25063 | 1.1715   |
| 46055 | P14079 | Q6ZTB9 | 0.58198  |
| 46056 | P14079 | Q66LE6 | 0.61407  |

|       |        |        |         |
|-------|--------|--------|---------|
| 46057 | P14079 | P16415 | 0.69298 |
| 46058 | P14079 | Q9ULJ1 | 0.27102 |
| 46059 | P14079 | Q86UW9 | 0.71351 |
| 46060 | P14079 | Q9NZT2 | 0.34337 |
| 46061 | P14079 | P62140 | 0.73213 |
| 46062 | P14079 | Q9NYT6 | 0.54706 |
| 46063 | P14079 | Q9H9L3 | 0.47764 |
| 46064 | P14079 | Q96IT6 | 1.1715  |
| 46065 | P14079 | Q6ZQT0 | 0.29306 |
| 46066 | P14079 | P49450 | 0.40599 |
| 46067 | P14079 | Q8N8M0 | 0.80482 |
| 46068 | P14079 | E9PI22 | 1.3036  |
| 46069 | P14079 | Q86UD0 | 0.84107 |
| 46070 | P14079 | Q6ZST8 | 0.42526 |
| 46071 | P14079 | Q86WJ1 | 0.22432 |
| 46072 | P14079 | Q9H379 | 1.3698  |
| 46073 | P14079 | F8W1W9 | 0.85075 |
| 46074 | P14079 | P23258 | 0.56665 |
| 46075 | P14079 | Q99990 | 0.67082 |
| 46076 | P14079 | Q86V81 | 0.82685 |
| 46077 | P14079 | Q8N2G8 | 0.10345 |
| 46078 | P14079 | Q8N485 | 0.59587 |
| 46079 | P14079 | I3L1I5 | 0.89553 |
| 46080 | P14079 | Q8WU58 | 0.7295  |
| 46081 | P14079 | Q9NY87 | 1.5672  |
| 46082 | P14079 | Q5VZ72 | 1.1047  |
| 46083 | P14079 | O95164 | 1.1657  |
| 46084 | P14079 | P15336 | 1.007   |
| 46085 | P14079 | Q9UI09 | 0.18323 |
| 46086 | P14079 | Q9UQK1 | 0.45356 |
| 46087 | P14079 | Q9UL12 | 0.27733 |
| 46088 | P14079 | Q14593 | 1.0416  |
| 46089 | P14079 | Q8N5X7 | 0.18127 |
| 46090 | P14079 | Q96BF6 | 0.44669 |
| 46091 | P14079 | Q9NRR4 | 0.52495 |
| 46092 | P14079 | Q8N4B1 | 0.29473 |
| 46093 | P14079 | Q9UBF2 | 0.49977 |
| 46094 | P14079 | Q9NZD4 | 1.3136  |
| 46095 | P14079 | B9A014 | 0.68497 |
| 46096 | P14079 | Q96AX1 | 0.28966 |
| 46097 | P14079 | Q86Y46 | 0.90092 |
| 46098 | P14079 | Q19AV6 | 1.8943  |
| 46099 | P14079 | Q4LEZ3 | 1.5542  |
| 46100 | P14079 | Q8IZA0 | 0.11531 |
| 46101 | P14079 | Q92750 | 0.70434 |
| 46102 | P14079 | P0CL81 | 0.99818 |
| 46103 | P14079 | Q6ZPA2 | 1.1715  |
| 46104 | P14079 | Q15010 | 0.27541 |
| 46105 | P14079 | A8MX34 | 1.0199  |
| 46106 | P14079 | P45381 | 0.40919 |
| 46107 | P14079 | Q9NYP8 | 0.86236 |
| 46108 | P14079 | Q9HD15 | 0.81901 |
| 46109 | P14079 | Q8IZ63 | 1.1715  |
| 46110 | P14079 | Q8N0U6 | 1.1715  |
| 46111 | P14079 | P46087 | 0.72645 |
| 46112 | P14079 | Q9ULZ0 | 0.28036 |
| 46113 | P14079 | P62166 | 0.31055 |
| 46114 | P14079 | A8MUU9 | 0.44324 |
| 46115 | P14079 | Q86U42 | 0.79452 |
| 46116 | P14079 | O95785 | 0.25518 |
| 46117 | P14079 | Q8WTW4 | 0.73884 |
| 46118 | P14079 | Q6R2W3 | 0.50892 |
| 46119 | P14079 | Q96JM3 | 0.52775 |
| 46120 | P14079 | Q7L8S5 | 0.68767 |
| 46121 | P14079 | Q99575 | 0.7507  |
| 46122 | P14079 | Q9P2A4 | 0.35778 |
| 46123 | P14079 | Q99460 | 0.73342 |
| 46124 | P14079 | P11686 | 0.19063 |
| 46125 | P14079 | O94964 | 1.3221  |
| 46126 | P14079 | Q96NC0 | 0.19168 |
| 46127 | P14079 | Q8NBT3 | 1.2485  |
| 46128 | P14079 | Q8IXK0 | 0.20684 |
| 46129 | P14079 | Q9H0C8 | 0.48094 |
| 46130 | P14079 | Q9Y5Q8 | 0.90791 |
| 46131 | P14079 | Q9HBH7 | 1.2234  |
| 46132 | P14079 | Q8NC38 | 0.68921 |

|       |        |        |          |
|-------|--------|--------|----------|
| 46133 | P14079 | Q4AC94 | 0.50486  |
| 46134 | P14079 | P24855 | 0.41532  |
| 46135 | P14079 | Q86TX2 | 0.23623  |
| 46136 | P14079 | O94811 | 1.1938   |
| 46137 | P14079 | Q8IVP9 | 0.68773  |
| 46138 | P14079 | P0C7W8 | 0.42916  |
| 46139 | P14079 | Q12981 | 0.22084  |
| 46140 | P14079 | Q9H720 | 0.76278  |
| 46141 | P14079 | Q16384 | 1.0102   |
| 46142 | P14079 | P35325 | 1.1715   |
| 46143 | P14079 | Q8NFC6 | 1.426    |
| 46144 | P14079 | Q8N5Q1 | 1.8805   |
| 46145 | P14079 | P35573 | 0.56956  |
| 46146 | P14079 | Q96GM5 | 0.87682  |
| 46147 | P14079 | Q96I59 | 0.93806  |
| 46148 | P14079 | Q9BV47 | 0.30407  |
| 46149 | P14079 | Q9Y697 | 0.53297  |
| 46150 | P14079 | Q7Z3Z2 | 0.80814  |
| 46151 | P14079 | A2A2V5 | 1.2485   |
| 46152 | P14079 | Q96IZ7 | 1.6932   |
| 46153 | P14079 | Q5VT33 | 1.0561   |
| 46154 | P14079 | Q9UP83 | 1.4109   |
| 46155 | P14079 | Q15424 | 0.78231  |
| 46156 | P14079 | Q96LW9 | 0.50361  |
| 46157 | P14079 | P53370 | 0.28988  |
| 46158 | P14079 | A6NEW6 | 0.50122  |
| 46159 | P14079 | Q92665 | 1.0836   |
| 46160 | P14079 | P78316 | 1.5094   |
| 46161 | P14079 | O00559 | 0.70333  |
| 46162 | P14079 | Q9NVV4 | 0.37993  |
| 46163 | P14079 | Q30KQ1 | 0.91101  |
| 46164 | P14079 | Q5VSD8 | 0.91925  |
| 46165 | P14079 | Q8NHW3 | 0.25031  |
| 46166 | P14079 | Q8N8Q9 | 1.288    |
| 46167 | P14079 | Q9H1H9 | 0.84329  |
| 46168 | P14079 | Q8NAP1 | 1.3222   |
| 46169 | P14079 | P51523 | 0.42092  |
| 46170 | P14079 | Q92616 | 0.31467  |
| 46171 | P14079 | Q17RF5 | 1.6543   |
| 46172 | P14079 | Q8NDL9 | 0.4298   |
| 46173 | P14079 | Q969F9 | 1.7573   |
| 46174 | P14079 | P24522 | 0.72305  |
| 46175 | P14079 | P0C1Z6 | 1.5552   |
| 46176 | P14079 | Q9NZ43 | 0.11193  |
| 46177 | P14079 | Q15697 | 0.56549  |
| 46178 | P14079 | Q8N2I2 | 0.5613   |
| 46179 | P14079 | O00148 | 0.11315  |
| 46180 | P14079 | Q96KX2 | 0.099211 |
| 46181 | P14079 | Q9Y2Q9 | 1.1544   |
| 46182 | P14079 | P48200 | 0.53296  |
| 46183 | P14079 | Q8WV07 | 0.67114  |
| 46184 | P14079 | Q9Y2B5 | 0.87921  |
| 46185 | P14079 | Q96AC1 | 0.2129   |
| 46186 | P14079 | P05814 | 1.283    |
| 46187 | P14079 | Q8NBN3 | 1.07     |
| 46188 | P14079 | Q8N1H7 | 0.78134  |
| 46189 | P14079 | Q9UKK6 | 0.90817  |
| 46190 | P14079 | Q96H22 | 1.0112   |
| 46191 | P14079 | Q99445 | 1.0261   |
| 46192 | P14079 | Q9BQE6 | 1.4565   |
| 46193 | P14079 | Q8N3V7 | 1.2495   |
| 46194 | P14079 | A6NI56 | 0.17318  |
| 46195 | P14079 | Q68DU8 | 0.09989  |
| 46196 | P14079 | Q9NZP6 | 1.4294   |
| 46197 | P14079 | Q3BBV0 | 0.51494  |
| 46198 | P14079 | Q96M83 | 0.60363  |
| 46199 | P14079 | Q96M78 | 0.16172  |
| 46200 | P14079 | P36578 | 1.1841   |
| 46201 | P14079 | O00124 | 0.64648  |
| 46202 | P14079 | Q9UBK9 | 1.1731   |
| 46203 | P14079 | P28702 | 0.4803   |
| 46204 | P14079 | Q969S2 | 0.6449   |
| 46205 | P14079 | P52743 | 0.87928  |
| 46206 | P14079 | P00156 | 0.83264  |
| 46207 | P14079 | P24278 | 0.82022  |
| 46208 | P14079 | P60660 | 0.36482  |

|       |        |        |          |
|-------|--------|--------|----------|
| 46209 | P14079 | Q13510 | 0.89222  |
| 46210 | P14079 | Q9P2X3 | 0.53955  |
| 46211 | P14079 | Q9BTV4 | 1.2072   |
| 46212 | P14079 | P04198 | 0.85622  |
| 46213 | P14079 | Q8N5N7 | 1.3095   |
| 46214 | P14079 | O43310 | 0.63702  |
| 46215 | P14079 | Q16630 | 0.32913  |
| 46216 | P14079 | Q9BYM8 | 0.25919  |
| 46217 | P14079 | A5D8V6 | 0.5802   |
| 46218 | P14079 | Q9NR28 | 1.0156   |
| 46219 | P14079 | Q6ZRH3 | 0.98809  |
| 46220 | P14079 | P27348 | 0.43432  |
| 46221 | P14079 | P0CJ72 | 1.3031   |
| 46222 | P14079 | Q9Y3C4 | 1.1411   |
| 46223 | P14079 | Q9Y3M9 | 0.43665  |
| 46224 | P14079 | Q9UBF1 | 0.95823  |
| 46225 | P14079 | Q6ZW49 | 0.35646  |
| 46226 | P14079 | Q9BY41 | 0.34641  |
| 46227 | P14079 | Q6ZRC1 | 1.1715   |
| 46228 | P14079 | A1L429 | 0.99818  |
| 46229 | P14079 | Q9NRX1 | 0.21047  |
| 46230 | P14079 | P62308 | 0.79088  |
| 46231 | P14079 | P17020 | 0.46843  |
| 46232 | P14079 | P07864 | 0.60641  |
| 46233 | P14079 | Q96RT7 | 0.73313  |
| 46234 | P14079 | Q96T49 | 0.34246  |
| 46235 | P14079 | P06454 | 1.2158   |
| 46236 | P14079 | Q95299 | 0.11193  |
| 46237 | P14079 | Q9BT73 | 0.033928 |
| 46238 | P14079 | Q8N9Z2 | 1.3103   |
| 46239 | P14079 | Q9H6D7 | 0.74419  |
| 46240 | P14079 | Q8NFD5 | 0.86989  |
| 46241 | P14079 | P26640 | 0.75011  |
| 46242 | P14079 | Q8WXH0 | 0.37918  |
| 46243 | P14079 | O14978 | 0.50576  |
| 46244 | P14079 | P23490 | 1.0462   |
| 46245 | P14079 | O60551 | 0.52303  |
| 46246 | P14079 | Q8TAD8 | 1.3186   |
| 46247 | P14079 | Q8WZ55 | 1.0478   |
| 46248 | P14079 | A6NNX1 | 0.456    |
| 46249 | P14079 | Q8WV37 | 1.0106   |
| 46250 | P14079 | Q9GZZ8 | 1.1715   |
| 46251 | P14079 | E9PQ53 | 1.3799   |
| 46252 | P14079 | Q86TU6 | 1.5193   |
| 46253 | P14079 | Q9NY30 | 0.5861   |
| 46254 | P14079 | Q9BQY4 | 0.87039  |
| 46255 | P14079 | Q9Y4A0 | 0.22994  |
| 46256 | P14079 | Q9Y3Y4 | 0.69802  |
| 46257 | P14079 | Q8NHS9 | 0.84314  |
| 46258 | P14079 | O75175 | 1.2501   |
| 46259 | P14079 | O75953 | 0.8209   |
| 46260 | P14079 | Q6ZMY3 | 0.39257  |
| 46261 | P14079 | Q5VVP1 | 2.1067   |
| 46262 | P14079 | A4D1N5 | 0.050586 |
| 46263 | P14079 | Q8NFH3 | 1.0451   |
| 46264 | P14079 | B4DZS4 | 0.91737  |
| 46265 | P14079 | Q5T0Z8 | 1.3222   |
| 46266 | P14079 | P55854 | 0.72692  |
| 46267 | P14079 | P0CW22 | 0.35338  |
| 46268 | P14079 | P35663 | 0.87908  |
| 46269 | P14079 | Q9Y6R6 | 0.77845  |
| 46270 | P14079 | Q8NDZ9 | 1.1715   |
| 46271 | P14079 | Q02833 | 1.0506   |
| 46272 | P14079 | Q9BYD1 | 1.2954   |
| 46273 | P14079 | Q6TFL3 | 0.51874  |
| 46274 | P14079 | Q9NYB0 | 1.3868   |
| 46275 | P14079 | Q9NYP3 | 1.2876   |
| 46276 | P14079 | Q96IZ0 | 0.88889  |
| 46277 | P14079 | O60749 | 0.40371  |
| 46278 | P14079 | P30419 | 0.61312  |
| 46279 | P14079 | Q8WUB8 | 0.42855  |
| 46280 | P14079 | Q96N03 | 0.56221  |
| 46281 | P14079 | Q9HB58 | 0.48009  |
| 46282 | P14079 | Q96ES6 | 1.1888   |
| 46283 | P14079 | Q8NA56 | 0.12101  |
| 46284 | P14079 | A1L4M7 | 0.53867  |

|       |        |        |         |
|-------|--------|--------|---------|
| 46285 | P14079 | Q4V348 | 0.50207 |
| 46286 | P14079 | Q96RV3 | 0.90212 |
| 46287 | P14079 | Q86UA6 | 1.5804  |
| 46288 | P14079 | Q9UHR5 | 1.296   |
| 46289 | P14079 | Q00LT1 | 1.3639  |
| 46290 | P14079 | Q9NRN7 | 0.85257 |
| 46291 | P14079 | A6NMP4 | 0.73811 |
| 46292 | P14079 | P61586 | 1.0002  |
| 46293 | P14079 | O60506 | 0.41053 |
| 46294 | P14079 | Q9H944 | 1.1216  |
| 46295 | P14079 | Q92791 | 0.51659 |
| 46296 | P14079 | Q5VWM4 | 0.23582 |
| 46297 | P14079 | P07900 | 0.37972 |
| 46298 | P14079 | O75360 | 0.56413 |
| 46299 | P14079 | O43294 | 0.26735 |
| 46300 | P14079 | Q15370 | 1.0733  |
| 46301 | P14079 | Q6ZMZ3 | 0.34389 |
| 46302 | P14079 | Q8N6N3 | 1.2669  |
| 46303 | P14079 | Q8N945 | 0.28861 |
| 46304 | P14079 | Q3LI81 | 1.5617  |
| 46305 | P14079 | Q8NBJ7 | 0.78482 |
| 46306 | P14079 | Q9H8W2 | 0.78622 |
| 46307 | P14079 | Q9Y4B6 | 1.0215  |
| 46308 | P14079 | Q6ZW13 | 1.1715  |
| 46309 | P14079 | Q15468 | 0.8912  |
| 46310 | P14079 | Q9UK10 | 0.77845 |
| 46311 | P14079 | Q15696 | 0.27824 |
| 46312 | P14079 | Q8N8Y2 | 0.22388 |
| 46313 | P14079 | Q6GPH4 | 0.48648 |
| 46314 | P14079 | Q9P253 | 0.38226 |
| 46315 | P14079 | P0C7X3 | 1.0071  |
| 46316 | P14079 | Q3ZLR7 | 1.1571  |
| 46317 | P14079 | Q9P243 | 0.44368 |
| 46318 | P14079 | Q8TAT6 | 0.60557 |
| 46319 | P14079 | Q9Y2X9 | 0.6956  |
| 46320 | P14079 | Q7Z6I8 | 0.1972  |
| 46321 | P14079 | P05204 | 1.4345  |
| 46322 | P14079 | P0C843 | 1.0642  |
| 46323 | P14079 | Q8TF45 | 0.51784 |
| 46324 | P14079 | Q9UJG1 | 1.5137  |
| 46325 | P14079 | O95045 | 0.70949 |
| 46326 | P14079 | Q8NDX6 | 0.25535 |
| 46327 | P14079 | Q9Y5Y2 | 0.36504 |
| 46328 | P14079 | Q8TC56 | 1.8805  |
| 46329 | P14079 | Q9Y2V0 | 0.78852 |
| 46330 | P14079 | Q9Y2M5 | 0.8291  |
| 46331 | P14079 | Q15788 | 0.33503 |
| 46332 | P14079 | O43325 | 1.4554  |
| 46333 | P14079 | Q8TAD7 | 1.3222  |
| 46334 | P14079 | Q96EE3 | 0.63251 |
| 46335 | P14079 | Q86XU0 | 0.61968 |
| 46336 | P14079 | Q5TGS1 | 0.53112 |
| 46337 | P14079 | O95292 | 0.21831 |
| 46338 | P14079 | Q969H8 | 0.56769 |
| 46339 | P14079 | Q8N6U2 | 0.88733 |
| 46340 | P14079 | Q9UBB9 | 0.11939 |
| 46341 | P14079 | Q92759 | 0.78501 |
| 46342 | P14079 | Q2NL98 | 1.4633  |
| 46343 | P14079 | Q7Z412 | 0.49805 |
| 46344 | P14079 | Q9Y6Y0 | 0.87402 |
| 46345 | P14079 | Q9UFF9 | 0.46117 |
| 46346 | P14079 | Q9UJQ4 | 0.2776  |
| 46347 | P14079 | Q6PD74 | 1.0622  |
| 46348 | P14079 | Q8WWM7 | 0.84985 |
| 46349 | P14079 | P09012 | 0.40061 |
| 46350 | P14079 | Q8WVE6 | 1.2491  |
| 46351 | P14079 | Q96P11 | 0.27012 |
| 46352 | P14079 | O75909 | 1.1193  |
| 46353 | P14079 | Q93015 | 1.3566  |
| 46354 | P14079 | P86478 | 1.1715  |
| 46355 | P14079 | P60709 | 0.99952 |
| 46356 | P14079 | Q15185 | 0.49417 |
| 46357 | P14079 | Q5XKK7 | 0.61804 |
| 46358 | P14079 | Q8WXQ3 | 1.7722  |
| 46359 | P14079 | Q96LP6 | 0.55149 |
| 46360 | P14079 | Q96B33 | 0.80677 |

|       |        |        |          |
|-------|--------|--------|----------|
| 46361 | P14079 | P13639 | 0.32386  |
| 46362 | P14079 | Q8TB69 | 0.99996  |
| 46363 | P14079 | Q9Y4W2 | 1.4808   |
| 46364 | P14079 | A8MVJ9 | 1.3134   |
| 46365 | P14079 | O76013 | 0.89111  |
| 46366 | P14079 | Q969R8 | 0.21636  |
| 46367 | P14079 | Q13360 | 0.69598  |
| 46368 | P14079 | Q9H8V3 | 0.30676  |
| 46369 | P14079 | Q8N801 | 0.3216   |
| 46370 | P14079 | P49910 | 0.80948  |
| 46371 | P14079 | A9YTQ3 | 0.36908  |
| 46372 | P14079 | P16930 | 0.42436  |
| 46373 | P14079 | Q6UWT4 | 0.98371  |
| 46374 | P14079 | Q53GA4 | 0.26713  |
| 46375 | P14079 | Q8N841 | 0.16329  |
| 46376 | P14079 | Q5T1N1 | 1.7669   |
| 46377 | P14079 | P49356 | 0.22029  |
| 46378 | P14079 | P09669 | 0.92323  |
| 46379 | P14079 | Q8WWL7 | 1.0581   |
| 46380 | P14079 | Q15847 | 1.1715   |
| 46381 | P14079 | Q9HAW0 | 0.58565  |
| 46382 | P14079 | Q08J23 | 0.70295  |
| 46383 | P14079 | P26358 | 0.31541  |
| 46384 | P14079 | Q5VZB9 | 0.34305  |
| 46385 | P14079 | Q9UBV8 | 0.34285  |
| 46386 | P14079 | Q9BUL9 | 1.6376   |
| 46387 | P14079 | Q9UK99 | 0.23607  |
| 46388 | P14079 | Q8WTY6 | 0.49244  |
| 46389 | P14079 | P56192 | 0.96395  |
| 46390 | P14079 | Q96I45 | 1.0611   |
| 46391 | P14079 | Q9Y4X0 | 0.55607  |
| 46392 | P14079 | Q9Y6M1 | 0.35318  |
| 46393 | P14079 | Q8N4W9 | 0.77845  |
| 46394 | P14079 | Q96AQ6 | 1.5244   |
| 46395 | P14079 | Q9HCD5 | 1.0823   |
| 46396 | P14079 | Q9UNN4 | 0.49868  |
| 46397 | P14079 | Q01664 | 0.57174  |
| 46398 | P14079 | Q9HAP6 | 0.26763  |
| 46399 | P14079 | Q7Z3B3 | 0.62676  |
| 46400 | P14079 | Q13326 | 0.59723  |
| 46401 | P14079 | Q6KB66 | 0.68555  |
| 46402 | P14079 | Q86W11 | 0.53302  |
| 46403 | P14079 | Q495D7 | 0.7212   |
| 46404 | P14079 | Q8NEZ2 | 1.0224   |
| 46405 | P14079 | O43583 | 1.58     |
| 46406 | P14079 | Q8N8U2 | 0.57165  |
| 46407 | P14079 | Q96HG1 | 1.1715   |
| 46408 | P14079 | O76027 | 0.23093  |
| 46409 | P14079 | P50749 | 0.83155  |
| 46410 | P14079 | P37198 | 0.96678  |
| 46411 | P14079 | Q99417 | 1.4189   |
| 46412 | P14079 | Q96FI4 | 0.78243  |
| 46413 | P14079 | P51861 | 1.0928   |
| 46414 | P14079 | Q96B23 | 1.4247   |
| 46415 | P14079 | Q9HCK8 | 0.25544  |
| 46416 | P14079 | O14818 | 1.1252   |
| 46417 | P14079 | Q9UJA5 | 1.5428   |
| 46418 | P14079 | Q13794 | 0.78216  |
| 46419 | P14079 | Q9HBF5 | 1.4218   |
| 46420 | P14079 | Q96M95 | 0.20635  |
| 46421 | P14079 | Q5TF58 | 0.010267 |
| 46422 | P14079 | P22033 | 0.89387  |
| 46423 | P14079 | Q5VIR6 | 1.1035   |
| 46424 | P14079 | P46695 | 0.06196  |
| 46425 | P14079 | P59797 | 1.4417   |
| 46426 | P14079 | Q92837 | 1.4457   |
| 46427 | P14079 | Q70Z53 | 1.4174   |
| 46428 | P14079 | Q8WU20 | 0.49101  |
| 46429 | P14079 | Q9P0J0 | 0.54655  |
| 46430 | P14079 | Q5T754 | 1.1715   |
| 46431 | P14079 | Q86WC6 | 0.44638  |
| 46432 | P14079 | O00570 | 0.76011  |
| 46433 | P14079 | Q8IVP5 | 0.43385  |
| 46434 | P14079 | O00221 | 0.25504  |
| 46435 | P14079 | P26447 | 0.40345  |
| 46436 | P14079 | Q9NSD9 | 1.357    |



|       |        |        |          |
|-------|--------|--------|----------|
| 46437 | P14079 | P15822 | 0.97655  |
| 46438 | P14079 | Q71UM5 | 0.84666  |
| 46439 | P14079 | Q9Y312 | 0.73746  |
| 46440 | P14079 | P51786 | 0.58477  |
| 46441 | P14079 | Q5GH77 | 1.2967   |
| 46442 | P14079 | Q96MP5 | 0.96459  |
| 46443 | P14079 | O14653 | 0.48837  |
| 46444 | P14079 | Q14134 | 0.63721  |
| 46445 | P14079 | Q14684 | 0.78842  |
| 46446 | P14079 | A8MXZ3 | 1.1715   |
| 46447 | P14079 | Q6ZMB5 | 0.80647  |
| 46448 | P14079 | O76041 | 0.29068  |
| 46449 | P14079 | Q5JTJ3 | 0.60441  |
| 46450 | P14079 | Q92889 | 0.35617  |
| 46451 | P14079 | Q9BQA9 | 0.78103  |
| 46452 | P14079 | Q9Y512 | 0.39629  |
| 46453 | P14079 | Q5JVG2 | 0.43827  |
| 46454 | P14079 | Q9BX69 | 0.28419  |
| 46455 | P14079 | Q9H0R8 | 0.49318  |
| 46456 | P14079 | Q3ZCV2 | 1.3222   |
| 46457 | P14079 | Q71RC2 | 0.7753   |
| 46458 | P14079 | Q8IX07 | 0.33682  |
| 46459 | P14079 | Q9BQJ4 | 1.416    |
| 46460 | P14079 | C9JDV5 | 0.34773  |
| 46461 | P14079 | Q17RM4 | 1.1876   |
| 46462 | P14079 | Q6NSX1 | 1.1393   |
| 46463 | P14079 | Q96PE7 | 0.078639 |
| 46464 | P14079 | Q12767 | 1.2485   |
| 46465 | P14079 | Q14153 | 1.4106   |
| 46466 | P14079 | P31249 | 0.3817   |
| 46467 | P14079 | Q9Y3V2 | 0.986    |
| 46468 | P14079 | Q9BPU9 | 0.57826  |
| 46469 | P14079 | Q8WZ26 | 0.91231  |
| 46470 | P14079 | Q96HV5 | 1.2024   |
| 46471 | P14079 | Q9UJW8 | 0.53909  |
| 46472 | P14079 | O76015 | 0.88619  |
| 46473 | P14079 | Q14689 | 0.21852  |
| 46474 | P14079 | Q7RTT5 | 0.5033   |
| 46475 | P14079 | Q7RTT6 | 1.0669   |
| 46476 | P14079 | P78386 | 1.0109   |
| 46477 | P14079 | Q15366 | 1.0026   |
| 46478 | P14079 | O95983 | 1.3944   |
| 46479 | P14079 | Q8N1D0 | 0.41893  |
| 46480 | P14079 | Q9NZY2 | 1.1715   |
| 46481 | P14079 | A6NEN9 | 0.28541  |
| 46482 | P14079 | Q68E01 | 1.1752   |
| 46483 | P14079 | A6NKF1 | 1.187    |
| 46484 | P14079 | Q9Y5U8 | 1.0559   |
| 46485 | P14079 | Q8N8I6 | 1.1715   |
| 46486 | P14079 | A2BFH1 | 0.18124  |
| 46487 | P14079 | Q9P258 | 0.74223  |
| 46488 | P14079 | Q96B96 | 1.1905   |
| 46489 | P14079 | Q9Y248 | 0.993    |
| 46490 | P14079 | Q9HA92 | 0.75283  |
| 46491 | P14079 | Q5PR19 | 0.57015  |
| 46492 | P14079 | Q2M3X9 | 0.58948  |
| 46493 | P14079 | Q8TBZ5 | 0.60617  |
| 46494 | P14079 | Q9Y693 | 1.0892   |
| 46495 | P14079 | Q15834 | 1.6027   |
| 46496 | P14079 | P58512 | 1.4076   |
| 46497 | P14079 | Q9BYC8 | 1.358    |
| 46498 | P14079 | P55789 | 0.60627  |
| 46499 | P14079 | A4D1B5 | 0.41503  |
| 46500 | P14079 | Q86UY8 | 0.18886  |
| 46501 | P14079 | O43903 | 0.21429  |
| 46502 | P14079 | A6NK06 | 0.7927   |
| 46503 | P14079 | Q14533 | 1.2624   |
| 46504 | P14079 | Q17RN3 | 1.0245   |
| 46505 | P14079 | Q6ZW34 | 1.1715   |
| 46506 | P14079 | Q9NS26 | 1.6039   |
| 46507 | P14079 | Q9NZI5 | 0.38913  |
| 46508 | P14079 | Q96MF6 | 1.1332   |
| 46509 | P14079 | Q96Q05 | 0.71092  |
| 46510 | P14079 | Q8WUY8 | 1.3524   |
| 46511 | P14079 | P09497 | 0.60453  |
| 46512 | P14079 | Q14247 | 0.39231  |

|       |        |        |         |
|-------|--------|--------|---------|
| 46513 | P14079 | Q8IUB9 | 1.1715  |
| 46514 | P14079 | Q9NS25 | 1.6647  |
| 46515 | P14079 | Q6P1S2 | 0.73522 |
| 46516 | P14079 | Q9BTL3 | 1.4185  |
| 46517 | P14079 | Q2TAL8 | 1.5279  |
| 46518 | P14079 | P56270 | 0.76103 |
| 46519 | P14079 | Q13409 | 0.90128 |
| 46520 | P14079 | O60936 | 1.4994  |
| 46521 | P14079 | P04141 | 0.3192  |
| 46522 | P14079 | Q5TB30 | 0.19381 |
| 46523 | P14079 | O00110 | 0.25535 |
| 46524 | P14079 | O14836 | 0.79686 |
| 46525 | P14079 | B3EWG6 | 1.3222  |
| 46526 | P14079 | P27695 | 0.40389 |
| 46527 | P14079 | Q53HI1 | 1.2269  |
| 46528 | P14079 | Q8WUB2 | 0.92288 |
| 46529 | P14079 | Q5JVF3 | 0.4711  |
| 46530 | P14079 | Q12983 | 0.31011 |
| 46531 | P14079 | Q16082 | 0.97903 |
| 46532 | P14079 | Q8NA42 | 0.62543 |
| 46533 | P14079 | Q8NHQ8 | 1.3577  |
| 46534 | P14079 | Q9P2X7 | 1.1715  |
| 46535 | P14079 | Q9BYQ7 | 1.4903  |
| 46536 | P14079 | Q13561 | 1.0563  |
| 46537 | P14079 | P51811 | 0.48458 |
| 46538 | P14079 | Q96BY7 | 0.42558 |
| 46539 | P14079 | Q9NX18 | 1.2662  |
| 46540 | P14079 | Q9Y471 | 0.74886 |
| 46541 | P14079 | Q8IX21 | 0.67217 |
| 46542 | P14079 | Q0IIN9 | 0.96477 |
| 46543 | P14079 | P49721 | 0.9257  |
| 46544 | P14079 | Q92905 | 0.61873 |
| 46545 | P14079 | Q9UJY1 | 0.51272 |
| 46546 | P14079 | P62304 | 0.79088 |
| 46547 | P14079 | Q15428 | 1.2202  |
| 46548 | P14079 | Q8N268 | 0.44185 |
| 46549 | P14079 | Q8TCU4 | 0.48652 |
| 46550 | P14079 | Q9P2K3 | 1.3016  |
| 46551 | P14079 | Q8N8U3 | 0.44963 |
| 46552 | P14079 | Q2M238 | 0.39555 |
| 46553 | P14079 | Q6ZMW2 | 0.59361 |
| 46554 | P14079 | O43264 | 0.80601 |
| 46555 | P14079 | Q9BRJ6 | 1.3436  |
| 46556 | P14079 | O43612 | 0.57385 |
| 46557 | P14079 | A2RRP1 | 0.5874  |
| 46558 | P14079 | Q9UHL9 | 1.0411  |
| 46559 | P14079 | Q5VSR9 | 1.5871  |
| 46560 | P14079 | P13232 | 0.23998 |
| 46561 | P14079 | O75335 | 0.38952 |
| 46562 | P14079 | Q7Z3V5 | 0.76643 |
| 46563 | P14079 | O96002 | 1.1715  |
| 46564 | P14079 | P51116 | 0.80869 |
| 46565 | P14079 | Q13351 | 0.24015 |
| 46566 | P14079 | Q99909 | 0.63993 |
| 46567 | P14079 | P10124 | 0.84379 |
| 46568 | P14079 | P78424 | 0.24971 |
| 46569 | P14079 | Q96RK1 | 0.66181 |
| 46570 | P14079 | Q9UBD0 | 1.0024  |
| 46571 | P14079 | Q9H0K6 | 0.59132 |
| 46572 | P14079 | Q9P0S9 | 1.1991  |
| 46573 | P14079 | Q8IWJ2 | 0.88802 |
| 46574 | P14079 | A2RUB6 | 0.5633  |
| 46575 | P14079 | Q9NX01 | 0.22059 |
| 46576 | P14079 | Q5C9Z4 | 0.72507 |
| 46577 | P14079 | Q156A1 | 1.1715  |
| 46578 | P14079 | Q96T92 | 0.32579 |
| 46579 | P14079 | Q9BU02 | 1.4752  |
| 46580 | P14079 | Q75NE6 | 1.7896  |
| 46581 | P14079 | Q8N668 | 0.8728  |
| 46582 | P14079 | Q92618 | 0.45445 |
| 46583 | P14079 | P81172 | 0.90887 |
| 46584 | P14079 | Q96H79 | 1.1469  |
| 46585 | P14079 | Q5TG53 | 1.1715  |
| 46586 | P14079 | Q8NC74 | 0.66448 |
| 46587 | P14079 | Q96LX7 | 0.24257 |
| 46588 | P14079 | Q9H633 | 0.71899 |

|       |        |        |         |
|-------|--------|--------|---------|
| 46589 | P14079 | Q6P499 | 1.288   |
| 46590 | P14079 | Q9P2L0 | 0.24371 |
| 46591 | P14079 | Q4G0N7 | 1.1772  |
| 46592 | P14079 | Q96FG2 | 0.77824 |
| 46593 | P14079 | O94992 | 1.9791  |
| 46594 | P14079 | Q9NY74 | 1.7829  |
| 46595 | P14079 | Q9NV70 | 0.77687 |
| 46596 | P14079 | Q15042 | 0.82616 |
| 46597 | P14079 | Q5JRC9 | 1.563   |
| 46598 | P14079 | Q9BQ52 | 0.59042 |
| 46599 | P14079 | O95171 | 0.24918 |
| 46600 | P14079 | Q14194 | 0.51502 |
| 46601 | P14079 | Q49MG5 | 1.5728  |
| 46602 | P14079 | Q6ZVW7 | 0.40597 |
| 46603 | P14079 | Q9NVK5 | 0.44274 |
| 46604 | P14079 | Q7Z309 | 0.62375 |
| 46605 | P14079 | O15235 | 1.1209  |
| 46606 | P14079 | Q9BR76 | 0.67612 |
| 46607 | P14079 | Q96KN1 | 0.54018 |
| 46608 | P14079 | Q9BQD3 | 0.62279 |
| 46609 | P14079 | Q9UMX3 | 0.71216 |
| 46610 | P14079 | Q8NEP9 | 0.96033 |
| 46611 | P14079 | Q96B70 | 0.631   |
| 46612 | P14079 | Q17RP2 | 0.07601 |
| 46613 | P14079 | Q86X51 | 0.84025 |
| 46614 | P14079 | Q6ZRG5 | 0.13328 |
| 46615 | P14079 | Q68D10 | 1.3222  |
| 46616 | P14079 | Q96N35 | 1.1715  |
| 46617 | P14079 | Q6UXR8 | 1.1715  |
| 46618 | P14079 | Q8N635 | 0.21069 |
| 46619 | P14079 | Q96LI9 | 1.0458  |
| 46620 | P14079 | P60059 | 0.62098 |
| 46621 | P14079 | Q49A33 | 0.96042 |
| 46622 | P14079 | Q8TAL5 | 1.1147  |
| 46623 | P14079 | Q9NX58 | 0.97698 |
| 46624 | P14079 | Q8IWA6 | 0.78655 |
| 46625 | P14079 | Q9UKL0 | 1.3743  |
| 46626 | P14079 | Q9Y2Y1 | 0.2521  |
| 46627 | P14079 | Q9BYV9 | 0.34085 |
| 46628 | P14079 | B2RUZ4 | 1.9102  |
| 46629 | P14079 | P63010 | 0.58823 |
| 46630 | P14079 | A7MCY6 | 1.1699  |
| 46631 | P14079 | P32929 | 0.32406 |
| 46632 | P14079 | Q86VD1 | 0.84372 |
| 46633 | P14079 | Q9Y284 | 1.5652  |
| 46634 | P14079 | Q7Z7J5 | 1.6035  |
| 46635 | P14079 | P62906 | 0.89675 |
| 46636 | P14079 | P68543 | 0.67857 |
| 46637 | P14079 | Q9H8U3 | 0.44416 |
| 46638 | P14079 | Q8N8K9 | 0.75198 |
| 46639 | P14079 | Q9UI32 | 0.32823 |
| 46640 | P14079 | Q96MA1 | 0.24718 |
| 46641 | P14079 | Q5VZ52 | 0.19009 |
| 46642 | P14079 | Q8N1I8 | 1.1715  |
| 46643 | P14079 | Q5BIV9 | 1.2495  |
| 46644 | P14079 | P48788 | 0.75294 |
| 46645 | P14079 | Q99766 | 1.136   |
| 46646 | P14079 | Q9Y2M0 | 1.0293  |
| 46647 | P14079 | P09917 | 0.27611 |
| 46648 | P14079 | Q9H091 | 0.88953 |
| 46649 | P14079 | A8MVA2 | 1.3698  |
| 46650 | P14079 | Q969W0 | 1.1145  |
| 46651 | P14079 | Q15035 | 0.44496 |
| 46652 | P14079 | Q8NBK3 | 0.53612 |
| 46653 | P14079 | Q96Q06 | 1.3686  |
| 46654 | P14079 | Q1ZZU3 | 0.85797 |
| 46655 | P14079 | Q9HAU5 | 0.86467 |
| 46656 | P14079 | Q8NDB6 | 0.73902 |
| 46657 | P14079 | Q9Y2L1 | 0.35797 |
| 46658 | P14079 | Q9H3Y8 | 0.6771  |
| 46659 | P14079 | Q9H0I2 | 0.6489  |
| 46660 | P14079 | Q9NWR8 | 1.1808  |
| 46661 | P14079 | A1A5D9 | 1.3485  |
| 46662 | P14079 | Q6ZUC2 | 1.1308  |
| 46663 | P14079 | Q2VY69 | 0.6867  |
| 46664 | P14079 | Q5T7P3 | 1.1715  |

|       |        |        |         |
|-------|--------|--------|---------|
| 46665 | P14079 | Q96B54 | 1.6662  |
| 46666 | P14079 | O76014 | 0.88619 |
| 46667 | P14079 | Q9Y281 | 0.87566 |
| 46668 | P14079 | Q6UWQ7 | 1.179   |
| 46669 | P14079 | Q6IPW1 | 0.84062 |
| 46670 | P14079 | Q96AJ1 | 1.8924  |
| 46671 | P14079 | A8MT69 | 0.47369 |
| 46672 | P14079 | P22830 | 0.24916 |
| 46673 | P14079 | Q96PT3 | 0.2245  |
| 46674 | P14079 | Q14586 | 0.54706 |
| 46675 | P14079 | Q9NXV2 | 1.5238  |
| 46676 | P14079 | Q9Y597 | 0.18591 |
| 46677 | P14079 | O15397 | 1.0661  |
| 46678 | P14079 | Q96RL1 | 0.69462 |
| 46679 | P14079 | Q9Y603 | 1.0917  |
| 46680 | P14079 | Q9NWX6 | 1.0228  |
| 46681 | P14079 | P60329 | 0.4643  |
| 46682 | P14079 | Q8N140 | 1.1533  |
| 46683 | P14079 | Q9H649 | 0.25428 |
| 46684 | P14079 | Q96NJ3 | 0.55945 |
| 46685 | P14079 | Q8NA77 | 1.1016  |
| 46686 | P14079 | Q9HAI6 | 1.2004  |
| 46687 | P14079 | Q9NUL5 | 0.73707 |
| 46688 | P14079 | Q8NAM6 | 0.08829 |
| 46689 | P14079 | Q9NS56 | 0.26052 |
| 46690 | P14079 | O60264 | 0.24762 |
| 46691 | P14079 | Q9BQC3 | 1.5583  |
| 46692 | P14079 | Q96A26 | 0.59041 |
| 46693 | P14079 | Q8TDH9 | 0.37268 |
| 46694 | P14079 | Q9HC78 | 0.38798 |
| 46695 | P14079 | Q5T7N7 | 1.1715  |
| 46696 | P14079 | Q9NPJ6 | 1.1048  |
| 46697 | P14079 | Q8IWA0 | 0.27853 |
| 46698 | P14079 | Q9ULX9 | 0.45253 |
| 46699 | P14079 | Q15327 | 0.52229 |
| 46700 | P14079 | Q8TF30 | 0.17554 |
| 46701 | P14079 | Q7Z5B4 | 1.1257  |
| 46702 | P14079 | O43365 | 0.30277 |
| 46703 | P14079 | Q92530 | 1.1169  |
| 46704 | P14079 | P49790 | 1.2323  |
| 46705 | P14079 | P0DJ07 | 1.2916  |
| 46706 | P14079 | Q8NDW8 | 0.17571 |
| 46707 | P14079 | O15040 | 0.56221 |
| 46708 | P14079 | O00287 | 1.4402  |
| 46709 | P14079 | Q9BZL3 | 1.2438  |
| 46710 | P14079 | P62316 | 0.81563 |
| 46711 | P14079 | Q9NSC5 | 0.6154  |
| 46712 | P14079 | Q6ZN28 | 1.2595  |
| 46713 | P14079 | P47914 | 1.6642  |
| 46714 | P14079 | Q9H6X4 | 1.2485  |
| 46715 | P14079 | Q14135 | 0.46001 |
| 46716 | P14079 | Q96DX5 | 0.96869 |
| 46717 | P14079 | P50539 | 0.3262  |
| 46718 | P14079 | P62280 | 1.2308  |
| 46719 | P14079 | Q96GK7 | 0.85454 |
| 46720 | P14079 | Q5XKE5 | 0.97807 |
| 46721 | P14079 | Q66K66 | 1.1905  |
| 46722 | P14079 | P46926 | 0.19637 |
| 46723 | P14079 | Q93075 | 1.1     |
| 46724 | P14079 | Q16378 | 1.1715  |
| 46725 | P14079 | Q8N7W2 | 1.1043  |
| 46726 | P14079 | P53677 | 0.51642 |
| 46727 | P14079 | Q9NPL8 | 1.3081  |
| 46728 | P14079 | Q13227 | 1.7877  |
| 46729 | P14079 | Q8IVC4 | 0.62784 |
| 46730 | P14079 | Q9UI36 | 0.21828 |
| 46731 | P14079 | Q6UXP8 | 1.1715  |
| 46732 | P14079 | P11277 | 0.47428 |
| 46733 | P14079 | Q8IU54 | 0.6502  |
| 46734 | P14079 | Q86UE4 | 0.99589 |
| 46735 | P14079 | Q92982 | 0.92601 |
| 46736 | P14079 | C9JG80 | 0.0132  |
| 46737 | P14079 | Q9BRD0 | 1.1869  |
| 46738 | P14079 | Q9C0F3 | 0.51295 |
| 46739 | P14079 | Q8N7M0 | 0.68191 |
| 46740 | P14079 | Q969Z0 | 0.72808 |

|       |        |        |          |
|-------|--------|--------|----------|
| 46741 | P14079 | Q6P5R6 | 0.49889  |
| 46742 | P14079 | Q8WTV1 | 1.5608   |
| 46743 | P14079 | Q5SW79 | 1.2527   |
| 46744 | P14079 | Q9H354 | 1.1363   |
| 46745 | P14079 | Q86UU0 | 1.2687   |
| 46746 | P14079 | A8MVS1 | 0.97958  |
| 46747 | P14079 | Q5RL73 | 0.90297  |
| 46748 | P14079 | P84090 | 0.74249  |
| 46749 | P14079 | Q9UMQ3 | 0.78855  |
| 46750 | P14079 | Q969S9 | 0.95321  |
| 46751 | P14079 | Q5TA77 | 1.1715   |
| 46752 | P14079 | O95744 | 0.17708  |
| 46753 | P14079 | Q2TBE0 | 1.0173   |
| 46754 | P14079 | Q5JSQ8 | 0.52068  |
| 46755 | P14079 | Q8N1X5 | 1.1715   |
| 46756 | P14079 | Q9BQQ3 | 0.44857  |
| 46757 | P14079 | A6NFQ2 | 1.3323   |
| 46758 | P14079 | P62310 | 0.59113  |
| 46759 | P14079 | O95336 | 0.17151  |
| 46760 | P14079 | Q9UI30 | 0.85602  |
| 46761 | P14079 | P35638 | 0.68384  |
| 46762 | P14079 | Q9Y6X0 | 0.092831 |
| 46763 | P14079 | Q96J02 | 0.22763  |
| 46764 | P14079 | Q14154 | 0.76014  |
| 46765 | P14079 | Q9HA38 | 0.31108  |
| 46766 | P14079 | O95551 | 0.67931  |
| 46767 | P14079 | Q7Z7B8 | 0.7885   |
| 46768 | P14079 | Q9NYP9 | 0.79074  |
| 46769 | P14079 | P21127 | 0.019892 |
| 46770 | P14079 | Q07955 | 0.59424  |
| 46771 | P14079 | O15083 | 0.83     |
| 46772 | P14079 | O95295 | 0.49368  |
| 46773 | P14079 | Q96ES7 | 0.48021  |
| 46774 | P14079 | Q92817 | 0.2619   |
| 46775 | P14079 | Q8IW40 | 0.62875  |
| 46776 | P14079 | Q8WWY6 | 0.46001  |
| 46777 | P14079 | Q9Y324 | 1.4302   |
| 46778 | P14079 | E5RJ46 | 1.1715   |
| 46779 | P14079 | Q9NX77 | 0.67632  |
| 46780 | P14079 | Q9NX38 | 0.54613  |
| 46781 | P14079 | Q8IXQ9 | 0.59026  |
| 46782 | P14079 | Q9H2F5 | 0.64266  |
| 46783 | P14079 | O43296 | 0.67419  |
| 46784 | P14079 | Q9NQ03 | 0.28348  |
| 46785 | P14079 | Q6H8Q1 | 0.44301  |
| 46786 | P14079 | P57764 | 0.20537  |
| 46787 | P14079 | D6RF30 | 0.32342  |
| 46788 | P14079 | Q8N0X7 | 0.33756  |
| 46789 | P14079 | Q9Y4F5 | 0.25965  |
| 46790 | P14079 | Q9C0F0 | 0.7151   |
| 46791 | P14079 | Q9UDV7 | 0.5221   |
| 46792 | P14079 | P49902 | 0.47454  |
| 46793 | P14079 | Q5H9B9 | 0.76129  |
| 46794 | P14079 | O97980 | 1.0613   |
| 46795 | P14079 | Q8WZ69 | 0.69812  |
| 46796 | P14079 | O14593 | 0.62471  |
| 46797 | P14079 | Q8IZN7 | 1.2598   |
| 46798 | P14079 | Q4G0G2 | 1.2808   |
| 46799 | P14079 | Q9NW68 | 0.11129  |
| 46800 | P14079 | Q8N0Z3 | 0.83672  |
| 46801 | P14079 | P23297 | 0.65573  |
| 46802 | P14079 | P49642 | 0.70213  |
| 46803 | P14079 | Q9UFN0 | 0.85079  |
| 46804 | P14079 | Q9NP77 | 0.25698  |
| 46805 | P14079 | P61574 | 1.355    |
| 46806 | P14079 | Q16621 | 0.38414  |
| 46807 | P14079 | Q9GZP8 | 1.1715   |
| 46808 | P14079 | Q9NV79 | 0.23644  |
| 46809 | P14079 | Q5T0D9 | 0.96378  |
| 46810 | P14079 | A9QM74 | 0.74447  |
| 46811 | P14079 | Q92754 | 0.47927  |
| 46812 | P14079 | P61962 | 0.51928  |
| 46813 | P14079 | Q9BZQ2 | 0.86063  |
| 46814 | P14079 | Q03701 | 0.4328   |
| 46815 | P14079 | A2IDD5 | 0.98748  |
| 46816 | P14079 | P06748 | 0.61252  |

|       |        |        |          |
|-------|--------|--------|----------|
| 46817 | P14079 | P01106 | 0.4548   |
| 46818 | P14079 | Q9BSJ2 | 1.4884   |
| 46819 | P14079 | Q6ZP65 | 0.29059  |
| 46820 | P14079 | Q5TZK3 | 0.41231  |
| 46821 | P14079 | Q4KMQ1 | 1.3945   |
| 46822 | P14079 | Q8IV32 | 1.3103   |
| 46823 | P14079 | Q9H5Y0 | 1.1977   |
| 46824 | P14079 | P62258 | 0.99134  |
| 46825 | P14079 | Q13316 | 1.0114   |
| 46826 | P14079 | Q8NDH2 | 0.46743  |
| 46827 | P14079 | Q9UGC7 | 1.0983   |
| 46828 | P14079 | Q9H6P5 | 0.83297  |
| 46829 | P14079 | Q8N699 | 1.4834   |
| 46830 | P14079 | Q96LR2 | 1.6693   |
| 46831 | P14079 | O14662 | 0.63466  |
| 46832 | P14079 | Q9UBC9 | 0.70807  |
| 46833 | P14079 | Q8TD31 | 1.5287   |
| 46834 | P14079 | Q9ULU4 | 0.77514  |
| 46835 | P14079 | O14569 | 1.0846   |
| 46836 | P14079 | O43303 | 1.2546   |
| 46837 | P14079 | Q8IX19 | 0.91911  |
| 46838 | P14079 | P12883 | 0.029907 |
| 46839 | P14079 | Q5HYK7 | 1.2276   |
| 46840 | P14079 | Q5VTE6 | 0.25093  |
| 46841 | P14079 | Q8WWR8 | 0.37398  |
| 46842 | P14079 | Q9H115 | 0.1505   |
| 46843 | P14079 | Q9NRT5 | 0.98554  |
| 46844 | P14079 | Q6ZTC4 | 1.1715   |
| 46845 | P14079 | Q8NEM0 | 0.25939  |
| 46846 | P14079 | Q9H0G5 | 0.84899  |
| 46847 | P14079 | Q15973 | 0.56012  |
| 46848 | P14079 | Q9Y262 | 1.007    |
| 46849 | P14079 | P50453 | 0.58006  |
| 46850 | P14079 | Q13596 | 0.53389  |
| 46851 | P14079 | Q9Y3A0 | 0.8541   |
| 46852 | P14079 | Q86U37 | 0.5118   |
| 46853 | P14079 | Q6SJ96 | 0.8553   |
| 46854 | P14079 | P61803 | 1.013    |
| 46855 | P14079 | Q9BZS9 | 1.1715   |
| 46856 | P14079 | Q9H8Y5 | 0.28018  |
| 46857 | P14079 | Q9H6Q3 | 0.27607  |
| 46858 | P14079 | P02794 | 0.68691  |
| 46859 | P14079 | Q9HBK9 | 0.15658  |
| 46860 | P14079 | Q96F07 | 0.68049  |
| 46861 | P14079 | Q9BTC8 | 0.6807   |
| 46862 | P14079 | Q9C0F1 | 0.60994  |
| 46863 | P14079 | Q6PI47 | 0.18591  |
| 46864 | P14079 | O00472 | 0.55101  |
| 46865 | P14079 | O76003 | 0.27567  |
| 46866 | P14079 | Q9NUJ3 | 0.94507  |
| 46867 | P14079 | Q7RTS9 | 1.6545   |
| 46868 | P14079 | Q86X53 | 0.89857  |
| 46869 | P14079 | Q9HDB8 | 0.78217  |
| 46870 | P14079 | Q9NX04 | 1.0719   |
| 46871 | P14079 | P10620 | 0.37055  |
| 46872 | P14079 | Q6PCE3 | 0.88769  |
| 46873 | P14079 | Q9NZ20 | 0.62318  |
| 46874 | P14079 | O00505 | 1.3124   |
| 46875 | P14079 | Q9C099 | 1.1827   |
| 46876 | P14079 | Q9BXD5 | 1.0285   |
| 46877 | P14079 | Q86YI8 | 0.82436  |
| 46878 | P14079 | O43502 | 0.25181  |
| 46879 | P14079 | Q9H9R9 | 0.27259  |
| 46880 | P14079 | Q8N3R9 | 0.27052  |
| 46881 | P14079 | O75444 | 0.36893  |
| 46882 | P14079 | Q69YG0 | 0.89617  |
| 46883 | P14079 | Q6UX46 | 1.2766   |
| 46884 | P14079 | Q8WXC6 | 0.89072  |
| 46885 | P14079 | Q6DKK2 | 1.2422   |
| 46886 | P14079 | Q15181 | 0.22589  |
| 46887 | P14079 | Q5R3I4 | 0.76669  |
| 46888 | P14079 | Q9BYR4 | 1.3698   |
| 46889 | P14079 | Q13501 | 0.55826  |
| 46890 | P14079 | Q68D91 | 0.20182  |
| 46891 | P14079 | Q5VZE5 | 0.60146  |
| 46892 | P14079 | Q8N300 | 0.81519  |

|       |        |        |          |
|-------|--------|--------|----------|
| 46893 | P14079 | Q9NSU2 | 0.29877  |
| 46894 | P14079 | O43402 | 1.4169   |
| 46895 | P14079 | Q969W3 | 1.3025   |
| 46896 | P14079 | Q5BKX5 | 1.3222   |
| 46897 | P14079 | Q14181 | 0.90529  |
| 46898 | P14079 | Q6MZT1 | 1.6755   |
| 46899 | P14079 | Q9UIE0 | 0.61583  |
| 46900 | P14079 | Q9H0W7 | 0.095786 |
| 46901 | P14079 | Q6P3V2 | 0.43181  |
| 46902 | P14079 | Q96LS8 | 1.1168   |
| 46903 | P14079 | P54277 | 0.20422  |
| 46904 | P14079 | Q6P1L6 | 0.53333  |
| 46905 | P14079 | Q7Z3G6 | 0.23989  |
| 46906 | P14079 | Q969L4 | 0.92302  |
| 46907 | P14079 | Q9H6Z4 | 1.3066   |
| 46908 | P14079 | Q13137 | 1.3248   |
| 46909 | P14079 | Q9UH92 | 0.54754  |
| 46910 | P14079 | B7ZAQ6 | 1.0766   |
| 46911 | P14079 | Q14CN4 | 0.90092  |
| 46912 | P14079 | O43929 | 0.15225  |
| 46913 | P14079 | Q969H4 | 0.35284  |
| 46914 | P14079 | Q86VK4 | 0.1949   |
| 46915 | P14079 | Q8N7Q2 | 1.1715   |
| 46916 | P14079 | Q9NTK5 | 1.2962   |
| 46917 | P14079 | Q6UXR6 | 1.1715   |
| 46918 | P14079 | P62899 | 1.1272   |
| 46919 | P14079 | P56645 | 0.25887  |
| 46920 | P14079 | Q8NDW4 | 0.58579  |
| 46921 | P14079 | Q0VGE8 | 0.55107  |
| 46922 | P14079 | F2Z333 | 1.2485   |
| 46923 | P14079 | Q6NT89 | 1.6052   |
| 46924 | P14079 | A6NNV3 | 1.092    |
| 46925 | P14079 | Q12765 | 1.2277   |
| 46926 | P14079 | Q96QR1 | 1.3458   |
| 46927 | P14079 | H3BNL8 | 1.4707   |
| 46928 | P14079 | Q9H3R5 | 0.6487   |
| 46929 | P14079 | Q8N4Q1 | 0.43709  |
| 46930 | P14079 | P52657 | 1.2857   |
| 46931 | P14079 | P05783 | 1.5771   |
| 46932 | P14079 | Q9Y2Z4 | 1.0041   |
| 46933 | P14079 | Q8N715 | 1.0359   |
| 46934 | P14079 | Q6IN84 | 0.60587  |
| 46935 | P14079 | Q9H490 | 0.93748  |
| 46936 | P14079 | Q7L775 | 1.1992   |
| 46937 | P14079 | Q8NF99 | 0.54734  |
| 46938 | P14079 | P56693 | 0.59086  |
| 46939 | P14079 | Q9P1J3 | 1.1715   |
| 46940 | P14079 | A6NMD2 | 0.38459  |
| 46941 | P14079 | P58004 | 1.1371   |
| 46942 | P14079 | Q16236 | 0.61135  |
| 46943 | P14079 | Q9P2M7 | 0.72392  |
| 46944 | P14079 | Q94973 | 0.54956  |
| 46945 | P14079 | P98169 | 0.14748  |
| 46946 | P14079 | Q16533 | 0.99906  |
| 46947 | P14079 | Q5T2W1 | 0.62129  |
| 46948 | P14079 | Q9Y692 | 0.54917  |
| 46949 | P14079 | P17025 | 0.5751   |
| 46950 | P14079 | Q5SXM8 | 0.71366  |
| 46951 | P14079 | Q9BWN1 | 1.3222   |
| 46952 | P14079 | Q13398 | 1.0082   |
| 46953 | P14079 | A6NGG3 | 1.1715   |
| 46954 | P14079 | Q96LD1 | 0.71011  |
| 46955 | P14079 | Q96P16 | 0.30841  |
| 46956 | P14079 | P61163 | 0.51854  |
| 46957 | P14079 | Q8TDB4 | 0.6111   |
| 46958 | P14079 | O94952 | 1.2769   |
| 46959 | P14079 | Q96KJ9 | 0.63232  |
| 46960 | P14079 | Q8WVH0 | 0.45689  |
| 46961 | P14079 | Q00444 | 0.20401  |
| 46962 | P14079 | Q8IYJ0 | 1.0077   |
| 46963 | P14079 | A6NEQ2 | 1.1715   |
| 46964 | P14079 | Q9GZM8 | 0.16153  |
| 46965 | P14079 | Q8TAE8 | 1.2109   |
| 46966 | P14079 | Q9Y3R4 | 0.56955  |
| 46967 | P14079 | Q06190 | 0.35736  |
| 46968 | P14079 | O43541 | 1.0002   |

|       |        |        |          |
|-------|--------|--------|----------|
| 46969 | P14079 | Q8N1B4 | 0.96022  |
| 46970 | P14079 | Q15365 | 1.0645   |
| 46971 | P14079 | Q00577 | 0.25729  |
| 46972 | P14079 | Q9NVL1 | 0.096751 |
| 46973 | P14079 | P59022 | 1.2299   |
| 46974 | P14079 | P0CL80 | 0.99818  |
| 46975 | P14079 | O95997 | 0.80691  |
| 46976 | P14079 | Q9Y3D2 | 0.6629   |
| 46977 | P14079 | Q2T9F4 | 0.49817  |
| 46978 | P14079 | Q9P0U4 | 0.40074  |
| 46979 | P14079 | O14862 | 0.60936  |
| 46980 | P14079 | Q04726 | 1.0096   |
| 46981 | P14079 | Q96RE7 | 0.91919  |
| 46982 | P14079 | Q9H6L5 | 1.204    |
| 46983 | P14079 | Q5JUQ0 | 0.82273  |
| 46984 | P14079 | Q6URH7 | 0.40586  |
| 46985 | P14079 | Q9NP92 | 1.4515   |
| 46986 | P14079 | A6NH52 | 1.4268   |
| 46987 | P14079 | Q8WUQ7 | 0.35942  |
| 46988 | P14079 | Q6ZRU5 | 1.1715   |
| 46989 | P14079 | Q9HAN9 | 0.57993  |
| 46990 | P14079 | Q9Y606 | 1.5284   |
| 46991 | P14079 | Q9UJX6 | 0.68984  |
| 46992 | P14079 | Q12972 | 0.60179  |
| 46993 | P14079 | Q494X3 | 1.0057   |
| 46994 | P14079 | Q9NP87 | 0.31543  |
| 46995 | P14079 | Q9Y4X4 | 0.26907  |
| 46996 | P14079 | P0C853 | 1.1715   |
| 46997 | P14079 | Q9BYN8 | 1.5042   |
| 46998 | P14079 | Q5SRD0 | 0.78389  |
| 46999 | P14079 | Q96GE9 | 1.1025   |
| 47000 | P14079 | Q12800 | 0.23725  |
| 47001 | P14079 | Q86WB0 | 1.7921   |
| 47002 | P14079 | Q8TDP1 | 1.2571   |
| 47003 | P14079 | Q14139 | 0.43973  |
| 47004 | P14079 | Q86WZ0 | 1.2281   |
| 47005 | P14079 | Q8N2G4 | 0.55467  |
| 47006 | P14079 | Q8N2H4 | 1.6954   |
| 47007 | P14079 | Q7RTU0 | 0.42542  |
| 47008 | P14079 | Q96FB5 | 1.2828   |
| 47009 | P14079 | Q8NCU1 | 1.1333   |
| 47010 | P14079 | Q9P031 | 1.8208   |
| 47011 | P14079 | Q8WW24 | 0.4859   |
| 47012 | P14079 | Q96G01 | 0.34967  |
| 47013 | P14079 | Q0VD86 | 0.42364  |
| 47014 | P14079 | Q9H0H0 | 0.76335  |
| 47015 | P14079 | Q9BS34 | 0.5583   |
| 47016 | P14079 | A6NFA0 | 1.2485   |
| 47017 | P14079 | Q7RTV3 | 0.33874  |
| 47018 | P14079 | Q9P0W5 | 1.211    |
| 47019 | P14079 | Q96A44 | 0.51053  |
| 47020 | P14079 | P01358 | 1.1715   |
| 47021 | P14079 | Q13405 | 1.0375   |
| 47022 | P14079 | Q8TBR4 | 0.75577  |
| 47023 | P14079 | Q96E09 | 1.3798   |
| 47024 | P14079 | Q5T5Y3 | 0.70577  |
| 47025 | P14079 | Q9UFE4 | 0.48824  |
| 47026 | P14079 | P48444 | 0.61213  |
| 47027 | P14079 | Q8N8A4 | 0.45439  |
| 47028 | P14079 | Q6ZV50 | 0.40094  |
| 47029 | P14079 | P0CJ92 | 0.47222  |
| 47030 | P14079 | P0DKV0 | 0.52246  |
| 47031 | P14079 | Q96JE9 | 0.50405  |
| 47032 | P14079 | Q8WVK2 | 1.4232   |
| 47033 | P14079 | O95478 | 0.98764  |
| 47034 | P14079 | Q6L8G5 | 1.1715   |
| 47035 | P14079 | Q2M2I3 | 0.42028  |
| 47036 | P14079 | Q86WR6 | 0.11302  |
| 47037 | P14079 | Q5TEZ4 | 1.1715   |
| 47038 | P14079 | O75366 | 0.03519  |
| 47039 | P14079 | Q8WW43 | 0.44321  |
| 47040 | P14079 | Q96DB5 | 0.81776  |
| 47041 | P14079 | Q96SL8 | 0.45054  |
| 47042 | P14079 | O42043 | 0.89894  |
| 47043 | P14079 | P42224 | 0.27399  |
| 47044 | P14079 | Q9HCU9 | 1.3518   |



|       |        |         |         |
|-------|--------|---------|---------|
| 47045 | P14079 | A4D1U4  | 0.92289 |
| 47046 | P14079 | P00480  | 0.43592 |
| 47047 | P14079 | Q6P4R8  | 1.1571  |
| 47048 | P14079 | O75964  | 0.37657 |
| 47049 | P14079 | Q5VUA4  | 0.5522  |
| 47050 | P14079 | Q86V85  | 1.0214  |
| 47051 | P14079 | Q86UD4  | 0.53698 |
| 47052 | P14079 | O00411  | 0.89423 |
| 47053 | P14079 | Q96BM0  | 0.99429 |
| 47054 | P14079 | O75531  | 1.2091  |
| 47055 | P14079 | Q2M2E5  | 1.1606  |
| 47056 | P14079 | Q8IUC2  | 1.497   |
| 47057 | P14079 | Q6S9Z5  | 1.5994  |
| 47058 | P14079 | Q9UPV7  | 0.88749 |
| 47059 | P14079 | Q6L8G9  | 1.1715  |
| 47060 | P14079 | Q8N6L7  | 1.5998  |
| 47061 | P14079 | Q7Z570  | 0.41433 |
| 47062 | P14079 | P58505  | 0.9848  |
| 47063 | P14079 | Q8N1V2  | 0.66973 |
| 47064 | P14079 | Q5VTH2  | 1.0108  |
| 47065 | P14079 | Q9BZG8  | 0.64153 |
| 47066 | P14079 | Q8I WV1 | 0.93551 |
| 47067 | P14079 | Q9UN37  | 0.51704 |
| 47068 | P14079 | Q13617  | 0.82578 |
| 47069 | P14079 | Q6UX71  | 0.25154 |
| 47070 | P14079 | P02810  | 1.1715  |
| 47071 | P14079 | Q8TEX9  | 0.59093 |
| 47072 | P14079 | P0CG35  | 1.1711  |
| 47073 | P14079 | Q6ZNM6  | 1.3143  |
| 47074 | P14079 | C9J442  | 0.86791 |
| 47075 | P14079 | P33992  | 0.34466 |
| 47076 | P14079 | Q8N0Z6  | 0.41189 |
| 47077 | P14079 | Q96RU7  | 0.35709 |
| 47078 | P14079 | Q7Z614  | 0.66074 |
| 47079 | P14079 | O00488  | 0.27261 |
| 47080 | P14079 | O60831  | 1.6215  |
| 47081 | P14079 | Q4QY38  | 0.91101 |
| 47082 | P14079 | Q96QA6  | 0.51205 |
| 47083 | P14079 | A8MYP8  | 1.1675  |
| 47084 | P14079 | P17038  | 0.78684 |
| 47085 | P14079 | Q6ECI4  | 0.75812 |
| 47086 | P14079 | Q8N3J9  | 0.53011 |
| 47087 | P14079 | O43543  | 0.17588 |
| 47088 | P14079 | Q8IWD5  | 1.1674  |
| 47089 | P14079 | Q8TBZ0  | 0.32082 |
| 47090 | P14079 | Q9H4Z3  | 0.14508 |
| 47091 | P14079 | Q6ZVT0  | 0.15983 |
| 47092 | P14079 | P10588  | 0.35299 |
| 47093 | P14079 | Q8N3X6  | 1.3764  |
| 47094 | P14079 | Q569K4  | 0.41299 |
| 47095 | P14079 | Q99848  | 0.63023 |
| 47096 | P14079 | Q6ZRP5  | 1.1715  |
| 47097 | P14079 | Q9UI17  | 0.28997 |
| 47098 | P14079 | Q96FZ7  | 0.21536 |
| 47099 | P14079 | Q8N1G0  | 0.31886 |
| 47100 | P14079 | Q6PGN9  | 1.3047  |
| 47101 | P14079 | Q13601  | 0.4915  |
| 47102 | P14079 | Q5QJE6  | 1.5743  |
| 47103 | P14079 | Q9BX26  | 1.5747  |
| 47104 | P14079 | Q3LI72  | 1.1715  |
| 47105 | P14079 | Q3LI77  | 0.38733 |
| 47106 | P14079 | Q8IXJ6  | 0.43022 |
| 47107 | P14079 | Q6IA69  | 0.8506  |
| 47108 | P14079 | Q8NA58  | 0.75455 |
| 47109 | P14079 | H3BU77  | 1.2231  |
| 47110 | P14079 | P63241  | 0.60259 |
| 47111 | P14079 | Q96JL9  | 0.58146 |
| 47112 | P14079 | B1AJZ1  | 0.35534 |
| 47113 | P14079 | Q5VZI3  | 0.96135 |
| 47114 | P14079 | Q99595  | 0.3024  |
| 47115 | P14079 | Q13542  | 0.84446 |
| 47116 | P14079 | Q6AI39  | 1.4234  |
| 47117 | P14079 | Q9UBW5  | 0.72622 |
| 47118 | P14079 | Q86WG5  | 0.26861 |
| 47119 | P14079 | A6NEA5  | 0.77329 |
| 47120 | P14079 | P35226  | 0.52277 |

|       |        |        |         |
|-------|--------|--------|---------|
| 47121 | P14079 | Q8NBF4 | 0.40238 |
| 47122 | P14079 | Q5TB80 | 0.97846 |
| 47123 | P14079 | Q9UH77 | 0.86931 |
| 47124 | P14079 | Q9ULD2 | 0.61049 |
| 47125 | P14079 | P18850 | 0.69574 |
| 47126 | P14079 | Q4ZIN3 | 0.92863 |
| 47127 | P14079 | Q8N0Z2 | 0.515   |
| 47128 | P14079 | Q8IZL8 | 1.734   |
| 47129 | P14079 | Q8N612 | 1.2179  |
| 47130 | P14079 | P32243 | 0.70641 |
| 47131 | P14079 | Q5U649 | 0.8077  |
| 47132 | P14079 | Q6RUI8 | 1.0067  |
| 47133 | P14079 | Q96S66 | 1.0439  |
| 47134 | P14079 | Q86UL8 | 0.42389 |
| 47135 | P14079 | Q8WX92 | 1.49    |
| 47136 | P14079 | O60296 | 0.55606 |
| 47137 | P14079 | P61353 | 0.90311 |
| 47138 | P14079 | Q9BT78 | 1.0752  |
| 47139 | P14079 | Q6PJ61 | 1.4744  |
| 47140 | P14079 | Q53HL2 | 1.0798  |
| 47141 | P14079 | P14625 | 0.13259 |
| 47142 | P14079 | Q68CL5 | 0.25965 |
| 47143 | P14079 | Q00587 | 0.53442 |
| 47144 | P14079 | Q969V4 | 0.24436 |
| 47145 | P14079 | P62081 | 1.2158  |
| 47146 | P14079 | Q86VE0 | 1.9844  |
| 47147 | P14079 | A6NP61 | 1.5416  |
| 47148 | P14079 | A8MV24 | 0.86888 |
| 47149 | P14079 | Q96HP8 | 1.7635  |
| 47150 | P14079 | Q3KNV8 | 0.90711 |
| 47151 | P14079 | Q86XF7 | 1.0317  |
| 47152 | P14079 | Q8NAV1 | 1.4595  |
| 47153 | P14079 | Q15554 | 0.59298 |
| 47154 | P14079 | Q7Z6R9 | 0.27592 |
| 47155 | P14079 | Q9Y5R8 | 0.22979 |
| 47156 | P14079 | Q9HAC7 | 0.40397 |
| 47157 | P14079 | Q8WWK9 | 0.73992 |
| 47158 | P14079 | Q5W0Q7 | 0.69597 |
| 47159 | P14079 | Q5HY98 | 0.94687 |
| 47160 | P14079 | Q9H1A3 | 0.56221 |
| 47161 | P14079 | P62945 | 1.1715  |
| 47162 | P14079 | A6NDX5 | 0.76931 |
| 47163 | P14079 | Q96MW5 | 0.22963 |
| 47164 | P14079 | Q5JXC2 | 0.85423 |
| 47165 | P14079 | P20700 | 0.85037 |
| 47166 | P14079 | Q6P9A3 | 0.55626 |
| 47167 | P14079 | Q92628 | 1.1914  |
| 47168 | P14079 | Q9UIV1 | 1.0611  |
| 47169 | P14079 | Q8N3J2 | 0.41934 |
| 47170 | P14079 | Q96IU4 | 0.37496 |
| 47171 | P14079 | Q6B0K9 | 0.67533 |
| 47172 | P14079 | Q6ZR54 | 1.1715  |
| 47173 | P14079 | P41212 | 0.67455 |
| 47174 | P14079 | Q6ICG8 | 1.8858  |
| 47175 | P14079 | Q6ZUX7 | 1.089   |
| 47176 | P14079 | Q9GZP4 | 0.41871 |
| 47177 | P14079 | Q9Y2A4 | 1.0063  |
| 47178 | P14079 | P32780 | 0.85017 |
| 47179 | P14079 | Q86Y91 | 0.32532 |
| 47180 | P14079 | Q5SWL8 | 0.44171 |
| 47181 | P14079 | Q9NUM4 | 1.1092  |
| 47182 | P14079 | O75081 | 1.3237  |
| 47183 | P14079 | Q8TAP9 | 1.7479  |
| 47184 | P14079 | Q86UZ6 | 0.25535 |
| 47185 | P14079 | Q9NQ60 | 1.1768  |
| 47186 | P14079 | Q9BSJ6 | 0.93719 |
| 47187 | P14079 | P50548 | 0.84161 |
| 47188 | P14079 | Q16762 | 0.45974 |
| 47189 | P14079 | Q9NYJ1 | 1.7853  |
| 47190 | P14079 | Q3LI64 | 1.1715  |
| 47191 | P14079 | Q53HV7 | 0.94774 |
| 47192 | P14079 | Q8N5P1 | 0.31955 |
| 47193 | P14079 | Q9Y2K1 | 0.1949  |
| 47194 | P14079 | Q6PJW8 | 0.25691 |
| 47195 | P14079 | Q86SQ7 | 1.3851  |
| 47196 | P14079 | Q9C0B2 | 0.97185 |

|       |        |        |          |
|-------|--------|--------|----------|
| 47197 | P14079 | Q8N1L9 | 0.9021   |
| 47198 | P14079 | Q9NQ89 | 0.7842   |
| 47199 | P14079 | Q8WWZ3 | 0.59849  |
| 47200 | P14079 | Q5HYN5 | 0.69828  |
| 47201 | P14079 | Q13064 | 0.25562  |
| 47202 | P14079 | Q8IXM7 | 0.89587  |
| 47203 | P14079 | Q04743 | 0.32405  |
| 47204 | P14079 | O95760 | 0.47642  |
| 47205 | P14079 | Q16775 | 0.68487  |
| 47206 | P14079 | Q8N682 | 0.91469  |
| 47207 | P14079 | Q96EL3 | 0.37599  |
| 47208 | P14079 | Q6IN85 | 0.73174  |
| 47209 | P14079 | Q05195 | 0.31539  |
| 47210 | P14079 | P86480 | 1.1715   |
| 47211 | P14079 | P49915 | 0.82607  |
| 47212 | P14079 | Q9BXN6 | 0.90284  |
| 47213 | P14079 | Q8N7Y1 | 1.1715   |
| 47214 | P14079 | O75489 | 0.65364  |
| 47215 | P14079 | Q96A65 | 0.23284  |
| 47216 | P14079 | Q9BW71 | 1.5495   |
| 47217 | P14079 | A4D263 | 1.0065   |
| 47218 | P14079 | Q71SY5 | 1.1024   |
| 47219 | P14079 | Q96PS6 | 1.4933   |
| 47220 | P14079 | Q9BWQ6 | 0.94085  |
| 47221 | P14079 | O43361 | 0.61922  |
| 47222 | P14079 | P41208 | 0.8237   |
| 47223 | P14079 | Q9NX20 | 1.1212   |
| 47224 | P14079 | P46777 | 1.3499   |
| 47225 | P14079 | Q96DN6 | 1.466    |
| 47226 | P14079 | Q8NDC4 | 0.20571  |
| 47227 | P14079 | Q5TD97 | 0.21928  |
| 47228 | P14079 | Q16626 | 1.0599   |
| 47229 | P14079 | Q8N488 | 0.66504  |
| 47230 | P14079 | Q07687 | 0.38856  |
| 47231 | P14079 | Q8N442 | 0.75378  |
| 47232 | P14079 | Q7Z3T8 | 0.29551  |
| 47233 | P14079 | Q4G0A6 | 1.6293   |
| 47234 | P14079 | P04731 | 0.77468  |
| 47235 | P14079 | Q8N5W9 | 1.0043   |
| 47236 | P14079 | P42677 | 1.0677   |
| 47237 | P14079 | O14713 | 1.2954   |
| 47238 | P14079 | Q8IYI6 | 0.94258  |
| 47239 | P14079 | A6NKF9 | 0.79972  |
| 47240 | P14079 | O14508 | 0.29526  |
| 47241 | P14079 | O14770 | 0.52138  |
| 47242 | P14079 | P13929 | 0.088474 |
| 47243 | P14079 | Q14814 | 0.69901  |
| 47244 | P14079 | Q96BT1 | 0.57319  |
| 47245 | P14079 | Q701N4 | 1.1715   |
| 47246 | P14079 | Q9H9J2 | 0.42492  |
| 47247 | P14079 | Q8N0T1 | 1.231    |
| 47248 | P14079 | P60371 | 1.3698   |
| 47249 | P14079 | Q8N9H6 | 0.96957  |
| 47250 | P14079 | Q96EK4 | 1.737    |
| 47251 | P14079 | Q53H64 | 1.027    |
| 47252 | P14079 | Q9Y5K6 | 0.4045   |
| 47253 | P14079 | Q9UKR5 | 1.0014   |
| 47254 | P14079 | P30050 | 0.96995  |
| 47255 | P14079 | Q5VUM1 | 0.86374  |
| 47256 | P14079 | Q5SY85 | 1.0086   |
| 47257 | P14079 | Q6AI08 | 1.0435   |
| 47258 | P14079 | Q5JTH9 | 0.74995  |
| 47259 | P14079 | O75920 | 1.8872   |
| 47260 | P14079 | Q9NRP2 | 1.5509   |
| 47261 | P14079 | Q902F8 | 1.0072   |
| 47262 | P14079 | Q86Y26 | 1.3874   |
| 47263 | P14079 | Q9NYF3 | 1.2768   |
| 47264 | P14079 | A2AJT9 | 0.90854  |
| 47265 | P14079 | O14645 | 0.35766  |
| 47266 | P14079 | Q0D2K3 | 1.359    |
| 47267 | P14079 | Q9Y2M2 | 1.0144   |
| 47268 | P14079 | P81877 | 0.76434  |
| 47269 | P14079 | Q9BUY5 | 0.93637  |
| 47270 | P14079 | Q9NV44 | 0.81779  |
| 47271 | P14079 | Q6NZI2 | 1.1701   |
| 47272 | P14079 | Q0VDD5 | 1.1715   |

|       |        |         |          |
|-------|--------|---------|----------|
| 47273 | P14079 | Q13067  | 0.33792  |
| 47274 | P14079 | Q86TG7  | 0.7057   |
| 47275 | P14079 | Q8TD06  | 0.64135  |
| 47276 | P14079 | Q5T4I8  | 0.030869 |
| 47277 | P14079 | Q9H4M3  | 0.46683  |
| 47278 | P14079 | Q9H7R5  | 0.80079  |
| 47279 | P14079 | Q53TS8  | 0.83039  |
| 47280 | P14079 | Q8N9M5  | 0.57481  |
| 47281 | P14079 | Q9HCX3  | 0.4662   |
| 47282 | P14079 | Q9Y2G2  | 0.67892  |
| 47283 | P14079 | Q9H4A5  | 1.4788   |
| 47284 | P14079 | Q13367  | 0.58338  |
| 47285 | P14079 | Q12933  | 0.49506  |
| 47286 | P14079 | Q6PK81  | 0.62253  |
| 47287 | P14079 | Q9P015  | 1.0817   |
| 47288 | P14079 | O60813  | 0.66668  |
| 47289 | P14079 | Q8TBF2  | 0.70828  |
| 47290 | P14079 | Q13432  | 0.80475  |
| 47291 | P14079 | Q6ZV77  | 1.1715   |
| 47292 | P14079 | Q9BS31  | 0.47343  |
| 47293 | P14079 | Q9GZW5  | 0.85599  |
| 47294 | P14079 | A6NIY4  | 1.092    |
| 47295 | P14079 | Q04724  | 0.73839  |
| 47296 | P14079 | O95424  | 1.2617   |
| 47297 | P14079 | Q9UJ04  | 0.33753  |
| 47298 | P14079 | Q3LI54  | 1.1715   |
| 47299 | P14079 | P17050  | 0.20718  |
| 47300 | P14079 | Q9Y366  | 0.35221  |
| 47301 | P14079 | Q8TAZ6  | 1.2231   |
| 47302 | P14079 | Q5JPF3  | 0.2366   |
| 47303 | P14079 | C9JLR9  | 1.2541   |
| 47304 | P14079 | Q96PE3  | 0.27686  |
| 47305 | P14079 | P20248  | 1.2785   |
| 47306 | P14079 | O60841  | 0.65335  |
| 47307 | P14079 | Q9BXI3  | 0.58523  |
| 47308 | P14079 | Q6ICB4  | 0.29473  |
| 47309 | P14079 | P61978  | 0.9111   |
| 47310 | P14079 | Q8TC44  | 0.30219  |
| 47311 | P14079 | A6NKU9  | 1.092    |
| 47312 | P14079 | Q14872  | 0.83337  |
| 47313 | P14079 | Q8NFB4  | 1.0451   |
| 47314 | P14079 | Q9UL03  | 1.5664   |
| 47315 | P14079 | P06746  | 0.51936  |
| 47316 | P14079 | Q8TDD2  | 0.43309  |
| 47317 | P14079 | Q9Y6N9  | 0.49723  |
| 47318 | P14079 | Q5T7B8  | 0.31989  |
| 47319 | P14079 | A1A580  | 1.37     |
| 47320 | P14079 | Q12789  | 0.97949  |
| 47321 | P14079 | Q5BJD5  | 0.79644  |
| 47322 | P14079 | Q8IUE0  | 0.28169  |
| 47323 | P14079 | Q8WV19  | 0.86513  |
| 47324 | P14079 | Q9NQS7  | 1.1689   |
| 47325 | P14079 | Q8N584  | 1.653    |
| 47326 | P14079 | P35227  | 0.62761  |
| 47327 | P14079 | P53602  | 0.84459  |
| 47328 | P14079 | P15927  | 0.65178  |
| 47329 | P14079 | Q63ZY3  | 1.0436   |
| 47330 | P14079 | Q7L5N1  | 1.2924   |
| 47331 | P14079 | Q2NL67  | 0.31763  |
| 47332 | P14079 | Q9H7E2  | 0.61895  |
| 47333 | P14079 | P27815  | 0.3436   |
| 47334 | P14079 | P31943  | 0.30568  |
| 47335 | P14079 | Q8TES7  | 1.0311   |
| 47336 | P14079 | Q6ZSS3  | 0.5908   |
| 47337 | P14079 | Q9BSC4  | 0.27853  |
| 47338 | P14079 | Q14676  | 0.77309  |
| 47339 | P14079 | Q14839  | 0.49367  |
| 47340 | P14079 | Q9Y2X8  | 0.61533  |
| 47341 | P14079 | P23610  | 1.1715   |
| 47342 | P14079 | Q2WVGJ8 | 1.4568   |
| 47343 | P14079 | Q9UKI3  | 0.52561  |
| 47344 | P14079 | Q86UT6  | 0.26264  |
| 47345 | P14079 | Q9BT43  | 0.59427  |
| 47346 | P14079 | Q8WWB7  | 1.1221   |
| 47347 | P14079 | Q8N3F0  | 1.0703   |
| 47348 | P14079 | O60756  | 1.1715   |

|       |        |        |          |
|-------|--------|--------|----------|
| 47349 | P14079 | Q9Y3M2 | 0.97242  |
| 47350 | P14079 | Q6ZVT6 | 0.81988  |
| 47351 | P14079 | Q93050 | 0.071365 |
| 47352 | P14079 | A6NFY4 | 0.81841  |
| 47353 | P14079 | P20749 | 0.3133   |
| 47354 | P14079 | O75925 | 0.55938  |
| 47355 | P14079 | P15880 | 1.244    |
| 47356 | P14079 | P22532 | 1.1715   |
| 47357 | P14079 | Q9HCM1 | 1.495    |
| 47358 | P14079 | Q96LC9 | 1.0982   |
| 47359 | P14079 | Q86W67 | 0.3419   |
| 47360 | P14079 | Q96RS6 | 0.28036  |
| 47361 | P14079 | Q99440 | 0.72369  |
| 47362 | P14079 | P0CJ78 | 0.43771  |
| 47363 | P14079 | Q6P656 | 0.58401  |
| 47364 | P14079 | Q01850 | 0.92717  |
| 47365 | P14079 | Q9NWM3 | 0.56024  |
| 47366 | P14079 | Q9Y5R4 | 0.25663  |
| 47367 | P14079 | Q68DY1 | 1.0245   |
| 47368 | P14079 | Q9H3K2 | 0.19238  |
| 47369 | P14079 | Q92547 | 0.82233  |
| 47370 | P14079 | Q5CZC0 | 1.6821   |
| 47371 | P14079 | Q14764 | 1.3355   |
| 47372 | P14079 | P59051 | 0.92794  |
| 47373 | P14079 | A6NFU8 | 1.2681   |
| 47374 | P14079 | Q6ZTK2 | 0.33165  |
| 47375 | P14079 | Q6ICC9 | 1.2101   |
| 47376 | P14079 | Q6ZV80 | 1.0896   |
| 47377 | P14079 | Q9H9Y2 | 0.34874  |
| 47378 | P14079 | A4D0V7 | 1.545    |
| 47379 | P14079 | Q9H4B0 | 1.2682   |
| 47380 | P14079 | Q8NA54 | 0.37985  |
| 47381 | P14079 | Q9H0R1 | 0.3898   |
| 47382 | P14079 | Q8ND83 | 1.6777   |
| 47383 | P14079 | A8MPV3 | 0.28719  |
| 47384 | P14079 | Q9P270 | 0.77824  |
| 47385 | P14079 | Q9NUK0 | 0.097805 |
| 47386 | P14079 | Q01081 | 0.48752  |
| 47387 | P14079 | Q9BUN1 | 0.99149  |
| 47388 | P14079 | Q9BTT4 | 0.75955  |
| 47389 | P14079 | K7EIQ3 | 1.7079   |
| 47390 | P14079 | P10515 | 0.2639   |
| 47391 | P14079 | Q9Y253 | 0.29773  |
| 47392 | P14079 | P43358 | 0.36435  |
| 47393 | P14079 | B2RXF5 | 0.59902  |
| 47394 | P14079 | Q8TC84 | 0.42364  |
| 47395 | P14079 | O14512 | 0.23998  |
| 47396 | P14079 | P35659 | 1.0131   |
| 47397 | P14079 | Q9BYJ9 | 1.0626   |
| 47398 | P14079 | P62993 | 0.29114  |
| 47399 | P14079 | O95810 | 0.6938   |
| 47400 | P14079 | Q05682 | 0.37576  |
| 47401 | P14079 | Q86TA1 | 0.50254  |
| 47402 | P14079 | Q9H8N7 | 0.28775  |
| 47403 | P14079 | B4DX44 | 1.0418   |
| 47404 | P14079 | P49427 | 0.51632  |
| 47405 | P14079 | P23193 | 1.2446   |
| 47406 | P14079 | Q9H875 | 0.80308  |
| 47407 | P14079 | Q9Y5W3 | 0.2338   |
| 47408 | P14079 | Q8N6F7 | 1.037    |
| 47409 | P14079 | Q5TYW1 | 0.50207  |
| 47410 | P14079 | Q59GN2 | 0.85698  |
| 47411 | P14079 | A0PJX8 | 1.2485   |
| 47412 | P14079 | C9JH25 | 1.2485   |
| 47413 | P14079 | Q8WZ79 | 0.73073  |
| 47414 | P14079 | Q8IXW0 | 0.86347  |
| 47415 | P14079 | Q3B820 | 1.2395   |
| 47416 | P14079 | O15525 | 0.48275  |
| 47417 | P14079 | O75394 | 1.0864   |
| 47418 | P14079 | Q96LT6 | 0.72651  |
| 47419 | P14079 | Q13158 | 0.686    |
| 47420 | P14079 | O43918 | 1.0025   |
| 47421 | P14079 | A8K0Z3 | 0.22727  |
| 47422 | P14079 | Q96PE6 | 0.56902  |
| 47423 | P14079 | Q99541 | 0.42649  |
| 47424 | P14079 | Q96AZ6 | 0.27591  |

|       |        |        |         |
|-------|--------|--------|---------|
| 47425 | P14079 | Q96S95 | 1.2152  |
| 47426 | P14079 | Q9H0A9 | 1.983   |
| 47427 | P14079 | Q7Z6Z6 | 0.66576 |
| 47428 | P14079 | P13984 | 0.52071 |
| 47429 | P14079 | Q9P1D8 | 1.1715  |
| 47430 | P14079 | O75818 | 0.34553 |
| 47431 | P14079 | P49750 | 0.93386 |
| 47432 | P14079 | Q9BYG3 | 0.28323 |
| 47433 | P14079 | P30039 | 0.54005 |
| 47434 | P14079 | Q9ULL0 | 1.282   |
| 47435 | P14079 | Q6ZVL8 | 1.1715  |
| 47436 | P14079 | O75698 | 1.1715  |
| 47437 | P14079 | Q9BPX3 | 0.96308 |
| 47438 | P14079 | P25440 | 0.38451 |
| 47439 | P14079 | O00458 | 1.4355  |
| 47440 | P14079 | Q9BZF9 | 0.49459 |
| 47441 | P14079 | P47874 | 0.76953 |
| 47442 | P14079 | Q9BTY7 | 0.83392 |
| 47443 | P14079 | Q6AWC8 | 1.1144  |
| 47444 | P14079 | Q8TDR0 | 1.6182  |
| 47445 | P14079 | Q8N554 | 0.1949  |
| 47446 | P14079 | Q86WC4 | 1.3944  |
| 47447 | P14079 | Q07627 | 1.1219  |
| 47448 | P14079 | Q7Z7H8 | 0.5435  |
| 47449 | P14079 | Q7L5A3 | 1.3061  |
| 47450 | P14079 | Q4W5P6 | 0.94884 |
| 47451 | P14079 | P38432 | 1.2401  |
| 47452 | P14079 | Q9BSK1 | 0.55471 |
| 47453 | P14079 | Q14493 | 1.0702  |
| 47454 | P14079 | P78406 | 0.59352 |
| 47455 | P14079 | Q8NE31 | 0.37695 |
| 47456 | P14079 | Q96SZ6 | 0.50612 |
| 47457 | P14079 | Q8WXE9 | 0.639   |
| 47458 | P14079 | P30260 | 1.34    |
| 47459 | P14079 | Q06323 | 1.14    |
| 47460 | P14079 | A5D6W6 | 1.255   |
| 47461 | P14079 | Q9H5L9 | 0.94805 |
| 47462 | P14079 | Q6L8H1 | 1.1715  |
| 47463 | P14079 | Q6P9G4 | 1.1755  |
| 47464 | P14079 | Q9UN79 | 0.80136 |
| 47465 | P14079 | Q9UJJ7 | 0.60589 |
| 47466 | P14079 | Q7Z6M4 | 1.1822  |
| 47467 | P14079 | Q8TAX7 | 1.1715  |
| 47468 | P14079 | P20073 | 0.54721 |
| 47469 | P14079 | O43639 | 0.52506 |
| 47470 | P14079 | P0C7Q2 | 0.48185 |
| 47471 | P14079 | P60602 | 1.0996  |
| 47472 | P14079 | Q9Y3F1 | 1.1715  |
| 47473 | P14079 | Q5T7R7 | 1.2485  |
| 47474 | P14079 | P62891 | 1.1719  |
| 47475 | P14079 | P10163 | 1.1715  |
| 47476 | P14079 | O43299 | 1.6886  |
| 47477 | P14079 | Q9UNW1 | 0.47791 |
| 47478 | P14079 | O95613 | 1.1964  |
| 47479 | P14079 | Q5T011 | 0.82772 |
| 47480 | P14079 | Q9Y5Z9 | 0.96105 |
| 47481 | P14079 | O75293 | 0.75297 |
| 47482 | P14079 | Q6PEX7 | 1.1591  |
| 47483 | P14079 | Q9ULR5 | 0.66885 |
| 47484 | P14079 | Q86VM9 | 0.55754 |
| 47485 | P14079 | P38646 | 0.4814  |
| 47486 | P14079 | Q13503 | 0.71015 |
| 47487 | P14079 | Q9UKY7 | 1.5263  |
| 47488 | P14079 | Q8N729 | 0.78321 |
| 47489 | P14079 | Q7Z4T9 | 0.8771  |
| 47490 | P14079 | Q9UII5 | 0.76639 |
| 47491 | P14079 | Q7Z401 | 0.36034 |
| 47492 | P14079 | Q96CB9 | 0.86615 |
| 47493 | P14079 | P15407 | 0.68498 |
| 47494 | P14079 | Q8TB45 | 0.25735 |
| 47495 | P14079 | Q2KHR2 | 0.70362 |
| 47496 | P14079 | Q969Q6 | 0.54546 |
| 47497 | P14079 | Q0VFX6 | 1.3222  |
| 47498 | P14079 | Q9Y4R8 | 0.73803 |
| 47499 | P14079 | Q99487 | 0.24435 |
| 47500 | P14079 | Q9NVU0 | 0.96822 |

|       |        |        |         |
|-------|--------|--------|---------|
| 47501 | P14079 | Q96FZ2 | 1.6109  |
| 47502 | P14079 | Q06455 | 0.60605 |
| 47503 | P14079 | Q8N9U0 | 0.12251 |
| 47504 | P14079 | Q8NDZ6 | 1.0041  |
| 47505 | P14079 | Q9HCG8 | 0.45885 |
| 47506 | P14079 | Q8IXM2 | 0.34032 |
| 47507 | P14079 | Q96SD1 | 0.26629 |
| 47508 | P14079 | Q8TCY5 | 0.76276 |
| 47509 | P14079 | Q9BQ87 | 0.46001 |
| 47510 | P14079 | Q9BQP7 | 0.62271 |
| 47511 | P14079 | P03923 | 0.88317 |
| 47512 | P14079 | O43747 | 0.85714 |
| 47513 | P14079 | Q8NCD3 | 1.0545  |
| 47514 | P14079 | Q96EF9 | 0.95381 |
| 47515 | P14079 | Q8N8J7 | 1.0453  |
| 47516 | P14079 | Q96LM1 | 1.3478  |
| 47517 | P14079 | Q4V326 | 0.33792 |
| 47518 | P14079 | P10599 | 0.25512 |
| 47519 | P14079 | Q5HYM0 | 0.49753 |
| 47520 | P14079 | Q9Y283 | 0.33296 |
| 47521 | P14079 | Q9C0H6 | 0.28511 |
| 47522 | P14079 | Q8IYM0 | 0.59546 |
| 47523 | P14079 | P27694 | 0.72229 |
| 47524 | P14079 | P59020 | 0.38345 |
| 47525 | P14079 | Q6RSH7 | 0.61897 |
| 47526 | P14079 | Q96M42 | 0.79299 |
| 47527 | P14079 | Q52M75 | 0.33278 |
| 47528 | P14079 | Q8N5L8 | 1.528   |
| 47529 | P14079 | P0DJ93 | 1.0943  |
| 47530 | P14079 | Q96MZ4 | 0.21702 |
| 47531 | P14079 | O60220 | 0.96103 |
| 47532 | P14079 | Q15051 | 0.95184 |
| 47533 | P14079 | Q9UBS8 | 0.50052 |
| 47534 | P14079 | Q8TD86 | 0.29425 |
| 47535 | P14079 | Q5T1J6 | 0.40445 |
| 47536 | P14079 | Q05877 | 1.528   |
| 47537 | P14079 | Q8N9R8 | 1.2172  |
| 47538 | P14079 | Q8WZA8 | 1.1715  |
| 47539 | P14079 | P28290 | 1.0145  |
| 47540 | P14079 | Q86WX3 | 1.3055  |
| 47541 | P14079 | Q8NEZ5 | 0.50971 |
| 47542 | P14079 | O43159 | 0.68649 |
| 47543 | P14079 | O75410 | 0.90619 |
| 47544 | P14079 | Q5JPI3 | 1.3459  |
| 47545 | P14079 | P63167 | 1.4007  |
| 47546 | P14079 | Q96KR1 | 0.86763 |
| 47547 | P14079 | O95456 | 0.67679 |
| 47548 | P14079 | Q00978 | 0.85637 |
| 47549 | P14079 | Q9H019 | 1.1992  |
| 47550 | P14079 | Q3YBR2 | 0.56875 |
| 47551 | P14079 | Q6PI26 | 1.6894  |
| 47552 | P14079 | Q8N8Z3 | 0.54286 |
| 47553 | P14079 | Q2M218 | 0.58948 |
| 47554 | P14079 | Q9H079 | 0.8672  |
| 47555 | P14079 | Q6GMR7 | 1.3551  |
| 47556 | P14079 | Q8WWB3 | 0.25478 |
| 47557 | P14079 | Q86WZ6 | 0.54153 |
| 47558 | P14079 | P62191 | 0.44962 |
| 47559 | P14079 | Q8N6Q8 | 0.90569 |
| 47560 | P14079 | Q9P242 | 1.4801  |
| 47561 | P14079 | Q9NNW5 | 0.70613 |
| 47562 | P14079 | Q96PQ6 | 1.0085  |
| 47563 | P14079 | P60411 | 1.3698  |
| 47564 | P14079 | O95777 | 0.7091  |
| 47565 | P14079 | P82909 | 0.8163  |
| 47566 | P14079 | Q9UGM6 | 0.4857  |
| 47567 | P14079 | Q8IYN0 | 0.71522 |
| 47568 | P14079 | Q14331 | 0.89597 |
| 47569 | P14079 | Q6UWP8 | 0.92298 |
| 47570 | P14079 | Q6ZU52 | 0.65732 |
| 47571 | P14079 | Q9H0F6 | 0.48379 |
| 47572 | P14079 | Q9UBQ0 | 0.9541  |
| 47573 | P14079 | Q7Z3B4 | 1.0968  |
| 47574 | P14079 | B4DXR9 | 1.0055  |
| 47575 | P14079 | Q16878 | 0.2905  |
| 47576 | P14079 | Q6ZU69 | 1.2444  |

|       |        |        |         |
|-------|--------|--------|---------|
| 47577 | P14079 | P29459 | 0.40949 |
| 47578 | P14079 | Q96IS3 | 0.265   |
| 47579 | P14079 | Q4V328 | 1.1859  |
| 47580 | P14079 | Q9H7H0 | 0.86917 |
| 47581 | P14079 | Q96MX3 | 0.50263 |
| 47582 | P14079 | Q9P1Y5 | 0.92651 |
| 47583 | P14079 | O75182 | 1.1438  |
| 47584 | P14079 | Q14602 | 0.30059 |
| 47585 | P14079 | Q9UM00 | 1.7083  |
| 47586 | P14079 | Q96GJ1 | 0.61033 |
| 47587 | P14079 | O43752 | 0.75051 |
| 47588 | P14079 | Q9UHT4 | 1.1715  |
| 47589 | P14079 | P82675 | 1.0749  |
| 47590 | P14079 | Q8TC76 | 2.1949  |
| 47591 | P14079 | Q6ZMW3 | 0.25965 |
| 47592 | P14079 | Q8WYQ5 | 0.81704 |
| 47593 | P14079 | Q9NZV5 | 0.86701 |
| 47594 | P14079 | Q9H582 | 0.1949  |
| 47595 | P14079 | Q9H9A5 | 0.33348 |
| 47596 | P14079 | A0PK05 | 1.1071  |
| 47597 | P14079 | A8MVS5 | 0.82656 |
| 47598 | P14079 | Q9NWW7 | 1.3714  |
| 47599 | P14079 | P00915 | 0.09112 |
| 47600 | P14079 | O75376 | 0.43186 |
| 47601 | P14079 | A6NJI1 | 1.149   |
| 47602 | P14079 | Q9Y605 | 2.1545  |
| 47603 | P14079 | A8MXY4 | 0.78684 |
| 47604 | P14079 | O43791 | 0.60482 |
| 47605 | P14079 | C9JI98 | 1.2485  |
| 47606 | P14079 | P60510 | 1.0237  |
| 47607 | P14079 | Q9ULE6 | 0.85079 |
| 47608 | P14079 | P54259 | 1.3385  |
| 47609 | P14079 | P31689 | 0.52933 |
| 47610 | P14079 | Q86XI2 | 1.2329  |
| 47611 | P14079 | Q9UK76 | 1.6397  |
| 47612 | P14079 | Q96LY2 | 1.4698  |
| 47613 | P14079 | O95563 | 0.93325 |
| 47614 | P14079 | P24310 | 0.93068 |
| 47615 | P14079 | Q9H4I3 | 0.42615 |
| 47616 | P14079 | O14529 | 0.33373 |
| 47617 | P14079 | Q6P047 | 0.99599 |
| 47618 | P14079 | Q92900 | 0.48983 |
| 47619 | P14079 | A8MWA4 | 1.1051  |
| 47620 | P14079 | Q9BT92 | 0.97696 |
| 47621 | P14079 | A5D8W1 | 0.38804 |
| 47622 | P14079 | Q6AZW8 | 0.57976 |
| 47623 | P14079 | O15042 | 0.23802 |
| 47624 | P14079 | P0C860 | 0.32777 |
| 47625 | P14079 | Q9NVM1 | 1.5543  |
| 47626 | P14079 | Q5T750 | 0.91588 |
| 47627 | P14079 | Q86YF9 | 0.42019 |
| 47628 | P14079 | Q8TC05 | 1.4671  |
| 47629 | P14079 | Q5T0J3 | 0.92739 |
| 47630 | P14079 | Q63HK5 | 0.32909 |
| 47631 | P14079 | O15260 | 0.44373 |
| 47632 | P14079 | Q8N9P0 | 0.97019 |
| 47633 | P14079 | A8MYV0 | 0.5863  |
| 47634 | P14079 | O60583 | 1.2949  |
| 47635 | P14079 | Q7Z2F6 | 0.86015 |
| 47636 | P14079 | O15078 | 0.86652 |
| 47637 | P14079 | P78317 | 0.38643 |
| 47638 | P14079 | O75478 | 0.41524 |
| 47639 | P14079 | Q09666 | 0.8366  |
| 47640 | P14079 | Q96AN5 | 0.83643 |
| 47641 | P14079 | Q86UF4 | 0.81869 |
| 47642 | P14079 | Q96F45 | 0.25535 |
| 47643 | P14079 | Q06787 | 1.0337  |
| 47644 | P14079 | O00198 | 1.34    |
| 47645 | P14079 | Q8IY18 | 0.36305 |
| 47646 | P14079 | Q8TCB0 | 0.38012 |
| 47647 | P14079 | Q5T619 | 0.53756 |
| 47648 | P14079 | Q8N9K5 | 0.63696 |
| 47649 | P14079 | Q8WW33 | 1.107   |
| 47650 | P14079 | O14579 | 0.81721 |
| 47651 | P14079 | Q9Y3E7 | 0.97471 |
| 47652 | P14079 | Q6NSH3 | 1.0398  |



|       |        |        |         |
|-------|--------|--------|---------|
| 47653 | P14079 | Q9HCI7 | 0.58654 |
| 47654 | P14079 | Q96KM6 | 0.29703 |
| 47655 | P14079 | Q86W56 | 0.73527 |
| 47656 | P14079 | Q9H972 | 0.98371 |
| 47657 | P14079 | Q6NXP0 | 0.45259 |
| 47658 | P14079 | Q495M9 | 0.51568 |
| 47659 | P14079 | Q3MJ40 | 0.61872 |
| 47660 | P14079 | Q6EMB2 | 0.16797 |
| 47661 | P14079 | Q9BW30 | 0.51322 |
| 47662 | P14079 | Q6TGC4 | 1.0771  |
| 47663 | P14079 | Q16718 | 0.2537  |
| 47664 | P14079 | Q92499 | 0.27658 |
| 47665 | P14079 | Q92896 | 0.76442 |
| 47666 | P14079 | Q96SQ5 | 0.61621 |
| 47667 | P14079 | Q6ZRP0 | 1.3222  |
| 47668 | P14079 | Q9HB21 | 0.27571 |
| 47669 | P14079 | Q9Y6Y9 | 0.65133 |
| 47670 | P14079 | Q9NZE8 | 1.2688  |
| 47671 | P14079 | Q92674 | 0.45874 |
| 47672 | P14079 | P04053 | 0.21992 |
| 47673 | P14079 | Q96FC9 | 0.31672 |
| 47674 | P14079 | Q3LHN2 | 1.1715  |
| 47675 | P14079 | Q9UKT7 | 0.26246 |
| 47676 | P14079 | Q9UIF3 | 0.47258 |
| 47677 | P14079 | Q96B26 | 0.52268 |
| 47678 | P14079 | Q96CX2 | 0.25699 |
| 47679 | P14079 | Q96BK5 | 0.57277 |
| 47680 | P14079 | Q9HCZ1 | 0.68687 |
| 47681 | P14079 | Q8IYI0 | 1.0541  |
| 47682 | P14079 | O95232 | 0.60528 |
| 47683 | P14079 | O15265 | 1.3286  |
| 47684 | P14079 | Q9Y2H8 | 0.60224 |
| 47685 | P14079 | P17014 | 0.57901 |
| 47686 | P14079 | A4QMS7 | 0.69189 |
| 47687 | P14079 | Q9H5F2 | 0.95058 |
| 47688 | P14079 | Q8WY50 | 1.1715  |
| 47689 | P14079 | O00541 | 0.72102 |
| 47690 | P14079 | Q6PGQ1 | 1.0619  |
| 47691 | P14079 | Q9UKB5 | 0.89575 |
| 47692 | P14079 | Q8TBK2 | 0.62058 |
| 47693 | P14079 | P67870 | 0.14264 |
| 47694 | P14079 | O95476 | 0.31656 |
| 47695 | P14079 | Q9P032 | 0.72777 |
| 47696 | P14079 | Q5T8I3 | 0.88228 |
| 47697 | P14079 | O60299 | 0.567   |
| 47698 | P14079 | Q8N6K4 | 1.1715  |
| 47699 | P14079 | Q99638 | 0.73731 |
| 47700 | P14079 | Q9BT30 | 1.1173  |
| 47701 | P14079 | O43687 | 1.0589  |
| 47702 | P14079 | Q02577 | 0.51395 |
| 47703 | P14079 | Q8N6S5 | 1.2918  |
| 47704 | P14079 | Q9HB96 | 1.1715  |
| 47705 | P14079 | A6NNA5 | 0.15259 |
| 47706 | P14079 | Q9UI12 | 0.34264 |
| 47707 | P14079 | Q9HD33 | 1.3251  |
| 47708 | P14079 | Q6L8G4 | 1.1715  |
| 47709 | P14079 | Q96C55 | 0.1949  |
| 47710 | P14079 | Q9NWW0 | 0.28036 |
| 47711 | P14079 | Q8IWE5 | 0.61701 |
| 47712 | P14079 | Q9H0B3 | 0.22519 |
| 47713 | P14079 | Q15928 | 1.0401  |
| 47714 | P14079 | Q4V321 | 0.33792 |
| 47715 | P14079 | P62888 | 0.95912 |
| 47716 | P14079 | Q8IW36 | 0.97541 |
| 47717 | P14079 | P19623 | 0.34236 |
| 47718 | P14079 | P46527 | 0.53936 |
| 47719 | P14079 | Q9P1T7 | 1.2328  |
| 47720 | P14079 | O43561 | 0.3714  |
| 47721 | P14079 | P03897 | 0.37061 |
| 47722 | P14079 | Q9UFV3 | 0.41797 |
| 47723 | P14079 | Q9BS92 | 0.20744 |
| 47724 | P14079 | Q502W7 | 1.0857  |
| 47725 | P14079 | Q9Y6X3 | 1.2207  |
| 47726 | P14079 | P08865 | 0.947   |
| 47727 | P14079 | Q14699 | 0.94946 |
| 47728 | P14079 | Q9BYR5 | 1.3698  |

|       |        |        |         |
|-------|--------|--------|---------|
| 47729 | P14079 | O14787 | 1.1507  |
| 47730 | P14079 | O75688 | 0.34197 |
| 47731 | P14079 | A6NJQ4 | 0.50122 |
| 47732 | P14079 | Q15486 | 0.86844 |
| 47733 | P14079 | Q9UIA9 | 0.78594 |
| 47734 | P14079 | Q5VT52 | 0.44811 |
| 47735 | P14079 | Q9NSE4 | 0.92993 |
| 47736 | P14079 | P55735 | 0.73364 |
| 47737 | P14079 | Q6ZNH5 | 0.64121 |
| 47738 | P14079 | Q14590 | 0.54706 |
| 47739 | P14079 | Q8WXF8 | 1.8009  |
| 47740 | P14079 | Q8NCN5 | 0.27578 |
| 47741 | P14079 | Q9NVV5 | 1.215   |
| 47742 | P14079 | Q9Y4C2 | 1.572   |
| 47743 | P14079 | Q96AV8 | 0.24141 |
| 47744 | P14079 | Q9NPA5 | 0.31665 |
| 47745 | P14079 | Q709C8 | 0.98802 |
| 47746 | P14079 | Q9H8K7 | 1.097   |
| 47747 | P14079 | Q9HBU9 | 0.95511 |
| 47748 | P14079 | Q8N5Z5 | 0.11489 |
| 47749 | P14079 | Q96BY9 | 0.73316 |
| 47750 | P14079 | P62837 | 0.61533 |
| 47751 | P14079 | Q14584 | 0.6355  |
| 47752 | P14079 | Q70YC4 | 1.356   |
| 47753 | P14079 | Q14011 | 0.30813 |
| 47754 | P14079 | P41162 | 0.39136 |
| 47755 | P14079 | Q9UQE7 | 0.26751 |
| 47756 | P14079 | Q0P140 | 1.0897  |
| 47757 | P14079 | Q13155 | 0.64833 |
| 47758 | P14079 | Q8ND07 | 1.2418  |
| 47759 | P14079 | Q15562 | 0.76782 |
| 47760 | P14079 | Q7Z7B7 | 1.4082  |
| 47761 | P14079 | Q8N1K5 | 1.2536  |
| 47762 | P14079 | Q86T75 | 1.2315  |
| 47763 | P14079 | Q5JSZ5 | 1.6357  |
| 47764 | P14079 | O75132 | 0.54692 |
| 47765 | P14079 | Q8WUW1 | 0.5375  |
| 47766 | P14079 | Q0ZLH3 | 0.98547 |
| 47767 | P14079 | Q8N988 | 1.0415  |
| 47768 | P14079 | Q13069 | 0.33792 |
| 47769 | P14079 | Q8N511 | 1.181   |
| 47770 | P14079 | A1L443 | 1.8285  |
| 47771 | P14079 | Q9UKI9 | 1.125   |
| 47772 | P14079 | Q5BKY9 | 1.3222  |
| 47773 | P14079 | Q8N371 | 0.28706 |
| 47774 | P14079 | A8MXK9 | 1.0599  |
| 47775 | P14079 | Q9Y3P4 | 1.3186  |
| 47776 | P14079 | Q5BKY1 | 0.34053 |
| 47777 | P14079 | O15067 | 0.86107 |
| 47778 | P14079 | O75607 | 0.78487 |
| 47779 | P14079 | Q9P2K1 | 0.65575 |
| 47780 | P14079 | Q2TAA8 | 0.63289 |
| 47781 | P14079 | Q15493 | 0.22702 |
| 47782 | P14079 | Q9UPR3 | 0.99648 |
| 47783 | P14079 | P36508 | 0.19861 |
| 47784 | P14079 | P15884 | 0.58656 |
| 47785 | P14079 | P56381 | 0.56918 |
| 47786 | P14079 | Q1ED39 | 1.6655  |
| 47787 | P14079 | Q9NRD1 | 0.25467 |
| 47788 | P14079 | Q9H607 | 0.6802  |
| 47789 | P14079 | Q9H0K4 | 1.3497  |
| 47790 | P14079 | Q96AW1 | 1.0095  |
| 47791 | P14079 | Q8IYF1 | 0.73891 |
| 47792 | P14079 | Q8WV92 | 0.63707 |
| 47793 | P14079 | Q8WXX7 | 1.0321  |
| 47794 | P14079 | P78414 | 0.24936 |
| 47795 | P14079 | Q5TA45 | 0.24462 |
| 47796 | P14079 | Q99504 | 0.37888 |
| 47797 | P14079 | Q6N069 | 0.22485 |
| 47798 | P14079 | P15954 | 0.80284 |
| 47799 | P14079 | Q99439 | 0.28032 |
| 47800 | P14079 | B8ZZ34 | 0.85881 |
| 47801 | P14079 | Q5VWN6 | 0.70296 |
| 47802 | P14079 | Q96QU4 | 1.4627  |
| 47803 | P14079 | Q13515 | 0.71659 |
| 47804 | P14079 | P55769 | 0.95127 |

|       |        |        |         |
|-------|--------|--------|---------|
| 47805 | P14079 | Q9NR55 | 0.33566 |
| 47806 | P14079 | A6NHY6 | 0.83592 |
| 47807 | P14079 | Q96LR7 | 1.3492  |
| 47808 | P14079 | Q9H3M7 | 0.77713 |
| 47809 | P14079 | Q9P127 | 1.0058  |
| 47810 | P14079 | P78545 | 0.96817 |
| 47811 | P14079 | O60885 | 0.84975 |
| 47812 | P14079 | Q8IV54 | 0.65487 |
| 47813 | P14079 | Q9BSE2 | 1.2485  |
| 47814 | P14079 | P82673 | 0.42865 |
| 47815 | P14079 | Q13164 | 0.22996 |
| 47816 | P14079 | Q4KMX7 | 0.42881 |
| 47817 | P14079 | P42025 | 0.55528 |
| 47818 | P14079 | P41134 | 0.37184 |
| 47819 | P14079 | P59998 | 0.51342 |
| 47820 | P14079 | Q9BX40 | 1.3349  |
| 47821 | P14079 | Q53GL7 | 0.70576 |
| 47822 | P14079 | O14972 | 0.65935 |
| 47823 | P14079 | Q53H82 | 0.24685 |
| 47824 | P14079 | Q96M19 | 1.1715  |
| 47825 | P14079 | Q9BRH9 | 0.6446  |
| 47826 | P14079 | Q03468 | 0.35882 |
| 47827 | P14079 | P78395 | 1.2703  |
| 47828 | P14079 | Q7Z4H7 | 0.99639 |
| 47829 | P14079 | P49454 | 0.63791 |
| 47830 | P14079 | Q17RG1 | 0.18591 |
| 47831 | P14079 | Q9BVS5 | 0.69481 |
| 47832 | P14079 | Q4G0X4 | 0.18591 |
| 47833 | P14079 | Q7Z5V6 | 1.07    |
| 47834 | P14079 | Q96SA4 | 0.98083 |
| 47835 | P14079 | O95886 | 0.66785 |
| 47836 | P14079 | Q7Z7G2 | 0.96679 |
| 47837 | P14079 | Q96B36 | 1.4131  |
| 47838 | P14079 | Q8IWB4 | 1.3668  |
| 47839 | P14079 | Q5JU67 | 0.27365 |
| 47840 | P14079 | Q9NQC8 | 0.29688 |
| 47841 | P14079 | P18669 | 0.96654 |
| 47842 | P14079 | Q9BQ70 | 1.1757  |
| 47843 | P14079 | P53675 | 0.44178 |
| 47844 | P14079 | P53672 | 1.342   |
| 47845 | P14079 | Q5SQ13 | 0.41385 |
| 47846 | P14079 | Q9NZJ0 | 0.75845 |
| 47847 | P14079 | O75204 | 1.2525  |
| 47848 | P14079 | Q92543 | 0.19276 |
| 47849 | P14079 | Q9NZ63 | 1.1793  |
| 47850 | P14079 | Q9H9E3 | 0.77803 |
| 47851 | P14079 | Q9BTP7 | 1.3249  |
| 47852 | P14079 | Q5XKP0 | 0.86282 |
| 47853 | P14079 | Q6IPR1 | 0.69293 |
| 47854 | P14079 | Q2M3C7 | 0.69688 |
| 47855 | P14079 | Q9H8G1 | 1.0416  |
| 47856 | P14079 | Q8N137 | 1.1318  |
| 47857 | P14079 | O75154 | 0.93282 |
| 47858 | P14079 | A5PL33 | 1.4259  |
| 47859 | P14079 | P51397 | 1.073   |
| 47860 | P14079 | Q92466 | 0.67782 |
| 47861 | P14079 | Q96GM8 | 0.54697 |
| 47862 | P14079 | Q9NVA1 | 0.8146  |
| 47863 | P14079 | A6NJB7 | 1.4513  |
| 47864 | P14079 | P15941 | 0.62212 |
| 47865 | P14079 | Q9NQV7 | 0.61787 |
| 47866 | P14079 | Q9BUV0 | 1.3222  |
| 47867 | P14079 | O75884 | 1.7845  |
| 47868 | P14079 | Q8IYE1 | 0.10982 |
| 47869 | P14079 | Q3LHN1 | 1.1715  |
| 47870 | P14079 | Q9NZV7 | 1.0397  |
| 47871 | P14079 | A8MW95 | 0.18893 |
| 47872 | P14079 | P38935 | 0.28933 |
| 47873 | P14079 | Q69YZ2 | 1.0911  |
| 47874 | P14079 | Q14137 | 1.0331  |
| 47875 | P14079 | Q96JB5 | 0.48919 |
| 47876 | P14079 | Q16589 | 0.51813 |
| 47877 | P14079 | Q86SH2 | 0.85922 |
| 47878 | P14079 | Q9HBZ2 | 0.32463 |
| 47879 | P14079 | P12004 | 0.31204 |
| 47880 | P14079 | Q9Y3C5 | 0.47703 |

|       |        |        |           |
|-------|--------|--------|-----------|
| 47881 | P14079 | P0CG33 | 0.65403   |
| 47882 | P14079 | P12757 | 0.4993    |
| 47883 | P14079 | Q9Y3E0 | 0.63707   |
| 47884 | P14079 | Q9GZR5 | 0.61366   |
| 47885 | P14079 | Q8IXS0 | 1.3222    |
| 47886 | P14079 | A6NG73 | 0.53464   |
| 47887 | P14079 | Q96EV8 | 0.24444   |
| 47888 | P14079 | P42166 | 0.66295   |
| 47889 | P14079 | Q15011 | 1.1862    |
| 47890 | P14079 | O14521 | 0.95483   |
| 47891 | P14079 | I3L273 | 0.64251   |
| 47892 | P14079 | P61927 | 1.1915    |
| 47893 | P14079 | Q9P2B7 | 1.3222    |
| 47894 | P14079 | P48378 | 0.81485   |
| 47895 | P14079 | Q9Y5V0 | 1.0887    |
| 47896 | P14079 | Q9HAH1 | 0.8897    |
| 47897 | P14079 | Q96DX8 | 0.44125   |
| 47898 | P14079 | O14948 | 0.36877   |
| 47899 | P14079 | Q6IC83 | 0.43269   |
| 47900 | P14079 | Q9NRP0 | 0.75027   |
| 47901 | P14079 | P52597 | 0.35545   |
| 47902 | P14079 | O43920 | 1.105     |
| 47903 | P14079 | Q96MC5 | 0.18792   |
| 47904 | P14079 | O60516 | 0.52655   |
| 47905 | P14079 | P62633 | 0.54488   |
| 47906 | P14079 | O43390 | 0.47614   |
| 47907 | P14079 | Q14397 | 0.67702   |
| 47908 | P14079 | P60606 | 1.1353    |
| 47909 | P14079 | Q5MJ09 | 0.94021   |
| 47910 | P14079 | Q9P021 | 0.5684    |
| 47911 | P14079 | Q9Y2A0 | 1.0097    |
| 47912 | P14079 | Q6UE05 | 1.2485    |
| 47913 | P14079 | O15015 | 0.77928   |
| 47914 | P14079 | P04732 | 0.74382   |
| 47915 | P14079 | Q9UHA2 | 0.75785   |
| 47916 | P14079 | Q9UBA6 | 0.0072542 |
| 47917 | P14079 | Q8NCS4 | 1.2485    |
| 47918 | P14079 | Q96CB5 | 0.28199   |
| 47919 | P14079 | Q9Y2B4 | 0.52313   |
| 47920 | P14079 | Q96M66 | 0.62927   |
| 47921 | P14079 | Q5VUG0 | 0.4217    |
| 47922 | P14079 | O95670 | 0.33047   |
| 47923 | P14079 | Q9NRY2 | 1.3328    |
| 47924 | P14079 | Q7KZF4 | 0.95706   |
| 47925 | P14079 | A6NGG8 | 1.1324    |
| 47926 | P14079 | P62917 | 1.2356    |
| 47927 | P14079 | P09234 | 0.70688   |
| 47928 | P14079 | Q6ZSR9 | 0.38618   |
| 47929 | P14079 | Q02386 | 0.52686   |
| 47930 | P14079 | Q6ZV56 | 1.1715    |
| 47931 | P14079 | Q5JQS6 | 0.90873   |
| 47932 | P14079 | Q9BX70 | 0.78093   |
| 47933 | P14079 | Q9H2L5 | 1.3389    |
| 47934 | P14079 | Q99598 | 0.48144   |
| 47935 | P14079 | P81274 | 0.65749   |
| 47936 | P14079 | Q8N3X1 | 0.58099   |
| 47937 | P14079 | Q8N2M8 | 1.5721    |
| 47938 | P14079 | Q6ZV60 | 1.1715    |
| 47939 | P14079 | Q9BYQ6 | 1.3698    |
| 47940 | P14079 | P61567 | 0.89911   |
| 47941 | P14079 | Q6UWH6 | 0.75507   |
| 47942 | P14079 | O75381 | 0.92958   |
| 47943 | P14079 | Q9H0V9 | 0.5884    |
| 47944 | P14079 | O15239 | 0.85656   |
| 47945 | P14079 | Q676U5 | 0.85706   |
| 47946 | P14079 | Q96MG7 | 0.75772   |
| 47947 | P14079 | Q6NVU6 | 0.77363   |
| 47948 | P14079 | Q9GZY8 | 0.74641   |
| 47949 | P14079 | Q9BT25 | 0.84907   |
| 47950 | P14079 | Q9H1Z4 | 0.42364   |
| 47951 | P14079 | P49321 | 1.2541    |
| 47952 | P14079 | Q9NS86 | 0.89463   |
| 47953 | P14079 | P08670 | 0.67998   |
| 47954 | P14079 | O43493 | 1.3864    |
| 47955 | P14079 | Q9HAV4 | 1.3593    |
| 47956 | P14079 | P07902 | 1.0429    |

|       |        |        |         |
|-------|--------|--------|---------|
| 47957 | P14079 | Q96MP8 | 0.30217 |
| 47958 | P14079 | Q8IWS0 | 0.49861 |
| 47959 | P14079 | O00762 | 0.56632 |
| 47960 | P14079 | Q9H5P4 | 0.57823 |
| 47961 | P14079 | A6NEH8 | 0.79147 |
| 47962 | P14079 | O15226 | 0.88662 |
| 47963 | P14079 | P0DI80 | 0.99732 |
| 47964 | P14079 | Q96DM1 | 1.3329  |
| 47965 | P14079 | Q5VSL9 | 1.2993  |
| 47966 | P14079 | Q5D0E6 | 1.3835  |
| 47967 | P14079 | O43504 | 0.57711 |
| 47968 | P14079 | O94817 | 0.77481 |
| 47969 | P14079 | Q9Y3B7 | 1.448   |
| 47970 | P14079 | Q6W0C5 | 0.79124 |
| 47971 | P14079 | O15182 | 0.61917 |
| 47972 | P14079 | Q8IZ20 | 0.1949  |
| 47973 | P14079 | Q99615 | 0.94133 |
| 47974 | P14079 | Q96N38 | 1.0078  |
| 47975 | P14079 | P21695 | 0.23566 |
| 47976 | P14079 | Q8NBD8 | 1.3453  |
| 47977 | P14079 | Q14687 | 0.56221 |
| 47978 | P14079 | Q9P1A6 | 0.40933 |
| 47979 | P14079 | Q9P2B4 | 0.5316  |
| 47980 | P14079 | O95602 | 0.65753 |
| 47981 | P14079 | Q8N398 | 1.0259  |
| 47982 | P14079 | Q9HCN2 | 1.1715  |
| 47983 | P14079 | P0CG00 | 0.4186  |
| 47984 | P14079 | P61568 | 0.91326 |
| 47985 | P14079 | O75347 | 1.6299  |
| 47986 | P14079 | H0YL14 | 1.2438  |
| 47987 | P14079 | Q96AA3 | 0.75495 |
| 47988 | P14079 | Q96G21 | 1.0268  |
| 47989 | P14079 | Q9BRT6 | 1.2134  |
| 47990 | P14079 | Q6P2H3 | 0.8317  |
| 47991 | P14079 | Q969H9 | 1.1715  |
| 47992 | P14079 | Q96EK6 | 0.79959 |
| 47993 | P14079 | Q8NBL1 | 0.2531  |
| 47994 | P14079 | Q9HC07 | 0.70465 |
| 47995 | P14079 | Q15910 | 0.41492 |
| 47996 | P14079 | P23526 | 0.06411 |
| 47997 | P14079 | A6NJ08 | 0.44102 |
| 47998 | P14079 | Q68CP9 | 0.57407 |
| 47999 | P14079 | Q5SY13 | 1.1715  |
| 48000 | P14079 | P30305 | 0.61999 |
| 48001 | P14079 | Q8IUI8 | 0.24637 |
| 48002 | P14079 | Q12872 | 1.1231  |
| 48003 | P14079 | Q9BXL5 | 0.56169 |
| 48004 | P14079 | Q5SRD1 | 0.66747 |
| 48005 | P14079 | Q6UW49 | 0.84301 |
| 48006 | P14079 | Q8NHQ1 | 1.6759  |
| 48007 | P14079 | P49023 | 0.22044 |
| 48008 | P14079 | Q96Q11 | 0.72477 |
| 48009 | P14079 | Q5VZ46 | 0.8317  |
| 48010 | P14079 | P56279 | 1.4567  |
| 48011 | P14079 | Q9BU64 | 0.79525 |
| 48012 | P14079 | Q96MT0 | 0.5188  |
| 48013 | P14079 | Q15008 | 0.53113 |
| 48014 | P14079 | Q16625 | 0.27078 |
| 48015 | P14079 | Q9UMY4 | 0.30859 |
| 48016 | P14079 | Q9NUP1 | 0.82799 |
| 48017 | P14079 | Q5VWP2 | 0.77554 |
| 48018 | P14079 | Q5MNV8 | 1.1154  |
| 48019 | P14079 | Q9NS93 | 1.0843  |
| 48020 | P14079 | Q9NZF1 | 0.54531 |
| 48021 | P14079 | Q9NZH4 | 1.0343  |
| 48022 | P14079 | Q6NZ67 | 1.1772  |
| 48023 | P14079 | Q00765 | 0.20445 |
| 48024 | P14079 | Q9Y2R0 | 1.1307  |
| 48025 | P14079 | Q9H0V1 | 1.1456  |
| 48026 | P14079 | O75351 | 0.34578 |
| 48027 | P14079 | O60269 | 0.94916 |
| 48028 | P14079 | Q9NQ87 | 0.34239 |
| 48029 | P14079 | Q13761 | 0.72016 |
| 48030 | P14079 | Q5JR59 | 1.5282  |
| 48031 | P14079 | Q9UJP4 | 0.23093 |
| 48032 | P14079 | Q02556 | 0.38123 |

|       |        |        |         |
|-------|--------|--------|---------|
| 48033 | P14079 | P49773 | 0.15016 |
| 48034 | P14079 | O60356 | 1.3652  |
| 48035 | P14079 | Q6UX65 | 0.91469 |
| 48036 | P14079 | P26678 | 1.0711  |
| 48037 | P14079 | Q5T7N8 | 0.58699 |
| 48038 | P14079 | Q9P0J6 | 1.1765  |
| 48039 | P14079 | Q8WWR9 | 1.0802  |
| 48040 | P14079 | P24928 | 0.77418 |
| 48041 | P14079 | Q96TA1 | 0.48639 |
| 48042 | P14079 | P04264 | 0.83522 |
| 48043 | P14079 | Q8IU81 | 0.17242 |
| 48044 | P14079 | Q9H5Q4 | 0.98288 |
| 48045 | P14079 | Q6PKG0 | 0.7217  |
| 48046 | P14079 | O75638 | 2.0085  |
| 48047 | P14079 | P11137 | 0.37648 |
| 48048 | P14079 | Q6ZN68 | 1.1385  |
| 48049 | P14079 | Q9NV92 | 0.57166 |
| 48050 | P14079 | Q86VW0 | 0.49719 |
| 48051 | P14079 | Q68D51 | 0.15996 |
| 48052 | P14079 | Q8N7B1 | 1.1865  |
| 48053 | P14079 | Q03052 | 0.3383  |
| 48054 | P14079 | Q13829 | 0.63207 |
| 48055 | P14079 | Q6U949 | 1.1715  |
| 48056 | P14079 | Q53SZ7 | 1.3222  |
| 48057 | P14079 | Q14558 | 0.29872 |
| 48058 | P14079 | Q5BLP8 | 0.98371 |
| 48059 | P14079 | E9PQX1 | 0.65653 |
| 48060 | P14079 | Q68CZ6 | 0.74419 |
| 48061 | P14079 | Q9NSK0 | 0.32818 |
| 48062 | P14079 | Q9Y2P8 | 0.88776 |
| 48063 | P14079 | Q96G03 | 1.0299  |
| 48064 | P14079 | P80723 | 1.4509  |
| 48065 | P14079 | Q9ULM6 | 0.81919 |
| 48066 | P14079 | Q13395 | 0.18527 |
| 48067 | P14079 | P42773 | 0.53314 |
| 48068 | P14079 | Q8NEA6 | 0.37626 |
| 48069 | P14079 | O75665 | 0.995   |
| 48070 | P14079 | Q8N1G4 | 0.49474 |
| 48071 | P14079 | P61566 | 0.77952 |
| 48072 | P14079 | Q96MR7 | 1.6542  |
| 48073 | P14079 | P30153 | 0.65571 |
| 48074 | P14079 | Q1RMZ1 | 1.0134  |
| 48075 | P14079 | Q8N9Z9 | 0.96871 |
| 48076 | P14079 | Q8N184 | 0.6226  |
| 48077 | P14079 | Q15369 | 1.4771  |
| 48078 | P14079 | P46778 | 0.86734 |
| 48079 | P14079 | Q96A09 | 1.0411  |
| 48080 | P14079 | Q9P2N5 | 0.45404 |
| 48081 | P14079 | Q13895 | 0.8551  |
| 48082 | P14079 | Q9NPC7 | 0.47342 |
| 48083 | P14079 | P62249 | 1.041   |
| 48084 | P14079 | Q96K58 | 0.53274 |
| 48085 | P14079 | O95201 | 0.77928 |
| 48086 | P14079 | A8MWP6 | 1.1715  |
| 48087 | P14079 | Q9NWB1 | 0.29393 |
| 48088 | P14079 | Q69YI7 | 1.9808  |
| 48089 | P14079 | P0C2W7 | 1.1715  |
| 48090 | P14079 | Q8IY42 | 1.7396  |
| 48091 | P14079 | Q6ZW61 | 0.39428 |
| 48092 | P14079 | Q52LD8 | 1.0449  |
| 48093 | P14079 | Q7Z4V5 | 0.12814 |
| 48094 | P14079 | Q9Y6F6 | 1.0148  |
| 48095 | P14079 | Q9H7S9 | 0.82104 |
| 48096 | P14079 | A6NMC2 | 0.23582 |
| 48097 | P14079 | Q9HB65 | 0.5511  |
| 48098 | P14079 | Q3KRA6 | 1.8872  |
| 48099 | P14079 | Q8IYX7 | 1.6142  |
| 48100 | P14079 | Q9BRV8 | 0.77377 |
| 48101 | P14079 | P13928 | 0.1776  |
| 48102 | P14079 | Q6UXP7 | 0.58236 |
| 48103 | P14079 | Q9NWW5 | 0.72955 |
| 48104 | P14079 | Q8NBA8 | 0.78495 |
| 48105 | P14079 | Q6ZSG2 | 1.2582  |
| 48106 | P14079 | P0DI82 | 0.58206 |
| 48107 | P14079 | Q9H7T3 | 1.1029  |
| 48108 | P14079 | Q12824 | 0.97423 |

|       |        |        |          |
|-------|--------|--------|----------|
| 48109 | P14079 | P49754 | 0.55406  |
| 48110 | P14079 | Q6PI97 | 0.8805   |
| 48111 | P14079 | P43686 | 0.42227  |
| 48112 | P14079 | Q8IYE0 | 1.4415   |
| 48113 | P14079 | P48553 | 0.50402  |
| 48114 | P14079 | P10589 | 0.51812  |
| 48115 | P14079 | Q5EBL2 | 0.47388  |
| 48116 | P14079 | Q9BRQ3 | 1.3548   |
| 48117 | P14079 | A8MWS5 | 0.094263 |
| 48118 | P14079 | A2A288 | 1.1916   |
| 48119 | P14079 | Q96MG2 | 0.9579   |
| 48120 | P14079 | P51816 | 0.844    |
| 48121 | P14079 | P78345 | 1.5053   |
| 48122 | P14079 | Q9Y4K1 | 1.2574   |
| 48123 | P14079 | O15091 | 0.18283  |
| 48124 | P14079 | Q99471 | 0.85964  |
| 48125 | P14079 | Q8N4K4 | 0.98613  |
| 48126 | P14079 | Q96BR6 | 0.91027  |
| 48127 | P14079 | Q96JB2 | 0.96024  |
| 48128 | P14079 | Q86WI3 | 0.61196  |
| 48129 | P14079 | Q8N8D7 | 1.2144   |
| 48130 | P14079 | Q6PF04 | 0.58172  |
| 48131 | P14079 | P42575 | 0.3597   |
| 48132 | P14079 | Q0PNE2 | 1.0526   |
| 48133 | P14079 | Q12904 | 0.34908  |
| 48134 | P14079 | Q9NUS5 | 0.78027  |
| 48135 | P14079 | O14617 | 0.28225  |
| 48136 | P14079 | Q96CD2 | 0.28535  |
| 48137 | P14079 | Q13469 | 1.0596   |
| 48138 | P14079 | Q2V2M9 | 0.49226  |
| 48139 | P14079 | Q5VVS0 | 1.4691   |
| 48140 | P14079 | Q8WZB0 | 0.1848   |
| 48141 | P14079 | P06703 | 0.28251  |
| 48142 | P14079 | Q9NZZ3 | 1.1966   |
| 48143 | P14079 | Q9UKA2 | 0.44847  |
| 48144 | P14079 | P59074 | 0.28141  |
| 48145 | P14079 | Q8NEL0 | 0.39442  |
| 48146 | P14079 | A8MWC7 | 0.40984  |
| 48147 | P14079 | Q96KF2 | 1.1715   |
| 48148 | P14079 | Q9Y234 | 0.73817  |
| 48149 | P14079 | Q93074 | 0.61282  |
| 48150 | P14079 | Q9BUG6 | 0.53728  |
| 48151 | P14079 | O00425 | 0.4506   |
| 48152 | P14079 | Q99081 | 0.30875  |
| 48153 | P14079 | Q96F05 | 0.96431  |
| 48154 | P14079 | P58107 | 0.25262  |
| 48155 | P14079 | P51003 | 0.4016   |
| 48156 | P14079 | Q9C0G0 | 0.1949   |
| 48157 | P14079 | Q9BU68 | 1.3629   |
| 48158 | P14079 | P54098 | 0.73069  |
| 48159 | P14079 | Q969W9 | 1.1905   |
| 48160 | P14079 | Q43790 | 1.0109   |
| 48161 | P14079 | Q8IW03 | 0.36274  |
| 48162 | P14079 | Q5FWE3 | 1.2485   |
| 48163 | P14079 | Q2NKX9 | 1.3222   |
| 48164 | P14079 | Q13347 | 0.84637  |
| 48165 | P14079 | Q8N1N2 | 1.098    |
| 48166 | P14079 | Q01831 | 0.89757  |
| 48167 | P14079 | O43242 | 0.74956  |
| 48168 | P14079 | Q86V48 | 1.7373   |
| 48169 | P14079 | Q6B0B8 | 0.94313  |
| 48170 | P14079 | Q03393 | 0.39044  |
| 48171 | P14079 | Q6ZTR5 | 0.96725  |
| 48172 | P14079 | Q499Z4 | 0.61432  |
| 48173 | P14079 | Q8TBC3 | 0.18591  |
| 48174 | P14079 | A2RRL7 | 0.95768  |
| 48175 | P14079 | Q8NHV5 | 0.46842  |
| 48176 | P14079 | O14503 | 0.91914  |
| 48177 | P14079 | Q8WVIO | 1.2916   |
| 48178 | P14079 | Q9Y3B9 | 0.94247  |
| 48179 | P14079 | Q9Y676 | 1.2292   |
| 48180 | P14079 | Q96A57 | 1.2485   |
| 48181 | P14079 | P62826 | 0.81358  |
| 48182 | P14079 | O43399 | 0.73148  |
| 48183 | P14079 | P25788 | 1.1793   |
| 48184 | P14079 | Q15154 | 0.96547  |

|       |        |        |          |
|-------|--------|--------|----------|
| 48185 | P14079 | Q7L945 | 0.7079   |
| 48186 | P14079 | P17040 | 0.74724  |
| 48187 | P14079 | O95361 | 0.31586  |
| 48188 | P14079 | Q9P2N6 | 0.85702  |
| 48189 | P14079 | Q8TD10 | 0.12251  |
| 48190 | P14079 | P63208 | 0.80456  |
| 48191 | P14079 | P82930 | 1.4302   |
| 48192 | P14079 | Q9H2M3 | 0.24202  |
| 48193 | P14079 | Q6IQ32 | 0.35383  |
| 48194 | P14079 | P98182 | 0.37529  |
| 48195 | P14079 | Q8N7R7 | 0.29414  |
| 48196 | P14079 | P09467 | 0.18009  |
| 48197 | P14079 | Q86VY4 | 0.51106  |
| 48198 | P14079 | Q96DV4 | 0.48692  |
| 48199 | P14079 | Q6DN90 | 0.21773  |
| 48200 | P14079 | P43364 | 0.986    |
| 48201 | P14079 | Q9GZV8 | 0.14398  |
| 48202 | P14079 | Q15004 | 0.99932  |
| 48203 | P14079 | Q9UJT9 | 0.40806  |
| 48204 | P14079 | Q9BRT7 | 1.1715   |
| 48205 | P14079 | Q7Z353 | 0.24936  |
| 48206 | P14079 | Q8TAF3 | 0.92057  |
| 48207 | P14079 | P0DI81 | 1.0187   |
| 48208 | P14079 | Q12996 | 0.24687  |
| 48209 | P14079 | P49116 | 0.54187  |
| 48210 | P14079 | O75436 | 0.91783  |
| 48211 | P14079 | Q9BQ83 | 0.92854  |
| 48212 | P14079 | Q12768 | 0.61386  |
| 48213 | P14079 | Q92796 | 0.42346  |
| 48214 | P14079 | Q9H7C9 | 0.096766 |
| 48215 | P14079 | P07315 | 0.75753  |
| 48216 | P14079 | Q8TD17 | 0.49238  |
| 48217 | P14079 | Q5VXH4 | 0.68944  |
| 48218 | P14079 | P09661 | 0.65844  |
| 48219 | P14079 | Q5J8M3 | 0.66992  |
| 48220 | P14079 | O76031 | 1.2054   |
| 48221 | P14079 | Q969Q0 | 0.49586  |
| 48222 | P14079 | P02144 | 0.35657  |
| 48223 | P14079 | O00167 | 0.45324  |
| 48224 | P14079 | Q6UXB1 | 1.0714   |
| 48225 | P14079 | Q9BXW7 | 0.51221  |
| 48226 | P14079 | Q7L1Q6 | 0.42018  |
| 48227 | P14079 | Q9ULE4 | 0.84924  |
| 48228 | P14079 | Q9UHD1 | 0.2552   |
| 48229 | P14079 | Q13465 | 0.15933  |
| 48230 | P14079 | P04733 | 0.74382  |
| 48231 | P14079 | B3EWG5 | 1.3222   |
| 48232 | P14079 | O95260 | 0.07708  |
| 48233 | P14079 | Q8NCF5 | 0.53807  |
| 48234 | P14079 | Q3SYG4 | 1.0405   |
| 48235 | P14079 | P61165 | 1.2098   |
| 48236 | P14079 | Q14197 | 0.28117  |
| 48237 | P14079 | Q8N187 | 1.3571   |
| 48238 | P14079 | Q9H3H1 | 1.2564   |
| 48239 | P14079 | Q8N5H3 | 1.3222   |
| 48240 | P14079 | Q9BYR0 | 1.3698   |
| 48241 | P14079 | Q9UKN5 | 0.44064  |
| 48242 | P14079 | O14802 | 0.30928  |
| 48243 | P14079 | A0AVK6 | 0.23824  |
| 48244 | P14079 | Q9NPJ4 | 2.1195   |
| 48245 | P14079 | O14576 | 0.62893  |
| 48246 | P14079 | Q8WYN3 | 1.0932   |
| 48247 | P14079 | Q9NZN8 | 0.62429  |
| 48248 | P14079 | O00231 | 0.91737  |
| 48249 | P14079 | Q13616 | 0.90417  |
| 48250 | P14079 | Q9H7B2 | 1.2354   |
| 48251 | P14079 | Q9P2G1 | 0.47474  |
| 48252 | P14079 | O95273 | 1.4627   |
| 48253 | P14079 | Q5TA76 | 1.1715   |
| 48254 | P14079 | Q5T4T6 | 1.5167   |
| 48255 | P14079 | Q9Y2L8 | 0.97673  |
| 48256 | P14079 | Q5W111 | 0.40158  |
| 48257 | P14079 | O00479 | 1.5162   |
| 48258 | P14079 | Q9H2L4 | 0.86848  |
| 48259 | P14079 | Q01469 | 0.23959  |
| 48260 | P14079 | Q96B45 | 0.53275  |



|       |        |        |          |
|-------|--------|--------|----------|
| 48261 | P14079 | P59090 | 1.1715   |
| 48262 | P14079 | P13994 | 0.61194  |
| 48263 | P14079 | P05386 | 1.3548   |
| 48264 | P14079 | Q53S58 | 1.2485   |
| 48265 | P14079 | Q9H478 | 0.6572   |
| 48266 | P14079 | Q96N28 | 0.52805  |
| 48267 | P14079 | Q5U4N7 | 1.1715   |
| 48268 | P14079 | Q5VUB5 | 1.245    |
| 48269 | P14079 | O75505 | 0.24936  |
| 48270 | P14079 | Q5U5X0 | 1.5744   |
| 48271 | P14079 | Q8IYB1 | 0.78965  |
| 48272 | P14079 | Q96GX2 | 1.3048   |
| 48273 | P14079 | P50402 | 0.82475  |
| 48274 | P14079 | E5RQL4 | 0.90413  |
| 48275 | P14079 | A6NK39 | 0.51953  |
| 48276 | P14079 | O15055 | 0.2505   |
| 48277 | P14079 | Q9BY89 | 0.59638  |
| 48278 | P14079 | Q5XKR9 | 1.4417   |
| 48279 | P14079 | P52701 | 0.071543 |
| 48280 | P14079 | Q9BT49 | 1.251    |
| 48281 | P14079 | P23284 | 0.45927  |
| 48282 | P14079 | Q96SW2 | 0.53413  |
| 48283 | P14079 | Q6PJP8 | 0.65361  |
| 48284 | P14079 | Q9NV39 | 1.1263   |
| 48285 | P14079 | Q8NF91 | 0.7265   |
| 48286 | P14079 | O15318 | 1.3734   |
| 48287 | P14079 | P28066 | 1.0649   |
| 48288 | P14079 | Q53GL0 | 0.31187  |
| 48289 | P14079 | Q86X67 | 0.1685   |
| 48290 | P14079 | O95600 | 0.1949   |
| 48291 | P14079 | P05412 | 0.69047  |
| 48292 | P14079 | P49588 | 0.3369   |
| 48293 | P14079 | Q9Y5A9 | 0.90872  |
| 48294 | P14079 | P35268 | 1.1731   |
| 48295 | P14079 | Q7L4S7 | 0.9976   |
| 48296 | P14079 | Q9H7E9 | 1.3222   |
| 48297 | P14079 | Q8IZS6 | 0.29307  |
| 48298 | P14079 | Q14929 | 0.57629  |
| 48299 | P14079 | Q5RGN0 | 1.2315   |
| 48300 | P14079 | O95486 | 0.5833   |
| 48301 | P14079 | Q0VD67 | 0.51792  |
| 48302 | P14079 | O95678 | 0.96275  |
| 48303 | P14079 | Q6UX04 | 0.17257  |
| 48304 | P14079 | Q15650 | 0.89143  |
| 48305 | P14079 | Q9BTK2 | 0.95937  |
| 48306 | P14079 | P83916 | 0.92361  |
| 48307 | P14079 | Q96SK2 | 1.0541   |
| 48308 | P14079 | Q29RF7 | 1.0435   |
| 48309 | P14079 | Q96N77 | 0.63598  |
| 48310 | P14079 | Q9Y5P8 | 0.97899  |
| 48311 | P14079 | Q14232 | 0.3442   |
| 48312 | P14079 | Q13371 | 0.60581  |
| 48313 | P14079 | Q5T9G4 | 1.6704   |
| 48314 | P14079 | Q9BRA2 | 0.58615  |
| 48315 | P14079 | Q15466 | 0.52952  |
| 48316 | P14079 | Q494X1 | 0.85319  |
| 48317 | P14079 | Q12901 | 0.77985  |
| 48318 | P14079 | Q8WUU5 | 0.2657   |
| 48319 | P14079 | A4D0Y5 | 1.1715   |
| 48320 | P14079 | Q5T5S1 | 0.96683  |
| 48321 | P14079 | Q96JY0 | 0.34297  |
| 48322 | P14079 | Q9NPB6 | 0.84441  |
| 48323 | P14079 | Q9H6S1 | 0.040636 |
| 48324 | P14079 | Q96K80 | 0.48141  |
| 48325 | P14079 | Q8IWF6 | 1.103    |
| 48326 | P14079 | Q6NX45 | 0.54513  |
| 48327 | P14079 | Q13569 | 1.0831   |
| 48328 | P14079 | Q86VP6 | 0.59636  |
| 48329 | P14079 | Q53G59 | 0.36217  |
| 48330 | P14079 | P0CW24 | 0.63681  |
| 48331 | P14079 | Q9BZX4 | 0.39663  |
| 48332 | P14079 | Q9Y294 | 0.97527  |
| 48333 | P14079 | Q8TBQ9 | 1.2188   |
| 48334 | P14079 | Q9H444 | 1.0092   |
| 48335 | P14079 | Q86XR8 | 1.2032   |
| 48336 | P14079 | Q9UL46 | 0.79475  |

|       |        |        |          |
|-------|--------|--------|----------|
| 48337 | P14079 | Q8WW27 | 0.41182  |
| 48338 | P14079 | Q92845 | 0.38197  |
| 48339 | P14079 | P04424 | 0.22289  |
| 48340 | P14079 | B7ZAP0 | 0.16319  |
| 48341 | P14079 | Q7Z3B0 | 1.2485   |
| 48342 | P14079 | P13682 | 0.60953  |
| 48343 | P14079 | P04792 | 0.44966  |
| 48344 | P14079 | O15382 | 0.20063  |
| 48345 | P14079 | Q86XN6 | 0.7875   |
| 48346 | P14079 | Q96KC9 | 1.156    |
| 48347 | P14079 | C9JQI7 | 1.0446   |
| 48348 | P14079 | Q96KQ4 | 1.0437   |
| 48349 | P14079 | Q9BRG1 | 1.2337   |
| 48350 | P14079 | A6NJL1 | 0.433    |
| 48351 | P14079 | Q9NXR1 | 0.44827  |
| 48352 | P14079 | A6NJR5 | 1.092    |
| 48353 | P14079 | Q6P589 | 0.59722  |
| 48354 | P14079 | Q9Y6B2 | 1.0479   |
| 48355 | P14079 | Q9Y2D8 | 0.90028  |
| 48356 | P14079 | Q96LB3 | 0.77709  |
| 48357 | P14079 | Q9NWS6 | 1.2099   |
| 48358 | P14079 | Q5VV17 | 0.32224  |
| 48359 | P14079 | Q9BS40 | 0.72292  |
| 48360 | P14079 | O00244 | 0.34485  |
| 48361 | P14079 | Q5HYW2 | 1.4755   |
| 48362 | P14079 | Q9GZY4 | 0.76052  |
| 48363 | P14079 | P50748 | 0.97641  |
| 48364 | P14079 | O96020 | 1.3119   |
| 48365 | P14079 | Q9UHD9 | 0.89246  |
| 48366 | P14079 | Q2TAP0 | 1.074    |
| 48367 | P14079 | Q9BSG1 | 0.89445  |
| 48368 | P14079 | Q9HBF4 | 0.38968  |
| 48369 | P14079 | Q12888 | 0.76442  |
| 48370 | P14079 | Q9UEY8 | 0.36953  |
| 48371 | P14079 | Q9GZN1 | 0.30313  |
| 48372 | P14079 | Q8N1L1 | 1.1715   |
| 48373 | P14079 | Q8N1W2 | 0.41707  |
| 48374 | P14079 | Q96KF7 | 1.2485   |
| 48375 | P14079 | P0C7T4 | 1.1715   |
| 48376 | P14079 | Q86VQ1 | 0.69657  |
| 48377 | P14079 | P0DKX0 | 0.93942  |
| 48378 | P14079 | Q8NEJ9 | 0.95563  |
| 48379 | P14079 | Q9BPZ7 | 1.0698   |
| 48380 | P14079 | Q8NCX0 | 0.82953  |
| 48381 | P14079 | O96015 | 0.13595  |
| 48382 | P14079 | Q7Z5G4 | 0.081494 |
| 48383 | P14079 | A1L4L8 | 0.9941   |
| 48384 | P14079 | A8MVP8 | 0.57465  |
| 48385 | P14079 | O75330 | 0.69157  |
| 48386 | P14079 | P17661 | 0.86222  |
| 48387 | P14079 | Q8WW35 | 0.56221  |
| 48388 | P14079 | Q8IYS2 | 1.2485   |
| 48389 | P14079 | Q96B42 | 1.2793   |
| 48390 | P14079 | Q5U623 | 1.0343   |
| 48391 | P14079 | Q9H3H9 | 1.3282   |
| 48392 | P14079 | Q9Y3R5 | 1.1776   |
| 48393 | P14079 | O15499 | 0.17194  |
| 48394 | P14079 | Q8IZ40 | 0.5655   |
| 48395 | P14079 | A8MYA2 | 0.84926  |
| 48396 | P14079 | O15084 | 1.0339   |
| 48397 | P14079 | P62913 | 1.2436   |
| 48398 | P14079 | Q12769 | 1.1446   |
| 48399 | P14079 | Q9BW60 | 0.77014  |
| 48400 | P14079 | P0C7Q3 | 0.20861  |
| 48401 | P14079 | P15621 | 0.97355  |
| 48402 | P14079 | O95235 | 0.26822  |
| 48403 | P14079 | Q9HD40 | 0.63347  |
| 48404 | P14079 | Q13526 | 0.66011  |
| 48405 | P14079 | O75794 | 1.4757   |
| 48406 | P14079 | Q8N9Y4 | 1.4003   |
| 48407 | P14079 | A6NL82 | 0.91687  |
| 48408 | P14079 | A2VCL2 | 0.012635 |
| 48409 | P14079 | Q8IXP5 | 1.3222   |
| 48410 | P14079 | Q96PC3 | 0.53718  |
| 48411 | P14079 | Q9H609 | 0.1949   |
| 48412 | P14079 | P41214 | 0.96826  |

|       |        |         |          |
|-------|--------|---------|----------|
| 48413 | P14079 | Q9Y6X9  | 0.30533  |
| 48414 | P14079 | P36551  | 0.51446  |
| 48415 | P14079 | Q5VZV4  | 1.3564   |
| 48416 | P14079 | Q9UHHJ3 | 0.4217   |
| 48417 | P14079 | Q9P2F5  | 0.98034  |
| 48418 | P14079 | Q86Y37  | 0.18775  |
| 48419 | P14079 | P04259  | 0.96294  |
| 48420 | P14079 | Q9UH99  | 0.36872  |
| 48421 | P14079 | P10242  | 1.0047   |
| 48422 | P14079 | P49368  | 0.20734  |
| 48423 | P14079 | Q9Y4A8  | 0.51752  |
| 48424 | P14079 | Q6P1J9  | 0.65062  |
| 48425 | P14079 | Q9UM07  | 0.85846  |
| 48426 | P14079 | Q9UJU3  | 0.45921  |
| 48427 | P14079 | P40925  | 0.53087  |
| 48428 | P14079 | Q7Z2X4  | 0.26533  |
| 48429 | P14079 | Q99698  | 0.33817  |
| 48430 | P14079 | Q5T6F0  | 0.29528  |
| 48431 | P14079 | Q9Y2D4  | 0.065533 |
| 48432 | P14079 | Q9H0E2  | 0.32328  |
| 48433 | P14079 | Q16543  | 0.51074  |
| 48434 | P14079 | P02545  | 1.0341   |
| 48435 | P14079 | P56524  | 0.40413  |
| 48436 | P14079 | Q6P1K8  | 0.48284  |
| 48437 | P14079 | Q6UXV1  | 0.9137   |
| 48438 | P14079 | Q5F1R6  | 0.22664  |
| 48439 | P14079 | Q8TCZ7  | 1.0031   |
| 48440 | P14079 | A8MYX2  | 0.29906  |
| 48441 | P14079 | Q15361  | 0.91731  |
| 48442 | P14079 | O14813  | 0.3514   |
| 48443 | P14079 | Q14671  | 0.29662  |
| 48444 | P14079 | Q9H7L9  | 0.60772  |
| 48445 | P14079 | P51398  | 1.3991   |
| 48446 | P14079 | Q2YD98  | 0.85599  |
| 48447 | P14079 | Q7RTP0  | 1.2835   |
| 48448 | P14079 | Q7RTU3  | 0.42542  |
| 48449 | P14079 | O60930  | 0.6524   |
| 48450 | P14079 | Q6BDS2  | 1.0765   |
| 48451 | P14079 | A6NEQ9  | 1.1715   |
| 48452 | P14079 | Q9UHN1  | 0.47606  |
| 48453 | P14079 | Q8TF08  | 1.0799   |
| 48454 | P14079 | Q96S19  | 0.67085  |
| 48455 | P14079 | Q15021  | 0.8373   |
| 48456 | P14079 | Q6ZTY8  | 0.45451  |
| 48457 | P14079 | Q8IXS8  | 1.5286   |
| 48458 | P14079 | Q8ND99  | 0.94323  |
| 48459 | P14079 | Q6PI48  | 1.313    |
| 48460 | P14079 | Q96MY1  | 1.567    |
| 48461 | P14079 | P50440  | 0.79588  |
| 48462 | P14079 | Q96S59  | 1.0009   |
| 48463 | P14079 | Q13127  | 0.50538  |
| 48464 | P14079 | Q9P000  | 0.69689  |
| 48465 | P14079 | Q9H7X2  | 1.2485   |
| 48466 | P14079 | Q9Y6R9  | 1.3453   |
| 48467 | P14079 | P53801  | 1.6318   |
| 48468 | P14079 | Q96AQ2  | 1.2485   |
| 48469 | P14079 | Q3LI73  | 1.37     |
| 48470 | P14079 | P99999  | 0.6508   |
| 48471 | P14079 | Q9NVE4  | 0.7456   |
| 48472 | P14079 | Q92529  | 0.31669  |
| 48473 | P14079 | Q6ZWJ1  | 0.25736  |
| 48474 | P14079 | P0DMB2  | 0.9729   |
| 48475 | P14079 | Q9Y426  | 0.86782  |
| 48476 | P14079 | Q9GZR1  | 0.29531  |
| 48477 | P14079 | Q0VDI3  | 0.93342  |
| 48478 | P14079 | Q8N6K0  | 1.2485   |
| 48479 | P14079 | Q09028  | 0.54109  |
| 48480 | P14079 | O75030  | 0.4973   |
| 48481 | P14079 | O95411  | 1.1715   |
| 48482 | P14079 | Q13015  | 1.1588   |
| 48483 | P14079 | P49789  | 0.50878  |
| 48484 | P14079 | Q16864  | 0.25856  |
| 48485 | P14079 | Q9Y2B0  | 0.26545  |
| 48486 | P14079 | Q52M93  | 0.44666  |
| 48487 | P14079 | Q9H2T7  | 0.71681  |
| 48488 | P14079 | H0Y354  | 1.1532   |

|       |        |        |         |
|-------|--------|--------|---------|
| 48489 | P14079 | P49716 | 0.39819 |
| 48490 | P14079 | Q6ZQV5 | 0.77845 |
| 48491 | P14079 | Q8N983 | 0.81151 |
| 48492 | P14079 | Q96QD9 | 1.0012  |
| 48493 | P14079 | Q96FX8 | 1.371   |
| 48494 | P14079 | Q9NQM4 | 0.37406 |
| 48495 | P14079 | Q86UP9 | 1.4314  |
| 48496 | P14079 | Q06416 | 0.28169 |
| 48497 | P14079 | Q6IEE7 | 1.5917  |
| 48498 | P14079 | Q6ZNG1 | 0.80079 |
| 48499 | P14079 | Q9BXP5 | 1.1551  |
| 48500 | P14079 | Q99816 | 0.51931 |
| 48501 | P14079 | Q96DT7 | 0.25992 |
| 48502 | P14079 | Q96IT1 | 0.80141 |
| 48503 | P14079 | Q8WYR4 | 0.41342 |
| 48504 | P14079 | Q9NVS2 | 1.3164  |
| 48505 | P14079 | Q9BX66 | 0.5448  |
| 48506 | P14079 | Q9NRC8 | 1.1295  |
| 48507 | P14079 | Q9UK61 | 1.153   |
| 48508 | P14079 | Q6ZSJ8 | 1.3222  |
| 48509 | P14079 | P25490 | 0.27672 |
| 48510 | P14079 | O43172 | 0.61022 |
| 48511 | P14079 | Q86XT9 | 1.2094  |
| 48512 | P14079 | Q9UM63 | 0.46138 |
| 48513 | P14079 | Q16514 | 0.77274 |
| 48514 | P14079 | Q86SH4 | 1.1715  |
| 48515 | P14079 | P49639 | 0.22592 |
| 48516 | P14079 | P54840 | 0.72704 |
| 48517 | P14079 | Q9P2W9 | 0.43891 |
| 48518 | P14079 | Q504U0 | 0.61075 |
| 48519 | P14079 | P05387 | 0.86734 |
| 48520 | P14079 | A6NE21 | 0.57067 |
| 48521 | P14079 | O95619 | 0.73892 |
| 48522 | P14079 | Q8N5U0 | 1.1715  |
| 48523 | P14079 | Q14457 | 0.74447 |
| 48524 | P14079 | Q9Y530 | 0.92331 |
| 48525 | P14079 | Q6P2S7 | 0.45533 |
| 48526 | P14079 | P57060 | 0.88455 |
| 48527 | P14079 | P0DM63 | 1.3504  |
| 48528 | P14079 | Q5VXD3 | 0.38652 |
| 48529 | P14079 | Q5T440 | 0.75391 |
| 48530 | P14079 | Q96QU8 | 1.06    |
| 48531 | P14079 | Q9UMY1 | 1.6598  |
| 48532 | P14079 | Q9Y2G5 | 0.63446 |
| 48533 | P14079 | P52756 | 0.2354  |
| 48534 | P14079 | Q5TAB7 | 1.1416  |
| 48535 | P14079 | Q6ZR93 | 1.1715  |
| 48536 | P14079 | Q9NRH1 | 0.75101 |
| 48537 | P14079 | Q8IYL2 | 1.215   |
| 48538 | P14079 | Q6DHV5 | 0.74624 |
| 48539 | P14079 | O60238 | 0.51962 |
| 48540 | P14079 | Q16534 | 0.67324 |
| 48541 | P14079 | Q9BY60 | 0.25965 |
| 48542 | P14079 | Q96HE8 | 1.0454  |
| 48543 | P14079 | O43819 | 0.51556 |
| 48544 | P14079 | Q2M3W8 | 1.0323  |
| 48545 | P14079 | Q9BYP8 | 1.1715  |
| 48546 | P14079 | O75494 | 0.54516 |
| 48547 | P14079 | Q8N814 | 1.5319  |
| 48548 | P14079 | Q9UKD2 | 0.28    |
| 48549 | P14079 | Q9UBX2 | 0.25626 |
| 48550 | P14079 | B1AL46 | 1.8041  |
| 48551 | P14079 | O15355 | 0.83255 |
| 48552 | P14079 | Q6UXD1 | 1.2485  |
| 48553 | P14079 | Q6ZVN6 | 0.70081 |
| 48554 | P14079 | O14598 | 1.445   |
| 48555 | P14079 | Q96HM7 | 1.4207  |
| 48556 | P14079 | Q9Y536 | 0.13659 |
| 48557 | P14079 | P50616 | 0.50727 |
| 48558 | P14079 | Q86XE5 | 1.167   |
| 48559 | P14079 | Q7Z7A3 | 0.92707 |
| 48560 | P14079 | Q6PEY1 | 1.5919  |
| 48561 | P14079 | Q9BUX1 | 1.0162  |
| 48562 | P14079 | Q9UBQ5 | 1.0646  |
| 48563 | P14079 | Q9H1D9 | 0.70875 |
| 48564 | P14079 | P61247 | 1.2837  |

|       |        |        |         |
|-------|--------|--------|---------|
| 48565 | P14079 | Q6ZRQ5 | 0.77501 |
| 48566 | P14079 | Q8NFP0 | 1.0653  |
| 48567 | P14079 | Q5JUW0 | 0.84162 |
| 48568 | P14079 | Q8WV44 | 0.29839 |
| 48569 | P14079 | Q5T9Z0 | 1.0479  |
| 48570 | P14079 | Q53T94 | 0.52936 |
| 48571 | P14079 | Q8WUH2 | 0.88995 |
| 48572 | P14079 | Q5T6X4 | 1.455   |
| 48573 | P14079 | Q6EBC2 | 1.1894  |
| 48574 | P14079 | Q9H4I2 | 0.65266 |
| 48575 | P14079 | Q8WUE5 | 0.44258 |
| 48576 | P14079 | Q15233 | 0.51822 |
| 48577 | P14079 | O75474 | 1.8186  |
| 48578 | P14079 | Q8NF67 | 1.1388  |
| 48579 | P14079 | Q7Z5K2 | 0.79075 |
| 48580 | P14079 | P28360 | 0.12926 |
| 48581 | P14079 | Q9Y2I6 | 0.51416 |
| 48582 | P14079 | Q6ZUI0 | 0.75474 |
| 48583 | P14079 | Q8TBF5 | 0.87959 |
| 48584 | P14079 | Q9BSY9 | 0.92372 |
| 48585 | P14079 | Q8N8R7 | 1.2929  |
| 48586 | P14079 | Q96MW1 | 1.3222  |
| 48587 | P14079 | Q6ZS62 | 1.0604  |
| 48588 | P14079 | Q9BZ98 | 0.41696 |
| 48589 | P14079 | Q8WTU0 | 0.58349 |
| 48590 | P14079 | Q6L8G8 | 1.1715  |
| 48591 | P14079 | Q8WW22 | 0.57749 |
| 48592 | P14079 | Q8IYA6 | 1.4195  |
| 48593 | P14079 | P52740 | 0.50207 |
| 48594 | P14079 | Q3KNT9 | 1.5131  |
| 48595 | P14079 | Q13813 | 0.41012 |
| 48596 | P14079 | O43313 | 0.25342 |
| 48597 | P14079 | P24539 | 0.23288 |
| 48598 | P14079 | Q9NVX2 | 0.31898 |
| 48599 | P14079 | Q99547 | 1.3951  |
| 48600 | P14079 | Q96TC7 | 1.3844  |
| 48601 | P14079 | Q5BKU6 | 0.58702 |
| 48602 | P14079 | Q8N8R7 | 1.0631  |
| 48603 | P14079 | P35244 | 0.79307 |
| 48604 | P14079 | Q5UIP0 | 1.4491  |
| 48605 | P14079 | Q9NTG7 | 0.5543  |
| 48606 | P14079 | Q9Y221 | 0.93134 |
| 48607 | P14079 | O15105 | 0.92638 |
| 48608 | P14079 | Q9BZZ5 | 0.4731  |
| 48609 | P14079 | Q14140 | 2.1106  |
| 48610 | P14079 | A6NGK3 | 1.0162  |
| 48611 | P14079 | P78347 | 0.4492  |
| 48612 | P14079 | Q5JTC6 | 1.6336  |
| 48613 | P14079 | Q8NFV5 | 1.092   |
| 48614 | P14079 | Q8N6V4 | 0.89445 |
| 48615 | P14079 | Q9UDW3 | 0.34419 |
| 48616 | P14079 | Q7Z3I7 | 0.56358 |
| 48617 | P14079 | Q96E14 | 1.4104  |
| 48618 | P14079 | Q69YN4 | 0.97769 |
| 48619 | P14079 | Q96HQ0 | 0.59196 |
| 48620 | P14079 | A6NGY1 | 1.395   |
| 48621 | P14079 | Q5VWM1 | 0.88502 |
| 48622 | P14079 | Q9BYQ0 | 1.3698  |
| 48623 | P14079 | P54105 | 1.3451  |
| 48624 | P14079 | Q9HAH7 | 1.1817  |
| 48625 | P14079 | P0CW26 | 0.86237 |
| 48626 | P14079 | Q92575 | 1.1286  |
| 48627 | P14079 | Q96BD8 | 0.82119 |
| 48628 | P14079 | P78524 | 0.15996 |
| 48629 | P14079 | Q8N1I0 | 0.30564 |
| 48630 | P14079 | P48059 | 0.40537 |
| 48631 | P14079 | Q8IZT9 | 1.532   |
| 48632 | P14079 | A6NFI3 | 0.50383 |
| 48633 | P14079 | Q86VQ0 | 0.70174 |
| 48634 | P14079 | Q9BVA0 | 0.23525 |
| 48635 | P14079 | Q06609 | 0.4668  |
| 48636 | P14079 | Q69YW2 | 0.96912 |
| 48637 | P14079 | Q8TEF2 | 1.1885  |
| 48638 | P14079 | O14901 | 0.35221 |
| 48639 | P14079 | Q92988 | 0.46462 |
| 48640 | P14079 | Q86TY3 | 1.2485  |

|       |        |        |         |
|-------|--------|--------|---------|
| 48641 | P14079 | Q8NB50 | 0.80079 |
| 48642 | P14079 | O75122 | 0.41983 |
| 48643 | P14079 | Q8N9G6 | 1.1938  |
| 48644 | P14079 | Q9Y3I1 | 1.0138  |
| 48645 | P14079 | Q8TBP5 | 1.2485  |
| 48646 | P14079 | Q8WYA1 | 0.30398 |
| 48647 | P14079 | Q9Y6X8 | 0.63663 |
| 48648 | P14079 | Q07021 | 1.1692  |
| 48649 | P14079 | O00470 | 0.46739 |
| 48650 | P14079 | Q14683 | 0.53802 |
| 48651 | P14079 | O00267 | 1.1843  |
| 48652 | P14079 | Q9NW38 | 0.97455 |
| 48653 | P14079 | P62318 | 0.83696 |
| 48654 | P14079 | P0CG47 | 0.68371 |
| 48655 | P14079 | Q6ZQN3 | 1.5648  |
| 48656 | P14079 | Q3LI76 | 1.3568  |
| 48657 | P14079 | A6NCN8 | 1.3222  |
| 48658 | P14079 | Q32P44 | 0.25965 |
| 48659 | P14079 | Q96ME1 | 0.3778  |
| 48660 | P14079 | Q9H489 | 0.51865 |
| 48661 | P14079 | Q9UN36 | 0.43896 |
| 48662 | P14079 | P52736 | 0.67364 |
| 48663 | P14079 | Q9NVP1 | 0.10046 |
| 48664 | P14079 | Q86SZ3 | 0.71601 |
| 48665 | P14079 | Q8IY50 | 1.1271  |
| 48666 | P14079 | Q96FQ7 | 0.52179 |
| 48667 | P14079 | P56555 | 1.5466  |
| 48668 | P14079 | P54727 | 0.78942 |
| 48669 | P14079 | Q17RQ9 | 0.91808 |
| 48670 | P14079 | Q6S8J3 | 0.96316 |
| 48671 | P14079 | Q6ZUB0 | 1.2485  |
| 48672 | P14079 | Q9HAA7 | 0.49115 |
| 48673 | P14079 | Q9NYK5 | 0.76971 |
| 48674 | P14079 | Q8N616 | 1.1715  |
| 48675 | P14079 | O14965 | 0.33962 |
| 48676 | P14079 | Q9UQ80 | 0.93404 |
| 48677 | P14079 | Q5T1B0 | 0.13008 |
| 48678 | P14079 | Q6P9A1 | 0.92077 |
| 48679 | P14079 | Q15935 | 0.6303  |
| 48680 | P14079 | Q5TKA1 | 0.54465 |
| 48681 | P14079 | P81277 | 0.50785 |
| 48682 | P14079 | Q5JRM2 | 1.0613  |
| 48683 | P14079 | Q14582 | 0.38342 |
| 48684 | P14079 | Q9NX65 | 0.45326 |
| 48685 | P14079 | O95780 | 1.0602  |
| 48686 | P14079 | Q9Y5L0 | 1.1151  |
| 48687 | P14079 | Q96Q83 | 0.74287 |
| 48688 | P14079 | P02549 | 0.31687 |
| 48689 | P14079 | Q86TS7 | 1.1715  |
| 48690 | P14079 | Q6UWH4 | 1.3408  |
| 48691 | P14079 | Q9NXF1 | 0.66658 |
| 48692 | P14079 | O95257 | 0.70637 |
| 48693 | P14079 | P62269 | 1.0666  |
| 48694 | P14079 | Q86VR2 | 1.2942  |
| 48695 | P14079 | Q9H2J4 | 1.0518  |
| 48696 | P14079 | Q9ULJ6 | 0.50195 |
| 48697 | P14079 | Q96MH2 | 1.1717  |
| 48698 | P14079 | Q86WR7 | 1.5091  |
| 48699 | P14079 | P21673 | 0.55294 |
| 48700 | P14079 | Q96PS1 | 1.1146  |
| 48701 | P14079 | Q8N7S6 | 1.1715  |
| 48702 | P14079 | Q5TCZ1 | 0.39444 |
| 48703 | P14079 | O94776 | 1.1148  |
| 48704 | P14079 | A6NHS1 | 1.3601  |
| 48705 | P14079 | Q6PH85 | 0.20994 |
| 48706 | P14079 | Q9H0B6 | 0.93946 |
| 48707 | P14079 | Q86YD7 | 0.52751 |
| 48708 | P14079 | P0C7W0 | 1.3222  |
| 48709 | P14079 | O15151 | 0.46361 |
| 48710 | P14079 | Q9UJC5 | 0.95503 |
| 48711 | P14079 | Q8WYA6 | 0.97385 |
| 48712 | P14079 | Q9H4A6 | 0.97652 |
| 48713 | P14079 | Q96E16 | 1.3579  |
| 48714 | P14079 | Q9UNS1 | 0.45634 |
| 48715 | P14079 | Q6PIZ9 | 1.0881  |
| 48716 | P14079 | P69892 | 0.65657 |

|       |        |        |          |
|-------|--------|--------|----------|
| 48717 | P14079 | Q9NRX6 | 0.60686  |
| 48718 | P14079 | Q9Y4Y9 | 0.82907  |
| 48719 | P14079 | Q8N0V1 | 1.0577   |
| 48720 | P14079 | Q9NR77 | 0.99614  |
| 48721 | P14079 | Q6ZMS4 | 0.54886  |
| 48722 | P14079 | Q9P1Z2 | 1.0392   |
| 48723 | P14079 | P61578 | 1.1515   |
| 48724 | P14079 | Q9UPY6 | 0.28326  |
| 48725 | P14079 | Q9NVD7 | 0.53488  |
| 48726 | P14079 | Q96LU7 | 1.028    |
| 48727 | P14079 | P62701 | 0.62217  |
| 48728 | P14079 | P0CJ76 | 1.3031   |
| 48729 | P14079 | E9PAV3 | 0.7974   |
| 48730 | P14079 | Q9BYZ2 | 0.60641  |
| 48731 | P14079 | Q9Y573 | 0.19215  |
| 48732 | P14079 | O75969 | 0.66724  |
| 48733 | P14079 | Q9BQQ7 | 0.54081  |
| 48734 | P14079 | Q13287 | 0.56868  |
| 48735 | P14079 | Q7Z2Z1 | 1.441    |
| 48736 | P14079 | Q9UJ78 | 0.46997  |
| 48737 | P14079 | Q17RA5 | 1.1715   |
| 48738 | P14079 | Q6EEV6 | 0.22082  |
| 48739 | P14079 | Q9BRK4 | 0.83379  |
| 48740 | P14079 | Q2NKJ3 | 1.0156   |
| 48741 | P14079 | Q6UN15 | 1.7325   |
| 48742 | P14079 | Q92622 | 0.53802  |
| 48743 | P14079 | P18583 | 0.42296  |
| 48744 | P14079 | Q9Y239 | 0.28448  |
| 48745 | P14079 | Q9NRX3 | 1.2495   |
| 48746 | P14079 | P36954 | 0.2975   |
| 48747 | P14079 | Q9H7U1 | 1.6767   |
| 48748 | P14079 | P51826 | 0.6984   |
| 48749 | P14079 | O96006 | 1.4929   |
| 48750 | P14079 | Q9NWQ4 | 1.3098   |
| 48751 | P14079 | Q7Z2E3 | 0.62573  |
| 48752 | P14079 | P17030 | 0.60452  |
| 48753 | P14079 | Q8N808 | 1.2643   |
| 48754 | P14079 | Q5VYV7 | 0.56221  |
| 48755 | P14079 | Q7Z4W3 | 1.1715   |
| 48756 | P14079 | Q12857 | 0.40943  |
| 48757 | P14079 | Q8IYX8 | 0.34309  |
| 48758 | P14079 | Q9UHB9 | 0.50433  |
| 48759 | P14079 | Q15274 | 0.46804  |
| 48760 | P14079 | H3BQW9 | 1.2292   |
| 48761 | P14079 | Q8IUI4 | 0.70324  |
| 48762 | P14079 | Q9H5H4 | 0.5795   |
| 48763 | P14079 | P36956 | 0.2924   |
| 48764 | P14079 | O43617 | 0.58443  |
| 48765 | P14079 | Q9ULV5 | 0.38365  |
| 48766 | P14079 | P36871 | 0.059046 |
| 48767 | P14079 | Q96LM5 | 0.031437 |
| 48768 | P14079 | Q53TQ3 | 0.94572  |
| 48769 | P14079 | O75616 | 0.87     |
| 48770 | P14079 | A6NGB0 | 1.2485   |
| 48771 | P14079 | O14879 | 0.64608  |
| 48772 | P14079 | E9PB15 | 0.6674   |
| 48773 | P14079 | A8MWP4 | 0.86626  |
| 48774 | P14079 | Q96GY3 | 1.0215   |
| 48775 | P14079 | Q9Y5A7 | 0.8753   |
| 48776 | P14079 | Q9UQC2 | 0.43364  |
| 48777 | P14079 | Q6QNY1 | 1.0022   |
| 48778 | P14079 | O43151 | 1.0447   |
| 48779 | P14079 | Q9Y236 | 0.30349  |
| 48780 | P14079 | Q4VC39 | 0.8325   |
| 48781 | P14079 | Q6PII3 | 1.1705   |
| 48782 | P14079 | Q6URK8 | 1.0272   |
| 48783 | P14079 | Q9P2Y5 | 0.71445  |
| 48784 | P14079 | Q01094 | 0.79105  |
| 48785 | P14079 | Q5NDL2 | 0.38766  |
| 48786 | P14079 | Q13352 | 0.61244  |
| 48787 | P14079 | Q16612 | 0.31255  |
| 48788 | P14079 | Q9UBP8 | 0.9498   |
| 48789 | P14079 | Q9H902 | 0.23906  |
| 48790 | P14079 | Q9H5Z6 | 1.3222   |
| 48791 | P14079 | O00483 | 0.38303  |
| 48792 | P14079 | O75935 | 1.0307   |

|       |        |        |          |
|-------|--------|--------|----------|
| 48793 | P14079 | Q86X95 | 1.7529   |
| 48794 | P14079 | Q9Y5B6 | 1.4104   |
| 48795 | P14079 | Q5T1B1 | 1.7345   |
| 48796 | P14079 | Q504Q3 | 0.10722  |
| 48797 | P14079 | O60443 | 0.62947  |
| 48798 | P14079 | A6NFD8 | 0.255    |
| 48799 | P14079 | Q9H568 | 0.70001  |
| 48800 | P14079 | Q8N4C9 | 1.2485   |
| 48801 | P14079 | Q969P6 | 0.78697  |
| 48802 | P14079 | Q8NEG0 | 0.90331  |
| 48803 | P14079 | Q5T5A4 | 0.94754  |
| 48804 | P14079 | A6NDR6 | 0.24936  |
| 48805 | P14079 | Q7L2Z9 | 0.79627  |
| 48806 | P14079 | Q6DCA0 | 0.70001  |
| 48807 | P14079 | Q9P2S5 | 0.2601   |
| 48808 | P14079 | P53701 | 1.1115   |
| 48809 | P14079 | Q14678 | 0.49494  |
| 48810 | P14079 | Q9C0D2 | 1.5293   |
| 48811 | P14079 | Q8N912 | 1.4726   |
| 48812 | P14079 | Q96MT3 | 0.86795  |
| 48813 | P14079 | Q96G25 | 0.95487  |
| 48814 | P14079 | Q9Y224 | 1.6052   |
| 48815 | P14079 | P86452 | 0.84777  |
| 48816 | P14079 | Q9Y5J9 | 0.97706  |
| 48817 | P14079 | P0CG38 | 0.99952  |
| 48818 | P14079 | Q5HYW3 | 1.7339   |
| 48819 | P14079 | Q92585 | 1.0491   |
| 48820 | P14079 | O60765 | 0.68218  |
| 48821 | P14079 | Q8N228 | 0.38002  |
| 48822 | P14079 | Q7RTU4 | 0.42542  |
| 48823 | P14079 | O75486 | 1.0316   |
| 48824 | P14079 | Q9Y2Z0 | 0.49088  |
| 48825 | P14079 | O00255 | 0.39266  |
| 48826 | P14079 | Q96HA4 | 0.82292  |
| 48827 | P14079 | O76042 | 1.1521   |
| 48828 | P14079 | Q9NUN5 | 0.96178  |
| 48829 | P14079 | A6NK58 | 0.58354  |
| 48830 | P14079 | P83111 | 0.14665  |
| 48831 | P14079 | P61575 | 1.355    |
| 48832 | P14079 | Q8N8C0 | 0.61722  |
| 48833 | P14079 | Q9NQC7 | 0.18479  |
| 48834 | P14079 | Q9H496 | 0.91283  |
| 48835 | P14079 | O95900 | 1.2936   |
| 48836 | P14079 | Q6ZS17 | 0.74576  |
| 48837 | P14079 | Q2VPJ9 | 1.3222   |
| 48838 | P14079 | Q96KS0 | 0.32306  |
| 48839 | P14079 | Q8WUF8 | 0.97691  |
| 48840 | P14079 | Q8N6I1 | 1.4032   |
| 48841 | P14079 | P15408 | 0.53462  |
| 48842 | P14079 | Q580R0 | 0.4117   |
| 48843 | P14079 | Q9ULK2 | 1.0973   |
| 48844 | P14079 | Q6PEV8 | 0.24266  |
| 48845 | P14079 | Q9UBY9 | 1.028    |
| 48846 | P14079 | P43355 | 1.0517   |
| 48847 | P14079 | Q3LI68 | 1.6908   |
| 48848 | P14079 | Q6ZV70 | 0.74121  |
| 48849 | P14079 | O94868 | 0.56221  |
| 48850 | P14079 | O14933 | 0.50939  |
| 48851 | P14079 | Q96C12 | 0.041588 |
| 48852 | P14079 | P61244 | 0.79362  |
| 48853 | P14079 | Q9HC77 | 1.211    |
| 48854 | P14079 | Q5JQC4 | 1.1715   |
| 48855 | P14079 | A6NLX4 | 1.2485   |
| 48856 | P14079 | Q6UWD8 | 0.94074  |
| 48857 | P14079 | O60884 | 0.58981  |
| 48858 | P14079 | Q9HBQ8 | 1.4427   |
| 48859 | P14079 | Q17R31 | 0.49931  |
| 48860 | P14079 | A6NNP5 | 0.20695  |
| 48861 | P14079 | Q13951 | 0.73049  |
| 48862 | P14079 | Q9ULE0 | 0.29482  |
| 48863 | P14079 | Q9BZQ8 | 1.311    |
| 48864 | P14079 | P63313 | 1.1711   |
| 48865 | P14079 | Q96CN0 | 1.1715   |
| 48866 | P14079 | Q8IYW2 | 1.1715   |
| 48867 | P14079 | Q8N7H5 | 0.88688  |
| 48868 | P14079 | P51580 | 0.67068  |



|       |        |        |          |
|-------|--------|--------|----------|
| 48869 | P14079 | A6XGL0 | 0.87949  |
| 48870 | P14079 | P08727 | 0.99997  |
| 48871 | P14079 | Q15940 | 0.88249  |
| 48872 | P14079 | Q8TEB1 | 0.37638  |
| 48873 | P14079 | Q9NW07 | 0.55049  |
| 48874 | P14079 | Q9NRA8 | 1.2586   |
| 48875 | P14079 | P0C7I6 | 1.3224   |
| 48876 | P14079 | Q9NX31 | 0.30749  |
| 48877 | P14079 | O75971 | 1.8063   |
| 48878 | P14079 | Q8TF63 | 1.3902   |
| 48879 | P14079 | O15480 | 0.081932 |
| 48880 | P14079 | Q15628 | 0.85695  |
| 48881 | P14079 | Q96M11 | 1.783    |
| 48882 | P14079 | Q6TDU7 | 0.93752  |
| 48883 | P14079 | Q53S33 | 1.5781   |
| 48884 | P14079 | Q9H3Q1 | 0.53442  |
| 48885 | P14079 | Q13145 | 0.59749  |
| 48886 | P14079 | Q96N11 | 0.96974  |
| 48887 | P14079 | Q9BXV9 | 1.1715   |
| 48888 | P14079 | O15259 | 0.40028  |
| 48889 | P14079 | Q96FT9 | 0.54383  |
| 48890 | P14079 | O14908 | 0.26554  |
| 48891 | P14079 | Q9H6K1 | 0.53811  |
| 48892 | P14079 | Q5SRE5 | 0.98304  |
| 48893 | P14079 | P04818 | 0.29906  |
| 48894 | P14079 | O14618 | 0.44614  |
| 48895 | P14079 | Q02080 | 0.79005  |
| 48896 | P14079 | Q06265 | 0.37119  |
| 48897 | P14079 | Q9UEU5 | 0.53923  |
| 48898 | P14079 | Q9NRG9 | 0.82786  |
| 48899 | P14079 | A2RUT3 | 1.344    |
| 48900 | P14079 | P0CW23 | 1.0342   |
| 48901 | P14079 | Q9Y4J8 | 0.30054  |
| 48902 | P14079 | Q8N7B7 | 0.58518  |
| 48903 | P14079 | Q96EY4 | 1.0971   |
| 48904 | P14079 | O14523 | 1.3259   |
| 48905 | P14079 | Q6ZVC0 | 1.4801   |
| 48906 | P14079 | Q5HYK3 | 0.92098  |
| 48907 | P14079 | Q8WW14 | 0.59037  |
| 48908 | P14079 | Q9H8M7 | 1.0018   |
| 48909 | P14079 | Q9NSB2 | 0.94437  |
| 48910 | P14079 | Q96DM3 | 0.72814  |
| 48911 | P14079 | P51571 | 0.7016   |
| 48912 | P14079 | Q96KT0 | 0.95937  |
| 48913 | P14079 | Q30KQ6 | 0.91101  |
| 48914 | P14079 | Q8IW35 | 1.5022   |
| 48915 | P14079 | Q9GZV4 | 0.75544  |
| 48916 | P14079 | P01100 | 0.63772  |
| 48917 | P14079 | Q4W4Y0 | 0.93518  |
| 48918 | P14079 | Q9UJ68 | 0.44542  |
| 48919 | P14079 | Q8NE65 | 0.91121  |
| 48920 | P14079 | Q96PZ2 | 1.0953   |
| 48921 | P14079 | Q9P267 | 0.58195  |
| 48922 | P14079 | P10075 | 0.52953  |
| 48923 | P14079 | O75153 | 0.2893   |
| 48924 | P14079 | Q8TDI8 | 0.94171  |
| 48925 | P14079 | Q9NQ40 | 1.2062   |
| 48926 | P14079 | H3BTG2 | 1.2331   |
| 48927 | P14079 | O43395 | 0.92992  |
| 48928 | P14079 | P61313 | 1.2548   |
| 48929 | P14079 | Q5TBC7 | 0.57328  |
| 48930 | P14079 | Q9UBT6 | 0.38564  |
| 48931 | P14079 | Q9BRU2 | 0.52899  |
| 48932 | P14079 | P12035 | 0.98252  |
| 48933 | P14079 | P78412 | 0.24936  |
| 48934 | P14079 | Q8N812 | 1.4217   |
| 48935 | P14079 | P63146 | 0.56404  |
| 48936 | P14079 | O15273 | 0.33372  |
| 48937 | P14079 | Q9H816 | 0.64409  |
| 48938 | P14079 | Q8N7Q3 | 0.80886  |
| 48939 | P14079 | O95625 | 0.40943  |
| 48940 | P14079 | A8MTZ0 | 1.2008   |
| 48941 | P14079 | P0DL12 | 1.0595   |
| 48942 | P14079 | Q5VT03 | 1.8041   |
| 48943 | P14079 | O95218 | 0.61067  |
| 48944 | P14079 | Q5T5A8 | 1.1715   |

|       |        |        |          |
|-------|--------|--------|----------|
| 48945 | P14079 | Q9BQ13 | 0.18591  |
| 48946 | P14079 | Q96G28 | 0.60862  |
| 48947 | P14079 | Q719I0 | 0.58864  |
| 48948 | P14079 | Q9BYT5 | 0.88786  |
| 48949 | P14079 | Q96FX7 | 0.50331  |
| 48950 | P14079 | O75683 | 1.1414   |
| 48951 | P14079 | Q9NP71 | 0.37373  |
| 48952 | P14079 | Q8WZ71 | 1.2289   |
| 48953 | P14079 | Q9NZW5 | 0.2686   |
| 48954 | P14079 | Q9Y376 | 0.24404  |
| 48955 | P14079 | Q16342 | 0.23145  |
| 48956 | P14079 | O15234 | 1.5056   |
| 48957 | P14079 | Q5JSJ4 | 1.8235   |
| 48958 | P14079 | Q9BXW4 | 0.43453  |
| 48959 | P14079 | P0CL84 | 0.46781  |
| 48960 | P14079 | Q9NZB2 | 1.4239   |
| 48961 | P14079 | P42695 | 0.42114  |
| 48962 | P14079 | Q96EZ8 | 0.77469  |
| 48963 | P14079 | O75694 | 0.70035  |
| 48964 | P14079 | Q5TDH0 | 0.38319  |
| 48965 | P14079 | O14599 | 1.1715   |
| 48966 | P14079 | Q14188 | 0.69755  |
| 48967 | P14079 | Q9HAT2 | 0.9994   |
| 48968 | P14079 | Q10586 | 0.41112  |
| 48969 | P14079 | Q96SN8 | 0.77329  |
| 48970 | P14079 | Q9BY65 | 1.2746   |
| 48971 | P14079 | Q8IUM7 | 0.27737  |
| 48972 | P14079 | P23769 | 0.41158  |
| 48973 | P14079 | O60716 | 0.3233   |
| 48974 | P14079 | Q5T653 | 1.2117   |
| 48975 | P14079 | Q9UIG5 | 0.30168  |
| 48976 | P14079 | Q9H7Y2 | 1.0738   |
| 48977 | P14079 | Q8WVB3 | 0.096538 |
| 48978 | P14079 | O14681 | 1.4529   |
| 48979 | P14079 | P50502 | 0.71713  |
| 48980 | P14079 | O75717 | 0.57211  |
| 48981 | P14079 | Q96C03 | 1.2573   |
| 48982 | P14079 | P14406 | 0.83234  |
| 48983 | P14079 | P23511 | 1.1288   |
| 48984 | P14079 | Q96M34 | 0.63065  |
| 48985 | P14079 | Q8IYS4 | 0.577    |
| 48986 | P14079 | Q86Y97 | 0.23361  |
| 48987 | P14079 | Q9BTC0 | 0.35575  |
| 48988 | P14079 | O95473 | 0.8439   |
| 48989 | P14079 | Q56VL3 | 1.1262   |
| 48990 | P14079 | Q8TAF5 | 1.1715   |
| 48991 | P14079 | Q9NVN3 | 0.37442  |
| 48992 | P14079 | Q8NEF9 | 0.61376  |
| 48993 | P14079 | Q96H40 | 0.97758  |
| 48994 | P14079 | Q9H4R4 | 0.30003  |
| 48995 | P14079 | Q9P287 | 0.78489  |
| 48996 | P14079 | Q5UE93 | 0.9255   |
| 48997 | P14079 | Q9NV96 | 0.32918  |
| 48998 | P14079 | O15360 | 1.0132   |
| 48999 | P14079 | Q86X60 | 0.96022  |
| 49000 | P14079 | Q9HB75 | 0.85994  |
| 49001 | P14079 | P03901 | 0.87522  |
| 49002 | P14079 | Q08209 | 0.40183  |
| 49003 | P14079 | Q6ZU65 | 0.83977  |
| 49004 | P14079 | P14316 | 0.89714  |
| 49005 | P14079 | Q9NXX6 | 0.52703  |
| 49006 | P14079 | O00629 | 0.7272   |
| 49007 | P14079 | Q8WWW0 | 0.70331  |
| 49008 | P14079 | O60232 | 1.7258   |
| 49009 | P14079 | Q9H974 | 1.77     |
| 49010 | P14079 | Q8NCQ5 | 0.24772  |
| 49011 | P14079 | P0CG24 | 0.58926  |
| 49012 | P14079 | O60810 | 1.0087   |
| 49013 | P14079 | Q8NA61 | 0.31561  |
| 49014 | P14079 | Q8WTQ4 | 0.70852  |
| 49015 | P14079 | Q8N8D0 | 1.1715   |
| 49016 | P14079 | Q7L1V2 | 1.4935   |
| 49017 | P14079 | Q5T7V8 | 2.2431   |
| 49018 | P14079 | P68133 | 0.99952  |
| 49019 | P14079 | P82663 | 1.2209   |
| 49020 | P14079 | Q3BBV2 | 1.2315   |

|       |        |        |         |
|-------|--------|--------|---------|
| 49021 | P14079 | Q15438 | 0.29933 |
| 49022 | P14079 | Q9H300 | 0.88713 |
| 49023 | P14079 | P53680 | 0.285   |
| 49024 | P14079 | Q06250 | 1.1715  |
| 49025 | P14079 | P04280 | 0.9456  |
| 49026 | P14079 | Q9BZK8 | 1.1715  |
| 49027 | P14079 | Q86SY8 | 1.1715  |
| 49028 | P14079 | Q01658 | 0.50564 |
| 49029 | P14079 | P03886 | 0.52548 |
| 49030 | P14079 | O43593 | 0.15936 |
| 49031 | P14079 | Q969S3 | 0.88076 |
| 49032 | P14079 | Q96AQ1 | 1.4698  |
| 49033 | P14079 | P25205 | 0.40918 |
| 49034 | P14079 | Q96G04 | 0.16974 |
| 49035 | P14079 | Q9NZJ9 | 0.42934 |
| 49036 | P14079 | Q494R4 | 0.015   |
| 49037 | P14079 | Q9NR33 | 0.22047 |
| 49038 | P14079 | P52292 | 1.2387  |
| 49039 | P14079 | O43734 | 1.3222  |
| 49040 | P14079 | Q9NQG5 | 1.1221  |
| 49041 | P14079 | Q14152 | 1.2128  |
| 49042 | P14079 | Q9NQX6 | 0.60526 |
| 49043 | P14079 | P78537 | 1.3442  |
| 49044 | P14079 | Q7L0Y3 | 1.2327  |
| 49045 | P14079 | Q9BZE0 | 0.23869 |
| 49046 | P14079 | O75382 | 0.54243 |
| 49047 | P14079 | Q16401 | 1.1304  |
| 49048 | P14079 | Q8TD16 | 0.42765 |
| 49049 | P14079 | Q92615 | 0.93817 |
| 49050 | P14079 | P0CAP2 | 0.95944 |
| 49051 | P14079 | Q96CV9 | 0.70345 |
| 49052 | P14079 | Q9Y5U2 | 1.2745  |
| 49053 | P14079 | Q13426 | 0.45686 |
| 49054 | P14079 | P59047 | 0.25552 |
| 49055 | P14079 | Q5SSG8 | 1.0613  |
| 49056 | P14079 | Q8TAB7 | 1.3784  |
| 49057 | P14079 | Q4W5G0 | 0.83593 |
| 49058 | P14079 | Q9HBE1 | 0.43665 |
| 49059 | P14079 | O43761 | 1.0406  |
| 49060 | P14079 | Q9UKW6 | 0.41417 |
| 49061 | P14079 | Q9UQ84 | 0.23136 |
| 49062 | P14079 | P10144 | 0.33581 |
| 49063 | P14079 | Q05932 | 0.55322 |
| 49064 | P14079 | P48595 | 0.15934 |
| 49065 | P14079 | Q494V2 | 0.29766 |
| 49066 | P14079 | Q6P1W5 | 1.1201  |
| 49067 | P14079 | Q9NXB0 | 1.2914  |
| 49068 | P14079 | Q96PV7 | 1.5091  |
| 49069 | P14079 | Q96BP3 | 0.17474 |
| 49070 | P14079 | Q9UJX4 | 0.98825 |
| 49071 | P14079 | Q8NET1 | 1.0712  |
| 49072 | P14079 | Q96M60 | 1.0841  |
| 49073 | P14079 | Q8IWF9 | 0.74167 |
| 49074 | P14079 | Q7Z589 | 1.6808  |
| 49075 | P14079 | Q5H9R7 | 1.486   |
| 49076 | P14079 | Q9H9D4 | 0.72847 |
| 49077 | P14079 | Q96T76 | 1.0157  |
| 49078 | P14079 | Q9NUD7 | 0.50384 |
| 49079 | P14079 | Q13113 | 0.95129 |
| 49080 | P14079 | Q96I23 | 0.425   |
| 49081 | P14079 | Q8N3Z6 | 0.36455 |
| 49082 | P14079 | Q8WXD5 | 0.88465 |
| 49083 | P14079 | Q9NQR4 | 0.182   |
| 49084 | P14079 | Q9ULW6 | 0.46579 |
| 49085 | P14079 | Q8TD47 | 0.42121 |
| 49086 | P14079 | Q9Y3S2 | 0.99113 |
| 49087 | P14079 | Q9BYV8 | 1.0174  |
| 49088 | P14079 | P53990 | 1.0291  |
| 49089 | P14079 | Q9Y5L4 | 0.18193 |
| 49090 | P14079 | Q9BV57 | 0.48759 |
| 49091 | P14079 | Q5VV11 | 0.72163 |
| 49092 | P14079 | Q14686 | 1.3606  |
| 49093 | P14079 | Q8NG41 | 0.62495 |
| 49094 | P14079 | Q5T0W9 | 0.62653 |
| 49095 | P14079 | Q2M2W7 | 1.3222  |
| 49096 | P14079 | Q15542 | 1.0481  |

|       |        |        |         |
|-------|--------|--------|---------|
| 49097 | P14079 | Q8NDT2 | 0.93071 |
| 49098 | P14079 | Q9H063 | 1.0257  |
| 49099 | P14079 | A6NFR6 | 0.79017 |
| 49100 | P14079 | Q8TAE6 | 1.0405  |
| 49101 | P14079 | Q5VWG9 | 0.80351 |
| 49102 | P14079 | P17405 | 0.40576 |
| 49103 | P14079 | Q5FWF6 | 0.98476 |
| 49104 | P14079 | Q6MZM9 | 1.1715  |
| 49105 | P14079 | P0C7T8 | 1.2485  |
| 49106 | P14079 | Q9UHF7 | 0.57559 |
| 49107 | P14079 | Q96C10 | 0.27214 |
| 49108 | P14079 | Q96CG3 | 0.70329 |
| 49109 | P14079 | P41970 | 1.0851  |
| 49110 | P14079 | Q14999 | 1.048   |
| 49111 | P14079 | Q8WY98 | 0.83696 |
| 49112 | P14079 | O75956 | 0.86418 |
| 49113 | P14079 | O60921 | 0.95343 |
| 49114 | P14079 | P49711 | 0.2757  |
| 49115 | P14079 | Q92567 | 1.2766  |
| 49116 | P14079 | Q9BV44 | 0.60174 |
| 49117 | P14079 | O94842 | 0.79153 |
| 49118 | P14079 | P54920 | 0.61622 |
| 49119 | P14079 | Q9H9L4 | 0.86209 |
| 49120 | P14079 | Q9NQ7  | 1.1715  |
| 49121 | P14079 | B2RC85 | 0.12268 |
| 49122 | P14079 | Q9NQS1 | 1.1436  |
| 49123 | P14079 | P17980 | 0.69287 |
| 49124 | P14079 | Q6NXP2 | 1.8257  |
| 49125 | P14079 | P78318 | 1.2612  |
| 49126 | P14079 | O15327 | 0.29326 |
| 49127 | P14079 | Q8TDG2 | 0.96178 |
| 49128 | P14079 | Q9Y5M1 | 0.94864 |
| 49129 | P14079 | Q8N3U1 | 1.1715  |
| 49130 | P14079 | Q9NXK8 | 0.73761 |
| 49131 | P14079 | P0CJ71 | 1.3031  |
| 49132 | P14079 | Q92688 | 0.28036 |
| 49133 | P14079 | Q15022 | 0.74446 |
| 49134 | P14079 | O75496 | 1.1102  |
| 49135 | P14079 | Q9H693 | 1.0439  |
| 49136 | P14079 | O75901 | 0.89717 |
| 49137 | P14079 | P0C7T5 | 0.86422 |
| 49138 | P14079 | Q15326 | 1.1825  |
| 49139 | P14079 | Q6IQ19 | 1.0173  |
| 49140 | P14079 | Q8NEY8 | 1.4341  |
| 49141 | P14079 | Q8WV15 | 1.2485  |
| 49142 | P14079 | Q9Y2W1 | 1.1981  |
| 49143 | P14079 | Q96DE0 | 1.7427  |
| 49144 | P14079 | Q3YBM2 | 1.6651  |
| 49145 | P14079 | P18754 | 1.3321  |
| 49146 | P14079 | Q9Y6F1 | 0.37578 |
| 49147 | P14079 | P86481 | 1.1715  |
| 49148 | P14079 | Q03154 | 0.51173 |
| 49149 | P14079 | Q9NPA8 | 0.58928 |
| 49150 | P14079 | Q96EL2 | 0.48542 |
| 49151 | P14079 | Q96K31 | 1.1415  |
| 49152 | P14079 | Q96N95 | 0.36857 |
| 49153 | P14079 | Q9NZL4 | 0.89153 |
| 49154 | P14079 | Q8NE18 | 1.6831  |
| 49155 | P14079 | Q96GN5 | 1.129   |
| 49156 | P14079 | Q8TC21 | 0.60926 |
| 49157 | P14079 | Q8NHR9 | 0.29665 |
| 49158 | P14079 | Q9BZW4 | 1.4221  |
| 49159 | P14079 | Q9NQ92 | 0.8653  |
| 49160 | P14079 | O15131 | 1.3085  |
| 49161 | P14079 | Q96EY1 | 1.0003  |
| 49162 | P14079 | P78358 | 1.3978  |
| 49163 | P14079 | O60304 | 0.54607 |
| 49164 | P14079 | Q6ZPD9 | 0.85783 |
| 49165 | P14079 | Q69YW0 | 0.75607 |
| 49166 | P14079 | Q8N111 | 1.0085  |
| 49167 | P14079 | Q8N0Y7 | 0.86177 |
| 49168 | P14079 | O14777 | 0.71284 |
| 49169 | P14079 | Q96PK6 | 0.69306 |
| 49170 | P14079 | P50222 | 0.45113 |
| 49171 | P14079 | P07814 | 0.90646 |
| 49172 | P14079 | P0DJI8 | 0.9033  |

|       |        |        |          |
|-------|--------|--------|----------|
| 49173 | P14079 | Q9BS18 | 1.1557   |
| 49174 | P14079 | P17023 | 0.53698  |
| 49175 | P14079 | O94993 | 0.25139  |
| 49176 | P14079 | A6NC51 | 0.91469  |
| 49177 | P14079 | Q8NFJ8 | 0.47544  |
| 49178 | P14079 | Q6ZN17 | 1.1761   |
| 49179 | P14079 | Q9C0E2 | 1.0412   |
| 49180 | P14079 | Q9UHD4 | 1.0828   |
| 49181 | P14079 | Q7Z624 | 0.65124  |
| 49182 | P14079 | Q5TEA3 | 0.92792  |
| 49183 | P14079 | Q9UI66 | 1.1715   |
| 49184 | P14079 | Q9P2D0 | 0.31138  |
| 49185 | P14079 | Q86UB9 | 1.4779   |
| 49186 | P14079 | Q96C90 | 0.97829  |
| 49187 | P14079 | A1L4Q6 | 0.6655   |
| 49188 | P14079 | O95202 | 0.64075  |
| 49189 | P14079 | Q9NUQ9 | 0.16973  |
| 49190 | P14079 | Q96PI1 | 1.4673   |
| 49191 | P14079 | Q04727 | 0.56344  |
| 49192 | P14079 | Q99836 | 0.26126  |
| 49193 | P14079 | O75177 | 1.2692   |
| 49194 | P14079 | O00743 | 0.8056   |
| 49195 | P14079 | Q969W8 | 0.92268  |
| 49196 | P14079 | Q86TJ2 | 0.56769  |
| 49197 | P14079 | P07741 | 0.83577  |
| 49198 | P14079 | Q8WUA4 | 0.32842  |
| 49199 | P14079 | Q86YD1 | 1.2708   |
| 49200 | P14079 | Q9Y2V2 | 0.74468  |
| 49201 | P14079 | Q8WYH8 | 0.46104  |
| 49202 | P14079 | Q16520 | 0.91566  |
| 49203 | P14079 | Q9NZH5 | 0.87682  |
| 49204 | P14079 | Q14203 | 1.2742   |
| 49205 | P14079 | Q9UJ94 | 1.1715   |
| 49206 | P14079 | Q9H3F6 | 0.30734  |
| 49207 | P14079 | A6NK44 | 0.39752  |
| 49208 | P14079 | O43324 | 1.2237   |
| 49209 | P14079 | Q86UQ5 | 1.1715   |
| 49210 | P14079 | Q9Y462 | 0.8349   |
| 49211 | P14079 | Q8IY63 | 0.49732  |
| 49212 | P14079 | Q9H5J4 | 0.77014  |
| 49213 | P14079 | Q8IYF3 | 0.62499  |
| 49214 | P14079 | P30047 | 0.73534  |
| 49215 | P14079 | Q8NFT6 | 0.32605  |
| 49216 | P14079 | Q9BY31 | 0.4226   |
| 49217 | P14079 | Q9H9F9 | 1.1207   |
| 49218 | P14079 | Q9UGU0 | 0.41998  |
| 49219 | P14079 | O95050 | 0.013212 |
| 49220 | P14079 | Q9BRX5 | 0.51585  |
| 49221 | P14079 | Q8IY51 | 0.18624  |
| 49222 | P14079 | Q96B86 | 0.91194  |
| 49223 | P14079 | Q12893 | 1.0673   |
| 49224 | P14079 | Q5H9J7 | 1.4257   |
| 49225 | P14079 | Q9P219 | 0.41225  |
| 49226 | P14079 | Q8IXM6 | 1.3508   |
| 49227 | P14079 | Q8WUZ0 | 1.3152   |
| 49228 | P14079 | O15144 | 0.58107  |
| 49229 | P14079 | Q96CN9 | 0.89744  |
| 49230 | P14079 | Q5SV97 | 1.3928   |
| 49231 | P14079 | Q8IWB1 | 0.97642  |
| 49232 | P14079 | Q8WW38 | 0.59341  |
| 49233 | P14079 | Q2KHR3 | 0.47117  |
| 49234 | P14079 | Q6UWI2 | 1.3063   |
| 49235 | P14079 | Q5VVK0 | 0.18717  |
| 49236 | P14079 | Q5VXU9 | 0.26969  |
| 49237 | P14079 | Q2T9L4 | 0.79289  |
| 49238 | P14079 | P47928 | 0.57993  |
| 49239 | P14079 | P48539 | 0.78118  |
| 49240 | P14079 | Q9UJT2 | 1.2581   |
| 49241 | P14079 | Q96DP5 | 1.1415   |
| 49242 | P14079 | P0C2S0 | 1.1353   |
| 49243 | P14079 | Q8IVY1 | 1.1823   |
| 49244 | P14079 | Q5JR98 | 0.99094  |
| 49245 | P14079 | Q9UBM8 | 0.82214  |
| 49246 | P14079 | P02729 | 1.1715   |
| 49247 | P14079 | Q9NQE9 | 0.30614  |
| 49248 | P14079 | O94850 | 1.2904   |

|       |        |        |         |
|-------|--------|--------|---------|
| 49249 | P14079 | Q8TAX9 | 0.45181 |
| 49250 | P14079 | P0CG39 | 0.96316 |
| 49251 | P14079 | Q8IZT6 | 0.44773 |
| 49252 | P14079 | Q96PB1 | 1.382   |
| 49253 | P14079 | Q9Y2B1 | 1.2485  |
| 49254 | P14079 | P62851 | 1.3924  |
| 49255 | P14079 | P27816 | 0.73656 |
| 49256 | P14079 | Q5VU36 | 1.3668  |
| 49257 | P14079 | Q8N7U9 | 0.47868 |
| 49258 | P14079 | Q9HCL3 | 1.0178  |
| 49259 | P14079 | Q9H788 | 1.0563  |
| 49260 | P14079 | Q8IYA8 | 1.3222  |
| 49261 | P14079 | O43684 | 0.87238 |
| 49262 | P14079 | Q8N688 | 0.7885  |
| 49263 | P14079 | Q8TAU3 | 0.61621 |
| 49264 | P14079 | P07992 | 0.13874 |
| 49265 | P14079 | Q6P1L8 | 1.3656  |
| 49266 | P14079 | Q9NVS9 | 0.70574 |
| 49267 | P14079 | Q32M84 | 0.44343 |
| 49268 | P14079 | Q49AQ9 | 0.80567 |
| 49269 | P14079 | P0C6E6 | 0.35338 |
| 49270 | P14079 | Q9BTM9 | 1.2887  |
| 49271 | P14079 | Q8TCS8 | 0.42442 |
| 49272 | P14079 | Q9NZU7 | 0.54708 |
| 49273 | P14079 | Q9BTX1 | 1.1942  |
| 49274 | P14079 | Q86WW8 | 1.0085  |
| 49275 | P14079 | P37275 | 0.74765 |
| 49276 | P14079 | A6NLC5 | 1.0773  |
| 49277 | P14079 | Q8NEM1 | 1.0245  |
| 49278 | P14079 | Q8N7C4 | 1.1715  |
| 49279 | P14079 | P35241 | 0.30182 |
| 49280 | P14079 | Q96S06 | 1.2107  |
| 49281 | P14079 | Q07352 | 0.87138 |
| 49282 | P14079 | Q9UGP4 | 0.45652 |
| 49283 | P14079 | Q969G5 | 0.90632 |
| 49284 | P14079 | Q53QV2 | 1.0452  |
| 49285 | P14079 | Q7Z5W3 | 1.0929  |
| 49286 | P14079 | O14490 | 0.44078 |
| 49287 | P14079 | Q8TC71 | 0.88532 |
| 49288 | P14079 | Q96FW1 | 0.5784  |
| 49289 | P14079 | Q9H6K4 | 1.1856  |
| 49290 | P14079 | Q92925 | 0.55839 |
| 49291 | P14079 | Q5T013 | 0.60157 |
| 49292 | P14079 | Q8TDC0 | 1.2628  |
| 49293 | P14079 | Q6J272 | 1.6338  |
| 49294 | P14079 | P28072 | 0.98613 |
| 49295 | P14079 | Q9BSM1 | 0.98923 |
| 49296 | P14079 | Q96M85 | 1.1715  |
| 49297 | P14079 | Q04323 | 0.39913 |
| 49298 | P14079 | P0C7V6 | 1.1571  |
| 49299 | P14079 | Q99619 | 0.33959 |
| 49300 | P14079 | P19447 | 0.17153 |
| 49301 | P14079 | Q3SY56 | 0.22134 |
| 49302 | P14079 | Q9UMS5 | 1.6062  |
| 49303 | P14079 | Q8N1Q8 | 0.98341 |
| 49304 | P14079 | Q9Y535 | 0.45833 |
| 49305 | P14079 | Q7Z2V1 | 1.1715  |
| 49306 | P14079 | Q8TAV0 | 1.5675  |
| 49307 | P14079 | Q8N3J3 | 1.1154  |
| 49308 | P14079 | Q8NC69 | 0.18591 |
| 49309 | P14079 | Q6UXP9 | 0.7104  |
| 49310 | P14079 | Q9BWX1 | 0.29221 |
| 49311 | P14079 | Q96NS1 | 0.50693 |
| 49312 | P14079 | O95751 | 1.3101  |
| 49313 | P14079 | Q9UGR2 | 0.8057  |
| 49314 | P14079 | Q9BYQ8 | 1.3698  |
| 49315 | P14079 | O43542 | 0.5359  |
| 49316 | P14079 | Q8WTS6 | 0.27252 |
| 49317 | P14079 | Q8WZA0 | 0.51671 |
| 49318 | P14079 | Q8TAD1 | 1.0968  |
| 49319 | P14079 | A6NGU7 | 0.85092 |
| 49320 | P14079 | Q86XK3 | 1.5029  |
| 49321 | P14079 | O95391 | 0.52634 |
| 49322 | P14079 | Q9Y657 | 0.54786 |
| 49323 | P14079 | Q9P0K7 | 0.31337 |
| 49324 | P14079 | Q15849 | 0.9101  |

|       |        |        |         |
|-------|--------|--------|---------|
| 49325 | P14079 | Q9UNH5 | 0.66839 |
| 49326 | P14079 | Q9NWX4 | 1.3425  |
| 49327 | P14079 | P39687 | 1.2895  |
| 49328 | P14079 | Q9BU19 | 0.1949  |
| 49329 | P14079 | Q9H501 | 1.86    |
| 49330 | P14079 | B7Z6K7 | 0.53821 |
| 49331 | P14079 | Q8N8F7 | 1.2485  |
| 49332 | P14079 | Q9UIY3 | 0.74433 |
| 49333 | P14079 | Q5J8X5 | 1.2485  |
| 49334 | P14079 | Q96A59 | 1.1211  |
| 49335 | P14079 | P49411 | 0.76812 |
| 49336 | P14079 | O60308 | 0.89162 |
| 49337 | P14079 | Q96AP0 | 0.70534 |
| 49338 | P14079 | Q9UBU7 | 0.40821 |
| 49339 | P14079 | Q96EY9 | 0.75258 |
| 49340 | P14079 | Q96KN7 | 0.249   |
| 49341 | P14079 | Q6AZY7 | 0.7893  |
| 49342 | P14079 | P46108 | 0.50407 |
| 49343 | P14079 | Q3MUY2 | 1.0803  |
| 49344 | P14079 | P0C7T7 | 1.1715  |
| 49345 | P14079 | Q09161 | 0.89826 |
| 49346 | P14079 | P05388 | 1.5593  |
| 49347 | P14079 | O43805 | 0.86603 |
| 49348 | P14079 | Q5T2D3 | 0.16521 |
| 49349 | P14079 | A8MQ14 | 0.64109 |
| 49350 | P14079 | Q6P1M3 | 1.0859  |
| 49351 | P14079 | Q9Y2G9 | 1.2728  |
| 49352 | P14079 | P11441 | 0.66019 |
| 49353 | P14079 | O60927 | 1.3662  |
| 49354 | P14079 | P17535 | 0.99069 |
| 49355 | P14079 | P0C7X0 | 0.13295 |
| 49356 | P14079 | Q8IUD6 | 0.22805 |
| 49357 | P14079 | Q14587 | 0.50207 |
| 49358 | P14079 | Q674X7 | 0.60051 |
| 49359 | P14079 | Q9Y608 | 0.44446 |
| 49360 | P14079 | Q8N766 | 0.90574 |
| 49361 | P14079 | Q53EZ4 | 0.91616 |
| 49362 | P14079 | Q86WS4 | 1.1715  |
| 49363 | P14079 | Q6ZSB9 | 0.48782 |
| 49364 | P14079 | Q04637 | 0.67817 |
| 49365 | P14079 | Q09FC8 | 0.63549 |
| 49366 | P14079 | Q9NX78 | 0.9887  |
| 49367 | P14079 | O75459 | 1.0766  |
| 49368 | P14079 | Q5JX71 | 1.0613  |
| 49369 | P14079 | P31483 | 0.4127  |
| 49370 | P14079 | Q5JYT7 | 0.29793 |
| 49371 | P14079 | P09496 | 0.26061 |
| 49372 | P14079 | O14628 | 0.99076 |
| 49373 | P14079 | P50221 | 0.34143 |
| 49374 | P14079 | Q9NSC2 | 0.36055 |
| 49375 | P14079 | P0CJ85 | 0.25626 |
| 49376 | P14079 | Q9BRR3 | 0.80054 |
| 49377 | P14079 | Q5SXJ2 | 1.9823  |
| 49378 | P14079 | Q99550 | 0.69042 |
| 49379 | P14079 | Q9Y6X4 | 1.8063  |
| 49380 | P14079 | P22626 | 0.43549 |
| 49381 | P14079 | Q14019 | 0.43264 |
| 49382 | P14079 | Q8N7K0 | 0.77845 |
| 49383 | P14079 | P46020 | 0.58361 |
| 49384 | P14079 | Q9UFM2 | 0.92038 |
| 49385 | P14079 | Q15390 | 0.89576 |
| 49386 | P14079 | Q96MF4 | 1.1689  |
| 49387 | P14079 | Q8N8E2 | 0.28627 |
| 49388 | P14079 | Q8NI51 | 0.6408  |
| 49389 | P14079 | Q7Z7A1 | 1.5113  |
| 49390 | P14079 | Q9BSF0 | 0.74122 |
| 49391 | P14079 | Q99767 | 0.45309 |
| 49392 | P14079 | P07305 | 0.39419 |
| 49393 | P14079 | Q6IV72 | 0.53255 |
| 49394 | P14079 | Q14CZ0 | 2.0415  |
| 49395 | P14079 | Q8NFR9 | 1.3079  |
| 49396 | P14079 | Q3B7T3 | 0.95483 |
| 49397 | P14079 | Q8NCR6 | 1.0796  |
| 49398 | P14079 | Q13619 | 0.57252 |
| 49399 | P14079 | Q5H9L2 | 1.0823  |
| 49400 | P14079 | Q9NVT9 | 0.5743  |

|       |        |        |          |
|-------|--------|--------|----------|
| 49401 | P14079 | Q15643 | 1.2878   |
| 49402 | P14079 | Q5SRR4 | 1.0431   |
| 49403 | P14079 | Q8NBF1 | 0.50773  |
| 49404 | P14079 | Q1AE95 | 1.1391   |
| 49405 | P14079 | Q9NRP4 | 0.040861 |
| 49406 | P14079 | Q00522 | 0.4172   |
| 49407 | P14079 | A6NM28 | 0.57412  |
| 49408 | P14079 | Q5T953 | 1.566    |
| 49409 | P14079 | Q5VTL8 | 1.5092   |
| 49410 | P14079 | Q96K17 | 0.9967   |
| 49411 | P14079 | A6NEY3 | 1.4427   |
| 49412 | P14079 | Q8N183 | 0.4383   |
| 49413 | P14079 | Q53QW1 | 1.3222   |
| 49414 | P14079 | Q9Y587 | 0.23675  |
| 49415 | P14079 | O15488 | 0.25288  |
| 49416 | P14079 | Q96N58 | 0.63215  |
| 49417 | P14079 | O14524 | 1.0244   |
| 49418 | P14079 | Q8N8A2 | 0.56221  |
| 49419 | P14079 | Q9H6F2 | 0.81473  |
| 49420 | P14079 | Q96IP4 | 1.041    |
| 49421 | P14079 | Q96C74 | 0.48695  |
| 49422 | P14079 | O76009 | 0.88619  |
| 49423 | P14079 | Q3SXR2 | 1.0048   |
| 49424 | P14079 | O60763 | 0.65928  |
| 49425 | P14079 | P13051 | 1.7343   |
| 49426 | P14079 | P10914 | 0.43127  |
| 49427 | P14079 | P22674 | 0.60056  |
| 49428 | P14079 | Q9H160 | 0.43867  |
| 49429 | P14079 | O43236 | 0.34542  |
| 49430 | P14079 | Q2M3D2 | 0.50714  |
| 49431 | P14079 | Q86X83 | 1.0047   |
| 49432 | P14079 | P84103 | 0.69899  |
| 49433 | P14079 | Q9UN30 | 0.20516  |
| 49434 | P14079 | P0C841 | 1.1715   |
| 49435 | P14079 | Q9ULJ3 | 0.73947  |
| 49436 | P14079 | P59861 | 0.91101  |
| 49437 | P14079 | Q8NHZ7 | 0.91772  |
| 49438 | P14079 | Q6NUN7 | 1.1715   |
| 49439 | P14079 | Q7Z398 | 0.58326  |
| 49440 | P14079 | Q6ZSA8 | 1.1715   |
| 49441 | P14079 | P29083 | 1.4132   |
| 49442 | P14079 | Q5SZD1 | 1.0363   |
| 49443 | P14079 | Q96NJ6 | 0.55736  |
| 49444 | P14079 | Q5THK1 | 0.62789  |
| 49445 | P14079 | Q13342 | 0.67034  |
| 49446 | P14079 | Q86SE9 | 1.0622   |
| 49447 | P14079 | Q6P597 | 0.35092  |
| 49448 | P14079 | Q5SNT6 | 1.3964   |
| 49449 | P14079 | Q9Y3P8 | 1.1766   |
| 49450 | P14079 | A6NGC4 | 1.2485   |
| 49451 | P14079 | Q8IWZ8 | 0.20168  |
| 49452 | P14079 | Q8NAA6 | 0.38693  |
| 49453 | P14079 | Q9H267 | 0.43954  |
| 49454 | P14079 | Q8IY92 | 0.53104  |
| 49455 | P14079 | Q8IYS1 | 0.37516  |
| 49456 | P14079 | O43257 | 0.92402  |
| 49457 | P14079 | Q95865 | 0.42125  |
| 49458 | P14079 | Q9HA58 | 1.1715   |
| 49459 | P14079 | Q8N0U2 | 1.1715   |
| 49460 | P14079 | P60368 | 1.1184   |
| 49461 | P14079 | Q9UK59 | 0.48061  |
| 49462 | P14079 | O15534 | 0.27529  |
| 49463 | P14079 | Q6NSW7 | 0.28169  |
| 49464 | P14079 | Q02446 | 0.17327  |
| 49465 | P14079 | P61925 | 0.24433  |
| 49466 | P14079 | Q96NF6 | 0.79957  |
| 49467 | P14079 | Q8NEG7 | 0.94318  |
| 49468 | P14079 | Q92993 | 0.78229  |
| 49469 | P14079 | Q8TCY9 | 1.4147   |
| 49470 | P14079 | Q4G0Z9 | 1.1602   |
| 49471 | P14079 | P19419 | 1.4312   |
| 49472 | P14079 | O94927 | 0.74419  |
| 49473 | P14079 | P0CE67 | 1.1715   |
| 49474 | P14079 | O60224 | 0.31443  |
| 49475 | P14079 | Q8TF47 | 0.9897   |
| 49476 | P14079 | Q14690 | 0.5416   |



|       |        |        |          |
|-------|--------|--------|----------|
| 49477 | P14079 | P49917 | 0.088548 |
| 49478 | P14079 | O75170 | 1.2288   |
| 49479 | P14079 | Q9Y222 | 0.83457  |
| 49480 | P14079 | Q9BU61 | 0.83674  |
| 49481 | P14079 | O15014 | 1.7517   |
| 49482 | P14079 | Q9BYQ5 | 1.3698   |
| 49483 | P14079 | O94854 | 0.37444  |
| 49484 | P14079 | Q7Z7K6 | 1.1257   |
| 49485 | P14079 | Q9H714 | 0.86906  |
| 49486 | P14079 | Q9H999 | 0.95045  |
| 49487 | P14079 | Q6ZR85 | 1.1715   |
| 49488 | P14079 | Q08AF8 | 0.95714  |
| 49489 | P14079 | Q9H089 | 0.38984  |
| 49490 | P14079 | Q9HAB8 | 1.2931   |
| 49491 | P14079 | Q99551 | 0.90561  |
| 49492 | P14079 | Q8WWH5 | 1.054    |
| 49493 | P14079 | Q63HM2 | 1.0148   |
| 49494 | P14079 | Q13114 | 0.51165  |
| 49495 | P14079 | Q27J81 | 0.31443  |
| 49496 | P14079 | P55957 | 0.7724   |
| 49497 | P14079 | Q9UQN3 | 0.67368  |
| 49498 | P14079 | P21675 | 0.42258  |
| 49499 | P14079 | Q9UPQ9 | 0.81704  |
| 49500 | P14079 | Q9Y2K5 | 0.872    |
| 49501 | P14079 | A6NHP3 | 1.092    |
| 49502 | P14079 | Q9NPA0 | 0.972    |
| 49503 | P14079 | P13647 | 1.0576   |
| 49504 | P14079 | Q8N6G2 | 0.031863 |
| 49505 | P14079 | Q96KN8 | 0.012626 |
| 49506 | P14079 | Q8TAT8 | 0.93818  |
| 49507 | P14079 | O00268 | 1.1166   |
| 49508 | P14079 | C9JXX5 | 0.98371  |
| 49509 | P14079 | Q5VU43 | 1.2821   |
| 49510 | P14079 | Q16666 | 0.61225  |
| 49511 | P14079 | Q8IUR6 | 1.2406   |
| 49512 | P14079 | Q9HBM6 | 0.64795  |
| 49513 | P14079 | Q9BR09 | 0.55714  |
| 49514 | P14079 | P01858 | 1.1715   |
| 49515 | P14079 | Q8WVF5 | 0.18591  |
| 49516 | P14079 | P30622 | 0.53773  |
| 49517 | P14079 | Q659A1 | 1.0193   |
| 49518 | P14079 | Q86X10 | 0.82063  |
| 49519 | P14079 | P39748 | 0.26791  |
| 49520 | P14079 | P14651 | 0.15955  |
| 49521 | P14079 | Q5TGY3 | 0.85254  |
| 49522 | P14079 | P59991 | 1.4458   |
| 49523 | P14079 | P38159 | 0.70663  |
| 49524 | P14079 | Q68EN5 | 0.75145  |
| 49525 | P14079 | Q8IZ26 | 0.60675  |
| 49526 | P14079 | Q9NS73 | 0.83522  |
| 49527 | P14079 | Q9UIF8 | 0.86433  |
| 49528 | P14079 | Q5CZA5 | 0.72218  |
| 49529 | P14079 | P49901 | 1.1715   |
| 49530 | P14079 | Q96I27 | 0.55399  |
| 49531 | P14079 | Q9H116 | 0.62194  |
| 49532 | P14079 | Q13438 | 0.086056 |
| 49533 | P14079 | Q96LZ7 | 0.29703  |
| 49534 | P14079 | Q96L11 | 1.0694   |
| 49535 | P14079 | Q6P1K2 | 1.1203   |
| 49536 | P14079 | Q9UKT9 | 0.45512  |
| 49537 | P14079 | Q9NV64 | 0.9257   |
| 49538 | P14079 | A6NEF3 | 1.4427   |
| 49539 | P14079 | P58340 | 0.29421  |
| 49540 | P14079 | B1AH88 | 1.1715   |
| 49541 | P14079 | Q64ET8 | 1.4746   |
| 49542 | P14079 | Q96BW1 | 0.55137  |
| 49543 | P14079 | Q96CW5 | 1.3221   |
| 49544 | P14079 | P52948 | 1.1774   |
| 49545 | P14079 | O75113 | 1.0336   |
| 49546 | P14079 | P34896 | 0.35304  |
| 49547 | P14079 | Q9NQ55 | 0.75934  |
| 49548 | P14079 | P13693 | 0.15486  |
| 49549 | P14079 | Q9BYG8 | 0.62864  |
| 49550 | P14079 | A1L170 | 1.1715   |
| 49551 | P14079 | Q9H606 | 1.0403   |
| 49552 | P14079 | Q6IQ21 | 0.75178  |

|       |        |        |          |
|-------|--------|--------|----------|
| 49553 | P14079 | Q6NW34 | 1.0613   |
| 49554 | P14079 | Q6NX49 | 0.53332  |
| 49555 | P14079 | Q14978 | 1.3241   |
| 49556 | P14079 | Q3L8U1 | 0.6457   |
| 49557 | P14079 | P0CG13 | 0.59217  |
| 49558 | P14079 | Q9ULD0 | 0.2653   |
| 49559 | P14079 | Q17RB0 | 1.2815   |
| 49560 | P14079 | Q99750 | 0.99421  |
| 49561 | P14079 | Q8NDV7 | 0.6329   |
| 49562 | P14079 | O95298 | 1.2593   |
| 49563 | P14079 | Q8N6V9 | 0.2666   |
| 49564 | P14079 | Q96GC6 | 1.1189   |
| 49565 | P14079 | Q96T58 | 0.7015   |
| 49566 | P14079 | O75970 | 0.34015  |
| 49567 | P14079 | B7Z1M9 | 0.17796  |
| 49568 | P14079 | Q5M9N0 | 0.023846 |
| 49569 | P14079 | Q96EH5 | 1.2526   |
| 49570 | P14079 | Q53EL6 | 1.1627   |
| 49571 | P14079 | Q9UJL9 | 0.53095  |
| 49572 | P14079 | Q8NA03 | 1.1425   |
| 49573 | P14079 | Q7Z713 | 0.28036  |
| 49574 | P14079 | Q5JNZ3 | 0.71663  |
| 49575 | P14079 | Q0VAF6 | 0.48057  |
| 49576 | P14079 | Q9H9Y6 | 0.65343  |
| 49577 | P14079 | Q9P2I0 | 0.96424  |
| 49578 | P14079 | Q9UPV0 | 1.8404   |
| 49579 | P14079 | Q9H7M6 | 0.71756  |
| 49580 | P14079 | Q15372 | 0.81331  |
| 49581 | P14079 | Q13296 | 0.8483   |
| 49582 | P14079 | Q5T6F2 | 1.5951   |
| 49583 | P14079 | Q7LBC6 | 0.32669  |
| 49584 | P14079 | Q8IU68 | 0.94171  |
| 49585 | P14079 | Q08999 | 1.2778   |
| 49586 | P14079 | Q5VZL5 | 1.6004   |
| 49587 | P14079 | Q8N5C7 | 0.33635  |
| 49588 | P14079 | A0PJW6 | 1.2281   |
| 49589 | P14079 | Q9UJV8 | 0.10002  |
| 49590 | P14079 | Q5TYW8 | 0.24326  |
| 49591 | P14079 | Q96QF7 | 0.77901  |
| 49592 | P14079 | Q8IW50 | 1.3222   |
| 49593 | P14079 | Q96JS3 | 0.40998  |
| 49594 | P14079 | Q8IYG6 | 0.022844 |
| 49595 | P14079 | Q96HW7 | 0.81654  |
| 49596 | P14079 | Q8NDY6 | 0.57363  |
| 49597 | P14079 | Q3LI58 | 1.1715   |
| 49598 | P14079 | Q8N8D9 | 0.69563  |
| 49599 | P14079 | Q8NAQ8 | 1.9833   |
| 49600 | P14079 | Q7Z5L4 | 1.0219   |
| 49601 | P14079 | Q9NRI7 | 1.1715   |
| 49602 | P14079 | P43320 | 0.53079  |
| 49603 | P14079 | Q6ZN11 | 0.55341  |
| 49604 | P14079 | E7EW31 | 1.1715   |
| 49605 | P14079 | Q9BYD9 | 0.96178  |
| 49606 | P14079 | Q9UBG7 | 0.16561  |
| 49607 | P14079 | Q9NZD2 | 0.99061  |
| 49608 | P14079 | Q9NYF0 | 0.49655  |
| 49609 | P14079 | Q8NCE8 | 1.059    |
| 49610 | P14079 | Q53F19 | 1.6203   |
| 49611 | P14079 | P50750 | 0.35626  |
| 49612 | P14079 | Q86TA4 | 0.64033  |
| 49613 | P14079 | Q8WXG1 | 0.2836   |
| 49614 | P14079 | Q7Z5L2 | 0.92628  |
| 49615 | P14079 | Q5TG92 | 1.2191   |
| 49616 | P14079 | Q9H081 | 0.81275  |
| 49617 | P14079 | P20290 | 1.152    |
| 49618 | P14079 | Q6PB30 | 1.4359   |
| 49619 | P14079 | Q5T6S3 | 0.37434  |
| 49620 | P14079 | Q9Y6J0 | 0.13942  |
| 49621 | P14079 | O00273 | 0.53131  |
| 49622 | P14079 | P40305 | 1.1533   |
| 49623 | P14079 | Q86W50 | 0.8542   |
| 49624 | P14079 | Q9NUG4 | 0.37637  |
| 49625 | P14079 | P42768 | 0.62745  |
| 49626 | P14079 | C9JLW8 | 1.1508   |
| 49627 | P14079 | Q5VWT5 | 1.2828   |
| 49628 | P14079 | Q53EQ6 | 0.98962  |

|       |        |        |         |
|-------|--------|--------|---------|
| 49629 | P14079 | A6NF83 | 1.1925  |
| 49630 | P14079 | Q8TBE0 | 0.75096 |
| 49631 | P14079 | Q8WVM0 | 0.92582 |
| 49632 | P14079 | Q30KP9 | 0.97021 |
| 49633 | P14079 | Q6VUC0 | 0.37224 |
| 49634 | P14079 | Q16836 | 0.1092  |
| 49635 | P14079 | Q9HCH0 | 1.8498  |
| 49636 | P14079 | A8MT70 | 1.3446  |
| 49637 | P14079 | Q15545 | 0.84454 |
| 49638 | P14079 | Q13490 | 0.39996 |
| 49639 | P14079 | P46977 | 0.42096 |
| 49640 | P14079 | O00712 | 0.49375 |
| 49641 | P14079 | Q7Z6B0 | 0.99148 |
| 49642 | P14079 | Q5TG08 | 1.5912  |
| 49643 | P14079 | Q92870 | 0.64656 |
| 49644 | P14079 | A6NLC8 | 1.5655  |
| 49645 | P14079 | Q96NB1 | 0.42054 |
| 49646 | P14079 | P42771 | 0.68193 |
| 49647 | P14079 | Q99962 | 0.37228 |
| 49648 | P14079 | Q9Y295 | 0.70778 |
| 49649 | P14079 | Q9Y3D5 | 1.1754  |
| 49650 | P14079 | Q69383 | 1.355   |
| 49651 | P14079 | Q99457 | 0.5801  |
| 49652 | P14079 | Q9BWH2 | 0.15502 |
| 49653 | P14079 | Q9H322 | 1.3275  |
| 49654 | P14079 | Q8N138 | 1.0559  |
| 49655 | P14079 | Q96SI1 | 0.18591 |
| 49656 | P14079 | Q9Y2G1 | 0.36614 |
| 49657 | P14079 | Q8N7R0 | 0.28169 |
| 49658 | P14079 | Q9HAV7 | 0.87526 |
| 49659 | P14079 | A6NHN6 | 1.1493  |
| 49660 | P14079 | Q5T280 | 1.7686  |
| 49661 | P14079 | P49366 | 0.46787 |
| 49662 | P14079 | Q96KR6 | 1.3607  |
| 49663 | P14079 | Q6ZRH4 | 1.9689  |
| 49664 | P14079 | Q8NAF0 | 0.1949  |
| 49665 | P14079 | Q9Y2D9 | 0.77928 |
| 49666 | P14079 | P10636 | 0.18943 |
| 49667 | P14079 | Q9UBK5 | 1.522   |
| 49668 | P14079 | J3KSC0 | 0.27668 |
| 49669 | P14079 | O00401 | 0.60638 |
| 49670 | P14079 | Q96KG9 | 0.28377 |
| 49671 | P14079 | Q9H6E4 | 0.83655 |
| 49672 | P14079 | P81534 | 0.95735 |
| 49673 | P14079 | Q9UPX6 | 1.2485  |
| 49674 | P14079 | Q5T5P2 | 0.60719 |
| 49675 | P14079 | P42898 | 0.5127  |
| 49676 | P14079 | Q14008 | 1.2114  |
| 49677 | P14079 | Q9GZU7 | 0.6395  |
| 49678 | P14079 | A6NEY8 | 0.88702 |
| 49679 | P14079 | Q9UI08 | 0.35537 |
| 49680 | P14079 | Q6ZP82 | 0.56221 |
| 49681 | P14079 | A2RU67 | 0.91569 |
| 49682 | P14079 | Q92733 | 1.1715  |
| 49683 | P14079 | A8MV72 | 1.2455  |
| 49684 | P14079 | F8WFD2 | 0.93248 |
| 49685 | P14079 | Q14119 | 0.34674 |
| 49686 | P14079 | Q9Y2L5 | 0.43112 |
| 49687 | P14079 | Q5T871 | 1.1715  |
| 49688 | P14079 | Q96D09 | 0.35142 |
| 49689 | P14079 | Q9NPP4 | 0.28783 |
| 49690 | P14079 | P17028 | 0.80586 |
| 49691 | P14079 | O96001 | 1.0538  |
| 49692 | P14079 | P04406 | 0.21361 |
| 49693 | P14079 | Q8N998 | 0.71406 |
| 49694 | P14079 | Q9BSE4 | 1.0284  |
| 49695 | P14079 | Q8WWB5 | 1.4021  |
| 49696 | P14079 | Q5VW36 | 0.6409  |
| 49697 | P14079 | Q9H201 | 0.36898 |
| 49698 | P14079 | Q8WVJ2 | 0.46566 |
| 49699 | P14079 | Q14681 | 0.18591 |
| 49700 | P14079 | P23760 | 0.82375 |
| 49701 | P14079 | Q96EU6 | 0.84735 |
| 49702 | P14079 | Q9C0D7 | 0.96288 |
| 49703 | P14079 | Q6ZTU2 | 1.5023  |
| 49704 | P14079 | Q8NBC4 | 1.1715  |

|       |        |        |         |
|-------|--------|--------|---------|
| 49705 | P14079 | Q96GV9 | 0.67424 |
| 49706 | P14079 | P0DJH9 | 0.75084 |
| 49707 | P14079 | Q3BBV1 | 1.9823  |
| 49708 | P14079 | P62857 | 0.97776 |
| 49709 | P14079 | Q86TL2 | 1.1538  |
| 49710 | P14079 | Q9NSN8 | 0.25447 |
| 49711 | P14079 | Q6ZSB3 | 0.46525 |
| 49712 | P14079 | Q96PV4 | 0.30393 |
| 49713 | P14079 | Q9BT04 | 1.0825  |
| 49714 | P14079 | Q9BYX7 | 0.86229 |
| 49715 | P14079 | Q9BVW5 | 1.0454  |
| 49716 | P14079 | Q8TAQ5 | 0.77845 |
| 49717 | P14079 | Q9UPX8 | 0.39138 |
| 49718 | P14079 | Q96G75 | 0.21263 |
| 49719 | P14079 | P05060 | 0.71989 |
| 49720 | P14079 | P55884 | 0.29678 |
| 49721 | P14079 | Q8NHY2 | 1.0798  |
| 49722 | P14079 | Q9P1G2 | 1.1212  |
| 49723 | P14079 | Q8NA96 | 1.0613  |
| 49724 | P14079 | P62861 | 1.6749  |
| 49725 | P14079 | Q9H6K5 | 1.3222  |
| 49726 | P14079 | Q92843 | 0.66563 |
| 49727 | P14079 | Q8IWE4 | 0.62851 |
| 49728 | P14079 | Q96CM4 | 0.55134 |
| 49729 | P14079 | Q9GZM5 | 1.0676  |
| 49730 | P14079 | Q8TAF7 | 0.9897  |
| 49731 | P14079 | Q15942 | 0.54799 |
| 49732 | P14079 | P0CJ79 | 0.71663 |
| 49733 | P14079 | E7ETH6 | 0.5823  |
| 49734 | P14079 | Q8WXI4 | 0.28777 |
| 49735 | P14079 | Q6ZS94 | 1.1715  |
| 49736 | P14079 | Q5T686 | 1.029   |
| 49737 | P14079 | Q5VV41 | 0.38732 |
| 49738 | P14079 | A1L190 | 1.5102  |
| 49739 | P14079 | Q96C28 | 0.8567  |
| 49740 | P14079 | P46013 | 0.62183 |
| 49741 | P14079 | Q9Y3D9 | 0.7261  |
| 49742 | P14079 | Q6P2I3 | 0.70336 |
| 49743 | P14079 | Q6ZTI6 | 1.2431  |
| 49744 | P14079 | P60412 | 1.3698  |
| 49745 | P14079 | Q96LQ0 | 1.073   |
| 49746 | P14079 | Q15398 | 1.1106  |
| 49747 | P14079 | Q9GZY6 | 0.69012 |
| 49748 | P14079 | H3BQB6 | 1.5312  |
| 49749 | P14079 | O94916 | 0.51423 |
| 49750 | P14079 | Q06587 | 0.50535 |
| 49751 | P14079 | Q6ZSR6 | 0.70369 |
| 49752 | P14079 | Q8N5F7 | 1.3918  |
| 49753 | P14079 | A0ZSE6 | 1.0693  |
| 49754 | P14079 | P43362 | 0.30704 |
| 49755 | P14079 | Q5VT40 | 1.1731  |
| 49756 | P14079 | Q5TA78 | 1.1715  |
| 49757 | P14079 | Q14201 | 0.20849 |
| 49758 | P14079 | Q66K41 | 1.3958  |
| 49759 | P14079 | O43731 | 0.80489 |
| 49760 | P14079 | P22415 | 0.38671 |
| 49761 | P14079 | Q9H0C5 | 0.71001 |
| 49762 | P14079 | P37837 | 1.247   |
| 49763 | P14079 | P82914 | 1.2442  |
| 49764 | P14079 | Q8IUZ0 | 0.25965 |
| 49765 | P14079 | P43351 | 0.89489 |
| 49766 | P14079 | O15503 | 0.51487 |
| 49767 | P14079 | Q6ZTZ1 | 0.90832 |
| 49768 | P14079 | P61024 | 1.0304  |
| 49769 | P14079 | Q86T29 | 0.51784 |
| 49770 | P14079 | Q86SX3 | 1.9267  |
| 49771 | P14079 | Q8N852 | 0.84909 |
| 49772 | P14079 | Q7L3B6 | 0.62039 |
| 49773 | P14079 | Q96PQ5 | 0.43343 |
| 49774 | P14079 | Q15653 | 1.2753  |
| 49775 | P14079 | Q9BSR8 | 1.0273  |
| 49776 | P14079 | Q8WXI9 | 0.8296  |
| 49777 | P14079 | Q13495 | 1.7083  |
| 49778 | P14079 | Q8NHW5 | 0.4748  |
| 49779 | P14079 | Q8TAT2 | 0.82352 |
| 49780 | P14079 | P51948 | 0.56751 |

|       |        |        |          |
|-------|--------|--------|----------|
| 49781 | P14079 | Q5T5B0 | 1.1715   |
| 49782 | P14079 | Q6ZTI0 | 1.1715   |
| 49783 | P14079 | O15544 | 0.53058  |
| 49784 | P14079 | Q8TAA5 | 0.87526  |
| 49785 | P14079 | Q8IW19 | 0.38463  |
| 49786 | P14079 | Q9HD34 | 1.0041   |
| 49787 | P14079 | Q6NSZ9 | 0.38376  |
| 49788 | P14079 | P21912 | 0.082224 |
| 49789 | P14079 | Q8WTP8 | 0.11287  |
| 49790 | P14079 | Q9UMS6 | 0.83339  |
| 49791 | P14079 | Q9NXZ1 | 0.47767  |
| 49792 | P14079 | P58513 | 0.23646  |
| 49793 | P14079 | Q9NX55 | 0.64512  |
| 49794 | P14079 | Q96C57 | 1.1674   |
| 49795 | P14079 | Q13123 | 1.4533   |
| 49796 | P14079 | Q9H814 | 1.5648   |
| 49797 | P14079 | Q96LM6 | 0.51314  |
| 49798 | P14079 | Q7Z4H3 | 0.35535  |
| 49799 | P14079 | Q17R26 | 0.70934  |
| 49800 | P14079 | Q5TBB1 | 1.5049   |
| 49801 | P14079 | Q8IXR5 | 1.0576   |
| 49802 | P14079 | Q6ICL3 | 0.81135  |
| 49803 | P14079 | Q9HD47 | 0.58708  |
| 49804 | P14079 | Q9H6B1 | 0.98575  |
| 49805 | P14079 | Q96NL8 | 1.4283   |
| 49806 | P14079 | O75391 | 1.3421   |
| 49807 | P14079 | P49406 | 0.94824  |
| 49808 | P14079 | Q96FM1 | 0.85426  |
| 49809 | P14079 | Q9Y6Q2 | 0.28158  |
| 49810 | P14079 | Q8N8H1 | 0.93794  |
| 49811 | P14079 | O94983 | 1.2996   |
| 49812 | P14079 | Q96F83 | 0.68697  |
| 49813 | P14079 | P63162 | 0.80323  |
| 49814 | P14079 | K9M1U5 | 1.1715   |
| 49815 | P14079 | Q6JBY9 | 0.97806  |
| 49816 | P14079 | Q96CS2 | 0.76457  |
| 49817 | P14079 | Q9BZW7 | 0.27174  |
| 49818 | Q2Q067 | Q3KQU3 | 0.36757  |
| 49819 | Q2Q067 | Q9BTW9 | 0.10311  |
| 49820 | Q2Q067 | Q92783 | 0.5594   |
| 49821 | Q2Q067 | O95363 | 0.23654  |
| 49822 | Q2Q067 | P19012 | 0.69995  |
| 49823 | Q2Q067 | Q86W56 | 0.66187  |
| 49824 | Q2Q067 | P04156 | 0.31504  |
| 49825 | Q2Q067 | P61580 | 0.48164  |
| 49826 | Q2Q067 | Q9H714 | 0.17438  |
| 49827 | Q2Q067 | Q96S95 | 0.26715  |
| 49828 | Q2Q067 | Q5JS54 | 0.23277  |
| 49829 | Q2Q067 | Q7Z3C6 | 0.068786 |
| 49830 | Q2Q067 | Q5JNZ5 | 0.27303  |
| 49831 | Q2Q067 | Q6P047 | 0.22687  |
| 49832 | Q2Q067 | E7ETH6 | 0.10377  |
| 49833 | Q2Q067 | O95376 | 0.31653  |
| 49834 | Q2Q067 | Q8N5N7 | 0.28691  |
| 49835 | Q2Q067 | Q68CZ2 | 0.33339  |
| 49836 | Q2Q067 | Q13562 | 0.25144  |
| 49837 | Q2Q067 | Q0D2J5 | 0.11356  |
| 49838 | Q2Q067 | Q5VSL9 | 0.76954  |
| 49839 | Q2Q067 | Q12901 | 0.1777   |
| 49840 | Q2Q067 | Q8IXW0 | 0.22005  |
| 49841 | Q2Q067 | O95411 | 0.19215  |
| 49842 | Q2Q067 | P05204 | 0.35292  |
| 49843 | Q2Q067 | Q5MJ07 | 0.40408  |
| 49844 | Q2Q067 | A8MYZ0 | 0.30161  |
| 49845 | Q2Q067 | P02792 | 0.15177  |
| 49846 | Q2Q067 | O60806 | 0.46742  |
| 49847 | Q2Q067 | Q9NUC0 | 0.061697 |
| 49848 | Q2Q067 | P51398 | 1.1807   |
| 49849 | Q2Q067 | P49454 | 0.55148  |
| 49850 | Q2Q067 | Q9HC78 | 0.13257  |
| 49851 | Q2Q067 | Q09FC8 | 0.21153  |
| 49852 | Q2Q067 | Q96EI5 | 0.42404  |
| 49853 | Q2Q067 | A8MTY7 | 0.34715  |
| 49854 | Q2Q067 | Q9Y253 | 0.22824  |
| 49855 | Q2Q067 | Q8WW24 | 0.1203   |
| 49856 | Q2Q067 | Q9H4I2 | 0.76059  |

|       |        |        |          |
|-------|--------|--------|----------|
| 49857 | Q2Q067 | Q01844 | 0.51672  |
| 49858 | Q2Q067 | Q9NZ81 | 0.69263  |
| 49859 | Q2Q067 | Q9UNP9 | 0.3075   |
| 49860 | Q2Q067 | Q9UM63 | 0.16623  |
| 49861 | Q2Q067 | O15014 | 0.6492   |
| 49862 | Q2Q067 | P23588 | 0.12363  |
| 49863 | Q2Q067 | Q92900 | 0.53858  |
| 49864 | Q2Q067 | A6NJJ6 | 0.29573  |
| 49865 | Q2Q067 | P05198 | 0.70496  |
| 49866 | Q2Q067 | Q96SQ5 | 0.12519  |
| 49867 | Q2Q067 | Q96TC7 | 0.31827  |
| 49868 | Q2Q067 | O15511 | 0.13168  |
| 49869 | Q2Q067 | Q14974 | 1.104    |
| 49870 | Q2Q067 | P78346 | 0.35194  |
| 49871 | Q2Q067 | Q9HD33 | 0.36818  |
| 49872 | Q2Q067 | Q7L2H7 | 0.52105  |
| 49873 | Q2Q067 | Q2TAM9 | 0.54396  |
| 49874 | Q2Q067 | Q13278 | 0.32659  |
| 49875 | Q2Q067 | Q9BUE0 | 1.0006   |
| 49876 | Q2Q067 | Q9Y473 | 0.24041  |
| 49877 | Q2Q067 | Q6ZRS4 | 0.2567   |
| 49878 | Q2Q067 | Q9BYE7 | 0.77359  |
| 49879 | Q2Q067 | Q9H583 | 1.008    |
| 49880 | Q2Q067 | Q66PJ3 | 0.60884  |
| 49881 | Q2Q067 | O43290 | 0.93736  |
| 49882 | Q2Q067 | Q13573 | 0.62304  |
| 49883 | Q2Q067 | Q8TCS8 | 0.069106 |
| 49884 | Q2Q067 | Q9C0C6 | 0.43222  |
| 49885 | Q2Q067 | Q8IZ16 | 0.13934  |
| 49886 | Q2Q067 | Q96F63 | 0.29573  |
| 49887 | Q2Q067 | P61313 | 1.0382   |
| 49888 | Q2Q067 | Q9BU02 | 0.46811  |
| 49889 | Q2Q067 | B1AH88 | 0.19215  |
| 49890 | Q2Q067 | Q9NQG7 | 0.26694  |
| 49891 | Q2Q067 | Q9BSU1 | 0.35334  |
| 49892 | Q2Q067 | P07438 | 0.18499  |
| 49893 | Q2Q067 | Q14526 | 0.53132  |
| 49894 | Q2Q067 | Q8NHR7 | 0.057884 |
| 49895 | Q2Q067 | Q9Y5K5 | 0.32826  |
| 49896 | Q2Q067 | P30153 | 0.55294  |
| 49897 | Q2Q067 | Q8WV37 | 0.38703  |
| 49898 | Q2Q067 | Q9BRT2 | 0.32308  |
| 49899 | Q2Q067 | Q9NWS1 | 0.93617  |
| 49900 | Q2Q067 | Q9UNN4 | 0.41554  |
| 49901 | Q2Q067 | Q8N859 | 0.22415  |
| 49902 | Q2Q067 | Q12798 | 0.60905  |
| 49903 | Q2Q067 | O43365 | 0.89284  |
| 49904 | Q2Q067 | O95602 | 0.58405  |
| 49905 | Q2Q067 | Q2YD98 | 0.12878  |
| 49906 | Q2Q067 | Q6PF05 | 0.17122  |
| 49907 | Q2Q067 | P83369 | 0.68999  |
| 49908 | Q2Q067 | P52742 | 0.1371   |
| 49909 | Q2Q067 | Q15054 | 0.59032  |
| 49910 | Q2Q067 | Q15573 | 0.44637  |
| 49911 | Q2Q067 | Q9BRH9 | 0.11603  |
| 49912 | Q2Q067 | Q8NDY4 | 0.19215  |
| 49913 | Q2Q067 | Q9ULD0 | 0.32592  |
| 49914 | Q2Q067 | Q9UKI9 | 1.2939   |
| 49915 | Q2Q067 | Q3KRA6 | 0.59206  |
| 49916 | Q2Q067 | Q9UI26 | 0.32176  |
| 49917 | Q2Q067 | Q9Y4R8 | 0.11677  |
| 49918 | Q2Q067 | Q8NG57 | 0.24331  |
| 49919 | Q2Q067 | Q86X02 | 0.074505 |
| 49920 | Q2Q067 | Q96N77 | 0.29295  |
| 49921 | Q2Q067 | Q9Y2J2 | 0.32669  |
| 49922 | Q2Q067 | Q5SZL2 | 0.071228 |
| 49923 | Q2Q067 | Q3MIV0 | 0.19215  |
| 49924 | Q2Q067 | Q9UBW5 | 0.47001  |
| 49925 | Q2Q067 | Q9NWB6 | 0.39593  |
| 49926 | Q2Q067 | Q8N0U6 | 0.19215  |
| 49927 | Q2Q067 | Q9Y6X3 | 0.94733  |
| 49928 | Q2Q067 | Q4G0F5 | 0.054305 |
| 49929 | Q2Q067 | C9JN71 | 0.13128  |
| 49930 | Q2Q067 | Q8NHY2 | 1.0329   |
| 49931 | Q2Q067 | Q14151 | 0.65493  |
| 49932 | Q2Q067 | Q9BZZ5 | 0.35432  |

|       |        |        |          |
|-------|--------|--------|----------|
| 49933 | Q2Q067 | Q9P2Y5 | 0.23327  |
| 49934 | Q2Q067 | O14734 | 0.23345  |
| 49935 | Q2Q067 | Q12905 | 1.0621   |
| 49936 | Q2Q067 | O43463 | 0.77783  |
| 49937 | Q2Q067 | Q9UPP1 | 0.40636  |
| 49938 | Q2Q067 | O95671 | 0.23493  |
| 49939 | Q2Q067 | Q9NNW5 | 0.46718  |
| 49940 | Q2Q067 | Q7RTT3 | 0.12144  |
| 49941 | Q2Q067 | Q96EE3 | 0.56907  |
| 49942 | Q2Q067 | Q9NWX4 | 0.20754  |
| 49943 | Q2Q067 | A6NFL8 | 0.37471  |
| 49944 | Q2Q067 | Q9NZI7 | 0.2899   |
| 49945 | Q2Q067 | Q8TAF3 | 0.62517  |
| 49946 | Q2Q067 | Q8IUD2 | 0.80658  |
| 49947 | Q2Q067 | Q8WZ33 | 0.81112  |
| 49948 | Q2Q067 | P33240 | 0.48395  |
| 49949 | Q2Q067 | Q01082 | 0.43036  |
| 49950 | Q2Q067 | Q9NWK9 | 0.4745   |
| 49951 | Q2Q067 | Q99460 | 0.2383   |
| 49952 | Q2Q067 | O15027 | 0.30734  |
| 49953 | Q2Q067 | P27540 | 0.43526  |
| 49954 | Q2Q067 | Q3LI58 | 0.19215  |
| 49955 | Q2Q067 | A4D997 | 0.2528   |
| 49956 | Q2Q067 | P17544 | 1.069    |
| 49957 | Q2Q067 | Q9P2D3 | 0.38872  |
| 49958 | Q2Q067 | O75525 | 0.75429  |
| 49959 | Q2Q067 | Q9BWC9 | 0.47289  |
| 49960 | Q2Q067 | P30281 | 0.70821  |
| 49961 | Q2Q067 | Q13118 | 0.323    |
| 49962 | Q2Q067 | A6NJV1 | 0.26085  |
| 49963 | Q2Q067 | Q8WW35 | 0.28783  |
| 49964 | Q2Q067 | Q9BZL4 | 0.47001  |
| 49965 | Q2Q067 | P25490 | 0.24197  |
| 49966 | Q2Q067 | Q33E94 | 0.91753  |
| 49967 | Q2Q067 | Q6VMQ6 | 0.99512  |
| 49968 | Q2Q067 | P52434 | 0.29775  |
| 49969 | Q2Q067 | Q8NCF5 | 0.47309  |
| 49970 | Q2Q067 | Q3ZCV2 | 0.29573  |
| 49971 | Q2Q067 | Q9BZK3 | 0.1814   |
| 49972 | Q2Q067 | Q92750 | 0.63491  |
| 49973 | Q2Q067 | Q9BPX7 | 0.062418 |
| 49974 | Q2Q067 | Q6IPW1 | 0.21605  |
| 49975 | Q2Q067 | O60232 | 0.5901   |
| 49976 | Q2Q067 | P01100 | 0.60196  |
| 49977 | Q2Q067 | Q96J02 | 0.30092  |
| 49978 | Q2Q067 | Q9H3C7 | 0.51883  |
| 49979 | Q2Q067 | P83876 | 0.91461  |
| 49980 | Q2Q067 | Q8IXJ6 | 0.31795  |
| 49981 | Q2Q067 | Q99613 | 0.69547  |
| 49982 | Q2Q067 | Q96D70 | 0.44312  |
| 49983 | Q2Q067 | Q9UL45 | 0.15732  |
| 49984 | Q2Q067 | Q9BQ61 | 0.29573  |
| 49985 | Q2Q067 | Q03989 | 0.29397  |
| 49986 | Q2Q067 | P62701 | 0.50169  |
| 49987 | Q2Q067 | P22392 | 0.26528  |
| 49988 | Q2Q067 | P46108 | 0.42959  |
| 49989 | Q2Q067 | Q3KNT7 | 0.032013 |
| 49990 | Q2Q067 | H3BU77 | 0.18601  |
| 49991 | Q2Q067 | Q96S07 | 0.19215  |
| 49992 | Q2Q067 | Q9UN81 | 0.30205  |
| 49993 | Q2Q067 | Q6PB30 | 0.42267  |
| 49994 | Q2Q067 | Q9UK13 | 0.23615  |
| 49995 | Q2Q067 | P35789 | 0.20369  |
| 49996 | Q2Q067 | Q9HBH1 | 0.35356  |
| 49997 | Q2Q067 | P53370 | 0.41559  |
| 49998 | Q2Q067 | Q9UH99 | 0.081153 |
| 49999 | Q2Q067 | O60524 | 0.55837  |
| 50000 | Q2Q067 | Q8NCT3 | 0.37244  |
| 50001 | Q2Q067 | P50402 | 0.14022  |
| 50002 | Q2Q067 | Q6V9R5 | 0.21433  |
| 50003 | Q2Q067 | Q8NA42 | 0.11771  |
| 50004 | Q2Q067 | O00213 | 0.39095  |
| 50005 | Q2Q067 | Q9HB65 | 0.51366  |
| 50006 | Q2Q067 | Q9Y6X8 | 0.69773  |
| 50007 | Q2Q067 | Q6FI81 | 0.36772  |
| 50008 | Q2Q067 | Q8NHW5 | 0.09739  |

|       |        |        |          |
|-------|--------|--------|----------|
| 50009 | Q2Q067 | Q92585 | 0.9681   |
| 50010 | Q2Q067 | O75351 | 0.27784  |
| 50011 | Q2Q067 | Q9BTV5 | 0.37446  |
| 50012 | Q2Q067 | Q96HA8 | 0.94956  |
| 50013 | Q2Q067 | Q92988 | 0.56881  |
| 50014 | Q2Q067 | P35908 | 0.24881  |
| 50015 | Q2Q067 | O00425 | 0.4258   |
| 50016 | Q2Q067 | O75161 | 0.51717  |
| 50017 | Q2Q067 | Q8N187 | 0.66047  |
| 50018 | Q2Q067 | Q9H2G9 | 0.40367  |
| 50019 | Q2Q067 | P82921 | 0.33904  |
| 50020 | Q2Q067 | Q8WWX9 | 0.4411   |
| 50021 | Q2Q067 | O95639 | 0.32893  |
| 50022 | Q2Q067 | Q3SY00 | 0.41702  |
| 50023 | Q2Q067 | Q9Y3A2 | 0.84719  |
| 50024 | Q2Q067 | Q96MR7 | 0.77455  |
| 50025 | Q2Q067 | Q96FV9 | 0.8617   |
| 50026 | Q2Q067 | Q9ULR5 | 0.42796  |
| 50027 | Q2Q067 | Q9GZT8 | 0.81427  |
| 50028 | Q2Q067 | O43167 | 0.58991  |
| 50029 | Q2Q067 | Q2M218 | 0.10324  |
| 50030 | Q2Q067 | Q04864 | 1.232    |
| 50031 | Q2Q067 | P02538 | 0.67965  |
| 50032 | Q2Q067 | P81877 | 0.42639  |
| 50033 | Q2Q067 | Q8TA86 | 0.47525  |
| 50034 | Q2Q067 | Q9UHL9 | 0.27553  |
| 50035 | Q2Q067 | Q7L0X2 | 0.061262 |
| 50036 | Q2Q067 | Q9NYP9 | 0.30323  |
| 50037 | Q2Q067 | P0C853 | 0.19215  |
| 50038 | Q2Q067 | Q9BYD6 | 0.2879   |
| 50039 | Q2Q067 | Q9UJN7 | 0.091745 |
| 50040 | Q2Q067 | Q9NXW9 | 0.1687   |
| 50041 | Q2Q067 | Q5SWW7 | 0.19215  |
| 50042 | Q2Q067 | O00411 | 0.49157  |
| 50043 | Q2Q067 | Q5H9J9 | 0.058047 |
| 50044 | Q2Q067 | Q96MW7 | 0.19704  |
| 50045 | Q2Q067 | Q8N831 | 0.2401   |
| 50046 | Q2Q067 | O75832 | 0.464    |
| 50047 | Q2Q067 | Q99865 | 0.32334  |
| 50048 | Q2Q067 | P0C1Z6 | 1.1991   |
| 50049 | Q2Q067 | Q16236 | 0.67566  |
| 50050 | Q2Q067 | Q5TAQ9 | 0.24229  |
| 50051 | Q2Q067 | Q03923 | 0.25959  |
| 50052 | Q2Q067 | Q6UN15 | 0.61578  |
| 50053 | Q2Q067 | Q9Y2S7 | 0.44629  |
| 50054 | Q2Q067 | Q9Y2M0 | 0.33929  |
| 50055 | Q2Q067 | Q8N5R6 | 0.32153  |
| 50056 | Q2Q067 | Q14657 | 0.7317   |
| 50057 | Q2Q067 | O60684 | 0.32002  |
| 50058 | Q2Q067 | A8MSI8 | 0.69679  |
| 50059 | Q2Q067 | Q86U42 | 0.70446  |
| 50060 | Q2Q067 | A8MYA2 | 0.15705  |
| 50061 | Q2Q067 | P48556 | 0.39923  |
| 50062 | Q2Q067 | O94973 | 0.39104  |
| 50063 | Q2Q067 | O15234 | 0.87169  |
| 50064 | Q2Q067 | Q9Y4A5 | 0.80781  |
| 50065 | Q2Q067 | Q8WV44 | 0.29601  |
| 50066 | Q2Q067 | P09917 | 0.23837  |
| 50067 | Q2Q067 | Q9BYQ7 | 0.41862  |
| 50068 | Q2Q067 | Q13084 | 1.0215   |
| 50069 | Q2Q067 | Q9UEG4 | 0.11466  |
| 50070 | Q2Q067 | Q9H321 | 0.43298  |
| 50071 | Q2Q067 | P62633 | 0.60791  |
| 50072 | Q2Q067 | P10746 | 0.14814  |
| 50073 | Q2Q067 | Q5VVS0 | 0.53547  |
| 50074 | Q2Q067 | Q9NVH2 | 0.20549  |
| 50075 | Q2Q067 | Q6ZUA9 | 0.24272  |
| 50076 | Q2Q067 | Q5TD94 | 0.094971 |
| 50077 | Q2Q067 | Q9H2U2 | 0.3933   |
| 50078 | Q2Q067 | Q96N21 | 0.28161  |
| 50079 | Q2Q067 | P54252 | 0.43114  |
| 50080 | Q2Q067 | Q8IWL8 | 0.4678   |
| 50081 | Q2Q067 | Q6P387 | 0.32989  |
| 50082 | Q2Q067 | Q6NUN7 | 0.19215  |
| 50083 | Q2Q067 | Q9BUG6 | 0.076446 |
| 50084 | Q2Q067 | Q969W3 | 0.36981  |



|       |        |        |          |
|-------|--------|--------|----------|
| 50085 | Q2Q067 | Q9NUL5 | 0.025585 |
| 50086 | Q2Q067 | C9JE40 | 0.83476  |
| 50087 | Q2Q067 | Q5R3I4 | 0.054652 |
| 50088 | Q2Q067 | Q8NCX0 | 0.11855  |
| 50089 | Q2Q067 | P18754 | 1.0894   |
| 50090 | Q2Q067 | P49458 | 0.40228  |
| 50091 | Q2Q067 | Q96S65 | 0.70154  |
| 50092 | Q2Q067 | Q9BYQ6 | 0.34715  |
| 50093 | Q2Q067 | P60331 | 0.34715  |
| 50094 | Q2Q067 | Q96GE4 | 0.031307 |
| 50095 | Q2Q067 | Q9NX08 | 0.28783  |
| 50096 | Q2Q067 | Q96H22 | 0.14794  |
| 50097 | Q2Q067 | Q9BZE1 | 0.28685  |
| 50098 | Q2Q067 | A6NDX5 | 0.15529  |
| 50099 | Q2Q067 | Q15013 | 0.80221  |
| 50100 | Q2Q067 | P47914 | 0.57329  |
| 50101 | Q2Q067 | P23381 | 0.2013   |
| 50102 | Q2Q067 | A8MU10 | 0.19215  |
| 50103 | Q2Q067 | P02545 | 0.73076  |
| 50104 | Q2Q067 | Q9H3J6 | 0.39716  |
| 50105 | Q2Q067 | O43364 | 0.61745  |
| 50106 | Q2Q067 | Q6VN20 | 0.35239  |
| 50107 | Q2Q067 | Q86VW0 | 0.19247  |
| 50108 | Q2Q067 | P82933 | 0.59997  |
| 50109 | Q2Q067 | Q8IU60 | 0.90724  |
| 50110 | Q2Q067 | P07910 | 0.24013  |
| 50111 | Q2Q067 | P31749 | 0.55651  |
| 50112 | Q2Q067 | Q8NEM1 | 0.24839  |
| 50113 | Q2Q067 | P52948 | 1.0538   |
| 50114 | Q2Q067 | Q92890 | 0.80268  |
| 50115 | Q2Q067 | P35754 | 0.3622   |
| 50116 | Q2Q067 | Q9Y305 | 0.31752  |
| 50117 | Q2Q067 | Q9NRP2 | 0.40933  |
| 50118 | Q2Q067 | Q71F23 | 0.61356  |
| 50119 | Q2Q067 | O15525 | 0.39254  |
| 50120 | Q2Q067 | Q7LBR1 | 0.85651  |
| 50121 | Q2Q067 | Q6P2H3 | 0.50076  |
| 50122 | Q2Q067 | P40306 | 0.41448  |
| 50123 | Q2Q067 | Q13185 | 0.77814  |
| 50124 | Q2Q067 | Q6NVH7 | 0.56614  |
| 50125 | Q2Q067 | Q9NWS8 | 0.32996  |
| 50126 | Q2Q067 | Q9UC06 | 0.10905  |
| 50127 | Q2Q067 | Q9BZE4 | 0.26462  |
| 50128 | Q2Q067 | Q8N535 | 0.20616  |
| 50129 | Q2Q067 | Q96GA3 | 0.44044  |
| 50130 | Q2Q067 | Q52M58 | 0.30292  |
| 50131 | Q2Q067 | Q9BQY9 | 0.41843  |
| 50132 | Q2Q067 | Q14258 | 1.0352   |
| 50133 | Q2Q067 | Q86VG3 | 0.23361  |
| 50134 | Q2Q067 | Q86XA9 | 0.087098 |
| 50135 | Q2Q067 | P50995 | 0.7908   |
| 50136 | Q2Q067 | P0DMB2 | 0.26811  |
| 50137 | Q2Q067 | Q99583 | 0.41784  |
| 50138 | Q2Q067 | Q2KHR2 | 0.22597  |
| 50139 | Q2Q067 | Q9ULX3 | 0.63234  |
| 50140 | Q2Q067 | Q6ZN28 | 0.57327  |
| 50141 | Q2Q067 | P62312 | 0.84991  |
| 50142 | Q2Q067 | A8MTB1 | 0.19215  |
| 50143 | Q2Q067 | Q08AI8 | 0.29573  |
| 50144 | Q2Q067 | Q93034 | 0.75541  |
| 50145 | Q2Q067 | O75155 | 0.76301  |
| 50146 | Q2Q067 | Q8IZL2 | 0.87367  |
| 50147 | Q2Q067 | P98182 | 0.042317 |
| 50148 | Q2Q067 | Q14008 | 0.83619  |
| 50149 | Q2Q067 | Q9BSJ6 | 0.47129  |
| 50150 | Q2Q067 | Q6UXP7 | 0.10047  |
| 50151 | Q2Q067 | Q9Y2Y0 | 0.97635  |
| 50152 | Q2Q067 | P42773 | 0.31869  |
| 50153 | Q2Q067 | O43920 | 0.32856  |
| 50154 | Q2Q067 | Q9Y333 | 0.73413  |
| 50155 | Q2Q067 | Q8IX15 | 0.51811  |
| 50156 | Q2Q067 | Q8N6V4 | 0.072688 |
| 50157 | Q2Q067 | Q5U5X0 | 0.4051   |
| 50158 | Q2Q067 | Q9NRF9 | 0.034431 |
| 50159 | Q2Q067 | A0AUK8 | 0.045275 |
| 50160 | Q2Q067 | Q5HYW3 | 0.41864  |

|       |        |        |           |
|-------|--------|--------|-----------|
| 50161 | Q2Q067 | Q9UN52 | 0.6289    |
| 50162 | Q2Q067 | Q12769 | 1.0412    |
| 50163 | Q2Q067 | Q9H4X1 | 0.41661   |
| 50164 | Q2Q067 | Q12837 | 0.56038   |
| 50165 | Q2Q067 | Q96SD1 | 0.0024929 |
| 50166 | Q2Q067 | Q96CB9 | 0.35209   |
| 50167 | Q2Q067 | Q8WUQ7 | 0.11351   |
| 50168 | Q2Q067 | Q8N2M8 | 0.54566   |
| 50169 | Q2Q067 | P46779 | 1.1616    |
| 50170 | Q2Q067 | O00186 | 0.73784   |
| 50171 | Q2Q067 | Q9H7X3 | 0.091251  |
| 50172 | Q2Q067 | Q9H008 | 0.40325   |
| 50173 | Q2Q067 | O14786 | 0.33477   |
| 50174 | Q2Q067 | Q9H910 | 0.45693   |
| 50175 | Q2Q067 | Q6UXP9 | 0.03377   |
| 50176 | Q2Q067 | Q9BYQ2 | 0.34715   |
| 50177 | Q2Q067 | Q9BXU2 | 0.2148    |
| 50178 | Q2Q067 | Q8TF63 | 0.34114   |
| 50179 | Q2Q067 | Q7L8J4 | 0.20814   |
| 50180 | Q2Q067 | O14744 | 0.93696   |
| 50181 | Q2Q067 | Q9BVP2 | 0.18996   |
| 50182 | Q2Q067 | Q9Y6K5 | 0.10627   |
| 50183 | Q2Q067 | Q9UPN9 | 0.4484    |
| 50184 | Q2Q067 | O60239 | 0.27414   |
| 50185 | Q2Q067 | Q96EL2 | 0.30752   |
| 50186 | Q2Q067 | Q9Y5Q3 | 0.87933   |
| 50187 | Q2Q067 | Q9Y3S2 | 0.21919   |
| 50188 | Q2Q067 | Q8WXF5 | 0.26153   |
| 50189 | Q2Q067 | Q5T036 | 0.016216  |
| 50190 | Q2Q067 | P35321 | 0.37712   |
| 50191 | Q2Q067 | Q9Y6D6 | 0.60753   |
| 50192 | Q2Q067 | Q9Y6Q5 | 0.34478   |
| 50193 | Q2Q067 | Q9BYD1 | 0.82504   |
| 50194 | Q2Q067 | Q03052 | 0.3639    |
| 50195 | Q2Q067 | O75461 | 0.26705   |
| 50196 | Q2Q067 | Q9Y613 | 0.54262   |
| 50197 | Q2Q067 | Q9H246 | 0.10062   |
| 50198 | Q2Q067 | Q8IUC6 | 0.24356   |
| 50199 | Q2Q067 | O00410 | 1.1626    |
| 50200 | Q2Q067 | P56524 | 0.32728   |
| 50201 | Q2Q067 | Q93009 | 0.32544   |
| 50202 | Q2Q067 | Q9UK11 | 0.1732    |
| 50203 | Q2Q067 | Q9BY41 | 0.37912   |
| 50204 | Q2Q067 | P17029 | 0.2057    |
| 50205 | Q2Q067 | Q8WXQ3 | 0.65353   |
| 50206 | Q2Q067 | Q96GX2 | 0.36712   |
| 50207 | Q2Q067 | Q12796 | 1.0622    |
| 50208 | Q2Q067 | Q9BW66 | 0.85206   |
| 50209 | Q2Q067 | P52738 | 0.079889  |
| 50210 | Q2Q067 | Q9ULX6 | 0.3226    |
| 50211 | Q2Q067 | Q9NR56 | 0.40937   |
| 50212 | Q2Q067 | Q96IP4 | 0.25585   |
| 50213 | Q2Q067 | Q9H0C8 | 0.36563   |
| 50214 | Q2Q067 | Q96GI7 | 0.29573   |
| 50215 | Q2Q067 | Q10587 | 0.36826   |
| 50216 | Q2Q067 | A8MTY0 | 0.22615   |
| 50217 | Q2Q067 | P0C7X3 | 0.18322   |
| 50218 | Q2Q067 | O75427 | 0.4431    |
| 50219 | Q2Q067 | Q6NVV0 | 0.29201   |
| 50220 | Q2Q067 | A5PL33 | 0.36577   |
| 50221 | Q2Q067 | Q9HAW0 | 0.41702   |
| 50222 | Q2Q067 | Q495Y8 | 0.23617   |
| 50223 | Q2Q067 | O75909 | 1.0122    |
| 50224 | Q2Q067 | Q3MHD2 | 0.33951   |
| 50225 | Q2Q067 | Q9Y3C7 | 0.91133   |
| 50226 | Q2Q067 | Q9NQT4 | 0.48699   |
| 50227 | Q2Q067 | A0AVK6 | 0.39033   |
| 50228 | Q2Q067 | Q96NU7 | 0.065492  |
| 50229 | Q2Q067 | Q15631 | 0.71082   |
| 50230 | Q2Q067 | Q8N228 | 0.30214   |
| 50231 | Q2Q067 | P55036 | 0.59286   |
| 50232 | Q2Q067 | Q9UMS5 | 0.5332    |
| 50233 | Q2Q067 | Q96D98 | 0.5152    |
| 50234 | Q2Q067 | Q9H7R0 | 0.20181   |
| 50235 | Q2Q067 | Q99747 | 0.48767   |
| 50236 | Q2Q067 | Q96PE6 | 0.089474  |

|       |        |        |          |
|-------|--------|--------|----------|
| 50237 | Q2Q067 | Q8N1I8 | 0.19215  |
| 50238 | Q2Q067 | Q8IZD2 | 0.25129  |
| 50239 | Q2Q067 | Q3LI54 | 0.19215  |
| 50240 | Q2Q067 | Q4U2R6 | 0.82504  |
| 50241 | Q2Q067 | A6NFQ7 | 0.32768  |
| 50242 | Q2Q067 | Q99502 | 0.12582  |
| 50243 | Q2Q067 | Q9H3H9 | 0.51012  |
| 50244 | Q2Q067 | Q8IZ26 | 0.10927  |
| 50245 | Q2Q067 | P07741 | 0.23436  |
| 50246 | Q2Q067 | Q10567 | 0.6406   |
| 50247 | Q2Q067 | Q7Z353 | 0.25814  |
| 50248 | Q2Q067 | P60002 | 0.54009  |
| 50249 | Q2Q067 | Q9HBZ2 | 0.32854  |
| 50250 | Q2Q067 | Q9NR28 | 0.85518  |
| 50251 | Q2Q067 | O75474 | 0.61002  |
| 50252 | Q2Q067 | Q9BRR0 | 0.29228  |
| 50253 | Q2Q067 | Q6ZW49 | 0.38588  |
| 50254 | Q2Q067 | Q96HW7 | 0.57387  |
| 50255 | Q2Q067 | Q5VUG0 | 0.3157   |
| 50256 | Q2Q067 | Q96HA1 | 0.47828  |
| 50257 | Q2Q067 | Q9UPR3 | 1.0134   |
| 50258 | Q2Q067 | P10827 | 0.27434  |
| 50259 | Q2Q067 | Q8WWY6 | 0.39593  |
| 50260 | Q2Q067 | A6NJL1 | 0.058453 |
| 50261 | Q2Q067 | P04198 | 0.86056  |
| 50262 | Q2Q067 | Q9Y615 | 0.28879  |
| 50263 | Q2Q067 | P15884 | 0.63579  |
| 50264 | Q2Q067 | Q96A49 | 0.51629  |
| 50265 | Q2Q067 | B1AL46 | 0.4993   |
| 50266 | Q2Q067 | Q9P219 | 0.31389  |
| 50267 | Q2Q067 | Q2KJ03 | 0.077271 |
| 50268 | Q2Q067 | P20700 | 0.34604  |
| 50269 | Q2Q067 | O75663 | 0.39655  |
| 50270 | Q2Q067 | P20226 | 0.97674  |
| 50271 | Q2Q067 | Q9NVM4 | 0.22247  |
| 50272 | Q2Q067 | Q04726 | 0.99024  |
| 50273 | Q2Q067 | Q6ZRH9 | 0.19215  |
| 50274 | Q2Q067 | Q96N03 | 0.28783  |
| 50275 | Q2Q067 | Q96HR3 | 0.77088  |
| 50276 | Q2Q067 | Q96KQ4 | 0.86974  |
| 50277 | Q2Q067 | O15126 | 0.18082  |
| 50278 | Q2Q067 | O43361 | 0.12208  |
| 50279 | Q2Q067 | Q9HAU4 | 0.34925  |
| 50280 | Q2Q067 | Q5D1E8 | 0.40254  |
| 50281 | Q2Q067 | P0C7T4 | 0.19215  |
| 50282 | Q2Q067 | O60294 | 0.27826  |
| 50283 | Q2Q067 | A9UHW6 | 0.73024  |
| 50284 | Q2Q067 | P10243 | 0.5304   |
| 50285 | Q2Q067 | Q9Y462 | 0.60647  |
| 50286 | Q2Q067 | Q7Z4W3 | 0.19215  |
| 50287 | Q2Q067 | Q9Y324 | 0.54298  |
| 50288 | Q2Q067 | P55957 | 0.44251  |
| 50289 | Q2Q067 | P24385 | 0.59769  |
| 50290 | Q2Q067 | Q99417 | 1.4642   |
| 50291 | Q2Q067 | Q7Z6J0 | 0.24785  |
| 50292 | Q2Q067 | P55769 | 0.86276  |
| 50293 | Q2Q067 | Q7L5A3 | 0.25564  |
| 50294 | Q2Q067 | Q9Y5V3 | 0.81168  |
| 50295 | Q2Q067 | Q9NRH1 | 0.11691  |
| 50296 | Q2Q067 | P59022 | 0.28782  |
| 50297 | Q2Q067 | P09067 | 0.26893  |
| 50298 | Q2Q067 | P56377 | 0.33492  |
| 50299 | Q2Q067 | Q8TCE6 | 0.58433  |
| 50300 | Q2Q067 | Q7Z4H7 | 0.80542  |
| 50301 | Q2Q067 | P78559 | 0.64888  |
| 50302 | Q2Q067 | Q96NI8 | 0.20344  |
| 50303 | Q2Q067 | Q3BBV2 | 0.3158   |
| 50304 | Q2Q067 | Q9GZW5 | 0.5105   |
| 50305 | Q2Q067 | Q92681 | 0.37464  |
| 50306 | Q2Q067 | Q5JXB2 | 0.10977  |
| 50307 | Q2Q067 | Q16594 | 0.60742  |
| 50308 | Q2Q067 | Q6ZUG5 | 0.10067  |
| 50309 | Q2Q067 | O75340 | 0.41759  |
| 50310 | Q2Q067 | O00303 | 0.24485  |
| 50311 | Q2Q067 | Q6ZTY9 | 0.11671  |
| 50312 | Q2Q067 | Q9Y266 | 0.49408  |

|       |        |        |          |
|-------|--------|--------|----------|
| 50313 | Q2Q067 | Q9BVL4 | 0.6609   |
| 50314 | Q2Q067 | P49591 | 0.17564  |
| 50315 | Q2Q067 | P56182 | 0.44684  |
| 50316 | Q2Q067 | Q9UGU0 | 0.3101   |
| 50317 | Q2Q067 | Q9GZP8 | 0.19215  |
| 50318 | Q2Q067 | Q96NB3 | 0.38146  |
| 50319 | Q2Q067 | Q32M84 | 0.018047 |
| 50320 | Q2Q067 | Q96DE9 | 0.012384 |
| 50321 | Q2Q067 | O75925 | 0.53475  |
| 50322 | Q2Q067 | O95273 | 0.88398  |
| 50323 | Q2Q067 | P07195 | 0.23751  |
| 50324 | Q2Q067 | Q92922 | 1.0562   |
| 50325 | Q2Q067 | Q6NUN9 | 0.70422  |
| 50326 | Q2Q067 | Q63HQ0 | 0.19215  |
| 50327 | Q2Q067 | P63104 | 1.0277   |
| 50328 | Q2Q067 | Q6ZVL8 | 0.19215  |
| 50329 | Q2Q067 | Q8IVT2 | 0.40664  |
| 50330 | Q2Q067 | Q96KN1 | 0.33672  |
| 50331 | Q2Q067 | P07737 | 0.87363  |
| 50332 | Q2Q067 | Q8N9R8 | 0.56447  |
| 50333 | Q2Q067 | Q9UII4 | 0.30181  |
| 50334 | Q2Q067 | Q9Y3F4 | 0.84451  |
| 50335 | Q2Q067 | Q711Q0 | 0.19215  |
| 50336 | Q2Q067 | P39687 | 1.403    |
| 50337 | Q2Q067 | Q13033 | 0.66266  |
| 50338 | Q2Q067 | P55895 | 0.42067  |
| 50339 | Q2Q067 | Q8N9R0 | 0.19215  |
| 50340 | Q2Q067 | Q9UJL9 | 0.088569 |
| 50341 | Q2Q067 | Q15398 | 0.97416  |
| 50342 | Q2Q067 | Q8N1D5 | 0.037777 |
| 50343 | Q2Q067 | Q9UL41 | 0.32741  |
| 50344 | Q2Q067 | Q9BPY3 | 0.037799 |
| 50345 | Q2Q067 | Q96QU8 | 0.94532  |
| 50346 | Q2Q067 | O60664 | 0.49615  |
| 50347 | Q2Q067 | Q13875 | 0.49762  |
| 50348 | Q2Q067 | Q13536 | 0.19215  |
| 50349 | Q2Q067 | A6NEY8 | 0.09569  |
| 50350 | Q2Q067 | Q9UQ80 | 1.0888   |
| 50351 | Q2Q067 | Q3LHN0 | 0.46381  |
| 50352 | Q2Q067 | Q13356 | 0.057687 |
| 50353 | Q2Q067 | Q9NS56 | 0.28734  |
| 50354 | Q2Q067 | Q96RT8 | 0.30342  |
| 50355 | Q2Q067 | Q70YC5 | 0.1967   |
| 50356 | Q2Q067 | O43747 | 0.6781   |
| 50357 | Q2Q067 | O60304 | 0.087873 |
| 50358 | Q2Q067 | Q9NTK1 | 0.4489   |
| 50359 | Q2Q067 | Q96PV7 | 0.33983  |
| 50360 | Q2Q067 | Q9H5J4 | 0.2866   |
| 50361 | Q2Q067 | Q8IVF1 | 0.59249  |
| 50362 | Q2Q067 | Q9BRU2 | 0.46897  |
| 50363 | Q2Q067 | P22087 | 0.58162  |
| 50364 | Q2Q067 | P55265 | 0.37419  |
| 50365 | Q2Q067 | P23511 | 1.1908   |
| 50366 | Q2Q067 | P63172 | 0.78748  |
| 50367 | Q2Q067 | Q9BU68 | 0.24142  |
| 50368 | Q2Q067 | Q7Z2Z1 | 0.64555  |
| 50369 | Q2Q067 | Q9NSB2 | 0.15836  |
| 50370 | Q2Q067 | H0UI37 | 0.053977 |
| 50371 | Q2Q067 | Q9Y4P1 | 0.17069  |
| 50372 | Q2Q067 | Q15010 | 0.13408  |
| 50373 | Q2Q067 | Q9BYR5 | 0.34715  |
| 50374 | Q2Q067 | P24278 | 0.80978  |
| 50375 | Q2Q067 | P49790 | 1.1348   |
| 50376 | Q2Q067 | P82912 | 0.2882   |
| 50377 | Q2Q067 | Q3LI63 | 0.19215  |
| 50378 | Q2Q067 | Q9UD71 | 0.46617  |
| 50379 | Q2Q067 | Q8NEP9 | 0.21203  |
| 50380 | Q2Q067 | Q99638 | 0.53786  |
| 50381 | Q2Q067 | Q9H2H8 | 0.21345  |
| 50382 | Q2Q067 | P59036 | 0.19215  |
| 50383 | Q2Q067 | Q59GN2 | 0.12011  |
| 50384 | Q2Q067 | O95782 | 0.43539  |
| 50385 | Q2Q067 | Q9P209 | 0.77967  |
| 50386 | Q2Q067 | O15519 | 0.23517  |
| 50387 | Q2Q067 | Q53QW1 | 0.29573  |
| 50388 | Q2Q067 | Q9H063 | 0.26238  |

|       |        |        |          |
|-------|--------|--------|----------|
| 50389 | Q2Q067 | Q96E14 | 0.38255  |
| 50390 | Q2Q067 | Q9BSH4 | 0.56218  |
| 50391 | Q2Q067 | Q9NYK6 | 0.23304  |
| 50392 | Q2Q067 | Q9Y5A7 | 0.66696  |
| 50393 | Q2Q067 | Q8WVC0 | 0.98527  |
| 50394 | Q2Q067 | Q8N1G4 | 0.22814  |
| 50395 | Q2Q067 | Q05066 | 0.49594  |
| 50396 | Q2Q067 | Q8NEF9 | 0.62384  |
| 50397 | Q2Q067 | P07196 | 0.56096  |
| 50398 | Q2Q067 | Q8WX93 | 0.24777  |
| 50399 | Q2Q067 | Q6ZQV5 | 0.16182  |
| 50400 | Q2Q067 | Q9HBE1 | 0.073018 |
| 50401 | Q2Q067 | Q14315 | 0.23532  |
| 50402 | Q2Q067 | Q06416 | 0.32768  |
| 50403 | Q2Q067 | O60296 | 0.50953  |
| 50404 | Q2Q067 | Q5T6F2 | 0.47078  |
| 50405 | Q2Q067 | O60841 | 0.072619 |
| 50406 | Q2Q067 | Q8TAD8 | 1.2689   |
| 50407 | Q2Q067 | A6NGQ2 | 0.14982  |
| 50408 | Q2Q067 | Q9NXR8 | 0.25197  |
| 50409 | Q2Q067 | Q86SY8 | 0.19215  |
| 50410 | Q2Q067 | P82932 | 0.46547  |
| 50411 | Q2Q067 | Q9Y6C7 | 0.19215  |
| 50412 | Q2Q067 | Q86WQ0 | 0.49421  |
| 50413 | Q2Q067 | Q9H444 | 0.70817  |
| 50414 | Q2Q067 | Q16589 | 0.26633  |
| 50415 | Q2Q067 | Q13487 | 0.88241  |
| 50416 | Q2Q067 | Q63HK5 | 0.32097  |
| 50417 | Q2Q067 | Q5TAP6 | 0.31591  |
| 50418 | Q2Q067 | O95391 | 0.10313  |
| 50419 | Q2Q067 | P0CJ88 | 0.27517  |
| 50420 | Q2Q067 | Q9BY44 | 0.34844  |
| 50421 | Q2Q067 | Q6ZVK8 | 0.26464  |
| 50422 | Q2Q067 | Q9NQW6 | 0.22355  |
| 50423 | Q2Q067 | Q8NI35 | 0.24382  |
| 50424 | Q2Q067 | Q9BUP3 | 0.18682  |
| 50425 | Q2Q067 | E9PI22 | 0.28994  |
| 50426 | Q2Q067 | Q8TD31 | 0.37672  |
| 50427 | Q2Q067 | Q9HAV7 | 0.18761  |
| 50428 | Q2Q067 | Q6ICB0 | 0.41668  |
| 50429 | Q2Q067 | Q86UA6 | 0.61659  |
| 50430 | Q2Q067 | Q99081 | 0.4861   |
| 50431 | Q2Q067 | Q86XZ4 | 0.21187  |
| 50432 | Q2Q067 | Q8N0Y2 | 0.10021  |
| 50433 | Q2Q067 | Q9Y3B7 | 0.85845  |
| 50434 | Q2Q067 | Q9Y2D1 | 1.1951   |
| 50435 | Q2Q067 | Q96PV6 | 0.37901  |
| 50436 | Q2Q067 | Q1A5X6 | 0.29573  |
| 50437 | Q2Q067 | Q92664 | 0.098905 |
| 50438 | Q2Q067 | C9J3I9 | 0.20816  |
| 50439 | Q2Q067 | Q5VTD9 | 0.22242  |
| 50440 | Q2Q067 | P86480 | 0.19215  |
| 50441 | Q2Q067 | Q96C74 | 0.23098  |
| 50442 | Q2Q067 | Q9GZL7 | 0.7062   |
| 50443 | Q2Q067 | Q8IY63 | 0.42771  |
| 50444 | Q2Q067 | Q15928 | 0.25761  |
| 50445 | Q2Q067 | Q14160 | 0.56212  |
| 50446 | Q2Q067 | Q6PGQ1 | 0.20845  |
| 50447 | Q2Q067 | Q9NPB6 | 0.67809  |
| 50448 | Q2Q067 | Q9BSF8 | 0.32989  |
| 50449 | Q2Q067 | Q2VPB7 | 0.45094  |
| 50450 | Q2Q067 | Q8IY18 | 0.31658  |
| 50451 | Q2Q067 | Q6ZQR2 | 0.51861  |
| 50452 | Q2Q067 | Q96K75 | 0.090033 |
| 50453 | Q2Q067 | O95433 | 0.53418  |
| 50454 | Q2Q067 | Q9Y3Q8 | 1.2604   |
| 50455 | Q2Q067 | Q9H7N4 | 0.57009  |
| 50456 | Q2Q067 | Q9UHB7 | 1.3326   |
| 50457 | Q2Q067 | Q12888 | 0.73469  |
| 50458 | Q2Q067 | Q9BYQ8 | 0.34715  |
| 50459 | Q2Q067 | Q9H175 | 1.1059   |
| 50460 | Q2Q067 | P51861 | 0.30462  |
| 50461 | Q2Q067 | O00512 | 0.78563  |
| 50462 | Q2Q067 | Q96LI5 | 0.55342  |
| 50463 | Q2Q067 | Q6XD76 | 0.29177  |
| 50464 | Q2Q067 | Q8NEE0 | 0.19215  |

|       |        |        |          |
|-------|--------|--------|----------|
| 50465 | Q2Q067 | Q96B97 | 0.33314  |
| 50466 | Q2Q067 | O00291 | 0.43039  |
| 50467 | Q2Q067 | Q8WW12 | 0.59432  |
| 50468 | Q2Q067 | O00470 | 0.61739  |
| 50469 | Q2Q067 | Q8NCR6 | 0.15623  |
| 50470 | Q2Q067 | P52272 | 0.22401  |
| 50471 | Q2Q067 | Q9BUT9 | 0.60936  |
| 50472 | Q2Q067 | Q9UBX2 | 0.27517  |
| 50473 | Q2Q067 | O75818 | 0.23666  |
| 50474 | Q2Q067 | Q6PJP8 | 0.58221  |
| 50475 | Q2Q067 | Q8WY54 | 0.79297  |
| 50476 | Q2Q067 | Q86V59 | 0.16324  |
| 50477 | Q2Q067 | Q92889 | 0.24821  |
| 50478 | Q2Q067 | Q9UHR5 | 1.2198   |
| 50479 | Q2Q067 | Q13887 | 0.25257  |
| 50480 | Q2Q067 | Q7L8W6 | 0.2896   |
| 50481 | Q2Q067 | Q9Y6G5 | 0.28783  |
| 50482 | Q2Q067 | Q14980 | 1.0414   |
| 50483 | Q2Q067 | Q9NVU7 | 0.38967  |
| 50484 | Q2Q067 | Q92572 | 0.37613  |
| 50485 | Q2Q067 | Q9P032 | 0.46005  |
| 50486 | Q2Q067 | Q8NCQ2 | 0.37491  |
| 50487 | Q2Q067 | Q15293 | 0.24578  |
| 50488 | Q2Q067 | O00267 | 1.0433   |
| 50489 | Q2Q067 | P35080 | 0.34479  |
| 50490 | Q2Q067 | Q02543 | 0.78122  |
| 50491 | Q2Q067 | Q96RK1 | 0.6348   |
| 50492 | Q2Q067 | P06400 | 0.71708  |
| 50493 | Q2Q067 | Q8TA94 | 0.24343  |
| 50494 | Q2Q067 | Q9HB96 | 0.80624  |
| 50495 | Q2Q067 | Q8IV32 | 0.28913  |
| 50496 | Q2Q067 | P61326 | 1.0595   |
| 50497 | Q2Q067 | O43493 | 0.35412  |
| 50498 | Q2Q067 | B4DZS4 | 0.01678  |
| 50499 | Q2Q067 | O60784 | 0.33773  |
| 50500 | Q2Q067 | Q6NUP7 | 0.40334  |
| 50501 | Q2Q067 | Q8IVG9 | 0.081155 |
| 50502 | Q2Q067 | Q6ZN32 | 0.32768  |
| 50503 | Q2Q067 | Q9H9T3 | 0.78432  |
| 50504 | Q2Q067 | P30419 | 0.12854  |
| 50505 | Q2Q067 | Q9NPJ6 | 0.88576  |
| 50506 | Q2Q067 | O75534 | 0.081839 |
| 50507 | Q2Q067 | O75494 | 0.57959  |
| 50508 | Q2Q067 | O00231 | 0.48061  |
| 50509 | Q2Q067 | Q8WYA1 | 0.33342  |
| 50510 | Q2Q067 | Q9UMX3 | 0.55272  |
| 50511 | Q2Q067 | Q8IZH2 | 0.20517  |
| 50512 | Q2Q067 | Q0D2K3 | 0.48085  |
| 50513 | Q2Q067 | Q8NCE0 | 0.35634  |
| 50514 | Q2Q067 | Q7L9L4 | 0.74681  |
| 50515 | Q2Q067 | Q8IWE5 | 0.33609  |
| 50516 | Q2Q067 | O43257 | 0.24537  |
| 50517 | Q2Q067 | Q96I24 | 0.43219  |
| 50518 | Q2Q067 | Q8WW33 | 0.26738  |
| 50519 | Q2Q067 | P14866 | 0.4648   |
| 50520 | Q2Q067 | Q9BXQ6 | 0.19215  |
| 50521 | Q2Q067 | Q7Z5K2 | 0.69142  |
| 50522 | Q2Q067 | P29374 | 0.23394  |
| 50523 | Q2Q067 | Q99547 | 0.67294  |
| 50524 | Q2Q067 | P26373 | 1.0132   |
| 50525 | Q2Q067 | O95567 | 0.19215  |
| 50526 | Q2Q067 | O00233 | 0.65724  |
| 50527 | Q2Q067 | P42167 | 0.12377  |
| 50528 | Q2Q067 | Q9NPF5 | 0.90449  |
| 50529 | Q2Q067 | P29692 | 0.31326  |
| 50530 | Q2Q067 | Q9UJX3 | 0.74537  |
| 50531 | Q2Q067 | Q9UJX5 | 0.80792  |
| 50532 | Q2Q067 | A6NL46 | 0.41724  |
| 50533 | Q2Q067 | Q6NW29 | 0.072759 |
| 50534 | Q2Q067 | Q86YE8 | 0.16182  |
| 50535 | Q2Q067 | P21980 | 0.20719  |
| 50536 | Q2Q067 | Q9H2K2 | 0.30117  |
| 50537 | Q2Q067 | Q5SRH9 | 0.43965  |
| 50538 | Q2Q067 | O43663 | 0.78883  |
| 50539 | Q2Q067 | P27694 | 0.54919  |
| 50540 | Q2Q067 | P51825 | 1.0085   |

|       |        |        |          |
|-------|--------|--------|----------|
| 50541 | Q2Q067 | Q08AN1 | 0.16182  |
| 50542 | Q2Q067 | Q9C005 | 0.61146  |
| 50543 | Q2Q067 | P49959 | 0.19297  |
| 50544 | Q2Q067 | Q6RW13 | 0.47173  |
| 50545 | Q2Q067 | Q9Y676 | 0.32798  |
| 50546 | Q2Q067 | Q5TG08 | 0.42889  |
| 50547 | Q2Q067 | P41220 | 0.37096  |
| 50548 | Q2Q067 | Q8NEM7 | 0.27988  |
| 50549 | Q2Q067 | Q5XKK7 | 0.027736 |
| 50550 | Q2Q067 | Q15459 | 0.60867  |
| 50551 | Q2Q067 | P49792 | 0.85947  |
| 50552 | Q2Q067 | Q01094 | 0.79982  |
| 50553 | Q2Q067 | P58317 | 0.12151  |
| 50554 | Q2Q067 | O75394 | 0.23005  |
| 50555 | Q2Q067 | Q8IYF1 | 0.1975   |
| 50556 | Q2Q067 | Q9UKV0 | 0.41393  |
| 50557 | Q2Q067 | Q14678 | 0.4662   |
| 50558 | Q2Q067 | Q8WW38 | 0.53047  |
| 50559 | Q2Q067 | Q99575 | 0.6777   |
| 50560 | Q2Q067 | Q9Y4B6 | 0.8822   |
| 50561 | Q2Q067 | Q13427 | 0.38384  |
| 50562 | Q2Q067 | O95684 | 0.8369   |
| 50563 | Q2Q067 | Q9H706 | 0.28783  |
| 50564 | Q2Q067 | Q08999 | 1.328    |
| 50565 | Q2Q067 | Q96LR2 | 0.53194  |
| 50566 | Q2Q067 | Q6ZMY9 | 0.22722  |
| 50567 | Q2Q067 | Q56VL3 | 0.23797  |
| 50568 | Q2Q067 | Q96NJ1 | 0.19215  |
| 50569 | Q2Q067 | P40763 | 0.35081  |
| 50570 | Q2Q067 | Q9H5Q4 | 0.34354  |
| 50571 | Q2Q067 | Q8WYH8 | 0.51055  |
| 50572 | Q2Q067 | P78424 | 0.24106  |
| 50573 | Q2Q067 | Q8N8Z8 | 0.090549 |
| 50574 | Q2Q067 | P14921 | 0.85141  |
| 50575 | Q2Q067 | Q6ZNK6 | 0.53044  |
| 50576 | Q2Q067 | Q9NXV6 | 0.52994  |
| 50577 | Q2Q067 | Q8TAV0 | 0.44409  |
| 50578 | Q2Q067 | Q96A35 | 0.31215  |
| 50579 | Q2Q067 | Q5VZB9 | 0.026821 |
| 50580 | Q2Q067 | Q8TF01 | 0.44409  |
| 50581 | Q2Q067 | Q9UBQ5 | 1.0282   |
| 50582 | Q2Q067 | P0C7W0 | 0.29573  |
| 50583 | Q2Q067 | P23610 | 0.19215  |
| 50584 | Q2Q067 | P62750 | 0.86707  |
| 50585 | Q2Q067 | Q7Z6I5 | 0.47585  |
| 50586 | Q2Q067 | Q6ZS27 | 0.093473 |
| 50587 | Q2Q067 | Q9BV29 | 0.027765 |
| 50588 | Q2Q067 | Q9Y3E1 | 0.33063  |
| 50589 | Q2Q067 | Q8WWL7 | 0.88592  |
| 50590 | Q2Q067 | Q5VUE5 | 0.21787  |
| 50591 | Q2Q067 | Q96MT4 | 0.38755  |
| 50592 | Q2Q067 | Q0VDF9 | 0.26091  |
| 50593 | Q2Q067 | Q9NYB0 | 0.51342  |
| 50594 | Q2Q067 | Q9P127 | 0.071225 |
| 50595 | Q2Q067 | Q08209 | 0.38483  |
| 50596 | Q2Q067 | A6NP11 | 0.2627   |
| 50597 | Q2Q067 | Q8TAF5 | 0.19215  |
| 50598 | Q2Q067 | O60732 | 0.28783  |
| 50599 | Q2Q067 | Q9UL59 | 0.095324 |
| 50600 | Q2Q067 | Q96LA8 | 0.68414  |
| 50601 | Q2Q067 | Q8N6N3 | 0.098878 |
| 50602 | Q2Q067 | O15226 | 0.79674  |
| 50603 | Q2Q067 | Q9NS26 | 0.45678  |
| 50604 | Q2Q067 | P61579 | 0.36503  |
| 50605 | Q2Q067 | Q3SYF9 | 0.19215  |
| 50606 | Q2Q067 | Q8IZD4 | 0.95237  |
| 50607 | Q2Q067 | P06454 | 0.40814  |
| 50608 | Q2Q067 | Q9BZK8 | 0.19215  |
| 50609 | Q2Q067 | Q8N4W9 | 0.16182  |
| 50610 | Q2Q067 | Q53EQ6 | 0.24653  |
| 50611 | Q2Q067 | Q64ET8 | 0.38375  |
| 50612 | Q2Q067 | A6NGS2 | 0.31249  |
| 50613 | Q2Q067 | Q13889 | 0.25609  |
| 50614 | Q2Q067 | Q96NT1 | 0.57092  |
| 50615 | Q2Q067 | Q9H1L0 | 0.27594  |
| 50616 | Q2Q067 | Q9BRV8 | 0.52594  |

|       |        |        |          |
|-------|--------|--------|----------|
| 50617 | Q2Q067 | P60413 | 0.34715  |
| 50618 | Q2Q067 | P41219 | 0.091321 |
| 50619 | Q2Q067 | Q6ZQN3 | 0.3913   |
| 50620 | Q2Q067 | Q13352 | 0.43741  |
| 50621 | Q2Q067 | P31040 | 0.6795   |
| 50622 | Q2Q067 | P01106 | 0.456    |
| 50623 | Q2Q067 | O14579 | 0.31897  |
| 50624 | Q2Q067 | P47813 | 0.69178  |
| 50625 | Q2Q067 | Q8N1N5 | 0.44566  |
| 50626 | Q2Q067 | Q9H2P0 | 0.20944  |
| 50627 | Q2Q067 | P62258 | 0.8833   |
| 50628 | Q2Q067 | Q13148 | 0.5022   |
| 50629 | Q2Q067 | Q7Z6B0 | 0.25012  |
| 50630 | Q2Q067 | O95257 | 0.24277  |
| 50631 | Q2Q067 | Q6NS38 | 0.2331   |
| 50632 | Q2Q067 | A6NN90 | 0.070821 |
| 50633 | Q2Q067 | P10073 | 0.19323  |
| 50634 | Q2Q067 | A6NK39 | 0.17929  |
| 50635 | Q2Q067 | Q5I0X4 | 0.29573  |
| 50636 | Q2Q067 | Q52LR7 | 0.39053  |
| 50637 | Q2Q067 | O75145 | 0.3839   |
| 50638 | Q2Q067 | Q4VX62 | 0.040805 |
| 50639 | Q2Q067 | Q96JZ2 | 0.40655  |
| 50640 | Q2Q067 | Q8WUE5 | 0.039346 |
| 50641 | Q2Q067 | Q9BYG5 | 0.64098  |
| 50642 | Q2Q067 | Q6PGQ7 | 0.69013  |
| 50643 | Q2Q067 | Q7Z460 | 0.37141  |
| 50644 | Q2Q067 | O75940 | 0.61947  |
| 50645 | Q2Q067 | O14503 | 0.93756  |
| 50646 | Q2Q067 | Q9HAZ2 | 0.35867  |
| 50647 | Q2Q067 | Q6ZUJ4 | 0.18391  |
| 50648 | Q2Q067 | P36402 | 0.52095  |
| 50649 | Q2Q067 | O43159 | 0.78443  |
| 50650 | Q2Q067 | Q6ZR85 | 0.19215  |
| 50651 | Q2Q067 | Q7Z589 | 0.61115  |
| 50652 | Q2Q067 | Q9P2M7 | 0.42199  |
| 50653 | Q2Q067 | Q9BWG6 | 0.24343  |
| 50654 | Q2Q067 | Q12872 | 0.39866  |
| 50655 | Q2Q067 | Q8IZW8 | 0.29235  |
| 50656 | Q2Q067 | P63151 | 0.40284  |
| 50657 | Q2Q067 | Q16666 | 0.61541  |
| 50658 | Q2Q067 | Q6ZQP7 | 0.19215  |
| 50659 | Q2Q067 | P46937 | 0.80691  |
| 50660 | Q2Q067 | Q9UKX2 | 0.15564  |
| 50661 | Q2Q067 | Q15910 | 0.43964  |
| 50662 | Q2Q067 | Q8NCU1 | 0.10104  |
| 50663 | Q2Q067 | Q8N0Y7 | 0.37579  |
| 50664 | Q2Q067 | Q8IVM0 | 0.47001  |
| 50665 | Q2Q067 | Q9NR55 | 0.39056  |
| 50666 | Q2Q067 | O00193 | 0.54789  |
| 50667 | Q2Q067 | Q9NPJ8 | 0.11252  |
| 50668 | Q2Q067 | Q16533 | 0.47122  |
| 50669 | Q2Q067 | O75167 | 0.14846  |
| 50670 | Q2Q067 | Q8N2N9 | 0.24591  |
| 50671 | Q2Q067 | O43447 | 0.58868  |
| 50672 | Q2Q067 | O75151 | 0.60009  |
| 50673 | Q2Q067 | Q16775 | 0.15797  |
| 50674 | Q2Q067 | Q9Y3T9 | 1.0427   |
| 50675 | Q2Q067 | Q14690 | 0.60477  |
| 50676 | Q2Q067 | O60481 | 0.41087  |
| 50677 | Q2Q067 | P38432 | 0.70413  |
| 50678 | Q2Q067 | Q6IE81 | 1.0884   |
| 50679 | Q2Q067 | Q7KZF4 | 0.89741  |
| 50680 | Q2Q067 | Q96QA5 | 0.063067 |
| 50681 | Q2Q067 | Q92636 | 0.2383   |
| 50682 | Q2Q067 | P62273 | 0.62974  |
| 50683 | Q2Q067 | P67809 | 0.61143  |
| 50684 | Q2Q067 | Q9BQD3 | 0.34344  |
| 50685 | Q2Q067 | Q12982 | 0.21654  |
| 50686 | Q2Q067 | O95402 | 1.074    |
| 50687 | Q2Q067 | Q6PD62 | 0.61136  |
| 50688 | Q2Q067 | Q9BRT7 | 0.19215  |
| 50689 | Q2Q067 | Q13485 | 0.66858  |
| 50690 | Q2Q067 | P13929 | 0.16413  |
| 50691 | Q2Q067 | P09913 | 0.56698  |
| 50692 | Q2Q067 | Q8TF09 | 0.20659  |



|       |        |         |          |
|-------|--------|---------|----------|
| 50693 | Q2Q067 | A6NGD5  | 0.14982  |
| 50694 | Q2Q067 | Q9Y2B5  | 0.30342  |
| 50695 | Q2Q067 | Q6ZTU2  | 0.48197  |
| 50696 | Q2Q067 | Q6ZUT1  | 0.19215  |
| 50697 | Q2Q067 | Q9UHQ7  | 0.3414   |
| 50698 | Q2Q067 | Q96DX5  | 1.0354   |
| 50699 | Q2Q067 | Q5SXM1  | 0.16388  |
| 50700 | Q2Q067 | Q9BRA2  | 0.48685  |
| 50701 | Q2Q067 | A2RUQ5  | 0.006992 |
| 50702 | Q2Q067 | Q01543  | 0.41566  |
| 50703 | Q2Q067 | O75334  | 0.48165  |
| 50704 | Q2Q067 | Q9Y285  | 0.34673  |
| 50705 | Q2Q067 | O43734  | 0.29573  |
| 50706 | Q2Q067 | Q6ZS52  | 0.19215  |
| 50707 | Q2Q067 | O00287  | 0.36415  |
| 50708 | Q2Q067 | Q6IV72  | 0.15254  |
| 50709 | Q2Q067 | A8MVS1  | 0.2324   |
| 50710 | Q2Q067 | O95886  | 0.22198  |
| 50711 | Q2Q067 | Q9UNS1  | 0.52015  |
| 50712 | Q2Q067 | Q96K17  | 0.25699  |
| 50713 | Q2Q067 | Q9HAJ7  | 0.72841  |
| 50714 | Q2Q067 | O14639  | 0.51637  |
| 50715 | Q2Q067 | P10589  | 0.2603   |
| 50716 | Q2Q067 | Q3LI64  | 0.19215  |
| 50717 | Q2Q067 | Q8N2I2  | 0.11047  |
| 50718 | Q2Q067 | Q8N999  | 0.14222  |
| 50719 | Q2Q067 | Q8N3V7  | 0.31798  |
| 50720 | Q2Q067 | Q7Z6K1  | 0.31828  |
| 50721 | Q2Q067 | Q6ECI4  | 0.14687  |
| 50722 | Q2Q067 | P63313  | 0.34514  |
| 50723 | Q2Q067 | P62837  | 0.53228  |
| 50724 | Q2Q067 | Q9UC07  | 0.11961  |
| 50725 | Q2Q067 | Q9NSC5  | 0.40811  |
| 50726 | Q2Q067 | O14974  | 0.28951  |
| 50727 | Q2Q067 | P46087  | 0.67093  |
| 50728 | Q2Q067 | P35680  | 0.29203  |
| 50729 | Q2Q067 | Q9NX58  | 0.14931  |
| 50730 | Q2Q067 | Q05BU3  | 0.19215  |
| 50731 | Q2Q067 | P53804  | 0.65686  |
| 50732 | Q2Q067 | P38646  | 0.52131  |
| 50733 | Q2Q067 | Q8WU58  | 0.071927 |
| 50734 | Q2Q067 | Q14549  | 0.3497   |
| 50735 | Q2Q067 | P51665  | 0.28864  |
| 50736 | Q2Q067 | Q8I WV8 | 0.19345  |
| 50737 | Q2Q067 | P55735  | 0.60413  |
| 50738 | Q2Q067 | Q9P0U4  | 0.25659  |
| 50739 | Q2Q067 | Q8NDD1  | 0.042204 |
| 50740 | Q2Q067 | Q9H9D4  | 0.53405  |
| 50741 | Q2Q067 | Q12986  | 0.19805  |
| 50742 | Q2Q067 | Q9Y2L1  | 0.52771  |
| 50743 | Q2Q067 | P55795  | 0.060059 |
| 50744 | Q2Q067 | Q6P6B1  | 0.29573  |
| 50745 | Q2Q067 | A6NJ64  | 0.079595 |
| 50746 | Q2Q067 | Q9NR48  | 0.25973  |
| 50747 | Q2Q067 | Q9Y3C4  | 0.29856  |
| 50748 | Q2Q067 | Q5VWQ0  | 0.69023  |
| 50749 | Q2Q067 | Q01130  | 0.72983  |
| 50750 | Q2Q067 | Q496A3  | 0.092627 |
| 50751 | Q2Q067 | A6NES4  | 0.15278  |
| 50752 | Q2Q067 | Q9HCN2  | 0.19215  |
| 50753 | Q2Q067 | Q5JQC4  | 0.19215  |
| 50754 | Q2Q067 | Q9UI56  | 0.19215  |
| 50755 | Q2Q067 | P31274  | 0.14312  |
| 50756 | Q2Q067 | O95997  | 0.90099  |
| 50757 | Q2Q067 | P13056  | 0.62814  |
| 50758 | Q2Q067 | Q14674  | 0.25361  |
| 50759 | Q2Q067 | Q9UJK0  | 0.52429  |
| 50760 | Q2Q067 | Q9NPI6  | 0.97572  |
| 50761 | Q2Q067 | Q9NVN8  | 0.27062  |
| 50762 | Q2Q067 | Q8N0Z6  | 0.24265  |
| 50763 | Q2Q067 | Q9H2T7  | 0.32281  |
| 50764 | Q2Q067 | O75694  | 0.63148  |
| 50765 | Q2Q067 | Q9HCH0  | 0.62636  |
| 50766 | Q2Q067 | Q8IXK0  | 0.18945  |
| 50767 | Q2Q067 | Q9C0F0  | 0.3175   |
| 50768 | Q2Q067 | Q9P000  | 0.15956  |

|       |        |        |          |
|-------|--------|--------|----------|
| 50769 | Q2Q067 | Q6IPU0 | 0.30454  |
| 50770 | Q2Q067 | P31268 | 0.33074  |
| 50771 | Q2Q067 | Q8WXE9 | 0.48133  |
| 50772 | Q2Q067 | Q96C57 | 0.055702 |
| 50773 | Q2Q067 | Q9Y2R9 | 0.50788  |
| 50774 | Q2Q067 | Q6ZT77 | 0.10945  |
| 50775 | Q2Q067 | Q9BYP9 | 0.34715  |
| 50776 | Q2Q067 | Q86TX2 | 0.12431  |
| 50777 | Q2Q067 | Q8IUE1 | 0.32768  |
| 50778 | Q2Q067 | Q9H1B4 | 0.3004   |
| 50779 | Q2Q067 | Q86XL3 | 0.23482  |
| 50780 | Q2Q067 | Q5VSD8 | 0.12143  |
| 50781 | Q2Q067 | Q9UJT2 | 0.43475  |
| 50782 | Q2Q067 | Q9UHF7 | 0.49599  |
| 50783 | Q2Q067 | O43516 | 0.18712  |
| 50784 | Q2Q067 | P53675 | 0.24736  |
| 50785 | Q2Q067 | Q15323 | 0.16267  |
| 50786 | Q2Q067 | P62318 | 0.84614  |
| 50787 | Q2Q067 | P62826 | 0.66768  |
| 50788 | Q2Q067 | O43189 | 0.44104  |
| 50789 | Q2Q067 | Q99816 | 0.43689  |
| 50790 | Q2Q067 | Q96ST8 | 0.56668  |
| 50791 | Q2Q067 | Q8IVN3 | 0.4066   |
| 50792 | Q2Q067 | Q99741 | 0.50582  |
| 50793 | Q2Q067 | Q96GY3 | 0.46738  |
| 50794 | Q2Q067 | P62508 | 0.46129  |
| 50795 | Q2Q067 | Q9BZQ8 | 0.32218  |
| 50796 | Q2Q067 | Q6XQN6 | 0.2015   |
| 50797 | Q2Q067 | Q92797 | 0.68324  |
| 50798 | Q2Q067 | Q6P1J9 | 0.62418  |
| 50799 | Q2Q067 | Q9ULD5 | 0.062315 |
| 50800 | Q2Q067 | Q6AI39 | 0.33904  |
| 50801 | Q2Q067 | P51508 | 0.10324  |
| 50802 | Q2Q067 | Q9BQA1 | 0.9983   |
| 50803 | Q2Q067 | Q9UBB5 | 1.1786   |
| 50804 | Q2Q067 | Q14CZ0 | 0.74667  |
| 50805 | Q2Q067 | Q0PNE2 | 0.33673  |
| 50806 | Q2Q067 | Q14590 | 0.087195 |
| 50807 | Q2Q067 | Q93015 | 0.29439  |
| 50808 | Q2Q067 | A6NDD8 | 0.3158   |
| 50809 | Q2Q067 | Q17RN3 | 0.10332  |
| 50810 | Q2Q067 | F5H4B4 | 0.42889  |
| 50811 | Q2Q067 | Q8TF40 | 0.45661  |
| 50812 | Q2Q067 | Q9BRP4 | 0.40677  |
| 50813 | Q2Q067 | Q9Y3V2 | 0.81743  |
| 50814 | Q2Q067 | A5YKK6 | 1.0576   |
| 50815 | Q2Q067 | Q15386 | 0.2463   |
| 50816 | Q2Q067 | Q15596 | 0.62232  |
| 50817 | Q2Q067 | P48380 | 0.33275  |
| 50818 | Q2Q067 | Q8WVM0 | 0.53637  |
| 50819 | Q2Q067 | O95295 | 0.43916  |
| 50820 | Q2Q067 | Q9H2U6 | 0.10589  |
| 50821 | Q2Q067 | O14813 | 0.33768  |
| 50822 | Q2Q067 | Q9BSW2 | 0.75194  |
| 50823 | Q2Q067 | Q08E93 | 0.19215  |
| 50824 | Q2Q067 | Q69YL0 | 0.19215  |
| 50825 | Q2Q067 | Q13405 | 0.64337  |
| 50826 | Q2Q067 | Q9NTW7 | 0.22405  |
| 50827 | Q2Q067 | Q9Y606 | 0.66525  |
| 50828 | Q2Q067 | P08779 | 0.73022  |
| 50829 | Q2Q067 | Q16656 | 0.38036  |
| 50830 | Q2Q067 | Q9Y2Y9 | 0.75393  |
| 50831 | Q2Q067 | Q96NG8 | 0.11072  |
| 50832 | Q2Q067 | Q96GC5 | 0.64337  |
| 50833 | Q2Q067 | Q9HCK5 | 0.70956  |
| 50834 | Q2Q067 | Q5TC04 | 0.013253 |
| 50835 | Q2Q067 | P35712 | 0.55247  |
| 50836 | Q2Q067 | Q6ZNO6 | 0.22154  |
| 50837 | Q2Q067 | Q9UHL3 | 0.012028 |
| 50838 | Q2Q067 | Q6NVV1 | 0.18467  |
| 50839 | Q2Q067 | Q15233 | 0.57138  |
| 50840 | Q2Q067 | Q13829 | 0.71763  |
| 50841 | Q2Q067 | O95751 | 0.56499  |
| 50842 | Q2Q067 | Q6VY07 | 0.58097  |
| 50843 | Q2Q067 | Q9NXZ1 | 0.15082  |
| 50844 | Q2Q067 | P41182 | 0.19432  |

|       |        |        |          |
|-------|--------|--------|----------|
| 50845 | Q2Q067 | Q9Y2X9 | 0.61743  |
| 50846 | Q2Q067 | P19474 | 0.37901  |
| 50847 | Q2Q067 | Q15554 | 0.475    |
| 50848 | Q2Q067 | P54259 | 0.86885  |
| 50849 | Q2Q067 | Q5W111 | 0.043034 |
| 50850 | Q2Q067 | Q8WWY3 | 0.36663  |
| 50851 | Q2Q067 | Q9H5H4 | 0.10741  |
| 50852 | Q2Q067 | Q99497 | 0.11091  |
| 50853 | Q2Q067 | I6L9F6 | 0.11246  |
| 50854 | Q2Q067 | Q86VX2 | 0.42881  |
| 50855 | Q2Q067 | Q5SQN1 | 0.28062  |
| 50856 | Q2Q067 | P10828 | 0.51689  |
| 50857 | Q2Q067 | Q96BZ8 | 0.29573  |
| 50858 | Q2Q067 | P82930 | 0.39251  |
| 50859 | Q2Q067 | Q96AE4 | 0.56102  |
| 50860 | Q2Q067 | Q12988 | 0.35026  |
| 50861 | Q2Q067 | Q15562 | 0.84489  |
| 50862 | Q2Q067 | Q9GZS3 | 1.1095   |
| 50863 | Q2Q067 | P15880 | 1.0109   |
| 50864 | Q2Q067 | Q96R06 | 0.86521  |
| 50865 | Q2Q067 | Q8N9K7 | 0.19215  |
| 50866 | Q2Q067 | P40429 | 0.7867   |
| 50867 | Q2Q067 | Q8IZU1 | 0.32741  |
| 50868 | Q2Q067 | Q5MJ09 | 0.07779  |
| 50869 | Q2Q067 | O60260 | 0.44894  |
| 50870 | Q2Q067 | Q8NE18 | 0.72254  |
| 50871 | Q2Q067 | Q9P2H0 | 0.28783  |
| 50872 | Q2Q067 | Q9BYN8 | 0.45686  |
| 50873 | Q2Q067 | P30793 | 0.16239  |
| 50874 | Q2Q067 | A6NJR5 | 0.23617  |
| 50875 | Q2Q067 | O94818 | 0.54789  |
| 50876 | Q2Q067 | Q9NUL3 | 0.61088  |
| 50877 | Q2Q067 | Q9H074 | 0.46652  |
| 50878 | Q2Q067 | Q460N3 | 0.2508   |
| 50879 | Q2Q067 | O96019 | 0.89356  |
| 50880 | Q2Q067 | Q9HC52 | 0.78769  |
| 50881 | Q2Q067 | Q9H1H9 | 0.44235  |
| 50882 | Q2Q067 | Q01664 | 0.59316  |
| 50883 | Q2Q067 | Q9UDY8 | 0.24277  |
| 50884 | Q2Q067 | Q9BXH1 | 0.34828  |
| 50885 | Q2Q067 | P60371 | 0.34715  |
| 50886 | Q2Q067 | Q9BU76 | 0.40566  |
| 50887 | Q2Q067 | P55197 | 1.3702   |
| 50888 | Q2Q067 | Q5JTD0 | 0.96483  |
| 50889 | Q2Q067 | Q9UF83 | 0.12181  |
| 50890 | Q2Q067 | Q8NBB4 | 0.10279  |
| 50891 | Q2Q067 | Q06265 | 0.074678 |
| 50892 | Q2Q067 | Q9NUP1 | 0.67061  |
| 50893 | Q2Q067 | Q9BUL9 | 0.97869  |
| 50894 | Q2Q067 | O00570 | 0.88029  |
| 50895 | Q2Q067 | P28072 | 0.50319  |
| 50896 | Q2Q067 | Q6A162 | 0.12452  |
| 50897 | Q2Q067 | Q9GZS1 | 0.3579   |
| 50898 | Q2Q067 | Q8N3X6 | 0.48739  |
| 50899 | Q2Q067 | Q7Z4G1 | 0.81276  |
| 50900 | Q2Q067 | Q6ZUT4 | 0.31485  |
| 50901 | Q2Q067 | Q8N814 | 0.45016  |
| 50902 | Q2Q067 | P61024 | 0.63428  |
| 50903 | Q2Q067 | P0DI83 | 0.34546  |
| 50904 | Q2Q067 | Q96JI7 | 0.54765  |
| 50905 | Q2Q067 | P82979 | 0.35432  |
| 50906 | Q2Q067 | Q9UBB6 | 0.2024   |
| 50907 | Q2Q067 | Q14159 | 0.62808  |
| 50908 | Q2Q067 | Q9BRQ6 | 0.67393  |
| 50909 | Q2Q067 | P09132 | 0.32235  |
| 50910 | Q2Q067 | Q8IZ63 | 0.19215  |
| 50911 | Q2Q067 | Q96H40 | 0.22807  |
| 50912 | Q2Q067 | Q9Y6E7 | 0.37851  |
| 50913 | Q2Q067 | P49910 | 0.70866  |
| 50914 | Q2Q067 | Q6P1X6 | 0.3233   |
| 50915 | Q2Q067 | Q9P0M2 | 0.10037  |
| 50916 | Q2Q067 | Q8N5U6 | 1.072    |
| 50917 | Q2Q067 | O14604 | 0.36209  |
| 50918 | Q2Q067 | Q9ULC6 | 0.53444  |
| 50919 | Q2Q067 | Q15326 | 1.2007   |
| 50920 | Q2Q067 | I3L1I5 | 0.23961  |

|       |        |        |          |
|-------|--------|--------|----------|
| 50921 | Q2Q067 | A6NCD4 | 0.12554  |
| 50922 | Q2Q067 | Q9NWU5 | 0.31991  |
| 50923 | Q2Q067 | Q9NZV7 | 0.26783  |
| 50924 | Q2Q067 | Q96IS3 | 0.19365  |
| 50925 | Q2Q067 | Q9P299 | 0.14226  |
| 50926 | Q2Q067 | Q86UQ8 | 0.39593  |
| 50927 | Q2Q067 | O95243 | 0.69212  |
| 50928 | Q2Q067 | O95801 | 0.11363  |
| 50929 | Q2Q067 | P18847 | 1.2352   |
| 50930 | Q2Q067 | Q9NWN3 | 0.1566   |
| 50931 | Q2Q067 | Q9UHX1 | 0.60346  |
| 50932 | Q2Q067 | P49427 | 0.3813   |
| 50933 | Q2Q067 | Q9HA90 | 0.29573  |
| 50934 | Q2Q067 | Q14684 | 0.20074  |
| 50935 | Q2Q067 | P0CJ87 | 0.27517  |
| 50936 | Q2Q067 | Q8N7X2 | 0.19215  |
| 50937 | Q2Q067 | Q8TEV9 | 0.29626  |
| 50938 | Q2Q067 | P51531 | 0.63605  |
| 50939 | Q2Q067 | Q8WZA9 | 0.29573  |
| 50940 | Q2Q067 | P60660 | 0.27881  |
| 50941 | Q2Q067 | P53990 | 0.48207  |
| 50942 | Q2Q067 | Q5VTL8 | 0.40188  |
| 50943 | Q2Q067 | Q9NPG3 | 0.87003  |
| 50944 | Q2Q067 | Q99708 | 0.6494   |
| 50945 | Q2Q067 | A0PJX2 | 0.18467  |
| 50946 | Q2Q067 | Q96FJ8 | 0.19215  |
| 50947 | Q2Q067 | P08729 | 1.4125   |
| 50948 | Q2Q067 | P10515 | 0.36792  |
| 50949 | Q2Q067 | Q8N9N5 | 0.22482  |
| 50950 | Q2Q067 | Q96F86 | 0.66099  |
| 50951 | Q2Q067 | P18887 | 0.64626  |
| 50952 | Q2Q067 | Q32MQ0 | 0.32623  |
| 50953 | Q2Q067 | P49716 | 0.43022  |
| 50954 | Q2Q067 | Q8WYR4 | 0.32597  |
| 50955 | Q2Q067 | P41970 | 0.90765  |
| 50956 | Q2Q067 | P57076 | 0.14907  |
| 50957 | Q2Q067 | Q8N684 | 0.43159  |
| 50958 | Q2Q067 | Q8N7L0 | 0.12804  |
| 50959 | Q2Q067 | O75807 | 0.44729  |
| 50960 | Q2Q067 | Q9HAF1 | 1.0414   |
| 50961 | Q2Q067 | Q6P2D0 | 0.095999 |
| 50962 | Q2Q067 | Q86X83 | 0.28783  |
| 50963 | Q2Q067 | Q9HCL3 | 0.2406   |
| 50964 | Q2Q067 | O43805 | 0.51752  |
| 50965 | Q2Q067 | Q3C1V9 | 0.15384  |
| 50966 | Q2Q067 | P46782 | 0.52651  |
| 50967 | Q2Q067 | Q6U7Q0 | 0.10668  |
| 50968 | Q2Q067 | Q93083 | 0.18499  |
| 50969 | Q2Q067 | P78385 | 0.1632   |
| 50970 | Q2Q067 | Q8NAB5 | 0.19215  |
| 50971 | Q2Q067 | Q14204 | 0.3083   |
| 50972 | Q2Q067 | Q9NSQ0 | 0.16808  |
| 50973 | Q2Q067 | P57060 | 0.30098  |
| 50974 | Q2Q067 | Q8WTT2 | 0.14455  |
| 50975 | Q2Q067 | Q7Z4Q2 | 0.41883  |
| 50976 | Q2Q067 | C9J302 | 0.19051  |
| 50977 | Q2Q067 | Q6ZSN7 | 0.12388  |
| 50978 | Q2Q067 | Q8IVM7 | 0.19215  |
| 50979 | Q2Q067 | Q7Z7A3 | 0.59907  |
| 50980 | Q2Q067 | P0CW21 | 0.19215  |
| 50981 | Q2Q067 | Q13111 | 1.0018   |
| 50982 | Q2Q067 | Q96LJ8 | 0.25736  |
| 50983 | Q2Q067 | Q8WXF8 | 0.84218  |
| 50984 | Q2Q067 | Q5SW79 | 0.7589   |
| 50985 | Q2Q067 | A6NIX2 | 1.0036   |
| 50986 | Q2Q067 | G3V211 | 0.40883  |
| 50987 | Q2Q067 | Q9UKJ3 | 0.39207  |
| 50988 | Q2Q067 | O75865 | 0.30975  |
| 50989 | Q2Q067 | Q9Y5Q8 | 0.68039  |
| 50990 | Q2Q067 | Q86VY4 | 0.47962  |
| 50991 | Q2Q067 | P22033 | 0.20874  |
| 50992 | Q2Q067 | Q9BRJ2 | 0.31691  |
| 50993 | Q2Q067 | Q8TD23 | 0.51835  |
| 50994 | Q2Q067 | Q8N137 | 0.78742  |
| 50995 | Q2Q067 | Q9BW11 | 0.37545  |
| 50996 | Q2Q067 | A1L429 | 0.019044 |

|       |        |        |          |
|-------|--------|--------|----------|
| 50997 | Q2Q067 | Q9NQ87 | 0.49684  |
| 50998 | Q2Q067 | O00762 | 0.52837  |
| 50999 | Q2Q067 | Q9HAB8 | 0.28376  |
| 51000 | Q2Q067 | Q9Y244 | 0.32215  |
| 51001 | Q2Q067 | Q5PSV4 | 0.35681  |
| 51002 | Q2Q067 | Q6PD74 | 0.24076  |
| 51003 | Q2Q067 | P13349 | 0.33049  |
| 51004 | Q2Q067 | Q9UJG1 | 0.43623  |
| 51005 | Q2Q067 | Q8ND07 | 0.40143  |
| 51006 | Q2Q067 | Q8IUC1 | 0.16378  |
| 51007 | Q2Q067 | P0DL12 | 0.16593  |
| 51008 | Q2Q067 | Q7Z3Z0 | 0.23725  |
| 51009 | Q2Q067 | Q53FD0 | 0.45629  |
| 51010 | Q2Q067 | Q9H0F6 | 0.11885  |
| 51011 | Q2Q067 | Q9Y312 | 0.079991 |
| 51012 | Q2Q067 | Q9UI30 | 0.339    |
| 51013 | Q2Q067 | Q96B49 | 0.3098   |
| 51014 | Q2Q067 | A6NIE6 | 0.28619  |
| 51015 | Q2Q067 | Q9NV31 | 0.85286  |
| 51016 | Q2Q067 | Q96B23 | 0.49034  |
| 51017 | Q2Q067 | Q9Y2X8 | 0.22096  |
| 51018 | Q2Q067 | P10155 | 0.41704  |
| 51019 | Q2Q067 | Q96DC7 | 0.5972   |
| 51020 | Q2Q067 | Q9H6J7 | 0.15082  |
| 51021 | Q2Q067 | Q96SK3 | 0.14687  |
| 51022 | Q2Q067 | P61457 | 1.0532   |
| 51023 | Q2Q067 | Q96IT1 | 0.64563  |
| 51024 | Q2Q067 | Q147U1 | 0.11372  |
| 51025 | Q2Q067 | Q15697 | 0.46776  |
| 51026 | Q2Q067 | O43255 | 0.34072  |
| 51027 | Q2Q067 | Q9BQS6 | 0.79385  |
| 51028 | Q2Q067 | Q96LW1 | 0.22688  |
| 51029 | Q2Q067 | Q96P71 | 0.47123  |
| 51030 | Q2Q067 | Q9NZL3 | 0.6383   |
| 51031 | Q2Q067 | Q6VUC0 | 0.47835  |
| 51032 | Q2Q067 | Q9Y2J8 | 0.38199  |
| 51033 | Q2Q067 | O96004 | 0.49229  |
| 51034 | Q2Q067 | Q8N0Z3 | 0.46631  |
| 51035 | Q2Q067 | Q8WV92 | 0.23327  |
| 51036 | Q2Q067 | Q92985 | 0.61347  |
| 51037 | Q2Q067 | O95400 | 0.73093  |
| 51038 | Q2Q067 | P35268 | 0.67288  |
| 51039 | Q2Q067 | Q8TBY8 | 0.26354  |
| 51040 | Q2Q067 | Q9Y6M1 | 0.34676  |
| 51041 | Q2Q067 | O94927 | 0.45285  |
| 51042 | Q2Q067 | Q6P1K2 | 1.1493   |
| 51043 | Q2Q067 | O43390 | 0.54895  |
| 51044 | Q2Q067 | Q9HBM1 | 0.69818  |
| 51045 | Q2Q067 | Q15059 | 1.1367   |
| 51046 | Q2Q067 | Q53SZ7 | 0.29573  |
| 51047 | Q2Q067 | Q8WXU2 | 0.71405  |
| 51048 | Q2Q067 | A8MYP8 | 0.15024  |
| 51049 | Q2Q067 | Q9UL49 | 0.24991  |
| 51050 | Q2Q067 | Q7Z6R9 | 0.32732  |
| 51051 | Q2Q067 | Q8N398 | 0.27203  |
| 51052 | Q2Q067 | Q8HWS3 | 0.26676  |
| 51053 | Q2Q067 | Q7L2R6 | 0.22332  |
| 51054 | Q2Q067 | Q5JSQ8 | 0.029629 |
| 51055 | Q2Q067 | O00167 | 0.59874  |
| 51056 | Q2Q067 | Q9NZD8 | 0.81753  |
| 51057 | Q2Q067 | O75794 | 0.50176  |
| 51058 | Q2Q067 | Q9BXM0 | 0.61991  |
| 51059 | Q2Q067 | P60409 | 0.34715  |
| 51060 | Q2Q067 | P49419 | 0.649    |
| 51061 | Q2Q067 | Q8N1B3 | 0.57535  |
| 51062 | Q2Q067 | P08151 | 0.29798  |
| 51063 | Q2Q067 | Q9BZE3 | 0.46596  |
| 51064 | Q2Q067 | Q969F9 | 0.59662  |
| 51065 | Q2Q067 | O60437 | 0.71369  |
| 51066 | Q2Q067 | Q9C086 | 1.2094   |
| 51067 | Q2Q067 | P15121 | 0.28053  |
| 51068 | Q2Q067 | Q5UIP0 | 0.48693  |
| 51069 | Q2Q067 | O60829 | 0.27828  |
| 51070 | Q2Q067 | Q15653 | 1.0047   |
| 51071 | Q2Q067 | Q9BW61 | 0.29409  |
| 51072 | Q2Q067 | P49750 | 1.0431   |

|       |        |        |          |
|-------|--------|--------|----------|
| 51073 | Q2Q067 | P36639 | 0.30724  |
| 51074 | Q2Q067 | Q5TC12 | 0.42044  |
| 51075 | Q2Q067 | O96006 | 0.45919  |
| 51076 | Q2Q067 | Q01196 | 0.33705  |
| 51077 | Q2Q067 | Q00613 | 0.88678  |
| 51078 | Q2Q067 | A1A4V9 | 0.075963 |
| 51079 | Q2Q067 | Q9H211 | 0.74533  |
| 51080 | Q2Q067 | O14618 | 0.45271  |
| 51081 | Q2Q067 | Q8IYI0 | 0.17721  |
| 51082 | Q2Q067 | O75698 | 0.19215  |
| 51083 | Q2Q067 | P56181 | 0.27543  |
| 51084 | Q2Q067 | Q9HCM1 | 0.40736  |
| 51085 | Q2Q067 | O43439 | 0.94602  |
| 51086 | Q2Q067 | Q5VYK3 | 0.11595  |
| 51087 | Q2Q067 | Q96TA1 | 0.30806  |
| 51088 | Q2Q067 | Q99676 | 0.14687  |
| 51089 | Q2Q067 | Q9NRR4 | 0.44199  |
| 51090 | Q2Q067 | Q8N9H9 | 0.19215  |
| 51091 | Q2Q067 | Q5VZE5 | 0.18621  |
| 51092 | Q2Q067 | Q6ZP68 | 0.42662  |
| 51093 | Q2Q067 | Q9UJY4 | 0.44418  |
| 51094 | Q2Q067 | O75478 | 0.44071  |
| 51095 | Q2Q067 | Q16082 | 0.95302  |
| 51096 | Q2Q067 | Q9BRG1 | 1.1485   |
| 51097 | Q2Q067 | P33316 | 0.62114  |
| 51098 | Q2Q067 | Q96CM4 | 0.027173 |
| 51099 | Q2Q067 | Q13435 | 0.41643  |
| 51100 | Q2Q067 | Q13077 | 0.22767  |
| 51101 | Q2Q067 | Q17RM4 | 0.19498  |
| 51102 | Q2Q067 | Q92552 | 0.68082  |
| 51103 | Q2Q067 | A6NNH0 | 0.42645  |
| 51104 | Q2Q067 | Q01105 | 0.84414  |
| 51105 | Q2Q067 | Q86UU0 | 0.71419  |
| 51106 | Q2Q067 | Q6ZRC1 | 0.19215  |
| 51107 | Q2Q067 | Q96T88 | 0.26705  |
| 51108 | Q2Q067 | Q9P0W5 | 0.37055  |
| 51109 | Q2Q067 | Q9UJW0 | 0.46824  |
| 51110 | Q2Q067 | Q17RH7 | 0.19215  |
| 51111 | Q2Q067 | Q13772 | 0.3324   |
| 51112 | Q2Q067 | P24534 | 0.61369  |
| 51113 | Q2Q067 | Q0IIN9 | 0.026247 |
| 51114 | Q2Q067 | O75935 | 0.841    |
| 51115 | Q2Q067 | P23490 | 0.7457   |
| 51116 | Q2Q067 | Q49AS3 | 0.071261 |
| 51117 | Q2Q067 | Q9P206 | 0.37524  |
| 51118 | Q2Q067 | P78406 | 0.49064  |
| 51119 | Q2Q067 | Q8N8G6 | 0.071687 |
| 51120 | Q2Q067 | Q6P3W6 | 0.32407  |
| 51121 | Q2Q067 | P19388 | 0.64726  |
| 51122 | Q2Q067 | Q5T8A7 | 0.68176  |
| 51123 | Q2Q067 | Q96SL8 | 0.081509 |
| 51124 | Q2Q067 | P08133 | 0.64843  |
| 51125 | Q2Q067 | P05813 | 0.081456 |
| 51126 | Q2Q067 | P37275 | 0.78485  |
| 51127 | Q2Q067 | Q70Z53 | 0.62556  |
| 51128 | Q2Q067 | Q8IXQ3 | 0.26691  |
| 51129 | Q2Q067 | O00273 | 0.28887  |
| 51130 | Q2Q067 | Q8IYX7 | 0.57176  |
| 51131 | Q2Q067 | Q9BYR9 | 0.028225 |
| 51132 | Q2Q067 | Q8IWY8 | 0.091092 |
| 51133 | Q2Q067 | Q6ZUU3 | 0.19215  |
| 51134 | Q2Q067 | P19367 | 0.28571  |
| 51135 | Q2Q067 | Q14140 | 0.94414  |
| 51136 | Q2Q067 | Q7Z7A1 | 1.0945   |
| 51137 | Q2Q067 | O75081 | 1.154    |
| 51138 | Q2Q067 | Q8N5H3 | 0.29573  |
| 51139 | Q2Q067 | Q5SXM2 | 0.64653  |
| 51140 | Q2Q067 | Q6ZNR8 | 0.19215  |
| 51141 | Q2Q067 | Q12815 | 0.25268  |
| 51142 | Q2Q067 | Q96NT3 | 0.21475  |
| 51143 | Q2Q067 | Q05516 | 0.78221  |
| 51144 | Q2Q067 | Q8NEK8 | 0.32016  |
| 51145 | Q2Q067 | Q32MZ4 | 1.1057   |
| 51146 | Q2Q067 | P20749 | 0.40075  |
| 51147 | Q2Q067 | Q8NF64 | 1.2752   |
| 51148 | Q2Q067 | Q05481 | 0.16589  |

|       |        |        |          |
|-------|--------|--------|----------|
| 51149 | Q2Q067 | Q5EE01 | 0.55233  |
| 51150 | Q2Q067 | Q02930 | 0.80635  |
| 51151 | Q2Q067 | Q8N377 | 0.19215  |
| 51152 | Q2Q067 | Q9HD15 | 0.55021  |
| 51153 | Q2Q067 | P54274 | 0.42787  |
| 51154 | Q2Q067 | Q9Y6K1 | 0.33326  |
| 51155 | Q2Q067 | P0C843 | 0.22236  |
| 51156 | Q2Q067 | Q96DI7 | 0.58275  |
| 51157 | Q2Q067 | Q8N888 | 0.46193  |
| 51158 | Q2Q067 | P52435 | 0.58166  |
| 51159 | Q2Q067 | A6NNW6 | 0.23001  |
| 51160 | Q2Q067 | Q9BYJ9 | 0.3979   |
| 51161 | Q2Q067 | Q12765 | 0.25535  |
| 51162 | Q2Q067 | P01009 | 0.14201  |
| 51163 | Q2Q067 | Q9NVW2 | 0.27915  |
| 51164 | Q2Q067 | O76013 | 0.16267  |
| 51165 | Q2Q067 | Q8NCK3 | 0.094185 |
| 51166 | Q2Q067 | Q9BW71 | 0.59938  |
| 51167 | Q2Q067 | O00743 | 0.72072  |
| 51168 | Q2Q067 | Q460N5 | 0.31041  |
| 51169 | Q2Q067 | Q8NDW4 | 0.11252  |
| 51170 | Q2Q067 | Q9NRN7 | 0.42659  |
| 51171 | Q2Q067 | A6NKD9 | 0.6484   |
| 51172 | Q2Q067 | O14929 | 0.74515  |
| 51173 | Q2Q067 | Q15696 | 0.19822  |
| 51174 | Q2Q067 | A6NGG3 | 0.19215  |
| 51175 | Q2Q067 | O00257 | 0.94276  |
| 51176 | Q2Q067 | Q8NDF8 | 0.27957  |
| 51177 | Q2Q067 | Q2NL82 | 0.2207   |
| 51178 | Q2Q067 | Q5VU69 | 0.16708  |
| 51179 | Q2Q067 | O60543 | 0.30174  |
| 51180 | Q2Q067 | Q9BSI4 | 0.20173  |
| 51181 | Q2Q067 | P38117 | 0.080424 |
| 51182 | Q2Q067 | Q9P1D8 | 0.19215  |
| 51183 | Q2Q067 | O75820 | 0.076987 |
| 51184 | Q2Q067 | Q9NZJ0 | 0.72356  |
| 51185 | Q2Q067 | O43172 | 0.67307  |
| 51186 | Q2Q067 | Q9NZI6 | 0.4959   |
| 51187 | Q2Q067 | P49116 | 0.54835  |
| 51188 | Q2Q067 | Q9UIF7 | 0.36542  |
| 51189 | Q2Q067 | P22090 | 0.40762  |
| 51190 | Q2Q067 | Q7Z7J5 | 0.5181   |
| 51191 | Q2Q067 | P10074 | 0.30665  |
| 51192 | Q2Q067 | Q9BXW4 | 0.14432  |
| 51193 | Q2Q067 | Q15046 | 0.34151  |
| 51194 | Q2Q067 | Q8WWK9 | 0.20995  |
| 51195 | Q2Q067 | A8CG34 | 0.26858  |
| 51196 | Q2Q067 | Q9Y5N5 | 0.24625  |
| 51197 | Q2Q067 | O75489 | 0.17115  |
| 51198 | Q2Q067 | Q7Z2E3 | 0.447    |
| 51199 | Q2Q067 | Q9HCD5 | 1.0622   |
| 51200 | Q2Q067 | Q9NX40 | 0.42502  |
| 51201 | Q2Q067 | Q3LI68 | 0.58843  |
| 51202 | Q2Q067 | O60315 | 0.25286  |
| 51203 | Q2Q067 | Q04206 | 0.70317  |
| 51204 | Q2Q067 | P36543 | 0.23471  |
| 51205 | Q2Q067 | A8MV72 | 0.14505  |
| 51206 | Q2Q067 | Q99551 | 0.689    |
| 51207 | Q2Q067 | Q9UM82 | 0.50559  |
| 51208 | Q2Q067 | P49770 | 0.23477  |
| 51209 | Q2Q067 | Q8IV20 | 0.12239  |
| 51210 | Q2Q067 | P11387 | 0.64508  |
| 51211 | Q2Q067 | P86478 | 0.19215  |
| 51212 | Q2Q067 | Q15181 | 0.2614   |
| 51213 | Q2Q067 | A5PLN7 | 0.29573  |
| 51214 | Q2Q067 | Q9UJY5 | 0.4651   |
| 51215 | Q2Q067 | Q6P4D5 | 0.34883  |
| 51216 | Q2Q067 | Q96FA7 | 0.62008  |
| 51217 | Q2Q067 | Q53TS8 | 0.13687  |
| 51218 | Q2Q067 | Q8WYP5 | 0.68915  |
| 51219 | Q2Q067 | P46778 | 0.65612  |
| 51220 | Q2Q067 | Q6ZU52 | 0.28783  |
| 51221 | Q2Q067 | Q99456 | 0.20138  |
| 51222 | Q2Q067 | Q9BXL5 | 0.32507  |
| 51223 | Q2Q067 | Q6AWC8 | 0.21229  |
| 51224 | Q2Q067 | Q9P0L1 | 0.14032  |

|       |        |        |          |
|-------|--------|--------|----------|
| 51225 | Q2Q067 | O95336 | 0.24312  |
| 51226 | Q2Q067 | A8MVW5 | 0.64088  |
| 51227 | Q2Q067 | Q8N8F4 | 0.11552  |
| 51228 | Q2Q067 | Q9ULV3 | 0.22922  |
| 51229 | Q2Q067 | A6NC62 | 0.073722 |
| 51230 | Q2Q067 | Q9H944 | 1.0474   |
| 51231 | Q2Q067 | Q3LI67 | 0.19215  |
| 51232 | Q2Q067 | Q9BR46 | 0.45148  |
| 51233 | Q2Q067 | P61981 | 0.51156  |
| 51234 | Q2Q067 | O75896 | 0.20705  |
| 51235 | Q2Q067 | Q5T752 | 0.19215  |
| 51236 | Q2Q067 | P42695 | 0.28165  |
| 51237 | Q2Q067 | Q9BYR0 | 0.34715  |
| 51238 | Q2Q067 | P12980 | 0.87666  |
| 51239 | Q2Q067 | Q8N7B6 | 0.19165  |
| 51240 | Q2Q067 | Q5CZC0 | 0.56427  |
| 51241 | Q2Q067 | P61604 | 0.73497  |
| 51242 | Q2Q067 | Q99457 | 0.24396  |
| 51243 | Q2Q067 | Q9H3R5 | 0.53     |
| 51244 | Q2Q067 | Q5DJT8 | 0.070895 |
| 51245 | Q2Q067 | P50502 | 0.60041  |
| 51246 | Q2Q067 | Q9UK45 | 0.80491  |
| 51247 | Q2Q067 | Q14119 | 0.17633  |
| 51248 | Q2Q067 | Q5BKY6 | 0.19215  |
| 51249 | Q2Q067 | Q9BPZ2 | 0.34715  |
| 51250 | Q2Q067 | P50548 | 0.32358  |
| 51251 | Q2Q067 | Q9H4Z2 | 0.58991  |
| 51252 | Q2Q067 | Q8N319 | 0.73498  |
| 51253 | Q2Q067 | Q96C86 | 0.89985  |
| 51254 | Q2Q067 | Q00994 | 0.6878   |
| 51255 | Q2Q067 | Q8NHV4 | 0.67001  |
| 51256 | Q2Q067 | P30279 | 0.70512  |
| 51257 | Q2Q067 | Q92870 | 0.70196  |
| 51258 | Q2Q067 | P05062 | 0.25069  |
| 51259 | Q2Q067 | P30084 | 0.17267  |
| 51260 | Q2Q067 | Q6P9A1 | 0.19035  |
| 51261 | Q2Q067 | Q13868 | 0.60425  |
| 51262 | Q2Q067 | Q12933 | 0.61278  |
| 51263 | Q2Q067 | Q9NWD9 | 0.26682  |
| 51264 | Q2Q067 | Q6ZNE5 | 0.33497  |
| 51265 | Q2Q067 | Q96MA1 | 0.16114  |
| 51266 | Q2Q067 | Q8TAB7 | 0.43978  |
| 51267 | Q2Q067 | A8MQ03 | 0.26889  |
| 51268 | Q2Q067 | Q16633 | 0.60416  |
| 51269 | Q2Q067 | Q9ULV5 | 0.41665  |
| 51270 | Q2Q067 | O43639 | 0.38531  |
| 51271 | Q2Q067 | Q9HAN9 | 0.19872  |
| 51272 | Q2Q067 | Q8TEV8 | 0.19215  |
| 51273 | Q2Q067 | O94829 | 0.9899   |
| 51274 | Q2Q067 | Q8IV36 | 0.43406  |
| 51275 | Q2Q067 | P62140 | 0.72381  |
| 51276 | Q2Q067 | Q8IXT2 | 0.024199 |
| 51277 | Q2Q067 | Q9UKY7 | 0.44099  |
| 51278 | Q2Q067 | Q96PQ6 | 0.24081  |
| 51279 | Q2Q067 | Q86SE9 | 1.0134   |
| 51280 | Q2Q067 | Q9Y3B6 | 0.38138  |
| 51281 | Q2Q067 | Q9UHC1 | 0.4197   |
| 51282 | Q2Q067 | Q8N782 | 0.22914  |
| 51283 | Q2Q067 | Q6P1M3 | 0.83943  |
| 51284 | Q2Q067 | Q9NSD9 | 0.39523  |
| 51285 | Q2Q067 | Q969S2 | 0.071613 |
| 51286 | Q2Q067 | B1AMM8 | 0.10475  |
| 51287 | Q2Q067 | Q5T1C6 | 0.33137  |
| 51288 | Q2Q067 | P82663 | 0.45173  |
| 51289 | Q2Q067 | P07954 | 0.079242 |
| 51290 | Q2Q067 | Q96NL3 | 0.12037  |
| 51291 | Q2Q067 | Q6NXT1 | 0.33708  |
| 51292 | Q2Q067 | Q96B36 | 0.81015  |
| 51293 | Q2Q067 | O60238 | 0.19067  |
| 51294 | Q2Q067 | Q96B01 | 0.54081  |
| 51295 | Q2Q067 | Q96HG1 | 0.19215  |
| 51296 | Q2Q067 | Q4W5G0 | 0.21381  |
| 51297 | Q2Q067 | P26641 | 0.45788  |
| 51298 | Q2Q067 | Q13625 | 0.37536  |
| 51299 | Q2Q067 | Q8WTR7 | 0.62849  |
| 51300 | Q2Q067 | Q6P1N0 | 0.23728  |



|       |        |        |          |
|-------|--------|--------|----------|
| 51301 | Q2Q067 | Q9NYJ8 | 0.52371  |
| 51302 | Q2Q067 | Q13547 | 0.82322  |
| 51303 | Q2Q067 | Q6PI26 | 1.1443   |
| 51304 | Q2Q067 | A8MV65 | 0.39593  |
| 51305 | Q2Q067 | Q6ZSJ8 | 0.29573  |
| 51306 | Q2Q067 | Q9NP66 | 1.0069   |
| 51307 | Q2Q067 | Q14511 | 0.63404  |
| 51308 | Q2Q067 | Q9UP83 | 1.2689   |
| 51309 | Q2Q067 | Q05195 | 0.55058  |
| 51310 | Q2Q067 | P08238 | 0.62824  |
| 51311 | Q2Q067 | Q8TAW3 | 0.12685  |
| 51312 | Q2Q067 | Q96AV8 | 0.33531  |
| 51313 | Q2Q067 | Q6ZTZ1 | 0.1662   |
| 51314 | Q2Q067 | Q5T5F5 | 0.19215  |
| 51315 | Q2Q067 | P38919 | 0.23137  |
| 51316 | Q2Q067 | Q9BTT4 | 0.63393  |
| 51317 | Q2Q067 | Q9BXX3 | 0.25565  |
| 51318 | Q2Q067 | P63167 | 1.4147   |
| 51319 | Q2Q067 | P0C867 | 0.13702  |
| 51320 | Q2Q067 | P51815 | 0.097938 |
| 51321 | Q2Q067 | P14373 | 0.23549  |
| 51322 | Q2Q067 | Q8N6F7 | 0.31193  |
| 51323 | Q2Q067 | Q5VWX1 | 0.68611  |
| 51324 | Q2Q067 | P0DM35 | 0.42541  |
| 51325 | Q2Q067 | Q9UJY1 | 0.41943  |
| 51326 | Q2Q067 | Q14103 | 0.83961  |
| 51327 | Q2Q067 | Q9UIS9 | 0.51543  |
| 51328 | Q2Q067 | P78358 | 0.47001  |
| 51329 | Q2Q067 | O43752 | 0.067951 |
| 51330 | Q2Q067 | P55345 | 0.3446   |
| 51331 | Q2Q067 | O60506 | 0.3481   |
| 51332 | Q2Q067 | A5LHX3 | 0.30339  |
| 51333 | Q2Q067 | Q96MF4 | 0.19092  |
| 51334 | Q2Q067 | O00712 | 0.2268   |
| 51335 | Q2Q067 | Q8NF67 | 0.25537  |
| 51336 | Q2Q067 | P22061 | 0.21052  |
| 51337 | Q2Q067 | Q9NZI5 | 0.4457   |
| 51338 | Q2Q067 | Q8N9H6 | 0.083116 |
| 51339 | Q2Q067 | Q99990 | 0.54172  |
| 51340 | Q2Q067 | Q9BYC8 | 0.44271  |
| 51341 | Q2Q067 | Q93074 | 0.4745   |
| 51342 | Q2Q067 | Q8TF20 | 0.15472  |
| 51343 | Q2Q067 | Q6ICC9 | 0.24396  |
| 51344 | Q2Q067 | Q9UGC7 | 0.18502  |
| 51345 | Q2Q067 | Q01201 | 1.0626   |
| 51346 | Q2Q067 | P34949 | 0.13199  |
| 51347 | Q2Q067 | Q6UUV9 | 1.4899   |
| 51348 | Q2Q067 | Q9HB58 | 0.24792  |
| 51349 | Q2Q067 | Q9UBU9 | 0.49442  |
| 51350 | Q2Q067 | Q6ZR52 | 0.16589  |
| 51351 | Q2Q067 | Q9BSB4 | 0.25531  |
| 51352 | Q2Q067 | Q00534 | 0.16164  |
| 51353 | Q2Q067 | Q8IYA8 | 0.29573  |
| 51354 | Q2Q067 | Q7Z6G3 | 0.36954  |
| 51355 | Q2Q067 | O60930 | 0.22588  |
| 51356 | Q2Q067 | A3KN83 | 0.5167   |
| 51357 | Q2Q067 | P60604 | 0.22096  |
| 51358 | Q2Q067 | Q3B820 | 0.28732  |
| 51359 | Q2Q067 | Q5H9J7 | 0.46546  |
| 51360 | Q2Q067 | Q15528 | 1.1757   |
| 51361 | Q2Q067 | P0CB43 | 0.050495 |
| 51362 | Q2Q067 | Q99684 | 0.3657   |
| 51363 | Q2Q067 | P52741 | 0.13205  |
| 51364 | Q2Q067 | Q9P1Y5 | 0.26677  |
| 51365 | Q2Q067 | Q5TKA1 | 0.35625  |
| 51366 | Q2Q067 | Q9UDV7 | 0.085876 |
| 51367 | Q2Q067 | Q5FBB7 | 0.72076  |
| 51368 | Q2Q067 | Q9P1A6 | 0.16775  |
| 51369 | Q2Q067 | Q8N9P6 | 0.19215  |
| 51370 | Q2Q067 | P35244 | 0.55376  |
| 51371 | Q2Q067 | O00566 | 0.41428  |
| 51372 | Q2Q067 | P49450 | 0.25741  |
| 51373 | Q2Q067 | O14662 | 0.35498  |
| 51374 | Q2Q067 | P62888 | 0.77652  |
| 51375 | Q2Q067 | Q15006 | 0.27584  |
| 51376 | Q2Q067 | Q53FT3 | 0.22423  |

|       |        |        |          |
|-------|--------|--------|----------|
| 51377 | Q2Q067 | Q13884 | 0.42605  |
| 51378 | Q2Q067 | Q14814 | 0.57726  |
| 51379 | Q2Q067 | P39880 | 0.6071   |
| 51380 | Q2Q067 | O95347 | 0.34876  |
| 51381 | Q2Q067 | Q8N9V7 | 0.24893  |
| 51382 | Q2Q067 | Q93073 | 0.44152  |
| 51383 | Q2Q067 | Q13257 | 0.72968  |
| 51384 | Q2Q067 | Q8NFR7 | 0.26479  |
| 51385 | Q2Q067 | Q86XR8 | 0.98037  |
| 51386 | Q2Q067 | Q8IUR0 | 0.49239  |
| 51387 | Q2Q067 | P18850 | 0.64812  |
| 51388 | Q2Q067 | Q9NV88 | 0.57387  |
| 51389 | Q2Q067 | Q9UBP6 | 0.76859  |
| 51390 | Q2Q067 | Q6QNY0 | 0.46851  |
| 51391 | Q2Q067 | Q8TF68 | 0.068884 |
| 51392 | Q2Q067 | Q3KQV3 | 0.11652  |
| 51393 | Q2Q067 | O43617 | 0.26475  |
| 51394 | Q2Q067 | P50549 | 0.95391  |
| 51395 | Q2Q067 | P83436 | 0.3792   |
| 51396 | Q2Q067 | Q92990 | 0.060339 |
| 51397 | Q2Q067 | P32780 | 0.72187  |
| 51398 | Q2Q067 | Q99594 | 1.1492   |
| 51399 | Q2Q067 | Q9H777 | 0.23511  |
| 51400 | Q2Q067 | Q9BZV1 | 1.0068   |
| 51401 | Q2Q067 | Q86WB0 | 0.84294  |
| 51402 | Q2Q067 | Q96AQ6 | 0.50051  |
| 51403 | Q2Q067 | Q8N2Z9 | 0.53289  |
| 51404 | Q2Q067 | O94983 | 1.342    |
| 51405 | Q2Q067 | Q9H322 | 0.36356  |
| 51406 | Q2Q067 | A6NDE8 | 0.019044 |
| 51407 | Q2Q067 | Q8WUH2 | 0.63392  |
| 51408 | Q2Q067 | Q8IUW3 | 0.40712  |
| 51409 | Q2Q067 | Q8IUE0 | 0.32768  |
| 51410 | Q2Q067 | Q5JY77 | 0.47001  |
| 51411 | Q2Q067 | Q9XR5  | 0.28783  |
| 51412 | Q2Q067 | Q8N1N4 | 0.16378  |
| 51413 | Q2Q067 | Q9Y3D9 | 0.3707   |
| 51414 | Q2Q067 | P61573 | 0.36503  |
| 51415 | Q2Q067 | O00204 | 0.43043  |
| 51416 | Q2Q067 | O75208 | 0.25111  |
| 51417 | Q2Q067 | Q9P255 | 0.1589   |
| 51418 | Q2Q067 | Q8IZP0 | 0.2508   |
| 51419 | Q2Q067 | Q96FH0 | 0.21828  |
| 51420 | Q2Q067 | Q9H6T0 | 0.087135 |
| 51421 | Q2Q067 | P32969 | 0.88677  |
| 51422 | Q2Q067 | A6H8Y1 | 0.70245  |
| 51423 | Q2Q067 | Q09MP3 | 0.058385 |
| 51424 | Q2Q067 | O76031 | 0.30997  |
| 51425 | Q2Q067 | Q8NC26 | 0.18763  |
| 51426 | Q2Q067 | P17483 | 0.13846  |
| 51427 | Q2Q067 | Q6L8G5 | 0.19215  |
| 51428 | Q2Q067 | O95999 | 0.23471  |
| 51429 | Q2Q067 | Q9Y3C0 | 0.24973  |
| 51430 | Q2Q067 | P14316 | 0.97948  |
| 51431 | Q2Q067 | Q96EY5 | 0.23232  |
| 51432 | Q2Q067 | A8MT69 | 0.43813  |
| 51433 | Q2Q067 | Q6UYE1 | 0.46973  |
| 51434 | Q2Q067 | O43296 | 0.1152   |
| 51435 | Q2Q067 | Q86Y79 | 0.3086   |
| 51436 | Q2Q067 | P58004 | 0.15724  |
| 51437 | Q2Q067 | A6NKX1 | 0.19215  |
| 51438 | Q2Q067 | Q6R2W3 | 0.44069  |
| 51439 | Q2Q067 | Q76L83 | 0.47583  |
| 51440 | Q2Q067 | Q8NAX2 | 0.29573  |
| 51441 | Q2Q067 | O94776 | 1.0289   |
| 51442 | Q2Q067 | Q9H4T2 | 0.058453 |
| 51443 | Q2Q067 | Q9UBU7 | 0.077023 |
| 51444 | Q2Q067 | O15453 | 0.35671  |
| 51445 | Q2Q067 | P56555 | 0.54172  |
| 51446 | Q2Q067 | O15379 | 0.5597   |
| 51447 | Q2Q067 | O75486 | 0.54134  |
| 51448 | Q2Q067 | O15266 | 0.52908  |
| 51449 | Q2Q067 | P36956 | 0.23929  |
| 51450 | Q2Q067 | P0CG30 | 0.2324   |
| 51451 | Q2Q067 | P61970 | 0.39203  |
| 51452 | Q2Q067 | P62277 | 1.1246   |

|       |        |        |          |
|-------|--------|--------|----------|
| 51453 | Q2Q067 | Q99567 | 0.79612  |
| 51454 | Q2Q067 | Q8N1F7 | 0.60294  |
| 51455 | Q2Q067 | P18615 | 0.93209  |
| 51456 | Q2Q067 | Q9C0E2 | 0.85201  |
| 51457 | Q2Q067 | A6NFD8 | 0.28241  |
| 51458 | Q2Q067 | P60372 | 0.34715  |
| 51459 | Q2Q067 | Q8IWL3 | 0.48319  |
| 51460 | Q2Q067 | Q86WS4 | 0.19215  |
| 51461 | Q2Q067 | O95948 | 0.37793  |
| 51462 | Q2Q067 | Q8N1B4 | 0.47716  |
| 51463 | Q2Q067 | P56945 | 0.57099  |
| 51464 | Q2Q067 | O14709 | 0.16182  |
| 51465 | Q2Q067 | P0CL81 | 0.019044 |
| 51466 | Q2Q067 | Q99933 | 0.82086  |
| 51467 | Q2Q067 | P41134 | 0.31519  |
| 51468 | Q2Q067 | C9JBD0 | 0.29933  |
| 51469 | Q2Q067 | P41161 | 0.20842  |
| 51470 | Q2Q067 | Q08ER8 | 0.14861  |
| 51471 | Q2Q067 | P0C7M4 | 0.25814  |
| 51472 | Q2Q067 | Q5T681 | 0.38114  |
| 51473 | Q2Q067 | Q9UJT9 | 0.31311  |
| 51474 | Q2Q067 | Q9H1Z4 | 0.32989  |
| 51475 | Q2Q067 | Q13601 | 0.38006  |
| 51476 | Q2Q067 | Q86SZ2 | 0.3221   |
| 51477 | Q2Q067 | O60535 | 0.51608  |
| 51478 | Q2Q067 | Q9BQ87 | 0.39593  |
| 51479 | Q2Q067 | Q9UKN8 | 0.54599  |
| 51480 | Q2Q067 | Q14192 | 0.65721  |
| 51481 | Q2Q067 | Q5T5D7 | 0.13247  |
| 51482 | Q2Q067 | P13646 | 0.18021  |
| 51483 | Q2Q067 | P07900 | 0.61392  |
| 51484 | Q2Q067 | Q86UC2 | 0.20504  |
| 51485 | Q2Q067 | Q96EV8 | 0.2465   |
| 51486 | Q2Q067 | P56537 | 1.1743   |
| 51487 | Q2Q067 | Q9BWW4 | 0.47427  |
| 51488 | Q2Q067 | Q13123 | 0.48874  |
| 51489 | Q2Q067 | Q70EL1 | 0.33398  |
| 51490 | Q2Q067 | Q9H171 | 0.16258  |
| 51491 | Q2Q067 | P57723 | 0.40522  |
| 51492 | Q2Q067 | Q9NQX1 | 0.51532  |
| 51493 | Q2Q067 | P50616 | 0.29444  |
| 51494 | Q2Q067 | Q9HC77 | 0.76588  |
| 51495 | Q2Q067 | Q9UPV0 | 1.5272   |
| 51496 | Q2Q067 | Q7Z5D8 | 0.32756  |
| 51497 | Q2Q067 | Q03188 | 0.23296  |
| 51498 | Q2Q067 | Q9Y5R5 | 0.15414  |
| 51499 | Q2Q067 | Q9H098 | 0.40352  |
| 51500 | Q2Q067 | Q8TE76 | 0.15693  |
| 51501 | Q2Q067 | Q5SY85 | 0.12635  |
| 51502 | Q2Q067 | P05114 | 0.23888  |
| 51503 | Q2Q067 | Q92800 | 0.44805  |
| 51504 | Q2Q067 | Q96M61 | 0.28783  |
| 51505 | Q2Q067 | Q8IYB1 | 0.10399  |
| 51506 | Q2Q067 | O60318 | 0.30747  |
| 51507 | Q2Q067 | Q9BWK5 | 0.39148  |
| 51508 | Q2Q067 | Q86WR7 | 0.33983  |
| 51509 | Q2Q067 | Q6NZI2 | 1.1279   |
| 51510 | Q2Q067 | Q5VYV7 | 0.28783  |
| 51511 | Q2Q067 | Q96EZ8 | 0.78764  |
| 51512 | Q2Q067 | Q15633 | 0.87516  |
| 51513 | Q2Q067 | Q96S55 | 0.1724   |
| 51514 | Q2Q067 | Q6ZMW2 | 0.097854 |
| 51515 | Q2Q067 | Q9UNA4 | 0.29656  |
| 51516 | Q2Q067 | P53672 | 0.39249  |
| 51517 | Q2Q067 | Q8N5I9 | 0.29573  |
| 51518 | Q2Q067 | Q9H825 | 0.10872  |
| 51519 | Q2Q067 | P06748 | 0.44904  |
| 51520 | Q2Q067 | P30876 | 0.57966  |
| 51521 | Q2Q067 | Q107X0 | 0.34746  |
| 51522 | Q2Q067 | O14757 | 0.545    |
| 51523 | Q2Q067 | A8MUX0 | 0.11141  |
| 51524 | Q2Q067 | Q9UNH5 | 0.57225  |
| 51525 | Q2Q067 | P49789 | 0.54893  |
| 51526 | Q2Q067 | Q9NWX8 | 0.5884   |
| 51527 | Q2Q067 | Q7RTS7 | 0.16378  |
| 51528 | Q2Q067 | O95503 | 0.90908  |

|       |        |        |          |
|-------|--------|--------|----------|
| 51529 | Q2Q067 | Q8WU03 | 0.30493  |
| 51530 | Q2Q067 | P19387 | 0.474    |
| 51531 | Q2Q067 | Q8N699 | 0.27397  |
| 51532 | Q2Q067 | Q86XN7 | 0.29573  |
| 51533 | Q2Q067 | Q4LE39 | 0.91834  |
| 51534 | Q2Q067 | Q9NVX0 | 0.98487  |
| 51535 | Q2Q067 | Q86VX9 | 0.59741  |
| 51536 | Q2Q067 | Q9UER7 | 0.86986  |
| 51537 | Q2Q067 | Q6P1R3 | 0.28243  |
| 51538 | Q2Q067 | Q9C0B2 | 0.058025 |
| 51539 | Q2Q067 | P62241 | 0.65617  |
| 51540 | Q2Q067 | O00148 | 0.23552  |
| 51541 | Q2Q067 | Q86WV1 | 0.53429  |
| 51542 | Q2Q067 | Q16520 | 0.99622  |
| 51543 | Q2Q067 | P15976 | 0.29548  |
| 51544 | Q2Q067 | O95931 | 0.78662  |
| 51545 | Q2Q067 | P59991 | 0.40476  |
| 51546 | Q2Q067 | Q9UNL4 | 0.44852  |
| 51547 | Q2Q067 | Q9BWX5 | 0.33243  |
| 51548 | Q2Q067 | Q96G21 | 0.86474  |
| 51549 | Q2Q067 | Q8N5N4 | 0.19583  |
| 51550 | Q2Q067 | Q86X51 | 0.093973 |
| 51551 | Q2Q067 | Q6ZRI6 | 0.19455  |
| 51552 | Q2Q067 | Q8N8U2 | 0.41458  |
| 51553 | Q2Q067 | Q6L8H1 | 0.19215  |
| 51554 | Q2Q067 | Q96MY7 | 0.5595   |
| 51555 | Q2Q067 | Q8N7J2 | 0.51822  |
| 51556 | Q2Q067 | Q8N8K9 | 0.042224 |
| 51557 | Q2Q067 | Q9H307 | 0.64076  |
| 51558 | Q2Q067 | Q8N660 | 0.72826  |
| 51559 | Q2Q067 | Q9P2B4 | 0.25434  |
| 51560 | Q2Q067 | P40222 | 0.3161   |
| 51561 | Q2Q067 | O75347 | 0.60524  |
| 51562 | Q2Q067 | Q5T3J3 | 0.99943  |
| 51563 | Q2Q067 | Q9Y6X4 | 0.63552  |
| 51564 | Q2Q067 | O75586 | 0.71829  |
| 51565 | Q2Q067 | Q6P582 | 0.33705  |
| 51566 | Q2Q067 | Q8N196 | 0.70099  |
| 51567 | Q2Q067 | Q9Y2G9 | 0.39051  |
| 51568 | Q2Q067 | Q96JC9 | 0.97359  |
| 51569 | Q2Q067 | Q9H0E3 | 0.58496  |
| 51570 | Q2Q067 | F5GYI3 | 0.51184  |
| 51571 | Q2Q067 | Q9H8V8 | 0.19215  |
| 51572 | Q2Q067 | Q9BXW3 | 0.19215  |
| 51573 | Q2Q067 | Q66LE6 | 0.34277  |
| 51574 | Q2Q067 | O60356 | 0.49079  |
| 51575 | Q2Q067 | Q3KP66 | 0.52159  |
| 51576 | Q2Q067 | Q2M3W8 | 0.24938  |
| 51577 | Q2Q067 | Q15542 | 1.0491   |
| 51578 | Q2Q067 | Q15172 | 0.209    |
| 51579 | Q2Q067 | Q17RC7 | 0.19694  |
| 51580 | Q2Q067 | Q14686 | 0.27868  |
| 51581 | Q2Q067 | Q16626 | 0.056025 |
| 51582 | Q2Q067 | O15535 | 0.058453 |
| 51583 | Q2Q067 | Q9NXR1 | 0.3083   |
| 51584 | Q2Q067 | Q6MZP7 | 0.57419  |
| 51585 | Q2Q067 | P14136 | 0.11798  |
| 51586 | Q2Q067 | Q9P0M9 | 0.30628  |
| 51587 | Q2Q067 | Q6SJ96 | 0.24496  |
| 51588 | Q2Q067 | Q9H8Y8 | 0.28916  |
| 51589 | Q2Q067 | Q6H8Q1 | 0.28044  |
| 51590 | Q2Q067 | A6NHQ4 | 0.29095  |
| 51591 | Q2Q067 | Q69383 | 0.36503  |
| 51592 | Q2Q067 | O00423 | 0.37113  |
| 51593 | Q2Q067 | Q13200 | 0.50051  |
| 51594 | Q2Q067 | Q3LI83 | 0.39972  |
| 51595 | Q2Q067 | Q9BYQ5 | 0.34715  |
| 51596 | Q2Q067 | Q8TEL6 | 0.3881   |
| 51597 | Q2Q067 | Q7RTT5 | 0.12144  |
| 51598 | Q2Q067 | Q4VC44 | 0.29551  |
| 51599 | Q2Q067 | A6NCN2 | 0.16378  |
| 51600 | Q2Q067 | Q6ZP82 | 0.28783  |
| 51601 | Q2Q067 | Q03933 | 0.71603  |
| 51602 | Q2Q067 | Q8TDN6 | 0.28013  |
| 51603 | Q2Q067 | P28356 | 0.23273  |
| 51604 | Q2Q067 | Q9HCH5 | 0.54012  |

|       |        |        |          |
|-------|--------|--------|----------|
| 51605 | Q2Q067 | Q6ZU67 | 0.19686  |
| 51606 | Q2Q067 | P29966 | 0.52276  |
| 51607 | Q2Q067 | Q13432 | 0.37123  |
| 51608 | Q2Q067 | Q92754 | 0.53491  |
| 51609 | Q2Q067 | Q96I23 | 0.26103  |
| 51610 | Q2Q067 | Q96CN9 | 0.44998  |
| 51611 | Q2Q067 | O94842 | 0.64158  |
| 51612 | Q2Q067 | Q9ULN7 | 0.47117  |
| 51613 | Q2Q067 | Q6L8G9 | 0.19215  |
| 51614 | Q2Q067 | A8K8P3 | 0.75366  |
| 51615 | Q2Q067 | Q8N3J3 | 0.11159  |
| 51616 | Q2Q067 | Q9HC44 | 0.93086  |
| 51617 | Q2Q067 | Q96ST3 | 0.76474  |
| 51618 | Q2Q067 | O14628 | 0.21589  |
| 51619 | Q2Q067 | P58557 | 0.52167  |
| 51620 | Q2Q067 | Q9NSB4 | 0.17614  |
| 51621 | Q2Q067 | Q8TBC5 | 0.058453 |
| 51622 | Q2Q067 | Q15025 | 0.48873  |
| 51623 | Q2Q067 | Q9UBQ0 | 0.22655  |
| 51624 | Q2Q067 | Q5T7V8 | 1.0647   |
| 51625 | Q2Q067 | Q9UL16 | 0.11333  |
| 51626 | Q2Q067 | P61218 | 0.238    |
| 51627 | Q2Q067 | Q8IWP9 | 0.54093  |
| 51628 | Q2Q067 | O75570 | 0.18602  |
| 51629 | Q2Q067 | Q96RK0 | 0.97805  |
| 51630 | Q2Q067 | Q8N8G2 | 0.85361  |
| 51631 | Q2Q067 | Q9Y237 | 0.30914  |
| 51632 | Q2Q067 | A6ZKI3 | 0.24822  |
| 51633 | Q2Q067 | P62244 | 0.75691  |
| 51634 | Q2Q067 | Q86TU6 | 0.43187  |
| 51635 | Q2Q067 | O15350 | 0.34389  |
| 51636 | Q2Q067 | P05387 | 0.65612  |
| 51637 | Q2Q067 | Q5SXJ2 | 0.72826  |
| 51638 | Q2Q067 | Q6ZSS3 | 0.10643  |
| 51639 | Q2Q067 | Q8N9K3 | 0.29573  |
| 51640 | Q2Q067 | Q92759 | 0.66671  |
| 51641 | Q2Q067 | Q6ZRS2 | 0.33704  |
| 51642 | Q2Q067 | Q9BTK6 | 0.43906  |
| 51643 | Q2Q067 | P13073 | 0.11152  |
| 51644 | Q2Q067 | P35638 | 0.79814  |
| 51645 | Q2Q067 | Q5T5J6 | 0.48112  |
| 51646 | Q2Q067 | Q96EY4 | 0.24029  |
| 51647 | Q2Q067 | A1L443 | 0.54396  |
| 51648 | Q2Q067 | Q7L804 | 0.55959  |
| 51649 | Q2Q067 | Q9NY61 | 0.87278  |
| 51650 | Q2Q067 | Q8TDY2 | 0.85805  |
| 51651 | Q2Q067 | Q68DL7 | 0.19215  |
| 51652 | Q2Q067 | O75448 | 0.49164  |
| 51653 | Q2Q067 | Q96AH0 | 0.25041  |
| 51654 | Q2Q067 | Q9Y6J0 | 0.086745 |
| 51655 | Q2Q067 | Q9NVR2 | 0.92109  |
| 51656 | Q2Q067 | Q9NWM3 | 0.022228 |
| 51657 | Q2Q067 | Q96GX9 | 0.35808  |
| 51658 | Q2Q067 | Q92945 | 0.7916   |
| 51659 | Q2Q067 | P48444 | 0.38198  |
| 51660 | Q2Q067 | P54727 | 0.66024  |
| 51661 | Q2Q067 | Q9UFW8 | 0.36593  |
| 51662 | Q2Q067 | Q9NPI1 | 0.98674  |
| 51663 | Q2Q067 | Q96PS1 | 0.24529  |
| 51664 | Q2Q067 | Q9NQ48 | 0.21534  |
| 51665 | Q2Q067 | Q03252 | 0.30514  |
| 51666 | Q2Q067 | P41236 | 0.27377  |
| 51667 | Q2Q067 | P02511 | 0.38569  |
| 51668 | Q2Q067 | Q8IY42 | 0.62395  |
| 51669 | Q2Q067 | Q96ST2 | 0.16697  |
| 51670 | Q2Q067 | Q9Y2Z2 | 0.47355  |
| 51671 | Q2Q067 | Q9BY42 | 0.32207  |
| 51672 | Q2Q067 | I3L3R5 | 0.19215  |
| 51673 | Q2Q067 | P57075 | 0.29437  |
| 51674 | Q2Q067 | A6NL82 | 0.14181  |
| 51675 | Q2Q067 | P54198 | 1.0547   |
| 51676 | Q2Q067 | Q9H5F2 | 0.15819  |
| 51677 | Q2Q067 | Q6NXS1 | 0.42296  |
| 51678 | Q2Q067 | Q9UK76 | 0.45693  |
| 51679 | Q2Q067 | Q8WVR3 | 0.29573  |
| 51680 | Q2Q067 | Q7L5N1 | 1.1024   |

|       |        |        |          |
|-------|--------|--------|----------|
| 51681 | Q2Q067 | Q6ISB3 | 0.65972  |
| 51682 | Q2Q067 | A6NEY3 | 0.37471  |
| 51683 | Q2Q067 | Q8TDR4 | 0.1456   |
| 51684 | Q2Q067 | Q08378 | 0.28439  |
| 51685 | Q2Q067 | Q02447 | 0.50481  |
| 51686 | Q2Q067 | P25787 | 0.63799  |
| 51687 | Q2Q067 | Q5T653 | 0.2979   |
| 51688 | Q2Q067 | Q6ZR93 | 0.19215  |
| 51689 | Q2Q067 | O15040 | 0.28783  |
| 51690 | Q2Q067 | Q99909 | 0.12144  |
| 51691 | Q2Q067 | Q5VYM1 | 0.094766 |
| 51692 | Q2Q067 | Q6ZV77 | 0.19215  |
| 51693 | Q2Q067 | P52594 | 0.40922  |
| 51694 | Q2Q067 | Q86YF9 | 0.047542 |
| 51695 | Q2Q067 | A8MXZ3 | 0.19215  |
| 51696 | Q2Q067 | Q9NVS2 | 0.36613  |
| 51697 | Q2Q067 | Q9NQE9 | 0.31788  |
| 51698 | Q2Q067 | Q9NSD4 | 0.12553  |
| 51699 | Q2Q067 | Q8NBR6 | 0.8215   |
| 51700 | Q2Q067 | Q16534 | 0.19072  |
| 51701 | Q2Q067 | P37837 | 0.2728   |
| 51702 | Q2Q067 | Q14152 | 1.1237   |
| 51703 | Q2Q067 | Q2M1K9 | 0.26579  |
| 51704 | Q2Q067 | P62861 | 0.62997  |
| 51705 | Q2Q067 | Q04727 | 0.6205   |
| 51706 | Q2Q067 | Q6NT46 | 0.019044 |
| 51707 | Q2Q067 | Q8TDH9 | 0.15809  |
| 51708 | Q2Q067 | E9PAV3 | 0.23436  |
| 51709 | Q2Q067 | Q96T58 | 0.68595  |
| 51710 | Q2Q067 | Q8WY36 | 0.30214  |
| 51711 | Q2Q067 | P08107 | 0.57181  |
| 51712 | Q2Q067 | Q9C099 | 0.90062  |
| 51713 | Q2Q067 | Q8N1L9 | 0.91996  |
| 51714 | Q2Q067 | Q9P270 | 0.4152   |
| 51715 | Q2Q067 | O60244 | 0.5241   |
| 51716 | Q2Q067 | Q9H5P4 | 0.35833  |
| 51717 | Q2Q067 | A2RUB1 | 0.29573  |
| 51718 | Q2Q067 | Q5HYR2 | 0.51158  |
| 51719 | Q2Q067 | Q86YP4 | 0.81915  |
| 51720 | Q2Q067 | Q5BKX5 | 0.29573  |
| 51721 | Q2Q067 | Q05877 | 0.44533  |
| 51722 | Q2Q067 | H0YKK7 | 0.35087  |
| 51723 | Q2Q067 | Q96SC8 | 0.09819  |
| 51724 | Q2Q067 | Q9Y3Y4 | 0.58591  |
| 51725 | Q2Q067 | A6NEV1 | 0.26898  |
| 51726 | Q2Q067 | Q53HL2 | 0.90486  |
| 51727 | Q2Q067 | Q13522 | 0.11603  |
| 51728 | Q2Q067 | P52657 | 1.2277   |
| 51729 | Q2Q067 | A6NGK3 | 0.014778 |
| 51730 | Q2Q067 | Q6ZNA4 | 0.53595  |
| 51731 | Q2Q067 | O14896 | 0.51883  |
| 51732 | Q2Q067 | Q8IX12 | 0.94764  |
| 51733 | Q2Q067 | P42766 | 0.84323  |
| 51734 | Q2Q067 | Q06323 | 0.38843  |
| 51735 | Q2Q067 | Q9Y534 | 0.30532  |
| 51736 | Q2Q067 | A6NHQ2 | 0.14692  |
| 51737 | Q2Q067 | Q8TAA5 | 0.18761  |
| 51738 | Q2Q067 | P41218 | 0.58282  |
| 51739 | Q2Q067 | O00401 | 0.63747  |
| 51740 | Q2Q067 | Q5TH74 | 0.22525  |
| 51741 | Q2Q067 | Q96SN8 | 0.46256  |
| 51742 | Q2Q067 | P67775 | 0.7377   |
| 51743 | Q2Q067 | Q9NVF7 | 0.41087  |
| 51744 | Q2Q067 | Q96KD3 | 0.63352  |
| 51745 | Q2Q067 | O43684 | 0.69341  |
| 51746 | Q2Q067 | Q8NBT2 | 0.71527  |
| 51747 | Q2Q067 | O75683 | 0.30487  |
| 51748 | Q2Q067 | Q8NAV1 | 0.42622  |
| 51749 | Q2Q067 | Q8WUF5 | 0.83767  |
| 51750 | Q2Q067 | Q96HR8 | 0.85827  |
| 51751 | Q2Q067 | P17030 | 0.11003  |
| 51752 | Q2Q067 | Q9Y3R5 | 0.3434   |
| 51753 | Q2Q067 | P86496 | 0.19215  |
| 51754 | Q2Q067 | P51610 | 0.53119  |
| 51755 | Q2Q067 | O60927 | 0.40566  |
| 51756 | Q2Q067 | Q14934 | 0.50357  |

|       |        |        |           |
|-------|--------|--------|-----------|
| 51757 | Q2Q067 | Q9H981 | 1.0513    |
| 51758 | Q2Q067 | Q86WP2 | 0.43952   |
| 51759 | Q2Q067 | Q9NUQ6 | 0.32989   |
| 51760 | Q2Q067 | Q9ULQ0 | 0.54306   |
| 51761 | Q2Q067 | A6NNL0 | 0.4993    |
| 51762 | Q2Q067 | Q504T8 | 0.15082   |
| 51763 | Q2Q067 | Q7Z3B4 | 0.84932   |
| 51764 | Q2Q067 | Q96K30 | 0.77794   |
| 51765 | Q2Q067 | P17031 | 0.12798   |
| 51766 | Q2Q067 | Q14457 | 0.50194   |
| 51767 | Q2Q067 | Q8TBK2 | 0.49261   |
| 51768 | Q2Q067 | Q7Z340 | 0.089995  |
| 51769 | Q2Q067 | P42704 | 1.0209    |
| 51770 | Q2Q067 | Q14532 | 0.095341  |
| 51771 | Q2Q067 | A6NLC8 | 0.64333   |
| 51772 | Q2Q067 | Q7L0Y3 | 0.88456   |
| 51773 | Q2Q067 | Q86UE3 | 0.1529    |
| 51774 | Q2Q067 | Q6ZMV5 | 0.23054   |
| 51775 | Q2Q067 | Q53TQ3 | 0.52874   |
| 51776 | Q2Q067 | O14910 | 0.61417   |
| 51777 | Q2Q067 | P09086 | 0.32347   |
| 51778 | Q2Q067 | Q5JTC6 | 0.47488   |
| 51779 | Q2Q067 | P04792 | 0.39356   |
| 51780 | Q2Q067 | P26447 | 0.27454   |
| 51781 | Q2Q067 | Q9H668 | 0.22561   |
| 51782 | Q2Q067 | P63279 | 0.78863   |
| 51783 | Q2Q067 | Q6ZR03 | 0.069256  |
| 51784 | Q2Q067 | O75362 | 0.74678   |
| 51785 | Q2Q067 | Q8N5D0 | 0.53453   |
| 51786 | Q2Q067 | Q96FX2 | 0.84723   |
| 51787 | Q2Q067 | Q6P656 | 0.0013873 |
| 51788 | Q2Q067 | Q96AB3 | 0.70499   |
| 51789 | Q2Q067 | O00189 | 0.23587   |
| 51790 | Q2Q067 | Q16670 | 0.14982   |
| 51791 | Q2Q067 | Q9BVV6 | 0.19215   |
| 51792 | Q2Q067 | Q96N95 | 0.24359   |
| 51793 | Q2Q067 | Q8N3U1 | 0.19215   |
| 51794 | Q2Q067 | Q9Y5A6 | 0.6937    |
| 51795 | Q2Q067 | Q9UBZ9 | 0.44017   |
| 51796 | Q2Q067 | B3EWG4 | 0.29573   |
| 51797 | Q2Q067 | Q92547 | 0.5473    |
| 51798 | Q2Q067 | A2RU37 | 0.0024558 |
| 51799 | Q2Q067 | Q9Y3Y2 | 0.66209   |
| 51800 | Q2Q067 | E9PJI5 | 0.2076    |
| 51801 | Q2Q067 | Q9H8Q6 | 0.5038    |
| 51802 | Q2Q067 | Q8TF47 | 0.22688   |
| 51803 | Q2Q067 | Q86YC2 | 0.65438   |
| 51804 | Q2Q067 | Q9NPI7 | 0.011348  |
| 51805 | Q2Q067 | Q13158 | 0.46394   |
| 51806 | Q2Q067 | Q7Z3Y9 | 0.20138   |
| 51807 | Q2Q067 | Q9NQ29 | 0.40207   |
| 51808 | Q2Q067 | O75971 | 0.63552   |
| 51809 | Q2Q067 | Q86TS7 | 0.19215   |
| 51810 | Q2Q067 | Q330K2 | 0.14487   |
| 51811 | Q2Q067 | P05386 | 1.1616    |
| 51812 | Q2Q067 | Q5T160 | 0.37733   |
| 51813 | Q2Q067 | O75175 | 1.3889    |
| 51814 | Q2Q067 | Q9H6R4 | 0.21385   |
| 51815 | Q2Q067 | Q9Y291 | 0.29299   |
| 51816 | Q2Q067 | Q8ND90 | 0.67563   |
| 51817 | Q2Q067 | P17036 | 0.29645   |
| 51818 | Q2Q067 | Q6P435 | 0.11005   |
| 51819 | Q2Q067 | P49005 | 0.53807   |
| 51820 | Q2Q067 | Q7Z614 | 0.36101   |
| 51821 | Q2Q067 | O15117 | 0.44503   |
| 51822 | Q2Q067 | P53801 | 0.3061    |
| 51823 | Q2Q067 | O94993 | 0.21921   |
| 51824 | Q2Q067 | Q13838 | 0.13097   |
| 51825 | Q2Q067 | F8W1W9 | 0.10647   |
| 51826 | Q2Q067 | Q9ULJ3 | 0.5849    |
| 51827 | Q2Q067 | Q13415 | 0.25023   |
| 51828 | Q2Q067 | O14776 | 1.1053    |
| 51829 | Q2Q067 | Q9ULR0 | 0.45607   |
| 51830 | Q2Q067 | Q86V48 | 0.463     |
| 51831 | Q2Q067 | Q8TBE0 | 0.766     |
| 51832 | Q2Q067 | Q6VVB1 | 0.34427   |

|       |        |        |          |
|-------|--------|--------|----------|
| 51833 | Q2Q067 | D6RGH6 | 1.1954   |
| 51834 | Q2Q067 | O95990 | 0.05789  |
| 51835 | Q2Q067 | P86479 | 0.19215  |
| 51836 | Q2Q067 | P17040 | 0.61696  |
| 51837 | Q2Q067 | Q96P70 | 0.9557   |
| 51838 | Q2Q067 | Q15560 | 1.0054   |
| 51839 | Q2Q067 | Q9P258 | 0.57237  |
| 51840 | Q2Q067 | P17676 | 0.85627  |
| 51841 | Q2Q067 | Q2QGD7 | 0.63202  |
| 51842 | Q2Q067 | Q9H019 | 0.24596  |
| 51843 | Q2Q067 | Q16531 | 0.62333  |
| 51844 | Q2Q067 | Q6U949 | 0.19215  |
| 51845 | Q2Q067 | Q86V97 | 0.37541  |
| 51846 | Q2Q067 | O95359 | 0.25184  |
| 51847 | Q2Q067 | Q5T280 | 0.60492  |
| 51848 | Q2Q067 | O95551 | 0.70051  |
| 51849 | Q2Q067 | Q9H320 | 0.4701   |
| 51850 | Q2Q067 | P17482 | 1.1273   |
| 51851 | Q2Q067 | Q9P086 | 1.0006   |
| 51852 | Q2Q067 | O00541 | 0.3554   |
| 51853 | Q2Q067 | P17010 | 0.2503   |
| 51854 | Q2Q067 | O95625 | 0.11121  |
| 51855 | Q2Q067 | Q96MD2 | 0.096693 |
| 51856 | Q2Q067 | P11308 | 0.53389  |
| 51857 | Q2Q067 | Q92837 | 0.47558  |
| 51858 | Q2Q067 | Q53H80 | 0.36625  |
| 51859 | Q2Q067 | P17038 | 0.16589  |
| 51860 | Q2Q067 | Q56P42 | 0.1321   |
| 51861 | Q2Q067 | Q9Y3B2 | 0.81126  |
| 51862 | Q2Q067 | Q8N5Y2 | 0.010509 |
| 51863 | Q2Q067 | Q49B96 | 0.18994  |
| 51864 | Q2Q067 | Q7L1Q6 | 0.30306  |
| 51865 | Q2Q067 | Q07955 | 0.57369  |
| 51866 | Q2Q067 | Q6PF06 | 0.40441  |
| 51867 | Q2Q067 | P59091 | 0.080353 |
| 51868 | Q2Q067 | Q08AD1 | 0.42372  |
| 51869 | Q2Q067 | Q9P0J6 | 0.31693  |
| 51870 | Q2Q067 | Q9BWJ5 | 0.22568  |
| 51871 | Q2Q067 | Q9Y2B4 | 0.18741  |
| 51872 | Q2Q067 | Q9Y4Z2 | 0.23396  |
| 51873 | Q2Q067 | Q9NTG7 | 0.44604  |
| 51874 | Q2Q067 | Q9UK12 | 0.10888  |
| 51875 | Q2Q067 | Q6I9Y2 | 0.79296  |
| 51876 | Q2Q067 | Q96LT7 | 0.32524  |
| 51877 | Q2Q067 | Q8WU90 | 0.82814  |
| 51878 | Q2Q067 | Q1MSJ5 | 0.58511  |
| 51879 | Q2Q067 | Q9NPD3 | 0.33603  |
| 51880 | Q2Q067 | Q96MH2 | 1.2105   |
| 51881 | Q2Q067 | Q9H7T3 | 0.1762   |
| 51882 | Q2Q067 | Q8WYN3 | 0.54101  |
| 51883 | Q2Q067 | Q9UDW3 | 0.24989  |
| 51884 | Q2Q067 | Q9NVK5 | 0.091575 |
| 51885 | Q2Q067 | P38935 | 0.42274  |
| 51886 | Q2Q067 | Q8NDY6 | 0.48324  |
| 51887 | Q2Q067 | E9PGG2 | 0.25814  |
| 51888 | Q2Q067 | Q9NYG5 | 0.77379  |
| 51889 | Q2Q067 | Q86TB9 | 0.86845  |
| 51890 | Q2Q067 | Q96CB8 | 0.47713  |
| 51891 | Q2Q067 | Q5BJF2 | 0.084686 |
| 51892 | Q2Q067 | Q9NYF8 | 1.202    |
| 51893 | Q2Q067 | P08047 | 0.82146  |
| 51894 | Q2Q067 | Q8NFB4 | 0.96831  |
| 51895 | Q2Q067 | Q8NEU8 | 0.34017  |
| 51896 | Q2Q067 | Q96DP5 | 0.20614  |
| 51897 | Q2Q067 | Q8TC21 | 0.11317  |
| 51898 | Q2Q067 | Q5VSR9 | 0.40408  |
| 51899 | Q2Q067 | Q8N5T8 | 0.32005  |
| 51900 | Q2Q067 | Q9BRD0 | 0.32021  |
| 51901 | Q2Q067 | P11473 | 0.34642  |
| 51902 | Q2Q067 | Q13156 | 0.15449  |
| 51903 | Q2Q067 | Q7RTU5 | 0.37479  |
| 51904 | Q2Q067 | Q00978 | 0.98772  |
| 51905 | Q2Q067 | P15924 | 0.28022  |
| 51906 | Q2Q067 | O00458 | 0.4403   |
| 51907 | Q2Q067 | Q8NAV2 | 0.060335 |
| 51908 | Q2Q067 | Q99471 | 0.87157  |



|       |        |        |           |
|-------|--------|--------|-----------|
| 51909 | Q2Q067 | Q63HM1 | 0.26003   |
| 51910 | Q2Q067 | Q8NFI3 | 0.10239   |
| 51911 | Q2Q067 | Q9BQN1 | 0.39979   |
| 51912 | Q2Q067 | Q8TAB5 | 0.29573   |
| 51913 | Q2Q067 | Q9UHJ3 | 0.3157    |
| 51914 | Q2Q067 | Q7Z3Y7 | 0.26069   |
| 51915 | Q2Q067 | Q8NF91 | 0.46851   |
| 51916 | Q2Q067 | Q96C28 | 0.20379   |
| 51917 | Q2Q067 | O75928 | 0.75671   |
| 51918 | Q2Q067 | P30304 | 0.59861   |
| 51919 | Q2Q067 | O15355 | 0.85795   |
| 51920 | Q2Q067 | O14907 | 0.41824   |
| 51921 | Q2Q067 | Q92905 | 0.6389    |
| 51922 | Q2Q067 | Q7RTT6 | 0.25757   |
| 51923 | Q2Q067 | Q9NPE3 | 0.69397   |
| 51924 | Q2Q067 | Q9BZI7 | 0.71832   |
| 51925 | Q2Q067 | Q3LI81 | 0.46381   |
| 51926 | Q2Q067 | Q96N16 | 0.47595   |
| 51927 | Q2Q067 | Q96RJ6 | 0.37545   |
| 51928 | Q2Q067 | Q3LI73 | 0.33745   |
| 51929 | Q2Q067 | O75182 | 1.1319    |
| 51930 | Q2Q067 | Q13769 | 0.5654    |
| 51931 | Q2Q067 | Q13794 | 0.39809   |
| 51932 | Q2Q067 | Q8NDT2 | 0.84724   |
| 51933 | Q2Q067 | P22557 | 0.14376   |
| 51934 | Q2Q067 | P59090 | 0.19215   |
| 51935 | Q2Q067 | P63241 | 0.50269   |
| 51936 | Q2Q067 | Q13342 | 0.64253   |
| 51937 | Q2Q067 | Q9NY87 | 0.38704   |
| 51938 | Q2Q067 | Q16629 | 0.585     |
| 51939 | Q2Q067 | A6NHU5 | 0.046436  |
| 51940 | Q2Q067 | Q569G3 | 0.29573   |
| 51941 | Q2Q067 | Q86V42 | 0.20882   |
| 51942 | Q2Q067 | Q9H1A4 | 0.78777   |
| 51943 | Q2Q067 | Q9ULJ6 | 0.47094   |
| 51944 | Q2Q067 | Q15022 | 0.60427   |
| 51945 | Q2Q067 | O43829 | 0.5896    |
| 51946 | Q2Q067 | Q569K6 | 0.01004   |
| 51947 | Q2Q067 | Q96EK5 | 0.18336   |
| 51948 | Q2Q067 | P16415 | 0.14116   |
| 51949 | Q2Q067 | P35573 | 0.50123   |
| 51950 | Q2Q067 | Q5JVX7 | 0.36583   |
| 51951 | Q2Q067 | Q9BSM1 | 1.0132    |
| 51952 | Q2Q067 | P21953 | 0.032982  |
| 51953 | Q2Q067 | K7EJ46 | 0.19215   |
| 51954 | Q2Q067 | Q8NHM5 | 0.25829   |
| 51955 | Q2Q067 | Q5VVH5 | 0.5795    |
| 51956 | Q2Q067 | Q86Y25 | 0.11612   |
| 51957 | Q2Q067 | Q9BQ15 | 0.62943   |
| 51958 | Q2Q067 | Q9H9Y6 | 0.6483    |
| 51959 | Q2Q067 | Q6P1L8 | 0.47888   |
| 51960 | Q2Q067 | Q96KP1 | 0.23167   |
| 51961 | Q2Q067 | Q9Y2D8 | 0.62948   |
| 51962 | Q2Q067 | Q01892 | 0.37629   |
| 51963 | Q2Q067 | Q9BV47 | 0.30694   |
| 51964 | Q2Q067 | P0CG00 | 0.14982   |
| 51965 | Q2Q067 | A8MV24 | 0.20432   |
| 51966 | Q2Q067 | Q14790 | 0.2561    |
| 51967 | Q2Q067 | Q4G0A6 | 0.61435   |
| 51968 | Q2Q067 | Q969Q0 | 0.076547  |
| 51969 | Q2Q067 | P60370 | 0.34715   |
| 51970 | Q2Q067 | A6NP61 | 0.43237   |
| 51971 | Q2Q067 | Q9Y262 | 0.74056   |
| 51972 | Q2Q067 | O95848 | 0.39895   |
| 51973 | Q2Q067 | Q8N5F7 | 1.304     |
| 51974 | Q2Q067 | Q96BW1 | 0.1321    |
| 51975 | Q2Q067 | Q96HB5 | 0.11635   |
| 51976 | Q2Q067 | Q5VWI1 | 0.61845   |
| 51977 | Q2Q067 | O95793 | 0.21619   |
| 51978 | Q2Q067 | Q96JS3 | 0.3271    |
| 51979 | Q2Q067 | Q8N3S3 | 0.30002   |
| 51980 | Q2Q067 | P13196 | 0.24356   |
| 51981 | Q2Q067 | Q495D7 | 0.0050941 |
| 51982 | Q2Q067 | Q92973 | 1.1537    |
| 51983 | Q2Q067 | A6NKF1 | 0.83843   |
| 51984 | Q2Q067 | P30154 | 0.27198   |

|       |        |        |          |
|-------|--------|--------|----------|
| 51985 | Q2Q067 | P12270 | 0.62677  |
| 51986 | Q2Q067 | Q7Z6Z7 | 0.26428  |
| 51987 | Q2Q067 | Q92558 | 0.32937  |
| 51988 | Q2Q067 | Q6L8H4 | 0.19215  |
| 51989 | Q2Q067 | Q6PIJ6 | 0.41713  |
| 51990 | Q2Q067 | Q75400 | 0.85533  |
| 51991 | Q2Q067 | Q14749 | 0.58985  |
| 51992 | Q2Q067 | P09017 | 0.13176  |
| 51993 | Q2Q067 | Q8WXC6 | 0.05478  |
| 51994 | Q2Q067 | Q8N184 | 0.12227  |
| 51995 | Q2Q067 | Q9NZC7 | 0.39266  |
| 51996 | Q2Q067 | Q96NJ6 | 0.10402  |
| 51997 | Q2Q067 | Q8NAP1 | 0.29573  |
| 51998 | Q2Q067 | O14829 | 0.23249  |
| 51999 | Q2Q067 | Q96CS3 | 0.50666  |
| 52000 | Q2Q067 | P51965 | 0.46506  |
| 52001 | Q2Q067 | P22670 | 0.82305  |
| 52002 | Q2Q067 | Q14240 | 0.12388  |
| 52003 | Q2Q067 | O60563 | 1.5404   |
| 52004 | Q2Q067 | Q9UNX3 | 0.58372  |
| 52005 | Q2Q067 | Q6PEX3 | 0.173    |
| 52006 | Q2Q067 | Q9ULE4 | 0.16834  |
| 52007 | Q2Q067 | H3BR10 | 0.19215  |
| 52008 | Q2Q067 | Q9UIC8 | 0.24264  |
| 52009 | Q2Q067 | Q5BJF6 | 0.4207   |
| 52010 | Q2Q067 | Q504Q3 | 0.19513  |
| 52011 | Q2Q067 | Q9HB09 | 0.54165  |
| 52012 | Q2Q067 | Q6ZPA2 | 0.19215  |
| 52013 | Q2Q067 | Q8WUB8 | 0.33944  |
| 52014 | Q2Q067 | Q9ULG3 | 0.19215  |
| 52015 | Q2Q067 | O95416 | 0.39341  |
| 52016 | Q2Q067 | Q5JQF7 | 0.19215  |
| 52017 | Q2Q067 | Q9Y3I1 | 0.84401  |
| 52018 | Q2Q067 | Q495Z4 | 0.15603  |
| 52019 | Q2Q067 | Q9BRA0 | 0.1321   |
| 52020 | Q2Q067 | Q6P1W5 | 0.28783  |
| 52021 | Q2Q067 | A8MUL3 | 0.19215  |
| 52022 | Q2Q067 | Q8TCI5 | 0.54999  |
| 52023 | Q2Q067 | Q9BYQ3 | 0.34715  |
| 52024 | Q2Q067 | Q9UHA3 | 0.23499  |
| 52025 | Q2Q067 | Q8IY31 | 0.43461  |
| 52026 | Q2Q067 | Q6P5X5 | 0.38205  |
| 52027 | Q2Q067 | Q9BQC3 | 0.49955  |
| 52028 | Q2Q067 | Q9GZR1 | 0.34325  |
| 52029 | Q2Q067 | Q8WYQ5 | 0.63894  |
| 52030 | Q2Q067 | Q5TYM5 | 0.067904 |
| 52031 | Q2Q067 | P0DKL9 | 0.34521  |
| 52032 | Q2Q067 | Q8TAD7 | 0.29573  |
| 52033 | Q2Q067 | Q8WUN7 | 0.32989  |
| 52034 | Q2Q067 | O15084 | 0.74487  |
| 52035 | Q2Q067 | P13640 | 0.58416  |
| 52036 | Q2Q067 | Q9NVI1 | 0.64465  |
| 52037 | Q2Q067 | P05413 | 0.22369  |
| 52038 | Q2Q067 | Q9BWD3 | 0.38894  |
| 52039 | Q2Q067 | Q00597 | 0.81225  |
| 52040 | Q2Q067 | O43542 | 0.51424  |
| 52041 | Q2Q067 | Q13129 | 0.71922  |
| 52042 | Q2Q067 | Q6BDS2 | 0.21707  |
| 52043 | Q2Q067 | Q9H7S9 | 0.70338  |
| 52044 | Q2Q067 | Q2M2Z5 | 0.60634  |
| 52045 | Q2Q067 | Q8N726 | 0.6017   |
| 52046 | Q2Q067 | O95394 | 0.42751  |
| 52047 | Q2Q067 | Q86UE4 | 0.34996  |
| 52048 | Q2Q067 | P11831 | 0.62072  |
| 52049 | Q2Q067 | P60174 | 0.22071  |
| 52050 | Q2Q067 | Q96FZ2 | 0.55312  |
| 52051 | Q2Q067 | Q6ZUT6 | 0.010056 |
| 52052 | Q2Q067 | O95198 | 0.36902  |
| 52053 | Q2Q067 | P20265 | 0.67286  |
| 52054 | Q2Q067 | O75531 | 0.95974  |
| 52055 | Q2Q067 | Q5JTW2 | 0.29868  |
| 52056 | Q2Q067 | Q7Z3V5 | 0.1529   |
| 52057 | Q2Q067 | Q9NR22 | 0.29276  |
| 52058 | Q2Q067 | P60673 | 0.13329  |
| 52059 | Q2Q067 | P30050 | 0.78122  |
| 52060 | Q2Q067 | Q8WUY3 | 0.13288  |

|       |        |        |          |
|-------|--------|--------|----------|
| 52061 | Q2Q067 | Q6ZRN7 | 0.19215  |
| 52062 | Q2Q067 | Q9H267 | 0.20356  |
| 52063 | Q2Q067 | P15172 | 0.34264  |
| 52064 | Q2Q067 | Q6IPT2 | 0.63352  |
| 52065 | Q2Q067 | Q06609 | 0.4263   |
| 52066 | Q2Q067 | P0C7T5 | 0.22651  |
| 52067 | Q2Q067 | P63010 | 0.4232   |
| 52068 | Q2Q067 | Q9H147 | 0.26255  |
| 52069 | Q2Q067 | Q3SXZ3 | 0.1161   |
| 52070 | Q2Q067 | Q86VP6 | 0.69972  |
| 52071 | Q2Q067 | Q9BV57 | 0.61675  |
| 52072 | Q2Q067 | A1A580 | 0.33745  |
| 52073 | Q2Q067 | O43248 | 0.30805  |
| 52074 | Q2Q067 | Q9Y2M2 | 0.18873  |
| 52075 | Q2Q067 | O94906 | 0.29907  |
| 52076 | Q2Q067 | Q6NT76 | 0.48135  |
| 52077 | Q2Q067 | P0CL83 | 0.26834  |
| 52078 | Q2Q067 | Q5TAX3 | 0.63196  |
| 52079 | Q2Q067 | Q156A1 | 0.19215  |
| 52080 | Q2Q067 | Q8NEQ6 | 0.092004 |
| 52081 | Q2Q067 | A6NHS1 | 0.24407  |
| 52082 | Q2Q067 | A6NEH8 | 0.059362 |
| 52083 | Q2Q067 | P57721 | 0.59986  |
| 52084 | Q2Q067 | Q9H9Q4 | 0.44685  |
| 52085 | Q2Q067 | Q14CW9 | 0.84061  |
| 52086 | Q2Q067 | Q96PC3 | 0.3056   |
| 52087 | Q2Q067 | P28702 | 0.3661   |
| 52088 | Q2Q067 | O43148 | 0.88239  |
| 52089 | Q2Q067 | Q9UFB7 | 0.10004  |
| 52090 | Q2Q067 | Q96I59 | 0.23394  |
| 52091 | Q2Q067 | Q6IQ21 | 0.14332  |
| 52092 | Q2Q067 | Q6ZS49 | 0.19215  |
| 52093 | Q2Q067 | Q00577 | 0.53588  |
| 52094 | Q2Q067 | A6NIY4 | 0.23617  |
| 52095 | Q2Q067 | O15049 | 0.45056  |
| 52096 | Q2Q067 | P48552 | 0.64919  |
| 52097 | Q2Q067 | P54105 | 0.87701  |
| 52098 | Q2Q067 | Q13398 | 0.23851  |
| 52099 | Q2Q067 | Q53GI3 | 0.095696 |
| 52100 | Q2Q067 | Q9ULW6 | 0.19253  |
| 52101 | Q2Q067 | Q96T17 | 0.2792   |
| 52102 | Q2Q067 | Q8IU81 | 0.1973   |
| 52103 | Q2Q067 | Q9Y3E5 | 0.53996  |
| 52104 | Q2Q067 | Q9BSD3 | 0.19165  |
| 52105 | Q2Q067 | Q3BBV1 | 0.72826  |
| 52106 | Q2Q067 | P12035 | 0.33029  |
| 52107 | Q2Q067 | Q96PT3 | 0.20973  |
| 52108 | Q2Q067 | Q96MR9 | 0.19951  |
| 52109 | Q2Q067 | P48378 | 0.30214  |
| 52110 | Q2Q067 | Q86TP1 | 0.74515  |
| 52111 | Q2Q067 | P80217 | 0.70076  |
| 52112 | Q2Q067 | Q9BZE9 | 0.45326  |
| 52113 | Q2Q067 | Q05DH4 | 0.51319  |
| 52114 | Q2Q067 | Q6PJT7 | 0.89072  |
| 52115 | Q2Q067 | P36871 | 0.16427  |
| 52116 | Q2Q067 | Q15561 | 0.89884  |
| 52117 | Q2Q067 | O96000 | 0.38297  |
| 52118 | Q2Q067 | Q8NEG0 | 0.11635  |
| 52119 | Q2Q067 | Q8NBZ0 | 1.2195   |
| 52120 | Q2Q067 | P31943 | 0.40418  |
| 52121 | Q2Q067 | Q14134 | 0.52019  |
| 52122 | Q2Q067 | Q96BV0 | 0.088474 |
| 52123 | Q2Q067 | O75446 | 0.82922  |
| 52124 | Q2Q067 | Q8IZL8 | 0.77769  |
| 52125 | Q2Q067 | Q5EBL4 | 0.37598  |
| 52126 | Q2Q067 | Q96LW7 | 0.35829  |
| 52127 | Q2Q067 | A8MTA8 | 0.041351 |
| 52128 | Q2Q067 | Q9UNK9 | 0.10793  |
| 52129 | Q2Q067 | Q96BF6 | 0.34443  |
| 52130 | Q2Q067 | Q9UBB4 | 0.47725  |
| 52131 | Q2Q067 | Q5H9M0 | 0.54367  |
| 52132 | Q2Q067 | O43776 | 0.27004  |
| 52133 | Q2Q067 | P11388 | 0.21876  |
| 52134 | Q2Q067 | Q9NP97 | 0.51119  |
| 52135 | Q2Q067 | Q9UJW3 | 0.62971  |
| 52136 | Q2Q067 | P28065 | 0.67176  |

|       |        |        |          |
|-------|--------|--------|----------|
| 52137 | Q2Q067 | P35227 | 0.7238   |
| 52138 | Q2Q067 | Q92979 | 0.3144   |
| 52139 | Q2Q067 | P54725 | 0.60679  |
| 52140 | Q2Q067 | Q6ZRV3 | 0.19215  |
| 52141 | Q2Q067 | A8MT65 | 0.21334  |
| 52142 | Q2Q067 | Q9P2B7 | 0.29573  |
| 52143 | Q2Q067 | A6NK53 | 0.12921  |
| 52144 | Q2Q067 | Q99873 | 0.58684  |
| 52145 | Q2Q067 | Q12962 | 1.1094   |
| 52146 | Q2Q067 | Q9H788 | 0.93512  |
| 52147 | Q2Q067 | Q9Y295 | 0.083135 |
| 52148 | Q2Q067 | Q9NZP6 | 0.53604  |
| 52149 | Q2Q067 | Q14669 | 0.30105  |
| 52150 | Q2Q067 | Q8WZA8 | 0.19215  |
| 52151 | Q2Q067 | P37802 | 0.31983  |
| 52152 | Q2Q067 | Q9Y5L0 | 0.93565  |
| 52153 | Q2Q067 | Q8TF74 | 0.37525  |
| 52154 | Q2Q067 | Q8N612 | 0.30099  |
| 52155 | Q2Q067 | P11166 | 0.56565  |
| 52156 | Q2Q067 | Q86TJ2 | 0.38905  |
| 52157 | Q2Q067 | Q9H693 | 0.31641  |
| 52158 | Q2Q067 | Q96GT9 | 0.34764  |
| 52159 | Q2Q067 | Q9NX18 | 0.76163  |
| 52160 | Q2Q067 | P28069 | 0.70744  |
| 52161 | Q2Q067 | P32189 | 0.075902 |
| 52162 | Q2Q067 | Q9BUY5 | 0.22248  |
| 52163 | Q2Q067 | Q86UL8 | 0.25899  |
| 52164 | Q2Q067 | Q96GU1 | 0.12303  |
| 52165 | Q2Q067 | Q09028 | 0.59745  |
| 52166 | Q2Q067 | O14818 | 0.67138  |
| 52167 | Q2Q067 | O60663 | 0.5435   |
| 52168 | Q2Q067 | Q15629 | 0.17994  |
| 52169 | Q2Q067 | P61077 | 0.49702  |
| 52170 | Q2Q067 | Q68EN5 | 0.022543 |
| 52171 | Q2Q067 | P07902 | 0.28639  |
| 52172 | Q2Q067 | P22674 | 0.32574  |
| 52173 | Q2Q067 | O14972 | 0.12028  |
| 52174 | Q2Q067 | Q5VY09 | 0.39148  |
| 52175 | Q2Q067 | Q9UKW6 | 0.46358  |
| 52176 | Q2Q067 | Q8IYA6 | 0.34279  |
| 52177 | Q2Q067 | P14635 | 0.28317  |
| 52178 | Q2Q067 | Q9P2T0 | 0.32695  |
| 52179 | Q2Q067 | Q86X53 | 0.015065 |
| 52180 | Q2Q067 | Q96QC0 | 0.69279  |
| 52181 | Q2Q067 | Q8N9Y4 | 0.5618   |
| 52182 | Q2Q067 | Q8TCH9 | 0.014743 |
| 52183 | Q2Q067 | P0CE67 | 0.19215  |
| 52184 | Q2Q067 | O43583 | 0.47232  |
| 52185 | Q2Q067 | P08727 | 0.52331  |
| 52186 | Q2Q067 | P58005 | 0.18393  |
| 52187 | Q2Q067 | P49756 | 0.36378  |
| 52188 | Q2Q067 | Q8IXM3 | 0.37574  |
| 52189 | Q2Q067 | Q3C1V1 | 0.29573  |
| 52190 | Q2Q067 | Q9BWN1 | 0.29573  |
| 52191 | Q2Q067 | Q9BYD9 | 0.11065  |
| 52192 | Q2Q067 | A6NGU7 | 0.029617 |
| 52193 | Q2Q067 | Q9UPP5 | 0.26085  |
| 52194 | Q2Q067 | O95049 | 0.43202  |
| 52195 | Q2Q067 | Q15424 | 0.73604  |
| 52196 | Q2Q067 | Q8N9P0 | 0.022434 |
| 52197 | Q2Q067 | P78545 | 0.80701  |
| 52198 | Q2Q067 | B2RXF5 | 0.26381  |
| 52199 | Q2Q067 | Q9BQI9 | 0.49528  |
| 52200 | Q2Q067 | Q7KZ85 | 0.43973  |
| 52201 | Q2Q067 | P23528 | 0.7641   |
| 52202 | Q2Q067 | P26196 | 0.52569  |
| 52203 | Q2Q067 | O00170 | 0.67949  |
| 52204 | Q2Q067 | Q8N3J9 | 0.092234 |
| 52205 | Q2Q067 | Q8N6T7 | 0.60063  |
| 52206 | Q2Q067 | Q9Y2P0 | 0.10893  |
| 52207 | Q2Q067 | P60369 | 0.34715  |
| 52208 | Q2Q067 | A6NCW3 | 0.48486  |
| 52209 | Q2Q067 | Q9Y3D3 | 0.64964  |
| 52210 | Q2Q067 | Q6ZRH3 | 0.11916  |
| 52211 | Q2Q067 | P09629 | 0.95676  |
| 52212 | Q2Q067 | Q92575 | 0.91112  |

|       |        |        |          |
|-------|--------|--------|----------|
| 52213 | Q2Q067 | O15069 | 0.26705  |
| 52214 | Q2Q067 | P63165 | 0.94553  |
| 52215 | Q2Q067 | Q9NS37 | 0.9139   |
| 52216 | Q2Q067 | Q9UHD9 | 0.76126  |
| 52217 | Q2Q067 | Q9BQG0 | 0.65151  |
| 52218 | Q2Q067 | O43156 | 0.28783  |
| 52219 | Q2Q067 | Q9Y2H8 | 0.10687  |
| 52220 | Q2Q067 | Q9NQ55 | 0.30746  |
| 52221 | Q2Q067 | O15304 | 1.0183   |
| 52222 | Q2Q067 | Q9BRP8 | 0.88626  |
| 52223 | Q2Q067 | Q5MNV8 | 0.21946  |
| 52224 | Q2Q067 | Q70YC4 | 0.38139  |
| 52225 | Q2Q067 | Q9UQR0 | 0.26021  |
| 52226 | Q2Q067 | Q8IV33 | 0.18863  |
| 52227 | Q2Q067 | Q96AQ7 | 0.54799  |
| 52228 | Q2Q067 | P52743 | 0.19186  |
| 52229 | Q2Q067 | Q9NYZ3 | 0.29936  |
| 52230 | Q2Q067 | Q99871 | 0.44212  |
| 52231 | Q2Q067 | Q5HYW2 | 0.37524  |
| 52232 | Q2Q067 | Q96QF0 | 0.55901  |
| 52233 | Q2Q067 | Q9Y2R5 | 0.23001  |
| 52234 | Q2Q067 | Q99627 | 0.35354  |
| 52235 | Q2Q067 | P58340 | 0.36825  |
| 52236 | Q2Q067 | Q96GN5 | 0.80438  |
| 52237 | Q2Q067 | Q9BUX1 | 0.76376  |
| 52238 | Q2Q067 | Q8WY50 | 0.19215  |
| 52239 | Q2Q067 | Q499Z4 | 0.12624  |
| 52240 | Q2Q067 | Q8N9A8 | 0.24698  |
| 52241 | Q2Q067 | Q10570 | 0.80815  |
| 52242 | Q2Q067 | Q04323 | 0.28937  |
| 52243 | Q2Q067 | P54845 | 0.32624  |
| 52244 | Q2Q067 | Q9Y248 | 0.69799  |
| 52245 | Q2Q067 | Q12996 | 0.1657   |
| 52246 | Q2Q067 | P18077 | 0.54068  |
| 52247 | Q2Q067 | O75886 | 1.1179   |
| 52248 | Q2Q067 | Q9NZQ3 | 0.68275  |
| 52249 | Q2Q067 | Q8IXH6 | 1.1569   |
| 52250 | Q2Q067 | Q9UND3 | 0.22989  |
| 52251 | Q2Q067 | Q8N8A2 | 0.28783  |
| 52252 | Q2Q067 | Q9UBS4 | 0.18138  |
| 52253 | Q2Q067 | P42568 | 0.88643  |
| 52254 | Q2Q067 | Q9NXE8 | 0.23818  |
| 52255 | Q2Q067 | Q15937 | 0.09883  |
| 52256 | Q2Q067 | Q9BV90 | 0.017889 |
| 52257 | Q2Q067 | Q9Y2A0 | 0.12175  |
| 52258 | Q2Q067 | Q9Y4A8 | 0.55723  |
| 52259 | Q2Q067 | Q96A04 | 0.47507  |
| 52260 | Q2Q067 | B3EWF7 | 0.19215  |
| 52261 | Q2Q067 | Q9BXC8 | 0.4808   |
| 52262 | Q2Q067 | Q9BTX9 | 0.46063  |
| 52263 | Q2Q067 | P62891 | 0.65612  |
| 52264 | Q2Q067 | Q9ULK4 | 1.2089   |
| 52265 | Q2Q067 | O95873 | 0.29573  |
| 52266 | Q2Q067 | Q68DK2 | 0.74516  |
| 52267 | Q2Q067 | Q00444 | 0.30046  |
| 52268 | Q2Q067 | A6NN06 | 0.19215  |
| 52269 | Q2Q067 | Q96AQ9 | 0.18349  |
| 52270 | Q2Q067 | Q8TEP8 | 0.79058  |
| 52271 | Q2Q067 | Q86XI2 | 0.44202  |
| 52272 | Q2Q067 | Q6ZVD7 | 0.24679  |
| 52273 | Q2Q067 | Q9H6Y2 | 0.35417  |
| 52274 | Q2Q067 | Q7Z2W4 | 0.40411  |
| 52275 | Q2Q067 | P27695 | 0.49683  |
| 52276 | Q2Q067 | Q15723 | 1.2601   |
| 52277 | Q2Q067 | Q7Z3E2 | 0.22303  |
| 52278 | Q2Q067 | Q9UBC3 | 0.23372  |
| 52279 | Q2Q067 | Q5T871 | 0.19215  |
| 52280 | Q2Q067 | P62314 | 0.88999  |
| 52281 | Q2Q067 | Q86Y26 | 0.34427  |
| 52282 | Q2Q067 | P08621 | 0.3612   |
| 52283 | Q2Q067 | Q8IXQ5 | 0.24902  |
| 52284 | Q2Q067 | Q15744 | 0.34751  |
| 52285 | Q2Q067 | A4D1U4 | 0.09293  |
| 52286 | Q2Q067 | Q9GZR2 | 0.15787  |
| 52287 | Q2Q067 | Q8N7G0 | 0.32768  |
| 52288 | Q2Q067 | Q9H3K6 | 0.25156  |

|       |        |        |          |
|-------|--------|--------|----------|
| 52289 | Q2Q067 | Q8IX03 | 1.0564   |
| 52290 | Q2Q067 | Q08050 | 0.43526  |
| 52291 | Q2Q067 | Q9UHK0 | 0.30672  |
| 52292 | Q2Q067 | Q8IXP5 | 0.29573  |
| 52293 | Q2Q067 | P31948 | 0.92039  |
| 52294 | Q2Q067 | Q13541 | 0.83371  |
| 52295 | Q2Q067 | Q5VZV4 | 0.17662  |
| 52296 | Q2Q067 | Q68EA5 | 0.2352   |
| 52297 | Q2Q067 | Q5TID7 | 0.29924  |
| 52298 | Q2Q067 | Q9Y2K5 | 0.090139 |
| 52299 | Q2Q067 | O75323 | 0.24511  |
| 52300 | Q2Q067 | Q5T1B1 | 0.57378  |
| 52301 | Q2Q067 | O43399 | 0.54549  |
| 52302 | Q2Q067 | P11142 | 0.43896  |
| 52303 | Q2Q067 | Q9NZF1 | 0.041328 |
| 52304 | Q2Q067 | P0CI01 | 0.23617  |
| 52305 | Q2Q067 | Q96DB5 | 0.23408  |
| 52306 | Q2Q067 | O75381 | 0.15633  |
| 52307 | Q2Q067 | O75607 | 0.66024  |
| 52308 | Q2Q067 | Q9NQS7 | 0.84216  |
| 52309 | Q2Q067 | Q14203 | 0.93183  |
| 52310 | Q2Q067 | O15405 | 1.0076   |
| 52311 | Q2Q067 | P61978 | 1.0113   |
| 52312 | Q2Q067 | A6NDB9 | 0.17589  |
| 52313 | Q2Q067 | O43823 | 0.18694  |
| 52314 | Q2Q067 | Q99569 | 0.25429  |
| 52315 | Q2Q067 | Q16630 | 0.21378  |
| 52316 | Q2Q067 | Q5T0J3 | 0.02475  |
| 52317 | Q2Q067 | Q8N5C8 | 0.50869  |
| 52318 | Q2Q067 | Q8WUB2 | 0.15683  |
| 52319 | Q2Q067 | Q96B67 | 0.24659  |
| 52320 | Q2Q067 | Q9BQ48 | 0.41104  |
| 52321 | Q2Q067 | Q9Y5B6 | 0.49189  |
| 52322 | Q2Q067 | Q9BW60 | 0.27937  |
| 52323 | Q2Q067 | O95163 | 0.64551  |
| 52324 | Q2Q067 | P62324 | 0.69074  |
| 52325 | Q2Q067 | A6NEQ9 | 0.19215  |
| 52326 | Q2Q067 | Q9C075 | 0.12751  |
| 52327 | Q2Q067 | Q9UKL0 | 1.2555   |
| 52328 | Q2Q067 | Q8IZT9 | 0.46789  |
| 52329 | Q2Q067 | O60711 | 0.38633  |
| 52330 | Q2Q067 | Q9BQ67 | 0.32989  |
| 52331 | Q2Q067 | Q14765 | 0.3453   |
| 52332 | Q2Q067 | Q9HAU5 | 0.91985  |
| 52333 | Q2Q067 | Q9Y5Z7 | 0.37558  |
| 52334 | Q2Q067 | Q3LI70 | 0.19215  |
| 52335 | Q2Q067 | Q9HBL0 | 0.32175  |
| 52336 | Q2Q067 | Q1ED39 | 0.54789  |
| 52337 | Q2Q067 | O95521 | 0.23465  |
| 52338 | Q2Q067 | P22528 | 0.18454  |
| 52339 | Q2Q067 | Q8IVV7 | 0.16238  |
| 52340 | Q2Q067 | A8K830 | 0.19215  |
| 52341 | Q2Q067 | K7EIQ3 | 0.59911  |
| 52342 | Q2Q067 | O95178 | 0.20969  |
| 52343 | Q2Q067 | Q06830 | 0.2735   |
| 52344 | Q2Q067 | Q8N6K4 | 0.19215  |
| 52345 | Q2Q067 | Q5TEZ4 | 0.19215  |
| 52346 | Q2Q067 | Q9H3L0 | 0.32481  |
| 52347 | Q2Q067 | Q13287 | 0.49256  |
| 52348 | Q2Q067 | Q96IF1 | 0.35608  |
| 52349 | Q2Q067 | P29084 | 1.2414   |
| 52350 | Q2Q067 | Q13112 | 1.4257   |
| 52351 | Q2Q067 | Q96CW1 | 0.5269   |
| 52352 | Q2Q067 | Q9UJX2 | 0.65145  |
| 52353 | Q2Q067 | Q8WVY7 | 0.20797  |
| 52354 | Q2Q067 | Q68DY1 | 0.24839  |
| 52355 | Q2Q067 | Q5TB30 | 0.2064   |
| 52356 | Q2Q067 | Q8IXW5 | 0.52959  |
| 52357 | Q2Q067 | Q7RTV3 | 0.31762  |
| 52358 | Q2Q067 | Q12972 | 0.78554  |
| 52359 | Q2Q067 | Q5JR98 | 0.28783  |
| 52360 | Q2Q067 | Q14137 | 0.81691  |
| 52361 | Q2Q067 | Q6ICB4 | 0.1425   |
| 52362 | Q2Q067 | P27797 | 0.5449   |
| 52363 | Q2Q067 | P12004 | 0.20035  |
| 52364 | Q2Q067 | Q9UQL6 | 0.4749   |

|       |        |        |          |
|-------|--------|--------|----------|
| 52365 | Q2Q067 | Q9H7C4 | 0.37499  |
| 52366 | Q2Q067 | Q8N5P1 | 0.23388  |
| 52367 | Q2Q067 | Q07021 | 0.82388  |
| 52368 | Q2Q067 | Q6ZSR6 | 0.13792  |
| 52369 | Q2Q067 | Q8TAK5 | 0.48352  |
| 52370 | Q2Q067 | Q00059 | 0.89131  |
| 52371 | Q2Q067 | P0CW26 | 0.1398   |
| 52372 | Q2Q067 | Q9Y3M2 | 0.2699   |
| 52373 | Q2Q067 | Q8ND83 | 0.52119  |
| 52374 | Q2Q067 | O43524 | 0.37516  |
| 52375 | Q2Q067 | Q14181 | 0.25532  |
| 52376 | Q2Q067 | Q8TDC0 | 0.42718  |
| 52377 | Q2Q067 | Q16851 | 0.36745  |
| 52378 | Q2Q067 | P53999 | 1.2704   |
| 52379 | Q2Q067 | Q8N336 | 0.15109  |
| 52380 | Q2Q067 | Q8TBR4 | 0.15526  |
| 52381 | Q2Q067 | Q96G23 | 0.249    |
| 52382 | Q2Q067 | Q99549 | 0.5967   |
| 52383 | Q2Q067 | Q9BU89 | 0.16533  |
| 52384 | Q2Q067 | Q9HCG1 | 0.17676  |
| 52385 | Q2Q067 | P61923 | 0.33189  |
| 52386 | Q2Q067 | Q12959 | 0.89825  |
| 52387 | Q2Q067 | O43502 | 0.24716  |
| 52388 | Q2Q067 | P63146 | 0.18529  |
| 52389 | Q2Q067 | O43593 | 0.18506  |
| 52390 | Q2Q067 | Q9Y297 | 0.26871  |
| 52391 | Q2Q067 | P0C2W7 | 0.19215  |
| 52392 | Q2Q067 | Q96G25 | 0.97578  |
| 52393 | Q2Q067 | Q9ULW3 | 0.81105  |
| 52394 | Q2Q067 | A6XGL0 | 0.18759  |
| 52395 | Q2Q067 | P06746 | 0.44745  |
| 52396 | Q2Q067 | O43745 | 0.70022  |
| 52397 | Q2Q067 | Q9BZE7 | 0.29573  |
| 52398 | Q2Q067 | P61927 | 0.67882  |
| 52399 | Q2Q067 | Q6P280 | 0.25546  |
| 52400 | Q2Q067 | Q9NYF0 | 0.22391  |
| 52401 | Q2Q067 | Q9NRG4 | 0.70392  |
| 52402 | Q2Q067 | Q5RKV6 | 0.16261  |
| 52403 | Q2Q067 | O75884 | 0.62748  |
| 52404 | Q2Q067 | O95678 | 0.12106  |
| 52405 | Q2Q067 | Q9Y399 | 0.49845  |
| 52406 | Q2Q067 | Q8WXC3 | 0.65637  |
| 52407 | Q2Q067 | Q5PRF9 | 0.57881  |
| 52408 | Q2Q067 | P60520 | 0.21691  |
| 52409 | Q2Q067 | Q9BUI4 | 0.17968  |
| 52410 | Q2Q067 | Q76KD6 | 0.22122  |
| 52411 | Q2Q067 | Q9BY77 | 0.32468  |
| 52412 | Q2Q067 | Q99966 | 0.25065  |
| 52413 | Q2Q067 | Q9ULE6 | 0.66387  |
| 52414 | Q2Q067 | Q9NS25 | 0.4381   |
| 52415 | Q2Q067 | O15162 | 0.084687 |
| 52416 | Q2Q067 | O95721 | 0.29435  |
| 52417 | Q2Q067 | Q9UDY4 | 0.79848  |
| 52418 | Q2Q067 | O95159 | 0.29654  |
| 52419 | Q2Q067 | Q8TAU3 | 0.12519  |
| 52420 | Q2Q067 | P39023 | 1.0298   |
| 52421 | Q2Q067 | Q15173 | 0.32421  |
| 52422 | Q2Q067 | O15061 | 0.6837   |
| 52423 | Q2Q067 | Q9Y448 | 0.7815   |
| 52424 | Q2Q067 | Q9UQB3 | 0.51091  |
| 52425 | Q2Q067 | Q92994 | 0.30729  |
| 52426 | Q2Q067 | Q9NX05 | 0.23892  |
| 52427 | Q2Q067 | Q5QP74 | 0.19215  |
| 52428 | Q2Q067 | Q8N5J4 | 0.52127  |
| 52429 | Q2Q067 | Q14691 | 0.21101  |
| 52430 | Q2Q067 | Q9UL58 | 0.34566  |
| 52431 | Q2Q067 | P24522 | 0.5346   |
| 52432 | Q2Q067 | P38159 | 0.60383  |
| 52433 | Q2Q067 | Q13469 | 1.1637   |
| 52434 | Q2Q067 | Q9H1A3 | 0.28783  |
| 52435 | Q2Q067 | Q8N0Z2 | 0.26485  |
| 52436 | Q2Q067 | Q9UMX2 | 0.19131  |
| 52437 | Q2Q067 | P0CG35 | 0.34514  |
| 52438 | Q2Q067 | Q5U623 | 0.75208  |
| 52439 | Q2Q067 | P52747 | 0.7753   |
| 52440 | Q2Q067 | Q15004 | 0.82494  |

|       |        |        |           |
|-------|--------|--------|-----------|
| 52441 | Q2Q067 | Q13137 | 1.0462    |
| 52442 | Q2Q067 | O43264 | 0.56817   |
| 52443 | Q2Q067 | P04264 | 0.22852   |
| 52444 | Q2Q067 | Q9Y3A5 | 0.63233   |
| 52445 | Q2Q067 | Q9Y5P8 | 0.63371   |
| 52446 | Q2Q067 | Q3LI60 | 0.19215   |
| 52447 | Q2Q067 | Q9UHV2 | 0.97663   |
| 52448 | Q2Q067 | Q9H4B0 | 0.26213   |
| 52449 | Q2Q067 | P78412 | 0.25814   |
| 52450 | Q2Q067 | Q4KN68 | 0.0029586 |
| 52451 | Q2Q067 | P0CW23 | 0.18954   |
| 52452 | Q2Q067 | O60287 | 0.57829   |
| 52453 | Q2Q067 | Q14CS0 | 0.3846    |
| 52454 | Q2Q067 | Q96SR6 | 0.10324   |
| 52455 | Q2Q067 | P0C860 | 0.32398   |
| 52456 | Q2Q067 | Q1ZZU3 | 0.65109   |
| 52457 | Q2Q067 | Q15003 | 0.70011   |
| 52458 | Q2Q067 | P55347 | 0.47374   |
| 52459 | Q2Q067 | Q9NZH4 | 0.36819   |
| 52460 | Q2Q067 | O94811 | 0.36864   |
| 52461 | Q2Q067 | P62487 | 0.20584   |
| 52462 | Q2Q067 | Q86X60 | 0.11744   |
| 52463 | Q2Q067 | O75396 | 0.18423   |
| 52464 | Q2Q067 | P60896 | 0.19215   |
| 52465 | Q2Q067 | O15127 | 0.61071   |
| 52466 | Q2Q067 | Q9UBF1 | 0.77285   |
| 52467 | Q2Q067 | Q8N1A0 | 0.13334   |
| 52468 | Q2Q067 | Q9UHI6 | 0.36011   |
| 52469 | Q2Q067 | K7EIZ4 | 0.19215   |
| 52470 | Q2Q067 | Q9UKC9 | 0.48063   |
| 52471 | Q2Q067 | A6NLW8 | 0.27517   |
| 52472 | Q2Q067 | Q9UK73 | 0.71298   |
| 52473 | Q2Q067 | A6NGH7 | 0.1265    |
| 52474 | Q2Q067 | Q5THR3 | 0.31018   |
| 52475 | Q2Q067 | Q8N812 | 0.20739   |
| 52476 | Q2Q067 | P78317 | 0.61126   |
| 52477 | Q2Q067 | P11532 | 0.488     |
| 52478 | Q2Q067 | Q14929 | 0.095275  |
| 52479 | Q2Q067 | Q99504 | 0.4532    |
| 52480 | Q2Q067 | Q5T619 | 0.092671  |
| 52481 | Q2Q067 | P62081 | 1.0552    |
| 52482 | Q2Q067 | Q9Y2Q9 | 0.34109   |
| 52483 | Q2Q067 | Q6ZSN1 | 0.15872   |
| 52484 | Q2Q067 | P61247 | 1.1759    |
| 52485 | Q2Q067 | Q9GZR5 | 0.11923   |
| 52486 | Q2Q067 | Q9BSV6 | 0.14822   |
| 52487 | Q2Q067 | Q96CJ1 | 1.2231    |
| 52488 | Q2Q067 | P23769 | 0.39645   |
| 52489 | Q2Q067 | Q8NEY8 | 0.43815   |
| 52490 | Q2Q067 | Q8WUM4 | 1.0558    |
| 52491 | Q2Q067 | P62304 | 0.76738   |
| 52492 | Q2Q067 | P29372 | 0.42387   |
| 52493 | Q2Q067 | Q8NFW9 | 0.2636    |
| 52494 | Q2Q067 | Q29RF7 | 0.93936   |
| 52495 | Q2Q067 | P54253 | 0.94427   |
| 52496 | Q2Q067 | P62714 | 0.72383   |
| 52497 | Q2Q067 | Q96L92 | 0.72097   |
| 52498 | Q2Q067 | Q14593 | 0.24672   |
| 52499 | Q2Q067 | Q9UBS3 | 0.59006   |
| 52500 | Q2Q067 | Q6RVD6 | 0.19215   |
| 52501 | Q2Q067 | Q15929 | 0.19354   |
| 52502 | Q2Q067 | O94992 | 1.1074    |
| 52503 | Q2Q067 | O14980 | 1.0988    |
| 52504 | Q2Q067 | Q3LI76 | 0.33428   |
| 52505 | Q2Q067 | Q8N655 | 0.19215   |
| 52506 | Q2Q067 | P35548 | 0.66903   |
| 52507 | Q2Q067 | Q86T75 | 0.3158    |
| 52508 | Q2Q067 | Q5VWM6 | 0.50615   |
| 52509 | Q2Q067 | P55199 | 1.0226    |
| 52510 | Q2Q067 | O75391 | 0.39794   |
| 52511 | Q2Q067 | Q9UHB9 | 0.33983   |
| 52512 | Q2Q067 | Q4G112 | 0.32768   |
| 52513 | Q2Q067 | Q9NZ38 | 0.0034562 |
| 52514 | Q2Q067 | Q9UIV1 | 1.2119    |
| 52515 | Q2Q067 | Q8TB69 | 0.22332   |
| 52516 | Q2Q067 | Q8NCA5 | 0.30415   |



|       |        |        |          |
|-------|--------|--------|----------|
| 52517 | Q2Q067 | Q86Y46 | 0.16378  |
| 52518 | Q2Q067 | Q13428 | 0.74222  |
| 52519 | Q2Q067 | Q8TB03 | 0.23419  |
| 52520 | Q2Q067 | Q9BVI4 | 0.26767  |
| 52521 | Q2Q067 | P84103 | 0.57338  |
| 52522 | Q2Q067 | P61254 | 0.55702  |
| 52523 | Q2Q067 | A6PW82 | 0.28103  |
| 52524 | Q2Q067 | Q9UI66 | 0.19215  |
| 52525 | Q2Q067 | O60645 | 0.36981  |
| 52526 | Q2Q067 | Q8N8I6 | 0.19215  |
| 52527 | Q2Q067 | Q99743 | 0.44653  |
| 52528 | Q2Q067 | P86481 | 0.19215  |
| 52529 | Q2Q067 | O75817 | 0.83239  |
| 52530 | Q2Q067 | Q9UI10 | 0.35277  |
| 52531 | Q2Q067 | P20719 | 0.34943  |
| 52532 | Q2Q067 | Q5T6S3 | 0.26767  |
| 52533 | Q2Q067 | Q15072 | 0.14006  |
| 52534 | Q2Q067 | Q07157 | 0.65562  |
| 52535 | Q2Q067 | Q6X4W1 | 0.56337  |
| 52536 | Q2Q067 | Q15935 | 0.29124  |
| 52537 | Q2Q067 | A6NEM1 | 0.35087  |
| 52538 | Q2Q067 | Q9Y4C2 | 0.38834  |
| 52539 | Q2Q067 | Q7Z7K6 | 0.25055  |
| 52540 | Q2Q067 | P59047 | 0.26213  |
| 52541 | Q2Q067 | Q9H8S9 | 0.45294  |
| 52542 | Q2Q067 | Q9H4K1 | 0.13168  |
| 52543 | Q2Q067 | P17987 | 0.1401   |
| 52544 | Q2Q067 | Q8NB91 | 0.17168  |
| 52545 | Q2Q067 | P15036 | 0.83597  |
| 52546 | Q2Q067 | B9ZVM9 | 0.65755  |
| 52547 | Q2Q067 | Q15388 | 0.088916 |
| 52548 | Q2Q067 | Q8NFV5 | 0.23617  |
| 52549 | Q2Q067 | Q8IZS5 | 0.16407  |
| 52550 | Q2Q067 | Q9BYR6 | 0.46381  |
| 52551 | Q2Q067 | Q5VZQ5 | 0.42632  |
| 52552 | Q2Q067 | Q96C00 | 0.26461  |
| 52553 | Q2Q067 | P62249 | 0.4969   |
| 52554 | Q2Q067 | Q8N1G2 | 0.25458  |
| 52555 | Q2Q067 | Q9BYK8 | 0.36866  |
| 52556 | Q2Q067 | Q8IYB3 | 0.36892  |
| 52557 | Q2Q067 | Q5H9R7 | 0.76926  |
| 52558 | Q2Q067 | P30307 | 0.7347   |
| 52559 | Q2Q067 | Q9UEU5 | 0.2716   |
| 52560 | Q2Q067 | Q9GZZ1 | 0.35731  |
| 52561 | Q2Q067 | Q2TAL8 | 0.55978  |
| 52562 | Q2Q067 | Q9H2C0 | 0.53534  |
| 52563 | Q2Q067 | Q8IVP9 | 0.12984  |
| 52564 | Q2Q067 | Q6W2J9 | 0.39006  |
| 52565 | Q2Q067 | Q05048 | 0.75247  |
| 52566 | Q2Q067 | P20073 | 0.41715  |
| 52567 | Q2Q067 | Q5VT03 | 0.4993   |
| 52568 | Q2Q067 | P51826 | 0.35697  |
| 52569 | Q2Q067 | Q14186 | 1.2564   |
| 52570 | Q2Q067 | Q63HK3 | 0.32906  |
| 52571 | Q2Q067 | Q9UII2 | 0.18937  |
| 52572 | Q2Q067 | Q92674 | 0.3827   |
| 52573 | Q2Q067 | Q8N8X9 | 0.094384 |
| 52574 | Q2Q067 | P49901 | 0.19215  |
| 52575 | Q2Q067 | A8MZF0 | 0.29573  |
| 52576 | Q2Q067 | Q99608 | 0.15494  |
| 52577 | Q2Q067 | Q5TA31 | 0.4504   |
| 52578 | Q2Q067 | Q6ZW54 | 0.5886   |
| 52579 | Q2Q067 | P78352 | 0.5949   |
| 52580 | Q2Q067 | P40426 | 0.31986  |
| 52581 | Q2Q067 | Q8TD35 | 0.29573  |
| 52582 | Q2Q067 | O75717 | 0.3687   |
| 52583 | Q2Q067 | Q59GR2 | 0.25814  |
| 52584 | Q2Q067 | Q3LI62 | 0.19215  |
| 52585 | Q2Q067 | Q6XCG6 | 0.19215  |
| 52586 | Q2Q067 | Q15699 | 0.47902  |
| 52587 | Q2Q067 | Q86Y13 | 0.24905  |
| 52588 | Q2Q067 | P53677 | 0.16059  |
| 52589 | Q2Q067 | Q9UII5 | 0.15472  |
| 52590 | Q2Q067 | Q9C0D2 | 0.32508  |
| 52591 | Q2Q067 | Q12800 | 0.33871  |
| 52592 | Q2Q067 | A8MZ59 | 0.25814  |

|       |        |        |          |
|-------|--------|--------|----------|
| 52593 | Q2Q067 | Q15532 | 0.9955   |
| 52594 | Q2Q067 | Q96NS8 | 0.011195 |
| 52595 | Q2Q067 | Q9UJM3 | 0.37745  |
| 52596 | Q2Q067 | P59051 | 0.014148 |
| 52597 | Q2Q067 | Q9GZY1 | 0.40863  |
| 52598 | Q2Q067 | Q5HYI7 | 0.52812  |
| 52599 | Q2Q067 | O60828 | 0.78818  |
| 52600 | Q2Q067 | Q8NE65 | 0.21673  |
| 52601 | Q2Q067 | P04732 | 0.17228  |
| 52602 | Q2Q067 | O75582 | 0.24816  |
| 52603 | Q2Q067 | O14508 | 0.28692  |
| 52604 | Q2Q067 | A2RU30 | 0.2567   |
| 52605 | Q2Q067 | Q05084 | 0.35642  |
| 52606 | Q2Q067 | P26678 | 0.20139  |
| 52607 | Q2Q067 | A8MUV8 | 0.23774  |
| 52608 | Q2Q067 | O94913 | 0.31311  |
| 52609 | Q2Q067 | O15131 | 1.0961   |
| 52610 | Q2Q067 | Q96KR1 | 0.21109  |
| 52611 | Q2Q067 | Q9P243 | 0.30054  |
| 52612 | Q2Q067 | Q9ULM2 | 0.12578  |
| 52613 | Q2Q067 | Q15047 | 0.60094  |
| 52614 | Q2Q067 | Q7Z2V1 | 0.19215  |
| 52615 | Q2Q067 | Q9HB71 | 0.53074  |
| 52616 | Q2Q067 | Q6NT89 | 0.46329  |
| 52617 | Q2Q067 | Q8WW18 | 0.29573  |
| 52618 | Q2Q067 | Q14938 | 0.2275   |
| 52619 | Q2Q067 | O75529 | 0.62313  |
| 52620 | Q2Q067 | Q5T035 | 0.23031  |
| 52621 | Q2Q067 | Q9UM13 | 0.68627  |
| 52622 | Q2Q067 | Q9NP64 | 0.20997  |
| 52623 | Q2Q067 | Q9BQ70 | 1.3375   |
| 52624 | Q2Q067 | Q9UG56 | 0.082841 |
| 52625 | Q2Q067 | P62280 | 0.58547  |
| 52626 | Q2Q067 | O43310 | 0.46475  |
| 52627 | Q2Q067 | Q96N38 | 0.23896  |
| 52628 | Q2Q067 | Q14997 | 0.15484  |
| 52629 | Q2Q067 | A8MWA4 | 0.28061  |
| 52630 | Q2Q067 | P49356 | 0.055029 |
| 52631 | Q2Q067 | P62328 | 0.57525  |
| 52632 | Q2Q067 | P83731 | 0.78122  |
| 52633 | Q2Q067 | Q9NX55 | 0.126    |
| 52634 | Q2Q067 | Q569H4 | 0.29573  |
| 52635 | Q2Q067 | O00471 | 0.20737  |
| 52636 | Q2Q067 | Q9UBF2 | 0.19276  |
| 52637 | Q2Q067 | Q9BYV8 | 0.59644  |
| 52638 | Q2Q067 | A1L4L8 | 0.23043  |
| 52639 | Q2Q067 | Q5VTQ0 | 0.03809  |
| 52640 | Q2Q067 | Q9UGP4 | 0.40894  |
| 52641 | Q2Q067 | Q86WX3 | 1.0915   |
| 52642 | Q2Q067 | Q96A22 | 0.13147  |
| 52643 | Q2Q067 | P40337 | 0.88045  |
| 52644 | Q2Q067 | Q5SVQ8 | 0.13712  |
| 52645 | Q2Q067 | Q99750 | 0.37113  |
| 52646 | Q2Q067 | Q9BW27 | 0.79856  |
| 52647 | Q2Q067 | Q6NXP2 | 0.58076  |
| 52648 | Q2Q067 | Q9BTC8 | 0.65355  |
| 52649 | Q2Q067 | Q9Y6P5 | 0.15879  |
| 52650 | Q2Q067 | Q8NA03 | 0.17761  |
| 52651 | Q2Q067 | O43924 | 0.049969 |
| 52652 | Q2Q067 | O43768 | 0.0786   |
| 52653 | Q2Q067 | O15235 | 0.69895  |
| 52654 | Q2Q067 | Q5H9F3 | 0.5573   |
| 52655 | Q2Q067 | Q9NWX4 | 0.32203  |
| 52656 | Q2Q067 | A8MQ14 | 0.12001  |
| 52657 | Q2Q067 | Q14498 | 0.71097  |
| 52658 | Q2Q067 | Q96M53 | 0.6806   |
| 52659 | Q2Q067 | P56693 | 0.61852  |
| 52660 | Q2Q067 | Q9NYJ1 | 0.54683  |
| 52661 | Q2Q067 | Q92748 | 0.80162  |
| 52662 | Q2Q067 | Q9Y6H5 | 0.74221  |
| 52663 | Q2Q067 | Q9BZW7 | 0.24135  |
| 52664 | Q2Q067 | P05787 | 1.4311   |
| 52665 | Q2Q067 | Q96LB3 | 0.57283  |
| 52666 | Q2Q067 | A4GXA9 | 0.52312  |
| 52667 | Q2Q067 | Q502W7 | 0.22955  |
| 52668 | Q2Q067 | O14787 | 0.9249   |

|       |        |        |           |
|-------|--------|--------|-----------|
| 52669 | Q2Q067 | O43236 | 0.26293   |
| 52670 | Q2Q067 | Q96BT3 | 0.52964   |
| 52671 | Q2Q067 | Q9H9C1 | 0.47086   |
| 52672 | Q2Q067 | Q8NDA8 | 0.28583   |
| 52673 | Q2Q067 | Q08J23 | 0.58512   |
| 52674 | Q2Q067 | Q8N7R0 | 0.32768   |
| 52675 | Q2Q067 | A6NHP3 | 0.23617   |
| 52676 | Q2Q067 | Q96CX3 | 0.1094    |
| 52677 | Q2Q067 | Q9BTP7 | 0.98908   |
| 52678 | Q2Q067 | Q8IWS0 | 0.4602    |
| 52679 | Q2Q067 | Q8NHQ1 | 1.3488    |
| 52680 | Q2Q067 | Q969S8 | 0.78192   |
| 52681 | Q2Q067 | A6NH11 | 0.23677   |
| 52682 | Q2Q067 | O14867 | 0.44301   |
| 52683 | Q2Q067 | P25791 | 0.44052   |
| 52684 | Q2Q067 | Q9BSU3 | 0.42308   |
| 52685 | Q2Q067 | Q96F24 | 0.64765   |
| 52686 | Q2Q067 | Q5VT33 | 0.1131    |
| 52687 | Q2Q067 | Q9Y6Y0 | 0.46721   |
| 52688 | Q2Q067 | P17032 | 0.098292  |
| 52689 | Q2Q067 | Q6ZRP0 | 0.29573   |
| 52690 | Q2Q067 | Q86V81 | 0.84896   |
| 52691 | Q2Q067 | P11171 | 0.46556   |
| 52692 | Q2Q067 | P48788 | 0.55237   |
| 52693 | Q2Q067 | Q99728 | 0.25007   |
| 52694 | Q2Q067 | Q9NXB0 | 0.37844   |
| 52695 | Q2Q067 | Q8IWZ8 | 0.21707   |
| 52696 | Q2Q067 | Q9BV19 | 0.15266   |
| 52697 | Q2Q067 | Q9H8E8 | 0.69857   |
| 52698 | Q2Q067 | Q6PGN9 | 0.76172   |
| 52699 | Q2Q067 | Q2M3C7 | 0.44855   |
| 52700 | Q2Q067 | Q86TA1 | 0.24537   |
| 52701 | Q2Q067 | P61576 | 0.36503   |
| 52702 | Q2Q067 | P19532 | 0.74798   |
| 52703 | Q2Q067 | P52758 | 0.43552   |
| 52704 | Q2Q067 | Q96BD5 | 0.45567   |
| 52705 | Q2Q067 | Q53GS7 | 0.44998   |
| 52706 | Q2Q067 | Q6P9G9 | 0.068077  |
| 52707 | Q2Q067 | Q6AI08 | 0.21869   |
| 52708 | Q2Q067 | P26358 | 0.36604   |
| 52709 | Q2Q067 | Q9ULX9 | 0.45688   |
| 52710 | Q2Q067 | Q04695 | 0.36996   |
| 52711 | Q2Q067 | P51948 | 0.45496   |
| 52712 | Q2Q067 | Q9NSG2 | 0.20414   |
| 52713 | Q2Q067 | Q13561 | 0.75444   |
| 52714 | Q2Q067 | Q92546 | 0.48301   |
| 52715 | Q2Q067 | Q9Y2T7 | 0.16801   |
| 52716 | Q2Q067 | Q52M93 | 0.050676  |
| 52717 | Q2Q067 | Q9H2W6 | 0.18515   |
| 52718 | Q2Q067 | Q96G03 | 0.27675   |
| 52719 | Q2Q067 | P31350 | 0.36998   |
| 52720 | Q2Q067 | Q66GS9 | 0.33645   |
| 52721 | Q2Q067 | Q96F07 | 0.42663   |
| 52722 | Q2Q067 | O75618 | 1.1491    |
| 52723 | Q2Q067 | Q9Y221 | 0.78026   |
| 52724 | Q2Q067 | Q9UBW8 | 0.35354   |
| 52725 | Q2Q067 | P35527 | 0.20138   |
| 52726 | Q2Q067 | P15621 | 0.22556   |
| 52727 | Q2Q067 | Q8N0T1 | 0.21773   |
| 52728 | Q2Q067 | A8MUA0 | 0.10188   |
| 52729 | Q2Q067 | Q6GPH4 | 0.37129   |
| 52730 | Q2Q067 | Q92831 | 0.86249   |
| 52731 | Q2Q067 | Q96EH3 | 0.071065  |
| 52732 | Q2Q067 | P60900 | 0.4445    |
| 52733 | Q2Q067 | Q92782 | 0.54353   |
| 52734 | Q2Q067 | Q8TEM1 | 0.15609   |
| 52735 | Q2Q067 | P46976 | 0.43257   |
| 52736 | Q2Q067 | Q14585 | 0.096646  |
| 52737 | Q2Q067 | Q8TBZ9 | 0.59043   |
| 52738 | Q2Q067 | Q14106 | 0.18125   |
| 52739 | Q2Q067 | Q6IN85 | 0.16498   |
| 52740 | Q2Q067 | O43711 | 0.38188   |
| 52741 | Q2Q067 | Q9NQX6 | 0.10835   |
| 52742 | Q2Q067 | Q9HAH7 | 0.25984   |
| 52743 | Q2Q067 | Q96MT3 | 0.87839   |
| 52744 | Q2Q067 | Q86UY5 | 0.0086481 |

|       |        |        |          |
|-------|--------|--------|----------|
| 52745 | Q2Q067 | P17022 | 0.058453 |
| 52746 | Q2Q067 | Q9H5J8 | 0.97805  |
| 52747 | Q2Q067 | Q9BPZ7 | 0.28461  |
| 52748 | Q2Q067 | Q15050 | 0.36233  |
| 52749 | Q2Q067 | Q9H8T0 | 0.38239  |
| 52750 | Q2Q067 | D6RB28 | 0.35087  |
| 52751 | Q2Q067 | Q96BW9 | 0.18187  |
| 52752 | Q2Q067 | Q9UL46 | 0.30616  |
| 52753 | Q2Q067 | Q16143 | 0.30318  |
| 52754 | Q2Q067 | Q07666 | 0.41267  |
| 52755 | Q2Q067 | Q9BZD4 | 0.74384  |
| 52756 | Q2Q067 | Q99576 | 0.46068  |
| 52757 | Q2Q067 | Q14653 | 0.67565  |
| 52758 | Q2Q067 | Q68DI1 | 0.12293  |
| 52759 | Q2Q067 | P51504 | 0.12014  |
| 52760 | Q2Q067 | Q9UBC9 | 0.44764  |
| 52761 | Q2Q067 | Q9GZY8 | 0.13705  |
| 52762 | Q2Q067 | P67870 | 0.25144  |
| 52763 | Q2Q067 | Q9NQ89 | 0.16984  |
| 52764 | Q2Q067 | Q6PK04 | 0.563    |
| 52765 | Q2Q067 | Q9NX53 | 0.28783  |
| 52766 | Q2Q067 | Q9Y6N9 | 0.29806  |
| 52767 | Q2Q067 | Q8TEX9 | 0.38871  |
| 52768 | Q2Q067 | O60934 | 0.18361  |
| 52769 | Q2Q067 | P04733 | 0.17228  |
| 52770 | Q2Q067 | Q9UPX8 | 0.27864  |
| 52771 | Q2Q067 | Q9UKY1 | 0.35561  |
| 52772 | Q2Q067 | Q9HD64 | 0.086969 |
| 52773 | Q2Q067 | Q8WWW0 | 0.26515  |
| 52774 | Q2Q067 | Q9H9H5 | 0.26302  |
| 52775 | Q2Q067 | P34896 | 0.072845 |
| 52776 | Q2Q067 | Q96T37 | 0.29022  |
| 52777 | Q2Q067 | P61289 | 0.86538  |
| 52778 | Q2Q067 | Q96LY2 | 0.32771  |
| 52779 | Q2Q067 | Q9H9Y2 | 0.17106  |
| 52780 | Q2Q067 | O75505 | 0.25814  |
| 52781 | Q2Q067 | Q96A73 | 0.5634   |
| 52782 | Q2Q067 | Q8N8C0 | 0.12775  |
| 52783 | Q2Q067 | Q13495 | 0.64204  |
| 52784 | Q2Q067 | Q5T4H9 | 0.19215  |
| 52785 | Q2Q067 | Q9Y2D9 | 0.58991  |
| 52786 | Q2Q067 | Q96DE5 | 0.53951  |
| 52787 | Q2Q067 | Q96SZ4 | 0.13104  |
| 52788 | Q2Q067 | Q15654 | 0.77947  |
| 52789 | Q2Q067 | Q5T0L3 | 0.61368  |
| 52790 | Q2Q067 | Q96DB2 | 0.21383  |
| 52791 | Q2Q067 | Q96BY7 | 0.067745 |
| 52792 | Q2Q067 | Q96KW2 | 0.3869   |
| 52793 | Q2Q067 | Q5BN46 | 0.015082 |
| 52794 | Q2Q067 | Q9HD34 | 0.276    |
| 52795 | Q2Q067 | P56270 | 0.53182  |
| 52796 | Q2Q067 | Q96DF8 | 0.57902  |
| 52797 | Q2Q067 | Q6IQ32 | 0.43053  |
| 52798 | Q2Q067 | Q659A1 | 0.11284  |
| 52799 | Q2Q067 | A2RRD8 | 0.13766  |
| 52800 | Q2Q067 | Q15306 | 0.84729  |
| 52801 | Q2Q067 | Q14746 | 0.29922  |
| 52802 | Q2Q067 | B4DXR9 | 0.24252  |
| 52803 | Q2Q067 | Q9UKD1 | 0.75185  |
| 52804 | Q2Q067 | Q8N6G1 | 0.19215  |
| 52805 | Q2Q067 | Q6NX45 | 0.10964  |
| 52806 | Q2Q067 | P62263 | 0.54942  |
| 52807 | Q2Q067 | P51816 | 0.28754  |
| 52808 | Q2Q067 | Q9BXY8 | 0.3233   |
| 52809 | Q2Q067 | O43482 | 0.43553  |
| 52810 | Q2Q067 | Q86US8 | 0.55593  |
| 52811 | Q2Q067 | O96017 | 0.61168  |
| 52812 | Q2Q067 | P51959 | 0.44026  |
| 52813 | Q2Q067 | Q15370 | 1.1359   |
| 52814 | Q2Q067 | P17098 | 0.24084  |
| 52815 | Q2Q067 | Q9BU61 | 0.67207  |
| 52816 | Q2Q067 | O60832 | 0.66642  |
| 52817 | Q2Q067 | O75437 | 0.21652  |
| 52818 | Q2Q067 | Q8NF99 | 0.24359  |
| 52819 | Q2Q067 | P12755 | 0.16421  |
| 52820 | Q2Q067 | Q9UNN5 | 0.66039  |

|       |        |        |          |
|-------|--------|--------|----------|
| 52821 | Q2Q067 | Q9BSH5 | 0.34486  |
| 52822 | Q2Q067 | Q9Y4X5 | 0.37901  |
| 52823 | Q2Q067 | O14948 | 0.43476  |
| 52824 | Q2Q067 | Q14687 | 0.28783  |
| 52825 | Q2Q067 | Q9P1G2 | 0.16666  |
| 52826 | Q2Q067 | Q5MJ68 | 0.18657  |
| 52827 | Q2Q067 | P61572 | 0.36503  |
| 52828 | Q2Q067 | Q13360 | 0.13061  |
| 52829 | Q2Q067 | A8MUU9 | 0.041221 |
| 52830 | Q2Q067 | O43303 | 0.83056  |
| 52831 | Q2Q067 | Q8N1I0 | 0.22781  |
| 52832 | Q2Q067 | Q6Q795 | 0.19215  |
| 52833 | Q2Q067 | Q9UBD5 | 0.55511  |
| 52834 | Q2Q067 | Q9UBF6 | 0.67217  |
| 52835 | Q2Q067 | Q9BRT6 | 0.26064  |
| 52836 | Q2Q067 | Q8IXQ4 | 0.29573  |
| 52837 | Q2Q067 | O43678 | 0.29601  |
| 52838 | Q2Q067 | Q92624 | 0.83087  |
| 52839 | Q2Q067 | Q9UPN7 | 0.93763  |
| 52840 | Q2Q067 | Q96C90 | 0.33265  |
| 52841 | Q2Q067 | Q9NQ32 | 0.10598  |
| 52842 | Q2Q067 | Q9BTE7 | 0.24809  |
| 52843 | Q2Q067 | Q8N1E6 | 0.30239  |
| 52844 | Q2Q067 | P60410 | 0.46381  |
| 52845 | Q2Q067 | Q8TES7 | 0.55549  |
| 52846 | Q2Q067 | Q86UB2 | 0.34167  |
| 52847 | Q2Q067 | Q8N8H1 | 0.21059  |
| 52848 | Q2Q067 | Q9HCC9 | 0.38464  |
| 52849 | Q2Q067 | Q14978 | 0.44204  |
| 52850 | Q2Q067 | Q00610 | 0.89233  |
| 52851 | Q2Q067 | Q96S59 | 0.93087  |
| 52852 | Q2Q067 | Q9H1I8 | 0.17504  |
| 52853 | Q2Q067 | P84022 | 0.57434  |
| 52854 | Q2Q067 | Q8WXW3 | 0.35292  |
| 52855 | Q2Q067 | Q9HB19 | 0.48472  |
| 52856 | Q2Q067 | Q8NDC0 | 0.25997  |
| 52857 | Q2Q067 | P61571 | 0.36503  |
| 52858 | Q2Q067 | P61966 | 0.2696   |
| 52859 | Q2Q067 | Q5MJ70 | 0.23617  |
| 52860 | Q2Q067 | Q92796 | 0.29068  |
| 52861 | Q2Q067 | Q9NZ63 | 0.32989  |
| 52862 | Q2Q067 | Q9UKZ1 | 0.34234  |
| 52863 | Q2Q067 | Q9NZL4 | 0.2662   |
| 52864 | Q2Q067 | O76095 | 0.056502 |
| 52865 | Q2Q067 | Q96RT7 | 0.30342  |
| 52866 | Q2Q067 | P60014 | 0.41862  |
| 52867 | Q2Q067 | Q969G3 | 1.0426   |
| 52868 | Q2Q067 | Q6EEV4 | 0.19215  |
| 52869 | Q2Q067 | Q8WYR1 | 0.21949  |
| 52870 | Q2Q067 | Q16222 | 0.18225  |
| 52871 | Q2Q067 | Q8NBA8 | 0.050719 |
| 52872 | Q2Q067 | P60866 | 0.68165  |
| 52873 | Q2Q067 | Q8TAT8 | 0.042768 |
| 52874 | Q2Q067 | O14641 | 0.70016  |
| 52875 | Q2Q067 | P78414 | 0.25814  |
| 52876 | Q2Q067 | P43358 | 0.37541  |
| 52877 | Q2Q067 | P62906 | 0.69861  |
| 52878 | Q2Q067 | A6NKN8 | 0.47586  |
| 52879 | Q2Q067 | Q63ZY3 | 0.87257  |
| 52880 | Q2Q067 | Q86SX3 | 0.77799  |
| 52881 | Q2Q067 | Q6ZTR5 | 0.007447 |
| 52882 | Q2Q067 | Q9NXV2 | 1.3531   |
| 52883 | Q2Q067 | Q99856 | 0.69763  |
| 52884 | Q2Q067 | A8MVJ9 | 0.31076  |
| 52885 | Q2Q067 | Q6P9A3 | 0.089995 |
| 52886 | Q2Q067 | I3L0S3 | 0.18858  |
| 52887 | Q2Q067 | Q9NSP4 | 0.065359 |
| 52888 | Q2Q067 | Q5SV97 | 0.36776  |
| 52889 | Q2Q067 | Q8N9T2 | 0.19215  |
| 52890 | Q2Q067 | P55212 | 0.45752  |
| 52891 | Q2Q067 | P31949 | 0.32321  |
| 52892 | Q2Q067 | Q69YI7 | 0.77707  |
| 52893 | Q2Q067 | P82650 | 0.15784  |
| 52894 | Q2Q067 | Q6P9F0 | 0.19934  |
| 52895 | Q2Q067 | P50221 | 0.58373  |
| 52896 | Q2Q067 | B1APH4 | 0.16825  |

|       |        |        |          |
|-------|--------|--------|----------|
| 52897 | Q2Q067 | Q6P1X5 | 0.88281  |
| 52898 | Q2Q067 | P46939 | 0.5748   |
| 52899 | Q2Q067 | P68871 | 0.19188  |
| 52900 | Q2Q067 | Q68DN1 | 0.20111  |
| 52901 | Q2Q067 | Q9C0D0 | 0.19632  |
| 52902 | Q2Q067 | Q5XKR9 | 0.41636  |
| 52903 | Q2Q067 | Q9BQC6 | 0.42309  |
| 52904 | Q2Q067 | Q9UL33 | 0.14849  |
| 52905 | Q2Q067 | Q9BQ83 | 0.55537  |
| 52906 | Q2Q067 | P10914 | 0.43506  |
| 52907 | Q2Q067 | Q8N5M1 | 0.45243  |
| 52908 | Q2Q067 | P41252 | 0.6402   |
| 52909 | Q2Q067 | Q92539 | 0.5881   |
| 52910 | Q2Q067 | Q8WTP9 | 0.56155  |
| 52911 | Q2Q067 | H3BTG2 | 0.35676  |
| 52912 | Q2Q067 | P15927 | 0.44711  |
| 52913 | Q2Q067 | Q9ULM3 | 0.79657  |
| 52914 | Q2Q067 | Q9NV39 | 0.19817  |
| 52915 | Q2Q067 | A9QM74 | 0.55585  |
| 52916 | Q2Q067 | Q86T82 | 0.28022  |
| 52917 | Q2Q067 | P52815 | 0.59141  |
| 52918 | Q2Q067 | A8MZG2 | 0.29573  |
| 52919 | Q2Q067 | Q06787 | 0.85959  |
| 52920 | Q2Q067 | Q8N448 | 0.29429  |
| 52921 | Q2Q067 | P41227 | 0.32975  |
| 52922 | Q2Q067 | Q8N140 | 0.85807  |
| 52923 | Q2Q067 | Q66K41 | 0.50607  |
| 52924 | Q2Q067 | Q9NZH5 | 0.2278   |
| 52925 | Q2Q067 | Q96JM7 | 0.36067  |
| 52926 | Q2Q067 | Q99622 | 0.056995 |
| 52927 | Q2Q067 | Q15102 | 0.18314  |
| 52928 | Q2Q067 | P56277 | 0.37076  |
| 52929 | Q2Q067 | A6NDZ8 | 0.083005 |
| 52930 | Q2Q067 | Q14533 | 0.76812  |
| 52931 | Q2Q067 | P25063 | 0.19215  |
| 52932 | Q2Q067 | Q9UI72 | 0.19215  |
| 52933 | Q2Q067 | P0C7X5 | 0.1331   |
| 52934 | Q2Q067 | Q8IYH5 | 0.42909  |
| 52935 | Q2Q067 | Q13330 | 0.46645  |
| 52936 | Q2Q067 | Q6IQ49 | 0.11794  |
| 52937 | Q2Q067 | Q8NC74 | 0.098973 |
| 52938 | Q2Q067 | Q8TEE9 | 0.59276  |
| 52939 | Q2Q067 | Q5VIR6 | 0.45548  |
| 52940 | Q2Q067 | Q15024 | 0.70039  |
| 52941 | Q2Q067 | Q8N3C0 | 0.23328  |
| 52942 | Q2Q067 | Q9NPD8 | 0.16359  |
| 52943 | Q2Q067 | O14933 | 0.24582  |
| 52944 | Q2Q067 | Q5T1N1 | 0.60003  |
| 52945 | Q2Q067 | Q7Z3B3 | 0.099314 |
| 52946 | Q2Q067 | Q8NEH6 | 0.51039  |
| 52947 | Q2Q067 | P09972 | 0.60856  |
| 52948 | Q2Q067 | Q00716 | 1.0864   |
| 52949 | Q2Q067 | Q15437 | 0.23106  |
| 52950 | Q2Q067 | P0CJ89 | 0.27517  |
| 52951 | Q2Q067 | Q96IZ7 | 0.74909  |
| 52952 | Q2Q067 | Q7Z2X7 | 0.27875  |
| 52953 | Q2Q067 | O60284 | 0.16141  |
| 52954 | Q2Q067 | O14862 | 0.54443  |
| 52955 | Q2Q067 | Q5T5A4 | 0.14848  |
| 52956 | Q2Q067 | Q13310 | 0.37021  |
| 52957 | Q2Q067 | Q86WZ0 | 0.36666  |
| 52958 | Q2Q067 | Q12834 | 0.773    |
| 52959 | Q2Q067 | P55060 | 0.84838  |
| 52960 | Q2Q067 | Q8IUC0 | 0.17889  |
| 52961 | Q2Q067 | A5D8V6 | 0.21598  |
| 52962 | Q2Q067 | Q15643 | 0.89117  |
| 52963 | Q2Q067 | O75177 | 0.46797  |
| 52964 | Q2Q067 | Q8NDZ9 | 0.19215  |
| 52965 | Q2Q067 | O75528 | 0.72373  |
| 52966 | Q2Q067 | Q9H379 | 0.29403  |
| 52967 | Q2Q067 | Q6ZS46 | 0.41154  |
| 52968 | Q2Q067 | Q96HJ3 | 0.29573  |
| 52969 | Q2Q067 | Q6ZU65 | 0.15082  |
| 52970 | Q2Q067 | Q8WUU5 | 0.27248  |
| 52971 | Q2Q067 | P16383 | 0.58843  |
| 52972 | Q2Q067 | P54840 | 0.16949  |

|       |        |        |          |
|-------|--------|--------|----------|
| 52973 | Q2Q067 | O60220 | 0.24913  |
| 52974 | Q2Q067 | Q9NQ31 | 0.60393  |
| 52975 | Q2Q067 | Q96BQ5 | 0.35134  |
| 52976 | Q2Q067 | P56279 | 0.4108   |
| 52977 | Q2Q067 | P41002 | 0.90366  |
| 52978 | Q2Q067 | P53992 | 1.0081   |
| 52979 | Q2Q067 | Q9Y6K9 | 0.97261  |
| 52980 | Q2Q067 | O95628 | 0.62707  |
| 52981 | Q2Q067 | P36873 | 0.71627  |
| 52982 | Q2Q067 | P0CJ90 | 0.27517  |
| 52983 | Q2Q067 | Q96GC6 | 1.1176   |
| 52984 | Q2Q067 | Q96RY5 | 0.52852  |
| 52985 | Q2Q067 | P51668 | 0.56922  |
| 52986 | Q2Q067 | Q8NET4 | 0.36766  |
| 52987 | Q2Q067 | P57081 | 0.88359  |
| 52988 | Q2Q067 | P69208 | 0.19215  |
| 52989 | Q2Q067 | Q92925 | 0.54643  |
| 52990 | Q2Q067 | Q76KX8 | 0.24459  |
| 52991 | Q2Q067 | Q96FQ6 | 0.24695  |
| 52992 | Q2Q067 | Q9NVE4 | 0.15811  |
| 52993 | Q2Q067 | Q8WW14 | 0.10032  |
| 52994 | Q2Q067 | Q9H0W8 | 0.33044  |
| 52995 | Q2Q067 | Q00056 | 0.31739  |
| 52996 | Q2Q067 | Q5T9G4 | 0.53071  |
| 52997 | Q2Q067 | A6NHJ4 | 0.25938  |
| 52998 | Q2Q067 | Q2TAK8 | 0.61715  |
| 52999 | Q2Q067 | Q9NUW8 | 0.63095  |
| 53000 | Q2Q067 | Q8NCU7 | 0.51068  |
| 53001 | Q2Q067 | Q14232 | 0.11373  |
| 53002 | Q2Q067 | Q9Y5J6 | 0.1495   |
| 53003 | Q2Q067 | Q92843 | 0.44311  |
| 53004 | Q2Q067 | Q15021 | 0.79968  |
| 53005 | Q2Q067 | Q9P2R6 | 1.0528   |
| 53006 | Q2Q067 | Q01658 | 0.46171  |
| 53007 | Q2Q067 | Q8NEF3 | 0.10748  |
| 53008 | Q2Q067 | Q6NSW7 | 0.32768  |
| 53009 | Q2Q067 | P28347 | 1.0068   |
| 53010 | Q2Q067 | Q15468 | 0.12309  |
| 53011 | Q2Q067 | Q96ES7 | 0.12155  |
| 53012 | Q2Q067 | Q8N3F8 | 0.36106  |
| 53013 | Q2Q067 | Q96MW1 | 0.29573  |
| 53014 | Q2Q067 | Q8N895 | 0.46528  |
| 53015 | Q2Q067 | Q96N22 | 0.24759  |
| 53016 | Q2Q067 | Q92541 | 0.98668  |
| 53017 | Q2Q067 | A8MXY4 | 0.16589  |
| 53018 | Q2Q067 | Q8N141 | 0.24938  |
| 53019 | Q2Q067 | P0CG34 | 0.34514  |
| 53020 | Q2Q067 | Q9NQP4 | 0.93882  |
| 53021 | Q2Q067 | Q96G28 | 0.10619  |
| 53022 | Q2Q067 | P31276 | 0.58233  |
| 53023 | Q2Q067 | P82914 | 0.34576  |
| 53024 | Q2Q067 | Q96HQ2 | 0.59644  |
| 53025 | Q2Q067 | Q2VPK5 | 0.68166  |
| 53026 | Q2Q067 | P22531 | 0.4396   |
| 53027 | Q2Q067 | Q9UKJ5 | 0.20853  |
| 53028 | Q2Q067 | Q02878 | 0.86759  |
| 53029 | Q2Q067 | Q8IYF3 | 0.41833  |
| 53030 | Q2Q067 | Q7Z3Y8 | 0.24865  |
| 53031 | Q2Q067 | P46777 | 1.2478   |
| 53032 | Q2Q067 | O94888 | 0.37669  |
| 53033 | Q2Q067 | P25440 | 0.44349  |
| 53034 | Q2Q067 | Q674X7 | 0.33682  |
| 53035 | Q2Q067 | Q05519 | 0.64186  |
| 53036 | Q2Q067 | Q9BVC3 | 0.5637   |
| 53037 | Q2Q067 | O15499 | 0.23001  |
| 53038 | Q2Q067 | Q96IL0 | 0.14247  |
| 53039 | Q2Q067 | Q03924 | 0.099343 |
| 53040 | Q2Q067 | Q8TBZ0 | 0.23272  |
| 53041 | Q2Q067 | O60826 | 0.35962  |
| 53042 | Q2Q067 | Q9BXL8 | 0.11478  |
| 53043 | Q2Q067 | Q8TAT6 | 0.4564   |
| 53044 | Q2Q067 | Q92562 | 0.25618  |
| 53045 | Q2Q067 | Q96LX8 | 0.13171  |
| 53046 | Q2Q067 | Q8N6T0 | 0.1112   |
| 53047 | Q2Q067 | Q96E11 | 0.36691  |
| 53048 | Q2Q067 | Q9BVC4 | 0.38322  |

|       |        |        |          |
|-------|--------|--------|----------|
| 53049 | Q2Q067 | Q8WWC4 | 0.3021   |
| 53050 | Q2Q067 | P55854 | 0.48173  |
| 53051 | Q2Q067 | Q9UBK9 | 0.9743   |
| 53052 | Q2Q067 | O95486 | 0.37983  |
| 53053 | Q2Q067 | O95424 | 0.098644 |
| 53054 | Q2Q067 | P26368 | 0.50935  |
| 53055 | Q2Q067 | Q9NRJ2 | 0.19215  |
| 53056 | Q2Q067 | Q5MIZ7 | 0.34658  |
| 53057 | Q2Q067 | Q96QU4 | 0.35987  |
| 53058 | Q2Q067 | P50748 | 0.7517   |
| 53059 | Q2Q067 | Q92769 | 0.37839  |
| 53060 | Q2Q067 | P0CL82 | 0.019044 |
| 53061 | Q2Q067 | A8MVM7 | 0.19215  |
| 53062 | Q2Q067 | P28062 | 0.30294  |
| 53063 | Q2Q067 | O43715 | 0.60731  |
| 53064 | Q2Q067 | Q12904 | 0.16744  |
| 53065 | Q2Q067 | Q8TBB1 | 0.70049  |
| 53066 | Q2Q067 | Q9BVL2 | 0.66174  |
| 53067 | Q2Q067 | Q5JNZ3 | 0.14538  |
| 53068 | Q2Q067 | Q96EP1 | 0.50656  |
| 53069 | Q2Q067 | P0CW71 | 0.19215  |
| 53070 | Q2Q067 | Q3LI72 | 0.19215  |
| 53071 | Q2Q067 | Q14497 | 0.68177  |
| 53072 | Q2Q067 | Q03701 | 0.36517  |
| 53073 | Q2Q067 | Q7Z7F7 | 0.30983  |
| 53074 | Q2Q067 | Q9NRL3 | 0.36948  |
| 53075 | Q2Q067 | Q9Y2Q1 | 0.23552  |
| 53076 | Q2Q067 | Q96D46 | 0.56745  |
| 53077 | Q2Q067 | Q9H091 | 0.16259  |
| 53078 | Q2Q067 | A6NHX0 | 0.42645  |
| 53079 | Q2Q067 | O00255 | 0.18783  |
| 53080 | Q2Q067 | Q5VTH2 | 0.3129   |
| 53081 | Q2Q067 | P62899 | 0.65612  |
| 53082 | Q2Q067 | O15105 | 0.30414  |
| 53083 | Q2Q067 | Q6PK81 | 0.10998  |
| 53084 | Q2Q067 | Q5JRC9 | 0.32957  |
| 53085 | Q2Q067 | Q96NG5 | 0.2131   |
| 53086 | Q2Q067 | Q8ND56 | 0.36151  |
| 53087 | Q2Q067 | Q969H9 | 0.19215  |
| 53088 | Q2Q067 | O43251 | 0.31738  |
| 53089 | Q2Q067 | Q13114 | 0.39935  |
| 53090 | Q2Q067 | P78344 | 0.39826  |
| 53091 | Q2Q067 | Q06330 | 0.55419  |
| 53092 | Q2Q067 | P15559 | 0.19366  |
| 53093 | Q2Q067 | O14713 | 0.3134   |
| 53094 | Q2Q067 | Q8N1L1 | 0.19215  |
| 53095 | Q2Q067 | O75496 | 0.91921  |
| 53096 | Q2Q067 | H3BMG3 | 0.10388  |
| 53097 | Q2Q067 | Q6P2Q9 | 0.55483  |
| 53098 | Q2Q067 | Q7LG56 | 0.23867  |
| 53099 | Q2Q067 | P06396 | 0.4134   |
| 53100 | Q2Q067 | Q96RL7 | 0.47185  |
| 53101 | Q2Q067 | P14859 | 1.2183   |
| 53102 | Q2Q067 | Q9BQ90 | 0.77585  |
| 53103 | Q2Q067 | O75190 | 0.7221   |
| 53104 | Q2Q067 | Q96A09 | 0.23631  |
| 53105 | Q2Q067 | Q1RN00 | 0.19215  |
| 53106 | Q2Q067 | Q9NR50 | 0.5329   |
| 53107 | Q2Q067 | Q15543 | 1.032    |
| 53108 | Q2Q067 | Q9UHU1 | 0.19215  |
| 53109 | Q2Q067 | Q9UMS0 | 1.082    |
| 53110 | Q2Q067 | O14530 | 0.26249  |
| 53111 | Q2Q067 | Q9UHV7 | 0.5241   |
| 53112 | Q2Q067 | Q8IZ40 | 0.61441  |
| 53113 | Q2Q067 | Q96PM5 | 0.41147  |
| 53114 | Q2Q067 | Q5SY13 | 0.19215  |
| 53115 | Q2Q067 | Q86UW9 | 0.83797  |
| 53116 | Q2Q067 | Q7Z3K6 | 0.56295  |
| 53117 | Q2Q067 | P60368 | 0.13835  |
| 53118 | Q2Q067 | P56282 | 0.12754  |
| 53119 | Q2Q067 | A6NNF4 | 0.16589  |
| 53120 | Q2Q067 | O95644 | 0.85682  |
| 53121 | Q2Q067 | P24864 | 0.62119  |
| 53122 | Q2Q067 | Q9GZV5 | 1.0546   |
| 53123 | Q2Q067 | P09467 | 0.31993  |
| 53124 | Q2Q067 | Q96EK7 | 0.25011  |



|       |        |        |          |
|-------|--------|--------|----------|
| 53125 | Q2Q067 | Q96KH6 | 0.20696  |
| 53126 | Q2Q067 | O75444 | 0.45861  |
| 53127 | Q2Q067 | Q13127 | 0.52563  |
| 53128 | Q2Q067 | Q9P2J8 | 0.14687  |
| 53129 | Q2Q067 | Q8N9E0 | 0.29573  |
| 53130 | Q2Q067 | O95780 | 0.26444  |
| 53131 | Q2Q067 | Q7RTS9 | 0.69343  |
| 53132 | Q2Q067 | Q5TBC7 | 0.19429  |
| 53133 | Q2Q067 | P54278 | 0.36292  |
| 53134 | Q2Q067 | Q9HB07 | 0.20036  |
| 53135 | Q2Q067 | O95067 | 0.55782  |
| 53136 | Q2Q067 | P49848 | 0.74102  |
| 53137 | Q2Q067 | A8MTZ7 | 0.013691 |
| 53138 | Q2Q067 | Q9UQ84 | 0.23423  |
| 53139 | Q2Q067 | Q9BQ89 | 0.55269  |
| 53140 | Q2Q067 | Q8IYW2 | 0.19215  |
| 53141 | Q2Q067 | P18669 | 0.59899  |
| 53142 | Q2Q067 | O75843 | 0.62243  |
| 53143 | Q2Q067 | P08708 | 0.45742  |
| 53144 | Q2Q067 | Q96JM3 | 0.30197  |
| 53145 | Q2Q067 | O95447 | 0.062404 |
| 53146 | Q2Q067 | Q8NHY5 | 0.47754  |
| 53147 | Q2Q067 | Q8N3F0 | 0.19189  |
| 53148 | Q2Q067 | Q9BSJ2 | 1.1259   |
| 53149 | Q2Q067 | O43541 | 0.63458  |
| 53150 | Q2Q067 | Q969Q6 | 0.20448  |
| 53151 | Q2Q067 | P41567 | 0.44098  |
| 53152 | Q2Q067 | Q5TI25 | 0.72826  |
| 53153 | Q2Q067 | Q6PF04 | 0.10934  |
| 53154 | Q2Q067 | Q9NSA3 | 0.78176  |
| 53155 | Q2Q067 | Q9HCU9 | 1.1108   |
| 53156 | Q2Q067 | Q8WTX7 | 0.21796  |
| 53157 | Q2Q067 | Q9NWA0 | 1.0006   |
| 53158 | Q2Q067 | Q6NZY4 | 0.57421  |
| 53159 | Q2Q067 | Q9H8M7 | 0.80582  |
| 53160 | Q2Q067 | Q75L30 | 0.19215  |
| 53161 | Q2Q067 | Q5JR59 | 0.58169  |
| 53162 | Q2Q067 | Q9HD42 | 0.96738  |
| 53163 | Q2Q067 | P12525 | 0.28643  |
| 53164 | Q2Q067 | Q14135 | 0.39593  |
| 53165 | Q2Q067 | Q9Y2V2 | 0.23707  |
| 53166 | Q2Q067 | P28324 | 1.4495   |
| 53167 | Q2Q067 | Q9NPI8 | 0.79638  |
| 53168 | Q2Q067 | Q2M1V0 | 0.32768  |
| 53169 | Q2Q067 | Q9BR84 | 0.25938  |
| 53170 | Q2Q067 | Q9NQG5 | 1.1012   |
| 53171 | Q2Q067 | Q9BV20 | 0.1163   |
| 53172 | Q2Q067 | Q9H116 | 0.3242   |
| 53173 | Q2Q067 | Q9BUW7 | 0.29573  |
| 53174 | Q2Q067 | Q53EL6 | 1.0571   |
| 53175 | Q2Q067 | O00625 | 0.5364   |
| 53176 | Q2Q067 | Q9H869 | 1.3764   |
| 53177 | Q2Q067 | Q16719 | 0.32377  |
| 53178 | Q2Q067 | Q6ZW13 | 0.19215  |
| 53179 | Q2Q067 | P29474 | 0.59305  |
| 53180 | Q2Q067 | Q86Y97 | 0.38387  |
| 53181 | Q2Q067 | Q9Y6X2 | 0.68746  |
| 53182 | Q2Q067 | Q96EH5 | 0.31757  |
| 53183 | Q2Q067 | P50991 | 0.22812  |
| 53184 | Q2Q067 | P78345 | 0.83239  |
| 53185 | Q2Q067 | Q8IU53 | 0.30456  |
| 53186 | Q2Q067 | P50750 | 0.32865  |
| 53187 | Q2Q067 | B2RV13 | 0.29537  |
| 53188 | Q2Q067 | Q9UNM6 | 0.21423  |
| 53189 | Q2Q067 | O43598 | 0.14352  |
| 53190 | Q2Q067 | Q9Y2N7 | 0.59498  |
| 53191 | Q2Q067 | Q99732 | 0.17771  |
| 53192 | Q2Q067 | Q96E29 | 0.25377  |
| 53193 | Q2Q067 | P08865 | 0.82696  |
| 53194 | Q2Q067 | Q9H2J4 | 0.6157   |
| 53195 | Q2Q067 | Q96JB2 | 0.77765  |
| 53196 | Q2Q067 | Q8IZM0 | 0.036535 |
| 53197 | Q2Q067 | Q9UBB9 | 0.3683   |
| 53198 | Q2Q067 | Q9NZE8 | 0.34099  |
| 53199 | Q2Q067 | Q9UBW7 | 0.50531  |
| 53200 | Q2Q067 | Q96DE0 | 0.52521  |

|       |        |        |          |
|-------|--------|--------|----------|
| 53201 | Q2Q067 | Q9BYR4 | 0.34715  |
| 53202 | Q2Q067 | Q9ULH7 | 0.86805  |
| 53203 | Q2Q067 | P11161 | 0.43705  |
| 53204 | Q2Q067 | Q9Y5B0 | 0.53599  |
| 53205 | Q2Q067 | Q9NWT6 | 0.46768  |
| 53206 | Q2Q067 | Q07020 | 0.77652  |
| 53207 | Q2Q067 | Q96LC9 | 0.53279  |
| 53208 | Q2Q067 | Q6P4R8 | 1.1095   |
| 53209 | Q2Q067 | Q9Y6R9 | 0.31304  |
| 53210 | Q2Q067 | Q9UDY2 | 0.9378   |
| 53211 | Q2Q067 | Q8IXS0 | 0.29573  |
| 53212 | Q2Q067 | Q15544 | 0.88756  |
| 53213 | Q2Q067 | Q9NTX7 | 0.46641  |
| 53214 | Q2Q067 | Q8IZU0 | 0.46789  |
| 53215 | Q2Q067 | Q9H9G7 | 0.70956  |
| 53216 | Q2Q067 | Q8IYT1 | 0.26415  |
| 53217 | Q2Q067 | Q9Y603 | 1.2469   |
| 53218 | Q2Q067 | Q9H4M3 | 0.21437  |
| 53219 | Q2Q067 | Q9NWT8 | 0.79659  |
| 53220 | Q2Q067 | Q96MC4 | 0.41621  |
| 53221 | Q2Q067 | P62913 | 1.1154   |
| 53222 | Q2Q067 | Q8TAE8 | 0.98322  |
| 53223 | Q2Q067 | A2AJT9 | 0.28979  |
| 53224 | Q2Q067 | Q12906 | 1.1711   |
| 53225 | Q2Q067 | Q8WXE1 | 0.69055  |
| 53226 | Q2Q067 | Q96AP0 | 0.058987 |
| 53227 | Q2Q067 | Q9NZM5 | 0.2044   |
| 53228 | Q2Q067 | P0C880 | 0.19215  |
| 53229 | Q2Q067 | Q9BT25 | 0.45603  |
| 53230 | Q2Q067 | Q9HAP2 | 0.65234  |
| 53231 | Q2Q067 | Q8IUC2 | 0.41492  |
| 53232 | Q2Q067 | P25788 | 0.71276  |
| 53233 | Q2Q067 | Q9UN79 | 0.93491  |
| 53234 | Q2Q067 | Q92529 | 0.23318  |
| 53235 | Q2Q067 | O94855 | 0.37983  |
| 53236 | Q2Q067 | Q9UL42 | 0.82285  |
| 53237 | Q2Q067 | O75152 | 0.17304  |
| 53238 | Q2Q067 | Q9BYQ9 | 0.34715  |
| 53239 | Q2Q067 | Q9HD36 | 0.44153  |
| 53240 | Q2Q067 | O95561 | 0.33241  |
| 53241 | Q2Q067 | Q96Q89 | 0.367    |
| 53242 | Q2Q067 | Q13233 | 0.50718  |
| 53243 | Q2Q067 | Q5SQS8 | 0.18589  |
| 53244 | Q2Q067 | O15265 | 1.0666   |
| 53245 | Q2Q067 | Q969U7 | 0.58946  |
| 53246 | Q2Q067 | Q9HD40 | 0.47685  |
| 53247 | Q2Q067 | O14602 | 0.33755  |
| 53248 | Q2Q067 | Q05BQ5 | 0.19432  |
| 53249 | Q2Q067 | O60783 | 0.27648  |
| 53250 | Q2Q067 | Q719H9 | 0.71882  |
| 53251 | Q2Q067 | P82094 | 1.3206   |
| 53252 | Q2Q067 | Q8WXD5 | 0.91066  |
| 53253 | Q2Q067 | Q08211 | 0.24611  |
| 53254 | Q2Q067 | P48382 | 0.95927  |
| 53255 | Q2Q067 | Q9H095 | 0.12544  |
| 53256 | Q2Q067 | O43679 | 0.20599  |
| 53257 | Q2Q067 | Q99733 | 0.73896  |
| 53258 | Q2Q067 | A6NDR6 | 0.25814  |
| 53259 | Q2Q067 | O00268 | 1.1435   |
| 53260 | Q2Q067 | Q00587 | 0.1208   |
| 53261 | Q2Q067 | Q9Y5U2 | 0.27963  |
| 53262 | Q2Q067 | P09874 | 0.65642  |
| 53263 | Q2Q067 | P51532 | 0.39878  |
| 53264 | Q2Q067 | Q9H6K5 | 0.29573  |
| 53265 | Q2Q067 | Q8NI51 | 0.57281  |
| 53266 | Q2Q067 | P62269 | 0.72891  |
| 53267 | Q2Q067 | A7MCY6 | 0.29324  |
| 53268 | Q2Q067 | A0JLT2 | 0.6262   |
| 53269 | Q2Q067 | P60228 | 0.9759   |
| 53270 | Q2Q067 | P42575 | 0.28737  |
| 53271 | Q2Q067 | Q6P2C8 | 0.93857  |
| 53272 | Q2Q067 | Q86V87 | 0.28054  |
| 53273 | Q2Q067 | Q13426 | 0.36253  |
| 53274 | Q2Q067 | P15622 | 0.12037  |
| 53275 | Q2Q067 | Q5JSZ5 | 0.45822  |
| 53276 | Q2Q067 | Q9BR76 | 0.25203  |

|       |        |        |           |
|-------|--------|--------|-----------|
| 53277 | Q2Q067 | Q8NA77 | 0.38647   |
| 53278 | Q2Q067 | Q5SZD1 | 0.030898  |
| 53279 | Q2Q067 | A4D0V7 | 0.46408   |
| 53280 | Q2Q067 | Q6RSH7 | 0.38366   |
| 53281 | Q2Q067 | P43357 | 0.28783   |
| 53282 | Q2Q067 | P78386 | 0.17395   |
| 53283 | Q2Q067 | P42025 | 0.29978   |
| 53284 | Q2Q067 | Q9H6D7 | 0.45285   |
| 53285 | Q2Q067 | P0DI81 | 1.0626    |
| 53286 | Q2Q067 | Q9C0F1 | 0.15787   |
| 53287 | Q2Q067 | O14656 | 0.1222    |
| 53288 | Q2Q067 | Q9H4L7 | 0.28997   |
| 53289 | Q2Q067 | P57077 | 0.81701   |
| 53290 | Q2Q067 | Q2T9L4 | 0.045843  |
| 53291 | Q2Q067 | Q9H6U6 | 0.77469   |
| 53292 | Q2Q067 | Q53GL7 | 0.42253   |
| 53293 | Q2Q067 | Q3SXR2 | 0.097006  |
| 53294 | Q2Q067 | Q96K62 | 0.12473   |
| 53295 | Q2Q067 | P08579 | 0.23294   |
| 53296 | Q2Q067 | Q9BUL8 | 0.64903   |
| 53297 | Q2Q067 | Q02410 | 0.4695    |
| 53298 | Q2Q067 | Q9HCU8 | 0.45491   |
| 53299 | Q2Q067 | Q7Z3K3 | 0.4342    |
| 53300 | Q2Q067 | Q5T200 | 0.49872   |
| 53301 | Q2Q067 | P62136 | 0.64024   |
| 53302 | Q2Q067 | Q9NP92 | 0.44968   |
| 53303 | Q2Q067 | Q53HC0 | 0.55049   |
| 53304 | Q2Q067 | Q96PU5 | 0.24726   |
| 53305 | Q2Q067 | Q3KP31 | 0.22136   |
| 53306 | Q2Q067 | Q5JVG8 | 0.21596   |
| 53307 | Q2Q067 | O75170 | 0.41832   |
| 53308 | Q2Q067 | O75419 | 0.85684   |
| 53309 | Q2Q067 | P0C7V6 | 0.41066   |
| 53310 | Q2Q067 | Q13616 | 0.63441   |
| 53311 | Q2Q067 | Q99618 | 0.50762   |
| 53312 | Q2Q067 | Q99550 | 0.29368   |
| 53313 | Q2Q067 | O43830 | 0.07691   |
| 53314 | Q2Q067 | P0C7T7 | 0.19215   |
| 53315 | Q2Q067 | Q2NL98 | 0.51994   |
| 53316 | Q2Q067 | P13807 | 0.38518   |
| 53317 | Q2Q067 | Q96MT8 | 0.99208   |
| 53318 | Q2Q067 | Q9UIL1 | 0.66124   |
| 53319 | Q2Q067 | Q99848 | 0.12439   |
| 53320 | Q2Q067 | P0DI82 | 0.27065   |
| 53321 | Q2Q067 | Q16254 | 1.0289    |
| 53322 | Q2Q067 | Q9Y6G3 | 0.1688    |
| 53323 | Q2Q067 | Q6ZSG2 | 0.14952   |
| 53324 | Q2Q067 | Q14525 | 0.16267   |
| 53325 | Q2Q067 | P62380 | 0.10365   |
| 53326 | Q2Q067 | P52597 | 0.45981   |
| 53327 | Q2Q067 | Q92530 | 0.66661   |
| 53328 | Q2Q067 | Q9H8W3 | 0.26101   |
| 53329 | Q2Q067 | Q68CJ9 | 0.7447    |
| 53330 | Q2Q067 | P08697 | 0.088986  |
| 53331 | Q2Q067 | Q0VDD5 | 0.19215   |
| 53332 | Q2Q067 | Q8NI29 | 0.19476   |
| 53333 | Q2Q067 | Q9UQN3 | 0.45283   |
| 53334 | Q2Q067 | O43918 | 0.98354   |
| 53335 | Q2Q067 | O15078 | 0.59182   |
| 53336 | Q2Q067 | P41212 | 0.80779   |
| 53337 | Q2Q067 | Q8TEB1 | 0.24229   |
| 53338 | Q2Q067 | P61236 | 0.15082   |
| 53339 | Q2Q067 | O75251 | 0.14207   |
| 53340 | Q2Q067 | Q9UKX7 | 1.0952    |
| 53341 | Q2Q067 | A8MVP8 | 0.0051645 |
| 53342 | Q2Q067 | Q9C0I3 | 0.44766   |
| 53343 | Q2Q067 | Q9HD47 | 0.12585   |
| 53344 | Q2Q067 | Q8TAY7 | 0.8034    |
| 53345 | Q2Q067 | Q6K0P9 | 0.19747   |
| 53346 | Q2Q067 | A5PLN9 | 0.20866   |
| 53347 | Q2Q067 | O94868 | 0.28783   |
| 53348 | Q2Q067 | Q96Q83 | 0.51771   |
| 53349 | Q2Q067 | P0CJ86 | 0.27517   |
| 53350 | Q2Q067 | Q9BYP8 | 0.19215   |
| 53351 | Q2Q067 | Q8IUI4 | 0.14271   |
| 53352 | Q2Q067 | Q9NVD7 | 0.25107   |

|       |        |        |          |
|-------|--------|--------|----------|
| 53353 | Q2Q067 | Q49A33 | 0.21234  |
| 53354 | Q2Q067 | P50613 | 0.16905  |
| 53355 | Q2Q067 | Q9UHV9 | 0.80141  |
| 53356 | Q2Q067 | P07814 | 0.17255  |
| 53357 | Q2Q067 | Q8IW19 | 0.34829  |
| 53358 | Q2Q067 | P15408 | 0.60615  |
| 53359 | Q2Q067 | O75306 | 0.17028  |
| 53360 | Q2Q067 | Q5T953 | 0.39148  |
| 53361 | Q2Q067 | O15198 | 0.4728   |
| 53362 | Q2Q067 | P48634 | 0.81743  |
| 53363 | Q2Q067 | A6NCL1 | 0.16771  |
| 53364 | Q2Q067 | Q8TF46 | 0.20595  |
| 53365 | Q2Q067 | Q15742 | 0.32419  |
| 53366 | Q2Q067 | Q5VWM5 | 0.3955   |
| 53367 | Q2Q067 | Q6P161 | 0.050442 |
| 53368 | Q2Q067 | O14746 | 0.50018  |
| 53369 | Q2Q067 | Q8NEP4 | 0.29573  |
| 53370 | Q2Q067 | Q8TAD1 | 0.1321   |
| 53371 | Q2Q067 | P23246 | 0.74507  |
| 53372 | Q2Q067 | Q6IS14 | 0.22578  |
| 53373 | Q2Q067 | Q12873 | 0.52831  |
| 53374 | Q2Q067 | Q9NVC6 | 0.55772  |
| 53375 | Q2Q067 | P86452 | 0.44885  |
| 53376 | Q2Q067 | Q9NX46 | 0.28347  |
| 53377 | Q2Q067 | Q9UNX4 | 0.25362  |
| 53378 | Q2Q067 | Q8TAIL | 0.17874  |
| 53379 | Q2Q067 | P14678 | 0.84317  |
| 53380 | Q2Q067 | Q96CV9 | 0.4484   |
| 53381 | Q2Q067 | Q9UN37 | 0.4286   |
| 53382 | Q2Q067 | Q9Y5S9 | 0.78715  |
| 53383 | Q2Q067 | Q9UHY8 | 0.21701  |
| 53384 | Q2Q067 | Q8IWJ2 | 0.65581  |
| 53385 | Q2Q067 | Q6DCA0 | 0.048023 |
| 53386 | Q2Q067 | Q9UHT4 | 0.19215  |
| 53387 | Q2Q067 | Q86YA3 | 0.46888  |
| 53388 | Q2Q067 | P59990 | 0.34715  |
| 53389 | Q2Q067 | P25208 | 0.67783  |
| 53390 | Q2Q067 | Q14677 | 0.45812  |
| 53391 | Q2Q067 | Q969P5 | 0.083655 |
| 53392 | Q2Q067 | P49354 | 0.28904  |
| 53393 | Q2Q067 | O95810 | 0.1401   |
| 53394 | Q2Q067 | Q9BW85 | 0.52606  |
| 53395 | Q2Q067 | Q8WVJ9 | 0.61729  |
| 53396 | Q2Q067 | Q7L8S5 | 0.15009  |
| 53397 | Q2Q067 | Q15327 | 0.45975  |
| 53398 | Q2Q067 | Q96H20 | 0.97764  |
| 53399 | Q2Q067 | P62424 | 1.1042   |
| 53400 | Q2Q067 | P48668 | 0.24811  |
| 53401 | Q2Q067 | Q9ULU4 | 0.49831  |
| 53402 | Q2Q067 | Q92830 | 0.76579  |
| 53403 | Q2Q067 | Q4G0N7 | 0.26286  |
| 53404 | Q2Q067 | Q8TC05 | 0.38025  |
| 53405 | Q2Q067 | P04406 | 0.43996  |
| 53406 | Q2Q067 | A6NME0 | 0.086493 |
| 53407 | Q2Q067 | O15164 | 0.2597   |
| 53408 | Q2Q067 | Q9GZX7 | 0.22546  |
| 53409 | Q2Q067 | Q00005 | 0.39272  |
| 53410 | Q2Q067 | Q9BQ95 | 1.0645   |
| 53411 | Q2Q067 | Q3SY52 | 0.097807 |
| 53412 | Q2Q067 | Q96EU6 | 0.20221  |
| 53413 | Q2Q067 | Q9Y2T2 | 0.48849  |
| 53414 | Q2Q067 | P0C7H8 | 0.028225 |
| 53415 | Q2Q067 | P49366 | 0.38667  |
| 53416 | Q2Q067 | Q9UGK8 | 0.63032  |
| 53417 | Q2Q067 | P78560 | 0.53874  |
| 53418 | Q2Q067 | Q9H467 | 0.99517  |
| 53419 | Q2Q067 | P61088 | 0.72685  |
| 53420 | Q2Q067 | P57055 | 0.35678  |
| 53421 | Q2Q067 | Q13506 | 0.39213  |
| 53422 | Q2Q067 | P35226 | 0.56358  |
| 53423 | Q2Q067 | Q9H0R1 | 0.10509  |
| 53424 | Q2Q067 | Q68D10 | 0.29573  |
| 53425 | Q2Q067 | Q8N1X5 | 0.19215  |
| 53426 | Q2Q067 | B4DX44 | 0.24123  |
| 53427 | Q2Q067 | Q15329 | 1.2808   |
| 53428 | Q2Q067 | Q9Y4W2 | 0.4697   |

|       |        |        |           |
|-------|--------|--------|-----------|
| 53429 | Q2Q067 | Q8N8E1 | 0.141     |
| 53430 | Q2Q067 | P35869 | 0.38948   |
| 53431 | Q2Q067 | Q9H160 | 0.41814   |
| 53432 | Q2Q067 | Q5VVC0 | 0.14578   |
| 53433 | Q2Q067 | Q8TD16 | 0.18846   |
| 53434 | Q2Q067 | Q9H7P6 | 0.45961   |
| 53435 | Q2Q067 | Q9HB75 | 0.59831   |
| 53436 | Q2Q067 | Q8NI08 | 0.79678   |
| 53437 | Q2Q067 | Q5SNX5 | 0.19215   |
| 53438 | Q2Q067 | P25786 | 0.59507   |
| 53439 | Q2Q067 | Q7Z4U5 | 0.50891   |
| 53440 | Q2Q067 | Q9NTI5 | 0.81387   |
| 53441 | Q2Q067 | Q9UFF9 | 0.54407   |
| 53442 | Q2Q067 | Q6L8G4 | 0.19215   |
| 53443 | Q2Q067 | Q01081 | 0.50209   |
| 53444 | Q2Q067 | P62917 | 0.79151   |
| 53445 | Q2Q067 | Q99615 | 0.76055   |
| 53446 | Q2Q067 | Q4G0G2 | 0.062331  |
| 53447 | Q2Q067 | Q96BK5 | 0.49728   |
| 53448 | Q2Q067 | Q8N3X1 | 0.15082   |
| 53449 | Q2Q067 | Q96M63 | 0.02824   |
| 53450 | Q2Q067 | O75530 | 0.60426   |
| 53451 | Q2Q067 | Q7L2K0 | 0.025513  |
| 53452 | Q2Q067 | Q9Y2J4 | 0.28511   |
| 53453 | Q2Q067 | O75533 | 0.27774   |
| 53454 | Q2Q067 | Q5TCQ9 | 0.51783   |
| 53455 | Q2Q067 | Q5VU43 | 0.91543   |
| 53456 | Q2Q067 | Q8N988 | 0.24518   |
| 53457 | Q2Q067 | P57772 | 0.29999   |
| 53458 | Q2Q067 | P59923 | 0.16182   |
| 53459 | Q2Q067 | Q9Y6B2 | 0.92479   |
| 53460 | Q2Q067 | Q8TC84 | 0.32989   |
| 53461 | Q2Q067 | Q9BQY4 | 0.91181   |
| 53462 | Q2Q067 | Q8N8R7 | 0.47001   |
| 53463 | Q2Q067 | Q16543 | 0.39807   |
| 53464 | Q2Q067 | Q96QR8 | 0.25392   |
| 53465 | Q2Q067 | Q13439 | 0.62465   |
| 53466 | Q2Q067 | Q9NVR5 | 0.37008   |
| 53467 | Q2Q067 | Q14865 | 0.29149   |
| 53468 | Q2Q067 | Q96CT7 | 0.048796  |
| 53469 | Q2Q067 | Q13094 | 0.58586   |
| 53470 | Q2Q067 | O95397 | 0.50547   |
| 53471 | Q2Q067 | Q9GZN2 | 0.41768   |
| 53472 | Q2Q067 | P0CJ85 | 0.27517   |
| 53473 | Q2Q067 | Q96RS0 | 0.59831   |
| 53474 | Q2Q067 | Q8TEQ6 | 0.79711   |
| 53475 | Q2Q067 | Q9NRG9 | 0.88098   |
| 53476 | Q2Q067 | Q08379 | 0.24553   |
| 53477 | Q2Q067 | Q9NRI7 | 0.19215   |
| 53478 | Q2Q067 | Q9BV86 | 0.27257   |
| 53479 | Q2Q067 | Q13045 | 1.0426    |
| 53480 | Q2Q067 | Q9Y4L5 | 0.34282   |
| 53481 | Q2Q067 | Q9UMS6 | 0.59922   |
| 53482 | Q2Q067 | P62829 | 0.96199   |
| 53483 | Q2Q067 | Q9NZZ3 | 0.97999   |
| 53484 | Q2Q067 | Q5VWN6 | 0.029137  |
| 53485 | Q2Q067 | Q9Y592 | 0.39615   |
| 53486 | Q2Q067 | Q9Y6H1 | 0.46303   |
| 53487 | Q2Q067 | Q92733 | 0.7732    |
| 53488 | Q2Q067 | Q8N2C9 | 0.0074981 |
| 53489 | Q2Q067 | Q9Y605 | 0.85968   |
| 53490 | Q2Q067 | Q8TE02 | 1.1888    |
| 53491 | Q2Q067 | Q9BRX2 | 0.29713   |
| 53492 | Q2Q067 | Q969J2 | 0.08952   |
| 53493 | Q2Q067 | Q9P2M1 | 0.47001   |
| 53494 | Q2Q067 | Q16514 | 0.88551   |
| 53495 | Q2Q067 | Q5VUA4 | 0.38433   |
| 53496 | Q2Q067 | Q658Y4 | 0.23348   |
| 53497 | Q2Q067 | Q8N616 | 0.19215   |
| 53498 | Q2Q067 | Q49A88 | 0.21748   |
| 53499 | Q2Q067 | Q6UB98 | 0.32989   |
| 53500 | Q2Q067 | A2RUB6 | 0.062424  |
| 53501 | Q2Q067 | Q9NYT6 | 0.087195  |
| 53502 | Q2Q067 | Q9BVJ6 | 0.76251   |
| 53503 | Q2Q067 | Q8NA31 | 0.32608   |
| 53504 | Q2Q067 | Q8NHW3 | 0.30206   |

|       |        |        |          |
|-------|--------|--------|----------|
| 53505 | Q2Q067 | P78396 | 0.88691  |
| 53506 | Q2Q067 | Q96FX7 | 0.14337  |
| 53507 | Q2Q067 | Q3SY84 | 0.15455  |
| 53508 | Q2Q067 | Q13951 | 0.69524  |
| 53509 | Q2Q067 | O00567 | 0.80842  |
| 53510 | Q2Q067 | P20962 | 0.26036  |
| 53511 | Q2Q067 | Q15185 | 0.49607  |
| 53512 | Q2Q067 | P0DM63 | 0.2076   |
| 53513 | Q2Q067 | Q494X3 | 0.2352   |
| 53514 | Q2Q067 | O15116 | 0.85257  |
| 53515 | Q2Q067 | Q96GM5 | 0.73649  |
| 53516 | Q2Q067 | Q6NSI3 | 0.46166  |
| 53517 | Q2Q067 | Q9Y4E1 | 0.23137  |
| 53518 | Q2Q067 | A6NM28 | 0.087389 |
| 53519 | Q2Q067 | Q86TC9 | 0.36967  |
| 53520 | Q2Q067 | P82970 | 0.65236  |
| 53521 | Q2Q067 | Q9Y2L8 | 0.2806   |
| 53522 | Q2Q067 | Q9NR77 | 0.17731  |
| 53523 | Q2Q067 | Q8IYB9 | 0.17393  |
| 53524 | Q2Q067 | Q14157 | 0.27733  |
| 53525 | Q2Q067 | P46100 | 0.53938  |
| 53526 | Q2Q067 | Q9BSQ5 | 0.21053  |
| 53527 | Q2Q067 | Q9NRY2 | 0.74516  |
| 53528 | Q2Q067 | Q6ZVQ6 | 0.64833  |
| 53529 | Q2Q067 | Q9BY27 | 0.1902   |
| 53530 | Q2Q067 | P0DMC3 | 0.19215  |
| 53531 | Q2Q067 | Q16621 | 0.5124   |
| 53532 | Q2Q067 | P56211 | 0.1133   |
| 53533 | Q2Q067 | Q9H410 | 0.86114  |
| 53534 | Q2Q067 | P46783 | 1.3783   |
| 53535 | Q2Q067 | Q92993 | 0.97777  |
| 53536 | Q2Q067 | P25815 | 0.50011  |
| 53537 | Q2Q067 | Q9UGL9 | 0.19215  |
| 53538 | Q2Q067 | Q8IYD1 | 0.25773  |
| 53539 | Q2Q067 | Q8IX07 | 0.30822  |
| 53540 | Q2Q067 | Q96DG6 | 0.020614 |
| 53541 | Q2Q067 | Q9BRS8 | 0.15525  |
| 53542 | Q2Q067 | O76021 | 0.18936  |
| 53543 | Q2Q067 | O60291 | 0.41047  |
| 53544 | Q2Q067 | Q5TB80 | 0.77652  |
| 53545 | Q2Q067 | O60907 | 0.78214  |
| 53546 | Q2Q067 | Q53G59 | 0.47555  |
| 53547 | Q2Q067 | Q6UWZ7 | 0.4372   |
| 53548 | Q2Q067 | O00198 | 0.3284   |
| 53549 | Q2Q067 | Q9P2I0 | 0.8431   |
| 53550 | Q2Q067 | Q1W6H9 | 0.57734  |
| 53551 | Q2Q067 | Q5RGN0 | 0.3158   |
| 53552 | Q2Q067 | P99999 | 0.71729  |
| 53553 | Q2Q067 | Q5SYE7 | 0.25742  |
| 53554 | Q2Q067 | Q6ZVF9 | 0.29429  |
| 53555 | Q2Q067 | Q6IA86 | 0.56015  |
| 53556 | Q2Q067 | Q8WWM1 | 0.29682  |
| 53557 | Q2Q067 | Q8TB05 | 0.29573  |
| 53558 | Q2Q067 | P10599 | 0.37112  |
| 53559 | Q2Q067 | Q8TCY9 | 0.18241  |
| 53560 | Q2Q067 | Q32M78 | 0.20406  |
| 53561 | Q2Q067 | Q15527 | 0.47257  |
| 53562 | Q2Q067 | Q9H9Z2 | 0.72373  |
| 53563 | Q2Q067 | O60225 | 0.12144  |
| 53564 | Q2Q067 | Q96EF9 | 0.13335  |
| 53565 | Q2Q067 | Q8NFB3 | 0.96831  |
| 53566 | Q2Q067 | Q9BVC6 | 0.25552  |
| 53567 | Q2Q067 | O00505 | 1.0699   |
| 53568 | Q2Q067 | O60299 | 0.22169  |
| 53569 | Q2Q067 | Q9BXS5 | 0.78023  |
| 53570 | Q2Q067 | Q15599 | 0.39808  |
| 53571 | Q2Q067 | P14651 | 0.82501  |
| 53572 | Q2Q067 | Q9UIA9 | 0.40708  |
| 53573 | Q2Q067 | Q9BUH6 | 0.21267  |
| 53574 | Q2Q067 | A6NK89 | 0.33428  |
| 53575 | Q2Q067 | Q8TEA8 | 0.49464  |
| 53576 | Q2Q067 | Q9P278 | 0.6859   |
| 53577 | Q2Q067 | Q9Y3C8 | 0.25661  |
| 53578 | Q2Q067 | Q8NAE3 | 0.14783  |
| 53579 | Q2Q067 | Q96EN9 | 0.28783  |
| 53580 | Q2Q067 | Q7Z465 | 0.70091  |

|       |        |        |          |
|-------|--------|--------|----------|
| 53581 | Q2Q067 | Q9H0B6 | 0.59695  |
| 53582 | Q2Q067 | P50749 | 0.68057  |
| 53583 | Q2Q067 | P53805 | 0.62064  |
| 53584 | Q2Q067 | Q701N2 | 0.19215  |
| 53585 | Q2Q067 | P53041 | 0.57333  |
| 53586 | Q2Q067 | Q03468 | 0.35123  |
| 53587 | Q2Q067 | Q6UUU7 | 0.95107  |
| 53588 | Q2Q067 | O75030 | 0.59186  |
| 53589 | Q2Q067 | O94850 | 0.13591  |
| 53590 | Q2Q067 | Q99996 | 0.47016  |
| 53591 | Q2Q067 | Q9H7U1 | 0.5887   |
| 53592 | Q2Q067 | P0CW24 | 0.063253 |
| 53593 | Q2Q067 | P61574 | 0.36503  |
| 53594 | Q2Q067 | O14771 | 0.34111  |
| 53595 | Q2Q067 | Q16890 | 0.39259  |
| 53596 | Q2Q067 | P57678 | 0.93385  |
| 53597 | Q2Q067 | O75920 | 0.59206  |
| 53598 | Q2Q067 | Q9UPW6 | 0.75656  |
| 53599 | Q2Q067 | Q9NQZ8 | 0.097501 |
| 53600 | Q2Q067 | P0CH99 | 0.33562  |
| 53601 | Q2Q067 | P25685 | 0.30525  |
| 53602 | Q2Q067 | Q5SWL7 | 0.33217  |
| 53603 | Q2Q067 | Q9BYD3 | 0.42449  |
| 53604 | Q2Q067 | Q6ZWC4 | 0.013407 |
| 53605 | Q2Q067 | P61244 | 0.92522  |
| 53606 | Q2Q067 | Q96JE7 | 0.46306  |
| 53607 | Q2Q067 | Q8WUW1 | 0.10774  |
| 53608 | Q2Q067 | Q8NHZ8 | 1.2126   |
| 53609 | Q2Q067 | Q8NFD5 | 0.8695   |
| 53610 | Q2Q067 | Q8WUI4 | 0.34989  |
| 53611 | Q2Q067 | Q9BUN5 | 0.39517  |
| 53612 | Q2Q067 | Q9P0J0 | 0.43792  |
| 53613 | Q2Q067 | Q8N823 | 0.16182  |
| 53614 | Q2Q067 | P17041 | 0.085739 |
| 53615 | Q2Q067 | P13984 | 0.54364  |
| 53616 | Q2Q067 | O60516 | 0.22678  |
| 53617 | Q2Q067 | Q9NZJ4 | 0.053608 |
| 53618 | Q2Q067 | Q6P9B9 | 0.14385  |
| 53619 | Q2Q067 | Q8N9K5 | 0.12582  |
| 53620 | Q2Q067 | P62495 | 0.6309   |
| 53621 | Q2Q067 | Q4VC05 | 0.24573  |
| 53622 | Q2Q067 | Q8WVP5 | 0.46852  |
| 53623 | Q2Q067 | P55055 | 0.27905  |
| 53624 | Q2Q067 | A8MUQ0 | 0.54439  |
| 53625 | Q2Q067 | Q9UIH9 | 0.33767  |
| 53626 | Q2Q067 | Q13243 | 0.73564  |
| 53627 | Q2Q067 | Q8IY85 | 0.24057  |
| 53628 | Q2Q067 | Q9UK41 | 0.70008  |
| 53629 | Q2Q067 | Q9ULW0 | 0.75066  |
| 53630 | Q2Q067 | P09661 | 0.6216   |
| 53631 | Q2Q067 | P38936 | 0.24536  |
| 53632 | Q2Q067 | H0Y7S4 | 0.0356   |
| 53633 | Q2Q067 | Q9BSG1 | 0.1979   |
| 53634 | Q2Q067 | Q13618 | 0.4084   |
| 53635 | Q2Q067 | P40925 | 0.50653  |
| 53636 | Q2Q067 | Q9NWQ4 | 0.25028  |
| 53637 | Q2Q067 | P0CJ79 | 0.13064  |
| 53638 | Q2Q067 | Q3MJ62 | 0.064855 |
| 53639 | Q2Q067 | Q969S3 | 0.69024  |
| 53640 | Q2Q067 | Q66K80 | 0.19215  |
| 53641 | Q2Q067 | P12956 | 0.28914  |
| 53642 | Q2Q067 | Q15796 | 0.6625   |
| 53643 | Q2Q067 | Q8N7M2 | 0.2352   |
| 53644 | Q2Q067 | Q9BT49 | 0.37438  |
| 53645 | Q2Q067 | O60765 | 0.1235   |
| 53646 | Q2Q067 | Q8NB50 | 0.17365  |
| 53647 | Q2Q067 | O95232 | 0.47333  |
| 53648 | Q2Q067 | O75475 | 1.437    |
| 53649 | Q2Q067 | P20248 | 1.0139   |
| 53650 | Q2Q067 | Q8N0V3 | 0.38294  |
| 53651 | Q2Q067 | Q9P2G4 | 0.29573  |
| 53652 | Q2Q067 | Q6ZUF6 | 0.039038 |
| 53653 | Q2Q067 | Q6ZV65 | 0.1916   |
| 53654 | Q2Q067 | Q9BYR8 | 0.46381  |
| 53655 | Q2Q067 | Q8IWZ3 | 0.95545  |
| 53656 | Q2Q067 | P21912 | 0.23634  |

|       |        |        |           |
|-------|--------|--------|-----------|
| 53657 | Q2Q067 | P36578 | 1.1205    |
| 53658 | Q2Q067 | Q5JQS6 | 0.14012   |
| 53659 | Q2Q067 | Q8IYB0 | 0.19215   |
| 53660 | Q2Q067 | O43790 | 0.24811   |
| 53661 | Q2Q067 | Q9H0W9 | 0.59309   |
| 53662 | Q2Q067 | Q12980 | 0.30116   |
| 53663 | Q2Q067 | Q9NVU0 | 0.29186   |
| 53664 | Q2Q067 | Q9NZU7 | 0.33072   |
| 53665 | Q2Q067 | Q14739 | 0.24525   |
| 53666 | Q2Q067 | Q6PGP7 | 0.71583   |
| 53667 | Q2Q067 | Q15369 | 1.4885    |
| 53668 | Q2Q067 | Q3ZCT1 | 0.11131   |
| 53669 | Q2Q067 | P50570 | 0.2484    |
| 53670 | Q2Q067 | Q02241 | 0.60864   |
| 53671 | Q2Q067 | P0CG43 | 0.19215   |
| 53672 | Q2Q067 | Q02080 | 0.44277   |
| 53673 | Q2Q067 | O60303 | 0.089781  |
| 53674 | Q2Q067 | Q8N9N2 | 0.29007   |
| 53675 | Q2Q067 | Q8N344 | 0.56295   |
| 53676 | Q2Q067 | Q5SNV9 | 0.14361   |
| 53677 | Q2Q067 | Q68E01 | 0.51307   |
| 53678 | Q2Q067 | O60216 | 0.73233   |
| 53679 | Q2Q067 | Q96DM1 | 0.40861   |
| 53680 | Q2Q067 | Q9UKV8 | 0.82272   |
| 53681 | Q2Q067 | Q9P2R7 | 0.12719   |
| 53682 | Q2Q067 | P60412 | 0.34715   |
| 53683 | Q2Q067 | P39748 | 0.25775   |
| 53684 | Q2Q067 | Q8N1Q8 | 0.2254    |
| 53685 | Q2Q067 | Q86VQ0 | 0.22681   |
| 53686 | Q2Q067 | O75665 | 0.68434   |
| 53687 | Q2Q067 | Q5VTE6 | 0.005233  |
| 53688 | Q2Q067 | Q9NSI6 | 0.77944   |
| 53689 | Q2Q067 | Q9C0C2 | 0.12993   |
| 53690 | Q2Q067 | Q9NRL2 | 0.97584   |
| 53691 | Q2Q067 | O00321 | 0.36394   |
| 53692 | Q2Q067 | P62857 | 0.53096   |
| 53693 | Q2Q067 | Q7Z7C8 | 0.39993   |
| 53694 | Q2Q067 | Q9Y2P8 | 0.25341   |
| 53695 | Q2Q067 | P69905 | 0.23079   |
| 53696 | Q2Q067 | Q15366 | 0.97393   |
| 53697 | Q2Q067 | Q96KS0 | 0.15817   |
| 53698 | Q2Q067 | O96020 | 0.97371   |
| 53699 | Q2Q067 | O75164 | 1.0338    |
| 53700 | Q2Q067 | Q8WVV9 | 0.084811  |
| 53701 | Q2Q067 | Q16401 | 0.44118   |
| 53702 | Q2Q067 | Q2M329 | 0.20623   |
| 53703 | Q2Q067 | Q96BY2 | 0.44081   |
| 53704 | Q2Q067 | O00139 | 0.30244   |
| 53705 | Q2Q067 | Q5HYK9 | 0.14282   |
| 53706 | Q2Q067 | Q96BP2 | 1.1637    |
| 53707 | Q2Q067 | Q6WBX8 | 0.40347   |
| 53708 | Q2Q067 | Q96S19 | 0.044202  |
| 53709 | Q2Q067 | O96007 | 0.35731   |
| 53710 | Q2Q067 | A8MWP6 | 0.19215   |
| 53711 | Q2Q067 | Q9NRA8 | 1.0807    |
| 53712 | Q2Q067 | Q9UBU8 | 0.72779   |
| 53713 | Q2Q067 | P12883 | 0.029906  |
| 53714 | Q2Q067 | P62875 | 0.15766   |
| 53715 | Q2Q067 | Q8NHU0 | 0.070895  |
| 53716 | Q2Q067 | Q9HAV4 | 1.1922    |
| 53717 | Q2Q067 | P16333 | 0.6178    |
| 53718 | Q2Q067 | P78337 | 0.43456   |
| 53719 | Q2Q067 | Q8N0W5 | 0.0050811 |
| 53720 | Q2Q067 | Q96C34 | 0.34894   |
| 53721 | Q2Q067 | Q02556 | 0.45623   |
| 53722 | Q2Q067 | Q96AQ1 | 0.32771   |
| 53723 | Q2Q067 | Q5TAB7 | 0.39269   |
| 53724 | Q2Q067 | Q9NTX9 | 0.033089  |
| 53725 | Q2Q067 | Q0VFX4 | 0.18567   |
| 53726 | Q2Q067 | Q9H4H8 | 0.30155   |
| 53727 | Q2Q067 | Q99496 | 0.41054   |
| 53728 | Q2Q067 | Q3L8U1 | 0.79413   |
| 53729 | Q2Q067 | P12524 | 0.28643   |
| 53730 | Q2Q067 | A4QMS7 | 0.12785   |
| 53731 | Q2Q067 | Q9BZS9 | 0.19215   |
| 53732 | Q2Q067 | Q53EZ4 | 0.61171   |



|       |        |        |            |
|-------|--------|--------|------------|
| 53733 | Q2Q067 | Q96IR3 | 0.36085    |
| 53734 | Q2Q067 | Q96QF7 | 0.090284   |
| 53735 | Q2Q067 | P23760 | 0.88981    |
| 53736 | Q2Q067 | O00472 | 0.53722    |
| 53737 | Q2Q067 | Q5PR19 | 0.14285    |
| 53738 | Q2Q067 | P09914 | 0.40286    |
| 53739 | Q2Q067 | P13489 | 0.40547    |
| 53740 | Q2Q067 | Q04725 | 0.84299    |
| 53741 | Q2Q067 | Q53G26 | 0.62959    |
| 53742 | Q2Q067 | Q5VTR2 | 0.65587    |
| 53743 | Q2Q067 | O95218 | 0.54912    |
| 53744 | Q2Q067 | P15259 | 0.4389     |
| 53745 | Q2Q067 | Q494R0 | 0.19215    |
| 53746 | Q2Q067 | Q96NB1 | 0.071453   |
| 53747 | Q2Q067 | Q8N9Z0 | 0.20884    |
| 53748 | Q2Q067 | P80294 | 0.68253    |
| 53749 | Q2Q067 | Q96S94 | 0.32541    |
| 53750 | Q2Q067 | Q99543 | 0.53207    |
| 53751 | Q2Q067 | Q9HBH7 | 0.27598    |
| 53752 | Q2Q067 | O14593 | 0.71517    |
| 53753 | Q2Q067 | A6NH13 | 0.077732   |
| 53754 | Q2Q067 | Q96AT1 | 0.29573    |
| 53755 | Q2Q067 | O75312 | 0.20523    |
| 53756 | Q2Q067 | Q9NRY5 | 0.5901     |
| 53757 | Q2Q067 | O60308 | 0.20737    |
| 53758 | Q2Q067 | Q92785 | 0.54201    |
| 53759 | Q2Q067 | Q7L5D6 | 0.54305    |
| 53760 | Q2Q067 | O14770 | 0.50626    |
| 53761 | Q2Q067 | Q96NL0 | 0.093297   |
| 53762 | Q2Q067 | Q6ZS72 | 0.035036   |
| 53763 | Q2Q067 | Q96JN0 | 0.54127    |
| 53764 | Q2Q067 | P24928 | 0.79577    |
| 53765 | Q2Q067 | Q9BUK0 | 0.47723    |
| 53766 | Q2Q067 | Q2VY69 | 0.13644    |
| 53767 | Q2Q067 | P50453 | 0.67963    |
| 53768 | Q2Q067 | Q969H6 | 0.86242    |
| 53769 | Q2Q067 | Q7Z4T9 | 0.6529     |
| 53770 | Q2Q067 | Q8IYX3 | 0.49265    |
| 53771 | Q2Q067 | Q9Y6J9 | 0.84579    |
| 53772 | Q2Q067 | Q6ZN84 | 0.00073997 |
| 53773 | Q2Q067 | Q99607 | 1.146      |
| 53774 | Q2Q067 | Q8N8E3 | 0.13549    |
| 53775 | Q2Q067 | A1L190 | 0.45857    |
| 53776 | Q2Q067 | P19338 | 0.523      |
| 53777 | Q2Q067 | Q9NX63 | 0.76994    |
| 53778 | Q2Q067 | Q9UJ98 | 0.19368    |
| 53779 | Q2Q067 | Q7Z591 | 0.6833     |
| 53780 | Q2Q067 | P37198 | 0.94595    |
| 53781 | Q2Q067 | Q96FA3 | 0.27313    |
| 53782 | Q2Q067 | Q9H6W3 | 0.22721    |
| 53783 | Q2Q067 | P19419 | 1.4007     |
| 53784 | Q2Q067 | O76009 | 0.1595     |
| 53785 | Q2Q067 | Q86VE0 | 0.75201    |
| 53786 | Q2Q067 | A6NF01 | 0.53604    |
| 53787 | Q2Q067 | Q96T23 | 0.64822    |
| 53788 | Q2Q067 | Q7Z2X4 | 0.21413    |
| 53789 | Q2Q067 | A6NCN8 | 0.29573    |
| 53790 | Q2Q067 | Q13363 | 0.41999    |
| 53791 | Q2Q067 | Q9H0A9 | 0.65658    |
| 53792 | Q2Q067 | Q8WTV1 | 0.51793    |
| 53793 | Q2Q067 | Q9H0A8 | 0.47001    |
| 53794 | Q2Q067 | P49639 | 0.27943    |
| 53795 | Q2Q067 | A1A5D9 | 0.37499    |
| 53796 | Q2Q067 | P61956 | 0.66633    |
| 53797 | Q2Q067 | O95456 | 0.43156    |
| 53798 | Q2Q067 | Q8WTW4 | 0.27195    |
| 53799 | Q2Q067 | O43809 | 0.7152     |
| 53800 | Q2Q067 | Q08AG7 | 0.62715    |
| 53801 | Q2Q067 | P62879 | 0.45831    |
| 53802 | Q2Q067 | Q8N7U7 | 0.27961    |
| 53803 | Q2Q067 | O94986 | 1.1801     |
| 53804 | Q2Q067 | Q86X95 | 1.0119     |
| 53805 | Q2Q067 | Q4KMZ1 | 0.19545    |
| 53806 | Q2Q067 | Q9UQF2 | 0.49242    |
| 53807 | Q2Q067 | Q8NE22 | 0.51037    |
| 53808 | Q2Q067 | P51523 | 0.11099    |

|       |        |        |           |
|-------|--------|--------|-----------|
| 53809 | Q2Q067 | H3BNL8 | 0.62577   |
| 53810 | Q2Q067 | Q5VWP3 | 0.45084   |
| 53811 | Q2Q067 | Q9UKV3 | 0.60252   |
| 53812 | Q2Q067 | Q13503 | 0.65819   |
| 53813 | Q2Q067 | O75122 | 0.23468   |
| 53814 | Q2Q067 | Q9H4A6 | 0.35272   |
| 53815 | Q2Q067 | Q9BYD2 | 0.40045   |
| 53816 | Q2Q067 | Q6P444 | 0.24596   |
| 53817 | Q2Q067 | Q96HA7 | 0.72884   |
| 53818 | Q2Q067 | Q86WG3 | 0.27301   |
| 53819 | Q2Q067 | Q86YW9 | 0.35753   |
| 53820 | Q2Q067 | Q15014 | 1.1838    |
| 53821 | Q2Q067 | Q9UQK1 | 0.31962   |
| 53822 | Q2Q067 | Q96PI1 | 0.35595   |
| 53823 | Q2Q067 | O95777 | 0.60859   |
| 53824 | Q2Q067 | C9JC47 | 0.19215   |
| 53825 | Q2Q067 | Q9H7L9 | 0.60114   |
| 53826 | Q2Q067 | Q8NFJ8 | 0.39592   |
| 53827 | Q2Q067 | Q7Z5V6 | 0.33218   |
| 53828 | Q2Q067 | O00232 | 0.22677   |
| 53829 | Q2Q067 | Q15029 | 0.24706   |
| 53830 | Q2Q067 | O94874 | 0.78286   |
| 53831 | Q2Q067 | Q9H963 | 0.18125   |
| 53832 | Q2Q067 | Q9Y3F1 | 0.19215   |
| 53833 | Q2Q067 | Q58F21 | 0.25544   |
| 53834 | Q2Q067 | A6NCI8 | 0.43502   |
| 53835 | Q2Q067 | Q92499 | 0.3782    |
| 53836 | Q2Q067 | Q8NI27 | 0.48653   |
| 53837 | Q2Q067 | P0C841 | 0.19215   |
| 53838 | Q2Q067 | P78316 | 0.62208   |
| 53839 | Q2Q067 | O15370 | 0.41049   |
| 53840 | Q2Q067 | P12036 | 0.38138   |
| 53841 | Q2Q067 | Q99687 | 0.51701   |
| 53842 | Q2Q067 | Q9UKT7 | 0.37815   |
| 53843 | Q2Q067 | Q969R5 | 0.12247   |
| 53844 | Q2Q067 | Q8TAC9 | 0.21229   |
| 53845 | Q2Q067 | Q8N4B4 | 0.0048627 |
| 53846 | Q2Q067 | Q9NYW8 | 0.073244  |
| 53847 | Q2Q067 | Q96NS1 | 0.15082   |
| 53848 | Q2Q067 | Q9Y3D5 | 0.317     |
| 53849 | Q2Q067 | O76064 | 0.25902   |
| 53850 | Q2Q067 | P41162 | 0.32805   |
| 53851 | Q2Q067 | Q9NX70 | 1.0414    |
| 53852 | Q2Q067 | Q5TZA2 | 0.60841   |
| 53853 | Q2Q067 | Q0VDD7 | 0.80408   |
| 53854 | Q2Q067 | Q8WY41 | 0.37563   |
| 53855 | Q2Q067 | Q13309 | 0.5599    |
| 53856 | Q2Q067 | Q9C073 | 0.39992   |
| 53857 | Q2Q067 | Q92621 | 1.1037    |
| 53858 | Q2Q067 | Q86TG7 | 0.47799   |
| 53859 | Q2Q067 | O95476 | 0.20316   |
| 53860 | Q2Q067 | Q15819 | 0.57992   |
| 53861 | Q2Q067 | P54920 | 0.41764   |
| 53862 | Q2Q067 | Q5BKZ1 | 0.44438   |
| 53863 | Q2Q067 | A2RTY3 | 0.090801  |
| 53864 | Q2Q067 | Q9UJC5 | 0.2992    |
| 53865 | Q2Q067 | A8MX80 | 0.36346   |
| 53866 | Q2Q067 | Q3B726 | 0.14307   |
| 53867 | Q2Q067 | Q9BYN7 | 0.11099   |
| 53868 | Q2Q067 | Q96E09 | 0.41087   |
| 53869 | Q2Q067 | Q9UN36 | 0.48375   |
| 53870 | Q2Q067 | P62072 | 0.21425   |
| 53871 | Q2Q067 | Q9NP98 | 0.29468   |
| 53872 | Q2Q067 | Q9BYZ2 | 0.28317   |
| 53873 | Q2Q067 | Q9UK99 | 0.33387   |
| 53874 | Q2Q067 | Q96GE5 | 0.22136   |
| 53875 | Q2Q067 | Q15257 | 0.45136   |
| 53876 | Q2Q067 | Q9NWF9 | 0.76376   |
| 53877 | Q2Q067 | Q9NQ33 | 0.49715   |
| 53878 | Q2Q067 | Q86UP8 | 0.020629  |
| 53879 | Q2Q067 | P62847 | 0.52089   |
| 53880 | Q2Q067 | Q13216 | 0.41003   |
| 53881 | Q2Q067 | P09016 | 0.20026   |
| 53882 | Q2Q067 | Q07866 | 0.57641   |
| 53883 | Q2Q067 | Q9Y6Z5 | 0.4296    |
| 53884 | Q2Q067 | Q96IV0 | 0.41955   |

|       |        |        |          |
|-------|--------|--------|----------|
| 53885 | Q2Q067 | E9PQ53 | 0.41088  |
| 53886 | Q2Q067 | Q8WWQ0 | 0.59548  |
| 53887 | Q2Q067 | Q8N7Z2 | 0.23387  |
| 53888 | Q2Q067 | Q2NKJ3 | 0.2483   |
| 53889 | Q2Q067 | Q9NX04 | 0.18379  |
| 53890 | Q2Q067 | Q5T0Z8 | 0.29573  |
| 53891 | Q2Q067 | Q8N720 | 0.87239  |
| 53892 | Q2Q067 | P51786 | 0.1134   |
| 53893 | Q2Q067 | Q9BWT1 | 0.5376   |
| 53894 | Q2Q067 | Q9BQ69 | 0.42245  |
| 53895 | Q2Q067 | O43812 | 0.33577  |
| 53896 | Q2Q067 | Q15466 | 0.57433  |
| 53897 | Q2Q067 | P19838 | 0.80098  |
| 53898 | Q2Q067 | Q8IZX4 | 0.32539  |
| 53899 | Q2Q067 | Q7Z739 | 0.35458  |
| 53900 | Q2Q067 | Q3LI61 | 0.19215  |
| 53901 | Q2Q067 | Q9BX70 | 0.50941  |
| 53902 | Q2Q067 | Q96RU7 | 0.40416  |
| 53903 | Q2Q067 | O75143 | 0.57818  |
| 53904 | Q2Q067 | Q9BTA0 | 0.29573  |
| 53905 | Q2Q067 | P81274 | 0.503    |
| 53906 | Q2Q067 | O75564 | 0.15072  |
| 53907 | Q2Q067 | Q9Y3E7 | 0.74027  |
| 53908 | Q2Q067 | Q9H4S2 | 0.23981  |
| 53909 | Q2Q067 | O75436 | 0.65274  |
| 53910 | Q2Q067 | Q02833 | 0.28004  |
| 53911 | Q2Q067 | O94805 | 0.65921  |
| 53912 | Q2Q067 | Q9NRI5 | 0.31353  |
| 53913 | Q2Q067 | O75822 | 0.69547  |
| 53914 | Q2Q067 | Q8NDM7 | 0.22433  |
| 53915 | Q2Q067 | A8K0S8 | 0.25814  |
| 53916 | Q2Q067 | Q96QK1 | 0.67258  |
| 53917 | Q2Q067 | Q9Y697 | 0.68656  |
| 53918 | Q2Q067 | O15318 | 0.39305  |
| 53919 | Q2Q067 | Q14764 | 1.0591   |
| 53920 | Q2Q067 | Q9NNW7 | 0.2469   |
| 53921 | Q2Q067 | Q14145 | 1.2608   |
| 53922 | Q2Q067 | Q8IWD4 | 0.29573  |
| 53923 | Q2Q067 | O43299 | 1.1628   |
| 53924 | Q2Q067 | P43351 | 0.6546   |
| 53925 | Q2Q067 | Q8IX90 | 0.54913  |
| 53926 | Q2Q067 | P78395 | 0.70004  |
| 53927 | Q2Q067 | O60675 | 0.44562  |
| 53928 | Q2Q067 | Q99962 | 0.23041  |
| 53929 | Q2Q067 | A6NGY1 | 0.40607  |
| 53930 | Q2Q067 | P28749 | 1.3398   |
| 53931 | Q2Q067 | Q68DK7 | 0.49031  |
| 53932 | Q2Q067 | A8K5M9 | 0.43931  |
| 53933 | Q2Q067 | Q8NG31 | 0.61982  |
| 53934 | Q2Q067 | Q9UI25 | 0.19215  |
| 53935 | Q2Q067 | O15397 | 0.78973  |
| 53936 | Q2Q067 | Q9HCZ1 | 0.1371   |
| 53937 | Q2Q067 | Q8NB42 | 0.24653  |
| 53938 | Q2Q067 | P09012 | 0.33137  |
| 53939 | Q2Q067 | P43268 | 0.47798  |
| 53940 | Q2Q067 | P20823 | 0.26562  |
| 53941 | Q2Q067 | A1L3X0 | 0.27937  |
| 53942 | Q2Q067 | Q56P03 | 0.3005   |
| 53943 | Q2Q067 | Q14CN4 | 0.16378  |
| 53944 | Q2Q067 | Q8IZQ1 | 0.57051  |
| 53945 | Q2Q067 | Q02952 | 0.095475 |
| 53946 | Q2Q067 | Q8N4S0 | 0.29573  |
| 53947 | Q2Q067 | Q68DX3 | 0.37964  |
| 53948 | Q2Q067 | Q15051 | 0.53775  |
| 53949 | Q2Q067 | Q96NM4 | 0.30214  |
| 53950 | Q2Q067 | A6NKU9 | 0.23617  |
| 53951 | Q2Q067 | O95865 | 0.35963  |
| 53952 | Q2Q067 | Q8TDB6 | 0.35545  |
| 53953 | Q2Q067 | O43504 | 0.14358  |
| 53954 | Q2Q067 | P49207 | 0.65612  |
| 53955 | Q2Q067 | O75943 | 0.18524  |
| 53956 | Q2Q067 | Q9P1Q0 | 0.3571   |
| 53957 | Q2Q067 | P78549 | 0.24732  |
| 53958 | Q2Q067 | Q15583 | 0.29195  |
| 53959 | Q2Q067 | P23193 | 1.2059   |
| 53960 | Q2Q067 | Q9H0C5 | 0.50935  |

|       |        |        |          |
|-------|--------|--------|----------|
| 53961 | Q2Q067 | Q16186 | 0.51632  |
| 53962 | Q2Q067 | Q9UFN0 | 0.66387  |
| 53963 | Q2Q067 | Q9ULW8 | 0.24394  |
| 53964 | Q2Q067 | Q96NL8 | 0.30292  |
| 53965 | Q2Q067 | P54098 | 0.41903  |
| 53966 | Q2Q067 | Q13228 | 1.167    |
| 53967 | Q2Q067 | O75360 | 0.48529  |
| 53968 | Q2Q067 | Q8WXC7 | 0.29877  |
| 53969 | Q2Q067 | P07738 | 0.39498  |
| 53970 | Q2Q067 | Q9UM11 | 1.1325   |
| 53971 | Q2Q067 | Q70EK8 | 0.35448  |
| 53972 | Q2Q067 | Q658L1 | 0.37222  |
| 53973 | Q2Q067 | Q3ZLR7 | 0.41066  |
| 53974 | Q2Q067 | Q9H9H4 | 0.34221  |
| 53975 | Q2Q067 | Q9H7E9 | 0.29573  |
| 53976 | Q2Q067 | A6NJG6 | 0.32768  |
| 53977 | Q2Q067 | Q9HBT7 | 0.1308   |
| 53978 | Q2Q067 | Q96CD0 | 0.28783  |
| 53979 | Q2Q067 | Q7L590 | 1.0005   |
| 53980 | Q2Q067 | Q9C035 | 0.5585   |
| 53981 | Q2Q067 | Q53HM4 | 0.086378 |
| 53982 | Q2Q067 | Q8NHS9 | 0.061239 |
| 53983 | Q2Q067 | Q13144 | 0.51879  |
| 53984 | Q2Q067 | P23258 | 0.25072  |
| 53985 | Q2Q067 | Q13155 | 0.64457  |
| 53986 | Q2Q067 | Q9H816 | 0.46804  |
| 53987 | Q2Q067 | Q96GX8 | 0.29573  |
| 53988 | Q2Q067 | O95373 | 0.99159  |
| 53989 | Q2Q067 | Q86VP1 | 0.44412  |
| 53990 | Q2Q067 | Q9H9L3 | 0.39744  |
| 53991 | Q2Q067 | Q9Y383 | 0.38285  |
| 53992 | Q2Q067 | P17861 | 0.71423  |
| 53993 | Q2Q067 | Q96CF2 | 0.13146  |
| 53994 | Q2Q067 | P23396 | 0.80307  |
| 53995 | Q2Q067 | Q8IWC1 | 0.51943  |
| 53996 | Q2Q067 | A6NMN3 | 0.23345  |
| 53997 | Q2Q067 | O76014 | 0.1595   |
| 53998 | Q2Q067 | Q6V702 | 0.047142 |
| 53999 | Q2Q067 | Q9H6Z9 | 0.51439  |
| 54000 | Q2Q067 | Q07687 | 0.50565  |
| 54001 | Q2Q067 | Q8TBZ5 | 0.11543  |
| 54002 | Q2Q067 | P0C852 | 0.19215  |
| 54003 | Q2Q067 | Q9NSI2 | 0.29573  |
| 54004 | Q2Q067 | Q8TE69 | 0.28783  |
| 54005 | Q2Q067 | Q86UD0 | 0.32989  |
| 54006 | Q2Q067 | Q9HAH1 | 0.17187  |
| 54007 | Q2Q067 | Q9BVT8 | 0.37351  |
| 54008 | Q2Q067 | P13645 | 0.24722  |
| 54009 | Q2Q067 | P61201 | 0.48844  |
| 54010 | Q2Q067 | Q9H1B7 | 0.54659  |
| 54011 | Q2Q067 | Q7RTU4 | 0.331    |
| 54012 | Q2Q067 | Q9UJX4 | 0.79494  |
| 54013 | Q2Q067 | Q96F83 | 0.23538  |
| 54014 | Q2Q067 | A8MUI8 | 0.12312  |
| 54015 | Q2Q067 | Q8N371 | 0.25169  |
| 54016 | Q2Q067 | Q86VM9 | 0.08833  |
| 54017 | Q2Q067 | Q9Y2P7 | 0.35911  |
| 54018 | Q2Q067 | O43913 | 0.32451  |
| 54019 | Q2Q067 | Q8NOV1 | 0.20711  |
| 54020 | Q2Q067 | Q09161 | 0.85247  |
| 54021 | Q2Q067 | Q6P3V2 | 0.044968 |
| 54022 | Q2Q067 | Q12968 | 0.69183  |
| 54023 | Q2Q067 | Q9Y5J7 | 0.22811  |
| 54024 | Q2Q067 | Q1W209 | 0.19215  |
| 54025 | Q2Q067 | P28074 | 0.58405  |
| 54026 | Q2Q067 | O75346 | 0.21624  |
| 54027 | Q2Q067 | A6NLJ0 | 0.4501   |
| 54028 | Q2Q067 | Q8NEG2 | 0.24764  |
| 54029 | Q2Q067 | Q5T6C5 | 0.41879  |
| 54030 | Q2Q067 | P53618 | 0.75935  |
| 54031 | Q2Q067 | Q7L266 | 0.20407  |
| 54032 | Q2Q067 | Q9H009 | 0.26705  |
| 54033 | Q2Q067 | P54136 | 0.70579  |
| 54034 | Q2Q067 | P25789 | 0.71276  |
| 54035 | Q2Q067 | Q15572 | 0.52261  |
| 54036 | Q2Q067 | A6NCJ1 | 0.075582 |

|       |        |        |           |
|-------|--------|--------|-----------|
| 54037 | Q2Q067 | Q93008 | 0.3667    |
| 54038 | Q2Q067 | Q8N5U0 | 0.19215   |
| 54039 | Q2Q067 | Q14588 | 0.16182   |
| 54040 | Q2Q067 | Q8WV24 | 0.58814   |
| 54041 | Q2Q067 | Q6ZRM9 | 0.29537   |
| 54042 | Q2Q067 | Q6PJG2 | 0.73738   |
| 54043 | Q2Q067 | O14529 | 0.38741   |
| 54044 | Q2Q067 | Q92540 | 0.97845   |
| 54045 | Q2Q067 | P52630 | 0.74354   |
| 54046 | Q2Q067 | Q6P3X8 | 0.23464   |
| 54047 | Q2Q067 | Q9P013 | 0.45511   |
| 54048 | Q2Q067 | Q9UPY8 | 0.92011   |
| 54049 | Q2Q067 | O43791 | 0.54707   |
| 54050 | Q2Q067 | Q9H0U6 | 0.21747   |
| 54051 | Q2Q067 | O00629 | 0.54258   |
| 54052 | Q2Q067 | O60248 | 0.53834   |
| 54053 | Q2Q067 | Q9HCE1 | 0.67098   |
| 54054 | Q2Q067 | Q9UKD2 | 0.092757  |
| 54055 | Q2Q067 | Q5T5Y3 | 0.10527   |
| 54056 | Q2Q067 | Q9H501 | 0.72614   |
| 54057 | Q2Q067 | Q14839 | 0.53856   |
| 54058 | Q2Q067 | Q2M2W7 | 0.29573   |
| 54059 | Q2Q067 | Q8N7R1 | 0.3413    |
| 54060 | Q2Q067 | Q9UBC1 | 0.47546   |
| 54061 | Q2Q067 | Q96LL4 | 0.29573   |
| 54062 | Q2Q067 | Q13620 | 0.69543   |
| 54063 | Q2Q067 | Q6ZMV8 | 0.25223   |
| 54064 | Q2Q067 | Q9NRX3 | 0.34211   |
| 54065 | Q2Q067 | Q6UVJ0 | 0.73827   |
| 54066 | Q2Q067 | Q9Y543 | 0.33048   |
| 54067 | Q2Q067 | O15504 | 0.55455   |
| 54068 | Q2Q067 | Q9UPV9 | 0.73538   |
| 54069 | Q2Q067 | Q9Y6D9 | 0.89613   |
| 54070 | Q2Q067 | Q8WW01 | 0.16169   |
| 54071 | Q2Q067 | Q96H79 | 0.31077   |
| 54072 | Q2Q067 | P15336 | 0.91556   |
| 54073 | Q2Q067 | O60885 | 0.72097   |
| 54074 | Q2Q067 | Q5HYJ3 | 0.27696   |
| 54075 | Q2Q067 | Q7L592 | 0.1846    |
| 54076 | Q2Q067 | Q9Y2X0 | 0.49579   |
| 54077 | Q2Q067 | Q96HT8 | 0.76267   |
| 54078 | Q2Q067 | O95996 | 0.22899   |
| 54079 | Q2Q067 | Q86XD5 | 0.087168  |
| 54080 | Q2Q067 | O95073 | 1.0622    |
| 54081 | Q2Q067 | Q8N9W8 | 0.63352   |
| 54082 | Q2Q067 | Q9Y4K1 | 0.36388   |
| 54083 | Q2Q067 | P59998 | 0.032071  |
| 54084 | Q2Q067 | Q14592 | 0.11369   |
| 54085 | Q2Q067 | Q9BY65 | 0.17246   |
| 54086 | Q2Q067 | Q8IXH7 | 1.211     |
| 54087 | Q2Q067 | Q9HCG8 | 0.13524   |
| 54088 | Q2Q067 | P21399 | 0.34387   |
| 54089 | Q2Q067 | Q9UQ35 | 0.27937   |
| 54090 | Q2Q067 | Q13526 | 0.54209   |
| 54091 | Q2Q067 | Q8TB33 | 0.0020931 |
| 54092 | Q2Q067 | A6NLX3 | 0.086897  |
| 54093 | Q2Q067 | O94864 | 0.52148   |
| 54094 | Q2Q067 | Q8N5Q1 | 0.63352   |
| 54095 | Q2Q067 | Q6AZW8 | 0.11061   |
| 54096 | Q2Q067 | Q6NSZ9 | 0.058453  |
| 54097 | Q2Q067 | Q9BVW5 | 0.93848   |
| 54098 | Q2Q067 | P12757 | 0.31397   |
| 54099 | Q2Q067 | A6NMK8 | 0.24138   |
| 54100 | Q2Q067 | Q8WU39 | 0.19746   |
| 54101 | Q2Q067 | P28838 | 0.32575   |
| 54102 | Q2Q067 | A6NI86 | 0.36408   |
| 54103 | Q2Q067 | O43615 | 0.12862   |
| 54104 | Q2Q067 | Q9H2K0 | 0.15085   |
| 54105 | Q2Q067 | P35813 | 0.24988   |
| 54106 | Q2Q067 | Q8N1K5 | 0.19622   |
| 54107 | Q2Q067 | Q9BUJ2 | 1.1326    |
| 54108 | Q2Q067 | P42768 | 0.32835   |
| 54109 | Q2Q067 | Q86V15 | 0.24936   |
| 54110 | Q2Q067 | Q9UKT4 | 0.85641   |
| 54111 | Q2Q067 | P28698 | 0.71774   |
| 54112 | Q2Q067 | A2IDD5 | 0.24519   |

|       |        |        |          |
|-------|--------|--------|----------|
| 54113 | Q2Q067 | Q9H3P2 | 1.0781   |
| 54114 | Q2Q067 | Q6NUQ1 | 0.46762  |
| 54115 | Q2Q067 | Q8NFZ5 | 0.91099  |
| 54116 | Q2Q067 | Q9BYV9 | 0.36753  |
| 54117 | Q2Q067 | Q6ZNG0 | 0.095101 |
| 54118 | Q2Q067 | Q6J272 | 0.45578  |
| 54119 | Q2Q067 | P25963 | 0.6963   |
| 54120 | Q2Q067 | Q9UHT9 | 0.19215  |
| 54121 | Q2Q067 | Q8N9F8 | 0.12347  |
| 54122 | Q2Q067 | Q99619 | 0.50289  |
| 54123 | Q2Q067 | P0CG47 | 0.43777  |
| 54124 | Q2Q067 | Q9H503 | 0.24679  |
| 54125 | Q2Q067 | Q9P2K3 | 1.2155   |
| 54126 | Q2Q067 | Q5TG92 | 0.24542  |
| 54127 | Q2Q067 | P40121 | 0.36665  |
| 54128 | Q2Q067 | Q96MY1 | 0.41206  |
| 54129 | Q2Q067 | P04053 | 0.16257  |
| 54130 | Q2Q067 | P19013 | 0.3611   |
| 54131 | Q2Q067 | Q9UGK3 | 0.63634  |
| 54132 | Q2Q067 | P20042 | 0.45905  |
| 54133 | Q2Q067 | A1L170 | 0.19215  |
| 54134 | Q2Q067 | P0C7V5 | 0.16874  |
| 54135 | Q2Q067 | Q8IVD9 | 0.13223  |
| 54136 | Q2Q067 | P20290 | 1.1159   |
| 54137 | Q2Q067 | O43186 | 0.91667  |
| 54138 | Q2Q067 | Q13619 | 0.37811  |
| 54139 | Q2Q067 | Q12983 | 0.15809  |
| 54140 | Q2Q067 | P17021 | 0.12412  |
| 54141 | Q2Q067 | Q13569 | 0.47474  |
| 54142 | Q2Q067 | Q86U86 | 1.0201   |
| 54143 | Q2Q067 | Q86UW6 | 0.057907 |
| 54144 | Q2Q067 | O76042 | 0.26541  |
| 54145 | Q2Q067 | Q7RTV0 | 0.46192  |
| 54146 | Q2Q067 | Q6ZTI0 | 0.19215  |
| 54147 | Q2Q067 | Q9Y2M5 | 0.78992  |
| 54148 | Q2Q067 | Q9BPZ3 | 0.41707  |
| 54149 | Q2Q067 | O60573 | 0.54014  |
| 54150 | Q2Q067 | Q9HB03 | 0.27937  |
| 54151 | Q2Q067 | Q86XI8 | 0.32983  |
| 54152 | Q2Q067 | Q9H5Z6 | 0.29573  |
| 54153 | Q2Q067 | P08235 | 0.24961  |
| 54154 | Q2Q067 | Q14686 | 0.61404  |
| 54155 | Q2Q067 | Q6PJ61 | 0.47865  |
| 54156 | Q2Q067 | Q9UNY4 | 0.43574  |
| 54157 | Q2Q067 | Q8WV99 | 0.17572  |
| 54158 | Q2Q067 | P57740 | 0.79639  |
| 54159 | Q2Q067 | P06744 | 0.58779  |
| 54160 | Q2Q067 | O95983 | 1.2526   |
| 54161 | Q2Q067 | Q96T76 | 0.87561  |
| 54162 | Q2Q067 | Q8N998 | 0.1321   |
| 54163 | Q2Q067 | Q96BD8 | 0.57652  |
| 54164 | Q2Q067 | Q9H446 | 0.28783  |
| 54165 | Q2Q067 | Q8N865 | 0.067777 |
| 54166 | Q2Q067 | Q04917 | 0.24793  |
| 54167 | Q2Q067 | Q96QT6 | 0.90151  |
| 54168 | Q2Q067 | P04818 | 0.08183  |
| 54169 | Q2Q067 | Q9BZK7 | 0.93529  |
| 54170 | Q2Q067 | Q6QNY1 | 0.72768  |
| 54171 | Q2Q067 | Q9UI95 | 1.2173   |
| 54172 | Q2Q067 | Q9H900 | 0.4861   |
| 54173 | Q2Q067 | Q9Y3D0 | 0.93292  |
| 54174 | Q2Q067 | Q9HC62 | 0.44458  |
| 54175 | Q2Q067 | Q8N584 | 0.41526  |
| 54176 | Q2Q067 | O75934 | 0.65319  |
| 54177 | Q2Q067 | Q8N769 | 0.04082  |
| 54178 | Q2Q067 | Q9NWW0 | 0.1321   |
| 54179 | Q2Q067 | O14920 | 0.53843  |
| 54180 | Q2Q067 | Q9Y5N6 | 0.58096  |
| 54181 | Q2Q067 | Q15545 | 0.916    |
| 54182 | Q2Q067 | Q9NV56 | 0.51626  |
| 54183 | Q2Q067 | Q9UID6 | 0.49754  |
| 54184 | Q2Q067 | Q14872 | 0.82318  |
| 54185 | Q2Q067 | A6H8Z2 | 0.099505 |
| 54186 | Q2Q067 | A6NGY3 | 0.014439 |
| 54187 | Q2Q067 | Q969H0 | 0.71405  |
| 54188 | Q2Q067 | P11441 | 0.55479  |

|       |        |        |          |
|-------|--------|--------|----------|
| 54189 | Q2Q067 | Q5T655 | 0.19215  |
| 54190 | Q2Q067 | Q9UDV6 | 0.53405  |
| 54191 | Q2Q067 | Q8N9Z2 | 0.28913  |
| 54192 | Q2Q067 | P33552 | 0.24853  |
| 54193 | Q2Q067 | Q3KNV8 | 0.88293  |
| 54194 | Q2Q067 | P27348 | 0.27005  |
| 54195 | Q2Q067 | O75688 | 0.30336  |
| 54196 | Q2Q067 | P63173 | 0.55038  |
| 54197 | Q2Q067 | Q15170 | 0.91417  |
| 54198 | Q2Q067 | Q8N1V2 | 0.4017   |
| 54199 | Q2Q067 | O95271 | 0.55337  |
| 54200 | Q2Q067 | A4D1E1 | 0.34832  |
| 54201 | Q2Q067 | Q7Z5W3 | 0.30807  |
| 54202 | Q2Q067 | Q12789 | 0.83172  |
| 54203 | Q2Q067 | P18621 | 0.66583  |
| 54204 | Q2Q067 | Q9BPW8 | 0.2403   |
| 54205 | Q2Q067 | O75638 | 0.66876  |
| 54206 | Q2Q067 | Q9NZN8 | 0.76576  |
| 54207 | Q2Q067 | Q5CZA5 | 0.14861  |
| 54208 | Q2Q067 | Q03111 | 1.2772   |
| 54209 | Q2Q067 | Q9BYQ0 | 0.34715  |
| 54210 | Q2Q067 | P31946 | 0.57881  |
| 54211 | Q2Q067 | Q9Y3C5 | 0.38958  |
| 54212 | Q2Q067 | Q717R9 | 0.11898  |
| 54213 | Q2Q067 | Q96HQ0 | 0.10921  |
| 54214 | Q2Q067 | Q99590 | 0.54874  |
| 54215 | Q2Q067 | Q9H6V9 | 0.14806  |
| 54216 | Q2Q067 | Q32P41 | 0.33795  |
| 54217 | Q2Q067 | Q3ZCQ2 | 0.19215  |
| 54218 | Q2Q067 | Q13416 | 0.52064  |
| 54219 | Q2Q067 | Q6NUR6 | 0.33189  |
| 54220 | Q2Q067 | Q96JN8 | 0.097927 |
| 54221 | Q2Q067 | Q9BRR8 | 0.45395  |
| 54222 | Q2Q067 | Q9UKN5 | 0.24654  |
| 54223 | Q2Q067 | P0DKX0 | 0.20817  |
| 54224 | Q2Q067 | Q9BXN6 | 0.1321   |
| 54225 | Q2Q067 | O60759 | 0.33914  |
| 54226 | Q2Q067 | Q9UNY5 | 0.23106  |
| 54227 | Q2Q067 | Q8TB72 | 0.48365  |
| 54228 | Q2Q067 | P22415 | 0.52116  |
| 54229 | Q2Q067 | Q9H4D5 | 0.27675  |
| 54230 | Q2Q067 | Q8NA72 | 0.16939  |
| 54231 | Q2Q067 | Q96N06 | 0.20389  |
| 54232 | Q2Q067 | Q9BQE6 | 0.18439  |
| 54233 | Q2Q067 | Q9NS73 | 0.71625  |
| 54234 | Q2Q067 | P10244 | 0.5915   |
| 54235 | Q2Q067 | Q8N3L3 | 0.44763  |
| 54236 | Q2Q067 | Q9H707 | 0.11835  |
| 54237 | Q2Q067 | Q96MG7 | 0.78122  |
| 54238 | Q2Q067 | Q6VB84 | 0.45162  |
| 54239 | Q2Q067 | O75150 | 0.45876  |
| 54240 | Q2Q067 | A8MX34 | 0.043653 |
| 54241 | Q2Q067 | P0C7P2 | 0.08037  |
| 54242 | Q2Q067 | Q9UM07 | 0.32946  |
| 54243 | Q2Q067 | Q96H12 | 0.59249  |
| 54244 | Q2Q067 | Q06455 | 0.68894  |
| 54245 | Q2Q067 | Q13761 | 0.7696   |
| 54246 | Q2Q067 | Q9NSJ1 | 0.13291  |
| 54247 | Q2Q067 | Q9H5V9 | 0.26016  |
| 54248 | Q2Q067 | Q9NY12 | 0.17397  |
| 54249 | Q2Q067 | Q6ZT83 | 0.029944 |
| 54250 | Q2Q067 | Q9UI32 | 0.32457  |
| 54251 | Q2Q067 | Q9BYA6 | 0.19215  |
| 54252 | Q2Q067 | Q6ULP2 | 0.60143  |
| 54253 | Q2Q067 | P13647 | 0.84255  |
| 54254 | Q2Q067 | O75410 | 0.71458  |
| 54255 | Q2Q067 | Q5VZR2 | 0.54396  |
| 54256 | Q2Q067 | E5RJ46 | 0.19215  |
| 54257 | Q2Q067 | Q9UKT9 | 0.46923  |
| 54258 | Q2Q067 | Q6ZUL3 | 0.19215  |
| 54259 | Q2Q067 | P82675 | 0.26409  |
| 54260 | Q2Q067 | Q9C000 | 0.23977  |
| 54261 | Q2Q067 | P41208 | 0.56902  |
| 54262 | Q2Q067 | P52292 | 1.0043   |
| 54263 | Q2Q067 | Q2KHT3 | 0.27949  |
| 54264 | Q2Q067 | Q9H0A6 | 0.322    |

|       |        |        |          |
|-------|--------|--------|----------|
| 54265 | Q2Q067 | Q8N9Z9 | 0.5973   |
| 54266 | Q2Q067 | Q96HZ7 | 0.19215  |
| 54267 | Q2Q067 | Q9UMQ3 | 0.70586  |
| 54268 | Q2Q067 | Q5HYK7 | 1.1753   |
| 54269 | Q2Q067 | Q92567 | 0.097372 |
| 54270 | Q2Q067 | Q6ZS92 | 0.05235  |
| 54271 | Q2Q067 | O15155 | 0.050295 |
| 54272 | Q2Q067 | Q5JVS0 | 0.77575  |
| 54273 | Q2Q067 | Q96IY1 | 0.88845  |
| 54274 | Q2Q067 | Q5SVZ6 | 0.52342  |
| 54275 | Q2Q067 | P52298 | 0.60569  |
| 54276 | Q2Q067 | Q9NR09 | 0.34827  |
| 54277 | Q2Q067 | Q9H9J2 | 0.13576  |
| 54278 | Q2Q067 | Q3YBR2 | 0.47307  |
| 54279 | Q2Q067 | P52655 | 1.0625   |
| 54280 | Q2Q067 | B3KS81 | 0.075701 |
| 54281 | Q2Q067 | Q6ZP98 | 0.033666 |
| 54282 | Q2Q067 | Q8TCJ0 | 0.52452  |
| 54283 | Q2Q067 | Q9UI43 | 0.36696  |
| 54284 | Q2Q067 | P19484 | 0.56917  |
| 54285 | Q2Q067 | O14646 | 0.56733  |
| 54286 | Q2Q067 | Q13901 | 1.0971   |
| 54287 | Q2Q067 | Q96NY9 | 0.59748  |
| 54288 | Q2Q067 | P0CG12 | 0.63746  |
| 54289 | Q2Q067 | P16989 | 0.24429  |
| 54290 | Q2Q067 | O95238 | 0.27218  |
| 54291 | Q2Q067 | B4DU55 | 0.14861  |
| 54292 | Q2Q067 | H3BNL1 | 0.19958  |
| 54293 | Q2Q067 | Q6PG37 | 0.24987  |
| 54294 | Q2Q067 | P31314 | 0.64403  |
| 54295 | Q2Q067 | Q9BPX1 | 0.24031  |
| 54296 | Q2Q067 | O60290 | 0.31054  |
| 54297 | Q2Q067 | Q86XK3 | 0.65109  |
| 54298 | Q2Q067 | O75373 | 0.12589  |
| 54299 | Q2Q067 | O75113 | 0.86437  |
| 54300 | Q2Q067 | C9J6K1 | 0.20143  |
| 54301 | Q2Q067 | Q9BYX4 | 0.22796  |
| 54302 | Q2Q067 | Q6RUI8 | 0.16407  |
| 54303 | Q2Q067 | Q9Y618 | 1.0608   |
| 54304 | Q2Q067 | Q8IW36 | 0.22586  |
| 54305 | Q2Q067 | Q14209 | 1.0888   |
| 54306 | Q2Q067 | Q9BRP1 | 0.44985  |
| 54307 | Q2Q067 | Q96IK1 | 0.046572 |
| 54308 | Q2Q067 | Q9UFG5 | 0.28783  |
| 54309 | Q2Q067 | O95619 | 0.82652  |
| 54310 | Q2Q067 | P20618 | 0.7081   |
| 54311 | Q2Q067 | Q96Q35 | 0.21453  |
| 54312 | Q2Q067 | Q19AV6 | 0.6616   |
| 54313 | Q2Q067 | Q05BW5 | 0.1197   |
| 54314 | Q2Q067 | Q96CS4 | 0.0891   |
| 54315 | Q2Q067 | A6NEF3 | 0.37471  |
| 54316 | Q2Q067 | Q9BTL4 | 0.23433  |
| 54317 | Q2Q067 | P45984 | 0.31783  |
| 54318 | Q2Q067 | Q15628 | 0.59619  |
| 54319 | Q2Q067 | Q9H0U9 | 0.32889  |
| 54320 | Q2Q067 | Q13642 | 0.39105  |
| 54321 | Q2Q067 | Q49AA0 | 0.22377  |
| 54322 | Q2Q067 | P43356 | 0.90472  |
| 54323 | Q2Q067 | A6NIH7 | 0.14363  |
| 54324 | Q2Q067 | Q9HBM6 | 0.64399  |
| 54325 | Q2Q067 | Q96LR7 | 0.4017   |
| 54326 | Q2Q067 | P42771 | 0.57159  |
| 54327 | Q2Q067 | Q8N490 | 0.19295  |
| 54328 | Q2Q067 | Q8IZT6 | 0.29741  |
| 54329 | Q2Q067 | P17096 | 0.56949  |
| 54330 | Q2Q067 | Q9NP79 | 0.21927  |
| 54331 | Q2Q067 | Q6L8G8 | 0.19215  |
| 54332 | Q2Q067 | O95817 | 0.40658  |
| 54333 | Q2Q067 | P14652 | 0.75998  |
| 54334 | Q2Q067 | Q9UNE7 | 0.29173  |
| 54335 | Q2Q067 | Q96GS4 | 0.55202  |
| 54336 | Q2Q067 | Q04724 | 0.87158  |
| 54337 | Q2Q067 | P48147 | 0.17299  |
| 54338 | Q2Q067 | O95831 | 0.82038  |
| 54339 | Q2Q067 | Q9ULG1 | 0.25781  |
| 54340 | Q2Q067 | O75956 | 0.12532  |



|       |        |        |           |
|-------|--------|--------|-----------|
| 54341 | Q2Q067 | P48595 | 0.15224   |
| 54342 | Q2Q067 | P35269 | 1.1671    |
| 54343 | Q2Q067 | Q86SQ7 | 0.92008   |
| 54344 | Q2Q067 | Q6PIF2 | 0.22309   |
| 54345 | Q2Q067 | Q8TE85 | 0.26235   |
| 54346 | Q2Q067 | Q15427 | 0.26438   |
| 54347 | Q2Q067 | Q9H6Z4 | 1.0909    |
| 54348 | Q2Q067 | Q8TC76 | 0.8034    |
| 54349 | Q2Q067 | Q13425 | 0.41362   |
| 54350 | Q2Q067 | P11474 | 0.3714    |
| 54351 | Q2Q067 | Q99623 | 1.0884    |
| 54352 | Q2Q067 | P09497 | 0.36942   |
| 54353 | Q2Q067 | Q14139 | 0.52171   |
| 54354 | Q2Q067 | Q8IUR6 | 0.96386   |
| 54355 | Q2Q067 | O76015 | 0.1595    |
| 54356 | Q2Q067 | Q8N987 | 0.18628   |
| 54357 | Q2Q067 | O60763 | 0.33937   |
| 54358 | Q2Q067 | Q9GZU2 | 0.4615    |
| 54359 | Q2Q067 | Q9UKK6 | 0.65001   |
| 54360 | Q2Q067 | Q86TJ5 | 0.090948  |
| 54361 | Q2Q067 | O94925 | 0.51299   |
| 54362 | Q2Q067 | Q12824 | 0.96773   |
| 54363 | Q2Q067 | Q6NSI8 | 0.36551   |
| 54364 | Q2Q067 | Q6DKK2 | 0.92814   |
| 54365 | Q2Q067 | Q15714 | 0.77243   |
| 54366 | Q2Q067 | Q9Y2X3 | 0.62828   |
| 54367 | Q2Q067 | Q9BXV9 | 0.19215   |
| 54368 | Q2Q067 | O00161 | 0.83252   |
| 54369 | Q2Q067 | Q8N6Y0 | 0.57595   |
| 54370 | Q2Q067 | P80723 | 0.2424    |
| 54371 | Q2Q067 | A1L188 | 0.30457   |
| 54372 | Q2Q067 | O43513 | 1.173     |
| 54373 | Q2Q067 | O43325 | 0.47607   |
| 54374 | Q2Q067 | Q9UBL0 | 0.1095    |
| 54375 | Q2Q067 | Q9NS23 | 0.26693   |
| 54376 | Q2Q067 | Q6PI48 | 0.51597   |
| 54377 | Q2Q067 | Q0VG06 | 0.44196   |
| 54378 | Q2Q067 | Q00653 | 1.2521    |
| 54379 | Q2Q067 | Q8IVC4 | 0.10131   |
| 54380 | Q2Q067 | Q9UHN1 | 0.068535  |
| 54381 | Q2Q067 | Q9Y5J3 | 0.33325   |
| 54382 | Q2Q067 | Q15833 | 0.31713   |
| 54383 | Q2Q067 | Q8N488 | 0.48407   |
| 54384 | Q2Q067 | Q96MB7 | 0.23984   |
| 54385 | Q2Q067 | P0CG48 | 0.42887   |
| 54386 | Q2Q067 | P49459 | 0.18529   |
| 54387 | Q2Q067 | Q9UK10 | 0.16182   |
| 54388 | Q2Q067 | Q9NRX2 | 0.22339   |
| 54389 | Q2Q067 | P42166 | 0.10415   |
| 54390 | Q2Q067 | A8MUZ8 | 0.25083   |
| 54391 | Q2Q067 | Q9UPA5 | 0.11064   |
| 54392 | Q2Q067 | P29083 | 1.1985    |
| 54393 | Q2Q067 | P04731 | 0.18499   |
| 54394 | Q2Q067 | A6NJB7 | 0.48545   |
| 54395 | Q2Q067 | O75791 | 0.99055   |
| 54396 | Q2Q067 | Q5SVJ3 | 0.13859   |
| 54397 | Q2Q067 | Q8N8D1 | 0.34559   |
| 54398 | Q2Q067 | Q5JUK9 | 0.071824  |
| 54399 | Q2Q067 | O14925 | 0.11495   |
| 54400 | Q2Q067 | P60953 | 0.52014   |
| 54401 | Q2Q067 | Q96GG9 | 0.23957   |
| 54402 | Q2Q067 | P0C5Y4 | 0.18143   |
| 54403 | Q2Q067 | P0CZ20 | 0.1398    |
| 54404 | Q2Q067 | Q5JUQ0 | 0.0064825 |
| 54405 | Q2Q067 | Q9BZE2 | 0.6962    |
| 54406 | Q2Q067 | A6NJI1 | 0.11178   |
| 54407 | Q2Q067 | O75382 | 0.23749   |
| 54408 | Q2Q067 | P25205 | 0.31163   |
| 54409 | Q2Q067 | Q9NY43 | 0.4479    |
| 54410 | Q2Q067 | O60504 | 0.67904   |
| 54411 | Q2Q067 | Q9ULL0 | 0.32402   |
| 54412 | Q2Q067 | Q9HAI6 | 0.36248   |
| 54413 | Q2Q067 | O75154 | 0.77122   |
| 54414 | Q2Q067 | Q96EK4 | 1.1978    |
| 54415 | Q2Q067 | P07315 | 0.553     |
| 54416 | Q2Q067 | Q86WR0 | 0.13106   |

|       |        |        |          |
|-------|--------|--------|----------|
| 54417 | Q2Q067 | Q96SE7 | 0.1529   |
| 54418 | Q2Q067 | Q9P0U1 | 0.11286  |
| 54419 | Q2Q067 | A6QL64 | 0.24591  |
| 54420 | Q2Q067 | O14556 | 0.45488  |
| 54421 | Q2Q067 | Q9NWB7 | 0.54182  |
| 54422 | Q2Q067 | P40855 | 0.17848  |
| 54423 | Q2Q067 | Q08752 | 0.31714  |
| 54424 | Q2Q067 | Q6ICG8 | 0.71678  |
| 54425 | Q2Q067 | A1L168 | 0.29573  |
| 54426 | Q2Q067 | Q13895 | 0.71903  |
| 54427 | Q2Q067 | P35251 | 0.26843  |
| 54428 | Q2Q067 | Q8N6M0 | 0.050661 |
| 54429 | Q2Q067 | Q9HCK8 | 0.33915  |
| 54430 | Q2Q067 | P46013 | 0.057215 |
| 54431 | Q2Q067 | P47974 | 0.25497  |
| 54432 | Q2Q067 | Q86YI8 | 0.51239  |
| 54433 | Q2Q067 | P40926 | 0.31757  |
| 54434 | Q2Q067 | Q9H7B2 | 0.46797  |
| 54435 | Q2Q067 | Q13409 | 0.42104  |
| 54436 | Q2Q067 | Q9BQ65 | 0.23303  |
| 54437 | Q2Q067 | Q14676 | 0.59527  |
| 54438 | Q2Q067 | P62316 | 0.81631  |
| 54439 | Q2Q067 | Q8N7Y1 | 0.19215  |
| 54440 | Q2Q067 | A6NNA2 | 0.41991  |
| 54441 | Q2Q067 | Q7RTU0 | 0.331    |
| 54442 | Q2Q067 | P61575 | 0.36503  |
| 54443 | Q2Q067 | Q96EZ4 | 0.19215  |
| 54444 | Q2Q067 | Q9P242 | 0.41813  |
| 54445 | Q2Q067 | Q8N7H5 | 0.90831  |
| 54446 | Q2Q067 | O43318 | 0.56984  |
| 54447 | Q2Q067 | Q86TS9 | 0.28685  |
| 54448 | Q2Q067 | P47928 | 0.42634  |
| 54449 | Q2Q067 | Q9UJA5 | 0.54666  |
| 54450 | Q2Q067 | Q7L945 | 0.13415  |
| 54451 | Q2Q067 | Q8NDQ6 | 0.14494  |
| 54452 | Q2Q067 | Q92600 | 1.1929   |
| 54453 | Q2Q067 | O75764 | 0.15182  |
| 54454 | Q2Q067 | A6NHR8 | 0.19215  |
| 54455 | Q2Q067 | Q9UI54 | 0.19215  |
| 54456 | Q2Q067 | Q495M9 | 0.2632   |
| 54457 | Q2Q067 | Q13106 | 0.088399 |
| 54458 | Q2Q067 | O43395 | 0.77663  |
| 54459 | Q2Q067 | P49336 | 0.30371  |
| 54460 | Q2Q067 | Q9GZT9 | 0.28162  |
| 54461 | Q2Q067 | Q9ULZ2 | 0.73769  |
| 54462 | Q2Q067 | Q86XF7 | 0.26079  |
| 54463 | Q2Q067 | Q5TEC3 | 0.10451  |
| 54464 | Q2Q067 | Q96AY2 | 0.70921  |
| 54465 | Q2Q067 | Q8IYN6 | 0.41087  |
| 54466 | Q2Q067 | O95487 | 0.71201  |
| 54467 | Q2Q067 | Q9UIL8 | 0.26767  |
| 54468 | Q2Q067 | Q9Y294 | 0.98793  |
| 54469 | Q2Q067 | Q9HA77 | 0.22897  |
| 54470 | Q2Q067 | P61758 | 0.58553  |
| 54471 | Q2Q067 | Q96PU4 | 0.30404  |
| 54472 | Q2Q067 | Q9H4B6 | 0.6052   |
| 54473 | Q2Q067 | Q969V6 | 1.3959   |
| 54474 | Q2Q067 | Q9UHD4 | 0.36735  |
| 54475 | Q2Q067 | Q6KB66 | 0.16378  |
| 54476 | Q2Q067 | Q8TED0 | 0.2608   |
| 54477 | Q2Q067 | Q658K8 | 0.25783  |
| 54478 | Q2Q067 | Q9P016 | 0.28009  |
| 54479 | Q2Q067 | Q5T230 | 1.238    |
| 54480 | Q2Q067 | Q9H2L5 | 0.35152  |
| 54481 | Q2Q067 | Q99700 | 0.7581   |
| 54482 | Q2Q067 | Q6ZNM6 | 0.39825  |
| 54483 | Q2Q067 | O15182 | 0.29326  |
| 54484 | Q2Q067 | O43633 | 0.0924   |
| 54485 | Q2Q067 | Q6NZ67 | 0.65427  |
| 54486 | Q2Q067 | O14964 | 0.59632  |
| 54487 | Q2Q067 | O95125 | 0.10046  |
| 54488 | Q2Q067 | Q9P1Z2 | 0.80685  |
| 54489 | Q2Q067 | A6NIN4 | 0.19215  |
| 54490 | Q2Q067 | Q96PK6 | 0.6901   |
| 54491 | Q2Q067 | Q9Y2S6 | 0.19215  |
| 54492 | Q2Q067 | Q9UIF9 | 0.66537  |

|       |        |        |           |
|-------|--------|--------|-----------|
| 54493 | Q2Q067 | P58304 | 0.2505    |
| 54494 | Q2Q067 | O60583 | 1.0344    |
| 54495 | Q2Q067 | Q8WVZ9 | 0.37541   |
| 54496 | Q2Q067 | Q3LI59 | 0.19215   |
| 54497 | Q2Q067 | Q8TCC3 | 0.050442  |
| 54498 | Q2Q067 | Q8NAQ8 | 0.76219   |
| 54499 | Q2Q067 | Q8IYE0 | 0.40359   |
| 54500 | Q2Q067 | Q9Y4P8 | 0.86574   |
| 54501 | Q2Q067 | P00338 | 0.44348   |
| 54502 | Q2Q067 | O43765 | 0.56998   |
| 54503 | Q2Q067 | Q68CP9 | 0.49369   |
| 54504 | Q2Q067 | Q6ZVN8 | 0.16496   |
| 54505 | Q2Q067 | O14737 | 0.20547   |
| 54506 | Q2Q067 | Q5JSJ4 | 0.69602   |
| 54507 | Q2Q067 | Q6ZV60 | 0.19215   |
| 54508 | Q2Q067 | Q96D15 | 0.23084   |
| 54509 | Q2Q067 | Q9GZN7 | 0.23416   |
| 54510 | Q2Q067 | Q8IXT1 | 0.14088   |
| 54511 | Q2Q067 | Q7Z6M4 | 0.3396    |
| 54512 | Q2Q067 | Q9NUS5 | 0.49249   |
| 54513 | Q2Q067 | A6NHY6 | 0.0020931 |
| 54514 | Q2Q067 | Q7Z4H3 | 0.17558   |
| 54515 | Q2Q067 | A6NCS6 | 0.16295   |
| 54516 | Q2Q067 | Q9BVS5 | 0.23308   |
| 54517 | Q2Q067 | P24863 | 1.1027    |
| 54518 | Q2Q067 | Q9H808 | 0.54509   |
| 54519 | Q2Q067 | P27986 | 0.56117   |
| 54520 | Q2Q067 | Q14146 | 0.19215   |
| 54521 | Q2Q067 | Q16385 | 0.77981   |
| 54522 | Q2Q067 | Q8NCU4 | 0.10943   |
| 54523 | Q2Q067 | O94916 | 0.1921    |
| 54524 | Q2Q067 | Q5T2W1 | 0.38598   |
| 54525 | Q2Q067 | P17019 | 0.24839   |
| 54526 | Q2Q067 | Q05086 | 0.36811   |
| 54527 | Q2Q067 | Q9BXS6 | 0.35465   |
| 54528 | Q2Q067 | Q0VFX6 | 0.29573   |
| 54529 | Q2Q067 | P0CG31 | 0.10282   |
| 54530 | Q2Q067 | Q9NP71 | 0.57066   |
| 54531 | Q2Q067 | P16455 | 0.15841   |
| 54532 | Q2Q067 | Q9UKF6 | 0.72295   |
| 54533 | Q2Q067 | P28070 | 0.48151   |
| 54534 | Q2Q067 | P43897 | 0.5868    |
| 54535 | Q2Q067 | Q8IXM7 | 0.030976  |
| 54536 | Q2Q067 | Q9NPJ4 | 1.216     |
| 54537 | Q2Q067 | Q8N693 | 0.45786   |
| 54538 | Q2Q067 | Q8NDZ2 | 0.093968  |
| 54539 | Q2Q067 | Q9Y2G2 | 0.46379   |
| 54540 | Q2Q067 | Q9H9L7 | 0.20402   |
| 54541 | Q2Q067 | Q96M85 | 0.19215   |
| 54542 | Q2Q067 | Q14244 | 0.36124   |
| 54543 | Q2Q067 | O60682 | 0.33408   |
| 54544 | Q2Q067 | Q9BYH8 | 0.29711   |
| 54545 | Q2Q067 | Q6ZUC2 | 0.037726  |
| 54546 | Q2Q067 | Q8TAQ2 | 1.3657    |
| 54547 | Q2Q067 | Q86WJ1 | 0.26769   |
| 54548 | Q2Q067 | Q01831 | 0.6541    |
| 54549 | Q2Q067 | Q52MB2 | 0.54194   |
| 54550 | Q2Q067 | Q8WU49 | 0.19215   |
| 54551 | Q2Q067 | Q3LHN2 | 0.19215   |
| 54552 | Q2Q067 | Q9NYF3 | 0.18893   |
| 54553 | Q2Q067 | P39019 | 0.89125   |
| 54554 | Q2Q067 | Q32MH5 | 0.19038   |
| 54555 | Q2Q067 | Q92844 | 0.43515   |
| 54556 | Q2Q067 | O75558 | 0.49308   |
| 54557 | Q2Q067 | P0C7X2 | 0.29369   |
| 54558 | Q2Q067 | B1ANY3 | 0.12253   |
| 54559 | Q2Q067 | Q0VG73 | 0.19215   |
| 54560 | Q2Q067 | Q14493 | 0.90013   |
| 54561 | Q2Q067 | Q4LEZ3 | 0.53771   |
| 54562 | Q2Q067 | Q96RE7 | 0.97958   |
| 54563 | Q2Q067 | Q8WUM0 | 0.71047   |
| 54564 | Q2Q067 | Q8NEG4 | 0.18146   |
| 54565 | Q2Q067 | P62256 | 0.1399    |
| 54566 | Q2Q067 | O96018 | 0.40012   |
| 54567 | Q2Q067 | Q9BQE4 | 0.30448   |
| 54568 | Q2Q067 | Q92793 | 0.69902   |

|       |        |        |          |
|-------|--------|--------|----------|
| 54569 | Q2Q067 | Q86U70 | 0.22923  |
| 54570 | Q2Q067 | Q12894 | 0.37525  |
| 54571 | Q2Q067 | Q6ZTC4 | 0.19215  |
| 54572 | Q2Q067 | P59052 | 0.21828  |
| 54573 | Q2Q067 | Q8WYK2 | 0.34507  |
| 54574 | Q2Q067 | Q6ZSA8 | 0.19215  |
| 54575 | Q2Q067 | Q9Y2G7 | 0.27402  |
| 54576 | Q2Q067 | Q14582 | 0.27371  |
| 54577 | Q2Q067 | Q9BW92 | 0.14821  |
| 54578 | Q2Q067 | Q5T8I3 | 0.036233 |
| 54579 | Q2Q067 | Q8IYX0 | 0.22687  |
| 54580 | Q2Q067 | Q6ZS94 | 0.19215  |
| 54581 | Q2Q067 | Q70IA6 | 0.33544  |
| 54582 | Q2Q067 | Q92734 | 0.086426 |
| 54583 | Q2Q067 | Q9NY27 | 0.83126  |
| 54584 | Q2Q067 | Q93052 | 0.28159  |
| 54585 | Q2Q067 | Q01860 | 0.71188  |
| 54586 | Q2Q067 | Q9H204 | 1.1366   |
| 54587 | Q2Q067 | P18848 | 1.1446   |
| 54588 | Q2Q067 | Q5VZT2 | 0.079214 |
| 54589 | Q2Q067 | Q69YH5 | 0.70287  |
| 54590 | Q2Q067 | O94817 | 0.47665  |
| 54591 | Q2Q067 | Q5TGS1 | 0.49191  |
| 54592 | Q2Q067 | Q6ZR54 | 0.19215  |
| 54593 | Q2Q067 | Q9UJW7 | 0.087195 |
| 54594 | Q2Q067 | Q9NWX8 | 0.77708  |
| 54595 | Q2Q067 | Q6IEG0 | 0.28458  |
| 54596 | Q2Q067 | Q96MF7 | 0.50143  |
| 54597 | Q2Q067 | Q9NSC2 | 0.30573  |
| 54598 | Q2Q067 | P28066 | 0.64272  |
| 54599 | Q2Q067 | P68036 | 0.70287  |
| 54600 | Q2Q067 | P63000 | 0.53952  |
| 54601 | Q2Q067 | Q9BZR8 | 0.40255  |
| 54602 | Q2Q067 | A8MU93 | 0.29573  |
| 54603 | Q2Q067 | Q5T749 | 0.36489  |
| 54604 | Q2Q067 | Q03393 | 0.052168 |
| 54605 | Q2Q067 | O00165 | 0.70942  |
| 54606 | Q2Q067 | B3EWG5 | 0.29573  |
| 54607 | Q2Q067 | Q6DHV5 | 0.040826 |
| 54608 | Q2Q067 | Q5T8I9 | 0.060217 |
| 54609 | Q2Q067 | Q92670 | 0.11083  |
| 54610 | Q2Q067 | Q2M2I5 | 0.24903  |
| 54611 | Q2Q067 | B1AK76 | 0.45637  |
| 54612 | Q2Q067 | Q6ZRQ5 | 0.5726   |
| 54613 | Q2Q067 | P41250 | 0.083964 |
| 54614 | Q2Q067 | Q8NA57 | 0.38348  |
| 54615 | Q2Q067 | Q9BT78 | 0.97885  |
| 54616 | Q2Q067 | Q9UGJ1 | 0.23823  |
| 54617 | Q2Q067 | Q5HYN5 | 0.068648 |
| 54618 | Q2Q067 | Q8IW50 | 0.29573  |
| 54619 | Q2Q067 | Q5C9Z4 | 0.68611  |
| 54620 | Q2Q067 | P0CG29 | 0.2324   |
| 54621 | Q2Q067 | P35579 | 0.76187  |
| 54622 | Q2Q067 | Q9P287 | 0.63694  |
| 54623 | Q2Q067 | P82664 | 0.51696  |
| 54624 | Q2Q067 | Q8IXQ6 | 0.8177   |
| 54625 | Q2Q067 | O95613 | 0.74518  |
| 54626 | Q2Q067 | Q9UL18 | 1.0094   |
| 54627 | Q2Q067 | P35606 | 0.3668   |
| 54628 | Q2Q067 | Q14683 | 0.40589  |
| 54629 | Q2Q067 | Q8WVM7 | 0.74085  |
| 54630 | Q2Q067 | P52736 | 0.59639  |
| 54631 | Q2Q067 | Q8N9G6 | 0.38062  |
| 54632 | Q2Q067 | Q96FJ2 | 0.73009  |
| 54633 | Q2Q067 | P61353 | 0.68644  |
| 54634 | Q2Q067 | Q92845 | 0.21744  |
| 54635 | Q2Q067 | Q8N3Z6 | 0.219    |
| 54636 | Q2Q067 | Q01826 | 0.78354  |
| 54637 | Q2Q067 | Q5VWT5 | 0.29297  |
| 54638 | Q2Q067 | Q8WTW3 | 0.43424  |
| 54639 | Q2Q067 | P63272 | 0.98552  |
| 54640 | Q2Q067 | Q96NJ3 | 0.092025 |
| 54641 | Q2Q067 | Q96DM3 | 0.12918  |
| 54642 | Q2Q067 | Q9BTD1 | 0.11911  |
| 54643 | Q2Q067 | O75800 | 0.37316  |
| 54644 | Q2Q067 | Q6ZRH4 | 0.7143   |

|       |        |        |           |
|-------|--------|--------|-----------|
| 54645 | Q2Q067 | P14324 | 0.30544   |
| 54646 | Q2Q067 | Q86XN6 | 0.16407   |
| 54647 | Q2Q067 | P0C5J1 | 0.0062999 |
| 54648 | Q2Q067 | O15371 | 0.66708   |
| 54649 | Q2Q067 | Q63HN1 | 0.041424  |
| 54650 | Q2Q067 | Q8N5L8 | 0.59554   |
| 54651 | Q2Q067 | Q04637 | 0.56617   |
| 54652 | Q2Q067 | Q9BZQ2 | 0.20753   |
| 54653 | Q2Q067 | Q49MG5 | 0.81452   |
| 54654 | Q2Q067 | Q96L21 | 0.22517   |
| 54655 | Q2Q067 | P21675 | 0.40917   |
| 54656 | Q2Q067 | Q8WWB5 | 0.37929   |
| 54657 | Q2Q067 | Q9BRU9 | 0.27054   |
| 54658 | Q2Q067 | P30305 | 0.34443   |
| 54659 | Q2Q067 | Q9H607 | 0.20751   |
| 54660 | Q2Q067 | Q9NXK8 | 0.54027   |
| 54661 | Q2Q067 | Q96FN9 | 0.2423    |
| 54662 | Q2Q067 | O14519 | 0.16694   |
| 54663 | Q2Q067 | Q9GZX5 | 0.78838   |
| 54664 | Q2Q067 | Q8N5J2 | 0.64851   |
| 54665 | Q2Q067 | Q3SYG4 | 0.3028    |
| 54666 | Q2Q067 | Q9Y375 | 0.55492   |
| 54667 | Q2Q067 | Q86WI3 | 0.49128   |
| 54668 | Q2Q067 | P43487 | 0.2174    |
| 54669 | Q2Q067 | Q9NP87 | 0.027903  |
| 54670 | Q2Q067 | Q9P1F3 | 0.36214   |
| 54671 | Q2Q067 | P53803 | 0.43971   |
| 54672 | Q2Q067 | Q5TBE3 | 0.17069   |
| 54673 | Q2Q067 | Q9H8G1 | 0.24672   |
| 54674 | Q2Q067 | Q9H9A7 | 0.56702   |
| 54675 | Q2Q067 | P20810 | 0.10732   |
| 54676 | Q2Q067 | Q96SW2 | 0.5059    |
| 54677 | Q2Q067 | Q9H3F6 | 0.46195   |
| 54678 | Q2Q067 | Q96AN2 | 0.13154   |
| 54679 | Q2Q067 | Q8N4J0 | 0.41546   |
| 54680 | Q2Q067 | Q7Z745 | 0.24419   |
| 54681 | Q2Q067 | Q9H2F5 | 0.5648    |
| 54682 | Q2Q067 | Q15007 | 0.38473   |
| 54683 | Q2Q067 | P13994 | 0.37883   |
| 54684 | Q2Q067 | Q49AM1 | 0.37468   |
| 54685 | Q2Q067 | Q5T5N4 | 0.011803  |
| 54686 | Q2Q067 | Q9GZU8 | 0.20538   |
| 54687 | Q2Q067 | Q96MN9 | 0.57845   |
| 54688 | Q2Q067 | Q9BRQ3 | 0.37843   |
| 54689 | Q2Q067 | Q9BQ52 | 0.13114   |
| 54690 | Q2Q067 | Q99436 | 0.7081    |
| 54691 | Q2Q067 | Q15853 | 0.67957   |
| 54692 | Q2Q067 | Q9GZV4 | 0.6574    |
| 54693 | Q2Q067 | Q9BZF9 | 0.52962   |
| 54694 | Q2Q067 | P24941 | 0.60816   |
| 54695 | Q2Q067 | Q5T319 | 0.19215   |
| 54696 | Q2Q067 | Q8IWN6 | 0.17426   |
| 54697 | Q2Q067 | Q96MU7 | 0.69944   |
| 54698 | Q2Q067 | Q96NA2 | 0.54692   |
| 54699 | Q2Q067 | Q9NPA8 | 0.38862   |
| 54700 | Q2Q067 | Q96RN5 | 1.2481    |
| 54701 | Q2Q067 | Q8TAA3 | 0.33536   |
| 54702 | Q2Q067 | Q9BQA5 | 0.82823   |
| 54703 | Q2Q067 | Q8N7B7 | 0.047422  |
| 54704 | Q2Q067 | P13010 | 0.3567    |
| 54705 | Q2Q067 | Q8IY92 | 0.38211   |
| 54706 | Q2Q067 | Q9H875 | 0.23232   |
| 54707 | Q2Q067 | Q14241 | 0.24567   |
| 54708 | Q2Q067 | Q7L1V2 | 0.50098   |
| 54709 | Q2Q067 | Q9NUQ3 | 0.62219   |
| 54710 | Q2Q067 | Q9BZ01 | 0.10585   |
| 54711 | Q2Q067 | P78347 | 0.55159   |
| 54712 | Q2Q067 | Q9UKA2 | 0.40312   |
| 54713 | Q2Q067 | P49006 | 0.43756   |
| 54714 | Q2Q067 | P17025 | 0.097501  |
| 54715 | Q2Q067 | P30047 | 0.698     |
| 54716 | Q2Q067 | O43592 | 0.28929   |
| 54717 | Q2Q067 | Q6NSH3 | 0.28186   |
| 54718 | Q2Q067 | Q9H489 | 0.16209   |
| 54719 | Q2Q067 | Q9UKK3 | 0.6119    |
| 54720 | Q2Q067 | P49321 | 0.39458   |

|       |        |        |          |
|-------|--------|--------|----------|
| 54721 | Q2Q067 | P07320 | 0.43779  |
| 54722 | Q2Q067 | P84101 | 0.54319  |
| 54723 | Q2Q067 | P62266 | 0.98376  |
| 54724 | Q2Q067 | Q9BU64 | 0.16343  |
| 54725 | Q2Q067 | Q9BRT9 | 0.2581   |
| 54726 | Q2Q067 | Q96M91 | 0.49951  |
| 54727 | Q2Q067 | Q8N4C6 | 0.17376  |
| 54728 | Q2Q067 | P42677 | 0.88927  |
| 54729 | Q2Q067 | Q9Y3U8 | 0.87684  |
| 54730 | Q2Q067 | O60508 | 0.34093  |
| 54731 | Q2Q067 | Q6NUI1 | 0.40369  |
| 54732 | Q2Q067 | P0C5K6 | 0.19215  |
| 54733 | Q2Q067 | Q8IYJ2 | 0.34262  |
| 54734 | Q2Q067 | A6NK75 | 0.15308  |
| 54735 | Q2Q067 | Q9H0G5 | 0.59475  |
| 54736 | Q2Q067 | Q9UJX6 | 0.55799  |
| 54737 | Q2Q067 | Q8WUX9 | 0.47274  |
| 54738 | Q2Q067 | Q494X1 | 0.097326 |
| 54739 | Q2Q067 | P62306 | 0.36035  |
| 54740 | Q2Q067 | Q9NRD1 | 0.12874  |
| 54741 | Q2Q067 | Q5BJE1 | 0.091411 |
| 54742 | Q2Q067 | A1A4G5 | 0.19215  |
| 54743 | Q2Q067 | P35232 | 0.5356   |
| 54744 | Q2Q067 | P63220 | 0.60047  |
| 54745 | Q2Q067 | P43359 | 0.5323   |
| 54746 | Q2Q067 | Q9UBD0 | 1.1534   |
| 54747 | Q2Q067 | P49593 | 0.21652  |
| 54748 | Q2Q067 | Q9H840 | 0.91039  |
| 54749 | Q2Q067 | Q5T9C2 | 0.29573  |
| 54750 | Q2Q067 | Q538Z0 | 0.19215  |
| 54751 | Q2Q067 | P0C838 | 0.16605  |
| 54752 | Q2Q067 | Q15652 | 0.42512  |
| 54753 | Q2Q067 | P62841 | 0.76298  |
| 54754 | Q2Q067 | O60869 | 0.64648  |
| 54755 | Q2Q067 | Q3SY46 | 0.18753  |
| 54756 | Q2Q067 | Q8WYQ3 | 0.30457  |
| 54757 | Q2Q067 | P61962 | 0.64054  |
| 54758 | Q2Q067 | Q8IV03 | 0.54663  |
| 54759 | Q2Q067 | O60518 | 0.92214  |
| 54760 | Q2Q067 | Q9HBD4 | 0.63303  |
| 54761 | Q2Q067 | O14512 | 0.40695  |
| 54762 | Q2Q067 | Q8NE71 | 0.30646  |
| 54763 | Q2Q067 | Q8TDP1 | 0.26412  |
| 54764 | Q2Q067 | O95229 | 0.76205  |
| 54765 | Q2Q067 | Q9UBX3 | 0.3044   |
| 54766 | Q2Q067 | Q9NWW7 | 0.34234  |
| 54767 | Q2Q067 | Q9UNZ5 | 0.29573  |
| 54768 | Q2Q067 | Q96CN0 | 0.19215  |
| 54769 | Q2Q067 | Q8N587 | 0.19721  |
| 54770 | Q2Q067 | Q8WXS3 | 0.54261  |
| 54771 | Q2Q067 | Q9Y5B9 | 0.25371  |
| 54772 | Q2Q067 | Q17RB0 | 0.32676  |
| 54773 | Q2Q067 | Q8TC56 | 0.63352  |
| 54774 | Q2Q067 | Q8N7Q3 | 0.16587  |
| 54775 | Q2Q067 | Q9Y678 | 0.56898  |
| 54776 | Q2Q067 | Q7Z398 | 0.090424 |
| 54777 | Q2Q067 | P83881 | 0.79659  |
| 54778 | Q2Q067 | Q8N6I1 | 0.48818  |
| 54779 | Q2Q067 | P06132 | 0.28987  |
| 54780 | Q2Q067 | P62987 | 0.34173  |
| 54781 | Q2Q067 | Q9UHZ2 | 0.19215  |
| 54782 | Q2Q067 | Q9BYR3 | 0.34715  |
| 54783 | Q2Q067 | Q75QN2 | 0.57387  |
| 54784 | Q2Q067 | Q92466 | 0.62869  |
| 54785 | Q2Q067 | P13682 | 0.13461  |
| 54786 | Q2Q067 | Q8IYI8 | 0.15228  |
| 54787 | Q2Q067 | P26651 | 0.70354  |
| 54788 | Q2Q067 | Q86V71 | 0.17393  |
| 54789 | Q2Q067 | Q04743 | 0.29077  |
| 54790 | Q2Q067 | Q53T94 | 0.39009  |
| 54791 | Q2Q067 | O43242 | 0.24416  |
| 54792 | Q2Q067 | Q09666 | 0.6659   |
| 54793 | Q2Q067 | Q2VPJ9 | 0.29573  |
| 54794 | Q2Q067 | Q9H4A5 | 0.42637  |
| 54795 | Q2Q067 | P06730 | 0.59023  |
| 54796 | Q2Q067 | P61583 | 0.56753  |

|       |        |        |          |
|-------|--------|--------|----------|
| 54797 | Q2Q067 | P45973 | 0.72647  |
| 54798 | Q2Q067 | P07476 | 0.23421  |
| 54799 | Q2Q067 | Q8NCR3 | 0.05824  |
| 54800 | Q2Q067 | Q8TEK3 | 0.33646  |
| 54801 | Q2Q067 | P52744 | 0.12365  |
| 54802 | Q2Q067 | Q9BX66 | 0.34532  |
| 54803 | Q2Q067 | Q6ZRT6 | 0.29573  |
| 54804 | Q2Q067 | Q15121 | 0.41476  |
| 54805 | Q2Q067 | Q99689 | 0.084184 |
| 54806 | Q2Q067 | P55327 | 0.30757  |
| 54807 | Q2Q067 | P08670 | 0.15912  |
| 54808 | Q2Q067 | Q14188 | 0.75905  |
| 54809 | Q2Q067 | P60411 | 0.34715  |
| 54810 | Q2Q067 | A6NE82 | 0.083005 |
| 54811 | Q2Q067 | Q9UGR2 | 0.3848   |
| 54812 | Q2Q067 | Q02577 | 0.60493  |
| 54813 | Q2Q067 | Q9BWU0 | 0.50521  |
| 54814 | Q2Q067 | P58505 | 0.15831  |
| 54815 | Q2Q067 | Q9NVV2 | 0.19215  |
| 54816 | Q2Q067 | Q86Y01 | 0.5697   |
| 54817 | Q2Q067 | Q93075 | 0.36219  |
| 54818 | Q2Q067 | Q96MC9 | 0.57527  |
| 54819 | Q2Q067 | Q6PII3 | 0.18937  |
| 54820 | Q2Q067 | A6NN14 | 0.16589  |
| 54821 | Q2Q067 | Q8N9M1 | 0.020318 |
| 54822 | Q2Q067 | Q96JL9 | 0.093779 |
| 54823 | Q2Q067 | P55771 | 0.8544   |
| 54824 | Q2Q067 | P51116 | 0.54346  |
| 54825 | Q2Q067 | Q9UNQ2 | 0.23005  |
| 54826 | Q2Q067 | P28370 | 0.40773  |
| 54827 | Q2Q067 | Q96E16 | 0.42683  |
| 54828 | Q2Q067 | O14777 | 0.58838  |
| 54829 | Q2Q067 | Q9BYS1 | 0.18143  |
| 54830 | Q2Q067 | Q9UKG1 | 0.35594  |
| 54831 | Q2Q067 | Q9H8H0 | 0.15082  |
| 54832 | Q2Q067 | P50222 | 0.61971  |
| 54833 | Q2Q067 | Q16537 | 0.26328  |
| 54834 | Q2Q067 | Q86YV9 | 0.45174  |
| 54835 | Q2Q067 | Q9BYR7 | 0.612    |
| 54836 | Q2Q067 | Q9NVM9 | 1.0684   |
| 54837 | Q2Q067 | Q9H974 | 0.65431  |
| 54838 | Q2Q067 | Q16576 | 0.40926  |
| 54839 | Q2Q067 | Q676U5 | 0.5938   |
| 54840 | Q2Q067 | Q562F6 | 0.75083  |
| 54841 | Q2Q067 | P0CB33 | 0.21506  |
| 54842 | Q2Q067 | Q8IXR5 | 0.13528  |
| 54843 | Q2Q067 | Q5T4T6 | 0.63267  |
| 54844 | Q2Q067 | Q6ZNH5 | 0.11824  |
| 54845 | Q2Q067 | Q9H040 | 0.4778   |
| 54846 | Q2Q067 | Q9UHA2 | 0.14678  |
| 54847 | Q2Q067 | Q8WWR8 | 0.062727 |
| 54848 | Q2Q067 | Q96A44 | 0.4314   |
| 54849 | Q2Q067 | Q9BVN2 | 0.50579  |
| 54850 | Q2Q067 | K9M1U5 | 0.19215  |
| 54851 | Q2Q067 | Q8N7W2 | 0.30398  |
| 54852 | Q2Q067 | Q9NWS9 | 0.058453 |
| 54853 | Q2Q067 | Q8TDR0 | 0.44569  |
| 54854 | Q2Q067 | P60006 | 0.2755   |
| 54855 | Q2Q067 | Q3ZCX4 | 0.12173  |
| 54856 | Q2Q067 | Q8IV54 | 0.18774  |
| 54857 | Q2Q067 | Q9UJ94 | 0.19215  |
| 54858 | Q2Q067 | Q9BX82 | 0.22861  |
| 54859 | Q2Q067 | Q03060 | 0.94836  |
| 54860 | Q2Q067 | O75953 | 0.76677  |
| 54861 | Q2Q067 | Q8N7M0 | 0.068878 |
| 54862 | Q2Q067 | P59942 | 0.31749  |
| 54863 | Q2Q067 | Q9Y2W2 | 0.70292  |
| 54864 | Q2Q067 | P0DJG4 | 0.44149  |
| 54865 | Q2Q067 | Q5T870 | 0.33506  |
| 54866 | Q2Q067 | Q9UHR6 | 0.53273  |
| 54867 | Q2Q067 | Q7Z6J9 | 0.39165  |
| 54868 | Q2Q067 | Q9NTM9 | 0.1805   |
| 54869 | Q2Q067 | Q01850 | 0.85476  |
| 54870 | Q2Q067 | O43402 | 0.42689  |
| 54871 | Q2Q067 | Q8NC38 | 0.028349 |
| 54872 | Q2Q067 | Q9UGY1 | 0.1644   |

|       |        |        |          |
|-------|--------|--------|----------|
| 54873 | Q2Q067 | P49589 | 0.23058  |
| 54874 | Q2Q067 | Q8NA47 | 0.29573  |
| 54875 | Q2Q067 | Q9H7T9 | 0.66026  |
| 54876 | Q2Q067 | Q9UBL3 | 0.2639   |
| 54877 | Q2Q067 | Q6STE5 | 0.72873  |
| 54878 | Q2Q067 | O95453 | 0.4386   |
| 54879 | Q2Q067 | P30260 | 1.0912   |
| 54880 | Q2Q067 | Q14154 | 0.46376  |
| 54881 | Q2Q067 | Q6PI77 | 0.30886  |
| 54882 | Q2Q067 | Q9BZG8 | 0.17656  |
| 54883 | Q2Q067 | Q5T7W7 | 0.29573  |
| 54884 | Q2Q067 | Q9Y3B9 | 0.3108   |
| 54885 | Q2Q067 | Q8N128 | 0.19215  |
| 54886 | Q2Q067 | Q86XK2 | 0.68917  |
| 54887 | Q2Q067 | Q13404 | 1.1048   |
| 54888 | Q2Q067 | P49721 | 0.46321  |
| 54889 | Q2Q067 | O14558 | 0.75457  |
| 54890 | Q2Q067 | Q9HCM9 | 0.43663  |
| 54891 | Q2Q067 | P42226 | 0.81651  |
| 54892 | Q2Q067 | P49406 | 0.44787  |
| 54893 | Q2Q067 | P04259 | 0.16907  |
| 54894 | Q2Q067 | Q9P0T4 | 0.15194  |
| 54895 | Q2Q067 | Q9BSY4 | 0.22513  |
| 54896 | Q2Q067 | P80297 | 0.1848   |
| 54897 | Q2Q067 | B2CW77 | 0.19215  |
| 54898 | Q2Q067 | Q8IY57 | 1.0804   |
| 54899 | Q2Q067 | Q96PT4 | 0.20973  |
| 54900 | Q2Q067 | Q5VWG9 | 0.75763  |
| 54901 | Q2Q067 | A7E2U8 | 0.16298  |
| 54902 | Q2Q067 | Q5U5X8 | 0.44143  |
| 54903 | Q2Q067 | Q9BPU9 | 0.11821  |
| 54904 | Q2Q067 | Q5H9L2 | 1.0622   |
| 54905 | Q2Q067 | Q9UPT5 | 0.51375  |
| 54906 | Q2Q067 | Q8NC51 | 0.68607  |
| 54907 | Q2Q067 | Q5HY98 | 0.20168  |
| 54908 | Q2Q067 | Q04837 | 0.50628  |
| 54909 | Q2Q067 | Q86VS8 | 0.34707  |
| 54910 | Q2Q067 | Q5W5X9 | 0.1308   |
| 54911 | Q2Q067 | Q9Y316 | 0.22173  |
| 54912 | Q2Q067 | Q6B0B8 | 0.20513  |
| 54913 | Q2Q067 | Q9BRQ4 | 0.18858  |
| 54914 | Q2Q067 | Q9BRJ6 | 0.28759  |
| 54915 | Q2Q067 | P13051 | 0.6816   |
| 54916 | Q2Q067 | O75792 | 0.62546  |
| 54917 | Q2Q067 | Q9Y2W1 | 0.49282  |
| 54918 | Q2Q067 | P11802 | 0.68089  |
| 54919 | Q2Q067 | Q8TBN0 | 0.23226  |
| 54920 | Q2Q067 | Q9UGB4 | 0.19215  |
| 54921 | Q2Q067 | Q16612 | 0.12099  |
| 54922 | Q2Q067 | Q969E8 | 0.61461  |
| 54923 | Q2Q067 | A6NJ88 | 0.44763  |
| 54924 | Q2Q067 | Q9UIF8 | 0.83615  |
| 54925 | Q2Q067 | Q96LT6 | 0.062368 |
| 54926 | Q2Q067 | Q96IZ0 | 0.75083  |
| 54927 | Q2Q067 | Q9Y296 | 0.21109  |
| 54928 | Q2Q067 | Q9HAT8 | 0.58735  |
| 54929 | Q2Q067 | Q9UH90 | 0.26638  |
| 54930 | Q2Q067 | Q92597 | 0.51709  |
| 54931 | Q2Q067 | P0CG42 | 0.19215  |
| 54932 | Q2Q067 | Q15637 | 0.32376  |
| 54933 | Q2Q067 | Q9UL03 | 0.6471   |
| 54934 | Q2Q067 | P23497 | 0.95366  |
| 54935 | Q2Q067 | O95707 | 0.62866  |
| 54936 | Q2Q067 | Q6ZVT6 | 0.29799  |
| 54937 | Q2Q067 | A6NLF2 | 0.24331  |
| 54938 | Q2Q067 | P02489 | 0.27733  |
| 54939 | Q2Q067 | A6NJ46 | 0.27517  |
| 54940 | Q2Q067 | P78371 | 0.54367  |
| 54941 | Q2Q067 | Q8NA19 | 0.32208  |
| 54942 | Q2Q067 | Q75VX8 | 0.48064  |
| 54943 | Q2Q067 | P09496 | 0.25578  |
| 54944 | Q2Q067 | Q8NEK5 | 0.10714  |
| 54945 | Q2Q067 | Q9Y421 | 0.28802  |
| 54946 | Q2Q067 | Q6TDU7 | 0.21694  |
| 54947 | Q2Q067 | Q9BYG4 | 0.64686  |
| 54948 | Q2Q067 | Q9HBX3 | 0.19215  |



|       |        |        |           |
|-------|--------|--------|-----------|
| 54949 | Q2Q067 | Q9Y692 | 0.7094    |
| 54950 | Q2Q067 | P55198 | 0.86945   |
| 54951 | Q2Q067 | Q96BN8 | 0.0088176 |
| 54952 | Q2Q067 | O60756 | 0.19215   |
| 54953 | Q2Q067 | Q71SY5 | 1.0545    |
| 54954 | Q2Q067 | Q6XYB7 | 0.32768   |
| 54955 | Q2Q067 | Q9BPX3 | 0.84697   |
| 54956 | Q2Q067 | P14672 | 0.64871   |
| 54957 | Q2Q067 | Q9Y535 | 0.24506   |
| 54958 | Q2Q067 | Q66K74 | 0.18112   |
| 54959 | Q2Q067 | Q6X4T0 | 0.045008  |
| 54960 | Q2Q067 | Q5UE93 | 0.48785   |
| 54961 | Q2Q067 | Q8NDZ0 | 0.066494  |
| 54962 | Q2Q067 | O15063 | 0.12426   |
| 54963 | Q2Q067 | Q969X6 | 1.2086    |
| 54964 | Q2Q067 | Q9Y252 | 0.38865   |
| 54965 | Q2Q067 | Q86Z20 | 0.54696   |
| 54966 | Q2Q067 | P46527 | 0.35675   |
| 54967 | Q2Q067 | Q6ICG7 | 0.19215   |
| 54968 | Q2Q067 | Q9P015 | 0.29141   |
| 54969 | Q2Q067 | Q8WXI9 | 0.47763   |
| 54970 | Q2Q067 | P23284 | 0.3348    |
| 54971 | Q2Q067 | P14653 | 0.34715   |
| 54972 | Q2Q067 | P49720 | 0.4633    |
| 54973 | Q2Q067 | O00463 | 0.28027   |
| 54974 | Q2Q067 | Q13952 | 0.72246   |
| 54975 | Q2Q067 | P15923 | 0.60179   |
| 54976 | Q2Q067 | P10242 | 0.97441   |
| 54977 | Q2Q067 | Q8NB12 | 0.26907   |
| 54978 | Q2Q067 | Q6P9B6 | 0.28783   |
| 54979 | Q2Q067 | O43309 | 0.1126    |
| 54980 | Q2Q067 | O14978 | 0.37704   |
| 54981 | Q2Q067 | Q9P2W9 | 0.12791   |
| 54982 | Q2Q067 | O60422 | 0.32817   |
| 54983 | Q2Q067 | P35637 | 0.36892   |
| 54984 | Q2Q067 | Q9NRR5 | 0.69817   |
| 54985 | Q2Q067 | O60810 | 0.34439   |
| 54986 | Q2Q067 | Q6ZN79 | 0.20479   |
| 54987 | Q2Q067 | Q99717 | 0.43825   |
| 54988 | Q2Q067 | P06733 | 0.90363   |
| 54989 | Q2Q067 | A7E2V4 | 0.7741    |
| 54990 | Q2Q067 | Q15834 | 1.0846    |
| 54991 | Q2Q067 | P51580 | 0.048096  |
| 54992 | Q2Q067 | Q9H299 | 0.04381   |
| 54993 | Q2Q067 | Q8TDN4 | 0.56222   |
| 54994 | Q2Q067 | Q9BXF6 | 0.54172   |
| 54995 | Q2Q067 | P15407 | 0.70602   |
| 54996 | Q2Q067 | Q9ULK2 | 0.41879   |
| 54997 | Q2Q067 | Q9Y675 | 0.35987   |
| 54998 | Q2Q067 | Q8NCD3 | 0.48788   |
| 54999 | Q2Q067 | Q9H7R5 | 0.17365   |
| 55000 | Q2Q067 | Q8IUC3 | 0.41492   |
| 55001 | Q2Q067 | Q9UBI1 | 0.28783   |
| 55002 | Q2Q067 | Q6ZTI6 | 0.43678   |
| 55003 | Q2Q067 | Q02040 | 0.23213   |
| 55004 | Q2Q067 | P22626 | 0.50288   |
| 55005 | Q2Q067 | Q12857 | 0.34044   |
| 55006 | Q2Q067 | A6NFQ2 | 0.21043   |
| 55007 | Q2Q067 | Q9UH77 | 0.56809   |
| 55008 | Q2Q067 | Q96DZ1 | 0.23454   |
| 55009 | Q2Q067 | P27469 | 0.68347   |
| 55010 | Q2Q067 | Q9C0F3 | 0.29295   |
| 55011 | Q2Q067 | Q9BXR0 | 0.66528   |
| 55012 | Q2Q067 | P78318 | 0.45704   |
| 55013 | Q2Q067 | Q69YN4 | 0.14045   |
| 55014 | Q2Q067 | P21673 | 0.24866   |
| 55015 | Q2Q067 | O60870 | 0.36278   |
| 55016 | Q2Q067 | Q9BYU5 | 0.17348   |
| 55017 | Q2Q067 | Q9BTL3 | 0.5188    |
| 55018 | Q2Q067 | P02533 | 0.84232   |
| 55019 | Q2Q067 | Q8N972 | 0.16182   |
| 55020 | Q2Q067 | C9JFL3 | 0.19215   |
| 55021 | Q2Q067 | Q01546 | 0.23657   |
| 55022 | Q2Q067 | Q6ZYL4 | 0.5539    |
| 55023 | Q2Q067 | Q96CS2 | 0.45603   |
| 55024 | Q2Q067 | P11172 | 0.19175   |

|       |        |        |          |
|-------|--------|--------|----------|
| 55025 | Q2Q067 | Q8NHZ7 | 0.27948  |
| 55026 | Q2Q067 | Q8ND76 | 0.52785  |
| 55027 | Q2Q067 | Q13568 | 0.99226  |
| 55028 | Q2Q067 | Q8TAG6 | 0.28217  |
| 55029 | Q2Q067 | A6NI87 | 0.24415  |
| 55030 | Q2Q067 | Q0VD86 | 0.32989  |
| 55031 | Q2Q067 | Q3B7T1 | 0.39593  |
| 55032 | Q2Q067 | Q13490 | 0.4373   |
| 55033 | Q2Q067 | Q12816 | 0.25165  |
| 55034 | Q2Q067 | Q9H0M5 | 0.087195 |
| 55035 | Q2Q067 | Q9UL40 | 0.58706  |
| 55036 | Q2Q067 | Q9UHQ1 | 0.39745  |
| 55037 | Q2Q067 | Q9BYQ4 | 0.34715  |
| 55038 | Q2Q067 | O60809 | 0.23856  |
| 55039 | Q2Q067 | Q9UMX0 | 0.74746  |
| 55040 | Q2Q067 | Q8N3U4 | 0.64546  |
| 55041 | Q2Q067 | Q6W349 | 0.27117  |
| 55042 | Q2Q067 | Q96BN2 | 0.55997  |
| 55043 | Q2Q067 | P51808 | 0.24236  |
| 55044 | Q2Q067 | Q6PJG6 | 0.5463   |
| 55045 | Q2Q067 | A6NFY7 | 0.29289  |
| 55046 | Q2Q067 | Q7L190 | 0.75962  |
| 55047 | Q2Q067 | Q5W0V3 | 0.39515  |
| 55048 | Q2Q067 | Q13765 | 1.1259   |
| 55049 | Q2Q067 | C9JLW8 | 0.39201  |
| 55050 | Q2Q067 | P50914 | 1.0505   |
| 55051 | Q2Q067 | P46776 | 1.0382   |
| 55052 | Q2Q067 | Q9BWH6 | 0.35453  |
| 55053 | Q2Q067 | Q6TFL3 | 0.06639  |
| 55054 | Q2Q067 | Q8N8P6 | 0.28355  |
| 55055 | Q2Q067 | Q9Y281 | 0.46094  |
| 55056 | Q2Q067 | Q9BUH8 | 0.35983  |
| 55057 | Q2Q067 | Q15287 | 0.91508  |
| 55058 | Q2Q067 | Q2NL68 | 0.29573  |
| 55059 | Q2Q067 | Q9NVV4 | 0.45273  |
| 55060 | Q2Q067 | Q8NDN9 | 0.57472  |
| 55061 | Q2Q067 | Q6IPX3 | 0.48462  |
| 55062 | Q2Q067 | Q8WVK2 | 0.34939  |
| 55063 | Q2Q067 | Q75MW2 | 0.40129  |
| 55064 | Q2Q067 | P50452 | 0.63006  |
| 55065 | Q2Q067 | P27816 | 0.37839  |
| 55066 | Q2Q067 | Q7L4I2 | 0.86202  |
| 55067 | Q2Q067 | P18583 | 0.32302  |
| 55068 | Q2Q067 | P0CL80 | 0.019044 |
| 55069 | Q2Q067 | Q9ULC4 | 0.34109  |
| 55070 | Q2Q067 | Q7Z417 | 0.75561  |
| 55071 | Q2Q067 | Q6R327 | 0.10297  |
| 55072 | Q2Q067 | A0JNW5 | 0.27888  |
| 55073 | Q2Q067 | Q86WH2 | 0.095084 |
| 55074 | Q2Q067 | Q96M29 | 0.27079  |
| 55075 | Q2Q067 | O75376 | 0.41585  |
| 55076 | Q2Q067 | Q6ZN08 | 0.20699  |
| 55077 | Q2Q067 | Q13042 | 1.2279   |
| 55078 | Q2Q067 | Q9HA58 | 0.19215  |
| 55079 | Q2Q067 | P35900 | 0.80198  |
| 55080 | Q2Q067 | Q96KT6 | 0.19215  |
| 55081 | Q2Q067 | P57086 | 0.52078  |
| 55082 | Q2Q067 | Q5JRK9 | 0.56155  |
| 55083 | Q2Q067 | Q8NHY6 | 0.17262  |
| 55084 | Q2Q067 | Q96EF6 | 0.28838  |
| 55085 | Q2Q067 | Q9NNX9 | 0.50252  |
| 55086 | Q2Q067 | P31689 | 0.21633  |
| 55087 | Q2Q067 | Q9H7H0 | 0.63713  |
| 55088 | Q2Q067 | Q9UK39 | 0.47893  |
| 55089 | Q2Q067 | Q6ZTN6 | 0.25703  |
| 55090 | Q2Q067 | Q8TBZ8 | 0.11921  |
| 55091 | Q2Q067 | Q16384 | 0.26023  |
| 55092 | Q2Q067 | P27815 | 0.27142  |
| 55093 | Q2Q067 | P61586 | 0.086378 |
| 55094 | Q2Q067 | Q86VN1 | 0.4456   |
| 55095 | Q2Q067 | Q8ND04 | 0.60077  |
| 55096 | Q2Q067 | Q96CM3 | 0.35441  |
| 55097 | Q2Q067 | Q9UIE0 | 0.10351  |
| 55098 | Q2Q067 | Q5HYC2 | 0.013015 |
| 55099 | Q2Q067 | Q92556 | 0.21248  |
| 55100 | Q2Q067 | Q86WV5 | 0.28751  |

|       |        |        |          |
|-------|--------|--------|----------|
| 55101 | Q2Q067 | Q16637 | 0.91809  |
| 55102 | Q2Q067 | Q9Y468 | 0.89613  |
| 55103 | Q2Q067 | Q92917 | 0.79042  |
| 55104 | Q2Q067 | Q96PG8 | 0.19215  |
| 55105 | Q2Q067 | Q15651 | 0.59073  |
| 55106 | Q2Q067 | Q3LHN1 | 0.19215  |
| 55107 | Q2Q067 | Q9Y222 | 0.95215  |
| 55108 | Q2Q067 | Q96DV4 | 0.18823  |
| 55109 | Q2Q067 | Q8IXJ9 | 0.72893  |
| 55110 | Q2Q067 | Q68DY9 | 0.11859  |
| 55111 | Q2Q067 | P11940 | 0.41331  |
| 55112 | Q2Q067 | Q5T5S1 | 0.26593  |
| 55113 | Q2Q067 | Q5VIY5 | 0.22332  |
| 55114 | Q2Q067 | P0CG24 | 0.096646 |
| 55115 | Q2Q067 | Q14331 | 0.21951  |
| 55116 | Q2Q067 | O75290 | 0.21203  |
| 55117 | Q2Q067 | Q96AJ1 | 0.66981  |
| 55118 | Q2Q067 | Q3T8J9 | 0.66073  |
| 55119 | Q2Q067 | Q5VT40 | 0.14645  |
| 55120 | Q2Q067 | H0Y354 | 0.2014   |
| 55121 | Q2Q067 | Q9H5I1 | 0.52917  |
| 55122 | Q2Q067 | Q15691 | 0.59811  |
| 55123 | Q2Q067 | Q9UMX1 | 0.38377  |
| 55124 | Q2Q067 | P22681 | 0.32162  |
| 55125 | Q2Q067 | Q9H081 | 0.69508  |
| 55126 | Q2Q067 | O60888 | 0.32529  |
| 55127 | Q2Q067 | Q96N11 | 0.080189 |
| 55128 | Q2Q067 | O95905 | 0.76119  |
| 55129 | Q2Q067 | Q8WXF1 | 0.91836  |
| 55130 | Q2Q067 | Q9NP77 | 0.17929  |
| 55131 | Q2Q067 | Q99814 | 0.39116  |
| 55132 | Q2Q067 | P82909 | 0.29299  |
| 55133 | Q2Q067 | Q8WVK7 | 0.5628   |
| 55134 | Q2Q067 | Q6P1K8 | 0.37742  |
| 55135 | Q2Q067 | Q9H7E2 | 0.40074  |
| 55136 | Q2Q067 | Q8WXB4 | 0.29295  |
| 55137 | Q2Q067 | P60510 | 0.79182  |
| 55138 | Q2Q067 | Q8IYL3 | 0.4501   |
| 55139 | Q2Q067 | Q14689 | 0.2891   |
| 55140 | Q2Q067 | Q5XG85 | 0.19215  |
| 55141 | Q2Q067 | P49711 | 0.23837  |
| 55142 | Q2Q067 | P40425 | 0.68399  |
| 55143 | Q2Q067 | H3BN30 | 0.19215  |
| 55144 | Q2Q067 | A2A288 | 0.27756  |
| 55145 | Q2Q067 | P26371 | 0.19215  |
| 55146 | Q2Q067 | Q9NT62 | 0.4061   |
| 55147 | Q2Q067 | Q9GZQ3 | 0.58655  |
| 55148 | Q2Q067 | Q8N5A5 | 0.82604  |
| 55149 | Q2Q067 | Q9H3M7 | 0.793    |
| 55150 | Q2Q067 | Q15111 | 0.58744  |
| 55151 | Q2Q067 | Q93062 | 0.75782  |
| 55152 | Q2Q067 | Q969E4 | 0.39593  |
| 55153 | Q2Q067 | P35658 | 1.0644   |
| 55154 | Q2Q067 | P63162 | 0.62351  |
| 55155 | Q2Q067 | Q9Y250 | 0.95669  |
| 55156 | Q2Q067 | O75368 | 0.091338 |
| 55157 | Q2Q067 | Q16649 | 0.19221  |
| 55158 | Q2Q067 | Q86UD1 | 0.08103  |
| 55159 | Q2Q067 | P83916 | 0.65607  |
| 55160 | Q2Q067 | Q6ZQY7 | 0.21688  |
| 55161 | Q2Q067 | P05423 | 0.045505 |
| 55162 | Q2Q067 | Q6NXR4 | 0.071917 |
| 55163 | Q2Q067 | Q5T7N7 | 0.19215  |
| 55164 | Q2Q067 | Q9NVV9 | 1.0089   |
| 55165 | Q2Q067 | Q53ET0 | 0.95107  |
| 55166 | Q2Q067 | Q8TAP9 | 1.3725   |
| 55167 | Q2Q067 | Q8IW35 | 1.1355   |
| 55168 | Q2Q067 | Q9P0V3 | 0.5366   |
| 55169 | Q2Q067 | P62854 | 0.89742  |
| 55170 | Q2Q067 | Q16352 | 0.15904  |
| 55171 | Q2Q067 | P17480 | 1.0261   |
| 55172 | Q2Q067 | Q96KF2 | 0.19215  |
| 55173 | Q2Q067 | Q9BQ66 | 0.34715  |
| 55174 | Q2Q067 | Q92841 | 0.56233  |
| 55175 | Q2Q067 | Q9BRJ7 | 0.33213  |
| 55176 | Q2Q067 | Q9HAW4 | 0.41415  |

|       |        |         |          |
|-------|--------|---------|----------|
| 55177 | Q2Q067 | Q9NZM4  | 0.68842  |
| 55178 | Q2Q067 | O76011  | 0.20138  |
| 55179 | Q2Q067 | P23297  | 0.50745  |
| 55180 | Q2Q067 | Q96ED9  | 0.40636  |
| 55181 | Q2Q067 | Q5T1J5  | 0.46303  |
| 55182 | Q2Q067 | O43324  | 1.1875   |
| 55183 | Q2Q067 | Q9Y2Z0  | 0.40817  |
| 55184 | Q2Q067 | P62308  | 0.76738  |
| 55185 | Q2Q067 | Q00987  | 0.24833  |
| 55186 | Q2Q067 | P05783  | 1.3037   |
| 55187 | Q2Q067 | Q9HC16  | 0.082948 |
| 55188 | Q2Q067 | P59037  | 0.47948  |
| 55189 | Q2Q067 | P49247  | 0.32814  |
| 55190 | Q2Q067 | Q96A26  | 0.060523 |
| 55191 | Q2Q067 | Q9UMS4  | 0.58015  |
| 55192 | Q2Q067 | Q8TCZ7  | 0.3653   |
| 55193 | Q2Q067 | Q9P2J5  | 0.2541   |
| 55194 | Q2Q067 | Q0VG99  | 0.25704  |
| 55195 | Q2Q067 | Q9BWM5  | 0.10781  |
| 55196 | Q2Q067 | Q7Z4H9  | 0.22946  |
| 55197 | Q2Q067 | Q9BS18  | 0.36764  |
| 55198 | Q2Q067 | B3EWG3  | 0.29573  |
| 55199 | Q2Q067 | Q8TF32  | 0.2627   |
| 55200 | Q2Q067 | Q96GM8  | 0.16332  |
| 55201 | Q2Q067 | P09001  | 0.27695  |
| 55202 | Q2Q067 | Q13867  | 0.31023  |
| 55203 | Q2Q067 | P62753  | 1.0004   |
| 55204 | Q2Q067 | Q86VP3  | 0.1701   |
| 55205 | Q2Q067 | Q9BTE3  | 0.64252  |
| 55206 | Q2Q067 | Q16600  | 0.11257  |
| 55207 | Q2Q067 | Q2M3X9  | 0.10324  |
| 55208 | Q2Q067 | Q14602  | 0.25221  |
| 55209 | Q2Q067 | P08397  | 0.082511 |
| 55210 | Q2Q067 | Q9NTK5  | 0.36121  |
| 55211 | Q2Q067 | O14595  | 0.18238  |
| 55212 | Q2Q067 | P52737  | 0.58783  |
| 55213 | Q2Q067 | O14893  | 0.68045  |
| 55214 | Q2Q067 | O15083  | 0.48996  |
| 55215 | Q2Q067 | Q6ZRP5  | 0.19215  |
| 55216 | Q2Q067 | Q6PI98  | 0.56735  |
| 55217 | Q2Q067 | Q9NR46  | 0.36835  |
| 55218 | Q2Q067 | Q6ZV50  | 0.30214  |
| 55219 | Q2Q067 | Q96JK9  | 0.94709  |
| 55220 | Q2Q067 | Q6P1L5  | 0.66876  |
| 55221 | Q2Q067 | Q7Z794  | 0.25607  |
| 55222 | Q2Q067 | Q9HCI5  | 0.58736  |
| 55223 | Q2Q067 | Q9BX26  | 0.70346  |
| 55224 | Q2Q067 | Q14781  | 0.76031  |
| 55225 | Q2Q067 | Q9UQR1  | 0.81979  |
| 55226 | Q2Q067 | P61578  | 0.36503  |
| 55227 | Q2Q067 | Q9NY74  | 0.51037  |
| 55228 | Q2Q067 | Q9NXX6  | 0.36585  |
| 55229 | Q2Q067 | Q8N668  | 0.76974  |
| 55230 | Q2Q067 | A6NEQ2  | 0.19215  |
| 55231 | Q2Q067 | Q3LI66  | 0.19215  |
| 55232 | Q2Q067 | Q96HI0  | 0.45788  |
| 55233 | Q2Q067 | Q96QD9  | 0.74944  |
| 55234 | Q2Q067 | Q6ZVC0  | 0.41813  |
| 55235 | Q2Q067 | Q8TAF7  | 0.22688  |
| 55236 | Q2Q067 | A6NI79  | 0.44645  |
| 55237 | Q2Q067 | P05388  | 1.3866   |
| 55238 | Q2Q067 | Q5XKE5  | 0.16378  |
| 55239 | Q2Q067 | Q8N7K0  | 0.16182  |
| 55240 | Q2Q067 | Q86UT8  | 0.63552  |
| 55241 | Q2Q067 | Q13023  | 0.57576  |
| 55242 | Q2Q067 | Q9H9F9  | 1.1446   |
| 55243 | Q2Q067 | Q8IUUF8 | 0.41474  |
| 55244 | Q2Q067 | Q8NEZ5  | 0.76375  |
| 55245 | Q2Q067 | Q13542  | 0.22574  |
| 55246 | Q2Q067 | P49754  | 0.42108  |
| 55247 | Q2Q067 | Q14207  | 0.93013  |
| 55248 | Q2Q067 | O14802  | 0.059031 |
| 55249 | Q2Q067 | Q9H3H3  | 0.17807  |
| 55250 | Q2Q067 | Q9H7D7  | 0.32989  |
| 55251 | Q2Q067 | Q86YD1  | 0.43789  |
| 55252 | Q2Q067 | Q8NFH5  | 0.58316  |

|       |        |        |           |
|-------|--------|--------|-----------|
| 55253 | Q2Q067 | Q15776 | 0.42224   |
| 55254 | Q2Q067 | Q6NSW5 | 0.59569   |
| 55255 | Q2Q067 | Q6MZT1 | 0.37048   |
| 55256 | Q2Q067 | Q66K89 | 0.80655   |
| 55257 | Q2Q067 | Q8IYD8 | 0.2662    |
| 55258 | Q2Q067 | Q9P031 | 1.0622    |
| 55259 | Q2Q067 | P0C7V0 | 0.19215   |
| 55260 | Q2Q067 | Q15154 | 0.5453    |
| 55261 | Q2Q067 | Q6Q759 | 0.3409    |
| 55262 | Q2Q067 | Q08AG5 | 0.28629   |
| 55263 | Q2Q067 | Q14129 | 0.21494   |
| 55264 | Q2Q067 | Q53QV2 | 0.34416   |
| 55265 | Q2Q067 | P52294 | 1.1063    |
| 55266 | Q2Q067 | Q7LBC6 | 0.13449   |
| 55267 | Q2Q067 | Q99459 | 1.1226    |
| 55268 | Q2Q067 | Q6PCE3 | 0.21723   |
| 55269 | Q2Q067 | Q96IT6 | 0.19215   |
| 55270 | Q2Q067 | Q8N983 | 0.28685   |
| 55271 | Q2Q067 | P35711 | 0.99574   |
| 55272 | Q2Q067 | Q9UBY9 | 0.97029   |
| 55273 | Q2Q067 | O14599 | 0.42055   |
| 55274 | Q2Q067 | Q12874 | 0.44296   |
| 55275 | Q2Q067 | Q9NQR7 | 0.19215   |
| 55276 | Q2Q067 | Q9NTI7 | 0.27612   |
| 55277 | Q2Q067 | P42224 | 0.25809   |
| 55278 | Q2Q067 | O60671 | 0.50231   |
| 55279 | Q2Q067 | P0C879 | 0.19215   |
| 55280 | Q2Q067 | Q5VT28 | 0.19025   |
| 55281 | Q2Q067 | Q15436 | 0.67823   |
| 55282 | Q2Q067 | Q96LP2 | 0.0063133 |
| 55283 | Q2Q067 | Q6ZQT7 | 0.19215   |
| 55284 | Q2Q067 | Q9H9E3 | 0.40446   |
| 55285 | Q2Q067 | O95190 | 0.3724    |
| 55286 | Q2Q067 | Q5RHP9 | 0.15076   |
| 55287 | Q2Q067 | Q96IU4 | 0.34381   |
| 55288 | Q2Q067 | O75132 | 0.1794    |
| 55289 | Q2Q067 | A6NKF2 | 0.62076   |
| 55290 | Q2Q067 | Q86W11 | 0.080718  |
| 55291 | Q2Q067 | E7EW31 | 0.19215   |
| 55292 | Q2Q067 | P60842 | 0.096503  |
| 55293 | Q2Q067 | Q8WYA6 | 0.72943   |
| 55294 | Q2Q067 | O15360 | 0.77154   |
| 55295 | Q2Q067 | P49918 | 0.65241   |
| 55296 | Q2Q067 | P0C7I6 | 0.41634   |
| 55297 | Q2Q067 | P51522 | 0.10512   |
| 55298 | Q2Q067 | Q96FF9 | 0.7783    |
| 55299 | Q2Q067 | Q6L8H2 | 0.19215   |
| 55300 | Q2Q067 | P07197 | 0.72757   |
| 55301 | Q2Q067 | Q9NXR7 | 0.35979   |
| 55302 | Q2Q067 | P22736 | 0.28716   |
| 55303 | Q2Q067 | P32929 | 0.28033   |
| 55304 | Q2Q067 | Q9BUA3 | 0.22848   |
| 55305 | Q2Q067 | Q9NPA3 | 0.679     |
| 55306 | Q2Q067 | Q96EY1 | 0.45981   |
| 55307 | Q2Q067 | Q96K31 | 0.22027   |
| 55308 | Q2Q067 | Q16836 | 0.54671   |
| 55309 | Q2Q067 | Q5M9Q1 | 0.56383   |
| 55310 | Q2Q067 | Q6ZN17 | 1.1649    |
| 55311 | Q2Q067 | A6NEJ1 | 0.12144   |
| 55312 | Q2Q067 | Q9NRR3 | 0.44144   |
| 55313 | Q2Q067 | Q86X55 | 0.75837   |
| 55314 | Q2Q067 | O94763 | 0.76772   |
| 55315 | Q2Q067 | Q7Z7L8 | 0.5317    |
| 55316 | Q2Q067 | O14598 | 0.43298   |
| 55317 | Q2Q067 | Q8NFG4 | 0.66644   |
| 55318 | Q2Q067 | Q8TC71 | 0.34074   |
| 55319 | Q2Q067 | O00479 | 0.40838   |
| 55320 | Q2Q067 | O75674 | 0.31065   |
| 55321 | Q2Q067 | Q71F78 | 0.21703   |
| 55322 | Q2Q067 | Q9UN30 | 0.29394   |
| 55323 | Q2Q067 | O15205 | 0.49835   |
| 55324 | Q2Q067 | O15037 | 0.25087   |
| 55325 | Q2Q067 | Q96N23 | 0.28161   |
| 55326 | Q2Q067 | Q13227 | 0.66652   |
| 55327 | Q2Q067 | O15392 | 0.25893   |
| 55328 | Q2Q067 | P63208 | 0.61478   |

|       |        |        |          |
|-------|--------|--------|----------|
| 55329 | Q2Q067 | Q96BN6 | 0.07306  |
| 55330 | Q2Q067 | Q7RTU3 | 0.331    |
| 55331 | Q2Q067 | P18124 | 0.64646  |
| 55332 | Q2Q067 | P62851 | 0.84318  |
| 55333 | Q2Q067 | Q96PM9 | 0.29295  |
| 55334 | Q2Q067 | Q96BR6 | 0.19239  |
| 55335 | Q2Q067 | Q6L9T8 | 0.2014   |
| 55336 | Q2Q067 | Q9Y255 | 0.02603  |
| 55337 | Q2Q067 | Q9BTM9 | 0.60343  |
| 55338 | Q2Q067 | Q8IYN2 | 0.68354  |
| 55339 | Q2Q067 | Q01534 | 0.17836  |
| 55340 | Q2Q067 | Q00839 | 0.32314  |
| 55341 | Q2Q067 | Q9Y2V0 | 0.012657 |
| 55342 | Q2Q067 | Q96IR2 | 0.17365  |
| 55343 | Q2Q067 | Q6RFH8 | 0.84719  |
| 55344 | Q2Q067 | Q06587 | 0.75155  |
| 55345 | Q2Q067 | Q13617 | 0.6907   |
| 55346 | Q2Q067 | Q9UI36 | 0.38708  |
| 55347 | Q2Q067 | Q9ULM6 | 1.0399   |
| 55348 | Q2Q067 | P25398 | 0.70288  |
| 55349 | Q2Q067 | Q9Y6Y1 | 0.4808   |
| 55350 | Q2Q067 | P55209 | 0.71127  |
| 55351 | Q2Q067 | Q32NC0 | 0.078975 |
| 55352 | Q2Q067 | Q969W8 | 0.19891  |
| 55353 | Q2Q067 | Q96RL1 | 0.72257  |
| 55354 | Q2Q067 | P07864 | 0.23751  |
| 55355 | Q2Q067 | Q14442 | 0.085141 |
| 55356 | Q2Q067 | Q6ZNA1 | 0.1529   |
| 55357 | Q2Q067 | A7MD48 | 0.25021  |
| 55358 | Q2Q067 | Q15056 | 0.30053  |
| 55359 | Q2Q067 | A6NKH3 | 0.22158  |
| 55360 | Q2Q067 | Q9H0I3 | 0.40058  |
| 55361 | Q2Q067 | Q15361 | 0.75669  |
| 55362 | Q2Q067 | P43355 | 1.0298   |
| 55363 | Q2Q067 | Q9HCM7 | 0.46067  |
| 55364 | Q2Q067 | Q96QE5 | 0.85675  |
| 55365 | Q2Q067 | Q8IWE2 | 0.36405  |
| 55366 | Q2Q067 | Q9HCS7 | 0.42486  |
| 55367 | Q2Q067 | O95201 | 0.58991  |
| 55368 | Q2Q067 | Q96EA4 | 0.70461  |
| 55369 | Q2Q067 | Q1RMZ1 | 0.26132  |
| 55370 | Q2Q067 | O43345 | 0.15472  |
| 55371 | Q2Q067 | Q15759 | 0.25547  |
| 55372 | Q2Q067 | Q96JJ3 | 0.1634   |
| 55373 | Q2Q067 | Q9NYV6 | 0.52468  |
| 55374 | Q2Q067 | Q9NQ92 | 0.90299  |
| 55375 | Q2Q067 | O95153 | 0.59445  |
| 55376 | Q2Q067 | Q3KP22 | 0.035759 |
| 55377 | Q2Q067 | Q8TDD2 | 0.26613  |
| 55378 | Q2Q067 | Q701N4 | 0.19215  |
| 55379 | Q2Q067 | Q96GV9 | 0.34825  |
| 55380 | Q2Q067 | Q16829 | 0.27641  |
| 55381 | Q2Q067 | Q9UKT5 | 0.39402  |
| 55382 | Q2Q067 | P62937 | 0.71116  |
| 55383 | Q2Q067 | Q9BTA9 | 0.9345   |
| 55384 | Q2Q067 | Q15797 | 0.2318   |
| 55385 | Q2Q067 | Q9H1D9 | 0.52885  |
| 55386 | Q2Q067 | Q5FWF6 | 0.22668  |
| 55387 | Q2Q067 | Q9Y608 | 0.28344  |
| 55388 | Q2Q067 | A6NNV3 | 0.23617  |
| 55389 | Q2Q067 | P78537 | 0.71698  |
| 55390 | Q2Q067 | Q16526 | 0.36035  |
| 55391 | Q2Q067 | Q9Y4Z0 | 0.74207  |
| 55392 | Q2Q067 | Q68CZ6 | 0.45285  |
| 55393 | Q2Q067 | O60936 | 0.78617  |
| 55394 | Q2Q067 | Q8N393 | 0.10262  |
| 55395 | Q2Q067 | Q5TG53 | 0.19215  |
| 55396 | Q2Q067 | Q9H633 | 0.21528  |
| 55397 | Q2Q067 | Q9BUV0 | 0.29573  |
| 55398 | Q2Q067 | P23409 | 0.082963 |
| 55399 | Q2Q067 | P62877 | 0.57674  |
| 55400 | Q2Q067 | Q9H1Y0 | 0.3353   |
| 55401 | Q2Q067 | A8MTZ0 | 0.1618   |
| 55402 | Q2Q067 | O43660 | 0.26829  |
| 55403 | Q2Q067 | Q8TAL5 | 0.021499 |
| 55404 | Q2Q067 | Q9BXY0 | 0.15082  |

|       |        |        |          |
|-------|--------|--------|----------|
| 55405 | Q2Q067 | Q9P0W2 | 0.68024  |
| 55406 | Q2Q067 | O75969 | 0.19461  |
| 55407 | Q2Q067 | P23508 | 0.30324  |
| 55408 | Q2Q067 | F8WFD2 | 0.18974  |
| 55409 | Q2Q067 | Q14194 | 0.37021  |
| 55410 | Q2Q067 | Q8N163 | 0.70197  |
| 55411 | Q2Q067 | P07199 | 0.36696  |
| 55412 | Q2Q067 | O75157 | 0.19596  |
| 55413 | Q2Q067 | Q96HY6 | 0.28028  |
| 55414 | Q2Q067 | Q6UXR8 | 0.19215  |
| 55415 | Q2Q067 | Q8WTZ3 | 0.2176   |
| 55416 | Q2Q067 | Q9NQ50 | 0.37344  |
| 55417 | Q2Q067 | Q8NAP3 | 0.32935  |
| 55418 | Q2Q067 | Q9BZA5 | 0.44921  |
| 55419 | Q2Q067 | Q6P1M9 | 0.14781  |
| 55420 | Q2Q067 | P61960 | 0.12104  |
| 55421 | Q2Q067 | Q96ND8 | 0.25317  |
| 55422 | Q2Q067 | Q96LW9 | 0.078878 |
| 55423 | Q2Q067 | P62910 | 0.68644  |
| 55424 | Q2Q067 | Q86V20 | 0.35815  |
| 55425 | Q2Q067 | Q12830 | 0.93115  |
| 55426 | Q2Q067 | Q3MIS6 | 0.23615  |
| 55427 | Q2Q067 | O43708 | 0.42655  |
| 55428 | Q2Q067 | Q5T0J7 | 0.15651  |
| 55429 | Q2Q067 | H3BQW9 | 0.20873  |
| 55430 | Q2Q067 | Q9UL36 | 0.092391 |
| 55431 | Q2Q067 | Q9BT81 | 0.37886  |
| 55432 | Q2Q067 | Q9H1E3 | 0.5166   |
| 55433 | Q2Q067 | Q53FN2 | 0.081486 |
| 55434 | Q2Q067 | Q06547 | 1.0749   |
| 55435 | Q2Q067 | P02795 | 0.56547  |
| 55436 | Q2Q067 | Q8TAQ5 | 0.16182  |
| 55437 | Q2Q067 | Q13501 | 0.42554  |
| 55438 | Q2Q067 | Q969T9 | 0.56472  |
| 55439 | Q2Q067 | Q8NEZ2 | 0.69312  |
| 55440 | Q2Q067 | O95571 | 0.48914  |
| 55441 | Q2Q067 | Q96CG3 | 0.29472  |
| 55442 | Q2Q067 | Q5XUX1 | 0.28783  |
| 55443 | Q2Q067 | Q92901 | 0.65612  |
| 55444 | Q2Q067 | Q6ZU35 | 0.29573  |
| 55445 | Q2Q067 | A4D0Y5 | 0.19215  |
| 55446 | Q2Q067 | Q13105 | 0.46045  |
| 55447 | Q2Q067 | Q9Y2S0 | 0.088781 |
| 55448 | Q2Q067 | O15446 | 0.15775  |
| 55449 | Q2Q067 | Q9NV72 | 0.22615  |
| 55450 | Q2Q067 | Q6ZNG1 | 0.17365  |
| 55451 | Q2Q067 | Q9Y651 | 0.30116  |
| 55452 | Q2Q067 | Q86TU7 | 0.22227  |
| 55453 | Q2Q067 | Q9Y3A3 | 0.44873  |
| 55454 | Q2Q067 | Q9BT92 | 0.53675  |
| 55455 | Q2Q067 | P68104 | 0.72576  |
| 55456 | Q2Q067 | Q9BYR2 | 0.34715  |
| 55457 | Q2Q067 | Q8IYN0 | 0.14642  |
| 55458 | Q2Q067 | P46781 | 1.0735   |
| 55459 | Q2Q067 | P54821 | 0.23179  |
| 55460 | Q2Q067 | Q2TAZ0 | 0.28783  |
| 55461 | Q2Q067 | Q53HV7 | 0.62087  |
| 55462 | Q2Q067 | Q9NZ52 | 0.42151  |
| 55463 | Q2Q067 | Q9H0N5 | 0.50243  |
| 55464 | Q2Q067 | Q9NYP3 | 0.26737  |
| 55465 | Q2Q067 | P48200 | 0.45288  |
| 55466 | Q2Q067 | Q96JC4 | 0.13985  |
| 55467 | Q2Q067 | Q49AR2 | 0.10332  |
| 55468 | Q2Q067 | P82673 | 0.03469  |
| 55469 | Q2Q067 | P09234 | 0.54036  |
| 55470 | Q2Q067 | Q9H814 | 0.40666  |
| 55471 | Q2Q067 | O15015 | 0.58991  |
| 55472 | Q2Q067 | Q02078 | 0.4685   |
| 55473 | Q2Q067 | Q9NZD4 | 0.27078  |
| 55474 | Q2Q067 | Q8IYI6 | 0.38485  |
| 55475 | Q2Q067 | Q8IUB9 | 0.19215  |
| 55476 | Q2Q067 | Q9GZU7 | 0.50024  |
| 55477 | Q2Q067 | Q9BYC9 | 0.71324  |
| 55478 | Q2Q067 | Q9UPG8 | 0.26702  |
| 55479 | Q2Q067 | Q96LM1 | 0.29717  |
| 55480 | Q2Q067 | Q96DN6 | 0.36406  |

|       |        |        |          |
|-------|--------|--------|----------|
| 55481 | Q2Q067 | Q9P1T7 | 1.3561   |
| 55482 | Q2Q067 | Q8IY81 | 0.67503  |
| 55483 | Q2Q067 | P43360 | 0.37541  |
| 55484 | Q2Q067 | Q14695 | 0.33095  |
| 55485 | Q2Q067 | Q9UJW9 | 1.006    |
| 55486 | Q2Q067 | Q9BXP5 | 1.0962   |
| 55487 | Q2Q067 | Q7Z699 | 0.24346  |
| 55488 | Q2Q067 | Q5W0A0 | 0.069344 |
| 55489 | Q2Q067 | Q5T0F9 | 0.37026  |
| 55490 | Q2Q067 | A8MU76 | 0.36785  |
| 55491 | Q2Q067 | A6NJ08 | 0.023567 |
| 55492 | Q2Q067 | Q96LI6 | 0.49272  |
| 55493 | Q2Q067 | Q96LS8 | 0.12149  |
| 55494 | Q2Q067 | O14576 | 0.3666   |
| 55495 | Q2Q067 | P14868 | 0.36433  |
| 55496 | Q2Q067 | P62310 | 0.73525  |
| 55497 | Q2Q067 | O00422 | 1.1916   |
| 55498 | Q2Q067 | P27635 | 0.6597   |
| 55499 | Q2Q067 | Q06546 | 1.2638   |
| 55500 | Q2Q067 | Q9Y2A4 | 0.24211  |
| 55501 | Q2Q067 | Q6TGC4 | 0.1952   |
| 55502 | Q2Q067 | O14879 | 0.67845  |
| 55503 | Q2Q067 | Q07352 | 0.94002  |
| 55504 | Q2Q067 | O75821 | 0.53888  |
| 55505 | Q2Q067 | Q6P0N0 | 0.49413  |
| 55506 | Q2Q067 | Q92665 | 0.75625  |
| 55507 | Q2Q067 | P21506 | 0.12798  |
| 55508 | Q2Q067 | Q9BRK4 | 0.52591  |
| 55509 | Q2Q067 | Q96FF7 | 0.19215  |
| 55510 | Q2Q067 | P40424 | 0.66752  |
| 55511 | Q2Q067 | Q14584 | 0.099703 |
| 55512 | Q2Q067 | Q13888 | 0.53202  |
| 55513 | Q2Q067 | Q9Y6R6 | 0.16182  |
| 55514 | Q2Q067 | Q6ZV56 | 0.19215  |
| 55515 | Q2Q067 | Q5MJ10 | 0.40408  |
| 55516 | Q2Q067 | Q13367 | 0.43742  |
| 55517 | Q2Q067 | Q96B26 | 0.72226  |
| 55518 | Q2Q067 | Q9BUR4 | 0.78256  |
| 55519 | Q2Q067 | Q9H0E9 | 0.27776  |
| 55520 | Q2Q067 | Q8NG50 | 0.033243 |
| 55521 | Q2Q067 | P31269 | 0.62409  |
| 55522 | Q2Q067 | Q5SRE5 | 0.60242  |
| 55523 | Q2Q067 | Q86XU0 | 0.11633  |
| 55524 | Q2Q067 | Q9BYT5 | 0.026204 |
| 55525 | Q2Q067 | P53567 | 0.71039  |
| 55526 | Q2Q067 | Q16548 | 0.49625  |
| 55527 | Q2Q067 | Q9BSH3 | 0.082154 |
| 55528 | Q2Q067 | Q96IU2 | 0.6958   |
| 55529 | Q2Q067 | Q8N443 | 0.15958  |
| 55530 | Q2Q067 | Q2M238 | 0.026067 |
| 55531 | Q2Q067 | P17014 | 0.088992 |
| 55532 | Q2Q067 | Q6PI97 | 0.019436 |
| 55533 | Q2Q067 | Q8N4M7 | 0.55862  |
| 55534 | Q2Q067 | P49715 | 0.26309  |
| 55535 | Q2Q067 | Q969L4 | 0.67441  |
| 55536 | Q2Q067 | Q8N6U2 | 0.16254  |
| 55537 | Q2Q067 | Q8IYK2 | 0.30879  |
| 55538 | Q2Q067 | Q15276 | 0.11491  |
| 55539 | Q2Q067 | P42772 | 0.82255  |
| 55540 | Q2Q067 | Q8N365 | 0.29573  |
| 55541 | Q2Q067 | Q8N108 | 1.1031   |
| 55542 | Q2Q067 | Q15750 | 0.53869  |
| 55543 | Q2Q067 | P43364 | 0.81743  |
| 55544 | Q2Q067 | Q5QJE6 | 0.58597  |
| 55545 | Q2Q067 | Q8WWR9 | 0.13202  |
| 55546 | Q2Q067 | Q9Y224 | 1.4946   |
| 55547 | Q2Q067 | Q8IUD6 | 0.33425  |
| 55548 | Q2Q067 | Q6A163 | 0.1595   |
| 55549 | Q2Q067 | Q95900 | 0.37176  |
| 55550 | Q2Q067 | Q6ZMS7 | 0.13488  |
| 55551 | Q2Q067 | Q9NZY2 | 0.19215  |
| 55552 | Q2Q067 | Q9NPC6 | 0.45775  |
| 55553 | Q2Q067 | Q8NFB8 | 0.36855  |
| 55554 | Q2Q067 | P17023 | 0.07693  |
| 55555 | Q2Q067 | Q9Y242 | 0.24     |
| 55556 | Q2Q067 | Q537H7 | 0.021168 |



|       |        |        |          |
|-------|--------|--------|----------|
| 55557 | Q2Q067 | O15372 | 0.66707  |
| 55558 | Q2Q067 | O15160 | 0.098048 |
| 55559 | Q2Q067 | Q9Y3X0 | 0.25461  |
| 55560 | Q2Q067 | A8MXK9 | 0.056025 |
| 55561 | Q2Q067 | Q13347 | 0.69547  |
| 55562 | Q2Q067 | Q8NDP4 | 0.12171  |
| 55563 | Q2Q067 | Q6ZN01 | 0.54853  |
| 55564 | Q2Q067 | Q9H2G4 | 0.64407  |
| 55565 | Q2Q067 | Q9UPZ3 | 0.29328  |
| 55566 | Q2Q067 | Q96EB1 | 1.1189   |
| 55567 | Q2Q067 | Q5VT06 | 0.54771  |
| 55568 | Q2Q067 | O60921 | 0.76636  |
| 55569 | Q2Q067 | P18146 | 0.71039  |
| 55570 | Q2Q067 | Q9UMY1 | 0.55436  |
| 55571 | Q2Q067 | P48539 | 0.15397  |
| 55572 | Q2Q067 | P61513 | 0.65311  |
| 55573 | Q2Q067 | O75901 | 0.31125  |
| 55574 | Q2Q067 | P28715 | 0.26787  |
| 55575 | Q2Q067 | Q7Z6E9 | 0.29485  |
| 55576 | Q2Q067 | Q03112 | 0.24904  |
| 55577 | Q2Q067 | Q96N53 | 0.19215  |
| 55578 | Q2Q067 | Q5T6M2 | 0.52198  |
| 55579 | Q2Q067 | P0CG20 | 0.094965 |
| 55580 | Q2Q067 | Q15906 | 0.90378  |
| 55581 | Q2Q067 | Q96CW6 | 0.4403   |
| 55582 | Q2Q067 | Q9ULD2 | 0.28553  |
| 55583 | Q2Q067 | O43261 | 0.28783  |
| 55584 | Q2Q067 | Q15650 | 0.741    |
| 55585 | Q2Q067 | Q52LA3 | 0.25483  |
| 55586 | Q2Q067 | P41214 | 0.32308  |
| 55587 | Q2Q067 | P17947 | 0.76782  |
| 55588 | Q2Q067 | Q15428 | 0.27906  |
| 55589 | Q2Q067 | Q9BV73 | 0.59325  |
| 55590 | Q2Q067 | Q9NW38 | 0.34433  |
| 55591 | Q2Q067 | P17028 | 0.71534  |
| 55592 | Q2Q067 | Q9P1J3 | 0.19215  |
| 55593 | Q2Q067 | Q96T21 | 0.33324  |
| 55594 | Q2Q067 | Q76FK4 | 0.26013  |
| 55595 | Q2Q067 | Q92966 | 0.5105   |
| 55596 | Q2Q067 | Q9BXW9 | 0.75446  |
| 55597 | Q2Q067 | Q9NXF7 | 0.24229  |
| 55598 | Q2Q067 | O96028 | 0.26507  |
| 55599 | Q2Q067 | O95478 | 0.27472  |
| 55600 | Q2Q067 | A6NGR9 | 0.10872  |
| 55601 | Q2Q067 | Q8IYS8 | 0.203    |
| 55602 | Q2Q067 | P31260 | 0.31482  |
| 55603 | Q2Q067 | Q8N9B5 | 0.74328  |
| 55604 | Q2Q067 | O76075 | 0.088878 |
| 55605 | Q2Q067 | Q96QA6 | 0.15082  |
| 55606 | Q2Q067 | Q5T7N2 | 0.051652 |
| 55607 | Q2Q067 | P32519 | 1.351    |
| 55608 | Q2Q067 | O60477 | 0.46956  |
| 55609 | Q2Q067 | P51946 | 0.58237  |
| 55610 | Q2Q067 | Q9UHB4 | 0.69243  |
| 55611 | Q2Q067 | Q8WX92 | 1.4633   |
| 55612 | Q2Q067 | P15822 | 0.81374  |
| 55613 | Q2Q067 | A8MVA2 | 0.34715  |
| 55614 | Q2Q067 | Q10586 | 0.45169  |
| 55615 | Q2Q067 | Q9UKL3 | 0.83173  |
| 55616 | Q2Q067 | Q03936 | 0.22595  |
| 55617 | Q2Q067 | Q00403 | 1.0773   |
| 55618 | Q2Q067 | Q96M11 | 0.50313  |
| 55619 | Q2Q067 | Q0VF49 | 0.19215  |
| 55620 | Q2Q067 | Q9HBQ8 | 0.37471  |
| 55621 | Q2Q067 | Q8WTS6 | 0.41774  |
| 55622 | Q2Q067 | Q13064 | 0.1746   |
| 55623 | Q2Q067 | A8MSY0 | 0.17929  |
| 55624 | Q2Q067 | P61582 | 0.6269   |
| 55625 | Q2Q067 | Q9BXF3 | 0.62569  |
| 55626 | Q2Q067 | Q9H1K1 | 0.92173  |
| 55627 | Q2Q067 | Q92764 | 0.12452  |
| 55628 | Q2Q067 | Q14693 | 0.36437  |
| 55629 | Q2Q067 | Q96CW5 | 0.854    |
| 55630 | Q2Q067 | Q9Y5P3 | 0.34734  |
| 55631 | Q2Q067 | Q5BKY9 | 0.29573  |
| 55632 | Q2Q067 | Q9H6F5 | 0.27346  |

|       |        |        |          |
|-------|--------|--------|----------|
| 55633 | Q2Q067 | Q6NZ36 | 0.18889  |
| 55634 | Q2Q067 | P61581 | 0.48164  |
| 55635 | Q2Q067 | Q9BXJ9 | 0.63108  |
| 55636 | Q2Q067 | Q969F1 | 0.53813  |
| 55637 | Q2Q067 | Q8N2W9 | 1.0436   |
| 55638 | Q2Q067 | Q9Y2G0 | 0.13247  |
| 55639 | Q2Q067 | P14625 | 0.11874  |
| 55640 | Q2Q067 | P78543 | 0.64694  |
| 55641 | Q2Q067 | Q9NUP9 | 0.19112  |
| 55642 | Q2Q067 | P17024 | 0.11858  |
| 55643 | Q2Q067 | Q7Z401 | 0.28495  |
| 55644 | Q2Q067 | Q9BSF0 | 0.13376  |
| 55645 | Q2Q067 | A6NF83 | 0.38305  |
| 55646 | Q2Q067 | Q9C002 | 0.11333  |
| 55647 | Q2Q067 | Q9UK61 | 0.31972  |
| 55648 | Q2Q067 | Q6NV74 | 0.29573  |
| 55649 | Q2Q067 | Q7Z5L9 | 0.54659  |
| 55650 | Q2Q067 | O95149 | 0.40765  |
| 55651 | Q2Q067 | Q08945 | 1.1419   |
| 55652 | Q2Q067 | Q9Y4Y9 | 0.8048   |
| 55653 | Q2Q067 | Q8N9T8 | 0.73271  |
| 55654 | Q2Q067 | P62945 | 0.78122  |
| 55655 | Q2Q067 | Q71UM5 | 0.59435  |
| 55656 | Q2Q067 | O14490 | 0.18368  |
| 55657 | Q2Q067 | P24539 | 0.21749  |
| 55658 | Q2Q067 | Q00534 | 0.57395  |
| 55659 | Q2Q067 | Q71F56 | 0.38241  |
| 55660 | Q2Q067 | Q14738 | 0.679    |
| 55661 | Q2Q067 | Q96A56 | 0.94809  |
| 55662 | Q2Q067 | Q9NX20 | 0.39144  |
| 55663 | Q2Q067 | Q5TBB1 | 0.46264  |
| 55664 | Q2Q067 | F2Z3M2 | 0.19215  |
| 55665 | Q2Q067 | A8K8V0 | 0.15483  |
| 55666 | Q2Q067 | P98168 | 0.65295  |
| 55667 | Q2Q067 | Q96LI9 | 0.11502  |
| 55668 | Q2Q067 | Q9UBS8 | 0.5892   |
| 55669 | Q2Q067 | Q2NKX9 | 0.29573  |
| 55670 | Q2Q067 | Q9H1J1 | 0.63642  |
| 55671 | Q2Q067 | O60716 | 0.4503   |
| 55672 | Q2Q067 | P0DMB1 | 0.28994  |
| 55673 | Q2Q067 | Q15773 | 0.54845  |
| 55674 | Q2Q067 | P33076 | 0.48422  |
| 55675 | Q2Q067 | Q6P2E9 | 1.0441   |
| 55676 | Q2Q067 | Q9NX95 | 0.16774  |
| 55677 | Q2Q067 | Q7Z3I7 | 0.10896  |
| 55678 | Q2Q067 | Q9UK58 | 0.32541  |
| 55679 | Q2Q067 | P23025 | 0.14463  |
| 55680 | Q2Q067 | Q14999 | 0.99891  |
| 55681 | Q2Q067 | P51003 | 0.082232 |
| 55682 | Q2Q067 | Q14397 | 0.7035   |
| 55683 | Q2Q067 | Q9NUP7 | 0.49321  |
| 55684 | Q2Q067 | Q03938 | 0.2426   |
| 55685 | Q2Q067 | P17661 | 0.46281  |
| 55686 | Q2Q067 | Q8TC90 | 0.36804  |
| 55687 | Q2Q067 | Q8TF39 | 0.24938  |
| 55688 | Q2Q067 | O75691 | 0.75875  |
| 55689 | Q2Q067 | O60224 | 0.12144  |
| 55690 | Q2Q067 | Q9Y314 | 1.0074   |
| 55691 | Q2Q067 | O15297 | 0.5428   |
| 55692 | Q2Q067 | A8MZA4 | 0.23387  |
| 55693 | Q2Q067 | P35237 | 0.31689  |
| 55694 | Q2Q067 | Q96JB5 | 0.27508  |
| 55695 | Q2Q067 | Q3C1V8 | 0.65617  |
| 55696 | Q2Q067 | P08651 | 0.29736  |
| 55697 | Q2Q067 | Q9H606 | 0.18694  |
| 55698 | Q2Q067 | O95059 | 0.19174  |
| 55699 | Q2Q067 | B3EWG6 | 0.29573  |
| 55700 | Q2Q067 | Q17RA5 | 0.19215  |
| 55701 | Q2Q067 | Q8TAP6 | 0.91292  |
| 55702 | Q2Q067 | O95429 | 0.18833  |
| 55703 | Q2Q067 | Q9NRC8 | 1.186    |
| 55704 | Q2Q067 | Q9NQR4 | 0.23372  |
| 55705 | Q2Q067 | P62979 | 0.24073  |
| 55706 | Q85601 | Q53EZ4 | 0.83584  |
| 55707 | Q85601 | Q5T230 | 1.4611   |
| 55708 | Q85601 | P43351 | 0.70282  |

|       |        |        |          |
|-------|--------|--------|----------|
| 55709 | Q85601 | Q53EQ6 | 0.31563  |
| 55710 | Q85601 | Q14139 | 0.56913  |
| 55711 | Q85601 | Q9UQR1 | 0.869    |
| 55712 | Q85601 | Q9HCZ1 | 0.24497  |
| 55713 | Q85601 | Q8TEM1 | 0.23406  |
| 55714 | Q85601 | Q8N8C0 | 0.33856  |
| 55715 | Q85601 | Q9Y534 | 0.27039  |
| 55716 | Q85601 | Q13367 | 0.5528   |
| 55717 | Q85601 | Q9UJX2 | 0.62375  |
| 55718 | Q85601 | P13646 | 0.60904  |
| 55719 | Q85601 | Q5SVZ6 | 0.58384  |
| 55720 | Q85601 | Q5TA45 | 0.27948  |
| 55721 | Q85601 | Q3YBR2 | 0.50265  |
| 55722 | Q85601 | Q03701 | 0.40583  |
| 55723 | Q85601 | Q6R2W3 | 0.40732  |
| 55724 | Q85601 | F5H284 | 0.41838  |
| 55725 | Q85601 | Q14457 | 0.59947  |
| 55726 | Q85601 | Q99569 | 0.34708  |
| 55727 | Q85601 | Q96RK1 | 0.73522  |
| 55728 | Q85601 | Q9H492 | 0.27226  |
| 55729 | Q85601 | Q9BW61 | 0.29245  |
| 55730 | Q85601 | Q9ULM2 | 0.23415  |
| 55731 | Q85601 | Q13596 | 0.31572  |
| 55732 | Q85601 | Q8NHQ1 | 1.4287   |
| 55733 | Q85601 | Q9HCG1 | 0.35977  |
| 55734 | Q85601 | Q9UBZ4 | 0.19423  |
| 55735 | Q85601 | P54259 | 1.0389   |
| 55736 | Q85601 | Q9HAY2 | 0.083938 |
| 55737 | Q85601 | Q9NVM9 | 1.1708   |
| 55738 | Q85601 | P37802 | 0.59014  |
| 55739 | Q85601 | Q8N7M0 | 0.29611  |
| 55740 | Q85601 | A6NNL0 | 0.052748 |
| 55741 | Q85601 | Q8NBT2 | 0.78187  |
| 55742 | Q85601 | Q9H4M3 | 0.22947  |
| 55743 | Q85601 | Q14530 | 0.29336  |
| 55744 | Q85601 | A6NFF2 | 0.15883  |
| 55745 | Q85601 | Q9UNN4 | 0.4428   |
| 55746 | Q85601 | P51946 | 0.58511  |
| 55747 | Q85601 | Q8IYI6 | 0.47741  |
| 55748 | Q85601 | Q16890 | 0.39179  |
| 55749 | Q85601 | P46783 | 1.3535   |
| 55750 | Q85601 | Q96QK1 | 0.77042  |
| 55751 | Q85601 | A6NNJ1 | 0.38628  |
| 55752 | Q85601 | P32969 | 0.78249  |
| 55753 | Q85601 | Q5T870 | 0.22853  |
| 55754 | Q85601 | Q9NV31 | 0.77712  |
| 55755 | Q85601 | Q95619 | 0.8366   |
| 55756 | Q85601 | P0CL83 | 0.5512   |
| 55757 | Q85601 | Q8IXK0 | 0.33686  |
| 55758 | Q85601 | P10144 | 0.37105  |
| 55759 | Q85601 | Q6IPT2 | 0.61067  |
| 55760 | Q85601 | Q9NQG7 | 0.29038  |
| 55761 | Q85601 | Q9BSU1 | 0.49715  |
| 55762 | Q85601 | P01106 | 0.44321  |
| 55763 | Q85601 | Q9P2R6 | 1.1313   |
| 55764 | Q85601 | Q3KNS6 | 0.27274  |
| 55765 | Q85601 | Q16612 | 0.21227  |
| 55766 | Q85601 | Q92618 | 0.15915  |
| 55767 | Q85601 | Q9ULL0 | 0.079905 |
| 55768 | Q85601 | P18146 | 0.72781  |
| 55769 | Q85601 | A4D1E1 | 0.17469  |
| 55770 | Q85601 | Q494X3 | 0.51008  |
| 55771 | Q85601 | Q5VYK3 | 0.3294   |
| 55772 | Q85601 | Q8N1N4 | 0.54466  |
| 55773 | Q85601 | Q9H3K6 | 0.15967  |
| 55774 | Q85601 | P0C7V6 | 0.60189  |
| 55775 | Q85601 | P52657 | 1.1978   |
| 55776 | Q85601 | Q9UI26 | 0.44324  |
| 55777 | Q85601 | P10243 | 0.59997  |
| 55778 | Q85601 | P28066 | 0.50362  |
| 55779 | Q85601 | Q96IZ0 | 0.78792  |
| 55780 | Q85601 | P17480 | 1.0184   |
| 55781 | Q85601 | Q5SZL2 | 0.29784  |
| 55782 | Q85601 | Q96FQ6 | 0.3678   |
| 55783 | Q85601 | Q9UBW5 | 0.53217  |
| 55784 | Q85601 | Q9HCE1 | 0.68731  |

|       |        |        |          |
|-------|--------|--------|----------|
| 55785 | Q85601 | O75373 | 0.3518   |
| 55786 | Q85601 | Q8N3X6 | 0.38445  |
| 55787 | Q85601 | P61163 | 0.080961 |
| 55788 | Q85601 | Q8N1G0 | 0.23504  |
| 55789 | Q85601 | O14925 | 0.1344   |
| 55790 | Q85601 | Q969S8 | 0.8072   |
| 55791 | Q85601 | O00401 | 0.65167  |
| 55792 | Q85601 | Q9H4A5 | 0.76777  |
| 55793 | Q85601 | Q9BZI7 | 0.5723   |
| 55794 | Q85601 | Q9ULW3 | 0.72865  |
| 55795 | Q85601 | Q68CJ9 | 0.77593  |
| 55796 | Q85601 | Q8N196 | 0.72062  |
| 55797 | Q85601 | P08048 | 0.063932 |
| 55798 | Q85601 | Q969E4 | 0.45278  |
| 55799 | Q85601 | Q8N8X9 | 0.15738  |
| 55800 | Q85601 | Q9H5I1 | 0.61828  |
| 55801 | Q85601 | O95625 | 0.23736  |
| 55802 | Q85601 | Q99816 | 0.48045  |
| 55803 | Q85601 | O60664 | 0.64168  |
| 55804 | Q85601 | P30281 | 0.79451  |
| 55805 | Q85601 | Q9UNM6 | 0.043919 |
| 55806 | Q85601 | Q86TC9 | 0.41884  |
| 55807 | Q85601 | Q7Z6E9 | 0.51348  |
| 55808 | Q85601 | Q5PR19 | 0.24756  |
| 55809 | Q85601 | Q8IY42 | 0.58572  |
| 55810 | Q85601 | Q8IYN2 | 1.1171   |
| 55811 | Q85601 | Q8NE22 | 0.36467  |
| 55812 | Q85601 | Q96CN9 | 0.56478  |
| 55813 | Q85601 | Q6ZQN3 | 0.28407  |
| 55814 | Q85601 | Q6NX45 | 0.30406  |
| 55815 | Q85601 | Q6PD62 | 0.63548  |
| 55816 | Q85601 | O14639 | 0.67109  |
| 55817 | Q85601 | O15198 | 0.4669   |
| 55818 | Q85601 | Q9UGY1 | 0.18048  |
| 55819 | Q85601 | O43765 | 0.61084  |
| 55820 | Q85601 | Q9UPN9 | 0.52676  |
| 55821 | Q85601 | Q9BRT2 | 0.41231  |
| 55822 | Q85601 | Q5MJ07 | 0.17798  |
| 55823 | Q85601 | P61513 | 0.641    |
| 55824 | Q85601 | P22674 | 0.41032  |
| 55825 | Q85601 | P30405 | 0.41838  |
| 55826 | Q85601 | O75182 | 1.1498   |
| 55827 | Q85601 | Q96J02 | 0.29623  |
| 55828 | Q85601 | P78317 | 0.72144  |
| 55829 | Q85601 | P60900 | 0.29628  |
| 55830 | Q85601 | Q8NI51 | 0.68416  |
| 55831 | Q85601 | Q99543 | 0.60297  |
| 55832 | Q85601 | Q63HQ0 | 0.29117  |
| 55833 | Q85601 | Q96MH2 | 1.2631   |
| 55834 | Q85601 | Q9NZC7 | 0.387    |
| 55835 | Q85601 | Q6N069 | 0.23097  |
| 55836 | Q85601 | Q9UPZ3 | 0.3451   |
| 55837 | Q85601 | Q8IXT2 | 0.13144  |
| 55838 | Q85601 | O14490 | 0.21086  |
| 55839 | Q85601 | Q9Y250 | 1.0078   |
| 55840 | Q85601 | Q03989 | 0.29804  |
| 55841 | Q85601 | Q6P435 | 0.24823  |
| 55842 | Q85601 | Q99497 | 0.10065  |
| 55843 | Q85601 | P61981 | 0.52884  |
| 55844 | Q85601 | P49454 | 0.60589  |
| 55845 | Q85601 | O60225 | 0.1323   |
| 55846 | Q85601 | Q9HBH1 | 0.4727   |
| 55847 | Q85601 | Q9Y2X0 | 0.49674  |
| 55848 | Q85601 | P20700 | 0.34811  |
| 55849 | Q85601 | Q05DH4 | 0.51349  |
| 55850 | Q85601 | O00186 | 0.76455  |
| 55851 | Q85601 | Q6UX04 | 0.37848  |
| 55852 | Q85601 | Q9NRL3 | 0.4461   |
| 55853 | Q85601 | Q14978 | 0.54092  |
| 55854 | Q85601 | Q9BUL9 | 0.92982  |
| 55855 | Q85601 | O00213 | 0.43411  |
| 55856 | Q85601 | P08729 | 1.4372   |
| 55857 | Q85601 | Q15637 | 0.35183  |
| 55858 | Q85601 | Q8NHW5 | 0.23796  |
| 55859 | Q85601 | Q92585 | 0.97005  |
| 55860 | Q85601 | Q8IWI2 | 0.70332  |

|       |        |        |           |
|-------|--------|--------|-----------|
| 55861 | Q85601 | Q5SRE5 | 0.63596   |
| 55862 | Q85601 | P17097 | 0.22177   |
| 55863 | Q85601 | P54920 | 0.42692   |
| 55864 | Q85601 | Q9NRC8 | 1.3084    |
| 55865 | Q85601 | P51786 | 0.28387   |
| 55866 | Q85601 | Q96CJ1 | 1.2412    |
| 55867 | Q85601 | Q15014 | 1.2761    |
| 55868 | Q85601 | Q8TE85 | 0.28792   |
| 55869 | Q85601 | Q96M02 | 0.089366  |
| 55870 | Q85601 | P69905 | 0.26103   |
| 55871 | Q85601 | Q6QNY0 | 0.453     |
| 55872 | Q85601 | Q9NRN7 | 0.50494   |
| 55873 | Q85601 | Q32P41 | 0.42706   |
| 55874 | Q85601 | Q15532 | 0.99318   |
| 55875 | Q85601 | Q9P2D3 | 0.78495   |
| 55876 | Q85601 | Q969J2 | 0.28525   |
| 55877 | Q85601 | O75161 | 0.73523   |
| 55878 | Q85601 | Q8N9K5 | 0.33324   |
| 55879 | Q85601 | P78424 | 0.25161   |
| 55880 | Q85601 | Q9NZU5 | 0.3841    |
| 55881 | Q85601 | O15511 | 0.17646   |
| 55882 | Q85601 | Q15542 | 1.0029    |
| 55883 | Q85601 | Q9UHL9 | 0.33524   |
| 55884 | Q85601 | Q32M78 | 0.41841   |
| 55885 | Q85601 | P28698 | 0.73618   |
| 55886 | Q85601 | P02538 | 0.64802   |
| 55887 | Q85601 | Q8IZC7 | 0.20522   |
| 55888 | Q85601 | Q9BRR8 | 0.51058   |
| 55889 | Q85601 | Q92664 | 0.13833   |
| 55890 | Q85601 | O00458 | 0.55047   |
| 55891 | Q85601 | Q5RKV6 | 0.16112   |
| 55892 | Q85601 | Q92734 | 0.15525   |
| 55893 | Q85601 | O75496 | 0.93006   |
| 55894 | Q85601 | P49639 | 0.24257   |
| 55895 | Q85601 | P15621 | 0.4573    |
| 55896 | Q85601 | Q9NWS1 | 1.0405    |
| 55897 | Q85601 | Q8WXC7 | 0.41805   |
| 55898 | Q85601 | Q9Y608 | 0.3283    |
| 55899 | Q85601 | Q96BW1 | 0.23411   |
| 55900 | Q85601 | O75971 | 0.63409   |
| 55901 | Q85601 | P09629 | 0.94441   |
| 55902 | Q85601 | F8WFD2 | 0.0035824 |
| 55903 | Q85601 | Q63HK3 | 0.42016   |
| 55904 | Q85601 | P26373 | 0.85396   |
| 55905 | Q85601 | Q96JM3 | 0.43543   |
| 55906 | Q85601 | Q4VC44 | 0.34052   |
| 55907 | Q85601 | O15234 | 0.69419   |
| 55908 | Q85601 | Q6PGN9 | 0.87183   |
| 55909 | Q85601 | Q9BQ52 | 0.20652   |
| 55910 | Q85601 | Q52LA3 | 0.15697   |
| 55911 | Q85601 | P49756 | 0.35585   |
| 55912 | Q85601 | Q96MU7 | 0.65242   |
| 55913 | Q85601 | Q7Z739 | 0.30691   |
| 55914 | Q85601 | P61978 | 0.89653   |
| 55915 | Q85601 | P09234 | 0.53619   |
| 55916 | Q85601 | O43913 | 0.34368   |
| 55917 | Q85601 | Q6PJG6 | 0.62145   |
| 55918 | Q85601 | P0CG00 | 0.24501   |
| 55919 | Q85601 | Q96CB8 | 0.60464   |
| 55920 | Q85601 | P51815 | 0.24802   |
| 55921 | Q85601 | Q9H7T9 | 0.77512   |
| 55922 | Q85601 | Q969W3 | 0.66653   |
| 55923 | Q85601 | Q9Y2M0 | 0.42227   |
| 55924 | Q85601 | Q9UHF7 | 0.5276    |
| 55925 | Q85601 | P02489 | 0.33296   |
| 55926 | Q85601 | Q9BRU9 | 0.22662   |
| 55927 | Q85601 | Q9Y5T5 | 0.3555    |
| 55928 | Q85601 | P62857 | 0.48227   |
| 55929 | Q85601 | Q96S65 | 0.98924   |
| 55930 | Q85601 | Q13487 | 1.1552    |
| 55931 | Q85601 | P36954 | 0.20346   |
| 55932 | Q85601 | Q9ULR0 | 0.58204   |
| 55933 | Q85601 | Q86WV6 | 0.066901  |
| 55934 | Q85601 | A8K5M9 | 0.47412   |
| 55935 | Q85601 | P52815 | 0.49984   |
| 55936 | Q85601 | Q96G28 | 0.22222   |

|       |        |        |          |
|-------|--------|--------|----------|
| 55937 | Q85601 | Q9Y3Y2 | 0.60593  |
| 55938 | Q85601 | P54198 | 1.0554   |
| 55939 | Q85601 | Q6ZR52 | 0.35363  |
| 55940 | Q85601 | Q7Z4Q2 | 0.50242  |
| 55941 | Q85601 | Q15643 | 1.0185   |
| 55942 | Q85601 | O15527 | 0.49379  |
| 55943 | Q85601 | Q99440 | 0.34284  |
| 55944 | Q85601 | Q8N5Y2 | 0.093673 |
| 55945 | Q85601 | Q9NQX6 | 0.31946  |
| 55946 | Q85601 | Q96LC9 | 0.56756  |
| 55947 | Q85601 | Q15370 | 1.0998   |
| 55948 | Q85601 | Q6P2E9 | 1.0826   |
| 55949 | Q85601 | O15126 | 0.29796  |
| 55950 | Q85601 | Q13064 | 0.30039  |
| 55951 | Q85601 | Q9Y3I1 | 0.89867  |
| 55952 | Q85601 | O43598 | 0.20944  |
| 55953 | Q85601 | O43715 | 0.62853  |
| 55954 | Q85601 | Q7Z5D8 | 0.2625   |
| 55955 | Q85601 | Q64ET8 | 0.33413  |
| 55956 | Q85601 | Q92837 | 0.54459  |
| 55957 | Q85601 | Q9HCS7 | 0.41569  |
| 55958 | Q85601 | Q9UKV0 | 0.47138  |
| 55959 | Q85601 | Q16543 | 0.40373  |
| 55960 | Q85601 | Q96QR8 | 0.36511  |
| 55961 | Q85601 | P08151 | 0.37549  |
| 55962 | Q85601 | P60174 | 0.22831  |
| 55963 | Q85601 | Q9H2F5 | 0.60595  |
| 55964 | Q85601 | Q9Y4R8 | 0.1799   |
| 55965 | Q85601 | O43493 | 0.32124  |
| 55966 | Q85601 | P62244 | 0.65109  |
| 55967 | Q85601 | Q13409 | 0.56296  |
| 55968 | Q85601 | Q96GA3 | 0.76879  |
| 55969 | Q85601 | Q6PEW1 | 0.11394  |
| 55970 | Q85601 | Q6ZTI6 | 0.49989  |
| 55971 | Q85601 | P46087 | 0.63965  |
| 55972 | Q85601 | Q86W11 | 0.26361  |
| 55973 | Q85601 | Q9ULX3 | 0.38276  |
| 55974 | Q85601 | P09001 | 0.23391  |
| 55975 | Q85601 | Q14746 | 0.38227  |
| 55976 | Q85601 | O60346 | 0.23449  |
| 55977 | Q85601 | Q8NA42 | 0.32641  |
| 55978 | Q85601 | P11831 | 0.58038  |
| 55979 | Q85601 | Q8WX93 | 0.27531  |
| 55980 | Q85601 | Q8N137 | 0.91377  |
| 55981 | Q85601 | Q9Y2T7 | 0.16139  |
| 55982 | Q85601 | Q5T7V8 | 1.2798   |
| 55983 | Q85601 | Q96BY7 | 0.21592  |
| 55984 | Q85601 | Q14929 | 0.29322  |
| 55985 | Q85601 | P07315 | 0.60917  |
| 55986 | Q85601 | Q9H7E2 | 0.48909  |
| 55987 | Q85601 | Q96T76 | 0.98752  |
| 55988 | Q85601 | Q4LE39 | 0.93481  |
| 55989 | Q85601 | Q14525 | 0.57121  |
| 55990 | Q85601 | Q00536 | 0.21058  |
| 55991 | Q85601 | Q9BQA1 | 1.0289   |
| 55992 | Q85601 | Q15853 | 0.62632  |
| 55993 | Q85601 | Q9BWC9 | 0.33334  |
| 55994 | Q85601 | P63104 | 0.99323  |
| 55995 | Q85601 | Q9H4X1 | 0.66666  |
| 55996 | Q85601 | Q8NFW9 | 0.36471  |
| 55997 | Q85601 | Q96CV9 | 0.54213  |
| 55998 | Q85601 | Q9BZL1 | 0.075178 |
| 55999 | Q85601 | Q9UMY1 | 0.49334  |
| 56000 | Q85601 | Q6TDU7 | 0.050024 |
| 56001 | Q85601 | Q8TF39 | 0.47651  |
| 56002 | Q85601 | A6NHX0 | 0.37151  |
| 56003 | Q85601 | Q9HBT8 | 0.25932  |
| 56004 | Q85601 | Q9UPG8 | 0.32454  |
| 56005 | Q85601 | Q8ND90 | 0.72645  |
| 56006 | Q85601 | O14896 | 0.56525  |
| 56007 | Q85601 | Q02078 | 0.42287  |
| 56008 | Q85601 | Q9P1U0 | 0.24173  |
| 56009 | Q85601 | Q96JK9 | 0.95809  |
| 56010 | Q85601 | O00629 | 0.63007  |
| 56011 | Q85601 | Q9BQC6 | 0.4222   |
| 56012 | Q85601 | P53675 | 0.31245  |

|       |        |        |         |
|-------|--------|--------|---------|
| 56013 | Q85601 | O60239 | 0.34525 |
| 56014 | Q85601 | Q96EL2 | 0.33745 |
| 56015 | Q85601 | P17676 | 0.82024 |
| 56016 | Q85601 | P15036 | 0.80146 |
| 56017 | Q85601 | Q5SZD4 | 0.26929 |
| 56018 | Q85601 | Q9NTK5 | 0.38722 |
| 56019 | Q85601 | P35321 | 0.42949 |
| 56020 | Q85601 | Q92575 | 0.98214 |
| 56021 | Q85601 | Q9BXR0 | 1.0205  |
| 56022 | Q85601 | Q16666 | 0.62688 |
| 56023 | Q85601 | Q9BYD1 | 0.82143 |
| 56024 | Q85601 | P78386 | 0.59315 |
| 56025 | Q85601 | Q96C34 | 0.56737 |
| 56026 | Q85601 | Q5HYR2 | 0.42695 |
| 56027 | Q85601 | P80294 | 0.82454 |
| 56028 | Q85601 | Q17RC7 | 0.17046 |
| 56029 | Q85601 | Q96A73 | 0.59692 |
| 56030 | Q85601 | P09874 | 0.75725 |
| 56031 | Q85601 | O75688 | 0.36875 |
| 56032 | Q85601 | Q8NC51 | 0.66443 |
| 56033 | Q85601 | P54136 | 0.74221 |
| 56034 | Q85601 | O43324 | 1.1838  |
| 56035 | Q85601 | O60481 | 0.48963 |
| 56036 | Q85601 | Q13309 | 0.50889 |
| 56037 | Q85601 | Q9NSD9 | 0.47301 |
| 56038 | Q85601 | Q14593 | 0.52008 |
| 56039 | Q85601 | P62913 | 0.96947 |
| 56040 | Q85601 | Q96DB2 | 0.29035 |
| 56041 | Q85601 | P62633 | 0.75856 |
| 56042 | Q85601 | Q9BUE0 | 0.99267 |
| 56043 | Q85601 | Q9P2G1 | 0.32982 |
| 56044 | Q85601 | Q9ULZ2 | 0.8334  |
| 56045 | Q85601 | P09913 | 0.57298 |
| 56046 | Q85601 | O75360 | 0.47218 |
| 56047 | Q85601 | P17040 | 0.7007  |
| 56048 | Q85601 | Q9ULW8 | 0.35517 |
| 56049 | Q85601 | Q6ZN11 | 0.29342 |
| 56050 | Q85601 | Q9UHB4 | 0.64392 |
| 56051 | Q85601 | P11473 | 0.3983  |
| 56052 | Q85601 | O95602 | 0.69449 |
| 56053 | Q85601 | Q9UPX8 | 0.32367 |
| 56054 | Q85601 | Q2VY69 | 0.34062 |
| 56055 | Q85601 | Q53FT3 | 0.28883 |
| 56056 | Q85601 | Q3MJ62 | 0.27663 |
| 56057 | Q85601 | O75843 | 0.67375 |
| 56058 | Q85601 | Q8NCR3 | 0.20341 |
| 56059 | Q85601 | Q9NRP2 | 0.37355 |
| 56060 | Q85601 | O94864 | 0.53771 |
| 56061 | Q85601 | P08107 | 0.5604  |
| 56062 | Q85601 | Q8N720 | 0.97565 |
| 56063 | Q85601 | Q86XU0 | 0.31419 |
| 56064 | Q85601 | P62253 | 0.66549 |
| 56065 | Q85601 | P55036 | 0.40012 |
| 56066 | Q85601 | P34949 | 0.15804 |
| 56067 | Q85601 | Q9BXT5 | 0.45162 |
| 56068 | Q85601 | Q9UJK0 | 0.40165 |
| 56069 | Q85601 | O00534 | 0.22094 |
| 56070 | Q85601 | Q92546 | 0.44379 |
| 56071 | Q85601 | Q92614 | 0.14547 |
| 56072 | Q85601 | Q06455 | 0.76621 |
| 56073 | Q85601 | A6NGY1 | 0.46463 |
| 56074 | Q85601 | Q96SZ4 | 0.23061 |
| 56075 | Q85601 | Q56P03 | 0.38682 |
| 56076 | Q85601 | P83916 | 0.64402 |
| 56077 | Q85601 | Q9UHY8 | 0.23573 |
| 56078 | Q85601 | P27816 | 0.52058 |
| 56079 | Q85601 | Q9NZU7 | 0.39583 |
| 56080 | Q85601 | Q9UNY5 | 0.41246 |
| 56081 | Q85601 | Q75VX8 | 0.36411 |
| 56082 | Q85601 | P25208 | 0.62407 |
| 56083 | Q85601 | Q9H1I8 | 0.28491 |
| 56084 | Q85601 | Q9P0J0 | 0.47949 |
| 56085 | Q85601 | Q14586 | 0.25802 |
| 56086 | Q85601 | Q96MA1 | 0.25289 |
| 56087 | Q85601 | P22681 | 0.4208  |
| 56088 | Q85601 | Q9UJW0 | 0.61354 |

|       |        |         |         |
|-------|--------|---------|---------|
| 56089 | Q85601 | Q9H6Z9  | 0.48193 |
| 56090 | Q85601 | O75145  | 0.44987 |
| 56091 | Q85601 | P13807  | 0.41596 |
| 56092 | Q85601 | O14529  | 0.37591 |
| 56093 | Q85601 | O15535  | 0.24212 |
| 56094 | Q85601 | O43502  | 0.33083 |
| 56095 | Q85601 | O15499  | 0.17895 |
| 56096 | Q85601 | P02545  | 0.70597 |
| 56097 | Q85601 | Q6EEV6  | 0.15956 |
| 56098 | Q85601 | Q5T9G4  | 0.72122 |
| 56099 | Q85601 | Q96S99  | 0.18945 |
| 56100 | Q85601 | Q9NPA5  | 0.03995 |
| 56101 | Q85601 | P62879  | 0.48684 |
| 56102 | Q85601 | O15315  | 0.17029 |
| 56103 | Q85601 | P11168  | 0.11351 |
| 56104 | Q85601 | Q9UJW8  | 0.26111 |
| 56105 | Q85601 | P33076  | 0.51825 |
| 56106 | Q85601 | Q9HAU4  | 0.3815  |
| 56107 | Q85601 | Q9BT49  | 0.60554 |
| 56108 | Q85601 | Q13495  | 0.96538 |
| 56109 | Q85601 | Q8NBB4  | 0.33082 |
| 56110 | Q85601 | P31946  | 0.55624 |
| 56111 | Q85601 | Q9UPT5  | 0.59042 |
| 56112 | Q85601 | Q9NQV7  | 0.32042 |
| 56113 | Q85601 | P68133  | 0.1273  |
| 56114 | Q85601 | O95229  | 0.84892 |
| 56115 | Q85601 | Q9H8M2  | 0.12117 |
| 56116 | Q85601 | Q6VUC0  | 0.46815 |
| 56117 | Q85601 | A2BFH1  | 0.41838 |
| 56118 | Q85601 | Q9Y2J2  | 0.40749 |
| 56119 | Q85601 | Q96JB3  | 0.14292 |
| 56120 | Q85601 | Q6X4W1  | 0.81023 |
| 56121 | Q85601 | Q9UKL3  | 0.99189 |
| 56122 | Q85601 | Q96DE5  | 0.77206 |
| 56123 | Q85601 | Q53ET0  | 1.5062  |
| 56124 | Q85601 | A6NHJ4  | 0.51874 |
| 56125 | Q85601 | Q9NPD3  | 0.29968 |
| 56126 | Q85601 | Q9HAV4  | 1.0917  |
| 56127 | Q85601 | Q96PK6  | 0.67816 |
| 56128 | Q85601 | O94925  | 0.52928 |
| 56129 | Q85601 | Q9BSH4  | 0.57595 |
| 56130 | Q85601 | Q9UIA9  | 0.52513 |
| 56131 | Q85601 | Q9ULJ3  | 0.64573 |
| 56132 | Q85601 | Q13127  | 0.55803 |
| 56133 | Q85601 | Q9ULN7  | 0.58341 |
| 56134 | Q85601 | Q9NS56  | 0.3887  |
| 56135 | Q85601 | P16157  | 0.25001 |
| 56136 | Q85601 | Q9NP79  | 0.34292 |
| 56137 | Q85601 | Q99733  | 0.77641 |
| 56138 | Q85601 | Q9NVD7  | 0.28387 |
| 56139 | Q85601 | P14373  | 0.33721 |
| 56140 | Q85601 | O43316  | 0.23878 |
| 56141 | Q85601 | Q9BXXH1 | 0.33715 |
| 56142 | Q85601 | Q9NY87  | 0.27561 |
| 56143 | Q85601 | Q96LB3  | 0.69517 |
| 56144 | Q85601 | Q9H707  | 0.32213 |
| 56145 | Q85601 | O43148  | 0.8035  |
| 56146 | Q85601 | Q96HA7  | 0.82587 |
| 56147 | Q85601 | P62854  | 0.82503 |
| 56148 | Q85601 | O15027  | 0.56456 |
| 56149 | Q85601 | P26447  | 0.24274 |
| 56150 | Q85601 | Q2M3X9  | 0.31208 |
| 56151 | Q85601 | Q8N1G2  | 0.3469  |
| 56152 | Q85601 | P48444  | 0.49215 |
| 56153 | Q85601 | Q7L590  | 1.0642  |
| 56154 | Q85601 | Q9UJX6  | 0.57029 |
| 56155 | Q85601 | Q9NP97  | 0.64482 |
| 56156 | Q85601 | Q00610  | 0.89452 |
| 56157 | Q85601 | Q16763  | 0.76908 |
| 56158 | Q85601 | P78346  | 0.57931 |
| 56159 | Q85601 | Q8TDR0  | 0.53674 |
| 56160 | Q85601 | Q9GZW5  | 0.5118  |
| 56161 | Q85601 | Q8IUE1  | 0.32996 |
| 56162 | Q85601 | Q96M95  | 0.08493 |
| 56163 | Q85601 | Q08AM6  | 0.22856 |
| 56164 | Q85601 | O75528  | 0.67935 |



|       |        |        |          |
|-------|--------|--------|----------|
| 56165 | Q85601 | P23025 | 0.21206  |
| 56166 | Q85601 | Q9H2H8 | 0.41446  |
| 56167 | Q85601 | Q9NZH4 | 0.82051  |
| 56168 | Q85601 | O75143 | 0.66359  |
| 56169 | Q85601 | P82930 | 0.23982  |
| 56170 | Q85601 | P55273 | 0.23207  |
| 56171 | Q85601 | Q9Y2T2 | 0.55686  |
| 56172 | Q85601 | Q96MX3 | 0.2804   |
| 56173 | Q85601 | P31749 | 0.51456  |
| 56174 | Q85601 | Q16236 | 0.70242  |
| 56175 | Q85601 | Q6V9R5 | 0.46434  |
| 56176 | Q85601 | Q7Z4H3 | 0.24491  |
| 56177 | Q85601 | Q5EBL2 | 0.23545  |
| 56178 | Q85601 | C9JN71 | 0.36472  |
| 56179 | Q85601 | P99999 | 0.71828  |
| 56180 | Q85601 | P62993 | 0.24712  |
| 56181 | Q85601 | O76013 | 0.57121  |
| 56182 | Q85601 | Q86XA9 | 0.16218  |
| 56183 | Q85601 | O75928 | 0.90382  |
| 56184 | Q85601 | O00541 | 0.41038  |
| 56185 | Q85601 | Q9BTE3 | 0.79474  |
| 56186 | Q85601 | Q9NYK6 | 0.12492  |
| 56187 | Q85601 | Q86VP1 | 0.42515  |
| 56188 | Q85601 | P24539 | 0.21524  |
| 56189 | Q85601 | P02533 | 0.80646  |
| 56190 | Q85601 | P24385 | 0.57805  |
| 56191 | Q85601 | Q53TQ3 | 0.65253  |
| 56192 | Q85601 | Q7Z2Z1 | 0.72232  |
| 56193 | Q85601 | Q13490 | 0.46505  |
| 56194 | Q85601 | Q7Z7K6 | 0.36399  |
| 56195 | Q85601 | Q8TDB6 | 0.54871  |
| 56196 | Q85601 | Q8N3Z6 | 0.63294  |
| 56197 | Q85601 | Q7Z340 | 0.28926  |
| 56198 | Q85601 | P31689 | 0.62541  |
| 56199 | Q85601 | Q9BRU2 | 0.50791  |
| 56200 | Q85601 | O43924 | 0.10185  |
| 56201 | Q85601 | Q9NUP9 | 0.25634  |
| 56202 | Q85601 | Q9HCI6 | 0.44445  |
| 56203 | Q85601 | P14316 | 0.95521  |
| 56204 | Q85601 | Q9BTP7 | 1.0759   |
| 56205 | Q85601 | P09496 | 0.29788  |
| 56206 | Q85601 | O14829 | 0.29398  |
| 56207 | Q85601 | Q5RGN0 | 0.46437  |
| 56208 | Q85601 | Q6ZN17 | 1.1721   |
| 56209 | Q85601 | P17096 | 0.56154  |
| 56210 | Q85601 | Q3LI76 | 0.3247   |
| 56211 | Q85601 | Q9Y383 | 0.6951   |
| 56212 | Q85601 | Q9H0E7 | 0.28572  |
| 56213 | Q85601 | Q9BYR3 | 0.17342  |
| 56214 | Q85601 | P06396 | 0.39315  |
| 56215 | Q85601 | Q8WV37 | 0.55776  |
| 56216 | Q85601 | Q9NUP1 | 0.67833  |
| 56217 | Q85601 | Q9Y2W2 | 0.68707  |
| 56218 | Q85601 | P82912 | 0.13386  |
| 56219 | Q85601 | Q9UQN3 | 0.51425  |
| 56220 | Q85601 | Q96SR6 | 0.31208  |
| 56221 | Q85601 | Q5JNZ3 | 0.35232  |
| 56222 | Q85601 | A6NK39 | 0.26877  |
| 56223 | Q85601 | A6NIE6 | 0.38764  |
| 56224 | Q85601 | P62081 | 0.95151  |
| 56225 | Q85601 | Q96ND8 | 0.48756  |
| 56226 | Q85601 | Q5VWI1 | 0.92413  |
| 56227 | Q85601 | Q8NEF3 | 0.067446 |
| 56228 | Q85601 | O75154 | 0.88221  |
| 56229 | Q85601 | O95831 | 0.75889  |
| 56230 | Q85601 | Q9H5P4 | 0.39218  |
| 56231 | Q85601 | P26639 | 0.3236   |
| 56232 | Q85601 | P50452 | 0.65696  |
| 56233 | Q85601 | Q9H5F2 | 0.056236 |
| 56234 | Q85601 | O75112 | 0.36365  |
| 56235 | Q85601 | P41134 | 0.34456  |
| 56236 | Q85601 | Q9Y324 | 0.51234  |
| 56237 | Q85601 | Q86TA1 | 0.32369  |
| 56238 | Q85601 | Q6UVJ0 | 0.86345  |
| 56239 | Q85601 | Q6P2D8 | 0.26522  |
| 56240 | Q85601 | P63146 | 0.75667  |

|       |        |        |          |
|-------|--------|--------|----------|
| 56241 | Q85601 | Q6PG37 | 0.4826   |
| 56242 | Q85601 | Q9H0S4 | 0.062964 |
| 56243 | Q85601 | O43390 | 0.4471   |
| 56244 | Q85601 | P51116 | 0.53086  |
| 56245 | Q85601 | Q96K62 | 0.25678  |
| 56246 | Q85601 | Q15834 | 1.1825   |
| 56247 | Q85601 | O14933 | 0.67993  |
| 56248 | Q85601 | Q8N8G2 | 0.93149  |
| 56249 | Q85601 | Q99575 | 0.7077   |
| 56250 | Q85601 | Q02241 | 0.74051  |
| 56251 | Q85601 | Q6P5R6 | 0.16468  |
| 56252 | Q85601 | Q8IYB3 | 0.26886  |
| 56253 | Q85601 | P10768 | 0.3075   |
| 56254 | Q85601 | Q9NPI6 | 0.98163  |
| 56255 | Q85601 | P61582 | 0.50359  |
| 56256 | Q85601 | Q5T2W1 | 0.45137  |
| 56257 | Q85601 | O14813 | 0.32759  |
| 56258 | Q85601 | Q15038 | 1.3908   |
| 56259 | Q85601 | Q8WVC0 | 1.0172   |
| 56260 | Q85601 | Q8WZ19 | 0.085341 |
| 56261 | Q85601 | Q9Y4Z2 | 0.26076  |
| 56262 | Q85601 | Q8NFB4 | 0.94794  |
| 56263 | Q85601 | Q96EK4 | 1.3031   |
| 56264 | Q85601 | P14868 | 0.53295  |
| 56265 | Q85601 | Q96RL1 | 0.78178  |
| 56266 | Q85601 | Q92917 | 0.81269  |
| 56267 | Q85601 | Q9NQW6 | 0.36215  |
| 56268 | Q85601 | Q9UD71 | 0.67861  |
| 56269 | Q85601 | O43708 | 0.4296   |
| 56270 | Q85601 | Q5JVS0 | 0.80389  |
| 56271 | Q85601 | P61353 | 0.63754  |
| 56272 | Q85601 | Q9BZE2 | 0.99823  |
| 56273 | Q85601 | Q14765 | 0.40309  |
| 56274 | Q85601 | Q15750 | 0.49663  |
| 56275 | Q85601 | Q96A35 | 0.22165  |
| 56276 | Q85601 | Q01831 | 0.6933   |
| 56277 | Q85601 | Q5TYW1 | 0.23373  |
| 56278 | Q85601 | O94986 | 1.2566   |
| 56279 | Q85601 | O95149 | 0.42501  |
| 56280 | Q85601 | Q9UG56 | 0.069329 |
| 56281 | Q85601 | A6NFI3 | 0.25155  |
| 56282 | Q85601 | P0DMB2 | 0.40554  |
| 56283 | Q85601 | Q8TAA5 | 0.15218  |
| 56284 | Q85601 | Q6J272 | 0.43043  |
| 56285 | Q85601 | Q15388 | 0.17257  |
| 56286 | Q85601 | P60369 | 0.17342  |
| 56287 | Q85601 | Q9Y2S7 | 0.37972  |
| 56288 | Q85601 | Q7Z591 | 0.7194   |
| 56289 | Q85601 | Q9NQP4 | 0.92786  |
| 56290 | Q85601 | Q9BSF8 | 0.44273  |
| 56291 | Q85601 | Q8N228 | 0.35025  |
| 56292 | Q85601 | Q9NR22 | 0.34147  |
| 56293 | Q85601 | Q14258 | 1.1077   |
| 56294 | Q85601 | P53672 | 0.45348  |
| 56295 | Q85601 | Q8N7B1 | 0.48996  |
| 56296 | Q85601 | P62891 | 0.53692  |
| 56297 | Q85601 | O96017 | 0.68679  |
| 56298 | Q85601 | Q07666 | 0.38949  |
| 56299 | Q85601 | O14910 | 0.61887  |
| 56300 | Q85601 | Q9BQC3 | 0.73233  |
| 56301 | Q85601 | Q9NSB4 | 0.43164  |
| 56302 | Q85601 | Q8NFB3 | 0.94794  |
| 56303 | Q85601 | Q9UC07 | 0.33398  |
| 56304 | Q85601 | Q9BXF3 | 0.64247  |
| 56305 | Q85601 | Q15154 | 0.58697  |
| 56306 | Q85601 | Q92636 | 0.31212  |
| 56307 | Q85601 | Q03188 | 0.35005  |
| 56308 | Q85601 | P46776 | 0.87396  |
| 56309 | Q85601 | Q96CS4 | 0.29188  |
| 56310 | Q85601 | Q9H1D9 | 0.53094  |
| 56311 | Q85601 | Q14689 | 0.34277  |
| 56312 | Q85601 | Q92754 | 0.50278  |
| 56313 | Q85601 | Q9NX08 | 0.30691  |
| 56314 | Q85601 | Q02556 | 0.45491  |
| 56315 | Q85601 | P17028 | 0.73424  |
| 56316 | Q85601 | P51522 | 0.27754  |

|       |        |        |          |
|-------|--------|--------|----------|
| 56317 | Q85601 | O60563 | 1.5422   |
| 56318 | Q85601 | P42568 | 0.88121  |
| 56319 | Q85601 | Q6NUQ1 | 0.55827  |
| 56320 | Q85601 | P51808 | 0.45905  |
| 56321 | Q85601 | P61968 | 0.30088  |
| 56322 | Q85601 | Q9C002 | 0.16534  |
| 56323 | Q85601 | Q9BZQ2 | 0.28402  |
| 56324 | Q85601 | Q8N7M2 | 0.51008  |
| 56325 | Q85601 | Q9P0W2 | 0.69802  |
| 56326 | Q85601 | Q969W8 | 0.4005   |
| 56327 | Q85601 | Q9NUA8 | 0.25219  |
| 56328 | Q85601 | Q8TDD2 | 0.37485  |
| 56329 | Q85601 | Q9UHD1 | 0.23859  |
| 56330 | Q85601 | Q9BWX5 | 0.44233  |
| 56331 | Q85601 | Q8IUI4 | 0.024346 |
| 56332 | Q85601 | A6NK75 | 0.38145  |
| 56333 | Q85601 | P36405 | 0.28994  |
| 56334 | Q85601 | Q96NT1 | 0.97031  |
| 56335 | Q85601 | Q9H900 | 0.55274  |
| 56336 | Q85601 | P31150 | 0.14549  |
| 56337 | Q85601 | O00471 | 0.29941  |
| 56338 | Q85601 | Q5VWT5 | 0.15215  |
| 56339 | Q85601 | Q8NHY5 | 1.0082   |
| 56340 | Q85601 | Q01538 | 0.25156  |
| 56341 | Q85601 | Q8NOV3 | 0.20454  |
| 56342 | Q85601 | P60368 | 0.043883 |
| 56343 | Q85601 | Q6ZYL4 | 0.71016  |
| 56344 | Q85601 | P0CB33 | 0.47854  |
| 56345 | Q85601 | Q5XKE5 | 0.47806  |
| 56346 | Q85601 | Q8N8E3 | 0.17433  |
| 56347 | Q85601 | Q8WV24 | 0.68711  |
| 56348 | Q85601 | Q9BR77 | 0.2015   |
| 56349 | Q85601 | Q99687 | 0.48385  |
| 56350 | Q85601 | Q6ZRH4 | 1.169    |
| 56351 | Q85601 | Q9P2K5 | 0.12152  |
| 56352 | Q85601 | Q93009 | 0.41255  |
| 56353 | Q85601 | Q9ULD5 | 0.21694  |
| 56354 | Q85601 | P47813 | 0.95003  |
| 56355 | Q85601 | P09086 | 0.36102  |
| 56356 | Q85601 | P08779 | 0.67587  |
| 56357 | Q85601 | Q96A65 | 0.22651  |
| 56358 | Q85601 | P21506 | 0.33241  |
| 56359 | Q85601 | Q9BUX1 | 0.79509  |
| 56360 | Q85601 | Q15398 | 1.0112   |
| 56361 | Q85601 | Q9BSB4 | 0.31361  |
| 56362 | Q85601 | Q6XYB7 | 0.32996  |
| 56363 | Q85601 | Q15466 | 0.59583  |
| 56364 | Q85601 | Q13884 | 0.51394  |
| 56365 | Q85601 | Q01892 | 0.39719  |
| 56366 | Q85601 | Q8N2H4 | 1.188    |
| 56367 | Q85601 | Q96BP3 | 0.39478  |
| 56368 | Q85601 | Q8N371 | 0.32176  |
| 56369 | Q85601 | Q9UPW6 | 0.7876   |
| 56370 | Q85601 | A6NJ46 | 0.27808  |
| 56371 | Q85601 | Q7Z6M4 | 0.32095  |
| 56372 | Q85601 | Q86X55 | 0.74104  |
| 56373 | Q85601 | Q9H7P6 | 0.58802  |
| 56374 | Q85601 | Q9BVS5 | 0.27037  |
| 56375 | Q85601 | Q8WV44 | 0.43447  |
| 56376 | Q85601 | Q15004 | 0.856    |
| 56377 | Q85601 | Q86VS8 | 0.43012  |
| 56378 | Q85601 | P82933 | 0.56602  |
| 56379 | Q85601 | Q86Z20 | 0.96654  |
| 56380 | Q85601 | Q6ZMR3 | 0.49983  |
| 56381 | Q85601 | O15534 | 0.2614   |
| 56382 | Q85601 | Q96AH0 | 0.30118  |
| 56383 | Q85601 | Q8IUR6 | 0.94308  |
| 56384 | Q85601 | Q9UQ80 | 0.99514  |
| 56385 | Q85601 | Q3SY84 | 0.49278  |
| 56386 | Q85601 | Q96JP2 | 0.21058  |
| 56387 | Q85601 | P18077 | 0.43553  |
| 56388 | Q85601 | Q7L804 | 0.61046  |
| 56389 | Q85601 | Q6AI08 | 0.2144   |
| 56390 | Q85601 | P50539 | 0.23243  |
| 56391 | Q85601 | Q12901 | 0.38699  |
| 56392 | Q85601 | O95684 | 0.86376  |

|       |        |        |          |
|-------|--------|--------|----------|
| 56393 | Q85601 | Q9H706 | 0.30691  |
| 56394 | Q85601 | Q08999 | 1.3764   |
| 56395 | Q85601 | P56270 | 0.53744  |
| 56396 | Q85601 | Q9NYJ8 | 0.5534   |
| 56397 | Q85601 | Q9H0N5 | 0.84344  |
| 56398 | Q85601 | O95347 | 0.48583  |
| 56399 | Q85601 | Q9H8G1 | 0.52008  |
| 56400 | Q85601 | Q8IYL3 | 0.20715  |
| 56401 | Q85601 | P15976 | 0.30803  |
| 56402 | Q85601 | Q14008 | 0.93152  |
| 56403 | Q85601 | O75909 | 1.0706   |
| 56404 | Q85601 | Q969H0 | 0.73138  |
| 56405 | Q85601 | A1L3X0 | 0.54781  |
| 56406 | Q85601 | Q9BQG0 | 0.73881  |
| 56407 | Q85601 | Q3SXZ3 | 0.35256  |
| 56408 | Q85601 | Q8IYD8 | 0.37551  |
| 56409 | Q85601 | Q6IN85 | 0.30982  |
| 56410 | Q85601 | Q5T0L3 | 1.2136   |
| 56411 | Q85601 | Q96SC8 | 0.15598  |
| 56412 | Q85601 | Q96BP2 | 1.2261   |
| 56413 | Q85601 | Q52M58 | 0.016113 |
| 56414 | Q85601 | Q6UUV9 | 1.5436   |
| 56415 | Q85601 | P25787 | 0.4982   |
| 56416 | Q85601 | Q8WWK9 | 0.36901  |
| 56417 | Q85601 | Q96MT4 | 0.10176  |
| 56418 | Q85601 | Q9GZZ1 | 0.42632  |
| 56419 | Q85601 | P46060 | 0.2863   |
| 56420 | Q85601 | Q9UJY4 | 0.49979  |
| 56421 | Q85601 | Q9BY41 | 0.49946  |
| 56422 | Q85601 | Q9BWH6 | 0.30032  |
| 56423 | Q85601 | Q96EE3 | 0.60109  |
| 56424 | Q85601 | Q14194 | 0.42574  |
| 56425 | Q85601 | P61313 | 0.87396  |
| 56426 | Q85601 | P41091 | 0.075188 |
| 56427 | Q85601 | Q9UL59 | 0.31481  |
| 56428 | Q85601 | Q9Y2R5 | 0.16086  |
| 56429 | Q85601 | O94776 | 1.0617   |
| 56430 | Q85601 | Q5C9Z4 | 0.6325   |
| 56431 | Q85601 | O60888 | 0.37537  |
| 56432 | Q85601 | Q2KHR2 | 0.23821  |
| 56433 | Q85601 | Q9BQQ3 | 0.19147  |
| 56434 | Q85601 | Q9UQ84 | 0.31837  |
| 56435 | Q85601 | Q6Q759 | 0.41576  |
| 56436 | Q85601 | O00165 | 0.77123  |
| 56437 | Q85601 | Q7RTV0 | 0.41513  |
| 56438 | Q85601 | Q9Y3D5 | 0.15711  |
| 56439 | Q85601 | Q7L945 | 0.31315  |
| 56440 | Q85601 | Q8WXE1 | 0.74037  |
| 56441 | Q85601 | Q92994 | 0.43515  |
| 56442 | Q85601 | Q86SG2 | 0.27273  |
| 56443 | Q85601 | P61962 | 0.72744  |
| 56444 | Q85601 | Q15265 | 1.1631   |
| 56445 | Q85601 | Q96H20 | 1.0443   |
| 56446 | Q85601 | O75396 | 0.25941  |
| 56447 | Q85601 | Q96RT1 | 0.29127  |
| 56448 | Q85601 | Q9UQC2 | 0.26123  |
| 56449 | Q85601 | Q9C0G0 | 0.034064 |
| 56450 | Q85601 | Q99613 | 0.68618  |
| 56451 | Q85601 | Q16384 | 0.35321  |
| 56452 | Q85601 | Q8TBK2 | 0.52369  |
| 56453 | Q85601 | P49406 | 0.44234  |
| 56454 | Q85601 | P05388 | 1.2109   |
| 56455 | Q85601 | P50479 | 0.32982  |
| 56456 | Q85601 | P19484 | 0.61389  |
| 56457 | Q85601 | Q13243 | 0.63967  |
| 56458 | Q85601 | P50750 | 0.41449  |
| 56459 | Q85601 | Q9UBQ5 | 1.0283   |
| 56460 | Q85601 | P17019 | 0.47479  |
| 56461 | Q85601 | O75691 | 0.80216  |
| 56462 | Q85601 | Q52LR7 | 0.51352  |
| 56463 | Q85601 | Q96NG8 | 0.31529  |
| 56464 | Q85601 | Q5VV17 | 0.020218 |
| 56465 | Q85601 | Q9Y2Z0 | 0.49016  |
| 56466 | Q85601 | Q14202 | 0.31871  |
| 56467 | Q85601 | Q9HD47 | 0.22925  |
| 56468 | Q85601 | Q7L4I2 | 1.2837   |

|       |        |        |           |
|-------|--------|--------|-----------|
| 56469 | Q85601 | P15172 | 0.35304   |
| 56470 | Q85601 | P49789 | 0.63948   |
| 56471 | Q85601 | Q04724 | 0.89452   |
| 56472 | Q85601 | Q17RY6 | 0.30939   |
| 56473 | Q85601 | O75190 | 0.72468   |
| 56474 | Q85601 | Q9UN36 | 0.58221   |
| 56475 | Q85601 | Q9HCK5 | 0.62448   |
| 56476 | Q85601 | B2RV13 | 0.11433   |
| 56477 | Q85601 | O95059 | 0.04101   |
| 56478 | Q85601 | Q92547 | 0.68618   |
| 56479 | Q85601 | Q9H040 | 0.58752   |
| 56480 | Q85601 | Q5HYK7 | 1.2402    |
| 56481 | Q85601 | P05413 | 0.25825   |
| 56482 | Q85601 | P62714 | 0.80429   |
| 56483 | Q85601 | Q9ULK2 | 0.79691   |
| 56484 | Q85601 | Q5HY98 | 0.40802   |
| 56485 | Q85601 | Q96MC9 | 0.55426   |
| 56486 | Q85601 | Q9GZV4 | 0.58359   |
| 56487 | Q85601 | P0CG29 | 0.35473   |
| 56488 | Q85601 | A6NNA5 | 0.16654   |
| 56489 | Q85601 | Q8N2N9 | 0.1977    |
| 56490 | Q85601 | Q96BD5 | 0.59171   |
| 56491 | Q85601 | Q9NVD3 | 0.066076  |
| 56492 | Q85601 | P14921 | 0.8125    |
| 56493 | Q85601 | Q8IYF3 | 0.4174    |
| 56494 | Q85601 | Q6B0B8 | 0.2124    |
| 56495 | Q85601 | P18887 | 0.67327   |
| 56496 | Q85601 | B9ZVM9 | 1.0414    |
| 56497 | Q85601 | Q969S2 | 0.14825   |
| 56498 | Q85601 | Q9ULV5 | 0.42204   |
| 56499 | Q85601 | Q9UBS3 | 0.60494   |
| 56500 | Q85601 | O60437 | 0.78594   |
| 56501 | Q85601 | Q9UL33 | 0.33243   |
| 56502 | Q85601 | Q9BZE4 | 0.34768   |
| 56503 | Q85601 | Q8IUC6 | 0.22221   |
| 56504 | Q85601 | Q92558 | 0.37137   |
| 56505 | Q85601 | Q2M2Z5 | 0.71476   |
| 56506 | Q85601 | Q6P1L6 | 0.24948   |
| 56507 | Q85601 | Q9H320 | 0.27102   |
| 56508 | Q85601 | P63151 | 0.38747   |
| 56509 | Q85601 | Q03052 | 0.36887   |
| 56510 | Q85601 | Q8N8L2 | 0.26852   |
| 56511 | Q85601 | Q9HB09 | 0.58717   |
| 56512 | Q85601 | Q6ZN57 | 0.27324   |
| 56513 | Q85601 | Q96BR6 | 0.38547   |
| 56514 | Q85601 | Q9ULK4 | 1.1733    |
| 56515 | Q85601 | Q6NZ36 | 0.31289   |
| 56516 | Q85601 | Q5VYV7 | 0.30691   |
| 56517 | Q85601 | Q6ZMS7 | 0.34677   |
| 56518 | Q85601 | Q96HQ0 | 0.30526   |
| 56519 | Q85601 | Q5JSH3 | 0.24526   |
| 56520 | Q85601 | Q9HD36 | 0.44977   |
| 56521 | Q85601 | Q96JM2 | 0.24984   |
| 56522 | Q85601 | P62495 | 0.54199   |
| 56523 | Q85601 | Q8N9R8 | 0.66054   |
| 56524 | Q85601 | Q9NP92 | 0.5641    |
| 56525 | Q85601 | Q9Y5K6 | 0.27184   |
| 56526 | Q85601 | Q5VTE0 | 0.65989   |
| 56527 | Q85601 | P17661 | 0.44395   |
| 56528 | Q85601 | Q9Y2N7 | 0.61566   |
| 56529 | Q85601 | Q9BQD3 | 0.36464   |
| 56530 | Q85601 | A6NKH3 | 0.17681   |
| 56531 | Q85601 | Q86WV5 | 0.36843   |
| 56532 | Q85601 | Q9BRA2 | 0.52661   |
| 56533 | Q85601 | Q9NPG3 | 0.81431   |
| 56534 | Q85601 | Q659C4 | 0.44911   |
| 56535 | Q85601 | Q96CW1 | 0.53952   |
| 56536 | Q85601 | Q6NVV0 | 0.0062555 |
| 56537 | Q85601 | P86452 | 0.52553   |
| 56538 | Q85601 | Q9UQL6 | 0.5214    |
| 56539 | Q85601 | Q8NB12 | 0.43737   |
| 56540 | Q85601 | Q9Y3B7 | 0.87707   |
| 56541 | Q85601 | Q15629 | 0.21048   |
| 56542 | Q85601 | P13682 | 0.33475   |
| 56543 | Q85601 | P09917 | 0.24236   |
| 56544 | Q85601 | P13051 | 0.95553   |

|       |        |        |          |
|-------|--------|--------|----------|
| 56545 | Q85601 | P08651 | 0.27919  |
| 56546 | Q85601 | O14879 | 0.69926  |
| 56547 | Q85601 | Q9H489 | 0.63412  |
| 56548 | Q85601 | Q9UGR2 | 0.45     |
| 56549 | Q85601 | Q15833 | 0.34385  |
| 56550 | Q85601 | O14579 | 0.43636  |
| 56551 | Q85601 | Q15293 | 0.24763  |
| 56552 | Q85601 | Q86YA3 | 0.33347  |
| 56553 | Q85601 | Q3B7T1 | 0.45278  |
| 56554 | Q85601 | Q9UIF9 | 0.68509  |
| 56555 | Q85601 | Q3L8U1 | 0.93471  |
| 56556 | Q85601 | Q7Z713 | 0.23411  |
| 56557 | Q85601 | P13533 | 0.42967  |
| 56558 | Q85601 | Q15486 | 0.36486  |
| 56559 | Q85601 | Q86VM9 | 0.21504  |
| 56560 | Q85601 | Q86V15 | 0.43653  |
| 56561 | Q85601 | O95487 | 0.75672  |
| 56562 | Q85601 | P57772 | 0.1819   |
| 56563 | Q85601 | Q9BXW9 | 0.8225   |
| 56564 | Q85601 | Q6STE5 | 0.74559  |
| 56565 | Q85601 | Q9H6D7 | 0.65651  |
| 56566 | Q85601 | O75151 | 0.63486  |
| 56567 | Q85601 | Q96JF6 | 0.24796  |
| 56568 | Q85601 | Q9BT25 | 0.6577   |
| 56569 | Q85601 | Q8TBE0 | 0.79568  |
| 56570 | Q85601 | O95671 | 0.21076  |
| 56571 | Q85601 | Q2V2M9 | 0.33461  |
| 56572 | Q85601 | Q99547 | 0.65741  |
| 56573 | Q85601 | Q7Z4T9 | 0.71018  |
| 56574 | Q85601 | Q9UBB4 | 0.69763  |
| 56575 | Q85601 | P21399 | 0.35882  |
| 56576 | Q85601 | O15182 | 0.46019  |
| 56577 | Q85601 | Q5PSV4 | 0.41331  |
| 56578 | Q85601 | O75398 | 0.26549  |
| 56579 | Q85601 | Q9H321 | 0.29282  |
| 56580 | Q85601 | Q8WUN7 | 0.44273  |
| 56581 | Q85601 | P17032 | 0.29823  |
| 56582 | Q85601 | Q9Y3M2 | 0.30815  |
| 56583 | Q85601 | A8MTZ0 | 0.22515  |
| 56584 | Q85601 | P49589 | 0.28679  |
| 56585 | Q85601 | Q9P253 | 0.1619   |
| 56586 | Q85601 | Q9NZF1 | 0.033739 |
| 56587 | Q85601 | Q16656 | 0.42101  |
| 56588 | Q85601 | Q99871 | 0.66313  |
| 56589 | Q85601 | Q9C0F0 | 0.43526  |
| 56590 | Q85601 | Q9NQS7 | 0.97485  |
| 56591 | Q85601 | A8CG34 | 0.35769  |
| 56592 | Q85601 | Q8IY18 | 0.45417  |
| 56593 | Q85601 | Q6PF04 | 0.28195  |
| 56594 | Q85601 | Q5T6M2 | 0.4715   |
| 56595 | Q85601 | P48634 | 0.87447  |
| 56596 | Q85601 | Q9UL58 | 0.55761  |
| 56597 | Q85601 | Q9Y3D0 | 1.0174   |
| 56598 | Q85601 | P60002 | 0.64354  |
| 56599 | Q85601 | Q96F07 | 0.45729  |
| 56600 | Q85601 | O95153 | 0.65356  |
| 56601 | Q85601 | Q96DC7 | 1.1041   |
| 56602 | Q85601 | P17036 | 0.37229  |
| 56603 | Q85601 | Q6UXP7 | 0.08194  |
| 56604 | Q85601 | Q4U2R6 | 0.82143  |
| 56605 | Q85601 | Q6DD87 | 0.24776  |
| 56606 | Q85601 | Q96RT8 | 0.44028  |
| 56607 | Q85601 | Q9HCL3 | 0.46743  |
| 56608 | Q85601 | O15151 | 0.23627  |
| 56609 | Q85601 | Q13439 | 0.73916  |
| 56610 | Q85601 | Q14CW9 | 0.92932  |
| 56611 | Q85601 | Q9NRR5 | 0.7184   |
| 56612 | Q85601 | Q9BYG5 | 0.69973  |
| 56613 | Q85601 | P04732 | 0.26807  |
| 56614 | Q85601 | Q9BW71 | 0.61353  |
| 56615 | Q85601 | O95447 | 0.039897 |
| 56616 | Q85601 | Q86U70 | 0.23897  |
| 56617 | Q85601 | Q9Y613 | 0.6135   |
| 56618 | Q85601 | Q06546 | 1.2105   |
| 56619 | Q85601 | O14599 | 0.44263  |
| 56620 | Q85601 | Q9HCK1 | 0.59445  |

|       |        |        |           |
|-------|--------|--------|-----------|
| 56621 | Q85601 | Q05048 | 0.61245   |
| 56622 | Q85601 | P23508 | 0.41383   |
| 56623 | Q85601 | P61289 | 0.70459   |
| 56624 | Q85601 | Q9Y2L8 | 0.50068   |
| 56625 | Q85601 | P60331 | 0.17342   |
| 56626 | Q85601 | Q6W349 | 0.0019713 |
| 56627 | Q85601 | P06730 | 0.5129    |
| 56628 | Q85601 | Q8IY63 | 0.45941   |
| 56629 | Q85601 | Q9P2D1 | 0.20471   |
| 56630 | Q85601 | Q93015 | 0.094911  |
| 56631 | Q85601 | P50548 | 0.35477   |
| 56632 | Q85601 | P62304 | 0.61651   |
| 56633 | Q85601 | Q9GZU7 | 0.56237   |
| 56634 | Q85601 | O95251 | 0.95255   |
| 56635 | Q85601 | P07196 | 0.50402   |
| 56636 | Q85601 | Q9NY61 | 0.96593   |
| 56637 | Q85601 | Q9Y603 | 1.2207    |
| 56638 | Q85601 | Q96P70 | 1.0115    |
| 56639 | Q85601 | Q8N5T8 | 0.014388  |
| 56640 | Q85601 | Q13769 | 0.53982   |
| 56641 | Q85601 | Q15329 | 1.2562    |
| 56642 | Q85601 | Q8WW38 | 0.60882   |
| 56643 | Q85601 | Q16531 | 0.68698   |
| 56644 | Q85601 | O95295 | 0.47071   |
| 56645 | Q85601 | Q3LHN0 | 0.36976   |
| 56646 | Q85601 | Q12769 | 0.99377   |
| 56647 | Q85601 | Q8TAC9 | 0.4198    |
| 56648 | Q85601 | Q9UK58 | 0.36692   |
| 56649 | Q85601 | P57060 | 0.51969   |
| 56650 | Q85601 | P56645 | 0.25571   |
| 56651 | Q85601 | Q01130 | 0.60688   |
| 56652 | Q85601 | Q8IYW7 | 0.16498   |
| 56653 | Q85601 | Q58FF8 | 0.58819   |
| 56654 | Q85601 | P00480 | 0.096384  |
| 56655 | Q85601 | Q9P2D0 | 0.24728   |
| 56656 | Q85601 | Q8TC05 | 0.19623   |
| 56657 | Q85601 | Q8TAQ5 | 0.35685   |
| 56658 | Q85601 | A6NIX2 | 1.1079    |
| 56659 | Q85601 | O14713 | 0.33086   |
| 56660 | Q85601 | Q96MC4 | 0.49605   |
| 56661 | Q85601 | Q8TDY3 | 0.11637   |
| 56662 | Q85601 | O95049 | 0.46996   |
| 56663 | Q85601 | Q02386 | 0.25356   |
| 56664 | Q85601 | Q0VG99 | 0.25935   |
| 56665 | Q85601 | Q86YE8 | 0.35685   |
| 56666 | Q85601 | Q9H0W8 | 0.25594   |
| 56667 | Q85601 | Q9H307 | 0.62961   |
| 56668 | Q85601 | P43364 | 0.87447   |
| 56669 | Q85601 | Q15554 | 0.51667   |
| 56670 | Q85601 | O00463 | 0.40793   |
| 56671 | Q85601 | O95166 | 0.25156   |
| 56672 | Q85601 | Q9UJW3 | 0.68369   |
| 56673 | Q85601 | Q9BYN7 | 0.23504   |
| 56674 | Q85601 | Q8NAP3 | 0.42211   |
| 56675 | Q85601 | O60506 | 0.27208   |
| 56676 | Q85601 | Q68CZ2 | 0.33837   |
| 56677 | Q85601 | Q14240 | 0.12356   |
| 56678 | Q85601 | O15194 | 0.07935   |
| 56679 | Q85601 | Q6P1J9 | 0.65102   |
| 56680 | Q85601 | Q9H379 | 0.053121  |
| 56681 | Q85601 | Q9P206 | 0.10358   |
| 56682 | Q85601 | Q6P1R3 | 0.61143   |
| 56683 | Q85601 | Q14549 | 0.3482    |
| 56684 | Q85601 | Q9HBT7 | 0.33141   |
| 56685 | Q85601 | P41220 | 0.44772   |
| 56686 | Q85601 | Q9UI95 | 1.3525    |
| 56687 | Q85601 | Q92540 | 0.99281   |
| 56688 | Q85601 | Q8NFV5 | 0.15217   |
| 56689 | Q85601 | Q9UBU9 | 0.41756   |
| 56690 | Q85601 | A6NJR5 | 0.15217   |
| 56691 | Q85601 | Q5FWF6 | 0.50115   |
| 56692 | Q85601 | Q96FH0 | 0.23255   |
| 56693 | Q85601 | O60763 | 0.46912   |
| 56694 | Q85601 | Q5MIZ7 | 0.50035   |
| 56695 | Q85601 | Q6GPH4 | 0.54266   |
| 56696 | Q85601 | P56282 | 0.29436   |

|       |        |        |          |
|-------|--------|--------|----------|
| 56697 | Q85601 | Q96A44 | 0.49751  |
| 56698 | Q85601 | Q96HR8 | 0.94664  |
| 56699 | Q85601 | Q14244 | 0.57757  |
| 56700 | Q85601 | Q96CS3 | 0.55184  |
| 56701 | Q85601 | P51161 | 0.22891  |
| 56702 | Q85601 | Q96GT9 | 0.033402 |
| 56703 | Q85601 | Q8N814 | 0.46598  |
| 56704 | Q85601 | A6NDR6 | 0.22476  |
| 56705 | Q85601 | Q32MQ0 | 0.3878   |
| 56706 | Q85601 | Q9H0C8 | 0.48256  |
| 56707 | Q85601 | Q96JE7 | 0.80621  |
| 56708 | Q85601 | Q9Y606 | 0.95198  |
| 56709 | Q85601 | Q9P2Y5 | 0.3312   |
| 56710 | Q85601 | Q86WX3 | 1.1459   |
| 56711 | Q85601 | Q9UBP0 | 0.2492   |
| 56712 | Q85601 | Q12857 | 0.33573  |
| 56713 | Q85601 | Q5VTA0 | 0.21119  |
| 56714 | Q85601 | Q8WXF5 | 0.30028  |
| 56715 | Q85601 | Q16621 | 0.51617  |
| 56716 | Q85601 | Q13158 | 0.43747  |
| 56717 | Q85601 | Q9NQR1 | 0.70355  |
| 56718 | Q85601 | Q9UBX3 | 0.3138   |
| 56719 | Q85601 | Q8IYN0 | 0.3511   |
| 56720 | Q85601 | Q93083 | 0.28384  |
| 56721 | Q85601 | Q99471 | 0.85973  |
| 56722 | Q85601 | Q19AV6 | 1.0556   |
| 56723 | Q85601 | Q75MW2 | 0.63202  |
| 56724 | Q85601 | Q9BYQ6 | 0.17342  |
| 56725 | Q85601 | Q14331 | 0.26834  |
| 56726 | Q85601 | O95714 | 0.24897  |
| 56727 | Q85601 | Q7Z398 | 0.27319  |
| 56728 | Q85601 | Q9H081 | 0.76113  |
| 56729 | Q85601 | P49427 | 0.71895  |
| 56730 | Q85601 | P0DKL9 | 0.22322  |
| 56731 | Q85601 | P17020 | 0.23662  |
| 56732 | Q85601 | P06400 | 0.68784  |
| 56733 | Q85601 | P0CJ87 | 0.27808  |
| 56734 | Q85601 | Q06330 | 0.55059  |
| 56735 | Q85601 | P48378 | 0.35025  |
| 56736 | Q85601 | Q6ZP82 | 0.30691  |
| 56737 | Q85601 | Q9Y3C5 | 0.54471  |
| 56738 | Q85601 | Q969V6 | 1.4633   |
| 56739 | Q85601 | Q96BV0 | 0.14522  |
| 56740 | Q85601 | Q92733 | 0.8435   |
| 56741 | Q85601 | P08670 | 0.1621   |
| 56742 | Q85601 | O75306 | 0.088033 |
| 56743 | Q85601 | Q9UKZ1 | 0.07327  |
| 56744 | Q85601 | Q7Z465 | 0.67559  |
| 56745 | Q85601 | O75969 | 0.26233  |
| 56746 | Q85601 | Q13360 | 0.21568  |
| 56747 | Q85601 | A8MXT2 | 0.074529 |
| 56748 | Q85601 | P05787 | 1.3992   |
| 56749 | Q85601 | P35579 | 0.72294  |
| 56750 | Q85601 | Q92979 | 0.36034  |
| 56751 | Q85601 | Q9UQK1 | 0.32904  |
| 56752 | Q85601 | Q96PY6 | 0.34212  |
| 56753 | Q85601 | Q9HD40 | 0.5402   |
| 56754 | Q85601 | Q9Y4W2 | 0.52047  |
| 56755 | Q85601 | Q8N7R0 | 0.32996  |
| 56756 | Q85601 | Q5T5J6 | 0.62257  |
| 56757 | Q85601 | Q68E01 | 0.58042  |
| 56758 | Q85601 | Q96QT6 | 1.0006   |
| 56759 | Q85601 | Q96BF6 | 0.39891  |
| 56760 | Q85601 | P12036 | 0.37769  |
| 56761 | Q85601 | P63173 | 0.44684  |
| 56762 | Q85601 | P25788 | 0.56503  |
| 56763 | Q85601 | Q9H7S9 | 0.77083  |
| 56764 | Q85601 | Q8WTT2 | 0.32895  |
| 56765 | Q85601 | B4DXR9 | 0.48246  |
| 56766 | Q85601 | Q16548 | 0.53158  |
| 56767 | Q85601 | O75312 | 0.29157  |
| 56768 | Q85601 | P52758 | 0.54086  |
| 56769 | Q85601 | P56279 | 0.4939   |
| 56770 | Q85601 | Q9UIL8 | 0.44456  |
| 56771 | Q85601 | O43541 | 0.61274  |
| 56772 | Q85601 | Q9H5L6 | 0.44059  |



|       |        |        |           |
|-------|--------|--------|-----------|
| 56773 | Q85601 | P38935 | 0.52983   |
| 56774 | Q85601 | O95677 | 0.18933   |
| 56775 | Q85601 | P53567 | 0.65379   |
| 56776 | Q85601 | Q8N5Q1 | 0.61067   |
| 56777 | Q85601 | O95336 | 0.30631   |
| 56778 | Q85601 | Q96LX8 | 0.25378   |
| 56779 | Q85601 | Q96MP8 | 0.28648   |
| 56780 | Q85601 | Q12798 | 0.75373   |
| 56781 | Q85601 | Q8WWW0 | 0.44409   |
| 56782 | Q85601 | Q9P258 | 0.75673   |
| 56783 | Q85601 | Q9H7U1 | 0.53923   |
| 56784 | Q85601 | P36952 | 0.44379   |
| 56785 | Q85601 | Q96DE9 | 0.0095678 |
| 56786 | Q85601 | Q96IK1 | 0.25452   |
| 56787 | Q85601 | B1APH4 | 0.41767   |
| 56788 | Q85601 | O60290 | 0.462     |
| 56789 | Q85601 | Q8TD23 | 0.59385   |
| 56790 | Q85601 | Q8N8J6 | 0.14203   |
| 56791 | Q85601 | O60907 | 0.81225   |
| 56792 | Q85601 | Q9NQ89 | 0.21086   |
| 56793 | Q85601 | Q8N4B4 | 0.096051  |
| 56794 | Q85601 | Q9H0U6 | 0.16934   |
| 56795 | Q85601 | Q9BYQ8 | 0.17342   |
| 56796 | Q85601 | P49593 | 0.23655   |
| 56797 | Q85601 | P13349 | 0.3025    |
| 56798 | Q85601 | Q9P2J5 | 0.28687   |
| 56799 | Q85601 | Q13310 | 0.33513   |
| 56800 | Q85601 | P23588 | 0.2373    |
| 56801 | Q85601 | Q9NX20 | 0.41909   |
| 56802 | Q85601 | P39687 | 1.3964    |
| 56803 | Q85601 | Q3LI81 | 0.36976   |
| 56804 | Q85601 | Q53FD0 | 0.46154   |
| 56805 | Q85601 | Q9H7D7 | 0.44273   |
| 56806 | Q85601 | A8MWA4 | 0.47865   |
| 56807 | Q85601 | Q96T23 | 0.74481   |
| 56808 | Q85601 | P50995 | 0.84142   |
| 56809 | Q85601 | Q9BR84 | 0.51874   |
| 56810 | Q85601 | Q6ZNG0 | 0.29924   |
| 56811 | Q85601 | Q8TCC3 | 0.096586  |
| 56812 | Q85601 | Q9Y2Y9 | 0.79713   |
| 56813 | Q85601 | O15111 | 0.56444   |
| 56814 | Q85601 | P12980 | 0.88215   |
| 56815 | Q85601 | Q9P2N5 | 0.092264  |
| 56816 | Q85601 | Q12796 | 1.4021    |
| 56817 | Q85601 | Q96E11 | 0.29765   |
| 56818 | Q85601 | Q14103 | 0.74831   |
| 56819 | Q85601 | Q8WV92 | 0.33148   |
| 56820 | Q85601 | Q9BX66 | 0.37986   |
| 56821 | Q85601 | P54845 | 0.37984   |
| 56822 | Q85601 | P81274 | 0.55664   |
| 56823 | Q85601 | Q9BYR8 | 0.36976   |
| 56824 | Q85601 | Q14966 | 0.093242  |
| 56825 | Q85601 | Q9Y535 | 0.31717   |
| 56826 | Q85601 | Q13148 | 0.41095   |
| 56827 | Q85601 | Q15797 | 0.20726   |
| 56828 | Q85601 | P15622 | 0.33129   |
| 56829 | Q85601 | Q15773 | 0.73083   |
| 56830 | Q85601 | Q86YS3 | 0.1723    |
| 56831 | Q85601 | Q9Y294 | 1.045     |
| 56832 | Q85601 | Q9BUL8 | 0.70256   |
| 56833 | Q85601 | P50549 | 0.92949   |
| 56834 | Q85601 | P14649 | 0.23442   |
| 56835 | Q85601 | Q96BQ5 | 0.28632   |
| 56836 | Q85601 | Q96H40 | 0.45522   |
| 56837 | Q85601 | Q969X6 | 1.2392    |
| 56838 | Q85601 | Q9H8M7 | 0.81549   |
| 56839 | Q85601 | Q2M3W8 | 0.47651   |
| 56840 | Q85601 | Q6NZ67 | 0.76106   |
| 56841 | Q85601 | Q96EU6 | 0.21827   |
| 56842 | Q85601 | P82921 | 0.19944   |
| 56843 | Q85601 | O75800 | 0.55351   |
| 56844 | Q85601 | Q96Q06 | 0.45148   |
| 56845 | Q85601 | Q9Y2X8 | 0.84493   |
| 56846 | Q85601 | O95391 | 0.20973   |
| 56847 | Q85601 | Q13888 | 0.60111   |
| 56848 | Q85601 | O15116 | 0.7323    |

|       |        |        |          |
|-------|--------|--------|----------|
| 56849 | Q85601 | A6NHQ2 | 0.17525  |
| 56850 | Q85601 | Q6PF05 | 0.41532  |
| 56851 | Q85601 | P14653 | 0.36728  |
| 56852 | Q85601 | Q96SN8 | 0.54678  |
| 56853 | Q85601 | Q8N7U7 | 0.33004  |
| 56854 | Q85601 | Q8N5J2 | 0.80151  |
| 56855 | Q85601 | Q00005 | 0.48982  |
| 56856 | Q85601 | Q8N1B3 | 0.55825  |
| 56857 | Q85601 | Q9Y283 | 0.3204   |
| 56858 | Q85601 | Q7Z6R9 | 0.37155  |
| 56859 | Q85601 | Q9BZE3 | 0.45111  |
| 56860 | Q85601 | Q9C086 | 1.5253   |
| 56861 | Q85601 | O43248 | 0.3357   |
| 56862 | Q85601 | O60315 | 0.3178   |
| 56863 | Q85601 | Q15036 | 0.20782  |
| 56864 | Q85601 | Q96BT3 | 0.58839  |
| 56865 | Q85601 | Q53G26 | 0.6202   |
| 56866 | Q85601 | P19013 | 0.53559  |
| 56867 | Q85601 | Q9UP83 | 1.3101   |
| 56868 | Q85601 | Q8N5F7 | 1.3374   |
| 56869 | Q85601 | Q8N8R7 | 0.53217  |
| 56870 | Q85601 | P16455 | 0.12464  |
| 56871 | Q85601 | Q9BS18 | 0.47296  |
| 56872 | Q85601 | Q7Z7C8 | 0.515    |
| 56873 | Q85601 | P62072 | 0.2988   |
| 56874 | Q85601 | Q14587 | 0.23373  |
| 56875 | Q85601 | Q03933 | 0.72386  |
| 56876 | Q85601 | Q9HAF1 | 1.0938   |
| 56877 | Q85601 | Q13155 | 0.66899  |
| 56878 | Q85601 | Q5H9M0 | 0.77709  |
| 56879 | Q85601 | A2RRD8 | 0.35853  |
| 56880 | Q85601 | Q16719 | 0.35607  |
| 56881 | Q85601 | Q8NDY6 | 0.50494  |
| 56882 | Q85601 | Q9H0E3 | 0.59933  |
| 56883 | Q85601 | Q8NHY6 | 0.36725  |
| 56884 | Q85601 | Q8TEA8 | 0.56335  |
| 56885 | Q85601 | O75935 | 0.98736  |
| 56886 | Q85601 | Q96GX2 | 0.57132  |
| 56887 | Q85601 | P17027 | 0.24382  |
| 56888 | Q85601 | Q9Y3Q8 | 1.2713   |
| 56889 | Q85601 | Q9BXS5 | 0.78977  |
| 56890 | Q85601 | Q5TD94 | 0.1602   |
| 56891 | Q85601 | Q01105 | 0.80248  |
| 56892 | Q85601 | Q9BSF0 | 0.31662  |
| 56893 | Q85601 | P10746 | 0.18815  |
| 56894 | Q85601 | Q9BUI4 | 0.21882  |
| 56895 | Q85601 | Q9UM07 | 0.48976  |
| 56896 | Q85601 | Q9BU02 | 0.44767  |
| 56897 | Q85601 | O60813 | 0.35214  |
| 56898 | Q85601 | Q92665 | 0.76108  |
| 56899 | Q85601 | Q7Z4H7 | 1.0083   |
| 56900 | Q85601 | Q9Y6Z5 | 0.32555  |
| 56901 | Q85601 | C9JE40 | 0.79215  |
| 56902 | Q85601 | Q71F78 | 0.066686 |
| 56903 | Q85601 | Q9Y6J0 | 0.19372  |
| 56904 | Q85601 | Q13112 | 1.4944   |
| 56905 | Q85601 | Q9H467 | 1.0637   |
| 56906 | Q85601 | Q9H2W6 | 0.24725  |
| 56907 | Q85601 | Q9H9T3 | 0.85073  |
| 56908 | Q85601 | Q5VVM6 | 0.11502  |
| 56909 | Q85601 | Q9UDY8 | 0.2681   |
| 56910 | Q85601 | Q9UKT4 | 0.91064  |
| 56911 | Q85601 | Q9BQ95 | 1.1106   |
| 56912 | Q85601 | A8MUV8 | 0.45887  |
| 56913 | Q85601 | Q9HC16 | 0.15547  |
| 56914 | Q85601 | Q96IM9 | 0.051044 |
| 56915 | Q85601 | P16333 | 0.63078  |
| 56916 | Q85601 | Q15006 | 0.36308  |
| 56917 | Q85601 | Q8NEU8 | 0.46037  |
| 56918 | Q85601 | Q9NR11 | 0.26517  |
| 56919 | Q85601 | P07814 | 0.095726 |
| 56920 | Q85601 | Q13216 | 0.45555  |
| 56921 | Q85601 | P02042 | 0.21071  |
| 56922 | Q85601 | Q8N684 | 0.30538  |
| 56923 | Q85601 | O75400 | 0.86897  |
| 56924 | Q85601 | P78406 | 0.54407  |

|       |        |        |          |
|-------|--------|--------|----------|
| 56925 | Q85601 | Q9Y6X2 | 0.80526  |
| 56926 | Q85601 | Q03936 | 0.49862  |
| 56927 | Q85601 | Q96P15 | 0.44379  |
| 56928 | Q85601 | Q08AG5 | 0.47311  |
| 56929 | Q85601 | Q9Y4C2 | 0.087078 |
| 56930 | Q85601 | Q9H9F9 | 1.2785   |
| 56931 | Q85601 | Q8N7R1 | 0.4324   |
| 56932 | Q85601 | Q13573 | 0.56464  |
| 56933 | Q85601 | O60308 | 0.448    |
| 56934 | Q85601 | P59022 | 0.21923  |
| 56935 | Q85601 | Q8IXQ3 | 0.40137  |
| 56936 | Q85601 | Q3LI73 | 0.12421  |
| 56937 | Q85601 | Q56P42 | 0.23411  |
| 56938 | Q85601 | Q9Y2Y1 | 0.079874 |
| 56939 | Q85601 | Q9BPX1 | 0.21026  |
| 56940 | Q85601 | P57740 | 0.78245  |
| 56941 | Q85601 | Q9H116 | 0.4026   |
| 56942 | Q85601 | Q13951 | 0.65543  |
| 56943 | Q85601 | Q2M1K9 | 0.32175  |
| 56944 | Q85601 | A1L4L8 | 0.2683   |
| 56945 | Q85601 | Q9BPZ7 | 0.37079  |
| 56946 | Q85601 | Q86SE8 | 0.10355  |
| 56947 | Q85601 | Q8TF01 | 0.22014  |
| 56948 | Q85601 | A8MQ11 | 0.26267  |
| 56949 | Q85601 | Q5M9Q1 | 0.91137  |
| 56950 | Q85601 | Q8IYW4 | 0.097374 |
| 56951 | Q85601 | O75330 | 0.032524 |
| 56952 | Q85601 | Q14790 | 0.26841  |
| 56953 | Q85601 | Q92560 | 0.19596  |
| 56954 | Q85601 | P62877 | 0.65851  |
| 56955 | Q85601 | Q99417 | 1.5168   |
| 56956 | Q85601 | Q9UHV7 | 0.53444  |
| 56957 | Q85601 | P0CG30 | 0.35473  |
| 56958 | Q85601 | Q9H8S9 | 0.50726  |
| 56959 | Q85601 | Q5EE01 | 0.66487  |
| 56960 | Q85601 | P43487 | 0.3375   |
| 56961 | Q85601 | Q92925 | 0.56238  |
| 56962 | Q85601 | Q53GS7 | 0.58454  |
| 56963 | Q85601 | Q6ZN79 | 0.44594  |
| 56964 | Q85601 | Q9Y4P1 | 0.15616  |
| 56965 | Q85601 | Q15459 | 0.49001  |
| 56966 | Q85601 | Q9Y651 | 0.29874  |
| 56967 | Q85601 | Q6ZU67 | 0.20174  |
| 56968 | Q85601 | Q15424 | 0.6905   |
| 56969 | Q85601 | Q8N815 | 0.029075 |
| 56970 | Q85601 | P51826 | 0.41232  |
| 56971 | Q85601 | Q9NUS5 | 0.59556  |
| 56972 | Q85601 | Q96SW2 | 0.58941  |
| 56973 | Q85601 | Q17R31 | 0.1199   |
| 56974 | Q85601 | Q99966 | 0.23916  |
| 56975 | Q85601 | Q9NWS9 | 0.14382  |
| 56976 | Q85601 | P0CW01 | 0.47415  |
| 56977 | Q85601 | Q9H3C7 | 0.51707  |
| 56978 | Q85601 | Q8N680 | 0.030777 |
| 56979 | Q85601 | P40337 | 0.92223  |
| 56980 | Q85601 | Q8WTP9 | 0.48065  |
| 56981 | Q85601 | Q75030 | 0.59539  |
| 56982 | Q85601 | Q14684 | 0.29799  |
| 56983 | Q85601 | P23396 | 0.70236  |
| 56984 | Q85601 | O76009 | 0.56535  |
| 56985 | Q85601 | B1AL46 | 0.052748 |
| 56986 | Q85601 | Q7RTT3 | 0.1323   |
| 56987 | Q85601 | Q6P1W5 | 0.30691  |
| 56988 | Q85601 | Q9NR48 | 0.45985  |
| 56989 | Q85601 | Q9BRG1 | 1.1953   |
| 56990 | Q85601 | Q9NRG9 | 0.95732  |
| 56991 | Q85601 | P35244 | 0.58868  |
| 56992 | Q85601 | Q86UA6 | 0.86102  |
| 56993 | Q85601 | A6NHP3 | 0.15217  |
| 56994 | Q85601 | P56377 | 0.40398  |
| 56995 | Q85601 | Q99962 | 0.26823  |
| 56996 | Q85601 | P15822 | 0.9109   |
| 56997 | Q85601 | Q9BZF9 | 0.56708  |
| 56998 | Q85601 | P62273 | 0.6715   |
| 56999 | Q85601 | Q9NVX0 | 1.1722   |
| 57000 | Q85601 | Q07352 | 0.96008  |

|       |        |        |          |
|-------|--------|--------|----------|
| 57001 | Q85601 | Q8NHZ8 | 1.1937   |
| 57002 | Q85601 | Q9Y5J9 | 0.36408  |
| 57003 | Q85601 | Q9UL18 | 0.91108  |
| 57004 | Q85601 | Q9BUR4 | 0.76452  |
| 57005 | Q85601 | Q330K2 | 0.25558  |
| 57006 | Q85601 | A8MVS1 | 0.51279  |
| 57007 | Q85601 | Q33E94 | 0.90177  |
| 57008 | Q85601 | Q9BR46 | 0.39384  |
| 57009 | Q85601 | Q14695 | 0.045486 |
| 57010 | Q85601 | Q9Y5J6 | 0.23724  |
| 57011 | Q85601 | P15407 | 0.60512  |
| 57012 | Q85601 | Q8N7G0 | 0.32996  |
| 57013 | Q85601 | O95433 | 0.55163  |
| 57014 | Q85601 | P49336 | 0.348    |
| 57015 | Q85601 | Q6P4D5 | 0.13627  |
| 57016 | Q85601 | Q15007 | 0.41196  |
| 57017 | Q85601 | Q96T21 | 0.23184  |
| 57018 | Q85601 | Q8WYP5 | 0.69735  |
| 57019 | Q85601 | P46778 | 0.53692  |
| 57020 | Q85601 | Q8N6Q8 | 0.40516  |
| 57021 | Q85601 | Q8NET4 | 0.47206  |
| 57022 | Q85601 | A8MVW5 | 0.84854  |
| 57023 | Q85601 | Q96EK7 | 0.32352  |
| 57024 | Q85601 | Q14872 | 0.86407  |
| 57025 | Q85601 | Q86UL8 | 0.30124  |
| 57026 | Q85601 | Q8NDW4 | 0.28521  |
| 57027 | Q85601 | Q9UKN5 | 0.32886  |
| 57028 | Q85601 | Q99708 | 0.71058  |
| 57029 | Q85601 | Q8TC84 | 0.44273  |
| 57030 | Q85601 | P18848 | 1.1636   |
| 57031 | Q85601 | Q9BTX9 | 0.60224  |
| 57032 | Q85601 | P10155 | 0.44362  |
| 57033 | Q85601 | Q96LT7 | 0.34081  |
| 57034 | Q85601 | Q6NSZ9 | 0.16158  |
| 57035 | Q85601 | A4GXA9 | 0.50747  |
| 57036 | Q85601 | Q14533 | 0.73612  |
| 57037 | Q85601 | Q7Z3Y8 | 0.56535  |
| 57038 | Q85601 | Q9HC62 | 0.53611  |
| 57039 | Q85601 | Q15654 | 0.91786  |
| 57040 | Q85601 | P62829 | 1.0901   |
| 57041 | Q85601 | Q9HBF4 | 0.27561  |
| 57042 | Q85601 | Q9H9Y2 | 0.17841  |
| 57043 | Q85601 | Q5H9L4 | 0.13504  |
| 57044 | Q85601 | Q8WVY7 | 0.29101  |
| 57045 | Q85601 | P61604 | 0.7587   |
| 57046 | Q85601 | Q99457 | 0.72919  |
| 57047 | Q85601 | O75832 | 0.34497  |
| 57048 | Q85601 | Q8N5X7 | 0.057444 |
| 57049 | Q85601 | Q96D03 | 0.23369  |
| 57050 | Q85601 | Q9P0W5 | 0.42435  |
| 57051 | Q85601 | Q4G0N7 | 0.13085  |
| 57052 | Q85601 | Q8NHV4 | 0.83842  |
| 57053 | Q85601 | Q14814 | 0.60477  |
| 57054 | Q85601 | Q86TX2 | 0.20044  |
| 57055 | Q85601 | Q13506 | 0.44716  |
| 57056 | Q85601 | Q9P299 | 0.3048   |
| 57057 | Q85601 | Q9UDV6 | 0.59532  |
| 57058 | Q85601 | Q0VDD7 | 1.0786   |
| 57059 | Q85601 | Q13129 | 0.80582  |
| 57060 | Q85601 | Q8WV60 | 0.22702  |
| 57061 | Q85601 | O15304 | 1.0978   |
| 57062 | Q85601 | P19419 | 1.3196   |
| 57063 | Q85601 | P40763 | 0.34573  |
| 57064 | Q85601 | O15155 | 0.1451   |
| 57065 | Q85601 | P18669 | 0.68342  |
| 57066 | Q85601 | P30050 | 0.67535  |
| 57067 | Q85601 | Q05195 | 0.57599  |
| 57068 | Q85601 | O95989 | 0.20108  |
| 57069 | Q85601 | Q7L266 | 0.31754  |
| 57070 | Q85601 | Q8N3S3 | 0.34535  |
| 57071 | Q85601 | Q9NWB7 | 0.62582  |
| 57072 | Q85601 | Q3BBV2 | 0.46437  |
| 57073 | Q85601 | Q8IV36 | 0.55151  |
| 57074 | Q85601 | Q9NY27 | 0.90459  |
| 57075 | Q85601 | O14978 | 0.48564  |
| 57076 | Q85601 | Q9H0A6 | 0.50637  |

|       |        |         |          |
|-------|--------|---------|----------|
| 57077 | Q85601 | Q13426  | 0.37448  |
| 57078 | Q85601 | P28702  | 0.42036  |
| 57079 | Q85601 | Q86X83  | 0.30691  |
| 57080 | Q85601 | Q14241  | 0.38545  |
| 57081 | Q85601 | Q8TBZ9  | 1.0465   |
| 57082 | Q85601 | Q03112  | 0.26561  |
| 57083 | Q85601 | Q96A04  | 0.55173  |
| 57084 | Q85601 | Q9UMS4  | 0.5981   |
| 57085 | Q85601 | Q8ND76  | 0.60582  |
| 57086 | Q85601 | Q6P1M3  | 0.96691  |
| 57087 | Q85601 | P60006  | 0.098824 |
| 57088 | Q85601 | Q9UHVJ9 | 0.23343  |
| 57089 | Q85601 | P35080  | 0.39563  |
| 57090 | Q85601 | Q06787  | 0.76464  |
| 57091 | Q85601 | Q49AN0  | 0.19762  |
| 57092 | Q85601 | Q9Y697  | 0.68453  |
| 57093 | Q85601 | Q5TI25  | 1.1879   |
| 57094 | Q85601 | Q8NFG4  | 0.73997  |
| 57095 | Q85601 | P28069  | 0.75337  |
| 57096 | Q85601 | A0PJX2  | 0.11453  |
| 57097 | Q85601 | O60583  | 1.0619   |
| 57098 | Q85601 | P17030  | 0.31301  |
| 57099 | Q85601 | P62753  | 0.9568   |
| 57100 | Q85601 | P21912  | 0.22872  |
| 57101 | Q85601 | Q75QN2  | 0.58748  |
| 57102 | Q85601 | Q9UKA2  | 0.50627  |
| 57103 | Q85601 | P32519  | 1.3867   |
| 57104 | Q85601 | Q6PI26  | 1.1608   |
| 57105 | Q85601 | P14859  | 1.1649   |
| 57106 | Q85601 | O95793  | 0.19089  |
| 57107 | Q85601 | Q93050  | 0.19447  |
| 57108 | Q85601 | Q6P047  | 0.23425  |
| 57109 | Q85601 | P79522  | 0.51489  |
| 57110 | Q85601 | Q9UDY2  | 0.95632  |
| 57111 | Q85601 | Q9Y468  | 0.94204  |
| 57112 | Q85601 | Q9BVJ6  | 0.78003  |
| 57113 | Q85601 | Q9NQ92  | 0.92865  |
| 57114 | Q85601 | Q9H0R8  | 0.23785  |
| 57115 | Q85601 | Q9Y4A5  | 0.81288  |
| 57116 | Q85601 | P61201  | 0.53411  |
| 57117 | Q85601 | O60663  | 0.62482  |
| 57118 | Q85601 | Q8TF74  | 0.4558   |
| 57119 | Q85601 | P27815  | 0.38367  |
| 57120 | Q85601 | Q01534  | 0.48372  |
| 57121 | Q85601 | P52740  | 0.23373  |
| 57122 | Q85601 | A6NCC3  | 0.19777  |
| 57123 | Q85601 | P11172  | 0.24693  |
| 57124 | Q85601 | Q96KM6  | 0.24704  |
| 57125 | Q85601 | E9PAV3  | 0.43898  |
| 57126 | Q85601 | P61956  | 0.67961  |
| 57127 | Q85601 | Q8TDB4  | 0.19268  |
| 57128 | Q85601 | Q12982  | 0.26253  |
| 57129 | Q85601 | Q8NFT6  | 0.080342 |
| 57130 | Q85601 | Q9UBP6  | 0.78746  |
| 57131 | Q85601 | Q1ED39  | 0.40862  |
| 57132 | Q85601 | Q6ZWJ1  | 0.26891  |
| 57133 | Q85601 | Q13868  | 0.53805  |
| 57134 | Q85601 | Q5XKP0  | 0.17482  |
| 57135 | Q85601 | Q6ZMY9  | 0.46919  |
| 57136 | Q85601 | Q8TF20  | 0.34917  |
| 57137 | Q85601 | P23769  | 0.41287  |
| 57138 | Q85601 | Q6NVH7  | 0.61236  |
| 57139 | Q85601 | Q86TU7  | 0.29926  |
| 57140 | Q85601 | Q8NEK8  | 0.056455 |
| 57141 | Q85601 | P41970  | 0.91163  |
| 57142 | Q85601 | P30622  | 0.31687  |
| 57143 | Q85601 | Q9BUG6  | 0.1704   |
| 57144 | Q85601 | P42772  | 0.83753  |
| 57145 | Q85601 | P27635  | 0.61112  |
| 57146 | Q85601 | Q6PCD5  | 0.25357  |
| 57147 | Q85601 | Q9HC44  | 1.1837   |
| 57148 | Q85601 | Q9H825  | 0.22935  |
| 57149 | Q85601 | Q49MG5  | 1.0561   |
| 57150 | Q85601 | Q13415  | 0.27467  |
| 57151 | Q85601 | Q9Y6P5  | 0.12766  |
| 57152 | Q85601 | Q9NPI8  | 0.8558   |

|       |        |        |          |
|-------|--------|--------|----------|
| 57153 | Q85601 | Q9H1A4 | 0.80113  |
| 57154 | Q85601 | O60825 | 0.098147 |
| 57155 | Q85601 | Q9UHV9 | 0.81008  |
| 57156 | Q85601 | Q96MG7 | 0.8768   |
| 57157 | Q85601 | Q15573 | 0.45563  |
| 57158 | Q85601 | Q9BYD9 | 0.23763  |
| 57159 | Q85601 | Q460N3 | 0.32411  |
| 57160 | Q85601 | Q9Y2Y4 | 0.33186  |
| 57161 | Q85601 | Q5TG08 | 0.27158  |
| 57162 | Q85601 | P61326 | 0.832    |
| 57163 | Q85601 | Q9NVM4 | 0.28518  |
| 57164 | Q85601 | Q9H0E9 | 0.31576  |
| 57165 | Q85601 | Q9Y2Y0 | 1.0662   |
| 57166 | Q85601 | Q9P1Y5 | 0.47913  |
| 57167 | Q85601 | P56555 | 0.45994  |
| 57168 | Q85601 | A6NLJ0 | 0.20715  |
| 57169 | Q85601 | Q9NYF0 | 0.25933  |
| 57170 | Q85601 | Q9UBW8 | 0.45647  |
| 57171 | Q85601 | Q2M2I5 | 0.65053  |
| 57172 | Q85601 | Q9HCM1 | 0.078626 |
| 57173 | Q85601 | Q969Z0 | 0.30153  |
| 57174 | Q85601 | Q9Y5N6 | 0.54307  |
| 57175 | Q85601 | Q9NWT6 | 0.46684  |
| 57176 | Q85601 | O95789 | 0.28688  |
| 57177 | Q85601 | P22626 | 0.40714  |
| 57178 | Q85601 | Q5W1A9 | 0.52851  |
| 57179 | Q85601 | Q12894 | 0.38673  |
| 57180 | Q85601 | P62826 | 0.71799  |
| 57181 | Q85601 | Q9P1A6 | 0.15593  |
| 57182 | Q85601 | O60759 | 0.40385  |
| 57183 | Q85601 | E9PKD4 | 0.018234 |
| 57184 | Q85601 | Q9NR83 | 0.23802  |
| 57185 | Q85601 | Q9NY30 | 0.39819  |
| 57186 | Q85601 | Q86WB0 | 1.1662   |
| 57187 | Q85601 | O15015 | 0.66443  |
| 57188 | Q85601 | Q9H609 | 0.030777 |
| 57189 | Q85601 | O15516 | 0.25817  |
| 57190 | Q85601 | K7EIQ3 | 0.55422  |
| 57191 | Q85601 | P78545 | 0.86389  |
| 57192 | Q85601 | Q9UMS6 | 0.6286   |
| 57193 | Q85601 | Q86WP2 | 0.51936  |
| 57194 | Q85601 | O60220 | 0.35269  |
| 57195 | Q85601 | O75437 | 0.47119  |
| 57196 | Q85601 | Q1ZZU3 | 0.72103  |
| 57197 | Q85601 | Q8IWE2 | 0.12713  |
| 57198 | Q85601 | P61573 | 0.42275  |
| 57199 | Q85601 | Q5SV97 | 0.15398  |
| 57200 | Q85601 | P62324 | 0.68795  |
| 57201 | Q85601 | Q13106 | 0.27099  |
| 57202 | Q85601 | Q9UL41 | 0.38942  |
| 57203 | Q85601 | P07438 | 0.28384  |
| 57204 | Q85601 | O60810 | 0.7262   |
| 57205 | Q85601 | Q7Z5W3 | 0.48406  |
| 57206 | Q85601 | Q9BXD5 | 0.27456  |
| 57207 | Q85601 | Q9Y2X9 | 0.66648  |
| 57208 | Q85601 | O60613 | 0.37128  |
| 57209 | Q85601 | Q9UHX1 | 0.50971  |
| 57210 | Q85601 | Q9UKK3 | 0.68803  |
| 57211 | Q85601 | Q9HAT8 | 0.55461  |
| 57212 | Q85601 | Q86WZ6 | 0.25228  |
| 57213 | Q85601 | Q6NUN9 | 0.7856   |
| 57214 | Q85601 | Q9UJW7 | 0.25802  |
| 57215 | Q85601 | Q96BY2 | 0.45037  |
| 57216 | Q85601 | Q92844 | 0.52095  |
| 57217 | Q85601 | Q9Y242 | 0.34999  |
| 57218 | Q85601 | Q969T9 | 0.63313  |
| 57219 | Q85601 | Q96PM5 | 0.52296  |
| 57220 | Q85601 | Q8N888 | 0.70485  |
| 57221 | Q85601 | Q7L5Y9 | 0.065327 |
| 57222 | Q85601 | Q5XUX1 | 0.30691  |
| 57223 | Q85601 | Q15287 | 0.86643  |
| 57224 | Q85601 | O75420 | 0.46266  |
| 57225 | Q85601 | Q12800 | 0.34317  |
| 57226 | Q85601 | Q96PU4 | 0.42938  |
| 57227 | Q85601 | Q8WUM0 | 0.6988   |
| 57228 | Q85601 | Q9BS31 | 0.20185  |

|       |        |        |          |
|-------|--------|--------|----------|
| 57229 | Q85601 | Q9Y3A5 | 0.67777  |
| 57230 | Q85601 | Q16829 | 0.29411  |
| 57231 | Q85601 | Q5T7N2 | 0.10593  |
| 57232 | Q85601 | Q9H3P2 | 1.0803   |
| 57233 | Q85601 | B4DU55 | 0.3562   |
| 57234 | Q85601 | Q8N1F7 | 0.64329  |
| 57235 | Q85601 | Q93052 | 0.47173  |
| 57236 | Q85601 | Q658L1 | 0.35687  |
| 57237 | Q85601 | Q8WYA1 | 0.37626  |
| 57238 | Q85601 | Q9UER7 | 0.92678  |
| 57239 | Q85601 | Q8IVP9 | 0.19068  |
| 57240 | Q85601 | P12757 | 0.35694  |
| 57241 | Q85601 | Q8IYH5 | 0.59189  |
| 57242 | Q85601 | Q9BYC8 | 0.80739  |
| 57243 | Q85601 | O00148 | 0.31771  |
| 57244 | Q85601 | Q8IYJ2 | 0.030099 |
| 57245 | Q85601 | Q9Y3A2 | 0.8919   |
| 57246 | Q85601 | O14709 | 0.35685  |
| 57247 | Q85601 | Q96T51 | 0.21499  |
| 57248 | Q85601 | Q71F23 | 0.68614  |
| 57249 | Q85601 | O43865 | 0.18326  |
| 57250 | Q85601 | Q9HBL8 | 0.011802 |
| 57251 | Q85601 | Q14596 | 0.2581   |
| 57252 | Q85601 | O95678 | 0.48476  |
| 57253 | Q85601 | P63000 | 0.49747  |
| 57254 | Q85601 | Q5T681 | 0.30691  |
| 57255 | Q85601 | Q5TID7 | 0.22094  |
| 57256 | Q85601 | A6NE82 | 0.14127  |
| 57257 | Q85601 | Q8NAQ8 | 1.0544   |
| 57258 | Q85601 | Q96SQ5 | 0.30086  |
| 57259 | Q85601 | Q99728 | 0.32588  |
| 57260 | Q85601 | Q6ZNG1 | 0.3621   |
| 57261 | Q85601 | Q3KP31 | 0.44626  |
| 57262 | Q85601 | Q969H6 | 0.88988  |
| 57263 | Q85601 | P48200 | 0.44186  |
| 57264 | Q85601 | O75534 | 0.033036 |
| 57265 | Q85601 | Q9NVR2 | 0.98546  |
| 57266 | Q85601 | Q96PT3 | 0.17792  |
| 57267 | Q85601 | Q09FC8 | 0.36697  |
| 57268 | Q85601 | O75794 | 0.83607  |
| 57269 | Q85601 | Q9BYC9 | 0.67372  |
| 57270 | Q85601 | Q9H3M9 | 0.24397  |
| 57271 | Q85601 | Q9Y4L5 | 0.49757  |
| 57272 | Q85601 | Q96NL0 | 0.039649 |
| 57273 | Q85601 | Q9UBS4 | 0.49536  |
| 57274 | Q85601 | Q96IS3 | 0.23786  |
| 57275 | Q85601 | Q5U5X8 | 0.20879  |
| 57276 | Q85601 | Q9HC77 | 0.86436  |
| 57277 | Q85601 | Q5VWX1 | 0.63445  |
| 57278 | Q85601 | Q04637 | 0.47994  |
| 57279 | Q85601 | Q86V71 | 0.37553  |
| 57280 | Q85601 | P01011 | 0.46483  |
| 57281 | Q85601 | Q16589 | 0.40753  |
| 57282 | Q85601 | Q9Y5J7 | 0.31533  |
| 57283 | Q85601 | P82932 | 0.48697  |
| 57284 | Q85601 | P23381 | 0.23118  |
| 57285 | Q85601 | Q9BVN2 | 0.63997  |
| 57286 | Q85601 | Q52M93 | 0.22722  |
| 57287 | Q85601 | Q15545 | 0.95348  |
| 57288 | Q85601 | O60318 | 0.63842  |
| 57289 | Q85601 | Q9NZJ0 | 0.82491  |
| 57290 | Q85601 | Q6TGC4 | 0.18125  |
| 57291 | Q85601 | Q4KN68 | 0.14073  |
| 57292 | Q85601 | Q9BXM0 | 0.69575  |
| 57293 | Q85601 | Q96H86 | 0.30217  |
| 57294 | Q85601 | Q9BU76 | 0.10565  |
| 57295 | Q85601 | Q13616 | 0.56057  |
| 57296 | Q85601 | P15880 | 0.85397  |
| 57297 | Q85601 | Q8IXW0 | 0.43036  |
| 57298 | Q85601 | P17026 | 0.25896  |
| 57299 | Q85601 | Q8IZL8 | 0.87012  |
| 57300 | Q85601 | F5GYI3 | 0.44476  |
| 57301 | Q85601 | O43815 | 0.24741  |
| 57302 | Q85601 | Q9UMS0 | 1.1206   |
| 57303 | Q85601 | P53803 | 0.69977  |
| 57304 | Q85601 | P17022 | 0.15323  |

|       |        |        |          |
|-------|--------|--------|----------|
| 57305 | Q85601 | Q66K74 | 0.20382  |
| 57306 | Q85601 | Q9H4D5 | 0.34438  |
| 57307 | Q85601 | Q8TDN6 | 0.33075  |
| 57308 | Q85601 | P80303 | 0.21328  |
| 57309 | Q85601 | Q9BQ48 | 0.2264   |
| 57310 | Q85601 | Q6P050 | 0.35579  |
| 57311 | Q85601 | Q8N5A5 | 0.88447  |
| 57312 | Q85601 | O60284 | 0.29935  |
| 57313 | Q85601 | P46379 | 0.25226  |
| 57314 | Q85601 | Q8WU03 | 0.60461  |
| 57315 | Q85601 | Q92610 | 0.13618  |
| 57316 | Q85601 | Q9BTA9 | 0.98373  |
| 57317 | Q85601 | Q6ZP68 | 0.3752   |
| 57318 | Q85601 | Q9BZZ5 | 0.44011  |
| 57319 | Q85601 | Q9ULH7 | 0.89664  |
| 57320 | Q85601 | Q86VX9 | 1.0727   |
| 57321 | Q85601 | Q7Z2W4 | 0.47974  |
| 57322 | Q85601 | Q9BV86 | 0.37897  |
| 57323 | Q85601 | O14686 | 0.4087   |
| 57324 | Q85601 | Q9P0M9 | 0.20232  |
| 57325 | Q85601 | Q8TAW3 | 0.29665  |
| 57326 | Q85601 | Q8N8U2 | 0.43066  |
| 57327 | Q85601 | P56537 | 1.1846   |
| 57328 | Q85601 | Q86UU0 | 1.0294   |
| 57329 | Q85601 | Q96KR1 | 0.27194  |
| 57330 | Q85601 | Q16520 | 0.93729  |
| 57331 | Q85601 | O95931 | 0.812    |
| 57332 | Q85601 | Q9UBU8 | 0.80726  |
| 57333 | Q85601 | Q2NKJ3 | 0.33247  |
| 57334 | Q85601 | Q12981 | 0.11152  |
| 57335 | Q85601 | Q9UMR2 | 0.18918  |
| 57336 | Q85601 | O43264 | 0.62727  |
| 57337 | Q85601 | Q9BTW9 | 0.19749  |
| 57338 | Q85601 | Q14204 | 0.43908  |
| 57339 | Q85601 | P42695 | 0.37827  |
| 57340 | Q85601 | Q99504 | 0.63531  |
| 57341 | Q85601 | P37837 | 0.21314  |
| 57342 | Q85601 | Q9H0M5 | 0.25802  |
| 57343 | Q85601 | P52744 | 0.28555  |
| 57344 | Q85601 | Q14188 | 0.76874  |
| 57345 | Q85601 | Q3KP66 | 0.52811  |
| 57346 | Q85601 | A6NEF3 | 0.36009  |
| 57347 | Q85601 | Q2TAK8 | 0.68972  |
| 57348 | Q85601 | P36639 | 0.46161  |
| 57349 | Q85601 | Q2M218 | 0.31208  |
| 57350 | Q85601 | Q14738 | 0.73465  |
| 57351 | Q85601 | Q7L2E3 | 0.26894  |
| 57352 | Q85601 | Q8N4M7 | 0.52218  |
| 57353 | Q85601 | Q8N9W8 | 0.61067  |
| 57354 | Q85601 | Q6Y7W6 | 0.45625  |
| 57355 | Q85601 | Q15723 | 1.2665   |
| 57356 | Q85601 | Q12772 | 0.24967  |
| 57357 | Q85601 | Q9H7Z6 | 0.23381  |
| 57358 | Q85601 | O60936 | 0.64646  |
| 57359 | Q85601 | Q9GZX7 | 0.3587   |
| 57360 | Q85601 | P83881 | 0.77044  |
| 57361 | Q85601 | Q15121 | 0.46765  |
| 57362 | Q85601 | Q2TAZ0 | 0.30691  |
| 57363 | Q85601 | Q49B96 | 0.21739  |
| 57364 | Q85601 | Q96LX7 | 0.040277 |
| 57365 | Q85601 | Q8IVE0 | 0.10052  |
| 57366 | Q85601 | Q9BRQ6 | 0.9351   |
| 57367 | Q85601 | Q16613 | 0.099648 |
| 57368 | Q85601 | A7E2U8 | 0.29566  |
| 57369 | Q85601 | Q9H9H4 | 0.55347  |
| 57370 | Q85601 | P25490 | 0.26892  |
| 57371 | Q85601 | Q8IZ26 | 0.31448  |
| 57372 | Q85601 | Q9Y3C0 | 0.27462  |
| 57373 | Q85601 | Q53HL2 | 1.003    |
| 57374 | Q85601 | Q96G25 | 0.95395  |
| 57375 | Q85601 | Q07020 | 0.67122  |
| 57376 | Q85601 | P14136 | 0.4788   |
| 57377 | Q85601 | P98170 | 0.2987   |
| 57378 | Q85601 | Q6ZN55 | 0.2978   |
| 57379 | Q85601 | Q86VN1 | 0.55443  |
| 57380 | Q85601 | Q9UNL4 | 0.47794  |



|       |        |        |         |
|-------|--------|--------|---------|
| 57381 | Q85601 | Q9Y5N5 | 0.27167 |
| 57382 | Q85601 | Q6IPX3 | 0.69016 |
| 57383 | Q85601 | Q8N895 | 0.53895 |
| 57384 | Q85601 | Q8IXJ9 | 0.78478 |
| 57385 | Q85601 | Q9P209 | 0.8423  |
| 57386 | Q85601 | Q96ES7 | 0.1849  |
| 57387 | Q85601 | Q9HCH5 | 0.62811 |
| 57388 | Q85601 | O43364 | 0.21789 |
| 57389 | Q85601 | Q9NRR4 | 0.40467 |
| 57390 | Q85601 | Q9BY44 | 0.38911 |
| 57391 | Q85601 | Q9BX82 | 0.46104 |
| 57392 | Q85601 | Q5MJ10 | 0.17798 |
| 57393 | Q85601 | Q71F56 | 0.41257 |
| 57394 | Q85601 | Q9Y2S0 | 0.12685 |
| 57395 | Q85601 | Q96NG5 | 0.43917 |
| 57396 | Q85601 | O00327 | 0.24098 |
| 57397 | Q85601 | Q6ICG8 | 0.98185 |
| 57398 | Q85601 | Q8WXE9 | 0.55826 |
| 57399 | Q85601 | Q96JB2 | 0.85702 |
| 57400 | Q85601 | Q9BXS6 | 0.60089 |
| 57401 | Q85601 | O60232 | 0.84357 |
| 57402 | Q85601 | Q5VWQ0 | 0.73867 |
| 57403 | Q85601 | Q5T8I9 | 0.18886 |
| 57404 | Q85601 | P0C7X2 | 0.49647 |
| 57405 | Q85601 | O43747 | 0.70114 |
| 57406 | Q85601 | Q96IU4 | 0.47431 |
| 57407 | Q85601 | Q96MY1 | 0.13475 |
| 57408 | Q85601 | P30153 | 0.53282 |
| 57409 | Q85601 | Q9Y2G2 | 0.43487 |
| 57410 | Q85601 | Q9NPJ8 | 0.19087 |
| 57411 | Q85601 | Q8WYA6 | 0.69048 |
| 57412 | Q85601 | P61218 | 0.27725 |
| 57413 | Q85601 | P61923 | 0.44012 |
| 57414 | Q85601 | Q14157 | 0.20159 |
| 57415 | Q85601 | Q5VTL8 | 0.13542 |
| 57416 | Q85601 | Q8NF99 | 0.36056 |
| 57417 | Q85601 | Q13045 | 1.1607  |
| 57418 | Q85601 | P24522 | 0.58994 |
| 57419 | Q85601 | Q9Y618 | 1.0493  |
| 57420 | Q85601 | O00268 | 1.1466  |
| 57421 | Q85601 | O94913 | 0.27748 |
| 57422 | Q85601 | Q96RL7 | 0.79605 |
| 57423 | Q85601 | Q9NWK9 | 0.29901 |
| 57424 | Q85601 | P31948 | 0.98121 |
| 57425 | Q85601 | P83436 | 0.45159 |
| 57426 | Q85601 | P39019 | 0.75947 |
| 57427 | Q85601 | Q96AY2 | 0.8436  |
| 57428 | Q85601 | Q9H1H9 | 0.62043 |
| 57429 | Q85601 | Q2QGD7 | 0.71271 |
| 57430 | Q85601 | Q9Y6X9 | 0.40866 |
| 57431 | Q85601 | Q9UPM8 | 0.2822  |
| 57432 | Q85601 | O75792 | 0.70545 |
| 57433 | Q85601 | O14503 | 0.90936 |
| 57434 | Q85601 | Q7RTU4 | 0.35333 |
| 57435 | Q85601 | Q8TDY2 | 0.90525 |
| 57436 | Q85601 | O15083 | 0.55526 |
| 57437 | Q85601 | Q6PJ61 | 0.61091 |
| 57438 | Q85601 | Q15172 | 0.2938  |
| 57439 | Q85601 | Q8IX12 | 0.93602 |
| 57440 | Q85601 | Q8NDP4 | 0.33691 |
| 57441 | Q85601 | Q96IR3 | 0.22107 |
| 57442 | Q85601 | Q03252 | 0.32784 |
| 57443 | Q85601 | Q9BSH3 | 0.18011 |
| 57444 | Q85601 | Q13642 | 0.52476 |
| 57445 | Q85601 | Q86XN6 | 0.34745 |
| 57446 | Q85601 | Q9Y3E1 | 0.42546 |
| 57447 | Q85601 | Q96CG3 | 0.31205 |
| 57448 | Q85601 | Q8WW22 | 0.61984 |
| 57449 | Q85601 | P35712 | 0.53342 |
| 57450 | Q85601 | Q658K8 | 0.17164 |
| 57451 | Q85601 | Q9Y376 | 0.20504 |
| 57452 | Q85601 | Q9C099 | 1.0968  |
| 57453 | Q85601 | Q96KD3 | 0.61067 |
| 57454 | Q85601 | Q8WTW4 | 0.34112 |
| 57455 | Q85601 | Q9H079 | 0.11712 |
| 57456 | Q85601 | Q10587 | 0.31301 |

|       |        |        |          |
|-------|--------|--------|----------|
| 57457 | Q85601 | Q9Y2Z2 | 0.4166   |
| 57458 | Q85601 | P26641 | 0.3773   |
| 57459 | Q85601 | Q9UIV1 | 1.2122   |
| 57460 | Q85601 | P57075 | 0.36962  |
| 57461 | Q85601 | Q14588 | 0.35685  |
| 57462 | Q85601 | P06733 | 0.94057  |
| 57463 | Q85601 | O43299 | 1.2455   |
| 57464 | Q85601 | P08621 | 0.21791  |
| 57465 | Q85601 | Q6ISB3 | 0.75682  |
| 57466 | Q85601 | Q9UII5 | 0.34917  |
| 57467 | Q85601 | P33316 | 0.62298  |
| 57468 | Q85601 | Q8NG31 | 0.68072  |
| 57469 | Q85601 | Q7Z2F6 | 0.36366  |
| 57470 | Q85601 | Q5TB30 | 0.22332  |
| 57471 | Q85601 | Q6IQ23 | 0.34738  |
| 57472 | Q85601 | Q08378 | 0.42404  |
| 57473 | Q85601 | Q5T653 | 0.12175  |
| 57474 | Q85601 | P55145 | 0.52859  |
| 57475 | Q85601 | Q5U5X0 | 0.28489  |
| 57476 | Q85601 | Q9BRP4 | 0.39421  |
| 57477 | Q85601 | Q96G21 | 0.87497  |
| 57478 | Q85601 | Q15583 | 0.28862  |
| 57479 | Q85601 | Q86X02 | 0.23754  |
| 57480 | Q85601 | Q96QE5 | 0.84806  |
| 57481 | Q85601 | Q86UD0 | 0.44273  |
| 57482 | Q85601 | O43159 | 0.86375  |
| 57483 | Q85601 | Q9H4T2 | 0.21005  |
| 57484 | Q85601 | Q969L4 | 0.54521  |
| 57485 | Q85601 | Q96JC4 | 0.34256  |
| 57486 | Q85601 | Q9Y3U8 | 0.85824  |
| 57487 | Q85601 | Q9GZQ3 | 0.74748  |
| 57488 | Q85601 | Q96PU5 | 0.26407  |
| 57489 | Q85601 | Q9UNX4 | 0.32032  |
| 57490 | Q85601 | P11532 | 0.55083  |
| 57491 | Q85601 | O95243 | 0.78481  |
| 57492 | Q85601 | Q71UM5 | 0.64925  |
| 57493 | Q85601 | P10242 | 0.96031  |
| 57494 | Q85601 | Q5SRH9 | 0.2768   |
| 57495 | Q85601 | Q9BYR5 | 0.17342  |
| 57496 | Q85601 | Q00059 | 0.88259  |
| 57497 | Q85601 | Q8IVV7 | 0.1691   |
| 57498 | Q85601 | Q15173 | 0.358    |
| 57499 | Q85601 | Q96S95 | 0.34448  |
| 57500 | Q85601 | Q9P013 | 0.34749  |
| 57501 | Q85601 | Q9BQ15 | 0.69149  |
| 57502 | Q85601 | Q9NR50 | 0.52538  |
| 57503 | Q85601 | Q969T4 | 0.66163  |
| 57504 | Q85601 | Q8TF40 | 0.67907  |
| 57505 | Q85601 | Q9NR28 | 0.83878  |
| 57506 | Q85601 | Q8TBZ8 | 0.33231  |
| 57507 | Q85601 | Q8IZS6 | 0.10543  |
| 57508 | Q85601 | Q6NXT1 | 0.44793  |
| 57509 | Q85601 | Q15306 | 0.88646  |
| 57510 | Q85601 | Q8WXF1 | 0.87826  |
| 57511 | Q85601 | Q9Y296 | 0.24464  |
| 57512 | Q85601 | P46108 | 0.47433  |
| 57513 | Q85601 | Q14592 | 0.31944  |
| 57514 | Q85601 | Q9GZV5 | 1.0516   |
| 57515 | Q85601 | Q9NP61 | 0.15994  |
| 57516 | Q85601 | P61758 | 0.62383  |
| 57517 | Q85601 | A6NFQ7 | 0.32996  |
| 57518 | Q85601 | Q9UBU7 | 0.18355  |
| 57519 | Q85601 | Q5JWF8 | 0.059966 |
| 57520 | Q85601 | Q6ZQR2 | 0.95851  |
| 57521 | Q85601 | Q86VP6 | 0.73502  |
| 57522 | Q85601 | A6NK53 | 0.32578  |
| 57523 | Q85601 | P61970 | 0.43591  |
| 57524 | Q85601 | O15078 | 0.64765  |
| 57525 | Q85601 | Q9NQZ8 | 0.29598  |
| 57526 | Q85601 | Q9Y248 | 0.68519  |
| 57527 | Q85601 | Q9BZR9 | 0.36094  |
| 57528 | Q85601 | Q9NVF7 | 0.15623  |
| 57529 | Q85601 | O14497 | 0.65923  |
| 57530 | Q85601 | Q99767 | 0.26494  |
| 57531 | Q85601 | Q7Z6G3 | 0.42435  |
| 57532 | Q85601 | Q14591 | 0.22599  |

|       |        |        |          |
|-------|--------|--------|----------|
| 57533 | Q85601 | Q14764 | 1.0478   |
| 57534 | Q85601 | P0CV98 | 0.47415  |
| 57535 | Q85601 | Q9Y5B9 | 0.33569  |
| 57536 | Q85601 | Q9H974 | 1.1119   |
| 57537 | Q85601 | O96019 | 0.95333  |
| 57538 | Q85601 | Q9NUQ6 | 0.44273  |
| 57539 | Q85601 | O00151 | 0.32086  |
| 57540 | Q85601 | P18846 | 0.89421  |
| 57541 | Q85601 | Q5SWA1 | 0.39244  |
| 57542 | Q85601 | Q49AM1 | 0.38793  |
| 57543 | Q85601 | Q14135 | 0.45278  |
| 57544 | Q85601 | A1L020 | 0.24871  |
| 57545 | Q85601 | Q9UBD5 | 0.51828  |
| 57546 | Q85601 | Q8N1L9 | 0.82627  |
| 57547 | Q85601 | Q8N8H1 | 0.43069  |
| 57548 | Q85601 | O00757 | 0.052019 |
| 57549 | Q85601 | Q14669 | 0.37872  |
| 57550 | Q85601 | Q9NWF9 | 0.90252  |
| 57551 | Q85601 | Q9BYN8 | 0.45531  |
| 57552 | Q85601 | O43633 | 0.35918  |
| 57553 | Q85601 | Q14106 | 0.39383  |
| 57554 | Q85601 | Q96B36 | 0.82412  |
| 57555 | Q85601 | P58317 | 0.32159  |
| 57556 | Q85601 | Q5TAQ9 | 0.26501  |
| 57557 | Q85601 | Q9BWD3 | 0.17478  |
| 57558 | Q85601 | Q9BYP9 | 0.17342  |
| 57559 | Q85601 | Q9NQ33 | 0.54057  |
| 57560 | Q85601 | Q9UGP5 | 0.15546  |
| 57561 | Q85601 | O60884 | 0.61098  |
| 57562 | Q85601 | P62701 | 0.42389  |
| 57563 | Q85601 | Q9C0F3 | 0.4507   |
| 57564 | Q85601 | P06744 | 0.5954   |
| 57565 | Q85601 | Q6ZRM9 | 0.07997  |
| 57566 | Q85601 | Q9NRX3 | 0.28656  |
| 57567 | Q85601 | Q99814 | 0.39512  |
| 57568 | Q85601 | O15392 | 0.31084  |
| 57569 | Q85601 | P62241 | 0.63007  |
| 57570 | Q85601 | P47974 | 0.31317  |
| 57571 | Q85601 | P82675 | 0.18591  |
| 57572 | Q85601 | Q86WI3 | 0.52892  |
| 57573 | Q85601 | P62424 | 0.96913  |
| 57574 | Q85601 | Q8TF32 | 0.47998  |
| 57575 | Q85601 | P27797 | 0.49982  |
| 57576 | Q85601 | P16383 | 0.56205  |
| 57577 | Q85601 | Q9ULR5 | 0.48638  |
| 57578 | Q85601 | Q15046 | 0.4088   |
| 57579 | Q85601 | P49959 | 0.21375  |
| 57580 | Q85601 | P27540 | 0.45254  |
| 57581 | Q85601 | Q15776 | 0.54641  |
| 57582 | Q85601 | A8MQ14 | 0.33896  |
| 57583 | Q85601 | Q86XK2 | 0.84447  |
| 57584 | Q85601 | Q02833 | 0.27688  |
| 57585 | Q85601 | O15226 | 0.68555  |
| 57586 | Q85601 | Q3MIS6 | 0.4637   |
| 57587 | Q85601 | Q3KQV3 | 0.35068  |
| 57588 | Q85601 | O75290 | 0.4755   |
| 57589 | Q85601 | Q9NR56 | 0.40669  |
| 57590 | Q85601 | Q8N8D1 | 0.21225  |
| 57591 | Q85601 | P53999 | 1.2563   |
| 57592 | Q85601 | Q96SE7 | 0.34313  |
| 57593 | Q85601 | Q13363 | 0.4173   |
| 57594 | Q85601 | P0CG48 | 0.38014  |
| 57595 | Q85601 | Q8IUW3 | 0.51618  |
| 57596 | Q85601 | B4DX44 | 0.52111  |
| 57597 | Q85601 | Q9BRS8 | 0.28869  |
| 57598 | Q85601 | P49005 | 0.57237  |
| 57599 | Q85601 | Q7Z614 | 0.46832  |
| 57600 | Q85601 | Q8IUD6 | 0.45959  |
| 57601 | Q85601 | P21673 | 0.24146  |
| 57602 | Q85601 | Q92552 | 0.68709  |
| 57603 | Q85601 | D6RGH6 | 1.2222   |
| 57604 | Q85601 | Q9P242 | 0.49979  |
| 57605 | Q85601 | O43678 | 0.46284  |
| 57606 | Q85601 | P30304 | 0.61658  |
| 57607 | Q85601 | O75448 | 0.49069  |
| 57608 | Q85601 | P11171 | 0.54943  |

|       |        |        |          |
|-------|--------|--------|----------|
| 57609 | Q85601 | P26358 | 0.41192  |
| 57610 | Q85601 | Q9HAW0 | 0.5505   |
| 57611 | Q85601 | Q15386 | 0.27509  |
| 57612 | Q85601 | Q8IUE0 | 0.32996  |
| 57613 | Q85601 | Q86V81 | 0.66105  |
| 57614 | Q85601 | Q9UJJ7 | 0.29565  |
| 57615 | Q85601 | Q8NA19 | 0.41299  |
| 57616 | Q85601 | O94888 | 0.41463  |
| 57617 | Q85601 | P19338 | 0.47871  |
| 57618 | Q85601 | Q9P2F9 | 0.23029  |
| 57619 | Q85601 | O43776 | 0.44735  |
| 57620 | Q85601 | Q6NSI3 | 0.27847  |
| 57621 | Q85601 | Q92834 | 0.34976  |
| 57622 | Q85601 | Q7L5D6 | 0.69734  |
| 57623 | Q85601 | Q9Y3D9 | 0.40077  |
| 57624 | Q85601 | O14646 | 0.68604  |
| 57625 | Q85601 | Q5BJF6 | 0.54742  |
| 57626 | Q85601 | Q8N402 | 0.013005 |
| 57627 | Q85601 | P04259 | 0.29484  |
| 57628 | Q85601 | Q9Y3M9 | 0.21995  |
| 57629 | Q85601 | P17038 | 0.35363  |
| 57630 | Q85601 | Q13469 | 1.1836   |
| 57631 | Q85601 | O95155 | 0.2281   |
| 57632 | Q85601 | Q9P255 | 0.3582   |
| 57633 | Q85601 | Q92831 | 0.83185  |
| 57634 | Q85601 | O14519 | 0.21194  |
| 57635 | Q85601 | Q5SWL7 | 0.40413  |
| 57636 | Q85601 | Q7Z2X4 | 0.2584   |
| 57637 | Q85601 | O00303 | 0.28168  |
| 57638 | Q85601 | Q9UBI1 | 0.30691  |
| 57639 | Q85601 | Q9Y2I6 | 0.2286   |
| 57640 | Q85601 | Q5VIR6 | 0.83133  |
| 57641 | Q85601 | Q86Y37 | 0.096562 |
| 57642 | Q85601 | P49006 | 0.5503   |
| 57643 | Q85601 | Q9H3R5 | 0.56057  |
| 57644 | Q85601 | Q9BUJ2 | 0.98171  |
| 57645 | Q85601 | A2AJT9 | 0.40717  |
| 57646 | Q85601 | P83731 | 0.67535  |
| 57647 | Q85601 | Q9NS23 | 0.46717  |
| 57648 | Q85601 | Q96FX7 | 0.26475  |
| 57649 | Q85601 | Q9ULE4 | 0.38313  |
| 57650 | Q85601 | Q9UMX3 | 0.5441   |
| 57651 | Q85601 | Q14203 | 1.0161   |
| 57652 | Q85601 | P49754 | 0.55242  |
| 57653 | Q85601 | Q14674 | 0.34323  |
| 57654 | Q85601 | Q96DX5 | 1.0999   |
| 57655 | Q85601 | Q6ZP65 | 0.12603  |
| 57656 | Q85601 | Q14690 | 0.50624  |
| 57657 | Q85601 | Q01082 | 0.4779   |
| 57658 | Q85601 | A6NM28 | 0.24786  |
| 57659 | Q85601 | O60516 | 0.2404   |
| 57660 | Q85601 | P55795 | 0.044924 |
| 57661 | Q85601 | Q6FI81 | 0.46181  |
| 57662 | Q85601 | Q7LBR1 | 0.93272  |
| 57663 | Q85601 | O75494 | 0.48444  |
| 57664 | Q85601 | Q6PK81 | 0.30557  |
| 57665 | Q85601 | Q9H0W9 | 0.68688  |
| 57666 | Q85601 | O60682 | 0.32532  |
| 57667 | Q85601 | Q9BTT0 | 0.24373  |
| 57668 | Q85601 | Q96B02 | 0.34744  |
| 57669 | Q85601 | Q99549 | 0.70898  |
| 57670 | Q85601 | P59037 | 0.40089  |
| 57671 | Q85601 | Q7RTU5 | 0.41     |
| 57672 | Q85601 | Q9BW66 | 0.95888  |
| 57673 | Q85601 | Q00978 | 0.99137  |
| 57674 | Q85601 | P17987 | 0.28891  |
| 57675 | Q85601 | P07199 | 0.6359   |
| 57676 | Q85601 | Q96CW5 | 0.922    |
| 57677 | Q85601 | Q66LE6 | 0.45703  |
| 57678 | Q85601 | Q6ZN06 | 0.47911  |
| 57679 | Q85601 | Q9Y3C7 | 0.90947  |
| 57680 | Q85601 | Q2VPK5 | 0.72283  |
| 57681 | Q85601 | O76075 | 0.11089  |
| 57682 | Q85601 | P17031 | 0.33241  |
| 57683 | Q85601 | Q92562 | 0.31444  |
| 57684 | Q85601 | Q96AQ7 | 0.56781  |

|       |        |        |          |
|-------|--------|--------|----------|
| 57685 | Q85601 | Q8IWY8 | 0.30203  |
| 57686 | Q85601 | Q9UPV9 | 0.78103  |
| 57687 | Q85601 | Q7Z745 | 0.068541 |
| 57688 | Q85601 | Q15653 | 0.99871  |
| 57689 | Q85601 | P17014 | 0.26841  |
| 57690 | Q85601 | P51948 | 0.49986  |
| 57691 | Q85601 | P56181 | 0.31992  |
| 57692 | Q85601 | Q9NZN8 | 0.78474  |
| 57693 | Q85601 | O75940 | 0.54579  |
| 57694 | Q85601 | P63241 | 0.42065  |
| 57695 | Q85601 | P61024 | 0.64091  |
| 57696 | Q85601 | Q96MU6 | 0.25692  |
| 57697 | Q85601 | P59990 | 0.17342  |
| 57698 | Q85601 | Q8N2W9 | 1.179    |
| 57699 | Q85601 | Q96EA4 | 0.81946  |
| 57700 | Q85601 | Q5T1R4 | 0.26895  |
| 57701 | Q85601 | P0DMB1 | 0.12166  |
| 57702 | Q85601 | P23297 | 0.54937  |
| 57703 | Q85601 | Q8TDN4 | 0.65176  |
| 57704 | Q85601 | Q9BYD2 | 0.18773  |
| 57705 | Q85601 | P19532 | 0.80405  |
| 57706 | Q85601 | Q9NZQ3 | 0.68539  |
| 57707 | Q85601 | Q53HC0 | 0.6391   |
| 57708 | Q85601 | O15164 | 0.30384  |
| 57709 | Q85601 | P10074 | 0.43473  |
| 57710 | Q85601 | P27469 | 0.65292  |
| 57711 | Q85601 | Q9ULW0 | 0.90726  |
| 57712 | Q85601 | P78337 | 0.47953  |
| 57713 | Q85601 | P18615 | 0.85075  |
| 57714 | Q85601 | Q9UHD4 | 0.60783  |
| 57715 | Q85601 | P62899 | 0.53692  |
| 57716 | Q85601 | Q9H0F6 | 0.16715  |
| 57717 | Q85601 | Q8NEP9 | 0.4755   |
| 57718 | Q85601 | Q5VVH5 | 0.67368  |
| 57719 | Q85601 | O60551 | 0.012632 |
| 57720 | Q85601 | Q9NRY5 | 0.7954   |
| 57721 | Q85601 | Q9NPD8 | 0.70402  |
| 57722 | Q85601 | P52594 | 0.71285  |
| 57723 | Q85601 | Q86SQ9 | 0.037422 |
| 57724 | Q85601 | Q12815 | 0.32326  |
| 57725 | Q85601 | P51959 | 0.46954  |
| 57726 | Q85601 | Q9NV72 | 0.49058  |
| 57727 | Q85601 | Q49A33 | 0.42548  |
| 57728 | Q85601 | P41002 | 1.0265   |
| 57729 | Q85601 | P50749 | 0.77142  |
| 57730 | Q85601 | O60216 | 0.81022  |
| 57731 | Q85601 | Q9UJN7 | 0.29276  |
| 57732 | Q85601 | P25685 | 0.35605  |
| 57733 | Q85601 | Q92499 | 0.39211  |
| 57734 | Q85601 | Q9BW92 | 0.18872  |
| 57735 | Q85601 | Q8WUH2 | 0.68878  |
| 57736 | Q85601 | Q86SE9 | 1.15     |
| 57737 | Q85601 | Q15560 | 1.1072   |
| 57738 | Q85601 | O43439 | 0.99403  |
| 57739 | Q85601 | Q92698 | 0.325    |
| 57740 | Q85601 | P20042 | 0.40394  |
| 57741 | Q85601 | P13196 | 0.31075  |
| 57742 | Q85601 | Q15742 | 0.36508  |
| 57743 | Q85601 | P21953 | 0.044157 |
| 57744 | Q85601 | P52565 | 0.076593 |
| 57745 | Q85601 | O60732 | 0.30691  |
| 57746 | Q85601 | Q8WVM7 | 0.79622  |
| 57747 | Q85601 | Q9UJ41 | 0.33721  |
| 57748 | Q85601 | Q9UFF9 | 0.52259  |
| 57749 | Q85601 | Q9Y244 | 0.43351  |
| 57750 | Q85601 | Q6P1K8 | 0.60791  |
| 57751 | Q85601 | Q13144 | 0.51759  |
| 57752 | Q85601 | Q5TA31 | 0.6271   |
| 57753 | Q85601 | A6NEJ1 | 0.1323   |
| 57754 | Q85601 | Q6PIJ6 | 0.34036  |
| 57755 | Q85601 | P0CG34 | 0.34646  |
| 57756 | Q85601 | Q16594 | 0.59884  |
| 57757 | Q85601 | P02795 | 0.67625  |
| 57758 | Q85601 | P12270 | 0.66547  |
| 57759 | Q85601 | Q86VD1 | 0.47469  |
| 57760 | Q85601 | Q9H6Y2 | 0.45754  |

|       |        |        |          |
|-------|--------|--------|----------|
| 57761 | Q85601 | Q9BX26 | 1.2608   |
| 57762 | Q85601 | Q7KZF4 | 0.9223   |
| 57763 | Q85601 | P42166 | 0.1051   |
| 57764 | Q85601 | Q9BT92 | 0.6393   |
| 57765 | Q85601 | Q96D15 | 0.2366   |
| 57766 | Q85601 | Q9NYJ1 | 0.60066  |
| 57767 | Q85601 | Q6NT76 | 0.53051  |
| 57768 | Q85601 | Q9HAH1 | 0.41282  |
| 57769 | Q85601 | Q16385 | 0.75053  |
| 57770 | Q85601 | Q9ULE0 | 0.025837 |
| 57771 | Q85601 | Q8WZ33 | 0.9452   |
| 57772 | Q85601 | P62945 | 0.67535  |
| 57773 | Q85601 | O95801 | 0.59067  |
| 57774 | Q85601 | Q08AN1 | 0.35685  |
| 57775 | Q85601 | P05062 | 0.25209  |
| 57776 | Q85601 | Q9NZV7 | 0.5777   |
| 57777 | Q85601 | Q9NSK7 | 0.69694  |
| 57778 | Q85601 | Q6PF18 | 0.10745  |
| 57779 | Q85601 | Q9HD34 | 0.34692  |
| 57780 | Q85601 | Q96JJ3 | 0.22638  |
| 57781 | Q85601 | P05423 | 0.011362 |
| 57782 | Q85601 | O43639 | 0.40857  |
| 57783 | Q85601 | Q16629 | 0.5623   |
| 57784 | Q85601 | Q13114 | 0.4463   |
| 57785 | Q85601 | O75934 | 0.63461  |
| 57786 | Q85601 | Q99743 | 0.46562  |
| 57787 | Q85601 | Q9UHD9 | 0.84611  |
| 57788 | Q85601 | P06454 | 0.55036  |
| 57789 | Q85601 | Q8IZT6 | 0.44049  |
| 57790 | Q85601 | Q7Z3Y9 | 0.65053  |
| 57791 | Q85601 | Q9BYQ3 | 0.17342  |
| 57792 | Q85601 | Q6P5X5 | 0.46258  |
| 57793 | Q85601 | Q15596 | 0.66539  |
| 57794 | Q85601 | Q10567 | 0.66655  |
| 57795 | Q85601 | Q9Y4B6 | 0.91845  |
| 57796 | Q85601 | O00472 | 0.60012  |
| 57797 | Q85601 | Q7Z6I5 | 0.70261  |
| 57798 | Q85601 | P32189 | 0.12021  |
| 57799 | Q85601 | Q5VSL9 | 0.81542  |
| 57800 | Q85601 | O14972 | 0.33489  |
| 57801 | Q85601 | Q03923 | 0.5423   |
| 57802 | Q85601 | Q8N3X1 | 0.23708  |
| 57803 | Q85601 | O43791 | 0.54465  |
| 57804 | Q85601 | Q9H6Z4 | 1.126    |
| 57805 | Q85601 | P52736 | 0.64331  |
| 57806 | Q85601 | O95983 | 1.2724   |
| 57807 | Q85601 | Q9NRY2 | 0.82948  |
| 57808 | Q85601 | P63172 | 0.88034  |
| 57809 | Q85601 | P0CI01 | 0.15217  |
| 57810 | Q85601 | Q99608 | 0.19284  |
| 57811 | Q85601 | O43303 | 0.88925  |
| 57812 | Q85601 | O95503 | 0.9346   |
| 57813 | Q85601 | P56211 | 0.18549  |
| 57814 | Q85601 | O95644 | 0.867    |
| 57815 | Q85601 | Q9BRP8 | 0.84437  |
| 57816 | Q85601 | Q8N823 | 0.35685  |
| 57817 | Q85601 | Q9Y285 | 0.32126  |
| 57818 | Q85601 | Q6H8Q1 | 0.4492   |
| 57819 | Q85601 | Q9BTE1 | 0.2393   |
| 57820 | Q85601 | O14786 | 0.26941  |
| 57821 | Q85601 | Q9BZV1 | 1.1103   |
| 57822 | Q85601 | Q92782 | 0.72731  |
| 57823 | Q85601 | C9J3I9 | 0.24699  |
| 57824 | Q85601 | Q9P2W9 | 0.23007  |
| 57825 | Q85601 | Q4G0F5 | 0.22527  |
| 57826 | Q85601 | Q6P2H3 | 0.66448  |
| 57827 | Q85601 | Q9UK45 | 0.64797  |
| 57828 | Q85601 | P17024 | 0.34274  |
| 57829 | Q85601 | Q14149 | 0.2444   |
| 57830 | Q85601 | O96004 | 0.49151  |
| 57831 | Q85601 | Q8WUW1 | 0.14428  |
| 57832 | Q85601 | P17017 | 0.25157  |
| 57833 | Q85601 | Q15714 | 0.80572  |
| 57834 | Q85601 | Q5JY77 | 0.53217  |
| 57835 | Q85601 | Q9H714 | 0.32406  |
| 57836 | Q85601 | P49321 | 0.54318  |

|       |        |        |          |
|-------|--------|--------|----------|
| 57837 | Q85601 | Q5VUG0 | 0.33843  |
| 57838 | Q85601 | Q8IYT1 | 0.16823  |
| 57839 | Q85601 | Q9Y692 | 0.81539  |
| 57840 | Q85601 | Q96PV6 | 0.74358  |
| 57841 | Q85601 | O75886 | 1.1736   |
| 57842 | Q85601 | O14744 | 0.95954  |
| 57843 | Q85601 | Q2VWA4 | 0.14677  |
| 57844 | Q85601 | Q9BQ89 | 0.69883  |
| 57845 | Q85601 | Q9NTI5 | 0.88649  |
| 57846 | Q85601 | F5H4B4 | 0.27158  |
| 57847 | Q85601 | Q08211 | 0.2283   |
| 57848 | Q85601 | P62316 | 0.73261  |
| 57849 | Q85601 | Q9BZL4 | 0.53217  |
| 57850 | Q85601 | Q15054 | 0.62168  |
| 57851 | Q85601 | Q9GZS1 | 0.46613  |
| 57852 | Q85601 | Q9BR76 | 0.30241  |
| 57853 | Q85601 | O94906 | 0.18673  |
| 57854 | Q85601 | A6NKF1 | 0.98946  |
| 57855 | Q85601 | P41162 | 0.34071  |
| 57856 | Q85601 | P51668 | 0.5612   |
| 57857 | Q85601 | P48147 | 0.099878 |
| 57858 | Q85601 | O60304 | 0.26172  |
| 57859 | Q85601 | Q29RF7 | 1.0294   |
| 57860 | Q85601 | P60372 | 0.17342  |
| 57861 | Q85601 | P35237 | 0.4028   |
| 57862 | Q85601 | Q7Z401 | 0.33155  |
| 57863 | Q85601 | Q9UJY5 | 0.51602  |
| 57864 | Q85601 | Q9Y2D9 | 0.66443  |
| 57865 | Q85601 | Q15436 | 0.70253  |
| 57866 | Q85601 | Q8WXU2 | 0.76138  |
| 57867 | Q85601 | P59923 | 0.35685  |
| 57868 | Q85601 | Q8N2I2 | 0.32741  |
| 57869 | Q85601 | Q96FX2 | 0.96174  |
| 57870 | Q85601 | Q8NDM7 | 0.47911  |
| 57871 | Q85601 | P31350 | 0.34814  |
| 57872 | Q85601 | P49247 | 0.40225  |
| 57873 | Q85601 | Q00613 | 0.88771  |
| 57874 | Q85601 | A6NKU9 | 0.15217  |
| 57875 | Q85601 | Q86V48 | 0.41133  |
| 57876 | Q85601 | Q13398 | 0.45392  |
| 57877 | Q85601 | Q9HAN9 | 0.26242  |
| 57878 | Q85601 | Q9BYR2 | 0.17342  |
| 57879 | Q85601 | Q53GI3 | 0.33218  |
| 57880 | Q85601 | Q9UK11 | 0.38013  |
| 57881 | Q85601 | Q96LR5 | 0.68983  |
| 57882 | Q85601 | Q2KJ03 | 0.22952  |
| 57883 | Q85601 | O15525 | 0.3792   |
| 57884 | Q85601 | Q13867 | 0.34721  |
| 57885 | Q85601 | P68036 | 0.74875  |
| 57886 | Q85601 | O15405 | 1.0093   |
| 57887 | Q85601 | Q9Y3E5 | 0.54486  |
| 57888 | Q85601 | Q07955 | 0.4732   |
| 57889 | Q85601 | Q8IYE0 | 0.45506  |
| 57890 | Q85601 | Q9BYR0 | 0.17342  |
| 57891 | Q85601 | Q86UD4 | 0.23314  |
| 57892 | Q85601 | P49770 | 0.24497  |
| 57893 | Q85601 | O43463 | 0.83832  |
| 57894 | Q85601 | P80723 | 0.26754  |
| 57895 | Q85601 | Q15651 | 0.75901  |
| 57896 | Q85601 | Q9NP71 | 0.54876  |
| 57897 | Q85601 | P55055 | 0.34325  |
| 57898 | Q85601 | Q04864 | 1.2378   |
| 57899 | Q85601 | P20290 | 1.1199   |
| 57900 | Q85601 | P17010 | 0.35675  |
| 57901 | Q85601 | P49711 | 0.28095  |
| 57902 | Q85601 | Q93008 | 0.47433  |
| 57903 | Q85601 | Q9UID6 | 0.52887  |
| 57904 | Q85601 | P55769 | 0.72149  |
| 57905 | Q85601 | O43345 | 0.34917  |
| 57906 | Q85601 | Q9UIH9 | 0.44148  |
| 57907 | Q85601 | Q9BZE9 | 0.53308  |
| 57908 | Q85601 | Q8TAF7 | 0.44666  |
| 57909 | Q85601 | Q96R06 | 1.025    |
| 57910 | Q85601 | Q15059 | 1.1508   |
| 57911 | Q85601 | Q13952 | 0.63635  |
| 57912 | Q85601 | Q96BW9 | 0.046395 |

|       |        |        |          |
|-------|--------|--------|----------|
| 57913 | Q85601 | Q8WWB5 | 0.39346  |
| 57914 | Q85601 | Q8N612 | 0.33981  |
| 57915 | Q85601 | Q9H008 | 0.50987  |
| 57916 | Q85601 | Q658Y4 | 0.11028  |
| 57917 | Q85601 | Q9H1B4 | 0.34963  |
| 57918 | Q85601 | Q8N184 | 0.22783  |
| 57919 | Q85601 | Q9BSV6 | 0.12236  |
| 57920 | Q85601 | Q92600 | 1.202    |
| 57921 | Q85601 | P0CW00 | 0.47415  |
| 57922 | Q85601 | Q9NZP6 | 0.73813  |
| 57923 | Q85601 | O75694 | 0.65755  |
| 57924 | Q85601 | Q9H089 | 0.065354 |
| 57925 | Q85601 | Q9BUY5 | 0.38602  |
| 57926 | Q85601 | Q8TF47 | 0.44666  |
| 57927 | Q85601 | Q9NVU0 | 0.34399  |
| 57928 | Q85601 | O95278 | 0.24408  |
| 57929 | Q85601 | Q04917 | 0.2928   |
| 57930 | Q85601 | Q9C0E2 | 0.9044   |
| 57931 | Q85601 | A6NNV3 | 0.15217  |
| 57932 | Q85601 | Q9NWT8 | 0.8447   |
| 57933 | Q85601 | Q9H7H0 | 0.65762  |
| 57934 | Q85601 | Q96GX9 | 0.39127  |
| 57935 | Q85601 | O43617 | 0.3729   |
| 57936 | Q85601 | Q9BV57 | 0.67387  |
| 57937 | Q85601 | Q8WYR4 | 0.40293  |
| 57938 | Q85601 | O43745 | 0.75611  |
| 57939 | Q85601 | Q6A162 | 0.49362  |
| 57940 | Q85601 | P24534 | 0.56684  |
| 57941 | Q85601 | Q9NSQ0 | 0.28946  |
| 57942 | Q85601 | P61077 | 0.84493  |
| 57943 | Q85601 | O75474 | 0.685    |
| 57944 | Q85601 | P59998 | 0.10187  |
| 57945 | Q85601 | Q13427 | 0.42908  |
| 57946 | Q85601 | Q9P2R7 | 0.18355  |
| 57947 | Q85601 | Q9UJP4 | 0.34819  |
| 57948 | Q85601 | Q9UJL9 | 0.25255  |
| 57949 | Q85601 | P63279 | 0.95217  |
| 57950 | Q85601 | Q504Q3 | 0.20317  |
| 57951 | Q85601 | Q9H777 | 0.17836  |
| 57952 | Q85601 | Q9H095 | 0.13285  |
| 57953 | Q85601 | P16118 | 0.048629 |
| 57954 | Q85601 | P02100 | 0.21071  |
| 57955 | Q85601 | P27694 | 0.59008  |
| 57956 | Q85601 | O14776 | 1.1056   |
| 57957 | Q85601 | Q6ZRQ5 | 0.63646  |
| 57958 | Q85601 | O94817 | 0.51065  |
| 57959 | Q85601 | Q96AQ9 | 0.35099  |
| 57960 | Q85601 | Q8IYI8 | 0.37155  |
| 57961 | Q85601 | O43542 | 0.62826  |
| 57962 | Q85601 | Q9NYW8 | 0.23651  |
| 57963 | Q85601 | Q8WUB8 | 0.49575  |
| 57964 | Q85601 | P51610 | 0.52523  |
| 57965 | Q85601 | A1L3Z2 | 0.1242   |
| 57966 | Q85601 | O75953 | 0.72315  |
| 57967 | Q85601 | Q14145 | 1.3273   |
| 57968 | Q85601 | Q00597 | 0.87279  |
| 57969 | Q85601 | Q96FI4 | 0.046803 |
| 57970 | Q85601 | A6NI86 | 0.53871  |
| 57971 | Q85601 | A8MXY4 | 0.35363  |
| 57972 | Q85601 | Q9NWB6 | 0.45278  |
| 57973 | Q85601 | Q9UBB9 | 0.32033  |
| 57974 | Q85601 | Q7Z3Y7 | 0.43373  |
| 57975 | Q85601 | Q02080 | 0.43699  |
| 57976 | Q85601 | P62263 | 0.45907  |
| 57977 | Q85601 | Q9P015 | 0.3236   |
| 57978 | Q85601 | P15259 | 0.68269  |
| 57979 | Q85601 | Q96EN9 | 0.30691  |
| 57980 | Q85601 | Q9BQI9 | 0.60265  |
| 57981 | Q85601 | Q6ZSR6 | 0.092509 |
| 57982 | Q85601 | O14508 | 0.30918  |
| 57983 | Q85601 | Q5VT03 | 0.052748 |
| 57984 | Q85601 | Q9NQ55 | 0.39508  |
| 57985 | Q85601 | O00198 | 0.11728  |
| 57986 | Q85601 | Q12834 | 0.80713  |
| 57987 | Q85601 | P12755 | 0.18972  |
| 57988 | Q85601 | Q9UHA3 | 0.29583  |



|       |        |        |          |
|-------|--------|--------|----------|
| 57989 | Q85601 | P08697 | 0.48679  |
| 57990 | Q85601 | Q13541 | 0.82449  |
| 57991 | Q85601 | Q9NZ81 | 0.7685   |
| 57992 | Q85601 | Q9GZS3 | 1.1737   |
| 57993 | Q85601 | Q96FA3 | 0.50393  |
| 57994 | Q85601 | Q9Y2L1 | 0.47911  |
| 57995 | Q85601 | P62861 | 0.78596  |
| 57996 | Q85601 | O95125 | 0.29137  |
| 57997 | Q85601 | Q8IVD9 | 0.27808  |
| 57998 | Q85601 | Q8N3L3 | 0.64397  |
| 57999 | Q85601 | Q96FZ7 | 0.0591   |
| 58000 | Q85601 | Q8N0T1 | 0.060104 |
| 58001 | Q85601 | Q9ULU4 | 0.62624  |
| 58002 | Q85601 | Q8IYB7 | 0.1794   |
| 58003 | Q85601 | Q9H9C1 | 0.58292  |
| 58004 | Q85601 | Q8TC90 | 0.053868 |
| 58005 | Q85601 | Q12830 | 1.0786   |
| 58006 | Q85601 | Q3MHD2 | 0.3103   |
| 58007 | Q85601 | Q8N6M0 | 0.11358  |
| 58008 | Q85601 | Q8WTW3 | 0.49486  |
| 58009 | Q85601 | Q5VWP3 | 0.34989  |
| 58010 | Q85601 | Q8NCD3 | 0.5611   |
| 58011 | Q85601 | Q02878 | 0.92243  |
| 58012 | Q85601 | Q70YC4 | 0.10442  |
| 58013 | Q85601 | Q9Y5Q3 | 0.84634  |
| 58014 | Q85601 | Q8TC94 | 0.09652  |
| 58015 | Q85601 | Q9NS25 | 0.22764  |
| 58016 | Q85601 | Q9BYD6 | 0.13092  |
| 58017 | Q85601 | O75607 | 0.68022  |
| 58018 | Q85601 | Q09161 | 0.66542  |
| 58019 | Q85601 | Q5JTW2 | 0.41939  |
| 58020 | Q85601 | O96015 | 0.095656 |
| 58021 | Q85601 | Q9Y6E7 | 0.45303  |
| 58022 | Q85601 | P30793 | 0.21691  |
| 58023 | Q85601 | P0DM35 | 0.61713  |
| 58024 | Q85601 | H3BNL1 | 0.06625  |
| 58025 | Q85601 | Q66K41 | 0.80902  |
| 58026 | Q85601 | P0C1Z6 | 1.2944   |
| 58027 | Q85601 | Q8IZX4 | 0.36401  |
| 58028 | Q85601 | Q6TFL3 | 0.24285  |
| 58029 | Q85601 | Q499Z4 | 0.36859  |
| 58030 | Q85601 | Q9HA77 | 0.15236  |
| 58031 | Q85601 | O15504 | 0.64926  |
| 58032 | Q85601 | O95273 | 0.95972  |
| 58033 | Q85601 | Q13404 | 1.075    |
| 58034 | Q85601 | Q14974 | 1.1196   |
| 58035 | Q85601 | O15040 | 0.30691  |
| 58036 | Q85601 | P30047 | 0.68998  |
| 58037 | Q85601 | Q86YV9 | 0.52102  |
| 58038 | Q85601 | Q9H7R0 | 0.45863  |
| 58039 | Q85601 | Q9UQF2 | 0.4945   |
| 58040 | Q85601 | Q9BV47 | 0.43786  |
| 58041 | Q85601 | Q9UBG7 | 0.20316  |
| 58042 | Q85601 | Q9Y6J9 | 0.80676  |
| 58043 | Q85601 | Q8WX92 | 1.475    |
| 58044 | Q85601 | P10914 | 0.42804  |
| 58045 | Q85601 | Q9Y6H1 | 0.45749  |
| 58046 | Q85601 | Q9NQG5 | 1.1118   |
| 58047 | Q85601 | Q6VN20 | 0.41722  |
| 58048 | Q85601 | P08047 | 0.81026  |
| 58049 | Q85601 | Q5VWG9 | 0.8798   |
| 58050 | Q85601 | Q96DI7 | 0.56944  |
| 58051 | Q85601 | Q12888 | 0.83329  |
| 58052 | Q85601 | Q9NRF9 | 0.049858 |
| 58053 | Q85601 | Q8IWE5 | 0.40289  |
| 58054 | Q85601 | Q8TEP8 | 0.84777  |
| 58055 | Q85601 | Q96E09 | 0.15623  |
| 58056 | Q85601 | Q9NNW5 | 0.52681  |
| 58057 | Q85601 | Q969R5 | 0.2939   |
| 58058 | Q85601 | Q8N6M9 | 0.25399  |
| 58059 | Q85601 | Q99623 | 1.1373   |
| 58060 | Q85601 | Q86Y26 | 0.23411  |
| 58061 | Q85601 | Q9H6W3 | 0.38183  |
| 58062 | Q85601 | P11802 | 0.71107  |
| 58063 | Q85601 | Q9BZQ8 | 0.27536  |
| 58064 | Q85601 | Q8WUX9 | 0.54483  |

|       |        |        |         |
|-------|--------|--------|---------|
| 58065 | Q85601 | Q13257 | 0.7841  |
| 58066 | Q85601 | Q8NDW8 | 0.07941 |
| 58067 | Q85601 | Q6PK04 | 0.7463  |
| 58068 | Q85601 | P30154 | 0.29047 |
| 58069 | Q85601 | O60806 | 0.46238 |
| 58070 | Q85601 | P27986 | 0.51594 |
| 58071 | Q85601 | Q9H267 | 0.27986 |
| 58072 | Q85601 | Q9HC78 | 0.25392 |
| 58073 | Q85601 | Q8IZH2 | 0.17653 |
| 58074 | Q85601 | Q86TB9 | 0.81298 |
| 58075 | Q85601 | Q9UM82 | 0.70127 |
| 58076 | Q85601 | O94829 | 1.0478  |
| 58077 | Q85601 | Q12840 | 0.32423 |
| 58078 | Q85601 | P53370 | 0.52773 |
| 58079 | Q85601 | O43156 | 0.30691 |
| 58080 | Q85601 | Q8N9F8 | 0.3341  |
| 58081 | Q85601 | Q6IQ21 | 0.38106 |
| 58082 | Q85601 | P54252 | 0.4911  |
| 58083 | Q85601 | Q9UH92 | 0.9312  |
| 58084 | Q85601 | O43663 | 0.93053 |
| 58085 | Q85601 | Q7Z3C6 | 0.18695 |
| 58086 | Q85601 | Q9H501 | 0.83262 |
| 58087 | Q85601 | O43752 | 0.10883 |
| 58088 | Q85601 | P07737 | 0.86799 |
| 58089 | Q85601 | Q8N5C8 | 0.51487 |
| 58090 | Q85601 | O75152 | 0.30436 |
| 58091 | Q85601 | Q9UKN8 | 0.54113 |
| 58092 | Q85601 | Q9H0I3 | 0.50191 |
| 58093 | Q85601 | Q96MT3 | 1.023   |
| 58094 | Q85601 | Q8IWP9 | 0.56423 |
| 58095 | Q85601 | P60412 | 0.17342 |
| 58096 | Q85601 | Q08209 | 0.42864 |
| 58097 | Q85601 | P07954 | 0.13144 |
| 58098 | Q85601 | Q9H9Y6 | 0.73346 |
| 58099 | Q85601 | Q01954 | 0.23811 |
| 58100 | Q85601 | O14598 | 0.29282 |
| 58101 | Q85601 | O95201 | 0.66443 |
| 58102 | Q85601 | P52630 | 0.75059 |
| 58103 | Q85601 | P82979 | 0.37644 |
| 58104 | Q85601 | Q96D70 | 0.18591 |
| 58105 | Q85601 | Q9HAU0 | 0.22989 |
| 58106 | Q85601 | P80217 | 0.68462 |
| 58107 | Q85601 | P55771 | 0.86377 |
| 58108 | Q85601 | O95707 | 0.66791 |
| 58109 | Q85601 | P39023 | 0.91979 |
| 58110 | Q85601 | Q5VIY5 | 0.48095 |
| 58111 | Q85601 | Q96NY9 | 0.73144 |
| 58112 | Q85601 | Q92889 | 0.28062 |
| 58113 | Q85601 | Q9UKC9 | 0.53813 |
| 58114 | Q85601 | Q5VXH4 | 0.39986 |
| 58115 | Q85601 | Q9H5Z6 | 0.30691 |
| 58116 | Q85601 | Q9UBW7 | 0.74644 |
| 58117 | Q85601 | Q8NE18 | 0.98223 |
| 58118 | Q85601 | P38919 | 0.1849  |
| 58119 | Q85601 | P60709 | 0.1273  |
| 58120 | Q85601 | Q9UFW8 | 0.42685 |
| 58121 | Q85601 | P23258 | 0.33875 |
| 58122 | Q85601 | Q9NPC6 | 0.44329 |
| 58123 | Q85601 | Q5VTH2 | 0.50188 |
| 58124 | Q85601 | P61254 | 0.92236 |
| 58125 | Q85601 | Q6XQN6 | 0.28493 |
| 58126 | Q85601 | Q96C86 | 0.91904 |
| 58127 | Q85601 | Q9BWU0 | 0.51865 |
| 58128 | Q85601 | Q8TAP9 | 1.55    |
| 58129 | Q85601 | Q5H9L2 | 1.0775  |
| 58130 | Q85601 | Q5VSY0 | 0.42807 |
| 58131 | Q85601 | P51531 | 0.70188 |
| 58132 | Q85601 | Q9H944 | 1.0147  |
| 58133 | Q85601 | O14757 | 0.58553 |
| 58134 | Q85601 | P26651 | 0.72892 |
| 58135 | Q85601 | Q13562 | 0.24578 |
| 58136 | Q85601 | Q96CF2 | 0.25144 |
| 58137 | Q85601 | O43399 | 0.5636  |
| 58138 | Q85601 | P14678 | 0.71073 |
| 58139 | Q85601 | O15371 | 0.65807 |
| 58140 | Q85601 | Q9Y592 | 0.34831 |

|       |        |        |          |
|-------|--------|--------|----------|
| 58141 | Q85601 | Q96AJ1 | 0.71342  |
| 58142 | Q85601 | A8MQ03 | 0.51676  |
| 58143 | Q85601 | Q96QA6 | 0.22094  |
| 58144 | Q85601 | Q9P219 | 0.44686  |
| 58145 | Q85601 | P01100 | 0.52602  |
| 58146 | Q85601 | Q9NXW9 | 0.050174 |
| 58147 | Q85601 | Q6UYE1 | 0.44165  |
| 58148 | Q85601 | Q16587 | 0.27674  |
| 58149 | Q85601 | Q9NP77 | 0.26877  |
| 58150 | Q85601 | Q96LY2 | 0.26137  |
| 58151 | Q85601 | Q9UKA1 | 0.2751   |
| 58152 | Q85601 | Q8NG57 | 0.28453  |
| 58153 | Q85601 | O75155 | 0.76094  |
| 58154 | Q85601 | Q96L92 | 0.75331  |
| 58155 | Q85601 | Q5TC12 | 0.43305  |
| 58156 | Q85601 | Q9Y2R9 | 0.52881  |
| 58157 | Q85601 | Q9P2K3 | 1.2253   |
| 58158 | Q85601 | Q7Z5K2 | 0.80067  |
| 58159 | Q85601 | Q96ST8 | 0.95843  |
| 58160 | Q85601 | Q9HBM6 | 0.66365  |
| 58161 | Q85601 | Q15572 | 0.83482  |
| 58162 | Q85601 | Q96EY4 | 0.025737 |
| 58163 | Q85601 | Q14734 | 0.19758  |
| 58164 | Q85601 | Q15022 | 0.66823  |
| 58165 | Q85601 | O75167 | 0.16374  |
| 58166 | Q85601 | Q7Z589 | 0.72806  |
| 58167 | Q85601 | O75943 | 0.27475  |
| 58168 | Q85601 | Q05481 | 0.35363  |
| 58169 | Q85601 | Q92674 | 0.39777  |
| 58170 | Q85601 | Q08752 | 0.34797  |
| 58171 | Q85601 | Q9H869 | 1.4396   |
| 58172 | Q85601 | Q05BW5 | 0.16675  |
| 58173 | Q85601 | Q14934 | 0.52688  |
| 58174 | Q85601 | Q86W54 | 0.27647  |
| 58175 | Q85601 | Q8N6I1 | 0.7162   |
| 58176 | Q85601 | O15370 | 0.43108  |
| 58177 | Q85601 | P25789 | 0.56503  |
| 58178 | Q85601 | O00170 | 0.71442  |
| 58179 | Q85601 | Q8N1E6 | 0.37168  |
| 58180 | Q85601 | Q13263 | 0.24788  |
| 58181 | Q85601 | P15924 | 0.28681  |
| 58182 | Q85601 | P28715 | 0.33211  |
| 58183 | Q85601 | Q9H6Q4 | 0.36939  |
| 58184 | Q85601 | O60291 | 0.57057  |
| 58185 | Q85601 | Q8TE69 | 0.30691  |
| 58186 | Q85601 | Q76KD6 | 0.1715   |
| 58187 | Q85601 | Q8NG50 | 0.08841  |
| 58188 | Q85601 | Q9BSJ6 | 0.50114  |
| 58189 | Q85601 | P11387 | 0.66195  |
| 58190 | Q85601 | Q68DI1 | 0.20591  |
| 58191 | Q85601 | Q53H80 | 0.40153  |
| 58192 | Q85601 | Q8IVN3 | 0.65462  |
| 58193 | Q85601 | Q8NHW3 | 0.30267  |
| 58194 | Q85601 | Q63HM1 | 0.31838  |
| 58195 | Q85601 | Q8TCI5 | 0.64143  |
| 58196 | Q85601 | P52746 | 0.15724  |
| 58197 | Q85601 | P41212 | 0.79031  |
| 58198 | Q85601 | Q9UQB3 | 0.56667  |
| 58199 | Q85601 | Q9GZY1 | 0.57995  |
| 58200 | Q85601 | O15060 | 0.10687  |
| 58201 | Q85601 | O95397 | 0.78981  |
| 58202 | Q85601 | Q86VY4 | 0.49249  |
| 58203 | Q85601 | Q15397 | 0.10584  |
| 58204 | Q85601 | Q9BXF9 | 0.17482  |
| 58205 | Q85601 | P41250 | 0.26219  |
| 58206 | Q85601 | Q13405 | 0.60679  |
| 58207 | Q85601 | Q8N7W2 | 0.30709  |
| 58208 | Q85601 | O43516 | 0.26053  |
| 58209 | Q85601 | Q14526 | 0.61919  |
| 58210 | Q85601 | Q5HYW3 | 0.47423  |
| 58211 | Q85601 | P0C7T5 | 0.31707  |
| 58212 | Q85601 | Q7Z794 | 0.60912  |
| 58213 | Q85601 | Q9NS73 | 0.7671   |
| 58214 | Q85601 | Q5U623 | 0.86074  |
| 58215 | Q85601 | Q13137 | 1.153    |
| 58216 | Q85601 | Q8IYS8 | 0.16318  |

|       |        |        |          |
|-------|--------|--------|----------|
| 58217 | Q85601 | Q8N831 | 0.72964  |
| 58218 | Q85601 | Q6IQ32 | 0.46356  |
| 58219 | Q85601 | Q8N0Z6 | 0.40068  |
| 58220 | Q85601 | Q96MR7 | 1.398    |
| 58221 | Q85601 | O60716 | 0.50682  |
| 58222 | Q85601 | Q96FV9 | 0.7404   |
| 58223 | Q85601 | Q96GM5 | 0.70305  |
| 58224 | Q85601 | O75820 | 0.25157  |
| 58225 | Q85601 | P22415 | 0.48296  |
| 58226 | Q85601 | O00233 | 0.49743  |
| 58227 | Q85601 | Q9P267 | 0.30676  |
| 58228 | Q85601 | Q9NRR3 | 0.57279  |
| 58229 | Q85601 | O96000 | 0.38937  |
| 58230 | Q85601 | P56277 | 0.20355  |
| 58231 | Q85601 | P62487 | 0.34189  |
| 58232 | Q85601 | O75122 | 0.34746  |
| 58233 | Q85601 | Q16222 | 0.26636  |
| 58234 | Q85601 | Q9UNH5 | 0.72671  |
| 58235 | Q85601 | Q8N6H7 | 0.095847 |
| 58236 | Q85601 | P51398 | 1.174    |
| 58237 | Q85601 | Q9H0B3 | 0.35296  |
| 58238 | Q85601 | O60294 | 0.31922  |
| 58239 | Q85601 | Q8NEA6 | 0.27834  |
| 58240 | Q85601 | Q86WQ0 | 0.49427  |
| 58241 | Q85601 | Q13515 | 0.52501  |
| 58242 | Q85601 | Q3ZCX4 | 0.31466  |
| 58243 | Q85601 | A8MSI8 | 1.0161   |
| 58244 | Q85601 | O60518 | 0.97198  |
| 58245 | Q85601 | Q9Y675 | 0.11206  |
| 58246 | Q85601 | Q9NVK5 | 0.17272  |
| 58247 | Q85601 | Q9Y6R6 | 0.35685  |
| 58248 | Q85601 | Q5VZQ5 | 0.16431  |
| 58249 | Q85601 | Q9H0A9 | 0.87042  |
| 58250 | Q85601 | Q8TF50 | 0.31798  |
| 58251 | Q85601 | Q14566 | 0.19588  |
| 58252 | Q85601 | P0CJ79 | 0.34347  |
| 58253 | Q85601 | O96020 | 0.96446  |
| 58254 | Q85601 | Q9BVC4 | 0.41749  |
| 58255 | Q85601 | A6NFY7 | 0.12949  |
| 58256 | Q85601 | Q9H9A7 | 0.58122  |
| 58257 | Q85601 | Q9GZX5 | 0.85087  |
| 58258 | Q85601 | Q14CN4 | 0.38819  |
| 58259 | Q85601 | P30305 | 0.44078  |
| 58260 | Q85601 | Q16633 | 0.6041   |
| 58261 | Q85601 | Q14686 | 0.83382  |
| 58262 | Q85601 | Q8NEY3 | 0.24738  |
| 58263 | Q85601 | Q9BQY4 | 0.83988  |
| 58264 | Q85601 | P01009 | 0.58305  |
| 58265 | Q85601 | Q9UBL3 | 0.37294  |
| 58266 | Q85601 | Q14677 | 0.52978  |
| 58267 | Q85601 | O43361 | 0.23119  |
| 58268 | Q85601 | Q14965 | 0.32114  |
| 58269 | Q85601 | Q96B67 | 0.32317  |
| 58270 | Q85601 | Q9BRT9 | 0.32153  |
| 58271 | Q85601 | Q9NW07 | 0.29941  |
| 58272 | Q85601 | Q8WYQ5 | 0.61385  |
| 58273 | Q85601 | Q92688 | 0.23411  |
| 58274 | Q85601 | Q9BY77 | 0.34382  |
| 58275 | Q85601 | Q9H4I2 | 0.80688  |
| 58276 | Q85601 | Q9Y266 | 0.81943  |
| 58277 | Q85601 | B5ME19 | 0.10003  |
| 58278 | Q85601 | Q9H0G5 | 0.47357  |
| 58279 | Q85601 | Q5SXM2 | 0.63642  |
| 58280 | Q85601 | Q08AD1 | 0.55282  |
| 58281 | Q85601 | O60870 | 0.76742  |
| 58282 | Q85601 | Q13503 | 0.67458  |
| 58283 | Q85601 | P36508 | 0.085001 |
| 58284 | Q85601 | Q9Y3D3 | 0.61351  |
| 58285 | Q85601 | P19388 | 0.64744  |
| 58286 | Q85601 | Q9NP66 | 1.0098   |
| 58287 | Q85601 | Q5T160 | 0.58369  |
| 58288 | Q85601 | Q8TC21 | 0.3052   |
| 58289 | Q85601 | Q9BVC3 | 0.57287  |
| 58290 | Q85601 | Q9UPV0 | 1.674    |
| 58291 | Q85601 | P29084 | 1.2529   |
| 58292 | Q85601 | A6ZKI3 | 0.014132 |

|       |        |         |          |
|-------|--------|---------|----------|
| 58293 | Q85601 | P43360  | 0.39393  |
| 58294 | Q85601 | Q6ZW54  | 0.57078  |
| 58295 | Q85601 | Q9BWT1  | 0.54914  |
| 58296 | Q85601 | Q8NBZ0  | 1.3122   |
| 58297 | Q85601 | Q86WV1  | 0.63596  |
| 58298 | Q85601 | P49207  | 0.56747  |
| 58299 | Q85601 | P60228  | 0.96807  |
| 58300 | Q85601 | O75817  | 0.86917  |
| 58301 | Q85601 | Q9UMX2  | 0.23662  |
| 58302 | Q85601 | O75818  | 0.31289  |
| 58303 | Q85601 | Q8NI35  | 0.30687  |
| 58304 | Q85601 | Q9BXW4  | 0.28257  |
| 58305 | Q85601 | Q6PJT7  | 0.96236  |
| 58306 | Q85601 | P31260  | 0.3006   |
| 58307 | Q85601 | Q16851  | 0.42688  |
| 58308 | Q85601 | Q7Z3K3  | 0.57886  |
| 58309 | Q85601 | P23409  | 0.061646 |
| 58310 | Q85601 | Q9BW85  | 0.57104  |
| 58311 | Q85601 | Q9H2J4  | 0.64168  |
| 58312 | Q85601 | Q8TCE6  | 0.63405  |
| 58313 | Q85601 | P35637  | 0.36552  |
| 58314 | Q85601 | Q8IWL8  | 0.33985  |
| 58315 | Q85601 | O75570  | 0.15733  |
| 58316 | Q85601 | Q96KQ4  | 0.93945  |
| 58317 | Q85601 | Q86WR7  | 0.002423 |
| 58318 | Q85601 | Q9UK12  | 0.29749  |
| 58319 | Q85601 | O43681  | 0.076137 |
| 58320 | Q85601 | Q96F83  | 0.38237  |
| 58321 | Q85601 | Q8NHZ7  | 0.35546  |
| 58322 | Q85601 | Q6MZT1  | 0.16673  |
| 58323 | Q85601 | Q8TEB1  | 0.26501  |
| 58324 | Q85601 | P10599  | 0.36373  |
| 58325 | Q85601 | Q96HQ2  | 0.51797  |
| 58326 | Q85601 | P11940  | 0.30426  |
| 58327 | Q85601 | Q9XRX5  | 0.30691  |
| 58328 | Q85601 | Q9NX65  | 0.25071  |
| 58329 | Q85601 | O60296  | 0.55208  |
| 58330 | Q85601 | Q5VY09  | 0.10715  |
| 58331 | Q85601 | Q14186  | 1.2123   |
| 58332 | Q85601 | P50222  | 0.60616  |
| 58333 | Q85601 | Q9UII2  | 0.29944  |
| 58334 | Q85601 | Q5T215  | 0.25485  |
| 58335 | Q85601 | Q53T94  | 0.43283  |
| 58336 | Q85601 | Q7Z6J0  | 0.37823  |
| 58337 | Q85601 | Q8NDQ6  | 0.36823  |
| 58338 | Q85601 | P51508  | 0.31208  |
| 58339 | Q85601 | Q9Y5Q8  | 0.68797  |
| 58340 | Q85601 | Q86XR8  | 1.0712   |
| 58341 | Q85601 | Q96GC5  | 0.60679  |
| 58342 | Q85601 | Q9Y6B2  | 1.0017   |
| 58343 | Q85601 | Q8WYN3  | 0.54068  |
| 58344 | Q85601 | Q92830  | 0.7091   |
| 58345 | Q85601 | Q9H2C0  | 0.62105  |
| 58346 | Q85601 | Q9BYQ0  | 0.17342  |
| 58347 | Q85601 | Q5HYW2  | 0.10358  |
| 58348 | Q85601 | Q9UKX2  | 0.51716  |
| 58349 | Q85601 | O76003  | 0.24797  |
| 58350 | Q85601 | Q9UH99  | 0.17456  |
| 58351 | Q85601 | Q9BPX3  | 0.95902  |
| 58352 | Q85601 | Q86XL3  | 0.34348  |
| 58353 | Q85601 | Q9UK13  | 0.4637   |
| 58354 | Q85601 | O75444  | 0.46027  |
| 58355 | Q85601 | Q04725  | 0.86798  |
| 58356 | Q85601 | Q9Y291  | 0.32562  |
| 58357 | Q85601 | Q9Y2K3  | 0.51716  |
| 58358 | Q85601 | Q9Y316  | 0.18002  |
| 58359 | Q85601 | Q8NFIJ8 | 0.41298  |
| 58360 | Q85601 | Q9Y512  | 0.070431 |
| 58361 | Q85601 | P60411  | 0.17342  |
| 58362 | Q85601 | P40424  | 0.68028  |
| 58363 | Q85601 | Q96TA1  | 0.37785  |
| 58364 | Q85601 | Q96Q89  | 0.5345   |
| 58365 | Q85601 | Q96LK0  | 0.082628 |
| 58366 | Q85601 | Q14653  | 0.64119  |
| 58367 | Q85601 | Q14164  | 0.256    |
| 58368 | Q85601 | Q9C0C6  | 0.42921  |

|       |        |        |          |
|-------|--------|--------|----------|
| 58369 | Q85601 | Q9Y6M1 | 0.31661  |
| 58370 | Q85601 | Q8N3Y1 | 0.23501  |
| 58371 | Q85601 | Q13123 | 0.48226  |
| 58372 | Q85601 | Q9H2K2 | 0.4227   |
| 58373 | Q85601 | Q6P9F0 | 0.3298   |
| 58374 | Q85601 | Q00577 | 0.52822  |
| 58375 | Q85601 | P38432 | 0.70754  |
| 58376 | Q85601 | Q9BQ70 | 1.3752   |
| 58377 | Q85601 | P20618 | 0.55261  |
| 58378 | Q85601 | Q8NCE8 | 0.22279  |
| 58379 | Q85601 | A2RTY3 | 0.29059  |
| 58380 | Q85601 | Q92764 | 0.49362  |
| 58381 | Q85601 | Q6ZN08 | 0.47241  |
| 58382 | Q85601 | P62910 | 0.63754  |
| 58383 | Q85601 | Q09666 | 0.67291  |
| 58384 | Q85601 | A8MUA0 | 0.074848 |
| 58385 | Q85601 | Q9BSJ2 | 1.2259   |
| 58386 | Q85601 | Q15170 | 1.2578   |
| 58387 | Q85601 | Q14151 | 0.63079  |
| 58388 | Q85601 | Q17RB0 | 0.18373  |
| 58389 | Q85601 | Q5T6F2 | 0.37239  |
| 58390 | Q85601 | Q9GZU2 | 0.55913  |
| 58391 | Q85601 | Q9NQR4 | 0.342    |
| 58392 | Q85601 | O15131 | 1.1156   |
| 58393 | Q85601 | Q96LI5 | 0.58716  |
| 58394 | Q85601 | Q9UKT7 | 0.44103  |
| 58395 | Q85601 | Q9Y6G3 | 0.21762  |
| 58396 | Q85601 | Q9BW27 | 0.79769  |
| 58397 | Q85601 | Q8TEA1 | 0.3843   |
| 58398 | Q85601 | Q9Y6F1 | 0.31952  |
| 58399 | Q85601 | P49716 | 0.40244  |
| 58400 | Q85601 | Q92624 | 0.95818  |
| 58401 | Q85601 | Q92541 | 1.0075   |
| 58402 | Q85601 | Q9Y305 | 0.31106  |
| 58403 | Q85601 | P12524 | 0.24393  |
| 58404 | Q85601 | Q8NBF1 | 0.30995  |
| 58405 | Q85601 | Q03468 | 0.43375  |
| 58406 | Q85601 | Q86T75 | 0.46437  |
| 58407 | Q85601 | O60711 | 0.52082  |
| 58408 | Q85601 | Q13352 | 0.56493  |
| 58409 | Q85601 | Q9Y6K9 | 0.93812  |
| 58410 | Q85601 | Q8WW24 | 0.47167  |
| 58411 | Q85601 | Q969S3 | 0.81425  |
| 58412 | Q85601 | Q04726 | 1.0193   |
| 58413 | Q85601 | P0CJ88 | 0.27808  |
| 58414 | Q85601 | Q9H693 | 0.49978  |
| 58415 | Q85601 | A6NNH0 | 0.37151  |
| 58416 | Q85601 | P07864 | 0.51979  |
| 58417 | Q85601 | Q9P0U4 | 0.38382  |
| 58418 | Q85601 | Q8IWS0 | 0.64406  |
| 58419 | Q85601 | Q96QU4 | 0.11206  |
| 58420 | Q85601 | Q8N1W2 | 0.20923  |
| 58421 | Q85601 | P25791 | 0.52433  |
| 58422 | Q85601 | O15117 | 0.46369  |
| 58423 | Q85601 | B1AK76 | 0.72454  |
| 58424 | Q85601 | P69892 | 0.21071  |
| 58425 | Q85601 | Q9Y6Y0 | 0.51682  |
| 58426 | Q85601 | Q6P1M9 | 0.067225 |
| 58427 | Q85601 | P46976 | 0.47383  |
| 58428 | Q85601 | P61576 | 0.42275  |
| 58429 | Q85601 | Q12968 | 0.74986  |
| 58430 | Q85601 | Q9NRX2 | 0.080202 |
| 58431 | Q85601 | Q8N339 | 0.26192  |
| 58432 | Q85601 | Q86UW9 | 1.0046   |
| 58433 | Q85601 | Q9HB96 | 0.85803  |
| 58434 | Q85601 | Q9NXB0 | 0.71708  |
| 58435 | Q85601 | Q15650 | 0.97814  |
| 58436 | Q85601 | P17535 | 0.93121  |
| 58437 | Q85601 | Q14154 | 0.46951  |
| 58438 | Q85601 | Q9NQX1 | 0.55479  |
| 58439 | Q85601 | Q2M3C7 | 0.5088   |
| 58440 | Q85601 | O15355 | 0.97576  |
| 58441 | Q85601 | P51532 | 0.46107  |
| 58442 | Q85601 | Q9H814 | 0.32123  |
| 58443 | Q85601 | Q7Z3Z0 | 0.65053  |
| 58444 | Q85601 | Q8WWY6 | 0.45278  |

|       |        |        |          |
|-------|--------|--------|----------|
| 58445 | Q85601 | Q9H607 | 0.52454  |
| 58446 | Q85601 | Q8N983 | 0.38107  |
| 58447 | Q85601 | Q9NVV9 | 1.1119   |
| 58448 | Q85601 | A1L443 | 0.41643  |
| 58449 | Q85601 | Q96JC9 | 0.98642  |
| 58450 | Q85601 | Q9Y295 | 0.16619  |
| 58451 | Q85601 | P82909 | 0.3334   |
| 58452 | Q85601 | P62310 | 0.57719  |
| 58453 | Q85601 | P49354 | 0.32494  |
| 58454 | Q85601 | P48788 | 0.55831  |
| 58455 | Q85601 | Q8NA31 | 0.69948  |
| 58456 | Q85601 | O75461 | 0.31906  |
| 58457 | Q85601 | Q9H808 | 0.59026  |
| 58458 | Q85601 | Q04695 | 0.61937  |
| 58459 | Q85601 | Q9H3J6 | 0.31705  |
| 58460 | Q85601 | O15235 | 0.65885  |
| 58461 | Q85601 | Q9BRJ7 | 0.23559  |
| 58462 | Q85601 | Q5D0E6 | 0.71202  |
| 58463 | Q85601 | Q6PI98 | 0.69936  |
| 58464 | Q85601 | A6NGD5 | 0.24501  |
| 58465 | Q85601 | Q15555 | 0.19135  |
| 58466 | Q85601 | Q9H7B2 | 0.59847  |
| 58467 | Q85601 | Q9H981 | 1.1956   |
| 58468 | Q85601 | Q9H9G7 | 0.62448  |
| 58469 | Q85601 | Q86TP1 | 0.84729  |
| 58470 | Q85601 | Q66GS9 | 0.43133  |
| 58471 | Q85601 | P41227 | 0.35218  |
| 58472 | Q85601 | Q9Y221 | 0.71902  |
| 58473 | Q85601 | Q96RN5 | 1.2874   |
| 58474 | Q85601 | Q8WTZ3 | 0.54425  |
| 58475 | Q85601 | Q6NUR6 | 0.33369  |
| 58476 | Q85601 | Q5T280 | 0.75349  |
| 58477 | Q85601 | Q6ZNM6 | 0.27807  |
| 58478 | Q85601 | Q6P597 | 0.15687  |
| 58479 | Q85601 | Q9NXX8 | 0.59558  |
| 58480 | Q85601 | P30307 | 0.74217  |
| 58481 | Q85601 | P62249 | 0.62339  |
| 58482 | Q85601 | Q9BTM9 | 0.63526  |
| 58483 | Q85601 | A6NJL1 | 0.14537  |
| 58484 | Q85601 | O00159 | 0.10814  |
| 58485 | Q85601 | P60371 | 0.17342  |
| 58486 | Q85601 | O75351 | 0.35344  |
| 58487 | Q85601 | Q8N6F7 | 0.38721  |
| 58488 | Q85601 | Q9BUT9 | 0.65162  |
| 58489 | Q85601 | P62280 | 0.46957  |
| 58490 | Q85601 | Q13435 | 0.33181  |
| 58491 | Q85601 | Q9BYV9 | 0.3452   |
| 58492 | Q85601 | Q9NP64 | 0.32117  |
| 58493 | Q85601 | Q86SQ7 | 0.96487  |
| 58494 | Q85601 | Q8TED0 | 0.37018  |
| 58495 | Q85601 | Q9Y2B5 | 0.015978 |
| 58496 | Q85601 | O75665 | 0.74902  |
| 58497 | Q85601 | Q8NEK5 | 0.31166  |
| 58498 | Q85601 | Q8N4W9 | 0.35685  |
| 58499 | Q85601 | Q9Y6K5 | 0.171    |
| 58500 | Q85601 | Q9H8T0 | 0.48015  |
| 58501 | Q85601 | Q5XG87 | 0.19723  |
| 58502 | Q85601 | Q92785 | 0.71958  |
| 58503 | Q85601 | Q96N38 | 0.44393  |
| 58504 | Q85601 | P62314 | 0.75147  |
| 58505 | Q85601 | Q9NWW7 | 0.056741 |
| 58506 | Q85601 | Q6PJG2 | 0.79574  |
| 58507 | Q85601 | Q9UK41 | 0.75787  |
| 58508 | Q85601 | Q6ICB0 | 0.22109  |
| 58509 | Q85601 | Q8N587 | 0.41898  |
| 58510 | Q85601 | Q9UIS9 | 0.5967   |
| 58511 | Q85601 | Q16537 | 0.35772  |
| 58512 | Q85601 | Q8N344 | 0.61167  |
| 58513 | Q85601 | Q9H9E3 | 0.47267  |
| 58514 | Q85601 | Q3ZLR7 | 0.60189  |
| 58515 | Q85601 | Q8IXF0 | 0.37679  |
| 58516 | Q85601 | P0DKX0 | 0.41402  |
| 58517 | Q85601 | Q9H171 | 0.1766   |
| 58518 | Q85601 | P50991 | 0.3524   |
| 58519 | Q85601 | Q9BXY8 | 0.43646  |
| 58520 | Q85601 | P13984 | 0.58119  |

|       |        |        |          |
|-------|--------|--------|----------|
| 58521 | Q85601 | P52742 | 0.31741  |
| 58522 | Q85601 | Q02930 | 0.82676  |
| 58523 | Q85601 | Q9H175 | 1.0813   |
| 58524 | Q85601 | O43768 | 0.20509  |
| 58525 | Q85601 | Q9BUK0 | 0.46889  |
| 58526 | Q85601 | Q9H9H5 | 0.23747  |
| 58527 | Q85601 | Q9UK73 | 0.75079  |
| 58528 | Q85601 | Q6P3W6 | 0.5858   |
| 58529 | Q85601 | Q7LG56 | 0.30283  |
| 58530 | Q85601 | P63208 | 0.56811  |
| 58531 | Q85601 | Q16600 | 0.30669  |
| 58532 | Q85601 | Q9UMQ3 | 0.72237  |
| 58533 | Q85601 | Q8NCQ2 | 0.31985  |
| 58534 | Q85601 | Q9UBX0 | 0.18918  |
| 58535 | Q85601 | Q92681 | 0.50404  |
| 58536 | Q85601 | Q8N140 | 0.97576  |
| 58537 | Q85601 | Q9Y5A6 | 0.76515  |
| 58538 | Q85601 | Q9BW60 | 0.54781  |
| 58539 | Q85601 | A6NJG6 | 0.32996  |
| 58540 | Q85601 | P78364 | 0.11142  |
| 58541 | Q85601 | Q8NDT2 | 0.70395  |
| 58542 | Q85601 | Q96F24 | 0.7162   |
| 58543 | Q85601 | Q15013 | 0.87467  |
| 58544 | Q85601 | O00423 | 0.50943  |
| 58545 | Q85601 | P56945 | 0.55736  |
| 58546 | Q85601 | Q9P0T4 | 0.51717  |
| 58547 | Q85601 | Q9BTC0 | 0.35868  |
| 58548 | Q85601 | Q8N1Q8 | 0.31225  |
| 58549 | Q85601 | Q9H7R5 | 0.3621   |
| 58550 | Q85601 | P15170 | 0.43964  |
| 58551 | Q85601 | Q8TAY7 | 1.2384   |
| 58552 | Q85601 | Q9UKK6 | 0.69123  |
| 58553 | Q85601 | Q99551 | 0.67614  |
| 58554 | Q85601 | Q969G3 | 0.99321  |
| 58555 | Q85601 | O76064 | 0.35812  |
| 58556 | Q85601 | Q13901 | 1.0326   |
| 58557 | Q85601 | Q96D46 | 0.67304  |
| 58558 | Q85601 | Q9Y448 | 0.95148  |
| 58559 | Q85601 | Q96M61 | 0.30691  |
| 58560 | Q85601 | P11166 | 0.51847  |
| 58561 | Q85601 | Q13098 | 0.25218  |
| 58562 | Q85601 | Q96JB5 | 0.30051  |
| 58563 | Q85601 | Q76N32 | 0.16485  |
| 58564 | Q85601 | Q9Y375 | 0.58968  |
| 58565 | Q85601 | P62306 | 0.25364  |
| 58566 | Q85601 | O15049 | 1.115    |
| 58567 | Q85601 | Q9HAU5 | 0.83184  |
| 58568 | Q85601 | Q8N726 | 0.61718  |
| 58569 | Q85601 | Q9UNN5 | 0.6553   |
| 58570 | Q85601 | Q9UBY9 | 1.0044   |
| 58571 | Q85601 | Q5JUW0 | 0.42505  |
| 58572 | Q85601 | O14948 | 0.41785  |
| 58573 | Q85601 | Q96JN0 | 0.43765  |
| 58574 | Q85601 | O94811 | 0.46837  |
| 58575 | Q85601 | Q9BPZ2 | 0.11417  |
| 58576 | Q85601 | P35573 | 0.53811  |
| 58577 | Q85601 | Q8N1V2 | 0.49205  |
| 58578 | Q85601 | Q9C0I3 | 0.61281  |
| 58579 | Q85601 | P17098 | 0.46069  |
| 58580 | Q85601 | Q6PII5 | 0.27846  |
| 58581 | Q85601 | Q9BSM1 | 1.1396   |
| 58582 | Q85601 | Q96MN9 | 0.63622  |
| 58583 | Q85601 | P05783 | 1.3089   |
| 58584 | Q85601 | O95232 | 0.4564   |
| 58585 | Q85601 | P47914 | 0.75257  |
| 58586 | Q85601 | A6NNA2 | 0.22379  |
| 58587 | Q85601 | P80297 | 0.28331  |
| 58588 | Q85601 | O14556 | 0.40264  |
| 58589 | Q85601 | Q70IA6 | 0.49011  |
| 58590 | Q85601 | Q9P0L1 | 0.31855  |
| 58591 | Q85601 | O60508 | 0.31055  |
| 58592 | Q85601 | Q9GZT9 | 0.29579  |
| 58593 | Q85601 | Q9HD15 | 0.61064  |
| 58594 | Q85601 | Q14582 | 0.29416  |
| 58595 | Q85601 | Q96N23 | 0.061982 |
| 58596 | Q85601 | Q8NB42 | 0.46793  |



|       |        |        |          |
|-------|--------|--------|----------|
| 58597 | Q85601 | P54098 | 0.43286  |
| 58598 | Q85601 | Q8TEQ6 | 0.67546  |
| 58599 | Q85601 | P84098 | 0.53692  |
| 58600 | Q85601 | Q96L21 | 0.44662  |
| 58601 | Q85601 | Q9UL36 | 0.26904  |
| 58602 | Q85601 | Q96S59 | 0.96682  |
| 58603 | Q85601 | Q8WXW3 | 0.67691  |
| 58604 | Q85601 | Q8NHQ8 | 0.69012  |
| 58605 | Q85601 | Q9H1A7 | 0.078638 |
| 58606 | Q85601 | Q7Z7F7 | 0.53795  |
| 58607 | Q85601 | Q9BY43 | 0.23409  |
| 58608 | Q85601 | P25205 | 0.39368  |
| 58609 | Q85601 | Q12988 | 0.44697  |
| 58610 | Q85601 | P54727 | 0.7372   |
| 58611 | Q85601 | Q8WVZ9 | 0.39393  |
| 58612 | Q85601 | P12882 | 0.51716  |
| 58613 | Q85601 | O95045 | 0.13239  |
| 58614 | Q85601 | Q15928 | 0.48462  |
| 58615 | Q85601 | Q5TAX3 | 0.7593   |
| 58616 | Q85601 | Q9H6Q3 | 0.23771  |
| 58617 | Q85601 | O95810 | 0.25915  |
| 58618 | Q85601 | Q96D98 | 0.56772  |
| 58619 | Q85601 | Q9ULJ1 | 0.20123  |
| 58620 | Q85601 | Q8IY92 | 0.43168  |
| 58621 | Q85601 | Q9UGK3 | 0.75929  |
| 58622 | Q85601 | Q8N1K5 | 0.037193 |
| 58623 | Q85601 | Q9H788 | 0.99905  |
| 58624 | Q85601 | Q9H322 | 0.22152  |
| 58625 | Q85601 | O15266 | 0.51854  |
| 58626 | Q85601 | Q92621 | 1.0545   |
| 58627 | Q85601 | O14641 | 0.91156  |
| 58628 | Q85601 | Q13428 | 0.80299  |
| 58629 | Q85601 | Q04323 | 0.29914  |
| 58630 | Q85601 | P23511 | 1.1869   |
| 58631 | Q85601 | Q9H2L5 | 0.56881  |
| 58632 | Q85601 | Q53FN2 | 0.43378  |
| 58633 | Q85601 | Q9ULX6 | 0.4606   |
| 58634 | Q85601 | P40222 | 0.43034  |
| 58635 | Q85601 | Q9NVI1 | 0.72835  |
| 58636 | Q85601 | Q96AA8 | 0.16774  |
| 58637 | Q85601 | Q96MR9 | 0.41154  |
| 58638 | Q85601 | Q6P9A3 | 0.28926  |
| 58639 | Q85601 | G3V211 | 0.26611  |
| 58640 | Q85601 | P40306 | 0.2902   |
| 58641 | Q85601 | Q562F6 | 0.80833  |
| 58642 | Q85601 | Q9UGJ1 | 0.35201  |
| 58643 | Q85601 | O14929 | 0.80404  |
| 58644 | Q85601 | Q5XKR9 | 0.18341  |
| 58645 | Q85601 | P0CJ90 | 0.27808  |
| 58646 | Q85601 | Q96CM4 | 0.060673 |
| 58647 | Q85601 | O95260 | 0.13334  |
| 58648 | Q85601 | Q9Y4I5 | 0.25865  |
| 58649 | Q85601 | Q8WW12 | 0.63253  |
| 58650 | Q85601 | Q9Y6Q2 | 0.25242  |
| 58651 | Q85601 | Q969U7 | 0.58031  |
| 58652 | Q85601 | Q3B726 | 0.2395   |
| 58653 | Q85601 | P78537 | 0.71602  |
| 58654 | Q85601 | Q5MCW4 | 0.23549  |
| 58655 | Q85601 | Q9BXF6 | 0.64939  |
| 58656 | Q85601 | Q8NI29 | 0.20965  |
| 58657 | Q85601 | P34896 | 0.1538   |
| 58658 | Q85601 | Q9UI43 | 0.43925  |
| 58659 | Q85601 | P0CJ89 | 0.27808  |
| 58660 | Q85601 | P14618 | 0.21841  |
| 58661 | Q85601 | P14635 | 0.29826  |
| 58662 | Q85601 | Q9UKV3 | 0.59809  |
| 58663 | Q85601 | Q9HAI6 | 0.39507  |
| 58664 | Q85601 | Q8TES7 | 0.62243  |
| 58665 | Q85601 | P15927 | 0.47514  |
| 58666 | Q85601 | Q96N20 | 0.29141  |
| 58667 | Q85601 | Q13084 | 1.0547   |
| 58668 | Q85601 | Q8IXJ6 | 0.44872  |
| 58669 | Q85601 | Q9NZH5 | 0.2953   |
| 58670 | Q85601 | Q96JM7 | 0.42113  |
| 58671 | Q85601 | Q15010 | 0.66046  |
| 58672 | Q85601 | P08708 | 0.41302  |

|       |        |        |         |
|-------|--------|--------|---------|
| 58673 | Q85601 | Q8IU81 | 0.32443 |
| 58674 | Q85601 | O43920 | 0.52048 |
| 58675 | Q85601 | Q68DK7 | 0.59147 |
| 58676 | Q85601 | P04264 | 0.24418 |
| 58677 | Q85601 | Q9UJ04 | 0.43856 |
| 58678 | Q85601 | Q15124 | 0.0581  |
| 58679 | Q85601 | Q92759 | 0.68569 |
| 58680 | Q85601 | Q9UM00 | 1.2572  |
| 58681 | Q85601 | Q96EV8 | 0.26869 |
| 58682 | Q85601 | Q9HAW4 | 0.45285 |
| 58683 | Q85601 | O95402 | 1.0285  |
| 58684 | Q85601 | O95373 | 1.0699  |
| 58685 | Q85601 | Q9H2U2 | 0.61239 |
| 58686 | Q85601 | Q4L180 | 0.29744 |
| 58687 | Q85601 | A6NJ88 | 0.50922 |
| 58688 | Q85601 | Q8NFX5 | 0.91545 |
| 58689 | Q85601 | Q9UKJ3 | 0.57521 |
| 58690 | Q85601 | P0CH99 | 0.60067 |
| 58691 | Q85601 | Q7Z3K6 | 0.61167 |
| 58692 | Q85601 | Q9UJ98 | 0.43151 |
| 58693 | Q85601 | Q15437 | 0.3832  |
| 58694 | Q85601 | Q9BRR0 | 0.39725 |
| 58695 | Q85601 | Q9HCC9 | 0.50361 |
| 58696 | Q85601 | Q13042 | 1.2683  |
| 58697 | Q85601 | Q9BXP5 | 1.1175  |
| 58698 | Q85601 | Q9UJX5 | 0.81417 |
| 58699 | Q85601 | Q16649 | 0.1743  |
| 58700 | Q85601 | Q6ZV65 | 0.29968 |
| 58701 | Q85601 | P32780 | 0.75513 |
| 58702 | Q85601 | A2A288 | 0.37394 |
| 58703 | Q85601 | Q99933 | 0.81753 |
| 58704 | Q85601 | Q01546 | 0.53559 |
| 58705 | Q85601 | Q5JSZ5 | 0.34802 |
| 58706 | Q85601 | P55060 | 0.88193 |
| 58707 | Q85601 | Q15528 | 1.2058  |
| 58708 | Q85601 | Q12933 | 0.56751 |
| 58709 | Q85601 | Q969E8 | 0.76821 |
| 58710 | Q85601 | Q8WTS6 | 0.47897 |
| 58711 | Q85601 | Q9Y4P8 | 0.90804 |
| 58712 | Q85601 | Q92973 | 1.1218  |
| 58713 | Q85601 | Q9BV73 | 0.66203 |
| 58714 | Q85601 | P51965 | 0.68983 |
| 58715 | Q85601 | Q8TC56 | 0.61067 |
| 58716 | Q85601 | P63162 | 0.53183 |
| 58717 | Q85601 | Q9Y4Z0 | 0.59942 |
| 58718 | Q85601 | P58340 | 0.48604 |
| 58719 | Q85601 | Q9UM63 | 0.26495 |
| 58720 | Q85601 | Q96M29 | 0.2844  |
| 58721 | Q85601 | O75170 | 0.65636 |
| 58722 | Q85601 | O75529 | 0.60544 |
| 58723 | Q85601 | B3KS81 | 0.14306 |
| 58724 | Q85601 | Q9UBL0 | 0.28883 |
| 58725 | Q85601 | Q99873 | 0.62354 |
| 58726 | Q85601 | Q14657 | 1.1485  |
| 58727 | Q85601 | Q9Y3A3 | 0.59577 |
| 58728 | Q85601 | P16415 | 0.34784 |
| 58729 | Q85601 | P18847 | 1.1558  |
| 58730 | Q85601 | Q9Y2D8 | 0.62427 |
| 58731 | Q85601 | Q8IZW8 | 0.352   |
| 58732 | Q85601 | O60543 | 0.32301 |
| 58733 | Q85601 | Q4W5G0 | 0.3562  |
| 58734 | Q85601 | Q5VZE5 | 0.31265 |
| 58735 | Q85601 | P60370 | 0.17342 |
| 58736 | Q85601 | Q8WV07 | 0.36585 |
| 58737 | Q85601 | Q9H7X3 | 0.27623 |
| 58738 | Q85601 | Q96N22 | 0.46418 |
| 58739 | Q85601 | Q8IXQ5 | 0.34482 |
| 58740 | Q85601 | P62136 | 0.68883 |
| 58741 | Q85601 | Q9UBF2 | 0.32595 |
| 58742 | Q85601 | O95948 | 0.38258 |
| 58743 | Q85601 | Q9NYP9 | 0.44466 |
| 58744 | Q85601 | Q9NXZ1 | 0.22094 |
| 58745 | Q85601 | P22531 | 0.48792 |
| 58746 | Q85601 | Q9HD26 | 0.93765 |
| 58747 | Q85601 | Q12906 | 1.0894  |
| 58748 | Q85601 | Q9BU64 | 0.2216  |

|       |        |        |          |
|-------|--------|--------|----------|
| 58749 | Q85601 | Q9H5J4 | 0.54781  |
| 58750 | Q85601 | Q96BK5 | 0.56752  |
| 58751 | Q85601 | Q9Y2G7 | 0.51519  |
| 58752 | Q85601 | Q9UL40 | 0.62881  |
| 58753 | Q85601 | Q6VY07 | 0.58636  |
| 58754 | Q85601 | P36956 | 0.25724  |
| 58755 | Q85601 | Q5TGS1 | 0.49887  |
| 58756 | Q85601 | Q9NQT4 | 0.44095  |
| 58757 | Q85601 | Q9UDV7 | 0.22809  |
| 58758 | Q85601 | Q5VZK9 | 0.24265  |
| 58759 | Q85601 | O43790 | 0.59315  |
| 58760 | Q85601 | Q13838 | 0.20603  |
| 58761 | Q85601 | Q5TBC7 | 0.22389  |
| 58762 | Q85601 | Q03924 | 0.26034  |
| 58763 | Q85601 | A6NDZ8 | 0.14127  |
| 58764 | Q85601 | P78543 | 0.66016  |
| 58765 | Q85601 | Q5VVS0 | 0.68876  |
| 58766 | Q85601 | Q9BQ90 | 0.80204  |
| 58767 | Q85601 | Q86YP4 | 0.87517  |
| 58768 | Q85601 | P49257 | 0.15735  |
| 58769 | Q85601 | Q96QU8 | 1.0199   |
| 58770 | Q85601 | Q13526 | 0.56993  |
| 58771 | Q85601 | Q9Y2J8 | 0.27437  |
| 58772 | Q85601 | O95416 | 0.41877  |
| 58773 | Q85601 | I3L1I5 | 0.2125   |
| 58774 | Q85601 | Q96MB7 | 0.38963  |
| 58775 | Q85601 | Q9UKW6 | 0.48607  |
| 58776 | Q85601 | Q9Y2A4 | 0.46674  |
| 58777 | Q85601 | Q7Z406 | 0.38986  |
| 58778 | Q85601 | P13929 | 0.19822  |
| 58779 | Q85601 | P35711 | 0.9437   |
| 58780 | Q85601 | P62258 | 0.85659  |
| 58781 | Q85601 | Q9H8E8 | 0.71981  |
| 58782 | Q85601 | Q9Y5B0 | 0.5743   |
| 58783 | Q85601 | Q92769 | 0.38354  |
| 58784 | Q85601 | Q9H444 | 0.75643  |
| 58785 | Q85601 | A6NFD8 | 0.2553   |
| 58786 | Q85601 | Q8N398 | 0.50435  |
| 58787 | Q85601 | Q9UBF6 | 0.82327  |
| 58788 | Q85601 | P59991 | 0.28316  |
| 58789 | Q85601 | Q96CX3 | 0.31716  |
| 58790 | Q85601 | P49720 | 0.32736  |
| 58791 | Q85601 | Q9UBF1 | 0.82202  |
| 58792 | Q85601 | Q9NVP1 | 0.073846 |
| 58793 | Q85601 | Q69383 | 0.42275  |
| 58794 | Q85601 | Q9NQC7 | 0.23176  |
| 58795 | Q85601 | Q8N859 | 0.481    |
| 58796 | Q85601 | P42575 | 0.28376  |
| 58797 | Q85601 | Q15973 | 0.25925  |
| 58798 | Q85601 | Q8N6T3 | 0.085439 |
| 58799 | Q85601 | Q14683 | 0.47454  |
| 58800 | Q85601 | Q2TAM9 | 0.41643  |
| 58801 | Q85601 | Q86Y79 | 0.2038   |
| 58802 | Q85601 | Q96KS0 | 0.12673  |
| 58803 | Q85601 | Q9C005 | 0.67065  |
| 58804 | Q85601 | Q0PNE2 | 0.41581  |
| 58805 | Q85601 | P63261 | 0.1273   |
| 58806 | Q85601 | Q96DE0 | 0.49983  |
| 58807 | Q85601 | P40121 | 0.43477  |
| 58808 | Q85601 | Q9Y678 | 0.64808  |
| 58809 | Q85601 | O60765 | 0.31611  |
| 58810 | Q85601 | P16220 | 0.89316  |
| 58811 | Q85601 | Q9UHV2 | 1.3689   |
| 58812 | Q85601 | Q9UPQ4 | 0.26238  |
| 58813 | Q85601 | Q99717 | 0.45393  |
| 58814 | Q85601 | Q96Q05 | 0.2753   |
| 58815 | Q85601 | Q6PF06 | 0.60031  |
| 58816 | Q85601 | Q9BQ87 | 0.45278  |
| 58817 | Q85601 | Q9H469 | 0.26661  |
| 58818 | Q85601 | Q9H0A8 | 0.53217  |
| 58819 | Q85601 | Q15699 | 0.47481  |
| 58820 | Q85601 | P52435 | 0.59245  |
| 58821 | Q85601 | Q9UKD2 | 0.11049  |
| 58822 | Q85601 | Q6PGQ7 | 1.1081   |
| 58823 | Q85601 | Q9H1Y0 | 0.34271  |
| 58824 | Q85601 | Q9Y2L5 | 0.018984 |

|       |        |        |          |
|-------|--------|--------|----------|
| 58825 | Q85601 | Q9Y3B2 | 0.74131  |
| 58826 | Q85601 | Q96LM1 | 0.053839 |
| 58827 | Q85601 | O14920 | 0.51586  |
| 58828 | Q85601 | Q08J23 | 0.68001  |
| 58829 | Q85601 | Q96GS4 | 0.45413  |
| 58830 | Q85601 | Q92804 | 0.1918   |
| 58831 | Q85601 | Q04206 | 0.65196  |
| 58832 | Q85601 | Q8TB03 | 0.13329  |
| 58833 | Q85601 | O15069 | 0.39619  |
| 58834 | Q85601 | Q8WXI9 | 0.61135  |
| 58835 | Q85601 | A5YKK6 | 1.0584   |
| 58836 | Q85601 | Q9BZD4 | 0.80465  |
| 58837 | Q85601 | P45973 | 0.76939  |
| 58838 | Q85601 | Q8TF63 | 0.019456 |
| 58839 | Q85601 | P42768 | 0.32931  |
| 58840 | Q85601 | Q99618 | 0.63956  |
| 58841 | Q85601 | P42226 | 0.81952  |
| 58842 | Q85601 | Q9P2J8 | 0.33301  |
| 58843 | Q85601 | O95780 | 0.50474  |
| 58844 | Q85601 | Q7RTS9 | 0.79491  |
| 58845 | Q85601 | P49848 | 0.74107  |
| 58846 | Q85601 | P52738 | 0.26944  |
| 58847 | Q85601 | Q5HYC2 | 0.050346 |
| 58848 | Q85601 | Q8N4J0 | 0.13604  |
| 58849 | Q85601 | Q15035 | 0.12009  |
| 58850 | Q85601 | O60535 | 0.55767  |
| 58851 | Q85601 | Q96SD1 | 0.10075  |
| 58852 | Q85601 | A8MV24 | 0.30462  |
| 58853 | Q85601 | Q16576 | 0.43235  |
| 58854 | Q85601 | Q9ULM3 | 0.77908  |
| 58855 | Q85601 | P04733 | 0.26807  |
| 58856 | Q85601 | Q147U1 | 0.32338  |
| 58857 | Q85601 | Q9BRD0 | 0.3958   |
| 58858 | Q85601 | Q8WW35 | 0.30691  |
| 58859 | Q85601 | O95628 | 0.6637   |
| 58860 | Q85601 | Q96LR7 | 0.55927  |
| 58861 | Q85601 | Q8IXM2 | 0.17756  |
| 58862 | Q85601 | O75394 | 0.087903 |
| 58863 | Q85601 | Q9HCU9 | 1.1402   |
| 58864 | Q85601 | Q9NZL3 | 0.69462  |
| 58865 | Q85601 | Q8IYL2 | 0.035405 |
| 58866 | Q85601 | Q96K17 | 0.38713  |
| 58867 | Q85601 | Q9H875 | 0.1221   |
| 58868 | Q85601 | Q96FA7 | 0.67443  |
| 58869 | Q85601 | O95453 | 0.42994  |
| 58870 | Q85601 | P62318 | 0.71454  |
| 58871 | Q85601 | P36873 | 0.77927  |
| 58872 | Q85601 | Q8WW14 | 0.10567  |
| 58873 | Q85601 | P36871 | 0.23274  |
| 58874 | Q85601 | Q8TEX9 | 0.52907  |
| 58875 | Q85601 | Q9UM13 | 0.69316  |
| 58876 | Q85601 | P53990 | 0.56687  |
| 58877 | Q85601 | P02511 | 0.41614  |
| 58878 | Q85601 | Q8WXC3 | 0.68383  |
| 58879 | Q85601 | Q12972 | 0.72428  |
| 58880 | Q85601 | P42766 | 0.8239   |
| 58881 | Q85601 | Q8TCS8 | 0.063162 |
| 58882 | Q85601 | Q9Y5V3 | 0.80082  |
| 58883 | Q85601 | Q04727 | 0.66551  |
| 58884 | Q85601 | P27348 | 0.31999  |
| 58885 | Q85601 | Q9Y6Y1 | 0.56813  |
| 58886 | Q85601 | Q6ICB4 | 0.20544  |
| 58887 | Q85601 | Q5VZR2 | 0.41643  |
| 58888 | Q85601 | Q15050 | 0.60958  |
| 58889 | Q85601 | Q96G01 | 0.20772  |
| 58890 | Q85601 | Q9H668 | 0.26893  |
| 58891 | Q85601 | Q15029 | 0.25171  |
| 58892 | Q85601 | Q6NUP7 | 0.45743  |
| 58893 | Q85601 | Q8NFH8 | 0.41733  |
| 58894 | Q85601 | P54725 | 0.64358  |
| 58895 | Q85601 | Q12873 | 0.74097  |
| 58896 | Q85601 | O43679 | 0.23803  |
| 58897 | Q85601 | Q8IXQ6 | 0.86431  |
| 58898 | Q85601 | Q99502 | 0.19626  |
| 58899 | Q85601 | P19012 | 0.65618  |
| 58900 | Q85601 | Q14678 | 0.53304  |

|       |        |        |          |
|-------|--------|--------|----------|
| 58901 | Q85601 | Q6SJ96 | 0.30319  |
| 58902 | Q85601 | P48668 | 0.29484  |
| 58903 | Q85601 | Q9NRX1 | 0.11529  |
| 58904 | Q85601 | Q99576 | 0.49374  |
| 58905 | Q85601 | Q96E29 | 0.2333   |
| 58906 | Q85601 | Q96NM4 | 0.35025  |
| 58907 | Q85601 | Q9NZE8 | 0.24719  |
| 58908 | Q85601 | P98169 | 0.16053  |
| 58909 | Q85601 | Q96G23 | 0.21925  |
| 58910 | Q85601 | A6NDY2 | 0.41169  |
| 58911 | Q85601 | A2RTX5 | 0.31009  |
| 58912 | Q85601 | P20585 | 0.069378 |
| 58913 | Q85601 | Q8TAB7 | 0.55584  |
| 58914 | Q85601 | Q8N9A8 | 0.327    |
| 58915 | Q85601 | Q9Y6N9 | 0.34388  |
| 58916 | Q85601 | A6NGH7 | 0.03624  |
| 58917 | Q85601 | Q5VT06 | 0.70295  |
| 58918 | Q85601 | Q9H8N7 | 0.25422  |
| 58919 | Q85601 | Q9NWX8 | 0.79341  |
| 58920 | Q85601 | P40425 | 0.71734  |
| 58921 | Q85601 | Q8NAV1 | 0.27791  |
| 58922 | Q85601 | P52597 | 0.35289  |
| 58923 | Q85601 | Q9C0F1 | 0.3295   |
| 58924 | Q85601 | P28062 | 0.19715  |
| 58925 | Q85601 | Q96T92 | 0.2566   |
| 58926 | Q85601 | Q9BRK4 | 0.80461  |
| 58927 | Q85601 | Q9NWW0 | 0.23411  |
| 58928 | Q85601 | Q8TB72 | 0.4606   |
| 58929 | Q85601 | O60573 | 0.49787  |
| 58930 | Q85601 | Q8WY36 | 0.35025  |
| 58931 | Q85601 | Q8WWQ0 | 0.62682  |
| 58932 | Q85601 | P57081 | 0.92091  |
| 58933 | Q85601 | Q08ER8 | 0.3562   |
| 58934 | Q85601 | Q9UBZ9 | 0.54528  |
| 58935 | Q85601 | Q76FK4 | 0.26936  |
| 58936 | Q85601 | Q70EK8 | 0.48644  |
| 58937 | Q85601 | P09972 | 0.61758  |
| 58938 | Q85601 | P21980 | 0.30238  |
| 58939 | Q85601 | O15014 | 0.99461  |
| 58940 | Q85601 | Q5SVQ8 | 0.34583  |
| 58941 | Q85601 | H3BTG2 | 0.059472 |
| 58942 | Q85601 | Q6DKK2 | 1.0861   |
| 58943 | Q85601 | Q9NS26 | 0.10376  |
| 58944 | Q85601 | Q68DX3 | 0.46837  |
| 58945 | Q85601 | Q9UN79 | 0.90111  |
| 58946 | Q85601 | A6NKN8 | 0.32037  |
| 58947 | Q85601 | Q13765 | 1.1467   |
| 58948 | Q85601 | Q9C075 | 0.49847  |
| 58949 | Q85601 | Q14192 | 0.74043  |
| 58950 | Q85601 | Q9BYZ2 | 0.51979  |
| 58951 | Q85601 | Q8NA57 | 0.058715 |
| 58952 | Q85601 | Q495Y8 | 0.15217  |
| 58953 | Q85601 | P11142 | 0.39211  |
| 58954 | Q85601 | Q9UHI6 | 0.38026  |
| 58955 | Q85601 | Q9H6B1 | 0.42155  |
| 58956 | Q85601 | Q6NZY4 | 0.62781  |
| 58957 | Q85601 | P23284 | 0.3785   |
| 58958 | Q85601 | P59282 | 0.1732   |
| 58959 | Q85601 | Q9UI36 | 0.42238  |
| 58960 | Q85601 | Q05BQ5 | 0.37736  |
| 58961 | Q85601 | Q15691 | 0.7221   |
| 58962 | Q85601 | Q96M11 | 0.49129  |
| 58963 | Q85601 | Q96N58 | 0.33023  |
| 58964 | Q85601 | Q9NVX2 | 0.25829  |
| 58965 | Q85601 | Q3C1V8 | 0.69877  |
| 58966 | Q85601 | E7ETH6 | 0.29082  |
| 58967 | Q85601 | O75347 | 0.86916  |
| 58968 | Q85601 | P41218 | 0.69977  |
| 58969 | Q85601 | Q9NVS2 | 0.20731  |
| 58970 | Q85601 | P49721 | 0.33721  |
| 58971 | Q85601 | Q8NFD5 | 0.86361  |
| 58972 | Q85601 | A6NLC8 | 1.1466   |
| 58973 | Q85601 | O60447 | 0.27633  |
| 58974 | Q85601 | P62269 | 0.71568  |
| 58975 | Q85601 | Q96AB3 | 0.75676  |
| 58976 | Q85601 | O95190 | 0.44854  |

|       |        |        |         |
|-------|--------|--------|---------|
| 58977 | Q85601 | Q71SY5 | 1.0633  |
| 58978 | Q85601 | Q9NXT0 | 0.28473 |
| 58979 | Q85601 | Q9UPA5 | 0.23693 |
| 58980 | Q85601 | Q15058 | 0.39558 |
| 58981 | Q85601 | Q8N3V7 | 0.30177 |
| 58982 | Q85601 | A6NJB7 | 0.8046  |
| 58983 | Q85601 | P46939 | 0.70764 |
| 58984 | Q85601 | Q15051 | 0.63616 |
| 58985 | Q85601 | P08238 | 0.59133 |
| 58986 | Q85601 | Q8TC76 | 1.2384  |
| 58987 | Q85601 | Q8TBR4 | 0.36001 |
| 58988 | Q85601 | Q92905 | 0.73096 |
| 58989 | Q85601 | P0DI81 | 1.0828  |
| 58990 | Q85601 | P11055 | 0.49425 |
| 58991 | Q85601 | Q17R26 | 0.33678 |
| 58992 | Q85601 | Q9UKJ5 | 0.31486 |
| 58993 | Q85601 | Q8IYM9 | 0.23121 |
| 58994 | Q85601 | Q9BPZ3 | 0.47384 |
| 58995 | Q85601 | Q53HV7 | 0.68591 |
| 58996 | Q85601 | Q92843 | 0.43463 |
| 58997 | Q85601 | P42704 | 0.9074  |
| 58998 | Q85601 | P68104 | 0.74396 |
| 58999 | Q85601 | O60248 | 0.56083 |
| 59000 | Q85601 | Q7KZ85 | 0.36784 |
| 59001 | Q85601 | Q7Z7A3 | 0.59048 |
| 59002 | Q85601 | Q13425 | 0.51399 |
| 59003 | Q85601 | A6NLF2 | 0.28453 |
| 59004 | Q85601 | Q96MT8 | 1.1268  |
| 59005 | Q85601 | Q02577 | 0.63064 |
| 59006 | Q85601 | Q15025 | 0.50214 |
| 59007 | Q85601 | Q96BD8 | 0.71027 |
| 59008 | Q85601 | Q9HB21 | 0.22805 |
| 59009 | Q85601 | H3BNL8 | 0.8759  |
| 59010 | Q85601 | Q9Y3C6 | 0.41446 |
| 59011 | Q85601 | O75427 | 0.46754 |
| 59012 | Q85601 | P13645 | 0.62632 |
| 59013 | Q85601 | Q6P4R8 | 1.1785  |
| 59014 | Q85601 | Q10570 | 0.67495 |
| 59015 | Q85601 | Q2TAL8 | 0.73779 |
| 59016 | Q85601 | Q9Y2V2 | 0.3826  |
| 59017 | Q85601 | Q9H4L7 | 0.37974 |
| 59018 | Q85601 | Q63ZY3 | 0.917   |
| 59019 | Q85601 | Q9Y6D9 | 0.99597 |
| 59020 | Q85601 | P0DJG4 | 0.37717 |
| 59021 | Q85601 | Q99848 | 0.20362 |
| 59022 | Q85601 | Q9UJT9 | 0.47915 |
| 59023 | Q85601 | A6NFL8 | 0.36009 |
| 59024 | Q85601 | Q8N1B4 | 0.57724 |
| 59025 | Q85601 | P62312 | 0.72853 |
| 59026 | Q85601 | Q7Z3V5 | 0.34313 |
| 59027 | Q85601 | P50570 | 0.33077 |
| 59028 | Q85601 | Q15297 | 0.62316 |
| 59029 | Q85601 | A8MT69 | 0.5523  |
| 59030 | Q85601 | Q5JVG2 | 0.22174 |
| 59031 | Q85601 | Q9NUU7 | 0.12738 |
| 59032 | Q85601 | Q5T5D7 | 0.23741 |
| 59033 | Q85601 | Q6P3V2 | 0.21678 |
| 59034 | Q85601 | P33552 | 0.48731 |
| 59035 | Q85601 | Q9NYG5 | 0.89025 |
| 59036 | Q85601 | O94868 | 0.30691 |
| 59037 | Q85601 | Q9UHQ7 | 0.34176 |
| 59038 | Q85601 | Q9P2I0 | 0.72998 |
| 59039 | Q85601 | Q96B01 | 0.5406  |
| 59040 | Q85601 | Q8NHM5 | 0.24145 |
| 59041 | Q85601 | Q99750 | 0.44206 |
| 59042 | Q85601 | Q8N7Q3 | 0.40278 |
| 59043 | Q85601 | Q9HB58 | 0.42194 |
| 59044 | Q85601 | Q5T5Y3 | 0.19313 |
| 59045 | Q85601 | Q96NJ6 | 0.2572  |
| 59046 | Q85601 | Q13330 | 0.62062 |
| 59047 | Q85601 | Q8IYX0 | 0.52859 |
| 59048 | Q85601 | A8MTY7 | 0.17342 |
| 59049 | Q85601 | Q15562 | 0.8268  |
| 59050 | Q85601 | P35269 | 1.1459  |
| 59051 | Q85601 | Q9UI30 | 0.355   |
| 59052 | Q85601 | P55735 | 0.58386 |

|       |        |        |          |
|-------|--------|--------|----------|
| 59053 | Q85601 | Q15942 | 0.36531  |
| 59054 | Q85601 | Q1MSJ5 | 0.90957  |
| 59055 | Q85601 | O75618 | 1.1705   |
| 59056 | Q85601 | P30279 | 0.75314  |
| 59057 | Q85601 | O60921 | 0.87251  |
| 59058 | Q85601 | Q5UIP0 | 0.7346   |
| 59059 | Q85601 | Q7RTS7 | 0.30573  |
| 59060 | Q85601 | Q9BW30 | 0.17594  |
| 59061 | Q85601 | Q13228 | 1.2014   |
| 59062 | Q85601 | Q8TA86 | 0.78197  |
| 59063 | Q85601 | Q6P1X5 | 0.94103  |
| 59064 | Q85601 | A9QM74 | 0.64351  |
| 59065 | Q85601 | Q676U5 | 0.66804  |
| 59066 | Q85601 | Q96RK0 | 0.98599  |
| 59067 | Q85601 | Q9P031 | 1.0775   |
| 59068 | Q85601 | Q99594 | 1.1076   |
| 59069 | Q85601 | P22736 | 0.33614  |
| 59070 | Q85601 | Q01543 | 0.41988  |
| 59071 | Q85601 | Q14585 | 0.26341  |
| 59072 | Q85601 | Q9NSI6 | 0.85296  |
| 59073 | Q85601 | Q9HA38 | 0.12328  |
| 59074 | Q85601 | Q9Y262 | 0.78361  |
| 59075 | Q85601 | P52948 | 0.98646  |
| 59076 | Q85601 | Q9NX18 | 0.82462  |
| 59077 | Q85601 | Q9Y6X8 | 0.7345   |
| 59078 | Q85601 | Q6NSI8 | 0.53008  |
| 59079 | Q85601 | Q0VGE8 | 0.27192  |
| 59080 | Q85601 | P41236 | 0.29012  |
| 59081 | Q85601 | P61086 | 0.66863  |
| 59082 | Q85601 | P54105 | 0.89605  |
| 59083 | Q85601 | Q9Y222 | 1.0356   |
| 59084 | Q85601 | Q9Y5K5 | 0.39149  |
| 59085 | Q85601 | P51825 | 0.95867  |
| 59086 | Q85601 | P14324 | 0.38597  |
| 59087 | Q85601 | Q3SY00 | 0.46698  |
| 59088 | Q85601 | Q15744 | 0.31821  |
| 59089 | Q85601 | P20248 | 1.0879   |
| 59090 | Q85601 | Q9Y6G5 | 0.30691  |
| 59091 | Q85601 | Q9H8X3 | 0.046811 |
| 59092 | Q85601 | Q6ZVX7 | 0.33546  |
| 59093 | Q85601 | Q96A09 | 0.32844  |
| 59094 | Q85601 | Q9BVL4 | 0.83521  |
| 59095 | Q85601 | O14576 | 0.48682  |
| 59096 | Q85601 | Q5VX52 | 0.045849 |
| 59097 | Q85601 | A6NF01 | 0.73813  |
| 59098 | Q85601 | Q6ZVC0 | 0.49979  |
| 59099 | Q85601 | Q5JSJ4 | 0.79698  |
| 59100 | Q85601 | Q13772 | 0.40531  |
| 59101 | Q85601 | Q92529 | 0.22811  |
| 59102 | Q85601 | Q96LW1 | 0.44666  |
| 59103 | Q85601 | P55957 | 0.45454  |
| 59104 | Q85601 | Q96N21 | 0.087345 |
| 59105 | Q85601 | O14907 | 0.50144  |
| 59106 | Q85601 | Q6UWZ7 | 0.5094   |
| 59107 | Q85601 | Q9H446 | 0.30691  |
| 59108 | Q85601 | Q9Y2P8 | 0.36246  |
| 59109 | Q85601 | O14771 | 0.51744  |
| 59110 | Q85601 | Q9NQ31 | 0.6177   |
| 59111 | Q85601 | Q96GC6 | 1.1959   |
| 59112 | Q85601 | Q86XF7 | 0.57451  |
| 59113 | Q85601 | Q9BWW4 | 0.59856  |
| 59114 | Q85601 | Q8IVI9 | 0.26628  |
| 59115 | Q85601 | Q9Y2Q9 | 0.51005  |
| 59116 | Q85601 | Q9NRH1 | 0.046709 |
| 59117 | Q85601 | Q9BXJ9 | 0.73231  |
| 59118 | Q85601 | Q6ZT77 | 0.32091  |
| 59119 | Q85601 | A7MCY6 | 0.30033  |
| 59120 | Q85601 | Q96N95 | 0.36056  |
| 59121 | Q85601 | Q86UY8 | 0.082163 |
| 59122 | Q85601 | Q9BZG8 | 0.24982  |
| 59123 | Q85601 | Q8TAX9 | 0.11589  |
| 59124 | Q85601 | P35548 | 0.62341  |
| 59125 | Q85601 | Q9UET6 | 0.63322  |
| 59126 | Q85601 | P25815 | 0.53671  |
| 59127 | Q85601 | Q9NWV8 | 0.68771  |
| 59128 | Q85601 | O75346 | 0.42716  |

|       |        |        |          |
|-------|--------|--------|----------|
| 59129 | Q85601 | Q9BYX4 | 0.27942  |
| 59130 | Q85601 | O60281 | 0.23085  |
| 59131 | Q85601 | Q86VQ0 | 0.36803  |
| 59132 | Q85601 | O75530 | 0.62919  |
| 59133 | Q85601 | Q15024 | 0.63781  |
| 59134 | Q85601 | Q96QD9 | 0.66063  |
| 59135 | Q85601 | Q8NA77 | 0.66564  |
| 59136 | Q85601 | Q96GM8 | 0.26102  |
| 59137 | Q85601 | Q8WXF8 | 1.1205   |
| 59138 | Q85601 | Q8TD16 | 0.34126  |
| 59139 | Q85601 | O00273 | 0.27785  |
| 59140 | Q85601 | Q3KQU3 | 0.67812  |
| 59141 | Q85601 | P35251 | 0.54569  |
| 59142 | Q85601 | Q9Y6K1 | 0.41313  |
| 59143 | Q85601 | Q5VZB9 | 0.13144  |
| 59144 | Q85601 | Q96B97 | 0.38402  |
| 59145 | Q85601 | Q99459 | 1.0318   |
| 59146 | Q85601 | P25786 | 0.42578  |
| 59147 | Q85601 | O15205 | 0.53206  |
| 59148 | Q85601 | Q8IVM0 | 0.53217  |
| 59149 | Q85601 | Q6ZV50 | 0.35025  |
| 59150 | Q85601 | Q9ULC6 | 0.67611  |
| 59151 | Q85601 | Q9UKX7 | 1.0399   |
| 59152 | Q85601 | Q01081 | 0.46858  |
| 59153 | Q85601 | P35680 | 0.27516  |
| 59154 | Q85601 | Q9H3H9 | 0.81942  |
| 59155 | Q85601 | Q8IZD4 | 0.99091  |
| 59156 | Q85601 | O14862 | 0.53011  |
| 59157 | Q85601 | P05412 | 0.82835  |
| 59158 | Q85601 | Q8IZL2 | 0.90799  |
| 59159 | Q85601 | Q9Y543 | 0.35965  |
| 59160 | Q85601 | P17029 | 0.40292  |
| 59161 | Q85601 | Q9BYV8 | 0.65594  |
| 59162 | Q85601 | Q9BYD3 | 0.37248  |
| 59163 | Q85601 | Q9NPJ4 | 1.4797   |
| 59164 | Q85601 | Q6ZTZ1 | 0.15138  |
| 59165 | Q85601 | O95159 | 0.25798  |
| 59166 | Q85601 | Q6ZRS2 | 0.43405  |
| 59167 | Q85601 | Q9NQ87 | 0.48689  |
| 59168 | Q85601 | Q86V97 | 0.39393  |
| 59169 | Q85601 | Q9NWN3 | 0.11079  |
| 59170 | Q85601 | Q9H2P0 | 0.23466  |
| 59171 | Q85601 | Q9Y4A8 | 0.51624  |
| 59172 | Q85601 | Q99909 | 0.1323   |
| 59173 | Q85601 | Q8ND83 | 0.64429  |
| 59174 | Q85601 | P11388 | 0.23538  |
| 59175 | Q85601 | Q96RS0 | 0.63241  |
| 59176 | Q85601 | Q9UQ35 | 0.098785 |
| 59177 | Q85601 | Q9NWU5 | 0.16289  |
| 59178 | Q85601 | Q96T88 | 0.35764  |
| 59179 | Q85601 | P29083 | 1.2587   |
| 59180 | Q85601 | Q9ULM6 | 1.006    |
| 59181 | Q85601 | Q76L83 | 0.579    |
| 59182 | Q85601 | P35749 | 0.51716  |
| 59183 | Q85601 | Q7Z7A1 | 1.2059   |
| 59184 | Q85601 | Q9Y281 | 0.49304  |
| 59185 | Q85601 | P31040 | 0.61317  |
| 59186 | Q85601 | P49450 | 0.26478  |
| 59187 | Q85601 | Q92985 | 0.61376  |
| 59188 | Q85601 | A6NP11 | 0.47998  |
| 59189 | Q85601 | Q15327 | 0.44772  |
| 59190 | Q85601 | Q3ZCQ8 | 0.074459 |
| 59191 | Q85601 | Q9Y6X4 | 0.63409  |
| 59192 | Q85601 | Q9BXY0 | 0.22094  |
| 59193 | Q85601 | Q9HAV7 | 0.15218  |
| 59194 | Q85601 | Q8IZU1 | 0.52287  |
| 59195 | Q85601 | Q9UGC7 | 0.16954  |
| 59196 | Q85601 | Q8TE02 | 1.2405   |
| 59197 | Q85601 | Q9NZM4 | 0.83263  |
| 59198 | Q85601 | Q9P2M1 | 0.53217  |
| 59199 | Q85601 | Q7Z4U5 | 0.47271  |
| 59200 | Q85601 | Q16514 | 0.85038  |
| 59201 | Q85601 | Q15929 | 0.51514  |
| 59202 | Q85601 | P61571 | 0.42275  |
| 59203 | Q85601 | Q9BYE7 | 0.85006  |
| 59204 | Q85601 | Q05519 | 0.52715  |



|       |        |        |          |
|-------|--------|--------|----------|
| 59205 | Q85601 | Q8NEM1 | 0.47479  |
| 59206 | Q85601 | P28347 | 0.97128  |
| 59207 | Q85601 | Q9Y3F4 | 0.83317  |
| 59208 | Q85601 | Q9UBT6 | 0.14377  |
| 59209 | Q85601 | O95257 | 0.30906  |
| 59210 | Q85601 | Q99615 | 0.81088  |
| 59211 | Q85601 | O14656 | 0.21293  |
| 59212 | Q85601 | P22033 | 0.16304  |
| 59213 | Q85601 | P55822 | 0.33116  |
| 59214 | Q85601 | O14613 | 0.090252 |
| 59215 | Q85601 | Q5JR98 | 0.57776  |
| 59216 | Q85601 | P82970 | 0.72651  |
| 59217 | Q85601 | Q9NR77 | 0.11041  |
| 59218 | Q85601 | Q14160 | 0.55452  |
| 59219 | Q85601 | Q8N5N7 | 0.096586 |
| 59220 | Q85601 | P78352 | 0.57108  |
| 59221 | Q85601 | Q70Z53 | 0.64005  |
| 59222 | Q85601 | P61579 | 0.42275  |
| 59223 | Q85601 | Q14691 | 0.27431  |
| 59224 | Q85601 | Q9Y4K1 | 0.429    |
| 59225 | Q85601 | Q9HBH7 | 0.31713  |
| 59226 | Q85601 | O00255 | 0.20587  |
| 59227 | Q85601 | P35789 | 0.46557  |
| 59228 | Q85601 | Q9UMS5 | 0.39428  |
| 59229 | Q85601 | A6NK89 | 0.39529  |
| 59230 | Q85601 | Q5TB80 | 0.99182  |
| 59231 | Q85601 | Q6ZNA1 | 0.34313  |
| 59232 | Q85601 | Q96IL0 | 0.11737  |
| 59233 | Q85601 | P67809 | 0.5219   |
| 59234 | Q85601 | P78396 | 0.90272  |
| 59235 | Q85601 | P18621 | 0.61843  |
| 59236 | Q85601 | Q8IYD1 | 0.38439  |
| 59237 | Q85601 | Q8IX07 | 0.35191  |
| 59238 | Q85601 | O75663 | 0.45644  |
| 59239 | Q85601 | P18850 | 0.61224  |
| 59240 | Q85601 | P12035 | 0.49278  |
| 59241 | Q85601 | A6H8Y1 | 0.72281  |
| 59242 | Q85601 | A6NL46 | 0.53989  |
| 59243 | Q85601 | A8MSY0 | 0.26877  |
| 59244 | Q85601 | Q8ND04 | 0.57242  |
| 59245 | Q85601 | O96018 | 0.45308  |
| 59246 | Q85601 | Q569K6 | 0.16068  |
| 59247 | Q85601 | Q9Y676 | 0.23408  |
| 59248 | Q85601 | Q01826 | 0.7568   |
| 59249 | Q85601 | Q9NUW8 | 0.73305  |
| 59250 | Q85601 | Q3KNT7 | 0.1041   |
| 59251 | Q85601 | A6NDD8 | 0.46437  |
| 59252 | Q85601 | Q6TAR4 | 0.31043  |
| 59253 | Q85601 | Q14590 | 0.25802  |
| 59254 | Q85601 | Q9NYZ3 | 0.13637  |
| 59255 | Q85601 | Q9H902 | 0.12846  |
| 59256 | Q85601 | P05387 | 0.53692  |
| 59257 | Q85601 | Q9UKI9 | 1.2717   |
| 59258 | Q85601 | Q8NI27 | 0.41556  |
| 59259 | Q85601 | Q6U7Q0 | 0.31481  |
| 59260 | Q85601 | Q8IXW5 | 0.67475  |
| 59261 | Q85601 | Q9HAP2 | 0.714    |
| 59262 | Q85601 | Q9NQ29 | 0.76753  |
| 59263 | Q85601 | O94921 | 0.20163  |
| 59264 | Q85601 | Q99550 | 0.48083  |
| 59265 | Q85601 | A8MVA2 | 0.17342  |
| 59266 | Q85601 | Q8N668 | 0.8235   |
| 59267 | Q85601 | O00399 | 0.21107  |
| 59268 | Q85601 | Q9NYK5 | 0.41111  |
| 59269 | Q85601 | Q13625 | 0.42937  |
| 59270 | Q85601 | Q9BSH5 | 0.37166  |
| 59271 | Q85601 | P41219 | 0.42248  |
| 59272 | Q85601 | P10244 | 0.60258  |
| 59273 | Q85601 | Q8IZU0 | 0.32773  |
| 59274 | Q85601 | P13994 | 0.39471  |
| 59275 | Q85601 | P42771 | 0.54658  |
| 59276 | Q85601 | Q9BYK8 | 0.42373  |
| 59277 | Q85601 | P53041 | 0.71071  |
| 59278 | Q85601 | A6NKF2 | 0.6668   |
| 59279 | Q85601 | P53680 | 0.17962  |
| 59280 | Q85601 | Q86UC2 | 0.090855 |

|       |        |        |          |
|-------|--------|--------|----------|
| 59281 | Q85601 | Q9P2B4 | 0.2596   |
| 59282 | Q85601 | Q15323 | 0.57121  |
| 59283 | Q85601 | Q9UC06 | 0.33046  |
| 59284 | Q85601 | P57086 | 0.48953  |
| 59285 | Q85601 | O75376 | 0.39862  |
| 59286 | Q85601 | Q9HB03 | 0.54781  |
| 59287 | Q85601 | P60673 | 0.22639  |
| 59288 | Q85601 | Q5JTD0 | 1.014    |
| 59289 | Q85601 | Q99612 | 0.33002  |
| 59290 | Q85601 | Q9NTK1 | 0.36172  |
| 59291 | Q85601 | O00470 | 0.61384  |
| 59292 | Q85601 | P42224 | 0.25227  |
| 59293 | Q85601 | Q9NXG0 | 0.075608 |
| 59294 | Q85601 | Q6NUI1 | 0.32095  |
| 59295 | Q85601 | Q9H5H4 | 0.2988   |
| 59296 | Q85601 | Q8N883 | 0.26649  |
| 59297 | Q85601 | Q8N9N5 | 0.17951  |
| 59298 | Q85601 | Q9NX05 | 0.29038  |
| 59299 | Q85601 | O00425 | 0.38222  |
| 59300 | Q85601 | Q96HT8 | 1.0195   |
| 59301 | Q85601 | O00762 | 0.53262  |
| 59302 | Q85601 | Q9BVA0 | 0.24767  |
| 59303 | Q85601 | O94818 | 0.40862  |
| 59304 | Q85601 | Q9NTX7 | 0.61804  |
| 59305 | Q85601 | Q9NPA3 | 1.128    |
| 59306 | Q85601 | Q96EB1 | 1.1249   |
| 59307 | Q85601 | Q6ZRF7 | 0.22879  |
| 59308 | Q85601 | A8MU76 | 0.59101  |
| 59309 | Q85601 | Q9Y462 | 0.69057  |
| 59310 | Q85601 | Q86YI8 | 0.68137  |
| 59311 | Q85601 | P60410 | 0.36976  |
| 59312 | Q85601 | Q01201 | 1.0942   |
| 59313 | Q85601 | Q8IW35 | 1.2526   |
| 59314 | Q85601 | Q15369 | 1.4177   |
| 59315 | Q85601 | Q9BYQ9 | 0.17342  |
| 59316 | Q85601 | Q6RW13 | 0.61172  |
| 59317 | Q85601 | Q13185 | 0.77515  |
| 59318 | Q85601 | O75582 | 0.25797  |
| 59319 | Q85601 | P83369 | 0.57475  |
| 59320 | Q85601 | P78344 | 0.35663  |
| 59321 | Q85601 | Q8WV99 | 0.31044  |
| 59322 | Q85601 | Q9BRJ2 | 0.35401  |
| 59323 | Q85601 | Q9UPP1 | 0.45928  |
| 59324 | Q85601 | Q8NCA9 | 0.17891  |
| 59325 | Q85601 | Q6ZTU2 | 0.3554   |
| 59326 | Q85601 | Q14061 | 0.21339  |
| 59327 | Q85601 | P06748 | 0.42839  |
| 59328 | Q85601 | Q5TCQ9 | 0.53803  |
| 59329 | Q85601 | P28072 | 0.36955  |
| 59330 | Q85601 | Q8N108 | 1.1716   |
| 59331 | Q85601 | Q16254 | 1.0233   |
| 59332 | Q85601 | O00566 | 0.52956  |
| 59333 | Q85601 | P06132 | 0.40087  |
| 59334 | Q85601 | Q96IP4 | 0.22677  |
| 59335 | Q85601 | P08235 | 0.38006  |
| 59336 | Q85601 | A5PLL1 | 0.23411  |
| 59337 | Q85601 | Q7Z7K2 | 0.19496  |
| 59338 | Q85601 | Q53TS8 | 0.045146 |
| 59339 | Q85601 | Q96I59 | 0.40226  |
| 59340 | Q85601 | Q14865 | 0.27274  |
| 59341 | Q85601 | O43711 | 0.33472  |
| 59342 | Q85601 | Q92783 | 0.62742  |
| 59343 | Q85601 | Q6ZN32 | 0.32996  |
| 59344 | Q85601 | Q9NZZ3 | 1.0146   |
| 59345 | Q85601 | Q12816 | 0.3353   |
| 59346 | Q85601 | Q14CX7 | 0.11557  |
| 59347 | Q85601 | Q9H7N4 | 0.55181  |
| 59348 | Q85601 | Q9NRL2 | 1.0693   |
| 59349 | Q85601 | O75717 | 0.45182  |
| 59350 | Q85601 | Q8NFH5 | 0.65007  |
| 59351 | Q85601 | Q9UNX3 | 0.95826  |
| 59352 | Q85601 | P49356 | 0.14845  |
| 59353 | Q85601 | Q53QV2 | 0.51773  |
| 59354 | Q85601 | Q9UN30 | 0.31192  |
| 59355 | Q85601 | Q8N0X7 | 0.12616  |
| 59356 | Q85601 | A9YTQ3 | 0.31551  |

|       |        |        |           |
|-------|--------|--------|-----------|
| 59357 | Q85601 | Q01658 | 0.4524    |
| 59358 | Q85601 | Q9NW38 | 0.57219   |
| 59359 | Q85601 | P22392 | 0.27933   |
| 59360 | Q85601 | Q53EL6 | 0.9849    |
| 59361 | Q85601 | P17023 | 0.25965   |
| 59362 | Q85601 | Q96NI8 | 0.40366   |
| 59363 | Q85601 | Q86YC2 | 0.70674   |
| 59364 | Q85601 | P15121 | 0.2827    |
| 59365 | Q85601 | Q9NV88 | 0.58748   |
| 59366 | Q85601 | Q96F45 | 0.13825   |
| 59367 | Q85601 | P60842 | 0.081216  |
| 59368 | Q85601 | Q9BX40 | 0.6395    |
| 59369 | Q85601 | Q9BT78 | 1.0402    |
| 59370 | Q85601 | Q3KNV8 | 1.0124    |
| 59371 | Q85601 | Q9NQ48 | 0.22344   |
| 59372 | Q85601 | Q8N6T7 | 0.7136    |
| 59373 | Q85601 | O43829 | 0.66734   |
| 59374 | Q85601 | P82650 | 0.2061    |
| 59375 | Q85601 | Q9H063 | 0.31186   |
| 59376 | Q85601 | Q00403 | 1.1565    |
| 59377 | Q85601 | Q92796 | 0.31669   |
| 59378 | Q85601 | Q99689 | 0.18901   |
| 59379 | Q85601 | Q9UDY4 | 0.83815   |
| 59380 | Q85601 | P0CI00 | 0.59643   |
| 59381 | Q85601 | Q9NPB6 | 0.73072   |
| 59382 | Q85601 | Q8TD17 | 0.21952   |
| 59383 | Q85601 | Q9UKV8 | 0.777     |
| 59384 | Q85601 | Q8N2Z9 | 0.617     |
| 59385 | Q85601 | Q8TBN0 | 0.25155   |
| 59386 | Q85601 | Q8WWM7 | 0.45629   |
| 59387 | Q85601 | Q9UJX3 | 0.75873   |
| 59388 | Q85601 | Q13200 | 0.34911   |
| 59389 | Q85601 | Q2M3D2 | 0.19689   |
| 59390 | Q85601 | Q9GZR2 | 0.14046   |
| 59391 | Q85601 | Q9UDW3 | 0.39181   |
| 59392 | Q85601 | Q9Y2J4 | 0.31586   |
| 59393 | Q85601 | Q96SK3 | 0.33301   |
| 59394 | Q85601 | Q9ULG1 | 0.3907    |
| 59395 | Q85601 | Q86UE4 | 0.42116   |
| 59396 | Q85601 | P61572 | 0.42275   |
| 59397 | Q85601 | O14787 | 0.97419   |
| 59398 | Q85601 | Q13033 | 0.69293   |
| 59399 | Q85601 | P62277 | 1.0607    |
| 59400 | Q85601 | Q6ZS17 | 0.40578   |
| 59401 | Q85601 | P05121 | 0.40287   |
| 59402 | Q85601 | P61586 | 0.41676   |
| 59403 | Q85601 | Q96C90 | 0.72564   |
| 59404 | Q85601 | Q9P0R6 | 0.12102   |
| 59405 | Q85601 | Q9NZD4 | 0.22245   |
| 59406 | Q85601 | P57077 | 0.81038   |
| 59407 | Q85601 | Q14209 | 1.0839    |
| 59408 | Q85601 | P0CW23 | 0.0033438 |
| 59409 | Q85601 | Q99590 | 0.64132   |
| 59410 | Q85601 | Q3SY52 | 0.25357   |
| 59411 | Q85601 | Q4V348 | 0.23373   |
| 59412 | Q85601 | Q9HB75 | 0.66976   |
| 59413 | Q85601 | Q5SNV9 | 0.15838   |
| 59414 | Q85601 | Q13569 | 0.53046   |
| 59415 | Q85601 | O95456 | 0.4877    |
| 59416 | Q85601 | O00512 | 0.84935   |
| 59417 | Q85601 | Q6PB30 | 0.3347    |
| 59418 | Q85601 | A8MV65 | 0.6425    |
| 59419 | Q85601 | O94983 | 1.3507    |
| 59420 | Q85601 | O96007 | 0.25437   |
| 59421 | Q85601 | Q96NJ3 | 0.27477   |
| 59422 | Q85601 | C9JBD0 | 0.51292   |
| 59423 | Q85601 | Q9H074 | 0.39976   |
| 59424 | Q85601 | P12883 | 0.42967   |
| 59425 | Q85601 | P11474 | 0.45661   |
| 59426 | Q85601 | Q13015 | 0.36536   |
| 59427 | Q85601 | O43830 | 0.21822   |
| 59428 | Q85601 | Q9BV68 | 0.32982   |
| 59429 | Q85601 | P22061 | 0.22004   |
| 59430 | Q85601 | Q8TA94 | 0.50616   |
| 59431 | Q85601 | Q14315 | 0.32294   |
| 59432 | Q85601 | Q9C0D0 | 0.27901   |

|       |        |        |           |
|-------|--------|--------|-----------|
| 59433 | Q85601 | P50613 | 0.23004   |
| 59434 | Q85601 | O00479 | 0.22868   |
| 59435 | Q85601 | Q6P9B6 | 0.30691   |
| 59436 | Q85601 | Q6P1L5 | 0.70874   |
| 59437 | Q85601 | O60293 | 0.023553  |
| 59438 | Q85601 | Q9BQN1 | 0.61318   |
| 59439 | Q85601 | Q6PIF2 | 0.30814   |
| 59440 | Q85601 | P15923 | 0.57651   |
| 59441 | Q85601 | Q86T29 | 0.24382   |
| 59442 | Q85601 | Q9HBZ2 | 0.36971   |
| 59443 | Q85601 | O95905 | 0.82902   |
| 59444 | Q85601 | Q9H4H8 | 0.48115   |
| 59445 | Q85601 | O14964 | 0.68622   |
| 59446 | Q85601 | Q8IUC3 | 0.19997   |
| 59447 | Q85601 | O43395 | 0.77919   |
| 59448 | Q85601 | Q99496 | 0.52824   |
| 59449 | Q85601 | Q13356 | 0.37952   |
| 59450 | Q85601 | P36402 | 0.50187   |
| 59451 | Q85601 | Q8N5J4 | 0.52414   |
| 59452 | Q85601 | Q5H9J7 | 0.75921   |
| 59453 | Q85601 | Q13118 | 0.35551   |
| 59454 | Q85601 | Q96JI7 | 0.66917   |
| 59455 | Q85601 | O94927 | 0.65651   |
| 59456 | Q85601 | P49459 | 0.75667   |
| 59457 | Q85601 | Q8N9Z0 | 0.413     |
| 59458 | Q85601 | Q32MZ4 | 1.1437    |
| 59459 | Q85601 | O14593 | 0.74057   |
| 59460 | Q85601 | P10827 | 0.30334   |
| 59461 | Q85601 | Q8WUF5 | 0.90221   |
| 59462 | Q85601 | O75920 | 0.53899   |
| 59463 | Q85601 | Q9C0C2 | 0.20143   |
| 59464 | Q85601 | O75884 | 0.78365   |
| 59465 | Q85601 | O43290 | 0.92898   |
| 59466 | Q85601 | Q5MJ68 | 0.30022   |
| 59467 | Q85601 | O43615 | 0.18182   |
| 59468 | Q85601 | P58304 | 0.29838   |
| 59469 | Q85601 | Q3ZCT1 | 0.2542    |
| 59470 | Q85601 | Q96N06 | 0.0049316 |
| 59471 | Q85601 | O43812 | 0.33281   |
| 59472 | Q85601 | P50453 | 0.6813    |
| 59473 | Q85601 | Q3B820 | 0.22617   |
| 59474 | Q85601 | Q9UHJ3 | 0.33843   |
| 59475 | Q85601 | Q5HYK9 | 0.32689   |
| 59476 | Q85601 | P28065 | 0.52148   |
| 59477 | Q85601 | O00267 | 1.0411    |
| 59478 | Q85601 | P07900 | 0.59162   |
| 59479 | Q85601 | Q96A56 | 1.0032    |
| 59480 | Q85601 | Q69YQ0 | 0.32946   |
| 59481 | Q85601 | Q8TAF3 | 0.7018    |
| 59482 | Q85601 | P22670 | 0.81966   |
| 59483 | Q85601 | Q8N5L8 | 0.75315   |
| 59484 | Q85601 | O60384 | 0.4606    |
| 59485 | Q85601 | Q9H6U6 | 0.83192   |
| 59486 | Q85601 | P30414 | 0.37076   |
| 59487 | Q85601 | Q9H410 | 0.95919   |
| 59488 | Q85601 | Q96PV7 | 0.002423  |
| 59489 | Q85601 | Q14181 | 0.48339   |
| 59490 | Q85601 | Q96ST2 | 0.048128  |
| 59491 | Q85601 | Q8IYW5 | 0.32282   |
| 59492 | Q85601 | P32243 | 0.82415   |
| 59493 | Q85601 | O95478 | 0.30989   |
| 59494 | Q85601 | Q8TBB1 | 0.89474   |
| 59495 | Q85601 | P42773 | 0.36929   |
| 59496 | Q85601 | P35268 | 0.57838   |
| 59497 | Q85601 | Q8IYA6 | 0.48306   |
| 59498 | Q85601 | Q6ZVF9 | 0.17604   |
| 59499 | Q85601 | O14867 | 0.41765   |
| 59500 | Q85601 | Q9H201 | 0.15033   |
| 59501 | Q85601 | Q96EG3 | 0.24722   |
| 59502 | Q85601 | Q6VVB1 | 0.45052   |
| 59503 | Q85601 | Q5T1B0 | 0.017737  |
| 59504 | Q85601 | Q15633 | 0.73409   |
| 59505 | Q85601 | P48382 | 0.94565   |
| 59506 | Q85601 | Q6ZW49 | 0.45397   |
| 59507 | Q85601 | Q2M1V0 | 0.32996   |
| 59508 | Q85601 | Q8IVC4 | 0.33107   |

|       |        |        |           |
|-------|--------|--------|-----------|
| 59509 | Q85601 | Q5JTC6 | 0.51778   |
| 59510 | Q85601 | Q9UHK0 | 0.31655   |
| 59511 | Q85601 | Q9BQ66 | 0.17342   |
| 59512 | Q85601 | O75340 | 0.42354   |
| 59513 | Q85601 | Q96T58 | 0.61375   |
| 59514 | Q85601 | Q6IE81 | 1.1652    |
| 59515 | Q85601 | Q8N693 | 0.46012   |
| 59516 | Q85601 | Q02447 | 0.53876   |
| 59517 | Q85601 | O75558 | 0.57427   |
| 59518 | Q85601 | O95630 | 0.26274   |
| 59519 | Q85601 | O75132 | 0.3014    |
| 59520 | Q85601 | Q09028 | 0.61593   |
| 59521 | Q85601 | Q9H8Q6 | 0.42897   |
| 59522 | Q85601 | P56693 | 0.62105   |
| 59523 | Q85601 | O94993 | 0.22899   |
| 59524 | Q85601 | O75446 | 1.1128    |
| 59525 | Q85601 | Q96EK6 | 0.24602   |
| 59526 | Q85601 | O94992 | 1.2993    |
| 59527 | Q85601 | P55854 | 0.55188   |
| 59528 | Q85601 | Q96T17 | 0.5147    |
| 59529 | Q85601 | P23193 | 1.3006    |
| 59530 | Q85601 | Q6IB77 | 0.21134   |
| 59531 | Q85601 | Q6NSH3 | 0.26275   |
| 59532 | Q85601 | P07741 | 0.29291   |
| 59533 | Q85601 | P29966 | 0.6503    |
| 59534 | Q85601 | Q9BTC8 | 0.80236   |
| 59535 | Q85601 | Q8IY81 | 0.72213   |
| 59536 | Q85601 | Q8NE65 | 0.41818   |
| 59537 | Q85601 | Q5T8A7 | 0.7082    |
| 59538 | Q85601 | Q96N77 | 0.4507    |
| 59539 | Q85601 | Q9H4A6 | 0.45283   |
| 59540 | Q85601 | Q68EA5 | 0.51008   |
| 59541 | Q85601 | P43897 | 0.83286   |
| 59542 | Q85601 | Q8WWY3 | 0.2811    |
| 59543 | Q85601 | Q8N5U6 | 1.2392    |
| 59544 | Q85601 | Q8WUU5 | 0.36139   |
| 59545 | Q85601 | Q13601 | 0.40628   |
| 59546 | Q85601 | Q68DK2 | 0.97998   |
| 59547 | Q85601 | O14980 | 0.97828   |
| 59548 | Q85601 | O95486 | 0.46446   |
| 59549 | Q85601 | Q5H9I0 | 0.51907   |
| 59550 | Q85601 | P67775 | 0.74297   |
| 59551 | Q85601 | Q0D2I5 | 0.032492  |
| 59552 | Q85601 | Q99684 | 0.39106   |
| 59553 | Q85601 | Q06265 | 0.043245  |
| 59554 | Q85601 | P53805 | 0.61145   |
| 59555 | Q85601 | P0C7M4 | 0.22476   |
| 59556 | Q85601 | P62979 | 0.42618   |
| 59557 | Q85601 | Q8WY41 | 0.45449   |
| 59558 | Q85601 | O75334 | 0.53887   |
| 59559 | Q85601 | Q9H0C5 | 0.56117   |
| 59560 | Q85601 | O43402 | 0.44852   |
| 59561 | Q85601 | O95476 | 0.29522   |
| 59562 | Q85601 | Q9BYQ7 | 0.24199   |
| 59563 | Q85601 | O95751 | 0.5794    |
| 59564 | Q85601 | Q7L2H7 | 0.56583   |
| 59565 | Q85601 | P50402 | 0.14245   |
| 59566 | Q85601 | A8MX80 | 0.48715   |
| 59567 | Q85601 | Q8IW19 | 0.47439   |
| 59568 | Q85601 | Q96GN5 | 0.90605   |
| 59569 | Q85601 | P55265 | 0.35162   |
| 59570 | Q85601 | Q13347 | 0.68618   |
| 59571 | Q85601 | Q14207 | 0.94752   |
| 59572 | Q85601 | Q15185 | 0.51947   |
| 59573 | Q85601 | A6NMK8 | 0.069652  |
| 59574 | Q85601 | Q96RY5 | 0.92224   |
| 59575 | Q85601 | Q8WU90 | 1.0051    |
| 59576 | Q85601 | P61575 | 0.42275   |
| 59577 | Q85601 | O43309 | 0.29938   |
| 59578 | Q85601 | O94973 | 0.414     |
| 59579 | Q85601 | Q6ZS46 | 0.14684   |
| 59580 | Q85601 | A8K554 | 0.0096984 |
| 59581 | Q85601 | Q99436 | 0.55261   |
| 59582 | Q85601 | Q9BSU3 | 0.57753   |
| 59583 | Q85601 | E9PQ53 | 0.45141   |
| 59584 | Q85601 | Q8TEK3 | 0.38665   |

|       |        |        |          |
|-------|--------|--------|----------|
| 59585 | Q85601 | P62847 | 0.50417  |
| 59586 | Q85601 | P48059 | 0.27985  |
| 59587 | Q85601 | Q8N7Z2 | 0.43599  |
| 59588 | Q85601 | Q8N319 | 0.88732  |
| 59589 | Q85601 | Q12872 | 0.48278  |
| 59590 | Q85601 | P50616 | 0.34763  |
| 59591 | Q85601 | P29474 | 0.55459  |
| 59592 | Q85601 | Q96PC3 | 0.37967  |
| 59593 | Q85601 | A1A5D9 | 0.4266   |
| 59594 | Q85601 | Q9P1F3 | 0.42724  |
| 59595 | Q85601 | Q5SXJ2 | 1.1879   |
| 59596 | Q85601 | Q9C035 | 0.67191  |
| 59597 | Q85601 | Q9NUP7 | 0.68595  |
| 59598 | Q85601 | O15360 | 0.85288  |
| 59599 | Q85601 | Q9BQ69 | 0.45446  |
| 59600 | Q85601 | Q8TF68 | 0.17544  |
| 59601 | Q85601 | O00204 | 0.48026  |
| 59602 | Q85601 | Q7Z6J9 | 0.43992  |
| 59603 | Q85601 | Q7Z6B0 | 0.56037  |
| 59604 | Q85601 | Q99583 | 0.40766  |
| 59605 | Q85601 | Q8ND07 | 0.91064  |
| 59606 | Q85601 | Q3SYG4 | 0.45195  |
| 59607 | Q85601 | O60927 | 0.47351  |
| 59608 | Q85601 | Q9BX70 | 0.56934  |
| 59609 | Q85601 | Q96RU7 | 0.41875  |
| 59610 | Q85601 | O75382 | 0.38199  |
| 59611 | Q85601 | Q8NDF8 | 0.4516   |
| 59612 | Q85601 | Q15628 | 0.63136  |
| 59613 | Q85601 | Q14146 | 0.22094  |
| 59614 | Q85601 | Q9NQ35 | 0.56585  |
| 59615 | Q85601 | O75436 | 0.71451  |
| 59616 | Q85601 | Q07157 | 0.672    |
| 59617 | Q85601 | Q52MB2 | 1.0838   |
| 59618 | Q85601 | Q8N5P1 | 0.27685  |
| 59619 | Q85601 | P17544 | 1.0969   |
| 59620 | Q85601 | O75822 | 0.68618  |
| 59621 | Q85601 | Q0D2K3 | 0.61619  |
| 59622 | Q85601 | A8K0S8 | 0.22476  |
| 59623 | Q85601 | Q6ZVK8 | 0.44238  |
| 59624 | Q85601 | H0Y7S4 | 0.17874  |
| 59625 | Q85601 | Q96S94 | 0.36692  |
| 59626 | Q85601 | Q6GMV2 | 0.2559   |
| 59627 | Q85601 | Q8TDG2 | 0.11637  |
| 59628 | Q85601 | Q9NZI6 | 0.54905  |
| 59629 | Q85601 | P28070 | 0.35054  |
| 59630 | Q85601 | Q8IX90 | 0.71489  |
| 59631 | Q85601 | O75323 | 0.25139  |
| 59632 | Q85601 | D6RB28 | 0.36182  |
| 59633 | Q85601 | P28749 | 1.3532   |
| 59634 | Q85601 | Q9NXF7 | 0.26501  |
| 59635 | Q85601 | Q9HBD4 | 0.63336  |
| 59636 | Q85601 | P20073 | 0.4097   |
| 59637 | Q85601 | P84103 | 0.44933  |
| 59638 | Q85601 | P09467 | 0.36812  |
| 59639 | Q85601 | Q9NW08 | 0.075132 |
| 59640 | Q85601 | P55199 | 1.002    |
| 59641 | Q85601 | Q8NE71 | 0.34177  |
| 59642 | Q85601 | P35658 | 0.98869  |
| 59643 | Q85601 | O15446 | 0.26237  |
| 59644 | Q85601 | Q6PGQ1 | 0.090372 |
| 59645 | Q85601 | Q6NS38 | 0.1836   |
| 59646 | Q85601 | P68871 | 0.21136  |
| 59647 | Q85601 | Q9NUL3 | 0.59396  |
| 59648 | Q85601 | P41567 | 0.57053  |
| 59649 | Q85601 | Q05516 | 0.74507  |
| 59650 | Q85601 | P31249 | 0.55631  |
| 59651 | Q85601 | O75901 | 0.56929  |
| 59652 | Q85601 | Q9HCU8 | 0.48603  |
| 59653 | Q85601 | P13489 | 0.45993  |
| 59654 | Q85601 | Q14397 | 0.67815  |
| 59655 | Q85601 | Q6ZS27 | 0.30272  |
| 59656 | Q85601 | Q9P1Q0 | 0.38973  |
| 59657 | Q85601 | Q9NTW7 | 0.44079  |
| 59658 | Q85601 | Q9BQ67 | 0.44273  |
| 59659 | Q85601 | Q8N3U4 | 0.70179  |
| 59660 | Q85601 | Q9HD33 | 0.53386  |

|       |        |        |          |
|-------|--------|--------|----------|
| 59661 | Q85601 | O95996 | 0.37452  |
| 59662 | Q85601 | Q9H9L3 | 0.41513  |
| 59663 | Q85601 | Q92797 | 0.76638  |
| 59664 | Q85601 | Q7L2R6 | 0.48095  |
| 59665 | Q85601 | Q86T82 | 0.37009  |
| 59666 | Q85601 | Q14980 | 1.1479   |
| 59667 | Q85601 | P26196 | 0.51162  |
| 59668 | Q85601 | Q5H9F3 | 0.6922   |
| 59669 | Q85601 | O75150 | 0.58822  |
| 59670 | Q85601 | O14602 | 0.30529  |
| 59671 | Q85601 | O95363 | 0.26326  |
| 59672 | Q85601 | O00482 | 0.28056  |
| 59673 | Q85601 | Q9UK39 | 0.45512  |
| 59674 | Q85601 | Q14152 | 1.1177   |
| 59675 | Q85601 | Q96IF1 | 0.43578  |
| 59676 | Q85601 | Q04446 | 0.083373 |
| 59677 | Q85601 | P0DI82 | 0.37836  |
| 59678 | Q85601 | P40925 | 0.52398  |
| 59679 | Q85601 | Q86US8 | 0.63152  |
| 59680 | Q85601 | Q96DM1 | 0.5015   |
| 59681 | Q85601 | P61244 | 0.88429  |
| 59682 | Q85601 | P51504 | 0.28078  |
| 59683 | Q85601 | Q9ULE6 | 0.70162  |
| 59684 | Q85601 | Q86Y97 | 0.44708  |
| 59685 | Q85601 | P09914 | 0.35572  |
| 59686 | Q85601 | Q2VPB7 | 0.52847  |
| 59687 | Q85601 | Q9BQA5 | 0.86907  |
| 59688 | Q85601 | P05198 | 0.62266  |
| 59689 | Q85601 | P60608 | 0.27602  |
| 59690 | Q85601 | Q9NX70 | 1.0544   |
| 59691 | Q85601 | H0YKK7 | 0.36182  |
| 59692 | Q85601 | P84022 | 0.52723  |
| 59693 | Q85601 | Q9Y3T9 | 1.0543   |
| 59694 | Q85601 | O95376 | 0.45704  |
| 59695 | Q85601 | O60260 | 0.51261  |
| 59696 | Q85601 | P61580 | 0.33886  |
| 59697 | Q85601 | Q06830 | 0.25096  |
| 59698 | Q85601 | Q8IWC1 | 0.66237  |
| 59699 | Q85601 | Q6ZN19 | 0.24382  |
| 59700 | Q85601 | Q9P0M2 | 0.11226  |
| 59701 | Q85601 | P78345 | 0.86917  |
| 59702 | Q85601 | Q6ZN01 | 0.57302  |
| 59703 | Q85601 | Q5TG92 | 0.021192 |
| 59704 | Q85601 | Q9NPG2 | 0.04707  |
| 59705 | Q85601 | Q0D2J5 | 0.25527  |
| 59706 | Q85601 | Q9BWF2 | 0.27439  |
| 59707 | Q85601 | Q99607 | 1.1477   |
| 59708 | Q85601 | Q9NPI1 | 1.0584   |
| 59709 | Q85601 | Q6ZSS3 | 0.19331  |
| 59710 | Q85601 | Q15233 | 0.54537  |
| 59711 | Q85601 | Q9BY27 | 0.40938  |
| 59712 | Q85601 | P53618 | 0.79161  |
| 59713 | Q85601 | Q6NSW5 | 0.71297  |
| 59714 | Q85601 | Q9NT62 | 0.45066  |
| 59715 | Q85601 | Q3BBV1 | 1.1879   |
| 59716 | Q85601 | O95777 | 0.4945   |
| 59717 | Q85601 | Q96JZ2 | 0.47122  |
| 59718 | Q85601 | Q9UJX4 | 0.8039   |
| 59719 | Q85601 | P60520 | 0.24293  |
| 59720 | Q85601 | P42677 | 0.87727  |
| 59721 | Q85601 | Q7RTT5 | 0.1323   |
| 59722 | Q85601 | A6NKD9 | 1.0127   |
| 59723 | Q85601 | O95400 | 0.73661  |
| 59724 | Q85601 | Q9P2J3 | 0.26296  |
| 59725 | Q85601 | Q5VTR2 | 0.74573  |
| 59726 | Q85601 | Q9HCK8 | 0.44042  |
| 59727 | Q85601 | Q9H2G9 | 0.46468  |
| 59728 | Q85601 | P31271 | 0.15545  |
| 59729 | Q85601 | Q9BXG8 | 0.56813  |
| 59730 | Q85601 | Q9UM11 | 1.1792   |
| 59731 | Q85601 | Q5THR3 | 0.36002  |
| 59732 | Q85601 | Q9H9Q2 | 0.26218  |
| 59733 | Q85601 | Q86VE0 | 0.91598  |
| 59734 | Q85601 | P63220 | 0.5756   |
| 59735 | Q85601 | Q96CD0 | 0.30691  |
| 59736 | Q85601 | Q9Y252 | 0.53214  |

|       |        |        |          |
|-------|--------|--------|----------|
| 59737 | Q85601 | Q14584 | 0.31607  |
| 59738 | Q85601 | P49715 | 0.24028  |
| 59739 | Q85601 | Q9Y6B7 | 0.26685  |
| 59740 | Q85601 | Q9H009 | 0.39619  |
| 59741 | Q85601 | Q6NT89 | 0.31638  |
| 59742 | Q85601 | P05120 | 0.5571   |
| 59743 | Q85601 | Q5JR59 | 1.0463   |
| 59744 | Q85601 | Q99766 | 0.32668  |
| 59745 | Q85601 | Q9UIF8 | 0.96049  |
| 59746 | Q85601 | P50748 | 0.85215  |
| 59747 | Q85601 | Q9BTL3 | 0.45592  |
| 59748 | Q85601 | Q8TAP6 | 0.98771  |
| 59749 | Q85601 | Q8WY54 | 0.89818  |
| 59750 | Q85601 | Q96EH5 | 0.29456  |
| 59751 | Q85601 | Q8TF45 | 0.24382  |
| 59752 | Q85601 | A1A4V9 | 0.16683  |
| 59753 | Q85601 | Q16082 | 0.96818  |
| 59754 | Q85601 | P10072 | 0.30741  |
| 59755 | Q85601 | Q9Y615 | 0.41156  |
| 59756 | Q85601 | Q06547 | 1.0447   |
| 59757 | Q85601 | Q8TAA3 | 0.23663  |
| 59758 | Q85601 | Q9C0D7 | 0.5008   |
| 59759 | Q85601 | Q14159 | 0.84504  |
| 59760 | Q85601 | P09497 | 0.40767  |
| 59761 | Q85601 | P14866 | 0.36386  |
| 59762 | Q85601 | A1A580 | 0.12421  |
| 59763 | Q85601 | Q8NEF9 | 0.70872  |
| 59764 | Q85601 | O15055 | 0.24427  |
| 59765 | Q85601 | P62837 | 0.84493  |
| 59766 | Q85601 | Q6ZQV5 | 0.35685  |
| 59767 | Q85601 | Q9Y2D1 | 1.1737   |
| 59768 | Q85601 | Q12959 | 0.81923  |
| 59769 | Q85601 | Q9UL46 | 0.23001  |
| 59770 | Q85601 | Q8TB69 | 0.48095  |
| 59771 | Q85601 | Q6IA86 | 0.62651  |
| 59772 | Q85601 | Q96H79 | 0.43005  |
| 59773 | Q85601 | Q96RE9 | 0.27609  |
| 59774 | Q85601 | O60287 | 0.54149  |
| 59775 | Q85601 | Q9UGP4 | 0.50377  |
| 59776 | Q85601 | Q9NPC3 | 0.18232  |
| 59777 | Q85601 | O60885 | 0.74725  |
| 59778 | Q85601 | Q15326 | 1.3408   |
| 59779 | Q85601 | Q8WVK7 | 0.69369  |
| 59780 | Q85601 | P01008 | 0.50961  |
| 59781 | Q85601 | Q8IV54 | 0.39447  |
| 59782 | Q85601 | O76095 | 0.24388  |
| 59783 | Q85601 | Q6P2Q9 | 0.42471  |
| 59784 | Q85601 | O15037 | 0.15015  |
| 59785 | Q85601 | O14746 | 0.50341  |
| 59786 | Q85601 | Q9P2T0 | 0.17003  |
| 59787 | Q85601 | Q9Y5Z7 | 0.44239  |
| 59788 | Q85601 | Q99460 | 0.073424 |
| 59789 | Q85601 | O43296 | 0.33357  |
| 59790 | Q85601 | Q96IY1 | 1.0036   |
| 59791 | Q85601 | Q6RSH7 | 0.38278  |
| 59792 | Q85601 | Q5T6S3 | 0.44456  |
| 59793 | Q85601 | Q96EF6 | 0.56397  |
| 59794 | Q85601 | O00231 | 0.31995  |
| 59795 | Q85601 | Q96DN6 | 0.085767 |
| 59796 | Q85601 | A6XGL0 | 0.07969  |
| 59797 | Q85601 | Q5T1J5 | 0.45749  |
| 59798 | Q85601 | Q15937 | 0.31898  |
| 59799 | Q85601 | P78385 | 0.57095  |
| 59800 | Q85601 | P14317 | 0.24754  |
| 59801 | Q85601 | O95639 | 0.37546  |
| 59802 | Q85601 | Q9UKY7 | 0.27624  |
| 59803 | Q85601 | O60671 | 0.57712  |
| 59804 | Q85601 | Q49AA0 | 0.42883  |
| 59805 | Q85601 | Q15759 | 0.26024  |
| 59806 | Q85601 | Q86WG3 | 0.29197  |
| 59807 | Q85601 | Q96IZ7 | 0.81436  |
| 59808 | Q85601 | A2IDD5 | 0.56034  |
| 59809 | Q85601 | Q9UNS2 | 0.68562  |
| 59810 | Q85601 | Q15906 | 0.92172  |
| 59811 | Q85601 | Q9NYV6 | 0.55014  |
| 59812 | Q85601 | P41161 | 0.1922   |



|       |        |        |          |
|-------|--------|--------|----------|
| 59813 | Q85601 | Q16204 | 0.27235  |
| 59814 | Q85601 | P55347 | 0.46007  |
| 59815 | Q85601 | P08727 | 0.65053  |
| 59816 | Q85601 | P0CG47 | 0.38823  |
| 59817 | Q85601 | Q8WYH8 | 0.6445   |
| 59818 | Q85601 | Q99996 | 0.58352  |
| 59819 | Q85601 | O95394 | 0.77304  |
| 59820 | Q85601 | P04053 | 0.30571  |
| 59821 | Q85601 | Q9BPU9 | 0.22596  |
| 59822 | Q85601 | P83876 | 0.90466  |
| 59823 | Q85601 | P31949 | 0.33539  |
| 59824 | Q85601 | Q96QC0 | 0.8009   |
| 59825 | Q85601 | P63165 | 0.99903  |
| 59826 | Q85601 | P45984 | 0.33373  |
| 59827 | Q85601 | Q8N782 | 0.39148  |
| 59828 | Q85601 | Q9BSY4 | 0.14226  |
| 59829 | Q85601 | P49918 | 0.71902  |
| 59830 | Q85601 | P0C7V5 | 0.39609  |
| 59831 | Q85601 | P53677 | 0.27389  |
| 59832 | Q85601 | P07197 | 0.73455  |
| 59833 | Q85601 | P07195 | 0.51979  |
| 59834 | Q85601 | O76011 | 0.65053  |
| 59835 | Q85601 | Q9UGU0 | 0.4567   |
| 59836 | Q85601 | Q8WYJ6 | 0.22655  |
| 59837 | Q85601 | I6L9F6 | 0.1936   |
| 59838 | Q85601 | Q8IZQ1 | 0.66974  |
| 59839 | Q85601 | Q8IYX3 | 0.51024  |
| 59840 | Q85601 | Q6ZSB9 | 0.26338  |
| 59841 | Q85601 | Q8IXM3 | 0.41683  |
| 59842 | Q85601 | Q5VU43 | 1.0486   |
| 59843 | Q85601 | P37275 | 0.80059  |
| 59844 | Q85601 | Q96Q83 | 0.55486  |
| 59845 | Q85601 | Q9UJM3 | 0.43184  |
| 59846 | Q85601 | Q9BYH8 | 0.35203  |
| 59847 | Q85601 | O43933 | 0.28557  |
| 59848 | Q85601 | Q8WUY3 | 0.33707  |
| 59849 | Q85601 | Q96RJ6 | 0.38487  |
| 59850 | Q85601 | Q12983 | 0.15033  |
| 59851 | Q85601 | Q9BRP1 | 0.81769  |
| 59852 | Q85601 | Q99567 | 0.79786  |
| 59853 | Q85601 | Q4G163 | 0.15891  |
| 59854 | Q85601 | Q96C74 | 0.3025   |
| 59855 | Q85601 | O00193 | 0.40862  |
| 59856 | Q85601 | O95218 | 0.47274  |
| 59857 | Q85601 | Q96S55 | 0.30528  |
| 59858 | Q85601 | Q5W0V3 | 0.37171  |
| 59859 | Q85601 | Q7Z7L8 | 0.5865   |
| 59860 | Q85601 | Q8IXH7 | 1.1826   |
| 59861 | Q85601 | Q9BZK7 | 0.9479   |
| 59862 | Q85601 | Q9UPR3 | 1.0283   |
| 59863 | Q85601 | P35754 | 0.4084   |
| 59864 | Q85601 | P56524 | 0.3562   |
| 59865 | Q85601 | P61581 | 0.33886  |
| 59866 | Q85601 | O75638 | 0.70874  |
| 59867 | Q85601 | Q9NZM5 | 0.1358   |
| 59868 | Q85601 | Q9UK10 | 0.35685  |
| 59869 | Q85601 | Q8IYB9 | 0.37553  |
| 59870 | Q85601 | Q96CS2 | 0.6577   |
| 59871 | Q85601 | Q86TJ5 | 0.27901  |
| 59872 | Q85601 | Q8IY85 | 0.3446   |
| 59873 | Q85601 | Q5EBM4 | 0.13188  |
| 59874 | Q85601 | P60953 | 0.48547  |
| 59875 | Q85601 | Q6ZNA4 | 0.68882  |
| 59876 | Q85601 | O43447 | 0.56819  |
| 59877 | Q85601 | Q9NSC5 | 0.45206  |
| 59878 | Q85601 | P60510 | 0.94439  |
| 59879 | Q85601 | Q8IXH6 | 1.2338   |
| 59880 | Q85601 | Q5TKA1 | 0.4182   |
| 59881 | Q85601 | Q9BUK6 | 0.088619 |
| 59882 | Q85601 | Q9UPN7 | 1.0006   |
| 59883 | Q85601 | Q12789 | 0.84031  |
| 59884 | Q85601 | Q9UIF7 | 0.45846  |
| 59885 | Q85601 | Q9C073 | 0.28218  |
| 59886 | Q85601 | P84101 | 0.444    |
| 59887 | Q85601 | Q9BYR7 | 0.95215  |
| 59888 | Q85601 | Q8N584 | 0.28954  |

|       |        |         |          |
|-------|--------|---------|----------|
| 59889 | Q85601 | Q99627  | 0.45647  |
| 59890 | Q85601 | P62328  | 0.74911  |
| 59891 | Q85601 | Q9UKG1  | 0.42863  |
| 59892 | Q85601 | Q8N163  | 0.68828  |
| 59893 | Q85601 | Q92870  | 0.70969  |
| 59894 | Q85601 | P54278  | 0.40936  |
| 59895 | Q85601 | Q9BZA5  | 0.57772  |
| 59896 | Q85601 | P31274  | 0.11617  |
| 59897 | Q85601 | Q13416  | 0.49719  |
| 59898 | Q85601 | P14625  | 0.47529  |
| 59899 | Q85601 | P62508  | 0.55105  |
| 59900 | Q85601 | Q86TS9  | 0.31905  |
| 59901 | Q85601 | Q9NPC7  | 0.20159  |
| 59902 | Q85601 | Q92845  | 0.25621  |
| 59903 | Q85601 | P02792  | 0.091884 |
| 59904 | Q85601 | Q9BTV5  | 0.5661   |
| 59905 | Q85601 | Q9Y2H8  | 0.31465  |
| 59906 | Q85601 | Q9NRI5  | 0.3971   |
| 59907 | Q85601 | Q5T6C5  | 0.79691  |
| 59908 | Q85601 | O15379  | 0.56347  |
| 59909 | Q85601 | A6NKD2  | 0.47415  |
| 59910 | Q85601 | O60422  | 0.31892  |
| 59911 | Q85601 | Q5VTD9  | 0.29486  |
| 59912 | Q85601 | Q8N187  | 0.65088  |
| 59913 | Q85601 | A8MT65  | 0.43523  |
| 59914 | Q85601 | Q8IUUC1 | 0.17154  |
| 59915 | Q85601 | Q6NZI2  | 1.0757   |
| 59916 | Q85601 | Q6ICC9  | 0.14915  |
| 59917 | Q85601 | Q8NEG4  | 0.22895  |
| 59918 | Q85601 | O15287  | 0.97951  |
| 59919 | Q85601 | A4D1E9  | 0.50026  |
| 59920 | Q85601 | Q00839  | 0.25022  |
| 59921 | Q85601 | Q8N9N2  | 0.33188  |
| 59922 | Q85601 | Q8N8A2  | 0.30691  |
| 59923 | Q85601 | Q8NBR6  | 1.043    |
| 59924 | Q85601 | P52292  | 0.99784  |
| 59925 | Q85601 | O15453  | 0.43364  |
| 59926 | Q85601 | Q08945  | 1.2245   |
| 59927 | Q85601 | P18583  | 0.21812  |
| 59928 | Q85601 | P52737  | 0.66077  |
| 59929 | Q85601 | Q6ULP2  | 0.74669  |
| 59930 | Q85601 | P13647  | 0.83409  |
| 59931 | Q85601 | Q9UGN5  | 0.23351  |
| 59932 | Q85601 | Q14999  | 1.0211   |
| 59933 | Q85601 | Q9H832  | 0.71893  |
| 59934 | Q85601 | Q9HBQ8  | 0.36009  |
| 59935 | Q85601 | Q96AE4  | 0.50785  |
| 59936 | Q85601 | Q9BZE1  | 0.31905  |
| 59937 | Q85601 | A6NCN2  | 0.56056  |
| 59938 | Q85601 | Q8N8Z8  | 0.26087  |
| 59939 | Q85601 | Q92750  | 0.66232  |
| 59940 | Q85601 | P0C838  | 0.039046 |
| 59941 | Q85601 | Q7Z6K1  | 0.61884  |
| 59942 | Q85601 | Q9Y2P0  | 0.3051   |
| 59943 | Q85601 | Q12905  | 1.0661   |
| 59944 | Q85601 | Q96RE7  | 1.0907   |
| 59945 | Q85601 | P18754  | 1.1489   |
| 59946 | Q85601 | Q7L190  | 0.79565  |
| 59947 | Q85601 | Q5TZA2  | 0.6997   |
| 59948 | Q85601 | P17947  | 0.68691  |
| 59949 | Q85601 | Q9UBQ0  | 0.413    |
| 59950 | Q85601 | Q9UK61  | 0.16983  |
| 59951 | Q85601 | O43189  | 0.6581   |
| 59952 | Q85601 | P38646  | 0.56814  |
| 59953 | Q85601 | P21675  | 0.43567  |
| 59954 | Q85601 | O15127  | 0.73273  |
| 59955 | Q85601 | Q8IYE1  | 0.069201 |
| 59956 | Q85601 | Q4G0A6  | 1.0129   |
| 59957 | Q85601 | Q14532  | 0.43235  |
| 59958 | Q85601 | Q15910  | 0.451    |
| 59959 | Q85601 | Q9HB19  | 0.58404  |
| 59960 | Q85601 | Q9NR09  | 0.46276  |
| 59961 | Q85601 | Q9NX01  | 0.18972  |
| 59962 | Q85601 | Q8TEV9  | 0.29797  |
| 59963 | Q85601 | Q6NXS1  | 0.37994  |
| 59964 | Q85601 | Q9GZL7  | 0.69538  |

|       |        |        |         |
|-------|--------|--------|---------|
| 59965 | Q85601 | Q9UGK8 | 0.70708 |
| 59966 | Q85601 | Q12765 | 0.19835 |
| 59967 | Q85601 | Q2TAY7 | 0.23411 |
| 59968 | Q85601 | P08133 | 0.65183 |
| 59969 | Q85601 | Q8WWC4 | 0.25358 |
| 59970 | Q85601 | Q96MW7 | 0.26569 |
| 59971 | Q85601 | O15084 | 0.74616 |
| 59972 | Q85601 | Q8IVF1 | 0.68211 |
| 59973 | Q85601 | P46782 | 0.48716 |
| 59974 | Q85601 | P04156 | 0.45508 |
| 59975 | Q85601 | Q96BN2 | 0.57389 |
| 59976 | Q85601 | P46937 | 0.80712 |
| 59977 | Q85601 | Q08050 | 0.49872 |
| 59978 | Q85601 | Q6P2C8 | 0.984   |
| 59979 | Q85601 | Q6P9G9 | 0.23611 |
| 59980 | Q85601 | Q9NPA8 | 0.452   |
| 59981 | Q85601 | Q8TAD8 | 1.3007  |
| 59982 | Q85601 | P34932 | 0.25755 |
| 59983 | Q85601 | P11844 | 0.45348 |
| 59984 | Q85601 | P07902 | 0.44927 |
| 59985 | Q85601 | Q9UHC1 | 0.46569 |
| 59986 | Q85601 | Q9UBS8 | 0.75535 |
| 59987 | Q85601 | Q7Z6Z7 | 0.34731 |
| 59988 | Q85601 | O75113 | 0.90095 |
| 59989 | Q85601 | Q8IW36 | 0.41128 |
| 59990 | Q85601 | Q9NX53 | 0.30691 |
| 59991 | Q85601 | Q9UHY7 | 0.25572 |
| 59992 | Q85601 | Q12962 | 1.0919  |
| 59993 | Q85601 | Q13156 | 0.31224 |
| 59994 | Q85601 | Q5T5S1 | 0.29947 |
| 59995 | Q85601 | Q6WBX8 | 0.42899 |
| 59996 | Q85601 | Q6UN15 | 0.53151 |
| 59997 | Q85601 | A3KN83 | 0.65721 |
| 59998 | Q85601 | Q9BRH9 | 0.30507 |
| 59999 | Q85601 | Q06732 | 0.1945  |
| 60000 | Q85601 | Q9H6J7 | 0.22094 |
| 60001 | Q85601 | A6NIH7 | 0.21378 |
| 60002 | Q85601 | Q4LE28 | 0.86988 |
| 60003 | Q85601 | Q9NQ50 | 0.39826 |
| 60004 | Q85601 | P25440 | 0.53346 |
| 60005 | Q85601 | P61574 | 0.42275 |
| 60006 | Q85601 | Q8WUM4 | 1.0897  |
| 60007 | Q85601 | Q16836 | 0.58616 |
| 60008 | Q85601 | P19387 | 0.51723 |
| 60009 | Q85601 | P47897 | 0.15004 |
| 60010 | Q85601 | Q92966 | 0.52171 |
| 60011 | Q85601 | P04792 | 0.39423 |
| 60012 | Q85601 | O14974 | 0.3667  |
| 60013 | Q85601 | O75164 | 1.0999  |
| 60014 | Q85601 | Q86TG7 | 0.63057 |
| 60015 | Q85601 | Q6RFH5 | 0.28079 |
| 60016 | Q85601 | Q6ZN28 | 0.66442 |
| 60017 | Q85601 | O75486 | 0.76646 |
| 60018 | Q85601 | P28370 | 0.53132 |
| 60019 | Q85601 | Q96LL4 | 0.30691 |
| 60020 | Q85601 | Q7Z2E3 | 0.55772 |
| 60021 | Q85601 | Q13077 | 0.30817 |
| 60022 | Q85601 | P08397 | 0.12718 |
| 60023 | Q85601 | Q9UHB9 | 0.23248 |
| 60024 | Q85601 | Q9NX63 | 0.82378 |
| 60025 | Q85601 | P82094 | 1.392   |
| 60026 | Q85601 | P35232 | 0.56245 |
| 60027 | Q85601 | Q969M7 | 0.50956 |
| 60028 | Q85601 | Q9Y6D6 | 0.6295  |
| 60029 | Q85601 | Q9H098 | 0.16626 |
| 60030 | Q85601 | C9JLW8 | 0.48854 |
| 60031 | Q85601 | Q9Y5Y2 | 0.31185 |
| 60032 | Q85601 | Q16533 | 0.49002 |
| 60033 | Q85601 | Q8WYR1 | 0.26653 |
| 60034 | Q85601 | P35869 | 0.41025 |
| 60035 | Q85601 | P63272 | 1.0154  |
| 60036 | Q85601 | Q13432 | 0.49494 |
| 60037 | Q85601 | P23526 | 0.156   |
| 60038 | Q85601 | P48556 | 0.28592 |
| 60039 | Q85601 | O60356 | 0.59589 |
| 60040 | Q85601 | O00743 | 0.8226  |

|       |        |        |          |
|-------|--------|--------|----------|
| 60041 | Q85601 | Q9GZN2 | 0.40758  |
| 60042 | Q85601 | Q6ZU65 | 0.22094  |
| 60043 | Q85601 | Q9H1Z4 | 0.44273  |
| 60044 | Q85601 | Q8N6Y0 | 0.61302  |
| 60045 | Q85601 | P35226 | 0.63936  |
| 60046 | Q85601 | O60783 | 0.22814  |
| 60047 | Q85601 | A6PW82 | 0.25205  |
| 60048 | Q85601 | O15105 | 0.29133  |
| 60049 | Q85601 | Q9H8Y8 | 0.3516   |
| 60050 | Q85601 | O60826 | 0.30177  |
| 60051 | Q85601 | Q6PJP8 | 0.76941  |
| 60052 | Q85601 | O43325 | 0.65006  |
| 60053 | Q85601 | A7E2V4 | 1.106    |
| 60054 | Q85601 | Q6ZMW2 | 0.27186  |
| 60055 | Q85601 | Q8NCT3 | 0.096861 |
| 60056 | Q85601 | Q6PI48 | 0.53389  |
| 60057 | Q85601 | Q16534 | 0.24205  |
| 60058 | Q85601 | Q5T1N1 | 0.52145  |
| 60059 | Q85601 | P35527 | 0.65053  |
| 60060 | Q85601 | A6NDX5 | 0.34569  |
| 60061 | Q85601 | Q8N9Z9 | 0.63675  |
| 60062 | Q85601 | Q96T37 | 0.2362   |
| 60063 | Q85601 | P06746 | 0.58587  |
| 60064 | Q85601 | Q92890 | 0.84087  |
| 60065 | Q85601 | P48595 | 0.53196  |
| 60066 | Q85601 | P46779 | 1.0109   |
| 60067 | Q85601 | O15397 | 0.85646  |
| 60068 | Q85601 | Q9H1A3 | 0.30691  |
| 60069 | Q85601 | P04731 | 0.28384  |
| 60070 | Q85601 | P69891 | 0.21071  |
| 60071 | Q85601 | Q969F9 | 0.64742  |
| 60072 | Q85601 | P21127 | 0.19986  |
| 60073 | Q85601 | Q9NV06 | 0.26385  |
| 60074 | Q85601 | Q7Z460 | 0.45881  |
| 60075 | Q85601 | O76031 | 0.21672  |
| 60076 | Q85601 | Q01850 | 0.90193  |
| 60077 | Q85601 | A0JLT2 | 0.81271  |
| 60078 | Q85601 | Q8IWZ3 | 0.92963  |
| 60079 | Q85601 | Q02410 | 0.51848  |
| 60080 | Q85601 | Q8NHR7 | 0.1968   |
| 60081 | Q85601 | O94763 | 0.76278  |
| 60082 | Q85601 | P12004 | 0.22697  |
| 60083 | Q85601 | Q9BSK1 | 0.23095  |
| 60084 | Q85601 | Q86WJ1 | 0.43773  |
| 60085 | Q85601 | Q9BYR4 | 0.17342  |
| 60086 | Q85601 | Q9UK76 | 0.50873  |
| 60087 | Q85601 | O60504 | 0.72529  |
| 60088 | Q85601 | O14645 | 0.063327 |
| 60089 | Q85601 | Q9UHB7 | 1.3188   |
| 60090 | Q85601 | Q7L9L4 | 0.83348  |
| 60091 | Q85601 | O00625 | 0.53963  |
| 60092 | Q85601 | P0CG31 | 0.33659  |
| 60093 | Q85601 | Q96HI0 | 0.56814  |
| 60094 | Q85601 | P52655 | 1.1688   |
| 60095 | Q85601 | Q8IVT2 | 0.32966  |
| 60096 | Q85601 | Q8NA92 | 0.48281  |
| 60097 | Q85601 | Q8N972 | 0.35685  |
| 60098 | Q85601 | Q59F38 | 0.12414  |
| 60099 | Q85601 | Q5SW79 | 0.88838  |
| 60100 | Q85601 | Q6A163 | 0.56535  |
| 60101 | Q85601 | Q6UUV7 | 1.5062   |
| 60102 | Q85601 | Q9NRA8 | 1.1263   |
| 60103 | Q85601 | Q7RTT6 | 0.21427  |
| 60104 | Q85601 | Q9Y2M5 | 0.85527  |
| 60105 | Q85601 | Q504T8 | 0.22094  |
| 60106 | Q85601 | Q9HCD5 | 1.0775   |
| 60107 | Q85601 | Q13342 | 0.76749  |
| 60108 | Q85601 | Q96AQ1 | 0.26137  |
| 60109 | Q85601 | O75157 | 0.26223  |
| 60110 | Q85601 | Q96Q35 | 0.20289  |
| 60111 | Q85601 | Q7RTU0 | 0.35333  |
| 60112 | Q85601 | O94892 | 0.25103  |
| 60113 | Q85601 | Q9UK99 | 0.37327  |
| 60114 | Q85601 | A9UHW6 | 0.68598  |
| 60115 | Q85601 | Q8NDN9 | 0.70013  |
| 60116 | Q85601 | Q5HYI7 | 0.6849   |

|       |        |        |          |
|-------|--------|--------|----------|
| 60117 | Q85601 | Q9UJA5 | 0.50971  |
| 60118 | Q85601 | Q7L3S4 | 0.3434   |
| 60119 | Q85601 | P62750 | 0.71935  |
| 60120 | Q85601 | Q9NY74 | 0.44273  |
| 60121 | Q85601 | Q9Y5R5 | 0.22314  |
| 60122 | Q85601 | Q9BW11 | 0.38487  |
| 60123 | Q85601 | P30740 | 0.5571   |
| 60124 | Q85601 | Q9NPE3 | 0.70791  |
| 60125 | Q85601 | Q107X0 | 0.2935   |
| 60126 | Q85601 | Q9NNX9 | 0.41572  |
| 60127 | Q85601 | O00567 | 0.78841  |
| 60128 | Q85601 | O43823 | 0.14095  |
| 60129 | Q85601 | P54840 | 0.27263  |
| 60130 | Q85601 | Q96EI5 | 0.64454  |
| 60131 | Q85601 | P35580 | 0.45053  |
| 60132 | Q85601 | Q96M63 | 0.10546  |
| 60133 | Q85601 | Q8TD86 | 0.31552  |
| 60134 | Q85601 | Q92670 | 0.25371  |
| 60135 | Q85601 | P0CW19 | 0.089127 |
| 60136 | Q85601 | P0CG35 | 0.34646  |
| 60137 | Q85601 | O96006 | 0.52318  |
| 60138 | Q85601 | Q5JXB2 | 0.57619  |
| 60139 | Q85601 | O15350 | 0.3653   |
| 60140 | Q85601 | P22087 | 0.55179  |
| 60141 | Q85601 | Q9Y6I3 | 0.063115 |
| 60142 | Q85601 | P62851 | 0.76152  |
| 60143 | Q85601 | Q96KG9 | 0.35576  |
| 60144 | Q85601 | Q99990 | 0.58101  |
| 60145 | Q85601 | Q5SQN1 | 0.34826  |
| 60146 | Q85601 | O00291 | 0.52911  |
| 60147 | Q85601 | P46013 | 0.11435  |
| 60148 | Q85601 | P63010 | 0.44784  |
| 60149 | Q85601 | Q9BU61 | 0.69211  |
| 60150 | Q85601 | Q8NEY8 | 0.43176  |
| 60151 | Q85601 | Q96TC7 | 0.5413   |
| 60152 | Q85601 | A8MUQ0 | 0.86025  |
| 60153 | Q85601 | Q9UBX2 | 0.27808  |
| 60154 | Q85601 | Q08AG7 | 0.73064  |
| 60155 | Q85601 | Q92945 | 0.66688  |
| 60156 | Q85601 | O14893 | 0.60858  |
| 60157 | Q85601 | Q9NZJ4 | 0.11739  |
| 60158 | Q85601 | Q9NWS8 | 0.43365  |
| 60159 | Q85601 | Q9NRG4 | 0.82855  |
| 60160 | Q85601 | Q13547 | 0.80362  |
| 60161 | Q85601 | P43356 | 0.91823  |
| 60162 | Q85601 | Q00994 | 0.80404  |
| 60163 | Q85601 | Q9H5Q4 | 0.42946  |
| 60164 | Q85601 | P50221 | 0.59282  |
| 60165 | Q85601 | P35908 | 0.43137  |
| 60166 | Q85601 | Q99081 | 0.45844  |
| 60167 | Q85601 | Q7L0Y3 | 0.92633  |
| 60168 | Q85601 | Q96C00 | 0.38071  |
| 60169 | Q85601 | Q9H9E1 | 0.28584  |
| 60170 | Q85601 | Q96DG6 | 0.12173  |
| 60171 | Q85601 | P31314 | 0.58769  |
| 60172 | Q85601 | Q9BTT4 | 0.64203  |
| 60173 | Q85601 | A8MTY0 | 0.49058  |
| 60174 | Q85601 | Q58FF3 | 0.58819  |
| 60175 | Q85601 | P49116 | 0.60785  |
| 60176 | Q85601 | Q86WZ0 | 0.055025 |
| 60177 | Q85601 | Q9NWA0 | 1.2185   |
| 60178 | Q85601 | Q05086 | 0.37964  |
| 60179 | Q85601 | O75764 | 0.28588  |
| 60180 | Q85601 | Q9UFB7 | 0.27524  |
| 60181 | Q85601 | Q6PEX3 | 0.12132  |
| 60182 | Q85601 | O75635 | 0.53196  |
| 60183 | Q85601 | Q92597 | 0.61836  |
| 60184 | Q85601 | Q9BQ83 | 0.67767  |
| 60185 | Q85601 | Q9H2T7 | 0.47128  |
| 60186 | Q85601 | Q66K89 | 0.87707  |
| 60187 | Q85601 | Q6ECI4 | 0.33301  |
| 60188 | Q85601 | Q9HCH0 | 0.84314  |
| 60189 | Q85601 | Q4LEZ3 | 0.82218  |
| 60190 | Q85601 | Q5T619 | 0.30138  |
| 60191 | Q85601 | O94916 | 0.21845  |
| 60192 | Q85601 | Q9GZR5 | 0.25401  |

|       |        |        |          |
|-------|--------|--------|----------|
| 60193 | Q85601 | P14651 | 0.21781  |
| 60194 | Q85601 | Q9BWD1 | 0.25837  |
| 60195 | Q85601 | Q9UKY1 | 0.40299  |
| 60196 | Q85601 | O76015 | 0.56535  |
| 60197 | Q85601 | Q9NZ63 | 0.44273  |
| 60198 | Q85601 | O43660 | 0.24685  |
| 60199 | Q85601 | Q5MNV8 | 0.015793 |
| 60200 | Q85601 | A8MUU9 | 0.20599  |
| 60201 | Q85601 | Q8TD26 | 0.25567  |
| 60202 | Q85601 | P62841 | 0.65289  |
| 60203 | Q85601 | Q14687 | 0.30691  |
| 60204 | Q85601 | Q9H2G4 | 0.74715  |
| 60205 | Q85601 | Q96CX2 | 0.12893  |
| 60206 | Q85601 | Q8N3F8 | 0.56503  |
| 60207 | Q85601 | Q6PCE3 | 0.27478  |
| 60208 | Q85601 | Q86YW9 | 0.38726  |
| 60209 | Q85601 | P78559 | 0.76712  |
| 60210 | Q85601 | P24928 | 0.84064  |
| 60211 | Q85601 | Q96M53 | 0.88952  |
| 60212 | Q85601 | O75362 | 0.76406  |
| 60213 | Q85601 | Q5TYX0 | 0.39986  |
| 60214 | Q85601 | P62140 | 0.79298  |
| 60215 | Q85601 | P28074 | 0.43342  |
| 60216 | Q85601 | O75626 | 0.21959  |
| 60217 | Q85601 | Q96F86 | 0.58011  |
| 60218 | Q85601 | Q96DV4 | 0.25881  |
| 60219 | Q85601 | O15372 | 0.65806  |
| 60220 | Q85601 | P49792 | 0.84652  |
| 60221 | Q85601 | Q9Y6H5 | 0.79138  |
| 60222 | Q85601 | Q9H0P0 | 0.23155  |
| 60223 | Q85601 | Q96NL3 | 0.33129  |
| 60224 | Q85601 | A6NKC0 | 0.38628  |
| 60225 | Q85601 | Q8NCX0 | 0.4165   |
| 60226 | Q85601 | Q7Z699 | 0.32678  |
| 60227 | Q85601 | P62308 | 0.61651  |
| 60228 | Q85601 | Q86U86 | 1.0582   |
| 60229 | Q85601 | Q13505 | 0.57244  |
| 60230 | Q85601 | P24863 | 1.0796   |
| 60231 | Q85601 | Q96P71 | 0.54597  |
| 60232 | Q85601 | P62256 | 0.64759  |
| 60233 | Q85601 | Q8WW33 | 0.30188  |
| 60234 | Q85601 | Q6IPR1 | 0.24479  |
| 60235 | Q85601 | Q674X7 | 0.47037  |
| 60236 | Q85601 | P61236 | 0.22094  |
| 60237 | Q85601 | P52298 | 0.46662  |
| 60238 | Q85601 | Q96JL9 | 0.31555  |
| 60239 | Q85601 | Q9P0V3 | 0.57627  |
| 60240 | Q85601 | P67870 | 0.32339  |
| 60241 | Q85601 | Q92530 | 0.49661  |
| 60242 | Q85601 | P57055 | 0.53242  |
| 60243 | Q85601 | Q9Y3R5 | 0.57461  |
| 60244 | Q85601 | P54253 | 0.90493  |
| 60245 | Q85601 | P0DI83 | 0.31331  |
| 60246 | Q85601 | Q13233 | 0.50148  |
| 60247 | Q85601 | Q9HB65 | 0.577    |
| 60248 | Q85601 | P38936 | 0.24747  |
| 60249 | Q85601 | Q96IT1 | 0.72157  |
| 60250 | Q85601 | P30876 | 0.63992  |
| 60251 | Q85601 | Q86XI2 | 0.87879  |
| 60252 | Q85601 | Q96SL8 | 0.22259  |
| 60253 | Q85601 | Q9Y473 | 0.36604  |
| 60254 | Q85601 | O00570 | 0.86232  |
| 60255 | Q85601 | Q9P243 | 0.40909  |
| 60256 | Q85601 | O94903 | 0.28497  |
| 60257 | Q85601 | Q92572 | 0.44823  |
| 60258 | Q85601 | O60930 | 0.27532  |
| 60259 | Q85601 | Q8NB50 | 0.3621   |
| 60260 | Q85601 | Q86VX2 | 0.39824  |
| 60261 | Q85601 | Q5TAB7 | 0.67278  |
| 60262 | Q85601 | P59797 | 0.35084  |
| 60263 | Q85601 | Q9Y5A7 | 0.67799  |
| 60264 | Q85601 | P04406 | 0.43756  |
| 60265 | Q85601 | O75865 | 0.48612  |
| 60266 | Q85601 | O15162 | 0.14547  |
| 60267 | Q85601 | P50502 | 0.61194  |
| 60268 | Q85601 | P62987 | 0.69107  |

|       |        |        |           |
|-------|--------|--------|-----------|
| 60269 | Q85601 | O95848 | 0.52955   |
| 60270 | Q85601 | P38159 | 0.50539   |
| 60271 | Q85601 | Q0VD86 | 0.44273   |
| 60272 | Q85601 | Q14140 | 1.3369    |
| 60273 | Q85601 | A6NNF4 | 0.35363   |
| 60274 | Q85601 | P35900 | 0.78804   |
| 60275 | Q85601 | P13056 | 0.67556   |
| 60276 | Q85601 | Q6ZRV2 | 0.4694    |
| 60277 | Q85601 | P33992 | 0.22948   |
| 60278 | Q85601 | Q8WVM0 | 0.5613    |
| 60279 | Q85601 | Q8IWE4 | 0.22361   |
| 60280 | Q85601 | P48552 | 0.65928   |
| 60281 | Q85601 | Q5QJE6 | 0.67276   |
| 60282 | Q85601 | Q9UM54 | 0.13547   |
| 60283 | Q85601 | Q96JN8 | 0.20637   |
| 60284 | Q85601 | O95886 | 0.47854   |
| 60285 | Q85601 | Q9P287 | 0.71896   |
| 60286 | Q85601 | Q13620 | 0.79062   |
| 60287 | Q85601 | O95613 | 0.81301   |
| 60288 | Q85601 | P82663 | 0.52149   |
| 60289 | Q85601 | P17025 | 0.29598   |
| 60290 | Q85601 | P23528 | 0.75141   |
| 60291 | Q85601 | Q00534 | 0.55879   |
| 60292 | Q85601 | P52434 | 0.38455   |
| 60293 | Q85601 | P40426 | 0.32503   |
| 60294 | Q85601 | P61966 | 0.33417   |
| 60295 | Q85601 | Q6P280 | 0.53556   |
| 60296 | Q85601 | Q8NCN2 | 0.23504   |
| 60297 | Q85601 | Q9BQY9 | 0.48095   |
| 60298 | Q85601 | P24278 | 0.87609   |
| 60299 | Q85601 | Q7Z4G1 | 0.98109   |
| 60300 | Q85601 | Q7Z3I7 | 0.2712    |
| 60301 | Q85601 | P55198 | 0.96966   |
| 60302 | Q85601 | Q13618 | 0.40585   |
| 60303 | Q85601 | P78371 | 0.60016   |
| 60304 | Q85601 | P20962 | 0.13853   |
| 60305 | Q85601 | P22090 | 0.3174    |
| 60306 | Q85601 | Q8N0Z3 | 0.63491   |
| 60307 | Q85601 | P59780 | 0.11413   |
| 60308 | Q85601 | P55212 | 0.47336   |
| 60309 | Q85601 | Q7Z7J5 | 0.56409   |
| 60310 | Q85601 | Q8N7B6 | 0.50855   |
| 60311 | Q85601 | Q13111 | 1.1695    |
| 60312 | Q85601 | A0JNW5 | 0.24031   |
| 60313 | Q85601 | O00287 | 0.044135  |
| 60314 | Q85601 | O43365 | 0.44188   |
| 60315 | Q85601 | Q9BWX1 | 0.46583   |
| 60316 | Q85601 | Q00653 | 1.2012    |
| 60317 | Q85601 | Q15543 | 1.002     |
| 60318 | Q85601 | Q0VG06 | 0.57771   |
| 60319 | Q85601 | P0C5J1 | 0.077411  |
| 60320 | Q85601 | Q86UW6 | 0.1057    |
| 60321 | Q85601 | O60224 | 0.1323    |
| 60322 | Q85601 | Q9NSC2 | 0.33591   |
| 60323 | Q85601 | O95067 | 0.61356   |
| 60324 | Q85601 | Q9NYB0 | 0.70042   |
| 60325 | Q85601 | Q15696 | 0.19106   |
| 60326 | Q85601 | Q9HCE5 | 0.040716  |
| 60327 | Q85601 | Q96EP1 | 0.6574    |
| 60328 | Q85601 | Q9BVL2 | 0.6879    |
| 60329 | Q85601 | Q92993 | 1.0514    |
| 60330 | Q85601 | Q86UQ0 | 0.2655    |
| 60331 | Q85601 | Q8WWX9 | 0.56952   |
| 60332 | Q85601 | O95999 | 0.23621   |
| 60333 | Q85601 | Q96C28 | 0.42238   |
| 60334 | Q85601 | Q9NVR5 | 0.18366   |
| 60335 | Q85601 | O00712 | 0.21983   |
| 60336 | Q85601 | O43379 | 0.23994   |
| 60337 | Q85601 | Q9NP87 | 0.18464   |
| 60338 | Q85601 | Q5T1B1 | 0.66469   |
| 60339 | Q85601 | P43268 | 0.45463   |
| 60340 | Q85601 | P23246 | 0.7257    |
| 60341 | Q85601 | O94952 | 0.43005   |
| 60342 | Q85601 | P26368 | 0.39579   |
| 60343 | Q85601 | Q9BYQ5 | 0.17342   |
| 60344 | Q85601 | A2A368 | 0.0050687 |

|       |        |        |          |
|-------|--------|--------|----------|
| 60345 | Q85601 | Q9H3F6 | 0.57939  |
| 60346 | Q85601 | P60014 | 0.24199  |
| 60347 | Q85601 | Q15652 | 0.3922   |
| 60348 | Q85601 | P56182 | 0.58089  |
| 60349 | Q85601 | Q96HA1 | 0.27234  |
| 60350 | Q85601 | Q3LIE5 | 0.28273  |
| 60351 | Q85601 | Q96LI6 | 0.53277  |
| 60352 | Q85601 | Q53G59 | 0.50177  |
| 60353 | Q85601 | P15336 | 0.85752  |
| 60354 | Q85601 | P51814 | 0.20304  |
| 60355 | Q85601 | P10828 | 0.56356  |
| 60356 | Q85601 | Q8IYX7 | 0.41357  |
| 60357 | Q85601 | Q9NVV4 | 0.53159  |
| 60358 | Q85601 | Q8N3J9 | 0.29108  |
| 60359 | Q85601 | P41182 | 0.2049   |
| 60360 | Q85601 | Q8NEH6 | 0.7115   |
| 60361 | Q85601 | P04198 | 0.80092  |
| 60362 | Q85601 | Q6NSW7 | 0.32996  |
| 60363 | Q85601 | Q8N0Y7 | 0.68269  |
| 60364 | Q85601 | Q8WW01 | 0.19808  |
| 60365 | Q85601 | Q9Y333 | 0.57419  |
| 60366 | Q85601 | P41252 | 0.6845   |
| 60367 | Q85601 | O60524 | 0.7181   |
| 60368 | Q85601 | Q9P1T7 | 1.4438   |
| 60369 | Q85601 | Q6RFH8 | 0.80608  |
| 60370 | Q85601 | Q8IWL3 | 0.55255  |
| 60371 | Q85601 | Q8IZ40 | 0.62744  |
| 60372 | Q85601 | Q15047 | 0.78175  |
| 60373 | Q85601 | Q16352 | 0.56137  |
| 60374 | Q85601 | Q8TAK5 | 0.51059  |
| 60375 | Q85601 | O43318 | 0.56455  |
| 60376 | Q85601 | Q8IUF8 | 0.51676  |
| 60377 | Q85601 | Q8IXY8 | 0.37076  |
| 60378 | Q85601 | Q9NS37 | 0.8506   |
| 60379 | Q85601 | O00422 | 1.2551   |
| 60380 | Q85601 | Q9H299 | 0.12519  |
| 60381 | Q85601 | Q92793 | 0.49738  |
| 60382 | Q85601 | Q9HCG8 | 0.10681  |
| 60383 | Q85601 | Q9H4R4 | 0.071132 |
| 60384 | Q85601 | O75525 | 0.69164  |
| 60385 | Q85601 | A8MUZ8 | 0.5338   |
| 60386 | Q85601 | P39880 | 0.64255  |
| 60387 | Q85601 | P05114 | 0.39536  |
| 60388 | Q85601 | A6NEY3 | 0.36009  |
| 60389 | Q85601 | Q9H4P4 | 0.28984  |
| 60390 | Q85601 | P57071 | 0.15266  |
| 60391 | Q85601 | Q15365 | 0.86619  |
| 60392 | Q85601 | Q3T8J9 | 0.68539  |
| 60393 | Q85601 | Q8N4C6 | 0.20678  |
| 60394 | Q85601 | Q8IV03 | 0.59031  |
| 60395 | Q85601 | Q9HAJ7 | 1.1032   |
| 60396 | Q85601 | P11441 | 0.58661  |
| 60397 | Q85601 | Q99456 | 0.65053  |
| 60398 | Q85601 | A5LHX3 | 0.20043  |
| 60399 | Q85601 | P13535 | 0.42967  |
| 60400 | Q85601 | A6NE21 | 0.38628  |
| 60401 | Q85601 | P39748 | 0.311    |
| 60402 | Q85601 | Q59GR2 | 0.22476  |
| 60403 | Q85601 | Q15697 | 0.53796  |
| 60404 | Q85601 | P31276 | 0.54231  |
| 60405 | Q85601 | Q9NX40 | 0.45409  |
| 60406 | Q85601 | A6NI87 | 0.29386  |
| 60407 | Q85601 | P19474 | 0.42127  |
| 60408 | Q85601 | P61578 | 0.42275  |
| 60409 | Q85601 | Q6PGP7 | 0.76943  |
| 60410 | Q85601 | Q9H1K1 | 0.991    |
| 60411 | Q85601 | Q96PQ5 | 0.25389  |
| 60412 | Q85601 | Q5CZA5 | 0.3562   |
| 60413 | Q85601 | Q14119 | 0.26775  |
| 60414 | Q85601 | Q8IZP0 | 0.25964  |
| 60415 | Q85601 | Q9UJU3 | 0.23015  |
| 60416 | Q85601 | Q96NB3 | 0.60232  |
| 60417 | Q85601 | Q8WUI4 | 0.41655  |
| 60418 | Q85601 | Q8TDC0 | 0.48602  |
| 60419 | Q85601 | Q8N2G8 | 0.21239  |
| 60420 | Q85601 | Q9Y2P7 | 0.41378  |



|       |        |        |          |
|-------|--------|--------|----------|
| 60421 | Q85601 | P40692 | 0.020736 |
| 60422 | Q85601 | Q8N488 | 0.59094  |
| 60423 | Q85601 | Q9BQS6 | 0.85017  |
| 60424 | Q85601 | P82664 | 0.5511   |
| 60425 | Q85601 | P48643 | 0.093816 |
| 60426 | Q85601 | Q9BQW3 | 0.052078 |
| 60427 | Q85601 | Q9BV20 | 0.087351 |
| 60428 | Q85601 | P61583 | 0.46208  |
| 60429 | Q85601 | Q15181 | 0.35841  |
| 60430 | Q85601 | O60869 | 0.66067  |
| 60431 | Q85601 | P48380 | 0.36319  |
| 60432 | Q85601 | P53804 | 0.775    |
| 60433 | Q85601 | P51003 | 0.13828  |
| 60434 | Q85601 | Q9P1Z2 | 0.89867  |
| 60435 | Q85601 | Q9BYJ9 | 0.43793  |
| 60436 | Q85601 | Q14512 | 0.50209  |
| 60437 | Q85601 | Q8TDP1 | 0.054443 |
| 60438 | Q85601 | Q9UPQ9 | 0.31398  |
| 60439 | Q85601 | Q9UI32 | 0.32153  |
| 60440 | Q85601 | Q9H1E3 | 0.35225  |
| 60441 | Q85601 | Q96NA2 | 0.81162  |
| 60442 | Q85601 | Q16775 | 0.2909   |
| 60443 | Q85601 | Q15361 | 0.77684  |
| 60444 | Q85601 | O75467 | 0.25481  |
| 60445 | Q85601 | Q66PJ3 | 0.60135  |
| 60446 | Q85601 | Q9HCS4 | 0.19771  |
| 60447 | Q85601 | O60264 | 0.24551  |
| 60448 | Q85601 | Q13023 | 0.6037   |
| 60449 | Q85601 | Q9UIC8 | 0.28095  |
| 60450 | Q85601 | Q6P387 | 0.44273  |
| 60451 | Q85601 | Q92800 | 0.53755  |
| 60452 | Q85601 | Q496M5 | 0.29702  |
| 60453 | Q85601 | Q9HBL0 | 0.38212  |
| 60454 | Q85601 | Q14CZ0 | 0.94458  |
| 60455 | Q85601 | O43593 | 0.24489  |
| 60456 | Q85601 | Q7RTU3 | 0.35333  |
| 60457 | Q85601 | Q9NZL4 | 0.26708  |
| 60458 | Q85601 | Q9Y6Q3 | 0.23957  |
| 60459 | Q85601 | P78549 | 0.33886  |
| 60460 | Q85601 | Q5BKZ1 | 0.49567  |
| 60461 | Q85601 | Q92466 | 0.66746  |
| 60462 | Q85601 | P51523 | 0.23504  |
| 60463 | Q85601 | P61927 | 0.59299  |
| 60464 | Q85601 | P57721 | 0.60293  |
| 60465 | Q85601 | Q9Y6Q5 | 0.41971  |
| 60466 | Q85601 | Q9NV56 | 0.61832  |
| 60467 | Q85601 | Q96LW7 | 0.22546  |
| 60468 | Q85601 | O75475 | 1.4175   |
| 60469 | Q85601 | O75586 | 0.72122  |
| 60470 | Q85601 | Q8TE76 | 0.31901  |
| 60471 | Q85601 | P30419 | 0.26527  |
| 60472 | Q85601 | P29692 | 0.29126  |
| 60473 | Q85601 | O14558 | 0.76901  |
| 60474 | Q85601 | Q5SXM1 | 0.36542  |
| 60475 | Q85601 | P0CG12 | 0.94895  |
| 60476 | Q85601 | Q6VMQ6 | 1.0068   |
| 60477 | Q85601 | Q13875 | 0.60004  |
| 60478 | Q85601 | A6NEM1 | 0.36182  |
| 60479 | Q85601 | Q9BYG7 | 0.22094  |
| 60480 | Q85601 | Q9NXR1 | 0.40331  |
| 60481 | Q85601 | Q8N0Z2 | 0.38202  |
| 60482 | Q85601 | Q9UQR0 | 0.27872  |
| 60483 | Q85601 | Q5VWM5 | 0.83567  |
| 60484 | Q85601 | P36578 | 1.027    |
| 60485 | Q85601 | Q8TAV0 | 0.22014  |
| 60486 | Q85601 | O60828 | 0.86811  |
| 60487 | Q85601 | Q6PDB4 | 0.53147  |
| 60488 | Q85601 | O95271 | 0.64192  |
| 60489 | Q85601 | Q8N7J2 | 0.62717  |
| 60490 | Q85601 | Q9BY42 | 0.28551  |
| 60491 | Q85601 | Q9BZR8 | 0.43422  |
| 60492 | Q85601 | Q86Y01 | 0.68911  |
| 60493 | Q85601 | Q9UPY8 | 1.0962   |
| 60494 | Q85601 | Q05877 | 0.35703  |
| 60495 | Q85601 | Q9BT04 | 0.12374  |
| 60496 | Q85601 | P61088 | 0.73482  |

|       |        |        |          |
|-------|--------|--------|----------|
| 60497 | Q85601 | Q5T3J3 | 1.014    |
| 60498 | Q85601 | Q16526 | 0.43508  |
| 60499 | Q85601 | Q8N8E2 | 0.030979 |
| 60500 | Q85601 | Q6AZW8 | 0.27624  |
| 60501 | Q85601 | Q9NX95 | 0.33039  |
| 60502 | Q85601 | O00505 | 1.078    |
| 60503 | Q85601 | Q96K30 | 0.86615  |
| 60504 | Q85601 | Q06416 | 0.32996  |
| 60505 | Q85601 | P07738 | 0.71167  |
| 60506 | Q85601 | P41214 | 0.56892  |
| 60507 | Q85601 | O95071 | 0.25694  |
| 60508 | Q85601 | Q9NXV2 | 1.3776   |
| 60509 | Q85601 | O00257 | 1.0268   |
| 60510 | Q85601 | Q8IY57 | 1.2114   |
| 60511 | Q85601 | Q9UHQ1 | 0.48754  |
| 60512 | Q85601 | Q8IZT9 | 0.32773  |
| 60513 | Q85601 | Q96K80 | 0.30436  |
| 60514 | Q85601 | P19447 | 0.17925  |
| 60515 | Q85601 | P35813 | 0.32149  |
| 60516 | Q85601 | Q7LBC6 | 0.19072  |
| 60517 | Q85601 | Q5SWL8 | 0.22854  |
| 60518 | Q85601 | O94855 | 0.46446  |
| 60519 | Q85601 | O75381 | 0.093015 |
| 60520 | Q85601 | Q4G112 | 0.32996  |
| 60521 | Q85601 | Q8TCZ7 | 0.17067  |
| 60522 | Q85601 | Q3LI83 | 0.30526  |
| 60523 | Q85601 | Q14527 | 0.38727  |
| 60524 | Q85601 | Q99732 | 0.25289  |
| 60525 | Q85601 | Q6P589 | 0.54448  |
| 60526 | Q85601 | Q460N5 | 0.43876  |
| 60527 | Q85601 | P07093 | 0.48695  |
| 60528 | Q85601 | Q06323 | 0.66336  |
| 60529 | Q85601 | Q13895 | 0.81358  |
| 60530 | Q85601 | Q14129 | 0.44911  |
| 60531 | Q85601 | O60675 | 0.4338   |
| 60532 | Q85601 | Q8NC74 | 0.32582  |
| 60533 | Q85601 | P17677 | 0.12482  |
| 60534 | Q85601 | Q9NP98 | 0.29985  |
| 60535 | Q85601 | Q6ZVQ6 | 0.80526  |
| 60536 | Q85601 | O43255 | 0.46825  |
| 60537 | Q85601 | P35606 | 0.45069  |
| 60538 | Q85601 | Q8WXS3 | 0.52129  |
| 60539 | Q85601 | Q6IPW1 | 0.44312  |
| 60540 | Q85601 | P43358 | 0.39393  |
| 60541 | Q85601 | Q9UJC5 | 0.31265  |
| 60542 | Q85601 | Q96NS1 | 0.22094  |
| 60543 | Q85601 | P59942 | 0.15779  |
| 60544 | Q85601 | Q76KX8 | 0.47842  |
| 60545 | Q85601 | Q13829 | 0.772    |
| 60546 | Q85601 | Q96JS3 | 0.3411   |
| 60547 | Q85601 | Q9H9J2 | 0.3715   |
| 60548 | Q85601 | Q8NEZ2 | 0.82693  |
| 60549 | Q85601 | Q9H9L7 | 0.29751  |
| 60550 | Q85601 | Q53HM4 | 0.41676  |
| 60551 | Q85601 | O94805 | 0.68682  |
| 60552 | Q85601 | Q9UKT8 | 0.30575  |
| 60553 | Q85601 | A6NN14 | 0.35363  |
| 60554 | Q85601 | Q6IV72 | 0.28727  |
| 60555 | Q85601 | P10515 | 0.36422  |
| 60556 | Q85601 | P30260 | 1.0724   |
| 60557 | Q85601 | O15160 | 0.11656  |
| 60558 | Q85601 | Q5VWM1 | 0.21119  |
| 60559 | Q85601 | Q6PI77 | 0.23411  |
| 60560 | Q85601 | O00167 | 0.76642  |
| 60561 | Q85601 | P05386 | 1.0109   |
| 60562 | Q85601 | Q9NZ52 | 0.4798   |
| 60563 | Q85601 | A6NIY4 | 0.15217  |
| 60564 | Q85601 | Q9BSQ5 | 0.27614  |
| 60565 | Q85601 | Q6Q0C0 | 0.29694  |
| 60566 | Q85601 | Q7Z5L9 | 1.0383   |
| 60567 | Q85601 | Q9NXR8 | 0.36762  |
| 60568 | Q85601 | O14618 | 0.52629  |
| 60569 | Q85601 | Q96MY7 | 0.69781  |
| 60570 | Q85601 | Q63HK5 | 0.34582  |
| 60571 | Q85601 | O75419 | 0.88082  |
| 60572 | Q85601 | Q68DY9 | 0.32778  |

|       |        |        |          |
|-------|--------|--------|----------|
| 60573 | Q85601 | Q9Y3C4 | 0.33622  |
| 60574 | Q85601 | O75807 | 0.45325  |
| 60575 | Q85601 | Q9H963 | 0.38556  |
| 60576 | Q85601 | Q6P582 | 0.38744  |
| 60577 | Q85601 | Q8IX03 | 1.1331   |
| 60578 | Q85601 | Q5T200 | 0.72102  |
| 60579 | Q85601 | Q9H633 | 0.27714  |
| 60580 | Q85601 | Q92900 | 0.62568  |
| 60581 | Q85601 | Q7Z7L9 | 0.35574  |
| 60582 | Q85601 | P17275 | 0.8753   |
| 60583 | Q85601 | Q04837 | 0.50733  |
| 60584 | Q85601 | A8K8V0 | 0.29979  |
| 60585 | Q85601 | O76042 | 0.34315  |
| 60586 | Q85601 | Q86WH2 | 0.23992  |
| 60587 | Q85601 | Q9Y3B9 | 0.37346  |
| 60588 | Q85601 | Q9NY12 | 0.11152  |
| 60589 | Q85601 | Q8N141 | 0.47651  |
| 60590 | Q85601 | Q15257 | 0.44473  |
| 60591 | Q85601 | Q9Y2W1 | 0.74335  |
| 60592 | Q85601 | Q9H816 | 0.60266  |
| 60593 | Q85601 | Q9UIE0 | 0.29689  |
| 60594 | Q85601 | O00411 | 0.5138   |
| 60595 | Q85601 | Q9ULD0 | 0.25856  |
| 60596 | Q85601 | Q9UH77 | 0.61228  |
| 60597 | Q85601 | P43355 | 1.105    |
| 60598 | Q85601 | O95163 | 0.69488  |
| 60599 | Q85601 | Q9H160 | 0.52674  |
| 60600 | Q85601 | Q9UFN0 | 0.70162  |
| 60601 | Q85601 | Q5VUA4 | 0.5491   |
| 60602 | Q85601 | Q86U42 | 0.59136  |
| 60603 | Q85601 | Q9UBK9 | 1.0315   |
| 60604 | Q85601 | P78358 | 0.53217  |
| 60605 | Q85601 | Q16637 | 0.80459  |
| 60606 | Q85601 | Q9BWK5 | 0.10715  |
| 60607 | Q85601 | Q9P270 | 0.50492  |
| 60608 | Q85601 | P0CV99 | 0.47415  |
| 60609 | Q85601 | Q9BVT8 | 0.096518 |
| 60610 | Q85601 | Q9UL03 | 0.6603   |
| 60611 | Q85601 | O43310 | 0.4272   |
| 60612 | Q85601 | P43359 | 0.89264  |
| 60613 | Q85601 | Q96EZ8 | 0.87961  |
| 60614 | Q85601 | P58557 | 0.54045  |
| 60615 | Q85601 | Q9BTE7 | 0.35501  |
| 60616 | Q85601 | Q6ZMV8 | 0.51618  |
| 60617 | Q85601 | Q96I27 | 0.22137  |
| 60618 | Q85601 | Q9UIL1 | 0.75722  |
| 60619 | Q85601 | Q00987 | 0.27074  |
| 60620 | Q85601 | Q92922 | 1.0359   |
| 60621 | Q85601 | Q8N2M8 | 0.44232  |
| 60622 | Q85601 | Q8WXQ3 | 0.75655  |
| 60623 | Q85601 | Q8NF91 | 0.55864  |
| 60624 | Q85601 | O75531 | 0.96342  |
| 60625 | Q85601 | O95571 | 0.60703  |
| 60626 | Q85601 | P60660 | 0.29254  |
| 60627 | Q85601 | P14672 | 0.658    |
| 60628 | Q85601 | Q8N660 | 1.1879   |
| 60629 | Q85601 | O94901 | 0.1732   |
| 60630 | Q85601 | Q8NCK3 | 0.38119  |
| 60631 | Q85601 | Q9UPU9 | 0.29653  |
| 60632 | Q85601 | Q9H7L9 | 0.58157  |
| 60633 | Q85601 | Q9BS34 | 0.23195  |
| 60634 | Q85601 | O94842 | 0.65684  |
| 60635 | Q85601 | P31943 | 0.29634  |
| 60636 | Q85601 | P60604 | 0.84493  |
| 60637 | Q85601 | Q8TCJ0 | 0.70616  |
| 60638 | Q85601 | P82914 | 0.36105  |
| 60639 | Q85601 | Q14671 | 0.15118  |
| 60640 | Q85601 | Q14602 | 0.3273   |
| 60641 | Q85601 | Q96CA5 | 0.28697  |
| 60642 | Q85601 | Q7L1Q6 | 0.39547  |
| 60643 | Q85601 | Q9BU89 | 0.14569  |
| 60644 | Q85601 | Q8IYF1 | 0.26678  |
| 60645 | Q85601 | Q8TBZ5 | 0.32035  |
| 60646 | Q85601 | O60238 | 0.24065  |
| 60647 | Q85601 | Q9BSG1 | 0.3414   |
| 60648 | Q85601 | P55209 | 0.72964  |

|       |        |        |         |
|-------|--------|--------|---------|
| 60649 | Q85601 | A0AVK6 | 0.38629 |
| 60650 | Q85601 | Q96HA8 | 0.99895 |
| 60651 | Q85601 | O43583 | 0.42393 |
| 60652 | Q85601 | Q9BXX3 | 0.23715 |
| 60653 | Q85601 | Q9NXX6 | 0.45765 |
| 60654 | Q85601 | Q9P032 | 0.47401 |
| 60655 | Q85601 | O95073 | 1.0775  |
| 60656 | Q85601 | O60684 | 0.45049 |
| 60657 | Q85601 | Q5VWM6 | 0.55878 |
| 60658 | Q85601 | P02794 | 0.83798 |
| 60659 | Q85601 | Q86UB2 | 0.23911 |
| 60660 | Q85601 | Q9GZY8 | 0.0909  |
| 60661 | Q85601 | Q96KP1 | 0.29032 |
| 60662 | Q85601 | Q8N1I0 | 0.29301 |
| 60663 | Q85601 | Q68CP9 | 0.57799 |
| 60664 | Q85601 | P19838 | 0.74405 |
| 60665 | Q85601 | Q9H910 | 0.50873 |
| 60666 | Q85601 | Q9BYQ2 | 0.17342 |
| 60667 | Q85601 | Q8IUD2 | 0.8735  |
| 60668 | Q85601 | Q9Y536 | 0.34528 |
| 60669 | Q85601 | Q6PD74 | 0.07822 |
| 60670 | Q85601 | Q96EY5 | 0.42771 |
| 60671 | Q85601 | Q8NG27 | 0.31785 |
| 60672 | Q85601 | O95429 | 0.2471  |
| 60673 | Q85601 | P20823 | 0.24546 |
| 60674 | Q85601 | Q14568 | 0.58819 |
| 60675 | Q85601 | Q9NSA3 | 0.79026 |
| 60676 | Q85601 | Q9Y5L0 | 1.0116  |
| 60677 | Q85601 | Q9H0U9 | 0.62675 |
| 60678 | Q85601 | O43592 | 0.35643 |
| 60679 | Q85601 | Q9BRX2 | 0.46286 |
| 60680 | Q85601 | A8K8P3 | 0.80069 |
| 60681 | Q85601 | Q96B23 | 0.70273 |
| 60682 | Q85601 | Q12824 | 0.95921 |
| 60683 | Q85601 | Q8TDR4 | 0.43441 |
| 60684 | Q85601 | Q99741 | 0.54331 |
| 60685 | Q85601 | Q96ED9 | 0.50596 |
| 60686 | Q85601 | A6NCW3 | 0.38171 |
| 60687 | Q85601 | Q9Y3B6 | 0.42169 |
| 60688 | Q85601 | P29508 | 0.5571  |
| 60689 | Q85601 | P62166 | 0.26764 |
| 60690 | Q85601 | Q15935 | 0.44819 |
| 60691 | Q85601 | Q0VDF9 | 0.32329 |
| 60692 | Q85601 | O75123 | 0.27785 |
| 60693 | Q85601 | Q13568 | 0.99579 |
| 60694 | Q85601 | O76021 | 0.3407  |
| 60695 | Q85601 | Q9UKT5 | 0.42017 |
| 60696 | Q85601 | Q9UNE7 | 0.31603 |
| 60697 | Q85601 | Q9C0H6 | 0.29592 |
| 60698 | Q85601 | P0C7X5 | 0.34201 |
| 60699 | Q85601 | P12525 | 0.24393 |
| 60700 | Q85601 | Q8WV22 | 0.30525 |
| 60701 | Q85601 | Q07021 | 0.84521 |
| 60702 | Q85601 | P23490 | 0.76464 |
| 60703 | Q85601 | B2RXF5 | 0.39835 |
| 60704 | Q85601 | Q9BV97 | 0.31257 |
| 60705 | Q85601 | O95171 | 0.22473 |
| 60706 | Q85601 | O43900 | 0.34039 |
| 60707 | Q85601 | Q86TU6 | 0.40682 |
| 60708 | Q85601 | O75175 | 1.3902  |
| 60709 | Q85601 | Q9H6R4 | 0.25211 |
| 60710 | Q85601 | Q6ZNK6 | 0.47043 |
| 60711 | Q85601 | Q8NFC6 | 0.44287 |
| 60712 | Q85601 | Q9H9Z2 | 0.72802 |
| 60713 | Q85601 | Q9UND3 | 0.35037 |
| 60714 | Q85601 | Q12837 | 0.55614 |
| 60715 | Q85601 | Q13619 | 0.40128 |
| 60716 | Q85601 | O43172 | 0.62322 |
| 60717 | Q85601 | Q7Z417 | 0.7281  |
| 60718 | Q85601 | Q9NVN8 | 0.31781 |
| 60719 | Q85601 | Q14511 | 0.74532 |
| 60720 | Q85601 | Q8TAQ2 | 1.3452  |
| 60721 | Q85601 | Q9UBC9 | 0.49294 |
| 60722 | Q85601 | P08865 | 0.81009 |
| 60723 | Q85601 | Q6P0N0 | 0.92676 |
| 60724 | Q85601 | Q06609 | 0.47698 |

|       |        |        |          |
|-------|--------|--------|----------|
| 60725 | Q85601 | Q14137 | 0.80661  |
| 60726 | Q85601 | Q6P1N0 | 0.36804  |
| 60727 | Q85601 | Q6AW86 | 0.2426   |
| 60728 | Q85601 | Q9UKL0 | 1.2317   |
| 60729 | Q85601 | O60244 | 0.53444  |
| 60730 | Q85601 | A8MWS5 | 0.031834 |
| 60731 | Q85601 | Q9ULC4 | 0.4109   |
| 60732 | Q85601 | Q9H211 | 0.71344  |
| 60733 | Q85601 | Q96E16 | 0.56465  |
| 60734 | Q85601 | O14628 | 0.47825  |
| 60735 | Q85601 | Q9Y399 | 0.69618  |
| 60736 | Q85601 | P0CG24 | 0.25538  |
| 60737 | Q85601 | O94874 | 0.84465  |
| 60738 | Q85601 | Q9NR46 | 0.44185  |
| 60739 | Q85601 | Q13485 | 0.61727  |
| 60740 | Q85601 | Q8N0Y2 | 0.19248  |
| 60741 | Q85601 | Q5JRK9 | 0.48065  |
| 60742 | Q85601 | Q9NTG7 | 0.58959  |
| 60743 | Q85601 | P62380 | 0.15879  |
| 60744 | Q85601 | Q5CZC0 | 0.57575  |
| 60745 | Q85601 | Q9GZM3 | 0.078638 |
| 60746 | Q85601 | P61247 | 1.0467   |
| 60747 | Q85601 | Q9C0D2 | 0.32222  |
| 60748 | Q85601 | Q9BVI4 | 0.33254  |
| 60749 | Q85601 | Q86XK3 | 0.72103  |
| 60750 | Q85601 | Q9Y5B6 | 0.5411   |
| 60751 | Q85601 | Q9H204 | 1.2311   |
| 60752 | Q85601 | Q96HR3 | 0.78003  |
| 60753 | Q85601 | Q15003 | 0.81542  |
| 60754 | Q85601 | Q96CM3 | 0.33888  |
| 60755 | Q85601 | Q5UE93 | 0.50691  |
| 60756 | Q85601 | Q96PQ6 | 0.45965  |
| 60757 | Q85601 | Q9UHN1 | 0.15329  |
| 60758 | Q85601 | O14818 | 0.52419  |
| 60759 | Q85601 | Q9NSJ1 | 0.32039  |
| 60760 | Q85601 | Q7Z3B4 | 0.86448  |
| 60761 | Q85601 | P48454 | 0.15271  |
| 60762 | Q85601 | Q03111 | 1.3273   |
| 60763 | Q85601 | Q8IYN6 | 0.15623  |
| 60764 | Q85601 | Q9P278 | 0.79241  |
| 60765 | Q85601 | Q93075 | 0.36782  |
| 60766 | Q85601 | Q9UNH7 | 0.21881  |
| 60767 | Q85601 | Q8WTR7 | 0.61682  |
| 60768 | Q85601 | Q86UE3 | 0.34313  |
| 60769 | Q85601 | Q96A49 | 1.1033   |
| 60770 | Q85601 | P62937 | 0.68795  |
| 60771 | Q85601 | O75925 | 0.64922  |
| 60772 | Q85601 | O14737 | 0.18434  |
| 60773 | Q85601 | Q8N9B5 | 0.80931  |
| 60774 | Q85601 | Q96E14 | 0.28852  |
| 60775 | Q85601 | Q96FF9 | 0.88564  |
| 60776 | Q85601 | P16989 | 0.27533  |
| 60777 | Q85601 | O95817 | 0.44201  |
| 60778 | Q85601 | Q9BSN8 | 0.46923  |
| 60779 | Q85601 | Q9UMX1 | 0.66109  |
| 60780 | Q85601 | P69208 | 0.21862  |
| 60781 | Q85601 | Q5T1C6 | 0.38073  |
| 60782 | Q85601 | Q9H583 | 1.0138   |
| 60783 | Q85601 | Q96LR2 | 0.579    |
| 60784 | Q85601 | P78395 | 0.73702  |
| 60785 | Q85601 | Q9Y2X3 | 0.68675  |
| 60786 | Q85601 | Q9UN37 | 0.51619  |
| 60787 | Q85601 | O43482 | 0.49992  |
| 60788 | Q85601 | Q9BYR6 | 0.36976  |
| 60789 | Q85601 | Q6P1K2 | 1.2022   |
| 60790 | Q85601 | P00338 | 0.51979  |
| 60791 | Q85601 | Q8WXB4 | 0.4507   |
| 60792 | Q85601 | Q14257 | 0.59027  |
| 60793 | Q85601 | O75564 | 0.32629  |
| 60794 | Q85601 | Q9GZM8 | 0.11916  |
| 60795 | Q85601 | Q9BUP3 | 0.15572  |
| 60796 | Q85601 | A6NEV1 | 0.016027 |
| 60797 | Q85601 | O14595 | 0.27475  |
| 60798 | Q85601 | Q06730 | 0.1945   |
| 60799 | Q85601 | O14662 | 0.50559  |
| 60800 | Q85601 | Q6NXP2 | 0.56949  |

|       |        |        |         |
|-------|--------|--------|---------|
| 60801 | Q85601 | E9PI22 | 0.12166 |
| 60802 | Q85601 | Q6QNY1 | 0.79556 |
| 60803 | Q85601 | P78347 | 0.59367 |
| 60804 | Q85601 | Q8NHY2 | 1.1508  |
| 60805 | Q85601 | Q6K0P9 | 0.25406 |
| 60806 | Q85601 | Q93074 | 0.48189 |
| 60807 | Q85601 | O75683 | 0.18732 |
| 60808 | Q85601 | Q9UHR5 | 1.233   |
| 60809 | Q85601 | Q7RTV3 | 0.42458 |
| 60810 | Q85601 | Q9P000 | 0.15603 |
| 60811 | Q85601 | Q14232 | 0.13937 |
| 60812 | Q85601 | Q5H9R7 | 0.89784 |
| 60813 | Q85601 | Q06587 | 0.8641  |
| 60814 | Q85601 | Q3LI68 | 0.56205 |
| 60815 | Q85601 | Q9Y237 | 0.38149 |
| 60816 | Q85601 | Q9GZR1 | 0.44343 |
| 60817 | Q85601 | Q9Y253 | 0.38148 |
| 60818 | Q85601 | P24941 | 0.64414 |
| 60819 | Q85601 | Q9H091 | 0.3431  |
| 60820 | Q85601 | Q99700 | 0.7383  |
| 60821 | Q85601 | O75391 | 0.40327 |
| 60822 | Q85601 | Q8TBC5 | 0.14382 |
| 60823 | Q85601 | Q9BY31 | 0.20447 |
| 60824 | Q85601 | Q9UNA4 | 0.38806 |
| 60825 | Q85601 | Q14498 | 0.6239  |
| 60826 | Q85601 | Q9UBD0 | 1.1552  |
| 60827 | Q85601 | Q9HB71 | 0.55656 |
| 60828 | Q85601 | Q9Y3E7 | 0.80521 |
| 60829 | Q85601 | Q9Y623 | 0.51716 |
| 60830 | Q85601 | Q8TF09 | 0.37628 |
| 60831 | Q85601 | Q9UBB5 | 1.1835  |
| 60832 | Q85601 | Q8NEG2 | 0.14697 |
| 60833 | Q85601 | Q969Q6 | 0.30938 |
| 60834 | Q85601 | P62736 | 0.1273  |
| 60835 | Q85601 | P42025 | 0.42566 |
| 60836 | Q85601 | Q9HD42 | 1.0544  |
| 60837 | Q85601 | Q7L8S5 | 0.1957  |
| 60838 | Q85601 | Q14264 | 0.13723 |
| 60839 | Q85601 | P27695 | 0.47938 |
| 60840 | Q85601 | Q05639 | 0.48937 |
| 60841 | Q85601 | A6QL64 | 0.1977  |
| 60842 | Q85601 | O75478 | 0.47717 |
| 60843 | Q85601 | Q8NC26 | 0.43748 |
| 60844 | Q85601 | Q9H3M7 | 0.80144 |
| 60845 | Q85601 | P0C7X3 | 0.21452 |
| 60846 | Q85601 | Q9NZI5 | 0.55032 |
| 60847 | Q85601 | Q13907 | 0.36557 |
| 60848 | Q85601 | Q8TAT6 | 0.54294 |
| 60849 | Q85601 | Q96KN1 | 0.41804 |
| 60850 | Q85601 | Q8IXQ9 | 0.40774 |
| 60851 | Q85601 | Q6NX49 | 0.23154 |
| 60852 | Q85601 | P11161 | 0.48778 |
| 60853 | Q85601 | Q9Y6X3 | 1.0014  |
| 60854 | Q85601 | Q9UKF6 | 0.65374 |
| 60855 | Q85601 | Q9P0J6 | 0.28738 |
| 60856 | Q85601 | Q5TEC3 | 0.30549 |
| 60857 | Q85601 | P52294 | 1.099   |
| 60858 | Q85601 | Q9H4S2 | 0.25468 |
| 60859 | Q85601 | Q8N5R6 | 0.46276 |
| 60860 | Q85601 | Q01664 | 0.54678 |
| 60861 | Q85601 | Q86Y25 | 0.32151 |
| 60862 | Q85601 | Q5PRF9 | 0.67729 |
| 60863 | Q85601 | Q9BVP2 | 0.22073 |
| 60864 | Q85601 | Q53GL7 | 0.52503 |
| 60865 | Q85601 | Q9HB07 | 0.2432  |
| 60866 | Q85601 | Q92539 | 0.64055 |
| 60867 | Q85601 | O43167 | 0.66443 |
| 60868 | Q85601 | Q9UL42 | 0.84009 |
| 60869 | Q85601 | O00161 | 0.86656 |
| 60870 | Q85601 | Q9NY43 | 0.42222 |
| 60871 | Q85601 | Q99676 | 0.33301 |
| 60872 | Q85601 | Q9NU63 | 0.26501 |
| 60873 | Q85601 | Q58F21 | 0.28359 |
| 60874 | Q85601 | Q9UEG4 | 0.32458 |
| 60875 | Q85601 | Q86VP3 | 0.24427 |
| 60876 | Q85601 | P53539 | 0.05508 |

|       |        |        |          |
|-------|--------|--------|----------|
| 60877 | Q85601 | P17861 | 0.64185  |
| 60878 | Q85601 | Q9Y3Y4 | 0.72184  |
| 60879 | Q85601 | P30084 | 0.14954  |
| 60880 | Q85601 | Q6I9Y2 | 0.70776  |
| 60881 | Q85601 | O15519 | 0.24415  |
| 60882 | Q85601 | A6NI79 | 0.79453  |
| 60883 | Q85601 | Q96HW7 | 0.58748  |
| 60884 | Q85601 | O75821 | 0.45305  |
| 60885 | Q85601 | Q1W6H9 | 1.0334   |
| 60886 | Q85601 | O14777 | 0.64654  |
| 60887 | Q85601 | Q8TAE8 | 0.98919  |
| 60888 | Q85601 | P31269 | 0.61174  |
| 60889 | Q85601 | Q96QG7 | 0.27773  |
| 60890 | Q85601 | Q96N03 | 0.30691  |
| 60891 | Q85601 | Q96PE6 | 0.25817  |
| 60892 | Q85601 | P49790 | 1.1051   |
| 60893 | Q85601 | Q01860 | 0.71185  |
| 60894 | Q85601 | Q15544 | 1.0988   |
| 60895 | Q85601 | O14802 | 0.23159  |
| 60896 | Q85601 | Q14676 | 0.67893  |
| 60897 | Q85601 | Q8N1A0 | 0.51757  |
| 60898 | Q85601 | Q9UNY4 | 0.54198  |
| 60899 | Q85601 | Q03060 | 0.52421  |
| 60900 | Q85601 | Q96AQ6 | 0.6418   |
| 60901 | Q85601 | P09132 | 0.19159  |
| 60902 | Q85601 | O00716 | 1.0909   |
| 60903 | Q85601 | Q9UID3 | 0.058561 |
| 60904 | Q85601 | Q9BR11 | 0.030716 |
| 60905 | Q85601 | O43684 | 0.73129  |
| 60906 | Q85601 | Q9H246 | 0.062588 |
| 60907 | Q85601 | A6NF83 | 0.54771  |
| 60908 | Q85601 | P63167 | 1.4751   |
| 60909 | Q85601 | Q07866 | 0.69561  |
| 60910 | Q85601 | Q6ZN30 | 0.27806  |
| 60911 | Q85601 | O15382 | 0.083993 |
| 60912 | Q85601 | Q9BWM5 | 0.31039  |
| 60913 | Q85601 | O14604 | 0.3618   |
| 60914 | Q85601 | Q8IZD2 | 0.38167  |
| 60915 | Q85601 | Q14493 | 0.76474  |
| 60916 | Q85601 | Q8WTV1 | 0.9441   |
| 60917 | Q85601 | O00139 | 0.47037  |
| 60918 | Q85601 | Q5JNZ5 | 0.58749  |
| 60919 | Q85601 | P46100 | 0.70071  |
| 60920 | Q85601 | P52743 | 0.35842  |
| 60921 | Q85601 | Q9NXR7 | 0.45196  |
| 60922 | Q85601 | Q9H5J8 | 0.98599  |
| 60923 | Q85601 | Q96K75 | 0.28997  |
| 60924 | Q85601 | Q13227 | 0.89008  |
| 60925 | Q85601 | Q96B26 | 0.66329  |
| 60926 | Q85601 | Q7L5N1 | 1.1436   |
| 60927 | Q85601 | O60832 | 0.62067  |
| 60928 | Q85601 | Q00444 | 0.26861  |
| 60929 | Q85601 | O75410 | 0.81047  |
| 60930 | Q85601 | Q8TF46 | 0.24037  |
| 60931 | Q85601 | Q15072 | 0.26529  |
| 60932 | Q85601 | P55895 | 0.72084  |
| 60933 | Q85601 | Q8N5D0 | 0.55289  |
| 60934 | Q85601 | Q08379 | 0.31744  |
| 60935 | Q85601 | O60645 | 0.40819  |
| 60936 | Q85601 | P0C7I6 | 0.56164  |
| 60937 | Q85601 | P46777 | 1.108    |
| 60938 | Q85601 | Q14749 | 0.6289   |
| 60939 | Q85601 | P07320 | 0.50881  |
| 60940 | Q85601 | Q13105 | 0.51774  |
| 60941 | Q85601 | Q9HBM1 | 0.76436  |
| 60942 | Q85601 | P52747 | 0.79534  |
| 60943 | Q85601 | P28324 | 1.4499   |
| 60944 | Q85601 | Q9Y3V2 | 0.87447  |
| 60945 | Q85601 | Q8TEE9 | 0.96706  |
| 60946 | Q85601 | Q9Y224 | 1.5525   |
| 60947 | Q85601 | Q96EY1 | 0.43061  |
| 60948 | Q85601 | Q86UT8 | 0.63409  |
| 60949 | Q85601 | Q9UJY1 | 0.44665  |
| 60950 | Q85601 | Q8N5M1 | 0.46241  |
| 60951 | Q85601 | Q96G03 | 0.34124  |
| 60952 | Q85601 | Q9H0B6 | 0.69114  |

|       |        |        |          |
|-------|--------|--------|----------|
| 60953 | Q85601 | O15318 | 0.32016  |
| 60954 | Q85601 | Q969I3 | 0.28917  |
| 60955 | Q85601 | Q6UB98 | 0.44273  |
| 60956 | Q85601 | Q9NPJ6 | 0.88491  |
| 60957 | Q85601 | Q13887 | 0.40176  |
| 60958 | Q85601 | P20749 | 0.41947  |
| 60959 | Q85601 | P78318 | 0.70034  |
| 60960 | Q85601 | Q9UKT9 | 0.49262  |
| 60961 | Q85601 | Q9H4B6 | 0.6298   |
| 60962 | Q85601 | Q9UJT2 | 0.51896  |
| 60963 | Q85601 | Q96PM9 | 0.4507   |
| 60964 | Q85601 | Q99638 | 0.60089  |
| 60965 | Q85601 | P53992 | 1.05     |
| 60966 | Q85601 | Q9BYQ4 | 0.17342  |
| 60967 | Q85601 | P17035 | 0.25157  |
| 60968 | Q85601 | Q05084 | 0.42095  |
| 60969 | Q85601 | P09661 | 0.48367  |
| 60970 | Q85601 | Q8NCF5 | 0.5366   |
| 60971 | Q85601 | Q9NSB2 | 0.52968  |
| 60972 | Q85601 | P51587 | 0.20156  |
| 60973 | Q85601 | Q6IQ49 | 0.22664  |
| 60974 | Q85601 | Q96I24 | 0.46909  |
| 60975 | Q85601 | P61457 | 1.0544   |
| 60976 | Q85601 | Q86W56 | 0.78896  |
| 60977 | Q85601 | Q86V20 | 0.53968  |
| 60978 | Q85601 | Q9NXV6 | 0.6297   |
| 60979 | Q85601 | O95551 | 0.85587  |
| 60980 | Q85601 | Q9BSW2 | 0.81632  |
| 60981 | Q85601 | Q495M9 | 0.30418  |
| 60982 | Q85601 | Q8NF64 | 1.3998   |
| 60983 | Q85601 | Q9UJG1 | 0.52318  |
| 60984 | Q85601 | O43918 | 1.1122   |
| 60985 | Q85601 | Q15631 | 0.67878  |
| 60986 | Q85601 | P40926 | 0.2868   |
| 60987 | Q85601 | P62917 | 0.8426   |
| 60988 | Q85601 | Q7Z353 | 0.22476  |
| 60989 | Q85601 | Q96AV8 | 0.36573  |
| 60990 | Q85601 | Q9ULD2 | 0.50254  |
| 60991 | Q85601 | A6NCI8 | 0.74095  |
| 60992 | Q85601 | Q9ULX9 | 0.43921  |
| 60993 | Q85601 | Q8NEQ6 | 0.13649  |
| 60994 | Q85601 | Q16401 | 0.69289  |
| 60995 | Q85601 | Q96N16 | 0.82953  |
| 60996 | Q85601 | Q07687 | 0.45813  |
| 60997 | Q85601 | Q86Y46 | 0.38819  |
| 60998 | Q85601 | Q9H0R1 | 0.22943  |
| 60999 | Q85601 | Q8TAU3 | 0.30086  |
| 61000 | Q85601 | Q9BT81 | 0.41682  |
| 61001 | Q85601 | Q86X51 | 0.021782 |
| 61002 | Q85601 | Q9NSD4 | 0.3085   |
| 61003 | Q85601 | Q8HWS3 | 0.32893  |
| 61004 | Q85601 | Q9BSC4 | 0.22094  |
| 61005 | Q85601 | Q9NVC6 | 0.57019  |
| 61006 | Q85601 | Q8WYK2 | 0.33701  |
| 61007 | Q85601 | Q92901 | 0.53692  |
| 61008 | Q85601 | O60784 | 0.37325  |
| 61009 | Q85601 | Q14938 | 0.21226  |
| 61010 | Q85601 | O43513 | 1.1362   |
| 61011 | Q85601 | A6NGN4 | 0.31479  |
| 61012 | Q85601 | P33240 | 0.37136  |
| 61013 | Q85601 | Q9BRV8 | 0.57655  |
| 61014 | Q85601 | Q86XI8 | 0.48333  |
| 61015 | Q85601 | Q15561 | 0.86197  |
| 61016 | Q85601 | Q15021 | 0.90272  |
| 61017 | Q85601 | A6NCL1 | 0.23306  |
| 61018 | Q85601 | Q86V87 | 0.29416  |
| 61019 | Q85601 | Q5JVG8 | 0.43626  |
| 61020 | Q85601 | Q9ULJ6 | 0.67462  |
| 61021 | Q85601 | Q9Y2G9 | 0.50646  |
| 61022 | Q85601 | P81877 | 0.47332  |
| 61023 | Q85601 | Q8TDH9 | 0.16483  |
| 61024 | Q85601 | Q68CZ6 | 0.65651  |
| 61025 | Q85601 | O95721 | 0.41187  |
| 61026 | Q85601 | Q8IUC2 | 0.19997  |
| 61027 | Q85601 | Q01844 | 0.60555  |
| 61028 | Q85601 | Q15366 | 0.84759  |



|       |        |        |          |
|-------|--------|--------|----------|
| 61029 | Q85601 | Q86VW0 | 0.21411  |
| 61030 | Q85601 | Q69YH5 | 0.86736  |
| 61031 | Q85601 | P98182 | 0.24385  |
| 61032 | Q85601 | Q9ULD9 | 1.0374   |
| 61033 | Q85601 | Q86SX3 | 1.3695   |
| 61034 | Q85601 | Q99856 | 0.69112  |
| 61035 | Q85601 | Q9H1B7 | 1.0383   |
| 61036 | Q85601 | Q01094 | 0.79845  |
| 61037 | Q85601 | Q9HC52 | 0.82264  |
| 61038 | Q85601 | Q6P161 | 0.096586 |
| 61039 | Q85601 | Q9UMX0 | 0.75358  |
| 61040 | Q85601 | O14770 | 0.47655  |
| 61041 | Q85601 | P23760 | 0.89634  |
| 61042 | Q85601 | Q96DB5 | 0.40071  |
| 61043 | Q85601 | Q9Y605 | 1.0114   |
| 61044 | Q85601 | Q8N7H5 | 0.93884  |
| 61045 | Q85601 | Q9UI10 | 0.34591  |
| 61046 | Q85601 | Q9NZI7 | 0.2809   |
| 61047 | Q85601 | O00189 | 0.39573  |
| 61048 | Q85601 | Q13136 | 0.27847  |
| 61049 | Q85601 | P78560 | 0.52916  |
| 61050 | Q85601 | P18124 | 0.53419  |
| 61051 | Q85601 | P46781 | 0.93932  |
| 61052 | Q85601 | O15144 | 0.22199  |
| 61053 | Q85601 | Q9Y4X5 | 0.51813  |
| 61054 | Q85601 | P49419 | 0.60607  |
| 61055 | Q85601 | Q16186 | 0.59685  |
| 61056 | Q85601 | Q5FBB7 | 0.84022  |
| 61057 | Q85601 | A6NG73 | 0.26877  |
| 61058 | Q85601 | Q9P2M7 | 0.44775  |
| 61059 | Q85601 | Q86X95 | 1.1472   |
| 61060 | Q85601 | P0CJ86 | 0.27808  |
| 61061 | Q85601 | P40855 | 0.18588  |
| 61062 | Q85601 | Q7L1V2 | 0.64982  |
| 61063 | Q85601 | Q96GV9 | 0.42859  |
| 61064 | Q85601 | P62875 | 0.16371  |
| 61065 | Q85601 | P11308 | 0.5673   |
| 61066 | Q85601 | P51955 | 0.28986  |
| 61067 | Q85601 | P15408 | 0.58289  |
| 61068 | Q85601 | O43805 | 0.62133  |
| 61069 | Q85601 | O95997 | 0.95013  |
| 61070 | Q85601 | O95198 | 0.43876  |
| 61071 | Q85601 | Q6NVV1 | 0.30606  |
| 61072 | Q85601 | Q93034 | 0.7442   |
| 61073 | Q85601 | Q9NYF8 | 1.2225   |
| 61074 | Q85601 | Q86Y13 | 0.35301  |
| 61075 | Q85601 | A6NLW8 | 0.27808  |
| 61076 | Q85601 | Q86SZ2 | 0.54013  |
| 61077 | Q85601 | Q9NVW2 | 0.45447  |
| 61078 | Q85601 | P54274 | 0.46876  |
| 61079 | Q85601 | Q96GG9 | 0.26518  |
| 61080 | Q85601 | Q9NR55 | 0.3675   |
| 61081 | Q85601 | P55197 | 1.5024   |
| 61082 | Q85601 | Q9UHR6 | 0.88837  |
| 61083 | Q85601 | Q99698 | 0.23958  |
| 61084 | Q85601 | Q8TD31 | 0.18278  |
| 61085 | Q85601 | P25398 | 0.67193  |
| 61086 | Q85601 | Q8NCY6 | 0.066453 |
| 61087 | Q85601 | P60413 | 0.17342  |
| 61088 | Q85601 | Q9NUQ3 | 0.71742  |
| 61089 | Q85601 | Q8N9G6 | 0.58181  |
| 61090 | Q85601 | Q6MZP7 | 0.61771  |
| 61091 | Q85601 | Q9BUH8 | 0.43846  |
| 61092 | Q85601 | Q9UHA2 | 0.13257  |
| 61093 | Q85601 | Q8IY31 | 0.55516  |
| 61094 | Q85601 | Q70EL1 | 0.37528  |
| 61095 | Q85601 | Q9Y5J3 | 0.33498  |
| 61096 | Q85601 | Q8N7K0 | 0.35685  |
| 61097 | Q85601 | Q2NL98 | 0.42183  |
| 61098 | Q85601 | Q5VSR9 | 0.17798  |
| 61099 | Q85601 | Q86YF9 | 0.15496  |
| 61100 | Q85601 | Q9ULQ0 | 0.72106  |
| 61101 | Q85601 | O00410 | 1.2006   |
| 61102 | Q85601 | Q96LA8 | 0.73526  |
| 61103 | Q85601 | Q5JVX7 | 0.25806  |
| 61104 | Q85601 | Q8IX15 | 0.52968  |

|       |        |        |          |
|-------|--------|--------|----------|
| 61105 | Q85601 | P60866 | 0.58002  |
| 61106 | Q85601 | Q9H7C4 | 0.39325  |
| 61107 | Q85601 | P13640 | 0.70858  |
| 61108 | Q85601 | P17039 | 0.24382  |
| 61109 | Q85601 | Q96DF8 | 0.87719  |
| 61110 | Q85601 | Q8NA72 | 0.33054  |
| 61111 | Q85601 | Q12874 | 0.4347   |
| 61112 | Q85601 | Q14739 | 0.26015  |
| 61113 | Q85601 | Q9UJW9 | 1.3317   |
| 61114 | Q85601 | Q6L8Q7 | 0.21804  |
| 61115 | Q85601 | Q5T0F9 | 0.4287   |
| 61116 | Q85601 | P15884 | 0.63294  |
| 61117 | Q85601 | Q5D1E8 | 0.55548  |
| 61118 | Q85601 | O76014 | 0.56535  |
| 61119 | Q85601 | Q6P2D0 | 0.24529  |
| 61120 | Q85601 | Q15599 | 0.46943  |
| 61121 | Q85601 | A6NP61 | 0.38149  |
| 61122 | Q85601 | Q8WVJ9 | 0.61808  |
| 61123 | Q85601 | Q13794 | 0.42491  |
| 61124 | Q85601 | Q99747 | 0.52433  |
| 61125 | Q85601 | Q86YD1 | 0.65604  |
| 61126 | Q85601 | Q9H9Q4 | 0.49527  |
| 61127 | Q85601 | O43809 | 0.59647  |
| 61128 | Q85601 | Q96ME1 | 0.018414 |
| 61129 | Q85601 | Q9NQE9 | 0.43583  |
| 61130 | Q85601 | O43236 | 0.35007  |
| 61131 | Q85601 | Q96M91 | 0.3251   |
| 61132 | Q85601 | Q8N393 | 0.2815   |
| 61133 | Q85601 | Q9HCX3 | 0.2381   |
| 61134 | Q85601 | Q9NX46 | 0.46527  |
| 61135 | Q85601 | Q6ZNH5 | 0.29511  |
| 61136 | Q85601 | Q96IU2 | 0.84291  |
| 61137 | Q85601 | Q96NB1 | 0.18363  |
| 61138 | Q85601 | P55210 | 0.2495   |
| 61139 | Q85601 | Q9NWD9 | 0.33708  |
| 61140 | Q85601 | P60409 | 0.17342  |
| 61141 | Q85601 | Q9Y5S9 | 0.60352  |
| 61142 | Q85601 | Q6P9A1 | 0.4386   |
| 61143 | Q85601 | P51114 | 0.046507 |
| 61144 | Q85601 | Q15796 | 0.62535  |
| 61145 | Q85601 | Q99619 | 0.56371  |
| 61146 | Q85601 | Q14839 | 0.76144  |
| 61147 | Q85601 | Q02543 | 0.67535  |
| 61148 | Q85601 | Q9BVW5 | 1.0943   |
| 61149 | Q85601 | Q8NCE0 | 0.44197  |
| 61150 | Q85601 | Q8NI08 | 0.78563  |
| 61151 | Q85601 | P13010 | 0.46288  |
| 61152 | Q85601 | P17482 | 1.0884   |
| 61153 | Q85601 | Q9H503 | 0.34451  |
| 61154 | Q85601 | Q96FZ2 | 0.81589  |
| 61155 | Q85601 | Q5TBE3 | 0.27805  |
| 61156 | Q85601 | Q96CB9 | 0.62356  |
| 61157 | Q85601 | Q5VZF2 | 0.098392 |
| 61158 | Q85601 | Q9Y5P8 | 0.61544  |
| 61159 | Q85601 | Q2NL82 | 0.27965  |
| 61160 | Q85601 | Q13287 | 0.53128  |
| 61161 | Q85601 | Q96FN9 | 0.19276  |
| 61162 | Q85601 | Q86UP8 | 0.069336 |
| 61163 | Q85601 | Q5T953 | 0.10715  |
| 61164 | Q85601 | P12956 | 0.41369  |
| 61165 | Q85601 | Q96LW9 | 0.29347  |
| 61166 | Q85601 | P20226 | 0.99054  |
| 61167 | Q85601 | Q6ZMV5 | 0.24311  |
| 61168 | Q85601 | Q96IV0 | 0.54749  |
| 61169 | Q85601 | P20265 | 0.63686  |
| 61170 | Q85601 | Q9HCM9 | 0.51307  |
| 61171 | Q85601 | Q5EBL4 | 0.48196  |
| 61172 | Q85601 | P45877 | 0.41838  |
| 61173 | Q85601 | Q7Z7F1 | 0.2923   |
| 61174 | Q85601 | Q9BWJ5 | 0.39471  |
| 61175 | Q85601 | Q8N6U2 | 0.1156   |
| 61176 | Q85601 | P0C7M6 | 0.015638 |
| 61177 | Q85601 | O95359 | 0.38902  |
| 61178 | Q85601 | Q8IYX8 | 0.14399  |
| 61179 | Q85601 | Q10586 | 0.41727  |
| 61180 | Q85601 | Q9HCM7 | 0.68293  |

|       |        |         |          |
|-------|--------|---------|----------|
| 61181 | Q85601 | Q9ULV3  | 0.30359  |
| 61182 | Q85601 | P62906  | 0.5806   |
| 61183 | Q85601 | Q16670  | 0.27829  |
| 61184 | Q85601 | P10073  | 0.37085  |
| 61185 | Q85601 | Q8TEL6  | 0.4024   |
| 61186 | Q85601 | Q5VZL5  | 0.66684  |
| 61187 | Q85601 | Q8N490  | 0.36256  |
| 61188 | Q85601 | O00321  | 0.33555  |
| 61189 | Q85601 | Q9NX55  | 0.28432  |
| 61190 | Q85601 | Q96P63  | 0.53297  |
| 61191 | Q85601 | P50914  | 0.91075  |
| 61192 | Q85601 | P78316  | 0.81914  |
| 61193 | Q85601 | Q9ULW6  | 0.63254  |
| 61194 | Q85601 | Q719H9  | 0.79244  |
| 61195 | Q85601 | O95238  | 0.28217  |
| 61196 | Q85601 | Q6KB66  | 0.27556  |
| 61197 | Q85601 | O95865  | 0.41795  |
| 61198 | Q85601 | O43257  | 0.32369  |
| 61199 | Q85601 | Q8N3J5  | 0.14718  |
| 61200 | Q85601 | Q9Y2Q1  | 0.5019   |
| 61201 | Q85601 | P0CJ85  | 0.27808  |
| 61202 | Q85601 | P47928  | 0.43184  |
| 61203 | Q85601 | Q9UBC3  | 0.29334  |
| 61204 | Q85601 | Q13501  | 0.49482  |
| 61205 | Q85601 | Q6IS14  | 0.27703  |
| 61206 | Q85601 | Q8TBY8  | 0.67192  |
| 61207 | Q85601 | Q16143  | 0.40639  |
| 61208 | Q85601 | Q9BQE4  | 0.34004  |
| 61209 | Q85601 | Q9P086  | 0.99267  |
| 61210 | Q85601 | Q5ZEY9  | 0.65143  |
| 61211 | Q85601 | P05204  | 0.3992   |
| 61212 | Q85601 | Q3BBV0  | 0.39434  |
| 61213 | Q85601 | Q96RT7  | 0.44028  |
| 61214 | Q85601 | Q8WXD5  | 0.86569  |
| 61215 | Q85601 | P46527  | 0.35121  |
| 61216 | Q85601 | Q68DY1  | 0.47479  |
| 61217 | Q85601 | Q9NVU7  | 0.45699  |
| 61218 | Q85601 | Q5TBB1  | 0.56804  |
| 61219 | Q85601 | P0C860  | 0.39201  |
| 61220 | Q85601 | Q8I WV8 | 0.312    |
| 61221 | Q85601 | Q96CW6  | 0.39619  |
| 61222 | Q85601 | Q13278  | 0.1053   |
| 61223 | Q85601 | Q13094  | 0.59128  |
| 61224 | Q85601 | Q9UN81  | 0.080004 |
| 61225 | Q85601 | P49910  | 0.75423  |
| 61226 | Q85601 | Q86TJ2  | 0.54197  |
| 61227 | Q85601 | Q9H840  | 0.86538  |
| 61228 | Q85601 | Q9HCI5  | 0.63819  |
| 61229 | Q85601 | O75177  | 0.65721  |
| 61230 | Q85601 | Q96MF7  | 0.68427  |
| 61231 | Q85601 | Q5VT98  | 0.19615  |
| 61232 | Q85601 | Q9BZK3  | 0.44131  |
| 61233 | Q85601 | Q6W2J9  | 0.42563  |
| 61234 | Q85601 | P62266  | 0.90541  |
| 61235 | Q85601 | Q8N988  | 0.45816  |
| 61236 | Q85601 | Q92748  | 1.0327   |
| 61237 | Q85601 | Q9NYT6  | 0.25802  |
| 61238 | Q85601 | P55345  | 0.38065  |
| 61239 | Q85601 | Q9H1L0  | 0.011592 |
| 61240 | Q85601 | Q9BRA0  | 0.23411  |
| 61241 | Q85601 | O96028  | 0.44617  |
| 61242 | Q85601 | Q96H12  | 0.59705  |
| 61243 | Q85601 | A1L190  | 0.59889  |
| 61244 | Q85601 | Q15102  | 0.23493  |
| 61245 | Q85601 | Q6IEG0  | 0.38447  |
| 61246 | Q85601 | Q9NS91  | 0.29817  |
| 61247 | Q85601 | Q5T4T6  | 1.1728   |
| 61248 | Q85601 | O75081  | 1.2518   |
| 61249 | Q85601 | P49750  | 1.0592   |
| 61250 | Q85601 | Q8IU60  | 0.87575  |
| 61251 | Q85601 | A8MZA4  | 0.43599  |
| 61252 | Q85601 | P40429  | 0.76028  |
| 61253 | Q85601 | Q9HBE1  | 0.18618  |
| 61254 | Q85601 | P52741  | 0.26593  |
| 61255 | Q85601 | Q8N9Y4  | 1.0652   |
| 61256 | Q85601 | Q96KW2  | 0.51785  |

|       |        |        |           |
|-------|--------|--------|-----------|
| 61257 | Q85601 | O75674 | 0.40441   |
| 61258 | Q85601 | O15481 | 0.0040392 |
| 61259 | Q85601 | O75791 | 1.0297    |
| 61260 | Q85601 | Q96IR2 | 0.3621    |
| 61261 | Q85601 | Q8N3C0 | 0.37436   |
| 61262 | Q85601 | O60299 | 0.4493    |
| 61263 | Q85601 | Q13542 | 0.30615   |
| 61264 | Q85601 | Q96QF0 | 0.61439   |
| 61265 | Q85601 | Q8NEZ5 | 0.80077   |
| 61266 | Q85601 | Q14693 | 0.40171   |
| 61267 | Q85601 | Q8WVP5 | 0.51467   |
| 61268 | Q85601 | P17021 | 0.21987   |
| 61269 | Q85601 | Q13561 | 0.9038    |
| 61270 | Q85601 | O15061 | 0.69172   |
| 61271 | Q85601 | Q969P5 | 0.18526   |
| 61272 | Q85601 | P35227 | 0.76277   |
| 61273 | Q85601 | A8MYZ0 | 0.14353   |
| 61274 | Q85601 | O95561 | 0.43524   |
| 61275 | Q85601 | Q9UBC1 | 0.48716   |
| 61276 | Q85601 | Q8ND56 | 0.40244   |
| 61277 | Q85601 | P35638 | 0.7996    |
| 61278 | Q85601 | P32929 | 0.2836    |
| 61279 | Q85601 | O95782 | 0.44251   |
| 61280 | Q85601 | P29372 | 0.48233   |
| 61281 | Q85601 | Q9UNK9 | 0.1279    |
| 61282 | Q85601 | Q12986 | 0.30709   |
| 61283 | Q85601 | Q8WWL7 | 0.93873   |
| 61284 | Q85601 | P98168 | 0.73128   |
| 61285 | Q85601 | Q13761 | 0.78343   |
| 61286 | Q85601 | P24864 | 0.64356   |
| 61287 | Q85601 | P19367 | 0.3186    |
| 61288 | Q85601 | Q9NPF5 | 0.95515   |
| 61289 | Q85601 | Q96RS6 | 0.23411   |
| 61290 | Q85601 | Q9UJ78 | 0.1443    |
| 61291 | Q85601 | Q5MJ70 | 0.15217   |
| 61292 | Q85601 | Q5SW24 | 0.17152   |
| 61293 | Q85601 | Q9BYG4 | 0.73056   |
| 61294 | Q85601 | Q92988 | 0.51984   |
| 61295 | Q85601 | P0CJ78 | 0.22175   |
| 61296 | Q85601 | Q8N9T8 | 0.89002   |
| 61297 | Q85601 | Q6XD76 | 0.3033    |
| 61298 | Q85601 | O60934 | 0.21425   |
| 61299 | Q85601 | P62888 | 0.67122   |
| 61300 | Q85601 | P41208 | 0.67183   |
| 61301 | Q85601 | Q969F1 | 0.57203   |
| 61302 | Q85601 | Q9UNQ2 | 0.22422   |
| 61303 | Q85601 | Q9NRD1 | 0.22461   |
| 61304 | Q85601 | P36543 | 0.25967   |
| 61305 | Q85601 | Q96GE5 | 0.44626   |
| 61306 | Q85601 | Q5F1R6 | 0.13209   |
| 61307 | Q85601 | P59047 | 0.32635   |
| 61308 | Q85601 | Q9H1J1 | 0.7755    |
| 61309 | Q85601 | Q9HAZ2 | 0.41573   |
| 61310 | Q85601 | Q14781 | 0.78798   |
| 61311 | Q85601 | Q9BZW7 | 0.32881   |
| 61312 | Q85601 | Q14CS0 | 0.49805   |
| 61313 | Q85601 | Q8NCU7 | 0.35559   |
| 61314 | Q85601 | Q96ST3 | 0.75696   |
| 61315 | Q85601 | Q9H9D4 | 0.59532   |
| 61316 | Q85601 | Q96K58 | 0.24355   |
| 61317 | Q85601 | Q03938 | 0.49372   |
| 61318 | Q85601 | Q93062 | 0.71565   |
| 61319 | Q85601 | O75505 | 0.22476   |
| 61320 | Q85601 | Q9UNS1 | 0.58477   |
| 61321 | Q85601 | Q6P1L8 | 0.48917   |
| 61322 | Q85601 | Q8TBZ0 | 0.42109   |
| 61323 | Q85601 | Q9UH90 | 0.47944   |
| 61324 | Q85601 | P25963 | 0.65776   |
| 61325 | Q85601 | P63313 | 0.34646   |
| 61326 | Q85601 | Q9Y314 | 1.0165    |
| 61327 | Q85601 | Q13617 | 0.63773   |
| 61328 | Q85601 | P43357 | 0.30691   |
| 61329 | Q85601 | Q15819 | 0.60636   |
| 61330 | Q85601 | Q93073 | 0.50624   |
| 61331 | Q85601 | P17041 | 0.20836   |
| 61332 | Q85601 | Q9Y4Y9 | 0.65294   |

|       |        |        |           |
|-------|--------|--------|-----------|
| 61333 | Q85601 | O60381 | 0.20822   |
| 61334 | Q85601 | Q9H2U1 | 0.30851   |
| 61335 | Q85601 | A5D8V6 | 0.33266   |
| 61336 | Q85601 | Q69YI7 | 0.92402   |
| 61337 | Q85601 | P05813 | 0.11642   |
| 61338 | Q85601 | P10589 | 0.337     |
| 61339 | Q85601 | Q3KRA6 | 0.53899   |
| 61340 | Q85601 | Q8IUR0 | 0.78953   |
| 61341 | P03346 | O95166 | 0.35361   |
| 61342 | P03346 | Q96HJ3 | 0.0077221 |
| 61343 | P03346 | O43402 | 0.58768   |
| 61344 | P03346 | Q3LI63 | 0.36736   |
| 61345 | P03346 | O75390 | 0.2886    |
| 61346 | P03346 | Q5T751 | 0.02884   |
| 61347 | P03346 | Q13439 | 0.91311   |
| 61348 | P03346 | Q86VQ1 | 0.20041   |
| 61349 | P03346 | Q15172 | 0.49945   |
| 61350 | P03346 | Q8TEM1 | 0.3066    |
| 61351 | P03346 | Q13425 | 0.67643   |
| 61352 | P03346 | Q08J23 | 0.77685   |
| 61353 | P03346 | Q6PCB5 | 0.32217   |
| 61354 | P03346 | O60921 | 0.92444   |
| 61355 | P03346 | P08107 | 0.62758   |
| 61356 | P03346 | Q86UQ0 | 0.27382   |
| 61357 | P03346 | Q9HCE5 | 0.2425    |
| 61358 | P03346 | Q9BVJ6 | 1.0223    |
| 61359 | P03346 | P13646 | 0.40838   |
| 61360 | P03346 | E7ETH6 | 0.29208   |
| 61361 | P03346 | Q9UPR3 | 1.1579    |
| 61362 | P03346 | Q6PRD7 | 0.20041   |
| 61363 | P03346 | Q96T92 | 0.4754    |
| 61364 | P03346 | Q9Y6N9 | 0.45149   |
| 61365 | P03346 | Q9NVU0 | 0.47837   |
| 61366 | P03346 | Q15723 | 1.5382    |
| 61367 | P03346 | Q5F1R6 | 0.29473   |
| 61368 | P03346 | A6NK53 | 0.4412    |
| 61369 | P03346 | O60437 | 0.95254   |
| 61370 | P03346 | Q6R2W3 | 0.66866   |
| 61371 | P03346 | A6NKD9 | 0.21102   |
| 61372 | P03346 | P02792 | 0.20776   |
| 61373 | P03346 | Q92681 | 0.65264   |
| 61374 | P03346 | Q12888 | 0.93194   |
| 61375 | P03346 | Q13596 | 0.47468   |
| 61376 | P03346 | O75179 | 0.54311   |
| 61377 | P03346 | Q6P3S1 | 0.27403   |
| 61378 | P03346 | Q5JU85 | 0.25055   |
| 61379 | P03346 | P31271 | 0.35862   |
| 61380 | P03346 | Q06330 | 0.63292   |
| 61381 | P03346 | B2CW77 | 0.37007   |
| 61382 | P03346 | Q15014 | 0.16261   |
| 61383 | P03346 | Q9NVM9 | 1.2737    |
| 61384 | P03346 | P37802 | 0.61307   |
| 61385 | P03346 | Q56VL3 | 0.10111   |
| 61386 | P03346 | Q8TEX9 | 0.72929   |
| 61387 | P03346 | Q99081 | 0.71921   |
| 61388 | P03346 | Q9BSI4 | 0.40892   |
| 61389 | P03346 | A8MU46 | 0.35118   |
| 61390 | P03346 | Q6KB66 | 0.51027   |
| 61391 | P03346 | Q9NSC5 | 0.65663   |
| 61392 | P03346 | Q7Z3K3 | 0.63786   |
| 61393 | P03346 | Q15773 | 0.4712    |
| 61394 | P03346 | Q9NZJ0 | 0.87744   |
| 61395 | P03346 | P85037 | 0.30304   |
| 61396 | P03346 | Q9NPG3 | 1.0533    |
| 61397 | P03346 | Q5VZR2 | 0.13835   |
| 61398 | P03346 | Q3C1V8 | 0.95636   |
| 61399 | P03346 | Q8IYI6 | 0.72129   |
| 61400 | P03346 | Q06945 | 0.26791   |
| 61401 | P03346 | P43357 | 0.66787   |
| 61402 | P03346 | Q9BW60 | 0.17942   |
| 61403 | P03346 | A8MU93 | 0.0077221 |
| 61404 | P03346 | Q66LE6 | 0.54012   |
| 61405 | P03346 | Q96G01 | 0.30728   |
| 61406 | P03346 | Q5T870 | 0.016444  |
| 61407 | P03346 | P59282 | 0.20041   |
| 61408 | P03346 | P0CL83 | 0.32217   |

|       |        |        |           |
|-------|--------|--------|-----------|
| 61409 | P03346 | Q9NQG7 | 0.47425   |
| 61410 | P03346 | Q9Y606 | 0.54269   |
| 61411 | P03346 | Q9BSU1 | 0.48715   |
| 61412 | P03346 | P15924 | 0.39773   |
| 61413 | P03346 | P10244 | 0.90277   |
| 61414 | P03346 | Q6SJ96 | 0.62171   |
| 61415 | P03346 | Q9NSI2 | 0.0077221 |
| 61416 | P03346 | Q3KNS6 | 0.31436   |
| 61417 | P03346 | P53805 | 0.89744   |
| 61418 | P03346 | Q5T5Y3 | 0.24315   |
| 61419 | P03346 | Q9NQ39 | 0.26641   |
| 61420 | P03346 | O75382 | 0.48695   |
| 61421 | P03346 | Q0VFZ6 | 0.0077221 |
| 61422 | P03346 | Q15833 | 0.50672   |
| 61423 | P03346 | Q14781 | 1.0654    |
| 61424 | P03346 | Q13588 | 0.28579   |
| 61425 | P03346 | Q9BRD0 | 0.13004   |
| 61426 | P03346 | Q9Y5S9 | 0.96812   |
| 61427 | P03346 | Q8NEA9 | 0.49726   |
| 61428 | P03346 | Q8N1N4 | 0.51027   |
| 61429 | P03346 | P62136 | 0.62219   |
| 61430 | P03346 | Q9UI26 | 0.66815   |
| 61431 | P03346 | Q96NG5 | 0.31256   |
| 61432 | P03346 | O00204 | 0.59274   |
| 61433 | P03346 | Q8IYK2 | 0.089753  |
| 61434 | P03346 | P54105 | 1.0322    |
| 61435 | P03346 | Q5JVG2 | 0.31436   |
| 61436 | P03346 | Q9NPC8 | 0.37474   |
| 61437 | P03346 | Q5SZL2 | 0.35785   |
| 61438 | P03346 | Q5BKX5 | 0.0077221 |
| 61439 | P03346 | Q9UBW5 | 0.8379    |
| 61440 | P03346 | Q96FX7 | 0.26326   |
| 61441 | P03346 | Q96FV9 | 1.1932    |
| 61442 | P03346 | Q6P582 | 0.38127   |
| 61443 | P03346 | Q96A35 | 0.36869   |
| 61444 | P03346 | Q9Y6D9 | 0.93575   |
| 61445 | P03346 | Q9Y3Z3 | 0.24674   |
| 61446 | P03346 | Q9NRI5 | 0.41938   |
| 61447 | P03346 | O95400 | 0.99518   |
| 61448 | P03346 | Q9H0A8 | 0.8379    |
| 61449 | P03346 | P21283 | 0.2957    |
| 61450 | P03346 | Q969S3 | 0.77714   |
| 61451 | P03346 | Q13886 | 0.26545   |
| 61452 | P03346 | O14925 | 0.3672    |
| 61453 | P03346 | Q969S8 | 0.90291   |
| 61454 | P03346 | Q9H4A5 | 0.015986  |
| 61455 | P03346 | Q9BZI7 | 0.87372   |
| 61456 | P03346 | O15265 | 1.1472    |
| 61457 | P03346 | P41567 | 0.24325   |
| 61458 | P03346 | Q9Y6Y1 | 0.8829    |
| 61459 | P03346 | P08048 | 0.31436   |
| 61460 | P03346 | Q86UT5 | 0.35488   |
| 61461 | P03346 | P25787 | 0.58476   |
| 61462 | P03346 | Q9BZE0 | 0.39211   |
| 61463 | P03346 | Q9H5V9 | 0.01482   |
| 61464 | P03346 | Q9NS91 | 0.40413   |
| 61465 | P03346 | Q9BYR9 | 0.40421   |
| 61466 | P03346 | Q5JUW0 | 0.18405   |
| 61467 | P03346 | O60664 | 0.83759   |
| 61468 | P03346 | Q12901 | 0.30845   |
| 61469 | P03346 | P30281 | 0.92277   |
| 61470 | P03346 | Q86TC9 | 0.65924   |
| 61471 | P03346 | O60739 | 0.15258   |
| 61472 | P03346 | Q05481 | 0.30845   |
| 61473 | P03346 | Q6ZU52 | 0.66787   |
| 61474 | P03346 | Q14695 | 0.018128  |
| 61475 | P03346 | Q9Y6J9 | 1.0763    |
| 61476 | P03346 | Q96CN9 | 0.7532    |
| 61477 | P03346 | Q96AP0 | 0.3118    |
| 61478 | P03346 | Q9BTM9 | 0.8612    |
| 61479 | P03346 | Q9Y6X9 | 0.37702   |
| 61480 | P03346 | Q8N7U7 | 0.66978   |
| 61481 | P03346 | P31249 | 0.82379   |
| 61482 | P03346 | Q8TC90 | 0.047438  |
| 61483 | P03346 | Q8N2Z9 | 0.68496   |
| 61484 | P03346 | P21980 | 0.36432   |

|       |        |        |          |
|-------|--------|--------|----------|
| 61485 | P03346 | Q6PD62 | 0.82089  |
| 61486 | P03346 | Q7KZ85 | 0.67774  |
| 61487 | P03346 | P0C860 | 0.66665  |
| 61488 | P03346 | O95201 | 0.85529  |
| 61489 | P03346 | Q9NWS9 | 0.34285  |
| 61490 | P03346 | O75691 | 0.96902  |
| 61491 | P03346 | Q96ST3 | 0.85354  |
| 61492 | P03346 | Q9UPN9 | 0.61911  |
| 61493 | P03346 | Q9Y6K9 | 0.85059  |
| 61494 | P03346 | Q9Y2A0 | 0.32273  |
| 61495 | P03346 | P12004 | 0.30954  |
| 61496 | P03346 | Q75MW2 | 0.013232 |
| 61497 | P03346 | Q86YV9 | 0.035399 |
| 61498 | P03346 | Q6P9B9 | 0.41065  |
| 61499 | P03346 | P49716 | 0.7783   |
| 61500 | P03346 | P54821 | 0.50689  |
| 61501 | P03346 | Q96J02 | 0.32915  |
| 61502 | P03346 | P19012 | 1.0238   |
| 61503 | P03346 | Q7Z398 | 0.31436  |
| 61504 | P03346 | Q8NI51 | 0.74193  |
| 61505 | P03346 | Q8N3V7 | 0.32588  |
| 61506 | P03346 | O76021 | 0.35979  |
| 61507 | P03346 | Q9UKA2 | 0.68012  |
| 61508 | P03346 | O75995 | 0.29221  |
| 61509 | P03346 | Q96AB3 | 0.94726  |
| 61510 | P03346 | Q9Y253 | 0.451    |
| 61511 | P03346 | O14490 | 0.4623   |
| 61512 | P03346 | Q96D70 | 0.32442  |
| 61513 | P03346 | Q9BXU7 | 0.37305  |
| 61514 | P03346 | P59047 | 0.40262  |
| 61515 | P03346 | Q03989 | 0.64621  |
| 61516 | P03346 | Q8NB91 | 0.47294  |
| 61517 | P03346 | P23381 | 0.39962  |
| 61518 | P03346 | Q9NVS2 | 0.35603  |
| 61519 | P03346 | Q9NS26 | 0.37392  |
| 61520 | P03346 | B1AL46 | 0.083147 |
| 61521 | P03346 | Q6PB30 | 0.12075  |
| 61522 | P03346 | Q96AC1 | 0.27921  |
| 61523 | P03346 | Q15427 | 0.63876  |
| 61524 | P03346 | P47902 | 0.52805  |
| 61525 | P03346 | Q15058 | 0.4559   |
| 61526 | P03346 | Q9HBH1 | 0.1523   |
| 61527 | P03346 | P05387 | 0.66528  |
| 61528 | P03346 | Q9Y399 | 0.42537  |
| 61529 | P03346 | Q05DH4 | 0.11947  |
| 61530 | P03346 | Q5T6C5 | 0.021938 |
| 61531 | P03346 | P05412 | 0.74008  |
| 61532 | P03346 | Q9UKS7 | 0.3141   |
| 61533 | P03346 | Q4G0F5 | 0.37782  |
| 61534 | P03346 | Q96A04 | 0.19265  |
| 61535 | P03346 | Q96N20 | 0.28776  |
| 61536 | P03346 | P51991 | 0.29183  |
| 61537 | P03346 | O00213 | 0.48095  |
| 61538 | P03346 | Q6P444 | 0.12222  |
| 61539 | P03346 | O95639 | 0.44661  |
| 61540 | P03346 | P08729 | 1.4081   |
| 61541 | P03346 | Q8NHW5 | 0.40389  |
| 61542 | P03346 | Q9Y467 | 0.30822  |
| 61543 | P03346 | Q92585 | 1.1044   |
| 61544 | P03346 | Q0P6D6 | 0.17073  |
| 61545 | P03346 | P17097 | 0.12564  |
| 61546 | P03346 | Q9H0H0 | 0.28295  |
| 61547 | P03346 | Q9H5Y0 | 0.11048  |
| 61548 | P03346 | P46779 | 1.1135   |
| 61549 | P03346 | Q96CJ1 | 1.4506   |
| 61550 | P03346 | Q3YBM2 | 0.10902  |
| 61551 | P03346 | Q9ULC6 | 0.096187 |
| 61552 | P03346 | Q3SY00 | 0.074014 |
| 61553 | P03346 | Q96GY3 | 0.79591  |
| 61554 | P03346 | Q9ULR5 | 0.77353  |
| 61555 | P03346 | Q969H4 | 0.37958  |
| 61556 | P03346 | Q8IUC2 | 0.36736  |
| 61557 | P03346 | P56279 | 0.71939  |
| 61558 | P03346 | Q9BVL4 | 0.042492 |
| 61559 | P03346 | Q3KNV8 | 1.0307   |
| 61560 | P03346 | Q9UQK1 | 0.56439  |

|       |        |        |          |
|-------|--------|--------|----------|
| 61561 | P03346 | Q13077 | 0.51585  |
| 61562 | P03346 | Q12874 | 0.68494  |
| 61563 | P03346 | Q7Z713 | 0.49807  |
| 61564 | P03346 | Q12830 | 0.99924  |
| 61565 | P03346 | F78424 | 0.58965  |
| 61566 | P03346 | Q9NZU5 | 0.40809  |
| 61567 | P03346 | P61966 | 0.38948  |
| 61568 | P03346 | Q15542 | 1.0313   |
| 61569 | P03346 | P63119 | 0.25941  |
| 61570 | P03346 | Q9UHL9 | 0.62534  |
| 61571 | P03346 | Q96LW1 | 0.31436  |
| 61572 | P03346 | O75603 | 0.2075   |
| 61573 | P03346 | Q9GZT8 | 1.0537   |
| 61574 | P03346 | P02538 | 0.96257  |
| 61575 | P03346 | Q99615 | 1.026    |
| 61576 | P03346 | Q9BRR8 | 0.091185 |
| 61577 | P03346 | Q9Y3A2 | 1.0224   |
| 61578 | P03346 | Q9UFG5 | 0.66787  |
| 61579 | P03346 | P82930 | 0.37322  |
| 61580 | P03346 | O00463 | 0.50566  |
| 61581 | P03346 | Q5T6F0 | 0.33351  |
| 61582 | P03346 | Q5RKV6 | 0.37388  |
| 61583 | P03346 | Q9H2U2 | 0.49126  |
| 61584 | P03346 | P09972 | 0.61814  |
| 61585 | P03346 | Q8IY22 | 0.3715   |
| 61586 | P03346 | P55735 | 0.79328  |
| 61587 | P03346 | Q99828 | 0.34258  |
| 61588 | P03346 | P49639 | 0.43096  |
| 61589 | P03346 | Q7Z7A1 | 1.252    |
| 61590 | P03346 | P43378 | 0.26119  |
| 61591 | P03346 | Q16621 | 0.70942  |
| 61592 | P03346 | P46063 | 0.26106  |
| 61593 | P03346 | Q8ND76 | 0.74759  |
| 61594 | P03346 | P57071 | 0.31436  |
| 61595 | P03346 | Q9BT25 | 0.61124  |
| 61596 | P03346 | Q5T5D7 | 0.31436  |
| 61597 | P03346 | Q86U42 | 0.87824  |
| 61598 | P03346 | Q5FBB7 | 0.79884  |
| 61599 | P03346 | O75592 | 0.22812  |
| 61600 | P03346 | Q4VC44 | 0.53049  |
| 61601 | P03346 | Q9H7Z3 | 0.12821  |
| 61602 | P03346 | O15234 | 1.0632   |
| 61603 | P03346 | Q9NRX4 | 0.17976  |
| 61604 | P03346 | Q7Z7K2 | 0.31436  |
| 61605 | P03346 | Q9NWT1 | 0.31438  |
| 61606 | P03346 | Q96PE7 | 0.23435  |
| 61607 | P03346 | Q96MU7 | 1.0368   |
| 61608 | P03346 | Q9NWQ4 | 0.025377 |
| 61609 | P03346 | Q9NQ92 | 1.1894   |
| 61610 | P03346 | P61978 | 1.2176   |
| 61611 | P03346 | Q99742 | 0.37607  |
| 61612 | P03346 | Q86V48 | 0.272    |
| 61613 | P03346 | Q5VIR6 | 0.78353  |
| 61614 | P03346 | Q6L8H1 | 0.40421  |
| 61615 | P03346 | Q8WYQ3 | 0.15058  |
| 61616 | P03346 | P28070 | 0.41915  |
| 61617 | P03346 | Q9HBT8 | 0.31436  |
| 61618 | P03346 | P15863 | 0.29181  |
| 61619 | P03346 | Q96FJ2 | 0.78047  |
| 61620 | P03346 | Q8TA86 | 0.70811  |
| 61621 | P03346 | Q15562 | 1.0268   |
| 61622 | P03346 | Q9UGC7 | 0.37518  |
| 61623 | P03346 | Q9UKT7 | 0.67239  |
| 61624 | P03346 | Q969W3 | 0.079386 |
| 61625 | P03346 | Q6T4R5 | 0.22607  |
| 61626 | P03346 | Q9UHF7 | 0.72708  |
| 61627 | P03346 | O95456 | 0.74679  |
| 61628 | P03346 | Q9Y238 | 0.18007  |
| 61629 | P03346 | Q86XT2 | 0.23325  |
| 61630 | P03346 | P46937 | 0.85015  |
| 61631 | P03346 | Q96S65 | 0.80066  |
| 61632 | P03346 | Q13487 | 0.84503  |
| 61633 | P03346 | Q9H0C8 | 0.55545  |
| 61634 | P03346 | Q9ULR0 | 0.49972  |
| 61635 | P03346 | Q13263 | 0.33358  |
| 61636 | P03346 | Q9NZR4 | 0.31775  |



|       |        |        |           |
|-------|--------|--------|-----------|
| 61637 | P03346 | Q96RK0 | 1.3467    |
| 61638 | P03346 | Q86Y46 | 0.51027   |
| 61639 | P03346 | Q494X3 | 0.31436   |
| 61640 | P03346 | Q9Y3Y2 | 0.80207   |
| 61641 | P03346 | Q01534 | 0.50617   |
| 61642 | P03346 | Q8TDG2 | 0.18249   |
| 61643 | P03346 | A8MX4  | 0.31436   |
| 61644 | P03346 | O15042 | 0.61867   |
| 61645 | P03346 | Q1ED39 | 0.48532   |
| 61646 | P03346 | O60443 | 0.13037   |
| 61647 | P03346 | Q9H1M0 | 0.25042   |
| 61648 | P03346 | Q6L8G8 | 0.40421   |
| 61649 | P03346 | Q9BXS6 | 0.53688   |
| 61650 | P03346 | P35453 | 0.37872   |
| 61651 | P03346 | A5PLN7 | 0.0077221 |
| 61652 | P03346 | Q9NQX6 | 0.31436   |
| 61653 | P03346 | Q9BU61 | 0.93433   |
| 61654 | P03346 | Q15370 | 1.1586    |
| 61655 | P03346 | A6NCI8 | 0.088756  |
| 61656 | P03346 | Q504Q3 | 0.35865   |
| 61657 | P03346 | Q9C0I3 | 0.074845  |
| 61658 | P03346 | Q9ULM6 | 1.1227    |
| 61659 | P03346 | Q9P267 | 0.24689   |
| 61660 | P03346 | Q9Y2B0 | 0.35908   |
| 61661 | P03346 | Q9H6D7 | 0.6137    |
| 61662 | P03346 | O00743 | 0.86072   |
| 61663 | P03346 | Q96P70 | 1.2452    |
| 61664 | P03346 | Q16589 | 0.54657   |
| 61665 | P03346 | Q9Y4Z2 | 0.4895    |
| 61666 | P03346 | O75364 | 0.37074   |
| 61667 | P03346 | O43752 | 0.29222   |
| 61668 | P03346 | P50135 | 0.29983   |
| 61669 | P03346 | Q8N0Z2 | 0.52744   |
| 61670 | P03346 | P31260 | 0.68712   |
| 61671 | P03346 | Q9NR83 | 0.46284   |
| 61672 | P03346 | Q96QR8 | 0.49779   |
| 61673 | P03346 | Q5TD97 | 0.25563   |
| 61674 | P03346 | Q96DF8 | 0.43067   |
| 61675 | P03346 | P12524 | 0.66312   |
| 61676 | P03346 | Q96QK1 | 0.95549   |
| 61677 | P03346 | Q96GA3 | 0.65405   |
| 61678 | P03346 | Q9C075 | 0.47854   |
| 61679 | P03346 | O43172 | 1.0046    |
| 61680 | P03346 | Q7Z4G1 | 1.1129    |
| 61681 | P03346 | Q06520 | 0.35198   |
| 61682 | P03346 | Q9BXT5 | 0.054477  |
| 61683 | P03346 | Q9H1A3 | 0.66787   |
| 61684 | P03346 | O75564 | 0.36833   |
| 61685 | P03346 | Q9ULX3 | 0.23621   |
| 61686 | P03346 | P78396 | 1.0035    |
| 61687 | P03346 | Q14746 | 0.61116   |
| 61688 | P03346 | O60346 | 0.25925   |
| 61689 | P03346 | Q08AI8 | 0.0077221 |
| 61690 | P03346 | Q6RS7  | 0.60896   |
| 61691 | P03346 | Q96HJ5 | 0.2721    |
| 61692 | P03346 | Q9UBS3 | 0.80265   |
| 61693 | P03346 | P98182 | 0.32702   |
| 61694 | P03346 | O95405 | 0.29681   |
| 61695 | P03346 | Q15438 | 0.28448   |
| 61696 | P03346 | Q86Z20 | 0.19101   |
| 61697 | P03346 | Q8NFB4 | 0.9376    |
| 61698 | P03346 | Q7Z5V6 | 0.69317   |
| 61699 | P03346 | Q3SY84 | 0.48986   |
| 61700 | P03346 | Q9UBB4 | 0.72181   |
| 61701 | P03346 | Q99698 | 0.3692    |
| 61702 | P03346 | O75608 | 0.31836   |
| 61703 | P03346 | Q9NRZ9 | 0.26085   |
| 61704 | P03346 | Q16352 | 0.48875   |
| 61705 | P03346 | Q14320 | 0.23226   |
| 61706 | P03346 | Q14525 | 0.47854   |
| 61707 | P03346 | Q15050 | 0.51875   |
| 61708 | P03346 | B5ME19 | 0.26396   |
| 61709 | P03346 | P45984 | 0.3645    |
| 61710 | P03346 | Q00536 | 0.12605   |
| 61711 | P03346 | Q8IW50 | 0.0077221 |
| 61712 | P03346 | Q93009 | 0.43093   |

|       |        |        |           |
|-------|--------|--------|-----------|
| 61713 | P03346 | Q8WUM0 | 0.72663   |
| 61714 | P03346 | Q9H4X1 | 0.38122   |
| 61715 | P03346 | Q3LI62 | 0.36736   |
| 61716 | P03346 | Q9BZL1 | 0.22802   |
| 61717 | P03346 | P50219 | 0.35523   |
| 61718 | P03346 | Q5TID7 | 0.48532   |
| 61719 | P03346 | Q8TF39 | 0.34285   |
| 61720 | P03346 | Q8ND56 | 0.15872   |
| 61721 | P03346 | Q9Y6K1 | 0.48829   |
| 61722 | P03346 | Q9P0M2 | 0.28742   |
| 61723 | P03346 | Q86VQ0 | 0.62992   |
| 61724 | P03346 | Q96NL6 | 0.1536    |
| 61725 | P03346 | P09086 | 0.64479   |
| 61726 | P03346 | Q02078 | 0.51952   |
| 61727 | P03346 | Q6L8G5 | 0.40421   |
| 61728 | P03346 | O00629 | 0.79747   |
| 61729 | P03346 | Q13542 | 0.52615   |
| 61730 | P03346 | O60239 | 0.57378   |
| 61731 | P03346 | Q96EL2 | 0.53303   |
| 61732 | P03346 | O95159 | 0.22769   |
| 61733 | P03346 | Q9GZR1 | 0.61944   |
| 61734 | P03346 | Q96KR7 | 0.19728   |
| 61735 | P03346 | Q9BRX5 | 0.27113   |
| 61736 | P03346 | Q02386 | 0.18062   |
| 61737 | P03346 | P38935 | 0.52354   |
| 61738 | P03346 | P35321 | 0.6687    |
| 61739 | P03346 | Q8IVM0 | 0.8379    |
| 61740 | P03346 | Q7L9B9 | 0.12849   |
| 61741 | P03346 | Q96B97 | 0.54128   |
| 61742 | P03346 | Q16666 | 0.71647   |
| 61743 | P03346 | Q9BYD1 | 1.0411    |
| 61744 | P03346 | Q9NQX1 | 0.70756   |
| 61745 | P03346 | Q8N573 | 0.27564   |
| 61746 | P03346 | Q96A73 | 0.071131  |
| 61747 | P03346 | P16083 | 0.19498   |
| 61748 | P03346 | P52954 | 0.29339   |
| 61749 | P03346 | Q86UW9 | 0.96795   |
| 61750 | P03346 | Q8NC51 | 0.96509   |
| 61751 | P03346 | Q96ES7 | 0.43902   |
| 61752 | P03346 | Q2NL98 | 0.20041   |
| 61753 | P03346 | Q14739 | 0.46788   |
| 61754 | P03346 | Q09161 | 0.89647   |
| 61755 | P03346 | P31040 | 0.6884    |
| 61756 | P03346 | Q8WXA3 | 0.39353   |
| 61757 | P03346 | P10827 | 0.29735   |
| 61758 | P03346 | Q9P2G1 | 0.4708    |
| 61759 | P03346 | Q9UMS5 | 0.63182   |
| 61760 | P03346 | Q8N4W9 | 0.31436   |
| 61761 | P03346 | P22061 | 0.08464   |
| 61762 | P03346 | Q9H9P5 | 0.2879    |
| 61763 | P03346 | Q9HB65 | 0.77121   |
| 61764 | P03346 | E9PPG2 | 0.66978   |
| 61765 | P03346 | Q969U7 | 0.87323   |
| 61766 | P03346 | P35813 | 0.34007   |
| 61767 | P03346 | P49910 | 0.83464   |
| 61768 | P03346 | P0CJ88 | 0.6797    |
| 61769 | P03346 | P11473 | 0.47939   |
| 61770 | P03346 | Q86U70 | 0.34185   |
| 61771 | P03346 | Q1A5X6 | 0.0077221 |
| 61772 | P03346 | P63173 | 0.56339   |
| 61773 | P03346 | O15524 | 0.31897   |
| 61774 | P03346 | Q3MJ62 | 0.34285   |
| 61775 | P03346 | Q86UU5 | 0.090554  |
| 61776 | P03346 | P31268 | 0.58644   |
| 61777 | P03346 | Q5JNZ5 | 0.26013   |
| 61778 | P03346 | Q9Y281 | 0.77626   |
| 61779 | P03346 | P56181 | 0.44494   |
| 61780 | P03346 | P25789 | 0.60446   |
| 61781 | P03346 | Q9NQC8 | 0.27766   |
| 61782 | P03346 | P28715 | 0.37917   |
| 61783 | P03346 | P55036 | 0.56941   |
| 61784 | P03346 | Q96N21 | 0.32091   |
| 61785 | P03346 | Q86UR1 | 0.35153   |
| 61786 | P03346 | Q7Z5Q5 | 0.28643   |
| 61787 | P03346 | Q8WXF1 | 1.1933    |
| 61788 | P03346 | P50570 | 0.37221   |

|       |        |        |           |
|-------|--------|--------|-----------|
| 61789 | P03346 | O94892 | 0.31436   |
| 61790 | P03346 | P02549 | 0.25731   |
| 61791 | P03346 | Q15788 | 0.38446   |
| 61792 | P03346 | P28324 | 1.7076    |
| 61793 | P03346 | P06730 | 0.66164   |
| 61794 | P03346 | Q08AF8 | 0.11048   |
| 61795 | P03346 | P62917 | 0.77029   |
| 61796 | P03346 | Q13895 | 1.0021    |
| 61797 | P03346 | Q9NSK0 | 0.20059   |
| 61798 | P03346 | Q16082 | 1.1541    |
| 61799 | P03346 | P23511 | 1.476     |
| 61800 | P03346 | Q9NY74 | 0.65405   |
| 61801 | P03346 | O15397 | 1.105     |
| 61802 | P03346 | Q9HBD4 | 0.65913   |
| 61803 | P03346 | Q8N653 | 0.40553   |
| 61804 | P03346 | Q75VX8 | 0.12284   |
| 61805 | P03346 | Q6NT89 | 0.39616   |
| 61806 | P03346 | Q12988 | 0.63076   |
| 61807 | P03346 | A8MS94 | 0.11048   |
| 61808 | P03346 | Q9H115 | 0.20354   |
| 61809 | P03346 | P45973 | 0.80014   |
| 61810 | P03346 | A6NGD5 | 0.35994   |
| 61811 | P03346 | Q8N9K3 | 0.0077221 |
| 61812 | P03346 | Q9UJW0 | 0.70358   |
| 61813 | P03346 | O14598 | 0.072694  |
| 61814 | P03346 | O75394 | 0.36869   |
| 61815 | P03346 | P13807 | 0.52153   |
| 61816 | P03346 | Q00005 | 0.65814   |
| 61817 | P03346 | O15535 | 0.34285   |
| 61818 | P03346 | Q8IX12 | 1.1735    |
| 61819 | P03346 | O14908 | 0.35749   |
| 61820 | P03346 | Q8IZM8 | 0.31436   |
| 61821 | P03346 | P07196 | 0.75215   |
| 61822 | P03346 | Q9NP64 | 0.46537   |
| 61823 | P03346 | Q92560 | 0.33481   |
| 61824 | P03346 | Q6PEX3 | 0.36736   |
| 61825 | P03346 | O76064 | 0.28794   |
| 61826 | P03346 | P62249 | 0.52229   |
| 61827 | P03346 | Q9NPA5 | 0.31436   |
| 61828 | P03346 | P55198 | 1.0375    |
| 61829 | P03346 | Q7Z3C6 | 0.40129   |
| 61830 | P03346 | Q5JWR5 | 0.20151   |
| 61831 | P03346 | P62913 | 1.036     |
| 61832 | P03346 | Q9BTC0 | 0.38439   |
| 61833 | P03346 | Q9HAU4 | 0.47666   |
| 61834 | P03346 | Q9Y657 | 0.17655   |
| 61835 | P03346 | B3EWG3 | 0.0077221 |
| 61836 | P03346 | Q3SY89 | 0.30149   |
| 61837 | P03346 | Q9UPT5 | 0.78834   |
| 61838 | P03346 | O15111 | 0.5684    |
| 61839 | P03346 | P86452 | 0.73972   |
| 61840 | P03346 | Q15366 | 1.1483    |
| 61841 | P03346 | Q9NQV7 | 0.09464   |
| 61842 | P03346 | O95229 | 0.88832   |
| 61843 | P03346 | Q6ZVN8 | 0.38048   |
| 61844 | P03346 | Q99811 | 0.36987   |
| 61845 | P03346 | A2RRD8 | 0.31436   |
| 61846 | P03346 | Q6X4W1 | 0.085953  |
| 61847 | P03346 | Q6NZ67 | 0.93117   |
| 61848 | P03346 | Q6P1L6 | 0.31436   |
| 61849 | P03346 | Q7L5A3 | 0.32217   |
| 61850 | P03346 | Q53ET0 | 1.0631    |
| 61851 | P03346 | Q96LR2 | 0.17204   |
| 61852 | P03346 | P52434 | 0.35827   |
| 61853 | P03346 | Q6QHK4 | 0.40854   |
| 61854 | P03346 | P0CG31 | 0.31436   |
| 61855 | P03346 | Q9HAH1 | 0.31436   |
| 61856 | P03346 | Q15061 | 0.48532   |
| 61857 | P03346 | P60660 | 0.48407   |
| 61858 | P03346 | Q53GT1 | 0.24691   |
| 61859 | P03346 | Q9HAV4 | 1.374     |
| 61860 | P03346 | Q9BV68 | 0.4708    |
| 61861 | P03346 | Q06787 | 1.1282    |
| 61862 | P03346 | Q9Y283 | 0.48185   |
| 61863 | P03346 | Q8TAY7 | 0.2489    |
| 61864 | P03346 | Q99687 | 0.86901   |

|       |        |        |          |
|-------|--------|--------|----------|
| 61865 | P03346 | Q8IZD9 | 0.47044  |
| 61866 | P03346 | Q4G0A6 | 0.10934  |
| 61867 | P03346 | P49406 | 0.66389  |
| 61868 | P03346 | O95402 | 1.3271   |
| 61869 | P03346 | Q08AN1 | 0.31436  |
| 61870 | P03346 | Q9Y2Z0 | 0.62591  |
| 61871 | P03346 | Q9P2W9 | 0.49831  |
| 61872 | P03346 | Q9NY87 | 0.51434  |
| 61873 | P03346 | Q7Z5Y7 | 0.3559   |
| 61874 | P03346 | O95677 | 0.21762  |
| 61875 | P03346 | Q96HA7 | 0.92502  |
| 61876 | P03346 | Q9H8N7 | 0.44027  |
| 61877 | P03346 | Q96MP8 | 0.4624   |
| 61878 | P03346 | A6NJ78 | 0.052605 |
| 61879 | P03346 | Q96NJ6 | 0.31644  |
| 61880 | P03346 | P35325 | 0.1267   |
| 61881 | P03346 | Q5XKR9 | 0.1098   |
| 61882 | P03346 | O15027 | 0.35285  |
| 61883 | P03346 | A6NJ88 | 0.037931 |
| 61884 | P03346 | Q96HW7 | 0.88882  |
| 61885 | P03346 | A2A288 | 0.36027  |
| 61886 | P03346 | P12270 | 0.67176  |
| 61887 | P03346 | O95625 | 0.4117   |
| 61888 | P03346 | P12956 | 0.37332  |
| 61889 | P03346 | Q49A33 | 0.31436  |
| 61890 | P03346 | P78346 | 0.38004  |
| 61891 | P03346 | Q14207 | 1.1312   |
| 61892 | P03346 | Q9H2G9 | 0.68677  |
| 61893 | P03346 | Q9BRR0 | 0.50363  |
| 61894 | P03346 | Q8IUE1 | 0.71675  |
| 61895 | P03346 | O43290 | 1.1428   |
| 61896 | P03346 | Q9H2H8 | 0.61887  |
| 61897 | P03346 | Q9NZH4 | 0.37793  |
| 61898 | P03346 | Q9UHD9 | 1.0361   |
| 61899 | P03346 | P55273 | 0.34327  |
| 61900 | P03346 | O14576 | 0.5285   |
| 61901 | P03346 | Q08379 | 0.60748  |
| 61902 | P03346 | C9JN71 | 0.33838  |
| 61903 | P03346 | Q9NVI1 | 0.93052  |
| 61904 | P03346 | Q8WX93 | 0.5483   |
| 61905 | P03346 | Q6PJG6 | 0.87916  |
| 61906 | P03346 | Q99966 | 0.28724  |
| 61907 | P03346 | Q92979 | 0.58902  |
| 61908 | P03346 | Q6ZRF7 | 0.31436  |
| 61909 | P03346 | Q96C55 | 0.31436  |
| 61910 | P03346 | P24385 | 0.57196  |
| 61911 | P03346 | Q7Z2Z1 | 0.87087  |
| 61912 | P03346 | Q9NPJ6 | 1.0502   |
| 61913 | P03346 | Q9UGP4 | 0.50346  |
| 61914 | P03346 | Q7L2Z9 | 0.1652   |
| 61915 | P03346 | P61579 | 0.74357  |
| 61916 | P03346 | Q7Z340 | 0.31436  |
| 61917 | P03346 | A2RU30 | 0.17173  |
| 61918 | P03346 | Q9BPZ3 | 0.75006  |
| 61919 | P03346 | Q01201 | 1.2761   |
| 61920 | P03346 | Q9BRU2 | 0.77395  |
| 61921 | P03346 | Q9P2N7 | 0.33151  |
| 61922 | P03346 | Q5T1R4 | 0.46405  |
| 61923 | P03346 | O14829 | 0.44379  |
| 61924 | P03346 | Q9BU68 | 0.015848 |
| 61925 | P03346 | Q8TBN0 | 0.58254  |
| 61926 | P03346 | Q9H765 | 0.47271  |
| 61927 | P03346 | Q8N7R0 | 0.71675  |
| 61928 | P03346 | Q9P031 | 1.3712   |
| 61929 | P03346 | Q96MR9 | 0.31436  |
| 61930 | P03346 | Q96FQ6 | 0.40893  |
| 61931 | P03346 | Q9P0J6 | 0.35035  |
| 61932 | P03346 | O60907 | 0.9283   |
| 61933 | P03346 | Q96CM4 | 0.3216   |
| 61934 | P03346 | Q8N888 | 0.06799  |
| 61935 | P03346 | Q8N983 | 0.54515  |
| 61936 | P03346 | Q9HCU8 | 0.63576  |
| 61937 | P03346 | Q9Y4P1 | 0.41895  |
| 61938 | P03346 | Q8WV37 | 0.61543  |
| 61939 | P03346 | Q9NZV7 | 0.32639  |
| 61940 | P03346 | Q8WTZ3 | 0.49903  |

|       |        |        |          |
|-------|--------|--------|----------|
| 61941 | P03346 | P62861 | 0.59083  |
| 61942 | P03346 | Q9UD57 | 0.44258  |
| 61943 | P03346 | Q9NSV4 | 0.25725  |
| 61944 | P03346 | P82912 | 0.34123  |
| 61945 | P03346 | A3KN83 | 0.13259  |
| 61946 | P03346 | Q14315 | 0.47632  |
| 61947 | P03346 | Q9H469 | 0.52327  |
| 61948 | P03346 | Q6ICB0 | 0.15286  |
| 61949 | P03346 | P50221 | 0.88868  |
| 61950 | P03346 | P80303 | 0.3114   |
| 61951 | P03346 | O96006 | 0.23908  |
| 61952 | P03346 | Q06609 | 0.56365  |
| 61953 | P03346 | P04406 | 0.4566   |
| 61954 | P03346 | P18847 | 1.4119   |
| 61955 | P03346 | Q08170 | 0.351    |
| 61956 | P03346 | Q8IV13 | 0.32217  |
| 61957 | P03346 | P50452 | 0.83471  |
| 61958 | P03346 | O94915 | 0.46683  |
| 61959 | P03346 | Q9NQG5 | 1.3274   |
| 61960 | P03346 | Q96C00 | 0.51556  |
| 61961 | P03346 | Q8N1L9 | 1.2652   |
| 61962 | P03346 | Q13362 | 0.36461  |
| 61963 | P03346 | Q75112 | 0.42222  |
| 61964 | P03346 | Q9NQ55 | 0.65145  |
| 61965 | P03346 | Q9Y324 | 0.47318  |
| 61966 | P03346 | Q96S95 | 0.54986  |
| 61967 | P03346 | P07900 | 0.54452  |
| 61968 | P03346 | P13489 | 0.72993  |
| 61969 | P03346 | Q6P2D8 | 0.50299  |
| 61970 | P03346 | Q9BV90 | 0.42391  |
| 61971 | P03346 | Q15928 | 0.34297  |
| 61972 | P03346 | Q8NBJ4 | 0.04142  |
| 61973 | P03346 | Q86YD1 | 0.76096  |
| 61974 | P03346 | Q8N163 | 0.95118  |
| 61975 | P03346 | Q96MF7 | 0.56794  |
| 61976 | P03346 | P30279 | 0.74976  |
| 61977 | P03346 | Q9Y5R8 | 0.26633  |
| 61978 | P03346 | Q15834 | 1.3132   |
| 61979 | P03346 | P29373 | 0.37665  |
| 61980 | P03346 | Q5XG87 | 0.32566  |
| 61981 | P03346 | Q8N8G2 | 1.1121   |
| 61982 | P03346 | Q13228 | 1.4162   |
| 61983 | P03346 | P83111 | 0.30744  |
| 61984 | P03346 | Q9NRN7 | 0.59542  |
| 61985 | P03346 | Q8IYB3 | 0.69873  |
| 61986 | P03346 | P05783 | 1.3154   |
| 61987 | P03346 | P57055 | 0.30852  |
| 61988 | P03346 | Q96HY6 | 0.6139   |
| 61989 | P03346 | Q9NPI6 | 1.1149   |
| 61990 | P03346 | P61582 | 0.32217  |
| 61991 | P03346 | Q14135 | 0.74266  |
| 61992 | P03346 | Q5T2W1 | 0.73663  |
| 61993 | P03346 | Q14813 | 0.59994  |
| 61994 | P03346 | Q8WZ19 | 0.36195  |
| 61995 | P03346 | Q14678 | 0.68265  |
| 61996 | P03346 | Q9H091 | 0.40481  |
| 61997 | P03346 | Q96EK4 | 1.3957   |
| 61998 | P03346 | Q5HYJ3 | 0.3708   |
| 61999 | P03346 | Q9NQW6 | 0.45355  |
| 62000 | P03346 | Q96PU8 | 0.558    |
| 62001 | P03346 | Q9BQE9 | 0.018583 |
| 62002 | P03346 | Q7RTS1 | 0.42611  |
| 62003 | P03346 | P62277 | 1.0516   |
| 62004 | P03346 | Q02878 | 0.89181  |
| 62005 | P03346 | Q9Y6B7 | 0.47607  |
| 62006 | P03346 | Q9UDY2 | 1.0997   |
| 62007 | P03346 | Q9UKY7 | 0.37538  |
| 62008 | P03346 | P41091 | 0.21796  |
| 62009 | P03346 | Q8IYA6 | 0.17073  |
| 62010 | P03346 | O75427 | 0.77888  |
| 62011 | P03346 | Q5CZC0 | 0.14441  |
| 62012 | P03346 | Q9NWU2 | 0.32217  |
| 62013 | P03346 | Q9BWM5 | 0.31436  |
| 62014 | P03346 | O95149 | 0.63942  |
| 62015 | P03346 | Q96PU5 | 0.35656  |
| 62016 | P03346 | Q6TGC4 | 0.35113  |

|       |        |        |          |
|-------|--------|--------|----------|
| 62017 | P03346 | Q14591 | 0.31436  |
| 62018 | P03346 | Q99612 | 0.47502  |
| 62019 | P03346 | P0CG33 | 0.11048  |
| 62020 | P03346 | P29374 | 0.57232  |
| 62021 | P03346 | P68036 | 0.80924  |
| 62022 | P03346 | Q9BUY5 | 0.31436  |
| 62023 | P03346 | Q7Z3Y8 | 0.58681  |
| 62024 | P03346 | P60369 | 0.40421  |
| 62025 | P03346 | Q99873 | 0.7549   |
| 62026 | P03346 | Q9UEG4 | 0.31436  |
| 62027 | P03346 | Q7Z591 | 0.70946  |
| 62028 | P03346 | P58012 | 0.44874  |
| 62029 | P03346 | Q9BSF8 | 0.65405  |
| 62030 | P03346 | Q14258 | 0.96218  |
| 62031 | P03346 | Q9Y5Q8 | 0.96338  |
| 62032 | P03346 | Q8N0U4 | 0.20041  |
| 62033 | P03346 | Q9HB19 | 0.80031  |
| 62034 | P03346 | Q95551 | 0.81525  |
| 62035 | P03346 | Q9BYU5 | 0.40421  |
| 62036 | P03346 | P0CAP2 | 0.19564  |
| 62037 | P03346 | Q14814 | 0.79961  |
| 62038 | P03346 | P78337 | 0.69282  |
| 62039 | P03346 | Q96017 | 0.64279  |
| 62040 | P03346 | Q8IXH7 | 1.2815   |
| 62041 | P03346 | Q99598 | 0.22257  |
| 62042 | P03346 | P60006 | 0.16466  |
| 62043 | P03346 | P36508 | 0.30991  |
| 62044 | P03346 | Q9BXF3 | 0.89565  |
| 62045 | P03346 | Q9NQZ5 | 0.14441  |
| 62046 | P03346 | Q93062 | 1.0871   |
| 62047 | P03346 | Q96S94 | 0.70286  |
| 62048 | P03346 | Q9Y2P0 | 0.31436  |
| 62049 | P03346 | A6NN14 | 0.31436  |
| 62050 | P03346 | Q95397 | 0.17705  |
| 62051 | P03346 | Q6ZRQ5 | 0.8272   |
| 62052 | P03346 | Q9NX70 | 1.3404   |
| 62053 | P03346 | Q9H9R9 | 0.20041  |
| 62054 | P03346 | Q8NCA9 | 0.31436  |
| 62055 | P03346 | Q8WY54 | 0.87888  |
| 62056 | P03346 | Q75446 | 1.1355   |
| 62057 | P03346 | Q86XR8 | 1.0762   |
| 62058 | P03346 | Q8IXM2 | 0.35777  |
| 62059 | P03346 | Q9P032 | 0.74971  |
| 62060 | P03346 | P14373 | 0.43268  |
| 62061 | P03346 | Q14511 | 0.80823  |
| 62062 | P03346 | Q15522 | 0.32126  |
| 62063 | P03346 | Q8WYB5 | 0.31511  |
| 62064 | P03346 | Q96SD1 | 0.23342  |
| 62065 | P03346 | Q9NS69 | 0.33771  |
| 62066 | P03346 | Q52M93 | 0.33838  |
| 62067 | P03346 | Q9H116 | 0.5775   |
| 62068 | P03346 | Q86UT8 | 0.19349  |
| 62069 | P03346 | Q9UP83 | 1.4519   |
| 62070 | P03346 | Q7RTS3 | 0.28657  |
| 62071 | P03346 | Q5HYW3 | 0.06162  |
| 62072 | P03346 | Q8TF40 | 0.81274  |
| 62073 | P03346 | Q12905 | 1.3597   |
| 62074 | P03346 | Q00471 | 0.51716  |
| 62075 | P03346 | Q96LY2 | 0.035326 |
| 62076 | P03346 | P49247 | 0.10717  |
| 62077 | P03346 | P25685 | 0.55324  |
| 62078 | P03346 | Q9Y3C0 | 0.6156   |
| 62079 | P03346 | Q32MQ0 | 0.33966  |
| 62080 | P03346 | Q9UBK8 | 0.3176   |
| 62081 | P03346 | Q8NHY5 | 0.043795 |
| 62082 | P03346 | Q01538 | 0.20768  |
| 62083 | P03346 | Q9HCS5 | 0.30298  |
| 62084 | P03346 | Q12769 | 1.035    |
| 62085 | P03346 | Q14671 | 0.43352  |
| 62086 | P03346 | Q8N8E3 | 0.35785  |
| 62087 | P03346 | Q86WZ0 | 0.024832 |
| 62088 | P03346 | Q9BWT6 | 0.34355  |
| 62089 | P03346 | Q8NAF0 | 0.31436  |
| 62090 | P03346 | Q8WV24 | 0.8543   |
| 62091 | P03346 | Q16626 | 0.3776   |
| 62092 | P03346 | Q9BR77 | 0.17073  |

|       |        |        |          |
|-------|--------|--------|----------|
| 62093 | P03346 | Q3KNW1 | 0.29876  |
| 62094 | P03346 | A6NFD8 | 0.52759  |
| 62095 | P03346 | Q8IVW6 | 0.45236  |
| 62096 | P03346 | Q15916 | 0.31436  |
| 62097 | P03346 | Q9P2K5 | 0.21518  |
| 62098 | P03346 | Q9ULD5 | 0.31644  |
| 62099 | P03346 | P47813 | 0.22577  |
| 62100 | P03346 | Q96KR1 | 0.50963  |
| 62101 | P03346 | Q8N2Y8 | 0.33623  |
| 62102 | P03346 | P08779 | 0.99925  |
| 62103 | P03346 | Q96A65 | 0.34809  |
| 62104 | P03346 | Q9BUX1 | 0.90682  |
| 62105 | P03346 | P46100 | 0.63978  |
| 62106 | P03346 | Q8N9B5 | 0.91437  |
| 62107 | P03346 | Q6PCD5 | 0.24588  |
| 62108 | P03346 | Q9GZR2 | 0.4593   |
| 62109 | P03346 | Q5JTW2 | 0.54312  |
| 62110 | P03346 | Q96GM5 | 0.91711  |
| 62111 | P03346 | Q9UPW6 | 0.95034  |
| 62112 | P03346 | A6NJ46 | 0.6797   |
| 62113 | P03346 | Q9Y4C2 | 0.04631  |
| 62114 | P03346 | Q8N4Q1 | 0.28165  |
| 62115 | P03346 | Q9H2T7 | 0.65396  |
| 62116 | P03346 | Q9H0A9 | 0.18187  |
| 62117 | P03346 | Q9C005 | 0.85182  |
| 62118 | P03346 | Q96RT1 | 0.43573  |
| 62119 | P03346 | Q659A1 | 0.32217  |
| 62120 | P03346 | O00567 | 1.0379   |
| 62121 | P03346 | Q8TAB7 | 0.10854  |
| 62122 | P03346 | P16220 | 0.83731  |
| 62123 | P03346 | Q3LI64 | 0.49573  |
| 62124 | P03346 | O15392 | 0.22634  |
| 62125 | P03346 | O60765 | 0.34402  |
| 62126 | P03346 | Q86VS8 | 0.51929  |
| 62127 | P03346 | Q9BV97 | 0.18405  |
| 62128 | P03346 | P82933 | 0.82079  |
| 62129 | P03346 | O43684 | 0.76034  |
| 62130 | P03346 | P98171 | 0.4059   |
| 62131 | P03346 | Q96NS5 | 0.4168   |
| 62132 | P03346 | Q68DX3 | 0.66523  |
| 62133 | P03346 | Q9BYR2 | 0.40421  |
| 62134 | P03346 | Q8IZC7 | 0.31436  |
| 62135 | P03346 | Q5TAP6 | 0.072987 |
| 62136 | P03346 | Q96JP2 | 0.31558  |
| 62137 | P03346 | Q9UKD2 | 0.38434  |
| 62138 | P03346 | P09651 | 0.41588  |
| 62139 | P03346 | Q6P2S7 | 0.20041  |
| 62140 | P03346 | Q9UQR1 | 0.90998  |
| 62141 | P03346 | O75150 | 0.54455  |
| 62142 | P03346 | O43447 | 0.90052  |
| 62143 | P03346 | O95684 | 0.93666  |
| 62144 | P03346 | Q9H706 | 0.66787  |
| 62145 | P03346 | Q08999 | 1.5259   |
| 62146 | P03346 | P56270 | 0.79233  |
| 62147 | P03346 | Q96EL3 | 0.37322  |
| 62148 | P03346 | H0YKK7 | 0.015632 |
| 62149 | P03346 | P17039 | 0.31436  |
| 62150 | P03346 | Q8TEA8 | 0.29687  |
| 62151 | P03346 | P08727 | 0.70581  |
| 62152 | P03346 | Q2QGD7 | 0.78596  |
| 62153 | P03346 | Q99633 | 0.42359  |
| 62154 | P03346 | O60888 | 0.71012  |
| 62155 | P03346 | Q12840 | 0.34571  |
| 62156 | P03346 | P61581 | 0.32217  |
| 62157 | P03346 | O75362 | 0.89268  |
| 62158 | P03346 | Q9UKL0 | 1.3912   |
| 62159 | P03346 | O00479 | 0.28899  |
| 62160 | P03346 | Q5T8I9 | 0.34901  |
| 62161 | P03346 | Q99460 | 0.24711  |
| 62162 | P03346 | Q8IX06 | 0.19743  |
| 62163 | P03346 | B2RD01 | 0.29934  |
| 62164 | P03346 | Q9BQG0 | 0.85473  |
| 62165 | P03346 | Q6P161 | 0.37322  |
| 62166 | P03346 | Q92734 | 0.47639  |
| 62167 | P03346 | Q9NX02 | 0.27397  |
| 62168 | P03346 | Q9Y3C6 | 0.1282   |

|       |        |        |          |
|-------|--------|--------|----------|
| 62169 | P03346 | Q96BP2 | 1.3827   |
| 62170 | P03346 | Q9Y2P7 | 0.65117  |
| 62171 | P03346 | Q9UM11 | 1.1515   |
| 62172 | P03346 | Q9H3M9 | 0.099429 |
| 62173 | P03346 | P59103 | 0.174    |
| 62174 | P03346 | Q96BU1 | 0.21289  |
| 62175 | P03346 | Q8N6M9 | 0.32295  |
| 62176 | P03346 | P23610 | 0.34434  |
| 62177 | P03346 | Q8N8B7 | 0.34797  |
| 62178 | P03346 | Q9UH77 | 0.82842  |
| 62179 | P03346 | Q8NAP8 | 0.27653  |
| 62180 | P03346 | A7MCY6 | 0.64944  |
| 62181 | P03346 | Q86UE4 | 0.5164   |
| 62182 | P03346 | Q96MT4 | 0.028327 |
| 62183 | P03346 | Q9H2W2 | 0.31302  |
| 62184 | P03346 | Q14639 | 0.64739  |
| 62185 | P03346 | Q86US8 | 0.66704  |
| 62186 | P03346 | Q96PV6 | 0.66787  |
| 62187 | P03346 | O60248 | 0.87002  |
| 62188 | P03346 | Q96EE3 | 0.5754   |
| 62189 | P03346 | Q5TA76 | 0.02884  |
| 62190 | P03346 | Q5HYK9 | 0.31436  |
| 62191 | P03346 | Q8N3U4 | 0.80821  |
| 62192 | P03346 | P06401 | 0.30356  |
| 62193 | P03346 | Q5T0L3 | 0.063008 |
| 62194 | P03346 | Q9BYG8 | 0.34138  |
| 62195 | P03346 | Q9UL59 | 0.31436  |
| 62196 | P03346 | Q8IW19 | 0.53882  |
| 62197 | P03346 | O43918 | 1.0302   |
| 62198 | P03346 | Q3SYF9 | 0.36736  |
| 62199 | P03346 | Q96HQ2 | 0.074789 |
| 62200 | P03346 | O60287 | 0.50071  |
| 62201 | P03346 | Q9H0M5 | 0.31436  |
| 62202 | P03346 | P43355 | 1.3154   |
| 62203 | P03346 | Q96D03 | 0.18705  |
| 62204 | P03346 | Q96FF9 | 0.92293  |
| 62205 | P03346 | Q96BA8 | 0.38626  |
| 62206 | P03346 | P17676 | 0.90299  |
| 62207 | P03346 | Q7RTV0 | 0.82488  |
| 62208 | P03346 | P55265 | 0.52873  |
| 62209 | P03346 | Q96P71 | 0.7022   |
| 62210 | P03346 | O60732 | 0.66787  |
| 62211 | P03346 | Q9H2Z4 | 0.44791  |
| 62212 | P03346 | Q03052 | 0.62115  |
| 62213 | P03346 | Q9UIV1 | 1.2819   |
| 62214 | P03346 | O43167 | 0.85529  |
| 62215 | P03346 | P78414 | 0.66978  |
| 62216 | P03346 | Q16384 | 0.4707   |
| 62217 | P03346 | Q9BSU3 | 0.67596  |
| 62218 | P03346 | P06748 | 0.46184  |
| 62219 | P03346 | Q99567 | 0.84082  |
| 62220 | P03346 | Q96N16 | 0.38993  |
| 62221 | P03346 | Q99543 | 0.76865  |
| 62222 | P03346 | Q9Y4X4 | 0.44999  |
| 62223 | P03346 | P19484 | 0.83584  |
| 62224 | P03346 | Q15323 | 0.4917   |
| 62225 | P03346 | P17098 | 0.34464  |
| 62226 | P03346 | Q9UBQ5 | 1.1695   |
| 62227 | P03346 | Q13616 | 0.68917  |
| 62228 | P03346 | P29474 | 0.49774  |
| 62229 | P03346 | Q86V71 | 0.31436  |
| 62230 | P03346 | Q15370 | 0.70372  |
| 62231 | P03346 | Q52LR7 | 0.67697  |
| 62232 | P03346 | Q14901 | 0.37359  |
| 62233 | P03346 | Q9UNL4 | 0.49684  |
| 62234 | P03346 | Q9H2H0 | 0.31327  |
| 62235 | P03346 | Q8IZT9 | 0.32217  |
| 62236 | P03346 | P0C7T5 | 0.43488  |
| 62237 | P03346 | Q8N1N5 | 0.70085  |
| 62238 | P03346 | Q8NC26 | 0.31436  |
| 62239 | P03346 | P12757 | 0.51782  |
| 62240 | P03346 | Q96C86 | 0.93398  |
| 62241 | P03346 | Q8NFV4 | 0.23421  |
| 62242 | P03346 | Q96NJ3 | 0.31436  |
| 62243 | P03346 | Q96JB2 | 0.97756  |
| 62244 | P03346 | O75190 | 0.9094   |



|       |        |        |           |
|-------|--------|--------|-----------|
| 62245 | P03346 | P36402 | 0.711     |
| 62246 | P03346 | Q59GN2 | 0.26013   |
| 62247 | P03346 | Q9ULW3 | 1.1111    |
| 62248 | P03346 | O75175 | 1.5435    |
| 62249 | P03346 | Q9NWF9 | 0.83187   |
| 62250 | P03346 | O75586 | 0.94731   |
| 62251 | P03346 | P62633 | 0.73529   |
| 62252 | P03346 | Q96M11 | 0.62166   |
| 62253 | P03346 | Q8IZW8 | 0.62882   |
| 62254 | P03346 | Q13489 | 0.26936   |
| 62255 | P03346 | Q15036 | 0.35362   |
| 62256 | P03346 | P14866 | 0.82995   |
| 62257 | P03346 | P05413 | 0.48904   |
| 62258 | P03346 | Q9H5P4 | 0.73341   |
| 62259 | P03346 | Q9ULK2 | 0.021938  |
| 62260 | P03346 | P15336 | 0.76253   |
| 62261 | P03346 | O14633 | 0.090938  |
| 62262 | P03346 | Q9UIF8 | 1.0526    |
| 62263 | P03346 | Q9GZV4 | 0.81623   |
| 62264 | P03346 | Q14764 | 1.3615    |
| 62265 | P03346 | O15511 | 0.46897   |
| 62266 | P03346 | Q70EK8 | 0.11093   |
| 62267 | P03346 | Q9BTK6 | 0.78688   |
| 62268 | P03346 | Q5VWP3 | 0.46875   |
| 62269 | P03346 | Q8ND07 | 0.02348   |
| 62270 | P03346 | Q693B1 | 0.25645   |
| 62271 | P03346 | A2RUB1 | 0.0077221 |
| 62272 | P03346 | Q9BS16 | 0.30284   |
| 62273 | P03346 | Q92800 | 0.71272   |
| 62274 | P03346 | Q5MJ70 | 0.24687   |
| 62275 | P03346 | Q99607 | 1.4279    |
| 62276 | P03346 | P55327 | 0.54942   |
| 62277 | P03346 | Q9BTL3 | 0.86184   |
| 62278 | P03346 | Q5JR59 | 0.83673   |
| 62279 | P03346 | Q86Y97 | 0.66005   |
| 62280 | P03346 | Q9BZE4 | 0.47105   |
| 62281 | P03346 | P63010 | 0.49483   |
| 62282 | P03346 | Q2M2Z5 | 0.89893   |
| 62283 | P03346 | Q4VC05 | 0.1373    |
| 62284 | P03346 | P23526 | 0.27712   |
| 62285 | P03346 | Q99569 | 0.48418   |
| 62286 | P03346 | O60716 | 0.61418   |
| 62287 | P03346 | Q9BSD3 | 0.49501   |
| 62288 | P03346 | Q9NRX1 | 0.4493    |
| 62289 | P03346 | Q9UL46 | 0.31172   |
| 62290 | P03346 | Q9BQY4 | 1.2815    |
| 62291 | P03346 | Q9P0W2 | 0.98902   |
| 62292 | P03346 | P54098 | 0.62685   |
| 62293 | P03346 | Q96HQ0 | 0.31436   |
| 62294 | P03346 | O14787 | 1.2325    |
| 62295 | P03346 | Q96G27 | 0.13083   |
| 62296 | P03346 | Q05925 | 0.28165   |
| 62297 | P03346 | O43639 | 0.52501   |
| 62298 | P03346 | Q9NU63 | 0.11664   |
| 62299 | P03346 | Q8IXQ9 | 0.19045   |
| 62300 | P03346 | O75531 | 1.055     |
| 62301 | P03346 | Q86WV5 | 0.55886   |
| 62302 | P03346 | Q9BRA2 | 0.76653   |
| 62303 | P03346 | O14737 | 0.51019   |
| 62304 | P03346 | A5D8V6 | 0.44579   |
| 62305 | P03346 | Q9H9L3 | 0.66406   |
| 62306 | P03346 | Q5VWM5 | 0.13291   |
| 62307 | P03346 | Q13129 | 0.90427   |
| 62308 | P03346 | Q9Y2V2 | 0.56604   |
| 62309 | P03346 | Q1KMD3 | 0.31389   |
| 62310 | P03346 | Q8TCY9 | 0.38134   |
| 62311 | P03346 | Q9Y6R7 | 0.25935   |
| 62312 | P03346 | P78415 | 0.43683   |
| 62313 | P03346 | Q13515 | 0.28247   |
| 62314 | P03346 | Q9BSC4 | 0.48532   |
| 62315 | P03346 | Q9BYG7 | 0.48532   |
| 62316 | P03346 | Q9UFM2 | 0.32217   |
| 62317 | P03346 | Q9H8W5 | 0.26638   |
| 62318 | P03346 | Q2VPB7 | 0.82273   |
| 62319 | P03346 | Q2M218 | 0.31436   |
| 62320 | P03346 | Q8NFH8 | 0.70824   |

|       |        |        |           |
|-------|--------|--------|-----------|
| 62321 | P03346 | P62280 | 0.60402   |
| 62322 | P03346 | P39023 | 0.97199   |
| 62323 | P03346 | P36956 | 0.34264   |
| 62324 | P03346 | A8MX34 | 0.36736   |
| 62325 | P03346 | Q8NHU6 | 0.39484   |
| 62326 | P03346 | P52739 | 0.30845   |
| 62327 | P03346 | Q7Z5K2 | 0.79964   |
| 62328 | P03346 | P23258 | 0.42942   |
| 62329 | P03346 | O15209 | 0.31436   |
| 62330 | P03346 | Q05066 | 0.84269   |
| 62331 | P03346 | Q9UGR2 | 0.58215   |
| 62332 | P03346 | P0CJ78 | 0.31436   |
| 62333 | P03346 | Q5T9G4 | 0.11273   |
| 62334 | P03346 | Q16836 | 0.47466   |
| 62335 | P03346 | Q8N187 | 0.93502   |
| 62336 | P03346 | Q3B8N5 | 0.45838   |
| 62337 | P03346 | Q13449 | 0.23273   |
| 62338 | P03346 | Q6ZP68 | 0.10317   |
| 62339 | P03346 | Q8N141 | 0.31436   |
| 62340 | P03346 | Q7Z4H9 | 0.32217   |
| 62341 | P03346 | P35527 | 0.4258    |
| 62342 | P03346 | Q86SG2 | 0.48449   |
| 62343 | P03346 | Q96DN6 | 0.40606   |
| 62344 | P03346 | Q9H9A5 | 0.27623   |
| 62345 | P03346 | Q8WYH8 | 0.66329   |
| 62346 | P03346 | Q8TAE8 | 1.1514    |
| 62347 | P03346 | P57772 | 0.02108   |
| 62348 | P03346 | Q5VTR2 | 0.70801   |
| 62349 | P03346 | Q8WYR1 | 0.37743   |
| 62350 | P03346 | O60688 | 0.28191   |
| 62351 | P03346 | Q7Z3V5 | 0.31436   |
| 62352 | P03346 | Q9H2P0 | 0.30078   |
| 62353 | P03346 | A6NNW6 | 0.13007   |
| 62354 | P03346 | Q8IU81 | 0.52293   |
| 62355 | P03346 | P14625 | 0.20272   |
| 62356 | P03346 | Q03828 | 0.53574   |
| 62357 | P03346 | Q6P1Q0 | 0.19489   |
| 62358 | P03346 | Q9Y3M2 | 0.53651   |
| 62359 | P03346 | P50502 | 0.8208    |
| 62360 | P03346 | Q29RF7 | 1.1167    |
| 62361 | P03346 | Q9P253 | 0.34863   |
| 62362 | P03346 | Q107X0 | 0.49807   |
| 62363 | P03346 | Q16656 | 0.67954   |
| 62364 | P03346 | Q99871 | 0.58118   |
| 62365 | P03346 | Q9C0F0 | 0.6213    |
| 62366 | P03346 | Q8IZQ1 | 0.80442   |
| 62367 | P03346 | Q00613 | 1.0835    |
| 62368 | P03346 | Q9P016 | 0.32217   |
| 62369 | P03346 | O15144 | 0.4638    |
| 62370 | P03346 | Q6ZT77 | 0.31436   |
| 62371 | P03346 | Q9UL58 | 0.34285   |
| 62372 | P03346 | H3BTG2 | 0.053998  |
| 62373 | P03346 | Q9BQ61 | 0.0077221 |
| 62374 | P03346 | Q8NCN2 | 0.4412    |
| 62375 | P03346 | Q96F07 | 0.73014   |
| 62376 | P03346 | Q96DC7 | 0.11078   |
| 62377 | P03346 | P35638 | 0.90684   |
| 62378 | P03346 | Q9BQA1 | 1.1125    |
| 62379 | P03346 | Q92622 | 0.2745    |
| 62380 | P03346 | Q9UKS6 | 0.45921   |
| 62381 | P03346 | P35548 | 0.67359   |
| 62382 | P03346 | O75489 | 0.27897   |
| 62383 | P03346 | Q02535 | 0.25594   |
| 62384 | P03346 | Q96RT8 | 0.49672   |
| 62385 | P03346 | O43516 | 0.47715   |
| 62386 | P03346 | Q9NZL4 | 0.58319   |
| 62387 | P03346 | Q96LC9 | 0.71437   |
| 62388 | P03346 | O75901 | 0.53338   |
| 62389 | P03346 | Q9BV20 | 0.25587   |
| 62390 | P03346 | Q8N823 | 0.31436   |
| 62391 | P03346 | Q5TA79 | 0.02884   |
| 62392 | P03346 | Q8WW38 | 0.58882   |
| 62393 | P03346 | Q6ZQV5 | 0.31436   |
| 62394 | P03346 | Q9H6Q3 | 0.39484   |
| 62395 | P03346 | Q9H4E7 | 0.30962   |
| 62396 | P03346 | Q9Y613 | 0.81756   |

|       |        |        |           |
|-------|--------|--------|-----------|
| 62397 | P03346 | P07148 | 0.28329   |
| 62398 | P03346 | P52747 | 0.91894   |
| 62399 | P03346 | Q7Z6J0 | 0.45115   |
| 62400 | P03346 | O94888 | 0.68635   |
| 62401 | P03346 | Q9H633 | 0.47406   |
| 62402 | P03346 | O43598 | 0.36276   |
| 62403 | P03346 | Q9BYU1 | 0.62328   |
| 62404 | P03346 | P23508 | 0.61141   |
| 62405 | P03346 | Q6AI39 | 0.014834  |
| 62406 | P03346 | O00167 | 0.74077   |
| 62407 | P03346 | Q9Y2L8 | 0.34285   |
| 62408 | P03346 | Q96DB2 | 0.37504   |
| 62409 | P03346 | P07320 | 0.74096   |
| 62410 | P03346 | P08235 | 0.5016    |
| 62411 | P03346 | Q8TAK5 | 0.75531   |
| 62412 | P03346 | Q8IVI9 | 0.43719   |
| 62413 | P03346 | Q06547 | 1.3202    |
| 62414 | P03346 | Q93015 | 0.24025   |
| 62415 | P03346 | P62304 | 0.96834   |
| 62416 | P03346 | O95155 | 0.37573   |
| 62417 | P03346 | Q9HD90 | 0.34553   |
| 62418 | P03346 | Q9BYR0 | 0.40421   |
| 62419 | P03346 | Q7Z4H7 | 0.91493   |
| 62420 | P03346 | Q14159 | 0.097226  |
| 62421 | P03346 | Q9H305 | 0.33838   |
| 62422 | P03346 | O75530 | 0.84893   |
| 62423 | P03346 | P11831 | 0.54448   |
| 62424 | P03346 | Q6ZW61 | 0.36636   |
| 62425 | P03346 | Q8N5T8 | 0.0096925 |
| 62426 | P03346 | Q8TAV0 | 0.10094   |
| 62427 | P03346 | P11388 | 0.27006   |
| 62428 | P03346 | P31270 | 0.29828   |
| 62429 | P03346 | A2AJT9 | 0.14441   |
| 62430 | P03346 | O95171 | 0.31428   |
| 62431 | P03346 | P83876 | 1.161     |
| 62432 | P03346 | Q15329 | 1.4551    |
| 62433 | P03346 | Q9UHR5 | 1.4582    |
| 62434 | P03346 | Q3KQV3 | 0.31436   |
| 62435 | P03346 | Q9NQE9 | 0.53016   |
| 62436 | P03346 | O95295 | 0.51879   |
| 62437 | P03346 | O43296 | 0.31436   |
| 62438 | P03346 | O43502 | 0.46204   |
| 62439 | P03346 | Q9UKX7 | 1.1367    |
| 62440 | P03346 | Q9Y5Z7 | 0.61242   |
| 62441 | P03346 | P57060 | 0.12821   |
| 62442 | P03346 | P52758 | 0.65761   |
| 62443 | P03346 | O95685 | 0.13234   |
| 62444 | P03346 | Q96A44 | 0.80377   |
| 62445 | P03346 | Q9BPU9 | 0.35918   |
| 62446 | P03346 | Q9H3J6 | 0.23222   |
| 62447 | P03346 | Q9NV56 | 0.59651   |
| 62448 | P03346 | Q0VD86 | 0.65405   |
| 62449 | P03346 | Q8TAQ5 | 0.31436   |
| 62450 | P03346 | P11277 | 0.36475   |
| 62451 | P03346 | Q9BS18 | 0.64128   |
| 62452 | P03346 | O95376 | 0.51259   |
| 62453 | P03346 | P20073 | 0.54575   |
| 62454 | P03346 | O43379 | 0.4243    |
| 62455 | P03346 | Q9UKF6 | 0.85617   |
| 62456 | P03346 | Q93008 | 0.52875   |
| 62457 | P03346 | Q6PEW1 | 0.2862    |
| 62458 | P03346 | Q9BXA9 | 0.2629    |
| 62459 | P03346 | Q86TJ5 | 0.31436   |
| 62460 | P03346 | Q0VG99 | 0.56934   |
| 62461 | P03346 | Q99627 | 0.64501   |
| 62462 | P03346 | O95751 | 0.89531   |
| 62463 | P03346 | Q32P41 | 0.5669    |
| 62464 | P03346 | P28347 | 1.2907    |
| 62465 | P03346 | Q9Y5W3 | 0.27234   |
| 62466 | P03346 | O95777 | 0.99127   |
| 62467 | P03346 | Q15554 | 0.60191   |
| 62468 | P03346 | Q8IY31 | 0.69715   |
| 62469 | P03346 | P13929 | 0.23686   |
| 62470 | P03346 | P84101 | 0.47084   |
| 62471 | P03346 | Q9H7E2 | 0.69328   |
| 62472 | P03346 | Q8N612 | 0.65183   |

|       |        |        |           |
|-------|--------|--------|-----------|
| 62473 | P03346 | O00541 | 0.54749   |
| 62474 | P03346 | Q86VX2 | 0.67432   |
| 62475 | P03346 | Q9UJT9 | 0.49978   |
| 62476 | P03346 | O00458 | 0.0048076 |
| 62477 | P03346 | O43747 | 0.73375   |
| 62478 | P03346 | O60930 | 0.42005   |
| 62479 | P03346 | Q3ZLR7 | 0.061177  |
| 62480 | P03346 | P42768 | 0.50419   |
| 62481 | P03346 | Q96QC0 | 0.12543   |
| 62482 | P03346 | Q9UQ80 | 1.3364    |
| 62483 | P03346 | Q9ULJ1 | 0.17073   |
| 62484 | P03346 | Q8IUE0 | 0.71675   |
| 62485 | P03346 | Q9Y3D7 | 0.18731   |
| 62486 | P03346 | P62987 | 0.26228   |
| 62487 | P03346 | Q96K75 | 0.31436   |
| 62488 | P03346 | O43309 | 0.34285   |
| 62489 | P03346 | O15379 | 0.61709   |
| 62490 | P03346 | Q6ZUV0 | 0.16914   |
| 62491 | P03346 | P61927 | 0.62242   |
| 62492 | P03346 | Q8NFB5 | 0.040024  |
| 62493 | P03346 | Q9P2H0 | 0.66787   |
| 62494 | P03346 | A6NJR5 | 0.040024  |
| 62495 | P03346 | Q5FWF6 | 0.31436   |
| 62496 | P03346 | Q9ULM2 | 0.31436   |
| 62497 | P03346 | Q460N3 | 0.58912   |
| 62498 | P03346 | P27694 | 0.5525    |
| 62499 | P03346 | Q5MIZ7 | 0.65084   |
| 62500 | P03346 | Q8TC71 | 0.60623   |
| 62501 | P03346 | Q9NP62 | 0.24492   |
| 62502 | P03346 | Q6ZSB9 | 0.31436   |
| 62503 | P03346 | Q96DZ1 | 0.52394   |
| 62504 | P03346 | Q9UNX3 | 0.59833   |
| 62505 | P03346 | Q96CS3 | 0.76262   |
| 62506 | P03346 | P20700 | 0.59061   |
| 62507 | P03346 | Q7Z3I7 | 0.31436   |
| 62508 | P03346 | P02489 | 0.41799   |
| 62509 | P03346 | Q9UKT9 | 0.61775   |
| 62510 | P03346 | Q14011 | 0.46555   |
| 62511 | P03346 | Q96KQ4 | 1.0991    |
| 62512 | P03346 | P28072 | 0.42723   |
| 62513 | P03346 | Q9H503 | 0.63188   |
| 62514 | P03346 | Q8IY42 | 0.18359   |
| 62515 | P03346 | P25815 | 0.78586   |
| 62516 | P03346 | Q6ZUT4 | 0.036288  |
| 62517 | P03346 | O95900 | 0.058374  |
| 62518 | P03346 | Q9P0T4 | 0.31436   |
| 62519 | P03346 | Q12857 | 0.62522   |
| 62520 | P03346 | Q99594 | 1.3764    |
| 62521 | P03346 | Q06732 | 0.30845   |
| 62522 | P03346 | A6NCW3 | 0.051589  |
| 62523 | P03346 | Q9BUP3 | 0.3855    |
| 62524 | P03346 | Q13158 | 0.51695   |
| 62525 | P03346 | Q92674 | 0.58969   |
| 62526 | P03346 | Q96H40 | 0.31436   |
| 62527 | P03346 | Q9NQRL | 0.82009   |
| 62528 | P03346 | Q8NFD5 | 1.1291    |
| 62529 | P03346 | Q9UBX3 | 0.47383   |
| 62530 | P03346 | Q9BRP1 | 0.28097   |
| 62531 | P03346 | Q9NTK1 | 0.14441   |
| 62532 | P03346 | Q9BX26 | 0.36633   |
| 62533 | P03346 | Q99471 | 1.1105    |
| 62534 | P03346 | Q7Z5D8 | 0.66978   |
| 62535 | P03346 | Q9Y5K8 | 0.29845   |
| 62536 | P03346 | Q71SY5 | 1.2331    |
| 62537 | P03346 | Q8N3X6 | 0.74923   |
| 62538 | P03346 | O75694 | 0.6949    |
| 62539 | P03346 | Q92990 | 0.27399   |
| 62540 | P03346 | O95714 | 0.25585   |
| 62541 | P03346 | P21127 | 0.38747   |
| 62542 | P03346 | Q8N668 | 0.9041    |
| 62543 | P03346 | Q8NFW5 | 0.28171   |
| 62544 | P03346 | Q9UJ04 | 0.22545   |
| 62545 | P03346 | Q9UIL1 | 0.89622   |
| 62546 | P03346 | P49427 | 0.55213   |
| 62547 | P03346 | P23297 | 0.69686   |
| 62548 | P03346 | P48443 | 0.29353   |

|       |        |        |           |
|-------|--------|--------|-----------|
| 62549 | P03346 | Q8IXW5 | 0.72837   |
| 62550 | P03346 | P06400 | 0.6333    |
| 62551 | P03346 | P0CJ87 | 0.6797    |
| 62552 | P03346 | Q8N7M2 | 0.31436   |
| 62553 | P03346 | Q9H3K2 | 0.31831   |
| 62554 | P03346 | O75123 | 0.31436   |
| 62555 | P03346 | P48378 | 0.70946   |
| 62556 | P03346 | Q9Y3C5 | 0.60132   |
| 62557 | P03346 | Q4G112 | 0.71675   |
| 62558 | P03346 | P25963 | 0.63309   |
| 62559 | P03346 | Q96IQ9 | 0.27653   |
| 62560 | P03346 | Q8N365 | 0.0077221 |
| 62561 | P03346 | O75717 | 0.72588   |
| 62562 | P03346 | Q14590 | 0.31436   |
| 62563 | P03346 | Q9UKZ1 | 0.29996   |
| 62564 | P03346 | Q7Z465 | 0.94068   |
| 62565 | P03346 | O75969 | 0.38966   |
| 62566 | P03346 | Q9NR28 | 0.97883   |
| 62567 | P03346 | Q9HD42 | 1.0545    |
| 62568 | P03346 | P0CH99 | 0.31436   |
| 62569 | P03346 | A6NLC8 | 0.14736   |
| 62570 | P03346 | P35579 | 0.59517   |
| 62571 | P03346 | P61956 | 0.96086   |
| 62572 | P03346 | P40426 | 0.60625   |
| 62573 | P03346 | Q9ULP0 | 0.18381   |
| 62574 | P03346 | Q14774 | 0.24495   |
| 62575 | P03346 | Q9UHP9 | 0.35139   |
| 62576 | P03346 | P0CB47 | 0.24944   |
| 62577 | P03346 | Q96I25 | 0.62422   |
| 62578 | P03346 | Q9Y6M1 | 0.5981    |
| 62579 | P03346 | Q9UHV9 | 1.0346    |
| 62580 | P03346 | P78352 | 0.59603   |
| 62581 | P03346 | Q96K62 | 0.31436   |
| 62582 | P03346 | Q9H788 | 1.1922    |
| 62583 | P03346 | P62857 | 0.54082   |
| 62584 | P03346 | Q92572 | 0.66302   |
| 62585 | P03346 | Q9NW07 | 0.27529   |
| 62586 | P03346 | O75143 | 0.7576    |
| 62587 | P03346 | Q96MW5 | 0.24239   |
| 62588 | P03346 | O00425 | 0.66259   |
| 62589 | P03346 | P25788 | 0.60446   |
| 62590 | P03346 | Q8WTT2 | 0.48728   |
| 62591 | P03346 | Q6V9R5 | 0.31436   |
| 62592 | P03346 | P35789 | 0.30845   |
| 62593 | P03346 | Q96Q35 | 0.25662   |
| 62594 | P03346 | Q9GZW5 | 0.71564   |
| 62595 | P03346 | Q8N6F7 | 0.59604   |
| 62596 | P03346 | O75312 | 0.28033   |
| 62597 | P03346 | Q9Y5N6 | 0.8517    |
| 62598 | P03346 | Q8WU90 | 0.953     |
| 62599 | P03346 | Q9UM82 | 0.095474  |
| 62600 | P03346 | Q12815 | 0.64315   |
| 62601 | P03346 | Q8WYJ6 | 0.40868   |
| 62602 | P03346 | O94875 | 0.25457   |
| 62603 | P03346 | P62736 | 0.10464   |
| 62604 | P03346 | O95336 | 0.40684   |
| 62605 | P03346 | Q8NEF9 | 0.94205   |
| 62606 | P03346 | Q8NEZ5 | 0.83047   |
| 62607 | P03346 | Q9BVC4 | 0.61635   |
| 62608 | P03346 | P52740 | 0.30845   |
| 62609 | P03346 | O14656 | 0.34574   |
| 62610 | P03346 | Q14691 | 0.49738   |
| 62611 | P03346 | Q9HBH7 | 0.40297   |
| 62612 | P03346 | P35326 | 0.051514  |
| 62613 | P03346 | Q99784 | 0.27912   |
| 62614 | P03346 | Q9NR11 | 0.31436   |
| 62615 | P03346 | Q9BSH3 | 0.31628   |
| 62616 | P03346 | Q9NRR3 | 0.67693   |
| 62617 | P03346 | Q9Y5U2 | 0.0004879 |
| 62618 | P03346 | P60520 | 0.47776   |
| 62619 | P03346 | Q9BYM8 | 0.26426   |
| 62620 | P03346 | A8MT69 | 0.67014   |
| 62621 | P03346 | Q8TD23 | 0.68219   |
| 62622 | P03346 | Q9H171 | 0.48683   |
| 62623 | P03346 | Q2TAL8 | 0.12821   |
| 62624 | P03346 | Q15291 | 0.35197   |

|       |        |        |           |
|-------|--------|--------|-----------|
| 62625 | P03346 | Q9BYT5 | 0.40421   |
| 62626 | P03346 | Q9H0U6 | 0.28895   |
| 62627 | P03346 | O95260 | 0.36922   |
| 62628 | P03346 | Q08AG5 | 0.31436   |
| 62629 | P03346 | Q9GZP8 | 0.23885   |
| 62630 | P03346 | P51532 | 0.49528   |
| 62631 | P03346 | Q9Y2D8 | 0.90008   |
| 62632 | P03346 | Q9BYQ8 | 0.40421   |
| 62633 | P03346 | Q14149 | 0.22619   |
| 62634 | P03346 | P13349 | 0.54017   |
| 62635 | P03346 | Q99728 | 0.38016   |
| 62636 | P03346 | Q9UJ72 | 0.11346   |
| 62637 | P03346 | Q96IL0 | 0.16708   |
| 62638 | P03346 | P53680 | 0.24199   |
| 62639 | P03346 | Q53FD0 | 0.072131  |
| 62640 | P03346 | Q9C0E2 | 1.1931    |
| 62641 | P03346 | Q8TCC3 | 0.37322   |
| 62642 | P03346 | Q5SQN1 | 0.63881   |
| 62643 | P03346 | Q9P2N5 | 0.17397   |
| 62644 | P03346 | O43711 | 0.70304   |
| 62645 | P03346 | Q9H147 | 0.32217   |
| 62646 | P03346 | Q6TFL4 | 0.16082   |
| 62647 | P03346 | Q8N7J2 | 0.16832   |
| 62648 | P03346 | Q00577 | 0.72177   |
| 62649 | P03346 | Q8WWC4 | 0.14441   |
| 62650 | P03346 | Q96M53 | 0.20758   |
| 62651 | P03346 | P49754 | 0.57176   |
| 62652 | P03346 | Q8IZP0 | 0.40502   |
| 62653 | P03346 | P35226 | 0.59869   |
| 62654 | P03346 | P54845 | 0.63031   |
| 62655 | P03346 | Q14CX7 | 0.20041   |
| 62656 | P03346 | Q969W8 | 0.31436   |
| 62657 | P03346 | Q9NZM5 | 0.25053   |
| 62658 | P03346 | P28074 | 0.50625   |
| 62659 | P03346 | Q9UMR2 | 0.30472   |
| 62660 | P03346 | Q56P03 | 0.55781   |
| 62661 | P03346 | Q13148 | 0.83133   |
| 62662 | P03346 | Q92614 | 0.33814   |
| 62663 | P03346 | Q15797 | 0.31096   |
| 62664 | P03346 | Q70SY1 | 0.22489   |
| 62665 | P03346 | Q86XK3 | 0.93048   |
| 62666 | P03346 | Q9Y3C1 | 0.44008   |
| 62667 | P03346 | Q14188 | 0.9282    |
| 62668 | P03346 | Q9GZV5 | 1.1069    |
| 62669 | P03346 | O60393 | 0.53731   |
| 62670 | P03346 | P27469 | 0.85174   |
| 62671 | P03346 | P50549 | 1.2238    |
| 62672 | P03346 | Q00059 | 1.0768    |
| 62673 | P03346 | Q969X6 | 1.4533    |
| 62674 | P03346 | Q7LBC6 | 0.35116   |
| 62675 | P03346 | P49721 | 0.39017   |
| 62676 | P03346 | Q6ZTU2 | 0.14315   |
| 62677 | P03346 | Q9BX40 | 0.07292   |
| 62678 | P03346 | Q7Z3Z0 | 0.56472   |
| 62679 | P03346 | Q12772 | 0.38786   |
| 62680 | P03346 | Q96SZ4 | 0.3828    |
| 62681 | P03346 | O95391 | 0.38013   |
| 62682 | P03346 | A6NHQ2 | 0.47653   |
| 62683 | P03346 | Q2NKX9 | 0.0077221 |
| 62684 | P03346 | Q96EZ8 | 0.97144   |
| 62685 | P03346 | Q8N1B3 | 0.92701   |
| 62686 | P03346 | Q96MU6 | 0.31436   |
| 62687 | P03346 | Q9BY42 | 0.12821   |
| 62688 | P03346 | Q8NFZ5 | 1.03      |
| 62689 | P03346 | Q9BZE3 | 0.75924   |
| 62690 | P03346 | Q92841 | 0.76902   |
| 62691 | P03346 | Q9UBI9 | 0.084219  |
| 62692 | P03346 | Q8TB05 | 0.0077221 |
| 62693 | P03346 | Q9C086 | 1.3348    |
| 62694 | P03346 | O60315 | 0.42363   |
| 62695 | P03346 | Q9Y2J8 | 0.089801  |
| 62696 | P03346 | Q13541 | 0.94031   |
| 62697 | P03346 | Q9UMS6 | 0.8913    |
| 62698 | P03346 | O75410 | 0.90173   |
| 62699 | P03346 | Q15154 | 0.67625   |
| 62700 | P03346 | O60563 | 1.4423    |

|       |        |        |         |
|-------|--------|--------|---------|
| 62701 | P03346 | Q9NRG9 | 0.84905 |
| 62702 | P03346 | Q4L180 | 0.50297 |
| 62703 | P03346 | Q15653 | 1.0848  |
| 62704 | P03346 | O43734 | 0.36847 |
| 62705 | P03346 | P0C7Q3 | 0.3447  |
| 62706 | P03346 | Q8WXF8 | 1.0874  |
| 62707 | P03346 | Q3LI66 | 0.36736 |
| 62708 | P03346 | Q9BWX5 | 0.52607 |
| 62709 | P03346 | P48382 | 1.3272  |
| 62710 | P03346 | Q03933 | 0.96667 |
| 62711 | P03346 | O60290 | 0.44737 |
| 62712 | P03346 | Q9Y4Y9 | 1.0498  |
| 62713 | P03346 | O60238 | 0.34015 |
| 62714 | P03346 | Q9H7B2 | 0.48532 |
| 62715 | P03346 | Q6P1K8 | 0.58027 |
| 62716 | P03346 | O75935 | 0.83661 |
| 62717 | P03346 | Q96R06 | 0.94529 |
| 62718 | P03346 | P17027 | 0.31436 |
| 62719 | P03346 | Q9Y3Q8 | 1.4983  |
| 62720 | P03346 | Q9UHB4 | 0.81821 |
| 62721 | P03346 | Q5MCW4 | 0.31436 |
| 62722 | P03346 | Q96AQ6 | 0.76887 |
| 62723 | P03346 | Q01105 | 0.9195  |
| 62724 | P03346 | Q5TCQ9 | 0.67473 |
| 62725 | P03346 | Q8IXM3 | 0.6134  |
| 62726 | P03346 | Q13347 | 0.91246 |
| 62727 | P03346 | Q9H1A7 | 0.34613 |
| 62728 | P03346 | Q5T280 | 0.12821 |
| 62729 | P03346 | Q9UNA4 | 0.58081 |
| 62730 | P03346 | Q9NZL9 | 0.3273  |
| 62731 | P03346 | O15225 | 0.12821 |
| 62732 | P03346 | Q96GV9 | 0.72835 |
| 62733 | P03346 | Q9BV57 | 0.63506 |
| 62734 | P03346 | Q92543 | 0.36184 |
| 62735 | P03346 | Q96HZ4 | 0.52404 |
| 62736 | P03346 | O00139 | 0.38589 |
| 62737 | P03346 | P51786 | 0.33736 |
| 62738 | P03346 | Q13884 | 0.70507 |
| 62739 | P03346 | Q15038 | 1.174   |
| 62740 | P03346 | Q15013 | 1.072   |
| 62741 | P03346 | Q9UKI9 | 1.506   |
| 62742 | P03346 | Q9H467 | 1.2782  |
| 62743 | P03346 | O60268 | 0.20041 |
| 62744 | P03346 | Q9UDY8 | 0.35986 |
| 62745 | P03346 | Q4G0X4 | 0.3559  |
| 62746 | P03346 | P51808 | 0.4321  |
| 62747 | P03346 | Q99626 | 0.2616  |
| 62748 | P03346 | P08579 | 0.62522 |
| 62749 | P03346 | O94763 | 0.9523  |
| 62750 | P03346 | Q8N137 | 0.99816 |
| 62751 | P03346 | P07992 | 0.22388 |
| 62752 | P03346 | Q9BRV8 | 0.81344 |
| 62753 | P03346 | P07814 | 0.25862 |
| 62754 | P03346 | Q6ZU65 | 0.48532 |
| 62755 | P03346 | Q14247 | 0.38215 |
| 62756 | P03346 | O60841 | 0.33694 |
| 62757 | P03346 | Q75400 | 1.0982  |
| 62758 | P03346 | P78406 | 0.59153 |
| 62759 | P03346 | Q12837 | 0.76453 |
| 62760 | P03346 | Q8NHY2 | 1.0862  |
| 62761 | P03346 | Q03936 | 0.43781 |
| 62762 | P03346 | Q9UFN0 | 0.96272 |
| 62763 | P03346 | Q16559 | 0.33959 |
| 62764 | P03346 | Q9H9G7 | 0.9068  |
| 62765 | P03346 | Q9H9F9 | 1.3617  |
| 62766 | P03346 | Q96JG9 | 0.31436 |
| 62767 | P03346 | Q5T7W7 | 0.12821 |
| 62768 | P03346 | O60308 | 0.27763 |
| 62769 | P03346 | Q00056 | 0.46888 |
| 62770 | P03346 | Q56P42 | 0.49807 |
| 62771 | P03346 | Q69YH5 | 0.93524 |
| 62772 | P03346 | P26678 | 0.12727 |
| 62773 | P03346 | Q15911 | 0.38173 |
| 62774 | P03346 | O75159 | 0.25263 |
| 62775 | P03346 | Q9BPX1 | 0.40948 |
| 62776 | P03346 | P57740 | 0.81471 |

|       |        |         |           |
|-------|--------|---------|-----------|
| 62777 | P03346 | Q15691  | 0.69333   |
| 62778 | P03346 | P55795  | 0.41851   |
| 62779 | P03346 | P56182  | 0.39855   |
| 62780 | P03346 | Q2M1K9  | 0.51803   |
| 62781 | P03346 | P17275  | 0.9366    |
| 62782 | P03346 | Q5XKE5  | 0.51027   |
| 62783 | P03346 | P78347  | 0.8781    |
| 62784 | P03346 | Q9BPZ7  | 0.22315   |
| 62785 | P03346 | Q9BUK6  | 0.22289   |
| 62786 | P03346 | Q32MZ4  | 1.4131    |
| 62787 | P03346 | Q96JI7  | 0.82463   |
| 62788 | P03346 | O96020  | 1.1053    |
| 62789 | P03346 | Q86T29  | 0.31436   |
| 62790 | P03346 | A8MUV8  | 0.31436   |
| 62791 | P03346 | P82094  | 1.6111    |
| 62792 | P03346 | Q8NEP4  | 0.0077221 |
| 62793 | P03346 | Q8IUD6  | 0.51477   |
| 62794 | P03346 | O95628  | 0.7576    |
| 62795 | P03346 | Q99733  | 1.019     |
| 62796 | P03346 | Q147U1  | 0.31436   |
| 62797 | P03346 | Q5EE01  | 0.75503   |
| 62798 | P03346 | Q6ZWB6  | 0.18903   |
| 62799 | P03346 | P0CG34  | 0.18695   |
| 62800 | P03346 | Q13322  | 0.24418   |
| 62801 | P03346 | Q6UX04  | 0.31049   |
| 62802 | P03346 | Q9UBD5  | 0.8176    |
| 62803 | P03346 | P02100  | 0.079165  |
| 62804 | P03346 | Q8TD17  | 0.30647   |
| 62805 | P03346 | P54274  | 0.53047   |
| 62806 | P03346 | P61578  | 0.74357   |
| 62807 | P03346 | Q9UBV8  | 0.44472   |
| 62808 | P03346 | Q6ZNK6  | 0.11316   |
| 62809 | P03346 | Q14587  | 0.30845   |
| 62810 | P03346 | Q9Y5N5  | 0.57383   |
| 62811 | P03346 | Q9P2D0  | 0.44053   |
| 62812 | P03346 | P52738  | 0.30845   |
| 62813 | P03346 | Q70IA6  | 0.59206   |
| 62814 | P03346 | Q9NQV6  | 0.31436   |
| 62815 | P03346 | Q8TF45  | 0.31436   |
| 62816 | P03346 | P49116  | 0.65381   |
| 62817 | P03346 | Q9ULZ2  | 0.94204   |
| 62818 | P03346 | P0CB33  | 0.31436   |
| 62819 | P03346 | Q8I WV1 | 0.094509  |
| 62820 | P03346 | Q15466  | 0.73748   |
| 62821 | P03346 | Q9UJQ4  | 0.2964    |
| 62822 | P03346 | P42575  | 0.42735   |
| 62823 | P03346 | Q96LM6  | 0.32217   |
| 62824 | P03346 | Q96M61  | 0.66787   |
| 62825 | P03346 | Q8N680  | 0.31436   |
| 62826 | P03346 | Q9H4A6  | 0.539     |
| 62827 | P03346 | Q99689  | 0.29649   |
| 62828 | P03346 | Q6XYB7  | 0.71675   |
| 62829 | P03346 | P24863  | 1.2736    |
| 62830 | P03346 | Q8TF42  | 0.25957   |
| 62831 | P03346 | O43678  | 0.042351  |
| 62832 | P03346 | Q9NZ09  | 0.20041   |
| 62833 | P03346 | P35244  | 0.6789    |
| 62834 | P03346 | Q9NZD4  | 0.13291   |
| 62835 | P03346 | Q7Z7C8  | 0.72567   |
| 62836 | P03346 | Q9NZI6  | 0.74458   |
| 62837 | P03346 | P49257  | 0.1441    |
| 62838 | P03346 | Q9UIU6  | 0.32493   |
| 62839 | P03346 | Q8WXH0  | 0.2744    |
| 62840 | P03346 | O95178  | 0.076823  |
| 62841 | P03346 | P56377  | 0.46913   |
| 62842 | P03346 | Q99962  | 0.41567   |
| 62843 | P03346 | P14316  | 1.1903    |
| 62844 | P03346 | Q9Y5M1  | 0.14265   |
| 62845 | P03346 | Q4G0J3  | 0.27663   |
| 62846 | P03346 | Q15004  | 1.0139    |
| 62847 | P03346 | Q9UNW9  | 0.29353   |
| 62848 | P03346 | Q9NS39  | 0.35297   |
| 62849 | P03346 | O14818  | 0.57414   |
| 62850 | P03346 | Q8N699  | 0.32217   |
| 62851 | P03346 | Q9UL18  | 1.1618    |
| 62852 | P03346 | P43487  | 0.41721   |



|       |        |        |          |
|-------|--------|--------|----------|
| 62853 | P03346 | P05423 | 0.23946  |
| 62854 | P03346 | Q9UK59 | 0.19758  |
| 62855 | P03346 | P51580 | 0.22531  |
| 62856 | P03346 | Q9Y3Y4 | 0.75202  |
| 62857 | P03346 | A8MVS1 | 0.31436  |
| 62858 | P03346 | P24278 | 0.99545  |
| 62859 | P03346 | Q96BZ8 | 0.12821  |
| 62860 | P03346 | Q8TBK2 | 0.77445  |
| 62861 | P03346 | Q9P2W1 | 0.30977  |
| 62862 | P03346 | Q6WBX8 | 0.69682  |
| 62863 | P03346 | P43243 | 0.36115  |
| 62864 | P03346 | P49336 | 0.51587  |
| 62865 | P03346 | Q6P4D5 | 0.030447 |
| 62866 | P03346 | Q15007 | 0.68744  |
| 62867 | P03346 | Q8WYN3 | 0.84255  |
| 62868 | P03346 | Q7Z6J9 | 0.47419  |
| 62869 | P03346 | P17861 | 0.88041  |
| 62870 | P03346 | Q8WV99 | 0.4159   |
| 62871 | P03346 | Q8WYP5 | 0.84454  |
| 62872 | P03346 | P46778 | 0.66528  |
| 62873 | P03346 | Q8WVV9 | 0.50036  |
| 62874 | P03346 | Q96KM6 | 0.42081  |
| 62875 | P03346 | Q9BRT9 | 0.54885  |
| 62876 | P03346 | Q8NEP9 | 0.31436  |
| 62877 | P03346 | A8MVW5 | 0.84596  |
| 62878 | P03346 | O15360 | 1.0037   |
| 62879 | P03346 | P23769 | 0.40313  |
| 62880 | P03346 | Q08AD1 | 0.7583   |
| 62881 | P03346 | Q96QU8 | 1.2014   |
| 62882 | P03346 | Q14872 | 0.88058  |
| 62883 | P03346 | Q5TBB1 | 0.44207  |
| 62884 | P03346 | Q9UBZ9 | 0.67138  |
| 62885 | P03346 | Q99708 | 0.81332  |
| 62886 | P03346 | Q8TC84 | 0.65405  |
| 62887 | P03346 | Q3LI67 | 0.36736  |
| 62888 | P03346 | O43159 | 0.96934  |
| 62889 | P03346 | Q8NE65 | 0.45059  |
| 62890 | P03346 | Q9NSI6 | 1.0217   |
| 62891 | P03346 | Q96LT7 | 0.56579  |
| 62892 | P03346 | Q9BYQ2 | 0.40421  |
| 62893 | P03346 | P49207 | 0.66528  |
| 62894 | P03346 | Q96SI1 | 0.3559   |
| 62895 | P03346 | Q5VIY5 | 0.31436  |
| 62896 | P03346 | Q52LG2 | 0.36736  |
| 62897 | P03346 | Q5BKY1 | 0.35029  |
| 62898 | P03346 | Q9HD15 | 0.84135  |
| 62899 | P03346 | Q9BSJ6 | 0.81053  |
| 62900 | P03346 | Q14527 | 0.41511  |
| 62901 | P03346 | Q53GL7 | 0.68363  |
| 62902 | P03346 | Q8WV07 | 0.12821  |
| 62903 | P03346 | P35250 | 0.24636  |
| 62904 | P03346 | P61604 | 0.89852  |
| 62905 | P03346 | Q99457 | 0.26935  |
| 62906 | P03346 | Q9ULG1 | 0.3561   |
| 62907 | P03346 | P62258 | 0.86843  |
| 62908 | P03346 | Q8IYL2 | 0.11829  |
| 62909 | P03346 | P43360 | 0.7115   |
| 62910 | P03346 | Q9BW85 | 0.15973  |
| 62911 | P03346 | Q96HR3 | 0.9704   |
| 62912 | P03346 | Q8N5X7 | 0.32031  |
| 62913 | P03346 | Q8N693 | 0.75837  |
| 62914 | P03346 | Q8WW12 | 0.93479  |
| 62915 | P03346 | P25490 | 0.38428  |
| 62916 | P03346 | P0CG12 | 0.32217  |
| 62917 | P03346 | P0C7M4 | 0.66978  |
| 62918 | P03346 | Q8NHV4 | 0.827    |
| 62919 | P03346 | Q9NRR5 | 0.87944  |
| 62920 | P03346 | O43615 | 0.38522  |
| 62921 | P03346 | Q8N336 | 0.22247  |
| 62922 | P03346 | Q15583 | 0.5099   |
| 62923 | P03346 | Q6P1X6 | 0.14441  |
| 62924 | P03346 | Q9NQP4 | 1.1073   |
| 62925 | P03346 | O95848 | 0.65552  |
| 62926 | P03346 | Q99436 | 0.61155  |
| 62927 | P03346 | Q8N5U6 | 1.2104   |
| 62928 | P03346 | Q6ZS17 | 0.20041  |

|       |        |        |          |
|-------|--------|--------|----------|
| 62929 | P03346 | O15304 | 0.93239  |
| 62930 | P03346 | P19419 | 1.4977   |
| 62931 | P03346 | O95983 | 1.5008   |
| 62932 | P03346 | Q5VYV7 | 0.66787  |
| 62933 | P03346 | P17152 | 0.11747  |
| 62934 | P03346 | Q9H4S2 | 0.58682  |
| 62935 | P03346 | Q9NZU7 | 0.48041  |
| 62936 | P03346 | Q5VZE5 | 0.48194  |
| 62937 | P03346 | Q7L266 | 0.46489  |
| 62938 | P03346 | Q9UBF1 | 1.0697   |
| 62939 | P03346 | Q96A56 | 1.1279   |
| 62940 | P03346 | Q5H9K5 | 0.12127  |
| 62941 | P03346 | Q9UMX2 | 0.40841  |
| 62942 | P03346 | P80723 | 0.43277  |
| 62943 | P03346 | P24941 | 0.542    |
| 62944 | P03346 | Q15637 | 0.52708  |
| 62945 | P03346 | Q96FS4 | 0.26014  |
| 62946 | P03346 | Q9NS18 | 0.29487  |
| 62947 | P03346 | Q9NSB4 | 0.4983   |
| 62948 | P03346 | Q8IV36 | 0.70802  |
| 62949 | P03346 | Q9NY27 | 1.0556   |
| 62950 | P03346 | O14978 | 0.53898  |
| 62951 | P03346 | Q68CZ1 | 0.23235  |
| 62952 | P03346 | Q8NA19 | 0.57808  |
| 62953 | P03346 | Q13426 | 0.43065  |
| 62954 | P03346 | P55957 | 0.55552  |
| 62955 | P03346 | Q96IU4 | 0.63477  |
| 62956 | P03346 | Q15633 | 0.98749  |
| 62957 | P03346 | Q9Y483 | 0.29285  |
| 62958 | P03346 | Q9GZL7 | 0.88792  |
| 62959 | P03346 | Q5T749 | 0.20041  |
| 62960 | P03346 | O75971 | 0.84595  |
| 62961 | P03346 | Q9UIF3 | 0.27341  |
| 62962 | P03346 | Q8TBZ9 | 0.11896  |
| 62963 | P03346 | P51610 | 0.62549  |
| 62964 | P03346 | Q0PNE2 | 0.48755  |
| 62965 | P03346 | Q9UMS4 | 0.89313  |
| 62966 | P03346 | Q9NVR5 | 0.13727  |
| 62967 | P03346 | Q6P1M3 | 1.1397   |
| 62968 | P03346 | Q15629 | 0.19702  |
| 62969 | P03346 | Q49AN0 | 0.33723  |
| 62970 | P03346 | Q9BQ66 | 0.40421  |
| 62971 | P03346 | Q8IXQ5 | 0.54624  |
| 62972 | P03346 | O75505 | 0.66978  |
| 62973 | P03346 | Q15573 | 0.73389  |
| 62974 | P03346 | Q8TE76 | 0.41006  |
| 62975 | P03346 | P0DJD3 | 0.39713  |
| 62976 | P03346 | Q8NHX4 | 0.030538 |
| 62977 | P03346 | Q14789 | 0.16731  |
| 62978 | P03346 | Q9NXG0 | 0.2135   |
| 62979 | P03346 | Q9UH99 | 0.31937  |
| 62980 | P03346 | Q6P5R6 | 0.26013  |
| 62981 | P03346 | Q6PI26 | 1.2996   |
| 62982 | P03346 | P55895 | 0.5582   |
| 62983 | P03346 | P14859 | 1.4216   |
| 62984 | P03346 | Q6P280 | 0.31436  |
| 62985 | P03346 | Q969U6 | 0.43555  |
| 62986 | P03346 | Q9NSC2 | 0.3293   |
| 62987 | P03346 | Q5T0B9 | 0.31436  |
| 62988 | P03346 | O95177 | 0.12821  |
| 62989 | P03346 | O75486 | 0.72982  |
| 62990 | P03346 | P30304 | 0.68407  |
| 62991 | P03346 | Q8IZU0 | 0.48532  |
| 62992 | P03346 | Q9P0U1 | 0.34671  |
| 62993 | P03346 | O43313 | 0.28901  |
| 62994 | P03346 | P48380 | 0.58858  |
| 62995 | P03346 | Q9BZE2 | 0.27126  |
| 62996 | P03346 | Q8IYA7 | 0.40452  |
| 62997 | P03346 | Q93073 | 0.09655  |
| 62998 | P03346 | Q8N393 | 0.31436  |
| 62999 | P03346 | Q7Z4T9 | 0.9529   |
| 63000 | P03346 | Q14498 | 1.059    |
| 63001 | P03346 | Q16531 | 0.81024  |
| 63002 | P03346 | P25208 | 0.99829  |
| 63003 | P03346 | Q13156 | 0.35755  |
| 63004 | P03346 | P50548 | 0.7271   |

|       |        |        |           |
|-------|--------|--------|-----------|
| 63005 | P03346 | Q9H814 | 0.57057   |
| 63006 | P03346 | Q9BVL2 | 0.72769   |
| 63007 | P03346 | P62937 | 0.68285   |
| 63008 | P03346 | Q9P2D3 | 0.037241  |
| 63009 | P03346 | Q8IWI9 | 0.61719   |
| 63010 | P03346 | Q96AH0 | 0.29287   |
| 63011 | P03346 | O60506 | 0.67399   |
| 63012 | P03346 | P23246 | 1.0834    |
| 63013 | P03346 | Q96I27 | 0.31436   |
| 63014 | P03346 | Q8WVR3 | 0.0077221 |
| 63015 | P03346 | Q8TF20 | 0.31436   |
| 63016 | P03346 | A8MXZ3 | 0.40421   |
| 63017 | P03346 | Q13888 | 0.47329   |
| 63018 | P03346 | Q49MI3 | 0.49573   |
| 63019 | P03346 | Q9Y6D5 | 0.2691    |
| 63020 | P03346 | Q8NF99 | 0.48931   |
| 63021 | P03346 | Q8NE22 | 0.14894   |
| 63022 | P03346 | P42772 | 0.89187   |
| 63023 | P03346 | Q92925 | 0.79576   |
| 63024 | P03346 | Q5T7P2 | 0.02884   |
| 63025 | P03346 | Q5XKL5 | 0.48532   |
| 63026 | P03346 | O95359 | 0.46427   |
| 63027 | P03346 | Q8IX15 | 0.86572   |
| 63028 | P03346 | P35237 | 0.4892    |
| 63029 | P03346 | Q27J81 | 0.40488   |
| 63030 | P03346 | Q6MZP7 | 0.91345   |
| 63031 | P03346 | P52741 | 0.43781   |
| 63032 | P03346 | Q75865 | 0.19974   |
| 63033 | P03346 | Q9NR55 | 0.74127   |
| 63034 | P03346 | Q8TD26 | 0.39509   |
| 63035 | P03346 | P56282 | 0.284     |
| 63036 | P03346 | P55197 | 1.4434    |
| 63037 | P03346 | Q96MG7 | 1.0555    |
| 63038 | P03346 | Q9C0A1 | 0.33644   |
| 63039 | P03346 | O75474 | 0.19883   |
| 63040 | P03346 | P20264 | 0.38212   |
| 63041 | P03346 | Q15149 | 0.29123   |
| 63042 | P03346 | Q8WZ33 | 1.0595    |
| 63043 | P03346 | Q9Y6Z2 | 0.12821   |
| 63044 | P03346 | Q86YE8 | 0.31436   |
| 63045 | P03346 | Q8NA72 | 0.48271   |
| 63046 | P03346 | Q969X5 | 0.33219   |
| 63047 | P03346 | P15923 | 0.6404    |
| 63048 | P03346 | P0CG48 | 0.3483    |
| 63049 | P03346 | Q8TDY3 | 0.18249   |
| 63050 | P03346 | P78371 | 0.70595   |
| 63051 | P03346 | Q5QJE6 | 0.88516   |
| 63052 | P03346 | P59780 | 0.31594   |
| 63053 | P03346 | Q8TEK3 | 0.62033   |
| 63054 | P03346 | Q13618 | 0.56752   |
| 63055 | P03346 | O60759 | 0.66918   |
| 63056 | P03346 | Q9H307 | 0.9812    |
| 63057 | P03346 | Q8TAD7 | 0.0077221 |
| 63058 | P03346 | Q8NCY6 | 0.32217   |
| 63059 | P03346 | Q6ZMY9 | 0.31436   |
| 63060 | P03346 | Q8WTW3 | 0.76711   |
| 63061 | P03346 | P62266 | 0.93627   |
| 63062 | P03346 | Q86WB0 | 0.93708   |
| 63063 | P03346 | Q6VB84 | 0.82071   |
| 63064 | P03346 | Q9H1K1 | 1.0109    |
| 63065 | P03346 | P78413 | 0.56441   |
| 63066 | P03346 | Q9NZI8 | 0.32823   |
| 63067 | P03346 | Q9BZV1 | 1.2424    |
| 63068 | P03346 | Q58WW2 | 0.40762   |
| 63069 | P03346 | O75886 | 1.2996    |
| 63070 | P03346 | O75820 | 0.33736   |
| 63071 | P03346 | Q86WP2 | 0.82039   |
| 63072 | P03346 | Q8WXX3 | 0.4168    |
| 63073 | P03346 | Q86X83 | 0.66787   |
| 63074 | P03346 | P61573 | 0.74357   |
| 63075 | P03346 | P05787 | 1.4645    |
| 63076 | P03346 | Q9BQY9 | 0.77922   |
| 63077 | P03346 | P25800 | 0.33777   |
| 63078 | P03346 | A8MTZ0 | 0.53853   |
| 63079 | P03346 | Q8IUD2 | 1.1112    |
| 63080 | P03346 | Q9HC52 | 1.0098    |

|       |        |        |          |
|-------|--------|--------|----------|
| 63081 | P03346 | Q8IV53 | 0.27403  |
| 63082 | P03346 | P15172 | 0.44942  |
| 63083 | P03346 | Q8NEZ2 | 0.80799  |
| 63084 | P03346 | Q9H2G4 | 0.79429  |
| 63085 | P03346 | Q8NCN5 | 0.19849  |
| 63086 | P03346 | Q8N5M1 | 0.77251  |
| 63087 | P03346 | Q70Z53 | 0.96082  |
| 63088 | P03346 | Q8WXD5 | 1.1182   |
| 63089 | P03346 | Q15796 | 0.62201  |
| 63090 | P03346 | Q9BXS5 | 0.80569  |
| 63091 | P03346 | Q9UKK3 | 0.86273  |
| 63092 | P03346 | Q9H3S7 | 0.28533  |
| 63093 | P03346 | Q86WZ6 | 0.31436  |
| 63094 | P03346 | Q15257 | 0.51431  |
| 63095 | P03346 | P41225 | 0.30193  |
| 63096 | P03346 | P56693 | 0.77478  |
| 63097 | P03346 | Q9UII4 | 0.4434   |
| 63098 | P03346 | K7EIQ3 | 0.10013  |
| 63099 | P03346 | Q969T9 | 0.67303  |
| 63100 | P03346 | Q96PM5 | 0.57174  |
| 63101 | P03346 | Q75475 | 1.3577   |
| 63102 | P03346 | P49750 | 1.3411   |
| 63103 | P03346 | P56555 | 0.19669  |
| 63104 | P03346 | Q49A88 | 0.17073  |
| 63105 | P03346 | Q15185 | 0.65103  |
| 63106 | P03346 | Q14744 | 1.0467   |
| 63107 | P03346 | Q9BW11 | 0.72512  |
| 63108 | P03346 | Q96A26 | 0.34785  |
| 63109 | P03346 | P23760 | 1.1996   |
| 63110 | P03346 | Q8IZ20 | 0.31436  |
| 63111 | P03346 | Q9BWT7 | 0.4803   |
| 63112 | P03346 | P56524 | 0.30994  |
| 63113 | P03346 | Q6NSW7 | 0.71675  |
| 63114 | P03346 | P15408 | 0.88458  |
| 63115 | P03346 | Q5JT18 | 0.11221  |
| 63116 | P03346 | Q75970 | 0.34021  |
| 63117 | P03346 | Q9UL68 | 0.20768  |
| 63118 | P03346 | Q9H3P2 | 1.1924   |
| 63119 | P03346 | Q9UK11 | 0.29135  |
| 63120 | P03346 | Q76009 | 0.47854  |
| 63121 | P03346 | Q6UWF3 | 0.058829 |
| 63122 | P03346 | Q8N1F7 | 0.7092   |
| 63123 | P03346 | Q9NTM9 | 0.42423  |
| 63124 | P03346 | Q9H329 | 0.23737  |
| 63125 | P03346 | Q9P2F5 | 0.091138 |
| 63126 | P03346 | P17535 | 1.2441   |
| 63127 | P03346 | Q9NUW8 | 0.82428  |
| 63128 | P03346 | P60608 | 0.10147  |
| 63129 | P03346 | P13010 | 0.43325  |
| 63130 | P03346 | P04732 | 0.26681  |
| 63131 | P03346 | Q86YW9 | 0.66979  |
| 63132 | P03346 | Q8IYH5 | 0.69313  |
| 63133 | P03346 | Q9BYC8 | 0.52493  |
| 63134 | P03346 | O43298 | 0.31436  |
| 63135 | P03346 | Q16401 | 0.42833  |
| 63136 | P03346 | Q15327 | 0.54356  |
| 63137 | P03346 | Q14709 | 0.34285  |
| 63138 | P03346 | Q96T51 | 0.3324   |
| 63139 | P03346 | Q8ND83 | 0.12237  |
| 63140 | P03346 | P19622 | 0.56791  |
| 63141 | P03346 | Q6NX45 | 0.31436  |
| 63142 | P03346 | Q156A1 | 0.39361  |
| 63143 | P03346 | Q9UNS1 | 0.69573  |
| 63144 | P03346 | Q7Z3G6 | 0.27687  |
| 63145 | P03346 | Q9H0R1 | 0.39797  |
| 63146 | P03346 | Q96KH6 | 0.032912 |
| 63147 | P03346 | O95678 | 0.29497  |
| 63148 | P03346 | O00410 | 1.2954   |
| 63149 | P03346 | Q8NCR6 | 0.2975   |
| 63150 | P03346 | Q5T681 | 0.66787  |
| 63151 | P03346 | Q8N9W5 | 0.2256   |
| 63152 | P03346 | O00712 | 0.43428  |
| 63153 | P03346 | Q86SZ2 | 0.19974  |
| 63154 | P03346 | A6NE82 | 0.46683  |
| 63155 | P03346 | P05114 | 0.43324  |
| 63156 | P03346 | Q9H4P4 | 0.35636  |

|       |        |        |           |
|-------|--------|--------|-----------|
| 63157 | P03346 | P07738 | 0.13177   |
| 63158 | P03346 | O75335 | 0.47367   |
| 63159 | P03346 | Q5PSV4 | 0.69594   |
| 63160 | P03346 | Q3SY52 | 0.31436   |
| 63161 | P03346 | A5LHX3 | 0.31946   |
| 63162 | P03346 | Q04743 | 0.60536   |
| 63163 | P03346 | Q969H6 | 1.0569    |
| 63164 | P03346 | O75534 | 0.51545   |
| 63165 | P03346 | Q96NA2 | 0.29144   |
| 63166 | P03346 | Q71F56 | 0.70213   |
| 63167 | P03346 | P19367 | 0.35383   |
| 63168 | P03346 | Q15906 | 1.2523    |
| 63169 | P03346 | O00287 | 0.38899   |
| 63170 | P03346 | Q9ULE6 | 0.96272   |
| 63171 | P03346 | Q8IV03 | 0.1189    |
| 63172 | P03346 | P15121 | 0.31372   |
| 63173 | P03346 | Q9HC77 | 0.87076   |
| 63174 | P03346 | Q9NQY0 | 0.55748   |
| 63175 | P03346 | O75170 | 0.7731    |
| 63176 | P03346 | P60709 | 0.17041   |
| 63177 | P03346 | P26641 | 0.66337   |
| 63178 | P03346 | Q92858 | 0.27936   |
| 63179 | P03346 | Q9UJY1 | 0.73028   |
| 63180 | P03346 | Q9NX40 | 0.71965   |
| 63181 | P03346 | Q9Y5J7 | 0.38256   |
| 63182 | P03346 | Q93074 | 0.62696   |
| 63183 | P03346 | Q53GS7 | 0.7748    |
| 63184 | P03346 | P78358 | 0.8379    |
| 63185 | P03346 | Q63HM1 | 0.45465   |
| 63186 | P03346 | P78344 | 0.64438   |
| 63187 | P03346 | P58557 | 0.32514   |
| 63188 | P03346 | Q5TD94 | 0.32867   |
| 63189 | P03346 | Q96QT6 | 0.99279   |
| 63190 | P03346 | Q8IVF2 | 0.32217   |
| 63191 | P03346 | Q99426 | 0.40646   |
| 63192 | P03346 | O60318 | 0.12686   |
| 63193 | P03346 | C9JLW8 | 0.035984  |
| 63194 | P03346 | Q9NPI1 | 1.1453    |
| 63195 | P03346 | P31276 | 0.93576   |
| 63196 | P03346 | Q5H9F3 | 0.83748   |
| 63197 | P03346 | O95707 | 0.84413   |
| 63198 | P03346 | P36543 | 0.41387   |
| 63199 | P03346 | Q9NVK5 | 0.37004   |
| 63200 | P03346 | P17026 | 0.27098   |
| 63201 | P03346 | P19013 | 0.63855   |
| 63202 | P03346 | O43815 | 0.44982   |
| 63203 | P03346 | Q99856 | 0.99026   |
| 63204 | P03346 | Q9UMS0 | 1.2158    |
| 63205 | P03346 | P49789 | 0.71335   |
| 63206 | P03346 | O43255 | 0.49178   |
| 63207 | P03346 | P53803 | 0.25184   |
| 63208 | P03346 | P17022 | 0.34285   |
| 63209 | P03346 | P61254 | 0.56901   |
| 63210 | P03346 | P23409 | 0.3371    |
| 63211 | P03346 | Q96B42 | 0.15106   |
| 63212 | P03346 | O14757 | 0.57005   |
| 63213 | P03346 | Q66K74 | 0.39023   |
| 63214 | P03346 | A6NFQ7 | 0.71675   |
| 63215 | P03346 | Q96E16 | 0.18669   |
| 63216 | P03346 | Q9BQ48 | 0.35035   |
| 63217 | P03346 | Q6P050 | 0.044653  |
| 63218 | P03346 | Q8N5A5 | 0.98821   |
| 63219 | P03346 | P10746 | 0.070149  |
| 63220 | P03346 | Q8WU03 | 0.017346  |
| 63221 | P03346 | Q7Z7J5 | 0.79885   |
| 63222 | P03346 | Q9ULH7 | 1.1244    |
| 63223 | P03346 | Q8TBC5 | 0.34285   |
| 63224 | P03346 | Q86VX9 | 0.18908   |
| 63225 | P03346 | O95347 | 0.54682   |
| 63226 | P03346 | Q9HBG6 | 0.27148   |
| 63227 | P03346 | Q9Y678 | 0.73223   |
| 63228 | P03346 | Q9H9Y6 | 0.79813   |
| 63229 | P03346 | P38919 | 0.43752   |
| 63230 | P03346 | P0C7H9 | 0.34408   |
| 63231 | P03346 | P27348 | 0.60811   |
| 63232 | P03346 | Q5BKY9 | 0.0077221 |

|       |        |        |           |
|-------|--------|--------|-----------|
| 63233 | P03346 | P56537 | 1.3571    |
| 63234 | P03346 | Q14141 | 0.24173   |
| 63235 | P03346 | Q9NX95 | 0.40627   |
| 63236 | P03346 | Q16520 | 1.3202    |
| 63237 | P03346 | O95931 | 1.072     |
| 63238 | P03346 | Q12986 | 0.46222   |
| 63239 | P03346 | Q5HY98 | 0.31436   |
| 63240 | P03346 | Q12981 | 0.32001   |
| 63241 | P03346 | Q86WG5 | 0.29048   |
| 63242 | P03346 | O60573 | 0.77468   |
| 63243 | P03346 | O43264 | 0.67768   |
| 63244 | P03346 | P35227 | 0.83862   |
| 63245 | P03346 | Q86TG7 | 0.76047   |
| 63246 | P03346 | P62495 | 0.78457   |
| 63247 | P03346 | Q7Z589 | 0.74315   |
| 63248 | P03346 | Q04206 | 0.59224   |
| 63249 | P03346 | Q06250 | 0.12821   |
| 63250 | P03346 | P18054 | 0.26966   |
| 63251 | P03346 | Q2TAK8 | 0.90302   |
| 63252 | P03346 | Q8N660 | 0.2685    |
| 63253 | P03346 | P36639 | 0.44095   |
| 63254 | P03346 | Q8IZ40 | 0.90354   |
| 63255 | P03346 | Q5T3J3 | 1.286     |
| 63256 | P03346 | Q9UIC8 | 0.55281   |
| 63257 | P03346 | Q68DI1 | 0.31436   |
| 63258 | P03346 | Q7L2E3 | 0.47278   |
| 63259 | P03346 | P33076 | 0.67986   |
| 63260 | P03346 | Q8N9W8 | 0.65405   |
| 63261 | P03346 | Q8IVG9 | 0.34294   |
| 63262 | P03346 | Q96GX8 | 0.0077221 |
| 63263 | P03346 | Q9UBU7 | 0.28145   |
| 63264 | P03346 | P07910 | 0.65875   |
| 63265 | P03346 | B9ZVM9 | 0.13682   |
| 63266 | P03346 | O14682 | 0.24083   |
| 63267 | P03346 | Q9HAJ7 | 0.72377   |
| 63268 | P03346 | Q12802 | 0.29716   |
| 63269 | P03346 | Q9BSB4 | 0.59468   |
| 63270 | P03346 | Q86UE3 | 0.31436   |
| 63271 | P03346 | Q53H80 | 0.61993   |
| 63272 | P03346 | O95782 | 0.50253   |
| 63273 | P03346 | Q71UM5 | 0.74156   |
| 63274 | P03346 | Q86WU2 | 0.27165   |
| 63275 | P03346 | P51826 | 0.70369   |
| 63276 | P03346 | Q2TAZ0 | 0.66787   |
| 63277 | P03346 | Q49B96 | 0.33623   |
| 63278 | P03346 | P07476 | 0.1775    |
| 63279 | P03346 | Q9NTX7 | 0.62836   |
| 63280 | P03346 | Q8TAK6 | 0.45852   |
| 63281 | P03346 | Q8N9Y4 | 0.078026  |
| 63282 | P03346 | Q9H9D4 | 0.81093   |
| 63283 | P03346 | O00170 | 0.78527   |
| 63284 | P03346 | Q6W0C5 | 0.21901   |
| 63285 | P03346 | Q9BRQ6 | 0.60438   |
| 63286 | P03346 | Q8IV54 | 0.41915   |
| 63287 | P03346 | Q8NA47 | 0.0077221 |
| 63288 | P03346 | Q9NXR1 | 0.40251   |
| 63289 | P03346 | P23786 | 0.22883   |
| 63290 | P03346 | P0CJ85 | 0.6797    |
| 63291 | P03346 | Q9P2S5 | 0.33677   |
| 63292 | P03346 | Q99816 | 0.47178   |
| 63293 | P03346 | P24864 | 0.62892   |
| 63294 | P03346 | O15061 | 0.90394   |
| 63295 | P03346 | Q9NX18 | 1.0071    |
| 63296 | P03346 | Q96RS6 | 0.49807   |
| 63297 | P03346 | Q53HL2 | 0.99405   |
| 63298 | P03346 | P53618 | 0.82388   |
| 63299 | P03346 | P14136 | 0.27393   |
| 63300 | P03346 | Q9UQC2 | 0.42636   |
| 63301 | P03346 | Q9UKT8 | 0.59623   |
| 63302 | P03346 | Q9UMY4 | 0.3759    |
| 63303 | P03346 | Q8IYN6 | 0.033045  |
| 63304 | P03346 | P98170 | 0.32274   |
| 63305 | P03346 | Q0VG06 | 0.7527    |
| 63306 | P03346 | Q5T200 | 0.479     |
| 63307 | P03346 | Q9NZD8 | 0.92951   |
| 63308 | P03346 | Q3MIS6 | 0.31436   |

|       |        |        |           |
|-------|--------|--------|-----------|
| 63309 | P03346 | Q8N9K5 | 0.31436   |
| 63310 | P03346 | Q8N895 | 0.72538   |
| 63311 | P03346 | H3BNL1 | 0.0057171 |
| 63312 | P03346 | Q9P209 | 0.98246   |
| 63313 | P03346 | Q9ULD0 | 0.47651   |
| 63314 | P03346 | P52737 | 0.85532   |
| 63315 | P03346 | Q96BP3 | 0.35639   |
| 63316 | P03346 | Q9HCH5 | 0.72116   |
| 63317 | P03346 | Q9Y383 | 0.37335   |
| 63318 | P03346 | O95238 | 0.62145   |
| 63319 | P03346 | Q8N684 | 0.72199   |
| 63320 | P03346 | Q12906 | 1.4304    |
| 63321 | P03346 | Q9NXV2 | 1.5071    |
| 63322 | P03346 | Q7L3S4 | 0.31436   |
| 63323 | P03346 | O95163 | 0.86669   |
| 63324 | P03346 | O94776 | 1.0655    |
| 63325 | P03346 | P28698 | 0.80408   |
| 63326 | P03346 | Q6ZMS7 | 0.49207   |
| 63327 | P03346 | Q07021 | 0.85059   |
| 63328 | P03346 | Q9ULJ3 | 0.81535   |
| 63329 | P03346 | P60329 | 0.40421   |
| 63330 | P03346 | P13056 | 0.76403   |
| 63331 | P03346 | Q7Z739 | 0.66787   |
| 63332 | P03346 | Q9NQ69 | 0.32758   |
| 63333 | P03346 | Q6ICG8 | 0.15615   |
| 63334 | P03346 | Q9BVT8 | 0.18669   |
| 63335 | P03346 | H3BNL8 | 0.093534  |
| 63336 | P03346 | O00321 | 0.59456   |
| 63337 | P03346 | Q16222 | 0.39917   |
| 63338 | P03346 | Q5T4T6 | 0.48532   |
| 63339 | P03346 | O60232 | 0.88126   |
| 63340 | P03346 | Q9H1L0 | 0.037061  |
| 63341 | P03346 | Q96FH0 | 0.57969   |
| 63342 | P03346 | Q9UN30 | 0.67357   |
| 63343 | P03346 | Q13835 | 0.45247   |
| 63344 | P03346 | Q96MY1 | 0.0030483 |
| 63345 | P03346 | Q6ZRV2 | 0.05054   |
| 63346 | P03346 | Q6PJG2 | 1.0775    |
| 63347 | P03346 | P61218 | 0.39077   |
| 63348 | P03346 | Q5T753 | 0.02884   |
| 63349 | P03346 | P11142 | 0.46893   |
| 63350 | P03346 | Q14157 | 0.54888   |
| 63351 | P03346 | Q9UM13 | 0.75019   |
| 63352 | P03346 | P25686 | 0.33635   |
| 63353 | P03346 | A8MSY0 | 0.51797   |
| 63354 | P03346 | Q01850 | 1.1499    |
| 63355 | P03346 | O00268 | 1.1351    |
| 63356 | P03346 | P52951 | 0.41368   |
| 63357 | P03346 | Q9NWK9 | 0.51534   |
| 63358 | P03346 | P31948 | 1.1289    |
| 63359 | P03346 | O95671 | 0.30272   |
| 63360 | P03346 | Q9H1H9 | 0.53583   |
| 63361 | P03346 | Q8WW59 | 0.44546   |
| 63362 | P03346 | P82979 | 0.73986   |
| 63363 | P03346 | Q8IXJ6 | 0.30827   |
| 63364 | P03346 | Q13023 | 0.76475   |
| 63365 | P03346 | O60806 | 0.7711    |
| 63366 | P03346 | Q9P2T0 | 0.50795   |
| 63367 | P03346 | Q92886 | 0.40266   |
| 63368 | P03346 | Q6ZS46 | 0.097853  |
| 63369 | P03346 | Q96J94 | 0.24392   |
| 63370 | P03346 | P02794 | 0.83316   |
| 63371 | P03346 | P41161 | 0.58257   |
| 63372 | P03346 | O75940 | 0.99671   |
| 63373 | P03346 | Q8TDY2 | 1.0268    |
| 63374 | P03346 | P18583 | 0.67782   |
| 63375 | P03346 | C9J3V5 | 0.16168   |
| 63376 | P03346 | Q9UHN1 | 0.33966   |
| 63377 | P03346 | P56177 | 0.68689   |
| 63378 | P03346 | Q96CS4 | 0.31436   |
| 63379 | P03346 | Q8NFG4 | 0.95898   |
| 63380 | P03346 | P48668 | 0.56559   |
| 63381 | P03346 | Q9NPB6 | 0.71273   |
| 63382 | P03346 | Q9POL1 | 0.34285   |
| 63383 | P03346 | Q9BQ13 | 0.3559    |
| 63384 | P03346 | Q9NUL3 | 0.90311   |

|       |        |        |           |
|-------|--------|--------|-----------|
| 63385 | P03346 | Q15056 | 0.50024   |
| 63386 | P03346 | Q96M29 | 0.098591  |
| 63387 | P03346 | P60174 | 0.31474   |
| 63388 | P03346 | O60244 | 0.69619   |
| 63389 | P03346 | Q9C035 | 0.62746   |
| 63390 | P03346 | Q9BYW2 | 0.27122   |
| 63391 | P03346 | Q9H7J1 | 0.11316   |
| 63392 | P03346 | P28062 | 0.27531   |
| 63393 | P03346 | Q9H583 | 1.2195    |
| 63394 | P03346 | Q96IF1 | 0.39035   |
| 63395 | P03346 | Q96FA7 | 0.21218   |
| 63396 | P03346 | Q9H4W6 | 0.3142    |
| 63397 | P03346 | Q8WTW4 | 0.63302   |
| 63398 | P03346 | A8MWD9 | 0.43888   |
| 63399 | P03346 | Q9ULM3 | 1.1015    |
| 63400 | P03346 | Q13190 | 0.26687   |
| 63401 | P03346 | Q8WWB5 | 0.024172  |
| 63402 | P03346 | Q9Y2Z2 | 0.093068  |
| 63403 | P03346 | Q92826 | 0.38236   |
| 63404 | P03346 | Q86XG9 | 0.20041   |
| 63405 | P03346 | Q04741 | 0.25665   |
| 63406 | P03346 | Q9BYE4 | 0.1267    |
| 63407 | P03346 | P57075 | 0.57332   |
| 63408 | P03346 | Q6ZQN3 | 0.14944   |
| 63409 | P03346 | P08621 | 0.75238   |
| 63410 | P03346 | Q6ISB3 | 1.0208    |
| 63411 | P03346 | Q86VN1 | 0.73862   |
| 63412 | P03346 | Q63HK5 | 0.44917   |
| 63413 | P03346 | Q00587 | 0.41991   |
| 63414 | P03346 | Q5TB30 | 0.52474   |
| 63415 | P03346 | P15173 | 0.27649   |
| 63416 | P03346 | Q08378 | 0.55199   |
| 63417 | P03346 | Q14532 | 0.45506   |
| 63418 | P03346 | P55854 | 0.81086   |
| 63419 | P03346 | Q5T653 | 0.36869   |
| 63420 | P03346 | Q8IXT5 | 0.20671   |
| 63421 | P03346 | Q9NX01 | 0.52949   |
| 63422 | P03346 | Q08050 | 0.55808   |
| 63423 | P03346 | Q96G21 | 1.1327    |
| 63424 | P03346 | Q8IUC1 | 0.51027   |
| 63425 | P03346 | Q9GZL8 | 0.12821   |
| 63426 | P03346 | Q9NVA1 | 0.14661   |
| 63427 | P03346 | Q9BPY8 | 0.45864   |
| 63428 | P03346 | Q17R26 | 0.18405   |
| 63429 | P03346 | Q5JSS6 | 0.11646   |
| 63430 | P03346 | Q9H8E8 | 0.93209   |
| 63431 | P03346 | P11940 | 0.59808   |
| 63432 | P03346 | Q9UMX0 | 0.95095   |
| 63433 | P03346 | Q8IX03 | 1.2138    |
| 63434 | P03346 | Q9UNX4 | 0.55433   |
| 63435 | P03346 | P60953 | 0.45024   |
| 63436 | P03346 | Q9Y2U9 | 0.32217   |
| 63437 | P03346 | Q14209 | 1.2864    |
| 63438 | P03346 | O00193 | 0.12821   |
| 63439 | P03346 | P12525 | 0.66312   |
| 63440 | P03346 | P78386 | 0.48588   |
| 63441 | P03346 | P42226 | 1.0337    |
| 63442 | P03346 | Q13242 | 0.38429   |
| 63443 | P03346 | Q8N5I9 | 0.0077221 |
| 63444 | P03346 | P0DI83 | 0.48532   |
| 63445 | P03346 | Q9BQP7 | 0.14441   |
| 63446 | P03346 | Q53QW1 | 0.0077221 |
| 63447 | P03346 | P52742 | 0.35506   |
| 63448 | P03346 | Q6UN15 | 0.41273   |
| 63449 | P03346 | Q8WW35 | 0.66787   |
| 63450 | P03346 | Q8WV22 | 0.35126   |
| 63451 | P03346 | P69208 | 0.39865   |
| 63452 | P03346 | Q9UDV7 | 0.32869   |
| 63453 | P03346 | Q9H825 | 0.46931   |
| 63454 | P03346 | Q6MZT1 | 0.20055   |
| 63455 | P03346 | Q8IUR6 | 1.211     |
| 63456 | P03346 | P18754 | 1.1134    |
| 63457 | P03346 | Q9C0D4 | 0.31436   |
| 63458 | P03346 | Q9BYE7 | 0.93606   |
| 63459 | P03346 | Q15306 | 0.96747   |
| 63460 | P03346 | Q9H2C0 | 0.84908   |



|       |        |        |           |
|-------|--------|--------|-----------|
| 63461 | P03346 | P29692 | 0.53711   |
| 63462 | P03346 | Q9NPG2 | 0.18476   |
| 63463 | P03346 | Q8WTR7 | 0.80821   |
| 63464 | P03346 | P60409 | 0.40421   |
| 63465 | P03346 | O60296 | 0.75029   |
| 63466 | P03346 | Q9BWD3 | 0.042514  |
| 63467 | P03346 | Q96RL1 | 0.91191   |
| 63468 | P03346 | P31943 | 0.77544   |
| 63469 | P03346 | Q9Y5Q3 | 1.0804    |
| 63470 | P03346 | Q14129 | 0.18789   |
| 63471 | P03346 | Q96C03 | 0.19801   |
| 63472 | P03346 | Q9NVP1 | 0.32037   |
| 63473 | P03346 | Q9NT62 | 0.66634   |
| 63474 | P03346 | Q9BR76 | 0.58858   |
| 63475 | P03346 | Q9P206 | 0.079707  |
| 63476 | P03346 | P15622 | 0.31436   |
| 63477 | P03346 | Q9BXM0 | 0.8808    |
| 63478 | P03346 | Q9NVF7 | 0.033045  |
| 63479 | P03346 | Q99767 | 0.52381   |
| 63480 | P03346 | Q96T21 | 0.46003   |
| 63481 | P03346 | E9PI22 | 0.03215   |
| 63482 | P03346 | Q8NDQ6 | 0.4754    |
| 63483 | P03346 | Q9UBC3 | 0.35859   |
| 63484 | P03346 | Q7Z6K1 | 0.30661   |
| 63485 | P03346 | Q08495 | 0.37177   |
| 63486 | P03346 | Q75QN2 | 0.88882   |
| 63487 | P03346 | Q93050 | 0.31235   |
| 63488 | P03346 | Q9P2Y4 | 0.46703   |
| 63489 | P03346 | Q96NU7 | 0.16571   |
| 63490 | P03346 | P23759 | 0.44525   |
| 63491 | P03346 | Q9NUQ6 | 0.65405   |
| 63492 | P03346 | Q96HM7 | 0.021317  |
| 63493 | P03346 | Q95630 | 0.30098   |
| 63494 | P03346 | P62993 | 0.25485   |
| 63495 | P03346 | Q5SWA1 | 0.0070612 |
| 63496 | P03346 | P10588 | 0.3835    |
| 63497 | P03346 | Q3KRA6 | 0.11292   |
| 63498 | P03346 | Q14457 | 0.61186   |
| 63499 | P03346 | Q96QS3 | 0.31976   |
| 63500 | P03346 | Q13522 | 0.43501   |
| 63501 | P03346 | O76014 | 0.47854   |
| 63502 | P03346 | Q9HCK0 | 0.31644   |
| 63503 | P03346 | Q8IVC4 | 0.31436   |
| 63504 | P03346 | A6NCN2 | 0.51027   |
| 63505 | P03346 | Q00839 | 0.7396    |
| 63506 | P03346 | O60832 | 0.86912   |
| 63507 | P03346 | Q9H7D7 | 0.65405   |
| 63508 | P03346 | Q96AE4 | 0.87019   |
| 63509 | P03346 | O43396 | 0.29833   |
| 63510 | P03346 | Q12824 | 0.9908    |
| 63511 | P03346 | Q9NQ33 | 0.81208   |
| 63512 | P03346 | P14652 | 0.26926   |
| 63513 | P03346 | P63279 | 0.75888   |
| 63514 | P03346 | Q96AV8 | 0.6776    |
| 63515 | P03346 | O43482 | 0.65128   |
| 63516 | P03346 | Q8TA94 | 0.31436   |
| 63517 | P03346 | Q9C0F3 | 0.59404   |
| 63518 | P03346 | Q6PG37 | 0.31436   |
| 63519 | P03346 | P06703 | 0.24825   |
| 63520 | P03346 | Q9NRX3 | 0.0042209 |
| 63521 | P03346 | O75396 | 0.5114    |
| 63522 | P03346 | P42574 | 0.24622   |
| 63523 | P03346 | Q96IY1 | 0.98886   |
| 63524 | P03346 | Q96TC7 | 0.51061   |
| 63525 | P03346 | Q7L9L4 | 0.9099    |
| 63526 | P03346 | Q9NYG5 | 0.73939   |
| 63527 | P03346 | Q9H2W6 | 0.4377    |
| 63528 | P03346 | Q9NZW5 | 0.38073   |
| 63529 | P03346 | O43186 | 1.125     |
| 63530 | P03346 | Q9NX65 | 0.31436   |
| 63531 | P03346 | Q16526 | 0.60722   |
| 63532 | P03346 | O00505 | 1.173     |
| 63533 | P03346 | Q9H8G2 | 0.055233  |
| 63534 | P03346 | P0C7I0 | 0.34408   |
| 63535 | P03346 | Q13247 | 0.38429   |
| 63536 | P03346 | Q8IYF3 | 0.79132   |

|       |        |        |           |
|-------|--------|--------|-----------|
| 63537 | P03346 | Q8IZY5 | 0.34086   |
| 63538 | P03346 | Q9NYH9 | 0.20732   |
| 63539 | P03346 | Q96GG9 | 0.60572   |
| 63540 | P03346 | Q8TF32 | 0.31436   |
| 63541 | P03346 | Q9NRJ4 | 0.49512   |
| 63542 | P03346 | Q00257 | 1.1586    |
| 63543 | P03346 | Q9Y2D1 | 1.4334    |
| 63544 | P03346 | P27540 | 0.55369   |
| 63545 | P03346 | Q9NWV4 | 0.12821   |
| 63546 | P03346 | Q8N5J4 | 0.86768   |
| 63547 | P03346 | A8MQ14 | 0.31436   |
| 63548 | P03346 | Q86XK2 | 0.77334   |
| 63549 | P03346 | Q9P1Y5 | 0.12027   |
| 63550 | P03346 | Q86TX2 | 0.31629   |
| 63551 | P03346 | Q5JSZ5 | 0.66787   |
| 63552 | P03346 | Q9NP08 | 0.50207   |
| 63553 | P03346 | Q86UD4 | 0.31436   |
| 63554 | P03346 | P58340 | 0.7624    |
| 63555 | P03346 | Q96SE7 | 0.31436   |
| 63556 | P03346 | Q86U86 | 1.2708    |
| 63557 | P03346 | Q9UIF7 | 0.44976   |
| 63558 | P03346 | Q6ZRP0 | 0.0077221 |
| 63559 | P03346 | Q96AY2 | 0.91889   |
| 63560 | P03346 | Q99666 | 0.29545   |
| 63561 | P03346 | Q96DM1 | 0.02649   |
| 63562 | P03346 | Q8N319 | 0.23171   |
| 63563 | P03346 | Q969V6 | 1.5183    |
| 63564 | P03346 | Q9BUR4 | 1.0566    |
| 63565 | P03346 | Q9HCG1 | 0.32241   |
| 63566 | P03346 | Q86WQ0 | 0.80058   |
| 63567 | P03346 | Q9BTT4 | 0.88548   |
| 63568 | P03346 | P49005 | 0.73761   |
| 63569 | P03346 | Q7Z614 | 0.70874   |
| 63570 | P03346 | Q9NZI5 | 0.77514   |
| 63571 | P03346 | Q15942 | 0.3631    |
| 63572 | P03346 | P58304 | 0.53667   |
| 63573 | P03346 | P21673 | 0.44554   |
| 63574 | P03346 | Q6P0N0 | 0.46306   |
| 63575 | P03346 | Q92552 | 0.96448   |
| 63576 | P03346 | Q8NFH5 | 0.65126   |
| 63577 | P03346 | D6RGH6 | 1.408     |
| 63578 | P03346 | P62424 | 1.0566    |
| 63579 | P03346 | P16989 | 0.51604   |
| 63580 | P03346 | Q13438 | 0.3358    |
| 63581 | P03346 | P26358 | 0.48717   |
| 63582 | P03346 | P62273 | 0.5294    |
| 63583 | P03346 | Q96NL8 | 0.20041   |
| 63584 | P03346 | P28289 | 0.30407   |
| 63585 | P03346 | Q15386 | 0.51528   |
| 63586 | P03346 | A6NJT0 | 0.32488   |
| 63587 | P03346 | Q8WWZ8 | 0.30386   |
| 63588 | P03346 | Q6IPT2 | 0.15847   |
| 63589 | P03346 | Q9UK41 | 0.81621   |
| 63590 | P03346 | P62714 | 0.79091   |
| 63591 | P03346 | Q15560 | 1.0868    |
| 63592 | P03346 | P67775 | 0.69165   |
| 63593 | P03346 | Q9P258 | 0.6922    |
| 63594 | P03346 | P19338 | 0.85432   |
| 63595 | P03346 | Q9P2F9 | 0.31436   |
| 63596 | P03346 | Q8TAF7 | 0.31436   |
| 63597 | P03346 | O43776 | 0.077096  |
| 63598 | P03346 | Q9UBL3 | 0.54182   |
| 63599 | P03346 | P55884 | 0.47197   |
| 63600 | P03346 | Q14204 | 0.39303   |
| 63601 | P03346 | Q6P3W6 | 0.20041   |
| 63602 | P03346 | Q5VVS0 | 0.099891  |
| 63603 | P03346 | Q7L5D6 | 0.32035   |
| 63604 | P03346 | Q99717 | 0.59502   |
| 63605 | P03346 | P0C7X2 | 0.31644   |
| 63606 | P03346 | P0C7W0 | 0.0077221 |
| 63607 | P03346 | Q8IZE3 | 0.31629   |
| 63608 | P03346 | O14646 | 0.84901   |
| 63609 | P03346 | Q92748 | 0.9834    |
| 63610 | P03346 | P20823 | 0.33472   |
| 63611 | P03346 | P49459 | 0.26571   |
| 63612 | P03346 | Q6XZF7 | 0.41963   |

|       |        |        |           |
|-------|--------|--------|-----------|
| 63613 | P03346 | Q9H0E3 | 0.83226   |
| 63614 | P03346 | Q9Y3M9 | 0.31436   |
| 63615 | P03346 | Q96BR9 | 0.31644   |
| 63616 | P03346 | Q9P299 | 0.50306   |
| 63617 | P03346 | P17038 | 0.31436   |
| 63618 | P03346 | Q3SY46 | 0.36736   |
| 63619 | P03346 | P15559 | 0.33425   |
| 63620 | P03346 | Q9BYD2 | 0.35035   |
| 63621 | P03346 | Q92688 | 0.49807   |
| 63622 | P03346 | Q92831 | 0.80513   |
| 63623 | P03346 | Q9UBQ0 | 0.23882   |
| 63624 | P03346 | Q9H4Q3 | 0.24147   |
| 63625 | P03346 | P25440 | 0.74785   |
| 63626 | P03346 | Q99638 | 0.69529   |
| 63627 | P03346 | Q96IK1 | 0.31764   |
| 63628 | P03346 | P0CJ89 | 0.6797    |
| 63629 | P03346 | Q02575 | 0.30595   |
| 63630 | P03346 | Q96RE7 | 1.2139    |
| 63631 | P03346 | O14613 | 0.25795   |
| 63632 | P03346 | A6NK75 | 0.31436   |
| 63633 | P03346 | Q9H609 | 0.31436   |
| 63634 | P03346 | O15350 | 0.39063   |
| 63635 | P03346 | P49918 | 0.8359    |
| 63636 | P03346 | Q9H4B0 | 0.17422   |
| 63637 | P03346 | Q7Z2X4 | 0.32308   |
| 63638 | P03346 | Q96N38 | 0.31436   |
| 63639 | P03346 | O95153 | 0.88554   |
| 63640 | P03346 | Q9NXX8 | 0.85722   |
| 63641 | P03346 | O15105 | 0.32916   |
| 63642 | P03346 | P26599 | 0.51652   |
| 63643 | P03346 | Q9NZM4 | 0.66787   |
| 63644 | P03346 | O75626 | 0.39311   |
| 63645 | P03346 | Q9NTW7 | 0.31436   |
| 63646 | P03346 | Q6NT04 | 0.31623   |
| 63647 | P03346 | Q9Y697 | 0.74987   |
| 63648 | P03346 | Q9BUJ2 | 1.3931    |
| 63649 | P03346 | Q9H173 | 0.22607   |
| 63650 | P03346 | P83731 | 0.777     |
| 63651 | P03346 | Q8NDY6 | 0.81266   |
| 63652 | P03346 | Q9UI08 | 0.38271   |
| 63653 | P03346 | Q8ND04 | 0.80865   |
| 63654 | P03346 | A6NFY7 | 0.19558   |
| 63655 | P03346 | Q14203 | 1.0185    |
| 63656 | P03346 | P60866 | 0.68912   |
| 63657 | P03346 | Q99502 | 0.19123   |
| 63658 | P03346 | Q9Y3S2 | 0.12714   |
| 63659 | P03346 | Q9BSM1 | 1.0963    |
| 63660 | P03346 | Q96EK7 | 0.62751   |
| 63661 | P03346 | Q9UBX0 | 0.51937   |
| 63662 | P03346 | Q8TAF3 | 0.90189   |
| 63663 | P03346 | P09467 | 0.34447   |
| 63664 | P03346 | Q15847 | 0.12821   |
| 63665 | P03346 | Q9Y5K6 | 0.43381   |
| 63666 | P03346 | Q9Y534 | 0.77514   |
| 63667 | P03346 | O14579 | 0.55508   |
| 63668 | P03346 | Q9NWW7 | 0.0055509 |
| 63669 | P03346 | P69905 | 0.38076   |
| 63670 | P03346 | Q92945 | 1.0841    |
| 63671 | P03346 | Q9BX66 | 0.45129   |
| 63672 | P03346 | Q9BYE0 | 0.44815   |
| 63673 | P03346 | O00189 | 0.54953   |
| 63674 | P03346 | Q9H0W9 | 0.83215   |
| 63675 | P03346 | O60682 | 0.64543   |
| 63676 | P03346 | Q13526 | 0.66868   |
| 63677 | P03346 | Q13287 | 0.75968   |
| 63678 | P03346 | Q9NRL2 | 1.0377    |
| 63679 | P03346 | Q14586 | 0.12564   |
| 63680 | P03346 | Q16254 | 1.1321    |
| 63681 | P03346 | Q7RTU5 | 0.71524   |
| 63682 | P03346 | Q00978 | 1.1771    |
| 63683 | P03346 | Q00994 | 0.85383   |
| 63684 | P03346 | Q68CZ2 | 0.64872   |
| 63685 | P03346 | Q9H379 | 0.052842  |
| 63686 | P03346 | Q6PI98 | 0.80838   |
| 63687 | P03346 | P49458 | 0.12229   |
| 63688 | P03346 | Q96CW5 | 0.92204   |

|       |        |        |          |
|-------|--------|--------|----------|
| 63689 | P03346 | Q05084 | 0.54689  |
| 63690 | P03346 | P13667 | 0.44143  |
| 63691 | P03346 | Q9P1F3 | 0.031128 |
| 63692 | P03346 | Q9NZJ4 | 0.2776   |
| 63693 | P03346 | P29084 | 1.3881   |
| 63694 | P03346 | Q86XI2 | 0.67152  |
| 63695 | P03346 | Q04864 | 1.4649   |
| 63696 | P03346 | Q92562 | 0.36869  |
| 63697 | P03346 | Q7RTT6 | 0.50821  |
| 63698 | P03346 | Q96AQ7 | 0.75005  |
| 63699 | P03346 | Q08211 | 0.46177  |
| 63700 | P03346 | A8K010 | 0.10398  |
| 63701 | P03346 | P0CW22 | 0.26013  |
| 63702 | P03346 | Q13769 | 0.85549  |
| 63703 | P03346 | Q8NFW8 | 0.25265  |
| 63704 | P03346 | Q96B26 | 0.90032  |
| 63705 | P03346 | P17014 | 0.32869  |
| 63706 | P03346 | P22557 | 0.26423  |
| 63707 | P03346 | P35573 | 0.54666  |
| 63708 | P03346 | P63241 | 0.60747  |
| 63709 | P03346 | P61024 | 0.84472  |
| 63710 | P03346 | O60902 | 0.27238  |
| 63711 | P03346 | Q75030 | 0.79704  |
| 63712 | P03346 | Q3I5F7 | 0.31089  |
| 63713 | P03346 | Q13610 | 0.38523  |
| 63714 | P03346 | P59990 | 0.40421  |
| 63715 | P03346 | Q92670 | 0.33573  |
| 63716 | P03346 | A8MVA2 | 0.40421  |
| 63717 | P03346 | Q9Y2X8 | 0.097659 |
| 63718 | P03346 | Q9NXW9 | 0.14527  |
| 63719 | P03346 | P37198 | 0.84762  |
| 63720 | P03346 | Q9ULL0 | 0.042085 |
| 63721 | P03346 | P0DMB1 | 0.03215  |
| 63722 | P03346 | P20618 | 0.61155  |
| 63723 | P03346 | Q9BYQ6 | 0.40421  |
| 63724 | P03346 | Q8TDN4 | 0.74915  |
| 63725 | P03346 | Q6ZNB5 | 0.3001   |
| 63726 | P03346 | Q9H213 | 0.21317  |
| 63727 | P03346 | Q53HC0 | 0.88011  |
| 63728 | P03346 | Q9Y5R5 | 0.4512   |
| 63729 | P03346 | Q8N587 | 0.31436  |
| 63730 | P03346 | Q9BQQ7 | 0.3017   |
| 63731 | P03346 | P10074 | 0.58416  |
| 63732 | P03346 | O43316 | 0.48603  |
| 63733 | P03346 | Q9UM63 | 0.45516  |
| 63734 | P03346 | Q9BXY8 | 0.55091  |
| 63735 | P03346 | Q14749 | 0.75573  |
| 63736 | P03346 | P62899 | 0.66528  |
| 63737 | P03346 | Q9H0F6 | 0.30748  |
| 63738 | P03346 | P55060 | 1.142    |
| 63739 | P03346 | Q5VVH5 | 0.90654  |
| 63740 | P03346 | P0CI00 | 0.052348 |
| 63741 | P03346 | Q8NB42 | 0.31436  |
| 63742 | P03346 | Q86SQ9 | 0.2697   |
| 63743 | P03346 | Q8NFB3 | 0.9376   |
| 63744 | P03346 | P80294 | 0.82607  |
| 63745 | P03346 | Q8N1G4 | 0.61963  |
| 63746 | P03346 | Q96N03 | 0.66787  |
| 63747 | P03346 | O60224 | 0.50821  |
| 63748 | P03346 | Q9NV72 | 0.31436  |
| 63749 | P03346 | P14653 | 0.60023  |
| 63750 | P03346 | Q6NXP2 | 0.13639  |
| 63751 | P03346 | P41002 | 1.0998   |
| 63752 | P03346 | Q969G9 | 0.32226  |
| 63753 | P03346 | P42771 | 0.61052  |
| 63754 | P03346 | P63272 | 0.91126  |
| 63755 | P03346 | Q5T1N1 | 0.20041  |
| 63756 | P03346 | O95067 | 0.67346  |
| 63757 | P03346 | Q969Q0 | 0.40345  |
| 63758 | P03346 | Q96KN7 | 0.26083  |
| 63759 | P03346 | Q86VK4 | 0.31436  |
| 63760 | P03346 | Q3SXZ3 | 0.31436  |
| 63761 | P03346 | Q8WUH2 | 0.95094  |
| 63762 | P03346 | O00192 | 0.39219  |
| 63763 | P03346 | Q9NR33 | 0.45672  |
| 63764 | P03346 | Q8TE85 | 0.51353  |

|       |        |        |           |
|-------|--------|--------|-----------|
| 63765 | P03346 | Q9UI95 | 1.3116    |
| 63766 | P03346 | Q8N5F7 | 1.4735    |
| 63767 | P03346 | Q92698 | 0.43068   |
| 63768 | P03346 | P35658 | 1.0245    |
| 63769 | P03346 | P13196 | 0.3707    |
| 63770 | P03346 | O00570 | 1.2085    |
| 63771 | P03346 | Q5T5J6 | 0.0041285 |
| 63772 | P03346 | P52298 | 0.61199   |
| 63773 | P03346 | P52565 | 0.24952   |
| 63774 | P03346 | P49593 | 0.27913   |
| 63775 | P03346 | O00409 | 0.53018   |
| 63776 | P03346 | P31269 | 1.0022    |
| 63777 | P03346 | Q9HAN9 | 0.40198   |
| 63778 | P03346 | O00232 | 0.24174   |
| 63779 | P03346 | Q9Y376 | 0.44312   |
| 63780 | P03346 | Q14152 | 1.1998    |
| 63781 | P03346 | O94842 | 0.97768   |
| 63782 | P03346 | Q5TA31 | 0.6447    |
| 63783 | P03346 | A6NEJ1 | 0.50821   |
| 63784 | P03346 | Q6PIJ6 | 0.49807   |
| 63785 | P03346 | Q15269 | 0.39995   |
| 63786 | P03346 | O75330 | 0.10891   |
| 63787 | P03346 | Q96FC7 | 0.32015   |
| 63788 | P03346 | Q96RJ6 | 0.72512   |
| 63789 | P03346 | Q9UBC9 | 0.73821   |
| 63790 | P03346 | Q6ISU1 | 0.12063   |
| 63791 | P03346 | Q9H0B3 | 0.14441   |
| 63792 | P03346 | Q9NXH3 | 0.13021   |
| 63793 | P03346 | Q15652 | 0.60922   |
| 63794 | P03346 | A8MUQ0 | 0.10245   |
| 63795 | P03346 | O43390 | 0.9144    |
| 63796 | P03346 | Q96BV0 | 0.31436   |
| 63797 | P03346 | A6NK39 | 0.51797   |
| 63798 | P03346 | Q9H165 | 0.27659   |
| 63799 | P03346 | P05937 | 0.3744    |
| 63800 | P03346 | Q09FC8 | 0.52569   |
| 63801 | P03346 | P55212 | 0.5604    |
| 63802 | P03346 | A2RU54 | 0.27791   |
| 63803 | P03346 | Q8N859 | 0.31436   |
| 63804 | P03346 | O60662 | 0.25349   |
| 63805 | P03346 | Q8WTP9 | 0.11615   |
| 63806 | P03346 | Q68E01 | 0.77609   |
| 63807 | P03346 | Q70YC5 | 0.50381   |
| 63808 | P03346 | P52743 | 0.30845   |
| 63809 | P03346 | Q9NRF2 | 0.28246   |
| 63810 | P03346 | Q9HD34 | 0.42864   |
| 63811 | P03346 | P13378 | 0.35755   |
| 63812 | P03346 | O15090 | 0.27009   |
| 63813 | P03346 | Q9HCS7 | 0.77413   |
| 63814 | P03346 | O60810 | 0.13291   |
| 63815 | P03346 | P82909 | 0.55092   |
| 63816 | P03346 | P46976 | 0.55502   |
| 63817 | P03346 | Q96JJ3 | 0.45997   |
| 63818 | P03346 | Q86Z02 | 0.26531   |
| 63819 | P03346 | Q96EH3 | 0.35757   |
| 63820 | P03346 | Q16629 | 0.71368   |
| 63821 | P03346 | Q13114 | 0.45103   |
| 63822 | P03346 | P17483 | 0.40257   |
| 63823 | P03346 | Q9BYQ3 | 0.40421   |
| 63824 | P03346 | Q96DG6 | 0.32467   |
| 63825 | P03346 | Q8NBB4 | 0.34285   |
| 63826 | P03346 | Q9NV92 | 0.20982   |
| 63827 | P03346 | P42166 | 0.41424   |
| 63828 | P03346 | Q5TYM5 | 0.32015   |
| 63829 | P03346 | Q9HCI6 | 0.051831  |
| 63830 | P03346 | Q9Y4B6 | 1.1309    |
| 63831 | P03346 | O00472 | 0.82513   |
| 63832 | P03346 | Q7Z6I5 | 0.078049  |
| 63833 | P03346 | O75151 | 0.62579   |
| 63834 | P03346 | O14972 | 0.30942   |
| 63835 | P03346 | P55196 | 0.29903   |
| 63836 | P03346 | Q96C90 | 0.13021   |
| 63837 | P03346 | O75821 | 0.75623   |
| 63838 | P03346 | Q03923 | 0.2741    |
| 63839 | P03346 | Q9NRF9 | 0.41315   |
| 63840 | P03346 | Q8TEE9 | 0.91815   |

|       |        |        |           |
|-------|--------|--------|-----------|
| 63841 | P03346 | Q8N3X1 | 0.48532   |
| 63842 | P03346 | Q96BY2 | 0.74329   |
| 63843 | P03346 | O75764 | 0.47702   |
| 63844 | P03346 | Q58A44 | 0.20041   |
| 63845 | P03346 | O43818 | 0.40136   |
| 63846 | P03346 | O00291 | 0.66993   |
| 63847 | P03346 | Q96EI5 | 0.74266   |
| 63848 | P03346 | P0CI01 | 0.040024  |
| 63849 | P03346 | P60842 | 0.2192    |
| 63850 | P03346 | Q9UKJ5 | 0.51667   |
| 63851 | P03346 | Q12983 | 0.21047   |
| 63852 | P03346 | Q9P278 | 0.92959   |
| 63853 | P03346 | O75208 | 0.13301   |
| 63854 | P03346 | A0JNW5 | 0.0046665 |
| 63855 | P03346 | P56211 | 0.31284   |
| 63856 | P03346 | O95644 | 1.0229    |
| 63857 | P03346 | Q8NCP5 | 0.31436   |
| 63858 | P03346 | Q8TAP4 | 0.26636   |
| 63859 | P03346 | Q9BYC9 | 0.92832   |
| 63860 | P03346 | Q6H8Q1 | 0.44572   |
| 63861 | P03346 | P55072 | 0.31183   |
| 63862 | P03346 | Q9BTE1 | 0.38066   |
| 63863 | P03346 | Q6XD76 | 0.65096   |
| 63864 | P03346 | P22626 | 0.84628   |
| 63865 | P03346 | Q6IBW4 | 0.059658  |
| 63866 | P03346 | Q9UJW8 | 0.31436   |
| 63867 | P03346 | Q9BZE7 | 0.12821   |
| 63868 | P03346 | Q8TDC0 | 0.78707   |
| 63869 | P03346 | Q9H0E2 | 0.41487   |
| 63870 | P03346 | Q9BWK5 | 0.20041   |
| 63871 | P03346 | Q86V15 | 0.5379    |
| 63872 | P03346 | Q9BYH8 | 0.63558   |
| 63873 | P03346 | Q9UI30 | 0.67304   |
| 63874 | P03346 | Q6P3W7 | 0.2786    |
| 63875 | P03346 | Q8IYX8 | 0.19876   |
| 63876 | P03346 | Q5JY77 | 0.8379    |
| 63877 | P03346 | Q8IWE4 | 0.16249   |
| 63878 | P03346 | Q969P5 | 0.46321   |
| 63879 | P03346 | P49321 | 0.50122   |
| 63880 | P03346 | Q9Y3B2 | 0.99024   |
| 63881 | P03346 | O15194 | 0.17092   |
| 63882 | P03346 | Q01094 | 0.90913   |
| 63883 | P03346 | P09496 | 0.33995   |
| 63884 | P03346 | Q9BY31 | 0.31436   |
| 63885 | P03346 | P36871 | 0.27618   |
| 63886 | P03346 | Q9UID3 | 0.33905   |
| 63887 | P03346 | Q569H4 | 0.0077221 |
| 63888 | P03346 | P46939 | 0.62909   |
| 63889 | P03346 | Q13829 | 0.91986   |
| 63890 | P03346 | Q2VWA4 | 0.41921   |
| 63891 | P03346 | Q7L273 | 0.3559    |
| 63892 | P03346 | Q9BQ89 | 0.82175   |
| 63893 | P03346 | Q6NZI2 | 1.2277    |
| 63894 | P03346 | Q9NUA8 | 0.24742   |
| 63895 | P03346 | P17032 | 0.30845   |
| 63896 | P03346 | Q9BZL4 | 0.8379    |
| 63897 | P03346 | Q9H1Q7 | 0.017694  |
| 63898 | P03346 | O94906 | 0.59299   |
| 63899 | P03346 | Q86T82 | 0.50066   |
| 63900 | P03346 | F5GYI3 | 0.10275   |
| 63901 | P03346 | Q9BT92 | 0.76351   |
| 63902 | P03346 | Q03393 | 0.18587   |
| 63903 | P03346 | P51668 | 0.60607   |
| 63904 | P03346 | P49715 | 0.30636   |
| 63905 | P03346 | A5YKK6 | 1.2404    |
| 63906 | P03346 | Q9BUQ8 | 0.30911   |
| 63907 | P03346 | Q9NPJ4 | 1.4753    |
| 63908 | P03346 | Q8NAV2 | 0.32217   |
| 63909 | P03346 | Q8N2I2 | 0.31436   |
| 63910 | P03346 | Q6NVV1 | 0.44865   |
| 63911 | P03346 | Q9Y333 | 0.9835    |
| 63912 | P03346 | Q9UEU5 | 0.6395    |
| 63913 | P03346 | Q4V328 | 0.037097  |
| 63914 | P03346 | Q9ULX9 | 0.74398   |
| 63915 | P03346 | P16157 | 0.35835   |
| 63916 | P03346 | P17096 | 0.57141   |

|       |        |        |           |
|-------|--------|--------|-----------|
| 63917 | P03346 | Q13398 | 0.31436   |
| 63918 | P03346 | Q66K89 | 0.78892   |
| 63919 | P03346 | Q53GI3 | 0.34285   |
| 63920 | P03346 | Q9C0F1 | 0.4555    |
| 63921 | P03346 | Q92754 | 0.6818    |
| 63922 | P03346 | Q8NF64 | 1.2739    |
| 63923 | P03346 | P26038 | 0.26393   |
| 63924 | P03346 | P35268 | 0.67797   |
| 63925 | P03346 | Q9HD47 | 0.44146   |
| 63926 | P03346 | Q9Y3E5 | 0.72765   |
| 63927 | P03346 | Q07955 | 0.83833   |
| 63928 | P03346 | Q8N554 | 0.31436   |
| 63929 | P03346 | P41252 | 0.78233   |
| 63930 | P03346 | Q9BWG4 | 0.31505   |
| 63931 | P03346 | Q5T447 | 0.44665   |
| 63932 | P03346 | A6NJL1 | 0.34285   |
| 63933 | P03346 | P17025 | 0.31436   |
| 63934 | P03346 | O43463 | 0.83694   |
| 63935 | P03346 | O60784 | 0.66751   |
| 63936 | P03346 | Q9BR61 | 0.42689   |
| 63937 | P03346 | Q9Y5J3 | 0.42775   |
| 63938 | P03346 | P0C7H8 | 0.40421   |
| 63939 | P03346 | Q15055 | 0.48958   |
| 63940 | P03346 | Q96AX9 | 0.32276   |
| 63941 | P03346 | P15621 | 0.52569   |
| 63942 | P03346 | Q01469 | 0.49166   |
| 63943 | P03346 | P31274 | 0.52225   |
| 63944 | P03346 | Q9UBC0 | 0.43979   |
| 63945 | P03346 | P17010 | 0.51548   |
| 63946 | P03346 | Q16342 | 0.29065   |
| 63947 | P03346 | A6NEY3 | 0.028905  |
| 63948 | P03346 | O43345 | 0.31436   |
| 63949 | P03346 | A6NDN3 | 0.11048   |
| 63950 | P03346 | Q6P9A1 | 0.31436   |
| 63951 | P03346 | Q15059 | 1.3786    |
| 63952 | P03346 | P59817 | 0.27653   |
| 63953 | P03346 | A8MZA4 | 0.0055218 |
| 63954 | P03346 | Q9BUL9 | 1.1361    |
| 63955 | P03346 | P02545 | 0.80404   |
| 63956 | P03346 | Q9H1B4 | 0.67477   |
| 63957 | P03346 | Q53HI1 | 0.085     |
| 63958 | P03346 | A8MT65 | 0.31436   |
| 63959 | P03346 | Q96LK0 | 0.28986   |
| 63960 | P03346 | Q01860 | 0.82991   |
| 63961 | P03346 | A8K0Z3 | 0.24163   |
| 63962 | P03346 | P61571 | 0.74357   |
| 63963 | P03346 | Q9NZP6 | 0.046204  |
| 63964 | P03346 | Q92750 | 0.79022   |
| 63965 | P03346 | Q9HCX3 | 0.31436   |
| 63966 | P03346 | Q02410 | 0.7377    |
| 63967 | P03346 | Q92843 | 0.68455   |
| 63968 | P03346 | Q9ULJ6 | 0.71354   |
| 63969 | P03346 | O75182 | 1.291     |
| 63970 | P03346 | O75896 | 0.11635   |
| 63971 | P03346 | Q04917 | 0.4713    |
| 63972 | P03346 | Q6EKJ0 | 0.41934   |
| 63973 | P03346 | Q9NWT8 | 1.0257    |
| 63974 | P03346 | Q5EBL8 | 0.27837   |
| 63975 | P03346 | Q0D2I5 | 0.36736   |
| 63976 | P03346 | Q5T440 | 0.20736   |
| 63977 | P03346 | P09565 | 0.066272  |
| 63978 | P03346 | Q64ET8 | 0.32217   |
| 63979 | P03346 | P61077 | 0.50466   |
| 63980 | P03346 | Q13427 | 0.64676   |
| 63981 | P03346 | Q8N8U2 | 0.73269   |
| 63982 | P03346 | Q96SQ7 | 0.39968   |
| 63983 | P03346 | O95997 | 1.0108    |
| 63984 | P03346 | Q2V2M9 | 0.48977   |
| 63985 | P03346 | Q8TDB4 | 0.15367   |
| 63986 | P03346 | Q96H20 | 1.1484    |
| 63987 | P03346 | Q9BTP7 | 1.2551    |
| 63988 | P03346 | O14867 | 0.71603   |
| 63989 | P03346 | Q9BZE9 | 0.67074   |
| 63990 | P03346 | Q9BVI4 | 0.61859   |
| 63991 | P03346 | P09132 | 0.52288   |
| 63992 | P03346 | Q08945 | 1.2584    |

|       |        |        |          |
|-------|--------|--------|----------|
| 63993 | P03346 | Q9H3H9 | 0.74266  |
| 63994 | P03346 | Q9UIA9 | 0.71827  |
| 63995 | P03346 | Q9NYW8 | 0.3493   |
| 63996 | P03346 | P20719 | 0.34215  |
| 63997 | P03346 | Q5T6F2 | 0.059122 |
| 63998 | P03346 | Q14602 | 0.687    |
| 63999 | P03346 | Q9NXV6 | 0.7221   |
| 64000 | P03346 | O60809 | 0.13291  |
| 64001 | P03346 | Q8N0Z3 | 0.66142  |
| 64002 | P03346 | Q658L1 | 0.092368 |
| 64003 | P03346 | Q8TD31 | 0.11766  |
| 64004 | P03346 | Q93034 | 0.76791  |
| 64005 | P03346 | O00151 | 0.36662  |
| 64006 | P03346 | P60014 | 0.40421  |
| 64007 | P03346 | Q13351 | 0.24179  |
| 64008 | P03346 | O43805 | 0.73629  |
| 64009 | P03346 | Q5BJF2 | 0.32996  |
| 64010 | P03346 | P22103 | 0.10501  |
| 64011 | P03346 | Q9BQI9 | 0.75728  |
| 64012 | P03346 | Q8WWX9 | 0.68371  |
| 64013 | P03346 | O00186 | 0.88556  |
| 64014 | P03346 | O14508 | 0.46528  |
| 64015 | P03346 | P62826 | 0.6236   |
| 64016 | P03346 | Q8TB72 | 0.81129  |
| 64017 | P03346 | Q00987 | 0.24456  |
| 64018 | P03346 | Q8TEW0 | 0.27001  |
| 64019 | P03346 | Q96FZ2 | 0.096385 |
| 64020 | P03346 | P61962 | 0.98152  |
| 64021 | P03346 | Q9BWG6 | 0.31086  |
| 64022 | P03346 | Q12834 | 0.81339  |
| 64023 | P03346 | O00566 | 0.65759  |
| 64024 | P03346 | P0CG40 | 0.26056  |
| 64025 | P03346 | A5A3E0 | 0.12449  |
| 64026 | P03346 | O15519 | 0.48875  |
| 64027 | P03346 | O15198 | 0.63064  |
| 64028 | P03346 | Q0VGE8 | 0.31436  |
| 64029 | P03346 | Q9NZ81 | 0.88516  |
| 64030 | P03346 | Q9Y664 | 0.18574  |
| 64031 | P03346 | O75444 | 0.69469  |
| 64032 | P03346 | P30305 | 0.42144  |
| 64033 | P03346 | Q96FA3 | 0.36925  |
| 64034 | P03346 | P62879 | 0.61016  |
| 64035 | P03346 | Q8N7K0 | 0.31436  |
| 64036 | P03346 | Q9BT78 | 1.2317   |
| 64037 | P03346 | Q6PGP7 | 1.0249   |
| 64038 | P03346 | Q6QNY0 | 0.58253  |
| 64039 | P03346 | Q96FZ7 | 0.25747  |
| 64040 | P03346 | Q9UKJ3 | 0.31701  |
| 64041 | P03346 | Q96A49 | 0.32217  |
| 64042 | P03346 | Q9H4T2 | 0.34285  |
| 64043 | P03346 | Q8IYB7 | 0.34269  |
| 64044 | P03346 | Q9BQ90 | 1.0087   |
| 64045 | P03346 | O95793 | 0.52023  |
| 64046 | P03346 | Q53T94 | 0.57036  |
| 64047 | P03346 | Q8TF09 | 0.20578  |
| 64048 | P03346 | Q5U5X8 | 0.089479 |
| 64049 | P03346 | Q8WUW1 | 0.254    |
| 64050 | P03346 | Q8NCD3 | 0.73851  |
| 64051 | P03346 | Q8NCQ2 | 0.055129 |
| 64052 | P03346 | P78426 | 0.28291  |
| 64053 | P03346 | Q8TC94 | 0.18249  |
| 64054 | P03346 | Q8NDX6 | 0.33838  |
| 64055 | P03346 | Q9NS25 | 0.47043  |
| 64056 | P03346 | P09001 | 0.31971  |
| 64057 | P03346 | Q9NSD4 | 0.31436  |
| 64058 | P03346 | Q86SE8 | 0.2959   |
| 64059 | P03346 | Q9Y6E7 | 0.52517  |
| 64060 | P03346 | Q9P086 | 1.2846   |
| 64061 | P03346 | Q9UKV3 | 0.78243  |
| 64062 | P03346 | Q9Y255 | 0.30778  |
| 64063 | P03346 | Q66K41 | 0.086253 |
| 64064 | P03346 | P0C1Z6 | 1.4882   |
| 64065 | P03346 | Q9ULX6 | 0.59749  |
| 64066 | P03346 | Q15051 | 0.79777  |
| 64067 | P03346 | Q499Z4 | 0.31436  |
| 64068 | P03346 | Q8N3C0 | 0.47934  |



|       |        |        |           |
|-------|--------|--------|-----------|
| 64069 | P03346 | Q13404 | 1.1721    |
| 64070 | P03346 | O15083 | 0.78869   |
| 64071 | P03346 | Q13620 | 0.89117   |
| 64072 | P03346 | P0CJ90 | 0.6797    |
| 64073 | P03346 | Q9BT04 | 0.14422   |
| 64074 | P03346 | P30047 | 0.79526   |
| 64075 | P03346 | Q93045 | 0.35564   |
| 64076 | P03346 | Q6P9G9 | 0.34285   |
| 64077 | P03346 | O15534 | 0.45236   |
| 64078 | P03346 | A7MD48 | 0.18768   |
| 64079 | P03346 | Q9BV47 | 0.5336    |
| 64080 | P03346 | Q69YN4 | 0.33682   |
| 64081 | P03346 | B3EWF7 | 0.32217   |
| 64082 | P03346 | O94855 | 0.52905   |
| 64083 | P03346 | A6NJV1 | 0.0037973 |
| 64084 | P03346 | P62891 | 0.66528   |
| 64085 | P03346 | Q14980 | 1.0226    |
| 64086 | P03346 | P21912 | 0.27179   |
| 64087 | P03346 | Q9P013 | 0.90122   |
| 64088 | P03346 | P08047 | 0.70163   |
| 64089 | P03346 | Q9BQW3 | 0.35613   |
| 64090 | P03346 | Q9BXP5 | 1.3763    |
| 64091 | P03346 | Q9H098 | 0.072414  |
| 64092 | P03346 | Q92870 | 0.92967   |
| 64093 | P03346 | Q9H582 | 0.31436   |
| 64094 | P03346 | Q8TBY8 | 0.20041   |
| 64095 | P03346 | Q5TAG4 | 0.20041   |
| 64096 | P03346 | P08708 | 0.47675   |
| 64097 | P03346 | Q8TEP8 | 0.96084   |
| 64098 | P03346 | P12980 | 1.192     |
| 64099 | P03346 | P16452 | 0.29561   |
| 64100 | P03346 | Q13889 | 0.30541   |
| 64101 | P03346 | Q9H0E9 | 0.48631   |
| 64102 | P03346 | Q9BYD5 | 0.17719   |
| 64103 | P03346 | Q12816 | 0.5544    |
| 64104 | P03346 | O95433 | 0.75642   |
| 64105 | P03346 | Q8IYJ3 | 0.40761   |
| 64106 | P03346 | Q86Y26 | 0.49807   |
| 64107 | P03346 | O14503 | 1.0133    |
| 64108 | P03346 | P11802 | 0.72154   |
| 64109 | P03346 | O95999 | 0.27343   |
| 64110 | P03346 | Q15853 | 0.88596   |
| 64111 | P03346 | Q96LW9 | 0.34285   |
| 64112 | P03346 | Q6P2H3 | 0.76205   |
| 64113 | P03346 | Q8TF68 | 0.3829    |
| 64114 | P03346 | Q9Y215 | 0.30704   |
| 64115 | P03346 | P06733 | 0.93815   |
| 64116 | P03346 | P20226 | 0.96545   |
| 64117 | P03346 | Q6PCE3 | 0.22356   |
| 64118 | P03346 | Q9H5F2 | 0.34434   |
| 64119 | P03346 | O76031 | 0.30017   |
| 64120 | P03346 | Q9HC78 | 0.46161   |
| 64121 | P03346 | Q8IZH2 | 0.39212   |
| 64122 | P03346 | Q9H8Q6 | 0.07938   |
| 64123 | P03346 | P41218 | 0.87411   |
| 64124 | P03346 | O00422 | 1.4224    |
| 64125 | P03346 | Q05048 | 1.044     |
| 64126 | P03346 | P20265 | 0.85574   |
| 64127 | P03346 | Q9H5H4 | 0.33052   |
| 64128 | P03346 | Q9NRG4 | 0.77723   |
| 64129 | P03346 | Q8N9F8 | 0.31436   |
| 64130 | P03346 | Q7L4I2 | 0.23762   |
| 64131 | P03346 | Q92766 | 0.29568   |
| 64132 | P03346 | Q86YF9 | 0.33308   |
| 64133 | P03346 | Q9H501 | 0.98376   |
| 64134 | P03346 | O95561 | 0.053798  |
| 64135 | P03346 | Q7Z6B0 | 0.60475   |
| 64136 | P03346 | Q96JM2 | 0.4606    |
| 64137 | P03346 | Q6IS14 | 0.48137   |
| 64138 | P03346 | Q92796 | 0.50101   |
| 64139 | P03346 | Q8N5C8 | 0.50165   |
| 64140 | P03346 | Q8TDD2 | 0.52439   |
| 64141 | P03346 | P98168 | 0.81958   |
| 64142 | P03346 | Q96MT3 | 0.87479   |
| 64143 | P03346 | Q9Y316 | 0.4389    |
| 64144 | P03346 | P18850 | 0.84134   |

|       |        |        |           |
|-------|--------|--------|-----------|
| 64145 | P03346 | A6NDB9 | 0.15886   |
| 64146 | P03346 | Q9H963 | 0.31436   |
| 64147 | P03346 | Q15024 | 0.87553   |
| 64148 | P03346 | P17480 | 1.2563    |
| 64149 | P03346 | Q6ZNE5 | 0.61745   |
| 64150 | P03346 | O75347 | 0.16678   |
| 64151 | P03346 | Q9H0R8 | 0.37923   |
| 64152 | P03346 | Q9UK10 | 0.31436   |
| 64153 | P03346 | Q13813 | 0.3054    |
| 64154 | P03346 | Q3B7T1 | 0.74266   |
| 64155 | P03346 | O00303 | 0.50424   |
| 64156 | P03346 | Q9H869 | 1.628     |
| 64157 | P03346 | Q9P2W6 | 0.20041   |
| 64158 | P03346 | P22670 | 1.1506    |
| 64159 | P03346 | Q7Z5L9 | 0.79377   |
| 64160 | P03346 | Q8WY36 | 0.70946   |
| 64161 | P03346 | Q69YQ0 | 0.47141   |
| 64162 | P03346 | Q9NZN8 | 0.9554    |
| 64163 | P03346 | Q14119 | 0.46294   |
| 64164 | P03346 | O95600 | 0.31436   |
| 64165 | P03346 | Q8IX01 | 0.33697   |
| 64166 | P03346 | Q9H5Z6 | 0.66787   |
| 64167 | P03346 | O94868 | 0.66787   |
| 64168 | P03346 | Q9Y371 | 0.2666    |
| 64169 | P03346 | O15056 | 0.28243   |
| 64170 | P03346 | Q96NY9 | 0.78341   |
| 64171 | P03346 | P61088 | 0.72665   |
| 64172 | P03346 | Q8N8E2 | 0.24287   |
| 64173 | P03346 | Q96CX3 | 0.31436   |
| 64174 | P03346 | Q16637 | 1.1259    |
| 64175 | P03346 | Q9UFW8 | 0.73648   |
| 64176 | P03346 | Q9UNQ2 | 0.26563   |
| 64177 | P03346 | Q14CZ0 | 0.22272   |
| 64178 | P03346 | A8MUZ8 | 0.31436   |
| 64179 | P03346 | O95453 | 0.53243   |
| 64180 | P03346 | P52736 | 0.83914   |
| 64181 | P03346 | P35908 | 0.52749   |
| 64182 | P03346 | Q6XQN6 | 0.3658    |
| 64183 | P03346 | O75167 | 0.52182   |
| 64184 | P03346 | P37837 | 0.20987   |
| 64185 | P03346 | Q9H5J8 | 1.3467    |
| 64186 | P03346 | Q8TDW5 | 0.23488   |
| 64187 | P03346 | Q9NX58 | 0.39353   |
| 64188 | P03346 | P52756 | 0.4042    |
| 64189 | P03346 | Q14919 | 0.41971   |
| 64190 | P03346 | O43768 | 0.3578    |
| 64191 | P03346 | P30153 | 0.60863   |
| 64192 | P03346 | Q8NFI3 | 0.23423   |
| 64193 | P03346 | Q03111 | 1.5813    |
| 64194 | P03346 | Q9H2U1 | 0.45689   |
| 64195 | P03346 | Q9BY27 | 0.32217   |
| 64196 | P03346 | Q5VUG0 | 0.68149   |
| 64197 | P03346 | Q9Y592 | 0.12821   |
| 64198 | P03346 | P98169 | 0.32702   |
| 64199 | P03346 | Q9H0A6 | 0.55337   |
| 64200 | P03346 | O75381 | 0.24195   |
| 64201 | P03346 | Q6P6B1 | 0.0077221 |
| 64202 | P03346 | Q8N1F1 | 0.14441   |
| 64203 | P03346 | Q9P219 | 0.68674   |
| 64204 | P03346 | A6NEF3 | 0.028905  |
| 64205 | P03346 | Q8TF05 | 0.41243   |
| 64206 | P03346 | Q13424 | 0.46403   |
| 64207 | P03346 | Q6UYE1 | 0.051053  |
| 64208 | P03346 | Q8N490 | 0.31689   |
| 64209 | P03346 | A6NNA2 | 0.12119   |
| 64210 | P03346 | Q5I0X4 | 0.0077221 |
| 64211 | P03346 | P57076 | 0.45623   |
| 64212 | P03346 | P61572 | 0.74357   |
| 64213 | P03346 | Q9UKA1 | 0.46008   |
| 64214 | P03346 | Q9Y5P8 | 0.8507    |
| 64215 | P03346 | O75155 | 1.0805    |
| 64216 | P03346 | Q5TC12 | 0.73559   |
| 64217 | P03346 | P48553 | 0.33524   |
| 64218 | P03346 | Q13098 | 0.43746   |
| 64219 | P03346 | P53370 | 0.65166   |
| 64220 | P03346 | Q5SRE5 | 0.71791   |

|       |        |        |          |
|-------|--------|--------|----------|
| 64221 | P03346 | P20132 | 0.22179  |
| 64222 | P03346 | O43593 | 0.4401   |
| 64223 | P03346 | Q96ST8 | 0.22843  |
| 64224 | P03346 | Q3LI58 | 0.36736  |
| 64225 | P03346 | Q5TA82 | 0.02884  |
| 64226 | P03346 | Q96G25 | 1.2401   |
| 64227 | P03346 | Q13432 | 0.66539  |
| 64228 | P03346 | Q14592 | 0.31436  |
| 64229 | P03346 | Q16236 | 0.84607  |
| 64230 | P03346 | O75943 | 0.40255  |
| 64231 | P03346 | Q15561 | 1.0846   |
| 64232 | P03346 | Q6NZ36 | 0.42259  |
| 64233 | P03346 | Q14934 | 0.67256  |
| 64234 | P03346 | Q86W54 | 0.57809  |
| 64235 | P03346 | Q9BRK4 | 0.71933  |
| 64236 | P03346 | Q9H9A7 | 0.89689  |
| 64237 | P03346 | Q8N1E6 | 0.6483   |
| 64238 | P03346 | Q8WXC3 | 0.88862  |
| 64239 | P03346 | Q9Y3P8 | 0.020273 |
| 64240 | P03346 | Q96MG8 | 0.19165  |
| 64241 | P03346 | Q8TD47 | 0.30258  |
| 64242 | P03346 | Q6NYC8 | 0.17453  |
| 64243 | P03346 | Q14103 | 1.0714   |
| 64244 | P03346 | Q76KD6 | 0.32864  |
| 64245 | P03346 | O75832 | 0.42388  |
| 64246 | P03346 | Q9UHQ7 | 0.094527 |
| 64247 | P03346 | Q9BTX1 | 0.20452  |
| 64248 | P03346 | Q8IVN3 | 0.41686  |
| 64249 | P03346 | O14530 | 0.61951  |
| 64250 | P03346 | O14618 | 0.52128  |
| 64251 | P03346 | Q9BWF3 | 0.28623  |
| 64252 | P03346 | Q9Y5B0 | 0.57394  |
| 64253 | P03346 | Q9H902 | 0.34547  |
| 64254 | P03346 | Q5JTD0 | 1.2039   |
| 64255 | P03346 | Q9C029 | 0.23964  |
| 64256 | P03346 | P46782 | 0.54595  |
| 64257 | P03346 | Q9UQB3 | 0.79197  |
| 64258 | P03346 | Q9HB31 | 0.39029  |
| 64259 | P03346 | O60225 | 0.50821  |
| 64260 | P03346 | Q9HAU0 | 0.55673  |
| 64261 | P03346 | O15060 | 0.31436  |
| 64262 | P03346 | P41250 | 0.1624   |
| 64263 | P03346 | Q8TAM2 | 0.30919  |
| 64264 | P03346 | O15318 | 0.23596  |
| 64265 | P03346 | Q8N7W2 | 0.66787  |
| 64266 | P03346 | Q86Y79 | 0.11387  |
| 64267 | P03346 | O60663 | 0.78011  |
| 64268 | P03346 | Q14526 | 0.74671  |
| 64269 | P03346 | Q96SW2 | 0.8129   |
| 64270 | P03346 | Q9UKN8 | 0.77023  |
| 64271 | P03346 | Q7Z794 | 0.55691  |
| 64272 | P03346 | Q5U623 | 1.0523   |
| 64273 | P03346 | Q9BQ65 | 0.35698  |
| 64274 | P03346 | Q16650 | 0.54723  |
| 64275 | P03346 | Q13137 | 1.1247   |
| 64276 | P03346 | Q14CS0 | 0.62071  |
| 64277 | P03346 | Q9Y222 | 1.2519   |
| 64278 | P03346 | Q7Z333 | 0.28045  |
| 64279 | P03346 | O43680 | 0.24082  |
| 64280 | P03346 | Q15532 | 1.2082   |
| 64281 | P03346 | Q9HAV7 | 0.17358  |
| 64282 | P03346 | Q9C0H6 | 0.44985  |
| 64283 | P03346 | Q92575 | 1.121    |
| 64284 | P03346 | Q99417 | 1.645    |
| 64285 | P03346 | Q9UHC1 | 0.56148  |
| 64286 | P03346 | Q8N0Z6 | 0.56885  |
| 64287 | P03346 | Q96MR7 | 0.27129  |
| 64288 | P03346 | P07438 | 0.27009  |
| 64289 | P03346 | P61353 | 0.6799   |
| 64290 | P03346 | Q8IY63 | 0.68302  |
| 64291 | P03346 | O00233 | 0.58983  |
| 64292 | P03346 | O96004 | 0.58969  |
| 64293 | P03346 | P62487 | 0.37796  |
| 64294 | P03346 | P17036 | 0.60049  |
| 64295 | P03346 | O15069 | 0.6555   |
| 64296 | P03346 | P61960 | 0.47575  |

|       |        |        |          |
|-------|--------|--------|----------|
| 64297 | P03346 | Q8WVL7 | 0.30755  |
| 64298 | P03346 | Q6ZNH5 | 0.31436  |
| 64299 | P03346 | P51398 | 1.3214   |
| 64300 | P03346 | P01106 | 0.48852  |
| 64301 | P03346 | O60294 | 0.63318  |
| 64302 | P03346 | O43364 | 0.43764  |
| 64303 | P03346 | Q6ZMW2 | 0.31436  |
| 64304 | P03346 | Q8IU60 | 0.96431  |
| 64305 | P03346 | Q3ZCX4 | 0.31436  |
| 64306 | P03346 | Q8TBZ5 | 0.31436  |
| 64307 | P03346 | Q4LE28 | 0.98457  |
| 64308 | P03346 | O60518 | 1.2688   |
| 64309 | P03346 | Q5M9Q1 | 0.15996  |
| 64310 | P03346 | Q9Y675 | 0.34434  |
| 64311 | P03346 | Q5TA50 | 0.17705  |
| 64312 | P03346 | Q5T230 | 1.4509   |
| 64313 | P03346 | Q9UJX6 | 0.61969  |
| 64314 | P03346 | Q9BS34 | 0.31436  |
| 64315 | P03346 | Q9UL40 | 0.77516  |
| 64316 | P03346 | Q9UI32 | 0.47494  |
| 64317 | P03346 | P41162 | 0.70008  |
| 64318 | P03346 | Q13155 | 0.87419  |
| 64319 | P03346 | Q9BRT3 | 0.15767  |
| 64320 | P03346 | Q14566 | 0.34049  |
| 64321 | P03346 | Q15555 | 0.25776  |
| 64322 | P03346 | P0CJ79 | 0.31436  |
| 64323 | P03346 | Q8WVK2 | 0.38097  |
| 64324 | P03346 | P78560 | 0.76726  |
| 64325 | P03346 | P45381 | 0.22643  |
| 64326 | P03346 | Q6P1N0 | 0.61151  |
| 64327 | P03346 | Q6ZPB5 | 0.14682  |
| 64328 | P03346 | B4DX44 | 0.31436  |
| 64329 | P03346 | O43583 | 0.68756  |
| 64330 | P03346 | O75448 | 0.63786  |
| 64331 | P03346 | P14649 | 0.44517  |
| 64332 | P03346 | P62877 | 0.50146  |
| 64333 | P03346 | Q96DX5 | 1.2584   |
| 64334 | P03346 | Q03701 | 0.75777  |
| 64335 | P03346 | P51843 | 0.24336  |
| 64336 | P03346 | Q92527 | 0.29284  |
| 64337 | P03346 | Q6UW56 | 0.40614  |
| 64338 | P03346 | Q5TB80 | 0.92611  |
| 64339 | P03346 | Q92879 | 0.39352  |
| 64340 | P03346 | Q96CF2 | 0.44645  |
| 64341 | P03346 | Q9Y421 | 0.57053  |
| 64342 | P03346 | Q68DU8 | 0.18903  |
| 64343 | P03346 | Q96MN9 | 0.79679  |
| 64344 | P03346 | Q96B67 | 0.61654  |
| 64345 | P03346 | Q9NZZ3 | 1.1792   |
| 64346 | P03346 | Q9BWW4 | 0.73202  |
| 64347 | P03346 | O00299 | 0.22344  |
| 64348 | P03346 | Q9UHB7 | 1.5103   |
| 64349 | P03346 | P25205 | 0.49675  |
| 64350 | P03346 | Q9Y266 | 0.62158  |
| 64351 | P03346 | P16333 | 0.71742  |
| 64352 | P03346 | Q969S2 | 0.14583  |
| 64353 | P03346 | Q9H0G5 | 0.93336  |
| 64354 | P03346 | P41208 | 0.62414  |
| 64355 | P03346 | O60870 | 0.18796  |
| 64356 | P03346 | Q9NRS6 | 0.29372  |
| 64357 | P03346 | O43592 | 0.62456  |
| 64358 | P03346 | P62854 | 0.86594  |
| 64359 | P03346 | Q8NFT6 | 0.20022  |
| 64360 | P03346 | P16278 | 0.2394   |
| 64361 | P03346 | Q9UHP3 | 0.48479  |
| 64362 | P03346 | Q9NV06 | 0.53085  |
| 64363 | P03346 | Q5H9R7 | 1.0703   |
| 64364 | P03346 | Q12926 | 0.53704  |
| 64365 | P03346 | P07197 | 0.92971  |
| 64366 | P03346 | P19388 | 0.71915  |
| 64367 | P03346 | Q9NP66 | 1.3021   |
| 64368 | P03346 | Q9Y608 | 0.64342  |
| 64369 | P03346 | Q14493 | 1.0553   |
| 64370 | P03346 | P38646 | 0.71143  |
| 64371 | P03346 | Q9HC44 | 0.70946  |
| 64372 | P03346 | P0C7V9 | 0.052605 |

|       |        |        |          |
|-------|--------|--------|----------|
| 64373 | P03346 | O75925 | 0.66727  |
| 64374 | P03346 | Q9Y3D9 | 0.60118  |
| 64375 | P03346 | Q9H910 | 0.35026  |
| 64376 | P03346 | Q8NBF1 | 0.52062  |
| 64377 | P03346 | O43365 | 0.65189  |
| 64378 | P03346 | Q9Y3U8 | 0.83414  |
| 64379 | P03346 | O75817 | 1.0575   |
| 64380 | P03346 | Q9BXX3 | 0.65882  |
| 64381 | P03346 | Q15528 | 1.4515   |
| 64382 | P03346 | Q6ZNA1 | 0.31436  |
| 64383 | P03346 | Q8NI35 | 0.50147  |
| 64384 | P03346 | Q9Y2X3 | 0.85545  |
| 64385 | P03346 | O60303 | 0.3318   |
| 64386 | P03346 | Q01082 | 0.56272  |
| 64387 | P03346 | Q92621 | 1.1216   |
| 64388 | P03346 | P82650 | 0.43065  |
| 64389 | P03346 | Q15699 | 0.76147  |
| 64390 | P03346 | P28702 | 0.49108  |
| 64391 | P03346 | P35637 | 0.63167  |
| 64392 | P03346 | O75635 | 0.17334  |
| 64393 | P03346 | Q96A72 | 0.37216  |
| 64394 | P03346 | Q8IWL8 | 0.49807  |
| 64395 | P03346 | Q9NSA3 | 0.92242  |
| 64396 | P03346 | Q5MJ10 | 0.10148  |
| 64397 | P03346 | O75570 | 0.35664  |
| 64398 | P03346 | Q9HCK5 | 0.9068   |
| 64399 | P03346 | Q9UL49 | 0.24934  |
| 64400 | P03346 | Q9NP71 | 0.60917  |
| 64401 | P03346 | Q9Y2V7 | 0.21668  |
| 64402 | P03346 | Q68D10 | 0.12821  |
| 64403 | P03346 | Q3T8J9 | 1.0209   |
| 64404 | P03346 | Q6ZTQ3 | 0.47956  |
| 64405 | P03346 | O60583 | 1.0197   |
| 64406 | P03346 | Q9H8W4 | 0.42264  |
| 64407 | P03346 | Q8TCB0 | 0.25642  |
| 64408 | P03346 | Q8TCJ0 | 0.67774  |
| 64409 | P03346 | P21506 | 0.31436  |
| 64410 | P03346 | P28358 | 0.49     |
| 64411 | P03346 | Q14186 | 1.3715   |
| 64412 | P03346 | P50222 | 0.96383  |
| 64413 | P03346 | Q9UII2 | 0.2692   |
| 64414 | P03346 | O14777 | 0.69975  |
| 64415 | P03346 | A6NF36 | 0.10483  |
| 64416 | P03346 | Q96M43 | 0.20041  |
| 64417 | P03346 | P51508 | 0.30845  |
| 64418 | P03346 | Q14139 | 0.79417  |
| 64419 | P03346 | Q9Y3R5 | 0.08417  |
| 64420 | P03346 | Q6ICC9 | 0.007188 |
| 64421 | P03346 | Q5VWI1 | 0.13503  |
| 64422 | P03346 | Q07666 | 0.76836  |
| 64423 | P03346 | P62318 | 1.0401   |
| 64424 | P03346 | Q14687 | 0.66787  |
| 64425 | P03346 | Q9NVH2 | 0.52498  |
| 64426 | P03346 | Q92830 | 0.77131  |
| 64427 | P03346 | Q9BYQ0 | 0.40421  |
| 64428 | P03346 | Q9BYE3 | 0.02884  |
| 64429 | P03346 | Q5HYW2 | 0.079707 |
| 64430 | P03346 | Q9Y330 | 0.31436  |
| 64431 | P03346 | Q9UK13 | 0.31436  |
| 64432 | P03346 | Q2TAY7 | 0.49807  |
| 64433 | P03346 | Q9BXW6 | 0.46742  |
| 64434 | P03346 | Q8N0Y2 | 0.34285  |
| 64435 | P03346 | Q5T953 | 0.054055 |
| 64436 | P03346 | A6NK89 | 0.19866  |
| 64437 | P03346 | Q92499 | 0.57503  |
| 64438 | P03346 | Q9Y5B6 | 0.81133  |
| 64439 | P03346 | Q5T686 | 0.066022 |
| 64440 | P03346 | P04733 | 0.26681  |
| 64441 | P03346 | Q7L4P6 | 0.11048  |
| 64442 | P03346 | Q9C0D2 | 0.35785  |
| 64443 | P03346 | Q8N8Z8 | 0.31436  |
| 64444 | P03346 | Q5MJ68 | 0.53166  |
| 64445 | P03346 | O75161 | 0.59038  |
| 64446 | P03346 | Q86VM9 | 0.32105  |
| 64447 | P03346 | Q96BN2 | 0.79965  |
| 64448 | P03346 | P0CG30 | 0.55716  |

|       |        |        |           |
|-------|--------|--------|-----------|
| 64449 | P03346 | Q9BT49 | 0.36317   |
| 64450 | P03346 | P18848 | 1.2955    |
| 64451 | P03346 | P60411 | 0.40421   |
| 64452 | P03346 | P04080 | 0.23731   |
| 64453 | P03346 | Q9Y6D6 | 0.73621   |
| 64454 | P03346 | P59998 | 0.3837    |
| 64455 | P03346 | Q3LI77 | 0.36736   |
| 64456 | P03346 | Q96B36 | 0.97009   |
| 64457 | P03346 | Q14582 | 0.64204   |
| 64458 | P03346 | Q9Y6F6 | 0.20843   |
| 64459 | P03346 | Q9GZM3 | 0.34613   |
| 64460 | P03346 | Q2M1V0 | 0.71675   |
| 64461 | P03346 | Q8N954 | 0.16667   |
| 64462 | P03346 | Q96JL9 | 0.31436   |
| 64463 | P03346 | Q53HV7 | 0.84229   |
| 64464 | P03346 | Q9P243 | 0.53478   |
| 64465 | P03346 | Q8IYI8 | 0.31436   |
| 64466 | P03346 | P99999 | 0.71944   |
| 64467 | P03346 | Q3LHN0 | 0.36736   |
| 64468 | P03346 | O00327 | 0.42918   |
| 64469 | P03346 | Q8ND82 | 0.27653   |
| 64470 | P03346 | Q8WW18 | 0.0077221 |
| 64471 | P03346 | Q6L8G9 | 0.40421   |
| 64472 | P03346 | Q9H2K2 | 0.45644   |
| 64473 | P03346 | Q58F21 | 0.49877   |
| 64474 | P03346 | Q99700 | 0.88628   |
| 64475 | P03346 | Q9BQ70 | 1.5977    |
| 64476 | P03346 | Q10567 | 0.74337   |
| 64477 | P03346 | Q16890 | 0.63019   |
| 64478 | P03346 | Q7Z4V5 | 0.35728   |
| 64479 | P03346 | Q09666 | 0.98011   |
| 64480 | P03346 | Q6NUQ1 | 0.80994   |
| 64481 | P03346 | Q9BZ29 | 0.22818   |
| 64482 | P03346 | Q9UKL3 | 1.1191    |
| 64483 | P03346 | Q15170 | 0.7505    |
| 64484 | P03346 | Q86TB9 | 1.0281    |
| 64485 | P03346 | Q14151 | 1.0819    |
| 64486 | P03346 | P12036 | 0.59177   |
| 64487 | P03346 | Q2M2I5 | 0.58798   |
| 64488 | P03346 | Q14153 | 0.12821   |
| 64489 | P03346 | Q9NQR4 | 0.45141   |
| 64490 | P03346 | Q9H4I8 | 0.35247   |
| 64491 | P03346 | Q96EP0 | 0.29887   |
| 64492 | P03346 | P14921 | 0.90073   |
| 64493 | P03346 | P47914 | 0.5786    |
| 64494 | P03346 | Q9HAW4 | 0.67337   |
| 64495 | P03346 | Q9NWW0 | 0.49807   |
| 64496 | P03346 | Q9BW27 | 0.78422   |
| 64497 | P03346 | Q9H1I8 | 0.46683   |
| 64498 | P03346 | P10155 | 0.733     |
| 64499 | P03346 | O00161 | 1.0128    |
| 64500 | P03346 | Q06710 | 0.2727    |
| 64501 | P03346 | Q92794 | 0.3239    |
| 64502 | P03346 | P13640 | 0.7077    |
| 64503 | P03346 | Q9NS56 | 0.35429   |
| 64504 | P03346 | Q8NAA4 | 0.3142    |
| 64505 | P03346 | P07316 | 0.27132   |
| 64506 | P03346 | Q9P215 | 0.22407   |
| 64507 | P03346 | Q96PI1 | 0.16848   |
| 64508 | P03346 | P18669 | 0.53998   |
| 64509 | P03346 | Q9BUN8 | 0.13626   |
| 64510 | P03346 | Q9Y5J6 | 0.13307   |
| 64511 | P03346 | Q93083 | 0.27009   |
| 64512 | P03346 | P84022 | 0.46882   |
| 64513 | P03346 | O43148 | 1.0228    |
| 64514 | P03346 | Q15643 | 1.1347    |
| 64515 | P03346 | Q15742 | 0.54606   |
| 64516 | P03346 | O14628 | 0.31436   |
| 64517 | P03346 | Q86Y25 | 0.31436   |
| 64518 | P03346 | Q8HWS3 | 0.6285    |
| 64519 | P03346 | Q14676 | 0.81288   |
| 64520 | P03346 | Q12904 | 0.20406   |
| 64521 | P03346 | Q8TAG6 | 0.015025  |
| 64522 | P03346 | P11308 | 0.91968   |
| 64523 | P03346 | Q04726 | 1.2415    |
| 64524 | P03346 | Q9H063 | 0.5776    |

|       |        |        |         |
|-------|--------|--------|---------|
| 64525 | P03346 | Q8IWS0 | 0.65171 |
| 64526 | P03346 | Q86SE9 | 1.1176  |
| 64527 | P03346 | Q9HB71 | 0.74225 |
| 64528 | P03346 | Q96QU4 | 0.32217 |
| 64529 | P03346 | Q8N1W2 | 0.31436 |
| 64530 | P03346 | Q9H9E1 | 0.46253 |
| 64531 | P03346 | P25791 | 0.56684 |
| 64532 | P03346 | Q14694 | 0.2755  |
| 64533 | P03346 | Q96DT7 | 0.34395 |
| 64534 | P03346 | Q14847 | 0.24749 |
| 64535 | P03346 | Q8IYX0 | 0.31436 |
| 64536 | P03346 | Q9Y6Y0 | 0.71184 |
| 64537 | P03346 | Q8TBC3 | 0.3559  |
| 64538 | P03346 | Q6PI47 | 0.3559  |
| 64539 | P03346 | P08133 | 0.86043 |
| 64540 | P03346 | Q9BW71 | 0.92446 |
| 64541 | P03346 | Q12968 | 0.86955 |
| 64542 | P03346 | Q86V81 | 1.0104  |
| 64543 | P03346 | O43513 | 1.3586  |
| 64544 | P03346 | O75843 | 0.79291 |
| 64545 | P03346 | P11171 | 0.60687 |
| 64546 | P03346 | P31275 | 0.47959 |
| 64547 | P03346 | Q9NXB0 | 0.55633 |
| 64548 | P03346 | O14980 | 0.99933 |
| 64549 | P03346 | Q8N5Q1 | 0.15847 |
| 64550 | P03346 | Q2M3C7 | 0.80513 |
| 64551 | P03346 | Q6IPR1 | 0.14441 |
| 64552 | P03346 | Q8IWE2 | 0.20041 |
| 64553 | P03346 | Q9NVX0 | 1.0192  |
| 64554 | P03346 | Q14264 | 0.20187 |
| 64555 | P03346 | O76041 | 0.39195 |
| 64556 | P03346 | Q8NHY6 | 0.31436 |
| 64557 | P03346 | Q8WWY6 | 0.74266 |
| 64558 | P03346 | P30154 | 0.64032 |
| 64559 | P03346 | A1L443 | 0.13835 |
| 64560 | P03346 | Q9Y295 | 0.38451 |
| 64561 | P03346 | P09917 | 0.31318 |
| 64562 | P03346 | P49354 | 0.48802 |
| 64563 | P03346 | P17542 | 0.2696  |
| 64564 | P03346 | P48444 | 0.64186 |
| 64565 | P03346 | Q14232 | 0.26348 |
| 64566 | P03346 | Q04695 | 0.6272  |
| 64567 | P03346 | Q96IZ0 | 0.93292 |
| 64568 | P03346 | Q96DE5 | 0.78189 |
| 64569 | P03346 | Q9BRJ7 | 0.19151 |
| 64570 | P03346 | Q14978 | 0.55489 |
| 64571 | P03346 | O95232 | 0.82701 |
| 64572 | P03346 | Q96CV9 | 0.69102 |
| 64573 | P03346 | Q9NSB2 | 0.45278 |
| 64574 | P03346 | Q9BRH9 | 0.31436 |
| 64575 | P03346 | Q7Z3T8 | 0.22867 |
| 64576 | P03346 | O96019 | 0.99164 |
| 64577 | P03346 | P31350 | 0.41787 |
| 64578 | P03346 | Q66GS9 | 0.54506 |
| 64579 | P03346 | P51116 | 0.90296 |
| 64580 | P03346 | Q13166 | 0.12821 |
| 64581 | P03346 | Q9Y6Q2 | 0.17721 |
| 64582 | P03346 | Q9Y221 | 1.0659  |
| 64583 | P03346 | Q9BPZ2 | 0.38912 |
| 64584 | P03346 | Q9Y285 | 0.42426 |
| 64585 | P03346 | O60508 | 0.66701 |
| 64586 | P03346 | Q9Y224 | 1.5799  |
| 64587 | P03346 | Q9HCS4 | 0.40583 |
| 64588 | P03346 | P49419 | 0.69827 |
| 64589 | P03346 | Q8TCE9 | 0.29604 |
| 64590 | P03346 | Q9UHY8 | 0.55168 |
| 64591 | P03346 | Q9Y692 | 0.94282 |
| 64592 | P03346 | Q9BUT9 | 0.14751 |
| 64593 | P03346 | Q3LI81 | 0.36736 |
| 64594 | P03346 | P20340 | 0.25176 |
| 64595 | P03346 | Q96AA8 | 0.1222  |
| 64596 | P03346 | P43897 | 0.29557 |
| 64597 | P03346 | Q9BYV9 | 0.72849 |
| 64598 | P03346 | Q8WUU5 | 0.50432 |
| 64599 | P03346 | P50479 | 0.4708  |
| 64600 | P03346 | A7E2V4 | 0.18508 |

|       |        |        |          |
|-------|--------|--------|----------|
| 64601 | P03346 | Q14863 | 0.53117  |
| 64602 | P03346 | O75665 | 0.8202   |
| 64603 | P03346 | Q92973 | 1.2454   |
| 64604 | P03346 | Q9ULW0 | 0.88417  |
| 64605 | P03346 | Q8NEJ9 | 0.14793  |
| 64606 | P03346 | Q9H8T0 | 0.60863  |
| 64607 | P03346 | Q9Y2R5 | 0.39239  |
| 64608 | P03346 | P10144 | 0.5244   |
| 64609 | P03346 | P10242 | 1.1363   |
| 64610 | P03346 | Q9NTK5 | 0.54635  |
| 64611 | P03346 | Q96D15 | 0.52803  |
| 64612 | P03346 | P08865 | 0.77937  |
| 64613 | P03346 | O60481 | 0.64743  |
| 64614 | P03346 | Q9UI15 | 0.31193  |
| 64615 | P03346 | Q9UIS9 | 0.73489  |
| 64616 | P03346 | Q6ZN11 | 0.31436  |
| 64617 | P03346 | Q9Y237 | 0.52498  |
| 64618 | P03346 | Q5VTA0 | 0.13291  |
| 64619 | P03346 | P17661 | 0.64018  |
| 64620 | P03346 | O95231 | 0.44258  |
| 64621 | P03346 | Q8IVT2 | 0.060929 |
| 64622 | P03346 | A6NDE4 | 0.35549  |
| 64623 | P03346 | Q8IXF0 | 0.60186  |
| 64624 | P03346 | Q9C0J9 | 0.36662  |
| 64625 | P03346 | Q8N3R9 | 0.35052  |
| 64626 | P03346 | Q8NB15 | 0.31436  |
| 64627 | P03346 | P02511 | 0.4092   |
| 64628 | P03346 | P51784 | 0.44991  |
| 64629 | P03346 | Q6ECI4 | 0.4412   |
| 64630 | P03346 | Q15436 | 0.79968  |
| 64631 | P03346 | P61236 | 0.48532  |
| 64632 | P03346 | Q9UNY5 | 0.34285  |
| 64633 | P03346 | Q9H175 | 1.3844   |
| 64634 | P03346 | Q4LEZ3 | 0.11085  |
| 64635 | P03346 | Q8IYM9 | 0.25665  |
| 64636 | P03346 | Q8WXE0 | 0.22802  |
| 64637 | P03346 | Q9H9H5 | 0.21597  |
| 64638 | P03346 | Q9Y3E7 | 0.90636  |
| 64639 | P03346 | Q9UK76 | 0.32217  |
| 64640 | P03346 | Q7LG56 | 0.28167  |
| 64641 | P03346 | Q6ZW54 | 0.079753 |
| 64642 | P03346 | Q8WXE9 | 0.77418  |
| 64643 | P03346 | O43236 | 0.43364  |
| 64644 | P03346 | Q496M5 | 0.34337  |
| 64645 | P03346 | A9UHW6 | 1.0857   |
| 64646 | P03346 | Q13227 | 0.78822  |
| 64647 | P03346 | Q8N140 | 1.1421   |
| 64648 | P03346 | Q96DP5 | 0.051194 |
| 64649 | P03346 | Q6L8G4 | 0.40421  |
| 64650 | P03346 | Q7L804 | 0.76845  |
| 64651 | P03346 | Q8N960 | 0.2409   |
| 64652 | P03346 | O14556 | 0.4887   |
| 64653 | P03346 | Q96EA4 | 0.81999  |
| 64654 | P03346 | Q96L21 | 0.46101  |
| 64655 | P03346 | Q9Y2P8 | 0.38528  |
| 64656 | P03346 | Q8NDT2 | 1.0366   |
| 64657 | P03346 | Q96F24 | 0.94081  |
| 64658 | P03346 | P13984 | 0.68238  |
| 64659 | P03346 | P56945 | 0.62757  |
| 64660 | P03346 | Q8N1G0 | 0.4412   |
| 64661 | P03346 | O43829 | 0.8711   |
| 64662 | P03346 | Q13609 | 0.17275  |
| 64663 | P03346 | Q9H7R5 | 0.31436  |
| 64664 | P03346 | Q9H9E3 | 0.73683  |
| 64665 | P03346 | Q9NPP4 | 0.31859  |
| 64666 | P03346 | Q8TF47 | 0.30647  |
| 64667 | P03346 | O43541 | 0.72044  |
| 64668 | P03346 | O75391 | 0.32442  |
| 64669 | P03346 | Q8N5D0 | 0.72307  |
| 64670 | P03346 | O75157 | 0.42708  |
| 64671 | P03346 | Q8WYA6 | 1.0212   |
| 64672 | P03346 | Q9P021 | 0.11392  |
| 64673 | P03346 | Q15599 | 0.66945  |
| 64674 | P03346 | Q96TA1 | 0.58613  |
| 64675 | P03346 | Q9NQS1 | 0.29429  |
| 64676 | P03346 | Q96S55 | 0.35281  |



|       |        |        |           |
|-------|--------|--------|-----------|
| 64677 | P03346 | O60493 | 0.39777   |
| 64678 | P03346 | Q9GZU7 | 0.68923   |
| 64679 | P03346 | Q9NXR7 | 0.58204   |
| 64680 | P03346 | Q15398 | 1.1724    |
| 64681 | P03346 | O75340 | 0.59523   |
| 64682 | P03346 | Q9P0K7 | 0.28316   |
| 64683 | P03346 | Q99990 | 0.83994   |
| 64684 | P03346 | Q16667 | 0.25693   |
| 64685 | P03346 | Q9UNN5 | 0.78133   |
| 64686 | P03346 | P22736 | 0.37751   |
| 64687 | P03346 | Q9UBY9 | 1.1468    |
| 64688 | P03346 | Q5EBM4 | 0.31436   |
| 64689 | P03346 | Q86UT6 | 0.24323   |
| 64690 | P03346 | O14948 | 0.73517   |
| 64691 | P03346 | Q7Z3Y9 | 0.47854   |
| 64692 | P03346 | Q15020 | 0.49054   |
| 64693 | P03346 | A6NKF1 | 1.0318    |
| 64694 | P03346 | O00423 | 0.66229   |
| 64695 | P03346 | Q08752 | 0.6146    |
| 64696 | P03346 | P17706 | 0.33617   |
| 64697 | P03346 | Q9Y2S7 | 0.41262   |
| 64698 | P03346 | Q9Y2H0 | 0.22214   |
| 64699 | P03346 | Q86XN7 | 0.0077221 |
| 64700 | P03346 | Q92625 | 0.394     |
| 64701 | P03346 | Q8NEU8 | 0.63201   |
| 64702 | P03346 | Q7Z3U7 | 0.28092   |
| 64703 | P03346 | P49356 | 0.17685   |
| 64704 | P03346 | A8MWA4 | 0.31436   |
| 64705 | P03346 | P60604 | 0.21278   |
| 64706 | P03346 | Q96I34 | 0.4081    |
| 64707 | P03346 | Q9Y3C7 | 1.1558    |
| 64708 | P03346 | Q8N4B1 | 0.40002   |
| 64709 | P03346 | P51003 | 0.29309   |
| 64710 | P03346 | Q16851 | 0.48245   |
| 64711 | P03346 | P80297 | 0.2837    |
| 64712 | P03346 | Q9NX24 | 0.37863   |
| 64713 | P03346 | P63162 | 0.99913   |
| 64714 | P03346 | P0CL85 | 0.32217   |
| 64715 | P03346 | Q6VUC0 | 0.77894   |
| 64716 | P03346 | Q96QG7 | 0.55606   |
| 64717 | P03346 | Q15929 | 0.31436   |
| 64718 | P03346 | Q9BVC5 | 0.059131  |
| 64719 | P03346 | Q9UL33 | 0.26839   |
| 64720 | P03346 | Q6DKI1 | 0.26641   |
| 64721 | P03346 | Q96S59 | 1.1246    |
| 64722 | P03346 | A6NEM1 | 0.015632  |
| 64723 | P03346 | Q8WXW3 | 0.17073   |
| 64724 | P03346 | Q9UL36 | 0.28998   |
| 64725 | P03346 | Q9NXT0 | 0.31436   |
| 64726 | P03346 | P43364 | 1.1405    |
| 64727 | P03346 | Q5JT82 | 0.28835   |
| 64728 | P03346 | Q8IW35 | 1.3644    |
| 64729 | P03346 | Q9UPM8 | 0.50539   |
| 64730 | P03346 | P41223 | 0.35847   |
| 64731 | P03346 | Q9NRX2 | 0.34192   |
| 64732 | P03346 | P41227 | 0.60076   |
| 64733 | P03346 | Q96RM1 | 0.1267    |
| 64734 | P03346 | Q5TAX3 | 0.70349   |
| 64735 | P03346 | O94864 | 0.76663   |
| 64736 | P03346 | Q8TAC9 | 0.18551   |
| 64737 | P03346 | P60228 | 1.0953    |
| 64738 | P03346 | Q2KHM9 | 0.33677   |
| 64739 | P03346 | Q7Z3B3 | 0.41251   |
| 64740 | P03346 | Q96D98 | 0.41721   |
| 64741 | P03346 | Q96EU6 | 0.4578    |
| 64742 | P03346 | O00534 | 0.48532   |
| 64743 | P03346 | Q5THR3 | 0.6446    |
| 64744 | P03346 | Q6UB98 | 0.65405   |
| 64745 | P03346 | Q96J01 | 0.38754   |
| 64746 | P03346 | O15049 | 0.10023   |
| 64747 | P03346 | Q9ULU4 | 0.71002   |
| 64748 | P03346 | Q9GZU8 | 0.32217   |
| 64749 | P03346 | P15976 | 0.2944    |
| 64750 | P03346 | P51397 | 0.09264   |
| 64751 | P03346 | O43670 | 0.38302   |
| 64752 | P03346 | Q9NUP9 | 0.45984   |

|       |        |        |           |
|-------|--------|--------|-----------|
| 64753 | P03346 | O95125 | 0.34176   |
| 64754 | P03346 | P0C7Q2 | 0.28678   |
| 64755 | P03346 | O15266 | 0.93359   |
| 64756 | P03346 | Q8WVB3 | 0.32321   |
| 64757 | P03346 | Q13033 | 0.83745   |
| 64758 | P03346 | Q5VTL8 | 0.38557   |
| 64759 | P03346 | O14641 | 0.68532   |
| 64760 | P03346 | Q8N0Y7 | 0.098877  |
| 64761 | P03346 | O95096 | 0.27938   |
| 64762 | P03346 | O00221 | 0.39028   |
| 64763 | P03346 | A8MZF0 | 0.0077221 |
| 64764 | P03346 | Q9P0V3 | 0.82785   |
| 64765 | P03346 | Q9H2L5 | 0.54383   |
| 64766 | P03346 | Q86VW0 | 0.46616   |
| 64767 | P03346 | Q7Z624 | 0.18206   |
| 64768 | P03346 | Q9BR84 | 0.31436   |
| 64769 | P03346 | Q86UL8 | 0.40399   |
| 64770 | P03346 | Q9Y5A7 | 0.94494   |
| 64771 | P03346 | Q7Z4H3 | 0.41914   |
| 64772 | P03346 | P02533 | 0.98103   |
| 64773 | P03346 | Q6P9A3 | 0.31436   |
| 64774 | P03346 | G3V211 | 0.11485   |
| 64775 | P03346 | Q7Z7F7 | 0.54515   |
| 64776 | P03346 | Q8TBZ0 | 0.51747   |
| 64777 | P03346 | Q9HA90 | 0.0077221 |
| 64778 | P03346 | Q8N339 | 0.31991   |
| 64779 | P03346 | Q7RTT4 | 0.50821   |
| 64780 | P03346 | O75934 | 1.0039    |
| 64781 | P03346 | Q9Y6H1 | 0.14441   |
| 64782 | P03346 | Q6ZMV8 | 0.31436   |
| 64783 | P03346 | Q969R5 | 0.37249   |
| 64784 | P03346 | Q96PE6 | 0.31436   |
| 64785 | P03346 | P53999 | 1.5086    |
| 64786 | P03346 | Q5T215 | 0.19974   |
| 64787 | P03346 | O43660 | 0.71873   |
| 64788 | P03346 | Q9Y3C4 | 0.56085   |
| 64789 | P03346 | P24539 | 0.3971    |
| 64790 | P03346 | Q5JVG8 | 0.4412    |
| 64791 | P03346 | Q92597 | 0.63859   |
| 64792 | P03346 | Q8IXQ4 | 0.0077221 |
| 64793 | P03346 | O15235 | 0.91568   |
| 64794 | P03346 | Q15646 | 0.25593   |
| 64795 | P03346 | Q96L92 | 0.96575   |
| 64796 | P03346 | Q13469 | 1.3171    |
| 64797 | P03346 | Q8IU53 | 0.05831   |
| 64798 | P03346 | Q5SNV9 | 0.015339  |
| 64799 | P03346 | O75478 | 0.66256   |
| 64800 | P03346 | Q9GZN2 | 0.76817   |
| 64801 | P03346 | Q06190 | 0.33436   |
| 64802 | P03346 | Q9BPX3 | 1.0525    |
| 64803 | P03346 | P81274 | 0.7506    |
| 64804 | P03346 | P78537 | 0.82182   |
| 64805 | P03346 | O75884 | 0.47018   |
| 64806 | P03346 | Q15631 | 1.0841    |
| 64807 | P03346 | Q8NI29 | 0.55077   |
| 64808 | P03346 | Q92539 | 0.66965   |
| 64809 | P03346 | P60673 | 0.43973   |
| 64810 | P03346 | O75643 | 0.32729   |
| 64811 | P03346 | Q06546 | 1.4932    |
| 64812 | P03346 | P31749 | 0.45623   |
| 64813 | P03346 | Q15102 | 0.44064   |
| 64814 | P03346 | P61313 | 1.0067    |
| 64815 | P03346 | Q14681 | 0.3559    |
| 64816 | P03346 | P67809 | 0.82533   |
| 64817 | P03346 | Q9H074 | 0.71077   |
| 64818 | P03346 | P14635 | 0.30305   |
| 64819 | P03346 | Q52MB2 | 0.20041   |
| 64820 | P03346 | O43189 | 0.6218    |
| 64821 | P03346 | Q96F45 | 0.33838   |
| 64822 | P03346 | Q9P0U4 | 0.51572   |
| 64823 | P03346 | Q9H7U1 | 0.12902   |
| 64824 | P03346 | P25398 | 0.69139   |
| 64825 | P03346 | O14531 | 0.35313   |
| 64826 | P03346 | Q86VY4 | 0.74823   |
| 64827 | P03346 | Q8N9Z9 | 0.86041   |
| 64828 | P03346 | Q13084 | 1.2317    |

|       |        |        |           |
|-------|--------|--------|-----------|
| 64829 | P03346 | Q15596 | 0.76913   |
| 64830 | P03346 | O75663 | 0.74856   |
| 64831 | P03346 | Q9NZH5 | 0.39528   |
| 64832 | P03346 | Q96JM7 | 0.67529   |
| 64833 | P03346 | Q9BRU9 | 0.47318   |
| 64834 | P03346 | O43920 | 0.083243  |
| 64835 | P03346 | O60381 | 0.61477   |
| 64836 | P03346 | Q9UNH7 | 0.45658   |
| 64837 | P03346 | Q03468 | 0.45548   |
| 64838 | P03346 | O00255 | 0.2299    |
| 64839 | P03346 | Q96EV8 | 0.30977   |
| 64840 | P03346 | P55822 | 0.0616    |
| 64841 | P03346 | Q9H9T3 | 0.91275   |
| 64842 | P03346 | Q569G3 | 0.0077221 |
| 64843 | P03346 | Q02446 | 0.35659   |
| 64844 | P03346 | Q8IZU3 | 0.4635    |
| 64845 | P03346 | O60477 | 0.78015   |
| 64846 | P03346 | Q9UJ98 | 0.14287   |
| 64847 | P03346 | O75528 | 0.89171   |
| 64848 | P03346 | Q15437 | 0.4668    |
| 64849 | P03346 | P78395 | 0.94657   |
| 64850 | P03346 | O60519 | 0.37024   |
| 64851 | P03346 | Q701N2 | 0.40421   |
| 64852 | P03346 | Q8IUB9 | 0.36736   |
| 64853 | P03346 | Q86SQ7 | 1.08      |
| 64854 | P03346 | O94972 | 0.23795   |
| 64855 | P03346 | P83369 | 0.9271    |
| 64856 | P03346 | Q15287 | 1.0758    |
| 64857 | P03346 | Q13042 | 1.2579    |
| 64858 | P03346 | Q9Y4A5 | 0.94442   |
| 64859 | P03346 | Q9BZQ8 | 0.37021   |
| 64860 | P03346 | O75363 | 0.20041   |
| 64861 | P03346 | Q9Y4H4 | 0.10781   |
| 64862 | P03346 | P13985 | 0.12821   |
| 64863 | P03346 | Q9BWD1 | 0.37632   |
| 64864 | P03346 | P19532 | 1.0122    |
| 64865 | P03346 | Q9Y3F4 | 1.0739    |
| 64866 | P03346 | P17481 | 0.33743   |
| 64867 | P03346 | O95863 | 0.2395    |
| 64868 | P03346 | Q969G2 | 0.35394   |
| 64869 | P03346 | P10914 | 0.48601   |
| 64870 | P03346 | Q6VMQ6 | 1.1535    |
| 64871 | P03346 | Q96PT4 | 0.63594   |
| 64872 | P03346 | P52746 | 0.31644   |
| 64873 | P03346 | Q5TI25 | 0.2685    |
| 64874 | P03346 | Q9Y2W6 | 0.30527   |
| 64875 | P03346 | P13073 | 0.3053    |
| 64876 | P03346 | Q8IWF6 | 0.13827   |
| 64877 | P03346 | Q8WTS6 | 0.69474   |
| 64878 | P03346 | Q96GD3 | 0.32952   |
| 64879 | P03346 | Q8N5Y2 | 0.3776    |
| 64880 | P03346 | Q86U44 | 0.3878    |
| 64881 | P03346 | Q12894 | 0.71467   |
| 64882 | P03346 | P49640 | 0.61058   |
| 64883 | P03346 | Q9BQ15 | 0.88677   |
| 64884 | P03346 | O94986 | 1.3225    |
| 64885 | P03346 | Q9BYQ5 | 0.40421   |
| 64886 | P03346 | Q15072 | 0.48068   |
| 64887 | P03346 | P51965 | 0.53273   |
| 64888 | P03346 | Q13309 | 0.69768   |
| 64889 | P03346 | O43633 | 0.30224   |
| 64890 | P03346 | Q9Y4Z0 | 0.97219   |
| 64891 | P03346 | Q86VE0 | 0.93666   |
| 64892 | P03346 | Q9UJV8 | 0.29934   |
| 64893 | P03346 | O75529 | 0.83192   |
| 64894 | P03346 | Q9UBL0 | 0.33333   |
| 64895 | P03346 | O94818 | 0.4493    |
| 64896 | P03346 | Q7Z4W3 | 0.36736   |
| 64897 | P03346 | Q96MW1 | 0.0077221 |
| 64898 | P03346 | Q8N4M7 | 0.19      |
| 64899 | P03346 | P31483 | 0.55433   |
| 64900 | P03346 | Q9Y4R8 | 0.48613   |
| 64901 | P03346 | Q9Y3A3 | 0.76083   |
| 64902 | P03346 | P46060 | 0.37212   |
| 64903 | P03346 | O15315 | 0.39407   |
| 64904 | P03346 | P35080 | 0.59986   |

|       |        |        |          |
|-------|--------|--------|----------|
| 64905 | P03346 | Q9NYJ8 | 0.50485  |
| 64906 | P03346 | Q9HCG8 | 0.59442  |
| 64907 | P03346 | Q6QNY1 | 0.87709  |
| 64908 | P03346 | Q9NWB7 | 0.87532  |
| 64909 | P03346 | Q8NEM7 | 0.62791  |
| 64910 | P03346 | Q8N3S3 | 0.66325  |
| 64911 | P03346 | P16415 | 0.31436  |
| 64912 | P03346 | Q02556 | 0.65361  |
| 64913 | P03346 | Q15021 | 0.97005  |
| 64914 | P03346 | Q05877 | 0.080197 |
| 64915 | P03346 | Q9NZQ3 | 0.96012  |
| 64916 | P03346 | Q4W5G0 | 0.31623  |
| 64917 | P03346 | P60370 | 0.40421  |
| 64918 | P03346 | Q8N5J2 | 0.080918 |
| 64919 | P03346 | Q6AW86 | 0.31436  |
| 64920 | P03346 | Q9H7X3 | 0.31436  |
| 64921 | P03346 | A8MUX0 | 0.40421  |
| 64922 | P03346 | O60479 | 0.37795  |
| 64923 | P03346 | Q96N22 | 0.31436  |
| 64924 | P03346 | Q9UJX5 | 0.85075  |
| 64925 | P03346 | Q9UD71 | 0.052172 |
| 64926 | P03346 | Q15361 | 0.99331  |
| 64927 | P03346 | Q9NQZ8 | 0.30845  |
| 64928 | P03346 | Q8N5Z5 | 0.30072  |
| 64929 | P03346 | Q8IWy8 | 0.34285  |
| 64930 | P03346 | Q3LI73 | 0.36736  |
| 64931 | P03346 | Q68EA5 | 0.31436  |
| 64932 | P03346 | O95948 | 0.62342  |
| 64933 | P03346 | Q9UDV6 | 0.81093  |
| 64934 | P03346 | Q92599 | 0.23173  |
| 64935 | P03346 | Q9P2J5 | 0.4524   |
| 64936 | P03346 | P62380 | 0.41826  |
| 64937 | P03346 | P22531 | 0.74223  |
| 64938 | P03346 | Q6P2C8 | 1.1347   |
| 64939 | P03346 | Q9HD26 | 1.0444   |
| 64940 | P03346 | Q9H5J4 | 0.35216  |
| 64941 | P03346 | P41134 | 0.48086  |
| 64942 | P03346 | Q59GR2 | 0.66978  |
| 64943 | P03346 | Q9BYG5 | 0.79039  |
| 64944 | P03346 | Q33E94 | 1.198    |
| 64945 | P03346 | Q86UA1 | 0.26735  |
| 64946 | P03346 | Q15022 | 0.73486  |
| 64947 | P03346 | Q96HT8 | 0.25054  |
| 64948 | P03346 | Q9P2R6 | 1.1228   |
| 64949 | P03346 | O43790 | 0.56559  |
| 64950 | P03346 | Q5TBC7 | 0.4896   |
| 64951 | P03346 | Q9H4I2 | 0.89915  |
| 64952 | P03346 | Q03924 | 0.30845  |
| 64953 | P03346 | Q5T752 | 0.2355   |
| 64954 | P03346 | P59037 | 0.10581  |
| 64955 | P03346 | A6NDZ8 | 0.46683  |
| 64956 | P03346 | Q7Z6E9 | 0.53622  |
| 64957 | P03346 | Q9P0W5 | 0.74368  |
| 64958 | P03346 | Q5TAQ9 | 0.63666  |
| 64959 | P03346 | Q13951 | 0.93693  |
| 64960 | P03346 | Q9BX82 | 0.31436  |
| 64961 | P03346 | Q6ZYL4 | 0.75689  |
| 64962 | P03346 | Q86YP4 | 0.87127  |
| 64963 | P03346 | P63146 | 0.1493   |
| 64964 | P03346 | Q9UPV9 | 0.94187  |
| 64965 | P03346 | Q06730 | 0.30845  |
| 64966 | P03346 | Q13435 | 0.6571   |
| 64967 | P03346 | Q99684 | 0.43103  |
| 64968 | P03346 | Q01831 | 0.85728  |
| 64969 | P03346 | Q13938 | 0.24962  |
| 64970 | P03346 | Q9NRP2 | 0.14441  |
| 64971 | P03346 | Q9Y296 | 0.52011  |
| 64972 | P03346 | Q9Y587 | 0.24839  |
| 64973 | P03346 | Q8WVC0 | 1.1762   |
| 64974 | P03346 | Q7KZF4 | 0.97495  |
| 64975 | P03346 | Q96SN8 | 0.56466  |
| 64976 | P03346 | Q96JE7 | 0.14878  |
| 64977 | P03346 | Q92769 | 0.40432  |
| 64978 | P03346 | P17031 | 0.31436  |
| 64979 | P03346 | O95373 | 1.1332   |
| 64980 | P03346 | Q8N841 | 0.27099  |

|       |        |        |           |
|-------|--------|--------|-----------|
| 64981 | P03346 | Q8N5L8 | 0.32442   |
| 64982 | P03346 | O60826 | 0.12821   |
| 64983 | P03346 | P0CW71 | 0.3251    |
| 64984 | P03346 | P49720 | 0.40378   |
| 64985 | P03346 | Q9H444 | 0.98517   |
| 64986 | P03346 | Q9Y2G9 | 0.46111   |
| 64987 | P03346 | Q8N8J6 | 0.31436   |
| 64988 | P03346 | O95251 | 0.93231   |
| 64989 | P03346 | Q8N883 | 0.31436   |
| 64990 | P03346 | P31150 | 0.336     |
| 64991 | P03346 | P28065 | 0.57998   |
| 64992 | P03346 | Q9UK12 | 0.31436   |
| 64993 | P03346 | Q15973 | 0.31436   |
| 64994 | P03346 | Q6PD74 | 0.3594    |
| 64995 | P03346 | Q13342 | 0.81601   |
| 64996 | P03346 | Q14683 | 0.48208   |
| 64997 | P03346 | Q5VSR9 | 0.10148   |
| 64998 | P03346 | Q14192 | 0.67389   |
| 64999 | P03346 | Q2TAM9 | 0.13835   |
| 65000 | P03346 | O95990 | 0.30088   |
| 65001 | P03346 | P82914 | 0.41252   |
| 65002 | P03346 | Q6ZN32 | 0.71675   |
| 65003 | P03346 | Q9H8G1 | 0.31436   |
| 65004 | P03346 | B2RXF5 | 0.59424   |
| 65005 | P03346 | P13645 | 0.54047   |
| 65006 | P03346 | Q96DE0 | 0.44741   |
| 65007 | P03346 | P40121 | 0.58205   |
| 65008 | P03346 | Q9BTA0 | 0.0077221 |
| 65009 | P03346 | Q15019 | 0.2326    |
| 65010 | P03346 | Q8N2H4 | 0.15403   |
| 65011 | P03346 | Q9UPQ4 | 0.31959   |
| 65012 | P03346 | Q9BY77 | 0.66076   |
| 65013 | P03346 | Q96Q05 | 0.13265   |
| 65014 | P03346 | Q3LHN1 | 0.36736   |
| 65015 | P03346 | Q9UKT5 | 0.621     |
| 65016 | P03346 | Q9BQ87 | 0.74266   |
| 65017 | P03346 | Q9NWS1 | 1.2193    |
| 65018 | P03346 | Q9UBU8 | 0.95039   |
| 65019 | P03346 | Q9HB75 | 0.89263   |
| 65020 | P03346 | P52435 | 0.73091   |
| 65021 | P03346 | P11441 | 0.84523   |
| 65022 | P03346 | Q86WI3 | 0.63311   |
| 65023 | P03346 | Q9Y2L5 | 0.32094   |
| 65024 | P03346 | Q6VN20 | 0.59677   |
| 65025 | P03346 | Q5VZQ5 | 0.053799  |
| 65026 | P03346 | Q9NUQ3 | 0.84223   |
| 65027 | P03346 | Q5JNZ3 | 0.31436   |
| 65028 | P03346 | Q8NA31 | 0.25443   |
| 65029 | P03346 | O60783 | 0.40701   |
| 65030 | P03346 | Q9XRX5 | 0.66787   |
| 65031 | P03346 | Q9BYR4 | 0.40421   |
| 65032 | P03346 | Q9UBG7 | 0.49712   |
| 65033 | P03346 | Q9H322 | 0.12821   |
| 65034 | P03346 | P27815 | 0.41475   |
| 65035 | P03346 | Q8WWL7 | 1.1017    |
| 65036 | P03346 | Q8WXI9 | 0.65781   |
| 65037 | P03346 | Q86UV5 | 0.29763   |
| 65038 | P03346 | Q969F9 | 0.22764   |
| 65039 | P03346 | Q9H1D9 | 0.73301   |
| 65040 | P03346 | Q13118 | 0.53707   |
| 65041 | P03346 | P60368 | 0.40421   |
| 65042 | P03346 | Q9Y4G6 | 0.26054   |
| 65043 | P03346 | O00512 | 1.0328    |
| 65044 | P03346 | Q5U4N7 | 0.14441   |
| 65045 | P03346 | Q8TBZ8 | 0.31436   |
| 65046 | P03346 | P61574 | 0.74357   |
| 65047 | P03346 | Q9BVS5 | 0.55622   |
| 65048 | P03346 | Q04725 | 1.0784    |
| 65049 | P03346 | Q9P2J8 | 0.31436   |
| 65050 | P03346 | O95780 | 0.31436   |
| 65051 | P03346 | Q7RTS9 | 0.95027   |
| 65052 | P03346 | Q9NZC7 | 0.46319   |
| 65053 | P03346 | P49848 | 0.8852    |
| 65054 | P03346 | Q8WUA4 | 0.42193   |
| 65055 | P03346 | Q9BQN1 | 0.075667  |
| 65056 | P03346 | O14879 | 0.80924   |

|       |        |        |           |
|-------|--------|--------|-----------|
| 65057 | P03346 | Q9UNE7 | 0.37396   |
| 65058 | P03346 | Q8N4J0 | 0.025326  |
| 65059 | P03346 | O75164 | 0.94548   |
| 65060 | P03346 | A0A183 | 0.02884   |
| 65061 | P03346 | Q9Y248 | 0.95893   |
| 65062 | P03346 | P48728 | 0.21649   |
| 65063 | P03346 | P42704 | 1.2463    |
| 65064 | P03346 | O15131 | 1.3162    |
| 65065 | P03346 | Q6IPX3 | 0.74266   |
| 65066 | P03346 | P23490 | 0.95077   |
| 65067 | P03346 | Q9UHK0 | 0.51461   |
| 65068 | P03346 | Q3KP31 | 0.31436   |
| 65069 | P03346 | Q8NOV3 | 0.17914   |
| 65070 | P03346 | O60220 | 0.11808   |
| 65071 | P03346 | Q8WU39 | 0.25534   |
| 65072 | P03346 | O15499 | 0.63102   |
| 65073 | P03346 | Q9UGK3 | 0.91889   |
| 65074 | P03346 | Q6ZN79 | 0.31436   |
| 65075 | P03346 | Q13094 | 0.77627   |
| 65076 | P03346 | O95076 | 0.38874   |
| 65077 | P03346 | Q9Y2N7 | 0.78081   |
| 65078 | P03346 | Q9HCU9 | 1.3494    |
| 65079 | P03346 | P52744 | 0.30845   |
| 65080 | P03346 | Q9Y512 | 0.32318   |
| 65081 | P03346 | Q9UNN4 | 0.75009   |
| 65082 | P03346 | Q9Y6J0 | 0.36983   |
| 65083 | P03346 | Q9H4M3 | 0.58358   |
| 65084 | P03346 | P36873 | 0.6571    |
| 65085 | P03346 | Q8IXT2 | 0.43276   |
| 65086 | P03346 | O75569 | 0.31196   |
| 65087 | P03346 | Q14146 | 0.48532   |
| 65088 | P03346 | O60264 | 0.31372   |
| 65089 | P03346 | P50991 | 0.35881   |
| 65090 | P03346 | Q9P1Z2 | 1.0032    |
| 65091 | P03346 | Q5T6M2 | 0.10349   |
| 65092 | P03346 | Q13547 | 0.74285   |
| 65093 | P03346 | Q8TCS8 | 0.2012    |
| 65094 | P03346 | P58107 | 0.27094   |
| 65095 | P03346 | Q09028 | 0.76342   |
| 65096 | P03346 | P13051 | 0.33296   |
| 65097 | P03346 | O95817 | 0.67114   |
| 65098 | P03346 | Q9BUW7 | 0.12821   |
| 65099 | P03346 | Q16891 | 0.20834   |
| 65100 | P03346 | Q8N5I3 | 0.25994   |
| 65101 | P03346 | Q9H939 | 0.23336   |
| 65102 | P03346 | Q8WZA9 | 0.0077221 |
| 65103 | P03346 | O00762 | 0.56657   |
| 65104 | P03346 | O75541 | 0.31436   |
| 65105 | P03346 | Q96CW1 | 0.5959    |
| 65106 | P03346 | Q9H668 | 0.51244   |
| 65107 | P03346 | Q6ZP65 | 0.30372   |
| 65108 | P03346 | Q03112 | 0.36578   |
| 65109 | P03346 | Q6NUP7 | 0.72599   |
| 65110 | P03346 | Q9NV31 | 1.1257    |
| 65111 | P03346 | Q3BBV2 | 0.20041   |
| 65112 | P03346 | P61513 | 0.59853   |
| 65113 | P03346 | Q96E11 | 0.21106   |
| 65114 | P03346 | O75373 | 0.31436   |
| 65115 | P03346 | Q8IXQ6 | 1.0622    |
| 65116 | P03346 | P08651 | 0.66867   |
| 65117 | P03346 | Q14008 | 0.92913   |
| 65118 | P03346 | Q5TG92 | 0.012593  |
| 65119 | P03346 | P17041 | 0.31436   |
| 65120 | P03346 | Q9H040 | 0.74117   |
| 65121 | P03346 | Q9C0C7 | 0.4239    |
| 65122 | P03346 | Q9HBF5 | 0.039786  |
| 65123 | P03346 | O43491 | 0.35822   |
| 65124 | P03346 | Q6STE5 | 0.82264   |
| 65125 | P03346 | Q8NAX2 | 0.0077221 |
| 65126 | P03346 | O43324 | 1.3173    |
| 65127 | P03346 | P51587 | 0.23049   |
| 65128 | P03346 | Q8IXP5 | 0.0077221 |
| 65129 | P03346 | P0C7V6 | 0.061177  |
| 65130 | P03346 | Q99576 | 0.7712    |
| 65131 | P03346 | O95721 | 0.56735   |
| 65132 | P03346 | Q96E29 | 0.54443   |

|       |        |        |           |
|-------|--------|--------|-----------|
| 65133 | P03346 | Q04724 | 1.011     |
| 65134 | P03346 | Q9GZN1 | 0.18249   |
| 65135 | P03346 | Q6NSW5 | 0.19818   |
| 65136 | P03346 | Q14715 | 0.20667   |
| 65137 | P03346 | Q8N4S0 | 0.0077221 |
| 65138 | P03346 | P46379 | 0.41064   |
| 65139 | P03346 | Q8TD86 | 0.50336   |
| 65140 | P03346 | Q9NZE8 | 0.35035   |
| 65141 | P03346 | Q96G23 | 0.51611   |
| 65142 | P03346 | Q92558 | 0.59556   |
| 65143 | P03346 | P20585 | 0.19391   |
| 65144 | P03346 | Q6P2E9 | 1.1929    |
| 65145 | P03346 | Q8N9A8 | 0.56951   |
| 65146 | P03346 | Q9UJX2 | 0.7008    |
| 65147 | P03346 | Q60284 | 0.48424   |
| 65148 | P03346 | Q9BZD3 | 0.11744   |
| 65149 | P03346 | Q9HBM6 | 0.92173   |
| 65150 | P03346 | Q9UJT2 | 0.74985   |
| 65151 | P03346 | Q6IQ32 | 0.63322   |
| 65152 | P03346 | Q5VT06 | 0.79649   |
| 65153 | P03346 | A1L168 | 0.0077221 |
| 65154 | P03346 | Q9NWZ8 | 1.0928    |
| 65155 | P03346 | Q9Y242 | 0.46005   |
| 65156 | P03346 | P40425 | 0.97006   |
| 65157 | P03346 | Q96MC4 | 0.067335  |
| 65158 | P03346 | Q96AX1 | 0.36102   |
| 65159 | P03346 | Q86VZ6 | 0.33652   |
| 65160 | P03346 | P52594 | 0.67194   |
| 65161 | P03346 | Q9UBF2 | 0.48664   |
| 65162 | P03346 | P62306 | 0.61942   |
| 65163 | P03346 | Q9Y6R9 | 0.17073   |
| 65164 | P03346 | Q9P2B7 | 0.0077221 |
| 65165 | P03346 | Q8WWQ0 | 0.77865   |
| 65166 | P03346 | Q2M3W8 | 0.31436   |
| 65167 | P03346 | Q96A00 | 0.13021   |
| 65168 | P03346 | Q8IV32 | 0.010444  |
| 65169 | P03346 | Q7RTT3 | 0.50821   |
| 65170 | P03346 | Q08ER8 | 0.31436   |
| 65171 | P03346 | Q5SVZ6 | 0.18295   |
| 65172 | P03346 | Q9HCK8 | 0.49853   |
| 65173 | P03346 | Q02086 | 0.26233   |
| 65174 | P03346 | Q8WV92 | 0.62508   |
| 65175 | P03346 | Q13761 | 0.96747   |
| 65176 | P03346 | Q9H9H4 | 0.23325   |
| 65177 | P03346 | Q9H8Y8 | 0.61319   |
| 65178 | P03346 | P42566 | 0.3566    |
| 65179 | P03346 | A6NKH3 | 0.20022   |
| 65180 | P03346 | P05388 | 1.2114    |
| 65181 | P03346 | Q8WXE1 | 0.94737   |
| 65182 | P03346 | Q5SVQ8 | 0.31436   |
| 65183 | P03346 | Q14593 | 0.31436   |
| 65184 | P03346 | Q9GZT9 | 0.29458   |
| 65185 | P03346 | P48059 | 0.34038   |
| 65186 | P03346 | Q14497 | 0.84987   |
| 65187 | P03346 | Q14599 | 0.7469    |
| 65188 | P03346 | Q9UN79 | 1.2833    |
| 65189 | P03346 | Q9UKA4 | 0.16232   |
| 65190 | P03346 | Q8TD19 | 0.24254   |
| 65191 | P03346 | A6NKN8 | 0.06384   |
| 65192 | P03346 | P51946 | 0.59381   |
| 65193 | P03346 | P63302 | 0.13961   |
| 65194 | P03346 | P46087 | 0.95117   |
| 65195 | P03346 | P0CL84 | 0.32217   |
| 65196 | P03346 | Q3SYG4 | 0.56876   |
| 65197 | P03346 | Q15160 | 0.35048   |
| 65198 | P03346 | Q96BR6 | 0.31436   |
| 65199 | P03346 | Q14746 | 0.66193   |
| 65200 | P03346 | Q13506 | 0.64062   |
| 65201 | P03346 | Q6N069 | 0.43075   |
| 65202 | P03346 | Q495Y8 | 0.040024  |
| 65203 | P03346 | Q96PC3 | 0.45293   |
| 65204 | P03346 | Q9UHI6 | 0.56745   |
| 65205 | P03346 | Q43361 | 0.31436   |
| 65206 | P03346 | Q6NZY4 | 0.8366    |
| 65207 | P03346 | Q8TCN5 | 0.31436   |
| 65208 | P03346 | P78316 | 0.40819   |

|       |        |        |           |
|-------|--------|--------|-----------|
| 65209 | P03346 | P49756 | 0.7269    |
| 65210 | P03346 | Q05BQ5 | 0.44799   |
| 65211 | P03346 | Q9Y2R9 | 0.31455   |
| 65212 | P03346 | Q96RL7 | 0.50215   |
| 65213 | P03346 | P63165 | 1.0479    |
| 65214 | P03346 | Q00470 | 0.89289   |
| 65215 | P03346 | Q9BQI6 | 0.4479    |
| 65216 | P03346 | P28356 | 0.51881   |
| 65217 | P03346 | Q9H9L7 | 0.50812   |
| 65218 | P03346 | O43679 | 0.44468   |
| 65219 | P03346 | Q7Z4V0 | 0.31331   |
| 65220 | P03346 | Q96GN5 | 1.0805    |
| 65221 | P03346 | Q9NUX5 | 0.31486   |
| 65222 | P03346 | Q9NVV4 | 0.5714    |
| 65223 | P03346 | Q9HAP2 | 0.93709   |
| 65224 | P03346 | P50616 | 0.60353   |
| 65225 | P03346 | Q9H6K5 | 0.0077221 |
| 65226 | P03346 | Q9UI47 | 0.49577   |
| 65227 | P03346 | O60447 | 0.46771   |
| 65228 | P03346 | P62269 | 0.68064   |
| 65229 | P03346 | Q9NVU7 | 0.68586   |
| 65230 | P03346 | Q9HBL0 | 0.63271   |
| 65231 | P03346 | P47974 | 0.56211   |
| 65232 | P03346 | Q13875 | 0.72143   |
| 65233 | P03346 | P09017 | 0.41704   |
| 65234 | P03346 | A6NJB7 | 0.030001  |
| 65235 | P03346 | P29372 | 0.62367   |
| 65236 | P03346 | Q9BZZ5 | 0.67626   |
| 65237 | P03346 | Q68CZ6 | 0.6137    |
| 65238 | P03346 | Q8TC76 | 0.61314   |
| 65239 | P03346 | Q16534 | 0.39519   |
| 65240 | P03346 | Q8WVJ9 | 0.83542   |
| 65241 | P03346 | Q9HCM9 | 0.57043   |
| 65242 | P03346 | Q7Z7A3 | 0.80569   |
| 65243 | P03346 | P0DI81 | 1.3186    |
| 65244 | P03346 | P60900 | 0.40309   |
| 65245 | P03346 | Q9Y250 | 1.1128    |
| 65246 | P03346 | B4DU55 | 0.31436   |
| 65247 | P03346 | Q9NZC4 | 0.40309   |
| 65248 | P03346 | P55345 | 0.45759   |
| 65249 | P03346 | O60304 | 0.34285   |
| 65250 | P03346 | Q14585 | 0.36525   |
| 65251 | P03346 | Q92784 | 0.29483   |
| 65252 | P03346 | Q9BY41 | 0.51079   |
| 65253 | P03346 | A6NH11 | 0.17705   |
| 65254 | P03346 | Q96N77 | 0.59404   |
| 65255 | P03346 | Q6P1L8 | 0.56968   |
| 65256 | P03346 | Q9NZT2 | 0.32698   |
| 65257 | P03346 | Q6IQ21 | 0.31436   |
| 65258 | P03346 | Q9UGJ1 | 0.43675   |
| 65259 | P03346 | Q15025 | 0.68133   |
| 65260 | P03346 | Q8N9V7 | 0.26012   |
| 65261 | P03346 | Q9BTE7 | 0.12821   |
| 65262 | P03346 | Q6ZS27 | 0.31436   |
| 65263 | P03346 | P52657 | 1.1366    |
| 65264 | P03346 | O14713 | 0.60852   |
| 65265 | P03346 | P50750 | 0.42094   |
| 65266 | P03346 | Q9Y6I7 | 0.40158   |
| 65267 | P03346 | O60927 | 0.14098   |
| 65268 | P03346 | Q9NXF7 | 0.63666   |
| 65269 | P03346 | P49368 | 0.25633   |
| 65270 | P03346 | Q9UJY4 | 0.7119    |
| 65271 | P03346 | Q02548 | 0.52139   |
| 65272 | P03346 | Q9H8Y5 | 0.26015   |
| 65273 | P03346 | P0DJG4 | 0.084498  |
| 65274 | P03346 | Q3YBR2 | 0.7635    |
| 65275 | P03346 | Q99848 | 0.45465   |
| 65276 | P03346 | Q8IWT3 | 0.24366   |
| 65277 | P03346 | O95905 | 1.0243    |
| 65278 | P03346 | O94913 | 0.59753   |
| 65279 | P03346 | P41219 | 0.29398   |
| 65280 | P03346 | Q8N1B4 | 0.81562   |
| 65281 | P03346 | Q9NS73 | 0.98497   |
| 65282 | P03346 | Q9HAT8 | 0.78334   |
| 65283 | P03346 | Q96BK5 | 0.64853   |
| 65284 | P03346 | Q9Y5X2 | 0.29556   |



|       |        |         |           |
|-------|--------|---------|-----------|
| 65285 | P03346 | O15297  | 0.66138   |
| 65286 | P03346 | Q5VYK3  | 0.28431   |
| 65287 | P03346 | Q9NR22  | 0.49421   |
| 65288 | P03346 | O75840  | 0.29112   |
| 65289 | P03346 | P33552  | 0.22391   |
| 65290 | P03346 | Q14738  | 0.96533   |
| 65291 | P03346 | Q7L1Q6  | 0.65497   |
| 65292 | P03346 | Q9Y535  | 0.44201   |
| 65293 | P03346 | Q9H808  | 0.87638   |
| 65294 | P03346 | Q52M58  | 0.047878  |
| 65295 | P03346 | Q96B01  | 0.87999   |
| 65296 | P03346 | Q9Y305  | 0.095949  |
| 65297 | P03346 | Q99750  | 0.64023   |
| 65298 | P03346 | P51161  | 0.39308   |
| 65299 | P03346 | Q9NVM4  | 0.37631   |
| 65300 | P03346 | P32929  | 0.36468   |
| 65301 | P03346 | Q9NVX2  | 0.49858   |
| 65302 | P03346 | Q5JUK2  | 0.28233   |
| 65303 | P03346 | Q8N7Q3  | 0.31436   |
| 65304 | P03346 | Q02543  | 0.777     |
| 65305 | P03346 | Q9BXN6  | 0.49807   |
| 65306 | P03346 | Q6ZRT6  | 0.0077221 |
| 65307 | P03346 | P49711  | 0.35267   |
| 65308 | P03346 | A6NNV3  | 0.040024  |
| 65309 | P03346 | Q6UUUV9 | 1.5742    |
| 65310 | P03346 | Q6P597  | 0.38552   |
| 65311 | P03346 | Q13330  | 0.69701   |
| 65312 | P03346 | Q8WXU2  | 0.98431   |
| 65313 | P03346 | Q8TC56  | 0.65405   |
| 65314 | P03346 | O15145  | 0.40286   |
| 65315 | P03346 | Q5T2T1  | 0.39819   |
| 65316 | P03346 | Q8N3L3  | 0.80443   |
| 65317 | P03346 | O94805  | 0.84753   |
| 65318 | P03346 | Q01954  | 0.40449   |
| 65319 | P03346 | O75618  | 1.408     |
| 65320 | P03346 | Q5VZF2  | 0.31847   |
| 65321 | P03346 | P20248  | 1.1524    |
| 65322 | P03346 | A4D1E1  | 0.26638   |
| 65323 | P03346 | P51815  | 0.34285   |
| 65324 | P03346 | P42766  | 0.80227   |
| 65325 | P03346 | Q6P1X5  | 1.0326    |
| 65326 | P03346 | P54920  | 0.64037   |
| 65327 | P03346 | A9QM74  | 0.81996   |
| 65328 | P03346 | A6NCL1  | 0.49199   |
| 65329 | P03346 | P62081  | 0.99314   |
| 65330 | P03346 | Q9BWN1  | 0.0077221 |
| 65331 | P03346 | O43542  | 0.77288   |
| 65332 | P03346 | P17544  | 1.056     |
| 65333 | P03346 | Q9Y2L1  | 0.66168   |
| 65334 | P03346 | Q96JB5  | 0.61409   |
| 65335 | P03346 | Q6NXS1  | 0.073337  |
| 65336 | P03346 | Q9NY61  | 0.98945   |
| 65337 | P03346 | Q15121  | 0.75338   |
| 65338 | P03346 | Q96K30  | 0.99731   |
| 65339 | P03346 | Q9Y5B9  | 0.42681   |
| 65340 | P03346 | O95886  | 0.3359    |
| 65341 | P03346 | P09629  | 1.2421    |
| 65342 | P03346 | P33992  | 0.42117   |
| 65343 | P03346 | Q8IZS6  | 0.23523   |
| 65344 | P03346 | Q7Z4Q2  | 0.036882  |
| 65345 | P03346 | Q92837  | 0.21446   |
| 65346 | P03346 | Q5VWX1  | 1.0147    |
| 65347 | P03346 | Q6ZU35  | 0.0077221 |
| 65348 | P03346 | Q8NG50  | 0.38125   |
| 65349 | P03346 | Q9Y6X8  | 0.81001   |
| 65350 | P03346 | P36404  | 0.24723   |
| 65351 | P03346 | Q96IR3  | 0.065238  |
| 65352 | P03346 | Q9H492  | 0.4114    |
| 65353 | P03346 | O95361  | 0.27752   |
| 65354 | P03346 | Q9GZN7  | 0.22617   |
| 65355 | P03346 | A6NNF4  | 0.31436   |
| 65356 | P03346 | P51825  | 1.309     |
| 65357 | P03346 | Q9NWX4  | 0.32217   |
| 65358 | P03346 | P14324  | 0.35454   |
| 65359 | P03346 | P84550  | 0.24612   |
| 65360 | P03346 | Q15744  | 0.56888   |

|       |        |        |          |
|-------|--------|--------|----------|
| 65361 | P03346 | O95198 | 0.7002   |
| 65362 | P03346 | P61580 | 0.32217  |
| 65363 | P03346 | Q9Y247 | 0.32217  |
| 65364 | P03346 | Q9BTV5 | 0.58987  |
| 65365 | P03346 | Q9H7S9 | 0.75794  |
| 65366 | P03346 | Q8TAW3 | 0.31436  |
| 65367 | P03346 | Q9BYQ7 | 0.40421  |
| 65368 | P03346 | P22532 | 0.1267   |
| 65369 | P03346 | Q7L2H7 | 0.82729  |
| 65370 | P03346 | Q8N2H9 | 0.12252  |
| 65371 | P03346 | Q8IYX7 | 0.16921  |
| 65372 | P03346 | Q53EZ4 | 0.76841  |
| 65373 | P03346 | Q7L1V2 | 0.66787  |
| 65374 | P03346 | O75818 | 0.49469  |
| 65375 | P03346 | O14907 | 0.67472  |
| 65376 | P03346 | Q5JSH3 | 0.30491  |
| 65377 | P03346 | Q5VWQ0 | 0.32217  |
| 65378 | P03346 | Q8NA42 | 0.4754   |
| 65379 | P03346 | Q9BXL5 | 0.6919   |
| 65380 | P03346 | Q9NQS7 | 0.9042   |
| 65381 | P03346 | Q9NQ50 | 0.61579  |
| 65382 | P03346 | Q6MZN7 | 0.019993 |
| 65383 | P03346 | Q9H446 | 0.66787  |
| 65384 | P03346 | Q02952 | 0.30406  |
| 65385 | P03346 | Q8NB12 | 0.51268  |
| 65386 | P03346 | Q5XUX1 | 0.66787  |
| 65387 | P03346 | Q9NQ31 | 0.92853  |
| 65388 | P03346 | Q8TC05 | 0.37546  |
| 65389 | P03346 | P26368 | 0.77949  |
| 65390 | P03346 | Q96C28 | 0.31436  |
| 65391 | P03346 | Q5SXJ2 | 0.2685   |
| 65392 | P03346 | Q8N0X2 | 0.25566  |
| 65393 | P03346 | Q9BXJ9 | 0.93492  |
| 65394 | P03346 | Q9H5Q4 | 0.42025  |
| 65395 | P03346 | Q96N95 | 0.48931  |
| 65396 | P03346 | Q14669 | 0.52921  |
| 65397 | P03346 | P46109 | 0.37464  |
| 65398 | P03346 | A6NGY1 | 0.32217  |
| 65399 | P03346 | Q9H299 | 0.36516  |
| 65400 | P03346 | Q5D1E8 | 0.63489  |
| 65401 | P03346 | Q96BW1 | 0.49807  |
| 65402 | P03346 | P49366 | 0.62089  |
| 65403 | P03346 | B4DXR9 | 0.31436  |
| 65404 | P03346 | Q9NTI5 | 1.0163   |
| 65405 | P03346 | O75346 | 0.32869  |
| 65406 | P03346 | O14896 | 0.77539  |
| 65407 | P03346 | Q96QD9 | 1.0986   |
| 65408 | P03346 | Q9UER7 | 0.87398  |
| 65409 | P03346 | P40926 | 0.23751  |
| 65410 | P03346 | Q96Q89 | 0.42585  |
| 65411 | P03346 | Q13111 | 1.1818   |
| 65412 | P03346 | P37275 | 0.85922  |
| 65413 | P03346 | Q8TD16 | 0.50545  |
| 65414 | P03346 | Q3KQU3 | 0.23361  |
| 65415 | P03346 | O95049 | 0.73371  |
| 65416 | P03346 | O75604 | 0.43131  |
| 65417 | P03346 | Q96QA5 | 0.30036  |
| 65418 | P03346 | Q8N584 | 0.019313 |
| 65419 | P03346 | P55769 | 1.1421   |
| 65420 | P03346 | Q9H981 | 1.2681   |
| 65421 | P03346 | Q5HYR2 | 0.46683  |
| 65422 | P03346 | P25786 | 0.5458   |
| 65423 | P03346 | O15205 | 0.7252   |
| 65424 | P03346 | O75683 | 0.53714  |
| 65425 | P03346 | P61247 | 1.1213   |
| 65426 | P03346 | Q8TAP6 | 1.0949   |
| 65427 | P03346 | Q99704 | 0.34015  |
| 65428 | P03346 | Q01081 | 0.6805   |
| 65429 | P03346 | P35680 | 0.38337  |
| 65430 | P03346 | Q07157 | 0.77028  |
| 65431 | P03346 | O00231 | 0.44437  |
| 65432 | P03346 | Q7L2R6 | 0.31436  |
| 65433 | P03346 | P62837 | 0.59657  |
| 65434 | P03346 | P53675 | 0.46278  |
| 65435 | P03346 | O76003 | 0.41266  |
| 65436 | P03346 | P17029 | 0.40897  |

|       |        |        |           |
|-------|--------|--------|-----------|
| 65437 | P03346 | Q9NV88 | 0.88882   |
| 65438 | P03346 | Q9BYD3 | 0.56968   |
| 65439 | P03346 | Q8N6I1 | 0.73101   |
| 65440 | P03346 | O75533 | 0.64142   |
| 65441 | P03346 | Q14240 | 0.25895   |
| 65442 | P03346 | P54136 | 0.79974   |
| 65443 | P03346 | A6NNL0 | 0.083147  |
| 65444 | P03346 | Q2LD37 | 0.40841   |
| 65445 | P03346 | Q66PJ3 | 0.96112   |
| 65446 | P03346 | Q13415 | 0.4432    |
| 65447 | P03346 | Q13064 | 0.52727   |
| 65448 | P03346 | Q16543 | 0.63651   |
| 65449 | P03346 | P36954 | 0.25847   |
| 65450 | P03346 | Q9NQ87 | 0.58215   |
| 65451 | P03346 | Q99619 | 0.83304   |
| 65452 | P03346 | Q9NRD1 | 0.40231   |
| 65453 | P03346 | Q9HD33 | 0.59156   |
| 65454 | P03346 | Q9Y2G4 | 0.41753   |
| 65455 | P03346 | O95273 | 1.1923    |
| 65456 | P03346 | P31273 | 0.3175    |
| 65457 | P03346 | P49770 | 0.37562   |
| 65458 | P03346 | Q16649 | 0.479     |
| 65459 | P03346 | A6NFL8 | 0.028905  |
| 65460 | P03346 | Q99909 | 0.50821   |
| 65461 | P03346 | Q9UK58 | 0.70286   |
| 65462 | P03346 | P53611 | 0.22145   |
| 65463 | P03346 | Q96RS0 | 0.70992   |
| 65464 | P03346 | Q9H2F5 | 0.7612    |
| 65465 | P03346 | Q9NWU5 | 0.35413   |
| 65466 | P03346 | Q8TEQ6 | 1.0199    |
| 65467 | P03346 | O00198 | 0.32133   |
| 65468 | P03346 | Q9Y614 | 0.18601   |
| 65469 | P03346 | Q7L592 | 0.17342   |
| 65470 | P03346 | Q9NVR7 | 0.18714   |
| 65471 | P03346 | P48200 | 0.56494   |
| 65472 | P03346 | Q14533 | 1.0488    |
| 65473 | P03346 | A6NIX2 | 1.037     |
| 65474 | P03346 | Q96LL4 | 0.66787   |
| 65475 | P03346 | Q96E14 | 0.40655   |
| 65476 | P03346 | Q9HCM7 | 0.0055265 |
| 65477 | P03346 | Q9Y6X3 | 1.1327    |
| 65478 | P03346 | Q6DD87 | 0.31436   |
| 65479 | P03346 | Q9UKT4 | 0.82816   |
| 65480 | P03346 | Q9NW75 | 0.20662   |
| 65481 | P03346 | Q8IZU1 | 0.48532   |
| 65482 | P03346 | Q9BWH6 | 0.25646   |
| 65483 | P03346 | Q96B49 | 0.15427   |
| 65484 | P03346 | Q8TE02 | 1.4673    |
| 65485 | P03346 | Q9NUS5 | 0.74487   |
| 65486 | P03346 | Q9P2M1 | 0.8379    |
| 65487 | P03346 | Q7Z4U5 | 0.096716  |
| 65488 | P03346 | Q16514 | 0.94061   |
| 65489 | P03346 | Q9UIF9 | 0.76906   |
| 65490 | P03346 | Q9Y3D8 | 0.39058   |
| 65491 | P03346 | Q6PF04 | 0.31436   |
| 65492 | P03346 | Q8IUQ4 | 0.26247   |
| 65493 | P03346 | Q6DN90 | 0.29068   |
| 65494 | P03346 | Q9BYG4 | 0.84446   |
| 65495 | P03346 | Q8NEM1 | 0.4412    |
| 65496 | P03346 | Q96GX2 | 0.019168  |
| 65497 | P03346 | Q96MY7 | 0.12604   |
| 65498 | P03346 | Q86XN6 | 0.31436   |
| 65499 | P03346 | Q9UGU5 | 0.25621   |
| 65500 | P03346 | Q15475 | 0.30356   |
| 65501 | P03346 | Q562F6 | 0.89306   |
| 65502 | P03346 | O14627 | 0.38048   |
| 65503 | P03346 | Q15041 | 0.2474    |
| 65504 | P03346 | P82970 | 0.9396    |
| 65505 | P03346 | Q53TQ3 | 0.83123   |
| 65506 | P03346 | Q9NR77 | 0.35966   |
| 65507 | P03346 | Q9BU19 | 0.31436   |
| 65508 | P03346 | A6NP61 | 0.20041   |
| 65509 | P03346 | Q96DV4 | 0.49473   |
| 65510 | P03346 | Q96BF6 | 0.65737   |
| 65511 | P03346 | Q9Y3T9 | 1.2244    |
| 65512 | P03346 | Q8N1G2 | 0.5787    |

|       |        |        |          |
|-------|--------|--------|----------|
| 65513 | P03346 | Q9NYB0 | 0.73131  |
| 65514 | P03346 | Q96JC9 | 1.2946   |
| 65515 | P03346 | Q96KF2 | 0.32217  |
| 65516 | P03346 | Q9Y4P9 | 0.15451  |
| 65517 | P03346 | O43439 | 1.0194   |
| 65518 | P03346 | Q3LI76 | 0.36736  |
| 65519 | P03346 | Q969E4 | 0.74266  |
| 65520 | P03346 | P10073 | 0.31461  |
| 65521 | P03346 | Q9H6Y2 | 0.6387   |
| 65522 | P03346 | P18621 | 0.65765  |
| 65523 | P03346 | Q8IYD1 | 0.46586  |
| 65524 | P03346 | Q8IX07 | 0.3233   |
| 65525 | P03346 | O75771 | 0.33486  |
| 65526 | P03346 | Q99814 | 0.50112  |
| 65527 | P03346 | Q9BYR8 | 0.51027  |
| 65528 | P03346 | Q16143 | 0.48972  |
| 65529 | P03346 | Q12778 | 0.34919  |
| 65530 | P03346 | P78559 | 0.8362   |
| 65531 | P03346 | O95865 | 0.54229  |
| 65532 | P03346 | P12035 | 0.61289  |
| 65533 | P03346 | Q16695 | 0.29539  |
| 65534 | P03346 | Q5M775 | 0.32217  |
| 65535 | P03346 | Q96T23 | 0.71347  |
| 65536 | P03346 | Q12800 | 0.70486  |
| 65537 | P03346 | P61923 | 0.58833  |
| 65538 | P03346 | Q9H8M2 | 0.41385  |
| 65539 | P03346 | O00411 | 0.74772  |
| 65540 | P03346 | O43791 | 0.92521  |
| 65541 | P03346 | Q9C040 | 0.24743  |
| 65542 | P03346 | Q8TC21 | 0.31436  |
| 65543 | P03346 | O96018 | 0.6975   |
| 65544 | P03346 | Q9Y5Q9 | 0.42193  |
| 65545 | P03346 | Q6ZUI0 | 0.20041  |
| 65546 | P03346 | P42025 | 0.53281  |
| 65547 | P03346 | Q9Y676 | 0.35603  |
| 65548 | P03346 | A8MTY7 | 0.40421  |
| 65549 | P03346 | A6NDD8 | 0.20041  |
| 65550 | P03346 | Q6TAR4 | 0.12849  |
| 65551 | P03346 | Q9BUG6 | 0.34285  |
| 65552 | P03346 | Q9Y6H5 | 0.9764   |
| 65553 | P03346 | Q6PGN9 | 0.88602  |
| 65554 | P03346 | P46781 | 1.0034   |
| 65555 | P03346 | P31689 | 0.076321 |
| 65556 | P03346 | P61326 | 1.2558   |
| 65557 | P03346 | Q19AV6 | 0.70917  |
| 65558 | P03346 | P10243 | 0.91161  |
| 65559 | P03346 | Q6ZVQ6 | 0.21976  |
| 65560 | P03346 | Q68DK7 | 0.37786  |
| 65561 | P03346 | Q86WX3 | 1.3499   |
| 65562 | P03346 | O00399 | 0.34387  |
| 65563 | P03346 | Q9ULN7 | 0.014816 |
| 65564 | P03346 | Q9BRG1 | 1.3092   |
| 65565 | P03346 | Q13625 | 0.62352  |
| 65566 | P03346 | Q9BVG4 | 0.12821  |
| 65567 | P03346 | O75688 | 0.4464   |
| 65568 | P03346 | Q9H7H1 | 0.17702  |
| 65569 | P03346 | Q9BYP8 | 0.36736  |
| 65570 | P03346 | Q9Y3C8 | 0.61363  |
| 65571 | P03346 | A0JLT2 | 0.70213  |
| 65572 | P03346 | P13994 | 0.72322  |
| 65573 | P03346 | Q16576 | 0.66578  |
| 65574 | P03346 | Q7Z7K6 | 0.38728  |
| 65575 | P03346 | Q13123 | 0.71896  |
| 65576 | P03346 | Q13838 | 0.40119  |
| 65577 | P03346 | Q9H6T0 | 0.30861  |
| 65578 | P03346 | O14717 | 0.22039  |
| 65579 | P03346 | P53041 | 0.7057   |
| 65580 | P03346 | A6NKF2 | 0.98053  |
| 65581 | P03346 | Q9NRY5 | 0.065822 |
| 65582 | P03346 | Q9P2B4 | 0.62798  |
| 65583 | P03346 | Q8N1A0 | 0.47854  |
| 65584 | P03346 | Q9HD40 | 0.73249  |
| 65585 | P03346 | P31942 | 0.20683  |
| 65586 | P03346 | Q99551 | 0.92933  |
| 65587 | P03346 | Q6ZU80 | 0.28986  |
| 65588 | P03346 | Q9HB03 | 0.087632 |

|       |        |        |           |
|-------|--------|--------|-----------|
| 65589 | P03346 | Q9UNY4 | 0.70686   |
| 65590 | P03346 | Q12929 | 0.33793   |
| 65591 | P03346 | P50749 | 1.0024    |
| 65592 | P03346 | Q13233 | 0.46929   |
| 65593 | P03346 | P15927 | 0.54537   |
| 65594 | P03346 | Q8N0Z8 | 0.039888  |
| 65595 | P03346 | P42224 | 0.29914   |
| 65596 | P03346 | P11166 | 0.63079   |
| 65597 | P03346 | Q9Y375 | 0.82754   |
| 65598 | P03346 | P17035 | 0.31436   |
| 65599 | P03346 | Q8N9N5 | 0.397     |
| 65600 | P03346 | Q53G26 | 0.63579   |
| 65601 | P03346 | Q9HAU5 | 1.1094    |
| 65602 | P03346 | Q7Z401 | 0.67954   |
| 65603 | P03346 | O15453 | 0.12821   |
| 65604 | P03346 | Q9UHY7 | 0.29602   |
| 65605 | P03346 | O95411 | 0.39509   |
| 65606 | P03346 | Q96NG8 | 0.31436   |
| 65607 | P03346 | Q53EQ6 | 0.36833   |
| 65608 | P03346 | Q9Y2Y4 | 0.47796   |
| 65609 | P03346 | Q9UNZ5 | 0.0077221 |
| 65610 | P03346 | Q13428 | 1.0696    |
| 65611 | P03346 | Q9Y462 | 0.86964   |
| 65612 | P03346 | Q8WUI4 | 0.43144   |
| 65613 | P03346 | Q86UW6 | 0.33081   |
| 65614 | P03346 | P82921 | 0.35603   |
| 65615 | P03346 | Q9H081 | 0.83944   |
| 65616 | P03346 | Q9HCZ1 | 0.31436   |
| 65617 | P03346 | Q9BXL8 | 0.32217   |
| 65618 | P03346 | O14686 | 0.47606   |
| 65619 | P03346 | Q9HCE3 | 0.31436   |
| 65620 | P03346 | Q8N1V2 | 0.7731    |
| 65621 | P03346 | P38117 | 0.16585   |
| 65622 | P03346 | Q86Y37 | 0.21786   |
| 65623 | P03346 | Q9H777 | 0.22805   |
| 65624 | P03346 | O14604 | 0.17726   |
| 65625 | P03346 | O75582 | 0.2823    |
| 65626 | P03346 | Q16719 | 0.3698    |
| 65627 | P03346 | P17021 | 0.31436   |
| 65628 | P03346 | Q8NFX3 | 0.36367   |
| 65629 | P03346 | Q9UBC1 | 0.75445   |
| 65630 | P03346 | P39687 | 1.5136    |
| 65631 | P03346 | Q8NFX8 | 0.66886   |
| 65632 | P03346 | Q9UPP1 | 0.45563   |
| 65633 | P03346 | A5PLL1 | 0.49807   |
| 65634 | P03346 | Q86TU6 | 0.063806  |
| 65635 | P03346 | Q9Y5R6 | 0.21006   |
| 65636 | P03346 | Q16533 | 0.81327   |
| 65637 | P03346 | Q9HCN2 | 0.20245   |
| 65638 | P03346 | P35659 | 0.14468   |
| 65639 | P03346 | Q99829 | 0.45385   |
| 65640 | P03346 | Q9ULW8 | 0.48187   |
| 65641 | P03346 | Q8WVZ9 | 0.7115    |
| 65642 | P03346 | P62072 | 0.36394   |
| 65643 | P03346 | Q6ZN06 | 0.31436   |
| 65644 | P03346 | Q13495 | 0.73334   |
| 65645 | P03346 | P84098 | 0.66528   |
| 65646 | P03346 | O43251 | 0.58678   |
| 65647 | P03346 | Q8NBT2 | 0.87328   |
| 65648 | P03346 | Q9GZT3 | 0.3762    |
| 65649 | P03346 | Q969K4 | 0.31058   |
| 65650 | P03346 | Q9NQT5 | 0.42462   |
| 65651 | P03346 | Q9UBX2 | 0.6797    |
| 65652 | P03346 | P06132 | 0.29601   |
| 65653 | P03346 | Q01167 | 0.43779   |
| 65654 | P03346 | Q8IVF1 | 0.11021   |
| 65655 | P03346 | Q63HK3 | 0.50152   |
| 65656 | P03346 | Q2M3D2 | 0.12821   |
| 65657 | P03346 | Q9ULD2 | 0.49801   |
| 65658 | P03346 | P54727 | 0.83061   |
| 65659 | P03346 | Q13887 | 0.46455   |
| 65660 | P03346 | Q9H4Z3 | 0.36063   |
| 65661 | P03346 | Q13105 | 0.66671   |
| 65662 | P03346 | Q9HBM1 | 0.84227   |
| 65663 | P03346 | Q9UBP6 | 1.0275    |
| 65664 | P03346 | Q92541 | 1.2074    |

|       |        |        |           |
|-------|--------|--------|-----------|
| 65665 | P03346 | Q5H9I0 | 0.76225   |
| 65666 | P03346 | Q9P2G4 | 0.0077221 |
| 65667 | P03346 | P16383 | 0.72105   |
| 65668 | P03346 | Q6ZNA4 | 0.63021   |
| 65669 | P03346 | Q8N196 | 1.0641    |
| 65670 | P03346 | P63172 | 0.84915   |
| 65671 | P03346 | Q8NDW4 | 0.31436   |
| 65672 | P03346 | O00522 | 0.34245   |
| 65673 | P03346 | Q5SXM1 | 0.31436   |
| 65674 | P03346 | P15880 | 0.95946   |
| 65675 | P03346 | Q53QV2 | 0.70066   |
| 65676 | P03346 | Q9NQ29 | 0.20832   |
| 65677 | P03346 | Q8N0X7 | 0.21895   |
| 65678 | P03346 | A6NI15 | 0.32913   |
| 65679 | P03346 | O76011 | 0.45506   |
| 65680 | P03346 | Q96GM8 | 0.36705   |
| 65681 | P03346 | P22392 | 0.33987   |
| 65682 | P03346 | Q8N8C0 | 0.31436   |
| 65683 | P03346 | Q96NI8 | 0.31436   |
| 65684 | P03346 | Q86YC2 | 0.92471   |
| 65685 | P03346 | O75131 | 0.26514   |
| 65686 | P03346 | Q8NC69 | 0.3559    |
| 65687 | P03346 | O95810 | 0.45529   |
| 65688 | P03346 | P78314 | 0.24571   |
| 65689 | P03346 | O15116 | 1.0792    |
| 65690 | P03346 | Q9H8S9 | 0.69454   |
| 65691 | P03346 | Q9NQ48 | 0.60297   |
| 65692 | P03346 | Q8N6T7 | 0.65773   |
| 65693 | P03346 | Q5TGS1 | 0.71379   |
| 65694 | P03346 | Q8TEV9 | 0.48532   |
| 65695 | P03346 | Q6N043 | 0.27653   |
| 65696 | P03346 | O15126 | 0.53959   |
| 65697 | P03346 | Q8WVY7 | 0.49195   |
| 65698 | P03346 | Q5VYS4 | 0.20904   |
| 65699 | P03346 | Q15459 | 0.97087   |
| 65700 | P03346 | Q9BW66 | 1.0953    |
| 65701 | P03346 | Q9UKV8 | 0.80712   |
| 65702 | P03346 | O75376 | 0.48189   |
| 65703 | P03346 | Q86SX3 | 0.24707   |
| 65704 | P03346 | Q6Q0C0 | 0.37743   |
| 65705 | P03346 | Q9H094 | 0.20041   |
| 65706 | P03346 | P14868 | 0.427     |
| 65707 | P03346 | B1APH4 | 0.31436   |
| 65708 | P03346 | Q9UJX3 | 0.84947   |
| 65709 | P03346 | P98177 | 0.3553    |
| 65710 | P03346 | O94850 | 0.43769   |
| 65711 | P03346 | Q9UDW3 | 0.53829   |
| 65712 | P03346 | Q9Y2J4 | 0.57145   |
| 65713 | P03346 | Q96SK3 | 0.31436   |
| 65714 | P03346 | Q9BWJ5 | 0.58405   |
| 65715 | P03346 | Q17R31 | 0.1646    |
| 65716 | P03346 | Q9BYP9 | 0.40421   |
| 65717 | P03346 | Q6BEB4 | 0.32863   |
| 65718 | P03346 | Q86YH2 | 0.27653   |
| 65719 | P03346 | Q5BJF6 | 0.61228   |
| 65720 | P03346 | Q15750 | 0.58619   |
| 65721 | P03346 | Q9H0U9 | 0.61068   |
| 65722 | P03346 | P35249 | 0.2396    |
| 65723 | P03346 | Q9UBD0 | 1.4962    |
| 65724 | P03346 | Q8NHZ8 | 1.2859    |
| 65725 | P03346 | Q9Y2J2 | 0.5603    |
| 65726 | P03346 | Q86UA6 | 0.77095   |
| 65727 | P03346 | P63316 | 0.29807   |
| 65728 | P03346 | Q99590 | 0.74911   |
| 65729 | P03346 | Q4V348 | 0.31436   |
| 65730 | P03346 | P09016 | 0.50206   |
| 65731 | P03346 | P11137 | 0.22144   |
| 65732 | P03346 | Q9UL45 | 0.27747   |
| 65733 | P03346 | P50539 | 0.58825   |
| 65734 | P03346 | Q92540 | 1.1189    |
| 65735 | P03346 | A8MV65 | 0.74266   |
| 65736 | P03346 | O94983 | 1.5917    |
| 65737 | P03346 | Q5T124 | 0.18249   |
| 65738 | P03346 | O96007 | 0.41428   |
| 65739 | P03346 | Q96LB3 | 0.84564   |
| 65740 | P03346 | O75554 | 0.25907   |

|       |        |        |          |
|-------|--------|--------|----------|
| 65741 | P03346 | C9JBD0 | 0.18405  |
| 65742 | P03346 | Q07820 | 0.33803  |
| 65743 | P03346 | P17030 | 0.31436  |
| 65744 | P03346 | Q13015 | 0.19123  |
| 65745 | P03346 | P63208 | 0.66675  |
| 65746 | P03346 | Q9C0D0 | 0.16087  |
| 65747 | P03346 | O95833 | 0.23216  |
| 65748 | P03346 | Q5T5M9 | 0.32217  |
| 65749 | P03346 | Q9UNP9 | 0.71871  |
| 65750 | P03346 | Q9UBI1 | 0.66787  |
| 65751 | P03346 | Q5UIP0 | 0.29642  |
| 65752 | P03346 | O60293 | 0.35446  |
| 65753 | P03346 | Q9Y5V3 | 0.99592  |
| 65754 | P03346 | Q6PIF2 | 0.50716  |
| 65755 | P03346 | Q5EBL4 | 0.60701  |
| 65756 | P03346 | Q3LI72 | 0.36736  |
| 65757 | P03346 | O95831 | 0.86559  |
| 65758 | P03346 | Q12962 | 1.1225   |
| 65759 | P03346 | Q8N9Z2 | 0.010444 |
| 65760 | P03346 | Q3LI59 | 0.36736  |
| 65761 | P03346 | Q15006 | 0.53015  |
| 65762 | P03346 | Q9HBZ2 | 0.57495  |
| 65763 | P03346 | Q5JSJ4 | 0.17118  |
| 65764 | P03346 | Q9H4H8 | 0.56431  |
| 65765 | P03346 | P0CG29 | 0.55716  |
| 65766 | P03346 | Q96GS4 | 0.10793  |
| 65767 | P03346 | Q7RTT5 | 0.50821  |
| 65768 | P03346 | Q6ZMZ3 | 0.40031  |
| 65769 | P03346 | Q9NPD8 | 0.18644  |
| 65770 | P03346 | Q99496 | 0.5451   |
| 65771 | P03346 | Q13356 | 0.28162  |
| 65772 | P03346 | Q9BUI4 | 0.38462  |
| 65773 | P03346 | Q13216 | 0.56371  |
| 65774 | P03346 | Q07352 | 0.95692  |
| 65775 | P03346 | Q16385 | 1.0952   |
| 65776 | P03346 | P61289 | 0.77385  |
| 65777 | P03346 | Q3YEC7 | 0.23189  |
| 65778 | P03346 | P26447 | 0.55651  |
| 65779 | P03346 | Q8N831 | 0.22545  |
| 65780 | P03346 | Q96QF7 | 0.32217  |
| 65781 | P03346 | Q8NFC6 | 0.0507   |
| 65782 | P03346 | P50914 | 1.0108   |
| 65783 | P03346 | Q9H875 | 0.33497  |
| 65784 | P03346 | Q9H5J0 | 0.31436  |
| 65785 | P03346 | Q9NWB6 | 0.74266  |
| 65786 | P03346 | P78317 | 0.65393  |
| 65787 | P03346 | O14979 | 0.391    |
| 65788 | P03346 | P49959 | 0.30035  |
| 65789 | P03346 | O95718 | 0.28696  |
| 65790 | P03346 | O60763 | 0.62942  |
| 65791 | P03346 | Q8N9Z0 | 0.31436  |
| 65792 | P03346 | P46108 | 0.56592  |
| 65793 | P03346 | Q9Y468 | 0.88888  |
| 65794 | P03346 | Q969Q6 | 0.52335  |
| 65795 | P03346 | Q2YD98 | 0.40434  |
| 65796 | P03346 | Q06416 | 0.71675  |
| 65797 | P03346 | O14593 | 1.0084   |
| 65798 | P03346 | P78367 | 0.36891  |
| 65799 | P03346 | O94811 | 0.58679  |
| 65800 | P03346 | Q3MIV0 | 0.36736  |
| 65801 | P03346 | Q8WUF5 | 1.063    |
| 65802 | P03346 | O60281 | 0.45677  |
| 65803 | P03346 | Q8N157 | 0.27372  |
| 65804 | P03346 | O75920 | 0.15351  |
| 65805 | P03346 | Q9C0C2 | 0.34292  |
| 65806 | P03346 | P0CG13 | 0.29909  |
| 65807 | P03346 | Q96EK5 | 0.52556  |
| 65808 | P03346 | O95996 | 0.45792  |
| 65809 | P03346 | Q6P9B6 | 0.66787  |
| 65810 | P03346 | Q9Y5P3 | 0.68055  |
| 65811 | P03346 | Q9BZR8 | 0.69415  |
| 65812 | P03346 | Q3ZCT1 | 0.39671  |
| 65813 | P03346 | Q05195 | 0.8125   |
| 65814 | P03346 | P50453 | 0.75088  |
| 65815 | P03346 | Q3B820 | 0.48687  |
| 65816 | P03346 | Q14653 | 0.65395  |

|       |        |        |           |
|-------|--------|--------|-----------|
| 65817 | P03346 | Q5TYW1 | 0.31436   |
| 65818 | P03346 | O00267 | 1.0589    |
| 65819 | P03346 | Q99497 | 0.20141   |
| 65820 | P03346 | Q8NCF5 | 0.81924   |
| 65821 | P03346 | F78411 | 0.43749   |
| 65822 | P03346 | Q8TD35 | 0.0077221 |
| 65823 | P03346 | O94929 | 0.25051   |
| 65824 | P03346 | Q9BWT1 | 0.7111    |
| 65825 | P03346 | Q96JM3 | 0.44493   |
| 65826 | P03346 | Q9HB96 | 1.0466    |
| 65827 | P03346 | Q8N2W9 | 1.0917    |
| 65828 | P03346 | P50995 | 0.8799    |
| 65829 | P03346 | Q9H410 | 0.99979   |
| 65830 | P03346 | Q9NX08 | 0.66787   |
| 65831 | P03346 | Q14181 | 0.33792   |
| 65832 | P03346 | Q9H707 | 0.31436   |
| 65833 | P03346 | Q0VDF9 | 0.52593   |
| 65834 | P03346 | Q8IYW5 | 0.32314   |
| 65835 | P03346 | Q9ULZ0 | 0.49807   |
| 65836 | P03346 | Q6ZQR2 | 0.16235   |
| 65837 | P03346 | Q8TBB1 | 0.92069   |
| 65838 | P03346 | A6NHP3 | 0.040024  |
| 65839 | P03346 | P42773 | 0.50175   |
| 65840 | P03346 | Q5VTD9 | 0.45717   |
| 65841 | P03346 | Q13642 | 0.49322   |
| 65842 | P03346 | P42695 | 0.52439   |
| 65843 | P03346 | Q14190 | 0.26073   |
| 65844 | P03346 | Q8IUR0 | 0.18583   |
| 65845 | P03346 | Q96EG3 | 0.31436   |
| 65846 | P03346 | Q6VVB1 | 0.50732   |
| 65847 | P03346 | Q14684 | 0.44941   |
| 65848 | P03346 | Q9UBS8 | 0.73314   |
| 65849 | P03346 | P62166 | 0.39623   |
| 65850 | P03346 | Q5VV67 | 0.40809   |
| 65851 | P03346 | Q6GYQ0 | 0.28067   |
| 65852 | P03346 | P49589 | 0.38109   |
| 65853 | P03346 | Q9HCD5 | 1.3712    |
| 65854 | P03346 | Q9Y6G3 | 0.4115    |
| 65855 | P03346 | Q14966 | 0.31492   |
| 65856 | P03346 | Q6ZRS2 | 0.51782   |
| 65857 | P03346 | Q86TA1 | 0.5767    |
| 65858 | P03346 | P00338 | 0.35648   |
| 65859 | P03346 | O43708 | 0.53393   |
| 65860 | P03346 | Q9Y5Y2 | 0.3936    |
| 65861 | P03346 | Q8NB50 | 0.33838   |
| 65862 | P03346 | P30622 | 0.32137   |
| 65863 | P03346 | Q8NBZ0 | 1.4512    |
| 65864 | P03346 | P42285 | 0.31198   |
| 65865 | P03346 | P09874 | 0.67455   |
| 65866 | P03346 | O75122 | 0.31935   |
| 65867 | P03346 | Q14865 | 0.47942   |
| 65868 | P03346 | P35713 | 0.28929   |
| 65869 | P03346 | Q15910 | 0.60558   |
| 65870 | P03346 | Q96T58 | 0.8831    |
| 65871 | P03346 | Q6IE81 | 1.0818    |
| 65872 | P03346 | Q9Y6R6 | 0.31436   |
| 65873 | P03346 | Q15014 | 1.3807    |
| 65874 | P03346 | Q2NL82 | 0.51869   |
| 65875 | P03346 | Q5SRH9 | 0.12821   |
| 65876 | P03346 | Q9NWX8 | 0.82059   |
| 65877 | P03346 | Q96NU1 | 0.32217   |
| 65878 | P03346 | O75132 | 0.52804   |
| 65879 | P03346 | O75469 | 0.31981   |
| 65880 | P03346 | Q16829 | 0.37367   |
| 65881 | P03346 | A6NCN8 | 0.0077221 |
| 65882 | P03346 | Q9NWH9 | 0.4335    |
| 65883 | P03346 | Q9BYG3 | 0.52552   |
| 65884 | P03346 | O94993 | 0.59388   |
| 65885 | P03346 | Q9NQ03 | 0.34115   |
| 65886 | P03346 | Q9UQN3 | 0.65854   |
| 65887 | P03346 | Q9H1A4 | 0.89374   |
| 65888 | P03346 | O60299 | 0.53636   |
| 65889 | P03346 | Q96M91 | 0.12821   |
| 65890 | P03346 | Q8IWD4 | 0.0077221 |
| 65891 | P03346 | P50402 | 0.28265   |
| 65892 | P03346 | P29966 | 0.10135   |



|       |        |        |           |
|-------|--------|--------|-----------|
| 65893 | P03346 | Q8IY81 | 0.95434   |
| 65894 | P03346 | Q15628 | 0.77527   |
| 65895 | P03346 | Q96Q83 | 0.58703   |
| 65896 | P03346 | Q99575 | 0.90142   |
| 65897 | P03346 | Q9HBE1 | 0.36248   |
| 65898 | P03346 | P78364 | 0.24236   |
| 65899 | P03346 | Q13568 | 1.1994    |
| 65900 | P03346 | Q99459 | 1.5088    |
| 65901 | P03346 | Q8WWY3 | 0.69953   |
| 65902 | P03346 | Q9BU64 | 0.30272   |
| 65903 | P03346 | P43356 | 1.1776    |
| 65904 | P03346 | P62829 | 0.90784   |
| 65905 | P03346 | Q68DK2 | 0.86368   |
| 65906 | P03346 | P09630 | 0.44049   |
| 65907 | P03346 | Q15935 | 0.56298   |
| 65908 | P03346 | Q95486 | 0.52905   |
| 65909 | P03346 | P15407 | 0.78893   |
| 65910 | P03346 | Q86VF2 | 0.44181   |
| 65911 | P03346 | Q9Y2G7 | 0.31436   |
| 65912 | P03346 | Q8N9E0 | 0.0077221 |
| 65913 | P03346 | P62979 | 0.15342   |
| 65914 | P03346 | Q8WY41 | 0.57539   |
| 65915 | P03346 | P60328 | 0.40421   |
| 65916 | P03346 | Q8N9N8 | 0.29823   |
| 65917 | P03346 | P27797 | 0.47039   |
| 65918 | P03346 | P28066 | 0.58599   |
| 65919 | P03346 | Q95476 | 0.43032   |
| 65920 | P03346 | Q9UNM6 | 0.22847   |
| 65921 | P03346 | Q5T5B0 | 0.02884   |
| 65922 | P03346 | P41182 | 0.23596   |
| 65923 | P03346 | Q92994 | 0.45384   |
| 65924 | P03346 | Q6PJ61 | 0.66787   |
| 65925 | P03346 | P0CB48 | 0.29934   |
| 65926 | P03346 | O43809 | 0.88112   |
| 65927 | P03346 | Q8NFW9 | 0.4059    |
| 65928 | P03346 | Q9HAP6 | 0.23544   |
| 65929 | P03346 | P40337 | 0.98725   |
| 65930 | P03346 | Q6P2Q9 | 0.93858   |
| 65931 | P03346 | A6NNA5 | 0.47959   |
| 65932 | P03346 | Q9BYX4 | 0.29081   |
| 65933 | P03346 | Q96RY5 | 0.52957   |
| 65934 | P03346 | Q9Y3D5 | 0.35603   |
| 65935 | P03346 | Q9NVD7 | 0.41108   |
| 65936 | P03346 | Q70EL1 | 0.66867   |
| 65937 | P03346 | P61981 | 0.70075   |
| 65938 | P03346 | A5PL33 | 0.12821   |
| 65939 | P03346 | Q9BQQ3 | 0.39627   |
| 65940 | P03346 | Q76KX8 | 0.31436   |
| 65941 | P03346 | O43765 | 0.86252   |
| 65942 | P03346 | Q99613 | 0.91246   |
| 65943 | P03346 | Q96BT7 | 0.31246   |
| 65944 | P03346 | P24534 | 0.82574   |
| 65945 | P03346 | Q02241 | 0.62676   |
| 65946 | P03346 | Q92733 | 1.0495    |
| 65947 | P03346 | Q8WUY3 | 0.42233   |
| 65948 | P03346 | E9PQ53 | 0.085821  |
| 65949 | P03346 | Q9C099 | 1.0709    |
| 65950 | P03346 | Q96DI7 | 0.94062   |
| 65951 | P03346 | Q9BYV8 | 0.80538   |
| 65952 | P03346 | Q8N7Z2 | 0.0055218 |
| 65953 | P03346 | Q9H201 | 0.37865   |
| 65954 | P03346 | Q8N5P1 | 0.45032   |
| 65955 | P03346 | Q9BVC6 | 0.14639   |
| 65956 | P03346 | Q8N8R7 | 0.8379    |
| 65957 | P03346 | Q9BPW8 | 0.13339   |
| 65958 | P03346 | Q96T49 | 0.47965   |
| 65959 | P03346 | Q9NUP7 | 0.06216   |
| 65960 | P03346 | Q8IYB9 | 0.31436   |
| 65961 | P03346 | Q9BQ69 | 0.6876    |
| 65962 | P03346 | Q8TAP9 | 1.5184    |
| 65963 | P03346 | Q9GZS3 | 1.3044    |
| 65964 | P03346 | P59991 | 0.40421   |
| 65965 | P03346 | Q8WVM7 | 0.90978   |
| 65966 | P03346 | Q8IYL3 | 0.32217   |
| 65967 | P03346 | P08670 | 0.31964   |
| 65968 | P03346 | Q9BX70 | 0.86075   |

|       |        |        |           |
|-------|--------|--------|-----------|
| 65969 | P03346 | P60002 | 0.6213    |
| 65970 | P03346 | Q96RU7 | 0.46688   |
| 65971 | P03346 | Q9NRM2 | 0.2714    |
| 65972 | P03346 | Q8NDF8 | 0.52723   |
| 65973 | P03346 | Q14562 | 0.36366   |
| 65974 | P03346 | Q92905 | 0.75324   |
| 65975 | P03346 | P33991 | 0.24724   |
| 65976 | P03346 | O75436 | 0.89453   |
| 65977 | P03346 | P83436 | 0.68675   |
| 65978 | P03346 | P27816 | 0.5472    |
| 65979 | P03346 | Q03188 | 0.43509   |
| 65980 | P03346 | O60291 | 0.53969   |
| 65981 | P03346 | Q9BUZ4 | 0.31133   |
| 65982 | P03346 | P78549 | 0.38579   |
| 65983 | P03346 | O75822 | 0.91246   |
| 65984 | P03346 | A8K0S8 | 0.66978   |
| 65985 | P03346 | Q7Z6M4 | 0.11205   |
| 65986 | P03346 | P17028 | 0.81385   |
| 65987 | P03346 | O75909 | 1.2467    |
| 65988 | P03346 | Q13492 | 0.25135   |
| 65989 | P03346 | Q16633 | 0.89742   |
| 65990 | P03346 | Q9BQC3 | 0.18725   |
| 65991 | P03346 | P43351 | 0.93051   |
| 65992 | P03346 | Q5TCM9 | 0.02884   |
| 65993 | P03346 | Q8IX90 | 0.72046   |
| 65994 | P03346 | Q8WX92 | 1.4879    |
| 65995 | P03346 | O75323 | 0.44479   |
| 65996 | P03346 | D6RB28 | 0.015632  |
| 65997 | P03346 | P28749 | 1.3799    |
| 65998 | P03346 | P39019 | 0.84328   |
| 65999 | P03346 | Q96KC8 | 0.26726   |
| 66000 | P03346 | P17020 | 0.31436   |
| 66001 | P03346 | Q08AE8 | 0.25266   |
| 66002 | P03346 | Q9H6J7 | 0.48532   |
| 66003 | P03346 | Q9UH90 | 0.45018   |
| 66004 | P03346 | P09012 | 0.70729   |
| 66005 | P03346 | A6NDR6 | 0.66978   |
| 66006 | P03346 | P84103 | 0.85149   |
| 66007 | P03346 | P10412 | 0.34988   |
| 66008 | P03346 | O95475 | 0.43595   |
| 66009 | P03346 | P01358 | 0.064715  |
| 66010 | P03346 | Q8N344 | 0.94236   |
| 66011 | P03346 | Q9UQ35 | 0.41763   |
| 66012 | P03346 | O15446 | 0.40707   |
| 66013 | P03346 | Q8N3F8 | 0.60717   |
| 66014 | P03346 | Q8IXS0 | 0.0077221 |
| 66015 | P03346 | P68871 | 0.3052    |
| 66016 | P03346 | O00165 | 0.90446   |
| 66017 | P03346 | P04198 | 1.0425    |
| 66018 | P03346 | Q92759 | 0.7241    |
| 66019 | P03346 | A6NP11 | 0.31436   |
| 66020 | P03346 | Q68CJ9 | 1.0406    |
| 66021 | P03346 | Q05516 | 0.78991   |
| 66022 | P03346 | Q9BYD6 | 0.32361   |
| 66023 | P03346 | Q8N371 | 0.44164   |
| 66024 | P03346 | P31267 | 0.52225   |
| 66025 | P03346 | O95619 | 1.0739    |
| 66026 | P03346 | Q9BWW7 | 0.30845   |
| 66027 | P03346 | O43504 | 0.42626   |
| 66028 | P03346 | Q9NUU7 | 0.26513   |
| 66029 | P03346 | Q9Y3E1 | 0.61961   |
| 66030 | P03346 | P07315 | 0.85992   |
| 66031 | P03346 | Q14397 | 0.78423   |
| 66032 | P03346 | Q3BBV0 | 0.20041   |
| 66033 | P03346 | Q96RK1 | 0.92395   |
| 66034 | P03346 | P20749 | 0.48416   |
| 66035 | P03346 | Q9P1Q0 | 0.68918   |
| 66036 | P03346 | P23588 | 0.32001   |
| 66037 | P03346 | Q9H425 | 0.20041   |
| 66038 | P03346 | Q9H944 | 1.2699    |
| 66039 | P03346 | Q8N720 | 1.015     |
| 66040 | P03346 | Q8ND90 | 0.94807   |
| 66041 | P03346 | Q92797 | 0.94878   |
| 66042 | P03346 | Q13867 | 0.55126   |
| 66043 | P03346 | Q03252 | 0.59439   |
| 66044 | P03346 | Q96MA1 | 0.53454   |

|       |        |        |          |
|-------|--------|--------|----------|
| 66045 | P03346 | Q5T619 | 0.31436  |
| 66046 | P03346 | O60934 | 0.26203  |
| 66047 | P03346 | O43830 | 0.30845  |
| 66048 | P03346 | O95926 | 0.38755  |
| 66049 | P03346 | Q2KHR2 | 0.65433  |
| 66050 | P03346 | P17017 | 0.31436  |
| 66051 | P03346 | Q8IWZ8 | 0.62349  |
| 66052 | P03346 | Q969Q5 | 0.31609  |
| 66053 | P03346 | Q9UK39 | 0.77529  |
| 66054 | P03346 | Q7RTS7 | 0.51027  |
| 66055 | P03346 | Q9Y3D3 | 0.88505  |
| 66056 | P03346 | Q9H7H0 | 0.89139  |
| 66057 | P03346 | Q9UM07 | 0.53951  |
| 66058 | P03346 | P0DI82 | 0.59338  |
| 66059 | P03346 | Q9ULV0 | 0.24197  |
| 66060 | P03346 | Q16537 | 0.61316  |
| 66061 | P03346 | Q9UHD1 | 0.34769  |
| 66062 | P03346 | P61244 | 1.0269   |
| 66063 | P03346 | P18887 | 0.86698  |
| 66064 | P03346 | A4D0V7 | 0.014834 |
| 66065 | P03346 | P62314 | 1.1273   |
| 66066 | P03346 | Q8N5R6 | 0.66787  |
| 66067 | P03346 | P55199 | 1.1011   |
| 66068 | P03346 | Q8WWH5 | 0.058374 |
| 66069 | P03346 | P23396 | 0.75839  |
| 66070 | P03346 | Q96SC8 | 0.49241  |
| 66071 | P03346 | Q92481 | 0.2296   |
| 66072 | P03346 | Q99608 | 0.34382  |
| 66073 | P03346 | O60260 | 0.42666  |
| 66074 | P03346 | Q06830 | 0.39715  |
| 66075 | P03346 | Q96H12 | 0.12493  |
| 66076 | P03346 | Q9NYF0 | 0.38831  |
| 66077 | P03346 | Q8IWC1 | 0.77889  |
| 66078 | P03346 | Q86XU0 | 0.31436  |
| 66079 | P03346 | Q96G03 | 0.28026  |
| 66080 | P03346 | P78345 | 1.0575   |
| 66081 | P03346 | Q9BY44 | 0.5998   |
| 66082 | P03346 | Q9UPP2 | 0.39007  |
| 66083 | P03346 | Q13952 | 1.0093   |
| 66084 | P03346 | Q6ZN01 | 0.8248   |
| 66085 | P03346 | Q9BWF2 | 0.3362   |
| 66086 | P03346 | O15525 | 0.68012  |
| 66087 | P03346 | Q96ME7 | 0.27653  |
| 66088 | P03346 | Q96BD5 | 0.66929  |
| 66089 | P03346 | O95602 | 0.70088  |
| 66090 | P03346 | Q6ZSS3 | 0.31436  |
| 66091 | P03346 | Q6PDB4 | 0.052348 |
| 66092 | P03346 | Q9UJ41 | 0.46702  |
| 66093 | P03346 | Q8TE68 | 0.28078  |
| 66094 | P03346 | Q15233 | 0.94143  |
| 66095 | P03346 | P52272 | 0.56325  |
| 66096 | P03346 | Q5JRA6 | 0.20536  |
| 66097 | P03346 | P80217 | 0.90588  |
| 66098 | P03346 | Q8N357 | 0.066247 |
| 66099 | P03346 | Q7Z6J8 | 0.13492  |
| 66100 | P03346 | Q5T7P3 | 0.02884  |
| 66101 | P03346 | Q8IYJ2 | 0.049029 |
| 66102 | P03346 | Q9ULL5 | 0.026254 |
| 66103 | P03346 | Q13516 | 0.4062   |
| 66104 | P03346 | Q6ZVD7 | 0.63188  |
| 66105 | P03346 | P61201 | 0.7551   |
| 66106 | P03346 | Q3BBV1 | 0.2685   |
| 66107 | P03346 | Q3KP66 | 0.12757  |
| 66108 | P03346 | Q5PRF9 | 0.91815  |
| 66109 | P03346 | Q96JZ2 | 0.61201  |
| 66110 | P03346 | Q9HB21 | 0.35186  |
| 66111 | P03346 | Q9C0G0 | 0.31436  |
| 66112 | P03346 | Q92889 | 0.37336  |
| 66113 | P03346 | Q4U2R6 | 1.0411   |
| 66114 | P03346 | Q8WVM0 | 0.80912  |
| 66115 | P03346 | Q9UJX4 | 0.84541  |
| 66116 | P03346 | P42677 | 0.7545   |
| 66117 | P03346 | Q96LW7 | 0.41705  |
| 66118 | P03346 | Q9UQ13 | 0.34598  |
| 66119 | P03346 | Q04323 | 0.53817  |
| 66120 | P03346 | Q92547 | 0.82937  |

|       |        |        |           |
|-------|--------|--------|-----------|
| 66121 | P03346 | Q8IWP9 | 0.16948   |
| 66122 | P03346 | Q9Y4E1 | 0.20955   |
| 66123 | P03346 | Q9Y2I6 | 0.32951   |
| 66124 | P03346 | Q8TAB5 | 0.0077221 |
| 66125 | P03346 | Q5VV41 | 0.39605   |
| 66126 | P03346 | Q5K131 | 0.20041   |
| 66127 | P03346 | Q8WWW0 | 0.52771   |
| 66128 | P03346 | Q9H4D5 | 0.50831   |
| 66129 | P03346 | Q8IUC6 | 0.32244   |
| 66130 | P03346 | Q9H9Q2 | 0.49985   |
| 66131 | P03346 | Q5T1B1 | 0.16943   |
| 66132 | P03346 | Q15287 | 1.0988    |
| 66133 | P03346 | Q96CD0 | 0.66787   |
| 66134 | P03346 | Q8TF63 | 0.32217   |
| 66135 | P03346 | Q14584 | 0.31436   |
| 66136 | P03346 | Q9H009 | 0.6555    |
| 66137 | P03346 | Q8WVF5 | 0.45484   |
| 66138 | P03346 | O60936 | 1.0053    |
| 66139 | P03346 | Q9H2C1 | 0.33795   |
| 66140 | P03346 | Q969G3 | 1.1933    |
| 66141 | P03346 | Q8IUI8 | 0.29378   |
| 66142 | P03346 | Q63ZY3 | 1.1319    |
| 66143 | P03346 | O43310 | 0.81244   |
| 66144 | P03346 | P50748 | 0.87074   |
| 66145 | P03346 | O76075 | 0.31771   |
| 66146 | P03346 | Q9H7C4 | 0.60258   |
| 66147 | P03346 | Q8IYA8 | 0.0077221 |
| 66148 | P03346 | O94925 | 0.60754   |
| 66149 | P03346 | P36405 | 0.2841    |
| 66150 | P03346 | P62750 | 0.83664   |
| 66151 | P03346 | Q96EH5 | 0.23498   |
| 66152 | P03346 | P10072 | 0.12564   |
| 66153 | P03346 | P31946 | 0.62205   |
| 66154 | P03346 | Q4LE39 | 1.2566    |
| 66155 | P03346 | Q5T7V8 | 1.3234    |
| 66156 | P03346 | P62701 | 0.52297   |
| 66157 | P03346 | Q8TAA3 | 0.33427   |
| 66158 | P03346 | Q9NVN3 | 0.2331    |
| 66159 | P03346 | P09497 | 0.60937   |
| 66160 | P03346 | Q9BQC6 | 0.54515   |
| 66161 | P03346 | Q9Y597 | 0.3559    |
| 66162 | P03346 | B3EWG6 | 0.0077221 |
| 66163 | P03346 | P21675 | 0.42453   |
| 66164 | P03346 | Q9Y2T7 | 0.47604   |
| 66165 | P03346 | P11161 | 0.50957   |
| 66166 | P03346 | Q6P1L5 | 0.17224   |
| 66167 | P03346 | P35712 | 0.72986   |
| 66168 | P03346 | O94952 | 0.067476  |
| 66169 | P03346 | Q05519 | 0.89096   |
| 66170 | P03346 | Q5JVS0 | 0.96632   |
| 66171 | P03346 | P30050 | 0.777     |
| 66172 | P03346 | Q9NP92 | 0.58818   |
| 66173 | P03346 | Q8NA77 | 0.32217   |
| 66174 | P03346 | Q96HA8 | 1.1341    |
| 66175 | P03346 | Q96ED9 | 0.65717   |
| 66176 | P03346 | Q9BU02 | 0.42877   |
| 66177 | P03346 | Q15151 | 0.3796    |
| 66178 | P03346 | Q8TB69 | 0.31436   |
| 66179 | P03346 | Q6IA86 | 0.87217   |
| 66180 | P03346 | P02795 | 0.65129   |
| 66181 | P03346 | Q7Z417 | 1.0914    |
| 66182 | P03346 | Q96S99 | 0.24711   |
| 66183 | P03346 | Q9NPC3 | 0.41971   |
| 66184 | P03346 | O60885 | 0.90265   |
| 66185 | P03346 | P30876 | 0.66453   |
| 66186 | P03346 | Q15326 | 1.2117    |
| 66187 | P03346 | Q9UBS4 | 0.37563   |
| 66188 | P03346 | Q96JF6 | 0.31436   |
| 66189 | P03346 | Q96P63 | 0.14881   |
| 66190 | P03346 | P63104 | 1.0328    |
| 66191 | P03346 | Q15369 | 1.3485    |
| 66192 | P03346 | O95073 | 1.3712    |
| 66193 | P03346 | Q9HCU5 | 0.4236    |
| 66194 | P03346 | Q8TF74 | 0.73244   |
| 66195 | P03346 | Q9UKV0 | 0.45497   |
| 66196 | P03346 | Q6ZV50 | 0.70946   |

|       |        |        |          |
|-------|--------|--------|----------|
| 66197 | P03346 | P55211 | 0.26674  |
| 66198 | P03346 | Q9H7Z6 | 0.30894  |
| 66199 | P03346 | Q9Y6Z5 | 0.12821  |
| 66200 | P03346 | P32242 | 0.33815  |
| 66201 | P03346 | P02728 | 0.12821  |
| 66202 | P03346 | Q96EF6 | 0.55077  |
| 66203 | P03346 | Q00597 | 0.98435  |
| 66204 | P03346 | P35269 | 1.2011   |
| 66205 | P03346 | O75607 | 0.93808  |
| 66206 | P03346 | Q9BXW9 | 0.98291  |
| 66207 | P03346 | Q8N108 | 1.4013   |
| 66208 | P03346 | P17023 | 0.30845  |
| 66209 | P03346 | Q5T1J5 | 0.14441  |
| 66210 | P03346 | Q15937 | 0.28776  |
| 66211 | P03346 | P14317 | 0.46975  |
| 66212 | P03346 | Q9Y2D9 | 0.85529  |
| 66213 | P03346 | Q14790 | 0.27963  |
| 66214 | P03346 | Q8TAT6 | 0.56685  |
| 66215 | P03346 | P54840 | 0.1132   |
| 66216 | P03346 | Q504T8 | 0.48532  |
| 66217 | P03346 | O76015 | 0.47854  |
| 66218 | P03346 | Q9BXR0 | 0.46569  |
| 66219 | P03346 | P63313 | 0.18695  |
| 66220 | P03346 | Q9UMY1 | 0.5858   |
| 66221 | P03346 | P60412 | 0.40421  |
| 66222 | P03346 | Q49AA0 | 0.31436  |
| 66223 | P03346 | Q15759 | 0.32871  |
| 66224 | P03346 | Q15181 | 0.3984   |
| 66225 | P03346 | Q9NVC6 | 0.71491  |
| 66226 | P03346 | Q01130 | 0.99456  |
| 66227 | P03346 | A2IDD5 | 0.21672  |
| 66228 | P03346 | P32519 | 1.6144   |
| 66229 | P03346 | Q9HCH0 | 0.14064  |
| 66230 | P03346 | P49450 | 0.42499  |
| 66231 | P03346 | Q3ZCQ8 | 0.34092  |
| 66232 | P03346 | Q9NYV6 | 0.69649  |
| 66233 | P03346 | O75437 | 0.34395  |
| 66234 | P03346 | Q9BTY7 | 0.12821  |
| 66235 | P03346 | P55347 | 0.74632  |
| 66236 | P03346 | P14678 | 1.0328   |
| 66237 | P03346 | P62910 | 0.6799   |
| 66238 | P03346 | A6NDV4 | 0.35024  |
| 66239 | P03346 | P0CG47 | 0.35767  |
| 66240 | P03346 | Q9HC62 | 0.69326  |
| 66241 | P03346 | Q8NEK8 | 0.052605 |
| 66242 | P03346 | Q8TDR0 | 0.80517  |
| 66243 | P03346 | Q99996 | 0.71346  |
| 66244 | P03346 | O95394 | 0.13138  |
| 66245 | P03346 | Q17R98 | 0.31436  |
| 66246 | P03346 | Q13409 | 0.51366  |
| 66247 | P03346 | P04053 | 0.43196  |
| 66248 | P03346 | Q9H1E3 | 0.32217  |
| 66249 | P03346 | A6NCC3 | 0.11048  |
| 66250 | P03346 | Q9H0S4 | 0.32838  |
| 66251 | P03346 | P01858 | 0.047063 |
| 66252 | P03346 | P0C7V5 | 0.31436  |
| 66253 | P03346 | P35900 | 1.0521   |
| 66254 | P03346 | Q9UQ84 | 0.39528  |
| 66255 | P03346 | P07195 | 0.16748  |
| 66256 | P03346 | Q9H9Q4 | 0.72505  |
| 66257 | P03346 | Q96KS0 | 0.24846  |
| 66258 | P03346 | Q92832 | 0.39139  |
| 66259 | P03346 | Q15435 | 0.4155   |
| 66260 | P03346 | Q9BQS6 | 1.1048   |
| 66261 | P03346 | I6L9F6 | 0.47854  |
| 66262 | P03346 | Q13619 | 0.55412  |
| 66263 | P03346 | Q96PY6 | 0.27614  |
| 66264 | P03346 | Q13569 | 0.64702  |
| 66265 | P03346 | Q92922 | 1.2144   |
| 66266 | P03346 | O75251 | 0.21111  |
| 66267 | P03346 | Q8IYX3 | 0.12695  |
| 66268 | P03346 | P42568 | 1.1623   |
| 66269 | P03346 | Q96DB5 | 0.46677  |
| 66270 | P03346 | Q96PG8 | 0.17333  |
| 66271 | P03346 | Q14244 | 0.055101 |
| 66272 | P03346 | A6NHQ4 | 0.023698 |

|       |        |         |           |
|-------|--------|---------|-----------|
| 66273 | P03346 | Q8I WV8 | 0.33858   |
| 66274 | P03346 | Q14734  | 0.20715   |
| 66275 | P03346 | Q9NYP3  | 0.20089   |
| 66276 | P03346 | A1A580  | 0.36736   |
| 66277 | P03346 | P45985  | 0.27429   |
| 66278 | P03346 | Q6P387  | 0.65405   |
| 66279 | P03346 | Q6P2D0  | 0.31436   |
| 66280 | P03346 | Q96C74  | 0.57651   |
| 66281 | P03346 | P36578  | 1.0488    |
| 66282 | P03346 | O95218  | 0.80681   |
| 66283 | P03346 | Q86W56  | 0.80221   |
| 66284 | P03346 | Q14106  | 0.38076   |
| 66285 | P03346 | Q5W0V3  | 0.017038  |
| 66286 | P03346 | Q9BY43  | 0.14965   |
| 66287 | P03346 | Q96NB3  | 0.60097   |
| 66288 | P03346 | Q9BZK7  | 1.0935    |
| 66289 | P03346 | P35754  | 0.50462   |
| 66290 | P03346 | Q969F2  | 0.29808   |
| 66291 | P03346 | Q92783  | 0.81157   |
| 66292 | P03346 | Q99623  | 1.2753    |
| 66293 | P03346 | Q5JVX7  | 0.02804   |
| 66294 | P03346 | Q6IN84  | 0.19189   |
| 66295 | P03346 | Q14771  | 0.34285   |
| 66296 | P03346 | O75638  | 0.19728   |
| 66297 | P03346 | Q9Y244  | 0.54629   |
| 66298 | P03346 | Q9UGN5  | 0.46087   |
| 66299 | P03346 | Q96CB8  | 0.67648   |
| 66300 | P03346 | Q5T0Z8  | 0.0077221 |
| 66301 | P03346 | Q96CS2  | 0.61124   |
| 66302 | P03346 | Q5VY09  | 0.054055  |
| 66303 | P03346 | Q969F1  | 0.86984   |
| 66304 | P03346 | Q9Y6G5  | 0.66787   |
| 66305 | P03346 | Q04727  | 0.85805   |
| 66306 | P03346 | Q14596  | 0.32128   |
| 66307 | P03346 | Q8TDR4  | 0.32217   |
| 66308 | P03346 | Q9UBU9  | 0.69508   |
| 66309 | P03346 | Q13367  | 0.67465   |
| 66310 | P03346 | Q96SL8  | 0.39235   |
| 66311 | P03346 | P49006  | 0.12296   |
| 66312 | P03346 | Q8N814  | 0.055005  |
| 66313 | P03346 | Q8NEY8  | 0.6297    |
| 66314 | P03346 | Q8WYR4  | 0.61268   |
| 66315 | P03346 | Q9BRT2  | 0.61267   |
| 66316 | P03346 | P48539  | 0.44411   |
| 66317 | P03346 | Q8NHQ1  | 1.469     |
| 66318 | P03346 | Q5TKA1  | 0.62667   |
| 66319 | P03346 | O95271  | 0.54218   |
| 66320 | P03346 | Q12789  | 1.064     |
| 66321 | P03346 | O95243  | 0.86779   |
| 66322 | P03346 | Q6GPH4  | 0.49391   |
| 66323 | P03346 | Q9H6F5  | 0.55384   |
| 66324 | P03346 | O95219  | 0.26163   |
| 66325 | P03346 | A6NMT0  | 0.41485   |
| 66326 | P03346 | P26371  | 0.38044   |
| 66327 | P03346 | Q69YI7  | 0.39398   |
| 66328 | P03346 | Q6U7Q0  | 0.4754    |
| 66329 | P03346 | Q96IU2  | 0.23735   |
| 66330 | P03346 | B2RXH2  | 0.21292   |
| 66331 | P03346 | O75461  | 0.62713   |
| 66332 | P03346 | Q9NP79  | 0.51423   |
| 66333 | P03346 | P62328  | 0.58279   |
| 66334 | P03346 | Q9UKG1  | 0.55614   |
| 66335 | P03346 | P54725  | 0.76627   |
| 66336 | P03346 | Q717R9  | 0.27738   |
| 66337 | P03346 | O60925  | 0.30528   |
| 66338 | P03346 | P54278  | 0.54561   |
| 66339 | P03346 | Q8NAP1  | 0.0077221 |
| 66340 | P03346 | Q7Z3Y7  | 0.61016   |
| 66341 | P03346 | Q9NYZ3  | 0.19307   |
| 66342 | P03346 | Q9HB09  | 0.055233  |
| 66343 | P03346 | P41970  | 1.1327    |
| 66344 | P03346 | Q13416  | 0.72501   |
| 66345 | P03346 | Q96JS3  | 0.58833   |
| 66346 | P03346 | P62508  | 0.65402   |
| 66347 | P03346 | Q86TS9  | 0.54515   |
| 66348 | P03346 | P19474  | 0.57626   |

|       |        |        |            |
|-------|--------|--------|------------|
| 66349 | P03346 | Q5T754 | 0.02884    |
| 66350 | P03346 | Q9HB58 | 0.48704    |
| 66351 | P03346 | A8CG34 | 0.6157     |
| 66352 | P03346 | P10828 | 0.64601    |
| 66353 | P03346 | Q9BYJ9 | 0.0010721  |
| 66354 | P03346 | Q8TDN6 | 0.56035    |
| 66355 | P03346 | Q5VZ66 | 0.1222     |
| 66356 | P03346 | Q9UGL1 | 0.25338    |
| 66357 | P03346 | Q9UBR4 | 0.31095    |
| 66358 | P03346 | Q6NVH7 | 0.83782    |
| 66359 | P03346 | Q8NBC4 | 0.20041    |
| 66360 | P03346 | P48634 | 1.1405     |
| 66361 | P03346 | Q86XF7 | 0.31436    |
| 66362 | P03346 | P42765 | 0.2976     |
| 66363 | P03346 | Q8NE71 | 0.47874    |
| 66364 | P03346 | Q15047 | 0.81509    |
| 66365 | P03346 | O60422 | 0.67877    |
| 66366 | P03346 | P34949 | 0.18478    |
| 66367 | P03346 | Q9HBT7 | 0.31204    |
| 66368 | P03346 | Q5TA78 | 0.02884    |
| 66369 | P03346 | A8MTQ0 | 0.4313     |
| 66370 | P03346 | P0C5Y4 | 0.40421    |
| 66371 | P03346 | Q43257 | 0.5767     |
| 66372 | P03346 | Q8NAP3 | 0.57801    |
| 66373 | P03346 | Q0VDD7 | 0.51264    |
| 66374 | P03346 | P10768 | 0.41166    |
| 66375 | P03346 | Q16548 | 0.8444     |
| 66376 | P03346 | Q8N8A2 | 0.66787    |
| 66377 | P03346 | O15015 | 0.85529    |
| 66378 | P03346 | Q9NSJ1 | 0.31436    |
| 66379 | P03346 | P52292 | 1.0985     |
| 66380 | P03346 | Q8TF50 | 0.31436    |
| 66381 | P03346 | Q14933 | 0.46057    |
| 66382 | P03346 | Q15700 | 0.38166    |
| 66383 | P03346 | Q6ULP2 | 0.84706    |
| 66384 | P03346 | P13647 | 1.001      |
| 66385 | P03346 | Q14999 | 1.1162     |
| 66386 | P03346 | P26196 | 0.64969    |
| 66387 | P03346 | Q9BRJ2 | 0.55572    |
| 66388 | P03346 | A6NLF2 | 0.30149    |
| 66389 | P03346 | P28069 | 0.85369    |
| 66390 | P03346 | P56589 | 0.163      |
| 66391 | P03346 | Q9BZE1 | 0.54515    |
| 66392 | P03346 | P51858 | 0.24639    |
| 66393 | P03346 | Q9H9C1 | 0.79007    |
| 66394 | P03346 | O43763 | 0.5181     |
| 66395 | P03346 | Q86WC6 | 0.5452     |
| 66396 | P03346 | P82675 | 0.33708    |
| 66397 | P03346 | Q9Y2K1 | 0.31436    |
| 66398 | P03346 | Q5VSL9 | 1.0511     |
| 66399 | P03346 | Q9BYN7 | 0.4412     |
| 66400 | P03346 | Q7L190 | 1.1151     |
| 66401 | P03346 | Q2KHT3 | 0.00034324 |
| 66402 | P03346 | Q5TZA2 | 0.79779    |
| 66403 | P03346 | P17947 | 0.86894    |
| 66404 | P03346 | Q9Y543 | 0.64335    |
| 66405 | P03346 | Q5HYK7 | 1.2695     |
| 66406 | P03346 | Q96GI7 | 0.0077221  |
| 66407 | P03346 | Q99550 | 0.54928    |
| 66408 | P03346 | Q9H974 | 0.1503     |
| 66409 | P03346 | Q15388 | 0.30013    |
| 66410 | P03346 | Q9Y4U1 | 0.12178    |
| 66411 | P03346 | Q14137 | 1.0293     |
| 66412 | P03346 | Q01658 | 0.8084     |
| 66413 | P03346 | Q9NRR4 | 0.60186    |
| 66414 | P03346 | Q9UGU0 | 0.56674    |
| 66415 | P03346 | Q9UQF2 | 0.61632    |
| 66416 | P03346 | Q5VT03 | 0.083147   |
| 66417 | P03346 | Q99929 | 0.3727     |
| 66418 | P03346 | Q9GZU2 | 0.57957    |
| 66419 | P03346 | Q05BW5 | 0.52957    |
| 66420 | P03346 | Q9GZZ0 | 0.50996    |
| 66421 | P03346 | Q96MM3 | 0.35652    |
| 66422 | P03346 | Q9NR09 | 0.46983    |
| 66423 | P03346 | Q99593 | 0.37543    |
| 66424 | P03346 | Q9UND3 | 0.5886     |

|       |        |        |           |
|-------|--------|--------|-----------|
| 66425 | P03346 | Q96PQ6 | 0.31436   |
| 66426 | P03346 | Q9UGK8 | 0.89912   |
| 66427 | P03346 | Q12765 | 0.42408   |
| 66428 | P03346 | P60331 | 0.40421   |
| 66429 | P03346 | Q6ZN30 | 0.36047   |
| 66430 | P03346 | Q9UII5 | 0.31644   |
| 66431 | P03346 | P15259 | 0.43169   |
| 66432 | P03346 | Q96MW7 | 0.31623   |
| 66433 | P03346 | O15084 | 1.0519    |
| 66434 | P03346 | Q99549 | 0.81797   |
| 66435 | P03346 | Q9NRY2 | 0.9994    |
| 66436 | P03346 | A1L190 | 0.20951   |
| 66437 | P03346 | P04156 | 0.40166   |
| 66438 | P03346 | Q8N0T1 | 0.02781   |
| 66439 | P03346 | Q9BYR5 | 0.40421   |
| 66440 | P03346 | P11474 | 0.54412   |
| 66441 | P03346 | P32189 | 0.1943    |
| 66442 | P03346 | Q5XKR4 | 0.344     |
| 66443 | P03346 | Q9BXW4 | 0.46979   |
| 66444 | P03346 | O75351 | 0.42135   |
| 66445 | P03346 | P51504 | 0.30845   |
| 66446 | P03346 | Q8TBZ2 | 0.21514   |
| 66447 | P03346 | Q15355 | 0.95263   |
| 66448 | P03346 | Q14019 | 0.47298   |
| 66449 | P03346 | P34932 | 0.34031   |
| 66450 | P03346 | Q9BR11 | 0.16034   |
| 66451 | P03346 | Q10586 | 0.73588   |
| 66452 | P03346 | P50542 | 0.27987   |
| 66453 | P03346 | Q9HA38 | 0.28497   |
| 66454 | P03346 | P22528 | 0.185     |
| 66455 | P03346 | O43427 | 0.21959   |
| 66456 | P03346 | Q5T8A7 | 0.94798   |
| 66457 | P03346 | O75113 | 1.1172    |
| 66458 | P03346 | Q13363 | 0.49032   |
| 66459 | P03346 | P83916 | 0.85694   |
| 66460 | P03346 | Q6IN85 | 0.50807   |
| 66461 | P03346 | Q9NTU4 | 0.041628  |
| 66462 | P03346 | Q8IW36 | 0.29208   |
| 66463 | P03346 | Q9UHV2 | 1.0518    |
| 66464 | P03346 | Q02080 | 0.73795   |
| 66465 | P03346 | Q9NX53 | 0.66787   |
| 66466 | P03346 | Q8WWR8 | 0.26785   |
| 66467 | P03346 | A8K5M9 | 0.14441   |
| 66468 | P03346 | P62847 | 0.50875   |
| 66469 | P03346 | Q9Y5Z4 | 0.32015   |
| 66470 | P03346 | Q13536 | 0.32217   |
| 66471 | P03346 | Q86XZ4 | 0.20041   |
| 66472 | P03346 | Q96NM4 | 0.70946   |
| 66473 | P03346 | P48454 | 0.27418   |
| 66474 | P03346 | Q8N7G0 | 0.71675   |
| 66475 | P03346 | P78412 | 0.66978   |
| 66476 | P03346 | P10599 | 0.45337   |
| 66477 | P03346 | Q14997 | 0.17663   |
| 66478 | P03346 | Q8IYD8 | 0.50882   |
| 66479 | P03346 | Q9BZJ0 | 0.37969   |
| 66480 | P03346 | Q9UKX2 | 0.32156   |
| 66481 | P03346 | Q6ZRH4 | 0.26501   |
| 66482 | P03346 | Q05215 | 0.34039   |
| 66483 | P03346 | Q12798 | 0.73752   |
| 66484 | P03346 | O75145 | 0.72119   |
| 66485 | P03346 | Q9P255 | 0.31436   |
| 66486 | P03346 | A6NIH7 | 0.41396   |
| 66487 | P03346 | P57678 | 1.1197    |
| 66488 | P03346 | Q3LI68 | 0.36736   |
| 66489 | P03346 | Q8IYF1 | 0.3435    |
| 66490 | P03346 | Q9GZX5 | 0.93607   |
| 66491 | P03346 | Q13405 | 0.87915   |
| 66492 | P03346 | Q9Y6B2 | 1.213     |
| 66493 | P03346 | Q9BU89 | 0.33897   |
| 66494 | P03346 | Q9UK33 | 0.31436   |
| 66495 | P03346 | Q8N635 | 0.21886   |
| 66496 | P03346 | Q6PF06 | 0.021644  |
| 66497 | P03346 | Q2M2W7 | 0.0077221 |
| 66498 | P03346 | P48552 | 0.81524   |
| 66499 | P03346 | P48147 | 0.15525   |
| 66500 | P03346 | A9YTQ3 | 0.62042   |



|       |        |        |          |
|-------|--------|--------|----------|
| 66501 | P03346 | Q8NG57 | 0.30149  |
| 66502 | P03346 | Q6RFH5 | 0.49719  |
| 66503 | P03346 | P49790 | 0.93522  |
| 66504 | P03346 | Q13490 | 0.47124  |
| 66505 | P03346 | O60684 | 0.66208  |
| 66506 | P03346 | P28370 | 0.61914  |
| 66507 | P03346 | Q86VP6 | 1.0224   |
| 66508 | P03346 | Q9Y448 | 0.906    |
| 66509 | P03346 | Q5TA81 | 0.02884  |
| 66510 | P03346 | O75333 | 0.66404  |
| 66511 | P03346 | Q7Z2E3 | 0.49582  |
| 66512 | P03346 | Q96C01 | 0.32015  |
| 66513 | P03346 | Q16658 | 0.33737  |
| 66514 | P03346 | O94992 | 1.3434   |
| 66515 | P03346 | Q9UHB9 | 0.52523  |
| 66516 | P03346 | Q9H7L9 | 0.86954  |
| 66517 | P03346 | Q15527 | 0.12821  |
| 66518 | P03346 | F5H4B4 | 0.039472 |
| 66519 | P03346 | Q9UI56 | 0.27641  |
| 66520 | P03346 | P35232 | 0.699    |
| 66521 | P03346 | Q9H1Y0 | 0.54507  |
| 66522 | P03346 | Q5SZD4 | 0.053628 |
| 66523 | P03346 | Q96MH2 | 1.446    |
| 66524 | P03346 | Q13200 | 0.48035  |
| 66525 | P03346 | Q86X55 | 0.72159  |
| 66526 | P03346 | Q8NEY3 | 0.17139  |
| 66527 | P03346 | Q8WWK9 | 0.43711  |
| 66528 | P03346 | P48556 | 0.38543  |
| 66529 | P03346 | P61968 | 0.30511  |
| 66530 | P03346 | Q9P2I0 | 1.0675   |
| 66531 | P03346 | O60356 | 0.3135   |
| 66532 | P03346 | P40424 | 0.80012  |
| 66533 | P03346 | Q9H4Q4 | 0.24147  |
| 66534 | P03346 | Q9ULT8 | 0.305    |
| 66535 | P03346 | Q9HC24 | 0.20468  |
| 66536 | P03346 | Q9C002 | 0.42864  |
| 66537 | P03346 | Q12788 | 0.36522  |
| 66538 | P03346 | P62851 | 0.81692  |
| 66539 | P03346 | Q96QE5 | 1.0349   |
| 66540 | P03346 | Q8N6Y0 | 0.9619   |
| 66541 | P03346 | Q96ND8 | 0.31436  |
| 66542 | P03346 | P01009 | 0.22833  |
| 66543 | P03346 | P05813 | 0.3383   |
| 66544 | P03346 | P61575 | 0.74357  |
| 66545 | P03346 | O43325 | 0.42864  |
| 66546 | P03346 | P55210 | 0.40235  |
| 66547 | P03346 | Q8NCT3 | 0.045395 |
| 66548 | P03346 | Q6PI48 | 0.63265  |
| 66549 | P03346 | Q9BVC3 | 0.85526  |
| 66550 | P03346 | P06744 | 0.46349  |
| 66551 | P03346 | Q96GJ1 | 0.13477  |
| 66552 | P03346 | A6NDX5 | 0.31436  |
| 66553 | P03346 | Q9Y5L0 | 1.2303   |
| 66554 | P03346 | Q92636 | 0.59624  |
| 66555 | P03346 | Q76L83 | 0.71399  |
| 66556 | P03346 | Q6P4R8 | 1.3538   |
| 66557 | P03346 | Q9BXF6 | 0.80499  |
| 66558 | P03346 | Q8TEL6 | 0.72379  |
| 66559 | P03346 | O60535 | 0.78051  |
| 66560 | P03346 | Q5HYK3 | 0.1076   |
| 66561 | P03346 | Q01196 | 0.43708  |
| 66562 | P03346 | P04731 | 0.26681  |
| 66563 | P03346 | P23025 | 0.36975  |
| 66564 | P03346 | O14964 | 0.72434  |
| 66565 | P03346 | P11532 | 0.5096   |
| 66566 | P03346 | Q9Y536 | 0.19353  |
| 66567 | P03346 | Q9BZF9 | 0.64505  |
| 66568 | P03346 | Q9UG56 | 0.19461  |
| 66569 | P03346 | P41212 | 1.1768   |
| 66570 | P03346 | Q8TCI5 | 0.78747  |
| 66571 | P03346 | O15226 | 1.1196   |
| 66572 | P03346 | P19838 | 0.7671   |
| 66573 | P03346 | Q8IWZ3 | 1.2624   |
| 66574 | P03346 | O95050 | 0.23181  |
| 66575 | P03346 | Q8N5N7 | 0.37322  |
| 66576 | P03346 | Q9BSK1 | 0.31436  |

|       |        |        |           |
|-------|--------|--------|-----------|
| 66577 | P03346 | P53801 | 0.12443   |
| 66578 | P03346 | O60671 | 0.6775    |
| 66579 | P03346 | Q9UH73 | 0.28712   |
| 66580 | P03346 | Q5UE93 | 0.65556   |
| 66581 | P03346 | O96000 | 0.58279   |
| 66582 | P03346 | O60504 | 0.93099   |
| 66583 | P03346 | Q8IUC3 | 0.36736   |
| 66584 | P03346 | Q9BV86 | 0.52257   |
| 66585 | P03346 | Q8WUY8 | 0.10861   |
| 66586 | P03346 | O14645 | 0.19736   |
| 66587 | P03346 | Q12873 | 0.60683   |
| 66588 | P03346 | O75031 | 0.12293   |
| 66589 | P03346 | Q03060 | 0.56948   |
| 66590 | P03346 | Q9BSW2 | 1.009     |
| 66591 | P03346 | Q6PJP8 | 0.76176   |
| 66592 | P03346 | O00625 | 0.67871   |
| 66593 | P03346 | Q96HI0 | 0.74831   |
| 66594 | P03346 | Q99547 | 0.9544    |
| 66595 | P03346 | P63167 | 1.3222    |
| 66596 | P03346 | P40855 | 0.26839   |
| 66597 | P03346 | Q13310 | 0.68971   |
| 66598 | P03346 | Q8N972 | 0.31436   |
| 66599 | P03346 | Q8N0S2 | 0.2752    |
| 66600 | P03346 | Q5H9S7 | 0.02613   |
| 66601 | P03346 | Q9P2J3 | 0.41357   |
| 66602 | P03346 | Q9UBB6 | 0.13953   |
| 66603 | P03346 | Q6A163 | 0.47854   |
| 66604 | P03346 | Q6UUV7 | 1.0666    |
| 66605 | P03346 | Q86YI8 | 0.5901    |
| 66606 | P03346 | P58317 | 0.31436   |
| 66607 | P03346 | Q9H0W8 | 0.57312   |
| 66608 | P03346 | Q8IZT6 | 0.46517   |
| 66609 | P03346 | Q96AQ1 | 0.035326  |
| 66610 | P03346 | Q5MJ07 | 0.10148   |
| 66611 | P03346 | Q9UHJ3 | 0.68149   |
| 66612 | P03346 | Q7RTU0 | 0.71211   |
| 66613 | P03346 | P23497 | 0.95383   |
| 66614 | P03346 | Q96KD3 | 0.15847   |
| 66615 | P03346 | Q9UK99 | 0.70844   |
| 66616 | P03346 | Q8NDN9 | 0.89584   |
| 66617 | P03346 | Q5HYI7 | 0.16989   |
| 66618 | P03346 | Q9UJA5 | 0.33007   |
| 66619 | P03346 | P56178 | 0.21893   |
| 66620 | P03346 | Q16864 | 0.21751   |
| 66621 | P03346 | Q13485 | 0.6237    |
| 66622 | P03346 | O75052 | 0.3176    |
| 66623 | P03346 | P22090 | 0.4597    |
| 66624 | P03346 | Q9NPE3 | 0.9467    |
| 66625 | P03346 | Q8IXJ9 | 0.86436   |
| 66626 | P03346 | Q9NNX9 | 0.36398   |
| 66627 | P03346 | Q9BR46 | 0.14785   |
| 66628 | P03346 | Q86YS3 | 0.35813   |
| 66629 | P03346 | Q9BVN2 | 0.66894   |
| 66630 | P03346 | Q9H2K0 | 0.17581   |
| 66631 | P03346 | Q8IYE0 | 0.067115  |
| 66632 | P03346 | Q8WVP5 | 0.095521  |
| 66633 | P03346 | P60410 | 0.40421   |
| 66634 | P03346 | Q2NL68 | 0.0077221 |
| 66635 | P03346 | Q00534 | 0.56537   |
| 66636 | P03346 | Q6L8H2 | 0.40421   |
| 66637 | P03346 | Q0D2K3 | 0.47708   |
| 66638 | P03346 | Q12980 | 0.12821   |
| 66639 | P03346 | O95487 | 0.8356    |
| 66640 | P03346 | Q9Y4L5 | 0.57444   |
| 66641 | P03346 | Q5JXB2 | 0.29651   |
| 66642 | P03346 | P35251 | 0.40165   |
| 66643 | P03346 | Q9H6Z4 | 1.3618    |
| 66644 | P03346 | Q14442 | 0.23565   |
| 66645 | P03346 | Q96PU4 | 0.51115   |
| 66646 | P03346 | P22087 | 0.8468    |
| 66647 | P03346 | Q9H4B6 | 0.77881   |
| 66648 | P03346 | Q99456 | 0.4258    |
| 66649 | P03346 | Q96KG9 | 0.50767   |
| 66650 | P03346 | P22681 | 0.45312   |
| 66651 | P03346 | P20962 | 0.40417   |
| 66652 | P03346 | P13682 | 0.22654   |

|       |        |        |           |
|-------|--------|--------|-----------|
| 66653 | P03346 | Q9BSJ2 | 1.2285    |
| 66654 | P03346 | P46013 | 0.2921    |
| 66655 | P03346 | Q9BU76 | 0.061214  |
| 66656 | P03346 | P24855 | 0.30633   |
| 66657 | P03346 | Q6ZSR3 | 0.14441   |
| 66658 | P03346 | Q2M3X9 | 0.31436   |
| 66659 | P03346 | Q04637 | 0.68924   |
| 66660 | P03346 | Q15270 | 0.5808    |
| 66661 | P03346 | Q9Y6F1 | 0.40386   |
| 66662 | P03346 | Q8NAV1 | 0.38557   |
| 66663 | P03346 | Q8WYA1 | 0.62428   |
| 66664 | P03346 | Q08AG7 | 0.89552   |
| 66665 | P03346 | Q9P2D1 | 0.26185   |
| 66666 | P03346 | O14893 | 0.90496   |
| 66667 | P03346 | Q9Y5A6 | 0.82065   |
| 66668 | P03346 | Q9NWS8 | 0.14441   |
| 66669 | P03346 | P0CG35 | 0.18695   |
| 66670 | P03346 | Q5JPI3 | 0.055233  |
| 66671 | P03346 | Q9BTX9 | 0.15271   |
| 66672 | P03346 | Q8TCE6 | 0.19481   |
| 66673 | P03346 | P07199 | 0.52944   |
| 66674 | P03346 | O14617 | 0.23907   |
| 66675 | P03346 | P09913 | 0.69779   |
| 66676 | P03346 | Q8IXT1 | 0.4235    |
| 66677 | P03346 | Q7L5Y6 | 0.32217   |
| 66678 | P03346 | O75360 | 0.7066    |
| 66679 | P03346 | O43812 | 0.72697   |
| 66680 | P03346 | Q92616 | 0.3636    |
| 66681 | P03346 | Q7L0Y3 | 1.1085    |
| 66682 | P03346 | P25063 | 0.039856  |
| 66683 | P03346 | P31314 | 0.93467   |
| 66684 | P03346 | A8MTY0 | 0.31436   |
| 66685 | P03346 | Q96FW1 | 0.23854   |
| 66686 | P03346 | Q92917 | 1.0438    |
| 66687 | P03346 | Q96LX8 | 0.31436   |
| 66688 | P03346 | Q9UI14 | 0.21314   |
| 66689 | P03346 | Q7Z460 | 0.42227   |
| 66690 | P03346 | Q92845 | 0.38798   |
| 66691 | P03346 | Q05086 | 0.4864    |
| 66692 | P03346 | Q9UFB7 | 0.31436   |
| 66693 | P03346 | Q9UDY4 | 1.0035    |
| 66694 | P03346 | Q6IPU0 | 0.1652    |
| 66695 | P03346 | O43493 | 0.52467   |
| 66696 | P03346 | Q9Y232 | 0.41384   |
| 66697 | P03346 | Q9BQ83 | 0.72247   |
| 66698 | P03346 | Q7L945 | 0.31436   |
| 66699 | P03346 | Q8TBE0 | 1.0877    |
| 66700 | P03346 | P05062 | 0.25535   |
| 66701 | P03346 | O60749 | 0.38983   |
| 66702 | P03346 | Q9BXM8 | 0.12821   |
| 66703 | P03346 | P07737 | 0.93679   |
| 66704 | P03346 | O94916 | 0.5586    |
| 66705 | P03346 | P17040 | 0.68209   |
| 66706 | P03346 | Q9H7C9 | 0.2457    |
| 66707 | P03346 | P56545 | 0.42013   |
| 66708 | P03346 | P51522 | 0.30845   |
| 66709 | P03346 | Q8NCE8 | 0.11048   |
| 66710 | P03346 | Q9UKY1 | 0.64194   |
| 66711 | P03346 | Q7Z3D6 | 0.22932   |
| 66712 | P03346 | Q9UPG8 | 0.52891   |
| 66713 | P03346 | P53567 | 0.83664   |
| 66714 | P03346 | Q8WV28 | 0.34421   |
| 66715 | P03346 | Q5JR98 | 0.66787   |
| 66716 | P03346 | P59923 | 0.34285   |
| 66717 | P03346 | Q5T9C2 | 0.0077221 |
| 66718 | P03346 | Q15424 | 1.016     |
| 66719 | P03346 | Q9Y651 | 0.59394   |
| 66720 | P03346 | Q9NYJ1 | 0.057305  |
| 66721 | P03346 | Q9H489 | 0.22545   |
| 66722 | P03346 | Q96CX2 | 0.18903   |
| 66723 | P03346 | Q9UHD8 | 0.24999   |
| 66724 | P03346 | Q7Z392 | 0.23882   |
| 66725 | P03346 | P51513 | 0.28426   |
| 66726 | P03346 | P24928 | 0.85663   |
| 66727 | P03346 | Q9H5V7 | 0.31436   |
| 66728 | P03346 | P62140 | 0.71421   |

|       |        |        |           |
|-------|--------|--------|-----------|
| 66729 | P03346 | P51959 | 0.676     |
| 66730 | P03346 | P38432 | 0.95164   |
| 66731 | P03346 | P23193 | 1.0652    |
| 66732 | P03346 | P59022 | 0.12821   |
| 66733 | P03346 | Q7Z5J4 | 0.22013   |
| 66734 | P03346 | Q96FX2 | 1.0344    |
| 66735 | P03346 | Q8NHZ7 | 0.0061408 |
| 66736 | P03346 | Q96NL3 | 0.31436   |
| 66737 | P03346 | O75306 | 0.11709   |
| 66738 | P03346 | Q14160 | 0.61616   |
| 66739 | P03346 | Q9GZZ1 | 0.70063   |
| 66740 | P03346 | O14920 | 0.54928   |
| 66741 | P03346 | P06396 | 0.45947   |
| 66742 | P03346 | Q96IV0 | 0.67664   |
| 66743 | P03346 | P62256 | 0.20741   |
| 66744 | P03346 | Q8WW33 | 0.13077   |
| 66745 | P03346 | P27695 | 0.50253   |
| 66746 | P03346 | Q9C0C6 | 0.08035   |
| 66747 | P03346 | Q8TES7 | 0.81803   |
| 66748 | P03346 | Q674X7 | 0.5862    |
| 66749 | P03346 | Q9NX63 | 1.0049    |
| 66750 | P03346 | P51665 | 0.29843   |
| 66751 | P03346 | P67870 | 0.37334   |
| 66752 | P03346 | Q5H9L4 | 0.31      |
| 66753 | P03346 | Q7LBR1 | 1.105     |
| 66754 | P03346 | P54253 | 1.1797    |
| 66755 | P03346 | Q9HCL3 | 0.31436   |
| 66756 | P03346 | Q5TC79 | 0.31436   |
| 66757 | P03346 | Q8TDB6 | 0.57737   |
| 66758 | P03346 | Q70J99 | 0.25724   |
| 66759 | P03346 | Q7Z3K6 | 0.94236   |
| 66760 | P03346 | Q9H0M0 | 0.27712   |
| 66761 | P03346 | Q6P9F0 | 0.50445   |
| 66762 | P03346 | P0C7X5 | 0.31436   |
| 66763 | P03346 | Q02040 | 0.59792   |
| 66764 | P03346 | Q96IT1 | 0.78038   |
| 66765 | P03346 | P61457 | 1.1744    |
| 66766 | P03346 | Q5XKP0 | 0.14441   |
| 66767 | P03346 | Q9UC06 | 0.30845   |
| 66768 | P03346 | Q9NPI8 | 1.0354    |
| 66769 | P03346 | Q13029 | 0.2664    |
| 66770 | P03346 | Q9BYK8 | 0.51927   |
| 66771 | P03346 | Q96NT1 | 0.22545   |
| 66772 | P03346 | Q6ZSJ8 | 0.0077221 |
| 66773 | P03346 | Q9HAF1 | 1.2201    |
| 66774 | P03346 | Q16186 | 0.73559   |
| 66775 | P03346 | Q9H8M7 | 1.0503    |
| 66776 | P03346 | Q8IZD4 | 1.0983    |
| 66777 | P03346 | Q5TAB7 | 0.081068  |
| 66778 | P03346 | Q9Y2Y0 | 1.0961    |
| 66779 | P03346 | Q13401 | 0.2243    |
| 66780 | P03346 | Q8WUN7 | 0.65405   |
| 66781 | P03346 | A6NMX2 | 0.24972   |
| 66782 | P03346 | O94921 | 0.27773   |
| 66783 | P03346 | Q8IXK0 | 0.48439   |
| 66784 | P03346 | Q14CM0 | 0.23433   |
| 66785 | P03346 | P11172 | 0.1168    |
| 66786 | P03346 | P38936 | 0.24024   |
| 66787 | P03346 | Q9NRA8 | 1.3506    |
| 66788 | P03346 | Q96D71 | 0.2792    |
| 66789 | P03346 | P46777 | 1.1544    |
| 66790 | P03346 | P0C2Y1 | 0.20041   |
| 66791 | P03346 | A6NJ64 | 0.32217   |
| 66792 | P03346 | Q86UU0 | 0.89739   |
| 66793 | P03346 | Q9Y6P5 | 0.22881   |
| 66794 | P03346 | Q8TD10 | 0.32217   |
| 66795 | P03346 | Q9C0J8 | 0.27001   |
| 66796 | P03346 | Q96JN8 | 0.27763   |
| 66797 | P03346 | Q9NWT6 | 0.44005   |
| 66798 | P03346 | Q8N5H3 | 0.0077221 |
| 66799 | P03346 | Q9UMX3 | 0.7286    |
| 66800 | P03346 | A6NLW8 | 0.6797    |
| 66801 | P03346 | Q9P287 | 0.89001   |
| 66802 | P03346 | O95613 | 0.83751   |
| 66803 | P03346 | O15182 | 0.49065   |
| 66804 | P03346 | P82663 | 0.69806   |

|       |        |        |           |
|-------|--------|--------|-----------|
| 66805 | P03346 | P23528 | 0.7389    |
| 66806 | P03346 | Q96IS3 | 0.57491   |
| 66807 | P03346 | Q6RW13 | 0.031012  |
| 66808 | P03346 | Q9UBW8 | 0.64501   |
| 66809 | P03346 | Q9UNS2 | 0.90362   |
| 66810 | P03346 | Q9BXY0 | 0.48532   |
| 66811 | P03346 | Q9Y6I3 | 0.21086   |
| 66812 | P03346 | Q8IZX4 | 0.60934   |
| 66813 | P03346 | P81877 | 0.82396   |
| 66814 | P03346 | Q9Y6X4 | 0.19349   |
| 66815 | P03346 | Q9Y2X9 | 0.75995   |
| 66816 | P03346 | Q06265 | 0.19904   |
| 66817 | P03346 | Q96EN9 | 0.66787   |
| 66818 | P03346 | Q6GQQ9 | 0.25547   |
| 66819 | P03346 | Q96KN3 | 0.48099   |
| 66820 | P03346 | P29083 | 1.0608    |
| 66821 | P03346 | Q6P1W5 | 0.66787   |
| 66822 | P03346 | O94782 | 0.33552   |
| 66823 | P03346 | P20290 | 1.3944    |
| 66824 | P03346 | O15516 | 0.36252   |
| 66825 | P03346 | Q8NG31 | 0.70019   |
| 66826 | P03346 | O75334 | 0.81187   |
| 66827 | P03346 | O15078 | 0.73846   |
| 66828 | P03346 | Q96GE4 | 0.36553   |
| 66829 | P03346 | Q9P1T7 | 1.4038    |
| 66830 | P03346 | Q8NHM5 | 0.35814   |
| 66831 | P03346 | Q3LHN2 | 0.36736   |
| 66832 | P03346 | Q9Y4K1 | 0.1082    |
| 66833 | P03346 | Q9BRP8 | 1.1141    |
| 66834 | P03346 | Q969J2 | 0.34285   |
| 66835 | P03346 | Q96RT7 | 0.49672   |
| 66836 | P03346 | Q16600 | 0.32754   |
| 66837 | P03346 | P07741 | 0.37908   |
| 66838 | P03346 | Q9H8V3 | 0.27662   |
| 66839 | P03346 | P18146 | 0.75523   |
| 66840 | P03346 | Q86YA3 | 0.12482   |
| 66841 | P03346 | Q8N998 | 0.49807   |
| 66842 | P03346 | O96002 | 0.12821   |
| 66843 | P03346 | P51114 | 0.29138   |
| 66844 | P03346 | Q92993 | 0.92542   |
| 66845 | P03346 | Q96QA6 | 0.48532   |
| 66846 | P03346 | Q8TDH9 | 0.44015   |
| 66847 | P03346 | Q9UFF9 | 0.7333    |
| 66848 | P03346 | Q6A162 | 0.47854   |
| 66849 | P03346 | Q9Y2G2 | 0.69306   |
| 66850 | P03346 | P61970 | 0.71237   |
| 66851 | P03346 | Q8WUB8 | 0.55019   |
| 66852 | P03346 | Q8N782 | 0.31436   |
| 66853 | P03346 | Q6ZVK8 | 0.55791   |
| 66854 | P03346 | Q9BS31 | 0.31436   |
| 66855 | P03346 | P52815 | 0.83353   |
| 66856 | P03346 | Q9NP87 | 0.26612   |
| 66857 | P03346 | Q96AT1 | 0.0077221 |
| 66858 | P03346 | P43268 | 0.74884   |
| 66859 | P03346 | Q13045 | 1.3015    |
| 66860 | P03346 | O43865 | 0.39077   |
| 66861 | P03346 | Q5TCZ1 | 0.45894   |
| 66862 | P03346 | Q9BZG8 | 0.4964    |
| 66863 | P03346 | O15371 | 0.87739   |
| 66864 | P03346 | Q86UZ6 | 0.33838   |
| 66865 | P03346 | O94927 | 0.6137    |
| 66866 | P03346 | Q8NI08 | 1.0901    |
| 66867 | P03346 | Q9H3F6 | 0.79014   |
| 66868 | P03346 | Q9Y2X0 | 0.67097   |
| 66869 | P03346 | Q96HA1 | 0.32202   |
| 66870 | P03346 | Q49MG5 | 0.96723   |
| 66871 | P03346 | Q96JE9 | 0.31301   |
| 66872 | P03346 | Q9UH92 | 1.0537    |
| 66873 | P03346 | O43399 | 0.83892   |
| 66874 | P03346 | Q9UKK6 | 0.96714   |
| 66875 | P03346 | Q86XL3 | 0.46243   |
| 66876 | P03346 | Q96LI6 | 0.87614   |
| 66877 | P03346 | Q13573 | 0.83731   |
| 66878 | P03346 | Q14145 | 1.4041    |
| 66879 | P03346 | Q10571 | 0.11164   |
| 66880 | P03346 | P22735 | 0.3105    |

|       |        |        |           |
|-------|--------|--------|-----------|
| 66881 | P03346 | Q8IZL8 | 1.0914    |
| 66882 | P03346 | Q00403 | 0.96444   |
| 66883 | P03346 | P54257 | 0.2166    |
| 66884 | P03346 | Q9HBL8 | 0.23216   |
| 66885 | P03346 | Q8WW01 | 0.49505   |
| 66886 | P03346 | Q9NQL9 | 0.21867   |
| 66887 | P03346 | Q7Z699 | 0.47332   |
| 66888 | P03346 | Q15397 | 0.39983   |
| 66889 | P03346 | Q9H7N4 | 0.34932   |
| 66890 | P03346 | Q8WXC7 | 0.003115  |
| 66891 | P03346 | Q6RFH8 | 1.1865    |
| 66892 | P03346 | Q9H9Z2 | 0.79179   |
| 66893 | P03346 | A6NKU9 | 0.040024  |
| 66894 | P03346 | Q3LI70 | 0.36736   |
| 66895 | P03346 | P41220 | 0.49484   |
| 66896 | P03346 | O75398 | 0.41004   |
| 66897 | P03346 | Q13243 | 0.94383   |
| 66898 | P03346 | Q07020 | 0.77006   |
| 66899 | P03346 | Q7Z353 | 0.66978   |
| 66900 | P03346 | O43318 | 0.54605   |
| 66901 | P03346 | Q8IU8  | 0.71141   |
| 66902 | P03346 | Q8IYN0 | 0.31436   |
| 66903 | P03346 | Q99583 | 0.69694   |
| 66904 | P03346 | O00148 | 0.55569   |
| 66905 | P03346 | Q86WW8 | 0.14441   |
| 66906 | P03346 | Q92793 | 0.39005   |
| 66907 | P03346 | Q9UJY5 | 0.7472    |
| 66908 | P03346 | O43299 | 1.377     |
| 66909 | P03346 | P62263 | 0.53721   |
| 66910 | P03346 | Q8NI36 | 0.30305   |
| 66911 | P03346 | O75525 | 1.0952    |
| 66912 | P03346 | P39880 | 0.89231   |
| 66913 | P03346 | Q9Y603 | 1.5146    |
| 66914 | P03346 | Q9UPP5 | 0.0037973 |
| 66915 | P03346 | P61576 | 0.74357   |
| 66916 | P03346 | Q70YC4 | 0.12512   |
| 66917 | P03346 | O75154 | 0.89907   |
| 66918 | P03346 | Q9UID6 | 0.6848    |
| 66919 | P03346 | Q9UGY1 | 0.50087   |
| 66920 | P03346 | O15117 | 0.66543   |
| 66921 | P03346 | Q9Y2M5 | 0.97527   |
| 66922 | P03346 | Q92985 | 0.61349   |
| 66923 | P03346 | Q8N4C6 | 0.27106   |
| 66924 | P03346 | Q15651 | 0.77884   |
| 66925 | P03346 | Q13283 | 0.33925   |
| 66926 | P03346 | Q15035 | 0.29418   |
| 66927 | P03346 | P39748 | 0.31904   |
| 66928 | P03346 | Q15697 | 0.58346   |
| 66929 | P03346 | Q96IZ7 | 1.0717    |
| 66930 | P03346 | O95257 | 0.56478   |
| 66931 | P03346 | A1A5D9 | 0.06958   |
| 66932 | P03346 | O76095 | 0.26839   |
| 66933 | P03346 | O43933 | 0.41464   |
| 66934 | P03346 | Q96BW9 | 0.26772   |
| 66935 | P03346 | P62324 | 0.89982   |
| 66936 | P03346 | P04259 | 0.51514   |
| 66937 | P03346 | P51531 | 0.72474   |
| 66938 | P03346 | Q9P0J0 | 0.54717   |
| 66939 | P03346 | Q96L03 | 0.26585   |
| 66940 | P03346 | Q9BUH8 | 0.75048   |
| 66941 | P03346 | Q7Z5W3 | 0.26233   |
| 66942 | P03346 | Q8TEY5 | 0.36086   |
| 66943 | P03346 | Q9NR48 | 0.45122   |
| 66944 | P03346 | A6NJJ6 | 0.0077221 |
| 66945 | P03346 | P49755 | 0.25339   |
| 66946 | P03346 | Q6ZN04 | 0.29187   |
| 66947 | P03346 | P38159 | 0.81848   |
| 66948 | P03346 | Q6ZN57 | 0.31436   |
| 66949 | P03346 | Q01844 | 0.76726   |
| 66950 | P03346 | Q6NUN9 | 0.89074   |
| 66951 | P03346 | P82664 | 0.39029   |
| 66952 | P03346 | Q8N488 | 0.76261   |
| 66953 | P03346 | Q13360 | 0.34395   |
| 66954 | P03346 | O95873 | 0.0077221 |
| 66955 | P03346 | P62841 | 0.76558   |
| 66956 | P03346 | O60869 | 0.93085   |

|       |        |        |           |
|-------|--------|--------|-----------|
| 66957 | P03346 | Q9UKW6 | 0.79903   |
| 66958 | P03346 | Q9Y458 | 0.49647   |
| 66959 | P03346 | O75153 | 0.20041   |
| 66960 | P03346 | P53804 | 0.72818   |
| 66961 | P03346 | Q9C0H9 | 0.18129   |
| 66962 | P03346 | Q6FI81 | 0.67336   |
| 66963 | P03346 | Q86X95 | 1.2865    |
| 66964 | P03346 | P35869 | 0.51024   |
| 66965 | P03346 | O14512 | 0.72378   |
| 66966 | P03346 | Q5T6S3 | 0.51719   |
| 66967 | P03346 | Q5T7W0 | 0.31436   |
| 66968 | P03346 | Q96DT0 | 0.33081   |
| 66969 | P03346 | Q8TDP1 | 0.28881   |
| 66970 | P03346 | Q9UPQ9 | 0.046631  |
| 66971 | P03346 | P40925 | 0.4154    |
| 66972 | P03346 | Q16775 | 0.22625   |
| 66973 | P03346 | P78545 | 1.031     |
| 66974 | P03346 | Q9Y4X5 | 0.55137   |
| 66975 | P03346 | Q6NSI3 | 0.32217   |
| 66976 | P03346 | Q658K8 | 0.16092   |
| 66977 | P03346 | O75467 | 0.31436   |
| 66978 | P03346 | Q14CW9 | 1.0251    |
| 66979 | P03346 | Q9NZL3 | 0.85713   |
| 66980 | P03346 | Q8TE69 | 0.66787   |
| 66981 | P03346 | O75558 | 0.84982   |
| 66982 | P03346 | P83881 | 0.77605   |
| 66983 | P03346 | Q5T5A8 | 0.02884   |
| 66984 | P03346 | Q9Y605 | 1.1602    |
| 66985 | P03346 | P04264 | 0.50675   |
| 66986 | P03346 | Q969L4 | 0.93202   |
| 66987 | P03346 | Q9H6W3 | 0.25269   |
| 66988 | P03346 | Q9Y6X2 | 0.77674   |
| 66989 | P03346 | Q13503 | 0.89958   |
| 66990 | P03346 | Q9NP77 | 0.51797   |
| 66991 | P03346 | Q93052 | 0.52278   |
| 66992 | P03346 | P07954 | 0.2352    |
| 66993 | P03346 | Q9BYR3 | 0.40421   |
| 66994 | P03346 | Q8WVI7 | 0.14744   |
| 66995 | P03346 | Q7RTU3 | 0.71211   |
| 66996 | P03346 | Q96H86 | 0.31436   |
| 66997 | P03346 | Q15776 | 0.59654   |
| 66998 | P03346 | Q9Y6Q3 | 0.18859   |
| 66999 | P03346 | Q92466 | 0.85773   |
| 67000 | P03346 | P51523 | 0.4412    |
| 67001 | P03346 | O00482 | 0.37867   |
| 67002 | P03346 | O75674 | 0.59436   |
| 67003 | P03346 | Q8N0S6 | 0.1709    |
| 67004 | P03346 | Q9Y6Q5 | 0.48737   |
| 67005 | P03346 | Q15029 | 0.622     |
| 67006 | P03346 | O94829 | 1.2893    |
| 67007 | P03346 | P62316 | 1.043     |
| 67008 | P03346 | Q86T24 | 0.3974    |
| 67009 | P03346 | O60829 | 0.12821   |
| 67010 | P03346 | Q5H9J7 | 0.20041   |
| 67011 | P03346 | O14558 | 1.0264    |
| 67012 | P03346 | Q9H5I1 | 0.68427   |
| 67013 | P03346 | Q9UHX1 | 1.0035    |
| 67014 | P03346 | P61583 | 0.32217   |
| 67015 | P03346 | Q9HAK2 | 0.3142    |
| 67016 | P03346 | Q9P2Y5 | 0.55161   |
| 67017 | P03346 | Q9BTV7 | 0.25206   |
| 67018 | P03346 | Q8WTV1 | 0.57394   |
| 67019 | P03346 | Q06323 | 0.37906   |
| 67020 | P03346 | Q5VZB9 | 0.43276   |
| 67021 | P03346 | Q9H0H3 | 0.20041   |
| 67022 | P03346 | P09914 | 0.53021   |
| 67023 | P03346 | Q9Y252 | 0.59166   |
| 67024 | P03346 | Q14CN4 | 0.51027   |
| 67025 | P03346 | O95429 | 0.34992   |
| 67026 | P03346 | Q08209 | 0.39966   |
| 67027 | P03346 | B3EWG5 | 0.0077221 |
| 67028 | P03346 | Q9NW38 | 0.36786   |
| 67029 | P03346 | Q53SZ7 | 0.0077221 |
| 67030 | P03346 | O60828 | 1.1033    |
| 67031 | P03346 | Q8NEK5 | 0.31436   |
| 67032 | P03346 | Q14765 | 0.6359    |

|       |        |        |          |
|-------|--------|--------|----------|
| 67033 | P03346 | P28290 | 0.02158  |
| 67034 | P03346 | Q9Y2A4 | 0.3352   |
| 67035 | P03346 | Q02930 | 0.92415  |
| 67036 | P03346 | Q5VU43 | 1.1483   |
| 67037 | P03346 | P60896 | 0.26393  |
| 67038 | P03346 | Q86Y01 | 0.67378  |
| 67039 | P03346 | Q9UPY8 | 1.0813   |
| 67040 | P03346 | Q12982 | 0.44238  |
| 67041 | P03346 | Q14588 | 0.31436  |
| 67042 | P03346 | Q15545 | 1.0179   |
| 67043 | P03346 | Q96MC9 | 0.12899  |
| 67044 | P03346 | Q13601 | 0.69614  |
| 67045 | P03346 | Q8IXH6 | 1.3776   |
| 67046 | P03346 | Q6AZW8 | 0.31436  |
| 67047 | P03346 | P21399 | 0.41492  |
| 67048 | P03346 | Q15293 | 0.51955  |
| 67049 | P03346 | Q3L8U1 | 1.0032   |
| 67050 | P03346 | Q13112 | 1.5254   |
| 67051 | P03346 | P82932 | 0.68832  |
| 67052 | P03346 | Q9BZA5 | 0.062179 |
| 67053 | P03346 | Q9BZW7 | 0.52433  |
| 67054 | P03346 | P41214 | 0.28393  |
| 67055 | P03346 | Q9Y6R0 | 0.33544  |
| 67056 | P03346 | Q95071 | 0.30206  |
| 67057 | P03346 | Q96CG3 | 0.66132  |
| 67058 | P03346 | Q8IY57 | 1.1398   |
| 67059 | P03346 | Q9BYS1 | 0.45846  |
| 67060 | P03346 | P56645 | 0.50907  |
| 67061 | P03346 | Q96K80 | 0.479    |
| 67062 | P03346 | Q6ICB4 | 0.40002  |
| 67063 | P03346 | Q5SWL8 | 0.13291  |
| 67064 | P03346 | Q95278 | 0.29039  |
| 67065 | P03346 | Q8IWF2 | 0.26271  |
| 67066 | P03346 | Q9H112 | 0.32452  |
| 67067 | P03346 | Q676U5 | 0.94734  |
| 67068 | P03346 | Q86WJ1 | 0.48218  |
| 67069 | P03346 | Q96BD6 | 0.19943  |
| 67070 | P03346 | Q3LI83 | 0.51027  |
| 67071 | P03346 | Q63HQ0 | 0.42867  |
| 67072 | P03346 | Q14194 | 0.5577   |
| 67073 | P03346 | P41236 | 0.55027  |
| 67074 | P03346 | Q6R327 | 0.33075  |
| 67075 | P03346 | Q460N5 | 0.62546  |
| 67076 | P03346 | Q8N726 | 0.68819  |
| 67077 | P03346 | Q60675 | 0.78941  |
| 67078 | P03346 | Q9UJP4 | 0.44129  |
| 67079 | P03346 | Q8IY92 | 0.58513  |
| 67080 | P03346 | Q75290 | 0.31436  |
| 67081 | P03346 | Q95521 | 0.13291  |
| 67082 | P03346 | Q8WXQ3 | 0.24081  |
| 67083 | P03346 | Q6ZTI6 | 0.099945 |
| 67084 | P03346 | Q9ULK4 | 1.3998   |
| 67085 | P03346 | Q5H9M0 | 0.12655  |
| 67086 | P03346 | Q9UN36 | 0.6745   |
| 67087 | P03346 | Q9HAZ2 | 0.52341  |
| 67088 | P03346 | Q9BWU0 | 0.83875  |
| 67089 | P03346 | P35606 | 0.57918  |
| 67090 | P03346 | Q01101 | 0.27474  |
| 67091 | P03346 | Q86X76 | 0.25681  |
| 67092 | P03346 | P26651 | 0.73445  |
| 67093 | P03346 | Q9ULV5 | 0.72075  |
| 67094 | P03346 | Q2VPK5 | 0.92931  |
| 67095 | P03346 | Q8WXS3 | 0.69284  |
| 67096 | P03346 | Q9BQD3 | 0.71432  |
| 67097 | P03346 | P43358 | 0.7115   |
| 67098 | P03346 | Q9UI36 | 0.65026  |
| 67099 | P03346 | P59942 | 0.14441  |
| 67100 | P03346 | Q96FN9 | 0.26206  |
| 67101 | P03346 | Q8TAU0 | 0.38765  |
| 67102 | P03346 | Q9H9S0 | 0.51327  |
| 67103 | P03346 | Q43543 | 0.27754  |
| 67104 | P03346 | Q8IY18 | 0.49481  |
| 67105 | P03346 | Q6Q759 | 0.52346  |
| 67106 | P03346 | Q9HAB8 | 0.10288  |
| 67107 | P03346 | Q6BDS2 | 0.59118  |
| 67108 | P03346 | Q9NQZ2 | 0.14312  |



|       |        |        |           |
|-------|--------|--------|-----------|
| 67109 | P03346 | Q9BUK0 | 0.14441   |
| 67110 | P03346 | P17019 | 0.31436   |
| 67111 | P03346 | Q8NCK3 | 0.31436   |
| 67112 | P03346 | Q9BZR9 | 0.38775   |
| 67113 | P03346 | Q9Y2R2 | 0.34793   |
| 67114 | P03346 | Q6IV72 | 0.48638   |
| 67115 | P03346 | P10515 | 0.51892   |
| 67116 | P03346 | P30260 | 1.1617    |
| 67117 | P03346 | P29558 | 0.37652   |
| 67118 | P03346 | O43663 | 0.93454   |
| 67119 | P03346 | Q5VWM1 | 0.13291   |
| 67120 | P03346 | Q6PI77 | 0.49807   |
| 67121 | P03346 | P05386 | 1.1135    |
| 67122 | P03346 | Q86UP8 | 0.41934   |
| 67123 | P03346 | Q5JTJ3 | 0.2185    |
| 67124 | P03346 | Q5JRC9 | 0.017215  |
| 67125 | P03346 | Q86U90 | 0.03094   |
| 67126 | P03346 | Q16587 | 0.23445   |
| 67127 | P03346 | Q6P3V2 | 0.33838   |
| 67128 | P03346 | Q92529 | 0.4645    |
| 67129 | P03346 | O75152 | 0.479     |
| 67130 | P03346 | O75419 | 1.0273    |
| 67131 | P03346 | Q5VWG9 | 0.91559   |
| 67132 | P03346 | Q6NT76 | 0.83861   |
| 67133 | P03346 | Q10587 | 0.64466   |
| 67134 | P03346 | Q5SXM2 | 0.8976    |
| 67135 | P03346 | Q9UPN7 | 1.2009    |
| 67136 | P03346 | Q6WQI6 | 0.20041   |
| 67137 | P03346 | Q9HCE1 | 0.88075   |
| 67138 | P03346 | Q8IZ26 | 0.31436   |
| 67139 | P03346 | P61925 | 0.36995   |
| 67140 | P03346 | Q92900 | 0.56177   |
| 67141 | P03346 | Q8WXX7 | 0.12821   |
| 67142 | P03346 | Q04837 | 0.79744   |
| 67143 | P03346 | O76042 | 0.11556   |
| 67144 | P03346 | Q86WH2 | 0.41646   |
| 67145 | P03346 | Q9NYF8 | 1.423     |
| 67146 | P03346 | Q9Y3B9 | 0.5858    |
| 67147 | P03346 | Q9NY12 | 0.36978   |
| 67148 | P03346 | O00401 | 0.69896   |
| 67149 | P03346 | Q9Y618 | 1.2331    |
| 67150 | P03346 | O75593 | 0.28937   |
| 67151 | P03346 | Q9H0N5 | 0.73968   |
| 67152 | P03346 | Q15173 | 0.51364   |
| 67153 | P03346 | Q9Y2W1 | 0.31804   |
| 67154 | P03346 | Q9H816 | 0.65697   |
| 67155 | P03346 | Q9UIE0 | 0.31436   |
| 67156 | P03346 | P40222 | 0.18423   |
| 67157 | P03346 | Q13562 | 0.32505   |
| 67158 | P03346 | Q969E8 | 0.60099   |
| 67159 | P03346 | Q99504 | 0.62102   |
| 67160 | P03346 | Q8N988 | 0.31436   |
| 67161 | P03346 | Q2VPJ9 | 0.0077221 |
| 67162 | P03346 | A1L020 | 0.37032   |
| 67163 | P03346 | Q8TD94 | 0.31436   |
| 67164 | P03346 | O75928 | 0.87738   |
| 67165 | P03346 | Q6UWZ7 | 0.68665   |
| 67166 | P03346 | O75800 | 0.62778   |
| 67167 | P03346 | Q9P270 | 0.69267   |
| 67168 | P03346 | O95202 | 0.13225   |
| 67169 | P03346 | P46527 | 0.38261   |
| 67170 | P03346 | Q9UL03 | 0.91461   |
| 67171 | P03346 | Q13395 | 0.35603   |
| 67172 | P03346 | P52630 | 0.88323   |
| 67173 | P03346 | Q96FT9 | 0.22881   |
| 67174 | P03346 | Q9BQI5 | 0.20578   |
| 67175 | P03346 | Q13394 | 0.14436   |
| 67176 | P03346 | Q6W349 | 0.031625  |
| 67177 | P03346 | Q9ULU8 | 0.33294   |
| 67178 | P03346 | Q330K2 | 0.43445   |
| 67179 | P03346 | Q8N2M8 | 0.33682   |
| 67180 | P03346 | Q8NF91 | 0.63502   |
| 67181 | P03346 | Q9UL16 | 0.42864   |
| 67182 | P03346 | O15527 | 0.56466   |
| 67183 | P03346 | Q9UL41 | 0.33302   |
| 67184 | P03346 | P14672 | 0.68312   |

|       |        |        |          |
|-------|--------|--------|----------|
| 67185 | P03346 | O94901 | 0.42423  |
| 67186 | P03346 | Q9UI43 | 0.40113  |
| 67187 | P03346 | P18077 | 0.55595  |
| 67188 | P03346 | Q13144 | 0.62099  |
| 67189 | P03346 | Q96GC6 | 1.1058   |
| 67190 | P03346 | Q9NYP9 | 0.52774  |
| 67191 | P03346 | Q01892 | 0.74358  |
| 67192 | P03346 | P62952 | 0.23456  |
| 67193 | P03346 | Q96P15 | 0.17334  |
| 67194 | P03346 | Q15696 | 0.52102  |
| 67195 | P03346 | Q14602 | 0.54347  |
| 67196 | P03346 | P06454 | 0.71532  |
| 67197 | P03346 | Q9Y2J0 | 0.24779  |
| 67198 | P03346 | Q6FIF0 | 0.33968  |
| 67199 | P03346 | Q8N987 | 0.50336  |
| 67200 | P03346 | P35711 | 1.1563   |
| 67201 | P03346 | Q15003 | 0.93959  |
| 67202 | P03346 | Q96CA5 | 0.37182  |
| 67203 | P03346 | P20042 | 0.64794  |
| 67204 | P03346 | P20810 | 0.39661  |
| 67205 | P03346 | O94973 | 0.50288  |
| 67206 | P03346 | Q99865 | 0.18452  |
| 67207 | P03346 | Q68CP9 | 0.74747  |
| 67208 | P03346 | Q9H1Z4 | 0.65405  |
| 67209 | P03346 | Q3LI60 | 0.36736  |
| 67210 | P03346 | Q9BSG1 | 0.31436  |
| 67211 | P03346 | P55209 | 0.92626  |
| 67212 | P03346 | A0AVK6 | 0.68727  |
| 67213 | P03346 | Q9H3R5 | 0.68704  |
| 67214 | P03346 | Q9Y2M0 | 0.52144  |
| 67215 | P03346 | Q9Y2W2 | 1.0417   |
| 67216 | P03346 | Q15654 | 0.8846   |
| 67217 | P03346 | Q32P51 | 0.29187  |
| 67218 | P03346 | Q5VWM6 | 0.13291  |
| 67219 | P03346 | Q9BTC8 | 0.86432  |
| 67220 | P03346 | O96011 | 0.18361  |
| 67221 | P03346 | Q96QH2 | 0.46524  |
| 67222 | P03346 | Q9BZI1 | 0.58949  |
| 67223 | P03346 | Q49AM1 | 0.61052  |
| 67224 | P03346 | Q86UB2 | 0.49807  |
| 67225 | P03346 | Q9NV79 | 0.19165  |
| 67226 | P03346 | Q16612 | 0.45074  |
| 67227 | P03346 | O94817 | 0.76053  |
| 67228 | P03346 | Q8N1I0 | 0.50949  |
| 67229 | P03346 | Q92966 | 0.82822  |
| 67230 | P03346 | O43715 | 0.84578  |
| 67231 | P03346 | P40763 | 0.36703  |
| 67232 | P03346 | O14974 | 0.49168  |
| 67233 | P03346 | Q96EY5 | 0.55146  |
| 67234 | P03346 | Q8NG27 | 0.44961  |
| 67235 | P03346 | Q6AHZ1 | 0.31436  |
| 67236 | P03346 | P35398 | 0.49553  |
| 67237 | P03346 | Q7Z2W9 | 0.33708  |
| 67238 | P03346 | Q9Y4A0 | 0.25892  |
| 67239 | P03346 | Q99729 | 0.26624  |
| 67240 | P03346 | Q9Y297 | 0.30284  |
| 67241 | P03346 | Q9BXX1 | 0.29735  |
| 67242 | P03346 | Q96I23 | 0.54911  |
| 67243 | P03346 | Q9UJU3 | 0.31436  |
| 67244 | P03346 | P46776 | 1.0067   |
| 67245 | P03346 | Q15468 | 0.14621  |
| 67246 | P03346 | Q8N1Q8 | 0.16423  |
| 67247 | P03346 | Q9Y2B4 | 0.49129  |
| 67248 | P03346 | Q9BRX2 | 0.50088  |
| 67249 | P03346 | A8K8P3 | 0.95975  |
| 67250 | P03346 | Q8NHW3 | 0.59878  |
| 67251 | P03346 | Q14C87 | 0.14644  |
| 67252 | P03346 | P32243 | 0.94204  |
| 67253 | P03346 | Q96B23 | 0.024567 |
| 67254 | P03346 | Q16204 | 0.11832  |
| 67255 | P03346 | Q9GZY1 | 0.49807  |
| 67256 | P03346 | P49901 | 0.1708   |
| 67257 | P03346 | Q96AJ1 | 0.96082  |
| 67258 | P03346 | P40937 | 0.23432  |
| 67259 | P03346 | Q9H3C7 | 0.14677  |
| 67260 | P03346 | Q99741 | 0.58297  |

|       |        |        |            |
|-------|--------|--------|------------|
| 67261 | P03346 | P62241 | 0.65892    |
| 67262 | P03346 | Q68DY9 | 0.31436    |
| 67263 | P03346 | O43524 | 0.50519    |
| 67264 | P03346 | Q9Y3B6 | 0.18725    |
| 67265 | P03346 | Q9UKC9 | 0.73594    |
| 67266 | P03346 | Q96JN0 | 0.77046    |
| 67267 | P03346 | A6NF01 | 0.60441    |
| 67268 | P03346 | Q8IWN7 | 0.32775    |
| 67269 | P03346 | P06746 | 0.60529    |
| 67270 | P03346 | Q14677 | 0.71487    |
| 67271 | P03346 | A6NC98 | 0.23488    |
| 67272 | P03346 | Q9Y473 | 0.48112    |
| 67273 | P03346 | Q96CK0 | 0.31436    |
| 67274 | P03346 | Q969H0 | 0.75508    |
| 67275 | P03346 | O75386 | 0.25965    |
| 67276 | P03346 | P24666 | 0.33226    |
| 67277 | P03346 | Q9UPX8 | 0.52011    |
| 67278 | P03346 | Q9BRT6 | 0.00034207 |
| 67279 | P03346 | Q9BQ67 | 0.65405    |
| 67280 | P03346 | O60543 | 0.46471    |
| 67281 | P03346 | Q1ZZU3 | 0.93048    |
| 67282 | P03346 | Q86UP3 | 0.33644    |
| 67283 | P03346 | A8MSI8 | 0.1896     |
| 67284 | P03346 | O95059 | 0.33044    |
| 67285 | P03346 | Q5T0J7 | 0.25181    |
| 67286 | P03346 | Q9UJN7 | 0.31436    |
| 67287 | P03346 | Q7L590 | 1.1267     |
| 67288 | P03346 | Q15155 | 0.41202    |
| 67289 | P03346 | Q8NEA6 | 0.50181    |
| 67290 | P03346 | P0C2W1 | 0.24285    |
| 67291 | P03346 | Q9BXH1 | 0.45536    |
| 67292 | P03346 | Q8N3Z6 | 0.47403    |
| 67293 | P03346 | O43900 | 0.4682     |
| 67294 | P03346 | Q8N8D1 | 0.39362    |
| 67295 | P03346 | P52655 | 1.1535     |
| 67296 | P03346 | Q96HR8 | 1.1076     |
| 67297 | P03346 | Q6J272 | 0.01556    |
| 67298 | P03346 | Q5EBL2 | 0.30845    |
| 67299 | P03346 | O00110 | 0.33838    |
| 67300 | P03346 | Q9BVW5 | 1.062      |
| 67301 | P03346 | Q13765 | 1.3709     |
| 67302 | P03346 | Q8TAX9 | 0.20041    |
| 67303 | P03346 | Q01546 | 0.54448    |
| 67304 | P03346 | Q9NVN8 | 0.54601    |
| 67305 | P03346 | Q69383 | 0.74357    |
| 67306 | P03346 | Q9H320 | 0.49645    |
| 67307 | P03346 | Q8TAQ2 | 1.5206     |
| 67308 | P03346 | Q1MSJ5 | 0.34594    |
| 67309 | P03346 | Q9HBQ8 | 0.11048    |
| 67310 | P03346 | P61758 | 0.87904    |
| 67311 | P03346 | Q3SY56 | 0.33091    |
| 67312 | P03346 | Q9BRS8 | 0.31829    |
| 67313 | P03346 | O14519 | 0.48196    |
| 67314 | P03346 | Q92530 | 0.60542    |
| 67315 | P03346 | Q0D2J5 | 0.31436    |
| 67316 | P03346 | Q14674 | 0.46735    |
| 67317 | P03346 | Q16670 | 0.35994    |
| 67318 | P03346 | Q9UBZ4 | 0.20609    |
| 67319 | P03346 | Q9BQ52 | 0.31289    |
| 67320 | P03346 | Q6NXT1 | 0.56788    |
| 67321 | P03346 | Q9ULC4 | 0.67429    |
| 67322 | P03346 | Q9H211 | 0.94428    |
| 67323 | P03346 | Q9GZY8 | 0.30849    |
| 67324 | P03346 | Q9H7E9 | 0.0077221  |
| 67325 | P03346 | P0C5W0 | 0.20041    |
| 67326 | P03346 | Q7Z6G3 | 0.72646    |
| 67327 | P03346 | O94874 | 1.0089     |
| 67328 | P03346 | Q14690 | 0.88662    |
| 67329 | P03346 | Q9NR46 | 0.71623    |
| 67330 | P03346 | Q6ZN28 | 0.87917    |
| 67331 | P03346 | Q9UBK9 | 1.1786     |
| 67332 | P03346 | Q8N1K5 | 0.2854     |
| 67333 | P03346 | Q9Y5J1 | 0.41836    |
| 67334 | P03346 | Q8WUQ7 | 0.42116    |
| 67335 | P03346 | O14862 | 0.6476     |
| 67336 | P03346 | Q92624 | 1.0763     |

|       |        |        |          |
|-------|--------|--------|----------|
| 67337 | P03346 | Q5JRK9 | 0.11615  |
| 67338 | P03346 | P52597 | 0.84323  |
| 67339 | P03346 | Q9NTG7 | 0.52314  |
| 67340 | P03346 | Q8NBR6 | 0.14183  |
| 67341 | P03346 | Q9NSP4 | 0.32839  |
| 67342 | P03346 | Q9C010 | 0.040214 |
| 67343 | P03346 | Q8TAD8 | 1.5143   |
| 67344 | P03346 | P78543 | 0.79865  |
| 67345 | P03346 | Q9Y291 | 0.55092  |
| 67346 | P03346 | A6NLJ0 | 0.43496  |
| 67347 | P03346 | Q9H204 | 1.3946   |
| 67348 | P03346 | Q6VY07 | 0.65268  |
| 67349 | P03346 | Q96CM3 | 0.66264  |
| 67350 | P03346 | Q9Y2H8 | 0.31436  |
| 67351 | P03346 | Q68G74 | 0.41501  |
| 67352 | P03346 | Q96RE9 | 0.31436  |
| 67353 | P03346 | Q9BWX1 | 0.38717  |
| 67354 | P03346 | Q3SYA9 | 0.12821  |
| 67355 | P03346 | Q7Z3B4 | 0.87561  |
| 67356 | P03346 | Q92804 | 0.46741  |
| 67357 | P03346 | Q9NPA8 | 0.69969  |
| 67358 | P03346 | Q17RG1 | 0.3559   |
| 67359 | P03346 | Q9ULV3 | 0.4788   |
| 67360 | P03346 | O95478 | 0.56437  |
| 67361 | P03346 | Q93075 | 0.32779  |
| 67362 | P03346 | Q9NR50 | 0.68895  |
| 67363 | P03346 | P84090 | 0.149    |
| 67364 | P03346 | Q92556 | 0.38835  |
| 67365 | P03346 | Q9NQZ3 | 0.23949  |
| 67366 | P03346 | Q9NZ52 | 0.70493  |
| 67367 | P03346 | Q8N3J9 | 0.28776  |
| 67368 | P03346 | P09234 | 0.70516  |
| 67369 | P03346 | Q3BBW0 | 0.20041  |
| 67370 | P03346 | Q5BKX8 | 0.36865  |
| 67371 | P03346 | Q96EB1 | 1.3235   |
| 67372 | P03346 | Q9Y294 | 1.2128   |
| 67373 | P03346 | P56915 | 0.347    |
| 67374 | P03346 | Q8TAA5 | 0.32091  |
| 67375 | P03346 | Q8IVP9 | 0.31436  |
| 67376 | P03346 | O15040 | 0.66787  |
| 67377 | P03346 | Q96H22 | 0.17882  |
| 67378 | P03346 | P10916 | 0.27118  |
| 67379 | P03346 | Q9BSN8 | 0.18405  |
| 67380 | P03346 | Q86WV1 | 0.79673  |
| 67381 | P03346 | Q9UMX1 | 0.4294   |
| 67382 | P03346 | Q5CZA5 | 0.31436  |
| 67383 | P03346 | Q7RTV3 | 0.58561  |
| 67384 | P03346 | Q9NQ94 | 0.35727  |
| 67385 | P03346 | O75494 | 0.88094  |
| 67386 | P03346 | Q14657 | 0.19595  |
| 67387 | P03346 | Q9H2J4 | 0.89903  |
| 67388 | P03346 | Q9BXG8 | 0.8829   |
| 67389 | P03346 | B1AK76 | 0.020599 |
| 67390 | P03346 | Q6PJT7 | 1.0436   |
| 67391 | P03346 | Q9BYR6 | 0.51027  |
| 67392 | P03346 | Q02577 | 0.91538  |
| 67393 | P03346 | Q86UD0 | 0.65405  |
| 67394 | P03346 | O43929 | 0.2254   |
| 67395 | P03346 | Q6P1K2 | 1.2208   |
| 67396 | P03346 | Q92664 | 0.41213  |
| 67397 | P03346 | Q8NI27 | 0.84986  |
| 67398 | P03346 | Q7Z6Z7 | 0.53954  |
| 67399 | P03346 | Q9Y615 | 0.60052  |
| 67400 | P03346 | Q9NYT6 | 0.31436  |
| 67401 | P03346 | Q8WXB4 | 0.59404  |
| 67402 | P03346 | Q9HD36 | 0.68004  |
| 67403 | P03346 | Q9NS37 | 1.1786   |
| 67404 | P03346 | O14727 | 0.32426  |
| 67405 | P03346 | O95343 | 0.32504  |
| 67406 | P03346 | O14595 | 0.38808  |
| 67407 | P03346 | Q9UKN5 | 0.42915  |
| 67408 | P03346 | Q8N7B1 | 0.075097 |
| 67409 | P03346 | Q13285 | 0.23749  |
| 67410 | P03346 | Q9GZQ3 | 0.90599  |
| 67411 | P03346 | O14662 | 0.69065  |
| 67412 | P03346 | P15822 | 1.0302   |

|       |        |        |           |
|-------|--------|--------|-----------|
| 67413 | P03346 | A6NM28 | 0.31436   |
| 67414 | P03346 | Q8N9N2 | 0.66182   |
| 67415 | P03346 | Q9NUP1 | 0.87284   |
| 67416 | P03346 | Q6K0P9 | 0.5447    |
| 67417 | P03346 | Q96AB6 | 0.37733   |
| 67418 | P03346 | O75368 | 0.3734    |
| 67419 | P03346 | P0CG00 | 0.35994   |
| 67420 | P03346 | Q9NQT4 | 0.64211   |
| 67421 | P03346 | B3EWG4 | 0.0077221 |
| 67422 | P03346 | P42167 | 0.45481   |
| 67423 | P03346 | Q12972 | 1.1225    |
| 67424 | P03346 | P05204 | 0.73698   |
| 67425 | P03346 | Q92546 | 0.057999  |
| 67426 | P03346 | Q06587 | 0.82709   |
| 67427 | P03346 | Q9Y3I1 | 1.0722    |
| 67428 | P03346 | Q9UJK0 | 0.11942   |
| 67429 | P03346 | Q9NWA0 | 1.2846    |
| 67430 | P03346 | Q6ZU15 | 0.37229   |
| 67431 | P03346 | Q9Y3V2 | 1.1405    |
| 67432 | P03346 | Q9NVV9 | 1.1188    |
| 67433 | P03346 | Q13278 | 0.028183  |
| 67434 | P03346 | O60216 | 0.84481   |
| 67435 | P03346 | Q17RP2 | 0.31623   |
| 67436 | P03346 | P08238 | 0.56894   |
| 67437 | P03346 | O75953 | 1.0092    |
| 67438 | P03346 | Q9H160 | 0.54522   |
| 67439 | P03346 | Q8TED0 | 0.58256   |
| 67440 | P03346 | Q02447 | 0.54942   |
| 67441 | P03346 | Q96N58 | 0.31436   |
| 67442 | P03346 | O94822 | 0.32429   |
| 67443 | P03346 | Q8WUM4 | 1.1599    |
| 67444 | P03346 | P01100 | 0.58706   |
| 67445 | P03346 | Q99614 | 0.56728   |
| 67446 | P03346 | Q96NK8 | 0.39051   |
| 67447 | P03346 | P48788 | 0.79447   |
| 67448 | P03346 | P62308 | 0.96834   |
| 67449 | P03346 | Q9BYN8 | 0.32791   |
| 67450 | P03346 | Q9UBB5 | 1.3625    |
| 67451 | P03346 | Q9H6U6 | 1.0918    |
| 67452 | P03346 | P62312 | 1.066     |
| 67453 | P03346 | Q9H7P6 | 0.11302   |
| 67454 | P03346 | Q96PK6 | 0.8834    |
| 67455 | P03346 | Q96BD8 | 0.6813    |
| 67456 | P03346 | Q8TEC5 | 0.29076   |
| 67457 | P03346 | Q9UIW0 | 0.36159   |
| 67458 | P03346 | Q6PGQ7 | 0.81132   |
| 67459 | P03346 | Q9NZ63 | 0.65405   |
| 67460 | P03346 | Q9BSH4 | 0.13988   |
| 67461 | P03346 | Q9H3M7 | 0.90154   |
| 67462 | P03346 | Q8IWA0 | 0.48532   |
| 67463 | P03346 | Q9H693 | 0.013959  |
| 67464 | P03346 | P54277 | 0.2365    |
| 67465 | P03346 | Q96KN1 | 0.68296   |
| 67466 | P03346 | P53672 | 0.092431  |
| 67467 | P03346 | Q96DX8 | 0.3017    |
| 67468 | P03346 | Q6ZNG1 | 0.31436   |
| 67469 | P03346 | Q9UMQ3 | 1.0216    |
| 67470 | P03346 | Q6NX49 | 0.31436   |
| 67471 | P03346 | Q86UQ8 | 0.74266   |
| 67472 | P03346 | Q9BUL8 | 0.82745   |
| 67473 | P03346 | P62753 | 0.92542   |
| 67474 | P03346 | Q5TEC3 | 0.31644   |
| 67475 | P03346 | P49335 | 0.46546   |
| 67476 | P03346 | Q8TDZ2 | 0.26383   |
| 67477 | P03346 | O60711 | 0.55635   |
| 67478 | P03346 | Q9NS23 | 0.37573   |
| 67479 | P03346 | Q01664 | 0.72415   |
| 67480 | P03346 | Q92764 | 0.46894   |
| 67481 | P03346 | P53367 | 0.23294   |
| 67482 | P03346 | O43823 | 0.090445  |
| 67483 | P03346 | O15372 | 0.87738   |
| 67484 | P03346 | P63000 | 0.47256   |
| 67485 | P03346 | Q9H267 | 0.49592   |
| 67486 | P03346 | P51948 | 0.39506   |
| 67487 | P03346 | Q9HB07 | 0.47055   |
| 67488 | P03346 | Q10570 | 1.0075    |

|       |        |        |           |
|-------|--------|--------|-----------|
| 67489 | P03346 | Q9P2A4 | 0.44554   |
| 67490 | P03346 | Q9NPD3 | 0.47506   |
| 67491 | P03346 | Q92890 | 1.0288    |
| 67492 | P03346 | O14965 | 0.26677   |
| 67493 | P03346 | O75807 | 0.64518   |
| 67494 | P03346 | Q9UL42 | 1.1091    |
| 67495 | P03346 | Q96F86 | 0.8923    |
| 67496 | P03346 | Q9NY43 | 0.70366   |
| 67497 | P03346 | Q99676 | 0.31436   |
| 67498 | P03346 | Q8N3Y1 | 0.56538   |
| 67499 | P03346 | Q9BZD4 | 0.87556   |
| 67500 | P03346 | P60371 | 0.40421   |
| 67501 | P03346 | Q96LI5 | 0.67807   |
| 67502 | P03346 | Q86VP3 | 0.1875    |
| 67503 | P03346 | P53539 | 0.45433   |
| 67504 | P03346 | O60516 | 0.53398   |
| 67505 | P03346 | A6NJG6 | 0.71675   |
| 67506 | P03346 | O43242 | 0.25428   |
| 67507 | P03346 | Q96SR6 | 0.32869   |
| 67508 | P03346 | Q8IUC0 | 0.36736   |
| 67509 | P03346 | Q99618 | 0.67918   |
| 67510 | P03346 | A6NI79 | 0.047241  |
| 67511 | P03346 | Q9NP97 | 0.72671   |
| 67512 | P03346 | Q13185 | 0.96261   |
| 67513 | P03346 | Q12996 | 0.47363   |
| 67514 | P03346 | Q1W6H9 | 0.23544   |
| 67515 | P03346 | Q9BSV6 | 0.36392   |
| 67516 | P03346 | Q8WUZ0 | 0.055233  |
| 67517 | P03346 | A4GXA9 | 0.39915   |
| 67518 | P03346 | Q99743 | 0.63885   |
| 67519 | P03346 | P22674 | 0.54008   |
| 67520 | P03346 | Q495M9 | 0.47738   |
| 67521 | P03346 | P15036 | 1.1629    |
| 67522 | P03346 | A8MZG2 | 0.0077221 |
| 67523 | P03346 | P51816 | 0.15486   |
| 67524 | P03346 | Q9ULW6 | 0.26935   |
| 67525 | P03346 | Q9NP85 | 0.25829   |
| 67526 | P03346 | P56277 | 0.10843   |
| 67527 | P03346 | Q15544 | 1.0158    |
| 67528 | P03346 | Q86T75 | 0.20041   |
| 67529 | P03346 | O14802 | 0.20719   |
| 67530 | P03346 | Q96DX7 | 0.26015   |
| 67531 | P03346 | Q9UBF6 | 0.81607   |
| 67532 | P03346 | Q9Y5K5 | 0.47839   |
| 67533 | P03346 | A6NCW7 | 0.34408   |
| 67534 | P03346 | Q12796 | 1.3712    |
| 67535 | P03346 | Q6ZN08 | 0.31436   |
| 67536 | P03346 | Q8WW24 | 0.25283   |
| 67537 | P03346 | O00716 | 1.2981    |
| 67538 | P03346 | P62945 | 0.777     |
| 67539 | P03346 | P09067 | 0.47332   |
| 67540 | P03346 | Q9UJL8 | 0.51719   |
| 67541 | P03346 | Q14164 | 0.30386   |
| 67542 | P03346 | Q6UVJ0 | 0.98715   |
| 67543 | P03346 | Q8TEB1 | 0.63666   |
| 67544 | P03346 | Q86VP1 | 0.63554   |
| 67545 | P03346 | P52294 | 1.083     |
| 67546 | P03346 | P57081 | 1.139     |
| 67547 | P03346 | P57723 | 0.29802   |
| 67548 | P03346 | Q8NB16 | 0.30674   |
| 67549 | P03346 | P32780 | 0.77074   |
| 67550 | P03346 | Q9NRC8 | 1.2885    |
| 67551 | P03346 | Q14154 | 0.75918   |
| 67552 | P03346 | Q96D46 | 0.88829   |
| 67553 | P03346 | Q5SW79 | 0.99506   |
| 67554 | P03346 | P78385 | 0.48588   |
| 67555 | P03346 | Q8IZD2 | 0.39318   |
| 67556 | P03346 | P62995 | 0.38018   |
| 67557 | P03346 | P17509 | 0.47707   |
| 67558 | P03346 | Q9Y586 | 0.17376   |
| 67559 | P03346 | Q9UQL6 | 0.45923   |
| 67560 | P03346 | Q13772 | 0.58291   |
| 67561 | P03346 | Q6ZP82 | 0.66787   |
| 67562 | P03346 | P62310 | 1.0209    |
| 67563 | P03346 | Q9UHD4 | 0.028338  |
| 67564 | P03346 | O15164 | 0.37534   |

|       |        |        |           |
|-------|--------|--------|-----------|
| 67565 | P03346 | Q9BYQ9 | 0.40421   |
| 67566 | P03346 | P58005 | 0.28712   |
| 67567 | P03346 | A2BFH1 | 0.19353   |
| 67568 | P03346 | Q7L5N1 | 1.2607    |
| 67569 | P03346 | Q6L8H4 | 0.40421   |
| 67570 | P03346 | Q5XUX0 | 0.034173  |
| 67571 | P03346 | Q00444 | 0.65156   |
| 67572 | P03346 | Q8TF46 | 0.4664    |
| 67573 | P03346 | Q96T37 | 0.52705   |
| 67574 | P03346 | Q8IWL3 | 0.68855   |
| 67575 | P03346 | Q96F63 | 0.0077221 |
| 67576 | P03346 | Q9UK45 | 1.041     |
| 67577 | P03346 | Q86XP3 | 0.47172   |
| 67578 | P03346 | O60645 | 0.75516   |
| 67579 | P03346 | P0C7I6 | 0.048634  |
| 67580 | P03346 | O75081 | 1.1779    |
| 67581 | P03346 | Q76N32 | 0.34234   |
| 67582 | P03346 | Q96MB7 | 0.46683   |
| 67583 | P03346 | O95633 | 0.34092   |
| 67584 | P03346 | Q6NV74 | 0.0077221 |
| 67585 | P03346 | Q96EY1 | 0.43915   |
| 67586 | P03346 | Q8N9U0 | 0.32217   |
| 67587 | P03346 | Q9UHV7 | 0.69619   |
| 67588 | P03346 | Q96RN5 | 1.4635    |
| 67589 | P03346 | Q15393 | 0.43246   |
| 67590 | P03346 | Q9HBF4 | 0.31343   |
| 67591 | P03346 | Q53EL6 | 1.2435    |
| 67592 | P03346 | Q9Y6X0 | 0.29934   |
| 67593 | P03346 | Q9NRD5 | 0.23874   |
| 67594 | P03346 | Q9NR56 | 0.59772   |
| 67595 | P03346 | Q00610 | 0.82094   |
| 67596 | P03346 | P78318 | 0.52714   |
| 67597 | P03346 | Q9UIH9 | 0.54622   |
| 67598 | P03346 | O95416 | 0.77053   |
| 67599 | P03346 | Q9Y3D0 | 1.1594    |
| 67600 | P03346 | Q8N9R8 | 0.9259    |
| 67601 | P03346 | Q96PM9 | 0.59404   |
| 67602 | P03346 | Q96BT3 | 0.72017   |
| 67603 | P03346 | O95503 | 1.2145    |
| 67604 | P03346 | P53992 | 1.0626    |
| 67605 | P03346 | Q9BYQ4 | 0.40421   |
| 67606 | P03346 | P04792 | 0.44853   |
| 67607 | P03346 | P09661 | 0.97881   |
| 67608 | P03346 | O14529 | 0.73135   |
| 67609 | P03346 | Q9Y6K5 | 0.24713   |
| 67610 | P03346 | Q92618 | 0.31436   |
| 67611 | P03346 | Q92785 | 0.6929    |
| 67612 | P03346 | Q96I24 | 0.83679   |
| 67613 | P03346 | Q52LA3 | 0.19809   |
| 67614 | P03346 | Q9BTE3 | 0.81104   |
| 67615 | P03346 | Q9UC07 | 0.30845   |
| 67616 | P03346 | P0CJ86 | 0.6797    |
| 67617 | P03346 | Q3ZCV2 | 0.0077221 |
| 67618 | P03346 | P40261 | 0.2428    |
| 67619 | P03346 | Q14929 | 0.30845   |
| 67620 | P03346 | A0AVT1 | 0.234     |
| 67621 | P03346 | O43913 | 0.52486   |
| 67622 | P03346 | Q9HBK9 | 0.32899   |
| 67623 | P03346 | Q9UJG1 | 0.33837   |
| 67624 | P03346 | Q8NEH6 | 0.68367   |
| 67625 | P03346 | Q02833 | 0.47408   |
| 67626 | P03346 | Q01826 | 0.92258   |
| 67627 | P03346 | P55055 | 0.38736   |
| 67628 | P03346 | Q9UK73 | 0.92374   |
| 67629 | P03346 | A8MZ59 | 0.66978   |
| 67630 | P03346 | Q9GZS1 | 0.68412   |
| 67631 | P03346 | Q9UPZ3 | 0.29049   |
| 67632 | P03346 | P54198 | 1.2821    |
| 67633 | P03346 | Q15365 | 1.3006    |
| 67634 | P03346 | O43248 | 0.59392   |
| 67635 | P03346 | Q9BRX9 | 0.47834   |
| 67636 | P03346 | Q9Y4W2 | 0.49454   |
| 67637 | P03346 | Q6W2J9 | 0.58163   |
| 67638 | P03346 | O14910 | 0.8456    |
| 67639 | P03346 | P31949 | 0.57042   |
| 67640 | P03346 | Q5U5X0 | 0.14441   |

|       |        |        |           |
|-------|--------|--------|-----------|
| 67641 | P03346 | Q8TAU3 | 0.31436   |
| 67642 | P03346 | Q9Y2Y9 | 0.92628   |
| 67643 | P03346 | Q9BT81 | 0.68073   |
| 67644 | P03346 | Q96IK5 | 0.29008   |
| 67645 | P03346 | Q96SQ5 | 0.31436   |
| 67646 | P03346 | Q8NAQ8 | 0.29183   |
| 67647 | P03346 | P54259 | 1.0478    |
| 67648 | P03346 | O15405 | 1.2853    |
| 67649 | P03346 | Q9HCC9 | 0.61087   |
| 67650 | P03346 | Q15650 | 0.83522   |
| 67651 | P03346 | Q701N4 | 0.40421   |
| 67652 | P03346 | A6NIY4 | 0.040024  |
| 67653 | P03346 | Q6P1J9 | 0.79092   |
| 67654 | P03346 | Q6NSZ9 | 0.34285   |
| 67655 | P03346 | P18615 | 0.98868   |
| 67656 | P03346 | Q96LA8 | 0.77496   |
| 67657 | P03346 | A6NGQ2 | 0.22597   |
| 67658 | P03346 | Q8WYK2 | 0.68065   |
| 67659 | P03346 | Q71F23 | 0.74548   |
| 67660 | P03346 | Q92901 | 0.66528   |
| 67661 | P03346 | Q96KP1 | 0.57913   |
| 67662 | P03346 | Q5VWK0 | 0.20041   |
| 67663 | P03346 | P32969 | 0.84645   |
| 67664 | P03346 | A6H8Y1 | 1.0205    |
| 67665 | P03346 | O60524 | 0.62834   |
| 67666 | P03346 | Q9BQ95 | 1.2521    |
| 67667 | P03346 | P26373 | 0.98002   |
| 67668 | P03346 | Q14938 | 0.59318   |
| 67669 | P03346 | P33240 | 0.72592   |
| 67670 | P03346 | P60510 | 0.88739   |
| 67671 | P03346 | Q496Y0 | 0.30456   |
| 67672 | P03346 | Q00765 | 0.20494   |
| 67673 | P03346 | Q9NXR8 | 0.40705   |
| 67674 | P03346 | Q9H4Z2 | 0.85529   |
| 67675 | P03346 | Q9BUV0 | 0.0077221 |
| 67676 | P03346 | Q9H8H0 | 0.48532   |
| 67677 | P03346 | Q13106 | 0.30845   |
| 67678 | P03346 | Q8IY85 | 0.5541    |
| 67679 | P03346 | P17024 | 0.31436   |
| 67680 | P03346 | Q9BUE0 | 1.2846    |
| 67681 | P03346 | Q96PT3 | 0.63594   |
| 67682 | P03346 | O14929 | 0.93055   |
| 67683 | P03346 | Q8TDQ7 | 0.25359   |
| 67684 | P03346 | Q9H0I3 | 0.70363   |
| 67685 | P03346 | P58546 | 0.2888    |
| 67686 | P03346 | Q96GX9 | 0.50811   |
| 67687 | P03346 | A1L188 | 0.14441   |
| 67688 | P03346 | Q14549 | 0.72277   |
| 67689 | P03346 | Q96T88 | 0.38552   |
| 67690 | P03346 | Q15363 | 0.27896   |
| 67691 | P03346 | Q9UJL9 | 0.30845   |
| 67692 | P03346 | Q9H1B7 | 0.2474    |
| 67693 | P03346 | Q9NRL3 | 0.69771   |
| 67694 | P03346 | O14786 | 0.40434   |
| 67695 | P03346 | P31629 | 0.31436   |
| 67696 | P03346 | Q9NSI8 | 0.25669   |
| 67697 | P03346 | Q15714 | 1.0217    |
| 67698 | P03346 | Q9H008 | 0.51832   |
| 67699 | P03346 | O14770 | 0.90881   |
| 67700 | P03346 | Q86WG3 | 0.55275   |
| 67701 | P03346 | Q9NWZ5 | 0.23676   |
| 67702 | P03346 | Q9H6Z9 | 0.54327   |
| 67703 | P03346 | Q9UJW7 | 0.31436   |
| 67704 | P03346 | Q9Y4P8 | 1.0335    |
| 67705 | P03346 | Q96T76 | 1.0195    |
| 67706 | P03346 | Q8N7H5 | 1.063     |
| 67707 | P03346 | Q9UI10 | 0.48251   |
| 67708 | P03346 | Q9NZI7 | 0.61466   |
| 67709 | P03346 | Q13352 | 0.59025   |
| 67710 | P03346 | Q7Z2F6 | 0.18405   |
| 67711 | P03346 | Q8N2G8 | 0.43196   |
| 67712 | P03346 | Q13136 | 0.5711    |
| 67713 | P03346 | P51814 | 0.30845   |
| 67714 | P03346 | Q92834 | 0.46954   |
| 67715 | P03346 | P18124 | 0.66287   |
| 67716 | P03346 | Q3LI54 | 0.36736   |



|       |        |        |          |
|-------|--------|--------|----------|
| 67717 | P03346 | Q6ZR52 | 0.31436  |
| 67718 | P03346 | Q9NPJ8 | 0.47869  |
| 67719 | P03346 | Q9H0E7 | 0.2674   |
| 67720 | P03346 | Q6DKK2 | 1.0848   |
| 67721 | P03346 | Q9H511 | 0.46683  |
| 67722 | P03346 | P40306 | 0.35697  |
| 67723 | P03346 | A6NG73 | 0.51797  |
| 67724 | P03346 | Q9P2M7 | 0.68697  |
| 67725 | P03346 | Q5VZK9 | 0.43048  |
| 67726 | P03346 | Q13901 | 1.3298   |
| 67727 | P03346 | Q96ST2 | 0.35728  |
| 67728 | P03346 | Q16630 | 0.55154  |
| 67729 | P03346 | O95571 | 0.5637   |
| 67730 | P03346 | P27986 | 0.46786  |
| 67731 | P03346 | P40429 | 0.7656   |
| 67732 | P03346 | Q9UHQ1 | 0.25867  |
| 67733 | P03346 | O75506 | 0.23596  |
| 67734 | P03346 | Q9Y2S0 | 0.36696  |
| 67735 | P03346 | Q32M78 | 0.31436  |
| 67736 | P03346 | Q9Y4E5 | 0.27653  |
| 67737 | P03346 | P62875 | 0.19619  |
| 67738 | P03346 | Q13868 | 0.78577  |
| 67739 | P03346 | Q9BRP4 | 0.70798  |
| 67740 | P03346 | Q15054 | 0.70375  |
| 67741 | P03346 | Q9P1Z0 | 0.31436  |
| 67742 | P03346 | Q9P1A6 | 0.44109  |
| 67743 | P03346 | Q6IQ23 | 0.47461  |
| 67744 | P03346 | P27635 | 0.63476  |
| 67745 | P03346 | Q9H9Y2 | 0.47969  |
| 67746 | P03346 | Q86Y13 | 0.50352  |
| 67747 | P03346 | P19387 | 0.61911  |
| 67748 | P03346 | Q9NVW2 | 0.48386  |
| 67749 | P03346 | Q9BTT0 | 0.4727   |
| 67750 | P03346 | P68104 | 0.92192  |
| 67751 | P03346 | Q9BYR7 | 0.51027  |
| 67752 | P03346 | P43359 | 0.12821  |
| 67753 | P03346 | Q8WVK7 | 0.68113  |
| 67754 | P03346 | P60372 | 0.40421  |
| 67755 | P03346 | Q13257 | 0.78311  |
| 67756 | P03346 | Q9P015 | 0.54881  |
| 67757 | P03346 | P60413 | 0.40421  |
| 67758 | P03346 | Q9UNH5 | 0.7309   |
| 67759 | P03346 | Q86XI8 | 0.66787  |
| 67760 | P03346 | Q7Z6R9 | 0.68722  |
| 67761 | P03346 | Q9H0B6 | 0.77531  |
| 67762 | P03346 | Q01543 | 0.71944  |
| 67763 | P03346 | Q9UKD1 | 0.9924   |
| 67764 | P03346 | P30307 | 0.74366  |
| 67765 | P03346 | Q6ZW49 | 0.587    |
| 67766 | P03346 | Q6ZN55 | 0.31436  |
| 67767 | P03346 | Q7L3B6 | 0.20041  |
| 67768 | P03346 | Q9BWC9 | 0.32217  |
| 67769 | P03346 | Q96JC4 | 0.31436  |
| 67770 | P03346 | Q96JK9 | 1.1409   |
| 67771 | P03346 | P49454 | 0.56797  |
| 67772 | P03346 | Q9BVK6 | 0.26523  |
| 67773 | P03346 | Q8TAD1 | 0.49807  |
| 67774 | P03346 | Q7Z7H8 | 0.39474  |
| 67775 | P03346 | Q9NPA3 | 0.32318  |
| 67776 | P03346 | Q2TB10 | 0.31436  |
| 67777 | P03346 | Q99933 | 0.92563  |
| 67778 | P03346 | Q9UHA3 | 0.54249  |
| 67779 | P03346 | Q9UJC3 | 0.27874  |
| 67780 | P03346 | Q9UJW9 | 1.3047   |
| 67781 | P03346 | Q86W11 | 0.34285  |
| 67782 | P03346 | A6NI86 | 0.016778 |
| 67783 | P03346 | P0DM35 | 0.057754 |
| 67784 | P03346 | Q5T0F9 | 0.71646  |
| 67785 | P03346 | P15884 | 0.83694  |
| 67786 | P03346 | P46783 | 1.2929   |
| 67787 | P03346 | P53677 | 0.49013  |
| 67788 | P03346 | O43303 | 1.0096   |
| 67789 | P03346 | Q14134 | 0.73531  |
| 67790 | P03346 | P14651 | 0.52577  |
| 67791 | P03346 | Q96D09 | 0.18998  |
| 67792 | P03346 | Q9Y263 | 0.33778  |

|       |        |         |           |
|-------|--------|---------|-----------|
| 67793 | P03346 | Q2VY69  | 0.31436   |
| 67794 | P03346 | Q7RTU4  | 0.71211   |
| 67795 | P03346 | Q13794  | 0.44974   |
| 67796 | P03346 | Q99747  | 0.80403   |
| 67797 | P03346 | Q96EP1  | 0.59311   |
| 67798 | P03346 | Q95190  | 0.35332   |
| 67799 | P03346 | Q9Y3B7  | 1.0814    |
| 67800 | P03346 | Q9BVV6  | 0.16741   |
| 67801 | P03346 | O00273  | 0.484     |
| 67802 | P03346 | Q9BVP2  | 0.47629   |
| 67803 | P03346 | O14776  | 1.3638    |
| 67804 | P03346 | O43745  | 0.94933   |
| 67805 | P03346 | O15504  | 0.51674   |
| 67806 | P03346 | Q92844  | 0.66736   |
| 67807 | P03346 | Q6ZN17  | 1.2148    |
| 67808 | P03346 | Q8IZL2  | 1.0791    |
| 67809 | P03346 | Q9Y3A5  | 0.79477   |
| 67810 | P03346 | O94900  | 0.29934   |
| 67811 | P03346 | Q9NX46  | 0.51919   |
| 67812 | P03346 | C9JE40  | 1.1425    |
| 67813 | P03346 | Q9H568  | 0.18249   |
| 67814 | P03346 | Q9Y262  | 0.98025   |
| 67815 | P03346 | Q8IWIJ2 | 0.8761    |
| 67816 | P03346 | Q96NB1  | 0.33603   |
| 67817 | P03346 | P18846  | 0.99415   |
| 67818 | P03346 | Q8TB45  | 0.33533   |
| 67819 | P03346 | Q00653  | 1.2898    |
| 67820 | P03346 | Q9NVR2  | 1.187     |
| 67821 | P03346 | Q9NWD9  | 0.49807   |
| 67822 | P03346 | O75146  | 0.28704   |
| 67823 | P03346 | Q8N184  | 0.31436   |
| 67824 | P03346 | Q07866  | 0.73789   |
| 67825 | P03346 | P82673  | 0.32791   |
| 67826 | P03346 | P35452  | 0.29552   |
| 67827 | P03346 | Q14839  | 0.6227    |
| 67828 | P03346 | Q9UN37  | 0.60745   |
| 67829 | P03346 | Q8NCE0  | 0.60715   |
| 67830 | P03346 | O15062  | 0.31436   |
| 67831 | P03346 | Q96M02  | 0.21769   |
| 67832 | P03346 | Q9BYD9  | 0.45658   |
| 67833 | P03346 | Q8N8L2  | 0.31436   |
| 67834 | P03346 | O75496  | 1.0518    |
| 67835 | P03346 | P17482  | 1.3477    |
| 67836 | P03346 | Q53FT3  | 0.49582   |
| 67837 | P03346 | Q6I9Y2  | 1.1096    |
| 67838 | P03346 | O43617  | 0.56465   |
| 67839 | P03346 | Q96CB9  | 0.10745   |
| 67840 | P03346 | Q86Y82  | 0.30824   |
| 67841 | P03346 | Q3C1V1  | 0.0077221 |
| 67842 | P03346 | Q96NS1  | 0.48532   |
| 67843 | P03346 | P54252  | 0.61498   |
| 67844 | P03346 | P0CG24  | 0.31436   |
| 67845 | P03346 | Q5TA77  | 0.02884   |
| 67846 | P03346 | Q96MX3  | 0.31436   |
| 67847 | P03346 | O00488  | 0.40479   |
| 67848 | P03346 | Q96GC5  | 0.87915   |
| 67849 | P03346 | Q8IUM7  | 0.49754   |
| 67850 | P03346 | Q8WUX9  | 0.73294   |
| 67851 | P03346 | A8K8V0  | 0.31436   |
| 67852 | P03346 | Q6ZN19  | 0.31436   |
| 67853 | P03346 | Q6ZNG2  | 0.63594   |
| 67854 | P03346 | Q13127  | 0.49381   |
| 67855 | P03346 | Q96JB3  | 0.31476   |
| 67856 | P03346 | Q15276  | 0.2168    |
| 67857 | P03346 | Q92791  | 0.27393   |
| 67858 | P03346 | Q14689  | 0.60256   |
| 67859 | P03346 | Q14241  | 0.49349   |
| 67860 | P03346 | P62906  | 0.6733    |
| 67861 | P03346 | O43156  | 0.66787   |
| 67862 | P03346 | Q3B726  | 0.45304   |
| 67863 | P03346 | Q9H9J2  | 0.18104   |
| 67864 | P03346 | Q9Y2T2  | 0.81352   |
| 67865 | P03346 | Q9HCC6  | 0.43581   |
| 67866 | P03346 | Q5JTC6  | 0.68397   |
| 67867 | P03346 | Q6ZNG0  | 0.31436   |
| 67868 | P03346 | Q9UPA5  | 0.33877   |

|       |        |        |          |
|-------|--------|--------|----------|
| 67869 | P03346 | Q6EMB2 | 0.33397  |
| 67870 | P03346 | P57077 | 1.0839   |
| 67871 | P03346 | P58004 | 0.45703  |
| 67872 | P03346 | P24522 | 0.72605  |
| 67873 | P03346 | Q9P1U0 | 0.29314  |
| 67874 | P03346 | Q92782 | 0.71442  |
| 67875 | P03346 | Q96KE9 | 0.2411   |
| 67876 | P03346 | Q9Y2Q1 | 0.31436  |
| 67877 | P03346 | Q9Y573 | 0.10481  |
| 67878 | P03346 | P47928 | 0.62236  |
| 67879 | P03346 | Q9H900 | 0.67355  |
| 67880 | P03346 | P11387 | 0.75034  |
| 67881 | P03346 | Q13501 | 0.43654  |
| 67882 | P03346 | Q9UJC5 | 0.38386  |
| 67883 | P03346 | Q8N100 | 0.3164   |
| 67884 | P03346 | Q9Y2B5 | 0.22491  |
| 67885 | P03346 | Q96EL1 | 0.018638 |
| 67886 | P03346 | Q96MN5 | 0.35728  |
| 67887 | P03346 | Q6PK04 | 0.13524  |
| 67888 | P03346 | Q6IQ16 | 0.31881  |
| 67889 | P03346 | P30084 | 0.34738  |
| 67890 | P03346 | Q9H7R0 | 0.31436  |
| 67891 | P03346 | Q13465 | 0.41915  |
| 67892 | P03346 | Q9H4L7 | 0.49323  |
| 67893 | P03346 | Q68CQ4 | 0.27272  |
| 67894 | P03346 | Q68DY1 | 0.31436  |
| 67895 | P03346 | Q9UJW3 | 0.78038  |
| 67896 | P03346 | Q9UBP0 | 0.25863  |
| 67897 | P03346 | Q96CW6 | 0.6555   |
| 67898 | P03346 | O15127 | 0.89385  |
| 67899 | P03346 | Q9H7T9 | 0.94456  |
| 67900 | P03346 | Q9NXZ1 | 0.48532  |
| 67901 | P03346 | Q86TJ2 | 0.63707  |
| 67902 | P03346 | Q9H840 | 1.1178   |
| 67903 | P03346 | Q9HCI5 | 0.85992  |
| 67904 | P03346 | Q8NHV9 | 0.3984   |
| 67905 | P03346 | Q9NNW5 | 0.75324  |
| 67906 | P03346 | Q15428 | 0.19175  |
| 67907 | P03346 | O75177 | 0.30214  |
| 67908 | P03346 | A6NHJ4 | 0.31436  |
| 67909 | P03346 | Q9P0R6 | 0.20041  |
| 67910 | P03346 | Q5C9Z4 | 1.0375   |
| 67911 | P03346 | Q92665 | 0.99664  |
| 67912 | P03346 | Q9BSQ5 | 0.56066  |
| 67913 | P03346 | Q92600 | 1.3424   |
| 67914 | P03346 | Q9H8Y1 | 0.010965 |
| 67915 | P03346 | P22415 | 0.65432  |
| 67916 | P03346 | Q5TG08 | 0.039472 |
| 67917 | P03346 | Q9BYZ2 | 0.39931  |
| 67918 | P03346 | Q76FK4 | 0.60878  |
| 67919 | P03346 | O95379 | 0.18139  |
| 67920 | P03346 | Q5SWL7 | 0.13291  |
| 67921 | P03346 | P49792 | 0.75992  |
| 67922 | P03346 | Q9UBF9 | 0.25775  |
| 67923 | P03346 | Q96E09 | 0.033045 |
| 67924 | P03346 | Q9BRA0 | 0.49807  |
| 67925 | P03346 | Q96028 | 0.46319  |
| 67926 | P03346 | Q8N228 | 0.70946  |
| 67927 | P03346 | Q9P0M9 | 0.35035  |
| 67928 | P03346 | Q9H0C5 | 0.85567  |
| 67929 | P03346 | Q9HBU1 | 0.31456  |
| 67930 | P03346 | Q9UPV0 | 1.5638   |
| 67931 | P03346 | Q6IEG0 | 0.60652  |
| 67932 | P03346 | O76013 | 0.43194  |
| 67933 | P03346 | Q9Y4A8 | 0.86059  |
| 67934 | P03346 | Q9GZV8 | 0.22605  |
| 67935 | P03346 | Q8IY51 | 0.31623  |
| 67936 | P03346 | P23284 | 0.54604  |
| 67937 | P03346 | Q9BTA9 | 1.1823   |
| 67938 | P03346 | Q8IWE5 | 0.70256  |
| 67939 | P03346 | P63151 | 0.59318  |
| 67940 | P03346 | Q9NUK0 | 0.18624  |
| 67941 | P03346 | Q8WV44 | 0.59074  |
| 67942 | P03346 | Q8NDP4 | 0.31436  |
| 67943 | P03346 | Q8IYN2 | 0.74266  |
| 67944 | P03346 | Q9H079 | 0.19467  |

|       |        |        |           |
|-------|--------|--------|-----------|
| 67945 | P03346 | P62244 | 0.71628   |
| 67946 | P03346 | Q9BUN5 | 0.73188   |
| 67947 | P03346 | Q86XN8 | 0.30044   |
| 67948 | P03346 | Q8WYQ5 | 0.84334   |
| 67949 | P03346 | Q6NWX9 | 0.39171   |
| 67950 | P03346 | Q00308 | 0.35302   |
| 67951 | P03346 | Q9BSH5 | 0.63044   |
| 67952 | P03346 | O75791 | 1.1563    |
| 67953 | P03346 | Q96IR2 | 0.31436   |
| 67954 | P03346 | O43719 | 0.37502   |
| 67955 | P03346 | O43924 | 0.40187   |
| 67956 | P03346 | Q96MT8 | 1.1073    |
| 67957 | P03346 | Q8N9B4 | 0.29787   |
| 67958 | P03346 | Q9NXX6 | 0.66357   |
| 67959 | P03346 | Q9Y2K5 | 0.32442   |
| 67960 | P03346 | Q96QF0 | 0.79587   |
| 67961 | P03346 | Q14693 | 0.40555   |
| 67962 | P03346 | Q13561 | 0.84237   |
| 67963 | P03346 | Q5BKZ1 | 0.70902   |
| 67964 | P03346 | Q14140 | 0.94227   |
| 67965 | P03346 | A8MYZ0 | 0.0081679 |
| 67966 | P03346 | O75794 | 0.4159    |
| 67967 | P03346 | Q9BQA5 | 0.80479   |
| 67968 | P03346 | Q86V97 | 0.7115    |
| 67969 | P03346 | O75792 | 0.19611   |
| 67970 | P03346 | Q6PK81 | 0.31436   |
| 67971 | P03346 | Q7Z2W4 | 0.47034   |
| 67972 | P03346 | P48595 | 0.40828   |
| 67973 | P03346 | Q9P2K3 | 1.558     |
| 67974 | P03346 | Q9NP98 | 0.62885   |
| 67975 | P03346 | Q9NPJ3 | 0.26093   |
| 67976 | P03346 | Q9HAW0 | 0.58986   |
| 67977 | P03346 | Q9C000 | 0.39879   |
| 67978 | P03346 | P08151 | 0.41857   |
| 67979 | P03346 | Q6B0B8 | 0.31623   |
| 67980 | P03346 | Q14686 | 0.67818   |
| 67981 | P03346 | P57086 | 0.72258   |
| 67982 | P03346 | Q06455 | 0.88967   |
| 67983 | P03346 | P61586 | 0.04368   |
| 67984 | P03346 | Q9NPF5 | 1.1247    |
| 67985 | P03346 | Q12959 | 0.79438   |
| 67986 | P03346 | Q14974 | 0.95545   |
| 67987 | P03346 | Q86TP1 | 0.92135   |
| 67988 | P03346 | Q9UJ78 | 0.16034   |
| 67989 | P03346 | Q92988 | 0.99662   |
| 67990 | P03346 | Q12872 | 0.65353   |
| 67991 | P03346 | Q8N9T8 | 0.19762   |
| 67992 | P03346 | Q9NWB1 | 0.5773    |
| 67993 | P03346 | Q96SF7 | 0.55643   |
| 67994 | P03346 | Q14331 | 0.47788   |
| 67995 | P03346 | Q9NNW7 | 0.40442   |
| 67996 | P03346 | Q16594 | 0.66797   |
| 67997 | P03346 | Q15319 | 0.42501   |
| 67998 | P03346 | Q5VUA4 | 0.60213   |
| 67999 | P03346 | Q9NX20 | 0.63513   |
| 68000 | P03346 | P62888 | 0.77006   |
| 68001 | P03346 | Q9UBW7 | 0.64853   |
| 68002 | P03346 | P33316 | 0.74574   |
| 68003 | P03346 | Q15543 | 1.1405    |
| 68004 | P03346 | Q9H3L0 | 0.13297   |
| 68005 | P03346 | Q99581 | 0.25826   |
| 68006 | P03346 | P0C6E6 | 0.26013   |
| 68007 | P03346 | Q96GE5 | 0.31436   |
| 68008 | P03346 | Q9P127 | 0.32217   |
| 68009 | P03346 | P55771 | 1.1075    |
| 68010 | P03346 | Q8TF01 | 0.3708    |
| 68011 | P03346 | A0AUZ9 | 0.12483   |
| 68012 | P03346 | Q9H1J1 | 0.79498   |
| 68013 | P03346 | Q5U5Q3 | 0.25216   |
| 68014 | P03346 | Q9UJU5 | 0.45725   |
| 68015 | P03346 | P57721 | 0.85828   |
| 68016 | P03346 | Q9UJM3 | 0.57196   |
| 68017 | P03346 | Q8NE18 | 0.19136   |
| 68018 | P03346 | Q9HCM1 | 0.12643   |
| 68019 | P03346 | P63220 | 0.59745   |
| 68020 | P03346 | Q9NPC6 | 0.5238    |

|       |        |        |          |
|-------|--------|--------|----------|
| 68021 | P03346 | Q9UQR0 | 0.63072  |
| 68022 | P03346 | Q96K58 | 0.31436  |
| 68023 | P03346 | Q5TA45 | 0.4893   |
| 68024 | P03346 | Q03938 | 0.37791  |
| 68025 | P03346 | O00444 | 0.28717  |
| 68026 | P03346 | Q15572 | 0.7635   |
| 68027 | P03346 | Q8N812 | 0.043421 |
| 68028 | P03346 | Q9H2A3 | 0.45646  |
| 68029 | P03346 | O43261 | 0.66787  |
| 68030 | P03346 | Q99732 | 0.491    |
| 68031 | P03346 | P05198 | 0.85335  |
| 68032 | P03346 | P52948 | 0.93278  |
| 68033 | P03346 | Q9Y314 | 1.1612   |
| 68034 | P03346 | Q9NPC7 | 0.30845  |
| 68035 | P03346 | Q969T7 | 0.18902  |
| 68036 | P03346 | Q13617 | 0.78019  |
| 68037 | P03346 | Q6ZWJ1 | 0.45619  |
| 68038 | P03346 | Q86TU7 | 0.4618   |
| 68039 | P03346 | Q92610 | 0.33565  |
| 68040 | P03346 | Q15819 | 0.78782  |
| 68041 | P03346 | Q8WV41 | 0.49918  |
| 68042 | P03346 | Q5H9L2 | 1.3712   |
| 68043 | P03346 | O43395 | 1.1346   |
| 68044 | P03346 | P17987 | 0.25596  |
| 68045 | P03346 | O15162 | 0.19512  |
| 68046 | P03346 | P68543 | 0.13025  |
| 68047 | P03346 | Q2NKJ3 | 0.50945  |
| 68048 | P03346 | Q9Y2Q9 | 0.37459  |
| 68049 | P03346 | Q9BV73 | 0.75961  |
| 68050 | P03346 | Q8WU76 | 0.34188  |
| 68051 | P03346 | P53990 | 0.79746  |
| 68052 | P03346 | A6NFI3 | 0.31436  |
| 68053 | P03346 | A6NFF2 | 0.22545  |
| 68054 | P03346 | P10589 | 0.49107  |
| 68055 | P03346 | Q8NCU7 | 0.32217  |
| 68056 | P03346 | Q9H321 | 0.48532  |
| 68057 | P03346 | Q9H6R4 | 0.17869  |
| 68058 |        |        |          |

```
1 [Section 2] Predicted Non-interactions
2
3
4 P0C206 Q8N427 -0.46974
5 P0C206 Q8WYQ9 -0.33343
6 P0C206 Q96B96 -0.79503
7 P0C206 Q14117 -0.2083
8 P0C206 Q8NHP6 -0.66124
9 P0C206 Q8NH85 -1.1763
10 P0C206 A6NGE7 -0.34991
11 P0C206 Q05682 -0.33241
12 P0C206 Q5T5X7 -0.096481
13 P0C206 P01714 -0.9894
14 P0C206 Q6DHY5 -1.2801
15 P0C206 O95467 -0.71165
16 P0C206 P25089 -1.2776
17 P0C206 P17655 -0.25113
18 P0C206 Q5GH73 -0.79503
19 P0C206 A6NCF5 -0.22197
20 P0C206 O75084 -0.48904
21 P0C206 P29992 -0.83873
22 P0C206 P98198 -0.99233
23 P0C206 Q9H6R3 -0.78732
24 P0C206 Q16617 -1.0749
25 P0C206 P40394 -0.66011
26 P0C206 Q567U6 -0.17453
27 P0C206 A6NET4 -1.1763
28 P0C206 P05162 -0.21707
29 P0C206 P41595 -0.44101
30 P0C206 Q6ZN66 -0.8969
31 P0C206 A8MXB1 -0.937
32 P0C206 Q08722 -0.44745
33 P0C206 Q15661 -0.86059
34 P0C206 Q00532 -0.53984
35 P0C206 Q96P48 -0.22632
36 P0C206 Q6IEU7 -1.1763
37 P0C206 Q8IVG5 -0.074121
38 P0C206 Q9BWW8 -0.77232
39 P0C206 Q01668 -0.54549
40 P0C206 Q6PIU2 -0.81267
41 P0C206 Q06643 -0.84403
42 P0C206 Q8IV35 -0.22751
43 P0C206 Q8TE49 -0.18875
44 P0C206 A6NCE7 -0.14758
45 P0C206 Q86W47 -0.56298
46 P0C206 P21854 -0.65346
47 P0C206 O94875 -0.23018
48 P0C206 P36268 -0.64374
49 P0C206 Q16795 -0.083956
50 P0C206 P55061 -0.4894
51 P0C206 O95069 -0.98159
52 P0C206 Q9H0V9 -0.35145
53 P0C206 Q8NB90 -0.87709
54 P0C206 P01270 -0.58366
55 P0C206 P03923 -0.60005
56 P0C206 P63027 -0.21178
57 P0C206 A4D256 -0.67426
58 P0C206 Q99712 -1.1096
59 P0C206 Q6ZUB0 -0.79503
60 P0C206 O75159 -0.22735
61 P0C206 Q13442 -0.41452
62 P0C206 Q5MNZ9 -0.22739
63 P0C206 O60285 -0.25287
64 P0C206 Q8N465 -0.31438
65 P0C206 P35270 -0.22331
66 P0C206 Q2MKA7 -0.22521
67 P0C206 O95936 -0.51326
68 P0C206 P27701 -0.44738
69 P0C206 Q9Y3D6 -0.2076
70 P0C206 Q7Z5P9 -0.84669
71 P0C206 O14498 -0.99932
72 P0C206 Q0D2K0 -0.81143
73 P0C206 Q9HCP0 -0.91902
74 P0C206 Q9UKB5 -0.8722
75 P0C206 P10323 -0.82725
76 P0C206 Q99439 -0.2123
```

|     |        |        |          |
|-----|--------|--------|----------|
| 77  | P0C206 | Q02817 | -0.2853  |
| 78  | P0C206 | O75072 | -0.25042 |
| 79  | P0C206 | Q6QN14 | -0.39187 |
| 80  | P0C206 | Q13368 | -0.22554 |
| 81  | P0C206 | P43166 | -0.18623 |
| 82  | P0C206 | A6PVL3 | -0.61588 |
| 83  | P0C206 | Q8J025 | -0.9493  |
| 84  | P0C206 | P14550 | -0.35091 |
| 85  | P0C206 | Q687X5 | -1.2487  |
| 86  | P0C206 | O95665 | -1.3168  |
| 87  | P0C206 | Q9HCJ2 | -0.22763 |
| 88  | P0C206 | O75610 | -0.75878 |
| 89  | P0C206 | Q6ZRY4 | -0.76638 |
| 90  | P0C206 | Q8N135 | -0.8102  |
| 91  | P0C206 | P06241 | -0.32891 |
| 92  | P0C206 | Q9P2P1 | -0.54673 |
| 93  | P0C206 | O15264 | -0.22741 |
| 94  | P0C206 | P17752 | -0.39913 |
| 95  | P0C206 | Q70EL2 | -0.5726  |
| 96  | P0C206 | Q08AH3 | -0.76579 |
| 97  | P0C206 | Q6UXB1 | -0.80952 |
| 98  | P0C206 | P46940 | -0.22741 |
| 99  | P0C206 | P36404 | -0.22888 |
| 100 | P0C206 | C9JTQ0 | -0.22741 |
| 101 | P0C206 | Q5VV41 | -0.22967 |
| 102 | P0C206 | Q96BQ1 | -0.70176 |
| 103 | P0C206 | Q9GZU1 | -0.70803 |
| 104 | P0C206 | P50897 | -0.31864 |
| 105 | P0C206 | Q9Y257 | -0.99233 |
| 106 | P0C206 | Q96P16 | -0.2044  |
| 107 | P0C206 | P30613 | -0.37379 |
| 108 | P0C206 | Q8NI36 | -0.22767 |
| 109 | P0C206 | A2A2V5 | -0.79503 |
| 110 | P0C206 | O43916 | -0.50551 |
| 111 | P0C206 | P01710 | -0.9894  |
| 112 | P0C206 | P10114 | -0.47025 |
| 113 | P0C206 | P00734 | -0.55485 |
| 114 | P0C206 | Q6PEY2 | -0.43904 |
| 115 | P0C206 | A8MRT5 | -0.79503 |
| 116 | P0C206 | P49286 | -1.293   |
| 117 | P0C206 | P12110 | -0.52788 |
| 118 | P0C206 | Q9NP84 | -0.53151 |
| 119 | P0C206 | Q9H4Q3 | -0.22713 |
| 120 | P0C206 | P21462 | -0.91085 |
| 121 | P0C206 | Q15620 | -1.1763  |
| 122 | P0C206 | A6NCV1 | -1.1763  |
| 123 | P0C206 | Q8WXX0 | -0.46419 |
| 124 | P0C206 | Q8IXL6 | -0.982   |
| 125 | P0C206 | Q5VX71 | -0.79503 |
| 126 | P0C206 | Q70CQ3 | -0.91444 |
| 127 | P0C206 | Q8NFQ5 | -0.97846 |
| 128 | P0C206 | Q96QE4 | -0.5481  |
| 129 | P0C206 | Q96SZ6 | -0.2983  |
| 130 | P0C206 | Q9BR10 | -0.78219 |
| 131 | P0C206 | Q2MV58 | -0.65258 |
| 132 | P0C206 | Q9UBS0 | -0.57004 |
| 133 | P0C206 | P41247 | -0.21089 |
| 134 | P0C206 | Q8IYD2 | -0.22483 |
| 135 | P0C206 | Q8NHU6 | -0.21183 |
| 136 | P0C206 | Q13145 | -0.36173 |
| 137 | P0C206 | Q96PC5 | -0.80952 |
| 138 | P0C206 | Q9GZV1 | -0.45373 |
| 139 | P0C206 | Q16827 | -0.54594 |
| 140 | P0C206 | Q15111 | -0.44985 |
| 141 | P0C206 | O60894 | -0.22394 |
| 142 | P0C206 | Q8TDV5 | -1.3166  |
| 143 | P0C206 | Q8IXV7 | -0.21563 |
| 144 | P0C206 | P61158 | -0.14246 |
| 145 | P0C206 | Q8NGG7 | -1.1763  |
| 146 | P0C206 | P21781 | -0.49484 |
| 147 | P0C206 | A8MUU1 | -0.36221 |
| 148 | P0C206 | Q6ZNI0 | -0.62043 |
| 149 | P0C206 | Q5TZJ5 | -0.79503 |
| 150 | P0C206 | P21549 | -0.19888 |
| 151 | P0C206 | Q13519 | -0.93046 |
| 152 | P0C206 | Q969Q1 | -0.32619 |

|     |        |        |            |
|-----|--------|--------|------------|
| 153 | POC206 | Q4G0I0 | -0.79503   |
| 154 | POC206 | Q14914 | -0.64184   |
| 155 | POC206 | Q9GZP7 | -1.1472    |
| 156 | POC206 | Q5GH76 | -0.79503   |
| 157 | POC206 | P07766 | -0.66554   |
| 158 | POC206 | P80511 | -0.23158   |
| 159 | POC206 | O76038 | -0.68047   |
| 160 | POC206 | Q7RTV2 | -0.22509   |
| 161 | POC206 | Q29940 | -0.99995   |
| 162 | POC206 | Q96IZ5 | -0.83583   |
| 163 | POC206 | Q9Y6N3 | -0.77856   |
| 164 | POC206 | Q9UJU5 | -0.43399   |
| 165 | POC206 | P30466 | -0.99995   |
| 166 | POC206 | Q9BZJ0 | -0.1681    |
| 167 | POC206 | P55344 | -0.76939   |
| 168 | POC206 | Q96NS5 | -0.22744   |
| 169 | POC206 | Q96C19 | -0.41916   |
| 170 | POC206 | Q96F25 | -0.84984   |
| 171 | POC206 | Q6PI97 | -0.0090935 |
| 172 | POC206 | P17693 | -0.91582   |
| 173 | POC206 | Q5SY16 | -0.47682   |
| 174 | POC206 | Q9BSW7 | -0.31547   |
| 175 | POC206 | P13761 | -0.46652   |
| 176 | POC206 | Q8IV01 | -0.69273   |
| 177 | POC206 | Q86TL2 | -0.57403   |
| 178 | POC206 | P24903 | -0.75655   |
| 179 | POC206 | Q08493 | -0.42398   |
| 180 | POC206 | Q6P9A2 | -0.61743   |
| 181 | POC206 | Q9BUF7 | -0.78924   |
| 182 | POC206 | Q8WXI2 | -0.26918   |
| 183 | POC206 | Q9C0D4 | -0.22744   |
| 184 | POC206 | Q9UP65 | -0.73226   |
| 185 | POC206 | P51970 | -0.080384  |
| 186 | POC206 | Q1T7F1 | -0.096491  |
| 187 | POC206 | O43292 | -0.36744   |
| 188 | POC206 | Q9Y6H3 | -0.57424   |
| 189 | POC206 | Q8NH41 | -1.1763    |
| 190 | POC206 | Q9NU19 | -1.2801    |
| 191 | POC206 | Q9BYB0 | -0.22741   |
| 192 | POC206 | O75829 | -1.3253    |
| 193 | POC206 | Q6ZST2 | -0.17787   |
| 194 | POC206 | P22413 | -0.30294   |
| 195 | POC206 | P09038 | -0.37116   |
| 196 | POC206 | A6NC57 | -0.2274    |
| 197 | POC206 | Q9BXJ0 | -0.87668   |
| 198 | POC206 | Q14123 | -0.2236    |
| 199 | POC206 | P17509 | -0.20509   |
| 200 | POC206 | P28845 | -1.2934    |
| 201 | POC206 | Q8NHR9 | -0.041643  |
| 202 | POC206 | Q9Y2K7 | -0.22473   |
| 203 | POC206 | Q96H15 | -0.79503   |
| 204 | POC206 | P06727 | -0.46782   |
| 205 | POC206 | Q6ZT89 | -0.58473   |
| 206 | POC206 | P33527 | -0.32512   |
| 207 | POC206 | Q9NZI8 | -0.22666   |
| 208 | POC206 | Q8TDS4 | -1.019     |
| 209 | POC206 | Q6NUT3 | -0.72669   |
| 210 | POC206 | Q9Y3L3 | -0.95503   |
| 211 | POC206 | O43448 | -0.69923   |
| 212 | POC206 | Q96EK2 | -0.23369   |
| 213 | POC206 | Q13751 | -0.73761   |
| 214 | POC206 | P01569 | -0.75974   |
| 215 | POC206 | C9JWV0 | -0.79503   |
| 216 | POC206 | P80748 | -0.9894    |
| 217 | POC206 | Q9UH65 | -0.39895   |
| 218 | POC206 | P37235 | -0.30151   |
| 219 | POC206 | Q9Y3B4 | -0.31953   |
| 220 | POC206 | Q8NFU7 | -0.14198   |
| 221 | POC206 | P10997 | -1.0546    |
| 222 | POC206 | P0C5K7 | -0.095443  |
| 223 | POC206 | Q8NBM4 | -0.79503   |
| 224 | POC206 | Q96CU9 | -0.84836   |
| 225 | POC206 | Q8TCX5 | -0.60192   |
| 226 | POC206 | Q6WRX3 | -0.11764   |
| 227 | POC206 | P79483 | -0.77256   |
| 228 | POC206 | P0C0S8 | -0.67202   |



|     |        |        |           |
|-----|--------|--------|-----------|
| 229 | POC206 | Q8N100 | -0.23003  |
| 230 | POC206 | P0C6S8 | -0.79503  |
| 231 | POC206 | A1X283 | -0.22741  |
| 232 | POC206 | Q15121 | -0.93483  |
| 233 | POC206 | Q96RD2 | -1.1763   |
| 234 | POC206 | Q99584 | -0.27599  |
| 235 | POC206 | Q9UJ90 | -0.79576  |
| 236 | POC206 | Q8NCR0 | -0.65603  |
| 237 | POC206 | B2RTY4 | -0.95981  |
| 238 | POC206 | Q9BQ51 | -1.2967   |
| 239 | POC206 | Q9BX69 | -0.45025  |
| 240 | POC206 | Q96F85 | -0.16513  |
| 241 | POC206 | Q01995 | -0.19138  |
| 242 | POC206 | P50151 | -0.4705   |
| 243 | POC206 | Q86XJ1 | -0.23002  |
| 244 | POC206 | Q6PIY5 | -0.63178  |
| 245 | POC206 | Q2NKQ1 | -0.73798  |
| 246 | POC206 | Q5VTM2 | -0.85865  |
| 247 | POC206 | Q70EL3 | -0.36117  |
| 248 | POC206 | Q15777 | -0.098753 |
| 249 | POC206 | P09104 | -0.14692  |
| 250 | POC206 | Q9H3Y0 | -0.81997  |
| 251 | POC206 | Q96QS1 | -0.90697  |
| 252 | POC206 | P07478 | -0.90396  |
| 253 | POC206 | Q9Y5G5 | -1.1512   |
| 254 | POC206 | Q6P2H8 | -0.79503  |
| 255 | POC206 | O60662 | -0.21237  |
| 256 | POC206 | Q499Z3 | -0.72239  |
| 257 | POC206 | Q9BVJ7 | -0.22741  |
| 258 | POC206 | Q8NGZ2 | -1.1763   |
| 259 | POC206 | Q6B8I1 | -0.54733  |
| 260 | POC206 | O43556 | -0.65756  |
| 261 | POC206 | P15151 | -0.22741  |
| 262 | POC206 | P33121 | -0.78481  |
| 263 | POC206 | A6NHG4 | -0.18294  |
| 264 | POC206 | P78417 | -0.27515  |
| 265 | POC206 | P30460 | -1.0603   |
| 266 | POC206 | Q8WXX5 | -0.33725  |
| 267 | POC206 | Q9BRQ0 | -0.15166  |
| 268 | POC206 | P59535 | -1.1287   |
| 269 | POC206 | Q8NGG2 | -1.1763   |
| 270 | POC206 | Q6UWY0 | -0.71517  |
| 271 | POC206 | Q16790 | -0.31188  |
| 272 | POC206 | P0CB48 | -0.20511  |
| 273 | POC206 | Q5TYW2 | -0.32859  |
| 274 | POC206 | O94876 | -0.79503  |
| 275 | POC206 | P34903 | -0.77562  |
| 276 | POC206 | Q6SJ93 | -0.42295  |
| 277 | POC206 | O75173 | -0.72088  |
| 278 | POC206 | Q9Y2U2 | -1.0115   |
| 279 | POC206 | P31994 | -0.3981   |
| 280 | POC206 | P78362 | -0.47045  |
| 281 | POC206 | Q9BQ04 | -0.30909  |
| 282 | POC206 | Q9H3U5 | -0.73598  |
| 283 | POC206 | P46597 | -0.16936  |
| 284 | POC206 | Q9BXI9 | -1.0201   |
| 285 | POC206 | Q6ZNW5 | -0.42212  |
| 286 | POC206 | Q13554 | -0.64511  |
| 287 | POC206 | Q96RN1 | -0.51843  |
| 288 | POC206 | P15391 | -1.0763   |
| 289 | POC206 | O43312 | -0.2289   |
| 290 | POC206 | P46199 | -0.72009  |
| 291 | POC206 | P18084 | -0.91487  |
| 292 | POC206 | P15907 | -0.867    |
| 293 | POC206 | P51589 | -0.64595  |
| 294 | POC206 | Q9UL52 | -1.8888   |
| 295 | POC206 | A6NER3 | -0.13445  |
| 296 | POC206 | Q9UD57 | -0.2273   |
| 297 | POC206 | Q9GZY6 | -0.43371  |
| 298 | POC206 | O15031 | -1.0781   |
| 299 | POC206 | Q53S58 | -0.79503  |
| 300 | POC206 | A6NIM6 | -0.49358  |
| 301 | POC206 | P83110 | -0.70791  |
| 302 | POC206 | B1AJZ9 | -0.10954  |
| 303 | POC206 | Q9UKP6 | -0.90311  |
| 304 | POC206 | O60331 | -0.43443  |

|     |        |        |           |
|-----|--------|--------|-----------|
| 305 | P0C206 | Q8N9I0 | -0.60258  |
| 306 | P0C206 | Q6UY27 | -0.88207  |
| 307 | P0C206 | Q9HCS5 | -0.27086  |
| 308 | P0C206 | Q32MK0 | -0.71582  |
| 309 | P0C206 | Q96KB5 | -0.37734  |
| 310 | P0C206 | Q7Z408 | -0.91833  |
| 311 | P0C206 | P05408 | -0.43761  |
| 312 | P0C206 | Q9GZZ0 | -0.22739  |
| 313 | P0C206 | P51659 | -0.70054  |
| 314 | P0C206 | Q9HC84 | -0.49994  |
| 315 | P0C206 | P40937 | -0.18755  |
| 316 | P0C206 | Q96RV3 | -0.79503  |
| 317 | P0C206 | P49815 | -0.1986   |
| 318 | P0C206 | P26436 | -0.44614  |
| 319 | P0C206 | Q8NE62 | -0.42743  |
| 320 | P0C206 | P20231 | -1.3203   |
| 321 | P0C206 | Q13516 | -0.22756  |
| 322 | P0C206 | Q92563 | -0.94162  |
| 323 | P0C206 | Q9NYY3 | -0.38548  |
| 324 | P0C206 | A0PK00 | -0.57403  |
| 325 | P0C206 | O60909 | -0.41431  |
| 326 | P0C206 | A6NHC0 | -0.65317  |
| 327 | P0C206 | P58876 | -0.66158  |
| 328 | P0C206 | P62805 | -0.30177  |
| 329 | P0C206 | Q13813 | -0.22742  |
| 330 | P0C206 | A6NMC2 | -0.065812 |
| 331 | P0C206 | P30556 | -0.5071   |
| 332 | P0C206 | Q8NGJ1 | -1.1763   |
| 333 | P0C206 | Q86XQ3 | -0.91573  |
| 334 | P0C206 | Q8NBS3 | -0.61943  |
| 335 | P0C206 | P16104 | -0.41327  |
| 336 | P0C206 | P16189 | -1.0001   |
| 337 | P0C206 | P55283 | -1.1104   |
| 338 | P0C206 | Q6NUJ2 | -0.79503  |
| 339 | P0C206 | Q16595 | -0.17133  |
| 340 | P0C206 | Q9H7X0 | -0.15444  |
| 341 | P0C206 | Q9H0I2 | -0.26716  |
| 342 | P0C206 | A6NEL2 | -0.22741  |
| 343 | P0C206 | P0DJD8 | -1.1195   |
| 344 | P0C206 | P16260 | -0.44872  |
| 345 | P0C206 | O43665 | -0.22789  |
| 346 | P0C206 | P40259 | -0.42205  |
| 347 | P0C206 | P13164 | -0.35293  |
| 348 | P0C206 | Q9UKU6 | -1.2344   |
| 349 | P0C206 | C4AMC7 | -0.40202  |
| 350 | P0C206 | P29536 | -0.19983  |
| 351 | P0C206 | Q4VX67 | -0.79503  |
| 352 | P0C206 | Q8IXF9 | -0.71306  |
| 353 | P0C206 | P49327 | -0.57546  |
| 354 | P0C206 | Q496F6 | -0.91833  |
| 355 | P0C206 | Q96F15 | -0.88575  |
| 356 | P0C206 | Q96AP4 | -0.44814  |
| 357 | P0C206 | Q92520 | -0.70386  |
| 358 | P0C206 | Q14576 | -1.0214   |
| 359 | P0C206 | Q8WU68 | -0.40414  |
| 360 | P0C206 | Q04759 | -0.20206  |
| 361 | P0C206 | Q6PJ21 | -0.48675  |
| 362 | P0C206 | P0CG01 | -0.80952  |
| 363 | P0C206 | Q3MUY2 | -0.96676  |
| 364 | P0C206 | Q6PML9 | -0.40922  |
| 365 | P0C206 | Q8WZ55 | -0.58037  |
| 366 | P0C206 | P01817 | -0.9894   |
| 367 | P0C206 | Q99418 | -0.22741  |
| 368 | P0C206 | Q8N653 | -0.22717  |
| 369 | P0C206 | O14544 | -0.22718  |
| 370 | P0C206 | Q92599 | -0.1907   |
| 371 | P0C206 | Q8TB68 | -0.6938   |
| 372 | P0C206 | Q2PZI1 | -0.79503  |
| 373 | P0C206 | Q96M15 | -0.23992  |
| 374 | P0C206 | Q02880 | -0.16592  |
| 375 | P0C206 | Q6PRD1 | -1.3181   |
| 376 | P0C206 | Q15751 | -0.23745  |
| 377 | P0C206 | O75106 | -0.50963  |
| 378 | P0C206 | Q9GZZ9 | -0.1892   |
| 379 | P0C206 | Q96MX0 | -0.85091  |
| 380 | P0C206 | Q7Z2D5 | -0.9484   |

|     |        |        |           |
|-----|--------|--------|-----------|
| 381 | POC206 | Q96A99 | -0.79929  |
| 382 | POC206 | Q9NPH9 | -0.39478  |
| 383 | POC206 | Q8N1W1 | -0.68998  |
| 384 | POC206 | Q8NG77 | -1.1763   |
| 385 | POC206 | O15067 | -0.46318  |
| 386 | POC206 | P31947 | -0.60784  |
| 387 | POC206 | Q96SJ8 | -0.79503  |
| 388 | POC206 | Q13009 | -0.56509  |
| 389 | POC206 | Q8WZ59 | -0.79503  |
| 390 | POC206 | Q8WTQ7 | -1.2927   |
| 391 | POC206 | P0CG36 | -0.99341  |
| 392 | POC206 | Q8IXZ2 | -0.18788  |
| 393 | POC206 | P50391 | -1.1808   |
| 394 | POC206 | Q9UBR1 | -0.092058 |
| 395 | POC206 | P42696 | -0.33857  |
| 396 | POC206 | P0C0E4 | -0.78256  |
| 397 | POC206 | Q92839 | -0.89098  |
| 398 | POC206 | O00339 | -0.3419   |
| 399 | POC206 | Q9UH64 | -0.17644  |
| 400 | POC206 | P78563 | -0.10282  |
| 401 | POC206 | Q8IY37 | -0.7415   |
| 402 | POC206 | Q86TW2 | -1.3438   |
| 403 | POC206 | G3V0H7 | -0.8197   |
| 404 | POC206 | Q93038 | -1.2848   |
| 405 | POC206 | Q9HC73 | -1.4604   |
| 406 | POC206 | Q8TCZ2 | -1.0127   |
| 407 | POC206 | Q6ZW35 | -0.047702 |
| 408 | POC206 | P41586 | -0.50734  |
| 409 | POC206 | Q96NC0 | -0.24357  |
| 410 | POC206 | P35236 | -0.30874  |
| 411 | POC206 | A8MT79 | -0.937    |
| 412 | POC206 | O60423 | -0.91075  |
| 413 | POC206 | Q8WZB0 | -0.12478  |
| 414 | POC206 | Q92954 | -0.84257  |
| 415 | POC206 | Q5T9L3 | -0.20344  |
| 416 | POC206 | Q9NR81 | -0.39843  |
| 417 | POC206 | P28221 | -1.2462   |
| 418 | POC206 | Q96Q42 | -0.49212  |
| 419 | POC206 | P0C623 | -1.1763   |
| 420 | POC206 | Q16842 | -0.5639   |
| 421 | POC206 | Q8NH42 | -1.1763   |
| 422 | POC206 | Q9BTT6 | -0.24751  |
| 423 | POC206 | Q9C0B1 | -0.20328  |
| 424 | POC206 | Q8IZF7 | -1.2769   |
| 425 | POC206 | Q5VW36 | -0.11881  |
| 426 | POC206 | Q8N130 | -0.79194  |
| 427 | POC206 | Q7RTR8 | -1.1287   |
| 428 | POC206 | P0C264 | -1.13     |
| 429 | POC206 | Q96R48 | -1.1763   |
| 430 | POC206 | Q8IUB5 | -0.75923  |
| 431 | POC206 | Q9UBP9 | -0.31022  |
| 432 | POC206 | P58181 | -1.1763   |
| 433 | POC206 | Q96JQ2 | -0.58405  |
| 434 | POC206 | Q9H799 | -0.79503  |
| 435 | POC206 | O15050 | -0.22463  |
| 436 | POC206 | Q8N0V5 | -0.60834  |
| 437 | POC206 | P57058 | -1.3936   |
| 438 | POC206 | Q8IVW4 | -0.68319  |
| 439 | POC206 | Q92952 | -0.68481  |
| 440 | POC206 | O75339 | -0.84884  |
| 441 | POC206 | Q05996 | -1.0056   |
| 442 | POC206 | Q8NEX6 | -0.80952  |
| 443 | POC206 | Q9H0M0 | -0.22741  |
| 444 | POC206 | P03951 | -0.80032  |
| 445 | POC206 | Q8N474 | -0.40533  |
| 446 | POC206 | Q5T2L2 | -0.28953  |
| 447 | POC206 | Q9BZS1 | -0.35541  |
| 448 | POC206 | Q9NVA2 | -0.22701  |
| 449 | POC206 | Q12907 | -0.28429  |
| 450 | POC206 | P63119 | -0.56257  |
| 451 | POC206 | P40616 | -0.69472  |
| 452 | POC206 | P52849 | -0.49523  |
| 453 | POC206 | P51858 | -0.21299  |
| 454 | POC206 | Q8NHH9 | -0.43689  |
| 455 | POC206 | Q765P7 | -0.57683  |
| 456 | POC206 | A1E959 | -0.76434  |

|     |        |        |           |
|-----|--------|--------|-----------|
| 457 | POC206 | P17302 | -0.28809  |
| 458 | POC206 | P20800 | -0.53786  |
| 459 | POC206 | P98196 | -0.55403  |
| 460 | POC206 | A8MPP1 | -0.37449  |
| 461 | POC206 | A2RUH7 | -0.22782  |
| 462 | POC206 | Q9GZT3 | -0.22612  |
| 463 | POC206 | Q86XR5 | -0.69595  |
| 464 | POC206 | Q8TD46 | -0.69717  |
| 465 | POC206 | Q9H4A9 | -0.73441  |
| 466 | POC206 | Q9H343 | -1.1763   |
| 467 | POC206 | Q13061 | -0.70241  |
| 468 | POC206 | Q96CQ1 | -0.55919  |
| 469 | POC206 | Q9BZJ7 | -1.1108   |
| 470 | POC206 | Q96NT5 | -0.40212  |
| 471 | POC206 | Q8WXF3 | -0.7458   |
| 472 | POC206 | Q6P1A2 | -0.71042  |
| 473 | POC206 | Q5QGZ9 | -0.90889  |
| 474 | POC206 | P57082 | -0.33215  |
| 475 | POC206 | P84074 | -0.33531  |
| 476 | POC206 | Q6TCH4 | -0.79503  |
| 477 | POC206 | Q9UPQ7 | -0.47051  |
| 478 | POC206 | O75678 | -0.23123  |
| 479 | POC206 | Q9Y275 | -0.82475  |
| 480 | POC206 | O60814 | -0.64767  |
| 481 | POC206 | Q9BZ71 | -0.60476  |
| 482 | POC206 | Q9P1Q5 | -1.1763   |
| 483 | POC206 | O95497 | -0.66863  |
| 484 | POC206 | P50395 | -0.12234  |
| 485 | POC206 | O60844 | -0.51559  |
| 486 | POC206 | Q4KMQ2 | -0.82837  |
| 487 | POC206 | Q12866 | -0.67111  |
| 488 | POC206 | Q7Z419 | -0.17497  |
| 489 | POC206 | Q6ZU45 | -0.2154   |
| 490 | POC206 | Q68D91 | -0.14767  |
| 491 | POC206 | Q8NH51 | -1.1763   |
| 492 | POC206 | Q96AZ1 | -0.93514  |
| 493 | POC206 | P08034 | -0.80974  |
| 494 | POC206 | Q96PN7 | -0.18777  |
| 495 | POC206 | Q9NPH5 | -0.78439  |
| 496 | POC206 | A8MWK0 | -1.0326   |
| 497 | POC206 | P05154 | -0.5134   |
| 498 | POC206 | Q8NG81 | -1.1763   |
| 499 | POC206 | A8MUP2 | -0.14731  |
| 500 | POC206 | Q9UFP1 | -0.80952  |
| 501 | POC206 | P0DJ93 | -0.79503  |
| 502 | POC206 | Q96Q91 | -0.76687  |
| 503 | POC206 | Q5TEZ5 | -0.092462 |
| 504 | POC206 | Q9Y573 | -0.19714  |
| 505 | POC206 | Q5T7R7 | -0.79503  |
| 506 | POC206 | Q9BR01 | -0.45677  |
| 507 | POC206 | P08631 | -0.25832  |
| 508 | POC206 | Q9NYR8 | -1.2168   |
| 509 | POC206 | Q8IUW5 | -0.71397  |
| 510 | POC206 | Q00535 | -0.20765  |
| 511 | POC206 | P49674 | -0.22741  |
| 512 | POC206 | Q96HR9 | -0.79503  |
| 513 | POC206 | P55089 | -0.47654  |
| 514 | POC206 | Q8IVL6 | -0.5766   |
| 515 | POC206 | P53582 | -0.29158  |
| 516 | POC206 | Q9GZT6 | -0.62349  |
| 517 | POC206 | Q8NCE2 | -0.25061  |
| 518 | POC206 | Q99963 | -0.23512  |
| 519 | POC206 | Q7Z2G1 | -0.61314  |
| 520 | POC206 | Q7Z5A9 | -0.78747  |
| 521 | POC206 | Q12778 | -0.41802  |
| 522 | POC206 | Q8IXS6 | -0.45462  |
| 523 | POC206 | Q8IZP1 | -1.2801   |
| 524 | POC206 | Q9NV66 | -0.99403  |
| 525 | POC206 | Q86UD5 | -0.72714  |
| 526 | POC206 | O14874 | -0.34896  |
| 527 | POC206 | Q9NRW4 | -0.40655  |
| 528 | POC206 | Q3SY69 | -0.40427  |
| 529 | POC206 | P41271 | -0.60599  |
| 530 | POC206 | O76090 | -0.68899  |
| 531 | POC206 | Q6NV75 | -1.2448   |
| 532 | POC206 | P18089 | -0.5549   |

|     |        |        |           |
|-----|--------|--------|-----------|
| 533 | P0C206 | Q15042 | -0.21391  |
| 534 | P0C206 | Q9BZA8 | -1.1512   |
| 535 | P0C206 | Q5T848 | -1.2448   |
| 536 | P0C206 | Q9Y2I1 | -0.25439  |
| 537 | P0C206 | Q9NVR0 | -0.80952  |
| 538 | P0C206 | Q9NWU1 | -0.26156  |
| 539 | P0C206 | P49915 | -0.38935  |
| 540 | P0C206 | P23510 | -0.43892  |
| 541 | P0C206 | Q5QJU3 | -0.26334  |
| 542 | P0C206 | O00628 | -0.22735  |
| 543 | P0C206 | Q96PD7 | -0.34225  |
| 544 | P0C206 | P81408 | -0.68433  |
| 545 | P0C206 | P42679 | -0.4085   |
| 546 | P0C206 | P06127 | -0.51288  |
| 547 | P0C206 | Q7Z5N4 | -0.98895  |
| 548 | P0C206 | Q6PP77 | -0.91833  |
| 549 | P0C206 | Q7Z5A8 | -0.80952  |
| 550 | P0C206 | Q66K79 | -1.0723   |
| 551 | P0C206 | P28288 | -0.6441   |
| 552 | P0C206 | Q9NXE4 | -0.43916  |
| 553 | P0C206 | Q5U3C3 | -0.79503  |
| 554 | P0C206 | Q9BSE5 | -0.17447  |
| 555 | P0C206 | P53816 | -0.10115  |
| 556 | P0C206 | O60673 | -0.7226   |
| 557 | P0C206 | Q86YR6 | -0.4367   |
| 558 | P0C206 | Q9UN72 | -1.2044   |
| 559 | P0C206 | Q8WVX9 | -1.2038   |
| 560 | P0C206 | Q15283 | -0.22388  |
| 561 | P0C206 | Q02505 | -1.2691   |
| 562 | P0C206 | Q15262 | -0.66251  |
| 563 | P0C206 | Q7Z4K8 | -0.44814  |
| 564 | P0C206 | Q6NSI1 | -0.22738  |
| 565 | P0C206 | Q13002 | -0.53544  |
| 566 | P0C206 | P50148 | -0.7213   |
| 567 | P0C206 | Q8WWA0 | -1.1107   |
| 568 | P0C206 | A6NL99 | -0.71306  |
| 569 | P0C206 | O14827 | -0.61905  |
| 570 | P0C206 | Q5JZY3 | -1.2623   |
| 571 | P0C206 | P04040 | -0.3641   |
| 572 | P0C206 | O00451 | -0.35055  |
| 573 | P0C206 | Q92859 | -0.79438  |
| 574 | P0C206 | O75146 | -0.19605  |
| 575 | P0C206 | Q6UE05 | -0.79503  |
| 576 | P0C206 | O15075 | -1.1561   |
| 577 | P0C206 | Q15296 | -0.52402  |
| 578 | P0C206 | P15428 | -0.25537  |
| 579 | P0C206 | Q9NRJ1 | -0.22154  |
| 580 | P0C206 | A8K855 | -0.29182  |
| 581 | P0C206 | Q9HB55 | -0.75353  |
| 582 | P0C206 | P19404 | -0.3162   |
| 583 | P0C206 | Q96DA2 | -0.86447  |
| 584 | P0C206 | Q12884 | -0.58683  |
| 585 | P0C206 | Q8N5M4 | -0.22566  |
| 586 | P0C206 | Q7Z2T5 | -0.4413   |
| 587 | P0C206 | Q8N6C5 | -0.5672   |
| 588 | P0C206 | O60313 | -0.57197  |
| 589 | P0C206 | Q969S6 | -0.79503  |
| 590 | P0C206 | Q96CP7 | -0.79503  |
| 591 | P0C206 | Q6ZMP0 | -0.97676  |
| 592 | P0C206 | Q9H0V1 | -0.77738  |
| 593 | P0C206 | P01611 | -0.9894   |
| 594 | P0C206 | Q8TBF8 | -0.15728  |
| 595 | P0C206 | Q9NR12 | -0.29741  |
| 596 | P0C206 | Q6ZMJ4 | -0.69481  |
| 597 | P0C206 | Q8IYG6 | -0.033602 |
| 598 | P0C206 | Q8N8A6 | -0.36126  |
| 599 | P0C206 | Q70IA8 | -0.18044  |
| 600 | P0C206 | P16144 | -0.68945  |
| 601 | P0C206 | Q9H3S7 | -0.23245  |
| 602 | P0C206 | Q8TB52 | -0.26333  |
| 603 | P0C206 | Q63HM9 | -0.67047  |
| 604 | P0C206 | P15421 | -1.0749   |
| 605 | P0C206 | Q8N4F7 | -0.73705  |
| 606 | P0C206 | O75144 | -1.0755   |
| 607 | P0C206 | Q14296 | -0.33818  |
| 608 | P0C206 | Q15878 | -0.76412  |

|     |        |        |          |
|-----|--------|--------|----------|
| 609 | POC206 | P03989 | -0.95696 |
| 610 | POC206 | Q02218 | -0.20961 |
| 611 | POC206 | P37231 | -0.25342 |
| 612 | POC206 | Q14118 | -0.21009 |
| 613 | POC206 | Q15843 | -0.22421 |
| 614 | POC206 | Q12770 | -0.22741 |
| 615 | POC206 | Q6P5S2 | -0.80952 |
| 616 | POC206 | Q9H1M0 | -0.13832 |
| 617 | POC206 | P11117 | -0.77679 |
| 618 | POC206 | Q8TDD5 | -0.70596 |
| 619 | POC206 | P09466 | -0.90105 |
| 620 | POC206 | Q8NH18 | -1.1763  |
| 621 | POC206 | A6NNX1 | -0.3752  |
| 622 | POC206 | Q14344 | -0.40761 |
| 623 | POC206 | Q96Q04 | -1.1845  |
| 624 | POC206 | Q96FE7 | -0.73552 |
| 625 | POC206 | Q9NQA3 | -0.2168  |
| 626 | POC206 | Q4G0M1 | -0.80952 |
| 627 | POC206 | Q8N9F0 | -0.48697 |
| 628 | POC206 | Q13639 | -0.95598 |
| 629 | POC206 | Q8N0Z9 | -0.79503 |
| 630 | POC206 | Q96KP4 | -0.34456 |
| 631 | POC206 | Q5JXX7 | -0.79503 |
| 632 | POC206 | Q15116 | -0.6445  |
| 633 | POC206 | Q9Y2I7 | -0.22478 |
| 634 | POC206 | P31213 | -0.71797 |
| 635 | POC206 | Q9C0H2 | -0.86713 |
| 636 | POC206 | P31639 | -0.63966 |
| 637 | POC206 | P63145 | -0.15319 |
| 638 | POC206 | Q5DT21 | -0.21178 |
| 639 | POC206 | Q4JDL3 | -0.23522 |
| 640 | POC206 | Q8TCT0 | -0.65894 |
| 641 | POC206 | Q8IYS1 | -0.27706 |
| 642 | POC206 | Q96LW2 | -1.13    |
| 643 | POC206 | Q96G79 | -0.43045 |
| 644 | POC206 | O00453 | -0.44335 |
| 645 | POC206 | Q9C019 | -0.44148 |
| 646 | POC206 | O75414 | -0.53545 |
| 647 | POC206 | Q9Y6X1 | -0.39983 |
| 648 | POC206 | Q9Y4D8 | -0.68627 |
| 649 | POC206 | Q9H213 | -0.12561 |
| 650 | POC206 | Q8NCT1 | -0.37966 |
| 651 | POC206 | Q9H598 | -0.76797 |
| 652 | POC206 | Q9UJT1 | -0.20382 |
| 653 | POC206 | P05362 | -0.38881 |
| 654 | POC206 | Q12929 | -0.22741 |
| 655 | POC206 | Q99720 | -0.55589 |
| 656 | POC206 | P55087 | -0.49456 |
| 657 | POC206 | P19875 | -0.9829  |
| 658 | POC206 | Q95841 | -1.1081  |
| 659 | POC206 | Q2QL34 | -0.88813 |
| 660 | POC206 | A6NHI5 | -0.79503 |
| 661 | POC206 | P0CH98 | -0.33732 |
| 662 | POC206 | Q8IX29 | -0.20749 |
| 663 | POC206 | Q6ZUS5 | -0.31854 |
| 664 | POC206 | Q8IVJ1 | -0.94146 |
| 665 | POC206 | Q8N7C3 | -0.31529 |
| 666 | POC206 | P10645 | -0.70575 |
| 667 | POC206 | A6NFE3 | -0.45362 |
| 668 | POC206 | A6QL63 | -0.89028 |
| 669 | POC206 | Q16348 | -0.31934 |
| 670 | POC206 | Q7Z3Z4 | -0.22696 |
| 671 | POC206 | Q01362 | -0.90252 |
| 672 | POC206 | Q9H1U4 | -0.75032 |
| 673 | POC206 | A6NIJ5 | -0.19106 |
| 674 | POC206 | Q9Y2W3 | -0.55276 |
| 675 | POC206 | P06213 | -0.25135 |
| 676 | POC206 | Q30KR1 | -0.77981 |
| 677 | POC206 | Q8N1N2 | -0.79503 |
| 678 | POC206 | Q9UHX3 | -1.3638  |
| 679 | POC206 | Q15303 | -0.22741 |
| 680 | POC206 | Q14161 | -0.22741 |
| 681 | POC206 | Q8TAM1 | -0.35582 |
| 682 | POC206 | Q9Y2C3 | -0.65335 |
| 683 | POC206 | Q02742 | -0.57896 |
| 684 | POC206 | Q9Y4F4 | -0.13855 |

|     |        |         |           |
|-----|--------|---------|-----------|
| 685 | P0C206 | P01583  | -0.20404  |
| 686 | P0C206 | O00445  | -0.61227  |
| 687 | P0C206 | P42658  | -0.79973  |
| 688 | P0C206 | P22732  | -0.20648  |
| 689 | P0C206 | Q8NGI2  | -1.1763   |
| 690 | P0C206 | Q2TVT3  | -0.33258  |
| 691 | P0C206 | Q96S38  | -0.71858  |
| 692 | P0C206 | A4D1S5  | -1.0599   |
| 693 | P0C206 | Q13067  | -0.13445  |
| 694 | P0C206 | Q6UXN9  | -0.53988  |
| 695 | P0C206 | Q9P1Z0  | -0.21825  |
| 696 | P0C206 | Q9BZV3  | -0.96949  |
| 697 | P0C206 | Q5FYB0  | -0.71517  |
| 698 | P0C206 | O60861  | -0.22785  |
| 699 | P0C206 | Q8NHS4  | -0.041034 |
| 700 | P0C206 | Q9NS15  | -0.75944  |
| 701 | P0C206 | Q6ZVM7  | -0.17864  |
| 702 | P0C206 | Q5VZ52  | -0.10628  |
| 703 | P0C206 | O95249  | -0.1415   |
| 704 | P0C206 | Q8N8Y5  | -0.32767  |
| 705 | P0C206 | Q7Z4I7  | -0.19903  |
| 706 | P0C206 | Q9BXJ8  | -0.57403  |
| 707 | P0C206 | Q8N852  | -0.79503  |
| 708 | P0C206 | P04217  | -0.71676  |
| 709 | P0C206 | Q9H3T2  | -0.95404  |
| 710 | P0C206 | A6NGA9  | -0.79503  |
| 711 | P0C206 | Q8IWA5  | -0.81016  |
| 712 | P0C206 | Q86SS6  | -0.71462  |
| 713 | P0C206 | Q9NQS5  | -1.2064   |
| 714 | P0C206 | Q96BT7  | -0.18772  |
| 715 | P0C206 | Q2WVGJ6 | -0.19485  |
| 716 | P0C206 | P08100  | -0.56494  |
| 717 | P0C206 | Q9BRQ5  | -0.14232  |
| 718 | P0C206 | Q8NA61  | -0.16372  |
| 719 | P0C206 | Q9ULD8  | -0.91169  |
| 720 | P0C206 | Q9Y5T4  | -0.70501  |
| 721 | P0C206 | Q8N143  | -0.20099  |
| 722 | P0C206 | Q7Z3Z2  | -0.25256  |
| 723 | P0C206 | O15554  | -0.36416  |
| 724 | P0C206 | Q8IZS8  | -0.82595  |
| 725 | P0C206 | Q5T5W8  | -0.79503  |
| 726 | P0C206 | Q5JPF3  | -0.20385  |
| 727 | P0C206 | Q6IE36  | -0.79178  |
| 728 | P0C206 | Q5T1A1  | -0.79503  |
| 729 | P0C206 | Q969V3  | -0.10565  |
| 730 | P0C206 | Q13065  | -0.20415  |
| 731 | P0C206 | Q92502  | -0.93481  |
| 732 | P0C206 | P18283  | -0.46927  |
| 733 | P0C206 | Q5H8C1  | -1.5923   |
| 734 | P0C206 | Q9P0L2  | -0.90225  |
| 735 | P0C206 | O60256  | -0.19251  |
| 736 | P0C206 | Q7L3V2  | -0.12442  |
| 737 | P0C206 | P05549  | -0.2005   |
| 738 | P0C206 | P30492  | -0.99995  |
| 739 | P0C206 | P02763  | -0.31889  |
| 740 | P0C206 | P08476  | -0.22741  |
| 741 | P0C206 | Q9HCJ0  | -0.50305  |
| 742 | P0C206 | Q07869  | -0.24133  |
| 743 | P0C206 | P61006  | -0.60935  |
| 744 | P0C206 | Q96DZ7  | -0.79503  |
| 745 | P0C206 | P01763  | -0.9894   |
| 746 | P0C206 | Q9BV81  | -0.77756  |
| 747 | P0C206 | Q96NF6  | -0.79503  |
| 748 | P0C206 | P20794  | -0.22651  |
| 749 | P0C206 | Q9NVJ2  | -0.49982  |
| 750 | P0C206 | Q6ZNE9  | -0.21034  |
| 751 | P0C206 | Q9HAS0  | -0.22687  |
| 752 | P0C206 | P42681  | -0.47175  |
| 753 | P0C206 | P01298  | -0.85567  |
| 754 | P0C206 | O95047  | -1.1763   |
| 755 | P0C206 | P23416  | -0.72248  |
| 756 | P0C206 | Q6ZMN7  | -0.26333  |
| 757 | P0C206 | Q8TF65  | -0.22565  |
| 758 | P0C206 | Q13635  | -0.24183  |
| 759 | P0C206 | Q15418  | -0.20715  |
| 760 | P0C206 | P11766  | -0.25672  |

|     |        |        |           |
|-----|--------|--------|-----------|
| 761 | P0C206 | Q30KQ2 | -0.77981  |
| 762 | P0C206 | Q96PJ5 | -0.26942  |
| 763 | P0C206 | P27037 | -0.37366  |
| 764 | P0C206 | Q902F9 | -0.6451   |
| 765 | P0C206 | O95170 | -0.22901  |
| 766 | P0C206 | Q6IQ22 | -0.6585   |
| 767 | P0C206 | Q14324 | -0.61637  |
| 768 | P0C206 | Q86W92 | -0.52382  |
| 769 | P0C206 | Q9BPW9 | -0.8698   |
| 770 | P0C206 | Q9HAU8 | -0.57241  |
| 771 | P0C206 | Q96NY7 | -0.55821  |
| 772 | P0C206 | O43555 | -1.1356   |
| 773 | P0C206 | Q96EX1 | -0.79503  |
| 774 | P0C206 | Q9HAE3 | -0.29182  |
| 775 | P0C206 | P01597 | -0.9894   |
| 776 | P0C206 | Q9Y2I9 | -1.0472   |
| 777 | P0C206 | O15444 | -0.98718  |
| 778 | P0C206 | Q96ES6 | -0.73598  |
| 779 | P0C206 | B4DYI2 | -0.21805  |
| 780 | P0C206 | Q96GL9 | -0.79503  |
| 781 | P0C206 | Q9NZ43 | -0.068264 |
| 782 | P0C206 | P27487 | -0.68936  |
| 783 | P0C206 | A4FU49 | -0.22445  |
| 784 | P0C206 | Q2QD12 | -0.24415  |
| 785 | P0C206 | Q8IYU8 | -0.20251  |
| 786 | P0C206 | P59046 | -0.22716  |
| 787 | P0C206 | P11216 | -0.11717  |
| 788 | P0C206 | Q5VVJ2 | -0.22738  |
| 789 | P0C206 | Q9Y2Q3 | -0.58321  |
| 790 | P0C206 | A6NDA9 | -0.79503  |
| 791 | P0C206 | Q1L5Z9 | -0.33376  |
| 792 | P0C206 | Q6ZR37 | -0.63562  |
| 793 | P0C206 | O00254 | -1.0099   |
| 794 | P0C206 | Q9BVS4 | -1.1161   |
| 795 | P0C206 | Q9UPU5 | -0.59814  |
| 796 | P0C206 | Q01167 | -0.39177  |
| 797 | P0C206 | Q9UIL4 | -0.31455  |
| 798 | P0C206 | P27352 | -0.8116   |
| 799 | P0C206 | P00738 | -0.7538   |
| 800 | P0C206 | Q5TAH2 | -0.90566  |
| 801 | P0C206 | O00182 | -0.76317  |
| 802 | P0C206 | Q68D85 | -0.73791  |
| 803 | P0C206 | O76099 | -1.2234   |
| 804 | P0C206 | Q70SY1 | -0.19114  |
| 805 | P0C206 | O75449 | -0.22912  |
| 806 | P0C206 | P01765 | -0.9894   |
| 807 | P0C206 | Q5JUK3 | -1.2316   |
| 808 | P0C206 | P09529 | -0.22741  |
| 809 | P0C206 | Q9HBI5 | -0.18442  |
| 810 | P0C206 | Q9Y345 | -0.79256  |
| 811 | P0C206 | Q07699 | -0.77696  |
| 812 | P0C206 | Q13247 | -0.23108  |
| 813 | P0C206 | O60359 | -0.92678  |
| 814 | P0C206 | Q9UQ05 | -0.9101   |
| 815 | P0C206 | P61129 | -0.14469  |
| 816 | P0C206 | Q7L4S7 | -0.79503  |
| 817 | P0C206 | Q5FWF5 | -0.11303  |
| 818 | P0C206 | Q6UXB8 | -1.3229   |
| 819 | P0C206 | P0CW18 | -0.8107   |
| 820 | P0C206 | A6NDS4 | -1.2801   |
| 821 | P0C206 | Q9HC21 | -0.5634   |
| 822 | P0C206 | Q95918 | -1.1222   |
| 823 | P0C206 | Q7Z5P4 | -1.3299   |
| 824 | P0C206 | Q9UIQ6 | -1.3785   |
| 825 | P0C206 | Q8ND71 | -0.18099  |
| 826 | P0C206 | Q96MN2 | -0.72239  |
| 827 | P0C206 | H3BS89 | -0.79503  |
| 828 | P0C206 | Q96LU7 | -0.80952  |
| 829 | P0C206 | Q05329 | -0.23557  |
| 830 | P0C206 | Q96QV1 | -0.32464  |
| 831 | P0C206 | Q9ULZ0 | -0.5224   |
| 832 | P0C206 | Q8NFX7 | -0.45287  |
| 833 | P0C206 | Q96KS9 | -0.15967  |
| 834 | P0C206 | Q5XXA6 | -0.78283  |
| 835 | P0C206 | P10721 | -0.30489  |
| 836 | P0C206 | Q53GG5 | -0.22741  |



|     |        |        |          |
|-----|--------|--------|----------|
| 837 | P0C206 | Q86VF5 | -0.75391 |
| 838 | P0C206 | A8MUH7 | -0.23036 |
| 839 | P0C206 | O60687 | -0.28636 |
| 840 | P0C206 | Q01518 | -0.16622 |
| 841 | P0C206 | Q5SVS4 | -0.46059 |
| 842 | P0C206 | Q92847 | -0.6446  |
| 843 | P0C206 | P02549 | -0.22741 |
| 844 | P0C206 | Q96AX2 | -0.70445 |
| 845 | P0C206 | Q07011 | -0.88963 |
| 846 | P0C206 | Q93098 | -0.81895 |
| 847 | P0C206 | Q96HF1 | -0.27883 |
| 848 | P0C206 | Q8NDV1 | -0.5728  |
| 849 | P0C206 | Q01101 | -0.22308 |
| 850 | P0C206 | Q8N5I2 | -0.25355 |
| 851 | P0C206 | Q8NGR8 | -1.1763  |
| 852 | P0C206 | Q8NCW5 | -0.38541 |
| 853 | P0C206 | Q96D21 | -1.0302  |
| 854 | P0C206 | P11413 | -0.18644 |
| 855 | P0C206 | Q8IWW8 | -0.17522 |
| 856 | P0C206 | Q9H106 | -0.80952 |
| 857 | P0C206 | P56746 | -0.66396 |
| 858 | P0C206 | Q96AT9 | -0.09621 |
| 859 | P0C206 | Q8NH89 | -1.1763  |
| 860 | P0C206 | P61619 | -0.74847 |
| 861 | P0C206 | P35414 | -1.0274  |
| 862 | P0C206 | Q9Y240 | -0.26509 |
| 863 | P0C206 | Q96NK8 | -0.22764 |
| 864 | P0C206 | Q8NE79 | -0.68819 |
| 865 | P0C206 | Q14213 | -0.87841 |
| 866 | P0C206 | Q6ZMJ2 | -0.96395 |
| 867 | P0C206 | Q96A05 | -0.28883 |
| 868 | P0C206 | P46663 | -0.99456 |
| 869 | P0C206 | P28799 | -0.1084  |
| 870 | P0C206 | Q5TGP6 | -0.27103 |
| 871 | P0C206 | P81133 | -0.24794 |
| 872 | P0C206 | P0C629 | -1.1763  |
| 873 | P0C206 | Q96S21 | -0.94793 |
| 874 | P0C206 | Q8N8Z3 | -0.19723 |
| 875 | P0C206 | P01036 | -0.87562 |
| 876 | P0C206 | P78539 | -0.4932  |
| 877 | P0C206 | O43280 | -0.31454 |
| 878 | P0C206 | B1AL88 | -0.79503 |
| 879 | P0C206 | Q9C0K1 | -0.86643 |
| 880 | P0C206 | Q9UNA0 | -0.23739 |
| 881 | P0C206 | P30499 | -1.0603  |
| 882 | P0C206 | Q8IW52 | -0.89423 |
| 883 | P0C206 | Q9BWE0 | -0.32992 |
| 884 | P0C206 | O60513 | -0.44905 |
| 885 | P0C206 | P01579 | -0.2522  |
| 886 | P0C206 | P35625 | -0.22469 |
| 887 | P0C206 | Q8WV15 | -0.79503 |
| 888 | P0C206 | Q00337 | -0.83546 |
| 889 | P0C206 | Q8IZM8 | -0.22739 |
| 890 | P0C206 | P50053 | -0.30163 |
| 891 | P0C206 | P10696 | -0.71265 |
| 892 | P0C206 | P60983 | -0.6709  |
| 893 | P0C206 | Q9NQC3 | -0.17608 |
| 894 | P0C206 | P57775 | -0.22763 |
| 895 | P0C206 | Q8IZJ1 | -0.4763  |
| 896 | P0C206 | P62683 | -0.15319 |
| 897 | P0C206 | Q96KG7 | -0.84596 |
| 898 | P0C206 | A8MW92 | -0.15207 |
| 899 | P0C206 | O15212 | -0.26559 |
| 900 | P0C206 | P56199 | -0.42757 |
| 901 | P0C206 | Q9UMY4 | -0.21689 |
| 902 | P0C206 | P31327 | -0.16605 |
| 903 | P0C206 | O60307 | -0.60728 |
| 904 | P0C206 | A5YM72 | -0.64197 |
| 905 | P0C206 | P01920 | -0.62752 |
| 906 | P0C206 | Q9H920 | -0.73705 |
| 907 | P0C206 | Q9H3R0 | -0.1773  |
| 908 | P0C206 | P19022 | -0.59804 |
| 909 | P0C206 | P04439 | -1.0603  |
| 910 | P0C206 | Q96QS3 | -0.144   |
| 911 | P0C206 | Q9UIV8 | -0.42353 |
| 912 | P0C206 | Q96KN9 | -0.9183  |

|     |        |        |           |
|-----|--------|--------|-----------|
| 913 | POC206 | Q8NBP0 | -0.22733  |
| 914 | POC206 | Q8NGN6 | -1.1763   |
| 915 | POC206 | P31152 | -0.53961  |
| 916 | POC206 | Q96GC9 | -0.38358  |
| 917 | POC206 | P23469 | -0.23122  |
| 918 | POC206 | Q9BWT3 | -0.34266  |
| 919 | POC206 | Q3SXZ7 | -0.15945  |
| 920 | POC206 | Q5VUB5 | -0.79503  |
| 921 | POC206 | P10912 | -0.271    |
| 922 | POC206 | P29275 | -0.77435  |
| 923 | POC206 | P32247 | -1.1032   |
| 924 | POC206 | P54284 | -0.33773  |
| 925 | POC206 | Q9NQW7 | -0.32973  |
| 926 | POC206 | P29803 | -0.30049  |
| 927 | POC206 | Q9H422 | -0.22741  |
| 928 | POC206 | Q96EQ8 | -0.55003  |
| 929 | POC206 | Q9HCL0 | -1.2445   |
| 930 | POC206 | Q15646 | -0.21826  |
| 931 | POC206 | Q11206 | -0.72973  |
| 932 | POC206 | Q6UWP7 | -0.83446  |
| 933 | POC206 | Q9Y5K1 | -0.37699  |
| 934 | POC206 | O00622 | -0.44028  |
| 935 | POC206 | Q9HAT1 | -0.72772  |
| 936 | POC206 | Q96PZ0 | -0.22444  |
| 937 | POC206 | P03928 | -0.42759  |
| 938 | POC206 | P57723 | -0.041451 |
| 939 | POC206 | Q9HBL7 | -0.98995  |
| 940 | POC206 | Q9BSJ1 | -0.52059  |
| 941 | POC206 | P52952 | -0.33456  |
| 942 | POC206 | A6NK02 | -0.44814  |
| 943 | POC206 | Q8IYU2 | -0.2278   |
| 944 | POC206 | O60496 | -0.40251  |
| 945 | POC206 | Q8N3J2 | -0.25991  |
| 946 | POC206 | Q7Z7D3 | -0.99236  |
| 947 | POC206 | Q9H6A9 | -0.79503  |
| 948 | POC206 | Q7Z2W7 | -0.77331  |
| 949 | POC206 | Q15825 | -0.84007  |
| 950 | POC206 | A8MUM7 | -0.15498  |
| 951 | POC206 | Q16553 | -0.55743  |
| 952 | POC206 | O95136 | -1.2238   |
| 953 | POC206 | P10635 | -0.38434  |
| 954 | POC206 | Q9HBI0 | -0.33163  |
| 955 | POC206 | A6NJY1 | -0.81117  |
| 956 | POC206 | C9JRZ8 | -0.51459  |
| 957 | POC206 | Q9P291 | -0.79503  |
| 958 | POC206 | P49279 | -0.38364  |
| 959 | POC206 | Q5JTY5 | -0.72239  |
| 960 | POC206 | Q9UHJ6 | -0.5645   |
| 961 | POC206 | Q96EX2 | -0.73705  |
| 962 | POC206 | Q95837 | -0.95267  |
| 963 | POC206 | Q8NE00 | -0.57403  |
| 964 | POC206 | Q8NCK7 | -0.83852  |
| 965 | POC206 | P57059 | -0.31012  |
| 966 | POC206 | Q8N1Q1 | -0.16993  |
| 967 | POC206 | A1L157 | -0.79503  |
| 968 | POC206 | P36896 | -0.44158  |
| 969 | POC206 | Q8NG94 | -1.1763   |
| 970 | POC206 | Q14094 | -0.31943  |
| 971 | POC206 | Q8NGV0 | -1.1763   |
| 972 | POC206 | P08246 | -0.52602  |
| 973 | POC206 | Q9Y2H5 | -0.32146  |
| 974 | POC206 | Q3ZCU0 | -0.2039   |
| 975 | POC206 | O00585 | -0.51965  |
| 976 | POC206 | Q0VAF6 | -0.281    |
| 977 | POC206 | Q8NBI6 | -0.89004  |
| 978 | POC206 | P22570 | -0.19252  |
| 979 | POC206 | Q9BWU1 | -0.89086  |
| 980 | POC206 | A6NIZ1 | -0.94     |
| 981 | POC206 | Q9UM73 | -1.4329   |
| 982 | POC206 | Q01415 | -0.62362  |
| 983 | POC206 | Q8NDX1 | -0.69077  |
| 984 | POC206 | O00370 | -0.25956  |
| 985 | POC206 | Q9ULI3 | -0.92062  |
| 986 | POC206 | Q9NWQ8 | -0.46415  |
| 987 | POC206 | Q86U02 | -0.79503  |
| 988 | POC206 | Q9UN70 | -1.1252   |

|      |        |        |          |
|------|--------|--------|----------|
| 989  | P0C206 | O75521 | -0.74879 |
| 990  | P0C206 | Q7L591 | -0.33654 |
| 991  | P0C206 | O95210 | -0.39525 |
| 992  | P0C206 | Q8TDS5 | -1.1255  |
| 993  | P0C206 | Q6P9F5 | -0.44814 |
| 994  | P0C206 | P29400 | -0.91068 |
| 995  | P0C206 | O75526 | -0.23604 |
| 996  | P0C206 | Q53EP0 | -0.72774 |
| 997  | P0C206 | Q96AY4 | -0.22741 |
| 998  | P0C206 | Q8IV76 | -0.23493 |
| 999  | P0C206 | Q8NGJ6 | -1.1763  |
| 1000 | P0C206 | P59551 | -1.101   |
| 1001 | P0C206 | O75882 | -1.3844  |
| 1002 | P0C206 | Q5VST6 | -0.76697 |
| 1003 | P0C206 | Q16527 | -0.23467 |
| 1004 | P0C206 | Q96RR4 | -0.98957 |
| 1005 | P0C206 | P52824 | -0.22741 |
| 1006 | P0C206 | Q99956 | -0.48223 |
| 1007 | P0C206 | Q05639 | -0.34193 |
| 1008 | P0C206 | P15529 | -0.55723 |
| 1009 | P0C206 | O75052 | -0.22299 |
| 1010 | P0C206 | O60237 | -0.32776 |
| 1011 | P0C206 | Q6JVE5 | -0.77095 |
| 1012 | P0C206 | P61626 | -0.93755 |
| 1013 | P0C206 | P01606 | -0.9894  |
| 1014 | P0C206 | O43818 | -0.22979 |
| 1015 | P0C206 | Q13621 | -0.79151 |
| 1016 | P0C206 | Q9UP95 | -0.9573  |
| 1017 | P0C206 | Q5SR53 | -0.20028 |
| 1018 | P0C206 | Q15619 | -1.1763  |
| 1019 | P0C206 | Q8TEW6 | -0.23873 |
| 1020 | P0C206 | Q5QJ74 | -0.22585 |
| 1021 | P0C206 | P20337 | -0.74932 |
| 1022 | P0C206 | P20941 | -0.12805 |
| 1023 | P0C206 | O95985 | -0.53826 |
| 1024 | P0C206 | P06756 | -0.34519 |
| 1025 | P0C206 | P20338 | -0.3742  |
| 1026 | P0C206 | Q99832 | -0.20225 |
| 1027 | P0C206 | Q92583 | -1.2061  |
| 1028 | P0C206 | Q8NGQ4 | -1.1763  |
| 1029 | P0C206 | Q9NPB3 | -0.25385 |
| 1030 | P0C206 | A4D0T2 | -0.79503 |
| 1031 | P0C206 | Q8NFZ8 | -0.98895 |
| 1032 | P0C206 | Q92673 | -1.0823  |
| 1033 | P0C206 | P35998 | -0.35379 |
| 1034 | P0C206 | Q9GZX6 | -0.80803 |
| 1035 | P0C206 | P25874 | -0.4498  |
| 1036 | P0C206 | Q6NZY7 | -0.24622 |
| 1037 | P0C206 | Q3SXM5 | -0.92963 |
| 1038 | P0C206 | Q9BW91 | -0.28218 |
| 1039 | P0C206 | O14904 | -0.8306  |
| 1040 | P0C206 | Q6PJQ5 | -0.37706 |
| 1041 | P0C206 | Q96E66 | -0.22741 |
| 1042 | P0C206 | P01622 | -0.9894  |
| 1043 | P0C206 | Q8IZA0 | -0.14494 |
| 1044 | P0C206 | P05451 | -0.64775 |
| 1045 | P0C206 | Q9BX59 | -0.95102 |
| 1046 | P0C206 | P56748 | -0.63573 |
| 1047 | P0C206 | Q9P286 | -0.60379 |
| 1048 | P0C206 | Q96D31 | -0.43112 |
| 1049 | P0C206 | Q9Y662 | -0.5532  |
| 1050 | P0C206 | Q9NRK6 | -0.95241 |
| 1051 | P0C206 | Q9NSA0 | -0.67387 |
| 1052 | P0C206 | Q6NVU6 | -0.10064 |
| 1053 | P0C206 | P59666 | -0.83637 |
| 1054 | P0C206 | A4D1S0 | -0.78949 |
| 1055 | P0C206 | P12104 | -0.32841 |
| 1056 | P0C206 | Q8N5C6 | -0.33504 |
| 1057 | P0C206 | P52799 | -0.86529 |
| 1058 | P0C206 | Q9Y547 | -0.40007 |
| 1059 | P0C206 | Q6UWF5 | -0.79503 |
| 1060 | P0C206 | Q8N446 | -0.46721 |
| 1061 | P0C206 | P61421 | -0.11793 |
| 1062 | P0C206 | Q96J94 | -0.22642 |
| 1063 | P0C206 | P00558 | -0.13771 |
| 1064 | P0C206 | P35503 | -0.82591 |

|      |        |        |           |
|------|--------|--------|-----------|
| 1065 | P0C206 | P51878 | -0.77959  |
| 1066 | P0C206 | P30443 | -1.0356   |
| 1067 | P0C206 | Q99819 | -0.30055  |
| 1068 | P0C206 | Q14767 | -0.9276   |
| 1069 | P0C206 | A6NMB9 | -0.87404  |
| 1070 | P0C206 | Q96NZ1 | -0.36431  |
| 1071 | P0C206 | Q6NUQ4 | -0.79503  |
| 1072 | P0C206 | Q53R41 | -0.17946  |
| 1073 | P0C206 | Q8NEX9 | -0.63634  |
| 1074 | P0C206 | P12814 | -0.53956  |
| 1075 | P0C206 | P01833 | -1.4822   |
| 1076 | P0C206 | P49746 | -0.91122  |
| 1077 | P0C206 | P43686 | -0.36618  |
| 1078 | P0C206 | Q8N7F7 | -0.2252   |
| 1079 | P0C206 | O96013 | -0.71358  |
| 1080 | P0C206 | Q96T52 | -0.45464  |
| 1081 | P0C206 | Q96MI9 | -0.25871  |
| 1082 | P0C206 | Q9Y228 | -0.14232  |
| 1083 | P0C206 | Q9C0A0 | -1.2227   |
| 1084 | P0C206 | O95398 | -0.54464  |
| 1085 | P0C206 | O00763 | -0.29811  |
| 1086 | P0C206 | Q9BT88 | -0.38312  |
| 1087 | P0C206 | Q7Z4M0 | -0.12735  |
| 1088 | P0C206 | P35558 | -0.35419  |
| 1089 | P0C206 | Q8IYP9 | -0.77292  |
| 1090 | P0C206 | Q9NQB0 | -0.21171  |
| 1091 | P0C206 | Q92551 | -0.25807  |
| 1092 | P0C206 | A8MYJ7 | -0.14249  |
| 1093 | P0C206 | Q9NZM6 | -0.9018   |
| 1094 | P0C206 | Q9NPA0 | -0.50557  |
| 1095 | P0C206 | Q8NCM8 | -0.32984  |
| 1096 | P0C206 | O60242 | -1.2868   |
| 1097 | P0C206 | Q8TC07 | -0.63389  |
| 1098 | P0C206 | Q15020 | -0.22882  |
| 1099 | P0C206 | P78363 | -1.095    |
| 1100 | P0C206 | Q9Y5X2 | -0.21686  |
| 1101 | P0C206 | Q8NH43 | -1.1763   |
| 1102 | P0C206 | O75204 | -0.60323  |
| 1103 | P0C206 | P48742 | -0.22741  |
| 1104 | P0C206 | Q6DKJ4 | -0.13708  |
| 1105 | P0C206 | Q587J8 | -0.13869  |
| 1106 | P0C206 | O95057 | -1.3067   |
| 1107 | P0C206 | Q8NHL6 | -0.30165  |
| 1108 | P0C206 | P02787 | -0.078332 |
| 1109 | P0C206 | Q9Y5K3 | -0.30396  |
| 1110 | P0C206 | Q6ZMU1 | -0.30636  |
| 1111 | P0C206 | Q9NRE2 | -0.20206  |
| 1112 | P0C206 | Q9NPG4 | -1.0063   |
| 1113 | P0C206 | Q9UBK2 | -0.63651  |
| 1114 | P0C206 | Q9NPH0 | -0.65394  |
| 1115 | P0C206 | Q969V5 | -0.22738  |
| 1116 | P0C206 | P01614 | -0.9894   |
| 1117 | P0C206 | Q2TAL6 | -0.87688  |
| 1118 | P0C206 | P22314 | -0.21195  |
| 1119 | P0C206 | Q5VWK5 | -0.52268  |
| 1120 | P0C206 | Q86TE4 | -0.80952  |
| 1121 | P0C206 | Q9H7L2 | -0.80952  |
| 1122 | P0C206 | Q6UWT2 | -0.80952  |
| 1123 | P0C206 | O14788 | -0.59194  |
| 1124 | P0C206 | P32245 | -0.55324  |
| 1125 | P0C206 | Q5VWQ8 | -0.22598  |
| 1126 | P0C206 | Q5IJ48 | -1.5214   |
| 1127 | P0C206 | O00590 | -1.3838   |
| 1128 | P0C206 | Q8TCU5 | -0.36007  |
| 1129 | P0C206 | Q9Y5F0 | -1.1388   |
| 1130 | P0C206 | P34982 | -1.2657   |
| 1131 | P0C206 | Q9UIG4 | -0.62908  |
| 1132 | P0C206 | Q9NYM4 | -1.1858   |
| 1133 | P0C206 | Q8NHG8 | -0.3792   |
| 1134 | P0C206 | P78369 | -0.81471  |
| 1135 | P0C206 | Q92928 | -0.70004  |
| 1136 | P0C206 | Q96L12 | -0.43635  |
| 1137 | P0C206 | Q13882 | -0.59158  |
| 1138 | P0C206 | P30483 | -0.99995  |
| 1139 | P0C206 | O95352 | -0.20238  |
| 1140 | P0C206 | Q8WXH5 | -0.47617  |

|      |        |        |           |
|------|--------|--------|-----------|
| 1141 | P0C206 | Q96RQ3 | -0.63483  |
| 1142 | P0C206 | Q8NEE8 | -0.22733  |
| 1143 | P0C206 | Q6UXZ3 | -0.26942  |
| 1144 | P0C206 | Q13588 | -0.22741  |
| 1145 | P0C206 | P04280 | -0.71676  |
| 1146 | P0C206 | P59089 | -0.088184 |
| 1147 | P0C206 | A6NMB1 | -0.97776  |
| 1148 | P0C206 | Q9H2J1 | -0.19875  |
| 1149 | P0C206 | Q16778 | -0.64767  |
| 1150 | P0C206 | Q9NZQ9 | -0.2192   |
| 1151 | P0C206 | Q9UBI6 | -0.49689  |
| 1152 | P0C206 | Q5JXX5 | -0.76675  |
| 1153 | P0C206 | Q6ZMB0 | -0.60639  |
| 1154 | P0C206 | P04920 | -0.72348  |
| 1155 | P0C206 | O60427 | -0.28492  |
| 1156 | P0C206 | Q504U0 | -0.11485  |
| 1157 | P0C206 | Q9Y566 | -0.22743  |
| 1158 | P0C206 | Q9H244 | -0.81416  |
| 1159 | P0C206 | Q8NF37 | -0.5308   |
| 1160 | P0C206 | Q96CW9 | -0.66195  |
| 1161 | P0C206 | Q9Y6W5 | -0.37332  |
| 1162 | P0C206 | Q5VVQ6 | -0.24502  |
| 1163 | P0C206 | Q92824 | -0.89824  |
| 1164 | P0C206 | Q8TE57 | -1.173    |
| 1165 | P0C206 | Q6U736 | -1.1266   |
| 1166 | P0C206 | P30872 | -1.2394   |
| 1167 | P0C206 | Q9H7V2 | -0.81366  |
| 1168 | P0C206 | Q6UX46 | -0.80952  |
| 1169 | P0C206 | Q9H173 | -0.16019  |
| 1170 | P0C206 | P32418 | -0.46581  |
| 1171 | P0C206 | Q9UQD0 | -0.85254  |
| 1172 | P0C206 | Q14D04 | -0.54931  |
| 1173 | P0C206 | P01033 | -0.20453  |
| 1174 | P0C206 | Q9UGQ3 | -0.51956  |
| 1175 | P0C206 | P57727 | -1.3005   |
| 1176 | P0C206 | Q13651 | -0.54251  |
| 1177 | P0C206 | P11912 | -0.86562  |
| 1178 | P0C206 | P51841 | -1.3568   |
| 1179 | P0C206 | Q8TDI0 | -0.22255  |
| 1180 | P0C206 | Q2M2D7 | -0.88845  |
| 1181 | P0C206 | Q04771 | -0.32764  |
| 1182 | P0C206 | Q8NBP5 | -0.82397  |
| 1183 | P0C206 | Q9UK55 | -0.49056  |
| 1184 | P0C206 | Q6P4F2 | -0.088309 |
| 1185 | P0C206 | Q6ZQY3 | -0.44585  |
| 1186 | P0C206 | Q99731 | -0.47196  |
| 1187 | P0C206 | Q9Y265 | -0.44746  |
| 1188 | P0C206 | P13385 | -0.22748  |
| 1189 | P0C206 | Q8N2R8 | -0.20536  |
| 1190 | P0C206 | P54829 | -1.1245   |
| 1191 | P0C206 | Q8N1S5 | -0.8019   |
| 1192 | P0C206 | Q86UP9 | -0.79503  |
| 1193 | P0C206 | Q16602 | -0.52804  |
| 1194 | P0C206 | Q8NHC8 | -1.1763   |
| 1195 | P0C206 | P51690 | -0.31986  |
| 1196 | P0C206 | Q86UY6 | -0.25827  |
| 1197 | P0C206 | P59534 | -1.1287   |
| 1198 | P0C206 | P31944 | -0.2259   |
| 1199 | P0C206 | Q96KC2 | -1.3287   |
| 1200 | P0C206 | Q8IZ69 | -0.70471  |
| 1201 | P0C206 | Q9HBH9 | -0.61547  |
| 1202 | P0C206 | P09619 | -0.37194  |
| 1203 | P0C206 | Q5QP82 | -0.23317  |
| 1204 | P0C206 | P13796 | -0.48445  |
| 1205 | P0C206 | Q9HBV1 | -0.674    |
| 1206 | P0C206 | P52823 | -0.562    |
| 1207 | P0C206 | Q16378 | -0.94886  |
| 1208 | P0C206 | A6NDD2 | -0.77981  |
| 1209 | P0C206 | O95154 | -0.22248  |
| 1210 | P0C206 | Q5T9Z0 | -0.79503  |
| 1211 | P0C206 | P49759 | -0.90264  |
| 1212 | P0C206 | Q9HBH0 | -0.93565  |
| 1213 | P0C206 | P49908 | -0.85949  |
| 1214 | P0C206 | Q52WX2 | -1.0374   |
| 1215 | P0C206 | P54886 | -0.62629  |
| 1216 | P0C206 | Q9NSV4 | -0.21864  |

|      |        |        |           |
|------|--------|--------|-----------|
| 1217 | P0C206 | P48739 | -0.28342  |
| 1218 | P0C206 | Q6UXX5 | -0.74321  |
| 1219 | P0C206 | Q9UBT7 | -0.23697  |
| 1220 | P0C206 | P53007 | -0.25253  |
| 1221 | P0C206 | Q9NYP7 | -0.11877  |
| 1222 | P0C206 | O95872 | -0.24184  |
| 1223 | P0C206 | Q9GZV7 | -1.0334   |
| 1224 | P0C206 | O94806 | -0.22726  |
| 1225 | P0C206 | P09430 | -0.54913  |
| 1226 | P0C206 | Q2KJY2 | -0.55532  |
| 1227 | P0C206 | Q8NGG3 | -1.1763   |
| 1228 | P0C206 | Q8N9F7 | -0.49665  |
| 1229 | P0C206 | Q6ZS86 | -0.74728  |
| 1230 | P0C206 | P22102 | -0.42759  |
| 1231 | P0C206 | Q9H461 | -0.39063  |
| 1232 | P0C206 | Q7L5L3 | -0.72495  |
| 1233 | P0C206 | E7EML9 | -1.3203   |
| 1234 | P0C206 | Q75WM6 | -1.0259   |
| 1235 | P0C206 | Q15078 | -0.07797  |
| 1236 | P0C206 | A6NEH6 | -0.7666   |
| 1237 | P0C206 | Q6P4A8 | -0.63369  |
| 1238 | P0C206 | Q9UIW0 | -0.22724  |
| 1239 | P0C206 | Q14526 | -0.37391  |
| 1240 | P0C206 | Q8IYB5 | -0.62515  |
| 1241 | P0C206 | P0CG23 | -0.46721  |
| 1242 | P0C206 | Q9NZS9 | -0.78269  |
| 1243 | P0C206 | Q0P5N6 | -1.3287   |
| 1244 | P0C206 | Q9HAV0 | -0.35669  |
| 1245 | P0C206 | Q3YEC7 | -0.2278   |
| 1246 | P0C206 | Q9BS40 | -0.16911  |
| 1247 | P0C206 | Q92570 | -0.24739  |
| 1248 | P0C206 | Q6PIW4 | -0.26286  |
| 1249 | P0C206 | Q71RC9 | -0.79503  |
| 1250 | P0C206 | P23468 | -0.62667  |
| 1251 | P0C206 | Q96F10 | -0.16886  |
| 1252 | P0C206 | Q8IV13 | -0.22551  |
| 1253 | P0C206 | A8MT19 | -0.19634  |
| 1254 | P0C206 | Q86TI0 | -0.95714  |
| 1255 | P0C206 | P16860 | -0.43586  |
| 1256 | P0C206 | P54709 | -0.577    |
| 1257 | P0C206 | Q02252 | -0.30841  |
| 1258 | P0C206 | P49841 | -0.22769  |
| 1259 | P0C206 | Q9Y2Q5 | -0.24546  |
| 1260 | P0C206 | A9Z1Z3 | -0.79503  |
| 1261 | P0C206 | Q9UKZ4 | -1.0487   |
| 1262 | P0C206 | Q14112 | -0.6514   |
| 1263 | P0C206 | Q504Y2 | -0.73554  |
| 1264 | P0C206 | Q13011 | -0.093083 |
| 1265 | P0C206 | Q8WTQ1 | -0.77981  |
| 1266 | P0C206 | Q9BUJ0 | -0.48221  |
| 1267 | P0C206 | Q9GZZ8 | -0.48781  |
| 1268 | P0C206 | Q9NX00 | -0.62349  |
| 1269 | P0C206 | Q8N6S4 | -0.45044  |
| 1270 | P0C206 | Q14993 | -1.1814   |
| 1271 | P0C206 | Q9NZW5 | -0.22506  |
| 1272 | P0C206 | Q9Y3R0 | -0.22525  |
| 1273 | P0C206 | Q9BTD8 | -0.30066  |
| 1274 | P0C206 | Q9Y5E8 | -1.2044   |
| 1275 | P0C206 | Q658P3 | -0.55905  |
| 1276 | P0C206 | P49448 | -0.6554   |
| 1277 | P0C206 | P20908 | -0.84388  |
| 1278 | P0C206 | P04183 | -0.50049  |
| 1279 | P0C206 | Q5W0B7 | -0.79503  |
| 1280 | P0C206 | Q6ZU82 | -0.287    |
| 1281 | P0C206 | Q9NWW9 | -0.12794  |
| 1282 | P0C206 | Q86VV4 | -0.42978  |
| 1283 | P0C206 | Q9H210 | -1.1763   |
| 1284 | P0C206 | O95263 | -0.22667  |
| 1285 | P0C206 | Q8TDM0 | -0.087563 |
| 1286 | P0C206 | Q7Z6Z6 | -0.3712   |
| 1287 | P0C206 | Q0VGL1 | -0.49711  |
| 1288 | P0C206 | Q8TCB6 | -1.1763   |
| 1289 | P0C206 | A8MXU0 | -0.77981  |
| 1290 | P0C206 | P49761 | -0.66519  |
| 1291 | P0C206 | Q9H6D8 | -0.88965  |
| 1292 | P0C206 | Q8NGK1 | -1.1763   |

|      |        |        |           |
|------|--------|--------|-----------|
| 1293 | POC206 | Q96JX3 | -0.5937   |
| 1294 | POC206 | Q12923 | -0.22741  |
| 1295 | POC206 | Q16832 | -1.1028   |
| 1296 | POC206 | Q96AN5 | -0.5134   |
| 1297 | POC206 | Q8NCW6 | -0.49446  |
| 1298 | POC206 | Q8TF71 | -0.86761  |
| 1299 | POC206 | Q8N6S5 | -0.79503  |
| 1300 | POC206 | Q7Z569 | -0.22744  |
| 1301 | POC206 | P50454 | -0.31913  |
| 1302 | POC206 | Q8NB66 | -0.22741  |
| 1303 | POC206 | Q86YH2 | -0.2346   |
| 1304 | POC206 | Q9BV40 | -0.55289  |
| 1305 | POC206 | Q9NW82 | -0.22741  |
| 1306 | POC206 | Q8WWH4 | -0.48173  |
| 1307 | POC206 | P10911 | -0.22682  |
| 1308 | POC206 | Q99611 | -0.83671  |
| 1309 | POC206 | Q5TGI0 | -0.79503  |
| 1310 | POC206 | Q9P1P4 | -1.2135   |
| 1311 | POC206 | Q9UMX9 | -0.90957  |
| 1312 | POC206 | A4D1Z8 | -0.2154   |
| 1313 | POC206 | Q9H207 | -1.1763   |
| 1314 | POC206 | P51798 | -1.06     |
| 1315 | POC206 | P51956 | -0.22741  |
| 1316 | POC206 | Q96G74 | -0.44797  |
| 1317 | POC206 | Q9P0L9 | -0.39992  |
| 1318 | POC206 | A6NLE4 | -0.91833  |
| 1319 | POC206 | O75051 | -1.1268   |
| 1320 | POC206 | Q15828 | -0.83951  |
| 1321 | POC206 | Q96IJ6 | -0.66182  |
| 1322 | POC206 | Q5T4B2 | -0.44149  |
| 1323 | POC206 | Q9Y2G8 | -0.90054  |
| 1324 | POC206 | O60760 | -0.22551  |
| 1325 | POC206 | Q86V35 | -0.53765  |
| 1326 | POC206 | Q49A17 | -0.60134  |
| 1327 | POC206 | Q14625 | -1.0996   |
| 1328 | POC206 | Q9UGI0 | -0.21772  |
| 1329 | POC206 | Q702N8 | -0.20725  |
| 1330 | POC206 | Q6PXP3 | -0.65502  |
| 1331 | POC206 | Q96ET8 | -0.79503  |
| 1332 | POC206 | A6NJW9 | -0.91833  |
| 1333 | POC206 | Q6FI13 | -0.66158  |
| 1334 | POC206 | P27144 | -0.58206  |
| 1335 | POC206 | P00326 | -0.52938  |
| 1336 | POC206 | Q9Y5Q0 | -0.94702  |
| 1337 | POC206 | Q9NQ38 | -0.41128  |
| 1338 | POC206 | Q8N9X3 | -0.22606  |
| 1339 | POC206 | Q8N0W3 | -0.88616  |
| 1340 | POC206 | Q95972 | -0.69454  |
| 1341 | POC206 | Q6VVX0 | -0.6613   |
| 1342 | POC206 | Q96NH3 | -1.0266   |
| 1343 | POC206 | Q9H2X3 | -0.88322  |
| 1344 | POC206 | Q8NHH1 | -0.24704  |
| 1345 | POC206 | Q4FZB7 | -0.21111  |
| 1346 | POC206 | P13928 | -0.16283  |
| 1347 | POC206 | P15260 | -1.0416   |
| 1348 | POC206 | Q5SR56 | -0.82397  |
| 1349 | POC206 | P19652 | -0.76412  |
| 1350 | POC206 | A6NLI5 | -0.44814  |
| 1351 | POC206 | O00748 | -0.22731  |
| 1352 | POC206 | Q02978 | -0.32528  |
| 1353 | POC206 | Q13936 | -0.28414  |
| 1354 | POC206 | Q86UA1 | -0.13378  |
| 1355 | POC206 | Q16772 | -0.22441  |
| 1356 | POC206 | Q9UDT6 | -0.22694  |
| 1357 | POC206 | Q8NBD8 | -0.79503  |
| 1358 | POC206 | Q9UBX5 | -0.40781  |
| 1359 | POC206 | P14920 | -0.47782  |
| 1360 | POC206 | A8MWD9 | -0.15799  |
| 1361 | POC206 | Q9Y3P9 | -0.22911  |
| 1362 | POC206 | Q9NSB8 | -0.36556  |
| 1363 | POC206 | Q8TBA6 | -0.47765  |
| 1364 | POC206 | Q8N4E7 | -0.057801 |
| 1365 | POC206 | Q9UMD9 | -0.94754  |
| 1366 | POC206 | Q7LFL8 | -0.043593 |
| 1367 | POC206 | Q9P0K9 | -0.57403  |
| 1368 | POC206 | O15068 | -0.39684  |

|      |        |        |          |
|------|--------|--------|----------|
| 1369 | POC206 | Q9UNK0 | -0.80429 |
| 1370 | POC206 | O15021 | -1.02    |
| 1371 | POC206 | Q96FZ5 | -0.85091 |
| 1372 | POC206 | Q6VAB6 | -0.37954 |
| 1373 | POC206 | Q12849 | -0.45973 |
| 1374 | POC206 | Q4V9L6 | -0.57403 |
| 1375 | POC206 | A6NDN8 | -0.18531 |
| 1376 | POC206 | A7KAX9 | -0.34345 |
| 1377 | POC206 | Q04721 | -0.22742 |
| 1378 | POC206 | O14967 | -0.84139 |
| 1379 | POC206 | O75716 | -0.43097 |
| 1380 | POC206 | Q96FE5 | -0.70077 |
| 1381 | POC206 | Q96MS0 | -0.93528 |
| 1382 | POC206 | Q9NPG1 | -0.49371 |
| 1383 | POC206 | Q8N6M6 | -0.35559 |
| 1384 | POC206 | Q16048 | -0.78078 |
| 1385 | POC206 | Q6UXB3 | -0.44393 |
| 1386 | POC206 | P63125 | -0.56257 |
| 1387 | POC206 | P23276 | -0.59717 |
| 1388 | POC206 | Q96EU7 | -0.68578 |
| 1389 | POC206 | Q5H9U9 | -0.78816 |
| 1390 | POC206 | Q9GIP4 | -0.80326 |
| 1391 | POC206 | Q5W0N0 | -0.79503 |
| 1392 | POC206 | Q5MY95 | -1.2476  |
| 1393 | POC206 | Q13885 | -0.35753 |
| 1394 | POC206 | Q8NH06 | -1.1763  |
| 1395 | POC206 | Q9H2J7 | -0.92656 |
| 1396 | POC206 | P38398 | -0.22719 |
| 1397 | POC206 | Q9H8X9 | -0.77292 |
| 1398 | POC206 | Q9HBT6 | -1.103   |
| 1399 | POC206 | Q9NXA8 | -0.26774 |
| 1400 | POC206 | Q5VUJ6 | -0.23647 |
| 1401 | POC206 | P00966 | -0.15178 |
| 1402 | POC206 | P0DKX4 | -0.17694 |
| 1403 | POC206 | Q9NUM4 | -0.66502 |
| 1404 | POC206 | Q10469 | -0.65027 |
| 1405 | POC206 | Q16873 | -0.2709  |
| 1406 | POC206 | O60566 | -0.2274  |
| 1407 | POC206 | P46531 | -0.22784 |
| 1408 | POC206 | P21860 | -0.63727 |
| 1409 | POC206 | Q8IUX7 | -0.35815 |
| 1410 | POC206 | Q86U17 | -0.66462 |
| 1411 | POC206 | P37840 | -0.20961 |
| 1412 | POC206 | P03950 | -0.28556 |
| 1413 | POC206 | Q6NUS6 | -0.62469 |
| 1414 | POC206 | Q6UX39 | -0.85542 |
| 1415 | POC206 | Q8IU54 | -0.66248 |
| 1416 | POC206 | Q8WVE0 | -0.2224  |
| 1417 | POC206 | P20366 | -0.77038 |
| 1418 | POC206 | Q13641 | -0.86944 |
| 1419 | POC206 | P10523 | -0.83835 |
| 1420 | POC206 | P98155 | -0.88813 |
| 1421 | POC206 | P01770 | -0.9894  |
| 1422 | POC206 | Q9NYU2 | -0.31148 |
| 1423 | POC206 | P35442 | -0.8249  |
| 1424 | POC206 | Q13939 | -0.39373 |
| 1425 | POC206 | Q5T7M4 | -0.83968 |
| 1426 | POC206 | Q96RP3 | -0.82273 |
| 1427 | POC206 | Q7Z4W1 | -0.76605 |
| 1428 | POC206 | Q8NH07 | -1.1763  |
| 1429 | POC206 | Q9BX46 | -0.2992  |
| 1430 | POC206 | Q8IYM1 | -0.22467 |
| 1431 | POC206 | Q9P2G9 | -0.20424 |
| 1432 | POC206 | Q8N806 | -0.33534 |
| 1433 | POC206 | Q00975 | -0.70724 |
| 1434 | POC206 | Q13470 | -0.70525 |
| 1435 | POC206 | P08913 | -0.24723 |
| 1436 | POC206 | Q9H4L4 | -0.18617 |
| 1437 | POC206 | O75553 | -0.39807 |
| 1438 | POC206 | Q9UHH9 | -0.40194 |
| 1439 | POC206 | Q6ZS11 | -0.88637 |
| 1440 | POC206 | A7E2S9 | -0.22741 |
| 1441 | POC206 | Q8TEB9 | -0.47674 |
| 1442 | POC206 | Q9Y2E8 | -0.75338 |
| 1443 | POC206 | Q8N8V8 | -0.79503 |
| 1444 | POC206 | Q8IZV2 | -0.85091 |



|      |        |        |           |
|------|--------|--------|-----------|
| 1445 | P0C206 | P32004 | -0.59721  |
| 1446 | P0C206 | Q8NC42 | -0.8308   |
| 1447 | P0C206 | Q9NVF9 | -0.6292   |
| 1448 | P0C206 | A6NMK7 | -0.24372  |
| 1449 | P0C206 | P0C7W9 | -0.19106  |
| 1450 | P0C206 | Q99677 | -1.437    |
| 1451 | P0C206 | P04431 | -0.9894   |
| 1452 | P0C206 | Q12870 | -0.2284   |
| 1453 | P0C206 | Q8IYR6 | -1.1112   |
| 1454 | P0C206 | Q5JUR7 | -0.072322 |
| 1455 | P0C206 | Q7Z403 | -0.89601  |
| 1456 | P0C206 | Q9HC29 | -0.22728  |
| 1457 | P0C206 | Q9BRP9 | -0.085516 |
| 1458 | P0C206 | Q9Y485 | -0.22742  |
| 1459 | P0C206 | Q9NVS9 | -0.26496  |
| 1460 | P0C206 | Q9H2X8 | -0.79503  |
| 1461 | P0C206 | Q9Y574 | -0.22773  |
| 1462 | P0C206 | B5MCN3 | -0.85409  |
| 1463 | P0C206 | P80162 | -1.138    |
| 1464 | P0C206 | Q7Z429 | -0.79503  |
| 1465 | P0C206 | Q86WK6 | -1.2718   |
| 1466 | P0C206 | Q86U06 | -0.57422  |
| 1467 | P0C206 | Q92913 | -0.36206  |
| 1468 | P0C206 | Q8NCU8 | -0.79503  |
| 1469 | P0C206 | Q6X4U4 | -0.83341  |
| 1470 | P0C206 | Q8N8W4 | -0.3712   |
| 1471 | P0C206 | P13224 | -0.54788  |
| 1472 | P0C206 | P84351 | -0.86854  |
| 1473 | P0C206 | Q6ZSQ3 | -0.2284   |
| 1474 | P0C206 | Q92581 | -0.80966  |
| 1475 | P0C206 | Q8IYV9 | -0.90293  |
| 1476 | P0C206 | Q86TN4 | -0.33097  |
| 1477 | P0C206 | Q8IVQ6 | -0.40628  |
| 1478 | P0C206 | Q9UHC3 | -0.50567  |
| 1479 | P0C206 | Q5VU36 | -0.79503  |
| 1480 | P0C206 | Q14775 | -0.30279  |
| 1481 | P0C206 | Q8TET4 | -0.24798  |
| 1482 | P0C206 | Q9UIB8 | -1.148    |
| 1483 | P0C206 | P05091 | -0.38842  |
| 1484 | P0C206 | P50876 | -0.66565  |
| 1485 | P0C206 | Q86SQ3 | -1.3234   |
| 1486 | P0C206 | P14314 | -0.57163  |
| 1487 | P0C206 | Q5VTT5 | -0.23408  |
| 1488 | P0C206 | Q6PL24 | -0.60653  |
| 1489 | P0C206 | Q9HCP6 | -0.78812  |
| 1490 | P0C206 | Q5FYA8 | -0.65441  |
| 1491 | P0C206 | Q92820 | -0.59996  |
| 1492 | P0C206 | A8MYU2 | -1.1313   |
| 1493 | P0C206 | Q7Z5Y6 | -0.85411  |
| 1494 | P0C206 | P27824 | -0.22399  |
| 1495 | P0C206 | Q7RTS6 | -0.79503  |
| 1496 | P0C206 | Q96PD4 | -0.49251  |
| 1497 | P0C206 | Q58EX7 | -0.67089  |
| 1498 | P0C206 | Q96A37 | -0.44814  |
| 1499 | P0C206 | P56134 | -0.45363  |
| 1500 | P0C206 | Q99726 | -0.7086   |
| 1501 | P0C206 | P57103 | -0.76927  |
| 1502 | P0C206 | Q07002 | -0.95744  |
| 1503 | P0C206 | Q9H0J4 | -0.1926   |
| 1504 | P0C206 | P17516 | -0.22671  |
| 1505 | P0C206 | Q9UKW4 | -0.22741  |
| 1506 | P0C206 | Q95150 | -1.478    |
| 1507 | P0C206 | Q8NBQ5 | -1.1554   |
| 1508 | P0C206 | Q15523 | -0.56767  |
| 1509 | P0C206 | Q00755 | -0.41027  |
| 1510 | P0C206 | Q00330 | -0.17675  |
| 1511 | P0C206 | Q6XE38 | -0.80952  |
| 1512 | P0C206 | Q08397 | -1.1261   |
| 1513 | P0C206 | P08473 | -0.46489  |
| 1514 | P0C206 | Q6Y2X3 | -0.20829  |
| 1515 | P0C206 | Q8N543 | -0.14076  |
| 1516 | P0C206 | Q9P1A2 | -0.093045 |
| 1517 | P0C206 | Q9BZV2 | -0.62039  |
| 1518 | P0C206 | A7E2F4 | -0.15936  |
| 1519 | P0C206 | Q8NB46 | -0.22723  |
| 1520 | P0C206 | P52788 | -0.21936  |

|      |        |        |          |
|------|--------|--------|----------|
| 1521 | P0C206 | Q9NZ01 | -0.54526 |
| 1522 | P0C206 | O75636 | -0.60641 |
| 1523 | P0C206 | O60840 | -0.78307 |
| 1524 | P0C206 | P11274 | -0.7767  |
| 1525 | P0C206 | Q8N567 | -0.42965 |
| 1526 | P0C206 | Q9C026 | -0.56485 |
| 1527 | P0C206 | P0C7X1 | -1.2801  |
| 1528 | P0C206 | Q5JS37 | -0.80952 |
| 1529 | P0C206 | Q96NU0 | -1.2227  |
| 1530 | P0C206 | Q86Y82 | -0.39907 |
| 1531 | P0C206 | Q8NEM7 | -0.41334 |
| 1532 | P0C206 | Q96DZ9 | -0.85091 |
| 1533 | P0C206 | Q6WCQ1 | -0.2247  |
| 1534 | P0C206 | Q7Z412 | -0.21564 |
| 1535 | P0C206 | P0DJD3 | -0.24004 |
| 1536 | P0C206 | E0CX11 | -0.80952 |
| 1537 | P0C206 | O94832 | -0.54592 |
| 1538 | P0C206 | Q9C091 | -0.79503 |
| 1539 | P0C206 | Q9NRR2 | -1.3625  |
| 1540 | P0C206 | P51797 | -1.0027  |
| 1541 | P0C206 | Q9H161 | -0.20438 |
| 1542 | P0C206 | P09651 | -0.29415 |
| 1543 | P0C206 | O94808 | -0.11169 |
| 1544 | P0C206 | P28330 | -0.36962 |
| 1545 | P0C206 | Q9Y256 | -1.0783  |
| 1546 | P0C206 | Q9UGU5 | -0.24627 |
| 1547 | P0C206 | Q9ULK6 | -0.73705 |
| 1548 | P0C206 | Q9UPT9 | -0.38639 |
| 1549 | P0C206 | Q6KF10 | -0.53802 |
| 1550 | P0C206 | Q8NBR0 | -0.66736 |
| 1551 | P0C206 | Q8NBI2 | -1.0504  |
| 1552 | P0C206 | Q99250 | -0.91042 |
| 1553 | P0C206 | P20061 | -0.76925 |
| 1554 | P0C206 | Q8NGW6 | -1.1763  |
| 1555 | P0C206 | O60704 | -0.56039 |
| 1556 | P0C206 | Q6DN12 | -0.78942 |
| 1557 | P0C206 | O95406 | -0.61425 |
| 1558 | P0C206 | Q4G0X9 | -0.1647  |
| 1559 | P0C206 | Q9BWL3 | -0.88484 |
| 1560 | P0C206 | Q9ULX7 | -0.82826 |
| 1561 | P0C206 | Q12947 | -0.45206 |
| 1562 | P0C206 | Q6PJF5 | -0.79772 |
| 1563 | P0C206 | P48509 | -0.50578 |
| 1564 | P0C206 | Q9NQV8 | -0.47036 |
| 1565 | P0C206 | Q8WUR7 | -0.15294 |
| 1566 | P0C206 | Q6UY01 | -0.22741 |
| 1567 | P0C206 | P05177 | -0.4431  |
| 1568 | P0C206 | Q9NQM4 | -0.09119 |
| 1569 | P0C206 | Q9HCU0 | -0.56331 |
| 1570 | P0C206 | Q9BZB8 | -0.55699 |
| 1571 | P0C206 | P48039 | -1.1997  |
| 1572 | P0C206 | Q5JT25 | -0.91623 |
| 1573 | P0C206 | P80419 | -0.84138 |
| 1574 | P0C206 | P0C7P0 | -0.12404 |
| 1575 | P0C206 | Q9NPQ8 | -0.48769 |
| 1576 | P0C206 | A6NCF6 | -0.1103  |
| 1577 | P0C206 | Q8NGI3 | -1.1763  |
| 1578 | P0C206 | Q8IVM8 | -0.73598 |
| 1579 | P0C206 | Q6NUM6 | -0.99403 |
| 1580 | P0C206 | P30838 | -0.28314 |
| 1581 | P0C206 | P33764 | -0.27153 |
| 1582 | P0C206 | Q7Z7A4 | -0.76207 |
| 1583 | P0C206 | P28222 | -0.79456 |
| 1584 | P0C206 | Q9H3N1 | -0.84975 |
| 1585 | P0C206 | Q96PX8 | -0.89423 |
| 1586 | P0C206 | Q9UIX4 | -0.76295 |
| 1587 | P0C206 | P0C7M8 | -0.78949 |
| 1588 | P0C206 | Q8NB49 | -0.60199 |
| 1589 | P0C206 | P49585 | -0.29622 |
| 1590 | P0C206 | P27987 | -0.79538 |
| 1591 | P0C206 | Q92731 | -0.22746 |
| 1592 | P0C206 | O95786 | -0.227   |
| 1593 | P0C206 | Q07912 | -0.46852 |
| 1594 | P0C206 | Q7Z3D4 | -0.7776  |
| 1595 | P0C206 | Q8TE54 | -0.44381 |
| 1596 | P0C206 | Q9Y216 | -0.24541 |

|      |        |        |           |
|------|--------|--------|-----------|
| 1597 | P0C206 | P52566 | -0.51457  |
| 1598 | P0C206 | Q8NHC5 | -1.1763   |
| 1599 | P0C206 | Q92738 | -1.0967   |
| 1600 | P0C206 | P55073 | -0.80809  |
| 1601 | P0C206 | P30043 | -0.10423  |
| 1602 | P0C206 | Q9NX02 | -0.22723  |
| 1603 | P0C206 | Q8NGT2 | -1.1763   |
| 1604 | P0C206 | Q9UIA0 | -0.60943  |
| 1605 | P0C206 | Q9Y6N5 | -0.23686  |
| 1606 | P0C206 | Q9NWM8 | -0.32658  |
| 1607 | P0C206 | Q9NX77 | -0.6451   |
| 1608 | P0C206 | Q8N8F7 | -0.79503  |
| 1609 | P0C206 | Q9H339 | -1.1763   |
| 1610 | P0C206 | Q13685 | -0.50203  |
| 1611 | P0C206 | P01222 | -0.67757  |
| 1612 | P0C206 | P19801 | -0.8261   |
| 1613 | P0C206 | P11717 | -0.22367  |
| 1614 | P0C206 | Q8IYJ1 | -0.22946  |
| 1615 | P0C206 | Q9ULV8 | -0.30327  |
| 1616 | P0C206 | P31267 | -0.22226  |
| 1617 | P0C206 | Q9NVE5 | -0.59814  |
| 1618 | P0C206 | Q02747 | -0.90398  |
| 1619 | P0C206 | Q8WZA6 | -1.1763   |
| 1620 | P0C206 | Q6ZMI3 | -1.1618   |
| 1621 | P0C206 | P09488 | -0.21909  |
| 1622 | P0C206 | Q9H2C5 | -1.1763   |
| 1623 | P0C206 | O75676 | -0.201    |
| 1624 | P0C206 | O95471 | -0.12259  |
| 1625 | P0C206 | D6RBQ6 | -0.59814  |
| 1626 | P0C206 | P32881 | -0.75974  |
| 1627 | P0C206 | P52888 | -0.37776  |
| 1628 | P0C206 | Q14003 | -0.61549  |
| 1629 | P0C206 | Q8N5S9 | -0.61769  |
| 1630 | P0C206 | Q96DA0 | -0.80341  |
| 1631 | P0C206 | P56749 | -0.66396  |
| 1632 | P0C206 | Q9H061 | -0.53198  |
| 1633 | P0C206 | Q96EE4 | -0.80952  |
| 1634 | P0C206 | Q14318 | -0.22814  |
| 1635 | P0C206 | Q96JG8 | -0.064233 |
| 1636 | P0C206 | Q14640 | -0.070985 |
| 1637 | P0C206 | Q6UWV7 | -0.79503  |
| 1638 | P0C206 | Q86UL3 | -0.57828  |
| 1639 | P0C206 | Q8N4S7 | -0.79503  |
| 1640 | P0C206 | O15047 | -0.2237   |
| 1641 | P0C206 | Q66K66 | -0.79503  |
| 1642 | P0C206 | P14735 | -0.24652  |
| 1643 | P0C206 | Q8NH08 | -1.1763   |
| 1644 | P0C206 | Q96LD4 | -0.22729  |
| 1645 | P0C206 | Q16881 | -0.22079  |
| 1646 | P0C206 | Q8NE01 | -0.37157  |
| 1647 | P0C206 | P85299 | -0.10568  |
| 1648 | P0C206 | Q5H9E4 | -0.57194  |
| 1649 | P0C206 | P34947 | -0.48889  |
| 1650 | P0C206 | Q14626 | -1.1119   |
| 1651 | P0C206 | A6NDY0 | -0.61001  |
| 1652 | P0C206 | O95169 | -0.40058  |
| 1653 | P0C206 | Q96NX5 | -0.87649  |
| 1654 | P0C206 | P13762 | -0.63497  |
| 1655 | P0C206 | P36897 | -0.26801  |
| 1656 | P0C206 | Q6PJ69 | -0.44814  |
| 1657 | P0C206 | P50895 | -1.2097   |
| 1658 | P0C206 | O75844 | -0.86716  |
| 1659 | P0C206 | P17542 | -0.22768  |
| 1660 | P0C206 | Q9H310 | -0.71535  |
| 1661 | P0C206 | Q96T55 | -1.0115   |
| 1662 | P0C206 | Q9NZJ7 | -0.23479  |
| 1663 | P0C206 | O43506 | -1.0497   |
| 1664 | P0C206 | P28300 | -0.37089  |
| 1665 | P0C206 | Q14994 | -0.88145  |
| 1666 | P0C206 | P48449 | -0.40741  |
| 1667 | P0C206 | Q9NRI6 | -0.78978  |
| 1668 | P0C206 | Q9Y639 | -0.81218  |
| 1669 | P0C206 | Q96BA8 | -0.22656  |
| 1670 | P0C206 | Q96D96 | -0.7981   |
| 1671 | P0C206 | P01713 | -0.9894   |
| 1672 | P0C206 | A8MXE2 | -0.65603  |

|      |        |        |           |
|------|--------|--------|-----------|
| 1673 | P0C206 | Q0P6H9 | -0.79503  |
| 1674 | P0C206 | Q6NT52 | -0.78978  |
| 1675 | P0C206 | Q92968 | -0.2274   |
| 1676 | P0C206 | P18428 | -0.40395  |
| 1677 | P0C206 | O15156 | -0.20773  |
| 1678 | P0C206 | P84077 | -0.22827  |
| 1679 | P0C206 | Q96FQ7 | -0.017707 |
| 1680 | P0C206 | P51687 | -0.20745  |
| 1681 | P0C206 | Q8N8L6 | -1.3287   |
| 1682 | P0C206 | P63120 | -0.56257  |
| 1683 | P0C206 | Q86SE5 | -0.83583  |
| 1684 | P0C206 | P04637 | -0.22217  |
| 1685 | P0C206 | Q9H4E5 | -1.0225   |
| 1686 | P0C206 | Q8N9V2 | -0.50255  |
| 1687 | P0C206 | Q8NDV2 | -1.2337   |
| 1688 | P0C206 | P78552 | -0.39237  |
| 1689 | P0C206 | Q9P0Z9 | -0.65456  |
| 1690 | P0C206 | P85037 | -0.33689  |
| 1691 | P0C206 | O76080 | -0.27667  |
| 1692 | P0C206 | Q6MZW2 | -0.88269  |
| 1693 | P0C206 | Q86VW1 | -0.91018  |
| 1694 | P0C206 | P24298 | -0.20581  |
| 1695 | P0C206 | Q9BZA0 | -0.32065  |
| 1696 | P0C206 | A6NFE2 | -0.79503  |
| 1697 | P0C206 | O75695 | -0.45399  |
| 1698 | P0C206 | Q92886 | -0.22921  |
| 1699 | P0C206 | Q9Y277 | -0.96592  |
| 1700 | P0C206 | P35544 | -0.22585  |
| 1701 | P0C206 | P09544 | -0.41913  |
| 1702 | P0C206 | Q13595 | -0.55215  |
| 1703 | P0C206 | A6NFZ4 | -0.80952  |
| 1704 | P0C206 | D6R901 | -0.59814  |
| 1705 | P0C206 | Q9BUB5 | -0.22764  |
| 1706 | P0C206 | P17342 | -0.76715  |
| 1707 | P0C206 | Q96PE5 | -0.75656  |
| 1708 | P0C206 | Q9H342 | -1.1763   |
| 1709 | P0C206 | O15066 | -0.38923  |
| 1710 | P0C206 | Q9UGF7 | -1.1763   |
| 1711 | P0C206 | Q5VU57 | -0.25871  |
| 1712 | P0C206 | Q03013 | -0.27045  |
| 1713 | P0C206 | P04062 | -0.37687  |
| 1714 | P0C206 | Q30154 | -0.63497  |
| 1715 | P0C206 | Q5TC63 | -1.2801   |
| 1716 | P0C206 | Q86UP3 | -0.22544  |
| 1717 | P0C206 | Q9UNL2 | -0.73713  |
| 1718 | P0C206 | Q6UWL2 | -0.8705   |
| 1719 | P0C206 | Q06495 | -0.45677  |
| 1720 | P0C206 | Q9BTU6 | -0.32599  |
| 1721 | P0C206 | O95239 | -0.29077  |
| 1722 | P0C206 | Q86WS3 | -0.80952  |
| 1723 | P0C206 | O75594 | -0.61318  |
| 1724 | P0C206 | Q9UJX0 | -0.41588  |
| 1725 | P0C206 | Q5I7T1 | -0.85488  |
| 1726 | P0C206 | P52951 | -0.22699  |
| 1727 | P0C206 | P09327 | -0.13212  |
| 1728 | P0C206 | A6NIE9 | -1.3203   |
| 1729 | P0C206 | Q9Y2Z9 | -0.54955  |
| 1730 | P0C206 | Q9H2S6 | -0.68351  |
| 1731 | P0C206 | Q96M20 | -0.22528  |
| 1732 | P0C206 | Q8TBY9 | -0.29182  |
| 1733 | P0C206 | Q9BSE4 | -0.72124  |
| 1734 | P0C206 | Q4VNC0 | -0.96631  |
| 1735 | P0C206 | Q8TDQ1 | -0.91833  |
| 1736 | P0C206 | Q96SQ9 | -0.75353  |
| 1737 | P0C206 | Q8WU66 | -0.71048  |
| 1738 | P0C206 | P14222 | -0.466    |
| 1739 | P0C206 | P50458 | -0.22741  |
| 1740 | P0C206 | Q9NV35 | -0.14767  |
| 1741 | P0C206 | Q5T481 | -0.79481  |
| 1742 | P0C206 | Q5TGJ6 | -0.1628   |
| 1743 | P0C206 | Q8WZ74 | -0.53416  |
| 1744 | P0C206 | P01818 | -0.9894   |
| 1745 | P0C206 | Q9NV58 | -0.22394  |
| 1746 | P0C206 | Q96EH8 | -0.29043  |
| 1747 | P0C206 | Q969S0 | -0.42649  |
| 1748 | P0C206 | Q02575 | -0.22592  |

|      |        |        |           |
|------|--------|--------|-----------|
| 1749 | P0C206 | Q6ZP29 | -0.73949  |
| 1750 | P0C206 | P01574 | -0.4      |
| 1751 | P0C206 | P04434 | -0.9894   |
| 1752 | P0C206 | Q5SRD0 | -0.23752  |
| 1753 | P0C206 | Q6GTS8 | -1.1954   |
| 1754 | P0C206 | A6NNS2 | -1.4339   |
| 1755 | P0C206 | Q6UY11 | -0.9038   |
| 1756 | P0C206 | P05981 | -0.56908  |
| 1757 | P0C206 | O15213 | -0.22745  |
| 1758 | P0C206 | Q5VV42 | -0.65076  |
| 1759 | P0C206 | Q96RQ9 | -0.97302  |
| 1760 | P0C206 | Q8TAL6 | -0.63869  |
| 1761 | P0C206 | Q8NBX0 | -0.64011  |
| 1762 | P0C206 | Q6IAA8 | -0.22852  |
| 1763 | P0C206 | Q8IWZ5 | -0.44814  |
| 1764 | P0C206 | Q8WZA1 | -0.60641  |
| 1765 | P0C206 | Q9C0K7 | -0.22972  |
| 1766 | P0C206 | O94813 | -0.2781   |
| 1767 | P0C206 | Q6Q4G3 | -1.0789   |
| 1768 | P0C206 | P43405 | -0.29823  |
| 1769 | P0C206 | Q8ND24 | -0.20119  |
| 1770 | P0C206 | O43184 | -0.5584   |
| 1771 | P0C206 | Q9Y2B1 | -0.95247  |
| 1772 | P0C206 | O95822 | -0.33465  |
| 1773 | P0C206 | Q96IK0 | -0.91709  |
| 1774 | P0C206 | Q12889 | -0.23684  |
| 1775 | P0C206 | Q8TE77 | -0.3098   |
| 1776 | P0C206 | Q8IZ21 | -0.53469  |
| 1777 | P0C206 | Q86VH2 | -0.48825  |
| 1778 | P0C206 | P47992 | -0.44839  |
| 1779 | P0C206 | Q9UJV3 | -0.23001  |
| 1780 | P0C206 | Q53FP2 | -0.62314  |
| 1781 | P0C206 | Q6UX68 | -0.79503  |
| 1782 | P0C206 | P02750 | -0.84394  |
| 1783 | P0C206 | Q5T442 | -0.75996  |
| 1784 | P0C206 | P54750 | -0.2239   |
| 1785 | P0C206 | Q9Y680 | -0.4052   |
| 1786 | P0C206 | Q08623 | -0.21004  |
| 1787 | P0C206 | Q9Y5I1 | -1.2044   |
| 1788 | P0C206 | O14843 | -1.5035   |
| 1789 | P0C206 | Q5VWW1 | -0.85664  |
| 1790 | P0C206 | Q99755 | -0.19615  |
| 1791 | P0C206 | Q9C0J1 | -0.46822  |
| 1792 | P0C206 | P20815 | -0.70913  |
| 1793 | P0C206 | Q6ZMT4 | -0.22913  |
| 1794 | P0C206 | Q7RTY7 | -1.3213   |
| 1795 | P0C206 | Q13103 | -0.75974  |
| 1796 | P0C206 | P60323 | -0.057243 |
| 1797 | P0C206 | Q9UPW8 | -0.22741  |
| 1798 | P0C206 | Q9H4F8 | -1.2199   |
| 1799 | P0C206 | Q9NXF1 | -0.17332  |
| 1800 | P0C206 | Q9NZJ5 | -0.3524   |
| 1801 | P0C206 | Q8WX94 | -0.72239  |
| 1802 | P0C206 | O00142 | -0.56317  |
| 1803 | P0C206 | P15173 | -0.22733  |
| 1804 | P0C206 | Q5VYJ5 | -0.79503  |
| 1805 | P0C206 | Q13049 | -0.22739  |
| 1806 | P0C206 | Q8NHS1 | -0.79503  |
| 1807 | P0C206 | Q96NN9 | -0.21279  |
| 1808 | P0C206 | Q3KNW1 | -0.2035   |
| 1809 | P0C206 | Q8N8Z6 | -0.98895  |
| 1810 | P0C206 | P13498 | -0.35605  |
| 1811 | P0C206 | Q8N349 | -0.65244  |
| 1812 | P0C206 | Q5U5Z8 | -0.22795  |
| 1813 | P0C206 | Q02818 | -0.22132  |
| 1814 | P0C206 | O60941 | -0.22544  |
| 1815 | P0C206 | O75487 | -1.0671   |
| 1816 | P0C206 | Q13905 | -0.22733  |
| 1817 | P0C206 | O43320 | -0.88277  |
| 1818 | P0C206 | Q96P31 | -0.91833  |
| 1819 | P0C206 | O14756 | -1.108    |
| 1820 | P0C206 | Q15119 | -0.091902 |
| 1821 | P0C206 | Q96SI9 | -0.61226  |
| 1822 | P0C206 | P47710 | -0.72341  |
| 1823 | P0C206 | P16219 | -0.49663  |
| 1824 | P0C206 | P47211 | -1.1585   |

|      |        |        |           |
|------|--------|--------|-----------|
| 1825 | POC206 | Q96IZ2 | -0.91833  |
| 1826 | POC206 | Q6UXN8 | -0.84066  |
| 1827 | POC206 | Q6IED9 | -0.31532  |
| 1828 | POC206 | Q9NQC1 | -0.23035  |
| 1829 | POC206 | P27216 | -0.52837  |
| 1830 | POC206 | Q969J5 | -0.67349  |
| 1831 | POC206 | Q92743 | -0.87686  |
| 1832 | POC206 | Q9NRF8 | -0.36233  |
| 1833 | POC206 | P09848 | -0.66693  |
| 1834 | POC206 | P01135 | -0.25572  |
| 1835 | POC206 | Q9UKX3 | -0.39859  |
| 1836 | POC206 | Q96P68 | -1.1939   |
| 1837 | POC206 | Q9Y6R1 | -0.49432  |
| 1838 | POC206 | Q9P0T7 | -0.66311  |
| 1839 | POC206 | Q9H967 | -0.2271   |
| 1840 | POC206 | Q86VU5 | -0.49922  |
| 1841 | POC206 | Q9Y3A4 | -0.83583  |
| 1842 | POC206 | Q6ZUT3 | -0.53984  |
| 1843 | POC206 | Q8NBL1 | -0.20606  |
| 1844 | POC206 | A1Z1Q3 | -0.25448  |
| 1845 | POC206 | Q14206 | -0.69186  |
| 1846 | POC206 | B0I1T2 | -0.60181  |
| 1847 | POC206 | Q9GZN6 | -0.89736  |
| 1848 | POC206 | Q0VDD8 | -0.37529  |
| 1849 | POC206 | Q9Y5H3 | -1.1512   |
| 1850 | POC206 | Q15848 | -0.25972  |
| 1851 | POC206 | Q07444 | -0.78712  |
| 1852 | POC206 | Q43927 | -0.70067  |
| 1853 | POC206 | P23763 | -0.21007  |
| 1854 | POC206 | Q96DD7 | -0.79503  |
| 1855 | POC206 | Q9UBM4 | -0.8939   |
| 1856 | POC206 | Q96JB6 | -0.57214  |
| 1857 | POC206 | Q9BQS8 | -0.22649  |
| 1858 | POC206 | Q8NA70 | -0.044567 |
| 1859 | POC206 | Q9NS68 | -0.63482  |
| 1860 | POC206 | Q43353 | -0.22741  |
| 1861 | POC206 | Q9NYL2 | -0.22741  |
| 1862 | POC206 | Q9H2K8 | -0.23254  |
| 1863 | POC206 | Q96JD6 | -0.28762  |
| 1864 | POC206 | P42830 | -0.96161  |
| 1865 | POC206 | Q8IZ96 | -0.85091  |
| 1866 | POC206 | C9J442 | -0.80952  |
| 1867 | POC206 | O00292 | -0.70086  |
| 1868 | POC206 | Q9GZX9 | -0.88586  |
| 1869 | POC206 | Q43521 | -0.20882  |
| 1870 | POC206 | Q96A29 | -0.47191  |
| 1871 | POC206 | Q8N9W7 | -0.79503  |
| 1872 | POC206 | P06126 | -0.49129  |
| 1873 | POC206 | Q9NVT9 | -0.020764 |
| 1874 | POC206 | Q495W5 | -0.58601  |
| 1875 | POC206 | Q9Y4A0 | -0.059056 |
| 1876 | POC206 | Q9H8U3 | -0.23388  |
| 1877 | POC206 | A6NDH6 | -1.1763   |
| 1878 | POC206 | P49748 | -0.40971  |
| 1879 | POC206 | O60235 | -1.7384   |
| 1880 | POC206 | Q99735 | -0.63432  |
| 1881 | POC206 | Q9Y4G6 | -0.22787  |
| 1882 | POC206 | E5RQL4 | -0.37922  |
| 1883 | POC206 | P48448 | -0.62379  |
| 1884 | POC206 | Q15052 | -0.40418  |
| 1885 | POC206 | C9JQI7 | -0.79503  |
| 1886 | POC206 | Q9NP72 | -1.3177   |
| 1887 | POC206 | Q30167 | -0.63497  |
| 1888 | POC206 | Q96LA5 | -0.85719  |
| 1889 | POC206 | Q6ZU69 | -0.79503  |
| 1890 | POC206 | Q9BQI3 | -0.75978  |
| 1891 | POC206 | P0C7V8 | -0.22743  |
| 1892 | POC206 | Q8TDD1 | -0.16833  |
| 1893 | POC206 | Q9UG22 | -1.1862   |
| 1894 | POC206 | P61278 | -0.81276  |
| 1895 | POC206 | P58397 | -1.173    |
| 1896 | POC206 | Q9C037 | -0.368    |
| 1897 | POC206 | O14525 | -0.78367  |
| 1898 | POC206 | P06576 | -0.19312  |
| 1899 | POC206 | Q6AI12 | -0.22741  |
| 1900 | POC206 | P51608 | -0.13747  |

|      |        |        |           |
|------|--------|--------|-----------|
| 1901 | POC206 | Q9HBE4 | -0.81934  |
| 1902 | POC206 | Q15735 | -0.22545  |
| 1903 | POC206 | P21246 | -0.7077   |
| 1904 | POC206 | Q8NGB4 | -1.1763   |
| 1905 | POC206 | Q5NE16 | -0.29273  |
| 1906 | POC206 | Q7Z6V5 | -0.21215  |
| 1907 | POC206 | P43034 | -0.2293   |
| 1908 | POC206 | Q96CC6 | -0.4649   |
| 1909 | POC206 | P0C263 | -1.13     |
| 1910 | POC206 | O96033 | -0.25609  |
| 1911 | POC206 | Q03426 | -0.69486  |
| 1912 | POC206 | Q8IY34 | -0.7181   |
| 1913 | POC206 | Q8NGX8 | -1.1763   |
| 1914 | POC206 | P56817 | -0.7711   |
| 1915 | POC206 | Q6XYQ8 | -0.78181  |
| 1916 | POC206 | Q15291 | -0.22752  |
| 1917 | POC206 | Q02246 | -0.48617  |
| 1918 | POC206 | Q2TAC6 | -0.39587  |
| 1919 | POC206 | Q8NGL2 | -1.1763   |
| 1920 | POC206 | Q8WTP8 | -0.025175 |
| 1921 | POC206 | Q8NE35 | -0.75278  |
| 1922 | POC206 | Q8WUM9 | -1.0571   |
| 1923 | POC206 | A8K0Z3 | -0.16902  |
| 1924 | POC206 | Q5JUX0 | -0.20127  |
| 1925 | POC206 | C9JQL5 | -0.79976  |
| 1926 | POC206 | P16422 | -0.22692  |
| 1927 | POC206 | P09958 | -0.42274  |
| 1928 | POC206 | Q8N3Z0 | -0.8766   |
| 1929 | POC206 | Q9NZH0 | -0.5186   |
| 1930 | POC206 | Q9NS82 | -0.96169  |
| 1931 | POC206 | P09525 | -0.15215  |
| 1932 | POC206 | P47887 | -1.2662   |
| 1933 | POC206 | Q86TH1 | -0.48599  |
| 1934 | POC206 | P63127 | -0.56257  |
| 1935 | POC206 | P43116 | -1.2345   |
| 1936 | POC206 | P43657 | -1.1939   |
| 1937 | POC206 | Q8NBK3 | -0.36496  |
| 1938 | POC206 | P47898 | -1.1195   |
| 1939 | POC206 | Q8NFU4 | -0.80952  |
| 1940 | POC206 | Q969H8 | -0.62328  |
| 1941 | POC206 | Q9NVZ3 | -0.42593  |
| 1942 | POC206 | A6NHA9 | -1.1763   |
| 1943 | POC206 | Q6UXP8 | -0.80952  |
| 1944 | POC206 | P16562 | -0.88207  |
| 1945 | POC206 | Q13323 | -0.22971  |
| 1946 | POC206 | Q5T4D3 | -0.79503  |
| 1947 | POC206 | Q6ZSM3 | -0.83852  |
| 1948 | POC206 | P61009 | -0.73371  |
| 1949 | POC206 | Q9P2K6 | -0.21846  |
| 1950 | POC206 | P01610 | -0.9894   |
| 1951 | POC206 | Q9Y5S1 | -0.72739  |
| 1952 | POC206 | Q9NXC2 | -1.5883   |
| 1953 | POC206 | Q96Q07 | -0.40904  |
| 1954 | POC206 | Q96T60 | -0.32607  |
| 1955 | POC206 | Q9NPJ1 | -0.16753  |
| 1956 | POC206 | Q8TEJ3 | -0.22719  |
| 1957 | POC206 | P52798 | -0.49365  |
| 1958 | POC206 | Q5SQ80 | -0.2274   |
| 1959 | POC206 | P35250 | -0.17744  |
| 1960 | POC206 | P59190 | -0.96783  |
| 1961 | POC206 | P07108 | -0.19878  |
| 1962 | POC206 | Q7Z6P3 | -1.0599   |
| 1963 | POC206 | Q8TBE1 | -0.81448  |
| 1964 | POC206 | A6NGZ8 | -0.91833  |
| 1965 | POC206 | Q92608 | -0.22407  |
| 1966 | POC206 | Q9UKY3 | -0.74718  |
| 1967 | POC206 | Q8NAM6 | -0.012998 |
| 1968 | POC206 | O75911 | -1.517    |
| 1969 | POC206 | Q53G44 | -0.16042  |
| 1970 | POC206 | Q14156 | -0.69356  |
| 1971 | POC206 | P0C646 | -1.1763   |
| 1972 | POC206 | Q9UBR5 | -1.2394   |
| 1973 | POC206 | Q13449 | -0.22829  |
| 1974 | POC206 | O43173 | -0.52278  |
| 1975 | POC206 | Q6AI14 | -0.91926  |
| 1976 | POC206 | Q6R6M4 | -0.33013  |

|      |        |        |           |
|------|--------|--------|-----------|
| 1977 | P0C206 | Q6UWI4 | -1.087    |
| 1978 | P0C206 | Q86YW5 | -0.21202  |
| 1979 | P0C206 | Q86Y34 | -1.2769   |
| 1980 | P0C206 | P49798 | -0.3193   |
| 1981 | P0C206 | Q2M296 | -0.778    |
| 1982 | P0C206 | O75689 | -0.22713  |
| 1983 | P0C206 | Q6PKX4 | -0.31636  |
| 1984 | P0C206 | Q8WZ04 | -0.35731  |
| 1985 | P0C206 | P45983 | -0.22741  |
| 1986 | P0C206 | P35520 | -0.22435  |
| 1987 | P0C206 | Q684P5 | -0.30916  |
| 1988 | P0C206 | O43293 | -0.25315  |
| 1989 | P0C206 | Q96L03 | -0.2175   |
| 1990 | P0C206 | Q96GX1 | -0.56698  |
| 1991 | P0C206 | Q16773 | -0.20732  |
| 1992 | P0C206 | Q05209 | -0.23522  |
| 1993 | P0C206 | Q96S16 | -0.059352 |
| 1994 | P0C206 | Q6UXV0 | -0.89707  |
| 1995 | P0C206 | Q7Z5M5 | -0.79503  |
| 1996 | P0C206 | Q9UHR4 | -0.22738  |
| 1997 | P0C206 | Q9P2P6 | -0.30383  |
| 1998 | P0C206 | O00219 | -0.71468  |
| 1999 | P0C206 | Q8WV5  | -0.74259  |
| 2000 | P0C206 | P55774 | -0.68554  |
| 2001 | P0C206 | Q13614 | -0.21871  |
| 2002 | P0C206 | P09919 | -0.83256  |
| 2003 | P0C206 | Q8TDL5 | -1.0431   |
| 2004 | P0C206 | Q92874 | -0.76756  |
| 2005 | P0C206 | P20036 | -0.71237  |
| 2006 | P0C206 | Q9H0D2 | -0.22413  |
| 2007 | P0C206 | P62873 | -0.36148  |
| 2008 | P0C206 | Q6A555 | -0.28676  |
| 2009 | P0C206 | Q8WUJ3 | -0.21166  |
| 2010 | P0C206 | O95264 | -1.0398   |
| 2011 | P0C206 | Q8IYX4 | -0.56009  |
| 2012 | P0C206 | Q99536 | -0.97491  |
| 2013 | P0C206 | P47871 | -0.86316  |
| 2014 | P0C206 | P22897 | -0.98763  |
| 2015 | P0C206 | Q8TF17 | -0.35059  |
| 2016 | P0C206 | Q32P28 | -0.57409  |
| 2017 | P0C206 | O75127 | -0.18595  |
| 2018 | P0C206 | A6NMA1 | -0.08007  |
| 2019 | P0C206 | Q14697 | -0.17395  |
| 2020 | P0C206 | P78504 | -0.55815  |
| 2021 | P0C206 | A6NIR3 | -0.77452  |
| 2022 | P0C206 | Q6IFN5 | -1.1763   |
| 2023 | P0C206 | Q5JSL3 | -0.37025  |
| 2024 | P0C206 | P10109 | -0.14951  |
| 2025 | P0C206 | Q01459 | -0.32614  |
| 2026 | P0C206 | Q8NGR5 | -1.1763   |
| 2027 | P0C206 | Q5DID0 | -1.2453   |
| 2028 | P0C206 | Q7Z5H3 | -0.27875  |
| 2029 | P0C206 | Q8NGN5 | -1.1763   |
| 2030 | P0C206 | Q9NQ75 | -0.35596  |
| 2031 | P0C206 | Q6UXD1 | -0.79503  |
| 2032 | P0C206 | P01709 | -0.9894   |
| 2033 | P0C206 | Q8NFT2 | -1.0743   |
| 2034 | P0C206 | P04233 | -0.44225  |
| 2035 | P0C206 | Q8N257 | -0.66158  |
| 2036 | P0C206 | P33032 | -0.83272  |
| 2037 | P0C206 | Q8NBL3 | -0.79503  |
| 2038 | P0C206 | Q86VR2 | -0.79503  |
| 2039 | P0C206 | O43240 | -1.18     |
| 2040 | P0C206 | Q14542 | -0.28905  |
| 2041 | P0C206 | Q9Y320 | -0.59629  |
| 2042 | P0C206 | P15104 | -0.57533  |
| 2043 | P0C206 | Q8WXT5 | -0.45919  |
| 2044 | P0C206 | P55211 | -0.22509  |
| 2045 | P0C206 | Q8IZM9 | -0.87335  |
| 2046 | P0C206 | O43819 | -0.16813  |
| 2047 | P0C206 | Q9UQ49 | -0.39752  |
| 2048 | P0C206 | Q5JPI9 | -0.20034  |
| 2049 | P0C206 | P84243 | -1.0854   |
| 2050 | P0C206 | P15291 | -0.42924  |
| 2051 | P0C206 | P17643 | -0.4341   |
| 2052 | P0C206 | Q8N145 | -0.6452   |



|      |        |        |          |
|------|--------|--------|----------|
| 2053 | POC206 | Q6UXF7 | -0.80341 |
| 2054 | POC206 | P04628 | -0.22741 |
| 2055 | POC206 | P04798 | -0.32043 |
| 2056 | POC206 | O75891 | -0.41002 |
| 2057 | POC206 | P08493 | -0.89658 |
| 2058 | POC206 | Q8IUA7 | -1.0288  |
| 2059 | POC206 | O00421 | -1.3222  |
| 2060 | POC206 | Q8NDY3 | -0.20819 |
| 2061 | POC206 | P58418 | -0.90924 |
| 2062 | POC206 | Q8NFO0 | -0.7451  |
| 2063 | POC206 | Q8WV28 | -0.2274  |
| 2064 | POC206 | P40617 | -0.22797 |
| 2065 | POC206 | O75061 | -0.23641 |
| 2066 | POC206 | Q16518 | -0.29531 |
| 2067 | POC206 | Q6V1P9 | -1.1512  |
| 2068 | POC206 | Q5TF39 | -0.92647 |
| 2069 | POC206 | I3L273 | -0.16696 |
| 2070 | POC206 | Q56UN5 | -1.13    |
| 2071 | POC206 | Q9H611 | -0.39022 |
| 2072 | POC206 | Q86YB8 | -0.71424 |
| 2073 | POC206 | Q8N4Y2 | -0.11607 |
| 2074 | POC206 | Q8WX77 | -0.77605 |
| 2075 | POC206 | O76050 | -0.22737 |
| 2076 | POC206 | Q9ULZ1 | -0.70047 |
| 2077 | POC206 | P61266 | -0.67746 |
| 2078 | POC206 | Q96EX3 | -0.22752 |
| 2079 | POC206 | Q86SQ0 | -0.30631 |
| 2080 | POC206 | Q9NPZ5 | -0.45287 |
| 2081 | POC206 | P49326 | -1.0217  |
| 2082 | POC206 | Q9BW72 | -0.73999 |
| 2083 | POC206 | Q9ULL4 | -0.69264 |
| 2084 | POC206 | P61812 | -0.22741 |
| 2085 | POC206 | Q9HD90 | -0.22789 |
| 2086 | POC206 | Q8NFN8 | -1.2135  |
| 2087 | POC206 | Q9H340 | -1.1763  |
| 2088 | POC206 | Q8N967 | -0.79503 |
| 2089 | POC206 | A6NGC4 | -0.79503 |
| 2090 | POC206 | Q03001 | -0.23122 |
| 2091 | POC206 | Q7L4E1 | -0.79503 |
| 2092 | POC206 | Q9Y330 | -0.22202 |
| 2093 | POC206 | Q13790 | -0.9487  |
| 2094 | POC206 | Q8IY82 | -0.28596 |
| 2095 | POC206 | A2RU48 | -0.79503 |
| 2096 | POC206 | P24844 | -0.22611 |
| 2097 | POC206 | Q8TBR7 | -0.91833 |
| 2098 | POC206 | P09681 | -0.49832 |
| 2099 | POC206 | P48735 | -0.0775  |
| 2100 | POC206 | Q8NGD1 | -1.1763  |
| 2101 | POC206 | Q8N475 | -0.88269 |
| 2102 | POC206 | Q15218 | -1.2566  |
| 2103 | POC206 | P83105 | -1.2157  |
| 2104 | POC206 | Q8IXL7 | -0.43798 |
| 2105 | POC206 | Q13239 | -0.22741 |
| 2106 | POC206 | P52429 | -1.3754  |
| 2107 | POC206 | Q9Y5Y9 | -0.83392 |
| 2108 | POC206 | Q9UJA2 | -0.55947 |
| 2109 | POC206 | O00160 | -0.40542 |
| 2110 | POC206 | Q15645 | -0.22889 |
| 2111 | POC206 | A6NM66 | -0.14209 |
| 2112 | POC206 | Q9H1X3 | -0.88783 |
| 2113 | POC206 | P05067 | -0.23946 |
| 2114 | POC206 | P62760 | -0.29182 |
| 2115 | POC206 | O76039 | -0.37716 |
| 2116 | POC206 | Q8NGX2 | -1.1763  |
| 2117 | POC206 | Q9C098 | -0.71925 |
| 2118 | POC206 | Q9NYL9 | -0.211   |
| 2119 | POC206 | P48163 | -0.14846 |
| 2120 | POC206 | Q16513 | -0.21838 |
| 2121 | POC206 | Q8IXI2 | -0.63229 |
| 2122 | POC206 | Q9P2D7 | -0.29622 |
| 2123 | POC206 | Q9Y5X0 | -0.19313 |
| 2124 | POC206 | Q6UW10 | -0.80952 |
| 2125 | POC206 | Q13349 | -1.0131  |
| 2126 | POC206 | P54219 | -0.3978  |
| 2127 | POC206 | Q5CZ79 | -0.22739 |
| 2128 | POC206 | Q86XE3 | -0.8705  |

|      |        |        |          |
|------|--------|--------|----------|
| 2129 | POC206 | O14926 | -0.37256 |
| 2130 | POC206 | Q9H9J4 | -0.77976 |
| 2131 | POC206 | O95279 | -0.97572 |
| 2132 | POC206 | P09093 | -0.8727  |
| 2133 | POC206 | P07327 | -0.20814 |
| 2134 | POC206 | Q16787 | -1.0701  |
| 2135 | POC206 | P01598 | -0.9894  |
| 2136 | POC206 | Q9BUF5 | -0.50536 |
| 2137 | POC206 | P0CB46 | -0.67872 |
| 2138 | POC206 | Q02962 | -0.22732 |
| 2139 | POC206 | Q5UCC4 | -1.3191  |
| 2140 | POC206 | Q05586 | -0.36754 |
| 2141 | POC206 | Q6IEV9 | -1.1763  |
| 2142 | POC206 | Q9NP73 | -0.31219 |
| 2143 | POC206 | Q495N2 | -0.79503 |
| 2144 | POC206 | O76093 | -0.60594 |
| 2145 | POC206 | Q07973 | -0.37796 |
| 2146 | POC206 | A6NCW7 | -0.30371 |
| 2147 | POC206 | Q8WXI7 | -0.99867 |
| 2148 | POC206 | Q96MC6 | -0.82397 |
| 2149 | POC206 | Q00LT1 | -0.68322 |
| 2150 | POC206 | Q8N1Y9 | -0.79503 |
| 2151 | POC206 | Q8N436 | -1.1323  |
| 2152 | POC206 | Q15762 | -0.67722 |
| 2153 | POC206 | Q01638 | -0.87514 |
| 2154 | POC206 | Q9P1P5 | -1.2135  |
| 2155 | POC206 | Q9Y6V7 | -0.78816 |
| 2156 | POC206 | P49137 | -0.23074 |
| 2157 | POC206 | Q9NWW6 | -0.84106 |
| 2158 | POC206 | Q9BWQ6 | -0.77738 |
| 2159 | POC206 | Q9BZW4 | -0.674   |
| 2160 | POC206 | Q9Y6S9 | -0.85948 |
| 2161 | POC206 | Q75973 | -0.51371 |
| 2162 | POC206 | P31275 | -0.21322 |
| 2163 | POC206 | Q9UJ70 | -0.26128 |
| 2164 | POC206 | Q8NEZ4 | -0.47065 |
| 2165 | POC206 | P49418 | -0.22742 |
| 2166 | POC206 | Q8NES8 | -0.77981 |
| 2167 | POC206 | Q9UGC6 | -0.25393 |
| 2168 | POC206 | Q8TF72 | -0.22711 |
| 2169 | POC206 | Q9P2X0 | -0.17218 |
| 2170 | POC206 | Q76NI1 | -0.71406 |
| 2171 | POC206 | P56597 | -0.48523 |
| 2172 | POC206 | Q15582 | -1.2625  |
| 2173 | POC206 | P0CF74 | -0.95593 |
| 2174 | POC206 | Q16281 | -1.3192  |
| 2175 | POC206 | Q4KMG0 | -0.25395 |
| 2176 | POC206 | P10745 | -0.99702 |
| 2177 | POC206 | Q6MZZ7 | -0.99507 |
| 2178 | POC206 | P14616 | -1.3686  |
| 2179 | POC206 | Q7Z3S9 | -0.87096 |
| 2180 | POC206 | P10643 | -0.84419 |
| 2181 | POC206 | O15230 | -0.54445 |
| 2182 | POC206 | P32456 | -0.21467 |
| 2183 | POC206 | P15086 | -1.0826  |
| 2184 | POC206 | Q86W33 | -0.94505 |
| 2185 | POC206 | Q6ZN54 | -0.42115 |
| 2186 | POC206 | O75366 | -0.16071 |
| 2187 | POC206 | Q09328 | -0.58198 |
| 2188 | POC206 | Q9BWV3 | -0.35255 |
| 2189 | POC206 | Q6IQ26 | -0.22578 |
| 2190 | POC206 | Q15354 | -1.433   |
| 2191 | POC206 | Q9NZN9 | -0.21095 |
| 2192 | POC206 | Q9H0F5 | -0.25112 |
| 2193 | POC206 | Q9GZP1 | -0.85744 |
| 2194 | POC206 | P98187 | -0.978   |
| 2195 | POC206 | Q9NXW2 | -0.88783 |
| 2196 | POC206 | Q1KMD3 | -0.22481 |
| 2197 | POC206 | Q8TF27 | -0.77452 |
| 2198 | POC206 | P01596 | -0.9894  |
| 2199 | POC206 | P33402 | -0.64485 |
| 2200 | POC206 | P21815 | -0.99329 |
| 2201 | POC206 | A6NKC4 | -0.89738 |
| 2202 | POC206 | Q9HAT0 | -0.3752  |
| 2203 | POC206 | O43716 | -0.45955 |
| 2204 | POC206 | Q9BVV8 | -0.54794 |

|      |        |        |            |
|------|--------|--------|------------|
| 2205 | POC206 | P49747 | -0.62238   |
| 2206 | POC206 | Q8N8D9 | -0.0071128 |
| 2207 | POC206 | Q96PX9 | -0.63562   |
| 2208 | POC206 | P56373 | -0.52223   |
| 2209 | POC206 | Q96PG1 | -0.79503   |
| 2210 | POC206 | Q7Z6K4 | -0.35382   |
| 2211 | POC206 | Q9Y5Y7 | -0.74209   |
| 2212 | POC206 | P40123 | -0.45764   |
| 2213 | POC206 | P48065 | -0.9507    |
| 2214 | POC206 | Q6GMR7 | -0.71657   |
| 2215 | POC206 | Q96HY7 | -0.31317   |
| 2216 | POC206 | Q9NXG2 | -0.30404   |
| 2217 | POC206 | Q6NXR0 | -0.81039   |
| 2218 | POC206 | P25106 | -0.98393   |
| 2219 | POC206 | P49335 | -0.22741   |
| 2220 | POC206 | P27338 | -0.65888   |
| 2221 | POC206 | Q8NGX9 | -1.1763    |
| 2222 | POC206 | Q6F5E7 | -0.18004   |
| 2223 | POC206 | Q96JQ5 | -0.79503   |
| 2224 | POC206 | O95498 | -0.36855   |
| 2225 | POC206 | P0C7N8 | -1.1763    |
| 2226 | POC206 | Q6IEY1 | -1.1763    |
| 2227 | POC206 | Q14940 | -0.93776   |
| 2228 | POC206 | P30825 | -1.0098    |
| 2229 | POC206 | Q99470 | -0.94419   |
| 2230 | POC206 | Q96A08 | -0.62351   |
| 2231 | POC206 | Q86Z14 | -0.70945   |
| 2232 | POC206 | Q9BYV7 | -0.59719   |
| 2233 | POC206 | P35125 | -0.52878   |
| 2234 | POC206 | A0ZSE6 | -0.79503   |
| 2235 | POC206 | P29597 | -0.70545   |
| 2236 | POC206 | Q9NZP0 | -1.1763    |
| 2237 | POC206 | A2RU14 | -0.79503   |
| 2238 | POC206 | Q13948 | -0.46704   |
| 2239 | POC206 | P09923 | -1.0854    |
| 2240 | POC206 | O14735 | -0.60336   |
| 2241 | POC206 | Q8NCL8 | -0.57403   |
| 2242 | POC206 | Q5EBN2 | -0.44814   |
| 2243 | POC206 | P13236 | -0.94309   |
| 2244 | POC206 | O94854 | -0.45054   |
| 2245 | POC206 | Q9HC35 | -0.53943   |
| 2246 | POC206 | Q96SI1 | -0.17287   |
| 2247 | POC206 | P12645 | -0.75752   |
| 2248 | POC206 | P08195 | -0.29924   |
| 2249 | POC206 | Q5JW98 | -0.79503   |
| 2250 | POC206 | Q9Y2C4 | -0.052428  |
| 2251 | POC206 | O15273 | -0.045377  |
| 2252 | POC206 | Q6UXN2 | -0.80952   |
| 2253 | POC206 | Q8N1T3 | -0.55519   |
| 2254 | POC206 | Q5R3F8 | -0.7828    |
| 2255 | POC206 | P42263 | -0.78233   |
| 2256 | POC206 | Q9P2K2 | -0.82293   |
| 2257 | POC206 | Q8WWZ8 | -0.22741   |
| 2258 | POC206 | Q86W24 | -1.0908    |
| 2259 | POC206 | O15231 | -0.13797   |
| 2260 | POC206 | O95156 | -0.74315   |
| 2261 | POC206 | P10586 | -0.84585   |
| 2262 | POC206 | P02462 | -0.49107   |
| 2263 | POC206 | Q96I34 | -0.22739   |
| 2264 | POC206 | Q7Z5L0 | -0.79161   |
| 2265 | POC206 | Q7RTS5 | -0.74491   |
| 2266 | POC206 | Q6UY14 | -0.30999   |
| 2267 | POC206 | A8MYX2 | -0.40318   |
| 2268 | POC206 | P12268 | -0.71121   |
| 2269 | POC206 | O94766 | -0.46476   |
| 2270 | POC206 | O95389 | -0.87575   |
| 2271 | POC206 | Q9Y644 | -0.98057   |
| 2272 | POC206 | Q8NI60 | -0.78575   |
| 2273 | POC206 | P48775 | -0.36663   |
| 2274 | POC206 | Q5T4F4 | -0.25324   |
| 2275 | POC206 | P48145 | -0.67781   |
| 2276 | POC206 | Q70EL4 | -0.59814   |
| 2277 | POC206 | P30505 | -1.0001    |
| 2278 | POC206 | A8MV57 | -0.39587   |
| 2279 | POC206 | Q7RTX1 | -1.2025    |
| 2280 | POC206 | P04000 | -1.3368    |

|      |        |        |           |
|------|--------|--------|-----------|
| 2281 | P0C206 | Q9Y219 | -0.52747  |
| 2282 | P0C206 | Q9BZL3 | -0.79503  |
| 2283 | P0C206 | Q9NYJ7 | -0.8931   |
| 2284 | P0C206 | Q7Z3S7 | -0.83538  |
| 2285 | P0C206 | Q86VV8 | -0.43077  |
| 2286 | P0C206 | P0CW22 | -0.16221  |
| 2287 | P0C206 | P05997 | -0.87203  |
| 2288 | P0C206 | Q9Y5H8 | -1.2044   |
| 2289 | P0C206 | Q6UXQ6 | -0.80952  |
| 2290 | P0C206 | O43432 | -0.18078  |
| 2291 | P0C206 | Q92576 | -0.22252  |
| 2292 | P0C206 | Q6P6C2 | -0.62435  |
| 2293 | P0C206 | Q9NQL2 | -0.63232  |
| 2294 | P0C206 | Q58DX5 | -1.1336   |
| 2295 | P0C206 | Q6GTX8 | -0.26942  |
| 2296 | P0C206 | P53355 | -0.41341  |
| 2297 | P0C206 | Q9NY37 | -0.88181  |
| 2298 | P0C206 | Q8N0U2 | -0.79503  |
| 2299 | P0C206 | P01766 | -0.9894   |
| 2300 | P0C206 | Q5GH72 | -0.79503  |
| 2301 | P0C206 | Q9H1J7 | -0.86583  |
| 2302 | P0C206 | P08172 | -0.94998  |
| 2303 | P0C206 | P22466 | -0.29511  |
| 2304 | P0C206 | P23921 | -0.095602 |
| 2305 | P0C206 | Q9Y5E3 | -1.1831   |
| 2306 | P0C206 | Q6ZTB9 | -0.46721  |
| 2307 | P0C206 | Q9BUD6 | -1.0324   |
| 2308 | P0C206 | Q6ZSA7 | -0.97624  |
| 2309 | P0C206 | Q969D9 | -0.82318  |
| 2310 | P0C206 | Q9H9B4 | -0.68159  |
| 2311 | P0C206 | Q8NGQ1 | -1.1763   |
| 2312 | P0C206 | Q96FG2 | -0.355    |
| 2313 | P0C206 | P01782 | -0.9894   |
| 2314 | P0C206 | O00295 | -0.666    |
| 2315 | P0C206 | O00217 | -0.35275  |
| 2316 | P0C206 | Q6PJE2 | -0.092462 |
| 2317 | P0C206 | Q5VZV1 | -0.20034  |
| 2318 | P0C206 | Q8NGH6 | -1.1763   |
| 2319 | P0C206 | Q9NS67 | -1.2448   |
| 2320 | P0C206 | Q8NGZ3 | -1.1763   |
| 2321 | P0C206 | Q8N954 | -0.24184  |
| 2322 | P0C206 | P18859 | -0.14164  |
| 2323 | P0C206 | Q8N4E4 | -0.17637  |
| 2324 | P0C206 | Q05901 | -0.85336  |
| 2325 | P0C206 | P25311 | -0.99088  |
| 2326 | P0C206 | Q9H0C2 | -0.60588  |
| 2327 | P0C206 | Q6TCH7 | -0.5524   |
| 2328 | P0C206 | Q99973 | -0.35354  |
| 2329 | P0C206 | P02679 | -0.87467  |
| 2330 | P0C206 | Q8IVS2 | -0.51697  |
| 2331 | P0C206 | P26715 | -1.1138   |
| 2332 | P0C206 | Q86V40 | -1.1414   |
| 2333 | P0C206 | Q9P2E9 | -0.47825  |
| 2334 | P0C206 | Q96QE2 | -0.72018  |
| 2335 | P0C206 | Q9GZV9 | -0.80876  |
| 2336 | P0C206 | Q8IVU1 | -0.92146  |
| 2337 | P0C206 | Q86T13 | -0.78949  |
| 2338 | P0C206 | Q07889 | -0.28464  |
| 2339 | P0C206 | P48645 | -0.88982  |
| 2340 | P0C206 | Q75N03 | -0.19758  |
| 2341 | P0C206 | Q8WUP2 | -0.20339  |
| 2342 | P0C206 | Q587J7 | -0.2421   |
| 2343 | P0C206 | Q9H222 | -0.63072  |
| 2344 | P0C206 | Q9BV35 | -0.65286  |
| 2345 | P0C206 | P30501 | -1.0603   |
| 2346 | P0C206 | Q8WV93 | -0.56086  |
| 2347 | P0C206 | P05976 | -0.32961  |
| 2348 | P0C206 | C9J798 | -0.81479  |
| 2349 | P0C206 | Q9H0I9 | -0.24883  |
| 2350 | P0C206 | P04554 | -0.67284  |
| 2351 | P0C206 | O94991 | -0.89423  |
| 2352 | P0C206 | O15374 | -0.92922  |
| 2353 | P0C206 | Q29963 | -0.99995  |
| 2354 | P0C206 | Q13201 | -0.83428  |
| 2355 | P0C206 | Q8IZF2 | -1.2769   |
| 2356 | P0C206 | O00175 | -0.81585  |

|      |        |        |           |
|------|--------|--------|-----------|
| 2357 | P0C206 | P01877 | -0.37535  |
| 2358 | P0C206 | Q7Z4H4 | -0.72703  |
| 2359 | P0C206 | Q9UHL4 | -0.97241  |
| 2360 | P0C206 | Q9NV23 | -0.38221  |
| 2361 | P0C206 | P43629 | -1.0885   |
| 2362 | P0C206 | Q96LB1 | -1.1964   |
| 2363 | P0C206 | Q96LB0 | -1.2448   |
| 2364 | P0C206 | P78330 | -0.21612  |
| 2365 | P0C206 | Q99929 | -0.23878  |
| 2366 | P0C206 | Q2WEN9 | -0.81193  |
| 2367 | P0C206 | A6NJG2 | -0.2274   |
| 2368 | P0C206 | Q5VWM4 | -0.065812 |
| 2369 | P0C206 | Q9Y570 | -0.18752  |
| 2370 | P0C206 | P03901 | -0.59672  |
| 2371 | P0C206 | O95436 | -0.78875  |
| 2372 | P0C206 | Q8N3D4 | -0.23097  |
| 2373 | P0C206 | Q9Y5I7 | -0.64872  |
| 2374 | P0C206 | B7Z8K6 | -0.79503  |
| 2375 | P0C206 | Q9NUQ8 | -0.84563  |
| 2376 | P0C206 | P01779 | -0.9894   |
| 2377 | P0C206 | P48549 | -0.50902  |
| 2378 | P0C206 | P15056 | -0.29997  |
| 2379 | P0C206 | Q5T5C0 | -0.24945  |
| 2380 | P0C206 | Q6DN90 | -0.20747  |
| 2381 | P0C206 | Q8NEM0 | -0.20239  |
| 2382 | P0C206 | Q9H2L4 | -0.79503  |
| 2383 | P0C206 | A8MWS1 | -0.80952  |
| 2384 | P0C206 | Q9H2F3 | -0.99263  |
| 2385 | P0C206 | Q9UGM3 | -0.31483  |
| 2386 | P0C206 | Q96N46 | -0.30404  |
| 2387 | P0C206 | Q8N2E2 | -0.80952  |
| 2388 | P0C206 | Q4W5P6 | -0.80952  |
| 2389 | P0C206 | P06317 | -0.95593  |
| 2390 | P0C206 | P04150 | -0.22747  |
| 2391 | P0C206 | Q8WVJ2 | -0.28406  |
| 2392 | P0C206 | Q9H0K1 | -0.34383  |
| 2393 | P0C206 | P10082 | -0.71428  |
| 2394 | P0C206 | A2RU49 | -0.29546  |
| 2395 | P0C206 | Q96S79 | -1.2417   |
| 2396 | P0C206 | Q969M2 | -0.85666  |
| 2397 | P0C206 | Q8WYB5 | -0.47226  |
| 2398 | P0C206 | P59826 | -0.81526  |
| 2399 | P0C206 | Q969V4 | -0.066012 |
| 2400 | P0C206 | Q96J84 | -0.68611  |
| 2401 | P0C206 | Q9H477 | -0.75448  |
| 2402 | P0C206 | Q9UKZ9 | -0.81416  |
| 2403 | P0C206 | Q7Z4V0 | -0.2274   |
| 2404 | P0C206 | Q8NGD4 | -1.1763   |
| 2405 | P0C206 | Q6P988 | -0.76697  |
| 2406 | P0C206 | Q96PQ0 | -0.7958   |
| 2407 | P0C206 | O96009 | -1.1032   |
| 2408 | P0C206 | P51688 | -0.39164  |
| 2409 | P0C206 | P28039 | -0.8864   |
| 2410 | P0C206 | Q9UQ13 | -0.24987  |
| 2411 | P0C206 | Q9Y397 | -0.42707  |
| 2412 | P0C206 | Q86UX2 | -0.74321  |
| 2413 | P0C206 | Q14657 | -0.2011   |
| 2414 | P0C206 | Q9C093 | -0.25701  |
| 2415 | P0C206 | O95365 | -0.17835  |
| 2416 | P0C206 | Q6UXY1 | -0.70409  |
| 2417 | P0C206 | P48060 | -1.2964   |
| 2418 | P0C206 | Q8NGU4 | -1.1763   |
| 2419 | P0C206 | Q7Z5U6 | -0.22755  |
| 2420 | P0C206 | Q7KZI7 | -0.65491  |
| 2421 | P0C206 | Q5T011 | -0.18987  |
| 2422 | P0C206 | A6NJZ3 | -1.1763   |
| 2423 | P0C206 | Q96PP8 | -0.7325   |
| 2424 | P0C206 | O60942 | -0.55159  |
| 2425 | P0C206 | Q8NA97 | -0.18043  |
| 2426 | P0C206 | B0FP48 | -0.79503  |
| 2427 | P0C206 | O60741 | -1.1842   |
| 2428 | P0C206 | A6NGW2 | -0.80952  |
| 2429 | P0C206 | Q6ZMU5 | -0.22754  |
| 2430 | P0C206 | Q8ND25 | -0.23496  |
| 2431 | P0C206 | Q5JT78 | -0.17391  |
| 2432 | P0C206 | A6NE52 | -0.22744  |

|      |        |        |          |
|------|--------|--------|----------|
| 2433 | POC206 | Q5SZK8 | -1.3378  |
| 2434 | POC206 | E5RG02 | -0.8107  |
| 2435 | POC206 | Q9HBX9 | -1.1625  |
| 2436 | POC206 | Q495B1 | -0.37966 |
| 2437 | POC206 | Q96KT7 | -0.79503 |
| 2438 | POC206 | Q8IWU9 | -0.41884 |
| 2439 | POC206 | P0CF51 | -0.79503 |
| 2440 | POC206 | Q9H0J9 | -0.20444 |
| 2441 | POC206 | P47804 | -0.76705 |
| 2442 | POC206 | P24387 | -0.29263 |
| 2443 | POC206 | Q58EX2 | -0.98895 |
| 2444 | POC206 | O00168 | -1.032   |
| 2445 | POC206 | P61550 | -0.64883 |
| 2446 | POC206 | Q8NGD0 | -1.1763  |
| 2447 | POC206 | Q8N9U0 | -0.14871 |
| 2448 | POC206 | Q8TDW0 | -0.89601 |
| 2449 | POC206 | Q9BYJ4 | -0.23099 |
| 2450 | POC206 | Q8N1E2 | -0.77025 |
| 2451 | POC206 | Q9NVM6 | -0.87778 |
| 2452 | POC206 | P80421 | -0.84138 |
| 2453 | POC206 | Q49MI3 | -0.45252 |
| 2454 | POC206 | Q8NGP8 | -1.1763  |
| 2455 | POC206 | Q9HCX4 | -0.226   |
| 2456 | POC206 | Q9HCE6 | -0.37931 |
| 2457 | POC206 | Q6IPX1 | -1.2801  |
| 2458 | POC206 | Q9BVA1 | -0.14654 |
| 2459 | POC206 | Q2TBC4 | -0.61453 |
| 2460 | POC206 | Q8WTS1 | -0.1664  |
| 2461 | POC206 | Q8IZN7 | -0.77981 |
| 2462 | POC206 | P0C7Q5 | -0.79503 |
| 2463 | POC206 | B6A8C7 | -0.79503 |
| 2464 | POC206 | Q9Y5B8 | -0.61522 |
| 2465 | POC206 | P61647 | -0.54139 |
| 2466 | POC206 | Q86Y28 | -0.80952 |
| 2467 | POC206 | Q86TG1 | -0.89707 |
| 2468 | POC206 | O15247 | -0.59197 |
| 2469 | POC206 | O43676 | -0.42766 |
| 2470 | POC206 | Q4G148 | -0.5293  |
| 2471 | POC206 | Q86V24 | -0.94637 |
| 2472 | POC206 | Q9BQS2 | -0.91833 |
| 2473 | POC206 | Q9HBI6 | -1.0882  |
| 2474 | POC206 | Q13571 | -0.97556 |
| 2475 | POC206 | P07203 | -0.28877 |
| 2476 | POC206 | Q6P0Q8 | -0.50188 |
| 2477 | POC206 | Q9C0E8 | -0.91088 |
| 2478 | POC206 | P48995 | -0.24966 |
| 2479 | POC206 | Q8IVH4 | -0.82096 |
| 2480 | POC206 | P41145 | -0.83066 |
| 2481 | POC206 | Q9NS98 | -1.1053  |
| 2482 | POC206 | Q9UNG2 | -0.86472 |
| 2483 | POC206 | Q9UFH2 | -0.32494 |
| 2484 | POC206 | Q9NY99 | -0.22511 |
| 2485 | POC206 | P19021 | -0.81014 |
| 2486 | POC206 | P20023 | -0.90295 |
| 2487 | POC206 | Q5FWF7 | -0.22212 |
| 2488 | POC206 | Q8TDR2 | -0.5357  |
| 2489 | POC206 | P21554 | -0.68736 |
| 2490 | POC206 | P21145 | -0.48983 |
| 2491 | POC206 | Q9UJU2 | -0.19263 |
| 2492 | POC206 | Q9H1U9 | -0.57194 |
| 2493 | POC206 | O15123 | -0.49313 |
| 2494 | POC206 | A1L390 | -0.63562 |
| 2495 | POC206 | P12931 | -0.23262 |
| 2496 | POC206 | P01703 | -0.9894  |
| 2497 | POC206 | P19623 | -0.19568 |
| 2498 | POC206 | Q95604 | -0.99995 |
| 2499 | POC206 | P00491 | -0.28591 |
| 2500 | POC206 | Q13586 | -0.28105 |
| 2501 | POC206 | Q13607 | -1.1763  |
| 2502 | POC206 | P43007 | -0.45482 |
| 2503 | POC206 | Q6PEZ8 | -0.86336 |
| 2504 | POC206 | Q13520 | -0.70632 |
| 2505 | POC206 | Q9HD45 | -0.87207 |
| 2506 | POC206 | Q6ZS30 | -0.22741 |
| 2507 | POC206 | P21964 | -0.24434 |
| 2508 | POC206 | Q93097 | -0.84125 |

|      |        |        |           |
|------|--------|--------|-----------|
| 2509 | POC206 | P27707 | -0.43277  |
| 2510 | POC206 | Q9UHE5 | -0.91154  |
| 2511 | POC206 | Q9P121 | -0.22808  |
| 2512 | POC206 | Q14565 | -0.24385  |
| 2513 | POC206 | P23515 | -0.57467  |
| 2514 | POC206 | Q9NXL6 | -0.73433  |
| 2515 | POC206 | O00754 | -0.32013  |
| 2516 | POC206 | Q8NGJ7 | -1.1763   |
| 2517 | POC206 | P49588 | -0.21292  |
| 2518 | POC206 | Q8NGP2 | -1.1763   |
| 2519 | POC206 | O95248 | -0.79192  |
| 2520 | POC206 | Q9NP31 | -0.60296  |
| 2521 | POC206 | Q96E35 | -0.21139  |
| 2522 | POC206 | Q96QD8 | -0.98458  |
| 2523 | POC206 | P41597 | -0.53691  |
| 2524 | POC206 | Q6ZPD8 | -0.87102  |
| 2525 | POC206 | Q9UMR3 | -0.57853  |
| 2526 | POC206 | P41732 | -0.79825  |
| 2527 | POC206 | P22003 | -0.52089  |
| 2528 | POC206 | P06729 | -0.82494  |
| 2529 | POC206 | Q8NH76 | -1.1763   |
| 2530 | POC206 | Q92615 | -0.83583  |
| 2531 | POC206 | Q75473 | -1.3018   |
| 2532 | POC206 | Q9BWF3 | -0.2348   |
| 2533 | POC206 | Q1EHB4 | -0.96958  |
| 2534 | POC206 | P32302 | -1.2575   |
| 2535 | POC206 | Q08188 | -0.40659  |
| 2536 | POC206 | Q9NYW1 | -1.0414   |
| 2537 | POC206 | P68106 | -0.23119  |
| 2538 | POC206 | Q3MIW9 | -0.79503  |
| 2539 | POC206 | Q8WXA8 | -0.87891  |
| 2540 | POC206 | Q86YL7 | -0.81296  |
| 2541 | POC206 | C9JVI0 | -0.59814  |
| 2542 | POC206 | Q9UQQ2 | -0.27495  |
| 2543 | POC206 | Q92903 | -0.79315  |
| 2544 | POC206 | Q16394 | -0.5038   |
| 2545 | POC206 | P30411 | -0.58873  |
| 2546 | POC206 | Q99572 | -0.26188  |
| 2547 | POC206 | Q8WZA2 | -0.30745  |
| 2548 | POC206 | Q5T089 | -0.030445 |
| 2549 | POC206 | Q14939 | -0.21636  |
| 2550 | POC206 | Q9NTN9 | -1.0816   |
| 2551 | POC206 | Q96NZ8 | -0.72721  |
| 2552 | POC206 | Q13402 | -0.15369  |
| 2553 | POC206 | Q75074 | -0.79606  |
| 2554 | POC206 | Q5TIE3 | -0.80952  |
| 2555 | POC206 | Q24JP5 | -0.54973  |
| 2556 | POC206 | P48745 | -0.99354  |
| 2557 | POC206 | Q14236 | -0.40361  |
| 2558 | POC206 | Q13361 | -0.8734   |
| 2559 | POC206 | P59025 | -0.84217  |
| 2560 | POC206 | Q9HBG7 | -0.88706  |
| 2561 | POC206 | P06028 | -1.0749   |
| 2562 | POC206 | Q9NZL6 | -0.56247  |
| 2563 | POC206 | Q96KJ9 | -0.34301  |
| 2564 | POC206 | A6NNM8 | -0.24376  |
| 2565 | POC206 | Q8N690 | -0.77981  |
| 2566 | POC206 | Q8WUS8 | -1.2414   |
| 2567 | POC206 | Q96RD3 | -1.1763   |
| 2568 | POC206 | Q9UJH8 | -1.0147   |
| 2569 | POC206 | Q8NGU1 | -1.1763   |
| 2570 | POC206 | Q8TE67 | -0.22741  |
| 2571 | POC206 | Q9NPF7 | -0.41083  |
| 2572 | POC206 | Q99466 | -0.27199  |
| 2573 | POC206 | P17812 | -0.45257  |
| 2574 | POC206 | Q5VUY2 | -0.79036  |
| 2575 | POC206 | Q75460 | -0.37815  |
| 2576 | POC206 | Q8N271 | -0.93099  |
| 2577 | POC206 | Q75503 | -0.19141  |
| 2578 | POC206 | P06310 | -0.9894   |
| 2579 | POC206 | Q13950 | -0.53196  |
| 2580 | POC206 | P59537 | -1.1692   |
| 2581 | POC206 | O43306 | -0.54766  |
| 2582 | POC206 | Q9NXR5 | -0.22741  |
| 2583 | POC206 | P46063 | -0.22598  |
| 2584 | POC206 | P18858 | -0.15618  |

|      |        |        |           |
|------|--------|--------|-----------|
| 2585 | POC206 | Q76B58 | -0.51062  |
| 2586 | POC206 | Q9Y5L2 | -1.1008   |
| 2587 | POC206 | O60259 | -0.485    |
| 2588 | POC206 | Q96QV6 | -0.66158  |
| 2589 | POC206 | Q643R3 | -0.77663  |
| 2590 | POC206 | P25067 | -1.079    |
| 2591 | POC206 | Q3KP44 | -0.22739  |
| 2592 | POC206 | Q9H6P5 | -0.51736  |
| 2593 | POC206 | Q9NSA1 | -0.35426  |
| 2594 | POC206 | Q502X0 | -0.030445 |
| 2595 | POC206 | P10620 | -0.15586  |
| 2596 | POC206 | Q8WXG8 | -0.29182  |
| 2597 | POC206 | Q8NGS3 | -1.1763   |
| 2598 | POC206 | Q13231 | -0.75623  |
| 2599 | POC206 | P52907 | -0.38343  |
| 2600 | POC206 | P07550 | -0.34225  |
| 2601 | POC206 | P33993 | -0.18722  |
| 2602 | POC206 | P60852 | -1.2854   |
| 2603 | POC206 | Q9UQV4 | -0.91272  |
| 2604 | POC206 | Q6DJT9 | -0.080433 |
| 2605 | POC206 | P01375 | -0.24438  |
| 2606 | POC206 | P0DH78 | -0.22174  |
| 2607 | POC206 | Q9H1M3 | -0.77981  |
| 2608 | POC206 | P11309 | -0.25089  |
| 2609 | POC206 | P48729 | -0.22741  |
| 2610 | POC206 | P0CG38 | -0.20222  |
| 2611 | POC206 | Q8N556 | -0.22506  |
| 2612 | POC206 | Q8WV83 | -0.72669  |
| 2613 | POC206 | Q9HCQ5 | -0.60275  |
| 2614 | POC206 | Q6UXK2 | -0.96324  |
| 2615 | POC206 | Q15743 | -1.4304   |
| 2616 | POC206 | A6NP81 | -0.15936  |
| 2617 | POC206 | Q8NGJ4 | -1.1763   |
| 2618 | POC206 | Q8N392 | -1.0098   |
| 2619 | POC206 | Q09013 | -0.31076  |
| 2620 | POC206 | Q86T20 | -0.80952  |
| 2621 | POC206 | O15165 | -0.78726  |
| 2622 | POC206 | Q9NQQ7 | -0.72669  |
| 2623 | POC206 | P20774 | -0.34635  |
| 2624 | POC206 | Q63HM2 | -0.79503  |
| 2625 | POC206 | Q86VZ5 | -0.34315  |
| 2626 | POC206 | Q16635 | -0.45088  |
| 2627 | POC206 | P57054 | -0.80216  |
| 2628 | POC206 | P62068 | -0.46702  |
| 2629 | POC206 | Q5VZM2 | -0.25027  |
| 2630 | POC206 | Q15027 | -0.7189   |
| 2631 | POC206 | Q9NQS3 | -0.32816  |
| 2632 | POC206 | Q92561 | -0.19697  |
| 2633 | POC206 | Q14679 | -0.26875  |
| 2634 | POC206 | P31270 | -0.20894  |
| 2635 | POC206 | Q96N64 | -0.21582  |
| 2636 | POC206 | Q02045 | -0.25851  |
| 2637 | POC206 | P50579 | -0.29921  |
| 2638 | POC206 | Q12918 | -0.97275  |
| 2639 | POC206 | Q9UPN4 | -0.063676 |
| 2640 | POC206 | Q92526 | -0.40036  |
| 2641 | POC206 | Q7Z6M3 | -1.0239   |
| 2642 | POC206 | A6NLX4 | -0.79503  |
| 2643 | POC206 | Q8N2E6 | -1.205    |
| 2644 | POC206 | Q8TDX5 | -0.34502  |
| 2645 | POC206 | O95870 | -0.73314  |
| 2646 | POC206 | Q9Y546 | -0.15814  |
| 2647 | POC206 | Q5VTU8 | -0.18188  |
| 2648 | POC206 | Q8NGG0 | -1.1763   |
| 2649 | POC206 | A2A3N6 | -0.22427  |
| 2650 | POC206 | P01130 | -0.3671   |
| 2651 | POC206 | O00258 | -0.3319   |
| 2652 | POC206 | Q8TDB8 | -0.69667  |
| 2653 | POC206 | Q96P69 | -1.2337   |
| 2654 | POC206 | Q9NRY7 | -0.94699  |
| 2655 | POC206 | Q9HCJ1 | -0.85238  |
| 2656 | POC206 | Q16877 | -0.48707  |
| 2657 | POC206 | Q6BAA4 | -0.22908  |
| 2658 | POC206 | Q9NVI7 | -1.054    |
| 2659 | POC206 | Q7Z6I6 | -0.95167  |
| 2660 | POC206 | P08254 | -0.73488  |



|      |        |        |           |
|------|--------|--------|-----------|
| 2661 | POC206 | Q9BZF1 | -0.60853  |
| 2662 | POC206 | Q9H1N7 | -0.37101  |
| 2663 | POC206 | Q9Y5E4 | -1.1388   |
| 2664 | POC206 | Q9ULW2 | -0.68329  |
| 2665 | POC206 | Q8NH64 | -1.1763   |
| 2666 | POC206 | Q3KPI0 | -0.79503  |
| 2667 | POC206 | Q8IU83 | -0.81997  |
| 2668 | POC206 | O14545 | -0.41526  |
| 2669 | POC206 | Q9UGI6 | -0.68709  |
| 2670 | POC206 | P26441 | -0.21234  |
| 2671 | POC206 | Q07820 | -0.22738  |
| 2672 | POC206 | P11182 | -0.067682 |
| 2673 | POC206 | Q8N4K4 | -0.79503  |
| 2674 | POC206 | Q8N7N1 | -0.042663 |
| 2675 | POC206 | P30461 | -0.99995  |
| 2676 | POC206 | P62685 | -0.15319  |
| 2677 | POC206 | Q71RS6 | -0.86311  |
| 2678 | POC206 | Q8IYK8 | -1.3067   |
| 2679 | POC206 | P04424 | -0.075895 |
| 2680 | POC206 | Q8WVT3 | -0.08735  |
| 2681 | POC206 | P13674 | -0.40987  |
| 2682 | POC206 | Q8NFL0 | -0.46822  |
| 2683 | POC206 | Q9H2Q1 | -0.79503  |
| 2684 | POC206 | Q4KMG9 | -0.79503  |
| 2685 | POC206 | Q8NB37 | -0.80952  |
| 2686 | POC206 | Q9H9S5 | -1.0697   |
| 2687 | POC206 | Q13410 | -1.4816   |
| 2688 | POC206 | Q92186 | -0.32616  |
| 2689 | POC206 | O95479 | -0.71966  |
| 2690 | POC206 | Q8N5Z0 | -0.21877  |
| 2691 | POC206 | P30685 | -0.99995  |
| 2692 | POC206 | O75319 | -0.51859  |
| 2693 | POC206 | O00506 | -0.45448  |
| 2694 | POC206 | Q13698 | -0.60511  |
| 2695 | POC206 | Q86YJ5 | -0.70843  |
| 2696 | POC206 | Q92813 | -0.90083  |
| 2697 | POC206 | O95755 | -0.65904  |
| 2698 | POC206 | P21453 | -0.78285  |
| 2699 | POC206 | Q06210 | -0.10142  |
| 2700 | POC206 | Q8NGS1 | -1.1763   |
| 2701 | POC206 | Q02338 | -0.33094  |
| 2702 | POC206 | Q71RG6 | -0.80952  |
| 2703 | POC206 | Q96LD1 | -0.43804  |
| 2704 | POC206 | O00322 | -0.79966  |
| 2705 | POC206 | Q92858 | -0.2289   |
| 2706 | POC206 | O43314 | -0.49745  |
| 2707 | POC206 | P24071 | -1.58     |
| 2708 | POC206 | Q9H6R6 | -0.86766  |
| 2709 | POC206 | Q9UM21 | -0.84648  |
| 2710 | POC206 | A6NI28 | -1.2278   |
| 2711 | POC206 | Q99884 | -0.8658   |
| 2712 | POC206 | P58012 | -0.45919  |
| 2713 | POC206 | A2A2Z9 | -0.22734  |
| 2714 | POC206 | Q2TB10 | -0.2273   |
| 2715 | POC206 | P52848 | -0.39572  |
| 2716 | POC206 | Q9NSE2 | -0.22741  |
| 2717 | POC206 | Q8WVS4 | -0.21805  |
| 2718 | POC206 | Q8IUH8 | -0.98751  |
| 2719 | POC206 | P05937 | -0.22727  |
| 2720 | POC206 | Q8TAS1 | -0.32673  |
| 2721 | POC206 | Q9H330 | -0.674    |
| 2722 | POC206 | Q9Y5F7 | -1.1512   |
| 2723 | POC206 | P14209 | -1.0015   |
| 2724 | POC206 | Q8NH37 | -1.1763   |
| 2725 | POC206 | P12111 | -0.84783  |
| 2726 | POC206 | Q8IVN8 | -0.86989  |
| 2727 | POC206 | Q8N2A8 | -0.65762  |
| 2728 | POC206 | O43301 | -0.72239  |
| 2729 | POC206 | P25705 | -0.065194 |
| 2730 | POC206 | P19320 | -0.654    |
| 2731 | POC206 | Q9UHW5 | -0.81553  |
| 2732 | POC206 | Q9NZD1 | -1.2448   |
| 2733 | POC206 | O43719 | -0.21565  |
| 2734 | POC206 | P30511 | -1.0728   |
| 2735 | POC206 | Q9P0M4 | -0.863    |
| 2736 | POC206 | Q5VV11 | -0.26984  |

|      |        |        |           |
|------|--------|--------|-----------|
| 2737 | P0C206 | Q96JY0 | -0.060022 |
| 2738 | P0C206 | Q7L8A9 | -0.46835  |
| 2739 | P0C206 | P06318 | -0.9894   |
| 2740 | P0C206 | Q9NQH7 | -0.41859  |
| 2741 | P0C206 | O15016 | -0.22732  |
| 2742 | P0C206 | O75352 | -0.68598  |
| 2743 | P0C206 | O75964 | -0.13531  |
| 2744 | P0C206 | O43709 | -0.45739  |
| 2745 | P0C206 | P07339 | -1.0389   |
| 2746 | P0C206 | P00390 | -0.22404  |
| 2747 | P0C206 | Q92888 | -0.26127  |
| 2748 | P0C206 | Q9ULI0 | -0.84523  |
| 2749 | P0C206 | P43626 | -0.54035  |
| 2750 | P0C206 | O60486 | -0.99483  |
| 2751 | P0C206 | Q96G30 | -0.32345  |
| 2752 | P0C206 | Q8WXX4 | -0.48675  |
| 2753 | P0C206 | Q9H0R4 | -0.25005  |
| 2754 | P0C206 | Q9UNW1 | -0.34469  |
| 2755 | P0C206 | O00115 | -0.47728  |
| 2756 | P0C206 | Q9H5V7 | -0.22903  |
| 2757 | P0C206 | Q95672 | -1.333    |
| 2758 | P0C206 | Q4LDR2 | -0.77756  |
| 2759 | P0C206 | P05771 | -0.21226  |
| 2760 | P0C206 | Q6UWN8 | -0.75923  |
| 2761 | P0C206 | Q8WZ84 | -1.1763   |
| 2762 | P0C206 | Q99500 | -1.1973   |
| 2763 | P0C206 | Q10588 | -0.91238  |
| 2764 | P0C206 | P30481 | -0.99995  |
| 2765 | P0C206 | P48146 | -0.65146  |
| 2766 | P0C206 | Q13261 | -0.45024  |
| 2767 | P0C206 | Q9Y693 | -0.86094  |
| 2768 | P0C206 | Q9Y251 | -0.21795  |
| 2769 | P0C206 | P08311 | -1.1236   |
| 2770 | P0C206 | Q8TE12 | -0.22848  |
| 2771 | P0C206 | Q8NH95 | -1.1763   |
| 2772 | P0C206 | P78381 | -0.16463  |
| 2773 | P0C206 | Q9BT22 | -0.81141  |
| 2774 | P0C206 | Q96JP5 | -0.10237  |
| 2775 | P0C206 | Q9H156 | -0.89423  |
| 2776 | P0C206 | Q96Q40 | -0.93426  |
| 2777 | P0C206 | P20849 | -0.61434  |
| 2778 | P0C206 | Q9UIK4 | -0.80899  |
| 2779 | P0C206 | P63096 | -0.30884  |
| 2780 | P0C206 | Q9BWS9 | -0.76574  |
| 2781 | P0C206 | P00403 | -0.54701  |
| 2782 | P0C206 | Q309B1 | -0.217    |
| 2783 | P0C206 | Q9Y6N8 | -1.0941   |
| 2784 | P0C206 | A6NKF9 | -0.79503  |
| 2785 | P0C206 | Q8N8F6 | -0.89601  |
| 2786 | P0C206 | Q9UBY0 | -0.99629  |
| 2787 | P0C206 | P42229 | -0.22621  |
| 2788 | P0C206 | Q96L94 | -0.4024   |
| 2789 | P0C206 | O75864 | -0.24666  |
| 2790 | P0C206 | Q8NGR9 | -1.1763   |
| 2791 | P0C206 | P49788 | -0.81562  |
| 2792 | P0C206 | P07858 | -0.26576  |
| 2793 | P0C206 | P29320 | -1.0039   |
| 2794 | P0C206 | Q9ULH0 | -0.50503  |
| 2795 | P0C206 | Q6PHR2 | -0.50087  |
| 2796 | P0C206 | Q86X29 | -0.81595  |
| 2797 | P0C206 | P30484 | -0.99995  |
| 2798 | P0C206 | Q8IZS7 | -0.90889  |
| 2799 | P0C206 | Q9HAB3 | -0.93475  |
| 2800 | P0C206 | Q8NGJ2 | -1.1763   |
| 2801 | P0C206 | Q6S5L8 | -0.39304  |
| 2802 | P0C206 | Q02363 | -0.22762  |
| 2803 | P0C206 | Q9UHW9 | -0.79093  |
| 2804 | P0C206 | P04908 | -0.66158  |
| 2805 | P0C206 | Q8IZL9 | -0.15562  |
| 2806 | P0C206 | P47869 | -0.66055  |
| 2807 | P0C206 | P35225 | -0.20807  |
| 2808 | P0C206 | Q9UJ37 | -0.59794  |
| 2809 | P0C206 | Q00604 | -0.64403  |
| 2810 | P0C206 | P32241 | -0.73081  |
| 2811 | P0C206 | Q9UKJ8 | -1.0497   |
| 2812 | P0C206 | Q9H7P9 | -0.6199   |

|      |        |        |           |
|------|--------|--------|-----------|
| 2813 | POC206 | Q9NP56 | -0.34177  |
| 2814 | POC206 | Q6N043 | -0.22719  |
| 2815 | POC206 | O95835 | -0.2273   |
| 2816 | POC206 | P17813 | -0.20234  |
| 2817 | POC206 | P00973 | -0.38656  |
| 2818 | POC206 | Q8N4P3 | -0.35815  |
| 2819 | POC206 | Q02763 | -0.46068  |
| 2820 | POC206 | Q14541 | -0.23     |
| 2821 | POC206 | Q96PX6 | -0.15762  |
| 2822 | POC206 | Q9NRP4 | -0.054653 |
| 2823 | POC206 | Q92521 | -0.80216  |
| 2824 | POC206 | Q14641 | -1.1937   |
| 2825 | POC206 | Q15738 | -0.99748  |
| 2826 | POC206 | Q8WWZ4 | -1.1661   |
| 2827 | POC206 | Q8NGM8 | -1.1763   |
| 2828 | POC206 | Q12891 | -0.21655  |
| 2829 | POC206 | P58062 | -0.20293  |
| 2830 | POC206 | Q96DT5 | -0.45959  |
| 2831 | POC206 | O15550 | -0.6034   |
| 2832 | POC206 | Q8NGC4 | -1.1763   |
| 2833 | POC206 | Q95544 | -0.6682   |
| 2834 | POC206 | Q5JXA9 | -0.79503  |
| 2835 | POC206 | Q9UKA8 | -0.7583   |
| 2836 | POC206 | P24386 | -0.67144  |
| 2837 | POC206 | P35221 | -0.17175  |
| 2838 | POC206 | Q9BZJ6 | -1.1027   |
| 2839 | POC206 | P15144 | -0.78283  |
| 2840 | POC206 | Q13117 | -0.7142   |
| 2841 | POC206 | Q14654 | -0.51907  |
| 2842 | POC206 | Q8IU89 | -0.20261  |
| 2843 | POC206 | Q7LC44 | -0.41618  |
| 2844 | POC206 | Q9NZN1 | -0.60705  |
| 2845 | POC206 | P30453 | -1.0001   |
| 2846 | POC206 | Q92878 | -0.21017  |
| 2847 | POC206 | Q3ZCN5 | -0.18854  |
| 2848 | POC206 | Q9Y666 | -0.97996  |
| 2849 | POC206 | O14804 | -1.3724   |
| 2850 | POC206 | Q6H3X3 | -0.36433  |
| 2851 | POC206 | Q14667 | -0.80952  |
| 2852 | POC206 | Q92643 | -0.54679  |
| 2853 | POC206 | Q8N0X4 | -0.28298  |
| 2854 | POC206 | A6NHY2 | -0.37966  |
| 2855 | POC206 | O95302 | -0.44975  |
| 2856 | POC206 | Q9Y2Y8 | -0.25914  |
| 2857 | POC206 | P01595 | -0.9894   |
| 2858 | POC206 | P30464 | -0.99995  |
| 2859 | POC206 | Q13322 | -0.22741  |
| 2860 | POC206 | A5PLK6 | -0.77765  |
| 2861 | POC206 | A6NGJ6 | -0.44814  |
| 2862 | POC206 | Q99959 | -0.17701  |
| 2863 | POC206 | Q9BY11 | -0.22742  |
| 2864 | POC206 | Q9Y6C2 | -0.64707  |
| 2865 | POC206 | Q0D2K2 | -0.20499  |
| 2866 | POC206 | Q8IUR7 | -0.22761  |
| 2867 | POC206 | Q9HCK4 | -0.46952  |
| 2868 | POC206 | O60403 | -1.1763   |
| 2869 | POC206 | P14784 | -1.0576   |
| 2870 | POC206 | Q9Y6X6 | -0.21832  |
| 2871 | POC206 | P01566 | -0.75974  |
| 2872 | POC206 | Q9NRG0 | -0.28522  |
| 2873 | POC206 | Q6UWJ8 | -0.79503  |
| 2874 | POC206 | A6NIV6 | -0.27149  |
| 2875 | POC206 | Q96N66 | -0.26874  |
| 2876 | POC206 | P00352 | -0.42851  |
| 2877 | POC206 | P08861 | -1.3339   |
| 2878 | POC206 | Q6ZW31 | -0.76518  |
| 2879 | POC206 | P14679 | -0.40928  |
| 2880 | POC206 | Q5VZI3 | -0.79503  |
| 2881 | POC206 | P51793 | -1.0323   |
| 2882 | POC206 | Q92574 | -0.22708  |
| 2883 | POC206 | O60282 | -0.39435  |
| 2884 | POC206 | Q8TBX8 | -0.30358  |
| 2885 | POC206 | Q9GZQ6 | -1.1869   |
| 2886 | POC206 | Q0ZGT2 | -0.22741  |
| 2887 | POC206 | Q8IZA3 | -0.30125  |
| 2888 | POC206 | Q14390 | -0.2062   |

|      |        |        |           |
|------|--------|--------|-----------|
| 2889 | POC206 | Q9BZQ6 | -0.35718  |
| 2890 | POC206 | Q9H977 | -0.22736  |
| 2891 | POC206 | P46821 | -0.15906  |
| 2892 | POC206 | Q9NR20 | -0.9116   |
| 2893 | POC206 | Q9NX14 | -0.45779  |
| 2894 | POC206 | Q8TC29 | -0.29983  |
| 2895 | POC206 | O00624 | -0.92409  |
| 2896 | POC206 | Q16134 | -0.36411  |
| 2897 | POC206 | P16619 | -1.0127   |
| 2898 | POC206 | Q99715 | -1.14     |
| 2899 | POC206 | Q9NRW1 | -0.47117  |
| 2900 | POC206 | Q401N2 | -0.80981  |
| 2901 | POC206 | Q8N4P6 | -0.22713  |
| 2902 | POC206 | Q96MM7 | -0.58718  |
| 2903 | POC206 | P30485 | -0.99995  |
| 2904 | POC206 | Q6ZRR7 | -0.22732  |
| 2905 | POC206 | Q6UWB1 | -0.93353  |
| 2906 | POC206 | Q4G0S7 | -0.07141  |
| 2907 | POC206 | Q15389 | -0.50615  |
| 2908 | POC206 | Q99592 | -0.22759  |
| 2909 | POC206 | P78380 | -1.4359   |
| 2910 | POC206 | P0C864 | -0.099723 |
| 2911 | POC206 | Q8NGR2 | -1.1763   |
| 2912 | POC206 | Q6EMK4 | -1.3538   |
| 2913 | POC206 | Q9NVQ4 | -0.46696  |
| 2914 | POC206 | Q8TAV3 | -0.72996  |
| 2915 | POC206 | Q9BTM1 | -0.66158  |
| 2916 | POC206 | Q8WUG5 | -0.93518  |
| 2917 | POC206 | Q9BY14 | -0.4576   |
| 2918 | POC206 | Q9Y694 | -0.95394  |
| 2919 | POC206 | P48167 | -0.41439  |
| 2920 | POC206 | Q8N122 | -0.22741  |
| 2921 | POC206 | P13765 | -0.96989  |
| 2922 | POC206 | Q8IV38 | -0.3442   |
| 2923 | POC206 | Q9NY93 | -0.42994  |
| 2924 | POC206 | O94989 | -0.45896  |
| 2925 | POC206 | Q99558 | -0.22741  |
| 2926 | POC206 | O95377 | -0.87658  |
| 2927 | POC206 | Q7RTX8 | -0.040639 |
| 2928 | POC206 | Q8WTT0 | -0.76773  |
| 2929 | POC206 | Q99523 | -0.24724  |
| 2930 | POC206 | Q8N4W6 | -0.88783  |
| 2931 | POC206 | Q2M2E3 | -1.0668   |
| 2932 | POC206 | P21918 | -0.70242  |
| 2933 | POC206 | P49638 | -0.22659  |
| 2934 | POC206 | Q9NRP0 | -0.74691  |
| 2935 | POC206 | P55289 | -1.0941   |
| 2936 | POC206 | Q9UBX1 | -0.79604  |
| 2937 | POC206 | P35504 | -0.94053  |
| 2938 | POC206 | Q9BTX3 | -0.79503  |
| 2939 | POC206 | Q8IXI1 | -0.72929  |
| 2940 | POC206 | P07948 | -0.23172  |
| 2941 | POC206 | P51805 | -1.0205   |
| 2942 | POC206 | Q6ZVX9 | -0.79503  |
| 2943 | POC206 | Q8N7X0 | -0.63333  |
| 2944 | POC206 | Q92947 | -0.47966  |
| 2945 | POC206 | Q9UGF6 | -1.1763   |
| 2946 | POC206 | O95372 | -0.16644  |
| 2947 | POC206 | Q8NGG4 | -1.1763   |
| 2948 | POC206 | Q86Y29 | -0.80952  |
| 2949 | POC206 | Q96BM1 | -0.22741  |
| 2950 | POC206 | Q5JQD4 | -0.78978  |
| 2951 | POC206 | O75912 | -0.22741  |
| 2952 | POC206 | Q8NI32 | -0.44393  |
| 2953 | POC206 | Q8WXD2 | -0.60225  |
| 2954 | POC206 | Q96HV5 | -0.79503  |
| 2955 | POC206 | P06889 | -0.9894   |
| 2956 | POC206 | P16066 | -1.109    |
| 2957 | POC206 | Q9H0C1 | -0.44814  |
| 2958 | POC206 | Q9NW75 | -0.29468  |
| 2959 | POC206 | P38405 | -0.92636  |
| 2960 | POC206 | O43934 | -0.57403  |
| 2961 | POC206 | O75970 | -0.2268   |
| 2962 | POC206 | Q8N8D7 | -0.91833  |
| 2963 | POC206 | O15439 | -0.95491  |
| 2964 | POC206 | Q92806 | -0.52552  |

|      |        |        |           |
|------|--------|--------|-----------|
| 2965 | P0C206 | Q9Y6Y8 | -0.11874  |
| 2966 | P0C206 | A2RUR9 | -0.098357 |
| 2967 | P0C206 | P57735 | -0.41256  |
| 2968 | P0C206 | Q6UB28 | -0.36822  |
| 2969 | P0C206 | Q6UWW9 | -0.79503  |
| 2970 | P0C206 | P06280 | -0.12248  |
| 2971 | P0C206 | P20671 | -0.66158  |
| 2972 | P0C206 | Q8WWQ2 | -0.96425  |
| 2973 | P0C206 | Q6ZNF0 | -0.73577  |
| 2974 | P0C206 | Q14515 | -1.1366   |
| 2975 | P0C206 | Q969P6 | -0.36483  |
| 2976 | P0C206 | P00156 | -0.63591  |
| 2977 | P0C206 | Q96FL8 | -0.75089  |
| 2978 | P0C206 | Q96M27 | -0.056113 |
| 2979 | P0C206 | P49903 | -1.0198   |
| 2980 | P0C206 | P22460 | -0.53507  |
| 2981 | P0C206 | Q9Y3P4 | -0.83559  |
| 2982 | P0C206 | Q6IN97 | -0.22546  |
| 2983 | P0C206 | P11511 | -0.35933  |
| 2984 | P0C206 | Q8WW36 | -0.17787  |
| 2985 | P0C206 | Q08648 | -0.83864  |
| 2986 | P0C206 | P0CE71 | -0.29182  |
| 2987 | P0C206 | Q8NGH9 | -1.1763   |
| 2988 | P0C206 | P63218 | -0.4705   |
| 2989 | P0C206 | Q8IYJ0 | -0.79503  |
| 2990 | P0C206 | Q3KRB8 | -1.0098   |
| 2991 | P0C206 | Q3LFD5 | -0.59814  |
| 2992 | P0C206 | Q6NZ63 | -0.79503  |
| 2993 | P0C206 | Q5T2P9 | -0.77452  |
| 2994 | P0C206 | P63122 | -0.56257  |
| 2995 | P0C206 | A6NM76 | -1.1763   |
| 2996 | P0C206 | O00305 | -0.22713  |
| 2997 | P0C206 | Q94885 | -0.22734  |
| 2998 | P0C206 | P0C7M7 | -0.78078  |
| 2999 | P0C206 | Q9UNA1 | -0.32832  |
| 3000 | P0C206 | P56915 | -0.14294  |
| 3001 | P0C206 | P50416 | -0.37463  |
| 3002 | P0C206 | Q75077 | -1.224    |
| 3003 | P0C206 | Q63HR2 | -0.22741  |
| 3004 | P0C206 | Q96KE9 | -0.22371  |
| 3005 | P0C206 | A6NMS7 | -0.79503  |
| 3006 | P0C206 | P23771 | -0.22738  |
| 3007 | P0C206 | Q9NZP2 | -1.1763   |
| 3008 | P0C206 | P17174 | -0.18596  |
| 3009 | P0C206 | Q9HBY8 | -0.62769  |
| 3010 | P0C206 | Q6ZTA4 | -0.22741  |
| 3011 | P0C206 | Q9NYS0 | -0.90872  |
| 3012 | P0C206 | Q9NZK7 | -0.81875  |
| 3013 | P0C206 | Q06278 | -0.51986  |
| 3014 | P0C206 | P25116 | -0.40058  |
| 3015 | P0C206 | P02774 | -0.61453  |
| 3016 | P0C206 | Q9BXE9 | -1.1833   |
| 3017 | P0C206 | P06899 | -0.64767  |
| 3018 | P0C206 | Q13421 | -0.46884  |
| 3019 | P0C206 | Q9NW64 | -0.50491  |
| 3020 | P0C206 | Q8IYT4 | -0.47224  |
| 3021 | P0C206 | Q96PN8 | -1.4088   |
| 3022 | P0C206 | Q08AH1 | -0.84763  |
| 3023 | P0C206 | A6NJY4 | -0.79503  |
| 3024 | P0C206 | Q52M75 | -0.61953  |
| 3025 | P0C206 | Q9Y6N6 | -1.055    |
| 3026 | P0C206 | Q9ULH4 | -0.6938   |
| 3027 | P0C206 | Q7Z7L7 | -0.26636  |
| 3028 | P0C206 | A4D1P6 | -0.22745  |
| 3029 | P0C206 | Q9Y241 | -0.63023  |
| 3030 | P0C206 | Q13530 | -0.68568  |
| 3031 | P0C206 | Q6UVY6 | -1.1197   |
| 3032 | P0C206 | Q9HAS3 | -0.72219  |
| 3033 | P0C206 | Q16611 | -0.22724  |
| 3034 | P0C206 | P78367 | -0.22846  |
| 3035 | P0C206 | Q8IVE3 | -0.59951  |
| 3036 | P0C206 | Q9Y5V0 | -0.44814  |
| 3037 | P0C206 | Q96DS6 | -0.79503  |
| 3038 | P0C206 | Q6ZN44 | -1.02     |
| 3039 | P0C206 | Q8TDF6 | -0.3892   |
| 3040 | P0C206 | Q8N2Y8 | -0.22651  |

|      |        |        |           |
|------|--------|--------|-----------|
| 3041 | P0C206 | Q9NZR2 | -0.75096  |
| 3042 | P0C206 | O94788 | -0.68076  |
| 3043 | P0C206 | Q86XR7 | -0.25633  |
| 3044 | P0C206 | Q96ID5 | -0.80952  |
| 3045 | P0C206 | P52732 | -0.34579  |
| 3046 | P0C206 | Q8TF21 | -0.22747  |
| 3047 | P0C206 | Q6YHK3 | -0.9303   |
| 3048 | P0C206 | A6NLI3 | -0.090399 |
| 3049 | P0C206 | Q9Y679 | -0.33576  |
| 3050 | P0C206 | Q5S007 | -0.43126  |
| 3051 | P0C206 | O14638 | -1.0965   |
| 3052 | P0C206 | Q6AZZ1 | -0.22752  |
| 3053 | P0C206 | Q14573 | -0.22008  |
| 3054 | P0C206 | P78368 | -0.85811  |
| 3055 | P0C206 | Q9ULK5 | -0.38998  |
| 3056 | P0C206 | Q9Y2B0 | -0.22539  |
| 3057 | P0C206 | Q9C0K0 | -0.22693  |
| 3058 | P0C206 | Q13510 | -0.31631  |
| 3059 | P0C206 | Q9H813 | -0.79503  |
| 3060 | P0C206 | E9PQX1 | -0.065563 |
| 3061 | P0C206 | P10253 | -0.32543  |
| 3062 | P0C206 | Q99795 | -1.0825   |
| 3063 | P0C206 | Q8NDY8 | -0.79503  |
| 3064 | P0C206 | Q6AHZ1 | -0.22776  |
| 3065 | P0C206 | P55081 | -0.75297  |
| 3066 | P0C206 | Q92667 | -0.21404  |
| 3067 | P0C206 | Q5XG92 | -0.74611  |
| 3068 | P0C206 | O43680 | -0.22816  |
| 3069 | P0C206 | Q15622 | -1.1763   |
| 3070 | P0C206 | O75578 | -0.94705  |
| 3071 | P0C206 | Q8IZF3 | -1.2769   |
| 3072 | P0C206 | P61224 | -0.24216  |
| 3073 | P0C206 | Q6J4K2 | -0.93846  |
| 3074 | P0C206 | Q14994 | -0.22766  |
| 3075 | P0C206 | P42262 | -0.89053  |
| 3076 | P0C206 | O76082 | -0.35326  |
| 3077 | P0C206 | Q9H1J5 | -0.56424  |
| 3078 | P0C206 | P21802 | -0.25353  |
| 3079 | P0C206 | Q8NGX0 | -1.1763   |
| 3080 | P0C206 | Q6PIV2 | -0.48333  |
| 3081 | P0C206 | P86790 | -0.47219  |
| 3082 | P0C206 | Q99697 | -0.172    |
| 3083 | P0C206 | Q6ZVS6 | -0.80952  |
| 3084 | P0C206 | Q04941 | -0.57443  |
| 3085 | P0C206 | Q9P2J2 | -0.9696   |
| 3086 | P0C206 | Q9NZV8 | -0.71586  |
| 3087 | P0C206 | O60231 | -0.32636  |
| 3088 | P0C206 | O15173 | -0.99425  |
| 3089 | P0C206 | Q8TD30 | -0.20129  |
| 3090 | P0C206 | P28329 | -0.18448  |
| 3091 | P0C206 | P34981 | -1.1849   |
| 3092 | P0C206 | P41439 | -0.80144  |
| 3093 | P0C206 | Q99788 | -0.85428  |
| 3094 | P0C206 | Q86UU1 | -0.32146  |
| 3095 | P0C206 | P45844 | -0.50427  |
| 3096 | P0C206 | Q8TE68 | -0.22741  |
| 3097 | P0C206 | O00212 | -1.1391   |
| 3098 | P0C206 | Q5TGY1 | -0.79503  |
| 3099 | P0C206 | Q96P53 | -0.22741  |
| 3100 | P0C206 | Q9UJS0 | -0.38473  |
| 3101 | P0C206 | P42892 | -0.62101  |
| 3102 | P0C206 | Q96MC2 | -0.031612 |
| 3103 | P0C206 | Q8NGN1 | -1.1763   |
| 3104 | P0C206 | Q9BYV2 | -0.51257  |
| 3105 | P0C206 | Q01814 | -0.31251  |
| 3106 | P0C206 | Q8IZ02 | -0.22741  |
| 3107 | P0C206 | O75165 | -0.29995  |
| 3108 | P0C206 | P15531 | -0.17543  |
| 3109 | P0C206 | P34810 | -0.8546   |
| 3110 | P0C206 | Q15155 | -0.56413  |
| 3111 | P0C206 | Q9Y5G2 | -1.1512   |
| 3112 | P0C206 | Q5SQ64 | -0.91833  |
| 3113 | P0C206 | Q7Z7G1 | -0.49867  |
| 3114 | P0C206 | P68032 | -0.3408   |
| 3115 | P0C206 | Q6UXG3 | -0.85178  |
| 3116 | P0C206 | Q8IX94 | -0.67788  |

|      |        |        |           |
|------|--------|--------|-----------|
| 3117 | P0C206 | O15118 | -0.61549  |
| 3118 | P0C206 | Q9P298 | -0.79503  |
| 3119 | P0C206 | Q8TER5 | -0.47726  |
| 3120 | P0C206 | P20264 | -0.22741  |
| 3121 | P0C206 | O75508 | -0.85751  |
| 3122 | P0C206 | O95861 | -0.19713  |
| 3123 | P0C206 | P40261 | -0.17716  |
| 3124 | P0C206 | P35613 | -0.22742  |
| 3125 | P0C206 | P29322 | -1.2033   |
| 3126 | P0C206 | Q9Y6E0 | -0.23349  |
| 3127 | P0C206 | Q8N413 | -0.58473  |
| 3128 | P0C206 | Q5TF21 | -0.79503  |
| 3129 | P0C206 | O95522 | -0.065812 |
| 3130 | P0C206 | Q9UBD9 | -0.31263  |
| 3131 | P0C206 | O15541 | -0.22735  |
| 3132 | P0C206 | Q5VZR4 | -0.72007  |
| 3133 | P0C206 | Q96A58 | -0.61373  |
| 3134 | P0C206 | P15812 | -0.85736  |
| 3135 | P0C206 | Q9HCR9 | -0.22492  |
| 3136 | P0C206 | Q9NRA1 | -0.29897  |
| 3137 | P0C206 | O15243 | -0.4732   |
| 3138 | P0C206 | Q68CR1 | -0.79503  |
| 3139 | P0C206 | Q6NYC1 | -0.18713  |
| 3140 | P0C206 | P57679 | -0.65692  |
| 3141 | P0C206 | Q9Y2T3 | -0.23156  |
| 3142 | P0C206 | P13725 | -0.50356  |
| 3143 | P0C206 | Q9BZ29 | -0.22565  |
| 3144 | P0C206 | Q8IZQ8 | -0.53154  |
| 3145 | P0C206 | Q9UHF4 | -0.79503  |
| 3146 | P0C206 | P48594 | -0.51879  |
| 3147 | P0C206 | Q8WVD3 | -0.54285  |
| 3148 | P0C206 | Q02161 | -0.88765  |
| 3149 | P0C206 | A6NL08 | -1.1763   |
| 3150 | P0C206 | Q9BYU1 | -0.46964  |
| 3151 | P0C206 | O75131 | -0.22898  |
| 3152 | P0C206 | O60706 | -1.0297   |
| 3153 | P0C206 | Q9Y5R2 | -1.7465   |
| 3154 | P0C206 | P09912 | -0.24951  |
| 3155 | P0C206 | P52306 | -0.56776  |
| 3156 | P0C206 | Q16280 | -1.1623   |
| 3157 | P0C206 | P07202 | -0.95973  |
| 3158 | P0C206 | Q9Y276 | -0.48639  |
| 3159 | P0C206 | O94966 | -0.59318  |
| 3160 | P0C206 | Q5T4I8 | -0.068674 |
| 3161 | P0C206 | Q9UK80 | -0.41379  |
| 3162 | P0C206 | Q68G75 | -0.67219  |
| 3163 | P0C206 | P80365 | -0.66502  |
| 3164 | P0C206 | Q14500 | -0.9943   |
| 3165 | P0C206 | B2RXH2 | -0.10981  |
| 3166 | P0C206 | P01848 | -0.90773  |
| 3167 | P0C206 | Q8IX30 | -0.22754  |
| 3168 | P0C206 | A6NMT0 | -0.22787  |
| 3169 | P0C206 | Q9GZX3 | -0.4594   |
| 3170 | P0C206 | Q9BYT9 | -0.77342  |
| 3171 | P0C206 | Q9ULS6 | -0.77342  |
| 3172 | P0C206 | P08572 | -0.43078  |
| 3173 | P0C206 | Q9H172 | -1.1642   |
| 3174 | P0C206 | P01743 | -0.9894   |
| 3175 | P0C206 | Q5VY80 | -0.51932  |
| 3176 | P0C206 | Q86YS6 | -1.0599   |
| 3177 | P0C206 | Q96NI6 | -0.79503  |
| 3178 | P0C206 | Q15109 | -0.88706  |
| 3179 | P0C206 | Q8TDM5 | -0.62866  |
| 3180 | P0C206 | P42336 | -0.35348  |
| 3181 | P0C206 | Q14406 | -0.69791  |
| 3182 | P0C206 | Q9BQT9 | -0.89888  |
| 3183 | P0C206 | O43278 | -0.79238  |
| 3184 | P0C206 | Q9H553 | -0.19404  |
| 3185 | P0C206 | P30044 | -0.29422  |
| 3186 | P0C206 | P62333 | -0.38516  |
| 3187 | P0C206 | Q96JW4 | -0.94146  |
| 3188 | P0C206 | Q9UGL1 | -0.29986  |
| 3189 | P0C206 | Q9UQ90 | -0.55211  |
| 3190 | P0C206 | Q14201 | -0.079014 |
| 3191 | P0C206 | Q8N4F4 | -0.86     |
| 3192 | P0C206 | Q9H1C7 | -0.79503  |

|      |        |        |           |
|------|--------|--------|-----------|
| 3193 | P0C206 | A7E2Y1 | -0.67413  |
| 3194 | P0C206 | Q9NWT1 | -0.22823  |
| 3195 | P0C206 | A6NM15 | -0.72239  |
| 3196 | P0C206 | Q99972 | -0.84818  |
| 3197 | P0C206 | P78310 | -0.22741  |
| 3198 | P0C206 | Q4UJ75 | -0.22739  |
| 3199 | P0C206 | Q8N144 | -0.51195  |
| 3200 | P0C206 | Q86XA0 | -0.70885  |
| 3201 | P0C206 | Q13043 | -0.23382  |
| 3202 | P0C206 | Q8IXE1 | -1.1763   |
| 3203 | P0C206 | Q96KW9 | -0.80935  |
| 3204 | P0C206 | Q9H4I9 | -0.62349  |
| 3205 | P0C206 | P12273 | -0.85083  |
| 3206 | P0C206 | Q8N9I5 | -1.1005   |
| 3207 | P0C206 | Q12882 | -0.52463  |
| 3208 | P0C206 | P07996 | -0.30787  |
| 3209 | P0C206 | Q9NTG1 | -1.0013   |
| 3210 | P0C206 | Q6P093 | -1.214    |
| 3211 | P0C206 | P12081 | -0.20459  |
| 3212 | P0C206 | Q96C12 | -0.062245 |
| 3213 | P0C206 | Q9NZ08 | -0.52344  |
| 3214 | P0C206 | Q9BQ50 | -0.069224 |
| 3215 | P0C206 | Q96MU8 | -0.22745  |
| 3216 | P0C206 | Q95965 | -0.97144  |
| 3217 | P0C206 | P61204 | -0.40787  |
| 3218 | P0C206 | Q6UXA7 | -0.7099   |
| 3219 | P0C206 | Q8N9I1 | -0.79503  |
| 3220 | P0C206 | Q4G0S4 | -0.63837  |
| 3221 | P0C206 | Q6UWL6 | -0.91693  |
| 3222 | P0C206 | P58743 | -0.78672  |
| 3223 | P0C206 | Q9NWX6 | -0.51481  |
| 3224 | P0C206 | Q8IZY2 | -0.74535  |
| 3225 | P0C206 | Q95183 | -0.92158  |
| 3226 | P0C206 | Q9UN88 | -0.84687  |
| 3227 | P0C206 | Q7Z7G0 | -0.91827  |
| 3228 | P0C206 | P05108 | -0.29808  |
| 3229 | P0C206 | P19634 | -0.37902  |
| 3230 | P0C206 | Q52LC2 | -0.71564  |
| 3231 | P0C206 | P30490 | -0.99995  |
| 3232 | P0C206 | Q96AD5 | -0.65681  |
| 3233 | P0C206 | Q14195 | -0.20433  |
| 3234 | P0C206 | Q14330 | -1.1939   |
| 3235 | P0C206 | Q93033 | -0.95171  |
| 3236 | P0C206 | A2RUT3 | -0.79503  |
| 3237 | P0C206 | Q92629 | -0.40771  |
| 3238 | P0C206 | Q86UG4 | -0.8197   |
| 3239 | P0C206 | P02760 | -0.71307  |
| 3240 | P0C206 | Q5JS13 | -0.64868  |
| 3241 | P0C206 | P26232 | -0.17952  |
| 3242 | P0C206 | Q86VS3 | -0.35026  |
| 3243 | P0C206 | P22794 | -0.81049  |
| 3244 | P0C206 | Q60243 | -0.65025  |
| 3245 | P0C206 | Q15782 | -0.69482  |
| 3246 | P0C206 | Q8NG99 | -1.1763   |
| 3247 | P0C206 | Q9HCT0 | -0.54029  |
| 3248 | P0C206 | Q68CJ6 | -0.35992  |
| 3249 | P0C206 | P09471 | -0.81467  |
| 3250 | P0C206 | Q9NS84 | -0.45688  |
| 3251 | P0C206 | Q14185 | -0.22741  |
| 3252 | P0C206 | Q6UW02 | -1.0254   |
| 3253 | P0C206 | Q8WV74 | -0.018152 |
| 3254 | P0C206 | Q00178 | -0.72328  |
| 3255 | P0C206 | P01715 | -0.9894   |
| 3256 | P0C206 | Q96R05 | -0.21792  |
| 3257 | P0C206 | Q8IUH2 | -0.89812  |
| 3258 | P0C206 | Q9UJ99 | -1.1512   |
| 3259 | P0C206 | P51151 | -0.40314  |
| 3260 | P0C206 | Q00526 | -1.0454   |
| 3261 | P0C206 | Q01453 | -0.35134  |
| 3262 | P0C206 | Q16777 | -0.66158  |
| 3263 | P0C206 | Q9P0K1 | -0.47956  |
| 3264 | P0C206 | Q8NEA9 | -0.21437  |
| 3265 | P0C206 | Q9H479 | -0.42195  |
| 3266 | P0C206 | Q95399 | -0.61407  |
| 3267 | P0C206 | Q6PL45 | -0.79503  |
| 3268 | P0C206 | Q4W5N1 | -0.26029  |



|      |        |        |           |
|------|--------|--------|-----------|
| 3269 | P0C206 | Q8NCB2 | -0.5392   |
| 3270 | P0C206 | Q70CQ1 | -0.24191  |
| 3271 | P0C206 | Q9Y4F5 | -0.20835  |
| 3272 | P0C206 | Q8NB16 | -0.22741  |
| 3273 | P0C206 | Q6DD88 | -0.91354  |
| 3274 | P0C206 | Q8N9S7 | -0.79503  |
| 3275 | P0C206 | Q9Y3M8 | -0.23087  |
| 3276 | P0C206 | Q01955 | -0.52121  |
| 3277 | P0C206 | P31431 | -0.74069  |
| 3278 | P0C206 | Q5H8A4 | -0.92035  |
| 3279 | P0C206 | Q9BXB1 | -0.88932  |
| 3280 | P0C206 | O76036 | -1.0548   |
| 3281 | P0C206 | Q9P2W1 | -0.15263  |
| 3282 | P0C206 | P18825 | -0.36726  |
| 3283 | P0C206 | Q9H841 | -0.76064  |
| 3284 | P0C206 | Q8NHS0 | -0.34475  |
| 3285 | P0C206 | Q7L8C5 | -0.82522  |
| 3286 | P0C206 | O43566 | -0.22847  |
| 3287 | P0C206 | P35499 | -1.0187   |
| 3288 | P0C206 | P11464 | -0.81994  |
| 3289 | P0C206 | P59045 | -0.85539  |
| 3290 | P0C206 | Q8WTY6 | -0.18279  |
| 3291 | P0C206 | Q9GZP0 | -0.91212  |
| 3292 | P0C206 | Q7L099 | -0.6337   |
| 3293 | P0C206 | P09238 | -1.2114   |
| 3294 | P0C206 | Q96PB8 | -0.79503  |
| 3295 | P0C206 | Q9BT17 | -0.16775  |
| 3296 | P0C206 | Q8WXA9 | -0.22226  |
| 3297 | P0C206 | O95825 | -0.72806  |
| 3298 | P0C206 | P30101 | -0.2662   |
| 3299 | P0C206 | Q6DKI7 | -0.79503  |
| 3300 | P0C206 | Q96KQ7 | -0.22741  |
| 3301 | P0C206 | Q8TCT1 | -0.24604  |
| 3302 | P0C206 | Q8TEA7 | -1.012    |
| 3303 | P0C206 | P48052 | -1.0187   |
| 3304 | P0C206 | Q8NGE1 | -1.1763   |
| 3305 | P0C206 | Q8WXH6 | -1.1817   |
| 3306 | P0C206 | Q9C0D3 | -0.1932   |
| 3307 | P0C206 | Q99463 | -1.2388   |
| 3308 | P0C206 | P06681 | -1.3506   |
| 3309 | P0C206 | Q8IWX8 | -0.12031  |
| 3310 | P0C206 | P36406 | -0.3426   |
| 3311 | P0C206 | Q9BZX2 | -0.60066  |
| 3312 | P0C206 | O00635 | -0.61413  |
| 3313 | P0C206 | Q8NH90 | -1.1763   |
| 3314 | P0C206 | P16112 | -0.74531  |
| 3315 | P0C206 | Q9H3M0 | -0.77342  |
| 3316 | P0C206 | Q9BXJ7 | -1.003    |
| 3317 | P0C206 | Q96EW2 | -0.17413  |
| 3318 | P0C206 | P02689 | -0.18821  |
| 3319 | P0C206 | P18505 | -0.90082  |
| 3320 | P0C206 | Q9H1D0 | -0.96135  |
| 3321 | P0C206 | O75954 | -0.95247  |
| 3322 | P0C206 | Q96S53 | -0.65767  |
| 3323 | P0C206 | Q9ULM0 | -0.28344  |
| 3324 | P0C206 | Q96P47 | -1.0161   |
| 3325 | P0C206 | P63123 | -0.56257  |
| 3326 | P0C206 | P00736 | -1.3686   |
| 3327 | P0C206 | O14977 | -0.16296  |
| 3328 | P0C206 | Q6IMI4 | -0.23218  |
| 3329 | P0C206 | P80404 | -0.23998  |
| 3330 | P0C206 | Q9HB63 | -0.91393  |
| 3331 | P0C206 | Q8IUC8 | -0.60275  |
| 3332 | P0C206 | I1YAP6 | -0.2258   |
| 3333 | P0C206 | P08217 | -1.3203   |
| 3334 | P0C206 | Q9BZ11 | -1.0482   |
| 3335 | P0C206 | Q96JA4 | -0.79503  |
| 3336 | P0C206 | P55085 | -0.32718  |
| 3337 | P0C206 | Q8NDB6 | -0.67219  |
| 3338 | P0C206 | P56559 | -0.41434  |
| 3339 | P0C206 | Q6ZWK4 | -0.79503  |
| 3340 | P0C206 | Q9Y5Y5 | -0.37296  |
| 3341 | P0C206 | Q0GE19 | -0.86695  |
| 3342 | P0C206 | P62070 | -0.81767  |
| 3343 | P0C206 | P20020 | -0.65062  |
| 3344 | P0C206 | P02766 | -0.031684 |

|      |        |        |           |
|------|--------|--------|-----------|
| 3345 | P0C206 | Q9NZ71 | -0.4328   |
| 3346 | P0C206 | Q9UJD0 | -0.22273  |
| 3347 | P0C206 | Q9NRW7 | -0.21687  |
| 3348 | P0C206 | Q14733 | -0.23087  |
| 3349 | P0C206 | Q05397 | -0.22742  |
| 3350 | P0C206 | P30508 | -1.0603   |
| 3351 | P0C206 | Q8TC57 | -0.67438  |
| 3352 | P0C206 | Q96FV0 | -0.22709  |
| 3353 | P0C206 | Q58FF6 | -0.4889   |
| 3354 | P0C206 | Q53H12 | -0.78019  |
| 3355 | P0C206 | Q6PEX7 | -0.79503  |
| 3356 | P0C206 | P13688 | -0.77787  |
| 3357 | P0C206 | Q9H2C2 | -0.81705  |
| 3358 | P0C206 | Q99935 | -0.78063  |
| 3359 | P0C206 | O95711 | -0.94713  |
| 3360 | P0C206 | P42765 | -0.18496  |
| 3361 | P0C206 | P51513 | -0.11927  |
| 3362 | P0C206 | Q8NDV3 | -0.28342  |
| 3363 | P0C206 | Q9BXU1 | -1.13     |
| 3364 | P0C206 | Q99683 | -0.22737  |
| 3365 | P0C206 | Q3MIN7 | -0.83955  |
| 3366 | P0C206 | Q9BUL5 | -0.29892  |
| 3367 | P0C206 | Q96KN2 | -1.1373   |
| 3368 | P0C206 | A6NGH8 | -0.2274   |
| 3369 | P0C206 | Q7RTY1 | -0.8432   |
| 3370 | P0C206 | Q6IFH4 | -1.1763   |
| 3371 | P0C206 | Q6UX52 | -0.80952  |
| 3372 | P0C206 | O60306 | -0.4702   |
| 3373 | P0C206 | Q8N7B9 | -0.29182  |
| 3374 | P0C206 | O43508 | -0.99935  |
| 3375 | P0C206 | Q9NRQ5 | -0.57403  |
| 3376 | P0C206 | Q03828 | -0.22713  |
| 3377 | P0C206 | P43005 | -0.71313  |
| 3378 | P0C206 | Q8WVE7 | -0.79503  |
| 3379 | P0C206 | Q96MC5 | -0.055499 |
| 3380 | P0C206 | P31785 | -0.8255   |
| 3381 | P0C206 | Q6F5E8 | -0.22242  |
| 3382 | P0C206 | Q9NZS2 | -0.9807   |
| 3383 | P0C206 | Q5T6X5 | -1.1427   |
| 3384 | P0C206 | Q14534 | -1.1028   |
| 3385 | P0C206 | Q96J87 | -0.41477  |
| 3386 | P0C206 | Q9Y371 | -0.2274   |
| 3387 | P0C206 | Q14114 | -0.88232  |
| 3388 | P0C206 | Q8NEC5 | -0.59165  |
| 3389 | P0C206 | P26038 | -0.23874  |
| 3390 | P0C206 | Q9BY07 | -0.86981  |
| 3391 | P0C206 | P02747 | -0.91335  |
| 3392 | P0C206 | Q6P5Q4 | -0.23165  |
| 3393 | P0C206 | Q6UXT8 | -0.80952  |
| 3394 | P0C206 | Q8TCG1 | -0.085122 |
| 3395 | P0C206 | P49763 | -0.95334  |
| 3396 | P0C206 | Q8N9L1 | -0.24357  |
| 3397 | P0C206 | Q6ZT21 | -0.688    |
| 3398 | P0C206 | Q9GZY4 | -0.63887  |
| 3399 | P0C206 | Q6UXZ0 | -0.79503  |
| 3400 | P0C206 | P30495 | -0.99995  |
| 3401 | P0C206 | Q9H114 | -0.87562  |
| 3402 | P0C206 | P36959 | -0.41639  |
| 3403 | P0C206 | P84085 | -0.22784  |
| 3404 | P0C206 | Q9UKR3 | -0.52834  |
| 3405 | P0C206 | P54793 | -0.71517  |
| 3406 | P0C206 | Q9UDR5 | -0.54579  |
| 3407 | P0C206 | Q14210 | -0.57751  |
| 3408 | P0C206 | P50281 | -0.33592  |
| 3409 | P0C206 | P52333 | -0.34459  |
| 3410 | P0C206 | P01225 | -0.24913  |
| 3411 | P0C206 | Q6ZRX8 | -0.13829  |
| 3412 | P0C206 | Q6UXM1 | -0.79503  |
| 3413 | P0C206 | Q6ZNC8 | -0.75066  |
| 3414 | P0C206 | Q08174 | -0.99217  |
| 3415 | P0C206 | Q8N957 | -0.22718  |
| 3416 | P0C206 | Q8N608 | -0.95958  |
| 3417 | P0C206 | Q9Y4D2 | -0.66333  |
| 3418 | P0C206 | Q95365 | -0.99995  |
| 3419 | P0C206 | Q96QZ7 | -0.22402  |
| 3420 | P0C206 | Q71DI3 | -0.43755  |

|      |        |        |           |
|------|--------|--------|-----------|
| 3421 | POC206 | P01031 | -0.76364  |
| 3422 | POC206 | P36507 | -0.22788  |
| 3423 | POC206 | Q8NBI5 | -0.80137  |
| 3424 | POC206 | Q6UXI9 | -1.1509   |
| 3425 | POC206 | P16234 | -0.26759  |
| 3426 | POC206 | Q15399 | -0.97981  |
| 3427 | POC206 | Q7LFX5 | -0.43728  |
| 3428 | POC206 | Q9NS28 | -0.53604  |
| 3429 | POC206 | Q8NH87 | -1.1763   |
| 3430 | POC206 | Q695T7 | -0.97693  |
| 3431 | POC206 | P04003 | -0.22737  |
| 3432 | POC206 | Q8N3H0 | -0.19885  |
| 3433 | POC206 | O95231 | -0.2274   |
| 3434 | POC206 | P47888 | -1.1763   |
| 3435 | POC206 | Q2VIQ3 | -0.38922  |
| 3436 | POC206 | Q8WXX1 | -0.48675  |
| 3437 | POC206 | P07919 | -0.31837  |
| 3438 | POC206 | O43813 | -0.30081  |
| 3439 | POC206 | Q9Y624 | -0.62039  |
| 3440 | POC206 | Q14451 | -0.22741  |
| 3441 | POC206 | O00623 | -0.26259  |
| 3442 | POC206 | Q6GMV1 | -0.28684  |
| 3443 | POC206 | O43909 | -0.71808  |
| 3444 | POC206 | Q99501 | -0.085846 |
| 3445 | POC206 | Q9UEW3 | -0.97337  |
| 3446 | POC206 | Q8NGC6 | -1.1763   |
| 3447 | POC206 | Q8TEH3 | -0.61087  |
| 3448 | POC206 | Q8N4C9 | -0.79503  |
| 3449 | POC206 | Q99988 | -0.79909  |
| 3450 | POC206 | Q9H521 | -0.14803  |
| 3451 | POC206 | P12955 | -0.55091  |
| 3452 | POC206 | Q53EL9 | -0.87438  |
| 3453 | POC206 | Q8N2A0 | -0.22405  |
| 3454 | POC206 | Q6ZN68 | -0.79503  |
| 3455 | POC206 | Q02809 | -0.70137  |
| 3456 | POC206 | O95340 | -0.7457   |
| 3457 | POC206 | Q9BQF6 | -0.62226  |
| 3458 | POC206 | P57738 | -0.79503  |
| 3459 | POC206 | A6NC05 | -0.19519  |
| 3460 | POC206 | P40197 | -0.91086  |
| 3461 | POC206 | Q969E1 | -0.79092  |
| 3462 | POC206 | Q96A25 | -0.57403  |
| 3463 | POC206 | Q96AH8 | -0.59525  |
| 3464 | POC206 | P81172 | -0.5301   |
| 3465 | POC206 | Q13126 | -0.15347  |
| 3466 | POC206 | O14931 | -1.1292   |
| 3467 | POC206 | P51153 | -0.43189  |
| 3468 | POC206 | Q99983 | -0.89698  |
| 3469 | POC206 | Q8N4G2 | -0.65026  |
| 3470 | POC206 | Q15768 | -0.73908  |
| 3471 | POC206 | P50747 | -0.31027  |
| 3472 | POC206 | Q9UJ42 | -1.2448   |
| 3473 | POC206 | Q9H6E4 | -0.80952  |
| 3474 | POC206 | Q6NUJ5 | -0.21439  |
| 3475 | POC206 | O15130 | -0.93355  |
| 3476 | POC206 | Q05940 | -0.57486  |
| 3477 | POC206 | Q8NGT1 | -1.1763   |
| 3478 | POC206 | Q9HDC9 | -0.68238  |
| 3479 | POC206 | P0C881 | -0.11248  |
| 3480 | POC206 | Q9UQ74 | -0.80952  |
| 3481 | POC206 | P01241 | -0.19615  |
| 3482 | POC206 | Q15427 | -0.26394  |
| 3483 | POC206 | Q9UI38 | -0.48512  |
| 3484 | POC206 | Q5I0G3 | -0.56233  |
| 3485 | POC206 | O75367 | -0.50329  |
| 3486 | POC206 | Q8NHP1 | -0.51459  |
| 3487 | POC206 | Q92766 | -0.21357  |
| 3488 | POC206 | Q8TBB6 | -0.76825  |
| 3489 | POC206 | P24310 | -0.6299   |
| 3490 | POC206 | P33176 | -0.24155  |
| 3491 | POC206 | A3KMH1 | -1.1669   |
| 3492 | POC206 | Q6ZSB3 | -0.066713 |
| 3493 | POC206 | P78383 | -0.72186  |
| 3494 | POC206 | Q9UFV1 | -0.88845  |
| 3495 | POC206 | Q6UX41 | -0.22916  |
| 3496 | POC206 | O43824 | -0.92067  |

|      |        |        |          |
|------|--------|--------|----------|
| 3497 | P0C206 | Q8N431 | -0.70913 |
| 3498 | P0C206 | P21796 | -0.20701 |
| 3499 | P0C206 | Q99578 | -0.86969 |
| 3500 | P0C206 | Q9P232 | -0.56761 |
| 3501 | P0C206 | O00338 | -0.21963 |
| 3502 | P0C206 | Q9UBL6 | -0.26582 |
| 3503 | P0C206 | Q9UJT0 | -0.30437 |
| 3504 | P0C206 | Q00169 | -0.54477 |
| 3505 | P0C206 | Q5JU85 | -0.21344 |
| 3506 | P0C206 | Q8WWZ1 | -0.78709 |
| 3507 | P0C206 | Q99525 | -0.4717  |
| 3508 | P0C206 | Q6ZT98 | -0.53411 |
| 3509 | P0C206 | Q6WQI6 | -0.10741 |
| 3510 | P0C206 | Q8TED4 | -0.65916 |
| 3511 | P0C206 | Q9HBG6 | -0.22742 |
| 3512 | P0C206 | Q9NUR3 | -0.79503 |
| 3513 | P0C206 | O60725 | -0.50299 |
| 3514 | P0C206 | Q8N8A4 | -0.18803 |
| 3515 | P0C206 | P07307 | -0.37635 |
| 3516 | P0C206 | O95969 | -0.88207 |
| 3517 | P0C206 | Q94933 | -0.89423 |
| 3518 | P0C206 | P30488 | -0.99995 |
| 3519 | P0C206 | Q75N90 | -0.95878 |
| 3520 | P0C206 | Q9NWR8 | -0.79503 |
| 3521 | P0C206 | Q9Y337 | -0.80134 |
| 3522 | P0C206 | Q7L211 | -0.73314 |
| 3523 | P0C206 | Q02127 | -0.60294 |
| 3524 | P0C206 | Q96NX9 | -0.11844 |
| 3525 | P0C206 | O95995 | -0.14465 |
| 3526 | P0C206 | P35354 | -0.25251 |
| 3527 | P0C206 | P18065 | -0.38847 |
| 3528 | P0C206 | Q9UK23 | -0.39624 |
| 3529 | P0C206 | A6NGU5 | -0.67656 |
| 3530 | P0C206 | Q9Y5W3 | -0.22236 |
| 3531 | P0C206 | P28161 | -0.22484 |
| 3532 | P0C206 | A8MTJ3 | -0.67212 |
| 3533 | P0C206 | O75439 | -0.43912 |
| 3534 | P0C206 | P98160 | -0.93611 |
| 3535 | P0C206 | Q6ICL7 | -0.79503 |
| 3536 | P0C206 | Q9UPY5 | -0.68228 |
| 3537 | P0C206 | P05111 | -0.48119 |
| 3538 | P0C206 | Q6E213 | -0.81342 |
| 3539 | P0C206 | Q8N539 | -1.0628  |
| 3540 | P0C206 | P30049 | -0.11602 |
| 3541 | P0C206 | Q96LL3 | -0.79503 |
| 3542 | P0C206 | O95267 | -0.66517 |
| 3543 | P0C206 | A8K979 | -0.51041 |
| 3544 | P0C206 | Q8IV04 | -1.2801  |
| 3545 | P0C206 | Q6DWJ6 | -1.2448  |
| 3546 | P0C206 | P01761 | -0.9894  |
| 3547 | P0C206 | Q9Y5I0 | -1.1512  |
| 3548 | P0C206 | P08118 | -0.47392 |
| 3549 | P0C206 | A6NCI5 | -0.79503 |
| 3550 | P0C206 | Q9Y264 | -0.77231 |
| 3551 | P0C206 | Q4AC99 | -0.3258  |
| 3552 | P0C206 | P01133 | -0.82074 |
| 3553 | P0C206 | P01720 | -0.9894  |
| 3554 | P0C206 | B2RUY7 | -0.79979 |
| 3555 | P0C206 | Q9H015 | -0.42048 |
| 3556 | P0C206 | Q9NR16 | -1.4319  |
| 3557 | P0C206 | Q9UPN6 | -0.29137 |
| 3558 | P0C206 | P16930 | -0.21555 |
| 3559 | P0C206 | Q8NAB2 | -0.19821 |
| 3560 | P0C206 | P25025 | -1.1024  |
| 3561 | P0C206 | Q7L1W4 | -0.79503 |
| 3562 | P0C206 | Q96QD5 | -0.12256 |
| 3563 | P0C206 | Q9P0W8 | -0.45879 |
| 3564 | P0C206 | Q86UK0 | -1.2023  |
| 3565 | P0C206 | Q9Y2I2 | -0.2283  |
| 3566 | P0C206 | P45974 | -0.24508 |
| 3567 | P0C206 | O76100 | -1.1763  |
| 3568 | P0C206 | P01308 | -0.22485 |
| 3569 | P0C206 | Q96DR8 | -0.92643 |
| 3570 | P0C206 | A0PJZ0 | -0.22741 |
| 3571 | P0C206 | O43822 | -0.22717 |
| 3572 | P0C206 | Q02383 | -0.69638 |

|      |        |        |           |
|------|--------|--------|-----------|
| 3573 | P0C206 | Q7Z5G4 | -0.085314 |
| 3574 | P0C206 | Q9NR96 | -0.51688  |
| 3575 | P0C206 | Q6P5Z2 | -0.30721  |
| 3576 | P0C206 | P49641 | -0.434    |
| 3577 | P0C206 | Q13546 | -0.22741  |
| 3578 | P0C206 | Q8NG66 | -0.22743  |
| 3579 | P0C206 | A6NI15 | -0.22742  |
| 3580 | P0C206 | Q8TB96 | -1.3538   |
| 3581 | P0C206 | Q9UPW0 | -0.45919  |
| 3582 | P0C206 | Q14435 | -0.10244  |
| 3583 | P0C206 | P61916 | -0.5072   |
| 3584 | P0C206 | Q7RTP6 | -0.35373  |
| 3585 | P0C206 | Q6UWQ7 | -0.80952  |
| 3586 | P0C206 | Q95450 | -1.1287   |
| 3587 | P0C206 | P52735 | -0.22741  |
| 3588 | P0C206 | Q96RD1 | -1.1763   |
| 3589 | P0C206 | Q6ZMB5 | -0.79503  |
| 3590 | P0C206 | Q9Y297 | -0.28568  |
| 3591 | P0C206 | Q8NGY7 | -1.1763   |
| 3592 | P0C206 | P48431 | -0.30909  |
| 3593 | P0C206 | P13805 | -0.11642  |
| 3594 | P0C206 | Q9H2V7 | -0.22047  |
| 3595 | P0C206 | Q9Y576 | -0.60968  |
| 3596 | P0C206 | P62191 | -0.36227  |
| 3597 | P0C206 | Q8N0Y3 | -1.1763   |
| 3598 | P0C206 | Q13433 | -0.86508  |
| 3599 | P0C206 | Q5TGI4 | -0.22713  |
| 3600 | P0C206 | Q9N2J8 | -0.77946  |
| 3601 | P0C206 | P00748 | -0.64259  |
| 3602 | P0C206 | O75783 | -1.4513   |
| 3603 | P0C206 | Q13613 | -0.29425  |
| 3604 | P0C206 | Q6BCY4 | -0.49143  |
| 3605 | P0C206 | Q8NI77 | -0.61565  |
| 3606 | P0C206 | Q8IVF4 | -0.47345  |
| 3607 | P0C206 | Q2TV78 | -1.1662   |
| 3608 | P0C206 | Q16665 | -0.24859  |
| 3609 | P0C206 | Q8NF86 | -1.3626   |
| 3610 | P0C206 | Q92729 | -0.66395  |
| 3611 | P0C206 | Q8WXF0 | -0.48099  |
| 3612 | P0C206 | Q01064 | -0.2225   |
| 3613 | P0C206 | Q0VDI3 | -0.79503  |
| 3614 | P0C206 | Q8NEE6 | -0.21917  |
| 3615 | P0C206 | Q6UXG8 | -0.79503  |
| 3616 | P0C206 | P08908 | -1.1852   |
| 3617 | P0C206 | Q6NXN4 | -0.79503  |
| 3618 | P0C206 | Q8NH74 | -1.1763   |
| 3619 | P0C206 | Q9UKP5 | -1.173    |
| 3620 | P0C206 | Q8NB15 | -0.2264   |
| 3621 | P0C206 | O43424 | -0.56543  |
| 3622 | P0C206 | P01616 | -0.95593  |
| 3623 | P0C206 | Q14155 | -0.35921  |
| 3624 | P0C206 | Q43772 | -0.33683  |
| 3625 | P0C206 | Q5VUJ5 | -0.77452  |
| 3626 | P0C206 | Q13555 | -0.89568  |
| 3627 | P0C206 | Q6P4F7 | -1.0098   |
| 3628 | P0C206 | Q8N6Q1 | -0.79503  |
| 3629 | P0C206 | Q6ZVL6 | -0.79503  |
| 3630 | P0C206 | O43164 | -0.23396  |
| 3631 | P0C206 | Q8NHQ9 | -0.78816  |
| 3632 | P0C206 | Q9Y3N9 | -1.1763   |
| 3633 | P0C206 | Q01085 | -0.27594  |
| 3634 | P0C206 | O75679 | -0.22908  |
| 3635 | P0C206 | Q8N6U8 | -1.4035   |
| 3636 | P0C206 | Q1L6U9 | -0.80952  |
| 3637 | P0C206 | Q13576 | -0.8581   |
| 3638 | P0C206 | P0C7N1 | -1.1763   |
| 3639 | P0C206 | Q01523 | -0.77308  |
| 3640 | P0C206 | P15085 | -1.1137   |
| 3641 | P0C206 | Q9P0X4 | -0.45864  |
| 3642 | P0C206 | Q13535 | -0.69567  |
| 3643 | P0C206 | Q8N6M5 | -0.17824  |
| 3644 | P0C206 | P47881 | -1.1763   |
| 3645 | P0C206 | P19961 | -0.7599   |
| 3646 | P0C206 | P55058 | -0.97636  |
| 3647 | P0C206 | Q86XE0 | -0.165    |
| 3648 | P0C206 | Q6ZN92 | -0.17821  |

|      |        |        |           |
|------|--------|--------|-----------|
| 3649 | P0C206 | Q9Y278 | -0.49787  |
| 3650 | P0C206 | Q15198 | -0.67118  |
| 3651 | P0C206 | Q08499 | -0.2218   |
| 3652 | P0C206 | P21810 | -0.66311  |
| 3653 | P0C206 | O14986 | -0.23977  |
| 3654 | P0C206 | O60330 | -1.1512   |
| 3655 | P0C206 | Q9H2S5 | -0.22735  |
| 3656 | P0C206 | Q16828 | -0.27757  |
| 3657 | P0C206 | P26439 | -0.86409  |
| 3658 | P0C206 | Q8WVL7 | -0.22739  |
| 3659 | P0C206 | P09603 | -0.6017   |
| 3660 | P0C206 | Q9NYV7 | -0.51856  |
| 3661 | P0C206 | Q5VU97 | -0.81154  |
| 3662 | P0C206 | A6NLP5 | -0.21055  |
| 3663 | P0C206 | O77932 | -0.72374  |
| 3664 | P0C206 | A1A5C7 | -0.80335  |
| 3665 | P0C206 | Q6GMV3 | -0.44609  |
| 3666 | P0C206 | P22301 | -0.37785  |
| 3667 | P0C206 | O96005 | -0.60369  |
| 3668 | P0C206 | Q9HAW9 | -0.66112  |
| 3669 | P0C206 | Q14520 | -0.53259  |
| 3670 | P0C206 | Q9UF11 | -0.78978  |
| 3671 | P0C206 | Q5VXU1 | -0.91833  |
| 3672 | P0C206 | P01814 | -0.9894   |
| 3673 | P0C206 | Q86YD3 | -1.4604   |
| 3674 | P0C206 | Q9H8P0 | -0.70135  |
| 3675 | P0C206 | Q9HCS2 | -0.62815  |
| 3676 | P0C206 | O76096 | -0.69262  |
| 3677 | P0C206 | P55916 | -0.41711  |
| 3678 | P0C206 | P07451 | -0.14739  |
| 3679 | P0C206 | Q9H596 | -0.26697  |
| 3680 | P0C206 | O14732 | -0.19769  |
| 3681 | P0C206 | Q7LDI9 | -0.15319  |
| 3682 | P0C206 | O95807 | -0.53449  |
| 3683 | P0C206 | P20594 | -1.2838   |
| 3684 | P0C206 | Q9GZT5 | -0.86148  |
| 3685 | P0C206 | P46721 | -0.78522  |
| 3686 | P0C206 | A4D2B8 | -0.30816  |
| 3687 | P0C206 | P01911 | -0.63497  |
| 3688 | P0C206 | Q15147 | -0.22659  |
| 3689 | P0C206 | P53814 | -0.22954  |
| 3690 | P0C206 | P03986 | -1.0043   |
| 3691 | P0C206 | Q5VU65 | -0.79503  |
| 3692 | P0C206 | Q13232 | -0.56563  |
| 3693 | P0C206 | Q9UKR5 | -0.76802  |
| 3694 | P0C206 | Q6UXY8 | -0.79503  |
| 3695 | P0C206 | P48307 | -0.71944  |
| 3696 | P0C206 | Q8NH63 | -1.1763   |
| 3697 | P0C206 | A1L4Q6 | -0.26835  |
| 3698 | P0C206 | Q6UWN5 | -0.44393  |
| 3699 | P0C206 | P51553 | -0.028814 |
| 3700 | P0C206 | Q9NR19 | -0.22881  |
| 3701 | P0C206 | P22894 | -1.242    |
| 3702 | P0C206 | Q96LP6 | -0.10083  |
| 3703 | P0C206 | Q16853 | -1.0725   |
| 3704 | P0C206 | Q6PI78 | -0.62349  |
| 3705 | P0C206 | Q9ULZ3 | -0.12253  |
| 3706 | P0C206 | Q9Y225 | -0.48497  |
| 3707 | P0C206 | P0DJD0 | -0.35325  |
| 3708 | P0C206 | Q9NYB5 | -0.91972  |
| 3709 | P0C206 | Q9UBV4 | -0.77452  |
| 3710 | P0C206 | P01700 | -0.9894   |
| 3711 | P0C206 | P01621 | -0.9894   |
| 3712 | P0C206 | P09630 | -0.22638  |
| 3713 | P0C206 | P0C0P6 | -0.77467  |
| 3714 | P0C206 | Q9H4F1 | -0.32572  |
| 3715 | P0C206 | P23109 | -0.067937 |
| 3716 | P0C206 | Q9GZS0 | -0.22741  |
| 3717 | P0C206 | Q8N5W8 | -0.80952  |
| 3718 | P0C206 | O75493 | -0.7215   |
| 3719 | P0C206 | Q6P1J6 | -0.73051  |
| 3720 | P0C206 | Q6UWV6 | -0.68918  |
| 3721 | P0C206 | Q14508 | -0.99245  |
| 3722 | P0C206 | Q9H9K5 | -0.66361  |
| 3723 | P0C206 | Q8N0V4 | -0.80952  |
| 3724 | P0C206 | Q8WUT9 | -0.58473  |

|      |        |        |           |
|------|--------|--------|-----------|
| 3725 | P0C206 | Q8IWB1 | -0.4367   |
| 3726 | P0C206 | P19099 | -0.42654  |
| 3727 | P0C206 | A6NNY8 | -0.59814  |
| 3728 | P0C206 | P35626 | -1.1612   |
| 3729 | P0C206 | Q9Y3Q0 | -1.115    |
| 3730 | P0C206 | P06888 | -0.9894   |
| 3731 | P0C206 | Q8WWI1 | -0.22709  |
| 3732 | P0C206 | Q8NAA5 | -0.15364  |
| 3733 | P0C206 | P35916 | -0.56068  |
| 3734 | P0C206 | Q8WZ75 | -0.89004  |
| 3735 | P0C206 | Q5JU69 | -0.95667  |
| 3736 | P0C206 | Q5VZ03 | -0.16097  |
| 3737 | P0C206 | Q8IZF4 | -1.2769   |
| 3738 | P0C206 | Q96G61 | -0.20487  |
| 3739 | P0C206 | P35348 | -0.59388  |
| 3740 | P0C206 | O43852 | -0.22646  |
| 3741 | P0C206 | Q68CK6 | -0.73006  |
| 3742 | P0C206 | Q6ZNR0 | -0.58329  |
| 3743 | P0C206 | Q9UFC0 | -0.47045  |
| 3744 | P0C206 | O43295 | -1.0098   |
| 3745 | P0C206 | Q8N323 | -0.80952  |
| 3746 | P0C206 | Q9UBX7 | -1.1776   |
| 3747 | P0C206 | Q9BVX2 | -0.65823  |
| 3748 | P0C206 | Q9NXZ2 | -1.0395   |
| 3749 | P0C206 | O15496 | -0.57366  |
| 3750 | P0C206 | Q8TC59 | -0.42323  |
| 3751 | P0C206 | O60522 | -0.54943  |
| 3752 | P0C206 | Q99895 | -0.8107   |
| 3753 | P0C206 | Q9Y6H8 | -0.82686  |
| 3754 | P0C206 | Q9BQ16 | -1.0049   |
| 3755 | P0C206 | Q7Z5L2 | -0.73343  |
| 3756 | P0C206 | Q6ZMG9 | -0.19245  |
| 3757 | P0C206 | Q92623 | -0.20114  |
| 3758 | P0C206 | P23634 | -0.45207  |
| 3759 | P0C206 | Q9Y6Q9 | -0.42883  |
| 3760 | P0C206 | Q99808 | -0.75505  |
| 3761 | P0C206 | P00374 | -0.16874  |
| 3762 | P0C206 | Q9BSN7 | -0.70739  |
| 3763 | P0C206 | P51864 | -0.52136  |
| 3764 | P0C206 | P40967 | -0.89727  |
| 3765 | P0C206 | B9EJG8 | -0.79503  |
| 3766 | P0C206 | P33765 | -1.0757   |
| 3767 | P0C206 | P55103 | -0.6769   |
| 3768 | P0C206 | Q15113 | -1.2086   |
| 3769 | P0C206 | Q9P217 | -0.15207  |
| 3770 | P0C206 | Q9Y2L9 | -0.24729  |
| 3771 | P0C206 | Q95460 | -1.4188   |
| 3772 | P0C206 | P01137 | -0.22741  |
| 3773 | P0C206 | O60811 | -0.065812 |
| 3774 | P0C206 | B2RPK0 | -0.27402  |
| 3775 | P0C206 | O60462 | -0.68925  |
| 3776 | P0C206 | Q9NXJ0 | -0.79503  |
| 3777 | P0C206 | P04155 | -0.35652  |
| 3778 | P0C206 | P29475 | -0.22816  |
| 3779 | P0C206 | O15529 | -1.3861   |
| 3780 | P0C206 | Q6WN34 | -0.59312  |
| 3781 | P0C206 | P07998 | -0.16843  |
| 3782 | P0C206 | A8K0R7 | -0.44814  |
| 3783 | P0C206 | Q6P9H5 | -0.92067  |
| 3784 | P0C206 | O75417 | -0.44677  |
| 3785 | P0C206 | Q9NXL9 | -0.34661  |
| 3786 | P0C206 | Q9H7X7 | -1.0927   |
| 3787 | P0C206 | P10301 | -0.6908   |
| 3788 | P0C206 | O00203 | -0.143    |
| 3789 | P0C206 | O95393 | -0.22741  |
| 3790 | P0C206 | Q96M32 | -0.47822  |
| 3791 | P0C206 | Q15772 | -0.86584  |
| 3792 | P0C206 | Q9H0A3 | -0.79503  |
| 3793 | P0C206 | Q8N6N2 | -0.12492  |
| 3794 | P0C206 | A0A5B9 | -0.79503  |
| 3795 | P0C206 | Q9GZM6 | -1.1763   |
| 3796 | P0C206 | O43150 | -0.2274   |
| 3797 | P0C206 | Q8NGF7 | -1.1763   |
| 3798 | P0C206 | Q9H0H3 | -0.2064   |
| 3799 | P0C206 | P20711 | -0.59021  |
| 3800 | P0C206 | Q9UBY5 | -1.2539   |

|      |        |        |            |
|------|--------|--------|------------|
| 3801 | P0C206 | Q8TCG2 | -0.53451   |
| 3802 | P0C206 | Q8NFV4 | -0.21454   |
| 3803 | P0C206 | Q99653 | -0.22733   |
| 3804 | P0C206 | P13497 | -1.061     |
| 3805 | P0C206 | Q96PF1 | -0.26776   |
| 3806 | P0C206 | A6NJW4 | -0.79503   |
| 3807 | P0C206 | Q96NG3 | -0.2169    |
| 3808 | P0C206 | Q93070 | -0.47909   |
| 3809 | P0C206 | Q9P2E7 | -1.1512    |
| 3810 | P0C206 | A6NFH5 | -0.36221   |
| 3811 | P0C206 | Q86UW2 | -0.72089   |
| 3812 | P0C206 | Q13523 | -0.4233    |
| 3813 | P0C206 | Q8NBE8 | -0.19654   |
| 3814 | P0C206 | Q6PIU1 | -0.83562   |
| 3815 | P0C206 | Q9Y3Q3 | -0.35857   |
| 3816 | P0C206 | Q7Z404 | -0.79503   |
| 3817 | P0C206 | O43570 | -0.78301   |
| 3818 | P0C206 | Q86Y56 | -0.0012801 |
| 3819 | P0C206 | Q9BYJ1 | -0.50825   |
| 3820 | P0C206 | Q13304 | -1.263     |
| 3821 | P0C206 | Q9H9P2 | -0.42092   |
| 3822 | P0C206 | P68402 | -0.15883   |
| 3823 | P0C206 | A6NHL2 | -0.39209   |
| 3824 | P0C206 | P22680 | -0.65008   |
| 3825 | P0C206 | Q6IF00 | -1.1763    |
| 3826 | P0C206 | Q8NHK3 | -0.91833   |
| 3827 | P0C206 | P60985 | -0.88258   |
| 3828 | P0C206 | Q8WWI5 | -0.5681    |
| 3829 | P0C206 | P23677 | -0.87084   |
| 3830 | P0C206 | Q8NES3 | -0.87823   |
| 3831 | P0C206 | Q9H9Y4 | -0.71108   |
| 3832 | P0C206 | Q96R67 | -1.1763    |
| 3833 | P0C206 | Q96IG2 | -0.22618   |
| 3834 | P0C206 | P23280 | -0.58332   |
| 3835 | P0C206 | Q6DN72 | -0.80761   |
| 3836 | P0C206 | P02144 | -0.26566   |
| 3837 | P0C206 | Q96JC1 | -0.18862   |
| 3838 | P0C206 | P09326 | -0.51705   |
| 3839 | P0C206 | Q5SGD2 | -0.60887   |
| 3840 | P0C206 | Q6P9G4 | -0.79503   |
| 3841 | P0C206 | O75554 | -0.14435   |
| 3842 | P0C206 | Q7L523 | -0.22746   |
| 3843 | P0C206 | Q13162 | -0.21705   |
| 3844 | P0C206 | P20936 | -0.22741   |
| 3845 | P0C206 | Q15041 | -0.85794   |
| 3846 | P0C206 | Q9UL51 | -1.0409    |
| 3847 | P0C206 | P00742 | -0.75688   |
| 3848 | P0C206 | P62195 | -0.88969   |
| 3849 | P0C206 | Q8NGM9 | -1.1763    |
| 3850 | P0C206 | O75388 | -1.39      |
| 3851 | P0C206 | Q06124 | -0.22741   |
| 3852 | P0C206 | Q8NEY1 | -0.75633   |
| 3853 | P0C206 | Q8WU79 | -0.089691  |
| 3854 | P0C206 | Q9UJ96 | -0.62669   |
| 3855 | P0C206 | Q9H208 | -1.1763    |
| 3856 | P0C206 | Q6T310 | -0.26512   |
| 3857 | P0C206 | P47929 | -0.31487   |
| 3858 | P0C206 | Q96H72 | -0.46848   |
| 3859 | P0C206 | Q9BWM7 | -0.74779   |
| 3860 | P0C206 | Q5VUD6 | -0.89601   |
| 3861 | P0C206 | Q9BZM6 | -0.50453   |
| 3862 | P0C206 | Q13724 | -0.83099   |
| 3863 | P0C206 | O75311 | -0.77635   |
| 3864 | P0C206 | Q9HB90 | -0.69777   |
| 3865 | P0C206 | Q9Y2U9 | -0.22136   |
| 3866 | P0C206 | P30041 | -0.21282   |
| 3867 | P0C206 | Q6UXH8 | -1.0307    |
| 3868 | P0C206 | Q8NGK4 | -1.1763    |
| 3869 | P0C206 | Q8WWY8 | -1.1531    |
| 3870 | P0C206 | O94880 | -0.2418    |
| 3871 | P0C206 | Q3SY77 | -0.83789   |
| 3872 | P0C206 | O75063 | -1.1176    |
| 3873 | P0C206 | Q96H96 | -0.59561   |
| 3874 | P0C206 | Q8NGP3 | -1.1763    |
| 3875 | P0C206 | Q8WVX3 | -0.79503   |
| 3876 | P0C206 | Q9UKQ9 | -1.3203    |



|      |        |        |           |
|------|--------|--------|-----------|
| 3877 | P0C206 | Q9UHC9 | -0.3852   |
| 3878 | P0C206 | O14569 | -0.75114  |
| 3879 | P0C206 | Q15008 | -0.11528  |
| 3880 | P0C206 | Q8N5V2 | -0.79232  |
| 3881 | P0C206 | Q9NZG7 | -0.94742  |
| 3882 | P0C206 | P04090 | -0.79993  |
| 3883 | P0C206 | Q9NRZ7 | -0.80655  |
| 3884 | P0C206 | P37023 | -0.32761  |
| 3885 | P0C206 | Q13107 | -0.35124  |
| 3886 | P0C206 | Q13046 | -0.81994  |
| 3887 | P0C206 | Q7Z7B8 | -0.77981  |
| 3888 | P0C206 | P52895 | -0.3159   |
| 3889 | P0C206 | P35228 | -0.31389  |
| 3890 | P0C206 | P60606 | -0.77756  |
| 3891 | P0C206 | A8MZ36 | -0.18337  |
| 3892 | P0C206 | Q629K1 | -0.89601  |
| 3893 | P0C206 | P22749 | -0.80528  |
| 3894 | P0C206 | O95631 | -0.22741  |
| 3895 | P0C206 | Q147U7 | -0.79503  |
| 3896 | P0C206 | A6NFC9 | -1.1763   |
| 3897 | P0C206 | P25713 | -0.14184  |
| 3898 | P0C206 | P46098 | -0.85626  |
| 3899 | P0C206 | Q6SPF0 | -0.58449  |
| 3900 | P0C206 | Q96A11 | -0.57694  |
| 3901 | P0C206 | O00587 | -0.81073  |
| 3902 | P0C206 | Q7Z5J8 | -0.79503  |
| 3903 | P0C206 | Q9UL12 | -0.088903 |
| 3904 | P0C206 | Q7L273 | -0.19787  |
| 3905 | P0C206 | O95460 | -0.27618  |
| 3906 | P0C206 | Q9NXC5 | -0.22649  |
| 3907 | P0C206 | P32238 | -0.6994   |
| 3908 | P0C206 | A0PJX4 | -1.087    |
| 3909 | P0C206 | P08574 | -0.22882  |
| 3910 | P0C206 | O75575 | -0.52898  |
| 3911 | P0C206 | Q9HCN6 | -0.37995  |
| 3912 | P0C206 | Q8WXJ9 | -0.48675  |
| 3913 | P0C206 | Q99729 | -0.24897  |
| 3914 | P0C206 | P07947 | -0.58521  |
| 3915 | P0C206 | P40818 | -0.33997  |
| 3916 | P0C206 | O95221 | -1.1763   |
| 3917 | P0C206 | Q63ZY6 | -0.20034  |
| 3918 | P0C206 | Q9C056 | -0.2277   |
| 3919 | P0C206 | Q9UNZ2 | -0.46498  |
| 3920 | P0C206 | Q9Y4A9 | -1.1763   |
| 3921 | P0C206 | J3KSC0 | -0.58613  |
| 3922 | P0C206 | Q02153 | -0.6392   |
| 3923 | P0C206 | P29375 | -0.34999  |
| 3924 | P0C206 | P30487 | -0.99995  |
| 3925 | P0C206 | Q6UWR7 | -1.3563   |
| 3926 | P0C206 | Q9H6T3 | -0.22723  |
| 3927 | P0C206 | Q7Z2Y5 | -1.0694   |
| 3928 | P0C206 | P08709 | -0.84397  |
| 3929 | P0C206 | Q9BYG0 | -0.92489  |
| 3930 | P0C206 | Q6UXH0 | -0.18075  |
| 3931 | P0C206 | P60763 | -0.63096  |
| 3932 | P0C206 | Q68D51 | -0.20468  |
| 3933 | P0C206 | P01563 | -0.32299  |
| 3934 | P0C206 | P28358 | -0.36357  |
| 3935 | P0C206 | Q9UL26 | -0.45396  |
| 3936 | P0C206 | Q9NQG6 | -0.10991  |
| 3937 | P0C206 | Q8TEY7 | -0.30824  |
| 3938 | P0C206 | Q03519 | -0.30705  |
| 3939 | P0C206 | P26378 | -0.83025  |
| 3940 | P0C206 | P41440 | -0.69359  |
| 3941 | P0C206 | Q32Q52 | -0.04537  |
| 3942 | P0C206 | A6NDE4 | -0.23966  |
| 3943 | P0C206 | P06314 | -0.9894   |
| 3944 | P0C206 | Q96BM9 | -0.44423  |
| 3945 | P0C206 | Q9H2A9 | -0.53577  |
| 3946 | P0C206 | Q9UPR0 | -0.43228  |
| 3947 | P0C206 | P41279 | -0.31473  |
| 3948 | P0C206 | P48741 | -0.5176   |
| 3949 | P0C206 | O15178 | -0.34395  |
| 3950 | P0C206 | Q8IX95 | -0.15646  |
| 3951 | P0C206 | P30475 | -1.0603   |
| 3952 | P0C206 | Q96QH8 | -0.78748  |

|      |        |        |           |
|------|--------|--------|-----------|
| 3953 | P0C206 | Q07617 | -0.66946  |
| 3954 | P0C206 | O75385 | -0.49979  |
| 3955 | P0C206 | Q71RG4 | -0.79503  |
| 3956 | P0C206 | Q5VU92 | -0.2266   |
| 3957 | P0C206 | P39905 | -0.38102  |
| 3958 | P0C206 | P51911 | -0.20728  |
| 3959 | P0C206 | Q8NDC4 | -0.07094  |
| 3960 | P0C206 | O14842 | -1.1112   |
| 3961 | P0C206 | P10147 | -0.30345  |
| 3962 | P0C206 | P05546 | -0.67545  |
| 3963 | P0C206 | Q6B0I6 | -0.17857  |
| 3964 | P0C206 | Q92953 | -0.84585  |
| 3965 | P0C206 | Q96T68 | -0.21792  |
| 3966 | P0C206 | Q8WX39 | -0.7082   |
| 3967 | P0C206 | Q15005 | -0.73371  |
| 3968 | P0C206 | Q4ZG55 | -0.79503  |
| 3969 | P0C206 | Q96MD7 | -0.19045  |
| 3970 | P0C206 | Q8N7Q2 | -0.80952  |
| 3971 | P0C206 | P22004 | -0.57304  |
| 3972 | P0C206 | Q14004 | -0.14319  |
| 3973 | P0C206 | O75369 | -0.35315  |
| 3974 | P0C206 | O43766 | -0.40403  |
| 3975 | P0C206 | O43653 | -0.44393  |
| 3976 | P0C206 | O14684 | -0.70724  |
| 3977 | P0C206 | O94851 | -0.36846  |
| 3978 | P0C206 | Q9UDX5 | -0.58661  |
| 3979 | P0C206 | Q6AWC2 | -0.2274   |
| 3980 | P0C206 | Q6ZRR9 | -0.46207  |
| 3981 | P0C206 | Q17RQ9 | -0.79503  |
| 3982 | P0C206 | Q96IZ6 | -0.20034  |
| 3983 | P0C206 | Q86UT6 | -0.21837  |
| 3984 | P0C206 | Q9NQL9 | -0.13536  |
| 3985 | P0C206 | P11226 | -0.59523  |
| 3986 | P0C206 | P55083 | -1.2042   |
| 3987 | P0C206 | Q8NGY1 | -1.1763   |
| 3988 | P0C206 | Q9UGN4 | -1.1014   |
| 3989 | P0C206 | P48736 | -0.39162  |
| 3990 | P0C206 | Q7RTY8 | -1.3317   |
| 3991 | P0C206 | P61020 | -0.51283  |
| 3992 | P0C206 | P56696 | -0.78513  |
| 3993 | P0C206 | Q765I0 | -0.78978  |
| 3994 | P0C206 | P23467 | -0.61994  |
| 3995 | P0C206 | Q10713 | -0.42887  |
| 3996 | P0C206 | Q8N6P7 | -0.75289  |
| 3997 | P0C206 | Q8IUI8 | -0.2263   |
| 3998 | P0C206 | P80362 | -0.9894   |
| 3999 | P0C206 | Q6P2I3 | -0.36618  |
| 4000 | P0C206 | Q92611 | -0.23235  |
| 4001 | P0C206 | Q6ZT12 | -0.64469  |
| 4002 | P0C206 | Q95274 | -0.89026  |
| 4003 | P0C206 | P98179 | -0.44826  |
| 4004 | P0C206 | P36941 | -0.22731  |
| 4005 | P0C206 | O96008 | -0.42289  |
| 4006 | P0C206 | P02765 | -0.64613  |
| 4007 | P0C206 | Q6YFQ2 | -0.039404 |
| 4008 | P0C206 | Q8NCQ7 | -0.31747  |
| 4009 | P0C206 | Q15539 | -0.70302  |
| 4010 | P0C206 | P83859 | -0.62445  |
| 4011 | P0C206 | Q8TBZ2 | -0.1818   |
| 4012 | P0C206 | Q6ZR62 | -0.17787  |
| 4013 | P0C206 | P51671 | -0.91603  |
| 4014 | P0C206 | Q96EN8 | -0.22146  |
| 4015 | P0C206 | Q8TB40 | -0.27499  |
| 4016 | P0C206 | Q9NYW3 | -1.0414   |
| 4017 | P0C206 | P57764 | -0.18715  |
| 4018 | P0C206 | P61952 | -0.44154  |
| 4019 | P0C206 | Q9BYS8 | -0.61553  |
| 4020 | P0C206 | Q7L0Q8 | -0.45633  |
| 4021 | P0C206 | Q95371 | -1.1532   |
| 4022 | P0C206 | Q8IWX7 | -0.22228  |
| 4023 | P0C206 | Q9NQI0 | -0.54686  |
| 4024 | P0C206 | Q17R55 | -0.79503  |
| 4025 | P0C206 | Q9UHL0 | -0.33259  |
| 4026 | P0C206 | P51172 | -0.4677   |
| 4027 | P0C206 | P14207 | -0.95261  |
| 4028 | P0C206 | P57053 | -0.64767  |

|      |        |        |           |
|------|--------|--------|-----------|
| 4029 | P0C206 | A6NCS4 | -0.27551  |
| 4030 | P0C206 | Q9NWM0 | -0.21574  |
| 4031 | P0C206 | Q9NPR2 | -0.98098  |
| 4032 | P0C206 | Q9HBU1 | -0.22739  |
| 4033 | P0C206 | Q86UV7 | -0.44814  |
| 4034 | P0C206 | Q96SF7 | -0.38845  |
| 4035 | P0C206 | Q04656 | -0.22766  |
| 4036 | P0C206 | O76071 | -0.22765  |
| 4037 | P0C206 | Q6UXB4 | -0.27048  |
| 4038 | P0C206 | O95236 | -0.90275  |
| 4039 | P0C206 | O43524 | -0.45919  |
| 4040 | P0C206 | Q96KK5 | -0.66158  |
| 4041 | P0C206 | Q9Y4X1 | -0.81343  |
| 4042 | P0C206 | Q15717 | -0.56934  |
| 4043 | P0C206 | Q7RTR2 | -0.34212  |
| 4044 | P0C206 | C9J2P7 | -0.59814  |
| 4045 | P0C206 | O14610 | -1.129    |
| 4046 | P0C206 | P49895 | -1.0334   |
| 4047 | P0C206 | Q5SRD3 | -0.77452  |
| 4048 | P0C206 | O00222 | -1.2015   |
| 4049 | P0C206 | Q8N819 | -0.33093  |
| 4050 | P0C206 | P34925 | -0.50784  |
| 4051 | P0C206 | Q8NGZ0 | -1.1763   |
| 4052 | P0C206 | P46439 | -0.26905  |
| 4053 | P0C206 | Q9NTN3 | -0.58152  |
| 4054 | P0C206 | P49189 | -0.42199  |
| 4055 | P0C206 | A8MZ25 | -0.53566  |
| 4056 | P0C206 | Q5VXU9 | -0.45215  |
| 4057 | P0C206 | Q9H1R3 | -0.34943  |
| 4058 | P0C206 | O75387 | -0.992    |
| 4059 | P0C206 | A6NKZ8 | -0.39209  |
| 4060 | P0C206 | Q9BQG1 | -0.6261   |
| 4061 | P0C206 | Q2TB18 | -0.087271 |
| 4062 | P0C206 | Q13795 | -0.57354  |
| 4063 | P0C206 | O94827 | -0.36888  |
| 4064 | P0C206 | Q8WUA7 | -1.2265   |
| 4065 | P0C206 | A0AV02 | -0.86385  |
| 4066 | P0C206 | Q86XS8 | -0.28516  |
| 4067 | P0C206 | Q13214 | -0.92263  |
| 4068 | P0C206 | P13861 | -0.22735  |
| 4069 | P0C206 | Q86VZ1 | -1.1939   |
| 4070 | P0C206 | Q8N3G9 | -0.5524   |
| 4071 | P0C206 | O95147 | -0.74535  |
| 4072 | P0C206 | Q9P273 | -0.96113  |
| 4073 | P0C206 | Q0P641 | -0.15917  |
| 4074 | P0C206 | P41587 | -1.3214   |
| 4075 | P0C206 | Q9NWH9 | -0.22989  |
| 4076 | P0C206 | Q9H3Q3 | -0.6528   |
| 4077 | P0C206 | P33778 | -0.66158  |
| 4078 | P0C206 | Q9Y5F1 | -1.2044   |
| 4079 | P0C206 | Q8NHW6 | -0.83049  |
| 4080 | P0C206 | Q96IY4 | -0.91105  |
| 4081 | P0C206 | Q96JM4 | -0.22544  |
| 4082 | P0C206 | P06311 | -0.9894   |
| 4083 | P0C206 | Q9P0U3 | -0.13427  |
| 4084 | P0C206 | P55082 | -0.91833  |
| 4085 | P0C206 | P42345 | -0.30396  |
| 4086 | P0C206 | Q96JB8 | -0.22506  |
| 4087 | P0C206 | Q6UWB4 | -1.2466   |
| 4088 | P0C206 | P63215 | -0.37135  |
| 4089 | P0C206 | Q8WZA0 | -0.31296  |
| 4090 | P0C206 | Q95500 | -0.64435  |
| 4091 | P0C206 | Q6ZSV7 | -0.072625 |
| 4092 | P0C206 | Q99877 | -0.66158  |
| 4093 | P0C206 | Q99075 | -1.1003   |
| 4094 | P0C206 | P61018 | -0.86474  |
| 4095 | P0C206 | A6NH00 | -1.1763   |
| 4096 | P0C206 | Q6UB99 | -0.22742  |
| 4097 | P0C206 | O95813 | -0.50627  |
| 4098 | P0C206 | Q9BWV7 | -0.24376  |
| 4099 | P0C206 | Q9UNA3 | -0.56666  |
| 4100 | P0C206 | P13611 | -0.96996  |
| 4101 | P0C206 | Q9P2W7 | -0.47399  |
| 4102 | P0C206 | Q8WWU5 | -1.1461   |
| 4103 | P0C206 | P48201 | -0.61615  |
| 4104 | P0C206 | Q5VW22 | -0.77452  |

|      |        |        |          |
|------|--------|--------|----------|
| 4105 | POC206 | P54315 | -0.97359 |
| 4106 | POC206 | Q9H3Z7 | -0.17505 |
| 4107 | POC206 | O14683 | -0.79644 |
| 4108 | POC206 | Q8TCA0 | -0.22755 |
| 4109 | POC206 | Q99435 | -0.36875 |
| 4110 | POC206 | Q86SM8 | -1.2448  |
| 4111 | POC206 | Q9H6F2 | -0.44466 |
| 4112 | POC206 | O00442 | -0.47168 |
| 4113 | POC206 | A0M8Q6 | -0.95593 |
| 4114 | POC206 | Q86X27 | -0.75835 |
| 4115 | POC206 | Q92633 | -0.30881 |
| 4116 | POC206 | Q00887 | -0.81994 |
| 4117 | POC206 | Q96MH6 | -0.86243 |
| 4118 | POC206 | Q99542 | -1.1937  |
| 4119 | POC206 | Q93084 | -0.66551 |
| 4120 | POC206 | Q6UWN0 | -0.44393 |
| 4121 | POC206 | Q9P296 | -0.62565 |
| 4122 | POC206 | Q13557 | -0.68571 |
| 4123 | POC206 | Q15831 | -0.27819 |
| 4124 | POC206 | Q02539 | -0.64362 |
| 4125 | POC206 | Q9UKM9 | -0.47989 |
| 4126 | POC206 | Q0IIM8 | -1.3203  |
| 4127 | POC206 | Q32M45 | -0.77342 |
| 4128 | POC206 | Q99626 | -0.22605 |
| 4129 | POC206 | Q9BT73 | -0.16491 |
| 4130 | POC206 | O43323 | -0.83936 |
| 4131 | POC206 | Q9BXM9 | -0.11553 |
| 4132 | POC206 | P03897 | -0.20897 |
| 4133 | POC206 | Q9BYT8 | -0.20552 |
| 4134 | POC206 | Q9NRX6 | -0.5524  |
| 4135 | POC206 | P18465 | -0.99995 |
| 4136 | POC206 | Q96RW7 | -1.0617  |
| 4137 | POC206 | Q96D59 | -0.73705 |
| 4138 | POC206 | Q9NX45 | -0.22691 |
| 4139 | POC206 | P20701 | -0.87922 |
| 4140 | POC206 | P50219 | -0.2273  |
| 4141 | POC206 | Q8TAQ9 | -0.77784 |
| 4142 | POC206 | P01876 | -0.2691  |
| 4143 | POC206 | Q16206 | -1.277   |
| 4144 | POC206 | P78423 | -0.562   |
| 4145 | POC206 | O76083 | -0.22526 |
| 4146 | POC206 | Q99742 | -0.25638 |
| 4147 | POC206 | Q9H295 | -0.36105 |
| 4148 | POC206 | P41181 | -0.228   |
| 4149 | POC206 | Q15034 | -0.39987 |
| 4150 | POC206 | Q5SZI1 | -0.79503 |
| 4151 | POC206 | Q15434 | -0.53143 |
| 4152 | POC206 | P18074 | -0.26333 |
| 4153 | POC206 | Q5TDH0 | -0.36557 |
| 4154 | POC206 | Q5VWJ9 | -0.22115 |
| 4155 | POC206 | Q9H344 | -1.1763  |
| 4156 | POC206 | P30926 | -0.7864  |
| 4157 | POC206 | P98073 | -1.1926  |
| 4158 | POC206 | Q5T2P8 | -0.20272 |
| 4159 | POC206 | P0C6P0 | -0.12695 |
| 4160 | POC206 | Q9BZZ2 | -1.5563  |
| 4161 | POC206 | Q8NBZ7 | -0.97008 |
| 4162 | POC206 | P63211 | -0.6822  |
| 4163 | POC206 | Q8TAG5 | -0.80952 |
| 4164 | POC206 | P01721 | -0.9894  |
| 4165 | POC206 | Q8NG78 | -1.1763  |
| 4166 | POC206 | Q9UMX5 | -0.76867 |
| 4167 | POC206 | Q9NY59 | -0.30128 |
| 4168 | POC206 | Q95977 | -1.3542  |
| 4169 | POC206 | P08559 | -0.18919 |
| 4170 | POC206 | Q96SL1 | -0.8439  |
| 4171 | POC206 | Q7Z695 | -1.1916  |
| 4172 | POC206 | O00631 | -0.69038 |
| 4173 | POC206 | Q16820 | -1.3255  |
| 4174 | POC206 | P05496 | -0.56238 |
| 4175 | POC206 | Q8IZP9 | -1.2495  |
| 4176 | POC206 | P01825 | -0.9894  |
| 4177 | POC206 | P02708 | -0.6878  |
| 4178 | POC206 | Q95445 | -0.7823  |
| 4179 | POC206 | Q4G0X4 | -0.1642  |
| 4180 | POC206 | Q8NGX5 | -1.1763  |

|      |        |        |            |
|------|--------|--------|------------|
| 4181 | POC206 | Q5SQQ9 | -0.22738   |
| 4182 | POC206 | P25054 | -0.22669   |
| 4183 | POC206 | Q9UNW9 | -0.14242   |
| 4184 | POC206 | Q30KQ9 | -0.77981   |
| 4185 | POC206 | Q969N2 | -0.11348   |
| 4186 | POC206 | Q9UNW8 | -1.1575    |
| 4187 | POC206 | Q8IWY4 | -0.85123   |
| 4188 | POC206 | A6NM62 | -0.7415    |
| 4189 | POC206 | P54108 | -0.75162   |
| 4190 | POC206 | O75711 | -0.81124   |
| 4191 | POC206 | O75752 | -0.68776   |
| 4192 | POC206 | Q96DA6 | -0.51045   |
| 4193 | POC206 | Q8NI37 | -0.17181   |
| 4194 | POC206 | Q6IPT4 | -0.52386   |
| 4195 | POC206 | Q9H3W5 | -0.84215   |
| 4196 | POC206 | O75751 | -0.36986   |
| 4197 | POC206 | O94812 | -0.23925   |
| 4198 | POC206 | Q14142 | -0.22482   |
| 4199 | POC206 | Q86UV6 | -0.44814   |
| 4200 | POC206 | P54762 | -0.65999   |
| 4201 | POC206 | Q8N370 | -0.91933   |
| 4202 | POC206 | Q96N67 | -0.62505   |
| 4203 | POC206 | P15498 | -0.22741   |
| 4204 | POC206 | Q9UFD9 | -0.22738   |
| 4205 | POC206 | Q96MH7 | -0.0064895 |
| 4206 | POC206 | Q99467 | -0.96183   |
| 4207 | POC206 | O75409 | -0.31718   |
| 4208 | POC206 | Q96MA6 | -0.54678   |
| 4209 | POC206 | Q96BR1 | -0.91112   |
| 4210 | POC206 | P20674 | -0.090229  |
| 4211 | POC206 | Q9UKL6 | -0.20719   |
| 4212 | POC206 | Q9P2H5 | -0.59814   |
| 4213 | POC206 | P13716 | -0.18432   |
| 4214 | POC206 | Q07837 | -0.88446   |
| 4215 | POC206 | Q9NSI5 | -0.39293   |
| 4216 | POC206 | Q17RP2 | -0.061813  |
| 4217 | POC206 | A3KFT3 | -1.1763    |
| 4218 | POC206 | P51787 | -0.75747   |
| 4219 | POC206 | Q96PS8 | -0.81629   |
| 4220 | POC206 | Q8IV16 | -0.75948   |
| 4221 | POC206 | Q96G46 | -0.58447   |
| 4222 | POC206 | Q8NH67 | -1.1763    |
| 4223 | POC206 | Q7Z406 | -0.33079   |
| 4224 | POC206 | Q9Y585 | -1.1763    |
| 4225 | POC206 | Q08170 | -0.23086   |
| 4226 | POC206 | O75874 | -0.14779   |
| 4227 | POC206 | Q8NGK5 | -1.1763    |
| 4228 | POC206 | Q6P9G0 | -0.18782   |
| 4229 | POC206 | Q9HCD6 | -0.22741   |
| 4230 | POC206 | Q96CN4 | -0.75588   |
| 4231 | POC206 | Q14644 | -0.46619   |
| 4232 | POC206 | O75747 | -0.71959   |
| 4233 | POC206 | Q9P1C3 | -0.80952   |
| 4234 | POC206 | O60895 | -0.085698  |
| 4235 | POC206 | Q9NPY3 | -0.34482   |
| 4236 | POC206 | P30447 | -1.0001    |
| 4237 | POC206 | Q5JRS4 | -1.1763    |
| 4238 | POC206 | O00478 | -0.79503   |
| 4239 | POC206 | Q6UXQ4 | -0.80952   |
| 4240 | POC206 | O60755 | -1.1494    |
| 4241 | POC206 | Q7Z602 | -1.2448    |
| 4242 | POC206 | Q2M3M2 | -0.96241   |
| 4243 | POC206 | Q8NCQ3 | -0.79503   |
| 4244 | POC206 | O95727 | -0.91118   |
| 4245 | POC206 | Q7Z6J4 | -0.91497   |
| 4246 | POC206 | O43687 | -0.78448   |
| 4247 | POC206 | Q9Y5G6 | -1.1512    |
| 4248 | POC206 | Q6UX98 | -0.77292   |
| 4249 | POC206 | P01861 | -0.9687    |
| 4250 | POC206 | P19397 | -0.41273   |
| 4251 | POC206 | Q9H082 | -0.76598   |
| 4252 | POC206 | P63121 | -0.56257   |
| 4253 | POC206 | Q5T197 | -0.73705   |
| 4254 | POC206 | Q8N7C4 | -0.79503   |
| 4255 | POC206 | P33981 | -0.83553   |
| 4256 | POC206 | Q5TFQ8 | -0.79503   |

|      |        |        |           |
|------|--------|--------|-----------|
| 4257 | P0C206 | Q7LDG7 | -0.64855  |
| 4258 | P0C206 | Q96BX8 | -0.4806   |
| 4259 | P0C206 | Q9Y689 | -1.3287   |
| 4260 | P0C206 | O60241 | -1.2506   |
| 4261 | P0C206 | Q96JP0 | -0.22746  |
| 4262 | P0C206 | Q86VR7 | -0.79503  |
| 4263 | P0C206 | P0CE72 | -0.27153  |
| 4264 | P0C206 | Q8N2U9 | -0.79503  |
| 4265 | P0C206 | Q8IU99 | -0.96827  |
| 4266 | P0C206 | Q9Y6K0 | -0.40864  |
| 4267 | P0C206 | Q15614 | -1.1763   |
| 4268 | P0C206 | Q9UKQ2 | -1.6587   |
| 4269 | P0C206 | Q4VXF1 | -0.79503  |
| 4270 | P0C206 | Q5W5W9 | -0.5751   |
| 4271 | P0C206 | Q96KX0 | -0.77428  |
| 4272 | P0C206 | P34059 | -0.37551  |
| 4273 | P0C206 | Q9NT68 | -0.56487  |
| 4274 | P0C206 | Q96GF1 | -0.71639  |
| 4275 | P0C206 | Q969T3 | -0.4024   |
| 4276 | P0C206 | O94956 | -0.94099  |
| 4277 | P0C206 | Q96PL1 | -0.80952  |
| 4278 | P0C206 | Q8WXD0 | -1.0649   |
| 4279 | P0C206 | Q13443 | -0.60219  |
| 4280 | P0C206 | Q86T65 | -0.21732  |
| 4281 | P0C206 | P01824 | -0.9894   |
| 4282 | P0C206 | O14607 | -0.3335   |
| 4283 | P0C206 | Q8N1H7 | -0.39246  |
| 4284 | P0C206 | Q16445 | -0.76149  |
| 4285 | P0C206 | P01236 | -0.77379  |
| 4286 | P0C206 | Q9UNE2 | -0.2067   |
| 4287 | P0C206 | Q9NRJ7 | -1.1388   |
| 4288 | P0C206 | Q99941 | -0.21353  |
| 4289 | P0C206 | P06315 | -0.9894   |
| 4290 | P0C206 | Q8NBI3 | -0.78396  |
| 4291 | P0C206 | P01708 | -0.9894   |
| 4292 | P0C206 | P55268 | -0.71798  |
| 4293 | P0C206 | P31641 | -0.92531  |
| 4294 | P0C206 | O00459 | -0.2274   |
| 4295 | P0C206 | Q8N4X5 | -0.092676 |
| 4296 | P0C206 | P49590 | -0.10076  |
| 4297 | P0C206 | O43281 | -0.26182  |
| 4298 | P0C206 | Q9NV29 | -0.57403  |
| 4299 | P0C206 | Q9Y446 | -0.22837  |
| 4300 | P0C206 | A6NDG6 | -0.31829  |
| 4301 | P0C206 | Q6ZW34 | -0.79503  |
| 4302 | P0C206 | P43026 | -0.45507  |
| 4303 | P0C206 | Q9P2U8 | -0.74235  |
| 4304 | P0C206 | P35568 | -0.20604  |
| 4305 | P0C206 | Q13018 | -1.2211   |
| 4306 | P0C206 | Q8IYS0 | -0.79503  |
| 4307 | P0C206 | Q96QP1 | -0.59819  |
| 4308 | P0C206 | Q8NGH5 | -1.1763   |
| 4309 | P0C206 | P05161 | -0.37688  |
| 4310 | P0C206 | Q9UMQ6 | -0.97742  |
| 4311 | P0C206 | O14792 | -0.32237  |
| 4312 | P0C206 | Q6P2P2 | -0.19642  |
| 4313 | P0C206 | Q15484 | -0.97034  |
| 4314 | P0C206 | P49703 | -0.22789  |
| 4315 | P0C206 | Q8NH01 | -1.1763   |
| 4316 | P0C206 | Q5VYY1 | -0.2274   |
| 4317 | P0C206 | Q8N412 | -0.10239  |
| 4318 | P0C206 | P0CG04 | -0.9894   |
| 4319 | P0C206 | O75871 | -0.95247  |
| 4320 | P0C206 | Q9H9S3 | -0.66745  |
| 4321 | P0C206 | Q86Y30 | -0.80952  |
| 4322 | P0C206 | P81277 | -0.47748  |
| 4323 | P0C206 | A2VCK2 | -0.46207  |
| 4324 | P0C206 | Q6UX34 | -0.79503  |
| 4325 | P0C206 | P48304 | -0.82644  |
| 4326 | P0C206 | Q8NGP4 | -1.1763   |
| 4327 | P0C206 | P05538 | -0.65105  |
| 4328 | P0C206 | O75083 | -0.35538  |
| 4329 | P0C206 | O95219 | -0.21122  |
| 4330 | P0C206 | Q9C040 | -0.22741  |
| 4331 | P0C206 | A6NNZ2 | -0.50115  |
| 4332 | P0C206 | Q8N103 | -0.70193  |

|      |        |        |           |
|------|--------|--------|-----------|
| 4333 | POC206 | O95168 | -0.46065  |
| 4334 | POC206 | Q16875 | -0.44858  |
| 4335 | POC206 | Q96I99 | -0.65471  |
| 4336 | POC206 | Q9NYW2 | -1.0414   |
| 4337 | POC206 | Q86TI4 | -0.22776  |
| 4338 | POC206 | Q76MJ5 | -0.86642  |
| 4339 | POC206 | Q92794 | -0.39589  |
| 4340 | POC206 | O95473 | -0.79503  |
| 4341 | POC206 | O43155 | -1.0915   |
| 4342 | POC206 | Q8WWW8 | -0.32146  |
| 4343 | POC206 | Q9BUA6 | -0.22711  |
| 4344 | POC206 | A6NF34 | -0.78723  |
| 4345 | POC206 | Q9H9P8 | -0.62315  |
| 4346 | POC206 | Q13637 | -0.75068  |
| 4347 | POC206 | Q96BJ8 | -0.14969  |
| 4348 | POC206 | Q8TE73 | -0.36346  |
| 4349 | POC206 | Q96AM1 | -1.2448   |
| 4350 | POC206 | P08237 | -0.50313  |
| 4351 | POC206 | A6NEQ0 | -0.60591  |
| 4352 | POC206 | Q99675 | -0.22675  |
| 4353 | POC206 | Q9NUG4 | -0.092462 |
| 4354 | POC206 | P55084 | -0.18046  |
| 4355 | POC206 | P78357 | -0.54509  |
| 4356 | POC206 | A6NHS7 | -0.79503  |
| 4357 | POC206 | Q5Y7A7 | -0.63497  |
| 4358 | POC206 | Q03403 | -0.26313  |
| 4359 | POC206 | Q9NR63 | -0.59559  |
| 4360 | POC206 | P51685 | -1.3677   |
| 4361 | POC206 | P56851 | -0.76048  |
| 4362 | POC206 | Q7Z7M0 | -0.22741  |
| 4363 | POC206 | Q8N0U8 | -0.79503  |
| 4364 | POC206 | F8WBI6 | -0.056113 |
| 4365 | POC206 | Q64LD2 | -0.22758  |
| 4366 | POC206 | Q6ZUB1 | -0.79503  |
| 4367 | POC206 | P54257 | -0.052352 |
| 4368 | POC206 | O43781 | -0.9627   |
| 4369 | POC206 | Q14833 | -1.3349   |
| 4370 | POC206 | P29120 | -0.38374  |
| 4371 | POC206 | P41226 | -0.53648  |
| 4372 | POC206 | Q9P0P8 | -0.040177 |
| 4373 | POC206 | Q9BW83 | -1.0151   |
| 4374 | POC206 | Q8NGI4 | -1.1763   |
| 4375 | POC206 | Q15546 | -0.98255  |
| 4376 | POC206 | Q9BXU8 | -0.30236  |
| 4377 | POC206 | P09564 | -0.90388  |
| 4378 | POC206 | Q8NGR4 | -1.1763   |
| 4379 | POC206 | Q9H4B7 | -0.50228  |
| 4380 | POC206 | Q9UPT8 | -0.17787  |
| 4381 | POC206 | P35716 | -0.24867  |
| 4382 | POC206 | Q8WVM8 | -0.21388  |
| 4383 | POC206 | Q9UKY4 | -0.86752  |
| 4384 | POC206 | Q9H251 | -0.58819  |
| 4385 | POC206 | Q9P283 | -0.98098  |
| 4386 | POC206 | A0AVI4 | -0.57403  |
| 4387 | POC206 | Q96PY0 | -0.045754 |
| 4388 | POC206 | Q16566 | -0.28079  |
| 4389 | POC206 | Q6ZMN8 | -0.21288  |
| 4390 | POC206 | B5MCY1 | -0.2428   |
| 4391 | POC206 | P23141 | -0.25179  |
| 4392 | POC206 | P35858 | -0.65361  |
| 4393 | POC206 | Q9ULI4 | -0.37471  |
| 4394 | POC206 | Q14917 | -0.55846  |
| 4395 | POC206 | Q8TD55 | -0.32146  |
| 4396 | POC206 | Q8NDI1 | -0.23027  |
| 4397 | POC206 | Q9NQ36 | -0.88269  |
| 4398 | POC206 | Q7Z2K8 | -0.64252  |
| 4399 | POC206 | A1A5B4 | -0.97984  |
| 4400 | POC206 | P17844 | -0.50786  |
| 4401 | POC206 | Q96NJ5 | -0.19239  |
| 4402 | POC206 | Q7Z3U7 | -0.11608  |
| 4403 | POC206 | P41231 | -0.76284  |
| 4404 | POC206 | P42285 | -0.22168  |
| 4405 | POC206 | O15455 | -0.24874  |
| 4406 | POC206 | Q9HDB5 | -0.96515  |
| 4407 | POC206 | Q5HYA8 | -0.23779  |
| 4408 | POC206 | Q5T2D3 | -0.12034  |

|      |        |        |          |
|------|--------|--------|----------|
| 4409 | POC206 | Q92730 | -0.34558 |
| 4410 | POC206 | Q8IW92 | -0.70723 |
| 4411 | POC206 | Q9UJQ7 | -0.20392 |
| 4412 | POC206 | Q6ZSS7 | -0.80137 |
| 4413 | POC206 | P20333 | -0.68161 |
| 4414 | POC206 | Q70Z35 | -0.62301 |
| 4415 | POC206 | P18564 | -1.1138  |
| 4416 | POC206 | Q9NR64 | -0.2783  |
| 4417 | POC206 | A6NMZ5 | -1.1763  |
| 4418 | POC206 | Q9BXR5 | -1.2416  |
| 4419 | POC206 | P04629 | -0.57033 |
| 4420 | POC206 | Q9H0N0 | -0.32871 |
| 4421 | POC206 | Q96EM0 | -0.38298 |
| 4422 | POC206 | Q9NRF2 | -0.22741 |
| 4423 | POC206 | Q92485 | -0.84764 |
| 4424 | POC206 | Q43614 | -1.2586  |
| 4425 | POC206 | Q8NC67 | -0.79503 |
| 4426 | POC206 | Q95976 | -1.0549  |
| 4427 | POC206 | Q8N961 | -0.2274  |
| 4428 | POC206 | Q8IWB9 | -0.92488 |
| 4429 | POC206 | P62955 | -0.80222 |
| 4430 | POC206 | Q95935 | -0.41926 |
| 4431 | POC206 | P48546 | -1.2224  |
| 4432 | POC206 | Q8NF50 | -0.27489 |
| 4433 | POC206 | Q31610 | -0.99995 |
| 4434 | POC206 | Q6ICH7 | -0.99431 |
| 4435 | POC206 | P63132 | -0.20444 |
| 4436 | POC206 | Q43739 | -0.4615  |
| 4437 | POC206 | Q96SF2 | -0.45264 |
| 4438 | POC206 | Q8N5G2 | -0.51407 |
| 4439 | POC206 | A0PK11 | -0.79503 |
| 4440 | POC206 | Q9NQV5 | -0.12042 |
| 4441 | POC206 | P56730 | -1.2214  |
| 4442 | POC206 | Q9UIG5 | -0.20355 |
| 4443 | POC206 | Q01433 | -0.13239 |
| 4444 | POC206 | Q8IXN7 | -0.65288 |
| 4445 | POC206 | P08123 | -0.4491  |
| 4446 | POC206 | Q3MIP1 | -0.79503 |
| 4447 | POC206 | P0C7Q2 | -0.32748 |
| 4448 | POC206 | Q5XKR4 | -0.10246 |
| 4449 | POC206 | Q8WTV0 | -0.39946 |
| 4450 | POC206 | Q9Y2T5 | -1.3861  |
| 4451 | POC206 | P37088 | -0.48407 |
| 4452 | POC206 | Q9Y661 | -1.0837  |
| 4453 | POC206 | Q9Y217 | -0.21293 |
| 4454 | POC206 | Q9Y3Q7 | -1.1822  |
| 4455 | POC206 | Q8NGI8 | -1.1763  |
| 4456 | POC206 | P11801 | -0.53614 |
| 4457 | POC206 | Q6ZMC9 | -0.79503 |
| 4458 | POC206 | Q6XPR3 | -0.91037 |
| 4459 | POC206 | Q9Y243 | -0.17344 |
| 4460 | POC206 | Q95IE3 | -0.63497 |
| 4461 | POC206 | Q14CZ7 | -0.17946 |
| 4462 | POC206 | Q2TAL5 | -0.22944 |
| 4463 | POC206 | P19957 | -0.75528 |
| 4464 | POC206 | Q95863 | -0.22199 |
| 4465 | POC206 | Q01629 | -0.76536 |
| 4466 | POC206 | Q75348 | -0.35918 |
| 4467 | POC206 | Q8NFW1 | -0.70885 |
| 4468 | POC206 | Q9NQW1 | -0.22776 |
| 4469 | POC206 | Q9BQ31 | -0.35939 |
| 4470 | POC206 | Q86UF2 | -0.67788 |
| 4471 | POC206 | Q7LGC8 | -0.44326 |
| 4472 | POC206 | Q8IUE6 | -0.66158 |
| 4473 | POC206 | Q9NZC3 | -0.48836 |
| 4474 | POC206 | P21281 | -0.34912 |
| 4475 | POC206 | Q99985 | -0.8018  |
| 4476 | POC206 | Q9NXG6 | -1.1726  |
| 4477 | POC206 | Q95847 | -0.57711 |
| 4478 | POC206 | Q8WXS4 | -0.85712 |
| 4479 | POC206 | Q6PK18 | -1.0427  |
| 4480 | POC206 | Q8N8S7 | -0.22166 |
| 4481 | POC206 | Q6EIG7 | -0.73295 |
| 4482 | POC206 | P48751 | -0.95405 |
| 4483 | POC206 | Q8IU57 | -0.26981 |
| 4484 | POC206 | Q8N142 | -0.56569 |



|      |        |        |           |
|------|--------|--------|-----------|
| 4485 | POC206 | Q8TDF5 | -1.0837   |
| 4486 | POC206 | Q6P4E1 | -0.79503  |
| 4487 | POC206 | Q7L0J3 | -0.43605  |
| 4488 | POC206 | Q5JTV8 | -0.30812  |
| 4489 | POC206 | Q12965 | -0.15135  |
| 4490 | POC206 | Q5SW96 | -0.22725  |
| 4491 | POC206 | P28908 | -0.61173  |
| 4492 | POC206 | P29371 | -0.84362  |
| 4493 | POC206 | Q9Y303 | -0.038572 |
| 4494 | POC206 | Q9P1Z9 | -0.79503  |
| 4495 | POC206 | P22059 | -0.26222  |
| 4496 | POC206 | A6NH21 | -0.83256  |
| 4497 | POC206 | Q92609 | -0.73994  |
| 4498 | POC206 | Q08ET2 | -1.0867   |
| 4499 | POC206 | P12694 | -0.060034 |
| 4500 | POC206 | Q9P0L0 | -0.22273  |
| 4501 | POC206 | O15438 | -1.0935   |
| 4502 | POC206 | Q14126 | -0.888    |
| 4503 | POC206 | Q96FV3 | -0.82411  |
| 4504 | POC206 | Q5W188 | -0.87562  |
| 4505 | POC206 | Q12791 | -0.65332  |
| 4506 | POC206 | Q9NPB1 | -0.46556  |
| 4507 | POC206 | Q13069 | -0.13445  |
| 4508 | POC206 | Q92918 | -0.60926  |
| 4509 | POC206 | P24394 | -0.98295  |
| 4510 | POC206 | Q8IUG5 | -0.10586  |
| 4511 | POC206 | P07101 | -0.21881  |
| 4512 | POC206 | Q8WZ79 | -0.5737   |
| 4513 | POC206 | Q96PH6 | -0.79205  |
| 4514 | POC206 | P10747 | -0.19494  |
| 4515 | POC206 | Q5VTB9 | -0.22735  |
| 4516 | POC206 | O43903 | -0.15913  |
| 4517 | POC206 | P02452 | -0.26919  |
| 4518 | POC206 | Q8TCJ2 | -0.70277  |
| 4519 | POC206 | Q14730 | -0.50908  |
| 4520 | POC206 | P0C7U1 | -0.079556 |
| 4521 | POC206 | Q5VT79 | -0.20272  |
| 4522 | POC206 | P26951 | -0.87556  |
| 4523 | POC206 | Q9NUN7 | -0.34181  |
| 4524 | POC206 | Q6ZTQ4 | -1.1512   |
| 4525 | POC206 | O75915 | -0.59344  |
| 4526 | POC206 | Q8NGY2 | -1.1763   |
| 4527 | POC206 | P56706 | -0.4547   |
| 4528 | POC206 | P0C7U2 | -0.26349  |
| 4529 | POC206 | Q96HU1 | -0.22772  |
| 4530 | POC206 | Q9P0N8 | -0.9956   |
| 4531 | POC206 | P10619 | -0.17355  |
| 4532 | POC206 | P61073 | -0.28945  |
| 4533 | POC206 | P06850 | -0.48491  |
| 4534 | POC206 | Q14936 | -0.23197  |
| 4535 | POC206 | Q9H9V9 | -0.1969   |
| 4536 | POC206 | Q5HY92 | -0.51055  |
| 4537 | POC206 | P47874 | -0.30613  |
| 4538 | POC206 | Q6NSX1 | -0.91731  |
| 4539 | POC206 | Q14802 | -0.94448  |
| 4540 | POC206 | P06881 | -0.213    |
| 4541 | POC206 | Q8TC17 | -0.22741  |
| 4542 | POC206 | Q8N9L9 | -0.32966  |
| 4543 | POC206 | P01760 | -0.9894   |
| 4544 | POC206 | Q9UNT1 | -1.0597   |
| 4545 | POC206 | Q86Z02 | -0.22741  |
| 4546 | POC206 | Q8TEB7 | -0.50392  |
| 4547 | POC206 | P98161 | -0.26836  |
| 4548 | POC206 | Q96LR1 | -0.80952  |
| 4549 | POC206 | P18206 | -0.19972  |
| 4550 | POC206 | Q96DN5 | -0.70226  |
| 4551 | POC206 | Q9Y5I4 | -1.2044   |
| 4552 | POC206 | Q9NU53 | -0.79503  |
| 4553 | POC206 | P38567 | -0.57489  |
| 4554 | POC206 | Q8IYS4 | -0.43697  |
| 4555 | POC206 | Q5YKI7 | -0.45668  |
| 4556 | POC206 | O15303 | -1.1247   |
| 4557 | POC206 | Q8TD94 | -0.22203  |
| 4558 | POC206 | Q01432 | -0.080709 |
| 4559 | POC206 | Q7Z769 | -0.79503  |
| 4560 | POC206 | Q5VVY1 | -0.20034  |

|      |        |        |           |
|------|--------|--------|-----------|
| 4561 | P0C206 | A8MXD5 | -0.44034  |
| 4562 | P0C206 | Q15722 | -1.6332   |
| 4563 | P0C206 | Q8WU67 | -0.47699  |
| 4564 | P0C206 | P20151 | -1.291    |
| 4565 | P0C206 | P01275 | -0.56812  |
| 4566 | P0C206 | Q9NYW7 | -1.0481   |
| 4567 | P0C206 | Q8N0W4 | -0.36841  |
| 4568 | P0C206 | Q9Y4D7 | -1.107    |
| 4569 | P0C206 | P24593 | -0.3652   |
| 4570 | P0C206 | Q9Y5X9 | -0.79073  |
| 4571 | P0C206 | O75936 | -0.22357  |
| 4572 | P0C206 | P11215 | -0.22737  |
| 4573 | P0C206 | Q8IVH8 | -0.56135  |
| 4574 | P0C206 | P32297 | -0.69788  |
| 4575 | P0C206 | Q9H9P5 | -0.22738  |
| 4576 | P0C206 | Q6P2M8 | -0.64046  |
| 4577 | P0C206 | P00747 | -0.44033  |
| 4578 | P0C206 | O43914 | -0.63282  |
| 4579 | P0C206 | Q9NP74 | -0.40967  |
| 4580 | P0C206 | Q9BXJ5 | -0.92155  |
| 4581 | P0C206 | P13637 | -0.52338  |
| 4582 | P0C206 | O00253 | -0.78322  |
| 4583 | P0C206 | Q9Y4C5 | -0.59575  |
| 4584 | P0C206 | P21917 | -0.49114  |
| 4585 | P0C206 | Q14246 | -1.519    |
| 4586 | P0C206 | Q8NGC9 | -1.1763   |
| 4587 | P0C206 | P05230 | -0.28716  |
| 4588 | P0C206 | Q7Z442 | -0.91983  |
| 4589 | P0C206 | Q13151 | -0.2851   |
| 4590 | P0C206 | Q86SU0 | -0.49814  |
| 4591 | P0C206 | Q96GA7 | -0.078134 |
| 4592 | P0C206 | P43115 | -1.0058   |
| 4593 | P0C206 | Q8TBM8 | -0.88783  |
| 4594 | P0C206 | Q9BY10 | -0.78789  |
| 4595 | P0C206 | Q9Y342 | -0.81154  |
| 4596 | P0C206 | Q9H374 | -0.2536   |
| 4597 | P0C206 | O75044 | -0.22973  |
| 4598 | P0C206 | A0PJK1 | -0.86534  |
| 4599 | P0C206 | Q9UHM6 | -1.1291   |
| 4600 | P0C206 | P51572 | -0.16104  |
| 4601 | P0C206 | Q9NYW5 | -1.2301   |
| 4602 | P0C206 | Q92506 | -0.33301  |
| 4603 | P0C206 | Q5MAI5 | -0.72773  |
| 4604 | P0C206 | P56545 | -0.35595  |
| 4605 | P0C206 | Q2KHR3 | -0.33548  |
| 4606 | P0C206 | Q96L93 | -0.55305  |
| 4607 | P0C206 | P10600 | -0.22741  |
| 4608 | P0C206 | Q9NQW5 | -0.19041  |
| 4609 | P0C206 | Q96MT7 | -0.22738  |
| 4610 | P0C206 | P14138 | -0.70878  |
| 4611 | P0C206 | P02686 | -0.71805  |
| 4612 | P0C206 | Q12794 | -0.35829  |
| 4613 | P0C206 | Q9HCF6 | -0.83469  |
| 4614 | P0C206 | Q8IZD0 | -0.17472  |
| 4615 | P0C206 | Q6P1R4 | -0.59265  |
| 4616 | P0C206 | Q9NS40 | -0.96731  |
| 4617 | P0C206 | P27361 | -0.2274   |
| 4618 | P0C206 | Q8NET6 | -0.43827  |
| 4619 | P0C206 | P53609 | -0.2638   |
| 4620 | P0C206 | P25021 | -1.3591   |
| 4621 | P0C206 | Q96BF3 | -0.91833  |
| 4622 | P0C206 | Q07000 | -1.0001   |
| 4623 | P0C206 | O75937 | -0.16375  |
| 4624 | P0C206 | Q8TEU8 | -0.67017  |
| 4625 | P0C206 | A6NI73 | -1.3198   |
| 4626 | P0C206 | A6NI72 | -0.22741  |
| 4627 | P0C206 | P21757 | -0.45138  |
| 4628 | P0C206 | Q9NQA5 | -0.96515  |
| 4629 | P0C206 | Q9HD87 | -0.79503  |
| 4630 | P0C206 | Q13277 | -0.29028  |
| 4631 | P0C206 | Q9BQI0 | -0.52897  |
| 4632 | P0C206 | Q96N76 | -0.14359  |
| 4633 | P0C206 | Q06520 | -0.2288   |
| 4634 | P0C206 | P01906 | -0.72614  |
| 4635 | P0C206 | Q8NBU5 | -0.63529  |
| 4636 | P0C206 | Q96NW7 | -0.23122  |

|      |        |        |           |
|------|--------|--------|-----------|
| 4637 | P0C206 | Q8TAV5 | -0.80952  |
| 4638 | P0C206 | Q96R69 | -1.1763   |
| 4639 | P0C206 | Q9ULL1 | -0.67089  |
| 4640 | P0C206 | Q9BSK2 | -0.57194  |
| 4641 | P0C206 | Q8N1M1 | -0.73363  |
| 4642 | P0C206 | P49023 | -0.17752  |
| 4643 | P0C206 | Q9UHQ9 | -0.87065  |
| 4644 | P0C206 | Q6IEE8 | -0.75914  |
| 4645 | P0C206 | Q8N3C7 | -0.22741  |
| 4646 | P0C206 | P32246 | -0.7358   |
| 4647 | P0C206 | P53671 | -0.80729  |
| 4648 | P0C206 | Q5T1V6 | -0.97956  |
| 4649 | P0C206 | Q6ZW33 | -0.43881  |
| 4650 | P0C206 | Q16644 | -0.23075  |
| 4651 | P0C206 | Q96D42 | -0.64094  |
| 4652 | P0C206 | Q76G19 | -0.22707  |
| 4653 | P0C206 | P25090 | -1.4431   |
| 4654 | P0C206 | P24347 | -1.3263   |
| 4655 | P0C206 | P09172 | -0.4717   |
| 4656 | P0C206 | Q5QFB9 | -0.89601  |
| 4657 | P0C206 | P05089 | -0.1773   |
| 4658 | P0C206 | Q9TQE0 | -0.52257  |
| 4659 | P0C206 | Q5JQS5 | -1.1763   |
| 4660 | P0C206 | Q9BVG8 | -0.26962  |
| 4661 | P0C206 | Q7Z304 | -0.89968  |
| 4662 | P0C206 | P05187 | -1.0314   |
| 4663 | P0C206 | Q86V86 | -0.26597  |
| 4664 | P0C206 | P54764 | -0.57764  |
| 4665 | P0C206 | P14061 | -0.59774  |
| 4666 | P0C206 | Q9BYB4 | -0.2276   |
| 4667 | P0C206 | Q9Y2P5 | -0.8645   |
| 4668 | P0C206 | Q9BZJ3 | -1.3203   |
| 4669 | P0C206 | Q969Z4 | -0.66736  |
| 4670 | P0C206 | Q96MT1 | -0.73705  |
| 4671 | P0C206 | P42701 | -0.66587  |
| 4672 | P0C206 | P25929 | -0.84426  |
| 4673 | P0C206 | P14778 | -1.0436   |
| 4674 | P0C206 | Q8NET1 | -0.77981  |
| 4675 | P0C206 | Q9H867 | -0.17553  |
| 4676 | P0C206 | Q99944 | -1.2331   |
| 4677 | P0C206 | Q96L16 | -0.01358  |
| 4678 | P0C206 | Q58HT5 | -0.85122  |
| 4679 | P0C206 | Q8IVF5 | -0.86159  |
| 4680 | P0C206 | Q8WZ92 | -1.1763   |
| 4681 | P0C206 | Q8WZ42 | -0.32366  |
| 4682 | P0C206 | Q96BS2 | -0.22744  |
| 4683 | P0C206 | Q95716 | -0.66968  |
| 4684 | P0C206 | P49685 | -1.327    |
| 4685 | P0C206 | P02776 | -0.66888  |
| 4686 | P0C206 | P33260 | -0.73734  |
| 4687 | P0C206 | Q9H672 | -0.48675  |
| 4688 | P0C206 | P12829 | -0.27908  |
| 4689 | P0C206 | Q6ZN03 | -0.067832 |
| 4690 | P0C206 | Q76M96 | -0.99435  |
| 4691 | P0C206 | P26572 | -0.42685  |
| 4692 | P0C206 | P01732 | -0.8275   |
| 4693 | P0C206 | P50993 | -0.48987  |
| 4694 | P0C206 | Q6W4X9 | -0.85157  |
| 4695 | P0C206 | Q5TA89 | -0.22648  |
| 4696 | P0C206 | Q8NGI0 | -1.1763   |
| 4697 | P0C206 | A8MXK1 | -0.79503  |
| 4698 | P0C206 | Q86TY3 | -0.79503  |
| 4699 | P0C206 | Q9BRR3 | -0.79503  |
| 4700 | P0C206 | Q75596 | -0.88872  |
| 4701 | P0C206 | P63267 | -0.36762  |
| 4702 | P0C206 | Q96T75 | -0.20924  |
| 4703 | P0C206 | Q08345 | -0.9351   |
| 4704 | P0C206 | Q96I51 | -0.22288  |
| 4705 | P0C206 | Q3MII6 | -0.64177  |
| 4706 | P0C206 | P23471 | -1.2155   |
| 4707 | P0C206 | A4FU69 | -0.29182  |
| 4708 | P0C206 | Q9NPB0 | -0.75402  |
| 4709 | P0C206 | Q96AQ8 | -0.62349  |
| 4710 | P0C206 | Q02790 | -0.384    |
| 4711 | P0C206 | Q12799 | -0.076807 |
| 4712 | P0C206 | Q8IUS5 | -0.89394  |

|      |        |        |          |
|------|--------|--------|----------|
| 4713 | P0C206 | Q5T1J6 | -0.09335 |
| 4714 | P0C206 | Q8WYL5 | -0.30273 |
| 4715 | P0C206 | Q6X9E4 | -0.13476 |
| 4716 | P0C206 | P23229 | -0.24335 |
| 4717 | P0C206 | Q8NGE0 | -1.1763  |
| 4718 | P0C206 | Q9Y2T4 | -0.2878  |
| 4719 | P0C206 | Q9ULD6 | -0.22732 |
| 4720 | P0C206 | Q6UXE8 | -0.57403 |
| 4721 | P0C206 | Q6ZWK6 | -1.8172  |
| 4722 | P0C206 | P69849 | -0.77216 |
| 4723 | P0C206 | C9JXX5 | -0.80952 |
| 4724 | P0C206 | P04843 | -0.61845 |
| 4725 | P0C206 | Q8TB92 | -0.18308 |
| 4726 | P0C206 | Q9ULH1 | -0.29306 |
| 4727 | P0C206 | P78508 | -0.61643 |
| 4728 | P0C206 | O95502 | -0.92302 |
| 4729 | P0C206 | O00462 | -0.32138 |
| 4730 | P0C206 | Q9NPD5 | -0.64355 |
| 4731 | P0C206 | Q9BZJ4 | -0.56153 |
| 4732 | P0C206 | Q96R08 | -1.1763  |
| 4733 | P0C206 | Q9H400 | -0.69919 |
| 4734 | P0C206 | P20382 | -0.79264 |
| 4735 | P0C206 | P24158 | -0.37114 |
| 4736 | P0C206 | Q9Y5H1 | -1.1512  |
| 4737 | P0C206 | P46091 | -1.3861  |
| 4738 | P0C206 | Q96PS6 | -0.79503 |
| 4739 | P0C206 | Q9UN76 | -0.88946 |
| 4740 | P0C206 | Q9HB29 | -1.1308  |
| 4741 | P0C206 | Q8TBP6 | -0.58473 |
| 4742 | P0C206 | Q9NUL7 | -0.16058 |
| 4743 | P0C206 | Q14973 | -0.83405 |
| 4744 | P0C206 | P80108 | -0.4572  |
| 4745 | P0C206 | Q495M3 | -0.59434 |
| 4746 | P0C206 | Q08828 | -0.64503 |
| 4747 | P0C206 | Q9UPZ9 | -0.76183 |
| 4748 | P0C206 | A8MVS5 | -0.79503 |
| 4749 | P0C206 | Q14432 | -0.55965 |
| 4750 | P0C206 | P48436 | -0.33179 |
| 4751 | P0C206 | Q9Y6F7 | -0.22393 |
| 4752 | P0C206 | P01850 | -0.86734 |
| 4753 | P0C206 | Q9HB15 | -0.88298 |
| 4754 | P0C206 | Q86YQ2 | -0.97846 |
| 4755 | P0C206 | Q5T447 | -0.22828 |
| 4756 | P0C206 | Q7Z4T8 | -0.63165 |
| 4757 | P0C206 | P58511 | -0.57403 |
| 4758 | P0C206 | Q494V2 | -0.19123 |
| 4759 | P0C206 | Q05C16 | -0.22802 |
| 4760 | P0C206 | Q13268 | -0.2941  |
| 4761 | P0C206 | P46092 | -1.2781  |
| 4762 | P0C206 | Q8NDX9 | -0.62908 |
| 4763 | P0C206 | P01286 | -0.4711  |
| 4764 | P0C206 | A6NK59 | -0.48675 |
| 4765 | P0C206 | Q8N531 | -0.4432  |
| 4766 | P0C206 | Q9BY67 | -0.47554 |
| 4767 | P0C206 | P48058 | -0.95628 |
| 4768 | P0C206 | P36222 | -0.49513 |
| 4769 | P0C206 | Q9NUV9 | -0.20284 |
| 4770 | P0C206 | Q99666 | -0.21814 |
| 4771 | P0C206 | Q9UGB7 | -0.22466 |
| 4772 | P0C206 | Q05D32 | -0.31505 |
| 4773 | P0C206 | P28476 | -0.88129 |
| 4774 | P0C206 | Q05707 | -1.0457  |
| 4775 | P0C206 | O43602 | -0.29257 |
| 4776 | P0C206 | Q01959 | -0.32056 |
| 4777 | P0C206 | Q11203 | -0.74632 |
| 4778 | P0C206 | P49842 | -0.6899  |
| 4779 | P0C206 | P14555 | -0.80582 |
| 4780 | P0C206 | Q96SB3 | -0.22688 |
| 4781 | P0C206 | Q9UHC6 | -0.87783 |
| 4782 | P0C206 | P0DJD4 | -0.60591 |
| 4783 | P0C206 | Q9UKP4 | -1.1291  |
| 4784 | P0C206 | A4D2G3 | -1.1763  |
| 4785 | P0C206 | P21359 | -0.22568 |
| 4786 | P0C206 | Q7RTR0 | -0.51103 |
| 4787 | P0C206 | Q9H6Y7 | -0.23641 |
| 4788 | P0C206 | P21580 | -0.13721 |

|      |        |        |           |
|------|--------|--------|-----------|
| 4789 | POC206 | O75897 | -0.22259  |
| 4790 | POC206 | Q92833 | -0.20992  |
| 4791 | POC206 | Q9NQZ3 | -0.23152  |
| 4792 | POC206 | Q30KP9 | -0.77981  |
| 4793 | POC206 | Q99836 | -0.22739  |
| 4794 | POC206 | Q9H426 | -0.24201  |
| 4795 | POC206 | Q96NT0 | -0.31977  |
| 4796 | POC206 | Q96P56 | -0.56294  |
| 4797 | POC206 | P10321 | -0.99995  |
| 4798 | POC206 | Q86YC3 | -0.79503  |
| 4799 | POC206 | P10415 | -0.22725  |
| 4800 | POC206 | P16109 | -0.22741  |
| 4801 | POC206 | A6NMD0 | -0.91853  |
| 4802 | POC206 | O75078 | -0.99565  |
| 4803 | POC206 | Q99574 | -0.65067  |
| 4804 | POC206 | O94886 | -1.3591   |
| 4805 | POC206 | Q5FVE4 | -0.92555  |
| 4806 | POC206 | Q8N7U6 | -0.29182  |
| 4807 | POC206 | Q6UW78 | -0.80952  |
| 4808 | POC206 | Q7Z4P5 | -0.22741  |
| 4809 | POC206 | Q86YV6 | -1.13     |
| 4810 | POC206 | B1AKI9 | -0.80952  |
| 4811 | POC206 | Q969K3 | -0.22741  |
| 4812 | POC206 | Q7RTY9 | -0.93257  |
| 4813 | POC206 | A8MXZ1 | -0.19106  |
| 4814 | POC206 | P14091 | -0.51783  |
| 4815 | POC206 | Q9H2W1 | -0.79503  |
| 4816 | POC206 | Q9H2Z4 | -0.47045  |
| 4817 | POC206 | Q15612 | -0.97027  |
| 4818 | POC206 | Q86SG6 | -1.0305   |
| 4819 | POC206 | P11217 | -0.34137  |
| 4820 | POC206 | Q8NEW0 | -0.25206  |
| 4821 | POC206 | P15586 | -0.19892  |
| 4822 | POC206 | P41221 | -0.22928  |
| 4823 | POC206 | Q13387 | -0.17496  |
| 4824 | POC206 | Q9NZQ8 | -0.89785  |
| 4825 | POC206 | Q68DD2 | -0.28687  |
| 4826 | POC206 | O95208 | -0.16617  |
| 4827 | POC206 | Q6IA69 | -0.44632  |
| 4828 | POC206 | Q6PK57 | -0.40187  |
| 4829 | POC206 | O95199 | -0.2273   |
| 4830 | POC206 | P22760 | -0.78713  |
| 4831 | POC206 | Q9H936 | -0.23114  |
| 4832 | POC206 | Q6P4H8 | -0.79503  |
| 4833 | POC206 | Q8N7C0 | -0.97624  |
| 4834 | POC206 | Q96TA0 | -1.1512   |
| 4835 | POC206 | Q8NFA2 | -0.3185   |
| 4836 | POC206 | P28340 | -0.24997  |
| 4837 | POC206 | A6NJS3 | -0.80952  |
| 4838 | POC206 | Q9H2X0 | -0.55563  |
| 4839 | POC206 | Q15617 | -1.1763   |
| 4840 | POC206 | P60891 | -0.45624  |
| 4841 | POC206 | Q8WUX1 | -0.94667  |
| 4842 | POC206 | Q8TDE3 | -0.72676  |
| 4843 | POC206 | O15269 | -0.31896  |
| 4844 | POC206 | Q9H4I0 | -0.096694 |
| 4845 | POC206 | Q9UMW8 | -0.45354  |
| 4846 | POC206 | Q8NH04 | -1.1763   |
| 4847 | POC206 | Q8IZI9 | -0.84266  |
| 4848 | POC206 | Q8TBG9 | -0.66663  |
| 4849 | POC206 | Q9UL15 | -0.16302  |
| 4850 | POC206 | Q86XM0 | -1.0415   |
| 4851 | POC206 | Q9HCU5 | -0.2274   |
| 4852 | POC206 | Q9NX38 | -0.20296  |
| 4853 | POC206 | O15018 | -0.37144  |
| 4854 | POC206 | Q6ZRH7 | -1.1179   |
| 4855 | POC206 | P13804 | -0.08272  |
| 4856 | POC206 | Q86UV5 | -0.43576  |
| 4857 | POC206 | Q9Y5G4 | -1.1512   |
| 4858 | POC206 | P55017 | -0.36553  |
| 4859 | POC206 | Q08881 | -0.42084  |
| 4860 | POC206 | O95294 | -0.33497  |
| 4861 | POC206 | P01775 | -0.9894   |
| 4862 | POC206 | Q05823 | -0.28644  |
| 4863 | POC206 | P22001 | -0.75475  |
| 4864 | POC206 | Q8IUX1 | -0.57403  |

|      |        |        |           |
|------|--------|--------|-----------|
| 4865 | POC206 | Q9BZM5 | -0.98849  |
| 4866 | POC206 | Q8NB78 | -0.31409  |
| 4867 | POC206 | P21579 | -0.27229  |
| 4868 | POC206 | A0AVT1 | -0.22098  |
| 4869 | POC206 | A6NIU2 | -0.16664  |
| 4870 | POC206 | P41146 | -1.1883   |
| 4871 | POC206 | Q8TBP5 | -0.79503  |
| 4872 | POC206 | Q32VQ0 | -1.1763   |
| 4873 | POC206 | Q8NGS9 | -1.1763   |
| 4874 | POC206 | P30486 | -0.96478  |
| 4875 | POC206 | Q92777 | -0.45587  |
| 4876 | POC206 | O00429 | -0.5679   |
| 4877 | POC206 | Q9UHG0 | -0.39854  |
| 4878 | POC206 | P06307 | -0.74977  |
| 4879 | POC206 | P24592 | -0.63622  |
| 4880 | POC206 | Q96T53 | -0.80641  |
| 4881 | POC206 | Q99453 | -0.22609  |
| 4882 | POC206 | Q03518 | -0.36747  |
| 4883 | POC206 | Q8NDB2 | -0.20406  |
| 4884 | POC206 | Q8NHB8 | -1.1763   |
| 4885 | POC206 | Q8WXG6 | -0.1927   |
| 4886 | POC206 | O95866 | -0.7916   |
| 4887 | POC206 | Q8TE60 | -1.173    |
| 4888 | POC206 | Q9H0X9 | -0.97008  |
| 4889 | POC206 | P55000 | -0.97652  |
| 4890 | POC206 | Q6UXX5 | -0.79503  |
| 4891 | POC206 | P29279 | -0.29477  |
| 4892 | POC206 | Q86YQ8 | -0.23004  |
| 4893 | POC206 | P01619 | -0.95593  |
| 4894 | POC206 | O00507 | -0.46746  |
| 4895 | POC206 | P16471 | -0.97416  |
| 4896 | POC206 | P27449 | -0.19192  |
| 4897 | POC206 | P38484 | -0.96503  |
| 4898 | POC206 | O75845 | -0.90405  |
| 4899 | POC206 | Q7Z6J6 | -0.32544  |
| 4900 | POC206 | D3W0D1 | -0.41448  |
| 4901 | POC206 | Q14416 | -1.2621   |
| 4902 | POC206 | Q10472 | -0.85375  |
| 4903 | POC206 | Q5VWC8 | -1.0157   |
| 4904 | POC206 | O43581 | -0.80174  |
| 4905 | POC206 | Q14D33 | -0.79503  |
| 4906 | POC206 | Q96GR2 | -0.64849  |
| 4907 | POC206 | Q99758 | -1.1115   |
| 4908 | POC206 | Q13286 | -0.15344  |
| 4909 | POC206 | Q9P2F6 | -1.083    |
| 4910 | POC206 | Q6ZW76 | -0.22742  |
| 4911 | POC206 | P04440 | -0.65442  |
| 4912 | POC206 | Q9NYN1 | -1.2249   |
| 4913 | POC206 | Q16555 | -0.20376  |
| 4914 | POC206 | Q8NG97 | -1.1763   |
| 4915 | POC206 | P20807 | -0.75743  |
| 4916 | POC206 | Q15256 | -0.32462  |
| 4917 | POC206 | Q8N7P1 | -0.96469  |
| 4918 | POC206 | P0DI80 | -0.79503  |
| 4919 | POC206 | Q96K37 | -0.72669  |
| 4920 | POC206 | P42330 | -0.22385  |
| 4921 | POC206 | P21817 | -0.57611  |
| 4922 | POC206 | P78527 | -0.36557  |
| 4923 | POC206 | P06239 | -0.26135  |
| 4924 | POC206 | Q9UHQ4 | -0.37792  |
| 4925 | POC206 | P22223 | -1.0879   |
| 4926 | POC206 | P78333 | -1.1064   |
| 4927 | POC206 | P31151 | -0.21894  |
| 4928 | POC206 | P01034 | -0.31852  |
| 4929 | POC206 | O94760 | -0.043138 |
| 4930 | POC206 | P0C626 | -1.1837   |
| 4931 | POC206 | P07910 | -0.2297   |
| 4932 | POC206 | P15169 | -1.1176   |
| 4933 | POC206 | Q05193 | -0.24096  |
| 4934 | POC206 | P16188 | -0.93091  |
| 4935 | POC206 | Q9H478 | -0.092462 |
| 4936 | POC206 | Q5TEJ8 | -0.48991  |
| 4937 | POC206 | P36382 | -0.8508   |
| 4938 | POC206 | Q15165 | -0.58571  |
| 4939 | POC206 | Q8TE82 | -0.15646  |
| 4940 | POC206 | Q9H720 | -0.77762  |

|      |        |        |           |
|------|--------|--------|-----------|
| 4941 | POC206 | Q8WU10 | -0.51459  |
| 4942 | POC206 | P15538 | -0.43442  |
| 4943 | POC206 | Q9HA65 | -1.2801   |
| 4944 | POC206 | P0CZ25 | -0.026588 |
| 4945 | POC206 | Q9H8Y5 | -0.20906  |
| 4946 | POC206 | Q5T6R2 | -0.22317  |
| 4947 | POC206 | Q15075 | -0.21036  |
| 4948 | POC206 | Q6ZQN5 | -0.45919  |
| 4949 | POC206 | Q9P0S2 | -0.43781  |
| 4950 | POC206 | Q7Z4J2 | -0.64037  |
| 4951 | POC206 | Q9Y6A2 | -0.89495  |
| 4952 | POC206 | O43567 | -0.5149   |
| 4953 | POC206 | Q9BQ49 | -0.79503  |
| 4954 | POC206 | Q8TD90 | -0.081732 |
| 4955 | POC206 | Q16563 | -0.77341  |
| 4956 | POC206 | Q9BRP0 | -0.22149  |
| 4957 | POC206 | Q0VAM2 | -0.70657  |
| 4958 | POC206 | P49447 | -0.71941  |
| 4959 | POC206 | Q5JTN6 | -0.22969  |
| 4960 | POC206 | O14957 | -0.54022  |
| 4961 | POC206 | O00187 | -0.92563  |
| 4962 | POC206 | Q15835 | -1.0616   |
| 4963 | POC206 | P08253 | -0.63787  |
| 4964 | POC206 | P53621 | -0.22949  |
| 4965 | POC206 | P46977 | -0.34167  |
| 4966 | POC206 | P30711 | -0.22238  |
| 4967 | POC206 | P18440 | -0.18696  |
| 4968 | POC206 | Q6NTF9 | -0.83559  |
| 4969 | POC206 | P13726 | -0.31527  |
| 4970 | POC206 | Q9UHB6 | -0.22703  |
| 4971 | POC206 | A6NDI0 | -0.44814  |
| 4972 | POC206 | Q58G82 | -0.18821  |
| 4973 | POC206 | Q03721 | -0.7368   |
| 4974 | POC206 | P30519 | -0.17409  |
| 4975 | POC206 | Q9NQ40 | -0.92118  |
| 4976 | POC206 | P04430 | -0.9894   |
| 4977 | POC206 | Q16515 | -0.62624  |
| 4978 | POC206 | Q9Y6G1 | -0.79503  |
| 4979 | POC206 | Q4VX76 | -0.6758   |
| 4980 | POC206 | Q13303 | -0.67818  |
| 4981 | POC206 | Q8NEC7 | -0.16796  |
| 4982 | POC206 | Q9HB14 | -1.0115   |
| 4983 | POC206 | Q14191 | -0.22712  |
| 4984 | POC206 | Q8WW34 | -0.79503  |
| 4985 | POC206 | Q96NR7 | -0.047743 |
| 4986 | POC206 | A8K7I4 | -1.2635   |
| 4987 | POC206 | Q7RTS3 | -0.22951  |
| 4988 | POC206 | Q8NGK6 | -1.1763   |
| 4989 | POC206 | Q15056 | -0.22864  |
| 4990 | POC206 | Q9UPS6 | -0.22638  |
| 4991 | POC206 | P40313 | -0.8942   |
| 4992 | POC206 | O60939 | -0.74254  |
| 4993 | POC206 | Q4KMX7 | -0.33732  |
| 4994 | POC206 | Q8TDJ6 | -0.41198  |
| 4995 | POC206 | Q3MIT2 | -0.22444  |
| 4996 | POC206 | Q9UBC5 | -0.26849  |
| 4997 | POC206 | Q9H992 | -0.29043  |
| 4998 | POC206 | Q96BM0 | -0.79503  |
| 4999 | POC206 | Q5VTL7 | -0.80952  |
| 5000 | POC206 | Q9UQC9 | -1.4057   |
| 5001 | POC206 | Q9H1F0 | -0.75923  |
| 5002 | POC206 | Q96RB7 | -1.1763   |
| 5003 | POC206 | Q9H0X6 | -0.22329  |
| 5004 | POC206 | Q8N7U9 | -0.032616 |
| 5005 | POC206 | Q14393 | -0.28216  |
| 5006 | POC206 | Q96RY7 | -0.16514  |
| 5007 | POC206 | Q9H3R2 | -1.4139   |
| 5008 | POC206 | Q86UW8 | -1.0334   |
| 5009 | POC206 | Q08554 | -1.038    |
| 5010 | POC206 | Q641Q3 | -0.80952  |
| 5011 | POC206 | Q9BXA9 | -0.18864  |
| 5012 | POC206 | P11150 | -0.74593  |
| 5013 | POC206 | O75899 | -0.84421  |
| 5014 | POC206 | Q8NGL4 | -1.1763   |
| 5015 | POC206 | Q9H939 | -0.21872  |
| 5016 | POC206 | Q9NPC8 | -0.23279  |

|      |        |        |            |
|------|--------|--------|------------|
| 5017 | P0C206 | O95834 | -0.38438   |
| 5018 | P0C206 | O15400 | -0.79627   |
| 5019 | P0C206 | P01730 | -0.38032   |
| 5020 | P0C206 | P30491 | -0.99995   |
| 5021 | P0C206 | Q9Y5Y3 | -1.2448    |
| 5022 | P0C206 | A6PVS8 | -0.22576   |
| 5023 | P0C206 | P21333 | -0.23088   |
| 5024 | P0C206 | A8MWV9 | -0.79503   |
| 5025 | P0C206 | Q8NET8 | -0.80994   |
| 5026 | P0C206 | P49682 | -1.0627    |
| 5027 | P0C206 | O95428 | -1.0278    |
| 5028 | P0C206 | Q9BT09 | -0.28135   |
| 5029 | P0C206 | Q9BRJ9 | -0.2275    |
| 5030 | P0C206 | Q96DN2 | -0.88269   |
| 5031 | P0C206 | Q86SG4 | -0.13037   |
| 5032 | P0C206 | Q7L1I2 | -0.66307   |
| 5033 | P0C206 | Q6UWE0 | -0.22765   |
| 5034 | P0C206 | P15735 | -0.55021   |
| 5035 | P0C206 | P78509 | -0.57324   |
| 5036 | P0C206 | Q8NBP7 | -0.32146   |
| 5037 | P0C206 | Q07001 | -0.85232   |
| 5038 | P0C206 | Q14108 | -1.192     |
| 5039 | P0C206 | Q9UBM8 | -0.45156   |
| 5040 | P0C206 | Q2WGJ8 | -0.79503   |
| 5041 | P0C206 | P30498 | -0.99995   |
| 5042 | P0C206 | O75128 | -0.6255    |
| 5043 | P0C206 | Q9H270 | -0.22671   |
| 5044 | P0C206 | Q9Y6T7 | -0.80939   |
| 5045 | P0C206 | P52797 | -0.54062   |
| 5046 | P0C206 | Q6P4I2 | -0.18576   |
| 5047 | P0C206 | P18463 | -0.99995   |
| 5048 | P0C206 | O14562 | -0.14113   |
| 5049 | P0C206 | Q96HP0 | -0.051691  |
| 5050 | P0C206 | Q8N7E2 | -0.32564   |
| 5051 | P0C206 | O95760 | -0.10144   |
| 5052 | P0C206 | P16284 | -0.44718   |
| 5053 | P0C206 | Q8N6R0 | -0.30069   |
| 5054 | P0C206 | Q96GW7 | -0.89518   |
| 5055 | P0C206 | Q6ZUX7 | -0.79503   |
| 5056 | P0C206 | P78329 | -0.22913   |
| 5057 | P0C206 | Q13574 | -0.22741   |
| 5058 | P0C206 | O15409 | -0.45919   |
| 5059 | P0C206 | Q9NRZ5 | -0.75988   |
| 5060 | P0C206 | A6NL26 | -1.1763    |
| 5061 | P0C206 | Q5K651 | -0.16092   |
| 5062 | P0C206 | O43291 | -0.9512    |
| 5063 | P0C206 | A8K4G0 | -0.91833   |
| 5064 | P0C206 | P12821 | -0.72979   |
| 5065 | P0C206 | Q9BVQ7 | -0.67313   |
| 5066 | P0C206 | Q29718 | -0.99995   |
| 5067 | P0C206 | Q96ND0 | -0.62349   |
| 5068 | P0C206 | Q9BYN0 | -0.67624   |
| 5069 | P0C206 | O60502 | -0.0051398 |
| 5070 | P0C206 | P43354 | -0.24246   |
| 5071 | P0C206 | Q9HCN4 | -0.85366   |
| 5072 | P0C206 | O75140 | -0.46207   |
| 5073 | P0C206 | P0CK96 | -0.79503   |
| 5074 | P0C206 | Q8NH55 | -1.1763    |
| 5075 | P0C206 | Q8N9I9 | -0.22745   |
| 5076 | P0C206 | Q8N755 | -0.79503   |
| 5077 | P0C206 | Q9P0V8 | -0.80743   |
| 5078 | P0C206 | Q9BQ24 | -0.13237   |
| 5079 | P0C206 | P58400 | -0.56932   |
| 5080 | P0C206 | P04114 | -0.31047   |
| 5081 | P0C206 | Q9NYD6 | -0.31415   |
| 5082 | P0C206 | Q96S15 | -0.30322   |
| 5083 | P0C206 | Q17R89 | -0.33462   |
| 5084 | P0C206 | P51790 | -0.31272   |
| 5085 | P0C206 | P12429 | -0.38426   |
| 5086 | P0C206 | Q8N6F8 | -0.015171  |
| 5087 | P0C206 | Q86VQ3 | -0.22806   |
| 5088 | P0C206 | P35222 | -0.22932   |
| 5089 | P0C206 | Q9NWW5 | -0.30509   |
| 5090 | P0C206 | O43688 | -0.68227   |
| 5091 | P0C206 | A8MT33 | -0.22469   |
| 5092 | P0C206 | Q8IV42 | -0.73393   |



|      |        |        |          |
|------|--------|--------|----------|
| 5093 | P0C206 | P28906 | -0.51904 |
| 5094 | P0C206 | Q9BYJ0 | -0.8491  |
| 5095 | P0C206 | P57682 | -0.22398 |
| 5096 | P0C206 | O00206 | -0.22742 |
| 5097 | P0C206 | P08F94 | -0.22273 |
| 5098 | P0C206 | Q9Y619 | -0.48617 |
| 5099 | P0C206 | Q92736 | -0.34665 |
| 5100 | P0C206 | O75830 | -0.64986 |
| 5101 | P0C206 | B7U540 | -0.98012 |
| 5102 | P0C206 | Q8N6C7 | -0.03124 |
| 5103 | P0C206 | Q9NYQ8 | -0.65446 |
| 5104 | P0C206 | Q05BV3 | -0.22771 |
| 5105 | P0C206 | Q8NGE8 | -1.1763  |
| 5106 | P0C206 | Q6UB35 | -0.67459 |
| 5107 | P0C206 | Q8TE23 | -1.1725  |
| 5108 | P0C206 | Q9UF33 | -1.1355  |
| 5109 | P0C206 | Q9UQ88 | -0.14237 |
| 5110 | P0C206 | Q15842 | -0.71048 |
| 5111 | P0C206 | O95255 | -1.1787  |
| 5112 | P0C206 | Q8ND30 | -0.57228 |
| 5113 | P0C206 | Q9H1C3 | -0.82728 |
| 5114 | P0C206 | Q9H255 | -1.1763  |
| 5115 | P0C206 | Q92854 | -0.52505 |
| 5116 | P0C206 | Q9H2Y7 | -0.23219 |
| 5117 | P0C206 | P59646 | -0.839   |
| 5118 | P0C206 | Q96L46 | -0.29171 |
| 5119 | P0C206 | P54132 | -0.22571 |
| 5120 | P0C206 | P86397 | -0.63775 |
| 5121 | P0C206 | Q9P1U1 | -0.67942 |
| 5122 | P0C206 | P10176 | -0.47872 |
| 5123 | P0C206 | Q6P474 | -0.44585 |
| 5124 | P0C206 | Q9Y6I9 | -0.80952 |
| 5125 | P0C206 | Q9Y366 | -0.19028 |
| 5126 | P0C206 | P37173 | -0.3732  |
| 5127 | P0C206 | A8MVZ5 | -0.79503 |
| 5128 | P0C206 | P56178 | -0.21851 |
| 5129 | P0C206 | P20933 | -0.29108 |
| 5130 | P0C206 | O43174 | -0.70609 |
| 5131 | P0C206 | Q9UQ26 | -0.22741 |
| 5132 | P0C206 | P52757 | -0.73862 |
| 5133 | P0C206 | Q9HB89 | -1.0958  |
| 5134 | P0C206 | P05534 | -0.98849 |
| 5135 | P0C206 | P35968 | -0.38753 |
| 5136 | P0C206 | Q8N6L1 | -0.56336 |
| 5137 | P0C206 | Q03154 | -0.13831 |
| 5138 | P0C206 | O43761 | -0.66137 |
| 5139 | P0C206 | Q86VW2 | -0.55838 |
| 5140 | P0C206 | P06732 | -0.6539  |
| 5141 | P0C206 | P62341 | -0.27134 |
| 5142 | P0C206 | Q8WXE0 | -0.22746 |
| 5143 | P0C206 | Q9UGQ2 | -0.55354 |
| 5144 | P0C206 | Q9NVH1 | -0.19803 |
| 5145 | P0C206 | Q7Z698 | -0.19518 |
| 5146 | P0C206 | Q9UGJ0 | -0.69928 |
| 5147 | P0C206 | Q7Z3J3 | -0.35325 |
| 5148 | P0C206 | A6NHG9 | -1.1763  |
| 5149 | P0C206 | Q9UJ71 | -1.1097  |
| 5150 | P0C206 | P0C0S5 | -0.72568 |
| 5151 | P0C206 | Q9UBV7 | -0.42778 |
| 5152 | P0C206 | Q6PDA7 | -0.80952 |
| 5153 | P0C206 | Q93063 | -0.57431 |
| 5154 | P0C206 | Q9C0A1 | -0.2274  |
| 5155 | P0C206 | P55011 | -0.80092 |
| 5156 | P0C206 | A6NGB0 | -0.79503 |
| 5157 | P0C206 | Q9BQL6 | -0.42341 |
| 5158 | P0C206 | Q9UGF5 | -1.1763  |
| 5159 | P0C206 | O60602 | -1.0553  |
| 5160 | P0C206 | Q6ZNG9 | -0.16143 |
| 5161 | P0C206 | P55290 | -0.66232 |
| 5162 | P0C206 | Q9GIY3 | -0.63497 |
| 5163 | P0C206 | Q9GZK6 | -1.1763  |
| 5164 | P0C206 | P04118 | -0.74165 |
| 5165 | P0C206 | Q17RB8 | -0.33376 |
| 5166 | P0C206 | P08910 | -0.54893 |
| 5167 | P0C206 | A6NCM1 | -0.72239 |
| 5168 | P0C206 | P07602 | -0.84453 |

|      |        |        |           |
|------|--------|--------|-----------|
| 5169 | POC206 | Q9H8W2 | -0.052018 |
| 5170 | POC206 | Q14055 | -0.85863  |
| 5171 | POC206 | Q9HAD4 | -0.22741  |
| 5172 | POC206 | Q96I76 | -0.2446   |
| 5173 | POC206 | Q8NG80 | -1.0483   |
| 5174 | POC206 | P28223 | -0.69818  |
| 5175 | POC206 | Q6IC98 | -0.60169  |
| 5176 | POC206 | Q96J77 | -0.18647  |
| 5177 | POC206 | Q96CT2 | -0.19978  |
| 5178 | POC206 | O43795 | -0.31226  |
| 5179 | POC206 | P51884 | -0.60284  |
| 5180 | POC206 | Q6IAN0 | -1.2913   |
| 5181 | POC206 | Q9NR61 | -0.89517  |
| 5182 | POC206 | Q15149 | -0.2285   |
| 5183 | POC206 | O43820 | -0.66862  |
| 5184 | POC206 | Q17R60 | -0.95861  |
| 5185 | POC206 | P49821 | -0.30616  |
| 5186 | POC206 | Q06945 | -0.23828  |
| 5187 | POC206 | Q8TB33 | -0.11927  |
| 5188 | POC206 | Q8IZJ0 | -0.84266  |
| 5189 | POC206 | Q8NFU5 | -0.36415  |
| 5190 | POC206 | O60404 | -1.1763   |
| 5191 | POC206 | P41222 | -0.23342  |
| 5192 | POC206 | P01282 | -0.65605  |
| 5193 | POC206 | O43497 | -0.77816  |
| 5194 | POC206 | Q96N35 | -0.79503  |
| 5195 | POC206 | A4D2P6 | -0.25996  |
| 5196 | POC206 | O60229 | -0.98239  |
| 5197 | POC206 | P30048 | -0.20615  |
| 5198 | POC206 | P53384 | -0.15547  |
| 5199 | POC206 | Q6DN14 | -0.78942  |
| 5200 | POC206 | O15294 | -0.22623  |
| 5201 | POC206 | Q9NZU1 | -1.0915   |
| 5202 | POC206 | Q9P2F8 | -0.89897  |
| 5203 | POC206 | Q9Y493 | -1.0501   |
| 5204 | POC206 | P07988 | -0.59875  |
| 5205 | POC206 | P07098 | -0.80713  |
| 5206 | POC206 | Q8WYK0 | -0.13808  |
| 5207 | POC206 | Q9GZT4 | -0.52903  |
| 5208 | POC206 | P98095 | -0.9591   |
| 5209 | POC206 | Q53RY4 | -0.79503  |
| 5210 | POC206 | Q15746 | -0.47486  |
| 5211 | POC206 | P48681 | -0.13921  |
| 5212 | POC206 | Q9BV23 | -0.69144  |
| 5213 | POC206 | Q9NY25 | -0.83674  |
| 5214 | POC206 | Q6ZUQ5 | -0.63324  |
| 5215 | POC206 | Q92835 | -0.22741  |
| 5216 | POC206 | Q7Z5L7 | -0.71111  |
| 5217 | POC206 | Q9UPX6 | -0.79503  |
| 5218 | POC206 | Q96P11 | -0.20034  |
| 5219 | POC206 | Q8TB73 | -0.79296  |
| 5220 | POC206 | P26374 | -0.59018  |
| 5221 | POC206 | P08842 | -0.54421  |
| 5222 | POC206 | O95382 | -1.1997   |
| 5223 | POC206 | P21217 | -0.6228   |
| 5224 | POC206 | Q86YV0 | -0.41964  |
| 5225 | POC206 | P03999 | -1.3019   |
| 5226 | POC206 | P01242 | -0.77248  |
| 5227 | POC206 | Q9NV64 | -0.79503  |
| 5228 | POC206 | Q86UE8 | -0.22741  |
| 5229 | POC206 | Q6IQ20 | -0.34828  |
| 5230 | POC206 | Q8N7C7 | -0.73705  |
| 5231 | POC206 | Q9UM44 | -0.57403  |
| 5232 | POC206 | P98082 | -0.22622  |
| 5233 | POC206 | Q9H792 | -0.42816  |
| 5234 | POC206 | P00918 | -0.1575   |
| 5235 | POC206 | A0PJY2 | -0.0465   |
| 5236 | POC206 | P26010 | -1.1852   |
| 5237 | POC206 | O75443 | -0.99293  |
| 5238 | POC206 | P55773 | -1.0898   |
| 5239 | POC206 | Q9H0P7 | -0.080077 |
| 5240 | POC206 | P68366 | -0.50369  |
| 5241 | POC206 | Q4KMP7 | -1.0903   |
| 5242 | POC206 | Q674R7 | -0.75645  |
| 5243 | POC206 | Q9Y496 | -0.36581  |
| 5244 | POC206 | Q9NZR1 | -0.21322  |

|      |        |        |           |
|------|--------|--------|-----------|
| 5245 | P0C206 | Q16517 | -0.30287  |
| 5246 | P0C206 | Q13467 | -0.37959  |
| 5247 | P0C206 | P38571 | -0.45539  |
| 5248 | P0C206 | Q9H3S4 | -0.43104  |
| 5249 | P0C206 | Q8NH69 | -1.1763   |
| 5250 | P0C206 | Q8TAA9 | -0.35996  |
| 5251 | P0C206 | O43166 | -0.22802  |
| 5252 | P0C206 | P41968 | -0.82671  |
| 5253 | P0C206 | Q8TDU5 | -1.1833   |
| 5254 | P0C206 | Q96LK8 | -0.021229 |
| 5255 | P0C206 | Q75LS8 | -0.31614  |
| 5256 | P0C206 | P04234 | -0.43683  |
| 5257 | P0C206 | Q9BUY7 | -0.29182  |
| 5258 | P0C206 | A6NG13 | -0.7425   |
| 5259 | P0C206 | P16233 | -0.71812  |
| 5260 | P0C206 | F5H4A9 | -0.79503  |
| 5261 | P0C206 | Q5TEU4 | -0.16433  |
| 5262 | P0C206 | Q9H223 | -0.23491  |
| 5263 | P0C206 | P43403 | -0.46385  |
| 5264 | P0C206 | P17405 | -0.29014  |
| 5265 | P0C206 | Q6UVW9 | -0.32754  |
| 5266 | P0C206 | P14174 | -0.27091  |
| 5267 | P0C206 | O60234 | -0.55643  |
| 5268 | P0C206 | Q8NFZ6 | -1.1833   |
| 5269 | P0C206 | P29973 | -1.323    |
| 5270 | P0C206 | A6NNL5 | -0.80952  |
| 5271 | P0C206 | O94955 | -0.28135  |
| 5272 | P0C206 | Q9BY76 | -0.45071  |
| 5273 | P0C206 | O15479 | -0.1267   |
| 5274 | P0C206 | Q8WZ64 | -0.90132  |
| 5275 | P0C206 | Q9BZW8 | -0.49131  |
| 5276 | P0C206 | Q8WW32 | -0.38487  |
| 5277 | P0C206 | Q2WGN9 | -0.32146  |
| 5278 | P0C206 | Q9Y5F2 | -1.1831   |
| 5279 | P0C206 | Q9BZ67 | -0.16872  |
| 5280 | P0C206 | Q96J92 | -0.83267  |
| 5281 | P0C206 | Q8N428 | -0.49488  |
| 5282 | P0C206 | Q9Y4G8 | -0.96099  |
| 5283 | P0C206 | P0C7W6 | -0.092277 |
| 5284 | P0C206 | Q2I0M5 | -0.87541  |
| 5285 | P0C206 | Q8IWW6 | -1.083    |
| 5286 | P0C206 | Q9Y548 | -0.77738  |
| 5287 | P0C206 | Q9Y6V0 | -0.25659  |
| 5288 | P0C206 | Q5BJD5 | -0.79503  |
| 5289 | P0C206 | O15034 | -0.3577   |
| 5290 | P0C206 | P16152 | -0.74633  |
| 5291 | P0C206 | Q86XJ0 | -0.79503  |
| 5292 | P0C206 | P53985 | -0.50352  |
| 5293 | P0C206 | Q4AC94 | -0.23742  |
| 5294 | P0C206 | Q6U841 | -0.75412  |
| 5295 | P0C206 | Q8NGC2 | -1.1763   |
| 5296 | P0C206 | P63129 | -0.56257  |
| 5297 | P0C206 | P24046 | -0.76369  |
| 5298 | P0C206 | Q8NHE4 | -0.60438  |
| 5299 | P0C206 | P31942 | -0.29403  |
| 5300 | P0C206 | Q4ZHG4 | -0.55414  |
| 5301 | P0C206 | Q13131 | -0.27     |
| 5302 | P0C206 | Q07343 | -0.21961  |
| 5303 | P0C206 | O15480 | -0.040954 |
| 5304 | P0C206 | P18405 | -0.38214  |
| 5305 | P0C206 | Q9UN67 | -1.1388   |
| 5306 | P0C206 | Q8TCU6 | -0.2277   |
| 5307 | P0C206 | Q5T3F8 | -1.2585   |
| 5308 | P0C206 | Q9BQB4 | -0.2186   |
| 5309 | P0C206 | Q07812 | -0.22733  |
| 5310 | P0C206 | Q6UWP2 | -1.5883   |
| 5311 | P0C206 | Q86WK9 | -1.2379   |
| 5312 | P0C206 | Q6NWX9 | -0.22393  |
| 5313 | P0C206 | O00555 | -0.30229  |
| 5314 | P0C206 | P16389 | -0.7478   |
| 5315 | P0C206 | P0C7P1 | -0.60591  |
| 5316 | P0C206 | P56378 | -0.43134  |
| 5317 | P0C206 | P51679 | -1.2665   |
| 5318 | P0C206 | Q96QS6 | -1.13     |
| 5319 | P0C206 | A6NMS3 | -1.1763   |
| 5320 | P0C206 | O60499 | -0.17274  |

|      |        |        |           |
|------|--------|--------|-----------|
| 5321 | POC206 | Q9UI17 | -0.15601  |
| 5322 | POC206 | Q96JJ6 | -0.94961  |
| 5323 | POC206 | O43304 | -0.85409  |
| 5324 | POC206 | Q5T1Q4 | -0.72669  |
| 5325 | POC206 | Q15726 | -0.13902  |
| 5326 | POC206 | Q9Y5Y6 | -1.736    |
| 5327 | POC206 | Q8NGH3 | -1.1763   |
| 5328 | POC206 | Q9Y4C0 | -0.99032  |
| 5329 | POC206 | Q14943 | -1.0619   |
| 5330 | POC206 | Q16270 | -0.49189  |
| 5331 | POC206 | P06340 | -0.87852  |
| 5332 | POC206 | A6NGN9 | -0.80952  |
| 5333 | POC206 | Q96R30 | -1.1763   |
| 5334 | POC206 | A6NCL2 | -0.16412  |
| 5335 | POC206 | Q15785 | -0.4571   |
| 5336 | POC206 | Q8N442 | -0.61891  |
| 5337 | POC206 | O14863 | -0.52383  |
| 5338 | POC206 | P54296 | -0.46301  |
| 5339 | POC206 | Q9BUM1 | -0.35373  |
| 5340 | POC206 | O14944 | -0.48631  |
| 5341 | POC206 | Q8NI17 | -0.4661   |
| 5342 | POC206 | P34995 | -1.2806   |
| 5343 | POC206 | Q5T7W0 | -0.22597  |
| 5344 | POC206 | Q92619 | -0.9548   |
| 5345 | POC206 | Q9UH73 | -0.10016  |
| 5346 | POC206 | Q16659 | -0.22741  |
| 5347 | POC206 | Q93091 | -0.66334  |
| 5348 | POC206 | P47985 | -0.97729  |
| 5349 | POC206 | Q9NUQ2 | -0.65899  |
| 5350 | POC206 | Q8WUF8 | -0.78747  |
| 5351 | POC206 | Q8NA29 | -0.92656  |
| 5352 | POC206 | Q6XLA1 | -0.19365  |
| 5353 | POC206 | Q96M94 | -0.23335  |
| 5354 | POC206 | P30566 | -0.066042 |
| 5355 | POC206 | P58166 | -0.6947   |
| 5356 | POC206 | A8MY62 | -0.25739  |
| 5357 | POC206 | Q6JVE6 | -0.73664  |
| 5358 | POC206 | Q9Y6R7 | -0.21821  |
| 5359 | POC206 | Q0JRZ9 | -0.22401  |
| 5360 | POC206 | Q6UWU2 | -0.70723  |
| 5361 | POC206 | Q496J9 | -0.66454  |
| 5362 | POC206 | Q8N6W0 | -0.34533  |
| 5363 | POC206 | O60519 | -0.15145  |
| 5364 | POC206 | Q6ZRI8 | -1.0098   |
| 5365 | POC206 | A6NML5 | -0.79503  |
| 5366 | POC206 | O94819 | -0.21427  |
| 5367 | POC206 | Q8N5Z5 | -0.14217  |
| 5368 | POC206 | P23942 | -0.94965  |
| 5369 | POC206 | Q86YB7 | -0.4898   |
| 5370 | POC206 | Q75365 | -0.76647  |
| 5371 | POC206 | Q6ZWI9 | -0.22781  |
| 5372 | POC206 | Q96LB2 | -1.2027   |
| 5373 | POC206 | Q9H2R5 | -1.3203   |
| 5374 | POC206 | Q8TCV5 | -0.75923  |
| 5375 | POC206 | Q9UJM8 | -0.71922  |
| 5376 | POC206 | P25942 | -0.52311  |
| 5377 | POC206 | Q6ZMS4 | -0.46721  |
| 5378 | POC206 | Q9Y442 | -0.79503  |
| 5379 | POC206 | Q99570 | -0.41373  |
| 5380 | POC206 | O00270 | -1.3861   |
| 5381 | POC206 | Q8WXH2 | -0.79322  |
| 5382 | POC206 | Q9NRD0 | -0.22617  |
| 5383 | POC206 | Q9BYV6 | -0.22734  |
| 5384 | POC206 | O60347 | -1.2801   |
| 5385 | POC206 | Q8NFW5 | -0.18128  |
| 5386 | POC206 | P82251 | -0.91449  |
| 5387 | POC206 | P98077 | -0.22741  |
| 5388 | POC206 | Q6ZN18 | -0.47073  |
| 5389 | POC206 | Q8IYK4 | -0.2784   |
| 5390 | POC206 | Q9Y235 | -0.42528  |
| 5391 | POC206 | Q02318 | -0.4009   |
| 5392 | POC206 | Q96LM5 | -0.036893 |
| 5393 | POC206 | P36383 | -0.89472  |
| 5394 | POC206 | Q7Z4L5 | -0.42806  |
| 5395 | POC206 | Q16696 | -0.75353  |
| 5396 | POC206 | Q9UKJ1 | -0.83714  |

|      |        |        |           |
|------|--------|--------|-----------|
| 5397 | P0C206 | Q9GZNO | -1.1595   |
| 5398 | P0C206 | Q5BKU6 | -0.050044 |
| 5399 | P0C206 | Q8N1C3 | -0.70236  |
| 5400 | P0C206 | Q8N3T1 | -0.59455  |
| 5401 | P0C206 | P13987 | -0.41711  |
| 5402 | P0C206 | Q86U37 | -0.13869  |
| 5403 | P0C206 | P49888 | -0.22422  |
| 5404 | P0C206 | Q7Z7J9 | -0.45665  |
| 5405 | P0C206 | Q9H987 | -0.22709  |
| 5406 | P0C206 | Q92902 | -0.27019  |
| 5407 | P0C206 | Q8TD91 | -0.093462 |
| 5408 | P0C206 | Q6JVE9 | -0.74965  |
| 5409 | P0C206 | Q15345 | -0.23335  |
| 5410 | P0C206 | Q9Y6M0 | -0.70721  |
| 5411 | P0C206 | C9JDV5 | -0.053206 |
| 5412 | P0C206 | Q8WY07 | -0.8037   |
| 5413 | P0C206 | Q9BY64 | -0.91173  |
| 5414 | P0C206 | P0DJ07 | -0.62349  |
| 5415 | P0C206 | O95750 | -0.38809  |
| 5416 | P0C206 | P35590 | -1.0405   |
| 5417 | P0C206 | Q9NUE0 | -0.80265  |
| 5418 | P0C206 | Q9Y289 | -0.76105  |
| 5419 | P0C206 | P11487 | -0.33718  |
| 5420 | P0C206 | Q9NR34 | -0.60054  |
| 5421 | P0C206 | Q5EBL8 | -0.22662  |
| 5422 | P0C206 | Q9BYT3 | -0.64737  |
| 5423 | P0C206 | P54849 | -1.1172   |
| 5424 | P0C206 | Q86SI9 | -0.80952  |
| 5425 | P0C206 | P50406 | -0.85567  |
| 5426 | P0C206 | A8MVU1 | -0.22741  |
| 5427 | P0C206 | Q7Z6M1 | -0.22477  |
| 5428 | P0C206 | Q96A72 | -0.087451 |
| 5429 | P0C206 | Q01970 | -0.30446  |
| 5430 | P0C206 | Q14CB8 | -0.71566  |
| 5431 | P0C206 | P28566 | -1.2869   |
| 5432 | P0C206 | O95747 | -1.0645   |
| 5433 | P0C206 | Q5JRX3 | -0.13872  |
| 5434 | P0C206 | Q53HC9 | -0.22722  |
| 5435 | P0C206 | P60893 | -1.2448   |
| 5436 | P0C206 | Q8IVY1 | -0.79503  |
| 5437 | P0C206 | O95994 | -0.14022  |
| 5438 | P0C206 | Q6YI46 | -0.79503  |
| 5439 | P0C206 | P49683 | -1.2195   |
| 5440 | P0C206 | Q13451 | -0.53912  |
| 5441 | P0C206 | Q15669 | -0.22562  |
| 5442 | P0C206 | O00487 | -0.23995  |
| 5443 | P0C206 | Q16760 | -0.51481  |
| 5444 | P0C206 | Q96KJ4 | -0.98895  |
| 5445 | P0C206 | Q8NC24 | -1.0018   |
| 5446 | P0C206 | P54646 | -0.26313  |
| 5447 | P0C206 | Q8NH53 | -1.1763   |
| 5448 | P0C206 | Q92685 | -0.79276  |
| 5449 | P0C206 | Q8IZF0 | -0.89928  |
| 5450 | P0C206 | Q8WV35 | -0.20533  |
| 5451 | P0C206 | Q8N9N7 | -0.24091  |
| 5452 | P0C206 | Q16674 | -0.82916  |
| 5453 | P0C206 | Q5VYY2 | -0.81079  |
| 5454 | P0C206 | P43003 | -0.58834  |
| 5455 | P0C206 | P08588 | -0.68291  |
| 5456 | P0C206 | Q9NPF2 | -0.31864  |
| 5457 | P0C206 | Q5R387 | -0.8213   |
| 5458 | P0C206 | P62684 | -0.15319  |
| 5459 | P0C206 | O00237 | -0.54551  |
| 5460 | P0C206 | Q14680 | -0.49414  |
| 5461 | P0C206 | Q9H4G0 | -0.26961  |
| 5462 | P0C206 | Q9BSA4 | -0.35153  |
| 5463 | P0C206 | P07510 | -0.96336  |
| 5464 | P0C206 | P28827 | -0.51436  |
| 5465 | P0C206 | P35523 | -0.88293  |
| 5466 | P0C206 | Q96P65 | -1.2135   |
| 5467 | P0C206 | Q04844 | -0.96535  |
| 5468 | P0C206 | Q9BUU2 | -0.20034  |
| 5469 | P0C206 | Q9NP08 | -0.228    |
| 5470 | P0C206 | Q96FN5 | -0.39587  |
| 5471 | P0C206 | Q8IVW6 | -0.20508  |
| 5472 | P0C206 | Q96PB7 | -0.73932  |

|      |        |        |           |
|------|--------|--------|-----------|
| 5473 | P0C206 | Q8NBJ5 | -0.2784   |
| 5474 | P0C206 | P40227 | -0.29452  |
| 5475 | P0C206 | Q9Y5I3 | -1.6698   |
| 5476 | P0C206 | Q96RD0 | -1.1763   |
| 5477 | P0C206 | C9JI98 | -0.79503  |
| 5478 | P0C206 | Q9BZ97 | -0.79503  |
| 5479 | P0C206 | Q6ZS10 | -0.7514   |
| 5480 | P0C206 | O14543 | -0.22741  |
| 5481 | P0C206 | Q8IVB4 | -0.83741  |
| 5482 | P0C206 | Q16663 | -1.1308   |
| 5483 | P0C206 | Q9Y581 | -0.64832  |
| 5484 | P0C206 | Q86X59 | -0.17755  |
| 5485 | P0C206 | P0DKB6 | -0.79503  |
| 5486 | P0C206 | Q5JSP0 | -0.6584   |
| 5487 | P0C206 | Q13326 | -0.43877  |
| 5488 | P0C206 | Q9H3G5 | -0.55959  |
| 5489 | P0C206 | Q5T292 | -0.79503  |
| 5490 | P0C206 | Q9NYT0 | -0.37089  |
| 5491 | P0C206 | Q9H6S3 | -0.22741  |
| 5492 | P0C206 | Q8IY84 | -1.1849   |
| 5493 | P0C206 | Q96IX9 | -0.16509  |
| 5494 | P0C206 | Q58FG0 | -0.4889   |
| 5495 | P0C206 | Q9UHA7 | -0.90583  |
| 5496 | P0C206 | O43854 | -1.2166   |
| 5497 | P0C206 | Q9N2K0 | -0.53771  |
| 5498 | P0C206 | Q9UP52 | -0.98255  |
| 5499 | P0C206 | P49771 | -1.4806   |
| 5500 | P0C206 | Q14796 | -0.47619  |
| 5501 | P0C206 | O95988 | -0.22752  |
| 5502 | P0C206 | O95670 | -0.22294  |
| 5503 | P0C206 | Q8NA56 | -0.022842 |
| 5504 | P0C206 | Q4VXA5 | -0.82731  |
| 5505 | P0C206 | Q9UPE1 | -1.1015   |
| 5506 | P0C206 | P16473 | -0.68739  |
| 5507 | P0C206 | Q96RU3 | -0.22741  |
| 5508 | P0C206 | Q9UPS8 | -0.22738  |
| 5509 | P0C206 | Q96HE8 | -0.79503  |
| 5510 | P0C206 | Q969X1 | -0.77874  |
| 5511 | P0C206 | Q13797 | -0.79092  |
| 5512 | P0C206 | P15289 | -0.54052  |
| 5513 | P0C206 | Q9UBK5 | -0.92567  |
| 5514 | P0C206 | P01815 | -0.9894   |
| 5515 | P0C206 | Q9GZU0 | -0.43048  |
| 5516 | P0C206 | Q6NW34 | -0.79503  |
| 5517 | P0C206 | Q02297 | -0.25508  |
| 5518 | P0C206 | Q9QC07 | -0.2659   |
| 5519 | P0C206 | P0C862 | -0.85493  |
| 5520 | P0C206 | Q6GPH6 | -0.79503  |
| 5521 | P0C206 | Q9BS86 | -0.7942   |
| 5522 | P0C206 | Q8TCW9 | -1.2135   |
| 5523 | P0C206 | Q14166 | -0.1745   |
| 5524 | P0C206 | Q75600 | -0.099447 |
| 5525 | P0C206 | E2RYF7 | -0.80952  |
| 5526 | P0C206 | P08962 | -0.5442   |
| 5527 | P0C206 | Q8WU17 | -0.43248  |
| 5528 | P0C206 | P51810 | -0.41362  |
| 5529 | P0C206 | Q7Z3Q1 | -0.80137  |
| 5530 | P0C206 | Q9NVX7 | -0.22359  |
| 5531 | P0C206 | P23435 | -0.71373  |
| 5532 | P0C206 | P22307 | -0.19837  |
| 5533 | P0C206 | P37059 | -1.2534   |
| 5534 | P0C206 | Q9HA64 | -0.49258  |
| 5535 | P0C206 | Q96SU4 | -0.60853  |
| 5536 | P0C206 | Q5GH77 | -0.91833  |
| 5537 | P0C206 | Q5GAN4 | -0.8151   |
| 5538 | P0C206 | O95620 | -0.59265  |
| 5539 | P0C206 | Q9UGT4 | -0.81442  |
| 5540 | P0C206 | P24043 | -0.828    |
| 5541 | P0C206 | Q8N0Y5 | -1.1763   |
| 5542 | P0C206 | P49407 | -0.35881  |
| 5543 | P0C206 | Q8N3F9 | -0.79503  |
| 5544 | P0C206 | Q5TZF3 | -0.22741  |
| 5545 | P0C206 | P43080 | -0.63795  |
| 5546 | P0C206 | P01594 | -0.9894   |
| 5547 | P0C206 | P53667 | -0.22741  |
| 5548 | P0C206 | Q9NXN4 | -0.20633  |

|      |        |        |           |
|------|--------|--------|-----------|
| 5549 | P0C206 | A4QPH2 | -0.5893   |
| 5550 | P0C206 | Q9H5Z1 | -0.74966  |
| 5551 | P0C206 | P51843 | -0.22725  |
| 5552 | P0C206 | A6NGZ7 | -0.79503  |
| 5553 | P0C206 | P03956 | -1.0474   |
| 5554 | P0C206 | O75715 | -1.1851   |
| 5555 | P0C206 | Q96G91 | -1.1412   |
| 5556 | P0C206 | Q9BXI3 | -0.28825  |
| 5557 | P0C206 | Q99965 | -1.0814   |
| 5558 | P0C206 | P32321 | -0.17818  |
| 5559 | P0C206 | Q7Z692 | -0.79503  |
| 5560 | P0C206 | Q53GD3 | -0.75708  |
| 5561 | P0C206 | Q9Y388 | -0.83583  |
| 5562 | P0C206 | O75364 | -0.1634   |
| 5563 | P0C206 | P39210 | -0.52754  |
| 5564 | P0C206 | Q08257 | -0.47466  |
| 5565 | P0C206 | Q96QB1 | -0.30018  |
| 5566 | P0C206 | Q86YS7 | -0.42973  |
| 5567 | P0C206 | Q8TC44 | -0.22721  |
| 5568 | P0C206 | Q9P035 | -1.208    |
| 5569 | P0C206 | Q96DC9 | -0.6186   |
| 5570 | P0C206 | A6NF89 | -1.1763   |
| 5571 | P0C206 | Q06141 | -0.8977   |
| 5572 | P0C206 | Q6IC83 | -0.24547  |
| 5573 | P0C206 | P31513 | -0.92859  |
| 5574 | P0C206 | O43612 | -0.40809  |
| 5575 | P0C206 | P11047 | -0.85704  |
| 5576 | P0C206 | Q9HBE5 | -0.76776  |
| 5577 | P0C206 | Q96QE3 | -0.5167   |
| 5578 | P0C206 | Q8TDU6 | -1.2448   |
| 5579 | P0C206 | P35555 | -0.6985   |
| 5580 | P0C206 | Q8TEF2 | -0.79503  |
| 5581 | P0C206 | Q13285 | -0.22919  |
| 5582 | P0C206 | P54851 | -0.81197  |
| 5583 | P0C206 | Q8NGY5 | -1.1763   |
| 5584 | P0C206 | O95749 | -0.1322   |
| 5585 | P0C206 | O75881 | -0.60878  |
| 5586 | P0C206 | Q92959 | -0.95465  |
| 5587 | P0C206 | P04746 | -0.73426  |
| 5588 | P0C206 | Q5ZPR3 | -0.33483  |
| 5589 | P0C206 | Q38SD2 | -1.2656   |
| 5590 | P0C206 | O75541 | -0.23908  |
| 5591 | P0C206 | A6NGB7 | -0.79503  |
| 5592 | P0C206 | Q96JG9 | -0.22754  |
| 5593 | P0C206 | Q8NA75 | -0.22722  |
| 5594 | P0C206 | O43929 | -0.085488 |
| 5595 | P0C206 | Q8N165 | -0.89443  |
| 5596 | P0C206 | Q5T9C9 | -0.85019  |
| 5597 | P0C206 | Q9P1W8 | -0.51301  |
| 5598 | P0C206 | Q9Y625 | -1.0679   |
| 5599 | P0C206 | Q8IVP5 | -0.15542  |
| 5600 | P0C206 | Q9BYW1 | -0.65502  |
| 5601 | P0C206 | P05013 | -0.63478  |
| 5602 | P0C206 | Q76I76 | -0.48013  |
| 5603 | P0C206 | P49675 | -0.33223  |
| 5604 | P0C206 | Q53QZ3 | -0.90434  |
| 5605 | P0C206 | M0R1G4 | -0.052372 |
| 5606 | P0C206 | P07099 | -0.78909  |
| 5607 | P0C206 | Q8IWL1 | -0.95961  |
| 5608 | P0C206 | A6NI61 | -0.79503  |
| 5609 | P0C206 | Q01974 | -1.2005   |
| 5610 | P0C206 | Q9H334 | -0.45919  |
| 5611 | P0C206 | Q8WWF6 | -0.34475  |
| 5612 | P0C206 | Q6JQN1 | -0.69269  |
| 5613 | P0C206 | P51649 | -0.41017  |
| 5614 | P0C206 | P51788 | -0.72524  |
| 5615 | P0C206 | Q9NZB8 | -0.48335  |
| 5616 | P0C206 | Q15526 | -0.64239  |
| 5617 | P0C206 | Q8IYT8 | -0.73187  |
| 5618 | P0C206 | Q9H078 | -0.54016  |
| 5619 | P0C206 | B2RC85 | -0.11248  |
| 5620 | P0C206 | Q96IW2 | -0.2274   |
| 5621 | P0C206 | P25940 | -0.88305  |
| 5622 | P0C206 | Q03692 | -0.97726  |
| 5623 | P0C206 | A6NCI4 | -0.80952  |
| 5624 | P0C206 | F8VTS6 | -0.22743  |

|      |        |        |           |
|------|--------|--------|-----------|
| 5625 | P0C206 | Q4V339 | -0.72239  |
| 5626 | P0C206 | P78382 | -0.39515  |
| 5627 | P0C206 | Q1X8D7 | -0.22674  |
| 5628 | P0C206 | P30874 | -0.38585  |
| 5629 | P0C206 | Q9NZ53 | -0.50036  |
| 5630 | P0C206 | P58549 | -0.83427  |
| 5631 | P0C206 | P62491 | -0.2908   |
| 5632 | P0C206 | Q6J9G0 | -1.5563   |
| 5633 | P0C206 | P34741 | -0.28354  |
| 5634 | P0C206 | A6NM43 | -0.52815  |
| 5635 | P0C206 | P00739 | -0.94485  |
| 5636 | P0C206 | Q8NGU9 | -1.2448   |
| 5637 | P0C206 | Q9H6X2 | -0.47366  |
| 5638 | P0C206 | P12235 | -0.23525  |
| 5639 | P0C206 | Q5T013 | -0.17074  |
| 5640 | P0C206 | P07951 | -0.13302  |
| 5641 | P0C206 | P01609 | -0.9894   |
| 5642 | P0C206 | A8MT66 | -0.056609 |
| 5643 | P0C206 | Q53GL0 | -0.030748 |
| 5644 | P0C206 | P19256 | -0.58239  |
| 5645 | P0C206 | Q15528 | -0.31802  |
| 5646 | P0C206 | Q8NFY9 | -0.20871  |
| 5647 | P0C206 | Q9Y4H2 | -0.20389  |
| 5648 | P0C206 | Q8N8R5 | -0.80952  |
| 5649 | P0C206 | Q8NHV1 | -0.92067  |
| 5650 | P0C206 | P22459 | -0.47589  |
| 5651 | P0C206 | P28332 | -0.43505  |
| 5652 | P0C206 | Q9HBY0 | -0.78687  |
| 5653 | P0C206 | Q18PE1 | -0.58193  |
| 5654 | P0C206 | Q9H1P6 | -0.11238  |
| 5655 | P0C206 | Q14791 | -0.52205  |
| 5656 | P0C206 | Q00973 | -0.58037  |
| 5657 | P0C206 | Q15238 | -0.22791  |
| 5658 | P0C206 | P43246 | -0.17133  |
| 5659 | P0C206 | Q969Q4 | -0.71318  |
| 5660 | P0C206 | Q13133 | -0.23237  |
| 5661 | P0C206 | Q9UQF0 | -0.69905  |
| 5662 | P0C206 | Q96LM9 | -0.033276 |
| 5663 | P0C206 | Q43193 | -1.3537   |
| 5664 | P0C206 | Q8IY50 | -0.72669  |
| 5665 | P0C206 | Q8IZ07 | -0.22741  |
| 5666 | P0C206 | Q15286 | -0.4637   |
| 5667 | P0C206 | Q99661 | -0.36581  |
| 5668 | P0C206 | Q86TA4 | -0.010524 |
| 5669 | P0C206 | Q6PIS1 | -0.72007  |
| 5670 | P0C206 | Q7Z2Q7 | -0.79503  |
| 5671 | P0C206 | Q9C0A6 | -0.22335  |
| 5672 | P0C206 | Q96L96 | -0.58023  |
| 5673 | P0C206 | Q8N414 | -0.79503  |
| 5674 | P0C206 | Q6TDP4 | -0.57444  |
| 5675 | P0C206 | Q8IY47 | -0.2026   |
| 5676 | P0C206 | P55291 | -1.0739   |
| 5677 | P0C206 | Q95299 | -0.033458 |
| 5678 | P0C206 | Q2VPA4 | -0.66159  |
| 5679 | P0C206 | Q9Y279 | -0.22742  |
| 5680 | P0C206 | P20930 | -0.18929  |
| 5681 | P0C206 | Q9UPM6 | -0.22742  |
| 5682 | P0C206 | Q8NCF0 | -0.80341  |
| 5683 | P0C206 | A6NEC2 | -0.58286  |
| 5684 | P0C206 | Q96F81 | -0.73015  |
| 5685 | P0C206 | Q16623 | -0.3671   |
| 5686 | P0C206 | Q8N8U9 | -0.74345  |
| 5687 | P0C206 | Q8NEV1 | -1.0649   |
| 5688 | P0C206 | Q9UEW8 | -0.60268  |
| 5689 | P0C206 | Q9ULA0 | -0.3551   |
| 5690 | P0C206 | P04220 | -0.38101  |
| 5691 | P0C206 | Q9Y5P2 | -0.22085  |
| 5692 | P0C206 | P22676 | -0.22585  |
| 5693 | P0C206 | Q96HA4 | -0.79503  |
| 5694 | P0C206 | C9JPN9 | -0.59814  |
| 5695 | P0C206 | Q96S82 | -0.22107  |
| 5696 | P0C206 | Q9C0B0 | -0.17787  |
| 5697 | P0C206 | Q6IQ55 | -0.53741  |
| 5698 | P0C206 | Q9BZM2 | -0.65276  |
| 5699 | P0C206 | Q5I0X7 | -0.27195  |
| 5700 | P0C206 | Q8NH16 | -1.0483   |



|      |        |        |           |
|------|--------|--------|-----------|
| 5701 | P0C206 | O60292 | -0.89897  |
| 5702 | P0C206 | P17612 | -0.22564  |
| 5703 | P0C206 | Q8N7X8 | -0.79503  |
| 5704 | P0C206 | Q9H6D3 | -0.79503  |
| 5705 | P0C206 | P20916 | -0.86566  |
| 5706 | P0C206 | Q7Z6W7 | -0.34475  |
| 5707 | P0C206 | Q9UDX3 | -1.0025   |
| 5708 | P0C206 | Q9H8M5 | -0.83789  |
| 5709 | P0C206 | Q9NRJ5 | -0.13422  |
| 5710 | P0C206 | P62330 | -0.40073  |
| 5711 | P0C206 | P43119 | -1.0023   |
| 5712 | P0C206 | Q9GZQ8 | -0.1767   |
| 5713 | P0C206 | P04632 | -0.23326  |
| 5714 | P0C206 | A6NC98 | -0.15663  |
| 5715 | P0C206 | Q8IYA7 | -0.26538  |
| 5716 | P0C206 | P55318 | -0.37245  |
| 5717 | P0C206 | Q15057 | -0.77452  |
| 5718 | P0C206 | P09769 | -0.54326  |
| 5719 | P0C206 | P61106 | -0.30623  |
| 5720 | P0C206 | Q86YJ7 | -0.22741  |
| 5721 | P0C206 | Q9H115 | -0.068752 |
| 5722 | P0C206 | Q7Z3E5 | -0.22728  |
| 5723 | P0C206 | Q15438 | -0.22741  |
| 5724 | P0C206 | Q5XX13 | -0.22772  |
| 5725 | P0C206 | Q8N9C0 | -0.22748  |
| 5726 | P0C206 | Q6UXC1 | -0.47539  |
| 5727 | P0C206 | P54619 | -0.39836  |
| 5728 | P0C206 | Q15432 | -0.91892  |
| 5729 | P0C206 | A6ND01 | -0.79164  |
| 5730 | P0C206 | Q969R2 | -0.70235  |
| 5731 | P0C206 | O00626 | -1.0131   |
| 5732 | P0C206 | Q3B8N2 | -0.2154   |
| 5733 | P0C206 | P31273 | -0.57015  |
| 5734 | P0C206 | Q5VY43 | -0.87067  |
| 5735 | P0C206 | Q9Y4F1 | -0.37265  |
| 5736 | P0C206 | P45954 | -0.57595  |
| 5737 | P0C206 | P57073 | -0.38083  |
| 5738 | P0C206 | P10145 | -0.55619  |
| 5739 | P0C206 | P04350 | -0.16069  |
| 5740 | P0C206 | P60033 | -0.30737  |
| 5741 | P0C206 | Q96M19 | -0.79503  |
| 5742 | P0C206 | P56180 | -1.3368   |
| 5743 | P0C206 | Q8N816 | -0.79503  |
| 5744 | P0C206 | Q8N146 | -1.1763   |
| 5745 | P0C206 | P54652 | -0.22202  |
| 5746 | P0C206 | Q9BTN0 | -1.0445   |
| 5747 | P0C206 | Q8TD08 | -1.32     |
| 5748 | P0C206 | P48023 | -0.25454  |
| 5749 | P0C206 | Q8NGH7 | -1.1763   |
| 5750 | P0C206 | Q9Y5Z4 | -0.19802  |
| 5751 | P0C206 | Q8IVL0 | -0.5059   |
| 5752 | P0C206 | Q92481 | -0.18173  |
| 5753 | P0C206 | Q6PIY7 | -0.29278  |
| 5754 | P0C206 | Q9NZT1 | -0.47789  |
| 5755 | P0C206 | Q86XP1 | -0.49434  |
| 5756 | P0C206 | P60509 | -0.91833  |
| 5757 | P0C206 | P51164 | -0.81392  |
| 5758 | P0C206 | Q4AE62 | -0.29256  |
| 5759 | P0C206 | Q9HB31 | -0.22682  |
| 5760 | P0C206 | Q92496 | -0.90497  |
| 5761 | P0C206 | Q01581 | -0.17682  |
| 5762 | P0C206 | P08912 | -0.9581   |
| 5763 | P0C206 | P0C7T8 | -0.79503  |
| 5764 | P0C206 | P03915 | -0.5706   |
| 5765 | P0C206 | Q5R3K3 | -0.79503  |
| 5766 | P0C206 | P78415 | -0.23779  |
| 5767 | P0C206 | O60391 | -0.75831  |
| 5768 | P0C206 | Q9Y3T6 | -0.76638  |
| 5769 | P0C206 | Q86TI2 | -0.31267  |
| 5770 | P0C206 | Q5RIA9 | -0.72239  |
| 5771 | P0C206 | O95858 | -0.95247  |
| 5772 | P0C206 | Q8IVV8 | -0.91833  |
| 5773 | P0C206 | Q8NCG5 | -0.61826  |
| 5774 | P0C206 | Q8N183 | -0.19845  |
| 5775 | P0C206 | Q8NGI1 | -1.1763   |
| 5776 | P0C206 | Q6H9L7 | -0.25831  |

|      |        |        |           |
|------|--------|--------|-----------|
| 5777 | P0C206 | P32119 | -0.3383   |
| 5778 | P0C206 | P08620 | -0.63325  |
| 5779 | P0C206 | P82987 | -1.0186   |
| 5780 | P0C206 | Q7Z5L3 | -0.95488  |
| 5781 | P0C206 | Q9ULR3 | -0.32902  |
| 5782 | P0C206 | Q6UX73 | -0.80952  |
| 5783 | P0C206 | P49802 | -0.28537  |
| 5784 | P0C206 | Q03591 | -0.89411  |
| 5785 | P0C206 | A1A4S6 | -0.24111  |
| 5786 | P0C206 | Q9H3Y8 | -0.52676  |
| 5787 | P0C206 | Q9UJF2 | -0.41964  |
| 5788 | P0C206 | P22079 | -1.0889   |
| 5789 | P0C206 | P14854 | -0.11031  |
| 5790 | P0C206 | Q30KQ5 | -0.77981  |
| 5791 | P0C206 | Q9UHV5 | -0.7454   |
| 5792 | P0C206 | Q9UI46 | -0.22761  |
| 5793 | P0C206 | P13598 | -1.1274   |
| 5794 | P0C206 | Q13608 | -0.26442  |
| 5795 | P0C206 | Q16586 | -0.56225  |
| 5796 | P0C206 | Q86TM6 | -0.23053  |
| 5797 | P0C206 | Q75955 | -0.23685  |
| 5798 | P0C206 | A6NKG5 | -1.0008   |
| 5799 | P0C206 | Q95992 | -0.81067  |
| 5800 | P0C206 | Q5VST9 | -0.82351  |
| 5801 | P0C206 | P43235 | -0.5799   |
| 5802 | P0C206 | Q8N162 | -1.1763   |
| 5803 | P0C206 | O95528 | -0.36689  |
| 5804 | P0C206 | P43004 | -0.54818  |
| 5805 | P0C206 | Q86YT9 | -0.81892  |
| 5806 | P0C206 | Q9H3S5 | -0.78254  |
| 5807 | P0C206 | O43175 | -0.86909  |
| 5808 | P0C206 | Q5THJ4 | -0.26705  |
| 5809 | P0C206 | Q9C0B5 | -0.87953  |
| 5810 | P0C206 | Q8NA66 | -0.1528   |
| 5811 | P0C206 | Q5U4P2 | -0.99431  |
| 5812 | P0C206 | P10826 | -0.23537  |
| 5813 | P0C206 | Q9UPQ0 | -0.22721  |
| 5814 | P0C206 | P78334 | -0.76589  |
| 5815 | P0C206 | P05113 | -0.24964  |
| 5816 | P0C206 | Q6B9Z1 | -0.80952  |
| 5817 | P0C206 | P00740 | -1.1607   |
| 5818 | P0C206 | P32249 | -1.1984   |
| 5819 | P0C206 | P09683 | -0.7095   |
| 5820 | P0C206 | Q8N4T4 | -0.72993  |
| 5821 | P0C206 | Q96DL1 | -0.79503  |
| 5822 | P0C206 | Q8TD84 | -0.96369  |
| 5823 | P0C206 | P04899 | -0.32261  |
| 5824 | P0C206 | Q99946 | -0.79976  |
| 5825 | P0C206 | O96014 | -0.38217  |
| 5826 | P0C206 | Q9UNF1 | -0.058963 |
| 5827 | P0C206 | P20160 | -0.77272  |
| 5828 | P0C206 | P16070 | -0.26419  |
| 5829 | P0C206 | Q9H336 | -0.80952  |
| 5830 | P0C206 | Q8NA34 | -0.13953  |
| 5831 | P0C206 | Q09472 | -0.1411   |
| 5832 | P0C206 | Q71U36 | -0.18494  |
| 5833 | P0C206 | Q8N3J6 | -1.1002   |
| 5834 | P0C206 | P18509 | -0.66645  |
| 5835 | P0C206 | Q96LT4 | -0.74681  |
| 5836 | P0C206 | Q6P3S6 | -0.22669  |
| 5837 | P0C206 | P50226 | -0.19673  |
| 5838 | P0C206 | P54107 | -0.86215  |
| 5839 | P0C206 | Q5T8R8 | -0.27721  |
| 5840 | P0C206 | Q9UNQ0 | -0.50374  |
| 5841 | P0C206 | Q86UP6 | -0.50697  |
| 5842 | P0C206 | P49069 | -0.2543   |
| 5843 | P0C206 | P16885 | -0.22741  |
| 5844 | P0C206 | Q08426 | -0.38702  |
| 5845 | P0C206 | P05019 | -0.22465  |
| 5846 | P0C206 | Q9BTE0 | -0.17432  |
| 5847 | P0C206 | Q494W8 | -0.76562  |
| 5848 | P0C206 | P07306 | -0.46609  |
| 5849 | P0C206 | Q8N2Q7 | -0.36023  |
| 5850 | P0C206 | Q5VUM1 | -0.63209  |
| 5851 | P0C206 | O60487 | -0.34115  |
| 5852 | P0C206 | Q5GAN6 | -0.8151   |

|      |        |         |           |
|------|--------|---------|-----------|
| 5853 | P0C206 | Q9NY56  | -0.67592  |
| 5854 | P0C206 | Q16695  | -0.19605  |
| 5855 | P0C206 | P30968  | -1.4195   |
| 5856 | P0C206 | Q9UKI2  | -0.36491  |
| 5857 | P0C206 | Q9UQG0  | -0.20444  |
| 5858 | P0C206 | Q95967  | -0.52244  |
| 5859 | P0C206 | P07205  | -0.45674  |
| 5860 | P0C206 | Q5T4F7  | -0.7343   |
| 5861 | P0C206 | Q9HD23  | -0.66834  |
| 5862 | P0C206 | A6NIJ9  | -1.1763   |
| 5863 | P0C206 | Q9Y519  | -0.79503  |
| 5864 | P0C206 | P60008  | -0.54816  |
| 5865 | P0C206 | P06858  | -0.49159  |
| 5866 | P0C206 | Q9Y426  | -0.33013  |
| 5867 | P0C206 | P00846  | -0.41502  |
| 5868 | P0C206 | Q16625  | -0.22371  |
| 5869 | P0C206 | Q9NWD8  | -0.79503  |
| 5870 | P0C206 | Q9P0B6  | -0.79503  |
| 5871 | P0C206 | P18462  | -0.98682  |
| 5872 | P0C206 | P10606  | -0.082649 |
| 5873 | P0C206 | P28067  | -0.66314  |
| 5874 | P0C206 | Q6NT16  | -0.73598  |
| 5875 | P0C206 | Q9H195  | -0.82987  |
| 5876 | P0C206 | P11586  | -0.39062  |
| 5877 | P0C206 | Q96A83  | -1.0059   |
| 5878 | P0C206 | Q8NEA4  | -0.12995  |
| 5879 | P0C206 | Q8IV08  | -0.36898  |
| 5880 | P0C206 | Q5J TZ9 | -0.25136  |
| 5881 | P0C206 | P08138  | -0.27109  |
| 5882 | P0C206 | Q5JRM2  | -0.79503  |
| 5883 | P0C206 | Q9NZI2  | -0.58249  |
| 5884 | P0C206 | P28068  | -0.8679   |
| 5885 | P0C206 | P43628  | -0.54825  |
| 5886 | P0C206 | Q9P246  | -0.47054  |
| 5887 | P0C206 | Q6PIL6  | -0.85032  |
| 5888 | P0C206 | Q92478  | -0.94191  |
| 5889 | P0C206 | Q9H313  | -0.71127  |
| 5890 | P0C206 | P56750  | -0.53983  |
| 5891 | P0C206 | Q95661  | -0.71243  |
| 5892 | P0C206 | P0CI26  | -0.44814  |
| 5893 | P0C206 | Q6RI45  | -0.22792  |
| 5894 | P0C206 | Q96MF2  | -0.50158  |
| 5895 | P0C206 | Q9P0I2  | -0.56336  |
| 5896 | P0C206 | Q8IUK8  | -0.79503  |
| 5897 | P0C206 | P59541  | -1.1287   |
| 5898 | P0C206 | Q6V1X1  | -0.17585  |
| 5899 | P0C206 | P43353  | -0.41651  |
| 5900 | P0C206 | Q15403  | -0.92922  |
| 5901 | P0C206 | P23946  | -1.4252   |
| 5902 | P0C206 | Q95197  | -0.37864  |
| 5903 | P0C206 | P49411  | -0.68724  |
| 5904 | P0C206 | P35212  | -0.85069  |
| 5905 | P0C206 | Q96G97  | -0.56556  |
| 5906 | P0C206 | P41180  | -0.74924  |
| 5907 | P0C206 | Q9H898  | -0.24357  |
| 5908 | P0C206 | Q96E52  | -0.74382  |
| 5909 | P0C206 | Q0VDG4  | -0.37735  |
| 5910 | P0C206 | P22304  | -0.41793  |
| 5911 | P0C206 | O60729  | -0.22742  |
| 5912 | P0C206 | P50552  | -0.20981  |
| 5913 | P0C206 | Q9BZC7  | -0.95206  |
| 5914 | P0C206 | Q7Z2Z2  | -0.5753   |
| 5915 | P0C206 | P49862  | -1.2717   |
| 5916 | P0C206 | Q8TDW4  | -0.77272  |
| 5917 | P0C206 | Q9NQZ6  | -0.18044  |
| 5918 | P0C206 | Q05513  | -0.22339  |
| 5919 | P0C206 | Q8WUU4  | -0.22322  |
| 5920 | P0C206 | Q8IZR5  | -0.85091  |
| 5921 | P0C206 | P39877  | -0.59953  |
| 5922 | P0C206 | P04054  | -0.51941  |
| 5923 | P0C206 | Q15166  | -0.71292  |
| 5924 | P0C206 | B1AK53  | -0.37482  |
| 5925 | P0C206 | O15033  | -0.57621  |
| 5926 | P0C206 | Q9P2E2  | -0.25301  |
| 5927 | P0C206 | Q5W150  | -0.32705  |
| 5928 | P0C206 | P0C7Q6  | -0.79503  |

|      |        |        |          |
|------|--------|--------|----------|
| 5929 | P0C206 | Q86TD4 | -0.39006 |
| 5930 | P0C206 | Q14954 | -0.97794 |
| 5931 | P0C206 | Q7Z6G8 | -0.22749 |
| 5932 | P0C206 | O00560 | -0.22738 |
| 5933 | P0C206 | O75563 | -0.28968 |
| 5934 | P0C206 | P27448 | -0.69987 |
| 5935 | P0C206 | P02585 | -0.22906 |
| 5936 | P0C206 | O00244 | -0.21543 |
| 5937 | P0C206 | A6NL28 | -0.1769  |
| 5938 | P0C206 | Q8NGZ5 | -1.1763  |
| 5939 | P0C206 | Q9BXJ4 | -0.43791 |
| 5940 | P0C206 | Q9Y597 | -0.17669 |
| 5941 | P0C206 | Q5R372 | -0.89242 |
| 5942 | P0C206 | O95980 | -0.42635 |
| 5943 | P0C206 | Q96RL6 | -0.97776 |
| 5944 | P0C206 | Q5QJ38 | -0.29182 |
| 5945 | P0C206 | Q9HAR2 | -1.2548  |
| 5946 | P0C206 | Q6ZQW0 | -0.19958 |
| 5947 | P0C206 | Q8IVF7 | -0.21184 |
| 5948 | P0C206 | Q68D42 | -0.79503 |
| 5949 | P0C206 | P25100 | -1.1776  |
| 5950 | P0C206 | P54868 | -0.27916 |
| 5951 | P0C206 | A6NND4 | -1.1763  |
| 5952 | P0C206 | P02724 | -0.88909 |
| 5953 | P0C206 | Q9UHN6 | -1.0008  |
| 5954 | P0C206 | Q6SA08 | -0.76116 |
| 5955 | P0C206 | O00398 | -1.1939  |
| 5956 | P0C206 | O95573 | -0.74445 |
| 5957 | P0C206 | Q7Z6W1 | -0.79503 |
| 5958 | P0C206 | P53365 | -0.21712 |
| 5959 | P0C206 | Q8N5U1 | -0.79503 |
| 5960 | P0C206 | P54577 | -0.20677 |
| 5961 | P0C206 | Q8IZ08 | -1.2448  |
| 5962 | P0C206 | Q92537 | -0.57403 |
| 5963 | P0C206 | O76054 | -0.20214 |
| 5964 | P0C206 | Q9GZR7 | -0.37011 |
| 5965 | P0C206 | Q9P2R3 | -0.22741 |
| 5966 | P0C206 | P62699 | -0.41339 |
| 5967 | P0C206 | Q8NCN4 | -0.19451 |
| 5968 | P0C206 | P00519 | -0.22763 |
| 5969 | P0C206 | O60361 | -0.78653 |
| 5970 | P0C206 | A8MV81 | -0.79503 |
| 5971 | P0C206 | P01037 | -0.87562 |
| 5972 | P0C206 | P49758 | -0.56747 |
| 5973 | P0C206 | Q6ZNB7 | -1.0306  |
| 5974 | P0C206 | P29376 | -1.5045  |
| 5975 | P0C206 | O75602 | -0.22742 |
| 5976 | P0C206 | Q8NCH0 | -0.42955 |
| 5977 | P0C206 | Q9UHY1 | -0.22741 |
| 5978 | P0C206 | Q9UMR5 | -0.26617 |
| 5979 | P0C206 | Q69YU3 | -0.22652 |
| 5980 | P0C206 | Q15818 | -0.49251 |
| 5981 | P0C206 | P68431 | -0.41989 |
| 5982 | P0C206 | Q9UK17 | -0.98649 |
| 5983 | P0C206 | Q6ZPD9 | -0.79503 |
| 5984 | P0C206 | Q9Y2Y6 | -0.7666  |
| 5985 | P0C206 | P63316 | -0.22414 |
| 5986 | P0C206 | Q5W0Z9 | -0.77292 |
| 5987 | P0C206 | Q96PV4 | -0.17705 |
| 5988 | P0C206 | Q86WN2 | -0.81091 |
| 5989 | P0C206 | Q9UKU9 | -1.3165  |
| 5990 | P0C206 | Q92626 | -1.1609  |
| 5991 | P0C206 | P04070 | -0.76883 |
| 5992 | P0C206 | Q13258 | -0.68774 |
| 5993 | P0C206 | Q13093 | -0.83982 |
| 5994 | P0C206 | Q9UH62 | -0.63593 |
| 5995 | P0C206 | Q8WUD1 | -0.66407 |
| 5996 | P0C206 | P15248 | -0.74231 |
| 5997 | P0C206 | Q8NH57 | -1.1763  |
| 5998 | P0C206 | Q9NZH7 | -0.84032 |
| 5999 | P0C206 | P02671 | -0.48924 |
| 6000 | P0C206 | O95800 | -1.3861  |
| 6001 | P0C206 | Q9UN19 | -0.57656 |
| 6002 | P0C206 | Q8NGF8 | -1.1763  |
| 6003 | P0C206 | Q56A73 | -0.20127 |
| 6004 | P0C206 | A4D0S4 | -1.1496  |

|      |        |        |          |
|------|--------|--------|----------|
| 6005 | P0C206 | Q16667 | -0.2033  |
| 6006 | P0C206 | Q96I85 | -0.80952 |
| 6007 | P0C206 | Q8WWP7 | -1.1245  |
| 6008 | P0C206 | Q8TAI7 | -1.0238  |
| 6009 | P0C206 | Q9NYB9 | -0.23067 |
| 6010 | P0C206 | Q9UHD8 | -0.22293 |
| 6011 | P0C206 | Q9UH17 | -0.48087 |
| 6012 | P0C206 | P01780 | -0.9894  |
| 6013 | P0C206 | Q96B70 | -0.52145 |
| 6014 | P0C206 | P60484 | -0.22738 |
| 6015 | P0C206 | P05164 | -0.22278 |
| 6016 | P0C206 | P13945 | -0.41505 |
| 6017 | P0C206 | P0C7X4 | -0.30236 |
| 6018 | P0C206 | O00548 | -0.59144 |
| 6019 | P0C206 | Q4J6C6 | -0.33353 |
| 6020 | P0C206 | Q75976 | -0.62962 |
| 6021 | P0C206 | Q6UXI7 | -0.87734 |
| 6022 | P0C206 | A6NKP2 | -0.81582 |
| 6023 | P0C206 | P61567 | -0.6451  |
| 6024 | P0C206 | O15085 | -0.22741 |
| 6025 | P0C206 | Q5VYS8 | -0.22639 |
| 6026 | P0C206 | Q8N8Q3 | -0.02579 |
| 6027 | P0C206 | Q5T2D2 | -0.28259 |
| 6028 | P0C206 | O15375 | -0.90927 |
| 6029 | P0C206 | Q9UNP4 | -0.56993 |
| 6030 | P0C206 | P21926 | -0.57441 |
| 6031 | P0C206 | Q8N8N0 | -0.87196 |
| 6032 | P0C206 | Q3SXY7 | -0.79503 |
| 6033 | P0C206 | Q9NXH9 | -0.17017 |
| 6034 | P0C206 | P18507 | -0.41316 |
| 6035 | P0C206 | P01718 | -0.9894  |
| 6036 | P0C206 | P0C7P4 | -0.55145 |
| 6037 | P0C206 | Q6ZQQ6 | -0.17488 |
| 6038 | P0C206 | A8MUN3 | -0.80952 |
| 6039 | P0C206 | Q93088 | -0.14249 |
| 6040 | P0C206 | Q8NHM4 | -1.2853  |
| 6041 | P0C206 | Q9P2E8 | -0.64897 |
| 6042 | P0C206 | Q7LGA3 | -0.46359 |
| 6043 | P0C206 | P78356 | -0.39016 |
| 6044 | P0C206 | Q6WKZ4 | -0.20753 |
| 6045 | P0C206 | O15270 | -0.67095 |
| 6046 | P0C206 | Q14512 | -0.52735 |
| 6047 | P0C206 | Q9HC58 | -0.91666 |
| 6048 | P0C206 | Q6PEW0 | -0.79979 |
| 6049 | P0C206 | Q9NQT5 | -0.4684  |
| 6050 | P0C206 | Q8IYD9 | -0.80952 |
| 6051 | P0C206 | Q7Z3J2 | -0.79503 |
| 6052 | P0C206 | Q8NGA6 | -1.1763  |
| 6053 | P0C206 | Q15040 | -0.57018 |
| 6054 | P0C206 | B8ZZ34 | -0.79503 |
| 6055 | P0C206 | Q5VUY0 | -0.27706 |
| 6056 | P0C206 | Q8NH70 | -1.1763  |
| 6057 | P0C206 | Q2KHT4 | -0.87544 |
| 6058 | P0C206 | Q5VZY2 | -0.78768 |
| 6059 | P0C206 | Q15907 | -0.64213 |
| 6060 | P0C206 | Q9Y223 | -0.62697 |
| 6061 | P0C206 | Q8IZU8 | -0.7697  |
| 6062 | P0C206 | O14672 | -0.30118 |
| 6063 | P0C206 | Q8N3E9 | -0.40567 |
| 6064 | P0C206 | P11230 | -0.7947  |
| 6065 | P0C206 | Q5SYC1 | -0.42639 |
| 6066 | P0C206 | Q16539 | -0.22741 |
| 6067 | P0C206 | Q7Z6A9 | -0.99229 |
| 6068 | P0C206 | Q07065 | -0.62176 |
| 6069 | P0C206 | Q8WXB1 | -0.70885 |
| 6070 | P0C206 | Q8IZU9 | -0.78711 |
| 6071 | P0C206 | P04209 | -0.9894  |
| 6072 | P0C206 | P68371 | -0.13787 |
| 6073 | P0C206 | P30038 | -0.39342 |
| 6074 | P0C206 | Q7RTT9 | -0.84346 |
| 6075 | P0C206 | Q7Z5H5 | -0.97692 |
| 6076 | P0C206 | Q13748 | -0.18385 |
| 6077 | P0C206 | P01773 | -0.9894  |
| 6078 | P0C206 | P42338 | -0.44265 |
| 6079 | P0C206 | O94988 | -1.0098  |
| 6080 | P0C206 | Q8N6G6 | -0.99351 |

|      |        |        |           |
|------|--------|--------|-----------|
| 6081 | P0C206 | Q30KQ1 | -0.77981  |
| 6082 | P0C206 | O00750 | -0.2275   |
| 6083 | P0C206 | Q96PQ7 | -0.21225  |
| 6084 | P0C206 | Q9HDB9 | -0.15319  |
| 6085 | P0C206 | Q9NX74 | -0.55299  |
| 6086 | P0C206 | Q9Y4F9 | -0.26986  |
| 6087 | P0C206 | Q53EV4 | -0.22741  |
| 6088 | P0C206 | Q969F0 | -0.7666   |
| 6089 | P0C206 | P11678 | -0.59403  |
| 6090 | P0C206 | Q12774 | -0.66654  |
| 6091 | P0C206 | Q8NGW1 | -1.1763   |
| 6092 | P0C206 | Q8N4T8 | -0.33147  |
| 6093 | P0C206 | Q96P64 | -0.77452  |
| 6094 | P0C206 | Q9UBT3 | -0.79151  |
| 6095 | P0C206 | O43488 | -0.22314  |
| 6096 | P0C206 | Q8N807 | -0.60894  |
| 6097 | P0C206 | P07333 | -0.76013  |
| 6098 | P0C206 | Q13003 | -0.81478  |
| 6099 | P0C206 | Q8N9W6 | -0.34983  |
| 6100 | P0C206 | Q5SSJ5 | -0.54174  |
| 6101 | P0C206 | Q6NT32 | -0.67981  |
| 6102 | P0C206 | Q8NFM4 | -0.52254  |
| 6103 | P0C206 | A4D1N5 | -0.11996  |
| 6104 | P0C206 | Q6ZUX3 | -0.084869 |
| 6105 | P0C206 | Q5SQI0 | -0.27923  |
| 6106 | P0C206 | P30954 | -1.2518   |
| 6107 | P0C206 | Q9ULC3 | -0.90571  |
| 6108 | P0C206 | Q8WYK1 | -1.2227   |
| 6109 | P0C206 | Q86YH6 | -0.045461 |
| 6110 | P0C206 | Q8N129 | -0.92045  |
| 6111 | P0C206 | P35030 | -0.86895  |
| 6112 | P0C206 | Q8NHP7 | -0.58466  |
| 6113 | P0C206 | A6NMZ7 | -1.1505   |
| 6114 | P0C206 | Q9BZR6 | -0.22859  |
| 6115 | P0C206 | P02771 | -0.46863  |
| 6116 | P0C206 | Q9Y227 | -0.29191  |
| 6117 | P0C206 | P11245 | -0.15501  |
| 6118 | P0C206 | Q16798 | -0.44735  |
| 6119 | P0C206 | Q13029 | -0.22733  |
| 6120 | P0C206 | A6NNT2 | -0.14469  |
| 6121 | P0C206 | P53794 | -0.95225  |
| 6122 | P0C206 | Q9NXB9 | -0.067981 |
| 6123 | P0C206 | Q56UQ5 | -0.039586 |
| 6124 | P0C206 | Q96HJ9 | -0.04002  |
| 6125 | P0C206 | P04080 | -0.16601  |
| 6126 | P0C206 | Q96I45 | -0.79503  |
| 6127 | P0C206 | Q9UBM7 | -0.88153  |
| 6128 | P0C206 | O60512 | -0.26192  |
| 6129 | P0C206 | Q96R72 | -1.1763   |
| 6130 | P0C206 | P07355 | -0.16206  |
| 6131 | P0C206 | O15072 | -1.132    |
| 6132 | P0C206 | Q8IXA5 | -0.56839  |
| 6133 | P0C206 | Q1ZYL8 | -0.80952  |
| 6134 | P0C206 | Q6ZV70 | -0.42295  |
| 6135 | P0C206 | P86791 | -0.47219  |
| 6136 | P0C206 | Q16570 | -1.1397   |
| 6137 | P0C206 | Q9BXB5 | -0.60853  |
| 6138 | P0C206 | Q9H209 | -1.1763   |
| 6139 | P0C206 | P63128 | -0.43439  |
| 6140 | P0C206 | P04278 | -0.85375  |
| 6141 | P0C206 | Q9NU22 | -0.36187  |
| 6142 | P0C206 | O43638 | -0.41956  |
| 6143 | P0C206 | Q8NEW7 | -0.86732  |
| 6144 | P0C206 | P41240 | -0.22746  |
| 6145 | P0C206 | O43252 | -0.77654  |
| 6146 | P0C206 | Q3MJ13 | -0.22796  |
| 6147 | P0C206 | Q969Y2 | -0.85188  |
| 6148 | P0C206 | Q7Z4H8 | -0.16064  |
| 6149 | P0C206 | Q86UR1 | -0.22737  |
| 6150 | P0C206 | P30536 | -0.33935  |
| 6151 | P0C206 | Q6UXP3 | -0.79503  |
| 6152 | P0C206 | Q92696 | -0.29417  |
| 6153 | P0C206 | Q9NW15 | -0.9464   |
| 6154 | P0C206 | P49238 | -0.60633  |
| 6155 | P0C206 | P01593 | -0.9894   |
| 6156 | P0C206 | Q30KP8 | -0.77981  |

|      |        |        |          |
|------|--------|--------|----------|
| 6157 | POC206 | Q9BSA9 | -0.79503 |
| 6158 | POC206 | Q9H1K4 | -0.58713 |
| 6159 | POC206 | Q8NGC0 | -1.1763  |
| 6160 | POC206 | Q96KN3 | -0.4707  |
| 6161 | POC206 | Q8N6L0 | -0.79028 |
| 6162 | POC206 | F2Z333 | -0.79503 |
| 6163 | POC206 | P0CK97 | -0.79503 |
| 6164 | POC206 | O60353 | -0.43329 |
| 6165 | POC206 | O75325 | -1.1373  |
| 6166 | POC206 | Q9HCM3 | -0.79503 |
| 6167 | POC206 | Q9NQ60 | -0.71925 |
| 6168 | POC206 | Q8N752 | -0.91902 |
| 6169 | POC206 | O15467 | -0.99    |
| 6170 | POC206 | Q9NPP4 | -0.22733 |
| 6171 | POC206 | Q04900 | -1.1978  |
| 6172 | POC206 | Q6MZM9 | -0.80952 |
| 6173 | POC206 | Q8IW41 | -0.22784 |
| 6174 | POC206 | Q86YN6 | -0.22618 |
| 6175 | POC206 | P02812 | -0.62908 |
| 6176 | POC206 | Q9Y5X3 | -0.58299 |
| 6177 | POC206 | C9JUS6 | -0.80952 |
| 6178 | POC206 | P20963 | -0.12692 |
| 6179 | POC206 | P37287 | -0.31438 |
| 6180 | POC206 | Q16584 | -0.22741 |
| 6181 | POC206 | P09486 | -0.2593  |
| 6182 | POC206 | P19224 | -0.8389  |
| 6183 | POC206 | Q9BTF0 | -0.27222 |
| 6184 | POC206 | Q8NER5 | -1.0075  |
| 6185 | POC206 | Q13434 | -0.29587 |
| 6186 | POC206 | Q9NYX4 | -0.99946 |
| 6187 | POC206 | Q9BZW2 | -0.8907  |
| 6188 | POC206 | Q9BXW7 | -0.13472 |
| 6189 | POC206 | Q9H1Z8 | -0.78656 |
| 6190 | POC206 | O14654 | -0.73464 |
| 6191 | POC206 | P78426 | -0.22929 |
| 6192 | POC206 | Q6XZB0 | -1.1531  |
| 6193 | POC206 | Q15404 | -0.32103 |
| 6194 | POC206 | Q8NBT3 | -0.79503 |
| 6195 | POC206 | Q68DE3 | -0.2259  |
| 6196 | POC206 | P40205 | -0.43999 |
| 6197 | POC206 | Q8NCJ5 | -0.18705 |
| 6198 | POC206 | Q969S9 | -0.55048 |
| 6199 | POC206 | P09543 | -0.36367 |
| 6200 | POC206 | Q8ND23 | -0.22683 |
| 6201 | POC206 | Q8NGX6 | -1.1763  |
| 6202 | POC206 | Q9UP79 | -1.1647  |
| 6203 | POC206 | Q9NVV0 | -0.78033 |
| 6204 | POC206 | P25024 | -1.1392  |
| 6205 | POC206 | Q3V5L5 | -0.58965 |
| 6206 | POC206 | Q6UX15 | -0.86988 |
| 6207 | POC206 | Q6PEY0 | -0.9183  |
| 6208 | POC206 | P31995 | -0.22741 |
| 6209 | POC206 | Q53LP3 | -0.22741 |
| 6210 | POC206 | Q9BVA6 | -1.0695  |
| 6211 | POC206 | Q96RD6 | -0.70557 |
| 6212 | POC206 | Q86UK5 | -0.43942 |
| 6213 | POC206 | P0C842 | -0.42295 |
| 6214 | POC206 | A6NM45 | -0.62814 |
| 6215 | POC206 | Q96M96 | -0.84156 |
| 6216 | POC206 | P16615 | -0.84922 |
| 6217 | POC206 | P08637 | -1.4347  |
| 6218 | POC206 | Q08289 | -0.2717  |
| 6219 | POC206 | P43146 | -0.29932 |
| 6220 | POC206 | B4DS77 | -0.85746 |
| 6221 | POC206 | O76070 | -0.1945  |
| 6222 | POC206 | P04808 | -0.94733 |
| 6223 | POC206 | P35218 | -0.13385 |
| 6224 | POC206 | P23443 | -0.19659 |
| 6225 | POC206 | Q9NPI9 | -1.0101  |
| 6226 | POC206 | Q4G1C9 | -0.79503 |
| 6227 | POC206 | Q9Y334 | -0.62908 |
| 6228 | POC206 | Q96LB4 | -0.35133 |
| 6229 | POC206 | Q9NYL5 | -0.6561  |
| 6230 | POC206 | P51684 | -1.1472  |
| 6231 | POC206 | Q92781 | -1.0695  |
| 6232 | POC206 | P61328 | -0.30657 |

|      |        |        |           |
|------|--------|--------|-----------|
| 6233 | P0C206 | Q8NH59 | -1.1763   |
| 6234 | P0C206 | Q9Y467 | -0.22746  |
| 6235 | P0C206 | P42356 | -0.51299  |
| 6236 | P0C206 | Q8N5M9 | -0.89601  |
| 6237 | P0C206 | Q14694 | -0.28679  |
| 6238 | P0C206 | Q8IZP2 | -0.22697  |
| 6239 | P0C206 | O95833 | -0.20248  |
| 6240 | P0C206 | Q6Q788 | -0.39398  |
| 6241 | P0C206 | Q7RTS1 | -0.22792  |
| 6242 | P0C206 | P35790 | -0.73161  |
| 6243 | P0C206 | P41217 | -0.51249  |
| 6244 | P0C206 | P10153 | -0.79729  |
| 6245 | P0C206 | Q8N8R3 | -0.5634   |
| 6246 | P0C206 | Q8IY21 | -0.22176  |
| 6247 | P0C206 | Q6UXD7 | -0.73598  |
| 6248 | P0C206 | Q6ZQN7 | -1.0724   |
| 6249 | P0C206 | Q2M3G0 | -1.157    |
| 6250 | P0C206 | Q99469 | -0.2274   |
| 6251 | P0C206 | P61764 | -0.20983  |
| 6252 | P0C206 | Q96A46 | -0.74011  |
| 6253 | P0C206 | Q96D53 | -0.88755  |
| 6254 | P0C206 | P33151 | -0.58929  |
| 6255 | P0C206 | Q6UX72 | -0.65603  |
| 6256 | P0C206 | Q8N4L4 | -0.93576  |
| 6257 | P0C206 | O60547 | -0.78137  |
| 6258 | P0C206 | Q9UBI4 | -0.56346  |
| 6259 | P0C206 | Q8N7X4 | -0.092462 |
| 6260 | P0C206 | P07359 | -0.48016  |
| 6261 | P0C206 | Q96NY8 | -0.72869  |
| 6262 | P0C206 | O43464 | -0.22514  |
| 6263 | P0C206 | P48507 | -0.23284  |
| 6264 | P0C206 | P15509 | -1.5674   |
| 6265 | P0C206 | Q6UWM9 | -0.81911  |
| 6266 | P0C206 | Q8IWB4 | -0.79503  |
| 6267 | P0C206 | Q9BV79 | -0.93787  |
| 6268 | P0C206 | O00584 | -0.8042   |
| 6269 | P0C206 | Q9H5Q3 | -0.79503  |
| 6270 | P0C206 | Q86W74 | -0.79503  |
| 6271 | P0C206 | P07360 | -0.90335  |
| 6272 | P0C206 | P35575 | -0.36411  |
| 6273 | P0C206 | Q9Y6A9 | -0.60921  |
| 6274 | P0C206 | P56975 | -1.2869   |
| 6275 | P0C206 | P16050 | -0.20609  |
| 6276 | P0C206 | Q9UKX5 | -0.87191  |
| 6277 | P0C206 | Q9H227 | -0.22218  |
| 6278 | P0C206 | Q2M3R5 | -0.79503  |
| 6279 | P0C206 | P54710 | -0.92053  |
| 6280 | P0C206 | Q8TEQ8 | -0.87896  |
| 6281 | P0C206 | P48047 | -0.24217  |
| 6282 | P0C206 | Q92876 | -0.32842  |
| 6283 | P0C206 | Q2M1P5 | -0.31678  |
| 6284 | P0C206 | Q14880 | -0.95117  |
| 6285 | P0C206 | Q15195 | -0.80952  |
| 6286 | P0C206 | Q86X10 | -0.73568  |
| 6287 | P0C206 | Q2TAA8 | -0.39982  |
| 6288 | P0C206 | Q9UK08 | -0.82609  |
| 6289 | P0C206 | P42127 | -0.89821  |
| 6290 | P0C206 | Q9Y4D1 | -0.22118  |
| 6291 | P0C206 | Q9NRS4 | -1.2239   |
| 6292 | P0C206 | Q68BL8 | -0.8691   |
| 6293 | P0C206 | Q16819 | -1.1975   |
| 6294 | P0C206 | Q8NH00 | -1.1763   |
| 6295 | P0C206 | P46459 | -0.2347   |
| 6296 | P0C206 | Q9BZW5 | -0.674    |
| 6297 | P0C206 | Q15208 | -0.22735  |
| 6298 | P0C206 | Q8IVL1 | -0.5315   |
| 6299 | P0C206 | Q9BVR0 | -0.28976  |
| 6300 | P0C206 | Q2VIR3 | -0.71866  |
| 6301 | P0C206 | Q14849 | -0.70661  |
| 6302 | P0C206 | Q8NH50 | -1.1763   |
| 6303 | P0C206 | Q9ULV4 | -0.51904  |
| 6304 | P0C206 | Q9NXU5 | -1.3287   |
| 6305 | P0C206 | Q8N695 | -0.94722  |
| 6306 | P0C206 | P51617 | -0.22736  |
| 6307 | P0C206 | Q8NG68 | -0.62093  |
| 6308 | P0C206 | O14966 | -0.93632  |



|      |        |         |            |
|------|--------|---------|------------|
| 6309 | POC206 | Q8IUA0  | -0.75923   |
| 6310 | POC206 | Q8WVE6  | -0.79503   |
| 6311 | POC206 | P16671  | -0.43671   |
| 6312 | POC206 | Q9H1Z9  | -0.79503   |
| 6313 | POC206 | Q8N5I4  | -1.0819    |
| 6314 | POC206 | O75509  | -0.22471   |
| 6315 | POC206 | Q8NEB5  | -0.65249   |
| 6316 | POC206 | Q8N2B8  | -0.05784   |
| 6317 | POC206 | Q8N5K1  | -0.21907   |
| 6318 | POC206 | Q8NHB1  | -1.1763    |
| 6319 | POC206 | Q8NGH8  | -1.1763    |
| 6320 | POC206 | Q9UBH0  | -0.78709   |
| 6321 | POC206 | Q6QAJ8  | -0.79503   |
| 6322 | POC206 | Q9UPR6  | -0.47557   |
| 6323 | POC206 | Q96GS6  | -0.76697   |
| 6324 | POC206 | Q9Y5F9  | -1.1512    |
| 6325 | POC206 | P23458  | -0.52928   |
| 6326 | POC206 | Q9H8H3  | -0.33275   |
| 6327 | POC206 | Q9BU40  | -0.88375   |
| 6328 | POC206 | Q9BQP9  | -0.97846   |
| 6329 | POC206 | P49190  | -1.3848    |
| 6330 | POC206 | P0CW27  | -0.032273  |
| 6331 | POC206 | P35914  | -0.34771   |
| 6332 | POC206 | Q8NGT5  | -1.1763    |
| 6333 | POC206 | P43627  | -0.92567   |
| 6334 | POC206 | Q4G0N4  | -0.337     |
| 6335 | POC206 | A5D8V7  | -0.0056328 |
| 6336 | POC206 | Q30KQ4  | -0.77981   |
| 6337 | POC206 | Q9UQ10  | -0.79853   |
| 6338 | POC206 | Q6ZS02  | -0.12374   |
| 6339 | POC206 | Q8TD57  | -0.46419   |
| 6340 | POC206 | Q9HAZ1  | -1.0284    |
| 6341 | POC206 | Q9BYE2  | -1.2239    |
| 6342 | POC206 | Q96KX2  | -0.15505   |
| 6343 | POC206 | O94953  | -0.11028   |
| 6344 | POC206 | Q9H4B8  | -0.59767   |
| 6345 | POC206 | Q9UHV8  | -0.27219   |
| 6346 | POC206 | A1KZ92  | -0.84688   |
| 6347 | POC206 | Q9GZZ7  | -0.98053   |
| 6348 | POC206 | Q8TBZ3  | -0.22741   |
| 6349 | POC206 | A6NL88  | -0.79503   |
| 6350 | POC206 | A8TX70  | -1.1505    |
| 6351 | POC206 | Q8NGX3  | -1.1763    |
| 6352 | POC206 | Q86XH1  | -0.72239   |
| 6353 | POC206 | P01764  | -0.9894    |
| 6354 | POC206 | P00995  | -0.19928   |
| 6355 | POC206 | O00476  | -0.67439   |
| 6356 | POC206 | Q9BZ95  | -0.22726   |
| 6357 | POC206 | Q16568  | -0.32872   |
| 6358 | POC206 | Q8IWB6  | -0.22741   |
| 6359 | POC206 | Q15125  | -0.80138   |
| 6360 | POC206 | Q13823  | -0.28529   |
| 6361 | POC206 | Q15049  | -0.092662  |
| 6362 | POC206 | O95342  | -0.88409   |
| 6363 | POC206 | Q9Y616  | -0.24515   |
| 6364 | POC206 | Q9HCJ3  | -0.30066   |
| 6365 | POC206 | P06737  | -0.34033   |
| 6366 | POC206 | O75746  | -0.30291   |
| 6367 | POC206 | Q96NR8  | -1.2818    |
| 6368 | POC206 | Q8IYL9  | -1.3509    |
| 6369 | POC206 | Q9H093  | -0.52242   |
| 6370 | POC206 | O00469  | -0.7248    |
| 6371 | POC206 | P61803  | -0.76836   |
| 6372 | POC206 | P53597  | -0.55262   |
| 6373 | POC206 | P20783  | -0.55265   |
| 6374 | POC206 | Q99624  | -0.89364   |
| 6375 | POC206 | Q8IWD5  | -0.79503   |
| 6376 | POC206 | D6RJJB6 | -0.59814   |
| 6377 | POC206 | Q14642  | -0.40114   |
| 6378 | POC206 | Q96BT1  | -0.36875   |
| 6379 | POC206 | Q15077  | -1.1359    |
| 6380 | POC206 | P01777  | -0.9894    |
| 6381 | POC206 | Q99538  | -0.61945   |
| 6382 | POC206 | Q15389  | -0.97776   |
| 6383 | POC206 | P02655  | -0.53856   |
| 6384 | POC206 | Q8NGC3  | -1.1763    |

|      |        |        |           |
|------|--------|--------|-----------|
| 6385 | POC206 | P02743 | -0.75426  |
| 6386 | POC206 | Q9BX67 | -0.59641  |
| 6387 | POC206 | Q9NNZ6 | -0.68974  |
| 6388 | POC206 | Q9H341 | -1.1763   |
| 6389 | POC206 | Q9Y2H2 | -0.17729  |
| 6390 | POC206 | P29017 | -0.96832  |
| 6391 | POC206 | P28482 | -0.22741  |
| 6392 | POC206 | Q8N5I3 | -0.1176   |
| 6393 | POC206 | Q92819 | -0.6993   |
| 6394 | POC206 | Q9P2L0 | -0.22741  |
| 6395 | POC206 | Q14830 | -0.21573  |
| 6396 | POC206 | P01722 | -0.9894   |
| 6397 | POC206 | Q86SP6 | -1.1239   |
| 6398 | POC206 | P14770 | -1.017    |
| 6399 | POC206 | P48764 | -0.50665  |
| 6400 | POC206 | Q9NRC1 | -0.79503  |
| 6401 | POC206 | P45880 | -0.47135  |
| 6402 | POC206 | P48048 | -1.2353   |
| 6403 | POC206 | Q96R84 | -1.1763   |
| 6404 | POC206 | Q9NUB1 | -0.29775  |
| 6405 | POC206 | Q5TG30 | -1.0098   |
| 6406 | POC206 | P38606 | -0.53661  |
| 6407 | POC206 | Q96G42 | -0.20678  |
| 6408 | POC206 | Q32M88 | -0.24262  |
| 6409 | POC206 | Q8WUA2 | -0.46556  |
| 6410 | POC206 | Q94911 | -1.1892   |
| 6411 | POC206 | P30479 | -0.99995  |
| 6412 | POC206 | P59665 | -0.93638  |
| 6413 | POC206 | Q15244 | -0.81579  |
| 6414 | POC206 | Q8NGS4 | -1.1763   |
| 6415 | POC206 | Q86SJ6 | -1.3164   |
| 6416 | POC206 | Q8N884 | -0.24526  |
| 6417 | POC206 | P32322 | -0.58926  |
| 6418 | POC206 | Q99727 | -0.77082  |
| 6419 | POC206 | Q9H4M9 | -0.36182  |
| 6420 | POC206 | P0C5Z0 | -0.69547  |
| 6421 | POC206 | Q9GZM7 | -0.86497  |
| 6422 | POC206 | Q9Y6J8 | -0.49867  |
| 6423 | POC206 | Q96PD5 | -0.80725  |
| 6424 | POC206 | Q9NT22 | -0.69739  |
| 6425 | POC206 | Q9BQB6 | -1.0411   |
| 6426 | POC206 | P08833 | -0.82177  |
| 6427 | POC206 | Q8TB24 | -0.46997  |
| 6428 | POC206 | Q6UXS0 | -0.80341  |
| 6429 | POC206 | P05455 | -0.40831  |
| 6430 | POC206 | Q8N2F6 | -0.73091  |
| 6431 | POC206 | O75116 | -0.22694  |
| 6432 | POC206 | P54687 | -0.13239  |
| 6433 | POC206 | Q7Z475 | -0.80326  |
| 6434 | POC206 | P0CG32 | -0.17787  |
| 6435 | POC206 | Q9Y4B5 | -0.17485  |
| 6436 | POC206 | P0DJJ0 | -0.23358  |
| 6437 | POC206 | Q16718 | -0.0422   |
| 6438 | POC206 | Q8TCU3 | -0.74438  |
| 6439 | POC206 | Q15522 | -0.26788  |
| 6440 | POC206 | Q53GT1 | -0.20249  |
| 6441 | POC206 | Q6NUJ1 | -0.95562  |
| 6442 | POC206 | P12277 | -0.13017  |
| 6443 | POC206 | Q93079 | -0.66158  |
| 6444 | POC206 | P61225 | -0.87902  |
| 6445 | POC206 | Q5JWF2 | -0.65813  |
| 6446 | POC206 | Q96CN7 | -0.45373  |
| 6447 | POC206 | Q8IUF1 | -0.72239  |
| 6448 | POC206 | Q9Y6M5 | -0.70058  |
| 6449 | POC206 | Q9UNH6 | -0.4024   |
| 6450 | POC206 | Q562R1 | -0.46636  |
| 6451 | POC206 | P31025 | -0.93281  |
| 6452 | POC206 | Q3B7I2 | -0.058129 |
| 6453 | POC206 | Q95297 | -0.18461  |
| 6454 | POC206 | Q9NUD9 | -0.78254  |
| 6455 | POC206 | P16591 | -0.42214  |
| 6456 | POC206 | Q14841 | -0.55445  |
| 6457 | POC206 | Q9H2A2 | -0.64582  |
| 6458 | POC206 | Q02985 | -0.88207  |
| 6459 | POC206 | P50224 | -0.23266  |
| 6460 | POC206 | Q9UBL9 | -0.50154  |

|      |        |        |           |
|------|--------|--------|-----------|
| 6461 | P0C206 | Q14409 | -0.49971  |
| 6462 | P0C206 | Q4V326 | -0.13445  |
| 6463 | P0C206 | P48061 | -0.59097  |
| 6464 | P0C206 | Q15139 | -0.22712  |
| 6465 | P0C206 | Q9NUQ9 | -0.031069 |
| 6466 | P0C206 | Q6ZS82 | -0.87016  |
| 6467 | P0C206 | Q9UHI7 | -0.31528  |
| 6468 | P0C206 | Q96N19 | -0.79503  |
| 6469 | P0C206 | P04839 | -0.71085  |
| 6470 | P0C206 | Q9H4A3 | -0.46847  |
| 6471 | P0C206 | Q6P995 | -0.86094  |
| 6472 | P0C206 | A8MWE9 | -0.29182  |
| 6473 | P0C206 | A0PK05 | -0.79503  |
| 6474 | P0C206 | P19823 | -0.72246  |
| 6475 | P0C206 | Q99217 | -0.65285  |
| 6476 | P0C206 | Q8NC01 | -1.1934   |
| 6477 | P0C206 | Q8NH83 | -1.1763   |
| 6478 | P0C206 | Q8IY67 | -0.30066  |
| 6479 | P0C206 | P01767 | -0.9894   |
| 6480 | P0C206 | Q6P4A7 | -0.73924  |
| 6481 | P0C206 | Q9GZN1 | -0.061896 |
| 6482 | P0C206 | Q8N976 | -0.21927  |
| 6483 | P0C206 | Q96R54 | -1.1763   |
| 6484 | P0C206 | Q9H7C9 | -0.088091 |
| 6485 | P0C206 | Q6IWH7 | -0.35573  |
| 6486 | P0C206 | P51813 | -0.71677  |
| 6487 | P0C206 | A2RRH5 | -0.22743  |
| 6488 | P0C206 | Q53GQ0 | -0.70792  |
| 6489 | P0C206 | Q3SXM0 | -0.22743  |
| 6490 | P0C206 | P09110 | -0.18539  |
| 6491 | P0C206 | Q6ISS4 | -0.80952  |
| 6492 | P0C206 | P01774 | -0.9894   |
| 6493 | P0C206 | P42685 | -0.49521  |
| 6494 | P0C206 | Q9ULS5 | -0.79503  |
| 6495 | P0C206 | Q9UHP7 | -1.0457   |
| 6496 | P0C206 | Q9H5J0 | -0.22732  |
| 6497 | P0C206 | Q6ZNC4 | -0.44814  |
| 6498 | P0C206 | Q13508 | -0.62218  |
| 6499 | P0C206 | Q9BS92 | -0.015248 |
| 6500 | P0C206 | Q9Y5Y0 | -0.36126  |
| 6501 | P0C206 | Q969W9 | -0.78443  |
| 6502 | P0C206 | P08579 | -0.22703  |
| 6503 | P0C206 | Q9UHG2 | -0.71544  |
| 6504 | P0C206 | P04435 | -0.33576  |
| 6505 | P0C206 | Q9BRQ8 | -0.41134  |
| 6506 | P0C206 | O60548 | -0.45919  |
| 6507 | P0C206 | Q9UEY8 | -0.12467  |
| 6508 | P0C206 | Q8N2X6 | -0.80952  |
| 6509 | P0C206 | Q96S42 | -0.26228  |
| 6510 | P0C206 | A6NGE4 | -0.22743  |
| 6511 | P0C206 | Q96MG2 | -0.43388  |
| 6512 | P0C206 | P15692 | -0.31128  |
| 6513 | P0C206 | Q5RL73 | -0.29807  |
| 6514 | P0C206 | Q96RR1 | -0.14754  |
| 6515 | P0C206 | Q6Q8B3 | -0.79503  |
| 6516 | P0C206 | Q96NA8 | -0.68925  |
| 6517 | P0C206 | P17948 | -0.48146  |
| 6518 | P0C206 | Q6NXT2 | -0.66158  |
| 6519 | P0C206 | Q8NHS3 | -0.21802  |
| 6520 | P0C206 | P01702 | -0.9894   |
| 6521 | P0C206 | O95907 | -0.71853  |
| 6522 | P0C206 | Q86UN2 | -0.46981  |
| 6523 | P0C206 | P08069 | -0.5398   |
| 6524 | P0C206 | Q96QT4 | -1.2509   |
| 6525 | P0C206 | P23919 | -0.48694  |
| 6526 | P0C206 | O95072 | -0.19898  |
| 6527 | P0C206 | Q3B7S5 | -0.79503  |
| 6528 | P0C206 | Q8IVA1 | -0.413    |
| 6529 | P0C206 | Q8NAT2 | -0.52065  |
| 6530 | P0C206 | P17900 | -0.18921  |
| 6531 | P0C206 | Q9ULC5 | -0.79706  |
| 6532 | P0C206 | O94768 | -0.93769  |
| 6533 | P0C206 | P02749 | -0.43486  |
| 6534 | P0C206 | O00744 | -0.37801  |
| 6535 | P0C206 | Q14894 | -0.16635  |
| 6536 | P0C206 | Q8NH56 | -1.1763   |

|      |        |        |           |
|------|--------|--------|-----------|
| 6537 | POC206 | Q9UBS9 | -0.88009  |
| 6538 | POC206 | Q9NR23 | -0.70345  |
| 6539 | POC206 | Q92519 | -0.22874  |
| 6540 | POC206 | Q02846 | -1.4291   |
| 6541 | POC206 | Q6DKI2 | -0.2154   |
| 6542 | POC206 | Q2TAA5 | -0.82212  |
| 6543 | POC206 | Q8TCG5 | -0.78965  |
| 6544 | POC206 | Q9NW13 | -0.26603  |
| 6545 | POC206 | A4QN01 | -0.031601 |
| 6546 | POC206 | P13995 | -0.74663  |
| 6547 | POC206 | Q9NPF0 | -0.69571  |
| 6548 | POC206 | O75815 | -0.83796  |
| 6549 | POC206 | Q6UY13 | -0.80952  |
| 6550 | POC206 | Q8NBQ7 | -0.28058  |
| 6551 | POC206 | Q08AF3 | -0.49684  |
| 6552 | POC206 | Q99707 | -0.1486   |
| 6553 | POC206 | P13378 | -0.20696  |
| 6554 | POC206 | Q9Y2W6 | -0.22156  |
| 6555 | POC206 | O43526 | -0.81755  |
| 6556 | POC206 | Q2M3A8 | -0.069837 |
| 6557 | POC206 | Q96PR1 | -0.60665  |
| 6558 | POC206 | Q9C0E4 | -0.22475  |
| 6559 | POC206 | Q8N7P3 | -0.66396  |
| 6560 | POC206 | Q96L33 | -1.2043   |
| 6561 | POC206 | P01571 | -0.67252  |
| 6562 | POC206 | Q6UXN7 | -0.52347  |
| 6563 | POC206 | P49146 | -1.124    |
| 6564 | POC206 | Q8WUU8 | -0.79503  |
| 6565 | POC206 | P81534 | -0.79876  |
| 6566 | POC206 | Q5D862 | -0.1634   |
| 6567 | POC206 | Q9NVP4 | -0.44814  |
| 6568 | POC206 | Q8IZJ4 | -0.64239  |
| 6569 | POC206 | Q14581 | -1.1763   |
| 6570 | POC206 | Q92932 | -0.87653  |
| 6571 | POC206 | Q03164 | -0.22647  |
| 6572 | POC206 | Q7KZN9 | -0.7272   |
| 6573 | POC206 | O60701 | -0.752    |
| 6574 | POC206 | Q9NZN4 | -0.28454  |
| 6575 | POC206 | Q8N4P2 | -0.32033  |
| 6576 | POC206 | Q96F05 | -0.79503  |
| 6577 | POC206 | Q9BU23 | -0.89601  |
| 6578 | POC206 | Q15846 | -0.68107  |
| 6579 | POC206 | P63092 | -0.58187  |
| 6580 | POC206 | P62995 | -0.22418  |
| 6581 | POC206 | P00488 | -0.40238  |
| 6582 | POC206 | P51124 | -1.1702   |
| 6583 | POC206 | Q9NYV4 | -0.12681  |
| 6584 | POC206 | Q9BWW7 | -0.19528  |
| 6585 | POC206 | Q3MJ16 | -0.32547  |
| 6586 | POC206 | P52198 | -0.82134  |
| 6587 | POC206 | P43681 | -0.67904  |
| 6588 | POC206 | P01711 | -0.9894   |
| 6589 | POC206 | Q8N149 | -0.92735  |
| 6590 | POC206 | Q9UM47 | -0.23262  |
| 6591 | POC206 | Q15517 | -0.79873  |
| 6592 | POC206 | Q4ZJI4 | -0.74837  |
| 6593 | POC206 | Q8IX04 | -0.45956  |
| 6594 | POC206 | Q14C86 | -0.97152  |
| 6595 | POC206 | Q9HA72 | -0.79503  |
| 6596 | POC206 | Q14554 | -0.49896  |
| 6597 | POC206 | P19835 | -0.48322  |
| 6598 | POC206 | Q9Y6W6 | -0.28774  |
| 6599 | POC206 | Q8IWZ4 | -0.44814  |
| 6600 | POC206 | Q9BT76 | -0.93187  |
| 6601 | POC206 | P0C221 | -0.22121  |
| 6602 | POC206 | Q96MT0 | -0.40389  |
| 6603 | POC206 | Q9UL63 | -0.21754  |
| 6604 | POC206 | Q9UF02 | -0.7135   |
| 6605 | POC206 | Q9HBU9 | -0.674    |
| 6606 | POC206 | Q9HBJ8 | -0.95194  |
| 6607 | POC206 | Q9UPX0 | -0.91833  |
| 6608 | POC206 | Q9H3S3 | -1.4138   |
| 6609 | POC206 | Q8N878 | -0.3937   |
| 6610 | POC206 | P0C628 | -1.1763   |
| 6611 | POC206 | O75643 | -0.2268   |
| 6612 | POC206 | Q6Y288 | -0.76314  |

|      |        |        |           |
|------|--------|--------|-----------|
| 6613 | P0C206 | Q9P2K8 | -0.95652  |
| 6614 | P0C206 | Q7RTZ2 | -0.30259  |
| 6615 | P0C206 | P43361 | -0.092462 |
| 6616 | P0C206 | A6NIK2 | -0.23344  |
| 6617 | P0C206 | P58182 | -1.1763   |
| 6618 | P0C206 | Q6ZRG5 | -0.17123  |
| 6619 | P0C206 | P27658 | -1.0685   |
| 6620 | P0C206 | P43308 | -0.80264  |
| 6621 | P0C206 | Q8WXS8 | -1.127    |
| 6622 | P0C206 | Q14832 | -1.0356   |
| 6623 | P0C206 | Q6ZSC3 | -0.83583  |
| 6624 | P0C206 | Q9HC98 | -0.22877  |
| 6625 | P0C206 | Q8WWF1 | -0.80952  |
| 6626 | P0C206 | Q5T9S5 | -0.077482 |
| 6627 | P0C206 | Q96RP8 | -0.77342  |
| 6628 | P0C206 | P49961 | -1.4675   |
| 6629 | P0C206 | Q9P2U7 | -0.65293  |
| 6630 | P0C206 | Q8N1N0 | -0.88222  |
| 6631 | P0C206 | Q9UL25 | -0.28285  |
| 6632 | P0C206 | P0C7V7 | -1.0988   |
| 6633 | P0C206 | Q92522 | -0.54174  |
| 6634 | P0C206 | Q9NSY1 | -0.68308  |
| 6635 | P0C206 | P56962 | -0.52565  |
| 6636 | P0C206 | Q96Q45 | -0.82154  |
| 6637 | P0C206 | P01148 | -0.95173  |
| 6638 | P0C206 | Q5T8P6 | -0.19399  |
| 6639 | P0C206 | Q5VW00 | -0.22731  |
| 6640 | P0C206 | Q8TE96 | -0.34085  |
| 6641 | P0C206 | Q7Z6L0 | -0.91853  |
| 6642 | P0C206 | Q9HBW9 | -1.3087   |
| 6643 | P0C206 | Q8NEN9 | -0.22741  |
| 6644 | P0C206 | Q5VU13 | -0.79503  |
| 6645 | P0C206 | P11233 | -0.22762  |
| 6646 | P0C206 | P24821 | -1.1193   |
| 6647 | P0C206 | P20592 | -0.24068  |
| 6648 | P0C206 | P40198 | -0.79503  |
| 6649 | P0C206 | Q86VY9 | -0.79503  |
| 6650 | P0C206 | P24468 | -0.24633  |
| 6651 | P0C206 | Q6ZWL3 | -1.1567   |
| 6652 | P0C206 | Q9UHF3 | -0.91547  |
| 6653 | P0C206 | Q9BXR3 | -0.20444  |
| 6654 | P0C206 | Q5T0T0 | -0.80086  |
| 6655 | P0C206 | A8MTL3 | -0.15207  |
| 6656 | P0C206 | Q9UBQ7 | -0.64033  |
| 6657 | P0C206 | Q92963 | -0.58906  |
| 6658 | P0C206 | Q16698 | -0.20337  |
| 6659 | P0C206 | P43155 | -0.43009  |
| 6660 | P0C206 | Q9HBL6 | -0.79503  |
| 6661 | P0C206 | Q8IYA2 | -0.1835   |
| 6662 | P0C206 | P19087 | -0.83615  |
| 6663 | P0C206 | Q9BVH7 | -0.60521  |
| 6664 | P0C206 | P35913 | -0.36049  |
| 6665 | P0C206 | A6NER0 | -1.2801   |
| 6666 | P0C206 | P02768 | -0.21449  |
| 6667 | P0C206 | Q9BY71 | -0.22777  |
| 6668 | P0C206 | Q86SG5 | -0.2546   |
| 6669 | P0C206 | Q8TF08 | -0.58959  |
| 6670 | P0C206 | Q8N688 | -0.77981  |
| 6671 | P0C206 | Q96RP7 | -0.56164  |
| 6672 | P0C206 | P67936 | -0.23504  |
| 6673 | P0C206 | Q68DV7 | -0.25788  |
| 6674 | P0C206 | Q14721 | -0.24295  |
| 6675 | P0C206 | Q16549 | -0.97043  |
| 6676 | P0C206 | Q96NB2 | -0.74774  |
| 6677 | P0C206 | Q6PCB8 | -0.98895  |
| 6678 | P0C206 | A6NKB5 | -0.79503  |
| 6679 | P0C206 | P21754 | -0.31211  |
| 6680 | P0C206 | O43586 | -0.89452  |
| 6681 | P0C206 | Q16706 | -0.36093  |
| 6682 | P0C206 | Q08AI6 | -0.87335  |
| 6683 | P0C206 | Q4G0N0 | -0.42111  |
| 6684 | P0C206 | A0PJW6 | -0.62349  |
| 6685 | P0C206 | A2CJ06 | -0.39307  |
| 6686 | P0C206 | P49281 | -0.22198  |
| 6687 | P0C206 | P22888 | -0.52556  |
| 6688 | P0C206 | Q9UBN1 | -0.9864   |

|      |        |        |           |
|------|--------|--------|-----------|
| 6689 | P0C206 | P51817 | -0.491    |
| 6690 | P0C206 | O14626 | -1.1939   |
| 6691 | P0C206 | O43557 | -0.64492  |
| 6692 | P0C206 | P60981 | -0.31106  |
| 6693 | P0C206 | Q9BZD7 | -1.3635   |
| 6694 | P0C206 | Q8IYW2 | -1.0039   |
| 6695 | P0C206 | Q92544 | -0.79503  |
| 6696 | P0C206 | O60603 | -0.22757  |
| 6697 | P0C206 | Q07325 | -1.0633   |
| 6698 | P0C206 | Q9HB40 | -0.91101  |
| 6699 | P0C206 | Q8NGE9 | -1.1763   |
| 6700 | P0C206 | Q99527 | -1.0932   |
| 6701 | P0C206 | O00400 | -0.72855  |
| 6702 | P0C206 | Q8TDY8 | -0.91833  |
| 6703 | P0C206 | E7ERA6 | -0.73705  |
| 6704 | P0C206 | Q96GX5 | -0.22741  |
| 6705 | P0C206 | Q9NP80 | -0.50598  |
| 6706 | P0C206 | Q9UBK7 | -1.0597   |
| 6707 | P0C206 | Q96CN5 | -0.22692  |
| 6708 | P0C206 | Q8TC12 | -1.3345   |
| 6709 | P0C206 | P40200 | -1.2753   |
| 6710 | P0C206 | Q96GM1 | -0.87344  |
| 6711 | P0C206 | Q8IXT5 | -0.20732  |
| 6712 | P0C206 | P21452 | -1.3286   |
| 6713 | P0C206 | B2RXF0 | -0.43753  |
| 6714 | P0C206 | Q9NZH8 | -0.74947  |
| 6715 | P0C206 | O14782 | -0.30877  |
| 6716 | P0C206 | Q6X784 | -0.7942   |
| 6717 | P0C206 | Q7Z4R8 | -0.76849  |
| 6718 | P0C206 | Q9BTZ2 | -0.70116  |
| 6719 | P0C206 | Q96NR2 | -0.13184  |
| 6720 | P0C206 | Q8NBF6 | -0.76827  |
| 6721 | P0C206 | Q8NGB9 | -1.1763   |
| 6722 | P0C206 | P0C874 | -0.79503  |
| 6723 | P0C206 | P30493 | -0.99995  |
| 6724 | P0C206 | P16403 | -0.53263  |
| 6725 | P0C206 | P48740 | -0.89559  |
| 6726 | P0C206 | Q9UNU6 | -0.95654  |
| 6727 | P0C206 | O75841 | -0.62077  |
| 6728 | P0C206 | Q9C0D6 | -0.24224  |
| 6729 | P0C206 | O15327 | -0.10769  |
| 6730 | P0C206 | P59542 | -1.1287   |
| 6731 | P0C206 | Q8NI28 | -0.79503  |
| 6732 | P0C206 | A6NHN0 | -0.87668  |
| 6733 | P0C206 | Q92637 | -1.101    |
| 6734 | P0C206 | Q8NGG8 | -1.1763   |
| 6735 | P0C206 | A8MYG8 | -0.22741  |
| 6736 | P0C206 | P35410 | -0.47101  |
| 6737 | P0C206 | Q9Y236 | -0.30109  |
| 6738 | P0C206 | P08174 | -1.025    |
| 6739 | P0C206 | A8MYZ6 | -0.39973  |
| 6740 | P0C206 | P14416 | -0.26881  |
| 6741 | P0C206 | Q13686 | -0.27469  |
| 6742 | P0C206 | P13232 | -0.16826  |
| 6743 | P0C206 | Q92904 | -0.23459  |
| 6744 | P0C206 | Q6N022 | -0.27604  |
| 6745 | P0C206 | B6SEH8 | -0.79503  |
| 6746 | P0C206 | P50607 | -0.24219  |
| 6747 | P0C206 | O00767 | -1.0704   |
| 6748 | P0C206 | Q8N8X6 | -0.056113 |
| 6749 | P0C206 | Q96CE8 | -0.79503  |
| 6750 | P0C206 | P31751 | -0.10397  |
| 6751 | P0C206 | Q8NGN8 | -1.1763   |
| 6752 | P0C206 | P09237 | -1.0571   |
| 6753 | P0C206 | P43699 | -0.33518  |
| 6754 | P0C206 | Q5TDP6 | -0.3155   |
| 6755 | P0C206 | P40199 | -0.2275   |
| 6756 | P0C206 | Q6ZSK4 | -0.44864  |
| 6757 | P0C206 | Q67FW5 | -0.28684  |
| 6758 | P0C206 | Q16363 | -1.1087   |
| 6759 | P0C206 | Q15678 | -0.36117  |
| 6760 | P0C206 | Q9BZ98 | -0.25458  |
| 6761 | P0C206 | P11498 | -0.54928  |
| 6762 | P0C206 | P35346 | -0.98802  |
| 6763 | P0C206 | O75888 | -0.58888  |
| 6764 | P0C206 | P42702 | -1.0046   |

|      |        |        |          |
|------|--------|--------|----------|
| 6765 | P0C206 | P30457 | -0.98682 |
| 6766 | P0C206 | Q13291 | -0.20429 |
| 6767 | P0C206 | P35557 | -0.16663 |
| 6768 | P0C206 | Q96FC7 | -0.2026  |
| 6769 | P0C206 | Q8TEY5 | -0.22742 |
| 6770 | P0C206 | P33241 | -0.74827 |
| 6771 | P0C206 | P08648 | -0.32008 |
| 6772 | P0C206 | Q7RTN6 | -0.47037 |
| 6773 | P0C206 | P10966 | -0.80522 |
| 6774 | P0C206 | Q969V1 | -1.2448  |
| 6775 | P0C206 | Q15245 | -0.31584 |
| 6776 | P0C206 | Q5VT99 | -0.97624 |
| 6777 | P0C206 | P08590 | -0.22563 |
| 6778 | P0C206 | Q8NG41 | -0.21613 |
| 6779 | P0C206 | Q8NCI6 | -0.22837 |
| 6780 | P0C206 | C9JH25 | -0.79503 |
| 6781 | P0C206 | Q6ZNL6 | -0.90076 |
| 6782 | P0C206 | P82980 | -0.2133  |
| 6783 | P0C206 | Q15427 | -0.67014 |
| 6784 | P0C206 | Q68EM7 | -0.3786  |
| 6785 | P0C206 | A6NK97 | -0.82366 |
| 6786 | P0C206 | Q9H3T3 | -1.0553  |
| 6787 | P0C206 | Q96I36 | -0.62621 |
| 6788 | P0C206 | Q8TDX9 | -0.63979 |
| 6789 | P0C206 | Q9NXI6 | -0.73705 |
| 6790 | P0C206 | A6NJ69 | -0.80952 |
| 6791 | P0C206 | Q96JT2 | -0.73598 |
| 6792 | P0C206 | P98173 | -0.62908 |
| 6793 | P0C206 | Q8NGA8 | -1.1763  |
| 6794 | P0C206 | Q16821 | -0.62493 |
| 6795 | P0C206 | P01744 | -0.9894  |
| 6796 | P0C206 | Q96EY8 | -0.60524 |
| 6797 | P0C206 | P61769 | -0.50167 |
| 6798 | P0C206 | Q9Y2Q0 | -0.50993 |
| 6799 | P0C206 | Q9NQ30 | -0.69225 |
| 6800 | P0C206 | Q92484 | -0.28993 |
| 6801 | P0C206 | P01717 | -0.9894  |
| 6802 | P0C206 | P49913 | -0.65792 |
| 6803 | P0C206 | Q96P20 | -0.22708 |
| 6804 | P0C206 | Q92828 | -0.31462 |
| 6805 | P0C206 | Q9UPC5 | -0.67487 |
| 6806 | P0C206 | P10314 | -0.93203 |
| 6807 | P0C206 | Q14162 | -0.94031 |
| 6808 | P0C206 | Q9ULB5 | -1.0941  |
| 6809 | P0C206 | Q8NGV7 | -1.1763  |
| 6810 | P0C206 | Q6P1K1 | -0.67208 |
| 6811 | P0C206 | Q6NVY1 | -0.11625 |
| 6812 | P0C206 | Q8N119 | -1.2403  |
| 6813 | P0C206 | Q86SG7 | -0.77025 |
| 6814 | P0C206 | Q8NGL9 | -1.1763  |
| 6815 | P0C206 | Q6IPM2 | -0.1762  |
| 6816 | P0C206 | Q9UN86 | -0.79309 |
| 6817 | P0C206 | Q14514 | -1.4386  |
| 6818 | P0C206 | P55786 | -0.31331 |
| 6819 | P0C206 | P60059 | -0.51772 |
| 6820 | P0C206 | Q92185 | -0.43874 |
| 6821 | P0C206 | Q12829 | -1.1817  |
| 6822 | P0C206 | Q8N5G0 | -0.79503 |
| 6823 | P0C206 | Q9UJA9 | -1.557   |
| 6824 | P0C206 | P46736 | -0.2888  |
| 6825 | P0C206 | P61599 | -0.17723 |
| 6826 | P0C206 | P33763 | -0.26637 |
| 6827 | P0C206 | P25445 | -0.22723 |
| 6828 | P0C206 | Q6NTE8 | -0.12183 |
| 6829 | P0C206 | P59817 | -0.22723 |
| 6830 | P0C206 | Q6ZV73 | -0.56954 |
| 6831 | P0C206 | P51512 | -1.6008  |
| 6832 | P0C206 | Q8NBN3 | -0.79503 |
| 6833 | P0C206 | P0C2L3 | -0.79503 |
| 6834 | P0C206 | Q9H6H4 | -0.79503 |
| 6835 | P0C206 | Q6E0U4 | -0.88207 |
| 6836 | P0C206 | P26583 | -0.23267 |
| 6837 | P0C206 | Q9Y6A1 | -0.88561 |
| 6838 | P0C206 | Q95157 | -0.848   |
| 6839 | P0C206 | Q9Y484 | -0.22702 |
| 6840 | P0C206 | P01707 | -0.9894  |

|      |        |        |           |
|------|--------|--------|-----------|
| 6841 | P0C206 | A0FGR8 | -0.91833  |
| 6842 | P0C206 | Q6P1M0 | -1.0851   |
| 6843 | P0C206 | P09871 | -1.2852   |
| 6844 | P0C206 | Q96M89 | -0.083496 |
| 6845 | P0C206 | Q8NCQ5 | -0.24105  |
| 6846 | P0C206 | Q8NAT1 | -0.85496  |
| 6847 | P0C206 | P20339 | -0.53138  |
| 6848 | P0C206 | Q6UY09 | -0.79503  |
| 6849 | P0C206 | A6NHM9 | -0.60922  |
| 6850 | P0C206 | Q3ZCM7 | -0.50115  |
| 6851 | P0C206 | P15153 | -0.65948  |
| 6852 | P0C206 | Q1W4C9 | -0.75923  |
| 6853 | P0C206 | Q63HQ2 | -0.81466  |
| 6854 | P0C206 | Q13164 | -0.22741  |
| 6855 | P0C206 | Q99961 | -0.23113  |
| 6856 | P0C206 | Q69YW0 | -0.015999 |
| 6857 | P0C206 | A6NNB3 | -1.0863   |
| 6858 | P0C206 | Q6ZRF8 | -0.44814  |
| 6859 | P0C206 | P31930 | -0.42925  |
| 6860 | P0C206 | D6RA61 | -0.59814  |
| 6861 | P0C206 | Q76002 | -1.1763   |
| 6862 | P0C206 | P36969 | -0.45518  |
| 6863 | P0C206 | P15941 | -0.28274  |
| 6864 | P0C206 | Q94985 | -0.99853  |
| 6865 | P0C206 | Q5JPB2 | -0.46721  |
| 6866 | P0C206 | Q9UBK8 | -0.40806  |
| 6867 | P0C206 | P61296 | -0.23067  |
| 6868 | P0C206 | Q9H8M9 | -1.0592   |
| 6869 | P0C206 | Q9NPA2 | -1.3277   |
| 6870 | P0C206 | Q9BT23 | -0.22729  |
| 6871 | P0C206 | Q8TBE9 | -0.1218   |
| 6872 | P0C206 | P31629 | -0.22748  |
| 6873 | P0C206 | Q9Y226 | -0.87232  |
| 6874 | P0C206 | P63133 | -0.20444  |
| 6875 | P0C206 | A8MZH6 | -0.80952  |
| 6876 | P0C206 | Q9BY12 | -0.15408  |
| 6877 | P0C206 | Q15375 | -0.76611  |
| 6878 | P0C206 | P29353 | -0.22741  |
| 6879 | P0C206 | O60383 | -0.5611   |
| 6880 | P0C206 | Q86VE3 | -0.25827  |
| 6881 | P0C206 | Q7Z4B0 | -0.80952  |
| 6882 | P0C206 | Q14168 | -0.5597   |
| 6883 | P0C206 | P55201 | -0.22424  |
| 6884 | P0C206 | O75356 | -0.32279  |
| 6885 | P0C206 | Q8TE58 | -1.173    |
| 6886 | P0C206 | Q9Y5S8 | -0.41977  |
| 6887 | P0C206 | Q8NGK0 | -1.1763   |
| 6888 | P0C206 | Q9BR39 | -0.37064  |
| 6889 | P0C206 | P15090 | -0.18585  |
| 6890 | P0C206 | O60309 | -0.79503  |
| 6891 | P0C206 | Q92956 | -0.40485  |
| 6892 | P0C206 | Q5VZ89 | -0.64049  |
| 6893 | P0C206 | Q9BXA5 | -1.1575   |
| 6894 | P0C206 | Q8TED1 | -1.1199   |
| 6895 | P0C206 | Q16654 | -0.45483  |
| 6896 | P0C206 | Q9C030 | -0.23099  |
| 6897 | P0C206 | Q9UP38 | -0.36333  |
| 6898 | P0C206 | Q14772 | -0.80387  |
| 6899 | P0C206 | O60412 | -1.1763   |
| 6900 | P0C206 | Q8TC36 | -0.22687  |
| 6901 | P0C206 | O94907 | -0.36203  |
| 6902 | P0C206 | Q9NYW4 | -1.0481   |
| 6903 | P0C206 | Q9HDC5 | -0.80496  |
| 6904 | P0C206 | Q5T700 | -0.79503  |
| 6905 | P0C206 | Q5SSG8 | -0.93669  |
| 6906 | P0C206 | Q6UWM7 | -0.77764  |
| 6907 | P0C206 | A6NFR6 | -0.79503  |
| 6908 | P0C206 | Q8NAP8 | -0.22368  |
| 6909 | P0C206 | Q08357 | -0.90382  |
| 6910 | P0C206 | P08183 | -0.41082  |
| 6911 | P0C206 | P04275 | -0.22738  |
| 6912 | P0C206 | P19075 | -1.0792   |
| 6913 | P0C206 | P00709 | -0.90436  |
| 6914 | P0C206 | O60928 | -0.88161  |
| 6915 | P0C206 | P07911 | -0.69164  |
| 6916 | P0C206 | A8MPX8 | -0.42295  |



|      |        |        |          |
|------|--------|--------|----------|
| 6917 | P0C206 | Q8N9B4 | -0.22741 |
| 6918 | P0C206 | Q6ZP80 | -0.79503 |
| 6919 | P0C206 | P05181 | -0.45505 |
| 6920 | P0C206 | Q00537 | -0.89086 |
| 6921 | P0C206 | O43511 | -0.79296 |
| 6922 | P0C206 | Q9P0M6 | -0.7782  |
| 6923 | P0C206 | Q86Z23 | -0.87668 |
| 6924 | P0C206 | Q9Y271 | -1.2726  |
| 6925 | P0C206 | P35462 | -0.34716 |
| 6926 | P0C206 | P06493 | -0.21177 |
| 6927 | P0C206 | Q5VYP0 | -0.79503 |
| 6928 | P0C206 | P40933 | -0.15588 |
| 6929 | P0C206 | Q9UBN7 | -0.21417 |
| 6930 | P0C206 | Q8N2S1 | -0.46146 |
| 6931 | P0C206 | Q6PF15 | -0.22104 |
| 6932 | P0C206 | Q8NI99 | -1.3284  |
| 6933 | P0C206 | Q00325 | -0.69517 |
| 6934 | P0C206 | Q6ZU64 | -0.66124 |
| 6935 | P0C206 | Q8TCP9 | -0.7995  |
| 6936 | P0C206 | Q6IQ16 | -0.22245 |
| 6937 | P0C206 | P78325 | -0.3816  |
| 6938 | P0C206 | Q9NV12 | -0.79503 |
| 6939 | P0C206 | Q75712 | -0.85477 |
| 6940 | P0C206 | Q99706 | -0.64225 |
| 6941 | P0C206 | Q99519 | -0.4057  |
| 6942 | P0C206 | O42043 | -0.6451  |
| 6943 | P0C206 | Q5FYB1 | -0.69836 |
| 6944 | P0C206 | P62807 | -0.64767 |
| 6945 | P0C206 | Q96E93 | -0.98547 |
| 6946 | P0C206 | P02818 | -0.47935 |
| 6947 | P0C206 | P51784 | -0.39183 |
| 6948 | P0C206 | O94772 | -0.29803 |
| 6949 | P0C206 | P54578 | -0.40252 |
| 6950 | P0C206 | O60218 | -0.47875 |
| 6951 | P0C206 | Q8NFB2 | -0.79503 |
| 6952 | P0C206 | Q9NQX4 | -0.47323 |
| 6953 | P0C206 | Q8WXA2 | -0.80952 |
| 6954 | P0C206 | Q5NDL2 | -0.25084 |
| 6955 | P0C206 | O43286 | -0.45997 |
| 6956 | P0C206 | P52179 | -0.6364  |
| 6957 | P0C206 | Q969P0 | -0.25559 |
| 6958 | P0C206 | P0C2W1 | -0.20496 |
| 6959 | P0C206 | Q9NZM3 | -0.59946 |
| 6960 | P0C206 | O43683 | -0.22741 |
| 6961 | P0C206 | Q6ZSU1 | -0.43833 |
| 6962 | P0C206 | Q8N7P7 | -0.4241  |
| 6963 | P0C206 | Q6PI73 | -0.79503 |
| 6964 | P0C206 | Q8WV16 | -0.23317 |
| 6965 | P0C206 | P63098 | -0.2276  |
| 6966 | P0C206 | P22352 | -0.75825 |
| 6967 | P0C206 | Q96MR6 | -0.22763 |
| 6968 | P0C206 | Q13946 | -0.22065 |
| 6969 | P0C206 | Q8NGE2 | -1.1763  |
| 6970 | P0C206 | Q8N118 | -0.76244 |
| 6971 | P0C206 | Q5T1H1 | -0.98699 |
| 6972 | P0C206 | Q8NGX1 | -1.1763  |
| 6973 | P0C206 | Q13636 | -0.93775 |
| 6974 | P0C206 | Q7Z388 | -0.79503 |
| 6975 | P0C206 | Q6ZR08 | -0.47345 |
| 6976 | P0C206 | Q9BX73 | -0.79503 |
| 6977 | P0C206 | Q8NG95 | -1.1763  |
| 6978 | P0C206 | Q504Y0 | -0.8019  |
| 6979 | P0C206 | P43234 | -0.77978 |
| 6980 | P0C206 | Q96RI1 | -0.22991 |
| 6981 | P0C206 | Q8N6K0 | -0.79503 |
| 6982 | P0C206 | Q96S90 | -0.20388 |
| 6983 | P0C206 | Q5K4E3 | -1.1085  |
| 6984 | P0C206 | P00167 | -0.3513  |
| 6985 | P0C206 | P55808 | -0.93848 |
| 6986 | P0C206 | O75342 | -0.72537 |
| 6987 | P0C206 | Q50LG9 | -0.79503 |
| 6988 | P0C206 | Q96JA3 | -0.2268  |
| 6989 | P0C206 | Q6ZSJ9 | -0.79503 |
| 6990 | P0C206 | Q13190 | -0.19808 |
| 6991 | P0C206 | O15342 | -0.55665 |
| 6992 | P0C206 | Q9H205 | -1.1763  |

|      |        |        |           |
|------|--------|--------|-----------|
| 6993 | P0C206 | Q8N7R7 | -0.22804  |
| 6994 | P0C206 | Q9H2U9 | -0.94746  |
| 6995 | P0C206 | Q8WTR4 | -0.57146  |
| 6996 | P0C206 | Q5KSL6 | -0.82873  |
| 6997 | P0C206 | Q6UWT4 | -0.80952  |
| 6998 | P0C206 | Q06828 | -0.97876  |
| 6999 | P0C206 | Q2TBE0 | -0.42295  |
| 7000 | P0C206 | P15514 | -0.6137   |
| 7001 | P0C206 | Q8TEQ0 | -0.3763   |
| 7002 | P0C206 | Q9BXN1 | -0.95926  |
| 7003 | P0C206 | Q16878 | -0.28595  |
| 7004 | P0C206 | Q96SB4 | -0.22741  |
| 7005 | P0C206 | Q9ULX5 | -0.30661  |
| 7006 | P0C206 | P17540 | -0.85323  |
| 7007 | P0C206 | Q9H6Y5 | -0.22614  |
| 7008 | P0C206 | P08134 | -0.22585  |
| 7009 | P0C206 | Q8NBM8 | -1.0224   |
| 7010 | P0C206 | P05015 | -0.74337  |
| 7011 | P0C206 | Q9UI42 | -0.93681  |
| 7012 | P0C206 | P0C875 | -0.028848 |
| 7013 | P0C206 | Q8N966 | -0.77292  |
| 7014 | P0C206 | Q9UJ14 | -0.67656  |
| 7015 | P0C206 | Q7Z418 | -1.0157   |
| 7016 | P0C206 | P10071 | -0.22722  |
| 7017 | P0C206 | O15056 | -0.22657  |
| 7018 | P0C206 | Q5VTH9 | -0.22745  |
| 7019 | P0C206 | P57057 | -0.65916  |
| 7020 | P0C206 | Q99878 | -0.66158  |
| 7021 | P0C206 | O15498 | -0.18002  |
| 7022 | P0C206 | A0AVI2 | -0.79503  |
| 7023 | P0C206 | Q9Y4K3 | -0.22725  |
| 7024 | P0C206 | Q8NG92 | -1.1763   |
| 7025 | P0C206 | P25774 | -1.2165   |
| 7026 | P0C206 | Q96M42 | -0.15272  |
| 7027 | P0C206 | Q9Y210 | -0.31027  |
| 7028 | P0C206 | Q9UG01 | -0.55984  |
| 7029 | P0C206 | P51149 | -0.32782  |
| 7030 | P0C206 | Q9ULT8 | -0.53975  |
| 7031 | P0C206 | P29122 | -0.9575   |
| 7032 | P0C206 | Q6ZMV9 | -0.30148  |
| 7033 | P0C206 | Q14957 | -0.60914  |
| 7034 | P0C206 | A6NCW0 | -0.31013  |
| 7035 | P0C206 | P12872 | -0.87574  |
| 7036 | P0C206 | Q7Z7H5 | -0.7766   |
| 7037 | P0C206 | Q99967 | -0.14285  |
| 7038 | P0C206 | P10767 | -0.94928  |
| 7039 | P0C206 | Q96RD7 | -0.79979  |
| 7040 | P0C206 | Q9UK00 | -0.79503  |
| 7041 | P0C206 | Q8IZD6 | -0.82366  |
| 7042 | P0C206 | Q6QHF9 | -0.44348  |
| 7043 | P0C206 | P58215 | -0.40469  |
| 7044 | P0C206 | Q16538 | -1.2448   |
| 7045 | P0C206 | Q8N8M0 | -0.25827  |
| 7046 | P0C206 | Q8NGY3 | -1.1763   |
| 7047 | P0C206 | Q08708 | -1.0571   |
| 7048 | P0C206 | P41235 | -0.24306  |
| 7049 | P0C206 | Q9NV96 | -0.13988  |
| 7050 | P0C206 | P01567 | -0.6432   |
| 7051 | P0C206 | Q96M86 | -0.15873  |
| 7052 | P0C206 | O95319 | -0.36107  |
| 7053 | P0C206 | Q9NY64 | -0.55949  |
| 7054 | P0C206 | Q96S37 | -0.65119  |
| 7055 | P0C206 | Q9BPY8 | -0.21506  |
| 7056 | P0C206 | Q9Y5P6 | -0.65576  |
| 7057 | P0C206 | P23743 | -0.91263  |
| 7058 | P0C206 | Q9BZ72 | -1.2399   |
| 7059 | P0C206 | P05026 | -0.40062  |
| 7060 | P0C206 | P07357 | -1.4044   |
| 7061 | P0C206 | Q70Z44 | -0.95161  |
| 7062 | P0C206 | Q15915 | -0.22682  |
| 7063 | P0C206 | Q9H488 | -0.025222 |
| 7064 | P0C206 | Q9Y2G3 | -0.66564  |
| 7065 | P0C206 | P43652 | -0.77185  |
| 7066 | P0C206 | D6R9N7 | -0.59814  |
| 7067 | P0C206 | Q17RD7 | -0.39452  |
| 7068 | P0C206 | Q6XR72 | -0.91909  |

|      |        |        |           |
|------|--------|--------|-----------|
| 7069 | P0C206 | Q9NS87 | -0.245    |
| 7070 | P0C206 | P43632 | -1.0749   |
| 7071 | P0C206 | Q6ZN80 | -0.24811  |
| 7072 | P0C206 | Q8IWT1 | -0.74157  |
| 7073 | P0C206 | Q96RU2 | -0.55866  |
| 7074 | P0C206 | Q9NWC5 | -0.79503  |
| 7075 | P0C206 | Q16653 | -1.1043   |
| 7076 | P0C206 | Q96AA3 | -0.73142  |
| 7077 | P0C206 | Q92771 | -0.42331  |
| 7078 | P0C206 | Q14242 | -0.64986  |
| 7079 | P0C206 | Q14CN2 | -1.3448   |
| 7080 | P0C206 | Q02086 | -0.22375  |
| 7081 | P0C206 | P04001 | -1.3368   |
| 7082 | P0C206 | P52790 | -0.32891  |
| 7083 | P0C206 | Q5TIA1 | -0.26807  |
| 7084 | P0C206 | Q68D06 | -0.97254  |
| 7085 | P0C206 | A8MTB9 | -0.79503  |
| 7086 | P0C206 | Q9BZG9 | -1.2241   |
| 7087 | P0C206 | Q8TB36 | -0.37593  |
| 7088 | P0C206 | Q9BXU7 | -0.26843  |
| 7089 | P0C206 | Q6ZN16 | -1.0299   |
| 7090 | P0C206 | Q6IE38 | -0.75923  |
| 7091 | P0C206 | Q5RI15 | -0.63887  |
| 7092 | P0C206 | Q8IXU6 | -0.51239  |
| 7093 | P0C206 | Q96JA1 | -0.79503  |
| 7094 | P0C206 | Q8N292 | -0.89731  |
| 7095 | P0C206 | Q5JUK2 | -0.19872  |
| 7096 | P0C206 | Q8NGF4 | -1.1763   |
| 7097 | P0C206 | Q8NGN4 | -1.1763   |
| 7098 | P0C206 | Q9UKB1 | -0.5399   |
| 7099 | P0C206 | Q68CZ1 | -0.2081   |
| 7100 | P0C206 | Q7Z7B0 | -0.21701  |
| 7101 | P0C206 | Q7Z601 | -0.93015  |
| 7102 | P0C206 | O75923 | -0.77563  |
| 7103 | P0C206 | Q14005 | -0.25378  |
| 7104 | P0C206 | P14867 | -0.75977  |
| 7105 | P0C206 | P20929 | -0.2258   |
| 7106 | P0C206 | Q96Q27 | -0.63063  |
| 7107 | P0C206 | Q9Y5H9 | -1.2044   |
| 7108 | P0C206 | Q8N2M4 | -0.79503  |
| 7109 | P0C206 | A4D1F6 | -0.37966  |
| 7110 | P0C206 | Q96JH8 | -0.78573  |
| 7111 | P0C206 | P47884 | -1.266    |
| 7112 | P0C206 | Q96J86 | -0.674    |
| 7113 | P0C206 | P0CG37 | -0.90238  |
| 7114 | P0C206 | Q7Z7N9 | -0.79503  |
| 7115 | P0C206 | Q9UHP6 | -0.19883  |
| 7116 | P0C206 | Q96GR4 | -0.77292  |
| 7117 | P0C206 | Q8WUH6 | -0.79503  |
| 7118 | P0C206 | P35318 | -0.25571  |
| 7119 | P0C206 | Q6A1A2 | -0.99855  |
| 7120 | P0C206 | Q01780 | -0.19361  |
| 7121 | P0C206 | Q6PJI9 | -0.2274   |
| 7122 | P0C206 | Q06055 | -0.6755   |
| 7123 | P0C206 | P01303 | -0.65171  |
| 7124 | P0C206 | Q53FA7 | -0.73794  |
| 7125 | P0C206 | Q52LW3 | -0.83163  |
| 7126 | P0C206 | O95568 | -0.092302 |
| 7127 | P0C206 | O60476 | -0.43757  |
| 7128 | P0C206 | P0CB38 | -0.83583  |
| 7129 | P0C206 | Q8NH81 | -1.1763   |
| 7130 | P0C206 | Q9Y5R4 | -0.12464  |
| 7131 | P0C206 | Q9P2D8 | -0.79503  |
| 7132 | P0C206 | Q96SE0 | -0.58064  |
| 7133 | P0C206 | P51654 | -0.62901  |
| 7134 | P0C206 | Q14116 | -0.30778  |
| 7135 | P0C206 | A6NJZ7 | -0.22738  |
| 7136 | P0C206 | P05090 | -0.59836  |
| 7137 | P0C206 | O60879 | -0.22151  |
| 7138 | P0C206 | Q3T906 | -0.30938  |
| 7139 | P0C206 | Q7L5A8 | -0.78625  |
| 7140 | P0C206 | P0CG41 | -0.79503  |
| 7141 | P0C206 | Q9H8X2 | -0.59039  |
| 7142 | P0C206 | Q9H2H9 | -0.89691  |
| 7143 | P0C206 | Q8TDI8 | -0.82067  |
| 7144 | P0C206 | P01624 | -0.9894   |

|      |        |        |           |
|------|--------|--------|-----------|
| 7145 | P0C206 | Q9BUN1 | -0.80952  |
| 7146 | P0C206 | Q8IUH4 | -0.5949   |
| 7147 | P0C206 | Q9Y4B4 | -0.33551  |
| 7148 | P0C206 | Q43272 | -0.20186  |
| 7149 | P0C206 | Q9H1B5 | -0.61027  |
| 7150 | P0C206 | Q8NE28 | -0.93438  |
| 7151 | P0C206 | Q96SK2 | -0.79503  |
| 7152 | P0C206 | O00238 | -0.73729  |
| 7153 | P0C206 | Q9HCG7 | -0.76314  |
| 7154 | P0C206 | Q8IY26 | -0.89394  |
| 7155 | P0C206 | P42331 | -1.083    |
| 7156 | P0C206 | Q6UXZ4 | -0.96987  |
| 7157 | P0C206 | P62942 | -0.22836  |
| 7158 | P0C206 | Q8IXL9 | -0.20925  |
| 7159 | P0C206 | P47972 | -0.7214   |
| 7160 | P0C206 | Q8N9B8 | -0.66273  |
| 7161 | P0C206 | Q8IW93 | -0.74769  |
| 7162 | P0C206 | Q96E22 | -0.83597  |
| 7163 | P0C206 | Q96A54 | -1.029    |
| 7164 | P0C206 | P07237 | -0.3324   |
| 7165 | P0C206 | P07384 | -0.23607  |
| 7166 | P0C206 | Q8NC60 | -0.093107 |
| 7167 | P0C206 | Q8NFY4 | -0.61813  |
| 7168 | P0C206 | P51993 | -0.61967  |
| 7169 | P0C206 | Q9UHF5 | -0.87112  |
| 7170 | P0C206 | Q8NA23 | -0.2275   |
| 7171 | P0C206 | P01733 | -0.33576  |
| 7172 | P0C206 | Q9BVI0 | -0.22744  |
| 7173 | P0C206 | P0CG21 | -0.22365  |
| 7174 | P0C206 | P52569 | -0.63927  |
| 7175 | P0C206 | A8MTL0 | -0.21546  |
| 7176 | P0C206 | O75947 | -0.14123  |
| 7177 | P0C206 | Q6AZY7 | -0.72201  |
| 7178 | P0C206 | Q8NCV1 | -0.63428  |
| 7179 | P0C206 | P01625 | -0.9894   |
| 7180 | P0C206 | Q2UY09 | -1.0785   |
| 7181 | P0C206 | A1KXE4 | -0.80034  |
| 7182 | P0C206 | Q494U1 | -0.32146  |
| 7183 | P0C206 | Q8WZ73 | -0.22739  |
| 7184 | P0C206 | P0C8F1 | -0.83263  |
| 7185 | P0C206 | Q9NZK5 | -0.59966  |
| 7186 | P0C206 | P50238 | -0.22835  |
| 7187 | P0C206 | Q8N7X1 | -0.83583  |
| 7188 | P0C206 | P01112 | -0.22815  |
| 7189 | P0C206 | Q14353 | -0.12638  |
| 7190 | P0C206 | P33681 | -0.25684  |
| 7191 | P0C206 | P01912 | -0.61241  |
| 7192 | P0C206 | Q494R4 | -0.065449 |
| 7193 | P0C206 | B7ZC32 | -0.71699  |
| 7194 | P0C206 | P48664 | -0.96912  |
| 7195 | P0C206 | P21266 | -0.22197  |
| 7196 | P0C206 | Q8IWG1 | -0.11976  |
| 7197 | P0C206 | Q96DX4 | -0.76161  |
| 7198 | P0C206 | P47883 | -1.1763   |
| 7199 | P0C206 | Q86VD7 | -0.49827  |
| 7200 | P0C206 | P01127 | -0.32538  |
| 7201 | P0C206 | Q06418 | -0.70207  |
| 7202 | P0C206 | Q9Y4C1 | -0.088045 |
| 7203 | P0C206 | Q9Y5G3 | -1.1512   |
| 7204 | P0C206 | P43489 | -0.8172   |
| 7205 | P0C206 | Q96S52 | -0.29418  |
| 7206 | P0C206 | Q8ND94 | -0.79503  |
| 7207 | P0C206 | P20309 | -0.67542  |
| 7208 | P0C206 | Q14728 | -0.68834  |
| 7209 | P0C206 | Q9ULP9 | -0.5223   |
| 7210 | P0C206 | Q7Z572 | -0.29182  |
| 7211 | P0C206 | Q99616 | -1.0549   |
| 7212 | P0C206 | Q29836 | -0.99995  |
| 7213 | P0C206 | Q9Y2D0 | -0.19453  |
| 7214 | P0C206 | P24001 | -1.0167   |
| 7215 | P0C206 | O60565 | -0.21415  |
| 7216 | P0C206 | O75593 | -0.37706  |
| 7217 | P0C206 | Q9H3S1 | -0.92801  |
| 7218 | P0C206 | Q8NGS7 | -1.1763   |
| 7219 | P0C206 | Q8N511 | -0.79503  |
| 7220 | P0C206 | Q96P44 | -0.75749  |

|      |        |        |          |
|------|--------|--------|----------|
| 7221 | P0C206 | Q8TAV4 | -1.0744  |
| 7222 | P0C206 | P04433 | -0.9894  |
| 7223 | P0C206 | Q92737 | -0.7899  |
| 7224 | P0C206 | H3BPM6 | -0.4642  |
| 7225 | P0C206 | Q8N8Q8 | -0.37014 |
| 7226 | P0C206 | A6NE02 | -0.58156 |
| 7227 | P0C206 | Q6ZWE6 | -0.54994 |
| 7228 | P0C206 | Q8WY21 | -0.2125  |
| 7229 | P0C206 | Q9Y2C5 | -0.92409 |
| 7230 | P0C206 | Q9H2B4 | -0.78517 |
| 7231 | P0C206 | P08514 | -0.42316 |
| 7232 | P0C206 | Q14088 | -0.44538 |
| 7233 | P0C206 | P63131 | -0.56257 |
| 7234 | P0C206 | O95881 | -0.48004 |
| 7235 | P0C206 | A2VDJ0 | -0.79503 |
| 7236 | P0C206 | Q7Z2H8 | -0.76473 |
| 7237 | P0C206 | O43613 | -1.2965  |
| 7238 | P0C206 | Q8N568 | -0.89483 |
| 7239 | P0C206 | Q86W25 | -0.72239 |
| 7240 | P0C206 | Q5TEV5 | -0.80952 |
| 7241 | P0C206 | O00519 | -0.65026 |
| 7242 | P0C206 | Q9C0I4 | -0.79503 |
| 7243 | P0C206 | Q9UI40 | -0.91847 |
| 7244 | P0C206 | P30679 | -0.85337 |
| 7245 | P0C206 | P0DJD1 | -0.35325 |
| 7246 | P0C206 | P15170 | -0.33624 |
| 7247 | P0C206 | Q7RTX7 | -0.90219 |
| 7248 | P0C206 | Q8IW00 | -0.91833 |
| 7249 | P0C206 | Q8WUJ1 | -0.72742 |
| 7250 | P0C206 | Q96KP6 | -0.26527 |
| 7251 | P0C206 | Q9Y6C5 | -0.74993 |
| 7252 | P0C206 | Q3KQV9 | -0.31773 |
| 7253 | P0C206 | Q5HYJ1 | -0.8494  |
| 7254 | P0C206 | Q969X2 | -0.47039 |
| 7255 | P0C206 | Q9NP60 | -1.0975  |
| 7256 | P0C206 | P08949 | -0.72884 |
| 7257 | P0C206 | Q8N138 | -0.27081 |
| 7258 | P0C206 | Q8N456 | -0.27964 |
| 7259 | P0C206 | Q96AG3 | -0.37565 |
| 7260 | P0C206 | Q86YW0 | -0.22741 |
| 7261 | P0C206 | P11177 | -0.17935 |
| 7262 | P0C206 | P12319 | -0.98581 |
| 7263 | P0C206 | Q53FV1 | -0.86991 |
| 7264 | P0C206 | Q08431 | -0.76285 |
| 7265 | P0C206 | Q9P2G3 | -0.22648 |
| 7266 | P0C206 | Q7Z402 | -0.79503 |
| 7267 | P0C206 | O15120 | -0.69708 |
| 7268 | P0C206 | Q5SYB0 | -0.2274  |
| 7269 | P0C206 | Q6ZNA5 | -0.98652 |
| 7270 | P0C206 | A0PJZ3 | -0.77666 |
| 7271 | P0C206 | Q96NL1 | -0.89136 |
| 7272 | P0C206 | O60262 | -0.47511 |
| 7273 | P0C206 | Q9Y6M4 | -0.97952 |
| 7274 | P0C206 | P54792 | -0.59888 |
| 7275 | P0C206 | P04179 | -0.17759 |
| 7276 | P0C206 | C9J202 | -0.28684 |
| 7277 | P0C206 | Q0WX57 | -0.35782 |
| 7278 | P0C206 | P62834 | -0.33766 |
| 7279 | P0C206 | A8MUP6 | -0.79503 |
| 7280 | P0C206 | Q9NX57 | -0.68422 |
| 7281 | P0C206 | Q96BH3 | -0.81675 |
| 7282 | P0C206 | P47775 | -1.3477  |
| 7283 | P0C206 | Q9NUB4 | -0.79503 |
| 7284 | P0C206 | Q9NY46 | -0.69332 |
| 7285 | P0C206 | O00499 | -0.22764 |
| 7286 | P0C206 | Q6ZS81 | -0.79503 |
| 7287 | P0C206 | P07305 | -0.282   |
| 7288 | P0C206 | P16499 | -0.44946 |
| 7289 | P0C206 | O76024 | -0.5287  |
| 7290 | P0C206 | Q13873 | -0.4947  |
| 7291 | P0C206 | O95050 | -0.12761 |
| 7292 | P0C206 | Q53H96 | -0.91545 |
| 7293 | P0C206 | Q9Y2A7 | -0.33384 |
| 7294 | P0C206 | Q9NS62 | -1.1025  |
| 7295 | P0C206 | P58499 | -0.774   |
| 7296 | P0C206 | O43181 | -0.13074 |

|      |        |        |          |
|------|--------|--------|----------|
| 7297 | P0C206 | Q9NVP2 | -0.12779 |
| 7298 | P0C206 | O76061 | -0.68309 |
| 7299 | P0C206 | Q17RR3 | -0.86466 |
| 7300 | P0C206 | P08582 | -0.45818 |
| 7301 | P0C206 | Q8WTU2 | -0.88984 |
| 7302 | P0C206 | Q8N7A1 | -0.22716 |
| 7303 | P0C206 | Q8IZ52 | -0.39255 |
| 7304 | P0C206 | P13473 | -0.69468 |
| 7305 | P0C206 | Q86Y33 | -0.22741 |
| 7306 | P0C206 | P54756 | -1.0382  |
| 7307 | P0C206 | Q9BY15 | -1.7601  |
| 7308 | P0C206 | P34910 | -0.7102  |
| 7309 | P0C206 | C9JLJ4 | -0.59814 |
| 7310 | P0C206 | Q8IZV5 | -0.65312 |
| 7311 | P0C206 | P00325 | -0.5201  |
| 7312 | P0C206 | P35219 | -0.14447 |
| 7313 | P0C206 | Q69YG0 | -0.79503 |
| 7314 | P0C206 | Q9NZU0 | -1.0915  |
| 7315 | P0C206 | Q6P499 | -0.76064 |
| 7316 | P0C206 | O95819 | -0.39772 |
| 7317 | P0C206 | Q8TC27 | -0.8678  |
| 7318 | P0C206 | Q8TCQ1 | -0.86569 |
| 7319 | P0C206 | P19876 | -0.98327 |
| 7320 | P0C206 | Q96LA6 | -0.91833 |
| 7321 | P0C206 | P49184 | -0.23482 |
| 7322 | P0C206 | P53778 | -0.22741 |
| 7323 | P0C206 | Q6UDR6 | -0.75923 |
| 7324 | P0C206 | Q96H55 | -0.25302 |
| 7325 | P0C206 | Q12908 | -0.6582  |
| 7326 | P0C206 | O43548 | -0.1542  |
| 7327 | P0C206 | P32298 | -0.94177 |
| 7328 | P0C206 | Q8NHA6 | -1.1763  |
| 7329 | P0C206 | Q9Y5E7 | -1.1831  |
| 7330 | P0C206 | Q9Y6A4 | -0.43999 |
| 7331 | P0C206 | P32942 | -0.71459 |
| 7332 | P0C206 | Q15475 | -0.22749 |
| 7333 | P0C206 | O94889 | -0.19331 |
| 7334 | P0C206 | Q99969 | -0.35956 |
| 7335 | P0C206 | Q6ZVH6 | -0.31132 |
| 7336 | P0C206 | P60153 | -0.8151  |
| 7337 | P0C206 | P35453 | -0.22735 |
| 7338 | P0C206 | Q15349 | -0.65618 |
| 7339 | P0C206 | C9JL84 | -0.80952 |
| 7340 | P0C206 | O75333 | -0.41846 |
| 7341 | P0C206 | P01019 | -0.30325 |
| 7342 | P0C206 | Q68J44 | -0.54733 |
| 7343 | P0C206 | Q9H6L4 | -0.23077 |
| 7344 | P0C206 | P08567 | -0.22741 |
| 7345 | P0C206 | Q86VH4 | -0.79503 |
| 7346 | P0C206 | Q7Z5H4 | -1.1833  |
| 7347 | P0C206 | Q9NX09 | -0.23506 |
| 7348 | P0C206 | Q9H5Y7 | -0.89423 |
| 7349 | P0C206 | Q5VW38 | -0.79503 |
| 7350 | P0C206 | Q9NTJ4 | -0.23032 |
| 7351 | P0C206 | O15520 | -0.38713 |
| 7352 | P0C206 | P50225 | -0.20834 |
| 7353 | P0C206 | P04844 | -0.42278 |
| 7354 | P0C206 | Q7Z6L1 | -0.55296 |
| 7355 | P0C206 | A8MTQ0 | -0.22739 |
| 7356 | P0C206 | Q15334 | -0.56189 |
| 7357 | P0C206 | O00116 | -0.65655 |
| 7358 | P0C206 | Q13319 | -0.33968 |
| 7359 | P0C206 | Q16651 | -1.1367  |
| 7360 | P0C206 | A8MYB1 | -0.79503 |
| 7361 | P0C206 | Q58A45 | -0.2066  |
| 7362 | P0C206 | Q15464 | -0.58931 |
| 7363 | P0C206 | Q86TM3 | -0.57712 |
| 7364 | P0C206 | Q8NGB2 | -1.1763  |
| 7365 | P0C206 | Q14439 | -1.4087  |
| 7366 | P0C206 | Q11128 | -0.50637 |
| 7367 | P0C206 | O60890 | -0.73951 |
| 7368 | P0C206 | Q9Y5Z6 | -0.72293 |
| 7369 | P0C206 | Q86SJ2 | -0.22766 |
| 7370 | P0C206 | P55107 | -0.67338 |
| 7371 | P0C206 | Q3C1V0 | -0.79503 |
| 7372 | P0C206 | P0CG06 | -0.95593 |

|      |        |        |          |
|------|--------|--------|----------|
| 7373 | P0C206 | Q6XE24 | -0.60122 |
| 7374 | P0C206 | Q96N68 | -0.79503 |
| 7375 | P0C206 | P48050 | -0.43211 |
| 7376 | P0C206 | Q92772 | -0.47759 |
| 7377 | P0C206 | P60468 | -0.28235 |
| 7378 | P0C206 | O95470 | -0.32782 |
| 7379 | P0C206 | Q5VV63 | -0.82563 |
| 7380 | P0C206 | Q9Y5U5 | -1.4932  |
| 7381 | P0C206 | A6NN79 | -0.79503 |
| 7382 | P0C206 | Q5W064 | -0.27494 |
| 7383 | P0C206 | Q13237 | -0.9743  |
| 7384 | P0C206 | Q8N9V6 | -0.22741 |
| 7385 | P0C206 | P51795 | -0.90549 |
| 7386 | P0C206 | P36575 | -0.45948 |
| 7387 | P0C206 | P59044 | -0.22474 |
| 7388 | P0C206 | Q8IZE3 | -0.22733 |
| 7389 | P0C206 | Q969I6 | -0.97363 |
| 7390 | P0C206 | Q8NGK2 | -1.1763  |
| 7391 | P0C206 | Q6PI25 | -0.40707 |
| 7392 | P0C206 | P14060 | -0.84521 |
| 7393 | P0C206 | O00341 | -0.8712  |
| 7394 | P0C206 | P14927 | -0.21548 |
| 7395 | P0C206 | Q9P0S3 | -0.86991 |
| 7396 | P0C206 | Q9H2D1 | -0.41728 |
| 7397 | P0C206 | Q8NGP0 | -1.1763  |
| 7398 | P0C206 | A6NKW6 | -0.79503 |
| 7399 | P0C206 | O14905 | -0.54091 |
| 7400 | P0C206 | Q9ULQ1 | -0.42748 |
| 7401 | P0C206 | Q9NYG8 | -1.0115  |
| 7402 | P0C206 | Q2Y0W8 | -0.86989 |
| 7403 | P0C206 | Q4U2R8 | -0.35729 |
| 7404 | P0C206 | Q9H9S4 | -0.27605 |
| 7405 | P0C206 | P40225 | -0.79947 |
| 7406 | P0C206 | P04438 | -0.9894  |
| 7407 | P0C206 | Q96LR4 | -0.80952 |
| 7408 | P0C206 | P02647 | -0.30569 |
| 7409 | P0C206 | Q96S97 | -0.79503 |
| 7410 | P0C206 | Q8NEQ5 | -0.79503 |
| 7411 | P0C206 | Q3SY17 | -0.57194 |
| 7412 | P0C206 | Q9UII6 | -0.75574 |
| 7413 | P0C206 | O00311 | -0.22741 |
| 7414 | P0C206 | Q8IZC6 | -0.92379 |
| 7415 | P0C206 | Q9Y4F3 | -0.79606 |
| 7416 | P0C206 | P20336 | -0.3262  |
| 7417 | P0C206 | Q6QHC5 | -0.8818  |
| 7418 | P0C206 | Q5HYI8 | -1.0927  |
| 7419 | P0C206 | Q15415 | -0.62654 |
| 7420 | P0C206 | Q96J66 | -1.2066  |
| 7421 | P0C206 | Q92851 | -0.22628 |
| 7422 | P0C206 | Q8TC92 | -1.5774  |
| 7423 | P0C206 | P01601 | -0.9894  |
| 7424 | P0C206 | P47901 | -0.98354 |
| 7425 | P0C206 | P43220 | -0.64369 |
| 7426 | P0C206 | Q9UBU3 | -0.29583 |
| 7427 | P0C206 | Q30KQ7 | -0.77981 |
| 7428 | P0C206 | Q96DR5 | -0.97846 |
| 7429 | P0C206 | Q9BXP2 | -0.82385 |
| 7430 | P0C206 | Q9P0J1 | -0.03274 |
| 7431 | P0C206 | Q8IVW1 | -0.79602 |
| 7432 | P0C206 | Q5JX71 | -0.79503 |
| 7433 | P0C206 | Q5TGY3 | -0.26698 |
| 7434 | P0C206 | Q9Y458 | -0.51326 |
| 7435 | P0C206 | P50443 | -1.0005  |
| 7436 | P0C206 | P48506 | -0.31556 |
| 7437 | P0C206 | Q9NTQ9 | -0.87387 |
| 7438 | P0C206 | Q9BST9 | -0.57264 |
| 7439 | P0C206 | Q96J88 | -0.29251 |
| 7440 | P0C206 | Q9UM19 | -0.52207 |
| 7441 | P0C206 | Q8TB45 | -0.22741 |
| 7442 | P0C206 | P63136 | -0.20444 |
| 7443 | P0C206 | Q96PZ2 | -0.42295 |
| 7444 | P0C206 | Q5JXM2 | -0.75346 |
| 7445 | P0C206 | Q96PL2 | -1.043   |
| 7446 | P0C206 | Q92523 | -0.61997 |
| 7447 | P0C206 | P20702 | -0.4241  |
| 7448 | P0C206 | Q9Y5W7 | -0.64254 |

|      |        |        |           |
|------|--------|--------|-----------|
| 7449 | P0C206 | O14727 | -0.22858  |
| 7450 | P0C206 | O60245 | -1.2852   |
| 7451 | P0C206 | Q8WTR2 | -0.46642  |
| 7452 | P0C206 | Q8N4N8 | -0.37019  |
| 7453 | P0C206 | P42858 | -0.11095  |
| 7454 | P0C206 | Q14571 | -0.51393  |
| 7455 | P0C206 | O00468 | -0.49935  |
| 7456 | P0C206 | Q9H7T0 | -0.99956  |
| 7457 | P0C206 | O94900 | -0.21424  |
| 7458 | P0C206 | Q9Y4P3 | -0.22745  |
| 7459 | P0C206 | Q9H7X2 | -0.79503  |
| 7460 | P0C206 | Q9H5I5 | -0.87508  |
| 7461 | P0C206 | P00750 | -0.39671  |
| 7462 | P0C206 | Q16774 | -0.5819   |
| 7463 | P0C206 | P16662 | -0.83953  |
| 7464 | P0C206 | O75628 | -1.1229   |
| 7465 | P0C206 | P59796 | -1.1483   |
| 7466 | P0C206 | Q5FWE3 | -0.79503  |
| 7467 | P0C206 | Q6NXP6 | -0.75486  |
| 7468 | P0C206 | P51674 | -0.86386  |
| 7469 | P0C206 | Q5GLZ8 | -0.5397   |
| 7470 | P0C206 | Q5TBA9 | -0.28469  |
| 7471 | P0C206 | Q9BY21 | -1.1575   |
| 7472 | P0C206 | P01603 | -0.9894   |
| 7473 | P0C206 | C9JG80 | -0.12325  |
| 7474 | P0C206 | Q9NP94 | -0.9143   |
| 7475 | P0C206 | Q9NYV8 | -1.0481   |
| 7476 | P0C206 | Q6PID8 | -0.22702  |
| 7477 | P0C206 | A4D1T9 | -1.1117   |
| 7478 | P0C206 | Q9UBF9 | -0.2275   |
| 7479 | P0C206 | Q14831 | -0.68517  |
| 7480 | P0C206 | O14836 | -0.42811  |
| 7481 | P0C206 | P01889 | -1.0058   |
| 7482 | P0C206 | Q8N239 | -0.20877  |
| 7483 | P0C206 | Q8IVW8 | -0.85387  |
| 7484 | P0C206 | Q9HBA9 | -0.5463   |
| 7485 | P0C206 | Q9P1Z3 | -1.2213   |
| 7486 | P0C206 | Q8N565 | -0.44404  |
| 7487 | P0C206 | P78540 | -0.20374  |
| 7488 | P0C206 | O95076 | -0.22741  |
| 7489 | P0C206 | Q9Y5F8 | -1.1512   |
| 7490 | P0C206 | P17936 | -0.22712  |
| 7491 | P0C206 | Q08830 | -1.08     |
| 7492 | P0C206 | O95832 | -0.77612  |
| 7493 | P0C206 | P01712 | -0.9894   |
| 7494 | P0C206 | Q8N136 | -0.40388  |
| 7495 | P0C206 | Q13183 | -1.0496   |
| 7496 | P0C206 | O00230 | -0.8227   |
| 7497 | P0C206 | P13521 | -0.58426  |
| 7498 | P0C206 | P50336 | -0.6114   |
| 7499 | P0C206 | Q8NAS9 | -0.083639 |
| 7500 | P0C206 | Q15811 | -0.39916  |
| 7501 | P0C206 | Q8IVB5 | -0.14009  |
| 7502 | P0C206 | P13727 | -0.84913  |
| 7503 | P0C206 | O95407 | -0.2266   |
| 7504 | P0C206 | P29459 | -0.14713  |
| 7505 | P0C206 | P60328 | -0.34302  |
| 7506 | P0C206 | P28331 | -0.14954  |
| 7507 | P0C206 | Q9UH03 | -0.22073  |
| 7508 | P0C206 | Q13315 | -0.42627  |
| 7509 | P0C206 | Q6UX06 | -0.88551  |
| 7510 | P0C206 | Q5VVB8 | -0.79503  |
| 7511 | P0C206 | P01229 | -0.86584  |
| 7512 | P0C206 | P08218 | -1.3203   |
| 7513 | P0C206 | Q13017 | -0.73124  |
| 7514 | P0C206 | Q9Y487 | -0.23902  |
| 7515 | P0C206 | Q96LJ7 | -0.88484  |
| 7516 | P0C206 | O75354 | -1.0275   |
| 7517 | P0C206 | Q8N8N7 | -0.67012  |
| 7518 | P0C206 | Q8NGU2 | -1.1763   |
| 7519 | P0C206 | Q9H069 | -0.22738  |
| 7520 | P0C206 | Q92915 | -0.38043  |
| 7521 | P0C206 | Q5T890 | -0.19943  |
| 7522 | P0C206 | O95696 | -0.22346  |
| 7523 | P0C206 | A6NDQ2 | -0.44814  |
| 7524 | P0C206 | Q8IYS2 | -0.79503  |



|      |        |        |           |
|------|--------|--------|-----------|
| 7525 | P0C206 | Q8WTR8 | -0.80952  |
| 7526 | P0C206 | O60911 | -0.44486  |
| 7527 | P0C206 | P27105 | -0.16362  |
| 7528 | P0C206 | A1L4K1 | -0.22744  |
| 7529 | P0C206 | P19113 | -0.53015  |
| 7530 | P0C206 | Q14031 | -1.0874   |
| 7531 | P0C206 | O60336 | -0.22772  |
| 7532 | P0C206 | O14764 | -0.91707  |
| 7533 | P0C206 | Q6NT55 | -0.75088  |
| 7534 | P0C206 | P49619 | -0.90568  |
| 7535 | P0C206 | Q6L9W6 | -0.60863  |
| 7536 | P0C206 | Q9NW97 | -0.79503  |
| 7537 | P0C206 | O15344 | -0.22935  |
| 7538 | P0C206 | Q07092 | -0.5739   |
| 7539 | P0C206 | Q8WU43 | -0.029352 |
| 7540 | P0C206 | Q96JY6 | -0.22733  |
| 7541 | P0C206 | P56470 | -0.37258  |
| 7542 | P0C206 | Q9Y2D2 | -0.4146   |
| 7543 | P0C206 | Q9H0R3 | -0.79503  |
| 7544 | P0C206 | Q9BZL6 | -0.26399  |
| 7545 | P0C206 | Q8N609 | -0.6052   |
| 7546 | P0C206 | A8MQB9 | -0.22741  |
| 7547 | P0C206 | P63135 | -0.076791 |
| 7548 | P0C206 | Q8WWZ7 | -0.87151  |
| 7549 | P0C206 | Q969X0 | -0.023892 |
| 7550 | P0C206 | Q8N907 | -0.60506  |
| 7551 | P0C206 | Q9H0B8 | -0.90622  |
| 7552 | P0C206 | P03971 | -0.50788  |
| 7553 | P0C206 | Q96JP9 | -1.1706   |
| 7554 | P0C206 | P58294 | -0.65274  |
| 7555 | P0C206 | O43194 | -1.3782   |
| 7556 | P0C206 | Q8WWX0 | -0.48675  |
| 7557 | P0C206 | P08263 | -0.22467  |
| 7558 | P0C206 | Q8TF42 | -0.22741  |
| 7559 | P0C206 | Q9NSY0 | -0.63398  |
| 7560 | P0C206 | P51157 | -1.2187   |
| 7561 | P0C206 | P01344 | -0.2248   |
| 7562 | P0C206 | Q8NGD2 | -1.1763   |
| 7563 | P0C206 | Q9BWP8 | -1.0326   |
| 7564 | P0C206 | Q9NRD8 | -0.82006  |
| 7565 | P0C206 | Q96P66 | -1.2448   |
| 7566 | P0C206 | O60830 | -0.30565  |
| 7567 | P0C206 | P00492 | -0.17845  |
| 7568 | P0C206 | Q9HCJ5 | -0.15207  |
| 7569 | P0C206 | P22914 | -0.24928  |
| 7570 | P0C206 | Q86SQ6 | -1.067    |
| 7571 | P0C206 | P59773 | -0.79503  |
| 7572 | P0C206 | Q8N139 | -1.1661   |
| 7573 | P0C206 | Q86VI4 | -0.21896  |
| 7574 | P0C206 | A6NJI9 | -0.16145  |
| 7575 | P0C206 | Q7Z494 | -0.22715  |
| 7576 | P0C206 | Q9HBJ7 | -0.49793  |
| 7577 | P0C206 | P30455 | -0.93091  |
| 7578 | P0C206 | F2Z398 | -0.45161  |
| 7579 | P0C206 | P05106 | -0.35382  |
| 7580 | P0C206 | Q8WXG9 | -0.58953  |
| 7581 | P0C206 | Q95475 | -0.22776  |
| 7582 | P0C206 | Q14BN4 | -0.77554  |
| 7583 | P0C206 | Q8WZ71 | -0.79503  |
| 7584 | P0C206 | Q8N4S9 | -0.76231  |
| 7585 | P0C206 | Q9BWW9 | -0.77618  |
| 7586 | P0C206 | P0C6E5 | -0.28733  |
| 7587 | P0C206 | Q96C45 | -1.13     |
| 7588 | P0C206 | Q8N4T0 | -1.1171   |
| 7589 | P0C206 | Q9Y5E6 | -1.1831   |
| 7590 | P0C206 | Q14469 | -0.22515  |
| 7591 | P0C206 | O00764 | -0.1828   |
| 7592 | P0C206 | O14678 | -1.2401   |
| 7593 | P0C206 | Q5GJ75 | -0.020839 |
| 7594 | P0C206 | P01617 | -0.9894   |
| 7595 | P0C206 | Q9ULB1 | -0.32677  |
| 7596 | P0C206 | O14522 | -0.72197  |
| 7597 | P0C206 | P61964 | -0.64899  |
| 7598 | P0C206 | Q96P09 | -0.2274   |
| 7599 | P0C206 | Q9C0B6 | -0.51062  |
| 7600 | P0C206 | Q9BXJ3 | -0.80952  |

|      |        |        |           |
|------|--------|--------|-----------|
| 7601 | POC206 | Q4VCS5 | -0.12373  |
| 7602 | POC206 | Q9NW68 | -0.084733 |
| 7603 | POC206 | P48066 | -0.91412  |
| 7604 | POC206 | Q13886 | -0.22122  |
| 7605 | POC206 | Q9NPE6 | -0.41113  |
| 7606 | POC206 | A6NL05 | -0.79503  |
| 7607 | POC206 | P11686 | -0.077411 |
| 7608 | POC206 | P17858 | -0.24425  |
| 7609 | POC206 | Q8NGE3 | -1.1763   |
| 7610 | POC206 | O00180 | -0.77514  |
| 7611 | POC206 | P16949 | -0.47201  |
| 7612 | POC206 | P21709 | -1.1072   |
| 7613 | POC206 | Q12797 | -0.5143   |
| 7614 | POC206 | Q8NGF6 | -1.1763   |
| 7615 | POC206 | Q13702 | -0.22697  |
| 7616 | POC206 | E7EU14 | -0.22038  |
| 7617 | POC206 | Q15392 | -0.33142  |
| 7618 | POC206 | P0C869 | -0.4771   |
| 7619 | POC206 | A4D126 | -0.32006  |
| 7620 | POC206 | O60858 | -0.48762  |
| 7621 | POC206 | P59901 | -0.22742  |
| 7622 | POC206 | Q9NZ94 | -0.28001  |
| 7623 | POC206 | Q43561 | -0.32038  |
| 7624 | POC206 | Q8TE99 | -0.75057  |
| 7625 | POC206 | Q9H2D6 | -0.21101  |
| 7626 | POC206 | Q96DR4 | -0.50624  |
| 7627 | POC206 | P98194 | -0.80347  |
| 7628 | POC206 | A6BM72 | -0.79995  |
| 7629 | POC206 | Q2T9K0 | -0.79503  |
| 7630 | POC206 | Q16720 | -0.97178  |
| 7631 | POC206 | Q6ZRUS | -0.80952  |
| 7632 | POC206 | Q16557 | -0.80794  |
| 7633 | POC206 | P56705 | -0.28578  |
| 7634 | POC206 | P29460 | -0.25201  |
| 7635 | POC206 | P48551 | -0.85542  |
| 7636 | POC206 | P27930 | -0.83853  |
| 7637 | POC206 | C9JCN9 | -0.18627  |
| 7638 | POC206 | Q86VH5 | -0.79503  |
| 7639 | POC206 | P37268 | -0.94028  |
| 7640 | POC206 | Q8IUL8 | -0.79993  |
| 7641 | POC206 | Q07283 | -0.36793  |
| 7642 | POC206 | Q92838 | -0.92936  |
| 7643 | POC206 | Q07075 | -0.90232  |
| 7644 | POC206 | Q7Z3V4 | -0.3154   |
| 7645 | POC206 | Q8IUQ0 | -0.42639  |
| 7646 | POC206 | Q8NNG5 | -1.1763   |
| 7647 | POC206 | Q92786 | -0.20526  |
| 7648 | POC206 | P47895 | -0.43488  |
| 7649 | POC206 | Q96I15 | -0.24116  |
| 7650 | POC206 | A6NFA0 | -0.79503  |
| 7651 | POC206 | P18075 | -0.22741  |
| 7652 | POC206 | P49810 | -0.21766  |
| 7653 | POC206 | P30040 | -0.061955 |
| 7654 | POC206 | Q86UW1 | -0.83298  |
| 7655 | POC206 | P15328 | -0.93786  |
| 7656 | POC206 | Q96I13 | -0.38424  |
| 7657 | POC206 | Q6UWY5 | -0.80952  |
| 7658 | POC206 | Q6TFL4 | -0.24499  |
| 7659 | POC206 | Q2M2I8 | -0.92903  |
| 7660 | POC206 | A8MWX3 | -0.32585  |
| 7661 | POC206 | Q86UQ5 | -0.79503  |
| 7662 | POC206 | P31997 | -0.71443  |
| 7663 | POC206 | P23352 | -0.6457   |
| 7664 | POC206 | Q24JQ0 | -0.79503  |
| 7665 | POC206 | Q9NRM7 | -0.22741  |
| 7666 | POC206 | Q04756 | -1.1117   |
| 7667 | POC206 | P29590 | -0.22664  |
| 7668 | POC206 | O14815 | -0.95126  |
| 7669 | POC206 | Q9Y580 | -0.80403  |
| 7670 | POC206 | Q8IYT2 | -0.70885  |
| 7671 | POC206 | P22692 | -0.93962  |
| 7672 | POC206 | O15417 | -0.26698  |
| 7673 | POC206 | Q6V0I7 | -0.55846  |
| 7674 | POC206 | Q9H239 | -1.2672   |
| 7675 | POC206 | Q96HS1 | -0.54356  |
| 7676 | POC206 | Q9BWV2 | -1.1461   |

|      |        |        |           |
|------|--------|--------|-----------|
| 7677 | P0C206 | Q4L235 | -1.0433   |
| 7678 | P0C206 | A6NHR9 | -0.48065  |
| 7679 | P0C206 | Q6P5S7 | -0.59735  |
| 7680 | P0C206 | Q92805 | -0.20519  |
| 7681 | P0C206 | Q6UX65 | -0.66726  |
| 7682 | P0C206 | P09884 | -0.28099  |
| 7683 | P0C206 | A6ND91 | -0.88438  |
| 7684 | P0C206 | P13746 | -0.93091  |
| 7685 | P0C206 | P13584 | -0.69815  |
| 7686 | P0C206 | P0C7P3 | -0.72239  |
| 7687 | P0C206 | Q9NZ45 | -0.6856   |
| 7688 | P0C206 | A8MTI9 | -1.7463   |
| 7689 | P0C206 | Q9Y5C1 | -0.63396  |
| 7690 | P0C206 | O15197 | -1.6715   |
| 7691 | P0C206 | P08887 | -0.34737  |
| 7692 | P0C206 | Q9NPH6 | -0.67592  |
| 7693 | P0C206 | P29016 | -0.76223  |
| 7694 | P0C206 | Q6ZRI0 | -0.78799  |
| 7695 | P0C206 | O43692 | -0.72848  |
| 7696 | P0C206 | Q96RD9 | -0.91833  |
| 7697 | P0C206 | Q8IWY9 | -0.79503  |
| 7698 | P0C206 | Q96JK2 | -0.22741  |
| 7699 | P0C206 | Q9BPX6 | -0.39534  |
| 7700 | P0C206 | Q8N9M5 | -0.56167  |
| 7701 | P0C206 | Q9Y5X5 | -1.3273   |
| 7702 | P0C206 | Q9UGV2 | -0.17725  |
| 7703 | P0C206 | Q6UWJ1 | -0.86378  |
| 7704 | P0C206 | Q8NG06 | -0.44814  |
| 7705 | P0C206 | Q9NUH8 | -0.79503  |
| 7706 | P0C206 | Q9BV36 | -0.16052  |
| 7707 | P0C206 | Q15465 | -0.22739  |
| 7708 | P0C206 | Q96S44 | -0.44865  |
| 7709 | P0C206 | Q09160 | -0.96478  |
| 7710 | P0C206 | Q8N6M8 | -0.22319  |
| 7711 | P0C206 | P78524 | -0.23161  |
| 7712 | P0C206 | P01584 | -0.23351  |
| 7713 | P0C206 | O15551 | -0.81825  |
| 7714 | P0C206 | Q969K4 | -0.22724  |
| 7715 | P0C206 | Q6UXG2 | -0.79818  |
| 7716 | P0C206 | Q9Y5G0 | -1.1512   |
| 7717 | P0C206 | Q3KR37 | -0.79503  |
| 7718 | P0C206 | Q9UM22 | -0.82054  |
| 7719 | P0C206 | P23527 | -0.66158  |
| 7720 | P0C206 | Q8NHV5 | -0.069591 |
| 7721 | P0C206 | P01903 | -0.70502  |
| 7722 | P0C206 | P15309 | -1.3271   |
| 7723 | P0C206 | Q5J5C9 | -0.71756  |
| 7724 | P0C206 | Q9BXP8 | -1.411    |
| 7725 | P0C206 | Q15761 | -0.91209  |
| 7726 | P0C206 | Q6UWY2 | -1.3203   |
| 7727 | P0C206 | Q12852 | -0.47178  |
| 7728 | P0C206 | O43474 | -0.22359  |
| 7729 | P0C206 | Q5T2N8 | -0.87404  |
| 7730 | P0C206 | Q8NAA4 | -0.22776  |
| 7731 | P0C206 | Q6DRA6 | -0.66158  |
| 7732 | P0C206 | Q15506 | -0.27166  |
| 7733 | P0C206 | P33261 | -0.61231  |
| 7734 | P0C206 | Q3C1W6 | -0.44814  |
| 7735 | P0C206 | Q7Z407 | -0.91833  |
| 7736 | P0C206 | P56179 | -0.22378  |
| 7737 | P0C206 | P55008 | -0.22722  |
| 7738 | P0C206 | Q00872 | -0.64382  |
| 7739 | P0C206 | Q9UPN3 | -0.22868  |
| 7740 | P0C206 | P00813 | -0.16617  |
| 7741 | P0C206 | Q9UKU7 | -0.30029  |
| 7742 | P0C206 | Q2M1Z3 | -1.205    |
| 7743 | P0C206 | Q96C92 | -0.14817  |
| 7744 | P0C206 | Q8TBF4 | -0.27042  |
| 7745 | P0C206 | Q9BQI7 | -1.0026   |
| 7746 | P0C206 | P10646 | -0.75482  |
| 7747 | P0C206 | Q96HP4 | -0.35197  |
| 7748 | P0C206 | P06313 | -0.9894   |
| 7749 | P0C206 | P11086 | -0.12491  |
| 7750 | P0C206 | Q9NRC9 | -0.81371  |
| 7751 | P0C206 | P59768 | -0.45553  |
| 7752 | P0C206 | Q9UBQ6 | -1.1652   |

|      |        |        |           |
|------|--------|--------|-----------|
| 7753 | P0C206 | Q8NEV9 | -0.84416  |
| 7754 | P0C206 | P32239 | -0.54929  |
| 7755 | P0C206 | Q9BRR6 | -0.75318  |
| 7756 | P0C206 | Q8NEJ0 | -0.32798  |
| 7757 | P0C206 | Q92504 | -0.89688  |
| 7758 | P0C206 | Q7Z422 | -0.056641 |
| 7759 | P0C206 | Q9H0D6 | -0.15167  |
| 7760 | P0C206 | Q14289 | -0.23351  |
| 7761 | P0C206 | Q8TDX6 | -0.40987  |
| 7762 | P0C206 | Q04118 | -0.77729  |
| 7763 | P0C206 | Q58FF8 | -0.4889   |
| 7764 | P0C206 | Q8NC06 | -0.43776  |
| 7765 | P0C206 | Q8IUH3 | -0.53966  |
| 7766 | P0C206 | Q9H3U1 | -0.22695  |
| 7767 | P0C206 | P61019 | -0.51116  |
| 7768 | P0C206 | Q9HBV2 | -0.79503  |
| 7769 | P0C206 | Q96P26 | -0.29785  |
| 7770 | P0C206 | Q9BRI3 | -0.62122  |
| 7771 | P0C206 | Q9BRK5 | -0.22309  |
| 7772 | P0C206 | Q9NPG8 | -0.77292  |
| 7773 | P0C206 | A6NKT7 | -0.35325  |
| 7774 | P0C206 | Q8IZC4 | -0.72207  |
| 7775 | P0C206 | P36269 | -0.82109  |
| 7776 | P0C206 | Q9H300 | -0.63359  |
| 7777 | P0C206 | P36955 | -0.83801  |
| 7778 | P0C206 | O75200 | -0.80952  |
| 7779 | P0C206 | Q9NXH8 | -1.3066   |
| 7780 | P0C206 | P53708 | -0.86438  |
| 7781 | P0C206 | Q9HCY8 | -0.25305  |
| 7782 | P0C206 | Q17RW2 | -0.9459   |
| 7783 | P0C206 | Q9BQI4 | -0.78747  |
| 7784 | P0C206 | O15394 | -1.1012   |
| 7785 | P0C206 | Q99643 | -0.39229  |
| 7786 | P0C206 | Q13085 | -0.30133  |
| 7787 | P0C206 | P10632 | -0.66558  |
| 7788 | P0C206 | Q16099 | -0.67629  |
| 7789 | P0C206 | A6NHN6 | -0.80952  |
| 7790 | P0C206 | Q9Y4I1 | -0.20629  |
| 7791 | P0C206 | Q16322 | -0.75657  |
| 7792 | P0C206 | B4DJY2 | -0.79976  |
| 7793 | P0C206 | Q9H221 | -0.64836  |
| 7794 | P0C206 | P51812 | -0.22017  |
| 7795 | P0C206 | P04004 | -0.83062  |
| 7796 | P0C206 | A0AV96 | -0.53413  |
| 7797 | P0C206 | Q9NXF8 | -0.6098   |
| 7798 | P0C206 | Q56NI9 | -0.11303  |
| 7799 | P0C206 | Q96F44 | -0.2281   |
| 7800 | P0C206 | Q92508 | -0.87593  |
| 7801 | P0C206 | Q13418 | -0.32259  |
| 7802 | P0C206 | P01834 | -0.9894   |
| 7803 | P0C206 | Q9NY65 | -0.39209  |
| 7804 | P0C206 | Q6IBS0 | -0.3811   |
| 7805 | P0C206 | Q14717 | -0.12047  |
| 7806 | P0C206 | Q9UKG9 | -0.50659  |
| 7807 | P0C206 | P13284 | -1.0442   |
| 7808 | P0C206 | Q9BRB3 | -0.70567  |
| 7809 | P0C206 | P52943 | -0.22845  |
| 7810 | P0C206 | Q8WV19 | -0.40699  |
| 7811 | P0C206 | Q9ULJ8 | -0.22703  |
| 7812 | P0C206 | P12544 | -0.38374  |
| 7813 | P0C206 | Q96DW6 | -0.54457  |
| 7814 | P0C206 | P29622 | -0.71654  |
| 7815 | P0C206 | Q8NGQ2 | -1.1763   |
| 7816 | P0C206 | A6NKF7 | -0.79503  |
| 7817 | P0C206 | A8MTL9 | -0.75923  |
| 7818 | P0C206 | Q70EK9 | -0.5726   |
| 7819 | P0C206 | Q86YR7 | -0.67089  |
| 7820 | P0C206 | Q9GZS9 | -0.44535  |
| 7821 | P0C206 | Q8NAU1 | -1.2086   |
| 7822 | P0C206 | P15374 | -0.19424  |
| 7823 | P0C206 | O75445 | -0.74597  |
| 7824 | P0C206 | O75056 | -0.84516  |
| 7825 | P0C206 | Q5TCX8 | -1.0107   |
| 7826 | P0C206 | Q92538 | -0.2128   |
| 7827 | P0C206 | P51648 | -1.0008   |
| 7828 | P0C206 | P01860 | -0.9687   |

|      |        |        |           |
|------|--------|--------|-----------|
| 7829 | P0C206 | O14649 | -0.98163  |
| 7830 | P0C206 | Q8IZJ6 | -0.67491  |
| 7831 | P0C206 | Q8N5S1 | -0.58473  |
| 7832 | P0C206 | Q8N8V2 | -0.961    |
| 7833 | P0C206 | A0FGR9 | -0.91833  |
| 7834 | P0C206 | Q5XLA6 | -0.52218  |
| 7835 | P0C206 | Q9Y478 | -0.18484  |
| 7836 | P0C206 | P12034 | -0.66729  |
| 7837 | P0C206 | Q13825 | -0.28929  |
| 7838 | P0C206 | Q13253 | -0.31152  |
| 7839 | P0C206 | Q96JJ7 | -0.80334  |
| 7840 | P0C206 | Q8WU08 | -1.1715   |
| 7841 | P0C206 | P20340 | -0.27042  |
| 7842 | P0C206 | Q8N423 | -0.4188   |
| 7843 | P0C206 | Q9H2M9 | -0.54328  |
| 7844 | P0C206 | Q9NYK1 | -0.54983  |
| 7845 | P0C206 | Q8WWG1 | -1.3692   |
| 7846 | P0C206 | Q96FC9 | -0.32648  |
| 7847 | P0C206 | Q6ZUM4 | -0.89462  |
| 7848 | P0C206 | Q5BKT4 | -0.82922  |
| 7849 | P0C206 | Q969Y0 | -0.80952  |
| 7850 | P0C206 | O60503 | -1.0464   |
| 7851 | P0C206 | P10720 | -0.87947  |
| 7852 | P0C206 | P36021 | -0.84644  |
| 7853 | P0C206 | Q9UDY6 | -0.22905  |
| 7854 | P0C206 | P57087 | -0.36189  |
| 7855 | P0C206 | Q9BZG1 | -0.75431  |
| 7856 | P0C206 | Q9C0D5 | -0.4673   |
| 7857 | P0C206 | Q9ULC8 | -0.60074  |
| 7858 | P0C206 | Q9UPT6 | -0.22482  |
| 7859 | P0C206 | Q8N6D5 | -0.2274   |
| 7860 | P0C206 | Q8N6I4 | -0.79503  |
| 7861 | P0C206 | A6NJU9 | -0.79503  |
| 7862 | P0C206 | Q9HCU4 | -1.0246   |
| 7863 | P0C206 | P01857 | -0.41658  |
| 7864 | P0C206 | Q5JX69 | -0.79503  |
| 7865 | P0C206 | Q6NY19 | -0.22744  |
| 7866 | P0C206 | P02753 | -0.2818   |
| 7867 | P0C206 | Q14093 | -0.39373  |
| 7868 | P0C206 | P29317 | -0.6053   |
| 7869 | P0C206 | Q96RP9 | -0.70914  |
| 7870 | P0C206 | Q7Z4W2 | -0.78748  |
| 7871 | P0C206 | Q8IW75 | -0.617    |
| 7872 | P0C206 | Q9NWX5 | -0.2274   |
| 7873 | P0C206 | Q13591 | -1.0025   |
| 7874 | P0C206 | Q6NXE6 | -0.2074   |
| 7875 | P0C206 | Q14558 | -0.19725  |
| 7876 | P0C206 | Q17R98 | -0.22735  |
| 7877 | P0C206 | O95455 | -0.93807  |
| 7878 | P0C206 | Q8N2U0 | -0.79503  |
| 7879 | P0C206 | Q7Z7M1 | -1.2769   |
| 7880 | P0C206 | P30990 | -0.88706  |
| 7881 | P0C206 | Q9BX10 | -0.8969   |
| 7882 | P0C206 | Q92823 | -0.82947  |
| 7883 | P0C206 | O00409 | -0.42268  |
| 7884 | P0C206 | A6NHT5 | -0.22997  |
| 7885 | P0C206 | Q8IXX5 | -0.79503  |
| 7886 | P0C206 | Q96KN8 | -0.095246 |
| 7887 | P0C206 | Q13219 | -1.1849   |
| 7888 | P0C206 | P22792 | -0.77006  |
| 7889 | P0C206 | Q96E17 | -0.83207  |
| 7890 | P0C206 | Q8IWR0 | -0.21798  |
| 7891 | P0C206 | Q69YU5 | -0.80952  |
| 7892 | P0C206 | Q9BU79 | -0.79503  |
| 7893 | P0C206 | O14494 | -0.83581  |
| 7894 | P0C206 | P30510 | -1.0603   |
| 7895 | P0C206 | Q8NBS9 | -0.31121  |
| 7896 | P0C206 | Q6Y1H2 | -0.46398  |
| 7897 | P0C206 | P01891 | -1.0001   |
| 7898 | P0C206 | Q9NXD2 | -0.38153  |
| 7899 | P0C206 | Q8N6K7 | -0.18886  |
| 7900 | P0C206 | Q9Y3B3 | -0.3286   |
| 7901 | P0C206 | Q8NG85 | -1.0483   |
| 7902 | P0C206 | Q9UKV5 | -0.22842  |
| 7903 | P0C206 | Q9BRF8 | -0.14767  |
| 7904 | P0C206 | Q9HBR0 | -0.87335  |

|      |        |        |           |
|------|--------|--------|-----------|
| 7905 | P0C206 | Q6YN16 | -0.87577  |
| 7906 | P0C206 | P57773 | -0.9183   |
| 7907 | P0C206 | A2PYH4 | -0.7415   |
| 7908 | P0C206 | Q96QK8 | -0.79503  |
| 7909 | P0C206 | Q5T4W7 | -0.88101  |
| 7910 | P0C206 | Q13275 | -0.92584  |
| 7911 | P0C206 | P04222 | -1.0001   |
| 7912 | P0C206 | Q9NXS3 | -0.18277  |
| 7913 | P0C206 | Q8NG35 | -0.77981  |
| 7914 | P0C206 | O96024 | -0.66569  |
| 7915 | P0C206 | Q8WWU7 | -1.0532   |
| 7916 | P0C206 | P22309 | -0.49356  |
| 7917 | P0C206 | Q9BYE9 | -0.49731  |
| 7918 | P0C206 | Q2MJR0 | -0.52463  |
| 7919 | P0C206 | Q15063 | -1.1968   |
| 7920 | P0C206 | Q5SSQ6 | -0.1101   |
| 7921 | P0C206 | Q9BZJ8 | -1.1108   |
| 7922 | P0C206 | Q9BY49 | -1.0031   |
| 7923 | P0C206 | P47989 | -0.52688  |
| 7924 | P0C206 | Q9NP55 | -0.88719  |
| 7925 | P0C206 | P15814 | -0.94474  |
| 7926 | P0C206 | Q9H4K7 | -0.67027  |
| 7927 | P0C206 | Q9NSY2 | -0.29467  |
| 7928 | P0C206 | Q15760 | -1.3861   |
| 7929 | P0C206 | Q16609 | -0.62908  |
| 7930 | P0C206 | P04206 | -0.9894   |
| 7931 | P0C206 | Q6ZP01 | -0.52955  |
| 7932 | P0C206 | Q95772 | -0.74421  |
| 7933 | P0C206 | Q9UIR0 | -0.79503  |
| 7934 | P0C206 | Q5TCS8 | -0.87184  |
| 7935 | P0C206 | Q96L15 | -0.79026  |
| 7936 | P0C206 | Q9GZM5 | -0.57998  |
| 7937 | P0C206 | Q43930 | -1.13     |
| 7938 | P0C206 | Q5SZQ8 | -0.43763  |
| 7939 | P0C206 | P09455 | -0.29172  |
| 7940 | P0C206 | Q14761 | -0.90158  |
| 7941 | P0C206 | Q9Y6W3 | -0.64192  |
| 7942 | P0C206 | Q8NFP9 | -0.22741  |
| 7943 | P0C206 | Q6UWV2 | -0.38131  |
| 7944 | P0C206 | Q43610 | -0.24598  |
| 7945 | P0C206 | Q6DN03 | -0.66158  |
| 7946 | P0C206 | Q86W10 | -1.0978   |
| 7947 | P0C206 | Q01726 | -0.57718  |
| 7948 | P0C206 | A6NE01 | -0.18123  |
| 7949 | P0C206 | Q8NCM2 | -0.84159  |
| 7950 | P0C206 | O60812 | -0.42372  |
| 7951 | P0C206 | P30512 | -0.92002  |
| 7952 | P0C206 | Q92527 | -0.22737  |
| 7953 | P0C206 | Q6P2N6 | -0.91833  |
| 7954 | P0C206 | Q9UHF0 | -0.93323  |
| 7955 | P0C206 | O14511 | -1.356    |
| 7956 | P0C206 | P56856 | -0.66396  |
| 7957 | P0C206 | O95258 | -0.68671  |
| 7958 | P0C206 | Q9BZF3 | -0.24435  |
| 7959 | P0C206 | Q9UHC7 | -0.22182  |
| 7960 | P0C206 | Q8TF62 | -0.99922  |
| 7961 | P0C206 | P17980 | -0.31201  |
| 7962 | P0C206 | Q8IWI9 | -0.38472  |
| 7963 | P0C206 | P13760 | -0.46002  |
| 7964 | P0C206 | Q96AC6 | -0.39587  |
| 7965 | P0C206 | P48544 | -0.55027  |
| 7966 | P0C206 | Q14847 | -0.22741  |
| 7967 | P0C206 | Q6QHK4 | -0.24071  |
| 7968 | P0C206 | Q8NAC3 | -0.87647  |
| 7969 | P0C206 | P43365 | -0.092462 |
| 7970 | P0C206 | Q9BXA7 | -1.2011   |
| 7971 | P0C206 | B1ANH7 | -0.17258  |
| 7972 | P0C206 | P56880 | -0.66396  |
| 7973 | P0C206 | Q01968 | -0.30009  |
| 7974 | P0C206 | Q86X45 | -0.22741  |
| 7975 | P0C206 | Q8TDU9 | -1.2143   |
| 7976 | P0C206 | P40238 | -0.98954  |
| 7977 | P0C206 | Q96PE2 | -0.51781  |
| 7978 | P0C206 | P05165 | -0.59474  |
| 7979 | P0C206 | Q6ZVZ8 | -0.48675  |
| 7980 | P0C206 | P80098 | -0.93124  |

|      |        |        |           |
|------|--------|--------|-----------|
| 7981 | P0C206 | O60676 | -0.63952  |
| 7982 | P0C206 | Q99102 | -1.4758   |
| 7983 | P0C206 | P59861 | -0.77981  |
| 7984 | P0C206 | P24723 | -0.76787  |
| 7985 | P0C206 | Q99424 | -0.77366  |
| 7986 | P0C206 | Q499Y3 | -0.065031 |
| 7987 | P0C206 | O15020 | -0.22885  |
| 7988 | P0C206 | Q6XPS3 | -0.89845  |
| 7989 | P0C206 | O75147 | -0.23034  |
| 7990 | P0C206 | P22310 | -0.8389   |
| 7991 | P0C206 | Q9H013 | -1.1308   |
| 7992 | P0C206 | Q04828 | -0.22632  |
| 7993 | P0C206 | Q6HA08 | -0.56315  |
| 7994 | P0C206 | P14598 | -0.35715  |
| 7995 | P0C206 | Q9BV44 | -0.27222  |
| 7996 | P0C206 | Q99490 | -0.52977  |
| 7997 | P0C206 | Q9BYZ8 | -0.80341  |
| 7998 | P0C206 | Q99541 | -0.24736  |
| 7999 | P0C206 | Q075Z2 | -0.81675  |
| 8000 | P0C206 | Q96HH6 | -0.79503  |
| 8001 | P0C206 | Q13733 | -0.98631  |
| 8002 | P0C206 | O15079 | -0.41024  |
| 8003 | P0C206 | P18510 | -0.36824  |
| 8004 | P0C206 | P55316 | -0.45919  |
| 8005 | P0C206 | Q15417 | -0.44803  |
| 8006 | P0C206 | Q8NH21 | -1.1763   |
| 8007 | P0C206 | Q4QY38 | -0.77981  |
| 8008 | P0C206 | Q9UHG3 | -0.58837  |
| 8009 | P0C206 | P04141 | -0.11224  |
| 8010 | P0C206 | Q6P158 | -0.68176  |
| 8011 | P0C206 | Q16799 | -0.45582  |
| 8012 | P0C206 | P43304 | -0.22797  |
| 8013 | P0C206 | Q9UNI6 | -0.27792  |
| 8014 | P0C206 | Q6ZWB6 | -0.1758   |
| 8015 | P0C206 | Q5T6L9 | -0.79503  |
| 8016 | P0C206 | Q9Y385 | -1.2458   |
| 8017 | P0C206 | P13797 | -0.22771  |
| 8018 | P0C206 | Q9H6E5 | -0.22703  |
| 8019 | P0C206 | P00746 | -1.0012   |
| 8020 | P0C206 | Q15131 | -0.48172  |
| 8021 | P0C206 | Q9NRQ2 | -0.38758  |
| 8022 | P0C206 | Q96DD0 | -0.28279  |
| 8023 | P0C206 | P37288 | -0.42578  |
| 8024 | P0C206 | O60610 | -0.22719  |
| 8025 | P0C206 | Q400G9 | -0.59932  |
| 8026 | P0C206 | P29218 | -0.18707  |
| 8027 | P0C206 | Q8NHC6 | -1.1763   |
| 8028 | P0C206 | Q7RTW8 | -1.0646   |
| 8029 | P0C206 | Q01650 | -0.6622   |
| 8030 | P0C206 | P52209 | -0.22277  |
| 8031 | P0C206 | A6NC51 | -0.79503  |
| 8032 | P0C206 | Q4VXU2 | -0.83583  |
| 8033 | P0C206 | Q709F0 | -0.5374   |
| 8034 | P0C206 | Q96GP6 | -0.35961  |
| 8035 | P0C206 | Q8TC41 | -0.95824  |
| 8036 | P0C206 | Q96BZ4 | -0.77215  |
| 8037 | P0C206 | A6NM10 | -0.71306  |
| 8038 | P0C206 | Q96RT6 | -0.67788  |
| 8039 | P0C206 | Q9Y2F5 | -0.034204 |
| 8040 | P0C206 | Q9NPC2 | -1.0344   |
| 8041 | P0C206 | O60882 | -0.80078  |
| 8042 | P0C206 | P0C870 | -0.10674  |
| 8043 | P0C206 | P19971 | -0.40364  |
| 8044 | P0C206 | P0C645 | -1.1763   |
| 8045 | P0C206 | P04921 | -0.42575  |
| 8046 | P0C206 | Q9C0C4 | -0.71093  |
| 8047 | P0C206 | Q6NUN0 | -0.94889  |
| 8048 | P0C206 | Q14CX5 | -0.79503  |
| 8049 | P0C206 | P55010 | -0.32362  |
| 8050 | P0C206 | Q8NGN0 | -1.1763   |
| 8051 | P0C206 | P12314 | -0.7367   |
| 8052 | P0C206 | P02778 | -0.81352  |
| 8053 | P0C206 | P17481 | -0.21452  |
| 8054 | P0C206 | Q9BT30 | -0.47512  |
| 8055 | P0C206 | O95158 | -0.67014  |
| 8056 | P0C206 | Q96M98 | -0.13801  |

|      |        |        |           |
|------|--------|--------|-----------|
| 8057 | P0C206 | Q9HCM2 | -0.78468  |
| 8058 | P0C206 | Q13324 | -0.69537  |
| 8059 | P0C206 | O60896 | -0.1918   |
| 8060 | P0C206 | Q9NX76 | -0.85091  |
| 8061 | P0C206 | P46734 | -0.22828  |
| 8062 | P0C206 | Q9NQN1 | -1.1763   |
| 8063 | P0C206 | P09960 | -0.303    |
| 8064 | P0C206 | Q567V2 | -0.62349  |
| 8065 | P0C206 | P34130 | -0.72603  |
| 8066 | P0C206 | P50591 | -0.66177  |
| 8067 | P0C206 | Q9Y561 | -0.51947  |
| 8068 | P0C206 | Q9NYW0 | -1.0414   |
| 8069 | P0C206 | O94919 | -0.73049  |
| 8070 | P0C206 | Q8NFZ4 | -0.61267  |
| 8071 | P0C206 | P49753 | -0.15541  |
| 8072 | P0C206 | Q14960 | -0.76655  |
| 8073 | P0C206 | Q8IXH8 | -1.1512   |
| 8074 | P0C206 | P20138 | -1.3057   |
| 8075 | P0C206 | P19544 | -0.22033  |
| 8076 | P0C206 | P55285 | -0.57263  |
| 8077 | P0C206 | P22083 | -0.49136  |
| 8078 | P0C206 | P30988 | -0.60839  |
| 8079 | P0C206 | Q9BQ75 | -0.33531  |
| 8080 | P0C206 | P0C851 | -0.79503  |
| 8081 | P0C206 | Q7Z6M2 | -0.23335  |
| 8082 | P0C206 | Q13423 | -0.82244  |
| 8083 | P0C206 | P31645 | -0.29455  |
| 8084 | P0C206 | Q15822 | -0.88124  |
| 8085 | P0C206 | Q9UQ07 | -0.83906  |
| 8086 | P0C206 | Q9NUJ7 | -0.52138  |
| 8087 | P0C206 | Q13242 | -0.22725  |
| 8088 | P0C206 | Q9ULC0 | -1.4604   |
| 8089 | P0C206 | Q9NSN8 | -0.22493  |
| 8090 | P0C206 | Q8NH61 | -1.1763   |
| 8091 | P0C206 | Q99705 | -1.1173   |
| 8092 | P0C206 | Q07864 | -0.23027  |
| 8093 | P0C206 | Q9NRU3 | -0.95503  |
| 8094 | P0C206 | Q63ZE4 | -0.7014   |
| 8095 | P0C206 | P31937 | -0.44779  |
| 8096 | P0C206 | Q6ZVH7 | -0.22737  |
| 8097 | P0C206 | Q9UHD0 | -0.84906  |
| 8098 | P0C206 | A6NDL8 | -1.1763   |
| 8099 | P0C206 | Q8IWR1 | -0.96536  |
| 8100 | P0C206 | Q86Y38 | -1.0164   |
| 8101 | P0C206 | Q9H0H9 | -0.075132 |
| 8102 | P0C206 | O75095 | -0.22742  |
| 8103 | P0C206 | Q7Z3B1 | -0.28422  |
| 8104 | P0C206 | P17927 | -0.87078  |
| 8105 | P0C206 | Q9H497 | -0.44496  |
| 8106 | P0C206 | Q1MX18 | -0.26005  |
| 8107 | P0C206 | P22303 | -0.22705  |
| 8108 | P0C206 | P29033 | -0.71834  |
| 8109 | P0C206 | Q04912 | -0.89118  |
| 8110 | P0C206 | Q9NU39 | -0.45919  |
| 8111 | P0C206 | P10644 | -0.22755  |
| 8112 | P0C206 | Q9Y5P0 | -1.1763   |
| 8113 | P0C206 | A0PJW8 | -0.2727   |
| 8114 | P0C206 | P04208 | -0.9894   |
| 8115 | P0C206 | Q8TAB3 | -1.1512   |
| 8116 | P0C206 | P0DJR0 | -0.92067  |
| 8117 | P0C206 | Q03135 | -0.22598  |
| 8118 | P0C206 | P09341 | -1.1428   |
| 8119 | P0C206 | Q5VV16 | -0.45919  |
| 8120 | P0C206 | P35408 | -0.51967  |
| 8121 | P0C206 | Q8NGT7 | -1.1763   |
| 8122 | P0C206 | Q13393 | -0.41731  |
| 8123 | P0C206 | P01699 | -0.9894   |
| 8124 | P0C206 | O15391 | -0.21575  |
| 8125 | P0C206 | Q5VV67 | -0.22549  |
| 8126 | P0C206 | Q6UW01 | -0.73587  |
| 8127 | P0C206 | P52803 | -0.47041  |
| 8128 | P0C206 | Q9Y6M7 | -0.81643  |
| 8129 | P0C206 | P49757 | -0.22692  |
| 8130 | P0C206 | Q6UXB2 | -1.1006   |
| 8131 | P0C206 | P57789 | -1.1166   |
| 8132 | P0C206 | Q5W041 | -0.22805  |



|      |        |        |           |
|------|--------|--------|-----------|
| 8133 | POC206 | P05107 | -0.98509  |
| 8134 | POC206 | Q8NH03 | -1.1763   |
| 8135 | POC206 | B6SEH9 | -0.79503  |
| 8136 | POC206 | Q9NZN3 | -0.46305  |
| 8137 | POC206 | Q9ULJ7 | -0.2274   |
| 8138 | POC206 | O75343 | -0.66696  |
| 8139 | POC206 | Q53FZ2 | -0.69375  |
| 8140 | POC206 | Q8TBC3 | -0.17685  |
| 8141 | POC206 | Q9ULW5 | -0.77592  |
| 8142 | POC206 | P09210 | -0.22544  |
| 8143 | POC206 | Q8TE59 | -1.173    |
| 8144 | POC206 | Q9Y2T1 | -0.74112  |
| 8145 | POC206 | P32927 | -0.59487  |
| 8146 | POC206 | Q9BZP6 | -0.49094  |
| 8147 | POC206 | Q15695 | -0.28772  |
| 8148 | POC206 | Q96FS4 | -0.21426  |
| 8149 | POC206 | Q8N2K1 | -1.1131   |
| 8150 | POC206 | Q580R0 | -0.37293  |
| 8151 | POC206 | P0CG40 | -0.1879   |
| 8152 | POC206 | Q9NY84 | -0.34274  |
| 8153 | POC206 | P11021 | -0.22104  |
| 8154 | POC206 | Q9NWQ9 | -0.27934  |
| 8155 | POC206 | P33908 | -0.57906  |
| 8156 | POC206 | Q86TB3 | -0.59819  |
| 8157 | POC206 | Q0VAA5 | -0.67047  |
| 8158 | POC206 | Q9UMX6 | -0.55135  |
| 8159 | POC206 | P51689 | -0.36838  |
| 8160 | POC206 | P15848 | -0.26287  |
| 8161 | POC206 | P33897 | -0.23682  |
| 8162 | POC206 | Q00341 | -0.2442   |
| 8163 | POC206 | O14983 | -0.40726  |
| 8164 | POC206 | Q9NYM9 | -0.081627 |
| 8165 | POC206 | Q96Q11 | -0.50669  |
| 8166 | POC206 | O60337 | -0.82963  |
| 8167 | POC206 | Q8NHP8 | -0.44155  |
| 8168 | POC206 | Q6ZW05 | -0.5634   |
| 8169 | POC206 | Q9NPB9 | -1.3426   |
| 8170 | POC206 | Q9UIJ5 | -0.73987  |
| 8171 | POC206 | Q92887 | -0.79293  |
| 8172 | POC206 | H3BV60 | -0.79503  |
| 8173 | POC206 | Q8TED9 | -0.22559  |
| 8174 | POC206 | O75718 | -0.92907  |
| 8175 | POC206 | Q9P2S2 | -0.84391  |
| 8176 | POC206 | Q5U5R9 | -0.3154   |
| 8177 | POC206 | Q5SY80 | -0.79503  |
| 8178 | POC206 | Q86UD3 | -0.97195  |
| 8179 | POC206 | P17658 | -0.77342  |
| 8180 | POC206 | Q9H0Y0 | -0.18523  |
| 8181 | POC206 | P01704 | -0.9894   |
| 8182 | POC206 | Q02325 | -0.80952  |
| 8183 | POC206 | Q9H3N8 | -1.224    |
| 8184 | POC206 | P02729 | -0.71676  |
| 8185 | POC206 | Q9BRV3 | -0.25579  |
| 8186 | POC206 | Q9NWF4 | -0.93475  |
| 8187 | POC206 | Q9BXJ1 | -0.87668  |
| 8188 | POC206 | P80075 | -1        |
| 8189 | POC206 | Q9Y2C9 | -0.68837  |
| 8190 | POC206 | Q8IU68 | -0.89601  |
| 8191 | POC206 | Q969G6 | -0.33707  |
| 8192 | POC206 | P34820 | -0.91918  |
| 8193 | POC206 | Q58FF7 | -0.4889   |
| 8194 | POC206 | Q9H3P7 | -0.43846  |
| 8195 | POC206 | Q6NXT4 | -0.61581  |
| 8196 | POC206 | O75828 | -0.22658  |
| 8197 | POC206 | O14979 | -0.26493  |
| 8198 | POC206 | P04436 | -0.42444  |
| 8199 | POC206 | Q8IU68 | -0.89601  |
| 8200 | POC206 | Q13459 | -0.20034  |
| 8201 | POC206 | Q8IX01 | -0.14828  |
| 8202 | POC206 | Q9NRD9 | -0.97058  |
| 8203 | POC206 | Q9NZN5 | -0.22982  |
| 8204 | POC206 | P42694 | -0.27743  |
| 8205 | POC206 | Q9UPZ6 | -1.4591   |
| 8206 | POC206 | Q8IWU4 | -0.46792  |
| 8207 | POC206 | Q6NW40 | -0.62856  |
| 8208 | POC206 | Q8NDG6 | -0.43933  |

|      |        |        |           |
|------|--------|--------|-----------|
| 8209 | P0C206 | Q9Y6F8 | -0.22427  |
| 8210 | P0C206 | Q9H2B2 | -0.70159  |
| 8211 | P0C206 | P01605 | -0.9894   |
| 8212 | P0C206 | P55001 | -0.78496  |
| 8213 | P0C206 | Q7RTV5 | -0.19585  |
| 8214 | P0C206 | P14151 | -0.58957  |
| 8215 | P0C206 | A6NI56 | -0.037802 |
| 8216 | P0C206 | Q96L73 | -0.22764  |
| 8217 | P0C206 | O43837 | -0.10075  |
| 8218 | P0C206 | Q6PCB7 | -0.5941   |
| 8219 | P0C206 | P31358 | -0.53808  |
| 8220 | P0C206 | O15090 | -0.22063  |
| 8221 | P0C206 | Q7Z5L4 | -0.59105  |
| 8222 | P0C206 | Q9HC47 | -0.76957  |
| 8223 | P0C206 | Q5RGS2 | -0.79503  |
| 8224 | P0C206 | Q6UWS5 | -0.04002  |
| 8225 | P0C206 | Q9P1W3 | -0.79503  |
| 8226 | P0C206 | A6PVC2 | -0.20283  |
| 8227 | P0C206 | P27544 | -0.4724   |
| 8228 | P0C206 | Q7Z3Z3 | -0.4389   |
| 8229 | P0C206 | Q8WY64 | -0.22742  |
| 8230 | P0C206 | Q8NH49 | -1.1763   |
| 8231 | P0C206 | A6NMU1 | -1.1763   |
| 8232 | P0C206 | O14753 | -0.21547  |
| 8233 | P0C206 | Q14520 | -1.4553   |
| 8234 | P0C206 | Q0P5P2 | -0.80952  |
| 8235 | P0C206 | P15882 | -0.75264  |
| 8236 | P0C206 | P01604 | -0.9894   |
| 8237 | P0C206 | A8MV23 | -0.66462  |
| 8238 | P0C206 | Q9Y4L1 | -0.55015  |
| 8239 | P0C206 | Q96J01 | -0.22702  |
| 8240 | P0C206 | P29034 | -0.25189  |
| 8241 | P0C206 | P35475 | -0.39462  |
| 8242 | P0C206 | P17538 | -1.3413   |
| 8243 | P0C206 | P12830 | -0.57974  |
| 8244 | P0C206 | Q96PH1 | -0.80537  |
| 8245 | P0C206 | Q7Z5A4 | -1.3203   |
| 8246 | P0C206 | Q13308 | -0.44025  |
| 8247 | P0C206 | P01705 | -0.9894   |
| 8248 | P0C206 | Q9H9A6 | -0.22969  |
| 8249 | P0C206 | Q8TBR5 | -0.089878 |
| 8250 | P0C206 | Q05923 | -0.23144  |
| 8251 | P0C206 | Q96L08 | -0.79503  |
| 8252 | P0C206 | Q8WW27 | -0.23086  |
| 8253 | P0C206 | Q9UBU2 | -0.97365  |
| 8254 | P0C206 | P21728 | -0.32144  |
| 8255 | P0C206 | P30532 | -0.9526   |
| 8256 | P0C206 | Q92826 | -0.22708  |
| 8257 | P0C206 | Q8N594 | -0.58106  |
| 8258 | P0C206 | Q99784 | -0.22727  |
| 8259 | P0C206 | P60022 | -0.84122  |
| 8260 | P0C206 | Q7Z478 | -0.23994  |
| 8261 | P0C206 | Q9BXS0 | -1.5741   |
| 8262 | P0C206 | Q07507 | -1.1315   |
| 8263 | P0C206 | Q8NGJ0 | -1.1763   |
| 8264 | P0C206 | Q6ZRP7 | -1.1404   |
| 8265 | P0C206 | Q8IYR0 | -0.088319 |
| 8266 | P0C206 | Q8TB61 | -0.662    |
| 8267 | P0C206 | P05186 | -0.95389  |
| 8268 | P0C206 | P20155 | -0.73784  |
| 8269 | P0C206 | Q9BYC5 | -0.46513  |
| 8270 | P0C206 | Q9BXY4 | -0.82815  |
| 8271 | P0C206 | O95235 | -0.29277  |
| 8272 | P0C206 | P29377 | -0.26369  |
| 8273 | P0C206 | Q4G0W2 | -0.70859  |
| 8274 | P0C206 | Q06187 | -0.22741  |
| 8275 | P0C206 | O15335 | -0.8569   |
| 8276 | P0C206 | Q9H6I2 | -0.16316  |
| 8277 | P0C206 | Q8NI22 | -0.34206  |
| 8278 | P0C206 | O14793 | -0.36896  |
| 8279 | P0C206 | Q9Y5H7 | -1.2044   |
| 8280 | P0C206 | Q5SQS7 | -0.2274   |
| 8281 | P0C206 | Q9BR26 | -0.80827  |
| 8282 | P0C206 | Q04609 | -0.80165  |
| 8283 | P0C206 | Q6UWF7 | -0.80952  |
| 8284 | P0C206 | O15530 | -0.22449  |

|      |        |        |           |
|------|--------|--------|-----------|
| 8285 | POC206 | Q6Q6R5 | -0.23568  |
| 8286 | POC206 | Q6UXR6 | -0.80952  |
| 8287 | POC206 | Q9NQG1 | -0.79503  |
| 8288 | POC206 | Q8NI38 | -0.2274   |
| 8289 | POC206 | Q06710 | -0.22698  |
| 8290 | POC206 | Q9BZY9 | -0.22722  |
| 8291 | POC206 | O43921 | -0.30073  |
| 8292 | POC206 | Q9NYA4 | -0.21902  |
| 8293 | POC206 | Q9UBC7 | -0.6749   |
| 8294 | POC206 | Q2M3V2 | -0.22741  |
| 8295 | POC206 | O60635 | -0.92342  |
| 8296 | POC206 | Q96M93 | -0.78072  |
| 8297 | POC206 | A6NFX0 | -0.79503  |
| 8298 | POC206 | A6NC86 | -0.79159  |
| 8299 | POC206 | O95409 | -0.22702  |
| 8300 | POC206 | Q99943 | -0.62131  |
| 8301 | POC206 | Q86VE9 | -0.71456  |
| 8302 | POC206 | P35713 | -0.31261  |
| 8303 | POC206 | Q07890 | -0.22741  |
| 8304 | POC206 | P19440 | -0.29203  |
| 8305 | POC206 | Q8N5H7 | -0.57519  |
| 8306 | POC206 | P05166 | -0.39237  |
| 8307 | POC206 | Q16560 | -0.49537  |
| 8308 | POC206 | P55287 | -1.129    |
| 8309 | POC206 | P30414 | -0.25132  |
| 8310 | POC206 | Q9NP91 | -0.98412  |
| 8311 | POC206 | Q9P0P0 | -0.29043  |
| 8312 | POC206 | Q9ULB4 | -1.0091   |
| 8313 | POC206 | O75094 | -0.68879  |
| 8314 | POC206 | Q9NRC6 | -0.23713  |
| 8315 | POC206 | Q8NGM1 | -1.1763   |
| 8316 | POC206 | Q86T96 | -0.49505  |
| 8317 | POC206 | Q6IE37 | -0.79178  |
| 8318 | POC206 | Q9HAW7 | -0.69777  |
| 8319 | POC206 | Q9H0X4 | -0.79503  |
| 8320 | POC206 | P31146 | -0.22741  |
| 8321 | POC206 | O94967 | -0.22744  |
| 8322 | POC206 | Q9Y5Y4 | -1.2675   |
| 8323 | POC206 | Q8IWU5 | -0.36285  |
| 8324 | POC206 | P22694 | -0.22619  |
| 8325 | POC206 | Q9BPW4 | -0.96187  |
| 8326 | POC206 | Q9NVG8 | -1.2801   |
| 8327 | POC206 | Q7RTX9 | -0.83852  |
| 8328 | POC206 | Q13332 | -0.72191  |
| 8329 | POC206 | Q7Z309 | -0.10644  |
| 8330 | POC206 | O75808 | -0.61271  |
| 8331 | POC206 | Q32ZL2 | -0.89394  |
| 8332 | POC206 | O00418 | -0.82754  |
| 8333 | POC206 | O43147 | -0.88845  |
| 8334 | POC206 | O43347 | -0.36615  |
| 8335 | POC206 | Q8N0X2 | -0.22788  |
| 8336 | POC206 | P51168 | -0.42842  |
| 8337 | POC206 | Q08117 | -0.42992  |
| 8338 | POC206 | Q9Y5G7 | -1.1512   |
| 8339 | POC206 | Q8WWX8 | -0.86872  |
| 8340 | POC206 | Q7L7L0 | -0.66158  |
| 8341 | POC206 | P43250 | -1.1463   |
| 8342 | POC206 | Q99218 | -1.0615   |
| 8343 | POC206 | Q8TDW7 | -1.3181   |
| 8344 | POC206 | P41159 | -0.3807   |
| 8345 | POC206 | P30273 | -0.62302  |
| 8346 | POC206 | Q8N335 | -0.18657  |
| 8347 | POC206 | P98164 | -0.2817   |
| 8348 | POC206 | P11169 | -0.1412   |
| 8349 | POC206 | O15054 | -0.36101  |
| 8350 | POC206 | Q99748 | -0.5649   |
| 8351 | POC206 | Q8NFI4 | -0.22698  |
| 8352 | POC206 | Q4VC12 | -0.21594  |
| 8353 | POC206 | Q8IX06 | -0.043096 |
| 8354 | POC206 | P31644 | -0.79868  |
| 8355 | POC206 | Q8NDA2 | -0.96838  |
| 8356 | POC206 | Q16473 | -0.22741  |
| 8357 | POC206 | Q07326 | -0.80939  |
| 8358 | POC206 | P0C7X0 | -0.19106  |
| 8359 | POC206 | P01233 | -0.74617  |
| 8360 | POC206 | Q6ZV29 | -0.42016  |

|      |        |        |           |
|------|--------|--------|-----------|
| 8361 | P0C206 | P12644 | -0.22741  |
| 8362 | P0C206 | Q7Z6K3 | -0.27609  |
| 8363 | P0C206 | Q96DU9 | -0.61001  |
| 8364 | P0C206 | Q9NR21 | -0.28641  |
| 8365 | P0C206 | P38435 | -0.81047  |
| 8366 | P0C206 | Q8NGT9 | -1.1763   |
| 8367 | P0C206 | P12318 | -0.89738  |
| 8368 | P0C206 | Q8IX19 | -0.79503  |
| 8369 | P0C206 | Q0P651 | -0.80952  |
| 8370 | P0C206 | Q9H306 | -1.2353   |
| 8371 | P0C206 | Q9H6B4 | -0.7488   |
| 8372 | P0C206 | Q8TCT6 | -0.95802  |
| 8373 | P0C206 | P49760 | -0.52808  |
| 8374 | P0C206 | P48547 | -0.77342  |
| 8375 | P0C206 | A4QPB2 | -0.22742  |
| 8376 | P0C206 | Q9NY35 | -0.81745  |
| 8377 | P0C206 | O14795 | -0.22741  |
| 8378 | P0C206 | Q8N3K9 | -0.22764  |
| 8379 | P0C206 | Q8N8Q9 | -0.90363  |
| 8380 | P0C206 | A8MWL7 | -0.79503  |
| 8381 | P0C206 | O60500 | -0.54472  |
| 8382 | P0C206 | O43169 | -0.62839  |
| 8383 | P0C206 | P35610 | -0.78308  |
| 8384 | P0C206 | Q96AZ6 | -0.18299  |
| 8385 | P0C206 | Q5VVX9 | -0.79328  |
| 8386 | P0C206 | P29466 | -0.22735  |
| 8387 | P0C206 | Q6P6B7 | -0.22742  |
| 8388 | P0C206 | Q12766 | -0.22736  |
| 8389 | P0C206 | Q6URH7 | -0.074484 |
| 8390 | P0C206 | Q6IFG1 | -1.1763   |
| 8391 | P0C206 | P13639 | -0.24867  |
| 8392 | P0C206 | Q14449 | -0.22741  |
| 8393 | P0C206 | Q9Y263 | -0.22872  |
| 8394 | P0C206 | Q69YZ2 | -0.79503  |
| 8395 | P0C206 | P17931 | -0.15941  |
| 8396 | P0C206 | Q8NH73 | -1.1763   |
| 8397 | P0C206 | A6NJT0 | -0.18744  |
| 8398 | P0C206 | Q53H54 | -0.15587  |
| 8399 | P0C206 | O60469 | -0.92218  |
| 8400 | P0C206 | Q13976 | -0.37481  |
| 8401 | P0C206 | O60344 | -0.84606  |
| 8402 | P0C206 | Q8IYT3 | -0.17777  |
| 8403 | P0C206 | Q86UX7 | -0.55669  |
| 8404 | P0C206 | Q86Y07 | -0.37571  |
| 8405 | P0C206 | P02675 | -0.85165  |
| 8406 | P0C206 | Q8NGL6 | -1.1763   |
| 8407 | P0C206 | Q96A28 | -0.80743  |
| 8408 | P0C206 | Q6P5W5 | -0.7126   |
| 8409 | P0C206 | Q8TAT2 | -0.79787  |
| 8410 | P0C206 | Q9BX68 | -0.1841   |
| 8411 | P0C206 | P05112 | -0.18266  |
| 8412 | P0C206 | P47902 | -0.23555  |
| 8413 | P0C206 | P54819 | -0.57232  |
| 8414 | P0C206 | Q7Z449 | -1.0569   |
| 8415 | P0C206 | P35611 | -0.16445  |
| 8416 | P0C206 | Q5SQH8 | -0.13667  |
| 8417 | P0C206 | Q8NCG7 | -0.77116  |
| 8418 | P0C206 | Q5EB52 | -0.93508  |
| 8419 | P0C206 | Q92604 | -0.55189  |
| 8420 | P0C206 | Q9P2E5 | -0.39029  |
| 8421 | P0C206 | Q9P2A4 | -0.22747  |
| 8422 | P0C206 | Q96GQ7 | -0.4499   |
| 8423 | P0C206 | Q9Y5E9 | -1.1388   |
| 8424 | P0C206 | P48730 | -0.22741  |
| 8425 | P0C206 | P11229 | -0.79851  |
| 8426 | P0C206 | Q9NY97 | -0.42116  |
| 8427 | P0C206 | Q99880 | -0.66158  |
| 8428 | P0C206 | Q9BYT1 | -0.68749  |
| 8429 | P0C206 | Q9H3D4 | -0.22715  |
| 8430 | P0C206 | Q86UF4 | -0.032136 |
| 8431 | P0C206 | Q9P0S9 | -0.62641  |
| 8432 | P0C206 | O60902 | -0.12308  |
| 8433 | P0C206 | Q9Y343 | -0.4024   |
| 8434 | P0C206 | P23219 | -0.3172   |
| 8435 | P0C206 | P47755 | -0.45148  |
| 8436 | P0C206 | Q9UN66 | -1.1512   |

|      |        |        |           |
|------|--------|--------|-----------|
| 8437 | POC206 | Q8NBV8 | -0.71304  |
| 8438 | POC206 | Q03113 | -0.55359  |
| 8439 | POC206 | P04437 | -0.33576  |
| 8440 | POC206 | P10809 | -0.15683  |
| 8441 | POC206 | P21730 | -1.1688   |
| 8442 | POC206 | Q15399 | -0.70995  |
| 8443 | POC206 | P11310 | -0.4628   |
| 8444 | POC206 | Q8NCS4 | -0.79503  |
| 8445 | POC206 | P08754 | -0.31142  |
| 8446 | POC206 | Q969W1 | -0.82731  |
| 8447 | POC206 | Q9NPF8 | -0.53532  |
| 8448 | POC206 | Q9UGI8 | -0.54761  |
| 8449 | POC206 | Q29974 | -0.52074  |
| 8450 | POC206 | Q8TF61 | -0.45099  |
| 8451 | POC206 | Q7Z5R6 | -0.412    |
| 8452 | POC206 | Q16478 | -0.64257  |
| 8453 | POC206 | Q8N4V2 | -0.65624  |
| 8454 | POC206 | P59510 | -1.0494   |
| 8455 | POC206 | Q9Y5H5 | -1.1512   |
| 8456 | POC206 | Q9BTV6 | -0.22745  |
| 8457 | POC206 | Q6SZW1 | -0.42812  |
| 8458 | POC206 | Q8NGL0 | -1.1763   |
| 8459 | POC206 | P21439 | -0.99522  |
| 8460 | POC206 | Q8NGT0 | -1.1763   |
| 8461 | POC206 | Q8N3Y7 | -1.4243   |
| 8462 | POC206 | O95477 | -0.41433  |
| 8463 | POC206 | P04229 | -0.52257  |
| 8464 | POC206 | Q43529 | -0.61849  |
| 8465 | POC206 | Q8TD43 | -0.7664   |
| 8466 | POC206 | Q9UQ53 | -0.44466  |
| 8467 | POC206 | P61587 | -1.1755   |
| 8468 | POC206 | Q30134 | -0.63497  |
| 8469 | POC206 | Q75907 | -0.5255   |
| 8470 | POC206 | Q9H4A4 | -0.79391  |
| 8471 | POC206 | Q6XUX3 | -0.57665  |
| 8472 | POC206 | Q58FG1 | -0.4889   |
| 8473 | POC206 | Q8NCL4 | -0.54325  |
| 8474 | POC206 | P49223 | -0.75923  |
| 8475 | POC206 | P02458 | -0.57746  |
| 8476 | POC206 | Q9HCN3 | -0.9994   |
| 8477 | POC206 | Q3ZCW2 | -0.50023  |
| 8478 | POC206 | O60542 | -0.75812  |
| 8479 | POC206 | Q15382 | -1.1606   |
| 8480 | POC206 | Q68CR7 | -0.79503  |
| 8481 | POC206 | P01599 | -0.9894   |
| 8482 | POC206 | P02745 | -0.33325  |
| 8483 | POC206 | Q9NP78 | -0.75203  |
| 8484 | POC206 | Q9NRY6 | -0.54528  |
| 8485 | POC206 | P30301 | -0.88198  |
| 8486 | POC206 | Q8NH94 | -1.1763   |
| 8487 | POC206 | O75426 | -0.29388  |
| 8488 | POC206 | Q9H6X4 | -0.79503  |
| 8489 | POC206 | Q8NHJ6 | -0.46246  |
| 8490 | POC206 | P33991 | -0.21857  |
| 8491 | POC206 | P11465 | -0.65055  |
| 8492 | POC206 | Q9H7B7 | -0.80952  |
| 8493 | POC206 | P07686 | -0.30764  |
| 8494 | POC206 | A6NNM3 | -0.22738  |
| 8495 | POC206 | P02790 | -0.22446  |
| 8496 | POC206 | Q96R45 | -1.1763   |
| 8497 | POC206 | Q07654 | -0.81616  |
| 8498 | POC206 | A1L4M7 | -0.016255 |
| 8499 | POC206 | Q15649 | -0.14395  |
| 8500 | POC206 | Q6UX53 | -0.30069  |
| 8501 | POC206 | Q53RT3 | -1.0382   |
| 8502 | POC206 | Q5TC79 | -0.22704  |
| 8503 | POC206 | P52954 | -0.23196  |
| 8504 | POC206 | Q9UBR2 | -0.79137  |
| 8505 | POC206 | O75298 | -0.36968  |
| 8506 | POC206 | P49736 | -0.20381  |
| 8507 | POC206 | O95754 | -0.84574  |
| 8508 | POC206 | P01116 | -0.29308  |
| 8509 | POC206 | P54802 | -0.25873  |
| 8510 | POC206 | Q9P227 | -1.1223   |
| 8511 | POC206 | P51449 | -0.34185  |
| 8512 | POC206 | Q9Y2X7 | -0.22741  |

|      |        |        |           |
|------|--------|--------|-----------|
| 8513 | POC206 | Q0P6D2 | -0.89601  |
| 8514 | POC206 | A8K2U0 | -0.77505  |
| 8515 | POC206 | Q5T2S8 | -0.22885  |
| 8516 | POC206 | Q9BXT4 | -0.30806  |
| 8517 | POC206 | Q1XH10 | -0.41575  |
| 8518 | POC206 | Q95970 | -0.2285   |
| 8519 | POC206 | Q6NUT2 | -1.1553   |
| 8520 | POC206 | Q9NYR9 | -0.90872  |
| 8521 | POC206 | Q9UQ72 | -0.81994  |
| 8522 | POC206 | P02746 | -0.39503  |
| 8523 | POC206 | Q7Z3B0 | -0.79503  |
| 8524 | POC206 | Q92974 | -0.22745  |
| 8525 | POC206 | P62158 | -0.22714  |
| 8526 | POC206 | Q9H1E1 | -0.64338  |
| 8527 | POC206 | A8MW99 | -0.45389  |
| 8528 | POC206 | Q9BX51 | -0.2062   |
| 8529 | POC206 | P63244 | -0.22809  |
| 8530 | POC206 | Q13177 | -0.22812  |
| 8531 | POC206 | P08603 | -0.87211  |
| 8532 | POC206 | Q9H8J5 | -0.79503  |
| 8533 | POC206 | P02751 | -0.38976  |
| 8534 | POC206 | P32856 | -0.26714  |
| 8535 | POC206 | Q9NUG6 | -0.0636   |
| 8536 | POC206 | P25092 | -0.93454  |
| 8537 | POC206 | Q9Y2S2 | -0.34189  |
| 8538 | POC206 | Q5T4S7 | -0.089934 |
| 8539 | POC206 | Q9H7M9 | -0.79503  |
| 8540 | POC206 | Q8NGL7 | -1.1763   |
| 8541 | POC206 | Q9HBH5 | -0.91467  |
| 8542 | POC206 | Q8IZP6 | -0.22736  |
| 8543 | POC206 | P28328 | -0.22255  |
| 8544 | POC206 | Q9NS66 | -1.2448   |
| 8545 | POC206 | P61221 | -0.38156  |
| 8546 | POC206 | Q86SM5 | -1.2448   |
| 8547 | POC206 | A8MXQ7 | -0.22741  |
| 8548 | POC206 | Q5VXJ0 | -0.81079  |
| 8549 | POC206 | Q8N8Y2 | -0.057582 |
| 8550 | POC206 | Q5U5Q3 | -0.22738  |
| 8551 | POC206 | P01737 | -0.33576  |
| 8552 | POC206 | Q14982 | -0.73445  |
| 8553 | POC206 | Q14981 | -0.35756  |
| 8554 | POC206 | Q9HA47 | -0.69791  |
| 8555 | POC206 | Q95490 | -1.0431   |
| 8556 | POC206 | Q9H0T7 | -1.1626   |
| 8557 | POC206 | Q9NY28 | -0.60657  |
| 8558 | POC206 | O00241 | -0.68458  |
| 8559 | POC206 | Q8N743 | -0.91833  |
| 8560 | POC206 | A6NFA1 | -0.70058  |
| 8561 | POC206 | P35498 | -0.87027  |
| 8562 | POC206 | Q9NY15 | -1.0278   |
| 8563 | POC206 | F8WCM5 | -0.59438  |
| 8564 | POC206 | Q76000 | -1.1763   |
| 8565 | POC206 | P50553 | -0.58952  |
| 8566 | POC206 | Q9Y5W5 | -1.0658   |
| 8567 | POC206 | Q9ULI2 | -0.63999  |
| 8568 | POC206 | Q9UPQ8 | -0.80832  |
| 8569 | POC206 | P01210 | -0.89568  |
| 8570 | POC206 | O00515 | -0.85281  |
| 8571 | POC206 | P01781 | -0.9894   |
| 8572 | POC206 | P09382 | -0.56001  |
| 8573 | POC206 | Q6P3X3 | -0.22657  |
| 8574 | POC206 | Q7L014 | -0.59796  |
| 8575 | POC206 | Q06481 | -0.21812  |
| 8576 | POC206 | Q8NGL1 | -1.1763   |
| 8577 | POC206 | Q9P003 | -0.72378  |
| 8578 | POC206 | Q9Y3E0 | -0.3564   |
| 8579 | POC206 | Q9HC56 | -1.1125   |
| 8580 | POC206 | Q75840 | -0.22496  |
| 8581 | POC206 | Q86XX4 | -1.0344   |
| 8582 | POC206 | Q9Y691 | -0.91722  |
| 8583 | POC206 | Q9UNX9 | -1.0101   |
| 8584 | POC206 | Q6ZMI0 | -0.14042  |
| 8585 | POC206 | Q76N89 | -0.22741  |
| 8586 | POC206 | Q94804 | -0.58779  |
| 8587 | POC206 | Q8TEW8 | -0.22635  |
| 8588 | POC206 | Q9NVL1 | -0.17553  |

|      |        |        |           |
|------|--------|--------|-----------|
| 8589 | P0C206 | Q3KNT9 | -0.79503  |
| 8590 | P0C206 | Q30KQ6 | -0.77981  |
| 8591 | P0C206 | P13591 | -1.2528   |
| 8592 | P0C206 | Q8N5Y8 | -0.46007  |
| 8593 | P0C206 | Q9UIG8 | -0.91972  |
| 8594 | P0C206 | Q9HC36 | -0.063363 |
| 8595 | P0C206 | P21589 | -0.43427  |
| 8596 | P0C206 | A2A3K4 | -0.6349   |
| 8597 | P0C206 | Q9BXI2 | -0.47896  |
| 8598 | P0C206 | Q15012 | -0.63869  |
| 8599 | P0C206 | Q9ULV1 | -0.44393  |
| 8600 | P0C206 | Q9BXL6 | -0.34594  |
| 8601 | P0C206 | Q6NXG1 | -0.55414  |
| 8602 | P0C206 | Q9P203 | -0.2237   |
| 8603 | P0C206 | P59533 | -1.1287   |
| 8604 | P0C206 | Q96N96 | -0.2276   |
| 8605 | P0C206 | Q8TDX7 | -0.62232  |
| 8606 | P0C206 | Q6ZWJ8 | -0.80952  |
| 8607 | P0C206 | Q9UJJ9 | -0.65167  |
| 8608 | P0C206 | Q99447 | -0.37507  |
| 8609 | P0C206 | Q9H4Q4 | -0.22794  |
| 8610 | P0C206 | P27918 | -0.92375  |
| 8611 | P0C206 | Q6UXR4 | -0.66462  |
| 8612 | P0C206 | Q75648 | -0.39988  |
| 8613 | P0C206 | Q86Y78 | -0.80952  |
| 8614 | P0C206 | B2RU33 | -0.22739  |
| 8615 | P0C206 | A6NCL7 | -0.22743  |
| 8616 | P0C206 | P04075 | -0.34757  |
| 8617 | P0C206 | Q92620 | -0.22444  |
| 8618 | P0C206 | O95622 | -0.73853  |
| 8619 | P0C206 | P08686 | -0.71667  |
| 8620 | P0C206 | Q8WVB6 | -0.69562  |
| 8621 | P0C206 | Q7Z5M8 | -0.21803  |
| 8622 | P0C206 | Q8NGB6 | -1.1763   |
| 8623 | P0C206 | Q9H1R2 | -0.26944  |
| 8624 | P0C206 | Q9NYW6 | -1.0741   |
| 8625 | P0C206 | P55039 | -0.67416  |
| 8626 | P0C206 | Q7RTZ1 | -1.3213   |
| 8627 | P0C206 | O43741 | -0.56062  |
| 8628 | P0C206 | Q96P50 | -1.0165   |
| 8629 | P0C206 | Q5T7B8 | -0.34956  |
| 8630 | P0C206 | P25103 | -0.80391  |
| 8631 | P0C206 | Q9P055 | -0.73423  |
| 8632 | P0C206 | Q9UGI9 | -0.92713  |
| 8633 | P0C206 | Q30KQ8 | -0.77981  |
| 8634 | P0C206 | Q86UE6 | -0.7202   |
| 8635 | P0C206 | Q9BXB7 | -0.48324  |
| 8636 | P0C206 | P34998 | -0.63201  |
| 8637 | P0C206 | Q6NVV7 | -0.030459 |
| 8638 | P0C206 | Q9NYQ7 | -1.0233   |
| 8639 | P0C206 | Q8N6Y2 | -0.78768  |
| 8640 | P0C206 | Q9UKF7 | -0.13938  |
| 8641 | P0C206 | Q9HBA0 | -0.42018  |
| 8642 | P0C206 | Q4V321 | -0.13445  |
| 8643 | P0C206 | Q04826 | -0.99995  |
| 8644 | P0C206 | Q8NFD2 | -1.13     |
| 8645 | P0C206 | P04216 | -0.19597  |
| 8646 | P0C206 | P37058 | -0.47417  |
| 8647 | P0C206 | Q5JRV8 | -0.79503  |
| 8648 | P0C206 | Q92630 | -0.47079  |
| 8649 | P0C206 | Q5TCH4 | -0.71917  |
| 8650 | P0C206 | Q8IX18 | -0.7415   |
| 8651 | P0C206 | Q7Z3H4 | -0.21141  |
| 8652 | P0C206 | Q9BRS2 | -1.0992   |
| 8653 | P0C206 | Q8IY17 | -0.69787  |
| 8654 | P0C206 | Q6P996 | -0.44585  |
| 8655 | P0C206 | P29965 | -0.98443  |
| 8656 | P0C206 | Q9HCH3 | -0.36937  |
| 8657 | P0C206 | P0C7U0 | -0.7828   |
| 8658 | P0C206 | Q6UWM5 | -0.80952  |
| 8659 | P0C206 | P04181 | -0.098017 |
| 8660 | P0C206 | O15209 | -0.22544  |
| 8661 | P0C206 | Q15311 | -0.32092  |
| 8662 | P0C206 | Q15813 | -0.22741  |
| 8663 | P0C206 | Q96PF2 | -0.68954  |
| 8664 | P0C206 | Q9NQF3 | -0.21168  |

|      |        |        |           |
|------|--------|--------|-----------|
| 8665 | P0C206 | Q8NG75 | -1.1763   |
| 8666 | P0C206 | Q9Y508 | -0.84751  |
| 8667 | P0C206 | Q9BPX5 | -0.086419 |
| 8668 | P0C206 | P12109 | -0.87945  |
| 8669 | P0C206 | Q8TBP0 | -1.2801   |
| 8670 | P0C206 | Q5M8T2 | -0.66813  |
| 8671 | P0C206 | Q9H0C3 | -0.63987  |
| 8672 | P0C206 | Q9UKJ0 | -0.32565  |
| 8673 | P0C206 | P15382 | -0.83377  |
| 8674 | P0C206 | Q9H1C0 | -0.96328  |
| 8675 | P0C206 | Q9Y2P4 | -1.2453   |
| 8676 | P0C206 | Q969J3 | -0.10952  |
| 8677 | P0C206 | Q99805 | -0.71768  |
| 8678 | P0C206 | Q9NX47 | -0.23262  |
| 8679 | P0C206 | Q9Y646 | -0.76636  |
| 8680 | P0C206 | Q92908 | -0.22738  |
| 8681 | P0C206 | P43121 | -1.0178   |
| 8682 | P0C206 | Q16825 | -0.38947  |
| 8683 | P0C206 | Q6IC10 | -0.79503  |
| 8684 | P0C206 | Q5BKX6 | -0.72669  |
| 8685 | P0C206 | Q7L1T6 | -0.44532  |
| 8686 | P0C206 | Q7L5N7 | -0.6746   |
| 8687 | P0C206 | Q2W9J9 | -0.79503  |
| 8688 | P0C206 | Q96PD2 | -1.0398   |
| 8689 | P0C206 | O14921 | -0.22764  |
| 8690 | P0C206 | Q9NRB3 | -0.42624  |
| 8691 | P0C206 | Q8N111 | -0.79503  |
| 8692 | P0C206 | Q6ZV89 | -0.21622  |
| 8693 | P0C206 | P0C6C1 | -0.22741  |
| 8694 | P0C206 | Q8IYP2 | -1.3203   |
| 8695 | P0C206 | Q86XT4 | -0.31825  |
| 8696 | P0C206 | P14384 | -0.17906  |
| 8697 | P0C206 | P48067 | -0.84637  |
| 8698 | P0C206 | Q8NH05 | -1.1763   |
| 8699 | P0C206 | P29074 | -0.2276   |
| 8700 | P0C206 | P01854 | -0.2702   |
| 8701 | P0C206 | Q9Y584 | -0.34862  |
| 8702 | P0C206 | Q9NP99 | -1.4547   |
| 8703 | P0C206 | P60201 | -0.49433  |
| 8704 | P0C206 | Q5T4J0 | -0.62043  |
| 8705 | P0C206 | P07437 | -0.14917  |
| 8706 | P0C206 | P0C5Y9 | -0.69547  |
| 8707 | P0C206 | Q9UPQ3 | -1.1729   |
| 8708 | P0C206 | Q07817 | -0.2273   |
| 8709 | P0C206 | Q9Y5L3 | -1.128    |
| 8710 | P0C206 | C9JJH3 | -0.59814  |
| 8711 | P0C206 | Q9Y3A6 | -0.35749  |
| 8712 | P0C206 | Q658N2 | -0.82238  |
| 8713 | P0C206 | Q96SL4 | -1.1483   |
| 8714 | P0C206 | Q9H6L2 | -0.87353  |
| 8715 | P0C206 | Q8NGD5 | -1.1763   |
| 8716 | P0C206 | Q9BXB4 | -0.60853  |
| 8717 | P0C206 | O95452 | -0.90995  |
| 8718 | P0C206 | Q96KX1 | -0.14164  |
| 8719 | P0C206 | Q2KHN1 | -0.22741  |
| 8720 | P0C206 | P98177 | -0.43196  |
| 8721 | P0C206 | Q13115 | -0.2347   |
| 8722 | P0C206 | Q8NGD3 | -1.1763   |
| 8723 | P0C206 | Q8IVL8 | -1.0826   |
| 8724 | P0C206 | Q15904 | -0.80804  |
| 8725 | P0C206 | P30531 | -0.54325  |
| 8726 | P0C206 | P36537 | -0.91418  |
| 8727 | P0C206 | O43374 | -0.34903  |
| 8728 | P0C206 | O75592 | -0.22604  |
| 8729 | P0C206 | Q6IS24 | -0.61743  |
| 8730 | P0C206 | Q9H346 | -1.1763   |
| 8731 | P0C206 | Q2M5E4 | -0.5148   |
| 8732 | P0C206 | Q9Y3L5 | -0.76203  |
| 8733 | P0C206 | Q8NB14 | -0.59814  |
| 8734 | P0C206 | Q2T9J0 | -0.54885  |
| 8735 | P0C206 | Q7Z570 | -0.44814  |
| 8736 | P0C206 | Q69YN2 | -0.29088  |
| 8737 | P0C206 | Q9Y328 | -0.57189  |
| 8738 | P0C206 | Q5JV73 | -0.22704  |
| 8739 | P0C206 | Q86XF0 | -0.29343  |
| 8740 | P0C206 | Q9BWQ8 | -0.53906  |



|      |        |        |           |
|------|--------|--------|-----------|
| 8741 | P0C206 | Q13627 | -0.2515   |
| 8742 | P0C206 | Q685J3 | -0.59905  |
| 8743 | P0C206 | Q02535 | -0.22429  |
| 8744 | P0C206 | Q9Y267 | -0.87232  |
| 8745 | P0C206 | Q8N104 | -0.77981  |
| 8746 | P0C206 | Q8WXQ8 | -1.0826   |
| 8747 | P0C206 | Q9Y4W6 | -0.56744  |
| 8748 | P0C206 | P09228 | -0.87562  |
| 8749 | P0C206 | Q9P289 | -0.27252  |
| 8750 | P0C206 | Q96PZ7 | -0.79503  |
| 8751 | P0C206 | Q7L0L9 | -0.79503  |
| 8752 | P0C206 | Q7Z410 | -1.4475   |
| 8753 | P0C206 | Q5VT25 | -0.30499  |
| 8754 | P0C206 | O43182 | -0.6435   |
| 8755 | P0C206 | Q99879 | -0.66158  |
| 8756 | P0C206 | Q9BZM4 | -0.41858  |
| 8757 | P0C206 | P0DM48 | -0.22696  |
| 8758 | P0C206 | P52945 | -0.53542  |
| 8759 | P0C206 | P61081 | -0.12581  |
| 8760 | P0C206 | O95998 | -0.77627  |
| 8761 | P0C206 | Q96PC2 | -0.38941  |
| 8762 | P0C206 | Q9Y600 | -0.39191  |
| 8763 | P0C206 | P40939 | -0.10157  |
| 8764 | P0C206 | Q16558 | -0.94346  |
| 8765 | P0C206 | P15918 | -0.22671  |
| 8766 | P0C206 | Q71H61 | -0.82256  |
| 8767 | P0C206 | Q9BV38 | -0.43999  |
| 8768 | P0C206 | P05120 | -0.50819  |
| 8769 | P0C206 | P17252 | -0.21444  |
| 8770 | P0C206 | Q9C0I1 | -0.21153  |
| 8771 | P0C206 | Q8N434 | -0.7014   |
| 8772 | P0C206 | Q6NUI6 | -0.91496  |
| 8773 | P0C206 | Q6P5X7 | -0.79503  |
| 8774 | P0C206 | P02730 | -0.32072  |
| 8775 | P0C206 | B4E2M5 | -0.22741  |
| 8776 | P0C206 | Q9NPA1 | -0.9844   |
| 8777 | P0C206 | Q99442 | -0.60575  |
| 8778 | P0C206 | O60431 | -1.1763   |
| 8779 | P0C206 | O94810 | -0.46703  |
| 8780 | P0C206 | Q9NUI1 | -1.1463   |
| 8781 | P0C206 | O00501 | -0.57359  |
| 8782 | P0C206 | P63126 | -0.15319  |
| 8783 | P0C206 | Q9NXS2 | -0.81895  |
| 8784 | P0C206 | Q9BWT6 | -0.093729 |
| 8785 | P0C206 | P46109 | -0.22741  |
| 8786 | P0C206 | Q9UNI1 | -0.91748  |
| 8787 | P0C206 | Q8IX05 | -0.7194   |
| 8788 | P0C206 | Q8WWF5 | -0.49002  |
| 8789 | P0C206 | P32121 | -0.45229  |
| 8790 | P0C206 | A6NM36 | -0.22799  |
| 8791 | P0C206 | O75914 | -0.70201  |
| 8792 | P0C206 | O75096 | -0.49139  |
| 8793 | P0C206 | Q9Y5X4 | -0.231    |
| 8794 | P0C206 | P18464 | -1.0001   |
| 8795 | P0C206 | P39059 | -1.6084   |
| 8796 | P0C206 | P51692 | -0.22647  |
| 8797 | P0C206 | Q13207 | -0.4249   |
| 8798 | P0C206 | P26992 | -0.45854  |
| 8799 | P0C206 | Q59H18 | -0.22741  |
| 8800 | P0C206 | Q8N628 | -1.1763   |
| 8801 | P0C206 | Q9H0Z9 | -0.28431  |
| 8802 | P0C206 | Q86UP2 | -0.88324  |
| 8803 | P0C206 | Q4VC39 | -0.79503  |
| 8804 | P0C206 | Q14410 | -0.49971  |
| 8805 | P0C206 | O76076 | -0.9653   |
| 8806 | P0C206 | Q3KNS1 | -0.62909  |
| 8807 | P0C206 | Q9HCJ6 | -0.93444  |
| 8808 | P0C206 | P84996 | -0.74226  |
| 8809 | P0C206 | P08575 | -0.33209  |
| 8810 | P0C206 | Q8N4C7 | -0.42931  |
| 8811 | P0C206 | Q9H3H5 | -0.72892  |
| 8812 | P0C206 | Q6NUK1 | -0.65286  |
| 8813 | P0C206 | Q9UGM1 | -0.79785  |
| 8814 | P0C206 | O15228 | -0.46079  |
| 8815 | P0C206 | Q9H972 | -0.80952  |
| 8816 | P0C206 | O96001 | -0.47709  |

|      |        |        |           |
|------|--------|--------|-----------|
| 8817 | POC206 | Q12792 | -0.26869  |
| 8818 | POC206 | Q8WZ60 | -0.20692  |
| 8819 | POC206 | A2RRP1 | -0.035755 |
| 8820 | POC206 | Q15043 | -0.82653  |
| 8821 | POC206 | P10319 | -0.99995  |
| 8822 | POC206 | Q8NEB9 | -0.47905  |
| 8823 | POC206 | Q8NGV6 | -1.1763   |
| 8824 | POC206 | Q16619 | -0.5644   |
| 8825 | POC206 | Q9HAW8 | -0.8238   |
| 8826 | POC206 | Q8TDT2 | -1.2448   |
| 8827 | POC206 | P01111 | -0.61374  |
| 8828 | POC206 | Q9H871 | -0.13511  |
| 8829 | POC206 | Q8NEP7 | -0.19711  |
| 8830 | POC206 | Q9H354 | -0.79503  |
| 8831 | POC206 | Q15485 | -1.2131   |
| 8832 | POC206 | Q66K64 | -0.23335  |
| 8833 | POC206 | Q9BQ08 | -0.67685  |
| 8834 | POC206 | P46093 | -1.3861   |
| 8835 | POC206 | P39060 | -0.442    |
| 8836 | POC206 | Q70JA7 | -0.39255  |
| 8837 | POC206 | P35372 | -0.36863  |
| 8838 | POC206 | O94941 | -0.2088   |
| 8839 | POC206 | Q9NYF5 | -1.0098   |
| 8840 | POC206 | Q5QNW6 | -0.66158  |
| 8841 | POC206 | Q16661 | -0.72819  |
| 8842 | POC206 | Q14392 | -0.86332  |
| 8843 | POC206 | Q13113 | -0.79503  |
| 8844 | POC206 | Q5U651 | -0.16717  |
| 8845 | POC206 | P11597 | -0.645    |
| 8846 | POC206 | Q16572 | -0.88916  |
| 8847 | POC206 | Q9H2F9 | -0.13826  |
| 8848 | POC206 | O95859 | -1.0264   |
| 8849 | POC206 | Q9H490 | -0.79933  |
| 8850 | POC206 | P05093 | -0.47568  |
| 8851 | POC206 | P30530 | -0.66643  |
| 8852 | POC206 | Q96A98 | -0.80849  |
| 8853 | POC206 | Q92752 | -0.3726   |
| 8854 | POC206 | Q96GZ6 | -0.8985   |
| 8855 | POC206 | Q13070 | -0.13445  |
| 8856 | POC206 | P31371 | -0.61827  |
| 8857 | POC206 | Q9UI15 | -0.20244  |
| 8858 | POC206 | P20718 | -0.54259  |
| 8859 | POC206 | Q0Z7S8 | -0.16845  |
| 8860 | POC206 | Q01524 | -0.84243  |
| 8861 | POC206 | Q8NHC4 | -1.1763   |
| 8862 | POC206 | Q8NBB2 | -0.12171  |
| 8863 | POC206 | P56539 | -0.22284  |
| 8864 | POC206 | Q9UK05 | -0.22741  |
| 8865 | POC206 | Q9NSE7 | -0.37572  |
| 8866 | POC206 | Q9BPW5 | -1.2249   |
| 8867 | POC206 | P01742 | -0.9894   |
| 8868 | POC206 | Q9Y6F9 | -0.76338  |
| 8869 | POC206 | Q9BXS9 | -0.97117  |
| 8870 | POC206 | Q6ZMQ8 | -0.65673  |
| 8871 | POC206 | Q9UM01 | -0.96046  |
| 8872 | POC206 | Q8TBJ4 | -0.88747  |
| 8873 | POC206 | Q15320 | -0.26138  |
| 8874 | POC206 | Q7Z4Y8 | -0.23166  |
| 8875 | POC206 | Q9NSD7 | -1.3378   |
| 8876 | POC206 | Q96PB1 | -0.79503  |
| 8877 | POC206 | Q13202 | -0.37553  |
| 8878 | POC206 | P60329 | -0.20413  |
| 8879 | POC206 | Q9UJV9 | -0.5788   |
| 8880 | POC206 | Q96BY9 | -0.31246  |
| 8881 | POC206 | Q9P2V4 | -0.71044  |
| 8882 | POC206 | Q8TCE9 | -0.16063  |
| 8883 | POC206 | Q6ZVU0 | -0.018726 |
| 8884 | POC206 | Q86VB7 | -1.0022   |
| 8885 | POC206 | Q9Y5H6 | -1.2044   |
| 8886 | POC206 | Q86XD8 | -0.22182  |
| 8887 | POC206 | Q13461 | -0.45919  |
| 8888 | POC206 | Q86XS5 | -1.1346   |
| 8889 | POC206 | Q9BY08 | -0.85559  |
| 8890 | POC206 | Q9H2X6 | -0.22741  |
| 8891 | POC206 | Q12788 | -0.23099  |
| 8892 | POC206 | Q9GZY0 | -0.18185  |

|      |        |        |           |
|------|--------|--------|-----------|
| 8893 | P0C206 | P47890 | -1.1763   |
| 8894 | P0C206 | Q2M2E5 | -0.80952  |
| 8895 | P0C206 | Q6UXS9 | -0.22461  |
| 8896 | P0C206 | P12259 | -0.40033  |
| 8897 | P0C206 | O15393 | -1.5927   |
| 8898 | P0C206 | O75677 | -0.22896  |
| 8899 | P0C206 | Q15118 | -0.62355  |
| 8900 | P0C206 | Q7Z4F1 | -0.91333  |
| 8901 | P0C206 | Q16585 | -0.54485  |
| 8902 | P0C206 | P29323 | -0.8521   |
| 8903 | P0C206 | Q9P107 | -0.38522  |
| 8904 | P0C206 | Q6PKH6 | -1.5883   |
| 8905 | P0C206 | O95343 | -0.22805  |
| 8906 | P0C206 | Q86SH4 | -0.80952  |
| 8907 | P0C206 | A7MBM2 | -0.60224  |
| 8908 | P0C206 | P20848 | -0.66462  |
| 8909 | P0C206 | Q12809 | -0.6489   |
| 8910 | P0C206 | O75027 | -0.72072  |
| 8911 | P0C206 | Q9UBX8 | -0.45609  |
| 8912 | P0C206 | P15088 | -0.5192   |
| 8913 | P0C206 | Q969M1 | -0.34122  |
| 8914 | P0C206 | O43897 | -1.3564   |
| 8915 | P0C206 | Q8N1W0 | -0.79503  |
| 8916 | P0C206 | Q5TGU0 | -0.84016  |
| 8917 | P0C206 | Q8TF64 | -0.22394  |
| 8918 | P0C206 | P21128 | -0.72431  |
| 8919 | P0C206 | O71037 | -0.6451   |
| 8920 | P0C206 | A4D250 | -0.044073 |
| 8921 | P0C206 | Q53TN4 | -0.93833  |
| 8922 | P0C206 | Q9NQZ7 | -0.69783  |
| 8923 | P0C206 | P35243 | -0.56176  |
| 8924 | P0C206 | O14763 | -0.28411  |
| 8925 | P0C206 | Q9BV87 | -0.78166  |
| 8926 | P0C206 | O75038 | -0.37235  |
| 8927 | P0C206 | Q8NBJ9 | -0.85184  |
| 8928 | P0C206 | P01909 | -0.72614  |
| 8929 | P0C206 | P21731 | -0.66554  |
| 8930 | P0C206 | Q9NP58 | -0.73955  |
| 8931 | P0C206 | Q15648 | -0.12999  |
| 8932 | P0C206 | Q9NZQ7 | -0.64468  |
| 8933 | P0C206 | Q15391 | -1.1919   |
| 8934 | P0C206 | Q6UVM3 | -1.1811   |
| 8935 | P0C206 | Q9BRX9 | -0.2277   |
| 8936 | P0C206 | P56937 | -1.292    |
| 8937 | P0C206 | Q4LDG9 | -0.22741  |
| 8938 | P0C206 | Q4VC31 | -0.091539 |
| 8939 | P0C206 | Q9UKG4 | -1.0244   |
| 8940 | P0C206 | Q9H6U8 | -0.79386  |
| 8941 | P0C206 | Q9NQ11 | -1.0757   |
| 8942 | P0C206 | Q5JVL4 | -0.33059  |
| 8943 | P0C206 | Q9Y2A9 | -0.57575  |
| 8944 | P0C206 | P01607 | -0.9894   |
| 8945 | P0C206 | Q02224 | -0.26464  |
| 8946 | P0C206 | Q96MU5 | -0.80952  |
| 8947 | P0C206 | Q8WWT9 | -0.72884  |
| 8948 | P0C206 | P07204 | -0.48473  |
| 8949 | P0C206 | P68363 | -0.18494  |
| 8950 | P0C206 | A4D174 | -0.2897   |
| 8951 | P0C206 | Q9BRZ2 | -0.36768  |
| 8952 | P0C206 | Q8NEY4 | -0.28092  |
| 8953 | P0C206 | Q9UK32 | -0.66027  |
| 8954 | P0C206 | Q9C0J8 | -0.22727  |
| 8955 | P0C206 | A4FU28 | -0.79503  |
| 8956 | P0C206 | O95759 | -1.2479   |
| 8957 | P0C206 | Q96ER3 | -0.78004  |
| 8958 | P0C206 | Q9BZD6 | -1.0857   |
| 8959 | P0C206 | P35542 | -0.76142  |
| 8960 | P0C206 | P01620 | -0.9894   |
| 8961 | P0C206 | Q9UPI3 | -0.79039  |
| 8962 | P0C206 | Q16627 | -0.82937  |
| 8963 | P0C206 | Q9NYC9 | -0.44243  |
| 8964 | P0C206 | Q86YR5 | -0.22277  |
| 8965 | P0C206 | P58546 | -0.22741  |
| 8966 | P0C206 | Q9BY84 | -0.33127  |
| 8967 | P0C206 | Q8N307 | -0.77291  |
| 8968 | P0C206 | Q7Z7M8 | -0.62066  |

|      |        |        |          |
|------|--------|--------|----------|
| 8969 | P0C206 | A6NDD5 | -0.63904 |
| 8970 | P0C206 | P0C672 | -0.79503 |
| 8971 | P0C206 | Q6IMI6 | -0.23447 |
| 8972 | P0C206 | O76094 | -0.21016 |
| 8973 | P0C206 | P00441 | -0.21648 |
| 8974 | P0C206 | P57078 | -0.40355 |
| 8975 | P0C206 | Q8TER0 | -0.82054 |
| 8976 | P0C206 | Q9H7Y0 | -0.80952 |
| 8977 | P0C206 | Q9NYI0 | -0.44463 |
| 8978 | P0C206 | Q3SXY8 | -0.6781  |
| 8979 | P0C206 | Q8NH54 | -1.1763  |
| 8980 | P0C206 | Q03014 | -0.22821 |
| 8981 | P0C206 | Q2TB90 | -0.18992 |
| 8982 | P0C206 | P30456 | -0.98682 |
| 8983 | P0C206 | P21283 | -0.19081 |
| 8984 | P0C206 | P43307 | -0.62803 |
| 8985 | P0C206 | Q8IXB3 | -0.79976 |
| 8986 | P0C206 | Q5SXH7 | -0.32146 |
| 8987 | P0C206 | Q6UWE3 | -0.84689 |
| 8988 | P0C206 | P00533 | -0.33576 |
| 8989 | P0C206 | Q14964 | -0.82883 |
| 8990 | P0C206 | P0C7T3 | -1.1763  |
| 8991 | P0C206 | Q9Y3I0 | -0.42155 |
| 8992 | P0C206 | Q9H2Y9 | -0.8197  |
| 8993 | P0C206 | O75616 | -0.7311  |
| 8994 | P0C206 | Q14568 | -0.4889  |
| 8995 | P0C206 | Q9Y233 | -0.51489 |
| 8996 | P0C206 | Q9BYP7 | -0.36494 |
| 8997 | P0C206 | P0C0L5 | -1.0929  |
| 8998 | P0C206 | Q16678 | -0.69258 |
| 8999 | P0C206 | Q86UQ4 | -1.1661  |
| 9000 | P0C206 | B0YJ81 | -1.4213  |
| 9001 | P0C206 | P41229 | -0.48923 |
| 9002 | P0C206 | Q8WUY9 | -0.95122 |
| 9003 | P0C206 | Q8TCT7 | -0.296   |
| 9004 | P0C206 | Q92930 | -0.64336 |
| 9005 | P0C206 | Q7Z2K6 | -1.1518  |
| 9006 | P0C206 | A6NKQ9 | -0.78978 |
| 9007 | P0C206 | P01613 | -0.9894  |
| 9008 | P0C206 | Q8NGI6 | -1.1763  |
| 9009 | P0C206 | Q15126 | -0.58486 |
| 9010 | P0C206 | Q9H6B9 | -0.72038 |
| 9011 | P0C206 | O76081 | -0.25336 |
| 9012 | P0C206 | Q9P0W0 | -0.46384 |
| 9013 | P0C206 | Q8TE56 | -1.173   |
| 9014 | P0C206 | Q8IWA4 | -0.89051 |
| 9015 | P0C206 | P13612 | -0.40446 |
| 9016 | P0C206 | Q9Y6U3 | -0.13989 |
| 9017 | P0C206 | Q03395 | -1.1668  |
| 9018 | P0C206 | P51511 | -0.72646 |
| 9019 | P0C206 | Q11130 | -0.60756 |
| 9020 | P0C206 | Q8N5C1 | -0.79503 |
| 9021 | P0C206 | Q68D86 | -0.16932 |
| 9022 | P0C206 | Q9UHD2 | -0.22741 |
| 9023 | P0C206 | Q9NTU7 | -0.71912 |
| 9024 | P0C206 | Q9HB20 | -0.3329  |
| 9025 | P0C206 | P42684 | -0.47868 |
| 9026 | P0C206 | Q86Y39 | -0.45779 |
| 9027 | P0C206 | P51828 | -0.94445 |
| 9028 | P0C206 | Q9UQQ1 | -1.2702  |
| 9029 | P0C206 | Q8ND82 | -0.22711 |
| 9030 | P0C206 | P11908 | -0.6457  |
| 9031 | P0C206 | Q96MV1 | -0.57403 |
| 9032 | P0C206 | Q6UW63 | -0.19002 |
| 9033 | P0C206 | Q9ULI1 | -0.22741 |
| 9034 | P0C206 | Q9Y5F6 | -1.1512  |
| 9035 | P0C206 | P22455 | -0.8031  |
| 9036 | P0C206 | A0PJX8 | -0.79503 |
| 9037 | P0C206 | Q8TAA1 | -0.72676 |
| 9038 | P0C206 | O95139 | -0.15904 |
| 9039 | P0C206 | P49643 | -0.21337 |
| 9040 | P0C206 | Q9NP59 | -0.30683 |
| 9041 | P0C206 | P48357 | -0.99126 |
| 9042 | P0C206 | Q9NYQ6 | -1.0249  |
| 9043 | P0C206 | P21397 | -0.72969 |
| 9044 | P0C206 | Q0VD83 | -0.58694 |

|      |        |        |          |
|------|--------|--------|----------|
| 9045 | P0C206 | Q12979 | -0.77367 |
| 9046 | P0C206 | O95214 | -0.79503 |
| 9047 | P0C206 | Q86YT5 | -0.70684 |
| 9048 | P0C206 | P20853 | -0.78722 |
| 9049 | P0C206 | Q9Y215 | -0.26192 |
| 9050 | P0C206 | Q8NGF3 | -1.1763  |
| 9051 | P0C206 | Q969Q5 | -0.24044 |
| 9052 | P0C206 | Q4KWH8 | -0.23114 |
| 9053 | P0C206 | Q9ULT0 | -0.22596 |
| 9054 | P0C206 | Q86SR1 | -0.58821 |
| 9055 | P0C206 | O75879 | -0.45761 |
| 9056 | P0C206 | P18085 | -0.23457 |
| 9057 | P0C206 | Q96GE6 | -0.29182 |
| 9058 | P0C206 | O75795 | -0.84531 |
| 9059 | P0C206 | A6NM11 | -0.79503 |
| 9060 | P0C206 | Q5SV17 | -0.79503 |
| 9061 | P0C206 | Q70E73 | -0.62603 |
| 9062 | P0C206 | Q03431 | -0.78466 |
| 9063 | P0C206 | Q6DHV7 | -0.17868 |
| 9064 | P0C206 | P59539 | -1.1287  |
| 9065 | P0C206 | Q15120 | -0.22241 |
| 9066 | P0C206 | Q6Q0C1 | -0.58473 |
| 9067 | P0C206 | Q5J8X5 | -0.79503 |
| 9068 | P0C206 | Q96IR7 | -0.53366 |
| 9069 | P0C206 | Q96EP9 | -0.84727 |
| 9070 | P0C206 | Q86YW7 | -0.78978 |
| 9071 | P0C206 | O14976 | -0.63728 |
| 9072 | P0C206 | Q92914 | -0.37116 |
| 9073 | P0C206 | Q16690 | -0.38834 |
| 9074 | P0C206 | Q9H254 | -0.22857 |
| 9075 | P0C206 | P48051 | -0.30062 |
| 9076 | P0C206 | P35452 | -0.22754 |
| 9077 | P0C206 | P23560 | -0.45998 |
| 9078 | P0C206 | Q7L513 | -0.67319 |
| 9079 | P0C206 | Q68DQ2 | -0.2154  |
| 9080 | P0C206 | Q6ZMW3 | -0.22756 |
| 9081 | P0C206 | Q6ZSG1 | -0.24165 |
| 9082 | P0C206 | Q9NUM3 | -0.8019  |
| 9083 | P0C206 | Q86VI3 | -0.56261 |
| 9084 | P0C206 | Q8N4A0 | -0.43731 |
| 9085 | P0C206 | Q86YN1 | -0.76538 |
| 9086 | P0C206 | P54317 | -0.80979 |
| 9087 | P0C206 | P52756 | -0.22576 |
| 9088 | P0C206 | P58550 | -0.87317 |
| 9089 | P0C206 | O75452 | -1.5072  |
| 9090 | P0C206 | Q6UXF1 | -0.57403 |
| 9091 | P0C206 | O15062 | -0.22068 |
| 9092 | P0C206 | Q08477 | -0.90952 |
| 9093 | P0C206 | Q8N4F0 | -0.97846 |
| 9094 | P0C206 | P07492 | -1.0955  |
| 9095 | P0C206 | Q9Y2V3 | -0.13746 |
| 9096 | P0C206 | Q70UQ0 | -0.21985 |
| 9097 | P0C206 | Q8WWF3 | -0.79503 |
| 9098 | P0C206 | Q9BXM7 | -0.6204  |
| 9099 | P0C206 | Q13370 | -0.23376 |
| 9100 | P0C206 | Q8NE09 | -0.5148  |
| 9101 | P0C206 | Q5VUR7 | -0.22739 |
| 9102 | P0C206 | Q6ZMD2 | -0.85387 |
| 9103 | P0C206 | Q96FM1 | -0.60754 |
| 9104 | P0C206 | Q14714 | -0.94272 |
| 9105 | P0C206 | Q8NGR6 | -1.1763  |
| 9106 | P0C206 | Q8TDY4 | -0.22768 |
| 9107 | P0C206 | Q9BYC2 | -0.21492 |
| 9108 | P0C206 | Q9H1M4 | -0.70259 |
| 9109 | P0C206 | P98172 | -0.16492 |
| 9110 | P0C206 | P49796 | -0.26924 |
| 9111 | P0C206 | P49773 | -0.03654 |
| 9112 | P0C206 | Q9HAY6 | -0.30748 |
| 9113 | P0C206 | Q9H2S1 | -0.81284 |
| 9114 | P0C206 | Q1AE95 | -0.79503 |
| 9115 | P0C206 | Q5T7P8 | -0.53467 |
| 9116 | P0C206 | Q8IYQ7 | -0.1726  |
| 9117 | P0C206 | Q3ZAQ7 | -0.8269  |
| 9118 | P0C206 | Q9NWH7 | -1.1795  |
| 9119 | P0C206 | Q8N386 | -0.79503 |
| 9120 | P0C206 | P98174 | -0.7993  |

|      |        |        |           |
|------|--------|--------|-----------|
| 9121 | POC206 | P08240 | -0.97319  |
| 9122 | POC206 | Q12805 | -0.22783  |
| 9123 | POC206 | O60931 | -0.90097  |
| 9124 | POC206 | P26045 | -0.22766  |
| 9125 | POC206 | P61160 | -0.66821  |
| 9126 | POC206 | O75023 | -0.85407  |
| 9127 | POC206 | Q8IY95 | -0.87881  |
| 9128 | POC206 | Q02108 | -0.54563  |
| 9129 | POC206 | Q6S545 | -0.2274   |
| 9130 | POC206 | Q6PKC3 | -0.91748  |
| 9131 | POC206 | Q16581 | -0.98829  |
| 9132 | POC206 | P56202 | -0.70637  |
| 9133 | POC206 | Q5QGS0 | -0.10789  |
| 9134 | POC206 | Q9Y6U7 | -0.73705  |
| 9135 | POC206 | Q7L576 | -0.11532  |
| 9136 | POC206 | O43895 | -0.75286  |
| 9137 | POC206 | P63124 | -0.56257  |
| 9138 | POC206 | O95461 | -0.57727  |
| 9139 | POC206 | Q9Y261 | -0.38181  |
| 9140 | POC206 | O60266 | -0.54401  |
| 9141 | POC206 | Q9Y4G2 | -0.060215 |
| 9142 | POC206 | Q9UBP8 | -0.22009  |
| 9143 | POC206 | Q9Y258 | -0.96784  |
| 9144 | POC206 | Q8N3Z3 | -0.76882  |
| 9145 | POC206 | Q9BY79 | -0.70459  |
| 9146 | POC206 | Q14147 | -0.91906  |
| 9147 | POC206 | O76027 | -0.15285  |
| 9148 | POC206 | P10275 | -0.22743  |
| 9149 | POC206 | Q6UX07 | -1.5883   |
| 9150 | POC206 | Q9BQT8 | -0.50644  |
| 9151 | POC206 | P01880 | -1.4583   |
| 9152 | POC206 | Q96HD9 | -0.19288  |
| 9153 | POC206 | Q14627 | -0.24161  |
| 9154 | POC206 | Q9Y5Q6 | -0.69785  |
| 9155 | POC206 | A8MT82 | -0.77452  |
| 9156 | POC206 | Q14314 | -1.1069   |
| 9157 | POC206 | Q02750 | -0.22763  |
| 9158 | POC206 | Q8NET5 | -1.0558   |
| 9159 | POC206 | P09668 | -0.27127  |
| 9160 | POC206 | Q9P1V8 | -0.21426  |
| 9161 | POC206 | P51148 | -0.78042  |
| 9162 | POC206 | P61366 | -1.0743   |
| 9163 | POC206 | Q9NZC2 | -1.2884   |
| 9164 | POC206 | Q9NS71 | -0.51817  |
| 9165 | POC206 | Q8N283 | -0.22736  |
| 9166 | POC206 | Q7L5Y1 | -0.14799  |
| 9167 | POC206 | P13798 | -0.18035  |
| 9168 | POC206 | A8MX19 | -0.19106  |
| 9169 | POC206 | P25686 | -0.25279  |
| 9170 | POC206 | Q7Z7F0 | -0.031414 |
| 9171 | POC206 | O60312 | -0.60508  |
| 9172 | POC206 | Q16676 | -0.45919  |
| 9173 | POC206 | Q6ZSR9 | -0.25141  |
| 9174 | POC206 | Q495A1 | -0.35821  |
| 9175 | POC206 | P54803 | -0.20221  |
| 9176 | POC206 | Q8WVZ7 | -0.9095   |
| 9177 | POC206 | Q53F39 | -0.21455  |
| 9178 | POC206 | Q9BRK0 | -0.79503  |
| 9179 | POC206 | Q96T66 | -0.2941   |
| 9180 | POC206 | P55317 | -0.45919  |
| 9181 | POC206 | P08185 | -0.7788   |
| 9182 | POC206 | Q2TVT4 | -0.37572  |
| 9183 | POC206 | Q8TCW7 | -0.79503  |
| 9184 | POC206 | Q6UXU1 | -0.80952  |
| 9185 | POC206 | P24311 | -0.46291  |
| 9186 | POC206 | P24588 | -0.026457 |
| 9187 | POC206 | Q9H773 | -0.32748  |
| 9188 | POC206 | O95968 | -0.88207  |
| 9189 | POC206 | Q8NH92 | -1.1763   |
| 9190 | POC206 | Q5HYL7 | -0.79503  |
| 9191 | POC206 | P32019 | -0.32702  |
| 9192 | POC206 | P11234 | -0.23247  |
| 9193 | POC206 | Q96H78 | -0.58473  |
| 9194 | POC206 | Q07960 | -0.29421  |
| 9195 | POC206 | Q9Y5J5 | -0.28336  |
| 9196 | POC206 | P55286 | -1.1391   |

|      |        |        |           |
|------|--------|--------|-----------|
| 9197 | P0C206 | P46089 | -1.3301   |
| 9198 | P0C206 | Q96LD8 | -0.66766  |
| 9199 | P0C206 | Q9BSJ8 | -0.79503  |
| 9200 | P0C206 | P21291 | -0.22997  |
| 9201 | P0C206 | Q9NVH0 | -0.58466  |
| 9202 | P0C206 | Q9Y5G8 | -1.1512   |
| 9203 | P0C206 | Q92503 | -0.63553  |
| 9204 | P0C206 | P02748 | -1.0951   |
| 9205 | P0C206 | Q9Y5H4 | -1.1512   |
| 9206 | P0C206 | Q5FWF4 | -0.18128  |
| 9207 | P0C206 | Q12946 | -0.44515  |
| 9208 | P0C206 | Q96N87 | -0.97899  |
| 9209 | P0C206 | Q96CB5 | -0.14607  |
| 9210 | P0C206 | P34931 | -0.53309  |
| 9211 | P0C206 | P28325 | -0.29391  |
| 9212 | P0C206 | Q96T54 | -1.0115   |
| 9213 | P0C206 | P13500 | -0.35484  |
| 9214 | P0C206 | Q17RY0 | -0.77707  |
| 9215 | P0C206 | Q9UJQ1 | -0.8168   |
| 9216 | P0C206 | Q96EC8 | -0.7666   |
| 9217 | P0C206 | Q7Z3T1 | -1.1763   |
| 9218 | P0C206 | Q9NXX6 | -1.1501   |
| 9219 | P0C206 | Q9Y5E1 | -1.1388   |
| 9220 | P0C206 | Q99678 | -1.3861   |
| 9221 | P0C206 | Q96DT6 | -0.53737  |
| 9222 | P0C206 | P84157 | -0.79503  |
| 9223 | P0C206 | Q8TD22 | -0.74774  |
| 9224 | P0C206 | Q8IZP7 | -0.86384  |
| 9225 | P0C206 | Q9Y6Y9 | -0.020006 |
| 9226 | P0C206 | Q86X40 | -0.22865  |
| 9227 | P0C206 | Q6NSJ0 | -0.55635  |
| 9228 | P0C206 | Q96KR6 | -0.79503  |
| 9229 | P0C206 | Q86VZ4 | -0.79503  |
| 9230 | P0C206 | O60880 | -0.22741  |
| 9231 | P0C206 | Q9Y463 | -0.22741  |
| 9232 | P0C206 | P30462 | -1.0603   |
| 9233 | P0C206 | Q9Y2H6 | -0.35671  |
| 9234 | P0C206 | Q14165 | -0.73262  |
| 9235 | P0C206 | P40145 | -0.91135  |
| 9236 | P0C206 | Q9UIW2 | -0.67918  |
| 9237 | P0C206 | P80188 | -0.37312  |
| 9238 | P0C206 | Q9NSA2 | -0.84024  |
| 9239 | P0C206 | Q14647 | -0.42434  |
| 9240 | P0C206 | Q6S8J3 | -0.20222  |
| 9241 | P0C206 | Q9Y663 | -0.45632  |
| 9242 | P0C206 | Q8NH19 | -1.1763   |
| 9243 | P0C206 | P13671 | -0.23249  |
| 9244 | P0C206 | Q8NGC7 | -1.1763   |
| 9245 | P0C206 | Q8NFX3 | -0.41319  |
| 9246 | P0C206 | P13942 | -0.82198  |
| 9247 | P0C206 | P42261 | -0.52955  |
| 9248 | P0C206 | Q15347 | -0.65723  |
| 9249 | P0C206 | Q43187 | -0.22738  |
| 9250 | P0C206 | Q2M3T9 | -0.69795  |
| 9251 | P0C206 | P06312 | -0.9894   |
| 9252 | P0C206 | A6NN92 | -0.84756  |
| 9253 | P0C206 | Q9BQD7 | -0.79503  |
| 9254 | P0C206 | Q8IUR5 | -0.62349  |
| 9255 | P0C206 | P51159 | -0.24751  |
| 9256 | P0C206 | Q00056 | -0.14061  |
| 9257 | P0C206 | O95744 | -0.16246  |
| 9258 | P0C206 | A2RU67 | -0.79503  |
| 9259 | P0C206 | Q99685 | -0.45584  |
| 9260 | P0C206 | Q43808 | -0.27597  |
| 9261 | P0C206 | P52564 | -0.22969  |
| 9262 | P0C206 | P00387 | -0.31976  |
| 9263 | P0C206 | Q43603 | -1.179    |
| 9264 | P0C206 | P30550 | -1.1915   |
| 9265 | P0C206 | Q7Z5Q1 | -0.5901   |
| 9266 | P0C206 | Q9H228 | -1.1442   |
| 9267 | P0C206 | P51801 | -0.95047  |
| 9268 | P0C206 | Q9H3R1 | -0.6722   |
| 9269 | P0C206 | Q12926 | -0.30888  |
| 9270 | P0C206 | Q96C24 | -0.23418  |
| 9271 | P0C206 | Q8IYB4 | -0.22673  |
| 9272 | P0C206 | Q13683 | -0.62098  |

|      |        |        |           |
|------|--------|--------|-----------|
| 9273 | P0C206 | O75317 | -0.46376  |
| 9274 | P0C206 | O95562 | -0.40699  |
| 9275 | P0C206 | P40938 | -0.19621  |
| 9276 | P0C206 | O14810 | -0.19076  |
| 9277 | P0C206 | Q6S8J7 | -0.22677  |
| 9278 | P0C206 | Q96BI1 | -0.68507  |
| 9279 | P0C206 | P29350 | -0.22742  |
| 9280 | P0C206 | Q8TF66 | -0.79503  |
| 9281 | P0C206 | Q9UMF0 | -1.1678   |
| 9282 | P0C206 | O15305 | -0.25787  |
| 9283 | P0C206 | Q8NHY0 | -0.56168  |
| 9284 | P0C206 | O43520 | -0.54947  |
| 9285 | P0C206 | Q8TAE7 | -0.35663  |
| 9286 | P0C206 | Q86YD5 | -0.88351  |
| 9287 | P0C206 | P47893 | -1.2662   |
| 9288 | P0C206 | P18433 | -1.2025   |
| 9289 | P0C206 | Q9H1V8 | -0.70594  |
| 9290 | P0C206 | Q03167 | -0.29968  |
| 9291 | P0C206 | Q8NGZ9 | -1.1763   |
| 9292 | P0C206 | A6NKX4 | -0.82366  |
| 9293 | P0C206 | P26022 | -0.80448  |
| 9294 | P0C206 | Q8N109 | -0.91833  |
| 9295 | P0C206 | Q8WVC6 | -0.54066  |
| 9296 | P0C206 | Q9Y5F3 | -1.1512   |
| 9297 | P0C206 | Q3ZCQ3 | -0.79503  |
| 9298 | P0C206 | Q8N1L4 | -0.9391   |
| 9299 | P0C206 | Q96L58 | -0.4876   |
| 9300 | P0C206 | Q5VZ18 | -0.22741  |
| 9301 | P0C206 | O75962 | -0.59281  |
| 9302 | P0C206 | Q5T1S8 | -0.95232  |
| 9303 | P0C206 | P80422 | -0.84138  |
| 9304 | P0C206 | Q14376 | -0.34217  |
| 9305 | P0C206 | Q86XR2 | -0.32146  |
| 9306 | P0C206 | Q9UBA6 | -0.16651  |
| 9307 | P0C206 | Q7Z3H0 | -0.2274   |
| 9308 | P0C206 | Q96KK4 | -1.1763   |
| 9309 | P0C206 | Q8N2H3 | -0.51459  |
| 9310 | P0C206 | Q9H347 | -0.22602  |
| 9311 | P0C206 | Q92543 | -0.1826   |
| 9312 | P0C206 | Q8N697 | -0.60517  |
| 9313 | P0C206 | Q4G0P3 | -0.073434 |
| 9314 | P0C206 | Q71RH2 | -0.7666   |
| 9315 | P0C206 | Q9BYH1 | -0.89601  |
| 9316 | P0C206 | Q9BXC9 | -0.12048  |
| 9317 | P0C206 | Q8WVI0 | -0.62349  |
| 9318 | P0C206 | Q14254 | -0.60464  |
| 9319 | P0C206 | Q9GZU5 | -1.0979   |
| 9320 | P0C206 | P31415 | -0.21092  |
| 9321 | P0C206 | Q96R47 | -1.1763   |
| 9322 | P0C206 | P15813 | -0.65454  |
| 9323 | P0C206 | Q99835 | -0.26244  |
| 9324 | P0C206 | Q9BQR3 | -1.3203   |
| 9325 | P0C206 | Q7Z4L0 | -0.60109  |
| 9326 | P0C206 | Q5T742 | -0.80952  |
| 9327 | P0C206 | E5RJM6 | -0.22741  |
| 9328 | P0C206 | Q9Y2T6 | -1.1759   |
| 9329 | P0C206 | Q9BUR5 | -1.2877   |
| 9330 | P0C206 | Q8WVZ1 | -0.77292  |
| 9331 | P0C206 | O95259 | -0.28527  |
| 9332 | P0C206 | P02652 | -0.3259   |
| 9333 | P0C206 | O15381 | -0.261    |
| 9334 | P0C206 | Q6PHW0 | -1.0288   |
| 9335 | P0C206 | Q9NYY1 | -0.84611  |
| 9336 | P0C206 | P10915 | -1.0791   |
| 9337 | P0C206 | Q8TBG4 | -0.28585  |
| 9338 | P0C206 | P17050 | -0.13511  |
| 9339 | P0C206 | Q99518 | -0.87572  |
| 9340 | P0C206 | Q6UWX4 | -0.72506  |
| 9341 | P0C206 | Q9H999 | -0.65493  |
| 9342 | P0C206 | P36544 | -0.67662  |
| 9343 | P0C206 | P32926 | -0.86312  |
| 9344 | P0C206 | Q86WT6 | -0.22958  |
| 9345 | P0C206 | Q16880 | -0.68785  |
| 9346 | P0C206 | Q9H0H5 | -0.24016  |
| 9347 | P0C206 | Q9Y617 | -0.31062  |
| 9348 | P0C206 | O60637 | -0.79503  |



|      |        |        |           |
|------|--------|--------|-----------|
| 9349 | POC206 | Q6PIV7 | -0.57194  |
| 9350 | POC206 | Q8IV45 | -0.70859  |
| 9351 | POC206 | Q4LDE5 | -0.69407  |
| 9352 | POC206 | P17213 | -0.84524  |
| 9353 | POC206 | Q12756 | -0.25382  |
| 9354 | POC206 | Q8NH60 | -1.1763   |
| 9355 | POC206 | P01778 | -0.9894   |
| 9356 | POC206 | P20839 | -0.32824  |
| 9357 | POC206 | Q0VAK6 | -0.21424  |
| 9358 | POC206 | A8MTJ6 | -0.26645  |
| 9359 | POC206 | P62079 | -0.79503  |
| 9360 | POC206 | Q96A57 | -0.79503  |
| 9361 | POC206 | Q6IA17 | -0.46459  |
| 9362 | POC206 | Q5BJH7 | -0.79503  |
| 9363 | POC206 | Q7L0R7 | -0.23566  |
| 9364 | POC206 | Q5DX21 | -1.086    |
| 9365 | POC206 | A6NGY5 | -1.1763   |
| 9366 | POC206 | O94826 | -0.22725  |
| 9367 | POC206 | Q96Q80 | -0.25031  |
| 9368 | POC206 | O95947 | -0.51326  |
| 9369 | POC206 | P04553 | -0.67284  |
| 9370 | POC206 | O60641 | -0.45763  |
| 9371 | POC206 | Q6P3R8 | -1.1715   |
| 9372 | POC206 | O95084 | -1.0044   |
| 9373 | POC206 | P05109 | -0.23866  |
| 9374 | POC206 | Q3KR16 | -0.22815  |
| 9375 | POC206 | O15263 | -0.91729  |
| 9376 | POC206 | Q9UIU6 | -0.22751  |
| 9377 | POC206 | Q96MZ4 | -0.049809 |
| 9378 | POC206 | P55884 | -0.21839  |
| 9379 | POC206 | Q5SWX8 | -1.0034   |
| 9380 | POC206 | Q9ULF5 | -0.8019   |
| 9381 | POC206 | Q12967 | -0.62716  |
| 9382 | POC206 | P30533 | -0.71191  |
| 9383 | POC206 | O15440 | -0.88147  |
| 9384 | POC206 | Q8N1F8 | -0.22727  |
| 9385 | POC206 | O43869 | -1.1763   |
| 9386 | POC206 | O43704 | -0.20945  |
| 9387 | POC206 | Q9NNX6 | -0.88339  |
| 9388 | POC206 | O60938 | -0.76002  |
| 9389 | POC206 | Q96EY7 | -0.16993  |
| 9390 | POC206 | Q86V21 | -0.48461  |
| 9391 | POC206 | P43251 | -0.58717  |
| 9392 | POC206 | A8MYV0 | -0.46207  |
| 9393 | POC206 | Q9C0K3 | -0.704    |
| 9394 | POC206 | O95256 | -1.2389   |
| 9395 | POC206 | Q8WWN8 | -0.77386  |
| 9396 | POC206 | Q9NY26 | -0.95577  |
| 9397 | POC206 | O95388 | -0.8547   |
| 9398 | POC206 | Q14028 | -1.1065   |
| 9399 | POC206 | Q9NS85 | -0.23951  |
| 9400 | POC206 | P46695 | -0.17646  |
| 9401 | POC206 | P59894 | -0.46207  |
| 9402 | POC206 | Q8WXH4 | -0.48675  |
| 9403 | POC206 | A6NFX1 | -0.72669  |
| 9404 | POC206 | P18627 | -0.79549  |
| 9405 | POC206 | P28676 | -0.35317  |
| 9406 | POC206 | Q68DU8 | -0.066266 |
| 9407 | POC206 | O43246 | -0.71237  |
| 9408 | POC206 | Q9UBY8 | -0.35271  |
| 9409 | POC206 | O95971 | -0.62943  |
| 9410 | POC206 | P25098 | -0.37622  |
| 9411 | POC206 | O00299 | -0.18194  |
| 9412 | POC206 | O94972 | -0.2274   |
| 9413 | POC206 | Q13255 | -0.92467  |
| 9414 | POC206 | Q8IWF9 | -0.23907  |
| 9415 | POC206 | P35556 | -0.82199  |
| 9416 | POC206 | O75838 | -0.29182  |
| 9417 | POC206 | Q9NYS7 | -0.48675  |
| 9418 | POC206 | Q13507 | -0.4236   |
| 9419 | POC206 | O15357 | -0.22741  |
| 9420 | POC206 | Q9BZ76 | -1.8119   |
| 9421 | POC206 | Q8NBF2 | -0.22132  |
| 9422 | POC206 | Q9Y5Q5 | -1.525    |
| 9423 | POC206 | A6NMZ2 | -0.48114  |
| 9424 | POC206 | Q5EG05 | -0.56978  |

|      |        |        |          |
|------|--------|--------|----------|
| 9425 | POC206 | A0PJX0 | -0.29182 |
| 9426 | POC206 | Q9Y2E4 | -0.19159 |
| 9427 | POC206 | P0C617 | -1.1763  |
| 9428 | POC206 | Q9Y365 | -0.43531 |
| 9429 | POC206 | P45378 | -0.26795 |
| 9430 | POC206 | P48169 | -0.77564 |
| 9431 | POC206 | O43396 | -0.22824 |
| 9432 | POC206 | Q8IV77 | -1.1623  |
| 9433 | POC206 | P01189 | -0.55857 |
| 9434 | POC206 | Q12952 | -0.38829 |
| 9435 | POC206 | P04035 | -0.64826 |
| 9436 | POC206 | Q9BWH2 | -0.04002 |
| 9437 | POC206 | O15232 | -0.4835  |
| 9438 | POC206 | Q16552 | -0.52475 |
| 9439 | POC206 | P05543 | -0.66463 |
| 9440 | POC206 | Q9UBS5 | -0.63285 |
| 9441 | POC206 | P09429 | -0.22935 |
| 9442 | POC206 | P61601 | -0.59675 |
| 9443 | POC206 | Q8NGC1 | -1.1763  |
| 9444 | POC206 | Q9P202 | -0.22585 |
| 9445 | POC206 | P25325 | -0.20609 |
| 9446 | POC206 | P16871 | -0.82687 |
| 9447 | POC206 | Q6IF99 | -1.1763  |
| 9448 | POC206 | P01374 | -0.72239 |
| 9449 | POC206 | Q14444 | -0.33893 |
| 9450 | POC206 | Q6EBC2 | -0.82318 |
| 9451 | POC206 | Q8NGK9 | -1.1763  |
| 9452 | POC206 | Q9HD43 | -0.22742 |
| 9453 | POC206 | P10266 | -0.15884 |
| 9454 | POC206 | Q562E7 | -0.25531 |
| 9455 | POC206 | Q9BXX0 | -0.50666 |
| 9456 | POC206 | Q96DN0 | -0.16217 |
| 9457 | POC206 | Q8IYB8 | -0.22606 |
| 9458 | POC206 | P0C0L4 | -1.0929  |
| 9459 | POC206 | P11836 | -0.8738  |
| 9460 | POC206 | Q68CP4 | -0.71676 |
| 9461 | POC206 | Q9UBJ2 | -0.46234 |
| 9462 | POC206 | Q9BX97 | -0.55164 |
| 9463 | POC206 | Q4ZIN3 | -0.5481  |
| 9464 | POC206 | P07332 | -0.65464 |
| 9465 | POC206 | C9J1S8 | -0.44814 |
| 9466 | POC206 | Q8IZ81 | -0.59193 |
| 9467 | POC206 | Q99952 | -0.27528 |
| 9468 | POC206 | Q8N7S2 | -0.43641 |
| 9469 | POC206 | Q9P2Q2 | -0.2815  |
| 9470 | POC206 | Q8IU85 | -0.60611 |
| 9471 | POC206 | O95741 | -0.43332 |
| 9472 | POC206 | P51800 | -0.87057 |
| 9473 | POC206 | Q9HCC6 | -0.21773 |
| 9474 | POC206 | Q53H47 | -0.21919 |
| 9475 | POC206 | Q86XP0 | -0.22828 |
| 9476 | POC206 | Q96MZ0 | -0.22238 |
| 9477 | POC206 | O15482 | -0.674   |
| 9478 | POC206 | P63130 | -0.15319 |
| 9479 | POC206 | Q15393 | -0.14369 |
| 9480 | POC206 | Q96M69 | -0.87939 |
| 9481 | POC206 | P55160 | -0.2741  |
| 9482 | POC206 | Q9UPY3 | -0.21335 |
| 9483 | POC206 | Q01196 | -0.42257 |
| 9484 | POC206 | P62820 | -0.55688 |
| 9485 | POC206 | Q14916 | -0.97413 |
| 9486 | POC206 | Q9Y6Q6 | -0.2266  |
| 9487 | POC206 | O43657 | -0.99385 |
| 9488 | POC206 | Q76LX8 | -0.45571 |
| 9489 | POC206 | Q5M775 | -0.22764 |
| 9490 | POC206 | Q4G0J3 | -0.22279 |
| 9491 | POC206 | Q6URK8 | -0.80952 |
| 9492 | POC206 | Q75V66 | -0.84743 |
| 9493 | POC206 | P03891 | -0.59856 |
| 9494 | POC206 | P12018 | -0.84138 |
| 9495 | POC206 | Q9HCQ7 | -1.0279  |
| 9496 | POC206 | Q03169 | -0.5871  |
| 9497 | POC206 | O60449 | -1.1162  |
| 9498 | POC206 | O75037 | -0.39587 |
| 9499 | POC206 | Q14703 | -0.8575  |
| 9500 | POC206 | Q8NGP6 | -1.1763  |

|      |        |        |           |
|------|--------|--------|-----------|
| 9501 | P0C206 | Q08380 | -1.2956   |
| 9502 | P0C206 | Q96BH1 | -0.20516  |
| 9503 | P0C206 | Q8N6G5 | -0.36607  |
| 9504 | P0C206 | P52789 | -0.35427  |
| 9505 | P0C206 | P50120 | -0.19523  |
| 9506 | P0C206 | Q9BZG2 | -0.71781  |
| 9507 | P0C206 | Q96A61 | -0.44814  |
| 9508 | P0C206 | A5D8W1 | -0.007049 |
| 9509 | P0C206 | O75880 | -0.095461 |
| 9510 | P0C206 | Q8TD07 | -0.38851  |
| 9511 | P0C206 | Q8NH48 | -1.1763   |
| 9512 | P0C206 | P21741 | -0.79038  |
| 9513 | P0C206 | Q14956 | -1.0056   |
| 9514 | P0C206 | Q5T2R2 | -0.22486  |
| 9515 | P0C206 | Q9H3Z4 | -0.44702  |
| 9516 | P0C206 | O94759 | -0.87028  |
| 9517 | P0C206 | Q6BEB4 | -0.2201   |
| 9518 | P0C206 | Q13564 | -0.22961  |
| 9519 | P0C206 | O14493 | -0.76614  |
| 9520 | P0C206 | A4D0T7 | -0.79503  |
| 9521 | P0C206 | Q99719 | -0.22568  |
| 9522 | P0C206 | P0C6A0 | -0.2274   |
| 9523 | P0C206 | Q9H159 | -1.103    |
| 9524 | P0C206 | P34972 | -1.2074   |
| 9525 | P0C206 | P47870 | -0.61115  |
| 9526 | P0C206 | Q92747 | -0.22739  |
| 9527 | P0C206 | Q16610 | -0.45684  |
| 9528 | P0C206 | Q9Y6C9 | -0.57194  |
| 9529 | P0C206 | O75556 | -0.18061  |
| 9530 | P0C206 | Q8TB22 | -1.1959   |
| 9531 | P0C206 | Q15032 | -0.24184  |
| 9532 | P0C206 | Q9NP70 | -1.0193   |
| 9533 | P0C206 | P32970 | -0.59585  |
| 9534 | P0C206 | Q5UAW9 | -1.2886   |
| 9535 | P0C206 | Q9Y4X3 | -0.90497  |
| 9536 | P0C206 | Q14627 | -1.073    |
| 9537 | P0C206 | Q08116 | -0.60885  |
| 9538 | P0C206 | P09936 | -0.14601  |
| 9539 | P0C206 | O94779 | -0.43542  |
| 9540 | P0C206 | P42081 | -0.22666  |
| 9541 | P0C206 | Q9Y664 | -0.1085   |
| 9542 | P0C206 | Q6UW15 | -0.84582  |
| 9543 | P0C206 | Q86XP3 | -0.56936  |
| 9544 | P0C206 | Q8N3A8 | -0.54835  |
| 9545 | P0C206 | Q12864 | -0.89527  |
| 9546 | P0C206 | Q9BZM1 | -0.63355  |
| 9547 | P0C206 | Q14032 | -0.24477  |
| 9548 | P0C206 | Q9UBD6 | -0.68907  |
| 9549 | P0C206 | P04201 | -0.79144  |
| 9550 | P0C206 | Q95025 | -1.0754   |
| 9551 | P0C206 | Q9BXC1 | -1.1939   |
| 9552 | P0C206 | Q9NUN5 | -0.6843   |
| 9553 | P0C206 | Q6PIF6 | -0.6637   |
| 9554 | P0C206 | P02775 | -0.62171  |
| 9555 | P0C206 | P60827 | -0.87668  |
| 9556 | P0C206 | A6NDL7 | -0.20034  |
| 9557 | P0C206 | Q43307 | -0.50417  |
| 9558 | P0C206 | Q5BJH2 | -0.57403  |
| 9559 | P0C206 | P35368 | -0.75276  |
| 9560 | P0C206 | Q13336 | -0.8737   |
| 9561 | P0C206 | O15119 | -0.51326  |
| 9562 | P0C206 | Q5K4L6 | -1.2698   |
| 9563 | P0C206 | Q9BZC1 | -0.31669  |
| 9564 | P0C206 | Q7Z7M9 | -0.55933  |
| 9565 | P0C206 | Q15800 | -1.0088   |
| 9566 | P0C206 | Q9UPU7 | -0.84307  |
| 9567 | P0C206 | Q12899 | -0.30196  |
| 9568 | P0C206 | O43915 | -0.69959  |
| 9569 | P0C206 | Q7L1S5 | -0.83181  |
| 9570 | P0C206 | O94778 | -0.84047  |
| 9571 | P0C206 | P41225 | -0.26215  |
| 9572 | P0C206 | P59922 | -1.1763   |
| 9573 | P0C206 | Q9NZJ9 | -0.16368  |
| 9574 | P0C206 | Q9BYW2 | -0.22497  |
| 9575 | P0C206 | B3SHH9 | -0.91833  |
| 9576 | P0C206 | Q9UKL4 | -0.95555  |

|      |        |        |           |
|------|--------|--------|-----------|
| 9577 | P0C206 | Q86W42 | -0.22784  |
| 9578 | P0C206 | Q96H35 | -0.83583  |
| 9579 | P0C206 | P30953 | -1.1763   |
| 9580 | P0C206 | Q94898 | -0.66736  |
| 9581 | P0C206 | Q9UKR0 | -1.3626   |
| 9582 | P0C206 | P58401 | -0.98895  |
| 9583 | P0C206 | Q14563 | -0.69099  |
| 9584 | P0C206 | Q5VTE0 | -0.49768  |
| 9585 | P0C206 | P43088 | -1.4254   |
| 9586 | P0C206 | Q96IX5 | -0.62621  |
| 9587 | P0C206 | P02654 | -0.53101  |
| 9588 | P0C206 | Q9UI33 | -0.95081  |
| 9589 | P0C206 | Q9BQG2 | -0.2274   |
| 9590 | P0C206 | Q96S96 | -0.32973  |
| 9591 | P0C206 | Q96IV6 | -1.024    |
| 9592 | P0C206 | Q9H2E6 | -0.43791  |
| 9593 | P0C206 | P58335 | -0.92087  |
| 9594 | P0C206 | A6NFN9 | -0.22737  |
| 9595 | P0C206 | Q92911 | -0.64593  |
| 9596 | P0C206 | Q9NPH2 | -0.50977  |
| 9597 | P0C206 | P11509 | -0.65015  |
| 9598 | P0C206 | Q8NG04 | -0.69566  |
| 9599 | P0C206 | P09211 | -0.21832  |
| 9600 | P0C206 | P51570 | -0.43493  |
| 9601 | P0C206 | A2RRL7 | -0.79503  |
| 9602 | P0C206 | Q96HL8 | -0.2274   |
| 9603 | P0C206 | Q8NHS2 | -0.1894   |
| 9604 | P0C206 | Q86W26 | -0.72239  |
| 9605 | P0C206 | Q15784 | -0.22775  |
| 9606 | P0C206 | Q8NFI6 | -1.2361   |
| 9607 | P0C206 | Q9H0U3 | -0.93759  |
| 9608 | P0C206 | Q53H76 | -0.88275  |
| 9609 | P0C206 | Q7Z736 | -0.44363  |
| 9610 | P0C206 | Q969K7 | -0.57403  |
| 9611 | P0C206 | P28360 | -0.14568  |
| 9612 | P0C206 | O15537 | -0.97491  |
| 9613 | P0C206 | Q15477 | -0.2495   |
| 9614 | P0C206 | A6NMP4 | -0.2536   |
| 9615 | P0C206 | Q96T83 | -0.35386  |
| 9616 | P0C206 | Q03181 | -0.239    |
| 9617 | P0C206 | Q13753 | -1.1907   |
| 9618 | P0C206 | O60320 | -0.79503  |
| 9619 | P0C206 | Q8NGP9 | -1.1763   |
| 9620 | P0C206 | Q9HAV5 | -0.5377   |
| 9621 | P0C206 | Q9NQI8 | -0.25382  |
| 9622 | P0C206 | Q14574 | -1.0888   |
| 9623 | P0C206 | O60609 | -0.32408  |
| 9624 | P0C206 | Q9HC96 | -0.63535  |
| 9625 | P0C206 | Q9ULK0 | -0.75282  |
| 9626 | P0C206 | Q9BXA6 | -0.873    |
| 9627 | P0C206 | Q9BW62 | -0.47224  |
| 9628 | P0C206 | Q15466 | -0.4705   |
| 9629 | P0C206 | Q5T764 | -0.45573  |
| 9630 | P0C206 | O75438 | -0.41281  |
| 9631 | P0C206 | A6NLU0 | -0.22744  |
| 9632 | P0C206 | O15254 | -0.7563   |
| 9633 | P0C206 | Q12931 | -0.46091  |
| 9634 | P0C206 | Q9BWV1 | -0.46973  |
| 9635 | P0C206 | Q5VTY9 | -1.587    |
| 9636 | P0C206 | Q8WZ69 | -0.071916 |
| 9637 | P0C206 | Q8NE63 | -0.96142  |
| 9638 | P0C206 | P19526 | -0.63509  |
| 9639 | P0C206 | Q9C0D9 | -0.80425  |
| 9640 | P0C206 | Q9UHI8 | -1.1165   |
| 9641 | P0C206 | Q96KV7 | -0.22772  |
| 9642 | P0C206 | Q8TDN7 | -0.63509  |
| 9643 | P0C206 | Q9BXU9 | -0.53765  |
| 9644 | P0C206 | Q9BVK8 | -0.89601  |
| 9645 | P0C206 | Q12887 | -0.51515  |
| 9646 | P0C206 | Q68DC2 | -0.22746  |
| 9647 | P0C206 | Q9Y6I7 | -0.2289   |
| 9648 | P0C206 | P18827 | -0.46909  |
| 9649 | P0C206 | P16190 | -1.0001   |
| 9650 | P0C206 | Q8NHV9 | -0.21745  |
| 9651 | P0C206 | Q6PCB0 | -1.0297   |
| 9652 | P0C206 | O15428 | -0.2274   |

|      |        |        |          |
|------|--------|--------|----------|
| 9653 | P0C206 | P48230 | -0.71656 |
| 9654 | P0C206 | Q96D71 | -0.20919 |
| 9655 | P0C206 | Q6NUS8 | -0.83789 |
| 9656 | P0C206 | Q6PCB6 | -0.17505 |
| 9657 | P0C206 | Q149N8 | -0.39524 |
| 9658 | P0C206 | Q8N7Z5 | -0.22741 |
| 9659 | P0C206 | Q9Y2E6 | -0.21737 |
| 9660 | P0C206 | Q96A70 | -0.21712 |
| 9661 | P0C206 | Q3SXP7 | -0.79503 |
| 9662 | P0C206 | P19235 | -1.1185  |
| 9663 | P0C206 | Q13099 | -0.22727 |
| 9664 | P0C206 | P20393 | -0.62198 |
| 9665 | P0C206 | P35612 | -0.22168 |
| 9666 | P0C206 | A6NED2 | -0.22205 |
| 9667 | P0C206 | Q99679 | -1.3861  |
| 9668 | P0C206 | P98175 | -0.50214 |
| 9669 | P0C206 | Q9ULZ9 | -1.4281  |
| 9670 | P0C206 | O14745 | -0.64015 |
| 9671 | P0C206 | Q9Y6H6 | -0.83246 |
| 9672 | P0C206 | Q9GZK4 | -1.1763  |
| 9673 | P0C206 | P31321 | -0.27138 |
| 9674 | P0C206 | Q6UW68 | -0.79503 |
| 9675 | P0C206 | Q8IV61 | -0.6094  |
| 9676 | P0C206 | O43283 | -0.43098 |
| 9677 | P0C206 | Q7L0X0 | -0.71151 |
| 9678 | P0C206 | O95803 | -0.6722  |
| 9679 | P0C206 | Q96EB6 | -0.67221 |
| 9680 | P0C206 | O94823 | -0.51032 |
| 9681 | P0C206 | Q6DT37 | -0.32565 |
| 9682 | P0C206 | P50851 | -0.55626 |
| 9683 | P0C206 | P14543 | -1.0217  |
| 9684 | P0C206 | P17707 | -0.16425 |
| 9685 | P0C206 | Q8NGR1 | -1.1763  |
| 9686 | P0C206 | Q12841 | -0.9716  |
| 9687 | P0C206 | O15240 | -0.64382 |
| 9688 | P0C206 | O43315 | -0.56364 |
| 9689 | P0C206 | Q8WWV6 | -0.88886 |
| 9690 | P0C206 | Q96PY5 | -0.2264  |
| 9691 | P0C206 | Q15223 | -0.4656  |
| 9692 | P0C206 | Q9NYA1 | -0.29723 |
| 9693 | P0C206 | P13866 | -0.13804 |
| 9694 | P0C206 | Q5JT82 | -0.22106 |
| 9695 | P0C206 | Q9NSC7 | -0.61606 |
| 9696 | P0C206 | Q4ADV7 | -0.79503 |
| 9697 | P0C206 | Q96AW1 | -0.50602 |
| 9698 | P0C206 | Q96QI5 | -0.45632 |
| 9699 | P0C206 | P07288 | -0.83839 |
| 9700 | P0C206 | Q9H8S5 | -0.21288 |
| 9701 | P0C206 | O15143 | -0.2274  |
| 9702 | P0C206 | Q5VYX0 | -1.0736  |
| 9703 | P0C206 | Q9UNF0 | -0.22752 |
| 9704 | P0C206 | Q9NST1 | -0.69323 |
| 9705 | P0C206 | Q5T7N3 | -0.2274  |
| 9706 | P0C206 | Q16671 | -1.3969  |
| 9707 | P0C206 | Q9HC10 | -0.65401 |
| 9708 | P0C206 | O43609 | -0.19581 |
| 9709 | P0C206 | Q09428 | -0.63192 |
| 9710 | P0C206 | P04049 | -0.25586 |
| 9711 | P0C206 | Q6P179 | -1.0377  |
| 9712 | P0C206 | Q15884 | -0.57403 |
| 9713 | P0C206 | Q16650 | -0.484   |
| 9714 | P0C206 | Q96SM3 | -1.2743  |
| 9715 | P0C206 | Q12951 | -0.37245 |
| 9716 | P0C206 | O43300 | -0.6938  |
| 9717 | P0C206 | O15492 | -0.22811 |
| 9718 | P0C206 | P12532 | -0.82557 |
| 9719 | P0C206 | Q96LB9 | -0.84491 |
| 9720 | P0C206 | Q9GZV3 | -0.94317 |
| 9721 | P0C206 | Q8IZQ5 | -0.23576 |
| 9722 | P0C206 | Q86XP6 | -0.80952 |
| 9723 | P0C206 | Q6UWW0 | -0.77101 |
| 9724 | P0C206 | Q9UBN4 | -0.22739 |
| 9725 | P0C206 | Q9Y2C2 | -0.44947 |
| 9726 | P0C206 | A8MZ26 | -0.29182 |
| 9727 | P0C206 | O75569 | -0.15652 |
| 9728 | P0C206 | Q8NGG6 | -1.1763  |

|      |        |        |           |
|------|--------|--------|-----------|
| 9729 | P0C206 | Q6P1Q9 | -0.20034  |
| 9730 | P0C206 | Q96QR1 | -0.78264  |
| 9731 | P0C206 | A6ND48 | -1.1763   |
| 9732 | P0C206 | O75223 | -0.14798  |
| 9733 | P0C206 | Q13488 | -0.66162  |
| 9734 | P0C206 | Q9H237 | -0.77706  |
| 9735 | P0C206 | Q9UQ03 | -0.22741  |
| 9736 | P0C206 | O95222 | -1.1763   |
| 9737 | P0C206 | Q9H3U7 | -1.1746   |
| 9738 | P0C206 | Q6UWK7 | -0.80952  |
| 9739 | P0C206 | O60762 | -0.17676  |
| 9740 | P0C206 | Q6UXH9 | -1.0305   |
| 9741 | P0C206 | Q6ZMV7 | -0.14196  |
| 9742 | P0C206 | Q86WR6 | -0.050245 |
| 9743 | P0C206 | Q7Z6J2 | -0.22823  |
| 9744 | P0C206 | Q5T3U5 | -1.2066   |
| 9745 | P0C206 | Q9P2K9 | -0.51995  |
| 9746 | P0C206 | P03973 | -0.25614  |
| 9747 | P0C206 | P58170 | -1.1763   |
| 9748 | P0C206 | P03372 | -0.22748  |
| 9749 | P0C206 | P26885 | -0.23004  |
| 9750 | P0C206 | Q9NRH2 | -0.93243  |
| 9751 | P0C206 | Q9Y2U5 | -0.54228  |
| 9752 | P0C206 | Q9NPI0 | -0.79948  |
| 9753 | P0C206 | Q96IC2 | -0.8831   |
| 9754 | P0C206 | Q8TBB0 | -0.34142  |
| 9755 | P0C206 | Q96A84 | -0.75961  |
| 9756 | P0C206 | P10070 | -0.22717  |
| 9757 | P0C206 | Q8IV31 | -0.79503  |
| 9758 | P0C206 | O75110 | -0.86424  |
| 9759 | P0C206 | Q8IZ83 | -0.62263  |
| 9760 | P0C206 | P48723 | -0.69226  |
| 9761 | P0C206 | Q92882 | -0.54397  |
| 9762 | P0C206 | P22891 | -1.0157   |
| 9763 | P0C206 | P16442 | -0.91529  |
| 9764 | P0C206 | P29972 | -0.22707  |
| 9765 | P0C206 | P01706 | -0.9894   |
| 9766 | P0C206 | Q9Y5X1 | -0.22736  |
| 9767 | P0C206 | Q86SF2 | -0.49388  |
| 9768 | P0C206 | O75355 | -1.133    |
| 9769 | P0C206 | Q9HD20 | -0.72504  |
| 9770 | P0C206 | P16150 | -0.90592  |
| 9771 | P0C206 | Q9NZ20 | -0.51585  |
| 9772 | P0C206 | O14495 | -0.28248  |
| 9773 | P0C206 | Q7Z3F1 | -0.99135  |
| 9774 | P0C206 | Q8NGS0 | -1.1763   |
| 9775 | P0C206 | Q96L11 | -0.80952  |
| 9776 | P0C206 | Q5M9N0 | -0.077953 |
| 9777 | P0C206 | Q8TBJ5 | -0.0543   |
| 9778 | P0C206 | Q9H4B4 | -0.22742  |
| 9779 | P0C206 | O00194 | -0.65033  |
| 9780 | P0C206 | Q9UK22 | -0.18084  |
| 9781 | P0C206 | P09693 | -0.76743  |
| 9782 | P0C206 | O15013 | -0.22769  |
| 9783 | P0C206 | Q5GFL6 | -0.93972  |
| 9784 | P0C206 | Q9BTD3 | -0.57403  |
| 9785 | P0C206 | Q9H772 | -0.79049  |
| 9786 | P0C206 | Q8IVH2 | -0.24674  |
| 9787 | P0C206 | Q9Y4R7 | -0.22366  |
| 9788 | P0C206 | O94923 | -0.31565  |
| 9789 | P0C206 | Q8NGY6 | -1.1763   |
| 9790 | P0C206 | Q9NWH2 | -0.79503  |
| 9791 | P0C206 | Q3LXA3 | -0.85174  |
| 9792 | P0C206 | P0C7H9 | -0.29369  |
| 9793 | P0C206 | Q9NYG2 | -0.49432  |
| 9794 | P0C206 | Q9Y5N1 | -1.3234   |
| 9795 | P0C206 | Q8N8P7 | -0.80952  |
| 9796 | P0C206 | Q8TDN1 | -0.77342  |
| 9797 | P0C206 | P14923 | -0.63738  |
| 9798 | P0C206 | Q6ZMT1 | -0.44893  |
| 9799 | P0C206 | Q8IUB2 | -0.75923  |
| 9800 | P0C206 | Q9H169 | -0.30755  |
| 9801 | P0C206 | Q9Y2H9 | -0.49987  |
| 9802 | P0C206 | Q6IF82 | -1.1763   |
| 9803 | P0C206 | Q6UX27 | -0.79503  |
| 9804 | P0C206 | Q9C004 | -0.13229  |

|      |        |        |          |
|------|--------|--------|----------|
| 9805 | P0C206 | Q9NYU1 | -0.30687 |
| 9806 | P0C206 | Q9H000 | -0.52377 |
| 9807 | P0C206 | Q01113 | -1.629   |
| 9808 | P0C206 | Q9Y6I0 | -0.56257 |
| 9809 | P0C206 | Q8NH93 | -1.1763  |
| 9810 | P0C206 | Q9Y5P1 | -1.1763  |
| 9811 | P0C206 | Q96J42 | -0.81336 |
| 9812 | P0C206 | Q6W3E5 | -0.72495 |
| 9813 | P0C206 | Q3SYB3 | -0.45919 |
| 9814 | P0C206 | P14780 | -0.37737 |
| 9815 | P0C206 | P41743 | -0.21614 |
| 9816 | P0C206 | P30518 | -0.75382 |
| 9817 | P0C206 | P98088 | -0.9965  |
| 9818 | P0C206 | Q5TH69 | -0.8767  |
| 9819 | P0C206 | Q8NGL3 | -1.1763  |
| 9820 | P0C206 | Q96SA4 | -0.79503 |
| 9821 | P0C206 | Q96M78 | -0.11561 |
| 9822 | P0C206 | Q9UBP5 | -0.2266  |
| 9823 | P0C206 | P08236 | -0.36762 |
| 9824 | P0C206 | Q13075 | -0.27667 |
| 9825 | P0C206 | Q9Y5G9 | -1.2115  |
| 9826 | P0C206 | Q9Y2K2 | -0.4705  |
| 9827 | P0C206 | Q9P2E3 | -0.2275  |
| 9828 | P0C206 | Q75324 | -0.63011 |
| 9829 | P0C206 | Q15413 | -0.61679 |
| 9830 | P0C206 | Q9UBN6 | -0.85204 |
| 9831 | P0C206 | Q9NZM1 | -0.43952 |
| 9832 | P0C206 | Q8WWN9 | -0.39394 |
| 9833 | P0C206 | Q8NCC3 | -0.81761 |
| 9834 | P0C206 | Q9H427 | -0.88298 |
| 9835 | P0C206 | Q9H6A0 | -0.20468 |
| 9836 | P0C206 | Q9Y4M8 | -0.28146 |
| 9837 | P0C206 | Q86UP0 | -0.95561 |
| 9838 | P0C206 | P12236 | -0.23985 |
| 9839 | P0C206 | Q99797 | -0.35683 |
| 9840 | P0C206 | O60883 | -0.65482 |
| 9841 | P0C206 | A6NC97 | -0.79503 |
| 9842 | P0C206 | Q8N350 | -0.79503 |
| 9843 | P0C206 | Q9H9V4 | -0.5552  |
| 9844 | P0C206 | P01023 | -0.29371 |
| 9845 | P0C206 | Q6UWU4 | -0.59741 |
| 9846 | P0C206 | P07942 | -0.67978 |
| 9847 | P0C206 | Q96I82 | -1.0772  |
| 9848 | P0C206 | Q9Y6Q1 | -0.23856 |
| 9849 | P0C206 | E2RYF6 | -0.79503 |
| 9850 | P0C206 | P68400 | -0.47421 |
| 9851 | P0C206 | Q96T91 | -0.78978 |
| 9852 | P0C206 | Q70J99 | -0.23126 |
| 9853 | P0C206 | P40879 | -0.51808 |
| 9854 | P0C206 | Q6P531 | -0.67656 |
| 9855 | P0C206 | P04432 | -0.9894  |
| 9856 | P0C206 | Q01813 | -0.54195 |
| 9857 | P0C206 | Q9H257 | -0.20309 |
| 9858 | P0C206 | Q92628 | -0.72239 |
| 9859 | P0C206 | Q6IMN6 | -0.3323  |
| 9860 | P0C206 | Q9NX62 | -0.59036 |
| 9861 | P0C206 | Q13203 | -0.57362 |
| 9862 | P0C206 | Q96LC7 | -1.5979  |
| 9863 | P0C206 | Q8NDX5 | -0.24032 |
| 9864 | P0C206 | P06870 | -0.50077 |
| 9865 | P0C206 | Q8N6F1 | -0.19561 |
| 9866 | P0C206 | Q8IWL2 | -1.0276  |
| 9867 | P0C206 | Q71RC2 | -0.69956 |
| 9868 | P0C206 | P47712 | -0.2278  |
| 9869 | P0C206 | P54707 | -0.88036 |
| 9870 | P0C206 | A6NNH2 | -0.19106 |
| 9871 | P0C206 | Q5TC82 | -0.2274  |
| 9872 | P0C206 | Q8NGR3 | -1.1763  |
| 9873 | P0C206 | Q09327 | -0.59201 |
| 9874 | P0C206 | P13631 | -0.23154 |
| 9875 | P0C206 | Q92989 | -0.1775  |
| 9876 | P0C206 | Q13572 | -0.93177 |
| 9877 | P0C206 | Q9C0B7 | -0.79503 |
| 9878 | P0C206 | P53367 | -0.14447 |
| 9879 | P0C206 | P29274 | -0.33272 |
| 9880 | P0C206 | Q9C0C9 | -0.79328 |

|      |        |        |           |
|------|--------|--------|-----------|
| 9881 | P0C206 | P00439 | -0.44746  |
| 9882 | P0C206 | Q8NGE5 | -1.1763   |
| 9883 | P0C206 | Q96DC8 | -0.28102  |
| 9884 | P0C206 | P60507 | -0.77946  |
| 9885 | P0C206 | P51811 | -0.15355  |
| 9886 | P0C206 | Q6P461 | -1.0453   |
| 9887 | P0C206 | O00391 | -1.1945   |
| 9888 | P0C206 | O75386 | -0.17686  |
| 9889 | P0C206 | Q96AG4 | -0.81853  |
| 9890 | P0C206 | Q6UW32 | -0.27184  |
| 9891 | P0C206 | Q4G0G5 | -0.80952  |
| 9892 | P0C206 | A8MUK1 | -0.35782  |
| 9893 | P0C206 | Q13401 | -0.087229 |
| 9894 | P0C206 | Q9NUY8 | -0.88845  |
| 9895 | P0C206 | Q9P0K7 | -0.2275   |
| 9896 | P0C206 | P19105 | -0.22629  |
| 9897 | P0C206 | P05155 | -0.39877  |
| 9898 | P0C206 | Q92536 | -0.94907  |
| 9899 | P0C206 | Q86SX6 | -0.21249  |
| 9900 | P0C206 | Q7Z7E8 | -0.21286  |
| 9901 | P0C206 | Q15204 | -1.0335   |
| 9902 | P0C206 | Q7Z5A7 | -1.3538   |
| 9903 | P0C206 | Q8IWU6 | -0.31748  |
| 9904 | P0C206 | O75949 | -0.79503  |
| 9905 | P0C206 | Q6P3W2 | -0.31401  |
| 9906 | P0C206 | O94856 | -0.93462  |
| 9907 | P0C206 | O00634 | -0.58006  |
| 9908 | P0C206 | A8MVX0 | -0.57432  |
| 9909 | P0C206 | Q8IVV2 | -0.42305  |
| 9910 | P0C206 | P46059 | -0.77819  |
| 9911 | P0C206 | O60906 | -0.67729  |
| 9912 | P0C206 | Q8IXZ3 | -0.18671  |
| 9913 | P0C206 | Q8N6Q3 | -0.43255  |
| 9914 | P0C206 | Q12846 | -0.23759  |
| 9915 | P0C206 | P42857 | -0.17886  |
| 9916 | P0C206 | Q7Z4N8 | -0.54338  |
| 9917 | P0C206 | Q9H4G1 | -0.87562  |
| 9918 | P0C206 | O43825 | -0.70104  |
| 9919 | P0C206 | Q9NTZ6 | -0.33857  |
| 9920 | P0C206 | Q9BSL1 | -0.22357  |
| 9921 | P0C206 | Q9Y5I2 | -1.6698   |
| 9922 | P0C206 | P14410 | -0.49677  |
| 9923 | P0C206 | Q9H853 | -0.38713  |
| 9924 | P0C206 | A2RUC4 | -0.51118  |
| 9925 | P0C206 | P0C7L1 | -0.75923  |
| 9926 | P0C206 | Q96P67 | -1.2448   |
| 9927 | P0C206 | P02656 | -0.57362  |
| 9928 | P0C206 | Q8NGA5 | -1.0483   |
| 9929 | P0C206 | Q9H7F0 | -1.0002   |
| 9930 | P0C206 | Q9BXX2 | -0.62497  |
| 9931 | P0C206 | P51686 | -1.2691   |
| 9932 | P0C206 | Q9UKB3 | -0.34475  |
| 9933 | P0C206 | Q99593 | -0.44316  |
| 9934 | P0C206 | P02786 | -0.69196  |
| 9935 | P0C206 | Q9Y2R0 | -0.63887  |
| 9936 | P0C206 | P46094 | -1.252    |
| 9937 | P0C206 | Q6UW60 | -1.0641   |
| 9938 | P0C206 | Q9H0Q0 | -0.49741  |
| 9939 | P0C206 | O95206 | -1.1209   |
| 9940 | P0C206 | P04066 | -0.17015  |
| 9941 | P0C206 | Q9BXX2 | -0.22742  |
| 9942 | P0C206 | Q49SQ1 | -1.2543   |
| 9943 | P0C206 | P08294 | -0.21425  |
| 9944 | P0C206 | Q3B7J2 | -1.5669   |
| 9945 | P0C206 | Q9P104 | -0.23873  |
| 9946 | P0C206 | Q9NYV9 | -1.0414   |
| 9947 | P0C206 | Q6FIF0 | -0.53481  |
| 9948 | P0C206 | Q7L7V1 | -0.22021  |
| 9949 | P0C206 | Q96JH7 | -0.29045  |
| 9950 | P0C206 | A6NFU8 | -0.66766  |
| 9951 | P0C206 | Q8IU99 | -1.0213   |
| 9952 | P0C206 | Q9UKF2 | -1.0482   |
| 9953 | P0C206 | P22607 | -0.35098  |
| 9954 | P0C206 | Q86YV5 | -1.1198   |
| 9955 | P0C206 | P51170 | -0.53674  |
| 9956 | P0C206 | Q9BUB4 | -0.23072  |



|       |        |        |           |
|-------|--------|--------|-----------|
| 9957  | P0C206 | D6RCP7 | -0.59814  |
| 9958  | P0C206 | Q2I0M4 | -0.22895  |
| 9959  | P0C206 | Q9Y5K2 | -1.2878   |
| 9960  | P0C206 | Q96GQ5 | -0.79503  |
| 9961  | P0C206 | Q8NGQ6 | -1.1763   |
| 9962  | P0C206 | Q96DZ5 | -0.62162  |
| 9963  | P0C206 | Q2TAA2 | -0.27494  |
| 9964  | P0C206 | Q86WN1 | -0.2274   |
| 9965  | P0C206 | Q9UKL2 | -1.2943   |
| 9966  | P0C206 | Q9Y2H1 | -0.22736  |
| 9967  | P0C206 | Q8N8J7 | -0.79503  |
| 9968  | P0C206 | Q9H2P9 | -0.26024  |
| 9969  | P0C206 | Q9BT40 | -0.22518  |
| 9970  | P0C206 | Q8NH10 | -1.1763   |
| 9971  | P0C206 | Q9UKF5 | -1.0943   |
| 9972  | P0C206 | Q9H628 | -1.2249   |
| 9973  | P0C206 | P58513 | -0.53163  |
| 9974  | P0C206 | Q8NHW4 | -1.0065   |
| 9975  | P0C206 | A6NJ16 | -0.80952  |
| 9976  | P0C206 | Q9UNN8 | -0.22807  |
| 9977  | P0C206 | Q9HBW0 | -0.86183  |
| 9978  | P0C206 | Q13206 | -0.71942  |
| 9979  | P0C206 | Q2M2H8 | -0.70373  |
| 9980  | P0C206 | Q43827 | -1.0955   |
| 9981  | P0C206 | P38570 | -1.0363   |
| 9982  | P0C206 | Q86WA6 | -0.17493  |
| 9983  | P0C206 | Q16769 | -1.0489   |
| 9984  | P0C206 | A6NFY4 | -0.79503  |
| 9985  | P0C206 | P09493 | -0.22299  |
| 9986  | P0C206 | Q86TZ1 | -0.22739  |
| 9987  | P0C206 | Q8N4H0 | -0.074396 |
| 9988  | P0C206 | Q9NS61 | -0.39896  |
| 9989  | P0C206 | Q5TF58 | -0.12831  |
| 9990  | P0C206 | Q96MW5 | -0.20366  |
| 9991  | P0C206 | Q95185 | -1.0055   |
| 9992  | P0C206 | Q9NUQ7 | -0.14119  |
| 9993  | P0C206 | P43694 | -0.22738  |
| 9994  | P0C206 | P52926 | -0.030017 |
| 9995  | P0C206 | Q86UD7 | -1.2801   |
| 9996  | P0C206 | Q8NFF2 | -0.93731  |
| 9997  | P0C206 | Q6PJG9 | -0.79503  |
| 9998  | P0C206 | Q96FL9 | -0.49446  |
| 9999  | P0C206 | Q9NPI5 | -0.46416  |
| 10000 | P0C206 | Q13634 | -1.1391   |
| 10001 | P0C206 | P27169 | -0.74781  |
| 10002 | P0C206 | P45379 | -0.2682   |
| 10003 | P0C206 | P0DJI9 | -0.76142  |
| 10004 | P0C206 | Q6ZUJ8 | -0.09418  |
| 10005 | P0C206 | P30459 | -0.92002  |
| 10006 | P0C206 | B1ANS9 | -0.22745  |
| 10007 | P0C206 | A1IGU5 | -0.37931  |
| 10008 | P0C206 | P01859 | -0.9687   |
| 10009 | P0C206 | P48426 | -0.22748  |
| 10010 | P0C206 | Q8NGS8 | -1.1763   |
| 10011 | P0C206 | P36776 | -0.13643  |
| 10012 | P0C206 | Q8IXB1 | -0.34063  |
| 10013 | P0C206 | Q9H6S0 | -0.2274   |
| 10014 | P0C206 | P55042 | -0.62523  |
| 10015 | P0C206 | P0DKB5 | -0.79503  |
| 10016 | P0C206 | Q6ZMZ0 | -0.22371  |
| 10017 | P0C206 | Q8WWV3 | -0.77474  |
| 10018 | P0C206 | Q95196 | -0.66464  |
| 10019 | P0C206 | B7ZAP0 | -0.022415 |
| 10020 | P0C206 | Q8N687 | -0.77981  |
| 10021 | P0C206 | Q86X52 | -0.76566  |
| 10022 | P0C206 | Q5XPI4 | -0.22741  |
| 10023 | P0C206 | Q13445 | -0.193    |
| 10024 | P0C206 | Q5T2Q4 | -0.22804  |
| 10025 | P0C206 | P49221 | -0.23077  |
| 10026 | P0C206 | Q86VD9 | -0.8308   |
| 10027 | P0C206 | Q6KCM7 | -0.65286  |
| 10028 | P0C206 | Q13444 | -0.56436  |
| 10029 | P0C206 | Q8NGC8 | -1.1763   |
| 10030 | P0C206 | P15863 | -0.2268   |
| 10031 | P0C206 | Q6ZUT9 | -0.77845  |
| 10032 | P0C206 | Q9BYF1 | -0.891    |

|       |        |        |           |
|-------|--------|--------|-----------|
| 10033 | P0C206 | Q8IZJ3 | -0.93955  |
| 10034 | P0C206 | Q12836 | -1.2926   |
| 10035 | P0C206 | Q7Z7B1 | -0.83153  |
| 10036 | P0C206 | Q12950 | -0.45919  |
| 10037 | P0C206 | Q9HCE7 | -0.22741  |
| 10038 | P0C206 | Q00722 | -0.45382  |
| 10039 | P0C206 | Q12913 | -0.43991  |
| 10040 | P0C206 | Q9BX74 | -1.0016   |
| 10041 | P0C206 | P05023 | -0.36702  |
| 10042 | P0C206 | Q96T25 | -0.22807  |
| 10043 | P0C206 | Q9NRP7 | -0.29676  |
| 10044 | P0C206 | P21695 | -0.036394 |
| 10045 | P0C206 | O94761 | -0.22749  |
| 10046 | P0C206 | P62502 | -0.81675  |
| 10047 | P0C206 | P53779 | -0.2274   |
| 10048 | P0C206 | Q92871 | -0.23033  |
| 10049 | P0C206 | Q9H3Q1 | -0.25039  |
| 10050 | P0C206 | Q9UL17 | -0.42603  |
| 10051 | P0C206 | Q9C0G6 | -0.47345  |
| 10052 | P0C206 | P18577 | -0.88765  |
| 10053 | P0C206 | P18135 | -0.9894   |
| 10054 | P0C206 | O15239 | -0.45059  |
| 10055 | P0C206 | Q8IYS5 | -1.4604   |
| 10056 | P0C206 | Q6ZRZ4 | -0.80952  |
| 10057 | P0C206 | Q9NPU4 | -0.79503  |
| 10058 | P0C206 | Q5TON5 | -0.22741  |
| 10059 | P0C206 | Q9GZK3 | -1.1763   |
| 10060 | P0C206 | Q68DA7 | -0.21831  |
| 10061 | P0C206 | O60658 | -0.2267   |
| 10062 | P0C206 | P98066 | -0.60851  |
| 10063 | P0C206 | Q92879 | -0.24713  |
| 10064 | P0C206 | Q99714 | -0.20545  |
| 10065 | P0C206 | Q6UX40 | -0.69874  |
| 10066 | P0C206 | Q9UEU0 | -0.29801  |
| 10067 | P0C206 | A8MZ06 | -0.18364  |
| 10068 | P0C206 | P32320 | -0.56051  |
| 10069 | P0C206 | Q96QZ0 | -0.82534  |
| 10070 | P0C206 | Q9H8L6 | -0.44325  |
| 10071 | P0C206 | Q6PIZ9 | -0.94429  |
| 10072 | P0C206 | P05305 | -0.27107  |
| 10073 | P0C206 | A1L0T0 | -0.78434  |
| 10074 | P0C206 | P01762 | -0.9894   |
| 10075 | P0C206 | A6NI47 | -0.22738  |
| 10076 | P0C206 | Q8IWZ6 | -0.14668  |
| 10077 | P0C206 | Q96JF0 | -0.70141  |
| 10078 | P0C206 | Q0VF96 | -0.22579  |
| 10079 | P0C206 | P78562 | -0.94596  |
| 10080 | P0C206 | Q9P2S6 | -0.22741  |
| 10081 | P0C206 | Q8NG76 | -1.1763   |
| 10082 | P0C206 | Q9BQE3 | -0.27789  |
| 10083 | P0C206 | Q5T1M5 | -0.4833   |
| 10084 | P0C206 | Q9BTY2 | -0.71469  |
| 10085 | P0C206 | P10163 | -0.71676  |
| 10086 | P0C206 | Q8N4N3 | -0.23335  |
| 10087 | P0C206 | Q6UQ28 | -0.80939  |
| 10088 | P0C206 | Q8NHY3 | -0.14354  |
| 10089 | P0C206 | Q75054 | -0.79503  |
| 10090 | P0C206 | Q96NW4 | -0.22741  |
| 10091 | P0C206 | Q9NYZ4 | -0.54428  |
| 10092 | P0C206 | Q9NPC4 | -0.70547  |
| 10093 | P0C206 | Q6ZST4 | -0.13424  |
| 10094 | P0C206 | Q8NGZ6 | -1.1763   |
| 10095 | P0C206 | Q01344 | -0.51151  |
| 10096 | P0C206 | H7BZ55 | -0.052356 |
| 10097 | P0C206 | Q02413 | -0.65835  |
| 10098 | P0C206 | Q7Z553 | -0.49369  |
| 10099 | P0C206 | Q96SB8 | -0.21751  |
| 10100 | P0C206 | O43426 | -0.34833  |
| 10101 | P0C206 | Q9P272 | -0.30069  |
| 10102 | P0C206 | Q86VQ6 | -0.51157  |
| 10103 | P0C206 | Q86UU9 | -0.8429   |
| 10104 | P0C206 | O60779 | -0.5638   |
| 10105 | P0C206 | Q14624 | -0.59248  |
| 10106 | P0C206 | Q9BZM3 | -0.17075  |
| 10107 | P0C206 | A6NDX4 | -0.79503  |
| 10108 | P0C206 | Q6NXP0 | -0.30236  |

|       |        |        |           |
|-------|--------|--------|-----------|
| 10109 | P0C206 | Q9GZN4 | -1.3203   |
| 10110 | P0C206 | Q9UHK6 | -0.31799  |
| 10111 | P0C206 | Q9UKK9 | -0.451    |
| 10112 | P0C206 | Q9UKM7 | -0.83762  |
| 10113 | P0C206 | Q96RJ3 | -0.6763   |
| 10114 | P0C206 | O43149 | -0.24262  |
| 10115 | P0C206 | P78410 | -0.76957  |
| 10116 | P0C206 | P50990 | -0.037334 |
| 10117 | P0C206 | Q06033 | -0.72246  |
| 10118 | P0C206 | Q8NGY0 | -1.1763   |
| 10119 | P0C206 | Q8WXX3 | -0.22738  |
| 10120 | P0C206 | P15311 | -0.2368   |
| 10121 | P0C206 | P26718 | -0.53277  |
| 10122 | P0C206 | Q8TDG4 | -0.28208  |
| 10123 | P0C206 | Q8NDX2 | -0.70596  |
| 10124 | P0C206 | Q14183 | -0.25067  |
| 10125 | P0C206 | P19784 | -0.24617  |
| 10126 | P0C206 | Q8TF76 | -0.5052   |
| 10127 | P0C206 | Q9Y6J6 | -1.008    |
| 10128 | P0C206 | Q9H7F4 | -0.79503  |
| 10129 | P0C206 | Q32P44 | -0.2277   |
| 10130 | P0C206 | P16870 | -0.64019  |
| 10131 | P0C206 | Q8N5C7 | -0.11966  |
| 10132 | P0C206 | Q8N2K0 | -0.71758  |
| 10133 | P0C206 | Q9NTI2 | -1.0026   |
| 10134 | P0C206 | O43749 | -1.1763   |
| 10135 | P0C206 | Q9HAU6 | -0.17705  |
| 10136 | P0C206 | P0C1S8 | -0.36085  |
| 10137 | P0C206 | Q5W0Q7 | -0.37096  |
| 10138 | P0C206 | Q8NGK3 | -1.1763   |
| 10139 | P0C206 | Q9NP95 | -0.80867  |
| 10140 | P0C206 | Q13153 | -0.22801  |
| 10141 | P0C206 | Q9NY72 | -0.57026  |
| 10142 | P0C206 | Q9H4G4 | -0.65004  |
| 10143 | P0C206 | P78556 | -1.0464   |
| 10144 | P0C206 | Q96NE9 | -0.23585  |
| 10145 | P0C206 | Q92995 | -0.23317  |
| 10146 | P0C206 | Q13496 | -0.36233  |
| 10147 | P0C206 | Q96MS3 | -0.62013  |
| 10148 | P0C206 | Q9H0M4 | -0.21656  |
| 10149 | P0C206 | P00414 | -0.44851  |
| 10150 | P0C206 | Q9Y572 | -0.22741  |
| 10151 | P0C206 | Q95785 | -0.13911  |
| 10152 | P0C206 | P00797 | -0.91533  |
| 10153 | P0C206 | Q8IUH5 | -0.2274   |
| 10154 | P0C206 | Q96A47 | -0.22784  |
| 10155 | P0C206 | Q13740 | -1.2017   |
| 10156 | P0C206 | Q9UL68 | -0.11376  |
| 10157 | P0C206 | Q16816 | -0.61686  |
| 10158 | P0C206 | Q9Y450 | -0.79402  |
| 10159 | P0C206 | Q12767 | -0.79503  |
| 10160 | P0C206 | Q14950 | -0.22637  |
| 10161 | P0C206 | Q9NZC9 | -0.36681  |
| 10162 | P0C206 | P48651 | -0.79733  |
| 10163 | P0C206 | Q12851 | -0.30997  |
| 10164 | P0C206 | Q9BRT8 | -0.72239  |
| 10165 | P0C206 | Q8N2G4 | -0.44393  |
| 10166 | P0C206 | P78536 | -0.27189  |
| 10167 | P0C206 | Q96PW8 | -0.21402  |
| 10168 | P0C206 | Q9Y336 | -1.165    |
| 10169 | P0C206 | Q8N7I0 | -0.21399  |
| 10170 | P0C206 | P80370 | -0.79177  |
| 10171 | P0C206 | Q9Y259 | -0.62676  |
| 10172 | P0C206 | Q8N5S3 | -0.31283  |
| 10173 | P0C206 | Q8WWG9 | -0.88688  |
| 10174 | P0C206 | Q9NRG1 | -0.3223   |
| 10175 | P0C206 | P17081 | -0.87678  |
| 10176 | P0C206 | P40126 | -0.53564  |
| 10177 | P0C206 | Q9BRR9 | -1.083    |
| 10178 | P0C206 | P32754 | -0.3053   |
| 10179 | P0C206 | Q8TAK6 | -0.22745  |
| 10180 | P0C206 | Q16849 | -0.78145  |
| 10181 | P0C206 | Q8N808 | -0.79503  |
| 10182 | P0C206 | Q9BQS7 | -1.0748   |
| 10183 | P0C206 | Q8WUJ0 | -0.3849   |
| 10184 | P0C206 | Q86Y22 | -1.3667   |

|       |        |        |           |
|-------|--------|--------|-----------|
| 10185 | P0C206 | Q70HW3 | -0.29866  |
| 10186 | P0C206 | Q9NTJ5 | -0.51295  |
| 10187 | P0C206 | P17066 | -0.5176   |
| 10188 | P0C206 | A6NCK2 | -0.44814  |
| 10189 | P0C206 | O95013 | -1.1763   |
| 10190 | P0C206 | Q8NEA5 | -0.79503  |
| 10191 | P0C206 | Q6ZRR5 | -0.79503  |
| 10192 | P0C206 | Q9NQ84 | -1.158    |
| 10193 | P0C206 | Q8WUD6 | -0.47891  |
| 10194 | P0C206 | Q8NGA4 | -1.2543   |
| 10195 | P0C206 | P30408 | -0.82588  |
| 10196 | P0C206 | Q9P265 | -0.22494  |
| 10197 | P0C206 | Q9UL62 | -0.41834  |
| 10198 | P0C206 | Q9NR71 | -0.64248  |
| 10199 | P0C206 | Q9P1Y6 | -0.22743  |
| 10200 | P0C206 | P0CB47 | -0.22712  |
| 10201 | P0C206 | P58658 | -0.78949  |
| 10202 | P0C206 | Q96R28 | -1.1763   |
| 10203 | P0C206 | Q6UXD5 | -1.0144   |
| 10204 | P0C206 | Q9H560 | -0.2274   |
| 10205 | P0C206 | Q9P0N9 | -0.454    |
| 10206 | P0C206 | Q9BX79 | -0.43386  |
| 10207 | P0C206 | Q15540 | -0.23022  |
| 10208 | P0C206 | P51575 | -0.44005  |
| 10209 | P0C206 | Q8WXI8 | -0.76773  |
| 10210 | P0C206 | Q96KV6 | -0.79503  |
| 10211 | P0C206 | P01608 | -0.9894   |
| 10212 | P0C206 | P09669 | -0.47872  |
| 10213 | P0C206 | A6NKC9 | -0.22741  |
| 10214 | P0C206 | Q8TD20 | -0.43935  |
| 10215 | P0C206 | Q9H190 | -0.22729  |
| 10216 | P0C206 | Q9UKS7 | -0.39421  |
| 10217 | P0C206 | Q9NQ69 | -0.2274   |
| 10218 | P0C206 | Q9H892 | -0.22296  |
| 10219 | P0C206 | Q75T13 | -0.4124   |
| 10220 | P0C206 | Q9BSK4 | -0.22749  |
| 10221 | P0C206 | Q92565 | -0.34537  |
| 10222 | P0C206 | Q13188 | -0.2374   |
| 10223 | P0C206 | O60575 | -0.75923  |
| 10224 | P0C206 | Q9HCB6 | -0.59229  |
| 10225 | P0C206 | P0CG22 | -0.98933  |
| 10226 | P0C206 | Q96BY6 | -0.50302  |
| 10227 | P0C206 | Q8N6G2 | -0.086675 |
| 10228 | P0C206 | Q9UN75 | -1.1512   |
| 10229 | P0C206 | Q8NCR9 | -0.79503  |
| 10230 | P0C206 | Q13563 | -0.27921  |
| 10231 | P0C206 | Q9BSJ5 | -0.79503  |
| 10232 | P0C206 | Q7L985 | -0.79503  |
| 10233 | P0C206 | P20813 | -0.68317  |
| 10234 | P0C206 | P0C7U3 | -0.77292  |
| 10235 | P0C206 | Q9H2S9 | -0.34806  |
| 10236 | P0C206 | Q9BX93 | -0.86435  |
| 10237 | P0C206 | Q75506 | -0.099232 |
| 10238 | P0C206 | Q8N127 | -1.1763   |
| 10239 | P0C206 | Q8TCD6 | -0.41497  |
| 10240 | P0C206 | Q96C36 | -0.68348  |
| 10241 | P0C206 | Q9P2J9 | -0.13496  |
| 10242 | P0C206 | Q96L42 | -0.87666  |
| 10243 | P0C206 | Q53R12 | -0.91833  |
| 10244 | P0C206 | P14210 | -0.31964  |
| 10245 | P0C206 | Q5SWH9 | -0.79503  |
| 10246 | P0C206 | Q05925 | -0.22723  |
| 10247 | P0C206 | Q12879 | -0.31134  |
| 10248 | P0C206 | P12643 | -0.22741  |
| 10249 | P0C206 | Q76EJ3 | -0.35804  |
| 10250 | P0C206 | Q9NZP5 | -1.1763   |
| 10251 | P0C206 | Q5T8D3 | -0.85121  |
| 10252 | P0C206 | Q96MI6 | -0.10399  |
| 10253 | P0C206 | P59536 | -1.1287   |
| 10254 | P0C206 | Q9Y6I4 | -0.23772  |
| 10255 | P0C206 | Q7L311 | -0.79503  |
| 10256 | P0C206 | Q15940 | -0.46721  |
| 10257 | P0C206 | Q8N5D6 | -0.44951  |
| 10258 | P0C206 | Q53FE4 | -0.037615 |
| 10259 | P0C206 | Q9GZQ4 | -0.92298  |
| 10260 | P0C206 | O15553 | -0.22923  |

|       |        |        |          |
|-------|--------|--------|----------|
| 10261 | P0C206 | Q9H7D0 | -0.22741 |
| 10262 | P0C206 | Q9Y5S2 | -0.69861 |
| 10263 | P0C206 | Q96FJ0 | -0.46599 |
| 10264 | P0C206 | A4IF30 | -0.72669 |
| 10265 | P0C206 | Q9Y5G1 | -1.1512  |
| 10266 | P0C206 | Q8WVN6 | -1.4204  |
| 10267 | P0C206 | Q9NWZ3 | -0.22729 |
| 10268 | P0C206 | P08519 | -1.074   |
| 10269 | P0C206 | P30520 | -0.61799 |
| 10270 | P0C206 | Q9BSE2 | -0.79503 |
| 10271 | P0C206 | Q9HAT2 | -0.8274  |
| 10272 | P0C206 | Q9Y230 | -0.22755 |
| 10273 | P0C206 | P29762 | -0.51639 |
| 10274 | P0C206 | O95167 | -0.42766 |
| 10275 | P0C206 | O95715 | -0.87824 |
| 10276 | P0C206 | Q2NKX8 | -0.19259 |
| 10277 | P0C206 | Q5JPE7 | -0.2875  |
| 10278 | P0C206 | Q9HC97 | -1.3861  |
| 10279 | P0C206 | Q5BLP8 | -0.80952 |
| 10280 | P0C206 | Q13972 | -0.56462 |
| 10281 | P0C206 | Q6GPI1 | -1.3413  |
| 10282 | P0C206 | Q7Z434 | -0.21171 |
| 10283 | P0C206 | Q9BS26 | -0.24372 |
| 10284 | P0C206 | O60656 | -0.69223 |
| 10285 | P0C206 | Q9UHE8 | -1.0722  |
| 10286 | P0C206 | Q9BRG2 | -0.69572 |
| 10287 | P0C206 | Q8TCD1 | -0.44667 |
| 10288 | P0C206 | Q75762 | -0.81119 |
| 10289 | P0C206 | Q96PX1 | -0.22738 |
| 10290 | P0C206 | P53602 | -0.55412 |
| 10291 | P0C206 | A8MX76 | -0.99507 |
| 10292 | P0C206 | P0C7A2 | -0.46853 |
| 10293 | P0C206 | Q5T7P6 | -0.79503 |
| 10294 | P0C206 | P10398 | -0.34709 |
| 10295 | P0C206 | Q95897 | -0.80952 |
| 10296 | P0C206 | Q8WVQ1 | -0.81365 |
| 10297 | P0C206 | Q9NZP8 | -1.363   |
| 10298 | P0C206 | B5MD39 | -0.2062  |
| 10299 | P0C206 | P49795 | -0.22764 |
| 10300 | P0C206 | A1L4H1 | -0.88984 |
| 10301 | P0C206 | P01568 | -0.75974 |
| 10302 | P0C206 | Q9H2C8 | -1.1763  |
| 10303 | P0C206 | Q9HCE9 | -0.97984 |
| 10304 | P0C206 | Q8NGA1 | -1.1763  |
| 10305 | P0C206 | P10916 | -0.22564 |
| 10306 | P0C206 | O60721 | -0.58204 |
| 10307 | P0C206 | Q01718 | -0.85483 |
| 10308 | P0C206 | Q86W28 | -0.51103 |
| 10309 | P0C206 | Q96A32 | -0.34205 |
| 10310 | P0C206 | P11279 | -0.89543 |
| 10311 | P0C206 | Q31612 | -0.99995 |
| 10312 | P0C206 | Q14562 | -0.20542 |
| 10313 | P0C206 | O00592 | -0.93986 |
| 10314 | P0C206 | P50052 | -0.76061 |
| 10315 | P0C206 | Q8IUZ5 | -0.41404 |
| 10316 | P0C206 | Q8NGS2 | -1.1763  |
| 10317 | P0C206 | Q6KC79 | -0.14929 |
| 10318 | P0C206 | A5X5Y0 | -0.87891 |
| 10319 | P0C206 | A6NCQ9 | -0.73705 |
| 10320 | P0C206 | Q96NZ9 | -0.80952 |
| 10321 | P0C206 | Q6NUK4 | -0.79503 |
| 10322 | P0C206 | Q96A59 | -0.62697 |
| 10323 | P0C206 | Q9Y4E5 | -0.22511 |
| 10324 | P0C206 | Q8TF44 | -0.19993 |
| 10325 | P0C206 | P0C7V4 | -0.19106 |
| 10326 | P0C206 | Q8NFQ6 | -1.0321  |
| 10327 | P0C206 | P57105 | -0.58411 |
| 10328 | P0C206 | P30203 | -1.0746  |
| 10329 | P0C206 | Q9BVW6 | -0.79503 |
| 10330 | P0C206 | Q86T26 | -1.8172  |
| 10331 | P0C206 | P0C1H6 | -0.44535 |
| 10332 | P0C206 | Q8TDV2 | -1.2448  |
| 10333 | P0C206 | O15544 | -0.26218 |
| 10334 | P0C206 | P45452 | -0.8468  |
| 10335 | P0C206 | Q9H112 | -0.24897 |
| 10336 | P0C206 | Q8WW62 | -0.82098 |

|       |        |        |           |
|-------|--------|--------|-----------|
| 10337 | P0C206 | Q01973 | -0.88614  |
| 10338 | P0C206 | Q96K49 | -0.79503  |
| 10339 | P0C206 | Q13492 | -0.20405  |
| 10340 | P0C206 | A8MWC7 | -0.045906 |
| 10341 | P0C206 | Q8WYN0 | -0.22831  |
| 10342 | P0C206 | Q02223 | -1.2383   |
| 10343 | P0C206 | Q9BPV8 | -1.1174   |
| 10344 | P0C206 | O95757 | -0.22449  |
| 10345 | P0C206 | O14773 | -0.35875  |
| 10346 | P0C206 | Q6GYQ0 | -0.19546  |
| 10347 | P0C206 | P12838 | -0.84243  |
| 10348 | P0C206 | Q7Z4N2 | -1.1263   |
| 10349 | P0C206 | Q9NR99 | -0.80952  |
| 10350 | P0C206 | Q10589 | -0.35224  |
| 10351 | P0C206 | Q3MIR4 | -0.14494  |
| 10352 | P0C206 | Q92753 | -0.63946  |
| 10353 | P0C206 | P10451 | -0.71638  |
| 10354 | P0C206 | Q7RTU9 | -0.39299  |
| 10355 | P0C206 | Q9H1C4 | -0.6623   |
| 10356 | P0C206 | Q13191 | -0.22741  |
| 10357 | P0C206 | Q95237 | -0.62207  |
| 10358 | P0C206 | Q5PT55 | -0.84727  |
| 10359 | P0C206 | Q6ZVK1 | -0.79503  |
| 10360 | P0C206 | Q9Y5M8 | -1.2263   |
| 10361 | P0C206 | Q96LW4 | -0.24979  |
| 10362 | P0C206 | Q14774 | -0.22878  |
| 10363 | P0C206 | Q9NZH6 | -0.20703  |
| 10364 | P0C206 | P53004 | -0.46662  |
| 10365 | P0C206 | Q9P2N2 | -0.51452  |
| 10366 | P0C206 | P0DJD9 | -1.1195   |
| 10367 | P0C206 | P01701 | -0.9894   |
| 10368 | P0C206 | Q9Y5W9 | -0.4235   |
| 10369 | P0C206 | P57737 | -0.25053  |
| 10370 | P0C206 | P04085 | -0.30706  |
| 10371 | P0C206 | Q9BYX2 | -0.52779  |
| 10372 | P0C206 | O43157 | -0.88814  |
| 10373 | P0C206 | Q6UWP8 | -0.80952  |
| 10374 | P0C206 | A6NCD1 | -0.44814  |
| 10375 | P0C206 | O00571 | -0.57057  |
| 10376 | P0C206 | Q15319 | -0.22741  |
| 10377 | P0C206 | P56557 | -0.7533   |
| 10378 | P0C206 | Q96LT9 | -0.49537  |
| 10379 | P0C206 | Q9UKN1 | -0.86872  |
| 10380 | P0C206 | Q96PE1 | -1.1355   |
| 10381 | P0C206 | P52739 | -0.54186  |
| 10382 | P0C206 | P30837 | -0.45554  |
| 10383 | P0C206 | P51665 | -0.21863  |
| 10384 | P0C206 | Q6UXL0 | -0.63662  |
| 10385 | P0C206 | O00481 | -0.2301   |
| 10386 | P0C206 | Q58WW2 | -0.22739  |
| 10387 | P0C206 | Q9H5U6 | -0.16894  |
| 10388 | P0C206 | Q9Y272 | -0.7415   |
| 10389 | P0C206 | Q00013 | -0.37047  |
| 10390 | P0C206 | Q8WUK0 | -0.60703  |
| 10391 | P0C206 | Q9NQ66 | -0.22651  |
| 10392 | P0C206 | O94979 | -0.47057  |
| 10393 | P0C206 | Q8N9H8 | -0.58466  |
| 10394 | P0C206 | Q96L34 | -0.31844  |
| 10395 | P0C206 | Q8WYQ4 | -0.16522  |
| 10396 | P0C206 | O95864 | -0.90705  |
| 10397 | P0C206 | Q8NHC7 | -1.1763   |
| 10398 | P0C206 | Q9H329 | -0.2555   |
| 10399 | P0C206 | Q9BQ39 | -0.42402  |
| 10400 | P0C206 | P59020 | -0.27258  |
| 10401 | P0C206 | P36888 | -0.50814  |
| 10402 | P0C206 | Q008S8 | -0.57432  |
| 10403 | P0C206 | P30626 | -0.22839  |
| 10404 | P0C206 | P30086 | -0.37556  |
| 10405 | P0C206 | Q9P241 | -0.60199  |
| 10406 | P0C206 | Q9Y6L6 | -0.83014  |
| 10407 | P0C206 | Q9BYV1 | -0.14698  |
| 10408 | P0C206 | A1L167 | -0.79328  |
| 10409 | P0C206 | Q8N126 | -0.90631  |
| 10410 | P0C206 | Q8TAC2 | -0.63292  |
| 10411 | P0C206 | P84095 | -0.35309  |
| 10412 | P0C206 | Q8NFI5 | -1.137    |

|       |        |        |           |
|-------|--------|--------|-----------|
| 10413 | P0C206 | Q9Y3Q4 | -1.073    |
| 10414 | P0C206 | Q01628 | -0.77968  |
| 10415 | P0C206 | Q9H2W2 | -0.21504  |
| 10416 | P0C206 | Q8IZT8 | -0.20186  |
| 10417 | P0C206 | Q8WXD9 | -0.2274   |
| 10418 | P0C206 | P36894 | -0.36537  |
| 10419 | P0C206 | P04745 | -0.23799  |
| 10420 | P0C206 | Q9P244 | -0.68369  |
| 10421 | P0C206 | Q9UNE0 | -0.6159   |
| 10422 | P0C206 | P58753 | -0.21856  |
| 10423 | P0C206 | Q6NVV3 | -0.81143  |
| 10424 | P0C206 | Q9Y5Z0 | -0.76928  |
| 10425 | P0C206 | Q8IWF2 | -0.20399  |
| 10426 | P0C206 | Q9Y4K4 | -0.5019   |
| 10427 | P0C206 | Q9P2B2 | -0.22741  |
| 10428 | P0C206 | Q6UXQ8 | -0.80952  |
| 10429 | P0C206 | Q9NQX3 | -0.59078  |
| 10430 | P0C206 | A1YPR0 | -0.46721  |
| 10431 | P0C206 | P35240 | -0.23569  |
| 10432 | P0C206 | Q9Y620 | -0.1854   |
| 10433 | P0C206 | Q92817 | -0.20574  |
| 10434 | P0C206 | Q9Y2R4 | -0.35913  |
| 10435 | P0C206 | P0CG39 | -0.20222  |
| 10436 | P0C206 | Q8NFM7 | -0.43817  |
| 10437 | P0C206 | A6NNE9 | -0.78316  |
| 10438 | P0C206 | O75264 | -0.79503  |
| 10439 | P0C206 | O75197 | -0.22747  |
| 10440 | P0C206 | Q5SZJ8 | -0.013439 |
| 10441 | P0C206 | Q8N5T2 | -1.2801   |
| 10442 | P0C206 | Q8WUA8 | -0.80952  |
| 10443 | P0C206 | O94769 | -0.84832  |
| 10444 | P0C206 | Q9UNK4 | -0.81875  |
| 10445 | P0C206 | Q9C0H5 | -0.26845  |
| 10446 | P0C206 | P53420 | -0.89373  |
| 10447 | P0C206 | Q9H4L5 | -0.61141  |
| 10448 | P0C206 | P54753 | -0.96617  |
| 10449 | P0C206 | Q9UKU0 | -0.95301  |
| 10450 | P0C206 | P19174 | -0.22741  |
| 10451 | P0C206 | Q7Z444 | -1.3067   |
| 10452 | P0C206 | P41594 | -0.69699  |
| 10453 | P0C206 | Q9NR90 | -0.70995  |
| 10454 | P0C206 | Q8NG11 | -0.79503  |
| 10455 | P0C206 | Q96PL5 | -0.66351  |
| 10456 | P0C206 | O43414 | -0.54082  |
| 10457 | P0C206 | Q9NR45 | -0.074534 |
| 10458 | P0C206 | Q9HC57 | -0.61764  |
| 10459 | P0C206 | O15533 | -0.43871  |
| 10460 | P0C206 | P08571 | -0.50753  |
| 10461 | P0C206 | O60258 | -0.91287  |
| 10462 | P0C206 | O15195 | -0.18837  |
| 10463 | P0C206 | Q96JQ0 | -1.1252   |
| 10464 | P0C206 | P08684 | -0.55388  |
| 10465 | P0C206 | O43451 | -0.63229  |
| 10466 | P0C206 | Q68CQ1 | -0.79503  |
| 10467 | P0C206 | Q9NZV5 | -0.28448  |
| 10468 | P0C206 | Q9NQT6 | -0.19598  |
| 10469 | P0C206 | Q9NRV9 | -0.7063   |
| 10470 | P0C206 | E5RHQ5 | -0.16762  |
| 10471 | P0C206 | Q49AH0 | -0.73813  |
| 10472 | P0C206 | Q9NNX1 | -0.76601  |
| 10473 | P0C206 | P56703 | -0.47579  |
| 10474 | P0C206 | Q93086 | -0.89916  |
| 10475 | P0C206 | Q8NDZ6 | -0.79503  |
| 10476 | P0C206 | O14668 | -1.5447   |
| 10477 | P0C206 | Q6VB85 | -0.45919  |
| 10478 | P0C206 | Q13670 | -0.30816  |
| 10479 | P0C206 | Q8WYP3 | -0.72379  |
| 10480 | P0C206 | Q9UBG3 | -0.29491  |
| 10481 | P0C206 | P28472 | -0.90082  |
| 10482 | P0C206 | P01266 | -0.58049  |
| 10483 | P0C206 | Q8NH02 | -1.1763   |
| 10484 | P0C206 | Q9UQ52 | -0.51861  |
| 10485 | P0C206 | Q8N4L1 | -0.79503  |
| 10486 | P0C206 | Q9Y2K6 | -0.36372  |
| 10487 | P0C206 | O95626 | -0.15652  |
| 10488 | P0C206 | P06309 | -0.9894   |

|       |        |        |           |
|-------|--------|--------|-----------|
| 10489 | P0C206 | P55899 | -0.92132  |
| 10490 | P0C206 | Q14247 | -0.23378  |
| 10491 | P0C206 | Q86YM7 | -0.26025  |
| 10492 | P0C206 | Q96IQ9 | -0.22731  |
| 10493 | P0C206 | Q09019 | -0.22763  |
| 10494 | P0C206 | P14415 | -0.23184  |
| 10495 | P0C206 | Q86SQ4 | -1.2769   |
| 10496 | P0C206 | O00329 | -0.39132  |
| 10497 | P0C206 | P00451 | -0.56243  |
| 10498 | P0C206 | Q9UII4 | -0.3497   |
| 10499 | P0C206 | P51888 | -0.87862  |
| 10500 | P0C206 | Q9UDX4 | -1.0025   |
| 10501 | P0C206 | Q9BXT6 | -1.1824   |
| 10502 | P0C206 | Q9UBG0 | -0.88222  |
| 10503 | P0C206 | A8MXJ8 | -0.19106  |
| 10504 | P0C206 | Q05952 | -0.75664  |
| 10505 | P0C206 | Q96A19 | -0.20038  |
| 10506 | P0C206 | P0CI25 | -0.44814  |
| 10507 | P0C206 | P61371 | -0.22812  |
| 10508 | P0C206 | Q8IVL5 | -0.51655  |
| 10509 | P0C206 | P55064 | -0.43691  |
| 10510 | P0C206 | A2A3L6 | -0.22409  |
| 10511 | P0C206 | Q96RA2 | -0.90171  |
| 10512 | P0C206 | Q8NG83 | -1.1763   |
| 10513 | P0C206 | P54760 | -1.137    |
| 10514 | P0C206 | Q04671 | -0.15132  |
| 10515 | P0C206 | Q9NRM6 | -1.2364   |
| 10516 | P0C206 | Q6T4P5 | -0.87344  |
| 10517 | P0C206 | Q96SQ7 | -0.22789  |
| 10518 | P0C206 | Q9HBG4 | -0.3604   |
| 10519 | P0C206 | Q8NHA8 | -1.1763   |
| 10520 | P0C206 | Q9Y673 | -0.80913  |
| 10521 | P0C206 | P35670 | -0.22754  |
| 10522 | P0C206 | Q96QU1 | -1.386    |
| 10523 | P0C206 | Q96BZ9 | -1.5374   |
| 10524 | P0C206 | Q16559 | -0.22762  |
| 10525 | P0C206 | B2RXH4 | -0.22698  |
| 10526 | P0C206 | P47872 | -1.3495   |
| 10527 | P0C206 | Q9H0Q3 | -0.84165  |
| 10528 | P0C206 | Q8TBE3 | -0.79503  |
| 10529 | P0C206 | P43630 | -1.0515   |
| 10530 | P0C206 | O95674 | -0.5549   |
| 10531 | P0C206 | Q14722 | -0.71216  |
| 10532 | P0C206 | Q8NGE7 | -1.1763   |
| 10533 | P0C206 | P16519 | -0.22443  |
| 10534 | P0C206 | Q96CX6 | -0.2312   |
| 10535 | P0C206 | P42785 | -0.25749  |
| 10536 | P0C206 | Q8NBH2 | -0.28568  |
| 10537 | P0C206 | Q5VXI9 | -0.81079  |
| 10538 | P0C206 | Q99928 | -0.70054  |
| 10539 | P0C206 | Q16647 | -0.22757  |
| 10540 | P0C206 | Q9UGP8 | -0.68468  |
| 10541 | P0C206 | P82279 | -1.268    |
| 10542 | P0C206 | P58107 | -0.15426  |
| 10543 | P0C206 | Q9NNZ3 | -0.57792  |
| 10544 | P0C206 | Q8TEZ7 | -1.2379   |
| 10545 | P0C206 | Q8IUX8 | -1.3596   |
| 10546 | P0C206 | Q9UQ16 | -0.23793  |
| 10547 | P0C206 | Q96AE7 | -0.22191  |
| 10548 | P0C206 | O60343 | -0.94966  |
| 10549 | P0C206 | O14578 | -0.69318  |
| 10550 | P0C206 | Q99437 | -0.59178  |
| 10551 | P0C206 | Q6ZSZ6 | -0.22537  |
| 10552 | P0C206 | Q147X3 | -0.062454 |
| 10553 | P0C206 | Q14807 | -0.31677  |
| 10554 | P0C206 | Q9C0I9 | -0.22815  |
| 10555 | P0C206 | Q13283 | -0.23472  |
| 10556 | P0C206 | P23470 | -1.181    |
| 10557 | P0C206 | Q7L7X3 | -0.52353  |
| 10558 | P0C206 | Q8N158 | -0.94471  |
| 10559 | P0C206 | Q9UK85 | -1.0072   |
| 10560 | P0C206 | Q96EP5 | -0.55677  |
| 10561 | P0C206 | Q9H756 | -0.79503  |
| 10562 | P0C206 | Q6UWQ5 | -0.78748  |
| 10563 | P0C206 | Q5H913 | -1.2838   |
| 10564 | P0C206 | Q96PV0 | -0.60181  |



|       |        |        |           |
|-------|--------|--------|-----------|
| 10565 | P0C206 | P19438 | -0.31225  |
| 10566 | P0C206 | Q5VUJ9 | -0.29182  |
| 10567 | P0C206 | P46019 | -0.20158  |
| 10568 | P0C206 | Q8N3P4 | -0.21574  |
| 10569 | P0C206 | P35249 | -0.21702  |
| 10570 | P0C206 | Q9NQU5 | -0.37024  |
| 10571 | P0C206 | Q6ZMH5 | -0.80701  |
| 10572 | P0C206 | Q8TDC3 | -0.56773  |
| 10573 | P0C206 | B9A064 | -0.80952  |
| 10574 | P0C206 | Q8N6C8 | -1.0347   |
| 10575 | P0C206 | Q5TON1 | -0.099617 |
| 10576 | P0C206 | Q8TDS7 | -1.2448   |
| 10577 | P0C206 | P30542 | -0.37422  |
| 10578 | P0C206 | Q68CQ7 | -0.66768  |
| 10579 | P0C206 | O00141 | -0.47854  |
| 10580 | P0C206 | Q6W5P4 | -0.99118  |
| 10581 | P0C206 | Q9Y239 | -0.22739  |
| 10582 | P0C206 | Q5VXT5 | -0.79184  |
| 10583 | P0C206 | Q9UKN7 | -0.43933  |
| 10584 | P0C206 | Q96AJ9 | -0.16772  |
| 10585 | P0C206 | Q9Y577 | -0.22952  |
| 10586 | P0C206 | Q9BZH6 | -0.5481   |
| 10587 | P0C206 | P0C7N5 | -1.1763   |
| 10588 | P0C206 | Q6FHH7 | -0.35462  |
| 10589 | P0C206 | Q8IV50 | -0.20388  |
| 10590 | P0C206 | P60568 | -0.42236  |
| 10591 | P0C206 | P59544 | -1.1287   |
| 10592 | P0C206 | P0CG05 | -0.95593  |
| 10593 | P0C206 | O14798 | -0.71781  |
| 10594 | P0C206 | Q7Z443 | -0.74284  |
| 10595 | P0C206 | Q8NBT0 | -0.22791  |
| 10596 | P0C206 | Q9UEF7 | -1.0044   |
| 10597 | P0C206 | Q9P109 | -0.43594  |
| 10598 | P0C206 | Q9UQB9 | -0.38259  |
| 10599 | P0C206 | Q9Y231 | -0.46426  |
| 10600 | P0C206 | Q15431 | -0.025929 |
| 10601 | P0C206 | Q13395 | -0.092433 |
| 10602 | P0C206 | Q5M7Z0 | -0.73705  |
| 10603 | P0C206 | Q13509 | -0.46235  |
| 10604 | P0C206 | Q5TGZ0 | -0.50962  |
| 10605 | P0C206 | Q9UJA3 | -0.20165  |
| 10606 | P0C206 | Q99801 | -0.2331   |
| 10607 | P0C206 | Q9NRN5 | -1.0206   |
| 10608 | P0C206 | P0C024 | -0.36335  |
| 10609 | P0C206 | P01040 | -0.17723  |
| 10610 | P0C206 | Q9UN73 | -1.6698   |
| 10611 | P0C206 | Q53GS9 | -0.23482  |
| 10612 | P0C206 | Q9H8H2 | -0.35913  |
| 10613 | P0C206 | O00574 | -1.2109   |
| 10614 | P0C206 | Q8IZF6 | -1.2769   |
| 10615 | P0C206 | Q96L50 | -0.23335  |
| 10616 | P0C206 | Q8N131 | -0.8024   |
| 10617 | P0C206 | P04626 | -0.22741  |
| 10618 | P0C206 | Q6S5H4 | -0.22722  |
| 10619 | P0C206 | P05160 | -0.71746  |
| 10620 | P0C206 | Q4KMZ8 | -0.91833  |
| 10621 | P0C206 | Q8TAX0 | -0.19213  |
| 10622 | P0C206 | P55040 | -0.47903  |
| 10623 | P0C206 | Q9NVE7 | -0.65493  |
| 10624 | P0C206 | P01623 | -0.9894   |
| 10625 | P0C206 | Q96M66 | -0.10716  |
| 10626 | P0C206 | P55263 | -0.44949  |
| 10627 | P0C206 | Q8TDV0 | -1.2448   |
| 10628 | P0C206 | O60683 | -0.22742  |
| 10629 | P0C206 | P22612 | -0.57149  |
| 10630 | P0C206 | Q9NRW3 | -0.40339  |
| 10631 | P0C206 | Q92545 | -0.57403  |
| 10632 | P0C206 | Q8WTX9 | -0.74046  |
| 10633 | P0C206 | Q14332 | -0.52179  |
| 10634 | P0C206 | Q8NGF1 | -1.1763   |
| 10635 | P0C206 | Q8NGC5 | -1.1763   |
| 10636 | P0C206 | P07093 | -0.36735  |
| 10637 | P0C206 | Q96LU5 | -0.44706  |
| 10638 | P0C206 | P43320 | -0.32112  |
| 10639 | P0C206 | Q9NZW4 | -1.1125   |
| 10640 | P0C206 | Q99645 | -0.85153  |

|       |        |        |           |
|-------|--------|--------|-----------|
| 10641 | P0C206 | Q8WVD5 | -0.2279   |
| 10642 | P0C206 | Q86VF7 | -0.25303  |
| 10643 | P0C206 | Q0VAA2 | -0.22741  |
| 10644 | P0C206 | Q00602 | -1.1891   |
| 10645 | P0C206 | Q9GZW8 | -0.79503  |
| 10646 | P0C206 | P26599 | -0.22693  |
| 10647 | P0C206 | Q15048 | -0.068219 |
| 10648 | P0C206 | A8MPY1 | -0.64051  |
| 10649 | P0C206 | P60321 | -0.26129  |
| 10650 | P0C206 | Q86UR5 | -0.22742  |
| 10651 | P0C206 | P34969 | -1.2431   |
| 10652 | P0C206 | P35247 | -0.45506  |
| 10653 | P0C206 | P20851 | -0.94313  |
| 10654 | P0C206 | Q96AK3 | -0.45815  |
| 10655 | P0C206 | Q6P9H4 | -0.22734  |
| 10656 | P0C206 | Q9Y4E8 | -0.39055  |
| 10657 | P0C206 | Q9H2I8 | -0.22715  |
| 10658 | P0C206 | Q9H1P3 | -0.50624  |
| 10659 | P0C206 | Q94910 | -0.8026   |
| 10660 | P0C206 | O00220 | -0.22738  |
| 10661 | P0C206 | P26006 | -0.36579  |
| 10662 | P0C206 | Q99487 | -0.17326  |
| 10663 | P0C206 | Q96P88 | -1.183    |
| 10664 | P0C206 | Q8WVP7 | -0.77736  |
| 10665 | P0C206 | Q9P0J7 | -0.53631  |
| 10666 | P0C206 | Q9Y3Z3 | -0.1111   |
| 10667 | P0C206 | P18136 | -0.9894   |
| 10668 | P0C206 | Q9NQ76 | -0.41397  |
| 10669 | P0C206 | O15552 | -1.6166   |
| 10670 | P0C206 | Q9UBF8 | -0.69345  |
| 10671 | P0C206 | Q86WS5 | -1.2466   |
| 10672 | P0C206 | Q8NGS5 | -1.1763   |
| 10673 | P0C206 | Q9NQ79 | -0.93187  |
| 10674 | P0C206 | Q9Y2K3 | -0.36939  |
| 10675 | P0C206 | Q8IYX1 | -1.2801   |
| 10676 | P0C206 | Q92765 | -0.59404  |
| 10677 | P0C206 | O95926 | -0.095052 |
| 10678 | P0C206 | Q9NQ94 | -0.27256  |
| 10679 | P0C206 | Q6NXT6 | -0.84845  |
| 10680 | P0C206 | Q06889 | -0.2043   |
| 10681 | P0C206 | Q6ZT52 | -0.039893 |
| 10682 | P0C206 | Q9UIM3 | -0.22529  |
| 10683 | P0C206 | P51677 | -1.2185   |
| 10684 | P0C206 | Q96RK4 | -0.22679  |
| 10685 | P0C206 | P23378 | -0.55772  |
| 10686 | P0C206 | Q6UVK1 | -1.1199   |
| 10687 | P0C206 | Q9Y6X5 | -0.89394  |
| 10688 | P0C206 | O15431 | -1.0189   |
| 10689 | P0C206 | Q9BV99 | -0.22738  |
| 10690 | P0C206 | Q8NHU3 | -0.74768  |
| 10691 | P0C206 | Q9Y5P4 | -0.22762  |
| 10692 | P0C206 | P07711 | -0.44655  |
| 10693 | P0C206 | Q9UMN6 | -0.22587  |
| 10694 | P0C206 | Q9BYX7 | -0.69019  |
| 10695 | P0C206 | Q9Y2D4 | -0.056096 |
| 10696 | P0C206 | O00155 | -1.3861   |
| 10697 | P0C206 | Q8N264 | -0.64584  |
| 10698 | P0C206 | P20472 | -0.21372  |
| 10699 | P0C206 | P08319 | -0.23575  |
| 10700 | P0C206 | Q15836 | -0.22023  |
| 10701 | P0C206 | Q9NR80 | -0.23975  |
| 10702 | P0C206 | Q43707 | -0.62822  |
| 10703 | P0C206 | O75995 | -0.22737  |
| 10704 | P0C206 | Q13480 | -0.22718  |
| 10705 | P0C206 | P01719 | -0.9894   |
| 10706 | P0C206 | Q96DH6 | -0.61001  |
| 10707 | P0C206 | Q8TCX1 | -0.053796 |
| 10708 | P0C206 | Q96HH4 | -0.79503  |
| 10709 | P0C206 | Q32P51 | -0.27167  |
| 10710 | P0C206 | Q8WUY1 | -0.80952  |
| 10711 | P0C206 | Q8NFU1 | -0.70317  |
| 10712 | P0C206 | P10276 | -0.23552  |
| 10713 | P0C206 | O43423 | -0.074103 |
| 10714 | P0C206 | Q9H3V2 | -0.79503  |
| 10715 | P0C206 | P06753 | -0.21069  |
| 10716 | P0C206 | Q15569 | -0.64743  |

|       |        |        |           |
|-------|--------|--------|-----------|
| 10717 | P0C206 | O75916 | -0.39775  |
| 10718 | P0C206 | Q9NP86 | -0.22503  |
| 10719 | P0C206 | O94887 | -0.22749  |
| 10720 | P0C206 | Q9BXN2 | -0.49307  |
| 10721 | P0C206 | Q13474 | -0.22702  |
| 10722 | P0C206 | O95466 | -0.22021  |
| 10723 | P0C206 | Q15672 | -0.22807  |
| 10724 | P0C206 | O75015 | -1.0136   |
| 10725 | P0C206 | Q86TV6 | -0.22698  |
| 10726 | P0C206 | Q9UKA9 | -0.53445  |
| 10727 | P0C206 | Q5TGL8 | -0.3763   |
| 10728 | P0C206 | Q2VWP7 | -1.0008   |
| 10729 | P0C206 | P63252 | -1.2949   |
| 10730 | P0C206 | O43251 | -0.42028  |
| 10731 | P0C206 | Q9NX52 | -1.2567   |
| 10732 | P0C206 | Q96R09 | -1.1763   |
| 10733 | P0C206 | Q9H0U4 | -0.40066  |
| 10734 | P0C206 | O75908 | -0.78266  |
| 10735 | P0C206 | A4UGR9 | -0.17857  |
| 10736 | P0C206 | Q96K76 | -0.43845  |
| 10737 | P0C206 | Q53S99 | -0.27903  |
| 10738 | P0C206 | O75326 | -0.22565  |
| 10739 | P0C206 | O43760 | -0.79295  |
| 10740 | P0C206 | P30085 | -0.25135  |
| 10741 | P0C206 | O75191 | -0.74543  |
| 10742 | P0C206 | P51451 | -1.208    |
| 10743 | P0C206 | Q8TBY0 | -0.83583  |
| 10744 | P0C206 | Q5T4T1 | -0.79503  |
| 10745 | P0C206 | Q8NEN0 | -0.16636  |
| 10746 | P0C206 | Q9H9B1 | -0.22741  |
| 10747 | P0C206 | Q9NS75 | -1.133    |
| 10748 | P0C206 | Q6YP21 | -0.27083  |
| 10749 | P0C206 | P06319 | -0.9894   |
| 10750 | P0C206 | Q06413 | -0.075598 |
| 10751 | P0C206 | Q99595 | -0.26278  |
| 10752 | P0C206 | Q8N2G6 | -0.17787  |
| 10753 | P0C206 | Q9NZQ0 | -0.97225  |
| 10754 | P0C206 | O95096 | -0.23516  |
| 10755 | P0C206 | P01562 | -0.74337  |
| 10756 | P0C206 | Q9P225 | -0.44002  |
| 10757 | P0C206 | Q93099 | -0.37713  |
| 10758 | P0C206 | Q9NU02 | -0.29182  |
| 10759 | P0C206 | Q9NR97 | -0.76605  |
| 10760 | P0C206 | O15169 | -0.26136  |
| 10761 | P0C206 | Q86SZ3 | -0.16868  |
| 10762 | P0C206 | Q6ZTW0 | -0.22889  |
| 10763 | P0C206 | Q13477 | -1.1591   |
| 10764 | P0C206 | Q9BX84 | -0.79755  |
| 10765 | P0C206 | P07148 | -0.21694  |
| 10766 | P0C206 | Q9H0R6 | -0.46708  |
| 10767 | P0C206 | Q96EK9 | -0.72239  |
| 10768 | P0C206 | Q9BVV7 | -0.23545  |
| 10769 | P0C206 | Q52LD8 | -0.4367   |
| 10770 | P0C206 | Q6T311 | -1.3287   |
| 10771 | P0C206 | P00450 | -0.94314  |
| 10772 | P0C206 | Q86W34 | -0.59932  |
| 10773 | P0C206 | Q9NX78 | -0.79503  |
| 10774 | P0C206 | Q16643 | -0.61971  |
| 10775 | P0C206 | P51582 | -1.0737   |
| 10776 | P0C206 | Q14896 | -0.54623  |
| 10777 | P0C206 | Q9BXL7 | -0.22714  |
| 10778 | P0C206 | P21108 | -0.70084  |
| 10779 | P0C206 | P36980 | -0.80952  |
| 10780 | P0C206 | Q8NGV5 | -1.1763   |
| 10781 | P0C206 | Q96CG8 | -0.7403   |
| 10782 | P0C206 | P39900 | -1.1583   |
| 10783 | P0C206 | Q9NSI8 | -0.20978  |
| 10784 | P0C206 | Q6ZQY2 | -0.22731  |
| 10785 | P0C206 | Q9P2S5 | -0.22738  |
| 10786 | P0C206 | Q9H5V8 | -1.4604   |
| 10787 | P0C206 | Q7Z4V5 | -0.15778  |
| 10788 | P0C206 | O14817 | -1.0646   |
| 10789 | P0C206 | Q15615 | -1.1763   |
| 10790 | P0C206 | Q86X19 | -0.87353  |
| 10791 | P0C206 | P78332 | -0.75123  |
| 10792 | P0C206 | H3BUK9 | -0.2272   |

|       |        |        |            |
|-------|--------|--------|------------|
| 10793 | P0C206 | P26842 | -0.64967   |
| 10794 | P0C206 | Q8WUT4 | -0.79503   |
| 10795 | P0C206 | P02788 | -0.2003    |
| 10796 | P0C206 | Q6UXV4 | -0.6207    |
| 10797 | P0C206 | P30480 | -0.99995   |
| 10798 | P0C206 | P23142 | -0.97397   |
| 10799 | P0C206 | P04180 | -0.33611   |
| 10800 | P0C206 | Q9NRY4 | -0.26069   |
| 10801 | P0C206 | Q12955 | -0.22741   |
| 10802 | P0C206 | P31153 | -0.54519   |
| 10803 | P0C206 | Q5J8M3 | -0.74685   |
| 10804 | P0C206 | Q9BUP0 | -0.22478   |
| 10805 | P0C206 | Q9HCC8 | -0.54224   |
| 10806 | P0C206 | P49768 | -0.22122   |
| 10807 | P0C206 | Q9NSD5 | -0.92615   |
| 10808 | P0C206 | P13693 | -0.12877   |
| 10809 | P0C206 | Q96PG2 | -0.79503   |
| 10810 | P0C206 | Q9Y6M9 | -0.08166   |
| 10811 | P0C206 | O00358 | -0.45919   |
| 10812 | P0C206 | P35070 | -1.1956    |
| 10813 | P0C206 | A2A2Y4 | -0.3834    |
| 10814 | P0C206 | Q92802 | -0.092462  |
| 10815 | P0C206 | A1L1A6 | -0.79503   |
| 10816 | P0C206 | Q8NFK1 | -0.86546   |
| 10817 | P0C206 | Q6PID6 | -0.22733   |
| 10818 | P0C206 | Q9Y4C4 | -0.22973   |
| 10819 | P0C206 | Q96SZ5 | -0.39648   |
| 10820 | P0C206 | Q13224 | -0.27075   |
| 10821 | P0C206 | Q9NX94 | -0.79503   |
| 10822 | P0C206 | Q96Q15 | -0.6617    |
| 10823 | P0C206 | P19525 | -0.4834    |
| 10824 | P0C206 | Q9UKR8 | -0.79503   |
| 10825 | P0C206 | Q9BRN9 | -0.79503   |
| 10826 | P0C206 | Q8NH79 | -1.1763    |
| 10827 | P0C206 | A6PVI3 | -0.76638   |
| 10828 | P0C206 | O14924 | -0.29364   |
| 10829 | P0C206 | O75064 | -0.14984   |
| 10830 | P0C206 | Q69YW2 | -0.79503   |
| 10831 | P0C206 | P59538 | -1.1287    |
| 10832 | P0C206 | P01776 | -0.9894    |
| 10833 | P0C206 | Q9NQE7 | -0.67788   |
| 10834 | P0C206 | Q53HC5 | -0.19478   |
| 10835 | P0C206 | Q9BXY5 | -0.29182   |
| 10836 | P0C206 | Q8TAD2 | -0.89539   |
| 10837 | P0C206 | Q9BQD1 | -0.31795   |
| 10838 | P0C206 | Q5H8A3 | -0.72973   |
| 10839 | P0C206 | P50583 | -0.61959   |
| 10840 | P0C206 | O60478 | -0.95247   |
| 10841 | P0C206 | Q9C009 | -0.35842   |
| 10842 | P0C206 | Q60674 | -0.25176   |
| 10843 | P0C206 | Q9P2T1 | -0.41849   |
| 10844 | P0C206 | Q9NY57 | -1.1715    |
| 10845 | P0C206 | Q7Z4S9 | -0.22726   |
| 10846 | P0C206 | Q8NGS6 | -1.1763    |
| 10847 | P0C206 | P01769 | -0.9894    |
| 10848 | P0C206 | Q86U44 | -0.13935   |
| 10849 | P0C206 | P15313 | -0.26711   |
| 10850 | P0C206 | Q13585 | -1.3175    |
| 10851 | P0C206 | Q9H269 | -0.33464   |
| 10852 | P0C206 | Q6ZS62 | -0.79503   |
| 10853 | P0C206 | O00559 | -0.64999   |
| 10854 | P0C206 | Q92187 | -0.41132   |
| 10855 | P0C206 | P09017 | -0.19529   |
| 10856 | P0C206 | Q8NH72 | -1.1763    |
| 10857 | P0C206 | P59910 | -0.30094   |
| 10858 | P0C206 | P01772 | -0.9894    |
| 10859 | P0C206 | Q8WWZ3 | -0.4528    |
| 10860 | P0C206 | Q9H2A7 | -1.2394    |
| 10861 | P0C206 | P58417 | -0.92045   |
| 10862 | P0C206 | Q8WXI3 | -0.48675   |
| 10863 | P0C206 | Q9NX36 | -0.29995   |
| 10864 | P0C206 | Q6PCT2 | -0.23388   |
| 10865 | P0C206 | Q9Y2F9 | -0.22485   |
| 10866 | P0C206 | P26440 | -0.49028   |
| 10867 | P0C206 | Q8N3Y3 | -0.61408   |
| 10868 | P0C206 | Q6PEV8 | -0.0037482 |

|       |        |        |           |
|-------|--------|--------|-----------|
| 10869 | P0C206 | Q8NAG6 | -0.22741  |
| 10870 | P0C206 | P06316 | -0.9894   |
| 10871 | P0C206 | P01185 | -0.42837  |
| 10872 | P0C206 | P49662 | -0.78659  |
| 10873 | P0C206 | P18031 | -0.25332  |
| 10874 | P0C206 | Q6ZSY5 | -0.74245  |
| 10875 | P0C206 | Q6JEL2 | -0.21293  |
| 10876 | P0C206 | P60508 | -0.77946  |
| 10877 | P0C206 | H3BSY2 | -0.056113 |
| 10878 | P0C206 | Q9NQX5 | -0.79503  |
| 10879 | P0C206 | P78312 | -0.11789  |
| 10880 | P0C206 | P46095 | -1.2745   |
| 10881 | P0C206 | Q9NZA1 | -0.20491  |
| 10882 | P0C206 | P22234 | -0.31968  |
| 10883 | P0C206 | Q9H0R5 | -0.77043  |
| 10884 | P0C206 | Q06430 | -0.78187  |
| 10885 | P0C206 | P46952 | -0.23084  |
| 10886 | P0C206 | P13569 | -0.2737   |
| 10887 | P0C206 | P34096 | -0.70483  |
| 10888 | P0C206 | P58180 | -1.1763   |
| 10889 | P0C206 | Q8NGA2 | -1.1763   |
| 10890 | P0C206 | Q8IV63 | -0.60969  |
| 10891 | P0C206 | P22492 | -1.0221   |
| 10892 | P0C206 | Q6N075 | -0.72669  |
| 10893 | P0C206 | Q9BVG3 | -0.44814  |
| 10894 | P0C206 | Q969E3 | -0.76095  |
| 10895 | P0C206 | O76062 | -1.0313   |
| 10896 | P0C206 | Q9Y5E5 | -0.95123  |
| 10897 | P0C206 | Q9UQP3 | -0.98795  |
| 10898 | P0C206 | P55851 | -0.41093  |
| 10899 | P0C206 | Q6ZQQ2 | -0.79503  |
| 10900 | P0C206 | Q5T2E6 | -0.79503  |
| 10901 | P0C206 | Q13454 | -0.70412  |
| 10902 | P0C206 | Q86WD7 | -0.52774  |
| 10903 | P0C206 | Q5XG99 | -0.7776   |
| 10904 | P0C206 | Q29983 | -0.58383  |
| 10905 | P0C206 | Q8TBM7 | -0.79503  |
| 10906 | P0C206 | Q5T3I0 | -0.24184  |
| 10907 | P0C206 | O75951 | -0.78748  |
| 10908 | P0C206 | Q96K78 | -1.2769   |
| 10909 | P0C206 | P03979 | -0.38002  |
| 10910 | P0C206 | Q6N021 | -0.47671  |
| 10911 | P0C206 | P39086 | -0.637    |
| 10912 | P0C206 | Q8NC44 | -0.7666   |
| 10913 | P0C206 | Q96GE9 | -0.79503  |
| 10914 | P0C206 | P20062 | -0.81381  |
| 10915 | P0C206 | Q99958 | -0.27526  |
| 10916 | P0C206 | A6NMY6 | -0.74661  |
| 10917 | P0C206 | Q9Y6R0 | -0.22648  |
| 10918 | P0C206 | Q9Y653 | -1.5343   |
| 10919 | P0C206 | Q9NTX5 | -0.17268  |
| 10920 | P0C206 | P23368 | -0.68925  |
| 10921 | P0C206 | O60667 | -0.72478  |
| 10922 | P0C206 | Q9H7Z7 | -0.15952  |
| 10923 | P0C206 | Q9H1E5 | -0.7886   |
| 10924 | P0C206 | P01893 | -1.132    |
| 10925 | P0C206 | Q8NBN7 | -1.0819   |
| 10926 | P0C206 | Q9YNA8 | -0.15319  |
| 10927 | P0C206 | O95140 | -0.71318  |
| 10928 | P0C206 | Q13491 | -0.62032  |
| 10929 | P0C206 | Q8NGA0 | -1.1763   |
| 10930 | P0C206 | Q16512 | -0.21913  |
| 10931 | P0C206 | O14949 | -0.091304 |
| 10932 | P0C206 | Q8NCL9 | -0.79503  |
| 10933 | P0C206 | Q3SYC2 | -0.74054  |
| 10934 | P0C206 | P12271 | -0.64666  |
| 10935 | P0C206 | Q96LA9 | -1.2448   |
| 10936 | P0C206 | Q4G0Z9 | -0.32622  |
| 10937 | P0C206 | P01871 | -1.4583   |
| 10938 | P0C206 | P14902 | -0.24739  |
| 10939 | P0C206 | O15211 | -0.79127  |
| 10940 | P0C206 | Q5RGS3 | -0.79503  |
| 10941 | P0C206 | Q5VTJ3 | -0.79503  |
| 10942 | P0C206 | Q2M385 | -0.79503  |
| 10943 | P0C206 | Q02388 | -0.64555  |
| 10944 | P0C206 | Q8WXS5 | -0.77225  |

|       |        |        |           |
|-------|--------|--------|-----------|
| 10945 | POC206 | P00367 | -0.17305  |
| 10946 | POC206 | P17600 | -0.39436  |
| 10947 | POC206 | Q8NGB8 | -1.1763   |
| 10948 | POC206 | Q6NUM9 | -0.57149  |
| 10949 | POC206 | Q6ZTK2 | -0.17198  |
| 10950 | POC206 | Q9BZ81 | -0.092462 |
| 10951 | POC206 | O43196 | -0.54577  |
| 10952 | POC206 | P17181 | -0.88588  |
| 10953 | POC206 | O60341 | -0.22568  |
| 10954 | POC206 | Q5TBK1 | -0.074792 |
| 10955 | POC206 | Q14523 | -0.57403  |
| 10956 | POC206 | Q8TCT9 | -0.5585   |
| 10957 | POC206 | P0DJI8 | -0.55217  |
| 10958 | POC206 | Q86U10 | -0.27902  |
| 10959 | POC206 | Q6NSJ5 | -0.79503  |
| 10960 | POC206 | Q86V88 | -0.52535  |
| 10961 | POC206 | P01042 | -0.6594   |
| 10962 | POC206 | O00294 | -0.28972  |
| 10963 | POC206 | Q9Y6Z7 | -0.66416  |
| 10964 | POC206 | O00591 | -0.67531  |
| 10965 | POC206 | Q9NQ86 | -0.32086  |
| 10966 | POC206 | Q6UXU4 | -0.79503  |
| 10967 | POC206 | Q71UI9 | -0.66158  |
| 10968 | POC206 | Q969N4 | -1.2135   |
| 10969 | POC206 | A1XBS5 | -0.08205  |
| 10970 | POC206 | Q9P2C4 | -0.75225  |
| 10971 | POC206 | Q14517 | -0.23693  |
| 10972 | POC206 | P08581 | -0.43981  |
| 10973 | POC206 | P78314 | -0.22732  |
| 10974 | POC206 | Q9NWL6 | -0.19184  |
| 10975 | POC206 | P31512 | -1.0844   |
| 10976 | POC206 | Q96RU8 | -0.22907  |
| 10977 | POC206 | Q14190 | -0.2546   |
| 10978 | POC206 | O00746 | -0.56536  |
| 10979 | POC206 | Q9NS93 | -0.91833  |
| 10980 | POC206 | Q9Y2G1 | -0.17332  |
| 10981 | POC206 | P00395 | -0.18707  |
| 10982 | POC206 | Q6UY18 | -0.79503  |
| 10983 | POC206 | P20742 | -0.79814  |
| 10984 | POC206 | P41143 | -0.47743  |
| 10985 | POC206 | Q96PD6 | -0.73771  |
| 10986 | POC206 | Q9Y6W8 | -1.5622   |
| 10987 | POC206 | Q99571 | -0.46948  |
| 10988 | POC206 | A8MWL6 | -0.79503  |
| 10989 | POC206 | P28562 | -0.23935  |
| 10990 | POC206 | Q8IZK6 | -0.87317  |
| 10991 | POC206 | P30046 | -0.1743   |
| 10992 | POC206 | Q96CS7 | -0.37138  |
| 10993 | POC206 | A6NHY6 | -0.11927  |
| 10994 | POC206 | Q8TDQ0 | -0.79503  |
| 10995 | POC206 | Q9Y2B9 | -0.36298  |
| 10996 | POC206 | Q8NEX5 | -0.80952  |
| 10997 | POC206 | P15954 | -0.47872  |
| 10998 | POC206 | Q5VT97 | -0.76518  |
| 10999 | POC206 | A6NKL6 | -0.79503  |
| 11000 | POC206 | Q96MK3 | -0.80952  |
| 11001 | POC206 | Q8N468 | -0.73598  |
| 11002 | POC206 | Q9UHI5 | -0.3372   |
| 11003 | POC206 | Q6ZMM2 | -0.86335  |
| 11004 | POC206 | Q9NPH3 | -1.7024   |
| 11005 | POC206 | P01024 | -0.71446  |
| 11006 | POC206 | P08173 | -1.0255   |
| 11007 | POC206 | P54289 | -0.78044  |
| 11008 | POC206 | Q9Y2I8 | -0.2288   |
| 11009 | POC206 | P22105 | -1.1483   |
| 11010 | POC206 | O75310 | -0.89079  |
| 11011 | POC206 | Q86WA9 | -0.77615  |
| 11012 | POC206 | P58872 | -1.2228   |
| 11013 | POC206 | Q14623 | -0.44141  |
| 11014 | POC206 | O75379 | -0.47594  |
| 11015 | POC206 | Q2Q1W2 | -0.41956  |
| 11016 | POC206 | Q2M3C6 | -0.79503  |
| 11017 | POC206 | Q9UN74 | -1.2044   |
| 11018 | POC206 | Q9HCL2 | -0.42483  |
| 11019 | POC206 | P19878 | -0.22855  |
| 11020 | POC206 | Q9P0K8 | -0.45919  |

|       |        |         |            |
|-------|--------|---------|------------|
| 11021 | P0C206 | Q8IW70  | -0.79503   |
| 11022 | P0C206 | Q9HD89  | -0.50848   |
| 11023 | P0C206 | Q8N2R0  | -0.19622   |
| 11024 | P0C206 | Q16739  | -0.51941   |
| 11025 | P0C206 | Q5GAN3  | -0.8151    |
| 11026 | P0C206 | P98153  | -0.87446   |
| 11027 | P0C206 | Q02779  | -0.62979   |
| 11028 | P0C206 | Q96B33  | -0.66396   |
| 11029 | P0C206 | Q6IEZ7  | -1.1763    |
| 11030 | P0C206 | Q99942  | -0.22741   |
| 11031 | P0C206 | O95427  | -0.96504   |
| 11032 | P0C206 | Q01151  | -0.98805   |
| 11033 | P0C206 | Q9UL19  | -0.31887   |
| 11034 | P0C206 | Q8N4Z0  | -1.1614    |
| 11035 | P0C206 | Q86UF1  | -0.79503   |
| 11036 | P0C206 | C9JJ37  | -0.22005   |
| 11037 | P0C206 | Q14766  | -0.38597   |
| 11038 | P0C206 | P0C7I0  | -0.32386   |
| 11039 | P0C206 | Q5VZ72  | -0.87603   |
| 11040 | P0C206 | Q7Z2R9  | -0.80952   |
| 11041 | P0C206 | Q96BI3  | -0.26398   |
| 11042 | P0C206 | Q86YJ6  | -0.6868    |
| 11043 | P0C206 | Q8WWF8  | -0.22525   |
| 11044 | P0C206 | Q86WK7  | -0.97349   |
| 11045 | P0C206 | Q0D2K5  | -0.2326    |
| 11046 | P0C206 | O95838  | -1.1093    |
| 11047 | P0C206 | Q99853  | -0.4155    |
| 11048 | P0C206 | Q9HAQ2  | -0.40109   |
| 11049 | P0C206 | Q8WVF1  | -0.39415   |
| 11050 | P0C206 | Q96RC9  | -1.1763    |
| 11051 | P0C206 | Q30201  | -0.82284   |
| 11052 | P0C206 | O60669  | -0.90894   |
| 11053 | P0C206 | Q14548  | -0.097792  |
| 11054 | P0C206 | Q8N9W4  | -0.1424    |
| 11055 | P0C206 | Q96K12  | -1.2756    |
| 11056 | P0C206 | O95104  | -0.35243   |
| 11057 | P0C206 | Q9BXX1  | -0.20815   |
| 11058 | P0C206 | Q8WY98  | -0.79503   |
| 11059 | P0C206 | Q86T24  | -0.46246   |
| 11060 | P0C206 | Q8IUC4  | -0.37339   |
| 11061 | P0C206 | Q92997  | -0.11322   |
| 11062 | P0C206 | Q9P218  | -0.96905   |
| 11063 | P0C206 | Q4G0U5  | -0.32731   |
| 11064 | P0C206 | Q3ZCT8  | -0.21011   |
| 11065 | P0C206 | Q5T699  | -0.34963   |
| 11066 | P0C206 | P0C091  | -1.6223    |
| 11067 | P0C206 | Q8NHX9  | -0.45119   |
| 11068 | P0C206 | Q96C55  | -0.21978   |
| 11069 | P0C206 | Q8NH40  | -1.1763    |
| 11070 | P0C206 | Q9BY50  | -0.77408   |
| 11071 | P0C206 | Q6PJI1  | -0.19907   |
| 11072 | P0C206 | Q5J TZ5 | -0.0035004 |
| 11073 | P0C206 | Q8NGJ8  | -1.1763    |
| 11074 | P0C206 | Q495X7  | -0.44814   |
| 11075 | P0C206 | P49767  | -0.39342   |
| 11076 | P0C206 | Q6S5H5  | -0.22748   |
| 11077 | P0C206 | Q15229  | -0.59766   |
| 11078 | P0C206 | P01716  | -0.9894    |
| 11079 | P0C206 | Q7Z6B7  | -0.56671   |
| 11080 | P0C206 | A6NIL9  | -0.79503   |
| 11081 | P0C206 | P08243  | -0.36411   |
| 11082 | P0C206 | Q13938  | -0.22061   |
| 11083 | P0C206 | Q6ZWT7  | -0.75033   |
| 11084 | P0C206 | Q96HC4  | -0.26596   |
| 11085 | P0C206 | Q8IYR2  | -0.2013    |
| 11086 | P0C206 | Q96PN6  | -0.5783    |
| 11087 | P0C206 | Q7RTU7  | -0.23627   |
| 11088 | P0C206 | Q96HD1  | -0.84556   |
| 11089 | P0C206 | Q9UF12  | -0.32402   |
| 11090 | P0C206 | Q8IUZ0  | -0.22739   |
| 11091 | P0C206 | Q5T601  | -0.70818   |
| 11092 | P0C206 | P59095  | -0.50624   |
| 11093 | P0C206 | P01178  | -0.37949   |
| 11094 | P0C206 | Q14CZ8  | -0.62545   |
| 11095 | P0C206 | P28336  | -1.0854    |
| 11096 | P0C206 | Q96EG1  | -0.44076   |

|       |        |        |           |
|-------|--------|--------|-----------|
| 11097 | POC206 | Q9UF56 | -0.22039  |
| 11098 | POC206 | Q9HC23 | -0.9036   |
| 11099 | POC206 | Q9Y4E6 | -0.22742  |
| 11100 | POC206 | Q13796 | -0.22718  |
| 11101 | POC206 | Q9BS91 | -0.56253  |
| 11102 | POC206 | Q43677 | -0.42766  |
| 11103 | POC206 | Q9UFM2 | -0.13902  |
| 11104 | POC206 | Q9NR31 | -0.27089  |
| 11105 | POC206 | P01570 | -0.75974  |
| 11106 | POC206 | O14958 | -0.43639  |
| 11107 | POC206 | Q96RI0 | -1.3714   |
| 11108 | POC206 | Q9UMZ2 | -0.20838  |
| 11109 | POC206 | Q9H158 | -1.2044   |
| 11110 | POC206 | Q96HU8 | -1.3067   |
| 11111 | POC206 | Q96FT7 | -0.97112  |
| 11112 | POC206 | A0AVF1 | -0.33771  |
| 11113 | POC206 | Q15067 | -0.5688   |
| 11114 | POC206 | Q14656 | -0.6601   |
| 11115 | POC206 | Q9Y286 | -1.1211   |
| 11116 | POC206 | P57771 | -0.5148   |
| 11117 | POC206 | Q8TBE7 | -0.62997  |
| 11118 | POC206 | P51991 | -0.24905  |
| 11119 | POC206 | Q9HBJ0 | -0.83859  |
| 11120 | POC206 | Q6ZNL0 | -0.79683  |
| 11121 | POC206 | Q9NXL2 | -0.57432  |
| 11122 | POC206 | P51857 | -0.22569  |
| 11123 | POC206 | Q8TD33 | -0.80952  |
| 11124 | POC206 | Q8NGJ9 | -1.1763   |
| 11125 | POC206 | O75344 | -0.47499  |
| 11126 | POC206 | Q9ULT6 | -0.3587   |
| 11127 | POC206 | Q8N148 | -1.1763   |
| 11128 | POC206 | P04083 | -0.19134  |
| 11129 | POC206 | Q86WI1 | -0.74748  |
| 11130 | POC206 | A6NDP7 | -0.79503  |
| 11131 | POC206 | Q6P0A1 | -0.79503  |
| 11132 | POC206 | P04196 | -0.25944  |
| 11133 | POC206 | P18054 | -0.21537  |
| 11134 | POC206 | Q8N9X5 | -0.79503  |
| 11135 | POC206 | P19883 | -0.22406  |
| 11136 | POC206 | Q9NRJ3 | -0.91464  |
| 11137 | POC206 | O95563 | -0.57194  |
| 11138 | POC206 | O60397 | -0.20068  |
| 11139 | POC206 | Q60I27 | -0.78897  |
| 11140 | POC206 | Q02641 | -0.4765   |
| 11141 | POC206 | Q3B8N5 | -0.19841  |
| 11142 | POC206 | Q9Y4C8 | -0.40654  |
| 11143 | POC206 | Q9BSG5 | -0.80952  |
| 11144 | POC206 | Q9H0L4 | -0.82171  |
| 11145 | POC206 | P03952 | -0.75281  |
| 11146 | POC206 | Q9NRX5 | -0.41768  |
| 11147 | POC206 | Q96EV2 | -0.83583  |
| 11148 | POC206 | Q00526 | -0.48391  |
| 11149 | POC206 | Q6UWD8 | -0.79503  |
| 11150 | POC206 | P43366 | -0.040938 |
| 11151 | POC206 | Q8TB37 | -0.60244  |
| 11152 | POC206 | P61165 | -0.79503  |
| 11153 | POC206 | Q16620 | -0.5053   |
| 11154 | POC206 | Q9NPC1 | -1.3508   |
| 11155 | POC206 | P16581 | -0.37951  |
| 11156 | POC206 | P51452 | -0.27368  |
| 11157 | POC206 | O60488 | -0.75296  |
| 11158 | POC206 | Q02928 | -0.46006  |
| 11159 | POC206 | Q01449 | -0.22659  |
| 11160 | POC206 | Q9NY47 | -0.66956  |
| 11161 | POC206 | Q8IWQ3 | -0.70347  |
| 11162 | POC206 | P35443 | -0.7374   |
| 11163 | POC206 | Q09470 | -0.74427  |
| 11164 | POC206 | Q9BQE5 | -1.0817   |
| 11165 | POC206 | Q9Y394 | -1.0819   |
| 11166 | POC206 | A4FU01 | -0.38153  |
| 11167 | POC206 | O00154 | -0.068409 |
| 11168 | POC206 | P01768 | -0.9894   |
| 11169 | POC206 | Q05655 | -0.21769  |
| 11170 | POC206 | Q53EU6 | -0.7179   |
| 11171 | POC206 | Q5H943 | -0.91833  |
| 11172 | POC206 | Q5VSG8 | -0.50403  |



|       |        |        |           |
|-------|--------|--------|-----------|
| 11173 | POC206 | Q149M9 | -0.72239  |
| 11174 | POC206 | Q8NOW7 | -0.56298  |
| 11175 | POC206 | P51693 | -0.18826  |
| 11176 | POC206 | Q9BX95 | -0.65366  |
| 11177 | POC206 | Q9UBU6 | -0.79503  |
| 11178 | POC206 | P86434 | -0.068746 |
| 11179 | POC206 | Q14651 | -0.24344  |
| 11180 | POC206 | Q8N766 | -0.77756  |
| 11181 | POC206 | P31391 | -1.3055   |
| 11182 | POC206 | Q8N5B7 | -0.20922  |
| 11183 | POC206 | P01892 | -0.88852  |
| 11184 | POC206 | Q7L622 | -0.20158  |
| 11185 | POC206 | Q5VVW2 | -0.84118  |
| 11186 | POC206 | Q9H324 | -0.50446  |
| 11187 | POC206 | Q9UPU3 | -0.7958   |
| 11188 | POC206 | A6H8M9 | -1.1512   |
| 11189 | POC206 | O43866 | -0.87539  |
| 11190 | POC206 | Q8N6Y1 | -1.1512   |
| 11191 | POC206 | Q9BQY6 | -0.75923  |
| 11192 | POC206 | Q9H1Y3 | -1.1117   |
| 11193 | POC206 | Q96I25 | -0.19817  |
| 11194 | POC206 | Q9UHF1 | -1.0948   |
| 11195 | POC206 | Q96AQ2 | -0.57403  |
| 11196 | POC206 | Q76KP1 | -0.60863  |
| 11197 | POC206 | A1A4Y4 | -0.79028  |
| 11198 | POC206 | Q9P275 | -0.43562  |
| 11199 | POC206 | Q96J65 | -1.0164   |
| 11200 | POC206 | P20591 | -0.23504  |
| 11201 | POC206 | P29508 | -0.47418  |
| 11202 | POC206 | A6NDJ8 | -0.91623  |
| 11203 | POC206 | Q92613 | -0.23271  |
| 11204 | POC206 | P47736 | -0.18158  |
| 11205 | POC206 | P06276 | -0.66726  |
| 11206 | POC206 | Q8WXR4 | -0.82011  |
| 11207 | POC206 | Q96LP4 | -0.13116  |
| 11208 | POC206 | Q5JTB6 | -0.80952  |
| 11209 | POC206 | P16035 | -0.73277  |
| 11210 | POC206 | Q13822 | -0.9031   |
| 11211 | POC206 | Q9P0G3 | -1.1741   |
| 11212 | POC206 | Q14492 | -0.38567  |
| 11213 | POC206 | Q96IQ7 | -0.95247  |
| 11214 | POC206 | Q8NGG1 | -1.0761   |
| 11215 | POC206 | P51460 | -0.60752  |
| 11216 | POC206 | P49914 | -0.34101  |
| 11217 | POC206 | Q9P1W9 | -0.63484  |
| 11218 | POC206 | Q08462 | -0.7738   |
| 11219 | POC206 | P11712 | -0.55642  |
| 11220 | POC206 | Q6UW88 | -1.0697   |
| 11221 | POC206 | Q5T6J7 | -0.42169  |
| 11222 | POC206 | P24530 | -0.80158  |
| 11223 | POC206 | Q86UW7 | -0.21704  |
| 11224 | POC206 | P22362 | -1.0436   |
| 11225 | POC206 | Q8NFT8 | -0.67248  |
| 11226 | POC206 | B2RNN3 | -0.87668  |
| 11227 | POC206 | O60279 | -0.97363  |
| 11228 | POC206 | Q9NUJ1 | -0.32772  |
| 11229 | POC206 | Q5VSP4 | -0.80952  |
| 11230 | POC206 | Q9UPR5 | -0.81705  |
| 11231 | POC206 | P17735 | -0.2114   |
| 11232 | POC206 | Q9Y5W8 | -0.53852  |
| 11233 | POC206 | Q9UKP3 | -0.4753   |
| 11234 | POC206 | Q14894 | -0.95247  |
| 11235 | POC206 | Q12948 | -0.30751  |
| 11236 | POC206 | Q7Z469 | -0.57194  |
| 11237 | POC206 | Q6ZUK4 | -0.79503  |
| 11238 | POC206 | P23945 | -0.59024  |
| 11239 | POC206 | Q8WW43 | -0.3107   |
| 11240 | POC206 | P24462 | -0.76873  |
| 11241 | POC206 | P20648 | -1.0088   |
| 11242 | POC206 | Q9H6R0 | -0.22237  |
| 11243 | POC206 | Q6T423 | -0.73598  |
| 11244 | POC206 | Q13671 | -0.24268  |
| 11245 | POC206 | Q8N8J0 | -0.24721  |
| 11246 | POC206 | P61109 | -0.80952  |
| 11247 | POC206 | Q8NFR9 | -0.46373  |
| 11248 | POC206 | P10265 | -0.38812  |

|       |        |        |           |
|-------|--------|--------|-----------|
| 11249 | POC206 | Q96DX7 | -0.22851  |
| 11250 | POC206 | Q6N063 | -0.59202  |
| 11251 | POC206 | P11926 | -0.13064  |
| 11252 | POC206 | Q96II8 | -0.80952  |
| 11253 | POC206 | Q9P2W3 | -0.47756  |
| 11254 | POC206 | Q6UXV3 | -0.80952  |
| 11255 | POC206 | P36915 | -0.65434  |
| 11256 | POC206 | Q9NZV1 | -1.1122   |
| 11257 | POC206 | Q05469 | -0.21823  |
| 11258 | POC206 | Q9Y4K0 | -0.3672   |
| 11259 | POC206 | Q9Y2K9 | -0.27403  |
| 11260 | POC206 | Q8TEU7 | -0.79389  |
| 11261 | POC206 | Q15084 | -0.29722  |
| 11262 | POC206 | Q8TDI7 | -0.79503  |
| 11263 | POC206 | Q8IWK6 | -1.2732   |
| 11264 | POC206 | B3KVV0 | -0.79503  |
| 11265 | POC206 | Q96E39 | -0.49698  |
| 11266 | POC206 | Q9Y5E2 | -1.1252   |
| 11267 | POC206 | P16298 | -0.1234   |
| 11268 | POC206 | Q8WVV4 | -0.26894  |
| 11269 | POC206 | Q8N2I9 | -0.22742  |
| 11270 | POC206 | P09601 | -0.17345  |
| 11271 | POC206 | Q9UMZ3 | -1.1059   |
| 11272 | POC206 | Q5SY68 | -0.27153  |
| 11273 | POC206 | Q9BY78 | -0.63895  |
| 11274 | POC206 | Q8N8V4 | -0.32859  |
| 11275 | POC206 | Q5VT66 | -0.4252   |
| 11276 | POC206 | P05231 | -0.24898  |
| 11277 | POC206 | Q9NUV7 | -0.81219  |
| 11278 | POC206 | Q9Y2U8 | -0.1796   |
| 11279 | POC206 | P48165 | -0.94397  |
| 11280 | POC206 | P06731 | -0.53712  |
| 11281 | POC206 | Q9Y3E2 | -0.63209  |
| 11282 | POC206 | P07358 | -0.9681   |
| 11283 | POC206 | O43861 | -0.75868  |
| 11284 | POC206 | O43847 | -0.18518  |
| 11285 | POC206 | D6RBM5 | -0.25564  |
| 11286 | POC206 | Q9H930 | -0.22715  |
| 11287 | POC206 | O60636 | -0.89084  |
| 11288 | POC206 | Q96Q77 | -0.29182  |
| 11289 | POC206 | Q6P7N7 | -0.79503  |
| 11290 | POC206 | O75581 | -0.23124  |
| 11291 | POC206 | Q5VZ19 | -0.83583  |
| 11292 | POC206 | Q8N6R1 | -0.6052   |
| 11293 | POC206 | Q96LR9 | -1.6694   |
| 11294 | POC206 | P57768 | -0.40891  |
| 11295 | POC206 | Q9UF72 | -0.80952  |
| 11296 | POC206 | Q13606 | -1.1763   |
| 11297 | POC206 | Q02643 | -0.3301   |
| 11298 | POC206 | P53634 | -0.66012  |
| 11299 | POC206 | Q6ZMJ1 | -0.22741  |
| 11300 | POC206 | Q99680 | -1.3861   |
| 11301 | POC206 | Q02094 | -0.72523  |
| 11302 | POC206 | Q9UBE8 | -0.22741  |
| 11303 | POC206 | O95944 | -1.1986   |
| 11304 | POC206 | Q7RTU1 | -0.20612  |
| 11305 | POC206 | Q5VXH5 | -0.065812 |
| 11306 | POC206 | P54852 | -0.83501  |
| 11307 | POC206 | Q07108 | -0.95491  |
| 11308 | POC206 | Q6UWW8 | -0.22729  |
| 11309 | POC206 | Q8NEM8 | -0.22795  |
| 11310 | POC206 | Q15547 | -0.7007   |
| 11311 | POC206 | Q8NFA0 | -0.63489  |
| 11312 | POC206 | Q9NRG7 | -0.73343  |
| 11313 | POC206 | Q13241 | -0.98263  |
| 11314 | POC206 | P25101 | -0.47147  |
| 11315 | POC206 | P19622 | -0.22718  |
| 11316 | POC206 | Q8NFF5 | -0.55347  |
| 11317 | POC206 | Q8NGI7 | -1.1763   |
| 11318 | POC206 | Q9BXR6 | -0.79211  |
| 11319 | POC206 | P01258 | -0.51177  |
| 11320 | POC206 | P0CAP1 | -0.18545  |
| 11321 | POC206 | Q8TC99 | -0.24034  |
| 11322 | POC206 | Q7RTP0 | -0.78892  |
| 11323 | POC206 | Q8NCW0 | -0.74273  |
| 11324 | POC206 | P49019 | -1.327    |

|       |        |        |          |
|-------|--------|--------|----------|
| 11325 | POC206 | Q86WT1 | -0.32033 |
| 11326 | POC206 | Q8N326 | -0.79503 |
| 11327 | POC206 | P20142 | -0.683   |
| 11328 | POC206 | Q53RE8 | -0.22741 |
| 11329 | POC206 | Q9NX24 | -0.22238 |
| 11330 | POC206 | P01350 | -0.96539 |
| 11331 | POC206 | Q8TBH0 | -0.21993 |
| 11332 | POC206 | Q8IWT6 | -0.8442  |
| 11333 | POC206 | P78348 | -0.62032 |
| 11334 | POC206 | Q7KYR7 | -0.91887 |
| 11335 | POC206 | Q9BYZ6 | -1.2177  |
| 11336 | POC206 | Q8N614 | -0.79503 |
| 11337 | POC206 | Q7RTY3 | -0.8107  |
| 11338 | POC206 | A6NHZ5 | -0.2256  |
| 11339 | POC206 | Q9BRY0 | -0.85542 |
| 11340 | POC206 | Q8N6D2 | -0.20743 |
| 11341 | POC206 | Q5BVD1 | -0.89601 |
| 11342 | POC206 | Q52LJ0 | -0.20385 |
| 11343 | POC206 | A2RUU4 | -0.84689 |
| 11344 | POC206 | Q9NQ88 | -0.63575 |
| 11345 | POC206 | Q96A23 | -0.22687 |
| 11346 | POC206 | P19827 | -0.79916 |
| 11347 | POC206 | Q7RTY5 | -1.3203  |
| 11348 | POC206 | Q9BRK3 | -0.79503 |
| 11349 | POC206 | Q8N8I0 | -0.22519 |
| 11350 | POC206 | Q15858 | -0.85119 |
| 11351 | POC206 | P51178 | -0.27332 |
| 11352 | POC206 | P78324 | -1.1407  |
| 11353 | POC206 | Q8WZ94 | -1.1763  |
| 11354 | POC206 | Q9ULG6 | -0.63651 |
| 11355 | POC206 | P01602 | -0.9894  |
| 11356 | POC206 | Q6V0L0 | -0.92354 |
| 11357 | POC206 | Q75022 | -0.54561 |
| 11358 | POC206 | Q6UXU0 | -0.80952 |
| 11359 | POC206 | Q96DB9 | -0.86428 |
| 11360 | POC206 | P13747 | -1.0728  |
| 11361 | POC206 | Q15771 | -1.0718  |
| 11362 | POC206 | Q8IY49 | -0.5524  |
| 11363 | POC206 | Q8TDM6 | -0.38539 |
| 11364 | POC206 | P05129 | -0.42357 |
| 11365 | POC206 | Q8WV48 | -0.79503 |
| 11366 | POC206 | Q16540 | -0.33494 |
| 11367 | POC206 | P32248 | -0.50425 |
| 11368 | POC206 | Q6PFW1 | -0.10604 |
| 11369 | POC206 | Q92982 | -0.8286  |
| 11370 | POC206 | P31323 | -0.22726 |
| 11371 | POC206 | Q9P2P5 | -0.3154  |
| 11372 | POC206 | Q63HN8 | -0.68546 |
| 11373 | POC206 | Q9ULD4 | -0.22343 |
| 11374 | POC206 | P41273 | -1.0244  |
| 11375 | POC206 | Q86UK7 | -0.44814 |
| 11376 | POC206 | C9JDP6 | -0.62814 |
| 11377 | POC206 | Q495T6 | -1.3779  |
| 11378 | POC206 | Q9NP90 | -0.33073 |
| 11379 | POC206 | Q00G26 | -0.18977 |
| 11380 | POC206 | O75309 | -1.1512  |
| 11381 | POC206 | O60271 | -0.14275 |
| 11382 | POC206 | P53674 | -0.36181 |
| 11383 | POC206 | P20273 | -0.65339 |
| 11384 | POC206 | P11362 | -0.28454 |
| 11385 | POC206 | P28289 | -0.21837 |
| 11386 | POC206 | P09131 | -0.7137  |
| 11387 | POC206 | Q53SF7 | -0.26894 |
| 11388 | POC206 | Q6MZM0 | -1.0323  |
| 11389 | POC206 | O43896 | -0.29699 |
| 11390 | POC206 | Q96MX6 | -0.22728 |
| 11391 | POC206 | O75771 | -0.21441 |
| 11392 | POC206 | Q32NB8 | -0.67974 |
| 11393 | POC206 | Q96HE7 | -0.53687 |
| 11394 | POC206 | Q4G0T1 | -0.76749 |
| 11395 | POC206 | Q9UJW2 | -1.5815  |
| 11396 | POC206 | P05156 | -1.3638  |
| 11397 | POC206 | Q9NQW8 | -1.3268  |
| 11398 | POC206 | Q96PU9 | -0.44917 |
| 11399 | POC206 | Q86SG3 | -0.70995 |
| 11400 | POC206 | Q8NG08 | -0.58051 |

|       |        |        |          |
|-------|--------|--------|----------|
| 11401 | POC206 | P49765 | -0.71317 |
| 11402 | POC206 | Q6GV28 | -0.82578 |
| 11403 | POC206 | Q5W0B1 | -0.22745 |
| 11404 | POC206 | O00443 | -0.38111 |
| 11405 | POC206 | Q8IW45 | -0.42702 |
| 11406 | POC206 | O60240 | -0.37456 |
| 11407 | POC206 | Q96NR3 | -0.76546 |
| 11408 | POC206 | Q6ZMR5 | -1.7299  |
| 11409 | POC206 | Q99665 | -0.82974 |
| 11410 | POC206 | Q9NX61 | -0.73519 |
| 11411 | POC206 | Q6ZRK6 | -0.0625  |
| 11412 | POC206 | A6NH57 | -1.3287  |
| 11413 | POC206 | Q0ZLH3 | -0.42785 |
| 11414 | POC206 | A8MWY0 | -0.79503 |
| 11415 | POC206 | Q9BZD2 | -0.75775 |
| 11416 | POC206 | P00540 | -1.0967  |
| 11417 | POC206 | P26367 | -0.21389 |
| 11418 | POC206 | Q8N309 | -0.16589 |
| 11419 | POC206 | P23975 | -0.4503  |
| 11420 | POC206 | P57730 | -0.59316 |
| 11421 | POC206 | A0PJE2 | -1.0819  |
| 11422 | POC206 | P20827 | -0.43471 |
| 11423 | POC206 | Q49A92 | -0.3752  |
| 11424 | POC206 | Q5T7M9 | -0.89601 |
| 11425 | POC206 | P57729 | -0.75777 |
| 11426 | POC206 | Q10981 | -0.50694 |
| 11427 | POC206 | P0C604 | -1.1763  |
| 11428 | POC206 | Q96RI8 | -1.2135  |
| 11429 | POC206 | Q13643 | -0.22376 |
| 11430 | POC206 | Q9HBX8 | -1.2135  |
| 11431 | POC206 | Q92598 | -0.28696 |
| 11432 | POC206 | O00533 | -1.4845  |
| 11433 | POC206 | O00144 | -0.71895 |
| 11434 | POC206 | Q08629 | -0.78706 |
| 11435 | POC206 | Q496H8 | -0.38186 |
| 11436 | POC206 | P51681 | -0.4386  |
| 11437 | POC206 | Q86SH2 | -0.22972 |
| 11438 | POC206 | Q8TAC1 | -0.57998 |
| 11439 | POC206 | Q92482 | -0.4288  |
| 11440 | POC206 | P32745 | -0.5606  |
| 11441 | POC206 | P34913 | -0.3011  |
| 11442 | POC206 | P19237 | -0.16156 |
| 11443 | POC206 | Q7Z5S9 | -0.79503 |
| 11444 | POC206 | Q96EQ0 | -0.22689 |
| 11445 | POC206 | Q14643 | -0.26188 |
| 11446 | POC206 | Q96JK4 | -0.58719 |
| 11447 | POC206 | Q8TDN2 | -0.77342 |
| 11448 | POC206 | Q9UBP4 | -0.87837 |
| 11449 | POC206 | Q86YZ3 | -0.59217 |
| 11450 | POC206 | Q86WA8 | -0.29688 |
| 11451 | POC206 | P43631 | -0.97794 |
| 11452 | POC206 | Q6UXV1 | -0.79503 |
| 11453 | POC206 | Q99811 | -0.21081 |
| 11454 | POC206 | P06326 | -0.9894  |
| 11455 | POC206 | Q8NH09 | -1.1763  |
| 11456 | POC206 | Q9UIK5 | -1.2473  |
| 11457 | POC206 | Q9UGM5 | -0.82486 |
| 11458 | POC206 | Q8NAN2 | -0.79503 |
| 11459 | POC206 | Q5VTT2 | -0.79503 |
| 11460 | POC206 | Q96IK5 | -0.21088 |
| 11461 | POC206 | Q9H694 | -0.55033 |
| 11462 | POC206 | Q9NR82 | -0.97941 |
| 11463 | POC206 | Q86Y27 | -0.80952 |
| 11464 | POC206 | P06331 | -0.9894  |
| 11465 | POC206 | Q3SX64 | -0.11732 |
| 11466 | POC206 | P01138 | -0.43553 |
| 11467 | POC206 | P05452 | -0.81121 |
| 11468 | POC206 | A6NEK1 | -0.37966 |
| 11469 | POC206 | A6NI03 | -0.44814 |
| 11470 | POC206 | Q6PL18 | -0.23464 |
| 11471 | POC206 | Q86VZ2 | -0.25976 |
| 11472 | POC206 | Q96CD2 | -0.21778 |
| 11473 | POC206 | Q8WWQ8 | -0.7011  |
| 11474 | POC206 | Q7Z7L1 | -0.45622 |
| 11475 | POC206 | Q9UKI3 | -0.19927 |
| 11476 | POC206 | P27539 | -0.69344 |

|       |        |        |          |
|-------|--------|--------|----------|
| 11477 | P0C206 | Q8IZ57 | -0.78095 |
| 11478 | P0C206 | Q5VW32 | -0.31194 |
| 11479 | P0C206 | Q13087 | -0.32278 |
| 11480 | P0C206 | P23083 | -0.84138 |
| 11481 | P0C206 | Q9NRE1 | -1.144   |
| 11482 | P0C206 | P13686 | -0.39026 |
| 11483 | P0C206 | P21583 | -0.46552 |
| 11484 | P0C206 | Q96DU3 | -0.93062 |
| 11485 | P0C206 | Q6UX01 | -1.0071  |
| 11486 | P0C206 | Q8NGN7 | -1.1763  |
| 11487 | P0C206 | Q8N4Q0 | -0.76417 |
| 11488 | P0C206 | Q04741 | -0.22676 |
| 11489 | P0C206 | Q9Y696 | -0.20959 |
| 11490 | P0C206 | Q2VYF4 | -0.61789 |
| 11491 | P0C206 | O43143 | -0.40408 |
| 11492 | P0C206 | Q2PPJ7 | -0.16914 |
| 11493 | P0C206 | Q9NVC3 | -0.67378 |
| 11494 | P0C206 | Q9NY91 | -0.80025 |
| 11495 | P0C206 | P35367 | -0.58553 |
| 11496 | P0C206 | P57796 | -0.62478 |
| 11497 | P0C206 | Q8TBC4 | -0.22433 |
| 11498 | P0C206 | P27708 | -0.3874  |
| 11499 | P0C206 | Q8NGY9 | -1.0483  |
| 11500 | P0C206 | P07949 | -0.65621 |
| 11501 | P0C206 | Q4VNC1 | -0.96631 |
| 11502 | P0C206 | Q9BXI6 | -0.69236 |
| 11503 | P0C206 | A6NEE1 | -0.32146 |
| 11504 | P0C206 | P11049 | -0.17994 |
| 11505 | P0C206 | Q7Z7J7 | -0.79503 |
| 11506 | P0C206 | P06734 | -1.3505  |
| 11507 | P0C206 | Q96AP7 | -0.76697 |
| 11508 | P0C206 | Q96GD4 | -0.626   |
| 11509 | P0C206 | Q96KK3 | -0.36695 |
| 11510 | P0C206 | P51571 | -0.70125 |
| 11511 | P0C206 | Q9BY19 | -0.79503 |
| 11512 | P0C206 | Q9HC07 | -0.62997 |
| 11513 | P0C206 | O00408 | -0.22538 |
| 11514 | P0C206 | Q96F46 | -0.48181 |
| 11515 | P0C206 | Q9H2G2 | -1.0165  |
| 11516 | P0C206 | Q8NGQ3 | -1.1763  |
| 11517 | P0C206 | O15353 | -0.37245 |
| 11518 | P0C206 | Q6UWH6 | -0.68998 |
| 11519 | P0C206 | Q9WJR5 | -0.20444 |
| 11520 | P0C206 | Q9NVL8 | -0.15689 |
| 11521 | P0C206 | Q9NYZ2 | -0.74011 |
| 11522 | P0C206 | P57052 | -0.67324 |
| 11523 | P0C206 | Q8NEP3 | -0.22739 |
| 11524 | P0C206 | Q9ULE3 | -0.22295 |
| 11525 | P0C206 | O75071 | -0.29182 |
| 11526 | P0C206 | Q14002 | -0.91044 |
| 11527 | P0C206 | P61026 | -0.5319  |
| 11528 | P0C206 | Q8NBR9 | -0.20178 |
| 11529 | P0C206 | Q86VR8 | -0.88207 |
| 11530 | P0C206 | Q8N4V1 | -0.60909 |
| 11531 | P0C206 | Q14507 | -0.86199 |
| 11532 | P0C206 | P48637 | -0.43334 |
| 11533 | P0C206 | Q96LB8 | -0.84491 |
| 11534 | P0C206 | Q8TCC7 | -0.72359 |
| 11535 | P0C206 | Q53RD9 | -1.1664  |
| 11536 | P0C206 | Q99757 | -0.25244 |
| 11537 | P0C206 | Q9NRH3 | -0.20551 |
| 11538 | P0C206 | Q7Z2Y8 | -0.24777 |
| 11539 | P0C206 | Q5QGT7 | -0.84217 |
| 11540 | P0C206 | Q5W0U4 | -0.23099 |
| 11541 | P0C206 | Q9H2X9 | -0.86315 |
| 11542 | P0C206 | Q6UXH1 | -0.22741 |
| 11543 | P0C206 | Q03405 | -0.75314 |
| 11544 | P0C206 | Q02509 | -0.67544 |
| 11545 | P0C206 | Q14012 | -0.31551 |
| 11546 | P0C206 | A5PKW4 | -1.2424  |
| 11547 | P0C206 | Q14494 | -0.22668 |
| 11548 | P0C206 | P12272 | -0.25217 |
| 11549 | P0C206 | Q8NFX0 | -0.42474 |
| 11550 | P0C206 | P00749 | -0.67986 |
| 11551 | P0C206 | Q10471 | -0.86236 |
| 11552 | P0C206 | P25391 | -0.77136 |

|       |        |        |           |
|-------|--------|--------|-----------|
| 11553 | POC206 | A6NLB4 | -0.22428  |
| 11554 | POC206 | Q96PQ1 | -0.97776  |
| 11555 | POC206 | P01588 | -0.23012  |
| 11556 | POC206 | Q13630 | -0.77636  |
| 11557 | POC206 | O75900 | -1.3019   |
| 11558 | POC206 | P51530 | -0.23288  |
| 11559 | POC206 | Q8WWA1 | -0.79503  |
| 11560 | POC206 | Q13325 | -0.2179   |
| 11561 | POC206 | Q92949 | -0.39973  |
| 11562 | POC206 | Q9HDD0 | -0.22281  |
| 11563 | POC206 | Q8TBF5 | -0.82787  |
| 11564 | POC206 | Q99650 | -0.66412  |
| 11565 | POC206 | Q8NGI9 | -1.1763   |
| 11566 | POC206 | Q8NGZ4 | -1.1763   |
| 11567 | POC206 | Q8NDZ4 | -0.69054  |
| 11568 | POC206 | P16402 | -0.53323  |
| 11569 | POC206 | Q6UXB0 | -0.80952  |
| 11570 | POC206 | P42680 | -0.97867  |
| 11571 | POC206 | O94782 | -0.42077  |
| 11572 | POC206 | Q70CQ2 | -0.40239  |
| 11573 | POC206 | Q95704 | -0.22652  |
| 11574 | POC206 | P17787 | -0.4498   |
| 11575 | POC206 | Q96AY3 | -0.4052   |
| 11576 | POC206 | Q9NQ25 | -0.94916  |
| 11577 | POC206 | Q8N8D0 | -0.79503  |
| 11578 | POC206 | Q9Y6K8 | -0.40701  |
| 11579 | POC206 | A8MTW9 | -0.80952  |
| 11580 | POC206 | Q8NEZ3 | -0.2265   |
| 11581 | POC206 | O95415 | -0.79503  |
| 11582 | POC206 | P60903 | -0.51756  |
| 11583 | POC206 | O14559 | -0.28297  |
| 11584 | POC206 | Q8IZN3 | -0.77292  |
| 11585 | POC206 | Q06432 | -0.87748  |
| 11586 | POC206 | Q8NEV8 | -0.22108  |
| 11587 | POC206 | O43889 | -0.46918  |
| 11588 | POC206 | Q4G0N8 | -1.0155   |
| 11589 | POC206 | Q02487 | -0.93466  |
| 11590 | POC206 | Q13351 | -0.225    |
| 11591 | POC206 | Q8IXQ8 | -0.22602  |
| 11592 | POC206 | P0DJJ7 | -1.1195   |
| 11593 | POC206 | Q9Y2L6 | -0.25546  |
| 11594 | POC206 | P83593 | -0.95593  |
| 11595 | POC206 | O43247 | -0.10182  |
| 11596 | POC206 | Q9BV94 | -0.78707  |
| 11597 | POC206 | Q504Y3 | -0.15207  |
| 11598 | POC206 | P20039 | -0.70502  |
| 11599 | POC206 | P55056 | -0.82008  |
| 11600 | POC206 | Q11201 | -0.72957  |
| 11601 | POC206 | Q8NH80 | -1.1763   |
| 11602 | POC206 | Q15259 | -0.22741  |
| 11603 | POC206 | Q5MNZ6 | -0.22648  |
| 11604 | POC206 | Q5SNT2 | -0.43959  |
| 11605 | POC206 | Q8NEG5 | -0.22741  |
| 11606 | POC206 | O95932 | -0.18136  |
| 11607 | POC206 | Q9UPY6 | -0.18529  |
| 11608 | POC206 | P31277 | -0.24336  |
| 11609 | POC206 | Q8TD10 | -0.1606   |
| 11610 | POC206 | Q9Y471 | -0.31619  |
| 11611 | POC206 | B2RN74 | -1.1763   |
| 11612 | POC206 | Q8IXK2 | -0.60657  |
| 11613 | POC206 | Q9NPE2 | -0.63758  |
| 11614 | POC206 | Q19T08 | -1.1718   |
| 11615 | POC206 | Q9H4Y5 | -0.27011  |
| 11616 | POC206 | P67812 | -0.77408  |
| 11617 | POC206 | Q7Z4L9 | -0.22466  |
| 11618 | POC206 | Q8N114 | -0.38081  |
| 11619 | POC206 | Q08334 | -0.58154  |
| 11620 | POC206 | Q9UK96 | -0.29388  |
| 11621 | POC206 | Q01118 | -0.91562  |
| 11622 | POC206 | Q2M2I3 | -0.049745 |
| 11623 | POC206 | P09417 | -0.44864  |
| 11624 | POC206 | P12724 | -0.65845  |
| 11625 | POC206 | P16410 | -0.23847  |
| 11626 | POC206 | Q9ULL8 | -0.22672  |
| 11627 | POC206 | Q8NGJ3 | -1.1763   |
| 11628 | POC206 | Q9BVG9 | -0.95558  |

|       |        |        |          |
|-------|--------|--------|----------|
| 11629 | POC206 | O95925 | -0.21107 |
| 11630 | POC206 | Q9UBC2 | -0.22741 |
| 11631 | POC206 | O15457 | -0.35371 |
| 11632 | POC206 | P36957 | -0.16418 |
| 11633 | POC206 | Q9P281 | -0.26698 |
| 11634 | POC206 | Q5T7N8 | -0.17675 |
| 11635 | POC206 | P32455 | -0.87208 |
| 11636 | POC206 | P01591 | -0.84138 |
| 11637 | POC206 | Q7Z5J1 | -1.5883  |
| 11638 | POC206 | Q9BZF2 | -0.60853 |
| 11639 | POC206 | Q9UBM1 | -0.42088 |
| 11640 | POC206 | O43462 | -0.70658 |
| 11641 | POC206 | O95390 | -0.58875 |
| 11642 | POC206 | P28335 | -0.97552 |
| 11643 | POC206 | Q9Y2W7 | -0.2353  |
| 11644 | POC206 | Q2L4Q9 | -1.3203  |
| 11645 | POC206 | Q9Y698 | -0.50135 |
| 11646 | POC206 | P56159 | -0.44266 |
| 11647 | POC206 | Q92617 | -0.57403 |
| 11648 | POC206 | Q9HCC0 | -0.4347  |
| 11649 | POC206 | Q9UEE5 | -0.72549 |
| 11650 | POC206 | Q6QNK2 | -1.2769  |
| 11651 | POC206 | Q9HBD1 | -0.22739 |
| 11652 | POC206 | P20645 | -0.8193  |
| 11653 | POC206 | Q9BS16 | -0.21886 |
| 11654 | POC206 | Q8IUX4 | -0.29716 |
| 11655 | POC206 | Q3KNW5 | -0.90953 |
| 11656 | POC206 | Q2HXU8 | -0.90889 |
| 11657 | POC206 | Q9BT67 | -0.36478 |
| 11658 | POC206 | Q6UWF9 | -0.80952 |
| 11659 | POC206 | Q8NGF9 | -1.1763  |
| 11660 | POC206 | Q6UWF6 | -0.80952 |
| 11661 | POC206 | Q7M4L6 | -0.2274  |
| 11662 | POC206 | Q8TAM6 | -0.32247 |
| 11663 | POC206 | Q5NUL3 | -1.1146  |
| 11664 | POC206 | Q14524 | -0.30556 |
| 11665 | POC206 | Q6UX71 | -0.27076 |
| 11666 | POC206 | Q6P1S2 | -0.78295 |
| 11667 | POC206 | Q29980 | -0.79088 |
| 11668 | POC206 | A6NM03 | -1.1763  |
| 11669 | POC206 | O00300 | -0.89939 |
| 11670 | POC206 | Q6UXX9 | -0.73255 |
| 11671 | POC206 | Q86XK7 | -0.79503 |
| 11672 | POC206 | Q8NGN2 | -1.1763  |
| 11673 | POC206 | Q96RF0 | -0.22741 |
| 11674 | POC206 | P04279 | -0.14241 |
| 11675 | POC206 | P51957 | -0.29025 |
| 11676 | POC206 | Q29865 | -1.0001  |
| 11677 | POC206 | P55809 | -0.14029 |
| 11678 | POC206 | Q9BVK2 | -0.79155 |
| 11679 | POC206 | P59540 | -1.2947  |
| 11680 | POC206 | P07225 | -0.81954 |
| 11681 | POC206 | P01615 | -0.9894  |
| 11682 | POC206 | P57739 | -0.65312 |
| 11683 | POC206 | Q96LL9 | -0.48971 |
| 11684 | POC206 | A8MVG2 | -0.79503 |
| 11685 | POC206 | Q76001 | -1.1763  |
| 11686 | POC206 | A5PLL7 | -0.89601 |
| 11687 | POC206 | Q96KA5 | -0.76334 |
| 11688 | POC206 | Q8NEB7 | -0.6274  |
| 11689 | POC206 | Q3MIX3 | -0.88755 |
| 11690 | POC206 | P01160 | -0.27316 |
| 11691 | POC206 | Q96BQ3 | -0.44814 |
| 11692 | POC206 | Q969F8 | -0.77771 |
| 11693 | POC206 | Q6QEF8 | -0.31951 |
| 11694 | POC206 | Q9NQR9 | -0.38648 |
| 11695 | POC206 | Q8N461 | -0.21474 |
| 11696 | POC206 | Q13464 | -0.30738 |
| 11697 | POC206 | Q5SRN2 | -0.79503 |
| 11698 | POC206 | O43908 | -0.77816 |
| 11699 | POC206 | Q86WB7 | -0.78726 |
| 11700 | POC206 | Q8NBF4 | -0.48457 |
| 11701 | POC206 | P49441 | -0.31929 |
| 11702 | POC206 | Q495C1 | -0.15207 |
| 11703 | POC206 | P09622 | -0.2212  |
| 11704 | POC206 | Q96EF0 | -0.2264  |

|       |        |        |           |
|-------|--------|--------|-----------|
| 11705 | P0C206 | Q6P9F7 | -0.79503  |
| 11706 | P0C206 | Q8NGN3 | -1.1763   |
| 11707 | P0C206 | P19086 | -0.92948  |
| 11708 | P0C206 | Q96K21 | -0.21328  |
| 11709 | P0C206 | Q5JTD7 | -0.2147   |
| 11710 | P0C206 | O95006 | -1.1763   |
| 11711 | P0C206 | Q3KQZ1 | -0.57194  |
| 11712 | P0C206 | O14682 | -0.21068  |
| 11713 | P0C206 | Q8IY45 | -0.20533  |
| 11714 | P0C206 | Q9Y575 | -0.48675  |
| 11715 | P0C206 | Q9UBV2 | -0.22725  |
| 11716 | P0C206 | O95843 | -0.53319  |
| 11717 | P0C206 | Q9P0V9 | -0.27382  |
| 11718 | P0C206 | O95007 | -1.1763   |
| 11719 | P0C206 | Q99633 | -0.078747 |
| 11720 | P0C206 | P01589 | -0.61036  |
| 11721 | P0C206 | P51160 | -1.0071   |
| 11722 | P0C206 | Q6IF42 | -1.1763   |
| 11723 | P0C206 | O43559 | -0.55942  |
| 11724 | P0C206 | Q6UW49 | -0.457    |
| 11725 | P0C206 | Q96QU6 | -0.29678  |
| 11726 | P0C206 | Q96RI9 | -1.2135   |
| 11727 | P0C206 | Q5KU26 | -0.5155   |
| 11728 | P0C206 | Q9BXT8 | -0.24819  |
| 11729 | P0C206 | Q00688 | -0.22812  |
| 11730 | P0C206 | Q9H741 | -0.80952  |
| 11731 | P0C206 | O15146 | -0.88051  |
| 11732 | P0C206 | Q6ZMT9 | -0.37966  |
| 11733 | P0C206 | Q01740 | -0.80787  |
| 11734 | P0C206 | Q96B77 | -0.62349  |
| 11735 | P0C206 | P42126 | -0.29411  |
| 11736 | P0C206 | Q86WI0 | -0.79503  |
| 11737 | P0C206 | Q00888 | -0.80794  |
| 11738 | P0C206 | Q9UQM7 | -0.4113   |
| 11739 | P0C206 | Q6ZSZ5 | -0.43875  |
| 11740 | P0C206 | P06702 | -0.22919  |
| 11741 | P0C206 | Q5GH70 | -0.79503  |
| 11742 | P0C206 | Q9TNN7 | -1.0001   |
| 11743 | P0C206 | Q9BXC0 | -1.1993   |
| 11744 | P0C206 | Q92692 | -0.23359  |
| 11745 | P0C206 | Q5T9A4 | -0.75961  |
| 11746 | P0C206 | O75629 | -0.73794  |
| 11747 | P0C206 | P0C2S0 | -0.77756  |
| 11748 | P0C206 | Q15642 | -0.71889  |
| 11749 | P0C206 | Q8N441 | -0.89156  |
| 11750 | P0C206 | O75431 | -0.080449 |
| 11751 | P0C206 | Q99489 | -0.49202  |
| 11752 | P0C206 | Q00796 | -0.6607   |
| 11753 | P0C206 | Q96HH9 | -0.18736  |
| 11754 | P0C206 | Q13371 | -0.52308  |
| 11755 | P0C206 | Q8N4L2 | -0.81579  |
| 11756 | P0C206 | Q8IU80 | -0.90472  |
| 11757 | P0C206 | Q9BU20 | -0.85955  |
| 11758 | P0C206 | Q93077 | -0.66158  |
| 11759 | P0C206 | Q96FN4 | -0.22788  |
| 11760 | P0C206 | Q9H252 | -0.89501  |
| 11761 | P0C206 | Q15406 | -0.28012  |
| 11762 | P0C206 | Q99259 | -0.28181  |
| 11763 | P0C206 | A8MWA6 | -0.19106  |
| 11764 | P0C206 | O14975 | -0.78794  |
| 11765 | P0C206 | P48960 | -1.8663   |
| 11766 | P0C206 | Q8N3T6 | -0.57403  |
| 11767 | P0C206 | Q8NGJ5 | -1.1763   |
| 11768 | P0C206 | Q9H819 | -0.88783  |
| 11769 | P0C206 | P81605 | -1.0543   |
| 11770 | P0C206 | Q16850 | -1.0009   |
| 11771 | P0C206 | Q96GD3 | -0.075816 |
| 11772 | P0C206 | Q9HAC8 | -0.20134  |
| 11773 | P0C206 | Q9BYL1 | -0.1206   |
| 11774 | P0C206 | O75631 | -0.73837  |
| 11775 | P0C206 | O75185 | -0.51668  |
| 11776 | P0C206 | O75380 | -0.090234 |
| 11777 | P0C206 | Q9HBB8 | -1.0265   |
| 11778 | P0C206 | O60479 | -0.21798  |
| 11779 | P0C206 | Q96PE3 | -0.10769  |
| 11780 | P0C206 | Q70CQ4 | -0.59814  |



|       |        |        |           |
|-------|--------|--------|-----------|
| 11781 | POC206 | Q86T90 | -0.21025  |
| 11782 | POC206 | Q9NRM1 | -0.97256  |
| 11783 | POC206 | Q6NUI2 | -0.59384  |
| 11784 | POC206 | Q02156 | -0.22973  |
| 11785 | POC206 | P13501 | -0.6799   |
| 11786 | POC206 | Q2TBA0 | -0.20582  |
| 11787 | POC206 | P28907 | -0.60251  |
| 11788 | POC206 | Q96IW7 | -0.39414  |
| 11789 | POC206 | P80192 | -0.46641  |
| 11790 | POC206 | Q8N302 | -0.37241  |
| 11791 | POC206 | Q5TAT6 | -0.99497  |
| 11792 | POC206 | P0C7N4 | -0.79503  |
| 11793 | POC206 | Q9BSR8 | -0.61103  |
| 11794 | POC206 | Q07954 | -0.33062  |
| 11795 | POC206 | Q14990 | -0.47689  |
| 11796 | POC206 | P43363 | -0.027414 |
| 11797 | POC206 | P05014 | -0.67252  |
| 11798 | POC206 | Q9GZZ6 | -0.83593  |
| 11799 | POC206 | P07585 | -0.54269  |
| 11800 | POC206 | P26717 | -0.53504  |
| 11801 | POC206 | Q8TAD4 | -0.22589  |
| 11802 | POC206 | Q8NHA4 | -1.1763   |
| 11803 | POC206 | Q75129 | -0.79503  |
| 11804 | POC206 | Q12860 | -0.41221  |
| 11805 | POC206 | P17301 | -0.22735  |
| 11806 | POC206 | Q13072 | -0.80952  |
| 11807 | POC206 | Q92896 | -0.62613  |
| 11808 | POC206 | Q9Y6N7 | -0.54988  |
| 11809 | POC206 | P10092 | -0.91577  |
| 11810 | POC206 | O43405 | -0.30408  |
| 11811 | POC206 | Q96FB5 | -0.72787  |
| 11812 | POC206 | Q9H649 | -0.20034  |
| 11813 | POC206 | Q8N8Q1 | -0.75114  |
| 11814 | POC206 | O00214 | -0.08992  |
| 11815 | POC206 | Q9HCN8 | -0.25336  |
| 11816 | POC206 | Q13705 | -0.47722  |
| 11817 | POC206 | Q92569 | -0.2274   |
| 11818 | POC206 | Q9UKI8 | -0.61577  |
| 11819 | POC206 | Q9Y6B6 | -0.30418  |
| 11820 | POC206 | P08247 | -0.52659  |
| 11821 | POC206 | A8MQ27 | -0.22734  |
| 11822 | POC206 | Q8WVH0 | -0.18014  |
| 11823 | POC206 | Q9H0W7 | -0.06962  |
| 11824 | POC206 | A5D8T8 | -0.80341  |
| 11825 | POC206 | Q7Z3E1 | -0.26571  |
| 11826 | POC206 | Q9NT99 | -0.861    |
| 11827 | POC206 | P15018 | -0.34649  |
| 11828 | POC206 | P16401 | -0.54237  |
| 11829 | POC206 | O14594 | -0.7741   |
| 11830 | POC206 | Q8NGQ5 | -1.1763   |
| 11831 | POC206 | P08922 | -1.3021   |
| 11832 | POC206 | Q3B7T3 | -0.66456  |
| 11833 | POC206 | Q9BXS4 | -0.52975  |
| 11834 | POC206 | Q99674 | -0.90905  |
| 11835 | POC206 | Q96JB1 | -0.41223  |
| 11836 | POC206 | Q86UX6 | -1.1715   |
| 11837 | POC206 | Q9NQ39 | -0.11231  |
| 11838 | POC206 | P01213 | -0.81334  |
| 11839 | POC206 | Q5VXM1 | -0.80952  |
| 11840 | POC206 | Q13007 | -0.77422  |
| 11841 | POC206 | P30989 | -1.1633   |
| 11842 | POC206 | Q53T59 | -0.3763   |
| 11843 | POC206 | P11488 | -0.68315  |
| 11844 | POC206 | Q9NRM0 | -0.54979  |
| 11845 | POC206 | Q9Y274 | -0.37817  |
| 11846 | POC206 | O43868 | -0.90295  |
| 11847 | POC206 | Q14CM0 | -0.22741  |
| 11848 | POC206 | A8MQT2 | -0.15936  |
| 11849 | POC206 | Q6P4F1 | -0.43829  |
| 11850 | POC206 | P55157 | -0.39692  |
| 11851 | POC206 | Q6IF63 | -1.1763   |
| 11852 | POC206 | O95758 | -0.61342  |
| 11853 | POC206 | Q00266 | -0.55756  |
| 11854 | POC206 | Q96AC1 | -0.20332  |
| 11855 | POC206 | Q8NG84 | -1.1763   |
| 11856 | POC206 | Q9BZ68 | -0.16872  |

|       |        |        |          |
|-------|--------|--------|----------|
| 11857 | POC206 | Q9H0W5 | -0.37535 |
| 11858 | POC206 | Q92535 | -0.85771 |
| 11859 | POC206 | Q96RG2 | -0.49237 |
| 11860 | POC206 | Q6ZST8 | -0.14525 |
| 11861 | POC206 | O14669 | -1.5447  |
| 11862 | POC206 | Q9P2M4 | -1.201   |
| 11863 | POC206 | O43490 | -0.5237  |
| 11864 | POC206 | O75121 | -0.91833 |
| 11865 | POC206 | O00192 | -0.23047 |
| 11866 | POC206 | Q86XT9 | -0.87605 |
| 11867 | POC206 | Q6UX82 | -0.44393 |
| 11868 | POC206 | P01771 | -0.9894  |
| 11869 | POC206 | P19793 | -0.23953 |
| 11870 | POC206 | Q5VV43 | -0.50593 |
| 11871 | POC206 | Q8TDW5 | -0.24055 |
| 11872 | POC206 | P49863 | -1.3203  |
| 11873 | POC206 | P27482 | -0.29182 |
| 11874 | POC206 | Q86SK9 | -1.0818  |
| 11875 | POC206 | A8MU46 | -0.2326  |
| 11876 | POC206 | Q8TEC5 | -0.2274  |
| 11877 | POC206 | Q9Y5U4 | -0.27531 |
| 11878 | POC206 | O94844 | -1.2177  |
| 11879 | POC206 | Q8WXF7 | -0.53443 |
| 11880 | POC206 | Q8N7S6 | -0.79503 |
| 11881 | POC206 | Q9P2N4 | -1.2232  |
| 11882 | POC206 | Q9NZ56 | -0.5062  |
| 11883 | POC206 | Q9H0K6 | -0.22444 |
| 11884 | POC206 | P0C7T2 | -1.1763  |
| 11885 | POC206 | O14718 | -1.2428  |
| 11886 | POC206 | Q5JU00 | -0.22707 |
| 11887 | POC206 | Q9NX07 | -0.2525  |
| 11888 | POC206 | Q9ULY5 | -0.83543 |
| 11889 | POC206 | Q9P212 | -0.22741 |
| 11890 | POC206 | Q3V6T2 | -0.16695 |
| 11891 | POC206 | Q16854 | -0.35973 |
| 11892 | POC206 | Q9HAC7 | -0.34839 |
| 11893 | POC206 | Q8NB59 | -0.66456 |
| 11894 | POC206 | P43378 | -0.22987 |
| 11895 | POC206 | Q8TBB5 | -0.22307 |
| 11896 | POC206 | Q9UKE5 | -0.24586 |
| 11897 | POC206 | P61011 | -0.5329  |
| 11898 | POC206 | Q9HAP6 | -0.18735 |
| 11899 | POC206 | P04207 | -0.9894  |
| 11900 | POC206 | P55259 | -0.9731  |
| 11901 | POC206 | Q2TBF2 | -0.79503 |
| 11902 | POC206 | Q96PP9 | -0.40171 |
| 11903 | POC206 | Q9BQ13 | -0.14185 |
| 11904 | POC206 | P24752 | -0.17057 |
| 11905 | POC206 | Q13217 | -0.18115 |
| 11906 | POC206 | Q15321 | -0.89136 |
| 11907 | POC206 | Q9UQB8 | -0.22737 |
| 11908 | POC206 | Q8N682 | -0.90145 |
| 11909 | POC206 | P23759 | -0.21763 |
| 11910 | POC206 | Q9Y5H0 | -1.1512  |
| 11911 | POC206 | Q5W186 | -0.87562 |
| 11912 | POC206 | P23582 | -0.62083 |
| 11913 | POC206 | Q9BRC7 | -0.36584 |
| 11914 | POC206 | Q969Z3 | -0.55915 |
| 11915 | POC206 | Q8NGF0 | -1.1763  |
| 11916 | POC206 | P51636 | -0.22433 |
| 11917 | POC206 | Q8IY33 | -0.22747 |
| 11918 | POC206 | Q9NRR1 | -0.86318 |
| 11919 | POC206 | Q01484 | -0.2275  |
| 11920 | POC206 | Q5VZP5 | -0.52372 |
| 11921 | POC206 | Q93096 | -0.25474 |
| 11922 | POC206 | Q8IZU2 | -0.22758 |
| 11923 | POC206 | P24557 | -0.9417  |
| 11924 | POC206 | Q9H293 | -0.67084 |
| 11925 | POC206 | Q9ULV0 | -0.19762 |
| 11926 | POC206 | Q96BD0 | -0.85779 |
| 11927 | POC206 | Q01851 | -0.2274  |
| 11928 | POC206 | Q8NHB7 | -1.1763  |
| 11929 | POC206 | Q6NVV9 | -0.32978 |
| 11930 | POC206 | Q8NFS9 | -0.60834 |
| 11931 | POC206 | Q9H4M7 | -0.25963 |
| 11932 | POC206 | Q6ZSI9 | -0.99507 |

|       |        |        |           |
|-------|--------|--------|-----------|
| 11933 | POC206 | Q96MN5 | -0.21023  |
| 11934 | POC206 | Q8TD47 | -0.022308 |
| 11935 | POC206 | Q99759 | -0.53447  |
| 11936 | POC206 | P32314 | -0.41365  |
| 11937 | POC206 | P53396 | -0.065912 |
| 11938 | POC206 | P01612 | -0.9894   |
| 11939 | POC206 | O60494 | -0.22742  |
| 11940 | POC206 | Q8TBQ9 | -0.5524   |
| 11941 | POC206 | O60568 | -0.23284  |
| 11942 | POC206 | P01600 | -0.9894   |
| 11943 | POC206 | Q8N6N7 | -0.43776  |
| 11944 | POC206 | Q6UXT9 | -0.74611  |
| 11945 | POC206 | P05556 | -0.24286  |
| 11946 | POC206 | P05814 | -0.72148  |
| 11947 | POC206 | Q8WVF2 | -0.86122  |
| 11948 | POC206 | Q14952 | -1.0498   |
| 11949 | POC206 | A2VCL2 | -0.19771  |
| 11950 | POC206 | P25189 | -0.96519  |
| 11951 | POC206 | Q8N2C3 | -0.46207  |
| 11952 | POC206 | O95395 | -0.43619  |
| 11953 | POC206 | Q9UKT6 | -0.33259  |
| 11954 | POC206 | Q6ZUS6 | -0.12422  |
| 11955 | POC206 | P0C7U9 | -0.79503  |
| 11956 | POC206 | P60880 | -0.206    |
| 11957 | POC206 | Q9UBH6 | -1.0978   |
| 11958 | POC206 | Q99954 | -0.80952  |
| 11959 | POC206 | Q9NVA4 | -0.79503  |
| 11960 | POC206 | Q16288 | -1.0174   |
| 11961 | POC206 | Q5SRE7 | -0.56322  |
| 11962 | POC206 | Q8IVF6 | -0.22736  |
| 11963 | POC206 | P61566 | -0.6451   |
| 11964 | POC206 | Q14184 | -0.30775  |
| 11965 | POC206 | Q8TCB7 | -0.20034  |
| 11966 | POC206 | Q8N4M1 | -0.75708  |
| 11967 | POC206 | Q9HCM4 | -0.2782   |
| 11968 | POC206 | O43826 | -0.28209  |
| 11969 | POC206 | P01243 | -0.91236  |
| 11970 | POC206 | Q06203 | -0.36015  |
| 11971 | POC206 | Q9Y3S1 | -1.0911   |
| 11972 | POC206 | Q8MH63 | -0.80326  |
| 11973 | POC206 | A8MVW0 | -0.79503  |
| 11974 | POC206 | Q9HD67 | -0.44376  |
| 11975 | POC206 | O75093 | -0.66681  |
| 11976 | POC206 | Q9HBU6 | -0.66575  |
| 11977 | POC206 | Q8TC26 | -0.67806  |
| 11978 | POC206 | Q8WWY7 | -0.74226  |
| 11979 | POC206 | Q13163 | -0.23053  |
| 11980 | POC206 | Q08043 | -0.59235  |
| 11981 | POC206 | P42898 | -0.39842  |
| 11982 | POC206 | Q96RJ0 | -1.1832   |
| 11983 | POC206 | Q6ZT07 | -1.3203   |
| 11984 | POC206 | P03886 | -0.14268  |
| 11985 | POC206 | Q7Z628 | -0.23056  |
| 11986 | POC206 | Q8NG98 | -1.1763   |
| 11987 | POC206 | P03905 | -0.60086  |
| 11988 | POC206 | Q9HBW1 | -0.6938   |
| 11989 | POC206 | Q8IVU3 | -0.28001  |
| 11990 | POC206 | Q99062 | -1.7312   |
| 11991 | POC206 | P0C854 | -0.80952  |
| 11992 | POC206 | Q8NEV4 | -0.71276  |
| 11993 | POC206 | Q9NRA0 | -0.3414   |
| 11994 | POC206 | Q9BZ19 | -0.2274   |
| 11995 | POC206 | P56747 | -0.65312  |
| 11996 | POC206 | P50150 | -0.49687  |
| 11997 | POC206 | Q8IZ41 | -0.76966  |
| 11998 | POC206 | Q9BXT2 | -0.83585  |
| 11999 | POC206 | Q8NBW4 | -0.87335  |
| 12000 | POC206 | P42357 | -0.10207  |
| 12001 | POC206 | Q9Y6E2 | -0.4055   |
| 12002 | POC206 | Q9NRR6 | -0.22566  |
| 12003 | POC206 | Q8WVN8 | -0.54645  |
| 12004 | POC206 | Q99999 | -0.6797   |
| 12005 | POC206 | O43525 | -0.88767  |
| 12006 | POC206 | O60733 | -0.2274   |
| 12007 | POC206 | O15217 | -0.22403  |
| 12008 | POC206 | O00562 | -0.11667  |

|       |        |        |          |
|-------|--------|--------|----------|
| 12009 | P0C206 | Q9Y466 | -0.22844 |
| 12010 | P0C206 | Q9BYW3 | -0.73076 |
| 12011 | P0C206 | P02649 | -0.25891 |
| 12012 | P0C206 | Q9UL54 | -0.60503 |
| 12013 | P0C206 | P59543 | -1.1287  |
| 12014 | P0C206 | O95484 | -0.66396 |
| 12015 | P0C206 | Q7RTX0 | -1.1434  |
| 12016 | P0C206 | P59827 | -0.75377 |
| 12017 | P0C206 | O15460 | -0.58212 |
| 12018 | P0C206 | Q53GA4 | -0.10304 |
| 12019 | P0C206 | Q8IWX5 | -0.7143  |
| 12020 | P0C206 | Q13478 | -1.2177  |
| 12021 | P0C206 | Q7RTY0 | -0.83852 |
| 12022 | P0C206 | Q96KF7 | -0.79503 |
| 12023 | P0C206 | Q8N394 | -0.7666  |
| 12024 | P0C206 | P30450 | -0.98682 |
| 12025 | P0C206 | Q8IVF2 | -0.20895 |
| 12026 | P0C206 | Q9P126 | -0.51579 |
| 12027 | P0C206 | O60507 | -0.64878 |
| 12028 | P0C206 | Q7LBE3 | -0.85934 |
| 12029 | P0C206 | Q9H6D5 | -0.79503 |
| 12030 | P0C206 | O75019 | -0.95402 |
| 12031 | P0C206 | P55075 | -0.33944 |
| 12032 | P0C206 | Q9HBI1 | -0.32756 |
| 12033 | P0C206 | Q9NYL4 | -0.80427 |
| 12034 | P0C206 | Q9Y6R4 | -0.32555 |
| 12035 | P0C206 | Q96HN2 | -0.1903  |
| 12036 | P0C206 | Q9NYQ3 | -0.38103 |
| 12037 | P0C206 | Q96MV8 | -0.69479 |
| 12038 | P0C206 | P25105 | -0.82262 |
| 12039 | P0C206 | Q8TCY5 | -0.53634 |
| 12040 | P0C206 | Q9GZK7 | -1.1763  |
| 12041 | P0C206 | Q8NFP4 | -0.65652 |
| 12042 | P0C206 | O95857 | -0.95247 |
| 12043 | P0C206 | Q86VL8 | -0.80179 |
| 12044 | P0C206 | P49840 | -0.2277  |
| 12045 | P0C206 | P26012 | -1.1602  |
| 12046 | P0C206 | Q8WW52 | -0.674   |
| 12047 | P0C206 | P01816 | -0.9894  |
| 12048 | P0C206 | Q9NZR4 | -0.21006 |
| 12049 | P0C206 | Q29960 | -1.3061  |
| 12050 | P0C206 | Q86UN3 | -0.46981 |
| 12051 | P0C206 | Q92935 | -0.90208 |
| 12052 | P0C206 | Q66K37 | -0.22571 |
| 12053 | P0C206 | P51606 | -0.23739 |
| 12054 | P0C206 | P46934 | -0.22742 |
| 12055 | P0C206 | Q5TEA6 | -0.79503 |
| 12056 | P0C206 | O75781 | -0.14005 |
| 12057 | P0C206 | Q9UIJ7 | -0.6508  |
| 12058 | P0C206 | Q86WG5 | -0.22738 |
| 12059 | P0C206 | Q8TAF8 | -0.82222 |
| 12060 | P0C206 | Q5TCY1 | -0.64691 |
| 12061 | P0C206 | Q12999 | -0.85312 |
| 12062 | P0C206 | Q8IYY4 | -0.33793 |
| 12063 | P0C206 | Q9NRA2 | -0.99437 |
| 12064 | P0C206 | O43572 | -0.22169 |
| 12065 | P0C206 | Q9UF47 | -0.43641 |
| 12066 | P0C206 | Q9UBE0 | -0.22201 |
| 12067 | P0C206 | P30559 | -0.89198 |
| 12068 | P0C206 | Q5SRR4 | -0.80952 |
| 12069 | P0C206 | Q9BRL6 | -0.60591 |
| 12070 | P0C206 | Q96KC8 | -0.29858 |
| 12071 | P0C206 | A8MYZ5 | -0.21101 |
| 12072 | P0C206 | Q9BSG0 | -0.80952 |
| 12073 | P0C206 | Q9UBD3 | -1.0742  |
| 12074 | P0C206 | P21941 | -0.34294 |
| 12075 | P0C206 | O14807 | -1.2761  |
| 12076 | P0C206 | P62745 | -0.22717 |
| 12077 | P0C206 | P09758 | -0.83332 |
| 12078 | P0C206 | Q9UG63 | -0.62217 |
| 12079 | P0C206 | O75603 | -0.1135  |
| 12080 | P0C206 | Q9P0N5 | -0.56698 |
| 12081 | P0C206 | Q9H5K3 | -1.3783  |
| 12082 | P0C206 | Q68BL7 | -0.83204 |
| 12083 | P0C206 | P56704 | -0.23793 |
| 12084 | P0C206 | Q8N9V3 | -0.29388 |

|       |        |        |           |
|-------|--------|--------|-----------|
| 12085 | POC206 | Q68D20 | -0.18066  |
| 12086 | POC206 | Q8IWU2 | -0.81182  |
| 12087 | POC206 | Q8IVT5 | -0.22741  |
| 12088 | POC206 | Q14953 | -1.0875   |
| 12089 | POC206 | Q6ZXV5 | -0.79503  |
| 12090 | POC206 | Q7Z4S6 | -0.25001  |
| 12091 | POC206 | Q9UBT2 | -0.21049  |
| 12092 | POC206 | P00751 | -1.2793   |
| 12093 | POC206 | A6NNN8 | -0.87335  |
| 12094 | POC206 | P26927 | -0.82973  |
| 12095 | POC206 | Q6ZVS7 | -0.13812  |
| 12096 | POC206 | O95180 | -0.73463  |
| 12097 | POC206 | Q12974 | -0.5975   |
| 12098 | POC206 | P04211 | -0.9894   |
| 12099 | POC206 | P06887 | -0.9894   |
| 12100 | POC206 | Q6ZVD8 | -0.22892  |
| 12101 | POC206 | Q9H361 | -0.54958  |
| 12102 | POC206 | P15516 | -0.74487  |
| 12103 | POC206 | P58173 | -1.1763   |
| 12104 | POC206 | Q96CH1 | -1.2448   |
| 12105 | POC206 | Q0VAQ4 | -0.25486  |
| 12106 | POC206 | Q9Y6N1 | -0.62426  |
| 12107 | POC206 | Q96CK0 | -0.42755  |
| 12108 | POC206 | Q15758 | -0.74055  |
| 12109 | POC206 | Q96BD6 | -0.05548  |
| 12110 | POC206 | Q9NWB1 | -0.34444  |
| 12111 | POC206 | O60333 | -0.25926  |
| 12112 | POC206 | P30939 | -1.2869   |
| 12113 | POC206 | P06865 | -0.37885  |
| 12114 | POC206 | Q9UK97 | -0.29388  |
| 12115 | POC206 | Q9H903 | -0.7417   |
| 12116 | POC206 | Q9Y6L7 | -1.349    |
| 12117 | POC206 | P32971 | -0.85214  |
| 12118 | POC206 | P52272 | -0.20851  |
| 12119 | POC206 | P10316 | -0.95317  |
| 12120 | POC206 | P35052 | -0.84831  |
| 12121 | POC206 | Q96TA2 | -1.2282   |
| 12122 | POC206 | Q5T5U3 | -0.23237  |
| 12123 | POC206 | Q9Y5H2 | -1.1512   |
| 12124 | POC206 | Q9Y282 | -0.49254  |
| 12125 | POC206 | A2RU54 | -0.23289  |
| 12126 | POC206 | Q155Q3 | -0.22741  |
| 12127 | POC206 | Q5TZ20 | -1.1763   |
| 12128 | POC206 | Q06136 | -1.2999   |
| 12129 | POC206 | P48029 | -0.70018  |
| 12130 | POC206 | Q66K14 | -1.7345   |
| 12131 | POC206 | Q9Y672 | -0.7235   |
| 12132 | POC206 | Q9NZJ6 | -0.12899  |
| 12133 | POC206 | Q9Y490 | -0.22789  |
| 12134 | POC206 | Q9NUZ1 | -0.67893  |
| 12135 | POC206 | Q5JR12 | -0.22002  |
| 12136 | POC206 | Q9H3Y6 | -1.1198   |
| 12137 | POC206 | A8MXV6 | -0.79503  |
| 12138 | POC206 | O95425 | -0.096546 |
| 12139 | POC206 | Q8NCS7 | -0.75708  |
| 12140 | POC206 | P05141 | -0.23102  |
| 12141 | POC206 | Q96CP6 | -0.79503  |
| 12142 | POC206 | P47900 | -0.85344  |
| 12143 | POC206 | O15503 | -0.44634  |
| 12144 | POC206 | Q9BUT1 | -0.61653  |
| 12145 | POC206 | Q96B21 | -0.79503  |
| 12146 | POC206 | C9JR72 | -0.20671  |
| 12147 | POC206 | I6L899 | -0.056113 |
| 12148 | POC206 | Q9UGH3 | -0.54972  |
| 12149 | POC206 | Q6ZWH5 | -1.1958   |
| 12150 | POC206 | O75462 | -0.22755  |
| 12151 | POC206 | Q96LZ3 | -0.29182  |
| 12152 | POC206 | P35241 | -0.23367  |
| 12153 | POC206 | P08758 | -0.2997   |
| 12154 | POC206 | Q8IZF5 | -1.2769   |
| 12155 | POC206 | P02814 | -0.77859  |
| 12156 | POC206 | P85298 | -0.44288  |
| 12157 | POC206 | Q9BTX7 | -0.45984  |
| 12158 | POC206 | P02461 | -0.39378  |
| 12159 | POC206 | Q96K19 | -0.91607  |
| 12160 | POC206 | Q8IYM0 | -0.11426  |

|       |        |        |           |
|-------|--------|--------|-----------|
| 12161 | P0C206 | B3GLJ2 | -0.80952  |
| 12162 | P0C206 | P40189 | -0.47858  |
| 12163 | P0C206 | Q6WRI0 | -0.9769   |
| 12164 | P0C206 | Q8N387 | -1.415    |
| 12165 | P0C206 | Q96CM8 | -0.90166  |
| 12166 | P0C206 | Q14050 | -0.76315  |
| 12167 | P0C206 | Q9P2H3 | -0.22741  |
| 12168 | P0C206 | Q9NW61 | -0.32146  |
| 12169 | P0C206 | O43623 | -0.20867  |
| 12170 | P0C206 | P00568 | -0.54891  |
| 12171 | P0C206 | Q96FK6 | -0.2274   |
| 12172 | P0C206 | Q96DR7 | -0.94781  |
| 12173 | P0C206 | P12107 | -0.76271  |
| 12174 | P0C206 | Q6ZMY6 | -0.23041  |
| 12175 | P0C206 | Q49A26 | -0.60827  |
| 12176 | P0C206 | P11684 | -0.58233  |
| 12177 | P0C206 | Q6YBV0 | -0.68587  |
| 12178 | P0C206 | Q96S86 | -1.0334   |
| 12179 | P0C206 | Q8NCC5 | -0.65916  |
| 12180 | P0C206 | O43699 | -1.6511   |
| 12181 | P0C206 | Q8N4C8 | -0.51514  |
| 12182 | P0C206 | Q69YJ1 | -0.54994  |
| 12183 | P0C206 | P52961 | -0.57181  |
| 12184 | P0C206 | P54855 | -0.85845  |
| 12185 | P0C206 | A6NKK0 | -1.1763   |
| 12186 | P0C206 | P53350 | -0.22741  |
| 12187 | P0C206 | Q9BUQ8 | -0.48391  |
| 12188 | P0C206 | Q8IUY3 | -0.79503  |
| 12189 | P0C206 | A2VEC9 | -1.0501   |
| 12190 | P0C206 | Q6P4Q7 | -1.028    |
| 12191 | P0C206 | P16520 | -0.3209   |
| 12192 | P0C206 | P05000 | -0.73287  |
| 12193 | P0C206 | Q9Y2E5 | -0.66395  |
| 12194 | P0C206 | Q14995 | -0.30069  |
| 12195 | P0C206 | A2RUS2 | -0.2272   |
| 12196 | P0C206 | Q9NUT2 | -0.54374  |
| 12197 | P0C206 | Q96MM6 | -0.72239  |
| 12198 | P0C206 | Q5VYV0 | -0.45919  |
| 12199 | P0C206 | Q96L91 | -0.19034  |
| 12200 | P0C206 | P08700 | -0.54666  |
| 12201 | P0C206 | P22748 | -0.18039  |
| 12202 | P0C206 | P16444 | -0.36919  |
| 12203 | P0C206 | Q96R27 | -1.1763   |
| 12204 | P0C206 | O76074 | -0.4054   |
| 12205 | P0C206 | Q9BPU6 | -0.21107  |
| 12206 | P0C206 | Q8TCT8 | -0.58576  |
| 12207 | P0C206 | Q00889 | -0.75414  |
| 12208 | P0C206 | O60774 | -1.0588   |
| 12209 | P0C206 | Q9H0F7 | -0.64701  |
| 12210 | P0C206 | Q9NR30 | -0.36834  |
| 12211 | P0C206 | Q9NQ34 | -0.99385  |
| 12212 | P0C206 | Q2NL67 | -0.28641  |
| 12213 | P0C206 | Q9NS00 | -0.89957  |
| 12214 | P0C206 | A1L453 | -1.3203   |
| 12215 | P0C206 | Q9BZX4 | -0.20788  |
| 12216 | P0C206 | P06133 | -0.8505   |
| 12217 | P0C206 | P23415 | -0.49298  |
| 12218 | P0C206 | Q8N112 | -0.79503  |
| 12219 | P0C206 | P00505 | -0.21217  |
| 12220 | P0C206 | Q12802 | -0.22734  |
| 12221 | P0C206 | Q8NA82 | -0.29043  |
| 12222 | P03363 | P0C6T2 | -0.32626  |
| 12223 | P03363 | Q495M3 | -0.27731  |
| 12224 | P03363 | P58170 | -0.61656  |
| 12225 | P03363 | Q5TG92 | -0.026639 |
| 12226 | P03363 | Q96HJ3 | -0.031359 |
| 12227 | P03363 | Q5JTV8 | -0.11312  |
| 12228 | P03363 | Q5TG53 | -0.042737 |
| 12229 | P03363 | Q07065 | -0.32996  |
| 12230 | P03363 | Q14728 | -0.29818  |
| 12231 | P03363 | Q9P2E7 | -0.57898  |
| 12232 | P03363 | Q9H972 | -0.33992  |
| 12233 | P03363 | Q96SD1 | -0.16041  |
| 12234 | P03363 | Q9NUM3 | -0.35268  |
| 12235 | P03363 | P05091 | -0.27252  |
| 12236 | P03363 | P22792 | -0.33416  |

|       |        |        |           |
|-------|--------|--------|-----------|
| 12237 | P03363 | O75044 | -0.2281   |
| 12238 | P03363 | Q9BUN1 | -0.33992  |
| 12239 | P03363 | Q8TD35 | -0.031359 |
| 12240 | P03363 | Q8TEM1 | -0.12313  |
| 12241 | P03363 | Q3B7S5 | -0.32626  |
| 12242 | P03363 | Q6P575 | -0.16511  |
| 12243 | P03363 | P01876 | -0.22966  |
| 12244 | P03363 | Q9UKR8 | -0.32626  |
| 12245 | P03363 | P0C7V0 | -0.042737 |
| 12246 | P03363 | Q86YZ3 | -0.2312   |
| 12247 | P03363 | P46977 | -0.1572   |
| 12248 | P03363 | Q96LU5 | -0.19389  |
| 12249 | P03363 | P34998 | -0.37234  |
| 12250 | P03363 | Q6ZUT9 | -0.32424  |
| 12251 | P03363 | Q9Y4B5 | -0.22314  |
| 12252 | P03363 | Q7Z4K8 | -0.27953  |
| 12253 | P03363 | Q8NGY9 | -0.5361   |
| 12254 | P03363 | Q13576 | -0.32622  |
| 12255 | P03363 | O00155 | -0.73419  |
| 12256 | P03363 | P19784 | -0.2323   |
| 12257 | P03363 | A6NCF5 | -0.22342  |
| 12258 | P03363 | Q9H8X2 | -0.12426  |
| 12259 | P03363 | Q6ZRG5 | -0.22714  |
| 12260 | P03363 | Q8TCC7 | -0.4091   |
| 12261 | P03363 | P29992 | -0.44938  |
| 12262 | P03363 | Q9NYW4 | -0.49032  |
| 12263 | P03363 | Q14CZ8 | -0.22742  |
| 12264 | P03363 | Q99788 | -0.40362  |
| 12265 | P03363 | Q8TBB5 | -0.22712  |
| 12266 | P03363 | P52209 | -0.13402  |
| 12267 | P03363 | Q8IW93 | -0.27658  |
| 12268 | P03363 | A0AUZ9 | -0.09601  |
| 12269 | P03363 | P52824 | -0.22741  |
| 12270 | P03363 | Q86UF4 | -0.14794  |
| 12271 | P03363 | Q9NT22 | -0.22713  |
| 12272 | P03363 | Q9NSU2 | -0.18129  |
| 12273 | P03363 | Q8NHU2 | -0.17955  |
| 12274 | P03363 | P51788 | -0.34587  |
| 12275 | P03363 | O75955 | -0.19287  |
| 12276 | P03363 | O00339 | -0.22742  |
| 12277 | P03363 | Q9NY64 | -0.37141  |
| 12278 | P03363 | P80511 | -0.22789  |
| 12279 | P03363 | Q86UY6 | -0.14562  |
| 12280 | P03363 | Q9H4K7 | -0.28237  |
| 12281 | P03363 | P18858 | -0.21451  |
| 12282 | P03363 | Q96HY7 | -0.19846  |
| 12283 | P03363 | Q6IC83 | -0.21437  |
| 12284 | P03363 | P98073 | -0.4542   |
| 12285 | P03363 | P24387 | -0.23811  |
| 12286 | P03363 | Q14815 | -0.32279  |
| 12287 | P03363 | P17252 | -0.22864  |
| 12288 | P03363 | P26045 | -0.22749  |
| 12289 | P03363 | P38606 | -0.34539  |
| 12290 | P03363 | Q9NRV9 | -0.2138   |
| 12291 | P03363 | Q9NR61 | -0.48334  |
| 12292 | P03363 | Q14774 | -0.22776  |
| 12293 | P03363 | Q8NE28 | -0.4154   |
| 12294 | P03363 | Q9BW61 | -0.040985 |
| 12295 | P03363 | P48509 | -0.22929  |
| 12296 | P03363 | Q8WZ74 | -0.29489  |
| 12297 | P03363 | Q9P2E2 | -0.23146  |
| 12298 | P03363 | Q60676 | -0.22899  |
| 12299 | P03363 | Q96FZ5 | -0.44009  |
| 12300 | P03363 | Q95154 | -0.22687  |
| 12301 | P03363 | Q8IWB1 | -0.21178  |
| 12302 | P03363 | P49798 | -0.22738  |
| 12303 | P03363 | Q92637 | -0.58396  |
| 12304 | P03363 | Q9GZP9 | -0.13693  |
| 12305 | P03363 | Q96PZ7 | -0.32626  |
| 12306 | P03363 | Q495X7 | -0.27953  |
| 12307 | P03363 | P78312 | -0.21372  |
| 12308 | P03363 | Q9NS18 | -0.22638  |
| 12309 | P03363 | Q8IU54 | -0.48342  |
| 12310 | P03363 | Q16570 | -0.61342  |
| 12311 | P03363 | Q2TV78 | -0.40966  |
| 12312 | P03363 | Q9UBZ4 | -0.19387  |

|       |        |        |           |
|-------|--------|--------|-----------|
| 12313 | P03363 | Q9HB21 | -0.22741  |
| 12314 | P03363 | Q9NWW9 | -0.19893  |
| 12315 | P03363 | Q96FK6 | -0.22741  |
| 12316 | P03363 | Q15442 | -0.15847  |
| 12317 | P03363 | Q9BUE6 | -0.21344  |
| 12318 | P03363 | Q9HCE7 | -0.22741  |
| 12319 | P03363 | Q8NFM7 | -0.22384  |
| 12320 | P03363 | Q8IXU6 | -0.16776  |
| 12321 | P03363 | P31995 | -0.22741  |
| 12322 | P03363 | Q68D06 | -0.36668  |
| 12323 | P03363 | P10323 | -0.34161  |
| 12324 | P03363 | P04745 | -0.2032   |
| 12325 | P03363 | Q8NG08 | -0.2525   |
| 12326 | P03363 | Q02045 | -0.22734  |
| 12327 | P03363 | Q5SRR4 | -0.33992  |
| 12328 | P03363 | P28300 | -0.22568  |
| 12329 | P03363 | Q9NQM4 | -0.16129  |
| 12330 | P03363 | Q9H478 | -0.13502  |
| 12331 | P03363 | P06314 | -0.54902  |
| 12332 | P03363 | Q96PE1 | -0.60729  |
| 12333 | P03363 | Q9NPIO | -0.34122  |
| 12334 | P03363 | Q8WU66 | -0.30814  |
| 12335 | P03363 | Q70EL4 | -0.26193  |
| 12336 | P03363 | Q06187 | -0.22741  |
| 12337 | P03363 | Q96QP1 | -0.27818  |
| 12338 | P03363 | Q86XP1 | -0.32875  |
| 12339 | P03363 | Q86TH1 | -0.22732  |
| 12340 | P03363 | Q9NS93 | -0.47262  |
| 12341 | P03363 | Q9H0F7 | -0.23282  |
| 12342 | P03363 | P00326 | -0.38068  |
| 12343 | P03363 | Q96MH6 | -0.31151  |
| 12344 | P03363 | Q8NGL7 | -0.61656  |
| 12345 | P03363 | Q14654 | -0.43364  |
| 12346 | P03363 | O00602 | -0.6615   |
| 12347 | P03363 | Q9NS67 | -0.64046  |
| 12348 | P03363 | Q8IU57 | -0.24004  |
| 12349 | P03363 | Q9NYS0 | -0.28566  |
| 12350 | P03363 | P01889 | -0.57693  |
| 12351 | P03363 | P08913 | -0.22824  |
| 12352 | P03363 | Q9Y5U2 | -0.037391 |
| 12353 | P03363 | P51160 | -0.49755  |
| 12354 | P03363 | P54756 | -0.58468  |
| 12355 | P03363 | Q8NA97 | -0.22174  |
| 12356 | P03363 | Q96D31 | -0.19295  |
| 12357 | P03363 | Q96M42 | -0.2421   |
| 12358 | P03363 | P30048 | -0.22573  |
| 12359 | P03363 | Q9H2Y7 | -0.22829  |
| 12360 | P03363 | Q14617 | -0.20683  |
| 12361 | P03363 | O14990 | -0.050201 |
| 12362 | P03363 | Q8NGW6 | -0.61656  |
| 12363 | P03363 | P18577 | -0.4146   |
| 12364 | P03363 | P15085 | -0.61081  |
| 12365 | P03363 | Q9NQC7 | -0.22303  |
| 12366 | P03363 | A6NNJ1 | -0.2058   |
| 12367 | P03363 | P62873 | -0.26675  |
| 12368 | P03363 | A6NNC1 | -0.32626  |
| 12369 | P03363 | P21462 | -0.44013  |
| 12370 | P03363 | Q9BSN7 | -0.37043  |
| 12371 | P03363 | Q6UWL6 | -0.46746  |
| 12372 | P03363 | Q9NVL8 | -0.21943  |
| 12373 | P03363 | Q7Z5M8 | -0.22763  |
| 12374 | P03363 | Q9UHQ9 | -0.55063  |
| 12375 | P03363 | Q9H0W5 | -0.18071  |
| 12376 | P03363 | Q9NR81 | -0.22764  |
| 12377 | P03363 | Q96JQ5 | -0.32626  |
| 12378 | P03363 | Q8NAX2 | -0.031359 |
| 12379 | P03363 | Q9Y6W8 | -0.90494  |
| 12380 | P03363 | A8MZ06 | -0.22147  |
| 12381 | P03363 | Q2T9F4 | -0.17351  |
| 12382 | P03363 | P10632 | -0.55951  |
| 12383 | P03363 | O96005 | -0.11535  |
| 12384 | P03363 | O95202 | -0.13114  |
| 12385 | P03363 | Q5RL73 | -0.16701  |
| 12386 | P03363 | Q5TIE3 | -0.33992  |
| 12387 | P03363 | P29218 | -0.2241   |
| 12388 | P03363 | P0C626 | -0.61598  |



|       |        |        |           |
|-------|--------|--------|-----------|
| 12389 | P03363 | Q9Y4F1 | -0.22741  |
| 12390 | P03363 | H0Y354 | -0.046967 |
| 12391 | P03363 | Q0D2K5 | -0.22871  |
| 12392 | P03363 | Q75541 | -0.23065  |
| 12393 | P03363 | A6NHU5 | -0.10936  |
| 12394 | P03363 | P41440 | -0.45005  |
| 12395 | P03363 | P00709 | -0.46566  |
| 12396 | P03363 | P10316 | -0.35257  |
| 12397 | P03363 | Q6UQ28 | -0.33853  |
| 12398 | P03363 | Q92813 | -0.59603  |
| 12399 | P03363 | Q8TC92 | -0.80801  |
| 12400 | P03363 | Q9Y5E7 | -0.62573  |
| 12401 | P03363 | O60231 | -0.2271   |
| 12402 | P03363 | P24046 | -0.44062  |
| 12403 | P03363 | P43234 | -0.25677  |
| 12404 | P03363 | A6NN90 | -0.13398  |
| 12405 | P03363 | Q8IXB1 | -0.23348  |
| 12406 | P03363 | Q8NDD1 | -0.16497  |
| 12407 | P03363 | Q00975 | -0.30932  |
| 12408 | P03363 | Q5KSL6 | -0.45582  |
| 12409 | P03363 | Q76100 | -0.61656  |
| 12410 | P03363 | Q9H6B4 | -0.38099  |
| 12411 | P03363 | Q15342 | -0.28385  |
| 12412 | P03363 | A4D2P6 | -0.22739  |
| 12413 | P03363 | Q9BY50 | -0.44921  |
| 12414 | P03363 | Q96PL5 | -0.26341  |
| 12415 | P03363 | Q8IVT5 | -0.22741  |
| 12416 | P03363 | Q6ZRR9 | -0.10219  |
| 12417 | P03363 | Q16822 | -0.16191  |
| 12418 | P03363 | Q69YL0 | -0.042737 |
| 12419 | P03363 | Q13126 | -0.20654  |
| 12420 | P03363 | Q7Z602 | -0.64046  |
| 12421 | P03363 | Q9NQA5 | -0.5375   |
| 12422 | P03363 | Q8NI60 | -0.41925  |
| 12423 | P03363 | Q9HD45 | -0.36075  |
| 12424 | P03363 | O43749 | -0.61656  |
| 12425 | P03363 | Q99622 | -0.15822  |
| 12426 | P03363 | Q9HCM4 | -0.23775  |
| 12427 | P03363 | P05108 | -0.27726  |
| 12428 | P03363 | P0C672 | -0.32626  |
| 12429 | P03363 | Q9Y2D0 | -0.22548  |
| 12430 | P03363 | A8MTA8 | -0.14134  |
| 12431 | P03363 | A8MT33 | -0.22684  |
| 12432 | P03363 | Q5BKY9 | -0.031359 |
| 12433 | P03363 | Q9Y279 | -0.22741  |
| 12434 | P03363 | P51864 | -0.27361  |
| 12435 | P03363 | Q5JRM2 | -0.32626  |
| 12436 | P03363 | Q8IVU1 | -0.42241  |
| 12437 | P03363 | P0C025 | -0.07407  |
| 12438 | P03363 | P09382 | -0.26314  |
| 12439 | P03363 | Q03014 | -0.22763  |
| 12440 | P03363 | Q43292 | -0.25589  |
| 12441 | P03363 | P15311 | -0.22987  |
| 12442 | P03363 | O60256 | -0.16088  |
| 12443 | P03363 | P50150 | -0.30912  |
| 12444 | P03363 | Q9UBL6 | -0.22744  |
| 12445 | P03363 | Q6UX82 | -0.24531  |
| 12446 | P03363 | Q17RS7 | -0.21476  |
| 12447 | P03363 | P33765 | -0.60541  |
| 12448 | P03363 | C9J202 | -0.19944  |
| 12449 | P03363 | P43699 | -0.25714  |
| 12450 | P03363 | Q00391 | -0.79327  |
| 12451 | P03363 | Q96IZ2 | -0.47262  |
| 12452 | P03363 | Q00973 | -0.38324  |
| 12453 | P03363 | P15529 | -0.34244  |
| 12454 | P03363 | Q5SNX5 | -0.042737 |
| 12455 | P03363 | Q59F38 | -0.12005  |
| 12456 | P03363 | P09172 | -0.34489  |
| 12457 | P03363 | P06731 | -0.32292  |
| 12458 | P03363 | O95696 | -0.22645  |
| 12459 | P03363 | Q92794 | -0.2739   |
| 12460 | P03363 | Q96H15 | -0.32626  |
| 12461 | P03363 | Q9Y2K7 | -0.22736  |
| 12462 | P03363 | Q99795 | -0.58482  |
| 12463 | P03363 | P17174 | -0.22414  |
| 12464 | P03363 | A8MYZ6 | -0.27738  |

|       |        |        |           |
|-------|--------|--------|-----------|
| 12465 | P03363 | Q8IV32 | -0.026206 |
| 12466 | P03363 | Q96PY5 | -0.22731  |
| 12467 | P03363 | O95665 | -0.70808  |
| 12468 | P03363 | O00519 | -0.22178  |
| 12469 | P03363 | Q9BXJ7 | -0.56524  |
| 12470 | P03363 | O75864 | -0.22741  |
| 12471 | P03363 | Q9BVA1 | -0.2114   |
| 12472 | P03363 | Q9UPE1 | -0.51384  |
| 12473 | P03363 | A6NNS2 | -0.68592  |
| 12474 | P03363 | O95760 | -0.16909  |
| 12475 | P03363 | P01594 | -0.54902  |
| 12476 | P03363 | Q8N7B6 | -0.13928  |
| 12477 | P03363 | Q8IWZ6 | -0.21342  |
| 12478 | P03363 | Q8N0U2 | -0.32626  |
| 12479 | P03363 | P21283 | -0.22837  |
| 12480 | P03363 | O14511 | -0.78042  |
| 12481 | P03363 | Q9BZJ3 | -0.49563  |
| 12482 | P03363 | Q03169 | -0.18738  |
| 12483 | P03363 | P0C853 | -0.042737 |
| 12484 | P03363 | Q6P988 | -0.32464  |
| 12485 | P03363 | A6NDN8 | -0.22205  |
| 12486 | P03363 | Q9UJ94 | -0.042737 |
| 12487 | P03363 | A6NN92 | -0.43104  |
| 12488 | P03363 | O95502 | -0.59717  |
| 12489 | P03363 | Q9H4A5 | -0.048451 |
| 12490 | P03363 | Q8N442 | -0.29122  |
| 12491 | P03363 | O95168 | -0.29623  |
| 12492 | P03363 | P0CB38 | -0.2307   |
| 12493 | P03363 | Q5H9E4 | -0.29673  |
| 12494 | P03363 | P11511 | -0.30551  |
| 12495 | P03363 | P34820 | -0.45421  |
| 12496 | P03363 | Q92545 | -0.19187  |
| 12497 | P03363 | P52952 | -0.25683  |
| 12498 | P03363 | O00499 | -0.22741  |
| 12499 | P03363 | Q92769 | -0.1976   |
| 12500 | P03363 | Q07627 | -0.076191 |
| 12501 | P03363 | Q8N0Z9 | -0.32626  |
| 12502 | P03363 | Q8N7C7 | -0.47964  |
| 12503 | P03363 | Q96E40 | -0.18922  |
| 12504 | P03363 | Q9H2B4 | -0.42815  |
| 12505 | P03363 | Q9Y487 | -0.21387  |
| 12506 | P03363 | P21217 | -0.3251   |
| 12507 | P03363 | Q8NH90 | -0.61656  |
| 12508 | P03363 | Q8IZF2 | -0.6666   |
| 12509 | P03363 | Q8NDZ6 | -0.32626  |
| 12510 | P03363 | Q8WWF1 | -0.33992  |
| 12511 | P03363 | Q6ZSA7 | -0.51003  |
| 12512 | P03363 | Q53H96 | -0.42508  |
| 12513 | P03363 | Q9ULU8 | -0.19483  |
| 12514 | P03363 | Q8TEA7 | -0.46164  |
| 12515 | P03363 | Q8NGJ3 | -0.61656  |
| 12516 | P03363 | Q9HCC0 | -0.21514  |
| 12517 | P03363 | O95084 | -0.34795  |
| 12518 | P03363 | Q96NL1 | -0.3989   |
| 12519 | P03363 | Q13316 | -0.061066 |
| 12520 | P03363 | Q9UKY0 | -0.14558  |
| 12521 | P03363 | Q9BX51 | -0.20703  |
| 12522 | P03363 | Q70CQ2 | -0.25686  |
| 12523 | P03363 | P05013 | -0.3713   |
| 12524 | P03363 | Q6ZRZ4 | -0.33992  |
| 12525 | P03363 | O14727 | -0.22775  |
| 12526 | P03363 | O75355 | -0.51081  |
| 12527 | P03363 | Q14213 | -0.57695  |
| 12528 | P03363 | Q6ZVM7 | -0.19726  |
| 12529 | P03363 | P33121 | -0.50024  |
| 12530 | P03363 | Q9UNM6 | -0.19566  |
| 12531 | P03363 | O95567 | -0.042737 |
| 12532 | P03363 | Q96BN6 | -0.10488  |
| 12533 | P03363 | Q6ZNR0 | -0.2075   |
| 12534 | P03363 | Q9Y6A5 | -0.19886  |
| 12535 | P03363 | Q6ZS81 | -0.32626  |
| 12536 | P03363 | P0CW20 | -0.16055  |
| 12537 | P03363 | O75352 | -0.48076  |
| 12538 | P03363 | P53350 | -0.22742  |
| 12539 | P03363 | P22004 | -0.29643  |
| 12540 | P03363 | A6NHG4 | -0.22001  |

|       |        |        |           |
|-------|--------|--------|-----------|
| 12541 | P03363 | Q15415 | -0.2286   |
| 12542 | P03363 | Q8TE12 | -0.22689  |
| 12543 | P03363 | Q86WA6 | -0.21928  |
| 12544 | P03363 | P30460 | -0.59713  |
| 12545 | P03363 | Q9H1C4 | -0.48372  |
| 12546 | P03363 | P02458 | -0.31065  |
| 12547 | P03363 | Q14005 | -0.22597  |
| 12548 | P03363 | O95522 | -0.17842  |
| 12549 | P03363 | Q8N614 | -0.32626  |
| 12550 | P03363 | A6NDL8 | -0.61656  |
| 12551 | P03363 | Q9HD87 | -0.32626  |
| 12552 | P03363 | Q17RF5 | -0.33992  |
| 12553 | P03363 | P32119 | -0.22652  |
| 12554 | P03363 | Q14050 | -0.36137  |
| 12555 | P03363 | Q96EL1 | -0.040353 |
| 12556 | P03363 | Q96C12 | -0.19156  |
| 12557 | P03363 | P21359 | -0.22704  |
| 12558 | P03363 | P78362 | -0.22741  |
| 12559 | P03363 | P21980 | -0.20593  |
| 12560 | P03363 | Q15049 | -0.17709  |
| 12561 | P03363 | Q8IYP2 | -0.49563  |
| 12562 | P03363 | Q8N1D0 | -0.15785  |
| 12563 | P03363 | Q9H607 | -0.12026  |
| 12564 | P03363 | Q86TM6 | -0.22836  |
| 12565 | P03363 | Q5T5F5 | -0.042737 |
| 12566 | P03363 | Q8IUH4 | -0.4378   |
| 12567 | P03363 | Q9UGH3 | -0.33516  |
| 12568 | P03363 | Q9UIK5 | -0.62292  |
| 12569 | P03363 | Q96RN1 | -0.2284   |
| 12570 | P03363 | A6NFT4 | -0.22131  |
| 12571 | P03363 | P17980 | -0.36982  |
| 12572 | P03363 | Q9Y6T7 | -0.41747  |
| 12573 | P03363 | P18084 | -0.35351  |
| 12574 | P03363 | Q8IUS5 | -0.31429  |
| 12575 | P03363 | P25929 | -0.50651  |
| 12576 | P03363 | Q02742 | -0.33188  |
| 12577 | P03363 | P08263 | -0.22714  |
| 12578 | P03363 | Q9NQX0 | -0.20986  |
| 12579 | P03363 | Q8WVL7 | -0.2274   |
| 12580 | P03363 | Q8N755 | -0.32626  |
| 12581 | P03363 | P33947 | -0.24604  |
| 12582 | P03363 | Q9BPX7 | -0.11187  |
| 12583 | P03363 | P21926 | -0.25869  |
| 12584 | P03363 | Q9NZK5 | -0.47251  |
| 12585 | P03363 | Q03395 | -0.53906  |
| 12586 | P03363 | Q71RC9 | -0.32626  |
| 12587 | P03363 | Q96QT4 | -0.73978  |
| 12588 | P03363 | Q15649 | -0.21224  |
| 12589 | P03363 | Q13520 | -0.36209  |
| 12590 | P03363 | P98077 | -0.22741  |
| 12591 | P03363 | Q7Z2G1 | -0.15832  |
| 12592 | P03363 | P27658 | -0.4918   |
| 12593 | P03363 | Q15544 | -0.17721  |
| 12594 | P03363 | Q5SSG8 | -0.5037   |
| 12595 | P03363 | Q9NW15 | -0.50842  |
| 12596 | P03363 | Q9UHF5 | -0.46105  |
| 12597 | P03363 | Q95445 | -0.45587  |
| 12598 | P03363 | A8K979 | -0.20351  |
| 12599 | P03363 | Q9NYQ6 | -0.57677  |
| 12600 | P03363 | Q8NFK1 | -0.44534  |
| 12601 | P03363 | P51659 | -0.38986  |
| 12602 | P03363 | Q6NW34 | -0.32626  |
| 12603 | P03363 | P11055 | -0.12974  |
| 12604 | P03363 | Q8WYQ4 | -0.22034  |
| 12605 | P03363 | Q6TFL3 | -0.15159  |
| 12606 | P03363 | Q9UQ53 | -0.31974  |
| 12607 | P03363 | P30411 | -0.3248   |
| 12608 | P03363 | Q07889 | -0.22741  |
| 12609 | P03363 | Q6ZRM9 | -0.05099  |
| 12610 | P03363 | Q9ULH1 | -0.22744  |
| 12611 | P03363 | P13798 | -0.22753  |
| 12612 | P03363 | Q9H8Q6 | -0.019683 |
| 12613 | P03363 | Q9Y231 | -0.26417  |
| 12614 | P03363 | Q8N8A8 | -0.14089  |
| 12615 | P03363 | Q9H8Y5 | -0.22494  |
| 12616 | P03363 | Q9P0S3 | -0.51163  |

|       |        |        |           |
|-------|--------|--------|-----------|
| 12617 | P03363 | Q8TAQ9 | -0.3234   |
| 12618 | P03363 | Q9H173 | -0.21737  |
| 12619 | P03363 | Q16613 | -0.099245 |
| 12620 | P03363 | P48059 | -0.21676  |
| 12621 | P03363 | A8MW99 | -0.17752  |
| 12622 | P03363 | Q13103 | -0.36181  |
| 12623 | P03363 | P11836 | -0.51306  |
| 12624 | P03363 | Q86T65 | -0.22598  |
| 12625 | P03363 | Q8NET5 | -0.58751  |
| 12626 | P03363 | Q9BYN0 | -0.19036  |
| 12627 | P03363 | Q6P9F7 | -0.32626  |
| 12628 | P03363 | Q5JVX7 | -0.046201 |
| 12629 | P03363 | Q16527 | -0.22915  |
| 12630 | P03363 | P51589 | -0.53518  |
| 12631 | P03363 | H3BU77 | -0.089778 |
| 12632 | P03363 | Q969R5 | -0.17303  |
| 12633 | P03363 | Q9BY15 | -1.0122   |
| 12634 | P03363 | Q0P670 | -0.32626  |
| 12635 | P03363 | Q14967 | -0.4939   |
| 12636 | P03363 | Q07864 | -0.22474  |
| 12637 | P03363 | Q6SZW1 | -0.20426  |
| 12638 | P03363 | Q9BQQ3 | -0.21336  |
| 12639 | P03363 | Q6ZVE7 | -0.090669 |
| 12640 | P03363 | P46098 | -0.49161  |
| 12641 | P03363 | Q58EX7 | -0.22737  |
| 12642 | P03363 | Q9UL63 | -0.2258   |
| 12643 | P03363 | Q8TF66 | -0.32626  |
| 12644 | P03363 | Q9BV35 | -0.34281  |
| 12645 | P03363 | Q96MS3 | -0.17114  |
| 12646 | P03363 | Q8WY07 | -0.44667  |
| 12647 | P03363 | Q9ULI3 | -0.55665  |
| 12648 | P03363 | C4AMC7 | -0.21267  |
| 12649 | P03363 | Q9Y397 | -0.4143   |
| 12650 | P03363 | Q8IXH8 | -0.57898  |
| 12651 | P03363 | Q3SYC2 | -0.43717  |
| 12652 | P03363 | Q8NBN7 | -0.43578  |
| 12653 | P03363 | Q5FYA8 | -0.35293  |
| 12654 | P03363 | Q66K14 | -0.80734  |
| 12655 | P03363 | O00750 | -0.22743  |
| 12656 | P03363 | B8ZZ34 | -0.32626  |
| 12657 | P03363 | Q5T6C5 | -0.039165 |
| 12658 | P03363 | Q6P461 | -0.43534  |
| 12659 | P03363 | Q15614 | -0.61656  |
| 12660 | P03363 | Q9NYZ2 | -0.37848  |
| 12661 | P03363 | Q9UKS7 | -0.29405  |
| 12662 | P03363 | Q8N8I0 | -0.22702  |
| 12663 | P03363 | O43182 | -0.26658  |
| 12664 | P03363 | P62807 | -0.14534  |
| 12665 | P03363 | P01282 | -0.30155  |
| 12666 | P03363 | P28329 | -0.22598  |
| 12667 | P03363 | Q8IV48 | -0.19631  |
| 12668 | P03363 | Q60241 | -0.66213  |
| 12669 | P03363 | Q12860 | -0.23089  |
| 12670 | P03363 | Q9Y2L6 | -0.23522  |
| 12671 | P03363 | Q9H6A9 | -0.32626  |
| 12672 | P03363 | Q8IV50 | -0.18355  |
| 12673 | P03363 | Q9UQ16 | -0.23039  |
| 12674 | P03363 | Q96H72 | -0.25656  |
| 12675 | P03363 | A2RRL7 | -0.32626  |
| 12676 | P03363 | Q5M8T2 | -0.27356  |
| 12677 | P03363 | P46459 | -0.24053  |
| 12678 | P03363 | Q9UBX7 | -0.49918  |
| 12679 | P03363 | Q8IXZ2 | -0.21877  |
| 12680 | P03363 | Q9BUK6 | -0.15914  |
| 12681 | P03363 | A2RUR9 | -0.20634  |
| 12682 | P03363 | O14791 | -0.20231  |
| 12683 | P03363 | Q4G0N0 | -0.25948  |
| 12684 | P03363 | Q02108 | -0.27274  |
| 12685 | P03363 | P33908 | -0.3589   |
| 12686 | P03363 | Q9BRR9 | -0.43354  |
| 12687 | P03363 | Q6ZTZ1 | -0.1186   |
| 12688 | P03363 | Q16363 | -0.51752  |
| 12689 | P03363 | Q9Y639 | -0.43673  |
| 12690 | P03363 | Q58FF6 | -0.13259  |
| 12691 | P03363 | Q969X5 | -0.18528  |
| 12692 | P03363 | Q9NUB1 | -0.24459  |

|       |        |        |           |
|-------|--------|--------|-----------|
| 12693 | P03363 | Q8WYN0 | -0.19448  |
| 12694 | P03363 | A8K0R7 | -0.27953  |
| 12695 | P03363 | P63211 | -0.36983  |
| 12696 | P03363 | Q13402 | -0.21574  |
| 12697 | P03363 | Q9UIG0 | -0.22675  |
| 12698 | P03363 | Q9NPF4 | -0.16885  |
| 12699 | P03363 | Q9GIP4 | -0.33967  |
| 12700 | P03363 | Q5T0N5 | -0.22741  |
| 12701 | P03363 | Q15109 | -0.45818  |
| 12702 | P03363 | Q2TAA8 | -0.10685  |
| 12703 | P03363 | Q15020 | -0.22753  |
| 12704 | P03363 | Q6P4A7 | -0.40371  |
| 12705 | P03363 | Q95447 | -0.12036  |
| 12706 | P03363 | Q9H1B5 | -0.43346  |
| 12707 | P03363 | Q9H6K5 | -0.031359 |
| 12708 | P03363 | Q96EK6 | -0.10245  |
| 12709 | P03363 | Q9H0D2 | -0.2269   |
| 12710 | P03363 | Q9NYW3 | -0.47677  |
| 12711 | P03363 | P12644 | -0.22741  |
| 12712 | P03363 | Q8NBX0 | -0.39481  |
| 12713 | P03363 | Q13615 | -0.21551  |
| 12714 | P03363 | Q96DR5 | -0.41496  |
| 12715 | P03363 | Q16842 | -0.36723  |
| 12716 | P03363 | Q60519 | -0.20965  |
| 12717 | P03363 | Q8IYU4 | -0.18515  |
| 12718 | P03363 | P37268 | -0.55924  |
| 12719 | P03363 | Q8TDE3 | -0.20472  |
| 12720 | P03363 | Q9NP86 | -0.227    |
| 12721 | P03363 | P05155 | -0.2787   |
| 12722 | P03363 | Q75310 | -0.4641   |
| 12723 | P03363 | Q16539 | -0.22741  |
| 12724 | P03363 | Q7Z7B0 | -0.22563  |
| 12725 | P03363 | Q6UXE8 | -0.22835  |
| 12726 | P03363 | Q5DJT8 | -0.15722  |
| 12727 | P03363 | P46089 | -0.71021  |
| 12728 | P03363 | Q9Y3Q3 | -0.31983  |
| 12729 | P03363 | Q9P2D3 | -0.016071 |
| 12730 | P03363 | P61565 | -0.22613  |
| 12731 | P03363 | Q8IVL1 | -0.22745  |
| 12732 | P03363 | Q9HA77 | -0.051973 |
| 12733 | P03363 | Q9BVL4 | -0.012104 |
| 12734 | P03363 | Q9NRD8 | -0.49491  |
| 12735 | P03363 | Q60312 | -0.39263  |
| 12736 | P03363 | Q8IZT8 | -0.23071  |
| 12737 | P03363 | Q8NF86 | -0.54971  |
| 12738 | P03363 | P10912 | -0.22747  |
| 12739 | P03363 | Q9NS75 | -0.59006  |
| 12740 | P03363 | A8MZF0 | -0.031359 |
| 12741 | P03363 | Q16832 | -0.62786  |
| 12742 | P03363 | Q05996 | -0.76622  |
| 12743 | P03363 | Q5VST6 | -0.32464  |
| 12744 | P03363 | P01815 | -0.54902  |
| 12745 | P03363 | P28222 | -0.4305   |
| 12746 | P03363 | Q7RTR2 | -0.22741  |
| 12747 | P03363 | A0MZ66 | -0.14233  |
| 12748 | P03363 | Q9BQ39 | -0.23107  |
| 12749 | P03363 | P30498 | -0.54957  |
| 12750 | P03363 | Q9BWW9 | -0.26494  |
| 12751 | P03363 | Q9BYT3 | -0.29897  |
| 12752 | P03363 | Q4G0S4 | -0.42968  |
| 12753 | P03363 | Q709C8 | -0.080644 |
| 12754 | P03363 | Q16581 | -0.5835   |
| 12755 | P03363 | P43320 | -0.15389  |
| 12756 | P03363 | P01033 | -0.21869  |
| 12757 | P03363 | P50454 | -0.25663  |
| 12758 | P03363 | O00469 | -0.55885  |
| 12759 | P03363 | Q9Y478 | -0.22445  |
| 12760 | P03363 | Q13445 | -0.18852  |
| 12761 | P03363 | Q6ZMM2 | -0.45003  |
| 12762 | P03363 | Q8IUQ4 | -0.22656  |
| 12763 | P03363 | Q6ZT52 | -0.20443  |
| 12764 | P03363 | A8MPP1 | -0.24501  |
| 12765 | P03363 | Q96H96 | -0.30997  |
| 12766 | P03363 | P55773 | -0.63073  |
| 12767 | P03363 | P31512 | -0.70182  |
| 12768 | P03363 | P36222 | -0.28145  |

|       |        |        |           |
|-------|--------|--------|-----------|
| 12769 | P03363 | Q9UM73 | -0.81516  |
| 12770 | P03363 | Q9UNE0 | -0.19994  |
| 12771 | P03363 | Q5KU26 | -0.30409  |
| 12772 | P03363 | Q9NT68 | -0.24261  |
| 12773 | P03363 | Q93091 | -0.18525  |
| 12774 | P03363 | Q95013 | -0.61656  |
| 12775 | P03363 | Q5VST9 | -0.36385  |
| 12776 | P03363 | Q9NZP2 | -0.61656  |
| 12777 | P03363 | Q9H8H3 | -0.21686  |
| 12778 | P03363 | Q9NY35 | -0.34301  |
| 12779 | P03363 | P98174 | -0.38717  |
| 12780 | P03363 | P78334 | -0.43694  |
| 12781 | P03363 | Q68DD2 | -0.22765  |
| 12782 | P03363 | Q9BSD7 | -0.30716  |
| 12783 | P03363 | P43362 | -0.16966  |
| 12784 | P03363 | A8MYB1 | -0.32626  |
| 12785 | P03363 | Q8IZF6 | -0.6666   |
| 12786 | P03363 | Q5I0X4 | -0.031359 |
| 12787 | P03363 | Q8N9I1 | -0.32626  |
| 12788 | P03363 | Q9Y6A4 | -0.18072  |
| 12789 | P03363 | Q8N6T0 | -0.054137 |
| 12790 | P03363 | Q24JP5 | -0.38469  |
| 12791 | P03363 | Q8WVF1 | -0.1973   |
| 12792 | P03363 | Q8N511 | -0.32626  |
| 12793 | P03363 | Q9GZT5 | -0.5017   |
| 12794 | P03363 | Q6PID8 | -0.22717  |
| 12795 | P03363 | O60266 | -0.35977  |
| 12796 | P03363 | B2RXH4 | -0.2263   |
| 12797 | P03363 | Q8NGC0 | -0.61656  |
| 12798 | P03363 | Q15118 | -0.40242  |
| 12799 | P03363 | A1L162 | -0.15498  |
| 12800 | P03363 | O00254 | -0.52452  |
| 12801 | P03363 | Q92542 | -0.29767  |
| 12802 | P03363 | Q68DL7 | -0.042737 |
| 12803 | P03363 | Q14697 | -0.22215  |
| 12804 | P03363 | P61570 | -0.22613  |
| 12805 | P03363 | Q5VXT5 | -0.35711  |
| 12806 | P03363 | Q9NR96 | -0.38807  |
| 12807 | P03363 | Q6UXN2 | -0.33992  |
| 12808 | P03363 | Q6NUJ1 | -0.42786  |
| 12809 | P03363 | P48067 | -0.48731  |
| 12810 | P03363 | Q5VXU3 | -0.20369  |
| 12811 | P03363 | Q92537 | -0.22719  |
| 12812 | P03363 | Q9NNX1 | -0.294    |
| 12813 | P03363 | Q14197 | -0.17059  |
| 12814 | P03363 | A0PJW6 | -0.32227  |
| 12815 | P03363 | O15399 | -0.41738  |
| 12816 | P03363 | Q8N2K0 | -0.3013   |
| 12817 | P03363 | P06870 | -0.24715  |
| 12818 | P03363 | Q8TBJ4 | -0.30961  |
| 12819 | P03363 | P32314 | -0.28447  |
| 12820 | P03363 | Q86TM3 | -0.29567  |
| 12821 | P03363 | Q9P266 | -0.059407 |
| 12822 | P03363 | Q9BVG3 | -0.27953  |
| 12823 | P03363 | Q9Y2H2 | -0.21667  |
| 12824 | P03363 | Q9HAD4 | -0.22741  |
| 12825 | P03363 | Q15738 | -0.67503  |
| 12826 | P03363 | Q3MHD2 | -0.071314 |
| 12827 | P03363 | A0PK05 | -0.32626  |
| 12828 | P03363 | Q9NYV7 | -0.22952  |
| 12829 | P03363 | P43146 | -0.23072  |
| 12830 | P03363 | P25116 | -0.31981  |
| 12831 | P03363 | Q3LFD5 | -0.27277  |
| 12832 | P03363 | Q95819 | -0.22959  |
| 12833 | P03363 | P00414 | -0.28964  |
| 12834 | P03363 | Q9HA38 | -0.18898  |
| 12835 | P03363 | Q9Y617 | -0.11681  |
| 12836 | P03363 | Q6IA17 | -0.22741  |
| 12837 | P03363 | Q9UPQ3 | -0.55129  |
| 12838 | P03363 | O94953 | -0.19451  |
| 12839 | P03363 | P06734 | -0.83532  |
| 12840 | P03363 | P23510 | -0.31985  |
| 12841 | P03363 | O00233 | -0.22592  |
| 12842 | P03363 | A6NKW6 | -0.32626  |
| 12843 | P03363 | Q9H165 | -0.22733  |
| 12844 | P03363 | Q8NGX8 | -0.61656  |

|       |        |        |           |
|-------|--------|--------|-----------|
| 12845 | P03363 | Q5VTT2 | -0.32626  |
| 12846 | P03363 | P32942 | -0.25898  |
| 12847 | P03363 | O43908 | -0.3258   |
| 12848 | P03363 | A5PLL7 | -0.52348  |
| 12849 | P03363 | Q9UJ78 | -0.1342   |
| 12850 | P03363 | Q8IZP1 | -0.50908  |
| 12851 | P03363 | Q16627 | -0.47394  |
| 12852 | P03363 | Q6MZZ7 | -0.33515  |
| 12853 | P03363 | B3GLJ2 | -0.33992  |
| 12854 | P03363 | Q96Q40 | -0.54588  |
| 12855 | P03363 | P61916 | -0.2233   |
| 12856 | P03363 | Q9Y2I1 | -0.22741  |
| 12857 | P03363 | Q16473 | -0.22742  |
| 12858 | P03363 | Q9H269 | -0.11155  |
| 12859 | P03363 | Q96J84 | -0.37534  |
| 12860 | P03363 | P17026 | -0.14601  |
| 12861 | P03363 | A1YPR0 | -0.22756  |
| 12862 | P03363 | O60613 | -0.069728 |
| 12863 | P03363 | Q9Y5Y7 | -0.51829  |
| 12864 | P03363 | Q9HCQ5 | -0.30462  |
| 12865 | P03363 | Q9NRC6 | -0.22818  |
| 12866 | P03363 | Q9Y5X1 | -0.2274   |
| 12867 | P03363 | Q96AP7 | -0.39509  |
| 12868 | P03363 | Q95932 | -0.2243   |
| 12869 | P03363 | P04207 | -0.54902  |
| 12870 | P03363 | O75072 | -0.23675  |
| 12871 | P03363 | Q13464 | -0.22754  |
| 12872 | P03363 | Q13885 | -0.2121   |
| 12873 | P03363 | Q9P1Z0 | -0.2263   |
| 12874 | P03363 | Q8N461 | -0.22555  |
| 12875 | P03363 | P49760 | -0.22741  |
| 12876 | P03363 | Q6DN03 | -0.14674  |
| 12877 | P03363 | Q6ZR03 | -0.13029  |
| 12878 | P03363 | P42127 | -0.54356  |
| 12879 | P03363 | Q8NB78 | -0.22815  |
| 12880 | P03363 | Q13319 | -0.17433  |
| 12881 | P03363 | P32321 | -0.21721  |
| 12882 | P03363 | Q8WWP7 | -0.67422  |
| 12883 | P03363 | Q96PP4 | -0.13583  |
| 12884 | P03363 | P05231 | -0.23236  |
| 12885 | P03363 | Q96K12 | -0.8038   |
| 12886 | P03363 | Q9Y2Q3 | -0.25337  |
| 12887 | P03363 | Q2TBE0 | -0.092418 |
| 12888 | P03363 | Q6UXU4 | -0.32626  |
| 12889 | P03363 | Q8NEQ5 | -0.32626  |
| 12890 | P03363 | P13765 | -0.51638  |
| 12891 | P03363 | Q8WUA7 | -0.4852   |
| 12892 | P03363 | P43627 | -0.47883  |
| 12893 | P03363 | Q5S007 | -0.27859  |
| 12894 | P03363 | Q8TB24 | -0.29966  |
| 12895 | P03363 | Q6ZSA8 | -0.042737 |
| 12896 | P03363 | P0CJ71 | -0.13673  |
| 12897 | P03363 | Q8IYY4 | -0.2386   |
| 12898 | P03363 | Q9Y4C5 | -0.38138  |
| 12899 | P03363 | Q8N2U9 | -0.32626  |
| 12900 | P03363 | Q9NQ11 | -0.57982  |
| 12901 | P03363 | P57735 | -0.25941  |
| 12902 | P03363 | Q8TDY8 | -0.47262  |
| 12903 | P03363 | Q5JSL3 | -0.22721  |
| 12904 | P03363 | Q9NX31 | -0.17439  |
| 12905 | P03363 | Q96DT6 | -0.174    |
| 12906 | P03363 | O60353 | -0.26967  |
| 12907 | P03363 | Q8N142 | -0.21476  |
| 12908 | P03363 | Q4VC31 | -0.21147  |
| 12909 | P03363 | A5PLN7 | -0.031359 |
| 12910 | P03363 | P63123 | -0.11758  |
| 12911 | P03363 | O14772 | -0.17752  |
| 12912 | P03363 | Q9Y6Q6 | -0.22734  |
| 12913 | P03363 | O71037 | -0.22613  |
| 12914 | P03363 | Q6GTX8 | -0.22662  |
| 12915 | P03363 | Q9NZV8 | -0.35682  |
| 12916 | P03363 | P01617 | -0.54902  |
| 12917 | P03363 | P58294 | -0.2919   |
| 12918 | P03363 | O75311 | -0.44702  |
| 12919 | P03363 | A6NC57 | -0.22741  |
| 12920 | P03363 | O14718 | -0.61337  |

|       |        |        |           |
|-------|--------|--------|-----------|
| 12921 | P03363 | A6NKP2 | -0.38289  |
| 12922 | P03363 | Q96T54 | -0.54503  |
| 12923 | P03363 | P21953 | -0.16989  |
| 12924 | P03363 | Q14694 | -0.23749  |
| 12925 | P03363 | Q6ZPD8 | -0.48568  |
| 12926 | P03363 | Q9H2X6 | -0.22741  |
| 12927 | P03363 | Q6P2C0 | -0.082363 |
| 12928 | P03363 | Q14094 | -0.21739  |
| 12929 | P03363 | Q9UMQ6 | -0.34805  |
| 12930 | P03363 | P0C881 | -0.19685  |
| 12931 | P03363 | P61018 | -0.47509  |
| 12932 | P03363 | Q86WI0 | -0.32626  |
| 12933 | P03363 | Q16644 | -0.22834  |
| 12934 | P03363 | Q96SY0 | -0.17134  |
| 12935 | P03363 | P48664 | -0.5469   |
| 12936 | P03363 | Q6PI25 | -0.22429  |
| 12937 | P03363 | P51575 | -0.34164  |
| 12938 | P03363 | P47870 | -0.38039  |
| 12939 | P03363 | P46597 | -0.21583  |
| 12940 | P03363 | Q9NRQ5 | -0.19187  |
| 12941 | P03363 | P35611 | -0.21805  |
| 12942 | P03363 | Q9H422 | -0.22741  |
| 12943 | P03363 | Q96LJ8 | -0.077938 |
| 12944 | P03363 | P02746 | -0.25777  |
| 12945 | P03363 | P51828 | -0.59465  |
| 12946 | P03363 | O43897 | -0.64611  |
| 12947 | P03363 | Q8N2M4 | -0.32626  |
| 12948 | P03363 | P55073 | -0.59844  |
| 12949 | P03363 | P56748 | -0.3396   |
| 12950 | P03363 | Q9H172 | -0.6567   |
| 12951 | P03363 | Q9H3Z4 | -0.2774   |
| 12952 | P03363 | Q96DZ5 | -0.29491  |
| 12953 | P03363 | Q6UE05 | -0.32626  |
| 12954 | P03363 | Q13258 | -0.27432  |
| 12955 | P03363 | P01374 | -0.44444  |
| 12956 | P03363 | Q9UK97 | -0.20545  |
| 12957 | P03363 | P35372 | -0.25257  |
| 12958 | P03363 | Q8NFX4 | -0.30345  |
| 12959 | P03363 | Q8TAA1 | -0.17917  |
| 12960 | P03363 | Q9ULR3 | -0.19456  |
| 12961 | P03363 | Q96EY9 | -0.19917  |
| 12962 | P03363 | Q9NYL4 | -0.34479  |
| 12963 | P03363 | Q9P2T1 | -0.33287  |
| 12964 | P03363 | Q8TDV5 | -0.67242  |
| 12965 | P03363 | Q6UW63 | -0.22118  |
| 12966 | P03363 | Q13325 | -0.22494  |
| 12967 | P03363 | Q9Y234 | -0.11754  |
| 12968 | P03363 | Q9C0H5 | -0.22759  |
| 12969 | P03363 | Q96P67 | -0.64046  |
| 12970 | P03363 | P22749 | -0.40411  |
| 12971 | P03363 | Q9NUQ7 | -0.23     |
| 12972 | P03363 | Q9HCQ7 | -0.51466  |
| 12973 | P03363 | P40313 | -0.30726  |
| 12974 | P03363 | P20809 | -0.087675 |
| 12975 | P03363 | P31997 | -0.4605   |
| 12976 | P03363 | Q9NWH2 | -0.32626  |
| 12977 | P03363 | Q8WV15 | -0.32626  |
| 12978 | P03363 | Q15842 | -0.48828  |
| 12979 | P03363 | Q9BV87 | -0.32542  |
| 12980 | P03363 | Q96PX6 | -0.22063  |
| 12981 | P03363 | Q96P26 | -0.13966  |
| 12982 | P03363 | A0M8Q6 | -0.5251   |
| 12983 | P03363 | Q96MF2 | -0.22739  |
| 12984 | P03363 | Q9UNF1 | -0.19668  |
| 12985 | P03363 | O43927 | -0.42015  |
| 12986 | P03363 | A4D1T9 | -0.43459  |
| 12987 | P03363 | P30679 | -0.47582  |
| 12988 | P03363 | Q16549 | -0.44278  |
| 12989 | P03363 | Q9Y5P1 | -0.61656  |
| 12990 | P03363 | Q9ULI0 | -0.32966  |
| 12991 | P03363 | Q5JPE7 | -0.21563  |
| 12992 | P03363 | O15063 | -0.04971  |
| 12993 | P03363 | Q9NWS6 | -0.32626  |
| 12994 | P03363 | Q9Y6Y8 | -0.21663  |
| 12995 | P03363 | P0C2L3 | -0.32626  |
| 12996 | P03363 | A0AVF1 | -0.13836  |



|       |        |        |           |
|-------|--------|--------|-----------|
| 12997 | P03363 | P0C7Q6 | -0.32626  |
| 12998 | P03363 | Q9Y312 | -0.15613  |
| 12999 | P03363 | Q7Z7C7 | -0.078092 |
| 13000 | P03363 | Q58FG1 | -0.13533  |
| 13001 | P03363 | A1L170 | -0.042737 |
| 13002 | P03363 | Q5QGS0 | -0.18422  |
| 13003 | P03363 | Q9BPW5 | -0.51767  |
| 13004 | P03363 | Q50LG9 | -0.32626  |
| 13005 | P03363 | Q9NQX4 | -0.21146  |
| 13006 | P03363 | Q6P5S7 | -0.18683  |
| 13007 | P03363 | Q9BXX0 | -0.22742  |
| 13008 | P03363 | Q96ER3 | -0.32807  |
| 13009 | P03363 | A2RUG3 | -0.32626  |
| 13010 | P03363 | Q9BXS0 | -0.93802  |
| 13011 | P03363 | Q7Z3F1 | -0.43729  |
| 13012 | P03363 | Q9NRD9 | -0.59247  |
| 13013 | P03363 | Q7Z7M8 | -0.31422  |
| 13014 | P03363 | Q92802 | -0.19411  |
| 13015 | P03363 | P05106 | -0.23454  |
| 13016 | P03363 | Q9NXE8 | -0.071007 |
| 13017 | P03363 | P02686 | -0.377    |
| 13018 | P03363 | Q9P2M4 | -0.49279  |
| 13019 | P03363 | P16455 | -0.13365  |
| 13020 | P03363 | Q93086 | -0.4872   |
| 13021 | P03363 | Q8TAM1 | -0.19025  |
| 13022 | P03363 | Q9Y4F4 | -0.21315  |
| 13023 | P03363 | Q9Y2R4 | -0.24696  |
| 13024 | P03363 | Q8N6V4 | -0.13825  |
| 13025 | P03363 | A0PJZ0 | -0.22741  |
| 13026 | P03363 | Q8N2R0 | -0.22096  |
| 13027 | P03363 | Q8NEV1 | -0.54283  |
| 13028 | P03363 | Q8NGI2 | -0.61656  |
| 13029 | P03363 | Q8NFU4 | -0.33992  |
| 13030 | P03363 | P01019 | -0.25133  |
| 13031 | P03363 | Q14796 | -0.22741  |
| 13032 | P03363 | Q8IZ41 | -0.29499  |
| 13033 | P03363 | Q99932 | -0.042737 |
| 13034 | P03363 | Q14714 | -0.49135  |
| 13035 | P03363 | Q6IPX1 | -0.50908  |
| 13036 | P03363 | Q96HP4 | -0.23549  |
| 13037 | P03363 | Q9Y5T4 | -0.35448  |
| 13038 | P03363 | Q9H6A0 | -0.21263  |
| 13039 | P03363 | Q6P2H8 | -0.32626  |
| 13040 | P03363 | Q8N387 | -0.81585  |
| 13041 | P03363 | O00559 | -0.40387  |
| 13042 | P03363 | O75326 | -0.22739  |
| 13043 | P03363 | Q96JF0 | -0.35822  |
| 13044 | P03363 | Q9UPV7 | -0.1157   |
| 13045 | P03363 | P05164 | -0.22649  |
| 13046 | P03363 | Q8IVB4 | -0.44061  |
| 13047 | P03363 | Q9NPF7 | -0.28777  |
| 13048 | P03363 | Q92633 | -0.22788  |
| 13049 | P03363 | P08686 | -0.56891  |
| 13050 | P03363 | Q96PW8 | -0.22604  |
| 13051 | P03363 | Q05952 | -0.32567  |
| 13052 | P03363 | Q9Y574 | -0.22749  |
| 13053 | P03363 | Q00604 | -0.46269  |
| 13054 | P03363 | Q13822 | -0.47758  |
| 13055 | P03363 | Q9BRQ5 | -0.18141  |
| 13056 | P03363 | A6NDN3 | -0.13499  |
| 13057 | P03363 | P31629 | -0.22751  |
| 13058 | P03363 | Q92859 | -0.40841  |
| 13059 | P03363 | P25105 | -0.50138  |
| 13060 | P03363 | Q8NFX8 | -0.40601  |
| 13061 | P03363 | P61165 | -0.32626  |
| 13062 | P03363 | Q8IUL8 | -0.34833  |
| 13063 | P03363 | Q6ZMT4 | -0.26107  |
| 13064 | P03363 | Q9Y6K8 | -0.21359  |
| 13065 | P03363 | Q9P0G3 | -0.45476  |
| 13066 | P03363 | P05109 | -0.22829  |
| 13067 | P03363 | P27169 | -0.45165  |
| 13068 | P03363 | Q9P0V9 | -0.22554  |
| 13069 | P03363 | P57729 | -0.40793  |
| 13070 | P03363 | P48730 | -0.22741  |
| 13071 | P03363 | P01717 | -0.54902  |
| 13072 | P03363 | Q5T2R2 | -0.19284  |

|       |        |        |           |
|-------|--------|--------|-----------|
| 13073 | P03363 | O94889 | -0.19523  |
| 13074 | P03363 | A6NJJ6 | -0.031359 |
| 13075 | P03363 | Q96K21 | -0.22454  |
| 13076 | P03363 | Q8WV74 | -0.17704  |
| 13077 | P03363 | P84996 | -0.34091  |
| 13078 | P03363 | Q92805 | -0.22323  |
| 13079 | P03363 | Q7Z7N9 | -0.32626  |
| 13080 | P03363 | Q9NSE4 | -0.063122 |
| 13081 | P03363 | Q8NGG1 | -0.50046  |
| 13082 | P03363 | P08217 | -0.49563  |
| 13083 | P03363 | P07148 | -0.22598  |
| 13084 | P03363 | Q5JUK9 | -0.07747  |
| 13085 | P03363 | Q30201 | -0.34711  |
| 13086 | P03363 | Q6XCG6 | -0.042737 |
| 13087 | P03363 | Q9ULP9 | -0.20646  |
| 13088 | P03363 | P48549 | -0.22251  |
| 13089 | P03363 | Q6BDI9 | -0.16904  |
| 13090 | P03363 | Q9UKX5 | -0.44838  |
| 13091 | P03363 | Q86VH2 | -0.24931  |
| 13092 | P03363 | Q9BZL6 | -0.2273   |
| 13093 | P03363 | Q8NGL3 | -0.61656  |
| 13094 | P03363 | P55082 | -0.47262  |
| 13095 | P03363 | Q9Y463 | -0.22741  |
| 13096 | P03363 | Q95047 | -0.61656  |
| 13097 | P03363 | Q96Q04 | -0.59102  |
| 13098 | P03363 | Q9NUD9 | -0.43894  |
| 13099 | P03363 | Q8N4U5 | -0.17612  |
| 13100 | P03363 | Q92502 | -0.33184  |
| 13101 | P03363 | Q15072 | -0.57094  |
| 13102 | P03363 | Q8NAU1 | -0.75997  |
| 13103 | P03363 | A6NJJ4 | -0.32626  |
| 13104 | P03363 | A6NDE8 | -0.17634  |
| 13105 | P03363 | Q9H761 | -0.13804  |
| 13106 | P03363 | Q8NEG7 | -0.085206 |
| 13107 | P03363 | P35354 | -0.23815  |
| 13108 | P03363 | P0DJJ1 | -0.22453  |
| 13109 | P03363 | O43520 | -0.38309  |
| 13110 | P03363 | Q9H0Q3 | -0.41876  |
| 13111 | P03363 | Q9HAE3 | -0.22825  |
| 13112 | P03363 | Q5T870 | -0.011822 |
| 13113 | P03363 | Q14849 | -0.32291  |
| 13114 | P03363 | Q9H867 | -0.21882  |
| 13115 | P03363 | P24592 | -0.31066  |
| 13116 | P03363 | Q9GZX6 | -0.41986  |
| 13117 | P03363 | P01178 | -0.26417  |
| 13118 | P03363 | Q9H3K6 | -0.10968  |
| 13119 | P03363 | Q14534 | -0.68591  |
| 13120 | P03363 | Q9HC97 | -0.73419  |
| 13121 | P03363 | Q8ND30 | -0.22666  |
| 13122 | P03363 | Q96P66 | -0.64046  |
| 13123 | P03363 | Q3SXY8 | -0.22753  |
| 13124 | P03363 | Q86T13 | -0.32927  |
| 13125 | P03363 | P13725 | -0.28949  |
| 13126 | P03363 | Q9UPR6 | -0.10615  |
| 13127 | P03363 | Q9UHL0 | -0.18722  |
| 13128 | P03363 | Q8NET6 | -0.333    |
| 13129 | P03363 | Q99572 | -0.23637  |
| 13130 | P03363 | Q04671 | -0.18176  |
| 13131 | P03363 | Q86UD5 | -0.38716  |
| 13132 | P03363 | P52907 | -0.21008  |
| 13133 | P03363 | Q86VQ6 | -0.23397  |
| 13134 | P03363 | P47944 | -0.076851 |
| 13135 | P03363 | P58658 | -0.32927  |
| 13136 | P03363 | P17542 | -0.22749  |
| 13137 | P03363 | P48764 | -0.25396  |
| 13138 | P03363 | Q14512 | -0.26631  |
| 13139 | P03363 | Q9UJH8 | -0.47987  |
| 13140 | P03363 | Q8NFD2 | -0.54205  |
| 13141 | P03363 | Q8TAC9 | -0.11978  |
| 13142 | P03363 | P34931 | -0.22618  |
| 13143 | P03363 | O14626 | -0.62051  |
| 13144 | P03363 | Q401N2 | -0.50013  |
| 13145 | P03363 | Q8N616 | -0.042737 |
| 13146 | P03363 | P28068 | -0.46054  |
| 13147 | P03363 | Q14993 | -0.53334  |
| 13148 | P03363 | Q96G30 | -0.227    |

|       |        |        |           |
|-------|--------|--------|-----------|
| 13149 | P03363 | O96011 | -0.15279  |
| 13150 | P03363 | P29803 | -0.22555  |
| 13151 | P03363 | Q13887 | -0.22554  |
| 13152 | P03363 | Q5GAN3 | -0.18592  |
| 13153 | P03363 | A6NJK2 | -0.22741  |
| 13154 | P03363 | Q9H6R6 | -0.62928  |
| 13155 | P03363 | P02461 | -0.22744  |
| 13156 | P03363 | P57105 | -0.31247  |
| 13157 | P03363 | Q06141 | -0.37732  |
| 13158 | P03363 | P04075 | -0.24905  |
| 13159 | P03363 | Q9BZM6 | -0.38126  |
| 13160 | P03363 | Q9NPH9 | -0.20271  |
| 13161 | P03363 | O94919 | -0.17106  |
| 13162 | P03363 | Q8TCU6 | -0.22745  |
| 13163 | P03363 | P16189 | -0.36051  |
| 13164 | P03363 | Q8N183 | -0.17051  |
| 13165 | P03363 | Q5JXX5 | -0.43764  |
| 13166 | P03363 | Q9H3V2 | -0.32626  |
| 13167 | P03363 | A2RRP1 | -0.12432  |
| 13168 | P03363 | I3L1I5 | -0.067242 |
| 13169 | P03363 | Q9Y226 | -0.40539  |
| 13170 | P03363 | Q9Y5S1 | -0.42317  |
| 13171 | P03363 | Q95450 | -0.56881  |
| 13172 | P03363 | Q96NI6 | -0.32626  |
| 13173 | P03363 | Q9BRI3 | -0.31586  |
| 13174 | P03363 | P58876 | -0.14658  |
| 13175 | P03363 | Q6WRI0 | -0.41505  |
| 13176 | P03363 | P35240 | -0.22958  |
| 13177 | P03363 | Q8TE82 | -0.21218  |
| 13178 | P03363 | Q86WK6 | -0.62222  |
| 13179 | P03363 | Q9NS40 | -0.50886  |
| 13180 | P03363 | P54851 | -0.34924  |
| 13181 | P03363 | Q75891 | -0.27851  |
| 13182 | P03363 | P01570 | -0.43608  |
| 13183 | P03363 | Q96P69 | -0.63766  |
| 13184 | P03363 | A7E2U8 | -0.11717  |
| 13185 | P03363 | P55036 | -0.20597  |
| 13186 | P03363 | A8MT66 | -0.19439  |
| 13187 | P03363 | Q9Y276 | -0.25249  |
| 13188 | P03363 | Q94782 | -0.26272  |
| 13189 | P03363 | Q96AG3 | -0.22727  |
| 13190 | P03363 | Q86UK7 | -0.27953  |
| 13191 | P03363 | P0DI80 | -0.32626  |
| 13192 | P03363 | Q95407 | -0.22733  |
| 13193 | P03363 | Q76038 | -0.25409  |
| 13194 | P03363 | Q9UBH0 | -0.40777  |
| 13195 | P03363 | Q6ZS49 | -0.042737 |
| 13196 | P03363 | Q9UPU7 | -0.24536  |
| 13197 | P03363 | Q9H898 | -0.21375  |
| 13198 | P03363 | Q99967 | -0.20193  |
| 13199 | P03363 | Q5SVS4 | -0.22811  |
| 13200 | P03363 | Q8TE04 | -0.17135  |
| 13201 | P03363 | P10767 | -0.48864  |
| 13202 | P03363 | Q8N3F9 | -0.32626  |
| 13203 | P03363 | P02671 | -0.23505  |
| 13204 | P03363 | Q92482 | -0.22736  |
| 13205 | P03363 | Q96EK9 | -0.24873  |
| 13206 | P03363 | Q8NAT2 | -0.22439  |
| 13207 | P03363 | Q13724 | -0.41862  |
| 13208 | P03363 | Q9Y5Y6 | -0.848    |
| 13209 | P03363 | P59025 | -0.4465   |
| 13210 | P03363 | Q8TD57 | -0.22451  |
| 13211 | P03363 | Q32M92 | -0.18184  |
| 13212 | P03363 | Q8NEV8 | -0.1803   |
| 13213 | P03363 | Q8IUY3 | -0.32626  |
| 13214 | P03363 | P11413 | -0.17258  |
| 13215 | P03363 | Q6ZSJ9 | -0.32626  |
| 13216 | P03363 | Q8IVS2 | -0.23483  |
| 13217 | P03363 | Q969N2 | -0.21541  |
| 13218 | P03363 | Q2WJ6  | -0.20729  |
| 13219 | P03363 | Q86X10 | -0.24811  |
| 13220 | P03363 | Q9UM44 | -0.22741  |
| 13221 | P03363 | P25063 | -0.042737 |
| 13222 | P03363 | Q5VZT2 | -0.12311  |
| 13223 | P03363 | Q9Y5R8 | -0.19245  |
| 13224 | P03363 | O15481 | -0.1805   |

|       |        |         |          |
|-------|--------|---------|----------|
| 13225 | P03363 | P36956  | -0.22738 |
| 13226 | P03363 | A1L3Z2  | -0.12018 |
| 13227 | P03363 | Q8NGZ3  | -0.61656 |
| 13228 | P03363 | Q5TH69  | -0.38924 |
| 13229 | P03363 | O60285  | -0.22741 |
| 13230 | P03363 | Q6UWX4  | -0.32692 |
| 13231 | P03363 | P00748  | -0.28653 |
| 13232 | P03363 | P38570  | -0.52393 |
| 13233 | P03363 | P16615  | -0.4798  |
| 13234 | P03363 | O14498  | -0.41675 |
| 13235 | P03363 | O00237  | -0.29494 |
| 13236 | P03363 | Q8NG48  | -0.15502 |
| 13237 | P03363 | Q96KX1  | -0.22613 |
| 13238 | P03363 | O43424  | -0.31528 |
| 13239 | P03363 | Q9BSK4  | -0.22744 |
| 13240 | P03363 | Q14880  | -0.57353 |
| 13241 | P03363 | Q9Y5G7  | -0.57898 |
| 13242 | P03363 | P78539  | -0.22748 |
| 13243 | P03363 | Q95479  | -0.39727 |
| 13244 | P03363 | Q9UNA0  | -0.23018 |
| 13245 | P03363 | P42765  | -0.22251 |
| 13246 | P03363 | Q2M3R5  | -0.32626 |
| 13247 | P03363 | P52790  | -0.25225 |
| 13248 | P03363 | P22234  | -0.13841 |
| 13249 | P03363 | P01777  | -0.54902 |
| 13250 | P03363 | Q9NPQ8  | -0.21176 |
| 13251 | P03363 | P11498  | -0.32573 |
| 13252 | P03363 | P29322  | -0.66835 |
| 13253 | P03363 | P15170  | -0.12416 |
| 13254 | P03363 | P84351  | -0.42934 |
| 13255 | P03363 | Q6PEY0  | -0.45734 |
| 13256 | P03363 | Q9Y6X5  | -0.31429 |
| 13257 | P03363 | Q06828  | -0.61977 |
| 13258 | P03363 | Q9BRL6  | -0.21886 |
| 13259 | P03363 | Q8IZM8  | -0.2274  |
| 13260 | P03363 | Q8NGT9  | -0.61656 |
| 13261 | P03363 | P01562  | -0.42966 |
| 13262 | P03363 | O76094  | -0.22373 |
| 13263 | P03363 | Q86T24  | -0.29444 |
| 13264 | P03363 | P29728  | -0.18015 |
| 13265 | P03363 | Q8NI22  | -0.3453  |
| 13266 | P03363 | Q8WUA2  | -0.20638 |
| 13267 | P03363 | Q9ULD4  | -0.2265  |
| 13268 | P03363 | Q9UMF0  | -0.611   |
| 13269 | P03363 | P29371  | -0.46679 |
| 13270 | P03363 | P10720  | -0.43046 |
| 13271 | P03363 | P31994  | -0.22741 |
| 13272 | P03363 | P05997  | -0.41607 |
| 13273 | P03363 | Q96S99  | -0.20592 |
| 13274 | P03363 | Q6Q6R5  | -0.22952 |
| 13275 | P03363 | Q9UN67  | -0.58247 |
| 13276 | P03363 | Q5T011  | -0.10675 |
| 13277 | P03363 | P55087  | -0.26139 |
| 13278 | P03363 | P22304  | -0.31693 |
| 13279 | P03363 | A5YM72  | -0.2749  |
| 13280 | P03363 | Q9H773  | -0.10488 |
| 13281 | P03363 | Q8NFAQ8 | -0.27037 |
| 13282 | P03363 | Q92544  | -0.32626 |
| 13283 | P03363 | Q9P2D1  | -0.21096 |
| 13284 | P03363 | Q86YD3  | -0.82504 |
| 13285 | P03363 | Q9H346  | -0.61656 |
| 13286 | P03363 | Q9P246  | -0.27616 |
| 13287 | P03363 | A1A519  | -0.27953 |
| 13288 | P03363 | A6NLX4  | -0.32626 |
| 13289 | P03363 | Q8NEP3  | -0.22741 |
| 13290 | P03363 | P51817  | -0.22652 |
| 13291 | P03363 | O60831  | -0.20251 |
| 13292 | P03363 | Q9UL12  | -0.1801  |
| 13293 | P03363 | Q2NL67  | -0.16548 |
| 13294 | P03363 | Q9HDB8  | -0.13207 |
| 13295 | P03363 | P35228  | -0.23476 |
| 13296 | P03363 | P22914  | -0.14482 |
| 13297 | P03363 | P53384  | -0.22247 |
| 13298 | P03363 | Q9Y5Z9  | -0.15912 |
| 13299 | P03363 | Q8WWG1  | -0.78254 |
| 13300 | P03363 | P55001  | -0.34097 |

|       |        |        |           |
|-------|--------|--------|-----------|
| 13301 | P03363 | P35626 | -0.57844  |
| 13302 | P03363 | Q9H993 | -0.19183  |
| 13303 | P03363 | Q4G0T1 | -0.33438  |
| 13304 | P03363 | Q9UHD4 | -0.037082 |
| 13305 | P03363 | Q9UHQ4 | -0.26275  |
| 13306 | P03363 | Q9UKJ0 | -0.21868  |
| 13307 | P03363 | O15382 | -0.17975  |
| 13308 | P03363 | P29034 | -0.22975  |
| 13309 | P03363 | Q14332 | -0.3581   |
| 13310 | P03363 | Q5JWF2 | -0.40542  |
| 13311 | P03363 | Q9Y5U5 | -0.82732  |
| 13312 | P03363 | Q8N307 | -0.46151  |
| 13313 | P03363 | Q86XN7 | -0.031359 |
| 13314 | P03363 | Q8IWW8 | -0.29611  |
| 13315 | P03363 | Q8IYM2 | -0.12507  |
| 13316 | P03363 | Q6UW01 | -0.34955  |
| 13317 | P03363 | P30939 | -0.69447  |
| 13318 | P03363 | Q9GZM7 | -0.35653  |
| 13319 | P03363 | P56178 | -0.19459  |
| 13320 | P03363 | Q9HBL7 | -0.62072  |
| 13321 | P03363 | Q15404 | -0.23017  |
| 13322 | P03363 | Q96T59 | -0.13751  |
| 13323 | P03363 | Q9Y620 | -0.21499  |
| 13324 | P03363 | Q6YHK3 | -0.63076  |
| 13325 | P03363 | P48066 | -0.44616  |
| 13326 | P03363 | Q8NCQ5 | -0.18517  |
| 13327 | P03363 | P11086 | -0.19684  |
| 13328 | P03363 | P47888 | -0.61656  |
| 13329 | P03363 | Q9P0J7 | -0.24497  |
| 13330 | P03363 | Q14699 | -0.22475  |
| 13331 | P03363 | Q9UNF0 | -0.22737  |
| 13332 | P03363 | P52732 | -0.242    |
| 13333 | P03363 | P63135 | -0.22561  |
| 13334 | P03363 | Q6XE24 | -0.22891  |
| 13335 | P03363 | Q8WTU2 | -0.43818  |
| 13336 | P03363 | P62745 | -0.22758  |
| 13337 | P03363 | Q9BXB4 | -0.22758  |
| 13338 | P03363 | Q96BZ9 | -0.71595  |
| 13339 | P03363 | Q4LDG9 | -0.22741  |
| 13340 | P03363 | Q9UBD9 | -0.19333  |
| 13341 | P03363 | Q6NXE6 | -0.22297  |
| 13342 | P03363 | Q9UP79 | -0.58217  |
| 13343 | P03363 | Q6ZNC4 | -0.27953  |
| 13344 | P03363 | Q8NHV1 | -0.30235  |
| 13345 | P03363 | P35218 | -0.22457  |
| 13346 | P03363 | O14603 | -0.15801  |
| 13347 | P03363 | Q86SM8 | -0.64046  |
| 13348 | P03363 | P49356 | -0.1684   |
| 13349 | P03363 | Q7Z444 | -0.631    |
| 13350 | P03363 | Q75912 | -0.22741  |
| 13351 | P03363 | Q9P0N5 | -0.1374   |
| 13352 | P03363 | Q7Z7L9 | -0.11405  |
| 13353 | P03363 | Q5VWC8 | -0.58597  |
| 13354 | P03363 | P19447 | -0.20876  |
| 13355 | P03363 | Q8TCT9 | -0.2886   |
| 13356 | P03363 | Q8WZ26 | -0.17843  |
| 13357 | P03363 | Q9Y334 | -0.23038  |
| 13358 | P03363 | P07307 | -0.2413   |
| 13359 | P03363 | Q99453 | -0.22681  |
| 13360 | P03363 | P0C879 | -0.042737 |
| 13361 | P03363 | P08476 | -0.22741  |
| 13362 | P03363 | A6NHA9 | -0.61656  |
| 13363 | P03363 | P52961 | -0.33341  |
| 13364 | P03363 | Q5U5Z8 | -0.20299  |
| 13365 | P03363 | Q5VT33 | -0.039716 |
| 13366 | P03363 | Q9NY28 | -0.30368  |
| 13367 | P03363 | Q9NPD5 | -0.34416  |
| 13368 | P03363 | Q96L34 | -0.22876  |
| 13369 | P03363 | P05230 | -0.24161  |
| 13370 | P03363 | Q9H5V8 | -0.82504  |
| 13371 | P03363 | Q13107 | -0.25035  |
| 13372 | P03363 | O60547 | -0.22658  |
| 13373 | P03363 | Q9GZX3 | -0.32286  |
| 13374 | P03363 | P55318 | -0.27185  |
| 13375 | P03363 | P30041 | -0.22656  |
| 13376 | P03363 | Q4VX62 | -0.12113  |

|       |        |        |           |
|-------|--------|--------|-----------|
| 13377 | P03363 | Q53GQ0 | -0.40051  |
| 13378 | P03363 | Q6ZMT9 | -0.20979  |
| 13379 | P03363 | Q6GMV2 | -0.097708 |
| 13380 | P03363 | P56706 | -0.32023  |
| 13381 | P03363 | P35243 | -0.23036  |
| 13382 | P03363 | Q8NGX6 | -0.61656  |
| 13383 | P03363 | Q8NCN4 | -0.22223  |
| 13384 | P03363 | Q8N8A6 | -0.18845  |
| 13385 | P03363 | P46721 | -0.45771  |
| 13386 | P03363 | Q14DG7 | -0.19187  |
| 13387 | P03363 | P56556 | -0.11621  |
| 13388 | P03363 | P40225 | -0.43624  |
| 13389 | P03363 | Q9BY32 | -0.10995  |
| 13390 | P03363 | Q16553 | -0.34246  |
| 13391 | P03363 | P59052 | -0.091538 |
| 13392 | P03363 | Q9P2E5 | -0.3106   |
| 13393 | P03363 | Q5XKP0 | -0.10422  |
| 13394 | P03363 | Q6UXU1 | -0.33992  |
| 13395 | P03363 | Q5SR53 | -0.22334  |
| 13396 | P03363 | Q9HC47 | -0.30606  |
| 13397 | P03363 | Q9UN75 | -0.57898  |
| 13398 | P03363 | P07359 | -0.22741  |
| 13399 | P03363 | Q9C098 | -0.26115  |
| 13400 | P03363 | Q14409 | -0.24966  |
| 13401 | P03363 | Q8N5H7 | -0.22741  |
| 13402 | P03363 | Q86Y28 | -0.33992  |
| 13403 | P03363 | Q16270 | -0.22741  |
| 13404 | P03363 | Q8IX21 | -0.1438   |
| 13405 | P03363 | P31641 | -0.52605  |
| 13406 | P03363 | O14874 | -0.19943  |
| 13407 | P03363 | Q53QZ3 | -0.33651  |
| 13408 | P03363 | Q32M84 | -0.12161  |
| 13409 | P03363 | Q96KP4 | -0.1939   |
| 13410 | P03363 | Q64LD2 | -0.22744  |
| 13411 | P03363 | Q8N386 | -0.32626  |
| 13412 | P03363 | Q99832 | -0.16794  |
| 13413 | P03363 | Q13188 | -0.22949  |
| 13414 | P03363 | Q14954 | -0.51757  |
| 13415 | P03363 | Q8TDC3 | -0.37353  |
| 13416 | P03363 | P35998 | -0.43513  |
| 13417 | P03363 | C9JDV5 | -0.17078  |
| 13418 | P03363 | Q14766 | -0.22751  |
| 13419 | P03363 | A2PYH4 | -0.2273   |
| 13420 | P03363 | P25874 | -0.28956  |
| 13421 | P03363 | Q86SF2 | -0.27583  |
| 13422 | P03363 | Q9Y4E5 | -0.22712  |
| 13423 | P03363 | Q6UWB4 | -0.46525  |
| 13424 | P03363 | Q14904 | -0.48387  |
| 13425 | P03363 | Q14721 | -0.2289   |
| 13426 | P03363 | Q8IXJ6 | -0.23148  |
| 13427 | P03363 | Q5SZD4 | -0.067675 |
| 13428 | P03363 | A6BM72 | -0.42383  |
| 13429 | P03363 | Q13492 | -0.22402  |
| 13430 | P03363 | Q92820 | -0.35654  |
| 13431 | P03363 | P51956 | -0.22741  |
| 13432 | P03363 | P01619 | -0.5251   |
| 13433 | P03363 | Q6PKG0 | -0.066713 |
| 13434 | P03363 | Q9HCJ2 | -0.22747  |
| 13435 | P03363 | Q8N7X8 | -0.32626  |
| 13436 | P03363 | P11150 | -0.40145  |
| 13437 | P03363 | Q06124 | -0.22741  |
| 13438 | P03363 | Q8NH56 | -0.61656  |
| 13439 | P03363 | Q8IZJ1 | -0.22741  |
| 13440 | P03363 | P13693 | -0.20832  |
| 13441 | P03363 | Q8N326 | -0.32626  |
| 13442 | P03363 | Q5VXH5 | -0.17342  |
| 13443 | P03363 | Q8NBJ4 | -0.05534  |
| 13444 | P03363 | Q5XLA6 | -0.22663  |
| 13445 | P03363 | P12104 | -0.21433  |
| 13446 | P03363 | P35221 | -0.2104   |
| 13447 | P03363 | Q96M95 | -0.17471  |
| 13448 | P03363 | Q8IUA0 | -0.33498  |
| 13449 | P03363 | Q02224 | -0.23261  |
| 13450 | P03363 | P06312 | -0.54902  |
| 13451 | P03363 | Q9NR23 | -0.36473  |
| 13452 | P03363 | Q16647 | -0.22745  |

|       |        |        |           |
|-------|--------|--------|-----------|
| 13453 | P03363 | A6NHR9 | -0.18274  |
| 13454 | P03363 | Q92915 | -0.27723  |
| 13455 | P03363 | O00591 | -0.36728  |
| 13456 | P03363 | Q9UGQ3 | -0.2892   |
| 13457 | P03363 | Q9UHL4 | -0.41458  |
| 13458 | P03363 | P54760 | -0.57425  |
| 13459 | P03363 | Q16663 | -0.64721  |
| 13460 | P03363 | P15056 | -0.22741  |
| 13461 | P03363 | Q6ZW34 | -0.32626  |
| 13462 | P03363 | P60508 | -0.37161  |
| 13463 | P03363 | P49821 | -0.36397  |
| 13464 | P03363 | Q6NUQ4 | -0.32626  |
| 13465 | P03363 | P23921 | -0.18179  |
| 13466 | P03363 | Q5T0D9 | -0.058695 |
| 13467 | P03363 | P26842 | -0.26882  |
| 13468 | P03363 | P14598 | -0.2274   |
| 13469 | P03363 | Q6UXB1 | -0.33992  |
| 13470 | P03363 | Q8NGC3 | -0.61656  |
| 13471 | P03363 | P04629 | -0.34264  |
| 13472 | P03363 | Q9BY10 | -0.42292  |
| 13473 | P03363 | Q43526 | -0.45928  |
| 13474 | P03363 | Q14156 | -0.33152  |
| 13475 | P03363 | P27544 | -0.41551  |
| 13476 | P03363 | P51955 | -0.22741  |
| 13477 | P03363 | P63120 | -0.058169 |
| 13478 | P03363 | Q96NR8 | -0.55391  |
| 13479 | P03363 | Q9BTU6 | -0.23639  |
| 13480 | P03363 | Q8N264 | -0.25489  |
| 13481 | P03363 | Q86XA9 | -0.12935  |
| 13482 | P03363 | Q6PDA7 | -0.33992  |
| 13483 | P03363 | Q9Y616 | -0.2274   |
| 13484 | P03363 | Q96Q06 | -0.072251 |
| 13485 | P03363 | Q8N4S7 | -0.32626  |
| 13486 | P03363 | A6NEQ0 | -0.22841  |
| 13487 | P03363 | Q6ZV60 | -0.042737 |
| 13488 | P03363 | Q9BPY3 | -0.17043  |
| 13489 | P03363 | P36551 | -0.13891  |
| 13490 | P03363 | P59826 | -0.25399  |
| 13491 | P03363 | Q5VV16 | -0.29843  |
| 13492 | P03363 | Q6ZNL0 | -0.33209  |
| 13493 | P03363 | Q9H2B2 | -0.34139  |
| 13494 | P03363 | Q8NCW6 | -0.27406  |
| 13495 | P03363 | Q9HBI0 | -0.2206   |
| 13496 | P03363 | O15217 | -0.22722  |
| 13497 | P03363 | Q9C0E4 | -0.22677  |
| 13498 | P03363 | P0C7P1 | -0.22841  |
| 13499 | P03363 | Q9H000 | -0.22653  |
| 13500 | P03363 | P01042 | -0.46254  |
| 13501 | P03363 | O94761 | -0.2274   |
| 13502 | P03363 | Q8N5G0 | -0.32626  |
| 13503 | P03363 | P10635 | -0.37798  |
| 13504 | P03363 | Q9NZM6 | -0.39444  |
| 13505 | P03363 | Q3MJ40 | -0.16627  |
| 13506 | P03363 | P14854 | -0.20652  |
| 13507 | P03363 | P53778 | -0.22741  |
| 13508 | P03363 | Q96G42 | -0.21586  |
| 13509 | P03363 | Q6ZPD9 | -0.32626  |
| 13510 | P03363 | Q6P1X6 | -0.038124 |
| 13511 | P03363 | P01034 | -0.23758  |
| 13512 | P03363 | Q5T8R8 | -0.23133  |
| 13513 | P03363 | Q9P2S6 | -0.22741  |
| 13514 | P03363 | P0DKX0 | -0.08879  |
| 13515 | P03363 | P41221 | -0.22741  |
| 13516 | P03363 | A8MZH6 | -0.33992  |
| 13517 | P03363 | Q9H4M9 | -0.23203  |
| 13518 | P03363 | Q3KRB8 | -0.38968  |
| 13519 | P03363 | Q9NPG4 | -0.53383  |
| 13520 | P03363 | Q15825 | -0.46423  |
| 13521 | P03363 | P17568 | -0.18734  |
| 13522 | P03363 | Q969V5 | -0.2274   |
| 13523 | P03363 | Q96NJ5 | -0.16805  |
| 13524 | P03363 | Q96BI3 | -0.24827  |
| 13525 | P03363 | Q9BRK5 | -0.22706  |
| 13526 | P03363 | Q15139 | -0.22733  |
| 13527 | P03363 | P49281 | -0.22711  |
| 13528 | P03363 | Q96MN2 | -0.24873  |

|       |        |        |           |
|-------|--------|--------|-----------|
| 13529 | P03363 | Q96FX8 | -0.12898  |
| 13530 | P03363 | Q96G97 | -0.35024  |
| 13531 | P03363 | Q2NKX8 | -0.21712  |
| 13532 | P03363 | Q16134 | -0.37852  |
| 13533 | P03363 | Q9UHF3 | -0.36871  |
| 13534 | P03363 | Q6Pjq5 | -0.27326  |
| 13535 | P03363 | O95396 | -0.20303  |
| 13536 | P03363 | Q6ZTC4 | -0.042737 |
| 13537 | P03363 | P35475 | -0.24602  |
| 13538 | P03363 | Q9BYB4 | -0.22746  |
| 13539 | P03363 | Q5MNZ9 | -0.22741  |
| 13540 | P03363 | Q7Z5P9 | -0.38922  |
| 13541 | P03363 | Q969S0 | -0.235    |
| 13542 | P03363 | Q7Z3J2 | -0.32626  |
| 13543 | P03363 | P16050 | -0.22518  |
| 13544 | P03363 | Q96PZ0 | -0.21027  |
| 13545 | P03363 | Q9HCJ5 | -0.20906  |
| 13546 | P03363 | Q9GZK3 | -0.61656  |
| 13547 | P03363 | Q9BYE9 | -0.24933  |
| 13548 | P03363 | P78410 | -0.30606  |
| 13549 | P03363 | P16389 | -0.41173  |
| 13550 | P03363 | P55008 | -0.22738  |
| 13551 | P03363 | Q15858 | -0.43178  |
| 13552 | P03363 | Q8NGY2 | -0.61656  |
| 13553 | P03363 | P07311 | -0.10292  |
| 13554 | P03363 | Q9UM21 | -0.55115  |
| 13555 | P03363 | Q8N5C1 | -0.32626  |
| 13556 | P03363 | P78508 | -0.35518  |
| 13557 | P03363 | Q8WTY6 | -0.16889  |
| 13558 | P03363 | Q9Y6Q2 | -0.16577  |
| 13559 | P03363 | Q6QAJ8 | -0.32626  |
| 13560 | P03363 | P15498 | -0.22741  |
| 13561 | P03363 | Q99616 | -0.61705  |
| 13562 | P03363 | B6SEH9 | -0.32626  |
| 13563 | P03363 | P28066 | -0.13346  |
| 13564 | P03363 | Q13002 | -0.34865  |
| 13565 | P03363 | Q6ZMB0 | -0.31141  |
| 13566 | P03363 | Q9UK08 | -0.52863  |
| 13567 | P03363 | Q9Y261 | -0.26202  |
| 13568 | P03363 | Q8N6Y1 | -0.57898  |
| 13569 | P03363 | Q8TDI8 | -0.35134  |
| 13570 | P03363 | P13929 | -0.19282  |
| 13571 | P03363 | Q92747 | -0.2274   |
| 13572 | P03363 | Q9UM22 | -0.35723  |
| 13573 | P03363 | Q8NGE9 | -0.61656  |
| 13574 | P03363 | P50613 | -0.17983  |
| 13575 | P03363 | Q96IC2 | -0.29372  |
| 13576 | P03363 | P82987 | -0.49716  |
| 13577 | P03363 | Q14997 | -0.14536  |
| 13578 | P03363 | Q96SB4 | -0.22741  |
| 13579 | P03363 | E7ERA6 | -0.47964  |
| 13580 | P03363 | Q1RN00 | -0.042737 |
| 13581 | P03363 | Q75074 | -0.34373  |
| 13582 | P03363 | Q96RK4 | -0.22722  |
| 13583 | P03363 | P80303 | -0.21977  |
| 13584 | P03363 | P86479 | -0.042737 |
| 13585 | P03363 | Q9UHP7 | -0.66892  |
| 13586 | P03363 | Q9C0B7 | -0.32626  |
| 13587 | P03363 | Q9NY37 | -0.48013  |
| 13588 | P03363 | P22310 | -0.47051  |
| 13589 | P03363 | Q9NPR2 | -0.40796  |
| 13590 | P03363 | Q8NCQ7 | -0.18088  |
| 13591 | P03363 | Q06889 | -0.22102  |
| 13592 | P03363 | Q04771 | -0.2591   |
| 13593 | P03363 | Q9Y2C5 | -0.44445  |
| 13594 | P03363 | O75445 | -0.32598  |
| 13595 | P03363 | A6NER0 | -0.50908  |
| 13596 | P03363 | P20853 | -0.60707  |
| 13597 | P03363 | P26639 | -0.090919 |
| 13598 | P03363 | P55786 | -0.24379  |
| 13599 | P03363 | P01912 | -0.52155  |
| 13600 | P03363 | Q9NZW4 | -0.47509  |
| 13601 | P03363 | A6NHG9 | -0.61656  |
| 13602 | P03363 | Q969R8 | -0.18018  |
| 13603 | P03363 | O43184 | -0.39812  |
| 13604 | P03363 | P13747 | -0.58     |



|       |        |        |           |
|-------|--------|--------|-----------|
| 13605 | P03363 | Q6PXP3 | -0.35244  |
| 13606 | P03363 | P07225 | -0.44807  |
| 13607 | P03363 | Q86YR5 | -0.22631  |
| 13608 | P03363 | Q9HCC8 | -0.2759   |
| 13609 | P03363 | Q8IZ69 | -0.15255  |
| 13610 | P03363 | Q969F2 | -0.21802  |
| 13611 | P03363 | Q9UJD0 | -0.2269   |
| 13612 | P03363 | Q16769 | -0.53163  |
| 13613 | P03363 | Q8WXJ9 | -0.042218 |
| 13614 | P03363 | Q96LA5 | -0.4427   |
| 13615 | P03363 | Q8NH73 | -0.61656  |
| 13616 | P03363 | O60307 | -0.22751  |
| 13617 | P03363 | Q6P047 | -0.096322 |
| 13618 | P03363 | Q9BZD6 | -0.60653  |
| 13619 | P03363 | Q15620 | -0.61656  |
| 13620 | P03363 | P45378 | -0.20068  |
| 13621 | P03363 | Q9UJ90 | -0.33645  |
| 13622 | P03363 | Q7Z5A7 | -0.68689  |
| 13623 | P03363 | Q8N9L7 | -0.22565  |
| 13624 | P03363 | O14681 | -0.061978 |
| 13625 | P03363 | P01620 | -0.54902  |
| 13626 | P03363 | Q9ULL1 | -0.22758  |
| 13627 | P03363 | Q8NI28 | -0.32626  |
| 13628 | P03363 | Q95249 | -0.19062  |
| 13629 | P03363 | Q9UBT7 | -0.22431  |
| 13630 | P03363 | Q9UMW8 | -0.2687   |
| 13631 | P03363 | Q16181 | -0.22666  |
| 13632 | P03363 | O60343 | -0.28686  |
| 13633 | P03363 | B9A014 | -0.10057  |
| 13634 | P03363 | Q9UBP9 | -0.22741  |
| 13635 | P03363 | Q96M86 | -0.21645  |
| 13636 | P03363 | P13942 | -0.4047   |
| 13637 | P03363 | P07202 | -0.73449  |
| 13638 | P03363 | Q96TA0 | -0.57898  |
| 13639 | P03363 | Q75712 | -0.4464   |
| 13640 | P03363 | Q9H606 | -0.083358 |
| 13641 | P03363 | Q6ZV29 | -0.28874  |
| 13642 | P03363 | Q6ZSY5 | -0.32253  |
| 13643 | P03363 | Q13285 | -0.22783  |
| 13644 | P03363 | Q8NEG4 | -0.068704 |
| 13645 | P03363 | Q9H461 | -0.24558  |
| 13646 | P03363 | P00167 | -0.35744  |
| 13647 | P03363 | P78382 | -0.27134  |
| 13648 | P03363 | P08949 | -0.34875  |
| 13649 | P03363 | P37288 | -0.28288  |
| 13650 | P03363 | Q9H4F1 | -0.21511  |
| 13651 | P03363 | Q9H6H4 | -0.32626  |
| 13652 | P03363 | A6NM76 | -0.61656  |
| 13653 | P03363 | Q8WVB6 | -0.33882  |
| 13654 | P03363 | Q9C0J1 | -0.32017  |
| 13655 | P03363 | Q96NZ1 | -0.25879  |
| 13656 | P03363 | Q9P0K8 | -0.29843  |
| 13657 | P03363 | P20839 | -0.23825  |
| 13658 | P03363 | P01596 | -0.54902  |
| 13659 | P03363 | Q96EG1 | -0.32168  |
| 13660 | P03363 | P00488 | -0.20571  |
| 13661 | P03363 | P25067 | -0.50201  |
| 13662 | P03363 | Q8IX19 | -0.32626  |
| 13663 | P03363 | A6NJU9 | -0.32626  |
| 13664 | P03363 | P54577 | -0.15566  |
| 13665 | P03363 | P01816 | -0.54902  |
| 13666 | P03363 | Q8WW62 | -0.49086  |
| 13667 | P03363 | A1A4T8 | -0.14966  |
| 13668 | P03363 | Q9BTE0 | -0.16038  |
| 13669 | P03363 | Q9HD20 | -0.39003  |
| 13670 | P03363 | Q86U02 | -0.32626  |
| 13671 | P03363 | Q5T6J7 | -0.17562  |
| 13672 | P03363 | P49641 | -0.34957  |
| 13673 | P03363 | O43300 | -0.35901  |
| 13674 | P03363 | Q14168 | -0.23883  |
| 13675 | P03363 | P28332 | -0.33133  |
| 13676 | P03363 | Q9H772 | -0.40576  |
| 13677 | P03363 | P12429 | -0.20109  |
| 13678 | P03363 | Q8WTQ1 | -0.33516  |
| 13679 | P03363 | Q3KRA9 | -0.075242 |
| 13680 | P03363 | Q96KC8 | -0.24832  |

|       |        |        |           |
|-------|--------|--------|-----------|
| 13681 | P03363 | P58550 | -0.37783  |
| 13682 | P03363 | Q9Y5F1 | -0.62883  |
| 13683 | P03363 | Q9H488 | -0.19622  |
| 13684 | P03363 | Q9BZ81 | -0.19643  |
| 13685 | P03363 | P13928 | -0.18575  |
| 13686 | P03363 | O95989 | -0.11875  |
| 13687 | P03363 | Q9NYC9 | -0.2245   |
| 13688 | P03363 | Q53S99 | -0.20949  |
| 13689 | P03363 | Q8N3J5 | -0.19031  |
| 13690 | P03363 | O75815 | -0.28689  |
| 13691 | P03363 | P41146 | -0.64792  |
| 13692 | P03363 | Q9BWV3 | -0.21547  |
| 13693 | P03363 | O43934 | -0.19187  |
| 13694 | P03363 | Q99558 | -0.22741  |
| 13695 | P03363 | P52179 | -0.29495  |
| 13696 | P03363 | P04220 | -0.26737  |
| 13697 | P03363 | O75840 | -0.22662  |
| 13698 | P03363 | Q8NAB5 | -0.042737 |
| 13699 | P03363 | Q86VE3 | -0.21826  |
| 13700 | P03363 | Q8NB49 | -0.39079  |
| 13701 | P03363 | Q9UHE8 | -0.76032  |
| 13702 | P03363 | O00144 | -0.35559  |
| 13703 | P03363 | P29033 | -0.3877   |
| 13704 | P03363 | O15553 | -0.22796  |
| 13705 | P03363 | Q8N7P3 | -0.27242  |
| 13706 | P03363 | P61106 | -0.24811  |
| 13707 | P03363 | Q8N816 | -0.32626  |
| 13708 | P03363 | Q9BYH1 | -0.52348  |
| 13709 | P03363 | Q12809 | -0.29772  |
| 13710 | P03363 | Q01628 | -0.50846  |
| 13711 | P03363 | Q12899 | -0.22737  |
| 13712 | P03363 | Q9Y4X1 | -0.30421  |
| 13713 | P03363 | Q9C0B1 | -0.20979  |
| 13714 | P03363 | Q9HAU6 | -0.21809  |
| 13715 | P03363 | P16949 | -0.20313  |
| 13716 | P03363 | A1L4Q6 | -0.28713  |
| 13717 | P03363 | Q7Z7G2 | -0.14102  |
| 13718 | P03363 | Q9UHF4 | -0.32626  |
| 13719 | P03363 | Q9BRB3 | -0.34435  |
| 13720 | P03363 | Q15012 | -0.33208  |
| 13721 | P03363 | P59044 | -0.22698  |
| 13722 | P03363 | Q9NPH2 | -0.081886 |
| 13723 | P03363 | Q16643 | -0.19217  |
| 13724 | P03363 | Q8NGM9 | -0.61656  |
| 13725 | P03363 | P39086 | -0.39602  |
| 13726 | P03363 | P15516 | -0.37582  |
| 13727 | P03363 | P01705 | -0.54902  |
| 13728 | P03363 | O94929 | -0.21579  |
| 13729 | P03363 | Q75V66 | -0.50362  |
| 13730 | P03363 | Q8IVV7 | -0.12022  |
| 13731 | P03363 | Q9NQF3 | -0.22579  |
| 13732 | P03363 | P0DMB2 | -0.050712 |
| 13733 | P03363 | Q8WZA8 | -0.042737 |
| 13734 | P03363 | Q86V86 | -0.22751  |
| 13735 | P03363 | Q8NCR9 | -0.32626  |
| 13736 | P03363 | P0CG33 | -0.12979  |
| 13737 | P03363 | Q9H336 | -0.33992  |
| 13738 | P03363 | Q86VR8 | -0.42609  |
| 13739 | P03363 | Q15125 | -0.53219  |
| 13740 | P03363 | P55789 | -0.22562  |
| 13741 | P03363 | Q9HBJ0 | -0.34034  |
| 13742 | P03363 | Q96JK2 | -0.22741  |
| 13743 | P03363 | Q9BXU2 | -0.069656 |
| 13744 | P03363 | Q9HAW9 | -0.38223  |
| 13745 | P03363 | Q9P2U7 | -0.36936  |
| 13746 | P03363 | Q53GA4 | -0.17832  |
| 13747 | P03363 | Q8NBZ9 | -0.12672  |
| 13748 | P03363 | O95758 | -0.21871  |
| 13749 | P03363 | Q8IX04 | -0.24146  |
| 13750 | P03363 | Q14C86 | -0.48064  |
| 13751 | P03363 | Q8IVY1 | -0.32626  |
| 13752 | P03363 | O95167 | -0.2799   |
| 13753 | P03363 | O15244 | -0.50299  |
| 13754 | P03363 | P31944 | -0.22729  |
| 13755 | P03363 | Q13029 | -0.22744  |
| 13756 | P03363 | A8K830 | -0.042737 |

|       |        |        |            |
|-------|--------|--------|------------|
| 13757 | P03363 | Q9P2X3 | -0.14952   |
| 13758 | P03363 | Q8N3T1 | -0.30226   |
| 13759 | P03363 | O15090 | -0.22625   |
| 13760 | P03363 | Q7Z6I5 | -0.0024651 |
| 13761 | P03363 | O15034 | -0.22741   |
| 13762 | P03363 | Q96AC6 | -0.25383   |
| 13763 | P03363 | Q8N976 | -0.22694   |
| 13764 | P03363 | P54792 | -0.20929   |
| 13765 | P03363 | Q969Z0 | -0.087708  |
| 13766 | P03363 | Q9Y2F5 | -0.091726  |
| 13767 | P03363 | Q6PJF5 | -0.51868   |
| 13768 | P03363 | Q13637 | -0.30785   |
| 13769 | P03363 | Q5VTE6 | -0.18861   |
| 13770 | P03363 | A8MYZ5 | -0.22575   |
| 13771 | P03363 | Q96P47 | -0.48389   |
| 13772 | P03363 | Q8N0U7 | -0.10508   |
| 13773 | P03363 | Q8N8N7 | -0.30835   |
| 13774 | P03363 | Q9H2S5 | -0.22742   |
| 13775 | P03363 | Q6UXV4 | -0.3321    |
| 13776 | P03363 | P52569 | -0.34706   |
| 13777 | P03363 | Q9BX84 | -0.39736   |
| 13778 | P03363 | O95178 | -0.087042  |
| 13779 | P03363 | Q96GK7 | -0.12506   |
| 13780 | P03363 | Q6ZNI6 | -0.56551   |
| 13781 | P03363 | Q9BVH7 | -0.31249   |
| 13782 | P03363 | P61109 | -0.33992   |
| 13783 | P03363 | P20848 | -0.31049   |
| 13784 | P03363 | Q9P0X4 | -0.31112   |
| 13785 | P03363 | Q3MII6 | -0.29168   |
| 13786 | P03363 | P49961 | -0.75332   |
| 13787 | P03363 | P06319 | -0.54902   |
| 13788 | P03363 | Q9BZY9 | -0.22733   |
| 13789 | P03363 | Q92772 | -0.22711   |
| 13790 | P03363 | P04439 | -0.59713   |
| 13791 | P03363 | Q7RTY0 | -0.44138   |
| 13792 | P03363 | P13591 | -0.72618   |
| 13793 | P03363 | Q14957 | -0.33005   |
| 13794 | P03363 | Q7Z4Y8 | -0.15249   |
| 13795 | P03363 | Q99705 | -0.61874   |
| 13796 | P03363 | P0DKB5 | -0.32626   |
| 13797 | P03363 | O15394 | -0.55185   |
| 13798 | P03363 | Q9Y251 | -0.18822   |
| 13799 | P03363 | Q9Y5H7 | -0.62883   |
| 13800 | P03363 | Q9NQZ5 | -0.13353   |
| 13801 | P03363 | Q96A11 | -0.3095    |
| 13802 | P03363 | Q9Y680 | -0.23203   |
| 13803 | P03363 | Q15661 | -0.29967   |
| 13804 | P03363 | O75936 | -0.26696   |
| 13805 | P03363 | Q8TAE6 | -0.098737  |
| 13806 | P03363 | Q8NEE0 | -0.042737  |
| 13807 | P03363 | O15021 | -0.49597   |
| 13808 | P03363 | Q9ULC5 | -0.48033   |
| 13809 | P03363 | P20338 | -0.26592   |
| 13810 | P03363 | Q9Y342 | -0.36456   |
| 13811 | P03363 | Q9NZN5 | -0.22741   |
| 13812 | P03363 | Q8NE09 | -0.13839   |
| 13813 | P03363 | Q9H521 | -0.2207    |
| 13814 | P03363 | Q8NHK3 | -0.47262   |
| 13815 | P03363 | J3KSC0 | -0.28503   |
| 13816 | P03363 | Q13790 | -0.46055   |
| 13817 | P03363 | Q9GZN4 | -0.49563   |
| 13818 | P03363 | O43903 | -0.21985   |
| 13819 | P03363 | Q969W9 | -0.47705   |
| 13820 | P03363 | Q4KMQ2 | -0.44845   |
| 13821 | P03363 | P23276 | -0.25725   |
| 13822 | P03363 | Q96HU8 | -0.631     |
| 13823 | P03363 | Q6XPS3 | -0.50561   |
| 13824 | P03363 | Q8TBQ9 | -0.28673   |
| 13825 | P03363 | Q6ZNI3 | -0.2276    |
| 13826 | P03363 | P18065 | -0.22745   |
| 13827 | P03363 | Q8NFR7 | -0.055132  |
| 13828 | P03363 | O14966 | -0.45868   |
| 13829 | P03363 | P31431 | -0.53956   |
| 13830 | P03363 | Q9H8X9 | -0.4627    |
| 13831 | P03363 | Q8WUD6 | -0.36739   |
| 13832 | P03363 | Q9HC24 | -0.20947   |

|       |        |        |           |
|-------|--------|--------|-----------|
| 13833 | P03363 | Q5SQQ9 | -0.22716  |
| 13834 | P03363 | Q6ZMB5 | -0.32626  |
| 13835 | P03363 | Q5SQ80 | -0.22741  |
| 13836 | P03363 | Q01064 | -0.22658  |
| 13837 | P03363 | Q0D2H9 | -0.096487 |
| 13838 | P03363 | P53355 | -0.22742  |
| 13839 | P03363 | Q9BYB0 | -0.22741  |
| 13840 | P03363 | Q9UII6 | -0.30913  |
| 13841 | P03363 | Q6NXT2 | -0.2247   |
| 13842 | P03363 | Q96JG9 | -0.22744  |
| 13843 | P03363 | Q96DH6 | -0.24244  |
| 13844 | P03363 | P61968 | -0.22571  |
| 13845 | P03363 | Q69YW0 | -0.13278  |
| 13846 | P03363 | Q14108 | -0.58462  |
| 13847 | P03363 | P0C2W1 | -0.22464  |
| 13848 | P03363 | Q9BZQ2 | -0.061888 |
| 13849 | P03363 | O15173 | -0.44343  |
| 13850 | P03363 | Q8WWU7 | -0.47985  |
| 13851 | P03363 | Q9NYG8 | -0.54503  |
| 13852 | P03363 | Q5T6X4 | -0.32626  |
| 13853 | P03363 | Q52M75 | -0.29142  |
| 13854 | P03363 | Q9H3N8 | -0.62971  |
| 13855 | P03363 | Q75553 | -0.22725  |
| 13856 | P03363 | Q5RI15 | -0.33272  |
| 13857 | P03363 | Q6ZR54 | -0.042737 |
| 13858 | P03363 | Q9UBU6 | -0.32626  |
| 13859 | P03363 | Q5VVX9 | -0.18296  |
| 13860 | P03363 | Q6V0L0 | -0.60492  |
| 13861 | P03363 | P85299 | -0.20884  |
| 13862 | P03363 | Q8N695 | -0.50641  |
| 13863 | P03363 | Q8TBZ3 | -0.22741  |
| 13864 | P03363 | Q8TED4 | -0.27321  |
| 13865 | P03363 | Q9Y282 | -0.38341  |
| 13866 | P03363 | Q9NSY1 | -0.34429  |
| 13867 | P03363 | Q8IYX4 | -0.22691  |
| 13868 | P03363 | Q5ZPR3 | -0.22742  |
| 13869 | P03363 | Q14242 | -0.25132  |
| 13870 | P03363 | Q8TB92 | -0.1994   |
| 13871 | P03363 | Q494U1 | -0.15055  |
| 13872 | P03363 | Q86UW1 | -0.56972  |
| 13873 | P03363 | P54368 | -0.1465   |
| 13874 | P03363 | Q8WZA9 | -0.031359 |
| 13875 | P03363 | O60487 | -0.22745  |
| 13876 | P03363 | B4DJY2 | -0.33797  |
| 13877 | P03363 | Q15229 | -0.40644  |
| 13878 | P03363 | Q9UHH9 | -0.18337  |
| 13879 | P03363 | Q59H18 | -0.22741  |
| 13880 | P03363 | Q5T5U3 | -0.22879  |
| 13881 | P03363 | Q8N365 | -0.031359 |
| 13882 | P03363 | Q8IY33 | -0.22741  |
| 13883 | P03363 | Q7Z769 | -0.32626  |
| 13884 | P03363 | Q95528 | -0.15787  |
| 13885 | P03363 | P49902 | -0.21198  |
| 13886 | P03363 | A4QPB2 | -0.22741  |
| 13887 | P03363 | Q16655 | -0.18223  |
| 13888 | P03363 | Q3V6T2 | -0.21242  |
| 13889 | P03363 | Q7Z3G6 | -0.24177  |
| 13890 | P03363 | Q6W4X9 | -0.40019  |
| 13891 | P03363 | Q96PH6 | -0.35377  |
| 13892 | P03363 | Q6ZUM4 | -0.33111  |
| 13893 | P03363 | A8K7I4 | -0.80352  |
| 13894 | P03363 | Q5T9S5 | -0.21142  |
| 13895 | P03363 | Q9UQ10 | -0.40257  |
| 13896 | P03363 | Q86W26 | -0.24873  |
| 13897 | P03363 | Q6UW88 | -0.59139  |
| 13898 | P03363 | P22079 | -0.68768  |
| 13899 | P03363 | Q01538 | -0.12619  |
| 13900 | P03363 | P14555 | -0.59937  |
| 13901 | P03363 | Q8NCA5 | -0.030752 |
| 13902 | P03363 | Q9Y6A1 | -0.56218  |
| 13903 | P03363 | P21728 | -0.25976  |
| 13904 | P03363 | Q96LT4 | -0.42098  |
| 13905 | P03363 | Q9GZK6 | -0.61656  |
| 13906 | P03363 | Q95807 | -0.2137   |
| 13907 | P03363 | Q6ZMT1 | -0.22741  |
| 13908 | P03363 | P0C7U0 | -0.34054  |

|       |        |        |           |
|-------|--------|--------|-----------|
| 13909 | P03363 | A8MQ11 | -0.070444 |
| 13910 | P03363 | Q9BXT6 | -0.43863  |
| 13911 | P03363 | Q9GZY0 | -0.19946  |
| 13912 | P03363 | P57053 | -0.14534  |
| 13913 | P03363 | Q9BR77 | -0.14174  |
| 13914 | P03363 | O43525 | -0.49428  |
| 13915 | P03363 | Q8NGY6 | -0.61656  |
| 13916 | P03363 | Q8NC56 | -0.081238 |
| 13917 | P03363 | Q4G0S7 | -0.19747  |
| 13918 | P03363 | Q9UGI6 | -0.29886  |
| 13919 | P03363 | Q8N769 | -0.13208  |
| 13920 | P03363 | Q9Y5U4 | -0.1684   |
| 13921 | P03363 | Q9Y6K0 | -0.35113  |
| 13922 | P03363 | Q96PX9 | -0.22746  |
| 13923 | P03363 | Q96GJ1 | -0.1286   |
| 13924 | P03363 | Q9NXI6 | -0.47964  |
| 13925 | P03363 | P14416 | -0.23845  |
| 13926 | P03363 | P29353 | -0.22741  |
| 13927 | P03363 | Q14449 | -0.22741  |
| 13928 | P03363 | P25189 | -0.43379  |
| 13929 | P03363 | Q96HE8 | -0.32626  |
| 13930 | P03363 | Q9ULT0 | -0.22694  |
| 13931 | P03363 | A8MWV9 | -0.32626  |
| 13932 | P03363 | Q8NGJ8 | -0.61656  |
| 13933 | P03363 | Q8NBU5 | -0.41723  |
| 13934 | P03363 | P15735 | -0.35102  |
| 13935 | P03363 | Q7Z6I6 | -0.38234  |
| 13936 | P03363 | Q5H9U9 | -0.22312  |
| 13937 | P03363 | P14174 | -0.22326  |
| 13938 | P03363 | Q15256 | -0.23278  |
| 13939 | P03363 | Q86YB8 | -0.54358  |
| 13940 | P03363 | P98173 | -0.23038  |
| 13941 | P03363 | Q5SRN2 | -0.32626  |
| 13942 | P03363 | O60840 | -0.4152   |
| 13943 | P03363 | P60606 | -0.32322  |
| 13944 | P03363 | Q969J5 | -0.3421   |
| 13945 | P03363 | Q8NFT6 | -0.16657  |
| 13946 | P03363 | C9JCN9 | -0.22255  |
| 13947 | P03363 | Q7Z5Y6 | -0.41997  |
| 13948 | P03363 | Q13796 | -0.22734  |
| 13949 | P03363 | A4D2B8 | -0.16257  |
| 13950 | P03363 | Q9BS16 | -0.22578  |
| 13951 | P03363 | Q8N0U6 | -0.042737 |
| 13952 | P03363 | Q9P2P6 | -0.24111  |
| 13953 | P03363 | P20340 | -0.23945  |
| 13954 | P03363 | P05160 | -0.30978  |
| 13955 | P03363 | Q7Z7A4 | -0.343    |
| 13956 | P03363 | Q7Z6M4 | -0.019972 |
| 13957 | P03363 | Q6UY14 | -0.22752  |
| 13958 | P03363 | Q14183 | -0.23387  |
| 13959 | P03363 | Q5MJ08 | -0.1397   |
| 13960 | P03363 | Q9P0K1 | -0.27124  |
| 13961 | P03363 | P52739 | -0.28057  |
| 13962 | P03363 | P19397 | -0.24021  |
| 13963 | P03363 | Q8NBQ5 | -0.49104  |
| 13964 | P03363 | Q9H223 | -0.23005  |
| 13965 | P03363 | Q6PII5 | -0.17503  |
| 13966 | P03363 | Q32M45 | -0.3424   |
| 13967 | P03363 | A6NFZ4 | -0.33992  |
| 13968 | P03363 | Q5VT99 | -0.51003  |
| 13969 | P03363 | Q9HA72 | -0.32626  |
| 13970 | P03363 | P08581 | -0.30813  |
| 13971 | P03363 | Q9BZB8 | -0.19465  |
| 13972 | P03363 | P07585 | -0.39714  |
| 13973 | P03363 | Q96MU5 | -0.33992  |
| 13974 | P03363 | Q9BTF0 | -0.18984  |
| 13975 | P03363 | Q96F44 | -0.22776  |
| 13976 | P03363 | P20648 | -0.53751  |
| 13977 | P03363 | P08514 | -0.2274   |
| 13978 | P03363 | Q8TEB7 | -0.30145  |
| 13979 | P03363 | Q99437 | -0.32632  |
| 13980 | P03363 | P30825 | -0.56188  |
| 13981 | P03363 | Q96CP7 | -0.32626  |
| 13982 | P03363 | P07332 | -0.39374  |
| 13983 | P03363 | P60201 | -0.21571  |
| 13984 | P03363 | P49815 | -0.22353  |

|       |        |        |           |
|-------|--------|--------|-----------|
| 13985 | P03363 | Q9UHU1 | -0.042737 |
| 13986 | P03363 | Q8TB61 | -0.35954  |
| 13987 | P03363 | Q9NVS9 | -0.18306  |
| 13988 | P03363 | Q3SY56 | -0.22579  |
| 13989 | P03363 | Q9H7T3 | -0.16443  |
| 13990 | P03363 | Q9Y2C2 | -0.33808  |
| 13991 | P03363 | P0CJ77 | -0.13673  |
| 13992 | P03363 | Q9NUJ7 | -0.19296  |
| 13993 | P03363 | P08637 | -0.81832  |
| 13994 | P03363 | Q969K3 | -0.22741  |
| 13995 | P03363 | Q75716 | -0.22741  |
| 13996 | P03363 | P58400 | -0.37758  |
| 13997 | P03363 | P11684 | -0.19006  |
| 13998 | P03363 | Q8TBK6 | -0.076612 |
| 13999 | P03363 | P40198 | -0.32626  |
| 14000 | P03363 | Q9BXS4 | -0.27658  |
| 14001 | P03363 | O95371 | -0.60111  |
| 14002 | P03363 | P0C7N1 | -0.61656  |
| 14003 | P03363 | A6NNM8 | -0.19055  |
| 14004 | P03363 | O94808 | -0.21205  |
| 14005 | P03363 | Q96SE0 | -0.21963  |
| 14006 | P03363 | Q9H0R4 | -0.21158  |
| 14007 | P03363 | Q5VZQ5 | -0.025463 |
| 14008 | P03363 | Q8IVW4 | -0.3029   |
| 14009 | P03363 | Q6AI08 | -0.067045 |
| 14010 | P03363 | A2A2V5 | -0.32626  |
| 14011 | P03363 | Q5W0Z9 | -0.4627   |
| 14012 | P03363 | Q5T292 | -0.32626  |
| 14013 | P03363 | P55010 | -0.18138  |
| 14014 | P03363 | Q7L0X2 | -0.13187  |
| 14015 | P03363 | Q96EP9 | -0.37566  |
| 14016 | P03363 | Q6ZV77 | -0.042737 |
| 14017 | P03363 | Q9BV38 | -0.22741  |
| 14018 | P03363 | Q16853 | -0.67665  |
| 14019 | P03363 | Q8N292 | -0.46535  |
| 14020 | P03363 | O95340 | -0.29601  |
| 14021 | P03363 | Q8NH10 | -0.61656  |
| 14022 | P03363 | P48681 | -0.14067  |
| 14023 | P03363 | Q8N5Y8 | -0.26821  |
| 14024 | P03363 | Q9Y5B8 | -0.33868  |
| 14025 | P03363 | Q6ZN18 | -0.29498  |
| 14026 | P03363 | P33981 | -0.44504  |
| 14027 | P03363 | Q8N0X4 | -0.20342  |
| 14028 | P03363 | Q0GE19 | -0.38037  |
| 14029 | P03363 | Q5JRA6 | -0.195    |
| 14030 | P03363 | P0CE71 | -0.22673  |
| 14031 | P03363 | Q14246 | -0.80156  |
| 14032 | P03363 | P58215 | -0.26329  |
| 14033 | P03363 | P53701 | -0.29537  |
| 14034 | P03363 | Q9NVD3 | -0.17754  |
| 14035 | P03363 | P32881 | -0.43608  |
| 14036 | P03363 | Q5T699 | -0.22264  |
| 14037 | P03363 | P0C880 | -0.042737 |
| 14038 | P03363 | Q9Y2K6 | -0.22988  |
| 14039 | P03363 | Q01432 | -0.21404  |
| 14040 | P03363 | P34969 | -0.68877  |
| 14041 | P03363 | Q8NEC5 | -0.25092  |
| 14042 | P03363 | Q9Y272 | -0.27167  |
| 14043 | P03363 | P07988 | -0.32025  |
| 14044 | P03363 | P13284 | -0.65966  |
| 14045 | P03363 | O60906 | -0.45468  |
| 14046 | P03363 | Q8WVR3 | -0.031359 |
| 14047 | P03363 | Q8WXG1 | -0.1857   |
| 14048 | P03363 | Q8NH64 | -0.61656  |
| 14049 | P03363 | A1L3X0 | -0.07831  |
| 14050 | P03363 | Q9H1C3 | -0.32029  |
| 14051 | P03363 | P25445 | -0.22739  |
| 14052 | P03363 | P14207 | -0.58018  |
| 14053 | P03363 | P28062 | -0.16105  |
| 14054 | P03363 | Q6UWU4 | -0.23844  |
| 14055 | P03363 | Q95365 | -0.54957  |
| 14056 | P03363 | O95214 | -0.32626  |
| 14057 | P03363 | Q5JQF7 | -0.042737 |
| 14058 | P03363 | Q15381 | -0.28522  |
| 14059 | P03363 | P58417 | -0.39869  |
| 14060 | P03363 | Q6UWM7 | -0.47289  |

|       |        |        |           |
|-------|--------|--------|-----------|
| 14061 | P03363 | Q0VAA5 | -0.25769  |
| 14062 | P03363 | Q969M1 | -0.1916   |
| 14063 | P03363 | Q9HA47 | -0.31447  |
| 14064 | P03363 | Q8N8U3 | -0.16682  |
| 14065 | P03363 | Q16671 | -0.77596  |
| 14066 | P03363 | P16298 | -0.20132  |
| 14067 | P03363 | I6L899 | -0.17446  |
| 14068 | P03363 | Q96J02 | -0.22741  |
| 14069 | P03363 | Q8N5G2 | -0.20738  |
| 14070 | P03363 | Q9UNX9 | -0.54402  |
| 14071 | P03363 | O60636 | -0.37636  |
| 14072 | P03363 | A8MV57 | -0.24435  |
| 14073 | P03363 | Q6FHJ7 | -0.26032  |
| 14074 | P03363 | P59103 | -0.098035 |
| 14075 | P03363 | O75954 | -0.43294  |
| 14076 | P03363 | Q9BSR8 | -0.41981  |
| 14077 | P03363 | Q9NRU3 | -0.49701  |
| 14078 | P03363 | Q8N5D6 | -0.33199  |
| 14079 | P03363 | O95754 | -0.5351   |
| 14080 | P03363 | P13535 | -0.14387  |
| 14081 | P03363 | Q6P2M8 | -0.23262  |
| 14082 | P03363 | Q06481 | -0.2261   |
| 14083 | P03363 | Q15399 | -0.57188  |
| 14084 | P03363 | Q16777 | -0.29001  |
| 14085 | P03363 | Q3KR37 | -0.32626  |
| 14086 | P03363 | Q8WZA6 | -0.61656  |
| 14087 | P03363 | O60551 | -0.17746  |
| 14088 | P03363 | H3BNL1 | -0.033802 |
| 14089 | P03363 | Q8N6R0 | -0.21678  |
| 14090 | P03363 | Q9H9B1 | -0.22741  |
| 14091 | P03363 | P28331 | -0.22273  |
| 14092 | P03363 | P59922 | -0.61656  |
| 14093 | P03363 | Q8NAP8 | -0.22643  |
| 14094 | P03363 | A0PJZ3 | -0.31361  |
| 14095 | P03363 | Q5TZJ5 | -0.32626  |
| 14096 | P03363 | Q5H9J9 | -0.084529 |
| 14097 | P03363 | Q9P0S9 | -0.3296   |
| 14098 | P03363 | Q96MT4 | -0.019124 |
| 14099 | P03363 | Q9NRX4 | -0.17362  |
| 14100 | P03363 | Q9NQL2 | -0.30385  |
| 14101 | P03363 | A6NMS7 | -0.32626  |
| 14102 | P03363 | Q9BSL1 | -0.22719  |
| 14103 | P03363 | P01579 | -0.22823  |
| 14104 | P03363 | Q5JXX7 | -0.32626  |
| 14105 | P03363 | Q8NGN2 | -0.61656  |
| 14106 | P03363 | P09668 | -0.24693  |
| 14107 | P03363 | Q08AH3 | -0.34222  |
| 14108 | P03363 | O43175 | -0.42592  |
| 14109 | P03363 | Q6ZSB3 | -0.18041  |
| 14110 | P03363 | Q2TAA5 | -0.45393  |
| 14111 | P03363 | Q96EE3 | -0.22742  |
| 14112 | P03363 | Q4KN68 | -0.1363   |
| 14113 | P03363 | P01623 | -0.54902  |
| 14114 | P03363 | Q9HCN3 | -0.42437  |
| 14115 | P03363 | Q8IWF7 | -0.13484  |
| 14116 | P03363 | Q9H2R5 | -0.49563  |
| 14117 | P03363 | P30419 | -0.16679  |
| 14118 | P03363 | Q96LD4 | -0.22691  |
| 14119 | P03363 | Q13324 | -0.43791  |
| 14120 | P03363 | Q5XG87 | -0.21215  |
| 14121 | P03363 | P01210 | -0.42028  |
| 14122 | P03363 | Q6UWF9 | -0.33992  |
| 14123 | P03363 | P55160 | -0.21063  |
| 14124 | P03363 | Q5VYX0 | -0.57898  |
| 14125 | P03363 | O95298 | -0.10548  |
| 14126 | P03363 | P13762 | -0.53907  |
| 14127 | P03363 | Q96PQ0 | -0.33632  |
| 14128 | P03363 | Q6PJ69 | -0.27953  |
| 14129 | P03363 | Q9UHC6 | -0.47525  |
| 14130 | P03363 | Q13976 | -0.22711  |
| 14131 | P03363 | Q6ZP01 | -0.22504  |
| 14132 | P03363 | Q86SY8 | -0.042737 |
| 14133 | P03363 | Q9BQM9 | -0.19534  |
| 14134 | P03363 | Q96RI0 | -0.80303  |
| 14135 | P03363 | Q7Z3B0 | -0.32626  |
| 14136 | P03363 | Q9H343 | -0.61656  |

|       |        |        |           |
|-------|--------|--------|-----------|
| 14137 | P03363 | Q5VUD6 | -0.52348  |
| 14138 | P03363 | Q04844 | -0.54403  |
| 14139 | P03363 | Q8TDN2 | -0.41606  |
| 14140 | P03363 | Q8N8D9 | -0.2154   |
| 14141 | P03363 | P14625 | -0.13183  |
| 14142 | P03363 | Q9Y5X4 | -0.22819  |
| 14143 | P03363 | A4D1Z8 | -0.20543  |
| 14144 | P03363 | Q6UXB3 | -0.24531  |
| 14145 | P03363 | P01713 | -0.54902  |
| 14146 | P03363 | Q9H7L2 | -0.33992  |
| 14147 | P03363 | P01730 | -0.26905  |
| 14148 | P03363 | Q9H4G1 | -0.38852  |
| 14149 | P03363 | Q8N1Q1 | -0.22441  |
| 14150 | P03363 | Q6UX72 | -0.32369  |
| 14151 | P03363 | Q8NGE0 | -0.61656  |
| 14152 | P03363 | Q8N584 | -0.051698 |
| 14153 | P03363 | Q13946 | -0.22635  |
| 14154 | P03363 | Q96D96 | -0.37174  |
| 14155 | P03363 | Q8NCC5 | -0.27321  |
| 14156 | P03363 | Q9UKQ2 | -0.89786  |
| 14157 | P03363 | P43657 | -0.62051  |
| 14158 | P03363 | Q8N0V1 | -0.038055 |
| 14159 | P03363 | P15260 | -0.5809   |
| 14160 | P03363 | Q5SY80 | -0.32626  |
| 14161 | P03363 | P61566 | -0.22613  |
| 14162 | P03363 | A8K554 | -0.18481  |
| 14163 | P03363 | Q8IYB5 | -0.41099  |
| 14164 | P03363 | Q96E22 | -0.43854  |
| 14165 | P03363 | Q9Y5Z0 | -0.48347  |
| 14166 | P03363 | P05166 | -0.21977  |
| 14167 | P03363 | O75367 | -0.28211  |
| 14168 | P03363 | O95473 | -0.32626  |
| 14169 | P03363 | Q14523 | -0.19187  |
| 14170 | P03363 | Q93099 | -0.31778  |
| 14171 | P03363 | P80075 | -0.60602  |
| 14172 | P03363 | P49257 | -0.14894  |
| 14173 | P03363 | Q8N2K1 | -0.53724  |
| 14174 | P03363 | Q9H977 | -0.2274   |
| 14175 | P03363 | Q6ZVL8 | -0.042737 |
| 14176 | P03363 | Q9BYV1 | -0.21507  |
| 14177 | P03363 | Q96NB2 | -0.39035  |
| 14178 | P03363 | Q8IZP6 | -0.22738  |
| 14179 | P03363 | Q9NWS0 | -0.1115   |
| 14180 | P03363 | Q99497 | -0.18669  |
| 14181 | P03363 | Q00537 | -0.45391  |
| 14182 | P03363 | Q49AH0 | -0.31234  |
| 14183 | P03363 | Q4VNC0 | -0.53263  |
| 14184 | P03363 | Q86XM0 | -0.52423  |
| 14185 | P03363 | O60494 | -0.25499  |
| 14186 | P03363 | P33991 | -0.22588  |
| 14187 | P03363 | Q9UK05 | -0.22741  |
| 14188 | P03363 | Q8NFI6 | -0.64373  |
| 14189 | P03363 | P02689 | -0.21742  |
| 14190 | P03363 | O75200 | -0.33992  |
| 14191 | P03363 | Q9H8M9 | -0.69304  |
| 14192 | P03363 | Q9QC07 | -0.22758  |
| 14193 | P03363 | Q00444 | -0.22741  |
| 14194 | P03363 | P01704 | -0.54902  |
| 14195 | P03363 | Q96EH8 | -0.22741  |
| 14196 | P03363 | A8MYA2 | -0.12141  |
| 14197 | P03363 | Q8N3Z3 | -0.31871  |
| 14198 | P03363 | P35462 | -0.22924  |
| 14199 | P03363 | O60512 | -0.22791  |
| 14200 | P03363 | Q9ULZ9 | -0.75161  |
| 14201 | P03363 | P26006 | -0.2274   |
| 14202 | P03363 | P09669 | -0.29981  |
| 14203 | P03363 | Q8N4Q1 | -0.16971  |
| 14204 | P03363 | Q68CR7 | -0.32626  |
| 14205 | P03363 | P68032 | -0.12009  |
| 14206 | P03363 | Q8NEL0 | -0.15978  |
| 14207 | P03363 | Q16478 | -0.37618  |
| 14208 | P03363 | Q94830 | -0.20897  |
| 14209 | P03363 | Q9BZ71 | -0.22513  |
| 14210 | P03363 | Q9UNN8 | -0.22853  |
| 14211 | P03363 | Q96S07 | -0.042737 |
| 14212 | P03363 | Q38SD2 | -0.64521  |



|       |        |        |            |
|-------|--------|--------|------------|
| 14213 | P03363 | Q8NGE1 | -0.61656   |
| 14214 | P03363 | Q8WWX8 | -0.4648    |
| 14215 | P03363 | Q96PC3 | -0.2081    |
| 14216 | P03363 | Q92628 | -0.24873   |
| 14217 | P03363 | Q86YT5 | -0.40341   |
| 14218 | P03363 | Q8TDQ1 | -0.47262   |
| 14219 | P03363 | Q9BXU1 | -0.54205   |
| 14220 | P03363 | Q02747 | -0.41396   |
| 14221 | P03363 | P41968 | -0.36584   |
| 14222 | P03363 | Q16557 | -0.34941   |
| 14223 | P03363 | Q8WVIO | -0.32227   |
| 14224 | P03363 | P16284 | -0.22741   |
| 14225 | P03363 | P04209 | -0.54902   |
| 14226 | P03363 | Q9BR01 | -0.29518   |
| 14227 | P03363 | Q9NQ84 | -0.6873    |
| 14228 | P03363 | P48443 | -0.22747   |
| 14229 | P03363 | A6NI47 | -0.2274    |
| 14230 | P03363 | Q6UXC1 | -0.24204   |
| 14231 | P03363 | Q8IVF2 | -0.22529   |
| 14232 | P03363 | A6NKN8 | -0.0012295 |
| 14233 | P03363 | Q86U90 | -0.070136  |
| 14234 | P03363 | Q9BSY4 | -0.11446   |
| 14235 | P03363 | Q16891 | -0.13034   |
| 14236 | P03363 | Q9BX79 | -0.30653   |
| 14237 | P03363 | O96033 | -0.088448  |
| 14238 | P03363 | Q8NGN4 | -0.61656   |
| 14239 | P03363 | Q96MI6 | -0.20674   |
| 14240 | P03363 | P78536 | -0.24003   |
| 14241 | P03363 | Q8NGQ2 | -0.61656   |
| 14242 | P03363 | P11465 | -0.25922   |
| 14243 | P03363 | Q53H12 | -0.39171   |
| 14244 | P03363 | P0C874 | -0.32626   |
| 14245 | P03363 | A6NKX4 | -0.35232   |
| 14246 | P03363 | P16562 | -0.42609   |
| 14247 | P03363 | P02792 | -0.19615   |
| 14248 | P03363 | O94806 | -0.22737   |
| 14249 | P03363 | Q6UWJ8 | -0.32626   |
| 14250 | P03363 | Q9UBU7 | -0.18637   |
| 14251 | P03363 | Q96RJ0 | -0.61545   |
| 14252 | P03363 | Q9BRQ4 | -0.036157  |
| 14253 | P03363 | Q9UN74 | -0.62883   |
| 14254 | P03363 | Q6ZUU3 | -0.042737  |
| 14255 | P03363 | Q99731 | -0.33395   |
| 14256 | P03363 | P01732 | -0.45851   |
| 14257 | P03363 | Q8NDW8 | -0.16551   |
| 14258 | P03363 | Q9UNA3 | -0.31616   |
| 14259 | P03363 | Q96MF4 | -0.087005  |
| 14260 | P03363 | Q96C19 | -0.22693   |
| 14261 | P03363 | Q13546 | -0.22741   |
| 14262 | P03363 | Q6V702 | -0.15721   |
| 14263 | P03363 | Q7RTZ2 | -0.2393    |
| 14264 | P03363 | Q9H0I2 | -0.14716   |
| 14265 | P03363 | P22732 | -0.19004   |
| 14266 | P03363 | Q8WUF8 | -0.44258   |
| 14267 | P03363 | Q9H6L2 | -0.4571    |
| 14268 | P03363 | Q6ZV80 | -0.09964   |
| 14269 | P03363 | Q9H3R0 | -0.21219   |
| 14270 | P03363 | P08473 | -0.25233   |
| 14271 | P03363 | Q96JB1 | -0.22312   |
| 14272 | P03363 | Q96S90 | -0.20437   |
| 14273 | P03363 | Q9BXP2 | -0.43406   |
| 14274 | P03363 | Q75078 | -0.55617   |
| 14275 | P03363 | P28072 | -0.15933   |
| 14276 | P03363 | Q0D2K2 | -0.18114   |
| 14277 | P03363 | Q9P275 | -0.26742   |
| 14278 | P03363 | P01712 | -0.54902   |
| 14279 | P03363 | Q8TBM8 | -0.35579   |
| 14280 | P03363 | Q16773 | -0.22443   |
| 14281 | P03363 | P38405 | -0.50866   |
| 14282 | P03363 | Q6ZQP7 | -0.042737  |
| 14283 | P03363 | O75581 | -0.22745   |
| 14284 | P03363 | Q9UQC9 | -0.81024   |
| 14285 | P03363 | Q96B02 | -0.14797   |
| 14286 | P03363 | Q8NH08 | -0.61656   |
| 14287 | P03363 | Q6ZRS4 | -0.079099  |
| 14288 | P03363 | Q9BTY2 | -0.28573   |

|       |        |        |           |
|-------|--------|--------|-----------|
| 14289 | P03363 | P13804 | -0.2036   |
| 14290 | P03363 | P12109 | -0.41595  |
| 14291 | P03363 | Q9UIX4 | -0.42551  |
| 14292 | P03363 | Q15085 | -0.22741  |
| 14293 | P03363 | Q8TCY5 | -0.31039  |
| 14294 | P03363 | Q15178 | -0.35089  |
| 14295 | P03363 | Q16559 | -0.22747  |
| 14296 | P03363 | P35790 | -0.35849  |
| 14297 | P03363 | Q9NTJ4 | -0.19925  |
| 14298 | P03363 | Q9P126 | -0.29094  |
| 14299 | P03363 | P02729 | -0.28098  |
| 14300 | P03363 | Q9BYE3 | -0.042737 |
| 14301 | P03363 | P21583 | -0.21941  |
| 14302 | P03363 | Q8NOW5 | -0.12356  |
| 14303 | P03363 | Q9BYI3 | -0.083848 |
| 14304 | P03363 | Q8NGD5 | -0.61656  |
| 14305 | P03363 | Q9H9Y4 | -0.29586  |
| 14306 | P03363 | Q8N6G6 | -0.48363  |
| 14307 | P03363 | Q8WX94 | -0.24873  |
| 14308 | P03363 | B9A064 | -0.33992  |
| 14309 | P03363 | Q14958 | -0.21183  |
| 14310 | P03363 | P04844 | -0.24028  |
| 14311 | P03363 | Q9BYC5 | -0.27654  |
| 14312 | P03363 | Q8NEJ0 | -0.243    |
| 14313 | P03363 | Q92824 | -0.51178  |
| 14314 | P03363 | Q9ULA0 | -0.19159  |
| 14315 | P03363 | Q9Y6Q1 | -0.22938  |
| 14316 | P03363 | P10176 | -0.29981  |
| 14317 | P03363 | Q13323 | -0.095605 |
| 14318 | P03363 | Q8IY82 | -0.19574  |
| 14319 | P03363 | Q969E2 | -0.19581  |
| 14320 | P03363 | Q9NXJ0 | -0.32626  |
| 14321 | P03363 | Q60462 | -0.40319  |
| 14322 | P03363 | P23219 | -0.28962  |
| 14323 | P03363 | Q9BUB7 | -0.26562  |
| 14324 | P03363 | Q9H3M0 | -0.41606  |
| 14325 | P03363 | Q5VTU8 | -0.19751  |
| 14326 | P03363 | Q9UPU3 | -0.33632  |
| 14327 | P03363 | Q6MZW2 | -0.38315  |
| 14328 | P03363 | Q9ULJ1 | -0.15109  |
| 14329 | P03363 | Q96CH1 | -0.64046  |
| 14330 | P03363 | Q13557 | -0.41915  |
| 14331 | P03363 | Q9C0K7 | -0.22801  |
| 14332 | P03363 | Q5JRV8 | -0.32626  |
| 14333 | P03363 | A1L453 | -0.49563  |
| 14334 | P03363 | P05026 | -0.17431  |
| 14335 | P03363 | A0AVI2 | -0.32626  |
| 14336 | P03363 | Q8IUC6 | -0.18886  |
| 14337 | P03363 | P10826 | -0.22921  |
| 14338 | P03363 | Q8WWZ1 | -0.40777  |
| 14339 | P03363 | Q6BAA4 | -0.22825  |
| 14340 | P03363 | P24588 | -0.17153  |
| 14341 | P03363 | Q9BZZ2 | -0.85356  |
| 14342 | P03363 | Q92564 | -0.15067  |
| 14343 | P03363 | Q43795 | -0.18127  |
| 14344 | P03363 | Q6AHZ1 | -0.22753  |
| 14345 | P03363 | Q99766 | -0.18258  |
| 14346 | P03363 | P43629 | -0.59423  |
| 14347 | P03363 | Q8NG06 | -0.27953  |
| 14348 | P03363 | Q96GX8 | -0.031359 |
| 14349 | P03363 | Q6IF63 | -0.61656  |
| 14350 | P03363 | Q8N7R7 | -0.16579  |
| 14351 | P03363 | Q8NGK5 | -0.61656  |
| 14352 | P03363 | Q9Y3A4 | -0.078257 |
| 14353 | P03363 | Q16610 | -0.21615  |
| 14354 | P03363 | P53597 | -0.21442  |
| 14355 | P03363 | A6NHI5 | -0.32626  |
| 14356 | P03363 | O75832 | -0.22741  |
| 14357 | P03363 | P0DJ07 | -0.32227  |
| 14358 | P03363 | O75603 | -0.18664  |
| 14359 | P03363 | A7KAX9 | -0.23493  |
| 14360 | P03363 | P57054 | -0.44821  |
| 14361 | P03363 | Q13113 | -0.32626  |
| 14362 | P03363 | P0CG23 | -0.15103  |
| 14363 | P03363 | Q8IWT1 | -0.43648  |
| 14364 | P03363 | O43581 | -0.44044  |

|       |        |        |           |
|-------|--------|--------|-----------|
| 14365 | P03363 | O14715 | -0.19781  |
| 14366 | P03363 | Q92623 | -0.22291  |
| 14367 | P03363 | Q96DD7 | -0.32626  |
| 14368 | P03363 | P68371 | -0.20971  |
| 14369 | P03363 | Q08334 | -0.22662  |
| 14370 | P03363 | Q03405 | -0.43955  |
| 14371 | P03363 | Q14586 | -0.12133  |
| 14372 | P03363 | Q6P5Q4 | -0.22622  |
| 14373 | P03363 | Q9Y256 | -0.59175  |
| 14374 | P03363 | Q969T3 | -0.22098  |
| 14375 | P03363 | Q14257 | -0.11672  |
| 14376 | P03363 | Q7KZI7 | -0.32974  |
| 14377 | P03363 | Q5W0Q7 | -0.11825  |
| 14378 | P03363 | P10451 | -0.31472  |
| 14379 | P03363 | Q8N8I6 | -0.042737 |
| 14380 | P03363 | Q5TEU4 | -0.2084   |
| 14381 | P03363 | Q7Z6J4 | -0.4988   |
| 14382 | P03363 | Q16552 | -0.29445  |
| 14383 | P03363 | Q96LZ7 | -0.16786  |
| 14384 | P03363 | P14735 | -0.2274   |
| 14385 | P03363 | A6NKK0 | -0.61656  |
| 14386 | P03363 | Q9H6D5 | -0.32626  |
| 14387 | P03363 | Q43825 | -0.352    |
| 14388 | P03363 | P19099 | -0.38616  |
| 14389 | P03363 | Q9Y235 | -0.33403  |
| 14390 | P03363 | A6NGN9 | -0.33992  |
| 14391 | P03363 | Q9Y5G3 | -0.57898  |
| 14392 | P03363 | Q2M1Z3 | -0.47559  |
| 14393 | P03363 | P25025 | -0.62906  |
| 14394 | P03363 | Q9Y2B2 | -0.45064  |
| 14395 | P03363 | Q8NFQ6 | -0.45135  |
| 14396 | P03363 | Q99678 | -0.73419  |
| 14397 | P03363 | A6NNL0 | -0.028135 |
| 14398 | P03363 | P49746 | -0.39997  |
| 14399 | P03363 | A6NIK2 | -0.22836  |
| 14400 | P03363 | Q9NUN5 | -0.30508  |
| 14401 | P03363 | P59533 | -0.51612  |
| 14402 | P03363 | A6ND01 | -0.3365   |
| 14403 | P03363 | O60383 | -0.31195  |
| 14404 | P03363 | Q9UHM6 | -0.60615  |
| 14405 | P03363 | Q9P2B2 | -0.22741  |
| 14406 | P03363 | Q29974 | -0.44526  |
| 14407 | P03363 | Q13608 | -0.28917  |
| 14408 | P03363 | Q96HU1 | -0.22744  |
| 14409 | P03363 | Q9ULI4 | -0.25222  |
| 14410 | P03363 | Q96DY7 | -0.05178  |
| 14411 | P03363 | Q5DX21 | -0.54105  |
| 14412 | P03363 | Q6WRX3 | -0.21476  |
| 14413 | P03363 | Q9NQ90 | -0.20327  |
| 14414 | P03363 | P10070 | -0.22735  |
| 14415 | P03363 | Q86WS4 | -0.042737 |
| 14416 | P03363 | A6NNN8 | -0.38344  |
| 14417 | P03363 | P06576 | -0.21896  |
| 14418 | P03363 | P03928 | -0.29382  |
| 14419 | P03363 | C9JVI0 | -0.25139  |
| 14420 | P03363 | P09769 | -0.358    |
| 14421 | P03363 | Q8IVL8 | -0.5706   |
| 14422 | P03363 | Q95785 | -0.18275  |
| 14423 | P03363 | Q16513 | -0.22505  |
| 14424 | P03363 | Q9NRR1 | -0.41159  |
| 14425 | P03363 | Q8N7P7 | -0.2894   |
| 14426 | P03363 | A6NHN0 | -0.37669  |
| 14427 | P03363 | Q8IWY9 | -0.32626  |
| 14428 | P03363 | Q8NCI6 | -0.18808  |
| 14429 | P03363 | P23743 | -0.54185  |
| 14430 | P03363 | Q12767 | -0.32626  |
| 14431 | P03363 | Q8WUB8 | -0.23024  |
| 14432 | P03363 | Q86V21 | -0.23523  |
| 14433 | P03363 | Q7L5A8 | -0.59527  |
| 14434 | P03363 | Q9BWT3 | -0.13896  |
| 14435 | P03363 | Q96B33 | -0.27242  |
| 14436 | P03363 | Q9Y366 | -0.14721  |
| 14437 | P03363 | Q9Y343 | -0.22718  |
| 14438 | P03363 | Q9UJU6 | -0.3063   |
| 14439 | P03363 | Q99674 | -0.41391  |
| 14440 | P03363 | Q969M3 | -0.28     |

|       |        |        |            |
|-------|--------|--------|------------|
| 14441 | P03363 | Q17RB0 | -0.046698  |
| 14442 | P03363 | Q8WWI1 | -0.22734   |
| 14443 | P03363 | P09525 | -0.17356   |
| 14444 | P03363 | P14780 | -0.23867   |
| 14445 | P03363 | Q99798 | -0.2089    |
| 14446 | P03363 | O00562 | -0.21099   |
| 14447 | P03363 | O75648 | -0.069482  |
| 14448 | P03363 | A6NEM1 | -0.0006499 |
| 14449 | P03363 | Q8NGL4 | -0.61656   |
| 14450 | P03363 | Q86U38 | -0.13155   |
| 14451 | P03363 | P25103 | -0.42695   |
| 14452 | P03363 | P13727 | -0.3946    |
| 14453 | P03363 | Q8NGC4 | -0.61656   |
| 14454 | P03363 | Q6UX15 | -0.36093   |
| 14455 | P03363 | Q96RJ3 | -0.31166   |
| 14456 | P03363 | Q96K78 | -0.6666    |
| 14457 | P03363 | P59051 | -0.1241    |
| 14458 | P03363 | Q8NGC2 | -0.61656   |
| 14459 | P03363 | O15209 | -0.22706   |
| 14460 | P03363 | Q8NEE6 | -0.22621   |
| 14461 | P03363 | Q96LI9 | -0.15186   |
| 14462 | P03363 | Q8N8Q1 | -0.40288   |
| 14463 | P03363 | Q8NG68 | -0.21859   |
| 14464 | P03363 | P0C841 | -0.042737  |
| 14465 | P03363 | Q9BQB4 | -0.14774   |
| 14466 | P03363 | Q8N159 | -0.11972   |
| 14467 | P03363 | Q9NVM6 | -0.23623   |
| 14468 | P03363 | Q9HAU8 | -0.32366   |
| 14469 | P03363 | Q7L5N7 | -0.44371   |
| 14470 | P03363 | Q9ULD9 | -0.27953   |
| 14471 | P03363 | Q8TDF6 | -0.22741   |
| 14472 | P03363 | Q16678 | -0.54944   |
| 14473 | P03363 | P60153 | -0.18524   |
| 14474 | P03363 | Q5TCS8 | -0.35768   |
| 14475 | P03363 | Q92519 | -0.22776   |
| 14476 | P03363 | Q9UJQ7 | -0.19834   |
| 14477 | P03363 | A7MBM2 | -0.24307   |
| 14478 | P03363 | Q9NS00 | -0.43333   |
| 14479 | P03363 | A6NDV4 | -0.20717   |
| 14480 | P03363 | P06239 | -0.23626   |
| 14481 | P03363 | Q8N912 | -0.32626   |
| 14482 | P03363 | Q9BSF4 | -0.1595    |
| 14483 | P03363 | Q5VZR4 | -0.30015   |
| 14484 | P03363 | Q86VH5 | -0.32626   |
| 14485 | P03363 | P12838 | -0.44982   |
| 14486 | P03363 | Q9BWP8 | -0.4669    |
| 14487 | P03363 | Q496Y0 | -0.2274    |
| 14488 | P03363 | Q4V326 | -0.23345   |
| 14489 | P03363 | Q6ZSM3 | -0.44138   |
| 14490 | P03363 | Q14788 | -0.37018   |
| 14491 | P03363 | O00628 | -0.22741   |
| 14492 | P03363 | P11047 | -0.44686   |
| 14493 | P03363 | Q2KHR3 | -0.27407   |
| 14494 | P03363 | Q8TBG9 | -0.24414   |
| 14495 | P03363 | Q15475 | -0.22311   |
| 14496 | P03363 | P02585 | -0.22688   |
| 14497 | P03363 | Q86UV6 | -0.27953   |
| 14498 | P03363 | Q53GG5 | -0.22741   |
| 14499 | P03363 | P07101 | -0.22594   |
| 14500 | P03363 | Q07869 | -0.23078   |
| 14501 | P03363 | Q8IU99 | -0.65495   |
| 14502 | P03363 | Q93050 | -0.21494   |
| 14503 | P03363 | P47884 | -0.68388   |
| 14504 | P03363 | P05089 | -0.22084   |
| 14505 | P03363 | O00222 | -0.62391   |
| 14506 | P03363 | O75151 | -0.23471   |
| 14507 | P03363 | Q6EBC2 | -0.4194    |
| 14508 | P03363 | Q5GJ75 | -0.15347   |
| 14509 | P03363 | Q9NQL9 | -0.19973   |
| 14510 | P03363 | Q86X60 | -0.12371   |
| 14511 | P03363 | Q15582 | -0.69402   |
| 14512 | P03363 | Q9UNU6 | -0.70689   |
| 14513 | P03363 | P60891 | -0.32346   |
| 14514 | P03363 | Q9P1W8 | -0.22784   |
| 14515 | P03363 | Q32NC0 | -0.093051  |
| 14516 | P03363 | P60174 | -0.2085    |

|       |        |        |           |
|-------|--------|--------|-----------|
| 14517 | P03363 | Q8NBJ5 | -0.19386  |
| 14518 | P03363 | Q7Z553 | -0.27601  |
| 14519 | P03363 | Q6P995 | -0.25407  |
| 14520 | P03363 | P02708 | -0.41127  |
| 14521 | P03363 | Q9HAY6 | -0.28549  |
| 14522 | P03363 | Q9BXJ0 | -0.37669  |
| 14523 | P03363 | O95182 | -0.1245   |
| 14524 | P03363 | Q96IK5 | -0.22332  |
| 14525 | P03363 | Q8WTZ4 | -0.21221  |
| 14526 | P03363 | Q86X24 | -0.10319  |
| 14527 | P03363 | Q6PID6 | -0.22739  |
| 14528 | P03363 | Q99797 | -0.23827  |
| 14529 | P03363 | Q96N23 | -0.024193 |
| 14530 | P03363 | Q8NC06 | -0.23386  |
| 14531 | P03363 | P48449 | -0.30187  |
| 14532 | P03363 | Q9UMZ2 | -0.22476  |
| 14533 | P03363 | Q9UL68 | -0.21327  |
| 14534 | P03363 | Q96EV8 | -0.19779  |
| 14535 | P03363 | Q9BY84 | -0.23657  |
| 14536 | P03363 | Q9Y5R2 | -0.85875  |
| 14537 | P03363 | Q9Y6C9 | -0.29673  |
| 14538 | P03363 | P45983 | -0.22741  |
| 14539 | P03363 | Q8N6Q1 | -0.32626  |
| 14540 | P03363 | Q9NWX6 | -0.20107  |
| 14541 | P03363 | Q495A1 | -0.22746  |
| 14542 | P03363 | Q96DT0 | -0.21295  |
| 14543 | P03363 | Q8WUA8 | -0.33992  |
| 14544 | P03363 | Q8IVW1 | -0.32341  |
| 14545 | P03363 | Q8NGX5 | -0.61656  |
| 14546 | P03363 | Q9UK53 | -0.22911  |
| 14547 | P03363 | P20963 | -0.21928  |
| 14548 | P03363 | P21333 | -0.2277   |
| 14549 | P03363 | P15382 | -0.4904   |
| 14550 | P03363 | Q92581 | -0.57403  |
| 14551 | P03363 | Q96RF0 | -0.22741  |
| 14552 | P03363 | Q9UN86 | -0.29495  |
| 14553 | P03363 | Q14563 | -0.36379  |
| 14554 | P03363 | Q9HAV7 | -0.054912 |
| 14555 | P03363 | Q6ZUQ5 | -0.33959  |
| 14556 | P03363 | Q95859 | -0.56339  |
| 14557 | P03363 | Q9NPR9 | -0.32626  |
| 14558 | P03363 | Q5GFL6 | -0.40733  |
| 14559 | P03363 | Q9NS62 | -0.47019  |
| 14560 | P03363 | Q92685 | -0.44297  |
| 14561 | P03363 | P31358 | -0.32277  |
| 14562 | P03363 | O15391 | -0.22592  |
| 14563 | P03363 | Q6ZVT6 | -0.087178 |
| 14564 | P03363 | Q8N7C4 | -0.32626  |
| 14565 | P03363 | Q00325 | -0.39195  |
| 14566 | P03363 | Q8NG94 | -0.61656  |
| 14567 | P03363 | P16233 | -0.45499  |
| 14568 | P03363 | Q02817 | -0.22742  |
| 14569 | P03363 | Q9HAW0 | -0.21336  |
| 14570 | P03363 | P48230 | -0.29249  |
| 14571 | P03363 | Q9Y6D5 | -0.22587  |
| 14572 | P03363 | P04216 | -0.22635  |
| 14573 | P03363 | P30491 | -0.54957  |
| 14574 | P03363 | P48147 | -0.16036  |
| 14575 | P03363 | Q96KT6 | -0.042737 |
| 14576 | P03363 | Q7Z6M1 | -0.22707  |
| 14577 | P03363 | Q9UHL3 | -0.11569  |
| 14578 | P03363 | Q9H2H0 | -0.2137   |
| 14579 | P03363 | Q96HE7 | -0.45713  |
| 14580 | P03363 | Q08828 | -0.43484  |
| 14581 | P03363 | Q5ZEY9 | -0.050912 |
| 14582 | P03363 | P26992 | -0.28124  |
| 14583 | P03363 | Q99944 | -0.58568  |
| 14584 | P03363 | Q9P2S2 | -0.4472   |
| 14585 | P03363 | Q6P4F2 | -0.1826   |
| 14586 | P03363 | Q8IWG1 | -0.20147  |
| 14587 | P03363 | Q8NFD4 | -0.16854  |
| 14588 | P03363 | Q9P0L0 | -0.21332  |
| 14589 | P03363 | P23769 | -0.2274   |
| 14590 | P03363 | P78363 | -0.64775  |
| 14591 | P03363 | Q8N628 | -0.61656  |
| 14592 | P03363 | Q13207 | -0.44591  |

|       |        |        |            |
|-------|--------|--------|------------|
| 14593 | P03363 | O75489 | -0.18744   |
| 14594 | P03363 | Q9BXY4 | -0.38557   |
| 14595 | P03363 | A0PK11 | -0.32626   |
| 14596 | P03363 | Q9UI40 | -0.51511   |
| 14597 | P03363 | Q969V3 | -0.21072   |
| 14598 | P03363 | P34741 | -0.27427   |
| 14599 | P03363 | Q13795 | -0.2275    |
| 14600 | P03363 | Q9UKZ4 | -0.51723   |
| 14601 | P03363 | Q30KQ2 | -0.33516   |
| 14602 | P03363 | O60741 | -0.64041   |
| 14603 | P03363 | Q969F8 | -0.32596   |
| 14604 | P03363 | Q9UQ49 | -0.27427   |
| 14605 | P03363 | Q9Y548 | -0.3247    |
| 14606 | P03363 | Q86WI1 | -0.37533   |
| 14607 | P03363 | P63215 | -0.25214   |
| 14608 | P03363 | Q6UWI4 | -0.60583   |
| 14609 | P03363 | P17643 | -0.3259    |
| 14610 | P03363 | Q5GAN6 | -0.21697   |
| 14611 | P03363 | Q5TA79 | -0.042737  |
| 14612 | P03363 | Q86WK7 | -0.40433   |
| 14613 | P03363 | P83105 | -0.46928   |
| 14614 | P03363 | P16035 | -0.41641   |
| 14615 | P03363 | Q9Y520 | -0.10326   |
| 14616 | P03363 | O14936 | -0.22868   |
| 14617 | P03363 | A8MWC7 | -0.17321   |
| 14618 | P03363 | Q9H4E7 | -0.22741   |
| 14619 | P03363 | P15153 | -0.29      |
| 14620 | P03363 | Q8TEZ7 | -0.60607   |
| 14621 | P03363 | Q9ULW5 | -0.36782   |
| 14622 | P03363 | Q9NSE2 | -0.22741   |
| 14623 | P03363 | Q96QZ7 | -0.22647   |
| 14624 | P03363 | Q5SWH9 | -0.32626   |
| 14625 | P03363 | Q5QNW6 | -0.14658   |
| 14626 | P03363 | Q14BN4 | -0.32073   |
| 14627 | P03363 | P0C869 | -0.36067   |
| 14628 | P03363 | O14513 | -0.10375   |
| 14629 | P03363 | Q8WZ92 | -0.61656   |
| 14630 | P03363 | O75608 | -0.22626   |
| 14631 | P03363 | Q9NUE0 | -0.47172   |
| 14632 | P03363 | A6NCV1 | -0.61656   |
| 14633 | P03363 | O15130 | -0.41991   |
| 14634 | P03363 | Q9P2K2 | -0.35175   |
| 14635 | P03363 | O76074 | -0.26244   |
| 14636 | P03363 | Q86SQ0 | -0.22705   |
| 14637 | P03363 | O60565 | -0.2235    |
| 14638 | P03363 | P34982 | -0.70152   |
| 14639 | P03363 | P17342 | -0.39163   |
| 14640 | P03363 | Q30KQ9 | -0.33516   |
| 14641 | P03363 | Q9NY99 | -0.22685   |
| 14642 | P03363 | F5H4B4 | -0.029873  |
| 14643 | P03363 | Q01524 | -0.44982   |
| 14644 | P03363 | Q6N021 | -0.3312    |
| 14645 | P03363 | Q8WXF5 | -0.055326  |
| 14646 | P03363 | Q9NZG7 | -0.42455   |
| 14647 | P03363 | Q14061 | -0.082307  |
| 14648 | P03363 | Q8TE56 | -0.59199   |
| 14649 | P03363 | Q6ZMD2 | -0.36369   |
| 14650 | P03363 | Q01851 | -0.22741   |
| 14651 | P03363 | Q6ZVH6 | -0.22869   |
| 14652 | P03363 | Q8N7E2 | -0.22031   |
| 14653 | P03363 | O75426 | -0.22723   |
| 14654 | P03363 | Q6ZRT6 | -0.031359  |
| 14655 | P03363 | O14775 | -0.22626   |
| 14656 | P03363 | Q7L4E1 | -0.32626   |
| 14657 | P03363 | Q9ULJ7 | -0.22741   |
| 14658 | P03363 | O60830 | -0.17364   |
| 14659 | P03363 | Q8N5T8 | -0.0037923 |
| 14660 | P03363 | Q15822 | -0.48025   |
| 14661 | P03363 | Q8NI17 | -0.34862   |
| 14662 | P03363 | P18074 | -0.24293   |
| 14663 | P03363 | P42336 | -0.24898   |
| 14664 | P03363 | O43699 | -0.92046   |
| 14665 | P03363 | Q5THJ4 | -0.21134   |
| 14666 | P03363 | Q14571 | -0.35451   |
| 14667 | P03363 | A8K855 | -0.22726   |
| 14668 | P03363 | P03891 | -0.44445   |

|       |        |        |           |
|-------|--------|--------|-----------|
| 14669 | P03363 | Q9Y5G6 | -0.57898  |
| 14670 | P03363 | A2RU37 | -0.15776  |
| 14671 | P03363 | Q2Y0W8 | -0.47047  |
| 14672 | P03363 | Q8WTR8 | -0.33992  |
| 14673 | P03363 | Q96PB1 | -0.32626  |
| 14674 | P03363 | Q13239 | -0.22741  |
| 14675 | P03363 | A0PJX0 | -0.22763  |
| 14676 | P03363 | Q8NGS9 | -0.61656  |
| 14677 | P03363 | O75027 | -0.35971  |
| 14678 | P03363 | Q8NGK1 | -0.61656  |
| 14679 | P03363 | P19876 | -0.55393  |
| 14680 | P03363 | Q9UBG0 | -0.37229  |
| 14681 | P03363 | P59817 | -0.22741  |
| 14682 | P03363 | Q8N9L1 | -0.22725  |
| 14683 | P03363 | Q5VY43 | -0.45481  |
| 14684 | P03363 | Q9BS40 | -0.20123  |
| 14685 | P03363 | Q969N4 | -0.62775  |
| 14686 | P03363 | P35609 | -0.3577   |
| 14687 | P03363 | P32455 | -0.44392  |
| 14688 | P03363 | Q6VB85 | -0.29843  |
| 14689 | P03363 | P01702 | -0.54902  |
| 14690 | P03363 | P69849 | -0.3261   |
| 14691 | P03363 | Q0P6D2 | -0.52348  |
| 14692 | P03363 | O15350 | -0.22604  |
| 14693 | P03363 | O94813 | -0.22741  |
| 14694 | P03363 | Q5VXI9 | -0.3631   |
| 14695 | P03363 | P01589 | -0.37991  |
| 14696 | P03363 | Q58FF8 | -0.1166   |
| 14697 | P03363 | P00480 | -0.14131  |
| 14698 | P03363 | Q96QD8 | -0.53229  |
| 14699 | P03363 | Q8TB33 | -0.13984  |
| 14700 | P03363 | Q9UK80 | -0.26192  |
| 14701 | P03363 | P01779 | -0.54902  |
| 14702 | P03363 | P27930 | -0.38754  |
| 14703 | P03363 | Q92947 | -0.2932   |
| 14704 | P03363 | Q5JS37 | -0.33992  |
| 14705 | P03363 | Q96BI1 | -0.3827   |
| 14706 | P03363 | Q8TBP0 | -0.50908  |
| 14707 | P03363 | Q6ZSS7 | -0.32922  |
| 14708 | P03363 | Q8N146 | -0.61656  |
| 14709 | P03363 | O75129 | -0.32626  |
| 14710 | P03363 | Q8N5S3 | -0.21287  |
| 14711 | P03363 | Q5SY13 | -0.042737 |
| 14712 | P03363 | Q9UH73 | -0.19211  |
| 14713 | P03363 | P11912 | -0.51348  |
| 14714 | P03363 | P59538 | -0.51612  |
| 14715 | P03363 | Q969F0 | -0.42352  |
| 14716 | P03363 | Q9BXJ8 | -0.22024  |
| 14717 | P03363 | Q8N565 | -0.2327   |
| 14718 | P03363 | Q8NGF3 | -0.61656  |
| 14719 | P03363 | Q5VXJ0 | -0.3631   |
| 14720 | P03363 | P04080 | -0.21743  |
| 14721 | P03363 | P39748 | -0.21076  |
| 14722 | P03363 | Q9P0L2 | -0.51083  |
| 14723 | P03363 | Q8NBK3 | -0.38274  |
| 14724 | P03363 | Q9H6Q4 | -0.13876  |
| 14725 | P03363 | Q8NDV2 | -0.63766  |
| 14726 | P03363 | Q9UHW9 | -0.43129  |
| 14727 | P03363 | Q9H2S1 | -0.44082  |
| 14728 | P03363 | Q8NGU2 | -0.61656  |
| 14729 | P03363 | Q99835 | -0.23776  |
| 14730 | P03363 | Q8IY95 | -0.44363  |
| 14731 | P03363 | Q96GQ5 | -0.32626  |
| 14732 | P03363 | Q9UJ83 | -0.46959  |
| 14733 | P03363 | P49842 | -0.27585  |
| 14734 | P03363 | P49137 | -0.22833  |
| 14735 | P03363 | Q96HN2 | -0.22065  |
| 14736 | P03363 | Q9NWW6 | -0.43106  |
| 14737 | P03363 | Q9UBM7 | -0.60464  |
| 14738 | P03363 | P59510 | -0.53287  |
| 14739 | P03363 | O75064 | -0.21324  |
| 14740 | P03363 | O95825 | -0.42085  |
| 14741 | P03363 | O15240 | -0.31657  |
| 14742 | P03363 | Q14994 | -0.22747  |
| 14743 | P03363 | Q9NPF0 | -0.45745  |
| 14744 | P03363 | P06681 | -0.57328  |

|       |        |        |           |
|-------|--------|--------|-----------|
| 14745 | P03363 | Q4U2R8 | -0.24373  |
| 14746 | P03363 | Q494X1 | -0.11863  |
| 14747 | P03363 | O95925 | -0.22554  |
| 14748 | P03363 | Q14573 | -0.22644  |
| 14749 | P03363 | O95976 | -0.50513  |
| 14750 | P03363 | Q15760 | -0.73419  |
| 14751 | P03363 | Q9BVC6 | -0.06209  |
| 14752 | P03363 | Q9UL17 | -0.45691  |
| 14753 | P03363 | P01762 | -0.54902  |
| 14754 | P03363 | Q05329 | -0.23048  |
| 14755 | P03363 | Q6PIY7 | -0.20928  |
| 14756 | P03363 | O75469 | -0.23207  |
| 14757 | P03363 | Q9UGI8 | -0.27354  |
| 14758 | P03363 | Q56NI9 | -0.16389  |
| 14759 | P03363 | P56202 | -0.25037  |
| 14760 | P03363 | Q9Y6M9 | -0.21633  |
| 14761 | P03363 | Q7RTX8 | -0.20338  |
| 14762 | P03363 | Q9UNW8 | -0.60565  |
| 14763 | P03363 | Q9Y243 | -0.17394  |
| 14764 | P03363 | P21941 | -0.22741  |
| 14765 | P03363 | P05165 | -0.30902  |
| 14766 | P03363 | Q96RP8 | -0.41606  |
| 14767 | P03363 | Q11201 | -0.50486  |
| 14768 | P03363 | Q9H3E2 | -0.1726   |
| 14769 | P03363 | Q96R84 | -0.61656  |
| 14770 | P03363 | Q8TAZ6 | -0.16853  |
| 14771 | P03363 | Q9BZK3 | -0.093614 |
| 14772 | P03363 | Q96LW4 | -0.16674  |
| 14773 | P03363 | Q9HB58 | -0.21918  |
| 14774 | P03363 | O75366 | -0.21052  |
| 14775 | P03363 | Q9NQ30 | -0.30358  |
| 14776 | P03363 | P58012 | -0.29843  |
| 14777 | P03363 | Q76093 | -0.35249  |
| 14778 | P03363 | Q9BUD6 | -0.52209  |
| 14779 | P03363 | Q13702 | -0.22731  |
| 14780 | P03363 | Q15392 | -0.25672  |
| 14781 | P03363 | Q29983 | -0.36528  |
| 14782 | P03363 | Q9NZV6 | -0.32257  |
| 14783 | P03363 | Q0JRZ9 | -0.22675  |
| 14784 | P03363 | P12814 | -0.25736  |
| 14785 | P03363 | P41217 | -0.22741  |
| 14786 | P03363 | Q8NBR9 | -0.21425  |
| 14787 | P03363 | P41229 | -0.26349  |
| 14788 | P03363 | O43716 | -0.16789  |
| 14789 | P03363 | P40197 | -0.50198  |
| 14790 | P03363 | Q8N531 | -0.22286  |
| 14791 | P03363 | Q6UWP8 | -0.33992  |
| 14792 | P03363 | Q86XF0 | -0.24737  |
| 14793 | P03363 | Q1L5Z9 | -0.22703  |
| 14794 | P03363 | Q15283 | -0.12018  |
| 14795 | P03363 | O75251 | -0.20084  |
| 14796 | P03363 | Q8IW75 | -0.2931   |
| 14797 | P03363 | P35212 | -0.4694   |
| 14798 | P03363 | Q86WN1 | -0.22728  |
| 14799 | P03363 | Q96BR5 | -0.19205  |
| 14800 | P03363 | O15552 | -0.82889  |
| 14801 | P03363 | P48065 | -0.54119  |
| 14802 | P03363 | A0AUK8 | -0.091604 |
| 14803 | P03363 | Q8N8N0 | -0.40398  |
| 14804 | P03363 | Q8TCQ1 | -0.58602  |
| 14805 | P03363 | Q9Y6N7 | -0.2336   |
| 14806 | P03363 | Q53HI1 | -0.072901 |
| 14807 | P03363 | Q11130 | -0.31476  |
| 14808 | P03363 | P19404 | -0.35651  |
| 14809 | P03363 | Q9HAT2 | -0.36456  |
| 14810 | P03363 | Q9C0D4 | -0.22741  |
| 14811 | P03363 | Q5VU13 | -0.32626  |
| 14812 | P03363 | Q9HCM2 | -0.43749  |
| 14813 | P03363 | P56282 | -0.11952  |
| 14814 | P03363 | Q9P2P1 | -0.22224  |
| 14815 | P03363 | Q8N4K4 | -0.32626  |
| 14816 | P03363 | O75493 | -0.3082   |
| 14817 | P03363 | Q14184 | -0.23031  |
| 14818 | P03363 | Q14565 | -0.2026   |
| 14819 | P03363 | Q9NTX9 | -0.11714  |
| 14820 | P03363 | O94827 | -0.22734  |



|       |        |        |           |
|-------|--------|--------|-----------|
| 14821 | P03363 | O95835 | -0.22738  |
| 14822 | P03363 | A0PJX8 | -0.32626  |
| 14823 | P03363 | Q6P9H4 | -0.2274   |
| 14824 | P03363 | Q8TAF5 | -0.042737 |
| 14825 | P03363 | O76087 | -0.17634  |
| 14826 | P03363 | P02775 | -0.38811  |
| 14827 | P03363 | Q5VTY9 | -0.77777  |
| 14828 | P03363 | P16871 | -0.44262  |
| 14829 | P03363 | Q9Y5M8 | -0.55536  |
| 14830 | P03363 | P03372 | -0.22743  |
| 14831 | P03363 | Q9UHT9 | -0.042737 |
| 14832 | P03363 | Q9Y5G4 | -0.57898  |
| 14833 | P03363 | Q96T66 | -0.16691  |
| 14834 | P03363 | Q96L50 | -0.22743  |
| 14835 | P03363 | Q96R48 | -0.61656  |
| 14836 | P03363 | Q8WWB7 | -0.085481 |
| 14837 | P03363 | Q8TB36 | -0.22738  |
| 14838 | P03363 | Q6IBS0 | -0.22344  |
| 14839 | P03363 | A3QJZ6 | -0.20708  |
| 14840 | P03363 | Q8TCT1 | -0.18975  |
| 14841 | P03363 | P07203 | -0.24195  |
| 14842 | P03363 | Q8NGZ2 | -0.61656  |
| 14843 | P03363 | P01621 | -0.54902  |
| 14844 | P03363 | Q9Y696 | -0.22685  |
| 14845 | P03363 | Q96NX9 | -0.18385  |
| 14846 | P03363 | Q6TCH7 | -0.28673  |
| 14847 | P03363 | Q96BM1 | -0.22741  |
| 14848 | P03363 | Q8IZJ6 | -0.26966  |
| 14849 | P03363 | Q6ZUT4 | -0.023178 |
| 14850 | P03363 | Q9NQZ6 | -0.20602  |
| 14851 | P03363 | Q9NYY3 | -0.22744  |
| 14852 | P03363 | Q15019 | -0.22734  |
| 14853 | P03363 | Q9ULB4 | -0.51258  |
| 14854 | P03363 | Q8TBY0 | -0.22917  |
| 14855 | P03363 | P55107 | -0.37058  |
| 14856 | P03363 | Q96JW4 | -0.49352  |
| 14857 | P03363 | Q5VV63 | -0.35074  |
| 14858 | P03363 | P42685 | -0.23369  |
| 14859 | P03363 | O60344 | -0.37541  |
| 14860 | P03363 | Q96QE3 | -0.22691  |
| 14861 | P03363 | Q8IWU6 | -0.30547  |
| 14862 | P03363 | P16109 | -0.22741  |
| 14863 | P03363 | P06313 | -0.54902  |
| 14864 | P03363 | Q9NQQ7 | -0.29915  |
| 14865 | P03363 | Q8NGP8 | -0.61656  |
| 14866 | P03363 | Q5SQI0 | -0.18547  |
| 14867 | P03363 | Q6XUX3 | -0.25454  |
| 14868 | P03363 | Q7Z7L8 | -0.038421 |
| 14869 | P03363 | Q9H1E1 | -0.1867   |
| 14870 | P03363 | Q9HC38 | -0.21356  |
| 14871 | P03363 | Q8N5I3 | -0.13658  |
| 14872 | P03363 | Q8NE79 | -0.29345  |
| 14873 | P03363 | P46095 | -0.68514  |
| 14874 | P03363 | Q9C073 | -0.035993 |
| 14875 | P03363 | Q96MV1 | -0.19187  |
| 14876 | P03363 | P41273 | -0.60615  |
| 14877 | P03363 | P08887 | -0.25415  |
| 14878 | P03363 | P23763 | -0.22494  |
| 14879 | P03363 | Q9Y5U9 | -0.51321  |
| 14880 | P03363 | Q9UBX3 | -0.22838  |
| 14881 | P03363 | Q8NFP0 | -0.081327 |
| 14882 | P03363 | Q94905 | -0.1177   |
| 14883 | P03363 | Q8TCA0 | -0.22744  |
| 14884 | P03363 | Q92959 | -0.53194  |
| 14885 | P03363 | Q8NEB5 | -0.26007  |
| 14886 | P03363 | Q8N5S1 | -0.30119  |
| 14887 | P03363 | Q5CZ79 | -0.2274   |
| 14888 | P03363 | P42684 | -0.22741  |
| 14889 | P03363 | Q96BQ1 | -0.31658  |
| 14890 | P03363 | Q86SZ3 | -0.18433  |
| 14891 | P03363 | Q7Z4M0 | -0.17631  |
| 14892 | P03363 | P07492 | -0.54992  |
| 14893 | P03363 | Q9NS84 | -0.34135  |
| 14894 | P03363 | Q9Y275 | -0.47235  |
| 14895 | P03363 | O15239 | -0.29229  |
| 14896 | P03363 | Q99748 | -0.25885  |

|       |        |        |           |
|-------|--------|--------|-----------|
| 14897 | P03363 | Q07011 | -0.42432  |
| 14898 | P03363 | P60900 | -0.14942  |
| 14899 | P03363 | A8MT79 | -0.47243  |
| 14900 | P03363 | Q6PIU1 | -0.47196  |
| 14901 | P03363 | Q9NS66 | -0.64046  |
| 14902 | P03363 | Q16517 | -0.069871 |
| 14903 | P03363 | O95838 | -0.59135  |
| 14904 | P03363 | O75127 | -0.21832  |
| 14905 | P03363 | P01709 | -0.54902  |
| 14906 | P03363 | Q969G5 | -0.13384  |
| 14907 | P03363 | Q9C0B5 | -0.57443  |
| 14908 | P03363 | Q562E7 | -0.22741  |
| 14909 | P03363 | Q8IYS5 | -0.82504  |
| 14910 | P03363 | Q9NX05 | -0.082253 |
| 14911 | P03363 | P35713 | -0.24111  |
| 14912 | P03363 | Q01101 | -0.22686  |
| 14913 | P03363 | Q9H3S4 | -0.16152  |
| 14914 | P03363 | P36507 | -0.22755  |
| 14915 | P03363 | Q2TAA2 | -0.18414  |
| 14916 | P03363 | Q9Y2Z2 | -0.11616  |
| 14917 | P03363 | Q02809 | -0.50365  |
| 14918 | P03363 | P10415 | -0.2274   |
| 14919 | P03363 | Q8WWF8 | -0.22705  |
| 14920 | P03363 | Q9H9B4 | -0.36172  |
| 14921 | P03363 | P50993 | -0.29484  |
| 14922 | P03363 | Q96QI5 | -0.34145  |
| 14923 | P03363 | P32019 | -0.22742  |
| 14924 | P03363 | Q95801 | -0.11669  |
| 14925 | P03363 | Q7Z745 | -0.077985 |
| 14926 | P03363 | Q8NGR6 | -0.61656  |
| 14927 | P03363 | Q8NGH6 | -0.61656  |
| 14928 | P03363 | Q92806 | -0.22578  |
| 14929 | P03363 | Q43561 | -0.2652   |
| 14930 | P03363 | Q43826 | -0.27071  |
| 14931 | P03363 | Q8NH49 | -0.61656  |
| 14932 | P03363 | O95183 | -0.54162  |
| 14933 | P03363 | Q8IV42 | -0.36022  |
| 14934 | P03363 | P28799 | -0.2219   |
| 14935 | P03363 | P20916 | -0.46138  |
| 14936 | P03363 | P0CJ72 | -0.13673  |
| 14937 | P03363 | Q9H0C2 | -0.31268  |
| 14938 | P03363 | A8MUU9 | -0.15681  |
| 14939 | P03363 | P41594 | -0.34752  |
| 14940 | P03363 | O95164 | -0.33152  |
| 14941 | P03363 | Q8N5I4 | -0.43578  |
| 14942 | P03363 | Q8WZ59 | -0.32626  |
| 14943 | P03363 | Q96PD2 | -0.48443  |
| 14944 | P03363 | A6NC78 | -0.1376   |
| 14945 | P03363 | Q05D60 | -0.1711   |
| 14946 | P03363 | P56524 | -0.20755  |
| 14947 | P03363 | A1L3X4 | -0.067107 |
| 14948 | P03363 | Q6NV74 | -0.031359 |
| 14949 | P03363 | Q709F0 | -0.25889  |
| 14950 | P03363 | Q9H4B8 | -0.28503  |
| 14951 | P03363 | Q96M89 | -0.1959   |
| 14952 | P03363 | Q8N8F4 | -0.14738  |
| 14953 | P03363 | P81277 | -0.19418  |
| 14954 | P03363 | A6NGR9 | -0.091053 |
| 14955 | P03363 | Q5TGY3 | -0.13601  |
| 14956 | P03363 | Q9NYK1 | -0.40365  |
| 14957 | P03363 | O75695 | -0.21562  |
| 14958 | P03363 | P80098 | -0.5571   |
| 14959 | P03363 | Q15349 | -0.41934  |
| 14960 | P03363 | Q9BXM9 | -0.19253  |
| 14961 | P03363 | Q9UBT6 | -0.16734  |
| 14962 | P03363 | P08493 | -0.49698  |
| 14963 | P03363 | Q8ND94 | -0.32626  |
| 14964 | P03363 | Q96IW7 | -0.25648  |
| 14965 | P03363 | Q7L311 | -0.32626  |
| 14966 | P03363 | Q12778 | -0.28603  |
| 14967 | P03363 | Q8N149 | -0.41797  |
| 14968 | P03363 | Q96BD0 | -0.45878  |
| 14969 | P03363 | Q66K80 | -0.042737 |
| 14970 | P03363 | Q9BS92 | -0.21092  |
| 14971 | P03363 | Q9Y2A7 | -0.22106  |
| 14972 | P03363 | P01583 | -0.22119  |

|       |        |        |           |
|-------|--------|--------|-----------|
| 14973 | P03363 | Q9NUC0 | -0.13425  |
| 14974 | P03363 | Q9Y662 | -0.40699  |
| 14975 | P03363 | P53708 | -0.45282  |
| 14976 | P03363 | Q7LG56 | -0.19194  |
| 14977 | P03363 | Q9BY89 | -0.17034  |
| 14978 | P03363 | Q96ND0 | -0.32227  |
| 14979 | P03363 | Q6UXD7 | -0.30406  |
| 14980 | P03363 | Q6UXU0 | -0.33992  |
| 14981 | P03363 | Q8N8S7 | -0.22629  |
| 14982 | P03363 | Q6YN16 | -0.41055  |
| 14983 | P03363 | P55822 | -0.10654  |
| 14984 | P03363 | Q9BZP6 | -0.23646  |
| 14985 | P03363 | Q8IXI2 | -0.28678  |
| 14986 | P03363 | A2VEC9 | -0.50197  |
| 14987 | P03363 | Q9BQY6 | -0.33498  |
| 14988 | P03363 | Q9UJZ1 | -0.203    |
| 14989 | P03363 | P35575 | -0.31396  |
| 14990 | P03363 | Q07075 | -0.51148  |
| 14991 | P03363 | Q5JTH9 | -0.094448 |
| 14992 | P03363 | Q9UFH2 | -0.22349  |
| 14993 | P03363 | P01834 | -0.54902  |
| 14994 | P03363 | Q6IF42 | -0.61656  |
| 14995 | P03363 | Q9Y5I7 | -0.27557  |
| 14996 | P03363 | P02786 | -0.50544  |
| 14997 | P03363 | Q8IZC4 | -0.31816  |
| 14998 | P03363 | Q92819 | -0.34303  |
| 14999 | P03363 | Q6AWC8 | -0.060669 |
| 15000 | P03363 | Q9Y6I8 | -0.13984  |
| 15001 | P03363 | Q09472 | -0.20553  |
| 15002 | P03363 | Q9NSQ0 | -0.10621  |
| 15003 | P03363 | Q96GZ6 | -0.46797  |
| 15004 | P03363 | Q5VV11 | -0.2125   |
| 15005 | P03363 | Q96T83 | -0.27183  |
| 15006 | P03363 | Q16625 | -0.22696  |
| 15007 | P03363 | Q86TW2 | -0.73187  |
| 15008 | P03363 | P25788 | -0.15941  |
| 15009 | P03363 | Q8TBJ5 | -0.19658  |
| 15010 | P03363 | Q9UH03 | -0.22644  |
| 15011 | P03363 | Q9H1H1 | -0.079881 |
| 15012 | P03363 | Q2TB90 | -0.22648  |
| 15013 | P03363 | Q8N1W1 | -0.29566  |
| 15014 | P03363 | P48742 | -0.22738  |
| 15015 | P03363 | Q07954 | -0.22744  |
| 15016 | P03363 | Q8NFU7 | -0.18612  |
| 15017 | P03363 | O60729 | -0.22741  |
| 15018 | P03363 | Q13018 | -0.72848  |
| 15019 | P03363 | Q96R47 | -0.61656  |
| 15020 | P03363 | Q8NA66 | -0.20988  |
| 15021 | P03363 | O43414 | -0.192    |
| 15022 | P03363 | P04432 | -0.54902  |
| 15023 | P03363 | Q96HP8 | -0.32626  |
| 15024 | P03363 | P08123 | -0.23825  |
| 15025 | P03363 | Q8N6D2 | -0.22435  |
| 15026 | P03363 | Q9BXJ1 | -0.37669  |
| 15027 | P03363 | Q8NGI0 | -0.61656  |
| 15028 | P03363 | Q9BXJ4 | -0.23052  |
| 15029 | P03363 | P06318 | -0.54902  |
| 15030 | P03363 | Q9H992 | -0.20041  |
| 15031 | P03363 | Q86T20 | -0.33992  |
| 15032 | P03363 | Q6DRA6 | -0.14674  |
| 15033 | P03363 | Q9BT76 | -0.48044  |
| 15034 | P03363 | Q9H0Y0 | -0.15999  |
| 15035 | P03363 | Q9H5L6 | -0.18609  |
| 15036 | P03363 | P98164 | -0.28844  |
| 15037 | P03363 | A6ND91 | -0.41735  |
| 15038 | P03363 | Q8NHR7 | -0.099097 |
| 15039 | P03363 | Q04828 | -0.22732  |
| 15040 | P03363 | Q6ZRR7 | -0.2274   |
| 15041 | P03363 | P29016 | -0.33361  |
| 15042 | P03363 | Q9NP62 | -0.20193  |
| 15043 | P03363 | Q07444 | -0.34338  |
| 15044 | P03363 | Q9H190 | -0.22737  |
| 15045 | P03363 | P61421 | -0.19466  |
| 15046 | P03363 | P20941 | -0.21833  |
| 15047 | P03363 | Q7RTY5 | -0.49563  |
| 15048 | P03363 | Q13474 | -0.22734  |

|       |        |        |           |
|-------|--------|--------|-----------|
| 15049 | P03363 | Q6UX65 | -0.37107  |
| 15050 | P03363 | P84157 | -0.32626  |
| 15051 | P03363 | A2RUS2 | -0.22736  |
| 15052 | P03363 | Q99784 | -0.22739  |
| 15053 | P03363 | Q9UGI9 | -0.41237  |
| 15054 | P03363 | Q8N543 | -0.1745   |
| 15055 | P03363 | Q8NET8 | -0.37175  |
| 15056 | P03363 | Q96DE9 | -0.17203  |
| 15057 | P03363 | O00180 | -0.42063  |
| 15058 | P03363 | Q5JRS4 | -0.61656  |
| 15059 | P03363 | D6RJB6 | -0.25139  |
| 15060 | P03363 | P47972 | -0.37988  |
| 15061 | P03363 | A6NI61 | -0.32626  |
| 15062 | P03363 | Q9NVX7 | -0.21752  |
| 15063 | P03363 | Q12852 | -0.22741  |
| 15064 | P03363 | P04179 | -0.22167  |
| 15065 | P03363 | Q4G0W2 | -0.28073  |
| 15066 | P03363 | Q8N4F7 | -0.47964  |
| 15067 | P03363 | Q9NRC9 | -0.35866  |
| 15068 | P03363 | Q8TDW0 | -0.52348  |
| 15069 | P03363 | P55317 | -0.29843  |
| 15070 | P03363 | Q86XR5 | -0.37169  |
| 15071 | P03363 | Q6PII3 | -0.04303  |
| 15072 | P03363 | Q8IVL5 | -0.45172  |
| 15073 | P03363 | P01037 | -0.38852  |
| 15074 | P03363 | Q96RD9 | -0.47262  |
| 15075 | P03363 | Q96MS0 | -0.43613  |
| 15076 | P03363 | Q2KHN1 | -0.22728  |
| 15077 | P03363 | Q8NCM8 | -0.22728  |
| 15078 | P03363 | P04808 | -0.42836  |
| 15079 | P03363 | Q9NZ45 | -0.46772  |
| 15080 | P03363 | P04208 | -0.54902  |
| 15081 | P03363 | Q5JUQ0 | -0.12564  |
| 15082 | P03363 | P51684 | -0.65627  |
| 15083 | P03363 | Q15172 | -0.12238  |
| 15084 | P03363 | P0CG04 | -0.54902  |
| 15085 | P03363 | P49593 | -0.20005  |
| 15086 | P03363 | Q8N4Y2 | -0.21122  |
| 15087 | P03363 | Q96F45 | -0.20998  |
| 15088 | P03363 | P29622 | -0.37983  |
| 15089 | P03363 | P50226 | -0.22773  |
| 15090 | P03363 | P05538 | -0.54648  |
| 15091 | P03363 | Q99640 | -0.22741  |
| 15092 | P03363 | P22061 | -0.056941 |
| 15093 | P03363 | Q8IV31 | -0.32626  |
| 15094 | P03363 | P35225 | -0.21821  |
| 15095 | P03363 | Q49AR2 | -0.076012 |
| 15096 | P03363 | Q07092 | -0.22597  |
| 15097 | P03363 | P60008 | -0.10075  |
| 15098 | P03363 | Q96DL1 | -0.32626  |
| 15099 | P03363 | O75083 | -0.22744  |
| 15100 | P03363 | Q95169 | -0.34927  |
| 15101 | P03363 | Q969W0 | -0.11971  |
| 15102 | P03363 | Q96CS7 | -0.22736  |
| 15103 | P03363 | Q9NNZ6 | -0.11153  |
| 15104 | P03363 | Q9UGM5 | -0.38553  |
| 15105 | P03363 | Q9BZJ8 | -0.55636  |
| 15106 | P03363 | Q92908 | -0.2274   |
| 15107 | P03363 | Q76NI1 | -0.26033  |
| 15108 | P03363 | P0C5K6 | -0.042737 |
| 15109 | P03363 | Q96M98 | -0.2187   |
| 15110 | P03363 | Q9NV44 | -0.11978  |
| 15111 | P03363 | Q9NYF5 | -0.38968  |
| 15112 | P03363 | P46059 | -0.45178  |
| 15113 | P03363 | A6NNE9 | -0.35094  |
| 15114 | P03363 | P13686 | -0.27872  |
| 15115 | P03363 | Q9NV92 | -0.16252  |
| 15116 | P03363 | P49221 | -0.20815  |
| 15117 | P03363 | P04196 | -0.23964  |
| 15118 | P03363 | P13760 | -0.3613   |
| 15119 | P03363 | Q9NYI0 | -0.22739  |
| 15120 | P03363 | Q96L91 | -0.21645  |
| 15121 | P03363 | Q9UHC7 | -0.22481  |
| 15122 | P03363 | Q8IUB5 | -0.33498  |
| 15123 | P03363 | Q5T7M4 | -0.41142  |
| 15124 | P03363 | Q9BXA7 | -0.56721  |

|       |        |        |            |
|-------|--------|--------|------------|
| 15125 | P03363 | Q12797 | -0.36138   |
| 15126 | P03363 | O15480 | -0.19784   |
| 15127 | P03363 | Q8N9I9 | -0.22742   |
| 15128 | P03363 | Q9NRW3 | -0.52388   |
| 15129 | P03363 | Q9UF83 | -0.084848  |
| 15130 | P03363 | O43462 | -0.30122   |
| 15131 | P03363 | P37023 | -0.25643   |
| 15132 | P03363 | Q03113 | -0.26705   |
| 15133 | P03363 | Q8IUX1 | -0.19187   |
| 15134 | P03363 | P49763 | -0.51488   |
| 15135 | P03363 | Q8NG84 | -0.61656   |
| 15136 | P03363 | Q7RTS5 | -0.38969   |
| 15137 | P03363 | Q6P2N6 | -0.47262   |
| 15138 | P03363 | Q8TDM6 | -0.22739   |
| 15139 | P03363 | Q96GT9 | -0.0048471 |
| 15140 | P03363 | Q969R2 | -0.26019   |
| 15141 | P03363 | Q96HV5 | -0.32626   |
| 15142 | P03363 | Q8NH72 | -0.61656   |
| 15143 | P03363 | P49184 | -0.087383  |
| 15144 | P03363 | O14730 | -0.20742   |
| 15145 | P03363 | Q9H1E5 | -0.33463   |
| 15146 | P03363 | O43670 | -0.22263   |
| 15147 | P03363 | P09110 | -0.22259   |
| 15148 | P03363 | Q9NUQ8 | -0.38524   |
| 15149 | P03363 | Q15800 | -0.74476   |
| 15150 | P03363 | Q9H756 | -0.32626   |
| 15151 | P03363 | Q96D71 | -0.22836   |
| 15152 | P03363 | Q7Z6L0 | -0.47933   |
| 15153 | P03363 | Q9Y587 | -0.20568   |
| 15154 | P03363 | Q5T9C2 | -0.031359  |
| 15155 | P03363 | P01774 | -0.54902   |
| 15156 | P03363 | P41597 | -0.3457    |
| 15157 | P03363 | O43610 | -0.19667   |
| 15158 | P03363 | Q86YS3 | -0.21641   |
| 15159 | P03363 | Q9Y5F2 | -0.62573   |
| 15160 | P03363 | Q9UIR0 | -0.32626   |
| 15161 | P03363 | Q9NRI7 | -0.042737  |
| 15162 | P03363 | Q8N123 | -0.17268   |
| 15163 | P03363 | P30273 | -0.4076    |
| 15164 | P03363 | Q96CB9 | -0.049925  |
| 15165 | P03363 | O60706 | -0.61309   |
| 15166 | P03363 | Q86U37 | -0.1956    |
| 15167 | P03363 | Q5D862 | -0.22154   |
| 15168 | P03363 | Q14166 | -0.11001   |
| 15169 | P03363 | P34130 | -0.29819   |
| 15170 | P03363 | Q9P0J1 | -0.19851   |
| 15171 | P03363 | P49773 | -0.20344   |
| 15172 | P03363 | A6NG13 | -0.37022   |
| 15173 | P03363 | Q06418 | -0.40405   |
| 15174 | P03363 | Q9BX59 | -0.64313   |
| 15175 | P03363 | Q6NZY7 | -0.17297   |
| 15176 | P03363 | P45974 | -0.23171   |
| 15177 | P03363 | Q8NGN0 | -0.61656   |
| 15178 | P03363 | Q86VD1 | -0.19474   |
| 15179 | P03363 | Q8TBG4 | -0.21275   |
| 15180 | P03363 | P49721 | -0.17535   |
| 15181 | P03363 | P0CG42 | -0.042737  |
| 15182 | P03363 | Q8N1M1 | -0.3798    |
| 15183 | P03363 | P15121 | -0.22719   |
| 15184 | P03363 | Q8N6Y2 | -0.39617   |
| 15185 | P03363 | A8MYP8 | -0.048085  |
| 15186 | P03363 | Q67FW5 | -0.18537   |
| 15187 | P03363 | Q12772 | -0.22739   |
| 15188 | P03363 | Q6GMV1 | -0.20231   |
| 15189 | P03363 | Q9UNZ2 | -0.29561   |
| 15190 | P03363 | P29120 | -0.22581   |
| 15191 | P03363 | Q96MF6 | -0.097513  |
| 15192 | P03363 | Q9UI14 | -0.20342   |
| 15193 | P03363 | P34059 | -0.25843   |
| 15194 | P03363 | Q49AM3 | -0.22687   |
| 15195 | P03363 | Q8IZV5 | -0.37158   |
| 15196 | P03363 | P48741 | -0.22633   |
| 15197 | P03363 | Q96KJ9 | -0.22099   |
| 15198 | P03363 | Q6ZU67 | -0.0591    |
| 15199 | P03363 | Q7Z4R8 | -0.32935   |
| 15200 | P03363 | O00212 | -0.55411   |

|       |        |        |            |
|-------|--------|--------|------------|
| 15201 | P03363 | Q9UHD2 | -0.22741   |
| 15202 | P03363 | O00555 | -0.24958   |
| 15203 | P03363 | O94823 | -0.30169   |
| 15204 | P03363 | Q68D85 | -0.26896   |
| 15205 | P03363 | Q92503 | -0.32083   |
| 15206 | P03363 | A6NMD2 | -0.15293   |
| 15207 | P03363 | Q5R387 | -0.45643   |
| 15208 | P03363 | P21854 | -0.23885   |
| 15209 | P03363 | Q9H210 | -0.61656   |
| 15210 | P03363 | Q6RI45 | -0.22751   |
| 15211 | P03363 | Q14763 | -0.22714   |
| 15212 | P03363 | Q8N335 | -0.18328   |
| 15213 | P03363 | Q9NXR5 | -0.22741   |
| 15214 | P03363 | P34949 | -0.14763   |
| 15215 | P03363 | P45984 | -0.22741   |
| 15216 | P03363 | Q7Z422 | -0.21272   |
| 15217 | P03363 | Q13421 | -0.25666   |
| 15218 | P03363 | Q6ZP80 | -0.32626   |
| 15219 | P03363 | Q9BZM4 | -0.26      |
| 15220 | P03363 | Q86UP9 | -0.32626   |
| 15221 | P03363 | Q9H903 | -0.40262   |
| 15222 | P03363 | Q01344 | -0.22663   |
| 15223 | P03363 | Q13219 | -0.63251   |
| 15224 | P03363 | Q96M63 | -0.16327   |
| 15225 | P03363 | P32970 | -0.30387   |
| 15226 | P03363 | Q30KQ4 | -0.33516   |
| 15227 | P03363 | P05062 | -0.22556   |
| 15228 | P03363 | Q969W1 | -0.61092   |
| 15229 | P03363 | P08648 | -0.22738   |
| 15230 | P03363 | Q5W0U4 | -0.23086   |
| 15231 | P03363 | Q5TGJ6 | -0.2179    |
| 15232 | P03363 | Q8WWW8 | -0.2274    |
| 15233 | P03363 | Q13643 | -0.22525   |
| 15234 | P03363 | O95259 | -0.23216   |
| 15235 | P03363 | O95455 | -0.33232   |
| 15236 | P03363 | Q9NW97 | -0.32626   |
| 15237 | P03363 | P36021 | -0.48374   |
| 15238 | P03363 | Q4W5N1 | -0.23958   |
| 15239 | P03363 | Q96CP6 | -0.32626   |
| 15240 | P03363 | Q969S6 | -0.32626   |
| 15241 | P03363 | Q96A22 | -0.0077857 |
| 15242 | P03363 | Q5W188 | -0.38852   |
| 15243 | P03363 | A6NKG5 | -0.42039   |
| 15244 | P03363 | Q9BQD1 | -0.20618   |
| 15245 | P03363 | A8MTJ6 | -0.23616   |
| 15246 | P03363 | Q5TA81 | -0.042737  |
| 15247 | P03363 | O75019 | -0.50699   |
| 15248 | P03363 | Q3ZCM7 | -0.21516   |
| 15249 | P03363 | Q8NCL9 | -0.32626   |
| 15250 | P03363 | Q9P2E9 | -0.32087   |
| 15251 | P03363 | P54753 | -0.56805   |
| 15252 | P03363 | Q9NRE2 | -0.22297   |
| 15253 | P03363 | Q01196 | -0.25113   |
| 15254 | P03363 | Q9Y5V0 | -0.27953   |
| 15255 | P03363 | Q96S15 | -0.22742   |
| 15256 | P03363 | Q9UHY1 | -0.22741   |
| 15257 | P03363 | Q96J42 | -0.34063   |
| 15258 | P03363 | Q15743 | -0.76089   |
| 15259 | P03363 | Q69YU5 | -0.33992   |
| 15260 | P03363 | Q96JN2 | -0.32227   |
| 15261 | P03363 | A6NP81 | -0.17113   |
| 15262 | P03363 | Q8N7X0 | -0.21693   |
| 15263 | P03363 | A6NLU0 | -0.22743   |
| 15264 | P03363 | Q96JA1 | -0.32626   |
| 15265 | P03363 | Q9Y4M8 | -0.26912   |
| 15266 | P03363 | A6NHZ5 | -0.22718   |
| 15267 | P03363 | Q5TAA0 | -0.19377   |
| 15268 | P03363 | Q9NQV7 | -0.10648   |
| 15269 | P03363 | C9JXX5 | -0.33992   |
| 15270 | P03363 | Q9NY59 | -0.29818   |
| 15271 | P03363 | P05015 | -0.42966   |
| 15272 | P03363 | Q86SH4 | -0.33992   |
| 15273 | P03363 | Q9BXS9 | -0.49977   |
| 15274 | P03363 | Q9HCM3 | -0.32626   |
| 15275 | P03363 | A5PLN9 | -0.079878  |
| 15276 | P03363 | Q9HCE0 | -0.14831   |

|       |        |        |           |
|-------|--------|--------|-----------|
| 15277 | P03363 | Q6PCB6 | -0.19679  |
| 15278 | P03363 | P07942 | -0.31563  |
| 15279 | P03363 | Q99884 | -0.49508  |
| 15280 | P03363 | P22309 | -0.34355  |
| 15281 | P03363 | P59074 | -0.19699  |
| 15282 | P03363 | P15538 | -0.39301  |
| 15283 | P03363 | Q5BJH2 | -0.19187  |
| 15284 | P03363 | Q86UQ4 | -0.58975  |
| 15285 | P03363 | Q17RB8 | -0.22625  |
| 15286 | P03363 | O00142 | -0.34339  |
| 15287 | P03363 | Q9NSD5 | -0.52728  |
| 15288 | P03363 | P21549 | -0.22381  |
| 15289 | P03363 | P61952 | -0.27708  |
| 15290 | P03363 | Q92562 | -0.21787  |
| 15291 | P03363 | P01130 | -0.30382  |
| 15292 | P03363 | P31644 | -0.47584  |
| 15293 | P03363 | Q9NVZ3 | -0.22079  |
| 15294 | P03363 | Q0P6H9 | -0.32626  |
| 15295 | P03363 | Q9NQ86 | -0.22741  |
| 15296 | P03363 | Q86VY9 | -0.32626  |
| 15297 | P03363 | Q96BQ3 | -0.27953  |
| 15298 | P03363 | O14832 | -0.17753  |
| 15299 | P03363 | A8MVZ5 | -0.32626  |
| 15300 | P03363 | O43707 | -0.26835  |
| 15301 | P03363 | Q8NG83 | -0.61656  |
| 15302 | P03363 | Q9NQ66 | -0.22734  |
| 15303 | P03363 | P21397 | -0.49812  |
| 15304 | P03363 | Q66K66 | -0.32626  |
| 15305 | P03363 | O95861 | -0.22784  |
| 15306 | P03363 | Q9Y5E4 | -0.58247  |
| 15307 | P03363 | P50552 | -0.22308  |
| 15308 | P03363 | Q9UKU7 | -0.2338   |
| 15309 | P03363 | P17540 | -0.48047  |
| 15310 | P03363 | Q8IVE0 | -0.1543   |
| 15311 | P03363 | Q95069 | -0.53791  |
| 15312 | P03363 | Q9H251 | -0.29865  |
| 15313 | P03363 | Q9NRN5 | -0.43712  |
| 15314 | P03363 | Q96AJ9 | -0.19844  |
| 15315 | P03363 | Q9UHW5 | -0.26531  |
| 15316 | P03363 | P06316 | -0.54902  |
| 15317 | P03363 | Q8NBW4 | -0.38344  |
| 15318 | P03363 | P42338 | -0.26912  |
| 15319 | P03363 | P16188 | -0.43696  |
| 15320 | P03363 | Q9H6I2 | -0.21533  |
| 15321 | P03363 | P25774 | -0.59839  |
| 15322 | P03363 | Q9NVL1 | -0.21667  |
| 15323 | P03363 | P01229 | -0.4591   |
| 15324 | P03363 | Q9UNZ5 | -0.031359 |
| 15325 | P03363 | Q9UNG2 | -0.48446  |
| 15326 | P03363 | Q9H4R4 | -0.15137  |
| 15327 | P03363 | P51689 | -0.22718  |
| 15328 | P03363 | P01584 | -0.22759  |
| 15329 | P03363 | Q9UDY8 | -0.22742  |
| 15330 | P03363 | Q9UPP5 | -0.038144 |
| 15331 | P03363 | Q8NBH2 | -0.18953  |
| 15332 | P03363 | A6NCE7 | -0.20893  |
| 15333 | P03363 | Q9H330 | -0.24975  |
| 15334 | P03363 | P01213 | -0.4458   |
| 15335 | P03363 | Q3ZCU0 | -0.22567  |
| 15336 | P03363 | Q8WWF6 | -0.23551  |
| 15337 | P03363 | Q96RQ1 | -0.17183  |
| 15338 | P03363 | A6NDX4 | -0.32626  |
| 15339 | P03363 | Q8TD22 | -0.39035  |
| 15340 | P03363 | Q95500 | -0.35039  |
| 15341 | P03363 | Q01668 | -0.36602  |
| 15342 | P03363 | Q96IM9 | -0.14919  |
| 15343 | P03363 | Q9BQI3 | -0.37063  |
| 15344 | P03363 | Q96LD8 | -0.21494  |
| 15345 | P03363 | Q92771 | -0.27238  |
| 15346 | P03363 | Q4W5P6 | -0.33992  |
| 15347 | P03363 | O95755 | -0.30543  |
| 15348 | P03363 | P05981 | -0.30113  |
| 15349 | P03363 | Q8WUS8 | -0.64961  |
| 15350 | P03363 | P16401 | -0.12669  |
| 15351 | P03363 | Q9Y4U1 | -0.14172  |
| 15352 | P03363 | Q11128 | -0.28715  |

|       |        |        |           |
|-------|--------|--------|-----------|
| 15353 | P03363 | Q05655 | -0.22487  |
| 15354 | P03363 | Q9Y6F8 | -0.22716  |
| 15355 | P03363 | P78332 | -0.207    |
| 15356 | P03363 | Q13163 | -0.22822  |
| 15357 | P03363 | P02745 | -0.2331   |
| 15358 | P03363 | Q8NA58 | -0.10981  |
| 15359 | P03363 | Q9NXX6 | -0.48867  |
| 15360 | P03363 | A6NI28 | -0.51887  |
| 15361 | P03363 | Q86W47 | -0.25616  |
| 15362 | P03363 | Q8IYR6 | -0.5583   |
| 15363 | P03363 | Q5QP74 | -0.042737 |
| 15364 | P03363 | Q8N2N9 | -0.098275 |
| 15365 | P03363 | P20339 | -0.26923  |
| 15366 | P03363 | P01721 | -0.54902  |
| 15367 | P03363 | O14672 | -0.24689  |
| 15368 | P03363 | Q15054 | -0.15708  |
| 15369 | P03363 | Q9BXY5 | -0.22719  |
| 15370 | P03363 | Q9UJ55 | -0.16966  |
| 15371 | P03363 | Q7L0X0 | -0.31793  |
| 15372 | P03363 | A8MZ25 | -0.25734  |
| 15373 | P03363 | Q8NGS2 | -0.61656  |
| 15374 | P03363 | Q9BVA6 | -0.42039  |
| 15375 | P03363 | Q6NXT4 | -0.32368  |
| 15376 | P03363 | Q86SI9 | -0.33992  |
| 15377 | P03363 | Q8IYT4 | -0.23581  |
| 15378 | P03363 | Q8N2A8 | -0.34883  |
| 15379 | P03363 | Q8IZ13 | -0.19166  |
| 15380 | P03363 | Q8IXQ3 | -0.11004  |
| 15381 | P03363 | Q9NQW8 | -0.64584  |
| 15382 | P03363 | Q76B58 | -0.16677  |
| 15383 | P03363 | Q8NHP8 | -0.19842  |
| 15384 | P03363 | Q7Z2K6 | -0.6512   |
| 15385 | P03363 | P01614 | -0.54902  |
| 15386 | P03363 | Q8TB05 | -0.031359 |
| 15387 | P03363 | Q6UX73 | -0.33992  |
| 15388 | P03363 | Q6ICL7 | -0.32626  |
| 15389 | P03363 | O75204 | -0.2257   |
| 15390 | P03363 | Q2TB18 | -0.1753   |
| 15391 | P03363 | Q12950 | -0.29843  |
| 15392 | P03363 | Q06136 | -0.79593  |
| 15393 | P03363 | Q92535 | -0.4582   |
| 15394 | P03363 | P52926 | -0.16116  |
| 15395 | P03363 | Q9H3S3 | -0.5973   |
| 15396 | P03363 | P29459 | -0.13573  |
| 15397 | P03363 | P78324 | -0.58588  |
| 15398 | P03363 | Q96RA2 | -0.44795  |
| 15399 | P03363 | Q96P56 | -0.27531  |
| 15400 | P03363 | Q9BU79 | -0.32626  |
| 15401 | P03363 | Q8WVN6 | -0.9254   |
| 15402 | P03363 | Q8N7X2 | -0.042737 |
| 15403 | P03363 | O95490 | -0.54597  |
| 15404 | P03363 | Q6IFN5 | -0.61656  |
| 15405 | P03363 | Q5T5X7 | -0.20772  |
| 15406 | P03363 | Q96SB3 | -0.22725  |
| 15407 | P03363 | Q8IZY2 | -0.48136  |
| 15408 | P03363 | Q92888 | -0.22747  |
| 15409 | P03363 | Q9BPZ7 | -0.096593 |
| 15410 | P03363 | Q9NPB9 | -0.73754  |
| 15411 | P03363 | Q9NTG1 | -0.54142  |
| 15412 | P03363 | Q6UWY2 | -0.49563  |
| 15413 | P03363 | Q8N554 | -0.2232   |
| 15414 | P03363 | Q5M9N0 | -0.20249  |
| 15415 | P03363 | Q8WVT3 | -0.18808  |
| 15416 | P03363 | Q16654 | -0.32877  |
| 15417 | P03363 | Q96AG4 | -0.5025   |
| 15418 | P03363 | P10586 | -0.4859   |
| 15419 | P03363 | Q969I3 | -0.080042 |
| 15420 | P03363 | Q8TE99 | -0.32182  |
| 15421 | P03363 | A6NLI3 | -0.17304  |
| 15422 | P03363 | Q2M5E4 | -0.22749  |
| 15423 | P03363 | P13584 | -0.56912  |
| 15424 | P03363 | Q7Z392 | -0.1486   |
| 15425 | P03363 | Q07001 | -0.46879  |
| 15426 | P03363 | P10301 | -0.23957  |
| 15427 | P03363 | Q5R372 | -0.37411  |
| 15428 | P03363 | P0C0S5 | -0.30338  |



|       |        |        |           |
|-------|--------|--------|-----------|
| 15429 | P03363 | Q86YH2 | -0.22896  |
| 15430 | P03363 | Q9P2N4 | -0.6257   |
| 15431 | P03363 | Q9H228 | -0.59903  |
| 15432 | P03363 | Q9H9S3 | -0.38288  |
| 15433 | P03363 | Q9NYV4 | -0.18066  |
| 15434 | P03363 | P48145 | -0.2498   |
| 15435 | P03363 | Q96JE7 | -0.070162 |
| 15436 | P03363 | Q9BXA5 | -0.59393  |
| 15437 | P03363 | A6NFN3 | -0.30573  |
| 15438 | P03363 | Q00535 | -0.20957  |
| 15439 | P03363 | Q9Y5F9 | -0.57898  |
| 15440 | P03363 | Q13046 | -0.35037  |
| 15441 | P03363 | O75396 | -0.20836  |
| 15442 | P03363 | P28715 | -0.20668  |
| 15443 | P03363 | P12724 | -0.18008  |
| 15444 | P03363 | O00443 | -0.26545  |
| 15445 | P03363 | Q9P121 | -0.22762  |
| 15446 | P03363 | Q92478 | -0.4326   |
| 15447 | P03363 | P55273 | -0.22741  |
| 15448 | P03363 | Q8N2G6 | -0.21559  |
| 15449 | P03363 | P19526 | -0.36541  |
| 15450 | P03363 | Q9NQU5 | -0.22762  |
| 15451 | P03363 | P29475 | -0.22747  |
| 15452 | P03363 | A5YM69 | -0.17647  |
| 15453 | P03363 | A3KFT3 | -0.61656  |
| 15454 | P03363 | Q8WYA0 | -0.039433 |
| 15455 | P03363 | Q2T9L4 | -0.16222  |
| 15456 | P03363 | Q12756 | -0.23215  |
| 15457 | P03363 | Q9BVJ7 | -0.22741  |
| 15458 | P03363 | Q86V24 | -0.4308   |
| 15459 | P03363 | O43315 | -0.35264  |
| 15460 | P03363 | Q86UY8 | -0.18876  |
| 15461 | P03363 | Q9H324 | -0.22789  |
| 15462 | P03363 | Q9UPQ4 | -0.22753  |
| 15463 | P03363 | P42574 | -0.2272   |
| 15464 | P03363 | P29320 | -0.56386  |
| 15465 | P03363 | A6NK97 | -0.35232  |
| 15466 | P03363 | Q8TF17 | -0.22736  |
| 15467 | P03363 | A8MVG2 | -0.32626  |
| 15468 | P03363 | P06276 | -0.43901  |
| 15469 | P03363 | Q8NGP6 | -0.61656  |
| 15470 | P03363 | Q8WVN8 | -0.21374  |
| 15471 | P03363 | P15812 | -0.5512   |
| 15472 | P03363 | Q5VZV4 | -0.11562  |
| 15473 | P03363 | P54284 | -0.22627  |
| 15474 | P03363 | Q14118 | -0.19389  |
| 15475 | P03363 | Q07960 | -0.22907  |
| 15476 | P03363 | Q9NSB8 | -0.22676  |
| 15477 | P03363 | P78423 | -0.38085  |
| 15478 | P03363 | Q9Y6B6 | -0.26562  |
| 15479 | P03363 | Q8IUG5 | -0.20694  |
| 15480 | P03363 | Q43451 | -0.36729  |
| 15481 | P03363 | P26439 | -0.58021  |
| 15482 | P03363 | Q9H0W7 | -0.19661  |
| 15483 | P03363 | Q8N349 | -0.23218  |
| 15484 | P03363 | P13746 | -0.43696  |
| 15485 | P03363 | Q9BR39 | -0.22852  |
| 15486 | P03363 | Q9Y450 | -0.28012  |
| 15487 | P03363 | Q8N4P2 | -0.13662  |
| 15488 | P03363 | P42575 | -0.22698  |
| 15489 | P03363 | A8MV72 | -0.13219  |
| 15490 | P03363 | Q9UN76 | -0.48647  |
| 15491 | P03363 | F5H4A9 | -0.32626  |
| 15492 | P03363 | Q9BY66 | -0.44995  |
| 15493 | P03363 | Q9NYQ8 | -0.30653  |
| 15494 | P03363 | O95409 | -0.22735  |
| 15495 | P03363 | P05181 | -0.46524  |
| 15496 | P03363 | Q03519 | -0.22865  |
| 15497 | P03363 | Q96LT6 | -0.12736  |
| 15498 | P03363 | Q8TDX6 | -0.34137  |
| 15499 | P03363 | O00253 | -0.47682  |
| 15500 | P03363 | Q6NW29 | -0.12058  |
| 15501 | P03363 | Q9HD23 | -0.3493   |
| 15502 | P03363 | Q8NGQ1 | -0.61656  |
| 15503 | P03363 | Q5T1B0 | -0.17419  |
| 15504 | P03363 | Q9NYH9 | -0.1703   |

|       |        |        |           |
|-------|--------|--------|-----------|
| 15505 | P03363 | O95264 | -0.58018  |
| 15506 | P03363 | Q7Z5L2 | -0.21115  |
| 15507 | P03363 | Q13131 | -0.2318   |
| 15508 | P03363 | Q86W25 | -0.24873  |
| 15509 | P03363 | Q9H7M9 | -0.32626  |
| 15510 | P03363 | Q92608 | -0.22688  |
| 15511 | P03363 | Q9Y6N6 | -0.4301   |
| 15512 | P03363 | Q6X4W1 | -0.015109 |
| 15513 | P03363 | Q9HAV0 | -0.22444  |
| 15514 | P03363 | Q6NVY1 | -0.21276  |
| 15515 | P03363 | Q6P5W5 | -0.45305  |
| 15516 | P03363 | Q96HH4 | -0.32626  |
| 15517 | P03363 | Q92874 | -0.18993  |
| 15518 | P03363 | Q14190 | -0.23987  |
| 15519 | P03363 | P50553 | -0.29495  |
| 15520 | P03363 | Q8WUU4 | -0.22657  |
| 15521 | P03363 | P22607 | -0.26259  |
| 15522 | P03363 | Q8N398 | -0.1025   |
| 15523 | P03363 | P55040 | -0.22749  |
| 15524 | P03363 | A6NN73 | -0.15176  |
| 15525 | P03363 | P0CW23 | -0.12175  |
| 15526 | P03363 | Q6ZS82 | -0.38934  |
| 15527 | P03363 | Q9UQ72 | -0.35037  |
| 15528 | P03363 | P34995 | -0.68954  |
| 15529 | P03363 | Q8TCU3 | -0.3231   |
| 15530 | P03363 | P30531 | -0.34606  |
| 15531 | P03363 | Q16555 | -0.22179  |
| 15532 | P03363 | Q9P1F3 | -0.043506 |
| 15533 | P03363 | Q0P5P2 | -0.33992  |
| 15534 | P03363 | Q9Y2K9 | -0.22741  |
| 15535 | P03363 | Q14667 | -0.33992  |
| 15536 | P03363 | P56377 | -0.18828  |
| 15537 | P03363 | Q94956 | -0.49977  |
| 15538 | P03363 | Q0VDD5 | -0.042737 |
| 15539 | P03363 | Q13017 | -0.27182  |
| 15540 | P03363 | Q9UJ99 | -0.57898  |
| 15541 | P03363 | Q5EG05 | -0.2264   |
| 15542 | P03363 | Q5SVJ3 | -0.1218   |
| 15543 | P03363 | Q14D04 | -0.27171  |
| 15544 | P03363 | Q7Z736 | -0.21564  |
| 15545 | P03363 | Q02779 | -0.30877  |
| 15546 | P03363 | Q8WWN8 | -0.42306  |
| 15547 | P03363 | P63130 | -0.21163  |
| 15548 | P03363 | O94760 | -0.19086  |
| 15549 | P03363 | Q9BW04 | -0.14435  |
| 15550 | P03363 | Q8N431 | -0.22735  |
| 15551 | P03363 | P51170 | -0.24445  |
| 15552 | P03363 | Q6PIY5 | -0.31716  |
| 15553 | P03363 | P35249 | -0.22756  |
| 15554 | P03363 | Q6S8J3 | -0.12323  |
| 15555 | P03363 | Q86YV5 | -0.52784  |
| 15556 | P03363 | P22102 | -0.14724  |
| 15557 | P03363 | Q8TE60 | -0.59199  |
| 15558 | P03363 | Q8NGS5 | -0.61656  |
| 15559 | P03363 | A6NC51 | -0.32626  |
| 15560 | P03363 | Q9H1K4 | -0.30562  |
| 15561 | P03363 | H0YL14 | -0.017835 |
| 15562 | P03363 | Q9P2H3 | -0.22741  |
| 15563 | P03363 | Q9Y5Y5 | -0.17615  |
| 15564 | P03363 | P46695 | -0.21753  |
| 15565 | P03363 | Q9Y2H0 | -0.14511  |
| 15566 | P03363 | Q8WTT0 | -0.32532  |
| 15567 | P03363 | Q9UPT6 | -0.22709  |
| 15568 | P03363 | Q9HC58 | -0.49296  |
| 15569 | P03363 | Q9UBN4 | -0.22742  |
| 15570 | P03363 | Q8TAP8 | -0.059284 |
| 15571 | P03363 | P28328 | -0.22665  |
| 15572 | P03363 | Q99538 | -0.29067  |
| 15573 | P03363 | Q8IYU8 | -0.22418  |
| 15574 | P03363 | P57682 | -0.22636  |
| 15575 | P03363 | Q9NVE5 | -0.23885  |
| 15576 | P03363 | Q9Y5J6 | -0.10448  |
| 15577 | P03363 | A6NMD0 | -0.47933  |
| 15578 | P03363 | Q6ZN03 | -0.10963  |
| 15579 | P03363 | Q8NB14 | -0.25594  |
| 15580 | P03363 | Q9NWU1 | -0.22835  |

|       |        |        |           |
|-------|--------|--------|-----------|
| 15581 | P03363 | P53420 | -0.41753  |
| 15582 | P03363 | Q7Z2K8 | -0.30695  |
| 15583 | P03363 | O75342 | -0.33814  |
| 15584 | P03363 | Q9NRG1 | -0.2177   |
| 15585 | P03363 | B4E2M5 | -0.22741  |
| 15586 | P03363 | Q6P4D5 | -0.026246 |
| 15587 | P03363 | Q96Q27 | -0.22741  |
| 15588 | P03363 | P28221 | -0.67777  |
| 15589 | P03363 | Q9H3Y8 | -0.18193  |
| 15590 | P03363 | Q6PEY1 | -0.32626  |
| 15591 | P03363 | Q6ZT98 | -0.15211  |
| 15592 | P03363 | Q9BXA9 | -0.22026  |
| 15593 | P03363 | Q8N4P6 | -0.22738  |
| 15594 | P03363 | P59780 | -0.18365  |
| 15595 | P03363 | A7E2V4 | -0.16055  |
| 15596 | P03363 | Q9NPH6 | -0.29556  |
| 15597 | P03363 | Q32M88 | -0.14205  |
| 15598 | P03363 | Q9NPI5 | -0.22168  |
| 15599 | P03363 | Q8WZ79 | -0.11275  |
| 15600 | P03363 | Q6ZV89 | -0.22469  |
| 15601 | P03363 | P01711 | -0.54902  |
| 15602 | P03363 | Q9BRP0 | -0.22691  |
| 15603 | P03363 | P63136 | -0.22931  |
| 15604 | P03363 | P29275 | -0.47272  |
| 15605 | P03363 | Q9BX93 | -0.47134  |
| 15606 | P03363 | Q5HYI8 | -0.38666  |
| 15607 | P03363 | Q5T7M9 | -0.52348  |
| 15608 | P03363 | Q9P260 | -0.15746  |
| 15609 | P03363 | Q96DZ9 | -0.44009  |
| 15610 | P03363 | Q8TAG9 | -0.17721  |
| 15611 | P03363 | O95867 | -0.24531  |
| 15612 | P03363 | Q8N402 | -0.16651  |
| 15613 | P03363 | Q15554 | -0.22184  |
| 15614 | P03363 | Q05707 | -0.51986  |
| 15615 | P03363 | Q96Q15 | -0.32115  |
| 15616 | P03363 | Q9NRR6 | -0.22714  |
| 15617 | P03363 | Q6UXP8 | -0.33992  |
| 15618 | P03363 | P78364 | -0.20573  |
| 15619 | P03363 | Q6NUJ2 | -0.32626  |
| 15620 | P03363 | Q9NPB0 | -0.31872  |
| 15621 | P03363 | Q8IZL9 | -0.20278  |
| 15622 | P03363 | Q53TS8 | -0.12385  |
| 15623 | P03363 | Q6ZS52 | -0.042737 |
| 15624 | P03363 | Q5U3C3 | -0.32626  |
| 15625 | P03363 | Q8TDW7 | -0.65322  |
| 15626 | P03363 | Q5TBA9 | -0.15407  |
| 15627 | P03363 | Q68DE3 | -0.22716  |
| 15628 | P03363 | Q96RP7 | -0.29609  |
| 15629 | P03363 | P20309 | -0.43456  |
| 15630 | P03363 | P17948 | -0.34406  |
| 15631 | P03363 | Q9NPA0 | -0.13934  |
| 15632 | P03363 | Q9BXR3 | -0.22931  |
| 15633 | P03363 | Q9UBX1 | -0.29498  |
| 15634 | P03363 | P48304 | -0.36804  |
| 15635 | P03363 | A6NNP5 | -0.17757  |
| 15636 | P03363 | P13797 | -0.22744  |
| 15637 | P03363 | Q15669 | -0.2271   |
| 15638 | P03363 | O43914 | -0.28214  |
| 15639 | P03363 | P07948 | -0.22853  |
| 15640 | P03363 | O43921 | -0.20581  |
| 15641 | P03363 | Q2M2H8 | -0.31182  |
| 15642 | P03363 | P31153 | -0.31868  |
| 15643 | P03363 | P17858 | -0.22343  |
| 15644 | P03363 | Q96RP3 | -0.43948  |
| 15645 | P03363 | Q9BUU2 | -0.16533  |
| 15646 | P03363 | O14569 | -0.40288  |
| 15647 | P03363 | Q86UD7 | -0.50908  |
| 15648 | P03363 | Q6ZUS5 | -0.23088  |
| 15649 | P03363 | Q9P1J3 | -0.042737 |
| 15650 | P03363 | Q5SW96 | -0.22737  |
| 15651 | P03363 | Q16515 | -0.25901  |
| 15652 | P03363 | P46663 | -0.59543  |
| 15653 | P03363 | A1L4M7 | -0.19151  |
| 15654 | P03363 | O95562 | -0.18207  |
| 15655 | P03363 | Q15612 | -0.44279  |
| 15656 | P03363 | P56817 | -0.49433  |

|       |        |        |           |
|-------|--------|--------|-----------|
| 15657 | P03363 | Q12864 | -0.47987  |
| 15658 | P03363 | P19256 | -0.22422  |
| 15659 | P03363 | O75487 | -0.95157  |
| 15660 | P03363 | P36544 | -0.40723  |
| 15661 | P03363 | Q96DC8 | -0.21865  |
| 15662 | P03363 | Q9Y5G8 | -0.57898  |
| 15663 | P03363 | O00110 | -0.21478  |
| 15664 | P03363 | P43626 | -0.22713  |
| 15665 | P03363 | P12272 | -0.16691  |
| 15666 | P03363 | Q03692 | -0.5035   |
| 15667 | P03363 | P01775 | -0.54902  |
| 15668 | P03363 | B3SHH9 | -0.47262  |
| 15669 | P03363 | Q14916 | -0.54742  |
| 15670 | P03363 | Q96EX2 | -0.47964  |
| 15671 | P03363 | Q99218 | -0.42279  |
| 15672 | P03363 | Q14817 | -0.57133  |
| 15673 | P03363 | O43602 | -0.2187   |
| 15674 | P03363 | Q8NF37 | -0.38529  |
| 15675 | P03363 | Q13614 | -0.226    |
| 15676 | P03363 | Q99436 | -0.15482  |
| 15677 | P03363 | Q9UIG5 | -0.17847  |
| 15678 | P03363 | Q96F46 | -0.20813  |
| 15679 | P03363 | Q8N7U9 | -0.15358  |
| 15680 | P03363 | Q2M3A8 | -0.13629  |
| 15681 | P03363 | Q8NCL4 | -0.27277  |
| 15682 | P03363 | A8MV23 | -0.31049  |
| 15683 | P03363 | Q9Y2W7 | -0.23107  |
| 15684 | P03363 | Q9NX52 | -0.5638   |
| 15685 | P03363 | Q12841 | -0.47866  |
| 15686 | P03363 | Q5T7P8 | -0.31498  |
| 15687 | P03363 | Q9UJT0 | -0.21783  |
| 15688 | P03363 | Q8IUX8 | -0.70105  |
| 15689 | P03363 | Q9NYM4 | -0.61735  |
| 15690 | P03363 | Q96IX5 | -0.32948  |
| 15691 | P03363 | Q495N2 | -0.32626  |
| 15692 | P03363 | Q14520 | -0.57525  |
| 15693 | P03363 | P0CG06 | -0.5251   |
| 15694 | P03363 | Q5T9A4 | -0.40153  |
| 15695 | P03363 | Q9P2K9 | -0.30542  |
| 15696 | P03363 | Q96A99 | -0.43275  |
| 15697 | P03363 | Q9GZM5 | -0.28077  |
| 15698 | P03363 | Q5T2P9 | -0.45506  |
| 15699 | P03363 | Q9UI25 | -0.042737 |
| 15700 | P03363 | Q5VXU9 | -0.30272  |
| 15701 | P03363 | Q16706 | -0.31113  |
| 15702 | P03363 | Q0VD83 | -0.31641  |
| 15703 | P03363 | P11487 | -0.26803  |
| 15704 | P03363 | Q5SSQ6 | -0.20523  |
| 15705 | P03363 | Q8NHU3 | -0.5166   |
| 15706 | P03363 | Q5Y7A7 | -0.53907  |
| 15707 | P03363 | Q96SF7 | -0.41148  |
| 15708 | P03363 | Q8NDH2 | -0.17667  |
| 15709 | P03363 | Q8TED9 | -0.20621  |
| 15710 | P03363 | Q7L2K0 | -0.16316  |
| 15711 | P03363 | Q9C0C4 | -0.38163  |
| 15712 | P03363 | P0C221 | -0.21313  |
| 15713 | P03363 | P14679 | -0.22647  |
| 15714 | P03363 | A8MQ03 | -0.088708 |
| 15715 | P03363 | Q9NYM9 | -0.19603  |
| 15716 | P03363 | Q8IU89 | -0.21549  |
| 15717 | P03363 | P0DJ93 | -0.32626  |
| 15718 | P03363 | Q6ZNC8 | -0.39267  |
| 15719 | P03363 | Q96Q05 | -0.092846 |
| 15720 | P03363 | Q86SG7 | -0.29517  |
| 15721 | P03363 | Q8TDD5 | -0.298    |
| 15722 | P03363 | C9JDP6 | -0.23678  |
| 15723 | P03363 | Q86WC4 | -0.32094  |
| 15724 | P03363 | Q9BXE9 | -0.61551  |
| 15725 | P03363 | P18463 | -0.54957  |
| 15726 | P03363 | O15375 | -0.51249  |
| 15727 | P03363 | Q5SY68 | -0.2275   |
| 15728 | P03363 | P60880 | -0.22253  |
| 15729 | P03363 | O75369 | -0.22758  |
| 15730 | P03363 | Q8IWE4 | -0.14406  |
| 15731 | P03363 | Q86T96 | -0.32669  |
| 15732 | P03363 | Q9Y286 | -0.51223  |

|       |        |        |           |
|-------|--------|--------|-----------|
| 15733 | P03363 | Q96MW5 | -0.22424  |
| 15734 | P03363 | Q15053 | -0.16513  |
| 15735 | P03363 | A6NI56 | -0.17848  |
| 15736 | P03363 | Q9UHR4 | -0.2274   |
| 15737 | P03363 | Q9H7D0 | -0.22741  |
| 15738 | P03363 | Q9H892 | -0.22638  |
| 15739 | P03363 | Q6ZVH7 | -0.2274   |
| 15740 | P03363 | Q5T7N8 | -0.1984   |
| 15741 | P03363 | P47887 | -0.68713  |
| 15742 | P03363 | Q5T1C6 | -0.077926 |
| 15743 | P03363 | Q9P2J2 | -0.46376  |
| 15744 | P03363 | P42681 | -0.22741  |
| 15745 | P03363 | P15428 | -0.22389  |
| 15746 | P03363 | Q13470 | -0.22741  |
| 15747 | P03363 | Q7Z6W1 | -0.32626  |
| 15748 | P03363 | Q9Y5H9 | -0.62883  |
| 15749 | P03363 | P0C864 | -0.19364  |
| 15750 | P03363 | Q9HC73 | -0.82504  |
| 15751 | P03363 | Q8N4L8 | -0.14043  |
| 15752 | P03363 | C9JTQ0 | -0.22741  |
| 15753 | P03363 | P30740 | -0.12372  |
| 15754 | P03363 | Q9H0P7 | -0.23237  |
| 15755 | P03363 | P22891 | -0.4477   |
| 15756 | P03363 | O75830 | -0.30791  |
| 15757 | P03363 | Q10472 | -0.48244  |
| 15758 | P03363 | Q8TET4 | -0.22462  |
| 15759 | P03363 | Q9Y6V0 | -0.23551  |
| 15760 | P03363 | Q96R72 | -0.61656  |
| 15761 | P03363 | Q5VV17 | -0.16945  |
| 15762 | P03363 | Q9BQ49 | -0.32626  |
| 15763 | P03363 | Q7Z309 | -0.18064  |
| 15764 | P03363 | Q9HC98 | -0.2276   |
| 15765 | P03363 | Q04941 | -0.32087  |
| 15766 | P03363 | A8MPX8 | -0.22034  |
| 15767 | P03363 | P51582 | -0.61685  |
| 15768 | P03363 | P58418 | -0.4972   |
| 15769 | P03363 | Q9H2W1 | -0.32626  |
| 15770 | P03363 | Q9H0N0 | -0.23261  |
| 15771 | P03363 | Q9NZP8 | -0.56048  |
| 15772 | P03363 | Q96GR2 | -0.22774  |
| 15773 | P03363 | Q96FT7 | -0.47557  |
| 15774 | P03363 | Q7L8W6 | -0.048796 |
| 15775 | P03363 | Q9Y2M2 | -0.14907  |
| 15776 | P03363 | P21912 | -0.19676  |
| 15777 | P03363 | Q5T7N7 | -0.042737 |
| 15778 | P03363 | A0AV02 | -0.37855  |
| 15779 | P03363 | Q4J6C6 | -0.1603   |
| 15780 | P03363 | Q9Y4C8 | -0.22778  |
| 15781 | P03363 | A6NEK1 | -0.22147  |
| 15782 | P03363 | Q9BXW7 | -0.14771  |
| 15783 | P03363 | O60575 | -0.33498  |
| 15784 | P03363 | Q9H0A0 | -0.052704 |
| 15785 | P03363 | Q9NZC3 | -0.21979  |
| 15786 | P03363 | P01601 | -0.54902  |
| 15787 | P03363 | Q9BY49 | -0.56969  |
| 15788 | P03363 | O60237 | -0.22741  |
| 15789 | P03363 | Q15165 | -0.47125  |
| 15790 | P03363 | P54750 | -0.22675  |
| 15791 | P03363 | P56385 | -0.16627  |
| 15792 | P03363 | Q9NZJ9 | -0.17203  |
| 15793 | P03363 | Q6ZMJ2 | -0.53922  |
| 15794 | P03363 | Q8TCD1 | -0.099659 |
| 15795 | P03363 | Q8N5B7 | -0.22368  |
| 15796 | P03363 | P79522 | -0.093216 |
| 15797 | P03363 | B4DZS4 | -0.10932  |
| 15798 | P03363 | O95177 | -0.11689  |
| 15799 | P03363 | A1L168 | -0.031359 |
| 15800 | P03363 | P24298 | -0.22439  |
| 15801 | P03363 | A6NL88 | -0.32626  |
| 15802 | P03363 | P51692 | -0.22727  |
| 15803 | P03363 | Q5FWF7 | -0.22695  |
| 15804 | P03363 | Q5T742 | -0.33992  |
| 15805 | P03363 | Q9NTK1 | -0.059815 |
| 15806 | P03363 | Q8IYX1 | -0.50908  |
| 15807 | P03363 | Q68EN5 | -0.12704  |
| 15808 | P03363 | Q6P2I7 | -0.20244  |

|       |        |        |           |
|-------|--------|--------|-----------|
| 15809 | P03363 | Q9Y5E3 | -0.62573  |
| 15810 | P03363 | Q9BZM2 | -0.4196   |
| 15811 | P03363 | Q7Z404 | -0.32626  |
| 15812 | P03363 | Q9HB14 | -0.54503  |
| 15813 | P03363 | Q8IV08 | -0.21291  |
| 15814 | P03363 | Q95759 | -0.56853  |
| 15815 | P03363 | C9J302 | -0.067288 |
| 15816 | P03363 | O75379 | -0.31038  |
| 15817 | P03363 | P30968 | -0.74979  |
| 15818 | P03363 | A6NM03 | -0.61656  |
| 15819 | P03363 | Q9BUA6 | -0.22736  |
| 15820 | P03363 | A6NFY4 | -0.32626  |
| 15821 | P03363 | Q6UXF7 | -0.34245  |
| 15822 | P03363 | Q9Y6W3 | -0.22828  |
| 15823 | P03363 | Q99963 | -0.22778  |
| 15824 | P03363 | P01233 | -0.39258  |
| 15825 | P03363 | Q8TD30 | -0.22394  |
| 15826 | P03363 | Q96KM6 | -0.22729  |
| 15827 | P03363 | Q8N122 | -0.22741  |
| 15828 | P03363 | Q92781 | -0.59033  |
| 15829 | P03363 | P05154 | -0.35362  |
| 15830 | P03363 | Q8IXL9 | -0.22505  |
| 15831 | P03363 | Q6P499 | -0.32027  |
| 15832 | P03363 | Q5T2Q4 | -0.21219  |
| 15833 | P03363 | Q6U949 | -0.042737 |
| 15834 | P03363 | Q9GZT6 | -0.32227  |
| 15835 | P03363 | O15466 | -0.26934  |
| 15836 | P03363 | Q6UX40 | -0.25895  |
| 15837 | P03363 | P01859 | -0.50706  |
| 15838 | P03363 | P19075 | -0.4921   |
| 15839 | P03363 | B2RXH2 | -0.21009  |
| 15840 | P03363 | Q8NGV0 | -0.61656  |
| 15841 | P03363 | Q9BZD2 | -0.39682  |
| 15842 | P03363 | Q5SZJ8 | -0.14077  |
| 15843 | P03363 | Q9Y5E5 | -0.442    |
| 15844 | P03363 | Q96JG6 | -0.15887  |
| 15845 | P03363 | Q92610 | -0.19583  |
| 15846 | P03363 | Q8N1W0 | -0.32626  |
| 15847 | P03363 | Q92871 | -0.19833  |
| 15848 | P03363 | P20815 | -0.57687  |
| 15849 | P03363 | Q6IE38 | -0.33498  |
| 15850 | P03363 | Q7Z3Q1 | -0.32922  |
| 15851 | P03363 | Q5T9C9 | -0.31152  |
| 15852 | P03363 | P15328 | -0.60712  |
| 15853 | P03363 | Q1ZYL8 | -0.33992  |
| 15854 | P03363 | P59020 | -0.19962  |
| 15855 | P03363 | P19237 | -0.19794  |
| 15856 | P03363 | Q3LIE5 | -0.082608 |
| 15857 | P03363 | P0C7N4 | -0.32626  |
| 15858 | P03363 | Q9Y5Y4 | -0.7047   |
| 15859 | P03363 | Q8IZJ3 | -0.61239  |
| 15860 | P03363 | Q9H0C3 | -0.33749  |
| 15861 | P03363 | Q5EB52 | -0.47034  |
| 15862 | P03363 | Q9NZP0 | -0.61656  |
| 15863 | P03363 | Q96PX8 | -0.37674  |
| 15864 | P03363 | Q99611 | -0.3154   |
| 15865 | P03363 | P01766 | -0.54902  |
| 15866 | P03363 | Q96S66 | -0.14204  |
| 15867 | P03363 | P31785 | -0.38357  |
| 15868 | P03363 | Q92878 | -0.22444  |
| 15869 | P03363 | Q9Y5A9 | -0.10591  |
| 15870 | P03363 | Q92561 | -0.21522  |
| 15871 | P03363 | Q96NT5 | -0.21743  |
| 15872 | P03363 | Q8NH69 | -0.61656  |
| 15873 | P03363 | Q86X52 | -0.59037  |
| 15874 | P03363 | Q13296 | -0.14409  |
| 15875 | P03363 | Q86TU7 | -0.14411  |
| 15876 | P03363 | P50897 | -0.22555  |
| 15877 | P03363 | Q6NUI2 | -0.32347  |
| 15878 | P03363 | Q15843 | -0.22702  |
| 15879 | P03363 | Q96MM6 | -0.24873  |
| 15880 | P03363 | Q8N413 | -0.30119  |
| 15881 | P03363 | Q9H158 | -0.62883  |
| 15882 | P03363 | Q8NGL0 | -0.61656  |
| 15883 | P03363 | O96009 | -0.45052  |
| 15884 | P03363 | Q5TYW8 | -0.16408  |

|       |        |         |           |
|-------|--------|---------|-----------|
| 15885 | P03363 | Q8NH02  | -0.61656  |
| 15886 | P03363 | Q3C1V9  | -0.16967  |
| 15887 | P03363 | Q9Y5X9  | -0.41816  |
| 15888 | P03363 | Q16611  | -0.22737  |
| 15889 | P03363 | Q6ZRF8  | -0.27953  |
| 15890 | P03363 | Q99500  | -0.64803  |
| 15891 | P03363 | Q8IWQ3  | -0.37899  |
| 15892 | P03363 | Q9UKP4  | -0.57733  |
| 15893 | P03363 | Q8N7Z5  | -0.22741  |
| 15894 | P03363 | P05161  | -0.22704  |
| 15895 | P03363 | Q9NRA2  | -0.56281  |
| 15896 | P03363 | Q5H9R4  | -0.32626  |
| 15897 | P03363 | P54108  | -0.31462  |
| 15898 | P03363 | Q13530  | -0.4347   |
| 15899 | P03363 | Q9BZQ6  | -0.24377  |
| 15900 | P03363 | P17693  | -0.51733  |
| 15901 | P03363 | Q6P JW8 | -0.17045  |
| 15902 | P03363 | Q8WZ75  | -0.34237  |
| 15903 | P03363 | Q495Z4  | -0.02232  |
| 15904 | P03363 | Q6S9Z5  | -0.16055  |
| 15905 | P03363 | Q96H35  | -0.22487  |
| 15906 | P03363 | Q9BQB6  | -0.67398  |
| 15907 | P03363 | Q8NG99  | -0.61656  |
| 15908 | P03363 | Q4V321  | -0.23345  |
| 15909 | P03363 | Q7Z429  | -0.32626  |
| 15910 | P03363 | O75339  | -0.41725  |
| 15911 | P03363 | Q96JB6  | -0.3666   |
| 15912 | P03363 | Q8NFP4  | -0.33568  |
| 15913 | P03363 | P48594  | -0.17077  |
| 15914 | P03363 | Q495B1  | -0.22741  |
| 15915 | P03363 | Q6ZWH5  | -0.64356  |
| 15916 | P03363 | Q96S42  | -0.22741  |
| 15917 | P03363 | P04279  | -0.15874  |
| 15918 | P03363 | Q502W7  | -0.06178  |
| 15919 | P03363 | Q6NSH3  | -0.11841  |
| 15920 | P03363 | Q8IWZ4  | -0.27953  |
| 15921 | P03363 | P52306  | -0.22453  |
| 15922 | P03363 | O14669  | -0.81267  |
| 15923 | P03363 | O75503  | -0.18206  |
| 15924 | P03363 | Q13068  | -0.16758  |
| 15925 | P03363 | P11216  | -0.20974  |
| 15926 | P03363 | O95299  | -0.20054  |
| 15927 | P03363 | Q02221  | -0.14704  |
| 15928 | P03363 | Q6ZVU0  | -0.20561  |
| 15929 | P03363 | Q9NTZ6  | -0.2209   |
| 15930 | P03363 | O75949  | -0.32626  |
| 15931 | P03363 | Q8IXE1  | -0.61656  |
| 15932 | P03363 | P55899  | -0.49807  |
| 15933 | P03363 | P0C2S0  | -0.32322  |
| 15934 | P03363 | P01137  | -0.22741  |
| 15935 | P03363 | P23560  | -0.26118  |
| 15936 | P03363 | P59090  | -0.042737 |
| 15937 | P03363 | Q8NHC8  | -0.61656  |
| 15938 | P03363 | Q5TA82  | -0.042737 |
| 15939 | P03363 | Q8N8E1  | -0.062143 |
| 15940 | P03363 | Q15784  | -0.2275   |
| 15941 | P03363 | Q00889  | -0.31122  |
| 15942 | P03363 | Q9BX73  | -0.32626  |
| 15943 | P03363 | Q96A58  | -0.22765  |
| 15944 | P03363 | Q8TAD4  | -0.22563  |
| 15945 | P03363 | Q8N6S5  | -0.32626  |
| 15946 | P03363 | Q96E93  | -0.53374  |
| 15947 | P03363 | A6NKT7  | -0.22487  |
| 15948 | P03363 | Q6ZRH3  | -0.11434  |
| 15949 | P03363 | Q12908  | -0.40325  |
| 15950 | P03363 | P51151  | -0.29416  |
| 15951 | P03363 | Q0IIM8  | -0.53836  |
| 15952 | P03363 | P11388  | -0.20983  |
| 15953 | P03363 | P20813  | -0.57252  |
| 15954 | P03363 | Q8NB90  | -0.32128  |
| 15955 | P03363 | Q8NGS4  | -0.61656  |
| 15956 | P03363 | Q8WVX9  | -0.6778   |
| 15957 | P03363 | Q9BZS1  | -0.26663  |
| 15958 | P03363 | A6NH Y6 | -0.13984  |
| 15959 | P03363 | Q496J9  | -0.29546  |
| 15960 | P03363 | Q7L7V1  | -0.22529  |

|       |        |        |           |
|-------|--------|--------|-----------|
| 15961 | P03363 | Q8N2C3 | -0.2143   |
| 15962 | P03363 | Q96MZ0 | -0.22707  |
| 15963 | P03363 | Q14524 | -0.24213  |
| 15964 | P03363 | P33527 | -0.24585  |
| 15965 | P03363 | Q71U36 | -0.21891  |
| 15966 | P03363 | Q9BZA8 | -0.57898  |
| 15967 | P03363 | Q6UX71 | -0.22947  |
| 15968 | P03363 | Q6NZ63 | -0.32626  |
| 15969 | P03363 | Q9H8M1 | -0.12228  |
| 15970 | P03363 | Q9NWT6 | -0.19951  |
| 15971 | P03363 | P40616 | -0.32922  |
| 15972 | P03363 | Q06265 | -0.15432  |
| 15973 | P03363 | P86791 | -0.15172  |
| 15974 | P03363 | P84243 | -0.42375  |
| 15975 | P03363 | Q86Y91 | -0.25001  |
| 15976 | P03363 | Q9UG22 | -0.41477  |
| 15977 | P03363 | Q6UWU2 | -0.28182  |
| 15978 | P03363 | P61160 | -0.17894  |
| 15979 | P03363 | Q69YN2 | -0.14312  |
| 15980 | P03363 | Q96B21 | -0.32626  |
| 15981 | P03363 | Q15218 | -0.65644  |
| 15982 | P03363 | P12273 | -0.36077  |
| 15983 | P03363 | Q6ZS92 | -0.05282  |
| 15984 | P03363 | Q9H4A9 | -0.43857  |
| 15985 | P03363 | P06702 | -0.22759  |
| 15986 | P03363 | P78348 | -0.30173  |
| 15987 | P03363 | P09681 | -0.27851  |
| 15988 | P03363 | Q92847 | -0.37461  |
| 15989 | P03363 | Q7L1T6 | -0.3806   |
| 15990 | P03363 | Q86Y22 | -0.80744  |
| 15991 | P03363 | Q9UJ7  | -0.13843  |
| 15992 | P03363 | Q9Y6C5 | -0.29306  |
| 15993 | P03363 | P30530 | -0.39761  |
| 15994 | P03363 | P61266 | -0.33557  |
| 15995 | P03363 | P12111 | -0.43845  |
| 15996 | P03363 | P35503 | -0.43812  |
| 15997 | P03363 | Q16774 | -0.28866  |
| 15998 | P03363 | Q7Z7J7 | -0.32626  |
| 15999 | P03363 | Q8NBJ9 | -0.37745  |
| 16000 | P03363 | Q13519 | -0.43385  |
| 16001 | P03363 | Q2UY09 | -0.48825  |
| 16002 | P03363 | Q96MU8 | -0.22741  |
| 16003 | P03363 | Q9P0U3 | -0.21627  |
| 16004 | P03363 | O15547 | -0.30865  |
| 16005 | P03363 | Q6NTF7 | -0.40288  |
| 16006 | P03363 | Q03426 | -0.27467  |
| 16007 | P03363 | P16442 | -0.59365  |
| 16008 | P03363 | Q8NHS4 | -0.19977  |
| 16009 | P03363 | O43761 | -0.28669  |
| 16010 | P03363 | Q6PIS1 | -0.30015  |
| 16011 | P03363 | Q8TB52 | -0.20185  |
| 16012 | P03363 | Q6ZTY9 | -0.075686 |
| 16013 | P03363 | Q6PP77 | -0.47262  |
| 16014 | P03363 | Q8TDJ6 | -0.22741  |
| 16015 | P03363 | Q5VT03 | -0.028135 |
| 16016 | P03363 | O60883 | -0.22741  |
| 16017 | P03363 | Q15759 | -0.22741  |
| 16018 | P03363 | Q96FL9 | -0.27406  |
| 16019 | P03363 | Q6ZXV5 | -0.32626  |
| 16020 | P03363 | P36957 | -0.22264  |
| 16021 | P03363 | Q14896 | -0.29009  |
| 16022 | P03363 | Q8NGQ6 | -0.61656  |
| 16023 | P03363 | P43694 | -0.2274   |
| 16024 | P03363 | Q5T2D2 | -0.24768  |
| 16025 | P03363 | Q6UY18 | -0.32626  |
| 16026 | P03363 | Q5SV97 | -0.029005 |
| 16027 | P03363 | Q96F15 | -0.45457  |
| 16028 | P03363 | Q8TF72 | -0.22732  |
| 16029 | P03363 | Q9UKG4 | -0.56688  |
| 16030 | P03363 | Q9UL26 | -0.24776  |
| 16031 | P03363 | P43489 | -0.4948   |
| 16032 | P03363 | P58512 | -0.070267 |
| 16033 | P03363 | Q9UL25 | -0.23529  |
| 16034 | P03363 | Q6DCA0 | -0.1337   |
| 16035 | P03363 | Q8NBT3 | -0.32626  |
| 16036 | P03363 | Q8IZ57 | -0.28783  |



|       |        |        |           |
|-------|--------|--------|-----------|
| 16037 | P03363 | Q9Y216 | -0.22507  |
| 16038 | P03363 | Q15884 | -0.19187  |
| 16039 | P03363 | Q6ZT83 | -0.11253  |
| 16040 | P03363 | Q8NGZ6 | -0.61656  |
| 16041 | P03363 | P09417 | -0.24597  |
| 16042 | P03363 | Q8NH21 | -0.61656  |
| 16043 | P03363 | Q9NVE4 | -0.11118  |
| 16044 | P03363 | Q8N6L7 | -0.32626  |
| 16045 | P03363 | Q53FZ2 | -0.3061   |
| 16046 | P03363 | Q9UP38 | -0.25556  |
| 16047 | P03363 | Q9Y4C4 | -0.22784  |
| 16048 | P03363 | Q13351 | -0.22667  |
| 16049 | P03363 | Q8N300 | -0.098431 |
| 16050 | P03363 | P05111 | -0.24123  |
| 16051 | P03363 | Q8WW32 | -0.30401  |
| 16052 | P03363 | P41240 | -0.22742  |
| 16053 | P03363 | Q96N64 | -0.2254   |
| 16054 | P03363 | Q9Y4R7 | -0.15692  |
| 16055 | P03363 | Q12884 | -0.23022  |
| 16056 | P03363 | Q92913 | -0.26851  |
| 16057 | P03363 | Q9HD90 | -0.22753  |
| 16058 | P03363 | A1L188 | -0.050047 |
| 16059 | P03363 | Q7LC44 | -0.22396  |
| 16060 | P03363 | Q9Y2V0 | -0.14241  |
| 16061 | P03363 | Q13394 | -0.14082  |
| 16062 | P03363 | Q13505 | -0.20675  |
| 16063 | P03363 | Q9Y242 | -0.22941  |
| 16064 | P03363 | Q8N687 | -0.33516  |
| 16065 | P03363 | Q8IZN3 | -0.4627   |
| 16066 | P03363 | Q92185 | -0.26416  |
| 16067 | P03363 | Q6N022 | -0.22754  |
| 16068 | P03363 | P04054 | -0.36112  |
| 16069 | P03363 | Q12893 | -0.10171  |
| 16070 | P03363 | P11049 | -0.23494  |
| 16071 | P03363 | Q8N5U0 | -0.042737 |
| 16072 | P03363 | Q8WXI7 | -0.50834  |
| 16073 | P03363 | Q8NGD0 | -0.61656  |
| 16074 | P03363 | Q8NH16 | -0.5361   |
| 16075 | P03363 | Q96A26 | -0.19746  |
| 16076 | P03363 | Q504Y2 | -0.40637  |
| 16077 | P03363 | Q86YJ7 | -0.22741  |
| 16078 | P03363 | Q69YW2 | -0.32626  |
| 16079 | P03363 | P17066 | -0.22618  |
| 16080 | P03363 | Q96I99 | -0.24903  |
| 16081 | P03363 | Q96QE2 | -0.38413  |
| 16082 | P03363 | P43308 | -0.44511  |
| 16083 | P03363 | P14543 | -0.47775  |
| 16084 | P03363 | Q6ZNE9 | -0.22462  |
| 16085 | P03363 | Q9BT17 | -0.20911  |
| 16086 | P03363 | Q7RTN6 | -0.29488  |
| 16087 | P03363 | P0DJH9 | -0.12347  |
| 16088 | P03363 | Q1W4C9 | -0.33498  |
| 16089 | P03363 | A0A5B9 | -0.32626  |
| 16090 | P03363 | Q9Y5K3 | -0.19745  |
| 16091 | P03363 | Q5JT18 | -0.042737 |
| 16092 | P03363 | Q5T4S7 | -0.20641  |
| 16093 | P03363 | Q8WWF3 | -0.32626  |
| 16094 | P03363 | Q96T25 | -0.22731  |
| 16095 | P03363 | Q9NP72 | -0.61272  |
| 16096 | P03363 | P49757 | -0.22731  |
| 16097 | P03363 | Q9NRZ9 | -0.21196  |
| 16098 | P03363 | Q86XS5 | -0.56296  |
| 16099 | P03363 | Q5T7N2 | -0.15927  |
| 16100 | P03363 | Q15121 | -0.72199  |
| 16101 | P03363 | Q86XD8 | -0.22678  |
| 16102 | P03363 | Q75122 | -0.21233  |
| 16103 | P03363 | Q99935 | -0.36951  |
| 16104 | P03363 | Q86VR7 | -0.32626  |
| 16105 | P03363 | P18505 | -0.51294  |
| 16106 | P03363 | Q6NT46 | -0.17634  |
| 16107 | P03363 | P38567 | -0.29111  |
| 16108 | P03363 | Q8NFR9 | -0.1044   |
| 16109 | P03363 | P21918 | -0.44628  |
| 16110 | P03363 | Q8NGN8 | -0.61656  |
| 16111 | P03363 | Q9NUD5 | -0.17982  |
| 16112 | P03363 | Q3C1W6 | -0.27953  |

|       |        |        |           |
|-------|--------|--------|-----------|
| 16113 | P03363 | E7EU14 | -0.22941  |
| 16114 | P03363 | Q9NZU0 | -0.48434  |
| 16115 | P03363 | Q8NI36 | -0.22747  |
| 16116 | P03363 | P10321 | -0.54957  |
| 16117 | P03363 | Q8NAN2 | -0.32626  |
| 16118 | P03363 | Q8NGI1 | -0.61656  |
| 16119 | P03363 | Q31612 | -0.54957  |
| 16120 | P03363 | Q6ZN84 | -0.17696  |
| 16121 | P03363 | P59045 | -0.36894  |
| 16122 | P03363 | P27361 | -0.22741  |
| 16123 | P03363 | Q9C0D3 | -0.2212   |
| 16124 | P03363 | Q16401 | -0.028321 |
| 16125 | P03363 | Q8IYT1 | -0.084531 |
| 16126 | P03363 | Q8NCG7 | -0.4901   |
| 16127 | P03363 | O00526 | -0.55978  |
| 16128 | P03363 | Q6PIF6 | -0.34294  |
| 16129 | P03363 | Q9Y672 | -0.4017   |
| 16130 | P03363 | O95390 | -0.29258  |
| 16131 | P03363 | Q17R60 | -0.42169  |
| 16132 | P03363 | A2RUH7 | -0.22759  |
| 16133 | P03363 | P49959 | -0.18259  |
| 16134 | P03363 | Q9BRR3 | -0.32626  |
| 16135 | P03363 | P26715 | -0.60767  |
| 16136 | P03363 | Q8TD19 | -0.22741  |
| 16137 | P03363 | Q6UWF7 | -0.33992  |
| 16138 | P03363 | Q8IVV2 | -0.23546  |
| 16139 | P03363 | Q9Y5J5 | -0.21759  |
| 16140 | P03363 | Q14596 | -0.22504  |
| 16141 | P03363 | Q5SQS7 | -0.22741  |
| 16142 | P03363 | Q9NY47 | -0.45922  |
| 16143 | P03363 | Q6J272 | -0.011553 |
| 16144 | P03363 | Q96KV6 | -0.32626  |
| 16145 | P03363 | Q8NGL6 | -0.61656  |
| 16146 | P03363 | Q8NGB6 | -0.61656  |
| 16147 | P03363 | Q14410 | -0.24966  |
| 16148 | P03363 | Q14578 | -0.42332  |
| 16149 | P03363 | Q8WY91 | -0.14462  |
| 16150 | P03363 | P23942 | -0.40934  |
| 16151 | P03363 | Q9ULC3 | -0.46328  |
| 16152 | P03363 | Q43294 | -0.20184  |
| 16153 | P03363 | Q8N4F4 | -0.36646  |
| 16154 | P03363 | Q96RU8 | -0.22783  |
| 16155 | P03363 | O60880 | -0.22741  |
| 16156 | P03363 | Q5TEA6 | -0.32626  |
| 16157 | P03363 | Q6NSJ2 | -0.031815 |
| 16158 | P03363 | Q96C36 | -0.23661  |
| 16159 | P03363 | Q9BTX7 | -0.22464  |
| 16160 | P03363 | P13385 | -0.22743  |
| 16161 | P03363 | Q8TBZ6 | -0.13248  |
| 16162 | P03363 | P19086 | -0.58961  |
| 16163 | P03363 | Q9GZP4 | -0.14109  |
| 16164 | P03363 | Q43566 | -0.22754  |
| 16165 | P03363 | P35670 | -0.22756  |
| 16166 | P03363 | Q8NGN1 | -0.61656  |
| 16167 | P03363 | Q9Y2Y1 | -0.19917  |
| 16168 | P03363 | Q9NZQ8 | -0.4936   |
| 16169 | P03363 | Q9NPB8 | -0.20144  |
| 16170 | P03363 | Q8TB68 | -0.35901  |
| 16171 | P03363 | O15440 | -0.59665  |
| 16172 | P03363 | Q9H254 | -0.22752  |
| 16173 | P03363 | P48058 | -0.5164   |
| 16174 | P03363 | Q96LB0 | -0.64046  |
| 16175 | P03363 | P47736 | -0.22313  |
| 16176 | P03363 | Q8NGI3 | -0.61656  |
| 16177 | P03363 | O75937 | -0.21289  |
| 16178 | P03363 | Q8NFL0 | -0.32017  |
| 16179 | P03363 | Q8NFT8 | -0.2777   |
| 16180 | P03363 | Q6UXT8 | -0.33992  |
| 16181 | P03363 | Q09428 | -0.43468  |
| 16182 | P03363 | Q9BZW4 | -0.24975  |
| 16183 | P03363 | P59534 | -0.51612  |
| 16184 | P03363 | A6NDU8 | -0.1451   |
| 16185 | P03363 | Q13410 | -0.78122  |
| 16186 | P03363 | Q8N9G6 | -0.044483 |
| 16187 | P03363 | Q53GD3 | -0.44361  |
| 16188 | P03363 | Q0P5N6 | -0.49937  |

|       |        |        |           |
|-------|--------|--------|-----------|
| 16189 | P03363 | Q14432 | -0.31821  |
| 16190 | P03363 | Q9UKR3 | -0.24913  |
| 16191 | P03363 | Q9NZ71 | -0.31061  |
| 16192 | P03363 | Q99879 | -0.14658  |
| 16193 | P03363 | Q9UDR5 | -0.27784  |
| 16194 | P03363 | A4UGR9 | -0.17272  |
| 16195 | P03363 | P0CW19 | -0.1264   |
| 16196 | P03363 | Q14210 | -0.3057   |
| 16197 | P03363 | P15814 | -0.47034  |
| 16198 | P03363 | A6NM36 | -0.22751  |
| 16199 | P03363 | P14091 | -0.22968  |
| 16200 | P03363 | P0CG22 | -0.45164  |
| 16201 | P03363 | Q99466 | -0.23847  |
| 16202 | P03363 | Q8NAA5 | -0.21444  |
| 16203 | P03363 | Q13263 | -0.22746  |
| 16204 | P03363 | Q8N608 | -0.38533  |
| 16205 | P03363 | O00217 | -0.38097  |
| 16206 | P03363 | Q49A92 | -0.14512  |
| 16207 | P03363 | Q86XE5 | -0.10546  |
| 16208 | P03363 | P01600 | -0.54902  |
| 16209 | P03363 | Q43286 | -0.37464  |
| 16210 | P03363 | Q7Z2Q7 | -0.32626  |
| 16211 | P03363 | P43003 | -0.35236  |
| 16212 | P03363 | Q7Z2H8 | -0.49715  |
| 16213 | P03363 | A6NNM3 | -0.2274   |
| 16214 | P03363 | O76082 | -0.22958  |
| 16215 | P03363 | P01222 | -0.35151  |
| 16216 | P03363 | Q12891 | -0.22774  |
| 16217 | P03363 | Q9H3S5 | -0.43894  |
| 16218 | P03363 | Q99755 | -0.22376  |
| 16219 | P03363 | P08709 | -0.43759  |
| 16220 | P03363 | Q02413 | -0.35753  |
| 16221 | P03363 | Q8N7C3 | -0.22791  |
| 16222 | P03363 | Q69YJ1 | -0.25445  |
| 16223 | P03363 | Q13370 | -0.22641  |
| 16224 | P03363 | Q8TDD1 | -0.21577  |
| 16225 | P03363 | Q4G176 | -0.35685  |
| 16226 | P03363 | Q09013 | -0.28404  |
| 16227 | P03363 | Q7Z412 | -0.19917  |
| 16228 | P03363 | Q8ND25 | -0.22957  |
| 16229 | P03363 | Q5VSP4 | -0.33992  |
| 16230 | P03363 | Q6UXI9 | -0.56664  |
| 16231 | P03363 | Q6ZNF0 | -0.40754  |
| 16232 | P03363 | Q96P50 | -0.57369  |
| 16233 | P03363 | Q99928 | -0.38577  |
| 16234 | P03363 | Q9UL01 | -0.36252  |
| 16235 | P03363 | Q99988 | -0.42381  |
| 16236 | P03363 | Q8NFZ4 | -0.37473  |
| 16237 | P03363 | Q8N4H5 | -0.19922  |
| 16238 | P03363 | Q08881 | -0.22741  |
| 16239 | P03363 | Q96ER9 | -0.11617  |
| 16240 | P03363 | Q9Y2T4 | -0.22428  |
| 16241 | P03363 | Q8IZ21 | -0.13715  |
| 16242 | P03363 | Q93084 | -0.39362  |
| 16243 | P03363 | P17081 | -0.39995  |
| 16244 | P03363 | O14782 | -0.23877  |
| 16245 | P03363 | Q12792 | -0.19725  |
| 16246 | P03363 | Q6ZRI0 | -0.43979  |
| 16247 | P03363 | Q8NGH3 | -0.61656  |
| 16248 | P03363 | Q96AK3 | -0.50584  |
| 16249 | P03363 | P00505 | -0.2253   |
| 16250 | P03363 | Q01995 | -0.22018  |
| 16251 | P03363 | Q07343 | -0.22651  |
| 16252 | P03363 | Q7Z443 | -0.35743  |
| 16253 | P03363 | P81172 | -0.16533  |
| 16254 | P03363 | Q7Z4P5 | -0.22741  |
| 16255 | P03363 | P40763 | -0.22731  |
| 16256 | P03363 | P51153 | -0.26242  |
| 16257 | P03363 | P16860 | -0.21695  |
| 16258 | P03363 | P28845 | -0.76382  |
| 16259 | P03363 | Q9BZS9 | -0.042737 |
| 16260 | P03363 | P61568 | -0.15876  |
| 16261 | P03363 | Q99650 | -0.3191   |
| 16262 | P03363 | Q6ZS11 | -0.30344  |
| 16263 | P03363 | Q5HYN5 | -0.16149  |
| 16264 | P03363 | Q7Z5A8 | -0.33992  |

|       |        |        |           |
|-------|--------|--------|-----------|
| 16265 | P03363 | P0C024 | -0.23178  |
| 16266 | P03363 | Q1HG43 | -0.39199  |
| 16267 | P03363 | Q92753 | -0.34223  |
| 16268 | P03363 | Q9NQV8 | -0.29489  |
| 16269 | P03363 | Q96N06 | -0.079056 |
| 16270 | P03363 | P56705 | -0.25156  |
| 16271 | P03363 | Q96BJ3 | -0.055222 |
| 16272 | P03363 | P06311 | -0.54902  |
| 16273 | P03363 | Q8IVW8 | -0.36369  |
| 16274 | P03363 | Q92974 | -0.22742  |
| 16275 | P03363 | P43116 | -0.66892  |
| 16276 | P03363 | Q8N743 | -0.47262  |
| 16277 | P03363 | P06331 | -0.54902  |
| 16278 | P03363 | A8MUU1 | -0.20884  |
| 16279 | P03363 | Q8NC74 | -0.073154 |
| 16280 | P03363 | Q14444 | -0.20581  |
| 16281 | P03363 | Q9HAI6 | -0.036275 |
| 16282 | P03363 | Q8WU03 | -0.11409  |
| 16283 | P03363 | Q6UX41 | -0.22812  |
| 16284 | P03363 | O43824 | -0.30235  |
| 16285 | P03363 | Q99541 | -0.22304  |
| 16286 | P03363 | Q86WW8 | -0.12217  |
| 16287 | P03363 | Q15695 | -0.21184  |
| 16288 | P03363 | Q8N7X1 | -0.22482  |
| 16289 | P03363 | Q13562 | -0.22744  |
| 16290 | P03363 | Q86U17 | -0.31049  |
| 16291 | P03363 | Q8N112 | -0.32626  |
| 16292 | P03363 | Q96DZ7 | -0.32626  |
| 16293 | P03363 | A6NK02 | -0.27953  |
| 16294 | P03363 | Q9NWZ3 | -0.2274   |
| 16295 | P03363 | Q96HR9 | -0.32626  |
| 16296 | P03363 | Q96PP9 | -0.21962  |
| 16297 | P03363 | P19652 | -0.38125  |
| 16298 | P03363 | Q99956 | -0.33217  |
| 16299 | P03363 | P0CG39 | -0.12323  |
| 16300 | P03363 | Q9Y5H6 | -0.62883  |
| 16301 | P03363 | Q9Y6I4 | -0.22948  |
| 16302 | P03363 | Q9HBW0 | -0.37315  |
| 16303 | P03363 | A6NCX1 | -0.19808  |
| 16304 | P03363 | Q96HP0 | -0.19081  |
| 16305 | P03363 | Q8TCZ7 | -0.023862 |
| 16306 | P03363 | A6NEL3 | -0.15192  |
| 16307 | P03363 | Q8N9B4 | -0.22741  |
| 16308 | P03363 | Q14393 | -0.22796  |
| 16309 | P03363 | Q0Z7S8 | -0.21255  |
| 16310 | P03363 | Q9NWR8 | -0.32626  |
| 16311 | P03363 | Q96LU7 | -0.33992  |
| 16312 | P03363 | B1AL88 | -0.32626  |
| 16313 | P03363 | Q8NBF4 | -0.27069  |
| 16314 | P03363 | Q12774 | -0.23577  |
| 16315 | P03363 | P23443 | -0.21937  |
| 16316 | P03363 | Q96R27 | -0.61656  |
| 16317 | P03363 | Q9NUB4 | -0.32626  |
| 16318 | P03363 | O75829 | -0.67946  |
| 16319 | P03363 | Q9HCJ0 | -0.1323   |
| 16320 | P03363 | Q5TA78 | -0.042737 |
| 16321 | P03363 | Q9Y6Z4 | -0.14305  |
| 16322 | P03363 | Q9NWH7 | -0.50739  |
| 16323 | P03363 | P30520 | -0.29319  |
| 16324 | P03363 | P20132 | -0.20937  |
| 16325 | P03363 | Q8TCT8 | -0.24515  |
| 16326 | P03363 | P05093 | -0.40017  |
| 16327 | P03363 | Q12981 | -0.21875  |
| 16328 | P03363 | Q8IYB8 | -0.22716  |
| 16329 | P03363 | Q9UMD9 | -0.43707  |
| 16330 | P03363 | Q95IE3 | -0.53907  |
| 16331 | P03363 | Q9H2Y9 | -0.43295  |
| 16332 | P03363 | Q07817 | -0.22739  |
| 16333 | P03363 | P47211 | -0.61361  |
| 16334 | P03363 | Q8WVQ1 | -0.59423  |
| 16335 | P03363 | Q9BY64 | -0.4715   |
| 16336 | P03363 | Q9BZG2 | -0.3015   |
| 16337 | P03363 | P04206 | -0.54902  |
| 16338 | P03363 | Q8IV04 | -0.50908  |
| 16339 | P03363 | Q8N1P7 | -0.16175  |
| 16340 | P03363 | Q5BKX6 | -0.29915  |

|       |        |        |           |
|-------|--------|--------|-----------|
| 16341 | P03363 | Q8NGG5 | -0.61656  |
| 16342 | P03363 | Q96MC6 | -0.43269  |
| 16343 | P03363 | Q9Y330 | -0.2273   |
| 16344 | P03363 | Q9UGT4 | -0.35746  |
| 16345 | P03363 | Q9Y264 | -0.39951  |
| 16346 | P03363 | Q4ZHG4 | -0.24639  |
| 16347 | P03363 | Q13972 | -0.29844  |
| 16348 | P03363 | Q9UQ84 | -0.21635  |
| 16349 | P03363 | Q96LR5 | -0.13732  |
| 16350 | P03363 | Q8TD91 | -0.20595  |
| 16351 | P03363 | Q14254 | -0.31059  |
| 16352 | P03363 | Q9P286 | -0.30654  |
| 16353 | P03363 | Q9Y2B9 | -0.22626  |
| 16354 | P03363 | Q9HBE4 | -0.45758  |
| 16355 | P03363 | Q86UR5 | -0.22741  |
| 16356 | P03363 | Q14164 | -0.22741  |
| 16357 | P03363 | P01891 | -0.36051  |
| 16358 | P03363 | P04626 | -0.22741  |
| 16359 | P03363 | Q00796 | -0.54863  |
| 16360 | P03363 | P57737 | -0.22741  |
| 16361 | P03363 | Q9Y572 | -0.22741  |
| 16362 | P03363 | P0C6S8 | -0.32626  |
| 16363 | P03363 | P31025 | -0.40015  |
| 16364 | P03363 | Q8IXM7 | -0.16206  |
| 16365 | P03363 | Q9H2S9 | -0.27982  |
| 16366 | P03363 | Q6ZN80 | -0.22021  |
| 16367 | P03363 | Q53SF7 | -0.15221  |
| 16368 | P03363 | Q94768 | -0.54668  |
| 16369 | P03363 | Q86UU1 | -0.2274   |
| 16370 | P03363 | P55011 | -0.47206  |
| 16371 | P03363 | P19801 | -0.59872  |
| 16372 | P03363 | Q9H4L4 | -0.21509  |
| 16373 | P03363 | Q9BZ01 | -0.02786  |
| 16374 | P03363 | Q58DX5 | -0.44281  |
| 16375 | P03363 | Q03431 | -0.42307  |
| 16376 | P03363 | Q9HAS3 | -0.39911  |
| 16377 | P03363 | Q86YD7 | -0.20725  |
| 16378 | P03363 | Q9UK96 | -0.19475  |
| 16379 | P03363 | Q96B77 | -0.32227  |
| 16380 | P03363 | P49674 | -0.22741  |
| 16381 | P03363 | Q9H7Z6 | -0.22159  |
| 16382 | P03363 | A8MQB3 | -0.062334 |
| 16383 | P03363 | Q6T4P5 | -0.31162  |
| 16384 | P03363 | Q8WZA1 | -0.30655  |
| 16385 | P03363 | Q6UWQ7 | -0.33992  |
| 16386 | P03363 | Q6NUI6 | -0.38678  |
| 16387 | P03363 | Q9BQD7 | -0.32626  |
| 16388 | P03363 | Q1HG44 | -0.38154  |
| 16389 | P03363 | P21246 | -0.44512  |
| 16390 | P03363 | Q8IVL0 | -0.22747  |
| 16391 | P03363 | Q6UY13 | -0.33992  |
| 16392 | P03363 | Q5T442 | -0.39581  |
| 16393 | P03363 | Q15263 | -0.46453  |
| 16394 | P03363 | I1YAP6 | -0.2276   |
| 16395 | P03363 | Q8IVU9 | -0.15514  |
| 16396 | P03363 | Q9UGF6 | -0.61656  |
| 16397 | P03363 | Q75414 | -0.32572  |
| 16398 | P03363 | Q86SR1 | -0.36524  |
| 16399 | P03363 | Q96MZ4 | -0.17604  |
| 16400 | P03363 | Q9Y576 | -0.22741  |
| 16401 | P03363 | P24752 | -0.22176  |
| 16402 | P03363 | Q95936 | -0.5381   |
| 16403 | P03363 | Q8NHQ9 | -0.18407  |
| 16404 | P03363 | P13497 | -0.58789  |
| 16405 | P03363 | O60879 | -0.22654  |
| 16406 | P03363 | P01615 | -0.54902  |
| 16407 | P03363 | Q9BQF6 | -0.1922   |
| 16408 | P03363 | Q96B96 | -0.32626  |
| 16409 | P03363 | Q9BTX3 | -0.32626  |
| 16410 | P03363 | Q6UWV6 | -0.41641  |
| 16411 | P03363 | Q8IZ16 | -0.036281 |
| 16412 | P03363 | Q4G0G2 | -0.044777 |
| 16413 | P03363 | P22612 | -0.37883  |
| 16414 | P03363 | Q9BXJ3 | -0.33992  |
| 16415 | P03363 | Q9H244 | -0.50576  |
| 16416 | P03363 | Q5TZF3 | -0.22741  |

|       |        |        |           |
|-------|--------|--------|-----------|
| 16417 | P03363 | Q1XH10 | -0.18385  |
| 16418 | P03363 | Q6ZRN7 | -0.042737 |
| 16419 | P03363 | Q8NH94 | -0.61656  |
| 16420 | P03363 | Q5EBN2 | -0.27953  |
| 16421 | P03363 | P0CJ75 | -0.13673  |
| 16422 | P03363 | Q9NYB5 | -0.48146  |
| 16423 | P03363 | P07949 | -0.44555  |
| 16424 | P03363 | Q3MIX3 | -0.48516  |
| 16425 | P03363 | P07093 | -0.2226   |
| 16426 | P03363 | P48357 | -0.47708  |
| 16427 | P03363 | Q6NXN4 | -0.32626  |
| 16428 | P03363 | Q03154 | -0.19896  |
| 16429 | P03363 | Q9BZH6 | -0.22739  |
| 16430 | P03363 | Q9Y5E8 | -0.62883  |
| 16431 | P03363 | Q9Y225 | -0.43213  |
| 16432 | P03363 | Q8TE58 | -0.59199  |
| 16433 | P03363 | P09430 | -0.15489  |
| 16434 | P03363 | P42081 | -0.22739  |
| 16435 | P03363 | Q14162 | -0.43796  |
| 16436 | P03363 | Q14953 | -0.59224  |
| 16437 | P03363 | P48201 | -0.34078  |
| 16438 | P03363 | Q8WTX7 | -0.031838 |
| 16439 | P03363 | P16066 | -0.66376  |
| 16440 | P03363 | Q13641 | -0.38956  |
| 16441 | P03363 | Q5VWT5 | -0.096006 |
| 16442 | P03363 | Q8N145 | -0.22744  |
| 16443 | P03363 | Q96PC2 | -0.16419  |
| 16444 | P03363 | P35410 | -0.22741  |
| 16445 | P03363 | P42357 | -0.21742  |
| 16446 | P03363 | Q8IWZ5 | -0.27953  |
| 16447 | P03363 | Q8WXR4 | -0.34834  |
| 16448 | P03363 | A6NE02 | -0.23909  |
| 16449 | P03363 | P04181 | -0.20919  |
| 16450 | P03363 | P43354 | -0.23055  |
| 16451 | P03363 | Q14828 | -0.11978  |
| 16452 | P03363 | Q8IUR5 | -0.32227  |
| 16453 | P03363 | P20382 | -0.40982  |
| 16454 | P03363 | Q75462 | -0.22744  |
| 16455 | P03363 | Q00872 | -0.31979  |
| 16456 | P03363 | Q9UH65 | -0.22741  |
| 16457 | P03363 | Q43674 | -0.2799   |
| 16458 | P03363 | P31277 | -0.22501  |
| 16459 | P03363 | Q4ZJI4 | -0.32021  |
| 16460 | P03363 | Q9NV35 | -0.21829  |
| 16461 | P03363 | Q13200 | -0.11877  |
| 16462 | P03363 | Q9Y5S8 | -0.27662  |
| 16463 | P03363 | A6NDL7 | -0.21416  |
| 16464 | P03363 | Q86X67 | -0.20035  |
| 16465 | P03363 | P25940 | -0.41171  |
| 16466 | P03363 | P02768 | -0.17624  |
| 16467 | P03363 | Q96S37 | -0.34703  |
| 16468 | P03363 | P35247 | -0.22814  |
| 16469 | P03363 | Q9UBR2 | -0.37934  |
| 16470 | P03363 | Q9NR20 | -0.51796  |
| 16471 | P03363 | P0DJR0 | -0.30235  |
| 16472 | P03363 | Q8IYM9 | -0.22741  |
| 16473 | P03363 | Q9NPC1 | -0.73267  |
| 16474 | P03363 | Q9NX94 | -0.32626  |
| 16475 | P03363 | A6NGY3 | -0.11133  |
| 16476 | P03363 | Q94772 | -0.20648  |
| 16477 | P03363 | P78549 | -0.20014  |
| 16478 | P03363 | Q9NW61 | -0.22674  |
| 16479 | P03363 | Q14521 | -0.3046   |
| 16480 | P03363 | Q00241 | -0.25134  |
| 16481 | P03363 | Q9NVE7 | -0.20648  |
| 16482 | P03363 | Q6EMK4 | -0.68689  |
| 16483 | P03363 | P36383 | -0.50927  |
| 16484 | P03363 | Q14656 | -0.20394  |
| 16485 | P03363 | Q8NC24 | -0.52123  |
| 16486 | P03363 | Q14832 | -0.54013  |
| 16487 | P03363 | Q9NY97 | -0.2976   |
| 16488 | P03363 | Q08462 | -0.46738  |
| 16489 | P03363 | Q8WWZ8 | -0.22741  |
| 16490 | P03363 | Q9H4E5 | -0.50038  |
| 16491 | P03363 | P0C866 | -0.13697  |
| 16492 | P03363 | Q8N1Y9 | -0.32626  |

|       |        |        |           |
|-------|--------|--------|-----------|
| 16493 | P03363 | P39210 | -0.28589  |
| 16494 | P03363 | P03905 | -0.43594  |
| 16495 | P03363 | P55916 | -0.29182  |
| 16496 | P03363 | Q96SM3 | -0.65244  |
| 16497 | P03363 | Q9BT09 | -0.18341  |
| 16498 | P03363 | Q14732 | -0.22526  |
| 16499 | P03363 | Q969I6 | -0.5171   |
| 16500 | P03363 | Q9H293 | -0.3674   |
| 16501 | P03363 | P51957 | -0.33205  |
| 16502 | P03363 | Q9HBD1 | -0.2274   |
| 16503 | P03363 | A2VDF0 | -0.12245  |
| 16504 | P03363 | Q15777 | -0.20721  |
| 16505 | P03363 | Q5TZ20 | -0.61656  |
| 16506 | P03363 | Q9Y5E2 | -0.56957  |
| 16507 | P03363 | P23415 | -0.28355  |
| 16508 | P03363 | P01911 | -0.53907  |
| 16509 | P03363 | O95452 | -0.48308  |
| 16510 | P03363 | P14784 | -0.55592  |
| 16511 | P03363 | Q9UL51 | -0.58176  |
| 16512 | P03363 | Q13459 | -0.20818  |
| 16513 | P03363 | Q8N9V2 | -0.22778  |
| 16514 | P03363 | Q8WWF5 | -0.27732  |
| 16515 | P03363 | Q9Y471 | -0.19422  |
| 16516 | P03363 | Q5U4P2 | -0.53231  |
| 16517 | P03363 | Q96FQ7 | -0.15185  |
| 16518 | P03363 | O43896 | -0.23989  |
| 16519 | P03363 | P56470 | -0.21292  |
| 16520 | P03363 | Q9HCF6 | -0.38405  |
| 16521 | P03363 | Q6S5L8 | -0.22741  |
| 16522 | P03363 | Q8NGS7 | -0.61656  |
| 16523 | P03363 | P55000 | -0.48105  |
| 16524 | P03363 | Q9H741 | -0.33992  |
| 16525 | P03363 | Q9UNE2 | -0.2261   |
| 16526 | P03363 | Q8IUB3 | -0.35756  |
| 16527 | P03363 | P30872 | -0.67647  |
| 16528 | P03363 | Q02318 | -0.39041  |
| 16529 | P03363 | Q9ULZ3 | -0.2167   |
| 16530 | P03363 | Q5VSG8 | -0.27328  |
| 16531 | P03363 | P28906 | -0.35749  |
| 16532 | P03363 | Q9H1Z9 | -0.32626  |
| 16533 | P03363 | Q96IJ6 | -0.20686  |
| 16534 | P03363 | Q9BRY0 | -0.45821  |
| 16535 | P03363 | Q86YQ2 | -0.41496  |
| 16536 | P03363 | O95711 | -0.57024  |
| 16537 | P03363 | Q9ULL0 | -0.022994 |
| 16538 | P03363 | P01722 | -0.54902  |
| 16539 | P03363 | Q9BUV0 | -0.031359 |
| 16540 | P03363 | Q9Y5W5 | -0.48093  |
| 16541 | P03363 | Q86Z14 | -0.39382  |
| 16542 | P03363 | Q9UI72 | -0.042737 |
| 16543 | P03363 | Q86W67 | -0.16928  |
| 16544 | P03363 | Q8N5W8 | -0.33992  |
| 16545 | P03363 | Q8IXB3 | -0.33797  |
| 16546 | P03363 | O75417 | -0.11432  |
| 16547 | P03363 | P08684 | -0.42307  |
| 16548 | P03363 | Q6UWV7 | -0.32626  |
| 16549 | P03363 | Q9UF47 | -0.27227  |
| 16550 | P03363 | P0CJ76 | -0.13673  |
| 16551 | P03363 | Q7Z5M5 | -0.32626  |
| 16552 | P03363 | Q9NZS9 | -0.51241  |
| 16553 | P03363 | Q9P0T7 | -0.32799  |
| 16554 | P03363 | Q09MP3 | -0.1187   |
| 16555 | P03363 | Q8N257 | -0.17831  |
| 16556 | P03363 | Q9Y5I2 | -0.93203  |
| 16557 | P03363 | Q9UBF8 | -0.51362  |
| 16558 | P03363 | Q5H8A4 | -0.44143  |
| 16559 | P03363 | O95498 | -0.23601  |
| 16560 | P03363 | P27482 | -0.2273   |
| 16561 | P03363 | P51571 | -0.41105  |
| 16562 | P03363 | Q96A28 | -0.33958  |
| 16563 | P03363 | Q9Y277 | -0.50948  |
| 16564 | P03363 | Q16880 | -0.28336  |
| 16565 | P03363 | P07360 | -0.45991  |
| 16566 | P03363 | P55061 | -0.27695  |
| 16567 | P03363 | O95395 | -0.26159  |
| 16568 | P03363 | Q96RI9 | -0.62775  |

|       |        |        |           |
|-------|--------|--------|-----------|
| 16569 | P03363 | Q8NGC9 | -0.61656  |
| 16570 | P03363 | Q16653 | -0.55028  |
| 16571 | P03363 | O43895 | -0.44527  |
| 16572 | P03363 | Q96RB7 | -0.61656  |
| 16573 | P03363 | Q9Y623 | -0.12664  |
| 16574 | P03363 | P61020 | -0.23923  |
| 16575 | P03363 | O43295 | -0.38968  |
| 16576 | P03363 | A6NDI0 | -0.27953  |
| 16577 | P03363 | A1A5B4 | -0.44623  |
| 16578 | P03363 | P31941 | -0.49573  |
| 16579 | P03363 | P02655 | -0.35243  |
| 16580 | P03363 | P01286 | -0.31611  |
| 16581 | P03363 | H3BSY2 | -0.18965  |
| 16582 | P03363 | Q8WU17 | -0.22801  |
| 16583 | P03363 | Q96DT5 | -0.22366  |
| 16584 | P03363 | Q9Y2W1 | -0.013873 |
| 16585 | P03363 | O75121 | -0.47262  |
| 16586 | P03363 | P09758 | -0.50008  |
| 16587 | P03363 | Q92563 | -0.44579  |
| 16588 | P03363 | A6NJZ7 | -0.2274   |
| 16589 | P03363 | P22492 | -0.26782  |
| 16590 | P03363 | Q16540 | -0.11074  |
| 16591 | P03363 | Q9UI54 | -0.042737 |
| 16592 | P03363 | Q09328 | -0.29324  |
| 16593 | P03363 | A6NCI5 | -0.32626  |
| 16594 | P03363 | Q8IVG5 | -0.19445  |
| 16595 | P03363 | Q86UF1 | -0.32626  |
| 16596 | P03363 | Q99805 | -0.40223  |
| 16597 | P03363 | P98095 | -0.43084  |
| 16598 | P03363 | Q6UWH4 | -0.28673  |
| 16599 | P03363 | Q8NGJ2 | -0.61656  |
| 16600 | P03363 | Q5T036 | -0.095073 |
| 16601 | P03363 | A6NFK2 | -0.14958  |
| 16602 | P03363 | Q8N8F7 | -0.32626  |
| 16603 | P03363 | P83593 | -0.5251   |
| 16604 | P03363 | P36969 | -0.24029  |
| 16605 | P03363 | Q96M83 | -0.11187  |
| 16606 | P03363 | A8MWX3 | -0.22446  |
| 16607 | P03363 | Q9UBI6 | -0.31357  |
| 16608 | P03363 | P09093 | -0.30221  |
| 16609 | P03363 | Q6UWE3 | -0.3747   |
| 16610 | P03363 | Q9Y4B4 | -0.22033  |
| 16611 | P03363 | P14222 | -0.35764  |
| 16612 | P03363 | Q9UBP8 | -0.11408  |
| 16613 | P03363 | Q9BYW2 | -0.22684  |
| 16614 | P03363 | Q4G0N7 | -0.018274 |
| 16615 | P03363 | Q9H3S1 | -0.49066  |
| 16616 | P03363 | P03973 | -0.20035  |
| 16617 | P03363 | Q9BWQ6 | -0.3247   |
| 16618 | P03363 | Q5T9L3 | -0.21284  |
| 16619 | P03363 | Q9BT73 | -0.21627  |
| 16620 | P03363 | Q9UK61 | -0.085144 |
| 16621 | P03363 | Q12768 | -0.19359  |
| 16622 | P03363 | Q9NQG6 | -0.21004  |
| 16623 | P03363 | P48023 | -0.22713  |
| 16624 | P03363 | O15335 | -0.37012  |
| 16625 | P03363 | Q9P0B6 | -0.32626  |
| 16626 | P03363 | Q6PF15 | -0.22356  |
| 16627 | P03363 | P00540 | -0.5296   |
| 16628 | P03363 | O75093 | -0.33152  |
| 16629 | P03363 | Q13651 | -0.2131   |
| 16630 | P03363 | A1A4S6 | -0.23146  |
| 16631 | P03363 | Q13190 | -0.22125  |
| 16632 | P03363 | O75593 | -0.27048  |
| 16633 | P03363 | Q9Y255 | -0.15331  |
| 16634 | P03363 | Q9UKL4 | -0.49151  |
| 16635 | P03363 | Q9BUH6 | -0.060003 |
| 16636 | P03363 | Q5HYJ1 | -0.37112  |
| 16637 | P03363 | Q9BXV9 | -0.042737 |
| 16638 | P03363 | Q9H7B7 | -0.33992  |
| 16639 | P03363 | Q695T7 | -0.54915  |
| 16640 | P03363 | O75140 | -0.22725  |
| 16641 | P03363 | Q6PCB7 | -0.35432  |
| 16642 | P03363 | Q96KT0 | -0.1011   |
| 16643 | P03363 | Q9NYU2 | -0.13762  |
| 16644 | P03363 | P07954 | -0.17962  |



|       |        |        |           |
|-------|--------|--------|-----------|
| 16645 | P03363 | Q7L1S5 | -0.57333  |
| 16646 | P03363 | Q01118 | -0.43454  |
| 16647 | P03363 | A2RUQ5 | -0.13856  |
| 16648 | P03363 | Q9H8H2 | -0.20419  |
| 16649 | P03363 | P00451 | -0.37893  |
| 16650 | P03363 | Q96HD9 | -0.13695  |
| 16651 | P03363 | P51685 | -0.73884  |
| 16652 | P03363 | P0C7T4 | -0.042737 |
| 16653 | P03363 | Q5T2S8 | -0.22772  |
| 16654 | P03363 | Q9NVI7 | -0.52281  |
| 16655 | P03363 | Q6VAB6 | -0.23452  |
| 16656 | P03363 | Q9UGJ0 | -0.38378  |
| 16657 | P03363 | Q06203 | -0.22195  |
| 16658 | P03363 | Q9BYJ1 | -0.33149  |
| 16659 | P03363 | P00749 | -0.31879  |
| 16660 | P03363 | P23467 | -0.22745  |
| 16661 | P03363 | O60603 | -0.22745  |
| 16662 | P03363 | Q96K37 | -0.29915  |
| 16663 | P03363 | Q8NBM8 | -0.55768  |
| 16664 | P03363 | A6NCL2 | -0.20051  |
| 16665 | P03363 | Q75964 | -0.19736  |
| 16666 | P03363 | Q9UHK6 | -0.19792  |
| 16667 | P03363 | Q9BSK2 | -0.29673  |
| 16668 | P03363 | Q6PJG9 | -0.32626  |
| 16669 | P03363 | Q8NGI8 | -0.61656  |
| 16670 | P03363 | Q9BRK0 | -0.32626  |
| 16671 | P03363 | Q9NV66 | -0.53836  |
| 16672 | P03363 | P42345 | -0.24263  |
| 16673 | P03363 | Q9H3W5 | -0.45224  |
| 16674 | P03363 | Q9UBA6 | -0.21559  |
| 16675 | P03363 | Q2VYF4 | -0.31984  |
| 16676 | P03363 | Q75T13 | -0.27661  |
| 16677 | P03363 | P86790 | -0.15172  |
| 16678 | P03363 | Q86WN2 | -0.44549  |
| 16679 | P03363 | Q9H0H9 | -0.19469  |
| 16680 | P03363 | O15156 | -0.22355  |
| 16681 | P03363 | P55289 | -0.56365  |
| 16682 | P03363 | P42263 | -0.43123  |
| 16683 | P03363 | Q01650 | -0.32173  |
| 16684 | P03363 | Q9BUQ8 | -0.29015  |
| 16685 | P03363 | Q96H78 | -0.30119  |
| 16686 | P03363 | P35558 | -0.21052  |
| 16687 | P03363 | P61158 | -0.20484  |
| 16688 | P03363 | P29350 | -0.22741  |
| 16689 | P03363 | Q495Y7 | -0.14286  |
| 16690 | P03363 | P23471 | -0.59512  |
| 16691 | P03363 | Q96PG2 | -0.32626  |
| 16692 | P03363 | Q8IVF5 | -0.36506  |
| 16693 | P03363 | Q9NP50 | -0.04614  |
| 16694 | P03363 | P0C7N5 | -0.61656  |
| 16695 | P03363 | P63128 | -0.22176  |
| 16696 | P03363 | Q75838 | -0.22851  |
| 16697 | P03363 | Q9NR90 | -0.22743  |
| 16698 | P03363 | Q9H347 | -0.22726  |
| 16699 | P03363 | O95236 | -0.35492  |
| 16700 | P03363 | Q9HC56 | -0.55231  |
| 16701 | P03363 | Q9ULV0 | -0.22136  |
| 16702 | P03363 | Q8NHW4 | -0.56377  |
| 16703 | P03363 | Q6ZS72 | -0.080431 |
| 16704 | P03363 | Q92851 | -0.22729  |
| 16705 | P03363 | Q9UMR7 | -0.53374  |
| 16706 | P03363 | Q9Y2U9 | -0.22684  |
| 16707 | P03363 | Q6UWM9 | -0.28991  |
| 16708 | P03363 | Q96FF7 | -0.042737 |
| 16709 | P03363 | Q6ZP98 | -0.15656  |
| 16710 | P03363 | P49768 | -0.22568  |
| 16711 | P03363 | O00220 | -0.2274   |
| 16712 | P03363 | Q96BS2 | -0.22746  |
| 16713 | P03363 | Q6GYQ0 | -0.22398  |
| 16714 | P03363 | Q9UMX6 | -0.30197  |
| 16715 | P03363 | Q6ZR93 | -0.042737 |
| 16716 | P03363 | P60602 | -0.22952  |
| 16717 | P03363 | Q96JG8 | -0.20438  |
| 16718 | P03363 | Q9Y2Q0 | -0.33324  |
| 16719 | P03363 | Q29980 | -0.46804  |
| 16720 | P03363 | Q8IYT3 | -0.18233  |

|       |        |        |           |
|-------|--------|--------|-----------|
| 16721 | P03363 | Q53EV4 | -0.22741  |
| 16722 | P03363 | P40938 | -0.22311  |
| 16723 | P03363 | Q5T2E6 | -0.32626  |
| 16724 | P03363 | Q9P217 | -0.19423  |
| 16725 | P03363 | P83111 | -0.21801  |
| 16726 | P03363 | Q6ZWL3 | -0.7877   |
| 16727 | P03363 | O95199 | -0.22737  |
| 16728 | P03363 | O60938 | -0.48137  |
| 16729 | P03363 | P06309 | -0.54902  |
| 16730 | P03363 | Q9H9V4 | -0.56859  |
| 16731 | P03363 | Q8IV45 | -0.22664  |
| 16732 | P03363 | Q86YR6 | -0.22734  |
| 16733 | P03363 | O75888 | -0.3988   |
| 16734 | P03363 | P04233 | -0.36704  |
| 16735 | P03363 | Q9Y5F6 | -0.57898  |
| 16736 | P03363 | Q8N4W6 | -0.35579  |
| 16737 | P03363 | Q8TAM6 | -0.22087  |
| 16738 | P03363 | Q6SPF0 | -0.22043  |
| 16739 | P03363 | Q5VZ19 | -0.22519  |
| 16740 | P03363 | P61803 | -0.32616  |
| 16741 | P03363 | Q8WVC6 | -0.25093  |
| 16742 | P03363 | Q9NZQ0 | -0.39889  |
| 16743 | P03363 | Q9H334 | -0.29843  |
| 16744 | P03363 | P00739 | -0.34533  |
| 16745 | P03363 | Q8IXI1 | -0.33944  |
| 16746 | P03363 | Q96H55 | -0.18269  |
| 16747 | P03363 | Q8NHH1 | -0.17806  |
| 16748 | P03363 | P28676 | -0.22774  |
| 16749 | P03363 | P59544 | -0.51612  |
| 16750 | P03363 | Q9NSA2 | -0.47633  |
| 16751 | P03363 | Q9HCR9 | -0.22696  |
| 16752 | P03363 | Q9H4B7 | -0.21736  |
| 16753 | P03363 | Q8N9F7 | -0.21955  |
| 16754 | P03363 | Q68J44 | -0.31747  |
| 16755 | P03363 | Q6H9L7 | -0.22848  |
| 16756 | P03363 | Q15390 | -0.1344   |
| 16757 | P03363 | O96014 | -0.28961  |
| 16758 | P03363 | A8MWS5 | -0.18143  |
| 16759 | P03363 | Q8NCL8 | -0.20979  |
| 16760 | P03363 | Q5HYK3 | -0.12178  |
| 16761 | P03363 | Q8N697 | -0.27558  |
| 16762 | P03363 | Q6Y288 | -0.45423  |
| 16763 | P03363 | Q96GD3 | -0.21306  |
| 16764 | P03363 | Q15513 | -0.042737 |
| 16765 | P03363 | O60687 | -0.22754  |
| 16766 | P03363 | P09237 | -0.52249  |
| 16767 | P03363 | Q8TCT7 | -0.22127  |
| 16768 | P03363 | Q16288 | -0.56161  |
| 16769 | P03363 | Q9NQX7 | -0.12967  |
| 16770 | P03363 | Q6UWF6 | -0.33992  |
| 16771 | P03363 | O43623 | -0.22384  |
| 16772 | P03363 | Q96FG2 | -0.13955  |
| 16773 | P03363 | A6NGU5 | -0.281    |
| 16774 | P03363 | O75317 | -0.27086  |
| 16775 | P03363 | P52849 | -0.32166  |
| 16776 | P03363 | Q8N6M8 | -0.22693  |
| 16777 | P03363 | Q96NR3 | -0.39403  |
| 16778 | P03363 | Q9H6T3 | -0.22736  |
| 16779 | P03363 | Q4ADV7 | -0.32626  |
| 16780 | P03363 | Q8TF62 | -0.53043  |
| 16781 | P03363 | Q7L099 | -0.22395  |
| 16782 | P03363 | Q95873 | -0.031359 |
| 16783 | P03363 | Q7L5Y1 | -0.18296  |
| 16784 | P03363 | Q96RD3 | -0.61656  |
| 16785 | P03363 | Q8IZF7 | -0.6666   |
| 16786 | P03363 | Q8NB46 | -0.22736  |
| 16787 | P03363 | Q7LGA3 | -0.34507  |
| 16788 | P03363 | P51795 | -0.61743  |
| 16789 | P03363 | Q8TDS7 | -0.64046  |
| 16790 | P03363 | Q8N9P6 | -0.042737 |
| 16791 | P03363 | P02654 | -0.35508  |
| 16792 | P03363 | Q6L8Q7 | -0.15622  |
| 16793 | P03363 | Q8IUX4 | -0.475    |
| 16794 | P03363 | Q9Y5Q6 | -0.27747  |
| 16795 | P03363 | Q32Q52 | -0.19136  |
| 16796 | P03363 | P01625 | -0.54902  |

|       |        |         |           |
|-------|--------|---------|-----------|
| 16797 | P03363 | P0CF74  | -0.5251   |
| 16798 | P03363 | Q8N6C8  | -0.55544  |
| 16799 | P03363 | P01563  | -0.22298  |
| 16800 | P03363 | Q6UWS5  | -0.13924  |
| 16801 | P03363 | P01303  | -0.39213  |
| 16802 | P03363 | P23786  | -0.19705  |
| 16803 | P03363 | P08319  | -0.2465   |
| 16804 | P03363 | P32004  | -0.34813  |
| 16805 | P03363 | Q5T4F7  | -0.3986   |
| 16806 | P03363 | Q6UX34  | -0.32626  |
| 16807 | P03363 | Q9Y3A0  | -0.15005  |
| 16808 | P03363 | Q8N4B4  | -0.16164  |
| 16809 | P03363 | P39905  | -0.20337  |
| 16810 | P03363 | Q9H0P0  | -0.21858  |
| 16811 | P03363 | Q14CX5  | -0.32626  |
| 16812 | P03363 | Q8NGZ4  | -0.61656  |
| 16813 | P03363 | P02787  | -0.19244  |
| 16814 | P03363 | Q86Y39  | -0.29235  |
| 16815 | P03363 | Q86V42  | -0.039088 |
| 16816 | P03363 | Q86WR0  | -0.080074 |
| 16817 | P03363 | Q8IUXX7 | -0.22741  |
| 16818 | P03363 | Q9GZYG6 | -0.2425   |
| 16819 | P03363 | Q96ET8  | -0.32626  |
| 16820 | P03363 | Q5T751  | -0.042737 |
| 16821 | P03363 | E5RJM6  | -0.22741  |
| 16822 | P03363 | P46019  | -0.24378  |
| 16823 | P03363 | P63133  | -0.22959  |
| 16824 | P03363 | Q99490  | -0.31809  |
| 16825 | P03363 | Q9HCE6  | -0.22749  |
| 16826 | P03363 | Q96CQ1  | -0.29092  |
| 16827 | P03363 | P0CZ25  | -0.17547  |
| 16828 | P03363 | O60755  | -0.60519  |
| 16829 | P03363 | P00519  | -0.22746  |
| 16830 | P03363 | Q9UJ72  | -0.12176  |
| 16831 | P03363 | P69891  | -0.084803 |
| 16832 | P03363 | Q16099  | -0.37962  |
| 16833 | P03363 | Q8N9N7  | -0.22981  |
| 16834 | P03363 | O43665  | -0.22746  |
| 16835 | P03363 | Q96D42  | -0.26584  |
| 16836 | P03363 | Q14977  | -0.21027  |
| 16837 | P03363 | P78563  | -0.20768  |
| 16838 | P03363 | P07357  | -0.85356  |
| 16839 | P03363 | P41159  | -0.2716   |
| 16840 | P03363 | P23280  | -0.40916  |
| 16841 | P03363 | Q6PJE2  | -0.19263  |
| 16842 | P03363 | Q96N66  | -0.15987  |
| 16843 | P03363 | P46821  | -0.20851  |
| 16844 | P03363 | Q9UIK4  | -0.39362  |
| 16845 | P03363 | Q0ZLH3  | -0.13226  |
| 16846 | P03363 | Q9NS85  | -0.22705  |
| 16847 | P03363 | P07108  | -0.23172  |
| 16848 | P03363 | P08034  | -0.51526  |
| 16849 | P03363 | Q8NEM8  | -0.215    |
| 16850 | P03363 | Q4G1C9  | -0.32626  |
| 16851 | P03363 | Q7Z3E2  | -0.063837 |
| 16852 | P03363 | Q8IYS2  | -0.32626  |
| 16853 | P03363 | Q02223  | -0.64882  |
| 16854 | P03363 | Q9BUB4  | -0.1924   |
| 16855 | P03363 | O60478  | -0.43294  |
| 16856 | P03363 | Q9HB29  | -0.55814  |
| 16857 | P03363 | Q5SWA1  | -0.039233 |
| 16858 | P03363 | Q9UJ37  | -0.29961  |
| 16859 | P03363 | Q96NL0  | -0.12227  |
| 16860 | P03363 | Q9BT56  | -0.10864  |
| 16861 | P03363 | P46093  | -0.73419  |
| 16862 | P03363 | Q96FJ0  | -0.29421  |
| 16863 | P03363 | Q8TAG6  | -0.020089 |
| 16864 | P03363 | Q6UWR7  | -0.66965  |
| 16865 | P03363 | Q9H0X4  | -0.32626  |
| 16866 | P03363 | Q9BR11  | -0.14896  |
| 16867 | P03363 | P0C645  | -0.61656  |
| 16868 | P03363 | A6NHL2  | -0.21985  |
| 16869 | P03363 | Q5VTH9  | -0.22742  |
| 16870 | P03363 | O75364  | -0.21582  |
| 16871 | P03363 | A6NM11  | -0.32626  |
| 16872 | P03363 | P42330  | -0.22703  |

|       |        |         |           |
|-------|--------|---------|-----------|
| 16873 | P03363 | O00757  | -0.17076  |
| 16874 | P03363 | Q8N8D7  | -0.47262  |
| 16875 | P03363 | Q5R3I4  | -0.13895  |
| 16876 | P03363 | P42331  | -0.43354  |
| 16877 | P03363 | P41143  | -0.22873  |
| 16878 | P03363 | Q99943  | -0.38122  |
| 16879 | P03363 | C9JLJ4  | -0.24388  |
| 16880 | P03363 | Q6UWK7  | -0.33992  |
| 16881 | P03363 | P03923  | -0.44292  |
| 16882 | P03363 | Q6ZT12  | -0.31378  |
| 16883 | P03363 | P49682  | -0.53707  |
| 16884 | P03363 | O43633  | -0.14557  |
| 16885 | P03363 | O95674  | -0.38481  |
| 16886 | P03363 | Q8TF21  | -0.22743  |
| 16887 | P03363 | Q99965  | -0.54075  |
| 16888 | P03363 | Q9H2U9  | -0.53005  |
| 16889 | P03363 | P02748  | -0.60915  |
| 16890 | P03363 | Q9Y580  | -0.22693  |
| 16891 | P03363 | P08311  | -0.54585  |
| 16892 | P03363 | Q8IZP7  | -0.33782  |
| 16893 | P03363 | P18627  | -0.36871  |
| 16894 | P03363 | Q9NYB9  | -0.22772  |
| 16895 | P03363 | Q9P1Z9  | -0.32626  |
| 16896 | P03363 | Q9Y5E9  | -0.58247  |
| 16897 | P03363 | P50148  | -0.34535  |
| 16898 | P03363 | Q7L523  | -0.22741  |
| 16899 | P03363 | P51397  | -0.051827 |
| 16900 | P03363 | A6NH52  | -0.32626  |
| 16901 | P03363 | Q9UGP5  | -0.13978  |
| 16902 | P03363 | Q92643  | -0.24713  |
| 16903 | P03363 | O15014  | -0.11322  |
| 16904 | P03363 | Q8TB40  | -0.2236   |
| 16905 | P03363 | Q14568  | -0.1166   |
| 16906 | P03363 | Q9NVV0  | -0.47661  |
| 16907 | P03363 | P15313  | -0.21633  |
| 16908 | P03363 | P17787  | -0.32469  |
| 16909 | P03363 | P36896  | -0.29177  |
| 16910 | P03363 | Q9BW19  | -0.24246  |
| 16911 | P03363 | P01612  | -0.54902  |
| 16912 | P03363 | Q99595  | -0.15448  |
| 16913 | P03363 | Q96P48  | -0.22735  |
| 16914 | P03363 | P78369  | -0.31378  |
| 16915 | P03363 | Q8IY34  | -0.32377  |
| 16916 | P03363 | Q00532  | -0.21889  |
| 16917 | P03363 | P06703  | -0.22923  |
| 16918 | P03363 | Q8NGV6  | -0.61656  |
| 16919 | P03363 | Q68CK6  | -0.34737  |
| 16920 | P03363 | O76080  | -0.2382   |
| 16921 | P03363 | O75747  | -0.47956  |
| 16922 | P03363 | Q96AP4  | -0.27953  |
| 16923 | P03363 | Q08722  | -0.17475  |
| 16924 | P03363 | Q5JUK3  | -0.6493   |
| 16925 | P03363 | Q9Y5H0  | -0.57898  |
| 16926 | P03363 | Q8NG66  | -0.22741  |
| 16927 | P03363 | P20036  | -0.58178  |
| 16928 | P03363 | Q6ZU64  | -0.19457  |
| 16929 | P03363 | P0DJJD4 | -0.2288   |
| 16930 | P03363 | Q8IXS2  | -0.10779  |
| 16931 | P03363 | Q9NZ01  | -0.39973  |
| 16932 | P03363 | P02749  | -0.2274   |
| 16933 | P03363 | P13671  | -0.22741  |
| 16934 | P03363 | P09455  | -0.22408  |
| 16935 | P03363 | Q96FC9  | -0.28431  |
| 16936 | P03363 | A6NKL6  | -0.32626  |
| 16937 | P03363 | Q9BVV8  | -0.11965  |
| 16938 | P03363 | Q86XK7  | -0.32626  |
| 16939 | P03363 | P51654  | -0.61605  |
| 16940 | P03363 | P18054  | -0.2263   |
| 16941 | P03363 | P61011  | -0.21774  |
| 16942 | P03363 | Q9Y6J6  | -0.55767  |
| 16943 | P03363 | Q9H1P3  | -0.22015  |
| 16944 | P03363 | Q13607  | -0.61656  |
| 16945 | P03363 | Q8I WV1 | -0.096524 |
| 16946 | P03363 | Q9HCL2  | -0.28921  |
| 16947 | P03363 | O95744  | -0.16257  |
| 16948 | P03363 | P00746  | -0.44566  |

|       |        |        |           |
|-------|--------|--------|-----------|
| 16949 | P03363 | Q5FYB0 | -0.37914  |
| 16950 | P03363 | Q6ZWE6 | -0.25445  |
| 16951 | P03363 | Q04609 | -0.3264   |
| 16952 | P03363 | Q9NYP7 | -0.21415  |
| 16953 | P03363 | Q99808 | -0.45304  |
| 16954 | P03363 | Q96SQ9 | -0.61761  |
| 16955 | P03363 | A7E2F4 | -0.2073   |
| 16956 | P03363 | Q499Z3 | -0.24873  |
| 16957 | P03363 | Q8NHC5 | -0.61656  |
| 16958 | P03363 | O75037 | -0.55965  |
| 16959 | P03363 | O75084 | -0.3126   |
| 16960 | P03363 | P12004 | -0.21941  |
| 16961 | P03363 | Q9BWH2 | -0.19063  |
| 16962 | P03363 | Q8N5T2 | -0.50908  |
| 16963 | P03363 | Q13825 | -0.2116   |
| 16964 | P03363 | Q15162 | -0.16226  |
| 16965 | P03363 | Q13255 | -0.5014   |
| 16966 | P03363 | Q14202 | -0.08151  |
| 16967 | P03363 | Q15460 | -0.44879  |
| 16968 | P03363 | Q13621 | -0.44429  |
| 16969 | P03363 | P49590 | -0.16649  |
| 16970 | P03363 | Q96DA2 | -0.47243  |
| 16971 | P03363 | P0CI25 | -0.27953  |
| 16972 | P03363 | Q9BRN9 | -0.32626  |
| 16973 | P03363 | Q9NX74 | -0.27022  |
| 16974 | P03363 | Q13268 | -0.22378  |
| 16975 | P03363 | P0CG48 | -0.22739  |
| 16976 | P03363 | Q9ULG6 | -0.2744   |
| 16977 | P03363 | P61204 | -0.22754  |
| 16978 | P03363 | A6NGW2 | -0.33992  |
| 16979 | P03363 | Q07699 | -0.47153  |
| 16980 | P03363 | Q8N1V8 | -0.11835  |
| 16981 | P03363 | Q1MX18 | -0.22704  |
| 16982 | P03363 | Q6P179 | -0.65148  |
| 16983 | P03363 | Q969P0 | -0.2151   |
| 16984 | P03363 | A6NDJ8 | -0.30959  |
| 16985 | P03363 | Q8N4B5 | -0.070267 |
| 16986 | P03363 | P45452 | -0.44449  |
| 16987 | P03363 | A4D1E9 | -0.18446  |
| 16988 | P03363 | Q8IVH4 | -0.35835  |
| 16989 | P03363 | P12018 | -0.37246  |
| 16990 | P03363 | Q9HCX4 | -0.22722  |
| 16991 | P03363 | Q6P435 | -0.10788  |
| 16992 | P03363 | P54849 | -0.5282   |
| 16993 | P03363 | Q96N11 | -0.10358  |
| 16994 | P03363 | P29375 | -0.24084  |
| 16995 | P03363 | Q7Z402 | -0.32626  |
| 16996 | P03363 | Q8NGJ9 | -0.61656  |
| 16997 | P03363 | P54852 | -0.35494  |
| 16998 | P03363 | F2Z3M2 | -0.042737 |
| 16999 | P03363 | Q8IV77 | -0.54673  |
| 17000 | P03363 | Q76061 | -0.32073  |
| 17001 | P03363 | Q07507 | -0.53462  |
| 17002 | P03363 | O43506 | -0.55919  |
| 17003 | P03363 | O14545 | -0.26808  |
| 17004 | P03363 | Q16206 | -0.68184  |
| 17005 | P03363 | Q86SE5 | -0.22709  |
| 17006 | P03363 | Q96Q80 | -0.13693  |
| 17007 | P03363 | Q96EN8 | -0.22126  |
| 17008 | P03363 | P25090 | -0.74728  |
| 17009 | P03363 | A6NFN9 | -0.2274   |
| 17010 | P03363 | Q712K3 | -0.13397  |
| 17011 | P03363 | Q9H3H3 | -0.075874 |
| 17012 | P03363 | O43174 | -0.51544  |
| 17013 | P03363 | O15479 | -0.20974  |
| 17014 | P03363 | P17936 | -0.22743  |
| 17015 | P03363 | O43680 | -0.22764  |
| 17016 | P03363 | P01778 | -0.54902  |
| 17017 | P03363 | Q9UNA1 | -0.22774  |
| 17018 | P03363 | Q8NH61 | -0.61656  |
| 17019 | P03363 | Q9NRW7 | -0.22605  |
| 17020 | P03363 | O75718 | -0.40367  |
| 17021 | P03363 | P09565 | -0.08068  |
| 17022 | P03363 | Q8IVH2 | -0.23268  |
| 17023 | P03363 | P09493 | -0.22651  |
| 17024 | P03363 | Q6Y2X3 | -0.22562  |

|       |        |        |           |
|-------|--------|--------|-----------|
| 17025 | P03363 | Q8N556 | -0.22707  |
| 17026 | P03363 | P43220 | -0.38944  |
| 17027 | P03363 | Q5SZB4 | -0.11887  |
| 17028 | P03363 | P0CE72 | -0.22661  |
| 17029 | P03363 | P30461 | -0.54957  |
| 17030 | P03363 | Q86XE3 | -0.37181  |
| 17031 | P03363 | P03979 | -0.2304   |
| 17032 | P03363 | O75679 | -0.228    |
| 17033 | P03363 | O75628 | -0.46873  |
| 17034 | P03363 | O75333 | -0.4437   |
| 17035 | P03363 | Q5W5X9 | -0.052986 |
| 17036 | P03363 | Q5VTE0 | -0.095053 |
| 17037 | P03363 | Q9Y2I8 | -0.22784  |
| 17038 | P03363 | Q7Z7H3 | -0.12418  |
| 17039 | P03363 | P63252 | -0.69118  |
| 17040 | P03363 | Q8IV63 | -0.24945  |
| 17041 | P03363 | Q14CZ7 | -0.16052  |
| 17042 | P03363 | Q9H341 | -0.61656  |
| 17043 | P03363 | Q96LR4 | -0.33992  |
| 17044 | P03363 | Q9BQG1 | -0.39717  |
| 17045 | P03363 | Q9NRA1 | -0.22752  |
| 17046 | P03363 | O43529 | -0.32188  |
| 17047 | P03363 | O75947 | -0.22917  |
| 17048 | P03363 | O43246 | -0.32244  |
| 17049 | P03363 | O14753 | -0.22553  |
| 17050 | P03363 | Q8NGE3 | -0.61656  |
| 17051 | P03363 | O00115 | -0.11052  |
| 17052 | P03363 | A1KXE4 | -0.31464  |
| 17053 | P03363 | B2RUZ4 | -0.32626  |
| 17054 | P03363 | P0CW01 | -0.13002  |
| 17055 | P03363 | O00746 | -0.39747  |
| 17056 | P03363 | P30532 | -0.51445  |
| 17057 | P03363 | Q9C0J8 | -0.22737  |
| 17058 | P03363 | Q9BUP0 | -0.22687  |
| 17059 | P03363 | Q06495 | -0.19391  |
| 17060 | P03363 | Q92527 | -0.2274   |
| 17061 | P03363 | Q5JXA9 | -0.32626  |
| 17062 | P03363 | Q92567 | -0.11038  |
| 17063 | P03363 | Q8N7P1 | -0.34112  |
| 17064 | P03363 | Q53HC5 | -0.14685  |
| 17065 | P03363 | Q9NY46 | -0.2746   |
| 17066 | P03363 | Q9Y694 | -0.53438  |
| 17067 | P03363 | O95139 | -0.21596  |
| 17068 | P03363 | P04035 | -0.48543  |
| 17069 | P03363 | Q96NL6 | -0.14875  |
| 17070 | P03363 | Q6UVY6 | -0.75977  |
| 17071 | P03363 | Q8N4C0 | -0.15054  |
| 17072 | P03363 | O60882 | -0.32869  |
| 17073 | P03363 | Q3SY77 | -0.29189  |
| 17074 | P03363 | Q96IW2 | -0.22741  |
| 17075 | P03363 | Q9P2G9 | -0.20673  |
| 17076 | P03363 | Q99853 | -0.26504  |
| 17077 | P03363 | Q8N813 | -0.15883  |
| 17078 | P03363 | Q15375 | -0.41096  |
| 17079 | P03363 | P98172 | -0.21033  |
| 17080 | P03363 | O15013 | -0.22747  |
| 17081 | P03363 | Q9UBK2 | -0.27988  |
| 17082 | P03363 | P22413 | -0.2541   |
| 17083 | P03363 | Q9HCD6 | -0.22741  |
| 17084 | P03363 | P01707 | -0.54902  |
| 17085 | P03363 | P01850 | -0.46341  |
| 17086 | P03363 | P30485 | -0.54957  |
| 17087 | P03363 | P08575 | -0.25078  |
| 17088 | P03363 | Q68BL8 | -0.38139  |
| 17089 | P03363 | Q9Y5S2 | -0.42735  |
| 17090 | P03363 | Q16348 | -0.22241  |
| 17091 | P03363 | O15120 | -0.37777  |
| 17092 | P03363 | Q9NY26 | -0.61931  |
| 17093 | P03363 | Q71H61 | -0.30472  |
| 17094 | P03363 | O95471 | -0.2219   |
| 17095 | P03363 | Q6UX46 | -0.33992  |
| 17096 | P03363 | Q8WWM1 | -0.044437 |
| 17097 | P03363 | P48146 | -0.23492  |
| 17098 | P03363 | P02776 | -0.38935  |
| 17099 | P03363 | Q14500 | -0.54759  |
| 17100 | P03363 | Q96BR1 | -0.49852  |

|       |        |        |           |
|-------|--------|--------|-----------|
| 17101 | P03363 | Q5TF39 | -0.49085  |
| 17102 | P03363 | Q92576 | -0.23723  |
| 17103 | P03363 | P30462 | -0.59713  |
| 17104 | P03363 | Q8NCR3 | -0.11371  |
| 17105 | P03363 | Q9NQ34 | -0.44028  |
| 17106 | P03363 | Q7Z6J6 | -0.25149  |
| 17107 | P03363 | Q8NBI3 | -0.34077  |
| 17108 | P03363 | E9PJI5 | -0.06488  |
| 17109 | P03363 | Q5SV17 | -0.32626  |
| 17110 | P03363 | P04435 | -0.22874  |
| 17111 | P03363 | Q16651 | -0.49158  |
| 17112 | P03363 | Q9Y5F0 | -0.58247  |
| 17113 | P03363 | A8MTI9 | -0.6669   |
| 17114 | P03363 | Q8N5W9 | -0.14585  |
| 17115 | P03363 | P47804 | -0.25943  |
| 17116 | P03363 | Q5VVW2 | -0.29206  |
| 17117 | P03363 | Q7RTW8 | -0.6339   |
| 17118 | P03363 | Q6UXU6 | -0.32626  |
| 17119 | P03363 | Q96T75 | -0.22958  |
| 17120 | P03363 | P62166 | -0.23047  |
| 17121 | P03363 | P0C842 | -0.22479  |
| 17122 | P03363 | Q8N594 | -0.20103  |
| 17123 | P03363 | Q5SYB0 | -0.22741  |
| 17124 | P03363 | Q6ZVK1 | -0.32626  |
| 17125 | P03363 | Q5JPB2 | -0.22889  |
| 17126 | P03363 | Q6UX06 | -0.48864  |
| 17127 | P03363 | Q03135 | -0.22723  |
| 17128 | P03363 | Q5FVE4 | -0.29163  |
| 17129 | P03363 | Q86XH1 | -0.24873  |
| 17130 | P03363 | P30533 | -0.42138  |
| 17131 | P03363 | Q13217 | -0.22347  |
| 17132 | P03363 | Q8N2E6 | -0.57397  |
| 17133 | P03363 | P35556 | -0.38274  |
| 17134 | P03363 | Q8N6S4 | -0.27879  |
| 17135 | P03363 | Q9BU20 | -0.25981  |
| 17136 | P03363 | Q96F81 | -0.35481  |
| 17137 | P03363 | Q9UHY7 | -0.22373  |
| 17138 | P03363 | Q8IXL6 | -0.49845  |
| 17139 | P03363 | O00767 | -0.69504  |
| 17140 | P03363 | Q15506 | -0.20713  |
| 17141 | P03363 | Q5T6X5 | -0.60106  |
| 17142 | P03363 | A5LHX3 | -0.20377  |
| 17143 | P03363 | Q6YP21 | -0.22333  |
| 17144 | P03363 | P15088 | -0.31334  |
| 17145 | P03363 | P61599 | -0.22014  |
| 17146 | P03363 | O43687 | -0.40218  |
| 17147 | P03363 | Q03181 | -0.23037  |
| 17148 | P03363 | P20039 | -0.5784   |
| 17149 | P03363 | O95968 | -0.42609  |
| 17150 | P03363 | Q9NY93 | -0.28257  |
| 17151 | P03363 | Q8NA29 | -0.62582  |
| 17152 | P03363 | Q6UWN5 | -0.26151  |
| 17153 | P03363 | O14561 | -0.12161  |
| 17154 | P03363 | A6NKZ8 | -0.21627  |
| 17155 | P03363 | Q92882 | -0.22741  |
| 17156 | P03363 | Q96LM9 | -0.2046   |
| 17157 | P03363 | Q9H553 | -0.22224  |
| 17158 | P03363 | Q8N9W7 | -0.32626  |
| 17159 | P03363 | O95803 | -0.29396  |
| 17160 | P03363 | Q5BKY6 | -0.042737 |
| 17161 | P03363 | Q9Y5K2 | -0.55147  |
| 17162 | P03363 | Q7Z601 | -0.39449  |
| 17163 | P03363 | Q6P4Q7 | -0.51373  |
| 17164 | P03363 | Q9BYZ8 | -0.34245  |
| 17165 | P03363 | P01275 | -0.34196  |
| 17166 | P03363 | Q9Y6M7 | -0.45575  |
| 17167 | P03363 | P0CW00 | -0.13002  |
| 17168 | P03363 | Q9Y3D2 | -0.49305  |
| 17169 | P03363 | P12755 | -0.207    |
| 17170 | P03363 | Q6ZUL3 | -0.042737 |
| 17171 | P03363 | Q13507 | -0.22741  |
| 17172 | P03363 | P54710 | -0.4946   |
| 17173 | P03363 | O75631 | -0.45294  |
| 17174 | P03363 | Q9BQ51 | -0.73848  |
| 17175 | P03363 | Q8NAT1 | -0.3376   |
| 17176 | P03363 | Q13938 | -0.22617  |

|       |        |        |             |
|-------|--------|--------|-------------|
| 17177 | P03363 | Q5TC63 | -0.50908    |
| 17178 | P03363 | Q9HDC9 | -0.28753    |
| 17179 | P03363 | Q9NU22 | -0.22727    |
| 17180 | P03363 | P15374 | -0.20855    |
| 17181 | P03363 | P10114 | -0.22789    |
| 17182 | P03363 | Q6NUR6 | -0.00021053 |
| 17183 | P03363 | Q9NRD5 | -0.22736    |
| 17184 | P03363 | Q07617 | -0.22706    |
| 17185 | P03363 | Q6IS24 | -0.30847    |
| 17186 | P03363 | P43304 | -0.22735    |
| 17187 | P03363 | Q5T8D3 | -0.37912    |
| 17188 | P03363 | Q9H0H5 | -0.23118    |
| 17189 | P03363 | A6NCM1 | -0.24873    |
| 17190 | P03363 | Q9NZH7 | -0.44153    |
| 17191 | P03363 | Q99720 | -0.39277    |
| 17192 | P03363 | Q13443 | -0.35322    |
| 17193 | P03363 | Q9NYA3 | -0.15329    |
| 17194 | P03363 | Q9Y2D5 | -0.14739    |
| 17195 | P03363 | Q9P1W9 | -0.38306    |
| 17196 | P03363 | P22307 | -0.22382    |
| 17197 | P03363 | P10398 | -0.22741    |
| 17198 | P03363 | P41732 | -0.37132    |
| 17199 | P03363 | Q8IXQ8 | -0.22698    |
| 17200 | P03363 | O60337 | -0.50102    |
| 17201 | P03363 | Q9UFV3 | -0.15104    |
| 17202 | P03363 | P01236 | -0.37188    |
| 17203 | P03363 | Q96HH6 | -0.32626    |
| 17204 | P03363 | Q9NRJ3 | -0.51575    |
| 17205 | P03363 | Q4KMX7 | -0.24842    |
| 17206 | P03363 | P56730 | -0.52275    |
| 17207 | P03363 | Q14CN2 | -0.81361    |
| 17208 | P03363 | Q5TCY1 | -0.22741    |
| 17209 | P03363 | P47874 | -0.13387    |
| 17210 | P03363 | Q96JX3 | -0.41598    |
| 17211 | P03363 | Q95045 | -0.056965   |
| 17212 | P03363 | O14653 | -0.15615    |
| 17213 | P03363 | Q7Z478 | -0.22621    |
| 17214 | P03363 | P48052 | -0.54346    |
| 17215 | P03363 | P23458 | -0.29497    |
| 17216 | P03363 | O00418 | -0.3996     |
| 17217 | P03363 | Q8IZI9 | -0.45693    |
| 17218 | P03363 | P16402 | -0.12817    |
| 17219 | P03363 | Q86YR7 | -0.22726    |
| 17220 | P03363 | Q3SXP7 | -0.32626    |
| 17221 | P03363 | Q8N1D5 | -0.084694   |
| 17222 | P03363 | P01818 | -0.54902    |
| 17223 | P03363 | Q96LB4 | -0.17536    |
| 17224 | P03363 | O60542 | -0.38382    |
| 17225 | P03363 | A8TX70 | -0.49202    |
| 17226 | P03363 | Q7Z3S7 | -0.45405    |
| 17227 | P03363 | P50851 | -0.4267     |
| 17228 | P03363 | Q9BVS4 | -0.49009    |
| 17229 | P03363 | Q6ZVT0 | -0.17943    |
| 17230 | P03363 | Q9Y5G2 | -0.57898    |
| 17231 | P03363 | O43916 | -0.34695    |
| 17232 | P03363 | P39900 | -0.53537    |
| 17233 | P03363 | Q9P0W0 | -0.25972    |
| 17234 | P03363 | Q9NRY4 | -0.23459    |
| 17235 | P03363 | Q8NET4 | -0.042947   |
| 17236 | P03363 | Q14149 | -0.21951    |
| 17237 | P03363 | Q9P203 | -0.22611    |
| 17238 | P03363 | P05141 | -0.2283     |
| 17239 | P03363 | P48047 | -0.23924    |
| 17240 | P03363 | E9PQ53 | -0.080337   |
| 17241 | P03363 | Q8TBF5 | -0.48428    |
| 17242 | P03363 | Q15569 | -0.32168    |
| 17243 | P03363 | Q9BSF0 | -0.10447    |
| 17244 | P03363 | Q8N5K1 | -0.23158    |
| 17245 | P03363 | Q9H8L6 | -0.22735    |
| 17246 | P03363 | Q8TC59 | -0.22698    |
| 17247 | P03363 | Q8NGE5 | -0.61656    |
| 17248 | P03363 | Q8IVE3 | -0.22741    |
| 17249 | P03363 | P33151 | -0.30961    |
| 17250 | P03363 | Q6UVM3 | -0.6472     |
| 17251 | P03363 | Q8NBL1 | -0.18438    |
| 17252 | P03363 | Q4L235 | -0.29238    |



|       |        |        |           |
|-------|--------|--------|-----------|
| 17253 | P03363 | Q96I85 | -0.33992  |
| 17254 | P03363 | O43557 | -0.32014  |
| 17255 | P03363 | Q9NZN4 | -0.22918  |
| 17256 | P03363 | Q3KNT9 | -0.32626  |
| 17257 | P03363 | Q8NC67 | -0.32626  |
| 17258 | P03363 | O00341 | -0.46664  |
| 17259 | P03363 | P19544 | -0.2255   |
| 17260 | P03363 | O95834 | -0.30388  |
| 17261 | P03363 | Q9ULL4 | -0.23666  |
| 17262 | P03363 | Q86TI4 | -0.22747  |
| 17263 | P03363 | Q8N309 | -0.22041  |
| 17264 | P03363 | Q9UPT8 | -0.20802  |
| 17265 | P03363 | Q7RTU1 | -0.2227   |
| 17266 | P03363 | A8K010 | -0.059145 |
| 17267 | P03363 | Q12794 | -0.26785  |
| 17268 | P03363 | Q9BY65 | -0.088812 |
| 17269 | P03363 | Q9H221 | -0.4377   |
| 17270 | P03363 | Q8TBR7 | -0.47262  |
| 17271 | P03363 | Q15849 | -0.092086 |
| 17272 | P03363 | Q6UX98 | -0.4627   |
| 17273 | P03363 | Q9UMX5 | -0.44825  |
| 17274 | P03363 | Q9BYF1 | -0.55253  |
| 17275 | P03363 | Q569K4 | -0.15669  |
| 17276 | P03363 | P08237 | -0.29981  |
| 17277 | P03363 | P51948 | -0.22661  |
| 17278 | P03363 | Q8N609 | -0.38154  |
| 17279 | P03363 | Q9ULJ8 | -0.22731  |
| 17280 | P03363 | Q58FG0 | -0.13259  |
| 17281 | P03363 | P52798 | -0.23954  |
| 17282 | P03363 | Q01433 | -0.21901  |
| 17283 | P03363 | Q8WVF2 | -0.41193  |
| 17284 | P03363 | Q5R3F8 | -0.34054  |
| 17285 | P03363 | Q15155 | -0.17955  |
| 17286 | P03363 | Q8N1X5 | -0.042737 |
| 17287 | P03363 | Q7RTY7 | -0.5617   |
| 17288 | P03363 | Q6PGQ1 | -0.011129 |
| 17289 | P03363 | Q6UXN7 | -0.28339  |
| 17290 | P03363 | P20742 | -0.42697  |
| 17291 | P03363 | O15403 | -0.51932  |
| 17292 | P03363 | O43638 | -0.27937  |
| 17293 | P03363 | P98196 | -0.39593  |
| 17294 | P03363 | O15245 | -0.23637  |
| 17295 | P03363 | Q15645 | -0.22959  |
| 17296 | P03363 | O60725 | -0.30873  |
| 17297 | P03363 | P0DMB1 | -0.014215 |
| 17298 | P03363 | P0DKL9 | -0.03061  |
| 17299 | P03363 | Q8NGK2 | -0.61656  |
| 17300 | P03363 | Q9UHG3 | -0.35798  |
| 17301 | P03363 | Q16875 | -0.22341  |
| 17302 | P03363 | P08912 | -0.54017  |
| 17303 | P03363 | Q7RTM1 | -0.70143  |
| 17304 | P03363 | Q8WTX9 | -0.34425  |
| 17305 | P03363 | Q8WTR4 | -0.22006  |
| 17306 | P03363 | P54132 | -0.22701  |
| 17307 | P03363 | Q9BXR5 | -0.65778  |
| 17308 | P03363 | Q8WTP8 | -0.18236  |
| 17309 | P03363 | Q7Z469 | -0.29673  |
| 17310 | P03363 | P41743 | -0.22447  |
| 17311 | P03363 | Q6IC98 | -0.32     |
| 17312 | P03363 | Q9H611 | -0.19233  |
| 17313 | P03363 | Q9BTV7 | -0.15017  |
| 17314 | P03363 | Q5VUJ5 | -0.45506  |
| 17315 | P03363 | Q13326 | -0.13355  |
| 17316 | P03363 | A6NC97 | -0.32626  |
| 17317 | P03363 | Q30KQ1 | -0.33516  |
| 17318 | P03363 | Q8TD90 | -0.1999   |
| 17319 | P03363 | O75022 | -0.22748  |
| 17320 | P03363 | Q8NFF5 | -0.17402  |
| 17321 | P03363 | Q96PD6 | -0.43315  |
| 17322 | P03363 | O75096 | -0.22774  |
| 17323 | P03363 | A8MTL3 | -0.20731  |
| 17324 | P03363 | Q8IXN7 | -0.29718  |
| 17325 | P03363 | O43823 | -0.10039  |
| 17326 | P03363 | Q9NUI1 | -0.48947  |
| 17327 | P03363 | O43889 | -0.29461  |
| 17328 | P03363 | Q9C0E8 | -0.39981  |

|       |        |        |           |
|-------|--------|--------|-----------|
| 17329 | P03363 | Q8N3G9 | -0.44622  |
| 17330 | P03363 | Q9NQ76 | -0.12102  |
| 17331 | P03363 | P51124 | -0.46065  |
| 17332 | P03363 | Q9H9A6 | -0.22781  |
| 17333 | P03363 | P0C7W8 | -0.21146  |
| 17334 | P03363 | P15169 | -0.61262  |
| 17335 | P03363 | Q86Y34 | -0.6666   |
| 17336 | P03363 | Q56A73 | -0.13833  |
| 17337 | P03363 | Q6ZR08 | -0.22352  |
| 17338 | P03363 | Q96CE8 | -0.32626  |
| 17339 | P03363 | Q9C009 | -0.26297  |
| 17340 | P03363 | Q13509 | -0.21405  |
| 17341 | P03363 | P14923 | -0.327    |
| 17342 | P03363 | P42126 | -0.21132  |
| 17343 | P03363 | Q15005 | -0.43707  |
| 17344 | P03363 | Q8IX07 | -0.22742  |
| 17345 | P03363 | A2RTY3 | -0.15134  |
| 17346 | P03363 | Q6UX27 | -0.32626  |
| 17347 | P03363 | P06858 | -0.32696  |
| 17348 | P03363 | P0CW21 | -0.042737 |
| 17349 | P03363 | Q16445 | -0.45304  |
| 17350 | P03363 | P57088 | -0.31181  |
| 17351 | P03363 | A4D1S5 | -0.50243  |
| 17352 | P03363 | P51854 | -0.17938  |
| 17353 | P03363 | Q6ZUG5 | -0.037396 |
| 17354 | P03363 | P06317 | -0.5251   |
| 17355 | P03363 | Q6ZRY4 | -0.20482  |
| 17356 | P03363 | Q95747 | -0.51905  |
| 17357 | P03363 | Q9BQE5 | -0.48264  |
| 17358 | P03363 | Q70UQ0 | -0.22683  |
| 17359 | P03363 | Q9BXP8 | -0.70875  |
| 17360 | P03363 | Q9BS91 | -0.24102  |
| 17361 | P03363 | Q6ZMI0 | -0.15607  |
| 17362 | P03363 | O15540 | -0.22038  |
| 17363 | P03363 | Q6UX53 | -0.22172  |
| 17364 | P03363 | Q13797 | -0.42434  |
| 17365 | P03363 | Q0VGL1 | -0.17214  |
| 17366 | P03363 | Q6Q8B3 | -0.32626  |
| 17367 | P03363 | Q5SYC1 | -0.25844  |
| 17368 | P03363 | P52943 | -0.22754  |
| 17369 | P03363 | P35568 | -0.22344  |
| 17370 | P03363 | Q6UX01 | -0.51126  |
| 17371 | P03363 | Q06710 | -0.22732  |
| 17372 | P03363 | Q15846 | -0.28993  |
| 17373 | P03363 | P00387 | -0.32866  |
| 17374 | P03363 | Q00987 | -0.22488  |
| 17375 | P03363 | Q8NGA4 | -0.64715  |
| 17376 | P03363 | A8MYR8 | -0.20759  |
| 17377 | P03363 | P11245 | -0.22838  |
| 17378 | P03363 | Q8IXS6 | -0.22526  |
| 17379 | P03363 | P10636 | -0.19046  |
| 17380 | P03363 | Q9H0J9 | -0.22358  |
| 17381 | P03363 | Q86Y82 | -0.27827  |
| 17382 | P03363 | Q9HBB8 | -0.52877  |
| 17383 | P03363 | Q14442 | -0.16603  |
| 17384 | P03363 | P58511 | -0.19187  |
| 17385 | P03363 | P51606 | -0.15283  |
| 17386 | P03363 | Q68CZ1 | -0.2254   |
| 17387 | P03363 | Q8NCS7 | -0.44361  |
| 17388 | P03363 | P0C7Q2 | -0.22433  |
| 17389 | P03363 | Q149M9 | -0.24873  |
| 17390 | P03363 | Q86UW8 | -0.43243  |
| 17391 | P03363 | Q9HBI6 | -0.78387  |
| 17392 | P03363 | Q9H161 | -0.22411  |
| 17393 | P03363 | P09960 | -0.23971  |
| 17394 | P03363 | Q8IUB2 | -0.33498  |
| 17395 | P03363 | Q12913 | -0.25935  |
| 17396 | P03363 | P60852 | -0.79857  |
| 17397 | P03363 | P18507 | -0.28332  |
| 17398 | P03363 | P30414 | -0.14826  |
| 17399 | P03363 | Q56UN5 | -0.54205  |
| 17400 | P03363 | P25789 | -0.12695  |
| 17401 | P03363 | Q5T1S8 | -0.52651  |
| 17402 | P03363 | Q95006 | -0.61656  |
| 17403 | P03363 | Q8NHP6 | -0.29635  |
| 17404 | P03363 | Q9UPW0 | -0.29843  |

|       |        |        |           |
|-------|--------|--------|-----------|
| 17405 | P03363 | Q8IXQ4 | -0.031359 |
| 17406 | P03363 | Q8N1S5 | -0.35268  |
| 17407 | P03363 | Q8WYL5 | -0.25517  |
| 17408 | P03363 | C9JC47 | -0.042737 |
| 17409 | P03363 | O14795 | -0.22741  |
| 17410 | P03363 | P87889 | -0.20739  |
| 17411 | P03363 | P01375 | -0.23343  |
| 17412 | P03363 | Q96R28 | -0.61656  |
| 17413 | P03363 | Q86UL3 | -0.362    |
| 17414 | P03363 | Q7Z4Q2 | -0.021516 |
| 17415 | P03363 | Q8WXS4 | -0.39664  |
| 17416 | P03363 | Q6ZT21 | -0.37686  |
| 17417 | P03363 | Q8IWB9 | -0.40299  |
| 17418 | P03363 | Q9Y3D7 | -0.15839  |
| 17419 | P03363 | O14793 | -0.25441  |
| 17420 | P03363 | Q9P225 | -0.22537  |
| 17421 | P03363 | P13796 | -0.22745  |
| 17422 | P03363 | Q9HBW1 | -0.35901  |
| 17423 | P03363 | Q8WXS8 | -0.57231  |
| 17424 | P03363 | Q9H7J1 | -0.059987 |
| 17425 | P03363 | Q8NH03 | -0.61656  |
| 17426 | P03363 | P49917 | -0.21511  |
| 17427 | P03363 | O14804 | -0.73146  |
| 17428 | P03363 | O43709 | -0.29534  |
| 17429 | P03363 | Q8TDB4 | -0.08275  |
| 17430 | P03363 | Q5GH70 | -0.32626  |
| 17431 | P03363 | Q8IWL2 | -0.50051  |
| 17432 | P03363 | Q75425 | -0.19877  |
| 17433 | P03363 | P10966 | -0.42241  |
| 17434 | P03363 | Q969E3 | -0.36878  |
| 17435 | P03363 | Q9Y305 | -0.009902 |
| 17436 | P03363 | Q9NPC2 | -0.55997  |
| 17437 | P03363 | Q86VF5 | -0.43968  |
| 17438 | P03363 | Q8TEW6 | -0.22667  |
| 17439 | P03363 | Q8TC12 | -0.77013  |
| 17440 | P03363 | Q9BV79 | -0.59063  |
| 17441 | P03363 | A6NJY1 | -0.3432   |
| 17442 | P03363 | Q86VZ5 | -0.35656  |
| 17443 | P03363 | Q8N865 | -0.17655  |
| 17444 | P03363 | Q9UG56 | -0.15035  |
| 17445 | P03363 | Q9Y4E8 | -0.25702  |
| 17446 | P03363 | Q504Y0 | -0.35268  |
| 17447 | P03363 | Q9Y6U3 | -0.1664   |
| 17448 | P03363 | Q16572 | -0.51757  |
| 17449 | P03363 | P27918 | -0.49151  |
| 17450 | P03363 | P21730 | -0.66059  |
| 17451 | P03363 | Q9H0I9 | -0.19915  |
| 17452 | P03363 | Q96S82 | -0.22669  |
| 17453 | P03363 | Q86WD7 | -0.20947  |
| 17454 | P03363 | Q08708 | -0.57779  |
| 17455 | P03363 | Q7Z5Q1 | -0.22732  |
| 17456 | P03363 | P0CG05 | -0.5251   |
| 17457 | P03363 | Q6ZV65 | -0.041344 |
| 17458 | P03363 | O75223 | -0.1082   |
| 17459 | P03363 | Q9Y6M5 | -0.41322  |
| 17460 | P03363 | Q96KF7 | -0.32626  |
| 17461 | P03363 | Q9UKR0 | -0.54971  |
| 17462 | P03363 | P0C7L1 | -0.33498  |
| 17463 | P03363 | Q8WUX2 | -0.14489  |
| 17464 | P03363 | Q8WUY8 | -0.051462 |
| 17465 | P03363 | Q13478 | -0.64761  |
| 17466 | P03363 | A6NLE4 | -0.47262  |
| 17467 | P03363 | Q96RR4 | -0.54498  |
| 17468 | P03363 | Q8NGN3 | -0.61656  |
| 17469 | P03363 | P18206 | -0.22113  |
| 17470 | P03363 | P59537 | -0.61287  |
| 17471 | P03363 | Q13322 | -0.22741  |
| 17472 | P03363 | Q5NE16 | -0.23027  |
| 17473 | P03363 | P62834 | -0.22776  |
| 17474 | P03363 | Q702N8 | -0.17994  |
| 17475 | P03363 | Q8TC57 | -0.17596  |
| 17476 | P03363 | Q95297 | -0.22394  |
| 17477 | P03363 | Q15262 | -0.35018  |
| 17478 | P03363 | Q9BPW9 | -0.52824  |
| 17479 | P03363 | Q9BZJ6 | -0.5506   |
| 17480 | P03363 | P58505 | -0.091258 |

|       |        |        |           |
|-------|--------|--------|-----------|
| 17481 | P03363 | Q9P1Z3 | -0.65757  |
| 17482 | P03363 | Q14973 | -0.51185  |
| 17483 | P03363 | Q8N9Q2 | -0.19     |
| 17484 | P03363 | P83859 | -0.28166  |
| 17485 | P03363 | O43181 | -0.18327  |
| 17486 | P03363 | Q93079 | -0.14658  |
| 17487 | P03363 | Q9Y570 | -0.22074  |
| 17488 | P03363 | Q9NP95 | -0.37702  |
| 17489 | P03363 | O15027 | -0.058495 |
| 17490 | P03363 | Q15067 | -0.29149  |
| 17491 | P03363 | Q5JXC2 | -0.15885  |
| 17492 | P03363 | Q6IN84 | -0.14304  |
| 17493 | P03363 | Q9H477 | -0.33753  |
| 17494 | P03363 | Q96AE7 | -0.22605  |
| 17495 | P03363 | Q6PF18 | -0.12112  |
| 17496 | P03363 | P55084 | -0.22199  |
| 17497 | P03363 | Q96T68 | -0.22506  |
| 17498 | P03363 | Q8N6L0 | -0.43516  |
| 17499 | P03363 | Q99445 | -0.22779  |
| 17500 | P03363 | Q86VV4 | -0.1971   |
| 17501 | P03363 | Q8NE63 | -0.3934   |
| 17502 | P03363 | Q9HCK4 | -0.22762  |
| 17503 | P03363 | Q8IZQ5 | -0.12869  |
| 17504 | P03363 | Q8NFJ5 | -0.69024  |
| 17505 | P03363 | P01710 | -0.54902  |
| 17506 | P03363 | Q96MT1 | -0.47964  |
| 17507 | P03363 | P30556 | -0.2869   |
| 17508 | P03363 | Q8IYG6 | -0.2072   |
| 17509 | P03363 | B3KS81 | -0.15778  |
| 17510 | P03363 | Q8N475 | -0.38315  |
| 17511 | P03363 | Q6ZUB1 | -0.32626  |
| 17512 | P03363 | Q15363 | -0.21957  |
| 17513 | P03363 | P54707 | -0.47528  |
| 17514 | P03363 | Q96DN5 | -0.22881  |
| 17515 | P03363 | Q9BXU9 | -0.27015  |
| 17516 | P03363 | P01225 | -0.20329  |
| 17517 | P03363 | Q6MZQ0 | -0.18829  |
| 17518 | P03363 | Q14185 | -0.22739  |
| 17519 | P03363 | Q9NYL5 | -0.54036  |
| 17520 | P03363 | Q9H7Y2 | -0.14416  |
| 17521 | P03363 | Q8NGH7 | -0.61656  |
| 17522 | P03363 | Q99807 | -0.235    |
| 17523 | P03363 | P13236 | -0.54185  |
| 17524 | P03363 | A8MWE9 | -0.22057  |
| 17525 | P03363 | P08183 | -0.22847  |
| 17526 | P03363 | P30459 | -0.3515   |
| 17527 | P03363 | Q9NU02 | -0.22741  |
| 17528 | P03363 | Q8NHJ6 | -0.22753  |
| 17529 | P03363 | Q5VZ46 | -0.11741  |
| 17530 | P03363 | Q86V85 | -0.32626  |
| 17531 | P03363 | Q9UBX8 | -0.37261  |
| 17532 | P03363 | A1L167 | -0.21644  |
| 17533 | P03363 | Q96HH9 | -0.22403  |
| 17534 | P03363 | P58872 | -0.48473  |
| 17535 | P03363 | Q3SYB3 | -0.29843  |
| 17536 | P03363 | Q8IXY8 | -0.14826  |
| 17537 | P03363 | P23229 | -0.22739  |
| 17538 | P03363 | P20618 | -0.14767  |
| 17539 | P03363 | P57082 | -0.33421  |
| 17540 | P03363 | O43677 | -0.2799   |
| 17541 | P03363 | Q14623 | -0.28925  |
| 17542 | P03363 | P33897 | -0.22757  |
| 17543 | P03363 | Q16718 | -0.19468  |
| 17544 | P03363 | P31639 | -0.37564  |
| 17545 | P03363 | Q7Z2T5 | -0.22127  |
| 17546 | P03363 | Q00266 | -0.31814  |
| 17547 | P03363 | Q15119 | -0.20321  |
| 17548 | P03363 | Q9H300 | -0.28193  |
| 17549 | P03363 | Q8NOV4 | -0.33992  |
| 17550 | P03363 | Q8IW00 | -0.47262  |
| 17551 | P03363 | O95822 | -0.16486  |
| 17552 | P03363 | Q6UXX5 | -0.32626  |
| 17553 | P03363 | P55196 | -0.22727  |
| 17554 | P03363 | Q96F10 | -0.22236  |
| 17555 | P03363 | Q9BV40 | -0.36436  |
| 17556 | P03363 | Q16831 | -0.17116  |

|       |        |        |           |
|-------|--------|--------|-----------|
| 17557 | P03363 | A8MU10 | -0.042737 |
| 17558 | P03363 | Q96NU7 | -0.11381  |
| 17559 | P03363 | P27105 | -0.21843  |
| 17560 | P03363 | Q96GY0 | -0.098272 |
| 17561 | P03363 | O43432 | -0.19224  |
| 17562 | P03363 | Q9P273 | -0.43441  |
| 17563 | P03363 | Q8TAT5 | -0.10459  |
| 17564 | P03363 | Q6ZVW7 | -0.17711  |
| 17565 | P03363 | Q96KR4 | -0.2003   |
| 17566 | P03363 | Q6UXG8 | -0.32626  |
| 17567 | P03363 | P34947 | -0.21351  |
| 17568 | P03363 | P45880 | -0.19448  |
| 17569 | P03363 | P01036 | -0.38852  |
| 17570 | P03363 | Q9BQP9 | -0.41496  |
| 17571 | P03363 | Q9UK00 | -0.32626  |
| 17572 | P03363 | O75509 | -0.22735  |
| 17573 | P03363 | Q7Z4B0 | -0.33992  |
| 17574 | P03363 | Q5SQH8 | -0.2065   |
| 17575 | P03363 | Q92506 | -0.21681  |
| 17576 | P03363 | P13612 | -0.22737  |
| 17577 | P03363 | O60320 | -0.32626  |
| 17578 | P03363 | Q6ZMV7 | -0.2139   |
| 17579 | P03363 | Q9H2K0 | -0.11265  |
| 17580 | P03363 | Q8N357 | -0.10852  |
| 17581 | P03363 | Q9UKF5 | -0.54903  |
| 17582 | P03363 | Q9HAW7 | -0.39492  |
| 17583 | P03363 | Q8N6N6 | -0.19469  |
| 17584 | P03363 | Q6IPW1 | -0.040372 |
| 17585 | P03363 | Q92629 | -0.14249  |
| 17586 | P03363 | A0JNW5 | -0.031702 |
| 17587 | P03363 | Q7Z3Z2 | -0.11621  |
| 17588 | P03363 | Q9NQ32 | -0.1204   |
| 17589 | P03363 | O00533 | -0.8047   |
| 17590 | P03363 | O15417 | -0.18679  |
| 17591 | P03363 | Q8IVD9 | -0.10354  |
| 17592 | P03363 | Q9H7M6 | -0.16055  |
| 17593 | P03363 | Q13634 | -0.58249  |
| 17594 | P03363 | Q9NP73 | -0.21098  |
| 17595 | P03363 | Q5TCM9 | -0.042737 |
| 17596 | P03363 | B0I1T2 | -0.33597  |
| 17597 | P03363 | Q70EK9 | -0.33229  |
| 17598 | P03363 | Q9ULD8 | -0.47671  |
| 17599 | P03363 | Q9GZK4 | -0.61656  |
| 17600 | P03363 | P47881 | -0.61656  |
| 17601 | P03363 | Q6AWC2 | -0.22741  |
| 17602 | P03363 | P19174 | -0.22741  |
| 17603 | P03363 | Q9ULZ1 | -0.39493  |
| 17604 | P03363 | P20393 | -0.29896  |
| 17605 | P03363 | Q01459 | -0.22375  |
| 17606 | P03363 | P29762 | -0.222    |
| 17607 | P03363 | Q13277 | -0.24992  |
| 17608 | P03363 | Q8NEQ6 | -0.10882  |
| 17609 | P03363 | Q99819 | -0.19191  |
| 17610 | P03363 | O95870 | -0.30365  |
| 17611 | P03363 | Q96N35 | -0.32626  |
| 17612 | P03363 | O15228 | -0.26208  |
| 17613 | P03363 | A6NKQ9 | -0.33502  |
| 17614 | P03363 | P52735 | -0.22741  |
| 17615 | P03363 | P40617 | -0.22749  |
| 17616 | P03363 | Q9BXX2 | -0.22741  |
| 17617 | P03363 | Q6P996 | -0.2348   |
| 17618 | P03363 | P05534 | -0.35951  |
| 17619 | P03363 | P49023 | -0.20204  |
| 17620 | P03363 | O00230 | -0.41504  |
| 17621 | P03363 | P56159 | -0.26655  |
| 17622 | P03363 | Q7Z5H4 | -0.61551  |
| 17623 | P03363 | Q2TAP0 | -0.14116  |
| 17624 | P03363 | Q9GZY4 | -0.33272  |
| 17625 | P03363 | Q86SX6 | -0.22617  |
| 17626 | P03363 | Q9BUM1 | -0.31584  |
| 17627 | P03363 | Q86V87 | -0.065534 |
| 17628 | P03363 | Q9ULX7 | -0.5528   |
| 17629 | P03363 | Q6ZW33 | -0.17134  |
| 17630 | P03363 | P25800 | -0.22725  |
| 17631 | P03363 | O75899 | -0.36969  |
| 17632 | P03363 | B1ANS9 | -0.22742  |

|       |        |         |           |
|-------|--------|---------|-----------|
| 17633 | P03363 | Q05397  | -0.22741  |
| 17634 | P03363 | Q9P1V8  | -0.22539  |
| 17635 | P03363 | Q02962  | -0.22739  |
| 17636 | P03363 | Q5QFB9  | -0.52348  |
| 17637 | P03363 | P12955  | -0.25526  |
| 17638 | P03363 | P08236  | -0.22496  |
| 17639 | P03363 | P05452  | -0.36006  |
| 17640 | P03363 | Q9H479  | -0.19871  |
| 17641 | P03363 | Q16595  | -0.2225   |
| 17642 | P03363 | Q8TDQ0  | -0.32626  |
| 17643 | P03363 | Q43320  | -0.40154  |
| 17644 | P03363 | Q9Y3L5  | -0.32096  |
| 17645 | P03363 | P14061  | -0.22696  |
| 17646 | P03363 | Q8IZF5  | -0.6666   |
| 17647 | P03363 | P33241  | -0.39386  |
| 17648 | P03363 | Q9Y2P5  | -0.46285  |
| 17649 | P03363 | Q13886  | -0.22565  |
| 17650 | P03363 | Q92536  | -0.53667  |
| 17651 | P03363 | P01258  | -0.26614  |
| 17652 | P03363 | Q05932  | -0.13842  |
| 17653 | P03363 | Q9H4A3  | -0.22741  |
| 17654 | P03363 | P40306  | -0.15373  |
| 17655 | P03363 | Q96DR7  | -0.33867  |
| 17656 | P03363 | Q8NI77  | -0.29702  |
| 17657 | P03363 | Q96AT1  | -0.031359 |
| 17658 | P03363 | Q5IJ48  | -0.85767  |
| 17659 | P03363 | O95206  | -0.57786  |
| 17660 | P03363 | Q7RTT9  | -0.44758  |
| 17661 | P03363 | P04554  | -0.15232  |
| 17662 | P03363 | Q569H4  | -0.031359 |
| 17663 | P03363 | Q9BQ61  | -0.031359 |
| 17664 | P03363 | A2RU48  | -0.32626  |
| 17665 | P03363 | P35499  | -0.50943  |
| 17666 | P03363 | P36954  | -0.21696  |
| 17667 | P03363 | Q6ZUJ8  | -0.18305  |
| 17668 | P03363 | P35498  | -0.49998  |
| 17669 | P03363 | P32302  | -0.67913  |
| 17670 | P03363 | Q6QN14  | -0.25786  |
| 17671 | P03363 | O95716  | -0.39538  |
| 17672 | P03363 | Q8N2A0  | -0.22805  |
| 17673 | P03363 | Q14088  | -0.24637  |
| 17674 | P03363 | Q6WKZ4  | -0.22519  |
| 17675 | P03363 | Q2L4Q9  | -0.49563  |
| 17676 | P03363 | C9JUS6  | -0.33992  |
| 17677 | P03363 | Q6PHR2  | -0.22741  |
| 17678 | P03363 | Q29836  | -0.54957  |
| 17679 | P03363 | Q5J TZ5 | -0.21588  |
| 17680 | P03363 | Q96NZ8  | -0.32855  |
| 17681 | P03363 | Q96SL4  | -0.61777  |
| 17682 | P03363 | Q9HCN8  | -0.2006   |
| 17683 | P03363 | Q5JST6  | -0.076344 |
| 17684 | P03363 | Q75600  | -0.17791  |
| 17685 | P03363 | Q9NQ25  | -0.40566  |
| 17686 | P03363 | Q9UM54  | -0.18127  |
| 17687 | P03363 | Q8WWA0  | -0.66383  |
| 17688 | P03363 | Q5TAT6  | -0.46921  |
| 17689 | P03363 | Q5VUE5  | -0.099479 |
| 17690 | P03363 | Q6IQ49  | -0.10325  |
| 17691 | P03363 | Q4KMQ1  | -0.03565  |
| 17692 | P03363 | Q8NGE8  | -0.61656  |
| 17693 | P03363 | O14976  | -0.2942   |
| 17694 | P03363 | Q95954  | -0.13218  |
| 17695 | P03363 | Q13905  | -0.2274   |
| 17696 | P03363 | Q9Y289  | -0.48264  |
| 17697 | P03363 | Q12799  | -0.19991  |
| 17698 | P03363 | P0C671  | -0.17794  |
| 17699 | P03363 | Q86YC3  | -0.32626  |
| 17700 | P03363 | P49189  | -0.28181  |
| 17701 | P03363 | P0CG43  | -0.042737 |
| 17702 | P03363 | Q6ZSC3  | -0.061654 |
| 17703 | P03363 | P43632  | -0.57712  |
| 17704 | P03363 | P04438  | -0.54902  |
| 17705 | P03363 | A6NEN9  | -0.19803  |
| 17706 | P03363 | P01604  | -0.54902  |
| 17707 | P03363 | Q8NGF9  | -0.61656  |
| 17708 | P03363 | Q6UVW9  | -0.2475   |

|       |        |        |           |
|-------|--------|--------|-----------|
| 17709 | P03363 | O95007 | -0.61656  |
| 17710 | P03363 | Q6NUS6 | -0.26477  |
| 17711 | P03363 | Q8NDM7 | -0.095231 |
| 17712 | P03363 | Q15546 | -0.52539  |
| 17713 | P03363 | Q9Y5P2 | -0.24388  |
| 17714 | P03363 | Q9NXP7 | -0.20462  |
| 17715 | P03363 | Q9ULH0 | -0.22741  |
| 17716 | P03363 | Q4V328 | -0.063837 |
| 17717 | P03363 | Q6PKH6 | -0.74395  |
| 17718 | P03363 | Q13496 | -0.24513  |
| 17719 | P03363 | P49247 | -0.026865 |
| 17720 | P03363 | O75914 | -0.23683  |
| 17721 | P03363 | P32320 | -0.41036  |
| 17722 | P03363 | Q86YW0 | -0.22741  |
| 17723 | P03363 | Q9Y4A9 | -0.61656  |
| 17724 | P03363 | Q9BUA3 | -0.13643  |
| 17725 | P03363 | Q14990 | -0.17363  |
| 17726 | P03363 | Q8TBP6 | -0.30119  |
| 17727 | P03363 | P51809 | -0.22432  |
| 17728 | P03363 | P36888 | -0.32602  |
| 17729 | P03363 | Q10981 | -0.28746  |
| 17730 | P03363 | Q2KJ03 | -0.133    |
| 17731 | P03363 | Q8NH09 | -0.61656  |
| 17732 | P03363 | Q9UPZ9 | -0.41209  |
| 17733 | P03363 | P14384 | -0.2184   |
| 17734 | P03363 | P51617 | -0.2274   |
| 17735 | P03363 | Q6B0K9 | -0.084131 |
| 17736 | P03363 | P01138 | -0.30459  |
| 17737 | P03363 | Q96LR1 | -0.33992  |
| 17738 | P03363 | P40879 | -0.23582  |
| 17739 | P03363 | Q8N5M9 | -0.52348  |
| 17740 | P03363 | Q96Q07 | -0.21961  |
| 17741 | P03363 | Q6UXH1 | -0.22741  |
| 17742 | P03363 | Q6T423 | -0.30406  |
| 17743 | P03363 | Q2TVT3 | -0.25763  |
| 17744 | P03363 | Q2PPJ7 | -0.21996  |
| 17745 | P03363 | C9JG80 | -0.21661  |
| 17746 | P03363 | Q99973 | -0.22741  |
| 17747 | P03363 | Q969K7 | -0.19803  |
| 17748 | P03363 | P01737 | -0.23095  |
| 17749 | P03363 | Q9Y2I2 | -0.22761  |
| 17750 | P03363 | Q9HAR2 | -0.65832  |
| 17751 | P03363 | Q8TF61 | -0.20584  |
| 17752 | P03363 | Q08648 | -0.34918  |
| 17753 | P03363 | Q30167 | -0.53907  |
| 17754 | P03363 | P49810 | -0.22567  |
| 17755 | P03363 | A1A4V9 | -0.097916 |
| 17756 | P03363 | O00400 | -0.47192  |
| 17757 | P03363 | P0C5K7 | -0.18268  |
| 17758 | P03363 | A4D2B0 | -0.07407  |
| 17759 | P03363 | Q8NGV7 | -0.61656  |
| 17760 | P03363 | Q8NEG0 | -0.12499  |
| 17761 | P03363 | Q9H6X4 | -0.32626  |
| 17762 | P03363 | Q9NX00 | -0.32227  |
| 17763 | P03363 | O75077 | -0.60225  |
| 17764 | P03363 | Q92526 | -0.16086  |
| 17765 | P03363 | Q13423 | -0.54134  |
| 17766 | P03363 | Q6ZS02 | -0.20645  |
| 17767 | P03363 | P08253 | -0.34244  |
| 17768 | P03363 | Q5JRX3 | -0.22554  |
| 17769 | P03363 | Q8NFF2 | -0.49863  |
| 17770 | P03363 | Q8IXR9 | -0.14624  |
| 17771 | P03363 | Q5JPI9 | -0.21888  |
| 17772 | P03363 | A8MV24 | -0.12684  |
| 17773 | P03363 | P0DH78 | -0.22629  |
| 17774 | P03363 | Q5XX13 | -0.22749  |
| 17775 | P03363 | Q9UQP3 | -0.4836   |
| 17776 | P03363 | P18827 | -0.37273  |
| 17777 | P03363 | A6NF34 | -0.42043  |
| 17778 | P03363 | Q8N3J3 | -0.073581 |
| 17779 | P03363 | Q9YNA8 | -0.21947  |
| 17780 | P03363 | O43278 | -0.41192  |
| 17781 | P03363 | A8MQB9 | -0.22741  |
| 17782 | P03363 | Q15232 | -0.22741  |
| 17783 | P03363 | A1A4Y4 | -0.45715  |
| 17784 | P03363 | Q9H6V9 | -0.087979 |

|       |        |        |           |
|-------|--------|--------|-----------|
| 17785 | P03363 | Q96HF1 | -0.23106  |
| 17786 | P03363 | Q6RVD6 | -0.042737 |
| 17787 | P03363 | P24310 | -0.33309  |
| 17788 | P03363 | P23141 | -0.22739  |
| 17789 | P03363 | P12821 | -0.4664   |
| 17790 | P03363 | Q9NQ36 | -0.38315  |
| 17791 | P03363 | Q9BZV3 | -0.42912  |
| 17792 | P03363 | Q9UJH6 | -0.20554  |
| 17793 | P03363 | Q96GL9 | -0.32626  |
| 17794 | P03363 | Q9H2M9 | -0.23835  |
| 17795 | P03363 | Q9NRJ1 | -0.21841  |
| 17796 | P03363 | Q15485 | -0.62025  |
| 17797 | P03363 | O43704 | -0.23212  |
| 17798 | P03363 | Q6UXZ0 | -0.32626  |
| 17799 | P03363 | B6A8C7 | -0.32626  |
| 17800 | P03363 | A6NCC3 | -0.073619 |
| 17801 | P03363 | Q7Z695 | -0.6298   |
| 17802 | P03363 | Q8NAP1 | -0.031359 |
| 17803 | P03363 | Q9P0S2 | -0.21659  |
| 17804 | P03363 | P32298 | -0.43019  |
| 17805 | P03363 | Q14494 | -0.53172  |
| 17806 | P03363 | Q9BWX1 | -0.21896  |
| 17807 | P03363 | Q9NYL2 | -0.22741  |
| 17808 | P03363 | Q9H1X3 | -0.35579  |
| 17809 | P03363 | Q9Y271 | -0.70617  |
| 17810 | P03363 | Q8N8K9 | -0.17761  |
| 17811 | P03363 | Q6NUT2 | -0.49277  |
| 17812 | P03363 | Q8NEZ4 | -0.29494  |
| 17813 | P03363 | P08195 | -0.22651  |
| 17814 | P03363 | P08218 | -0.49563  |
| 17815 | P03363 | Q658Y4 | -0.058285 |
| 17816 | P03363 | Q6IPM2 | -0.21943  |
| 17817 | P03363 | Q96008 | -0.24024  |
| 17818 | P03363 | P15863 | -0.22726  |
| 17819 | P03363 | P50542 | -0.22736  |
| 17820 | P03363 | A6NFH5 | -0.22179  |
| 17821 | P03363 | P28336 | -0.51891  |
| 17822 | P03363 | Q6PI73 | -0.32626  |
| 17823 | P03363 | Q5T035 | -0.093889 |
| 17824 | P03363 | Q14392 | -0.40138  |
| 17825 | P03363 | P08922 | -0.71141  |
| 17826 | P03363 | Q16775 | -0.17503  |
| 17827 | P03363 | Q9Y5G5 | -0.57898  |
| 17828 | P03363 | P0C6C1 | -0.22741  |
| 17829 | P03363 | Q12766 | -0.22739  |
| 17830 | P03363 | O75751 | -0.22802  |
| 17831 | P03363 | Q9NWQ8 | -0.19994  |
| 17832 | P03363 | P0CJ69 | -0.13673  |
| 17833 | P03363 | Q9NQR9 | -0.33197  |
| 17834 | P03363 | P47775 | -0.73112  |
| 17835 | P03363 | P27352 | -0.4701   |
| 17836 | P03363 | Q8N6D5 | -0.22741  |
| 17837 | P03363 | Q9C0G6 | -0.22613  |
| 17838 | P03363 | Q9H596 | -0.2395   |
| 17839 | P03363 | P61009 | -0.43707  |
| 17840 | P03363 | Q5MNZ6 | -0.22725  |
| 17841 | P03363 | Q5TA77 | -0.042737 |
| 17842 | P03363 | P54855 | -0.45403  |
| 17843 | P03363 | Q96PE3 | -0.18825  |
| 17844 | P03363 | Q9H2X0 | -0.22892  |
| 17845 | P03363 | Q86T90 | -0.22451  |
| 17846 | P03363 | Q96NT3 | -0.083662 |
| 17847 | P03363 | Q8NGJ5 | -0.61656  |
| 17848 | P03363 | P24001 | -0.5118   |
| 17849 | P03363 | Q86XA0 | -0.24311  |
| 17850 | P03363 | Q59EK9 | -0.11167  |
| 17851 | P03363 | A6NCL7 | -0.22741  |
| 17852 | P03363 | Q6ZN66 | -0.30251  |
| 17853 | P03363 | Q8N4L2 | -0.41374  |
| 17854 | P03363 | Q5VW32 | -0.18386  |
| 17855 | P03363 | P49327 | -0.46289  |
| 17856 | P03363 | Q8IV38 | -0.23273  |
| 17857 | P03363 | P61366 | -0.51164  |
| 17858 | P03363 | Q9NWM0 | -0.22536  |
| 17859 | P03363 | Q9Y5Z6 | -0.3654   |
| 17860 | P03363 | P10092 | -0.43652  |



|       |        |        |            |
|-------|--------|--------|------------|
| 17861 | P03363 | P01765 | -0.54902   |
| 17862 | P03363 | Q86WB7 | -0.38516   |
| 17863 | P03363 | Q96A32 | -0.22731   |
| 17864 | P03363 | Q60669 | -0.51234   |
| 17865 | P03363 | P25089 | -0.67469   |
| 17866 | P03363 | Q0VF96 | -0.22713   |
| 17867 | P03363 | Q969X1 | -0.4049    |
| 17868 | P03363 | O00763 | -0.24669   |
| 17869 | P03363 | Q9NRP2 | -0.039978  |
| 17870 | P03363 | Q9HBX8 | -0.62776   |
| 17871 | P03363 | Q6ZMV5 | -0.059026  |
| 17872 | P03363 | Q02297 | -0.22741   |
| 17873 | P03363 | Q86X53 | -0.12539   |
| 17874 | P03363 | O00160 | -0.21419   |
| 17875 | P03363 | Q8TBP5 | -0.32626   |
| 17876 | P03363 | Q6NT52 | -0.33502   |
| 17877 | P03363 | Q96DX4 | -0.50054   |
| 17878 | P03363 | Q6W349 | -0.0018499 |
| 17879 | P03363 | Q68D86 | -0.22195   |
| 17880 | P03363 | Q96LP4 | -0.17371   |
| 17881 | P03363 | Q71RH2 | -0.42352   |
| 17882 | P03363 | O60704 | -0.37178   |
| 17883 | P03363 | Q95415 | -0.32626   |
| 17884 | P03363 | P30874 | -0.22758   |
| 17885 | P03363 | Q3MIW9 | -0.32626   |
| 17886 | P03363 | Q5TBE3 | -0.074221  |
| 17887 | P03363 | Q8NGC8 | -0.61656   |
| 17888 | P03363 | Q96I13 | -0.22718   |
| 17889 | P03363 | P05556 | -0.22741   |
| 17890 | P03363 | Q9P104 | -0.22198   |
| 17891 | P03363 | O75874 | -0.19786   |
| 17892 | P03363 | Q496A3 | -0.12088   |
| 17893 | P03363 | Q8TDI7 | -0.32626   |
| 17894 | P03363 | O77932 | -0.31013   |
| 17895 | P03363 | Q5VVJ2 | -0.2274    |
| 17896 | P03363 | Q9H095 | -0.083023  |
| 17897 | P03363 | Q15726 | -0.16495   |
| 17898 | P03363 | Q0VFX4 | -0.029315  |
| 17899 | P03363 | P16118 | -0.17934   |
| 17900 | P03363 | A8MZ26 | -0.22681   |
| 17901 | P03363 | O60347 | -0.50908   |
| 17902 | P03363 | Q86UD1 | -0.13492   |
| 17903 | P03363 | P19438 | -0.23306   |
| 17904 | P03363 | Q03393 | -0.14411   |
| 17905 | P03363 | A4D0T2 | -0.32626   |
| 17906 | P03363 | Q9BZC1 | -0.23162   |
| 17907 | P03363 | Q96G28 | -0.14356   |
| 17908 | P03363 | P18135 | -0.54902   |
| 17909 | P03363 | Q93077 | -0.29609   |
| 17910 | P03363 | P57739 | -0.2519    |
| 17911 | P03363 | Q8TBB0 | -0.19599   |
| 17912 | P03363 | P32929 | -0.22544   |
| 17913 | P03363 | Q00LT1 | -0.19964   |
| 17914 | P03363 | Q9H1P6 | -0.20348   |
| 17915 | P03363 | O60235 | -0.81968   |
| 17916 | P03363 | Q9Y6N1 | -0.3391    |
| 17917 | P03363 | Q9BQG2 | -0.22741   |
| 17918 | P03363 | D6RA61 | -0.25065   |
| 17919 | P03363 | Q00888 | -0.34941   |
| 17920 | P03363 | Q9H3D4 | -0.22736   |
| 17921 | P03363 | Q9H7H1 | -0.16409   |
| 17922 | P03363 | Q8NGW1 | -0.61656   |
| 17923 | P03363 | Q8TCH9 | -0.13358   |
| 17924 | P03363 | Q9HBX3 | -0.042737  |
| 17925 | P03363 | Q6IE37 | -0.42125   |
| 17926 | P03363 | Q12934 | -0.1704    |
| 17927 | P03363 | Q5T013 | -0.19725   |
| 17928 | P03363 | Q7Z6W7 | -0.24207   |
| 17929 | P03363 | F8VTS6 | -0.22741   |
| 17930 | P03363 | P51790 | -0.2229    |
| 17931 | P03363 | Q5W1A9 | -0.046368  |
| 17932 | P03363 | Q5TG08 | -0.029873  |
| 17933 | P03363 | Q9NUQ9 | -0.17662   |
| 17934 | P03363 | P58513 | -0.23961   |
| 17935 | P03363 | Q9NZK7 | -0.49627   |
| 17936 | P03363 | Q9H0Q0 | -0.18183   |

|       |        |        |           |
|-------|--------|--------|-----------|
| 17937 | P03363 | O60271 | -0.21567  |
| 17938 | P03363 | P31151 | -0.22953  |
| 17939 | P03363 | Q9C0I4 | -0.32626  |
| 17940 | P03363 | Q96KX2 | -0.18619  |
| 17941 | P03363 | P21453 | -0.41495  |
| 17942 | P03363 | Q15835 | -0.58578  |
| 17943 | P03363 | Q9UPU5 | -0.26952  |
| 17944 | P03363 | Q14004 | -0.17037  |
| 17945 | P03363 | A6NI86 | -0.021153 |
| 17946 | P03363 | Q9BRJ9 | -0.22744  |
| 17947 | P03363 | Q96RL6 | -0.40674  |
| 17948 | P03363 | O75094 | -0.41277  |
| 17949 | P03363 | O43868 | -0.51792  |
| 17950 | P03363 | Q9HBX9 | -0.65007  |
| 17951 | P03363 | Q9GZP0 | -0.45997  |
| 17952 | P03363 | Q8N377 | -0.042737 |
| 17953 | P03363 | Q5T1J6 | -0.17212  |
| 17954 | P03363 | Q4G0P3 | -0.20981  |
| 17955 | P03363 | F8WCM5 | -0.27723  |
| 17956 | P03363 | Q8TC17 | -0.22741  |
| 17957 | P03363 | P15509 | -0.90489  |
| 17958 | P03363 | Q4G0M1 | -0.33992  |
| 17959 | P03363 | Q5FWF5 | -0.20268  |
| 17960 | P03363 | P09603 | -0.42145  |
| 17961 | P03363 | Q6ZSR6 | -0.12442  |
| 17962 | P03363 | P34925 | -0.22816  |
| 17963 | P03363 | Q5W0B1 | -0.2274   |
| 17964 | P03363 | Q8IUW5 | -0.28283  |
| 17965 | P03363 | Q8IYD2 | -0.22618  |
| 17966 | P03363 | Q9NQV5 | -0.2063   |
| 17967 | P03363 | O75431 | -0.2035   |
| 17968 | P03363 | A6NCK2 | -0.27953  |
| 17969 | P03363 | Q8NAG6 | -0.22741  |
| 17970 | P03363 | A0AV96 | -0.22975  |
| 17971 | P03363 | Q96PN7 | -0.21833  |
| 17972 | P03363 | Q02156 | -0.26421  |
| 17973 | P03363 | O95185 | -0.53696  |
| 17974 | P03363 | Q9GZU1 | -0.40689  |
| 17975 | P03363 | Q13115 | -0.22964  |
| 17976 | P03363 | Q02153 | -0.3054   |
| 17977 | P03363 | Q9C0B9 | -0.20314  |
| 17978 | P03363 | Q5JTN6 | -0.22795  |
| 17979 | P03363 | P54762 | -0.37152  |
| 17980 | P03363 | O00154 | -0.18968  |
| 17981 | P03363 | Q9NZL6 | -0.2273   |
| 17982 | P03363 | P57796 | -0.24475  |
| 17983 | P03363 | B5MCY1 | -0.22596  |
| 17984 | P03363 | Q5VY80 | -0.29419  |
| 17985 | P03363 | P53621 | -0.22794  |
| 17986 | P03363 | P18440 | -0.22837  |
| 17987 | P03363 | O60279 | -0.40488  |
| 17988 | P03363 | Q8N568 | -0.35898  |
| 17989 | P03363 | Q86SJ2 | -0.22747  |
| 17990 | P03363 | Q6IMI4 | -0.23542  |
| 17991 | P03363 | Q2KHT4 | -0.51438  |
| 17992 | P03363 | Q9H6X2 | -0.23135  |
| 17993 | P03363 | Q8WWQ8 | -0.41622  |
| 17994 | P03363 | Q9UEU0 | -0.22159  |
| 17995 | P03363 | Q9UGL1 | -0.23493  |
| 17996 | P03363 | P62330 | -0.22744  |
| 17997 | P03363 | Q16878 | -0.27043  |
| 17998 | P03363 | Q6UXF1 | -0.19872  |
| 17999 | P03363 | Q8N957 | -0.22738  |
| 18000 | P03363 | E5RHQ5 | -0.21823  |
| 18001 | P03363 | O95672 | -0.62871  |
| 18002 | P03363 | O60245 | -0.67055  |
| 18003 | P03363 | Q6PCB0 | -0.45668  |
| 18004 | P03363 | A6NHQ4 | -0.02821  |
| 18005 | P03363 | Q504U0 | -0.17137  |
| 18006 | P03363 | Q8IUE6 | -0.27973  |
| 18007 | P03363 | Q9P0P0 | -0.22824  |
| 18008 | P03363 | P30495 | -0.54957  |
| 18009 | P03363 | Q9ULB5 | -0.56365  |
| 18010 | P03363 | Q14683 | -0.3347   |
| 18011 | P03363 | Q8TCF1 | -0.16055  |
| 18012 | P03363 | Q86VD9 | -0.46666  |

|       |        |        |           |
|-------|--------|--------|-----------|
| 18013 | P03363 | Q4VCS5 | -0.19877  |
| 18014 | P03363 | Q96FZ7 | -0.19491  |
| 18015 | P03363 | Q9UBM8 | -0.32267  |
| 18016 | P03363 | P29317 | -0.35285  |
| 18017 | P03363 | Q9NY15 | -0.50707  |
| 18018 | P03363 | Q01449 | -0.22726  |
| 18019 | P03363 | Q7Z3D6 | -0.19653  |
| 18020 | P03363 | Q9UKK9 | -0.23204  |
| 18021 | P03363 | Q9Y6L6 | -0.50407  |
| 18022 | P03363 | Q9UBC5 | -0.18916  |
| 18023 | P03363 | Q01955 | -0.23795  |
| 18024 | P03363 | Q5VTL7 | -0.33992  |
| 18025 | P03363 | Q5VT25 | -0.22749  |
| 18026 | P03363 | P09936 | -0.216    |
| 18027 | P03363 | Q0VG73 | -0.042737 |
| 18028 | P03363 | Q13444 | -0.27124  |
| 18029 | P03363 | Q86W28 | -0.2274   |
| 18030 | P03363 | P01624 | -0.54902  |
| 18031 | P03363 | Q9NS71 | -0.21325  |
| 18032 | P03363 | Q9NSI2 | -0.031359 |
| 18033 | P03363 | Q9BXT8 | -0.22922  |
| 18034 | P03363 | O00124 | -0.12592  |
| 18035 | P03363 | Q9NRH1 | -0.069835 |
| 18036 | P03363 | O43731 | -0.2766   |
| 18037 | P03363 | Q9UJV3 | -0.22846  |
| 18038 | P03363 | P60568 | -0.2597   |
| 18039 | P03363 | Q96QH8 | -0.29732  |
| 18040 | P03363 | Q15672 | -0.22762  |
| 18041 | P03363 | O75556 | -0.22985  |
| 18042 | P03363 | P22736 | -0.22808  |
| 18043 | P03363 | P02778 | -0.51559  |
| 18044 | P03363 | Q12791 | -0.34761  |
| 18045 | P03363 | Q15439 | -0.54922  |
| 18046 | P03363 | Q9UNW1 | -0.20467  |
| 18047 | P03363 | O00764 | -0.21884  |
| 18048 | P03363 | Q8NDX6 | -0.22628  |
| 18049 | P03363 | O95428 | -0.51443  |
| 18050 | P03363 | Q9Y2G8 | -0.36788  |
| 18051 | P03363 | O15195 | -0.20823  |
| 18052 | P03363 | Q6Q0C0 | -0.23016  |
| 18053 | P03363 | Q9HA90 | -0.031359 |
| 18054 | P03363 | Q8WXI8 | -0.32532  |
| 18055 | P03363 | P51451 | -0.66614  |
| 18056 | P03363 | Q8TDU9 | -0.62825  |
| 18057 | P03363 | Q8WTQ4 | -0.13303  |
| 18058 | P03363 | O43614 | -0.68287  |
| 18059 | P03363 | Q9UFE4 | -0.15675  |
| 18060 | P03363 | Q13433 | -0.56677  |
| 18061 | P03363 | P06340 | -0.54085  |
| 18062 | P03363 | Q8IZU2 | -0.22743  |
| 18063 | P03363 | P13473 | -0.44899  |
| 18064 | P03363 | Q6UXL0 | -0.29572  |
| 18065 | P03363 | Q6BCY4 | -0.34946  |
| 18066 | P03363 | Q9NRQ2 | -0.16242  |
| 18067 | P03363 | P0C854 | -0.33992  |
| 18068 | P03363 | O15529 | -0.73419  |
| 18069 | P03363 | P01742 | -0.54902  |
| 18070 | P03363 | A1E959 | -0.28539  |
| 18071 | P03363 | O15269 | -0.18106  |
| 18072 | P03363 | P30988 | -0.2968   |
| 18073 | P03363 | Q96FJ8 | -0.042737 |
| 18074 | P03363 | Q8WVZ1 | -0.4627   |
| 18075 | P03363 | P22680 | -0.53501  |
| 18076 | P03363 | P62875 | -0.10523  |
| 18077 | P03363 | P43681 | -0.41135  |
| 18078 | P03363 | Q13315 | -0.25049  |
| 18079 | P03363 | P37840 | -0.22379  |
| 18080 | P03363 | Q9UI42 | -0.50831  |
| 18081 | P03363 | Q8N3P4 | -0.22564  |
| 18082 | P03363 | P28161 | -0.22719  |
| 18083 | P03363 | P21266 | -0.22684  |
| 18084 | P03363 | P03886 | -0.21998  |
| 18085 | P03363 | Q8TCB7 | -0.22327  |
| 18086 | P03363 | P01622 | -0.54902  |
| 18087 | P03363 | Q8NFP9 | -0.22741  |
| 18088 | P03363 | P31751 | -0.19313  |

|       |        |        |           |
|-------|--------|--------|-----------|
| 18089 | P03363 | Q9ULD6 | -0.22739  |
| 18090 | P03363 | O43426 | -0.22734  |
| 18091 | P03363 | P13073 | -0.095196 |
| 18092 | P03363 | P15086 | -0.5706   |
| 18093 | P03363 | E5RG02 | -0.2618   |
| 18094 | P03363 | C9JJH3 | -0.23969  |
| 18095 | P03363 | Q7Z408 | -0.47262  |
| 18096 | P03363 | A6H8Z2 | -0.13902  |
| 18097 | P03363 | P49915 | -0.094751 |
| 18098 | P03363 | Q9NV39 | -0.076367 |
| 18099 | P03363 | Q6IFG1 | -0.61656  |
| 18100 | P03363 | A6NNL5 | -0.33992  |
| 18101 | P03363 | Q96LK8 | -0.21888  |
| 18102 | P03363 | P0C7M8 | -0.32927  |
| 18103 | P03363 | P0CW27 | -0.16806  |
| 18104 | P03363 | Q8N4C8 | -0.27609  |
| 18105 | P03363 | Q9HCJ1 | -0.49469  |
| 18106 | P03363 | Q86UP2 | -0.48804  |
| 18107 | P03363 | Q8TAI7 | -0.42087  |
| 18108 | P03363 | Q9Y233 | -0.22665  |
| 18109 | P03363 | Q6UWY5 | -0.33992  |
| 18110 | P03363 | P51677 | -0.67651  |
| 18111 | P03363 | Q8N9F0 | -0.30459  |
| 18112 | P03363 | P13726 | -0.21983  |
| 18113 | P03363 | P59543 | -0.51612  |
| 18114 | P03363 | P30483 | -0.54957  |
| 18115 | P03363 | Q8NDA8 | -0.030531 |
| 18116 | P03363 | Q8IZD6 | -0.35232  |
| 18117 | P03363 | Q07325 | -0.62399  |
| 18118 | P03363 | P04114 | -0.25418  |
| 18119 | P03363 | Q5H913 | -0.48282  |
| 18120 | P03363 | P58182 | -0.61656  |
| 18121 | P03363 | Q00515 | -0.25984  |
| 18122 | P03363 | Q8N130 | -0.44755  |
| 18123 | P03363 | Q16602 | -0.35784  |
| 18124 | P03363 | O60858 | -0.22734  |
| 18125 | P03363 | P07237 | -0.30043  |
| 18126 | P03363 | Q5VT52 | -0.14352  |
| 18127 | P03363 | A6NKC9 | -0.22741  |
| 18128 | P03363 | O43688 | -0.40103  |
| 18129 | P03363 | P32745 | -0.22848  |
| 18130 | P03363 | Q15126 | -0.25307  |
| 18131 | P03363 | Q9NYZ4 | -0.2278   |
| 18132 | P03363 | P43353 | -0.23486  |
| 18133 | P03363 | Q86Y38 | -0.68894  |
| 18134 | P03363 | P04180 | -0.22043  |
| 18135 | P03363 | O95988 | -0.23237  |
| 18136 | P03363 | Q9H2U6 | -0.09431  |
| 18137 | P03363 | P05156 | -0.6135   |
| 18138 | P03363 | P07339 | -0.49995  |
| 18139 | P03363 | P33260 | -0.60561  |
| 18140 | P03363 | Q9BYW3 | -0.32366  |
| 18141 | P03363 | P20711 | -0.2966   |
| 18142 | P03363 | Q6IPR3 | -0.1137   |
| 18143 | P03363 | O75197 | -0.22746  |
| 18144 | P03363 | P55287 | -0.58473  |
| 18145 | P03363 | Q9UPM6 | -0.22741  |
| 18146 | P03363 | Q9H2M3 | -0.18873  |
| 18147 | P03363 | P25311 | -0.49741  |
| 18148 | P03363 | Q9P003 | -0.41828  |
| 18149 | P03363 | O60610 | -0.22738  |
| 18150 | P03363 | Q95630 | -0.23351  |
| 18151 | P03363 | Q9H497 | -0.21214  |
| 18152 | P03363 | Q9UBP4 | -0.45203  |
| 18153 | P03363 | Q7Z7H5 | -0.47546  |
| 18154 | P03363 | Q9UI12 | -0.17837  |
| 18155 | P03363 | Q96K19 | -0.62018  |
| 18156 | P03363 | A6NEQ2 | -0.042737 |
| 18157 | P03363 | Q9UQ88 | -0.17047  |
| 18158 | P03363 | Q53S33 | -0.23038  |
| 18159 | P03363 | Q9NRM0 | -0.3332   |
| 18160 | P03363 | Q8IY45 | -0.22419  |
| 18161 | P03363 | O95999 | -0.18661  |
| 18162 | P03363 | P59540 | -0.66425  |
| 18163 | P03363 | Q13523 | -0.22741  |
| 18164 | P03363 | Q99727 | -0.45737  |

|       |        |        |           |
|-------|--------|--------|-----------|
| 18165 | P03363 | Q6ZMY3 | -0.14946  |
| 18166 | P03363 | Q8WXC6 | -0.12948  |
| 18167 | P03363 | Q03167 | -0.24323  |
| 18168 | P03363 | Q10589 | -0.24214  |
| 18169 | P03363 | P45379 | -0.19941  |
| 18170 | P03363 | Q6PRD1 | -0.68611  |
| 18171 | P03363 | Q9P1U1 | -0.20484  |
| 18172 | P03363 | P04818 | -0.17368  |
| 18173 | P03363 | Q96KA5 | -0.31907  |
| 18174 | P03363 | Q6P474 | -0.23167  |
| 18175 | P03363 | Q9HA65 | -0.50908  |
| 18176 | P03363 | P37173 | -0.28072  |
| 18177 | P03363 | Q96Q11 | -0.13644  |
| 18178 | P03363 | Q5VTB9 | -0.22739  |
| 18179 | P03363 | Q14032 | -0.22127  |
| 18180 | P03363 | P35030 | -0.32521  |
| 18181 | P03363 | Q14155 | -0.22741  |
| 18182 | P03363 | Q9UHG2 | -0.43594  |
| 18183 | P03363 | O76081 | -0.22753  |
| 18184 | P03363 | B2RN74 | -0.61656  |
| 18185 | P03363 | Q9C0D5 | -0.22742  |
| 18186 | P03363 | Q9BZ29 | -0.22715  |
| 18187 | P03363 | Q16322 | -0.41009  |
| 18188 | P03363 | Q8N945 | -0.17428  |
| 18189 | P03363 | Q96JB3 | -0.17993  |
| 18190 | P03363 | P59861 | -0.33516  |
| 18191 | P03363 | Q8IX18 | -0.22529  |
| 18192 | P03363 | P41279 | -0.22735  |
| 18193 | P03363 | O75844 | -0.58365  |
| 18194 | P03363 | Q86TY3 | -0.32626  |
| 18195 | P03363 | P52823 | -0.26403  |
| 18196 | P03363 | Q9ULK6 | -0.47964  |
| 18197 | P03363 | P23352 | -0.32708  |
| 18198 | P03363 | Q0IIN9 | -0.064538 |
| 18199 | P03363 | Q9Y4W6 | -0.33456  |
| 18200 | P03363 | P20155 | -0.35072  |
| 18201 | P03363 | Q8NG77 | -0.61656  |
| 18202 | P03363 | O00300 | -0.48872  |
| 18203 | P03363 | Q9H967 | -0.22735  |
| 18204 | P03363 | Q2TAL6 | -0.42714  |
| 18205 | P03363 | P62683 | -0.21393  |
| 18206 | P03363 | P35613 | -0.22741  |
| 18207 | P03363 | Q86WS3 | -0.33992  |
| 18208 | P03363 | Q96II8 | -0.33992  |
| 18209 | P03363 | O43739 | -0.22741  |
| 18210 | P03363 | O60861 | -0.22741  |
| 18211 | P03363 | Q9C0A6 | -0.22642  |
| 18212 | P03363 | P0C7M6 | -0.18696  |
| 18213 | P03363 | Q96G91 | -0.63694  |
| 18214 | P03363 | Q9NQ75 | -0.22606  |
| 18215 | P03363 | Q14696 | -0.13354  |
| 18216 | P03363 | P16520 | -0.22277  |
| 18217 | P03363 | Q96JH8 | -0.23808  |
| 18218 | P03363 | O94812 | -0.22889  |
| 18219 | P03363 | Q9Y5H8 | -0.62883  |
| 18220 | P03363 | P61964 | -0.3404   |
| 18221 | P03363 | P38571 | -0.22596  |
| 18222 | P03363 | Q7Z5R6 | -0.22853  |
| 18223 | P03363 | Q6ZST2 | -0.21835  |
| 18224 | P03363 | P04234 | -0.22961  |
| 18225 | P03363 | Q2PZI1 | -0.32626  |
| 18226 | P03363 | Q9HAP6 | -0.21754  |
| 18227 | P03363 | P02774 | -0.3861   |
| 18228 | P03363 | Q13698 | -0.32834  |
| 18229 | P03363 | P04083 | -0.17477  |
| 18230 | P03363 | P01023 | -0.26879  |
| 18231 | P03363 | P01733 | -0.22296  |
| 18232 | P03363 | Q96GE6 | -0.22729  |
| 18233 | P03363 | Q14543 | -0.22741  |
| 18234 | P03363 | Q6UWB1 | -0.47032  |
| 18235 | P03363 | Q5I0G3 | -0.28296  |
| 18236 | P03363 | Q9Y6L7 | -0.64661  |
| 18237 | P03363 | Q9BUJ0 | -0.20948  |
| 18238 | P03363 | Q9BSG0 | -0.33992  |
| 18239 | P03363 | P37088 | -0.21282  |
| 18240 | P03363 | P56199 | -0.2274   |

|       |        |        |           |
|-------|--------|--------|-----------|
| 18241 | P03363 | P55017 | -0.2171   |
| 18242 | P03363 | Q9GZZ7 | -0.59574  |
| 18243 | P03363 | D3W0D1 | -0.24742  |
| 18244 | P03363 | Q6PIU2 | -0.42052  |
| 18245 | P03363 | Q9H2G2 | -0.51101  |
| 18246 | P03363 | Q9H6X5 | -0.16774  |
| 18247 | P03363 | Q9NX55 | -0.10888  |
| 18248 | P03363 | Q9H4D0 | -0.6479   |
| 18249 | P03363 | Q7LFX5 | -0.33235  |
| 18250 | P03363 | O75054 | -0.32626  |
| 18251 | P03363 | Q86VH4 | -0.32626  |
| 18252 | P03363 | Q7RTR0 | -0.22716  |
| 18253 | P03363 | Q9BX95 | -0.43822  |
| 18254 | P03363 | O15353 | -0.26663  |
| 18255 | P03363 | Q13387 | -0.2203   |
| 18256 | P03363 | O60229 | -0.46301  |
| 18257 | P03363 | A6NFR6 | -0.32626  |
| 18258 | P03363 | Q6ZMH5 | -0.43361  |
| 18259 | P03363 | Q9BZA7 | -0.68027  |
| 18260 | P03363 | Q7L014 | -0.30115  |
| 18261 | P03363 | O43741 | -0.28903  |
| 18262 | P03363 | P35968 | -0.27819  |
| 18263 | P03363 | P98088 | -0.46839  |
| 18264 | P03363 | Q9NZU1 | -0.48434  |
| 18265 | P03363 | A6NEQ9 | -0.042737 |
| 18266 | P03363 | Q9ULS6 | -0.41606  |
| 18267 | P03363 | Q15063 | -0.53228  |
| 18268 | P03363 | Q6ISS4 | -0.33992  |
| 18269 | P03363 | P09038 | -0.27421  |
| 18270 | P03363 | Q1A5X6 | -0.031359 |
| 18271 | P03363 | Q08209 | -0.20213  |
| 18272 | P03363 | P59894 | -0.12647  |
| 18273 | P03363 | Q9BQE4 | -0.11166  |
| 18274 | P03363 | Q8N7B9 | -0.22734  |
| 18275 | P03363 | P11908 | -0.36819  |
| 18276 | P03363 | P78417 | -0.22706  |
| 18277 | P03363 | Q9BQS8 | -0.2272   |
| 18278 | P03363 | O60658 | -0.2273   |
| 18279 | P03363 | Q8TB73 | -0.38679  |
| 18280 | P03363 | P43630 | -0.5719   |
| 18281 | P03363 | Q9H354 | -0.32626  |
| 18282 | P03363 | Q96QD5 | -0.19299  |
| 18283 | P03363 | P49916 | -0.22672  |
| 18284 | P03363 | C9J442 | -0.33992  |
| 18285 | P03363 | O43613 | -0.69909  |
| 18286 | P03363 | Q13202 | -0.25955  |
| 18287 | P03363 | Q8N9S7 | -0.32626  |
| 18288 | P03363 | Q8N8E2 | -0.18575  |
| 18289 | P03363 | Q96LZ3 | -0.22772  |
| 18290 | P03363 | Q2M238 | -0.15204  |
| 18291 | P03363 | P50443 | -0.55393  |
| 18292 | P03363 | Q9H7P9 | -0.22734  |
| 18293 | P03363 | A2VCL2 | -0.21768  |
| 18294 | P03363 | Q5TEA3 | -0.14351  |
| 18295 | P03363 | P23142 | -0.49798  |
| 18296 | P03363 | P05451 | -0.27761  |
| 18297 | P03363 | Q3ZCW2 | -0.20012  |
| 18298 | P03363 | P54803 | -0.15735  |
| 18299 | P03363 | O43852 | -0.22725  |
| 18300 | P03363 | Q9Y2G3 | -0.38877  |
| 18301 | P03363 | Q9H361 | -0.22904  |
| 18302 | P03363 | Q9BTV4 | -0.22292  |
| 18303 | P03363 | Q9HBA9 | -0.21964  |
| 18304 | P03363 | P32121 | -0.26282  |
| 18305 | P03363 | P50213 | -0.19612  |
| 18306 | P03363 | Q9UBQ7 | -0.26919  |
| 18307 | P03363 | O75095 | -0.22741  |
| 18308 | P03363 | P0C0L5 | -0.67108  |
| 18309 | P03363 | Q8NDX1 | -0.33061  |
| 18310 | P03363 | Q9P2U8 | -0.32185  |
| 18311 | P03363 | Q5VW36 | -0.20777  |
| 18312 | P03363 | Q8NGH9 | -0.61656  |
| 18313 | P03363 | Q9Y371 | -0.2274   |
| 18314 | P03363 | Q9BSE2 | -0.32626  |
| 18315 | P03363 | Q5JYT7 | -0.18575  |
| 18316 | P03363 | Q9Y653 | -0.79559  |

|       |        |        |           |
|-------|--------|--------|-----------|
| 18317 | P03363 | Q9NXS2 | -0.49195  |
| 18318 | P03363 | Q9H7V2 | -0.48082  |
| 18319 | P03363 | Q9H2E6 | -0.22739  |
| 18320 | P03363 | Q4ZG55 | -0.32626  |
| 18321 | P03363 | Q4LDE5 | -0.22792  |
| 18322 | P03363 | Q9Y2U5 | -0.35801  |
| 18323 | P03363 | Q8NAC3 | -0.45777  |
| 18324 | P03363 | Q8NG75 | -0.61656  |
| 18325 | P03363 | O60811 | -0.20016  |
| 18326 | P03363 | Q7LDI9 | -0.21154  |
| 18327 | P03363 | Q4JDL3 | -0.23037  |
| 18328 | P03363 | Q96MT0 | -0.21721  |
| 18329 | P03363 | Q9BZG9 | -0.68623  |
| 18330 | P03363 | Q8NER5 | -0.58323  |
| 18331 | P03363 | Q6IA69 | -0.16384  |
| 18332 | P03363 | Q6RW13 | -0.092081 |
| 18333 | P03363 | Q96AN5 | -0.24657  |
| 18334 | P03363 | Q8WUP2 | -0.2133   |
| 18335 | P03363 | Q9HCP6 | -0.46293  |
| 18336 | P03363 | Q14330 | -0.62051  |
| 18337 | P03363 | Q96L33 | -0.70485  |
| 18338 | P03363 | O15033 | -0.22803  |
| 18339 | P03363 | P0C7T8 | -0.32626  |
| 18340 | P03363 | P14415 | -0.19337  |
| 18341 | P03363 | Q9UJJ9 | -0.33475  |
| 18342 | P03363 | Q96DR4 | -0.26922  |
| 18343 | P03363 | Q5TC04 | -0.1487   |
| 18344 | P03363 | P51805 | -0.53086  |
| 18345 | P03363 | Q96R54 | -0.61656  |
| 18346 | P03363 | A6NND4 | -0.61656  |
| 18347 | P03363 | Q9NYJ1 | -0.018863 |
| 18348 | P03363 | Q6NT16 | -0.30406  |
| 18349 | P03363 | P55285 | -0.30662  |
| 18350 | P03363 | Q9BW72 | -0.25169  |
| 18351 | P03363 | Q9H4A4 | -0.55883  |
| 18352 | P03363 | Q99502 | -0.16128  |
| 18353 | P03363 | Q86XJ0 | -0.32626  |
| 18354 | P03363 | Q9NPC4 | -0.36536  |
| 18355 | P03363 | P53007 | -0.23231  |
| 18356 | P03363 | O15194 | -0.15848  |
| 18357 | P03363 | P02812 | -0.23038  |
| 18358 | P03363 | P40261 | -0.21281  |
| 18359 | P03363 | Q12948 | -0.25046  |
| 18360 | P03363 | Q8NGC5 | -0.61656  |
| 18361 | P03363 | P67812 | -0.44921  |
| 18362 | P03363 | Q8NGG0 | -0.61656  |
| 18363 | P03363 | Q8WXT5 | -0.29843  |
| 18364 | P03363 | Q08257 | -0.25528  |
| 18365 | P03363 | Q5EBL8 | -0.22723  |
| 18366 | P03363 | P15514 | -0.33363  |
| 18367 | P03363 | P18428 | -0.23458  |
| 18368 | P03363 | Q9NR30 | -0.22977  |
| 18369 | P03363 | Q8N4M1 | -0.44361  |
| 18370 | P03363 | Q9UKT6 | -0.21238  |
| 18371 | P03363 | Q92911 | -0.37385  |
| 18372 | P03363 | Q96DW6 | -0.28924  |
| 18373 | P03363 | Q99624 | -0.51284  |
| 18374 | P03363 | Q86X76 | -0.22078  |
| 18375 | P03363 | Q5TBK1 | -0.19758  |
| 18376 | P03363 | Q5TD97 | -0.22146  |
| 18377 | P03363 | Q4VC12 | -0.22595  |
| 18378 | P03363 | O43166 | -0.22739  |
| 18379 | P03363 | Q02509 | -0.28085  |
| 18380 | P03363 | Q7L591 | -0.18995  |
| 18381 | P03363 | Q9UFC0 | -0.2949   |
| 18382 | P03363 | Q9H3R1 | -0.29396  |
| 18383 | P03363 | Q3ZCV2 | -0.031359 |
| 18384 | P03363 | P27487 | -0.40131  |
| 18385 | P03363 | Q8NDZ9 | -0.042737 |
| 18386 | P03363 | Q96JK4 | -0.29017  |
| 18387 | P03363 | Q9BZ68 | -0.20754  |
| 18388 | P03363 | P14618 | -0.21087  |
| 18389 | P03363 | Q8NET1 | -0.33516  |
| 18390 | P03363 | O00634 | -0.2906   |
| 18391 | P03363 | P31371 | -0.32893  |
| 18392 | P03363 | Q9P0M6 | -0.29769  |

|       |        |        |           |
|-------|--------|--------|-----------|
| 18393 | P03363 | Q96PF2 | -0.25366  |
| 18394 | P03363 | Q6UYE1 | -0.037214 |
| 18395 | P03363 | O00501 | -0.22055  |
| 18396 | P03363 | Q3SXR2 | -0.10139  |
| 18397 | P03363 | O14960 | -0.3092   |
| 18398 | P03363 | Q9UQ05 | -0.47839  |
| 18399 | P03363 | Q587J7 | -0.2307   |
| 18400 | P03363 | Q86YN1 | -0.43916  |
| 18401 | P03363 | P22459 | -0.22552  |
| 18402 | P03363 | Q5JX71 | -0.32626  |
| 18403 | P03363 | Q9NS61 | -0.23215  |
| 18404 | P03363 | Q8N966 | -0.4627   |
| 18405 | P03363 | Q5THK1 | -0.075248 |
| 18406 | P03363 | P19367 | -0.22358  |
| 18407 | P03363 | P06753 | -0.21864  |
| 18408 | P03363 | Q68DV7 | -0.22876  |
| 18409 | P03363 | Q96IZ6 | -0.21587  |
| 18410 | P03363 | B2RPK0 | -0.22801  |
| 18411 | P03363 | Q5VXD3 | -0.17799  |
| 18412 | P03363 | Q5BKU9 | -0.14344  |
| 18413 | P03363 | Q2TAL5 | -0.22762  |
| 18414 | P03363 | P01571 | -0.39802  |
| 18415 | P03363 | O43281 | -0.22657  |
| 18416 | P03363 | Q9HCN4 | -0.22444  |
| 18417 | P03363 | Q53TN4 | -0.63677  |
| 18418 | P03363 | Q8N114 | -0.25764  |
| 18419 | P03363 | Q9NSI5 | -0.22758  |
| 18420 | P03363 | Q9UKP5 | -0.59199  |
| 18421 | P03363 | Q9BXT4 | -0.22721  |
| 18422 | P03363 | Q6NUM9 | -0.44237  |
| 18423 | P03363 | P0CV98 | -0.13002  |
| 18424 | P03363 | Q7Z6L1 | -0.19621  |
| 18425 | P03363 | Q5T7W0 | -0.22727  |
| 18426 | P03363 | Q13873 | -0.2953   |
| 18427 | P03363 | Q8WUM9 | -0.59919  |
| 18428 | P03363 | P10082 | -0.38376  |
| 18429 | P03363 | Q96T55 | -0.54503  |
| 18430 | P03363 | Q9HCE9 | -0.44623  |
| 18431 | P03363 | Q15782 | -0.36534  |
| 18432 | P03363 | P01781 | -0.54902  |
| 18433 | P03363 | P30711 | -0.22692  |
| 18434 | P03363 | Q96EY4 | -0.074182 |
| 18435 | P03363 | P01906 | -0.59202  |
| 18436 | P03363 | P54819 | -0.34472  |
| 18437 | P03363 | Q96FV2 | -0.03849  |
| 18438 | P03363 | Q9HA58 | -0.042737 |
| 18439 | P03363 | Q6UWY0 | -0.37914  |
| 18440 | P03363 | Q06430 | -0.40075  |
| 18441 | P03363 | O43505 | -0.30641  |
| 18442 | P03363 | O43272 | -0.24014  |
| 18443 | P03363 | P00751 | -0.57518  |
| 18444 | P03363 | A4D0V7 | -0.070267 |
| 18445 | P03363 | Q9NPA2 | -0.70446  |
| 18446 | P03363 | A6NCQ9 | -0.47964  |
| 18447 | P03363 | Q86YI8 | -0.24474  |
| 18448 | P03363 | Q13009 | -0.29369  |
| 18449 | P03363 | Q6FI13 | -0.29262  |
| 18450 | P03363 | O94832 | -0.22917  |
| 18451 | P03363 | Q9NRP0 | -0.31703  |
| 18452 | P03363 | Q9NZP5 | -0.61656  |
| 18453 | P03363 | D6RCP7 | -0.25139  |
| 18454 | P03363 | Q9Y345 | -0.43607  |
| 18455 | P03363 | Q8NGR1 | -0.61656  |
| 18456 | P03363 | Q6ZSG1 | -0.23091  |
| 18457 | P03363 | Q99519 | -0.27248  |
| 18458 | P03363 | Q9BXN1 | -0.39628  |
| 18459 | P03363 | Q8NCM2 | -0.43963  |
| 18460 | P03363 | Q6ZN04 | -0.2274   |
| 18461 | P03363 | Q99584 | -0.23178  |
| 18462 | P03363 | Q96TA2 | -0.64279  |
| 18463 | P03363 | O75871 | -0.43294  |
| 18464 | P03363 | Q8NG11 | -0.32626  |
| 18465 | P03363 | P25100 | -0.64252  |
| 18466 | P03363 | Q9NY72 | -0.36192  |
| 18467 | P03363 | Q9NQC3 | -0.1812   |
| 18468 | P03363 | P0C7I0 | -0.24582  |



|       |        |        |           |
|-------|--------|--------|-----------|
| 18469 | P03363 | Q8NGE7 | -0.61656  |
| 18470 | P03363 | Q9UBS0 | -0.305    |
| 18471 | P03363 | C9J1S8 | -0.27953  |
| 18472 | P03363 | Q96DC9 | -0.21264  |
| 18473 | P03363 | Q8NHU0 | -0.15722  |
| 18474 | P03363 | P22362 | -0.60162  |
| 18475 | P03363 | Q16394 | -0.40738  |
| 18476 | P03363 | A8MX76 | -0.33515  |
| 18477 | P03363 | Q9NNZ3 | -0.2843   |
| 18478 | P03363 | Q6UX68 | -0.32626  |
| 18479 | P03363 | O95947 | -0.5381   |
| 18480 | P03363 | O95424 | -0.12046  |
| 18481 | P03363 | Q496F6 | -0.47262  |
| 18482 | P03363 | Q6P6C2 | -0.37907  |
| 18483 | P03363 | P25942 | -0.32287  |
| 18484 | P03363 | P42858 | -0.20076  |
| 18485 | P03363 | Q7Z6G8 | -0.22743  |
| 18486 | P03363 | Q9C029 | -0.22886  |
| 18487 | P03363 | O14678 | -0.66061  |
| 18488 | P03363 | O43307 | -0.22741  |
| 18489 | P03363 | Q92786 | -0.21988  |
| 18490 | P03363 | Q9BV36 | -0.21872  |
| 18491 | P03363 | B1AJZ9 | -0.20838  |
| 18492 | P03363 | Q9P2D8 | -0.32626  |
| 18493 | P03363 | O60637 | -0.32626  |
| 18494 | P03363 | Q15345 | -0.20513  |
| 18495 | P03363 | Q5TGL8 | -0.22655  |
| 18496 | P03363 | Q10471 | -0.48837  |
| 18497 | P03363 | Q6ZRP0 | -0.031359 |
| 18498 | P03363 | P62070 | -0.35578  |
| 18499 | P03363 | P78310 | -0.22741  |
| 18500 | P03363 | Q9NYW0 | -0.47677  |
| 18501 | P03363 | Q86X29 | -0.43753  |
| 18502 | P03363 | Q68G74 | -0.22741  |
| 18503 | P03363 | O95258 | -0.39246  |
| 18504 | P03363 | Q99969 | -0.20629  |
| 18505 | P03363 | P54829 | -0.64499  |
| 18506 | P03363 | Q9NST1 | -0.34466  |
| 18507 | P03363 | Q6F5E7 | -0.10102  |
| 18508 | P03363 | Q96PH1 | -0.52682  |
| 18509 | P03363 | Q9UKB3 | -0.23854  |
| 18510 | P03363 | Q5TON1 | -0.21278  |
| 18511 | P03363 | P32248 | -0.35086  |
| 18512 | P03363 | Q96GA7 | -0.20022  |
| 18513 | P03363 | Q13939 | -0.20128  |
| 18514 | P03363 | Q6UXR8 | -0.042737 |
| 18515 | P03363 | Q9NU53 | -0.32626  |
| 18516 | P03363 | Q96BZ4 | -0.34273  |
| 18517 | P03363 | Q8IYA2 | -0.22107  |
| 18518 | P03363 | Q14123 | -0.22664  |
| 18519 | P03363 | Q8NHQ8 | -0.055927 |
| 18520 | P03363 | Q13145 | -0.24735  |
| 18521 | P03363 | A9Z1Z3 | -0.32626  |
| 18522 | P03363 | Q8NHB7 | -0.61656  |
| 18523 | P03363 | Q9BSJ1 | -0.27995  |
| 18524 | P03363 | Q0VD67 | -0.27168  |
| 18525 | P03363 | P0C870 | -0.20927  |
| 18526 | P03363 | P42701 | -0.35731  |
| 18527 | P03363 | Q96GE9 | -0.32626  |
| 18528 | P03363 | Q9H9J4 | -0.26347  |
| 18529 | P03363 | P12532 | -0.47546  |
| 18530 | P03363 | P29017 | -0.59243  |
| 18531 | P03363 | P01767 | -0.54902  |
| 18532 | P03363 | Q9Y6Q5 | -0.21496  |
| 18533 | P03363 | Q16827 | -0.27429  |
| 18534 | P03363 | Q8N4E7 | -0.19145  |
| 18535 | P03363 | Q15904 | -0.41354  |
| 18536 | P03363 | A6NCW0 | -0.2401   |
| 18537 | P03363 | Q8NG04 | -0.29817  |
| 18538 | P03363 | Q6W3E5 | -0.40128  |
| 18539 | P03363 | A5D6W6 | -0.42768  |
| 18540 | P03363 | O43293 | -0.22756  |
| 18541 | P03363 | Q8NHG7 | -0.26031  |
| 18542 | P03363 | P54764 | -0.34064  |
| 18543 | P03363 | Q9H2Q1 | -0.32626  |
| 18544 | P03363 | O94856 | -0.49965  |

|       |        |        |           |
|-------|--------|--------|-----------|
| 18545 | P03363 | Q5RIA9 | -0.24873  |
| 18546 | P03363 | P29401 | -0.19856  |
| 18547 | P03363 | Q6ZSN7 | -0.075264 |
| 18548 | P03363 | Q9Y3I0 | -0.084419 |
| 18549 | P03363 | Q68EM7 | -0.2694   |
| 18550 | P03363 | Q8WXF0 | -0.22591  |
| 18551 | P03363 | P30456 | -0.35929  |
| 18552 | P03363 | O75387 | -0.55184  |
| 18553 | P03363 | Q5VUB5 | -0.32626  |
| 18554 | P03363 | Q9BTT6 | -0.23075  |
| 18555 | P03363 | Q8N1C3 | -0.38655  |
| 18556 | P03363 | Q8NGM8 | -0.61656  |
| 18557 | P03363 | Q9HC16 | -0.41249  |
| 18558 | P03363 | P02743 | -0.44664  |
| 18559 | P03363 | Q9P000 | -0.12129  |
| 18560 | P03363 | P35070 | -0.69487  |
| 18561 | P03363 | Q9NRX6 | -0.28673  |
| 18562 | P03363 | Q16762 | -0.17704  |
| 18563 | P03363 | Q9H2X8 | -0.32626  |
| 18564 | P03363 | Q9GZV7 | -0.43243  |
| 18565 | P03363 | Q8WY64 | -0.22741  |
| 18566 | P03363 | Q68DA7 | -0.2261   |
| 18567 | P03363 | Q8N910 | -0.18111  |
| 18568 | P03363 | Q11203 | -0.50204  |
| 18569 | P03363 | C9JI98 | -0.32626  |
| 18570 | P03363 | P49418 | -0.2274   |
| 18571 | P03363 | H0UI37 | -0.15784  |
| 18572 | P03363 | P29972 | -0.22736  |
| 18573 | P03363 | Q71RC2 | -0.096758 |
| 18574 | P03363 | P19320 | -0.41782  |
| 18575 | P03363 | Q86X59 | -0.21334  |
| 18576 | P03363 | Q9Y581 | -0.25876  |
| 18577 | P03363 | Q60674 | -0.22765  |
| 18578 | P03363 | Q08116 | -0.22742  |
| 18579 | P03363 | Q96LP2 | -0.13795  |
| 18580 | P03363 | P00390 | -0.22713  |
| 18581 | P03363 | E9PIF3 | -0.19808  |
| 18582 | P03363 | Q96N96 | -0.22744  |
| 18583 | P03363 | Q92963 | -0.22744  |
| 18584 | P03363 | Q6QHC5 | -0.63085  |
| 18585 | P03363 | Q92187 | -0.24034  |
| 18586 | P03363 | Q9Y5F8 | -0.57898  |
| 18587 | P03363 | Q15124 | -0.19089  |
| 18588 | P03363 | Q96D05 | -0.32626  |
| 18589 | P03363 | Q9NY57 | -0.63188  |
| 18590 | P03363 | Q14324 | -0.22931  |
| 18591 | P03363 | Q8N884 | -0.21352  |
| 18592 | P03363 | O43155 | -0.48434  |
| 18593 | P03363 | Q7Z434 | -0.16362  |
| 18594 | P03363 | Q96M66 | -0.24     |
| 18595 | P03363 | Q8IYW4 | -0.17387  |
| 18596 | P03363 | Q29960 | -0.75152  |
| 18597 | P03363 | P18545 | -0.093866 |
| 18598 | P03363 | P29973 | -0.65806  |
| 18599 | P03363 | Q8NGT2 | -0.61656  |
| 18600 | P03363 | Q9NQ35 | -0.12754  |
| 18601 | P03363 | Q99501 | -0.20358  |
| 18602 | P03363 | Q9NZQ7 | -0.25301  |
| 18603 | P03363 | O43543 | -0.21376  |
| 18604 | P03363 | Q9NRH2 | -0.50722  |
| 18605 | P03363 | Q12965 | -0.2146   |
| 18606 | P03363 | Q95757 | -0.22676  |
| 18607 | P03363 | Q9UHA4 | -0.16234  |
| 18608 | P03363 | Q8WWQ2 | -0.65234  |
| 18609 | P03363 | O15320 | -0.22222  |
| 18610 | P03363 | Q49AJ0 | -0.16333  |
| 18611 | P03363 | P28838 | -0.094257 |
| 18612 | P03363 | P24394 | -0.55561  |
| 18613 | P03363 | P09848 | -0.38187  |
| 18614 | P03363 | Q9Y3B3 | -0.3001   |
| 18615 | P03363 | Q96LB9 | -0.49328  |
| 18616 | P03363 | P19793 | -0.22983  |
| 18617 | P03363 | P27824 | -0.18975  |
| 18618 | P03363 | Q9Y5C1 | -0.38236  |
| 18619 | P03363 | Q96NH3 | -0.29605  |
| 18620 | P03363 | Q9Y5G1 | -0.57898  |

|       |        |        |           |
|-------|--------|--------|-----------|
| 18621 | P03363 | O95626 | -0.21796  |
| 18622 | P03363 | Q12846 | -0.22976  |
| 18623 | P03363 | Q92619 | -0.4549   |
| 18624 | P03363 | Q14950 | -0.22723  |
| 18625 | P03363 | Q14566 | -0.21452  |
| 18626 | P03363 | P23469 | -0.22861  |
| 18627 | P03363 | Q5VYP0 | -0.32626  |
| 18628 | P03363 | P07510 | -0.54158  |
| 18629 | P03363 | O43861 | -0.40966  |
| 18630 | P03363 | Q9UG63 | -0.33445  |
| 18631 | P03363 | P24347 | -0.65341  |
| 18632 | P03363 | P50281 | -0.22742  |
| 18633 | P03363 | Q03013 | -0.22632  |
| 18634 | P03363 | Q96BY7 | -0.1528   |
| 18635 | P03363 | Q9H0R5 | -0.23224  |
| 18636 | P03363 | P40145 | -0.57493  |
| 18637 | P03363 | P05305 | -0.23355  |
| 18638 | P03363 | P49662 | -0.27101  |
| 18639 | P03363 | B0FP48 | -0.32626  |
| 18640 | P03363 | Q5VU69 | -0.085967 |
| 18641 | P03363 | Q95620 | -0.25666  |
| 18642 | P03363 | Q6P444 | -0.1062   |
| 18643 | P03363 | P28325 | -0.23046  |
| 18644 | P03363 | Q9BU70 | -0.21371  |
| 18645 | P03363 | Q86U10 | -0.22739  |
| 18646 | P03363 | Q9H2C2 | -0.35952  |
| 18647 | P03363 | Q6YBV0 | -0.3046   |
| 18648 | P03363 | P53667 | -0.22741  |
| 18649 | P03363 | P0C604 | -0.61656  |
| 18650 | P03363 | O75596 | -0.38807  |
| 18651 | P03363 | Q9H5Z1 | -0.22674  |
| 18652 | P03363 | P51843 | -0.22737  |
| 18653 | P03363 | Q9BZV2 | -0.38773  |
| 18654 | P03363 | Q13753 | -0.53204  |
| 18655 | P03363 | Q9P2H5 | -0.26023  |
| 18656 | P03363 | O15537 | -0.49316  |
| 18657 | P03363 | B1AKI9 | -0.33992  |
| 18658 | P03363 | A8MUM7 | -0.21647  |
| 18659 | P03363 | Q9UBS5 | -0.35408  |
| 18660 | P03363 | Q9HD43 | -0.22741  |
| 18661 | P03363 | Q9NY25 | -0.45821  |
| 18662 | P03363 | P78527 | -0.25335  |
| 18663 | P03363 | Q9BVK2 | -0.4418   |
| 18664 | P03363 | Q6L9T8 | -0.046967 |
| 18665 | P03363 | Q68DH5 | -0.32626  |
| 18666 | P03363 | B3EWG3 | -0.031359 |
| 18667 | P03363 | Q5VZ72 | -0.44899  |
| 18668 | P03363 | P23470 | -0.57696  |
| 18669 | P03363 | Q5JS54 | -0.052299 |
| 18670 | P03363 | Q9H427 | -0.40837  |
| 18671 | P03363 | Q96AD5 | -0.40051  |
| 18672 | P03363 | Q14931 | -0.61909  |
| 18673 | P03363 | Q96013 | -0.38847  |
| 18674 | P03363 | P35520 | -0.22717  |
| 18675 | P03363 | Q9NX76 | -0.44009  |
| 18676 | P03363 | Q96CM4 | -0.13585  |
| 18677 | P03363 | Q9UNI1 | -0.37399  |
| 18678 | P03363 | Q43678 | -0.094346 |
| 18679 | P03363 | O75344 | -0.22788  |
| 18680 | P03363 | Q14554 | -0.34832  |
| 18681 | P03363 | Q6GPH6 | -0.32626  |
| 18682 | P03363 | Q5JSQ8 | -0.16726  |
| 18683 | P03363 | P06887 | -0.54902  |
| 18684 | P03363 | Q9UHI5 | -0.24264  |
| 18685 | P03363 | Q8N158 | -0.94173  |
| 18686 | P03363 | O14544 | -0.22738  |
| 18687 | P03363 | G3V0H7 | -0.43295  |
| 18688 | P03363 | Q96BY9 | -0.14875  |
| 18689 | P03363 | Q4VC39 | -0.32626  |
| 18690 | P03363 | P04049 | -0.22741  |
| 18691 | P03363 | Q92930 | -0.37774  |
| 18692 | P03363 | Q13332 | -0.26243  |
| 18693 | P03363 | Q92611 | -0.20807  |
| 18694 | P03363 | Q9Y6Z7 | -0.22818  |
| 18695 | P03363 | O15327 | -0.19825  |
| 18696 | P03363 | P08572 | -0.24614  |

|       |        |        |           |
|-------|--------|--------|-----------|
| 18697 | P03363 | Q495T6 | -0.83121  |
| 18698 | P03363 | Q16763 | -0.088661 |
| 18699 | P03363 | P0CG38 | -0.12009  |
| 18700 | P03363 | P00403 | -0.4461   |
| 18701 | P03363 | Q9BXI3 | -0.13596  |
| 18702 | P03363 | Q14289 | -0.22741  |
| 18703 | P03363 | P41595 | -0.28168  |
| 18704 | P03363 | Q6ZSZ6 | -0.22701  |
| 18705 | P03363 | Q86TV6 | -0.22731  |
| 18706 | P03363 | Q7Z5L0 | -0.33646  |
| 18707 | P03363 | Q8WZ73 | -0.22741  |
| 18708 | P03363 | Q9NZJ7 | -0.22916  |
| 18709 | P03363 | Q8N8R3 | -0.29687  |
| 18710 | P03363 | Q8N465 | -0.25087  |
| 18711 | P03363 | Q8N7I0 | -0.22557  |
| 18712 | P03363 | P01776 | -0.54902  |
| 18713 | P03363 | Q6IEZ7 | -0.61656  |
| 18714 | P03363 | Q9GZZ6 | -0.45576  |
| 18715 | P03363 | Q96CN0 | -0.042737 |
| 18716 | P03363 | Q8N567 | -0.29311  |
| 18717 | P03363 | Q95072 | -0.18318  |
| 18718 | P03363 | Q8NGT5 | -0.61656  |
| 18719 | P03363 | P43251 | -0.2916   |
| 18720 | P03363 | Q86UN3 | -0.27591  |
| 18721 | P03363 | P0C7X0 | -0.21933  |
| 18722 | P03363 | Q9Y236 | -0.18823  |
| 18723 | P03363 | Q15772 | -0.39986  |
| 18724 | P03363 | Q96PJ5 | -0.22743  |
| 18725 | P03363 | Q96AQ8 | -0.32227  |
| 18726 | P03363 | O00255 | -0.11086  |
| 18727 | P03363 | Q03591 | -0.44401  |
| 18728 | P03363 | A6NED2 | -0.22661  |
| 18729 | P03363 | Q9BRT8 | -0.24873  |
| 18730 | P03363 | P0C0L4 | -0.67108  |
| 18731 | P03363 | Q9UBL9 | -0.34894  |
| 18732 | P03363 | Q96NA8 | -0.2727   |
| 18733 | P03363 | Q96MW1 | -0.031359 |
| 18734 | P03363 | O15530 | -0.22665  |
| 18735 | P03363 | A6NIN4 | -0.042737 |
| 18736 | P03363 | Q8IUH8 | -0.48744  |
| 18737 | P03363 | Q8N8G6 | -0.15898  |
| 18738 | P03363 | Q14692 | -0.082037 |
| 18739 | P03363 | Q9BUT1 | -0.25311  |
| 18740 | P03363 | Q9NS64 | -0.13412  |
| 18741 | P03363 | Q3LXA3 | -0.38539  |
| 18742 | P03363 | B3EWG5 | -0.031359 |
| 18743 | P03363 | Q9NWS8 | -0.062987 |
| 18744 | P03363 | P26374 | -0.21237  |
| 18745 | P03363 | P58401 | -0.40601  |
| 18746 | P03363 | P48454 | -0.18304  |
| 18747 | P03363 | Q9H0U4 | -0.26703  |
| 18748 | P03363 | P62502 | -0.35366  |
| 18749 | P03363 | P46926 | -0.21203  |
| 18750 | P03363 | P51861 | -0.1074   |
| 18751 | P03363 | A6NCI4 | -0.33992  |
| 18752 | P03363 | O95104 | -0.2239   |
| 18753 | P03363 | P42785 | -0.22328  |
| 18754 | P03363 | O60341 | -0.22711  |
| 18755 | P03363 | Q8IZJ0 | -0.45693  |
| 18756 | P03363 | P22894 | -0.58779  |
| 18757 | P03363 | Q92995 | -0.22846  |
| 18758 | P03363 | Q9BYT8 | -0.20994  |
| 18759 | P03363 | A2VDJ0 | -0.32626  |
| 18760 | P03363 | Q4G148 | -0.32228  |
| 18761 | P03363 | Q9NZJ5 | -0.22741  |
| 18762 | P03363 | Q7Z388 | -0.32626  |
| 18763 | P03363 | P52564 | -0.22804  |
| 18764 | P03363 | Q9H6D8 | -0.56672  |
| 18765 | P03363 | Q6P9A2 | -0.30847  |
| 18766 | P03363 | P01609 | -0.54902  |
| 18767 | P03363 | Q9Y6S9 | -0.3655   |
| 18768 | P03363 | P28562 | -0.23142  |
| 18769 | P03363 | Q01968 | -0.22751  |
| 18770 | P03363 | Q07973 | -0.35831  |
| 18771 | P03363 | Q8N5I9 | -0.031359 |
| 18772 | P03363 | O95563 | -0.29673  |

|       |        |        |           |
|-------|--------|--------|-----------|
| 18773 | P03363 | Q9NYK5 | -0.093279 |
| 18774 | P03363 | P31270 | -0.21703  |
| 18775 | P03363 | Q9HCK1 | -0.082965 |
| 18776 | P03363 | P16190 | -0.36051  |
| 18777 | P03363 | P21802 | -0.23452  |
| 18778 | P03363 | P59089 | -0.1679   |
| 18779 | P03363 | O95221 | -0.61656  |
| 18780 | P03363 | Q6ZMU1 | -0.2598   |
| 18781 | P03363 | O15514 | -0.16336  |
| 18782 | P03363 | P31939 | -0.12314  |
| 18783 | P03363 | O75952 | -0.12688  |
| 18784 | P03363 | Q8WZ42 | -0.22741  |
| 18785 | P03363 | Q8IXR5 | -0.10873  |
| 18786 | P03363 | Q9UJA2 | -0.33053  |
| 18787 | P03363 | Q9UGP8 | -0.39989  |
| 18788 | P03363 | O43808 | -0.23579  |
| 18789 | P03363 | Q8IWU5 | -0.33142  |
| 18790 | P03363 | P50225 | -0.23234  |
| 18791 | P03363 | B1ANH7 | -0.20501  |
| 18792 | P03363 | A2A2Z9 | -0.22738  |
| 18793 | P03363 | Q4G0U5 | -0.14321  |
| 18794 | P03363 | Q86UG4 | -0.43295  |
| 18795 | P03363 | Q8IZS5 | -0.062543 |
| 18796 | P03363 | P29460 | -0.22743  |
| 18797 | P03363 | P20783 | -0.30247  |
| 18798 | P03363 | Q9UJA9 | -0.73537  |
| 18799 | P03363 | Q8N4J0 | -0.023316 |
| 18800 | P03363 | Q6DJT9 | -0.19738  |
| 18801 | P03363 | Q01638 | -0.49661  |
| 18802 | P03363 | E9PB15 | -0.13386  |
| 18803 | P03363 | Q96P20 | -0.22736  |
| 18804 | P03363 | Q96N53 | -0.042737 |
| 18805 | P03363 | Q86WR7 | -0.053187 |
| 18806 | P03363 | F2Z333 | -0.32626  |
| 18807 | P03363 | O95388 | -0.34146  |
| 18808 | P03363 | Q2M3V2 | -0.22741  |
| 18809 | P03363 | Q6SA08 | -0.32204  |
| 18810 | P03363 | O43681 | -0.15791  |
| 18811 | P03363 | P02751 | -0.22741  |
| 18812 | P03363 | P12081 | -0.16649  |
| 18813 | P03363 | Q6UXM1 | -0.32626  |
| 18814 | P03363 | Q12951 | -0.25992  |
| 18815 | P03363 | A8MX19 | -0.21995  |
| 18816 | P03363 | Q8NA34 | -0.20791  |
| 18817 | P03363 | Q3SY17 | -0.29673  |
| 18818 | P03363 | P03956 | -0.50808  |
| 18819 | P03363 | P06881 | -0.21484  |
| 18820 | P03363 | Q9NQX5 | -0.32626  |
| 18821 | P03363 | Q9BXC1 | -0.62051  |
| 18822 | P03363 | Q92522 | -0.10908  |
| 18823 | P03363 | Q9BXC9 | -0.21017  |
| 18824 | P03363 | Q9HBE1 | -0.13229  |
| 18825 | P03363 | Q6ZQN5 | -0.29843  |
| 18826 | P03363 | P49638 | -0.21649  |
| 18827 | P03363 | O43474 | -0.22629  |
| 18828 | P03363 | Q075Z2 | -0.35366  |
| 18829 | P03363 | P00338 | -0.097671 |
| 18830 | P03363 | Q9H920 | -0.47964  |
| 18831 | P03363 | Q5VZ89 | -0.36368  |
| 18832 | P03363 | P36269 | -0.41766  |
| 18833 | P03363 | O43435 | -0.5381   |
| 18834 | P03363 | A6NGK3 | -0.143    |
| 18835 | P03363 | Q9NV12 | -0.32626  |
| 18836 | P03363 | Q14638 | -0.45672  |
| 18837 | P03363 | Q96A57 | -0.32626  |
| 18838 | P03363 | O76064 | -0.2274   |
| 18839 | P03363 | Q9UII2 | -0.083624 |
| 18840 | P03363 | Q5VWW1 | -0.37206  |
| 18841 | P03363 | A6NIJ9 | -0.61656  |
| 18842 | P03363 | Q8WWN9 | -0.2274   |
| 18843 | P03363 | Q9NXN4 | -0.22192  |
| 18844 | P03363 | P0CL81 | -0.17634  |
| 18845 | P03363 | P80192 | -0.28613  |
| 18846 | P03363 | P0C852 | -0.042737 |
| 18847 | P03363 | P0CJ73 | -0.13673  |
| 18848 | P03363 | Q8NEX9 | -0.22705  |

|       |        |        |           |
|-------|--------|--------|-----------|
| 18849 | P03363 | Q6IF82 | -0.61656  |
| 18850 | P03363 | Q7Z7M9 | -0.29569  |
| 18851 | P03363 | P51148 | -0.48971  |
| 18852 | P03363 | Q9GZU0 | -0.087005 |
| 18853 | P03363 | Q8WYB5 | -0.29502  |
| 18854 | P03363 | Q8WXH0 | -0.22779  |
| 18855 | P03363 | P12318 | -0.46529  |
| 18856 | P03363 | P11230 | -0.46706  |
| 18857 | P03363 | Q6ZSK4 | -0.19648  |
| 18858 | P03363 | O94955 | -0.22724  |
| 18859 | P03363 | Q8NFZ3 | -0.2274   |
| 18860 | P03363 | Q9NYY8 | -0.07491  |
| 18861 | P03363 | O14745 | -0.3028   |
| 18862 | P03363 | Q8NC01 | -0.5679   |
| 18863 | P03363 | O60469 | -0.45663  |
| 18864 | P03363 | Q9NRW4 | -0.23919  |
| 18865 | P03363 | Q9Y5P4 | -0.22745  |
| 18866 | P03363 | Q8NBN3 | -0.32626  |
| 18867 | P03363 | P17600 | -0.16402  |
| 18868 | P03363 | Q96FM1 | -0.45221  |
| 18869 | P03363 | Q96Q45 | -0.35512  |
| 18870 | P03363 | Q9BS26 | -0.23255  |
| 18871 | P03363 | O15432 | -0.43967  |
| 18872 | P03363 | Q16617 | -0.57712  |
| 18873 | P03363 | P31513 | -0.64748  |
| 18874 | P03363 | Q6X9E4 | -0.21743  |
| 18875 | P03363 | Q8IWD4 | -0.031359 |
| 18876 | P03363 | Q5BKT4 | -0.45687  |
| 18877 | P03363 | Q9UHD0 | -0.46918  |
| 18878 | P03363 | Q9BT30 | -0.33217  |
| 18879 | P03363 | Q6ZQQ2 | -0.32626  |
| 18880 | P03363 | Q96EK2 | -0.22885  |
| 18881 | P03363 | Q6IPR1 | -0.17904  |
| 18882 | P03363 | Q06643 | -0.44098  |
| 18883 | P03363 | P16152 | -0.24043  |
| 18884 | P03363 | O00429 | -0.2949   |
| 18885 | P03363 | F5H284 | -0.14395  |
| 18886 | P03363 | Q7L4P6 | -0.091104 |
| 18887 | P03363 | A2AJT9 | -0.075906 |
| 18888 | P03363 | Q99958 | -0.24129  |
| 18889 | P03363 | Q01085 | -0.2335   |
| 18890 | P03363 | Q969G6 | -0.25241  |
| 18891 | P03363 | O94769 | -0.38747  |
| 18892 | P03363 | P14616 | -0.73275  |
| 18893 | P03363 | Q9H0T7 | -0.56672  |
| 18894 | P03363 | Q9Y2K3 | -0.12664  |
| 18895 | P03363 | P47900 | -0.5079   |
| 18896 | P03363 | P48426 | -0.22349  |
| 18897 | P03363 | P0C862 | -0.3707   |
| 18898 | P03363 | Q5T764 | -0.2912   |
| 18899 | P03363 | O15427 | -0.43017  |
| 18900 | P03363 | Q9H1F0 | -0.33498  |
| 18901 | P03363 | Q9BX69 | -0.1766   |
| 18902 | P03363 | Q9BY43 | -0.15102  |
| 18903 | P03363 | O75762 | -0.41892  |
| 18904 | P03363 | Q9BY08 | -0.50559  |
| 18905 | P03363 | Q96MT7 | -0.22741  |
| 18906 | P03363 | Q15406 | -0.24038  |
| 18907 | P03363 | P62068 | -0.27177  |
| 18908 | P03363 | Q9NXD2 | -0.21849  |
| 18909 | P03363 | Q01581 | -0.2201   |
| 18910 | P03363 | Q8IUQ0 | -0.25844  |
| 18911 | P03363 | P03915 | -0.42397  |
| 18912 | P03363 | Q9BSJ8 | -0.32626  |
| 18913 | P03363 | Q96HS1 | -0.29551  |
| 18914 | P03363 | Q8N6R1 | -0.38154  |
| 18915 | P03363 | Q9UJM8 | -0.39478  |
| 18916 | P03363 | Q8NGG4 | -0.61656  |
| 18917 | P03363 | O14830 | -0.22388  |
| 18918 | P03363 | Q8NGC6 | -0.61656  |
| 18919 | P03363 | O60774 | -0.69016  |
| 18920 | P03363 | Q99447 | -0.1725   |
| 18921 | P03363 | Q8N394 | -0.42352  |
| 18922 | P03363 | Q8N878 | -0.27377  |
| 18923 | P03363 | Q9BQ52 | -0.1337   |
| 18924 | P03363 | P35858 | -0.31034  |

|       |        |        |           |
|-------|--------|--------|-----------|
| 18925 | P03363 | Q6P158 | -0.28204  |
| 18926 | P03363 | O75951 | -0.29732  |
| 18927 | P03363 | Q96ID5 | -0.33992  |
| 18928 | P03363 | Q96B70 | -0.15735  |
| 18929 | P03363 | C9JRZ8 | -0.22727  |
| 18930 | P03363 | Q6TDP4 | -0.22452  |
| 18931 | P03363 | Q12829 | -0.51194  |
| 18932 | P03363 | P49802 | -0.22742  |
| 18933 | P03363 | Q9Y5H3 | -0.57898  |
| 18934 | P03363 | Q9NPB1 | -0.33276  |
| 18935 | P03363 | Q9UK55 | -0.24487  |
| 18936 | P03363 | Q9H2J7 | -0.52815  |
| 18937 | P03363 | P22033 | -0.14375  |
| 18938 | P03363 | Q92989 | -0.19145  |
| 18939 | P03363 | Q9NQ88 | -0.13806  |
| 18940 | P03363 | P48745 | -0.45815  |
| 18941 | P03363 | Q9BWV2 | -0.48298  |
| 18942 | P03363 | B2RU33 | -0.22741  |
| 18943 | P03363 | Q9NQ69 | -0.22741  |
| 18944 | P03363 | Q14651 | -0.22743  |
| 18945 | P03363 | Q8NOW7 | -0.24031  |
| 18946 | P03363 | Q9UQM7 | -0.26591  |
| 18947 | P03363 | Q96CT2 | -0.19912  |
| 18948 | P03363 | P05067 | -0.22565  |
| 18949 | P03363 | P50990 | -0.18843  |
| 18950 | P03363 | Q9H3T3 | -0.52431  |
| 18951 | P03363 | Q9NZV1 | -0.65283  |
| 18952 | P03363 | P52566 | -0.10495  |
| 18953 | P03363 | Q96A37 | -0.27953  |
| 18954 | P03363 | Q5T1H1 | -0.44966  |
| 18955 | P03363 | Q96DX7 | -0.23004  |
| 18956 | P03363 | Q9BXC0 | -0.6204   |
| 18957 | P03363 | Q9UNT1 | -0.38219  |
| 18958 | P03363 | P08294 | -0.22636  |
| 18959 | P03363 | Q8N8J0 | -0.184    |
| 18960 | P03363 | P0DJD0 | -0.22435  |
| 18961 | P03363 | Q13075 | -0.22738  |
| 18962 | P03363 | P04628 | -0.22741  |
| 18963 | P03363 | Q9BVI0 | -0.2361   |
| 18964 | P03363 | Q8WY98 | -0.32626  |
| 18965 | P03363 | Q71RG6 | -0.33992  |
| 18966 | P03363 | Q7L7L0 | -0.29609  |
| 18967 | P03363 | A8MXJ8 | -0.22014  |
| 18968 | P03363 | Q9UBN6 | -0.34255  |
| 18969 | P03363 | Q8N3T6 | -0.19187  |
| 18970 | P03363 | Q9Y6W5 | -0.19393  |
| 18971 | P03363 | O94885 | -0.22755  |
| 18972 | P03363 | O00592 | -0.45542  |
| 18973 | P03363 | Q6ZRX8 | -0.2098   |
| 18974 | P03363 | Q8NDX5 | -0.18458  |
| 18975 | P03363 | A8MUA0 | -0.12937  |
| 18976 | P03363 | Q9BST9 | -0.14692  |
| 18977 | P03363 | P98175 | -0.21985  |
| 18978 | P03363 | Q68DQ2 | -0.18581  |
| 18979 | P03363 | Q6ZTA4 | -0.22741  |
| 18980 | P03363 | P54886 | -0.3546   |
| 18981 | P03363 | Q9P109 | -0.26105  |
| 18982 | P03363 | Q8NDC4 | -0.18844  |
| 18983 | P03363 | A6NGY5 | -0.61656  |
| 18984 | P03363 | A0PJK1 | -0.3785   |
| 18985 | P03363 | Q9Y3F1 | -0.042737 |
| 18986 | P03363 | Q0VDI3 | -0.32626  |
| 18987 | P03363 | P63145 | -0.21393  |
| 18988 | P03363 | Q70CQ4 | -0.2551   |
| 18989 | P03363 | Q9UHE5 | -0.36734  |
| 18990 | P03363 | P57773 | -0.45734  |
| 18991 | P03363 | Q8IWF2 | -0.22609  |
| 18992 | P03363 | Q9UBH6 | -0.59988  |
| 18993 | P03363 | Q8IVF7 | -0.22552  |
| 18994 | P03363 | H7BZ55 | -0.19799  |
| 18995 | P03363 | Q5T3Y7 | -0.15515  |
| 18996 | P03363 | Q6ZR62 | -0.20628  |
| 18997 | P03363 | B1AK53 | -0.22738  |
| 18998 | P03363 | Q9BXU3 | -0.27953  |
| 18999 | P03363 | P53680 | -0.21287  |
| 19000 | P03363 | Q9BSA9 | -0.32626  |

|       |        |        |           |
|-------|--------|--------|-----------|
| 19001 | P03363 | Q7Z5L3 | -0.41312  |
| 19002 | P03363 | P28476 | -0.51031  |
| 19003 | P03363 | Q08426 | -0.20397  |
| 19004 | P03363 | P14927 | -0.19864  |
| 19005 | P03363 | P12694 | -0.19101  |
| 19006 | P03363 | Q8NEE8 | -0.22739  |
| 19007 | P03363 | P25713 | -0.19454  |
| 19008 | P03363 | Q9BXB7 | -0.17794  |
| 19009 | P03363 | Q8NGR3 | -0.61656  |
| 19010 | P03363 | Q5FWE3 | -0.32626  |
| 19011 | P03363 | P01215 | -0.10559  |
| 19012 | P03363 | P0C617 | -0.61656  |
| 19013 | P03363 | P23771 | -0.2274   |
| 19014 | P03363 | Q6UWT2 | -0.33992  |
| 19015 | P03363 | O00168 | -0.57871  |
| 19016 | P03363 | Q8NHG8 | -0.34825  |
| 19017 | P03363 | P55089 | -0.1932   |
| 19018 | P03363 | Q9HCY8 | -0.23037  |
| 19019 | P03363 | P26927 | -0.27102  |
| 19020 | P03363 | O60431 | -0.61656  |
| 19021 | P03363 | Q5VWQ8 | -0.22715  |
| 19022 | P03363 | O43283 | -0.22741  |
| 19023 | P03363 | Q86VI4 | -0.21623  |
| 19024 | P03363 | Q9NWD8 | -0.32626  |
| 19025 | P03363 | A6NNT2 | -0.21784  |
| 19026 | P03363 | Q8NBL3 | -0.32626  |
| 19027 | P03363 | Q86UF2 | -0.25306  |
| 19028 | P03363 | Q99685 | -0.30138  |
| 19029 | P03363 | Q8TDT2 | -0.64046  |
| 19030 | P03363 | Q9P035 | -0.66139  |
| 19031 | P03363 | O15457 | -0.11654  |
| 19032 | P03363 | Q5W064 | -0.22563  |
| 19033 | P03363 | Q9P2L0 | -0.22741  |
| 19034 | P03363 | Q4G0X9 | -0.2206   |
| 19035 | P03363 | P56278 | -0.14893  |
| 19036 | P03363 | P13611 | -0.62243  |
| 19037 | P03363 | Q9NZ56 | -0.22555  |
| 19038 | P03363 | P62341 | -0.21381  |
| 19039 | P03363 | Q96GW7 | -0.6428   |
| 19040 | P03363 | Q6ZV70 | -0.18796  |
| 19041 | P03363 | P48060 | -0.78917  |
| 19042 | P03363 | O95352 | -0.22471  |
| 19043 | P03363 | Q9BTZ2 | -0.34851  |
| 19044 | P03363 | Q569G3 | -0.031359 |
| 19045 | P03363 | Q12955 | -0.22741  |
| 19046 | P03363 | Q9ULM0 | -0.22741  |
| 19047 | P03363 | Q5T8I3 | -0.13013  |
| 19048 | P03363 | Q8IXM6 | -0.057105 |
| 19049 | P03363 | P28067 | -0.41728  |
| 19050 | P03363 | Q6UXZ4 | -0.44065  |
| 19051 | P03363 | Q6GTS8 | -0.48488  |
| 19052 | P03363 | Q9NRX5 | -0.24315  |
| 19053 | P03363 | Q8WXH5 | -0.2274   |
| 19054 | P03363 | Q86SQ9 | -0.1831   |
| 19055 | P03363 | Q9H1D0 | -0.53289  |
| 19056 | P03363 | Q96RQ3 | -0.33273  |
| 19057 | P03363 | O00451 | -0.21188  |
| 19058 | P03363 | P48740 | -0.33966  |
| 19059 | P03363 | Q8N434 | -0.29081  |
| 19060 | P03363 | Q9Y3B1 | -0.18373  |
| 19061 | P03363 | Q5VWP2 | -0.13639  |
| 19062 | P03363 | Q13572 | -0.45449  |
| 19063 | P03363 | Q14142 | -0.23114  |
| 19064 | P03363 | Q9GZT9 | -0.21425  |
| 19065 | P03363 | Q70IA8 | -0.18413  |
| 19066 | P03363 | O15296 | -0.28189  |
| 19067 | P03363 | A8MUN3 | -0.33992  |
| 19068 | P03363 | Q9H0D6 | -0.21697  |
| 19069 | P03363 | A6NNH0 | -0.064982 |
| 19070 | P03363 | P07864 | -0.097671 |
| 19071 | P03363 | Q9BV29 | -0.15686  |
| 19072 | P03363 | O75147 | -0.22864  |
| 19073 | P03363 | P20472 | -0.22556  |
| 19074 | P03363 | Q9P0I2 | -0.19297  |
| 19075 | P03363 | Q6UW60 | -0.40326  |
| 19076 | P03363 | Q6X4T0 | -0.13195  |



|       |        |        |           |
|-------|--------|--------|-----------|
| 19077 | P03363 | P59665 | -0.5419   |
| 19078 | P03363 | Q9UPS8 | -0.2274   |
| 19079 | P03363 | P01903 | -0.5784   |
| 19080 | P03363 | Q8TD33 | -0.33992  |
| 19081 | P03363 | P04839 | -0.40216  |
| 19082 | P03363 | P25686 | -0.23987  |
| 19083 | P03363 | Q969Q1 | -0.22748  |
| 19084 | P03363 | B9EJG8 | -0.32626  |
| 19085 | P03363 | P59539 | -0.51612  |
| 19086 | P03363 | Q96Q91 | -0.4242   |
| 19087 | P03363 | Q7Z6K5 | -0.14166  |
| 19088 | P03363 | Q8WUT9 | -0.30119  |
| 19089 | P03363 | P02679 | -0.52351  |
| 19090 | P03363 | Q8IUC4 | -0.22693  |
| 19091 | P03363 | Q8N129 | -0.39869  |
| 19092 | P03363 | Q6NUN0 | -0.40205  |
| 19093 | P03363 | Q13488 | -0.43412  |
| 19094 | P03363 | Q7Z2R9 | -0.33992  |
| 19095 | P03363 | P18465 | -0.54957  |
| 19096 | P03363 | Q9BZC7 | -0.55452  |
| 19097 | P03363 | Q30KQ7 | -0.33516  |
| 19098 | P03363 | O00232 | -0.19557  |
| 19099 | P03363 | P01760 | -0.54902  |
| 19100 | P03363 | Q5T4D3 | -0.32626  |
| 19101 | P03363 | Q629K1 | -0.52348  |
| 19102 | P03363 | Q8N3Y7 | -0.78945  |
| 19103 | P03363 | A8MT82 | -0.45506  |
| 19104 | P03363 | Q6S5H4 | -0.22735  |
| 19105 | P03363 | Q9UN70 | -0.56957  |
| 19106 | P03363 | O75309 | -0.57898  |
| 19107 | P03363 | P43155 | -0.31843  |
| 19108 | P03363 | Q6UWM5 | -0.33992  |
| 19109 | P03363 | Q6ZRC1 | -0.042737 |
| 19110 | P03363 | B7Z6K7 | -0.12316  |
| 19111 | P03363 | Q9BZJ7 | -0.55636  |
| 19112 | P03363 | Q13201 | -0.36128  |
| 19113 | P03363 | Q9NZ08 | -0.33766  |
| 19114 | P03363 | O43759 | -0.29688  |
| 19115 | P03363 | Q15916 | -0.22413  |
| 19116 | P03363 | Q86YW7 | -0.33502  |
| 19117 | P03363 | Q96HC4 | -0.22995  |
| 19118 | P03363 | Q9UKM7 | -0.44216  |
| 19119 | P03363 | Q86TI0 | -0.33669  |
| 19120 | P03363 | Q7Z5L7 | -0.26204  |
| 19121 | P03363 | Q6NT32 | -0.3057   |
| 19122 | P03363 | Q53FD0 | -0.067107 |
| 19123 | P03363 | Q9Y4E6 | -0.22741  |
| 19124 | P03363 | Q96PD4 | -0.26582  |
| 19125 | P03363 | Q5XPI4 | -0.22741  |
| 19126 | P03363 | Q9UMX9 | -0.45852  |
| 19127 | P03363 | Q9Y336 | -0.53314  |
| 19128 | P03363 | Q9HCU4 | -0.4734   |
| 19129 | P03363 | P09871 | -0.5676   |
| 19130 | P03363 | Q5VW22 | -0.45506  |
| 19131 | P03363 | Q96EY7 | -0.21768  |
| 19132 | P03363 | Q6PCB8 | -0.40601  |
| 19133 | P03363 | Q8IW41 | -0.22753  |
| 19134 | P03363 | O00468 | -0.34835  |
| 19135 | P03363 | Q8WY22 | -0.34239  |
| 19136 | P03363 | Q8TAE7 | -0.22587  |
| 19137 | P03363 | Q15813 | -0.22741  |
| 19138 | P03363 | Q6NSI4 | -0.20256  |
| 19139 | P03363 | Q5PT55 | -0.37566  |
| 19140 | P03363 | P03952 | -0.31277  |
| 19141 | P03363 | O96001 | -0.16093  |
| 19142 | P03363 | P04424 | -0.17338  |
| 19143 | P03363 | Q92935 | -0.49933  |
| 19144 | P03363 | Q8NEY4 | -0.20316  |
| 19145 | P03363 | O00487 | -0.27999  |
| 19146 | P03363 | Q8IYP9 | -0.4627   |
| 19147 | P03363 | Q16799 | -0.21589  |
| 19148 | P03363 | Q9BY67 | -0.22745  |
| 19149 | P03363 | Q9NWM3 | -0.12089  |
| 19150 | P03363 | Q15195 | -0.33992  |
| 19151 | P03363 | Q8N766 | -0.32322  |
| 19152 | P03363 | P17301 | -0.2274   |

|       |        |         |           |
|-------|--------|---------|-----------|
| 19153 | P03363 | O14495  | -0.21644  |
| 19154 | P03363 | P0DJJD7 | -0.40663  |
| 19155 | P03363 | Q96RC9  | -0.61656  |
| 19156 | P03363 | P02753  | -0.22746  |
| 19157 | P03363 | Q7RTV5  | -0.22147  |
| 19158 | P03363 | P32754  | -0.42548  |
| 19159 | P03363 | Q96DA6  | -0.26598  |
| 19160 | P03363 | Q6NUK1  | -0.34281  |
| 19161 | P03363 | P00441  | -0.22617  |
| 19162 | P03363 | Q96KG7  | -0.44766  |
| 19163 | P03363 | Q8N4N8  | -0.25001  |
| 19164 | P03363 | P0C7Q5  | -0.32626  |
| 19165 | P03363 | Q86SJ6  | -0.72945  |
| 19166 | P03363 | P21781  | -0.31381  |
| 19167 | P03363 | O15400  | -0.42311  |
| 19168 | P03363 | P24468  | -0.23152  |
| 19169 | P03363 | Q9HAQ2  | -0.242    |
| 19170 | P03363 | O60361  | -0.40496  |
| 19171 | P03363 | Q15722  | -0.8583   |
| 19172 | P03363 | P49019  | -0.70873  |
| 19173 | P03363 | Q8NGP4  | -0.61656  |
| 19174 | P03363 | P09683  | -0.2944   |
| 19175 | P03363 | K7EJ46  | -0.042737 |
| 19176 | P03363 | P29376  | -0.84179  |
| 19177 | P03363 | Q5D0E6  | -0.0387   |
| 19178 | P03363 | Q7Z475  | -0.33967  |
| 19179 | P03363 | E2RYF7  | -0.33992  |
| 19180 | P03363 | Q52LJ0  | -0.10045  |
| 19181 | P03363 | Q96GM1  | -0.31162  |
| 19182 | P03363 | Q8N5C7  | -0.18987  |
| 19183 | P03363 | O60890  | -0.34885  |
| 19184 | P03363 | Q6ZNJ1  | -0.22741  |
| 19185 | P03363 | Q9H5I5  | -0.38366  |
| 19186 | P03363 | A8MYV0  | -0.14624  |
| 19187 | P03363 | Q9HC29  | -0.22739  |
| 19188 | P03363 | Q8N9T2  | -0.042737 |
| 19189 | P03363 | P00439  | -0.30799  |
| 19190 | P03363 | Q92982  | -0.33357  |
| 19191 | P03363 | Q96A23  | -0.22738  |
| 19192 | P03363 | Q92626  | -0.78763  |
| 19193 | P03363 | Q8N7B7  | -0.16262  |
| 19194 | P03363 | P01606  | -0.54902  |
| 19195 | P03363 | P37231  | -0.23332  |
| 19196 | P03363 | P00533  | -0.28533  |
| 19197 | P03363 | Q99715  | -0.55743  |
| 19198 | P03363 | Q9H4G4  | -0.39164  |
| 19199 | P03363 | Q6UXZ3  | -0.23937  |
| 19200 | P03363 | Q96L08  | -0.32626  |
| 19201 | P03363 | Q9Y2C3  | -0.41659  |
| 19202 | P03363 | Q00013  | -0.2269   |
| 19203 | P03363 | Q04826  | -0.54957  |
| 19204 | P03363 | Q6IMI6  | -0.23693  |
| 19205 | P03363 | P81534  | -0.38168  |
| 19206 | P03363 | P23434  | -0.1264   |
| 19207 | P03363 | Q96BH1  | -0.22381  |
| 19208 | P03363 | Q01813  | -0.28332  |
| 19209 | P03363 | Q9BQT9  | -0.6479   |
| 19210 | P03363 | Q8NFQ5  | -0.41496  |
| 19211 | P03363 | Q9Y303  | -0.21054  |
| 19212 | P03363 | Q5W150  | -0.2312   |
| 19213 | P03363 | Q5T750  | -0.16199  |
| 19214 | P03363 | A0A183  | -0.042737 |
| 19215 | P03363 | Q8TF76  | -0.22187  |
| 19216 | P03363 | Q9NRW1  | -0.23531  |
| 19217 | P03363 | A1L429  | -0.17634  |
| 19218 | P03363 | Q5VWM3  | -0.20577  |
| 19219 | P03363 | Q92570  | -0.23141  |
| 19220 | P03363 | O95365  | -0.21994  |
| 19221 | P03363 | Q9UHF1  | -0.53254  |
| 19222 | P03363 | Q9Y394  | -0.43578  |
| 19223 | P03363 | Q8NCW0  | -0.3078   |
| 19224 | P03363 | Q53T59  | -0.21052  |
| 19225 | P03363 | Q99570  | -0.22741  |
| 19226 | P03363 | Q8WV60  | -0.1311   |
| 19227 | P03363 | Q9BX67  | -0.34008  |
| 19228 | P03363 | Q99757  | -0.23729  |

|       |        |        |           |
|-------|--------|--------|-----------|
| 19229 | P03363 | Q8TB22 | -0.50247  |
| 19230 | P03363 | A6NH21 | -0.35694  |
| 19231 | P03363 | Q02094 | -0.45809  |
| 19232 | P03363 | P50395 | -0.21664  |
| 19233 | P03363 | Q8TCE9 | -0.21675  |
| 19234 | P03363 | P51608 | -0.2068   |
| 19235 | P03363 | Q17RD7 | -0.22745  |
| 19236 | P03363 | Q5T4I8 | -0.20171  |
| 19237 | P03363 | Q5K4E3 | -0.32943  |
| 19238 | P03363 | Q9P2F5 | -0.096574 |
| 19239 | P03363 | P30046 | -0.2107   |
| 19240 | P03363 | Q8IXP5 | -0.031359 |
| 19241 | P03363 | P31391 | -0.70053  |
| 19242 | P03363 | P63125 | -0.063394 |
| 19243 | P03363 | Q8TEJ3 | -0.22567  |
| 19244 | P03363 | B7ZC32 | -0.35942  |
| 19245 | P03363 | Q9NRH3 | -0.22306  |
| 19246 | P03363 | Q9Y4D2 | -0.4476   |
| 19247 | P03363 | Q92617 | -0.20426  |
| 19248 | P03363 | P59551 | -0.50724  |
| 19249 | P03363 | Q9BVM2 | -0.091755 |
| 19250 | P03363 | Q9Y3S1 | -0.5779   |
| 19251 | P03363 | Q13477 | -0.60515  |
| 19252 | P03363 | O60602 | -0.56237  |
| 19253 | P03363 | Q8TER0 | -0.35723  |
| 19254 | P03363 | Q03164 | -0.22712  |
| 19255 | P03363 | P00813 | -0.22295  |
| 19256 | P03363 | Q95377 | -0.40132  |
| 19257 | P03363 | Q9NYW2 | -0.47677  |
| 19258 | P03363 | Q8WUY1 | -0.33992  |
| 19259 | P03363 | P50461 | -0.22743  |
| 19260 | P03363 | Q12918 | -0.51177  |
| 19261 | P03363 | Q86UY5 | -0.13531  |
| 19262 | P03363 | Q8N468 | -0.30406  |
| 19263 | P03363 | Q9NYY1 | -0.44677  |
| 19264 | P03363 | O75385 | -0.22741  |
| 19265 | P03363 | P19022 | -0.34292  |
| 19266 | P03363 | Q12952 | -0.27425  |
| 19267 | P03363 | Q5VUY0 | -0.2266   |
| 19268 | P03363 | Q9Y5G9 | -0.60828  |
| 19269 | P03363 | Q02325 | -0.33992  |
| 19270 | P03363 | Q5T0T0 | -0.43373  |
| 19271 | P03363 | Q9NU39 | -0.29843  |
| 19272 | P03363 | Q9BVK6 | -0.21122  |
| 19273 | P03363 | Q9BR10 | -0.29375  |
| 19274 | P03363 | Q8N4C9 | -0.32626  |
| 19275 | P03363 | Q9NRD0 | -0.2273   |
| 19276 | P03363 | P02675 | -0.51259  |
| 19277 | P03363 | O95970 | -0.22765  |
| 19278 | P03363 | Q9UHG0 | -0.1952   |
| 19279 | P03363 | Q16620 | -0.36388  |
| 19280 | P03363 | Q17RM4 | -0.040204 |
| 19281 | P03363 | P30626 | -0.22773  |
| 19282 | P03363 | Q96M60 | -0.143    |
| 19283 | P03363 | Q8IZ08 | -0.64046  |
| 19284 | P03363 | Q86UK5 | -0.11259  |
| 19285 | P03363 | Q9NU63 | -0.13043  |
| 19286 | P03363 | Q8NGG8 | -0.61656  |
| 19287 | P03363 | Q9HCH3 | -0.22838  |
| 19288 | P03363 | P20774 | -0.22746  |
| 19289 | P03363 | P01699 | -0.54902  |
| 19290 | P03363 | Q2M296 | -0.20781  |
| 19291 | P03363 | Q9Y219 | -0.24801  |
| 19292 | P03363 | P01773 | -0.54902  |
| 19293 | P03363 | Q16518 | -0.27615  |
| 19294 | P03363 | P62191 | -0.44859  |
| 19295 | P03363 | P04271 | -0.33083  |
| 19296 | P03363 | Q8N144 | -0.29355  |
| 19297 | P03363 | P31689 | -0.10981  |
| 19298 | P03363 | Q5QGZ9 | -0.47112  |
| 19299 | P03363 | Q9UQ03 | -0.22741  |
| 19300 | P03363 | Q1W209 | -0.042737 |
| 19301 | P03363 | Q4ZIN3 | -0.1753   |
| 19302 | P03363 | P06850 | -0.22316  |
| 19303 | P03363 | P82980 | -0.22436  |
| 19304 | P03363 | Q6P1K1 | -0.3634   |

|       |        |        |            |
|-------|--------|--------|------------|
| 19305 | P03363 | Q8N1F8 | -0.2274    |
| 19306 | P03363 | Q9Y2Q5 | -0.14888   |
| 19307 | P03363 | O00116 | -0.42511   |
| 19308 | P03363 | P12110 | -0.22828   |
| 19309 | P03363 | Q6YHU6 | -0.17606   |
| 19310 | P03363 | Q9ULK0 | -0.40921   |
| 19311 | P03363 | P55056 | -0.38705   |
| 19312 | P03363 | O43150 | -0.22741   |
| 19313 | P03363 | Q8N807 | -0.26206   |
| 19314 | P03363 | P08590 | -0.2271    |
| 19315 | P03363 | P09923 | -0.58248   |
| 19316 | P03363 | Q92730 | -0.22743   |
| 19317 | P03363 | Q96CM8 | -0.29832   |
| 19318 | P03363 | Q13627 | -0.22741   |
| 19319 | P03363 | Q6UXP3 | -0.32626   |
| 19320 | P03363 | Q969H8 | -0.26361   |
| 19321 | P03363 | Q8IYS0 | -0.32626   |
| 19322 | P03363 | Q9H0V9 | -0.37397   |
| 19323 | P03363 | Q8N808 | -0.32626   |
| 19324 | P03363 | Q8TCD6 | -0.17852   |
| 19325 | P03363 | Q8N268 | -0.15685   |
| 19326 | P03363 | Q96I36 | -0.32948   |
| 19327 | P03363 | Q8N2Q7 | -0.25966   |
| 19328 | P03363 | P47883 | -0.61656   |
| 19329 | P03363 | Q86VI1 | -0.11566   |
| 19330 | P03363 | P0DJD8 | -0.40663   |
| 19331 | P03363 | O14493 | -0.36194   |
| 19332 | P03363 | Q86YH6 | -0.18335   |
| 19333 | P03363 | P61019 | -0.36907   |
| 19334 | P03363 | P08908 | -0.64584   |
| 19335 | P03363 | P00558 | -0.21032   |
| 19336 | P03363 | Q16821 | -0.27892   |
| 19337 | P03363 | Q16877 | -0.23598   |
| 19338 | P03363 | Q0WX57 | -0.25139   |
| 19339 | P03363 | Q5VZL5 | -0.14993   |
| 19340 | P03363 | A8MYU2 | -0.54898   |
| 19341 | P03363 | Q9BZX4 | -0.14536   |
| 19342 | P03363 | Q2TVT4 | -0.27277   |
| 19343 | P03363 | Q86WT6 | -0.22857   |
| 19344 | P03363 | Q496M5 | -0.22741   |
| 19345 | P03363 | Q8NCQ2 | -0.0047097 |
| 19346 | P03363 | A6NEY8 | -0.15487   |
| 19347 | P03363 | P04004 | -0.4485    |
| 19348 | P03363 | Q09470 | -0.41116   |
| 19349 | P03363 | A6H8M9 | -0.57898   |
| 19350 | P03363 | P49279 | -0.28284   |
| 19351 | P03363 | Q9NS15 | -0.36023   |
| 19352 | P03363 | Q9UHC3 | -0.26202   |
| 19353 | P03363 | P34910 | -0.22452   |
| 19354 | P03363 | Q8WV19 | -0.15487   |
| 19355 | P03363 | P24462 | -0.62044   |
| 19356 | P03363 | Q9BZF1 | -0.22729   |
| 19357 | P03363 | Q5SNT2 | -0.13394   |
| 19358 | P03363 | Q9BU76 | -0.0010803 |
| 19359 | P03363 | Q5JPF3 | -0.18313   |
| 19360 | P03363 | Q9BW60 | -0.057641  |
| 19361 | P03363 | Q08289 | -0.2273    |
| 19362 | P03363 | Q95944 | -0.65348   |
| 19363 | P03363 | Q7Z3U7 | -0.21402   |
| 19364 | P03363 | Q92952 | -0.3024    |
| 19365 | P03363 | Q9NS98 | -0.5371    |
| 19366 | P03363 | A8MWA6 | -0.2212    |
| 19367 | P03363 | O00337 | -0.49167   |
| 19368 | P03363 | Q8NGR8 | -0.61656   |
| 19369 | P03363 | Q3MJ13 | -0.22752   |
| 19370 | P03363 | P57764 | -0.20925   |
| 19371 | P03363 | Q8N8Z3 | -0.21536   |
| 19372 | P03363 | O15123 | -0.25464   |
| 19373 | P03363 | Q9NQT8 | -0.23159   |
| 19374 | P03363 | Q6ZWK4 | -0.32626   |
| 19375 | P03363 | P46439 | -0.22644   |
| 19376 | P03363 | Q02928 | -0.38541   |
| 19377 | P03363 | O75575 | -0.32438   |
| 19378 | P03363 | O43353 | -0.22741   |
| 19379 | P03363 | Q6PK18 | -0.62343   |
| 19380 | P03363 | O97980 | -0.13751   |

|       |        |        |           |
|-------|--------|--------|-----------|
| 19381 | P03363 | Q8N1Q8 | -0.11741  |
| 19382 | P03363 | Q08554 | -0.51728  |
| 19383 | P03363 | Q9Y6I3 | -0.19514  |
| 19384 | P03363 | Q96KN9 | -0.45734  |
| 19385 | P03363 | Q9NRG7 | -0.21115  |
| 19386 | P03363 | Q9UJS0 | -0.29844  |
| 19387 | P03363 | Q92997 | -0.21644  |
| 19388 | P03363 | P04921 | -0.21019  |
| 19389 | P03363 | Q9UNI6 | -0.24582  |
| 19390 | P03363 | P47901 | -0.5898   |
| 19391 | P03363 | Q6QEF8 | -0.22741  |
| 19392 | P03363 | Q9GZS9 | -0.31708  |
| 19393 | P03363 | Q5H8C1 | -0.78415  |
| 19394 | P03363 | P13861 | -0.2274   |
| 19395 | P03363 | Q9NPA1 | -0.55973  |
| 19396 | P03363 | Q9Y6X1 | -0.2895   |
| 19397 | P03363 | A8MWP4 | -0.21776  |
| 19398 | P03363 | P13667 | -0.2379   |
| 19399 | P03363 | Q2TB10 | -0.2274   |
| 19400 | P03363 | Q9NQI0 | -0.29831  |
| 19401 | P03363 | Q00445 | -0.37498  |
| 19402 | P03363 | Q96DP5 | -0.024911 |
| 19403 | P03363 | Q13069 | -0.23345  |
| 19404 | P03363 | Q96F63 | -0.031359 |
| 19405 | P03363 | Q6GV28 | -0.35067  |
| 19406 | P03363 | Q9Y5W9 | -0.22053  |
| 19407 | P03363 | Q9Y2C9 | -0.4256   |
| 19408 | P03363 | Q14649 | -0.55928  |
| 19409 | P03363 | Q75976 | -0.37357  |
| 19410 | P03363 | Q9NT99 | -0.44498  |
| 19411 | P03363 | A6NDA9 | -0.32626  |
| 19412 | P03363 | Q6ZQT7 | -0.042737 |
| 19413 | P03363 | P10915 | -0.45886  |
| 19414 | P03363 | P20807 | -0.41958  |
| 19415 | P03363 | Q8IUG1 | -0.076094 |
| 19416 | P03363 | Q7Z3E5 | -0.22739  |
| 19417 | P03363 | Q9NWW7 | -0.043191 |
| 19418 | P03363 | A6NMZ7 | -0.49202  |
| 19419 | P03363 | Q9H1R3 | -0.22741  |
| 19420 | P03363 | P80108 | -0.27192  |
| 19421 | P03363 | Q9BTC0 | -0.22867  |
| 19422 | P03363 | Q9H4W6 | -0.16754  |
| 19423 | P03363 | Q8IZA0 | -0.20675  |
| 19424 | P03363 | Q8N6V9 | -0.18176  |
| 19425 | P03363 | Q5T319 | -0.042737 |
| 19426 | P03363 | P12931 | -0.22877  |
| 19427 | P03363 | Q8TE59 | -0.59199  |
| 19428 | P03363 | Q9NSG2 | -0.057903 |
| 19429 | P03363 | Q99677 | -0.75406  |
| 19430 | P03363 | F8WBI6 | -0.19412  |
| 19431 | P03363 | Q99683 | -0.22739  |
| 19432 | P03363 | Q53LP3 | -0.22741  |
| 19433 | P03363 | P21554 | -0.43203  |
| 19434 | P03363 | Q15940 | -0.12428  |
| 19435 | P03363 | P0C7P2 | -0.12972  |
| 19436 | P03363 | Q9H2A7 | -0.78569  |
| 19437 | P03363 | Q94779 | -0.22747  |
| 19438 | P03363 | P26885 | -0.22813  |
| 19439 | P03363 | Q96HG1 | -0.042737 |
| 19440 | P03363 | P40126 | -0.3404   |
| 19441 | P03363 | Q8NC96 | -0.13117  |
| 19442 | P03363 | Q9BTD1 | -0.11746  |
| 19443 | P03363 | A8MU76 | -0.041619 |
| 19444 | P03363 | Q8NGF8 | -0.61656  |
| 19445 | P03363 | Q9NQB0 | -0.22398  |
| 19446 | P03363 | Q9H0C1 | -0.27953  |
| 19447 | P03363 | Q9UQV4 | -0.41107  |
| 19448 | P03363 | Q9TNN7 | -0.54957  |
| 19449 | P03363 | Q00214 | -0.2114   |
| 19450 | P03363 | P82279 | -0.72776  |
| 19451 | P03363 | O15444 | -0.56164  |
| 19452 | P03363 | Q8NEG5 | -0.22743  |
| 19453 | P03363 | Q92823 | -0.4566   |
| 19454 | P03363 | P24539 | -0.1808   |
| 19455 | P03363 | Q02535 | -0.22672  |
| 19456 | P03363 | Q8NEY1 | -0.20126  |

|       |        |        |           |
|-------|--------|--------|-----------|
| 19457 | P03363 | P30512 | -0.3515   |
| 19458 | P03363 | Q9Y4D7 | -0.61364  |
| 19459 | P03363 | O75128 | -0.32882  |
| 19460 | P03363 | Q9C030 | -0.22742  |
| 19461 | P03363 | O76050 | -0.2274   |
| 19462 | P03363 | Q96KB5 | -0.22741  |
| 19463 | P03363 | P09693 | -0.45631  |
| 19464 | P03363 | P13533 | -0.14387  |
| 19465 | P03363 | O60721 | -0.23936  |
| 19466 | P03363 | Q86UD3 | -0.48663  |
| 19467 | P03363 | Q8IUH3 | -0.22712  |
| 19468 | P03363 | P49758 | -0.24459  |
| 19469 | P03363 | Q96S96 | -0.21614  |
| 19470 | P03363 | Q92954 | -0.39179  |
| 19471 | P03363 | Q6KF10 | -0.36995  |
| 19472 | P03363 | Q8IV33 | -0.092612 |
| 19473 | P03363 | P22301 | -0.29583  |
| 19474 | P03363 | Q9P2X8 | -0.14396  |
| 19475 | P03363 | H3BR10 | -0.042737 |
| 19476 | P03363 | Q16740 | -0.10013  |
| 19477 | P03363 | P22888 | -0.37189  |
| 19478 | P03363 | P0CK97 | -0.32626  |
| 19479 | P03363 | Q8NA54 | -0.15736  |
| 19480 | P03363 | Q8WVZ7 | -0.52977  |
| 19481 | P03363 | Q9Y546 | -0.21889  |
| 19482 | P03363 | Q8NH55 | -0.012041 |
| 19483 | P03363 | Q9UIM3 | -0.22702  |
| 19484 | P03363 | Q9BT67 | -0.24123  |
| 19485 | P03363 | Q6NSI1 | -0.2274   |
| 19486 | P03363 | P02747 | -0.44064  |
| 19487 | P03363 | P08588 | -0.34909  |
| 19488 | P03363 | Q86W92 | -0.2263   |
| 19489 | P03363 | A6NEE1 | -0.22317  |
| 19490 | P03363 | P80419 | -0.37246  |
| 19491 | P03363 | Q15258 | -0.23701  |
| 19492 | P03363 | Q16819 | -0.65519  |
| 19493 | P03363 | Q8NH59 | -0.61656  |
| 19494 | P03363 | Q6P1M0 | -0.57257  |
| 19495 | P03363 | Q9Y4P3 | -0.22742  |
| 19496 | P03363 | P01877 | -0.22794  |
| 19497 | P03363 | P51686 | -0.70605  |
| 19498 | P03363 | Q9H227 | -0.22713  |
| 19499 | P03363 | Q2M2I3 | -0.18558  |
| 19500 | P03363 | Q8TAV5 | -0.33992  |
| 19501 | P03363 | Q01974 | -0.71082  |
| 19502 | P03363 | Q9Y566 | -0.22742  |
| 19503 | P03363 | Q02246 | -0.30785  |
| 19504 | P03363 | P21439 | -0.61476  |
| 19505 | P03363 | Q9Y2L9 | -0.23097  |
| 19506 | P03363 | Q2M1P5 | -0.24246  |
| 19507 | P03363 | Q96B54 | -0.27953  |
| 19508 | P03363 | Q96IP4 | -0.045358 |
| 19509 | P03363 | Q6ZRP5 | -0.042737 |
| 19510 | P03363 | Q86TI2 | -0.22569  |
| 19511 | P03363 | P51811 | -0.18663  |
| 19512 | P03363 | O95994 | -0.21811  |
| 19513 | P03363 | Q9NRS4 | -0.46183  |
| 19514 | P03363 | Q99424 | -0.37457  |
| 19515 | P03363 | Q8N7C0 | -0.51003  |
| 19516 | P03363 | Q02161 | -0.4146   |
| 19517 | P03363 | Q8IWU4 | -0.37207  |
| 19518 | P03363 | Q95150 | -0.90242  |
| 19519 | P03363 | Q9BZ98 | -0.25848  |
| 19520 | P03363 | Q9NXL2 | -0.2274   |
| 19521 | P03363 | Q8NHX9 | -0.27115  |
| 19522 | P03363 | P42262 | -0.56721  |
| 19523 | P03363 | Q6P5Z2 | -0.22591  |
| 19524 | P03363 | Q3KQV9 | -0.21706  |
| 19525 | P03363 | P42830 | -0.54662  |
| 19526 | P03363 | Q8IZK6 | -0.37783  |
| 19527 | P03363 | Q14722 | -0.28668  |
| 19528 | P03363 | A6NM66 | -0.1816   |
| 19529 | P03363 | P13674 | -0.4423   |
| 19530 | P03363 | Q00305 | -0.22736  |
| 19531 | P03363 | Q96BN8 | -0.096914 |
| 19532 | P03363 | Q96NX5 | -0.40805  |

|       |        |        |           |
|-------|--------|--------|-----------|
| 19533 | P03363 | Q96A83 | -0.52219  |
| 19534 | P03363 | A6NML5 | -0.32626  |
| 19535 | P03363 | Q8NI99 | -0.64269  |
| 19536 | P03363 | Q92934 | -0.19368  |
| 19537 | P03363 | P35916 | -0.31152  |
| 19538 | P03363 | A8MXK1 | -0.32626  |
| 19539 | P03363 | O14827 | -0.3633   |
| 19540 | P03363 | Q9H628 | -0.51767  |
| 19541 | P03363 | Q9H1Z8 | -0.39907  |
| 19542 | P03363 | Q5T089 | -0.16992  |
| 19543 | P03363 | O95876 | -0.13476  |
| 19544 | P03363 | Q6XYQ8 | -0.41416  |
| 19545 | P03363 | Q9NXU5 | -0.49937  |
| 19546 | P03363 | Q2M2E5 | -0.33992  |
| 19547 | P03363 | P18564 | -0.57882  |
| 19548 | P03363 | Q8IWR1 | -0.56722  |
| 19549 | P03363 | Q9UHN6 | -0.42039  |
| 19550 | P03363 | P14138 | -0.41317  |
| 19551 | P03363 | Q8N8A4 | -0.21195  |
| 19552 | P03363 | O95267 | -0.48063  |
| 19553 | P03363 | P04350 | -0.21405  |
| 19554 | P03363 | Q96IY4 | -0.52873  |
| 19555 | P03363 | Q75882 | -0.77685  |
| 19556 | P03363 | Q04756 | -0.37861  |
| 19557 | P03363 | Q9ULQ1 | -0.28176  |
| 19558 | P03363 | P35914 | -0.26957  |
| 19559 | P03363 | Q6HA08 | -0.30892  |
| 19560 | P03363 | Q9H9A5 | -0.19454  |
| 19561 | P03363 | B1AH88 | -0.042737 |
| 19562 | P03363 | P32971 | -0.45431  |
| 19563 | P03363 | Q9NW08 | -0.18994  |
| 19564 | P03363 | Q6ZS86 | -0.33285  |
| 19565 | P03363 | Q9TQE0 | -0.44839  |
| 19566 | P03363 | O95897 | -0.33992  |
| 19567 | P03363 | Q9H6B1 | -0.074392 |
| 19568 | P03363 | Q6UB99 | -0.22741  |
| 19569 | P03363 | Q9NXL6 | -0.31223  |
| 19570 | P03363 | Q12974 | -0.31404  |
| 19571 | P03363 | Q8TDS5 | -0.59202  |
| 19572 | P03363 | A0PJX4 | -0.60583  |
| 19573 | P03363 | P05362 | -0.27561  |
| 19574 | P03363 | A1L390 | -0.2278   |
| 19575 | P03363 | Q643R3 | -0.4499   |
| 19576 | P03363 | Q8WUH1 | -0.20471  |
| 19577 | P03363 | Q76000 | -0.61656  |
| 19578 | P03363 | Q8N2I9 | -0.22741  |
| 19579 | P03363 | A6NGB0 | -0.32626  |
| 19580 | P03363 | P51648 | -0.57565  |
| 19581 | P03363 | Q8WX39 | -0.30781  |
| 19582 | P03363 | Q6ZN54 | -0.28253  |
| 19583 | P03363 | Q8TAT8 | -0.1411   |
| 19584 | P03363 | Q96S97 | -0.32626  |
| 19585 | P03363 | P63132 | -0.22931  |
| 19586 | P03363 | P03897 | -0.21994  |
| 19587 | P03363 | Q71UI9 | -0.30338  |
| 19588 | P03363 | P09488 | -0.22646  |
| 19589 | P03363 | P10071 | -0.22736  |
| 19590 | P03363 | Q9UBR1 | -0.21779  |
| 19591 | P03363 | P43088 | -0.7216   |
| 19592 | P03363 | P32297 | -0.40969  |
| 19593 | P03363 | Q8NGQ4 | -0.61656  |
| 19594 | P03363 | Q2QD12 | -0.20679  |
| 19595 | P03363 | Q8IYW2 | -0.042737 |
| 19596 | P03363 | Q96GC9 | -0.18789  |
| 19597 | P03363 | Q16568 | -0.16477  |
| 19598 | P03363 | A6NMB1 | -0.40674  |
| 19599 | P03363 | Q7Z5S9 | -0.32626  |
| 19600 | P03363 | Q53FN2 | -0.089871 |
| 19601 | P03363 | Q9H6D3 | -0.32626  |
| 19602 | P03363 | Q9HCB6 | -0.22742  |
| 19603 | P03363 | Q8NBP7 | -0.23798  |
| 19604 | P03363 | Q8TE54 | -0.26035  |
| 19605 | P03363 | Q9Y3P4 | -0.34678  |
| 19606 | P03363 | Q86WR6 | -0.19434  |
| 19607 | P03363 | P19235 | -0.57546  |
| 19608 | P03363 | Q9HBY0 | -0.36072  |

|       |        |        |           |
|-------|--------|--------|-----------|
| 19609 | P03363 | Q8WU10 | -0.22679  |
| 19610 | P03363 | Q96B49 | -0.053473 |
| 19611 | P03363 | Q92903 | -0.46572  |
| 19612 | P03363 | Q96CD2 | -0.15259  |
| 19613 | P03363 | P32245 | -0.23849  |
| 19614 | P03363 | Q13882 | -0.29491  |
| 19615 | P03363 | Q71F78 | -0.05106  |
| 19616 | P03363 | O95980 | -0.2748   |
| 19617 | P03363 | O95935 | -0.4257   |
| 19618 | P03363 | Q5VYV0 | -0.29843  |
| 19619 | P03363 | P23582 | -0.3539   |
| 19620 | P03363 | O15488 | -0.20419  |
| 19621 | P03363 | P42696 | -0.22751  |
| 19622 | P03363 | O43597 | -0.18509  |
| 19623 | P03363 | Q99714 | -0.22177  |
| 19624 | P03363 | A8MUH7 | -0.22788  |
| 19625 | P03363 | Q8N5S9 | -0.2571   |
| 19626 | P03363 | A6NE52 | -0.22742  |
| 19627 | P03363 | Q4V339 | -0.24873  |
| 19628 | P03363 | P98082 | -0.22718  |
| 19629 | P03363 | Q16650 | -0.46981  |
| 19630 | P03363 | Q8TAT2 | -0.35397  |
| 19631 | P03363 | P28482 | -0.22741  |
| 19632 | P03363 | Q5T1Q4 | -0.29915  |
| 19633 | P03363 | Q5VZM2 | -0.22671  |
| 19634 | P03363 | Q3SXY7 | -0.32626  |
| 19635 | P03363 | Q96HE9 | -0.18016  |
| 19636 | P03363 | Q86V40 | -0.56168  |
| 19637 | P03363 | P35555 | -0.24086  |
| 19638 | P03363 | P20396 | -0.16726  |
| 19639 | P03363 | Q08AI6 | -0.38344  |
| 19640 | P03363 | Q96AQ9 | -0.074067 |
| 19641 | P03363 | P55103 | -0.29461  |
| 19642 | P03363 | Q9Y2X0 | -0.1999   |
| 19643 | P03363 | Q8NHY0 | -0.29762  |
| 19644 | P03363 | Q9Y6R4 | -0.22736  |
| 19645 | P03363 | Q8TDG4 | -0.22679  |
| 19646 | P03363 | O00370 | -0.21608  |
| 19647 | P03363 | Q5W0A0 | -0.15153  |
| 19648 | P03363 | P63122 | -0.17128  |
| 19649 | P03363 | Q96S06 | -0.41557  |
| 19650 | P03363 | Q53HC9 | -0.22737  |
| 19651 | P03363 | O15247 | -0.22718  |
| 19652 | P03363 | Q9BZQ4 | -0.17375  |
| 19653 | P03363 | Q76LX8 | -0.26575  |
| 19654 | P03363 | P57771 | -0.22745  |
| 19655 | P03363 | Q8WV83 | -0.29915  |
| 19656 | P03363 | Q9Y4I5 | -0.086466 |
| 19657 | P03363 | Q9HC21 | -0.29687  |
| 19658 | P03363 | O76062 | -0.72775  |
| 19659 | P03363 | Q8NH76 | -0.61656  |
| 19660 | P03363 | Q13061 | -0.31434  |
| 19661 | P03363 | Q05639 | -0.12172  |
| 19662 | P03363 | P00742 | -0.30919  |
| 19663 | P03363 | O43653 | -0.24531  |
| 19664 | P03363 | P35813 | -0.17825  |
| 19665 | P03363 | Q9BXR6 | -0.33674  |
| 19666 | P03363 | Q8IZU9 | -0.37727  |
| 19667 | P03363 | Q8TER5 | -0.19836  |
| 19668 | P03363 | Q9Y6J8 | -0.25166  |
| 19669 | P03363 | Q96JP9 | -0.61925  |
| 19670 | P03363 | A5PLK6 | -0.32362  |
| 19671 | P03363 | Q6ZMI3 | -0.61194  |
| 19672 | P03363 | Q86YB7 | -0.21299  |
| 19673 | P03363 | P04920 | -0.40109  |
| 19674 | P03363 | Q8WVV4 | -0.22551  |
| 19675 | P03363 | P34896 | -0.16604  |
| 19676 | P03363 | P01780 | -0.54902  |
| 19677 | P03363 | Q8NGI6 | -0.61656  |
| 19678 | P03363 | O75116 | -0.22728  |
| 19679 | P03363 | Q9UQQ2 | -0.22741  |
| 19680 | P03363 | Q16378 | -0.46924  |
| 19681 | P03363 | Q8NA96 | -0.13751  |
| 19682 | P03363 | Q6JVE5 | -0.34696  |
| 19683 | P03363 | Q7L5L3 | -0.40128  |
| 19684 | P03363 | A6NC62 | -0.094308 |



|       |        |        |           |
|-------|--------|--------|-----------|
| 19685 | P03363 | Q5VT97 | -0.27773  |
| 19686 | P03363 | Q96PE2 | -0.22752  |
| 19687 | P03363 | P0DJJ0 | -0.22437  |
| 19688 | P03363 | Q15052 | -0.22742  |
| 19689 | P03363 | Q5VUJ9 | -0.22718  |
| 19690 | P03363 | Q9UIU6 | -0.22735  |
| 19691 | P03363 | Q96KH6 | -0.023964 |
| 19692 | P03363 | Q9Y2G5 | -0.12688  |
| 19693 | P03363 | P17213 | -0.38694  |
| 19694 | P03363 | Q86UW2 | -0.40586  |
| 19695 | P03363 | P56539 | -0.22681  |
| 19696 | P03363 | P14635 | -0.19099  |
| 19697 | P03363 | Q9GZP1 | -0.42511  |
| 19698 | P03363 | Q6UWH6 | -0.27909  |
| 19699 | P03363 | Q9Y4D8 | -0.22789  |
| 19700 | P03363 | P10276 | -0.22923  |
| 19701 | P03363 | Q9UPR5 | -0.46881  |
| 19702 | P03363 | P51511 | -0.30615  |
| 19703 | P03363 | A4D1F6 | -0.22823  |
| 19704 | P03363 | O75330 | -0.10053  |
| 19705 | P03363 | Q5JV73 | -0.22735  |
| 19706 | P03363 | Q92508 | -0.58193  |
| 19707 | P03363 | Q99941 | -0.22367  |
| 19708 | P03363 | P19087 | -0.47154  |
| 19709 | P03363 | Q8N441 | -0.47803  |
| 19710 | P03363 | P11309 | -0.22745  |
| 19711 | P03363 | A0PJE2 | -0.43578  |
| 19712 | P03363 | Q9UKB1 | -0.2801   |
| 19713 | P03363 | Q5SZI1 | -0.32626  |
| 19714 | P03363 | P51857 | -0.2273   |
| 19715 | P03363 | O14841 | -0.24344  |
| 19716 | P03363 | Q6XE38 | -0.33992  |
| 19717 | P03363 | Q95677 | -0.18855  |
| 19718 | P03363 | Q9Y3P9 | -0.22877  |
| 19719 | P03363 | P50224 | -0.23475  |
| 19720 | P03363 | P36959 | -0.33041  |
| 19721 | P03363 | Q86UC2 | -0.090624 |
| 19722 | P03363 | Q9GZZ8 | -0.25227  |
| 19723 | P03363 | P14060 | -0.56971  |
| 19724 | P03363 | Q8ND71 | -0.22085  |
| 19725 | P03363 | Q9UK85 | -0.49932  |
| 19726 | P03363 | Q9NYZ1 | -0.32626  |
| 19727 | P03363 | P31321 | -0.22742  |
| 19728 | P03363 | Q8TEY5 | -0.22742  |
| 19729 | P03363 | P26440 | -0.29228  |
| 19730 | P03363 | Q5T754 | -0.042737 |
| 19731 | P03363 | Q6Q788 | -0.22723  |
| 19732 | P03363 | Q9NSK7 | -0.28412  |
| 19733 | P03363 | P30566 | -0.20234  |
| 19734 | P03363 | A7XYQ1 | -0.12245  |
| 19735 | P03363 | Q04912 | -0.47495  |
| 19736 | P03363 | Q9UBD6 | -0.41677  |
| 19737 | P03363 | Q86YV9 | -0.058321 |
| 19738 | P03363 | Q8WWM7 | -0.07887  |
| 19739 | P03363 | Q13630 | -0.26946  |
| 19740 | P03363 | O95749 | -0.21044  |
| 19741 | P03363 | P04211 | -0.54902  |
| 19742 | P03363 | Q9H4K1 | -0.080185 |
| 19743 | P03363 | Q6R6M4 | -0.24444  |
| 19744 | P03363 | Q5T3F8 | -0.54382  |
| 19745 | P03363 | O96024 | -0.33531  |
| 19746 | P03363 | P51674 | -0.43649  |
| 19747 | P03363 | Q15464 | -0.22741  |
| 19748 | P03363 | Q96HL8 | -0.22734  |
| 19749 | P03363 | P30837 | -0.29105  |
| 19750 | P03363 | P49747 | -0.22741  |
| 19751 | P03363 | P50391 | -0.6569   |
| 19752 | P03363 | Q5VT66 | -0.27447  |
| 19753 | P03363 | A6NJ88 | -0.012672 |
| 19754 | P03363 | O15254 | -0.40893  |
| 19755 | P03363 | Q8N6G1 | -0.042737 |
| 19756 | P03363 | Q9UFD9 | -0.22739  |
| 19757 | P03363 | A6NMK7 | -0.22469  |
| 19758 | P03363 | Q9ULS5 | -0.32626  |
| 19759 | P03363 | O43187 | -0.22741  |
| 19760 | P03363 | Q86XD5 | -0.10307  |

|       |        |        |           |
|-------|--------|--------|-----------|
| 19761 | P03363 | Q14576 | -0.24986  |
| 19762 | P03363 | Q9NYF3 | -0.052478 |
| 19763 | P03363 | Q9UN42 | -0.16163  |
| 19764 | P03363 | Q9ULI1 | -0.22741  |
| 19765 | P03363 | O00231 | -0.19508  |
| 19766 | P03363 | P20337 | -0.38473  |
| 19767 | P03363 | P86481 | -0.042737 |
| 19768 | P03363 | Q15437 | -0.11512  |
| 19769 | P03363 | P62158 | -0.22736  |
| 19770 | P03363 | C9JQL5 | -0.33797  |
| 19771 | P03363 | Q96F25 | -0.49155  |
| 19772 | P03363 | Q5TF58 | -0.083503 |
| 19773 | P03363 | A8MXB1 | -0.47243  |
| 19774 | P03363 | Q9UNK4 | -0.49627  |
| 19775 | P03363 | Q96MG2 | -0.27582  |
| 19776 | P03363 | Q8NGH8 | -0.61656  |
| 19777 | P03363 | P20061 | -0.34974  |
| 19778 | P03363 | Q9Y4K0 | -0.25307  |
| 19779 | P03363 | Q9ULF5 | -0.35268  |
| 19780 | P03363 | Q92484 | -0.19263  |
| 19781 | P03363 | A6NH00 | -0.61656  |
| 19782 | P03363 | P30466 | -0.54957  |
| 19783 | P03363 | Q8N6Q8 | -0.090251 |
| 19784 | P03363 | Q5VW00 | -0.22739  |
| 19785 | P03363 | P30685 | -0.54957  |
| 19786 | P03363 | Q9ULV1 | -0.28167  |
| 19787 | P03363 | P20594 | -0.73394  |
| 19788 | P03363 | Q9Y365 | -0.22934  |
| 19789 | P03363 | P01189 | -0.28208  |
| 19790 | P03363 | Q86UQ5 | -0.32626  |
| 19791 | P03363 | Q5SQS8 | -0.044767 |
| 19792 | P03363 | P29144 | -0.1883   |
| 19793 | P03363 | Q8TE49 | -0.2211   |
| 19794 | P03363 | O60397 | -0.15326  |
| 19795 | P03363 | Q12904 | -0.17396  |
| 19796 | P03363 | Q12946 | -0.29412  |
| 19797 | P03363 | Q6P5X7 | -0.32626  |
| 19798 | P03363 | Q9UBJ2 | -0.22941  |
| 19799 | P03363 | Q8TC26 | -0.41505  |
| 19800 | P03363 | Q9BU64 | -0.076702 |
| 19801 | P03363 | Q9ULE3 | -0.20999  |
| 19802 | P03363 | Q96GW9 | -0.098393 |
| 19803 | P03363 | P62491 | -0.24412  |
| 19804 | P03363 | Q92686 | -0.13744  |
| 19805 | P03363 | Q8N446 | -0.22546  |
| 19806 | P03363 | Q05315 | -0.21504  |
| 19807 | P03363 | P01817 | -0.54902  |
| 19808 | P03363 | Q95863 | -0.2265   |
| 19809 | P03363 | Q13449 | -0.22773  |
| 19810 | P03363 | Q60486 | -0.37846  |
| 19811 | P03363 | Q6ZUX3 | -0.20567  |
| 19812 | P03363 | Q7L513 | -0.22741  |
| 19813 | P03363 | Q75324 | -0.33273  |
| 19814 | P03363 | Q9BTM1 | -0.28115  |
| 19815 | P03363 | Q9BZW5 | -0.24975  |
| 19816 | P03363 | Q8WZA0 | -0.11322  |
| 19817 | P03363 | Q02846 | -0.81627  |
| 19818 | P03363 | Q8NHM4 | -0.55056  |
| 19819 | P03363 | Q9BW83 | -0.30875  |
| 19820 | P03363 | Q8N103 | -0.23938  |
| 19821 | P03363 | Q9H8M5 | -0.44651  |
| 19822 | P03363 | P12034 | -0.35371  |
| 19823 | P03363 | P35749 | -0.18837  |
| 19824 | P03363 | A6NFX1 | -0.29915  |
| 19825 | P03363 | Q6WN34 | -0.22739  |
| 19826 | P03363 | P11215 | -0.2274   |
| 19827 | P03363 | P51452 | -0.23749  |
| 19828 | P03363 | Q2M2E3 | -0.40339  |
| 19829 | P03363 | P49761 | -0.31369  |
| 19830 | P03363 | Q7Z3B1 | -0.22766  |
| 19831 | P03363 | Q96PR1 | -0.36555  |
| 19832 | P03363 | Q6UXV3 | -0.33992  |
| 19833 | P03363 | Q96PX1 | -0.2274   |
| 19834 | P03363 | Q8WXB1 | -0.24311  |
| 19835 | P03363 | Q8N8X9 | -0.114    |
| 19836 | P03363 | Q9H237 | -0.44     |

|       |        |        |           |
|-------|--------|--------|-----------|
| 19837 | P03363 | Q6ZRH9 | -0.042737 |
| 19838 | P03363 | P07947 | -0.3724   |
| 19839 | P03363 | Q8WUU8 | -0.32626  |
| 19840 | P03363 | Q8NB25 | -0.15592  |
| 19841 | P03363 | Q96I45 | -0.32626  |
| 19842 | P03363 | E9PI22 | -0.014215 |
| 19843 | P03363 | Q9BZR6 | -0.2278   |
| 19844 | P03363 | Q08357 | -0.51769  |
| 19845 | P03363 | P04155 | -0.26905  |
| 19846 | P03363 | Q9BR26 | -0.35076  |
| 19847 | P03363 | Q9UBT2 | -0.2256   |
| 19848 | P03363 | P38435 | -0.48594  |
| 19849 | P03363 | P33032 | -0.34929  |
| 19850 | P03363 | Q9UGM6 | -0.1452   |
| 19851 | P03363 | Q9Y6G1 | -0.32626  |
| 19852 | P03363 | P30508 | -0.59713  |
| 19853 | P03363 | Q96BX8 | -0.21717  |
| 19854 | P03363 | Q8NDY4 | -0.042737 |
| 19855 | P03363 | Q8NG41 | -0.13294  |
| 19856 | P03363 | Q9Y508 | -0.42983  |
| 19857 | P03363 | P22001 | -0.41114  |
| 19858 | P03363 | Q8TBA6 | -0.27572  |
| 19859 | P03363 | Q6ZQY2 | -0.22739  |
| 19860 | P03363 | Q8N7L0 | -0.095998 |
| 19861 | P03363 | P27987 | -0.35183  |
| 19862 | P03363 | Q8IZC6 | -0.41233  |
| 19863 | P03363 | Q9Y5H2 | -0.57898  |
| 19864 | P03363 | Q9UBN1 | -0.56575  |
| 19865 | P03363 | P00568 | -0.27713  |
| 19866 | P03363 | Q9NUM4 | -0.31073  |
| 19867 | P03363 | O60496 | -0.17278  |
| 19868 | P03363 | Q53H47 | -0.22537  |
| 19869 | P03363 | Q8NGA2 | -0.61656  |
| 19870 | P03363 | Q9Y679 | -0.2525   |
| 19871 | P03363 | Q9Y385 | -0.60337  |
| 19872 | P03363 | P04433 | -0.54902  |
| 19873 | P03363 | O95382 | -0.63958  |
| 19874 | P03363 | Q9NPE6 | -0.17045  |
| 19875 | P03363 | P0C7U9 | -0.32626  |
| 19876 | P03363 | Q9HC57 | -0.31471  |
| 19877 | P03363 | Q5VVQ6 | -0.17835  |
| 19878 | P03363 | Q6UWP7 | -0.46237  |
| 19879 | P03363 | P0C7T3 | -0.61656  |
| 19880 | P03363 | O95832 | -0.34454  |
| 19881 | P03363 | Q8TEY7 | -0.24333  |
| 19882 | P03363 | A8MTL0 | -0.22549  |
| 19883 | P03363 | P78368 | -0.45741  |
| 19884 | P03363 | Q9NX14 | -0.29235  |
| 19885 | P03363 | Q6IB77 | -0.14345  |
| 19886 | P03363 | Q15031 | -0.50118  |
| 19887 | P03363 | Q6ZVD8 | -0.22768  |
| 19888 | P03363 | Q96CW9 | -0.32325  |
| 19889 | P03363 | Q9UHV9 | -0.16796  |
| 19890 | P03363 | Q9UPN4 | -0.19628  |
| 19891 | P03363 | Q8IZ07 | -0.22741  |
| 19892 | P03363 | Q96P44 | -0.2432   |
| 19893 | P03363 | P26436 | -0.22013  |
| 19894 | P03363 | Q6UW10 | -0.33992  |
| 19895 | P03363 | Q86YJ6 | -0.35753  |
| 19896 | P03363 | P78383 | -0.4549   |
| 19897 | P03363 | Q08AI8 | -0.031359 |
| 19898 | P03363 | Q8N688 | -0.33516  |
| 19899 | P03363 | Q6P6B1 | -0.031359 |
| 19900 | P03363 | B2RTY4 | -0.43789  |
| 19901 | P03363 | P49863 | -0.49563  |
| 19902 | P03363 | P04003 | -0.22752  |
| 19903 | P03363 | Q4FZB7 | -0.22448  |
| 19904 | P03363 | Q99661 | -0.24798  |
| 19905 | P03363 | Q8NCU4 | -0.08139  |
| 19906 | P03363 | Q14195 | -0.22174  |
| 19907 | P03363 | A1L157 | -0.32626  |
| 19908 | P03363 | Q5T848 | -0.64046  |
| 19909 | P03363 | Q96MI9 | -0.1695   |
| 19910 | P03363 | Q96CX2 | -0.17701  |
| 19911 | P03363 | Q52LW3 | -0.40779  |
| 19912 | P03363 | Q8WUD1 | -0.48729  |

|       |        |        |           |
|-------|--------|--------|-----------|
| 19913 | P03363 | P11801 | -0.35533  |
| 19914 | P03363 | P28907 | -0.38973  |
| 19915 | P03363 | P11686 | -0.21176  |
| 19916 | P03363 | Q96F83 | -0.10435  |
| 19917 | P03363 | Q8NHX4 | -0.056129 |
| 19918 | P03363 | A6NCS6 | -0.12827  |
| 19919 | P03363 | A6NMN3 | -0.090965 |
| 19920 | P03363 | Q9H295 | -0.29006  |
| 19921 | P03363 | Q96N28 | -0.16793  |
| 19922 | P03363 | P58173 | -0.61656  |
| 19923 | P03363 | Q99653 | -0.2275   |
| 19924 | P03363 | P48775 | -0.30839  |
| 19925 | P03363 | Q96C24 | -0.22929  |
| 19926 | P03363 | Q9NPG8 | -0.4627   |
| 19927 | P03363 | O75879 | -0.17139  |
| 19928 | P03363 | Q9Y2V3 | -0.19205  |
| 19929 | P03363 | Q8WWM9 | -0.11509  |
| 19930 | P03363 | Q8NCW5 | -0.20173  |
| 19931 | P03363 | Q9H207 | -0.61656  |
| 19932 | P03363 | Q5W0B7 | -0.32626  |
| 19933 | P03363 | Q9Y3B8 | -0.14995  |
| 19934 | P03363 | Q5T440 | -0.16334  |
| 19935 | P03363 | Q96M15 | -0.21092  |
| 19936 | P03363 | Q9UDW1 | -0.14022  |
| 19937 | P03363 | Q9H1K6 | -0.1887   |
| 19938 | P03363 | Q96N76 | -0.14351  |
| 19939 | P03363 | Q9ULX5 | -0.22735  |
| 19940 | P03363 | Q9HBV1 | -0.24975  |
| 19941 | P03363 | Q6P5X5 | -0.076909 |
| 19942 | P03363 | O75881 | -0.50527  |
| 19943 | P03363 | P00797 | -0.44556  |
| 19944 | P03363 | P16278 | -0.21736  |
| 19945 | P03363 | Q9GZQ6 | -0.60721  |
| 19946 | P03363 | Q9BU23 | -0.52348  |
| 19947 | P03363 | Q8WW52 | -0.24975  |
| 19948 | P03363 | Q8TAX7 | -0.042737 |
| 19949 | P03363 | Q5VT40 | -0.073342 |
| 19950 | P03363 | Q5VZI3 | -0.32626  |
| 19951 | P03363 | O14810 | -0.15419  |
| 19952 | P03363 | P35913 | -0.24834  |
| 19953 | P03363 | Q8WUY9 | -0.38001  |
| 19954 | P03363 | Q9Y4C2 | -0.047568 |
| 19955 | P03363 | A6NHC0 | -0.23031  |
| 19956 | P03363 | Q9H943 | -0.18972  |
| 19957 | P03363 | C9JQI7 | -0.32626  |
| 19958 | P03363 | O75452 | -0.84032  |
| 19959 | P03363 | P01763 | -0.54902  |
| 19960 | P03363 | Q14995 | -0.24196  |
| 19961 | P03363 | Q4VXA5 | -0.27393  |
| 19962 | P03363 | Q6NXG1 | -0.17307  |
| 19963 | P03363 | P04843 | -0.39997  |
| 19964 | P03363 | Q9NP94 | -0.51876  |
| 19965 | P03363 | P21145 | -0.24698  |
| 19966 | P03363 | Q8NEF3 | -0.13329  |
| 19967 | P03363 | Q8NGN5 | -0.61656  |
| 19968 | P03363 | Q8N4Z0 | -0.4675   |
| 19969 | P03363 | Q86YD5 | -0.46761  |
| 19970 | P03363 | A6NHR8 | -0.042737 |
| 19971 | P03363 | Q96KQ7 | -0.22741  |
| 19972 | P03363 | Q9H6K1 | -0.16964  |
| 19973 | P03363 | P59535 | -0.51612  |
| 19974 | P03363 | Q9BV44 | -0.12283  |
| 19975 | P03363 | Q68CQ7 | -0.32184  |
| 19976 | P03363 | P18510 | -0.22409  |
| 19977 | P03363 | Q969P6 | -0.15582  |
| 19978 | P03363 | A6NK44 | -0.19547  |
| 19979 | P03363 | P25021 | -0.7313   |
| 19980 | P03363 | Q2MKA7 | -0.22729  |
| 19981 | P03363 | Q17RN3 | -0.089804 |
| 19982 | P03363 | A8MXQ7 | -0.22741  |
| 19983 | P03363 | Q7Z3Z3 | -0.22693  |
| 19984 | P03363 | Q8NCT1 | -0.18779  |
| 19985 | P03363 | O60391 | -0.4305   |
| 19986 | P03363 | A8MT19 | -0.22279  |
| 19987 | P03363 | Q9BVG9 | -0.55652  |
| 19988 | P03363 | P16870 | -0.46398  |

|       |        |        |           |
|-------|--------|--------|-----------|
| 19989 | P03363 | P56589 | -0.16049  |
| 19990 | P03363 | P48556 | -0.1334   |
| 19991 | P03363 | Q5JUR7 | -0.2014   |
| 19992 | P03363 | Q6DN14 | -0.34356  |
| 19993 | P03363 | Q9H819 | -0.35579  |
| 19994 | P03363 | Q92615 | -0.058948 |
| 19995 | P03363 | P40818 | -0.24828  |
| 19996 | P03363 | Q9H093 | -0.22743  |
| 19997 | P03363 | P01771 | -0.54902  |
| 19998 | P03363 | P0C7P4 | -0.47118  |
| 19999 | P03363 | P60981 | -0.19598  |
| 20000 | P03363 | Q8NGS1 | -0.61656  |
| 20001 | P03363 | Q9Y2K2 | -0.22928  |
| 20002 | P03363 | P01892 | -0.34874  |
| 20003 | P03363 | Q9BXS1 | -0.17719  |
| 20004 | P03363 | Q9Y577 | -0.22948  |
| 20005 | P03363 | Q13066 | -0.17634  |
| 20006 | P03363 | Q9HB40 | -0.372    |
| 20007 | P03363 | Q8NHS9 | -0.1817   |
| 20008 | P03363 | Q9NUU6 | -0.12153  |
| 20009 | P03363 | Q9Y2T3 | -0.25026  |
| 20010 | P03363 | Q9UIG4 | -0.23038  |
| 20011 | P03363 | Q6ZTR5 | -0.11744  |
| 20012 | P03363 | Q9NX38 | -0.15348  |
| 20013 | P03363 | Q9NP80 | -0.33714  |
| 20014 | P03363 | Q13043 | -0.22919  |
| 20015 | P03363 | Q96KR6 | -0.32626  |
| 20016 | P03363 | Q8N4F0 | -0.41496  |
| 20017 | P03363 | A8MWL7 | -0.32626  |
| 20018 | P03363 | Q5VTT5 | -0.22744  |
| 20019 | P03363 | P57057 | -0.27321  |
| 20020 | P03363 | Q8N0S2 | -0.21063  |
| 20021 | P03363 | B2RXF0 | -0.18426  |
| 20022 | P03363 | P62993 | -0.22741  |
| 20023 | P03363 | Q95872 | -0.2274   |
| 20024 | P03363 | Q96DA0 | -0.34245  |
| 20025 | P03363 | Q6X784 | -0.35666  |
| 20026 | P03363 | P0CL82 | -0.17634  |
| 20027 | P03363 | Q8NF67 | -0.067425 |
| 20028 | P03363 | A8MVM7 | -0.042737 |
| 20029 | P03363 | Q9H777 | -0.11322  |
| 20030 | P03363 | Q8TD55 | -0.22665  |
| 20031 | P03363 | Q7KYR7 | -0.4138   |
| 20032 | P03363 | Q7Z3T1 | -0.61656  |
| 20033 | P03363 | P16403 | -0.13683  |
| 20034 | P03363 | P0C867 | -0.075148 |
| 20035 | P03363 | Q13936 | -0.24467  |
| 20036 | P03363 | A6NKC0 | -0.2058   |
| 20037 | P03363 | P63316 | -0.22682  |
| 20038 | P03363 | Q75594 | -0.36489  |
| 20039 | P03363 | Q9H7Z7 | -0.21424  |
| 20040 | P03363 | A6NM45 | -0.23678  |
| 20041 | P03363 | Q96A09 | -0.028845 |
| 20042 | P03363 | Q8TDV0 | -0.64046  |
| 20043 | P03363 | Q6ZUT1 | -0.042737 |
| 20044 | P03363 | O15294 | -0.2271   |
| 20045 | P03363 | Q6UXR6 | -0.33992  |
| 20046 | P03363 | O00631 | -0.30657  |
| 20047 | P03363 | P06401 | -0.22741  |
| 20048 | P03363 | P10646 | -0.48294  |
| 20049 | P03363 | Q6NXT6 | -0.35935  |
| 20050 | P03363 | Q8N690 | -0.33516  |
| 20051 | P03363 | Q9BQ31 | -0.24165  |
| 20052 | P03363 | Q7Z5G4 | -0.20518  |
| 20053 | P03363 | P25101 | -0.33134  |
| 20054 | P03363 | Q8TCU4 | -0.12824  |
| 20055 | P03363 | Q9H1V8 | -0.36159  |
| 20056 | P03363 | Q3ZCQ2 | -0.042737 |
| 20057 | P03363 | Q9Y2S6 | -0.042737 |
| 20058 | P03363 | P29590 | -0.22732  |
| 20059 | P03363 | Q86TN4 | -0.16481  |
| 20060 | P03363 | Q8NEX5 | -0.33992  |
| 20061 | P03363 | P86434 | -0.2207   |
| 20062 | P03363 | P22455 | -0.54805  |
| 20063 | P03363 | O43252 | -0.29848  |
| 20064 | P03363 | Q9P2K8 | -0.47827  |

|       |        |        |           |
|-------|--------|--------|-----------|
| 20065 | P03363 | O15438 | -0.67592  |
| 20066 | P03363 | Q96NY7 | -0.25993  |
| 20067 | P03363 | Q15785 | -0.22706  |
| 20068 | P03363 | Q9NYQ3 | -0.24492  |
| 20069 | P03363 | P15144 | -0.44765  |
| 20070 | P03363 | A8MVU1 | -0.22739  |
| 20071 | P03363 | Q92630 | -0.22741  |
| 20072 | P03363 | Q86VR2 | -0.32626  |
| 20073 | P03363 | P61647 | -0.28902  |
| 20074 | P03363 | Q96LB1 | -0.62306  |
| 20075 | P03363 | Q9H208 | -0.61656  |
| 20076 | P03363 | Q8NH70 | -0.61656  |
| 20077 | P03363 | Q14406 | -0.36837  |
| 20078 | P03363 | P0C7X3 | -0.11115  |
| 20079 | P03363 | Q6ZS10 | -0.41924  |
| 20080 | P03363 | Q9BSY9 | -0.16753  |
| 20081 | P03363 | Q86WV6 | -0.19149  |
| 20082 | P03363 | P46531 | -0.22752  |
| 20083 | P03363 | Q6ZN92 | -0.21199  |
| 20084 | P03363 | P59768 | -0.30353  |
| 20085 | P03363 | Q5VYY2 | -0.3631   |
| 20086 | P03363 | Q8TEU7 | -0.33041  |
| 20087 | P03363 | P35318 | -0.2135   |
| 20088 | P03363 | Q9NUN7 | -0.34661  |
| 20089 | P03363 | P53985 | -0.37744  |
| 20090 | P03363 | Q6UXY8 | -0.32626  |
| 20091 | P03363 | Q2MV58 | -0.25486  |
| 20092 | P03363 | Q8NC54 | -0.32626  |
| 20093 | P03363 | O00330 | -0.21997  |
| 20094 | P03363 | Q3ZCQ3 | -0.32626  |
| 20095 | P03363 | Q6WCQ1 | -0.22703  |
| 20096 | P03363 | O94886 | -0.60202  |
| 20097 | P03363 | Q75071 | -0.22568  |
| 20098 | P03363 | Q9NQS5 | -0.61232  |
| 20099 | P03363 | Q9BXI9 | -0.49456  |
| 20100 | P03363 | A6NC05 | -0.16874  |
| 20101 | P03363 | Q96IQ7 | -0.43294  |
| 20102 | P03363 | Q9H8W3 | -0.075194 |
| 20103 | P03363 | Q86SK9 | -0.76022  |
| 20104 | P03363 | C9JH25 | -0.32626  |
| 20105 | P03363 | O43827 | -0.49902  |
| 20106 | P03363 | Q16585 | -0.22281  |
| 20107 | P03363 | A5PKW4 | -0.62036  |
| 20108 | P03363 | P37108 | -0.2928   |
| 20109 | P03363 | Q9NPJ1 | -0.22095  |
| 20110 | P03363 | A8MXD5 | -0.22399  |
| 20111 | P03363 | Q86W24 | -0.41802  |
| 20112 | P03363 | Q86WT1 | -0.1795   |
| 20113 | P03363 | Q8N2H4 | -0.14642  |
| 20114 | P03363 | Q8N2C9 | -0.16782  |
| 20115 | P03363 | Q9BPW8 | -0.11144  |
| 20116 | P03363 | P24071 | -0.91699  |
| 20117 | P03363 | P46094 | -0.69375  |
| 20118 | P03363 | Q9P2D7 | -0.22502  |
| 20119 | P03363 | O15428 | -0.22741  |
| 20120 | P03363 | A8MUK1 | -0.25139  |
| 20121 | P03363 | Q9UPW8 | -0.22741  |
| 20122 | P03363 | O75185 | -0.25933  |
| 20123 | P03363 | Q9Y5Q5 | -0.73807  |
| 20124 | P03363 | O75477 | -0.10111  |
| 20125 | P03363 | O43306 | -0.36392  |
| 20126 | P03363 | Q68DU8 | -0.15567  |
| 20127 | P03363 | Q9NRX3 | -0.064885 |
| 20128 | P03363 | Q7RTP6 | -0.22741  |
| 20129 | P03363 | P10314 | -0.3515   |
| 20130 | P03363 | Q3MIN7 | -0.29156  |
| 20131 | P03363 | Q8NGY1 | -0.61656  |
| 20132 | P03363 | Q5FWF4 | -0.2146   |
| 20133 | P03363 | O43194 | -0.78468  |
| 20134 | P03363 | Q9HBG7 | -0.36186  |
| 20135 | P03363 | O43164 | -0.22927  |
| 20136 | P03363 | P0C7X1 | -0.50908  |
| 20137 | P03363 | P49788 | -0.34069  |
| 20138 | P03363 | Q9P2F6 | -0.43354  |
| 20139 | P03363 | P51681 | -0.25703  |
| 20140 | P03363 | Q8NHA6 | -0.61656  |

|       |        |        |           |
|-------|--------|--------|-----------|
| 20141 | P03363 | P56696 | -0.35192  |
| 20142 | P03363 | Q8NGL9 | -0.61656  |
| 20143 | P03363 | Q92777 | -0.19152  |
| 20144 | P03363 | Q16586 | -0.21388  |
| 20145 | P03363 | Q6ZMR3 | -0.10125  |
| 20146 | P03363 | Q96GI7 | -0.031359 |
| 20147 | P03363 | Q04760 | -0.16794  |
| 20148 | P03363 | P46092 | -0.70051  |
| 20149 | P03363 | P36382 | -0.45833  |
| 20150 | P03363 | O76001 | -0.61656  |
| 20151 | P03363 | Q9BQ24 | -0.19715  |
| 20152 | P03363 | Q9BUY7 | -0.2267   |
| 20153 | P03363 | Q8N9X5 | -0.32626  |
| 20154 | P03363 | Q9Y2H1 | -0.2274   |
| 20155 | P03363 | Q8N5H3 | -0.031359 |
| 20156 | P03363 | Q08629 | -0.38111  |
| 20157 | P03363 | Q96CN5 | -0.22735  |
| 20158 | P03363 | Q9UHI7 | -0.21826  |
| 20159 | P03363 | Q53FA7 | -0.41388  |
| 20160 | P03363 | P14210 | -0.24028  |
| 20161 | P03363 | Q14165 | -0.44801  |
| 20162 | P03363 | Q8NCC3 | -0.42199  |
| 20163 | P03363 | Q08623 | -0.20327  |
| 20164 | P03363 | Q9HCN6 | -0.22775  |
| 20165 | P03363 | Q9HAB3 | -0.52326  |
| 20166 | P03363 | Q9H8S5 | -0.17162  |
| 20167 | P03363 | Q8TB03 | -0.051628 |
| 20168 | P03363 | Q6IE36 | -0.42125  |
| 20169 | P03363 | Q3ZCN5 | -0.22611  |
| 20170 | P03363 | Q8IY37 | -0.22634  |
| 20171 | P03363 | Q15223 | -0.27431  |
| 20172 | P03363 | Q9Y4X0 | -0.19678  |
| 20173 | P03363 | E9PQX1 | -0.20114  |
| 20174 | P03363 | Q3MIT2 | -0.13972  |
| 20175 | P03363 | Q5SQ13 | -0.19497  |
| 20176 | P03363 | P33764 | -0.22364  |
| 20177 | P03363 | O60566 | -0.22741  |
| 20178 | P03363 | B7Zaq6 | -0.33473  |
| 20179 | P03363 | P51512 | -0.80943  |
| 20180 | P03363 | Q6VVX0 | -0.55613  |
| 20181 | P03363 | A6NFA1 | -0.29667  |
| 20182 | P03363 | Q6N075 | -0.29915  |
| 20183 | P03363 | P23083 | -0.37246  |
| 20184 | P03363 | Q6L9W6 | -0.30048  |
| 20185 | P03363 | Q99523 | -0.23275  |
| 20186 | P03363 | Q00722 | -0.35885  |
| 20187 | P03363 | Q13422 | -0.2281   |
| 20188 | P03363 | Q6MZN7 | -0.042737 |
| 20189 | P03363 | Q9UN19 | -0.24999  |
| 20190 | P03363 | P02008 | -0.088519 |
| 20191 | P03363 | O43151 | -0.14959  |
| 20192 | P03363 | P12314 | -0.30942  |
| 20193 | P03363 | Q13164 | -0.22741  |
| 20194 | P03363 | P49223 | -0.33498  |
| 20195 | P03363 | P57087 | -0.22743  |
| 20196 | P03363 | P36268 | -0.36319  |
| 20197 | P03363 | P31930 | -0.34946  |
| 20198 | P03363 | O75841 | -0.23009  |
| 20199 | P03363 | Q86V35 | -0.27015  |
| 20200 | P03363 | O60733 | -0.22741  |
| 20201 | P03363 | Q8IZM9 | -0.38344  |
| 20202 | P03363 | Q6UX39 | -0.31226  |
| 20203 | P03363 | A6NL05 | -0.32626  |
| 20204 | P03363 | P53634 | -0.35352  |
| 20205 | P03363 | Q8NFU1 | -0.36754  |
| 20206 | P03363 | Q9NRJ7 | -0.58247  |
| 20207 | P03363 | Q9P227 | -0.43719  |
| 20208 | P03363 | A0FGR9 | -0.47262  |
| 20209 | P03363 | Q8IVF4 | -0.22572  |
| 20210 | P03363 | Q6B0I6 | -0.22246  |
| 20211 | P03363 | Q9H4B0 | -0.065872 |
| 20212 | P03363 | P06727 | -0.32842  |
| 20213 | P03363 | O14524 | -0.24975  |
| 20214 | P03363 | A8MXV4 | -0.14903  |
| 20215 | P03363 | P07478 | -0.35181  |
| 20216 | P03363 | O94759 | -0.4947   |

|       |        |        |           |
|-------|--------|--------|-----------|
| 20217 | P03363 | Q96CB5 | -0.21915  |
| 20218 | P03363 | Q8WVE7 | -0.32626  |
| 20219 | P03363 | Q8IYT2 | -0.24311  |
| 20220 | P03363 | Q9ULB1 | -0.22741  |
| 20221 | P03363 | Q8WUH6 | -0.32626  |
| 20222 | P03363 | Q32NB8 | -0.37941  |
| 20223 | P03363 | Q9NQX3 | -0.26312  |
| 20224 | P03363 | Q9BRZ2 | -0.2274   |
| 20225 | P03363 | Q95279 | -0.48438  |
| 20226 | P03363 | P01871 | -0.83033  |
| 20227 | P03363 | Q86XP6 | -0.33992  |
| 20228 | P03363 | P05976 | -0.22684  |
| 20229 | P03363 | P31152 | -0.22741  |
| 20230 | P03363 | A1L4L8 | -0.041683 |
| 20231 | P03363 | A8MXV6 | -0.32626  |
| 20232 | P03363 | Q16690 | -0.23019  |
| 20233 | P03363 | Q8NA82 | -0.19892  |
| 20234 | P03363 | Q9NZH8 | -0.38781  |
| 20235 | P03363 | Q96LD1 | -0.14623  |
| 20236 | P03363 | Q9NXE4 | -0.45153  |
| 20237 | P03363 | Q86UV7 | -0.27953  |
| 20238 | P03363 | Q8N2C7 | -0.32626  |
| 20239 | P03363 | Q7Z403 | -0.52348  |
| 20240 | P03363 | Q9BZG1 | -0.29492  |
| 20241 | P03363 | O95704 | -0.22724  |
| 20242 | P03363 | P36405 | -0.22759  |
| 20243 | P03363 | Q9Y5K1 | -0.21057  |
| 20244 | P03363 | P45985 | -0.22811  |
| 20245 | P03363 | P30550 | -0.65358  |
| 20246 | P03363 | Q86T03 | -0.41374  |
| 20247 | P03363 | P52895 | -0.22716  |
| 20248 | P03363 | Q9HCU5 | -0.22741  |
| 20249 | P03363 | Q9Y485 | -0.22742  |
| 20250 | P03363 | Q8IXS0 | -0.031359 |
| 20251 | P03363 | P49759 | -0.43254  |
| 20252 | P03363 | A6NGZ8 | -0.47262  |
| 20253 | P03363 | Q9H0F5 | -0.23316  |
| 20254 | P03363 | O60412 | -0.61656  |
| 20255 | P03363 | Q16820 | -0.76312  |
| 20256 | P03363 | Q96D59 | -0.47964  |
| 20257 | P03363 | Q9NUJ3 | -0.10309  |
| 20258 | P03363 | Q96RW7 | -0.47249  |
| 20259 | P03363 | Q16873 | -0.16101  |
| 20260 | P03363 | Q9NW68 | -0.20226  |
| 20261 | P03363 | O95302 | -0.24899  |
| 20262 | P03363 | Q9BZW2 | -0.47773  |
| 20263 | P03363 | O60895 | -0.18842  |
| 20264 | P03363 | P24821 | -0.56341  |
| 20265 | P03363 | P0DJD9 | -0.40663  |
| 20266 | P03363 | Q96K17 | -0.047385 |
| 20267 | P03363 | Q9BYE2 | -0.46183  |
| 20268 | P03363 | Q6UWW0 | -0.347    |
| 20269 | P03363 | A6NGG3 | -0.042737 |
| 20270 | P03363 | Q16665 | -0.23597  |
| 20271 | P03363 | Q96QE4 | -0.22758  |
| 20272 | P03363 | A6NJZ3 | -0.61656  |
| 20273 | P03363 | P24158 | -0.25479  |
| 20274 | P03363 | Q8N3U1 | -0.042737 |
| 20275 | P03363 | Q4AC99 | -0.22573  |
| 20276 | P03363 | O15550 | -0.34816  |
| 20277 | P03363 | Q8WW14 | -0.10307  |
| 20278 | P03363 | Q15768 | -0.35284  |
| 20279 | P03363 | P36871 | -0.19539  |
| 20280 | P03363 | P0C5Y9 | -0.26906  |
| 20281 | P03363 | O95237 | -0.41133  |
| 20282 | P03363 | Q9H2J1 | -0.22493  |
| 20283 | P03363 | C9JVV0 | -0.32626  |
| 20284 | P03363 | Q9Y4K4 | -0.228    |
| 20285 | P03363 | O43869 | -0.61656  |
| 20286 | P03363 | Q96A25 | -0.20633  |
| 20287 | P03363 | Q9BX68 | -0.21401  |
| 20288 | P03363 | Q15642 | -0.30267  |
| 20289 | P03363 | Q9BZ72 | -0.59352  |
| 20290 | P03363 | Q96M32 | -0.2162   |
| 20291 | P03363 | Q9UBN7 | -0.22325  |
| 20292 | P03363 | Q9BX97 | -0.21488  |



|       |        |        |            |
|-------|--------|--------|------------|
| 20293 | P03363 | Q8NGK0 | -0.61656   |
| 20294 | P03363 | P04440 | -0.55169   |
| 20295 | P03363 | P55316 | -0.29843   |
| 20296 | P03363 | Q43909 | -0.47684   |
| 20297 | P03363 | A2A3N6 | -0.2271    |
| 20298 | P03363 | Q9NP81 | -0.051159  |
| 20299 | P03363 | Q9UGQ2 | -0.22734   |
| 20300 | P03363 | Q9H672 | -0.22741   |
| 20301 | P03363 | O75459 | -0.16428   |
| 20302 | P03363 | Q9H4Q3 | -0.22736   |
| 20303 | P03363 | Q8IZP9 | -0.60733   |
| 20304 | P03363 | P31415 | -0.22374   |
| 20305 | P03363 | P35408 | -0.22741   |
| 20306 | P03363 | P34810 | -0.51915   |
| 20307 | P03363 | Q63HM9 | -0.25769   |
| 20308 | P03363 | Q6ZT07 | -0.53836   |
| 20309 | P03363 | Q96DM1 | -0.0015251 |
| 20310 | P03363 | P02818 | -0.25212   |
| 20311 | P03363 | Q9UHD1 | -0.21038   |
| 20312 | P03363 | P01598 | -0.54902   |
| 20313 | P03363 | Q8WXD0 | -0.54232   |
| 20314 | P03363 | Q9H0K1 | -0.23006   |
| 20315 | P03363 | Q8WXA2 | -0.33992   |
| 20316 | P03363 | Q6XR72 | -0.48497   |
| 20317 | P03363 | Q6ZV73 | -0.24331   |
| 20318 | P03363 | P00738 | -0.33674   |
| 20319 | P03363 | Q6ZU69 | -0.32626   |
| 20320 | P03363 | P51671 | -0.55001   |
| 20321 | P03363 | Q96HJ9 | -0.18052   |
| 20322 | P03363 | A4D1P6 | -0.22742   |
| 20323 | P03363 | Q53H64 | -0.13392   |
| 20324 | P03363 | Q6ZSU1 | -0.2461    |
| 20325 | P03363 | Q8NH07 | -0.61656   |
| 20326 | P03363 | P20273 | -0.22743   |
| 20327 | P03363 | Q15213 | -0.22742   |
| 20328 | P03363 | Q8TDY4 | -0.22746   |
| 20329 | P03363 | Q96PC5 | -0.33992   |
| 20330 | P03363 | P41586 | -0.25877   |
| 20331 | P03363 | Q9UKP6 | -0.51241   |
| 20332 | P03363 | P21580 | -0.2104    |
| 20333 | P03363 | Q9H1U9 | -0.29673   |
| 20334 | P03363 | Q8N7U6 | -0.22746   |
| 20335 | P03363 | Q13232 | -0.37372   |
| 20336 | P03363 | P23975 | -0.22722   |
| 20337 | P03363 | D6RF30 | -0.16232   |
| 20338 | P03363 | O00398 | -0.62051   |
| 20339 | P03363 | Q9C093 | -0.18727   |
| 20340 | P03363 | Q5T7P3 | -0.042737  |
| 20341 | P03363 | Q6NTF9 | -0.34678   |
| 20342 | P03363 | Q9ULK5 | -0.28654   |
| 20343 | P03363 | P30990 | -0.41207   |
| 20344 | P03363 | Q9H3H1 | -0.1177    |
| 20345 | P03363 | Q8N6K0 | -0.32626   |
| 20346 | P03363 | Q7RTY8 | -0.56839   |
| 20347 | P03363 | P13224 | -0.22781   |
| 20348 | P03363 | Q92743 | -0.32304   |
| 20349 | P03363 | P61812 | -0.22741   |
| 20350 | P03363 | O95969 | -0.42609   |
| 20351 | P03363 | B2RV13 | -0.0076565 |
| 20352 | P03363 | Q9BQS7 | -0.70439   |
| 20353 | P03363 | P00352 | -0.28357   |
| 20354 | P03363 | Q05923 | -0.22903   |
| 20355 | P03363 | Q9H0L4 | -0.22278   |
| 20356 | P03363 | Q96PL2 | -0.61664   |
| 20357 | P03363 | Q8WVD3 | -0.22601   |
| 20358 | P03363 | O14939 | -0.22649   |
| 20359 | P03363 | O60313 | -0.23444   |
| 20360 | P03363 | Q7RTV2 | -0.22719   |
| 20361 | P03363 | P19878 | -0.22726   |
| 20362 | P03363 | Q8TEQ0 | -0.22671   |
| 20363 | P03363 | Q5GH76 | -0.32626   |
| 20364 | P03363 | P60608 | -0.1073    |
| 20365 | P03363 | Q5K130 | -0.18037   |
| 20366 | P03363 | Q9P2J9 | -0.2098    |
| 20367 | P03363 | P56856 | -0.27242   |
| 20368 | P03363 | O75610 | -0.36456   |

|       |        |        |           |
|-------|--------|--------|-----------|
| 20369 | P03363 | P17735 | -0.22557  |
| 20370 | P03363 | Q9BU40 | -0.33724  |
| 20371 | P03363 | Q969M2 | -0.4444   |
| 20372 | P03363 | Q9H6Y5 | -0.22713  |
| 20373 | P03363 | A6NDK9 | -0.1431   |
| 20374 | P03363 | Q9H792 | -0.22741  |
| 20375 | P03363 | Q9NR71 | -0.46032  |
| 20376 | P03363 | P56373 | -0.32858  |
| 20377 | P03363 | P01703 | -0.54902  |
| 20378 | P03363 | Q9H4I3 | -0.17981  |
| 20379 | P03363 | P55072 | -0.27485  |
| 20380 | P03363 | Q92696 | -0.22554  |
| 20381 | P03363 | Q9H6E4 | -0.33992  |
| 20382 | P03363 | Q9Y3D6 | -0.21479  |
| 20383 | P03363 | Q9H9P2 | -0.22979  |
| 20384 | P03363 | Q9Y2X7 | -0.22741  |
| 20385 | P03363 | Q14206 | -0.20706  |
| 20386 | P03363 | Q96JC1 | -0.22069  |
| 20387 | P03363 | Q63ZY6 | -0.16691  |
| 20388 | P03363 | P61601 | -0.30391  |
| 20389 | P03363 | O60234 | -0.20068  |
| 20390 | P03363 | Q8TBF2 | -0.11602  |
| 20391 | P03363 | O00295 | -0.19863  |
| 20392 | P03363 | Q8TAB3 | -0.57898  |
| 20393 | P03363 | Q8NCE2 | -0.21815  |
| 20394 | P03363 | Q6P3W2 | -0.24801  |
| 20395 | P03363 | Q92833 | -0.22474  |
| 20396 | P03363 | Q8N9R0 | -0.042737 |
| 20397 | P03363 | Q9UKH3 | -0.22613  |
| 20398 | P03363 | Q8NGD1 | -0.61656  |
| 20399 | P03363 | P51149 | -0.23518  |
| 20400 | P03363 | Q6PIV7 | -0.29673  |
| 20401 | P03363 | Q9Y689 | -0.49937  |
| 20402 | P03363 | Q9H2H9 | -0.49556  |
| 20403 | P03363 | Q8NGD2 | -0.61656  |
| 20404 | P03363 | Q8IW92 | -0.28182  |
| 20405 | P03363 | P21291 | -0.22749  |
| 20406 | P03363 | Q9Y228 | -0.19752  |
| 20407 | P03363 | Q6UW32 | -0.095859 |
| 20408 | P03363 | Q8TAP4 | -0.22727  |
| 20409 | P03363 | P55291 | -0.56013  |
| 20410 | P03363 | Q16787 | -0.37272  |
| 20411 | P03363 | Q96AX1 | -0.22095  |
| 20412 | P03363 | Q9NWQ9 | -0.27401  |
| 20413 | P03363 | Q96DR8 | -0.47717  |
| 20414 | P03363 | Q5VUJ6 | -0.22913  |
| 20415 | P03363 | Q6P6B7 | -0.22741  |
| 20416 | P03363 | Q6UXP9 | -0.076756 |
| 20417 | P03363 | P41247 | -0.21195  |
| 20418 | P03363 | Q6DWJ6 | -0.64046  |
| 20419 | P03363 | O14863 | -0.31284  |
| 20420 | P03363 | Q68BL7 | -0.36226  |
| 20421 | P03363 | Q969Z4 | -0.25687  |
| 20422 | P03363 | Q86XX4 | -0.59773  |
| 20423 | P03363 | P84095 | -0.21575  |
| 20424 | P03363 | Q99578 | -0.3991   |
| 20425 | P03363 | P10746 | -0.061101 |
| 20426 | P03363 | Q8IYQ7 | -0.20886  |
| 20427 | P03363 | Q8NI32 | -0.24531  |
| 20428 | P03363 | P28330 | -0.2429   |
| 20429 | P03363 | Q7Z3J3 | -0.22549  |
| 20430 | P03363 | P01270 | -0.29241  |
| 20431 | P03363 | A6NGH7 | -0.11471  |
| 20432 | P03363 | P51164 | -0.44785  |
| 20433 | P03363 | Q9BYL1 | -0.20791  |
| 20434 | P03363 | Q9NXA8 | -0.23565  |
| 20435 | P03363 | Q8NFT2 | -0.72298  |
| 20436 | P03363 | Q9P2B7 | -0.031359 |
| 20437 | P03363 | P22748 | -0.22752  |
| 20438 | P03363 | Q7L3V2 | -0.20558  |
| 20439 | P03363 | Q6E0U4 | -0.42609  |
| 20440 | P03363 | O75264 | -0.32626  |
| 20441 | P03363 | Q7L7X3 | -0.32619  |
| 20442 | P03363 | Q7LBC6 | -0.19552  |
| 20443 | P03363 | Q8IXS8 | -0.097141 |
| 20444 | P03363 | Q8TAC2 | -0.18467  |

|       |        |        |           |
|-------|--------|--------|-----------|
| 20445 | P03363 | Q6P3W7 | -0.22741  |
| 20446 | P03363 | Q6TCH4 | -0.32626  |
| 20447 | P03363 | Q8N143 | -0.20592  |
| 20448 | P03363 | Q9UKE5 | -0.23253  |
| 20449 | P03363 | Q99895 | -0.26123  |
| 20450 | P03363 | A8MT70 | -0.27953  |
| 20451 | P03363 | Q7Z4L5 | -0.27984  |
| 20452 | P03363 | Q6NXP6 | -0.32132  |
| 20453 | P03363 | Q8WWY7 | -0.33098  |
| 20454 | P03363 | Q01523 | -0.42634  |
| 20455 | P03363 | Q07283 | -0.24246  |
| 20456 | P03363 | P47890 | -0.61656  |
| 20457 | P03363 | Q9UK28 | -0.28673  |
| 20458 | P03363 | Q5W0N0 | -0.32626  |
| 20459 | P03363 | Q9H2I8 | -0.22738  |
| 20460 | P03363 | P02741 | -0.39606  |
| 20461 | P03363 | Q96M27 | -0.18917  |
| 20462 | P03363 | P16435 | -0.50879  |
| 20463 | P03363 | Q9NR16 | -0.81213  |
| 20464 | P03363 | Q8IWU2 | -0.42418  |
| 20465 | P03363 | P51679 | -0.71806  |
| 20466 | P03363 | P01909 | -0.59202  |
| 20467 | P03363 | Q8IZF0 | -0.419    |
| 20468 | P03363 | A6PVS8 | -0.22714  |
| 20469 | P03363 | Q8IW03 | -0.15884  |
| 20470 | P03363 | Q70EK8 | -0.085371 |
| 20471 | P03363 | Q8NBP0 | -0.22739  |
| 20472 | P03363 | Q8NGU1 | -0.61656  |
| 20473 | P03363 | P04637 | -0.22596  |
| 20474 | P03363 | Q9UP52 | -0.41186  |
| 20475 | P03363 | Q96P09 | -0.22741  |
| 20476 | P03363 | P84074 | -0.26031  |
| 20477 | P03363 | A6NIR3 | -0.45506  |
| 20478 | P03363 | Q8NCR0 | -0.32369  |
| 20479 | P03363 | P0CG21 | -0.22691  |
| 20480 | P03363 | Q5NDL2 | -0.20995  |
| 20481 | P03363 | P51172 | -0.21431  |
| 20482 | P03363 | Q8WVI7 | -0.16035  |
| 20483 | P03363 | Q8N6M5 | -0.10604  |
| 20484 | P03363 | Q8TE23 | -0.62012  |
| 20485 | P03363 | Q96RV3 | -0.32626  |
| 20486 | P03363 | P20929 | -0.22725  |
| 20487 | P03363 | Q56UQ5 | -0.18846  |
| 20488 | P03363 | Q9Y4J8 | -0.22734  |
| 20489 | P03363 | Q15617 | -0.61656  |
| 20490 | P03363 | Q8NGI9 | -0.61656  |
| 20491 | P03363 | P00995 | -0.22527  |
| 20492 | P03363 | Q8NES3 | -0.53401  |
| 20493 | P03363 | Q9UPQ7 | -0.29491  |
| 20494 | P03363 | Q9Y6G9 | -0.22594  |
| 20495 | P03363 | Q9Y320 | -0.24409  |
| 20496 | P03363 | Q8TBF8 | -0.22129  |
| 20497 | P03363 | P05814 | -0.33261  |
| 20498 | P03363 | Q6ZQW0 | -0.22208  |
| 20499 | P03363 | Q9BRQ0 | -0.20754  |
| 20500 | P03363 | P05408 | -0.070145 |
| 20501 | P03363 | Q52WX2 | -0.4394   |
| 20502 | P03363 | Q8TBH0 | -0.2259   |
| 20503 | P03363 | C9JJ37 | -0.22317  |
| 20504 | P03363 | P78330 | -0.22691  |
| 20505 | P03363 | P07204 | -0.26288  |
| 20506 | P03363 | Q7Z5J8 | -0.32626  |
| 20507 | P03363 | O75354 | -0.63511  |
| 20508 | P03363 | Q8NA57 | -0.026387 |
| 20509 | P03363 | Q8TEW0 | -0.22686  |
| 20510 | P03363 | Q9HBH0 | -0.35423  |
| 20511 | P03363 | Q8WXH4 | -0.22757  |
| 20512 | P03363 | O14640 | -0.2062   |
| 20513 | P03363 | P21709 | -0.63262  |
| 20514 | P03363 | Q6ZNW5 | -0.13572  |
| 20515 | P03363 | O43847 | -0.22615  |
| 20516 | P03363 | O14668 | -0.81267  |
| 20517 | P03363 | Q02643 | -0.22823  |
| 20518 | P03363 | Q96EB6 | -0.4262   |
| 20519 | P03363 | Q9HD89 | -0.22172  |
| 20520 | P03363 | A8MX80 | -0.062278 |

|       |        |        |           |
|-------|--------|--------|-----------|
| 20521 | P03363 | Q96GP6 | -0.23062  |
| 20522 | P03363 | Q9H2S6 | -0.3021   |
| 20523 | P03363 | P12643 | -0.22741  |
| 20524 | P03363 | Q6ZVS6 | -0.33992  |
| 20525 | P03363 | P29274 | -0.2417   |
| 20526 | P03363 | Q01362 | -0.52448  |
| 20527 | P03363 | Q9NX45 | -0.22733  |
| 20528 | P03363 | Q9BSA4 | -0.18547  |
| 20529 | P03363 | A0FGR8 | -0.47262  |
| 20530 | P03363 | Q9BYC2 | -0.19165  |
| 20531 | P03363 | P10809 | -0.21202  |
| 20532 | P03363 | Q9UNK9 | -0.1708   |
| 20533 | P03363 | A1IGU5 | -0.22741  |
| 20534 | P03363 | P55263 | -0.29821  |
| 20535 | P03363 | Q2I0M4 | -0.22779  |
| 20536 | P03363 | Q96S79 | -0.60678  |
| 20537 | P03363 | Q9BXU8 | -0.23894  |
| 20538 | P03363 | Q5SRD0 | -0.14301  |
| 20539 | P03363 | P41180 | -0.33     |
| 20540 | P03363 | Q96FQ6 | -0.22831  |
| 20541 | P03363 | Q9HCG7 | -0.40325  |
| 20542 | P03363 | P49771 | -0.89362  |
| 20543 | P03363 | P30405 | -0.14395  |
| 20544 | P03363 | Q9NXL9 | -0.22124  |
| 20545 | P03363 | Q13177 | -0.22759  |
| 20546 | P03363 | P51690 | -0.22749  |
| 20547 | P03363 | Q8WXD2 | -0.32856  |
| 20548 | P03363 | Q9Y223 | -0.25772  |
| 20549 | P03363 | P09917 | -0.22839  |
| 20550 | P03363 | P18433 | -0.66547  |
| 20551 | P03363 | Q08477 | -0.68061  |
| 20552 | P03363 | P55081 | -0.29738  |
| 20553 | P03363 | P01599 | -0.54902  |
| 20554 | P03363 | Q8N9B8 | -0.22729  |
| 20555 | P03363 | P41222 | -0.22975  |
| 20556 | P03363 | Q9H0V1 | -0.3247   |
| 20557 | P03363 | Q15166 | -0.43164  |
| 20558 | P03363 | P20936 | -0.22741  |
| 20559 | P03363 | Q9BVK8 | -0.52348  |
| 20560 | P03363 | Q86YV6 | -0.54205  |
| 20561 | P03363 | Q8N118 | -0.60278  |
| 20562 | P03363 | Q9H4I0 | -0.1908   |
| 20563 | P03363 | Q765P7 | -0.20128  |
| 20564 | P03363 | Q6MZM9 | -0.33992  |
| 20565 | P03363 | Q4VXU2 | -0.23228  |
| 20566 | P03363 | Q8WU68 | -0.22153  |
| 20567 | P03363 | P54868 | -0.21855  |
| 20568 | P03363 | Q9H2C8 | -0.61656  |
| 20569 | P03363 | O15344 | -0.22835  |
| 20570 | P03363 | Q8WU79 | -0.21502  |
| 20571 | P03363 | P04280 | -0.28098  |
| 20572 | P03363 | Q9NQ79 | -0.39896  |
| 20573 | P03363 | A4D0Y5 | -0.042737 |
| 20574 | P03363 | Q674R7 | -0.3304   |
| 20575 | P03363 | Q9BPW4 | -0.46446  |
| 20576 | P03363 | Q93100 | -0.16452  |
| 20577 | P03363 | Q9NU19 | -0.50908  |
| 20578 | P03363 | Q86V88 | -0.26815  |
| 20579 | P03363 | Q5T4T1 | -0.32626  |
| 20580 | P03363 | Q9Y2I9 | -0.50984  |
| 20581 | P03363 | Q9ULK2 | -0.039165 |
| 20582 | P03363 | A8MYG8 | -0.22741  |
| 20583 | P03363 | P12235 | -0.22898  |
| 20584 | P03363 | Q53H54 | -0.2014   |
| 20585 | P03363 | Q6IEE7 | -0.32626  |
| 20586 | P03363 | P01040 | -0.21564  |
| 20587 | P03363 | P0DM63 | -0.06488  |
| 20588 | P03363 | O15211 | -0.27701  |
| 20589 | P03363 | Q9H426 | -0.23201  |
| 20590 | P03363 | A6NI72 | -0.2274   |
| 20591 | P03363 | A6NLU5 | -0.32626  |
| 20592 | P03363 | Q53FE4 | -0.13402  |
| 20593 | P03363 | P09326 | -0.25632  |
| 20594 | P03363 | Q7Z7F0 | -0.17628  |
| 20595 | P03363 | A6NFA0 | -0.32626  |
| 20596 | P03363 | Q9P272 | -0.22144  |

|       |        |        |           |
|-------|--------|--------|-----------|
| 20597 | P03363 | P04278 | -0.37453  |
| 20598 | P03363 | Q9BUV8 | -0.17047  |
| 20599 | P03363 | P13761 | -0.29925  |
| 20600 | P03363 | Q6IPU0 | -0.039198 |
| 20601 | P03363 | Q9BTK2 | -0.1011   |
| 20602 | P03363 | Q9NZ42 | -0.25593  |
| 20603 | P03363 | Q86UX2 | -0.33193  |
| 20604 | P03363 | P20333 | -0.34694  |
| 20605 | P03363 | Q9UGC6 | -0.22744  |
| 20606 | P03363 | P02452 | -0.22751  |
| 20607 | P03363 | P11717 | -0.22736  |
| 20608 | P03363 | O43323 | -0.42048  |
| 20609 | P03363 | Q2M329 | -0.13371  |
| 20610 | P03363 | Q8IV01 | -0.28781  |
| 20611 | P03363 | Q76I76 | -0.25703  |
| 20612 | P03363 | Q8N490 | -0.17454  |
| 20613 | P03363 | P25787 | -0.14218  |
| 20614 | P03363 | Q12889 | -0.22107  |
| 20615 | P03363 | Q9Y2H5 | -0.22741  |
| 20616 | P03363 | P02649 | -0.22711  |
| 20617 | P03363 | B5MCN3 | -0.31957  |
| 20618 | P03363 | Q7Z4I7 | -0.21567  |
| 20619 | P03363 | Q7Z2W7 | -0.38526  |
| 20620 | P03363 | Q9ULV8 | -0.22774  |
| 20621 | P03363 | Q8N961 | -0.22741  |
| 20622 | P03363 | Q6N063 | -0.36536  |
| 20623 | P03363 | Q9UN81 | -0.14653  |
| 20624 | P03363 | Q6ZTQ4 | -0.57898  |
| 20625 | P03363 | Q6UWJ1 | -0.38187  |
| 20626 | P03363 | A6NMA1 | -0.18041  |
| 20627 | P03363 | P30301 | -0.4944   |
| 20628 | P03363 | A6NEL2 | -0.22741  |
| 20629 | P03363 | Q8TAV4 | -0.55796  |
| 20630 | P03363 | P0CB46 | -0.22704  |
| 20631 | P03363 | Q9BT22 | -0.45191  |
| 20632 | P03363 | Q5BLP8 | -0.33992  |
| 20633 | P03363 | Q8TDN1 | -0.41606  |
| 20634 | P03363 | P47872 | -0.73033  |
| 20635 | P03363 | O76039 | -0.22719  |
| 20636 | P03363 | Q8NGF1 | -0.61656  |
| 20637 | P03363 | Q6ZMZ0 | -0.22681  |
| 20638 | P03363 | Q6P0A1 | -0.32626  |
| 20639 | P03363 | Q8NH37 | -0.61656  |
| 20640 | P03363 | Q6JQN1 | -0.34503  |
| 20641 | P03363 | Q6PJI1 | -0.11617  |
| 20642 | P03363 | P08833 | -0.42131  |
| 20643 | P03363 | Q9H1K0 | -0.2071   |
| 20644 | P03363 | Q9Y575 | -0.22741  |
| 20645 | P03363 | O60449 | -0.53716  |
| 20646 | P03363 | Q9Y6H8 | -0.436    |
| 20647 | P03363 | Q9HBH5 | -0.54817  |
| 20648 | P03363 | Q6J9G0 | -0.83641  |
| 20649 | P03363 | Q6NV75 | -0.64046  |
| 20650 | P03363 | Q6PI78 | -0.32227  |
| 20651 | P03363 | Q5VT79 | -0.18818  |
| 20652 | P03363 | Q96KK4 | -0.61656  |
| 20653 | P03363 | Q5TA89 | -0.22731  |
| 20654 | P03363 | Q8N9C0 | -0.22744  |
| 20655 | P03363 | O43497 | -0.42027  |
| 20656 | P03363 | Q9UBK5 | -0.47883  |
| 20657 | P03363 | P04746 | -0.43968  |
| 20658 | P03363 | Q14112 | -0.22854  |
| 20659 | P03363 | Q9Y232 | -0.22682  |
| 20660 | P03363 | P0C7T7 | -0.042737 |
| 20661 | P03363 | Q8WUR7 | -0.20705  |
| 20662 | P03363 | Q7Z2Z2 | -0.18542  |
| 20663 | P03363 | A1L1A6 | -0.32626  |
| 20664 | P03363 | Q53F39 | -0.21157  |
| 20665 | P03363 | Q8NGC7 | -0.61656  |
| 20666 | P03363 | Q9Y2V7 | -0.19455  |
| 20667 | P03363 | Q17RA5 | -0.042737 |
| 20668 | P03363 | Q8IVQ6 | -0.38567  |
| 20669 | P03363 | Q9BRC7 | -0.23046  |
| 20670 | P03363 | P55075 | -0.26132  |
| 20671 | P03363 | Q30KQ8 | -0.33516  |
| 20672 | P03363 | Q8WWB5 | -0.012856 |

|       |        |        |           |
|-------|--------|--------|-----------|
| 20673 | P03363 | O95180 | -0.39677  |
| 20674 | P03363 | Q9UBC7 | -0.28642  |
| 20675 | P03363 | Q8WV16 | -0.22743  |
| 20676 | P03363 | A6NEH8 | -0.12635  |
| 20677 | P03363 | Q96MK3 | -0.33992  |
| 20678 | P03363 | Q658N2 | -0.34581  |
| 20679 | P03363 | Q9P0Z9 | -0.31589  |
| 20680 | P03363 | P25024 | -0.6225   |
| 20681 | P03363 | P12319 | -0.55827  |
| 20682 | P03363 | Q8NH60 | -0.61656  |
| 20683 | P03363 | P39059 | -0.70834  |
| 20684 | P03363 | Q96PN6 | -0.31258  |
| 20685 | P03363 | P98160 | -0.63616  |
| 20686 | P03363 | P05162 | -0.22106  |
| 20687 | P03363 | Q9Y6Y9 | -0.14628  |
| 20688 | P03363 | Q70HW3 | -0.24055  |
| 20689 | P03363 | Q16659 | -0.22741  |
| 20690 | P03363 | Q641Q2 | -0.16619  |
| 20691 | P03363 | Q9NXJ5 | -0.095365 |
| 20692 | P03363 | Q5SY16 | -0.12864  |
| 20693 | P03363 | Q96GX1 | -0.12989  |
| 20694 | P03363 | Q96EE4 | -0.33992  |
| 20695 | P03363 | P49448 | -0.31676  |
| 20696 | P03363 | Q9UK17 | -0.53692  |
| 20697 | P03363 | Q96QS1 | -0.36861  |
| 20698 | P03363 | A8MUP6 | -0.32626  |
| 20699 | P03363 | Q16558 | -0.51446  |
| 20700 | P03363 | Q15391 | -0.62942  |
| 20701 | P03363 | P06127 | -0.24013  |
| 20702 | P03363 | A8MVJ9 | -0.014782 |
| 20703 | P03363 | P29122 | -0.54915  |
| 20704 | P03363 | P07498 | -0.32974  |
| 20705 | P03363 | Q95406 | -0.46539  |
| 20706 | P03363 | Q6NS38 | -0.16821  |
| 20707 | P03363 | Q9NP90 | -0.22853  |
| 20708 | P03363 | Q8WXI2 | -0.22741  |
| 20709 | P03363 | Q9Y4F3 | -0.1309   |
| 20710 | P03363 | A6NMC2 | -0.17342  |
| 20711 | P03363 | Q8NHS0 | -0.23836  |
| 20712 | P03363 | Q99959 | -0.21888  |
| 20713 | P03363 | Q96G79 | -0.22959  |
| 20714 | P03363 | Q8TC36 | -0.2149   |
| 20715 | P03363 | Q12907 | -0.36186  |
| 20716 | P03363 | O14807 | -0.62361  |
| 20717 | P03363 | Q8TCW7 | -0.32626  |
| 20718 | P03363 | Q2TBC4 | -0.29665  |
| 20719 | P03363 | Q17RR3 | -0.37289  |
| 20720 | P03363 | P25391 | -0.42056  |
| 20721 | P03363 | Q99966 | -0.21467  |
| 20722 | P03363 | Q9NXS3 | -0.18063  |
| 20723 | P03363 | Q96P11 | -0.1547   |
| 20724 | P03363 | Q8N371 | -0.20112  |
| 20725 | P03363 | Q92918 | -0.22754  |
| 20726 | P03363 | Q4KMG9 | -0.32626  |
| 20727 | P03363 | P35557 | -0.22245  |
| 20728 | P03363 | Q8NGK6 | -0.61656  |
| 20729 | P03363 | Q7Z407 | -0.47262  |
| 20730 | P03363 | Q6ZRV3 | -0.042737 |
| 20731 | P03363 | O43143 | -0.22688  |
| 20732 | P03363 | Q9Y5Q0 | -0.6181   |
| 20733 | P03363 | Q92574 | -0.22737  |
| 20734 | P03363 | Q5H8A3 | -0.32087  |
| 20735 | P03363 | P09958 | -0.34448  |
| 20736 | P03363 | Q9Y265 | -0.2946   |
| 20737 | P03363 | Q15622 | -0.61656  |
| 20738 | P03363 | P53396 | -0.20003  |
| 20739 | P03363 | Q9UKW4 | -0.22741  |
| 20740 | P03363 | Q6UDR6 | -0.33498  |
| 20741 | P03363 | Q94851 | -0.22741  |
| 20742 | P03363 | Q6P1N9 | -0.18293  |
| 20743 | P03363 | Q96DU7 | -0.12178  |
| 20744 | P03363 | Q8IYI0 | -0.078256 |
| 20745 | P03363 | Q4KWH8 | -0.22741  |
| 20746 | P03363 | Q9Y6E0 | -0.2291   |
| 20747 | P03363 | Q494R4 | -0.20842  |
| 20748 | P03363 | O94911 | -0.66714  |

|       |        |        |           |
|-------|--------|--------|-----------|
| 20749 | P03363 | I3L3R5 | -0.042737 |
| 20750 | P03363 | O15018 | -0.22624  |
| 20751 | P03363 | Q92953 | -0.45298  |
| 20752 | P03363 | A6PVI3 | -0.22378  |
| 20753 | P03363 | Q8NDX9 | -0.23038  |
| 20754 | P03363 | P51813 | -0.31074  |
| 20755 | P03363 | P26232 | -0.21293  |
| 20756 | P03363 | Q9H252 | -0.45966  |
| 20757 | P03363 | Q6P1A2 | -0.45354  |
| 20758 | P03363 | Q9BSW7 | -0.22776  |
| 20759 | P03363 | Q8TEU8 | -0.30472  |
| 20760 | P03363 | O60522 | -0.2893   |
| 20761 | P03363 | Q9H340 | -0.61656  |
| 20762 | P03363 | P48029 | -0.41925  |
| 20763 | P03363 | P19823 | -0.34717  |
| 20764 | P03363 | Q8N5V2 | -0.35174  |
| 20765 | P03363 | O60942 | -0.22502  |
| 20766 | P03363 | Q96A61 | -0.27953  |
| 20767 | P03363 | P63027 | -0.22516  |
| 20768 | P03363 | Q6ZUT3 | -0.29497  |
| 20769 | P03363 | Q5VWN6 | -0.12945  |
| 20770 | P03363 | P53367 | -0.21788  |
| 20771 | P03363 | Q9HAB8 | -0.057943 |
| 20772 | P03363 | Q92613 | -0.22878  |
| 20773 | P03363 | P08247 | -0.25891  |
| 20774 | P03363 | P09622 | -0.22678  |
| 20775 | P03363 | P14920 | -0.20007  |
| 20776 | P03363 | Q9H694 | -0.21587  |
| 20777 | P03363 | P21796 | -0.204    |
| 20778 | P03363 | Q9NRE1 | -0.58084  |
| 20779 | P03363 | P35125 | -0.22843  |
| 20780 | P03363 | P49895 | -0.77839  |
| 20781 | P03363 | Q14439 | -0.74746  |
| 20782 | P03363 | Q8N9L9 | -0.20635  |
| 20783 | P03363 | Q04900 | -0.65397  |
| 20784 | P03363 | Q9UJU2 | -0.22192  |
| 20785 | P03363 | Q8TF30 | -0.16517  |
| 20786 | P03363 | Q6P9F5 | -0.27953  |
| 20787 | P03363 | Q5TFG8 | -0.079523 |
| 20788 | P03363 | P78426 | -0.22792  |
| 20789 | P03363 | A6NDS4 | -0.50908  |
| 20790 | P03363 | P18089 | -0.27453  |
| 20791 | P03363 | O43312 | -0.2043   |
| 20792 | P03363 | Q70CQ3 | -0.444    |
| 20793 | P03363 | Q7Z6K4 | -0.22741  |
| 20794 | P03363 | P07195 | -0.097671 |
| 20795 | P03363 | P60033 | -0.2336   |
| 20796 | P03363 | Q8NBR0 | -0.25687  |
| 20797 | P03363 | P81408 | -0.27065  |
| 20798 | P03363 | Q8N423 | -0.22743  |
| 20799 | P03363 | Q9H6S3 | -0.22741  |
| 20800 | P03363 | Q9BWN1 | -0.031359 |
| 20801 | P03363 | P43004 | -0.32238  |
| 20802 | P03363 | Q6PJ21 | -0.22179  |
| 20803 | P03363 | Q8NGN6 | -0.61656  |
| 20804 | P03363 | Q7Z5H5 | -0.43265  |
| 20805 | P03363 | P29377 | -0.22753  |
| 20806 | P03363 | P25092 | -0.40326  |
| 20807 | P03363 | Q5T2P8 | -0.18575  |
| 20808 | P03363 | Q8NEC7 | -0.21962  |
| 20809 | P03363 | P10909 | -0.17797  |
| 20810 | P03363 | Q03403 | -0.22804  |
| 20811 | P03363 | P30203 | -0.49101  |
| 20812 | P03363 | Q5HY92 | -0.23023  |
| 20813 | P03363 | P11182 | -0.20446  |
| 20814 | P03363 | Q13087 | -0.25018  |
| 20815 | P03363 | Q08ET2 | -0.54168  |
| 20816 | P03363 | A8MVW0 | -0.32626  |
| 20817 | P03363 | Q8NEB9 | -0.27618  |
| 20818 | P03363 | Q5SGD2 | -0.39547  |
| 20819 | P03363 | P10747 | -0.21837  |
| 20820 | P03363 | O60814 | -0.14534  |
| 20821 | P03363 | Q9UIQ6 | -0.77054  |
| 20822 | P03363 | Q94989 | -0.22708  |
| 20823 | P03363 | P50440 | -0.11051  |
| 20824 | P03363 | P07902 | -0.15454  |

|       |        |        |           |
|-------|--------|--------|-----------|
| 20825 | P03363 | Q86XN8 | -0.22738  |
| 20826 | P03363 | Q9NTI7 | -0.040353 |
| 20827 | P03363 | Q9UGB7 | -0.20206  |
| 20828 | P03363 | Q95847 | -0.30096  |
| 20829 | P03363 | Q9BU68 | -0.022997 |
| 20830 | P03363 | Q9BQ75 | -0.22702  |
| 20831 | P03363 | P51888 | -0.54086  |
| 20832 | P03363 | Q6ZU35 | -0.031359 |
| 20833 | P03363 | A6ZKI3 | -0.066499 |
| 20834 | P03363 | Q5TEZ4 | -0.042737 |
| 20835 | P03363 | Q14894 | -0.43294  |
| 20836 | P03363 | A1Z1Q3 | -0.21496  |
| 20837 | P03363 | P48431 | -0.2399   |
| 20838 | P03363 | Q9Y5Y9 | -0.47578  |
| 20839 | P03363 | Q96CK0 | -0.27989  |
| 20840 | P03363 | P55083 | -0.53018  |
| 20841 | P03363 | P63126 | -0.21393  |
| 20842 | P03363 | Q8TDZ2 | -0.22741  |
| 20843 | P03363 | Q3KNS1 | -0.23826  |
| 20844 | P03363 | Q9Y5G0 | -0.57898  |
| 20845 | P03363 | Q8WWB3 | -0.15396  |
| 20846 | P03363 | Q86Y56 | -0.18597  |
| 20847 | P03363 | Q69384 | -0.22613  |
| 20848 | P03363 | Q96KK5 | -0.29609  |
| 20849 | P03363 | P35716 | -0.23003  |
| 20850 | P03363 | P43405 | -0.23598  |
| 20851 | P03363 | Q7L8L6 | -0.086811 |
| 20852 | P03363 | Q9GZM6 | -0.61656  |
| 20853 | P03363 | P49720 | -0.1592   |
| 20854 | P03363 | Q8TCX5 | -0.22744  |
| 20855 | P03363 | Q9Y5L2 | -0.61977  |
| 20856 | P03363 | Q96MK2 | -0.051977 |
| 20857 | P03363 | Q8IXZ3 | -0.21679  |
| 20858 | P03363 | Q14525 | -0.32224  |
| 20859 | P03363 | Q9UQ07 | -0.37189  |
| 20860 | P03363 | Q96N19 | -0.32626  |
| 20861 | P03363 | P41235 | -0.23058  |
| 20862 | P03363 | Q6ZRI8 | -0.38968  |
| 20863 | P03363 | Q9H841 | -0.32027  |
| 20864 | P03363 | P21964 | -0.23688  |
| 20865 | P03363 | Q9UIB8 | -0.61358  |
| 20866 | P03363 | Q9BSG5 | -0.33992  |
| 20867 | P03363 | Q6P1J6 | -0.44913  |
| 20868 | P03363 | Q6NT55 | -0.60121  |
| 20869 | P03363 | Q9H8X3 | -0.16429  |
| 20870 | P03363 | P56180 | -0.63971  |
| 20871 | P03363 | Q969Y2 | -0.35942  |
| 20872 | P03363 | P54578 | -0.25985  |
| 20873 | P03363 | Q96LZ2 | -0.18805  |
| 20874 | P03363 | Q9BRJ6 | -0.064833 |
| 20875 | P03363 | P13945 | -0.22813  |
| 20876 | P03363 | P0C0E4 | -0.38959  |
| 20877 | P03363 | Q14514 | -0.7649   |
| 20878 | P03363 | Q9P244 | -0.35068  |
| 20879 | P03363 | Q9P1P5 | -0.62775  |
| 20880 | P03363 | Q8TC20 | -0.1805   |
| 20881 | P03363 | Q6IQ22 | -0.33092  |
| 20882 | P03363 | Q9H4I9 | -0.32227  |
| 20883 | P03363 | Q92523 | -0.35824  |
| 20884 | P03363 | Q9NXH8 | -0.61896  |
| 20885 | P03363 | P49441 | -0.18079  |
| 20886 | P03363 | Q9UBP5 | -0.22723  |
| 20887 | P03363 | Q9UHR6 | -0.067107 |
| 20888 | P03363 | Q9BXU0 | -0.089493 |
| 20889 | P03363 | Q9NUZ1 | -0.24351  |
| 20890 | P03363 | P35222 | -0.2278   |
| 20891 | P03363 | Q8NH00 | -0.61656  |
| 20892 | P03363 | Q95858 | -0.43294  |
| 20893 | P03363 | P17931 | -0.21919  |
| 20894 | P03363 | Q99679 | -0.73419  |
| 20895 | P03363 | P15309 | -0.77079  |
| 20896 | P03363 | P13995 | -0.37648  |
| 20897 | P03363 | Q9Y337 | -0.23879  |
| 20898 | P03363 | Q5TDH0 | -0.20549  |
| 20899 | P03363 | P81605 | -0.42073  |
| 20900 | P03363 | O43169 | -0.41219  |



|       |        |        |           |
|-------|--------|--------|-----------|
| 20901 | P03363 | Q96DU9 | -0.23104  |
| 20902 | P03363 | P30793 | -0.1742   |
| 20903 | P03363 | Q96LJ7 | -0.53286  |
| 20904 | P03363 | P47871 | -0.54829  |
| 20905 | P03363 | Q9HB63 | -0.48666  |
| 20906 | P03363 | Q9BZ76 | -0.97697  |
| 20907 | P03363 | Q9HBW9 | -0.67707  |
| 20908 | P03363 | Q6UWL2 | -0.37181  |
| 20909 | P03363 | Q8N2E2 | -0.33992  |
| 20910 | P03363 | Q8WWA1 | -0.32626  |
| 20911 | P03363 | P11464 | -0.35037  |
| 20912 | P03363 | Q93063 | -0.44967  |
| 20913 | P03363 | Q15075 | -0.22486  |
| 20914 | P03363 | O14562 | -0.21148  |
| 20915 | P03363 | Q9UL45 | -0.17412  |
| 20916 | P03363 | A6NFC9 | -0.61656  |
| 20917 | P03363 | P49736 | -0.22188  |
| 20918 | P03363 | A6NCD4 | -0.046011 |
| 20919 | P03363 | Q9Y3E0 | -0.28508  |
| 20920 | P03363 | Q96BH3 | -0.35366  |
| 20921 | P03363 | P78357 | -0.22741  |
| 20922 | P03363 | Q6ZR37 | -0.22739  |
| 20923 | P03363 | Q6P589 | -0.068228 |
| 20924 | P03363 | Q8N239 | -0.21123  |
| 20925 | P03363 | Q8TAX0 | -0.22054  |
| 20926 | P03363 | Q14508 | -0.48589  |
| 20927 | P03363 | P50747 | -0.12613  |
| 20928 | P03363 | O00585 | -0.34976  |
| 20929 | P03363 | Q8TD46 | -0.31656  |
| 20930 | P03363 | Q99878 | -0.2748   |
| 20931 | P03363 | P78540 | -0.22665  |
| 20932 | P03363 | Q96T52 | -0.23683  |
| 20933 | P03363 | P55259 | -0.59054  |
| 20934 | P03363 | O14610 | -0.64385  |
| 20935 | P03363 | Q8IUH5 | -0.22741  |
| 20936 | P03363 | P61278 | -0.43433  |
| 20937 | P03363 | Q8TDI0 | -0.22614  |
| 20938 | P03363 | P54709 | -0.30775  |
| 20939 | P03363 | Q8IWA5 | -0.48584  |
| 20940 | P03363 | Q7LOR7 | -0.22984  |
| 20941 | P03363 | P78504 | -0.3494   |
| 20942 | P03363 | P30480 | -0.54957  |
| 20943 | P03363 | Q93009 | -0.25491  |
| 20944 | P03363 | P13521 | -0.31757  |
| 20945 | P03363 | P35523 | -0.44058  |
| 20946 | P03363 | Q8TBR4 | -0.05787  |
| 20947 | P03363 | P46952 | -0.19077  |
| 20948 | P03363 | P15291 | -0.35873  |
| 20949 | P03363 | P49675 | -0.23006  |
| 20950 | P03363 | Q8N6L1 | -0.19297  |
| 20951 | P03363 | O15347 | -0.29513  |
| 20952 | P03363 | Q9Y388 | -0.2232   |
| 20953 | P03363 | A6NDG6 | -0.19913  |
| 20954 | P03363 | Q96G75 | -0.1912   |
| 20955 | P03363 | P00750 | -0.25545  |
| 20956 | P03363 | Q9BQI0 | -0.22725  |
| 20957 | P03363 | P53674 | -0.15195  |
| 20958 | P03363 | P40394 | -0.46124  |
| 20959 | P03363 | P01719 | -0.54902  |
| 20960 | P03363 | Q8N0Y5 | -0.61656  |
| 20961 | P03363 | Q8WWU5 | -0.48298  |
| 20962 | P03363 | Q14390 | -0.23076  |
| 20963 | P03363 | Q9UGU0 | -0.21307  |
| 20964 | P03363 | P0CJ68 | -0.13673  |
| 20965 | P03363 | P07306 | -0.26489  |
| 20966 | P03363 | O43423 | -0.2036   |
| 20967 | P03363 | Q14344 | -0.24821  |
| 20968 | P03363 | Q9H313 | -0.40727  |
| 20969 | P03363 | Q14624 | -0.28195  |
| 20970 | P03363 | P10643 | -0.40804  |
| 20971 | P03363 | Q6ZMU5 | -0.2309   |
| 20972 | P03363 | Q9NRM2 | -0.21386  |
| 20973 | P03363 | Q93038 | -0.78033  |
| 20974 | P03363 | Q7RTP0 | -0.48698  |
| 20975 | P03363 | P0CF75 | -0.11727  |
| 20976 | P03363 | Q7Z5A9 | -0.44258  |

|       |        |        |           |
|-------|--------|--------|-----------|
| 20977 | P03363 | P02771 | -0.21896  |
| 20978 | P03363 | O95881 | -0.3289   |
| 20979 | P03363 | Q8WZ60 | -0.18944  |
| 20980 | P03363 | A8MRT5 | -0.32626  |
| 20981 | P03363 | Q9P2X7 | -0.042737 |
| 20982 | P03363 | Q8NH01 | -0.61656  |
| 20983 | P03363 | Q6UX07 | -0.74395  |
| 20984 | P03363 | Q14161 | -0.22741  |
| 20985 | P03363 | Q9C0D7 | -0.085755 |
| 20986 | P03363 | Q96R09 | -0.61656  |
| 20987 | P03363 | Q6ZQX7 | -0.20602  |
| 20988 | P03363 | P07477 | -0.6102   |
| 20989 | P03363 | A6NKD2 | -0.13002  |
| 20990 | P03363 | P29597 | -0.30499  |
| 20991 | P03363 | Q9Y5X3 | -0.26821  |
| 20992 | P03363 | Q9H4Z3 | -0.21733  |
| 20993 | P03363 | Q5I0X7 | -0.22741  |
| 20994 | P03363 | Q16864 | -0.15717  |
| 20995 | P03363 | P51687 | -0.29381  |
| 20996 | P03363 | Q8TCG5 | -0.42151  |
| 20997 | P03363 | Q9H0R3 | -0.32626  |
| 20998 | P03363 | Q9NRZ5 | -0.36407  |
| 20999 | P03363 | Q8NFY9 | -0.19831  |
| 21000 | P03363 | P62805 | -0.19757  |
| 21001 | P03363 | P05014 | -0.39802  |
| 21002 | P03363 | Q7Z4H4 | -0.35989  |
| 21003 | P03363 | Q8NGM1 | -0.61656  |
| 21004 | P03363 | Q13635 | -0.22717  |
| 21005 | P03363 | Q8NFP7 | -0.17459  |
| 21006 | P03363 | P35580 | -0.13566  |
| 21007 | P03363 | Q86UP0 | -0.50574  |
| 21008 | P03363 | A6NDQ2 | -0.27953  |
| 21009 | P03363 | I3L273 | -0.25477  |
| 21010 | P03363 | P49914 | -0.17012  |
| 21011 | P03363 | P23468 | -0.24309  |
| 21012 | P03363 | O75962 | -0.22741  |
| 21013 | P03363 | Q5T6S3 | -0.22717  |
| 21014 | P03363 | Q9Y5T5 | -0.24457  |
| 21015 | P03363 | P21281 | -0.26813  |
| 21016 | P03363 | Q5JUX0 | -0.11838  |
| 21017 | P03363 | Q8IZS7 | -0.47112  |
| 21018 | P03363 | Q9NZ20 | -0.38389  |
| 21019 | P03363 | Q9Y2I7 | -0.22692  |
| 21020 | P03363 | O00748 | -0.2274   |
| 21021 | P03363 | P26718 | -0.29179  |
| 21022 | P03363 | Q8TF64 | -0.22693  |
| 21023 | P03363 | Q9UL62 | -0.22741  |
| 21024 | P03363 | Q9NVF9 | -0.33435  |
| 21025 | P03363 | P16083 | -0.15639  |
| 21026 | P03363 | Q02127 | -0.43308  |
| 21027 | P03363 | P61550 | -0.23081  |
| 21028 | P03363 | Q96LV5 | -0.17839  |
| 21029 | P03363 | A6PVL3 | -0.1752   |
| 21030 | P03363 | O60656 | -0.41309  |
| 21031 | P03363 | B7U540 | -0.52329  |
| 21032 | P03363 | Q9H7B4 | -0.22734  |
| 21033 | P03363 | A6NJI9 | -0.21938  |
| 21034 | P03363 | Q9BPV8 | -0.66104  |
| 21035 | P03363 | Q16854 | -0.22747  |
| 21036 | P03363 | P48645 | -0.44839  |
| 21037 | P03363 | Q8WXQ8 | -0.5706   |
| 21038 | P03363 | P49795 | -0.22743  |
| 21039 | P03363 | Q06432 | -0.41282  |
| 21040 | P03363 | A6NDP7 | -0.32626  |
| 21041 | P03363 | P18136 | -0.54902  |
| 21042 | P03363 | Q8WVP7 | -0.32322  |
| 21043 | P03363 | P30504 | -0.54957  |
| 21044 | P03363 | Q15080 | -0.30616  |
| 21045 | P03363 | Q2VWP7 | -0.42039  |
| 21046 | P03363 | Q8IZR5 | -0.44009  |
| 21047 | P03363 | E5RQL4 | -0.15532  |
| 21048 | P03363 | Q6IEU7 | -0.61656  |
| 21049 | P03363 | P48448 | -0.26891  |
| 21050 | P03363 | P01610 | -0.54902  |
| 21051 | P03363 | Q05C16 | -0.22751  |
| 21052 | P03363 | O95159 | -0.10615  |

|       |        |        |           |
|-------|--------|--------|-----------|
| 21053 | P03363 | Q9UF56 | -0.22646  |
| 21054 | P03363 | A6NIM6 | -0.22066  |
| 21055 | P03363 | A6NNX1 | -0.17021  |
| 21056 | P03363 | P00915 | -0.22429  |
| 21057 | P03363 | Q9H1M0 | -0.21218  |
| 21058 | P03363 | Q9NZH0 | -0.36117  |
| 21059 | P03363 | Q6NXR0 | -0.3191   |
| 21060 | P03363 | Q96AW1 | -0.29668  |
| 21061 | P03363 | Q9C0B6 | -0.18589  |
| 21062 | P03363 | Q8N427 | -0.15692  |
| 21063 | P03363 | Q96Q42 | -0.26643  |
| 21064 | P03363 | Q05193 | -0.23123  |
| 21065 | P03363 | Q17R55 | -0.32626  |
| 21066 | P03363 | Q9NWN3 | -0.10703  |
| 21067 | P03363 | P11233 | -0.22747  |
| 21068 | P03363 | P79483 | -0.6109   |
| 21069 | P03363 | P0DJI9 | -0.32404  |
| 21070 | P03363 | Q5VYS8 | -0.2273   |
| 21071 | P03363 | Q6ZNB7 | -0.6774   |
| 21072 | P03363 | Q2WGN9 | -0.2274   |
| 21073 | P03363 | Q99986 | -0.22741  |
| 21074 | P03363 | P00918 | -0.22449  |
| 21075 | P03363 | P26012 | -0.5906   |
| 21076 | P03363 | P40692 | -0.13986  |
| 21077 | P03363 | Q9ULL8 | -0.22719  |
| 21078 | P03363 | P19623 | -0.15481  |
| 21079 | P03363 | Q86VV8 | -0.14142  |
| 21080 | P03363 | P31213 | -0.47437  |
| 21081 | P03363 | A4D1N5 | -0.22323  |
| 21082 | P03363 | Q12870 | -0.2277   |
| 21083 | P03363 | Q96NC0 | -0.17522  |
| 21084 | P03363 | P27216 | -0.25521  |
| 21085 | P03363 | Q9HBL6 | -0.32626  |
| 21086 | P03363 | Q9UHF0 | -0.47056  |
| 21087 | P03363 | A6NJV1 | -0.038144 |
| 21088 | P03363 | Q5T5N4 | -0.12526  |
| 21089 | P03363 | Q3MUY2 | -0.63736  |
| 21090 | P03363 | O75578 | -0.48309  |
| 21091 | P03363 | Q08AF3 | -0.16824  |
| 21092 | P03363 | P48723 | -0.35867  |
| 21093 | P03363 | Q6ZSN1 | -0.088119 |
| 21094 | P03363 | Q86VI3 | -0.22737  |
| 21095 | P03363 | Q8NBF6 | -0.32367  |
| 21096 | P03363 | P08173 | -0.56869  |
| 21097 | P03363 | Q9UPM9 | -0.19491  |
| 21098 | P03363 | O95972 | -0.37006  |
| 21099 | P03363 | Q92569 | -0.22741  |
| 21100 | P03363 | Q5VU57 | -0.20975  |
| 21101 | P03363 | Q6ZNL6 | -0.56448  |
| 21102 | P03363 | Q94941 | -0.22379  |
| 21103 | P03363 | P01160 | -0.2035   |
| 21104 | P03363 | P11234 | -0.22865  |
| 21105 | P03363 | Q96IK0 | -0.39539  |
| 21106 | P03363 | Q86VS3 | -0.23505  |
| 21107 | P03363 | Q9UL19 | -0.21439  |
| 21108 | P03363 | Q9Y259 | -0.2873   |
| 21109 | P03363 | Q9H270 | -0.22726  |
| 21110 | P03363 | Q5MNV8 | -0.022849 |
| 21111 | P03363 | Q3T906 | -0.23772  |
| 21112 | P03363 | A6NGS2 | -0.045383 |
| 21113 | P03363 | Q9H209 | -0.61656  |
| 21114 | P03363 | P02652 | -0.23628  |
| 21115 | P03363 | P02790 | -0.22738  |
| 21116 | P03363 | Q9H1N7 | -0.2599   |
| 21117 | P03363 | Q8N9M1 | -0.15213  |
| 21118 | P03363 | O15169 | -0.23215  |
| 21119 | P03363 | Q8NGB9 | -0.61656  |
| 21120 | P03363 | Q86UB9 | -0.37324  |
| 21121 | P03363 | Q9H790 | -0.17025  |
| 21122 | P03363 | Q9UBU2 | -0.4805   |
| 21123 | P03363 | P35542 | -0.32404  |
| 21124 | P03363 | A7E2Y1 | -0.30668  |
| 21125 | P03363 | Q14574 | -0.54442  |
| 21126 | P03363 | O43193 | -0.72428  |
| 21127 | P03363 | P69892 | -0.084803 |
| 21128 | P03363 | P55039 | -0.19073  |

|       |        |        |           |
|-------|--------|--------|-----------|
| 21129 | P03363 | Q9Y5E1 | -0.58247  |
| 21130 | P03363 | Q8WWZ7 | -0.5538   |
| 21131 | P03363 | Q9H3N1 | -0.55533  |
| 21132 | P03363 | P58335 | -0.62259  |
| 21133 | P03363 | Q8WZ55 | -0.27198  |
| 21134 | P03363 | Q5SNT6 | -0.16619  |
| 21135 | P03363 | Q008S8 | -0.22742  |
| 21136 | P03363 | Q9C019 | -0.27802  |
| 21137 | P03363 | Q9GZR5 | -0.10209  |
| 21138 | P03363 | Q8IW45 | -0.2018   |
| 21139 | P03363 | Q6UXS9 | -0.2269   |
| 21140 | P03363 | P01112 | -0.22764  |
| 21141 | P03363 | O75715 | -0.63939  |
| 21142 | P03363 | Q9NPU4 | -0.32626  |
| 21143 | P03363 | A6NMB9 | -0.33762  |
| 21144 | P03363 | Q0VAQ4 | -0.22351  |
| 21145 | P03363 | P17302 | -0.26215  |
| 21146 | P03363 | Q96PD5 | -0.52738  |
| 21147 | P03363 | P16070 | -0.23626  |
| 21148 | P03363 | Q86XI6 | -0.15     |
| 21149 | P03363 | Q12836 | -0.74863  |
| 21150 | P03363 | Q9NYU1 | -0.13366  |
| 21151 | P03363 | P12236 | -0.22982  |
| 21152 | P03363 | A1A4F0 | -0.18687  |
| 21153 | P03363 | P20142 | -0.27872  |
| 21154 | P03363 | Q8NH93 | -0.61656  |
| 21155 | P03363 | Q53SZ7 | -0.031359 |
| 21156 | P03363 | Q9BVR0 | -0.21051  |
| 21157 | P03363 | Q96N87 | -0.54413  |
| 21158 | P03363 | P51693 | -0.2172   |
| 21159 | P03363 | P51460 | -0.29939  |
| 21160 | P03363 | Q6UXH9 | -0.37298  |
| 21161 | P03363 | Q7Z304 | -0.53864  |
| 21162 | P03363 | Q9UJV9 | -0.30065  |
| 21163 | P03363 | Q9BUF7 | -0.42495  |
| 21164 | P03363 | Q86U28 | -0.18304  |
| 21165 | P03363 | P0C7M7 | -0.3433   |
| 21166 | P03363 | Q01518 | -0.19311  |
| 21167 | P03363 | Q92551 | -0.15396  |
| 21168 | P03363 | Q29940 | -0.54957  |
| 21169 | P03363 | P05019 | -0.22682  |
| 21170 | P03363 | Q8NDY8 | -0.32626  |
| 21171 | P03363 | Q9ULE4 | -0.10895  |
| 21172 | P03363 | Q6Q795 | -0.042737 |
| 21173 | P03363 | Q96RD6 | -0.32122  |
| 21174 | P03363 | Q9P2G3 | -0.19202  |
| 21175 | P03363 | Q70EL3 | -0.25274  |
| 21176 | P03363 | Q9UGB4 | -0.042737 |
| 21177 | P03363 | Q9Y5X2 | -0.22612  |
| 21178 | P03363 | Q43692 | -0.30057  |
| 21179 | P03363 | Q7L1I2 | -0.30287  |
| 21180 | P03363 | Q9NXG6 | -0.79582  |
| 21181 | P03363 | Q8NBS9 | -0.24874  |
| 21182 | P03363 | O95741 | -0.22749  |
| 21183 | P03363 | Q9Y4L1 | -0.27622  |
| 21184 | P03363 | P43686 | -0.42876  |
| 21185 | P03363 | P31645 | -0.22723  |
| 21186 | P03363 | Q9Y5P0 | -0.61656  |
| 21187 | P03363 | P80370 | -0.37009  |
| 21188 | P03363 | Q96BY6 | -0.22282  |
| 21189 | P03363 | Q9HBG4 | -0.22189  |
| 21190 | P03363 | Q6IWH7 | -0.20072  |
| 21191 | P03363 | Q9BX74 | -0.47263  |
| 21192 | P03363 | P35052 | -0.8106   |
| 21193 | P03363 | P50607 | -0.19195  |
| 21194 | P03363 | P0DMC3 | -0.042737 |
| 21195 | P03363 | Q8N3K9 | -0.22749  |
| 21196 | P03363 | Q86VQ3 | -0.22766  |
| 21197 | P03363 | Q3MJ16 | -0.22782  |
| 21198 | P03363 | P15976 | -0.2274   |
| 21199 | P03363 | Q8WZA2 | -0.22741  |
| 21200 | P03363 | Q9BXA6 | -0.36466  |
| 21201 | P03363 | Q9HAS0 | -0.15448  |
| 21202 | P03363 | P52954 | -0.22865  |
| 21203 | P03363 | O95255 | -0.67087  |
| 21204 | P03363 | Q92738 | -0.40914  |

|       |        |        |           |
|-------|--------|--------|-----------|
| 21205 | P03363 | Q53H82 | -0.20397  |
| 21206 | P03363 | Q96IL0 | -0.15633  |
| 21207 | P03363 | Q9HC96 | -0.3037   |
| 21208 | P03363 | Q8IWB6 | -0.22741  |
| 21209 | P03363 | Q9UKJ1 | -0.39062  |
| 21210 | P03363 | Q5SQ64 | -0.47262  |
| 21211 | P03363 | Q9BWM7 | -0.39019  |
| 21212 | P03363 | Q9BY78 | -0.41191  |
| 21213 | P03363 | Q14126 | -0.45903  |
| 21214 | P03363 | Q6NVV9 | -0.23299  |
| 21215 | P03363 | P54317 | -0.49409  |
| 21216 | P03363 | Q6UXB0 | -0.33992  |
| 21217 | P03363 | Q8N9S9 | -0.15471  |
| 21218 | P03363 | Q7Z628 | -0.22804  |
| 21219 | P03363 | Q8TDX5 | -0.18288  |
| 21220 | P03363 | Q9GZQ4 | -0.51324  |
| 21221 | P03363 | Q9HAT1 | -0.30459  |
| 21222 | P03363 | P19957 | -0.35605  |
| 21223 | P03363 | O43147 | -0.30569  |
| 21224 | P03363 | Q9UMR5 | -0.2178   |
| 21225 | P03363 | Q6ZVZ8 | -0.22741  |
| 21226 | P03363 | Q9H2X3 | -0.55876  |
| 21227 | P03363 | Q8N8U9 | -0.38679  |
| 21228 | P03363 | Q8N1E2 | -0.29517  |
| 21229 | P03363 | P43363 | -0.18968  |
| 21230 | P03363 | Q9Y5F3 | -0.57898  |
| 21231 | P03363 | Q9ULH4 | -0.35901  |
| 21232 | P03363 | Q96EM0 | -0.22507  |
| 21233 | P03363 | A6NMZ2 | -0.22839  |
| 21234 | P03363 | Q8TBB6 | -0.34427  |
| 21235 | P03363 | Q70SY1 | -0.21992  |
| 21236 | P03363 | Q99259 | -0.22803  |
| 21237 | P03363 | A2RU67 | -0.32626  |
| 21238 | P03363 | Q8NF50 | -0.19026  |
| 21239 | P03363 | A6NL46 | -0.03049  |
| 21240 | P03363 | O14657 | -0.22588  |
| 21241 | P03363 | Q9NXR8 | -0.22747  |
| 21242 | P03363 | M0R1G4 | -0.18161  |
| 21243 | P03363 | Q5M775 | -0.22743  |
| 21244 | P03363 | Q9NS87 | -0.22987  |
| 21245 | P03363 | P57059 | -0.2308   |
| 21246 | P03363 | O95998 | -0.4019   |
| 21247 | P03363 | P08754 | -0.24247  |
| 21248 | P03363 | P47869 | -0.37899  |
| 21249 | P03363 | Q16798 | -0.36888  |
| 21250 | P03363 | Q8IZ63 | -0.042737 |
| 21251 | P03363 | P43115 | -0.61462  |
| 21252 | P03363 | Q6ZUC2 | -0.11355  |
| 21253 | P03363 | Q8N414 | -0.32626  |
| 21254 | P03363 | Q15413 | -0.39725  |
| 21255 | P03363 | Q9H374 | -0.14773  |
| 21256 | P03363 | Q96QS6 | -0.54205  |
| 21257 | P03363 | Q9NX61 | -0.29315  |
| 21258 | P03363 | Q7L775 | -0.20553  |
| 21259 | P03363 | Q96R45 | -0.61656  |
| 21260 | P03363 | Q5T601 | -0.3729   |
| 21261 | P03363 | Q99469 | -0.22741  |
| 21262 | P03363 | Q96C57 | -0.11127  |
| 21263 | P03363 | Q96R30 | -0.61656  |
| 21264 | P03363 | Q6P5S2 | -0.33992  |
| 21265 | P03363 | Q9UHA7 | -0.47959  |
| 21266 | P03363 | Q9UGN4 | -0.54524  |
| 21267 | P03363 | O75306 | -0.13696  |
| 21268 | P03363 | A2A3K4 | -0.25236  |
| 21269 | P03363 | Q9NPG1 | -0.24396  |
| 21270 | P03363 | O60476 | -0.24449  |
| 21271 | P03363 | O43301 | -0.24873  |
| 21272 | P03363 | Q86VW2 | -0.22747  |
| 21273 | P03363 | Q86TL2 | -0.19187  |
| 21274 | P03363 | O95140 | -0.39133  |
| 21275 | P03363 | P30510 | -0.59713  |
| 21276 | P03363 | Q9Y3S2 | -0.10836  |
| 21277 | P03363 | P36980 | -0.33992  |
| 21278 | P03363 | B7Z1M9 | -0.20663  |
| 21279 | P03363 | Q9H2X9 | -0.48227  |
| 21280 | P03363 | P35414 | -0.54335  |

|       |        |        |           |
|-------|--------|--------|-----------|
| 21281 | P03363 | Q9BQE6 | -0.06484  |
| 21282 | P03363 | O94921 | -0.20839  |
| 21283 | P03363 | Q70EL2 | -0.33229  |
| 21284 | P03363 | Q5GH72 | -0.32626  |
| 21285 | P03363 | Q03001 | -0.22773  |
| 21286 | P03363 | Q8N3D4 | -0.22773  |
| 21287 | P03363 | P39656 | -0.085114 |
| 21288 | P03363 | Q96LR7 | -0.094032 |
| 21289 | P03363 | A6NHN6 | -0.33992  |
| 21290 | P03363 | Q9HC07 | -0.3203   |
| 21291 | P03363 | Q14116 | -0.23286  |
| 21292 | P03363 | Q9BXI6 | -0.30284  |
| 21293 | P03363 | Q8WZB0 | -0.19875  |
| 21294 | P03363 | Q9C0C9 | -0.18296  |
| 21295 | P03363 | Q9NXH9 | -0.19825  |
| 21296 | P03363 | Q7KZN9 | -0.41514  |
| 21297 | P03363 | P0CW22 | -0.22108  |
| 21298 | P03363 | Q92673 | -0.54889  |
| 21299 | P03363 | P51812 | -0.22552  |
| 21300 | P03363 | C9J069 | -0.15196  |
| 21301 | P03363 | O00478 | -0.32626  |
| 21302 | P03363 | Q9H0B3 | -0.14376  |
| 21303 | P03363 | P68366 | -0.21832  |
| 21304 | P03363 | Q5T7R7 | -0.32626  |
| 21305 | P03363 | P0C091 | -0.79947  |
| 21306 | P03363 | A6NJW9 | -0.47262  |
| 21307 | P03363 | Q9GZN6 | -0.40593  |
| 21308 | P03363 | Q96S52 | -0.17102  |
| 21309 | P03363 | Q6NW40 | -0.43435  |
| 21310 | P03363 | P10644 | -0.22743  |
| 21311 | P03363 | Q8WW34 | -0.32626  |
| 21312 | P03363 | Q6ICL3 | -0.1575   |
| 21313 | P03363 | Q4G0G5 | -0.33992  |
| 21314 | P03363 | Q9NNX6 | -0.53147  |
| 21315 | P03363 | Q8TEF2 | -0.32626  |
| 21316 | P03363 | Q15915 | -0.22731  |
| 21317 | P03363 | P61966 | -0.20888  |
| 21318 | P03363 | A0ZSE6 | -0.32626  |
| 21319 | P03363 | Q13241 | -0.52108  |
| 21320 | P03363 | Q9NQZ2 | -0.12979  |
| 21321 | P03363 | Q7L1W4 | -0.32626  |
| 21322 | P03363 | Q9NTN9 | -0.53374  |
| 21323 | P03363 | Q9ULY5 | -0.37528  |
| 21324 | P03363 | P16930 | -0.14547  |
| 21325 | P03363 | Q9P2F8 | -0.3125   |
| 21326 | P03363 | P12544 | -0.25329  |
| 21327 | P03363 | Q6NXR4 | -0.085729 |
| 21328 | P03363 | Q8NGQ3 | -0.61656  |
| 21329 | P03363 | Q7LFL8 | -0.18639  |
| 21330 | P03363 | Q6UXX5 | -0.33193  |
| 21331 | P03363 | Q96QU6 | -0.22578  |
| 21332 | P03363 | P47992 | -0.3243   |
| 21333 | P03363 | O95750 | -0.27927  |
| 21334 | P03363 | Q8WXG8 | -0.22871  |
| 21335 | P03363 | O75409 | -0.043056 |
| 21336 | P03363 | P98161 | -0.22741  |
| 21337 | P03363 | Q9NS56 | -0.22741  |
| 21338 | P03363 | O95786 | -0.22731  |
| 21339 | P03363 | Q7Z494 | -0.22683  |
| 21340 | P03363 | Q8NH57 | -0.61656  |
| 21341 | P03363 | P54826 | -0.13105  |
| 21342 | P03363 | Q95715 | -0.56043  |
| 21343 | P03363 | Q8WVE6 | -0.32626  |
| 21344 | P03363 | Q9Y2R0 | -0.33272  |
| 21345 | P03363 | Q8NG81 | -0.61656  |
| 21346 | P03363 | Q155Q3 | -0.22741  |
| 21347 | P03363 | P47895 | -0.28534  |
| 21348 | P03363 | Q9NZC7 | -0.22741  |
| 21349 | P03363 | P00740 | -0.54272  |
| 21350 | P03363 | Q96M20 | -0.22707  |
| 21351 | P03363 | Q9NZL9 | -0.2201   |
| 21352 | P03363 | Q16816 | -0.38648  |
| 21353 | P03363 | Q9H8W2 | -0.10594  |
| 21354 | P03363 | Q5VWK5 | -0.34064  |
| 21355 | P03363 | O00548 | -0.32036  |
| 21356 | P03363 | Q8NC38 | -0.10855  |

|       |        |        |           |
|-------|--------|--------|-----------|
| 21357 | P03363 | Q92887 | -0.38081  |
| 21358 | P03363 | O75911 | -0.72052  |
| 21359 | P03363 | Q8TCD5 | -0.14119  |
| 21360 | P03363 | O60507 | -0.32232  |
| 21361 | P03363 | Q6UWP2 | -0.74395  |
| 21362 | P03363 | O75380 | -0.20613  |
| 21363 | P03363 | P05543 | -0.36597  |
| 21364 | P03363 | O95477 | -0.3186   |
| 21365 | P03363 | Q15746 | -0.22741  |
| 21366 | P03363 | P01854 | -0.23419  |
| 21367 | P03363 | Q9UDY6 | -0.22824  |
| 21368 | P03363 | Q9BVA0 | -0.22787  |
| 21369 | P03363 | Q9UL54 | -0.31481  |
| 21370 | P03363 | Q8NE01 | -0.20351  |
| 21371 | P03363 | Q9UF11 | -0.25836  |
| 21372 | P03363 | Q9ULC8 | -0.45884  |
| 21373 | P03363 | Q96BM0 | -0.32626  |
| 21374 | P03363 | Q96SZ5 | -0.36077  |
| 21375 | P03363 | Q9NRA0 | -0.27656  |
| 21376 | P03363 | Q8NBA8 | -0.13726  |
| 21377 | P03363 | P62072 | -0.15208  |
| 21378 | P03363 | P52848 | -0.27536  |
| 21379 | P03363 | A6NN06 | -0.042737 |
| 21380 | P03363 | Q5K4L6 | -0.50446  |
| 21381 | P03363 | Q5TGI4 | -0.2274   |
| 21382 | P03363 | A8MYJ7 | -0.21028  |
| 21383 | P03363 | P31146 | -0.22741  |
| 21384 | P03363 | Q15036 | -0.21679  |
| 21385 | P03363 | Q8NGA6 | -0.61656  |
| 21386 | P03363 | Q9NTJ5 | -0.42807  |
| 21387 | P03363 | P35680 | -0.22588  |
| 21388 | P03363 | Q6UXK2 | -0.49271  |
| 21389 | P03363 | Q9P1P4 | -0.62775  |
| 21390 | P03363 | Q14494 | -0.22725  |
| 21391 | P03363 | P59542 | -0.51612  |
| 21392 | P03363 | Q7Z418 | -0.57262  |
| 21393 | P03363 | Q96PS8 | -0.43518  |
| 21394 | P03363 | Q9BWE0 | -0.15877  |
| 21395 | P03363 | P57738 | -0.32626  |
| 21396 | P03363 | B1ATL7 | -0.16263  |
| 21397 | P03363 | Q92729 | -0.30036  |
| 21398 | P03363 | P01298 | -0.38933  |
| 21399 | P03363 | Q3SXZ7 | -0.17484  |
| 21400 | P03363 | Q86XE0 | -0.22446  |
| 21401 | P03363 | Q00887 | -0.35037  |
| 21402 | P03363 | A6NHT5 | -0.22808  |
| 21403 | P03363 | P68402 | -0.15963  |
| 21404 | P03363 | Q13336 | -0.49582  |
| 21405 | P03363 | Q96M78 | -0.18485  |
| 21406 | P03363 | A6ND36 | -0.18315  |
| 21407 | P03363 | Q9HC10 | -0.46586  |
| 21408 | P03363 | P13232 | -0.18103  |
| 21409 | P03363 | O75582 | -0.22159  |
| 21410 | P03363 | O43683 | -0.22741  |
| 21411 | P03363 | P01701 | -0.54902  |
| 21412 | P03363 | Q8N1N2 | -0.32626  |
| 21413 | P03363 | P58181 | -0.61656  |
| 21414 | P03363 | P20674 | -0.19098  |
| 21415 | P03363 | Q96JJ7 | -0.48308  |
| 21416 | P03363 | Q8IXA5 | -0.24282  |
| 21417 | P03363 | O00476 | -0.42938  |
| 21418 | P03363 | Q14647 | -0.21939  |
| 21419 | P03363 | Q494V2 | -0.17939  |
| 21420 | P03363 | Q8NGZ0 | -0.61656  |
| 21421 | P03363 | Q9H5N1 | -0.10558  |
| 21422 | P03363 | Q14767 | -0.45956  |
| 21423 | P03363 | Q13950 | -0.27122  |
| 21424 | P03363 | Q9Y6R1 | -0.212    |
| 21425 | P03363 | O60331 | -0.24858  |
| 21426 | P03363 | Q14451 | -0.22741  |
| 21427 | P03363 | Q8WUZ0 | -0.045677 |
| 21428 | P03363 | Q6UXX9 | -0.3547   |
| 21429 | P03363 | Q8N2X6 | -0.33992  |
| 21430 | P03363 | Q8TDR2 | -0.22741  |
| 21431 | P03363 | O60500 | -0.22742  |
| 21432 | P03363 | Q5T5C0 | -0.22741  |

|       |        |        |           |
|-------|--------|--------|-----------|
| 21433 | P03363 | Q8NEL9 | -0.19572  |
| 21434 | P03363 | Q9BWW8 | -0.25676  |
| 21435 | P03363 | Q13231 | -0.36618  |
| 21436 | P03363 | A8MQ27 | -0.22739  |
| 21437 | P03363 | Q96L14 | -0.12458  |
| 21438 | P03363 | O00590 | -0.7524   |
| 21439 | P03363 | P08254 | -0.39855  |
| 21440 | P03363 | P26717 | -0.28758  |
| 21441 | P03363 | Q13291 | -0.22595  |
| 21442 | P03363 | Q8IYU2 | -0.22747  |
| 21443 | P03363 | Q96AZ1 | -0.34455  |
| 21444 | P03363 | Q9NPH0 | -0.35901  |
| 21445 | P03363 | P17405 | -0.1782   |
| 21446 | P03363 | B2RNN3 | -0.37669  |
| 21447 | P03363 | Q719I0 | -0.081307 |
| 21448 | P03363 | Q6ZUX7 | -0.32626  |
| 21449 | P03363 | P60507 | -0.37161  |
| 21450 | P03363 | Q13586 | -0.2208   |
| 21451 | P03363 | P26022 | -0.36618  |
| 21452 | P03363 | O95427 | -0.45523  |
| 21453 | P03363 | O95772 | -0.37357  |
| 21454 | P03363 | P38936 | -0.20677  |
| 21455 | P03363 | P06326 | -0.54902  |
| 21456 | P03363 | Q6UXB2 | -0.48954  |
| 21457 | P03363 | O60548 | -0.29843  |
| 21458 | P03363 | Q15027 | -0.44711  |
| 21459 | P03363 | Q9BQP7 | -0.098621 |
| 21460 | P03363 | P04632 | -0.22913  |
| 21461 | P03363 | Q92928 | -0.26733  |
| 21462 | P03363 | Q9NRF8 | -0.18355  |
| 21463 | P03363 | O75106 | -0.36179  |
| 21464 | P03363 | P29400 | -0.43249  |
| 21465 | P03363 | Q75746 | -0.23747  |
| 21466 | P03363 | P59541 | -0.51612  |
| 21467 | P03363 | P0C0P6 | -0.34247  |
| 21468 | P03363 | O95544 | -0.36247  |
| 21469 | P03363 | Q9Y666 | -0.54545  |
| 21470 | P03363 | P04430 | -0.54902  |
| 21471 | P03363 | Q76EJ3 | -0.22295  |
| 21472 | P03363 | Q6P1M9 | -0.143    |
| 21473 | P03363 | Q8TF27 | -0.45506  |
| 21474 | P03363 | A8MV81 | -0.32626  |
| 21475 | P03363 | Q86VG3 | -0.18512  |
| 21476 | P03363 | Q68D42 | -0.32626  |
| 21477 | P03363 | Q6P1S2 | -0.16999  |
| 21478 | P03363 | P0C7V4 | -0.22014  |
| 21479 | P03363 | Q9BVW6 | -0.32626  |
| 21480 | P03363 | A6NGC4 | -0.32626  |
| 21481 | P03363 | Q9GZW8 | -0.32626  |
| 21482 | P03363 | Q9BZ11 | -0.55585  |
| 21483 | P03363 | Q8NGH5 | -0.61656  |
| 21484 | P03363 | Q9NZY2 | -0.042737 |
| 21485 | P03363 | Q9NP58 | -0.566    |
| 21486 | P03363 | Q6UXV1 | -0.32626  |
| 21487 | P03363 | P20702 | -0.22741  |
| 21488 | P03363 | O14924 | -0.2274   |
| 21489 | P03363 | P48544 | -0.22807  |
| 21490 | P03363 | P45954 | -0.3338   |
| 21491 | P03363 | Q9BZL3 | -0.32626  |
| 21492 | P03363 | Q6UWQ5 | -0.29732  |
| 21493 | P03363 | P0CK96 | -0.32626  |
| 21494 | P03363 | Q96L93 | -0.23498  |
| 21495 | P03363 | P0C7W9 | -0.21933  |
| 21496 | P03363 | Q6ZMJ4 | -0.38263  |
| 21497 | P03363 | P13805 | -0.18603  |
| 21498 | P03363 | A6NKF9 | -0.32626  |
| 21499 | P03363 | Q8IWN6 | -0.069185 |
| 21500 | P03363 | P02042 | -0.084803 |
| 21501 | P03363 | Q9UKX3 | -0.18407  |
| 21502 | P03363 | Q7Z7L1 | -0.15764  |
| 21503 | P03363 | O43427 | -0.15884  |
| 21504 | P03363 | Q8NOV5 | -0.30445  |
| 21505 | P03363 | P16671 | -0.32872  |
| 21506 | P03363 | Q8NAJ2 | -0.22768  |
| 21507 | P03363 | Q8IYM0 | -0.16568  |
| 21508 | P03363 | Q9NWQ4 | -0.028181 |



|       |        |        |           |
|-------|--------|--------|-----------|
| 21509 | P03363 | Q6PF05 | -0.026366 |
| 21510 | P03363 | O00622 | -0.25199  |
| 21511 | P03363 | Q13057 | -0.15041  |
| 21512 | P03363 | Q5VV43 | -0.22599  |
| 21513 | P03363 | Q96QK8 | -0.32626  |
| 21514 | P03363 | Q9H5Q3 | -0.32626  |
| 21515 | P03363 | Q08AF8 | -0.073821 |
| 21516 | P03363 | Q96AY4 | -0.22741  |
| 21517 | P03363 | Q5TEJ8 | -0.19552  |
| 21518 | P03363 | Q86VZ1 | -0.62051  |
| 21519 | P03363 | O75131 | -0.22788  |
| 21520 | P03363 | Q96KN2 | -0.47943  |
| 21521 | P03363 | Q9H2L4 | -0.32626  |
| 21522 | P03363 | O95685 | -0.11391  |
| 21523 | P03363 | P12277 | -0.19941  |
| 21524 | P03363 | Q75L30 | -0.042737 |
| 21525 | P03363 | Q96KV7 | -0.22749  |
| 21526 | P03363 | Q15417 | -0.21793  |
| 21527 | P03363 | Q96C23 | -0.21467  |
| 21528 | P03363 | P20701 | -0.50267  |
| 21529 | P03363 | Q13574 | -0.22741  |
| 21530 | P03363 | P21757 | -0.2276   |
| 21531 | P03363 | P35368 | -0.43697  |
| 21532 | P03363 | Q8IYB4 | -0.22722  |
| 21533 | P03363 | Q9H0A3 | -0.32626  |
| 21534 | P03363 | Q0VAM2 | -0.29116  |
| 21535 | P03363 | P20023 | -0.49743  |
| 21536 | P03363 | A8MTL9 | -0.33498  |
| 21537 | P03363 | Q6N043 | -0.22737  |
| 21538 | P03363 | A4D126 | -0.22018  |
| 21539 | P03363 | A6NEC2 | -0.32648  |
| 21540 | P03363 | Q14236 | -0.096779 |
| 21541 | P03363 | Q96M34 | -0.14825  |
| 21542 | P03363 | A8MY62 | -0.24345  |
| 21543 | P03363 | P20908 | -0.43228  |
| 21544 | P03363 | Q6ZUS6 | -0.20609  |
| 21545 | P03363 | Q15131 | -0.18203  |
| 21546 | P03363 | P63244 | -0.22761  |
| 21547 | P03363 | P23435 | -0.3495   |
| 21548 | P03363 | P30049 | -0.22428  |
| 21549 | P03363 | P0CI00 | -0.067252 |
| 21550 | P03363 | Q8NGZ5 | -0.61656  |
| 21551 | P03363 | Q9UKJ8 | -0.55919  |
| 21552 | P03363 | Q86YL7 | -0.48075  |
| 21553 | P03363 | A8MWK0 | -0.7291   |
| 21554 | P03363 | P01706 | -0.54902  |
| 21555 | P03363 | Q8NGB4 | -0.61656  |
| 21556 | P03363 | O15496 | -0.38832  |
| 21557 | P03363 | Q5RCN0 | -0.03082  |
| 21558 | P03363 | Q8WXX5 | -0.23661  |
| 21559 | P03363 | Q9UP95 | -0.5348   |
| 21560 | P03363 | Q9Y5X5 | -0.70283  |
| 21561 | P03363 | Q92583 | -0.65282  |
| 21562 | P03363 | P12074 | -0.093559 |
| 21563 | P03363 | Q6H3X3 | -0.23742  |
| 21564 | P03363 | O43920 | -0.071526 |
| 21565 | P03363 | P98177 | -0.28272  |
| 21566 | P03363 | O15068 | -0.22741  |
| 21567 | P03363 | Q8IZD0 | -0.21191  |
| 21568 | P03363 | O15119 | -0.5381   |
| 21569 | P03363 | Q8IVN8 | -0.39477  |
| 21570 | P03363 | Q9H7F0 | -0.54721  |
| 21571 | P03363 | P47898 | -0.64502  |
| 21572 | P03363 | O60513 | -0.36814  |
| 21573 | P03363 | Q9H813 | -0.32626  |
| 21574 | P03363 | Q8NCQ3 | -0.32626  |
| 21575 | P03363 | A6NIE6 | -0.077333 |
| 21576 | P03363 | P61769 | -0.28354  |
| 21577 | P03363 | P47755 | -0.18052  |
| 21578 | P03363 | A0PJY2 | -0.19525  |
| 21579 | P03363 | P09919 | -0.44614  |
| 21580 | P03363 | Q9UKA8 | -0.17625  |
| 21581 | P03363 | Q14517 | -0.22914  |
| 21582 | P03363 | P29323 | -0.50489  |
| 21583 | P03363 | Q9BYV6 | -0.2274   |
| 21584 | P03363 | Q8WXS5 | -0.43033  |

|       |        |        |            |
|-------|--------|--------|------------|
| 21585 | P03363 | Q9NV64 | -0.32626   |
| 21586 | P03363 | P61224 | -0.22749   |
| 21587 | P03363 | Q8N2B8 | -0.093425  |
| 21588 | P03363 | Q3SY69 | -0.27693   |
| 21589 | P03363 | Q8IY26 | -0.31429   |
| 21590 | P03363 | P56937 | -0.81596   |
| 21591 | P03363 | P21815 | -0.44683   |
| 21592 | P03363 | Q9H8V8 | -0.042737  |
| 21593 | P03363 | Q9H3G5 | -0.21769   |
| 21594 | P03363 | O95248 | -0.30674   |
| 21595 | P03363 | O75629 | -0.35792   |
| 21596 | P03363 | Q9UKI2 | -0.14497   |
| 21597 | P03363 | Q9Y3Q7 | -0.54583   |
| 21598 | P03363 | O43488 | -0.22691   |
| 21599 | P03363 | Q8NHE4 | -0.29629   |
| 21600 | P03363 | D6RB28 | -0.0006499 |
| 21601 | P03363 | Q96BF3 | -0.47262   |
| 21602 | P03363 | P06126 | -0.2876    |
| 21603 | P03363 | Q6NY19 | -0.22742   |
| 21604 | P03363 | Q8NE00 | -0.19187   |
| 21605 | P03363 | Q6P9H5 | -0.30235   |
| 21606 | P03363 | Q8NH48 | -0.61656   |
| 21607 | P03363 | Q6P9G0 | -0.22039   |
| 21608 | P03363 | Q6S545 | -0.22741   |
| 21609 | P03363 | P40305 | -0.25089   |
| 21610 | P03363 | Q5TFE4 | -0.17747   |
| 21611 | P03363 | P42261 | -0.30204   |
| 21612 | P03363 | P81133 | -0.23571   |
| 21613 | P03363 | Q75LS8 | -0.2274    |
| 21614 | P03363 | Q5T6L9 | -0.32626   |
| 21615 | P03363 | Q9NU23 | -0.14067   |
| 21616 | P03363 | Q9UHI8 | -0.56589   |
| 21617 | P03363 | Q96HA4 | -0.32626   |
| 21618 | P03363 | Q15811 | -0.22741   |
| 21619 | P03363 | Q49AS3 | -0.077     |
| 21620 | P03363 | Q96AX2 | -0.25574   |
| 21621 | P03363 | Q9NSE7 | -0.22647   |
| 21622 | P03363 | P0C851 | -0.32626   |
| 21623 | P03363 | Q8TDU5 | -0.61551   |
| 21624 | P03363 | Q5SNV9 | -0.026123  |
| 21625 | P03363 | Q8NGS0 | -0.61656   |
| 21626 | P03363 | Q9NRK6 | -0.59374   |
| 21627 | P03363 | P28472 | -0.51294   |
| 21628 | P03363 | Q8N4P3 | -0.19437   |
| 21629 | P03363 | Q9P298 | -0.32626   |
| 21630 | P03363 | Q02763 | -0.30809   |
| 21631 | P03363 | Q7Z7B8 | -0.33516   |
| 21632 | P03363 | Q5VV42 | -0.3133    |
| 21633 | P03363 | Q53F19 | -0.21115   |
| 21634 | P03363 | Q99525 | -0.11762   |
| 21635 | P03363 | P35236 | -0.23215   |
| 21636 | P03363 | Q8IUI4 | -0.15886   |
| 21637 | P03363 | Q11206 | -0.49215   |
| 21638 | P03363 | Q6ZSJ8 | -0.031359  |
| 21639 | P03363 | Q8TC27 | -0.42052   |
| 21640 | P03363 | Q9Y2B0 | -0.23551   |
| 21641 | P03363 | Q92736 | -0.22821   |
| 21642 | P03363 | Q96MD7 | -0.22027   |
| 21643 | P03363 | Q8IYS4 | -0.29091   |
| 21644 | P03363 | P0C843 | -0.20621   |
| 21645 | P03363 | Q58FF7 | -0.16114   |
| 21646 | P03363 | Q8N1L1 | -0.042737  |
| 21647 | P03363 | P40227 | -0.18916   |
| 21648 | P03363 | O00175 | -0.48812   |
| 21649 | P03363 | Q9BYT9 | -0.3424    |
| 21650 | P03363 | Q08AH1 | -0.4185    |
| 21651 | P03363 | A6NIV6 | -0.23522   |
| 21652 | P03363 | Q15113 | -0.55555   |
| 21653 | P03363 | Q3C1V1 | -0.031359  |
| 21654 | P03363 | Q9UIV8 | -0.14429   |
| 21655 | P03363 | Q5HYL7 | -0.32626   |
| 21656 | P03363 | Q8IU85 | -0.23852   |
| 21657 | P03363 | P01566 | -0.43608   |
| 21658 | P03363 | P12883 | -0.14387   |
| 21659 | P03363 | O14594 | -0.50836   |
| 21660 | P03363 | P48637 | -0.24859   |

|       |        |        |           |
|-------|--------|--------|-----------|
| 21661 | P03363 | Q9H0X9 | -0.56924  |
| 21662 | P03363 | P0C5Z0 | -0.26977  |
| 21663 | P03363 | Q92828 | -0.22741  |
| 21664 | P03363 | Q6EEV6 | -0.16548  |
| 21665 | P03363 | Q5SRD1 | -0.10801  |
| 21666 | P03363 | Q01804 | -0.18391  |
| 21667 | P03363 | Q8N135 | -0.40569  |
| 21668 | P03363 | P54107 | -0.42014  |
| 21669 | P03363 | Q5GLZ8 | -0.28001  |
| 21670 | P03363 | Q15465 | -0.2274   |
| 21671 | P03363 | P17050 | -0.19369  |
| 21672 | P03363 | A6NGH8 | -0.22741  |
| 21673 | P03363 | Q6NUN7 | -0.042737 |
| 21674 | P03363 | Q9UQ90 | -0.42645  |
| 21675 | P03363 | Q6UWI2 | -0.10576  |
| 21676 | P03363 | P56749 | -0.27242  |
| 21677 | P03363 | Q8NFS9 | -0.30445  |
| 21678 | P03363 | P01009 | -0.12013  |
| 21679 | P03363 | Q92896 | -0.34131  |
| 21680 | P03363 | P31947 | -0.27808  |
| 21681 | P03363 | Q15434 | -0.23169  |
| 21682 | P03363 | Q9NSA0 | -0.29388  |
| 21683 | P03363 | Q8N9X3 | -0.22818  |
| 21684 | P03363 | Q95573 | -0.47255  |
| 21685 | P03363 | P61567 | -0.22613  |
| 21686 | P03363 | P78356 | -0.29062  |
| 21687 | P03363 | Q9BSJ5 | -0.32626  |
| 21688 | P03363 | Q70E73 | -0.22522  |
| 21689 | P03363 | Q6ZUF6 | -0.05845  |
| 21690 | P03363 | Q8NAS9 | -0.13472  |
| 21691 | P03363 | P19224 | -0.47051  |
| 21692 | P03363 | Q9UN73 | -0.93203  |
| 21693 | P03363 | P57789 | -0.60611  |
| 21694 | P03363 | O00587 | -0.49053  |
| 21695 | P03363 | P07288 | -0.30565  |
| 21696 | P03363 | Q92737 | -0.37401  |
| 21697 | P03363 | Q96QB1 | -0.25031  |
| 21698 | P03363 | Q14147 | -0.23548  |
| 21699 | P03363 | Q8IUZ5 | -0.21181  |
| 21700 | P03363 | Q9P242 | -0.033853 |
| 21701 | P03363 | P59666 | -0.47239  |
| 21702 | P03363 | P40939 | -0.20963  |
| 21703 | P03363 | Q9UBU3 | -0.20074  |
| 21704 | P03363 | Q5VTQ0 | -0.14409  |
| 21705 | P03363 | Q5TA76 | -0.042737 |
| 21706 | P03363 | Q8TC07 | -0.23647  |
| 21707 | P03363 | Q6P7N7 | -0.32626  |
| 21708 | P03363 | Q9BRG2 | -0.22741  |
| 21709 | P03363 | Q96HD1 | -0.3819   |
| 21710 | P03363 | Q8TAS1 | -0.22741  |
| 21711 | P03363 | Q9NP61 | -0.19039  |
| 21712 | P03363 | Q08397 | -0.72293  |
| 21713 | P03363 | P48960 | -1.069    |
| 21714 | P03363 | Q96G04 | -0.16643  |
| 21715 | P03363 | Q9UIA0 | -0.30806  |
| 21716 | P03363 | O75165 | -0.22235  |
| 21717 | P03363 | P11021 | -0.22597  |
| 21718 | P03363 | Q9P0K9 | -0.25285  |
| 21719 | P03363 | Q8N4G2 | -0.22753  |
| 21720 | P03363 | Q9NRM1 | -0.38997  |
| 21721 | P03363 | Q06033 | -0.34717  |
| 21722 | P03363 | P27695 | -0.19866  |
| 21723 | P03363 | Q8WVS4 | -0.22544  |
| 21724 | P03363 | Q92994 | -0.16262  |
| 21725 | P03363 | Q9Y3T6 | -0.07761  |
| 21726 | P03363 | P15848 | -0.29201  |
| 21727 | P03363 | Q8TEQ8 | -0.41057  |
| 21728 | P03363 | Q9Y3E2 | -0.33684  |
| 21729 | P03363 | Q96PN8 | -0.71032  |
| 21730 | P03363 | P09912 | -0.1408   |
| 21731 | P03363 | Q70CQ1 | -0.23016  |
| 21732 | P03363 | Q86WA8 | -0.2213   |
| 21733 | P03363 | Q86TE4 | -0.33992  |
| 21734 | P03363 | Q6ZVX9 | -0.32626  |
| 21735 | P03363 | P0C7V8 | -0.22742  |
| 21736 | P03363 | Q68D20 | -0.15378  |

|       |        |        |           |
|-------|--------|--------|-----------|
| 21737 | P03363 | Q8WUT4 | -0.32626  |
| 21738 | P03363 | P21860 | -0.40818  |
| 21739 | P03363 | Q96B18 | -0.13708  |
| 21740 | P03363 | Q7Z7D3 | -0.5135   |
| 21741 | P03363 | P11169 | -0.16236  |
| 21742 | P03363 | Q96AH8 | -0.31378  |
| 21743 | P03363 | Q13162 | -0.22591  |
| 21744 | P03363 | P01031 | -0.48028  |
| 21745 | P03363 | P16885 | -0.22741  |
| 21746 | P03363 | P08397 | -0.089096 |
| 21747 | P03363 | O60568 | -0.22863  |
| 21748 | P03363 | Q96K76 | -0.26238  |
| 21749 | P03363 | O95718 | -0.22741  |
| 21750 | P03363 | Q96PL1 | -0.33992  |
| 21751 | P03363 | Q9NYV9 | -0.47677  |
| 21752 | P03363 | Q14028 | -0.54089  |
| 21753 | P03363 | Q9Y4C1 | -0.23326  |
| 21754 | P03363 | Q9NZT1 | -0.2273   |
| 21755 | P03363 | Q9BQ16 | -0.52349  |
| 21756 | P03363 | P63267 | -0.12009  |
| 21757 | P03363 | P50053 | -0.20986  |
| 21758 | P03363 | Q86VW1 | -0.49166  |
| 21759 | P03363 | O00624 | -0.44445  |
| 21760 | P03363 | Q8NGL2 | -0.61656  |
| 21761 | P03363 | O00506 | -0.22883  |
| 21762 | P03363 | Q9BXB1 | -0.58807  |
| 21763 | P03363 | Q9P265 | -0.2266   |
| 21764 | P03363 | Q13304 | -0.68138  |
| 21765 | P03363 | Q9P055 | -0.4477   |
| 21766 | P03363 | P30481 | -0.54957  |
| 21767 | P03363 | P84077 | -0.22753  |
| 21768 | P03363 | Q9BUR5 | -0.72245  |
| 21769 | P03363 | P78381 | -0.22411  |
| 21770 | P03363 | Q8IWR0 | -0.22525  |
| 21771 | P03363 | Q95977 | -0.72613  |
| 21772 | P03363 | P01715 | -0.54902  |
| 21773 | P03363 | P26678 | -0.052227 |
| 21774 | P03363 | Q96DM3 | -0.11544  |
| 21775 | P03363 | Q9Y230 | -0.22759  |
| 21776 | P03363 | P31937 | -0.33224  |
| 21777 | P03363 | Q9BRL7 | -0.26185  |
| 21778 | P03363 | P48167 | -0.2734   |
| 21779 | P03363 | P01567 | -0.38171  |
| 21780 | P03363 | Q8IU68 | -0.52348  |
| 21781 | P03363 | D6R9N7 | -0.25139  |
| 21782 | P03363 | P00395 | -0.19846  |
| 21783 | P03363 | Q13671 | -0.22372  |
| 21784 | P03363 | P51801 | -0.53565  |
| 21785 | P03363 | P08697 | -0.13301  |
| 21786 | P03363 | Q504Y3 | -0.20699  |
| 21787 | P03363 | P80748 | -0.54902  |
| 21788 | P03363 | Q8IUA7 | -0.58348  |
| 21789 | P03363 | Q1EHB4 | -0.51275  |
| 21790 | P03363 | Q9P1D8 | -0.042737 |
| 21791 | P03363 | Q96N46 | -0.22626  |
| 21792 | P03363 | Q96MD2 | -0.10652  |
| 21793 | P03363 | Q8IUH2 | -0.66279  |
| 21794 | P03363 | O43915 | -0.41255  |
| 21795 | P03363 | P20671 | -0.29486  |
| 21796 | P03363 | Q8WW43 | -0.18832  |
| 21797 | P03363 | P15090 | -0.22174  |
| 21798 | P03363 | Q16619 | -0.31289  |
| 21799 | P03363 | Q63HN1 | -0.10827  |
| 21800 | P03363 | Q9BZ23 | -0.1702   |
| 21801 | P03363 | Q96PY6 | -0.22741  |
| 21802 | P03363 | F2Z398 | -0.29548  |
| 21803 | P03363 | Q8WVH0 | -0.16975  |
| 21804 | P03363 | Q9Y6A9 | -0.37705  |
| 21805 | P03363 | P55145 | -0.23623  |
| 21806 | P03363 | Q86Y30 | -0.33992  |
| 21807 | P03363 | P0DKX4 | -0.22204  |
| 21808 | P03363 | O14975 | -0.46185  |
| 21809 | P03363 | Q5TDP6 | -0.20107  |
| 21810 | P03363 | Q75WM6 | -0.31471  |
| 21811 | P03363 | O00483 | -0.21569  |
| 21812 | P03363 | O75880 | -0.18573  |

|       |        |        |           |
|-------|--------|--------|-----------|
| 21813 | P03363 | Q9BXT2 | -0.39488  |
| 21814 | P03363 | Q8TE73 | -0.22145  |
| 21815 | P03363 | P0CG37 | -0.52274  |
| 21816 | P03363 | Q8WXX0 | -0.22428  |
| 21817 | P03363 | Q13368 | -0.22705  |
| 21818 | P03363 | Q1X8D7 | -0.22732  |
| 21819 | P03363 | P15882 | -0.38023  |
| 21820 | P03363 | Q7Z6I8 | -0.16662  |
| 21821 | P03363 | P04798 | -0.29517  |
| 21822 | P03363 | Q15828 | -0.32986  |
| 21823 | P03363 | P03999 | -0.71014  |
| 21824 | P03363 | P15586 | -0.22782  |
| 21825 | P03363 | Q8WU43 | -0.18111  |
| 21826 | P03363 | Q5DT21 | -0.22644  |
| 21827 | P03363 | Q14641 | -0.6043   |
| 21828 | P03363 | Q8NH85 | -0.61656  |
| 21829 | P03363 | Q8WWZ3 | -0.1729   |
| 21830 | P03363 | Q9UM00 | -0.47835  |
| 21831 | P03363 | Q13308 | -0.22742  |
| 21832 | P03363 | Q92854 | -0.25244  |
| 21833 | P03363 | Q2M3C6 | -0.32626  |
| 21834 | P03363 | P22460 | -0.33662  |
| 21835 | P03363 | Q14627 | -0.52919  |
| 21836 | P03363 | Q9H853 | -0.21505  |
| 21837 | P03363 | Q86UT6 | -0.22608  |
| 21838 | P03363 | Q494W8 | -0.32774  |
| 21839 | P03363 | Q5GH77 | -0.47262  |
| 21840 | P03363 | Q9GZT4 | -0.2673   |
| 21841 | P03363 | O95918 | -0.59448  |
| 21842 | P03363 | Q9NSC7 | -0.31435  |
| 21843 | P03363 | O14905 | -0.35613  |
| 21844 | P03363 | Q6IEE8 | -0.34459  |
| 21845 | P03363 | Q86UE8 | -0.22741  |
| 21846 | P03363 | Q92914 | -0.27421  |
| 21847 | P03363 | P39877 | -0.461    |
| 21848 | P03363 | Q99712 | -0.61898  |
| 21849 | P03363 | P01761 | -0.54902  |
| 21850 | P03363 | P58549 | -0.36869  |
| 21851 | P03363 | Q13003 | -0.47391  |
| 21852 | P03363 | P36404 | -0.22763  |
| 21853 | P03363 | Q8N126 | -0.45783  |
| 21854 | P03363 | P55283 | -0.602    |
| 21855 | P03363 | Q6ZVF9 | -0.053085 |
| 21856 | P03363 | Q9HBI5 | -0.22114  |
| 21857 | P03363 | P09619 | -0.27357  |
| 21858 | P03363 | P22692 | -0.49155  |
| 21859 | P03363 | Q6P3S6 | -0.22733  |
| 21860 | P03363 | Q9Y2G1 | -0.13729  |
| 21861 | P03363 | P10153 | -0.19265  |
| 21862 | P03363 | Q9Y2P4 | -0.53952  |
| 21863 | P03363 | P32189 | -0.13171  |
| 21864 | P03363 | Q8N1L4 | -0.45655  |
| 21865 | P03363 | O15273 | -0.19963  |
| 21866 | P03363 | A1L4K1 | -0.22742  |
| 21867 | P03363 | P16444 | -0.24914  |
| 21868 | P03363 | Q8NA69 | -0.11521  |
| 21869 | P03363 | Q14249 | -0.18112  |
| 21870 | P03363 | Q8IYS8 | -0.067603 |
| 21871 | P03363 | Q0P651 | -0.33992  |
| 21872 | P03363 | Q8IVH8 | -0.22885  |
| 21873 | P03363 | A6NKB5 | -0.32626  |
| 21874 | P03363 | P08571 | -0.39604  |
| 21875 | P03363 | P52701 | -0.19135  |
| 21876 | P03363 | P0C6A0 | -0.22741  |
| 21877 | P03363 | Q14314 | -0.55279  |
| 21878 | P03363 | O95235 | -0.23842  |
| 21879 | P03363 | Q9BWL3 | -0.48534  |
| 21880 | P03363 | A1XBS5 | -0.21565  |
| 21881 | P03363 | P05023 | -0.29849  |
| 21882 | P03363 | A1L0T0 | -0.30883  |
| 21883 | P03363 | P61221 | -0.1968   |
| 21884 | P03363 | A6NEA5 | -0.11023  |
| 21885 | P03363 | P05186 | -0.51843  |
| 21886 | P03363 | P07550 | -0.2593   |
| 21887 | P03363 | Q71RS6 | -0.51007  |
| 21888 | P03363 | P47989 | -0.35251  |

|       |        |        |           |
|-------|--------|--------|-----------|
| 21889 | P03363 | O76054 | -0.22799  |
| 21890 | P03363 | Q8NB15 | -0.22723  |
| 21891 | P03363 | Q8NFA0 | -0.31146  |
| 21892 | P03363 | Q15517 | -0.30944  |
| 21893 | P03363 | Q5VVY1 | -0.19444  |
| 21894 | P03363 | Q16849 | -0.30999  |
| 21895 | P03363 | Q6PL24 | -0.18837  |
| 21896 | P03363 | P13639 | -0.15724  |
| 21897 | P03363 | Q95460 | -0.22741  |
| 21898 | P03363 | Q6IED9 | -0.1436   |
| 21899 | P03363 | Q99954 | -0.33992  |
| 21900 | P03363 | E5RJ46 | -0.042737 |
| 21901 | P03363 | Q13007 | -0.40271  |
| 21902 | P03363 | Q6UXQ6 | -0.33992  |
| 21903 | P03363 | Q9NRP4 | -0.19655  |
| 21904 | P03363 | Q15008 | -0.31853  |
| 21905 | P03363 | Q5XG85 | -0.042737 |
| 21906 | P03363 | Q02880 | -0.21769  |
| 21907 | P03363 | Q30134 | -0.53907  |
| 21908 | P03363 | O14944 | -0.3219   |
| 21909 | P03363 | Q9BQE3 | -0.21865  |
| 21910 | P03363 | O00151 | -0.22741  |
| 21911 | P03363 | Q6S5H5 | -0.22743  |
| 21912 | P03363 | Q53RT3 | -0.38176  |
| 21913 | P03363 | Q9HBF4 | -0.22447  |
| 21914 | P03363 | Q05877 | -0.02322  |
| 21915 | P03363 | Q86XT9 | -0.45846  |
| 21916 | P03363 | A6NCN8 | -0.031359 |
| 21917 | P03363 | Q8WVJ2 | -0.14069  |
| 21918 | P03363 | P21579 | -0.23987  |
| 21919 | P03363 | A7E2S9 | -0.22741  |
| 21920 | P03363 | Q9H6K4 | -0.085894 |
| 21921 | P03363 | P06028 | -0.57712  |
| 21922 | P03363 | Q96EZ4 | -0.042737 |
| 21923 | P03363 | Q8NGP0 | -0.61656  |
| 21924 | P03363 | Q9NW64 | -0.2945   |
| 21925 | P03363 | Q8N100 | -0.22809  |
| 21926 | P03363 | Q75678 | -0.22845  |
| 21927 | P03363 | Q8N474 | -0.27682  |
| 21928 | P03363 | Q99536 | -0.57526  |
| 21929 | P03363 | Q8WZ94 | -0.61656  |
| 21930 | P03363 | Q8IWX5 | -0.46271  |
| 21931 | P03363 | Q95837 | -0.51451  |
| 21932 | P03363 | Q8NFB2 | -0.32626  |
| 21933 | P03363 | Q96IV6 | -0.54772  |
| 21934 | P03363 | Q8NDZ2 | -0.10577  |
| 21935 | P03363 | Q6ZUA9 | -0.049345 |
| 21936 | P03363 | A2A3L6 | -0.22642  |
| 21937 | P03363 | Q8NBD8 | -0.32626  |
| 21938 | P03363 | Q9NXW9 | -0.035305 |
| 21939 | P03363 | A6NMP4 | -0.14773  |
| 21940 | P03363 | Q08E93 | -0.042737 |
| 21941 | P03363 | Q5T3U5 | -0.67725  |
| 21942 | P03363 | Q7Z4T8 | -0.3085   |
| 21943 | P03363 | O14526 | -0.2177   |
| 21944 | P03363 | Q9NTI2 | -0.53152  |
| 21945 | P03363 | Q5VU97 | -0.3484   |
| 21946 | P03363 | Q9BQ04 | -0.22779  |
| 21947 | P03363 | O14986 | -0.22453  |
| 21948 | P03363 | Q5JTD7 | -0.22516  |
| 21949 | P03363 | Q13554 | -0.39845  |
| 21950 | P03363 | Q5W041 | -0.22752  |
| 21951 | P03363 | Q96KP6 | -0.18408  |
| 21952 | P03363 | Q8N6U8 | -0.71081  |
| 21953 | P03363 | P30559 | -0.53023  |
| 21954 | P03363 | Q86VF7 | -0.22738  |
| 21955 | P03363 | Q9BVV2 | -0.19783  |
| 21956 | P03363 | Q9Y6N8 | -0.56365  |
| 21957 | P03363 | Q99439 | -0.2245   |
| 21958 | P03363 | P01611 | -0.54902  |
| 21959 | P03363 | P35348 | -0.37075  |
| 21960 | P03363 | Q3ZCT8 | -0.18666  |
| 21961 | P03363 | Q07326 | -0.47638  |
| 21962 | P03363 | Q9Y6I9 | -0.33992  |
| 21963 | P03363 | Q5T5J6 | -0.018784 |
| 21964 | P03363 | P61006 | -0.29467  |

|       |        |        |           |
|-------|--------|--------|-----------|
| 21965 | P03363 | P09210 | -0.22721  |
| 21966 | P03363 | P24043 | -0.31503  |
| 21967 | P03363 | A8MZG2 | -0.031359 |
| 21968 | P03363 | Q9P0P8 | -0.18716  |
| 21969 | P03363 | Q6PKC3 | -0.53468  |
| 21970 | P03363 | Q7Z6K3 | -0.19079  |
| 21971 | P03363 | Q5VV52 | -0.13041  |
| 21972 | P03363 | Q5SR56 | -0.43269  |
| 21973 | P03363 | Q96SZ6 | -0.15301  |
| 21974 | P03363 | Q99758 | -0.62914  |
| 21975 | P03363 | Q9HBJ8 | -0.39208  |
| 21976 | P03363 | P35250 | -0.21999  |
| 21977 | P03363 | Q765I0 | -0.33502  |
| 21978 | P03363 | Q96DN0 | -0.20848  |
| 21979 | P03363 | Q8N0W4 | -0.22739  |
| 21980 | P03363 | Q6PH85 | -0.13133  |
| 21981 | P03363 | O15431 | -0.5611   |
| 21982 | P03363 | Q8IYW2 | -0.57933  |
| 21983 | P03363 | P51157 | -0.58311  |
| 21984 | P03363 | O76090 | -0.3986   |
| 21985 | P03363 | Q9Y239 | -0.22741  |
| 21986 | P03363 | Q9H4B4 | -0.22744  |
| 21987 | P03363 | P83110 | -0.22741  |
| 21988 | P03363 | P35504 | -0.48211  |
| 21989 | P03363 | P20800 | -0.32965  |
| 21990 | P03363 | Q8IWT6 | -0.34484  |
| 21991 | P03363 | Q8WW18 | -0.031359 |
| 21992 | P03363 | Q8N9E0 | -0.031359 |
| 21993 | P03363 | P10253 | -0.22892  |
| 21994 | P03363 | Q6URH7 | -0.1958   |
| 21995 | P03363 | Q9Y6C2 | -0.22062  |
| 21996 | P03363 | Q9NRR8 | -0.070287 |
| 21997 | P03363 | Q8NDV1 | -0.29659  |
| 21998 | P03363 | P30505 | -0.54957  |
| 21999 | P03363 | Q13461 | -0.29843  |
| 22000 | P03363 | Q8IYE1 | -0.1727   |
| 22001 | P03363 | P20020 | -0.30181  |
| 22002 | P03363 | Q9P1U0 | -0.19252  |
| 22003 | P03363 | Q14542 | -0.22196  |
| 22004 | P03363 | Q5T5A8 | -0.042737 |
| 22005 | P03363 | Q9NTU7 | -0.34527  |
| 22006 | P03363 | Q9GZQ8 | -0.21619  |
| 22007 | P03363 | Q6DN12 | -0.34356  |
| 22008 | P03363 | Q8N119 | -0.57213  |
| 22009 | P03363 | P22003 | -0.25018  |
| 22010 | P03363 | Q9Y2Y6 | -0.42352  |
| 22011 | P03363 | Q96IT6 | -0.042737 |
| 22012 | P03363 | Q75061 | -0.2273   |
| 22013 | P03363 | Q5BKU6 | -0.13767  |
| 22014 | P03363 | Q14949 | -0.19075  |
| 22015 | P03363 | Q6UY11 | -0.40014  |
| 22016 | P03363 | Q9UBM4 | -0.37809  |
| 22017 | P03363 | P08758 | -0.15544  |
| 22018 | P03363 | Q9H6S1 | -0.19524  |
| 22019 | P03363 | Q6ZWC4 | -0.098122 |
| 22020 | P03363 | Q9GZV1 | -0.22701  |
| 22021 | P03363 | P05112 | -0.21354  |
| 22022 | P03363 | A2RUU4 | -0.3747   |
| 22023 | P03363 | Q14626 | -0.54482  |
| 22024 | P03363 | Q9Y4F9 | -0.19449  |
| 22025 | P03363 | Q9GZZ9 | -0.22263  |
| 22026 | P03363 | Q43772 | -0.23375  |
| 22027 | P03363 | Q8TCT0 | -0.38567  |
| 22028 | P03363 | P38484 | -0.62699  |
| 22029 | P03363 | Q5SZD1 | -0.057774 |
| 22030 | P03363 | Q96P16 | -0.13719  |
| 22031 | P03363 | Q5T5B0 | -0.042737 |
| 22032 | P03363 | Q96IQ9 | -0.22738  |
| 22033 | P03363 | Q13191 | -0.22741  |
| 22034 | P03363 | Q8N2H3 | -0.22738  |
| 22035 | P03363 | A6NMK8 | -0.036758 |
| 22036 | P03363 | P0CW24 | -0.12745  |
| 22037 | P03363 | P01770 | -0.54902  |
| 22038 | P03363 | P02144 | -0.14857  |
| 22039 | P03363 | Q8IZ81 | -0.20192  |
| 22040 | P03363 | Q9HA82 | -0.099932 |

|       |        |        |           |
|-------|--------|--------|-----------|
| 22041 | P03363 | Q8WU08 | -0.63188  |
| 22042 | P03363 | Q9BU89 | -0.15012  |
| 22043 | P03363 | Q9UJW2 | -0.69387  |
| 22044 | P03363 | Q96PV4 | -0.18076  |
| 22045 | P03363 | Q9UJ96 | -0.37617  |
| 22046 | P03363 | Q7LGC8 | -0.33454  |
| 22047 | P03363 | Q8NHS2 | -0.21609  |
| 22048 | P03363 | P29536 | -0.22394  |
| 22049 | P03363 | Q9UGI0 | -0.22635  |
| 22050 | P03363 | P54802 | -0.15103  |
| 22051 | P03363 | P42229 | -0.22724  |
| 22052 | P03363 | Q8N8V8 | -0.32626  |
| 22053 | P03363 | Q86VL8 | -0.42713  |
| 22054 | P03363 | P01893 | -0.61359  |
| 22055 | P03363 | Q86UX6 | -0.63188  |
| 22056 | P03363 | Q53EL9 | -0.50573  |
| 22057 | P03363 | Q8NGG2 | -0.61656  |
| 22058 | P03363 | P78552 | -0.22863  |
| 22059 | P03363 | Q8IY84 | -0.63741  |
| 22060 | P03363 | Q9H310 | -0.42625  |
| 22061 | P03363 | Q5VU65 | -0.32626  |
| 22062 | P03363 | O75916 | -0.22938  |
| 22063 | P03363 | Q9Y5H4 | -0.57898  |
| 22064 | P03363 | Q6UWN8 | -0.33498  |
| 22065 | P03363 | P14770 | -0.54843  |
| 22066 | P03363 | O95393 | -0.22741  |
| 22067 | P03363 | Q92839 | -0.56017  |
| 22068 | P03363 | Q8NDH6 | -0.16547  |
| 22069 | P03363 | Q14703 | -0.50547  |
| 22070 | P03363 | P14550 | -0.22726  |
| 22071 | P03363 | Q13275 | -0.51021  |
| 22072 | P03363 | P17900 | -0.22339  |
| 22073 | P03363 | Q8N7Z2 | -0.045157 |
| 22074 | P03363 | P50052 | -0.4913   |
| 22075 | P03363 | P11177 | -0.21023  |
| 22076 | P03363 | P01242 | -0.33171  |
| 22077 | P03363 | P13164 | -0.2167   |
| 22078 | P03363 | Q969Q4 | -0.22818  |
| 22079 | P03363 | Q8NER1 | -0.6014   |
| 22080 | P03363 | Q9H4G0 | -0.23843  |
| 22081 | P03363 | Q7Z6A9 | -0.553    |
| 22082 | P03363 | Q96S86 | -0.43243  |
| 22083 | P03363 | P59942 | -0.03507  |
| 22084 | P03363 | Q99643 | -0.3666   |
| 22085 | P03363 | Q9NP59 | -0.20716  |
| 22086 | P03363 | P49146 | -0.63173  |
| 22087 | P03363 | Q9UKU6 | -0.63742  |
| 22088 | P03363 | Q9NQG1 | -0.32626  |
| 22089 | P03363 | Q9H496 | -0.070267 |
| 22090 | P03363 | Q4KMZ1 | -0.106    |
| 22091 | P03363 | A6NCW7 | -0.23938  |
| 22092 | P03363 | Q9H5V9 | -0.026809 |
| 22093 | P03363 | Q13393 | -0.29434  |
| 22094 | P03363 | Q8WWV3 | -0.52122  |
| 22095 | P03363 | P49619 | -0.49394  |
| 22096 | P03363 | Q15619 | -0.61656  |
| 22097 | P03363 | Q9Y5Y3 | -0.64046  |
| 22098 | P03363 | A0PJX2 | -0.093562 |
| 22099 | P03363 | Q9BRQ8 | -0.21584  |
| 22100 | P03363 | Q9NYJ7 | -0.41288  |
| 22101 | P03363 | P53779 | -0.22741  |
| 22102 | P03363 | Q8NGY0 | -0.61656  |
| 22103 | P03363 | Q9NZN1 | -0.22741  |
| 22104 | P03363 | Q5SXH7 | -0.22011  |
| 22105 | P03363 | O95210 | -0.19478  |
| 22106 | P03363 | Q96BA8 | -0.22721  |
| 22107 | P03363 | P49913 | -0.28891  |
| 22108 | P03363 | P12271 | -0.29575  |
| 22109 | P03363 | P11310 | -0.30798  |
| 22110 | P03363 | Q9BV94 | -0.5105   |
| 22111 | P03363 | Q08188 | -0.21228  |
| 22112 | P03363 | Q96SJ8 | -0.32626  |
| 22113 | P03363 | Q5VTA0 | -0.10697  |
| 22114 | P03363 | P42356 | -0.25023  |
| 22115 | P03363 | Q9UF33 | -0.5793   |
| 22116 | P03363 | Q96RU7 | -0.22766  |



|       |        |        |           |
|-------|--------|--------|-----------|
| 22117 | P03363 | P59036 | -0.042737 |
| 22118 | P03363 | Q9NRY6 | -0.20104  |
| 22119 | P03363 | Q9H6R7 | -0.15489  |
| 22120 | P03363 | Q6ZVS7 | -0.18526  |
| 22121 | P03363 | O43242 | -0.18366  |
| 22122 | P03363 | Q96C11 | -0.15844  |
| 22123 | P03363 | P00367 | -0.21835  |
| 22124 | P03363 | O60896 | -0.18737  |
| 22125 | P03363 | P57052 | -0.2222   |
| 22126 | P03363 | Q6UXN8 | -0.3753   |
| 22127 | P03363 | O60336 | -0.22749  |
| 22128 | P03363 | P40933 | -0.19195  |
| 22129 | P03363 | Q96RQ9 | -0.55619  |
| 22130 | P03363 | Q96PF1 | -0.2212   |
| 22131 | P03363 | Q96EF0 | -0.2273   |
| 22132 | P03363 | Q9BRV3 | -0.18235  |
| 22133 | P03363 | Q13683 | -0.26447  |
| 22134 | P03363 | P04150 | -0.22742  |
| 22135 | P03363 | Q9UNK0 | -0.47042  |
| 22136 | P03363 | Q5VSY0 | -0.080372 |
| 22137 | P03363 | O95136 | -0.63267  |
| 22138 | P03363 | O75897 | -0.23483  |
| 22139 | P03363 | Q00169 | -0.21386  |
| 22140 | P03363 | Q53RE8 | -0.22741  |
| 22141 | P03363 | O60269 | -0.17427  |
| 22142 | P03363 | P12829 | -0.2271   |
| 22143 | P03363 | P07992 | -0.21028  |
| 22144 | P03363 | P49753 | -0.17822  |
| 22145 | P03363 | Q14318 | -0.22751  |
| 22146 | P03363 | Q9H339 | -0.61656  |
| 22147 | P03363 | O75298 | -0.17002  |
| 22148 | P03363 | Q8WXX4 | -0.22746  |
| 22149 | P03363 | Q95081 | -0.16376  |
| 22150 | P03363 | Q9HCP0 | -0.38034  |
| 22151 | P03363 | P0C7P0 | -0.19985  |
| 22152 | P03363 | O60259 | -0.23521  |
| 22153 | P03363 | P04201 | -0.47489  |
| 22154 | P03363 | Q8TED1 | -0.59479  |
| 22155 | P03363 | P51449 | -0.25272  |
| 22156 | P03363 | Q8NEM2 | -0.073317 |
| 22157 | P03363 | P41271 | -0.27301  |
| 22158 | P03363 | Q6ZUB0 | -0.32626  |
| 22159 | P03363 | H0Y7S4 | -0.14618  |
| 22160 | P03363 | Q5ST30 | -0.11573  |
| 22161 | P03363 | Q3KR16 | -0.22753  |
| 22162 | P03363 | P54315 | -0.5007   |
| 22163 | P03363 | P27037 | -0.25445  |
| 22164 | P03363 | Q96QV6 | -0.27872  |
| 22165 | P03363 | O94887 | -0.22743  |
| 22166 | P03363 | Q95466 | -0.22631  |
| 22167 | P03363 | Q9NRJ2 | -0.042737 |
| 22168 | P03363 | P0C875 | -0.23756  |
| 22169 | P03363 | Q8NGL1 | -0.61656  |
| 22170 | P03363 | P08861 | -0.50844  |
| 22171 | P03363 | Q14773 | -0.84156  |
| 22172 | P03363 | P28070 | -0.1196   |
| 22173 | P03363 | Q8N6F8 | -0.20065  |
| 22174 | P03363 | Q9HCU0 | -0.22741  |
| 22175 | P03363 | A6NDY0 | -0.22522  |
| 22176 | P03363 | Q5VZY2 | -0.32707  |
| 22177 | P03363 | Q7Z7G0 | -0.4621   |
| 22178 | P03363 | Q6PKX4 | -0.22033  |
| 22179 | P03363 | Q6P4F1 | -0.20661  |
| 22180 | P03363 | Q7Z3D4 | -0.32325  |
| 22181 | P03363 | Q6ZN68 | -0.32626  |
| 22182 | P03363 | Q5JTB6 | -0.33992  |
| 22183 | P03363 | Q6ZTB9 | -0.12428  |
| 22184 | P03363 | Q8N4T4 | -0.32501  |
| 22185 | P03363 | Q9BV10 | -0.43235  |
| 22186 | P03363 | Q8N8P7 | -0.33992  |
| 22187 | P03363 | Q5PR19 | -0.12137  |
| 22188 | P03363 | Q9NXZ2 | -0.29776  |
| 22189 | P03363 | Q8N0S6 | -0.14824  |
| 22190 | P03363 | P16619 | -0.56729  |
| 22191 | P03363 | P62979 | -0.1183   |
| 22192 | P03363 | P0C0S8 | -0.29899  |

|       |        |        |           |
|-------|--------|--------|-----------|
| 22193 | P03363 | P09467 | -0.1903   |
| 22194 | P03363 | P78524 | -0.19907  |
| 22195 | P03363 | Q6NUM6 | -0.53836  |
| 22196 | P03363 | P01743 | -0.54902  |
| 22197 | P03363 | Q96PY0 | -0.10705  |
| 22198 | P03363 | Q8IXK2 | -0.30368  |
| 22199 | P03363 | Q96JJ6 | -0.6274   |
| 22200 | P03363 | Q53RD9 | -0.50107  |
| 22201 | P03363 | Q01629 | -0.45838  |
| 22202 | P03363 | Q96C45 | -0.54205  |
| 22203 | P03363 | P80365 | -0.33031  |
| 22204 | P03363 | Q8N8Y2 | -0.18873  |
| 22205 | P03363 | Q502W6 | -0.18206  |
| 22206 | P03363 | Q70Z44 | -0.50116  |
| 22207 | P03363 | Q8IWB7 | -0.22742  |
| 22208 | P03363 | P28335 | -0.53689  |
| 22209 | P03363 | O14981 | -0.2146   |
| 22210 | P03363 | Q3MIP1 | -0.32626  |
| 22211 | P03363 | Q9HC23 | -0.43005  |
| 22212 | P03363 | O14798 | -0.42624  |
| 22213 | P03363 | Q30154 | -0.53907  |
| 22214 | P03363 | P17655 | -0.23305  |
| 22215 | P03363 | Q9NVA4 | -0.32626  |
| 22216 | P03363 | Q9BYZ6 | -0.54057  |
| 22217 | P03363 | Q5JRC9 | -0.049263 |
| 22218 | P03363 | P05107 | -0.53315  |
| 22219 | P03363 | P13500 | -0.28243  |
| 22220 | P03363 | Q6A555 | -0.22864  |
| 22221 | P03363 | P59773 | -0.32626  |
| 22222 | P03363 | Q9Y644 | -0.56566  |
| 22223 | P03363 | Q96EX1 | -0.32626  |
| 22224 | P03363 | P53609 | -0.20728  |
| 22225 | P03363 | Q9H8P0 | -0.46597  |
| 22226 | P03363 | P55064 | -0.24742  |
| 22227 | P03363 | Q13686 | -0.2511   |
| 22228 | P03363 | Q6P3X3 | -0.22721  |
| 22229 | P03363 | P21817 | -0.34896  |
| 22230 | P03363 | Q8N6K7 | -0.22291  |
| 22231 | P03363 | O60499 | -0.21959  |
| 22232 | P03363 | P34903 | -0.44647  |
| 22233 | P03363 | A4D1U4 | -0.024994 |
| 22234 | P03363 | Q9Y6A2 | -0.66336  |
| 22235 | P03363 | O75781 | -0.13904  |
| 22236 | P03363 | Q9H3Y0 | -0.35756  |
| 22237 | P03363 | Q14117 | -0.22295  |
| 22238 | P03363 | Q96MR6 | -0.22745  |
| 22239 | P03363 | Q8IU53 | -0.015092 |
| 22240 | P03363 | Q5K651 | -0.2155   |
| 22241 | P03363 | P01597 | -0.54902  |
| 22242 | P03363 | C9J3I9 | -0.044578 |
| 22243 | P03363 | Q8WY50 | -0.042737 |
| 22244 | P03363 | P0CG20 | -0.096472 |
| 22245 | P03363 | Q5RGS3 | -0.32626  |
| 22246 | P03363 | Q8N443 | -0.066029 |
| 22247 | P03363 | Q96R08 | -0.61656  |
| 22248 | P03363 | Q9HC36 | -0.21174  |
| 22249 | P03363 | P21589 | -0.30107  |
| 22250 | P03363 | Q685J3 | -0.29029  |
| 22251 | P03363 | Q9Y5N1 | -0.70919  |
| 22252 | P03363 | Q587J8 | -0.15924  |
| 22253 | P03363 | P48546 | -0.64975  |
| 22254 | P03363 | Q9BRT7 | -0.042737 |
| 22255 | P03363 | Q96MF0 | -0.16914  |
| 22256 | P03363 | Q15040 | -0.16351  |
| 22257 | P03363 | Q6GPH4 | -0.22634  |
| 22258 | P03363 | Q96R05 | -0.22659  |
| 22259 | P03363 | Q96G01 | -0.21359  |
| 22260 | P03363 | Q8N1A6 | -0.16744  |
| 22261 | P03363 | P60903 | -0.23136  |
| 22262 | P03363 | O95864 | -0.64552  |
| 22263 | P03363 | Q96S53 | -0.36203  |
| 22264 | P03363 | P53365 | -0.22676  |
| 22265 | P03363 | Q6DHV5 | -0.12147  |
| 22266 | P03363 | Q15848 | -0.23349  |
| 22267 | P03363 | Q9BZX2 | -0.27882  |
| 22268 | P03363 | Q8NGG7 | -0.61656  |

|       |        |        |            |
|-------|--------|--------|------------|
| 22269 | P03363 | Q9NQW7 | -0.1847    |
| 22270 | P03363 | Q6ZMY6 | -0.22831   |
| 22271 | P03363 | Q5BVD1 | -0.52348   |
| 22272 | P03363 | Q6NXP0 | -0.25704   |
| 22273 | P03363 | P61086 | -0.082454  |
| 22274 | P03363 | Q9NZ72 | -0.14885   |
| 22275 | P03363 | A6NL26 | -0.61656   |
| 22276 | P03363 | Q86VU5 | -0.22152   |
| 22277 | P03363 | Q5I7T1 | -0.42058   |
| 22278 | P03363 | O95841 | -0.55346   |
| 22279 | P03363 | Q7L4S7 | -0.32626   |
| 22280 | P03363 | Q8IZ96 | -0.44009   |
| 22281 | P03363 | Q15048 | -0.20019   |
| 22282 | P03363 | Q2VIR3 | -0.22776   |
| 22283 | P03363 | Q9WJR5 | -0.21887   |
| 22284 | P03363 | Q5T7P6 | -0.32626   |
| 22285 | P03363 | Q9H5K3 | -0.69027   |
| 22286 | P03363 | P52198 | -0.22784   |
| 22287 | P03363 | Q9Y6X6 | -0.22588   |
| 22288 | P03363 | Q6ZUJ4 | -0.065355  |
| 22289 | P03363 | P55157 | -0.28436   |
| 22290 | P03363 | Q5TEV5 | -0.33992   |
| 22291 | P03363 | Q9H195 | -0.37453   |
| 22292 | P03363 | P16519 | -0.22681   |
| 22293 | P03363 | Q8NEN9 | -0.22741   |
| 22294 | P03363 | Q8NHB1 | -0.61656   |
| 22295 | P03363 | Q8NI37 | -0.18592   |
| 22296 | P03363 | Q05940 | -0.34201   |
| 22297 | P03363 | Q3V5L5 | -0.3719    |
| 22298 | P03363 | Q9UMN6 | -0.22701   |
| 22299 | P03363 | Q8NFW1 | -0.22857   |
| 22300 | P03363 | A6NNB3 | -0.55518   |
| 22301 | P03363 | P17844 | -0.28882   |
| 22302 | P03363 | O15305 | -0.12491   |
| 22303 | P03363 | Q6NUT3 | -0.29915   |
| 22304 | P03363 | Q9Y2T6 | -0.64402   |
| 22305 | P03363 | P08842 | -0.45674   |
| 22306 | P03363 | Q9H6P5 | -0.23      |
| 22307 | P03363 | Q5TGU0 | -0.49772   |
| 22308 | P03363 | Q86WK9 | -0.60607   |
| 22309 | P03363 | P54793 | -0.37914   |
| 22310 | P03363 | Q9H930 | -0.22743   |
| 22311 | P03363 | P12107 | -0.39486   |
| 22312 | P03363 | Q9BRS2 | -0.46289   |
| 22313 | P03363 | P57679 | -0.2518    |
| 22314 | P03363 | Q8TDW5 | -0.23106   |
| 22315 | P03363 | P50591 | -0.38941   |
| 22316 | P03363 | Q16698 | -0.22003   |
| 22317 | P03363 | Q6UXT9 | -0.31903   |
| 22318 | P03363 | Q9NR82 | -0.53373   |
| 22319 | P03363 | O60403 | -0.61656   |
| 22320 | P03363 | Q92481 | -0.21306   |
| 22321 | P03363 | A6NMY6 | -0.3858    |
| 22322 | P03363 | Q9BY07 | -0.47477   |
| 22323 | P03363 | A6NL08 | -0.61656   |
| 22324 | P03363 | P05113 | -0.1933    |
| 22325 | P03363 | H0YKK7 | -0.0006499 |
| 22326 | P03363 | Q8NHP7 | -0.13639   |
| 22327 | P03363 | Q96DS6 | -0.32626   |
| 22328 | P03363 | Q2TAC2 | -0.19651   |
| 22329 | P03363 | P24311 | -0.29374   |
| 22330 | P03363 | O60260 | -0.22732   |
| 22331 | P03363 | Q5H9B9 | -0.14202   |
| 22332 | P03363 | Q13948 | -0.24964   |
| 22333 | P03363 | A2RUC4 | -0.32038   |
| 22334 | P03363 | P00374 | -0.15317   |
| 22335 | P03363 | Q9H1C0 | -0.47931   |
| 22336 | P03363 | Q96CC6 | -0.35481   |
| 22337 | P03363 | Q9UQ52 | -0.27493   |
| 22338 | P03363 | Q8IXW0 | -0.071874  |
| 22339 | P03363 | Q8TAL5 | -0.10066   |
| 22340 | P03363 | Q9HBU6 | -0.29305   |
| 22341 | P03363 | O95342 | -0.57204   |
| 22342 | P03363 | Q96AM1 | -0.64046   |
| 22343 | P03363 | Q9Y3L3 | -0.2948    |
| 22344 | P03363 | Q6ZW13 | -0.042737  |

|       |        |        |           |
|-------|--------|--------|-----------|
| 22345 | P03363 | O43374 | -0.22744  |
| 22346 | P03363 | O75348 | -0.17268  |
| 22347 | P03363 | Q8NG95 | -0.61656  |
| 22348 | P03363 | P06737 | -0.20487  |
| 22349 | P03363 | Q8N328 | -0.17338  |
| 22350 | P03363 | Q66K37 | -0.22716  |
| 22351 | P03363 | Q8TB37 | -0.39374  |
| 22352 | P03363 | Q8NB66 | -0.22741  |
| 22353 | P03363 | Q96LW2 | -0.54205  |
| 22354 | P03363 | Q9NPG2 | -0.16207  |
| 22355 | P03363 | Q16674 | -0.41855  |
| 22356 | P03363 | P0CG08 | -0.25477  |
| 22357 | P03363 | Q9P202 | -0.22709  |
| 22358 | P03363 | Q969H9 | -0.042737 |
| 22359 | P03363 | Q8NH05 | -0.61656  |
| 22360 | P03363 | Q8N392 | -0.38968  |
| 22361 | P03363 | Q86UW7 | -0.22621  |
| 22362 | P03363 | Q02338 | -0.24089  |
| 22363 | P03363 | Q95985 | -0.17214  |
| 22364 | P03363 | P16422 | -0.2274   |
| 22365 | P03363 | Q9C0I9 | -0.22754  |
| 22366 | P03363 | Q6Q4G3 | -0.56767  |
| 22367 | P03363 | P62699 | -0.23308  |
| 22368 | P03363 | Q6NUI1 | -0.076159 |
| 22369 | P03363 | Q5YKI7 | -0.19427  |
| 22370 | P03363 | Q9H6E5 | -0.22726  |
| 22371 | P03363 | Q9NRP7 | -0.22741  |
| 22372 | P03363 | Q15198 | -0.27587  |
| 22373 | P03363 | Q7LDG7 | -0.31437  |
| 22374 | P03363 | Q9BZM5 | -0.64282  |
| 22375 | P03363 | Q99759 | -0.2741   |
| 22376 | P03363 | Q4KMZ8 | -0.47262  |
| 22377 | P03363 | P16471 | -0.59337  |
| 22378 | P03363 | Q8TBE9 | -0.21309  |
| 22379 | P03363 | Q9BZD7 | -0.68707  |
| 22380 | P03363 | Q8N8Z6 | -0.40601  |
| 22381 | P03363 | P17097 | -0.13029  |
| 22382 | P03363 | Q7L8C5 | -0.37438  |
| 22383 | P03363 | Q8WYK0 | -0.21001  |
| 22384 | P03363 | Q6ICG7 | -0.042737 |
| 22385 | P03363 | A6NFU0 | -0.32626  |
| 22386 | P03363 | O60218 | -0.22716  |
| 22387 | P03363 | Q58EX2 | -0.40601  |
| 22388 | P03363 | Q9UF12 | -0.22963  |
| 22389 | P03363 | Q6ZTR7 | -0.17174  |
| 22390 | P03363 | Q8N6C7 | -0.17633  |
| 22391 | P03363 | Q9Y240 | -0.22789  |
| 22392 | P03363 | Q5T481 | -0.21142  |
| 22393 | P03363 | Q9GZP7 | -0.58908  |
| 22394 | P03363 | P13498 | -0.26167  |
| 22395 | P03363 | Q9H9P8 | -0.41854  |
| 22396 | P03363 | Q9UJ68 | -0.25733  |
| 22397 | P03363 | Q6PEV8 | -0.19707  |
| 22398 | P03363 | Q6UXD1 | -0.32626  |
| 22399 | P03363 | Q7Z570 | -0.27953  |
| 22400 | P03363 | Q9NZM3 | -0.22741  |
| 22401 | P03363 | P10696 | -0.42151  |
| 22402 | P03363 | Q6UWT4 | -0.33992  |
| 22403 | P03363 | Q96F85 | -0.2454   |
| 22404 | P03363 | Q8NG80 | -0.5361   |
| 22405 | P03363 | Q99250 | -0.48326  |
| 22406 | P03363 | Q96KC2 | -0.49937  |
| 22407 | P03363 | Q8NH89 | -0.61656  |
| 22408 | P03363 | Q9P1Q5 | -0.61656  |
| 22409 | P03363 | P13501 | -0.47758  |
| 22410 | P03363 | P30450 | -0.35929  |
| 22411 | P03363 | Q7Z5N4 | -0.40601  |
| 22412 | P03363 | P00973 | -0.31289  |
| 22413 | P03363 | Q12947 | -0.29624  |
| 22414 | P03363 | Q9NVH0 | -0.20731  |
| 22415 | P03363 | O60931 | -0.49661  |
| 22416 | P03363 | Q6PDB4 | -0.064364 |
| 22417 | P03363 | Q3B7I2 | -0.17191  |
| 22418 | P03363 | P09496 | -0.20236  |
| 22419 | P03363 | P51810 | -0.24827  |
| 22420 | P03363 | Q5SWW7 | -0.042737 |

|       |        |        |           |
|-------|--------|--------|-----------|
| 22421 | P03363 | Q01973 | -0.37682  |
| 22422 | P03363 | P57078 | -0.22741  |
| 22423 | P03363 | Q6P1R3 | -0.093825 |
| 22424 | P03363 | Q9NUQ2 | -0.37361  |
| 22425 | P03363 | Q9NVH6 | -0.31967  |
| 22426 | P03363 | P54922 | -0.061019 |
| 22427 | P03363 | P38398 | -0.22732  |
| 22428 | P03363 | P07919 | -0.25211  |
| 22429 | P03363 | Q95256 | -0.59746  |
| 22430 | P03363 | Q9NTX5 | -0.19537  |
| 22431 | P03363 | Q6ZVN7 | -0.1639   |
| 22432 | P03363 | Q9Y6J3 | -0.055927 |
| 22433 | P03363 | Q8NHS3 | -0.2244   |
| 22434 | P03363 | Q7Z6Z6 | -0.14614  |
| 22435 | P03363 | Q9UPR0 | -0.22741  |
| 22436 | P03363 | Q15477 | -0.22671  |
| 22437 | P03363 | Q12999 | -0.38826  |
| 22438 | P03363 | P05120 | -0.24642  |
| 22439 | P03363 | Q96NY8 | -0.32287  |
| 22440 | P03363 | P42566 | -0.22742  |
| 22441 | P03363 | Q08431 | -0.43866  |
| 22442 | P03363 | A6NMV5 | -0.15182  |
| 22443 | P03363 | Q15321 | -0.3989   |
| 22444 | P03363 | Q9UPW5 | -0.18206  |
| 22445 | P03363 | P06493 | -0.22291  |
| 22446 | P03363 | P98155 | -0.58852  |
| 22447 | P03363 | P02730 | -0.20993  |
| 22448 | P03363 | Q9Y625 | -0.97068  |
| 22449 | P03363 | Q9HBM0 | -0.20356  |
| 22450 | P03363 | Q15629 | -0.094075 |
| 22451 | P03363 | Q9UJF2 | -0.22732  |
| 22452 | P03363 | P42898 | -0.22948  |
| 22453 | P03363 | Q96GQ7 | -0.22753  |
| 22454 | P03363 | P48050 | -0.22466  |
| 22455 | P03363 | Q8NFX0 | -0.21123  |
| 22456 | P03363 | P42679 | -0.22744  |
| 22457 | P03363 | Q5TGY1 | -0.32626  |
| 22458 | P03363 | Q75192 | -0.078408 |
| 22459 | P03363 | Q7Z3H0 | -0.22741  |
| 22460 | P03363 | Q9Y274 | -0.2912   |
| 22461 | P03363 | P48163 | -0.2131   |
| 22462 | P03363 | Q6ICH7 | -0.53231  |
| 22463 | P03363 | P32249 | -0.66438  |
| 22464 | P03363 | Q9NX47 | -0.2066   |
| 22465 | P03363 | Q99706 | -0.2472   |
| 22466 | P03363 | Q9Y5J9 | -0.17317  |
| 22467 | P03363 | Q5T5W8 | -0.32626  |
| 22468 | P03363 | Q96DD0 | -0.23792  |
| 22469 | P03363 | Q9NZV5 | -0.14503  |
| 22470 | P03363 | Q42043 | -0.22613  |
| 22471 | P03363 | D6RBQ6 | -0.25065  |
| 22472 | P03363 | Q8NEZ3 | -0.22727  |
| 22473 | P03363 | P30039 | -0.16448  |
| 22474 | P03363 | P51570 | -0.20018  |
| 22475 | P03363 | Q8NGS3 | -0.61656  |
| 22476 | P03363 | Q12802 | -0.22741  |
| 22477 | P03363 | Q8NG78 | -0.61656  |
| 22478 | P03363 | P01880 | -0.83033  |
| 22479 | P03363 | Q8N9U9 | -0.11964  |
| 22480 | P03363 | Q9UEW8 | -0.22943  |
| 22481 | P03363 | Q75144 | -0.59686  |
| 22482 | P03363 | Q9UHX3 | -0.71221  |
| 22483 | P03363 | Q86V59 | -0.15479  |
| 22484 | P03363 | Q8NH06 | -0.61656  |
| 22485 | P03363 | P16104 | -0.27725  |
| 22486 | P03363 | Q8TAA3 | -0.12803  |
| 22487 | P03363 | Q9Y561 | -0.22741  |
| 22488 | P03363 | Q9NVN3 | -0.16104  |
| 22489 | P03363 | P27338 | -0.45933  |
| 22490 | P03363 | Q6AZY7 | -0.50436  |
| 22491 | P03363 | P98153 | -0.36357  |
| 22492 | P03363 | Q9UN72 | -0.62883  |
| 22493 | P03363 | Q5DID0 | -0.63974  |
| 22494 | P03363 | B3EWG6 | -0.031359 |
| 22495 | P03363 | Q8NGR9 | -0.61656  |
| 22496 | P03363 | Q96MC5 | -0.18531  |

|       |        |        |           |
|-------|--------|--------|-----------|
| 22497 | P03363 | A6NDY2 | -0.20404  |
| 22498 | P03363 | H3BRN8 | -0.15332  |
| 22499 | P03363 | Q13021 | -0.15983  |
| 22500 | P03363 | P48995 | -0.22739  |
| 22501 | P03363 | Q9BPU6 | -0.22543  |
| 22502 | P03363 | Q95965 | -0.43145  |
| 22503 | P03363 | Q9BUF5 | -0.21405  |
| 22504 | P03363 | Q8TB96 | -0.68689  |
| 22505 | P03363 | A8MXZ1 | -0.22014  |
| 22506 | P03363 | Q5W5W9 | -0.40701  |
| 22507 | P03363 | Q5VVP1 | -0.32626  |
| 22508 | P03363 | P78380 | -0.79786  |
| 22509 | P03363 | Q8NGS6 | -0.61656  |
| 22510 | P03363 | Q7Z7B7 | -0.33516  |
| 22511 | P03363 | H3BMG3 | -0.10734  |
| 22512 | P03363 | Q76024 | -0.34484  |
| 22513 | P03363 | Q9Y458 | -0.5381   |
| 22514 | P03363 | Q9HAW8 | -0.43522  |
| 22515 | P03363 | P41145 | -0.39828  |
| 22516 | P03363 | Q6UB28 | -0.23551  |
| 22517 | P03363 | Q96JQ0 | -0.56957  |
| 22518 | P03363 | P05187 | -0.55158  |
| 22519 | P03363 | P34096 | -0.1835   |
| 22520 | P03363 | Q68CR1 | -0.32626  |
| 22521 | P03363 | Q9NQ89 | -0.13012  |
| 22522 | P03363 | P63218 | -0.29343  |
| 22523 | P03363 | Q9Y6H3 | -0.25509  |
| 22524 | P03363 | Q8WWV6 | -0.47159  |
| 22525 | P03363 | P06213 | -0.23332  |
| 22526 | P03363 | P48051 | -0.22707  |
| 22527 | P03363 | Q63ZE4 | -0.29081  |
| 22528 | P03363 | Q86TB3 | -0.27818  |
| 22529 | P03363 | Q16676 | -0.29843  |
| 22530 | P03363 | P50336 | -0.41191  |
| 22531 | P03363 | Q9H4L5 | -0.29674  |
| 22532 | P03363 | Q8NEW0 | -0.21917  |
| 22533 | P03363 | Q8IWL1 | -0.46663  |
| 22534 | P03363 | Q86X51 | -0.1057   |
| 22535 | P03363 | O43173 | -0.28315  |
| 22536 | P03363 | Q96H79 | -0.099075 |
| 22537 | P03363 | P32322 | -0.38684  |
| 22538 | P03363 | Q9N2J8 | -0.37161  |
| 22539 | P03363 | Q15303 | -0.22741  |
| 22540 | P03363 | P25786 | -0.12653  |
| 22541 | P03363 | Q14735 | -0.50267  |
| 22542 | P03363 | Q86XT2 | -0.20087  |
| 22543 | P03363 | A6NDH6 | -0.61656  |
| 22544 | P03363 | Q9BV81 | -0.32322  |
| 22545 | P03363 | Q9H936 | -0.22817  |
| 22546 | P03363 | P01008 | -0.12999  |
| 22547 | P03363 | Q92752 | -0.22741  |
| 22548 | P03363 | P08172 | -0.52551  |
| 22549 | P03363 | P55085 | -0.25226  |
| 22550 | P03363 | A6QL63 | -0.37778  |
| 22551 | P03363 | Q9NY65 | -0.21594  |
| 22552 | P03363 | Q5VZ18 | -0.22741  |
| 22553 | P03363 | P03950 | -0.17738  |
| 22554 | P03363 | Q8TCT6 | -0.47738  |
| 22555 | P03363 | Q96ES6 | -0.30406  |
| 22556 | P03363 | Q7Z6P3 | -0.50243  |
| 22557 | P03363 | O15165 | -0.38516  |
| 22558 | P03363 | Q9NYP8 | -0.15318  |
| 22559 | P03363 | Q86UX7 | -0.2252   |
| 22560 | P03363 | Q92521 | -0.44821  |
| 22561 | P03363 | Q8N131 | -0.34729  |
| 22562 | P03363 | Q8NH04 | -0.61656  |
| 22563 | P03363 | Q96AT9 | -0.20947  |
| 22564 | P03363 | P49841 | -0.22748  |
| 22565 | P03363 | Q9U1L8 | -0.21705  |
| 22566 | P03363 | Q8NG97 | -0.61656  |
| 22567 | P03363 | P22105 | -0.59296  |
| 22568 | P03363 | O43837 | -0.24734  |
| 22569 | P03363 | Q76KP1 | -0.30048  |
| 22570 | P03363 | Q2M3M2 | -0.50279  |
| 22571 | P03363 | Q96DB2 | -0.21288  |
| 22572 | P03363 | Q6ZRP7 | -0.72216  |

|       |        |         |           |
|-------|--------|---------|-----------|
| 22573 | P03363 | P56962  | -0.30196  |
| 22574 | P03363 | Q99460  | -0.196    |
| 22575 | P03363 | Q8TE57  | -0.59199  |
| 22576 | P03363 | Q8N907  | -0.29756  |
| 22577 | P03363 | P55211  | -0.22708  |
| 22578 | P03363 | Q15526  | -0.38437  |
| 22579 | P03363 | Q8NE35  | -0.22727  |
| 22580 | P03363 | O75420  | -0.11122  |
| 22581 | P03363 | P23378  | -0.33564  |
| 22582 | P03363 | Q9ULW2  | -0.29494  |
| 22583 | P03363 | Q08493  | -0.22657  |
| 22584 | P03363 | Q8NE31  | -0.14793  |
| 22585 | P03363 | Q8NGR4  | -0.61656  |
| 22586 | P03363 | Q96C34  | -0.12436  |
| 22587 | P03363 | O94777  | -0.11119  |
| 22588 | P03363 | Q92565  | -0.22737  |
| 22589 | P03363 | Q8NGF0  | -0.61656  |
| 22590 | P03363 | Q9HAV5  | -0.22587  |
| 22591 | P03363 | Q9P2N6  | -0.1002   |
| 22592 | P03363 | Q9BZ19  | -0.22741  |
| 22593 | P03363 | Q16584  | -0.22741  |
| 22594 | P03363 | Q9BTA0  | -0.031359 |
| 22595 | P03363 | Q9H1U4  | -0.29743  |
| 22596 | P03363 | Q8N6C5  | -0.22741  |
| 22597 | P03363 | Q8NEX6  | -0.33992  |
| 22598 | P03363 | Q9H560  | -0.22741  |
| 22599 | P03363 | O14609  | -0.34019  |
| 22600 | P03363 | Q15067  | -0.10643  |
| 22601 | P03363 | Q5T0Z8  | -0.031359 |
| 22602 | P03363 | A6NJ69  | -0.33992  |
| 22603 | P03363 | Q8IUUK5 | -0.33107  |
| 22604 | P03363 | Q6ZRH7  | -0.47512  |
| 22605 | P03363 | Q16828  | -0.24833  |
| 22606 | P03363 | O43314  | -0.15793  |
| 22607 | P03363 | Q8TDX9  | -0.26381  |
| 22608 | P03363 | Q8WW27  | -0.34227  |
| 22609 | P03363 | P10600  | -0.22741  |
| 22610 | P03363 | Q15057  | -0.45506  |
| 22611 | P03363 | O95639  | -0.22576  |
| 22612 | P03363 | Q13636  | -0.45995  |
| 22613 | P03363 | P46734  | -0.22765  |
| 22614 | P03363 | P49238  | -0.26946  |
| 22615 | P03363 | O95170  | -0.22767  |
| 22616 | P03363 | P61586  | -0.034478 |
| 22617 | P03363 | Q7Z7K0  | -0.18009  |
| 22618 | P03363 | Q8TEV8  | -0.042737 |
| 22619 | P03363 | P23109  | -0.21156  |
| 22620 | P03363 | Q6ZTY8  | -0.18982  |
| 22621 | P03363 | Q9H999  | -0.17572  |
| 22622 | P03363 | Q6ZSV7  | -0.11675  |
| 22623 | P03363 | P0C263  | -0.54205  |
| 22624 | P03363 | Q538Z0  | -0.042737 |
| 22625 | P03363 | Q9NR31  | -0.22756  |
| 22626 | P03363 | E9PKD4  | -0.1831   |
| 22627 | P03363 | Q8IZ02  | -0.22741  |
| 22628 | P03363 | Q9UJ70  | -0.13932  |
| 22629 | P03363 | Q8N944  | -0.27488  |
| 22630 | P03363 | A6NGB9  | -0.14534  |
| 22631 | P03363 | P68106  | -0.22824  |
| 22632 | P03363 | P21128  | -0.30171  |
| 22633 | P03363 | Q14656  | -0.25052  |
| 22634 | P03363 | P08246  | -0.24661  |
| 22635 | P03363 | P56851  | -0.31358  |
| 22636 | P03363 | Q6W5P4  | -0.43893  |
| 22637 | P03363 | Q05469  | -0.22654  |
| 22638 | P03363 | Q12770  | -0.22741  |
| 22639 | P03363 | Q8IYS1  | -0.22011  |
| 22640 | P03363 | Q9BTV6  | -0.22742  |
| 22641 | P03363 | Q5VWM4  | -0.17342  |
| 22642 | P03363 | Q6UXA7  | -0.31272  |
| 22643 | P03363 | O75110  | -0.48556  |
| 22644 | P03363 | Q96LR9  | -0.88893  |
| 22645 | P03363 | Q9BZ67  | -0.21225  |
| 22646 | P03363 | Q15648  | -0.19962  |
| 22647 | P03363 | Q12967  | -0.22729  |
| 22648 | P03363 | Q9UFV1  | -0.30569  |

|       |        |        |           |
|-------|--------|--------|-----------|
| 22649 | P03363 | Q8N7N1 | -0.17939  |
| 22650 | P03363 | Q9HD64 | -0.11668  |
| 22651 | P03363 | O43464 | -0.22725  |
| 22652 | P03363 | Q96S19 | -0.10842  |
| 22653 | P03363 | P85298 | -0.24591  |
| 22654 | P03363 | Q86XR7 | -0.22582  |
| 22655 | P03363 | O15016 | -0.22739  |
| 22656 | P03363 | Q5VVC0 | -0.11862  |
| 22657 | P03363 | Q96A08 | -0.17088  |
| 22658 | P03363 | Q8WZ04 | -0.22608  |
| 22659 | P03363 | O43570 | -0.59618  |
| 22660 | P03363 | P0C7W6 | -0.20557  |
| 22661 | P03363 | Q99574 | -0.31079  |
| 22662 | P03363 | Q7Z7J9 | -0.17224  |
| 22663 | P03363 | O75056 | -0.65652  |
| 22664 | P03363 | Q8N1T3 | -0.22033  |
| 22665 | P03363 | Q9NR19 | -0.23261  |
| 22666 | P03363 | Q17R98 | -0.2274   |
| 22667 | P03363 | Q8NDB2 | -0.20652  |
| 22668 | P03363 | O43929 | -0.21262  |
| 22669 | P03363 | Q9BQL6 | -0.20236  |
| 22670 | P03363 | P56747 | -0.2519   |
| 22671 | P03363 | Q6NVV3 | -0.35265  |
| 22672 | P03363 | P26441 | -0.20783  |
| 22673 | P03363 | Q7RTX0 | -0.60804  |
| 22674 | P03363 | Q8IZ52 | -0.37869  |
| 22675 | P03363 | O15230 | -0.29321  |
| 22676 | P03363 | Q7RTY9 | -0.42068  |
| 22677 | P03363 | Q5SZK8 | -0.7133   |
| 22678 | P03363 | Q96T60 | -0.21219  |
| 22679 | P03363 | Q8NH95 | -0.61656  |
| 22680 | P03363 | Q53G44 | -0.21819  |
| 22681 | P03363 | O43508 | -0.54842  |
| 22682 | P03363 | O75900 | -0.7304   |
| 22683 | P03363 | Q01151 | -0.5534   |
| 22684 | P03363 | Q2M2D7 | -0.30569  |
| 22685 | P03363 | Q6AI14 | -0.49561  |
| 22686 | P03363 | Q7Z406 | -0.14387  |
| 22687 | P03363 | P51530 | -0.22993  |
| 22688 | P03363 | P42857 | -0.2379   |
| 22689 | P03363 | P01720 | -0.54902  |
| 22690 | P03363 | Q5T4W7 | -0.46404  |
| 22691 | P03363 | Q5UAW9 | -0.67063  |
| 22692 | P03363 | Q96BW5 | -0.17596  |
| 22693 | P03363 | Q9NPB3 | -0.22707  |
| 22694 | P03363 | Q8IZM0 | -0.087993 |
| 22695 | P03363 | Q6QNK2 | -0.6666   |
| 22696 | P03363 | Q9P2W1 | -0.21341  |
| 22697 | P03363 | Q9Y6V7 | -0.20864  |
| 22698 | P03363 | Q5U5X0 | -0.065469 |
| 22699 | P03363 | Q96KS0 | -0.19871  |
| 22700 | P03363 | Q96PG1 | -0.32626  |
| 22701 | P03363 | O75508 | -0.34199  |
| 22702 | P03363 | Q8N4N3 | -0.16225  |
| 22703 | P03363 | Q13585 | -0.70057  |
| 22704 | P03363 | A5D8T8 | -0.34245  |
| 22705 | P03363 | Q6GMR7 | -0.30041  |
| 22706 | P03363 | P0CF51 | -0.32626  |
| 22707 | P03363 | Q8NES8 | -0.33516  |
| 22708 | P03363 | Q96PE7 | -0.22107  |
| 22709 | P03363 | P80188 | -0.23177  |
| 22710 | P03363 | A8MTB9 | -0.32626  |
| 22711 | P03363 | O60427 | -0.27003  |
| 22712 | P03363 | Q8NGA1 | -0.61656  |
| 22713 | P03363 | Q96LA6 | -0.47262  |
| 22714 | P03363 | Q8N682 | -0.39958  |
| 22715 | P03363 | Q9HBH1 | -0.058849 |
| 22716 | P03363 | Q7M4L6 | -0.22741  |
| 22717 | P03363 | P43119 | -0.56749  |
| 22718 | P03363 | Q58A45 | -0.22387  |
| 22719 | P03363 | O95425 | -0.19308  |
| 22720 | P03363 | Q8N8W4 | -0.17689  |
| 22721 | P03363 | Q7RTY1 | -0.44589  |
| 22722 | P03363 | Q96P68 | -0.62051  |
| 22723 | P03363 | Q14964 | -0.38104  |
| 22724 | P03363 | Q8IYJ3 | -0.23397  |



|       |        |        |           |
|-------|--------|--------|-----------|
| 22725 | P03363 | O75908 | -0.45745  |
| 22726 | P03363 | Q29718 | -0.54957  |
| 22727 | P03363 | Q9UBP0 | -0.2309   |
| 22728 | P03363 | P30490 | -0.54957  |
| 22729 | P03363 | Q53GS9 | -0.22893  |
| 22730 | P03363 | Q6ZST8 | -0.22902  |
| 22731 | P03363 | Q8N6M0 | -0.15707  |
| 22732 | P03363 | Q96PG8 | -0.042737 |
| 22733 | P03363 | Q9BY12 | -0.22064  |
| 22734 | P03363 | O95156 | -0.3053   |
| 22735 | P03363 | P28288 | -0.30776  |
| 22736 | P03363 | P51159 | -0.23355  |
| 22737 | P03363 | Q8WWI5 | -0.41162  |
| 22738 | P03363 | Q6P4I2 | -0.21562  |
| 22739 | P03363 | A4D1B5 | -0.11849  |
| 22740 | P03363 | P01613 | -0.54902  |
| 22741 | P03363 | Q5W111 | -0.16671  |
| 22742 | P03363 | Q9BVG8 | -0.23295  |
| 22743 | P03363 | Q5VZV1 | -0.22077  |
| 22744 | P03363 | P02656 | -0.37816  |
| 22745 | P03363 | Q92956 | -0.2274   |
| 22746 | P03363 | P43235 | -0.23919  |
| 22747 | P03363 | P19440 | -0.25354  |
| 22748 | P03363 | P23946 | -0.55456  |
| 22749 | P03363 | A4D174 | -0.23198  |
| 22750 | P03363 | P09529 | -0.22741  |
| 22751 | P03363 | Q6ZP29 | -0.34972  |
| 22752 | P03363 | Q4G163 | -0.1909   |
| 22753 | P03363 | O94966 | -0.38097  |
| 22754 | P03363 | Q96R69 | -0.61656  |
| 22755 | P03363 | Q6ZN30 | -0.22724  |
| 22756 | P03363 | Q9BRX8 | -0.13623  |
| 22757 | P03363 | Q5T9Z0 | -0.32626  |
| 22758 | P03363 | P30519 | -0.25538  |
| 22759 | P03363 | P51688 | -0.2844   |
| 22760 | P03363 | Q5W0V3 | -0.02386  |
| 22761 | P03363 | Q9NPZ5 | -0.41204  |
| 22762 | P03363 | Q969K4 | -0.22727  |
| 22763 | P03363 | Q5T2N8 | -0.33762  |
| 22764 | P03363 | Q9COK1 | -0.46115  |
| 22765 | P03363 | Q5T4F4 | -0.22055  |
| 22766 | P03363 | P06889 | -0.54902  |
| 22767 | P03363 | P15421 | -0.57712  |
| 22768 | P03363 | Q9HBH9 | -0.32215  |
| 22769 | P03363 | Q8N111 | -0.32626  |
| 22770 | P03363 | Q9P2D6 | -0.17477  |
| 22771 | P03363 | Q8WXA8 | -0.46585  |
| 22772 | P03363 | Q9BUN8 | -0.12453  |
| 22773 | P03363 | Q9NXC2 | -0.74395  |
| 22774 | P03363 | Q95460 | -0.8958   |
| 22775 | P03363 | Q9H0E7 | -0.23118  |
| 22776 | P03363 | Q93098 | -0.46188  |
| 22777 | P03363 | F8WFD2 | -0.12777  |
| 22778 | P03363 | Q658P3 | -0.42009  |
| 22779 | P03363 | Q6Y1H2 | -0.22087  |
| 22780 | P03363 | Q969V1 | -0.64046  |
| 22781 | P03363 | Q8NHC7 | -0.61656  |
| 22782 | P03363 | Q9GZV9 | -0.50366  |
| 22783 | P03363 | Q8NHC4 | -0.61656  |
| 22784 | P03363 | P49643 | -0.18747  |
| 22785 | P03363 | Q7Z4V0 | -0.22741  |
| 22786 | P03363 | Q43760 | -0.34487  |
| 22787 | P03363 | Q93097 | -0.50548  |
| 22788 | P03363 | Q5NUL3 | -0.58686  |
| 22789 | P03363 | Q9UKN1 | -0.41522  |
| 22790 | P03363 | P22760 | -0.426    |
| 22791 | P03363 | Q3KNT7 | -0.14775  |
| 22792 | P03363 | P60468 | -0.1539   |
| 22793 | P03363 | P50458 | -0.22741  |
| 22794 | P03363 | P29279 | -0.25638  |
| 22795 | P03363 | Q5VZ03 | -0.21789  |
| 22796 | P03363 | Q9H114 | -0.38852  |
| 22797 | P03363 | Q12979 | -0.41327  |
| 22798 | P03363 | Q5FYB1 | -0.44796  |
| 22799 | P03363 | P13569 | -0.22741  |
| 22800 | P03363 | Q8IVA1 | -0.19892  |

|       |        |        |           |
|-------|--------|--------|-----------|
| 22801 | P03363 | Q9NQN1 | -0.61656  |
| 22802 | P03363 | O95484 | -0.27242  |
| 22803 | P03363 | Q96IR7 | -0.34423  |
| 22804 | P03363 | Q5T6V5 | -0.15275  |
| 22805 | P03363 | P49326 | -0.65957  |
| 22806 | P03363 | Q9HB90 | -0.29062  |
| 22807 | P03363 | Q9UKL2 | -0.70005  |
| 22808 | P03363 | O75602 | -0.22741  |
| 22809 | P03363 | P04062 | -0.23962  |
| 22810 | P03363 | P08243 | -0.17565  |
| 22811 | P03363 | P30085 | -0.21685  |
| 22812 | P03363 | Q8WUG5 | -0.52312  |
| 22813 | P03363 | Q9NSA1 | -0.26871  |
| 22814 | P03363 | O60678 | -0.18799  |
| 22815 | P03363 | Q6Q0C1 | -0.30119  |
| 22816 | P03363 | Q96RR1 | -0.21021  |
| 22817 | P03363 | P10163 | -0.28098  |
| 22818 | P03363 | Q8WXA3 | -0.22733  |
| 22819 | P03363 | O75995 | -0.2274   |
| 22820 | P03363 | Q9NYR9 | -0.28566  |
| 22821 | P03363 | P15502 | -0.080661 |
| 22822 | P03363 | Q8NAA6 | -0.14879  |
| 22823 | P03363 | C9J798 | -0.42661  |
| 22824 | P03363 | Q9NQ76 | -0.21066  |
| 22825 | P03363 | P56704 | -0.22741  |
| 22826 | P03363 | Q14802 | -0.49472  |
| 22827 | P03363 | O60779 | -0.36465  |
| 22828 | P03363 | Q14926 | -0.22487  |
| 22829 | P03363 | O43313 | -0.22741  |
| 22830 | P03363 | Q8WU20 | -0.16133  |
| 22831 | P03363 | Q9Y5L4 | -0.18429  |
| 22832 | P03363 | Q3MIR4 | -0.19772  |
| 22833 | P03363 | Q15503 | -0.20915  |
| 22834 | P03363 | Q96EF9 | -0.092287 |
| 22835 | P03363 | Q96FL8 | -0.40951  |
| 22836 | P03363 | Q9P2K6 | -0.22244  |
| 22837 | P03363 | Q9NZA1 | -0.22404  |
| 22838 | P03363 | Q96JD6 | -0.22715  |
| 22839 | P03363 | Q12912 | -0.41364  |
| 22840 | P03363 | Q8TCZ2 | -0.48827  |
| 22841 | P03363 | P35219 | -0.22689  |
| 22842 | P03363 | Q8N6M3 | -0.35953  |
| 22843 | P03363 | B7Z8K6 | -0.32626  |
| 22844 | P03363 | Q9Y267 | -0.40539  |
| 22845 | P03363 | P53602 | -0.28292  |
| 22846 | P03363 | Q9UIL4 | -0.24029  |
| 22847 | P03363 | Q92838 | -0.49575  |
| 22848 | P03363 | Q15231 | -0.21109  |
| 22849 | P03363 | Q8IYW7 | -0.12866  |
| 22850 | P03363 | Q6B8I1 | -0.23831  |
| 22851 | P03363 | B4DYI2 | -0.20894  |
| 22852 | P03363 | Q9UI66 | -0.042737 |
| 22853 | P03363 | P48307 | -0.32712  |
| 22854 | P03363 | Q9NRT5 | -0.10757  |
| 22855 | P03363 | Q9H6U8 | -0.44514  |
| 22856 | P03363 | Q5BJH7 | -0.32626  |
| 22857 | P03363 | P30518 | -0.56719  |
| 22858 | P03363 | P07355 | -0.19784  |
| 22859 | P03363 | Q8TD84 | -0.5041   |
| 22860 | P03363 | Q96GF1 | -0.39346  |
| 22861 | P03363 | P0C7W0 | -0.031359 |
| 22862 | P03363 | Q9UNP4 | -0.33923  |
| 22863 | P03363 | Q8N539 | -0.59237  |
| 22864 | P03363 | P15813 | -0.35489  |
| 22865 | P03363 | E9PAV3 | -0.080557 |
| 22866 | P03363 | Q99518 | -0.61708  |
| 22867 | P03363 | P49796 | -0.22741  |
| 22868 | P03363 | Q86SZ2 | -0.065786 |
| 22869 | P03363 | Q9Y6Q9 | -0.27996  |
| 22870 | P03363 | Q9H3U7 | -0.55381  |
| 22871 | P03363 | Q9NZM1 | -0.26529  |
| 22872 | P03363 | Q3ZAQ7 | -0.49252  |
| 22873 | P03363 | Q12879 | -0.25224  |
| 22874 | P03363 | B1AJZ1 | -0.1918   |
| 22875 | P03363 | Q6YI46 | -0.32626  |
| 22876 | P03363 | P42224 | -0.22722  |

|       |        |        |           |
|-------|--------|--------|-----------|
| 22877 | P03363 | Q5T0U0 | -0.18914  |
| 22878 | P03363 | P08574 | -0.22948  |
| 22879 | P03363 | Q9UNH6 | -0.22674  |
| 22880 | P03363 | P07711 | -0.24062  |
| 22881 | P03363 | A6NGJ6 | -0.27953  |
| 22882 | P03363 | Q13467 | -0.26967  |
| 22883 | P03363 | Q9NZ94 | -0.22737  |
| 22884 | P03363 | P56597 | -0.18405  |
| 22885 | P03363 | P09486 | -0.22629  |
| 22886 | P03363 | Q8WU67 | -0.2006   |
| 22887 | P03363 | O60423 | -0.51629  |
| 22888 | P03363 | Q7RTZ1 | -0.5617   |
| 22889 | P03363 | Q2M2I8 | -0.55834  |
| 22890 | P03363 | A6NJ08 | -0.12847  |
| 22891 | P03363 | P28223 | -0.39186  |
| 22892 | P03363 | Q9BW62 | -0.23193  |
| 22893 | P03363 | P01569 | -0.43608  |
| 22894 | P03363 | A6NET4 | -0.61656  |
| 22895 | P03363 | Q8TBC4 | -0.22689  |
| 22896 | P03363 | Q9C0A0 | -0.53557  |
| 22897 | P03363 | Q8NGQ5 | -0.61656  |
| 22898 | P03363 | Q5JQC4 | -0.042737 |
| 22899 | P03363 | Q15274 | -0.15122  |
| 22900 | P03363 | Q9H0X6 | -0.22643  |
| 22901 | P03363 | Q9NSC2 | -0.21024  |
| 22902 | P03363 | P82673 | -0.19112  |
| 22903 | P03363 | Q32P28 | -0.36141  |
| 22904 | P03363 | Q75356 | -0.24285  |
| 22905 | P03363 | O95461 | -0.30459  |
| 22906 | P03363 | Q9Y4G2 | -0.20308  |
| 22907 | P03363 | O60359 | -0.51427  |
| 22908 | P03363 | Q4KMP7 | -0.33798  |
| 22909 | P03363 | Q9NXF1 | -0.20264  |
| 22910 | P03363 | Q9H6L4 | -0.2284   |
| 22911 | P03363 | Q8WUK0 | -0.35218  |
| 22912 | P03363 | Q9Y5W3 | -0.22602  |
| 22913 | P03363 | Q9BY79 | -0.27625  |
| 22914 | P03363 | Q15818 | -0.25272  |
| 22915 | P03363 | Q99440 | -0.080972 |
| 22916 | P03363 | Q3SY05 | -0.1523   |
| 22917 | P03363 | P10275 | -0.22741  |
| 22918 | P03363 | Q6P587 | -0.19405  |
| 22919 | P03363 | P42694 | -0.22777  |
| 22920 | P03363 | Q15751 | -0.22945  |
| 22921 | P03363 | P30838 | -0.24123  |
| 22922 | P03363 | Q8N4T8 | -0.2179   |
| 22923 | P03363 | Q5JVL4 | -0.22659  |
| 22924 | P03363 | P48547 | -0.41606  |
| 22925 | P03363 | P0DJI8 | -0.27142  |
| 22926 | P03363 | Q969X2 | -0.25577  |
| 22927 | P03363 | Q9C0D9 | -0.47636  |
| 22928 | P03363 | P16219 | -0.30476  |
| 22929 | P03363 | Q8N8H1 | -0.07831  |
| 22930 | P03363 | Q9UBY0 | -0.53071  |
| 22931 | P03363 | Q5JWF8 | -0.14082  |
| 22932 | P03363 | Q9Y5W7 | -0.2552   |
| 22933 | P03363 | Q9BXI2 | -0.30469  |
| 22934 | P03363 | A8K4G0 | -0.47262  |
| 22935 | P03363 | P07996 | -0.23515  |
| 22936 | P03363 | P48729 | -0.22741  |
| 22937 | P03363 | Q5T5A4 | -0.11401  |
| 22938 | P03363 | Q8N9H6 | -0.092797 |
| 22939 | P03363 | Q96CN4 | -0.29371  |
| 22940 | P03363 | P21695 | -0.18328  |
| 22941 | P03363 | C9JL84 | -0.33992  |
| 22942 | P03363 | Q05D32 | -0.17609  |
| 22943 | P03363 | P00846 | -0.28618  |
| 22944 | P03363 | A6PVY3 | -0.20944  |
| 22945 | P03363 | P08185 | -0.40903  |
| 22946 | P03363 | A6NGE7 | -0.22229  |
| 22947 | P03363 | Q9Y2B1 | -0.43294  |
| 22948 | P03363 | Q8N7R1 | -0.078708 |
| 22949 | P03363 | Q9H649 | -0.15085  |
| 22950 | P03363 | Q8N6N2 | -0.20376  |
| 22951 | P03363 | O14684 | -0.26917  |
| 22952 | P03363 | Q6DHV7 | -0.22145  |

|       |        |        |           |
|-------|--------|--------|-----------|
| 22953 | P03363 | Q9HCJ6 | -0.50998  |
| 22954 | P03363 | A2CJ06 | -0.38654  |
| 22955 | P03363 | P11226 | -0.24484  |
| 22956 | P03363 | Q6UXN9 | -0.28003  |
| 22957 | P03363 | P25098 | -0.24153  |
| 22958 | P03363 | P05771 | -0.22346  |
| 22959 | P03363 | Q86TA4 | -0.16479  |
| 22960 | P03363 | Q14031 | -0.39923  |
| 22961 | P03363 | P0C838 | -0.077874 |
| 22962 | P03363 | Q9UIJ7 | -0.35464  |
| 22963 | P03363 | P04001 | -0.72285  |
| 22964 | P03363 | H3BS89 | -0.32626  |
| 22965 | P03363 | P54219 | -0.22547  |
| 22966 | P03363 | Q96NU0 | -0.53557  |
| 22967 | P03363 | Q9Y4K3 | -0.22679  |
| 22968 | P03363 | Q6ZR85 | -0.042737 |
| 22969 | P03363 | Q9UQB8 | -0.2274   |
| 22970 | P03363 | P78325 | -0.26991  |
| 22971 | P03363 | O94910 | -0.32634  |
| 22972 | P03363 | P38117 | -0.17219  |
| 22973 | P03363 | Q99801 | -0.22887  |
| 22974 | P03363 | Q8NH67 | -0.61656  |
| 22975 | P03363 | Q3SXM5 | -0.44936  |
| 22976 | P03363 | Q96N68 | -0.32626  |
| 22977 | P03363 | Q5JS13 | -0.24502  |
| 22978 | P03363 | Q8IVF6 | -0.22739  |
| 22979 | P03363 | O75676 | -0.22008  |
| 22980 | P03363 | P52803 | -0.27836  |
| 22981 | P03363 | Q9UBV4 | -0.40728  |
| 22982 | P03363 | Q5TAH2 | -0.41225  |
| 22983 | P03363 | A6NNY8 | -0.25785  |
| 22984 | P03363 | Q96PS6 | -0.32626  |
| 22985 | P03363 | Q8NC44 | -0.42352  |
| 22986 | P03363 | P98179 | -0.22775  |
| 22987 | P03363 | Q15062 | -0.2226   |
| 22988 | P03363 | P10319 | -0.54957  |
| 22989 | P03363 | Q9Y5W8 | -0.25433  |
| 22990 | P03363 | Q8TAD7 | -0.031359 |
| 22991 | P03363 | P09543 | -0.21267  |
| 22992 | P03363 | Q9UJX0 | -0.18236  |
| 22993 | P03363 | P15391 | -0.59027  |
| 22994 | P03363 | O95274 | -0.48937  |
| 22995 | P03363 | E9PJ23 | -0.17718  |
| 22996 | P03363 | P18859 | -0.1852   |
| 22997 | P03363 | P06315 | -0.54902  |
| 22998 | P03363 | Q6YFQ2 | -0.20019  |
| 22999 | P03363 | O60928 | -0.40735  |
| 23000 | P03363 | Q9GZM8 | -0.1785   |
| 23001 | P03363 | Q10588 | -0.46414  |
| 23002 | P03363 | Q00G26 | -0.21421  |
| 23003 | P03363 | Q86VZ2 | -0.23643  |
| 23004 | P03363 | Q1AE95 | -0.32626  |
| 23005 | P03363 | Q9UIG8 | -0.48146  |
| 23006 | P03363 | Q07000 | -0.54957  |
| 23007 | P03363 | P49190 | -0.74247  |
| 23008 | P03363 | Q96L96 | -0.2535   |
| 23009 | P03363 | Q86X02 | -0.13106  |
| 23010 | P03363 | Q14469 | -0.22715  |
| 23011 | P03363 | Q13823 | -0.18001  |
| 23012 | P03363 | O15389 | -0.40674  |
| 23013 | P03363 | Q9H1R2 | -0.24548  |
| 23014 | P03363 | Q96L58 | -0.37574  |
| 23015 | P03363 | Q8IY17 | -0.39885  |
| 23016 | P03363 | Q8TAL6 | -0.43936  |
| 23017 | P03363 | Q8N7M0 | -0.11513  |
| 23018 | P03363 | Q8NGE2 | -0.61656  |
| 23019 | P03363 | Q8NDG6 | -0.22715  |
| 23020 | P03363 | Q86W74 | -0.32626  |
| 23021 | P03363 | Q69YZ2 | -0.32626  |
| 23022 | P03363 | P30484 | -0.54957  |
| 23023 | P03363 | P60323 | -0.15216  |
| 23024 | P03363 | H3BPM6 | -0.27177  |
| 23025 | P03363 | Q9C0K3 | -0.21868  |
| 23026 | P03363 | Q96SU4 | -0.22748  |
| 23027 | P03363 | Q17RQ9 | -0.32626  |
| 23028 | P03363 | Q6ZQT0 | -0.19508  |

|       |        |        |           |
|-------|--------|--------|-----------|
| 23029 | P03363 | Q5JX69 | -0.32626  |
| 23030 | P03363 | Q9H1J7 | -0.49973  |
| 23031 | P03363 | P21917 | -0.28082  |
| 23032 | P03363 | Q9NZB8 | -0.25714  |
| 23033 | P03363 | Q8TAV3 | -0.61332  |
| 23034 | P03363 | E7EML9 | -0.49563  |
| 23035 | P03363 | Q7Z4F1 | -0.41054  |
| 23036 | P03363 | Q13751 | -0.2949   |
| 23037 | P03363 | Q9NUV9 | -0.22443  |
| 23038 | P03363 | Q8NGR5 | -0.61656  |
| 23039 | P03363 | Q8NA61 | -0.16661  |
| 23040 | P03363 | H3BN30 | -0.042737 |
| 23041 | P03363 | A4FU01 | -0.22212  |
| 23042 | P03363 | P36776 | -0.20333  |
| 23043 | P03363 | Q6IF00 | -0.61656  |
| 23044 | P03363 | Q8N8M0 | -0.14467  |
| 23045 | P03363 | Q07890 | -0.22741  |
| 23046 | P03363 | Q8WWC4 | -0.089107 |
| 23047 | P03363 | O15528 | -0.28722  |
| 23048 | P03363 | Q9P2C4 | -0.31689  |
| 23049 | P03363 | P0DKB6 | -0.32626  |
| 23050 | P03363 | Q6S8J7 | -0.22724  |
| 23051 | P03363 | Q7Z2Y8 | -0.21167  |
| 23052 | P03363 | Q9BVV7 | -0.17928  |
| 23053 | P03363 | Q14541 | -0.22791  |
| 23054 | P03363 | Q53HM4 | -0.024417 |
| 23055 | P03363 | Q9UGL9 | -0.042737 |
| 23056 | P03363 | Q7Z4S9 | -0.22739  |
| 23057 | P03363 | A8MXT2 | -0.17124  |
| 23058 | P03363 | Q8N9I0 | -0.30541  |
| 23059 | P03363 | Q6X4U4 | -0.41175  |
| 23060 | P03363 | Q96HZ7 | -0.042737 |
| 23061 | P03363 | P03986 | -0.475    |
| 23062 | P03363 | Q9Y5E6 | -0.62573  |
| 23063 | P03363 | P11712 | -0.47959  |
| 23064 | P03363 | Q9HBA0 | -0.26267  |
| 23065 | P03363 | Q53QW1 | -0.031359 |
| 23066 | P03363 | P23368 | -0.43425  |
| 23067 | P03363 | Q9P0L9 | -0.24326  |
| 23068 | P03363 | P02765 | -0.37779  |
| 23069 | P03363 | P34897 | -0.16903  |
| 23070 | P03363 | Q8WV93 | -0.25245  |
| 23071 | P03363 | P46020 | -0.16261  |
| 23072 | P03363 | Q6NUJ5 | -0.22502  |
| 23073 | P03363 | P80422 | -0.37246  |
| 23074 | P03363 | P23515 | -0.30423  |
| 23075 | P03363 | Q9P2R7 | -0.076819 |
| 23076 | P03363 | Q8TCX1 | -0.19724  |
| 23077 | P03363 | P07451 | -0.22573  |
| 23078 | P03363 | Q9P212 | -0.22741  |
| 23079 | P03363 | P60022 | -0.43537  |
| 23080 | P03363 | Q8NHH9 | -0.22144  |
| 23081 | P03363 | Q07654 | -0.34701  |
| 23082 | P03363 | P21754 | -0.31149  |
| 23083 | P03363 | Q96JQ2 | -0.22811  |
| 23084 | P03363 | P15151 | -0.22741  |
| 23085 | P03363 | Q8NGG6 | -0.61656  |
| 23086 | P03363 | O15041 | -0.48401  |
| 23087 | P03363 | Q9UMZ3 | -0.51776  |
| 23088 | P03363 | Q9HB03 | -0.057641 |
| 23089 | P03363 | O60760 | -0.22719  |
| 23090 | P03363 | Q0VF49 | -0.042737 |
| 23091 | P03363 | Q13049 | -0.22741  |
| 23092 | P03363 | O43866 | -0.48855  |
| 23093 | P03363 | P59091 | -0.075027 |
| 23094 | P03363 | Q60I27 | -0.22615  |
| 23095 | P03363 | Q5TGI0 | -0.32626  |
| 23096 | P03363 | Q8IWA6 | -0.16888  |
| 23097 | P03363 | Q71RG4 | -0.32626  |
| 23098 | P03363 | Q96PB8 | -0.32626  |
| 23099 | P03363 | Q01740 | -0.58355  |
| 23100 | P03363 | Q6UWW9 | -0.32626  |
| 23101 | P03363 | A1KZ92 | -0.4102   |
| 23102 | P03363 | Q9Y5I0 | -0.57898  |
| 23103 | P03363 | Q9NW81 | -0.18199  |
| 23104 | P03363 | O43196 | -0.11446  |

|       |        |        |           |
|-------|--------|--------|-----------|
| 23105 | P03363 | Q7Z4L0 | -0.31384  |
| 23106 | P03363 | A6NCD1 | -0.27953  |
| 23107 | P03363 | P00734 | -0.3036   |
| 23108 | P03363 | Q6UXY1 | -0.37275  |
| 23109 | P03363 | P0CJ74 | -0.13673  |
| 23110 | P03363 | Q7Z442 | -0.42101  |
| 23111 | P03363 | Q6SJ93 | -0.2222   |
| 23112 | P03363 | Q15389 | -0.32319  |
| 23113 | P03363 | Q8IYJ1 | -0.22798  |
| 23114 | P03363 | O43657 | -0.44028  |
| 23115 | P03363 | Q9NXC5 | -0.22726  |
| 23116 | P03363 | Q99463 | -0.59182  |
| 23117 | P03363 | P98187 | -0.72045  |
| 23118 | P03363 | Q9ULV4 | -0.22741  |
| 23119 | P03363 | Q9UGM1 | -0.4455   |
| 23120 | P03363 | Q8IZS8 | -0.45145  |
| 23121 | P03363 | O94810 | -0.22818  |
| 23122 | P03363 | P12645 | -0.35663  |
| 23123 | P03363 | P14902 | -0.21106  |
| 23124 | P03363 | Q9H115 | -0.20333  |
| 23125 | P03363 | Q6PML9 | -0.19719  |
| 23126 | P03363 | P60484 | -0.22741  |
| 23127 | P03363 | Q8N4H0 | -0.2261   |
| 23128 | P03363 | Q92932 | -0.39218  |
| 23129 | P03363 | Q8N5U1 | -0.32626  |
| 23130 | P03363 | Q8N6M6 | -0.24103  |
| 23131 | P03363 | Q96QV1 | -0.25726  |
| 23132 | P03363 | Q9H344 | -0.61656  |
| 23133 | P03363 | Q9BY21 | -0.59393  |
| 23134 | P03363 | Q6PEY2 | -0.2187   |
| 23135 | P03363 | Q8IV61 | -0.31959  |
| 23136 | P03363 | Q8N806 | -0.22166  |
| 23137 | P03363 | Q7Z7B1 | -0.45699  |
| 23138 | P03363 | Q8TD17 | -0.13455  |
| 23139 | P03363 | P22303 | -0.22738  |
| 23140 | P03363 | A6NGU7 | -0.12556  |
| 23141 | P03363 | O75711 | -0.39075  |
| 23142 | P03363 | Q14CB8 | -0.23039  |
| 23143 | P03363 | Q9NR80 | -0.22742  |
| 23144 | P03363 | Q8N3R3 | -0.10469  |
| 23145 | P03363 | Q6PH81 | -0.19028  |
| 23146 | P03363 | Q96GD0 | -0.20924  |
| 23147 | P03363 | Q8N9I5 | -0.58938  |
| 23148 | P03363 | Q8N4T0 | -0.57276  |
| 23149 | P03363 | Q9NYS7 | -0.22906  |
| 23150 | P03363 | Q99880 | -0.15495  |
| 23151 | P03363 | Q15078 | -0.17748  |
| 23152 | P03363 | Q9UK33 | -0.22291  |
| 23153 | P03363 | Q63HR2 | -0.22741  |
| 23154 | P03363 | P30086 | -0.25841  |
| 23155 | P03363 | Q6TDU7 | -0.040362 |
| 23156 | P03363 | Q14965 | -0.22869  |
| 23157 | P03363 | P30492 | -0.54957  |
| 23158 | P03363 | O14607 | -0.22714  |
| 23159 | P03363 | Q08345 | -0.53776  |
| 23160 | P03363 | P36894 | -0.2754   |
| 23161 | P03363 | O60641 | -0.25936  |
| 23162 | P03363 | Q6P3R8 | -0.63188  |
| 23163 | P03363 | Q8N2F6 | -0.5155   |
| 23164 | P03363 | P01602 | -0.54902  |
| 23165 | P03363 | Q1T7F1 | -0.21027  |
| 23166 | P03363 | P24903 | -0.60633  |
| 23167 | P03363 | P32241 | -0.36362  |
| 23168 | P03363 | Q9H1M4 | -0.29764  |
| 23169 | P03363 | Q2M243 | -0.16     |
| 23170 | P03363 | Q96CP2 | -0.17217  |
| 23171 | P03363 | Q9BRR6 | -0.45066  |
| 23172 | P03363 | O95497 | -0.37404  |
| 23173 | P03363 | P14151 | -0.2386   |
| 23174 | P03363 | Q8WUD4 | -0.15324  |
| 23175 | P03363 | P11926 | -0.21382  |
| 23176 | P03363 | P05121 | -0.15015  |
| 23177 | P03363 | P01568 | -0.43608  |
| 23178 | P03363 | Q86YM7 | -0.22682  |
| 23179 | P03363 | Q9BY19 | -0.32626  |
| 23180 | P03363 | A8MVS5 | -0.32626  |

|       |        |        |            |
|-------|--------|--------|------------|
| 23181 | P03363 | Q9H1M3 | -0.33516   |
| 23182 | P03363 | Q09160 | -0.43696   |
| 23183 | P03363 | Q8NEG2 | -0.065892  |
| 23184 | P03363 | Q76099 | -0.63915   |
| 23185 | P03363 | P34981 | -0.63945   |
| 23186 | P03363 | Q9BY14 | -0.25596   |
| 23187 | P03363 | Q8NH53 | -0.61656   |
| 23188 | P03363 | Q8NGY5 | -0.61656   |
| 23189 | P03363 | Q9UKL6 | -0.20298   |
| 23190 | P03363 | P84085 | -0.22747   |
| 23191 | P03363 | P22694 | -0.22709   |
| 23192 | P03363 | Q6ICC9 | -0.021185  |
| 23193 | P03363 | Q99467 | -0.50539   |
| 23194 | P03363 | Q99571 | -0.34197   |
| 23195 | P03363 | P08962 | -0.34619   |
| 23196 | P03363 | Q6ZUK4 | -0.32626   |
| 23197 | P03363 | Q4LDR2 | -0.32322   |
| 23198 | P03363 | Q2TBA0 | -0.2033    |
| 23199 | P03363 | P42892 | -0.40451   |
| 23200 | P03363 | Q75NE6 | -0.32626   |
| 23201 | P03363 | Q9NZD1 | -0.64046   |
| 23202 | P03363 | Q2NKQ1 | -0.29741   |
| 23203 | P03363 | Q95967 | -0.22756   |
| 23204 | P03363 | Q14522 | -0.32802   |
| 23205 | P03363 | Q8NGP9 | -0.61656   |
| 23206 | P03363 | Q6U736 | -0.53427   |
| 23207 | P03363 | P16473 | -0.27953   |
| 23208 | P03363 | A6NM62 | -0.31175   |
| 23209 | P03363 | A6NK58 | -0.13966   |
| 23210 | P03363 | O00292 | -0.38065   |
| 23211 | P03363 | Q8NI38 | -0.22741   |
| 23212 | P03363 | Q95857 | -0.43294   |
| 23213 | P03363 | Q8N9Z2 | -0.026206  |
| 23214 | P03363 | Q92504 | -0.43488   |
| 23215 | P03363 | Q8WUB2 | -0.14394   |
| 23216 | P03363 | Q8WWY8 | -0.65221   |
| 23217 | P03363 | A6NLB4 | -0.22731   |
| 23218 | P03363 | Q3KP22 | -0.098679  |
| 23219 | P03363 | P40200 | -0.66784   |
| 23220 | P03363 | P22083 | -0.2841    |
| 23221 | P03363 | Q9Y297 | -0.23728   |
| 23222 | P03363 | Q5VZ52 | -0.18779   |
| 23223 | P03363 | Q8NCU8 | -0.32626   |
| 23224 | P03363 | P15559 | -0.19515   |
| 23225 | P03363 | P01116 | -0.22767   |
| 23226 | P03363 | P15531 | -0.21724   |
| 23227 | P03363 | B5MD39 | -0.21306   |
| 23228 | P03363 | P51797 | -0.55366   |
| 23229 | P03363 | Q96NR2 | -0.18319   |
| 23230 | P03363 | Q9H3P7 | -0.30651   |
| 23231 | P03363 | P31327 | -0.21642   |
| 23232 | P03363 | Q8WUE5 | -0.10181   |
| 23233 | P03363 | P09131 | -0.32107   |
| 23234 | P03363 | O00322 | -0.51467   |
| 23235 | P03363 | Q8NHL6 | -0.22822   |
| 23236 | P03363 | Q9BY76 | -0.22735   |
| 23237 | P03363 | Q8N8L6 | -0.49937   |
| 23238 | P03363 | Q96AA3 | -0.31869   |
| 23239 | P03363 | Q92765 | -0.31248   |
| 23240 | P03363 | Q9UBS9 | -0.48066   |
| 23241 | P03363 | P05546 | -0.35417   |
| 23242 | P03363 | A6PW82 | -0.059448  |
| 23243 | P03363 | P09429 | -0.22796   |
| 23244 | P03363 | Q9UI33 | -0.52113   |
| 23245 | P03363 | Q96MX6 | -0.22738   |
| 23246 | P03363 | Q6IF99 | -0.61656   |
| 23247 | P03363 | Q13214 | -0.5522    |
| 23248 | P03363 | P50238 | -0.2276    |
| 23249 | P03363 | P30479 | -0.54957   |
| 23250 | P03363 | Q9H1Y3 | -0.56215   |
| 23251 | P03363 | Q8WVM8 | -0.22504   |
| 23252 | P03363 | Q8NEP7 | -0.22332   |
| 23253 | P03363 | Q07002 | -0.48453   |
| 23254 | P03363 | Q8NCT3 | -0.0015731 |
| 23255 | P03363 | O60894 | -0.16806   |
| 23256 | P03363 | A0PG75 | -0.17538   |

|       |        |         |           |
|-------|--------|---------|-----------|
| 23257 | P03363 | Q9Y2E4  | -0.22216  |
| 23258 | P03363 | Q9BWS9  | -0.35982  |
| 23259 | P03363 | Q5SRD3  | -0.45506  |
| 23260 | P03363 | A4D0T7  | -0.32626  |
| 23261 | P03363 | Q96MA6  | -0.21282  |
| 23262 | P03363 | Q99442  | -0.38307  |
| 23263 | P03363 | Q3B7J2  | -0.80253  |
| 23264 | P03363 | Q99952  | -0.24344  |
| 23265 | P03363 | A6NK59  | -0.2274   |
| 23266 | P03363 | A6NK06  | -0.12943  |
| 23267 | P03363 | Q9H205  | -0.61656  |
| 23268 | P03363 | Q16778  | -0.14658  |
| 23269 | P03363 | Q8TCG2  | -0.23136  |
| 23270 | P03363 | Q8NGF6  | -0.61656  |
| 23271 | P03363 | Q9NQ38  | -0.24204  |
| 23272 | P03363 | Q15397  | -0.196    |
| 23273 | P03363 | Q86VE9  | -0.50166  |
| 23274 | P03363 | Q5JR12  | -0.21506  |
| 23275 | P03363 | Q5U651  | -0.21679  |
| 23276 | P03363 | Q14507  | -0.42     |
| 23277 | P03363 | Q94964  | -0.41997  |
| 23278 | P03363 | P20794  | -0.22708  |
| 23279 | P03363 | Q15392  | -0.22394  |
| 23280 | P03363 | Q96M69  | -0.34533  |
| 23281 | P03363 | P13987  | -0.19524  |
| 23282 | P03363 | Q9UPZ6  | -0.80804  |
| 23283 | P03363 | Q9HA92  | -0.24197  |
| 23284 | P03363 | Q8WWT9  | -0.41668  |
| 23285 | P03363 | Q6UWW8  | -0.22739  |
| 23286 | P03363 | Q3KPI0  | -0.32626  |
| 23287 | P03363 | Q6ZNA5  | -0.6121   |
| 23288 | P03363 | Q9UKA9  | -0.22573  |
| 23289 | P03363 | Q9UF72  | -0.33992  |
| 23290 | P03363 | Q15043  | -0.57489  |
| 23291 | P03363 | Q96S38  | -0.22487  |
| 23292 | P03363 | Q8NGT7  | -0.61656  |
| 23293 | P03363 | Q9NXF8  | -0.44894  |
| 23294 | P03363 | Q9NZ53  | -0.16735  |
| 23295 | P03363 | Q96PD7  | -0.30883  |
| 23296 | P03363 | P30511  | -0.58     |
| 23297 | P03363 | Q6ZMN7  | -0.22924  |
| 23298 | P03363 | Q99946  | -0.33797  |
| 23299 | P03363 | P56559  | -0.22759  |
| 23300 | P03363 | Q6ZTK2  | -0.24104  |
| 23301 | P03363 | Q75521  | -0.31062  |
| 23302 | P03363 | Q9H598  | -0.41378  |
| 23303 | P03363 | Q15486  | -0.11296  |
| 23304 | P03363 | Q08043  | -0.26469  |
| 23305 | P03363 | Q8N6G5  | -0.35393  |
| 23306 | P03363 | A6NCF6  | -0.2119   |
| 23307 | P03363 | P0CZ20  | -0.12308  |
| 23308 | P03363 | Q6F5E8  | -0.22648  |
| 23309 | P03363 | Q8N4C7  | -0.23853  |
| 23310 | P03363 | P50120  | -0.22309  |
| 23311 | P03363 | Q16623  | -0.24089  |
| 23312 | P03363 | P33681  | -0.22741  |
| 23313 | P03363 | P35270  | -0.22717  |
| 23314 | P03363 | Q75N90  | -0.41722  |
| 23315 | P03363 | Q9H0U3  | -0.64473  |
| 23316 | P03363 | Q8IZ83  | -0.28014  |
| 23317 | P03363 | Q0D2K0  | -0.35265  |
| 23318 | P03363 | P43166  | -0.22428  |
| 23319 | P03363 | Q6U841  | -0.42053  |
| 23320 | P03363 | Q15091  | -0.19142  |
| 23321 | P03363 | Q9P296  | -0.22875  |
| 23322 | P03363 | P18283  | -0.29638  |
| 23323 | P03363 | Q8IUUF1 | -0.24873  |
| 23324 | P03363 | Q9BYP7  | -0.22741  |
| 23325 | P03363 | Q13564  | -0.22449  |
| 23326 | P03363 | Q8IUW3  | -0.058873 |
| 23327 | P03363 | Q9Y328  | -0.41478  |
| 23328 | P03363 | P34972  | -0.65709  |
| 23329 | P03363 | P01768  | -0.54902  |
| 23330 | P03363 | Q96MC2  | -0.16189  |
| 23331 | P03363 | O00754  | -0.23996  |
| 23332 | P03363 | Q5XKK7  | -0.12678  |



|       |        |        |           |
|-------|--------|--------|-----------|
| 23333 | P03363 | Q86VZ4 | -0.32626  |
| 23334 | P03363 | Q9NUJ1 | -0.21965  |
| 23335 | P03363 | P57727 | -0.6077   |
| 23336 | P03363 | Q8WXG6 | -0.21131  |
| 23337 | P03363 | Q8IWY4 | -0.53365  |
| 23338 | P03363 | Q15393 | -0.68601  |
| 23339 | P03363 | P09466 | -0.39938  |
| 23340 | P03363 | Q1RMZ1 | -0.094803 |
| 23341 | P03363 | Q95813 | -0.29615  |
| 23342 | P03363 | P01111 | -0.38346  |
| 23343 | P03363 | P40199 | -0.22743  |
| 23344 | P03363 | P54646 | -0.23458  |
| 23345 | P03363 | Q9H665 | -0.098354 |
| 23346 | P03363 | Q8NEV9 | -0.45754  |
| 23347 | P03363 | Q8TAF8 | -0.36244  |
| 23348 | P03363 | Q9NVP2 | -0.16537  |
| 23349 | P03363 | Q9BWU1 | -0.45391  |
| 23350 | P03363 | Q9UKY3 | -0.42004  |
| 23351 | P03363 | Q9H6R0 | -0.22621  |
| 23352 | P03363 | O76071 | -0.22746  |
| 23353 | P03363 | Q8NGX0 | -0.61656  |
| 23354 | P03363 | O43676 | -0.2799   |
| 23355 | P03363 | Q14790 | -0.22724  |
| 23356 | P03363 | P0C7U2 | -0.24013  |
| 23357 | P03363 | Q96T91 | -0.33502  |
| 23358 | P03363 | Q9Y2E8 | -0.40467  |
| 23359 | P03363 | O00358 | -0.29843  |
| 23360 | P03363 | P48039 | -0.65801  |
| 23361 | P03363 | Q96E52 | -0.43365  |
| 23362 | P03363 | Q14833 | -0.70887  |
| 23363 | P03363 | P60827 | -0.37669  |
| 23364 | P03363 | O60756 | -0.042737 |
| 23365 | P03363 | Q52LD8 | -0.21178  |
| 23366 | P03363 | Q5VXM1 | -0.33992  |
| 23367 | P03363 | P21452 | -0.70436  |
| 23368 | P03363 | O75677 | -0.22807  |
| 23369 | P03363 | P43490 | -0.13017  |
| 23370 | P03363 | Q6UWV2 | -0.22744  |
| 23371 | P03363 | Q9NUV7 | -0.44214  |
| 23372 | P03363 | P09327 | -0.20163  |
| 23373 | P03363 | P48165 | -0.5228   |
| 23374 | P03363 | Q15011 | -0.33418  |
| 23375 | P03363 | Q8N0U8 | -0.32626  |
| 23376 | P03363 | P18085 | -0.22745  |
| 23377 | P03363 | Q6XXX2 | -0.16243  |
| 23378 | P03363 | Q15255 | -0.15265  |
| 23379 | P03363 | Q96DY2 | -0.12767  |
| 23380 | P03363 | P41225 | -0.23227  |
| 23381 | P03363 | A6NFU8 | -0.18396  |
| 23382 | P03363 | A0PJW8 | -0.1867   |
| 23383 | P03363 | Q5T4H9 | -0.042737 |
| 23384 | P03363 | Q96KN8 | -0.21415  |
| 23385 | P03363 | P49755 | -0.21919  |
| 23386 | P03363 | Q96JM4 | -0.22719  |
| 23387 | P03363 | Q9NUY8 | -0.30569  |
| 23388 | P03363 | Q5SSJ5 | -0.12642  |
| 23389 | P03363 | Q13153 | -0.22757  |
| 23390 | P03363 | Q9NUG4 | -0.12636  |
| 23391 | P03363 | Q9H0J4 | -0.22277  |
| 23392 | P03363 | Q14921 | -0.22742  |
| 23393 | P03363 | Q8N6T3 | -0.18527  |
| 23394 | P03363 | Q43819 | -0.2061   |
| 23395 | P03363 | Q16719 | -0.19264  |
| 23396 | P03363 | Q8WVD5 | -0.22755  |
| 23397 | P03363 | Q9NRY7 | -0.49791  |
| 23398 | P03363 | P17812 | -0.17483  |
| 23399 | P03363 | P55290 | -0.3115   |
| 23400 | P03363 | Q8N7Y1 | -0.042737 |
| 23401 | P03363 | Q14353 | -0.17937  |
| 23402 | P03363 | Q6NVV0 | -0.031381 |
| 23403 | P03363 | Q9UBM1 | -0.33554  |
| 23404 | P03363 | Q9P1A2 | -0.20729  |
| 23405 | P03363 | Q9UK23 | -0.26315  |
| 23406 | P03363 | Q8WU49 | -0.042737 |
| 23407 | P03363 | Q9BYW1 | -0.35244  |
| 23408 | P03363 | Q8N9P0 | -0.097269 |

|       |        |        |           |
|-------|--------|--------|-----------|
| 23409 | P03363 | Q92609 | -0.22151  |
| 23410 | P03363 | P62684 | -0.21393  |
| 23411 | P03363 | P04275 | -0.22741  |
| 23412 | P03363 | Q92485 | -0.36506  |
| 23413 | P03363 | Q96RG2 | -0.22771  |
| 23414 | P03363 | O95222 | -0.61656  |
| 23415 | P03363 | Q8IVL6 | -0.44562  |
| 23416 | P03363 | Q9NZD2 | -0.1259   |
| 23417 | P03363 | Q7Z3S9 | -0.28215  |
| 23418 | P03363 | O95147 | -0.30836  |
| 23419 | P03363 | Q2NKX9 | -0.031359 |
| 23420 | P03363 | Q5XG99 | -0.32325  |
| 23421 | P03363 | P30954 | -0.68197  |
| 23422 | P03363 | Q9HDB5 | -0.39947  |
| 23423 | P03363 | P09238 | -0.5804   |
| 23424 | P03363 | Q15431 | -0.20345  |
| 23425 | P03363 | Q0VDD8 | -0.22436  |
| 23426 | P03363 | Q9UBK8 | -0.24413  |
| 23427 | P03363 | Q9H2C1 | -0.22733  |
| 23428 | P03363 | Q9NY30 | -0.054765 |
| 23429 | P03363 | Q7Z5A4 | -0.49563  |
| 23430 | P03363 | O15539 | -0.28655  |
| 23431 | P03363 | P30084 | -0.21222  |
| 23432 | P03363 | Q8NG92 | -0.61656  |
| 23433 | P03363 | Q53EU6 | -0.41941  |
| 23434 | P03363 | Q6P3X8 | -0.043982 |
| 23435 | P03363 | O15357 | -0.22741  |
| 23436 | P03363 | Q9H579 | -0.20075  |
| 23437 | P03363 | P35612 | -0.21706  |
| 23438 | P03363 | Q9UEY8 | -0.2148   |
| 23439 | P03363 | P43628 | -0.22688  |
| 23440 | P03363 | Q9P283 | -0.40796  |
| 23441 | P03363 | Q9HB15 | -0.40837  |
| 23442 | P03363 | Q8NDC0 | -0.034735 |
| 23443 | P03363 | Q13442 | -0.09026  |
| 23444 | P03363 | Q8IWB4 | -0.32626  |
| 23445 | P03363 | Q9NUR3 | -0.32626  |
| 23446 | P03363 | Q8TDX7 | -0.29714  |
| 23447 | P03363 | P01591 | -0.37246  |
| 23448 | P03363 | Q15164 | -0.22735  |
| 23449 | P03363 | Q9H2F3 | -0.6608   |
| 23450 | P03363 | Q86W10 | -0.76924  |
| 23451 | P03363 | Q30KQ5 | -0.33516  |
| 23452 | P03363 | Q7Z410 | -0.63619  |
| 23453 | P03363 | A5X5Y0 | -0.46585  |
| 23454 | P03363 | Q14956 | -0.51512  |
| 23455 | P03363 | A6NF89 | -0.61656  |
| 23456 | P03363 | Q6B9Z1 | -0.33992  |
| 23457 | P03363 | O15079 | -0.22737  |
| 23458 | P03363 | P06729 | -0.43468  |
| 23459 | P03363 | P01148 | -0.49551  |
| 23460 | P03363 | Q16661 | -0.33232  |
| 23461 | P03363 | Q6PUV4 | -0.12555  |
| 23462 | P03363 | P08519 | -0.50517  |
| 23463 | P03363 | P30501 | -0.59713  |
| 23464 | P03363 | Q8IZV2 | -0.44009  |
| 23465 | P03363 | Q8IV20 | -0.08306  |
| 23466 | P03363 | P22794 | -0.34198  |
| 23467 | P03363 | I3L0S3 | -0.038165 |
| 23468 | P03363 | Q9UIW2 | -0.26997  |
| 23469 | P03363 | Q8N127 | -0.61656  |
| 23470 | P03363 | Q5QJ38 | -0.22719  |
| 23471 | P03363 | P30101 | -0.23891  |
| 23472 | P03363 | Q8NC42 | -0.36298  |
| 23473 | P03363 | Q8TDB8 | -0.30551  |
| 23474 | P03363 | Q7Z6M3 | -0.55619  |
| 23475 | P03363 | A8MZ97 | -0.32626  |
| 23476 | P03363 | Q96MM7 | -0.34482  |
| 23477 | P03363 | Q15382 | -0.59515  |
| 23478 | P03363 | Q02363 | -0.22747  |
| 23479 | P03363 | Q7RTY3 | -0.26735  |
| 23480 | P03363 | Q9UG01 | -0.22722  |
| 23481 | P03363 | P46091 | -0.73419  |
| 23482 | P03363 | A6NM43 | -0.17992  |
| 23483 | P03363 | Q4VX76 | -0.29491  |
| 23484 | P03363 | P24386 | -0.25707  |

|       |        |        |           |
|-------|--------|--------|-----------|
| 23485 | P03363 | Q8NGB2 | -0.61656  |
| 23486 | P03363 | Q9UF02 | -0.39589  |
| 23487 | P03363 | Q4VNC1 | -0.53263  |
| 23488 | P03363 | P0CG32 | -0.21451  |
| 23489 | P03363 | Q7L8A9 | -0.28731  |
| 23490 | P03363 | P01344 | -0.22671  |
| 23491 | P03363 | Q06210 | -0.20677  |
| 23492 | P03363 | O75388 | -0.73743  |
| 23493 | P03363 | Q9NQ7  | -0.042737 |
| 23494 | P03363 | Q6NUS8 | -0.29189  |
| 23495 | P03363 | O95631 | -0.22741  |
| 23496 | P03363 | Q14831 | -0.42045  |
| 23497 | P03363 | O94778 | -0.48423  |
| 23498 | P03363 | P78329 | -0.22784  |
| 23499 | P03363 | Q6P093 | -0.49948  |
| 23500 | P03363 | Q99942 | -0.22741  |
| 23501 | P03363 | O00458 | -0.036778 |
| 23502 | P03363 | P43034 | -0.22787  |
| 23503 | P03363 | P28340 | -0.23341  |
| 23504 | P03363 | Q6ZSR3 | -0.042737 |
| 23505 | P03363 | Q8WXX1 | -0.22742  |
| 23506 | P03363 | Q5VUR7 | -0.2274   |
| 23507 | P03363 | Q9Y496 | -0.24798  |
| 23508 | P03363 | Q4G0I0 | -0.32626  |
| 23509 | P03363 | P35625 | -0.21454  |
| 23510 | P03363 | P54296 | -0.22863  |
| 23511 | P03363 | O75907 | -0.36512  |
| 23512 | P03363 | Q5TF21 | -0.32626  |
| 23513 | P03363 | Q9UEE9 | -0.089015 |
| 23514 | P03363 | Q8NCN5 | -0.18442  |
| 23515 | P03363 | O43291 | -0.44766  |
| 23516 | P03363 | P27449 | -0.23298  |
| 23517 | P03363 | Q15050 | -0.227    |
| 23518 | P03363 | Q6ZWJ8 | -0.33992  |
| 23519 | P03363 | Q8NDZ0 | -0.1489   |
| 23520 | P03363 | Q8NE86 | -0.12617  |
| 23521 | P03363 | O60911 | -0.23969  |
| 23522 | P03363 | Q15492 | -0.22747  |
| 23523 | P03363 | Q9NRZ7 | -0.51286  |
| 23524 | P03363 | Q9UKU9 | -0.64501  |
| 23525 | P03363 | A6NHX0 | -0.064982 |
| 23526 | P03363 | Q9NRI6 | -0.33502  |
| 23527 | P03363 | Q16512 | -0.22525  |
| 23528 | P03363 | P16581 | -0.22749  |
| 23529 | P03363 | Q8N7X4 | -0.19021  |
| 23530 | P03363 | Q6EIG7 | -0.32308  |
| 23531 | P03363 | P09105 | -0.084131 |
| 23532 | P03363 | Q8N3E9 | -0.22741  |
| 23533 | P03363 | K7EIZ4 | -0.042737 |
| 23534 | P03363 | Q9C0B2 | -0.13249  |
| 23535 | P03363 | O00507 | -0.2627   |
| 23536 | P03363 | Q5TC82 | -0.2274   |
| 23537 | P03363 | P51970 | -0.20475  |
| 23538 | P03363 | P51168 | -0.21806  |
| 23539 | P03363 | Q9Y5X0 | -0.22302  |
| 23540 | P03363 | Q32MH5 | -0.12266  |
| 23541 | P03363 | Q8NGG3 | -0.61656  |
| 23542 | P03363 | Q9Y446 | -0.22766  |
| 23543 | P03363 | Q8N6P7 | -0.30364  |
| 23544 | P03363 | Q17RC7 | -0.015159 |
| 23545 | P03363 | Q6P531 | -0.281    |
| 23546 | P03363 | P01716 | -0.54902  |
| 23547 | P03363 | P13866 | -0.19439  |
| 23548 | P03363 | A6NFC5 | -0.14188  |
| 23549 | P03363 | P33402 | -0.23479  |
| 23550 | P03363 | Q6UW68 | -0.32626  |
| 23551 | P03363 | Q02818 | -0.20407  |
| 23552 | P03363 | Q9GZU3 | -0.32626  |
| 23553 | P03363 | O60242 | -0.67902  |
| 23554 | P03363 | O00182 | -0.26408  |
| 23555 | P03363 | Q58FF3 | -0.1166   |
| 23556 | P03363 | Q6ZV56 | -0.042737 |
| 23557 | P03363 | P27707 | -0.24473  |
| 23558 | P03363 | Q9UBX5 | -0.22763  |
| 23559 | P03363 | A6NDD2 | -0.33516  |
| 23560 | P03363 | P35367 | -0.30514  |

|       |        |        |           |
|-------|--------|--------|-----------|
| 23561 | P03363 | Q9BYV7 | -0.43453  |
| 23562 | P03363 | O95197 | -0.35947  |
| 23563 | P03363 | Q9BQ08 | -0.27957  |
| 23564 | P03363 | Q05513 | -0.22642  |
| 23565 | P03363 | Q7RTU9 | -0.24019  |
| 23566 | P03363 | Q6MZM0 | -0.63703  |
| 23567 | P03363 | Q8N9K3 | -0.031359 |
| 23568 | P03363 | Q16739 | -0.2756   |
| 23569 | P03363 | Q8N8F6 | -0.52348  |
| 23570 | P03363 | Q8NE62 | -0.30566  |
| 23571 | P03363 | Q75063 | -0.58408  |
| 23572 | P03363 | Q5JTY5 | -0.24873  |
| 23573 | P03363 | Q96EU7 | -0.28902  |
| 23574 | P03363 | Q9NRM7 | -0.22741  |
| 23575 | P03363 | Q9BRF8 | -0.20957  |
| 23576 | P03363 | Q6P0Q8 | -0.22756  |
| 23577 | P03363 | A6NIZ1 | -0.38448  |
| 23578 | P03363 | Q9ULE0 | -0.17043  |
| 23579 | P03363 | Q96M93 | -0.28245  |
| 23580 | P03363 | O14654 | -0.37799  |
| 23581 | P03363 | C9JFL3 | -0.042737 |
| 23582 | P03363 | P10619 | -0.2212   |
| 23583 | P03363 | Q9H9V9 | -0.22253  |
| 23584 | P03363 | Q9UQD0 | -0.45944  |
| 23585 | P03363 | Q8ND24 | -0.22539  |
| 23586 | P03363 | A8MPY1 | -0.3491   |
| 23587 | P03363 | Q96FN5 | -0.24112  |
| 23588 | P03363 | Q9P0N8 | -0.62101  |
| 23589 | P03363 | P24593 | -0.22734  |
| 23590 | P03363 | Q9BYM8 | -0.22733  |
| 23591 | P03363 | Q02487 | -0.47729  |
| 23592 | P03363 | P06133 | -0.44967  |
| 23593 | P03363 | P22557 | -0.19297  |
| 23594 | P03363 | Q96G61 | -0.16171  |
| 23595 | P03363 | P51800 | -0.43429  |
| 23596 | P03363 | Q99675 | -0.22727  |
| 23597 | P03363 | Q01726 | -0.24346  |
| 23598 | P03363 | Q15831 | -0.24128  |
| 23599 | P03363 | Q5JQS6 | -0.10252  |
| 23600 | P03363 | Q94985 | -0.70167  |
| 23601 | P03363 | O00258 | -0.23336  |
| 23602 | P03363 | Q8NH51 | -0.61656  |
| 23603 | P03363 | P24557 | -0.68483  |
| 23604 | P03363 | A8MYZ0 | -0.050888 |
| 23605 | P03363 | Q6GPI1 | -0.55299  |
| 23606 | P03363 | P52333 | -0.22749  |
| 23607 | P03363 | O75554 | -0.20865  |
| 23608 | P03363 | P0CH98 | -0.24842  |
| 23609 | P03363 | Q8IYD9 | -0.33992  |
| 23610 | P03363 | P43366 | -0.19977  |
| 23611 | P03363 | Q9H013 | -0.59254  |
| 23612 | P03363 | P46199 | -0.31254  |
| 23613 | P03363 | Q9Y426 | -0.13259  |
| 23614 | P03363 | Q86YT6 | -0.22739  |
| 23615 | P03363 | Q12805 | -0.22751  |
| 23616 | P03363 | Q6UW02 | -0.62267  |
| 23617 | P03363 | Q9NTN3 | -0.40506  |
| 23618 | P03363 | P04899 | -0.24448  |
| 23619 | P03363 | Q96DB9 | -0.39127  |
| 23620 | P03363 | Q6XPR3 | -0.39377  |
| 23621 | P03363 | Q9UI38 | -0.28383  |
| 23622 | P03363 | Q7Z5U6 | -0.22744  |
| 23623 | P03363 | Q96FE7 | -0.31779  |
| 23624 | P03363 | Q15197 | -0.93196  |
| 23625 | P03363 | Q6ZSZ5 | -0.22737  |
| 23626 | P03363 | Q5VT28 | -0.056308 |
| 23627 | P03363 | Q95995 | -0.21856  |
| 23628 | P03363 | P56381 | -0.20587  |
| 23629 | P03363 | Q96LL9 | -0.30135  |
| 23630 | P03363 | Q9P2G4 | -0.031359 |
| 23631 | P03363 | Q9Y4G8 | -0.53066  |
| 23632 | P03363 | Q6DKI7 | -0.32626  |
| 23633 | P03363 | Q8N165 | -0.4145   |
| 23634 | P03363 | Q8NH43 | -0.61656  |
| 23635 | P03363 | P55809 | -0.21697  |
| 23636 | P03363 | Q6ZRI6 | -0.065563 |

|       |        |        |           |
|-------|--------|--------|-----------|
| 23637 | P03363 | Q86WS5 | -0.46525  |
| 23638 | P03363 | Q68CJ6 | -0.19721  |
| 23639 | P03363 | P36915 | -0.20734  |
| 23640 | P03363 | Q8N8Q3 | -0.15987  |
| 23641 | P03363 | O75325 | -0.4968   |
| 23642 | P03363 | Q9Y2E6 | -0.22566  |
| 23643 | P03363 | Q687X5 | -0.83356  |
| 23644 | P03363 | A8MS94 | -0.092015 |
| 23645 | P03363 | Q5JT78 | -0.16459  |
| 23646 | P03363 | Q8IZN7 | -0.33516  |
| 23647 | P03363 | P0C6E5 | -0.24418  |
| 23648 | P03363 | Q7Z5B4 | -0.43175  |
| 23649 | P03363 | Q6T310 | -0.22936  |
| 23650 | P03363 | Q96A84 | -0.48405  |
| 23651 | P03363 | Q8WZ84 | -0.61656  |
| 23652 | P03363 | C9J2P7 | -0.25139  |
| 23653 | P03363 | Q8NDI1 | -0.22764  |
| 23654 | P03363 | Q9Y2J0 | -0.23139  |
| 23655 | P03363 | Q6PEZ8 | -0.35782  |
| 23656 | P03363 | Q9BZA0 | -0.23952  |
| 23657 | P03363 | Q95070 | -0.17748  |
| 23658 | P03363 | P32238 | -0.44759  |
| 23659 | P03363 | Q6ZVN6 | -0.11772  |
| 23660 | P03363 | Q8IX05 | -0.234    |
| 23661 | P03363 | Q9H5V7 | -0.22768  |
| 23662 | P03363 | Q9BQK8 | -0.1856   |
| 23663 | P03363 | P28074 | -0.14854  |
| 23664 | P03363 | O00459 | -0.22741  |
| 23665 | P03363 | Q86SG5 | -0.23162  |
| 23666 | P03363 | O95389 | -0.44395  |
| 23667 | P03363 | A6NGE4 | -0.22742  |
| 23668 | P03363 | O75191 | -0.33465  |
| 23669 | P03363 | Q9Y284 | -0.32626  |
| 23670 | P03363 | Q9UL15 | -0.16197  |
| 23671 | P03363 | Q9H169 | -0.20795  |
| 23672 | P03363 | Q5GH73 | -0.32626  |
| 23673 | P03363 | P51572 | -0.22429  |
| 23674 | P03363 | P32247 | -0.53907  |
| 23675 | P03363 | Q8NH81 | -0.61656  |
| 23676 | P03363 | O95436 | -0.46865  |
| 23677 | P03363 | A6NHM9 | -0.37849  |
| 23678 | P03363 | Q6IN97 | -0.22701  |
| 23679 | P03363 | Q8NHZ7 | -0.023625 |
| 23680 | P03363 | Q7Z5J4 | -0.21822  |
| 23681 | P03363 | P62955 | -0.38611  |
| 23682 | P03363 | Q9UKF2 | -0.55585  |
| 23683 | P03363 | O43548 | -0.22067  |
| 23684 | P03363 | P01744 | -0.54902  |
| 23685 | P03363 | Q8N3C7 | -0.22741  |
| 23686 | P03363 | B1ANY3 | -0.09806  |
| 23687 | P03363 | Q9H0R6 | -0.17084  |
| 23688 | P03363 | A6NE01 | -0.21814  |
| 23689 | P03363 | Q8ND99 | -0.18512  |
| 23690 | P03363 | Q9H342 | -0.61656  |
| 23691 | P03363 | Q96QZ0 | -0.42885  |
| 23692 | P03363 | Q13685 | -0.22759  |
| 23693 | P03363 | Q86UP6 | -0.2707   |
| 23694 | P03363 | Q01113 | -0.98027  |
| 23695 | P03363 | Q6P2I3 | -0.17814  |
| 23696 | P03363 | P35443 | -0.38527  |
| 23697 | P03363 | Q902F9 | -0.22613  |
| 23698 | P03363 | Q8IW50 | -0.031359 |
| 23699 | P03363 | Q8IVB5 | -0.17736  |
| 23700 | P03363 | Q9NVM1 | -0.32626  |
| 23701 | P03363 | P32856 | -0.23728  |
| 23702 | P03363 | Q9H6L5 | -0.41678  |
| 23703 | P03363 | Q9UKZ9 | -0.35921  |
| 23704 | P03363 | Q13508 | -0.34577  |
| 23705 | P03363 | Q5MAI5 | -0.31245  |
| 23706 | P03363 | Q96LQ0 | -0.049345 |
| 23707 | P03363 | O43781 | -0.5431   |
| 23708 | P03363 | P20592 | -0.23164  |
| 23709 | P03363 | Q8N6I4 | -0.32626  |
| 23710 | P03363 | Q902F8 | -0.22613  |
| 23711 | P03363 | Q9UI09 | -0.19349  |
| 23712 | P03363 | Q9H3Q3 | -0.31385  |

|       |        |        |           |
|-------|--------|--------|-----------|
| 23713 | P03363 | Q9H857 | -0.07407  |
| 23714 | P03363 | P12268 | -0.2801   |
| 23715 | P03363 | P29074 | -0.22747  |
| 23716 | P03363 | P0CAP1 | -0.22211  |
| 23717 | P03363 | Q9BX10 | -0.30251  |
| 23718 | P03363 | Q8TC29 | -0.19912  |
| 23719 | P03363 | Q9NP78 | -0.50508  |
| 23720 | P03363 | Q04656 | -0.2276   |
| 23721 | P03363 | Q9HBY8 | -0.24924  |
| 23722 | P03363 | I3L1E1 | -0.12122  |
| 23723 | P03363 | Q8WUX1 | -0.49684  |
| 23724 | P03363 | Q9UQG0 | -0.22927  |
| 23725 | P03363 | P15907 | -0.49947  |
| 23726 | P03363 | Q6UXI7 | -0.38797  |
| 23727 | P03363 | Q96I82 | -0.47689  |
| 23728 | P03363 | P68400 | -0.29498  |
| 23729 | P03363 | Q8WXF7 | -0.26506  |
| 23730 | P03363 | Q96Q77 | -0.22766  |
| 23731 | P03363 | Q8NGA5 | -0.5361   |
| 23732 | P03363 | Q70J99 | -0.22855  |
| 23733 | P03363 | Q9Y258 | -0.55582  |
| 23734 | P03363 | O76036 | -0.5828   |
| 23735 | P03363 | Q8IXF9 | -0.29636  |
| 23736 | P03363 | Q6IBW4 | -0.097202 |
| 23737 | P03363 | Q5H943 | -0.47262  |
| 23738 | P03363 | Q93088 | -0.21941  |
| 23739 | P03363 | P07911 | -0.50947  |
| 23740 | P03363 | Q12887 | -0.28635  |
| 23741 | P03363 | P22059 | -0.22745  |
| 23742 | P03363 | O15551 | -0.36332  |
| 23743 | P03363 | Q9UQQ1 | -0.56536  |
| 23744 | P03363 | Q8NBS3 | -0.36806  |
| 23745 | P03363 | Q499Y3 | -0.19067  |
| 23746 | P03363 | Q7Z6J2 | -0.22753  |
| 23747 | P03363 | Q2TBF2 | -0.32626  |
| 23748 | P03363 | Q8WUJ0 | -0.23171  |
| 23749 | P03363 | Q8TAA9 | -0.21086  |
| 23750 | P03363 | Q8TEA1 | -0.09281  |
| 23751 | P03363 | Q8IZJ4 | -0.22726  |
| 23752 | P03363 | Q9BYV2 | -0.22738  |
| 23753 | P03363 | Q9NPH5 | -0.5099   |
| 23754 | P03363 | P19113 | -0.24194  |
| 23755 | P03363 | P07686 | -0.24291  |
| 23756 | P03363 | B6SEH8 | -0.32626  |
| 23757 | P03363 | O94898 | -0.25687  |
| 23758 | P03363 | Q8NEA4 | -0.20635  |
| 23759 | P03363 | Q8NGJ4 | -0.61656  |
| 23760 | P03363 | Q9HAA7 | -0.16797  |
| 23761 | P03363 | Q99985 | -0.4748   |
| 23762 | P03363 | Q8N6Q3 | -0.24887  |
| 23763 | P03363 | Q96NT0 | -0.2164   |
| 23764 | P03363 | B3EWG4 | -0.031359 |
| 23765 | P03363 | Q9NPL8 | -0.32227  |
| 23766 | P03363 | Q9C0K0 | -0.22735  |
| 23767 | P03363 | A4QMS7 | -0.05442  |
| 23768 | P03363 | Q8NGX2 | -0.61656  |
| 23769 | P03363 | Q8NG85 | -0.5361   |
| 23770 | P03363 | Q7Z4N8 | -0.43633  |
| 23771 | P03363 | Q711Q0 | -0.042737 |
| 23772 | P03363 | H3BV60 | -0.32626  |
| 23773 | P03363 | P59901 | -0.22741  |
| 23774 | P03363 | Q8TDM5 | -0.3313   |
| 23775 | P03363 | Q8TD43 | -0.54677  |
| 23776 | P03363 | Q9HDD0 | -0.2271   |
| 23777 | P03363 | P57730 | -0.22585  |
| 23778 | P03363 | O00294 | -0.19863  |
| 23779 | P03363 | Q9NV29 | -0.19187  |
| 23780 | P03363 | O15212 | -0.22518  |
| 23781 | P03363 | Q9BRQ3 | -0.082312 |
| 23782 | P03363 | Q2WEN9 | -0.35772  |
| 23783 | P03363 | Q96A47 | -0.2274   |
| 23784 | P03363 | Q8WTS1 | -0.22013  |
| 23785 | P03363 | Q5VVB8 | -0.32626  |
| 23786 | P03363 | O75865 | -0.095088 |
| 23787 | P03363 | Q99983 | -0.53696  |
| 23788 | P03363 | P07333 | -0.4857   |

|       |        |        |           |
|-------|--------|--------|-----------|
| 23789 | P03363 | P02647 | -0.24894  |
| 23790 | P03363 | Q7Z572 | -0.22722  |
| 23791 | P03363 | P10124 | -0.082555 |
| 23792 | P03363 | Q9NUH8 | -0.32626  |
| 23793 | P03363 | Q8N3I7 | -0.10783  |
| 23794 | P03363 | Q6P656 | -0.17256  |
| 23795 | P03363 | P11678 | -0.37427  |
| 23796 | P03363 | O15533 | -0.23202  |
| 23797 | P03363 | Q8NCF0 | -0.34245  |
| 23798 | P03363 | P08559 | -0.22227  |
| 23799 | P03363 | Q96EP5 | -0.28106  |
| 23800 | P03363 | Q6P4E1 | -0.32626  |
| 23801 | P03363 | A6NGA9 | -0.32626  |
| 23802 | P03363 | Q8WXF3 | -0.31934  |
| 23803 | P03363 | Q3KNW5 | -0.48775  |
| 23804 | P03363 | P08240 | -0.53724  |
| 23805 | P03363 | Q9UDX3 | -0.39188  |
| 23806 | P03363 | Q96AZ6 | -0.16609  |
| 23807 | P03363 | O94988 | -0.38968  |
| 23808 | P03363 | Q2T9K0 | -0.32626  |
| 23809 | P03363 | P19835 | -0.25955  |
| 23810 | P03363 | Q9H0Z9 | -0.22767  |
| 23811 | P03363 | P23527 | -0.14658  |
| 23812 | P03363 | P04040 | -0.36455  |
| 23813 | P03363 | Q96RD0 | -0.61656  |
| 23814 | P03363 | Q96PV7 | -0.053187 |
| 23815 | P03363 | Q8NDY3 | -0.15391  |
| 23816 | P03363 | Q6ZWK6 | -0.77984  |
| 23817 | P03363 | O76076 | -0.4717   |
| 23818 | P03363 | Q75N03 | -0.22267  |
| 23819 | P03363 | Q9UM19 | -0.23913  |
| 23820 | P03363 | Q6UXH8 | -0.47265  |
| 23821 | P03363 | Q5T655 | -0.042737 |
| 23822 | P03363 | Q9UKI8 | -0.34262  |
| 23823 | P03363 | O00571 | -0.30605  |
| 23824 | P03363 | P04553 | -0.15232  |
| 23825 | P03363 | Q9H3Y6 | -0.52784  |
| 23826 | P03363 | Q86T23 | -0.16316  |
| 23827 | P03363 | Q5VTJ3 | -0.32626  |
| 23828 | P03363 | Q9Y2D2 | -0.23461  |
| 23829 | P03363 | P27701 | -0.22873  |
| 23830 | P03363 | Q13591 | -0.50552  |
| 23831 | P03363 | Q6QHF9 | -0.23674  |
| 23832 | P03363 | O43559 | -0.2882   |
| 23833 | P03363 | Q86X40 | -0.22765  |
| 23834 | P03363 | Q9H1C7 | -0.32626  |
| 23835 | P03363 | Q9BVM4 | -0.09023  |
| 23836 | P03363 | A4D161 | -0.24778  |
| 23837 | P03363 | Q16850 | -0.72237  |
| 23838 | P03363 | Q8WVX3 | -0.32626  |
| 23839 | P03363 | Q3B7T3 | -0.27563  |
| 23840 | P03363 | Q8NH42 | -0.61656  |
| 23841 | P03363 | P12259 | -0.23926  |
| 23842 | P03363 | Q9NP31 | -0.22741  |
| 23843 | P03363 | Q8TD07 | -0.24164  |
| 23844 | P03363 | Q9UHB6 | -0.22714  |
| 23845 | P03363 | Q14D33 | -0.32626  |
| 23846 | P03363 | Q15042 | -0.083631 |
| 23847 | P03363 | Q7Z7L7 | -0.20048  |
| 23848 | P03363 | P51878 | -0.27218  |
| 23849 | P03363 | P53814 | -0.2276   |
| 23850 | P03363 | Q5U5R9 | -0.22806  |
| 23851 | P03363 | A6NFE2 | -0.32626  |
| 23852 | P03363 | Q8N323 | -0.33992  |
| 23853 | P03363 | Q86SQ6 | -0.48484  |
| 23854 | P03363 | P05129 | -0.30904  |
| 23855 | P03363 | Q9BT40 | -0.22719  |
| 23856 | P03363 | Q6ZWT7 | -0.39499  |
| 23857 | P03363 | Q8N2R8 | -0.22376  |
| 23858 | P03363 | P12882 | -0.12664  |
| 23859 | P03363 | Q9Y3R0 | -0.30923  |
| 23860 | P03363 | Q5MY95 | -0.6534   |
| 23861 | P03363 | Q9H6Y7 | -0.22991  |
| 23862 | P03363 | Q96EQ8 | -0.22638  |
| 23863 | P03363 | Q15771 | -0.51523  |
| 23864 | P03363 | Q9P2V4 | -0.40812  |

|       |        |        |           |
|-------|--------|--------|-----------|
| 23865 | P03363 | Q8NCS4 | -0.32626  |
| 23866 | P03363 | Q5JVF3 | -0.093459 |
| 23867 | P03363 | Q06413 | -0.18128  |
| 23868 | P03363 | Q15243 | -0.32707  |
| 23869 | P03363 | Q9NYV8 | -0.49029  |
| 23870 | P03363 | Q8N350 | -0.32626  |
| 23871 | P03363 | Q9P241 | -0.39079  |
| 23872 | P03363 | Q96CX6 | -0.22809  |
| 23873 | P03363 | Q8N8J7 | -0.32626  |
| 23874 | P03363 | Q2M3G0 | -0.67792  |
| 23875 | P03363 | Q75795 | -0.4446   |
| 23876 | P03363 | P04431 | -0.54902  |
| 23877 | P03363 | Q95727 | -0.4935   |
| 23878 | P03363 | Q8IZQ8 | -0.28183  |
| 23879 | P03363 | Q9BXL6 | -0.22236  |
| 23880 | P03363 | Q96KW9 | -0.34965  |
| 23881 | P03363 | Q8NFR3 | -0.11971  |
| 23882 | P03363 | Q9H2P9 | -0.18037  |
| 23883 | P03363 | Q13206 | -0.17877  |
| 23884 | P03363 | A8MWY0 | -0.32626  |
| 23885 | P03363 | Q86Y27 | -0.33992  |
| 23886 | P03363 | Q9GZV3 | -0.51694  |
| 23887 | P03363 | Q95208 | -0.20272  |
| 23888 | P03363 | Q8NFX7 | -0.20352  |
| 23889 | P03363 | A1L4H1 | -0.43818  |
| 23890 | P03363 | P02750 | -0.44396  |
| 23891 | P03363 | O15516 | -0.22743  |
| 23892 | P03363 | Q8IZ73 | -0.17592  |
| 23893 | P03363 | A6NGB7 | -0.32626  |
| 23894 | P03363 | Q6E213 | -0.46256  |
| 23895 | P03363 | P17707 | -0.18749  |
| 23896 | P03363 | Q6NSJ5 | -0.32626  |
| 23897 | P03363 | Q6IQ20 | -0.3043   |
| 23898 | P03363 | Q5QP82 | -0.22736  |
| 23899 | P03363 | Q00442 | -0.063671 |
| 23900 | P03363 | P07437 | -0.2121   |
| 23901 | P03363 | Q9UIJ5 | -0.44845  |
| 23902 | P03363 | P28908 | -0.27656  |
| 23903 | P03363 | A6NNH2 | -0.18986  |
| 23904 | P03363 | P30447 | -0.36051  |
| 23905 | P03363 | Q8NBZ7 | -0.53747  |
| 23906 | P03363 | P20645 | -0.47715  |
| 23907 | P03363 | Q12882 | -0.31619  |
| 23908 | P03363 | Q75973 | -0.27218  |
| 23909 | P03363 | Q6UB35 | -0.31802  |
| 23910 | P03363 | Q95372 | -0.22355  |
| 23911 | P03363 | Q5T700 | -0.32626  |
| 23912 | P03363 | Q99877 | -0.14658  |
| 23913 | P03363 | O14625 | -0.61788  |
| 23914 | P03363 | Q8IVM7 | -0.042737 |
| 23915 | P03363 | P0C5J1 | -0.13883  |
| 23916 | P03363 | Q08174 | -0.51285  |
| 23917 | P03363 | Q8NDB6 | -0.27198  |
| 23918 | P03363 | Q6UY27 | -0.42609  |
| 23919 | P03363 | P57775 | -0.22746  |
| 23920 | P03363 | Q2HXU8 | -0.47112  |
| 23921 | P03363 | P04141 | -0.18789  |
| 23922 | P03363 | P27708 | -0.2083   |
| 23923 | P03363 | Q00526 | -0.3476   |
| 23924 | P03363 | P15918 | -0.22436  |
| 23925 | P03363 | Q4QY38 | -0.33516  |
| 23926 | P03363 | Q7Z698 | -0.22095  |
| 23927 | P03363 | Q00421 | -0.72599  |
| 23928 | P03363 | Q15120 | -0.22677  |
| 23929 | P03363 | Q12849 | -0.21695  |
| 23930 | P03363 | Q6ZTW0 | -0.18689  |
| 23931 | P03363 | Q13286 | -0.21616  |
| 23932 | P03363 | Q14952 | -0.56938  |
| 23933 | P03363 | Q9H8V3 | -0.22751  |
| 23934 | P03363 | A4IF30 | -0.29915  |
| 23935 | P03363 | P24723 | -0.45797  |
| 23936 | P03363 | A6NKC4 | -0.46529  |
| 23937 | P03363 | Q14191 | -0.22725  |
| 23938 | P03363 | Q8NBQ7 | -0.16606  |
| 23939 | P03363 | Q01718 | -0.3598   |
| 23940 | P03363 | P06756 | -0.22739  |



|       |        |        |           |
|-------|--------|--------|-----------|
| 23941 | P03363 | Q6KCM7 | -0.34281  |
| 23942 | P03363 | Q53R41 | -0.1654   |
| 23943 | P03363 | Q9Y661 | -0.59367  |
| 23944 | P03363 | Q99697 | -0.21729  |
| 23945 | P03363 | Q969J3 | -0.1799   |
| 23946 | P03363 | Q9P2W7 | -0.41914  |
| 23947 | P03363 | Q8NHV5 | -0.20303  |
| 23948 | P03363 | O95467 | -0.30939  |
| 23949 | P03363 | P30486 | -0.35563  |
| 23950 | P03363 | A2RU49 | -0.18698  |
| 23951 | P03363 | Q01415 | -0.17484  |
| 23952 | P03363 | Q16795 | -0.22109  |
| 23953 | P03363 | Q9UM01 | -0.54194  |
| 23954 | P03363 | Q9HCL0 | -0.62071  |
| 23955 | P03363 | Q96A70 | -0.19226  |
| 23956 | P03363 | Q6UXB8 | -0.67955  |
| 23957 | P03363 | Q2QL34 | -0.38011  |
| 23958 | P03363 | Q86X27 | -0.28508  |
| 23959 | P03363 | P14778 | -0.56321  |
| 23960 | P03363 | A8MW92 | -0.20937  |
| 23961 | P03363 | Q94844 | -0.54057  |
| 23962 | P03363 | Q7RTX9 | -0.44138  |
| 23963 | P03363 | P63096 | -0.24201  |
| 23964 | P03363 | Q8TBF4 | -0.22626  |
| 23965 | P03363 | Q53S58 | -0.32626  |
| 23966 | P03363 | O00270 | -0.73419  |
| 23967 | P03363 | Q8NB37 | -0.33992  |
| 23968 | P03363 | Q96NR7 | -0.18441  |
| 23969 | P03363 | Q86WU2 | -0.20373  |
| 23970 | P03363 | O00755 | -0.31496  |
| 23971 | P03363 | P09341 | -0.65248  |
| 23972 | P03363 | Q9BYJ0 | -0.41192  |
| 23973 | P03363 | Q8NH63 | -0.61656  |
| 23974 | P03363 | P05000 | -0.40971  |
| 23975 | P03363 | P22735 | -0.21091  |
| 23976 | P03363 | O15204 | -0.54792  |
| 23977 | P03363 | Q9NQW1 | -0.22751  |
| 23978 | P03363 | P17752 | -0.25891  |
| 23979 | P03363 | P59190 | -0.47075  |
| 23980 | P03363 | Q13183 | -0.57762  |
| 23981 | P03363 | Q6UXR4 | -0.31049  |
| 23982 | P03363 | Q96AN2 | -0.04884  |
| 23983 | P03363 | O43280 | -0.23621  |
| 23984 | P03363 | Q9H7X2 | -0.32626  |
| 23985 | P03363 | Q66K79 | -0.55578  |
| 23986 | P03363 | Q9NR63 | -0.46665  |
| 23987 | P03363 | Q6ZVX7 | -0.054288 |
| 23988 | P03363 | Q96A98 | -0.34423  |
| 23989 | P03363 | Q2I0M5 | -0.38404  |
| 23990 | P03363 | P02763 | -0.22205  |
| 23991 | P03363 | Q9NX09 | -0.1601   |
| 23992 | P03363 | Q9H089 | -0.17855  |
| 23993 | P03363 | P48436 | -0.24261  |
| 23994 | P03363 | Q8IWU9 | -0.27709  |
| 23995 | P03363 | Q71DI3 | -0.2179   |
| 23996 | P03363 | Q9P0M4 | -0.45332  |
| 23997 | P03363 | Q6PIZ9 | -0.53666  |
| 23998 | P03363 | Q6ZT89 | -0.30119  |
| 23999 | P03363 | Q8IX30 | -0.22744  |
| 24000 | P03363 | O00141 | -0.37123  |
| 24001 | P03363 | P49286 | -0.69907  |
| 24002 | P03363 | A6NIJ5 | -0.21933  |
| 24003 | P03363 | Q9P218 | -0.48041  |
| 24004 | P03363 | Q6ZUT6 | -0.12336  |
| 24005 | P03363 | Q5VYY1 | -0.22741  |
| 24006 | P03363 | P78562 | -0.66153  |
| 24007 | P03363 | P60893 | -0.64046  |
| 24008 | P03363 | Q96SK2 | -0.32626  |
| 24009 | P03363 | P01595 | -0.54902  |
| 24010 | P03363 | P41182 | -0.20314  |
| 24011 | P03363 | P0CAT3 | -0.17903  |
| 24012 | P03363 | Q15238 | -0.22756  |
| 24013 | P03363 | Q8NGD4 | -0.61656  |
| 24014 | P03363 | A8MXX9 | -0.047124 |
| 24015 | P03363 | Q9UFP1 | -0.33992  |
| 24016 | P03363 | P60983 | -0.25172  |

|       |        |        |           |
|-------|--------|--------|-----------|
| 24017 | P03363 | Q6UWN0 | -0.24531  |
| 24018 | P03363 | P11597 | -0.40359  |
| 24019 | P03363 | Q8IUR7 | -0.22745  |
| 24020 | P03363 | P26378 | -0.24237  |
| 24021 | P03363 | O95843 | -0.22851  |
| 24022 | P03363 | P10145 | -0.31112  |
| 24023 | P03363 | Q8WTR2 | -0.23592  |
| 24024 | P03363 | Q96S21 | -0.40086  |
| 24025 | P03363 | Q9Y2H6 | -0.22741  |
| 24026 | P03363 | Q9NYW7 | -0.49032  |
| 24027 | P03363 | Q8TD20 | -0.16722  |
| 24028 | P03363 | Q9BQI4 | -0.44258  |
| 24029 | P03363 | Q6PEX7 | -0.32626  |
| 24030 | P03363 | Q5TCH4 | -0.57857  |
| 24031 | P03363 | Q96NN9 | -0.22592  |
| 24032 | P03363 | A6NHY2 | -0.22741  |
| 24033 | P03363 | Q496H8 | -0.21296  |
| 24034 | P03363 | Q9UJ42 | -0.64046  |
| 24035 | P03363 | O95157 | -0.36114  |
| 24036 | P03363 | Q8NGB8 | -0.61656  |
| 24037 | P03363 | Q04721 | -0.22741  |
| 24038 | P03363 | Q6ZVL6 | -0.32626  |
| 24039 | P03363 | P11509 | -0.54429  |
| 24040 | P03363 | Q5VUM1 | -0.33684  |
| 24041 | P03363 | Q9NP84 | -0.17298  |
| 24042 | P03363 | P51787 | -0.46717  |
| 24043 | P03363 | Q8N8R5 | -0.33992  |
| 24044 | P03363 | Q8NH80 | -0.61656  |
| 24045 | P03363 | P52429 | -0.76433  |
| 24046 | P03363 | Q8N9H9 | -0.042737 |
| 24047 | P03363 | Q9NVJ2 | -0.24691  |
| 24048 | P03363 | A6NCS4 | -0.24046  |
| 24049 | P03363 | A4D2H0 | -0.1886   |
| 24050 | P03363 | Q96CN7 | -0.15755  |
| 24051 | P03363 | Q9NS82 | -0.54156  |
| 24052 | P03363 | Q86WA9 | -0.56055  |
| 24053 | P03363 | Q9NX36 | -0.18683  |
| 24054 | P03363 | Q6PEW0 | -0.23654  |
| 24055 | P03363 | Q9UGU5 | -0.23184  |
| 24056 | P03363 | Q6AZZ1 | -0.22755  |
| 24057 | P03363 | Q99680 | -0.73419  |
| 24058 | P03363 | Q5VYJ5 | -0.32626  |
| 24059 | P03363 | Q9Y6M4 | -0.42837  |
| 24060 | P03363 | Q86Y37 | -0.1589   |
| 24061 | P03363 | A6XGL0 | -0.13445  |
| 24062 | P03363 | Q9HDC5 | -0.53436  |
| 24063 | P03363 | O75449 | -0.2303   |
| 24064 | P03363 | Q8N436 | -0.56581  |
| 24065 | P03363 | Q24JQ0 | -0.32626  |
| 24066 | P03363 | Q9NTJ3 | -0.22643  |
| 24067 | P03363 | Q8N752 | -0.38034  |
| 24068 | P03363 | Q9NZR2 | -0.33318  |
| 24069 | P03363 | Q30KR1 | -0.33516  |
| 24070 | P03363 | P49411 | -0.28842  |
| 24071 | P03363 | Q02505 | -0.67799  |
| 24072 | P03363 | Q6ZNR8 | -0.042737 |
| 24073 | P03363 | Q8TCV5 | -0.33498  |
| 24074 | P03363 | P78556 | -0.5937   |
| 24075 | P03363 | Q8IU80 | -0.31461  |
| 24076 | P03363 | Q9NY33 | -0.19746  |
| 24077 | P03363 | Q9NVR0 | -0.33992  |
| 24078 | P03363 | Q8IX94 | -0.25306  |
| 24079 | P03363 | Q5VZ66 | -0.12017  |
| 24080 | P03363 | A8MTB1 | -0.042737 |
| 24081 | P03363 | O95971 | -0.3666   |
| 24082 | P03363 | Q9H0B8 | -0.40719  |
| 24083 | P03363 | A6NGG8 | -0.14293  |
| 24084 | P03363 | Q14114 | -0.43435  |
| 24085 | P03363 | Q9UHT4 | -0.042737 |
| 24086 | P03363 | Q9NYW5 | -0.63778  |
| 24087 | P03363 | Q4G0N8 | -0.49595  |
| 24088 | P03363 | A6NE21 | -0.2058   |
| 24089 | P03363 | Q14644 | -0.26573  |
| 24090 | P03363 | Q53FP2 | -0.243    |
| 24091 | P03363 | P19971 | -0.17194  |
| 24092 | P03363 | P86480 | -0.042737 |

|       |        |         |           |
|-------|--------|---------|-----------|
| 24093 | P03363 | Q8IWW6  | -0.43354  |
| 24094 | P03363 | Q7Z419  | -0.22019  |
| 24095 | P03363 | Q8N4S0  | -0.031359 |
| 24096 | P03363 | Q52LC2  | -0.30911  |
| 24097 | P03363 | Q5JQS5  | -0.61656  |
| 24098 | P03363 | Q8N8Q8  | -0.21815  |
| 24099 | P03363 | Q8IW70  | -0.32626  |
| 24100 | P03363 | P11274  | -0.38244  |
| 24101 | P03363 | Q7Z2V1  | -0.042737 |
| 24102 | P03363 | A6NMZ5  | -0.61656  |
| 24103 | P03363 | Q5J TZ9 | -0.14449  |
| 24104 | P03363 | Q6ZS30  | -0.22741  |
| 24105 | P03363 | O60220  | -0.076757 |
| 24106 | P03363 | Q9H3H5  | -0.42921  |
| 24107 | P03363 | Q9Y4C0  | -0.53478  |
| 24108 | P03363 | O75690  | -0.076094 |
| 24109 | P03363 | Q9N YN1 | -0.51767  |
| 24110 | P03363 | P01011  | -0.13591  |
| 24111 | P03363 | Q6DKJ4  | -0.19343  |
| 24112 | P03363 | P15248  | -0.41211  |
| 24113 | P03363 | Q8NBJ7  | -0.17553  |
| 24114 | P03363 | P01772  | -0.54902  |
| 24115 | P03363 | Q58G82  | -0.2258   |
| 24116 | P03363 | Q5JXM2  | -0.27258  |
| 24117 | P03363 | P56277  | -0.017723 |
| 24118 | P03363 | Q8IV16  | -0.43153  |
| 24119 | P03363 | A4QN01  | -0.15626  |
| 24120 | P03363 | Q99735  | -0.41047  |
| 24121 | P03363 | P13637  | -0.33675  |
| 24122 | P03363 | Q15311  | -0.242    |
| 24123 | P03363 | Q6ZU82  | -0.24503  |
| 24124 | P03363 | P10645  | -0.37056  |
| 24125 | P03363 | Q15075  | -0.58829  |
| 24126 | P03363 | P0C7U1  | -0.23394  |
| 24127 | P03363 | P21108  | -0.36155  |
| 24128 | P03363 | Q4VX67  | -0.32626  |
| 24129 | P03363 | Q96J65  | -0.57396  |
| 24130 | P03363 | Q9GZN8  | -0.15796  |
| 24131 | P03363 | Q96GX5  | -0.22741  |
| 24132 | P03363 | O75319  | -0.22734  |
| 24133 | P03363 | O14843  | -0.78261  |
| 24134 | P03363 | Q10469  | -0.33038  |
| 24135 | P03363 | P30536  | -0.25519  |
| 24136 | P03363 | A6NEW6  | -0.20961  |
| 24137 | P03363 | Q8NCB2  | -0.34398  |
| 24138 | P03363 | Q9H7F4  | -0.32626  |
| 24139 | P03363 | Q86UN2  | -0.27591  |
| 24140 | P03363 | Q13610  | -0.22741  |
| 24141 | P03363 | Q9NP74  | -0.17352  |
| 24142 | P03363 | Q9Y490  | -0.22753  |
| 24143 | P03363 | Q8NBI2  | -0.68733  |
| 24144 | P03363 | Q9NZN3  | -0.2948   |
| 24145 | P03363 | A8MXE2  | -0.32369  |
| 24146 | P03363 | Q537H7  | -0.14193  |
| 24147 | P03363 | Q9Y466  | -0.22765  |
| 24148 | P03363 | Q12788  | -0.22834  |
| 24149 | P03363 | Q43555  | -0.5098   |
| 24150 | P03363 | Q9BUB5  | -0.22747  |
| 24151 | P03363 | Q96JY6  | -0.22739  |
| 24152 | P03363 | Q49A26  | -0.22719  |
| 24153 | P03363 | Q8N9H8  | -0.22192  |
| 24154 | P03363 | A6NCJ1  | -0.16694  |
| 24155 | P03363 | Q7Z6M2  | -0.20791  |
| 24156 | P03363 | Q8NGP3  | -0.61656  |
| 24157 | P03363 | Q86YQ8  | -0.22819  |
| 24158 | P03363 | P20591  | -0.22954  |
| 24159 | P03363 | P23416  | -0.42096  |
| 24160 | P03363 | O00264  | -0.20707  |
| 24161 | P03363 | Q15762  | -0.29741  |
| 24162 | P03363 | Q13418  | -0.23548  |
| 24163 | P03363 | Q9NVC3  | -0.35994  |
| 24164 | P03363 | Q8N4L1  | -0.32626  |
| 24165 | P03363 | Q9Y6N3  | -0.41574  |
| 24166 | P03363 | A6NFQ2  | -0.12207  |
| 24167 | P03363 | O00453  | -0.2615   |
| 24168 | P03363 | Q5J8M3  | -0.31625  |

|       |        |        |           |
|-------|--------|--------|-----------|
| 24169 | P03363 | Q16790 | -0.34836  |
| 24170 | P03363 | Q8WTQ7 | -0.68676  |
| 24171 | P03363 | P0C264 | -0.54205  |
| 24172 | P03363 | Q9H257 | -0.22452  |
| 24173 | P03363 | Q8NAE3 | -0.037606 |
| 24174 | P03363 | Q7Z3H4 | -0.22546  |
| 24175 | P03363 | Q6ZWB6 | -0.19075  |
| 24176 | P03363 | P16591 | -0.29505  |
| 24177 | P03363 | P78509 | -0.32747  |
| 24178 | P03363 | P01714 | -0.54902  |
| 24179 | P03363 | Q7L985 | -0.32626  |
| 24180 | P03363 | Q8NAM6 | -0.19054  |
| 24181 | P03363 | P03971 | -0.22741  |
| 24182 | P03363 | P0CG47 | -0.22739  |
| 24183 | P03363 | Q9UBV2 | -0.22743  |
| 24184 | P03363 | Q6UXV0 | -0.46508  |
| 24185 | P03363 | P09544 | -0.26412  |
| 24186 | P03363 | Q6IQ55 | -0.22741  |
| 24187 | P03363 | Q9UK32 | -0.36816  |
| 24188 | P03363 | Q9HCS2 | -0.46636  |
| 24189 | P03363 | Q9UHA2 | -0.11418  |
| 24190 | P03363 | P48751 | -0.53487  |
| 24191 | P03363 | P22695 | -0.19079  |
| 24192 | P03363 | Q15270 | -0.43     |
| 24193 | P03363 | Q96LM5 | -0.20307  |
| 24194 | P03363 | Q96P64 | -0.45506  |
| 24195 | P03363 | Q04446 | -0.11066  |
| 24196 | P03363 | P43631 | -0.51757  |
| 24197 | P03363 | Q1A5X7 | -0.19634  |
| 24198 | P03363 | Q9H720 | -0.32331  |
| 24199 | P03363 | Q15374 | -0.51932  |
| 24200 | P03363 | Q9NPI9 | -0.54402  |
| 24201 | P03363 | Q7Z692 | -0.32626  |
| 24202 | P03363 | Q13099 | -0.22738  |
| 24203 | P03363 | Q9NRR2 | -0.53451  |
| 24204 | P03363 | A8MZA4 | -0.045157 |
| 24205 | P03363 | Q96SB8 | -0.22586  |
| 24206 | P03363 | Q95633 | -0.22727  |
| 24207 | P03363 | Q9H2V7 | -0.22773  |
| 24208 | P03363 | B2RUY7 | -0.39164  |
| 24209 | P03363 | Q9NW82 | -0.22741  |
| 24210 | P03363 | P29965 | -0.61714  |
| 24211 | P03363 | Q8NGF7 | -0.61656  |
| 24212 | P03363 | Q8NBB2 | -0.21153  |
| 24213 | P03363 | P30475 | -0.59713  |
| 24214 | P03363 | F8W1W9 | -0.14085  |
| 24215 | P03363 | Q43521 | -0.22544  |
| 24216 | P03363 | P01308 | -0.22682  |
| 24217 | P03363 | Q8NB59 | -0.27563  |
| 24218 | P03363 | Q5TFQ8 | -0.32626  |
| 24219 | P03363 | Q9HAH7 | -0.048907 |
| 24220 | P03363 | Q08830 | -0.54287  |
| 24221 | P03363 | Q9H6W3 | -0.1013   |
| 24222 | P03363 | Q4W4Y0 | -0.17643  |
| 24223 | P03363 | A6NC86 | -0.33643  |
| 24224 | P03363 | Q8WUJ1 | -0.30522  |
| 24225 | P03363 | Q00574 | -0.65662  |
| 24226 | P03363 | P30953 | -0.61656  |
| 24227 | P03363 | Q70Z35 | -0.23472  |
| 24228 | P03363 | Q8NCG5 | -0.34059  |
| 24229 | P03363 | P31350 | -0.20469  |
| 24230 | P03363 | P58166 | -0.29844  |
| 24231 | P03363 | P11362 | -0.23309  |
| 24232 | P03363 | A5D8V7 | -0.1791   |
| 24233 | P03363 | Q9H845 | -0.30615  |
| 24234 | P03363 | Q16609 | -0.23038  |
| 24235 | P03363 | Q13133 | -0.22854  |
| 24236 | P03363 | Q86SQ3 | -0.6943   |
| 24237 | P03363 | Q9BUI4 | -0.19266  |
| 24238 | P03363 | Q9NYA4 | -0.22652  |
| 24239 | P03363 | Q9NSY2 | -0.23031  |
| 24240 | P03363 | Q8IWD5 | -0.32626  |
| 24241 | P03363 | Q9UH36 | -0.11911  |
| 24242 | P03363 | Q96L42 | -0.4354   |
| 24243 | P03363 | Q9H3T2 | -0.48245  |
| 24244 | P03363 | Q96J92 | -0.35778  |

|       |        |        |           |
|-------|--------|--------|-----------|
| 24245 | P03363 | A6NHS7 | -0.32626  |
| 24246 | P03363 | Q8TCU5 | -0.23989  |
| 24247 | P03363 | Q02383 | -0.25253  |
| 24248 | P03363 | A6NIL9 | -0.32626  |
| 24249 | P03363 | Q8NGT1 | -0.61656  |
| 24250 | P03363 | P56880 | -0.27242  |
| 24251 | P03363 | P49862 | -0.43924  |
| 24252 | P03363 | P47985 | -0.67091  |
| 24253 | P03363 | P37058 | -0.31156  |
| 24254 | P03363 | B1AL46 | -0.028135 |
| 24255 | P03363 | Q14982 | -0.40632  |
| 24256 | P03363 | Q3KP44 | -0.2274   |
| 24257 | P03363 | Q9H5J0 | -0.22736  |
| 24258 | P03363 | Q96LX7 | -0.17306  |
| 24259 | P03363 | O75173 | -0.33502  |
| 24260 | P03363 | Q6ZMS4 | -0.12428  |
| 24261 | P03363 | Q9NWL6 | -0.19245  |
| 24262 | P03363 | Q2M385 | -0.32626  |
| 24263 | P03363 | P01814 | -0.54902  |
| 24264 | P03363 | P19105 | -0.22722  |
| 24265 | P03363 | Q9P281 | -0.1947   |
| 24266 | P03363 | Q9NWM8 | -0.22759  |
| 24267 | P03363 | O43448 | -0.27855  |
| 24268 | P03363 | Q9C0I1 | -0.22312  |
| 24269 | P03363 | P01350 | -0.43587  |
| 24270 | P03363 | P05496 | -0.34155  |
| 24271 | P03363 | Q9Y586 | -0.16047  |
| 24272 | P03363 | P0C623 | -0.61656  |
| 24273 | P03363 | Q9GZU5 | -0.47355  |
| 24274 | P03363 | Q9Y5L3 | -0.53801  |
| 24275 | P03363 | Q70JA7 | -0.37869  |
| 24276 | P03363 | P61026 | -0.36775  |
| 24277 | P03363 | A6NJS3 | -0.33992  |
| 24278 | P03363 | Q9UNQ0 | -0.25294  |
| 24279 | P03363 | P46736 | -0.24549  |
| 24280 | P03363 | P16410 | -0.24003  |
| 24281 | P03363 | H3BQB6 | -0.10219  |
| 24282 | P03363 | Q9Y287 | -0.15607  |
| 24283 | P03363 | P07099 | -0.47013  |
| 24284 | P03363 | Q8N1F1 | -0.042737 |
| 24285 | P03363 | Q6J4K2 | -0.49957  |
| 24286 | P03363 | Q5R3K3 | -0.32626  |
| 24287 | P03363 | Q9NVT9 | -0.10281  |
| 24288 | P03363 | P11117 | -0.38557  |
| 24289 | P03363 | Q9P2W3 | -0.29713  |
| 24290 | P03363 | Q96PQ5 | -0.14035  |
| 24291 | P03363 | Q99418 | -0.22741  |
| 24292 | P03363 | Q5JW98 | -0.32626  |
| 24293 | P03363 | Q5VU92 | -0.22724  |
| 24294 | P03363 | Q13371 | -0.14657  |
| 24295 | P03363 | Q9H078 | -0.23961  |
| 24296 | P03363 | Q9UK22 | -0.20452  |
| 24297 | P03363 | Q86YV0 | -0.22738  |
| 24298 | P03363 | Q92731 | -0.22742  |
| 24299 | P03363 | Q9BTN0 | -0.50482  |
| 24300 | P03363 | Q13072 | -0.33992  |
| 24301 | P03363 | Q7Z4N2 | -0.62642  |
| 24302 | P03363 | Q9UPY5 | -0.29654  |
| 24303 | P03363 | Q96E17 | -0.41601  |
| 24304 | P03363 | Q9H3L0 | -0.048858 |
| 24305 | P03363 | Q9NP99 | -0.83898  |
| 24306 | P03363 | P40123 | -0.2539   |
| 24307 | P03363 | O95158 | -0.2622   |
| 24308 | P03363 | Q9HBE5 | -0.33953  |
| 24309 | P03363 | P12830 | -0.30107  |
| 24310 | P03363 | P06310 | -0.54902  |
| 24311 | P03363 | O43813 | -0.18852  |
| 24312 | P03363 | O75439 | -0.32779  |
| 24313 | P03363 | P62942 | -0.22764  |
| 24314 | P03363 | Q8N370 | -0.48531  |
| 24315 | P03363 | O60939 | -0.38466  |
| 24316 | P03363 | P09564 | -0.48524  |
| 24317 | P03363 | Q6DHY5 | -0.50908  |
| 24318 | P03363 | Q14756 | -0.62543  |
| 24319 | P03363 | Q969G2 | -0.22729  |
| 24320 | P03363 | Q13555 | -0.54284  |

|       |        |        |           |
|-------|--------|--------|-----------|
| 24321 | P03363 | O43247 | -0.2317   |
| 24322 | P03363 | Q9NVV2 | -0.042737 |
| 24323 | P03363 | P22392 | -0.21946  |
| 24324 | P03363 | P49588 | -0.14882  |
| 24325 | P03363 | P53004 | -0.35261  |
| 24326 | P03363 | P02788 | -0.21979  |
| 24327 | P03363 | P18464 | -0.54957  |
| 24328 | P03363 | Q9HB55 | -0.61761  |
| 24329 | P03363 | Q75MW2 | -0.038249 |
| 24330 | P03363 | Q9Y624 | -0.34433  |
| 24331 | P03363 | Q9HAT0 | -0.17028  |
| 24332 | P03363 | P53673 | -0.079512 |
| 24333 | P03363 | Q96KN4 | -0.20378  |
| 24334 | P03363 | P20160 | -0.3415   |
| 24335 | P03363 | Q9HCT0 | -0.34343  |
| 24336 | P03363 | Q43157 | -0.49566  |
| 24337 | P03363 | Q8NGT0 | -0.61656  |
| 24338 | P03363 | Q9UK59 | -0.1712   |
| 24339 | P03363 | Q96GS6 | -0.32464  |
| 24340 | P03363 | Q8N428 | -0.27588  |
| 24341 | P03363 | P21399 | -0.20819  |
| 24342 | P03363 | P37235 | -0.26354  |
| 24343 | P03363 | Q9BRK3 | -0.32626  |
| 24344 | P03363 | Q2M3T9 | -0.30065  |
| 24345 | P03363 | Q8N0W3 | -0.26121  |
| 24346 | P03363 | Q6IPT4 | -0.23451  |
| 24347 | P03363 | P0C7A2 | -0.26174  |
| 24348 | P03363 | Q5TC79 | -0.22735  |
| 24349 | P03363 | Q8NG98 | -0.61656  |
| 24350 | P03363 | Q96J66 | -0.67725  |
| 24351 | P03363 | Q96JT2 | -0.30406  |
| 24352 | P03363 | Q6ICI0 | -0.32626  |
| 24353 | P03363 | Q94979 | -0.29493  |
| 24354 | P03363 | Q8NBV8 | -0.32772  |
| 24355 | P03363 | Q9Y519 | -0.32626  |
| 24356 | P03363 | Q8TD08 | -0.7017   |
| 24357 | P03363 | Q0VFZ6 | -0.031359 |
| 24358 | P03363 | P0C646 | -0.61656  |
| 24359 | P03363 | Q969X0 | -0.19485  |
| 24360 | P03363 | Q8NGX9 | -0.61656  |
| 24361 | P03363 | P29466 | -0.2274   |
| 24362 | P03363 | Q147X3 | -0.20242  |
| 24363 | P03363 | P18825 | -0.22829  |
| 24364 | P03363 | Q6NVV7 | -0.15963  |
| 24365 | P03363 | Q15046 | -0.090126 |
| 24366 | P03363 | Q9NRB3 | -0.3271   |
| 24367 | P03363 | P02814 | -0.35967  |
| 24368 | P03363 | Q15303 | -0.62981  |
| 24369 | P03363 | Q6ZW31 | -0.27773  |
| 24370 | P03363 | Q06830 | -0.22646  |
| 24371 | P03363 | P61073 | -0.23306  |
| 24372 | P03363 | Q13639 | -0.51429  |
| 24373 | P03363 | Q9UBR5 | -0.73454  |
| 24374 | P03363 | Q5T686 | -0.083244 |
| 24375 | P03363 | P30457 | -0.35929  |
| 24376 | P03363 | Q6P1Q0 | -0.17415  |
| 24377 | P03363 | Q16696 | -0.61761  |
| 24378 | P03363 | Q5SWL8 | -0.14516  |
| 24379 | P03363 | Q9BQA9 | -0.1732   |
| 24380 | P03363 | Q9NPF8 | -0.27971  |
| 24381 | P03363 | Q8WXD9 | -0.22741  |
| 24382 | P03363 | Q96LB8 | -0.49328  |
| 24383 | P03363 | Q96RI8 | -0.62775  |
| 24384 | P03363 | Q95278 | -0.22888  |
| 24385 | P03363 | O60309 | -0.32626  |
| 24386 | P03363 | P01833 | -0.869    |
| 24387 | P03363 | Q9NPD7 | -0.21296  |
| 24388 | P03363 | A6NER3 | -0.23345  |
| 24389 | P03363 | Q8N3F0 | -0.076849 |
| 24390 | P03363 | P56378 | -0.20359  |
| 24391 | P03363 | Q86SS6 | -0.3891   |
| 24392 | P03363 | P0C1H6 | -0.13784  |
| 24393 | P03363 | Q9Y3N9 | -0.61656  |
| 24394 | P03363 | P0C7H9 | -0.23545  |
| 24395 | P03363 | P08910 | -0.22655  |
| 24396 | P03363 | Q5VX52 | -0.17745  |

|       |        |        |           |
|-------|--------|--------|-----------|
| 24397 | P03363 | P25325 | -0.22702  |
| 24398 | P03363 | Q9Y278 | -0.36237  |
| 24399 | P03363 | Q5SWX8 | -0.61559  |
| 24400 | P03363 | P33993 | -0.22197  |
| 24401 | P03363 | Q6ZS62 | -0.32626  |
| 24402 | P03363 | Q96P65 | -0.62776  |
| 24403 | P03363 | O00623 | -0.22588  |
| 24404 | P03363 | P0CJ70 | -0.13673  |
| 24405 | P03363 | P58397 | -0.59199  |
| 24406 | P03363 | Q9Y227 | -0.23654  |
| 24407 | P03363 | O15354 | -0.87868  |
| 24408 | P03363 | O94766 | -0.43165  |
| 24409 | P03363 | Q9UDX5 | -0.31268  |
| 24410 | P03363 | Q8NA47 | -0.031359 |
| 24411 | P03363 | Q06323 | -0.088826 |
| 24412 | P03363 | Q5SRE7 | -0.35541  |
| 24413 | P03363 | P43403 | -0.26175  |
| 24414 | P03363 | Q13733 | -0.5284   |
| 24415 | P03363 | Q96D21 | -0.52468  |
| 24416 | P03363 | Q9H5Y7 | -0.37674  |
| 24417 | P03363 | P19634 | -0.2629   |
| 24418 | P03363 | O95866 | -0.58391  |
| 24419 | P03363 | Q9Y6X9 | -0.2197   |
| 24420 | P03363 | P98198 | -0.59245  |
| 24421 | P03363 | Q15155 | -0.19964  |
| 24422 | P03363 | Q9HB20 | -0.22738  |
| 24423 | P03363 | Q9NWW5 | -0.16602  |
| 24424 | P03363 | A3KMH1 | -0.65661  |
| 24425 | P03363 | Q5XG92 | -0.31903  |
| 24426 | P03363 | Q6UXG2 | -0.3808   |
| 24427 | P03363 | Q8WW36 | -0.21505  |
| 24428 | P03363 | K9M1U5 | -0.042737 |
| 24429 | P03363 | P17677 | -0.15784  |
| 24430 | P03363 | Q9NV96 | -0.19794  |
| 24431 | P03363 | Q9UKU0 | -0.58427  |
| 24432 | P03363 | P62333 | -0.45562  |
| 24433 | P03363 | Q8IYT8 | -0.34156  |
| 24434 | P03363 | P17538 | -0.55299  |
| 24435 | P03363 | P55774 | -0.28443  |
| 24436 | P03363 | P16112 | -0.38833  |
| 24437 | P03363 | Q15418 | -0.22212  |
| 24438 | P03363 | Q5TEZ5 | -0.20408  |
| 24439 | P03363 | P01133 | -0.51676  |
| 24440 | P03363 | Q7L0Q8 | -0.2252   |
| 24441 | P03363 | Q9NZQ9 | -0.2262   |
| 24442 | P03363 | P61296 | -0.22843  |
| 24443 | P03363 | Q15070 | -0.13446  |
| 24444 | P03363 | P30042 | -0.16962  |
| 24445 | P03363 | Q9BXQ6 | -0.042737 |
| 24446 | P03363 | Q9H255 | -0.61656  |
| 24447 | P03363 | Q05682 | -0.22523  |
| 24448 | P03363 | Q9H1J5 | -0.36245  |
| 24449 | P03363 | Q76M96 | -0.45488  |
| 24450 | P03363 | Q96SL1 | -0.36923  |
| 24451 | P03363 | Q8N9K7 | -0.042737 |
| 24452 | P03363 | Q68CQ1 | -0.32626  |
| 24453 | P03363 | Q75636 | -0.22734  |
| 24454 | P03363 | P57768 | -0.22715  |
| 24455 | P03363 | A6NH13 | -0.055528 |
| 24456 | P03363 | Q9UKA4 | -0.14879  |
| 24457 | P03363 | A6NL99 | -0.29636  |
| 24458 | P03363 | Q9UL46 | -0.16516  |
| 24459 | P03363 | P59646 | -0.37586  |
| 24460 | P03363 | A4FU69 | -0.17115  |
| 24461 | P03363 | Q9NQS3 | -0.22754  |
| 24462 | P03363 | Q8NGY3 | -0.61656  |
| 24463 | P03363 | Q99435 | -0.22742  |
| 24464 | P03363 | Q8WYP3 | -0.23447  |
| 24465 | P03363 | Q13670 | -0.19772  |
| 24466 | P03363 | Q86U06 | -0.22808  |
| 24467 | P03363 | Q8N9V6 | -0.22741  |
| 24468 | P03363 | Q58HT5 | -0.47773  |
| 24469 | P03363 | Q96KJ4 | -0.40601  |
| 24470 | P03363 | P01266 | -0.44453  |
| 24471 | P03363 | O75365 | -0.46172  |
| 24472 | P03363 | Q9NXW2 | -0.35579  |

|       |        |        |           |
|-------|--------|--------|-----------|
| 24473 | P03363 | P55808 | -0.48647  |
| 24474 | P03363 | A4FU49 | -0.22641  |
| 24475 | P03363 | Q8IX95 | -0.20058  |
| 24476 | P03363 | Q15334 | -0.28694  |
| 24477 | P03363 | Q5TYW2 | -0.22741  |
| 24478 | P03363 | Q9NXB9 | -0.20449  |
| 24479 | P03363 | Q8TAD2 | -0.46136  |
| 24480 | P03363 | Q9GZV8 | -0.18597  |
| 24481 | P03363 | Q92692 | -0.22741  |
| 24482 | P03363 | Q96LP6 | -0.15716  |
| 24483 | P03363 | Q96S16 | -0.20456  |
| 24484 | P03363 | Q63HQ2 | -0.36455  |
| 24485 | P03363 | Q9UPQ8 | -0.47453  |
| 24486 | P03363 | Q5QGT7 | -0.4465   |
| 24487 | P03363 | Q8NGX3 | -0.61656  |
| 24488 | P03363 | Q8NHA4 | -0.61656  |
| 24489 | P03363 | Q8N128 | -0.042737 |
| 24490 | P03363 | Q92784 | -0.22855  |
| 24491 | P03363 | O00329 | -0.25927  |
| 24492 | P03363 | Q9BTL4 | -0.073458 |
| 24493 | P03363 | P23327 | -0.0813   |
| 24494 | P03363 | Q8NBE8 | -0.19217  |
| 24495 | P03363 | Q9BZ95 | -0.22737  |
| 24496 | P03363 | Q9UDX4 | -0.39188  |
| 24497 | P03363 | Q9P0W8 | -0.19243  |
| 24498 | P03363 | Q6PIV2 | -0.29185  |
| 24499 | P03363 | P22830 | -0.17565  |
| 24500 | P03363 | Q6AI12 | -0.22741  |
| 24501 | P03363 | Q8NFV4 | -0.22585  |
| 24502 | P03363 | Q99726 | -0.36959  |
| 24503 | P03363 | Q5VWM1 | -0.10697  |
| 24504 | P03363 | Q6PIW4 | -0.23163  |
| 24505 | P03363 | Q9HB89 | -0.6082   |
| 24506 | P03363 | Q9H7X7 | -0.38666  |
| 24507 | P03363 | Q86SQ4 | -0.6666   |
| 24508 | P03363 | O15482 | -0.24975  |
| 24509 | P03363 | P0C6P0 | -0.21927  |
| 24510 | P03363 | P23634 | -0.23685  |
| 24511 | P03363 | P49715 | -0.2234   |
| 24512 | P03363 | P43652 | -0.38841  |
| 24513 | P03363 | Q5JTJ3 | -0.17891  |
| 24514 | P03363 | Q7Z7M1 | -0.6666   |
| 24515 | P03363 | Q2KJY2 | -0.24395  |
| 24516 | P03363 | A8MQT2 | -0.20865  |
| 24517 | P03363 | Q5VT98 | -0.15602  |
| 24518 | P03363 | Q9NYD6 | -0.23984  |
| 24519 | P03363 | P35544 | -0.22726  |
| 24520 | P03363 | Q8NGA8 | -0.61656  |
| 24521 | P03363 | Q9UH62 | -0.2272   |
| 24522 | P03363 | Q14515 | -0.5594   |
| 24523 | P03363 | Q8NGJ7 | -0.61656  |
| 24524 | P03363 | Q9Y6F9 | -0.52005  |
| 24525 | P03363 | Q8N3J6 | -0.54507  |
| 24526 | P03363 | Q14643 | -0.22687  |
| 24527 | P03363 | P01588 | -0.17889  |
| 24528 | P03363 | Q7Z6B7 | -0.22755  |
| 24529 | P03363 | P42702 | -0.60846  |
| 24530 | P03363 | Q9UN71 | -0.56957  |
| 24531 | P03363 | Q8N7H1 | -0.18099  |
| 24532 | P03363 | Q8TEH3 | -0.31559  |
| 24533 | P03363 | Q9NS68 | -0.28507  |
| 24534 | P03363 | Q9NXG2 | -0.19786  |
| 24535 | P03363 | Q6DN72 | -0.34402  |
| 24536 | P03363 | Q9BZF2 | -0.23427  |
| 24537 | P03363 | O75923 | -0.42275  |
| 24538 | P03363 | Q5QJU3 | -0.22864  |
| 24539 | P03363 | Q8TBE3 | -0.32626  |
| 24540 | P03363 | P00450 | -0.62926  |
| 24541 | P03363 | Q9H7T0 | -0.4245   |
| 24542 | P03363 | Q8N801 | -0.20283  |
| 24543 | P03363 | Q9BT43 | -0.20133  |
| 24544 | P03363 | P30453 | -0.36051  |
| 24545 | P03363 | Q9NS86 | -0.17922  |
| 24546 | P03363 | Q9H061 | -0.26954  |
| 24547 | P03363 | Q9Y6F7 | -0.22712  |
| 24548 | P03363 | Q8NBI5 | -0.32922  |



|       |        |        |           |
|-------|--------|--------|-----------|
| 24549 | P03363 | Q6ZWI9 | -0.22752  |
| 24550 | P03363 | Q6UXQ4 | -0.33992  |
| 24551 | P03363 | Q8TAG5 | -0.33992  |
| 24552 | P03363 | P57073 | -0.24995  |
| 24553 | P03363 | Q92520 | -0.38015  |
| 24554 | P03363 | Q96M96 | -0.37326  |
| 24555 | P03363 | O95470 | -0.22699  |
| 24556 | P03363 | Q9ULT6 | -0.23048  |
| 24557 | P03363 | Q8NGK3 | -0.61656  |
| 24558 | P03363 | Q8N8V4 | -0.22741  |
| 24559 | P03363 | Q14940 | -0.50236  |
| 24560 | P03363 | Q8N8V2 | -0.37936  |
| 24561 | P03363 | Q8NFU5 | -0.20462  |
| 24562 | P03363 | Q9BXJ5 | -0.45165  |
| 24563 | P03363 | P60985 | -0.36496  |
| 24564 | P03363 | Q9NV58 | -0.22683  |
| 24565 | P03363 | Q0ZGT2 | -0.22741  |
| 24566 | P03363 | Q96NZ9 | -0.33992  |
| 24567 | P03363 | Q5EBM0 | -0.16512  |
| 24568 | P03363 | Q6UXQ8 | -0.33992  |
| 24569 | P03363 | P00325 | -0.37598  |
| 24570 | P03363 | O00584 | -0.3761   |
| 24571 | P03363 | Q15116 | -0.22863  |
| 24572 | P03363 | Q9NS28 | -0.22776  |
| 24573 | P03363 | Q96K49 | -0.32626  |
| 24574 | P03363 | Q6NYC1 | -0.22041  |
| 24575 | P03363 | P53816 | -0.21437  |
| 24576 | P03363 | Q5J8X5 | -0.32626  |
| 24577 | P03363 | Q9UBK7 | -0.38219  |
| 24578 | P03363 | Q9Y646 | -0.46877  |
| 24579 | P03363 | A6NI03 | -0.27953  |
| 24580 | P03363 | A8K2U0 | -0.41564  |
| 24581 | P03363 | Q6JVE9 | -0.32907  |
| 24582 | P03363 | Q96A59 | -0.24536  |
| 24583 | P03363 | Q96PV0 | -0.22739  |
| 24584 | P03363 | Q53FV1 | -0.51163  |
| 24585 | P03363 | O95057 | -0.631    |
| 24586 | P03363 | A8MUL3 | -0.042737 |
| 24587 | P03363 | Q06055 | -0.36412  |
| 24588 | P03363 | Q13510 | -0.1626   |
| 24589 | P03363 | Q86TG1 | -0.46508  |
| 24590 | P03363 | P32927 | -0.25838  |
| 24591 | P03363 | Q8TF71 | -0.45895  |
| 24592 | P03363 | P02100 | -0.084803 |
| 24593 | P03363 | P14410 | -0.35666  |
| 24594 | P03363 | O95263 | -0.22728  |
| 24595 | P03363 | Q8N4S9 | -0.39988  |
| 24596 | P03363 | Q9NPH3 | -0.97158  |
| 24597 | P03363 | Q2VPJ9 | -0.031359 |
| 24598 | P03363 | P48736 | -0.2556   |
| 24599 | P03363 | Q30KP9 | -0.33516  |
| 24600 | P03363 | Q13451 | -0.27989  |
| 24601 | P03363 | Q16281 | -0.70853  |
| 24602 | P03363 | O60262 | -0.3024   |
| 24603 | P03363 | Q4AE62 | -0.20815  |
| 24604 | P03363 | Q9UKR5 | -0.44674  |
| 24605 | P03363 | Q8NC60 | -0.20264  |
| 24606 | P03363 | Q8IWA4 | -0.36476  |
| 24607 | P03363 | P18405 | -0.30169  |
| 24608 | P03363 | P17181 | -0.52682  |
| 24609 | P03363 | Q99487 | -0.18877  |
| 24610 | P03363 | P20062 | -0.48896  |
| 24611 | P03363 | Q8IVJ1 | -0.49352  |
| 24612 | P03363 | Q9GZX9 | -0.44064  |
| 24613 | P03363 | Q53HR8 | -0.11995  |
| 24614 | P03363 | P80421 | -0.37246  |
| 24615 | P03363 | Q9Y257 | -0.53933  |
| 24616 | P03363 | P0CV99 | -0.13002  |
| 24617 | P03363 | P36406 | -0.22766  |
| 24618 | P03363 | Q9Y2T1 | -0.39804  |
| 24619 | P03363 | Q9NPE2 | -0.21005  |
| 24620 | P03363 | Q9UQB9 | -0.46334  |
| 24621 | P03363 | Q9HCI7 | -0.16705  |
| 24622 | P03363 | P48507 | -0.21097  |
| 24623 | P03363 | Q8N6H7 | -0.19371  |
| 24624 | P03363 | P62079 | -0.32626  |

|       |        |        |           |
|-------|--------|--------|-----------|
| 24625 | P03363 | Q5M7Z0 | -0.47964  |
| 24626 | P03363 | P58546 | -0.22741  |
| 24627 | P03363 | Q99999 | -0.4071   |
| 24628 | P03363 | Q2VPA4 | -0.22775  |
| 24629 | P03363 | Q13571 | -0.4653   |
| 24630 | P03363 | O75051 | -0.62126  |
| 24631 | P03363 | P36537 | -0.47383  |
| 24632 | P03363 | Q9H3M9 | -0.10067  |
| 24633 | P03363 | Q6NSX1 | -0.4806   |
| 24634 | P03363 | P49748 | -0.28902  |
| 24635 | P03363 | Q16048 | -0.33446  |
| 24636 | P03363 | Q96SA4 | -0.32626  |
| 24637 | P03363 | Q15111 | -0.22741  |
| 24638 | P03363 | Q96JA3 | -0.22733  |
| 24639 | P03363 | O00238 | -0.41524  |
| 24640 | P03363 | Q96QR1 | -0.40459  |
| 24641 | P03363 | Q9H7X0 | -0.21472  |
| 24642 | P03363 | Q7Z2X4 | -0.1898   |
| 24643 | P03363 | P06732 | -0.26396  |
| 24644 | P03363 | Q9BZK8 | -0.042737 |
| 24645 | P03363 | Q8WYK1 | -0.53557  |
| 24646 | P03363 | P53582 | -0.18772  |
| 24647 | P03363 | P07305 | -0.12004  |
| 24648 | P03363 | Q8N8Y5 | -0.15499  |
| 24649 | P03363 | B0YJ81 | -0.79014  |
| 24650 | P03363 | P11229 | -0.46538  |
| 24651 | P03363 | Q8WWH4 | -0.2274   |
| 24652 | P03363 | Q96J88 | -0.23479  |
| 24653 | P03363 | Q6ZTI0 | -0.042737 |
| 24654 | P03363 | O60683 | -0.2274   |
| 24655 | P03363 | O60673 | -0.2766   |
| 24656 | P03363 | Q9H2C5 | -0.61656  |
| 24657 | P03363 | Q8WY21 | -0.23294  |
| 24658 | P03363 | Q8N852 | -0.32626  |
| 24659 | P03363 | P0C1S8 | -0.25634  |
| 24660 | P03363 | Q8NH55 | -0.61656  |
| 24661 | P03363 | Q8N485 | -0.16174  |
| 24662 | P03363 | Q9H3R2 | -0.81528  |
| 24663 | P03363 | P05549 | -0.22166  |
| 24664 | P03363 | Q8TCB6 | -0.61656  |
| 24665 | P03363 | Q6PI97 | -0.11571  |
| 24666 | P03363 | P07098 | -0.36037  |
| 24667 | P03363 | Q9H2A9 | -0.30018  |
| 24668 | P03363 | P21741 | -0.46489  |
| 24669 | P03363 | P85037 | -0.25892  |
| 24670 | P03363 | O60941 | -0.22713  |
| 24671 | P03363 | P32926 | -0.43943  |
| 24672 | P03363 | Q147U7 | -0.32626  |
| 24673 | P03363 | Q8TD94 | -0.22589  |
| 24674 | P03363 | Q13261 | -0.33714  |
| 24675 | P03363 | O14773 | -0.25887  |
| 24676 | P03363 | Q9BYS8 | -0.29695  |
| 24677 | P03363 | P01861 | -0.50706  |
| 24678 | P03363 | Q4G0N4 | -0.14494  |
| 24679 | P03363 | P61371 | -0.22742  |
| 24680 | P03363 | Q8N7S2 | -0.20428  |
| 24681 | P03363 | P20851 | -0.5187   |
| 24682 | P03363 | P35590 | -0.53159  |
| 24683 | P03363 | Q96L16 | -0.18272  |
| 24684 | P03363 | Q96HB5 | -0.11729  |
| 24685 | P03363 | Q9H4M7 | -0.22738  |
| 24686 | P03363 | Q9NZF1 | -0.15399  |
| 24687 | P03363 | O43603 | -0.62392  |
| 24688 | P03363 | Q96JH7 | -0.21179  |
| 24689 | P03363 | Q9Y530 | -0.073098 |
| 24690 | P03363 | O43304 | -0.31957  |
| 24691 | P03363 | Q587I9 | -0.13917  |
| 24692 | P03363 | Q6ZMR5 | -0.82897  |
| 24693 | P03363 | Q8NGJ1 | -0.61656  |
| 24694 | P03363 | P01769 | -0.54902  |
| 24695 | P03363 | Q8NDZ4 | -0.31615  |
| 24696 | P03363 | Q5U4N7 | -0.042737 |
| 24697 | P03363 | Q8N4V2 | -0.29261  |
| 24698 | P03363 | P07858 | -0.24545  |
| 24699 | P03363 | P08567 | -0.22741  |
| 24700 | P03363 | E9PQR5 | -0.18854  |

|       |        |        |           |
|-------|--------|--------|-----------|
| 24701 | P03363 | Q96J77 | -0.22345  |
| 24702 | P03363 | Q9H5U6 | -0.21679  |
| 24703 | P03363 | P00156 | -0.49265  |
| 24704 | P03363 | Q8N655 | -0.042737 |
| 24705 | P03363 | Q9C091 | -0.32626  |
| 24706 | P03363 | O60292 | -0.3125   |
| 24707 | P03363 | O43612 | -0.23417  |
| 24708 | P03363 | P36955 | -0.49679  |
| 24709 | P03363 | Q6PK57 | -0.22382  |
| 24710 | P03363 | Q9H490 | -0.53629  |
| 24711 | P03363 | Q9UJ14 | -0.281    |
| 24712 | P03363 | Q8NHB8 | -0.61656  |
| 24713 | P03363 | Q7Z2X7 | -0.041022 |
| 24714 | P03363 | Q13740 | -0.54475  |
| 24715 | P03363 | Q9NPF2 | -0.24544  |
| 24716 | P03363 | Q5VU36 | -0.32626  |
| 24717 | P03363 | Q14943 | -0.58151  |
| 24718 | P03363 | Q5T1M5 | -0.2274   |
| 24719 | P03363 | Q6UY09 | -0.32626  |
| 24720 | P03363 | Q96R67 | -0.61656  |
| 24721 | P03363 | Q7Z3T8 | -0.21112  |
| 24722 | P03363 | Q9BWW1 | -0.22767  |
| 24723 | P03363 | P61225 | -0.44362  |
| 24724 | P03363 | Q6UXH0 | -0.21302  |
| 24725 | P03363 | Q15878 | -0.45737  |
| 24726 | P03363 | P0DL12 | -0.05567  |
| 24727 | P03363 | P37059 | -0.63809  |
| 24728 | P03363 | Q8N815 | -0.16262  |
| 24729 | P03363 | Q9UQ74 | -0.33992  |
| 24730 | P03363 | P03989 | -0.53203  |
| 24731 | P03363 | Q96EC8 | -0.42352  |
| 24732 | P03363 | Q8N0Y3 | -0.61656  |
| 24733 | P03363 | Q9Y2D4 | -0.19921  |
| 24734 | P03363 | Q86TZ1 | -0.2274   |
| 24735 | P03363 | Q6UW78 | -0.33992  |
| 24736 | P03363 | P61129 | -0.20966  |
| 24737 | P03363 | Q7L0J3 | -0.22961  |
| 24738 | P03363 | Q9H5X1 | -0.15906  |
| 24739 | P03363 | Q96PQ1 | -0.40674  |
| 24740 | P03363 | P56750 | -0.2744   |
| 24741 | P03363 | Q2KHT3 | -0.037515 |
| 24742 | P03363 | Q7Z4H8 | -0.21493  |
| 24743 | P03363 | Q4KMG0 | -0.22745  |
| 24744 | P03363 | Q13253 | -0.22602  |
| 24745 | P03363 | Q02539 | -0.12701  |
| 24746 | P03363 | O75015 | -0.61584  |
| 24747 | P03363 | O75787 | -0.13576  |
| 24748 | P03363 | A4D2G3 | -0.61656  |
| 24749 | P03363 | Q9BW91 | -0.19724  |
| 24750 | P03363 | P17813 | -0.22211  |
| 24751 | P03363 | A6NLI5 | -0.27953  |
| 24752 | P03363 | Q86SG3 | -0.22754  |
| 24753 | P03363 | P49407 | -0.24815  |
| 24754 | P03363 | Q8IY50 | -0.29915  |
| 24755 | P03363 | Q9Y693 | -0.25407  |
| 24756 | P03363 | Q9HBR0 | -0.38344  |
| 24757 | P03363 | Q96BQ5 | -0.058564 |
| 24758 | P03363 | Q9BWJ2 | -0.085383 |
| 24759 | P03363 | Q8N9R6 | -0.15058  |
| 24760 | P03363 | Q6KC79 | -0.20978  |
| 24761 | P03363 | Q00688 | -0.22753  |
| 24762 | P03363 | Q8IUC8 | -0.30462  |
| 24763 | P03363 | Q9GZNO | -0.58943  |
| 24764 | P03363 | O60609 | -0.22473  |
| 24765 | P03363 | Q5T871 | -0.042737 |
| 24766 | P03363 | Q14416 | -0.64838  |
| 24767 | P03363 | Q96D53 | -0.48516  |
| 24768 | P03363 | P01024 | -0.41236  |
| 24769 | P03363 | Q86W42 | -0.22752  |
| 24770 | P03363 | Q5SY85 | -0.098217 |
| 24771 | P03363 | Q8NHC6 | -0.61656  |
| 24772 | P03363 | Q9BV99 | -0.22741  |
| 24773 | P03363 | O00560 | -0.2274   |
| 24774 | P03363 | Q9NRS6 | -0.21493  |
| 24775 | P03363 | A6NMS3 | -0.61656  |
| 24776 | P03363 | Q15646 | -0.22661  |

|       |        |        |            |
|-------|--------|--------|------------|
| 24777 | P03363 | Q09019 | -0.22746   |
| 24778 | P03363 | Q6ZSG2 | -0.069604  |
| 24779 | P03363 | P49767 | -0.25384   |
| 24780 | P03363 | Q01453 | -0.19388   |
| 24781 | P03363 | Q9UPC5 | -0.28673   |
| 24782 | P03363 | Q8N5I2 | -0.23048   |
| 24783 | P03363 | P22466 | -0.19508   |
| 24784 | P03363 | Q9H6F2 | -0.17884   |
| 24785 | P03363 | P16260 | -0.28881   |
| 24786 | P03363 | P58499 | -0.40514   |
| 24787 | P03363 | P04085 | -0.24838   |
| 24788 | P03363 | P20823 | -0.22434   |
| 24789 | P03363 | Q7Z7G1 | -0.22741   |
| 24790 | P03363 | O60701 | -0.37859   |
| 24791 | P03363 | Q96P88 | -0.61536   |
| 24792 | P03363 | Q9HDB9 | -0.21344   |
| 24793 | P03363 | Q8N3Y3 | -0.30275   |
| 24794 | P03363 | A2RRH5 | -0.22741   |
| 24795 | P03363 | Q9H2A2 | -0.29105   |
| 24796 | P03363 | Q6ZPA2 | -0.042737  |
| 24797 | P03363 | Q96L15 | -0.32918   |
| 24798 | P03363 | P24530 | -0.45548   |
| 24799 | P03363 | Q5HY64 | -0.18164   |
| 24800 | P03363 | A8MWS1 | -0.33992   |
| 24801 | P03363 | B2RC85 | -0.19685   |
| 24802 | P03363 | P20827 | -0.2441    |
| 24803 | P03363 | Q9Y585 | -0.61656   |
| 24804 | P03363 | Q9Y217 | -0.22488   |
| 24805 | P03363 | O95394 | -0.0093192 |
| 24806 | P03363 | Q16280 | -0.54684   |
| 24807 | P03363 | Q8IVP5 | -0.23414   |
| 24808 | P03363 | Q49SQ1 | -0.64715   |
| 24809 | P03363 | Q9Y547 | -0.19093   |
| 24810 | P03363 | Q9Y5U8 | -0.16327   |
| 24811 | P03363 | Q8NGN7 | -0.61656   |
| 24812 | P03363 | P40937 | -0.22095   |
| 24813 | P03363 | P52789 | -0.26343   |
| 24814 | P03363 | A4D1S0 | -0.32927   |
| 24815 | P03363 | P56192 | -0.085101  |
| 24816 | P03363 | Q8TF44 | -0.22441   |
| 24817 | P03363 | Q9UKY4 | -0.55091   |
| 24818 | P03363 | P28566 | -0.69447   |
| 24819 | P03363 | P28065 | -0.15215   |
| 24820 | P03363 | P06899 | -0.14534   |
| 24821 | P03363 | P0CJ92 | -0.14508   |
| 24822 | P03363 | Q9BXL7 | -0.22736   |
| 24823 | P03363 | Q9UEW3 | -0.47683   |
| 24824 | P03363 | P49765 | -0.34482   |
| 24825 | P03363 | Q8NBP5 | -0.43269   |
| 24826 | P03363 | P20292 | -0.16969   |
| 24827 | P03363 | Q96NS8 | -0.14394   |
| 24828 | P03363 | Q15077 | -0.62429   |
| 24829 | P03363 | P14209 | -0.4355    |
| 24830 | P03363 | Q9H0K4 | -0.097141  |
| 24831 | P03363 | P14406 | -0.1542    |
| 24832 | P03363 | P61587 | -0.54024   |
| 24833 | P03363 | Q9C037 | -0.22915   |
| 24834 | P03363 | Q8NH74 | -0.61656   |
| 24835 | P03363 | Q9NR64 | -0.20604   |
| 24836 | P03363 | Q9NR97 | -0.3358    |
| 24837 | P03363 | Q8N136 | -0.22926   |
| 24838 | P03363 | Q8N1N0 | -0.37229   |
| 24839 | P03363 | P26367 | -0.22512   |
| 24840 | P03363 | Q9H8K7 | -0.077878  |
| 24841 | P03363 | P10523 | -0.32966   |
| 24842 | P03363 | P47712 | -0.22751   |
| 24843 | P03363 | P55058 | -0.44609   |
| 24844 | P03363 | Q96FV0 | -0.22737   |
| 24845 | P03363 | P12872 | -0.38564   |
| 24846 | P03363 | P52757 | -0.40038   |
| 24847 | P03363 | A6NGZ7 | -0.32626   |
| 24848 | P03363 | Q9HBT6 | -0.55889   |
| 24849 | P03363 | Q8N139 | -0.58975   |
| 24850 | P03363 | Q5HYC2 | -0.15166   |
| 24851 | P03363 | Q9UPX6 | -0.32626   |
| 24852 | P03363 | A8MTW9 | -0.33992   |

|       |        |        |           |
|-------|--------|--------|-----------|
| 24853 | P03363 | Q13203 | -0.22848  |
| 24854 | P03363 | O43854 | -0.53484  |
| 24855 | P03363 | O43586 | -0.32991  |
| 24856 | P03363 | Q6GMV3 | -0.18907  |
| 24857 | P03363 | Q96PB7 | -0.42752  |
| 24858 | P03363 | Q8N4L4 | -0.29338  |
| 24859 | P03363 | P58062 | -0.22573  |
| 24860 | P03363 | P01825 | -0.54902  |
| 24861 | P03363 | A6NM10 | -0.29636  |
| 24862 | P03363 | Q8TEW8 | -0.22719  |
| 24863 | P03363 | Q8NA75 | -0.22737  |
| 24864 | P03363 | Q14002 | -0.4972   |
| 24865 | P03363 | O14957 | -0.33213  |
| 24866 | P03363 | P23526 | -0.21064  |
| 24867 | P03363 | Q2Q1W2 | -0.22741  |
| 24868 | P03363 | Q6ZVC0 | -0.033853 |
| 24869 | P03363 | Q68D91 | -0.20233  |
| 24870 | P03363 | Q8TE77 | -0.25701  |
| 24871 | P03363 | Q7RTX7 | -0.46944  |
| 24872 | P03363 | Q8N819 | -0.16993  |
| 24873 | P03363 | O60346 | -0.22749  |
| 24874 | P03363 | P07951 | -0.19219  |
| 24875 | P03363 | Q96I15 | -0.19009  |
| 24876 | P03363 | P06888 | -0.54902  |
| 24877 | P03363 | Q7RTS6 | -0.32626  |
| 24878 | P03363 | P10266 | -0.22658  |
| 24879 | P03363 | Q5TC84 | -0.093553 |
| 24880 | P03363 | Q8IY49 | -0.28673  |
| 24881 | P03363 | P30488 | -0.54957  |
| 24882 | P03363 | Q9UHZ2 | -0.042737 |
| 24883 | P03363 | Q16881 | -0.22673  |
| 24884 | P03363 | Q86Z23 | -0.37669  |
| 24885 | P03363 | Q8TC41 | -0.42894  |
| 24886 | P03363 | Q96G46 | -0.29037  |
| 24887 | P03363 | Q9Y6H6 | -0.3955   |
| 24888 | P03363 | Q92667 | -0.22494  |
| 24889 | P03363 | Q86X45 | -0.22741  |
| 24890 | P03363 | P28827 | -0.22749  |
| 24891 | P03363 | A4D997 | -0.045676 |
| 24892 | P03363 | Q5T7P2 | -0.042737 |
| 24893 | P03363 | P11168 | -0.15602  |
| 24894 | P03363 | Q96FB5 | -0.31445  |
| 24895 | P03363 | Q9NQE7 | -0.27153  |
| 24896 | P03363 | Q9Y5P6 | -0.23033  |
| 24897 | P03363 | Q86YS7 | -0.22759  |
| 24898 | P03363 | Q9H222 | -0.34875  |
| 24899 | P03363 | Q17RH7 | -0.042737 |
| 24900 | P03363 | O15146 | -0.5031   |
| 24901 | P03363 | Q9H9L4 | -0.13073  |
| 24902 | P03363 | Q6PHW0 | -0.66927  |
| 24903 | P03363 | Q9Y2W3 | -0.23105  |
| 24904 | P03363 | P24844 | -0.22718  |
| 24905 | P03363 | P51649 | -0.27541  |
| 24906 | P03363 | Q9BZW8 | -0.22748  |
| 24907 | P03363 | A8MZ36 | -0.21961  |
| 24908 | P03363 | O76027 | -0.20058  |
| 24909 | P03363 | O00626 | -0.5782   |
| 24910 | P03363 | Q05209 | -0.2302   |
| 24911 | P03363 | P59046 | -0.22737  |
| 24912 | P03363 | P55344 | -0.39161  |
| 24913 | P03363 | Q86UV5 | -0.26341  |
| 24914 | P03363 | P0CW26 | -0.12308  |
| 24915 | P03363 | Q3B8N2 | -0.21656  |
| 24916 | P03363 | Q8WWG9 | -0.41982  |
| 24917 | P03363 | Q8NA56 | -0.16117  |
| 24918 | P03363 | Q9BXM7 | -0.35589  |
| 24919 | P03363 | Q8IYR2 | -0.22325  |
| 24920 | P03363 | Q05586 | -0.22834  |
| 24921 | P03363 | Q8WYQ9 | -0.18177  |
| 24922 | P03363 | Q8NGF4 | -0.61656  |
| 24923 | P03363 | Q9NRM6 | -0.66357  |
| 24924 | P03363 | Q9UBT3 | -0.32311  |
| 24925 | P03363 | P02462 | -0.24718  |
| 24926 | P03363 | P47893 | -0.68713  |
| 24927 | P03363 | Q6NSJ0 | -0.23247  |
| 24928 | P03363 | A6ND48 | -0.61656  |

|       |        |        |           |
|-------|--------|--------|-----------|
| 24929 | P03363 | Q8IYK8 | -0.631    |
| 24930 | P03363 | O43572 | -0.22657  |
| 24931 | P03363 | Q5T2L2 | -0.22714  |
| 24932 | P03363 | Q9NQ60 | -0.31923  |
| 24933 | P03363 | Q9BXN2 | -0.31172  |
| 24934 | P03363 | P55286 | -0.58249  |
| 24935 | P03363 | P10606 | -0.23403  |
| 24936 | P03363 | P48506 | -0.18766  |
| 24937 | P03363 | Q96QU1 | -0.81685  |
| 24938 | P03363 | Q9Y4X3 | -0.50656  |
| 24939 | P03363 | P22676 | -0.22716  |
| 24940 | P03363 | Q16635 | -0.2657   |
| 24941 | P03363 | O43149 | -0.22739  |
| 24942 | P03363 | O15484 | -0.34469  |
| 24943 | P03363 | Q9ULI2 | -0.21524  |
| 24944 | P03363 | Q9NVP4 | -0.27953  |
| 24945 | P03363 | P60321 | -0.15118  |
| 24946 | P03363 | Q6ZTN6 | -0.047636 |
| 24947 | P03363 | Q9BZJ4 | -0.29472  |
| 24948 | P03363 | P26572 | -0.31211  |
| 24949 | P03363 | Q8N138 | -0.10605  |
| 24950 | P03363 | Q76MJ5 | -0.48025  |
| 24951 | P03363 | Q9H7E9 | -0.031359 |
| 24952 | P03363 | Q5T5S1 | -0.071977 |
| 24953 | P03363 | P13716 | -0.21736  |
| 24954 | P03363 | P45844 | -0.42518  |
| 24955 | P03363 | Q9NYR8 | -0.54631  |
| 24956 | P03363 | Q15541 | -0.22735  |
| 24957 | P03363 | P06241 | -0.30198  |
| 24958 | P03363 | O75808 | -0.26302  |
| 24959 | P03363 | Q6PFW1 | -0.15721  |
| 24960 | P03363 | Q15084 | -0.24684  |
| 24961 | P03363 | P47710 | -0.31032  |
| 24962 | P03363 | Q969Y0 | -0.33992  |
| 24963 | P03363 | O60488 | -0.4156   |
| 24964 | P03363 | Q99542 | -0.53706  |
| 24965 | P03363 | P49685 | -0.70873  |
| 24966 | P03363 | Q9BRT3 | -0.14848  |
| 24967 | P03363 | Q8NGP2 | -0.61656  |
| 24968 | P03363 | Q9HAZ1 | -0.52894  |
| 24969 | P03363 | Q96J86 | -0.24975  |
| 24970 | P03363 | P15104 | -0.24489  |
| 24971 | P03363 | Q5VVM6 | -0.17923  |
| 24972 | P03363 | P62253 | -0.084569 |
| 24973 | P03363 | Q9NX57 | -0.27069  |
| 24974 | P03363 | Q6ZRU5 | -0.33992  |
| 24975 | P03363 | Q8TBM7 | -0.32626  |
| 24976 | P03363 | Q6P9G4 | -0.32626  |
| 24977 | P03363 | O75689 | -0.22756  |
| 24978 | P03363 | P68431 | -0.21839  |
| 24979 | P03363 | Q14642 | -0.22687  |
| 24980 | P03363 | Q8TE96 | -0.22513  |
| 24981 | P03363 | P49642 | -0.10428  |
| 24982 | P03363 | O60404 | -0.61656  |
| 24983 | P03363 | P20138 | -0.68748  |
| 24984 | P03363 | Q8N999 | -0.07949  |
| 24985 | P03363 | Q9Y6N5 | -0.20443  |
| 24986 | P03363 | Q8NBM4 | -0.32626  |
| 24987 | P03363 | Q9H2F9 | -0.21632  |
| 24988 | P03363 | P01127 | -0.25824  |
| 24989 | P03363 | A5D8W1 | -0.19469  |
| 24990 | P03363 | P08620 | -0.27296  |
| 24991 | P03363 | Q9H9S4 | -0.19534  |
| 24992 | P03363 | P07327 | -0.22687  |
| 24993 | P03363 | Q01780 | -0.18808  |
| 24994 | P03363 | Q8IZF3 | -0.6666   |
| 24995 | P03363 | Q9Y3R4 | -0.20114  |
| 24996 | P03363 | Q15788 | -0.24673  |
| 24997 | P03363 | Q99527 | -0.75275  |
| 24998 | P03363 | Q8NH54 | -0.61656  |
| 24999 | P03363 | Q96BM9 | -0.24708  |
| 25000 | P03363 | Q8NGS8 | -0.61656  |
| 25001 | P03363 | Q9UHV5 | -0.28333  |
| 25002 | P03363 | Q96B45 | -0.16466  |
| 25003 | P03363 | Q15615 | -0.61656  |
| 25004 | P03363 | Q8NFU0 | -0.37962  |

|       |        |        |           |
|-------|--------|--------|-----------|
| 25005 | P03363 | Q9BRT6 | -0.077855 |
| 25006 | P03363 | P43121 | -0.51031  |
| 25007 | P03363 | Q13491 | -0.32686  |
| 25008 | P03363 | P0CL80 | -0.17634  |
| 25009 | P03363 | Q9NR34 | -0.293    |
| 25010 | P03363 | Q96RP9 | -0.3004   |
| 25011 | P03363 | Q9P2P5 | -0.22741  |
| 25012 | P03363 | O14818 | -0.12617  |
| 25013 | P03363 | Q9BRP9 | -0.13211  |
| 25014 | P03363 | P11488 | -0.39355  |
| 25015 | P03363 | P03951 | -0.35236  |
| 25016 | P03363 | A8MTZ7 | -0.082405 |
| 25017 | P03363 | A6NL82 | -0.099871 |
| 25018 | P03363 | P98066 | -0.22739  |
| 25019 | P03363 | Q9Y584 | -0.18856  |
| 25020 | P03363 | Q96EQ0 | -0.22728  |
| 25021 | P03363 | Q9NUP7 | -0.022251 |
| 25022 | P03363 | Q9UPT9 | -0.25728  |
| 25023 | P03363 | Q9Y6U7 | -0.47964  |
| 25024 | P03363 | P30043 | -0.18572  |
| 25025 | P03363 | Q9Y3A6 | -0.31563  |
| 25026 | P03363 | Q9NZS2 | -0.46828  |
| 25027 | P03363 | Q17RY0 | -0.22641  |
| 25028 | P03363 | Q5TGZ0 | -0.24572  |
| 25029 | P03363 | P80362 | -0.54902  |
| 25030 | P03363 | Q9H3Q1 | -0.17297  |
| 25031 | P03363 | Q86Y78 | -0.33992  |
| 25032 | P03363 | Q8WU58 | -0.13856  |
| 25033 | P03363 | Q08380 | -0.67507  |
| 25034 | P03363 | Q9P2N2 | -0.23461  |
| 25035 | P03363 | Q6ZN44 | -0.55241  |
| 25036 | P03363 | P49888 | -0.23177  |
| 25037 | P03363 | Q13434 | -0.2206   |
| 25038 | P03363 | A8MWP6 | -0.042737 |
| 25039 | P03363 | Q9BY11 | -0.2274   |
| 25040 | P03363 | P17152 | -0.11021  |
| 25041 | P03363 | P84090 | -0.14396  |
| 25042 | P03363 | Q96F05 | -0.32626  |
| 25043 | P03363 | P22570 | -0.21444  |
| 25044 | P03363 | Q8NGA0 | -0.61656  |
| 25045 | P03363 | A0PK00 | -0.19187  |
| 25046 | P03363 | Q96A46 | -0.37848  |
| 25047 | P03363 | Q75438 | -0.27365  |
| 25048 | P03363 | P52799 | -0.4655   |
| 25049 | P03363 | P51636 | -0.22707  |
| 25050 | P03363 | Q9H8J5 | -0.32626  |
| 25051 | P03363 | Q6DD88 | -0.48053  |
| 25052 | P03363 | Q9NRC1 | -0.32626  |
| 25053 | P03363 | Q96BT1 | -0.23988  |
| 25054 | P03363 | Q9UN66 | -0.57898  |
| 25055 | P03363 | Q8NFA2 | -0.2274   |
| 25056 | P03363 | Q8TCJ2 | -0.41283  |
| 25057 | P03363 | Q9Y2C4 | -0.21146  |
| 25058 | P03363 | Q17R31 | -0.13769  |
| 25059 | P03363 | Q8N104 | -0.33516  |
| 25060 | P03363 | Q96H22 | -0.078502 |
| 25061 | P03363 | Q9NYA1 | -0.26224  |
| 25062 | P03363 | Q30KQ6 | -0.33516  |
| 25063 | P03363 | P06865 | -0.27229  |
| 25064 | P03363 | Q8NH92 | -0.61656  |
| 25065 | P03363 | Q9Y3Q4 | -0.59901  |
| 25066 | P03363 | Q8WWX0 | -0.22741  |
| 25067 | P03363 | O00187 | -0.32129  |
| 25068 | P03363 | P53794 | -0.53591  |
| 25069 | P03363 | Q99707 | -0.16382  |
| 25070 | P03363 | P07766 | -0.41954  |
| 25071 | P03363 | Q9BY71 | -0.22752  |
| 25072 | P03363 | P59827 | -0.215    |
| 25073 | P03363 | Q9UM47 | -0.22877  |
| 25074 | P03363 | P42680 | -0.54646  |
| 25075 | P03363 | P19021 | -0.42784  |
| 25076 | P03363 | O60502 | -0.18924  |
| 25077 | P03363 | Q02252 | -0.25016  |
| 25078 | P03363 | P11279 | -0.6194   |
| 25079 | P03363 | P01607 | -0.54902  |
| 25080 | P03363 | Q99645 | -0.36306  |

|       |        |        |            |
|-------|--------|--------|------------|
| 25081 | P03363 | Q9NUD7 | -0.16707   |
| 25082 | P03363 | Q6IEV9 | -0.61656   |
| 25083 | P03363 | Q8N4E4 | -0.22077   |
| 25084 | P03363 | P02511 | -0.21735   |
| 25085 | P03363 | P56134 | -0.30252   |
| 25086 | P03363 | Q9NPY3 | -0.22753   |
| 25087 | P03363 | Q5T0J3 | -0.12788   |
| 25088 | P03363 | O43405 | -0.22676   |
| 25089 | P03363 | Q99470 | -0.51389   |
| 25090 | P03363 | Q9H246 | -0.1301    |
| 25091 | P03363 | P08603 | -0.45403   |
| 25092 | P03363 | Q96HA9 | -0.0603    |
| 25093 | P03363 | Q9ULN7 | -0.03801   |
| 25094 | P03363 | P35610 | -0.45778   |
| 25095 | P03363 | Q6ZMP0 | -0.41383   |
| 25096 | P03363 | P56975 | -0.76133   |
| 25097 | P03363 | Q14003 | -0.35675   |
| 25098 | P03363 | Q8N6F1 | -0.20236   |
| 25099 | P03363 | Q9BSE5 | -0.22483   |
| 25100 | P03363 | P42658 | -0.33696   |
| 25101 | P03363 | Q9UBR4 | -0.2273    |
| 25102 | P03363 | Q8TDF5 | -0.62458   |
| 25103 | P03363 | P14621 | -0.22267   |
| 25104 | P03363 | P54289 | -0.4373    |
| 25105 | P03363 | Q13361 | -0.37346   |
| 25106 | P03363 | P48651 | -0.49095   |
| 25107 | P03363 | P01605 | -0.54902   |
| 25108 | P03363 | Q8WXH6 | -0.51194   |
| 25109 | P03363 | Q02575 | -0.22673   |
| 25110 | P03363 | Q92186 | -0.21646   |
| 25111 | P03363 | Q76N89 | -0.22741   |
| 25112 | P03363 | Q13454 | -0.49906   |
| 25113 | P03363 | A6NEV1 | -0.064084  |
| 25114 | P03363 | P01700 | -0.54902   |
| 25115 | P03363 | Q9NYT0 | -0.22741   |
| 25116 | P03363 | Q14679 | -0.18007   |
| 25117 | P03363 | Q9Y241 | -0.21564   |
| 25118 | P03363 | Q8TC90 | -0.0018204 |
| 25119 | P03363 | P25054 | -0.22726   |
| 25120 | P03363 | Q8N109 | -0.47262   |
| 25121 | P03363 | Q8IV76 | -0.23073   |
| 25122 | P03363 | Q8IUK8 | -0.32626   |
| 25123 | P03363 | P47929 | -0.2197    |
| 25124 | P03363 | Q9NX77 | -0.22613   |
| 25125 | P03363 | Q15286 | -0.38049   |
| 25126 | P03363 | P23677 | -0.36814   |
| 25127 | P03363 | Q8N2S1 | -0.22746   |
| 25128 | P03363 | P49447 | -0.39225   |
| 25129 | P03363 | P10147 | -0.26636   |
| 25130 | P03363 | Q5BKX5 | -0.031359  |
| 25131 | P03363 | Q9NP91 | -0.55544   |
| 25132 | P03363 | Q8IUN9 | -0.50022   |
| 25133 | P03363 | O14842 | -0.63805   |
| 25134 | P03363 | P47756 | -0.19652   |
| 25135 | P03363 | Q13613 | -0.22605   |
| 25136 | P03363 | O60667 | -0.26018   |
| 25137 | P03363 | Q8WW22 | -0.1671    |
| 25138 | P03363 | Q8N3Z0 | -0.38253   |
| 25139 | P03363 | O15264 | -0.22741   |
| 25140 | P03363 | Q13303 | -0.27356   |
| 25141 | P03363 | P04437 | -0.23957   |
| 25142 | P03363 | Q8WXC7 | -0.03305   |
| 25143 | P03363 | Q99593 | -0.46193   |
| 25144 | P03363 | P51884 | -0.41414   |
| 25145 | P03363 | Q9BZ97 | -0.32626   |
| 25146 | P03363 | Q18PE1 | -0.29528   |
| 25147 | P03363 | O94903 | -0.14189   |
| 25148 | P03363 | Q86TL0 | -0.10266   |
| 25149 | P03363 | Q7L622 | -0.22399   |
| 25150 | P03363 | P51798 | -0.52823   |
| 25151 | P03363 | H3BUK9 | -0.22734   |
| 25152 | P03363 | Q96LC7 | -0.8743    |
| 25153 | P03363 | Q9NVG8 | -0.50908   |
| 25154 | P03363 | Q86SG6 | -0.47291   |
| 25155 | P03363 | Q9ULC0 | -0.82504   |
| 25156 | P03363 | Q8IV35 | -0.22743   |



|       |        |        |            |
|-------|--------|--------|------------|
| 25157 | P03363 | Q68G75 | -0.27198   |
| 25158 | P03363 | P54687 | -0.19494   |
| 25159 | P03363 | O60934 | -0.2073    |
| 25160 | P03363 | Q96M85 | -0.042737  |
| 25161 | P03363 | A6NJI1 | -0.086312  |
| 25162 | P03363 | Q5T4B2 | -0.26714   |
| 25163 | P03363 | Q99075 | -0.69634   |
| 25164 | P03363 | Q86Z02 | -0.22741   |
| 25165 | P03363 | Q8NGI4 | -0.61656   |
| 25166 | P03363 | Q95604 | -0.54957   |
| 25167 | P03363 | P43005 | -0.40977   |
| 25168 | P03363 | Q9UHV8 | -0.2201    |
| 25169 | P03363 | Q8N9W4 | -0.21983   |
| 25170 | P03363 | Q8NG35 | -0.33516   |
| 25171 | P03363 | Q6ZMK1 | -0.19975   |
| 25172 | P03363 | Q6IQ26 | -0.22977   |
| 25173 | P03363 | Q6ZQY7 | -0.080322  |
| 25174 | P03363 | P46940 | -0.22741   |
| 25175 | P03363 | Q5U649 | -0.11961   |
| 25176 | P03363 | P16499 | -0.33696   |
| 25177 | P03363 | P01718 | -0.54902   |
| 25178 | P03363 | P04090 | -0.34519   |
| 25179 | P03363 | P43250 | -0.59713   |
| 25180 | P03363 | Q9NV23 | -0.21767   |
| 25181 | P03363 | Q9Y5F7 | -0.57898   |
| 25182 | P03363 | O95670 | -0.19437   |
| 25183 | P03363 | Q8NH40 | -0.61656   |
| 25184 | P03363 | P11766 | -0.24766   |
| 25185 | P03363 | Q8N201 | -0.083975  |
| 25186 | P03363 | Q5TGP6 | -0.20759   |
| 25187 | P03363 | Q8IZF4 | -0.6666    |
| 25188 | P03363 | Q8N4V1 | -0.50251   |
| 25189 | P03363 | Q96PZ2 | -0.077136  |
| 25190 | P03363 | P37287 | -0.22799   |
| 25191 | P03363 | Q16563 | -0.42636   |
| 25192 | P03363 | P30542 | -0.27085   |
| 25193 | P03363 | Q96I51 | -0.22652   |
| 25194 | P03363 | Q8NHP1 | -0.22682   |
| 25195 | P03363 | Q86VB7 | -0.49141   |
| 25196 | P03363 | Q86SP6 | -0.59125   |
| 25197 | P03363 | Q96GX2 | -0.0097536 |
| 25198 | P03363 | P15941 | -0.17539   |
| 25199 | P03363 | P49903 | -0.40522   |
| 25200 | P03363 | P60059 | -0.30095   |
| 25201 | P03363 | P20718 | -0.2366    |
| 25202 | P03363 | P80404 | -0.22207   |
| 25203 | P03363 | A6PVC2 | -0.17437   |
| 25204 | P03363 | Q6PL45 | -0.32626   |
| 25205 | P03363 | Q9NSD7 | -0.7149    |
| 25206 | P03363 | P01782 | -0.54902   |
| 25207 | P03363 | Q6V1X1 | -0.22385   |
| 25208 | P03363 | Q8J025 | -0.52466   |
| 25209 | P03363 | Q9NZC2 | -0.75158   |
| 25210 | P03363 | Q02750 | -0.22747   |
| 25211 | P03363 | Q569K6 | -0.16541   |
| 25212 | P03363 | Q8IWT0 | -0.19037   |
| 25213 | P03363 | Q9P289 | -0.22903   |
| 25214 | P03363 | P10827 | -0.22872   |
| 25215 | P03363 | P59095 | -0.22774   |
| 25216 | P03363 | O43556 | -0.27938   |
| 25217 | P03363 | Q9UKV5 | -0.22774   |
| 25218 | P03363 | P10721 | -0.25008   |
| 25219 | P03363 | O60503 | -0.65598   |
| 25220 | P03363 | P16234 | -0.22741   |
| 25221 | P03363 | A6NLP5 | -0.22537   |
| 25222 | P03363 | Q49A17 | -0.37768   |
| 25223 | P03363 | Q8WZ69 | -0.19769   |
| 25224 | P03363 | Q86Y33 | -0.22741   |
| 25225 | P03363 | P17516 | -0.22738   |
| 25226 | P03363 | Q0VAF6 | -0.16973   |
| 25227 | P03363 | Q7L8S5 | -0.1358    |
| 25228 | P03363 | Q8ND07 | -0.020806  |
| 25229 | P03363 | P62820 | -0.29831   |
| 25230 | P03363 | Q9Y6E2 | -0.1919    |
| 25231 | P03363 | Q7RTX1 | -0.63259   |
| 25232 | P03363 | O95868 | -0.32248   |

|       |        |        |           |
|-------|--------|--------|-----------|
| 25233 | P03363 | Q9P2R3 | -0.22741  |
| 25234 | P03363 | Q03721 | -0.40632  |
| 25235 | P03363 | P51553 | -0.19986  |
| 25236 | P03363 | A6QL64 | -0.098275 |
| 25237 | P03363 | P41226 | -0.22661  |
| 25238 | P03363 | Q9NQA3 | -0.15706  |
| 25239 | P03363 | Q07912 | -0.28157  |
| 25240 | P03363 | Q53GL0 | -0.1873   |
| 25241 | P03363 | O60635 | -0.39755  |
| 25242 | P03363 | P09884 | -0.23842  |
| 25243 | P03363 | Q562R1 | -0.12009  |
| 25244 | P03363 | P05177 | -0.38833  |
| 25245 | P03363 | Q6P4F7 | -0.38968  |
| 25246 | P03363 | Q9UHP6 | -0.22441  |
| 25247 | P03363 | Q9UKB5 | -0.43246  |
| 25248 | P03363 | P21731 | -0.33303  |
| 25249 | P03363 | Q05BQ5 | -0.1769   |
| 25250 | P03363 | Q96PP8 | -0.21482  |
| 25251 | P03363 | Q9NRG0 | -0.1542   |
| 25252 | P03363 | O75052 | -0.22644  |
| 25253 | P03363 | Q9C0H2 | -0.46271  |
| 25254 | P03363 | P61626 | -0.40033  |
| 25255 | P03363 | Q93096 | -0.22741  |
| 25256 | P03363 | P08118 | -0.22516  |
| 25257 | P03363 | P01708 | -0.54902  |
| 25258 | P03363 | Q9Y619 | -0.31052  |
| 25259 | P03363 | P23945 | -0.30543  |
| 25260 | P03363 | Q9UEE5 | -0.35669  |
| 25261 | P03363 | Q5RGS2 | -0.32626  |
| 25262 | P03363 | P01243 | -0.49674  |
| 25263 | P03363 | Q9BQT8 | -0.3122   |
| 25264 | P03363 | Q02641 | -0.27299  |
| 25265 | P03363 | Q96NE9 | -0.2304   |
| 25266 | P03363 | P33778 | -0.14658  |
| 25267 | P03363 | P36542 | -0.17941  |
| 25268 | P03363 | Q6ZW35 | -0.20217  |
| 25269 | P03363 | Q6ZMQ8 | -0.29491  |
| 25270 | P03363 | P51841 | -0.73584  |
| 25271 | P03363 | Q13237 | -0.615    |
| 25272 | P03363 | Q5J5C9 | -0.29792  |
| 25273 | P03363 | Q8NGY7 | -0.61656  |
| 25274 | P03363 | Q9UPQ0 | -0.22736  |
| 25275 | P03363 | Q9Y691 | -0.53118  |
| 25276 | P03363 | Q16566 | -0.2277   |
| 25277 | P03363 | Q9H0K6 | -0.13894  |
| 25278 | P03363 | Q8NGK9 | -0.61656  |
| 25279 | P03363 | P0C7N8 | -0.61656  |
| 25280 | P03363 | O95196 | -0.58514  |
| 25281 | P03363 | A6NLC5 | -0.13007  |
| 25282 | P03363 | Q7Z4L9 | -0.22709  |
| 25283 | P03363 | Q96GR4 | -0.4627   |
| 25284 | P03363 | Q6IMN6 | -0.24638  |
| 25285 | P03363 | Q96KX0 | -0.33313  |
| 25286 | P03363 | Q13093 | -0.43935  |
| 25287 | P03363 | Q6ZQN7 | -0.5503   |
| 25288 | P03363 | O43567 | -0.42749  |
| 25289 | P03363 | P09471 | -0.44991  |
| 25290 | P03363 | P0CI26 | -0.27953  |
| 25291 | P03363 | Q96LA9 | -0.64046  |
| 25292 | P03363 | P52797 | -0.32422  |
| 25293 | P03363 | O43240 | -0.46269  |
| 25294 | P03363 | A8MPS7 | -0.17315  |
| 25295 | P03363 | B1AMM8 | -0.066867 |
| 25296 | P03363 | Q5JQF8 | -0.30628  |
| 25297 | P03363 | A6NMU1 | -0.61656  |
| 25298 | P03363 | Q96SF2 | -0.19882  |
| 25299 | P03363 | Q5T753 | -0.042737 |
| 25300 | P03363 | Q8ND82 | -0.22735  |
| 25301 | P03363 | Q9BWV7 | -0.20638  |
| 25302 | P03363 | P17927 | -0.50925  |
| 25303 | P03363 | A8MTJ3 | -0.34607  |
| 25304 | P03363 | Q96KC9 | -0.1271   |
| 25305 | P03363 | Q86Y29 | -0.33992  |
| 25306 | P03363 | Q9BYA6 | -0.042737 |
| 25307 | P03363 | Q9NP55 | -0.37076  |
| 25308 | P03363 | Q96NJ1 | -0.042737 |

|       |        |        |           |
|-------|--------|--------|-----------|
| 25309 | P03363 | O15409 | -0.29843  |
| 25310 | P03363 | A8MUP2 | -0.21351  |
| 25311 | P03363 | Q32ZL2 | -0.31429  |
| 25312 | P03363 | O75896 | -0.066376 |
| 25313 | P03363 | Q8IVK1 | -0.12238  |
| 25314 | P03363 | O43766 | -0.26368  |
| 25315 | P03363 | Q86VP3 | -0.071222 |
| 25316 | P03363 | Q9UPY3 | -0.2244   |
| 25317 | P03363 | Q14376 | -0.24076  |
| 25318 | P03363 | Q8WWR8 | -0.20999  |
| 25319 | P03363 | Q8TF08 | -0.31118  |
| 25320 | P03363 | Q8IXX5 | -0.32626  |
| 25321 | P03363 | Q8NEW7 | -0.37069  |
| 25322 | P03363 | O94826 | -0.22737  |
| 25323 | P03363 | P23919 | -0.28432  |
| 25324 | P03363 | Q17RW2 | -0.4182   |
| 25325 | P03363 | Q86XT4 | -0.22789  |
| 25326 | P03363 | Q7RTR8 | -0.51612  |
| 25327 | P03363 | Q9H400 | -0.37833  |
| 25328 | P03363 | Q02086 | -0.22636  |
| 25329 | P03363 | Q96AQ2 | -0.19187  |
| 25330 | P03363 | Q9UBE8 | -0.22741  |
| 25331 | P03363 | P0C7U3 | -0.4627   |
| 25332 | P03363 | Q8NA70 | -0.2146   |
| 25333 | P03363 | Q8N4X5 | -0.19759  |
| 25334 | P03363 | Q6T311 | -0.49937  |
| 25335 | P03363 | Q9NPI7 | -0.199    |
| 25336 | P03363 | P55055 | -0.22965  |
| 25337 | P03363 | Q86YG4 | -0.09178  |
| 25338 | P03363 | D6R901 | -0.25139  |
| 25339 | P03363 | P08138 | -0.22738  |
| 25340 | P03363 | Q9UKG9 | -0.22049  |
| 25341 | P03363 | P43007 | -0.30172  |
| 25342 | P03363 | O14983 | -0.25704  |
| 25343 | P03363 | O95661 | -0.22787  |
| 25344 | P03363 | P04183 | -0.32981  |
| 25345 | P03363 | Q8TBY9 | -0.22741  |
| 25346 | P03363 | Q6UW49 | -0.11901  |
| 25347 | P03363 | Q9UKN7 | -0.19366  |
| 25348 | P03363 | Q6UWD8 | -0.32626  |
| 25349 | P03363 | Q9BWQ8 | -0.26382  |
| 25350 | P03363 | P06280 | -0.18289  |
| 25351 | P03363 | Q9Y5I4 | -0.62883  |
| 25352 | P03363 | Q86SM5 | -0.64046  |
| 25353 | P03363 | Q567V2 | -0.32227  |
| 25354 | P03363 | P0DKV0 | -0.15209  |
| 25355 | P03363 | Q9BZM3 | -0.20531  |
| 25356 | P03363 | Q6UWE0 | -0.22745  |
| 25357 | P03363 | O60884 | -0.14049  |
| 25358 | P03363 | Q5VUY2 | -0.28613  |
| 25359 | P03363 | Q8IY47 | -0.17905  |
| 25360 | P03363 | Q5JSP0 | -0.29042  |
| 25361 | P03363 | Q9HC84 | -0.22597  |
| 25362 | P03363 | P41231 | -0.50131  |
| 25363 | P03363 | Q9UQ26 | -0.22741  |
| 25364 | P03363 | O14802 | -0.163    |
| 25365 | P03363 | Q5BN46 | -0.12613  |
| 25366 | P03363 | Q14296 | -0.19441  |
| 25367 | P03363 | Q8IVU3 | -0.23573  |
| 25368 | P03363 | Q495D7 | -0.091704 |
| 25369 | P03363 | Q5TCX8 | -0.50449  |
| 25370 | P03363 | B7ZAP0 | -0.20005  |
| 25371 | P03363 | Q96KS9 | -0.2112   |
| 25372 | P03363 | Q9HAC8 | -0.2245   |
| 25373 | P03363 | Q8IVV8 | -0.47262  |
| 25374 | P03363 | P0C7M3 | -0.13751  |
| 25375 | P03363 | Q9BYT1 | -0.28512  |
| 25376 | P03363 | Q9Y2Y8 | -0.22842  |
| 25377 | P03363 | Q9UL52 | -0.87647  |
| 25378 | P03363 | Q13070 | -0.23345  |
| 25379 | P03363 | P19827 | -0.36956  |
| 25380 | P03363 | P36897 | -0.2388   |
| 25381 | P03363 | Q8N535 | -0.081906 |
| 25382 | P03363 | Q96A33 | -0.10792  |
| 25383 | P03363 | Q96T17 | -0.060569 |
| 25384 | P03363 | P0CW18 | -0.26609  |

|       |        |        |           |
|-------|--------|--------|-----------|
| 25385 | P03363 | B4DS77 | -0.43704  |
| 25386 | P03363 | Q6ZU45 | -0.23166  |
| 25387 | P03363 | P51665 | -0.22597  |
| 25388 | P03363 | P63098 | -0.22769  |
| 25389 | P03363 | O14548 | -0.19762  |
| 25390 | P03363 | Q9BTD3 | -0.19187  |
| 25391 | P03363 | Q5RHP9 | -0.13722  |
| 25392 | P03363 | P26998 | -0.045973 |
| 25393 | P03363 | Q495C1 | -0.20494  |
| 25394 | P03363 | P0CB43 | -0.075098 |
| 25395 | P03363 | Q5XXA6 | -0.34556  |
| 25396 | P03363 | P41238 | -0.31754  |
| 25397 | P03363 | P11586 | -0.20987  |
| 25398 | P03363 | P09211 | -0.22674  |
| 25399 | P03363 | Q86TS7 | -0.042737 |
| 25400 | P03363 | Q9BQI7 | -0.42588  |
| 25401 | P03363 | Q8IYB0 | -0.042737 |
| 25402 | P03363 | A6NF83 | -0.031208 |
| 25403 | P03363 | B3KVV0 | -0.32626  |
| 25404 | P03363 | P30038 | -0.2684   |
| 25405 | P03363 | Q5VTM2 | -0.48207  |
| 25406 | P03363 | Q9Y5I1 | -0.62883  |
| 25407 | P03363 | Q94907 | -0.20278  |
| 25408 | P03363 | Q5MJ09 | -0.15654  |
| 25409 | P03363 | Q96JP5 | -0.2082   |
| 25410 | P03363 | C9JLR9 | -0.17268  |
| 25411 | P03363 | O75038 | -0.22741  |
| 25412 | P03363 | Q8NDX2 | -0.29965  |
| 25413 | P03363 | Q7L2Z9 | -0.13266  |
| 25414 | P03363 | Q9BSE4 | -0.30025  |
| 25415 | P03363 | Q969D9 | -0.4194   |
| 25416 | P03363 | Q9Y5M6 | -0.042737 |
| 25417 | P03363 | P30443 | -0.58637  |
| 25418 | P03363 | P19525 | -0.22741  |
| 25419 | P03363 | Q5JQC9 | -0.12452  |
| 25420 | P03363 | Q5H9S7 | -0.032402 |
| 25421 | P03363 | Q8IZD2 | -0.22742  |
| 25422 | P03363 | P80162 | -0.63486  |
| 25423 | P03363 | P08700 | -0.30957  |
| 25424 | P03363 | O75343 | -0.2537   |
| 25425 | P03363 | P11217 | -0.20838  |
| 25426 | P03363 | P0C628 | -0.61656  |
| 25427 | P03363 | Q15493 | -0.207    |
| 25428 | P03363 | P01860 | -0.50706  |
| 25429 | P03363 | Q9NR45 | -0.18879  |
| 25430 | P03363 | Q9BVX2 | -0.36715  |
| 25431 | P03363 | Q7Z5P4 | -0.59828  |
| 25432 | P03363 | Q9Y210 | -0.22741  |
| 25433 | P03363 | Q8N9M5 | -0.22735  |
| 25434 | P03363 | Q92538 | -0.22551  |
| 25435 | P03363 | P00747 | -0.27245  |
| 25436 | P03363 | O76070 | -0.22293  |
| 25437 | P03363 | O60330 | -0.57898  |
| 25438 | P03363 | Q99489 | -0.20977  |
| 25439 | P03363 | Q86UU9 | -0.377    |
| 25440 | P03363 | Q9BS86 | -0.35666  |
| 25441 | P03363 | Q15455 | -0.22758  |
| 25442 | P03363 | Q9BQR3 | -0.49563  |
| 25443 | P03363 | A8MYX2 | -0.24784  |
| 25444 | P03363 | Q9BXB5 | -0.22879  |
| 25445 | P03363 | P18509 | -0.33456  |
| 25446 | P03363 | P63127 | -0.11106  |
| 25447 | P03363 | Q9HBV2 | -0.32626  |
| 25448 | P03363 | Q9NRF2 | -0.22741  |
| 25449 | P03363 | Q9NWT1 | -0.2276   |
| 25450 | P03363 | Q8IYB1 | -0.10714  |
| 25451 | P03363 | Q6ZMN8 | -0.21659  |
| 25452 | P03363 | P49703 | -0.22749  |
| 25453 | P03363 | Q9H156 | -0.37674  |
| 25454 | P03363 | Q96MV8 | -0.42952  |
| 25455 | P03363 | Q8NGI7 | -0.61656  |
| 25456 | P03363 | Q8N5Z0 | -0.22632  |
| 25457 | P03363 | Q8IUI8 | -0.22756  |
| 25458 | P03363 | P50579 | -0.1599   |
| 25459 | P03363 | Q6XZB0 | -0.65221  |
| 25460 | P03363 | Q6RUI8 | -0.066531 |

|       |        |        |            |
|-------|--------|--------|------------|
| 25461 | P03363 | P10075 | -0.12688   |
| 25462 | P03363 | O95239 | -0.23683   |
| 25463 | P03363 | Q53RY4 | -0.32626   |
| 25464 | P03363 | Q0P140 | -0.14271   |
| 25465 | P03363 | O75698 | -0.042737  |
| 25466 | P03363 | Q5SXM8 | -0.17839   |
| 25467 | P03363 | P49683 | -0.66389   |
| 25468 | P03363 | P0C7I6 | -0.0096527 |
| 25469 | P03363 | Q13224 | -0.23698   |
| 25470 | P03363 | P55851 | -0.27727   |
| 25471 | P03363 | Q9NYW1 | -0.47677   |
| 25472 | P03363 | P26951 | -0.46602   |
| 25473 | P03363 | Q5GAN4 | -0.18334   |
| 25474 | P03363 | Q5T2D3 | -0.21496   |
| 25475 | P03363 | P48169 | -0.44855   |
| 25476 | P03363 | Q9Y2T5 | -0.73419   |
| 25477 | P03363 | Q6ICG6 | -0.1729    |
| 25478 | P03363 | Q9H306 | -0.56253   |
| 25479 | P03363 | P0C8F1 | -0.41932   |
| 25480 | P03363 | Q14558 | -0.18074   |
| 25481 | P03363 | Q5JQD4 | -0.33502   |
| 25482 | P03363 | P30291 | -0.22741   |
| 25483 | P03363 | Q96MX0 | -0.44009   |
| 25484 | P03363 | Q9NQ40 | -0.52597   |
| 25485 | P03363 | Q63HM2 | -0.32626   |
| 25486 | P03363 | Q8NGJ6 | -0.61656   |
| 25487 | P03363 | Q3SXM0 | -0.22742   |
| 25488 | P03363 | Q9UBQ6 | -0.73588   |
| 25489 | P03363 | Q9Y2F9 | -0.22189   |
| 25490 | P03363 | P09228 | -0.38852   |
| 25491 | P03363 | Q86YN6 | -0.22698   |
| 25492 | P03363 | Q8N4Q0 | -0.48751   |
| 25493 | P03363 | Q00338 | -0.22861   |
| 25494 | P03363 | Q5T6R2 | -0.22594   |
| 25495 | P03363 | Q7Z6V5 | -0.19917   |
| 25496 | P03363 | Q2M389 | -0.20619   |
| 25497 | P03363 | Q9UPN3 | -0.22752   |
| 25498 | P03363 | P52788 | -0.16025   |
| 25499 | P03363 | P59910 | -0.21763   |
| 25500 | P03363 | Q8NAB2 | -0.20171   |
| 25501 | P03363 | Q9NY56 | -0.29556   |
| 25502 | P03363 | P29508 | -0.13734   |
| 25503 | P03363 | Q9H2D1 | -0.27762   |
| 25504 | P03363 | P00966 | -0.19456   |
| 25505 | P03363 | Q07812 | -0.2274    |
| 25506 | P03363 | O76096 | -0.25672   |
| 25507 | P03363 | Q96N67 | -0.2105    |
| 25508 | P03363 | Q86YS6 | -0.50243   |
| 25509 | P03363 | Q6ZQY3 | -0.22937   |
| 25510 | P03363 | P31323 | -0.22739   |
| 25511 | P03363 | Q9Y3Q0 | -0.45431   |
| 25512 | P03363 | Q63HN8 | -0.22741   |
| 25513 | P03363 | P26583 | -0.22901   |
| 25514 | P03363 | Q6UXB4 | -0.2345    |
| 25515 | P03363 | O95096 | -0.22936   |
| 25516 | P03363 | Q149N8 | -0.21711   |
| 25517 | P03363 | P02760 | -0.40498   |
| 25518 | P03363 | P10620 | -0.15292   |
| 25519 | P03363 | Q8TDW4 | -0.32138   |
| 25520 | P03363 | P0C7X4 | -0.23894   |
| 25521 | P03363 | Q9Y2Z9 | -0.32997   |
| 25522 | P03363 | Q96L11 | -0.33992   |
| 25523 | P03363 | P0C629 | -0.61656   |
| 25524 | P03363 | Q9NP60 | -0.51009   |
| 25525 | P03363 | O76083 | -0.22704   |
| 25526 | P03363 | Q8WWZ4 | -0.58975   |
| 25527 | P03363 | Q9BYX2 | -0.22748   |
| 25528 | P03363 | Q3KQZ1 | -0.29673   |
| 25529 | P03363 | P08069 | -0.32564   |
| 25530 | P03363 | Q5TZK3 | -0.16827   |
| 25531 | P03363 | Q08117 | -0.28582   |
| 25532 | P03363 | Q6UWF5 | -0.32626   |
| 25533 | P03363 | P0C7T2 | -0.61656   |
| 25534 | P03363 | Q8IZU8 | -0.32394   |
| 25535 | P03363 | P07205 | -0.21034   |
| 25536 | P03363 | Q502X0 | -0.16992   |

|       |        |        |           |
|-------|--------|--------|-----------|
| 25537 | P03363 | P63092 | -0.351    |
| 25538 | P03363 | Q14680 | -0.23775  |
| 25539 | P03363 | Q96G74 | -0.16369  |
| 25540 | P03363 | Q7L2J0 | -0.16579  |
| 25541 | P03363 | Q86VD7 | -0.28352  |
| 25542 | P03363 | Q9NZ43 | -0.19171  |
| 25543 | P03363 | Q8IW52 | -0.37674  |
| 25544 | P03363 | Q49AQ9 | -0.14021  |
| 25545 | P03363 | P0DM48 | -0.22734  |
| 25546 | P03363 | Q86XP0 | -0.22764  |
| 25547 | P03363 | Q13067 | -0.23345  |
| 25548 | P03363 | P57058 | -0.66447  |
| 25549 | P03363 | P27448 | -0.31535  |
| 25550 | P03363 | P30926 | -0.4699   |
| 25551 | P03363 | Q05823 | -0.22741  |
| 25552 | P03363 | Q6ZW76 | -0.22741  |
| 25553 | P03363 | Q9NZI2 | -0.23011  |
| 25554 | P03363 | O60240 | -0.21839  |
| 25555 | P03363 | Q96L12 | -0.27557  |
| 25556 | P03363 | P51587 | -0.20963  |
| 25557 | P03363 | Q8N5M4 | -0.22708  |
| 25558 | P03363 | Q99665 | -0.41477  |
| 25559 | P03363 | Q96PU9 | -0.041992 |
| 25560 | P03363 | Q6ZQQ6 | -0.21533  |
| 25561 | P03363 | O75828 | -0.22727  |
| 25562 | P03363 | Q0VAA2 | -0.22741  |
| 25563 | P03363 | A6NNZ2 | -0.21405  |
| 25564 | P03363 | Q05901 | -0.47075  |
| 25565 | P03363 | Q96EV2 | -0.11936  |
| 25566 | P03363 | P15692 | -0.25552  |
| 25567 | P03363 | Q8N5C6 | -0.2032   |
| 25568 | P03363 | P01920 | -0.52851  |
| 25569 | P03363 | Q8NGD3 | -0.61656  |
| 25570 | P03363 | P62760 | -0.23229  |
| 25571 | P03363 | Q96ME7 | -0.22292  |
| 25572 | P03363 | P41439 | -0.40055  |
| 25573 | P03363 | A2A2Y4 | -0.25003  |
| 25574 | P03363 | Q9NUT2 | -0.3298   |
| 25575 | P03363 | Q5JZY3 | -0.66602  |
| 25576 | P03363 | Q14761 | -0.46707  |
| 25577 | P03363 | P04066 | -0.14872  |
| 25578 | P03363 | Q6P4H8 | -0.32626  |
| 25579 | P03363 | Q56VL3 | -0.052009 |
| 25580 | P03363 | Q9NP70 | -0.41409  |
| 25581 | P03363 | Q8WZ64 | -0.43318  |
| 25582 | P03363 | Q9UNL2 | -0.41722  |
| 25583 | P03363 | Q9NX78 | -0.32626  |
| 25584 | P03363 | Q6A1A2 | -0.4421   |
| 25585 | P03363 | P59796 | -0.61777  |
| 25586 | P03363 | D6RBM5 | -0.2325   |
| 25587 | P03363 | Q3SX64 | -0.20608  |
| 25588 | P03363 | Q9UJQ1 | -0.49753  |
| 25589 | P03363 | Q9Y5Y0 | -0.18476  |
| 25590 | P03363 | O60384 | -0.058813 |
| 25591 | P03363 | Q9NYQ7 | -0.44023  |
| 25592 | P03363 | Q12851 | -0.23026  |
| 25593 | P03363 | Q92598 | -0.22697  |
| 25594 | P03363 | Q8N573 | -0.2081   |
| 25595 | P03363 | P40926 | -0.16941  |
| 25596 | P03363 | Q7Z449 | -0.76753  |
| 25597 | P03363 | P09601 | -0.22719  |
| 25598 | P03363 | Q14764 | -0.52126  |
| 25599 | P03363 | Q5BJD5 | -0.32626  |
| 25600 | P03363 | A6NJ16 | -0.33992  |
| 25601 | P03363 | A4QPH2 | -0.23674  |
| 25602 | P03363 | P14314 | -0.22741  |
| 25603 | P03363 | P49585 | -0.20166  |
| 25604 | P03363 | P30989 | -0.76946  |
| 25605 | P03363 | Q86W34 | -0.33218  |
| 25606 | P03363 | Q14232 | -0.16702  |
| 25607 | P03363 | P08134 | -0.22713  |
| 25608 | P03363 | Q8NDA2 | -0.42115  |
| 25609 | P03363 | Q9UH64 | -0.21065  |
| 25610 | P03363 | P16150 | -0.56575  |
| 25611 | P03363 | Q8IYV9 | -0.37576  |
| 25612 | P03363 | Q8TBR5 | -0.1633   |

|       |        |        |            |
|-------|--------|--------|------------|
| 25613 | P03363 | P15018 | -0.22262   |
| 25614 | P03363 | Q13117 | -0.22752   |
| 25615 | P03363 | C9J6K1 | -0.0031535 |
| 25616 | P03363 | Q86XJ1 | -0.22336   |
| 25617 | P03363 | P24390 | -0.25983   |
| 25618 | P03363 | A6NM15 | -0.24873   |
| 25619 | P03363 | Q6ZRK6 | -0.20796   |
| 25620 | P03363 | P01603 | -0.54902   |
| 25621 | P03363 | P47224 | -0.17198   |
| 25622 | P03363 | A6NDD5 | -0.33169   |
| 25623 | P03363 | A6NKX1 | -0.042737  |
| 25624 | P03363 | Q92835 | -0.22741   |
| 25625 | P03363 | P26038 | -0.23057   |
| 25626 | P03363 | Q9NSY0 | -0.22378   |
| 25627 | P03363 | Q9H9S5 | -0.76917   |
| 25628 | P03363 | P56746 | -0.27242   |
| 25629 | P03363 | Q8NDV3 | -0.22559   |
| 25630 | P03363 | P07738 | -0.071449  |
| 25631 | P03363 | P28039 | -0.39783   |
| 25632 | P03363 | Q6EEV4 | -0.042737  |
| 25633 | P03363 | Q96NF6 | -0.32626   |
| 25634 | P03363 | Q9H8W5 | -0.22741   |
| 25635 | P03363 | Q96DN2 | -0.38315   |
| 25636 | P03363 | P20933 | -0.16102   |
| 25637 | P03363 | Q8IVJ8 | -0.32626   |
| 25638 | P03363 | Q6V0I7 | -0.24196   |
| 25639 | P03363 | O95292 | -0.21354   |
| 25640 | P03363 | P07602 | -0.58824   |
| 25641 | P03363 | Q17R89 | -0.25718   |
| 25642 | P03363 | Q9UKI3 | -0.21367   |
| 25643 | P03363 | P53671 | -0.43738   |
| 25644 | P03363 | P30044 | -0.22662   |
| 25645 | P03363 | P43307 | -0.35828   |
| 25646 | P03363 | Q6ZMC9 | -0.32626   |
| 25647 | P03363 | Q75752 | -0.34911   |
| 25648 | P03363 | P48735 | -0.21221   |
| 25649 | P03363 | Q9H4Q4 | -0.22776   |
| 25650 | P03363 | P51911 | -0.22385   |
| 25651 | P03363 | Q6P4A8 | -0.34717   |
| 25652 | P03363 | Q13889 | -0.22071   |
| 25653 | P03363 | Q96E35 | -0.22639   |
| 25654 | P03363 | Q7Z5J1 | -0.74395   |
| 25655 | P03363 | P13631 | -0.22834   |
| 25656 | P03363 | O14733 | -0.22837   |
| 25657 | P03363 | A2RUB6 | -0.1555    |
| 25658 | P03363 | Q08AM6 | -0.14742   |
| 25659 | P03363 | Q7Z4W1 | -0.39491   |
| 25660 | P03363 | O60243 | -0.4036    |
| 25661 | P03363 | Q02388 | -0.22741   |
| 25662 | P03363 | Q15520 | -0.27344   |
| 25663 | P03363 | Q5UCC4 | -0.67275   |
| 25664 | P03363 | Q8N8X6 | -0.17043   |
| 25665 | P03363 | Q96NW7 | -0.22804   |
| 25666 | P03363 | Q86X19 | -0.4571    |
| 25667 | P03363 | Q9NY91 | -0.35446   |
| 25668 | P03363 | Q8NEV4 | -0.3507    |
| 25669 | P03363 | Q95992 | -0.63978   |
| 25670 | P03363 | Q8WXG9 | -0.24237   |
| 25671 | P03363 | P0CG40 | -0.2171    |
| 25672 | P03363 | P43365 | -0.18149   |
| 25673 | P03363 | Q8NEN0 | -0.21645   |
| 25674 | P03363 | Q14055 | -0.39291   |
| 25675 | P03363 | Q9BQJ4 | -0.37903   |
| 25676 | P03363 | A6NGN4 | -0.11502   |
| 25677 | P03363 | P33261 | -0.51593   |
| 25678 | P03363 | Q9NQZ7 | -0.29955   |
| 25679 | P03363 | Q03518 | -0.2909    |
| 25680 | P03363 | P17658 | -0.41606   |
| 25681 | P03363 | A8MPV3 | -0.16218   |
| 25682 | P03363 | Q8NEB7 | -0.2474    |
| 25683 | P03363 | Q9UJT1 | -0.22235   |
| 25684 | P03363 | A0AVI4 | -0.19187   |
| 25685 | P03363 | Q96FV3 | -0.28468   |
| 25686 | P03363 | P35241 | -0.22895   |
| 25687 | P03363 | Q6IAA8 | -0.19083   |
| 25688 | P03363 | Q96KK3 | -0.22841   |

|       |        |        |           |
|-------|--------|--------|-----------|
| 25689 | P03363 | Q86YW5 | -0.23347  |
| 25690 | P03363 | O00408 | -0.22705  |
| 25691 | P03363 | Q5JU67 | -0.15307  |
| 25692 | P03363 | Q5H9T9 | -0.089702 |
| 25693 | P03363 | Q0P641 | -0.15549  |
| 25694 | P03363 | Q15010 | -0.089406 |
| 25695 | P03363 | O60762 | -0.22178  |
| 25696 | P03363 | Q8N9V3 | -0.22753  |
| 25697 | P03363 | Q9Y2S2 | -0.19125  |
| 25698 | P03363 | Q9NQW5 | -0.20761  |
| 25699 | P03363 | O00203 | -0.21257  |
| 25700 | P03363 | O75023 | -0.37477  |
| 25701 | P03363 | P30493 | -0.54957  |
| 25702 | P03363 | Q5T1V6 | -0.26761  |
| 25703 | P03363 | P51178 | -0.22741  |
| 25704 | P03363 | P49069 | -0.10748  |
| 25705 | P03363 | P15954 | -0.29981  |
| 25706 | P03363 | P0C7P3 | -0.24873  |
| 25707 | P03363 | P61764 | -0.2245   |
| 25708 | P03363 | Q9UPP1 | -0.24602  |
| 25709 | P03363 | Q969Z3 | -0.36744  |
| 25710 | P03363 | Q6ZST4 | -0.21359  |
| 25711 | P03363 | Q5T215 | -0.16192  |
| 25712 | P03363 | Q95361 | -0.23147  |
| 25713 | P03363 | Q6ZNM6 | -0.1283   |
| 25714 | P03363 | P43026 | -0.26047  |
| 25715 | P03363 | Q86W50 | -0.1006   |
| 25716 | P03363 | Q96MP5 | -0.16055  |
| 25717 | P03363 | P20231 | -0.49563  |
| 25718 | P03363 | A6NI15 | -0.22741  |
| 25719 | P03363 | P43080 | -0.2791   |
| 25720 | P03363 | E7EW31 | -0.042737 |
| 25721 | P03363 | E2RYF6 | -0.32626  |
| 25722 | P03363 | Q9NP56 | -0.2268   |
| 25723 | P03363 | P22352 | -0.48426  |
| 25724 | P03363 | Q8WZ71 | -0.32626  |
| 25725 | P03363 | A6NME0 | -0.055335 |
| 25726 | P03363 | Q02790 | -0.25547  |
| 25727 | P03363 | Q86TX2 | -0.17822  |
| 25728 | P03363 | Q7Z3V4 | -0.22748  |
| 25729 | P03363 | Q9BZM1 | -0.44222  |
| 25730 | P03363 | O75592 | -0.22717  |
| 25731 | P03363 | Q6ZSI9 | -0.33515  |
| 25732 | P03363 | Q09327 | -0.29444  |
| 25733 | P03363 | Q8NGC1 | -0.61656  |
| 25734 | P03363 | P18075 | -0.22741  |
| 25735 | P03363 | Q7Z2D5 | -0.43438  |
| 25736 | P03363 | Q9NZB2 | -0.075573 |
| 25737 | P03363 | P30408 | -0.35301  |
| 25738 | P03363 | Q9UN88 | -0.49095  |
| 25739 | P03363 | Q9Y698 | -0.22023  |
| 25740 | P03363 | Q96B86 | -0.3061   |
| 25741 | P03363 | Q9UEF7 | -0.568    |
| 25742 | P03363 | Q641Q3 | -0.33992  |
| 25743 | P03363 | P40238 | -0.56605  |
| 25744 | P03363 | P08174 | -0.64982  |
| 25745 | P03363 | P01848 | -0.50917  |
| 25746 | P03363 | A6NN79 | -0.32626  |
| 25747 | P03363 | P0CG41 | -0.32626  |
| 25748 | P03363 | Q5HYA8 | -0.22918  |
| 25749 | P03363 | Q5BIV9 | -0.24531  |
| 25750 | P03363 | Q9NUL5 | -0.11419  |
| 25751 | P03363 | Q8NBF2 | -0.2265   |
| 25752 | P03363 | P48739 | -0.18585  |
| 25753 | P03363 | P04217 | -0.28098  |
| 25754 | P03363 | A4FU28 | -0.32626  |
| 25755 | P03363 | Q6PIL6 | -0.42988  |
| 25756 | P03363 | Q9NZ38 | -0.10962  |
| 25757 | P03363 | Q96AY3 | -0.23203  |
| 25758 | P03363 | Q2M2W7 | -0.031359 |
| 25759 | P03363 | Q8NA03 | -0.045366 |
| 25760 | P03363 | Q8N8D0 | -0.32626  |
| 25761 | P03363 | Q96T53 | -0.45249  |
| 25762 | P03363 | Q9UHC9 | -0.22715  |
| 25763 | P03363 | Q9UQE7 | -0.22696  |
| 25764 | P03363 | O14559 | -0.24383  |



|       |        |        |           |
|-------|--------|--------|-----------|
| 25765 | P03363 | P13688 | -0.37398  |
| 25766 | P03363 | Q9H799 | -0.32626  |
| 25767 | P03363 | Q96P53 | -0.22741  |
| 25768 | P03363 | Q00219 | -0.55681  |
| 25769 | P03363 | Q658T7 | -0.21772  |
| 25770 | P03363 | Q13011 | -0.21253  |
| 25771 | P03363 | Q8NGU9 | -0.64046  |
| 25772 | P03363 | Q96RD2 | -0.61656  |
| 25773 | P03363 | P18462 | -0.35929  |
| 25774 | P03363 | Q684P5 | -0.22254  |
| 25775 | P03363 | A6NI73 | -0.67466  |
| 25776 | P03363 | P45381 | -0.19279  |
| 25777 | P03363 | Q6UX52 | -0.33992  |
| 25778 | P03363 | Q8NCX0 | -0.097464 |
| 25779 | P03363 | Q8NDH3 | -0.17041  |
| 25780 | P03363 | Q5TG30 | -0.38968  |
| 25781 | P03363 | P04070 | -0.29834  |
| 25782 | P03363 | Q8NG76 | -0.61656  |
| 25783 | P03363 | Q9NR21 | -0.22182  |
| 25784 | P03363 | Q5JSH3 | -0.22741  |
| 25785 | P03363 | Q8WX77 | -0.33338  |
| 25786 | P03363 | Q6V1P9 | -0.57898  |
| 25787 | P03363 | P0C7V7 | -0.43105  |
| 25788 | P03363 | P01857 | -0.23201  |
| 25789 | P03363 | Q8NGK4 | -0.61656  |
| 25790 | P03363 | Q96K83 | -0.12281  |
| 25791 | P03363 | P22897 | -0.61154  |
| 25792 | P03363 | P41181 | -0.22738  |
| 25793 | P03363 | O75293 | -0.052098 |
| 25794 | P03363 | Q8N715 | -0.16459  |
| 25795 | P03363 | H3BQW9 | -0.094487 |
| 25796 | P03363 | Q495W5 | -0.30023  |
| 25797 | P03363 | Q19T08 | -0.5915   |
| 25798 | P03363 | Q92876 | -0.24413  |
| 25799 | P03363 | Q43930 | -0.54205  |
| 25800 | P03363 | Q8TBE1 | -0.43605  |
| 25801 | P03363 | Q96RT6 | -0.25306  |
| 25802 | P03363 | P01824 | -0.54902  |
| 25803 | P03363 | P61619 | -0.44618  |
| 25804 | P03363 | Q5TIA1 | -0.18536  |
| 25805 | P03363 | Q6XLA1 | -0.1753   |
| 25806 | P03363 | Q8TC99 | -0.23179  |
| 25807 | P03363 | Q9BYJ9 | -0.033395 |
| 25808 | P03363 | Q567U6 | -0.22411  |
| 25809 | P03363 | P04436 | -0.22804  |
| 25810 | P03363 | Q96FE5 | -0.38012  |
| 25811 | P03363 | P0CE67 | -0.042737 |
| 25812 | P03363 | Q8TDV2 | -0.64046  |
| 25813 | P03363 | P28360 | -0.20161  |
| 25814 | P03363 | Q6P1Q9 | -0.21307  |
| 25815 | P03363 | Q9Y2E5 | -0.40989  |
| 25816 | P03363 | Q15034 | -0.25833  |
| 25817 | P03363 | Q9H4G8 | -0.084423 |
| 25818 | P03363 | Q8WV35 | -0.22432  |
| 25819 | P03363 | Q8N6G2 | -0.20616  |
| 25820 | P03363 | Q8TCW9 | -0.62776  |
| 25821 | P03363 | Q8NA23 | -0.22746  |
| 25822 | P03363 | P10109 | -0.1713   |
| 25823 | P03363 | Q2MJR0 | -0.21985  |
| 25824 | P03363 | A2A368 | -0.17548  |
| 25825 | P03363 | Q9Y2G0 | -0.13021  |
| 25826 | P03363 | P50895 | -0.65039  |
| 25827 | P03363 | Q9NYG2 | -0.39948  |
| 25828 | P03363 | P08631 | -0.23452  |
| 25829 | P03363 | Q53EP0 | -0.40529  |
| 25830 | P03363 | Q8N967 | -0.32626  |
| 25831 | P03363 | Q96L46 | -0.22905  |
| 25832 | P03363 | Q00311 | -0.22741  |
| 25833 | P03363 | Q60909 | -0.35142  |
| 25834 | P03363 | Q6UXD5 | -0.66368  |
| 25835 | P03363 | Q96A54 | -0.538    |
| 25836 | P03363 | Q9NVA1 | -0.15494  |
| 25837 | P03363 | P32418 | -0.34734  |
| 25838 | P03363 | P20336 | -0.25368  |
| 25839 | P03363 | O75845 | -0.63755  |
| 25840 | P03363 | Q9H5L9 | -0.10156  |

|       |        |        |           |
|-------|--------|--------|-----------|
| 25841 | P03363 | Q9H8U3 | -0.15053  |
| 25842 | P03363 | E0CX11 | -0.33992  |
| 25843 | P03363 | Q96RY7 | -0.19423  |
| 25844 | P03363 | Q8IWX7 | -0.22624  |
| 25845 | P03363 | Q9UBI4 | -0.21492  |
| 25846 | P03363 | Q8N2G4 | -0.24531  |
| 25847 | P03363 | Q96A19 | -0.22319  |
| 25848 | P03363 | O60825 | -0.20915  |
| 25849 | P03363 | Q32MK0 | -0.33202  |
| 25850 | P03363 | Q9NYW6 | -0.49863  |
| 25851 | P03363 | Q5T0W9 | -0.17272  |
| 25852 | P03363 | A8MU93 | -0.031359 |
| 25853 | P03363 | Q8WTU0 | -0.1922   |
| 25854 | P03363 | Q8TCS8 | -0.1633   |
| 25855 | P03363 | Q8WXH2 | -0.5234   |
| 25856 | P03363 | Q8N6K4 | -0.042737 |
| 25857 | P03363 | P20366 | -0.46589  |
| 25858 | P03363 | Q96IX9 | -0.21983  |
| 25859 | P03363 | A8MVX0 | -0.22654  |
| 25860 | P03363 | Q9H9K5 | -0.23673  |
| 25861 | P03363 | Q96S44 | -0.22741  |
| 25862 | P03363 | Q86XR2 | -0.18427  |
| 25863 | P03363 | Q08499 | -0.22653  |
| 25864 | P03363 | Q96FN4 | -0.22756  |
| 25865 | P03363 | O43609 | -0.21304  |
| 25866 | P03363 | Q8N661 | -0.092454 |
| 25867 | P03363 | Q8TBE7 | -0.3203   |
| 25868 | P03363 | Q8IX29 | -0.22501  |
| 25869 | P03363 | Q96RD1 | -0.61656  |
| 25870 | P03363 | Q5T197 | -0.47964  |
| 25871 | P03363 | Q9H239 | -0.57309  |
| 25872 | P03363 | O75563 | -0.22723  |
| 25873 | P03363 | Q8NH18 | -0.61656  |
| 25874 | P03363 | P27539 | -0.3677   |
| 25875 | P03363 | Q8WYQ3 | -0.050047 |
| 25876 | P03363 | A2RUB1 | -0.031359 |
| 25877 | P03363 | Q13907 | -0.19677  |
| 25878 | P03363 | P19961 | -0.38179  |
| 25879 | P03363 | P35346 | -0.48997  |
| 25880 | P03363 | Q13085 | -0.24744  |
| 25881 | P03363 | Q6P087 | -0.17137  |
| 25882 | P03363 | Q15907 | -0.39653  |
| 25883 | P03363 | Q9Y484 | -0.22733  |
| 25884 | P03363 | P58743 | -0.43264  |
| 25885 | P03363 | O00159 | -0.20629  |
| 25886 | P03363 | Q9C026 | -0.22741  |
| 25887 | P03363 | Q69YG0 | -0.32626  |
| 25888 | P03363 | Q9P232 | -0.28732  |
| 25889 | P03363 | Q86SU0 | -0.18687  |
| 25890 | P03363 | P34913 | -0.22587  |
| 25891 | P03363 | Q8NHA8 | -0.61656  |
| 25892 | P03363 | Q92496 | -0.38924  |
| 25893 | P03363 | P43361 | -0.1868   |
| 25894 | P03363 | Q6IEY1 | -0.61656  |
| 25895 | P03363 | P54619 | -0.24777  |
| 25896 | P03363 | Q12866 | -0.3594   |
| 25897 | P03363 | Q93033 | -0.49622  |
| 25898 | P03363 | P01608 | -0.54902  |
| 25899 | P03363 | Q10713 | -0.25326  |
| 25900 | P03363 | P20930 | -0.20163  |
| 25901 | P03363 | Q8ND61 | -0.11178  |
| 25902 | P03363 | Q16760 | -0.31791  |
| 25903 | P03363 | P20151 | -0.49249  |
| 25904 | P03363 | Q9UKP3 | -0.31932  |
| 25905 | P03363 | Q04118 | -0.32362  |
| 25906 | P03363 | Q07837 | -0.50683  |
| 25907 | P03363 | O00244 | -0.19155  |
| 25908 | P03363 | Q5BJE1 | -0.14583  |
| 25909 | P03363 | Q5HYM0 | -0.14672  |
| 25910 | P03363 | Q9H7Y0 | -0.33992  |
| 25911 | P03363 | P04222 | -0.54957  |
| 25912 | P03363 | P58180 | -0.61656  |
| 25913 | P03363 | O00299 | -0.22085  |
| 25914 | P03363 | Q9BT23 | -0.22731  |
| 25915 | P03363 | Q6NUK4 | -0.32626  |
| 25916 | P03363 | Q7Z4W2 | -0.29732  |

|       |        |        |           |
|-------|--------|--------|-----------|
| 25917 | P03363 | P52888 | -0.1896   |
| 25918 | P03363 | Q8N4A0 | -0.24277  |
| 25919 | P03363 | Q9UPI3 | -0.42238  |
| 25920 | P03363 | Q7RTU7 | -0.2302   |
| 25921 | P03363 | Q9NV70 | -0.14883  |
| 25922 | P03363 | Q6UW15 | -0.37384  |
| 25923 | P03363 | A8MXU0 | -0.33516  |
| 25924 | P03363 | Q5VTH2 | -0.056826 |
| 25925 | P03363 | P0CG01 | -0.33992  |
| 25926 | P03363 | Q96RI1 | -0.22797  |
| 25927 | P03363 | Q75915 | -0.28841  |
| 25928 | P03363 | Q12983 | -0.1587   |
| 25929 | P03363 | Q9Y6M0 | -0.27017  |
| 25930 | P03363 | P04434 | -0.54902  |
| 25931 | P03363 | Q96PE5 | -0.46688  |
| 25932 | P03363 | Q96BJ8 | -0.19794  |
| 25933 | P03363 | Q9GZR7 | -0.20076  |
| 25934 | P03363 | P09104 | -0.19278  |
| 25935 | P03363 | Q5VYM1 | -0.098025 |
| 25936 | P03363 | Q9NX04 | -0.039919 |
| 25937 | P03363 | Q00744 | -0.26473  |
| 25938 | P03363 | P30487 | -0.54957  |
| 25939 | P03363 | Q6IAN0 | -0.57255  |
| 25940 | P03363 | P01574 | -0.24946  |
| 25941 | P03363 | Q6JEL2 | -0.20669  |
| 25942 | P03363 | Q8TAC1 | -0.37664  |
| 25943 | P03363 | Q9Y5H5 | -0.57898  |
| 25944 | P03363 | Q96ME1 | -0.16041  |
| 25945 | P03363 | P25705 | -0.20423  |
| 25946 | P03363 | Q96A29 | -0.24959  |
| 25947 | P03363 | Q6ZNI0 | -0.3069   |
| 25948 | P03363 | Q400G9 | -0.33218  |
| 25949 | P03363 | A6NIU2 | -0.22615  |
| 25950 | P03363 | Q6JVE6 | -0.31283  |
| 25951 | P03363 | P01185 | -0.29196  |
| 25952 | P03363 | P39060 | -0.22741  |
| 25953 | P03363 | Q8NGJ0 | -0.61656  |
| 25954 | P03363 | Q4V9L6 | -0.19187  |
| 25955 | P03363 | Q2T9J0 | -0.22276  |
| 25956 | P03363 | Q9BRP7 | -0.12058  |
| 25957 | P03363 | Q6PL18 | -0.24244  |
| 25958 | P03363 | Q8NBI6 | -0.49006  |
| 25959 | P03363 | Q15735 | -0.22718  |
| 25960 | P03363 | Q9UI17 | -0.17747  |
| 25961 | P03363 | Q95025 | -0.50936  |
| 25962 | P03363 | P06307 | -0.41978  |
| 25963 | P03363 | P00491 | -0.19229  |
| 25964 | P03363 | Q8TBX8 | -0.22358  |
| 25965 | P03363 | A6NEH6 | -0.42352  |
| 25966 | P03363 | Q17RY6 | -0.11395  |
| 25967 | P03363 | P14324 | -0.19577  |
| 25968 | P03363 | Q9Y600 | -0.22912  |
| 25969 | P03363 | A8MUI8 | -0.10986  |
| 25970 | P03363 | Q14894 | -0.20845  |
| 25971 | P03363 | Q580R0 | -0.27142  |
| 25972 | P03363 | A4D250 | -0.16367  |
| 25973 | P03363 | Q9BV19 | -0.09665  |
| 25974 | P03363 | Q9Y3M8 | -0.22846  |
| 25975 | P03363 | Q95399 | -0.35364  |
| 25976 | P03363 | P01593 | -0.54902  |
| 25977 | P03363 | Q6PEW1 | -0.21314  |
| 25978 | P03363 | A6NJQ4 | -0.20961  |
| 25979 | P03363 | Q8IYL9 | -0.71605  |
| 25980 | P03363 | Q9H3Z7 | -0.21189  |
| 25981 | P03363 | Q8N8P6 | -0.018018 |
| 25982 | P03363 | Q6UY01 | -0.22741  |
| 25983 | P03363 | Q94788 | -0.34606  |
| 25984 | P03363 | Q9H2K8 | -0.22875  |
| 25985 | P03363 | Q9BYG0 | -0.45424  |
| 25986 | P03363 | Q9Y4D1 | -0.22649  |
| 25987 | P03363 | Q9Y6D0 | -0.20488  |
| 25988 | P03363 | Q8IYA8 | -0.031359 |
| 25989 | P03363 | Q02218 | -0.21948  |
| 25990 | P03363 | Q29865 | -0.54957  |
| 25991 | P03363 | Q9BXJ2 | -0.29059  |
| 25992 | P03363 | Q9BYX7 | -0.23126  |

|       |        |        |            |
|-------|--------|--------|------------|
| 25993 | P03363 | Q8NHM5 | -0.22741   |
| 25994 | P03363 | P98194 | -0.43285   |
| 25995 | P03363 | Q6NSI8 | -0.085731  |
| 25996 | P03363 | Q7Z4J2 | -0.26853   |
| 25997 | P03363 | A8MWL6 | -0.32626   |
| 25998 | P03363 | O43490 | -0.26976   |
| 25999 | P03363 | Q9HBJ7 | -0.23692   |
| 26000 | P03363 | Q8WXA9 | -0.22528   |
| 26001 | P03363 | Q01484 | -0.22744   |
| 26002 | P03363 | Q8NHW6 | -0.36185   |
| 26003 | P03363 | Q31610 | -0.54957   |
| 26004 | P03363 | Q53R12 | -0.47262   |
| 26005 | P03363 | Q96P31 | -0.47262   |
| 26006 | P03363 | Q9H0M4 | -0.22574   |
| 26007 | P03363 | Q9BXW3 | -0.042737  |
| 26008 | P03363 | Q7Z3E1 | -0.22231   |
| 26009 | P03363 | Q8N6N7 | -0.23199   |
| 26010 | P03363 | Q8IYR0 | -0.20623   |
| 26011 | P03363 | Q5T1A1 | -0.32626   |
| 26012 | P03363 | Q9P291 | -0.32626   |
| 26013 | P03363 | Q9UH17 | -0.48571   |
| 26014 | P03363 | P51993 | -0.3176    |
| 26015 | P03363 | Q8NH83 | -0.61656   |
| 26016 | P03363 | Q15037 | -0.12068   |
| 26017 | P03363 | P18031 | -0.24339   |
| 26018 | P03363 | Q6PCT2 | -0.2256    |
| 26019 | P03363 | Q96C55 | -0.22606   |
| 26020 | P03363 | Q75473 | -0.69732   |
| 26021 | P03363 | P52945 | -0.27814   |
| 26022 | P03363 | Q04759 | -0.2212    |
| 26023 | P03363 | Q68DN1 | -0.071977  |
| 26024 | P03363 | P07384 | -0.22946   |
| 26025 | P03363 | Q15836 | -0.22666   |
| 26026 | P03363 | P48551 | -0.47514   |
| 26027 | P03363 | P22223 | -0.57366   |
| 26028 | P03363 | Q96B23 | -0.0049341 |
| 26029 | P03363 | Q8N8Q9 | -0.53856   |
| 26030 | P03363 | P50583 | -0.28011   |
| 26031 | P03363 | Q4AC94 | -0.11469   |
| 26032 | P03363 | Q6ZRR5 | -0.32626   |
| 26033 | P03363 | Q5VSD8 | -0.072717  |
| 26034 | P03363 | Q6JBY9 | -0.11255   |
| 26035 | P03363 | Q6Y7W6 | -0.11069   |
| 26036 | P03363 | A1A4G5 | -0.042737  |
| 26037 | P03363 | Q43511 | -0.44858   |
| 26038 | P03363 | Q5SRI9 | -0.26492   |
| 26039 | P03363 | Q94991 | -0.37674   |
| 26040 | P03363 | Q96CT7 | -0.12829   |
| 26041 | P03363 | Q6DT37 | -0.22742   |
| 26042 | P03363 | Q9Y673 | -0.44962   |
| 26043 | P03363 | Q9Y493 | -0.53166   |
| 26044 | P03363 | Q8N271 | -0.48509   |
| 26045 | P03363 | P16144 | -0.28125   |
| 26046 | P03363 | Q8MH63 | -0.33967   |
| 26047 | P03363 | Q96LL3 | -0.32626   |
| 26048 | P03363 | Q8N7Q2 | -0.33992   |
| 26049 | P03363 | Q9BXX5 | -0.10187   |
| 26050 | P03363 | P45877 | -0.14395   |
| 26051 | P03363 | Q8N7S6 | -0.32626   |
| 26052 | P03363 | Q7Z7F1 | -0.11223   |
| 26053 | P03363 | Q9BYJ4 | -0.22735   |
| 26054 | P03363 | Q99961 | -0.22758   |
| 26055 | P03363 | Q8N6U2 | -0.083626  |
| 26056 | P03363 | Q00194 | -0.3674    |
| 26057 | P03363 | A6NES4 | -0.092976  |
| 26058 | P03363 | Q16772 | -0.22725   |
| 26059 | P03363 | P62685 | -0.21393   |
| 26060 | P03363 | Q15678 | -0.22749   |
| 26061 | P03363 | Q9HCM7 | -0.024128  |
| 26062 | P03363 | Q06278 | -0.27658   |
| 26063 | P03363 | P01764 | -0.54902   |
| 26064 | P03363 | P30455 | -0.43696   |
| 26065 | P03363 | Q8N1I8 | -0.042737  |
| 26066 | P03363 | Q8WWR9 | -0.052009  |
| 26067 | P03363 | Q8N412 | -0.20427   |
| 26068 | P03363 | A2RU14 | -0.32626   |

|       |        |        |           |
|-------|--------|--------|-----------|
| 26069 | P03363 | P10599 | -0.22881  |
| 26070 | P03363 | Q86TD4 | -0.18804  |
| 26071 | P03363 | Q8NBV4 | -0.27114  |
| 26072 | P03363 | Q8NFM4 | -0.27286  |
| 26073 | P03363 | Q9Y663 | -0.34145  |
| 26074 | P03363 | P40189 | -0.31625  |
| 26075 | P03363 | Q7Z7G8 | -0.20096  |
| 26076 | P03363 | Q96L94 | -0.22538  |
| 26077 | P03363 | P04908 | -0.2948   |
| 26078 | P03363 | Q9C0B0 | -0.21151  |
| 26079 | P03363 | Q5JU00 | -0.22737  |
| 26080 | P03363 | Q9NY84 | -0.24098  |
| 26081 | P03363 | Q8NCK7 | -0.44138  |
| 26082 | P03363 | P40205 | -0.17881  |
| 26083 | P03363 | Q86YJ5 | -0.38092  |
| 26084 | P03363 | Q8NH41 | -0.61656  |
| 26085 | P03363 | O94854 | -0.22429  |
| 26086 | P03363 | Q6UXP7 | -0.14336  |
| 26087 | P03363 | Q9Y2U2 | -0.54503  |
| 26088 | P03363 | A8MW95 | -0.17265  |
| 26089 | P03363 | Q9HAC7 | -0.18468  |
| 26090 | P03363 | P32246 | -0.39926  |
| 26091 | P03363 | Q6ZMG9 | -0.20191  |
| 26092 | P03363 | P0CG36 | -0.42931  |
| 26093 | P03363 | Q9P1G2 | -0.033274 |
| 26094 | P03363 | O14492 | -0.22741  |
| 26095 | P03363 | Q9Y3X0 | -0.069457 |
| 26096 | P03363 | Q8N2U0 | -0.32626  |
| 26097 | P03363 | Q01970 | -0.22726  |
| 26098 | P03363 | Q2WGJ8 | -0.32626  |
| 26099 | P03363 | O14520 | -0.23355  |
| 26100 | P03363 | Q9BT88 | -0.23735  |
| 26101 | P03363 | O43822 | -0.22738  |
| 26102 | P03363 | Q16720 | -0.50765  |
| 26103 | P03363 | P58753 | -0.22678  |
| 26104 | P03363 | Q9GIY3 | -0.53907  |
| 26105 | P03363 | Q16825 | -0.22749  |
| 26106 | P03363 | Q96K31 | -0.064134 |
| 26107 | P03363 | P86397 | -0.33276  |
| 26108 | P03363 | Q8IWF9 | -0.20347  |
| 26109 | P03363 | O94880 | -0.23033  |
| 26110 | P03363 | Q9UBV7 | -0.40559  |
| 26111 | P03363 | A2RUT3 | -0.32626  |
| 26112 | P03363 | Q9BPX6 | -0.22577  |
| 26113 | P03363 | Q8N339 | -0.20018  |
| 26114 | P03363 | Q5W186 | -0.38852  |
| 26115 | P03363 | P00492 | -0.21735  |
| 26116 | P03363 | Q9NWC5 | -0.32626  |
| 26117 | P03363 | O94804 | -0.31731  |
| 26118 | P03363 | Q14917 | -0.24938  |
| 26119 | P03363 | Q9P1Y6 | -0.22741  |
| 26120 | P03363 | P60763 | -0.18154  |
| 26121 | P03363 | Q5VZP5 | -0.24337  |
| 26122 | P03363 | Q13501 | -0.22728  |
| 26123 | P03363 | Q8NGX1 | -0.61656  |
| 26124 | P03363 | O43820 | -0.30822  |
| 26125 | P03363 | Q9NZC9 | -0.21377  |
| 26126 | P03363 | O95622 | -0.50551  |
| 26127 | P03363 | Q93070 | -0.25395  |
| 26128 | P03363 | Q06945 | -0.2284   |
| 26129 | P03363 | Q8IV56 | -0.068108 |
| 26130 | P03363 | Q9H4Y5 | -0.22651  |
| 26131 | P03363 | O14598 | -0.005527 |
| 26132 | P03363 | Q86XS8 | -0.23091  |
| 26133 | P03363 | A6NFE3 | -0.22432  |
| 26134 | P03363 | Q9H6R3 | -0.24468  |
| 26135 | P03363 | P56557 | -0.47019  |
| 26136 | P03363 | Q96SI9 | -0.21971  |
| 26137 | P03363 | Q2TAC6 | -0.24614  |
| 26138 | P03363 | Q53H76 | -0.38189  |
| 26139 | P03363 | Q9UGM3 | -0.22742  |
| 26140 | P03363 | Q99972 | -0.41122  |
| 26141 | P03363 | Q1L6U9 | -0.33992  |
| 26142 | P03363 | Q8NHS1 | -0.32626  |
| 26143 | P03363 | Q15758 | -0.52191  |
| 26144 | P03363 | Q8NFN8 | -0.62774  |

|       |        |        |           |
|-------|--------|--------|-----------|
| 26145 | P03363 | P46527 | -0.2133   |
| 26146 | P03363 | Q13606 | -0.61656  |
| 26147 | P03363 | Q8NH87 | -0.61656  |
| 26148 | P03363 | A6NIE9 | -0.49563  |
| 26149 | P03363 | P16662 | -0.44843  |
| 26150 | P03363 | Q9UBG3 | -0.23369  |
| 26151 | P03363 | P14867 | -0.44474  |
| 26152 | P03363 | Q9ULG3 | -0.042737 |
| 26153 | P03363 | O96015 | -0.1884   |
| 26154 | P03363 | Q9C0D6 | -0.22568  |
| 26155 | P03363 | O75390 | -0.21352  |
| 26156 | P03363 | O15523 | -0.30303  |
| 26157 | P03363 | Q99102 | -0.83619  |
| 26158 | P03363 | Q9UBY5 | -0.68074  |
| 26159 | P03363 | Q9NR00 | -0.088379 |
| 26160 | P03363 | Q9PON9 | -0.21417  |
| 26161 | P03363 | O00178 | -0.19412  |
| 26162 | P03363 | P04000 | -0.72285  |
| 26163 | P03363 | Q8N6N3 | -0.12517  |
| 26164 | P03363 | Q9Y2H9 | -0.22752  |
| 26165 | P03363 | Q9HBU9 | -0.24975  |
| 26166 | P03363 | P01616 | -0.5251   |
| 26167 | P03363 | P15173 | -0.22737  |
| 26168 | P03363 | P51793 | -0.55558  |
| 26169 | P03363 | Q9NTQ9 | -0.44435  |
| 26170 | P03363 | O95907 | -0.45928  |
| 26171 | P03363 | Q5VW38 | -0.32626  |
| 26172 | P03363 | Q76002 | -0.61656  |
| 26173 | P03363 | Q9UBC2 | -0.22741  |
| 26174 | P03363 | Q9HD67 | -0.21196  |
| 26175 | P03363 | P67936 | -0.19285  |
| 26176 | P03363 | P57103 | -0.44906  |
| 26177 | P03363 | Q8NGR2 | -0.61656  |
| 26178 | P03363 | Q86W33 | -0.4183   |
| 26179 | P03363 | Q8IWK6 | -0.66694  |
| 26180 | P03363 | O94876 | -0.32626  |
| 26181 | P03363 | Q8NH50 | -0.61656  |
| 26182 | P03363 | Q2NL68 | -0.031359 |
| 26183 | P03363 | Q02985 | -0.42609  |
| 26184 | P03363 | Q9UP65 | -0.40127  |
| 26185 | P03363 | Q6UXG3 | -0.5619   |
| 26186 | P03363 | Q99062 | -0.9722   |
| 26187 | P03363 | Q86Y07 | -0.22741  |
| 26188 | P03363 | Q0VDG4 | -0.095992 |
| 26189 | P03363 | Q96CU9 | -0.52518  |
| 26190 | P03363 | Q9UGF7 | -0.61656  |
| 26191 | P03363 | Q92604 | -0.25023  |
| 26192 | P03363 | P08F94 | -0.22575  |
| 26193 | P03363 | Q9NYX4 | -0.54921  |
| 26194 | P03363 | Q8TDL5 | -0.49609  |
| 26195 | P03363 | A1A5C7 | -0.3461   |
| 26196 | P03363 | P01241 | -0.22288  |
| 26197 | P03363 | Q9H106 | -0.33992  |
| 26198 | P03363 | O95398 | -0.25512  |
| 26199 | P03363 | Q9UBD3 | -0.617    |
| 26200 | P03363 | C9JPN9 | -0.25139  |
| 26201 | P03363 | P55345 | -0.22741  |
| 26202 | P03363 | P05090 | -0.31234  |
| 26203 | P03363 | P03901 | -0.44092  |
| 26204 | P03363 | A6NJW4 | -0.32626  |
| 26205 | P03363 | Q13349 | -0.52811  |
| 26206 | P03363 | Q32VQ0 | -0.61656  |
| 26207 | P03363 | P43246 | -0.2107   |
| 26208 | P03363 | O95294 | -0.22741  |
| 26209 | P03363 | P33763 | -0.23055  |
| 26210 | P03363 | Q8WXI4 | -0.19177  |
| 26211 | P03363 | P19875 | -0.55371  |
| 26212 | P03363 | Q9UJA3 | -0.22177  |
| 26213 | P03363 | P15289 | -0.33881  |
| 26214 | P03363 | P86496 | -0.042737 |
| 26215 | P03363 | Q6ZS94 | -0.042737 |
| 26216 | P03363 | Q9P0V8 | -0.33958  |
| 26217 | P03363 | P26640 | -0.11629  |
| 26218 | P03363 | Q7L0L9 | -0.32626  |
| 26219 | P03363 | P50151 | -0.29343  |
| 26220 | P03363 | Q8TEB9 | -0.2472   |

|       |        |        |           |
|-------|--------|--------|-----------|
| 26221 | P03363 | Q7Z2Y5 | -0.51751  |
| 26222 | P03363 | Q29963 | -0.54957  |
| 26223 | P03363 | Q9UBY8 | -0.2868   |
| 26224 | P03363 | P35442 | -0.29703  |
| 26225 | P03363 | Q02978 | -0.2657   |
| 26226 | P03363 | Q6DKI2 | -0.21656  |
| 26227 | P03363 | Q9BVQ7 | -0.27983  |
| 26228 | P03363 | Q96DU3 | -0.4834   |
| 26229 | P03363 | Q00341 | -0.19738  |
| 26230 | P03363 | Q9P2X0 | -0.22227  |
| 26231 | P03363 | Q8N888 | -0.015755 |
| 26232 | P03363 | Q9Y6W6 | -0.24726  |
| 26233 | P03363 | Q9NP85 | -0.19928  |
| 26234 | P03363 | P17612 | -0.22695  |
| 26235 | P03363 | Q8NH79 | -0.61656  |
| 26236 | P03363 | Q8TAB5 | -0.031359 |
| 26237 | P03363 | O15467 | -0.54859  |
| 26238 | P03363 | Q96EY8 | -0.25913  |
| 26239 | P03363 | Q12931 | -0.19706  |
| 26240 | P03363 | A8K0Z3 | -0.21735  |
| 26241 | P03363 | Q4UJ75 | -0.2274   |
| 26242 | P03363 | A4D256 | -0.32794  |
| 26243 | P03363 | Q5VXU1 | -0.47262  |
| 26244 | P03363 | P02810 | -0.042737 |
| 26245 | P03363 | Q9BV23 | -0.31695  |
| 26246 | P03363 | Q9HBI1 | -0.22742  |
| 26247 | P03363 | P30613 | -0.2697   |
| 26248 | P03363 | Q6NTE8 | -0.23494  |
| 26249 | P03363 | O95800 | -0.73419  |
| 26250 | P03363 | Q86T26 | -0.77984  |
| 26251 | P03363 | P26010 | -0.65522  |
| 26252 | P03363 | O94923 | -0.28864  |
| 26253 | P03363 | Q9GZK7 | -0.61656  |
| 26254 | P03363 | P86478 | -0.042737 |
| 26255 | P03363 | Q8N162 | -0.61656  |
| 26256 | P03363 | Q96KW2 | -0.039141 |
| 26257 | P03363 | Q8NEA5 | -0.32626  |
| 26258 | P03363 | Q8TDN7 | -0.39329  |
| 26259 | P03363 | Q9Y2A9 | -0.38944  |
| 26260 | P03363 | P53611 | -0.21415  |
| 26261 | P03363 | Q96JA4 | -0.32626  |
| 26262 | P03363 | Q9H019 | -0.1062   |
| 26263 | P03363 | Q86UK0 | -0.61087  |
| 26264 | P03363 | O00462 | -0.20405  |
| 26265 | P03363 | Q8NH19 | -0.61656  |
| 26266 | P03363 | O95816 | -0.15427  |
| 26267 | P03363 | O94933 | -0.37674  |
| 26268 | P03363 | P46934 | -0.22741  |
| 26269 | P03363 | Q96A05 | -0.20007  |
| 26270 | P03363 | Q9H159 | -0.55889  |
| 26271 | P03363 | Q8N5N4 | -0.063443 |
| 26272 | P03363 | Q14693 | -0.16442  |
| 26273 | P03363 | Q15761 | -0.47555  |
| 26274 | P03363 | Q8TCP9 | -0.18736  |
| 26275 | P03363 | O00461 | -0.14273  |
| 26276 | P03363 | P10997 | -0.53637  |
| 26277 | P03363 | Q8NCH0 | -0.32844  |
| 26278 | P03363 | P08582 | -0.29042  |
| 26279 | P03363 | Q9P253 | -0.19574  |
| 26280 | P03363 | P30499 | -0.59713  |
| 26281 | P03363 | Q9H714 | -0.12129  |
| 26282 | P03363 | P30464 | -0.54957  |
| 26283 | P03363 | Q8WV48 | -0.32626  |
| 26284 | P03363 | Q8NGU4 | -0.61656  |
| 26285 | P03363 | Q9P107 | -0.24436  |
| 26286 | P03363 | Q2WGJ9 | -0.32626  |
| 26287 | P03363 | Q8TDS4 | -0.55071  |
| 26288 | P03363 | Q9P1W3 | -0.32626  |
| 26289 | P03363 | Q8N3A8 | -0.21074  |
| 26290 | P03363 | P02724 | -0.49302  |
| 26291 | P03363 | P04118 | -0.38819  |
| 26292 | P03363 | Q9NVH1 | -0.20958  |
| 26293 | P03363 | Q86UZ6 | -0.22706  |
| 26294 | P03363 | P25106 | -0.45996  |
| 26295 | P03363 | Q5JU69 | -0.54592  |
| 26296 | P03363 | Q9P2E3 | -0.22744  |

|       |        |        |            |
|-------|--------|--------|------------|
| 26297 | P03363 | Q8NCV1 | -0.17336   |
| 26298 | P03363 | Q5JT25 | -0.30959   |
| 26299 | P03363 | Q9HAK2 | -0.17784   |
| 26300 | P03363 | Q8TDU6 | -0.64046   |
| 26301 | P03363 | Q96RU2 | -0.28751   |
| 26302 | P03363 | Q15147 | -0.22727   |
| 26303 | P03363 | P30040 | -0.1937    |
| 26304 | P03363 | Q9NQH7 | -0.26134   |
| 26305 | P03363 | Q6VEQ5 | -0.18278   |
| 26306 | P03363 | Q01814 | -0.23656   |
| 26307 | P03363 | Q9NZJ6 | -0.21252   |
| 26308 | P03363 | P32456 | -0.22497   |
| 26309 | P03363 | Q68CP4 | -0.40386   |
| 26310 | P03363 | Q6UVK1 | -0.75293   |
| 26311 | P03363 | Q13705 | -0.29773   |
| 26312 | P03363 | Q7LBE3 | -0.4603    |
| 26313 | P03363 | Q9Y2U8 | -0.20089   |
| 26314 | P03363 | Q8IYK4 | -0.2125    |
| 26315 | P03363 | Q96MH7 | -0.18097   |
| 26316 | P03363 | Q92949 | -0.27151   |
| 26317 | P03363 | P60509 | -0.47262   |
| 26318 | P03363 | Q9HAY2 | -0.16966   |
| 26319 | P03363 | Q9UGF5 | -0.61656   |
| 26320 | P03363 | Q96LB2 | -0.62053   |
| 26321 | P03363 | Q8IVM8 | -0.30406   |
| 26322 | P03363 | P00736 | -0.54951   |
| 26323 | P03363 | P82251 | -0.52578   |
| 26324 | P03363 | Q8NDL9 | -0.18526   |
| 26325 | P03363 | P41587 | -0.71342   |
| 26326 | P03363 | Q9H4F8 | -0.5312    |
| 26327 | P03363 | Q9UQF0 | -0.3284    |
| 26328 | P03363 | Q8N283 | -0.22739   |
| 26329 | P03363 | Q14581 | -0.61656   |
| 26330 | P03363 | P10745 | -0.44738   |
| 26331 | P03363 | P55201 | -0.22664   |
| 26332 | P03363 | Q9Y442 | -0.32626   |
| 26333 | P03363 | Q5VX71 | -0.32626   |
| 26334 | P03363 | P49840 | -0.22748   |
| 26335 | P03363 | Q96L73 | -0.22743   |
| 26336 | P03363 | Q5SW24 | -0.13708   |
| 26337 | P03363 | Q86YT9 | -0.42511   |
| 26338 | P03363 | Q14012 | -0.22864   |
| 26339 | P03363 | Q68D51 | -0.19907   |
| 26340 | P03363 | Q9NR99 | -0.33992   |
| 26341 | P03363 | Q9UJ71 | -0.60166   |
| 26342 | P03363 | Q99836 | -0.22741   |
| 26343 | P03363 | Q01959 | -0.2273    |
| 26344 | P03363 | Q9UKQ9 | -0.49563   |
| 26345 | P03363 | P50406 | -0.35605   |
| 26346 | P03363 | Q6URK8 | -0.33992   |
| 26347 | P03363 | Q8NEP4 | -0.031359  |
| 26348 | P03363 | Q00206 | -0.22741   |
| 26349 | P03363 | P48048 | -0.67835   |
| 26350 | P03363 | A8MVP8 | -0.15656   |
| 26351 | P03363 | Q14914 | -0.31005   |
| 26352 | P03363 | Q7L8J4 | -0.073373  |
| 26353 | P03363 | Q92546 | -0.0044799 |
| 26354 | P03363 | Q9BQS2 | -0.47262   |
| 26355 | P03363 | Q7L211 | -0.30365   |
| 26356 | P03363 | P0C2W7 | -0.042737  |
| 26357 | P03363 | P50876 | -0.35588   |
| 26358 | P03363 | P30305 | -0.21744   |
| 26359 | P03363 | Q5T4J0 | -0.3069    |
| 26360 | P03363 | Q92858 | -0.22785   |
| 26361 | P03363 | Q9NQC1 | -0.22813   |
| 26362 | P03363 | Q8NFZ6 | -0.61551   |
| 26363 | P03363 | Q6ZW05 | -0.22703   |
| 26364 | P03363 | Q7L5Y9 | -0.16011   |
| 26365 | P03363 | Q9H015 | -0.24023   |
| 26366 | P03363 | Q07108 | -0.45451   |
| 26367 | P03363 | P59536 | -0.51612   |
| 26368 | P03363 | Q75443 | -0.59811   |
| 26369 | P03363 | Q8N205 | -0.16209   |
| 26370 | P03363 | Q8WTV0 | -0.2817    |
| 26371 | P03363 | Q6UXS0 | -0.34245   |
| 26372 | P03363 | P08100 | -0.36463   |



|       |        |        |           |
|-------|--------|--------|-----------|
| 26373 | P03363 | O15498 | -0.22031  |
| 26374 | P03363 | Q86UE6 | -0.42012  |
| 26375 | P03363 | Q86SG4 | -0.18971  |
| 26376 | P03363 | Q8IYJ0 | -0.32626  |
| 26377 | P03363 | Q96GU1 | -0.078067 |
| 26378 | P03363 | Q86XQ3 | -0.55728  |
| 26379 | P03363 | Q99217 | -0.22844  |
| 26380 | P03363 | Q96C10 | -0.22728  |
| 26381 | P03363 | Q9H6B9 | -0.22728  |
| 26382 | P03363 | Q8IV13 | -0.22707  |
| 26383 | P03363 | P27144 | -0.32467  |
| 26384 | P03363 | A2VCK2 | -0.19442  |
| 26385 | P03363 | O60844 | -0.30526  |
| 26386 | P03363 | Q13065 | -0.16758  |
| 26387 | P03363 | Q13563 | -0.23716  |
| 26388 | P03363 | P48061 | -0.39592  |
| 26389 | P03363 | P07358 | -0.5528   |
| 26390 | P03363 | Q9Y5H1 | -0.57898  |
| 26391 | P03363 | Q9H871 | -0.21838  |
| 26392 | P03363 | Q13535 | -0.33836  |
| 26393 | P03363 | Q3C1V0 | -0.32626  |
| 26394 | P03363 | Q969E1 | -0.33567  |
| 26395 | P03363 | Q7Z5L4 | -0.26925  |
| 26396 | P03363 | Q8TAI1 | -0.022699 |
| 26397 | P03363 | Q8NCJ5 | -0.2219   |
| 26398 | P03363 | Q9Y4I1 | -0.20629  |
| 26399 | P03363 | Q8NGZ9 | -0.61656  |
| 26400 | P03363 | Q8WXI3 | -0.22754  |
| 26401 | P03363 | O00635 | -0.347    |
| 26402 | P03363 | O00481 | -0.22844  |
| 26403 | P03363 | O15260 | -0.18548  |
| 26404 | P03363 | Q9H082 | -0.38828  |
| 26405 | P03363 | Q9GZX7 | -0.42024  |
| 26406 | P03363 | F7VJQ1 | -0.042737 |
| 26407 | P03363 | O75783 | -0.60952  |
| 26408 | P03363 | Q6ZNB6 | -0.12743  |
| 26409 | P03363 | Q13956 | -0.10901  |
| 26410 | P03363 | P04229 | -0.44839  |
| 26411 | P03363 | A6NKF7 | -0.32626  |
| 26412 | P03363 | P55268 | -0.30564  |
| 26413 | P03363 | Q96M94 | -0.17014  |
| 26414 | P03363 | Q8WVV5 | -0.31622  |
| 26415 | P03363 | Q9UPX0 | -0.47262  |
| 26416 | P03363 | Q96KT7 | -0.32626  |
| 26417 | P03363 | P49908 | -0.43505  |
| 26418 | P03363 | Q9UIY3 | -0.1721   |
| 26419 | P03363 | O75616 | -0.30154  |
| 26420 | P03363 | Q6IFH4 | -0.61656  |
| 26421 | P03363 | P01135 | -0.2274   |
| 26422 | P03363 | Q15208 | -0.22739  |
| 26423 | P03363 | O14994 | -0.3295   |
| 26424 | P03363 | Q6P1R4 | -0.25666  |
| 26425 | P03363 | P50416 | -0.24175  |
| 26426 | P03363 | Q9NX62 | -0.40836  |
| 26427 | P03363 | P13598 | -0.59599  |
| 26428 | P03363 | P40259 | -0.25853  |
| 26429 | P03363 | Q9N2K0 | -0.22726  |
| 26430 | P03363 | Q96M19 | -0.32626  |
| 26431 | P03363 | O75460 | -0.24721  |
| 26432 | P03363 | A6NH57 | -0.49937  |
| 26433 | P03363 | Q96IZ5 | -0.22736  |
| 26434 | P03363 | Q9P2E8 | -0.35794  |
| 26435 | P03363 | Q6ZSR9 | -0.23199  |
| 26436 | P03363 | Q14435 | -0.2144   |
| 26437 | P03363 | Q969S9 | -0.2293   |
| 26438 | P03363 | Q05BU3 | -0.042737 |
| 26439 | P03363 | O14792 | -0.22626  |
| 26440 | P03363 | P32239 | -0.31134  |
| 26441 | P03363 | Q96CG8 | -0.33283  |
| 26442 | P03363 | A1X283 | -0.2274   |
| 26443 | P03363 | Q6NVU6 | -0.15992  |
| 26444 | P03363 | Q9H3U5 | -0.30406  |
| 26445 | P03363 | P68543 | -0.12968  |
| 26446 | P03363 | P61328 | -0.25313  |
| 26447 | P03363 | Q96RD7 | -0.51819  |
| 26448 | P03363 | Q6PJI9 | -0.22741  |

|       |        |        |            |
|-------|--------|--------|------------|
| 26449 | P03363 | Q9HA64 | -0.19564   |
| 26450 | P03363 | P20849 | -0.35295   |
| 26451 | P03363 | Q9NRJ5 | -0.21091   |
| 26452 | P03363 | P56703 | -0.30162   |
| 26453 | P03363 | O60258 | -0.46101   |
| 26454 | P03363 | Q8N1H7 | -0.14835   |
| 26455 | P03363 | Q8NGV5 | -0.61656   |
| 26456 | P03363 | P55042 | -0.22817   |
| 26457 | P03363 | Q16538 | -0.64046   |
| 26458 | P03363 | Q30KP8 | -0.33516   |
| 26459 | P03363 | Q8N148 | -0.61656   |
| 26460 | P03363 | Q9NZH6 | -0.22548   |
| 26461 | P03363 | O14836 | -0.18776   |
| 26462 | P03363 | A4D0S4 | -0.48725   |
| 26463 | P03363 | Q9Y6C7 | -0.042737  |
| 26464 | P03363 | Q15018 | -0.13764   |
| 26465 | P03363 | O94819 | -0.20794   |
| 26466 | P03363 | Q86YL5 | -0.21872   |
| 26467 | P03363 | P36941 | -0.22741   |
| 26468 | P03363 | P21810 | -0.45287   |
| 26469 | P03363 | Q8IUR0 | -0.0025244 |
| 26470 | P03363 | Q92968 | -0.2274    |
| 26471 | P03410 | Q8NF86 | -1.4605    |
| 26472 | P03410 | Q5JTY5 | -0.66861   |
| 26473 | P03410 | Q6UWE3 | -0.77245   |
| 26474 | P03410 | Q9NPQ8 | -0.49998   |
| 26475 | P03410 | Q9BUY7 | -0.22214   |
| 26476 | P03410 | Q75593 | -0.39851   |
| 26477 | P03410 | O00339 | -0.4017    |
| 26478 | P03410 | P18509 | -0.60811   |
| 26479 | P03410 | Q16586 | -0.45661   |
| 26480 | P03410 | O00764 | -0.44658   |
| 26481 | P03410 | Q43813 | -0.45191   |
| 26482 | P03410 | Q8N690 | -0.69132   |
| 26483 | P03410 | Q8NHQ9 | -0.8216    |
| 26484 | P03410 | Q9UHG2 | -0.713     |
| 26485 | P03410 | Q96HN2 | -0.18717   |
| 26486 | P03410 | P84550 | -0.075615  |
| 26487 | P03410 | Q9UKX3 | -0.38076   |
| 26488 | P03410 | Q8NGF0 | -1.153     |
| 26489 | P03410 | A6NLP5 | -0.20624   |
| 26490 | P03410 | Q9UGM1 | -0.79596   |
| 26491 | P03410 | Q8NH94 | -1.153     |
| 26492 | P03410 | Q9Y3N9 | -1.153     |
| 26493 | P03410 | P29992 | -0.96045   |
| 26494 | P03410 | Q9NVC3 | -0.66883   |
| 26495 | P03410 | O76100 | -1.153     |
| 26496 | P03410 | P61081 | -0.42942   |
| 26497 | P03410 | Q9Y219 | -0.59277   |
| 26498 | P03410 | P0C7T3 | -1.153     |
| 26499 | P03410 | O15050 | -0.22422   |
| 26500 | P03410 | A8K855 | -0.22632   |
| 26501 | P03410 | Q96EU7 | -0.51276   |
| 26502 | P03410 | P30459 | -0.69535   |
| 26503 | P03410 | Q02045 | -0.22685   |
| 26504 | P03410 | O00155 | -1.4027    |
| 26505 | P03410 | Q9UKG4 | -1.0961    |
| 26506 | P03410 | P60033 | -0.21392   |
| 26507 | P03410 | Q9P0Z9 | -0.55042   |
| 26508 | P03410 | Q8NCH0 | -0.43575   |
| 26509 | P03410 | P50238 | -0.22842   |
| 26510 | P03410 | Q9BZW5 | -0.65846   |
| 26511 | P03410 | Q64LD2 | -0.22774   |
| 26512 | P03410 | P01615 | -0.90565   |
| 26513 | P03410 | Q8TE82 | -0.086992  |
| 26514 | P03410 | Q9BXA5 | -1.182     |
| 26515 | P03410 | Q8NGY6 | -1.153     |
| 26516 | P03410 | Q9NRD9 | -0.95976   |
| 26517 | P03410 | Q86XM0 | -1.0957    |
| 26518 | P03410 | O76061 | -0.63781   |
| 26519 | P03410 | Q9UJ14 | -0.67176   |
| 26520 | P03410 | Q13496 | -0.38712   |
| 26521 | P03410 | A6ND48 | -1.153     |
| 26522 | P03410 | P49221 | -0.30074   |
| 26523 | P03410 | Q9NUV9 | -0.25468   |
| 26524 | P03410 | Q8NH04 | -1.153     |

|       |        |        |          |
|-------|--------|--------|----------|
| 26525 | P03410 | Q8WUT4 | -0.63308 |
| 26526 | P03410 | Q9GZK4 | -1.153   |
| 26527 | P03410 | Q9Y2H1 | -0.46326 |
| 26528 | P03410 | Q5VVB8 | -0.63308 |
| 26529 | P03410 | Q92949 | -0.45026 |
| 26530 | P03410 | Q8NGJ1 | -1.153   |
| 26531 | P03410 | P56159 | -0.33199 |
| 26532 | P03410 | Q8TD07 | -0.25949 |
| 26533 | P03410 | Q68CK6 | -0.94682 |
| 26534 | P03410 | P55145 | -0.49433 |
| 26535 | P03410 | Q0P6D2 | -0.7715  |
| 26536 | P03410 | Q9Y2D0 | -0.18198 |
| 26537 | P03410 | Q9ULI1 | -0.22741 |
| 26538 | P03410 | Q9BWS9 | -0.70608 |
| 26539 | P03410 | P34925 | -0.7613  |
| 26540 | P03410 | Q8TCP9 | -0.60591 |
| 26541 | P03410 | Q3ZCT8 | -0.21201 |
| 26542 | P03410 | Q96LB9 | -0.75976 |
| 26543 | P03410 | Q86W47 | -0.58536 |
| 26544 | P03410 | Q5VU13 | -0.63308 |
| 26545 | P03410 | P02656 | -0.5951  |
| 26546 | P03410 | Q4VXU2 | -0.67771 |
| 26547 | P03410 | P02724 | -0.73297 |
| 26548 | P03410 | P58401 | -0.87167 |
| 26549 | P03410 | P12821 | -0.79968 |
| 26550 | P03410 | Q6P4A7 | -0.71976 |
| 26551 | P03410 | Q9P0T7 | -0.72438 |
| 26552 | P03410 | Q9BYV1 | -0.14895 |
| 26553 | P03410 | Q92583 | -1.2212  |
| 26554 | P03410 | O60391 | -0.78468 |
| 26555 | P03410 | Q8NGC0 | -1.153   |
| 26556 | P03410 | Q06495 | -0.45266 |
| 26557 | P03410 | O60259 | -0.56138 |
| 26558 | P03410 | Q8NG08 | -0.66708 |
| 26559 | P03410 | Q5EB52 | -0.85906 |
| 26560 | P03410 | O95407 | -0.22639 |
| 26561 | P03410 | P41247 | -0.2563  |
| 26562 | P03410 | Q9BUB4 | -0.173   |
| 26563 | P03410 | P84085 | -0.22781 |
| 26564 | P03410 | Q15762 | -0.64218 |
| 26565 | P03410 | P09228 | -0.8833  |
| 26566 | P03410 | Q96MM6 | -0.66861 |
| 26567 | P03410 | Q96MI9 | -0.47829 |
| 26568 | P03410 | Q9BZC1 | -0.3226  |
| 26569 | P03410 | Q9NZA1 | -0.20119 |
| 26570 | P03410 | Q8N6N2 | -0.10738 |
| 26571 | P03410 | Q96IW2 | -0.2274  |
| 26572 | P03410 | Q6UXC1 | -0.34966 |
| 26573 | P03410 | Q9C0J8 | -0.22731 |
| 26574 | P03410 | Q5VUJ5 | -0.97961 |
| 26575 | P03410 | Q5TC79 | -0.22678 |
| 26576 | P03410 | Q9UIJ7 | -0.76244 |
| 26577 | P03410 | Q8TDF5 | -0.9979  |
| 26578 | P03410 | Q8NGH7 | -1.153   |
| 26579 | P03410 | P35670 | -0.28049 |
| 26580 | P03410 | P36268 | -0.76002 |
| 26581 | P03410 | P37058 | -0.46003 |
| 26582 | P03410 | Q99954 | -0.71003 |
| 26583 | P03410 | P30953 | -1.153   |
| 26584 | P03410 | O75264 | -0.63308 |
| 26585 | P03410 | O00175 | -0.75203 |
| 26586 | P03410 | Q13099 | -0.22708 |
| 26587 | P03410 | Q5DID0 | -1.3319  |
| 26588 | P03410 | Q9NSA1 | -0.35426 |
| 26589 | P03410 | P24046 | -0.8025  |
| 26590 | P03410 | Q8TEB9 | -0.50806 |
| 26591 | P03410 | Q8NBI2 | -1.0304  |
| 26592 | P03410 | Q86SR1 | -0.56469 |
| 26593 | P03410 | P32754 | -0.32557 |
| 26594 | P03410 | P54132 | -0.22472 |
| 26595 | P03410 | O95870 | -0.62172 |
| 26596 | P03410 | P18074 | -0.2419  |
| 26597 | P03410 | O95600 | -0.20479 |
| 26598 | P03410 | O43240 | -1.2851  |
| 26599 | P03410 | Q8NH72 | -1.153   |
| 26600 | P03410 | P33681 | -0.22741 |

|       |        |        |          |
|-------|--------|--------|----------|
| 26601 | P03410 | P43628 | -0.44397 |
| 26602 | P03410 | Q96RD9 | -0.797   |
| 26603 | P03410 | Q9H582 | -0.17917 |
| 26604 | P03410 | Q8IUW5 | -0.67569 |
| 26605 | P03410 | O60449 | -0.99199 |
| 26606 | P03410 | Q6UVY6 | -1.1101  |
| 26607 | P03410 | Q96T60 | -0.5617  |
| 26608 | P03410 | Q9BRK0 | -0.63308 |
| 26609 | P03410 | P29371 | -0.90111 |
| 26610 | P03410 | O43292 | -0.18903 |
| 26611 | P03410 | Q9C098 | -1.0813  |
| 26612 | P03410 | A6NJ16 | -0.71003 |
| 26613 | P03410 | Q9BXT2 | -0.82739 |
| 26614 | P03410 | P01770 | -0.90565 |
| 26615 | P03410 | Q8IXL9 | -0.19666 |
| 26616 | P03410 | P26440 | -0.35444 |
| 26617 | P03410 | P20645 | -0.84212 |
| 26618 | P03410 | Q96NH3 | -1.0862  |
| 26619 | P03410 | O14640 | -0.14971 |
| 26620 | P03410 | Q14126 | -0.75665 |
| 26621 | P03410 | P26927 | -0.9005  |
| 26622 | P03410 | Q96SB4 | -0.35971 |
| 26623 | P03410 | Q7RTZ1 | -1.4101  |
| 26624 | P03410 | Q5VWQ8 | -0.22543 |
| 26625 | P03410 | O95947 | -0.53194 |
| 26626 | P03410 | P01624 | -0.90565 |
| 26627 | P03410 | Q8TAV4 | -0.99293 |
| 26628 | P03410 | Q5T4B2 | -0.35827 |
| 26629 | P03410 | Q9H2C2 | -0.68167 |
| 26630 | P03410 | A6NHG9 | -1.153   |
| 26631 | P03410 | Q6NUK1 | -0.58181 |
| 26632 | P03410 | Q8IWA5 | -0.8688  |
| 26633 | P03410 | Q13433 | -0.90573 |
| 26634 | P03410 | O43414 | -0.47332 |
| 26635 | P03410 | P62158 | -0.22709 |
| 26636 | P03410 | Q6DWJ6 | -1.2185  |
| 26637 | P03410 | Q9UBT2 | -0.23573 |
| 26638 | P03410 | Q9H340 | -1.153   |
| 26639 | P03410 | P30301 | -0.86286 |
| 26640 | P03410 | Q9UGJ0 | -0.70273 |
| 26641 | P03410 | P46459 | -0.23159 |
| 26642 | P03410 | P20142 | -0.93413 |
| 26643 | P03410 | Q96PE5 | -0.63132 |
| 26644 | P03410 | Q9UJM8 | -0.71156 |
| 26645 | P03410 | Q8TED1 | -1.0791  |
| 26646 | P03410 | Q5VZ19 | -0.67771 |
| 26647 | P03410 | Q9H0C1 | -0.39568 |
| 26648 | P03410 | Q5T4S7 | -0.32516 |
| 26649 | P03410 | O95302 | -0.34125 |
| 26650 | P03410 | Q16581 | -0.98117 |
| 26651 | P03410 | Q9UNX9 | -1.0591  |
| 26652 | P03410 | P51687 | -0.28645 |
| 26653 | P03410 | Q9BY15 | -1.8623  |
| 26654 | P03410 | P30464 | -0.88938 |
| 26655 | P03410 | O14967 | -0.72065 |
| 26656 | P03410 | Q92482 | -0.44199 |
| 26657 | P03410 | P01720 | -0.90565 |
| 26658 | P03410 | Q5SZI1 | -0.63308 |
| 26659 | P03410 | Q7Z769 | -0.63308 |
| 26660 | P03410 | Q17R60 | -0.93061 |
| 26661 | P03410 | Q92481 | -0.16497 |
| 26662 | P03410 | P26439 | -0.91083 |
| 26663 | P03410 | Q5T7P6 | -0.63308 |
| 26664 | P03410 | Q6UXR4 | -0.676   |
| 26665 | P03410 | P31267 | -0.22484 |
| 26666 | P03410 | Q53FV1 | -0.74586 |
| 26667 | P03410 | P09923 | -1.0723  |
| 26668 | P03410 | Q9HDB5 | -0.8589  |
| 26669 | P03410 | Q496F6 | -0.797   |
| 26670 | P03410 | P36915 | -0.63867 |
| 26671 | P03410 | Q9NPA2 | -1.4397  |
| 26672 | P03410 | P01722 | -0.90565 |
| 26673 | P03410 | P56470 | -0.28705 |
| 26674 | P03410 | Q96QS1 | -0.80237 |
| 26675 | P03410 | Q9NYC9 | -0.37504 |
| 26676 | P03410 | Q96DU9 | -0.51817 |

|       |        |        |           |
|-------|--------|--------|-----------|
| 26677 | P03410 | P20020 | -0.7552   |
| 26678 | P03410 | Q75N90 | -0.92993  |
| 26679 | P03410 | A6NJW4 | -0.63308  |
| 26680 | P03410 | P02748 | -1.114    |
| 26681 | P03410 | P50053 | -0.5237   |
| 26682 | P03410 | Q16048 | -0.76986  |
| 26683 | P03410 | O60814 | -0.78432  |
| 26684 | P03410 | Q9NXB9 | -0.060441 |
| 26685 | P03410 | Q12836 | -1.3262   |
| 26686 | P03410 | Q7L1S5 | -0.91421  |
| 26687 | P03410 | P21589 | -0.52284  |
| 26688 | P03410 | O75711 | -0.75621  |
| 26689 | P03410 | P98153 | -0.76241  |
| 26690 | P03410 | P30460 | -0.9827   |
| 26691 | P03410 | Q6UXB8 | -1.3307   |
| 26692 | P03410 | Q9BQD1 | -0.17434  |
| 26693 | P03410 | Q16348 | -0.28984  |
| 26694 | P03410 | Q6UWX4 | -0.67519  |
| 26695 | P03410 | Q8NGG2 | -1.153    |
| 26696 | P03410 | Q9UBR4 | -0.22715  |
| 26697 | P03410 | Q9H3R0 | -0.17187  |
| 26698 | P03410 | P0DJI9 | -0.65762  |
| 26699 | P03410 | Q86WN2 | -0.7441   |
| 26700 | P03410 | Q6UDR6 | -0.74696  |
| 26701 | P03410 | A6NCE7 | -0.11532  |
| 26702 | P03410 | A6NGU5 | -0.67176  |
| 26703 | P03410 | Q9UGH3 | -0.65846  |
| 26704 | P03410 | Q6UWN5 | -0.25338  |
| 26705 | P03410 | Q9NR63 | -0.68797  |
| 26706 | P03410 | Q9Y5I3 | -1.7115   |
| 26707 | P03410 | Q16667 | -0.19655  |
| 26708 | P03410 | Q93070 | -0.39773  |
| 26709 | P03410 | P16471 | -1.0006   |
| 26710 | P03410 | P18084 | -0.87513  |
| 26711 | P03410 | Q9Y2A9 | -0.59042  |
| 26712 | P03410 | O75923 | -0.72296  |
| 26713 | P03410 | Q5FWF4 | -0.24113  |
| 26714 | P03410 | Q9Y5T4 | -0.55167  |
| 26715 | P03410 | Q8IZL9 | -0.4103   |
| 26716 | P03410 | P25090 | -1.4858   |
| 26717 | P03410 | Q96MS0 | -0.99237  |
| 26718 | P03410 | Q6UXB4 | -0.25453  |
| 26719 | P03410 | Q9Y5Q6 | -0.72486  |
| 26720 | P03410 | Q99525 | -0.63901  |
| 26721 | P03410 | Q5SWX8 | -0.96084  |
| 26722 | P03410 | Q68BL8 | -0.78613  |
| 26723 | P03410 | Q86VF7 | -0.25973  |
| 26724 | P03410 | Q9BYL1 | -0.098501 |
| 26725 | P03410 | Q9C0B5 | -0.98778  |
| 26726 | P03410 | Q8NAC3 | -0.76249  |
| 26727 | P03410 | P07451 | -0.13439  |
| 26728 | P03410 | Q8TF61 | -0.29624  |
| 26729 | P03410 | Q9UIR0 | -0.63308  |
| 26730 | P03410 | P05108 | -0.29611  |
| 26731 | P03410 | C9J442 | -0.71003  |
| 26732 | P03410 | P11678 | -0.58452  |
| 26733 | P03410 | Q99424 | -0.68719  |
| 26734 | P03410 | Q8NH57 | -1.153    |
| 26735 | P03410 | Q8IXN7 | -0.95444  |
| 26736 | P03410 | Q96JD6 | -0.22687  |
| 26737 | P03410 | Q9NYV8 | -0.99183  |
| 26738 | P03410 | Q9BXX2 | -0.22742  |
| 26739 | P03410 | P53582 | -0.41462  |
| 26740 | P03410 | Q13520 | -0.73426  |
| 26741 | P03410 | Q99819 | -0.37574  |
| 26742 | P03410 | P00488 | -0.59904  |
| 26743 | P03410 | Q8NES3 | -1.0288   |
| 26744 | P03410 | Q9BXJ0 | -0.84635  |
| 26745 | P03410 | Q8N8Y5 | -0.53863  |
| 26746 | P03410 | Q8IZF4 | -1.2876   |
| 26747 | P03410 | Q15612 | -0.997    |
| 26748 | P03410 | P61266 | -0.58555  |
| 26749 | P03410 | Q9BYU1 | -0.51034  |
| 26750 | P03410 | Q17R55 | -0.63308  |
| 26751 | P03410 | Q9Y2K3 | -0.34319  |
| 26752 | P03410 | Q9H207 | -1.153    |

|       |        |        |          |
|-------|--------|--------|----------|
| 26753 | P03410 | Q8NBS3 | -0.59277 |
| 26754 | P03410 | Q9UPQ0 | -0.22719 |
| 26755 | P03410 | P02774 | -0.64338 |
| 26756 | P03410 | Q9UBC7 | -0.70646 |
| 26757 | P03410 | Q86T65 | -0.21702 |
| 26758 | P03410 | Q9C0C7 | -0.22744 |
| 26759 | P03410 | A6NEL2 | -0.22741 |
| 26760 | P03410 | Q96HC4 | -0.2445  |
| 26761 | P03410 | Q6ZSY5 | -0.60316 |
| 26762 | P03410 | P51159 | -0.25103 |
| 26763 | P03410 | Q6P1K1 | -0.61835 |
| 26764 | P03410 | P16410 | -0.22714 |
| 26765 | P03410 | P30486 | -0.72578 |
| 26766 | P03410 | Q8IVL8 | -1.2794  |
| 26767 | P03410 | P04217 | -0.76998 |
| 26768 | P03410 | O60548 | -0.49241 |
| 26769 | P03410 | Q96PL2 | -1.005   |
| 26770 | P03410 | Q53GT1 | -0.20087 |
| 26771 | P03410 | O43653 | -0.25338 |
| 26772 | P03410 | Q6ZUT9 | -0.62171 |
| 26773 | P03410 | Q6SZW1 | -0.28167 |
| 26774 | P03410 | Q86UV5 | -0.65247 |
| 26775 | P03410 | Q587J7 | -0.26178 |
| 26776 | P03410 | Q9H898 | -0.24184 |
| 26777 | P03410 | Q86W54 | -0.10047 |
| 26778 | P03410 | P05543 | -0.60164 |
| 26779 | P03410 | P54762 | -0.79517 |
| 26780 | P03410 | O43506 | -1.1969  |
| 26781 | P03410 | P80362 | -0.90565 |
| 26782 | P03410 | Q6UWU4 | -0.5302  |
| 26783 | P03410 | Q9NZP0 | -1.153   |
| 26784 | P03410 | Q9UBY0 | -1.0815  |
| 26785 | P03410 | P11279 | -0.89942 |
| 26786 | P03410 | Q96H96 | -0.52888 |
| 26787 | P03410 | Q7Z5A8 | -0.71003 |
| 26788 | P03410 | P35504 | -0.92417 |
| 26789 | P03410 | P21926 | -0.60534 |
| 26790 | P03410 | P0CG37 | -1.0098  |
| 26791 | P03410 | Q6YN16 | -0.9328  |
| 26792 | P03410 | Q9BRC7 | -0.43203 |
| 26793 | P03410 | Q9NV58 | -0.36862 |
| 26794 | P03410 | Q9Y2D2 | -0.3273  |
| 26795 | P03410 | Q9Y6H6 | -0.8362  |
| 26796 | P03410 | P01008 | -0.25698 |
| 26797 | P03410 | Q9U1L4 | -0.29276 |
| 26798 | P03410 | Q9UGI0 | -0.21324 |
| 26799 | P03410 | Q12979 | -0.76148 |
| 26800 | P03410 | Q9H819 | -0.75254 |
| 26801 | P03410 | Q9P2H5 | -0.66744 |
| 26802 | P03410 | Q9P0K9 | -0.61257 |
| 26803 | P03410 | Q8IX30 | -0.22754 |
| 26804 | P03410 | P01593 | -0.90565 |
| 26805 | P03410 | Q9Y5I2 | -1.7115  |
| 26806 | P03410 | O60911 | -0.53447 |
| 26807 | P03410 | P61601 | -0.3703  |
| 26808 | P03410 | Q99418 | -0.22741 |
| 26809 | P03410 | P16104 | -0.428   |
| 26810 | P03410 | Q8N1Q1 | -0.16025 |
| 26811 | P03410 | Q9Y5P4 | -0.22754 |
| 26812 | P03410 | Q6W4X9 | -0.79029 |
| 26813 | P03410 | Q8NH61 | -1.153   |
| 26814 | P03410 | Q96AH8 | -0.61416 |
| 26815 | P03410 | P60507 | -0.6544  |
| 26816 | P03410 | Q96D42 | -0.37348 |
| 26817 | P03410 | Q9NXR5 | -0.22741 |
| 26818 | P03410 | Q96AM1 | -1.2185  |
| 26819 | P03410 | Q49SQ1 | -1.2453  |
| 26820 | P03410 | A6NNL5 | -0.71003 |
| 26821 | P03410 | Q3KNW1 | -0.18985 |
| 26822 | P03410 | P04746 | -0.80454 |
| 26823 | P03410 | P35713 | -0.45189 |
| 26824 | P03410 | Q8NHB8 | -1.153   |
| 26825 | P03410 | O60487 | -0.22668 |
| 26826 | P03410 | Q9NQ30 | -0.62997 |
| 26827 | P03410 | Q6NSI1 | -0.22738 |
| 26828 | P03410 | O75487 | -1.184   |

|       |        |        |           |
|-------|--------|--------|-----------|
| 26829 | P03410 | Q9UI42 | -1.1675   |
| 26830 | P03410 | Q96RL6 | -0.86496  |
| 26831 | P03410 | Q8NHC8 | -1.153    |
| 26832 | P03410 | P30626 | -0.22889  |
| 26833 | P03410 | Q9Y256 | -1.0828   |
| 26834 | P03410 | Q9Y4G2 | -0.094087 |
| 26835 | P03410 | Q8N2E2 | -0.71003  |
| 26836 | P03410 | Q5VU57 | -0.47829  |
| 26837 | P03410 | Q70CQ2 | -0.59297  |
| 26838 | P03410 | O14522 | -0.74082  |
| 26839 | P03410 | Q8NDV3 | -0.42207  |
| 26840 | P03410 | Q8NBN7 | -0.99827  |
| 26841 | P03410 | Q9BPW4 | -1.0782   |
| 26842 | P03410 | Q86X29 | -0.72493  |
| 26843 | P03410 | Q96H15 | -0.63308  |
| 26844 | P03410 | P31151 | -0.16551  |
| 26845 | P03410 | P00749 | -0.74363  |
| 26846 | P03410 | P05305 | -0.26831  |
| 26847 | P03410 | P50591 | -0.62712  |
| 26848 | P03410 | O15269 | -0.31792  |
| 26849 | P03410 | Q95747 | -1.3931   |
| 26850 | P03410 | P45452 | -0.92093  |
| 26851 | P03410 | Q969T3 | -0.23542  |
| 26852 | P03410 | Q76G19 | -0.22706  |
| 26853 | P03410 | Q8N309 | -0.15329  |
| 26854 | P03410 | P54849 | -1.1255   |
| 26855 | P03410 | P01833 | -1.4903   |
| 26856 | P03410 | P14416 | -0.26839  |
| 26857 | P03410 | Q9Y5F7 | -1.0719   |
| 26858 | P03410 | Q8NGI0 | -1.153    |
| 26859 | P03410 | P20800 | -0.53913  |
| 26860 | P03410 | Q9BY12 | -0.17933  |
| 26861 | P03410 | Q8IZD0 | -0.082707 |
| 26862 | P03410 | Q06520 | -0.22791  |
| 26863 | P03410 | Q13219 | -1.3751   |
| 26864 | P03410 | Q9UBI6 | -0.38878  |
| 26865 | P03410 | Q8NE62 | -0.26203  |
| 26866 | P03410 | Q96FJ0 | -0.50419  |
| 26867 | P03410 | Q7LGC8 | -0.46053  |
| 26868 | P03410 | Q5SXH7 | -0.12972  |
| 26869 | P03410 | Q14432 | -0.55432  |
| 26870 | P03410 | Q7Z304 | -0.82581  |
| 26871 | P03410 | P28328 | -0.22098  |
| 26872 | P03410 | Q13261 | -0.54758  |
| 26873 | P03410 | Q14492 | -0.39927  |
| 26874 | P03410 | Q8N565 | -0.27339  |
| 26875 | P03410 | B1AKI9 | -0.71003  |
| 26876 | P03410 | Q16827 | -0.57105  |
| 26877 | P03410 | Q9H6H4 | -0.63308  |
| 26878 | P03410 | Q9Y328 | -0.48439  |
| 26879 | P03410 | P49914 | -0.49231  |
| 26880 | P03410 | Q96P64 | -0.97961  |
| 26881 | P03410 | Q04609 | -0.99864  |
| 26882 | P03410 | Q5SY68 | -0.1848   |
| 26883 | P03410 | A8MT19 | -0.191    |
| 26884 | P03410 | O14894 | -0.83693  |
| 26885 | P03410 | Q43556 | -0.57579  |
| 26886 | P03410 | Q8NHA8 | -1.153    |
| 26887 | P03410 | Q95371 | -1.1223   |
| 26888 | P03410 | Q13946 | -0.21814  |
| 26889 | P03410 | P01892 | -0.6692   |
| 26890 | P03410 | P51817 | -0.80275  |
| 26891 | P03410 | Q8WXB1 | -0.633    |
| 26892 | P03410 | Q96P20 | -0.22697  |
| 26893 | P03410 | Q9H252 | -0.94723  |
| 26894 | P03410 | Q9P2Y4 | -0.22738  |
| 26895 | P03410 | Q99518 | -0.8712   |
| 26896 | P03410 | Q8NBP7 | -0.33418  |
| 26897 | P03410 | Q96CH1 | -1.2185   |
| 26898 | P03410 | Q8NHU3 | -0.81172  |
| 26899 | P03410 | Q9UIJ5 | -0.82885  |
| 26900 | P03410 | Q8TAU0 | -0.22765  |
| 26901 | P03410 | P57105 | -0.43891  |
| 26902 | P03410 | Q43423 | -0.057998 |
| 26903 | P03410 | Q96P44 | -0.85694  |
| 26904 | P03410 | Q03519 | -0.29703  |

|       |        |        |           |
|-------|--------|--------|-----------|
| 26905 | P03410 | Q9NYR8 | -1.2257   |
| 26906 | P03410 | Q13241 | -0.9347   |
| 26907 | P03410 | Q8N8R3 | -0.4991   |
| 26908 | P03410 | Q01484 | -0.22753  |
| 26909 | P03410 | Q6GTS8 | -1.2802   |
| 26910 | P03410 | Q96RD2 | -1.153    |
| 26911 | P03410 | Q96CX6 | -0.23027  |
| 26912 | P03410 | Q8N264 | -0.6887   |
| 26913 | P03410 | P01730 | -0.34861  |
| 26914 | P03410 | O14791 | -0.45939  |
| 26915 | P03410 | Q8NGA5 | -1.1275   |
| 26916 | P03410 | P0C5Z0 | -0.82578  |
| 26917 | P03410 | Q9NVF9 | -0.87189  |
| 26918 | P03410 | Q9NUE0 | -0.88135  |
| 26919 | P03410 | Q96F44 | -0.50707  |
| 26920 | P03410 | P30488 | -0.88938  |
| 26921 | P03410 | Q9C0B7 | -0.63308  |
| 26922 | P03410 | P20340 | -0.27764  |
| 26923 | P03410 | P0CB48 | -0.20111  |
| 26924 | P03410 | P13584 | -0.78331  |
| 26925 | P03410 | B1AK53 | -0.2273   |
| 26926 | P03410 | Q9NQX0 | -0.094749 |
| 26927 | P03410 | Q7Z5H3 | -0.28743  |
| 26928 | P03410 | Q96A32 | -0.2266   |
| 26929 | P03410 | P59542 | -1.067    |
| 26930 | P03410 | Q06432 | -0.8837   |
| 26931 | P03410 | O95841 | -1.0797   |
| 26932 | P03410 | Q4V326 | -0.11494  |
| 26933 | P03410 | P01598 | -0.90565  |
| 26934 | P03410 | P31415 | -0.20778  |
| 26935 | P03410 | Q6ZN30 | -0.22574  |
| 26936 | P03410 | Q96NZ8 | -0.71578  |
| 26937 | P03410 | P59046 | -0.22705  |
| 26938 | P03410 | A6NER3 | -0.11494  |
| 26939 | P03410 | O43603 | -1.2674   |
| 26940 | P03410 | Q9C037 | -0.42657  |
| 26941 | P03410 | P09067 | -0.16556  |
| 26942 | P03410 | Q9BQI3 | -0.96366  |
| 26943 | P03410 | P49643 | -0.15767  |
| 26944 | P03410 | P19075 | -0.98436  |
| 26945 | P03410 | P12236 | -0.23749  |
| 26946 | P03410 | Q9NY64 | -0.66017  |
| 26947 | P03410 | P48145 | -0.61694  |
| 26948 | P03410 | Q9BY84 | -0.49294  |
| 26949 | P03410 | Q9H427 | -0.88099  |
| 26950 | P03410 | Q4KMG0 | -0.22748  |
| 26951 | P03410 | O00241 | -0.62574  |
| 26952 | P03410 | Q96LU5 | -0.51196  |
| 26953 | P03410 | O95255 | -1.2722   |
| 26954 | P03410 | Q8TBE7 | -0.46582  |
| 26955 | P03410 | P47902 | -0.22905  |
| 26956 | P03410 | P55084 | -0.17612  |
| 26957 | P03410 | P49619 | -1.1442   |
| 26958 | P03410 | Q05397 | -0.25147  |
| 26959 | P03410 | P43686 | -0.32364  |
| 26960 | P03410 | Q8TF64 | -0.22205  |
| 26961 | P03410 | P01714 | -0.90565  |
| 26962 | P03410 | Q86UX7 | -0.39779  |
| 26963 | P03410 | P61073 | -0.30137  |
| 26964 | P03410 | P10415 | -0.22718  |
| 26965 | P03410 | Q8TEU8 | -0.64393  |
| 26966 | P03410 | P13612 | -0.3683   |
| 26967 | P03410 | P46093 | -1.4027   |
| 26968 | P03410 | O15417 | -0.065475 |
| 26969 | P03410 | O43307 | -0.45166  |
| 26970 | P03410 | Q5W0B1 | -0.22742  |
| 26971 | P03410 | P60201 | -0.34951  |
| 26972 | P03410 | O15156 | -0.21813  |
| 26973 | P03410 | Q5UCC4 | -1.2584   |
| 26974 | P03410 | O94898 | -0.61569  |
| 26975 | P03410 | Q96QV1 | -0.43559  |
| 26976 | P03410 | Q9NSY1 | -0.99188  |
| 26977 | P03410 | Q0D2K2 | -0.20613  |
| 26978 | P03410 | Q9H4L4 | -0.32174  |
| 26979 | P03410 | P26572 | -0.4127   |
| 26980 | P03410 | P42356 | -0.71957  |



|       |        |        |           |
|-------|--------|--------|-----------|
| 26981 | P03410 | A6NFY4 | -0.63308  |
| 26982 | P03410 | P0C6S8 | -0.63308  |
| 26983 | P03410 | Q4KMQ2 | -0.82802  |
| 26984 | P03410 | P05156 | -1.3948   |
| 26985 | P03410 | Q07507 | -1.159    |
| 26986 | P03410 | Q05086 | -0.23226  |
| 26987 | P03410 | Q99469 | -0.2274   |
| 26988 | P03410 | Q7Z4W2 | -0.71769  |
| 26989 | P03410 | P49281 | -0.22825  |
| 26990 | P03410 | Q96H55 | -0.16204  |
| 26991 | P03410 | P0C881 | -0.086392 |
| 26992 | P03410 | Q15111 | -0.41694  |
| 26993 | P03410 | Q8IXL7 | -0.44093  |
| 26994 | P03410 | Q9P2P1 | -0.55568  |
| 26995 | P03410 | O43825 | -0.61066  |
| 26996 | P03410 | A2VCK2 | -0.26256  |
| 26997 | P03410 | O75084 | -0.58783  |
| 26998 | P03410 | P01597 | -0.90565  |
| 26999 | P03410 | Q8NGZ5 | -1.153    |
| 27000 | P03410 | Q7Z4W1 | -0.73993  |
| 27001 | P03410 | P18085 | -0.22797  |
| 27002 | P03410 | O43638 | -0.46127  |
| 27003 | P03410 | P78413 | -0.23117  |
| 27004 | P03410 | Q8IW52 | -0.73424  |
| 27005 | P03410 | Q8N5S9 | -0.96399  |
| 27006 | P03410 | P34995 | -1.287    |
| 27007 | P03410 | P48304 | -0.73773  |
| 27008 | P03410 | Q9Y6H8 | -0.76905  |
| 27009 | P03410 | O95390 | -0.58328  |
| 27010 | P03410 | P10721 | -0.35295  |
| 27011 | P03410 | Q04941 | -0.5104   |
| 27012 | P03410 | Q6ZT89 | -0.51629  |
| 27013 | P03410 | P49796 | -0.40847  |
| 27014 | P03410 | A6NJK2 | -0.2274   |
| 27015 | P03410 | P30511 | -1.0228   |
| 27016 | P03410 | P21731 | -0.62855  |
| 27017 | P03410 | Q5BJH7 | -0.63308  |
| 27018 | P03410 | P01903 | -0.70858  |
| 27019 | P03410 | Q9H4L5 | -0.55323  |
| 27020 | P03410 | Q96K21 | -0.20282  |
| 27021 | P03410 | Q6P3W7 | -0.22741  |
| 27022 | P03410 | Q9BX68 | -0.027146 |
| 27023 | P03410 | Q6S5H4 | -0.22718  |
| 27024 | P03410 | Q9NS62 | -1.1102   |
| 27025 | P03410 | Q96R48 | -1.153    |
| 27026 | P03410 | Q495X7 | -0.39568  |
| 27027 | P03410 | P17540 | -1.0085   |
| 27028 | P03410 | P45983 | -0.22741  |
| 27029 | P03410 | Q8TAA1 | -0.68133  |
| 27030 | P03410 | Q9BY50 | -0.76364  |
| 27031 | P03410 | P41732 | -0.58011  |
| 27032 | P03410 | O43699 | -1.71     |
| 27033 | P03410 | O60336 | -0.22791  |
| 27034 | P03410 | Q5XPI4 | -0.37457  |
| 27035 | P03410 | Q8NGD5 | -1.153    |
| 27036 | P03410 | Q9NVR0 | -0.71003  |
| 27037 | P03410 | Q8NGC2 | -1.153    |
| 27038 | P03410 | O14545 | -0.36462  |
| 27039 | P03410 | Q9NRJ5 | -0.31012  |
| 27040 | P03410 | P28476 | -0.93304  |
| 27041 | P03410 | Q15084 | -0.30559  |
| 27042 | P03410 | Q05329 | -0.23792  |
| 27043 | P03410 | O14495 | -0.27722  |
| 27044 | P03410 | P20273 | -0.58444  |
| 27045 | P03410 | P05090 | -0.54373  |
| 27046 | P03410 | Q96PQ1 | -0.86496  |
| 27047 | P03410 | Q70JA7 | -0.45111  |
| 27048 | P03410 | Q8IXV7 | -0.21627  |
| 27049 | P03410 | Q16445 | -0.80618  |
| 27050 | P03410 | P52799 | -0.9025   |
| 27051 | P03410 | Q9BXS0 | -1.6844   |
| 27052 | P03410 | Q8N9C0 | -0.22747  |
| 27053 | P03410 | Q9P2D7 | -0.20958  |
| 27054 | P03410 | Q9NQ03 | -0.17273  |
| 27055 | P03410 | Q9BX67 | -0.60595  |
| 27056 | P03410 | Q13507 | -0.4773   |

|       |        |        |           |
|-------|--------|--------|-----------|
| 27057 | P03410 | O43896 | -0.29074  |
| 27058 | P03410 | Q9ULL1 | -0.48994  |
| 27059 | P03410 | B6SEH9 | -0.63308  |
| 27060 | P03410 | Q8TAM1 | -0.22626  |
| 27061 | P03410 | O95183 | -1.0119   |
| 27062 | P03410 | O00445 | -0.73666  |
| 27063 | P03410 | P16112 | -0.91695  |
| 27064 | P03410 | P0DKB5 | -0.63308  |
| 27065 | P03410 | P62805 | -0.42897  |
| 27066 | P03410 | Q9P286 | -0.87053  |
| 27067 | P03410 | O15428 | -0.2274   |
| 27068 | P03410 | P50395 | -0.10616  |
| 27069 | P03410 | Q6WRX3 | -0.078107 |
| 27070 | P03410 | Q6ZVD8 | -0.22869  |
| 27071 | P03410 | O75829 | -1.4544   |
| 27072 | P03410 | Q9Y4L1 | -0.45769  |
| 27073 | P03410 | Q0Z7S8 | -0.1229   |
| 27074 | P03410 | P42858 | -0.071055 |
| 27075 | P03410 | Q8IXA5 | -0.5284   |
| 27076 | P03410 | Q5JWF2 | -0.6749   |
| 27077 | P03410 | Q8NGK1 | -1.153    |
| 27078 | P03410 | Q8IW41 | -0.48041  |
| 27079 | P03410 | P19086 | -0.9415   |
| 27080 | P03410 | Q8TED9 | -0.08366  |
| 27081 | P03410 | O15553 | -0.23391  |
| 27082 | P03410 | Q5VVQ6 | -0.35681  |
| 27083 | P03410 | Q6UX53 | -0.17912  |
| 27084 | P03410 | P23415 | -0.50544  |
| 27085 | P03410 | P15812 | -0.77309  |
| 27086 | P03410 | P51801 | -1.0369   |
| 27087 | P03410 | Q12889 | -0.2204   |
| 27088 | P03410 | Q9Y5S1 | -0.80602  |
| 27089 | P03410 | Q9P0K8 | -0.6656   |
| 27090 | P03410 | Q9H2B2 | -0.80769  |
| 27091 | P03410 | Q7Z6J2 | -0.22807  |
| 27092 | P03410 | Q5SZK8 | -1.3635   |
| 27093 | P03410 | Q9H1V8 | -0.77133  |
| 27094 | P03410 | Q9HCB6 | -0.57892  |
| 27095 | P03410 | Q16651 | -1.1612   |
| 27096 | P03410 | Q07001 | -0.87269  |
| 27097 | P03410 | P36897 | -0.26973  |
| 27098 | P03410 | Q96IZ2 | -0.797    |
| 27099 | P03410 | P40200 | -1.2357   |
| 27100 | P03410 | P59535 | -1.067    |
| 27101 | P03410 | Q9UHC6 | -0.86994  |
| 27102 | P03410 | P16284 | -0.42913  |
| 27103 | P03410 | Q15043 | -0.85607  |
| 27104 | P03410 | P58546 | -0.22741  |
| 27105 | P03410 | Q96F85 | -0.097697 |
| 27106 | P03410 | Q6U736 | -1.0603   |
| 27107 | P03410 | Q9H936 | -0.23013  |
| 27108 | P03410 | O43861 | -0.78494  |
| 27109 | P03410 | P30939 | -1.3104   |
| 27110 | P03410 | Q04759 | -0.19777  |
| 27111 | P03410 | Q96MU8 | -0.2275   |
| 27112 | P03410 | P12314 | -0.59125  |
| 27113 | P03410 | Q7RTY1 | -0.84589  |
| 27114 | P03410 | O76076 | -1.0616   |
| 27115 | P03410 | P13761 | -0.47326  |
| 27116 | P03410 | P27987 | -0.8687   |
| 27117 | P03410 | P19021 | -0.77188  |
| 27118 | P03410 | P0CG32 | -0.14571  |
| 27119 | P03410 | P12271 | -0.54902  |
| 27120 | P03410 | A6NJI9 | -0.13937  |
| 27121 | P03410 | Q9BQI0 | -0.26093  |
| 27122 | P03410 | P21281 | -0.43818  |
| 27123 | P03410 | Q9UH90 | -0.11457  |
| 27124 | P03410 | Q9Y5E5 | -0.96997  |
| 27125 | P03410 | Q8WX77 | -0.68507  |
| 27126 | P03410 | Q8NGX9 | -1.153    |
| 27127 | P03410 | Q8NA75 | -0.22729  |
| 27128 | P03410 | O94900 | -0.21291  |
| 27129 | P03410 | O95502 | -0.92713  |
| 27130 | P03410 | P06316 | -0.90565  |
| 27131 | P03410 | Q8NBX0 | -0.59598  |
| 27132 | P03410 | Q9H7L2 | -0.71003  |

|       |        |        |           |
|-------|--------|--------|-----------|
| 27133 | P03410 | P01818 | -0.90565  |
| 27134 | P03410 | Q9HAE3 | -0.22867  |
| 27135 | P03410 | Q9NYS7 | -0.3944   |
| 27136 | P03410 | Q15391 | -1.1542   |
| 27137 | P03410 | Q8IYD9 | -0.71003  |
| 27138 | P03410 | Q8NBS9 | -0.32311  |
| 27139 | P03410 | Q8NGQ6 | -1.153    |
| 27140 | P03410 | Q8IY47 | -0.20346  |
| 27141 | P03410 | O14807 | -1.3557   |
| 27142 | P03410 | Q8IZF6 | -1.2876   |
| 27143 | P03410 | P56202 | -0.71423  |
| 27144 | P03410 | Q9Y3R0 | -0.22504  |
| 27145 | P03410 | Q8NGK4 | -1.153    |
| 27146 | P03410 | Q9H6S0 | -0.2274   |
| 27147 | P03410 | Q8IZP1 | -1.3577   |
| 27148 | P03410 | Q86XT4 | -0.46984  |
| 27149 | P03410 | Q9BX84 | -1.0228   |
| 27150 | P03410 | Q8NFB2 | -0.63308  |
| 27151 | P03410 | P04808 | -0.8697   |
| 27152 | P03410 | Q9P1P4 | -1.188    |
| 27153 | P03410 | Q15320 | -0.17781  |
| 27154 | P03410 | P01562 | -0.71743  |
| 27155 | P03410 | Q5SYB0 | -0.2274   |
| 27156 | P03410 | Q14795 | -0.22741  |
| 27157 | P03410 | P14784 | -1.0181   |
| 27158 | P03410 | Q8N142 | -0.80368  |
| 27159 | P03410 | A6NL08 | -1.153    |
| 27160 | P03410 | Q00358 | -0.49241  |
| 27161 | P03410 | Q9NXC2 | -1.5956   |
| 27162 | P03410 | Q96QP1 | -0.69141  |
| 27163 | P03410 | Q92604 | -0.70629  |
| 27164 | P03410 | Q86UE6 | -0.74666  |
| 27165 | P03410 | Q8TBB6 | -0.7273   |
| 27166 | P03410 | Q08116 | -0.64799  |
| 27167 | P03410 | Q6NWX9 | -0.22346  |
| 27168 | P03410 | P30479 | -0.88938  |
| 27169 | P03410 | A6NM36 | -0.2279   |
| 27170 | P03410 | P01782 | -0.90565  |
| 27171 | P03410 | P40197 | -0.92336  |
| 27172 | P03410 | Q6ZRP7 | -1.2508   |
| 27173 | P03410 | Q8WXI3 | -0.3944   |
| 27174 | P03410 | P01743 | -0.90565  |
| 27175 | P03410 | Q9UKX5 | -0.81107  |
| 27176 | P03410 | P01721 | -0.90565  |
| 27177 | P03410 | Q9BZP6 | -0.50197  |
| 27178 | P03410 | P01711 | -0.90565  |
| 27179 | P03410 | P78332 | -0.69395  |
| 27180 | P03410 | Q9NRU3 | -0.93361  |
| 27181 | P03410 | P07205 | -0.67553  |
| 27182 | P03410 | Q6NUK4 | -0.63308  |
| 27183 | P03410 | P0C7I0 | -0.44208  |
| 27184 | P03410 | Q8NCC5 | -0.58761  |
| 27185 | P03410 | Q9HC21 | -0.4991   |
| 27186 | P03410 | Q9NZC4 | -0.077409 |
| 27187 | P03410 | Q9NZJ6 | -0.085415 |
| 27188 | P03410 | Q9Y5Z6 | -0.63207  |
| 27189 | P03410 | Q9NYQ7 | -1.0934   |
| 27190 | P03410 | P16581 | -0.32409  |
| 27191 | P03410 | Q9Y6I9 | -0.71003  |
| 27192 | P03410 | Q08499 | -0.21939  |
| 27193 | P03410 | Q8NCG5 | -0.60901  |
| 27194 | P03410 | Q9Y275 | -0.79284  |
| 27195 | P03410 | P50391 | -1.2185   |
| 27196 | P03410 | Q5TH69 | -0.72352  |
| 27197 | P03410 | A8MWA6 | -0.065054 |
| 27198 | P03410 | Q2UY09 | -1.2214   |
| 27199 | P03410 | Q9NYB9 | -0.22858  |
| 27200 | P03410 | O60894 | -0.19448  |
| 27201 | P03410 | Q17RD7 | -0.22726  |
| 27202 | P03410 | Q9UBH0 | -0.71391  |
| 27203 | P03410 | Q5VZ18 | -0.22741  |
| 27204 | P03410 | P98170 | -0.22737  |
| 27205 | P03410 | Q8NCP5 | -0.18444  |
| 27206 | P03410 | Q7Z478 | -0.30562  |
| 27207 | P03410 | O15540 | -0.27777  |
| 27208 | P03410 | Q5GAN4 | -0.68882  |

|       |        |        |          |
|-------|--------|--------|----------|
| 27209 | P03410 | O60361 | -0.91673 |
| 27210 | P03410 | Q9BXI6 | -0.80736 |
| 27211 | P03410 | Q8NGN1 | -1.153   |
| 27212 | P03410 | Q96K19 | -1.0233  |
| 27213 | P03410 | O15427 | -0.75866 |
| 27214 | P03410 | P01715 | -0.90565 |
| 27215 | P03410 | Q8TDX7 | -0.88717 |
| 27216 | P03410 | Q9GZK3 | -1.153   |
| 27217 | P03410 | Q8IW45 | -0.53832 |
| 27218 | P03410 | Q8NGJ8 | -1.153   |
| 27219 | P03410 | Q30201 | -0.61386 |
| 27220 | P03410 | A6PVS8 | -0.22503 |
| 27221 | P03410 | Q96PP9 | -0.50697 |
| 27222 | P03410 | Q5JRV8 | -0.63308 |
| 27223 | P03410 | P11413 | -0.28338 |
| 27224 | P03410 | Q9HB89 | -1.1008  |
| 27225 | P03410 | Q9BQE5 | -1.2337  |
| 27226 | P03410 | Q13651 | -0.44425 |
| 27227 | P03410 | Q9P1V8 | -0.2098  |
| 27228 | P03410 | Q01113 | -1.7262  |
| 27229 | P03410 | Q15496 | -0.64151 |
| 27230 | P03410 | Q9HBR0 | -0.82916 |
| 27231 | P03410 | Q9H3H5 | -0.72317 |
| 27232 | P03410 | P35052 | -0.94612 |
| 27233 | P03410 | P48357 | -1.0559  |
| 27234 | P03410 | Q01974 | -1.4443  |
| 27235 | P03410 | Q9UFH2 | -0.20363 |
| 27236 | P03410 | P42285 | -0.21994 |
| 27237 | P03410 | Q8IYR2 | -0.19289 |
| 27238 | P03410 | Q13387 | -0.16537 |
| 27239 | P03410 | P17612 | -0.22534 |
| 27240 | P03410 | Q53EU6 | -0.73635 |
| 27241 | P03410 | Q96DX7 | -0.26378 |
| 27242 | P03410 | Q9BX79 | -0.41279 |
| 27243 | P03410 | Q96SZ6 | -0.42306 |
| 27244 | P03410 | O94953 | -0.11802 |
| 27245 | P03410 | Q96BH3 | -0.72984 |
| 27246 | P03410 | Q15417 | -0.26344 |
| 27247 | P03410 | Q96MK3 | -0.71003 |
| 27248 | P03410 | Q9NX74 | -0.41714 |
| 27249 | P03410 | Q6ZWE6 | -0.44539 |
| 27250 | P03410 | Q9NXW2 | -0.75254 |
| 27251 | P03410 | Q9HB29 | -1.0136  |
| 27252 | P03410 | Q8TDG4 | -0.47772 |
| 27253 | P03410 | Q92617 | -0.61257 |
| 27254 | P03410 | O43763 | -0.22857 |
| 27255 | P03410 | Q96BI3 | -0.15224 |
| 27256 | P03410 | P15514 | -0.5171  |
| 27257 | P03410 | P51787 | -0.86941 |
| 27258 | P03410 | Q96C92 | -0.13497 |
| 27259 | P03410 | Q92930 | -0.743   |
| 27260 | P03410 | P02775 | -0.64438 |
| 27261 | P03410 | P63122 | -0.52549 |
| 27262 | P03410 | Q9BQT9 | -0.80469 |
| 27263 | P03410 | Q7Z410 | -1.5086  |
| 27264 | P03410 | Q96L15 | -0.79152 |
| 27265 | P03410 | Q9BUT1 | -0.61642 |
| 27266 | P03410 | P10321 | -0.88938 |
| 27267 | P03410 | Q5PT55 | -0.80181 |
| 27268 | P03410 | Q6ZNB7 | -0.96566 |
| 27269 | P03410 | Q96KJ4 | -0.87167 |
| 27270 | P03410 | P55211 | -0.22383 |
| 27271 | P03410 | Q96A54 | -0.93688 |
| 27272 | P03410 | Q13488 | -0.66849 |
| 27273 | P03410 | P32298 | -1.1717  |
| 27274 | P03410 | Q9UGC6 | -0.37113 |
| 27275 | P03410 | Q6JVE6 | -0.69874 |
| 27276 | P03410 | Q8NCW6 | -0.43111 |
| 27277 | P03410 | P58743 | -0.73229 |
| 27278 | P03410 | Q9P246 | -0.38441 |
| 27279 | P03410 | Q5VTB9 | -0.52848 |
| 27280 | P03410 | Q8NDZ4 | -0.57428 |
| 27281 | P03410 | Q96B77 | -0.45086 |
| 27282 | P03410 | Q9H222 | -0.6968  |
| 27283 | P03410 | Q9Y5S8 | -0.42948 |
| 27284 | P03410 | Q86SF2 | -0.43569 |

|       |        |        |           |
|-------|--------|--------|-----------|
| 27285 | P03410 | Q9GZP7 | -1.1726   |
| 27286 | P03410 | Q12829 | -1.2281   |
| 27287 | P03410 | Q9H4I0 | -0.075    |
| 27288 | P03410 | Q8ND82 | -0.22681  |
| 27289 | P03410 | P51512 | -1.7517   |
| 27290 | P03410 | Q6UXZ4 | -0.93386  |
| 27291 | P03410 | P30536 | -0.26835  |
| 27292 | P03410 | Q8NGU1 | -1.153    |
| 27293 | P03410 | Q99706 | -0.56844  |
| 27294 | P03410 | Q92974 | -0.22747  |
| 27295 | P03410 | Q6NUJ1 | -0.8787   |
| 27296 | P03410 | Q8NH69 | -1.153    |
| 27297 | P03410 | P09619 | -0.44536  |
| 27298 | P03410 | P42702 | -1.0589   |
| 27299 | P03410 | Q2TVT4 | -0.37573  |
| 27300 | P03410 | P42261 | -0.52772  |
| 27301 | P03410 | Q14574 | -1.0853   |
| 27302 | P03410 | P50406 | -0.84237  |
| 27303 | P03410 | Q7Z7L1 | -0.51366  |
| 27304 | P03410 | Q5JTN6 | -0.23118  |
| 27305 | P03410 | Q15482 | -0.65846  |
| 27306 | P03410 | Q4KMG9 | -0.63308  |
| 27307 | P03410 | Q8IZP9 | -1.3803   |
| 27308 | P03410 | Q8NGG3 | -1.153    |
| 27309 | P03410 | A6NLI5 | -0.39568  |
| 27310 | P03410 | Q96JJ6 | -0.87096  |
| 27311 | P03410 | Q96CW9 | -0.71638  |
| 27312 | P03410 | Q9Y548 | -0.6194   |
| 27313 | P03410 | P15311 | -0.2391   |
| 27314 | P03410 | Q96KX0 | -0.68083  |
| 27315 | P03410 | Q9UJV3 | -0.32532  |
| 27316 | P03410 | Q6ZQY2 | -0.22727  |
| 27317 | P03410 | Q8TEB7 | -0.81401  |
| 27318 | P03410 | P15289 | -0.55223  |
| 27319 | P03410 | Q9Y6E0 | -0.39489  |
| 27320 | P03410 | P20039 | -0.70858  |
| 27321 | P03410 | A6NCS4 | -0.28368  |
| 27322 | P03410 | Q8NGC9 | -1.153    |
| 27323 | P03410 | P41595 | -0.44516  |
| 27324 | P03410 | P56749 | -0.48903  |
| 27325 | P03410 | O00744 | -0.41662  |
| 27326 | P03410 | Q96K12 | -1.3597   |
| 27327 | P03410 | Q9HAK2 | -0.064937 |
| 27328 | P03410 | Q13461 | -0.49241  |
| 27329 | P03410 | Q16619 | -0.53165  |
| 27330 | P03410 | Q96NE9 | -0.23586  |
| 27331 | P03410 | Q15286 | -0.5037   |
| 27332 | P03410 | Q9UKR0 | -1.4605   |
| 27333 | P03410 | P01620 | -0.90565  |
| 27334 | P03410 | Q9UQV4 | -0.79722  |
| 27335 | P03410 | Q9P2S6 | -0.22741  |
| 27336 | P03410 | Q9BYB0 | -0.22741  |
| 27337 | P03410 | Q9BY64 | -0.88648  |
| 27338 | P03410 | Q8TE12 | -0.2262   |
| 27339 | P03410 | Q5T6J7 | -0.69193  |
| 27340 | P03410 | Q96PZ0 | -0.042715 |
| 27341 | P03410 | Q15415 | -0.64335  |
| 27342 | P03410 | Q9Y279 | -0.22742  |
| 27343 | P03410 | Q8TEY5 | -0.22766  |
| 27344 | P03410 | P12829 | -0.22518  |
| 27345 | P03410 | Q9NUM4 | -0.72834  |
| 27346 | P03410 | Q75WM6 | -1.2785   |
| 27347 | P03410 | Q6ZN54 | -0.40666  |
| 27348 | P03410 | P09681 | -0.50149  |
| 27349 | P03410 | Q6ZMH5 | -0.81544  |
| 27350 | P03410 | Q86T24 | -0.49965  |
| 27351 | P03410 | P0DKX4 | -0.12253  |
| 27352 | P03410 | P04432 | -0.90565  |
| 27353 | P03410 | P13236 | -0.92967  |
| 27354 | P03410 | Q9H6X2 | -0.4261   |
| 27355 | P03410 | Q8N6S4 | -0.28174  |
| 27356 | P03410 | Q2TAC6 | -0.31133  |
| 27357 | P03410 | O75147 | -0.23029  |
| 27358 | P03410 | Q8TBJ5 | -0.13373  |
| 27359 | P03410 | Q8N6M8 | -0.21668  |
| 27360 | P03410 | P46940 | -0.2274   |

|       |        |        |           |
|-------|--------|--------|-----------|
| 27361 | P03410 | P41235 | -0.24152  |
| 27362 | P03410 | P01920 | -0.61387  |
| 27363 | P03410 | P04181 | -0.045756 |
| 27364 | P03410 | Q43709 | -0.49354  |
| 27365 | P03410 | P08514 | -0.41236  |
| 27366 | P03410 | Q9BR61 | -0.22741  |
| 27367 | P03410 | Q8WWG1 | -1.3619   |
| 27368 | P03410 | Q8TDV5 | -1.3011   |
| 27369 | P03410 | Q96IJ6 | -0.69409  |
| 27370 | P03410 | Q43609 | -0.16645  |
| 27371 | P03410 | Q5SR53 | -0.19167  |
| 27372 | P03410 | Q6VB84 | -0.49241  |
| 27373 | P03410 | Q96RC9 | -1.153    |
| 27374 | P03410 | P07359 | -0.48596  |
| 27375 | P03410 | Q8IYW5 | -0.22686  |
| 27376 | P03410 | P40238 | -1.0312   |
| 27377 | P03410 | Q8NFI9 | -0.20836  |
| 27378 | P03410 | Q9UL62 | -0.42906  |
| 27379 | P03410 | P57727 | -1.3176   |
| 27380 | P03410 | Q8NI77 | -0.55948  |
| 27381 | P03410 | Q95985 | -0.61464  |
| 27382 | P03410 | O15431 | -1.081    |
| 27383 | P03410 | P01765 | -0.90565  |
| 27384 | P03410 | Q5U5R9 | -0.74859  |
| 27385 | P03410 | Q9ULD4 | -0.22301  |
| 27386 | P03410 | Q8IW03 | -0.17796  |
| 27387 | P03410 | Q8IZ41 | -0.82516  |
| 27388 | P03410 | P16298 | -0.10713  |
| 27389 | P03410 | Q5H8A4 | -0.85786  |
| 27390 | P03410 | P02585 | -0.22412  |
| 27391 | P03410 | Q9H1J7 | -0.95137  |
| 27392 | P03410 | Q92185 | -0.40481  |
| 27393 | P03410 | Q9NXX6 | -1.172    |
| 27394 | P03410 | P25874 | -0.42157  |
| 27395 | P03410 | P30954 | -1.2721   |
| 27396 | P03410 | F8WCM5 | -0.57056  |
| 27397 | P03410 | Q96EF0 | -0.22357  |
| 27398 | P03410 | Q94827 | -0.29869  |
| 27399 | P03410 | Q8IZJ6 | -0.57644  |
| 27400 | P03410 | Q9UQ26 | -0.22741  |
| 27401 | P03410 | Q6TCH7 | -0.3672   |
| 27402 | P03410 | Q30KQ4 | -0.69132  |
| 27403 | P03410 | Q9Y6Q1 | -0.2633   |
| 27404 | P03410 | Q8N5H7 | -0.44107  |
| 27405 | P03410 | P33032 | -0.83568  |
| 27406 | P03410 | Q9UKF2 | -1.1919   |
| 27407 | P03410 | P01718 | -0.90565  |
| 27408 | P03410 | Q9BUQ8 | -0.70351  |
| 27409 | P03410 | O15066 | -0.37472  |
| 27410 | P03410 | Q86XP3 | -0.83565  |
| 27411 | P03410 | Q8N1E2 | -0.70261  |
| 27412 | P03410 | Q14439 | -1.4275   |
| 27413 | P03410 | Q6ZS02 | -0.077927 |
| 27414 | P03410 | Q8NAP8 | -0.22284  |
| 27415 | P03410 | P62683 | -0.0271   |
| 27416 | P03410 | Q9NQ69 | -0.2274   |
| 27417 | P03410 | Q8IUQ4 | -0.24886  |
| 27418 | P03410 | O75339 | -0.85021  |
| 27419 | P03410 | Q8NEM8 | -0.47359  |
| 27420 | P03410 | O60519 | -0.12631  |
| 27421 | P03410 | Q9H867 | -0.19142  |
| 27422 | P03410 | Q86Z02 | -0.22741  |
| 27423 | P03410 | Q8IWL1 | -0.99447  |
| 27424 | P03410 | Q86YH2 | -0.23616  |
| 27425 | P03410 | Q86XP6 | -0.71003  |
| 27426 | P03410 | A2RUU4 | -0.77245  |
| 27427 | P03410 | Q6NUQ4 | -0.63308  |
| 27428 | P03410 | Q9H628 | -1.1785   |
| 27429 | P03410 | Q8NGY1 | -1.153    |
| 27430 | P03410 | O15254 | -0.65502  |
| 27431 | P03410 | Q9NUI1 | -1.0962   |
| 27432 | P03410 | Q95992 | -0.86349  |
| 27433 | P03410 | Q9UHF3 | -0.95769  |
| 27434 | P03410 | Q13107 | -0.49476  |
| 27435 | P03410 | Q8N7F7 | -0.22409  |
| 27436 | P03410 | Q96AE7 | -0.21881  |

|       |        |        |          |
|-------|--------|--------|----------|
| 27437 | P03410 | Q6PID6 | -0.22727 |
| 27438 | P03410 | O76001 | -1.153   |
| 27439 | P03410 | Q96NY8 | -0.57979 |
| 27440 | P03410 | P0C869 | -0.54313 |
| 27441 | P03410 | O14772 | -0.93912 |
| 27442 | P03410 | P78381 | -0.1329  |
| 27443 | P03410 | Q8IZM9 | -0.82916 |
| 27444 | P03410 | O43657 | -0.87515 |
| 27445 | P03410 | P49585 | -0.35345 |
| 27446 | P03410 | Q13315 | -0.44792 |
| 27447 | P03410 | P31275 | -0.21215 |
| 27448 | P03410 | Q8NGG6 | -1.153   |
| 27449 | P03410 | Q96DD7 | -0.63308 |
| 27450 | P03410 | Q8NAA5 | -0.1266  |
| 27451 | P03410 | A1A4Y4 | -0.80359 |
| 27452 | P03410 | Q6XUX3 | -0.9638  |
| 27453 | P03410 | Q13586 | -0.23023 |
| 27454 | P03410 | O75449 | -0.22834 |
| 27455 | P03410 | Q8N135 | -0.75795 |
| 27456 | P03410 | P78369 | -0.63894 |
| 27457 | P03410 | Q9NXN4 | -0.17732 |
| 27458 | P03410 | Q9UF33 | -1.4472  |
| 27459 | P03410 | P01375 | -0.24209 |
| 27460 | P03410 | P46092 | -1.3     |
| 27461 | P03410 | O95754 | -0.92972 |
| 27462 | P03410 | Q6UX27 | -0.63308 |
| 27463 | P03410 | P05177 | -0.48215 |
| 27464 | P03410 | P08637 | -1.4152  |
| 27465 | P03410 | Q8TF42 | -0.22741 |
| 27466 | P03410 | Q13418 | -0.36353 |
| 27467 | P03410 | P10586 | -0.90081 |
| 27468 | P03410 | A6NGY5 | -1.153   |
| 27469 | P03410 | Q6UB28 | -0.41989 |
| 27470 | P03410 | O00408 | -0.22428 |
| 27471 | P03410 | Q9H3S3 | -1.4549  |
| 27472 | P03410 | P48065 | -1.0237  |
| 27473 | P03410 | Q92574 | -0.22696 |
| 27474 | P03410 | Q6X784 | -0.71722 |
| 27475 | P03410 | P08581 | -0.50341 |
| 27476 | P03410 | P0CV98 | -0.5628  |
| 27477 | P03410 | P12931 | -0.2335  |
| 27478 | P03410 | P01779 | -0.90565 |
| 27479 | P03410 | Q8TCT7 | -0.2795  |
| 27480 | P03410 | Q8TCW9 | -1.1881  |
| 27481 | P03410 | Q93091 | -0.61685 |
| 27482 | P03410 | P08311 | -1.1909  |
| 27483 | P03410 | Q13464 | -0.36974 |
| 27484 | P03410 | O75900 | -1.4218  |
| 27485 | P03410 | Q8WWY7 | -0.73014 |
| 27486 | P03410 | P05013 | -0.63415 |
| 27487 | P03410 | Q9C0A6 | -0.22321 |
| 27488 | P03410 | Q6UX01 | -0.88978 |
| 27489 | P03410 | O43316 | -0.22288 |
| 27490 | P03410 | Q6ZPD8 | -0.8862  |
| 27491 | P03410 | O15034 | -0.22741 |
| 27492 | P03410 | Q99661 | -0.33185 |
| 27493 | P03410 | Q8TC36 | -0.22087 |
| 27494 | P03410 | P40198 | -0.63308 |
| 27495 | P03410 | P51178 | -0.36584 |
| 27496 | P03410 | P11464 | -0.71618 |
| 27497 | P03410 | Q96MV1 | -0.61257 |
| 27498 | P03410 | P01042 | -0.78537 |
| 27499 | P03410 | Q504Y2 | -1.0189  |
| 27500 | P03410 | P56748 | -0.41394 |
| 27501 | P03410 | P04431 | -0.90565 |
| 27502 | P03410 | O15247 | -0.66664 |
| 27503 | P03410 | Q9H2P9 | -0.19269 |
| 27504 | P03410 | P16070 | -0.30899 |
| 27505 | P03410 | Q9BRG2 | -0.51633 |
| 27506 | P03410 | Q6ZMB0 | -0.52342 |
| 27507 | P03410 | Q5JQS5 | -1.153   |
| 27508 | P03410 | Q9HD43 | -0.22742 |
| 27509 | P03410 | Q4G0X9 | -0.11136 |
| 27510 | P03410 | Q9C0D3 | -0.18579 |
| 27511 | P03410 | P58499 | -0.67629 |
| 27512 | P03410 | O43300 | -0.54113 |

|       |        |        |           |
|-------|--------|--------|-----------|
| 27513 | P03410 | A6NKT7 | -0.20767  |
| 27514 | P03410 | Q9ULK6 | -0.73225  |
| 27515 | P03410 | Q16363 | -1.1414   |
| 27516 | P03410 | Q9Y2E4 | -0.17444  |
| 27517 | P03410 | P07949 | -0.7662   |
| 27518 | P03410 | Q16854 | -0.58558  |
| 27519 | P03410 | Q13291 | -0.18912  |
| 27520 | P03410 | P29558 | -0.28314  |
| 27521 | P03410 | Q15027 | -0.94873  |
| 27522 | P03410 | P35590 | -1.2258   |
| 27523 | P03410 | Q58EX7 | -0.48994  |
| 27524 | P03410 | A6NHZ5 | -0.22461  |
| 27525 | P03410 | Q2KJY2 | -0.55889  |
| 27526 | P03410 | Q9C026 | -0.79631  |
| 27527 | P03410 | O43524 | -0.49241  |
| 27528 | P03410 | Q9NZQ9 | -0.21465  |
| 27529 | P03410 | P17858 | -0.55518  |
| 27530 | P03410 | P19113 | -0.51312  |
| 27531 | P03410 | P00325 | -0.75887  |
| 27532 | P03410 | Q969I6 | -1.0338   |
| 27533 | P03410 | Q6IPX1 | -1.3577   |
| 27534 | P03410 | Q04771 | -0.36125  |
| 27535 | P03410 | Q96EK9 | -0.66861  |
| 27536 | P03410 | Q15062 | -0.21911  |
| 27537 | P03410 | Q9H611 | -0.49444  |
| 27538 | P03410 | P0C617 | -1.153    |
| 27539 | P03410 | Q9BWV7 | -0.2609   |
| 27540 | P03410 | Q96JF0 | -0.74822  |
| 27541 | P03410 | Q70Z35 | -0.49794  |
| 27542 | P03410 | P23759 | -0.21799  |
| 27543 | P03410 | O00212 | -1.0836   |
| 27544 | P03410 | Q5BXX6 | -0.62453  |
| 27545 | P03410 | Q08170 | -0.22856  |
| 27546 | P03410 | Q03395 | -1.0856   |
| 27547 | P03410 | P01912 | -0.5925   |
| 27548 | P03410 | Q9BXJ4 | -0.47804  |
| 27549 | P03410 | P17050 | -0.090309 |
| 27550 | P03410 | Q5K651 | -0.14873  |
| 27551 | P03410 | Q9BZ71 | -0.52144  |
| 27552 | P03410 | Q8NDI1 | -0.2283   |
| 27553 | P03410 | P35410 | -0.62522  |
| 27554 | P03410 | P51798 | -1.2376   |
| 27555 | P03410 | Q6ZS86 | -0.87897  |
| 27556 | P03410 | Q9Y6M7 | -0.84888  |
| 27557 | P03410 | Q96FN5 | -0.29698  |
| 27558 | P03410 | Q06643 | -0.80394  |
| 27559 | P03410 | P32239 | -0.62624  |
| 27560 | P03410 | Q75452 | -1.5215   |
| 27561 | P03410 | C9JUS6 | -0.71003  |
| 27562 | P03410 | P16189 | -0.74344  |
| 27563 | P03410 | Q68DA7 | -0.21794  |
| 27564 | P03410 | Q94889 | -0.19105  |
| 27565 | P03410 | A0AVT1 | -0.22011  |
| 27566 | P03410 | Q96I99 | -0.77704  |
| 27567 | P03410 | P18440 | -0.1689   |
| 27568 | P03410 | Q8NCW5 | -0.46183  |
| 27569 | P03410 | Q95872 | -0.2274   |
| 27570 | P03410 | P22105 | -1.1707   |
| 27571 | P03410 | P01243 | -0.89138  |
| 27572 | P03410 | P30455 | -0.69714  |
| 27573 | P03410 | Q15916 | -0.18746  |
| 27574 | P03410 | P98175 | -0.60134  |
| 27575 | P03410 | O00451 | -0.18082  |
| 27576 | P03410 | Q8NH53 | -1.153    |
| 27577 | P03410 | Q9H461 | -0.48201  |
| 27578 | P03410 | O76002 | -1.153    |
| 27579 | P03410 | Q13332 | -0.73821  |
| 27580 | P03410 | P01716 | -0.90565  |
| 27581 | P03410 | P06737 | -0.51347  |
| 27582 | P03410 | Q8NFX7 | -0.34881  |
| 27583 | P03410 | Q96Q40 | -1.1999   |
| 27584 | P03410 | P0C091 | -1.6894   |
| 27585 | P03410 | Q96L96 | -0.85299  |
| 27586 | P03410 | Q8IVL0 | -0.46832  |
| 27587 | P03410 | P33765 | -1.0871   |
| 27588 | P03410 | Q06136 | -1.3498   |



|       |        |        |          |
|-------|--------|--------|----------|
| 27589 | P03410 | Q96KE9 | -0.22305 |
| 27590 | P03410 | Q9HCC8 | -0.54242 |
| 27591 | P03410 | O95925 | -0.21024 |
| 27592 | P03410 | P22680 | -0.70884 |
| 27593 | P03410 | Q9Y397 | -0.56698 |
| 27594 | P03410 | Q06828 | -1.0258  |
| 27595 | P03410 | P0C7V8 | -0.22745 |
| 27596 | P03410 | Q6UWQ5 | -0.71769 |
| 27597 | P03410 | Q8NCW0 | -0.67385 |
| 27598 | P03410 | P35212 | -0.82441 |
| 27599 | P03410 | P54855 | -0.83605 |
| 27600 | P03410 | P01594 | -0.90565 |
| 27601 | P03410 | Q7Z475 | -0.66489 |
| 27602 | P03410 | P36404 | -0.22874 |
| 27603 | P03410 | Q6PJF5 | -0.78336 |
| 27604 | P03410 | Q8NGN6 | -1.153   |
| 27605 | P03410 | Q6UXE8 | -0.61257 |
| 27606 | P03410 | P33991 | -0.21421 |
| 27607 | P03410 | Q9H7B4 | -0.22669 |
| 27608 | P03410 | Q3KR37 | -0.63308 |
| 27609 | P03410 | Q9H7T0 | -1.0619  |
| 27610 | P03410 | Q96G97 | -0.59235 |
| 27611 | P03410 | Q8N6G5 | -0.41493 |
| 27612 | P03410 | Q8WWV3 | -0.77996 |
| 27613 | P03410 | P11498 | -0.82182 |
| 27614 | P03410 | Q86YV5 | -1.3339  |
| 27615 | P03410 | Q8WW32 | -0.37091 |
| 27616 | P03410 | A0PJE2 | -0.99827 |
| 27617 | P03410 | Q8N2H3 | -0.36396 |
| 27618 | P03410 | Q9Y2A7 | -0.23254 |
| 27619 | P03410 | Q8NGN7 | -1.153   |
| 27620 | P03410 | O43683 | -0.22741 |
| 27621 | P03410 | Q5SR56 | -0.80607 |
| 27622 | P03410 | A8MYJ7 | -0.11868 |
| 27623 | P03410 | Q8NEE6 | -0.21663 |
| 27624 | P03410 | P49703 | -0.22784 |
| 27625 | P03410 | Q6MZM0 | -1.0735  |
| 27626 | P03410 | Q9NTQ9 | -0.74288 |
| 27627 | P03410 | P08648 | -0.22703 |
| 27628 | P03410 | P19474 | -0.23065 |
| 27629 | P03410 | P98077 | -0.22741 |
| 27630 | P03410 | Q6PI25 | -0.28042 |
| 27631 | P03410 | Q9NZJ5 | -0.43307 |
| 27632 | P03410 | Q12913 | -0.40862 |
| 27633 | P03410 | Q9UHY1 | -0.22741 |
| 27634 | P03410 | Q9BZQ6 | -0.2448  |
| 27635 | P03410 | P61296 | -0.23077 |
| 27636 | P03410 | Q8NG76 | -1.153   |
| 27637 | P03410 | Q5GAN3 | -0.68882 |
| 27638 | P03410 | Q6UY14 | -0.30014 |
| 27639 | P03410 | P39086 | -0.66701 |
| 27640 | P03410 | Q9NZ94 | -0.26322 |
| 27641 | P03410 | Q7Z569 | -0.38026 |
| 27642 | P03410 | A6NCM1 | -0.66861 |
| 27643 | P03410 | A6NDH6 | -1.153   |
| 27644 | P03410 | Q96SF7 | -0.44514 |
| 27645 | P03410 | Q687X5 | -1.3412  |
| 27646 | P03410 | Q8NCN4 | -0.17468 |
| 27647 | P03410 | Q9P0W8 | -0.30876 |
| 27648 | P03410 | Q99973 | -0.44994 |
| 27649 | P03410 | Q8NH76 | -1.153   |
| 27650 | P03410 | Q75594 | -0.56909 |
| 27651 | P03410 | Q8TCT9 | -0.56678 |
| 27652 | P03410 | Q7Z5L4 | -0.61823 |
| 27653 | P03410 | Q14730 | -0.63863 |
| 27654 | P03410 | P12107 | -0.7736  |
| 27655 | P03410 | Q8N131 | -0.67175 |
| 27656 | P03410 | Q9NZP8 | -1.429   |
| 27657 | P03410 | Q75578 | -0.87224 |
| 27658 | P03410 | Q86XH1 | -0.66861 |
| 27659 | P03410 | P01623 | -0.90565 |
| 27660 | P03410 | Q5R387 | -0.79557 |
| 27661 | P03410 | Q14C86 | -0.94587 |
| 27662 | P03410 | P46531 | -0.22798 |
| 27663 | P03410 | P83110 | -0.72311 |
| 27664 | P03410 | Q7RTY5 | -1.3874  |

|       |        |        |          |
|-------|--------|--------|----------|
| 27665 | P03410 | Q8N436 | -1.2251  |
| 27666 | P03410 | P48050 | -0.44473 |
| 27667 | P03410 | Q86X10 | -0.59039 |
| 27668 | P03410 | Q6Q0C0 | -0.26542 |
| 27669 | P03410 | Q8TEA7 | -1.0556  |
| 27670 | P03410 | Q86Y78 | -0.71003 |
| 27671 | P03410 | Q6NZ63 | -0.63308 |
| 27672 | P03410 | P41439 | -0.66257 |
| 27673 | P03410 | F8VTS6 | -0.22777 |
| 27674 | P03410 | Q15116 | -0.60659 |
| 27675 | P03410 | P01625 | -0.90565 |
| 27676 | P03410 | Q9BY07 | -0.90116 |
| 27677 | P03410 | Q8N2K1 | -1.4457  |
| 27678 | P03410 | Q9H1B5 | -0.59011 |
| 27679 | P03410 | P06899 | -0.78432 |
| 27680 | P03410 | Q9Y2F9 | -0.22444 |
| 27681 | P03410 | Q8IUM7 | -0.26331 |
| 27682 | P03410 | P15374 | -0.33252 |
| 27683 | P03410 | Q9NZR4 | -0.21079 |
| 27684 | P03410 | Q8IY45 | -0.19683 |
| 27685 | P03410 | P13591 | -1.3432  |
| 27686 | P03410 | O95932 | -0.19307 |
| 27687 | P03410 | Q8NET5 | -1.014   |
| 27688 | P03410 | Q9NZC3 | -0.52844 |
| 27689 | P03410 | P62684 | -0.0271  |
| 27690 | P03410 | Q96KN8 | -0.05767 |
| 27691 | P03410 | Q9Y5M8 | -1.1708  |
| 27692 | P03410 | Q8NGK6 | -1.153   |
| 27693 | P03410 | P21217 | -0.56667 |
| 27694 | P03410 | Q8WXH2 | -0.7637  |
| 27695 | P03410 | Q16394 | -0.56324 |
| 27696 | P03410 | O94769 | -0.82753 |
| 27697 | P03410 | Q9H306 | -1.4049  |
| 27698 | P03410 | P98095 | -0.93081 |
| 27699 | P03410 | O95365 | -0.28114 |
| 27700 | P03410 | Q8TE77 | -0.32695 |
| 27701 | P03410 | P57789 | -1.1914  |
| 27702 | P03410 | Q6UXN7 | -0.37803 |
| 27703 | P03410 | P33778 | -0.80275 |
| 27704 | P03410 | A6NHI5 | -0.63308 |
| 27705 | P03410 | Q13585 | -1.3449  |
| 27706 | P03410 | Q9Y4W6 | -0.67265 |
| 27707 | P03410 | Q15788 | -0.26826 |
| 27708 | P03410 | P56851 | -0.75594 |
| 27709 | P03410 | O96024 | -0.57848 |
| 27710 | P03410 | P48052 | -1.2025  |
| 27711 | P03410 | O75679 | -0.23735 |
| 27712 | P03410 | Q15034 | -0.77418 |
| 27713 | P03410 | P51160 | -0.97623 |
| 27714 | P03410 | Q9Y580 | -0.64272 |
| 27715 | P03410 | P15586 | -0.19402 |
| 27716 | P03410 | P04626 | -0.25028 |
| 27717 | P03410 | Q9H2V7 | -0.21843 |
| 27718 | P03410 | Q15735 | -0.25062 |
| 27719 | P03410 | O14647 | -0.51527 |
| 27720 | P03410 | A6NCF5 | -0.22175 |
| 27721 | P03410 | Q9BV94 | -0.73568 |
| 27722 | P03410 | P29144 | -0.13453 |
| 27723 | P03410 | Q2M2I8 | -1.0657  |
| 27724 | P03410 | Q9UK22 | -0.35066 |
| 27725 | P03410 | Q9NP80 | -0.54645 |
| 27726 | P03410 | P26010 | -1.2527  |
| 27727 | P03410 | Q969F8 | -0.6901  |
| 27728 | P03410 | P48426 | -0.5102  |
| 27729 | P03410 | Q8N6R1 | -0.50821 |
| 27730 | P03410 | P28325 | -0.26222 |
| 27731 | P03410 | P43353 | -0.36597 |
| 27732 | P03410 | P36222 | -0.54136 |
| 27733 | P03410 | P34972 | -1.1996  |
| 27734 | P03410 | P56373 | -0.56078 |
| 27735 | P03410 | Q6ZMU5 | -0.22841 |
| 27736 | P03410 | Q9P202 | -0.22565 |
| 27737 | P03410 | Q8NEJ0 | -0.44583 |
| 27738 | P03410 | Q9NWW9 | -0.18516 |
| 27739 | P03410 | Q5VVX9 | -1.0923  |
| 27740 | P03410 | Q9BXI2 | -0.42989 |

|       |        |        |          |
|-------|--------|--------|----------|
| 27741 | P03410 | Q96PE2 | -0.37283 |
| 27742 | P03410 | Q86VE3 | -0.17536 |
| 27743 | P03410 | P0C7V7 | -1.103   |
| 27744 | P03410 | P00439 | -0.47112 |
| 27745 | P03410 | O43490 | -0.47037 |
| 27746 | P03410 | Q8NGI8 | -1.153   |
| 27747 | P03410 | Q16875 | -0.68831 |
| 27748 | P03410 | O15374 | -0.96868 |
| 27749 | P03410 | O76054 | -0.20322 |
| 27750 | P03410 | Q9BST9 | -0.46566 |
| 27751 | P03410 | Q8NGJ4 | -1.153   |
| 27752 | P03410 | Q8TAM6 | -0.17024 |
| 27753 | P03410 | P02458 | -0.64126 |
| 27754 | P03410 | P25929 | -0.91476 |
| 27755 | P03410 | O75385 | -0.65894 |
| 27756 | P03410 | P05165 | -0.75491 |
| 27757 | P03410 | Q9HCG7 | -0.73681 |
| 27758 | P03410 | Q9P1W3 | -0.63308 |
| 27759 | P03410 | P35408 | -0.45774 |
| 27760 | P03410 | Q8TDV0 | -1.2185  |
| 27761 | P03410 | P35475 | -0.37004 |
| 27762 | P03410 | P49019 | -1.3417  |
| 27763 | P03410 | P08246 | -0.53754 |
| 27764 | P03410 | Q86VZ2 | -0.25624 |
| 27765 | P03410 | Q9NZH7 | -0.74254 |
| 27766 | P03410 | Q6Q6R5 | -0.2338  |
| 27767 | P03410 | Q9Y3S1 | -1.3476  |
| 27768 | P03410 | Q95393 | -0.22741 |
| 27769 | P03410 | Q14562 | -0.19895 |
| 27770 | P03410 | Q9ULF5 | -0.77628 |
| 27771 | P03410 | Q8WXG8 | -0.23209 |
| 27772 | P03410 | Q8TDC3 | -0.94376 |
| 27773 | P03410 | P43627 | -0.81791 |
| 27774 | P03410 | Q99697 | -0.16433 |
| 27775 | P03410 | Q8TDU9 | -1.1888  |
| 27776 | P03410 | Q8NGN3 | -1.153   |
| 27777 | P03410 | Q6QHC5 | -0.87888 |
| 27778 | P03410 | P10912 | -0.29076 |
| 27779 | P03410 | Q5VUJ9 | -0.22535 |
| 27780 | P03410 | Q9NYS0 | -0.95754 |
| 27781 | P03410 | P48594 | -0.57768 |
| 27782 | P03410 | Q9Y4D2 | -0.71058 |
| 27783 | P03410 | Q2TAA2 | -0.15516 |
| 27784 | P03410 | P35858 | -0.78581 |
| 27785 | P03410 | Q5T764 | -0.49308 |
| 27786 | P03410 | Q96GR2 | -0.79032 |
| 27787 | P03410 | Q8TCZ2 | -0.89339 |
| 27788 | P03410 | P08263 | -0.2242  |
| 27789 | P03410 | Q8TDJ6 | -0.35425 |
| 27790 | P03410 | Q8NH00 | -1.153   |
| 27791 | P03410 | Q5VZI3 | -0.63308 |
| 27792 | P03410 | Q9BRL6 | -0.5168  |
| 27793 | P03410 | Q8N539 | -1.0217  |
| 27794 | P03410 | A6NM62 | -0.58822 |
| 27795 | P03410 | O60568 | -0.20935 |
| 27796 | P03410 | Q9UBD3 | -1.0289  |
| 27797 | P03410 | Q86TD4 | -0.23899 |
| 27798 | P03410 | Q12884 | -0.52109 |
| 27799 | P03410 | Q6NY19 | -0.22745 |
| 27800 | P03410 | P53814 | -0.22801 |
| 27801 | P03410 | P40425 | -0.5113  |
| 27802 | P03410 | Q15165 | -0.80441 |
| 27803 | P03410 | P50052 | -0.82478 |
| 27804 | P03410 | P26715 | -1.0946  |
| 27805 | P03410 | P31997 | -0.59602 |
| 27806 | P03410 | Q96RP8 | -0.85728 |
| 27807 | P03410 | Q9H0M4 | -0.21187 |
| 27808 | P03410 | Q9P244 | -0.51882 |
| 27809 | P03410 | Q96LC7 | -1.6117  |
| 27810 | P03410 | Q8TED4 | -0.58761 |
| 27811 | P03410 | Q2M3G0 | -1.3109  |
| 27812 | P03410 | Q16280 | -1.2417  |
| 27813 | P03410 | Q8NBQ5 | -1.2089  |
| 27814 | P03410 | Q15335 | -0.84301 |
| 27815 | P03410 | P15121 | -0.22528 |
| 27816 | P03410 | Q9H1J5 | -0.63853 |

|       |        |        |           |
|-------|--------|--------|-----------|
| 27817 | P03410 | Q6TFL4 | -0.18502  |
| 27818 | P03410 | Q5T1V6 | -1.0245   |
| 27819 | P03410 | O94933 | -0.73424  |
| 27820 | P03410 | Q1W4C9 | -0.74696  |
| 27821 | P03410 | Q2WGJ6 | -0.19293  |
| 27822 | P03410 | Q9UIK4 | -0.99909  |
| 27823 | P03410 | Q9UH65 | -0.4082   |
| 27824 | P03410 | A6NND4 | -1.153    |
| 27825 | P03410 | O75165 | -0.11554  |
| 27826 | P03410 | O43149 | -0.22723  |
| 27827 | P03410 | Q15759 | -0.2274   |
| 27828 | P03410 | P58181 | -1.153    |
| 27829 | P03410 | O75955 | -0.11462  |
| 27830 | P03410 | Q16644 | -0.23108  |
| 27831 | P03410 | Q53S99 | -0.090566 |
| 27832 | P03410 | Q695T7 | -1.0413   |
| 27833 | P03410 | Q7Z698 | -0.17577  |
| 27834 | P03410 | Q05639 | -0.40409  |
| 27835 | P03410 | P08195 | -0.30055  |
| 27836 | P03410 | Q13885 | -0.29463  |
| 27837 | P03410 | Q99217 | -0.70066  |
| 27838 | P03410 | Q9H7P9 | -0.46505  |
| 27839 | P03410 | Q8N5C7 | -0.14631  |
| 27840 | P03410 | Q86UN3 | -0.34075  |
| 27841 | P03410 | Q96GQ7 | -0.58825  |
| 27842 | P03410 | P09651 | -0.37433  |
| 27843 | P03410 | P16949 | -0.50905  |
| 27844 | P03410 | Q8N6Q1 | -0.63308  |
| 27845 | P03410 | P0C851 | -0.63308  |
| 27846 | P03410 | O60879 | -0.22031  |
| 27847 | P03410 | P51530 | -0.23402  |
| 27848 | P03410 | O15143 | -0.22739  |
| 27849 | P03410 | Q86Z14 | -0.65391  |
| 27850 | P03410 | Q6PEY0 | -0.76864  |
| 27851 | P03410 | Q9NYL5 | -0.73085  |
| 27852 | P03410 | O00311 | -0.28935  |
| 27853 | P03410 | Q99541 | -0.27191  |
| 27854 | P03410 | Q96L12 | -0.464    |
| 27855 | P03410 | Q5SSJ5 | -0.67002  |
| 27856 | P03410 | Q9NP86 | -0.22444  |
| 27857 | P03410 | P17213 | -0.81383  |
| 27858 | P03410 | Q15126 | -0.78798  |
| 27859 | P03410 | O43772 | -0.34002  |
| 27860 | P03410 | Q8IU85 | -0.77465  |
| 27861 | P03410 | Q9BZY9 | -0.43222  |
| 27862 | P03410 | Q96DC9 | -0.71794  |
| 27863 | P03410 | P30086 | -0.41494  |
| 27864 | P03410 | Q96L73 | -0.2277   |
| 27865 | P03410 | P06732 | -0.92409  |
| 27866 | P03410 | Q8WWN9 | -0.32482  |
| 27867 | P03410 | O15270 | -0.67601  |
| 27868 | P03410 | Q9HCU0 | -0.6447   |
| 27869 | P03410 | Q86TW2 | -1.5774   |
| 27870 | P03410 | O00418 | -1.0837   |
| 27871 | P03410 | O14594 | -0.8261   |
| 27872 | P03410 | Q8NHW4 | -0.91317  |
| 27873 | P03410 | Q9UGU5 | -0.24803  |
| 27874 | P03410 | P10153 | -0.76424  |
| 27875 | P03410 | Q8N6W0 | -0.3302   |
| 27876 | P03410 | Q7Z5S9 | -0.63308  |
| 27877 | P03410 | P36955 | -0.91789  |
| 27878 | P03410 | Q8IZU8 | -0.66319  |
| 27879 | P03410 | Q8WY07 | -0.83932  |
| 27880 | P03410 | Q86W26 | -0.66861  |
| 27881 | P03410 | Q96EH8 | -0.49304  |
| 27882 | P03410 | P61019 | -0.46634  |
| 27883 | P03410 | Q9BVK2 | -0.75196  |
| 27884 | P03410 | O95007 | -1.153    |
| 27885 | P03410 | Q9H7Z6 | -0.19782  |
| 27886 | P03410 | Q9NRW1 | -0.49045  |
| 27887 | P03410 | Q8NG77 | -1.153    |
| 27888 | P03410 | P32322 | -0.62066  |
| 27889 | P03410 | Q9UIU6 | -0.22753  |
| 27890 | P03410 | Q8N7X8 | -0.63308  |
| 27891 | P03410 | Q7Z3D4 | -0.62065  |
| 27892 | P03410 | Q53RE8 | -0.22741  |

|       |        |        |           |
|-------|--------|--------|-----------|
| 27893 | P03410 | Q9BSK4 | -0.22752  |
| 27894 | P03410 | Q6P4F1 | -0.36084  |
| 27895 | P03410 | Q13351 | -0.22428  |
| 27896 | P03410 | P15056 | -0.47473  |
| 27897 | P03410 | O60701 | -0.84471  |
| 27898 | P03410 | Q99942 | -0.44808  |
| 27899 | P03410 | Q9P275 | -0.65855  |
| 27900 | P03410 | Q8TER5 | -0.37511  |
| 27901 | P03410 | Q9NX02 | -0.22714  |
| 27902 | P03410 | Q2WEN9 | -0.71219  |
| 27903 | P03410 | P47985 | -0.94536  |
| 27904 | P03410 | Q9NR16 | -1.4055   |
| 27905 | P03410 | Q8WTR8 | -0.71003  |
| 27906 | P03410 | Q8N3Y7 | -1.4118   |
| 27907 | P03410 | Q6UWV7 | -0.63308  |
| 27908 | P03410 | P48637 | -0.57668  |
| 27909 | P03410 | Q5TCH4 | -0.73066  |
| 27910 | P03410 | Q6PL24 | -0.52875  |
| 27911 | P03410 | Q6P2M8 | -0.95898  |
| 27912 | P03410 | Q9H5K3 | -1.4541   |
| 27913 | P03410 | Q8IYP9 | -0.86764  |
| 27914 | P03410 | Q8WZA6 | -1.153    |
| 27915 | P03410 | Q06889 | -0.2004   |
| 27916 | P03410 | A6NJS3 | -0.71003  |
| 27917 | P03410 | A6NHA9 | -1.153    |
| 27918 | P03410 | Q9NPC2 | -1.1273   |
| 27919 | P03410 | P08254 | -0.83864  |
| 27920 | P03410 | Q9H0R4 | -0.17925  |
| 27921 | P03410 | P21291 | -0.22803  |
| 27922 | P03410 | P78504 | -0.55887  |
| 27923 | P03410 | Q8IY37 | -0.78857  |
| 27924 | P03410 | Q86YD3 | -1.4339   |
| 27925 | P03410 | Q6UY09 | -0.63308  |
| 27926 | P03410 | Q9Y233 | -0.62049  |
| 27927 | P03410 | Q14638 | -1.0727   |
| 27928 | P03410 | Q9NZJ7 | -0.22784  |
| 27929 | P03410 | P31271 | -0.097959 |
| 27930 | P03410 | Q9NY84 | -0.34644  |
| 27931 | P03410 | Q96S37 | -0.62094  |
| 27932 | P03410 | Q96EN8 | -0.25008  |
| 27933 | P03410 | Q8NFZ3 | -0.3105   |
| 27934 | P03410 | P50876 | -0.85193  |
| 27935 | P03410 | Q3ZCM7 | -0.41888  |
| 27936 | P03410 | Q8NG84 | -1.153    |
| 27937 | P03410 | Q02487 | -0.83429  |
| 27938 | P03410 | Q16819 | -1.3836   |
| 27939 | P03410 | P50224 | -0.22861  |
| 27940 | P03410 | C9JJH3 | -0.66744  |
| 27941 | P03410 | B4E2M5 | -0.22741  |
| 27942 | P03410 | Q94782 | -0.65011  |
| 27943 | P03410 | Q9H3Y0 | -0.79661  |
| 27944 | P03410 | Q9HBJ7 | -0.65766  |
| 27945 | P03410 | Q96HU8 | -1.2887   |
| 27946 | P03410 | A6NFC9 | -1.153    |
| 27947 | P03410 | Q8NCC3 | -0.87387  |
| 27948 | P03410 | O14732 | -0.19114  |
| 27949 | P03410 | P05112 | -0.14728  |
| 27950 | P03410 | P01229 | -0.85775  |
| 27951 | P03410 | Q6PJ69 | -0.39568  |
| 27952 | P03410 | Q14831 | -0.66148  |
| 27953 | P03410 | P78423 | -0.56588  |
| 27954 | P03410 | Q96RD1 | -1.153    |
| 27955 | P03410 | Q8ND24 | -0.19852  |
| 27956 | P03410 | Q9GZX9 | -0.96175  |
| 27957 | P03410 | Q12951 | -0.61209  |
| 27958 | P03410 | Q6ZVX9 | -0.63308  |
| 27959 | P03410 | Q8NGV7 | -1.153    |
| 27960 | P03410 | Q92935 | -0.89041  |
| 27961 | P03410 | Q6WCQ1 | -0.22371  |
| 27962 | P03410 | P30493 | -0.88938  |
| 27963 | P03410 | Q9UPU3 | -0.63866  |
| 27964 | P03410 | A8MRT5 | -0.63308  |
| 27965 | P03410 | Q9H1U9 | -0.46336  |
| 27966 | P03410 | Q8TC27 | -0.83521  |
| 27967 | P03410 | P00734 | -0.66052  |
| 27968 | P03410 | Q9BRK3 | -0.63308  |

|       |        |        |          |
|-------|--------|--------|----------|
| 27969 | P03410 | Q9Y6I4 | -0.39831 |
| 27970 | P03410 | P19544 | -0.21932 |
| 27971 | P03410 | Q9NSA2 | -0.96832 |
| 27972 | P03410 | Q96E22 | -1.0305  |
| 27973 | P03410 | Q9UMW8 | -0.72167 |
| 27974 | P03410 | Q5JX69 | -0.63308 |
| 27975 | P03410 | Q92765 | -0.72977 |
| 27976 | P03410 | Q86W10 | -1.1458  |
| 27977 | P03410 | Q5T890 | -0.19259 |
| 27978 | P03410 | Q8WYK0 | -0.11275 |
| 27979 | P03410 | Q7L5N7 | -0.68699 |
| 27980 | P03410 | P80365 | -0.646   |
| 27981 | P03410 | P60763 | -0.65277 |
| 27982 | P03410 | Q92643 | -0.57014 |
| 27983 | P03410 | Q6PIS1 | -0.65506 |
| 27984 | P03410 | Q96SQ7 | -0.22791 |
| 27985 | P03410 | Q04721 | -0.22794 |
| 27986 | P03410 | Q8WVL7 | -0.22739 |
| 27987 | P03410 | Q95377 | -0.75601 |
| 27988 | P03410 | Q7LGA3 | -0.47143 |
| 27989 | P03410 | Q8N5V2 | -0.85041 |
| 27990 | P03410 | P06727 | -0.48894 |
| 27991 | P03410 | Q96LL9 | -0.49765 |
| 27992 | P03410 | Q9UI38 | -0.57383 |
| 27993 | P03410 | Q8NA23 | -0.22763 |
| 27994 | P03410 | Q9BTZ2 | -0.72419 |
| 27995 | P03410 | Q2QL34 | -0.8538  |
| 27996 | P03410 | Q14055 | -0.92751 |
| 27997 | P03410 | Q99797 | -0.45783 |
| 27998 | P03410 | Q96CN4 | -0.79567 |
| 27999 | P03410 | P41222 | -0.23449 |
| 28000 | P03410 | Q9GZU5 | -1.1493  |
| 28001 | P03410 | Q96EC8 | -0.59468 |
| 28002 | P03410 | O15520 | -0.39498 |
| 28003 | P03410 | P33993 | -0.17469 |
| 28004 | P03410 | O15075 | -1.3635  |
| 28005 | P03410 | Q6PCD5 | -0.22747 |
| 28006 | P03410 | Q8NGV0 | -1.153   |
| 28007 | P03410 | P41221 | -0.23214 |
| 28008 | P03410 | P04054 | -0.55241 |
| 28009 | P03410 | P52566 | -0.63635 |
| 28010 | P03410 | Q86T26 | -1.923   |
| 28011 | P03410 | Q9H0H3 | -0.20712 |
| 28012 | P03410 | P0C0L4 | -1.0444  |
| 28013 | P03410 | Q8NGP8 | -1.153   |
| 28014 | P03410 | Q8NBE8 | -0.19671 |
| 28015 | P03410 | J3KSC0 | -0.32038 |
| 28016 | P03410 | Q9C029 | -0.25093 |
| 28017 | P03410 | Q96PG2 | -0.63308 |
| 28018 | P03410 | Q5K4L6 | -1.2669  |
| 28019 | P03410 | Q0VAM2 | -0.57257 |
| 28020 | P03410 | P16562 | -0.82578 |
| 28021 | P03410 | Q95863 | -0.21778 |
| 28022 | P03410 | P17931 | -0.28478 |
| 28023 | P03410 | Q95897 | -0.71003 |
| 28024 | P03410 | Q8NHB7 | -1.153   |
| 28025 | P03410 | Q9NS85 | -0.22604 |
| 28026 | P03410 | P84077 | -0.2282  |
| 28027 | P03410 | Q7L7V1 | -0.3002  |
| 28028 | P03410 | Q14982 | -0.63866 |
| 28029 | P03410 | P18075 | -0.22741 |
| 28030 | P03410 | Q8N6D5 | -0.2274  |
| 28031 | P03410 | Q68G74 | -0.22741 |
| 28032 | P03410 | Q86XP1 | -0.80571 |
| 28033 | P03410 | Q9H7Y0 | -0.71003 |
| 28034 | P03410 | P43378 | -0.2311  |
| 28035 | P03410 | Q70EL3 | -0.50949 |
| 28036 | P03410 | P16234 | -0.29838 |
| 28037 | P03410 | Q8IVM8 | -0.67522 |
| 28038 | P03410 | O14921 | -0.29617 |
| 28039 | P03410 | Q13467 | -0.40533 |
| 28040 | P03410 | Q9HAU6 | -0.15723 |
| 28041 | P03410 | P42681 | -0.65415 |
| 28042 | P03410 | Q4VX67 | -0.63308 |
| 28043 | P03410 | Q70HW3 | -0.28712 |
| 28044 | P03410 | Q8IWT6 | -0.76273 |

|       |        |         |           |
|-------|--------|---------|-----------|
| 28045 | P03410 | A8MW92  | -0.15328  |
| 28046 | P03410 | Q9UBR2  | -0.84186  |
| 28047 | P03410 | P23634  | -0.54002  |
| 28048 | P03410 | Q1X8D7  | -0.22658  |
| 28049 | P03410 | A2RU48  | -0.63308  |
| 28050 | P03410 | Q8NET1  | -0.69132  |
| 28051 | P03410 | B2RXH2  | -0.072835 |
| 28052 | P03410 | Q96PX9  | -0.43168  |
| 28053 | P03410 | P30679  | -0.93024  |
| 28054 | P03410 | Q96PG1  | -0.63308  |
| 28055 | P03410 | Q9UBL6  | -0.22743  |
| 28056 | P03410 | Q96N64  | -0.21085  |
| 28057 | P03410 | Q14697  | -0.16622  |
| 28058 | P03410 | Q9NYF5  | -1.0031   |
| 28059 | P03410 | Q2TV78  | -1.1595   |
| 28060 | P03410 | Q14651  | -0.2275   |
| 28061 | P03410 | Q9UHC3  | -0.55676  |
| 28062 | P03410 | Q96AZ1  | -0.82521  |
| 28063 | P03410 | Q9NT22  | -0.73539  |
| 28064 | P03410 | Q8WVD5  | -0.22785  |
| 28065 | P03410 | Q9UH17  | -0.4635   |
| 28066 | P03410 | Q5JXX5  | -0.77524  |
| 28067 | P03410 | Q5I0X7  | -0.2274   |
| 28068 | P03410 | Q6UXG2  | -0.74933  |
| 28069 | P03410 | Q8N6L0  | -0.68649  |
| 28070 | P03410 | Q9NUZ1  | -0.65699  |
| 28071 | P03410 | Q8NHE4  | -0.5893   |
| 28072 | P03410 | Q8NGA8  | -1.153    |
| 28073 | P03410 | Q8NI38  | -0.2274   |
| 28074 | P03410 | Q99755  | -0.24968  |
| 28075 | P03410 | Q13422  | -0.063147 |
| 28076 | P03410 | P32942  | -0.64255  |
| 28077 | P03410 | Q9C091  | -0.63308  |
| 28078 | P03410 | A6NFE3  | -0.27484  |
| 28079 | P03410 | Q8N806  | -0.75369  |
| 28080 | P03410 | P35453  | -0.2274   |
| 28081 | P03410 | Q8WX94  | -0.66861  |
| 28082 | P03410 | P53794  | -1.0171   |
| 28083 | P03410 | Q8N4W6  | -0.75254  |
| 28084 | P03410 | Q8IYJ1  | -0.22997  |
| 28085 | P03410 | Q6NXP6  | -0.87435  |
| 28086 | P03410 | Q15291  | -0.22769  |
| 28087 | P03410 | Q8IYB8  | -0.22534  |
| 28088 | P03410 | Q14332  | -0.64429  |
| 28089 | P03410 | O00444  | -0.22741  |
| 28090 | P03410 | P18433  | -1.2878   |
| 28091 | P03410 | Q8IZ57  | -0.72622  |
| 28092 | P03410 | P08620  | -0.70599  |
| 28093 | P03410 | P23458  | -0.8854   |
| 28094 | P03410 | Q13009  | -0.45556  |
| 28095 | P03410 | Q6ZUS5  | -0.26189  |
| 28096 | P03410 | Q2KHN1  | -0.50107  |
| 28097 | P03410 | Q99986  | -0.22741  |
| 28098 | P03410 | Q9BZJ7  | -1.1837   |
| 28099 | P03410 | P51153  | -0.47411  |
| 28100 | P03410 | Q9H237  | -0.84672  |
| 28101 | P03410 | Q5U5Q3  | -0.22737  |
| 28102 | P03410 | Q92731  | -0.22745  |
| 28103 | P03410 | P46379  | -0.22458  |
| 28104 | P03410 | P19237  | -0.048031 |
| 28105 | P03410 | Q8IYM1  | -0.22371  |
| 28106 | P03410 | Q6ZMT9  | -0.20124  |
| 28107 | P03410 | Q9H1K4  | -0.52614  |
| 28108 | P03410 | O00555  | -0.31151  |
| 28109 | P03410 | P05997  | -0.99284  |
| 28110 | P03410 | P43004  | -0.56278  |
| 28111 | P03410 | Q9NWL6  | -0.18448  |
| 28112 | P03410 | Q9NPU4  | -0.63308  |
| 28113 | P03410 | Q2WVGJ9 | -0.63308  |
| 28114 | P03410 | P24158  | -0.34741  |
| 28115 | P03410 | Q7Z5R6  | -0.27525  |
| 28116 | P03410 | Q86XN8  | -0.22718  |
| 28117 | P03410 | P79483  | -0.7863   |
| 28118 | P03410 | Q9NYB5  | -0.93331  |
| 28119 | P03410 | Q8N9M5  | -0.3468   |
| 28120 | P03410 | Q3ZCU0  | -0.19721  |

|       |        |        |          |
|-------|--------|--------|----------|
| 28121 | P03410 | Q9Y2U8 | -0.12815 |
| 28122 | P03410 | Q9NS75 | -1.1371  |
| 28123 | P03410 | Q9NVE5 | -0.66744 |
| 28124 | P03410 | Q16787 | -1.1223  |
| 28125 | P03410 | Q7Z3Q1 | -0.67992 |
| 28126 | P03410 | B2RPK0 | -0.26739 |
| 28127 | P03410 | O14917 | -0.42836 |
| 28128 | P03410 | O15537 | -0.97058 |
| 28129 | P03410 | Q86XK7 | -0.63308 |
| 28130 | P03410 | O15178 | -0.35442 |
| 28131 | P03410 | Q99653 | -0.22731 |
| 28132 | P03410 | O00746 | -0.72875 |
| 28133 | P03410 | Q6ZMV7 | -0.12781 |
| 28134 | P03410 | O15130 | -0.84727 |
| 28135 | P03410 | Q6UXY1 | -0.59979 |
| 28136 | P03410 | Q8IX94 | -0.64062 |
| 28137 | P03410 | Q8TDF6 | -0.47674 |
| 28138 | P03410 | Q8NAM6 | -0.16492 |
| 28139 | P03410 | P22102 | -0.64383 |
| 28140 | P03410 | Q6NW40 | -0.56476 |
| 28141 | P03410 | Q16627 | -0.74497 |
| 28142 | P03410 | A0PJY2 | -0.16055 |
| 28143 | P03410 | Q9Y3L3 | -0.9779  |
| 28144 | P03410 | P47870 | -0.65571 |
| 28145 | P03410 | Q8IZ96 | -0.73505 |
| 28146 | P03410 | O00634 | -0.67508 |
| 28147 | P03410 | P30456 | -0.73998 |
| 28148 | P03410 | A6NJU9 | -0.63308 |
| 28149 | P03410 | P49842 | -0.90989 |
| 28150 | P03410 | Q9NRG1 | -0.39053 |
| 28151 | P03410 | Q96KQ7 | -0.22741 |
| 28152 | P03410 | P78380 | -1.5239  |
| 28153 | P03410 | Q9Y5Q5 | -1.6165  |
| 28154 | P03410 | Q8IV76 | -0.23346 |
| 28155 | P03410 | P49765 | -0.85281 |
| 28156 | P03410 | Q92888 | -0.26299 |
| 28157 | P03410 | P02649 | -0.2589  |
| 28158 | P03410 | Q9UP38 | -0.44547 |
| 28159 | P03410 | O95661 | -0.64731 |
| 28160 | P03410 | Q9UGQ2 | -0.59215 |
| 28161 | P03410 | P58400 | -0.55866 |
| 28162 | P03410 | A4D0T2 | -0.63308 |
| 28163 | P03410 | Q76B58 | -0.4982  |
| 28164 | P03410 | P28335 | -0.93127 |
| 28165 | P03410 | O95971 | -0.52594 |
| 28166 | P03410 | P22413 | -0.31975 |
| 28167 | P03410 | Q9UNP4 | -0.54822 |
| 28168 | P03410 | Q96Q77 | -0.22746 |
| 28169 | P03410 | P24844 | -0.22519 |
| 28170 | P03410 | Q8IU88 | -0.63308 |
| 28171 | P03410 | P09104 | -0.2029  |
| 28172 | P03410 | Q8NH05 | -1.153   |
| 28173 | P03410 | Q9NSY2 | -0.22839 |
| 28174 | P03410 | O00220 | -0.22737 |
| 28175 | P03410 | P52849 | -0.51675 |
| 28176 | P03410 | P17927 | -0.80416 |
| 28177 | P03410 | Q13363 | -0.53683 |
| 28178 | P03410 | Q5QNW6 | -0.80275 |
| 28179 | P03410 | P09110 | -0.18151 |
| 28180 | P03410 | P35575 | -0.41032 |
| 28181 | P03410 | P35348 | -0.61781 |
| 28182 | P03410 | Q8IVB4 | -0.87759 |
| 28183 | P03410 | Q9HB63 | -0.94584 |
| 28184 | P03410 | Q9HC97 | -1.4027  |
| 28185 | P03410 | Q9BY08 | -0.73863 |
| 28186 | P03410 | O75473 | -1.312   |
| 28187 | P03410 | Q8N6N7 | -0.2617  |
| 28188 | P03410 | P00742 | -0.80993 |
| 28189 | P03410 | P01607 | -0.90565 |
| 28190 | P03410 | P32745 | -0.59079 |
| 28191 | P03410 | O43291 | -1.0484  |
| 28192 | P03410 | Q6WRI0 | -1.04    |
| 28193 | P03410 | Q9Y4C0 | -0.99832 |
| 28194 | P03410 | O14782 | -0.28509 |
| 28195 | P03410 | Q09470 | -0.82342 |
| 28196 | P03410 | P28356 | -0.22718 |



|       |        |        |           |
|-------|--------|--------|-----------|
| 28197 | P03410 | Q96F81 | -0.71642  |
| 28198 | P03410 | Q9H293 | -0.60105  |
| 28199 | P03410 | O75095 | -0.22742  |
| 28200 | P03410 | Q7L3V2 | -0.085767 |
| 28201 | P03410 | A8MXB1 | -0.81221  |
| 28202 | P03410 | Q86T90 | -0.20199  |
| 28203 | P03410 | Q9Y6F9 | -0.86902  |
| 28204 | P03410 | O95406 | -0.52386  |
| 28205 | P03410 | Q6ZMU1 | -0.21471  |
| 28206 | P03410 | Q8TBG4 | -0.25203  |
| 28207 | P03410 | Q99626 | -0.22633  |
| 28208 | P03410 | P16402 | -0.6502   |
| 28209 | P03410 | P22794 | -0.66     |
| 28210 | P03410 | O00237 | -0.84289  |
| 28211 | P03410 | P04090 | -0.69874  |
| 28212 | P03410 | Q96JA3 | -0.22651  |
| 28213 | P03410 | Q8N697 | -0.5746   |
| 28214 | P03410 | O75908 | -0.78682  |
| 28215 | P03410 | Q9BVH7 | -0.5252   |
| 28216 | P03410 | Q6ZW76 | -0.22743  |
| 28217 | P03410 | Q9UKU9 | -1.3905   |
| 28218 | P03410 | Q68BL7 | -0.73393  |
| 28219 | P03410 | Q96DB9 | -0.77392  |
| 28220 | P03410 | P04350 | -0.13962  |
| 28221 | P03410 | Q9Y4L5 | -0.23475  |
| 28222 | P03410 | A2RUS2 | -0.22715  |
| 28223 | P03410 | P20851 | -0.88534  |
| 28224 | P03410 | Q13454 | -0.69226  |
| 28225 | P03410 | P41229 | -0.63376  |
| 28226 | P03410 | P16619 | -0.91615  |
| 28227 | P03410 | Q8TBG9 | -0.70577  |
| 28228 | P03410 | Q6UX06 | -0.85395  |
| 28229 | P03410 | Q99470 | -0.86243  |
| 28230 | P03410 | Q9BXX0 | -0.54917  |
| 28231 | P03410 | Q12770 | -0.22741  |
| 28232 | P03410 | Q9HD23 | -0.59447  |
| 28233 | P03410 | Q99961 | -0.22834  |
| 28234 | P03410 | Q86WA8 | -0.42946  |
| 28235 | P03410 | Q68DE3 | -0.22576  |
| 28236 | P03410 | Q9BUB5 | -0.48716  |
| 28237 | P03410 | Q8TAD4 | -0.31031  |
| 28238 | P03410 | Q96EQ8 | -0.74387  |
| 28239 | P03410 | O76038 | -0.73001  |
| 28240 | P03410 | Q9BXX1 | -0.20625  |
| 28241 | P03410 | Q8TEZ7 | -1.2895   |
| 28242 | P03410 | P00746 | -1.1144   |
| 28243 | P03410 | Q8NCL8 | -0.61257  |
| 28244 | P03410 | P57082 | -0.34313  |
| 28245 | P03410 | Q8IV45 | -0.64507  |
| 28246 | P03410 | Q9UKT6 | -0.37475  |
| 28247 | P03410 | Q14524 | -0.29388  |
| 28248 | P03410 | Q8N9I5 | -1.0047   |
| 28249 | P03410 | P0DJD3 | -0.24217  |
| 28250 | P03410 | P02790 | -0.22191  |
| 28251 | P03410 | Q14324 | -0.48745  |
| 28252 | P03410 | P59817 | -0.22708  |
| 28253 | P03410 | Q86TV6 | -0.22677  |
| 28254 | P03410 | A6NKQ9 | -0.69271  |
| 28255 | P03410 | O75311 | -0.82077  |
| 28256 | P03410 | Q02880 | -0.15191  |
| 28257 | P03410 | O15440 | -1.069    |
| 28258 | P03410 | Q60656 | -0.71975  |
| 28259 | P03410 | P01613 | -0.90565  |
| 28260 | P03410 | Q7RTR8 | -1.067    |
| 28261 | P03410 | P08913 | -0.26635  |
| 28262 | P03410 | O95859 | -1.0008   |
| 28263 | P03410 | Q8WX39 | -0.66557  |
| 28264 | P03410 | Q16878 | -0.26968  |
| 28265 | P03410 | O95278 | -0.22788  |
| 28266 | P03410 | Q8N162 | -1.153    |
| 28267 | P03410 | Q96NT5 | -0.45641  |
| 28268 | P03410 | Q92685 | -0.75345  |
| 28269 | P03410 | I1YAP6 | -0.23477  |
| 28270 | P03410 | Q8N6R0 | -0.17303  |
| 28271 | P03410 | Q8NG85 | -1.1275   |
| 28272 | P03410 | Q96PN7 | -0.29252  |

|       |        |        |           |
|-------|--------|--------|-----------|
| 28273 | P03410 | Q00169 | -0.48472  |
| 28274 | P03410 | O94844 | -1.206    |
| 28275 | P03410 | Q07889 | -0.22737  |
| 28276 | P03410 | O15530 | -0.22399  |
| 28277 | P03410 | Q99742 | -0.25215  |
| 28278 | P03410 | Q15695 | -0.38009  |
| 28279 | P03410 | Q5JU69 | -1.0318   |
| 28280 | P03410 | Q5H8A3 | -0.62945  |
| 28281 | P03410 | O95445 | -0.80789  |
| 28282 | P03410 | Q9H765 | -0.2274   |
| 28283 | P03410 | Q6UY11 | -0.7749   |
| 28284 | P03410 | Q5TAT6 | -1.1331   |
| 28285 | P03410 | Q86WA6 | -0.17204  |
| 28286 | P03410 | Q14568 | -0.53132  |
| 28287 | P03410 | Q9UPU5 | -0.72472  |
| 28288 | P03410 | P16671 | -0.46491  |
| 28289 | P03410 | Q9H3N8 | -1.2334   |
| 28290 | P03410 | A8MT66 | -0.017884 |
| 28291 | P03410 | P14679 | -0.37035  |
| 28292 | P03410 | P51693 | -0.16936  |
| 28293 | P03410 | Q14526 | -0.18861  |
| 28294 | P03410 | Q6UWI4 | -1.0663   |
| 28295 | P03410 | Q2PPJ7 | -0.18636  |
| 28296 | P03410 | B7ZC32 | -0.59099  |
| 28297 | P03410 | Q6ZNL6 | -0.88111  |
| 28298 | P03410 | P48048 | -1.3895   |
| 28299 | P03410 | Q8N434 | -0.64462  |
| 28300 | P03410 | A7MBM2 | -0.5752   |
| 28301 | P03410 | O43614 | -1.2702   |
| 28302 | P03410 | Q08043 | -0.37486  |
| 28303 | P03410 | Q14168 | -0.39877  |
| 28304 | P03410 | Q8IVB5 | -0.10645  |
| 28305 | P03410 | Q43396 | -0.22877  |
| 28306 | P03410 | P00491 | -0.25625  |
| 28307 | P03410 | P25774 | -1.2723   |
| 28308 | P03410 | Q8IUZ5 | -0.29717  |
| 28309 | P03410 | P56937 | -1.3167   |
| 28310 | P03410 | Q4J6C6 | -0.40093  |
| 28311 | P03410 | Q86VD9 | -0.7978   |
| 28312 | P03410 | Q8NGJ9 | -1.153    |
| 28313 | P03410 | Q3MJ13 | -0.22881  |
| 28314 | P03410 | P17302 | -0.29507  |
| 28315 | P03410 | A6NNS2 | -1.4425   |
| 28316 | P03410 | Q96B02 | -0.55845  |
| 28317 | P03410 | P08173 | -1.0385   |
| 28318 | P03410 | Q9NZW4 | -1.1906   |
| 28319 | P03410 | O14830 | -0.21375  |
| 28320 | P03410 | Q6PKC3 | -0.82779  |
| 28321 | P03410 | P33121 | -0.84601  |
| 28322 | P03410 | Q8IWB6 | -0.37286  |
| 28323 | P03410 | Q9NTZ6 | -0.3163   |
| 28324 | P03410 | Q9Y3L5 | -0.82208  |
| 28325 | P03410 | Q9BWW7 | -0.18048  |
| 28326 | P03410 | P51689 | -0.36296  |
| 28327 | P03410 | P29597 | -1.033    |
| 28328 | P03410 | Q8NH95 | -1.153    |
| 28329 | P03410 | Q16881 | -0.22018  |
| 28330 | P03410 | P20339 | -0.56941  |
| 28331 | P03410 | Q96DR4 | -0.33344  |
| 28332 | P03410 | P13995 | -0.71978  |
| 28333 | P03410 | A2RU54 | -0.31713  |
| 28334 | P03410 | Q99616 | -0.99309  |
| 28335 | P03410 | O94875 | -0.22815  |
| 28336 | P03410 | P58417 | -0.82614  |
| 28337 | P03410 | P30550 | -1.1995   |
| 28338 | P03410 | P84351 | -0.81596  |
| 28339 | P03410 | Q8WWG9 | -0.89179  |
| 28340 | P03410 | Q9Y5F0 | -1.0722   |
| 28341 | P03410 | B8ZZ34 | -0.63308  |
| 28342 | P03410 | Q9BTX7 | -0.26679  |
| 28343 | P03410 | Q86TH1 | -0.55247  |
| 28344 | P03410 | Q9Y2E6 | -0.30589  |
| 28345 | P03410 | P41968 | -0.84306  |
| 28346 | P03410 | O60359 | -0.97861  |
| 28347 | P03410 | Q8NGC6 | -1.153    |
| 28348 | P03410 | Q9H8M9 | -1.0006   |

|       |        |        |          |
|-------|--------|--------|----------|
| 28349 | P03410 | P21802 | -0.26287 |
| 28350 | P03410 | P62745 | -0.28028 |
| 28351 | P03410 | P59666 | -0.78998 |
| 28352 | P03410 | Q8TE56 | -1.3999  |
| 28353 | P03410 | Q9BY21 | -1.182   |
| 28354 | P03410 | Q86TI0 | -1.1042  |
| 28355 | P03410 | Q6ZQQ6 | -0.16463 |
| 28356 | P03410 | Q86WA9 | -0.7601  |
| 28357 | P03410 | Q9H2I8 | -0.22707 |
| 28358 | P03410 | Q14112 | -0.60524 |
| 28359 | P03410 | Q9BYV6 | -0.24386 |
| 28360 | P03410 | Q7Z5A9 | -0.67965 |
| 28361 | P03410 | Q9NRA0 | -0.37473 |
| 28362 | P03410 | P00973 | -0.59411 |
| 28363 | P03410 | Q9UMD9 | -1.0275  |
| 28364 | P03410 | Q9BS16 | -0.21723 |
| 28365 | P03410 | Q8WXS5 | -0.78448 |
| 28366 | P03410 | Q9HA64 | -0.48958 |
| 28367 | P03410 | O00482 | -0.22936 |
| 28368 | P03410 | P30483 | -0.88938 |
| 28369 | P03410 | Q9H334 | -0.49241 |
| 28370 | P03410 | P35228 | -0.25749 |
| 28371 | P03410 | P05549 | -0.19169 |
| 28372 | P03410 | O75077 | -1.3327  |
| 28373 | P03410 | Q8TDN7 | -0.67624 |
| 28374 | P03410 | Q76N89 | -0.5945  |
| 28375 | P03410 | Q9NRA1 | -0.3893  |
| 28376 | P03410 | Q8N3T1 | -0.50823 |
| 28377 | P03410 | Q15743 | -1.4302  |
| 28378 | P03410 | P04155 | -0.37206 |
| 28379 | P03410 | Q9UPN4 | -0.14134 |
| 28380 | P03410 | Q7Z7E8 | -0.45098 |
| 28381 | P03410 | Q96C45 | -1.3438  |
| 28382 | P03410 | Q9Y3Q4 | -1.216   |
| 28383 | P03410 | P57730 | -0.49012 |
| 28384 | P03410 | Q8TE68 | -0.22741 |
| 28385 | P03410 | Q8TB73 | -0.75313 |
| 28386 | P03410 | Q9BXS9 | -0.91916 |
| 28387 | P03410 | Q9NVE7 | -0.81674 |
| 28388 | P03410 | Q8TAP4 | -0.23215 |
| 28389 | P03410 | Q8N4L4 | -1.0881  |
| 28390 | P03410 | Q7Z7M9 | -0.51355 |
| 28391 | P03410 | Q8WWI1 | -0.2271  |
| 28392 | P03410 | O14863 | -0.52797 |
| 28393 | P03410 | Q8TCG5 | -0.80354 |
| 28394 | P03410 | Q6MZW2 | -0.77312 |
| 28395 | P03410 | P51617 | -0.22734 |
| 28396 | P03410 | Q4G0T1 | -0.63301 |
| 28397 | P03410 | Q6UXZ0 | -0.63308 |
| 28398 | P03410 | Q8TEQ0 | -0.21955 |
| 28399 | P03410 | O95274 | -0.77574 |
| 28400 | P03410 | P22352 | -0.80145 |
| 28401 | P03410 | Q13607 | -1.153   |
| 28402 | P03410 | B0YJ81 | -1.4684  |
| 28403 | P03410 | P07225 | -0.89125 |
| 28404 | P03410 | O76064 | -0.2274  |
| 28405 | P03410 | Q96II8 | -0.71003 |
| 28406 | P03410 | P54577 | -0.35321 |
| 28407 | P03410 | Q9NRY7 | -0.82963 |
| 28408 | P03410 | Q5VT25 | -0.46457 |
| 28409 | P03410 | P31513 | -0.92838 |
| 28410 | P03410 | Q92609 | -0.77861 |
| 28411 | P03410 | Q9NV35 | -0.10795 |
| 28412 | P03410 | Q02539 | -0.80423 |
| 28413 | P03410 | Q494W8 | -0.68373 |
| 28414 | P03410 | Q9BXJ2 | -0.88726 |
| 28415 | P03410 | Q00325 | -0.65938 |
| 28416 | P03410 | Q8WV22 | -0.21845 |
| 28417 | P03410 | O43670 | -0.19292 |
| 28418 | P03410 | Q13459 | -0.20475 |
| 28419 | P03410 | Q8IXZ3 | -0.17982 |
| 28420 | P03410 | P43405 | -0.32865 |
| 28421 | P03410 | Q96H35 | -0.67771 |
| 28422 | P03410 | Q9H6Y7 | -0.42204 |
| 28423 | P03410 | Q9UN86 | -0.90637 |
| 28424 | P03410 | Q9H4M9 | -0.39848 |

|       |        |        |           |
|-------|--------|--------|-----------|
| 28425 | P03410 | Q9P2B2 | -0.22741  |
| 28426 | P03410 | Q9BT17 | -0.19704  |
| 28427 | P03410 | Q5VXJ0 | -0.7829   |
| 28428 | P03410 | Q9UF02 | -0.69637  |
| 28429 | P03410 | Q53RT3 | -1.067    |
| 28430 | P03410 | Q6UWM9 | -0.73599  |
| 28431 | P03410 | Q86U06 | -0.49666  |
| 28432 | P03410 | Q9NYD6 | -0.30171  |
| 28433 | P03410 | Q8IWU9 | -0.47183  |
| 28434 | P03410 | Q8IVH2 | -0.5012   |
| 28435 | P03410 | P40939 | -0.086078 |
| 28436 | P03410 | Q9HAV5 | -0.57041  |
| 28437 | P03410 | Q8WU17 | -0.658    |
| 28438 | P03410 | Q9NXG2 | -0.054844 |
| 28439 | P03410 | O95006 | -1.153    |
| 28440 | P03410 | Q8NG35 | -0.69132  |
| 28441 | P03410 | Q96GF1 | -0.91266  |
| 28442 | P03410 | P83593 | -0.88633  |
| 28443 | P03410 | Q8N0W3 | -1.0825   |
| 28444 | P03410 | P14902 | -0.29029  |
| 28445 | P03410 | Q96QE3 | -0.63016  |
| 28446 | P03410 | Q969P0 | -0.13207  |
| 28447 | P03410 | P02753 | -0.26933  |
| 28448 | P03410 | Q8IWV2 | -1.0126   |
| 28449 | P03410 | Q8TD20 | -0.47238  |
| 28450 | P03410 | Q9UKN1 | -0.84198  |
| 28451 | P03410 | Q8NGN4 | -1.153    |
| 28452 | P03410 | Q9HCX4 | -0.22578  |
| 28453 | P03410 | Q14773 | -0.23651  |
| 28454 | P03410 | Q9Y624 | -0.43553  |
| 28455 | P03410 | Q8IW93 | -0.62342  |
| 28456 | P03410 | Q14669 | -0.22954  |
| 28457 | P03410 | Q0P641 | -0.053854 |
| 28458 | P03410 | Q86YW5 | -0.185    |
| 28459 | P03410 | P30481 | -0.88938  |
| 28460 | P03410 | Q5GAN6 | -0.68882  |
| 28461 | P03410 | A8MWE9 | -0.16997  |
| 28462 | P03410 | Q9Y240 | -0.26621  |
| 28463 | P03410 | Q8WYP3 | -0.85062  |
| 28464 | P03410 | Q8TD90 | -0.032476 |
| 28465 | P03410 | Q9HBH9 | -0.92769  |
| 28466 | P03410 | Q8N9L1 | -0.24184  |
| 28467 | P03410 | Q8N5Y8 | -0.5004   |
| 28468 | P03410 | P78310 | -0.22741  |
| 28469 | P03410 | Q14964 | -0.96244  |
| 28470 | P03410 | Q9UHR4 | -0.22737  |
| 28471 | P03410 | P18465 | -0.88938  |
| 28472 | P03410 | Q9BTV6 | -0.22745  |
| 28473 | P03410 | Q13887 | -0.21956  |
| 28474 | P03410 | P04040 | -0.39132  |
| 28475 | P03410 | Q15077 | -1.1417   |
| 28476 | P03410 | Q8TCX5 | -0.38718  |
| 28477 | P03410 | A5PLK6 | -0.62454  |
| 28478 | P03410 | Q9UBD6 | -0.74263  |
| 28479 | P03410 | Q8N3C7 | -0.22741  |
| 28480 | P03410 | Q9NQS5 | -1.2334   |
| 28481 | P03410 | Q99731 | -0.41996  |
| 28482 | P03410 | Q9UJA2 | -0.56634  |
| 28483 | P03410 | Q15223 | -0.41344  |
| 28484 | P03410 | Q2HXU8 | -0.79194  |
| 28485 | P03410 | Q9UBM1 | -0.37755  |
| 28486 | P03410 | Q13247 | -0.22774  |
| 28487 | P03410 | P63120 | -0.52549  |
| 28488 | P03410 | Q8NAT2 | -0.64569  |
| 28489 | P03410 | P15498 | -0.22741  |
| 28490 | P03410 | P04150 | -0.22746  |
| 28491 | P03410 | Q92928 | -0.77484  |
| 28492 | P03410 | Q8NGC7 | -1.153    |
| 28493 | P03410 | Q01085 | -0.29664  |
| 28494 | P03410 | P43116 | -1.2539   |
| 28495 | P03410 | P01241 | -0.19952  |
| 28496 | P03410 | P19099 | -0.46795  |
| 28497 | P03410 | Q8TBM8 | -0.75254  |
| 28498 | P03410 | Q58WW2 | -0.2274   |
| 28499 | P03410 | Q68CQ7 | -0.59066  |
| 28500 | P03410 | P50461 | -0.22734  |

|       |        |        |          |
|-------|--------|--------|----------|
| 28501 | P03410 | O94788 | -0.89781 |
| 28502 | P03410 | A6NET4 | -1.153   |
| 28503 | P03410 | Q9UKR5 | -0.7842  |
| 28504 | P03410 | Q14905 | -0.592   |
| 28505 | P03410 | Q96EX1 | -0.63308 |
| 28506 | P03410 | Q9NR61 | -0.91917 |
| 28507 | P03410 | Q9HCN8 | -0.0432  |
| 28508 | P03410 | Q6IPT4 | -0.37406 |
| 28509 | P03410 | P11215 | -0.22736 |
| 28510 | P03410 | Q6P093 | -1.1981  |
| 28511 | P03410 | Q5VT97 | -0.67199 |
| 28512 | P03410 | Q15569 | -0.95077 |
| 28513 | P03410 | Q96R08 | -1.153   |
| 28514 | P03410 | P32418 | -0.47334 |
| 28515 | P03410 | Q14161 | -0.22742 |
| 28516 | P03410 | Q8IX04 | -0.52793 |
| 28517 | P03410 | O95800 | -1.4027  |
| 28518 | P03410 | Q92729 | -0.68244 |
| 28519 | P03410 | P42338 | -0.65416 |
| 28520 | P03410 | Q16620 | -0.58648 |
| 28521 | P03410 | Q31612 | -0.88938 |
| 28522 | P03410 | A6NNE9 | -1.0237  |
| 28523 | P03410 | Q6NVV9 | -0.27221 |
| 28524 | P03410 | Q9H4M7 | -0.22718 |
| 28525 | P03410 | Q16695 | -0.19009 |
| 28526 | P03410 | Q7RTX9 | -0.83145 |
| 28527 | P03410 | Q9H2A2 | -0.55747 |
| 28528 | P03410 | Q8TC12 | -1.3246  |
| 28529 | P03410 | Q8N4P3 | -0.29611 |
| 28530 | P03410 | Q5VY43 | -0.7543  |
| 28531 | P03410 | P52179 | -0.57947 |
| 28532 | P03410 | P08559 | -0.17468 |
| 28533 | P03410 | Q15825 | -0.84553 |
| 28534 | P03410 | Q9UQD0 | -1.0122  |
| 28535 | P03410 | Q9NYW6 | -1.0161  |
| 28536 | P03410 | O00398 | -1.1683  |
| 28537 | P03410 | P00813 | -0.18662 |
| 28538 | P03410 | Q96KS9 | -0.14346 |
| 28539 | P03410 | P0DH78 | -0.21983 |
| 28540 | P03410 | O94766 | -0.51808 |
| 28541 | P03410 | Q00796 | -0.70123 |
| 28542 | P03410 | P09630 | -0.22691 |
| 28543 | P03410 | Q86VW1 | -1.0975  |
| 28544 | P03410 | Q3ZCN5 | -0.17695 |
| 28545 | P03410 | Q5VV43 | -0.48654 |
| 28546 | P03410 | Q9UBP9 | -0.2278  |
| 28547 | P03410 | Q96T91 | -0.69271 |
| 28548 | P03410 | P11465 | -0.6805  |
| 28549 | P03410 | Q6DT37 | -0.57719 |
| 28550 | P03410 | Q9BRF8 | -0.10714 |
| 28551 | P03410 | Q8NEY1 | -0.8715  |
| 28552 | P03410 | Q3KNW5 | -0.95105 |
| 28553 | P03410 | Q9UGT4 | -0.64746 |
| 28554 | P03410 | Q7L591 | -0.22438 |
| 28555 | P03410 | Q9C0D6 | -0.21474 |
| 28556 | P03410 | Q9H208 | -1.153   |
| 28557 | P03410 | Q8NH07 | -1.153   |
| 28558 | P03410 | Q8WWZ1 | -0.71391 |
| 28559 | P03410 | Q9BYC5 | -0.38276 |
| 28560 | P03410 | Q9BZX2 | -0.76512 |
| 28561 | P03410 | A3KFT3 | -1.153   |
| 28562 | P03410 | P20813 | -0.76226 |
| 28563 | P03410 | P47887 | -1.2888  |
| 28564 | P03410 | Q14874 | -0.50321 |
| 28565 | P03410 | A6NFN3 | -0.8749  |
| 28566 | P03410 | P51553 | -0.23972 |
| 28567 | P03410 | Q5M7Z0 | -0.73225 |
| 28568 | P03410 | O60825 | -0.10935 |
| 28569 | P03410 | Q05923 | -0.23243 |
| 28570 | P03410 | Q9NSD7 | -1.3655  |
| 28571 | P03410 | P01707 | -0.90565 |
| 28572 | P03410 | Q9P0L0 | -0.13751 |
| 28573 | P03410 | O95772 | -0.5986  |
| 28574 | P03410 | Q14793 | -0.37777 |
| 28575 | P03410 | Q9H2S5 | -0.22808 |
| 28576 | P03410 | P25024 | -1.1472  |

|       |        |        |           |
|-------|--------|--------|-----------|
| 28577 | P03410 | Q9NU39 | -0.49241  |
| 28578 | P03410 | P51857 | -0.25217  |
| 28579 | P03410 | Q8WZ59 | -0.63308  |
| 28580 | P03410 | Q96PM5 | -0.22622  |
| 28581 | P03410 | Q7Z406 | -0.35558  |
| 28582 | P03410 | P29762 | -0.56743  |
| 28583 | P03410 | Q14896 | -0.5264   |
| 28584 | P03410 | O95834 | -0.37044  |
| 28585 | P03410 | O43559 | -0.39931  |
| 28586 | P03410 | P47736 | -0.16601  |
| 28587 | P03410 | Q8NFZ6 | -1.1586   |
| 28588 | P03410 | O75074 | -0.62811  |
| 28589 | P03410 | Q9HBI5 | -0.16715  |
| 28590 | P03410 | O00562 | -0.14877  |
| 28591 | P03410 | Q8IWG1 | -0.069903 |
| 28592 | P03410 | Q7Z3T1 | -1.153    |
| 28593 | P03410 | P29965 | -1.0003   |
| 28594 | P03410 | P50993 | -0.5709   |
| 28595 | P03410 | Q8NCM2 | -0.89937  |
| 28596 | P03410 | Q9UKV5 | -0.48454  |
| 28597 | P03410 | Q13477 | -1.1314   |
| 28598 | P03410 | Q8IWB7 | -0.22752  |
| 28599 | P03410 | Q6UXF1 | -0.61257  |
| 28600 | P03410 | Q96J94 | -0.22592  |
| 28601 | P03410 | Q9H1Z9 | -0.63308  |
| 28602 | P03410 | Q9UM73 | -1.6533   |
| 28603 | P03410 | P28906 | -0.56796  |
| 28604 | P03410 | Q7Z3H0 | -0.2274   |
| 28605 | P03410 | Q7Z2D5 | -0.90101  |
| 28606 | P03410 | Q99967 | -0.11533  |
| 28607 | P03410 | Q9UFC0 | -0.51155  |
| 28608 | P03410 | Q7L0X0 | -0.51622  |
| 28609 | P03410 | Q96MF2 | -0.39288  |
| 28610 | P03410 | Q9H2H9 | -0.94472  |
| 28611 | P03410 | P41743 | -0.30606  |
| 28612 | P03410 | Q9HDD0 | -0.22087  |
| 28613 | P03410 | Q9BSG0 | -0.71003  |
| 28614 | P03410 | Q9UDR5 | -0.63131  |
| 28615 | P03410 | O14718 | -1.214    |
| 28616 | P03410 | Q92835 | -0.22741  |
| 28617 | P03410 | Q6ZMT4 | -0.22778  |
| 28618 | P03410 | Q9HA65 | -1.3577   |
| 28619 | P03410 | Q9H977 | -0.22734  |
| 28620 | P03410 | Q75V66 | -0.83379  |
| 28621 | P03410 | Q15349 | -0.9526   |
| 28622 | P03410 | Q9NWH9 | -0.23048  |
| 28623 | P03410 | Q9UNA3 | -0.54326  |
| 28624 | P03410 | Q96FS4 | -0.20979  |
| 28625 | P03410 | P38570 | -0.97366  |
| 28626 | P03410 | Q7Z5P9 | -0.76222  |
| 28627 | P03410 | Q03181 | -0.30554  |
| 28628 | P03410 | Q9NXL2 | -0.38845  |
| 28629 | P03410 | Q03169 | -0.62698  |
| 28630 | P03410 | Q8N441 | -0.81815  |
| 28631 | P03410 | Q8N5S1 | -0.51629  |
| 28632 | P03410 | Q9NR96 | -0.49661  |
| 28633 | P03410 | Q96QE4 | -0.46217  |
| 28634 | P03410 | Q9BWU1 | -1.1204   |
| 28635 | P03410 | Q13753 | -1.3092   |
| 28636 | P03410 | P01213 | -0.75772  |
| 28637 | P03410 | P22692 | -0.93274  |
| 28638 | P03410 | Q9Y231 | -0.43039  |
| 28639 | P03410 | P10253 | -0.31755  |
| 28640 | P03410 | Q9BVX2 | -0.71681  |
| 28641 | P03410 | Q8IYT8 | -0.9129   |
| 28642 | P03410 | P00750 | -0.47815  |
| 28643 | P03410 | Q9BY66 | -1.0594   |
| 28644 | P03410 | P09211 | -0.21562  |
| 28645 | P03410 | O60271 | -0.16803  |
| 28646 | P03410 | Q9P1W8 | -0.43908  |
| 28647 | P03410 | Q8WXA9 | -0.21959  |
| 28648 | P03410 | Q6PIV2 | -0.80007  |
| 28649 | P03410 | Q9BZ11 | -1.1919   |
| 28650 | P03410 | Q9GZZ7 | -0.89989  |
| 28651 | P03410 | Q9Y5G1 | -1.0719   |
| 28652 | P03410 | Q8NHM4 | -1.3701   |

|       |        |        |          |
|-------|--------|--------|----------|
| 28653 | P03410 | Q70CQ1 | -0.41976 |
| 28654 | P03410 | A2A3L6 | -0.22338 |
| 28655 | P03410 | A8MWS1 | -0.71003 |
| 28656 | P03410 | Q6UX40 | -0.80998 |
| 28657 | P03410 | P30685 | -0.88938 |
| 28658 | P03410 | P01768 | -0.90565 |
| 28659 | P03410 | P00709 | -0.84486 |
| 28660 | P03410 | Q5BJD5 | -0.63308 |
| 28661 | P03410 | Q5VWW1 | -0.86685 |
| 28662 | P03410 | O43909 | -0.70701 |
| 28663 | P03410 | A8MVX0 | -0.38845 |
| 28664 | P03410 | P14384 | -0.34772 |
| 28665 | P03410 | P01861 | -0.81547 |
| 28666 | P03410 | P14555 | -0.8703  |
| 28667 | P03410 | Q9ULV1 | -0.5585  |
| 28668 | P03410 | Q6P2P2 | -0.17606 |
| 28669 | P03410 | O95847 | -0.48495 |
| 28670 | P03410 | P00558 | -0.46013 |
| 28671 | P03410 | P45844 | -0.52283 |
| 28672 | P03410 | Q9HAT1 | -0.56183 |
| 28673 | P03410 | P48730 | -0.22741 |
| 28674 | P03410 | P55774 | -0.58125 |
| 28675 | P03410 | Q92611 | -0.11188 |
| 28676 | P03410 | P01178 | -0.38571 |
| 28677 | P03410 | Q96MI6 | -0.12075 |
| 28678 | P03410 | Q5T4F7 | -0.90098 |
| 28679 | P03410 | Q92620 | -0.22344 |
| 28680 | P03410 | P54886 | -0.77317 |
| 28681 | P03410 | Q16659 | -0.48015 |
| 28682 | P03410 | P01602 | -0.90565 |
| 28683 | P03410 | Q7Z4L0 | -0.44957 |
| 28684 | P03410 | Q9Y4C1 | -0.36607 |
| 28685 | P03410 | Q6TDP4 | -0.4618  |
| 28686 | P03410 | Q15884 | -0.61257 |
| 28687 | P03410 | Q9BT76 | -0.8335  |
| 28688 | P03410 | O43281 | -0.23919 |
| 28689 | P03410 | P01705 | -0.90565 |
| 28690 | P03410 | Q9UBE8 | -0.29422 |
| 28691 | P03410 | A2RRH5 | -0.22745 |
| 28692 | P03410 | Q15399 | -0.95057 |
| 28693 | P03410 | Q9NPR2 | -1.01    |
| 28694 | P03410 | Q8NGT0 | -1.153   |
| 28695 | P03410 | P05161 | -0.31912 |
| 28696 | P03410 | Q92989 | -0.23033 |
| 28697 | P03410 | O95294 | -0.25321 |
| 28698 | P03410 | Q7Z3Z4 | -0.25069 |
| 28699 | P03410 | Q01968 | -0.2726  |
| 28700 | P03410 | Q504Y3 | -0.15328 |
| 28701 | P03410 | Q6ZN66 | -0.83175 |
| 28702 | P03410 | A6NCL7 | -0.22743 |
| 28703 | P03410 | Q14500 | -1.0663  |
| 28704 | P03410 | Q8IV35 | -0.22779 |
| 28705 | P03410 | Q7Z4K8 | -0.39568 |
| 28706 | P03410 | P0C7T2 | -1.153   |
| 28707 | P03410 | Q5VT99 | -0.97335 |
| 28708 | P03410 | Q86SX6 | -0.20969 |
| 28709 | P03410 | Q15146 | -1.0513  |
| 28710 | P03410 | Q96L33 | -1.2103  |
| 28711 | P03410 | P22888 | -0.57643 |
| 28712 | P03410 | Q9H169 | -0.18412 |
| 28713 | P03410 | O14493 | -0.63293 |
| 28714 | P03410 | P04278 | -0.75371 |
| 28715 | P03410 | P31321 | -0.30704 |
| 28716 | P03410 | O60231 | -0.48074 |
| 28717 | P03410 | Q96SB3 | -0.22689 |
| 28718 | P03410 | Q92187 | -0.39727 |
| 28719 | P03410 | P49815 | -0.19033 |
| 28720 | P03410 | P01023 | -0.22836 |
| 28721 | P03410 | Q8NGT5 | -1.153   |
| 28722 | P03410 | Q9Y2Z9 | -0.38318 |
| 28723 | P03410 | O60522 | -0.54987 |
| 28724 | P03410 | Q16772 | -0.22355 |
| 28725 | P03410 | P10911 | -0.22652 |
| 28726 | P03410 | Q8NFU1 | -0.77803 |
| 28727 | P03410 | Q8WVF1 | -0.24814 |
| 28728 | P03410 | Q9H013 | -1.2283  |

|       |        |        |           |
|-------|--------|--------|-----------|
| 28729 | P03410 | Q9NS39 | -0.12222  |
| 28730 | P03410 | Q5XKR4 | -0.17803  |
| 28731 | P03410 | Q16512 | -0.21773  |
| 28732 | P03410 | Q9HCC6 | -0.21773  |
| 28733 | P03410 | Q6IMI6 | -0.22812  |
| 28734 | P03410 | Q6N063 | -0.5155   |
| 28735 | P03410 | O00292 | -0.79334  |
| 28736 | P03410 | Q8NAB2 | -0.19634  |
| 28737 | P03410 | O60243 | -0.69765  |
| 28738 | P03410 | O43464 | -0.22438  |
| 28739 | P03410 | O00168 | -1.0874   |
| 28740 | P03410 | O94822 | -0.10321  |
| 28741 | P03410 | Q96P67 | -1.2185   |
| 28742 | P03410 | P01242 | -0.6784   |
| 28743 | P03410 | Q96KP4 | -0.52901  |
| 28744 | P03410 | Q5T1M5 | -0.45685  |
| 28745 | P03410 | A6NCX1 | -0.01948  |
| 28746 | P03410 | O00462 | -0.2781   |
| 28747 | P03410 | P30825 | -1.0912   |
| 28748 | P03410 | Q9H0I9 | -0.30968  |
| 28749 | P03410 | Q86Y38 | -1.0333   |
| 28750 | P03410 | Q8NGS9 | -1.153    |
| 28751 | P03410 | Q8IZ02 | -0.22741  |
| 28752 | P03410 | Q8IV16 | -0.67809  |
| 28753 | P03410 | P16499 | -0.43782  |
| 28754 | P03410 | Q31610 | -0.88938  |
| 28755 | P03410 | O95248 | -0.85745  |
| 28756 | P03410 | P61769 | -0.42399  |
| 28757 | P03410 | Q53TN4 | -0.94936  |
| 28758 | P03410 | Q8IUH3 | -0.73453  |
| 28759 | P03410 | Q6V0L0 | -0.98231  |
| 28760 | P03410 | O43921 | -0.18518  |
| 28761 | P03410 | Q2Y0W8 | -0.9071   |
| 28762 | P03410 | O60678 | -0.066552 |
| 28763 | P03410 | Q6S5H5 | -0.22749  |
| 28764 | P03410 | Q6Y1H2 | -0.31465  |
| 28765 | P03410 | Q8N4E7 | -0.040906 |
| 28766 | P03410 | Q96DC8 | -0.12424  |
| 28767 | P03410 | Q14534 | -1.0251   |
| 28768 | P03410 | O95626 | -0.13395  |
| 28769 | P03410 | Q9H9S4 | -0.14769  |
| 28770 | P03410 | Q5I0G3 | -0.59925  |
| 28771 | P03410 | O43304 | -0.75378  |
| 28772 | P03410 | P10620 | -0.18771  |
| 28773 | P03410 | Q9Y5P1 | -1.153    |
| 28774 | P03410 | Q9NRH3 | -0.20067  |
| 28775 | P03410 | Q9H4I8 | -0.21557  |
| 28776 | P03410 | Q13286 | -0.13779  |
| 28777 | P03410 | P0DJ93 | -0.63308  |
| 28778 | P03410 | P49895 | -1.0449   |
| 28779 | P03410 | P30498 | -0.88938  |
| 28780 | P03410 | P24593 | -0.33647  |
| 28781 | P03410 | Q6J4K2 | -0.96647  |
| 28782 | P03410 | P55087 | -0.53416  |
| 28783 | P03410 | P09871 | -1.3199   |
| 28784 | P03410 | Q9P2P6 | -0.28879  |
| 28785 | P03410 | P07510 | -1.0192   |
| 28786 | P03410 | Q08623 | -0.3727   |
| 28787 | P03410 | Q6UX07 | -1.5956   |
| 28788 | P03410 | P37287 | -0.24103  |
| 28789 | P03410 | Q14CZ8 | -0.62392  |
| 28790 | P03410 | Q7Z404 | -0.63308  |
| 28791 | P03410 | P05089 | -0.18371  |
| 28792 | P03410 | Q8WWQ2 | -1.0226   |
| 28793 | P03410 | Q9HCP6 | -0.66508  |
| 28794 | P03410 | Q13401 | -0.016425 |
| 28795 | P03410 | P01034 | -0.32761  |
| 28796 | P03410 | O14804 | -1.3906   |
| 28797 | P03410 | O75907 | -0.55228  |
| 28798 | P03410 | Q6NUJ5 | -0.20791  |
| 28799 | P03410 | Q6QEF8 | -0.22741  |
| 28800 | P03410 | Q9UM01 | -1.0659   |
| 28801 | P03410 | P23142 | -0.91436  |
| 28802 | P03410 | Q9NZD1 | -1.2185   |
| 28803 | P03410 | Q99836 | -0.22738  |
| 28804 | P03410 | P48047 | -0.21735  |



|       |        |        |           |
|-------|--------|--------|-----------|
| 28805 | P03410 | Q9N2K0 | -0.59168  |
| 28806 | P03410 | Q9BSJ8 | -0.63308  |
| 28807 | P03410 | P30837 | -0.49481  |
| 28808 | P03410 | Q8N957 | -0.22705  |
| 28809 | P03410 | P12544 | -0.33742  |
| 28810 | P03410 | Q8TC92 | -1.6229   |
| 28811 | P03410 | P98172 | -0.19386  |
| 28812 | P03410 | P53355 | -0.47863  |
| 28813 | P03410 | Q99969 | -0.23578  |
| 28814 | P03410 | Q9UKR3 | -0.60537  |
| 28815 | P03410 | Q14254 | -0.53406  |
| 28816 | P03410 | Q8WVN6 | -1.4346   |
| 28817 | P03410 | P63125 | -0.52549  |
| 28818 | P03410 | Q75N03 | -0.27381  |
| 28819 | P03410 | Q9BY67 | -0.52212  |
| 28820 | P03410 | P04207 | -0.90565  |
| 28821 | P03410 | Q92819 | -0.69995  |
| 28822 | P03410 | P52824 | -0.22741  |
| 28823 | P03410 | Q9UP95 | -1.0267   |
| 28824 | P03410 | Q8TF72 | -0.22705  |
| 28825 | P03410 | P28676 | -0.2345   |
| 28826 | P03410 | Q14571 | -0.56399  |
| 28827 | P03410 | Q5THJ4 | -0.0871   |
| 28828 | P03410 | P20333 | -0.60172  |
| 28829 | P03410 | Q7Z418 | -1.0828   |
| 28830 | P03410 | P59533 | -1.067    |
| 28831 | P03410 | P01854 | -0.26198  |
| 28832 | P03410 | Q13748 | -0.17272  |
| 28833 | P03410 | Q9H5U6 | -0.21765  |
| 28834 | P03410 | P34903 | -0.81952  |
| 28835 | P03410 | A9Z1Z3 | -0.63308  |
| 28836 | P03410 | P16144 | -0.68562  |
| 28837 | P03410 | Q9H3P7 | -0.32511  |
| 28838 | P03410 | P06318 | -0.90565  |
| 28839 | P03410 | Q6P4E1 | -0.63308  |
| 28840 | P03410 | Q96RF0 | -0.22741  |
| 28841 | P03410 | P14920 | -0.4947   |
| 28842 | P03410 | P01606 | -0.90565  |
| 28843 | P03410 | Q13277 | -0.32192  |
| 28844 | P03410 | Q8N4Q0 | -0.91071  |
| 28845 | P03410 | Q8WVD3 | -0.74397  |
| 28846 | P03410 | Q8WUU8 | -0.63308  |
| 28847 | P03410 | Q15811 | -0.29864  |
| 28848 | P03410 | Q8NC44 | -0.59468  |
| 28849 | P03410 | Q16595 | -0.1557   |
| 28850 | P03410 | Q8NGK9 | -1.153    |
| 28851 | P03410 | P13674 | -0.37299  |
| 28852 | P03410 | Q16478 | -0.63188  |
| 28853 | P03410 | Q9NPH3 | -1.6993   |
| 28854 | P03410 | Q95461 | -0.50963  |
| 28855 | P03410 | Q6ZTA4 | -0.22741  |
| 28856 | P03410 | P01563 | -0.28155  |
| 28857 | P03410 | P11117 | -0.77646  |
| 28858 | P03410 | P48551 | -0.87711  |
| 28859 | P03410 | Q712K3 | -0.96148  |
| 28860 | P03410 | Q5QGT7 | -0.73817  |
| 28861 | P03410 | Q7L0J3 | -0.51689  |
| 28862 | P03410 | Q14508 | -1.1159   |
| 28863 | P03410 | Q8IUD6 | -0.23282  |
| 28864 | P03410 | Q14694 | -0.36703  |
| 28865 | P03410 | Q6NXR0 | -0.78353  |
| 28866 | P03410 | Q75631 | -0.63017  |
| 28867 | P03410 | P01570 | -0.73299  |
| 28868 | P03410 | P14138 | -0.75767  |
| 28869 | P03410 | P51864 | -0.38406  |
| 28870 | P03410 | Q15911 | -0.22739  |
| 28871 | P03410 | P01773 | -0.90565  |
| 28872 | P03410 | Q8NGG1 | -1.0187   |
| 28873 | P03410 | Q95861 | -0.27418  |
| 28874 | P03410 | Q9ULE3 | -0.030007 |
| 28875 | P03410 | Q8NH48 | -1.153    |
| 28876 | P03410 | Q8NH49 | -1.153    |
| 28877 | P03410 | O43866 | -0.75923  |
| 28878 | P03410 | Q9NY37 | -0.88396  |
| 28879 | P03410 | Q9NP56 | -0.35402  |
| 28880 | P03410 | P57796 | -0.64773  |

|       |        |        |          |
|-------|--------|--------|----------|
| 28881 | P03410 | P36406 | -0.52691 |
| 28882 | P03410 | Q9Y5X4 | -0.24807 |
| 28883 | P03410 | Q7Z2R9 | -0.71003 |
| 28884 | P03410 | P56915 | -0.13892 |
| 28885 | P03410 | P51788 | -0.70017 |
| 28886 | P03410 | Q9H3Y8 | -0.52461 |
| 28887 | P03410 | Q9Y689 | -1.269   |
| 28888 | P03410 | P23510 | -0.41174 |
| 28889 | P03410 | Q15464 | -0.62967 |
| 28890 | P03410 | Q9NUK0 | -0.10718 |
| 28891 | P03410 | P49146 | -1.1352  |
| 28892 | P03410 | Q2VPA4 | -0.60751 |
| 28893 | P03410 | Q7Z5H5 | -0.9861  |
| 28894 | P03410 | O43448 | -0.80792 |
| 28895 | P03410 | P20815 | -0.80543 |
| 28896 | P03410 | P17787 | -0.46251 |
| 28897 | P03410 | P59910 | -0.27586 |
| 28898 | P03410 | P31629 | -0.22736 |
| 28899 | P03410 | Q6ZRH7 | -1.1971  |
| 28900 | P03410 | Q6UWP2 | -1.5956  |
| 28901 | P03410 | Q8N7C7 | -0.73225 |
| 28902 | P03410 | P51511 | -0.82683 |
| 28903 | P03410 | Q86WB7 | -0.80441 |
| 28904 | P03410 | Q13319 | -0.25822 |
| 28905 | P03410 | Q9NX36 | -0.11554 |
| 28906 | P03410 | P47898 | -1.1397  |
| 28907 | P03410 | Q92752 | -0.49358 |
| 28908 | P03410 | Q95755 | -0.62933 |
| 28909 | P03410 | Q969Z3 | -0.48007 |
| 28910 | P03410 | Q9H1P3 | -0.33344 |
| 28911 | P03410 | P01719 | -0.90565 |
| 28912 | P03410 | Q6AI12 | -0.22741 |
| 28913 | P03410 | Q96SF2 | -0.50456 |
| 28914 | P03410 | Q08257 | -0.55106 |
| 28915 | P03410 | Q9Y4K4 | -0.72932 |
| 28916 | P03410 | P01584 | -0.22078 |
| 28917 | P03410 | P63131 | -0.52549 |
| 28918 | P03410 | P01708 | -0.90565 |
| 28919 | P03410 | P31930 | -0.45845 |
| 28920 | P03410 | Q02817 | -0.22687 |
| 28921 | P03410 | Q7Z4F1 | -0.73825 |
| 28922 | P03410 | Q99808 | -0.78427 |
| 28923 | P03410 | P48431 | -0.42958 |
| 28924 | P03410 | O15212 | -0.14041 |
| 28925 | P03410 | Q9UDX3 | -0.9136  |
| 28926 | P03410 | P03372 | -0.22747 |
| 28927 | P03410 | O96009 | -1.1988  |
| 28928 | P03410 | Q9Y577 | -0.28493 |
| 28929 | P03410 | Q9UJA3 | -0.19047 |
| 28930 | P03410 | P02778 | -0.79833 |
| 28931 | P03410 | Q9BX10 | -0.83175 |
| 28932 | P03410 | Q765P7 | -0.39585 |
| 28933 | P03410 | Q9H000 | -0.76346 |
| 28934 | P03410 | Q8MH63 | -0.66489 |
| 28935 | P03410 | O43278 | -0.75529 |
| 28936 | P03410 | Q8NG81 | -1.153   |
| 28937 | P03410 | Q8WY21 | -0.20803 |
| 28938 | P03410 | Q8WVN8 | -0.75224 |
| 28939 | P03410 | P50120 | -0.18876 |
| 28940 | P03410 | O43301 | -0.66861 |
| 28941 | P03410 | Q15646 | -0.21417 |
| 28942 | P03410 | Q9NY72 | -0.59667 |
| 28943 | P03410 | Q7Z4S9 | -0.22715 |
| 28944 | P03410 | Q8NHP8 | -0.34264 |
| 28945 | P03410 | P09564 | -0.79039 |
| 28946 | P03410 | Q495W5 | -0.50578 |
| 28947 | P03410 | Q9NPB1 | -0.57293 |
| 28948 | P03410 | P23469 | -0.23245 |
| 28949 | P03410 | O75643 | -0.22662 |
| 28950 | P03410 | P16435 | -0.77413 |
| 28951 | P03410 | Q6UXB0 | -0.71003 |
| 28952 | P03410 | Q8IUC8 | -0.52058 |
| 28953 | P03410 | Q8NGI1 | -1.153   |
| 28954 | P03410 | P78324 | -1.0796  |
| 28955 | P03410 | Q96A08 | -0.71099 |
| 28956 | P03410 | Q9UKB5 | -0.73457 |

|       |        |        |           |
|-------|--------|--------|-----------|
| 28957 | P03410 | Q6UX39 | -0.90287  |
| 28958 | P03410 | Q8IYX4 | -0.67366  |
| 28959 | P03410 | P34947 | -0.69401  |
| 28960 | P03410 | Q12908 | -0.77027  |
| 28961 | P03410 | Q96RD3 | -1.153    |
| 28962 | P03410 | Q92613 | -0.2331   |
| 28963 | P03410 | O00587 | -0.9231   |
| 28964 | P03410 | P49821 | -0.31524  |
| 28965 | P03410 | Q9H195 | -0.69111  |
| 28966 | P03410 | Q8WUY1 | -0.71003  |
| 28967 | P03410 | Q6UXI7 | -0.85147  |
| 28968 | P03410 | Q4L235 | -1.0573   |
| 28969 | P03410 | Q96P31 | -0.797    |
| 28970 | P03410 | P24071 | -1.5793   |
| 28971 | P03410 | P09093 | -0.89053  |
| 28972 | P03410 | P26012 | -1.1903   |
| 28973 | P03410 | Q6V1P9 | -1.0719   |
| 28974 | P03410 | B2RU33 | -0.22739  |
| 28975 | P03410 | P61916 | -0.39042  |
| 28976 | P03410 | Q9H2M9 | -0.59599  |
| 28977 | P03410 | P06493 | -0.20938  |
| 28978 | P03410 | Q8TC41 | -1.2725   |
| 28979 | P03410 | P40205 | -0.35533  |
| 28980 | P03410 | P19397 | -0.28282  |
| 28981 | P03410 | Q9C019 | -0.3907   |
| 28982 | P03410 | P15538 | -0.46771  |
| 28983 | P03410 | O14543 | -0.22741  |
| 28984 | P03410 | Q6PIF6 | -0.52298  |
| 28985 | P03410 | Q6ZUX3 | -0.031484 |
| 28986 | P03410 | Q9HC10 | -0.69673  |
| 28987 | P03410 | P10619 | -0.17108  |
| 28988 | P03410 | P05154 | -0.55528  |
| 28989 | P03410 | Q9NZB8 | -0.6653   |
| 28990 | P03410 | Q8IV61 | -0.64202  |
| 28991 | P03410 | P51888 | -0.98679  |
| 28992 | P03410 | Q92824 | -0.94562  |
| 28993 | P03410 | Q9BYJ0 | -0.79465  |
| 28994 | P03410 | P01583 | -0.18677  |
| 28995 | P03410 | Q96GE6 | -0.22645  |
| 28996 | P03410 | Q95342 | -1.0199   |
| 28997 | P03410 | P32320 | -0.66758  |
| 28998 | P03410 | Q9Y5G3 | -1.0719   |
| 28999 | P03410 | Q6P1Q9 | -0.097146 |
| 29000 | P03410 | Q8N143 | -0.17925  |
| 29001 | P03410 | Q96MX6 | -0.22724  |
| 29002 | P03410 | Q9NQ75 | -0.47806  |
| 29003 | P03410 | Q9HD20 | -0.93267  |
| 29004 | P03410 | P23352 | -0.75732  |
| 29005 | P03410 | Q96SL1 | -0.78103  |
| 29006 | P03410 | Q6ZQN7 | -1.2838   |
| 29007 | P03410 | P29320 | -1.1561   |
| 29008 | P03410 | P35414 | -1.1735   |
| 29009 | P03410 | P01603 | -0.90565  |
| 29010 | P03410 | Q02318 | -0.45577  |
| 29011 | P03410 | Q9BTY2 | -0.68318  |
| 29012 | P03410 | P22307 | -0.19881  |
| 29013 | P03410 | P06314 | -0.90565  |
| 29014 | P03410 | Q05469 | -0.21587  |
| 29015 | P03410 | Q7Z7L7 | -0.27819  |
| 29016 | P03410 | Q5JSL3 | -0.31107  |
| 29017 | P03410 | Q6IE38 | -0.74696  |
| 29018 | P03410 | P04440 | -0.63501  |
| 29019 | P03410 | Q8IZV5 | -0.69762  |
| 29020 | P03410 | Q6PEW0 | -0.75624  |
| 29021 | P03410 | Q99463 | -1.218    |
| 29022 | P03410 | P59045 | -0.81735  |
| 29023 | P03410 | Q9C0E8 | -0.89031  |
| 29024 | P03410 | Q9BYP7 | -0.52884  |
| 29025 | P03410 | P03971 | -0.54123  |
| 29026 | P03410 | Q6ZN04 | -0.22736  |
| 29027 | P03410 | Q8WWW8 | -0.22729  |
| 29028 | P03410 | Q99523 | -0.34595  |
| 29029 | P03410 | Q9NWT1 | -0.22935  |
| 29030 | P03410 | O75325 | -1.0549   |
| 29031 | P03410 | Q9Y6M0 | -0.73211  |
| 29032 | P03410 | Q9NVW2 | -0.2352   |

|       |        |        |          |
|-------|--------|--------|----------|
| 29033 | P03410 | Q14330 | -1.1683  |
| 29034 | P03410 | Q9NX14 | -0.38259 |
| 29035 | P03410 | Q18PE1 | -0.4056  |
| 29036 | P03410 | P54868 | -0.25567 |
| 29037 | P03410 | Q8NHC7 | -1.153   |
| 29038 | P03410 | P20794 | -0.22646 |
| 29039 | P03410 | O94804 | -0.75946 |
| 29040 | P03410 | Q7Z4L5 | -0.3881  |
| 29041 | P03410 | P19876 | -0.89287 |
| 29042 | P03410 | Q9UBU2 | -1.1206  |
| 29043 | P03410 | O75592 | -0.22564 |
| 29044 | P03410 | Q8NFZ0 | -0.55249 |
| 29045 | P03410 | Q9ULG6 | -0.52594 |
| 29046 | P03410 | Q9UJU5 | -0.54935 |
| 29047 | P03410 | O15020 | -0.22792 |
| 29048 | P03410 | Q9UBM4 | -0.87702 |
| 29049 | P03410 | Q15075 | -0.1993  |
| 29050 | P03410 | Q16563 | -0.8288  |
| 29051 | P03410 | Q6UB99 | -0.22742 |
| 29052 | P03410 | P13385 | -0.22749 |
| 29053 | P03410 | Q9Y5T5 | -0.36156 |
| 29054 | P03410 | Q14184 | -0.30361 |
| 29055 | P03410 | Q12794 | -0.43703 |
| 29056 | P03410 | Q9H3R2 | -1.3931  |
| 29057 | P03410 | A6NNB3 | -1.0857  |
| 29058 | P03410 | Q8NHS3 | -0.30365 |
| 29059 | P03410 | Q14CN2 | -1.4532  |
| 29060 | P03410 | P08134 | -0.22536 |
| 29061 | P03410 | P06702 | -0.22818 |
| 29062 | P03410 | Q9Y6X5 | -0.76406 |
| 29063 | P03410 | P55073 | -0.8498  |
| 29064 | P03410 | Q14667 | -0.71003 |
| 29065 | P03410 | Q6IC10 | -0.63308 |
| 29066 | P03410 | Q14406 | -0.79559 |
| 29067 | P03410 | Q5W5W9 | -0.46418 |
| 29068 | P03410 | Q9HC73 | -1.4339  |
| 29069 | P03410 | P01233 | -0.70126 |
| 29070 | P03410 | Q9ULX7 | -0.81732 |
| 29071 | P03410 | P31644 | -0.85898 |
| 29072 | P03410 | P55259 | -0.88748 |
| 29073 | P03410 | Q5SQ80 | -0.2274  |
| 29074 | P03410 | P35498 | -0.93346 |
| 29075 | P03410 | P04554 | -0.85986 |
| 29076 | P03410 | Q96MR6 | -0.22791 |
| 29077 | P03410 | Q01629 | -0.66644 |
| 29078 | P03410 | Q96DH6 | -0.51817 |
| 29079 | P03410 | O43525 | -0.98302 |
| 29080 | P03410 | P10319 | -0.88938 |
| 29081 | P03410 | O15211 | -0.68754 |
| 29082 | P03410 | Q14142 | -0.38076 |
| 29083 | P03410 | A6NIV6 | -0.26257 |
| 29084 | P03410 | A1L4H1 | -0.76301 |
| 29085 | P03410 | P16870 | -0.84569 |
| 29086 | P03410 | Q86YW7 | -0.69271 |
| 29087 | P03410 | Q86V35 | -0.46755 |
| 29088 | P03410 | Q8IYB4 | -0.22599 |
| 29089 | P03410 | Q12805 | -0.22784 |
| 29090 | P03410 | Q9BVI0 | -0.22694 |
| 29091 | P03410 | Q9UK96 | -0.32013 |
| 29092 | P03410 | Q86V24 | -0.83974 |
| 29093 | P03410 | Q96DN2 | -0.77312 |
| 29094 | P03410 | Q0VAA2 | -0.22741 |
| 29095 | P03410 | Q8N257 | -0.80275 |
| 29096 | P03410 | P25100 | -1.2862  |
| 29097 | P03410 | P24468 | -0.24444 |
| 29098 | P03410 | Q5XG99 | -0.62065 |
| 29099 | P03410 | P07478 | -0.96651 |
| 29100 | P03410 | P21728 | -0.32732 |
| 29101 | P03410 | P10314 | -0.69844 |
| 29102 | P03410 | P04211 | -0.90565 |
| 29103 | P03410 | Q86VR8 | -0.82578 |
| 29104 | P03410 | Q02224 | -0.25549 |
| 29105 | P03410 | Q86WK7 | -0.86266 |
| 29106 | P03410 | A8TX70 | -1.1822  |
| 29107 | P03410 | P22314 | -0.27145 |
| 29108 | P03410 | Q8WWZ3 | -0.54895 |

|       |        |        |          |
|-------|--------|--------|----------|
| 29109 | P03410 | P49286 | -1.3266  |
| 29110 | P03410 | Q9Y5L3 | -1.1898  |
| 29111 | P03410 | Q96L46 | -0.23473 |
| 29112 | P03410 | Q9GZK6 | -1.153   |
| 29113 | P03410 | Q9Y6N5 | -0.18891 |
| 29114 | P03410 | P0DJJ0 | -0.1892  |
| 29115 | P03410 | Q8N5G2 | -0.61332 |
| 29116 | P03410 | P98161 | -0.22948 |
| 29117 | P03410 | P05181 | -0.4783  |
| 29118 | P03410 | Q8N103 | -0.56845 |
| 29119 | P03410 | Q08334 | -0.43348 |
| 29120 | P03410 | Q9H9V9 | -0.1882  |
| 29121 | P03410 | Q9P2F6 | -1.0747  |
| 29122 | P03410 | Q53RD9 | -1.1655  |
| 29123 | P03410 | Q13224 | -0.27862 |
| 29124 | P03410 | P55851 | -0.34499 |
| 29125 | P03410 | P39210 | -0.4765  |
| 29126 | P03410 | Q9H2Y7 | -0.23796 |
| 29127 | P03410 | Q9HAV0 | -0.25356 |
| 29128 | P03410 | A6NEC2 | -0.74462 |
| 29129 | P03410 | P62820 | -0.53686 |
| 29130 | P03410 | Q70EK9 | -0.77511 |
| 29131 | P03410 | P20848 | -0.676   |
| 29132 | P03410 | Q9Y6U7 | -0.73225 |
| 29133 | P03410 | P02652 | -0.29816 |
| 29134 | P03410 | Q9NYR9 | -0.95754 |
| 29135 | P03410 | P62807 | -0.78432 |
| 29136 | P03410 | Q8N122 | -0.22741 |
| 29137 | P03410 | P01619 | -0.88633 |
| 29138 | P03410 | Q2M2E3 | -1.1444  |
| 29139 | P03410 | Q9Y227 | -0.46468 |
| 29140 | P03410 | Q9H2D1 | -0.36965 |
| 29141 | P03410 | Q86VQ6 | -0.74955 |
| 29142 | P03410 | Q9HCE7 | -0.22741 |
| 29143 | P03410 | Q7L0Q8 | -0.34379 |
| 29144 | P03410 | Q9ULH4 | -0.54113 |
| 29145 | P03410 | Q9BY76 | -0.56534 |
| 29146 | P03410 | Q5T5U3 | -0.23286 |
| 29147 | P03410 | P68400 | -0.88678 |
| 29148 | P03410 | P48506 | -0.44069 |
| 29149 | P03410 | O95084 | -1.1463  |
| 29150 | P03410 | Q9BYS8 | -0.55923 |
| 29151 | P03410 | Q96DX4 | -0.82007 |
| 29152 | P03410 | P20336 | -0.31591 |
| 29153 | P03410 | Q15619 | -1.153   |
| 29154 | P03410 | Q86UD7 | -1.3577  |
| 29155 | P03410 | Q29836 | -0.88938 |
| 29156 | P03410 | Q6NXG1 | -0.52481 |
| 29157 | P03410 | Q13303 | -0.78027 |
| 29158 | P03410 | P51636 | -0.22374 |
| 29159 | P03410 | P48448 | -0.49501 |
| 29160 | P03410 | Q9Y5F8 | -1.0719  |
| 29161 | P03410 | A4D1P6 | -0.22751 |
| 29162 | P03410 | P28562 | -0.24047 |
| 29163 | P03410 | Q96S42 | -0.2576  |
| 29164 | P03410 | Q6IQ55 | -0.71386 |
| 29165 | P03410 | Q95069 | -1.0454  |
| 29166 | P03410 | O75197 | -0.22747 |
| 29167 | P03410 | Q9HBL6 | -0.63308 |
| 29168 | P03410 | Q9NXJ0 | -0.63308 |
| 29169 | P03410 | P55061 | -0.47754 |
| 29170 | P03410 | Q99705 | -1.1484  |
| 29171 | P03410 | Q92963 | -0.47881 |
| 29172 | P03410 | Q9Y466 | -0.22833 |
| 29173 | P03410 | Q92581 | -0.88492 |
| 29174 | P03410 | Q8WW36 | -0.14571 |
| 29175 | P03410 | Q96RI9 | -1.188   |
| 29176 | P03410 | Q15465 | -0.22738 |
| 29177 | P03410 | Q99538 | -0.71033 |
| 29178 | P03410 | Q8WXI8 | -0.59338 |
| 29179 | P03410 | P20936 | -0.22741 |
| 29180 | P03410 | O60687 | -0.26008 |
| 29181 | P03410 | P13473 | -0.69321 |
| 29182 | P03410 | A8MV23 | -0.676   |
| 29183 | P03410 | Q9NVG8 | -1.3577  |
| 29184 | P03410 | Q96M93 | -0.95561 |

|       |        |        |           |
|-------|--------|--------|-----------|
| 29185 | P03410 | Q8N7X0 | -0.50895  |
| 29186 | P03410 | Q9GZV9 | -0.94292  |
| 29187 | P03410 | Q7Z6V5 | -0.25073  |
| 29188 | P03410 | Q9Y257 | -1.0529   |
| 29189 | P03410 | Q9NZN3 | -0.50045  |
| 29190 | P03410 | Q86VL8 | -0.79663  |
| 29191 | P03410 | Q8N3E9 | -0.46277  |
| 29192 | P03410 | P23141 | -0.22716  |
| 29193 | P03410 | P21757 | -0.44568  |
| 29194 | P03410 | Q5T2P9 | -0.97961  |
| 29195 | P03410 | Q86Z23 | -0.88726  |
| 29196 | P03410 | Q6W3E5 | -0.69758  |
| 29197 | P03410 | P11182 | -0.066284 |
| 29198 | P03410 | P41146 | -1.1932   |
| 29199 | P03410 | P05546 | -0.74503  |
| 29200 | P03410 | P13726 | -0.30751  |
| 29201 | P03410 | O95677 | -0.096896 |
| 29202 | P03410 | Q9BTD8 | -0.2921   |
| 29203 | P03410 | O00300 | -0.86769  |
| 29204 | P03410 | P23219 | -0.38868  |
| 29205 | P03410 | Q9NWX5 | -0.2274   |
| 29206 | P03410 | Q9NR81 | -0.33911  |
| 29207 | P03410 | Q8NGK3 | -1.153    |
| 29208 | P03410 | Q9BXR6 | -0.69557  |
| 29209 | P03410 | P22466 | -0.28228  |
| 29210 | P03410 | O95490 | -1.0798   |
| 29211 | P03410 | P04632 | -0.23536  |
| 29212 | P03410 | P08908 | -1.2254   |
| 29213 | P03410 | Q9BXE9 | -1.1586   |
| 29214 | P03410 | Q8WZ94 | -1.153    |
| 29215 | P03410 | Q149N8 | -0.90275  |
| 29216 | P03410 | Q9HC84 | -0.42659  |
| 29217 | P03410 | Q9NR31 | -0.22825  |
| 29218 | P03410 | P56880 | -0.48903  |
| 29219 | P03410 | Q04900 | -1.2886   |
| 29220 | P03410 | Q05193 | -0.2422   |
| 29221 | P03410 | P08962 | -0.59602  |
| 29222 | P03410 | Q6ZUK4 | -0.63308  |
| 29223 | P03410 | P26992 | -0.37996  |
| 29224 | P03410 | Q8N543 | -0.23684  |
| 29225 | P03410 | Q9Y6W5 | -0.12512  |
| 29226 | P03410 | Q9BZJ0 | -0.18016  |
| 29227 | P03410 | Q5T6R2 | -0.18579  |
| 29228 | P03410 | Q9H1P6 | -0.066122 |
| 29229 | P03410 | Q96AC6 | -0.34573  |
| 29230 | P03410 | Q86YV6 | -1.3438   |
| 29231 | P03410 | O60542 | -0.7404   |
| 29232 | P03410 | Q8TE59 | -1.3999   |
| 29233 | P03410 | Q9NRJ4 | -0.22179  |
| 29234 | P03410 | Q86SG3 | -0.98322  |
| 29235 | P03410 | P06865 | -0.36311  |
| 29236 | P03410 | Q6JQN1 | -0.53391  |
| 29237 | P03410 | Q13641 | -0.85001  |
| 29238 | P03410 | P22612 | -0.81144  |
| 29239 | P03410 | Q99489 | -0.42973  |
| 29240 | P03410 | O75083 | -0.30683  |
| 29241 | P03410 | Q16663 | -1.1028   |
| 29242 | P03410 | Q15506 | -0.21132  |
| 29243 | P03410 | Q9HC98 | -0.26071  |
| 29244 | P03410 | Q14643 | -0.23452  |
| 29245 | P03410 | Q96R54 | -1.153    |
| 29246 | P03410 | Q04741 | -0.2267   |
| 29247 | P03410 | Q9UDY8 | -0.22744  |
| 29248 | P03410 | P13798 | -0.17904  |
| 29249 | P03410 | Q6ZMY6 | -0.2313   |
| 29250 | P03410 | P22301 | -0.33952  |
| 29251 | P03410 | P01876 | -0.23451  |
| 29252 | P03410 | Q13410 | -1.4693   |
| 29253 | P03410 | Q8IWZ5 | -0.39568  |
| 29254 | P03410 | Q96KC8 | -0.24147  |
| 29255 | P03410 | P43308 | -0.60787  |
| 29256 | P03410 | Q6F5E8 | -0.22003  |
| 29257 | P03410 | Q96JT2 | -0.67522  |
| 29258 | P03410 | Q9UPT6 | -0.22416  |
| 29259 | P03410 | Q9Y6Q9 | -0.38921  |
| 29260 | P03410 | Q13698 | -0.70741  |

|       |        |        |          |
|-------|--------|--------|----------|
| 29261 | P03410 | Q15761 | -0.96713 |
| 29262 | P03410 | Q7Z3J2 | -0.63308 |
| 29263 | P03410 | Q96J01 | -0.22714 |
| 29264 | P03410 | Q9UJX0 | -0.48631 |
| 29265 | P03410 | P55899 | -0.82422 |
| 29266 | P03410 | Q8N4S7 | -0.63308 |
| 29267 | P03410 | Q9UQF0 | -0.60126 |
| 29268 | P03410 | Q9H2A7 | -1.2494  |
| 29269 | P03410 | Q5T4W7 | -0.90322 |
| 29270 | P03410 | Q5XG92 | -0.69784 |
| 29271 | P03410 | Q9UDX5 | -0.40967 |
| 29272 | P03410 | Q9NYY3 | -0.3702  |
| 29273 | P03410 | O60636 | -0.78272 |
| 29274 | P03410 | Q6UWN8 | -0.74696 |
| 29275 | P03410 | Q9Y5H3 | -1.0719  |
| 29276 | P03410 | P55201 | -0.22394 |
| 29277 | P03410 | P10301 | -0.6426  |
| 29278 | P03410 | P23945 | -0.59842 |
| 29279 | P03410 | Q96QZ0 | -0.80176 |
| 29280 | P03410 | O95467 | -0.7499  |
| 29281 | P03410 | Q9UKN7 | -0.33436 |
| 29282 | P03410 | O75716 | -0.59705 |
| 29283 | P03410 | P0C7N5 | -1.153   |
| 29284 | P03410 | P55103 | -0.60178 |
| 29285 | P03410 | P42262 | -0.96483 |
| 29286 | P03410 | Q15800 | -1.0141  |
| 29287 | P03410 | Q9NVI7 | -1.0491  |
| 29288 | P03410 | O95208 | -0.10849 |
| 29289 | P03410 | P46095 | -1.2793  |
| 29290 | P03410 | Q9UBR1 | -0.11182 |
| 29291 | P03410 | Q8IZP7 | -0.81727 |
| 29292 | P03410 | Q8TD30 | -0.19455 |
| 29293 | P03410 | Q9P1Z0 | -0.21304 |
| 29294 | P03410 | P82987 | -1.1407  |
| 29295 | P03410 | Q6P5Q4 | -0.20846 |
| 29296 | P03410 | Q9GZM6 | -1.153   |
| 29297 | P03410 | Q86X19 | -0.73951 |
| 29298 | P03410 | P0DJR0 | -0.86337 |
| 29299 | P03410 | Q86XR7 | -0.19857 |
| 29300 | P03410 | Q86WK6 | -1.3491  |
| 29301 | P03410 | Q9P232 | -0.42393 |
| 29302 | P03410 | Q9H244 | -0.83917 |
| 29303 | P03410 | P21453 | -0.7774  |
| 29304 | P03410 | Q9Y2Q0 | -0.6087  |
| 29305 | P03410 | O95484 | -0.48903 |
| 29306 | P03410 | P53708 | -0.89315 |
| 29307 | P03410 | Q969S0 | -0.33358 |
| 29308 | P03410 | Q6Q8B3 | -0.63308 |
| 29309 | P03410 | Q96JJ7 | -0.7787  |
| 29310 | P03410 | Q5VTJ3 | -0.63308 |
| 29311 | P03410 | Q05707 | -1.1285  |
| 29312 | P03410 | P13725 | -0.49926 |
| 29313 | P03410 | Q9Y2G3 | -0.69629 |
| 29314 | P03410 | P10147 | -0.30773 |
| 29315 | P03410 | Q9UJS0 | -0.44546 |
| 29316 | P03410 | Q9H295 | -0.35266 |
| 29317 | P03410 | Q8IZJ3 | -0.97602 |
| 29318 | P03410 | Q9HCS2 | -0.72543 |
| 29319 | P03410 | Q8IW00 | -0.797   |
| 29320 | P03410 | P32321 | -0.26627 |
| 29321 | P03410 | O14559 | -0.29236 |
| 29322 | P03410 | O00258 | -0.34259 |
| 29323 | P03410 | P06315 | -0.90565 |
| 29324 | P03410 | Q15389 | -0.86496 |
| 29325 | P03410 | P01817 | -0.90565 |
| 29326 | P03410 | P51570 | -0.62726 |
| 29327 | P03410 | Q0WX57 | -0.51062 |
| 29328 | P03410 | P01599 | -0.90565 |
| 29329 | P03410 | Q9Y6R7 | -0.21654 |
| 29330 | P03410 | P48651 | -0.82682 |
| 29331 | P03410 | Q8N5C1 | -0.63308 |
| 29332 | P03410 | Q6NUI2 | -0.60189 |
| 29333 | P03410 | Q8N413 | -0.51629 |
| 29334 | P03410 | Q7Z443 | -0.71623 |
| 29335 | P03410 | Q8IZ08 | -1.2185  |
| 29336 | P03410 | Q86TM3 | -0.87541 |

|       |        |        |          |
|-------|--------|--------|----------|
| 29337 | P03410 | A6NMZ2 | -0.25404 |
| 29338 | P03410 | Q9UIW0 | -0.22727 |
| 29339 | P03410 | Q14680 | -0.63152 |
| 29340 | P03410 | Q96DT7 | -0.22485 |
| 29341 | P03410 | Q9P2J2 | -0.97222 |
| 29342 | P03410 | O75310 | -0.86637 |
| 29343 | P03410 | Q9ULC3 | -0.95749 |
| 29344 | P03410 | P04049 | -0.3606  |
| 29345 | P03410 | Q8NFU7 | -0.27542 |
| 29346 | P03410 | O60603 | -0.2276  |
| 29347 | P03410 | Q15057 | -0.97961 |
| 29348 | P03410 | Q6ZT98 | -0.62241 |
| 29349 | P03410 | Q9HCK4 | -0.51003 |
| 29350 | P03410 | Q969Q1 | -0.70764 |
| 29351 | P03410 | P58753 | -0.2156  |
| 29352 | P03410 | Q14756 | -1.0276  |
| 29353 | P03410 | P00966 | -0.1925  |
| 29354 | P03410 | Q53EL9 | -0.8075  |
| 29355 | P03410 | Q99929 | -0.23915 |
| 29356 | P03410 | Q9HC57 | -0.62813 |
| 29357 | P03410 | A6NHC0 | -0.72079 |
| 29358 | P03410 | P28566 | -1.3104  |
| 29359 | P03410 | Q9H3S4 | -0.64632 |
| 29360 | P03410 | P51452 | -0.28255 |
| 29361 | P03410 | Q643R3 | -0.80329 |
| 29362 | P03410 | Q6ZNI0 | -0.53223 |
| 29363 | P03410 | O95727 | -0.85745 |
| 29364 | P03410 | Q12955 | -0.22742 |
| 29365 | P03410 | Q14514 | -1.4825  |
| 29366 | P03410 | Q96AY4 | -0.2274  |
| 29367 | P03410 | P52735 | -0.22741 |
| 29368 | P03410 | Q8WUS8 | -1.242   |
| 29369 | P03410 | P09210 | -0.2251  |
| 29370 | P03410 | Q8NGY0 | -1.153   |
| 29371 | P03410 | Q9NQT8 | -0.24862 |
| 29372 | P03410 | Q5SZQ8 | -0.46936 |
| 29373 | P03410 | P55289 | -1.0468  |
| 29374 | P03410 | Q9UL54 | -0.80494 |
| 29375 | P03410 | Q9NQZ6 | -0.10972 |
| 29376 | P03410 | P30461 | -0.88938 |
| 29377 | P03410 | Q9Y236 | -0.14074 |
| 29378 | P03410 | Q9BYM8 | -0.22665 |
| 29379 | P03410 | P06241 | -0.39381 |
| 29380 | P03410 | Q9Y2Y8 | -0.2316  |
| 29381 | P03410 | P01567 | -0.61117 |
| 29382 | P03410 | Q86T13 | -0.63321 |
| 29383 | P03410 | P22059 | -0.22757 |
| 29384 | P03410 | Q14554 | -0.46461 |
| 29385 | P03410 | Q7Z7G0 | -0.88782 |
| 29386 | P03410 | Q9UHB6 | -0.22645 |
| 29387 | P03410 | Q8NET8 | -0.80855 |
| 29388 | P03410 | Q96NC0 | -0.24184 |
| 29389 | P03410 | O95396 | -0.0677  |
| 29390 | P03410 | Q8WXI7 | -0.98155 |
| 29391 | P03410 | P05106 | -0.35459 |
| 29392 | P03410 | Q6VVB1 | -0.21698 |
| 29393 | P03410 | Q02446 | -0.10952 |
| 29394 | P03410 | Q13304 | -1.2769  |
| 29395 | P03410 | P16615 | -0.94951 |
| 29396 | P03410 | P18627 | -0.71501 |
| 29397 | P03410 | Q7Z5A4 | -1.3874  |
| 29398 | P03410 | Q7RTS3 | -0.22958 |
| 29399 | P03410 | Q99435 | -0.22746 |
| 29400 | P03410 | Q09019 | -0.22788 |
| 29401 | P03410 | Q9H300 | -0.68688 |
| 29402 | P03410 | P98066 | -0.47812 |
| 29403 | P03410 | Q02846 | -1.5531  |
| 29404 | P03410 | P57768 | -0.31148 |
| 29405 | P03410 | Q9UBV7 | -0.50814 |
| 29406 | P03410 | Q15835 | -1.1571  |
| 29407 | P03410 | P12273 | -0.7626  |
| 29408 | P03410 | O75319 | -0.57803 |
| 29409 | P03410 | O76070 | -0.17843 |
| 29410 | P03410 | P40259 | -0.55776 |
| 29411 | P03410 | Q3YEC7 | -0.22789 |
| 29412 | P03410 | Q7L1T6 | -0.4157  |



|       |        |        |           |
|-------|--------|--------|-----------|
| 29413 | P03410 | P19961 | -0.79875  |
| 29414 | P03410 | Q9UKG9 | -0.58337  |
| 29415 | P03410 | Q9Y2S2 | -0.41042  |
| 29416 | P03410 | Q9Y5E6 | -1.1542   |
| 29417 | P03410 | Q8NC01 | -1.1034   |
| 29418 | P03410 | P27824 | -0.20185  |
| 29419 | P03410 | Q96FE5 | -0.60139  |
| 29420 | P03410 | P15309 | -1.3218   |
| 29421 | P03410 | Q13206 | -0.73106  |
| 29422 | P03410 | Q496J9 | -0.72937  |
| 29423 | P03410 | Q96JP9 | -1.1351   |
| 29424 | P03410 | Q8TF17 | -0.22585  |
| 29425 | P03410 | Q9H0M0 | -0.22741  |
| 29426 | P03410 | P10966 | -0.77372  |
| 29427 | P03410 | Q8IWY4 | -0.82992  |
| 29428 | P03410 | Q06413 | -0.086215 |
| 29429 | P03410 | Q9P225 | -0.34231  |
| 29430 | P03410 | Q96FL9 | -0.43111  |
| 29431 | P03410 | Q9GZZ9 | -0.18778  |
| 29432 | P03410 | Q92478 | -0.83058  |
| 29433 | P03410 | Q9NXC5 | -0.22611  |
| 29434 | P03410 | P05000 | -0.65471  |
| 29435 | P03410 | Q9Y5N1 | -1.3574   |
| 29436 | P03410 | Q5T700 | -0.63308  |
| 29437 | P03410 | Q1MX18 | -0.33517  |
| 29438 | P03410 | Q9H6D3 | -0.63308  |
| 29439 | P03410 | P10276 | -0.23406  |
| 29440 | P03410 | Q9P035 | -1.2372   |
| 29441 | P03410 | P23942 | -0.80264  |
| 29442 | P03410 | A8MW99 | -0.41672  |
| 29443 | P03410 | Q8IZC4 | -0.55629  |
| 29444 | P03410 | Q9Y5F1 | -1.1668   |
| 29445 | P03410 | Q9P0N9 | -0.49627  |
| 29446 | P03410 | Q9UQ07 | -1.1443   |
| 29447 | P03410 | A2A2Z9 | -0.22732  |
| 29448 | P03410 | P32856 | -0.28015  |
| 29449 | P03410 | Q07617 | -0.74834  |
| 29450 | P03410 | P30484 | -0.88938  |
| 29451 | P03410 | Q6ZNL0 | -0.63702  |
| 29452 | P03410 | A1A5C7 | -0.77381  |
| 29453 | P03410 | P11216 | -0.18745  |
| 29454 | P03410 | O75882 | -1.49     |
| 29455 | P03410 | Q14773 | -1.5457   |
| 29456 | P03410 | Q68D86 | -0.13693  |
| 29457 | P03410 | P14373 | -0.24732  |
| 29458 | P03410 | Q8IWZ4 | -0.39568  |
| 29459 | P03410 | Q96RI8 | -1.188    |
| 29460 | P03410 | Q8N2Q7 | -0.31799  |
| 29461 | P03410 | Q1EHB4 | -1.0025   |
| 29462 | P03410 | Q14983 | -0.43631  |
| 29463 | P03410 | Q8IUE6 | -0.80275  |
| 29464 | P03410 | P30273 | -0.64509  |
| 29465 | P03410 | Q8IZN3 | -0.86764  |
| 29466 | P03410 | P06753 | -0.17972  |
| 29467 | P03410 | Q6W5P4 | -1.0232   |
| 29468 | P03410 | O76082 | -0.3805   |
| 29469 | P03410 | Q8WUP2 | -0.17777  |
| 29470 | P03410 | Q86YB7 | -0.2864   |
| 29471 | P03410 | Q86SE5 | -0.67771  |
| 29472 | P03410 | Q8NGE3 | -1.153    |
| 29473 | P03410 | Q86XE0 | -0.093779 |
| 29474 | P03410 | Q96JA4 | -0.63308  |
| 29475 | P03410 | Q8N7C3 | -0.33308  |
| 29476 | P03410 | Q9UHQ9 | -0.7658   |
| 29477 | P03410 | Q96KK3 | -0.39599  |
| 29478 | P03410 | Q9GZP1 | -0.92297  |
| 29479 | P03410 | Q9H3Y6 | -1.3339   |
| 29480 | P03410 | Q8WXD9 | -0.2274   |
| 29481 | P03410 | Q13636 | -0.91165  |
| 29482 | P03410 | Q7Z2W7 | -0.76987  |
| 29483 | P03410 | O75897 | -0.21189  |
| 29484 | P03410 | Q5JW98 | -0.63308  |
| 29485 | P03410 | Q8WUG5 | -0.98414  |
| 29486 | P03410 | Q6UXM1 | -0.63308  |
| 29487 | P03410 | D6RBM5 | -0.28671  |
| 29488 | P03410 | Q67FW5 | -0.18581  |

|       |        |        |          |
|-------|--------|--------|----------|
| 29489 | P03410 | Q03135 | -0.22557 |
| 29490 | P03410 | P23515 | -0.4378  |
| 29491 | P03410 | Q9Y258 | -0.90405 |
| 29492 | P03410 | Q9Y5F3 | -1.0719  |
| 29493 | P03410 | Q8NEW0 | -0.24735 |
| 29494 | P03410 | O60674 | -0.28223 |
| 29495 | P03410 | P24752 | -0.19646 |
| 29496 | P03410 | Q6UWL2 | -0.70406 |
| 29497 | P03410 | Q06055 | -0.60041 |
| 29498 | P03410 | O43930 | -1.3438  |
| 29499 | P03410 | Q8NHG8 | -0.43883 |
| 29500 | P03410 | P35240 | -0.23772 |
| 29501 | P03410 | Q8NGR9 | -1.153   |
| 29502 | P03410 | Q01459 | -0.22787 |
| 29503 | P03410 | Q8IWR1 | -0.91021 |
| 29504 | P03410 | Q8NGE9 | -1.153   |
| 29505 | P03410 | Q9NY25 | -0.69524 |
| 29506 | P03410 | P55055 | -0.23457 |
| 29507 | P03410 | P47884 | -1.2803  |
| 29508 | P03410 | Q9UJV9 | -0.81878 |
| 29509 | P03410 | Q9UPQ3 | -1.5536  |
| 29510 | P03410 | P04201 | -0.81342 |
| 29511 | P03410 | P49961 | -1.6094  |
| 29512 | P03410 | P61812 | -0.22741 |
| 29513 | P03410 | Q9H992 | -0.49304 |
| 29514 | P03410 | Q8N2C3 | -0.26256 |
| 29515 | P03410 | P15085 | -1.322   |
| 29516 | P03410 | P48764 | -0.52051 |
| 29517 | P03410 | Q14088 | -0.35054 |
| 29518 | P03410 | F2Z398 | -0.48792 |
| 29519 | P03410 | P06731 | -0.39071 |
| 29520 | P03410 | Q9NP60 | -0.94485 |
| 29521 | P03410 | Q00584 | -0.82804 |
| 29522 | P03410 | P51688 | -0.41972 |
| 29523 | P03410 | P48507 | -0.1902  |
| 29524 | P03410 | Q5VW22 | -0.97961 |
| 29525 | P03410 | Q15546 | -0.92025 |
| 29526 | P03410 | Q3MIN7 | -0.67385 |
| 29527 | P03410 | Q5W150 | -0.19355 |
| 29528 | P03410 | Q9Y691 | -1.0007  |
| 29529 | P03410 | Q9NWH7 | -1.3274  |
| 29530 | P03410 | Q32NB8 | -0.73399 |
| 29531 | P03410 | Q96KV6 | -0.63308 |
| 29532 | P03410 | O75061 | -0.22604 |
| 29533 | P03410 | P55196 | -0.22616 |
| 29534 | P03410 | P18825 | -0.42893 |
| 29535 | P03410 | Q9HAY6 | -0.35268 |
| 29536 | P03410 | Q7Z4H4 | -0.71781 |
| 29537 | P03410 | P07988 | -0.58616 |
| 29538 | P03410 | Q9UBD9 | -0.29619 |
| 29539 | P03410 | Q9BXJ8 | -0.61257 |
| 29540 | P03410 | Q8IZI9 | -0.76657 |
| 29541 | P03410 | Q02363 | -0.22766 |
| 29542 | P03410 | P34913 | -0.34506 |
| 29543 | P03410 | Q9H015 | -0.47087 |
| 29544 | P03410 | O43739 | -0.29328 |
| 29545 | P03410 | Q00533 | -1.6602  |
| 29546 | P03410 | P08247 | -0.5012  |
| 29547 | P03410 | P08700 | -0.49983 |
| 29548 | P03410 | B2RNN3 | -0.81484 |
| 29549 | P03410 | Q8N456 | -0.27197 |
| 29550 | P03410 | Q9HBE5 | -0.65915 |
| 29551 | P03410 | Q13823 | -0.37894 |
| 29552 | P03410 | Q6GYQ0 | -0.18578 |
| 29553 | P03410 | P00414 | -0.37069 |
| 29554 | P03410 | Q01814 | -0.32454 |
| 29555 | P03410 | P01036 | -0.8833  |
| 29556 | P03410 | Q9H112 | -0.32215 |
| 29557 | P03410 | Q9NY91 | -0.78143 |
| 29558 | P03410 | P63127 | -0.52549 |
| 29559 | P03410 | Q8TDI0 | -0.41808 |
| 29560 | P03410 | P68371 | -0.10809 |
| 29561 | P03410 | P32246 | -0.76817 |
| 29562 | P03410 | Q8IX18 | -0.78857 |
| 29563 | P03410 | Q96RQ3 | -0.78739 |
| 29564 | P03410 | Q7Z5Y6 | -0.94216 |

|       |        |        |           |
|-------|--------|--------|-----------|
| 29565 | P03410 | Q96EM0 | -0.20409  |
| 29566 | P03410 | O76036 | -1.0047   |
| 29567 | P03410 | Q8TCT0 | -0.91771  |
| 29568 | P03410 | Q6UB35 | -0.70522  |
| 29569 | P03410 | P30411 | -0.55832  |
| 29570 | P03410 | Q7Z444 | -1.2887   |
| 29571 | P03410 | Q95365 | -0.88938  |
| 29572 | P03410 | Q7Z695 | -1.3286   |
| 29573 | P03410 | Q8NGJ6 | -1.153    |
| 29574 | P03410 | P01889 | -0.94184  |
| 29575 | P03410 | Q96HR9 | -0.63308  |
| 29576 | P03410 | Q6DHV7 | -0.17673  |
| 29577 | P03410 | P62191 | -0.31027  |
| 29578 | P03410 | Q8WZ92 | -1.153    |
| 29579 | P03410 | Q9NR30 | -0.52684  |
| 29580 | P03410 | Q9Y6T7 | -1.0936   |
| 29581 | P03410 | Q8NH87 | -1.153    |
| 29582 | P03410 | Q8NG92 | -1.153    |
| 29583 | P03410 | A6BM72 | -0.68413  |
| 29584 | P03410 | O60844 | -0.57641  |
| 29585 | P03410 | Q9H672 | -0.3944   |
| 29586 | P03410 | Q9HAU8 | -0.72947  |
| 29587 | P03410 | Q96E17 | -0.94446  |
| 29588 | P03410 | Q6ISS4 | -0.71003  |
| 29589 | P03410 | Q9NRY4 | -0.37053  |
| 29590 | P03410 | O43174 | -0.74209  |
| 29591 | P03410 | Q9NY26 | -1.0048   |
| 29592 | P03410 | Q96PS8 | -0.81233  |
| 29593 | P03410 | P86397 | -0.46805  |
| 29594 | P03410 | P24386 | -0.65263  |
| 29595 | P03410 | Q9UHJ6 | -0.73757  |
| 29596 | P03410 | Q9Y3Q7 | -1.3791   |
| 29597 | P03410 | Q9H2Y9 | -0.76284  |
| 29598 | P03410 | O43854 | -1.2503   |
| 29599 | P03410 | P13497 | -1.3153   |
| 29600 | P03410 | Q12974 | -0.64078  |
| 29601 | P03410 | P58397 | -1.3999   |
| 29602 | P03410 | Q9UQ52 | -0.39546  |
| 29603 | P03410 | Q00973 | -0.58911  |
| 29604 | P03410 | Q8NBB2 | -0.051622 |
| 29605 | P03410 | P42701 | -0.63355  |
| 29606 | P03410 | P43034 | -0.2314   |
| 29607 | P03410 | Q9NQW5 | -0.24266  |
| 29608 | P03410 | Q5TON5 | -0.22741  |
| 29609 | P03410 | Q9UBX5 | -0.42938  |
| 29610 | P03410 | Q5JUR7 | -0.058117 |
| 29611 | P03410 | P67812 | -0.76364  |
| 29612 | P03410 | P31639 | -0.66721  |
| 29613 | P03410 | Q8TAX0 | -0.1689   |
| 29614 | P03410 | Q8N9B8 | -0.48688  |
| 29615 | P03410 | Q5VST9 | -1.024    |
| 29616 | P03410 | Q9UJ99 | -1.0719   |
| 29617 | P03410 | Q01433 | -0.14888  |
| 29618 | P03410 | Q92519 | -0.2557   |
| 29619 | P03410 | A6NMZ5 | -1.153    |
| 29620 | P03410 | P06028 | -0.99952  |
| 29621 | P03410 | Q8NGZ3 | -1.153    |
| 29622 | P03410 | P01767 | -0.90565  |
| 29623 | P03410 | A6NHY2 | -0.22741  |
| 29624 | P03410 | P06317 | -0.88633  |
| 29625 | P03410 | Q9NYP7 | -0.098399 |
| 29626 | P03410 | Q8NG06 | -0.39568  |
| 29627 | P03410 | Q8N165 | -1.1861   |
| 29628 | P03410 | Q9HBI0 | -0.18553  |
| 29629 | P03410 | Q9H4G0 | -0.2767   |
| 29630 | P03410 | P00751 | -1.3418   |
| 29631 | P03410 | Q9Y272 | -0.86824  |
| 29632 | P03410 | Q8TEJ3 | -0.22725  |
| 29633 | P03410 | Q96T75 | -0.19891  |
| 29634 | P03410 | Q8IZY2 | -0.84439  |
| 29635 | P03410 | Q92968 | -0.2274   |
| 29636 | P03410 | Q6ZW31 | -0.67199  |
| 29637 | P03410 | Q16099 | -0.74208  |
| 29638 | P03410 | P78540 | -0.20209  |
| 29639 | P03410 | Q9UDX4 | -0.9136   |
| 29640 | P03410 | Q8N323 | -0.71003  |

|       |        |        |          |
|-------|--------|--------|----------|
| 29641 | P03410 | Q9C0I9 | -0.228   |
| 29642 | P03410 | Q8TAI7 | -1.0506  |
| 29643 | P03410 | Q9UGM3 | -0.2732  |
| 29644 | P03410 | Q0P651 | -0.71003 |
| 29645 | P03410 | P49747 | -0.6094  |
| 29646 | P03410 | P27448 | -0.85088 |
| 29647 | P03410 | Q8N8I0 | -0.22408 |
| 29648 | P03410 | P0CE71 | -0.22136 |
| 29649 | P03410 | Q01650 | -0.88369 |
| 29650 | P03410 | P43005 | -0.76785 |
| 29651 | P03410 | P0CV99 | -0.5628  |
| 29652 | P03410 | B6A8C7 | -0.63308 |
| 29653 | P03410 | P63132 | -0.26043 |
| 29654 | P03410 | Q96T83 | -0.38002 |
| 29655 | P03410 | Q13564 | -0.20265 |
| 29656 | P03410 | Q9Y5G2 | -1.0719  |
| 29657 | P03410 | Q6ZNR0 | -0.62852 |
| 29658 | P03410 | Q10471 | -0.86782 |
| 29659 | P03410 | Q6UWY2 | -1.3874  |
| 29660 | P03410 | Q9H903 | -0.71441 |
| 29661 | P03410 | P27918 | -0.84216 |
| 29662 | P03410 | Q9NRF2 | -0.22741 |
| 29663 | P03410 | Q95620 | -0.4387  |
| 29664 | P03410 | Q5M8T2 | -0.56102 |
| 29665 | P03410 | Q86Y29 | -0.71003 |
| 29666 | P03410 | P06734 | -1.3774  |
| 29667 | P03410 | Q8WXI2 | -0.22741 |
| 29668 | P03410 | Q6JEL2 | -0.21302 |
| 29669 | P03410 | Q96BS2 | -0.22741 |
| 29670 | P03410 | P05023 | -0.38256 |
| 29671 | P03410 | Q8WV93 | -0.50032 |
| 29672 | P03410 | O75439 | -0.59244 |
| 29673 | P03410 | P49441 | -0.3232  |
| 29674 | P03410 | P57739 | -0.4382  |
| 29675 | P03410 | P09884 | -0.41867 |
| 29676 | P03410 | Q9UPY5 | -0.77395 |
| 29677 | P03410 | Q15843 | -0.22325 |
| 29678 | P03410 | P16188 | -0.69714 |
| 29679 | P03410 | Q8WWA0 | -1.0822  |
| 29680 | P03410 | Q96EW2 | -0.15664 |
| 29681 | P03410 | P15531 | -0.38699 |
| 29682 | P03410 | Q8WZ04 | -0.36038 |
| 29683 | P03410 | Q5J8M3 | -0.55282 |
| 29684 | P03410 | Q17R98 | -0.22726 |
| 29685 | P03410 | Q8IV04 | -1.3577  |
| 29686 | P03410 | C9J798 | -0.89809 |
| 29687 | P03410 | Q7Z3S7 | -0.86957 |
| 29688 | P03410 | Q9H4A4 | -0.94393 |
| 29689 | P03410 | Q7Z6I6 | -1.0429  |
| 29690 | P03410 | Q8TDW0 | -0.7715  |
| 29691 | P03410 | Q86WN1 | -0.2274  |
| 29692 | P03410 | Q9UBH6 | -1.065   |
| 29693 | P03410 | Q9UMX6 | -0.39564 |
| 29694 | P03410 | P20337 | -0.82859 |
| 29695 | P03410 | Q86YC3 | -0.63308 |
| 29696 | P03410 | O95750 | -0.39511 |
| 29697 | P03410 | A5X5Y0 | -0.89913 |
| 29698 | P03410 | Q9Y365 | -0.3009  |
| 29699 | P03410 | P51911 | -0.2122  |
| 29700 | P03410 | Q9NYN1 | -1.1785  |
| 29701 | P03410 | P36507 | -0.22799 |
| 29702 | P03410 | Q96LJ7 | -0.80201 |
| 29703 | P03410 | Q9NU19 | -1.3577  |
| 29704 | P03410 | Q6UXV0 | -0.77947 |
| 29705 | P03410 | O00453 | -0.38542 |
| 29706 | P03410 | P13797 | -0.22752 |
| 29707 | P03410 | P50553 | -0.88102 |
| 29708 | P03410 | P20711 | -0.82606 |
| 29709 | P03410 | P51589 | -0.72817 |
| 29710 | P03410 | Q6DN14 | -0.6075  |
| 29711 | P03410 | Q9NYA1 | -0.28009 |
| 29712 | P03410 | Q96CP6 | -0.63308 |
| 29713 | P03410 | P0CI26 | -0.39568 |
| 29714 | P03410 | P08571 | -0.42527 |
| 29715 | P03410 | Q9BXR5 | -1.0673  |
| 29716 | P03410 | P00736 | -1.3797  |

|       |        |        |           |
|-------|--------|--------|-----------|
| 29717 | P03410 | P21549 | -0.19195  |
| 29718 | P03410 | P01133 | -0.82319  |
| 29719 | P03410 | Q8N386 | -0.63308  |
| 29720 | P03410 | P51784 | -0.58206  |
| 29721 | P03410 | Q9H6R0 | -0.27796  |
| 29722 | P03410 | Q16570 | -1.1183   |
| 29723 | P03410 | Q9UQ90 | -0.69414  |
| 29724 | P03410 | Q86UR5 | -0.22742  |
| 29725 | P03410 | Q4G0M1 | -0.71003  |
| 29726 | P03410 | Q5TF58 | -0.019596 |
| 29727 | P03410 | Q8NG04 | -0.60965  |
| 29728 | P03410 | Q92551 | -0.54712  |
| 29729 | P03410 | Q9Y576 | -0.6924   |
| 29730 | P03410 | P07550 | -0.36168  |
| 29731 | P03410 | P60893 | -1.2185   |
| 29732 | P03410 | Q7L7X3 | -0.71203  |
| 29733 | P03410 | P58170 | -1.153    |
| 29734 | P03410 | P57057 | -0.58761  |
| 29735 | P03410 | P22760 | -0.7154   |
| 29736 | P03410 | P35612 | -0.10979  |
| 29737 | P03410 | Q9GZP0 | -0.90095  |
| 29738 | P03410 | Q96QD5 | -0.20079  |
| 29739 | P03410 | Q16555 | -0.18935  |
| 29740 | P03410 | O43184 | -0.78125  |
| 29741 | P03410 | Q9Y519 | -0.63308  |
| 29742 | P03410 | P55040 | -0.4542   |
| 29743 | P03410 | Q9HCN4 | -0.93232  |
| 29744 | P03410 | P98082 | -0.22553  |
| 29745 | P03410 | Q86YT9 | -0.74802  |
| 29746 | P03410 | O95837 | -1.047    |
| 29747 | P03410 | Q8TDB8 | -0.8199   |
| 29748 | P03410 | Q9ULB4 | -1.0208   |
| 29749 | P03410 | Q6GMV3 | -0.37124  |
| 29750 | P03410 | P12838 | -0.79369  |
| 29751 | P03410 | Q60I27 | -0.88323  |
| 29752 | P03410 | Q07654 | -0.88591  |
| 29753 | P03410 | Q8TBF4 | -0.25096  |
| 29754 | P03410 | P18089 | -0.58235  |
| 29755 | P03410 | Q9HDC5 | -0.81705  |
| 29756 | P03410 | Q9Y3M8 | -0.23143  |
| 29757 | P03410 | Q9BZ72 | -1.2123   |
| 29758 | P03410 | Q9H228 | -1.1163   |
| 29759 | P03410 | Q6V0I7 | -0.42836  |
| 29760 | P03410 | O43488 | -0.22344  |
| 29761 | P03410 | Q6ZWK6 | -1.923    |
| 29762 | P03410 | P29466 | -0.22732  |
| 29763 | P03410 | P14923 | -0.87094  |
| 29764 | P03410 | P15169 | -1.3264   |
| 29765 | P03410 | P04271 | -0.82268  |
| 29766 | P03410 | Q9Y4A9 | -1.153    |
| 29767 | P03410 | Q99720 | -0.58589  |
| 29768 | P03410 | Q1L6U9 | -0.71003  |
| 29769 | P03410 | O75015 | -0.90795  |
| 29770 | P03410 | P00918 | -0.19063  |
| 29771 | P03410 | Q8NFI4 | -0.22706  |
| 29772 | P03410 | Q969G6 | -0.60882  |
| 29773 | P03410 | Q01415 | -0.78684  |
| 29774 | P03410 | O15085 | -0.23919  |
| 29775 | P03410 | Q86UU9 | -0.74448  |
| 29776 | P03410 | Q9Y496 | -0.32553  |
| 29777 | P03410 | Q5T2Q4 | -0.067629 |
| 29778 | P03410 | Q92904 | -0.29805  |
| 29779 | P03410 | Q14376 | -0.37392  |
| 29780 | P03410 | Q8TDW4 | -0.61145  |
| 29781 | P03410 | P00995 | -0.19782  |
| 29782 | P03410 | Q9UJQ7 | -0.074264 |
| 29783 | P03410 | Q29983 | -0.55549  |
| 29784 | P03410 | O75388 | -1.4221   |
| 29785 | P03410 | O14936 | -0.23274  |
| 29786 | P03410 | O14986 | -0.36656  |
| 29787 | P03410 | Q13671 | -0.1803   |
| 29788 | P03410 | Q8N7U6 | -0.22754  |
| 29789 | P03410 | P60880 | -0.19689  |
| 29790 | P03410 | Q9NZV6 | -0.28362  |
| 29791 | P03410 | Q8IXZ2 | -0.17579  |
| 29792 | P03410 | Q9H3U7 | -1.1809   |

|       |        |        |           |
|-------|--------|--------|-----------|
| 29793 | P03410 | Q8TAG5 | -0.71003  |
| 29794 | P03410 | Q9NW61 | -0.19565  |
| 29795 | P03410 | P11509 | -0.73018  |
| 29796 | P03410 | Q9NPC8 | -0.23445  |
| 29797 | P03410 | Q8N119 | -1.3821   |
| 29798 | P03410 | A1L390 | -0.43168  |
| 29799 | P03410 | Q9BZM4 | -0.23654  |
| 29800 | P03410 | Q96M94 | -0.20542  |
| 29801 | P03410 | Q9Y2I9 | -0.95617  |
| 29802 | P03410 | Q9Y4B5 | -0.16198  |
| 29803 | P03410 | P12111 | -0.98937  |
| 29804 | P03410 | Q5VVW2 | -0.75562  |
| 29805 | P03410 | P13224 | -0.56073  |
| 29806 | P03410 | Q8NAN2 | -0.63308  |
| 29807 | P03410 | Q9Y6N8 | -1.0468   |
| 29808 | P03410 | Q94808 | -0.078152 |
| 29809 | P03410 | A6NJT0 | -0.20846  |
| 29810 | P03410 | Q9P0W0 | -0.38327  |
| 29811 | P03410 | Q9Y242 | -0.2135   |
| 29812 | P03410 | Q9ULK0 | -0.73947  |
| 29813 | P03410 | Q9NUJ7 | -0.34968  |
| 29814 | P03410 | Q86VZ6 | -0.22706  |
| 29815 | P03410 | P23276 | -0.67328  |
| 29816 | P03410 | P09486 | -0.30614  |
| 29817 | P03410 | P29536 | -0.1788   |
| 29818 | P03410 | Q13434 | -0.46167  |
| 29819 | P03410 | Q6P4I2 | -0.17411  |
| 29820 | P03410 | Q9UNL2 | -0.56885  |
| 29821 | P03410 | Q9BU79 | -0.63308  |
| 29822 | P03410 | Q6P9F7 | -0.63308  |
| 29823 | P03410 | A6NI61 | -0.63308  |
| 29824 | P03410 | Q9Y3P9 | -0.22912  |
| 29825 | P03410 | Q95696 | -0.22309  |
| 29826 | P03410 | Q8NGS7 | -1.153    |
| 29827 | P03410 | P53384 | -0.19606  |
| 29828 | P03410 | Q8IYR0 | -0.056572 |
| 29829 | P03410 | Q9NY46 | -0.75438  |
| 29830 | P03410 | P47755 | -0.37831  |
| 29831 | P03410 | Q9BTN0 | -0.92415  |
| 29832 | P03410 | Q9NS28 | -0.61181  |
| 29833 | P03410 | Q4FZB7 | -0.20632  |
| 29834 | P03410 | P01604 | -0.90565  |
| 29835 | P03410 | Q8NGM8 | -1.153    |
| 29836 | P03410 | Q8NBR9 | -0.07105  |
| 29837 | P03410 | P82980 | -0.19752  |
| 29838 | P03410 | Q6ZST4 | -0.071645 |
| 29839 | P03410 | P49746 | -0.85086  |
| 29840 | P03410 | Q8NEB5 | -0.65042  |
| 29841 | P03410 | P00519 | -0.22767  |
| 29842 | P03410 | Q95237 | -0.65653  |
| 29843 | P03410 | C9JJ37 | -0.21766  |
| 29844 | P03410 | Q96PW8 | -0.2052   |
| 29845 | P03410 | O43462 | -0.77467  |
| 29846 | P03410 | Q16270 | -0.42169  |
| 29847 | P03410 | Q9BXM9 | -0.10645  |
| 29848 | P03410 | Q8WVQ1 | -0.80021  |
| 29849 | P03410 | Q8NH06 | -1.153    |
| 29850 | P03410 | P04430 | -0.90565  |
| 29851 | P03410 | Q7Z3H4 | -0.2063   |
| 29852 | P03410 | Q92952 | -0.71833  |
| 29853 | P03410 | A6QL63 | -0.74849  |
| 29854 | P03410 | Q95672 | -1.4116   |
| 29855 | P03410 | O60676 | -0.72482  |
| 29856 | P03410 | Q8NB49 | -0.67755  |
| 29857 | P03410 | O00560 | -0.22734  |
| 29858 | P03410 | Q9HBU1 | -0.22742  |
| 29859 | P03410 | Q9NP59 | -0.34362  |
| 29860 | P03410 | Q86VZ4 | -0.63308  |
| 29861 | P03410 | Q9BS92 | -0.014314 |
| 29862 | P03410 | Q19T08 | -1.2503   |
| 29863 | P03410 | P30990 | -0.87977  |
| 29864 | P03410 | P16403 | -0.65686  |
| 29865 | P03410 | Q9UD57 | -0.22731  |
| 29866 | P03410 | Q13007 | -0.66139  |
| 29867 | P03410 | Q9UBK7 | -1.0276   |
| 29868 | P03410 | O95185 | -1.0243   |

|       |        |        |           |
|-------|--------|--------|-----------|
| 29869 | P03410 | Q6ZMR5 | -1.8909   |
| 29870 | P03410 | Q8TB37 | -0.64353  |
| 29871 | P03410 | Q9BQ16 | -1.0191   |
| 29872 | P03410 | Q95466 | -0.21918  |
| 29873 | P03410 | Q92995 | -0.24175  |
| 29874 | P03410 | Q6T423 | -0.67522  |
| 29875 | P03410 | Q01523 | -0.77129  |
| 29876 | P03410 | Q94823 | -0.59821  |
| 29877 | P03410 | Q5VUJ6 | -0.23513  |
| 29878 | P03410 | Q8WTQ1 | -0.69132  |
| 29879 | P03410 | P30049 | -0.097523 |
| 29880 | P03410 | P35221 | -0.12893  |
| 29881 | P03410 | A6NLB4 | -0.22261  |
| 29882 | P03410 | Q9NW75 | -0.094683 |
| 29883 | P03410 | Q92826 | -0.22714  |
| 29884 | P03410 | P63244 | -0.22845  |
| 29885 | P03410 | Q15904 | -0.84339  |
| 29886 | P03410 | Q15353 | -0.6915   |
| 29887 | P03410 | P18464 | -0.88938  |
| 29888 | P03410 | Q9NZS9 | -0.74563  |
| 29889 | P03410 | Q8N335 | -0.29723  |
| 29890 | P03410 | Q53EP0 | -0.54687  |
| 29891 | P03410 | P36383 | -0.90987  |
| 29892 | P03410 | Q8WZ60 | -0.20704  |
| 29893 | P03410 | Q75159 | -0.22732  |
| 29894 | P03410 | Q14766 | -0.2947   |
| 29895 | P03410 | Q8NH63 | -1.153    |
| 29896 | P03410 | Q63ZE4 | -0.64462  |
| 29897 | P03410 | Q9HAD4 | -0.22741  |
| 29898 | P03410 | P29275 | -0.80864  |
| 29899 | P03410 | Q99726 | -0.80407  |
| 29900 | P03410 | Q9BZD7 | -1.354    |
| 29901 | P03410 | Q7LBE3 | -0.82343  |
| 29902 | P03410 | A6NMS3 | -1.153    |
| 29903 | P03410 | P01877 | -0.23009  |
| 29904 | P03410 | Q9Y651 | -0.23875  |
| 29905 | P03410 | P58304 | -0.22687  |
| 29906 | P03410 | P19367 | -0.16373  |
| 29907 | P03410 | P40933 | -0.1381   |
| 29908 | P03410 | Q9BT73 | -0.08293  |
| 29909 | P03410 | P22681 | -0.22741  |
| 29910 | P03410 | A4QPH2 | -0.63691  |
| 29911 | P03410 | Q75054 | -0.63308  |
| 29912 | P03410 | Q96NW7 | -0.23064  |
| 29913 | P03410 | Q92784 | -0.23319  |
| 29914 | P03410 | Q14775 | -0.28005  |
| 29915 | P03410 | Q8N752 | -1.2688   |
| 29916 | P03410 | P35367 | -0.70546  |
| 29917 | P03410 | Q9HBW9 | -1.2797   |
| 29918 | P03410 | Q9UQ03 | -0.22745  |
| 29919 | P03410 | Q8IYP2 | -1.3874   |
| 29920 | P03410 | P04208 | -0.90565  |
| 29921 | P03410 | Q9H7B7 | -0.71003  |
| 29922 | P03410 | Q7Z7J7 | -0.63308  |
| 29923 | P03410 | Q9Y6F8 | -0.22391  |
| 29924 | P03410 | Q9NU53 | -0.63308  |
| 29925 | P03410 | P14415 | -0.27097  |
| 29926 | P03410 | Q8NBH2 | -0.30094  |
| 29927 | P03410 | Q06187 | -0.22741  |
| 29928 | P03410 | Q96E39 | -0.36121  |
| 29929 | P03410 | P09327 | -0.1029   |
| 29930 | P03410 | P43234 | -0.82337  |
| 29931 | P03410 | P23470 | -1.2052   |
| 29932 | P03410 | Q15746 | -0.5953   |
| 29933 | P03410 | Q9HCN6 | -0.35938  |
| 29934 | P03410 | P22309 | -0.49503  |
| 29935 | P03410 | P01266 | -0.57713  |
| 29936 | P03410 | Q96PD5 | -0.79076  |
| 29937 | P03410 | Q9HBI6 | -1.1814   |
| 29938 | P03410 | Q6IF00 | -1.153    |
| 29939 | P03410 | Q5VZV1 | -0.15914  |
| 29940 | P03410 | Q7Z6K4 | -0.28404  |
| 29941 | P03410 | P48066 | -1.0164   |
| 29942 | P03410 | Q96PP8 | -0.76825  |
| 29943 | P03410 | Q9P2F8 | -0.81959  |
| 29944 | P03410 | Q15582 | -1.3315   |

|       |        |         |           |
|-------|--------|---------|-----------|
| 29945 | P03410 | Q12774  | -0.66257  |
| 29946 | P03410 | P51648  | -0.97466  |
| 29947 | P03410 | P09936  | -0.12222  |
| 29948 | P03410 | Q96JP5  | -0.30843  |
| 29949 | P03410 | Q9HCM4  | -0.29474  |
| 29950 | P03410 | O60880  | -0.22741  |
| 29951 | P03410 | Q6NYC1  | -0.17281  |
| 29952 | P03410 | Q9NWM0  | -0.21234  |
| 29953 | P03410 | A0PK00  | -0.61257  |
| 29954 | P03410 | Q9NR99  | -0.71003  |
| 29955 | P03410 | Q9H106  | -0.71003  |
| 29956 | P03410 | Q08AH1  | -0.9971   |
| 29957 | P03410 | P07333  | -0.87025  |
| 29958 | P03410 | A6NCL2  | -0.052999 |
| 29959 | P03410 | Q8N423  | -0.43459  |
| 29960 | P03410 | P16519  | -0.22322  |
| 29961 | P03410 | Q96JY6  | -0.22732  |
| 29962 | P03410 | B5MCY1  | -0.18184  |
| 29963 | P03410 | P02749  | -0.40667  |
| 29964 | P03410 | Q9HCK0  | -0.14691  |
| 29965 | P03410 | Q9H251  | -0.50406  |
| 29966 | P03410 | P51810  | -0.38967  |
| 29967 | P03410 | Q5VYS8  | -0.24287  |
| 29968 | P03410 | Q13519  | -0.86567  |
| 29969 | P03410 | Q96E93  | -0.89791  |
| 29970 | P03410 | P59190  | -1.0112   |
| 29971 | P03410 | P63092  | -0.65863  |
| 29972 | P03410 | Q86XQ3  | -1.0634   |
| 29973 | P03410 | Q9Y2U9  | -0.21951  |
| 29974 | P03410 | Q6UY13  | -0.71003  |
| 29975 | P03410 | Q99758  | -1.2142   |
| 29976 | P03410 | O43272  | -0.15993  |
| 29977 | P03410 | Q6UVK1  | -1.2859   |
| 29978 | P03410 | Q9BZJ8  | -1.1837   |
| 29979 | P03410 | Q8NH60  | -1.153    |
| 29980 | P03410 | A6NIZ1  | -1.0123   |
| 29981 | P03410 | Q86WS5  | -1.2466   |
| 29982 | P03410 | P40261  | -0.15707  |
| 29983 | P03410 | O43312  | -0.11374  |
| 29984 | P03410 | Q8IWW6  | -1.0747   |
| 29985 | P03410 | Q06278  | -0.54156  |
| 29986 | P03410 | C9JVI0  | -0.66744  |
| 29987 | P03410 | Q93063  | -0.63306  |
| 29988 | P03410 | P14209  | -1.028    |
| 29989 | P03410 | P48163  | -0.33752  |
| 29990 | P03410 | Q6IQ26  | -0.22542  |
| 29991 | P03410 | Q5EBN2  | -0.39568  |
| 29992 | P03410 | Q09160  | -0.72578  |
| 29993 | P03410 | Q68CR1  | -0.63308  |
| 29994 | P03410 | Q99572  | -0.26854  |
| 29995 | P03410 | Q12846  | -0.24371  |
| 29996 | P03410 | P41594  | -0.71256  |
| 29997 | P03410 | P26885  | -0.23398  |
| 29998 | P03410 | Q8NGB6  | -1.153    |
| 29999 | P03410 | Q5J TZ9 | -0.32676  |
| 30000 | P03410 | Q9NRR6  | -0.22475  |
| 30001 | P03410 | Q9BX59  | -0.87924  |
| 30002 | P03410 | Q92794  | -0.42305  |
| 30003 | P03410 | Q6SPF0  | -0.57031  |
| 30004 | P03410 | P45974  | -0.29927  |
| 30005 | P03410 | Q6UWV6  | -0.64721  |
| 30006 | P03410 | Q9BV35  | -0.58181  |
| 30007 | P03410 | Q969T4  | -0.64064  |
| 30008 | P03410 | Q14833  | -1.392    |
| 30009 | P03410 | P59544  | -1.067    |
| 30010 | P03410 | Q9UHV5  | -0.55762  |
| 30011 | P03410 | P21709  | -1.281    |
| 30012 | P03410 | Q9BYZ6  | -1.206    |
| 30013 | P03410 | Q92772  | -0.83011  |
| 30014 | P03410 | Q8IX95  | -0.086992 |
| 30015 | P03410 | P10747  | -0.16721  |
| 30016 | P03410 | O14939  | -0.21345  |
| 30017 | P03410 | Q9Y2T6  | -1.1937   |
| 30018 | P03410 | P02750  | -0.91181  |
| 30019 | P03410 | O95757  | -0.22414  |
| 30020 | P03410 | P07204  | -0.46823  |



|       |        |        |           |
|-------|--------|--------|-----------|
| 30021 | P03410 | Q9UKJ1 | -0.68447  |
| 30022 | P03410 | Q16676 | -0.49241  |
| 30023 | P03410 | Q9H1R3 | -0.46157  |
| 30024 | P03410 | P07101 | -0.22201  |
| 30025 | P03410 | Q01973 | -1.137    |
| 30026 | P03410 | Q9GZS9 | -0.47311  |
| 30027 | P03410 | Q02153 | -0.75455  |
| 30028 | P03410 | O15264 | -0.31036  |
| 30029 | P03410 | P0C7U0 | -0.65269  |
| 30030 | P03410 | Q9Y478 | -0.056061 |
| 30031 | P03410 | Q96NR3 | -0.72447  |
| 30032 | P03410 | P04745 | -0.25613  |
| 30033 | P03410 | Q6IF99 | -1.153    |
| 30034 | P03410 | Q6P3W2 | -0.25566  |
| 30035 | P03410 | P48051 | -0.29086  |
| 30036 | P03410 | Q8N2G6 | -0.14571  |
| 30037 | P03410 | Q9UEF7 | -1.0513   |
| 30038 | P03410 | P02788 | -0.18884  |
| 30039 | P03410 | Q9UGP8 | -0.61833  |
| 30040 | P03410 | Q13535 | -0.88039  |
| 30041 | P03410 | Q6IEV9 | -1.153    |
| 30042 | P03410 | P16444 | -0.43551  |
| 30043 | P03410 | Q8N1C3 | -0.68308  |
| 30044 | P03410 | P22492 | -1.2605   |
| 30045 | P03410 | P27487 | -0.68568  |
| 30046 | P03410 | Q53FZ2 | -0.87143  |
| 30047 | P03410 | Q14162 | -0.84809  |
| 30048 | P03410 | P52569 | -0.72533  |
| 30049 | P03410 | O15432 | -0.903    |
| 30050 | P03410 | Q14714 | -0.86454  |
| 30051 | P03410 | O15232 | -0.43549  |
| 30052 | P03410 | Q969E3 | -0.75794  |
| 30053 | P03410 | O43193 | -1.3868   |
| 30054 | P03410 | O15522 | -0.27474  |
| 30055 | P03410 | Q96PL5 | -0.68046  |
| 30056 | P03410 | Q9UKL2 | -1.3145   |
| 30057 | P03410 | Q9Y663 | -0.46393  |
| 30058 | P03410 | Q9Y5E4 | -1.0722   |
| 30059 | P03410 | Q9HD89 | -0.61491  |
| 30060 | P03410 | P08185 | -0.81596  |
| 30061 | P03410 | Q96QU6 | -0.2071   |
| 30062 | P03410 | Q9H6L4 | -0.23067  |
| 30063 | P03410 | Q8N6H7 | -0.074593 |
| 30064 | P03410 | Q5T4F4 | -0.24354  |
| 30065 | P03410 | O15438 | -1.2944   |
| 30066 | P03410 | Q8TDN2 | -0.85728  |
| 30067 | P03410 | P25098 | -0.46317  |
| 30068 | P03410 | P52429 | -1.5539   |
| 30069 | P03410 | A6NDE4 | -0.24216  |
| 30070 | P03410 | P78426 | -0.22948  |
| 30071 | P03410 | Q7L1I2 | -0.73101  |
| 30072 | P03410 | Q8NDX1 | -0.45785  |
| 30073 | P03410 | Q96PF1 | -0.29018  |
| 30074 | P03410 | Q3KPI0 | -0.63308  |
| 30075 | P03410 | Q6IF42 | -1.153    |
| 30076 | P03410 | P28799 | -0.048231 |
| 30077 | P03410 | Q8NGL4 | -1.153    |
| 30078 | P03410 | Q6ZQW0 | -0.28561  |
| 30079 | P03410 | Q8IZC6 | -0.97678  |
| 30080 | P03410 | Q9NZ01 | -0.60059  |
| 30081 | P03410 | O95382 | -1.3873   |
| 30082 | P03410 | Q8WUY9 | -0.96778  |
| 30083 | P03410 | P18136 | -0.90565  |
| 30084 | P03410 | P0C7P3 | -0.66861  |
| 30085 | P03410 | Q7Z6B7 | -0.49285  |
| 30086 | P03410 | Q9NNX1 | -0.71448  |
| 30087 | P03410 | Q8NBP0 | -0.22726  |
| 30088 | P03410 | P0C0P6 | -0.68675  |
| 30089 | P03410 | Q9UHW9 | -0.81491  |
| 30090 | P03410 | A4D1S5 | -1.0301   |
| 30091 | P03410 | Q9H596 | -0.29462  |
| 30092 | P03410 | Q14721 | -0.27542  |
| 30093 | P03410 | P06280 | -0.13138  |
| 30094 | P03410 | A6NEH6 | -0.59468  |
| 30095 | P03410 | P25089 | -1.3082   |
| 30096 | P03410 | Q9NY15 | -0.96195  |

|       |        |        |           |
|-------|--------|--------|-----------|
| 30097 | P03410 | Q07343 | -0.21766  |
| 30098 | P03410 | P01160 | -0.31411  |
| 30099 | P03410 | Q99570 | -0.60218  |
| 30100 | P03410 | Q60706 | -1.168    |
| 30101 | P03410 | P19256 | -0.5379   |
| 30102 | P03410 | P16422 | -0.22669  |
| 30103 | P03410 | P56539 | -0.22137  |
| 30104 | P03410 | Q6P5S2 | -0.71003  |
| 30105 | P03410 | Q96K37 | -0.62453  |
| 30106 | P03410 | Q9Y661 | -1.0937   |
| 30107 | P03410 | Q6ZT12 | -0.89897  |
| 30108 | P03410 | Q8IZD2 | -0.22747  |
| 30109 | P03410 | O75556 | -0.0959   |
| 30110 | P03410 | Q13825 | -0.14786  |
| 30111 | P03410 | P00450 | -1.0751   |
| 30112 | P03410 | Q8IZQ8 | -0.8672   |
| 30113 | P03410 | Q96T55 | -1.0608   |
| 30114 | P03410 | Q9NPF0 | -0.66205  |
| 30115 | P03410 | A8MWY0 | -0.63308  |
| 30116 | P03410 | Q6UXL0 | -0.51412  |
| 30117 | P03410 | Q9UQC9 | -1.5331   |
| 30118 | P03410 | Q96A25 | -0.61257  |
| 30119 | P03410 | Q8IUH2 | -0.83265  |
| 30120 | P03410 | P0C629 | -1.153    |
| 30121 | P03410 | Q9Y490 | -0.22805  |
| 30122 | P03410 | Q9H4E7 | -0.2274   |
| 30123 | P03410 | Q86X40 | -0.22844  |
| 30124 | P03410 | Q9NRJ7 | -1.0722   |
| 30125 | P03410 | P04637 | -0.22035  |
| 30126 | P03410 | Q5T4D3 | -0.63308  |
| 30127 | P03410 | Q9H0K1 | -0.71238  |
| 30128 | P03410 | P16591 | -0.46521  |
| 30129 | P03410 | Q8IU89 | -0.27896  |
| 30130 | P03410 | O15217 | -0.22362  |
| 30131 | P03410 | Q9NT99 | -0.72927  |
| 30132 | P03410 | Q8TCV5 | -0.74696  |
| 30133 | P03410 | P56856 | -0.48903  |
| 30134 | P03410 | Q8IZF3 | -1.2876   |
| 30135 | P03410 | Q9H347 | -0.22574  |
| 30136 | P03410 | Q9NZP2 | -1.153    |
| 30137 | P03410 | Q9Y5H1 | -1.0719   |
| 30138 | P03410 | A1L0T0 | -0.92173  |
| 30139 | P03410 | O75342 | -0.66318  |
| 30140 | P03410 | A6NMT0 | -0.22792  |
| 30141 | P03410 | P01617 | -0.90565  |
| 30142 | P03410 | Q08431 | -0.67376  |
| 30143 | P03410 | P0CG40 | -0.1812   |
| 30144 | P03410 | P50454 | -0.32831  |
| 30145 | P03410 | Q96R69 | -1.153    |
| 30146 | P03410 | Q9BVQ7 | -0.73041  |
| 30147 | P03410 | Q8WXT5 | -0.49241  |
| 30148 | P03410 | Q9UJT0 | -0.16865  |
| 30149 | P03410 | Q8IZ07 | -0.22741  |
| 30150 | P03410 | Q58FG0 | -0.53132  |
| 30151 | P03410 | A8MZ06 | -0.16322  |
| 30152 | P03410 | Q07002 | -1.2359   |
| 30153 | P03410 | Q58G82 | -0.18409  |
| 30154 | P03410 | P03989 | -0.85604  |
| 30155 | P03410 | Q7Z6G8 | -0.2275   |
| 30156 | P03410 | P0C7P4 | -0.45687  |
| 30157 | P03410 | Q96IZ6 | -0.12236  |
| 30158 | P03410 | Q15019 | -0.22687  |
| 30159 | P03410 | Q6NXT4 | -0.56427  |
| 30160 | P03410 | O96013 | -0.95225  |
| 30161 | P03410 | O43293 | -0.40619  |
| 30162 | P03410 | P47888 | -1.153    |
| 30163 | P03410 | O96014 | -0.42988  |
| 30164 | P03410 | O60343 | -1.059    |
| 30165 | P03410 | Q5FWF5 | -0.31194  |
| 30166 | P03410 | Q92599 | -0.18089  |
| 30167 | P03410 | Q8IUY3 | -0.63308  |
| 30168 | P03410 | Q99250 | -0.92976  |
| 30169 | P03410 | Q9NR83 | -0.092544 |
| 30170 | P03410 | P00451 | -0.68391  |
| 30171 | P03410 | Q96BQ3 | -0.39568  |
| 30172 | P03410 | Q15435 | -0.22741  |

|       |        |        |           |
|-------|--------|--------|-----------|
| 30173 | P03410 | P0CI25 | -0.39568  |
| 30174 | P03410 | Q96DD0 | -0.27764  |
| 30175 | P03410 | P55001 | -0.75133  |
| 30176 | P03410 | A6NH00 | -1.153    |
| 30177 | P03410 | Q9UHD0 | -0.72436  |
| 30178 | P03410 | Q96R47 | -1.153    |
| 30179 | P03410 | Q9BZW2 | -0.92038  |
| 30180 | P03410 | Q9NZS2 | -0.91803  |
| 30181 | P03410 | Q8WU79 | -0.37305  |
| 30182 | P03410 | Q16799 | -0.34679  |
| 30183 | P03410 | Q96NX5 | -1.0598   |
| 30184 | P03410 | Q7Z4H8 | -0.1402   |
| 30185 | P03410 | P30499 | -0.9827   |
| 30186 | P03410 | Q9NYT0 | -0.24869  |
| 30187 | P03410 | A8MTJ6 | -0.75716  |
| 30188 | P03410 | Q6P179 | -1.1556   |
| 30189 | P03410 | Q14512 | -0.4805   |
| 30190 | P03410 | Q8IY21 | -0.22003  |
| 30191 | P03410 | Q9Y2W7 | -0.23459  |
| 30192 | P03410 | O00295 | -0.63881  |
| 30193 | P03410 | Q8IU68 | -0.7715   |
| 30194 | P03410 | Q9H871 | -0.10368  |
| 30195 | P03410 | P11766 | -0.39799  |
| 30196 | P03410 | Q9H4S2 | -0.19228  |
| 30197 | P03410 | A6NLU0 | -0.22786  |
| 30198 | P03410 | Q86UF1 | -0.63308  |
| 30199 | P03410 | Q9UQB9 | -0.71531  |
| 30200 | P03410 | Q9C004 | -0.08539  |
| 30201 | P03410 | Q9NQE7 | -0.75976  |
| 30202 | P03410 | Q9H1D0 | -1.0131   |
| 30203 | P03410 | P01780 | -0.90565  |
| 30204 | P03410 | O14924 | -0.43138  |
| 30205 | P03410 | Q6NXT6 | -0.7782   |
| 30206 | P03410 | P01744 | -0.90565  |
| 30207 | P03410 | Q9UHP3 | -0.43487  |
| 30208 | P03410 | Q8N387 | -1.396    |
| 30209 | P03410 | Q9C0I4 | -0.63308  |
| 30210 | P03410 | P34910 | -0.66728  |
| 30211 | P03410 | Q14494 | -0.22658  |
| 30212 | P03410 | Q8N3G9 | -0.3672   |
| 30213 | P03410 | Q9Y4K0 | -0.43794  |
| 30214 | P03410 | Q9NZK5 | -0.78412  |
| 30215 | P03410 | P08861 | -1.4064   |
| 30216 | P03410 | P54852 | -0.67168  |
| 30217 | P03410 | Q8TB92 | -0.1986   |
| 30218 | P03410 | P19835 | -0.60029  |
| 30219 | P03410 | P51571 | -0.52109  |
| 30220 | P03410 | P14598 | -0.22741  |
| 30221 | P03410 | Q6UQ28 | -0.66278  |
| 30222 | P03410 | Q8N3F9 | -0.63308  |
| 30223 | P03410 | Q96BY6 | -0.38641  |
| 30224 | P03410 | Q6ZNC8 | -0.82905  |
| 30225 | P03410 | Q6NTF9 | -0.66937  |
| 30226 | P03410 | Q9NS84 | -0.47839  |
| 30227 | P03410 | Q5TGZ0 | -0.48957  |
| 30228 | P03410 | Q10589 | -0.36728  |
| 30229 | P03410 | Q9NYW0 | -1.0339   |
| 30230 | P03410 | Q58FF7 | -0.53132  |
| 30231 | P03410 | Q9UHI5 | -0.4103   |
| 30232 | P03410 | Q7Z7D3 | -0.88135  |
| 30233 | P03410 | Q99884 | -0.90849  |
| 30234 | P03410 | Q75871 | -0.83693  |
| 30235 | P03410 | P60852 | -1.2981   |
| 30236 | P03410 | P58418 | -0.8054   |
| 30237 | P03410 | Q08648 | -0.87568  |
| 30238 | P03410 | Q5T2S8 | -0.22864  |
| 30239 | P03410 | Q96DT6 | -0.75588  |
| 30240 | P03410 | A1IGU5 | -0.27606  |
| 30241 | P03410 | Q4VCS5 | -0.090434 |
| 30242 | P03410 | Q16821 | -0.50181  |
| 30243 | P03410 | P04220 | -0.36451  |
| 30244 | P03410 | P22003 | -0.60057  |
| 30245 | P03410 | Q8TF21 | -0.22749  |
| 30246 | P03410 | Q9P2V4 | -0.73611  |
| 30247 | P03410 | P16662 | -0.80586  |
| 30248 | P03410 | Q6PIY7 | -0.53992  |

|       |        |        |          |
|-------|--------|--------|----------|
| 30249 | P03410 | Q9Y5H0 | -1.0719  |
| 30250 | P03410 | Q9HCU4 | -1.1866  |
| 30251 | P03410 | Q5JXA9 | -0.63308 |
| 30252 | P03410 | P49326 | -0.99591 |
| 30253 | P03410 | Q07890 | -0.2274  |
| 30254 | P03410 | Q8TB96 | -1.2911  |
| 30255 | P03410 | A6NM03 | -1.153   |
| 30256 | P03410 | P12081 | -0.31377 |
| 30257 | P03410 | P27361 | -0.2274  |
| 30258 | P03410 | P09382 | -0.56747 |
| 30259 | P03410 | Q07065 | -0.53156 |
| 30260 | P03410 | Q7L8A9 | -0.52526 |
| 30261 | P03410 | Q3B7J2 | -1.6572  |
| 30262 | P03410 | P12724 | -0.60752 |
| 30263 | P03410 | Q13162 | -0.21537 |
| 30264 | P03410 | P60568 | -0.4146  |
| 30265 | P03410 | Q96NK8 | -0.22765 |
| 30266 | P03410 | Q71H61 | -0.77531 |
| 30267 | P03410 | P23467 | -0.62247 |
| 30268 | P03410 | Q16572 | -1.026   |
| 30269 | P03410 | Q00270 | -1.4027  |
| 30270 | P03410 | Q7Z4N2 | -1.2057  |
| 30271 | P03410 | P01709 | -0.90565 |
| 30272 | P03410 | Q92576 | -0.29655 |
| 30273 | P03410 | Q96CM8 | -0.92124 |
| 30274 | P03410 | P43003 | -0.60101 |
| 30275 | P03410 | Q14541 | -0.2296  |
| 30276 | P03410 | Q8NGT9 | -1.153   |
| 30277 | P03410 | P98174 | -0.90147 |
| 30278 | P03410 | Q9P0N8 | -1.3079  |
| 30279 | P03410 | Q6TCH4 | -0.63308 |
| 30280 | P03410 | Q9Y5G5 | -1.0719  |
| 30281 | P03410 | Q8WV83 | -0.62453 |
| 30282 | P03410 | P98164 | -0.26099 |
| 30283 | P03410 | Q96RP3 | -0.805   |
| 30284 | P03410 | P62873 | -0.23916 |
| 30285 | P03410 | Q8N2E6 | -1.244   |
| 30286 | P03410 | Q8WWF8 | -0.22544 |
| 30287 | P03410 | Q9NSI8 | -0.19371 |
| 30288 | P03410 | Q9P0K1 | -0.44344 |
| 30289 | P03410 | Q9BU20 | -0.84662 |
| 30290 | P03410 | Q8N907 | -0.53574 |
| 30291 | P03410 | Q9Y5X1 | -0.22733 |
| 30292 | P03410 | Q12948 | -0.31899 |
| 30293 | P03410 | Q8ND71 | -0.16515 |
| 30294 | P03410 | Q96DI7 | -0.51311 |
| 30295 | P03410 | Q86XJ1 | -0.19377 |
| 30296 | P03410 | Q6IEY1 | -1.153   |
| 30297 | P03410 | Q13637 | -0.71765 |
| 30298 | P03410 | Q8WWF1 | -0.71003 |
| 30299 | P03410 | P13866 | -0.13673 |
| 30300 | P03410 | P40938 | -0.18033 |
| 30301 | P03410 | P24557 | -1.0364  |
| 30302 | P03410 | Q9H1C3 | -0.76158 |
| 30303 | P03410 | P41181 | -0.2271  |
| 30304 | P03410 | Q9UHV8 | -0.16314 |
| 30305 | P03410 | Q6UY01 | -0.22741 |
| 30306 | P03410 | Q9Y493 | -0.97807 |
| 30307 | P03410 | Q94832 | -0.47791 |
| 30308 | P03410 | Q9NX62 | -0.60422 |
| 30309 | P03410 | Q5QJU3 | -0.23137 |
| 30310 | P03410 | Q8IVH8 | -0.72039 |
| 30311 | P03410 | Q9NRB3 | -0.43347 |
| 30312 | P03410 | Q14542 | -0.36269 |
| 30313 | P03410 | Q96MH6 | -0.69631 |
| 30314 | P03410 | P18283 | -0.58491 |
| 30315 | P03410 | Q9H1Z8 | -0.79138 |
| 30316 | P03410 | Q8TCT8 | -0.60149 |
| 30317 | P03410 | P63145 | -0.0271  |
| 30318 | P03410 | Q8N3K9 | -0.22833 |
| 30319 | P03410 | Q86SK9 | -1.0608  |
| 30320 | P03410 | Q969W1 | -0.89434 |
| 30321 | P03410 | Q9BTU6 | -0.49007 |
| 30322 | P03410 | P27930 | -0.74936 |
| 30323 | P03410 | Q00459 | -0.2274  |
| 30324 | P03410 | Q0VAQ4 | -0.29458 |

|       |        |        |           |
|-------|--------|--------|-----------|
| 30325 | P03410 | Q6ZMJ2 | -0.98789  |
| 30326 | P03410 | P62502 | -0.72984  |
| 30327 | P03410 | Q969Q5 | -0.24267  |
| 30328 | P03410 | P15813 | -0.53312  |
| 30329 | P03410 | Q6PL45 | -0.63308  |
| 30330 | P03410 | Q6ZN16 | -1.2172   |
| 30331 | P03410 | Q59H18 | -0.50717  |
| 30332 | P03410 | Q9BXJ7 | -1.0573   |
| 30333 | P03410 | P01612 | -0.90565  |
| 30334 | P03410 | Q8NE35 | -0.61845  |
| 30335 | P03410 | Q8NH10 | -1.153    |
| 30336 | P03410 | Q96ME7 | -0.19238  |
| 30337 | P03410 | Q9UHP7 | -1.0117   |
| 30338 | P03410 | Q9P1W9 | -0.73637  |
| 30339 | P03410 | Q8NE28 | -0.98518  |
| 30340 | P03410 | Q14788 | -0.642    |
| 30341 | P03410 | Q5T7W0 | -0.22694  |
| 30342 | P03410 | A6NHM9 | -0.58335  |
| 30343 | P03410 | A6NMB1 | -0.86496  |
| 30344 | P03410 | P51679 | -1.2734   |
| 30345 | P03410 | Q9P2W1 | -0.11429  |
| 30346 | P03410 | Q13702 | -0.22681  |
| 30347 | P03410 | Q7Z5A7 | -1.2911   |
| 30348 | P03410 | Q8TC07 | -0.71567  |
| 30349 | P03410 | P04921 | -0.30314  |
| 30350 | P03410 | Q8IZU9 | -0.71531  |
| 30351 | P03410 | Q86VV4 | -0.17618  |
| 30352 | P03410 | Q9BX93 | -0.83854  |
| 30353 | P03410 | Q8IUH5 | -0.2274   |
| 30354 | P03410 | Q8N4X5 | -0.14083  |
| 30355 | P03410 | P28332 | -0.68817  |
| 30356 | P03410 | Q13153 | -0.22811  |
| 30357 | P03410 | Q6P0Q8 | -0.65841  |
| 30358 | P03410 | P46977 | -0.26272  |
| 30359 | P03410 | Q9H2G2 | -1.2708   |
| 30360 | P03410 | P46821 | -0.094649 |
| 30361 | P03410 | Q9P2W7 | -0.52778  |
| 30362 | P03410 | Q9UKW4 | -0.27293  |
| 30363 | P03410 | Q60312 | -0.68245  |
| 30364 | P03410 | P05111 | -0.50361  |
| 30365 | P03410 | P50579 | -0.42252  |
| 30366 | P03410 | Q15848 | -0.30375  |
| 30367 | P03410 | P0C874 | -0.63308  |
| 30368 | P03410 | Q05940 | -0.67838  |
| 30369 | P03410 | Q96ER3 | -0.673    |
| 30370 | P03410 | Q75326 | -0.22505  |
| 30371 | P03410 | Q9UIG8 | -0.93331  |
| 30372 | P03410 | P30532 | -0.97038  |
| 30373 | P03410 | P04437 | -0.16097  |
| 30374 | P03410 | Q6IMI4 | -0.22508  |
| 30375 | P03410 | P78363 | -1.2391   |
| 30376 | P03410 | Q49AM3 | -0.22539  |
| 30377 | P03410 | Q9UHF1 | -1.1987   |
| 30378 | P03410 | Q16760 | -0.75747  |
| 30379 | P03410 | Q9NZQ0 | -0.9596   |
| 30380 | P03410 | Q7L1W4 | -0.63308  |
| 30381 | P03410 | Q9UPN3 | -0.22784  |
| 30382 | P03410 | Q9NTJ5 | -0.52911  |
| 30383 | P03410 | Q9BU40 | -0.95051  |
| 30384 | P03410 | Q9UKI8 | -0.98239  |
| 30385 | P03410 | Q8N9W4 | -0.093472 |
| 30386 | P03410 | A6NE01 | -0.16447  |
| 30387 | P03410 | Q5T5C0 | -0.27616  |
| 30388 | P03410 | Q4ZIN3 | -0.46217  |
| 30389 | P03410 | Q5FYB0 | -0.75265  |
| 30390 | P03410 | Q9BXU8 | -0.26744  |
| 30391 | P03410 | Q6ZT21 | -0.65122  |
| 30392 | P03410 | Q15661 | -0.91095  |
| 30393 | P03410 | Q13075 | -0.32025  |
| 30394 | P03410 | Q9BZD6 | -1.138    |
| 30395 | P03410 | Q75LS8 | -0.22733  |
| 30396 | P03410 | P35030 | -0.92719  |
| 30397 | P03410 | Q86TI4 | -0.22813  |
| 30398 | P03410 | A8MPY1 | -0.68034  |
| 30399 | P03410 | Q9NTN9 | -1.1424   |
| 30400 | P03410 | Q9P1Y6 | -0.22743  |

|       |        |        |          |
|-------|--------|--------|----------|
| 30401 | P03410 | Q9BSK2 | -0.46336 |
| 30402 | P03410 | Q16790 | -0.47415 |
| 30403 | P03410 | P54756 | -1.1847  |
| 30404 | P03410 | P25092 | -0.97448 |
| 30405 | P03410 | P54289 | -0.81914 |
| 30406 | P03410 | Q5QP82 | -0.22725 |
| 30407 | P03410 | P60509 | -0.797   |
| 30408 | P03410 | Q9P2S2 | -0.8049  |
| 30409 | P03410 | Q9P2E8 | -0.90573 |
| 30410 | P03410 | P61009 | -0.73165 |
| 30411 | P03410 | Q5VZR4 | -0.65506 |
| 30412 | P03410 | Q5VYY2 | -0.7829  |
| 30413 | P03410 | Q9NPA1 | -1.0669  |
| 30414 | P03410 | O60496 | -0.35262 |
| 30415 | P03410 | O14625 | -1.0377  |
| 30416 | P03410 | Q8NGZ9 | -1.153   |
| 30417 | P03410 | Q8IWU6 | -0.30004 |
| 30418 | P03410 | P02786 | -0.6865  |
| 30419 | P03410 | P26951 | -0.80254 |
| 30420 | P03410 | P09919 | -0.88761 |
| 30421 | P03410 | O00305 | -0.22698 |
| 30422 | P03410 | A6NK97 | -0.79924 |
| 30423 | P03410 | Q8N5M4 | -0.22519 |
| 30424 | P03410 | P36537 | -0.87636 |
| 30425 | P03410 | Q13480 | -0.22708 |
| 30426 | P03410 | P28827 | -0.52171 |
| 30427 | P03410 | Q86UF2 | -0.64062 |
| 30428 | P03410 | Q3MIX3 | -0.93327 |
| 30429 | P03410 | Q9UJ90 | -0.65808 |
| 30430 | P03410 | Q9Y694 | -1.0306  |
| 30431 | P03410 | Q8IV42 | -0.84805 |
| 30432 | P03410 | Q96KG7 | -0.80085 |
| 30433 | P03410 | Q8N567 | -0.4938  |
| 30434 | P03410 | A1YPR0 | -0.37766 |
| 30435 | P03410 | Q9Y6C9 | -0.46336 |
| 30436 | P03410 | Q9UBE0 | -0.22031 |
| 30437 | P03410 | Q8N475 | -0.77312 |
| 30438 | P03410 | Q9HC58 | -0.96794 |
| 30439 | P03410 | Q8NGN5 | -1.153   |
| 30440 | P03410 | Q9ULL8 | -0.22663 |
| 30441 | P03410 | Q8NI60 | -0.9423  |
| 30442 | P03410 | P05164 | -0.2211  |
| 30443 | P03410 | Q3SXZ7 | -0.16176 |
| 30444 | P03410 | Q9H3N1 | -0.90621 |
| 30445 | P03410 | P54219 | -0.45273 |
| 30446 | P03410 | Q8NG83 | -1.153   |
| 30447 | P03410 | O75509 | -0.22367 |
| 30448 | P03410 | Q9UN76 | -0.94969 |
| 30449 | P03410 | Q15198 | -0.6972  |
| 30450 | P03410 | P21941 | -0.29091 |
| 30451 | P03410 | Q9Y6Q6 | -0.22599 |
| 30452 | P03410 | Q8N4P6 | -0.227   |
| 30453 | P03410 | Q13621 | -0.82927 |
| 30454 | P03410 | P39900 | -1.3117  |
| 30455 | P03410 | P01138 | -0.41034 |
| 30456 | P03410 | Q8N6C8 | -1.0122  |
| 30457 | P03410 | Q96IY4 | -1.0821  |
| 30458 | P03410 | P48061 | -0.59522 |
| 30459 | P03410 | Q8TE58 | -1.3999  |
| 30460 | P03410 | Q5XLA6 | -0.51365 |
| 30461 | P03410 | Q9Y3D8 | -0.17096 |
| 30462 | P03410 | Q92736 | -0.33892 |
| 30463 | P03410 | P05231 | -0.24296 |
| 30464 | P03410 | P35452 | -0.22463 |
| 30465 | P03410 | Q8NH03 | -1.153   |
| 30466 | P03410 | P04209 | -0.90565 |
| 30467 | P03410 | Q8IYK4 | -0.21108 |
| 30468 | P03410 | P36269 | -0.83349 |
| 30469 | P03410 | Q6ZMB5 | -0.63308 |
| 30470 | P03410 | Q9BQG1 | -0.71711 |
| 30471 | P03410 | P11233 | -0.22765 |
| 30472 | P03410 | Q8IZA3 | -0.49803 |
| 30473 | P03410 | Q9NPC4 | -0.66703 |
| 30474 | P03410 | Q8IZD6 | -0.79924 |
| 30475 | P03410 | Q86XX4 | -0.95446 |
| 30476 | P03410 | P0CF51 | -0.63308 |

|       |        |        |          |
|-------|--------|--------|----------|
| 30477 | P03410 | Q13796 | -0.22714 |
| 30478 | P03410 | Q6IEU7 | -1.153   |
| 30479 | P03410 | Q7L099 | -0.6473  |
| 30480 | P03410 | Q75369 | -0.36724 |
| 30481 | P03410 | P23743 | -1.1523  |
| 30482 | P03410 | Q9P2E9 | -0.37638 |
| 30483 | P03410 | O95319 | -0.37853 |
| 30484 | P03410 | Q9NRA2 | -1.1029  |
| 30485 | P03410 | P53671 | -1.2573  |
| 30486 | P03410 | Q6ZSG1 | -0.23758 |
| 30487 | P03410 | O95455 | -0.8364  |
| 30488 | P03410 | Q92535 | -0.82144 |
| 30489 | P03410 | P53621 | -0.23134 |
| 30490 | P03410 | Q96RG2 | -0.74953 |
| 30491 | P03410 | Q9GZT5 | -0.95634 |
| 30492 | P03410 | Q6GMV1 | -0.18581 |
| 30493 | P03410 | C9JQL5 | -0.6515  |
| 30494 | P03410 | Q9UKY4 | -0.88713 |
| 30495 | P03410 | Q9NQW1 | -0.22779 |
| 30496 | P03410 | O00116 | -0.68573 |
| 30497 | P03410 | Q96RI1 | -0.22946 |
| 30498 | P03410 | Q9Y6K8 | -0.59104 |
| 30499 | P03410 | Q15406 | -0.27034 |
| 30500 | P03410 | Q01524 | -0.79369 |
| 30501 | P03410 | Q96LA6 | -0.797   |
| 30502 | P03410 | Q9Y282 | -0.36659 |
| 30503 | P03410 | Q8WZ84 | -1.153   |
| 30504 | P03410 | Q6NUS8 | -0.75213 |
| 30505 | P03410 | Q8NB59 | -0.50959 |
| 30506 | P03410 | Q6UWW8 | -0.22724 |
| 30507 | P03410 | P12318 | -0.77982 |
| 30508 | P03410 | Q9NS87 | -0.24068 |
| 30509 | P03410 | Q96JH7 | -0.4914  |
| 30510 | P03410 | P0C5Y9 | -0.82578 |
| 30511 | P03410 | Q7Z5Q1 | -0.50019 |
| 30512 | P03410 | P43681 | -0.70997 |
| 30513 | P03410 | Q8TDD5 | -0.75094 |
| 30514 | P03410 | Q8IZV2 | -0.73505 |
| 30515 | P03410 | Q9Y241 | -0.45653 |
| 30516 | P03410 | Q5NE16 | -0.23134 |
| 30517 | P03410 | Q9BXL6 | -0.2369  |
| 30518 | P03410 | Q9BXT6 | -1.3632  |
| 30519 | P03410 | Q99801 | -0.23408 |
| 30520 | P03410 | Q86VF5 | -0.77318 |
| 30521 | P03410 | Q8TEW6 | -0.21862 |
| 30522 | P03410 | P28908 | -0.55687 |
| 30523 | P03410 | Q12934 | -0.39323 |
| 30524 | P03410 | Q9UMN6 | -0.23777 |
| 30525 | P03410 | O60383 | -0.5045  |
| 30526 | P03410 | Q14469 | -0.22507 |
| 30527 | P03410 | Q8TC26 | -0.6792  |
| 30528 | P03410 | P11049 | -0.15092 |
| 30529 | P03410 | Q52LC2 | -0.56892 |
| 30530 | P03410 | P98177 | -0.47636 |
| 30531 | P03410 | P31751 | -0.15557 |
| 30532 | P03410 | Q8NGK5 | -1.153   |
| 30533 | P03410 | Q9UP52 | -1.0695  |
| 30534 | P03410 | P49638 | -0.17202 |
| 30535 | P03410 | Q6DN72 | -0.66973 |
| 30536 | P03410 | P07947 | -0.82186 |
| 30537 | P03410 | P30872 | -1.2947  |
| 30538 | P03410 | Q9NVL1 | -0.10691 |
| 30539 | P03410 | P0C842 | -0.20847 |
| 30540 | P03410 | P60008 | -0.78661 |
| 30541 | P03410 | Q7Z6J6 | -0.32848 |
| 30542 | P03410 | O60721 | -0.56987 |
| 30543 | P03410 | P02746 | -0.64242 |
| 30544 | P03410 | Q9BTM1 | -0.80275 |
| 30545 | P03410 | Q9UBM7 | -0.91591 |
| 30546 | P03410 | Q5Y7A7 | -0.61332 |
| 30547 | P03410 | P61619 | -0.62347 |
| 30548 | P03410 | P07911 | -0.64992 |
| 30549 | P03410 | Q9H9S5 | -1.0937  |
| 30550 | P03410 | Q6NT52 | -0.69271 |
| 30551 | P03410 | Q8NGH5 | -1.153   |
| 30552 | P03410 | Q8N7B9 | -0.22669 |

|       |        |        |           |
|-------|--------|--------|-----------|
| 30553 | P03410 | Q9NZC2 | -1.2947   |
| 30554 | P03410 | Q96EB6 | -0.90901  |
| 30555 | P03410 | P01605 | -0.90565  |
| 30556 | P03410 | O75603 | -0.18991  |
| 30557 | P03410 | Q16820 | -1.5281   |
| 30558 | P03410 | O75771 | -0.20978  |
| 30559 | P03410 | Q00536 | -0.3099   |
| 30560 | P03410 | P52790 | -0.48281  |
| 30561 | P03410 | O43520 | -0.61623  |
| 30562 | P03410 | O14649 | -1.0497   |
| 30563 | P03410 | Q7Z2Z2 | -0.46584  |
| 30564 | P03410 | P19823 | -0.72413  |
| 30565 | P03410 | P10635 | -0.47288  |
| 30566 | P03410 | A1L453 | -1.3874   |
| 30567 | P03410 | Q13231 | -0.74586  |
| 30568 | P03410 | P51575 | -0.48919  |
| 30569 | P03410 | Q14117 | -0.19631  |
| 30570 | P03410 | Q5H9E4 | -0.46336  |
| 30571 | P03410 | Q9Y337 | -0.86029  |
| 30572 | P03410 | Q6IWH7 | -0.41313  |
| 30573 | P03410 | Q8NCR9 | -0.63308  |
| 30574 | P03410 | Q9UQM7 | -0.48739  |
| 30575 | P03410 | Q6UXU0 | -0.71003  |
| 30576 | P03410 | Q9Y2E5 | -0.74276  |
| 30577 | P03410 | O14798 | -0.58073  |
| 30578 | P03410 | P15882 | -0.78697  |
| 30579 | P03410 | P06326 | -0.90565  |
| 30580 | P03410 | Q8IVF6 | -0.22735  |
| 30581 | P03410 | Q5YKI7 | -0.57577  |
| 30582 | P03410 | Q9BR10 | -0.87259  |
| 30583 | P03410 | P31277 | -0.34353  |
| 30584 | P03410 | Q9GZQ4 | -0.91782  |
| 30585 | P03410 | Q8WZ73 | -0.22738  |
| 30586 | P03410 | Q9NU02 | -0.22742  |
| 30587 | P03410 | P29375 | -0.28063  |
| 30588 | P03410 | Q8TD55 | -0.2192   |
| 30589 | P03410 | Q13069 | -0.11494  |
| 30590 | P03410 | Q86W74 | -0.63308  |
| 30591 | P03410 | Q9UKM7 | -0.76316  |
| 30592 | P03410 | C9JG80 | -0.13016  |
| 30593 | P03410 | Q15836 | -0.21876  |
| 30594 | P03410 | P12277 | -0.36972  |
| 30595 | P03410 | Q6NXT2 | -0.80275  |
| 30596 | P03410 | Q7Z2T5 | -0.36029  |
| 30597 | P03410 | Q86UQ4 | -1.2534   |
| 30598 | P03410 | Q96R45 | -1.153    |
| 30599 | P03410 | P63218 | -0.34534  |
| 30600 | P03410 | Q8NES8 | -0.69132  |
| 30601 | P03410 | Q14246 | -1.5891   |
| 30602 | P03410 | P09758 | -0.8317   |
| 30603 | P03410 | Q96EK2 | -0.23333  |
| 30604 | P03410 | Q8NG66 | -0.51719  |
| 30605 | P03410 | P17752 | -0.44456  |
| 30606 | P03410 | Q8WUT9 | -0.51629  |
| 30607 | P03410 | A4D1N5 | -0.062892 |
| 30608 | P03410 | Q9HCL0 | -1.2083   |
| 30609 | P03410 | Q92569 | -0.2274   |
| 30610 | P03410 | P51172 | -0.40547  |
| 30611 | P03410 | Q9H6R6 | -0.9739   |
| 30612 | P03410 | Q8TBZ2 | -0.15608  |
| 30613 | P03410 | Q14832 | -1.0133   |
| 30614 | P03410 | Q5TCX8 | -1.2079   |
| 30615 | P03410 | Q3MIP1 | -0.63308  |
| 30616 | P03410 | Q9NYW1 | -1.0339   |
| 30617 | P03410 | Q10981 | -0.47335  |
| 30618 | P03410 | Q96Q27 | -0.55828  |
| 30619 | P03410 | P52333 | -0.43309  |
| 30620 | P03410 | C9JQT0 | -0.22741  |
| 30621 | P03410 | Q96S53 | -1.0977   |
| 30622 | P03410 | O43927 | -0.67704  |
| 30623 | P03410 | Q3KQZ1 | -0.46336  |
| 30624 | P03410 | Q68EM7 | -0.40416  |
| 30625 | P03410 | Q6XZB0 | -1.1851   |
| 30626 | P03410 | P18065 | -0.36138  |
| 30627 | P03410 | P78527 | -0.48117  |
| 30628 | P03410 | P23368 | -0.77463  |



|       |        |        |           |
|-------|--------|--------|-----------|
| 30629 | P03410 | Q562E7 | -0.22741  |
| 30630 | P03410 | O00476 | -0.76865  |
| 30631 | P03410 | Q9UFV1 | -0.79659  |
| 30632 | P03410 | Q8TF76 | -0.79939  |
| 30633 | P03410 | Q13634 | -1.0956   |
| 30634 | P03410 | P55011 | -0.84293  |
| 30635 | P03410 | A6NNM8 | -0.2609   |
| 30636 | P03410 | Q96G74 | -0.46382  |
| 30637 | P03410 | Q96PH6 | -0.73429  |
| 30638 | P03410 | P53634 | -0.64409  |
| 30639 | P03410 | O14958 | -0.2793   |
| 30640 | P03410 | P43250 | -1.3872   |
| 30641 | P03410 | O14735 | -0.61447  |
| 30642 | P03410 | Q9NV66 | -1.0081   |
| 30643 | P03410 | A6NJZ7 | -0.22735  |
| 30644 | P03410 | Q8IXI2 | -0.62735  |
| 30645 | P03410 | P41587 | -1.3881   |
| 30646 | P03410 | Q9NP62 | -0.26022  |
| 30647 | P03410 | Q76I76 | -0.43382  |
| 30648 | P03410 | A8MPP1 | -0.52371  |
| 30649 | P03410 | Q15195 | -0.71003  |
| 30650 | P03410 | P02671 | -0.51729  |
| 30651 | P03410 | Q13255 | -0.9599   |
| 30652 | P03410 | O00602 | -1.1775   |
| 30653 | P03410 | Q9NQS3 | -0.22951  |
| 30654 | P03410 | Q86YT5 | -0.72422  |
| 30655 | P03410 | Q9NQU5 | -0.63463  |
| 30656 | P03410 | Q75553 | -0.40194  |
| 30657 | P03410 | P08567 | -0.22741  |
| 30658 | P03410 | O43916 | -0.52058  |
| 30659 | P03410 | P35557 | -0.14779  |
| 30660 | P03410 | A1X283 | -0.22741  |
| 30661 | P03410 | Q99665 | -0.79199  |
| 30662 | P03410 | Q96EX3 | -0.22753  |
| 30663 | P03410 | Q13322 | -0.22741  |
| 30664 | P03410 | P32019 | -0.42998  |
| 30665 | P03410 | P09172 | -0.50363  |
| 30666 | P03410 | Q9BQ04 | -0.39456  |
| 30667 | P03410 | Q9NRW4 | -0.5259   |
| 30668 | P03410 | O15400 | -0.82746  |
| 30669 | P03410 | P01774 | -0.90565  |
| 30670 | P03410 | O14796 | -0.25259  |
| 30671 | P03410 | A5D8T8 | -0.70793  |
| 30672 | P03410 | O60240 | -0.26457  |
| 30673 | P03410 | Q99584 | -0.24191  |
| 30674 | P03410 | Q5VSP4 | -0.71003  |
| 30675 | P03410 | Q9BV36 | -0.13805  |
| 30676 | P03410 | Q9UNZ2 | -0.5045   |
| 30677 | P03410 | P49279 | -0.37664  |
| 30678 | P03410 | Q5VT79 | -0.099772 |
| 30679 | P03410 | Q16560 | -0.38264  |
| 30680 | P03410 | A6NCV1 | -1.153    |
| 30681 | P03410 | O60755 | -1.1188   |
| 30682 | P03410 | Q96M98 | -0.11745  |
| 30683 | P03410 | Q92823 | -0.86156  |
| 30684 | P03410 | Q2M3C6 | -0.63308  |
| 30685 | P03410 | Q76M96 | -0.99709  |
| 30686 | P03410 | Q5TEZ5 | -0.10645  |
| 30687 | P03410 | Q8TDX9 | -0.56023  |
| 30688 | P03410 | Q86Y82 | -0.42816  |
| 30689 | P03410 | Q5SRR4 | -0.71003  |
| 30690 | P03410 | P04118 | -0.7294   |
| 30691 | P03410 | P09430 | -0.72681  |
| 30692 | P03410 | Q16134 | -0.39993  |
| 30693 | P03410 | O75628 | -1.0463   |
| 30694 | P03410 | P15104 | -0.68735  |
| 30695 | P03410 | P28336 | -1.1491   |
| 30696 | P03410 | Q96K49 | -0.63308  |
| 30697 | P03410 | P78562 | -1.1169   |
| 30698 | P03410 | Q9BT40 | -0.22456  |
| 30699 | P03410 | P35443 | -0.79891  |
| 30700 | P03410 | P61366 | -1.1955   |
| 30701 | P03410 | P46059 | -0.82225  |
| 30702 | P03410 | P54317 | -0.88837  |
| 30703 | P03410 | P32926 | -0.7398   |
| 30704 | P03410 | Q13003 | -0.84954  |

|       |        |         |          |
|-------|--------|---------|----------|
| 30705 | P03410 | Q92887  | -0.90889 |
| 30706 | P03410 | Q96NU0  | -1.1358  |
| 30707 | P03410 | O43581  | -0.90424 |
| 30708 | P03410 | Q99536  | -1.0789  |
| 30709 | P03410 | P47972  | -0.82674 |
| 30710 | P03410 | Q92874  | -0.70729 |
| 30711 | P03410 | Q14894  | -0.2738  |
| 30712 | P03410 | Q8NGS8  | -1.153   |
| 30713 | P03410 | P0DJJD9 | -1.2183  |
| 30714 | P03410 | Q9HBI1  | -0.22741 |
| 30715 | P03410 | Q9NQNL  | -1.153   |
| 30716 | P03410 | Q86SS6  | -0.82297 |
| 30717 | P03410 | O95221  | -1.153   |
| 30718 | P03410 | Q9HCY8  | -0.22882 |
| 30719 | P03410 | Q30134  | -0.61332 |
| 30720 | P03410 | O00623  | -0.28134 |
| 30721 | P03410 | Q13046  | -0.71618 |
| 30722 | P03410 | Q8NFT8  | -0.56791 |
| 30723 | P03410 | P43630  | -0.98894 |
| 30724 | P03410 | Q9NYV7  | -0.42123 |
| 30725 | P03410 | Q8WXA8  | -0.89913 |
| 30726 | P03410 | Q01151  | -0.95087 |
| 30727 | P03410 | Q92626  | -1.2359  |
| 30728 | P03410 | Q96M96  | -0.74075 |
| 30729 | P03410 | Q63HR2  | -0.22741 |
| 30730 | P03410 | Q2L4Q9  | -1.3874  |
| 30731 | P03410 | Q8TBJ4  | -0.71479 |
| 30732 | P03410 | Q92859  | -0.74989 |
| 30733 | P03410 | Q969K3  | -0.5035  |
| 30734 | P03410 | P51686  | -1.2776  |
| 30735 | P03410 | P58872  | -1.2115  |
| 30736 | P03410 | Q9NVH1  | -0.03712 |
| 30737 | P03410 | P46091  | -1.4027  |
| 30738 | P03410 | P29972  | -0.22701 |
| 30739 | P03410 | Q96D31  | -0.39802 |
| 30740 | P03410 | Q8TBP6  | -0.51629 |
| 30741 | P03410 | Q9Y5G9  | -1.1822  |
| 30742 | P03410 | Q9BXJ3  | -0.93157 |
| 30743 | P03410 | O14626  | -1.1683  |
| 30744 | P03410 | P60981  | -0.14563 |
| 30745 | P03410 | Q8N5I2  | -0.29436 |
| 30746 | P03410 | Q96LU7  | -0.71003 |
| 30747 | P03410 | Q6PIW4  | -0.48787 |
| 30748 | P03410 | O15444  | -0.94631 |
| 30749 | P03410 | Q6UX73  | -0.71003 |
| 30750 | P03410 | Q5R3F8  | -0.65269 |
| 30751 | P03410 | Q9BZM6  | -0.34534 |
| 30752 | P03410 | Q8IVU1  | -0.80641 |
| 30753 | P03410 | P39059  | -1.8611  |
| 30754 | P03410 | P47775  | -1.3614  |
| 30755 | P03410 | P57058  | -1.6991  |
| 30756 | P03410 | Q96IQ7  | -0.83693 |
| 30757 | P03410 | O14763  | -0.22301 |
| 30758 | P03410 | Q9UKA1  | -0.22595 |
| 30759 | P03410 | Q8WW62  | -0.75654 |
| 30760 | P03410 | Q9BXB7  | -0.54046 |
| 30761 | P03410 | Q8IYD2  | -0.22462 |
| 30762 | P03410 | P40313  | -0.93469 |
| 30763 | P03410 | P0DM48  | -0.22685 |
| 30764 | P03410 | Q9HCS5  | -0.28499 |
| 30765 | P03410 | P01699  | -0.90565 |
| 30766 | P03410 | Q8WXA2  | -0.71003 |
| 30767 | P03410 | P16152  | -0.74249 |
| 30768 | P03410 | Q6UWJ1  | -0.8646  |
| 30769 | P03410 | Q4VC39  | -0.63308 |
| 30770 | P03410 | Q9NX52  | -1.2798  |
| 30771 | P03410 | Q8TDB6  | -0.22741 |
| 30772 | P03410 | O60840  | -0.79097 |
| 30773 | P03410 | P04439  | -0.9827  |
| 30774 | P03410 | Q00889  | -0.73155 |
| 30775 | P03410 | Q9H4F1  | -0.31007 |
| 30776 | P03410 | Q8N6M6  | -0.58029 |
| 30777 | P03410 | Q9UP65  | -0.85019 |
| 30778 | P03410 | Q9NUM3  | -0.77628 |
| 30779 | P03410 | A4D126  | -0.22911 |
| 30780 | P03410 | Q8N4F4  | -0.83207 |

|       |        |        |          |
|-------|--------|--------|----------|
| 30781 | P03410 | P45379 | -0.13414 |
| 30782 | P03410 | Q9UHP6 | -0.19812 |
| 30783 | P03410 | P20742 | -0.82874 |
| 30784 | P03410 | Q5VWK5 | -0.45479 |
| 30785 | P03410 | Q7Z736 | -0.20783 |
| 30786 | P03410 | Q15121 | -0.97061 |
| 30787 | P03410 | Q8WUK0 | -0.57618 |
| 30788 | P03410 | Q03167 | -0.29266 |
| 30789 | P03410 | P13284 | -1.0582  |
| 30790 | P03410 | Q5ZPR3 | -0.22745 |
| 30791 | P03410 | Q13822 | -1.0186  |
| 30792 | P03410 | Q75200 | -0.71003 |
| 30793 | P03410 | Q50LG9 | -0.63308 |
| 30794 | P03410 | P49223 | -0.74696 |
| 30795 | P03410 | Q9H209 | -1.153   |
| 30796 | P03410 | Q8TDT2 | -1.2185  |
| 30797 | P03410 | P08684 | -0.64211 |
| 30798 | P03410 | Q9Y2V3 | -0.30844 |
| 30799 | P03410 | P01595 | -0.90565 |
| 30800 | P03410 | O95264 | -1.1273  |
| 30801 | P03410 | P0C628 | -1.153   |
| 30802 | P03410 | A6NCD1 | -0.39568 |
| 30803 | P03410 | Q8N4F7 | -0.73225 |
| 30804 | P03410 | Q8TDU6 | -1.2185  |
| 30805 | P03410 | Q9H7F0 | -1.0627  |
| 30806 | P03410 | P61224 | -0.22771 |
| 30807 | P03410 | P28360 | -0.13223 |
| 30808 | P03410 | Q5JPI9 | -0.14609 |
| 30809 | P03410 | Q8IUA7 | -1.1007  |
| 30810 | P03410 | Q9UK33 | -0.19296 |
| 30811 | P03410 | A2RU14 | -0.63308 |
| 30812 | P03410 | P18031 | -0.31417 |
| 30813 | P03410 | Q9H1M3 | -0.69132 |
| 30814 | P03410 | O43248 | -0.21472 |
| 30815 | P03410 | H3BV60 | -0.63308 |
| 30816 | P03410 | Q9NYM4 | -1.1613  |
| 30817 | P03410 | P23771 | -0.22737 |
| 30818 | P03410 | P13762 | -0.61332 |
| 30819 | P03410 | Q8NH01 | -1.153   |
| 30820 | P03410 | Q8NGX3 | -1.153   |
| 30821 | P03410 | Q3SY77 | -0.75213 |
| 30822 | P03410 | Q96LR5 | -0.85406 |
| 30823 | P03410 | Q9BS26 | -0.24577 |
| 30824 | P03410 | Q8WZ64 | -1.1045  |
| 30825 | P03410 | P58062 | -0.20243 |
| 30826 | P03410 | P17542 | -0.22768 |
| 30827 | P03410 | P07711 | -0.57388 |
| 30828 | P03410 | Q9UNU6 | -1.055   |
| 30829 | P03410 | Q9UN67 | -1.0722  |
| 30830 | P03410 | Q96MM7 | -0.60127 |
| 30831 | P03410 | Q8N4L2 | -0.7487  |
| 30832 | P03410 | Q9HB90 | -0.66619 |
| 30833 | P03410 | Q9Y6N3 | -0.82839 |
| 30834 | P03410 | P0C264 | -1.3438  |
| 30835 | P03410 | Q9H190 | -0.22725 |
| 30836 | P03410 | Q96LT4 | -0.79715 |
| 30837 | P03410 | Q6ZQY3 | -0.29538 |
| 30838 | P03410 | P59827 | -0.7389  |
| 30839 | P03410 | Q6PL18 | -0.23062 |
| 30840 | P03410 | P34059 | -0.41128 |
| 30841 | P03410 | Q96A84 | -0.74264 |
| 30842 | P03410 | Q6UWL6 | -0.82609 |
| 30843 | P03410 | P35555 | -0.71087 |
| 30844 | P03410 | Q9BT67 | -0.30869 |
| 30845 | P03410 | P84095 | -0.32134 |
| 30846 | P03410 | P29317 | -0.68292 |
| 30847 | P03410 | Q6P1M0 | -1.1925  |
| 30848 | P03410 | P13631 | -0.23079 |
| 30849 | P03410 | P14091 | -0.5461  |
| 30850 | P03410 | Q15751 | -0.37135 |
| 30851 | P03410 | Q92871 | -0.26224 |
| 30852 | P03410 | P30450 | -0.73998 |
| 30853 | P03410 | Q969J5 | -0.65098 |
| 30854 | P03410 | P0CK97 | -0.63308 |
| 30855 | P03410 | Q9C0C9 | -1.0923  |
| 30856 | P03410 | Q8N468 | -0.67522 |

|       |        |        |           |
|-------|--------|--------|-----------|
| 30857 | P03410 | Q9H2B4 | -0.80185  |
| 30858 | P03410 | Q9BVA6 | -1.1167   |
| 30859 | P03410 | Q9H2S6 | -0.5489   |
| 30860 | P03410 | P50150 | -0.39146  |
| 30861 | P03410 | Q96BT7 | -0.17628  |
| 30862 | P03410 | Q05513 | -0.22271  |
| 30863 | P03410 | P19875 | -0.8926   |
| 30864 | P03410 | Q04656 | -0.22767  |
| 30865 | P03410 | Q14573 | -0.21675  |
| 30866 | P03410 | P56696 | -0.8967   |
| 30867 | P03410 | Q9TQE0 | -0.51359  |
| 30868 | P03410 | Q58FG1 | -0.53132  |
| 30869 | P03410 | Q9UK17 | -1.1072   |
| 30870 | P03410 | Q12841 | -0.90866  |
| 30871 | P03410 | Q8N5C6 | -0.11185  |
| 30872 | P03410 | Q9BPW9 | -0.81981  |
| 30873 | P03410 | Q8N1S5 | -0.77628  |
| 30874 | P03410 | Q86X24 | -0.407    |
| 30875 | P03410 | P11836 | -0.84823  |
| 30876 | P03410 | Q92565 | -0.25454  |
| 30877 | P03410 | Q9UNA1 | -0.30239  |
| 30878 | P03410 | P0CF74 | -0.88633  |
| 30879 | P03410 | Q9Y2T5 | -1.4027   |
| 30880 | P03410 | Q75840 | -0.22424  |
| 30881 | P03410 | Q9Y6W3 | -0.73226  |
| 30882 | P03410 | Q9NTU7 | -0.64044  |
| 30883 | P03410 | Q9NQV5 | -0.046731 |
| 30884 | P03410 | Q9HBT6 | -1.0201   |
| 30885 | P03410 | Q6A555 | -0.43259  |
| 30886 | P03410 | Q9BUZ4 | -0.22732  |
| 30887 | P03410 | P57737 | -0.26837  |
| 30888 | P03410 | C9JCN9 | -0.17968  |
| 30889 | P03410 | Q8TAB3 | -1.0719   |
| 30890 | P03410 | Q86UZ6 | -0.22789  |
| 30891 | P03410 | Q86UE8 | -0.22741  |
| 30892 | P03410 | Q4U2R8 | -0.30151  |
| 30893 | P03410 | A6NFX1 | -0.62453  |
| 30894 | P03410 | Q8NGR6 | -1.153    |
| 30895 | P03410 | Q52WX2 | -1.3428   |
| 30896 | P03410 | Q02094 | -0.78231  |
| 30897 | P03410 | Q9P291 | -0.63308  |
| 30898 | P03410 | Q6P1A2 | -0.78067  |
| 30899 | P03410 | Q16647 | -0.28758  |
| 30900 | P03410 | Q92878 | -0.20263  |
| 30901 | P03410 | Q9Y278 | -0.51107  |
| 30902 | P03410 | Q9Y6J6 | -1.0936   |
| 30903 | P03410 | Q8N239 | -0.20757  |
| 30904 | P03410 | Q8NBJ9 | -0.731    |
| 30905 | P03410 | A2PYH4 | -0.78857  |
| 30906 | P03410 | Q9BXC1 | -1.1683   |
| 30907 | P03410 | Q6UWM5 | -0.71003  |
| 30908 | P03410 | Q15005 | -0.73165  |
| 30909 | P03410 | P01712 | -0.90565  |
| 30910 | P03410 | P0C6C1 | -0.22741  |
| 30911 | P03410 | P12872 | -0.80104  |
| 30912 | P03410 | Q95231 | -0.22741  |
| 30913 | P03410 | P80421 | -0.7291   |
| 30914 | P03410 | A0A5B9 | -0.63308  |
| 30915 | P03410 | Q6P9A2 | -0.53218  |
| 30916 | P03410 | Q8N5G0 | -0.63308  |
| 30917 | P03410 | Q99729 | -0.27977  |
| 30918 | P03410 | P35520 | -0.22406  |
| 30919 | P03410 | Q9BVS4 | -1.2994   |
| 30920 | P03410 | Q8IVE3 | -0.4463   |
| 30921 | P03410 | Q96JG9 | -0.22764  |
| 30922 | P03410 | P41145 | -0.80335  |
| 30923 | P03410 | Q8WTR4 | -0.59319  |
| 30924 | P03410 | Q96S16 | -0.028415 |
| 30925 | P03410 | Q02156 | -0.30067  |
| 30926 | P03410 | Q9UKP4 | -1.3544   |
| 30927 | P03410 | P30041 | -0.21179  |
| 30928 | P03410 | Q14141 | -0.21216  |
| 30929 | P03410 | Q9H4E5 | -1.0211   |
| 30930 | P03410 | P51690 | -0.35504  |
| 30931 | P03410 | Q15409 | -0.49241  |
| 30932 | P03410 | Q6XPR3 | -0.86089  |

|       |        |        |           |
|-------|--------|--------|-----------|
| 30933 | P03410 | Q15120 | -0.22054  |
| 30934 | P03410 | P09429 | -0.22967  |
| 30935 | P03410 | Q9Y620 | -0.29734  |
| 30936 | P03410 | Q969V3 | -0.16725  |
| 30937 | P03410 | P30989 | -1.1622   |
| 30938 | P03410 | Q8IZ81 | -0.50246  |
| 30939 | P03410 | Q9UEU0 | -0.19273  |
| 30940 | P03410 | Q8IVU3 | -0.65142  |
| 30941 | P03410 | Q9UPE1 | -1.4472   |
| 30942 | P03410 | Q9Y5X3 | -0.53999  |
| 30943 | P03410 | Q16816 | -0.88269  |
| 30944 | P03410 | O43566 | -0.23065  |
| 30945 | P03410 | Q4AE62 | -0.18544  |
| 30946 | P03410 | Q96RJ0 | -1.1585   |
| 30947 | P03410 | P23560 | -0.42462  |
| 30948 | P03410 | A6NKB5 | -0.63308  |
| 30949 | P03410 | Q8NC42 | -1.0217   |
| 30950 | P03410 | Q53G44 | -0.13927  |
| 30951 | P03410 | Q9Y566 | -0.22744  |
| 30952 | P03410 | Q9Y251 | -0.23911  |
| 30953 | P03410 | Q9Y3B4 | -0.22411  |
| 30954 | P03410 | O15533 | -0.27081  |
| 30955 | P03410 | O43602 | -0.35423  |
| 30956 | P03410 | Q9UHQ4 | -0.21655  |
| 30957 | P03410 | P31937 | -0.49237  |
| 30958 | P03410 | Q9UPX0 | -0.797    |
| 30959 | P03410 | Q8N7I0 | -0.20654  |
| 30960 | P03410 | Q9UBC5 | -0.21213  |
| 30961 | P03410 | Q9HB14 | -1.0608   |
| 30962 | P03410 | Q5VTL7 | -0.71003  |
| 30963 | P03410 | Q13002 | -0.53551  |
| 30964 | P03410 | Q8NBM8 | -0.97368  |
| 30965 | P03410 | P60321 | -0.4459   |
| 30966 | P03410 | P42263 | -0.85095  |
| 30967 | P03410 | P10997 | -1.0303   |
| 30968 | P03410 | Q9NP95 | -0.84953  |
| 30969 | P03410 | P10767 | -1.0792   |
| 30970 | P03410 | Q9H6E5 | -0.22685  |
| 30971 | P03410 | P07355 | -0.15599  |
| 30972 | P03410 | P20916 | -0.83112  |
| 30973 | P03410 | Q15166 | -0.73784  |
| 30974 | P03410 | Q9ULI4 | -0.33855  |
| 30975 | P03410 | Q6ZUS6 | -0.10028  |
| 30976 | P03410 | O95977 | -1.3574   |
| 30977 | P03410 | O94956 | -0.97438  |
| 30978 | P03410 | Q8N755 | -0.63308  |
| 30979 | P03410 | P80404 | -0.16135  |
| 30980 | P03410 | Q8IUS5 | -0.76406  |
| 30981 | P03410 | Q92956 | -0.25262  |
| 30982 | P03410 | Q6ZVS6 | -0.71003  |
| 30983 | P03410 | P19957 | -0.80568  |
| 30984 | P03410 | Q9NY93 | -0.61488  |
| 30985 | P03410 | Q96BX8 | -0.34253  |
| 30986 | P03410 | P03979 | -0.23676  |
| 30987 | P03410 | P07306 | -0.35784  |
| 30988 | P03410 | Q96QB1 | -0.33665  |
| 30989 | P03410 | Q96PY5 | -0.22625  |
| 30990 | P03410 | Q96C12 | -0.01622  |
| 30991 | P03410 | Q8IXT5 | -0.089684 |
| 30992 | P03410 | Q9Y261 | -0.39324  |
| 30993 | P03410 | Q8TDM5 | -0.55723  |
| 30994 | P03410 | Q6UW02 | -1.0319   |
| 30995 | P03410 | Q5VVJ2 | -0.22736  |
| 30996 | P03410 | Q8N8Q3 | -0.083954 |
| 30997 | P03410 | Q7Z3V4 | -0.74859  |
| 30998 | P03410 | O00338 | -0.27065  |
| 30999 | P03410 | Q9H3Q3 | -0.65842  |
| 31000 | P03410 | Q9HCN3 | -1.0579   |
| 31001 | P03410 | P67936 | -0.19355  |
| 31002 | P03410 | P62341 | -0.12448  |
| 31003 | P03410 | P48165 | -0.90695  |
| 31004 | P03410 | P04434 | -0.90565  |
| 31005 | P03410 | Q5IJ48 | -1.487    |
| 31006 | P03410 | P01579 | -0.23042  |
| 31007 | P03410 | Q96P09 | -0.2274   |
| 31008 | P03410 | Q9Y2C4 | -0.089873 |

|       |        |        |          |
|-------|--------|--------|----------|
| 31009 | P03410 | Q9ULD6 | -0.22731 |
| 31010 | P03410 | P29377 | -0.22805 |
| 31011 | P03410 | Q9NZI8 | -0.2264  |
| 31012 | P03410 | Q6XPS3 | -1.012   |
| 31013 | P03410 | Q86UN2 | -0.34075 |
| 31014 | P03410 | P26367 | -0.21383 |
| 31015 | P03410 | B0I1T2 | -0.48471 |
| 31016 | P03410 | Q6UWY0 | -0.75265 |
| 31017 | P03410 | Q13470 | -0.9444  |
| 31018 | P03410 | A4D1T9 | -1.0736  |
| 31019 | P03410 | Q14435 | -0.14213 |
| 31020 | P03410 | Q8NI99 | -1.472   |
| 31021 | P03410 | Q8WXG6 | -0.12601 |
| 31022 | P03410 | Q2Q1W2 | -0.5532  |
| 31023 | P03410 | P30711 | -0.22196 |
| 31024 | P03410 | P51858 | -0.20789 |
| 31025 | P03410 | O75747 | -0.88624 |
| 31026 | P03410 | Q96KK4 | -1.153   |
| 31027 | P03410 | Q5VZ03 | -0.15991 |
| 31028 | P03410 | O14627 | -0.23516 |
| 31029 | P03410 | P56706 | -0.47461 |
| 31030 | P03410 | P78539 | -0.31674 |
| 31031 | P03410 | Q9BUM1 | -0.39461 |
| 31032 | P03410 | Q96A19 | -0.19742 |
| 31033 | P03410 | A6NGZ7 | -0.63308 |
| 31034 | P03410 | Q8NGC4 | -1.153   |
| 31035 | P03410 | Q16880 | -0.62887 |
| 31036 | P03410 | Q9BQR3 | -1.3874  |
| 31037 | P03410 | P59539 | -1.067   |
| 31038 | P03410 | Q9UQB8 | -0.22735 |
| 31039 | P03410 | Q05901 | -0.86384 |
| 31040 | P03410 | Q8N2R0 | -0.17397 |
| 31041 | P03410 | Q43688 | -0.65931 |
| 31042 | P03410 | Q9NQW8 | -1.4245  |
| 31043 | P03410 | Q9H3S5 | -0.74344 |
| 31044 | P03410 | Q9Y5H2 | -1.0719  |
| 31045 | P03410 | Q86UV6 | -0.39568 |
| 31046 | P03410 | Q99712 | -1.2053  |
| 31047 | P03410 | Q9UJ83 | -0.91534 |
| 31048 | P03410 | P21917 | -0.49374 |
| 31049 | P03410 | Q7Z333 | -0.23993 |
| 31050 | P03410 | P50151 | -0.34534 |
| 31051 | P03410 | Q16515 | -0.62137 |
| 31052 | P03410 | Q9NQW7 | -0.45664 |
| 31053 | P03410 | Q99519 | -0.409   |
| 31054 | P03410 | Q96IV6 | -0.92043 |
| 31055 | P03410 | Q96LT9 | -0.38264 |
| 31056 | P03410 | Q5T7P8 | -0.66547 |
| 31057 | P03410 | P51654 | -0.73763 |
| 31058 | P03410 | Q9BQE3 | -0.18473 |
| 31059 | P03410 | Q9H4Q4 | -0.22542 |
| 31060 | P03410 | Q8WV16 | -0.22761 |
| 31061 | P03410 | P28482 | -0.22741 |
| 31062 | P03410 | Q9UJ37 | -0.50976 |
| 31063 | P03410 | Q8TE23 | -1.1621  |
| 31064 | P03410 | P35218 | -0.11588 |
| 31065 | P03410 | P02730 | -0.28835 |
| 31066 | P03410 | P26006 | -0.29544 |
| 31067 | P03410 | Q9BQI7 | -0.77708 |
| 31068 | P03410 | Q5HYA8 | -0.22954 |
| 31069 | P03410 | P48549 | -0.49785 |
| 31070 | P03410 | Q9Y2C3 | -0.55228 |
| 31071 | P03410 | Q8WZA1 | -0.52741 |
| 31072 | P03410 | C4AMC7 | -0.23966 |
| 31073 | P03410 | O95544 | -0.84872 |
| 31074 | P03410 | Q9HAC7 | -0.22292 |
| 31075 | P03410 | P01568 | -0.73299 |
| 31076 | P03410 | P15172 | -0.22731 |
| 31077 | P03410 | P46934 | -0.22743 |
| 31078 | P03410 | A6NDD2 | -0.69132 |
| 31079 | P03410 | P37173 | -0.40836 |
| 31080 | P03410 | P05014 | -0.63335 |
| 31081 | P03410 | A8MZ25 | -0.40212 |
| 31082 | P03410 | Q8NCR0 | -0.56584 |
| 31083 | P03410 | Q16777 | -0.80275 |
| 31084 | P03410 | P35558 | -0.5384  |

|       |        |        |           |
|-------|--------|--------|-----------|
| 31085 | P03410 | P59510 | -1.2521   |
| 31086 | P03410 | B2RN74 | -1.153    |
| 31087 | P03410 | Q96SQ9 | -0.85327  |
| 31088 | P03410 | Q99944 | -1.1701   |
| 31089 | P03410 | Q9Y343 | -0.23542  |
| 31090 | P03410 | A8MYZ5 | -0.20016  |
| 31091 | P03410 | Q6BAA4 | -0.22929  |
| 31092 | P03410 | P30988 | -0.62332  |
| 31093 | P03410 | P04908 | -0.80275  |
| 31094 | P03410 | Q96PU4 | -0.22741  |
| 31095 | P03410 | Q9BXU1 | -1.3438   |
| 31096 | P03410 | O94921 | -0.16762  |
| 31097 | P03410 | P23109 | -0.12074  |
| 31098 | P03410 | P46721 | -0.84546  |
| 31099 | P03410 | Q96HA4 | -0.63308  |
| 31100 | P03410 | Q14641 | -1.26     |
| 31101 | P03410 | Q15771 | -1.0635   |
| 31102 | P03410 | Q07444 | -0.64533  |
| 31103 | P03410 | P34982 | -1.3192   |
| 31104 | P03410 | Q96DL1 | -0.63308  |
| 31105 | P03410 | Q9BXA6 | -1.2235   |
| 31106 | P03410 | Q3KNS1 | -0.61288  |
| 31107 | P03410 | P31146 | -0.22741  |
| 31108 | P03410 | Q92484 | -0.264    |
| 31109 | P03410 | P78552 | -0.30352  |
| 31110 | P03410 | Q9UKZ4 | -1.1886   |
| 31111 | P03410 | P20264 | -0.22741  |
| 31112 | P03410 | Q9H0Z9 | -0.34582  |
| 31113 | P03410 | Q6ZN92 | -0.059952 |
| 31114 | P03410 | P00367 | -0.19282  |
| 31115 | P03410 | P09038 | -0.37116  |
| 31116 | P03410 | Q86T82 | -0.43105  |
| 31117 | P03410 | P54646 | -0.35191  |
| 31118 | P03410 | Q8NGC5 | -1.153    |
| 31119 | P03410 | Q9P273 | -0.84523  |
| 31120 | P03410 | Q7Z402 | -0.63308  |
| 31121 | P03410 | Q96J87 | -0.38227  |
| 31122 | P03410 | P0CB38 | -0.67771  |
| 31123 | P03410 | Q16850 | -1.0816   |
| 31124 | P03410 | Q9Y4H2 | -0.16723  |
| 31125 | P03410 | Q99624 | -0.96635  |
| 31126 | P03410 | Q8NHC5 | -1.153    |
| 31127 | P03410 | Q7RTZ2 | -0.38454  |
| 31128 | P03410 | Q13555 | -1.1042   |
| 31129 | P03410 | Q9UK08 | -0.77526  |
| 31130 | P03410 | Q8TEU7 | -0.72578  |
| 31131 | P03410 | Q5TC82 | -0.2274   |
| 31132 | P03410 | O00622 | -0.4281   |
| 31133 | P03410 | Q8NGZ2 | -1.153    |
| 31134 | P03410 | Q6PIV7 | -0.46336  |
| 31135 | P03410 | Q9UNN8 | -0.19014  |
| 31136 | P03410 | Q96PC5 | -0.71003  |
| 31137 | P03410 | Q6PK57 | -0.24334  |
| 31138 | P03410 | O15523 | -0.83752  |
| 31139 | P03410 | Q9P1U1 | -0.57957  |
| 31140 | P03410 | Q5TGJ6 | -0.14195  |
| 31141 | P03410 | P63211 | -0.59902  |
| 31142 | P03410 | Q9BZG2 | -0.60989  |
| 31143 | P03410 | Q8NCS7 | -0.73205  |
| 31144 | P03410 | Q9BZG1 | -0.85497  |
| 31145 | P03410 | Q5VV63 | -0.68117  |
| 31146 | P03410 | Q3MUJ2 | -0.88328  |
| 31147 | P03410 | Q12852 | -0.62972  |
| 31148 | P03410 | Q8NGE0 | -1.153    |
| 31149 | P03410 | P51157 | -1.1852   |
| 31150 | P03410 | P06312 | -0.90565  |
| 31151 | P03410 | Q86YJ5 | -0.88116  |
| 31152 | P03410 | O00370 | -0.070052 |
| 31153 | P03410 | O00322 | -0.66102  |
| 31154 | P03410 | O95835 | -0.22728  |
| 31155 | P03410 | O75636 | -0.54514  |
| 31156 | P03410 | Q9UBM8 | -0.45164  |
| 31157 | P03410 | P0C623 | -1.153    |
| 31158 | P03410 | Q8N4N3 | -0.20202  |
| 31159 | P03410 | Q7RTU1 | -0.26904  |
| 31160 | P03410 | P31431 | -0.84579  |

|       |        |        |           |
|-------|--------|--------|-----------|
| 31161 | P03410 | Q6NXE6 | -0.19691  |
| 31162 | P03410 | Q8N6G6 | -1.159    |
| 31163 | P03410 | Q8TD46 | -0.53179  |
| 31164 | P03410 | Q9H792 | -0.5331   |
| 31165 | P03410 | P06681 | -1.4157   |
| 31166 | P03410 | Q13972 | -0.50659  |
| 31167 | P03410 | Q6ZMM2 | -0.91834  |
| 31168 | P03410 | P00505 | -0.2025   |
| 31169 | P03410 | Q14994 | -0.90477  |
| 31170 | P03410 | P51795 | -1.0384   |
| 31171 | P03410 | Q9C0A0 | -1.1358   |
| 31172 | P03410 | Q9BV38 | -0.35533  |
| 31173 | P03410 | A6NKK0 | -1.153    |
| 31174 | P03410 | Q9H2F9 | -0.10409  |
| 31175 | P03410 | Q00056 | -0.17505  |
| 31176 | P03410 | Q9NQ94 | -0.28682  |
| 31177 | P03410 | Q86YJ7 | -0.22741  |
| 31178 | P03410 | Q9UBN6 | -0.69781  |
| 31179 | P03410 | P47895 | -0.4707   |
| 31180 | P03410 | Q9GZ0  | -0.22739  |
| 31181 | P03410 | Q8TDV2 | -1.2185   |
| 31182 | P03410 | P06311 | -0.90565  |
| 31183 | P03410 | Q9H2U9 | -0.94085  |
| 31184 | P03410 | O60637 | -0.63308  |
| 31185 | P03410 | O60479 | -0.21923  |
| 31186 | P03410 | O60331 | -0.58026  |
| 31187 | P03410 | Q6UXI9 | -1.2594   |
| 31188 | P03410 | P30542 | -0.36086  |
| 31189 | P03410 | P49674 | -0.22741  |
| 31190 | P03410 | P0C6A0 | -0.29074  |
| 31191 | P03410 | Q6UWY5 | -0.71003  |
| 31192 | P03410 | A6NKW6 | -0.63308  |
| 31193 | P03410 | Q04671 | -0.13699  |
| 31194 | P03410 | Q8N4V2 | -0.72084  |
| 31195 | P03410 | P29323 | -0.96161  |
| 31196 | P03410 | P55056 | -0.78702  |
| 31197 | P03410 | Q9UQP3 | -1.0905   |
| 31198 | P03410 | Q9NRW7 | -0.21323  |
| 31199 | P03410 | O95259 | -0.36194  |
| 31200 | P03410 | Q6Y2X3 | -0.21936  |
| 31201 | P03410 | A1XBS5 | -0.07971  |
| 31202 | P03410 | Q9ULT0 | -0.22538  |
| 31203 | P03410 | Q96AJ9 | -0.15747  |
| 31204 | P03410 | Q6UXD5 | -0.92548  |
| 31205 | P03410 | Q8TCQ1 | -1.1303   |
| 31206 | P03410 | Q6P5Z2 | -0.53451  |
| 31207 | P03410 | Q9H255 | -1.153    |
| 31208 | P03410 | Q96C24 | -0.23584  |
| 31209 | P03410 | P51168 | -0.38102  |
| 31210 | P03410 | Q6ZS11 | -0.82323  |
| 31211 | P03410 | Q9UKE5 | -0.3349   |
| 31212 | P03410 | Q5JVL4 | -0.22023  |
| 31213 | P03410 | P54753 | -1.124    |
| 31214 | P03410 | Q9HAU4 | -0.22741  |
| 31215 | P03410 | P32245 | -0.52466  |
| 31216 | P03410 | Q5T8P6 | -0.14389  |
| 31217 | P03410 | P09417 | -0.51738  |
| 31218 | P03410 | P32971 | -0.75519  |
| 31219 | P03410 | Q15418 | -0.20373  |
| 31220 | P03410 | P02751 | -0.43964  |
| 31221 | P03410 | Q14515 | -1.1451   |
| 31222 | P03410 | Q9Y5C1 | -0.62068  |
| 31223 | P03410 | Q6QAJ8 | -0.63308  |
| 31224 | P03410 | Q86SQ6 | -1.1347   |
| 31225 | P03410 | P01766 | -0.90565  |
| 31226 | P03410 | Q5T9S5 | -0.048053 |
| 31227 | P03410 | Q86SQ4 | -1.2876   |
| 31228 | P03410 | P04180 | -0.37277  |
| 31229 | P03410 | O60635 | -0.79565  |
| 31230 | P03410 | Q8NH51 | -1.153    |
| 31231 | P03410 | Q5T1H1 | -0.86997  |
| 31232 | P03410 | Q9Y4X4 | -0.22182  |
| 31233 | P03410 | P08572 | -0.4732   |
| 31234 | P03410 | Q96AP4 | -0.39568  |
| 31235 | P03410 | P24298 | -0.20168  |
| 31236 | P03410 | P10826 | -0.23393  |



|       |        |        |           |
|-------|--------|--------|-----------|
| 31237 | P03410 | Q8NEB9 | -0.72633  |
| 31238 | P03410 | Q13421 | -0.41331  |
| 31239 | P03410 | O60234 | -0.33652  |
| 31240 | P03410 | Q16653 | -1.0336   |
| 31241 | P03410 | P30457 | -0.73998  |
| 31242 | P03410 | O43610 | -0.28373  |
| 31243 | P03410 | Q7Z6M3 | -0.9531   |
| 31244 | P03410 | Q6VAB6 | -0.51847  |
| 31245 | P03410 | Q9ULZ1 | -0.66736  |
| 31246 | P03410 | A5PKW4 | -1.098    |
| 31247 | P03410 | P09341 | -1.0961   |
| 31248 | P03410 | Q9Y6H3 | -0.6549   |
| 31249 | P03410 | Q9NSE2 | -0.22741  |
| 31250 | P03410 | Q9C0D4 | -0.22746  |
| 31251 | P03410 | Q8N682 | -0.75571  |
| 31252 | P03410 | O95965 | -0.92596  |
| 31253 | P03410 | A6NNT2 | -0.1209   |
| 31254 | P03410 | P38606 | -0.62032  |
| 31255 | P03410 | Q9Y5X0 | -0.1754   |
| 31256 | P03410 | Q05823 | -0.46944  |
| 31257 | P03410 | P10070 | -0.22712  |
| 31258 | P03410 | Q8NCI6 | -0.11686  |
| 31259 | P03410 | Q9NQ36 | -0.77312  |
| 31260 | P03410 | P01764 | -0.90565  |
| 31261 | P03410 | Q8NH18 | -1.153    |
| 31262 | P03410 | Q13393 | -0.39292  |
| 31263 | P03410 | Q6ZWI9 | -0.2298   |
| 31264 | P03410 | P80419 | -0.7291   |
| 31265 | P03410 | Q96QT4 | -1.4805   |
| 31266 | P03410 | Q9UPN6 | -0.25512  |
| 31267 | P03410 | Q9H6U8 | -0.75522  |
| 31268 | P03410 | P08910 | -0.56721  |
| 31269 | P03410 | P08240 | -0.92971  |
| 31270 | P03410 | P78508 | -0.6625   |
| 31271 | P03410 | A6NEQ0 | -0.5168   |
| 31272 | P03410 | P54829 | -1.1286   |
| 31273 | P03410 | Q9BS91 | -0.44211  |
| 31274 | P03410 | Q9H2W2 | -0.21505  |
| 31275 | P03410 | P30475 | -0.9827   |
| 31276 | P03410 | P08034 | -0.80612  |
| 31277 | P03410 | P43220 | -0.66735  |
| 31278 | P03410 | P27707 | -0.62297  |
| 31279 | P03410 | P48745 | -0.94749  |
| 31280 | P03410 | Q6ZV89 | -0.20331  |
| 31281 | P03410 | P15735 | -0.82364  |
| 31282 | P03410 | Q9P2H3 | -0.22741  |
| 31283 | P03410 | Q96A58 | -0.71273  |
| 31284 | P03410 | P17693 | -0.87205  |
| 31285 | P03410 | P01127 | -0.37447  |
| 31286 | P03410 | Q9Y4G8 | -0.89728  |
| 31287 | P03410 | Q9P2N4 | -1.492    |
| 31288 | P03410 | Q8NEZ3 | -0.22638  |
| 31289 | P03410 | A2VEC9 | -1.1006   |
| 31290 | P03410 | Q9H078 | -0.62515  |
| 31291 | P03410 | Q16602 | -0.54165  |
| 31292 | P03410 | P27539 | -0.64073  |
| 31293 | P03410 | Q8WUF8 | -0.67965  |
| 31294 | P03410 | Q7Z692 | -0.63308  |
| 31295 | P03410 | Q5I7T1 | -0.8186   |
| 31296 | P03410 | Q86YR5 | -0.22086  |
| 31297 | P03410 | Q9NNZ3 | -0.46392  |
| 31298 | P03410 | Q8WZ74 | -0.5115   |
| 31299 | P03410 | O94759 | -0.9669   |
| 31300 | P03410 | P51170 | -0.52487  |
| 31301 | P03410 | Q8TAV5 | -0.71003  |
| 31302 | P03410 | Q13614 | -0.21541  |
| 31303 | P03410 | Q8NH16 | -1.1275   |
| 31304 | P03410 | Q9Y6B6 | -0.27282  |
| 31305 | P03410 | Q5W064 | -0.15516  |
| 31306 | P03410 | O75344 | -0.43078  |
| 31307 | P03410 | P41217 | -0.39809  |
| 31308 | P03410 | Q86UX6 | -1.4156   |
| 31309 | P03410 | Q8NBQ7 | -0.33386  |
| 31310 | P03410 | P01225 | -0.066757 |
| 31311 | P03410 | Q86XS8 | -0.66773  |
| 31312 | P03410 | Q3SXY7 | -0.63308  |

|       |        |        |          |
|-------|--------|--------|----------|
| 31313 | P03410 | P01777 | -0.90565 |
| 31314 | P03410 | A6NHL2 | -0.2746  |
| 31315 | P03410 | P0CG05 | -0.88633 |
| 31316 | P03410 | Q9P0M4 | -0.81591 |
| 31317 | P03410 | Q9UBJ2 | -0.57315 |
| 31318 | P03410 | O60733 | -0.2274  |
| 31319 | P03410 | Q8WVZ1 | -0.86764 |
| 31320 | P03410 | A4FU01 | -0.21587 |
| 31321 | P03410 | Q6IF63 | -1.153   |
| 31322 | P03410 | Q6UXX5 | -0.73141 |
| 31323 | P03410 | Q99835 | -0.27101 |
| 31324 | P03410 | O43665 | -0.39956 |
| 31325 | P03410 | Q9HA72 | -0.63308 |
| 31326 | P03410 | Q92485 | -0.81412 |
| 31327 | P03410 | Q96RN1 | -0.61869 |
| 31328 | P03410 | Q8NEC5 | -0.70113 |
| 31329 | P03410 | Q7Z3E1 | -0.29327 |
| 31330 | P03410 | O15492 | -0.23118 |
| 31331 | P03410 | Q5JUK2 | -0.3305  |
| 31332 | P03410 | Q08289 | -0.22646 |
| 31333 | P03410 | Q95076 | -0.22739 |
| 31334 | P03410 | P28845 | -1.3159  |
| 31335 | P03410 | O00160 | -0.35546 |
| 31336 | P03410 | Q6PI78 | -0.45086 |
| 31337 | P03410 | Q58DX5 | -1.0966  |
| 31338 | P03410 | P17509 | -0.20656 |
| 31339 | P03410 | O14610 | -1.0845  |
| 31340 | P03410 | Q6PHR2 | -0.73427 |
| 31341 | P03410 | P78368 | -1.2462  |
| 31342 | P03410 | Q6PIY5 | -0.2116  |
| 31343 | P03410 | Q9H0L4 | -0.70757 |
| 31344 | P03410 | Q9UHG0 | -0.21932 |
| 31345 | P03410 | Q8NH74 | -1.153   |
| 31346 | P03410 | Q08380 | -1.3192  |
| 31347 | P03410 | Q14155 | -0.22743 |
| 31348 | P03410 | Q9BWM7 | -0.70478 |
| 31349 | P03410 | P46736 | -0.29207 |
| 31350 | P03410 | Q9NUQ2 | -0.69333 |
| 31351 | P03410 | A6NK02 | -0.39568 |
| 31352 | P03410 | O00515 | -0.77192 |
| 31353 | P03410 | P0C263 | -1.3438  |
| 31354 | P03410 | Q3LFD5 | -0.77038 |
| 31355 | P03410 | B2RTY4 | -1.019   |
| 31356 | P03410 | Q9GZX3 | -0.48896 |
| 31357 | P03410 | Q9BV40 | -0.49444 |
| 31358 | P03410 | P41226 | -0.70763 |
| 31359 | P03410 | P15863 | -0.22671 |
| 31360 | P03410 | Q9UJA9 | -1.5316  |
| 31361 | P03410 | Q93008 | -0.60742 |
| 31362 | P03410 | Q96E35 | -0.20822 |
| 31363 | P03410 | P03952 | -0.82138 |
| 31364 | P03410 | Q15245 | -0.32699 |
| 31365 | P03410 | O60760 | -0.2252  |
| 31366 | P03410 | Q96PD2 | -0.96856 |
| 31367 | P03410 | Q6ZWT7 | -0.83451 |
| 31368 | P03410 | B3SHH9 | -0.797   |
| 31369 | P03410 | Q9UI40 | -0.92735 |
| 31370 | P03410 | A8MTL9 | -0.74696 |
| 31371 | P03410 | Q2M2H8 | -0.59702 |
| 31372 | P03410 | O95858 | -0.83693 |
| 31373 | P03410 | Q9BZF2 | -0.44496 |
| 31374 | P03410 | Q5KSL6 | -1.074   |
| 31375 | P03410 | Q96EQ0 | -0.22699 |
| 31376 | P03410 | A6NL99 | -0.60778 |
| 31377 | P03410 | Q9Y6A4 | -0.35533 |
| 31378 | P03410 | P16442 | -0.98576 |
| 31379 | P03410 | Q8N4N8 | -0.33515 |
| 31380 | P03410 | Q6DD88 | -0.9334  |
| 31381 | P03410 | Q6P3R8 | -1.4156  |
| 31382 | P03410 | Q6IBS0 | -0.25002 |
| 31383 | P03410 | P46597 | -0.14161 |
| 31384 | P03410 | P15291 | -0.45363 |
| 31385 | P03410 | P19320 | -0.60295 |
| 31386 | P03410 | A6NI28 | -1.181   |
| 31387 | P03410 | P48546 | -1.2499  |
| 31388 | P03410 | P59020 | -0.10645 |

|       |        |        |            |
|-------|--------|--------|------------|
| 31389 | P03410 | Q15858 | -0.8674    |
| 31390 | P03410 | Q9H521 | -0.026931  |
| 31391 | P03410 | Q8WU67 | -0.55349   |
| 31392 | P03410 | Q8IVL1 | -0.65178   |
| 31393 | P03410 | P50895 | -1.2184    |
| 31394 | P03410 | Q96QK8 | -0.63308   |
| 31395 | P03410 | P28221 | -1.2755    |
| 31396 | P03410 | Q9BS86 | -0.71722   |
| 31397 | P03410 | P32297 | -0.6866    |
| 31398 | P03410 | Q8TAF8 | -0.665     |
| 31399 | P03410 | P11226 | -0.54184   |
| 31400 | P03410 | Q9UN74 | -1.1668    |
| 31401 | P03410 | P35613 | -0.22742   |
| 31402 | P03410 | Q8IYU8 | -0.20375   |
| 31403 | P03410 | O60235 | -1.8706    |
| 31404 | P03410 | P49798 | -0.37918   |
| 31405 | P03410 | Q0ZGT2 | -0.22741   |
| 31406 | P03410 | Q8N8L6 | -1.269     |
| 31407 | P03410 | Q6P9F5 | -0.39568   |
| 31408 | P03410 | P13671 | -0.22741   |
| 31409 | P03410 | O60469 | -0.93505   |
| 31410 | P03410 | P34931 | -0.50947   |
| 31411 | P03410 | Q8NGU4 | -1.153     |
| 31412 | P03410 | O75093 | -0.78058   |
| 31413 | P03410 | P01608 | -0.90565   |
| 31414 | P03410 | Q7Z6E9 | -0.17788   |
| 31415 | P03410 | Q92743 | -1.0235    |
| 31416 | P03410 | Q15516 | -0.22745   |
| 31417 | P03410 | P17706 | -0.25736   |
| 31418 | P03410 | Q9NPG8 | -0.86764   |
| 31419 | P03410 | Q9P2R3 | -0.2274    |
| 31420 | P03410 | Q9BY10 | -0.78241   |
| 31421 | P03410 | P20366 | -0.74445   |
| 31422 | P03410 | Q9NW68 | -0.0050094 |
| 31423 | P03410 | O95988 | -0.17894   |
| 31424 | P03410 | Q01167 | -0.41532   |
| 31425 | P03410 | Q9UK32 | -0.99012   |
| 31426 | P03410 | Q9H239 | -1.4421    |
| 31427 | P03410 | Q96JQ0 | -1.0493    |
| 31428 | P03410 | Q99784 | -0.22723   |
| 31429 | P03410 | Q96AY3 | -0.31928   |
| 31430 | P03410 | P01848 | -0.82713   |
| 31431 | P03410 | Q9Y5G4 | -1.0719    |
| 31432 | P03410 | Q5H9U9 | -0.8216    |
| 31433 | P03410 | Q8IVV2 | -0.23118   |
| 31434 | P03410 | P41240 | -0.22747   |
| 31435 | P03410 | O94887 | -0.2275    |
| 31436 | P03410 | A4D2B8 | -0.30356   |
| 31437 | P03410 | Q86YB8 | -0.58544   |
| 31438 | P03410 | Q562R1 | -0.42266   |
| 31439 | P03410 | Q9Y2L6 | -0.26233   |
| 31440 | P03410 | Q96SU4 | -0.44496   |
| 31441 | P03410 | Q9UNA0 | -0.35246   |
| 31442 | P03410 | Q7RTY0 | -0.83145   |
| 31443 | P03410 | Q5FVE4 | -1.1406    |
| 31444 | P03410 | Q5JQD4 | -0.69271   |
| 31445 | P03410 | Q7RTW8 | -1.02      |
| 31446 | P03410 | Q9H7D0 | -0.22741   |
| 31447 | P03410 | O43895 | -0.81241   |
| 31448 | P03410 | Q9P2K6 | -0.21906   |
| 31449 | P03410 | O00443 | -0.5632    |
| 31450 | P03410 | P0CK96 | -0.63308   |
| 31451 | P03410 | Q8NGL6 | -1.153     |
| 31452 | P03410 | B3KVVO | -0.63308   |
| 31453 | P03410 | Q15669 | -0.22498   |
| 31454 | P03410 | O60704 | -0.45934   |
| 31455 | P03410 | P20827 | -0.38635   |
| 31456 | P03410 | Q96NB2 | -0.7146    |
| 31457 | P03410 | P17600 | -0.29247   |
| 31458 | P03410 | Q02641 | -0.4425    |
| 31459 | P03410 | Q9H3G5 | -0.54881   |
| 31460 | P03410 | Q8WVE0 | -0.085761  |
| 31461 | P03410 | Q6DKI7 | -0.63308   |
| 31462 | P03410 | Q9H6A9 | -0.63308   |
| 31463 | P03410 | Q96JB1 | -0.31824   |
| 31464 | P03410 | P21579 | -0.29245   |

|       |        |        |           |
|-------|--------|--------|-----------|
| 31465 | P03410 | P35346 | -1.05     |
| 31466 | P03410 | P98179 | -0.44723  |
| 31467 | P03410 | Q9Y4X1 | -0.73619  |
| 31468 | P03410 | Q6PK18 | -0.9708   |
| 31469 | P03410 | Q7L8C5 | -0.69553  |
| 31470 | P03410 | Q86WT1 | -0.070829 |
| 31471 | P03410 | P18428 | -0.34113  |
| 31472 | P03410 | Q8NG11 | -0.63308  |
| 31473 | P03410 | Q9NSY0 | -0.70688  |
| 31474 | P03410 | Q92876 | -0.30295  |
| 31475 | P03410 | Q8NGD2 | -1.153    |
| 31476 | P03410 | P17252 | -0.24054  |
| 31477 | P03410 | P37023 | -0.348    |
| 31478 | P03410 | Q92954 | -0.73747  |
| 31479 | P03410 | Q9UNE2 | -0.19813  |
| 31480 | P03410 | Q43572 | -0.22     |
| 31481 | P03410 | P01761 | -0.90565  |
| 31482 | P03410 | Q8TD84 | -0.93422  |
| 31483 | P03410 | Q8NFW1 | -0.81376  |
| 31484 | P03410 | D6RCP7 | -0.66744  |
| 31485 | P03410 | Q14957 | -0.50023  |
| 31486 | P03410 | Q14444 | -0.28376  |
| 31487 | P03410 | Q8TF71 | -0.8856   |
| 31488 | P03410 | P02768 | -0.32858  |
| 31489 | P03410 | P49189 | -0.45571  |
| 31490 | P03410 | P0C646 | -1.153    |
| 31491 | P03410 | Q9NZR1 | -0.20346  |
| 31492 | P03410 | Q6MZZ7 | -0.99959  |
| 31493 | P03410 | Q9NP91 | -1.065    |
| 31494 | P03410 | P53597 | -0.69987  |
| 31495 | P03410 | P09622 | -0.22122  |
| 31496 | P03410 | P00441 | -0.21361  |
| 31497 | P03410 | A1A4S6 | -0.24342  |
| 31498 | P03410 | Q4AC99 | -0.20995  |
| 31499 | P03410 | Q00888 | -0.71259  |
| 31500 | P03410 | Q8NEV1 | -1.1948   |
| 31501 | P03410 | O14842 | -1.1633   |
| 31502 | P03410 | Q9UBV2 | -0.22711  |
| 31503 | P03410 | Q8IYT4 | -0.50095  |
| 31504 | P03410 | P13611 | -1.1109   |
| 31505 | P03410 | P43251 | -0.63429  |
| 31506 | P03410 | Q13630 | -0.82186  |
| 31507 | P03410 | Q9NZN4 | -0.34402  |
| 31508 | P03410 | Q7Z6M1 | -0.22407  |
| 31509 | P03410 | P55082 | -0.797    |
| 31510 | P03410 | A6H8M9 | -1.0719   |
| 31511 | P03410 | P39877 | -0.66785  |
| 31512 | P03410 | Q5H8C1 | -1.7326   |
| 31513 | P03410 | Q9H2E6 | -0.48361  |
| 31514 | P03410 | Q1XH10 | -0.41032  |
| 31515 | P03410 | O15123 | -0.59743  |
| 31516 | P03410 | Q9ULI0 | -0.81676  |
| 31517 | P03410 | Q5MAI5 | -1.0249   |
| 31518 | P03410 | Q9NRC9 | -0.7136   |
| 31519 | P03410 | Q2TB10 | -0.22725  |
| 31520 | P03410 | P49757 | -0.23047  |
| 31521 | P03410 | Q8NGD1 | -1.153    |
| 31522 | P03410 | Q96GM1 | -0.74755  |
| 31523 | P03410 | Q96PX6 | -0.1258   |
| 31524 | P03410 | Q8N8V8 | -0.63308  |
| 31525 | P03410 | A6NG13 | -0.73759  |
| 31526 | P03410 | P25101 | -0.47821  |
| 31527 | P03410 | Q6ZTW0 | -0.16854  |
| 31528 | P03410 | Q9BYV7 | -0.49874  |
| 31529 | P03410 | P23471 | -1.2767   |
| 31530 | P03410 | P53350 | -0.22742  |
| 31531 | P03410 | P35462 | -0.3204   |
| 31532 | P03410 | Q9Y4B4 | -0.38352  |
| 31533 | P03410 | Q2TBF2 | -0.63308  |
| 31534 | P03410 | O75298 | -0.27586  |
| 31535 | P03410 | A6NDI0 | -0.39568  |
| 31536 | P03410 | P51809 | -0.20379  |
| 31537 | P03410 | O75841 | -0.39852  |
| 31538 | P03410 | Q99683 | -0.22737  |
| 31539 | P03410 | Q9NQX4 | -0.36159  |
| 31540 | P03410 | P0C862 | -0.79437  |

|       |        |        |           |
|-------|--------|--------|-----------|
| 31541 | P03410 | Q4VXF1 | -0.63308  |
| 31542 | P03410 | Q8NH50 | -1.153    |
| 31543 | P03410 | P14317 | -0.22849  |
| 31544 | P03410 | Q9NRC1 | -0.63308  |
| 31545 | P03410 | O00182 | -0.77133  |
| 31546 | P03410 | Q96MA6 | -0.73849  |
| 31547 | P03410 | Q9UHM6 | -1.1015   |
| 31548 | P03410 | Q8IVW8 | -0.7786   |
| 31549 | P03410 | Q86UP6 | -0.501    |
| 31550 | P03410 | Q8N1L4 | -0.85726  |
| 31551 | P03410 | Q02252 | -0.31707  |
| 31552 | P03410 | Q5VXI9 | -0.7829   |
| 31553 | P03410 | P04438 | -0.90565  |
| 31554 | P03410 | P04179 | -0.1705   |
| 31555 | P03410 | Q9BZ95 | -0.40492  |
| 31556 | P03410 | Q30KQ5 | -0.69132  |
| 31557 | P03410 | Q7Z7B1 | -0.80265  |
| 31558 | P03410 | P30462 | -0.9827   |
| 31559 | P03410 | Q6A1A2 | -1.2428   |
| 31560 | P03410 | Q05209 | -0.23599  |
| 31561 | P03410 | Q9ULW2 | -0.88333  |
| 31562 | P03410 | O00591 | -0.64442  |
| 31563 | P03410 | Q9BZM5 | -0.95638  |
| 31564 | P03410 | Q5VY80 | -0.34179  |
| 31565 | P03410 | Q8WXD0 | -1.0607   |
| 31566 | P03410 | Q92911 | -0.79105  |
| 31567 | P03410 | P49768 | -0.22362  |
| 31568 | P03410 | P30926 | -0.83087  |
| 31569 | P03410 | P49447 | -0.65112  |
| 31570 | P03410 | P07288 | -0.84574  |
| 31571 | P03410 | Q9NYW3 | -1.0339   |
| 31572 | P03410 | P47890 | -1.153    |
| 31573 | P03410 | P09603 | -0.58675  |
| 31574 | P03410 | Q76EJ3 | -0.3538   |
| 31575 | P03410 | Q6B8I1 | -0.59878  |
| 31576 | P03410 | Q7Z6W1 | -0.63308  |
| 31577 | P03410 | P57729 | -0.81275  |
| 31578 | P03410 | P57682 | -0.31884  |
| 31579 | P03410 | O75838 | -0.22891  |
| 31580 | P03410 | Q14668 | -1.5145   |
| 31581 | P03410 | O95995 | -0.11601  |
| 31582 | P03410 | A6NDY0 | -0.51817  |
| 31583 | P03410 | Q9NYG8 | -1.0608   |
| 31584 | P03410 | Q8NEC7 | -0.12947  |
| 31585 | P03410 | Q92806 | -0.49787  |
| 31586 | P03410 | Q8NGC3 | -1.153    |
| 31587 | P03410 | P09958 | -0.44008  |
| 31588 | P03410 | Q08AF3 | -0.61851  |
| 31589 | P03410 | Q9UN72 | -1.1668   |
| 31590 | P03410 | P20719 | -0.22325  |
| 31591 | P03410 | Q6ZVZ8 | -0.3944   |
| 31592 | P03410 | Q7L513 | -0.73828  |
| 31593 | P03410 | Q9UMQ6 | -1.0439   |
| 31594 | P03410 | Q9UHE5 | -0.90975  |
| 31595 | P03410 | Q9Y6W6 | -0.29656  |
| 31596 | P03410 | P48960 | -2.0024   |
| 31597 | P03410 | P20702 | -0.36972  |
| 31598 | P03410 | Q5TGI4 | -0.22691  |
| 31599 | P03410 | Q8N4F0 | -0.88082  |
| 31600 | P03410 | Q00444 | -0.23351  |
| 31601 | P03410 | Q5CZ79 | -0.22739  |
| 31602 | P03410 | Q86TB3 | -0.69141  |
| 31603 | P03410 | A6NGZ8 | -0.797    |
| 31604 | P03410 | P61106 | -0.3195   |
| 31605 | P03410 | P15090 | -0.18125  |
| 31606 | P03410 | P41231 | -0.77811  |
| 31607 | P03410 | A4D1Z8 | -0.075802 |
| 31608 | P03410 | Q8N5M9 | -0.7715   |
| 31609 | P03410 | P81133 | -0.39954  |
| 31610 | P03410 | P21815 | -0.98299  |
| 31611 | P03410 | P05026 | -0.38352  |
| 31612 | P03410 | Q96L50 | -0.2275   |
| 31613 | P03410 | P19087 | -0.85788  |
| 31614 | P03410 | P17481 | -0.2131   |
| 31615 | P03410 | Q7Z4T8 | -0.5404   |
| 31616 | P03410 | Q99102 | -1.6102   |

|       |        |        |          |
|-------|--------|--------|----------|
| 31617 | P03410 | Q9BPW5 | -1.1785  |
| 31618 | P03410 | P28358 | -0.34425 |
| 31619 | P03410 | Q9NPI5 | -0.53318 |
| 31620 | P03410 | Q9BYX2 | -0.7013  |
| 31621 | P03410 | Q6ICH7 | -0.88987 |
| 31622 | P03410 | P01893 | -1.0492  |
| 31623 | P03410 | Q9NQ38 | -0.45162 |
| 31624 | P03410 | Q8N0U8 | -0.63308 |
| 31625 | P03410 | P42892 | -0.63963 |
| 31626 | P03410 | P59095 | -0.33344 |
| 31627 | P03410 | Q6AHZ1 | -0.22767 |
| 31628 | P03410 | C9J202 | -0.18581 |
| 31629 | P03410 | O75493 | -0.6225  |
| 31630 | P03410 | Q9UKT8 | -0.23388 |
| 31631 | P03410 | A1L167 | -1.0923  |
| 31632 | P03410 | A6NDJ8 | -0.89204 |
| 31633 | P03410 | Q8NGX2 | -1.153   |
| 31634 | P03410 | P12034 | -0.68251 |
| 31635 | P03410 | Q8NGL3 | -1.153   |
| 31636 | P03410 | Q5TC63 | -1.3577  |
| 31637 | P03410 | Q99983 | -1.0058  |
| 31638 | P03410 | O95786 | -0.22684 |
| 31639 | P03410 | P52732 | -0.31675 |
| 31640 | P03410 | Q92766 | -0.20356 |
| 31641 | P03410 | Q6IFH4 | -1.153   |
| 31642 | P03410 | O95976 | -0.97251 |
| 31643 | P03410 | Q8NGS5 | -1.153   |
| 31644 | P03410 | O75912 | -0.29845 |
| 31645 | P03410 | Q9UL68 | -0.3311  |
| 31646 | P03410 | Q9UMX9 | -0.7498  |
| 31647 | P03410 | Q9HC56 | -0.99275 |
| 31648 | P03410 | O75954 | -0.83693 |
| 31649 | P03410 | Q4V339 | -0.66861 |
| 31650 | P03410 | Q96NJ5 | -0.19368 |
| 31651 | P03410 | Q03518 | -0.34762 |
| 31652 | P03410 | Q9NSD5 | -0.98374 |
| 31653 | P03410 | O15209 | -0.22476 |
| 31654 | P03410 | Q9Y484 | -0.22691 |
| 31655 | P03410 | Q8IUX7 | -0.62454 |
| 31656 | P03410 | Q9H598 | -0.87642 |
| 31657 | P03410 | Q96LR1 | -0.71003 |
| 31658 | P03410 | O43424 | -0.56503 |
| 31659 | P03410 | Q96LA5 | -0.75169 |
| 31660 | P03410 | Q96T53 | -0.80271 |
| 31661 | P03410 | Q9GZT3 | -0.22962 |
| 31662 | P03410 | Q15392 | -0.37393 |
| 31663 | P03410 | P31944 | -0.39922 |
| 31664 | P03410 | Q92747 | -0.22738 |
| 31665 | P03410 | Q9H1E5 | -0.67335 |
| 31666 | P03410 | Q9NXI6 | -0.73225 |
| 31667 | P03410 | Q8NFU5 | -0.55484 |
| 31668 | P03410 | Q9BRT8 | -0.66861 |
| 31669 | P03410 | Q9Y2T4 | -0.20795 |
| 31670 | P03410 | P04798 | -0.34231 |
| 31671 | P03410 | P0C7P1 | -0.5168  |
| 31672 | P03410 | Q96ID5 | -0.71003 |
| 31673 | P03410 | Q86U10 | -0.22734 |
| 31674 | P03410 | Q8NH55 | -1.153   |
| 31675 | P03410 | Q96GS6 | -0.71711 |
| 31676 | P03410 | Q01995 | -0.19008 |
| 31677 | P03410 | P49802 | -0.47688 |
| 31678 | P03410 | Q9UN70 | -1.0493  |
| 31679 | P03410 | Q8WZA2 | -0.31328 |
| 31680 | P03410 | Q8N0Y5 | -1.153   |
| 31681 | P03410 | Q4W5N1 | -0.26796 |
| 31682 | P03410 | P80075 | -0.96206 |
| 31683 | P03410 | P55008 | -0.22709 |
| 31684 | P03410 | P42658 | -0.70712 |
| 31685 | P03410 | Q5T1A1 | -0.63308 |
| 31686 | P03410 | Q9UBS0 | -0.70989 |
| 31687 | P03410 | Q9BR26 | -0.753   |
| 31688 | P03410 | O43889 | -0.71691 |
| 31689 | P03410 | Q14190 | -0.25212 |
| 31690 | P03410 | P61018 | -0.82655 |
| 31691 | P03410 | Q9H3T3 | -1.1142  |
| 31692 | P03410 | Q13444 | -0.65017 |

|       |        |        |          |
|-------|--------|--------|----------|
| 31693 | P03410 | P01350 | -0.89937 |
| 31694 | P03410 | Q4ZJI4 | -0.70902 |
| 31695 | P03410 | P07357 | -1.3776  |
| 31696 | P03410 | Q8WWH4 | -0.58612 |
| 31697 | P03410 | Q9UIA0 | -0.4022  |
| 31698 | P03410 | Q96TA2 | -1.3686  |
| 31699 | P03410 | O94810 | -0.5444  |
| 31700 | P03410 | Q01449 | -0.22618 |
| 31701 | P03410 | P20023 | -0.78757 |
| 31702 | P03410 | Q9UBX0 | -0.17484 |
| 31703 | P03410 | Q8WUA2 | -0.43527 |
| 31704 | P03410 | Q9H4D0 | -0.80469 |
| 31705 | P03410 | Q9NY57 | -1.4156  |
| 31706 | P03410 | P19438 | -0.25567 |
| 31707 | P03410 | P0CG41 | -0.63308 |
| 31708 | P03410 | P00740 | -1.2696  |
| 31709 | P03410 | Q8IVW4 | -1.0177  |
| 31710 | P03410 | P24001 | -0.9648  |
| 31711 | P03410 | Q6ZWJ8 | -0.71003 |
| 31712 | P03410 | Q8IXK2 | -0.5184  |
| 31713 | P03410 | Q9BQ51 | -1.3363  |
| 31714 | P03410 | Q6ZMN8 | -0.18426 |
| 31715 | P03410 | Q5JUK3 | -1.3434  |
| 31716 | P03410 | Q9H3Z4 | -0.38626 |
| 31717 | P03410 | O14976 | -0.86373 |
| 31718 | P03410 | P36544 | -0.67479 |
| 31719 | P03410 | Q9NXF8 | -0.7035  |
| 31720 | P03410 | Q9P0L2 | -1.1031  |
| 31721 | P03410 | O75962 | -0.76977 |
| 31722 | P03410 | Q8IUX1 | -0.61257 |
| 31723 | P03410 | Q13085 | -0.30891 |
| 31724 | P03410 | P01137 | -0.22741 |
| 31725 | P03410 | Q01118 | -0.94472 |
| 31726 | P03410 | Q8N392 | -1.0031  |
| 31727 | P03410 | P42685 | -0.79174 |
| 31728 | P03410 | Q9NP90 | -0.3228  |
| 31729 | P03410 | P14735 | -0.33292 |
| 31730 | P03410 | Q9NQ66 | -0.24298 |
| 31731 | P03410 | Q16342 | -0.13827 |
| 31732 | P03410 | Q08426 | -0.57362 |
| 31733 | P03410 | P17900 | -0.15115 |
| 31734 | P03410 | Q8NGZ6 | -1.153   |
| 31735 | P03410 | Q7L4E1 | -0.63308 |
| 31736 | P03410 | Q9UQQ2 | -0.25824 |
| 31737 | P03410 | Q8N427 | -0.6454  |
| 31738 | P03410 | O75333 | -0.44369 |
| 31739 | P03410 | Q6ZSC3 | -0.67771 |
| 31740 | P03410 | Q7L311 | -0.63308 |
| 31741 | P03410 | Q53FP2 | -0.78122 |
| 31742 | P03410 | Q9UI33 | -0.97189 |
| 31743 | P03410 | Q96CQ1 | -0.48231 |
| 31744 | P03410 | P04899 | -0.46302 |
| 31745 | P03410 | Q8N3D4 | -0.22851 |
| 31746 | P03410 | Q6NT16 | -0.67522 |
| 31747 | P03410 | P06850 | -0.43257 |
| 31748 | P03410 | Q86UX2 | -0.73141 |
| 31749 | P03410 | Q14880 | -1.0361  |
| 31750 | P03410 | A6NKX4 | -0.79924 |
| 31751 | P03410 | Q96G42 | -0.20759 |
| 31752 | P03410 | O60662 | -0.21271 |
| 31753 | P03410 | Q8IZJ4 | -0.57694 |
| 31754 | P03410 | Q69YJ1 | -0.44539 |
| 31755 | P03410 | O43826 | -0.31608 |
| 31756 | P03410 | P10915 | -1.0827  |
| 31757 | P03410 | O60486 | -0.98514 |
| 31758 | P03410 | Q14147 | -0.97857 |
| 31759 | P03410 | P0CB46 | -0.71734 |
| 31760 | P03410 | Q96S97 | -0.63308 |
| 31761 | P03410 | Q8IUN9 | -0.83701 |
| 31762 | P03410 | Q9H1R2 | -0.2734  |
| 31763 | P03410 | Q96PH1 | -0.74539 |
| 31764 | P03410 | Q04828 | -0.22626 |
| 31765 | P03410 | Q9UKQ2 | -1.8821  |
| 31766 | P03410 | Q9P2E5 | -0.38336 |
| 31767 | P03410 | Q9BY11 | -0.2274  |
| 31768 | P03410 | Q9Y2H9 | -0.69204 |

|       |        |        |           |
|-------|--------|--------|-----------|
| 31769 | P03410 | Q02779 | -0.73834  |
| 31770 | P03410 | Q9H497 | -0.48001  |
| 31771 | P03410 | P13765 | -0.88193  |
| 31772 | P03410 | Q14BN4 | -0.69393  |
| 31773 | P03410 | Q9Y6I0 | -0.52549  |
| 31774 | P03410 | A8MZH6 | -0.71003  |
| 31775 | P03410 | A6NHR9 | -0.43106  |
| 31776 | P03410 | Q9H2P0 | -0.18664  |
| 31777 | P03410 | Q8IYY4 | -0.27762  |
| 31778 | P03410 | Q8NBL3 | -0.63308  |
| 31779 | P03410 | O75354 | -1.0515   |
| 31780 | P03410 | P07339 | -1.1609   |
| 31781 | P03410 | Q9Y2R4 | -0.52105  |
| 31782 | P03410 | Q6ZSM3 | -0.83145  |
| 31783 | P03410 | O60890 | -0.64674  |
| 31784 | P03410 | O00254 | -1.0863   |
| 31785 | P03410 | P05019 | -0.23133  |
| 31786 | P03410 | Q5JU85 | -0.20521  |
| 31787 | P03410 | Q8NFZ8 | -0.87167  |
| 31788 | P03410 | Q0VG99 | -0.22766  |
| 31789 | P03410 | Q7LDG7 | -0.67239  |
| 31790 | P03410 | Q9UP79 | -1.358    |
| 31791 | P03410 | Q6IEZ7 | -1.153    |
| 31792 | P03410 | O43374 | -0.28397  |
| 31793 | P03410 | Q96PZ7 | -0.63308  |
| 31794 | P03410 | Q96EE4 | -0.71003  |
| 31795 | P03410 | O15072 | -1.3365   |
| 31796 | P03410 | A8MUP6 | -0.63308  |
| 31797 | P03410 | Q8NGH8 | -1.153    |
| 31798 | P03410 | Q68CR7 | -0.63308  |
| 31799 | P03410 | A6NKP2 | -0.78878  |
| 31800 | P03410 | Q9H3U5 | -0.67522  |
| 31801 | P03410 | A6NE52 | -0.22746  |
| 31802 | P03410 | Q9Y6Y8 | -0.081667 |
| 31803 | P03410 | Q9UJ42 | -1.2185   |
| 31804 | P03410 | B9A064 | -0.71003  |
| 31805 | P03410 | Q16281 | -1.4423   |
| 31806 | P03410 | Q9H2R5 | -1.3874   |
| 31807 | P03410 | Q13164 | -0.22741  |
| 31808 | P03410 | P13569 | -0.32089  |
| 31809 | P03410 | Q9H210 | -1.153    |
| 31810 | P03410 | Q92619 | -1.0157   |
| 31811 | P03410 | Q9NQ84 | -1.2147   |
| 31812 | P03410 | P51993 | -0.56216  |
| 31813 | P03410 | Q9UMR5 | -0.19143  |
| 31814 | P03410 | O43692 | -0.82113  |
| 31815 | P03410 | Q13370 | -0.25624  |
| 31816 | P03410 | Q14565 | -0.35077  |
| 31817 | P03410 | Q63HM9 | -0.59937  |
| 31818 | P03410 | Q96Q04 | -1.537    |
| 31819 | P03410 | Q9H2A9 | -0.51644  |
| 31820 | P03410 | Q8WWZ4 | -1.2534   |
| 31821 | P03410 | Q8NA29 | -0.90563  |
| 31822 | P03410 | P01282 | -0.58921  |
| 31823 | P03410 | P04234 | -0.38379  |
| 31824 | P03410 | Q96N96 | -0.22769  |
| 31825 | P03410 | Q8NB15 | -0.22612  |
| 31826 | P03410 | Q13976 | -0.536    |
| 31827 | P03410 | Q969Z4 | -0.61569  |
| 31828 | P03410 | Q8NFW5 | -0.16783  |
| 31829 | P03410 | P57103 | -0.78255  |
| 31830 | P03410 | Q06203 | -0.42626  |
| 31831 | P03410 | Q6UWW0 | -0.74327  |
| 31832 | P03410 | Q96CC6 | -0.39089  |
| 31833 | P03410 | Q9Y679 | -0.36739  |
| 31834 | P03410 | Q5T442 | -0.65554  |
| 31835 | P03410 | Q96GP6 | -0.23571  |
| 31836 | P03410 | Q9NYG2 | -0.55561  |
| 31837 | P03410 | Q8IZU2 | -0.22814  |
| 31838 | P03410 | O15197 | -1.8321   |
| 31839 | P03410 | Q8IUK5 | -0.77704  |
| 31840 | P03410 | Q96JK2 | -0.22741  |
| 31841 | P03410 | Q8NGF3 | -1.153    |
| 31842 | P03410 | A6NHG4 | -0.16345  |
| 31843 | P03410 | Q9H2C5 | -1.153    |
| 31844 | P03410 | Q8IZT8 | -0.17631  |



|       |        |        |           |
|-------|--------|--------|-----------|
| 31845 | P03410 | O95104 | -0.31678  |
| 31846 | P03410 | Q12946 | -0.47636  |
| 31847 | P03410 | Q8NGB9 | -1.153    |
| 31848 | P03410 | Q8WYL5 | -0.29672  |
| 31849 | P03410 | P78556 | -0.98801  |
| 31850 | P03410 | Q99581 | -0.30811  |
| 31851 | P03410 | Q5SRN2 | -0.63308  |
| 31852 | P03410 | Q8NFN8 | -1.188    |
| 31853 | P03410 | Q96P69 | -1.2176   |
| 31854 | P03410 | P42680 | -1.2081   |
| 31855 | P03410 | Q8WUD6 | -0.52972  |
| 31856 | P03410 | Q01362 | -0.91379  |
| 31857 | P03410 | Q9H2J7 | -0.99855  |
| 31858 | P03410 | O75116 | -0.30412  |
| 31859 | P03410 | O60861 | -0.3022   |
| 31860 | P03410 | Q8NFA0 | -0.67774  |
| 31861 | P03410 | O75379 | -0.29303  |
| 31862 | P03410 | O43280 | -0.25728  |
| 31863 | P03410 | Q99611 | -0.97354  |
| 31864 | P03410 | Q16778 | -0.78432  |
| 31865 | P03410 | Q6ZU45 | -0.20895  |
| 31866 | P03410 | Q8NCJ5 | -0.17197  |
| 31867 | P03410 | Q9UN19 | -0.54651  |
| 31868 | P03410 | Q9Y5H6 | -1.1668   |
| 31869 | P03410 | Q14956 | -0.96657  |
| 31870 | P03410 | E2RYF7 | -0.71003  |
| 31871 | P03410 | Q96HP4 | -0.22221  |
| 31872 | P03410 | Q7Z469 | -0.46336  |
| 31873 | P03410 | Q6UWE0 | -0.22761  |
| 31874 | P03410 | Q15270 | -0.227    |
| 31875 | P03410 | Q8N9F0 | -0.51954  |
| 31876 | P03410 | Q8NH64 | -1.153    |
| 31877 | P03410 | Q9NTX7 | -0.2273   |
| 31878 | P03410 | O75881 | -0.63594  |
| 31879 | P03410 | P24043 | -0.81356  |
| 31880 | P03410 | Q16706 | -0.35004  |
| 31881 | P03410 | Q5TBK1 | -0.016074 |
| 31882 | P03410 | P0C7M8 | -0.63321  |
| 31883 | P03410 | O15056 | -0.2262   |
| 31884 | P03410 | P22792 | -0.68519  |
| 31885 | P03410 | Q8NAU1 | -1.3182   |
| 31886 | P03410 | Q96BF3 | -0.797    |
| 31887 | P03410 | A4D1F6 | -0.23136  |
| 31888 | P03410 | O94778 | -0.87207  |
| 31889 | P03410 | Q9UNT1 | -1.0276   |
| 31890 | P03410 | Q9UJH8 | -1.1314   |
| 31891 | P03410 | A6NFN9 | -0.22735  |
| 31892 | P03410 | Q86VF2 | -0.22754  |
| 31893 | P03410 | P62068 | -0.74386  |
| 31894 | P03410 | Q96A61 | -0.39568  |
| 31895 | P03410 | P59826 | -0.75872  |
| 31896 | P03410 | Q7Z6Z7 | -0.23517  |
| 31897 | P03410 | P43403 | -0.58389  |
| 31898 | P03410 | Q56NI9 | -0.31194  |
| 31899 | P03410 | P01185 | -0.4476   |
| 31900 | P03410 | Q96R84 | -1.153    |
| 31901 | P03410 | P15088 | -0.7001   |
| 31902 | P03410 | P26232 | -0.14724  |
| 31903 | P03410 | P33764 | -0.17055  |
| 31904 | P03410 | P31371 | -0.74989  |
| 31905 | P03410 | P01710 | -0.90565  |
| 31906 | P03410 | Q9NYJ7 | -0.9376   |
| 31907 | P03410 | Q16566 | -0.4735   |
| 31908 | P03410 | Q96RT6 | -0.64062  |
| 31909 | P03410 | P31323 | -0.22734  |
| 31910 | P03410 | Q86UG4 | -0.76284  |
| 31911 | P03410 | A6NIE9 | -1.3874   |
| 31912 | P03410 | Q8NB66 | -0.22741  |
| 31913 | P03410 | Q9HCM2 | -0.78883  |
| 31914 | P03410 | O15068 | -0.29843  |
| 31915 | P03410 | Q00266 | -0.73337  |
| 31916 | P03410 | O14904 | -0.92512  |
| 31917 | P03410 | P50583 | -0.58607  |
| 31918 | P03410 | Q8TBC4 | -0.22392  |
| 31919 | P03410 | Q5T0T0 | -1.0871   |
| 31920 | P03410 | P48509 | -0.48988  |

|       |        |        |          |
|-------|--------|--------|----------|
| 31921 | P03410 | Q86Y30 | -0.71003 |
| 31922 | P03410 | Q16322 | -0.83784 |
| 31923 | P03410 | O95479 | -0.75453 |
| 31924 | P03410 | Q9H7X0 | -0.18446 |
| 31925 | P03410 | Q9H3U1 | -0.22709 |
| 31926 | P03410 | Q7Z2H8 | -0.79235 |
| 31927 | P03410 | P11047 | -0.91758 |
| 31928 | P03410 | O43306 | -0.56708 |
| 31929 | P03410 | Q96JP0 | -0.22748 |
| 31930 | P03410 | Q05215 | -0.20905 |
| 31931 | P03410 | Q9C0K7 | -0.3006  |
| 31932 | P03410 | Q13115 | -0.23669 |
| 31933 | P03410 | P0C024 | -0.4578  |
| 31934 | P03410 | Q5T6X5 | -1.1212  |
| 31935 | P03410 | Q8NHX9 | -0.41522 |
| 31936 | P03410 | Q9HB40 | -1.0073  |
| 31937 | P03410 | Q01638 | -0.85895 |
| 31938 | P03410 | P13746 | -0.69714 |
| 31939 | P03410 | O14817 | -0.98334 |
| 31940 | P03410 | P05093 | -0.49025 |
| 31941 | P03410 | O76093 | -0.67913 |
| 31942 | P03410 | Q6ZNC4 | -0.39568 |
| 31943 | P03410 | Q95604 | -0.88938 |
| 31944 | P03410 | Q6UXN2 | -0.71003 |
| 31945 | P03410 | Q6FI13 | -0.80275 |
| 31946 | P03410 | O76081 | -0.3671  |
| 31947 | P03410 | P50443 | -1.0644  |
| 31948 | P03410 | P43146 | -0.2484  |
| 31949 | P03410 | Q14644 | -0.36968 |
| 31950 | P03410 | Q9BUN1 | -0.71003 |
| 31951 | P03410 | P23763 | -0.20539 |
| 31952 | P03410 | Q5T7M9 | -0.7715  |
| 31953 | P03410 | Q9NYW5 | -1.1904  |
| 31954 | P03410 | O95803 | -0.62605 |
| 31955 | P03410 | Q969N4 | -1.188   |
| 31956 | P03410 | Q8IYS0 | -0.63308 |
| 31957 | P03410 | P19634 | -0.41669 |
| 31958 | P03410 | Q96L93 | -0.47331 |
| 31959 | P03410 | O95258 | -0.63636 |
| 31960 | P03410 | P06340 | -0.85705 |
| 31961 | P03410 | Q8N126 | -0.84207 |
| 31962 | P03410 | Q9Y2I1 | -0.22741 |
| 31963 | P03410 | Q9BYH1 | -0.7715  |
| 31964 | P03410 | Q6ZMQ8 | -0.8817  |
| 31965 | P03410 | Q7RTV2 | -0.22468 |
| 31966 | P03410 | Q6ZNQ3 | -0.2282  |
| 31967 | P03410 | A6NKZ8 | -0.2746  |
| 31968 | P03410 | Q03403 | -0.2285  |
| 31969 | P03410 | P51164 | -0.83201 |
| 31970 | P03410 | A6NI03 | -0.39568 |
| 31971 | P03410 | Q9NPH5 | -0.79017 |
| 31972 | P03410 | A1KXE4 | -0.75617 |
| 31973 | P03410 | Q5NDL2 | -0.17626 |
| 31974 | P03410 | Q9NUD9 | -0.74344 |
| 31975 | P03410 | A6NGW2 | -0.71003 |
| 31976 | P03410 | Q9Y2X7 | -0.22741 |
| 31977 | P03410 | Q6GPH6 | -0.63308 |
| 31978 | P03410 | Q96PB8 | -0.63308 |
| 31979 | P03410 | A0FGR8 | -0.797   |
| 31980 | P03410 | P08253 | -0.75908 |
| 31981 | P03410 | P21781 | -0.49692 |
| 31982 | P03410 | Q8IV38 | -0.30818 |
| 31983 | P03410 | Q9Y625 | -1.1715  |
| 31984 | P03410 | P54707 | -0.98853 |
| 31985 | P03410 | P00167 | -0.44764 |
| 31986 | P03410 | Q86VZ5 | -0.38413 |
| 31987 | P03410 | Q9UKA8 | -0.66127 |
| 31988 | P03410 | Q9H0X6 | -0.22159 |
| 31989 | P03410 | Q9Y6G1 | -0.63308 |
| 31990 | P03410 | P54107 | -0.80759 |
| 31991 | P03410 | Q5JPB2 | -0.37766 |
| 31992 | P03410 | Q15831 | -0.43149 |
| 31993 | P03410 | Q14123 | -0.2218  |
| 31994 | P03410 | Q13733 | -1.1339  |
| 31995 | P03410 | Q96MN2 | -0.66861 |
| 31996 | P03410 | Q15155 | -0.60076 |

|       |        |        |          |
|-------|--------|--------|----------|
| 31997 | P03410 | Q93009 | -0.56317 |
| 31998 | P03410 | Q16825 | -0.35849 |
| 31999 | P03410 | Q06124 | -0.22741 |
| 32000 | P03410 | Q14916 | -1.0511  |
| 32001 | P03410 | Q8WXX0 | -0.36241 |
| 32002 | P03410 | P62760 | -0.23652 |
| 32003 | P03410 | Q6XE24 | -0.5398  |
| 32004 | P03410 | O75309 | -1.0719  |
| 32005 | P03410 | P07766 | -0.62495 |
| 32006 | P03410 | Q9H772 | -0.70426 |
| 32007 | P03410 | O43169 | -0.57955 |
| 32008 | P03410 | P42830 | -0.92432 |
| 32009 | P03410 | Q92502 | -0.87271 |
| 32010 | P03410 | Q9GZM7 | -0.93618 |
| 32011 | P03410 | Q9NXS2 | -0.95407 |
| 32012 | P03410 | P49771 | -1.5027  |
| 32013 | P03410 | Q2TVT3 | -0.34658 |
| 32014 | P03410 | P09131 | -0.65768 |
| 32015 | P03410 | P34741 | -0.31121 |
| 32016 | P03410 | O15551 | -0.6468  |
| 32017 | P03410 | Q8WWF5 | -0.56218 |
| 32018 | P03410 | Q53H47 | -0.21895 |
| 32019 | P03410 | Q6ZVL6 | -0.63308 |
| 32020 | P03410 | P49335 | -0.22741 |
| 32021 | P03410 | P19526 | -0.63144 |
| 32022 | P03410 | Q8NER5 | -1.1518  |
| 32023 | P03410 | P22004 | -0.60539 |
| 32024 | P03410 | O75830 | -0.67322 |
| 32025 | P03410 | P37108 | -0.3704  |
| 32026 | P03410 | Q9UNK0 | -0.73377 |
| 32027 | P03410 | P53985 | -0.55557 |
| 32028 | P03410 | P0C7M7 | -0.87771 |
| 32029 | P03410 | Q8NBV8 | -0.84909 |
| 32030 | P03410 | Q92667 | -0.20804 |
| 32031 | P03410 | Q7Z7G1 | -0.2963  |
| 32032 | P03410 | Q7Z5J8 | -0.63308 |
| 32033 | P03410 | A8MYU2 | -1.2495  |
| 32034 | P03410 | P0CG21 | -0.22315 |
| 32035 | P03410 | O00244 | -0.23827 |
| 32036 | P03410 | P37235 | -0.29079 |
| 32037 | P03410 | Q9NTN3 | -0.61987 |
| 32038 | P03410 | Q99645 | -0.80761 |
| 32039 | P03410 | Q86UW7 | -0.20672 |
| 32040 | P03410 | Q00975 | -0.79296 |
| 32041 | P03410 | P01596 | -0.90565 |
| 32042 | P03410 | Q5VW38 | -0.63308 |
| 32043 | P03410 | Q8IZM8 | -0.22739 |
| 32044 | P03410 | Q15319 | -0.22741 |
| 32045 | P03410 | Q92526 | -0.45088 |
| 32046 | P03410 | Q9UHF5 | -0.77222 |
| 32047 | P03410 | Q9GZV7 | -1.0389  |
| 32048 | P03410 | Q92753 | -0.74543 |
| 32049 | P03410 | Q5W0Z9 | -0.86764 |
| 32050 | P03410 | P53667 | -0.43646 |
| 32051 | P03410 | O15466 | -0.41551 |
| 32052 | P03410 | Q92903 | -0.83829 |
| 32053 | P03410 | P07858 | -0.27223 |
| 32054 | P03410 | P36021 | -0.87708 |
| 32055 | P03410 | Q02505 | -1.2574  |
| 32056 | P03410 | P51684 | -1.1647  |
| 32057 | P03410 | Q93033 | -0.87188 |
| 32058 | P03410 | Q4JDL3 | -0.23843 |
| 32059 | P03410 | Q9NP78 | -0.83322 |
| 32060 | P03410 | Q96IW7 | -0.26132 |
| 32061 | P03410 | O75899 | -0.87081 |
| 32062 | P03410 | Q9UBX8 | -0.49657 |
| 32063 | P03410 | P45880 | -0.47109 |
| 32064 | P03410 | Q6GQQ9 | -0.1268  |
| 32065 | P03410 | Q86SM5 | -1.2185  |
| 32066 | P03410 | Q9Y463 | -0.40615 |
| 32067 | P03410 | Q9NYX4 | -1.0034  |
| 32068 | P03410 | P16860 | -0.44429 |
| 32069 | P03410 | O60306 | -0.5111  |
| 32070 | P03410 | A2CJ06 | -0.36775 |
| 32071 | P03410 | Q8NH02 | -1.153   |
| 32072 | P03410 | A8MQB9 | -0.22741 |

|       |        |        |            |
|-------|--------|--------|------------|
| 32073 | P03410 | P22894 | -1.4045    |
| 32074 | P03410 | Q96AG4 | -0.70236   |
| 32075 | P03410 | P26842 | -0.58401   |
| 32076 | P03410 | Q9Y4C4 | -0.22937   |
| 32077 | P03410 | Q8NA34 | -0.0070088 |
| 32078 | P03410 | Q93077 | -0.80275   |
| 32079 | P03410 | Q92738 | -1.3374    |
| 32080 | P03410 | P05538 | -0.63607   |
| 32081 | P03410 | Q9NY97 | -0.46101   |
| 32082 | P03410 | P09960 | -0.50195   |
| 32083 | P03410 | Q9UJ71 | -0.99172   |
| 32084 | P03410 | O15541 | -0.22731   |
| 32085 | P03410 | Q8NGD3 | -1.153     |
| 32086 | P03410 | Q53GS9 | -0.24683   |
| 32087 | P03410 | Q6P5X7 | -0.63308   |
| 32088 | P03410 | Q7Z442 | -0.87039   |
| 32089 | P03410 | Q8N283 | -0.22734   |
| 32090 | P03410 | Q9BV79 | -0.94478   |
| 32091 | P03410 | O43246 | -0.65748   |
| 32092 | P03410 | P22303 | -0.22694   |
| 32093 | P03410 | Q309B1 | -0.25864   |
| 32094 | P03410 | P03973 | -0.237     |
| 32095 | P03410 | P33402 | -0.7477    |
| 32096 | P03410 | Q96R67 | -1.153     |
| 32097 | P03410 | Q9NRZ7 | -0.84533   |
| 32098 | P03410 | Q86T96 | -0.81952   |
| 32099 | P03410 | P21128 | -0.83872   |
| 32100 | P03410 | O43182 | -0.64698   |
| 32101 | P03410 | O95918 | -1.1039    |
| 32102 | P03410 | A8K979 | -0.51491   |
| 32103 | P03410 | Q53H54 | -0.043045  |
| 32104 | P03410 | Q13443 | -0.68023   |
| 32105 | P03410 | Q3SXM5 | -0.84021   |
| 32106 | P03410 | O15218 | -1.2545    |
| 32107 | P03410 | P0CW18 | -0.79769   |
| 32108 | P03410 | Q16665 | -0.24548   |
| 32109 | P03410 | Q7RTR0 | -0.54029   |
| 32110 | P03410 | Q9NRM0 | -0.53236   |
| 32111 | P03410 | P20062 | -0.89472   |
| 32112 | P03410 | Q8WUJ3 | -0.208     |
| 32113 | P03410 | P49640 | -0.22872   |
| 32114 | P03410 | P21817 | -0.63644   |
| 32115 | P03410 | P35318 | -0.25664   |
| 32116 | P03410 | O60830 | -0.17439   |
| 32117 | P03410 | A6NMD0 | -0.80936   |
| 32118 | P03410 | Q9UEE5 | -0.92892   |
| 32119 | P03410 | P01704 | -0.90565   |
| 32120 | P03410 | Q10588 | -0.93728   |
| 32121 | P03410 | Q96HE7 | -0.49534   |
| 32122 | P03410 | P11908 | -0.72093   |
| 32123 | P03410 | Q9BRR9 | -1.0747    |
| 32124 | P03410 | Q6ZSK4 | -0.14178   |
| 32125 | P03410 | Q8WUH1 | -0.14935   |
| 32126 | P03410 | Q8TC17 | -0.22741   |
| 32127 | P03410 | Q15113 | -1.3037    |
| 32128 | P03410 | O14581 | -1.153     |
| 32129 | P03410 | Q9Y5L2 | -1.1006    |
| 32130 | P03410 | Q9Y6A1 | -0.99584   |
| 32131 | P03410 | P0C2L3 | -0.63308   |
| 32132 | P03410 | Q12864 | -0.88468   |
| 32133 | P03410 | P24462 | -0.87829   |
| 32134 | P03410 | P49795 | -0.2292    |
| 32135 | P03410 | Q6UWV2 | -0.23214   |
| 32136 | P03410 | Q9NS56 | -0.2274    |
| 32137 | P03410 | Q99853 | -0.55364   |
| 32138 | P03410 | Q9NZK7 | -0.88286   |
| 32139 | P03410 | P04035 | -0.65057   |
| 32140 | P03410 | O75610 | -0.77381   |
| 32141 | P03410 | Q92839 | -0.98509   |
| 32142 | P03410 | Q9NQI0 | -0.80035   |
| 32143 | P03410 | Q07817 | -0.22725   |
| 32144 | P03410 | Q9UHN6 | -0.95161   |
| 32145 | P03410 | Q9BVJ7 | -0.22741   |
| 32146 | P03410 | Q9Y6X6 | -0.21964   |
| 32147 | P03410 | Q86TM6 | -0.23051   |
| 32148 | P03410 | P14060 | -0.89049   |

|       |        |        |           |
|-------|--------|--------|-----------|
| 32149 | P03410 | Q96LB8 | -0.75976  |
| 32150 | P03410 | P48544 | -0.54499  |
| 32151 | P03410 | Q8TD19 | -0.22741  |
| 32152 | P03410 | Q96FT7 | -0.98144  |
| 32153 | P03410 | Q8TD57 | -0.36241  |
| 32154 | P03410 | P14618 | -0.096995 |
| 32155 | P03410 | Q8WZ79 | -0.6181   |
| 32156 | P03410 | Q9Y561 | -0.38898  |
| 32157 | P03410 | Q86Y22 | -1.4338   |
| 32158 | P03410 | Q9UGI9 | -0.93903  |
| 32159 | P03410 | Q8TDS4 | -0.96892  |
| 32160 | P03410 | Q92560 | -0.094562 |
| 32161 | P03410 | A2RUR9 | -0.061221 |
| 32162 | P03410 | Q14393 | -0.30818  |
| 32163 | P03410 | Q15672 | -0.22809  |
| 32164 | P03410 | Q9UBL3 | -0.21714  |
| 32165 | P03410 | P04222 | -0.88938  |
| 32166 | P03410 | Q6ZMP0 | -1.0408   |
| 32167 | P03410 | Q07973 | -0.44744  |
| 32168 | P03410 | Q8N4Z0 | -1.1091   |
| 32169 | P03410 | Q92947 | -0.38613  |
| 32170 | P03410 | P05976 | -0.25472  |
| 32171 | P03410 | O00635 | -0.62108  |
| 32172 | P03410 | Q96S38 | -0.87008  |
| 32173 | P03410 | P40225 | -0.86746  |
| 32174 | P03410 | P0CE72 | -0.22075  |
| 32175 | P03410 | Q07326 | -0.69549  |
| 32176 | P03410 | Q9H0D2 | -0.24488  |
| 32177 | P03410 | Q9Y6S9 | -1.0018   |
| 32178 | P03410 | O95622 | -0.78042  |
| 32179 | P03410 | Q6IC83 | -0.16823  |
| 32180 | P03410 | Q8NGR2 | -1.153    |
| 32181 | P03410 | Q96IX9 | -0.14294  |
| 32182 | P03410 | Q8N7P7 | -0.1987   |
| 32183 | P03410 | P21554 | -0.70768  |
| 32184 | P03410 | P52954 | -0.23274  |
| 32185 | P03410 | O75554 | -0.12055  |
| 32186 | P03410 | Q5TGL8 | -0.21241  |
| 32187 | P03410 | Q9ULL4 | -0.6471   |
| 32188 | P03410 | P06858 | -0.48262  |
| 32189 | P03410 | P05362 | -0.34167  |
| 32190 | P03410 | Q9UBT7 | -0.22498  |
| 32191 | P03410 | Q9Y230 | -0.2274   |
| 32192 | P03410 | B1ANS9 | -0.22748  |
| 32193 | P03410 | Q9UMF0 | -1.1287   |
| 32194 | P03410 | Q9NRR2 | -1.3968   |
| 32195 | P03410 | O75106 | -0.52877  |
| 32196 | P03410 | Q9P1Q5 | -1.153    |
| 32197 | P03410 | P21741 | -0.89975  |
| 32198 | P03410 | Q14116 | -0.2992   |
| 32199 | P03410 | Q14990 | -0.47329  |
| 32200 | P03410 | Q9GIP4 | -0.66489  |
| 32201 | P03410 | Q6SA08 | -1.0831   |
| 32202 | P03410 | O94761 | -0.54298  |
| 32203 | P03410 | Q9UK53 | -0.22088  |
| 32204 | P03410 | P09543 | -0.27557  |
| 32205 | P03410 | A6NMZ7 | -1.1822   |
| 32206 | P03410 | P53609 | -0.34742  |
| 32207 | P03410 | Q8NGI7 | -1.153    |
| 32208 | P03410 | Q96BM9 | -0.50527  |
| 32209 | P03410 | P04629 | -0.69682  |
| 32210 | P03410 | Q96PD7 | -0.37561  |
| 32211 | P03410 | P30518 | -0.79762  |
| 32212 | P03410 | O60762 | -0.16135  |
| 32213 | P03410 | O14764 | -0.95845  |
| 32214 | P03410 | Q8NDV2 | -1.2176   |
| 32215 | P03410 | Q8N8S7 | -0.21464  |
| 32216 | P03410 | Q8WVZ7 | -1.1065   |
| 32217 | P03410 | Q9Y546 | -0.13271  |
| 32218 | P03410 | O75828 | -0.35636  |
| 32219 | P03410 | Q9NZN5 | -0.22741  |
| 32220 | P03410 | P05166 | -0.49289  |
| 32221 | P03410 | Q99727 | -0.78414  |
| 32222 | P03410 | Q9HCP0 | -1.2688   |
| 32223 | P03410 | Q17RS7 | -0.10713  |
| 32224 | P03410 | Q13049 | -0.2274   |

|       |        |        |          |
|-------|--------|--------|----------|
| 32225 | P03410 | P59665 | -0.88898 |
| 32226 | P03410 | Q9HB20 | -0.22708 |
| 32227 | P03410 | Q9NRC6 | -0.23028 |
| 32228 | P03410 | Q8NGA2 | -1.153   |
| 32229 | P03410 | Q9Y5I0 | -1.0719  |
| 32230 | P03410 | P12272 | -0.32934 |
| 32231 | P03410 | O95081 | -0.41209 |
| 32232 | P03410 | P16219 | -0.4059  |
| 32233 | P03410 | O14753 | -0.20645 |
| 32234 | P03410 | Q96HD1 | -0.6911  |
| 32235 | P03410 | Q8IWI9 | -0.44711 |
| 32236 | P03410 | P58549 | -0.78592 |
| 32237 | P03410 | Q3KR16 | -0.22853 |
| 32238 | P03410 | Q9NFB3 | -0.22523 |
| 32239 | P03410 | Q2M2D7 | -0.79659 |
| 32240 | P03410 | Q8WWI5 | -0.59492 |
| 32241 | P03410 | Q32P51 | -0.32656 |
| 32242 | P03410 | Q8WTR2 | -0.48393 |
| 32243 | P03410 | Q9NQ75 | -0.22174 |
| 32244 | P03410 | P32970 | -0.50489 |
| 32245 | P03410 | Q13242 | -0.22682 |
| 32246 | P03410 | P78415 | -0.23949 |
| 32247 | P03410 | Q9BYE2 | -1.2232  |
| 32248 | P03410 | Q9UBV4 | -0.92051 |
| 32249 | P03410 | A4D1S0 | -0.63321 |
| 32250 | P03410 | Q96PC2 | -0.6068  |
| 32251 | P03410 | Q13557 | -0.93996 |
| 32252 | P03410 | P00492 | -0.27481 |
| 32253 | P03410 | Q9Y2L9 | -0.24336 |
| 32254 | P03410 | Q4LDE5 | -0.59445 |
| 32255 | P03410 | O00750 | -0.35973 |
| 32256 | P03410 | Q9NR64 | -0.20498 |
| 32257 | P03410 | O00487 | -0.2436  |
| 32258 | P03410 | Q9HCJ1 | -0.87722 |
| 32259 | P03410 | Q8NGG8 | -1.153   |
| 32260 | P03410 | Q9BQS8 | -0.22546 |
| 32261 | P03410 | P04083 | -0.15849 |
| 32262 | P03410 | Q6IS24 | -0.53218 |
| 32263 | P03410 | Q9BUP0 | -0.22472 |
| 32264 | P03410 | P61328 | -0.3125  |
| 32265 | P03410 | Q14004 | -0.28491 |
| 32266 | P03410 | Q9H270 | -0.22644 |
| 32267 | P03410 | Q8N816 | -0.63308 |
| 32268 | P03410 | Q9BZ19 | -0.2274  |
| 32269 | P03410 | Q15615 | -1.153   |
| 32270 | P03410 | P17301 | -0.22732 |
| 32271 | P03410 | O60423 | -0.97709 |
| 32272 | P03410 | A6NNM3 | -0.22735 |
| 32273 | P03410 | Q9UM47 | -0.23432 |
| 32274 | P03410 | A6NDQ2 | -0.39568 |
| 32275 | P03410 | P02675 | -0.91058 |
| 32276 | P03410 | Q96RU8 | -0.22941 |
| 32277 | P03410 | P25116 | -0.41668 |
| 32278 | P03410 | P51513 | -0.12882 |
| 32279 | P03410 | O75071 | -0.21125 |
| 32280 | P03410 | Q9NP08 | -0.2281  |
| 32281 | P03410 | A6ND91 | -0.83079 |
| 32282 | P03410 | Q9H5Z1 | -0.8423  |
| 32283 | P03410 | Q8IV08 | -0.3082  |
| 32284 | P03410 | Q6X4U4 | -0.91127 |
| 32285 | P03410 | Q9H0C2 | -0.50602 |
| 32286 | P03410 | Q99959 | -0.16072 |
| 32287 | P03410 | Q9NS15 | -0.68507 |
| 32288 | P03410 | Q96PQ7 | -0.21311 |
| 32289 | P03410 | O00299 | -0.17746 |
| 32290 | P03410 | Q8IUG5 | -0.11674 |
| 32291 | P03410 | O14678 | -1.4241  |
| 32292 | P03410 | B2RUY7 | -0.74424 |
| 32293 | P03410 | Q96E52 | -0.83213 |
| 32294 | P03410 | P08575 | -0.328   |
| 32295 | P03410 | P19525 | -0.51149 |
| 32296 | P03410 | Q6DHY5 | -1.3577  |
| 32297 | P03410 | Q7RTY3 | -0.79769 |
| 32298 | P03410 | P30510 | -0.9827  |
| 32299 | P03410 | O95236 | -0.97873 |
| 32300 | P03410 | Q7LFX5 | -0.44452 |

|       |        |        |          |
|-------|--------|--------|----------|
| 32301 | P03410 | Q5QGZ9 | -0.79194 |
| 32302 | P03410 | P48167 | -0.41828 |
| 32303 | P03410 | Q8NGI4 | -1.153   |
| 32304 | P03410 | Q14654 | -0.56674 |
| 32305 | P03410 | Q8IXH8 | -1.0719  |
| 32306 | P03410 | Q53GQ0 | -0.6942  |
| 32307 | P03410 | Q9UPW8 | -0.22741 |
| 32308 | P03410 | Q6P3S6 | -0.22648 |
| 32309 | P03410 | A6NJW9 | -0.797   |
| 32310 | P03410 | Q9H9P2 | -0.35632 |
| 32311 | P03410 | P35914 | -0.36002 |
| 32312 | P03410 | Q9Y5E2 | -1.0493  |
| 32313 | P03410 | O75815 | -0.64108 |
| 32314 | P03410 | P20701 | -0.90521 |
| 32315 | P03410 | Q9UGI6 | -0.71547 |
| 32316 | P03410 | Q96T25 | -0.41457 |
| 32317 | P03410 | Q70UQ0 | -0.21684 |
| 32318 | P03410 | Q9Y487 | -0.202   |
| 32319 | P03410 | Q8NH93 | -1.153   |
| 32320 | P03410 | Q9NYZ2 | -0.6556  |
| 32321 | P03410 | P38571 | -0.36225 |
| 32322 | P03410 | Q8N8A6 | -0.51893 |
| 32323 | P03410 | P12104 | -0.3264  |
| 32324 | P03410 | Q9BTT6 | -0.24444 |
| 32325 | P03410 | Q13191 | -0.2274  |
| 32326 | P03410 | P18858 | -0.21177 |
| 32327 | P03410 | Q15846 | -0.58572 |
| 32328 | P03410 | Q96F15 | -0.88619 |
| 32329 | P03410 | Q16877 | -0.71749 |
| 32330 | P03410 | Q96NN9 | -0.21387 |
| 32331 | P03410 | Q9BZA7 | -1.2776  |
| 32332 | P03410 | Q9HBG4 | -0.31855 |
| 32333 | P03410 | Q01955 | -0.53769 |
| 32334 | P03410 | P34969 | -1.2773  |
| 32335 | P03410 | P33897 | -0.34177 |
| 32336 | P03410 | P08949 | -0.67514 |
| 32337 | P03410 | Q8IVS2 | -0.40841 |
| 32338 | P03410 | Q9BZ76 | -1.8318  |
| 32339 | P03410 | P21145 | -0.41189 |
| 32340 | P03410 | P21452 | -1.3515  |
| 32341 | P03410 | P43657 | -1.1683  |
| 32342 | P03410 | O75526 | -0.23394 |
| 32343 | P03410 | Q96DA6 | -0.39365 |
| 32344 | P03410 | Q8N5Z0 | -0.21608 |
| 32345 | P03410 | O43548 | -0.24778 |
| 32346 | P03410 | Q8NH56 | -1.153   |
| 32347 | P03410 | Q969Y0 | -0.71003 |
| 32348 | P03410 | Q96JY0 | -0.20713 |
| 32349 | P03410 | Q9H1X3 | -0.75254 |
| 32350 | P03410 | A6NMB9 | -0.85039 |
| 32351 | P03410 | P55085 | -0.31232 |
| 32352 | P03410 | Q8NFX4 | -0.74542 |
| 32353 | P03410 | Q7KYR7 | -0.89182 |
| 32354 | P03410 | Q15782 | -0.72032 |
| 32355 | P03410 | P55042 | -0.52004 |
| 32356 | P03410 | Q96D21 | -1.0133  |
| 32357 | P03410 | Q96GZ6 | -0.79179 |
| 32358 | P03410 | Q9H336 | -0.71003 |
| 32359 | P03410 | Q07325 | -1.0237  |
| 32360 | P03410 | Q6UX98 | -0.86764 |
| 32361 | P03410 | P31327 | -0.14104 |
| 32362 | P03410 | P15692 | -0.34561 |
| 32363 | P03410 | P01859 | -0.81547 |
| 32364 | P03410 | Q32VQ0 | -1.153   |
| 32365 | P03410 | P16050 | -0.20019 |
| 32366 | P03410 | Q03113 | -0.60907 |
| 32367 | P03410 | Q14849 | -0.6875  |
| 32368 | P03410 | O43526 | -0.90449 |
| 32369 | P03410 | O60513 | -0.48828 |
| 32370 | P03410 | O43555 | -1.1701  |
| 32371 | P03410 | Q96PR1 | -0.69571 |
| 32372 | P03410 | Q5SYC1 | -0.30108 |
| 32373 | P03410 | A8MWL7 | -0.63308 |
| 32374 | P03410 | Q15678 | -0.32183 |
| 32375 | P03410 | Q96DN5 | -0.60121 |
| 32376 | P03410 | O75056 | -0.85394 |

|       |        |        |          |
|-------|--------|--------|----------|
| 32377 | P03410 | P02765 | -0.61235 |
| 32378 | P03410 | Q8ND25 | -0.23555 |
| 32379 | P03410 | P30838 | -0.29293 |
| 32380 | P03410 | P27144 | -0.66778 |
| 32381 | P03410 | P29350 | -0.22742 |
| 32382 | P03410 | O60241 | -1.2569  |
| 32383 | P03410 | Q9H0J4 | -0.18432 |
| 32384 | P03410 | Q9UL26 | -0.42107 |
| 32385 | P03410 | P48443 | -0.22768 |
| 32386 | P03410 | Q5T601 | -0.78722 |
| 32387 | P03410 | Q9Y6V0 | -0.26153 |
| 32388 | P03410 | Q8N129 | -0.82614 |
| 32389 | P03410 | Q96NR8 | -1.1685  |
| 32390 | P03410 | O15375 | -0.95545 |
| 32391 | P03410 | Q7Z2Y5 | -1.2686  |
| 32392 | P03410 | P62685 | -0.0271  |
| 32393 | P03410 | Q99707 | -0.27215 |
| 32394 | P03410 | Q8TEH3 | -0.50258 |
| 32395 | P03410 | Q16610 | -0.44937 |
| 32396 | P03410 | Q8WTU2 | -0.76301 |
| 32397 | P03410 | Q6XR72 | -0.94546 |
| 32398 | P03410 | Q8N9B4 | -0.2274  |
| 32399 | P03410 | P01834 | -0.90565 |
| 32400 | P03410 | Q96DA2 | -0.83602 |
| 32401 | P03410 | P25445 | -0.2271  |
| 32402 | P03410 | P0C626 | -1.1593  |
| 32403 | P03410 | P55039 | -0.71124 |
| 32404 | P03410 | Q86SG5 | -0.20025 |
| 32405 | P03410 | O60431 | -1.153   |
| 32406 | P03410 | P0CG22 | -0.9336  |
| 32407 | P03410 | Q9BT23 | -0.227   |
| 32408 | P03410 | Q2KHT4 | -0.75476 |
| 32409 | P03410 | Q8WWY8 | -1.1851  |
| 32410 | P03410 | P49903 | -1.2016  |
| 32411 | P03410 | Q5S007 | -0.52177 |
| 32412 | P03410 | Q14919 | -0.07277 |
| 32413 | P03410 | Q9H1E1 | -0.57396 |
| 32414 | P03410 | Q9Y585 | -1.153   |
| 32415 | P03410 | Q8WUR7 | -0.11313 |
| 32416 | P03410 | P15509 | -1.6223  |
| 32417 | P03410 | Q96CN5 | -0.22669 |
| 32418 | P03410 | A8MT79 | -0.81221 |
| 32419 | P03410 | Q96JB8 | -0.22406 |
| 32420 | P03410 | O95427 | -0.89852 |
| 32421 | P03410 | P54819 | -0.69976 |
| 32422 | P03410 | P08686 | -0.7728  |
| 32423 | P03410 | Q9P109 | -0.38569 |
| 32424 | P03410 | P01742 | -0.90565 |
| 32425 | P03410 | Q9Y4F4 | -0.13236 |
| 32426 | P03410 | P20648 | -1.1223  |
| 32427 | P03410 | Q8WWU7 | -0.98559 |
| 32428 | P03410 | A8MUU1 | -0.19986 |
| 32429 | P03410 | Q685J3 | -0.54008 |
| 32430 | P03410 | P52797 | -0.42054 |
| 32431 | P03410 | Q9NZ08 | -0.66071 |
| 32432 | P03410 | Q9H0D6 | -0.12976 |
| 32433 | P03410 | Q5JRX3 | -0.28526 |
| 32434 | P03410 | P25325 | -0.20506 |
| 32435 | P03410 | P61006 | -0.75381 |
| 32436 | P03410 | Q9GZZ6 | -0.84691 |
| 32437 | P03410 | Q6DN12 | -0.6075  |
| 32438 | P03410 | Q6Q4G3 | -1.2261  |
| 32439 | P03410 | Q7Z6L0 | -0.80936 |
| 32440 | P03410 | Q8IXF9 | -0.60778 |
| 32441 | P03410 | Q9H0Q3 | -0.95509 |
| 32442 | P03410 | Q8TE73 | -0.33967 |
| 32443 | P03410 | P05452 | -0.82899 |
| 32444 | P03410 | Q14289 | -0.24345 |
| 32445 | P03410 | P35568 | -0.19248 |
| 32446 | P03410 | P35913 | -0.33355 |
| 32447 | P03410 | Q7Z6A9 | -0.97127 |
| 32448 | P03410 | Q8NGV5 | -1.153   |
| 32449 | P03410 | Q92777 | -0.36063 |
| 32450 | P03410 | P10646 | -0.84983 |
| 32451 | P03410 | Q0VDI3 | -0.63308 |
| 32452 | P03410 | Q9NQ34 | -0.87515 |



|       |        |        |           |
|-------|--------|--------|-----------|
| 32453 | P03410 | P10696 | -0.66832  |
| 32454 | P03410 | O95926 | -0.01279  |
| 32455 | P03410 | P02747 | -0.81838  |
| 32456 | P03410 | Q8N6Y1 | -1.0719   |
| 32457 | P03410 | Q5SGD2 | -0.6352   |
| 32458 | P03410 | O15498 | -0.17133  |
| 32459 | P03410 | P01148 | -0.98144  |
| 32460 | P03410 | P01781 | -0.90565  |
| 32461 | P03410 | P49862 | -1.352    |
| 32462 | P03410 | P30044 | -0.36456  |
| 32463 | P03410 | O43822 | -0.22712  |
| 32464 | P03410 | O43760 | -0.80372  |
| 32465 | P03410 | Q8WTS1 | -0.19263  |
| 32466 | P03410 | O94955 | -0.35068  |
| 32467 | P03410 | Q9NU22 | -0.45927  |
| 32468 | P03410 | Q8NGS1 | -1.153    |
| 32469 | P03410 | Q8TDL5 | -0.98735  |
| 32470 | P03410 | Q06210 | -0.055669 |
| 32471 | P03410 | Q9UJW2 | -1.7196   |
| 32472 | P03410 | Q86VB7 | -0.94264  |
| 32473 | P03410 | Q96NA8 | -0.51087  |
| 32474 | P03410 | Q8N4V1 | -0.54765  |
| 32475 | P03410 | O60931 | -0.94492  |
| 32476 | P03410 | Q7RTX7 | -1.0598   |
| 32477 | P03410 | P01891 | -0.74344  |
| 32478 | P03410 | Q99928 | -0.68123  |
| 32479 | P03410 | Q9UI15 | -0.20657  |
| 32480 | P03410 | Q92854 | -0.57474  |
| 32481 | P03410 | Q5VUY0 | -0.2143   |
| 32482 | P03410 | Q13017 | -0.71342  |
| 32483 | P03410 | Q99956 | -0.49094  |
| 32484 | P03410 | A6NDS4 | -1.3577   |
| 32485 | P03410 | Q8NBI3 | -0.84438  |
| 32486 | P03410 | Q9BRX9 | -0.22786  |
| 32487 | P03410 | Q5T447 | -0.22967  |
| 32488 | P03410 | Q9Y2P5 | -0.94092  |
| 32489 | P03410 | P0C604 | -1.153    |
| 32490 | P03410 | Q6UX72 | -0.56584  |
| 32491 | P03410 | Q5TA89 | -0.22634  |
| 32492 | P03410 | Q8N6G2 | -0.056941 |
| 32493 | P03410 | P28067 | -0.56194  |
| 32494 | P03410 | Q9UHI7 | -0.39186  |
| 32495 | P03410 | O94760 | -0.049683 |
| 32496 | P03410 | Q4W5P6 | -0.71003  |
| 32497 | P03410 | Q5JRS4 | -1.153    |
| 32498 | P03410 | O75891 | -0.44173  |
| 32499 | P03410 | Q8N109 | -0.797    |
| 32500 | P03410 | P21754 | -0.33791  |
| 32501 | P03410 | Q9Y6I7 | -0.22904  |
| 32502 | P03410 | Q7Z2Q7 | -0.63308  |
| 32503 | P03410 | Q8NGI3 | -1.153    |
| 32504 | P03410 | Q96PV0 | -0.55059  |
| 32505 | P03410 | Q08357 | -0.89765  |
| 32506 | P03410 | Q2M296 | -0.68045  |
| 32507 | P03410 | Q9H8H3 | -0.16725  |
| 32508 | P03410 | P01222 | -0.68493  |
| 32509 | P03410 | Q8N148 | -1.153    |
| 32510 | P03410 | Q9UPS8 | -0.22737  |
| 32511 | P03410 | O95716 | -0.66305  |
| 32512 | P03410 | P62955 | -0.79509  |
| 32513 | P03410 | Q9H4F8 | -1.3632   |
| 32514 | P03410 | P29622 | -0.76459  |
| 32515 | P03410 | Q9BZ29 | -0.22499  |
| 32516 | P03410 | P30504 | -0.88938  |
| 32517 | P03410 | Q92953 | -0.94821  |
| 32518 | P03410 | P49758 | -0.6448   |
| 32519 | P03410 | Q02575 | -0.2266   |
| 32520 | P03410 | P51460 | -0.59683  |
| 32521 | P03410 | Q9BY78 | -0.75124  |
| 32522 | P03410 | Q8NEP7 | -0.18421  |
| 32523 | P03410 | Q9UKB3 | -0.23233  |
| 32524 | P03410 | Q9UK97 | -0.32013  |
| 32525 | P03410 | Q8NGF9 | -1.153    |
| 32526 | P03410 | Q8NGW1 | -1.153    |
| 32527 | P03410 | Q92692 | -0.22743  |
| 32528 | P03410 | P23083 | -0.7291   |

|       |        |        |           |
|-------|--------|--------|-----------|
| 32529 | P03410 | Q9UIG0 | -0.22461  |
| 32530 | P03410 | Q2TAL5 | -0.22808  |
| 32531 | P03410 | Q9UK55 | -0.51544  |
| 32532 | P03410 | Q13595 | -0.49425  |
| 32533 | P03410 | P02776 | -0.68395  |
| 32534 | P03410 | P09525 | -0.033285 |
| 32535 | P03410 | P42224 | -0.22563  |
| 32536 | P03410 | Q9Y303 | -0.033209 |
| 32537 | P03410 | A0AV96 | -0.45901  |
| 32538 | P03410 | O95395 | -0.38636  |
| 32539 | P03410 | P08243 | -0.3813   |
| 32540 | P03410 | Q9UG63 | -0.63665  |
| 32541 | P03410 | A8MQ27 | -0.30589  |
| 32542 | P03410 | P07203 | -0.33049  |
| 32543 | P03410 | Q9HC96 | -0.69613  |
| 32544 | P03410 | Q8N1T3 | -0.47131  |
| 32545 | P03410 | Q96RD0 | -1.153    |
| 32546 | P03410 | Q9H4A9 | -0.79055  |
| 32547 | P03410 | P00747 | -0.51651  |
| 32548 | P03410 | Q07812 | -0.22728  |
| 32549 | P03410 | P12645 | -0.83788  |
| 32550 | P03410 | Q96HZ4 | -0.22481  |
| 32551 | P03410 | Q6KF10 | -0.48719  |
| 32552 | P03410 | Q9Y5W7 | -0.48273  |
| 32553 | P03410 | Q6ZSZ5 | -0.36535  |
| 32554 | P03410 | Q96T92 | -0.2265   |
| 32555 | P03410 | Q8NCB2 | -0.53092  |
| 32556 | P03410 | P15848 | -0.28984  |
| 32557 | P03410 | Q5H913 | -1.2232   |
| 32558 | P03410 | P46439 | -0.33152  |
| 32559 | P03410 | P27658 | -1.1411   |
| 32560 | P03410 | Q8IW75 | -0.66232  |
| 32561 | P03410 | Q9UQ05 | -0.99809  |
| 32562 | P03410 | Q9NYV4 | -0.35582  |
| 32563 | P03410 | P78411 | -0.23166  |
| 32564 | P03410 | Q8N9I9 | -0.30589  |
| 32565 | P03410 | O43497 | -0.86041  |
| 32566 | P03410 | P49761 | -1.0656   |
| 32567 | P03410 | Q9ULZ3 | -0.073069 |
| 32568 | P03410 | Q8NH89 | -1.153    |
| 32569 | P03410 | Q8NET6 | -0.44567  |
| 32570 | P03410 | O60883 | -0.63621  |
| 32571 | P03410 | A8MTB9 | -0.63308  |
| 32572 | P03410 | A8MXD5 | -0.40261  |
| 32573 | P03410 | P05160 | -0.6643   |
| 32574 | P03410 | A6NCW7 | -0.38822  |
| 32575 | P03410 | P61204 | -0.43398  |
| 32576 | P03410 | Q8NGX6 | -1.153    |
| 32577 | P03410 | Q17RY0 | -0.63589  |
| 32578 | P03410 | P22079 | -1.1959   |
| 32579 | P03410 | Q86VD7 | -0.44649  |
| 32580 | P03410 | P01374 | -0.60145  |
| 32581 | P03410 | Q13285 | -0.22897  |
| 32582 | P03410 | O95749 | -0.103    |
| 32583 | P03410 | P01906 | -0.73255  |
| 32584 | P03410 | Q9Y5H8 | -1.1668   |
| 32585 | P03410 | Q76039 | -0.70199  |
| 32586 | P03410 | Q9UHH9 | -0.53777  |
| 32587 | P03410 | O60779 | -0.55828  |
| 32588 | P03410 | Q8N9X3 | -0.21951  |
| 32589 | P03410 | Q96BM1 | -0.22741  |
| 32590 | P03410 | P20338 | -0.39901  |
| 32591 | P03410 | Q9BVR0 | -0.41091  |
| 32592 | P03410 | P10643 | -0.71991  |
| 32593 | P03410 | O15173 | -0.87581  |
| 32594 | P03410 | Q8NH85 | -1.153    |
| 32595 | P03410 | O00142 | -0.72697  |
| 32596 | P03410 | Q5FWF7 | -0.22045  |
| 32597 | P03410 | P16401 | -0.66317  |
| 32598 | P03410 | Q2M3V2 | -0.22741  |
| 32599 | P03410 | Q6ZSA7 | -0.97335  |
| 32600 | P03410 | P13598 | -1.0954   |
| 32601 | P03410 | Q9UBC2 | -0.22741  |
| 32602 | P03410 | O95969 | -0.82578  |
| 32603 | P03410 | Q9ULC5 | -0.86122  |
| 32604 | P03410 | P13727 | -0.81643  |

|       |        |        |           |
|-------|--------|--------|-----------|
| 32605 | P03410 | Q52LW3 | -0.87339  |
| 32606 | P03410 | Q92813 | -0.89536  |
| 32607 | P03410 | O60262 | -0.38125  |
| 32608 | P03410 | Q9H9B1 | -0.22741  |
| 32609 | P03410 | Q96P47 | -1.2351   |
| 32610 | P03410 | Q9BUF5 | -0.42032  |
| 32611 | P03410 | Q9NSA0 | -0.74027  |
| 32612 | P03410 | P52895 | -0.30945  |
| 32613 | P03410 | O15033 | -0.80807  |
| 32614 | P03410 | Q96QH8 | -0.71769  |
| 32615 | P03410 | Q13474 | -0.22698  |
| 32616 | P03410 | Q6ZV29 | -0.39067  |
| 32617 | P03410 | P23468 | -0.61742  |
| 32618 | P03410 | Q9C0K0 | -0.22666  |
| 32619 | P03410 | Q9P289 | -0.44087  |
| 32620 | P03410 | Q9Y5F9 | -1.0719   |
| 32621 | P03410 | P50897 | -0.39208  |
| 32622 | P03410 | Q8WXD2 | -0.63643  |
| 32623 | P03410 | P48039 | -1.2258   |
| 32624 | P03410 | Q96LZ3 | -0.22779  |
| 32625 | P03410 | P41597 | -0.52519  |
| 32626 | P03410 | Q9UL19 | -0.20628  |
| 32627 | P03410 | Q8N4Y2 | -0.07897  |
| 32628 | P03410 | Q13029 | -0.22719  |
| 32629 | P03410 | Q9Y581 | -0.69392  |
| 32630 | P03410 | Q01581 | -0.17543  |
| 32631 | P03410 | P13521 | -0.55946  |
| 32632 | P03410 | Q8NGS4 | -1.153    |
| 32633 | P03410 | Q8TBH0 | -0.23415  |
| 32634 | P03410 | Q15125 | -0.81493  |
| 32635 | P03410 | Q6IQ16 | -0.22091  |
| 32636 | P03410 | Q15477 | -0.41836  |
| 32637 | P03410 | Q8WVC6 | -0.48378  |
| 32638 | P03410 | Q96FZ5 | -0.73505  |
| 32639 | P03410 | Q8N149 | -0.81772  |
| 32640 | P03410 | P54108 | -0.77077  |
| 32641 | P03410 | Q99593 | -0.45725  |
| 32642 | P03410 | Q9UMZ3 | -1.0999   |
| 32643 | P03410 | P28288 | -0.80267  |
| 32644 | P03410 | Q9Y2I7 | -0.25498  |
| 32645 | P03410 | Q6QN14 | -0.58209  |
| 32646 | P03410 | A6NNZ2 | -0.41888  |
| 32647 | P03410 | Q9H254 | -0.22782  |
| 32648 | P03410 | P49190 | -1.4376   |
| 32649 | P03410 | P57078 | -0.5849   |
| 32650 | P03410 | P47989 | -0.62298  |
| 32651 | P03410 | A6NDD5 | -0.48837  |
| 32652 | P03410 | P60174 | -0.021091 |
| 32653 | P03410 | O00206 | -0.22742  |
| 32654 | P03410 | Q7Z403 | -0.7715   |
| 32655 | P03410 | P08172 | -0.95341  |
| 32656 | P03410 | P01760 | -0.90565  |
| 32657 | P03410 | P60903 | -0.34227  |
| 32658 | P03410 | Q96M32 | -0.63882  |
| 32659 | P03410 | Q86W34 | -0.76552  |
| 32660 | P03410 | Q86YL7 | -0.84893  |
| 32661 | P03410 | Q6PKX4 | -0.15757  |
| 32662 | P03410 | P48735 | -0.069588 |
| 32663 | P03410 | Q5VVY1 | -0.095112 |
| 32664 | P03410 | Q9P2P5 | -0.74859  |
| 32665 | P03410 | O60412 | -1.153    |
| 32666 | P03410 | Q15455 | -0.22807  |
| 32667 | P03410 | Q504Y0 | -0.77628  |
| 32668 | P03410 | Q7L5Y1 | -0.25404  |
| 32669 | P03410 | O95352 | -0.19563  |
| 32670 | P03410 | P34096 | -0.64154  |
| 32671 | P03410 | Q9UIB8 | -1.167    |
| 32672 | P03410 | Q9BWL3 | -0.80467  |
| 32673 | P03410 | P24903 | -0.86422  |
| 32674 | P03410 | P30508 | -0.9827   |
| 32675 | P03410 | Q76NI1 | -0.73344  |
| 32676 | P03410 | P04843 | -0.57879  |
| 32677 | P03410 | P12643 | -0.22741  |
| 32678 | P03410 | A8MYG8 | -0.22741  |
| 32679 | P03410 | O95497 | -0.61099  |
| 32680 | P03410 | P01700 | -0.90565  |

|       |        |        |           |
|-------|--------|--------|-----------|
| 32681 | P03410 | Q8NGG7 | -1.153    |
| 32682 | P03410 | Q9Y4D7 | -1.1378   |
| 32683 | P03410 | Q00532 | -0.91056  |
| 32684 | P03410 | Q14914 | -0.72249  |
| 32685 | P03410 | Q96NX9 | -0.31267  |
| 32686 | P03410 | Q10713 | -0.5166   |
| 32687 | P03410 | P01019 | -0.32112  |
| 32688 | P03410 | P48664 | -1.0391   |
| 32689 | P03410 | P09668 | -0.27533  |
| 32690 | P03410 | P50416 | -0.4085   |
| 32691 | P03410 | A6NI47 | -0.22738  |
| 32692 | P03410 | Q9UBN7 | -0.21092  |
| 32693 | P03410 | Q7Z3F1 | -0.86954  |
| 32694 | P03410 | Q13070 | -0.11494  |
| 32695 | P03410 | P48449 | -0.34583  |
| 32696 | P03410 | P41271 | -0.53032  |
| 32697 | P03410 | Q9NXH8 | -1.3129   |
| 32698 | P03410 | P01616 | -0.88633  |
| 32699 | P03410 | Q8N7P1 | -0.78692  |
| 32700 | P03410 | O76024 | -0.45899  |
| 32701 | P03410 | Q99650 | -0.60869  |
| 32702 | P03410 | P00568 | -0.7838   |
| 32703 | P03410 | P26583 | -0.23397  |
| 32704 | P03410 | Q9UBY5 | -1.2885   |
| 32705 | P03410 | P33527 | -0.46559  |
| 32706 | P03410 | Q96QS6 | -1.3438   |
| 32707 | P03410 | Q7Z7M1 | -1.2876   |
| 32708 | P03410 | Q9BRS2 | -1.269    |
| 32709 | P03410 | Q86VZ1 | -1.1683   |
| 32710 | P03410 | Q6ZSI9 | -0.99959  |
| 32711 | P03410 | Q8IV01 | -0.61037  |
| 32712 | P03410 | Q8NGI2 | -1.153    |
| 32713 | P03410 | P40394 | -0.80146  |
| 32714 | P03410 | Q9H560 | -0.2274   |
| 32715 | P03410 | Q12918 | -0.90242  |
| 32716 | P03410 | Q5VTH9 | -0.22745  |
| 32717 | P03410 | Q8NFF2 | -0.98193  |
| 32718 | P03410 | P06729 | -0.85251  |
| 32719 | P03410 | Q6ZSU1 | -0.40946  |
| 32720 | P03410 | P46098 | -0.9216   |
| 32721 | P03410 | Q9GZV3 | -1.0007   |
| 32722 | P03410 | Q9UBA6 | -0.12824  |
| 32723 | P03410 | Q95968 | -0.82578  |
| 32724 | P03410 | Q8NGQ5 | -1.153    |
| 32725 | P03410 | P08100 | -0.57062  |
| 32726 | P03410 | O15344 | -0.23688  |
| 32727 | P03410 | Q9H7F4 | -0.63308  |
| 32728 | P03410 | Q9BQP9 | -0.88082  |
| 32729 | P03410 | P49888 | -0.22725  |
| 32730 | P03410 | P48741 | -0.51024  |
| 32731 | P03410 | Q9BRZ2 | -0.5357   |
| 32732 | P03410 | Q9H2S1 | -0.79451  |
| 32733 | P03410 | A8MTJ3 | -0.73292  |
| 32734 | P03410 | P47992 | -0.41269  |
| 32735 | P03410 | Q03692 | -1.0632   |
| 32736 | P03410 | O14944 | -0.5449   |
| 32737 | P03410 | Q6ZMZ0 | -0.38555  |
| 32738 | P03410 | Q9C0D5 | -0.25984  |
| 32739 | P03410 | P43626 | -0.43348  |
| 32740 | P03410 | Q6NUT3 | -0.62453  |
| 32741 | P03410 | P08833 | -0.7466   |
| 32742 | P03410 | P05981 | -0.67547  |
| 32743 | P03410 | Q8TBP0 | -1.3577   |
| 32744 | P03410 | Q32P28 | -0.78209  |
| 32745 | P03410 | Q5T2L2 | -0.22686  |
| 32746 | P03410 | Q86UK0 | -1.2798   |
| 32747 | P03410 | P84996 | -0.52849  |
| 32748 | P03410 | Q2M3M2 | -0.98943  |
| 32749 | P03410 | A6NCI4 | -0.71003  |
| 32750 | P03410 | Q9HCE9 | -0.91796  |
| 32751 | P03410 | Q9NR97 | -0.60272  |
| 32752 | P03410 | C9JRZ8 | -0.36396  |
| 32753 | P03410 | Q6DJT9 | -0.079189 |
| 32754 | P03410 | Q9H6Y5 | -0.22604  |
| 32755 | P03410 | O75844 | -0.92646  |
| 32756 | P03410 | O95630 | -0.25988  |

|       |        |        |          |
|-------|--------|--------|----------|
| 32757 | P03410 | P15382 | -0.89461 |
| 32758 | P03410 | Q9Y2U2 | -1.0608  |
| 32759 | P03410 | Q96FK6 | -0.2274  |
| 32760 | P03410 | Q9Y243 | -0.44843 |
| 32761 | P03410 | O43286 | -0.50138 |
| 32762 | P03410 | Q96FN4 | -0.22799 |
| 32763 | P03410 | Q8IWK6 | -1.293   |
| 32764 | P03410 | Q6NSJ5 | -0.63308 |
| 32765 | P03410 | Q8ND23 | -0.22659 |
| 32766 | P03410 | P06870 | -0.56719 |
| 32767 | P03410 | Q0D2K5 | -0.23763 |
| 32768 | P03410 | Q9H223 | -0.2357  |
| 32769 | P03410 | O94989 | -0.4421  |
| 32770 | P03410 | Q4VC12 | -0.21218 |
| 32771 | P03410 | Q9UJT1 | -0.3218  |
| 32772 | P03410 | P51149 | -0.36976 |
| 32773 | P03410 | Q15642 | -0.62388 |
| 32774 | P03410 | Q8N5K1 | -0.17697 |
| 32775 | P03410 | Q7RTR2 | -0.39782 |
| 32776 | P03410 | Q70SY1 | -0.19321 |
| 32777 | P03410 | P04233 | -0.43958 |
| 32778 | P03410 | P28330 | -0.33126 |
| 32779 | P03410 | P36969 | -0.54025 |
| 32780 | P03410 | A0PJZ0 | -0.22741 |
| 32781 | P03410 | A8MXE2 | -0.56584 |
| 32782 | P03410 | Q14195 | -0.18959 |
| 32783 | P03410 | Q2I0M5 | -0.88423 |
| 32784 | P03410 | Q13588 | -0.22741 |
| 32785 | P03410 | Q96RJ3 | -0.55434 |
| 32786 | P03410 | Q16690 | -0.37753 |
| 32787 | P03410 | Q9NX76 | -0.73505 |
| 32788 | P03410 | Q13361 | -0.85704 |
| 32789 | P03410 | Q75916 | -0.53993 |
| 32790 | P03410 | O95715 | -0.82798 |
| 32791 | P03410 | P00748 | -0.68198 |
| 32792 | P03410 | Q9Y336 | -1.1297  |
| 32793 | P03410 | O00141 | -0.65734 |
| 32794 | P03410 | Q5T8D3 | -0.96753 |
| 32795 | P03410 | Q7Z602 | -1.2185  |
| 32796 | P03410 | Q75T13 | -0.36857 |
| 32797 | P03410 | Q9Y6L7 | -1.653   |
| 32798 | P03410 | Q12809 | -0.8262  |
| 32799 | P03410 | Q4G0J3 | -0.22012 |
| 32800 | P03410 | Q96KN9 | -0.76864 |
| 32801 | P03410 | Q14973 | -0.90223 |
| 32802 | P03410 | P19784 | -0.25201 |
| 32803 | P03410 | P0CW00 | -0.5628  |
| 32804 | P03410 | Q9Y3B3 | -0.25982 |
| 32805 | P03410 | Q9BXJ1 | -0.81484 |
| 32806 | P03410 | P11177 | -0.15373 |
| 32807 | P03410 | Q6DN90 | -0.19775 |
| 32808 | P03410 | Q9ULP9 | -0.6289  |
| 32809 | P03410 | P35270 | -0.27664 |
| 32810 | P03410 | Q5W041 | -0.22796 |
| 32811 | P03410 | P06889 | -0.90565 |
| 32812 | P03410 | Q8NGZ4 | -1.153   |
| 32813 | P03410 | P06239 | -0.26965 |
| 32814 | P03410 | Q14576 | -1.0808  |
| 32815 | P03410 | Q96BA8 | -0.2269  |
| 32816 | P03410 | Q8N5D6 | -0.46406 |
| 32817 | P03410 | Q9BW19 | -0.29483 |
| 32818 | P03410 | Q9NS82 | -1.0478  |
| 32819 | P03410 | P08118 | -0.65442 |
| 32820 | P03410 | Q9UIQ6 | -1.487   |
| 32821 | P03410 | O00507 | -0.63124 |
| 32822 | P03410 | Q07864 | -0.30565 |
| 32823 | P03410 | Q6E0U4 | -0.82578 |
| 32824 | P03410 | P42081 | -0.22632 |
| 32825 | P03410 | Q8WV35 | -0.19883 |
| 32826 | P03410 | P01112 | -0.22827 |
| 32827 | P03410 | P52756 | -0.22467 |
| 32828 | P03410 | A0PK11 | -0.63308 |
| 32829 | P03410 | Q02985 | -0.82578 |
| 32830 | P03410 | Q9BVG9 | -0.95391 |
| 32831 | P03410 | Q96M69 | -0.97669 |
| 32832 | P03410 | Q9UHI8 | -1.3322  |

|       |        |        |           |
|-------|--------|--------|-----------|
| 32833 | P03410 | Q14005 | -0.24541  |
| 32834 | P03410 | P28472 | -0.96857  |
| 32835 | P03410 | Q9UQ53 | -0.44474  |
| 32836 | P03410 | P20929 | -0.22486  |
| 32837 | P03410 | Q5VUY2 | -0.6564   |
| 32838 | P03410 | O00253 | -0.75233  |
| 32839 | P03410 | Q99811 | -0.19986  |
| 32840 | P03410 | Q8IYB5 | -0.82937  |
| 32841 | P03410 | O15296 | -0.47602  |
| 32842 | P03410 | Q8N2X6 | -0.71003  |
| 32843 | P03410 | O76071 | -0.22805  |
| 32844 | P03410 | Q86VI3 | -0.54276  |
| 32845 | P03410 | Q9BZJ3 | -1.3874   |
| 32846 | P03410 | P01308 | -0.22383  |
| 32847 | P03410 | P35125 | -0.65254  |
| 32848 | P03410 | Q6ZPD9 | -0.63308  |
| 32849 | P03410 | Q96IR7 | -0.46142  |
| 32850 | P03410 | P31268 | -0.29476  |
| 32851 | P03410 | Q8NDX2 | -0.75027  |
| 32852 | P03410 | Q7LC44 | -0.30729  |
| 32853 | P03410 | Q8IU54 | -0.63603  |
| 32854 | P03410 | Q9NR80 | -0.22753  |
| 32855 | P03410 | P09848 | -0.66887  |
| 32856 | P03410 | P98173 | -0.73668  |
| 32857 | P03410 | Q9ULK5 | -0.38215  |
| 32858 | P03410 | P50219 | -0.22752  |
| 32859 | P03410 | Q6P158 | -0.85147  |
| 32860 | P03410 | Q9P1P5 | -1.188    |
| 32861 | P03410 | Q6ZNW5 | -0.55994  |
| 32862 | P03410 | P35354 | -0.2611   |
| 32863 | P03410 | P35372 | -0.37432  |
| 32864 | P03410 | Q9BW62 | -0.50095  |
| 32865 | P03410 | P43629 | -1.0139   |
| 32866 | P03410 | Q6P5W5 | -0.74904  |
| 32867 | P03410 | P78329 | -0.22942  |
| 32868 | P03410 | A8MYX2 | -0.35325  |
| 32869 | P03410 | Q96FQ6 | -0.23181  |
| 32870 | P03410 | P14778 | -1.05     |
| 32871 | P03410 | Q5T197 | -0.73225  |
| 32872 | P03410 | Q9P0U3 | -0.12731  |
| 32873 | P03410 | Q9NXD2 | -0.21587  |
| 32874 | P03410 | Q8N7A1 | -0.22711  |
| 32875 | P03410 | Q9UKP5 | -1.3999   |
| 32876 | P03410 | Q15147 | -0.2261   |
| 32877 | P03410 | O43315 | -0.56566  |
| 32878 | P03410 | P48681 | -0.047624 |
| 32879 | P03410 | P01771 | -0.90565  |
| 32880 | P03410 | Q7RTY9 | -0.90923  |
| 32881 | P03410 | O95263 | -0.22624  |
| 32882 | P03410 | Q8NCK7 | -0.83145  |
| 32883 | P03410 | Q8NH40 | -1.153    |
| 32884 | P03410 | Q92521 | -0.76246  |
| 32885 | P03410 | Q9H6B9 | -0.83978  |
| 32886 | P03410 | Q9H2K8 | -0.40226  |
| 32887 | P03410 | P53365 | -0.21429  |
| 32888 | P03410 | P24723 | -1.0739   |
| 32889 | P03410 | Q9H9P5 | -0.22736  |
| 32890 | P03410 | A6NI72 | -0.22741  |
| 32891 | P03410 | Q6UWP7 | -0.91639  |
| 32892 | P03410 | P10176 | -0.40729  |
| 32893 | P03410 | Q16568 | -0.32451  |
| 32894 | P03410 | Q86Y07 | -0.56573  |
| 32895 | P03410 | Q9Y5R5 | -0.097841 |
| 32896 | P03410 | O00238 | -0.83466  |
| 32897 | P03410 | Q7Z3Z3 | -0.48492  |
| 32898 | P03410 | Q6UY27 | -0.82578  |
| 32899 | P03410 | Q07075 | -1.0662   |
| 32900 | P03410 | P63124 | -0.52549  |
| 32901 | P03410 | Q7Z6P3 | -1.0301   |
| 32902 | P03410 | P11511 | -0.40966  |
| 32903 | P03410 | O43353 | -0.22741  |
| 32904 | P03410 | Q8IY26 | -0.76406  |
| 32905 | P03410 | Q9H4B7 | -0.39366  |
| 32906 | P03410 | P53396 | -0.26465  |
| 32907 | P03410 | P25021 | -1.3688   |
| 32908 | P03410 | Q9NTJ3 | -0.21919  |

|       |        |        |            |
|-------|--------|--------|------------|
| 32909 | P03410 | Q08174 | -0.91946   |
| 32910 | P03410 | Q8TE49 | -0.51359   |
| 32911 | P03410 | P52952 | -0.35272   |
| 32912 | P03410 | Q96JW4 | -0.96881   |
| 32913 | P03410 | Q5SQS7 | -0.2274    |
| 32914 | P03410 | Q9GZQ6 | -1.2067    |
| 32915 | P03410 | Q8NG99 | -1.153     |
| 32916 | P03410 | O75677 | -0.23826   |
| 32917 | P03410 | Q5T3U5 | -1.364     |
| 32918 | P03410 | Q9HBH0 | -0.89415   |
| 32919 | P03410 | P07098 | -0.82537   |
| 32920 | P03410 | Q9NNX6 | -0.90208   |
| 32921 | P03410 | P57679 | -0.56062   |
| 32922 | P03410 | Q86SG6 | -1.2268    |
| 32923 | P03410 | Q15256 | -0.43516   |
| 32924 | P03410 | O43680 | -0.22814   |
| 32925 | P03410 | Q9HBA9 | -0.67535   |
| 32926 | P03410 | Q8NGQ2 | -1.153     |
| 32927 | P03410 | Q9P2U7 | -0.74788   |
| 32928 | P03410 | Q7Z3G6 | -0.3065    |
| 32929 | P03410 | O60320 | -0.63308   |
| 32930 | P03410 | P10266 | -0.29186   |
| 32931 | P03410 | P01298 | -0.78225   |
| 32932 | P03410 | Q9H6D8 | -0.75664   |
| 32933 | P03410 | P28300 | -0.49098   |
| 32934 | P03410 | O75874 | -0.2712    |
| 32935 | P03410 | P17813 | -0.18885   |
| 32936 | P03410 | Q9ULW5 | -0.8977    |
| 32937 | P03410 | P78312 | -0.089271  |
| 32938 | P03410 | Q8TE99 | -0.7023    |
| 32939 | P03410 | Q86XR5 | -0.59337   |
| 32940 | P03410 | Q8NFS9 | -0.52286   |
| 32941 | P03410 | Q8IWF2 | -0.20492   |
| 32942 | P03410 | O75563 | -0.25335   |
| 32943 | P03410 | P0C672 | -0.63308   |
| 32944 | P03410 | Q12923 | -0.22741   |
| 32945 | P03410 | Q9Y2H2 | -0.12431   |
| 32946 | P03410 | Q9ULV8 | -0.49585   |
| 32947 | P03410 | Q13131 | -0.34827   |
| 32948 | P03410 | Q8IY95 | -0.76969   |
| 32949 | P03410 | P04628 | -0.22741   |
| 32950 | P03410 | Q8NGT7 | -1.153     |
| 32951 | P03410 | P01713 | -0.90565   |
| 32952 | P03410 | Q96JG8 | -0.0054815 |
| 32953 | P03410 | Q99685 | -0.4725    |
| 32954 | P03410 | Q99677 | -1.4497    |
| 32955 | P03410 | Q9Y5R2 | -1.9052    |
| 32956 | P03410 | Q9BRJ9 | -0.22749   |
| 32957 | P03410 | Q7Z5L7 | -0.77339   |
| 32958 | P03410 | Q6NV75 | -1.2185    |
| 32959 | P03410 | P01733 | -0.16097   |
| 32960 | P03410 | Q9NUY8 | -0.79659   |
| 32961 | P03410 | O43869 | -1.153     |
| 32962 | P03410 | Q9BXT4 | -0.42057   |
| 32963 | P03410 | Q6ZR37 | -0.43168   |
| 32964 | P03410 | P35523 | -0.93297   |
| 32965 | P03410 | Q14642 | -0.25783   |
| 32966 | P03410 | P55010 | -0.3224    |
| 32967 | P03410 | O95057 | -1.2887    |
| 32968 | P03410 | O75864 | -0.2274    |
| 32969 | P03410 | Q9UF12 | -0.20238   |
| 32970 | P03410 | Q9UBP5 | -0.22652   |
| 32971 | P03410 | Q24JQ0 | -0.63308   |
| 32972 | P03410 | Q9UNI1 | -1.001     |
| 32973 | P03410 | Q92633 | -0.33101   |
| 32974 | P03410 | P25189 | -0.85458   |
| 32975 | P03410 | Q9HCJ5 | -0.15328   |
| 32976 | P03410 | Q9Y570 | -0.13293   |
| 32977 | P03410 | Q9Y2K7 | -0.22453   |
| 32978 | P03410 | Q4KMZ8 | -0.797     |
| 32979 | P03410 | Q2NKX8 | -0.30193   |
| 32980 | P03410 | P16389 | -0.82969   |
| 32981 | P03410 | Q8NHA4 | -1.153     |
| 32982 | P03410 | P52888 | -0.54139   |
| 32983 | P03410 | Q8N8P7 | -0.71003   |
| 32984 | P03410 | Q8TB40 | -0.19838   |

|       |        |        |           |
|-------|--------|--------|-----------|
| 32985 | P03410 | O75094 | -0.78309  |
| 32986 | P03410 | Q8TCB6 | -1.153    |
| 32987 | P03410 | Q8N474 | -0.43542  |
| 32988 | P03410 | Q14114 | -0.88441  |
| 32989 | P03410 | Q6PIL6 | -0.81279  |
| 32990 | P03410 | Q8IV13 | -0.22476  |
| 32991 | P03410 | Q6UXH8 | -1.0665   |
| 32992 | P03410 | P29460 | -0.24986  |
| 32993 | P03410 | P26436 | -0.44023  |
| 32994 | P03410 | P12319 | -0.98879  |
| 32995 | P03410 | Q6UXN8 | -0.71426  |
| 32996 | P03410 | Q6IN97 | -0.22511  |
| 32997 | P03410 | Q96PN6 | -0.64821  |
| 32998 | P03410 | Q14727 | -0.22898  |
| 32999 | P03410 | P43026 | -0.35647  |
| 33000 | P03410 | Q95631 | -0.22741  |
| 33001 | P03410 | P20138 | -1.3135   |
| 33002 | P03410 | P51124 | -1.1713   |
| 33003 | P03410 | Q86YM7 | -0.2216   |
| 33004 | P03410 | Q49MI3 | -0.47579  |
| 33005 | P03410 | Q8IVT5 | -0.23336  |
| 33006 | P03410 | Q8WVF2 | -0.85558  |
| 33007 | P03410 | Q8TBE3 | -0.63308  |
| 33008 | P03410 | Q9HBV1 | -0.65846  |
| 33009 | P03410 | P51681 | -0.38106  |
| 33010 | P03410 | Q6ZN80 | -0.17011  |
| 33011 | P03410 | Q9H2F3 | -1.0877   |
| 33012 | P03410 | Q60266 | -0.67049  |
| 33013 | P03410 | Q8N7C0 | -0.97335  |
| 33014 | P03410 | P21964 | -0.29873  |
| 33015 | P03410 | Q9NVA2 | -0.2269   |
| 33016 | P03410 | Q06481 | -0.2177   |
| 33017 | P03410 | Q8TCB7 | -0.18625  |
| 33018 | P03410 | P17936 | -0.22691  |
| 33019 | P03410 | Q8TBY9 | -0.2274   |
| 33020 | P03410 | Q5JT25 | -0.89204  |
| 33021 | P03410 | P22392 | -0.15208  |
| 33022 | P03410 | Q00571 | -0.85104  |
| 33023 | P03410 | Q04844 | -1.0296   |
| 33024 | P03410 | Q17RR3 | -0.84805  |
| 33025 | P03410 | A6NIJ9 | -1.153    |
| 33026 | P03410 | P78357 | -0.49898  |
| 33027 | P03410 | Q8TCA0 | -0.22752  |
| 33028 | P03410 | Q8N6P7 | -0.66204  |
| 33029 | P03410 | Q05D32 | -0.19452  |
| 33030 | P03410 | Q8TET4 | -0.19699  |
| 33031 | P03410 | Q13043 | -0.38546  |
| 33032 | P03410 | Q9BXN2 | -0.47781  |
| 33033 | P03410 | P15018 | -0.35976  |
| 33034 | P03410 | Q6NSJ0 | -0.48103  |
| 33035 | P03410 | Q14185 | -0.2782   |
| 33036 | P03410 | P00540 | -1.3021   |
| 33037 | P03410 | Q8IYX1 | -1.3577   |
| 33038 | P03410 | Q9BX73 | -0.63308  |
| 33039 | P03410 | P51649 | -0.42873  |
| 33040 | P03410 | Q969K7 | -0.61257  |
| 33041 | P03410 | Q8N4C7 | -0.28286  |
| 33042 | P03410 | Q75695 | -0.53378  |
| 33043 | P03410 | P48023 | -0.28042  |
| 33044 | P03410 | P52951 | -0.22752  |
| 33045 | P03410 | Q6ZVH6 | -0.049665 |
| 33046 | P03410 | Q8NGJ0 | -1.153    |
| 33047 | P03410 | Q8WUJ0 | -0.42609  |
| 33048 | P03410 | P61278 | -0.78714  |
| 33049 | P03410 | Q96J66 | -1.364    |
| 33050 | P03410 | Q9P2N7 | -0.17683  |
| 33051 | P03410 | Q92982 | -0.69216  |
| 33052 | P03410 | Q96IG2 | -0.22578  |
| 33053 | P03410 | Q15213 | -0.22752  |
| 33054 | P03410 | Q16206 | -1.355    |
| 33055 | P03410 | Q9BZF3 | -0.24019  |
| 33056 | P03410 | Q8IVL6 | -0.51917  |
| 33057 | P03410 | Q9HCJ3 | -0.2921   |
| 33058 | P03410 | A6NM76 | -1.153    |
| 33059 | P03410 | Q8IX29 | -0.19986  |
| 33060 | P03410 | Q00421 | -1.3389   |



|       |        |        |           |
|-------|--------|--------|-----------|
| 33061 | P03410 | P14151 | -0.57918  |
| 33062 | P03410 | P08319 | -0.3589   |
| 33063 | P03410 | Q2VWP7 | -0.95161  |
| 33064 | P03410 | Q6UW01 | -0.69502  |
| 33065 | P03410 | Q9BZA8 | -1.0719   |
| 33066 | P03410 | Q6PFW1 | -0.38593  |
| 33067 | P03410 | Q9NY59 | -0.26892  |
| 33068 | P03410 | Q8NGB2 | -1.153    |
| 33069 | P03410 | Q5T2D2 | -0.16454  |
| 33070 | P03410 | P29120 | -0.39629  |
| 33071 | P03410 | Q8TCD6 | -0.36493  |
| 33072 | P03410 | Q86V88 | -0.53498  |
| 33073 | P03410 | Q495N2 | -0.63308  |
| 33074 | P03410 | P12235 | -0.23351  |
| 33075 | P03410 | Q9Y646 | -0.91088  |
| 33076 | P03410 | P02654 | -0.50687  |
| 33077 | P03410 | Q9UPQ8 | -0.82035  |
| 33078 | P03410 | Q96PD4 | -0.37911  |
| 33079 | P03410 | O00624 | -0.9656   |
| 33080 | P03410 | Q9UMR7 | -1.0938   |
| 33081 | P03410 | Q9P107 | -0.41302  |
| 33082 | P03410 | O75715 | -1.2067   |
| 33083 | P03410 | A6NL88 | -0.63308  |
| 33084 | P03410 | Q01851 | -0.2274   |
| 33085 | P03410 | Q92737 | -0.88722  |
| 33086 | P03410 | O15303 | -1.1118   |
| 33087 | P03410 | Q6ZMD2 | -0.7786   |
| 33088 | P03410 | Q15768 | -0.72877  |
| 33089 | P03410 | O43173 | -0.45016  |
| 33090 | P03410 | O43719 | -0.21109  |
| 33091 | P03410 | Q8IVN8 | -0.75913  |
| 33092 | P03410 | A6NFH5 | -0.19986  |
| 33093 | P03410 | Q9Y289 | -0.83962  |
| 33094 | P03410 | Q01740 | -0.80817  |
| 33095 | P03410 | Q2VIR3 | -0.62559  |
| 33096 | P03410 | O95196 | -0.78716  |
| 33097 | P03410 | Q9NYW7 | -0.99189  |
| 33098 | P03410 | Q8IY82 | -0.26154  |
| 33099 | P03410 | P25942 | -0.50701  |
| 33100 | P03410 | A6ND01 | -0.69521  |
| 33101 | P03410 | Q9NQQ7 | -0.62453  |
| 33102 | P03410 | Q8N9V6 | -0.22741  |
| 33103 | P03410 | Q9UKQ9 | -1.3874   |
| 33104 | P03410 | Q68J44 | -0.59878  |
| 33105 | P03410 | Q96E66 | -0.22741  |
| 33106 | P03410 | Q8NFM4 | -0.56971  |
| 33107 | P03410 | Q9BZR9 | -0.22741  |
| 33108 | P03410 | P05534 | -0.71153  |
| 33109 | P03410 | Q12778 | -0.45919  |
| 33110 | P03410 | Q96CK0 | -0.38941  |
| 33111 | P03410 | Q6IMN6 | -0.48721  |
| 33112 | P03410 | P78334 | -0.77379  |
| 33113 | P03410 | O75937 | -0.064335 |
| 33114 | P03410 | Q9H9V4 | -0.53922  |
| 33115 | P03410 | P10145 | -0.49339  |
| 33116 | P03410 | Q5GFL6 | -0.8582   |
| 33117 | P03410 | Q6P0A1 | -0.63308  |
| 33118 | P03410 | A4FU49 | -0.22357  |
| 33119 | P03410 | Q13133 | -0.23147  |
| 33120 | P03410 | Q86XD8 | -0.22065  |
| 33121 | P03410 | A6NGN9 | -0.71003  |
| 33122 | P03410 | P55083 | -1.2888   |
| 33123 | P03410 | Q7Z5P4 | -1.5069   |
| 33124 | P03410 | P49916 | -0.21861  |
| 33125 | P03410 | Q9BSA4 | -0.2748   |
| 33126 | P03410 | Q13207 | -0.44592  |
| 33127 | P03410 | Q15375 | -0.88831  |
| 33128 | P03410 | A6NK59 | -0.3944   |
| 33129 | P03410 | O60667 | -0.56973  |
| 33130 | P03410 | Q14520 | -1.5776   |
| 33131 | P03410 | Q5W0Q7 | -0.51173  |
| 33132 | P03410 | P26045 | -0.22767  |
| 33133 | P03410 | A6NDA9 | -0.63308  |
| 33134 | P03410 | O00585 | -0.47489  |
| 33135 | P03410 | Q8NBF2 | -0.22095  |
| 33136 | P03410 | O15479 | -0.062167 |

|       |        |        |           |
|-------|--------|--------|-----------|
| 33137 | P03410 | O75689 | -0.29233  |
| 33138 | P03410 | Q8TCT6 | -0.98362  |
| 33139 | P03410 | Q8WXF7 | -0.49437  |
| 33140 | P03410 | Q6UXX2 | -0.95679  |
| 33141 | P03410 | P49767 | -0.48421  |
| 33142 | P03410 | P43007 | -0.42618  |
| 33143 | P03410 | Q6UXA7 | -0.8412   |
| 33144 | P03410 | P52943 | -0.22845  |
| 33145 | P03410 | P43166 | -0.18343  |
| 33146 | P03410 | P01762 | -0.90565  |
| 33147 | P03410 | A6NM43 | -0.53856  |
| 33148 | P03410 | P13716 | -0.14316  |
| 33149 | P03410 | P37059 | -1.2337   |
| 33150 | P03410 | Q96GQ5 | -0.63308  |
| 33151 | P03410 | Q8TER0 | -0.70984  |
| 33152 | P03410 | Q9UPC5 | -0.68871  |
| 33153 | P03410 | Q29940 | -0.88938  |
| 33154 | P03410 | Q6Q0C1 | -0.51629  |
| 33155 | P03410 | P05113 | -0.20789  |
| 33156 | P03410 | Q7L5A8 | -0.79732  |
| 33157 | P03410 | A6NCF6 | -0.080857 |
| 33158 | P03410 | O95881 | -0.38406  |
| 33159 | P03410 | Q9NPE2 | -0.86908  |
| 33160 | P03410 | P40145 | -0.95227  |
| 33161 | P03410 | Q96R05 | -0.21714  |
| 33162 | P03410 | Q9NTG1 | -1.0045   |
| 33163 | P03410 | Q9BXY5 | -0.22511  |
| 33164 | P03410 | Q8N7S2 | -0.23975  |
| 33165 | P03410 | Q6Q788 | -0.37391  |
| 33166 | P03410 | Q8NH19 | -1.153    |
| 33167 | P03410 | Q96A28 | -0.65799  |
| 33168 | P03410 | Q9UN73 | -1.7115   |
| 33169 | P03410 | Q96SB8 | -0.215    |
| 33170 | P03410 | P84243 | -1.2655   |
| 33171 | P03410 | P01701 | -0.90565  |
| 33172 | P03410 | Q30154 | -0.61332  |
| 33173 | P03410 | Q9NUH8 | -0.63308  |
| 33174 | P03410 | Q13368 | -0.22492  |
| 33175 | P03410 | Q9NUQ7 | -0.30154  |
| 33176 | P03410 | Q2TB90 | -0.40237  |
| 33177 | P03410 | Q9Y2I2 | -0.2292   |
| 33178 | P03410 | Q8NG78 | -1.153    |
| 33179 | P03410 | Q6UX34 | -0.63308  |
| 33180 | P03410 | Q9HBU6 | -0.94526  |
| 33181 | P03410 | Q96M20 | -0.22486  |
| 33182 | P03410 | P09769 | -0.63754  |
| 33183 | P03410 | Q14952 | -0.97562  |
| 33184 | P03410 | Q8N967 | -0.63308  |
| 33185 | P03410 | Q8NCF0 | -0.70793  |
| 33186 | P03410 | Q9HCJ6 | -0.94868  |
| 33187 | P03410 | P54710 | -0.97022  |
| 33188 | P03410 | Q9BXR3 | -0.26043  |
| 33189 | P03410 | P42127 | -0.87943  |
| 33190 | P03410 | Q05996 | -0.98895  |
| 33191 | P03410 | Q5T2P8 | -0.10114  |
| 33192 | P03410 | A6NHS7 | -0.63308  |
| 33193 | P03410 | Q7RTV5 | -0.14052  |
| 33194 | P03410 | Q13325 | -0.19806  |
| 33195 | P03410 | O95399 | -0.54305  |
| 33196 | P03410 | Q56UN5 | -1.3438   |
| 33197 | P03410 | P09237 | -1.1959   |
| 33198 | P03410 | Q9NYA4 | -0.29268  |
| 33199 | P03410 | P41440 | -0.72541  |
| 33200 | P03410 | Q8NBW4 | -0.82916  |
| 33201 | P03410 | Q9BZV3 | -0.89722  |
| 33202 | P03410 | P54687 | -0.15675  |
| 33203 | P03410 | P08582 | -0.48197  |
| 33204 | P03410 | P63123 | -0.52549  |
| 33205 | P03410 | P30501 | -0.9827   |
| 33206 | P03410 | Q9NWQ8 | -0.3097   |
| 33207 | P03410 | P48645 | -0.86859  |
| 33208 | P03410 | Q8IWX7 | -0.31367  |
| 33209 | P03410 | Q96DA0 | -0.70793  |
| 33210 | P03410 | Q8TB61 | -0.61348  |
| 33211 | P03410 | Q496M5 | -0.22741  |
| 33212 | P03410 | O15347 | -0.8832   |

|       |        |        |           |
|-------|--------|--------|-----------|
| 33213 | P03410 | Q6ZS30 | -0.22741  |
| 33214 | P03410 | Q9H158 | -1.1668   |
| 33215 | P03410 | Q13253 | -0.32657  |
| 33216 | P03410 | Q43852 | -0.2265   |
| 33217 | P03410 | Q15386 | -0.23518  |
| 33218 | P03410 | Q43795 | -0.26449  |
| 33219 | P03410 | Q9NRN5 | -1.0361   |
| 33220 | P03410 | Q8NEX5 | -0.71003  |
| 33221 | P03410 | Q9UPS6 | -0.35071  |
| 33222 | P03410 | Q6X9E4 | -0.11164  |
| 33223 | P03410 | Q05952 | -1.0984   |
| 33224 | P03410 | Q12791 | -0.71146  |
| 33225 | P03410 | P55263 | -0.70608  |
| 33226 | P03410 | Q8N5U1 | -0.63308  |
| 33227 | P03410 | Q8NGZ0 | -1.153    |
| 33228 | P03410 | Q9UJF2 | -0.24837  |
| 33229 | P03410 | Q96KV7 | -0.22791  |
| 33230 | P03410 | P41143 | -0.48178  |
| 33231 | P03410 | Q13067 | -0.11494  |
| 33232 | P03410 | P53539 | -0.036651 |
| 33233 | P03410 | Q13882 | -0.89445  |
| 33234 | P03410 | Q8NI17 | -0.40911  |
| 33235 | P03410 | Q3B7I2 | -0.022231 |
| 33236 | P03410 | P08709 | -0.91252  |
| 33237 | P03410 | Q9UQ49 | -0.37115  |
| 33238 | P03410 | Q96MT7 | -0.22738  |
| 33239 | P03410 | P81605 | -1.1256   |
| 33240 | P03410 | Q9NRM6 | -1.3446   |
| 33241 | P03410 | O75604 | -0.50055  |
| 33242 | P03410 | P48169 | -0.82087  |
| 33243 | P03410 | Q9NR90 | -0.98322  |
| 33244 | P03410 | Q9Y5H7 | -1.1668   |
| 33245 | P03410 | Q9H9J4 | -0.9709   |
| 33246 | P03410 | Q8TDQ1 | -0.797    |
| 33247 | P03410 | O60488 | -0.87288  |
| 33248 | P03410 | P32456 | -0.29784  |
| 33249 | P03410 | Q9BRP0 | -0.21477  |
| 33250 | P03410 | Q8N6K7 | -0.16535  |
| 33251 | P03410 | P35625 | -0.2183   |
| 33252 | P03410 | P08590 | -0.22512  |
| 33253 | P03410 | A6NFR6 | -0.63308  |
| 33254 | P03410 | P63129 | -0.52549  |
| 33255 | P03410 | O75367 | -0.43672  |
| 33256 | P03410 | Q7Z3B1 | -0.22815  |
| 33257 | P03410 | P29401 | -0.19907  |
| 33258 | P03410 | Q5U651 | -0.14138  |
| 33259 | P03410 | Q8NDB6 | -0.48933  |
| 33260 | P03410 | P61225 | -0.8778   |
| 33261 | P03410 | P68106 | -0.23529  |
| 33262 | P03410 | Q9NRE2 | -0.32279  |
| 33263 | P03410 | Q8N4T0 | -1.3479   |
| 33264 | P03410 | P51451 | -1.4167   |
| 33265 | P03410 | Q96NL1 | -0.85003  |
| 33266 | P03410 | O15539 | -0.75291  |
| 33267 | P03410 | P0C6P0 | -0.1023   |
| 33268 | P03410 | Q15165 | -0.6654   |
| 33269 | P03410 | Q8N695 | -0.94428  |
| 33270 | P03410 | P55344 | -0.60928  |
| 33271 | P03410 | Q6ZSZ6 | -0.22465  |
| 33272 | P03410 | Q9NYQ8 | -0.59867  |
| 33273 | P03410 | Q6P2N6 | -0.797    |
| 33274 | P03410 | Q2I0M4 | -0.22933  |
| 33275 | P03410 | Q8NGF1 | -1.153    |
| 33276 | P03410 | P27169 | -0.75794  |
| 33277 | P03410 | Q8NH54 | -1.153    |
| 33278 | P03410 | P57053 | -0.78432  |
| 33279 | P03410 | Q58HT5 | -0.86593  |
| 33280 | P03410 | Q5HYI8 | -1.0723   |
| 33281 | P03410 | Q4KMP7 | -1.2408   |
| 33282 | P03410 | Q8TC29 | -0.072463 |
| 33283 | P03410 | Q6UW15 | -0.72593  |
| 33284 | P03410 | Q6ZWK4 | -0.63308  |
| 33285 | P03410 | Q86W28 | -0.54029  |
| 33286 | P03410 | P01717 | -0.90565  |
| 33287 | P03410 | P01610 | -0.90565  |
| 33288 | P03410 | A6NDN8 | -0.16723  |

|       |        |        |           |
|-------|--------|--------|-----------|
| 33289 | P03410 | P11684 | -0.57026  |
| 33290 | P03410 | Q4G148 | -0.52729  |
| 33291 | P03410 | Q70Z44 | -0.99126  |
| 33292 | P03410 | Q3SXM0 | -0.22747  |
| 33293 | P03410 | Q9NNZ6 | -1.0861   |
| 33294 | P03410 | O00499 | -0.22738  |
| 33295 | P03410 | P0C7X1 | -1.3577   |
| 33296 | P03410 | Q53FA7 | -0.77406  |
| 33297 | P03410 | P60983 | -0.50357  |
| 33298 | P03410 | P04114 | -0.34141  |
| 33299 | P03410 | P02708 | -0.71064  |
| 33300 | P03410 | Q9H257 | -0.17305  |
| 33301 | P03410 | P09086 | -0.22741  |
| 33302 | P03410 | P07108 | -0.20426  |
| 33303 | P03410 | O15119 | -0.53194  |
| 33304 | P03410 | O00187 | -0.93796  |
| 33305 | P03410 | P62079 | -0.63308  |
| 33306 | P03410 | P10827 | -0.23222  |
| 33307 | P03410 | Q9H9A6 | -0.22923  |
| 33308 | P03410 | P0C0S5 | -0.87666  |
| 33309 | P03410 | Q6IFG1 | -1.153    |
| 33310 | P03410 | Q15760 | -1.4027   |
| 33311 | P03410 | Q9BQT8 | -0.4895   |
| 33312 | P03410 | P04004 | -0.8264   |
| 33313 | P03410 | Q5T1Q4 | -0.62453  |
| 33314 | P03410 | Q9P2K2 | -0.75354  |
| 33315 | P03410 | Q9BQG2 | -0.2274   |
| 33316 | P03410 | P23975 | -0.42789  |
| 33317 | P03410 | Q7RTT9 | -0.83174  |
| 33318 | P03410 | Q7L7L0 | -0.80275  |
| 33319 | P03410 | P17483 | -0.17025  |
| 33320 | P03410 | Q8TAC2 | -0.65927  |
| 33321 | P03410 | P10265 | -0.52822  |
| 33322 | P03410 | Q93097 | -0.9729   |
| 33323 | P03410 | Q8IWX5 | -0.69321  |
| 33324 | P03410 | Q04912 | -1.0911   |
| 33325 | P03410 | Q6UW68 | -0.63308  |
| 33326 | P03410 | Q8IU57 | -0.11343  |
| 33327 | P03410 | Q93079 | -0.80275  |
| 33328 | P03410 | Q9ULA0 | -0.57949  |
| 33329 | P03410 | Q8TBB0 | -0.22794  |
| 33330 | P03410 | Q96N46 | -0.22066  |
| 33331 | P03410 | Q96MS3 | -0.68749  |
| 33332 | P03410 | Q9UL52 | -2.0182   |
| 33333 | P03410 | Q8NEZ4 | -0.51179  |
| 33334 | P03410 | P20472 | -0.21     |
| 33335 | P03410 | Q86YD5 | -0.78132  |
| 33336 | P03410 | Q9NY56 | -0.69011  |
| 33337 | P03410 | Q5VWZ2 | -0.077908 |
| 33338 | P03410 | Q8IZF7 | -1.2876   |
| 33339 | P03410 | Q8NHC4 | -1.153    |
| 33340 | P03410 | P0C7N8 | -1.153    |
| 33341 | P03410 | Q9BWV2 | -1.2279   |
| 33342 | P03410 | Q9BZS1 | -0.37376  |
| 33343 | P03410 | Q8IWT3 | -0.22627  |
| 33344 | P03410 | P06213 | -0.29192  |
| 33345 | P03410 | Q95388 | -1.0089   |
| 33346 | P03410 | Q9Y3A6 | -0.2366   |
| 33347 | P03410 | O76080 | -0.34477  |
| 33348 | P03410 | P22304 | -0.44349  |
| 33349 | P03410 | P58335 | -0.9233   |
| 33350 | P03410 | Q6UWB1 | -0.88347  |
| 33351 | P03410 | Q5TGU0 | -0.77061  |
| 33352 | P03410 | Q9Y698 | -0.50514  |
| 33353 | P03410 | Q96I51 | -0.22164  |
| 33354 | P03410 | A8MUP2 | -0.12247  |
| 33355 | P03410 | Q5TZ20 | -1.153    |
| 33356 | P03410 | Q9H8P0 | -0.7237   |
| 33357 | P03410 | P61764 | -0.20551  |
| 33358 | P03410 | A0FGR9 | -0.797    |
| 33359 | P03410 | Q8N1W1 | -0.72093  |
| 33360 | P03410 | Q14165 | -0.64319  |
| 33361 | P03410 | Q9NST1 | -0.76294  |
| 33362 | P03410 | Q01780 | -0.2788   |
| 33363 | P03410 | Q9NZU5 | -0.25279  |
| 33364 | P03410 | P63128 | -0.46158  |

|       |        |        |           |
|-------|--------|--------|-----------|
| 33365 | P03410 | Q9BT88 | -0.45828  |
| 33366 | P03410 | Q8N8J0 | -0.073858 |
| 33367 | P03410 | P12955 | -0.62978  |
| 33368 | P03410 | Q96P65 | -1.1881   |
| 33369 | P03410 | Q9H4I9 | -0.45086  |
| 33370 | P03410 | A6NC97 | -0.63308  |
| 33371 | P03410 | Q9UFP1 | -0.71003  |
| 33372 | P03410 | Q9UPY3 | -0.20583  |
| 33373 | P03410 | Q9NR48 | -0.2273   |
| 33374 | P03410 | Q9UNW8 | -1.1247   |
| 33375 | P03410 | Q14494 | -0.87122  |
| 33376 | P03410 | Q9NPG1 | -0.56896  |
| 33377 | P03410 | Q95500 | -0.46068  |
| 33378 | P03410 | Q13202 | -0.481    |
| 33379 | P03410 | Q99985 | -0.84392  |
| 33380 | P03410 | Q9UPU7 | -0.87987  |
| 33381 | P03410 | Q8NGT2 | -1.153    |
| 33382 | P03410 | Q15067 | -0.57347  |
| 33383 | P03410 | Q00590 | -1.4701   |
| 33384 | P03410 | P00738 | -0.69885  |
| 33385 | P03410 | A6NJZ3 | -1.153    |
| 33386 | P03410 | Q96HL8 | -0.2274   |
| 33387 | P03410 | Q14975 | -0.87875  |
| 33388 | P03410 | Q96DR7 | -0.75211  |
| 33389 | P03410 | P35442 | -0.73059  |
| 33390 | P03410 | Q76000 | -1.153    |
| 33391 | P03410 | Q5VWC8 | -0.90926  |
| 33392 | P03410 | P01871 | -1.4196   |
| 33393 | P03410 | P32927 | -0.5594   |
| 33394 | P03410 | Q9UGM5 | -0.93823  |
| 33395 | P03410 | Q7Z6L1 | -0.47406  |
| 33396 | P03410 | Q9NRK6 | -1.0694   |
| 33397 | P03410 | Q86SQ0 | -0.22352  |
| 33398 | P03410 | P29508 | -0.5555   |
| 33399 | P03410 | Q96P56 | -0.66886  |
| 33400 | P03410 | Q96N87 | -1.0481   |
| 33401 | P03410 | Q9Y6M5 | -0.70999  |
| 33402 | P03410 | Q9NXL6 | -0.58209  |
| 33403 | P03410 | Q8WXF0 | -0.34827  |
| 33404 | P03410 | Q6NUT2 | -1.2466   |
| 33405 | P03410 | Q8N8F6 | -0.7715   |
| 33406 | P03410 | Q96A70 | -0.19123  |
| 33407 | P03410 | Q96A83 | -1.0662   |
| 33408 | P03410 | Q8NEE8 | -0.22733  |
| 33409 | P03410 | P52803 | -0.48068  |
| 33410 | P03410 | P29034 | -0.23562  |
| 33411 | P03410 | Q9NPF7 | -0.36012  |
| 33412 | P03410 | Q5SQ64 | -0.797    |
| 33413 | P03410 | Q9NP72 | -1.4515   |
| 33414 | P03410 | Q9UPZ6 | -1.5068   |
| 33415 | P03410 | Q86VU5 | -0.39583  |
| 33416 | P03410 | Q9Y6J8 | -0.38048  |
| 33417 | P03410 | Q7Z6M2 | -0.13883  |
| 33418 | P03410 | Q6ZSR9 | -0.012715 |
| 33419 | P03410 | P31995 | -0.22741  |
| 33420 | P03410 | Q9H205 | -1.153    |
| 33421 | P03410 | Q9NRI6 | -0.69271  |
| 33422 | P03410 | P21359 | -0.22533  |
| 33423 | P03410 | Q9H741 | -0.71003  |
| 33424 | P03410 | Q9HCT0 | -0.62013  |
| 33425 | P03410 | P07307 | -0.28009  |
| 33426 | P03410 | Q94851 | -0.33291  |
| 33427 | P03410 | Q9NY65 | -0.2746   |
| 33428 | P03410 | C9J2P7 | -0.66744  |
| 33429 | P03410 | P08217 | -1.3874   |
| 33430 | P03410 | Q9UBG0 | -0.73133  |
| 33431 | P03410 | Q6ZR08 | -0.37486  |
| 33432 | P03410 | Q495A1 | -0.22742  |
| 33433 | P03410 | P59534 | -1.067    |
| 33434 | P03410 | Q8NA66 | -0.12465  |
| 33435 | P03410 | P02771 | -0.58686  |
| 33436 | P03410 | Q8TBF5 | -0.71035  |
| 33437 | P03410 | Q96PF2 | -1.0246   |
| 33438 | P03410 | Q9H756 | -0.63308  |
| 33439 | P03410 | Q9BSE5 | -0.164    |
| 33440 | P03410 | Q9BX74 | -0.89309  |

|       |        |        |          |
|-------|--------|--------|----------|
| 33441 | P03410 | P11801 | -0.80261 |
| 33442 | P03410 | O43897 | -1.652   |
| 33443 | P03410 | O95838 | -1.1301  |
| 33444 | P03410 | P17538 | -1.4584  |
| 33445 | P03410 | Q9H5V7 | -0.22861 |
| 33446 | P03410 | P27482 | -0.22649 |
| 33447 | P03410 | Q8TD43 | -0.84531 |
| 33448 | P03410 | Q6PJQ5 | -0.80007 |
| 33449 | P03410 | P98196 | -0.61071 |
| 33450 | P03410 | Q9Y446 | -0.22834 |
| 33451 | P03410 | O60476 | -0.34468 |
| 33452 | P03410 | Q8NGF4 | -1.153   |
| 33453 | P03410 | Q9BRI3 | -0.63324 |
| 33454 | P03410 | Q9BRY0 | -0.87154 |
| 33455 | P03410 | Q06430 | -0.78674 |
| 33456 | P03410 | O60658 | -0.22639 |
| 33457 | P03410 | Q8NB14 | -0.66744 |
| 33458 | P03410 | P17066 | -0.51024 |
| 33459 | P03410 | O14684 | -0.67852 |
| 33460 | P03410 | P0C645 | -1.153   |
| 33461 | P03410 | Q15394 | -1.0302  |
| 33462 | P03410 | Q8NHC6 | -1.153   |
| 33463 | P03410 | Q96J77 | -0.16658 |
| 33464 | P03410 | Q1ZYL8 | -0.71003 |
| 33465 | P03410 | Q9BWP8 | -1.086   |
| 33466 | P03410 | Q14940 | -1.0014  |
| 33467 | P03410 | Q5TYW2 | -0.2274  |
| 33468 | P03410 | Q9H6D5 | -0.63308 |
| 33469 | P03410 | P48201 | -0.52245 |
| 33470 | P03410 | Q6ZNA5 | -0.94299 |
| 33471 | P03410 | Q96QZ7 | -0.2232  |
| 33472 | P03410 | P52564 | -0.23025 |
| 33473 | P03410 | Q96CG8 | -0.91094 |
| 33474 | P03410 | Q6Y288 | -0.75174 |
| 33475 | P03410 | O75131 | -0.22937 |
| 33476 | P03410 | P26378 | -0.71902 |
| 33477 | P03410 | P05771 | -0.2097  |
| 33478 | P03410 | P63121 | -0.52549 |
| 33479 | P03410 | Q9Y547 | -0.23742 |
| 33480 | P03410 | P23677 | -0.95022 |
| 33481 | P03410 | Q9UGN4 | -1.0223  |
| 33482 | P03410 | Q6IC98 | -0.39756 |
| 33483 | P03410 | P36980 | -0.71003 |
| 33484 | P03410 | Q8WTX9 | -0.89864 |
| 33485 | P03410 | Q86X45 | -0.2274  |
| 33486 | P03410 | P47893 | -1.2888  |
| 33487 | P03410 | Q9H342 | -1.153   |
| 33488 | P03410 | Q8NGK0 | -1.153   |
| 33489 | P03410 | Q58A45 | -0.19512 |
| 33490 | P03410 | P0CG36 | -1.0048  |
| 33491 | P03410 | Q16696 | -0.85327 |
| 33492 | P03410 | Q8N9N7 | -0.23963 |
| 33493 | P03410 | Q8NHA6 | -1.153   |
| 33494 | P03410 | Q8NGP0 | -1.153   |
| 33495 | P03410 | Q8N465 | -0.24837 |
| 33496 | P03410 | Q8N4G2 | -0.64023 |
| 33497 | P03410 | P02741 | -0.75028 |
| 33498 | P03410 | P51797 | -1.1411  |
| 33499 | P03410 | Q7Z5J1 | -1.5956  |
| 33500 | P03410 | Q9HBB8 | -0.93011 |
| 33501 | P03410 | O43313 | -0.22741 |
| 33502 | P03410 | Q9BSW7 | -0.22878 |
| 33503 | P03410 | Q5VST6 | -0.71711 |
| 33504 | P03410 | Q01959 | -0.32495 |
| 33505 | P03410 | O43934 | -0.61257 |
| 33506 | P03410 | Q8TCY5 | -0.49895 |
| 33507 | P03410 | Q8TDM6 | -0.24477 |
| 33508 | P03410 | Q9UG22 | -1.2307  |
| 33509 | P03410 | Q8N8V2 | -0.86655 |
| 33510 | P03410 | P20061 | -0.76018 |
| 33511 | P03410 | Q96NY7 | -0.58918 |
| 33512 | P03410 | O60427 | -0.32396 |
| 33513 | P03410 | Q8N1F8 | -0.22722 |
| 33514 | P03410 | Q7LDI9 | -0.0271  |
| 33515 | P03410 | Q9Y3I0 | -0.57833 |
| 33516 | P03410 | Q07837 | -0.99061 |

|       |        |        |          |
|-------|--------|--------|----------|
| 33517 | P03410 | P37840 | -0.20049 |
| 33518 | P03410 | Q8WWV6 | -0.78456 |
| 33519 | P03410 | Q8WXH5 | -0.40312 |
| 33520 | P03410 | A8MZ36 | -0.16933 |
| 33521 | P03410 | Q9H2X3 | -0.90704 |
| 33522 | P03410 | D6R901 | -0.66744 |
| 33523 | P03410 | A4D2G3 | -1.153   |
| 33524 | P03410 | P30203 | -1.0113  |
| 33525 | P03410 | Q02338 | -0.39643 |
| 33526 | P03410 | P49137 | -0.23106 |
| 33527 | P03410 | Q9NPF2 | -0.32453 |
| 33528 | P03410 | Q01101 | -0.22125 |
| 33529 | P03410 | Q9NRZ5 | -0.78929 |
| 33530 | P03410 | Q9NPG4 | -0.93098 |
| 33531 | P03410 | Q8NFP4 | -0.7508  |
| 33532 | P03410 | Q86VW2 | -0.50261 |
| 33533 | P03410 | Q96KN2 | -1.2349  |
| 33534 | P03410 | Q13258 | -0.63529 |
| 33535 | P03410 | Q5VTT2 | -0.63308 |
| 33536 | P03410 | Q6NUI6 | -0.87461 |
| 33537 | P03410 | P38405 | -0.97508 |
| 33538 | P03410 | P13942 | -0.86268 |
| 33539 | P03410 | P09017 | -0.21639 |
| 33540 | P03410 | Q8NGM9 | -1.153   |
| 33541 | P03410 | O60403 | -1.153   |
| 33542 | P03410 | Q15139 | -0.31237 |
| 33543 | P03410 | P04070 | -0.86018 |
| 33544 | P03410 | P35225 | -0.16599 |
| 33545 | P03410 | P35968 | -0.48028 |
| 33546 | P03410 | Q9Y3D6 | -0.12712 |
| 33547 | P03410 | Q8NDV1 | -0.4947  |
| 33548 | P03410 | P01772 | -0.90565 |
| 33549 | P03410 | Q5VZM2 | -0.2984  |
| 33550 | P03410 | Q8WYQ4 | -0.14947 |
| 33551 | P03410 | A6NHT5 | -0.33287 |
| 33552 | P03410 | Q6S5L8 | -0.22741 |
| 33553 | P03410 | A6NMY6 | -0.69696 |
| 33554 | P03410 | Q9H967 | -0.22701 |
| 33555 | P03410 | Q8TCG2 | -0.75648 |
| 33556 | P03410 | P05162 | -0.17328 |
| 33557 | P03410 | Q11203 | -0.79183 |
| 33558 | P03410 | O60245 | -1.2467  |
| 33559 | P03410 | Q9NVP4 | -0.39568 |
| 33560 | P03410 | O43255 | -0.22402 |
| 33561 | P03410 | Q96P50 | -1.1843  |
| 33562 | P03410 | Q6B0I6 | -0.16469 |
| 33563 | P03410 | P01275 | -0.62896 |
| 33564 | P03410 | Q9C0I1 | -0.20314 |
| 33565 | P03410 | Q16609 | -0.73668 |
| 33566 | P03410 | Q8NGJ3 | -1.153   |
| 33567 | P03410 | Q9NX45 | -0.26234 |
| 33568 | P03410 | Q3ZCQ3 | -0.63308 |
| 33569 | P03410 | P36382 | -0.86045 |
| 33570 | P03410 | Q9Y342 | -0.7708  |
| 33571 | P03410 | O76090 | -0.69258 |
| 33572 | P03410 | Q8NBI5 | -0.67992 |
| 33573 | P03410 | Q8TBR7 | -0.797   |
| 33574 | P03410 | P52798 | -0.40801 |
| 33575 | P03410 | Q6ZWL3 | -1.1628  |
| 33576 | P03410 | Q6UWU2 | -0.67669 |
| 33577 | P03410 | Q96BZ4 | -0.73679 |
| 33578 | P03410 | P19404 | -0.34027 |
| 33579 | P03410 | Q9H361 | -0.48114 |
| 33580 | P03410 | Q63HQ2 | -0.78446 |
| 33581 | P03410 | Q16674 | -0.79936 |
| 33582 | P03410 | Q9NPH0 | -0.60504 |
| 33583 | P03410 | Q9BUL5 | -0.2701  |
| 33584 | P03410 | Q96JA1 | -0.63308 |
| 33585 | P03410 | Q6ZP29 | -0.69576 |
| 33586 | P03410 | Q9BQD7 | -0.63308 |
| 33587 | P03410 | Q8WXS4 | -0.83911 |
| 33588 | P03410 | P20393 | -0.56426 |
| 33589 | P03410 | Q96JH8 | -0.76273 |
| 33590 | P03410 | Q8TC59 | -0.42685 |
| 33591 | P03410 | P01040 | -0.14556 |
| 33592 | P03410 | Q7Z7H5 | -0.72631 |

|       |        |        |           |
|-------|--------|--------|-----------|
| 33593 | P03410 | Q08050 | -0.47636  |
| 33594 | P03410 | Q14164 | -0.2274   |
| 33595 | P03410 | P01189 | -0.60428  |
| 33596 | P03410 | Q8IVF7 | -0.21134  |
| 33597 | P03410 | Q6P995 | -0.67018  |
| 33598 | P03410 | Q8NGX8 | -1.153    |
| 33599 | P03410 | Q9Y4F9 | -0.2739   |
| 33600 | P03410 | A6NEK1 | -0.20612  |
| 33601 | P03410 | P50851 | -0.63116  |
| 33602 | P03410 | P22459 | -0.53725  |
| 33603 | P03410 | Q00887 | -0.71618  |
| 33604 | P03410 | Q16553 | -0.45103  |
| 33605 | P03410 | P59541 | -1.067    |
| 33606 | P03410 | Q9Y5W3 | -0.22154  |
| 33607 | P03410 | Q9UH73 | -0.17192  |
| 33608 | P03410 | Q6PIU1 | -0.94837  |
| 33609 | P03410 | Q15334 | -0.48501  |
| 33610 | P03410 | Q9BZF1 | -0.44496  |
| 33611 | P03410 | P51955 | -0.22741  |
| 33612 | P03410 | Q9NXH9 | -0.15435  |
| 33613 | P03410 | P18827 | -0.49306  |
| 33614 | P03410 | Q9NRP7 | -0.73065  |
| 33615 | P03410 | Q96G46 | -0.55263  |
| 33616 | P03410 | P41225 | -0.31893  |
| 33617 | P03410 | Q9NS68 | -0.41377  |
| 33618 | P03410 | Q96DN0 | -0.093352 |
| 33619 | P03410 | Q8TDQ0 | -0.63308  |
| 33620 | P03410 | P09693 | -0.71891  |
| 33621 | P03410 | P80108 | -0.48376  |
| 33622 | P03410 | Q7Z429 | -0.63308  |
| 33623 | P03410 | Q8IYM9 | -0.22776  |
| 33624 | P03410 | Q76MJ5 | -0.92266  |
| 33625 | P03410 | P43155 | -0.44022  |
| 33626 | P03410 | Q9NXG6 | -1.1144   |
| 33627 | P03410 | Q86X52 | -0.85428  |
| 33628 | P03410 | Q9BYZ8 | -0.70793  |
| 33629 | P03410 | Q9BZG9 | -1.115    |
| 33630 | P03410 | Q8NH42 | -1.153    |
| 33631 | P03410 | Q16798 | -0.52063  |
| 33632 | P03410 | Q96S21 | -1.0268   |
| 33633 | P03410 | A8MZ26 | -0.22376  |
| 33634 | P03410 | Q12849 | -0.33762  |
| 33635 | P03410 | Q05586 | -0.34807  |
| 33636 | P03410 | Q6P9H5 | -0.86337  |
| 33637 | P03410 | Q5JQF8 | -0.67771  |
| 33638 | P03410 | Q96A37 | -0.39568  |
| 33639 | P03410 | O60285 | -0.58942  |
| 33640 | P03410 | O43252 | -0.94903  |
| 33641 | P03410 | Q9H324 | -0.83623  |
| 33642 | P03410 | P14616 | -1.5996   |
| 33643 | P03410 | Q9UBG3 | -0.25165  |
| 33644 | P03410 | Q6P531 | -0.67176  |
| 33645 | P03410 | Q6T311 | -1.269    |
| 33646 | P03410 | Q8IYR6 | -1.0985   |
| 33647 | P03410 | Q9GZK7 | -1.153    |
| 33648 | P03410 | P15173 | -0.22735  |
| 33649 | P03410 | Q96HF1 | -0.30571  |
| 33650 | P03410 | P49641 | -0.4327   |
| 33651 | P03410 | O75678 | -0.24094  |
| 33652 | P03410 | Q9H4B4 | -0.22744  |
| 33653 | P03410 | Q6PEZ8 | -0.82393  |
| 33654 | P03410 | P09601 | -0.22694  |
| 33655 | P03410 | P12644 | -0.22741  |
| 33656 | P03410 | A8K4G0 | -0.797    |
| 33657 | P03410 | Q6T310 | -0.3383   |
| 33658 | P03410 | O43820 | -0.65555  |
| 33659 | P03410 | Q14953 | -1.0009   |
| 33660 | P03410 | Q15131 | -0.61021  |
| 33661 | P03410 | P19235 | -1.1771   |
| 33662 | P03410 | Q9Y2Q3 | -0.53381  |
| 33663 | P03410 | P05129 | -0.61654  |
| 33664 | P03410 | O15457 | -0.38389  |
| 33665 | P03410 | Q9NTX5 | -0.093846 |
| 33666 | P03410 | P08912 | -0.94176  |
| 33667 | P03410 | P30043 | -0.34366  |
| 33668 | P03410 | Q8N1H7 | -0.48758  |



|       |        |        |           |
|-------|--------|--------|-----------|
| 33669 | P03410 | P51812 | -0.25398  |
| 33670 | P03410 | Q92608 | -0.22306  |
| 33671 | P03410 | Q02218 | -0.17435  |
| 33672 | P03410 | P01824 | -0.90565  |
| 33673 | P03410 | Q96PJ5 | -0.2275   |
| 33674 | P03410 | Q96GX5 | -0.22741  |
| 33675 | P03410 | Q02413 | -0.54989  |
| 33676 | P03410 | O75051 | -1.1786   |
| 33677 | P03410 | Q8N8N0 | -1.1136   |
| 33678 | P03410 | Q96R30 | -1.153    |
| 33679 | P03410 | P21854 | -0.60456  |
| 33680 | P03410 | Q9H0F7 | -0.6085   |
| 33681 | P03410 | Q9UBN4 | -0.22737  |
| 33682 | P03410 | Q12866 | -0.89758  |
| 33683 | P03410 | P00326 | -0.77572  |
| 33684 | P03410 | Q8N350 | -0.63308  |
| 33685 | P03410 | P20036 | -0.71861  |
| 33686 | P03410 | Q5EBL8 | -0.22655  |
| 33687 | P03410 | Q6ZNE9 | -0.19806  |
| 33688 | P03410 | Q03164 | -0.22646  |
| 33689 | P03410 | Q969P6 | -0.36707  |
| 33690 | P03410 | P83859 | -0.58096  |
| 33691 | P03410 | Q03591 | -0.8414   |
| 33692 | P03410 | Q9UGB7 | -0.25304  |
| 33693 | P03410 | P02763 | -0.22039  |
| 33694 | P03410 | Q6ZUM4 | -0.807    |
| 33695 | P03410 | E5RHQ5 | -0.15358  |
| 33696 | P03410 | Q8WUD1 | -0.64965  |
| 33697 | P03410 | Q6P996 | -0.29538  |
| 33698 | P03410 | P19652 | -0.75949  |
| 33699 | P03410 | Q8NDB2 | -0.023071 |
| 33700 | P03410 | Q96LA9 | -1.2185   |
| 33701 | P03410 | Q75027 | -0.86979  |
| 33702 | P03410 | Q8N0Z9 | -0.63308  |
| 33703 | P03410 | Q29718 | -0.88938  |
| 33704 | P03410 | Q9Y5E7 | -1.1542   |
| 33705 | P03410 | P58012 | -0.49241  |
| 33706 | P03410 | Q9NYK1 | -0.51839  |
| 33707 | P03410 | O94876 | -0.63308  |
| 33708 | P03410 | P02647 | -0.32962  |
| 33709 | P03410 | P12830 | -0.53989  |
| 33710 | P03410 | Q92802 | -0.10645  |
| 33711 | P03410 | P0C7W6 | -0.046528 |
| 33712 | P03410 | O15013 | -0.2278   |
| 33713 | P03410 | Q9NUN7 | -0.3121   |
| 33714 | P03410 | Q04756 | -1.2669   |
| 33715 | P03410 | Q9NR20 | -1.2317   |
| 33716 | P03410 | Q9UGQ3 | -0.47312  |
| 33717 | P03410 | Q9NQC7 | -0.18714  |
| 33718 | P03410 | Q86UV7 | -0.39568  |
| 33719 | P03410 | Q8TDS5 | -1.1024   |
| 33720 | P03410 | Q9BZW8 | -0.42134  |
| 33721 | P03410 | O60938 | -0.87469  |
| 33722 | P03410 | Q9UNF0 | -0.22737  |
| 33723 | P03410 | O95372 | -0.17573  |
| 33724 | P03410 | P14207 | -0.8649   |
| 33725 | P03410 | Q9P0L9 | -0.3694   |
| 33726 | P03410 | Q9Y2P4 | -1.3472   |
| 33727 | P03410 | O75462 | -0.22757  |
| 33728 | P03410 | Q5HY92 | -0.57577  |
| 33729 | P03410 | Q9UJQ1 | -0.80217  |
| 33730 | P03410 | Q8N9I1 | -0.63308  |
| 33731 | P03410 | Q92544 | -0.63308  |
| 33732 | P03410 | Q4G0S4 | -0.61388  |
| 33733 | P03410 | Q7L523 | -0.22739  |
| 33734 | P03410 | P15391 | -1.0598   |
| 33735 | P03410 | P28222 | -0.81852  |
| 33736 | P03410 | P01850 | -0.72486  |
| 33737 | P03410 | P04196 | -0.32289  |
| 33738 | P03410 | Q9Y5B8 | -0.73216  |
| 33739 | P03410 | Q9BX46 | -0.36835  |
| 33740 | P03410 | Q6IFN5 | -1.153    |
| 33741 | P03410 | Q96CB5 | -0.033578 |
| 33742 | P03410 | Q5VZ52 | -0.078532 |
| 33743 | P03410 | Q9UEW3 | -0.92157  |
| 33744 | P03410 | O00219 | -0.8075   |

|       |        |        |           |
|-------|--------|--------|-----------|
| 33745 | P03410 | Q8NE79 | -0.62575  |
| 33746 | P03410 | Q6WKZ4 | -0.20402  |
| 33747 | P03410 | P01116 | -0.27335  |
| 33748 | P03410 | Q9BZD2 | -0.73963  |
| 33749 | P03410 | Q96NG3 | -0.21443  |
| 33750 | P03410 | Q15204 | -1.2441   |
| 33751 | P03410 | P35249 | -0.19839  |
| 33752 | P03410 | Q5VYJ5 | -0.63308  |
| 33753 | P03410 | Q15722 | -1.6969   |
| 33754 | P03410 | Q9HBX9 | -1.2349   |
| 33755 | P03410 | Q43704 | -0.33227  |
| 33756 | P03410 | Q3MII6 | -0.83596  |
| 33757 | P03410 | Q9NPD5 | -0.76929  |
| 33758 | P03410 | P01776 | -0.90565  |
| 33759 | P03410 | Q7LFL8 | -0.16638  |
| 33760 | P03410 | Q95206 | -1.0669   |
| 33761 | P03410 | Q96EP9 | -0.80181  |
| 33762 | P03410 | Q13283 | -0.23624  |
| 33763 | P03410 | Q9UM21 | -0.88486  |
| 33764 | P03410 | Q99805 | -0.67145  |
| 33765 | P03410 | A6NGE7 | -0.31674  |
| 33766 | P03410 | Q96M89 | -0.080107 |
| 33767 | P03410 | Q86VK4 | -0.17704  |
| 33768 | P03410 | Q6ZN44 | -0.99693  |
| 33769 | P03410 | P35222 | -0.22915  |
| 33770 | P03410 | O60609 | -0.28852  |
| 33771 | P03410 | Q96CA5 | -0.22741  |
| 33772 | P03410 | Q8NGR5 | -1.153    |
| 33773 | P03410 | Q95452 | -0.7886   |
| 33774 | P03410 | P01344 | -0.26835  |
| 33775 | P03410 | Q9H4Y5 | -0.36581  |
| 33776 | P03410 | Q6QHK4 | -0.24113  |
| 33777 | P03410 | P48723 | -0.65383  |
| 33778 | P03410 | P0DJD8 | -1.2183   |
| 33779 | P03410 | P29074 | -0.22761  |
| 33780 | P03410 | Q9Y2I8 | -0.22906  |
| 33781 | P03410 | A0AVI2 | -0.63308  |
| 33782 | P03410 | Q66K37 | -0.22503  |
| 33783 | P03410 | Q9H6E4 | -0.71003  |
| 33784 | P03410 | P01130 | -0.32873  |
| 33785 | P03410 | P40967 | -0.76806  |
| 33786 | P03410 | P36957 | -0.15544  |
| 33787 | P03410 | Q43323 | -0.97131  |
| 33788 | P03410 | Q8N6T3 | -0.047464 |
| 33789 | P03410 | Q8N819 | -0.26716  |
| 33790 | P03410 | Q6UXH0 | -0.1037   |
| 33791 | P03410 | Q9NZN9 | -0.20862  |
| 33792 | P03410 | Q13239 | -0.22741  |
| 33793 | P03410 | Q15164 | -0.22714  |
| 33794 | P03410 | Q95718 | -0.22743  |
| 33795 | P03410 | Q70CQ3 | -1.0021   |
| 33796 | P03410 | Q8WWP7 | -1.0762   |
| 33797 | P03410 | P08473 | -0.5973   |
| 33798 | P03410 | Q6ZMJ4 | -0.62599  |
| 33799 | P03410 | P63133 | -0.26043  |
| 33800 | P03410 | Q5JV73 | -0.22675  |
| 33801 | P03410 | P13378 | -0.20804  |
| 33802 | P03410 | Q92918 | -0.77009  |
| 33803 | P03410 | P21860 | -0.72975  |
| 33804 | P03410 | Q8NG80 | -1.1275   |
| 33805 | P03410 | Q13530 | -0.53313  |
| 33806 | P03410 | P49913 | -0.57459  |
| 33807 | P03410 | Q13232 | -0.63855  |
| 33808 | P03410 | Q8NGL1 | -1.153    |
| 33809 | P03410 | Q75445 | -0.72676  |
| 33810 | P03410 | Q06710 | -0.22694  |
| 33811 | P03410 | Q8N9H8 | -0.46633  |
| 33812 | P03410 | Q6ZMI3 | -1.2735   |
| 33813 | P03410 | P12259 | -0.52373  |
| 33814 | P03410 | Q96NT0 | -0.14183  |
| 33815 | P03410 | P55000 | -0.93849  |
| 33816 | P03410 | Q8NDC4 | -0.034682 |
| 33817 | P03410 | P17658 | -0.85728  |
| 33818 | P03410 | P21580 | -0.18687  |
| 33819 | P03410 | Q9NRD8 | -0.79628  |
| 33820 | P03410 | Q8WYG9 | -0.57393  |

|       |        |        |           |
|-------|--------|--------|-----------|
| 33821 | P03410 | O15018 | -0.45869  |
| 33822 | P03410 | P22749 | -0.75421  |
| 33823 | P03410 | P58173 | -1.153    |
| 33824 | P03410 | Q96F25 | -0.72838  |
| 33825 | P03410 | Q9BXT8 | -0.46933  |
| 33826 | P03410 | Q9NRM7 | -0.22741  |
| 33827 | P03410 | O14520 | -0.55881  |
| 33828 | P03410 | Q6UXV4 | -0.52416  |
| 33829 | P03410 | P29400 | -1.0049   |
| 33830 | P03410 | Q9NZR2 | -0.59038  |
| 33831 | P03410 | O14525 | -0.72026  |
| 33832 | P03410 | Q8N954 | -0.038386 |
| 33833 | P03410 | Q9P218 | -0.98173  |
| 33834 | P03410 | Q16773 | -0.20182  |
| 33835 | P03410 | P06401 | -0.22742  |
| 33836 | P03410 | P29803 | -0.20527  |
| 33837 | P03410 | Q15777 | -0.068531 |
| 33838 | P03410 | Q6ZRG5 | -0.039517 |
| 33839 | P03410 | O14607 | -0.39757  |
| 33840 | P03410 | Q9Y6A2 | -0.97882  |
| 33841 | P03410 | P19801 | -0.86152  |
| 33842 | P03410 | O94966 | -0.7559   |
| 33843 | P03410 | P51790 | -0.36331  |
| 33844 | P03410 | Q9NR45 | -0.090472 |
| 33845 | P03410 | O60507 | -0.54563  |
| 33846 | P03410 | Q9BPU6 | -0.20585  |
| 33847 | P03410 | Q96HY7 | -0.17897  |
| 33848 | P03410 | Q6GTX8 | -0.19307  |
| 33849 | P03410 | Q9H8J5 | -0.63308  |
| 33850 | P03410 | Q6PCT2 | -0.22981  |
| 33851 | P03410 | Q8NCM8 | -0.31044  |
| 33852 | P03410 | Q9BYT1 | -0.61248  |
| 33853 | P03410 | O15047 | -0.38156  |
| 33854 | P03410 | Q8N412 | -0.070067 |
| 33855 | P03410 | P25105 | -0.91148  |
| 33856 | P03410 | P57087 | -0.2441   |
| 33857 | P03410 | Q96MV8 | -0.77355  |
| 33858 | P03410 | O75140 | -0.26256  |
| 33859 | P03410 | O60812 | -0.29837  |
| 33860 | P03410 | Q8NGY5 | -1.153    |
| 33861 | P03410 | P30874 | -0.39952  |
| 33862 | P03410 | Q8WTT0 | -0.59338  |
| 33863 | P03410 | P85298 | -0.38491  |
| 33864 | P03410 | Q9NZV1 | -1.1005   |
| 33865 | P03410 | P56962 | -0.39265  |
| 33866 | P03410 | Q17R89 | -0.35274  |
| 33867 | P03410 | Q8N594 | -0.5696   |
| 33868 | P03410 | P98194 | -0.90346  |
| 33869 | P03410 | P35236 | -0.35819  |
| 33870 | P03410 | Q9NSE7 | -0.43177  |
| 33871 | P03410 | Q9H0U3 | -0.96158  |
| 33872 | P03410 | Q96GR4 | -0.86764  |
| 33873 | P03410 | Q6UWR7 | -1.3631   |
| 33874 | P03410 | Q13117 | -0.98797  |
| 33875 | P03410 | Q99879 | -0.80275  |
| 33876 | P03410 | Q15828 | -0.88305  |
| 33877 | P03410 | P61026 | -0.51197  |
| 33878 | P03410 | P05187 | -1.0099   |
| 33879 | P03410 | Q6N043 | -0.22691  |
| 33880 | P03410 | P51572 | -0.13407  |
| 33881 | P03410 | Q9Y6F7 | -0.22352  |
| 33882 | P03410 | P19971 | -0.53109  |
| 33883 | P03410 | Q92959 | -0.96801  |
| 33884 | P03410 | P22460 | -0.57615  |
| 33885 | P03410 | Q9NZN1 | -0.51007  |
| 33886 | P03410 | P78325 | -0.44583  |
| 33887 | P03410 | Q4G1C9 | -0.63308  |
| 33888 | P03410 | Q6UWB4 | -1.2466   |
| 33889 | P03410 | Q9BWW9 | -0.85323  |
| 33890 | P03410 | Q9Y5F2 | -1.1542   |
| 33891 | P03410 | P23946 | -1.4611   |
| 33892 | P03410 | Q86VR7 | -0.63308  |
| 33893 | P03410 | Q9HAS3 | -0.71166  |
| 33894 | P03410 | P54760 | -1.404    |
| 33895 | P03410 | Q6PJI9 | -0.2274   |
| 33896 | P03410 | Q9UKY3 | -0.66609  |

|       |        |        |           |
|-------|--------|--------|-----------|
| 33897 | P03410 | Q92914 | -0.37116  |
| 33898 | P03410 | P34810 | -0.77244  |
| 33899 | P03410 | Q8TD08 | -1.5104   |
| 33900 | P03410 | Q6PCB7 | -0.68558  |
| 33901 | P03410 | Q6JVE5 | -0.74319  |
| 33902 | P03410 | P28039 | -0.84522  |
| 33903 | P03410 | P30968 | -1.5065   |
| 33904 | P03410 | Q9H1C4 | -0.58118  |
| 33905 | P03410 | O43451 | -0.62503  |
| 33906 | P03410 | O95340 | -0.92351  |
| 33907 | P03410 | Q8N158 | -1.0018   |
| 33908 | P03410 | Q8NH21 | -1.153    |
| 33909 | P03410 | Q5VTT5 | -0.22752  |
| 33910 | P03410 | Q9BVV7 | -0.18901  |
| 33911 | P03410 | Q969G2 | -0.2271   |
| 33912 | P03410 | Q8NGP4 | -1.153    |
| 33913 | P03410 | P60484 | -0.22737  |
| 33914 | P03410 | Q8TCU6 | -0.22794  |
| 33915 | P03410 | P68431 | -0.54817  |
| 33916 | P03410 | Q8NFL0 | -0.45595  |
| 33917 | P03410 | P08236 | -0.35055  |
| 33918 | P03410 | Q9NR82 | -1.0692   |
| 33919 | P03410 | Q86UA1 | -0.10298  |
| 33920 | P03410 | Q7L211 | -0.62172  |
| 33921 | P03410 | Q9HBD1 | -0.22737  |
| 33922 | P03410 | Q6BCY4 | -0.33191  |
| 33923 | P03410 | Q9Y5H5 | -1.0719   |
| 33924 | P03410 | Q01628 | -0.71658  |
| 33925 | P03410 | Q9NR34 | -0.46036  |
| 33926 | P03410 | O43508 | -1.0516   |
| 33927 | P03410 | P04920 | -0.7423   |
| 33928 | P03410 | Q9Y320 | -0.66052  |
| 33929 | P03410 | P30512 | -0.69535  |
| 33930 | P03410 | P33261 | -0.68521  |
| 33931 | P03410 | P29590 | -0.22639  |
| 33932 | P03410 | Q9UL63 | -0.21782  |
| 33933 | P03410 | Q6ZT07 | -1.3852   |
| 33934 | P03410 | P49736 | -0.19511  |
| 33935 | P03410 | A6NC86 | -0.69515  |
| 33936 | P03410 | Q9NZM1 | -0.4799   |
| 33937 | P03410 | Q6UY18 | -0.63308  |
| 33938 | P03410 | Q6UXG3 | -0.72647  |
| 33939 | P03410 | P11245 | -0.1689   |
| 33940 | P03410 | Q99798 | -0.083123 |
| 33941 | P03410 | Q8IW92 | -0.67669  |
| 33942 | P03410 | Q8N1M1 | -0.83088  |
| 33943 | P03410 | O94880 | -0.24209  |
| 33944 | P03410 | Q96JM4 | -0.22455  |
| 33945 | P03410 | Q8TAV3 | -0.80081  |
| 33946 | P03410 | P09493 | -0.2202   |
| 33947 | P03410 | Q8NGX0 | -1.153    |
| 33948 | P03410 | Q8N394 | -0.59468  |
| 33949 | P03410 | Q11128 | -0.47255  |
| 33950 | P03410 | Q9Y483 | -0.22838  |
| 33951 | P03410 | P15086 | -1.2794   |
| 33952 | P03410 | Q9H159 | -1.0201   |
| 33953 | P03410 | Q96IK5 | -0.20745  |
| 33954 | P03410 | Q9UBR5 | -1.222    |
| 33955 | P03410 | P80511 | -0.22913  |
| 33956 | P03410 | O60602 | -0.87948  |
| 33957 | P03410 | O00478 | -0.63308  |
| 33958 | P03410 | Q96T88 | -0.22742  |
| 33959 | P03410 | Q8NFA2 | -0.22738  |
| 33960 | P03410 | Q9NRX6 | -0.3672   |
| 33961 | P03410 | Q8TDW7 | -1.337    |
| 33962 | P03410 | Q8NGH3 | -1.153    |
| 33963 | P03410 | P30443 | -0.96062  |
| 33964 | P03410 | Q8TE67 | -0.22741  |
| 33965 | P03410 | Q8WY98 | -0.63308  |
| 33966 | P03410 | Q9UKA9 | -0.4481   |
| 33967 | P03410 | Q9C056 | -0.24664  |
| 33968 | P03410 | P20382 | -0.94889  |
| 33969 | P03410 | O95214 | -0.63308  |
| 33970 | P03410 | P30531 | -0.56665  |
| 33971 | P03410 | Q99501 | -0.055555 |
| 33972 | P03410 | Q9H2X6 | -0.22741  |

|       |        |        |          |
|-------|--------|--------|----------|
| 33973 | P03410 | Q9H0T7 | -1.1793  |
| 33974 | P03410 | Q495B1 | -0.22741 |
| 33975 | P03410 | Q6J9G0 | -1.8089  |
| 33976 | P03410 | Q09428 | -0.72926 |
| 33977 | P03410 | O60478 | -0.83693 |
| 33978 | P03410 | P12109 | -0.90178 |
| 33979 | P03410 | P47211 | -1.1555  |
| 33980 | P03410 | Q96L58 | -0.47901 |
| 33981 | P03410 | Q70CQ4 | -0.66744 |
| 33982 | P03410 | P07305 | -0.30644 |
| 33983 | P03410 | Q8NF50 | -0.20055 |
| 33984 | P03410 | Q6ZP01 | -0.42828 |
| 33985 | P03410 | Q8IYA2 | -0.17292 |
| 33986 | P03410 | P56705 | -0.32305 |
| 33987 | P03410 | O14498 | -0.94145 |
| 33988 | P03410 | Q8NGP9 | -1.153   |
| 33989 | P03410 | Q8N1N0 | -0.73133 |
| 33990 | P03410 | Q11201 | -0.81653 |
| 33991 | P03410 | P61109 | -0.71003 |
| 33992 | P03410 | O43915 | -0.82374 |
| 33993 | P03410 | A8MV57 | -0.19783 |
| 33994 | P03410 | P49407 | -0.53158 |
| 33995 | P03410 | P01609 | -0.90565 |
| 33996 | P03410 | O00222 | -1.2187  |
| 33997 | P03410 | P30505 | -0.88938 |
| 33998 | P03410 | Q4ZHG4 | -0.56607 |
| 33999 | P03410 | Q5SV17 | -0.63308 |
| 34000 | P03410 | Q6YP21 | -0.23462 |
| 34001 | P03410 | P20160 | -0.73391 |
| 34002 | P03410 | P56817 | -0.85168 |
| 34003 | P03410 | Q9Y639 | -0.75771 |
| 34004 | P03410 | O75718 | -0.97718 |
| 34005 | P03410 | P51805 | -1.028   |
| 34006 | P03410 | Q8NHL6 | -0.28457 |
| 34007 | P03410 | Q96C19 | -0.22431 |
| 34008 | P03410 | Q16527 | -0.48334 |
| 34009 | P03410 | Q01064 | -0.22092 |
| 34010 | P03410 | Q13491 | -0.74898 |
| 34011 | P03410 | P56545 | -0.5821  |
| 34012 | P03410 | Q9UGI8 | -0.4647  |
| 34013 | P03410 | Q9H2H0 | -0.11387 |
| 34014 | P03410 | Q9HBW1 | -0.54113 |
| 34015 | P03410 | Q9Y5U5 | -1.5012  |
| 34016 | P03410 | O60669 | -0.95513 |
| 34017 | P03410 | P31994 | -0.22741 |
| 34018 | P03410 | Q8IZR5 | -0.73505 |
| 34019 | P03410 | Q99748 | -0.51674 |
| 34020 | P03410 | P61158 | -0.1275  |
| 34021 | P03410 | Q8IXE1 | -1.153   |
| 34022 | P03410 | A8MXQ7 | -0.22741 |
| 34023 | P03410 | P04183 | -0.81241 |
| 34024 | P03410 | Q6ZRY4 | -0.62691 |
| 34025 | P03410 | Q8IXB1 | -0.3126  |
| 34026 | P03410 | O00763 | -0.33608 |
| 34027 | P03410 | Q9UBT3 | -1.0025  |
| 34028 | P03410 | P24592 | -0.67079 |
| 34029 | P03410 | Q8NGD4 | -1.153   |
| 34030 | P03410 | Q9BZB8 | -0.34606 |
| 34031 | P03410 | P31641 | -0.99403 |
| 34032 | P03410 | Q08828 | -0.70907 |
| 34033 | P03410 | P63126 | -0.0271  |
| 34034 | P03410 | Q9NVH0 | -0.46633 |
| 34035 | P03410 | Q8IUC4 | -0.24195 |
| 34036 | P03410 | O95013 | -1.153   |
| 34037 | P03410 | Q9UHC7 | -0.2634  |
| 34038 | P03410 | Q9BZJ6 | -1.1925  |
| 34039 | P03410 | O95460 | -0.22741 |
| 34040 | P03410 | O75023 | -0.75129 |
| 34041 | P03410 | Q9UL25 | -0.27062 |
| 34042 | P03410 | Q2TAA5 | -0.77781 |
| 34043 | P03410 | O94806 | -0.50109 |
| 34044 | P03410 | Q9Y4K3 | -0.22728 |
| 34045 | P03410 | Q13608 | -0.25007 |
| 34046 | P03410 | Q5KU26 | -0.45492 |
| 34047 | P03410 | Q9Y2K9 | -0.22741 |
| 34048 | P03410 | Q9NQA5 | -1.0131  |

|       |        |        |            |
|-------|--------|--------|------------|
| 34049 | P03410 | P55283 | -1.1226    |
| 34050 | P03410 | Q9Y6V7 | -0.8216    |
| 34051 | P03410 | Q16774 | -0.73519   |
| 34052 | P03410 | A6NI73 | -1.236     |
| 34053 | P03410 | O43147 | -0.79659   |
| 34054 | P03410 | P35499 | -1.0846    |
| 34055 | P03410 | Q96S15 | -0.22745   |
| 34056 | P03410 | Q5BJH2 | -0.61257   |
| 34057 | P03410 | Q29974 | -0.51469   |
| 34058 | P03410 | Q5TBA9 | -0.16257   |
| 34059 | P03410 | P38398 | -0.22713   |
| 34060 | P03410 | Q6V1X1 | -0.16303   |
| 34061 | P03410 | P0C0S8 | -0.83288   |
| 34062 | P03410 | Q92841 | -0.88457   |
| 34063 | P03410 | Q969Q4 | -0.59701   |
| 34064 | P03410 | Q96KX1 | -0.085913  |
| 34065 | P03410 | Q07960 | -0.25277   |
| 34066 | P03410 | Q92828 | -0.22741   |
| 34067 | P03410 | Q92520 | -0.8518    |
| 34068 | P03410 | Q96LW2 | -1.3438    |
| 34069 | P03410 | Q49AH0 | -0.66082   |
| 34070 | P03410 | P55317 | -0.49241   |
| 34071 | P03410 | P58215 | -0.35052   |
| 34072 | P03410 | Q96K78 | -1.2876    |
| 34073 | P03410 | P13928 | -0.10114   |
| 34074 | P03410 | Q96RK4 | -0.22582   |
| 34075 | P03410 | A6NNY8 | -0.66744   |
| 34076 | P03410 | Q9Y2H5 | -0.22741   |
| 34077 | P03410 | O94779 | -0.35209   |
| 34078 | P03410 | Q96G91 | -1.1671    |
| 34079 | P03410 | P08887 | -0.32682   |
| 34080 | P03410 | A0PJX0 | -0.22761   |
| 34081 | P03410 | Q9UK00 | -0.63308   |
| 34082 | P03410 | Q6YI46 | -0.63308   |
| 34083 | P03410 | P78417 | -0.36815   |
| 34084 | P03410 | Q969V1 | -1.2185    |
| 34085 | P03410 | P54851 | -0.65995   |
| 34086 | P03410 | Q9NWU1 | -0.2587    |
| 34087 | P03410 | P11488 | -0.6954    |
| 34088 | P03410 | Q6ZNJ1 | -0.22741   |
| 34089 | P03410 | Q15785 | -0.40306   |
| 34090 | P03410 | A5PLL7 | -0.7715    |
| 34091 | P03410 | Q15020 | -0.22624   |
| 34092 | P03410 | P36896 | -0.49232   |
| 34093 | P03410 | Q9Y297 | -0.38      |
| 34094 | P03410 | Q13627 | -0.38268   |
| 34095 | P03410 | Q16623 | -0.39788   |
| 34096 | P03410 | P04080 | -0.10041   |
| 34097 | P03410 | Q8NGE7 | -1.153     |
| 34098 | P03410 | Q96J92 | -1.0518    |
| 34099 | P03410 | O43511 | -0.81989   |
| 34100 | P03410 | Q99963 | -0.22902   |
| 34101 | P03410 | P80192 | -0.56953   |
| 34102 | P03410 | Q96RQ9 | -0.95612   |
| 34103 | P03410 | Q5U4P2 | -0.88987   |
| 34104 | P03410 | Q15738 | -1.0605    |
| 34105 | P03410 | Q8NB37 | -0.71003   |
| 34106 | P03410 | Q5DT21 | -0.21055   |
| 34107 | P03410 | Q05925 | -0.22921   |
| 34108 | P03410 | O95297 | -0.16331   |
| 34109 | P03410 | Q9NQT6 | -0.14672   |
| 34110 | P03410 | Q02928 | -0.54123   |
| 34111 | P03410 | O00308 | -0.22743   |
| 34112 | P03410 | P20309 | -0.70779   |
| 34113 | P03410 | P48067 | -0.88806   |
| 34114 | P03410 | Q9H344 | -1.153     |
| 34115 | P03410 | Q8IY84 | -1.4297    |
| 34116 | P03410 | Q09328 | -0.49389   |
| 34117 | P03410 | P21810 | -0.76075   |
| 34118 | P03410 | Q9Y4C5 | -0.67237   |
| 34119 | P03410 | Q8N414 | -0.63308   |
| 34120 | P03410 | Q5M9N0 | -0.0030481 |
| 34121 | P03410 | P04001 | -1.3411    |
| 34122 | P03410 | A2A3N6 | -0.22233   |
| 34123 | P03410 | Q9C0A1 | -0.2274    |
| 34124 | P03410 | P03915 | -0.52568   |

|       |        |        |           |
|-------|--------|--------|-----------|
| 34125 | P03410 | Q6IAN0 | -1.4273   |
| 34126 | P03410 | P11229 | -0.81121  |
| 34127 | P03410 | Q8IUX8 | -1.5394   |
| 34128 | P03410 | Q68D42 | -0.63308  |
| 34129 | P03410 | O60729 | -0.22742  |
| 34130 | P03410 | Q9UHA7 | -0.79209  |
| 34131 | P03410 | Q8WVN8 | -0.91697  |
| 34132 | P03410 | Q6P4H8 | -0.63308  |
| 34133 | P03410 | P35503 | -0.80843  |
| 34134 | P03410 | Q16552 | -0.41117  |
| 34135 | P03410 | Q8N9V3 | -0.32013  |
| 34136 | P03410 | Q6PID8 | -0.22696  |
| 34137 | P03410 | Q8NB90 | -1.1453   |
| 34138 | P03410 | P15313 | -0.28807  |
| 34139 | P03410 | Q9BX51 | -0.024374 |
| 34140 | P03410 | P31273 | -0.52244  |
| 34141 | P03410 | Q9NW13 | -0.26607  |
| 34142 | P03410 | P01033 | -0.24261  |
| 34143 | P03410 | Q8IUQ0 | -0.30108  |
| 34144 | P03410 | P23443 | -0.19138  |
| 34145 | P03410 | Q13615 | -0.11791  |
| 34146 | P03410 | Q99941 | -0.22171  |
| 34147 | P03410 | Q8N5B7 | -0.25661  |
| 34148 | P03410 | Q8TDE3 | -0.68133  |
| 34149 | P03410 | A8MVU1 | -0.2274   |
| 34150 | P03410 | Q96DT5 | -0.36314  |
| 34151 | P03410 | Q15822 | -0.8873   |
| 34152 | P03410 | Q02790 | -0.61552  |
| 34153 | P03410 | A6NGJ6 | -0.39568  |
| 34154 | P03410 | Q6N022 | -0.28806  |
| 34155 | P03410 | O75387 | -1.0586   |
| 34156 | P03410 | Q8N9W7 | -0.63308  |
| 34157 | P03410 | Q8IVF5 | -0.9422   |
| 34158 | P03410 | Q07869 | -0.23879  |
| 34159 | P03410 | Q9NQX3 | -0.61425  |
| 34160 | P03410 | P05109 | -0.23098  |
| 34161 | P03410 | P27338 | -0.61144  |
| 34162 | P03410 | P68402 | -0.28819  |
| 34163 | P03410 | Q8N8R5 | -0.71003  |
| 34164 | P03410 | Q9H920 | -0.73225  |
| 34165 | P03410 | Q8WUA7 | -1.2868   |
| 34166 | P03410 | O14981 | -0.51571  |
| 34167 | P03410 | Q92561 | -0.1246   |
| 34168 | P03410 | P30466 | -0.88938  |
| 34169 | P03410 | P21918 | -0.72238  |
| 34170 | P03410 | Q16739 | -0.50835  |
| 34171 | P03410 | Q9UF56 | -0.21759  |
| 34172 | P03410 | Q96J65 | -1.1276   |
| 34173 | P03410 | Q9BUD6 | -1.0757   |
| 34174 | P03410 | Q9Y276 | -0.44533  |
| 34175 | P03410 | A6NMK7 | -0.21116  |
| 34176 | P03410 | Q96S86 | -1.0389   |
| 34177 | P03410 | Q6PF15 | -0.22098  |
| 34178 | P03410 | Q8TDR2 | -0.93331  |
| 34179 | P03410 | Q99578 | -0.88078  |
| 34180 | P03410 | O14827 | -0.53447  |
| 34181 | P03410 | P11310 | -0.41283  |
| 34182 | P03410 | Q6P3X3 | -0.22554  |
| 34183 | P03410 | Q9P0J7 | -0.58333  |
| 34184 | P03410 | Q9NPZ5 | -0.51217  |
| 34185 | P03410 | Q14863 | -0.2274   |
| 34186 | P03410 | O00548 | -0.62837  |
| 34187 | P03410 | Q9C0G6 | -0.37486  |
| 34188 | P03410 | Q8WVM8 | -0.2106   |
| 34189 | P03410 | Q5DX21 | -1.02     |
| 34190 | P03410 | C9J1S8 | -0.39568  |
| 34191 | P03410 | P48307 | -0.81309  |
| 34192 | P03410 | Q16769 | -1.313    |
| 34193 | P03410 | Q9Y252 | -0.24546  |
| 34194 | P03410 | Q96IZ5 | -0.67771  |
| 34195 | P03410 | Q9Y4I1 | -0.13847  |
| 34196 | P03410 | P17081 | -0.85091  |
| 34197 | P03410 | Q8NGN8 | -1.153    |
| 34198 | P03410 | Q9NVM6 | -0.78301  |
| 34199 | P03410 | Q9NYM9 | -0.060081 |
| 34200 | P03410 | Q9ULD8 | -0.99417  |

|       |        |        |           |
|-------|--------|--------|-----------|
| 34201 | P03410 | Q9BZC7 | -1.0462   |
| 34202 | P03410 | Q8IZS7 | -0.79194  |
| 34203 | P03410 | P09466 | -0.98541  |
| 34204 | P03410 | O43166 | -0.2272   |
| 34205 | P03410 | Q8NGJ7 | -1.153    |
| 34206 | P03410 | Q8TF44 | -0.18907  |
| 34207 | P03410 | Q16654 | -0.69908  |
| 34208 | P03410 | Q86V21 | -0.52111  |
| 34209 | P03410 | Q6U841 | -0.7935   |
| 34210 | P03410 | Q86VH4 | -0.63308  |
| 34211 | P03410 | Q2M1Z3 | -1.1133   |
| 34212 | P03410 | Q8NCU8 | -0.63308  |
| 34213 | P03410 | P06331 | -0.90565  |
| 34214 | P03410 | Q93096 | -0.38509  |
| 34215 | P03410 | Q96MX0 | -0.73505  |
| 34216 | P03410 | Q05C16 | -0.22787  |
| 34217 | P03410 | O60909 | -0.44088  |
| 34218 | P03410 | A8MUH7 | -0.22972  |
| 34219 | P03410 | P37231 | -0.24867  |
| 34220 | P03410 | O60353 | -0.54773  |
| 34221 | P03410 | P0CB47 | -0.2271   |
| 34222 | P03410 | Q6ZST2 | -0.14571  |
| 34223 | P03410 | A4D0S4 | -1.1712   |
| 34224 | P03410 | P16885 | -0.22741  |
| 34225 | P03410 | Q92858 | -0.22885  |
| 34226 | P03410 | Q7Z5M8 | -0.22097  |
| 34227 | P03410 | P19174 | -0.22741  |
| 34228 | P03410 | Q9UGF7 | -1.153    |
| 34229 | P03410 | Q9BYX7 | -0.81982  |
| 34230 | P03410 | O95222 | -1.153    |
| 34231 | P03410 | O43529 | -0.6053   |
| 34232 | P03410 | Q9GZY0 | -0.32465  |
| 34233 | P03410 | Q96BZ9 | -1.5382   |
| 34234 | P03410 | Q8N966 | -0.86764  |
| 34235 | P03410 | O43749 | -1.153    |
| 34236 | P03410 | P51659 | -0.74923  |
| 34237 | P03410 | P52757 | -0.70351  |
| 34238 | P03410 | Q14563 | -0.70093  |
| 34239 | P03410 | Q9UKM9 | -0.43132  |
| 34240 | P03410 | Q5JSP0 | -0.62805  |
| 34241 | P03410 | Q9HBJ8 | -0.87622  |
| 34242 | P03410 | Q12851 | -0.3887   |
| 34243 | P03410 | O75398 | -0.20824  |
| 34244 | P03410 | Q7Z2Y8 | -0.40826  |
| 34245 | P03410 | Q4G0I0 | -0.63308  |
| 34246 | P03410 | Q16643 | -0.56453  |
| 34247 | P03410 | Q9UL17 | -0.46586  |
| 34248 | P03410 | Q01813 | -0.90665  |
| 34249 | P03410 | Q8IYV9 | -0.78301  |
| 34250 | P03410 | Q07000 | -0.88938  |
| 34251 | P03410 | Q8NEY4 | -0.19818  |
| 34252 | P03410 | Q5VV42 | -0.81416  |
| 34253 | P03410 | P53004 | -0.69123  |
| 34254 | P03410 | O75343 | -0.78938  |
| 34255 | P03410 | Q0P5N6 | -1.269    |
| 34256 | P03410 | P01732 | -0.81531  |
| 34257 | P03410 | A6NIU2 | -0.14532  |
| 34258 | P03410 | Q8TE60 | -1.3999   |
| 34259 | P03410 | Q4G176 | -0.98096  |
| 34260 | P03410 | Q9UMR3 | -0.61611  |
| 34261 | P03410 | O60566 | -0.2274   |
| 34262 | P03410 | Q8WUM9 | -1.1673   |
| 34263 | P03410 | P35609 | -0.77561  |
| 34264 | P03410 | Q8NGV6 | -1.153    |
| 34265 | P03410 | P48736 | -0.5733   |
| 34266 | P03410 | Q8NHY3 | -0.12352  |
| 34267 | P03410 | Q9NP73 | -0.27011  |
| 34268 | P03410 | Q8NGG0 | -1.153    |
| 34269 | P03410 | Q9UKP6 | -0.87886  |
| 34270 | P03410 | A8MUM7 | -0.028573 |
| 34271 | P03410 | O14654 | -0.60208  |
| 34272 | P03410 | Q9P2N2 | -0.62115  |
| 34273 | P03410 | Q9H1C0 | -1.0881   |
| 34274 | P03410 | Q15475 | -0.22779  |
| 34275 | P03410 | A6NE02 | -0.57707  |
| 34276 | P03410 | O60242 | -1.2945   |



|       |        |        |           |
|-------|--------|--------|-----------|
| 34277 | P03410 | Q9NXS3 | -0.18215  |
| 34278 | P03410 | P22362 | -0.95337  |
| 34279 | P03410 | O95279 | -1.0161   |
| 34280 | P03410 | Q5TF39 | -0.95521  |
| 34281 | P03410 | D3W0D1 | -0.31433  |
| 34282 | P03410 | Q9BRQ8 | -0.33715  |
| 34283 | P03410 | Q9NZL6 | -0.51966  |
| 34284 | P03410 | Q9Y5Q0 | -0.95974  |
| 34285 | P03410 | P30530 | -0.78683  |
| 34286 | P03410 | Q9NZQ8 | -0.92238  |
| 34287 | P03410 | Q7Z7B0 | -0.2145   |
| 34288 | P03410 | O94812 | -0.23325  |
| 34289 | P03410 | Q32ZL2 | -0.76406  |
| 34290 | P03410 | D6R9N7 | -0.66744  |
| 34291 | P03410 | P59025 | -0.73817  |
| 34292 | P03410 | Q8NGH6 | -1.153    |
| 34293 | P03410 | Q8TD22 | -0.7146   |
| 34294 | P03410 | A6NM15 | -0.66861  |
| 34295 | P03410 | Q05655 | -0.21604  |
| 34296 | P03410 | Q96D53 | -0.93327  |
| 34297 | P03410 | Q8NEN0 | -0.15969  |
| 34298 | P03410 | Q9H8W5 | -0.22743  |
| 34299 | P03410 | Q8N8U9 | -0.70094  |
| 34300 | P03410 | Q8IU80 | -0.22758  |
| 34301 | P03410 | P68366 | -0.49322  |
| 34302 | P03410 | Q96S96 | -0.13673  |
| 34303 | P03410 | Q8WWX0 | -0.3944   |
| 34304 | P03410 | Q14627 | -1.0415   |
| 34305 | P03410 | P57054 | -0.76246  |
| 34306 | P03410 | P07942 | -0.69689  |
| 34307 | P03410 | Q9NQ25 | -0.84949  |
| 34308 | P03410 | Q8IU80 | -0.88229  |
| 34309 | P03410 | Q9Y4F3 | -0.82232  |
| 34310 | P03410 | P24387 | -0.25978  |
| 34311 | P03410 | Q12891 | -0.2101   |
| 34312 | P03410 | Q5XX13 | -0.22794  |
| 34313 | P03410 | P49908 | -0.86807  |
| 34314 | P03410 | P20774 | -0.41497  |
| 34315 | P03410 | O60928 | -0.87928  |
| 34316 | P03410 | P06887 | -0.90565  |
| 34317 | P03410 | Q9HCE6 | -0.27606  |
| 34318 | P03410 | Q52M75 | -0.15247  |
| 34319 | P03410 | Q969M2 | -0.73684  |
| 34320 | P03410 | O60347 | -1.3577   |
| 34321 | P03410 | Q8NGN2 | -1.153    |
| 34322 | P03410 | P08574 | -0.28704  |
| 34323 | P03410 | P43304 | -0.22678  |
| 34324 | P03410 | D6RA61 | -0.66744  |
| 34325 | P03410 | Q9UDT6 | -0.22679  |
| 34326 | P03410 | Q00341 | -0.24353  |
| 34327 | P03410 | Q6T4P5 | -0.74755  |
| 34328 | P03410 | Q5VT66 | -0.31341  |
| 34329 | P03410 | Q9UL51 | -1.1842   |
| 34330 | P03410 | Q2T9J0 | -0.54955  |
| 34331 | P03410 | Q9BQ31 | -0.48184  |
| 34332 | P03410 | A6NIL9 | -0.63308  |
| 34333 | P03410 | Q2TAL6 | -0.95269  |
| 34334 | P03410 | Q7Z570 | -0.39568  |
| 34335 | P03410 | Q8NAG6 | -0.22741  |
| 34336 | P03410 | P21246 | -0.70682  |
| 34337 | P03410 | Q96GA7 | -0.083538 |
| 34338 | P03410 | Q96P66 | -1.2185   |
| 34339 | P03410 | O75019 | -0.90285  |
| 34340 | P03410 | Q5K4E3 | -1.2769   |
| 34341 | P03410 | A8MVZ5 | -0.63308  |
| 34342 | P03410 | P23280 | -0.76293  |
| 34343 | P03410 | P49715 | -0.20646  |
| 34344 | P03410 | O94910 | -0.79597  |
| 34345 | P03410 | Q9BV10 | -0.74145  |
| 34346 | P03410 | Q6ZN18 | -0.51189  |
| 34347 | P03410 | P09238 | -1.3814   |
| 34348 | P03410 | P05556 | -0.22741  |
| 34349 | P03410 | Q14318 | -0.22956  |
| 34350 | P03410 | Q9Y267 | -0.80487  |
| 34351 | P03410 | Q14206 | -0.64467  |
| 34352 | P03410 | Q14191 | -0.22739  |

|       |        |        |            |
|-------|--------|--------|------------|
| 34353 | P03410 | Q9Y485 | -0.22742   |
| 34354 | P03410 | Q9UNE0 | -0.63699   |
| 34355 | P03410 | O95573 | -0.82208   |
| 34356 | P03410 | Q8N7E2 | -0.45865   |
| 34357 | P03410 | O43157 | -0.96402   |
| 34358 | P03410 | Q5VYY1 | -0.2274    |
| 34359 | P03410 | Q86YR6 | -0.2405    |
| 34360 | P03410 | Q13790 | -0.92406   |
| 34361 | P03410 | Q9UGF5 | -1.153     |
| 34362 | P03410 | O43150 | -0.27749   |
| 34363 | P03410 | Q96FE7 | -0.59153   |
| 34364 | P03410 | P08069 | -0.62039   |
| 34365 | P03410 | Q9UPR0 | -0.39656   |
| 34366 | P03410 | Q3KP44 | -0.22739   |
| 34367 | P03410 | P51957 | -0.69556   |
| 34368 | P03410 | P05120 | -0.63682   |
| 34369 | P03410 | Q4G0P3 | -0.011727  |
| 34370 | P03410 | Q8NHJ6 | -0.33892   |
| 34371 | P03410 | Q9ULB1 | -0.31993   |
| 34372 | P03410 | P13760 | -0.46409   |
| 34373 | P03410 | Q15842 | -0.74879   |
| 34374 | P03410 | P08294 | -0.21199   |
| 34375 | P03410 | P60153 | -0.68882   |
| 34376 | P03410 | Q9UHF4 | -0.63308   |
| 34377 | P03410 | Q8IY67 | -0.2921    |
| 34378 | P03410 | O95825 | -0.76431   |
| 34379 | P03410 | Q13018 | -1.2356    |
| 34380 | P03410 | Q9GZV1 | -0.36038   |
| 34381 | P03410 | Q9Y5E9 | -1.0722    |
| 34382 | P03410 | P02689 | -0.16154   |
| 34383 | P03410 | Q9UGF6 | -1.153     |
| 34384 | P03410 | Q5T481 | -0.7576    |
| 34385 | P03410 | Q9H8S5 | -0.0091707 |
| 34386 | P03410 | P36776 | -0.11399   |
| 34387 | P03410 | Q9Y616 | -0.36072   |
| 34388 | P03410 | Q9HCQ7 | -0.9388    |
| 34389 | P03410 | Q6QNK2 | -1.2876    |
| 34390 | P03410 | Q2MJR0 | -0.41246   |
| 34391 | P03410 | Q96I13 | -0.22839   |
| 34392 | P03410 | Q5UAW9 | -1.3028    |
| 34393 | P03410 | Q8NHS2 | -0.1895    |
| 34394 | P03410 | Q9Y2C2 | -0.45688   |
| 34395 | P03410 | Q8IYK8 | -1.2887    |
| 34396 | P03410 | P48739 | -0.24317   |
| 34397 | P03410 | Q8NGG4 | -1.153     |
| 34398 | P03410 | Q2NKQ1 | -0.64626   |
| 34399 | P03410 | O95343 | -0.2282    |
| 34400 | P03410 | O43914 | -0.56436   |
| 34401 | P03410 | Q9C0B6 | -0.4982    |
| 34402 | P03410 | Q5TF21 | -0.63308   |
| 34403 | P03410 | Q04826 | -0.88938   |
| 34404 | P03410 | Q9UBU3 | -0.3135    |
| 34405 | P03410 | Q9NY47 | -0.73993   |
| 34406 | P03410 | Q96SL4 | -1.1629    |
| 34407 | P03410 | A8MTL3 | -0.15328   |
| 34408 | P03410 | Q8N743 | -0.797     |
| 34409 | P03410 | Q15090 | -0.21665   |
| 34410 | P03410 | P54709 | -0.66208   |
| 34411 | P03410 | Q495M3 | -0.64858   |
| 34412 | P03410 | Q9Y5P6 | -0.65487   |
| 34413 | P03410 | Q02818 | -0.12868   |
| 34414 | P03410 | Q7Z4R8 | -0.63059   |
| 34415 | P03410 | Q9H4A3 | -0.66638   |
| 34416 | P03410 | D6RBQ6 | -0.66744   |
| 34417 | P03410 | Q8IXL6 | -1.0872    |
| 34418 | P03410 | P40818 | -0.4706    |
| 34419 | P03410 | O95967 | -0.42117   |
| 34420 | P03410 | Q9Y385 | -1.5693    |
| 34421 | P03410 | P00915 | -0.14795   |
| 34422 | P03410 | P0C7P0 | -0.066299  |
| 34423 | P03410 | Q7Z4P5 | -0.22741   |
| 34424 | P03410 | Q99719 | -0.22518   |
| 34425 | P03410 | Q2TBC4 | -0.55756   |
| 34426 | P03410 | Q9HAW8 | -0.80553   |
| 34427 | P03410 | O75129 | -0.63308   |
| 34428 | P03410 | Q5BKT4 | -0.78737   |

|       |        |        |           |
|-------|--------|--------|-----------|
| 34429 | P03410 | O15381 | -0.37112  |
| 34430 | P03410 | Q96PE1 | -1.1497   |
| 34431 | P03410 | Q6DKJ4 | -0.41481  |
| 34432 | P03410 | P01775 | -0.90565  |
| 34433 | P03410 | Q9ULX5 | -0.47564  |
| 34434 | P03410 | P43361 | -0.10645  |
| 34435 | P03410 | Q9P0X4 | -0.46338  |
| 34436 | P03410 | P35070 | -1.2322   |
| 34437 | P03410 | Q9HB55 | -0.85327  |
| 34438 | P03410 | Q99218 | -1.1054   |
| 34439 | P03410 | O14815 | -1.0161   |
| 34440 | P03410 | Q9UBI4 | -0.60082  |
| 34441 | P03410 | Q5VTY9 | -1.7625   |
| 34442 | P03410 | Q96P88 | -1.1583   |
| 34443 | P03410 | Q8WU66 | -0.69485  |
| 34444 | P03410 | Q76LX8 | -0.61589  |
| 34445 | P03410 | Q9NQ11 | -1.1336   |
| 34446 | P03410 | Q86XS5 | -1.1051   |
| 34447 | P03410 | P30485 | -0.88938  |
| 34448 | P03410 | Q53R12 | -0.797    |
| 34449 | P03410 | Q3SX64 | -0.065561 |
| 34450 | P03410 | Q86YN6 | -0.22635  |
| 34451 | P03410 | P49810 | -0.21577  |
| 34452 | P03410 | Q6ZS81 | -0.63308  |
| 34453 | P03410 | Q9H0E7 | -0.27206  |
| 34454 | P03410 | O43298 | -0.17054  |
| 34455 | P03410 | Q9BY49 | -1.0122   |
| 34456 | P03410 | Q95398 | -0.53     |
| 34457 | P03410 | A6NH21 | -0.69144  |
| 34458 | P03410 | Q09013 | -0.53763  |
| 34459 | P03410 | P03986 | -0.88457  |
| 34460 | P03410 | Q08462 | -0.8218   |
| 34461 | P03410 | Q8NFX0 | -0.85052  |
| 34462 | P03410 | Q8N531 | -0.51042  |
| 34463 | P03410 | Q8IV77 | -1.2417   |
| 34464 | P03410 | O00755 | -0.44317  |
| 34465 | P03410 | Q96IK0 | -0.84999  |
| 34466 | P03410 | P24347 | -1.58     |
| 34467 | P03410 | P19224 | -0.87606  |
| 34468 | P03410 | Q8TCC7 | -0.76182  |
| 34469 | P03410 | P03950 | -0.33654  |
| 34470 | P03410 | P56557 | -0.75479  |
| 34471 | P03410 | Q02246 | -0.45494  |
| 34472 | P03410 | Q9H313 | -0.74505  |
| 34473 | P03410 | Q5SSQ6 | -0.05735  |
| 34474 | P03410 | O75414 | -0.61377  |
| 34475 | P03410 | Q8N9V2 | -0.78921  |
| 34476 | P03410 | O00488 | -0.20391  |
| 34477 | P03410 | Q01344 | -0.44988  |
| 34478 | P03410 | P11230 | -0.83755  |
| 34479 | P03410 | O96008 | -0.3516   |
| 34480 | P03410 | Q03154 | -0.24822  |
| 34481 | P03410 | Q9H172 | -1.2992   |
| 34482 | P03410 | O95998 | -0.73288  |
| 34483 | P03410 | Q9NVV0 | -0.78516  |
| 34484 | P03410 | Q9H1U4 | -0.70493  |
| 34485 | P03410 | Q9NZV8 | -0.81404  |
| 34486 | P03410 | Q8WXH6 | -1.2281   |
| 34487 | P03410 | Q5SRE7 | -0.48393  |
| 34488 | P03410 | Q9UBC0 | -0.22722  |
| 34489 | P03410 | Q9UQ16 | -0.23814  |
| 34490 | P03410 | Q13591 | -1.1046   |
| 34491 | P03410 | P49238 | -0.57548  |
| 34492 | P03410 | Q9H0F5 | -0.24469  |
| 34493 | P03410 | Q9H2C8 | -1.153    |
| 34494 | P03410 | P02787 | -0.053503 |
| 34495 | P03410 | P50226 | -0.32372  |
| 34496 | P03410 | P59901 | -0.22741  |
| 34497 | P03410 | Q14717 | -0.064779 |
| 34498 | P03410 | Q12766 | -0.22742  |
| 34499 | P03410 | P10092 | -0.8467   |
| 34500 | P03410 | Q9H4P4 | -0.22736  |
| 34501 | P03410 | O75022 | -0.48696  |
| 34502 | P03410 | O76074 | -0.46566  |
| 34503 | P03410 | Q8TDD1 | -0.32105  |
| 34504 | P03410 | P53007 | -0.2473   |

|       |        |        |          |
|-------|--------|--------|----------|
| 34505 | P03410 | P31260 | -0.22685 |
| 34506 | P03410 | Q9NRS4 | -1.2232  |
| 34507 | P03410 | Q14656 | -0.64398 |
| 34508 | P03410 | Q9BYW2 | -0.22473 |
| 34509 | P03410 | O60858 | -0.72562 |
| 34510 | P03410 | Q7Z7M8 | -0.53425 |
| 34511 | P03410 | Q9Y4D8 | -1.1116  |
| 34512 | P03410 | Q5H943 | -0.797   |
| 34513 | P03410 | P43119 | -1.0746  |
| 34514 | P03410 | Q8IVQ6 | -0.50675 |
| 34515 | P03410 | Q15648 | -0.11623 |
| 34516 | P03410 | Q92503 | -0.5083  |
| 34517 | P03410 | P00390 | -0.22392 |
| 34518 | P03410 | Q53T59 | -0.12633 |
| 34519 | P03410 | Q9Y5Y7 | -0.84971 |
| 34520 | P03410 | Q00013 | -0.22406 |
| 34521 | P03410 | Q8NHH1 | -0.21329 |
| 34522 | P03410 | P01566 | -0.73299 |
| 34523 | P03410 | O43716 | -0.46098 |
| 34524 | P03410 | Q6DN03 | -0.80275 |
| 34525 | P03410 | Q5VXM1 | -0.71003 |
| 34526 | P03410 | Q16720 | -1.1012  |
| 34527 | P03410 | Q96MM3 | -0.22756 |
| 34528 | P03410 | Q9Y5Z0 | -0.77623 |
| 34529 | P03410 | Q9NR19 | -0.42838 |
| 34530 | P03410 | Q15269 | -0.2231  |
| 34531 | P03410 | P35869 | -0.2479  |
| 34532 | P03410 | P48995 | -0.28424 |
| 34533 | P03410 | Q66K79 | -1.3677  |
| 34534 | P03410 | Q9BZM3 | -0.34173 |
| 34535 | P03410 | Q7RTX1 | -1.1917  |
| 34536 | P03410 | P48547 | -0.85728 |
| 34537 | P03410 | E5RG02 | -0.79769 |
| 34538 | P03410 | Q3C1W6 | -0.39568 |
| 34539 | P03410 | P51582 | -1.0993  |
| 34540 | P03410 | O00192 | -0.23038 |
| 34541 | P03410 | P34981 | -1.1846  |
| 34542 | P03410 | P18405 | -0.40254 |
| 34543 | P03410 | Q8NH43 | -1.153   |
| 34544 | P03410 | P02743 | -0.71854 |
| 34545 | P03410 | P29274 | -0.31698 |
| 34546 | P03410 | O75541 | -0.23377 |
| 34547 | P03410 | P59551 | -1.0411  |
| 34548 | P03410 | Q8IWU2 | -1.0076  |
| 34549 | P03410 | P09529 | -0.22741 |
| 34550 | P03410 | Q9UQ13 | -0.24657 |
| 34551 | P03410 | Q92851 | -0.22567 |
| 34552 | P03410 | Q6UXZ3 | -0.17671 |
| 34553 | P03410 | Q9Y3Q0 | -1.1418  |
| 34554 | P03410 | Q8WVV5 | -0.59379 |
| 34555 | P03410 | Q6WN34 | -0.72147 |
| 34556 | P03410 | Q9H999 | -0.81674 |
| 34557 | P03410 | Q96MZ0 | -0.22046 |
| 34558 | P03410 | Q8NCL9 | -0.63308 |
| 34559 | P03410 | Q6P1R4 | -0.4387  |
| 34560 | P03410 | Q6IA17 | -0.25703 |
| 34561 | P03410 | P43694 | -0.22738 |
| 34562 | P03410 | Q00526 | -0.66857 |
| 34563 | P03410 | Q8N9X5 | -0.63308 |
| 34564 | P03410 | Q71RG4 | -0.63308 |
| 34565 | P03410 | O75365 | -0.75142 |
| 34566 | P03410 | Q68CJ6 | -0.47745 |
| 34567 | P03410 | P23435 | -0.63871 |
| 34568 | P03410 | Q14344 | -0.47266 |
| 34569 | P03410 | Q9QC07 | -0.30714 |
| 34570 | P03410 | Q7Z5L3 | -0.8909  |
| 34571 | P03410 | Q7Z7A4 | -0.76159 |
| 34572 | P03410 | Q92186 | -0.32113 |
| 34573 | P03410 | Q96J02 | -0.22741 |
| 34574 | P03410 | Q7L985 | -0.63308 |
| 34575 | P03410 | Q9Y2B9 | -0.20509 |
| 34576 | P03410 | Q6PI73 | -0.63308 |
| 34577 | P03410 | P05107 | -0.99697 |
| 34578 | P03410 | Q96NW4 | -0.22741 |
| 34579 | P03410 | P30490 | -0.88938 |
| 34580 | P03410 | Q13324 | -0.70345 |

|       |        |        |          |
|-------|--------|--------|----------|
| 34581 | P03410 | O95025 | -1.1321  |
| 34582 | P03410 | P55316 | -0.49241 |
| 34583 | P03410 | Q8IY33 | -0.22742 |
| 34584 | P03410 | O00506 | -0.72293 |
| 34585 | P03410 | Q9ULT6 | -0.6961  |
| 34586 | P03410 | Q8N349 | -0.63594 |
| 34587 | P03410 | P09455 | -0.22799 |
| 34588 | P03410 | Q9Y345 | -0.7963  |
| 34589 | P03410 | Q8NGK2 | -1.153   |
| 34590 | P03410 | P48436 | -0.48576 |
| 34591 | P03410 | P07099 | -0.73446 |
| 34592 | P03410 | Q12792 | -0.10027 |
| 34593 | P03410 | Q8NFO6 | -0.93372 |
| 34594 | P03410 | O94967 | -0.22762 |
| 34595 | P03410 | P31947 | -0.86542 |
| 34596 | P03410 | P42126 | -0.2473  |
| 34597 | P03410 | Q8TB24 | -0.51201 |
| 34598 | P03410 | Q9GZM5 | -0.59599 |
| 34599 | P03410 | Q8TCW7 | -0.63308 |
| 34600 | P03410 | Q9NUJ1 | -0.32459 |
| 34601 | P03410 | Q96BR9 | -0.21689 |
| 34602 | P03410 | P17342 | -0.68734 |
| 34603 | P03410 | Q14682 | -0.21213 |
| 34604 | P03410 | Q96AG3 | -0.43815 |
| 34605 | P03410 | Q96A29 | -0.36908 |
| 34606 | P03410 | O95498 | -0.2599  |
| 34607 | P03410 | Q9H3S7 | -0.23409 |
| 34608 | P03410 | O95136 | -1.2257  |
| 34609 | P03410 | O75752 | -0.60042 |
| 34610 | P03410 | Q7RTY8 | -1.3587  |
| 34611 | P03410 | P18135 | -0.90565 |
| 34612 | P03410 | Q9P2U8 | -0.84551 |
| 34613 | P03410 | P43246 | -0.11861 |
| 34614 | P03410 | Q155Q3 | -0.22741 |
| 34615 | P03410 | Q99795 | -1.0181  |
| 34616 | P03410 | Q6P6B7 | -0.22742 |
| 34617 | P03410 | P52789 | -0.53785 |
| 34618 | P03410 | Q9UHD2 | -0.22741 |
| 34619 | P03410 | Q8NGG5 | -1.153   |
| 34620 | P03410 | Q92786 | -0.19268 |
| 34621 | P03410 | Q5XXA6 | -0.92323 |
| 34622 | P03410 | Q9BZH6 | -0.46217 |
| 34623 | P03410 | O43623 | -0.19741 |
| 34624 | P03410 | P23416 | -0.75507 |
| 34625 | P03410 | O60641 | -0.29966 |
| 34626 | P03410 | Q9NVA4 | -0.63308 |
| 34627 | P03410 | Q9Y2W3 | -0.48288 |
| 34628 | P03410 | Q95IE3 | -0.61332 |
| 34629 | P03410 | Q8NDX9 | -0.73668 |
| 34630 | P03410 | Q68DV7 | -0.62637 |
| 34631 | P03410 | Q8N2A0 | -0.22338 |
| 34632 | P03410 | O60341 | -0.22518 |
| 34633 | P03410 | P29016 | -0.60215 |
| 34634 | P03410 | P21108 | -0.84841 |
| 34635 | P03410 | A6NDL8 | -1.153   |
| 34636 | P03410 | Q2MKA7 | -0.22437 |
| 34637 | P03410 | Q8NGY9 | -1.1275  |
| 34638 | P03410 | Q7Z601 | -0.9208  |
| 34639 | P03410 | Q9H5I5 | -0.83579 |
| 34640 | P03410 | Q86X27 | -0.6592  |
| 34641 | P03410 | Q9P2G9 | -0.20331 |
| 34642 | P03410 | Q8N118 | -0.78564 |
| 34643 | P03410 | O95714 | -0.23246 |
| 34644 | P03410 | Q9BXY4 | -0.83584 |
| 34645 | P03410 | Q14296 | -0.39828 |
| 34646 | P03410 | P05230 | -0.30488 |
| 34647 | P03410 | O14926 | -0.2129  |
| 34648 | P03410 | A8MWV9 | -0.63308 |
| 34649 | P03410 | Q9NUT2 | -0.71327 |
| 34650 | P03410 | P01857 | -0.25819 |
| 34651 | P03410 | Q8IZP6 | -0.22734 |
| 34652 | P03410 | Q9P1A2 | -0.10645 |
| 34653 | P03410 | Q96HU1 | -0.22753 |
| 34654 | P03410 | Q15878 | -0.83879 |
| 34655 | P03410 | Q9UIK5 | -1.2603  |
| 34656 | P03410 | Q6AWC2 | -0.2274  |

|       |        |        |           |
|-------|--------|--------|-----------|
| 34657 | P03410 | Q9UHY7 | -0.16334  |
| 34658 | P03410 | Q8IVA1 | -0.26069  |
| 34659 | P03410 | P25067 | -1.1541   |
| 34660 | P03410 | Q8NEG5 | -0.34047  |
| 34661 | P03410 | Q07912 | -0.66711  |
| 34662 | P03410 | Q9UBL9 | -0.54013  |
| 34663 | P03410 | Q8N554 | -0.17842  |
| 34664 | P03410 | P24394 | -1.0422   |
| 34665 | P03410 | Q13683 | -0.62259  |
| 34666 | P03410 | O75581 | -0.2319   |
| 34667 | P03410 | P55058 | -0.94815  |
| 34668 | P03410 | Q7Z5H4 | -1.1586   |
| 34669 | P03410 | P78383 | -0.71145  |
| 34670 | P03410 | Q9HCF6 | -0.84161  |
| 34671 | P03410 | Q3SYC2 | -0.77426  |
| 34672 | P03410 | P21283 | -0.19085  |
| 34673 | P03410 | P55064 | -0.3998   |
| 34674 | P03410 | Q01718 | -0.86847  |
| 34675 | P03410 | O75845 | -0.88998  |
| 34676 | P03410 | Q9BYB4 | -0.22777  |
| 34677 | P03410 | Q96RD7 | -0.82103  |
| 34678 | P03410 | Q96QS3 | -0.14358  |
| 34679 | P03410 | Q709F0 | -0.44913  |
| 34680 | P03410 | Q3ZAQ7 | -0.76323  |
| 34681 | P03410 | Q8WVP7 | -0.61892  |
| 34682 | P03410 | Q6R6M4 | -0.45969  |
| 34683 | P03410 | Q9P2G3 | -0.21697  |
| 34684 | P03410 | Q92630 | -0.76978  |
| 34685 | P03410 | Q8NER1 | -1.1721   |
| 34686 | P03410 | Q99958 | -0.30452  |
| 34687 | P03410 | Q92538 | -0.20897  |
| 34688 | P03410 | Q15784 | -0.31747  |
| 34689 | P03410 | A6NDX4 | -0.63308  |
| 34690 | P03410 | Q8WWU5 | -1.2279   |
| 34691 | P03410 | O75185 | -0.57649  |
| 34692 | P03410 | A1Z1Q3 | -0.21156  |
| 34693 | P03410 | Q99542 | -1.4209   |
| 34694 | P03410 | P42684 | -0.678    |
| 34695 | P03410 | P55286 | -1.0956   |
| 34696 | P03410 | P55268 | -0.70836  |
| 34697 | P03410 | Q9NPY3 | -0.22773  |
| 34698 | P03410 | P68032 | -0.26513  |
| 34699 | P03410 | O95154 | -0.22279  |
| 34700 | P03410 | Q8NHK3 | -0.797    |
| 34701 | P03410 | Q8IXQ8 | -0.22605  |
| 34702 | P03410 | Q8IUA0 | -0.74696  |
| 34703 | P03410 | Q08345 | -1.0757   |
| 34704 | P03410 | Q8NGP2 | -1.153    |
| 34705 | P03410 | A4D256 | -0.78374  |
| 34706 | P03410 | Q9NWW6 | -0.98876  |
| 34707 | P03410 | Q9HCH3 | -0.23175  |
| 34708 | P03410 | Q14624 | -0.67374  |
| 34709 | P03410 | Q12756 | -0.24734  |
| 34710 | P03410 | P30533 | -0.7528   |
| 34711 | P03410 | Q96SM3 | -1.5021   |
| 34712 | P03410 | Q9BY79 | -0.63664  |
| 34713 | P03410 | P45954 | -0.47837  |
| 34714 | P03410 | Q96L34 | -0.4221   |
| 34715 | P03410 | P11309 | -0.62552  |
| 34716 | P03410 | P10275 | -0.22743  |
| 34717 | P03410 | Q96RR1 | -0.10621  |
| 34718 | P03410 | Q11130 | -0.55179  |
| 34719 | P03410 | A2RUH7 | -0.22778  |
| 34720 | P03410 | Q8WU68 | -0.47279  |
| 34721 | P03410 | Q8N4S9 | -0.58952  |
| 34722 | P03410 | Q7Z2G1 | -0.71844  |
| 34723 | P03410 | Q9UK85 | -1.0022   |
| 34724 | P03410 | P27708 | -0.54089  |
| 34725 | P03410 | Q9NRJ1 | -0.12032  |
| 34726 | P03410 | Q14449 | -0.22741  |
| 34727 | P03410 | Q8WXX5 | -0.23666  |
| 34728 | P03410 | Q6ZST8 | -0.031288 |
| 34729 | P03410 | Q9UNK4 | -0.88286  |
| 34730 | P03410 | Q96LB1 | -1.174    |
| 34731 | P03410 | C9JLJ4 | -0.66744  |
| 34732 | P03410 | Q92781 | -0.97058  |

|       |        |        |           |
|-------|--------|--------|-----------|
| 34733 | P03410 | Q8TBM7 | -0.63308  |
| 34734 | P03410 | Q9Y508 | -1.0039   |
| 34735 | P03410 | Q9Y4X3 | -0.83742  |
| 34736 | P03410 | Q7Z5J4 | -0.16247  |
| 34737 | P03410 | Q13177 | -0.26117  |
| 34738 | P03410 | Q5VU97 | -0.73342  |
| 34739 | P03410 | O15244 | -0.91063  |
| 34740 | P03410 | C9JPN9 | -0.66744  |
| 34741 | P03410 | Q9NRZ9 | -0.16629  |
| 34742 | P03410 | Q93084 | -0.82349  |
| 34743 | P03410 | Q9H3Z7 | -0.023676 |
| 34744 | P03410 | Q08708 | -0.9919   |
| 34745 | P03410 | P0CG06 | -0.88633  |
| 34746 | P03410 | P20783 | -0.59286  |
| 34747 | P03410 | Q9HAC8 | -0.19624  |
| 34748 | P03410 | Q8IZ52 | -0.45111  |
| 34749 | P03410 | Q15649 | -0.10844  |
| 34750 | P03410 | Q13183 | -1.1237   |
| 34751 | P03410 | Q96T68 | -0.35031  |
| 34752 | P03410 | O95475 | -0.22781  |
| 34753 | P03410 | Q8IYL9 | -1.4091   |
| 34754 | P03410 | O15528 | -0.36575  |
| 34755 | P03410 | Q6IE37 | -0.82964  |
| 34756 | P03410 | P54619 | -0.43773  |
| 34757 | P03410 | Q99972 | -0.74711  |
| 34758 | P03410 | Q99062 | -1.8364   |
| 34759 | P03410 | Q86VQ3 | -0.35614  |
| 34760 | P03410 | P20908 | -0.92779  |
| 34761 | P03410 | Q8NCT1 | -0.20124  |
| 34762 | P03410 | Q5MNZ6 | -0.22625  |
| 34763 | P03410 | Q99877 | -0.80275  |
| 34764 | P03410 | D6RJB6 | -0.66744  |
| 34765 | P03410 | Q86WT6 | -0.23902  |
| 34766 | P03410 | Q96QE2 | -0.69676  |
| 34767 | P03410 | Q76094 | -0.20048  |
| 34768 | P03410 | Q96RI0 | -1.4804   |
| 34769 | P03410 | Q6UXT9 | -0.69784  |
| 34770 | P03410 | O15079 | -0.31038  |
| 34771 | P03410 | O15550 | -0.73618  |
| 34772 | P03410 | Q9UKJ8 | -1.1969   |
| 34773 | P03410 | Q6UXH9 | -0.91159  |
| 34774 | P03410 | Q00537 | -1.1204   |
| 34775 | P03410 | Q9Y4P3 | -0.2275   |
| 34776 | P03410 | Q12965 | -0.16629  |
| 34777 | P03410 | P58182 | -1.153    |
| 34778 | P03410 | Q8NG98 | -1.153    |
| 34779 | P03410 | P63027 | -0.20747  |
| 34780 | P03410 | A4IF30 | -0.62453  |
| 34781 | P03410 | Q8NGF6 | -1.153    |
| 34782 | P03410 | Q9HAS0 | -0.22087  |
| 34783 | P03410 | Q9Y2R2 | -0.23146  |
| 34784 | P03410 | Q15119 | -0.36376  |
| 34785 | P03410 | Q9HBY8 | -0.97668  |
| 34786 | P03410 | P30046 | -0.12611  |
| 34787 | P03410 | P48742 | -0.22734  |
| 34788 | P03410 | Q9Y662 | -0.5884   |
| 34789 | P03410 | Q99259 | -0.23037  |
| 34790 | P03410 | O15354 | -1.4695   |
| 34791 | P03410 | O00481 | -0.23651  |
| 34792 | P03410 | P26441 | -0.35396  |
| 34793 | P03410 | Q15813 | -0.22741  |
| 34794 | P03410 | P55291 | -1.0465   |
| 34795 | P03410 | Q9ULY5 | -0.68383  |
| 34796 | P03410 | O60503 | -1.1064   |
| 34797 | P03410 | Q9UIW2 | -0.80193  |
| 34798 | P03410 | Q6PEY2 | -0.33357  |
| 34799 | P03410 | Q13093 | -0.86227  |
| 34800 | P03410 | P28068 | -0.7959   |
| 34801 | P03410 | P52198 | -0.7652   |
| 34802 | P03410 | Q96BD0 | -0.87019  |
| 34803 | P03410 | P41586 | -0.58077  |
| 34804 | P03410 | P55916 | -0.38955  |
| 34805 | P03410 | Q7Z628 | -0.23202  |
| 34806 | P03410 | O43847 | -0.22193  |
| 34807 | P03410 | A0PJZ3 | -0.7179   |
| 34808 | P03410 | Q6UXH1 | -0.22741  |

|       |        |        |           |
|-------|--------|--------|-----------|
| 34809 | P03410 | Q9Y5G6 | -1.0719   |
| 34810 | P03410 | P60985 | -0.86319  |
| 34811 | P03410 | Q9Y5I1 | -1.1668   |
| 34812 | P03410 | Q86SU0 | -0.48167  |
| 34813 | P03410 | P06276 | -0.62357  |
| 34814 | P03410 | Q14183 | -0.25461  |
| 34815 | P03410 | Q6ZMC9 | -0.63308  |
| 34816 | P03410 | Q8NGP3 | -1.153    |
| 34817 | P03410 | Q6P4Q7 | -0.99156  |
| 34818 | P03410 | Q8IUR5 | -0.45086  |
| 34819 | P03410 | Q96QU1 | -1.4258   |
| 34820 | P03410 | Q14094 | -0.18628  |
| 34821 | P03410 | Q14028 | -1.1428   |
| 34822 | P03410 | Q8WWQ8 | -0.77163  |
| 34823 | P03410 | P0C0L5 | -1.0444   |
| 34824 | P03410 | Q3SXY8 | -0.56913  |
| 34825 | P03410 | Q15818 | -0.29886  |
| 34826 | P03410 | Q5VTE0 | -0.47244  |
| 34827 | P03410 | Q99527 | -1.1076   |
| 34828 | P03410 | P04839 | -0.66265  |
| 34829 | P03410 | Q96FV3 | -0.88388  |
| 34830 | P03410 | Q6AZZ1 | -0.24927  |
| 34831 | P03410 | P30038 | -0.34722  |
| 34832 | P03410 | P04003 | -0.22728  |
| 34833 | P03410 | Q03431 | -0.87188  |
| 34834 | P03410 | Q13939 | -0.42272  |
| 34835 | P03410 | Q12926 | -0.38418  |
| 34836 | P03410 | Q9NPI9 | -1.0591   |
| 34837 | P03410 | O75317 | -0.7405   |
| 34838 | P03410 | Q9NWC5 | -0.63308  |
| 34839 | P03410 | P27216 | -0.38659  |
| 34840 | P03410 | Q8N326 | -0.63308  |
| 34841 | P03410 | Q86YR7 | -0.48994  |
| 34842 | P03410 | Q9H6B4 | -0.56848  |
| 34843 | P03410 | P0DKB6 | -0.63308  |
| 34844 | P03410 | Q6S8J7 | -0.22675  |
| 34845 | P03410 | O15228 | -0.43008  |
| 34846 | P03410 | Q9UQ88 | -0.44378  |
| 34847 | P03410 | Q7RTS5 | -0.65973  |
| 34848 | P03410 | Q9H3T2 | -1.0289   |
| 34849 | P03410 | Q9NX47 | -0.46914  |
| 34850 | P03410 | Q9Y5E8 | -1.1668   |
| 34851 | P03410 | Q99999 | -0.72853  |
| 34852 | P03410 | P54792 | -0.79119  |
| 34853 | P03410 | Q9Y2K6 | -0.60751  |
| 34854 | P03410 | P61221 | -0.34203  |
| 34855 | P03410 | O43781 | -1.2782   |
| 34856 | P03410 | P78563 | -0.089541 |
| 34857 | P03410 | Q9HCD6 | -0.2274   |
| 34858 | P03410 | Q8NGA6 | -1.153    |
| 34859 | P03410 | Q13639 | -1.0441   |
| 34860 | P03410 | P80422 | -0.7291   |
| 34861 | P03410 | Q9H5V8 | -1.4339   |
| 34862 | P03410 | Q8TAA9 | -0.26356  |
| 34863 | P03410 | Q86SM8 | -1.2185   |
| 34864 | P03410 | Q9BXU7 | -0.33996  |
| 34865 | P03410 | Q9UJD0 | -0.22038  |
| 34866 | P03410 | Q13087 | -0.33628  |
| 34867 | P03410 | Q86UP3 | -0.22482  |
| 34868 | P03410 | Q9NQZ3 | -0.27729  |
| 34869 | P03410 | P34998 | -0.622    |
| 34870 | P03410 | Q96H72 | -0.40119  |
| 34871 | P03410 | Q6PCB8 | -0.87167  |
| 34872 | P03410 | P35610 | -0.78766  |
| 34873 | P03410 | Q92833 | -0.27612  |
| 34874 | P03410 | Q92522 | -0.67002  |
| 34875 | P03410 | Q96AA3 | -0.61853  |
| 34876 | P03410 | Q9BWF3 | -0.23723  |
| 34877 | P03410 | Q8WU10 | -0.36396  |
| 34878 | P03410 | Q13188 | -0.4152   |
| 34879 | P03410 | Q8NH81 | -1.153    |
| 34880 | P03410 | Q9Y6A9 | -0.65965  |
| 34881 | P03410 | P57775 | -0.29344  |
| 34882 | P03410 | Q147X3 | -0.054796 |
| 34883 | P03410 | P25025 | -1.0978   |
| 34884 | P03410 | Q86XE3 | -0.70406  |



|       |        |        |           |
|-------|--------|--------|-----------|
| 34885 | P03410 | P62333 | -0.32435  |
| 34886 | P03410 | Q96L42 | -0.97865  |
| 34887 | P03410 | Q9UGL1 | -0.25541  |
| 34888 | P03410 | Q43347 | -0.53712  |
| 34889 | P03410 | Q8N7X1 | -0.67771  |
| 34890 | P03410 | Q9H422 | -0.47004  |
| 34891 | P03410 | O75386 | -0.15885  |
| 34892 | P03410 | Q86U17 | -0.676    |
| 34893 | P03410 | Q92673 | -1.0582   |
| 34894 | P03410 | Q9UHC9 | -0.37886  |
| 34895 | P03410 | P04062 | -0.35616  |
| 34896 | P03410 | Q9H892 | -0.22362  |
| 34897 | P03410 | Q09472 | -0.13568  |
| 34898 | P03410 | Q8ND30 | -0.40495  |
| 34899 | P03410 | Q86VH2 | -0.3534   |
| 34900 | P03410 | Q8IXI1 | -0.68645  |
| 34901 | P03410 | P08183 | -0.45547  |
| 34902 | P03410 | Q9ULH0 | -0.35579  |
| 34903 | P03410 | P31942 | -0.26983  |
| 34904 | P03410 | Q96A99 | -0.77513  |
| 34905 | P03410 | Q8NGY7 | -1.153    |
| 34906 | P03410 | Q12947 | -0.48426  |
| 34907 | P03410 | Q96A05 | -0.2123   |
| 34908 | P03410 | P14780 | -0.4013   |
| 34909 | P03410 | Q8IUL8 | -0.76631  |
| 34910 | P03410 | Q8TBX8 | -0.54486  |
| 34911 | P03410 | P0C870 | -0.070205 |
| 34912 | P03410 | G3V0H7 | -0.76284  |
| 34913 | P03410 | Q969R2 | -0.51284  |
| 34914 | P03410 | Q5JZY3 | -1.5278   |
| 34915 | P03410 | O95674 | -0.57236  |
| 34916 | P03410 | Q9Y2H6 | -0.29375  |
| 34917 | P03410 | Q9Y226 | -0.80487  |
| 34918 | P03410 | Q86V40 | -1.2751   |
| 34919 | P03410 | Q9BRQ0 | -0.13643  |
| 34920 | P03410 | P13987 | -0.34987  |
| 34921 | P03410 | Q9BWV1 | -0.39765  |
| 34922 | P03410 | Q96PU5 | -0.22742  |
| 34923 | P03410 | P25391 | -0.82064  |
| 34924 | P03410 | P42336 | -0.4989   |
| 34925 | P03410 | A6NLU5 | -0.63308  |
| 34926 | P03410 | Q9Y5W8 | -0.42874  |
| 34927 | P03410 | O43320 | -0.8535   |
| 34928 | P03410 | P59540 | -1.2525   |
| 34929 | P03410 | Q5TDP6 | -0.1427   |
| 34930 | P03410 | Q86Y33 | -0.22741  |
| 34931 | P03410 | Q53LP3 | -0.22741  |
| 34932 | P03410 | P15907 | -0.89083  |
| 34933 | P03410 | P42574 | -0.22464  |
| 34934 | P03410 | O60330 | -1.0719   |
| 34935 | P03410 | Q14517 | -0.23508  |
| 34936 | P03410 | Q95147 | -0.71917  |
| 34937 | P03410 | E7EML9 | -1.3874   |
| 34938 | P03410 | Q9Y5Y9 | -0.88084  |
| 34939 | P03410 | Q9P121 | -0.22816  |
| 34940 | P03410 | H3BS89 | -0.63308  |
| 34941 | P03410 | P14652 | -0.096998 |
| 34942 | P03410 | Q969X2 | -0.46858  |
| 34943 | P03410 | Q6PJG9 | -0.63308  |
| 34944 | P03410 | Q2M3T9 | -0.61273  |
| 34945 | P03410 | P09471 | -0.79651  |
| 34946 | P03410 | Q96QI5 | -0.46393  |
| 34947 | P03410 | O76096 | -0.75937  |
| 34948 | P03410 | Q15303 | -0.26049  |
| 34949 | P03410 | Q9BQ39 | -0.60495  |
| 34950 | P03410 | Q9UKL6 | -0.15128  |
| 34951 | P03410 | Q14032 | -0.32727  |
| 34952 | P03410 | P05496 | -0.53699  |
| 34953 | P03410 | O43567 | -0.80445  |
| 34954 | P03410 | P01111 | -0.60603  |
| 34955 | P03410 | P47871 | -0.89626  |
| 34956 | P03410 | P32121 | -0.72078  |
| 34957 | P03410 | O00180 | -0.87776  |
| 34958 | P03410 | P22083 | -0.46045  |
| 34959 | P03410 | Q9Y644 | -1.1949   |
| 34960 | P03410 | Q9NZH0 | -0.66694  |

|       |        |        |           |
|-------|--------|--------|-----------|
| 34961 | P03410 | Q8NGT1 | -1.153    |
| 34962 | P03410 | Q6ZV73 | -0.51627  |
| 34963 | P03410 | Q7RTN6 | -0.56298  |
| 34964 | P03410 | Q99680 | -1.4027   |
| 34965 | P03410 | Q5T9C9 | -0.99079  |
| 34966 | P03410 | Q9Y210 | -0.32483  |
| 34967 | P03410 | Q96Q42 | -0.45174  |
| 34968 | P03410 | Q149M9 | -0.66861  |
| 34969 | P03410 | Q8TF66 | -0.63308  |
| 34970 | P03410 | Q9UPW0 | -0.79192  |
| 34971 | P03410 | Q9NRV9 | -0.68787  |
| 34972 | P03410 | Q8N4T4 | -0.57756  |
| 34973 | P03410 | P13164 | -0.27121  |
| 34974 | P03410 | Q4LDG9 | -0.2274   |
| 34975 | P03410 | Q5TCY1 | -0.96243  |
| 34976 | P03410 | Q8NFK5 | -0.88082  |
| 34977 | P03410 | Q8NI37 | -0.097538 |
| 34978 | P03410 | Q99714 | -0.20223  |
| 34979 | P03410 | Q9BZM1 | -0.75914  |
| 34980 | P03410 | Q9Y5E3 | -1.1542   |
| 34981 | P03410 | Q9Y5P0 | -1.153    |
| 34982 | P03410 | P10644 | -0.22786  |
| 34983 | P03410 | Q75443 | -0.94767  |
| 34984 | P03410 | Q15382 | -1.1673   |
| 34985 | P03410 | P51692 | -0.22607  |
| 34986 | P03410 | Q9BYW1 | -0.62305  |
| 34987 | P03410 | Q15040 | -0.55908  |
| 34988 | P03410 | P28331 | -0.13902  |
| 34989 | P03410 | Q96KK5 | -0.80275  |
| 34990 | P03410 | Q14003 | -0.68842  |
| 34991 | P03410 | Q9Y394 | -0.99827  |
| 34992 | P03410 | P20591 | -0.23819  |
| 34993 | P03410 | P11169 | -0.13552  |
| 34994 | P03410 | Q96JK4 | -0.67781  |
| 34995 | P03410 | Q9H7M9 | -0.63308  |
| 34996 | P03410 | Q6PDA7 | -0.71003  |
| 34997 | P03410 | Q9ULC0 | -1.4339   |
| 34998 | P03410 | Q5SVS4 | -0.47777  |
| 34999 | P03410 | P22748 | -0.17874  |
| 35000 | P03410 | Q9NQL2 | -0.56897  |
| 35001 | P03410 | Q9UKJ0 | -0.17364  |
| 35002 | P03410 | P20155 | -0.73948  |
| 35003 | P03410 | A8MWX3 | -0.2092   |
| 35004 | P03410 | Q9Y5S2 | -0.82969  |
| 35005 | P03410 | P53420 | -0.97051  |
| 35006 | P03410 | Q99965 | -1.1391   |
| 35007 | P03410 | Q9H7Z7 | -0.10497  |
| 35008 | P03410 | A8MT82 | -0.97961  |
| 35009 | P03410 | Q9UHG3 | -0.5064   |
| 35010 | P03410 | Q5VZY2 | -0.69299  |
| 35011 | P03410 | Q13572 | -1.1148   |
| 35012 | P03410 | P05186 | -0.94563  |
| 35013 | P03410 | Q14D04 | -0.35655  |
| 35014 | P03410 | Q8NGP6 | -1.153    |
| 35015 | P03410 | Q75121 | -0.797    |
| 35016 | P03410 | Q8NH80 | -1.153    |
| 35017 | P03410 | Q76099 | -1.2415   |
| 35018 | P03410 | P07332 | -0.82867  |
| 35019 | P03410 | Q16538 | -1.2185   |
| 35020 | P03410 | Q99952 | -0.27679  |
| 35021 | P03410 | Q9BZZ2 | -1.5431   |
| 35022 | P03410 | P0CG04 | -0.90565  |
| 35023 | P03410 | Q5TG30 | -1.0031   |
| 35024 | P03410 | Q6KC79 | -0.11847  |
| 35025 | P03410 | P42330 | -0.22399  |
| 35026 | P03410 | Q9BWQ8 | -0.43996  |
| 35027 | P03410 | Q9UN71 | -1.0493   |
| 35028 | P03410 | Q95239 | -0.27233  |
| 35029 | P03410 | Q9NQL9 | -0.28302  |
| 35030 | P03410 | Q9H165 | -0.22652  |
| 35031 | P03410 | Q9BXM7 | -0.91778  |
| 35032 | P03410 | Q8IWL2 | -1.0402   |
| 35033 | P03410 | Q6UX41 | -0.23341  |
| 35034 | P03410 | Q96EG1 | -0.45651  |
| 35035 | P03410 | Q6ZTQ4 | -1.0719   |
| 35036 | P03410 | Q8WVB6 | -0.66293  |

|       |        |        |           |
|-------|--------|--------|-----------|
| 35037 | P03410 | Q5SW96 | -0.22721  |
| 35038 | P03410 | P20807 | -0.96699  |
| 35039 | P03410 | P00797 | -0.8901   |
| 35040 | P03410 | P0C2W1 | -0.19927  |
| 35041 | P03410 | A2RU67 | -0.63308  |
| 35042 | P03410 | Q53QZ3 | -0.93354  |
| 35043 | P03410 | O75914 | -0.89053  |
| 35044 | P03410 | P22897 | -0.95326  |
| 35045 | P03410 | Q9BY19 | -0.63308  |
| 35046 | P03410 | Q13635 | -0.24359  |
| 35047 | P03410 | Q15547 | -0.78724  |
| 35048 | P03410 | P33260 | -0.83404  |
| 35049 | P03410 | P12110 | -0.53116  |
| 35050 | P03410 | O95157 | -0.83259  |
| 35051 | P03410 | Q9H0U4 | -0.44879  |
| 35052 | P03410 | Q9H6I2 | -0.13536  |
| 35053 | P03410 | Q96BR1 | -1.114    |
| 35054 | P03410 | O15021 | -1.3369   |
| 35055 | P03410 | B3GLJ2 | -0.71003  |
| 35056 | P03410 | P14174 | -0.27151  |
| 35057 | P03410 | Q94856 | -0.86857  |
| 35058 | P03410 | Q00604 | -0.6889   |
| 35059 | P03410 | Q8IVV8 | -0.797    |
| 35060 | P03410 | Q8N3H0 | -0.18927  |
| 35061 | P03410 | Q7RTX0 | -1.1333   |
| 35062 | P03410 | Q9UBN1 | -1.0663   |
| 35063 | P03410 | P13498 | -0.27337  |
| 35064 | P03410 | Q7Z6K3 | -0.1813   |
| 35065 | P03410 | Q9NR21 | -0.18909  |
| 35066 | P03410 | Q8NGE5 | -1.153    |
| 35067 | P03410 | Q9Y696 | -0.20878  |
| 35068 | P03410 | P11926 | -0.10416  |
| 35069 | P03410 | Q8TB52 | -0.467    |
| 35070 | P03410 | A8MYB1 | -0.63308  |
| 35071 | P03410 | Q495T6 | -1.482    |
| 35072 | P03410 | Q14807 | -0.29484  |
| 35073 | P03410 | Q9UN66 | -1.0719   |
| 35074 | P03410 | Q30167 | -0.61332  |
| 35075 | P03410 | P18206 | -0.1848   |
| 35076 | P03410 | Q95813 | -0.47065  |
| 35077 | P03410 | Q9BXP8 | -1.5732   |
| 35078 | P03410 | Q6UXU4 | -0.63308  |
| 35079 | P03410 | Q9BX95 | -0.60472  |
| 35080 | P03410 | P01024 | -0.67643  |
| 35081 | P03410 | Q5JPE7 | -0.12618  |
| 35082 | P03410 | Q9NSV4 | -0.21819  |
| 35083 | P03410 | O75575 | -0.50646  |
| 35084 | P03410 | P15428 | -0.356    |
| 35085 | P03410 | Q5GH70 | -0.63308  |
| 35086 | P03410 | Q9H4G4 | -0.49497  |
| 35087 | P03410 | Q9HB15 | -0.88099  |
| 35088 | P03410 | Q86WS3 | -0.71003  |
| 35089 | P03410 | Q8NB78 | -0.49749  |
| 35090 | P03410 | Q8WXQ8 | -1.2794   |
| 35091 | P03410 | P60827 | -0.81484  |
| 35092 | P03410 | Q8NGQ4 | -1.153    |
| 35093 | P03410 | Q9HBH5 | -0.81591  |
| 35094 | P03410 | Q9BRR6 | -0.91597  |
| 35095 | P03410 | O95907 | -0.82436  |
| 35096 | P03410 | P56703 | -0.55599  |
| 35097 | P03410 | O95633 | -0.22274  |
| 35098 | P03410 | Q9BSD7 | -0.95804  |
| 35099 | P03410 | Q9NS66 | -1.2185   |
| 35100 | P03410 | P51685 | -1.403    |
| 35101 | P03410 | Q6AI14 | -0.98002  |
| 35102 | P03410 | P30453 | -0.74344  |
| 35103 | P03410 | Q9HDB9 | -0.027984 |
| 35104 | P03410 | P51800 | -0.92019  |
| 35105 | P03410 | Q15311 | -0.28883  |
| 35106 | P03410 | A0PJX4 | -1.0663   |
| 35107 | P03410 | Q9NWQ9 | -0.17973  |
| 35108 | P03410 | Q9UM19 | -0.27709  |
| 35109 | P03410 | Q9ULJ8 | -0.22698  |
| 35110 | P03410 | P54296 | -0.32221  |
| 35111 | P03410 | Q9UKU7 | -0.2475   |
| 35112 | P03410 | Q9HCC0 | -0.53929  |

|       |        |        |           |
|-------|--------|--------|-----------|
| 35113 | P03410 | Q96RP7 | -0.52783  |
| 35114 | P03410 | Q8IZF0 | -0.91849  |
| 35115 | P03410 | Q9Y6L6 | -0.91915  |
| 35116 | P03410 | Q8IWT1 | -0.76553  |
| 35117 | P03410 | Q92730 | -0.27224  |
| 35118 | P03410 | P0C1H6 | -0.63454  |
| 35119 | P03410 | Q9UK23 | -0.3729   |
| 35120 | P03410 | P61129 | -0.26656  |
| 35121 | P03410 | Q8IZ69 | -0.54134  |
| 35122 | P03410 | Q96EV2 | -0.67771  |
| 35123 | P03410 | Q8IY49 | -0.3672   |
| 35124 | P03410 | P56177 | -0.22609  |
| 35125 | P03410 | O15484 | -0.99169  |
| 35126 | P03410 | O43586 | -0.9403   |
| 35127 | P03410 | P48058 | -1.0067   |
| 35128 | P03410 | Q4G0W2 | -0.68639  |
| 35129 | P03410 | Q8NDA2 | -0.91783  |
| 35130 | P03410 | Q6UVW9 | -0.31403  |
| 35131 | P03410 | Q8NGF8 | -1.153    |
| 35132 | P03410 | Q9BXA7 | -1.62     |
| 35133 | P03410 | O60725 | -0.49647  |
| 35134 | P03410 | A5YM72 | -0.78971  |
| 35135 | P03410 | Q14722 | -0.85044  |
| 35136 | P03410 | Q96RD6 | -0.77755  |
| 35137 | P03410 | Q86UP2 | -0.8453   |
| 35138 | P03410 | O60941 | -0.22512  |
| 35139 | P03410 | Q9NP70 | -1.0185   |
| 35140 | P03410 | Q96KM6 | -0.22638  |
| 35141 | P03410 | Q5TIE3 | -0.71003  |
| 35142 | P03410 | Q5VU92 | -0.22644  |
| 35143 | P03410 | Q9NUL7 | -0.16078  |
| 35144 | P03410 | Q9UQG0 | -0.26043  |
| 35145 | P03410 | Q9BRN9 | -0.63308  |
| 35146 | P03410 | P11086 | -0.076548 |
| 35147 | P03410 | Q9NX78 | -0.63308  |
| 35148 | P03410 | Q9H4B8 | -0.63542  |
| 35149 | P03410 | O95180 | -0.8619   |
| 35150 | P03410 | O14979 | -0.30961  |
| 35151 | P03410 | Q9H2L4 | -0.63308  |
| 35152 | P03410 | P15153 | -0.73094  |
| 35153 | P03410 | Q6IQ22 | -0.62936  |
| 35154 | P03410 | Q68D85 | -0.57217  |
| 35155 | P03410 | Q13217 | -0.12566  |
| 35156 | P03410 | O75911 | -1.4876   |
| 35157 | P03410 | Q9C0K1 | -0.87311  |
| 35158 | P03410 | P62995 | -0.22143  |
| 35159 | P03410 | O15552 | -1.6364   |
| 35160 | P03410 | Q16853 | -1.0424   |
| 35161 | P03410 | Q8N878 | -0.39872  |
| 35162 | P03410 | Q10472 | -0.83943  |
| 35163 | P03410 | Q9H341 | -1.153    |
| 35164 | P03410 | Q14672 | -0.31339  |
| 35165 | P03410 | Q06141 | -0.9889   |
| 35166 | P03410 | O96028 | -0.22741  |
| 35167 | P03410 | Q8N145 | -0.64474  |
| 35168 | P03410 | Q8NGR4 | -1.153    |
| 35169 | P03410 | Q14728 | -0.59407  |
| 35170 | P03410 | Q96M86 | -0.14279  |
| 35171 | P03410 | O94768 | -1.1301   |
| 35172 | P03410 | Q9P1Z3 | -1.3733   |
| 35173 | P03410 | Q9UKS7 | -0.37441  |
| 35174 | P03410 | Q5R372 | -1.0689   |
| 35175 | P03410 | A8K7I4 | -1.3963   |
| 35176 | P03410 | A6PVI3 | -0.62691  |
| 35177 | P03410 | Q9BXU9 | -0.46755  |
| 35178 | P03410 | Q9BYT8 | -0.3603   |
| 35179 | P03410 | Q9Y5X5 | -1.3189   |
| 35180 | P03410 | Q9UIG5 | -0.056538 |
| 35181 | P03410 | Q13214 | -0.92558  |
| 35182 | P03410 | Q7L5L3 | -0.69758  |
| 35183 | P03410 | Q9NY35 | -0.65703  |
| 35184 | P03410 | Q8NBL1 | -0.1366   |
| 35185 | P03410 | Q6P474 | -0.29538  |
| 35186 | P03410 | P11234 | -0.23332  |
| 35187 | P03410 | O60315 | -0.19957  |
| 35188 | P03410 | Q9P227 | -1.0785   |

|       |        |        |          |
|-------|--------|--------|----------|
| 35189 | P03410 | Q9P2C4 | -0.59452 |
| 35190 | P03410 | Q9NRP0 | -0.59926 |
| 35191 | P03410 | O75712 | -0.72434 |
| 35192 | P03410 | H3BUK9 | -0.22715 |
| 35193 | P03410 | Q8WVE7 | -0.63308 |
| 35194 | P03410 | Q14031 | -1.1344  |
| 35195 | P03410 | Q03426 | -0.87583 |
| 35196 | P03410 | Q8N9I0 | -0.77822 |
| 35197 | P03410 | Q5JS13 | -0.62291 |
| 35198 | P03410 | Q96AT9 | -0.125   |
| 35199 | P03410 | Q9HD45 | -0.6947  |
| 35200 | P03410 | P62834 | -0.34933 |
| 35201 | P03410 | P61086 | -0.72013 |
| 35202 | P03410 | A6NIM6 | -0.37105 |
| 35203 | P03410 | Q5T2R2 | -0.23534 |
| 35204 | P03410 | Q96I45 | -0.63308 |
| 35205 | P03410 | Q14623 | -0.47857 |
| 35206 | P03410 | Q96ND0 | -0.45086 |
| 35207 | P03410 | Q96H78 | -0.51629 |
| 35208 | P03410 | P21127 | -0.11123 |
| 35209 | P03410 | Q15758 | -0.7874  |
| 35210 | P03410 | Q6PRD1 | -1.2817  |
| 35211 | P03410 | Q8NH09 | -1.153   |
| 35212 | P03410 | Q01196 | -0.71856 |
| 35213 | P03410 | Q8N8Q1 | -0.67845 |
| 35214 | P03410 | Q6FHJ7 | -0.5206  |
| 35215 | P03410 | Q01432 | -0.143   |
| 35216 | P03410 | Q71UI9 | -0.80275 |
| 35217 | P03410 | P31153 | -0.66081 |
| 35218 | P03410 | P08588 | -0.88995 |
| 35219 | P03410 | Q92820 | -0.56954 |
| 35220 | P03410 | Q9UBS5 | -0.72243 |
| 35221 | P03410 | P32004 | -0.69992 |
| 35222 | P03410 | O60337 | -1.127   |
| 35223 | P03410 | Q96PU9 | -0.58763 |
| 35224 | P03410 | Q8NGE1 | -1.153   |
| 35225 | P03410 | Q8NI22 | -0.31484 |
| 35226 | P03410 | Q8IUB5 | -0.74696 |
| 35227 | P03410 | Q8TBE9 | -0.096   |
| 35228 | P03410 | P10632 | -0.74259 |
| 35229 | P03410 | P01601 | -0.90565 |
| 35230 | P03410 | B7U540 | -1.013   |
| 35231 | P03410 | Q9UM22 | -0.70984 |
| 35232 | P03410 | Q9Y5F6 | -1.0719  |
| 35233 | P03410 | Q86YS7 | -0.286   |
| 35234 | P03410 | Q96EX2 | -0.73225 |
| 35235 | P03410 | P10082 | -0.69938 |
| 35236 | P03410 | Q9UKL4 | -0.83957 |
| 35237 | P03410 | Q96L91 | -0.2824  |
| 35238 | P03410 | P98198 | -1.0897  |
| 35239 | P03410 | Q8TDI7 | -0.63308 |
| 35240 | P03410 | Q15617 | -1.153   |
| 35241 | P03410 | O95197 | -0.18291 |
| 35242 | P03410 | P40126 | -0.58091 |
| 35243 | P03410 | Q9GZQ8 | -0.15901 |
| 35244 | P03410 | Q6UXF7 | -0.70793 |
| 35245 | P03410 | O00628 | -0.22743 |
| 35246 | P03410 | Q9NQV8 | -0.51142 |
| 35247 | P03410 | Q8N2M4 | -0.63308 |
| 35248 | P03410 | P56704 | -0.25964 |
| 35249 | P03410 | Q3MJ16 | -0.44228 |
| 35250 | P03410 | Q93038 | -1.3024  |
| 35251 | P03410 | Q86SJ6 | -1.2814  |
| 35252 | P03410 | Q96C55 | -0.19589 |
| 35253 | P03410 | P01210 | -0.83476 |
| 35254 | P03410 | Q9ULS6 | -0.85728 |
| 35255 | P03410 | Q9C0H2 | -0.86676 |
| 35256 | P03410 | Q8NGE2 | -1.153   |
| 35257 | P03410 | P41159 | -0.38233 |
| 35258 | P03410 | O95376 | -0.21581 |
| 35259 | P03410 | P0DJD1 | -0.20597 |
| 35260 | P03410 | Q8NH70 | -1.153   |
| 35261 | P03410 | Q6ZXV5 | -0.63308 |
| 35262 | P03410 | B0FP48 | -0.63308 |
| 35263 | P03410 | O95970 | -0.22869 |
| 35264 | P03410 | P59538 | -1.067   |

|       |        |        |           |
|-------|--------|--------|-----------|
| 35265 | P03410 | O75629 | -0.88382  |
| 35266 | P03410 | Q8WUH6 | -0.63308  |
| 35267 | P03410 | O75191 | -0.88331  |
| 35268 | P03410 | O43933 | -0.24902  |
| 35269 | P03410 | P15814 | -0.79743  |
| 35270 | P03410 | B1AJZ9 | -0.074429 |
| 35271 | P03410 | Q15907 | -0.71149  |
| 35272 | P03410 | Q9NRD0 | -0.22602  |
| 35273 | P03410 | Q9BXB4 | -0.44496  |
| 35274 | P03410 | P17181 | -0.87567  |
| 35275 | P03410 | Q8IY17 | -0.63106  |
| 35276 | P03410 | Q9P241 | -0.67755  |
| 35277 | P03410 | Q9ULM0 | -0.22741  |
| 35278 | P03410 | Q6UXS0 | -0.70793  |
| 35279 | P03410 | Q07820 | -0.22736  |
| 35280 | P03410 | Q9UNG2 | -0.80298  |
| 35281 | P03410 | Q8IWB9 | -0.86569  |
| 35282 | P03410 | Q9NQB0 | -0.18604  |
| 35283 | P03410 | Q8NG75 | -1.153    |
| 35284 | P03410 | Q9HAW7 | -0.69163  |
| 35285 | P03410 | Q15063 | -1.2574   |
| 35286 | P03410 | P56178 | -0.22055  |
| 35287 | P03410 | Q9GZR7 | -0.50281  |
| 35288 | P03410 | P30491 | -0.88938  |
| 35289 | P03410 | Q86UD5 | -0.71626  |
| 35290 | P03410 | Q9HA47 | -0.84924  |
| 35291 | P03410 | P47883 | -1.153    |
| 35292 | P03410 | Q9H0N0 | -0.29149  |
| 35293 | P03410 | P30556 | -0.49462  |
| 35294 | P03410 | P36894 | -0.39101  |
| 35295 | P03410 | Q8N271 | -0.80394  |
| 35296 | P03410 | Q92536 | -1.0571   |
| 35297 | P03410 | Q14994 | -0.22762  |
| 35298 | P03410 | P0C6E5 | -0.29738  |
| 35299 | P03410 | Q86UL3 | -0.58509  |
| 35300 | P03410 | P07327 | -0.20363  |
| 35301 | P03410 | Q99679 | -1.4027   |
| 35302 | P03410 | Q99487 | -0.13158  |
| 35303 | P03410 | Q401N2 | -0.85154  |
| 35304 | P03410 | Q9BQS7 | -1.1625   |
| 35305 | P03410 | Q9UQ74 | -0.71003  |
| 35306 | P03410 | O60462 | -0.80274  |
| 35307 | P03410 | Q9UG01 | -0.47465  |
| 35308 | P03410 | Q86W25 | -0.66861  |
| 35309 | P03410 | Q99592 | -0.23037  |
| 35310 | P03410 | O14669 | -1.5145   |
| 35311 | P03410 | P04000 | -1.3411   |
| 35312 | P03410 | Q5T9A4 | -0.71374  |
| 35313 | P03410 | P82251 | -1.0145   |
| 35314 | P03410 | Q96L08 | -0.63308  |
| 35315 | P03410 | Q9HAW9 | -0.65319  |
| 35316 | P03410 | Q94991 | -0.73424  |
| 35317 | P03410 | P78367 | -0.22864  |
| 35318 | P03410 | O00327 | -0.22737  |
| 35319 | P03410 | Q9H3V2 | -0.63308  |
| 35320 | P03410 | P22891 | -1.0333   |
| 35321 | P03410 | P51793 | -1.1556   |
| 35322 | P03410 | Q5T1R4 | -0.22736  |
| 35323 | P03410 | Q3SY69 | -0.43501  |
| 35324 | P03410 | Q96S44 | -0.66654  |
| 35325 | P03410 | P47869 | -0.67379  |
| 35326 | P03410 | P01860 | -0.81547  |
| 35327 | P03410 | P52823 | -0.59811  |
| 35328 | P03410 | Q9Y271 | -1.3011   |
| 35329 | P03410 | P43652 | -0.77841  |
| 35330 | P03410 | Q8NBM4 | -0.63308  |
| 35331 | P03410 | Q8NC06 | -0.2617   |
| 35332 | P03410 | P63130 | -0.0271   |
| 35333 | P03410 | Q96CU9 | -0.78622  |
| 35334 | P03410 | Q9BQS2 | -0.797    |
| 35335 | P03410 | Q6PHW0 | -1.0176   |
| 35336 | P03410 | Q6UXX9 | -0.73389  |
| 35337 | P03410 | P06881 | -0.22741  |
| 35338 | P03410 | Q6ZW33 | -0.62926  |
| 35339 | P03410 | Q9UNH6 | -0.23542  |
| 35340 | P03410 | Q9P0V9 | -0.2873   |

|       |        |        |          |
|-------|--------|--------|----------|
| 35341 | P03410 | Q13516 | -0.22755 |
| 35342 | P03410 | Q8NGB4 | -1.153   |
| 35343 | P03410 | O15403 | -0.96868 |
| 35344 | P03410 | P15248 | -0.68493 |
| 35345 | P03410 | Q96TA0 | -1.0719  |
| 35346 | P03410 | Q02127 | -0.58262 |
| 35347 | P03410 | Q075Z2 | -0.72984 |
| 35348 | P03410 | P01769 | -0.90565 |
| 35349 | P03410 | Q8NG95 | -1.153   |
| 35350 | P03410 | O00341 | -0.89285 |
| 35351 | P03410 | Q8NFZ4 | -0.57418 |
| 35352 | P03410 | Q9BVG8 | -0.25926 |
| 35353 | P03410 | Q9BWV3 | -0.36703 |
| 35354 | P03410 | P01763 | -0.90565 |
| 35355 | P03410 | Q8NCE2 | -0.28821 |
| 35356 | P03410 | Q8NH79 | -1.153   |
| 35357 | P03410 | P02679 | -0.93734 |
| 35358 | P03410 | Q9H9S0 | -0.22822 |
| 35359 | P03410 | P26717 | -0.4875  |
| 35360 | P03410 | Q9NR23 | -0.68677 |
| 35361 | P03410 | P49840 | -0.22828 |
| 35362 | P03410 | Q14995 | -0.28897 |
| 35363 | P03410 | P34932 | -0.22414 |
| 35364 | P03410 | P08237 | -0.86395 |
| 35365 | P03410 | P63215 | -0.22606 |
| 35366 | P03410 | P35243 | -0.39273 |
| 35367 | P03410 | Q99558 | -0.22741 |
| 35368 | P03410 | P52306 | -0.6554  |
| 35369 | P03410 | Q9UF47 | -0.36578 |
| 35370 | P03410 | Q8IZP2 | -0.22707 |
| 35371 | P03410 | O95072 | -0.22507 |
| 35372 | P03410 | P54315 | -0.98039 |
| 35373 | P03410 | P06888 | -0.90565 |
| 35374 | P03410 | Q8NDX5 | -0.40977 |
| 35375 | P03410 | Q9Y6R1 | -0.49927 |
| 35376 | P03410 | P59768 | -0.3974  |
| 35377 | P03410 | Q9BW91 | -0.11643 |
| 35378 | P03410 | Q6JVE9 | -0.71895 |
| 35379 | P03410 | Q15118 | -0.87538 |
| 35380 | P03410 | P59543 | -1.067   |
| 35381 | P03410 | P21397 | -0.71413 |
| 35382 | P03410 | Q14451 | -0.22741 |
| 35383 | P03410 | P32248 | -0.48277 |
| 35384 | P03410 | Q5T848 | -1.2185  |
| 35385 | P03410 | Q9UNQ0 | -0.55071 |
| 35386 | P03410 | Q9HD90 | -0.22801 |
| 35387 | P03410 | Q7Z407 | -0.797   |
| 35388 | P03410 | Q14774 | -0.23173 |
| 35389 | P03410 | P08138 | -0.35498 |
| 35390 | P03410 | Q13268 | -0.33497 |
| 35391 | P03410 | Q9H553 | -0.18091 |
| 35392 | P03410 | Q9C0E4 | -0.22453 |
| 35393 | P03410 | Q5TEA6 | -0.63308 |
| 35394 | P03410 | E7ERA6 | -0.73225 |
| 35395 | P03410 | Q9ULV4 | -0.30716 |
| 35396 | P03410 | P78536 | -0.27915 |
| 35397 | P03410 | Q3ZCW2 | -0.26927 |
| 35398 | P03410 | Q8NBZ7 | -0.90784 |
| 35399 | P03410 | Q5JS37 | -0.71003 |
| 35400 | P03410 | Q86UU1 | -0.22734 |
| 35401 | P03410 | Q96F46 | -0.40592 |
| 35402 | P03410 | Q95843 | -0.34873 |
| 35403 | P03410 | Q9BSG5 | -0.71003 |
| 35404 | P03410 | Q5QJ38 | -0.15664 |
| 35405 | P03410 | Q8WYK1 | -1.1358  |
| 35406 | P03410 | P80370 | -0.84305 |
| 35407 | P03410 | Q8IZJ0 | -0.76657 |
| 35408 | P03410 | P51608 | -0.10474 |
| 35409 | P03410 | P22310 | -0.87606 |
| 35410 | P03410 | P61160 | -0.56354 |
| 35411 | P03410 | Q9UBP4 | -1.0256  |
| 35412 | P03410 | Q8N6U8 | -1.4719  |
| 35413 | P03410 | Q658P3 | -0.62509 |
| 35414 | P03410 | Q94886 | -1.3144  |
| 35415 | P03410 | Q9UPQ7 | -0.74589 |
| 35416 | P03410 | Q03828 | -0.22833 |

|       |        |        |           |
|-------|--------|--------|-----------|
| 35417 | P03410 | Q8N5T2 | -1.3577   |
| 35418 | P03410 | Q6ZRI0 | -0.76866  |
| 35419 | P03410 | P49590 | -0.19372  |
| 35420 | P03410 | Q15230 | -0.57236  |
| 35421 | P03410 | Q13554 | -0.77089  |
| 35422 | P03410 | Q3KQV9 | -0.18407  |
| 35423 | P03410 | Q96FL8 | -0.74621  |
| 35424 | P03410 | O95139 | -0.050541 |
| 35425 | P03410 | Q8NGS2 | -1.153    |
| 35426 | P03410 | P20718 | -0.55469  |
| 35427 | P03410 | Q9P281 | -0.065475 |
| 35428 | P03410 | Q9BSL1 | -0.22221  |
| 35429 | P03410 | Q8N2I9 | -0.32125  |
| 35430 | P03410 | Q8N976 | -0.21581  |
| 35431 | P03410 | Q0P5P2 | -0.71003  |
| 35432 | P03410 | Q9C0B0 | -0.14571  |
| 35433 | P03410 | Q9H477 | -0.8892   |
| 35434 | P03410 | Q9HBG7 | -0.85513  |
| 35435 | P03410 | Q9UJU2 | -0.16607  |
| 35436 | P03410 | A6NDL7 | -0.095112 |
| 35437 | P03410 | Q92508 | -0.89414  |
| 35438 | P03410 | Q9UFD9 | -0.22735  |
| 35439 | P03410 | O43155 | -1.1156   |
| 35440 | P03410 | P50607 | -0.30921  |
| 35441 | P03410 | P55075 | -0.34538  |
| 35442 | P03410 | Q8N6C5 | -0.46805  |
| 35443 | P03410 | A8MXK1 | -0.63308  |
| 35444 | P03410 | Q6ZS82 | -0.71175  |
| 35445 | P03410 | P02461 | -0.42928  |
| 35446 | P03410 | O60279 | -0.864    |
| 35447 | P03410 | P21266 | -0.22045  |
| 35448 | P03410 | P18463 | -0.88938  |
| 35449 | P03410 | Q9NZH6 | -0.29597  |
| 35450 | P03410 | P11597 | -0.66423  |
| 35451 | P03410 | A8MPX8 | -0.20847  |
| 35452 | P03410 | Q8ND94 | -0.63308  |
| 35453 | P03410 | Q8TDX6 | -0.42957  |
| 35454 | P03410 | O15031 | -1.1889   |
| 35455 | P03410 | O95711 | -0.86036  |
| 35456 | P03410 | Q53GD3 | -0.73205  |
| 35457 | P03410 | Q5T3F8 | -1.1862   |
| 35458 | P03410 | Q66K14 | -1.8171   |
| 35459 | P03410 | O75356 | -0.5458   |
| 35460 | P03410 | P07148 | -0.21439  |
| 35461 | P03410 | Q8N7U9 | -0.022432 |
| 35462 | P03410 | P84074 | -0.28513  |
| 35463 | P03410 | O75947 | -0.076047 |
| 35464 | P03410 | Q8NGJ2 | -1.153    |
| 35465 | P03410 | Q9HBW0 | -0.8497   |
| 35466 | P03410 | P10600 | -0.22741  |
| 35467 | P03410 | Q9HBE4 | -0.75954  |
| 35468 | P03410 | P49675 | -0.23614  |
| 35469 | P03410 | Q8N568 | -1.135    |
| 35470 | P03410 | Q96I82 | -1.2085   |
| 35471 | P03410 | P62491 | -0.30152  |
| 35472 | P03410 | Q5TD97 | -0.20358  |
| 35473 | P03410 | Q76083 | -0.22436  |
| 35474 | P03410 | Q68DD2 | -0.37838  |
| 35475 | P03410 | P06313 | -0.90565  |
| 35476 | P03410 | Q08188 | -0.52407  |
| 35477 | P03410 | A1L4K1 | -0.22752  |
| 35478 | P03410 | Q8N3Y3 | -0.53244  |
| 35479 | P03410 | Q9BXP2 | -0.81092  |
| 35480 | P03410 | A6NMU1 | -1.153    |
| 35481 | P03410 | Q5VW00 | -0.22728  |
| 35482 | P03410 | A7KAX9 | -0.25714  |
| 35483 | P03410 | P08922 | -1.554    |
| 35484 | P03410 | Q8NGR3 | -1.153    |
| 35485 | P03410 | Q92879 | -0.26065  |
| 35486 | P03410 | P29322 | -1.4394   |
| 35487 | P03410 | Q15620 | -1.153    |
| 35488 | P03410 | Q99678 | -1.4027   |
| 35489 | P03410 | P08758 | -0.23176  |
| 35490 | P03410 | Q14679 | -0.27057  |
| 35491 | P03410 | Q9HCR9 | -0.2335   |
| 35492 | P03410 | P54821 | -0.22137  |



|       |        |        |           |
|-------|--------|--------|-----------|
| 35493 | P03410 | P52926 | -0.074628 |
| 35494 | P03410 | Q8TEQ8 | -0.86628  |
| 35495 | P03410 | P30447 | -0.74344  |
| 35496 | P03410 | Q6YHK3 | -0.96523  |
| 35497 | P03410 | P43121 | -0.9743   |
| 35498 | P03410 | Q12882 | -0.62653  |
| 35499 | P03410 | Q13508 | -0.57769  |
| 35500 | P03410 | Q9NUV7 | -0.82444  |
| 35501 | P03410 | A6NKC4 | -0.77982  |
| 35502 | P03410 | Q9P2E7 | -1.0719   |
| 35503 | P03410 | Q8N2K0 | -0.60958  |
| 35504 | P03410 | Q13562 | -0.22753  |
| 35505 | P03410 | Q1L5Z9 | -0.378    |
| 35506 | P03410 | Q9H3D4 | -0.22706  |
| 35507 | P03410 | Q9P272 | -0.17303  |
| 35508 | P03410 | P30085 | -0.49915  |
| 35509 | P03410 | O15294 | -0.22494  |
| 35510 | P03410 | Q8NBP5 | -0.80607  |
| 35511 | P03410 | Q9H2Q1 | -0.63308  |
| 35512 | P03410 | O00194 | -0.60719  |
| 35513 | P03410 | Q9Y4C8 | -0.58927  |
| 35514 | P03410 | P49448 | -0.71105  |
| 35515 | P03410 | Q6P9H4 | -0.22731  |
| 35516 | P03410 | Q5TGI0 | -0.63308  |
| 35517 | P03410 | P47712 | -0.22784  |
| 35518 | P03410 | Q8TAL6 | -0.53074  |
| 35519 | P03410 | Q07108 | -0.87596  |
| 35520 | P03410 | Q8NG94 | -1.153    |
| 35521 | P03410 | A4QPB2 | -0.22741  |
| 35522 | P03410 | Q6KCM7 | -0.58181  |
| 35523 | P03410 | P29279 | -0.35127  |
| 35524 | P03410 | O00626 | -0.93714  |
| 35525 | P03410 | Q43314 | -0.6703   |
| 35526 | P03410 | Q9H061 | -0.44012  |
| 35527 | P03410 | Q9BYV2 | -0.67684  |
| 35528 | P03410 | Q8TBB5 | -0.22177  |
| 35529 | P03410 | O95267 | -0.73872  |
| 35530 | P03410 | P08631 | -0.29914  |
| 35531 | P03410 | Q9UJ96 | -0.72844  |
| 35532 | P03410 | Q8IWR0 | -0.21938  |
| 35533 | P03410 | O76062 | -1.0477   |
| 35534 | P03410 | Q8N0V5 | -0.52286  |
| 35535 | P03410 | Q8NHS0 | -0.21408  |
| 35536 | P03410 | Q9H400 | -0.57808  |
| 35537 | P03410 | Q96S79 | -1.2248   |
| 35538 | P03410 | Q15389 | -0.56069  |
| 35539 | P03410 | O60902 | -0.21737  |
| 35540 | P03410 | P06307 | -0.73506  |
| 35541 | P03410 | Q96KB5 | -0.59009  |
| 35542 | P03410 | Q9UHL0 | -0.71489  |
| 35543 | P03410 | P01571 | -0.63335  |
| 35544 | P03410 | O75044 | -0.2303   |
| 35545 | P03410 | Q14213 | -0.84731  |
| 35546 | P03410 | P19878 | -0.22649  |
| 35547 | P03410 | O00748 | -0.22729  |
| 35548 | P03410 | P98073 | -1.1912   |
| 35549 | P03410 | Q86YQ8 | -0.2309   |
| 35550 | P03410 | Q9H0J9 | -0.19864  |
| 35551 | P03410 | Q9UDY6 | -0.3645   |
| 35552 | P03410 | P11912 | -0.79279  |
| 35553 | P03410 | Q8IYS5 | -1.4339   |
| 35554 | P03410 | P60508 | -0.6544   |
| 35555 | P03410 | P11021 | -0.22013  |
| 35556 | P03410 | Q15431 | -0.10388  |
| 35557 | P03410 | P0C0E4 | -0.83389  |
| 35558 | P03410 | O43405 | -0.221    |
| 35559 | P03410 | Q6NUM9 | -0.45325  |
| 35560 | P03410 | Q9Y5E1 | -1.0722   |
| 35561 | P03410 | P34820 | -1.0274   |
| 35562 | P03410 | P32455 | -0.96025  |
| 35563 | P03410 | A7E2Y1 | -0.57655  |
| 35564 | P03410 | Q9H832 | -0.55443  |
| 35565 | P03410 | Q6ZRI8 | -1.0031   |
| 35566 | P03410 | P46094 | -1.2639   |
| 35567 | P03410 | O00468 | -0.59562  |
| 35568 | P03410 | Q02086 | -0.22236  |

|       |        |        |           |
|-------|--------|--------|-----------|
| 35569 | P03410 | Q6UXT8 | -0.71003  |
| 35570 | P03410 | Q684P5 | -0.31384  |
| 35571 | P03410 | Q9BTX3 | -0.63308  |
| 35572 | P03410 | Q9H5J0 | -0.22738  |
| 35573 | P03410 | Q92696 | -0.40127  |
| 35574 | P03410 | Q06945 | -0.25431  |
| 35575 | P03410 | O95150 | -1.5084   |
| 35576 | P03410 | Q9C0H5 | -0.22831  |
| 35577 | P03410 | Q96CS7 | -0.22688  |
| 35578 | P03410 | P18564 | -1.0475   |
| 35579 | P03410 | Q9NX07 | -0.23285  |
| 35580 | P03410 | Q9NZ71 | -0.65401  |
| 35581 | P03410 | Q8NGY2 | -1.153    |
| 35582 | P03410 | Q6BEB4 | -0.21838  |
| 35583 | P03410 | Q08554 | -0.93673  |
| 35584 | P03410 | P34130 | -0.70065  |
| 35585 | P03410 | Q8NBI6 | -0.85376  |
| 35586 | P03410 | P49917 | -0.10272  |
| 35587 | P03410 | Q9Y5K1 | -0.46242  |
| 35588 | P03410 | P03999 | -1.3149   |
| 35589 | P03410 | A0PJK1 | -0.84715  |
| 35590 | P03410 | Q8NEA4 | -0.10815  |
| 35591 | P03410 | Q9UK05 | -0.22741  |
| 35592 | P03410 | O14733 | -0.23171  |
| 35593 | P03410 | P0DJDO | -0.20508  |
| 35594 | P03410 | P51148 | -0.87279  |
| 35595 | P03410 | Q5VXU9 | -0.21833  |
| 35596 | P03410 | Q8NGE8 | -1.153    |
| 35597 | P03410 | Q9Y6E2 | -0.40648  |
| 35598 | P03410 | Q8NBF6 | -0.62583  |
| 35599 | P03410 | Q68CP4 | -0.76648  |
| 35600 | P03410 | P59922 | -1.153    |
| 35601 | P03410 | Q96Q91 | -0.78506  |
| 35602 | P03410 | P53816 | -0.069672 |
| 35603 | P03410 | P18577 | -0.78247  |
| 35604 | P03410 | O15467 | -0.90269  |
| 35605 | P03410 | P98160 | -1.0102   |
| 35606 | P03410 | Q9NT68 | -0.48827  |
| 35607 | P03410 | Q9HAZ1 | -1.3294   |
| 35608 | P03410 | Q96F10 | -0.16449  |
| 35609 | P03410 | Q14314 | -1.0783   |
| 35610 | P03410 | P18462 | -0.73998  |
| 35611 | P03410 | Q96J88 | -0.30552  |
| 35612 | P03410 | Q02509 | -0.7705   |
| 35613 | P03410 | Q02548 | -0.22729  |
| 35614 | P03410 | O00592 | -0.93174  |
| 35615 | P03410 | O00337 | -0.87197  |
| 35616 | P03410 | Q86SP6 | -1.0984   |
| 35617 | P03410 | O43741 | -0.47064  |
| 35618 | P03410 | Q9Y4D1 | -0.22092  |
| 35619 | P03410 | P10071 | -0.22718  |
| 35620 | P03410 | A8MWL6 | -0.63308  |
| 35621 | P03410 | O15460 | -0.54986  |
| 35622 | P03410 | Q9YNA8 | -0.098666 |
| 35623 | P03410 | O14931 | -1.0361   |
| 35624 | P03410 | Q92838 | -0.99769  |
| 35625 | P03410 | Q8NE01 | -0.26347  |
| 35626 | P03410 | Q8NGL2 | -1.153    |
| 35627 | P03410 | O94988 | -1.0031   |
| 35628 | P03410 | P25311 | -0.90857  |
| 35629 | P03410 | Q9BUJ0 | -0.44125  |
| 35630 | P03410 | Q9BUR5 | -1.3301   |
| 35631 | P03410 | P19440 | -0.36104  |
| 35632 | P03410 | Q86W42 | -0.22838  |
| 35633 | P03410 | Q70E73 | -0.46686  |
| 35634 | P03410 | Q6NXP0 | -0.25116  |
| 35635 | P03410 | Q7Z449 | -1.1771   |
| 35636 | P03410 | Q96HH9 | -0.17184  |
| 35637 | P03410 | Q9BSJ5 | -0.63308  |
| 35638 | P03410 | P78330 | -0.27834  |
| 35639 | P03410 | Q8N6D2 | -0.40954  |
| 35640 | P03410 | P54750 | -0.22222  |
| 35641 | P03410 | Q9NXU5 | -1.269    |
| 35642 | P03410 | P32242 | -0.48499  |
| 35643 | P03410 | P01236 | -0.72001  |
| 35644 | P03410 | Q6UW60 | -1.0796   |

|       |        |         |           |
|-------|--------|---------|-----------|
| 35645 | P03410 | Q8N8Q8  | -0.22408  |
| 35646 | P03410 | Q86YS6  | -1.0301   |
| 35647 | P03410 | Q9P2E3  | -0.22751  |
| 35648 | P03410 | Q9H310  | -0.78249  |
| 35649 | P03410 | Q8NH37  | -1.153    |
| 35650 | P03410 | P30048  | -0.20375  |
| 35651 | P03410 | Q9Y2C9  | -0.57763  |
| 35652 | P03410 | P45378  | -0.10287  |
| 35653 | P03410 | Q9NRE1  | -1.3639   |
| 35654 | P03410 | Q9UPR5  | -0.83534  |
| 35655 | P03410 | Q8IUXX4 | -0.33983  |
| 35656 | P03410 | Q92537  | -0.61257  |
| 35657 | P03410 | P30408  | -0.84983  |
| 35658 | P03410 | Q6EIG7  | -0.55987  |
| 35659 | P03410 | Q8IYQ7  | -0.12952  |
| 35660 | P03410 | P07360  | -0.80999  |
| 35661 | P03410 | P26022  | -0.69489  |
| 35662 | P03410 | Q9BYG0  | -0.90364  |
| 35663 | P03410 | Q9H0R5  | -0.74669  |
| 35664 | P03410 | Q5W188  | -0.8833   |
| 35665 | P03410 | Q9Y5K3  | -0.38376  |
| 35666 | P03410 | Q9NW82  | -0.22746  |
| 35667 | P03410 | Q9H3W5  | -0.76285  |
| 35668 | P03410 | Q29960  | -1.2533   |
| 35669 | P03410 | Q9UPT8  | -0.14571  |
| 35670 | P03410 | Q96QD8  | -1.0615   |
| 35671 | P03410 | Q9GZT4  | -0.55166  |
| 35672 | P03410 | P10316  | -0.71194  |
| 35673 | P03410 | Q7Z412  | -0.039894 |
| 35674 | P03410 | P08754  | -0.43533  |
| 35675 | P03410 | Q93088  | -0.11671  |
| 35676 | P03410 | Q9Y672  | -0.72023  |
| 35677 | P03410 | Q95155  | -0.17399  |
| 35678 | P03410 | Q60565  | -0.20148  |
| 35679 | P03410 | Q9P2T1  | -0.48686  |
| 35680 | P03410 | Q16549  | -0.96065  |
| 35681 | P03410 | Q6S545  | -0.2274   |
| 35682 | P03410 | Q9H1M4  | -0.64611  |
| 35683 | P03410 | Q9UHE8  | -1.0761   |
| 35684 | P03410 | Q6PIU2  | -0.71642  |
| 35685 | P03410 | Q53H76  | -0.86568  |
| 35686 | P03410 | Q5VZ89  | -0.54144  |
| 35687 | P03410 | Q4UJ75  | -0.22739  |
| 35688 | P03410 | Q9BV23  | -0.56631  |
| 35689 | P03410 | Q9H2X0  | -0.59172  |
| 35690 | P03410 | Q8NH92  | -1.153    |
| 35691 | P03410 | Q99466  | -0.38058  |
| 35692 | P03410 | Q8N0W4  | -0.26431  |
| 35693 | P03410 | P30291  | -0.22741  |
| 35694 | P03410 | Q9Y265  | -0.47482  |
| 35695 | P03410 | P22223  | -1.0184   |
| 35696 | P03410 | Q8N5I4  | -0.99827  |
| 35697 | P03410 | Q8NDG6  | -0.73519  |
| 35698 | P03410 | Q8NHV9  | -0.21372  |
| 35699 | P03410 | Q9UPM6  | -0.33678  |
| 35700 | P03410 | P23527  | -0.80275  |
| 35701 | P03410 | Q8IUB2  | -0.74696  |
| 35702 | P03410 | Q8IVH4  | -0.83061  |
| 35703 | P03410 | P47929  | -0.39762  |
| 35704 | P03410 | P00739  | -0.83746  |
| 35705 | P03410 | P02818  | -0.46612  |
| 35706 | P03410 | Q9Y216  | -0.3277   |
| 35707 | P03410 | Q8IZ20  | -0.17173  |
| 35708 | P03410 | Q96P48  | -0.28928  |
| 35709 | P03410 | A6NM11  | -0.63308  |
| 35710 | P03410 | P08218  | -1.3874   |
| 35711 | P03410 | O15118  | -0.58635  |
| 35712 | P03410 | Q8TE54  | -0.48313  |
| 35713 | P03410 | Q75096  | -0.58988  |
| 35714 | P03410 | Q96LD8  | -0.69688  |
| 35715 | P03410 | Q8TAQ9  | -0.62091  |
| 35716 | P03410 | Q9HC23  | -0.89722  |
| 35717 | P03410 | Q9Y5W5  | -1.1714   |
| 35718 | P03410 | Q86YJ6  | -0.79483  |
| 35719 | P03410 | Q9UPT9  | -0.56522  |
| 35720 | P03410 | P07492  | -1.0654   |

|       |        |        |           |
|-------|--------|--------|-----------|
| 35721 | P03410 | Q16661 | -0.63744  |
| 35722 | P03410 | P61587 | -1.1005   |
| 35723 | P03410 | O00144 | -0.87792  |
| 35724 | P03410 | P23229 | -0.22726  |
| 35725 | P03410 | Q9ULJ7 | -0.2274   |
| 35726 | P03410 | P17643 | -0.35715  |
| 35727 | P03410 | P85037 | -0.43851  |
| 35728 | P03410 | P18505 | -0.96857  |
| 35729 | P03410 | Q6ZUB1 | -0.63308  |
| 35730 | P03410 | Q8IVW1 | -0.77503  |
| 35731 | P03410 | Q92496 | -0.78801  |
| 35732 | P03410 | Q9H6A0 | -0.04104  |
| 35733 | P03410 | Q8N3J6 | -1.0498   |
| 35734 | P03410 | P48060 | -1.3127   |
| 35735 | P03410 | Q6UW88 | -1.0719   |
| 35736 | P03410 | Q96SI9 | -0.78123  |
| 35737 | P03410 | Q13740 | -1.1539   |
| 35738 | P03410 | Q96LR9 | -1.7522   |
| 35739 | P03410 | O94985 | -1.0212   |
| 35740 | P03410 | P20823 | -0.21475  |
| 35741 | P03410 | Q16650 | -0.50192  |
| 35742 | P03410 | Q8TAC1 | -0.52538  |
| 35743 | P03410 | Q6IQ20 | -0.37499  |
| 35744 | P03410 | O75144 | -1.0457   |
| 35745 | P03410 | O94911 | -1.3538   |
| 35746 | P03410 | Q9UM44 | -0.61257  |
| 35747 | P03410 | Q6ZMT1 | -0.34969  |
| 35748 | P03410 | Q9Y5Y4 | -1.2964   |
| 35749 | P03410 | Q11206 | -0.77284  |
| 35750 | P03410 | O75676 | -0.19654  |
| 35751 | P03410 | Q8NGQ3 | -1.153    |
| 35752 | P03410 | P00352 | -0.46333  |
| 35753 | P03410 | P15529 | -0.54642  |
| 35754 | P03410 | Q9Y6Z7 | -0.69239  |
| 35755 | P03410 | Q96EP0 | -0.18316  |
| 35756 | P03410 | P37288 | -0.45032  |
| 35757 | P03410 | P49685 | -1.3417   |
| 35758 | P03410 | A6NFA1 | -0.82282  |
| 35759 | P03410 | P42357 | -0.077964 |
| 35760 | P03410 | P16109 | -0.22741  |
| 35761 | P03410 | O75762 | -0.80901  |
| 35762 | P03410 | P61968 | -0.22483  |
| 35763 | P03410 | P05455 | -0.32672  |
| 35764 | P03410 | Q12797 | -0.52184  |
| 35765 | P03410 | A2RUC4 | -0.42276  |
| 35766 | P03410 | Q8TBA6 | -0.33256  |
| 35767 | P03410 | Q3V6T2 | -0.11563  |
| 35768 | P03410 | Q15243 | -0.31527  |
| 35769 | P03410 | A2VDJ0 | -0.63308  |
| 35770 | P03410 | Q9H093 | -0.69058  |
| 35771 | P03410 | A8MY62 | -0.067997 |
| 35772 | P03410 | O95199 | -0.22727  |
| 35773 | P03410 | Q9UH03 | -0.21872  |
| 35774 | P03410 | Q6NT55 | -0.76312  |
| 35775 | P03410 | Q14108 | -1.1824   |
| 35776 | P03410 | P07477 | -1.4757   |
| 35777 | P03410 | Q9P296 | -0.67062  |
| 35778 | P03410 | Q8WWT9 | -0.75122  |
| 35779 | P03410 | P23582 | -0.53794  |
| 35780 | P03410 | P25106 | -1.0545   |
| 35781 | P03410 | Q86T20 | -0.71003  |
| 35782 | P03410 | Q8NGS3 | -1.153    |
| 35783 | P03410 | P08F94 | -0.21724  |
| 35784 | P03410 | P22694 | -0.22598  |
| 35785 | P03410 | P01611 | -0.90565  |
| 35786 | P03410 | Q9Y2C5 | -0.9656   |
| 35787 | P03410 | Q567U6 | -0.15525  |
| 35788 | P03410 | Q15404 | -0.2406   |
| 35789 | P03410 | P98187 | -1.0793   |
| 35790 | P03410 | Q03014 | -0.22835  |
| 35791 | P03410 | P62699 | -0.23201  |
| 35792 | P03410 | Q9GZN0 | -1.179    |
| 35793 | P03410 | P08476 | -0.22741  |
| 35794 | P03410 | P58294 | -0.62052  |
| 35795 | P03410 | O94923 | -0.26312  |
| 35796 | P03410 | P57771 | -0.59152  |

|       |        |        |           |
|-------|--------|--------|-----------|
| 35797 | P03410 | Q8NGS0 | -1.153    |
| 35798 | P03410 | Q9H0H5 | -0.24498  |
| 35799 | P03410 | Q9C0J9 | -0.22472  |
| 35800 | P03410 | Q8TE57 | -1.3999   |
| 35801 | P03410 | P04435 | -0.22315  |
| 35802 | P03410 | P13500 | -0.34256  |
| 35803 | P03410 | P20151 | -1.3624   |
| 35804 | P03410 | Q9BZJ4 | -0.45631  |
| 35805 | P03410 | P51884 | -0.64684  |
| 35806 | P03410 | A6NI15 | -0.22743  |
| 35807 | P03410 | Q01954 | -0.22048  |
| 35808 | P03410 | P06756 | -0.29271  |
| 35809 | P03410 | Q8N807 | -0.69901  |
| 35810 | P03410 | O43837 | -0.1849   |
| 35811 | P03410 | Q96LR4 | -0.71003  |
| 35812 | P03410 | Q96AK3 | -0.46817  |
| 35813 | P03410 | P01737 | -0.23285  |
| 35814 | P03410 | Q13873 | -0.57625  |
| 35815 | P03410 | Q29980 | -0.68658  |
| 35816 | P03410 | Q6UW56 | -0.22511  |
| 35817 | P03410 | Q5TEU4 | -0.086333 |
| 35818 | P03410 | O76050 | -0.24993  |
| 35819 | P03410 | Q6YBV0 | -0.61113  |
| 35820 | P03410 | Q9Y4Z2 | -0.22843  |
| 35821 | P03410 | Q96CT2 | -0.19641  |
| 35822 | P03410 | Q9NYL2 | -0.33039  |
| 35823 | P03410 | Q9H9P8 | -0.58352  |
| 35824 | P03410 | Q5VXT5 | -0.753    |
| 35825 | P03410 | Q13686 | -0.30859  |
| 35826 | P03410 | O75973 | -0.77182  |
| 35827 | P03410 | Q9H3M0 | -0.85728  |
| 35828 | P03410 | O43557 | -0.61742  |
| 35829 | P03410 | Q6NTE8 | -0.12145  |
| 35830 | P03410 | Q96A23 | -0.22675  |
| 35831 | P03410 | Q92997 | -0.18124  |
| 35832 | P03410 | Q92506 | -0.25523  |
| 35833 | P03410 | Q9NQ9  | -0.42628  |
| 35834 | P03410 | Q8N3P4 | -0.21149  |
| 35835 | P03410 | Q9Y3Q3 | -0.2979   |
| 35836 | P03410 | Q9Y442 | -0.63308  |
| 35837 | P03410 | P49759 | -1.2508   |
| 35838 | P03410 | Q6IF82 | -1.153    |
| 35839 | P03410 | P55773 | -1.0516   |
| 35840 | P03410 | P10451 | -0.7622   |
| 35841 | P03410 | Q8N370 | -0.94559  |
| 35842 | P03410 | Q49A26 | -0.63947  |
| 35843 | P03410 | P02745 | -0.30204  |
| 35844 | P03410 | O43283 | -0.53613  |
| 35845 | P03410 | Q8NGY3 | -1.153    |
| 35846 | P03410 | P01258 | -0.53929  |
| 35847 | P03410 | B2RXH4 | -0.22703  |
| 35848 | P03410 | P55107 | -0.65197  |
| 35849 | P03410 | Q7Z5N4 | -0.87167  |
| 35850 | P03410 | Q53H12 | -0.83204  |
| 35851 | P03410 | Q6RI45 | -0.22865  |
| 35852 | P03410 | Q6PKH6 | -1.5956   |
| 35853 | P03410 | Q9Y286 | -1.0601   |
| 35854 | P03410 | Q8NFD2 | -1.3438   |
| 35855 | P03410 | Q9NV23 | -0.26387  |
| 35856 | P03410 | Q96N67 | -0.66062  |
| 35857 | P03410 | Q9H8X2 | -0.78814  |
| 35858 | P03410 | Q92625 | -0.22741  |
| 35859 | P03410 | Q9HDC9 | -0.60312  |
| 35860 | P03410 | B7Z8K6 | -0.63308  |
| 35861 | P03410 | Q8NC24 | -0.90517  |
| 35862 | P03410 | O95864 | -0.93571  |
| 35863 | P03410 | O60258 | -1.0009   |
| 35864 | P03410 | P27449 | -0.13076  |
| 35865 | P03410 | Q8WTQ7 | -1.4764   |
| 35866 | P03410 | Q9H720 | -0.62068  |
| 35867 | P03410 | Q9P2Q2 | -0.29473  |
| 35868 | P03410 | Q8IVF4 | -0.37486  |
| 35869 | P03410 | O15041 | -0.94056  |
| 35870 | P03410 | A2A2Y4 | -0.31118  |
| 35871 | P03410 | Q99988 | -0.75891  |
| 35872 | P03410 | O75366 | -0.15371  |

|       |        |        |            |
|-------|--------|--------|------------|
| 35873 | P03410 | Q7KZI7 | -1.0307    |
| 35874 | P03410 | O60942 | -0.5468    |
| 35875 | P03410 | Q9P003 | -0.58669   |
| 35876 | P03410 | Q9BQB6 | -0.96619   |
| 35877 | P03410 | P15260 | -1.0269    |
| 35878 | P03410 | Q15238 | -0.22782   |
| 35879 | P03410 | P58180 | -1.153     |
| 35880 | P03410 | Q5T4J0 | -0.53223   |
| 35881 | P03410 | Q96AQ8 | -0.45086   |
| 35882 | P03410 | Q96JQ5 | -0.63308   |
| 35883 | P03410 | Q8WWF6 | -0.17924   |
| 35884 | P03410 | Q7L576 | -0.040654  |
| 35885 | P03410 | Q9H069 | -0.22737   |
| 35886 | P03410 | O95936 | -0.53194   |
| 35887 | P03410 | Q8TAE7 | -0.36772   |
| 35888 | P03410 | A1L157 | -0.63308   |
| 35889 | P03410 | P02452 | -0.31347   |
| 35890 | P03410 | Q8N2S1 | -0.48147   |
| 35891 | P03410 | Q86SQ3 | -1.3278    |
| 35892 | P03410 | O60307 | -0.77594   |
| 35893 | P03410 | A6NMS7 | -0.63308   |
| 35894 | P03410 | Q96AP7 | -0.65864   |
| 35895 | P03410 | P54764 | -0.68945   |
| 35896 | P03410 | Q7RTM1 | -1.3303    |
| 35897 | P03410 | O75426 | -0.32013   |
| 35898 | P03410 | Q16842 | -0.68067   |
| 35899 | P03410 | P35626 | -1.3579    |
| 35900 | P03410 | Q9Y5H9 | -1.1668    |
| 35901 | P03410 | Q9C0K3 | -0.53172   |
| 35902 | P03410 | P43489 | -0.7328    |
| 35903 | P03410 | Q6UW63 | -0.17906   |
| 35904 | P03410 | P19622 | -0.22842   |
| 35905 | P03410 | P36959 | -0.48443   |
| 35906 | P03410 | A6NF34 | -0.71215   |
| 35907 | P03410 | Q96AC1 | -0.18788   |
| 35908 | P03410 | O43474 | -0.22239   |
| 35909 | P03410 | A8MYZ6 | -0.45144   |
| 35910 | P03410 | Q5TFQ8 | -0.63308   |
| 35911 | P03410 | Q9H7V2 | -0.72254   |
| 35912 | P03410 | Q9P283 | -1.01      |
| 35913 | P03410 | Q8TB36 | -0.32317   |
| 35914 | P03410 | Q9HCQ5 | -0.52058   |
| 35915 | P03410 | O43766 | -0.42482   |
| 35916 | P03410 | Q8N428 | -0.43648   |
| 35917 | P03410 | P61952 | -0.31635   |
| 35918 | P03410 | O75460 | -0.44924   |
| 35919 | P03410 | P58166 | -0.61967   |
| 35920 | P03410 | Q8WUA8 | -0.71003   |
| 35921 | P03410 | Q99728 | -0.22741   |
| 35922 | P03410 | Q86W92 | -0.39925   |
| 35923 | P03410 | A3KMH1 | -1.2219    |
| 35924 | P03410 | Q14954 | -0.86675   |
| 35925 | P03410 | Q9UKU0 | -1.0757    |
| 35926 | P03410 | Q96T54 | -1.0608    |
| 35927 | P03410 | Q6P9G0 | -0.16627   |
| 35928 | P03410 | Q6ZW05 | -0.60078   |
| 35929 | P03410 | P78382 | -0.40143   |
| 35930 | P03410 | O43247 | -0.0079947 |
| 35931 | P03410 | Q9H6R3 | -0.80403   |
| 35932 | P03410 | P43354 | -0.2409    |
| 35933 | P03410 | Q9NZ56 | -0.50522   |
| 35934 | P03410 | P46019 | -0.062797  |
| 35935 | P03410 | Q6UVM3 | -1.3229    |
| 35936 | P03410 | Q96DW6 | -0.43777   |
| 35937 | P03410 | Q6ZMN7 | -0.467     |
| 35938 | P03410 | Q13308 | -0.50426   |
| 35939 | P03410 | P13861 | -0.22741   |
| 35940 | P03410 | P14867 | -0.80907   |
| 35941 | P03410 | Q92886 | -0.22915   |
| 35942 | P03410 | Q8NG97 | -1.153     |
| 35943 | P03410 | O95170 | -0.23152   |
| 35944 | P03410 | Q9Y264 | -0.77186   |
| 35945 | P03410 | Q13670 | -0.30356   |
| 35946 | P03410 | Q5U5Z8 | -0.47359   |
| 35947 | P03410 | P51449 | -0.45127   |
| 35948 | P03410 | Q02223 | -1.2886    |

|       |        |        |           |
|-------|--------|--------|-----------|
| 35949 | P03410 | P32881 | -0.73299  |
| 35950 | P03410 | O75795 | -0.798    |
| 35951 | P03410 | P47872 | -1.415    |
| 35952 | P03410 | Q9UQ10 | -0.80586  |
| 35953 | P03410 | O75995 | -0.22734  |
| 35954 | P03410 | Q9UKR8 | -0.63308  |
| 35955 | P03410 | Q9H2X9 | -0.84958  |
| 35956 | P03410 | Q9BYW3 | -0.65332  |
| 35957 | P03410 | Q96PB7 | -0.68728  |
| 35958 | P03410 | O14686 | -0.34579  |
| 35959 | P03410 | Q6QHF9 | -0.47854  |
| 35960 | P03410 | O95361 | -0.27217  |
| 35961 | P03410 | P37268 | -0.95702  |
| 35962 | P03410 | O00329 | -0.57222  |
| 35963 | P03410 | Q5SQQ9 | -0.28579  |
| 35964 | P03410 | O77932 | -0.699    |
| 35965 | P03410 | P61626 | -0.8981   |
| 35966 | P03410 | Q13643 | -0.21982  |
| 35967 | P03410 | Q9UIX4 | -0.86305  |
| 35968 | P03410 | P16035 | -0.70177  |
| 35969 | P03410 | Q9H6L2 | -0.73951  |
| 35970 | P03410 | Q96PX1 | -0.22738  |
| 35971 | P03410 | P14222 | -0.44765  |
| 35972 | P03410 | Q8NFB4 | -0.21588  |
| 35973 | P03410 | P57735 | -0.46615  |
| 35974 | P03410 | O75521 | -0.75037  |
| 35975 | P03410 | P0CG01 | -0.71003  |
| 35976 | P03410 | Q99675 | -0.22652  |
| 35977 | P03410 | Q9H7X7 | -1.0723   |
| 35978 | P03410 | Q12860 | -0.29531  |
| 35979 | P03410 | O43295 | -1.0031   |
| 35980 | P03410 | A6NIK2 | -0.23224  |
| 35981 | P03410 | Q8NH08 | -1.153    |
| 35982 | P03410 | Q9BX97 | -0.47952  |
| 35983 | P03410 | Q9UN88 | -0.88242  |
| 35984 | P03410 | Q8TEC5 | -0.2274   |
| 35985 | P03410 | Q16698 | -0.19943  |
| 35986 | P03410 | Q02809 | -0.67256  |
| 35987 | P03410 | Q6P7N7 | -0.63308  |
| 35988 | P03410 | Q6UXB2 | -1.2093   |
| 35989 | P03410 | P51956 | -0.33036  |
| 35990 | P03410 | Q86U02 | -0.63308  |
| 35991 | P03410 | P31785 | -0.83079  |
| 35992 | P03410 | Q96PX8 | -0.73424  |
| 35993 | P03410 | O75038 | -0.54618  |
| 35994 | P03410 | A6NGH8 | -0.2274   |
| 35995 | P03410 | E5RJM6 | -0.22741  |
| 35996 | P03410 | P54578 | -0.62939  |
| 35997 | P03410 | Q9NZU1 | -1.1156   |
| 35998 | P03410 | Q14392 | -0.75235  |
| 35999 | P03410 | Q13523 | -0.74527  |
| 36000 | P03410 | Q6UXD7 | -0.67522  |
| 36001 | P03410 | Q6ZUQ5 | -0.43153  |
| 36002 | P03410 | Q9Y6N7 | -0.62599  |
| 36003 | P03410 | Q86YZ3 | -0.53481  |
| 36004 | P03410 | O75037 | -0.29284  |
| 36005 | P03410 | Q6UX52 | -0.71003  |
| 36006 | P03410 | P33763 | -0.24041  |
| 36007 | P03410 | Q16832 | -1.2813   |
| 36008 | P03410 | Q92527 | -0.22737  |
| 36009 | P03410 | P03956 | -1.1533   |
| 36010 | P03410 | P82279 | -1.2489   |
| 36011 | P03410 | Q499Y3 | -0.030564 |
| 36012 | P03410 | Q96A11 | -0.53828  |
| 36013 | P03410 | Q12950 | -0.49241  |
| 36014 | P03410 | P02760 | -0.66075  |
| 36015 | P03410 | Q6VVX0 | -0.73677  |
| 36016 | P03410 | Q8IYU2 | -0.22838  |
| 36017 | P03410 | O60229 | -1.117    |
| 36018 | P03410 | Q8N556 | -0.22366  |
| 36019 | P03410 | P27701 | -0.32344  |
| 36020 | P03410 | Q8TCJ2 | -0.71172  |
| 36021 | P03410 | O14578 | -0.95433  |
| 36022 | P03410 | Q02108 | -0.5816   |
| 36023 | P03410 | Q969H8 | -0.4971   |
| 36024 | P03410 | P55017 | -0.37721  |

|       |        |        |           |
|-------|--------|--------|-----------|
| 36025 | P03410 | P04085 | -0.31456  |
| 36026 | P03410 | Q8NE09 | -0.59152  |
| 36027 | P03410 | Q3T906 | -0.55619  |
| 36028 | P03410 | Q14050 | -0.81066  |
| 36029 | P03410 | Q4VNC0 | -1.0267   |
| 36030 | P03410 | Q16611 | -0.22715  |
| 36031 | P03410 | P36888 | -0.58032  |
| 36032 | P03410 | Q5TAH2 | -0.93528  |
| 36033 | P03410 | Q15485 | -1.1852   |
| 36034 | P03410 | Q13797 | -0.73306  |
| 36035 | P03410 | P22001 | -0.84078  |
| 36036 | P03410 | Q9NSI5 | -0.2274   |
| 36037 | P03410 | O60575 | -0.74696  |
| 36038 | P03410 | Q99453 | -0.22244  |
| 36039 | P03410 | A6NN92 | -0.70668  |
| 36040 | P03410 | Q8N4C8 | -0.6404   |
| 36041 | P03410 | Q86Y34 | -1.2876   |
| 36042 | P03410 | A0M8Q6 | -0.88633  |
| 36043 | P03410 | Q71DI3 | -0.57626  |
| 36044 | P03410 | Q9BWT3 | -0.48956  |
| 36045 | P03410 | Q9BZE0 | -0.22682  |
| 36046 | P03410 | O94907 | -0.42558  |
| 36047 | P03410 | A0AV02 | -0.85498  |
| 36048 | P03410 | Q53GG5 | -0.22741  |
| 36049 | P03410 | O00330 | -0.16717  |
| 36050 | P03410 | P32249 | -1.2066   |
| 36051 | P03410 | Q96Q07 | -0.24708  |
| 36052 | P03410 | Q6EMK4 | -1.2911   |
| 36053 | P03410 | Q9NXL9 | -0.55974  |
| 36054 | P03410 | P08842 | -0.55874  |
| 36055 | P03410 | Q9BPX6 | -0.23522  |
| 36056 | P03410 | O95935 | -0.44151  |
| 36057 | P03410 | Q8IVJ1 | -0.96881  |
| 36058 | P03410 | P16150 | -0.94256  |
| 36059 | P03410 | P10398 | -0.65969  |
| 36060 | P03410 | Q12999 | -0.75014  |
| 36061 | P03410 | P60891 | -0.64212  |
| 36062 | P03410 | Q6SJ93 | -0.20847  |
| 36063 | P03410 | Q9UHW5 | -0.72016  |
| 36064 | P03410 | Q8IZF2 | -1.2876   |
| 36065 | P03410 | Q9ULC8 | -0.73771  |
| 36066 | P03410 | P55160 | -0.2244   |
| 36067 | P03410 | Q9Y5I7 | -0.53352  |
| 36068 | P03410 | P33908 | -0.42934  |
| 36069 | P03410 | Q8TDY8 | -0.797    |
| 36070 | P03410 | Q8TAD2 | -0.80023  |
| 36071 | P03410 | Q4ZG55 | -0.63308  |
| 36072 | P03410 | Q14657 | -0.19036  |
| 36073 | P03410 | P01591 | -0.7291   |
| 36074 | P03410 | P29033 | -0.66853  |
| 36075 | P03410 | Q9UBP0 | -0.22856  |
| 36076 | P03410 | Q8NH83 | -1.153    |
| 36077 | P03410 | P0C7A2 | -0.34266  |
| 36078 | P03410 | A6NFZ4 | -0.71003  |
| 36079 | P03410 | Q9UQQ1 | -1.3248   |
| 36080 | P03410 | Q96M78 | -0.028221 |
| 36081 | P03410 | P63252 | -1.3777   |
| 36082 | P03410 | Q9P0S2 | -0.45693  |
| 36083 | P03410 | Q7Z7M0 | -0.22741  |
| 36084 | P03410 | O60683 | -0.22741  |
| 36085 | P03410 | Q8WYB5 | -0.51196  |
| 36086 | P03410 | Q96R09 | -1.153    |
| 36087 | P03410 | Q15413 | -0.59103  |
| 36088 | P03410 | Q49A17 | -0.58391  |
| 36089 | P03410 | Q8NDY8 | -0.63308  |
| 36090 | P03410 | Q0P6H9 | -0.63308  |
| 36091 | P03410 | P98155 | -0.81261  |
| 36092 | P03410 | P0C7U2 | -0.13638  |
| 36093 | P03410 | Q13509 | -0.39415  |
| 36094 | P03410 | Q8NG27 | -0.23685  |
| 36095 | P03410 | Q58EX2 | -0.87167  |
| 36096 | P03410 | P12429 | -0.30643  |
| 36097 | P03410 | Q9Y623 | -0.27014  |
| 36098 | P03410 | P59536 | -1.067    |
| 36099 | P03410 | Q9NRH2 | -1.2432   |
| 36100 | P03410 | Q08117 | -0.46955  |



|       |        |        |          |
|-------|--------|--------|----------|
| 36101 | P03410 | Q0GE19 | -0.82005 |
| 36102 | P03410 | O43143 | -0.55146 |
| 36103 | P03410 | P01911 | -0.61332 |
| 36104 | P03410 | Q8NGR8 | -1.153   |
| 36105 | P03410 | P35247 | -0.44408 |
| 36106 | P03410 | Q9NPH9 | -0.33278 |
| 36107 | P03410 | P24821 | -1.1638  |
| 36108 | P03410 | Q9NY99 | -0.22483 |
| 36109 | P03410 | P07602 | -0.90704 |
| 36110 | P03410 | Q9NY28 | -0.5184  |
| 36111 | P03410 | Q07954 | -0.39893 |
| 36112 | P03410 | Q96JB6 | -0.55395 |
| 36113 | P03410 | Q6ZUT3 | -0.51134 |
| 36114 | P03410 | Q9BX63 | -0.30238 |
| 36115 | P03410 | Q7Z2K8 | -0.52726 |
| 36116 | P03410 | Q9BQI4 | -0.67965 |
| 36117 | P03410 | Q9NPF9 | -0.99857 |
| 36118 | P03410 | P16190 | -0.74344 |
| 36119 | P03410 | P00846 | -0.39448 |
| 36120 | P03410 | O60906 | -0.71887 |
| 36121 | P03410 | Q8NGM1 | -1.153   |
| 36122 | P03410 | Q5VXU1 | -0.797   |
| 36123 | P03410 | Q9Y4E6 | -0.22753 |
| 36124 | P03410 | Q8WVX9 | -1.2751  |
| 36125 | P03410 | Q9NS98 | -1.0941  |
| 36126 | P03410 | Q9NZH8 | -0.6861  |
| 36127 | P03410 | Q96NZ9 | -0.71003 |
| 36128 | P03410 | Q01668 | -0.60761 |
| 36129 | P03410 | Q9NXZ2 | -1.0711  |
| 36130 | P03410 | Q9NZC9 | -0.48606 |
| 36131 | P03410 | Q8NH41 | -1.153   |
| 36132 | P03410 | Q13751 | -0.83952 |
| 36133 | P03410 | Q9GZN4 | -1.3874  |
| 36134 | P03410 | Q969V5 | -0.22738 |
| 36135 | P03410 | P51991 | -0.26592 |
| 36136 | P03410 | Q99500 | -1.2065  |
| 36137 | P03410 | Q9H0B8 | -0.83828 |
| 36138 | P03410 | Q94819 | -0.21407 |
| 36139 | P03410 | P08519 | -1.2294  |
| 36140 | P03410 | Q86VH5 | -0.63308 |
| 36141 | P03410 | O94941 | -0.2419  |
| 36142 | P03410 | C9JR72 | -0.20618 |
| 36143 | P03410 | Q2WGN9 | -0.22729 |
| 36144 | P03410 | Q9NQ79 | -0.88078 |
| 36145 | P03410 | P42345 | -0.36455 |
| 36146 | P03410 | Q9H227 | -0.22164 |
| 36147 | P03410 | Q30KQ2 | -0.69132 |
| 36148 | P03410 | Q6ZRR7 | -0.22729 |
| 36149 | P03410 | Q6PCB0 | -1.0135  |
| 36150 | P03410 | Q9HCL2 | -0.42838 |
| 36151 | P03410 | Q9HB31 | -0.3498  |
| 36152 | P03410 | P35916 | -0.74414 |
| 36153 | P03410 | Q8WYN0 | -0.35155 |
| 36154 | P03410 | Q8NH67 | -1.153   |
| 36155 | P03410 | Q7KZN9 | -0.62529 |
| 36156 | P03410 | Q96PL1 | -0.71003 |
| 36157 | P03410 | P49683 | -1.2262  |
| 36158 | P03410 | Q9NPF8 | -0.63118 |
| 36159 | P03410 | A6NM10 | -0.60778 |
| 36160 | P03410 | Q15614 | -1.153   |
| 36161 | P03410 | Q8N4A0 | -0.371   |
| 36162 | P03410 | Q9NVQ4 | -0.32577 |
| 36163 | P03410 | P53778 | -0.22741 |
| 36164 | P03410 | P07202 | -1.0219  |
| 36165 | P03410 | Q6NUN0 | -1.0751  |
| 36166 | P03410 | Q9P298 | -0.63308 |
| 36167 | P03410 | P55089 | -0.40427 |
| 36168 | P03410 | Q969S6 | -0.63308 |
| 36169 | P03410 | Q9H0A3 | -0.63308 |
| 36170 | P03410 | Q6ZSJ9 | -0.63308 |
| 36171 | P03410 | Q9H8L6 | -0.41786 |
| 36172 | P03410 | Q8N2R8 | -0.19547 |
| 36173 | P03410 | O75063 | -1.2281  |
| 36174 | P03410 | O00526 | -1.0602  |
| 36175 | P03410 | A6NED2 | -0.22026 |
| 36176 | P03410 | Q9P203 | -0.22305 |

|       |        |        |           |
|-------|--------|--------|-----------|
| 36177 | P03410 | P10114 | -0.42665  |
| 36178 | P03410 | Q8NCV1 | -0.44156  |
| 36179 | P03410 | Q71RS6 | -0.89422  |
| 36180 | P03410 | Q9BTF0 | -0.11665  |
| 36181 | P03410 | Q2VIQ3 | -0.34952  |
| 36182 | P03410 | Q8TDY4 | -0.30276  |
| 36183 | P03410 | O95235 | -0.27672  |
| 36184 | P03410 | P29353 | -0.22741  |
| 36185 | P03410 | Q9UEW8 | -0.82844  |
| 36186 | P03410 | P00533 | -0.39365  |
| 36187 | P03410 | Q7Z494 | -0.22706  |
| 36188 | P03410 | Q8N9F7 | -0.53799  |
| 36189 | P03410 | Q07092 | -0.56419  |
| 36190 | P03410 | P57059 | -0.6149   |
| 36191 | P03410 | Q9BYT3 | -1.0145   |
| 36192 | P03410 | A6NKG5 | -0.95161  |
| 36193 | P03410 | P10745 | -1.0722   |
| 36194 | P03410 | Q9GIY3 | -0.61332  |
| 36195 | P03410 | O75417 | -0.53045  |
| 36196 | P03410 | O75128 | -0.48683  |
| 36197 | P03410 | Q99490 | -0.96738  |
| 36198 | P03410 | Q8N687 | -0.69132  |
| 36199 | P03410 | Q4G0N8 | -1.1976   |
| 36200 | P03410 | Q5BXX8 | -0.099981 |
| 36201 | P03410 | Q16539 | -0.22741  |
| 36202 | P03410 | Q9NUQ8 | -0.82203  |
| 36203 | P03410 | C9JL84 | -0.71003  |
| 36204 | P03410 | Q9P265 | -0.21347  |
| 36205 | P03410 | Q9Y5K2 | -1.3739   |
| 36206 | P03410 | P09683 | -0.66902  |
| 36207 | P03410 | Q8TF62 | -1.0644   |
| 36208 | P03410 | Q08397 | -1.1537   |
| 36209 | P03410 | Q13576 | -0.72321  |
| 36210 | P03410 | O15321 | -0.85003  |
| 36211 | P03410 | Q9ULI3 | -0.93444  |
| 36212 | P03410 | P49327 | -0.59537  |
| 36213 | P03410 | A8MT33 | -0.22437  |
| 36214 | P03410 | Q02388 | -0.75179  |
| 36215 | P03410 | Q86UK7 | -0.39568  |
| 36216 | P03410 | Q96LD4 | -0.22734  |
| 36217 | P03410 | P14543 | -1.0241   |
| 36218 | P03410 | Q9Y6R4 | -0.53474  |
| 36219 | P03410 | Q9UNI6 | -0.45194  |
| 36220 | P03410 | Q68CQ1 | -0.63308  |
| 36221 | P03410 | Q9BXC9 | -0.073474 |
| 36222 | P03410 | Q02535 | -0.22307  |
| 36223 | P03410 | A8MTI9 | -1.8805   |
| 36224 | P03410 | Q13402 | -0.16435  |
| 36225 | P03410 | P14410 | -0.50007  |
| 36226 | P03410 | Q6ZWH5 | -1.4491   |
| 36227 | P03410 | Q96DR5 | -0.88082  |
| 36228 | P03410 | Q7Z3E5 | -0.22726  |
| 36229 | P03410 | Q7Z3S9 | -1.0119   |
| 36230 | P03410 | Q96A47 | -0.35266  |
| 36231 | P03410 | Q9HAQ2 | -0.3227   |
| 36232 | P03410 | Q96BQ1 | -0.58982  |
| 36233 | P03410 | P22676 | -0.22534  |
| 36234 | P03410 | Q8N431 | -0.52217  |
| 36235 | P03410 | Q14CB8 | -0.78257  |
| 36236 | P03410 | Q6H3X3 | -0.24601  |
| 36237 | P03410 | Q8NH90 | -1.153    |
| 36238 | P03410 | Q13478 | -1.0904   |
| 36239 | P03410 | P46734 | -0.22843  |
| 36240 | P03410 | Q9P2K8 | -1.0722   |
| 36241 | P03410 | Q96PY6 | -0.22741  |
| 36242 | P03410 | Q9P2D8 | -0.63308  |
| 36243 | P03410 | P48740 | -0.91919  |
| 36244 | P03410 | P54652 | -0.22132  |
| 36245 | P03410 | O60344 | -0.93941  |
| 36246 | P03410 | Q96MD7 | -0.18168  |
| 36247 | P03410 | Q13571 | -0.96228  |
| 36248 | P03410 | Q8WTV0 | -0.37409  |
| 36249 | P03410 | Q9H426 | -0.24344  |
| 36250 | P03410 | P16520 | -0.20961  |
| 36251 | P03410 | P54284 | -0.28025  |
| 36252 | P03410 | P01814 | -0.90565  |

|       |        |        |           |
|-------|--------|--------|-----------|
| 36253 | P03410 | P0C7L1 | -0.74696  |
| 36254 | P03410 | Q8NFJ5 | -1.2187   |
| 36255 | P03410 | P29973 | -1.433    |
| 36256 | P03410 | Q0VDD8 | -0.24646  |
| 36257 | P03410 | Q9Y6K0 | -0.54235  |
| 36258 | P03410 | Q8N8N7 | -0.75322  |
| 36259 | P03410 | Q8NEA9 | -0.21176  |
| 36260 | P03410 | Q9HBX8 | -1.1881   |
| 36261 | P03410 | O60313 | -0.49891  |
| 36262 | P03410 | Q8N608 | -0.84942  |
| 36263 | P03410 | Q9HBY0 | -0.76128  |
| 36264 | P03410 | Q8NC67 | -0.63308  |
| 36265 | P03410 | Q9Y225 | -0.45988  |
| 36266 | P03410 | A8MVG2 | -0.63308  |
| 36267 | P03410 | Q86XA0 | -0.633    |
| 36268 | P03410 | Q08477 | -0.99514  |
| 36269 | P03410 | Q86V86 | -0.4583   |
| 36270 | P03410 | Q02161 | -0.78247  |
| 36271 | P03410 | P20671 | -0.80275  |
| 36272 | P03410 | P25940 | -0.94462  |
| 36273 | P03410 | Q8NHS4 | -0.050068 |
| 36274 | P03410 | Q8NHP1 | -0.36396  |
| 36275 | P03410 | Q5VX71 | -0.63308  |
| 36276 | P03410 | O00230 | -0.76672  |
| 36277 | P03410 | P38435 | -0.77906  |
| 36278 | P03410 | P51813 | -1.0011   |
| 36279 | P03410 | O95665 | -1.3626   |
| 36280 | P03410 | Q9BV99 | -0.22737  |
| 36281 | P03410 | Q8N2A8 | -0.69133  |
| 36282 | P03410 | O95096 | -0.2365   |
| 36283 | P03410 | Q16795 | -0.075685 |
| 36284 | P03410 | O94972 | -0.22741  |
| 36285 | P03410 | A2A3K4 | -0.58808  |
| 36286 | P03410 | Q9BZ81 | -0.10645  |
| 36287 | P03410 | Q15645 | -0.22823  |
| 36288 | P03410 | Q9NVJ2 | -0.50259  |
| 36289 | P03410 | Q96EY8 | -0.63685  |
| 36290 | P03410 | Q8NGD0 | -1.153    |
| 36291 | P03410 | O75110 | -0.91253  |
| 36292 | P03410 | P15918 | -0.22686  |
| 36293 | P03410 | O94813 | -0.28922  |
| 36294 | P03410 | Q70EL2 | -0.77511  |
| 36295 | P03410 | Q9Y6W8 | -1.5683   |
| 36296 | P03410 | A6NIR3 | -0.97961  |
| 36297 | P03410 | Q9H6T3 | -0.22726  |
| 36298 | P03410 | O94885 | -0.22623  |
| 36299 | P03410 | Q9H0W5 | -0.23983  |
| 36300 | P03410 | P12532 | -0.98039  |
| 36301 | P03410 | Q16518 | -0.30226  |
| 36302 | P03410 | Q12967 | -0.49348  |
| 36303 | P03410 | Q8TDS7 | -1.2185   |
| 36304 | P03410 | P35542 | -0.65762  |
| 36305 | P03410 | Q8TD91 | -0.040449 |
| 36306 | P03410 | O75078 | -1.0077   |
| 36307 | P03410 | Q4VNC1 | -1.0267   |
| 36308 | P03410 | Q96AD5 | -0.69486  |
| 36309 | P03410 | Q6PML9 | -0.51219  |
| 36310 | P03410 | P00395 | -0.22056  |
| 36311 | P03410 | P49662 | -0.70903  |
| 36312 | P03410 | Q6XYQ8 | -0.87508  |
| 36313 | P03410 | P61647 | -0.47014  |
| 36314 | P03410 | Q13574 | -0.22741  |
| 36315 | P03410 | P35749 | -0.30875  |
| 36316 | P03410 | P49841 | -0.22774  |
| 36317 | P03410 | P32238 | -0.72801  |
| 36318 | P03410 | P07585 | -0.57112  |
| 36319 | P03410 | P39905 | -0.36209  |
| 36320 | P03410 | P0CAP1 | -0.16779  |
| 36321 | P03410 | Q13795 | -0.44707  |
| 36322 | P03410 | Q9NZU0 | -1.1156   |
| 36323 | P03410 | Q9H161 | -0.20526  |
| 36324 | P03410 | Q5JT82 | -0.219    |
| 36325 | P03410 | Q8IV63 | -0.73037  |
| 36326 | P03410 | Q6P5S7 | -0.56808  |
| 36327 | P03410 | P01588 | -0.2059   |
| 36328 | P03410 | P48029 | -0.87454  |

|       |        |        |          |
|-------|--------|--------|----------|
| 36329 | P03410 | Q5T2N8 | -0.85039 |
| 36330 | P03410 | Q96DU3 | -0.82187 |
| 36331 | P03410 | Q9Y388 | -0.67771 |
| 36332 | P03410 | Q16288 | -1.2577  |
| 36333 | P03410 | Q06418 | -0.88469 |
| 36334 | P03410 | P07996 | -0.29756 |
| 36335 | P03410 | P25713 | -0.16759 |
| 36336 | P03410 | Q96BH1 | -0.30221 |
| 36337 | P03410 | P31213 | -0.81171 |
| 36338 | P03410 | Q8TC99 | -0.23872 |
| 36339 | P03410 | Q92504 | -0.91255 |
| 36340 | P03410 | O75808 | -0.7772  |
| 36341 | P03410 | Q9H8X9 | -0.86764 |
| 36342 | P03410 | Q96T52 | -0.5866  |
| 36343 | P03410 | O95972 | -0.63892 |
| 36344 | P03410 | P01622 | -0.90565 |
| 36345 | P03410 | Q9NP99 | -1.4741  |
| 36346 | P03410 | Q96ET8 | -0.63308 |
| 36347 | P03410 | O60404 | -1.153   |
| 36348 | P03410 | Q9NS91 | -0.22743 |
| 36349 | P03410 | P59796 | -1.1629  |
| 36350 | P03410 | P83105 | -1.2792  |
| 36351 | P03410 | Q9NYW4 | -0.99189 |
| 36352 | P03410 | Q8IWX8 | -0.09827 |
| 36353 | P03410 | Q8NFK1 | -0.71789 |
| 36354 | P03410 | Q58FF6 | -0.53132 |
| 36355 | P03410 | Q9H339 | -1.153   |
| 36356 | P03410 | Q9UPI3 | -0.78499 |
| 36357 | P03410 | P15328 | -0.90587 |
| 36358 | P03410 | Q53HC5 | -0.19656 |
| 36359 | P03410 | Q6P1S2 | -0.5948  |
| 36360 | P03410 | Q96L94 | -0.23542 |
| 36361 | P03410 | Q9Y6C2 | -0.63358 |
| 36362 | P03410 | Q8WVS4 | -0.21751 |
| 36363 | P03410 | O95140 | -0.751   |
| 36364 | P03410 | P22607 | -0.37606 |
| 36365 | P03410 | Q9UF11 | -0.80255 |
| 36366 | P03410 | P04206 | -0.90565 |
| 36367 | P03410 | Q14767 | -0.90818 |
| 36368 | P03410 | P31512 | -1.0372  |
| 36369 | P03410 | P35544 | -0.22508 |
| 36370 | P03410 | Q8WXH4 | -0.3944  |
| 36371 | P03410 | P03951 | -0.86114 |
| 36372 | P03410 | O43868 | -0.94425 |
| 36373 | P03410 | Q8IVL5 | -0.47545 |
| 36374 | P03410 | Q9GZN6 | -0.79442 |
| 36375 | P03410 | P07358 | -0.85741 |
| 36376 | P03410 | Q7RTY7 | -1.4101  |
| 36377 | P03410 | O14745 | -0.55913 |
| 36378 | P03410 | Q969Y2 | -0.73905 |
| 36379 | P03410 | O15240 | -0.7338  |
| 36380 | P03410 | Q9NW64 | -0.8618  |
| 36381 | P03410 | P51878 | -0.71494 |
| 36382 | P03410 | P13747 | -1.0228  |
| 36383 | P03410 | O75364 | -0.15544 |
| 36384 | P03410 | Q9NXA8 | -0.27937 |
| 36385 | P03410 | Q8NA97 | -0.1579  |
| 36386 | P03410 | P52848 | -0.3516  |
| 36387 | P03410 | Q13905 | -0.22731 |
| 36388 | P03410 | P00387 | -0.33675 |
| 36389 | P03410 | O43808 | -0.26779 |
| 36390 | P03410 | Q9C040 | -0.22742 |
| 36391 | P03410 | Q9BYE9 | -0.33251 |
| 36392 | P03410 | Q14012 | -0.58012 |
| 36393 | P03410 | Q69YG0 | -0.63308 |
| 36394 | P03410 | P59044 | -0.26895 |
| 36395 | P03410 | Q9WJR5 | -0.26043 |
| 36396 | P03410 | Q16763 | -0.50798 |
| 36397 | P03410 | Q01726 | -0.64558 |
| 36398 | P03410 | Q96IQ9 | -0.22731 |
| 36399 | P03410 | Q9BWD1 | -0.1827  |
| 36400 | P03410 | Q9BZL6 | -0.38637 |
| 36401 | P03410 | Q29963 | -0.88938 |
| 36402 | P03410 | Q96RA2 | -0.83193 |
| 36403 | P03410 | P01614 | -0.90565 |
| 36404 | P03410 | Q96N66 | -0.30893 |

|       |        |        |          |
|-------|--------|--------|----------|
| 36405 | P03410 | P0DJ7  | -1.2183  |
| 36406 | P03410 | Q9BQF6 | -0.702   |
| 36407 | P03410 | Q6GPI1 | -1.4584  |
| 36408 | P03410 | P55786 | -0.4607  |
| 36409 | P03410 | P14314 | -0.36168 |
| 36410 | P03410 | Q13103 | -0.67375 |
| 36411 | P03410 | Q3SY17 | -0.46336 |
| 36412 | P03410 | P62942 | -0.23015 |
| 36413 | P03410 | Q9BYN0 | -0.76672 |
| 36414 | P03410 | Q8TF65 | -0.22469 |
| 36415 | P03410 | A6NH57 | -1.269   |
| 36416 | P03410 | Q8N7Z5 | -0.22741 |
| 36417 | P03410 | P02814 | -0.86878 |
| 36418 | P03410 | P51828 | -0.99133 |
| 36419 | P03410 | A6NCK2 | -0.39568 |
| 36420 | P03410 | P17844 | -0.73674 |
| 36421 | P03410 | Q9H9Y4 | -0.84348 |
| 36422 | P03410 | Q9C0J1 | -0.45595 |
| 36423 | P03410 | Q13938 | -0.22022 |
| 36424 | P03410 | P30519 | -0.22705 |
| 36425 | P03410 | Q02962 | -0.22729 |
| 36426 | P03410 | P62070 | -0.69458 |
| 36427 | P03410 | P14210 | -0.37202 |
| 36428 | P03410 | Q7Z572 | -0.22594 |
| 36429 | P03410 | P17735 | -0.20823 |
| 36430 | P03410 | Q8NHH9 | -0.41001 |
| 36431 | P03410 | Q8N3A8 | -0.41801 |
| 36432 | P03410 | Q5SY16 | -0.67272 |
| 36433 | P03410 | Q16473 | -0.22741 |
| 36434 | P03410 | Q32M45 | -0.73004 |
| 36435 | P03410 | P61011 | -0.45129 |
| 36436 | P03410 | Q8WUX1 | -0.92112 |
| 36437 | P03410 | P60323 | -0.29935 |
| 36438 | P03410 | O15054 | -0.35885 |
| 36439 | P03410 | Q9NTI2 | -1.0554  |
| 36440 | P03410 | Q6L9W6 | -0.54608 |
| 36441 | P03410 | Q5W0U4 | -0.2679  |
| 36442 | P03410 | Q16849 | -0.8235  |
| 36443 | P03410 | Q5TCS8 | -0.85808 |
| 36444 | P03410 | Q8NGA1 | -1.153   |
| 36445 | P03410 | P13796 | -0.25704 |
| 36446 | P03410 | P31645 | -0.28977 |
| 36447 | P03410 | Q9H346 | -1.153   |
| 36448 | P03410 | Q6UX15 | -0.69298 |
| 36449 | P03410 | O95807 | -0.43615 |
| 36450 | P03410 | P01825 | -0.90565 |
| 36451 | P03410 | P11712 | -0.61077 |
| 36452 | P03410 | Q7Z419 | -0.3057  |
| 36453 | P03410 | Q8N0V4 | -0.71003 |
| 36454 | P03410 | P40199 | -0.22753 |
| 36455 | P03410 | Q96RR4 | -1.1914  |
| 36456 | P03410 | P17948 | -0.63686 |
| 36457 | P03410 | P42696 | -0.3163  |
| 36458 | P03410 | O75951 | -0.71769 |
| 36459 | P03410 | Q8N146 | -1.153   |
| 36460 | P03410 | Q9NWM8 | -0.23063 |
| 36461 | P03410 | Q92908 | -0.22737 |
| 36462 | P03410 | Q2MV58 | -0.65328 |
| 36463 | P03410 | P29218 | -0.17484 |
| 36464 | P03410 | Q15434 | -0.4816  |
| 36465 | P03410 | Q9Y5H4 | -1.0719  |
| 36466 | P03410 | Q2TBA0 | -0.20551 |
| 36467 | P03410 | Q9H4Q3 | -0.22703 |
| 36468 | P03410 | Q8N8V4 | -0.22742 |
| 36469 | P03410 | P16473 | -0.68648 |
| 36470 | P03410 | Q8NHM5 | -0.22632 |
| 36471 | P03410 | Q8WXS8 | -1.3392  |
| 36472 | P03410 | O60882 | -0.96005 |
| 36473 | P03410 | A1L1A6 | -0.63308 |
| 36474 | P03410 | P58550 | -0.82315 |
| 36475 | P03410 | Q9P0B6 | -0.63308 |
| 36476 | P03410 | Q5FYB1 | -0.72483 |
| 36477 | P03410 | Q9NZM3 | -0.47704 |
| 36478 | P03410 | O75888 | -0.5406  |
| 36479 | P03410 | Q9NPH6 | -0.69011 |
| 36480 | P03410 | Q8N127 | -1.153   |

|       |        |        |           |
|-------|--------|--------|-----------|
| 36481 | P03410 | Q5VV67 | -0.22656  |
| 36482 | P03410 | Q05315 | -0.45856  |
| 36483 | P03410 | Q9ULH1 | -0.45319  |
| 36484 | P03410 | P13686 | -0.43935  |
| 36485 | P03410 | Q5HYJ1 | -0.80495  |
| 36486 | P03410 | A4D2P6 | -0.22735  |
| 36487 | P03410 | P01031 | -0.73552  |
| 36488 | P03410 | Q9Y458 | -0.53194  |
| 36489 | P03410 | Q9NZP5 | -1.153    |
| 36490 | P03410 | Q96KN3 | -0.51321  |
| 36491 | P03410 | P0C7N1 | -1.153    |
| 36492 | P03410 | Q9P2K9 | -0.44495  |
| 36493 | P03410 | Q9H5Y7 | -0.73424  |
| 36494 | P03410 | P43235 | -0.68382  |
| 36495 | P03410 | P27037 | -0.47033  |
| 36496 | P03410 | Q9TNN7 | -0.88938  |
| 36497 | P03410 | Q13203 | -0.45944  |
| 36498 | P03410 | P11717 | -0.22315  |
| 36499 | P03410 | P40617 | -0.22793  |
| 36500 | P03410 | Q96MC6 | -0.80607  |
| 36501 | P03410 | Q96P68 | -1.1683   |
| 36502 | P03410 | P55318 | -0.67453  |
| 36503 | P03410 | Q8WVV4 | -0.21433  |
| 36504 | P03410 | P0C1S8 | -0.69293  |
| 36505 | P03410 | P50281 | -0.40973  |
| 36506 | P03410 | Q9UIM3 | -0.22551  |
| 36507 | P03410 | Q5TZF3 | -0.22741  |
| 36508 | P03410 | Q9NS67 | -1.2185   |
| 36509 | P03410 | Q02978 | -0.36243  |
| 36510 | P03410 | Q16513 | -0.21686  |
| 36511 | P03410 | Q9ULZ9 | -1.5597   |
| 36512 | P03410 | Q8NGC8 | -1.153    |
| 36513 | P03410 | Q6E213 | -0.82725  |
| 36514 | P03410 | Q8N884 | -0.1416   |
| 36515 | P03410 | P30492 | -0.88938  |
| 36516 | P03410 | Q6UXG8 | -0.63308  |
| 36517 | P03410 | Q99878 | -0.80275  |
| 36518 | P03410 | Q86XP0 | -0.36198  |
| 36519 | P03410 | P58876 | -0.80275  |
| 36520 | P03410 | Q8NFP9 | -0.22741  |
| 36521 | P03410 | O60741 | -1.3113   |
| 36522 | P03410 | Q9Y5Y6 | -1.8671   |
| 36523 | P03410 | Q9BQ24 | -0.099023 |
| 36524 | P03410 | Q13546 | -0.22741  |
| 36525 | P03410 | Q8NCL4 | -0.45903  |
| 36526 | P03410 | Q14416 | -1.2421   |
| 36527 | P03410 | Q9H3S1 | -0.99525  |
| 36528 | P03410 | Q6ZS10 | -0.69858  |
| 36529 | P03410 | Q9H330 | -0.65846  |
| 36530 | P03410 | Q13423 | -0.85409  |
| 36531 | P03410 | Q1KMD3 | -0.22388  |
| 36532 | P03410 | Q92882 | -0.4402   |
| 36533 | P03410 | Q03721 | -0.82268  |
| 36534 | P03410 | Q96JQ2 | -0.44051  |
| 36535 | P03410 | Q9Y4E8 | -0.58662  |
| 36536 | P03410 | Q8NGA0 | -1.153    |
| 36537 | P03410 | Q96PD6 | -0.75639  |
| 36538 | P03410 | Q8IX05 | -0.6402   |
| 36539 | P03410 | P03891 | -0.57055  |
| 36540 | P03410 | Q9NWZ3 | -0.22724  |
| 36541 | P03410 | P29376 | -1.7186   |
| 36542 | P03410 | Q96SE0 | -0.60747  |
| 36543 | P03410 | Q08629 | -0.8993   |
| 36544 | P03410 | Q8N4T8 | -0.24528  |
| 36545 | P03410 | P29122 | -1.0066   |
| 36546 | P03410 | Q9Y6R0 | -0.2262   |
| 36547 | P03410 | Q9ULI2 | -0.93234  |
| 36548 | P03410 | Q9HCM3 | -0.63308  |
| 36549 | P03410 | Q95470 | -0.30077  |
| 36550 | P03410 | Q02742 | -0.53378  |
| 36551 | P03410 | P50458 | -0.2274   |
| 36552 | P03410 | Q8IZK6 | -0.82315  |
| 36553 | P03410 | Q86W24 | -1.2768   |
| 36554 | P03410 | P01135 | -0.28146  |
| 36555 | P03410 | Q14390 | -0.024374 |
| 36556 | P03410 | Q9NSC7 | -0.53328  |

|       |        |        |           |
|-------|--------|--------|-----------|
| 36557 | P03410 | Q96J42 | -0.68593  |
| 36558 | P03410 | O95436 | -0.82772  |
| 36559 | P03410 | P24311 | -0.38011  |
| 36560 | P03410 | O95256 | -1.0943   |
| 36561 | P03410 | Q15080 | -0.53904  |
| 36562 | P03410 | Q86YV0 | -0.24837  |
| 36563 | P03410 | Q9NPC1 | -1.3843   |
| 36564 | P03410 | P98088 | -0.98867  |
| 36565 | P03410 | P32119 | -0.31713  |
| 36566 | P03410 | Q9NQC3 | -0.13148  |
| 36567 | P03410 | O95832 | -0.57523  |
| 36568 | P03410 | P25054 | -0.22661  |
| 36569 | P03410 | O60499 | -0.15794  |
| 36570 | P03410 | Q9Y575 | -0.3944   |
| 36571 | P03410 | O60774 | -0.98675  |
| 36572 | P03410 | O95450 | -1.3542   |
| 36573 | P03410 | P22570 | -0.13904  |
| 36574 | P03410 | Q9NZT1 | -0.31844  |
| 36575 | P03410 | P51674 | -0.81607  |
| 36576 | P03410 | Q12879 | -0.32551  |
| 36577 | P03410 | Q15169 | -0.31688  |
| 36578 | P03410 | Q6PXP3 | -0.62305  |
| 36579 | P03410 | Q9H9S3 | -0.64489  |
| 36580 | P03410 | Q14943 | -0.97797  |
| 36581 | P03410 | P47900 | -0.86434  |
| 36582 | P03410 | O94762 | -0.22607  |
| 36583 | P03410 | Q9NX61 | -0.62015  |
| 36584 | P03410 | Q75751 | -0.38254  |
| 36585 | P03410 | Q99612 | -0.22413  |
| 36586 | P03410 | Q5T1S8 | -0.8878   |
| 36587 | P03410 | Q5NUL3 | -1.0994   |
| 36588 | P03410 | Q8N4M1 | -0.73205  |
| 36589 | P03410 | Q9NP55 | -0.84792  |
| 36590 | P03410 | P52907 | -0.28268  |
| 36591 | P03410 | Q96NI6 | -0.63308  |
| 36592 | P03410 | A8K2U0 | -0.81169  |
| 36593 | P03410 | Q86WK9 | -1.2895   |
| 36594 | P03410 | Q969X1 | -0.66908  |
| 36595 | P03410 | Q9Y3E2 | -0.52019  |
| 36596 | P03410 | Q008S8 | -0.38845  |
| 36597 | P03410 | Q9Y259 | -0.88129  |
| 36598 | P03410 | Q9Y5Y0 | -0.38104  |
| 36599 | P03410 | O00294 | -0.19196  |
| 36600 | P03410 | P61020 | -0.45759  |
| 36601 | P03410 | Q8WWZ7 | -0.92594  |
| 36602 | P03410 | O15342 | -0.53821  |
| 36603 | P03410 | P55285 | -0.54596  |
| 36604 | P03410 | Q9ULS5 | -0.63308  |
| 36605 | P03410 | O75602 | -0.22743  |
| 36606 | P03410 | O95528 | -0.38917  |
| 36607 | P03410 | Q16181 | -0.22158  |
| 36608 | P03410 | Q14802 | -0.98455  |
| 36609 | P03410 | Q2QD12 | -0.20917  |
| 36610 | P03410 | Q99640 | -0.22741  |
| 36611 | P03410 | Q8N446 | -0.37766  |
| 36612 | P03410 | O14544 | -0.22702  |
| 36613 | P03410 | A0AVI4 | -0.61257  |
| 36614 | P03410 | Q8IYA7 | -0.2717   |
| 36615 | P03410 | O95389 | -0.87368  |
| 36616 | P03410 | P57764 | -0.13051  |
| 36617 | P03410 | Q9NRG7 | -0.62576  |
| 36618 | P03410 | P15151 | -0.272    |
| 36619 | P03410 | P28223 | -0.71552  |
| 36620 | P03410 | Q75173 | -0.94708  |
| 36621 | P03410 | Q9Y6N1 | -0.52251  |
| 36622 | P03410 | Q86UP0 | -0.90597  |
| 36623 | P03410 | Q86VS3 | -0.21145  |
| 36624 | P03410 | Q8NGU2 | -1.153    |
| 36625 | P03410 | Q9BXI9 | -1.0064   |
| 36626 | P03410 | Q8IWA4 | -0.96775  |
| 36627 | P03410 | Q3B8N2 | -0.039962 |
| 36628 | P03410 | P01706 | -0.90565  |
| 36629 | P03410 | P33981 | -1.016    |
| 36630 | P03410 | P40616 | -0.67006  |
| 36631 | P03410 | Q03001 | -0.22861  |
| 36632 | P03410 | Q9Y5G7 | -1.0719   |

|       |        |        |           |
|-------|--------|--------|-----------|
| 36633 | P03410 | Q8NHP6 | -0.53892  |
| 36634 | P03410 | P57073 | -0.60713  |
| 36635 | P03410 | P06126 | -0.41685  |
| 36636 | P03410 | Q75508 | -0.73442  |
| 36637 | P03410 | P0C7X4 | -0.26744  |
| 36638 | P03410 | Q658N2 | -0.6838   |
| 36639 | P03410 | Q8NGI6 | -1.153    |
| 36640 | P03410 | Q3SYB3 | -0.49241  |
| 36641 | P03410 | P62330 | -0.39728  |
| 36642 | P03410 | Q8WZ42 | -0.44005  |
| 36643 | P03410 | P20839 | -0.5339   |
| 36644 | P03410 | Q8NF37 | -0.51664  |
| 36645 | P03410 | Q5SY80 | -0.63308  |
| 36646 | P03410 | P04216 | -0.12774  |
| 36647 | P03410 | Q8WW52 | -0.65846  |
| 36648 | P03410 | Q17RB8 | -0.378    |
| 36649 | P03410 | Q5T9L3 | -0.25911  |
| 36650 | P03410 | P54793 | -0.75265  |
| 36651 | P03410 | P02462 | -0.50864  |
| 36652 | P03410 | P36575 | -0.73648  |
| 36653 | P03410 | Q9C0D9 | -0.88985  |
| 36654 | P03410 | Q96J84 | -0.56397  |
| 36655 | P03410 | Q5TEJ8 | -0.31291  |
| 36656 | P03410 | Q14511 | -1.3606   |
| 36657 | P03410 | O60939 | -0.74984  |
| 36658 | P03410 | P32241 | -0.9225   |
| 36659 | P03410 | Q969M1 | -0.36137  |
| 36660 | P03410 | Q86WI1 | -0.65586  |
| 36661 | P03410 | P07948 | -0.23817  |
| 36662 | P03410 | P49763 | -1.0123   |
| 36663 | P03410 | Q13489 | -0.2274   |
| 36664 | P03410 | Q92623 | -0.19629  |
| 36665 | P03410 | A6NC57 | -0.2274   |
| 36666 | P03410 | Q99735 | -0.71624  |
| 36667 | P03410 | P11055 | -0.2397   |
| 36668 | P03410 | Q8NH59 | -1.153    |
| 36669 | P03410 | Q9UII4 | -0.53009  |
| 36670 | P03410 | P21583 | -0.46072  |
| 36671 | P03410 | P17655 | -0.27397  |
| 36672 | P03410 | Q8NEX9 | -0.68613  |
| 36673 | P03410 | P48146 | -0.58475  |
| 36674 | P03410 | Q5T7M4 | -0.78354  |
| 36675 | P03410 | Q96S90 | -0.02113  |
| 36676 | P03410 | Q14993 | -1.3994   |
| 36677 | P03410 | A6NJY1 | -0.71156  |
| 36678 | P03410 | Q96R27 | -1.153    |
| 36679 | P03410 | Q86U37 | -0.039847 |
| 36680 | P03410 | Q9H694 | -0.46676  |
| 36681 | P03410 | Q96D59 | -0.73225  |
| 36682 | P03410 | Q7RTU7 | -0.23655  |
| 36683 | P03410 | Q9Y467 | -0.22749  |
| 36684 | P03410 | A8MTL0 | -0.19209  |
| 36685 | P03410 | Q9Y217 | -0.20805  |
| 36686 | P03410 | O15554 | -0.32186  |
| 36687 | P03410 | P10720 | -0.75937  |
| 36688 | P03410 | Q9BY71 | -0.22781  |
| 36689 | P03410 | Q8NGU9 | -1.2185   |
| 36690 | P03410 | Q13061 | -0.66494  |
| 36691 | P03410 | Q6P4F7 | -1.0031   |
| 36692 | P03410 | Q13151 | -0.31116  |
| 36693 | P03410 | O00409 | -0.46463  |
| 36694 | P03410 | Q15208 | -0.58716  |
| 36695 | P03410 | P04075 | -0.42592  |
| 36696 | P03410 | P29373 | -0.19332  |
| 36697 | P03410 | Q5SRD3 | -0.97961  |
| 36698 | P03410 | Q15052 | -0.39032  |
| 36699 | P03410 | Q8NE63 | -1.2451   |
| 36700 | P03410 | P08123 | -0.48863  |
| 36701 | P03410 | Q9UHX3 | -1.3877   |
| 36702 | P03410 | Q9P2J9 | -0.14796  |
| 36703 | P03410 | Q86YQ2 | -0.88082  |
| 36704 | P03410 | Q8N139 | -1.2534   |
| 36705 | P03410 | Q9Y666 | -1.0556   |
| 36706 | P03410 | Q9NYW2 | -1.0339   |
| 36707 | P03410 | Q15915 | -0.49008  |
| 36708 | P03410 | P29017 | -0.91548  |



|       |        |        |           |
|-------|--------|--------|-----------|
| 36709 | P03410 | Q9Y584 | -0.2122   |
| 36710 | P03410 | Q16558 | -0.99744  |
| 36711 | P03410 | Q9ULR3 | -0.16138  |
| 36712 | P03410 | Q96SJ8 | -0.63308  |
| 36713 | P03410 | Q3KRB8 | -1.0031   |
| 36714 | P03410 | Q15345 | -0.13883  |
| 36715 | P03410 | Q9Y5I4 | -1.1668   |
| 36716 | P03410 | P56199 | -0.40067  |
| 36717 | P03410 | Q9Y6M4 | -1.3732   |
| 36718 | P03410 | P78348 | -0.63366  |
| 36719 | P03410 | Q9NR12 | -0.24087  |
| 36720 | P03410 | Q9Y235 | -0.43001  |
| 36721 | P03410 | Q7RTS6 | -0.63308  |
| 36722 | P03410 | A8MTQ0 | -0.22739  |
| 36723 | P03410 | Q9UHK6 | -0.30934  |
| 36724 | P03410 | P07384 | -0.24094  |
| 36725 | P03410 | Q6PJ21 | -0.3944   |
| 36726 | P03410 | Q6NT32 | -0.63741  |
| 36727 | P03410 | O14966 | -0.96733  |
| 36728 | P03410 | Q08AH3 | -0.86442  |
| 36729 | P03410 | Q95980 | -0.35808  |
| 36730 | P03410 | P78356 | -0.65562  |
| 36731 | P03410 | Q9Y680 | -0.31928  |
| 36732 | P03410 | Q8IWU5 | -0.3492   |
| 36733 | P03410 | O14792 | -0.45479  |
| 36734 | P03410 | Q6UWF7 | -0.71003  |
| 36735 | P03410 | Q96FV0 | -0.22701  |
| 36736 | P03410 | O00754 | -0.38815  |
| 36737 | P03410 | Q9NYZ4 | -0.41815  |
| 36738 | P03410 | P01702 | -0.90565  |
| 36739 | P03410 | A6NFU0 | -0.63308  |
| 36740 | P03410 | Q9Y274 | -0.41239  |
| 36741 | P03410 | Q9NQC1 | -0.23055  |
| 36742 | P03410 | Q96GW7 | -0.95895  |
| 36743 | P03410 | Q9NR71 | -0.60529  |
| 36744 | P03410 | P01589 | -0.55567  |
| 36745 | P03410 | O94979 | -0.5117   |
| 36746 | P03410 | Q9GZU1 | -0.82553  |
| 36747 | P03410 | Q9H2W1 | -0.63308  |
| 36748 | P03410 | Q63HN8 | -1.0715   |
| 36749 | P03410 | O43613 | -1.3123   |
| 36750 | P03410 | Q7Z6W7 | -0.21821  |
| 36751 | P03410 | O95833 | -0.20026  |
| 36752 | P03410 | Q07011 | -0.77733  |
| 36753 | P03410 | P07093 | -0.429    |
| 36754 | P03410 | P59773 | -0.63308  |
| 36755 | P03410 | Q9UBQ7 | -0.8764   |
| 36756 | P03410 | P09544 | -0.52421  |
| 36757 | P03410 | O95477 | -0.45566  |
| 36758 | P03410 | Q5T2D3 | -0.047851 |
| 36759 | P03410 | Q8WU08 | -1.4156   |
| 36760 | P03410 | P24530 | -0.81722  |
| 36761 | P03410 | Q13948 | -0.33268  |
| 36762 | P03410 | Q14703 | -0.84769  |
| 36763 | P03410 | P01621 | -0.90565  |
| 36764 | P03410 | P06127 | -0.44076  |
| 36765 | P03410 | Q6UXK5 | -0.63308  |
| 36766 | P03410 | Q71RH2 | -0.59468  |
| 36767 | P03410 | Q9Y653 | -1.6482   |
| 36768 | P03410 | Q9H1Y3 | -1.0856   |
| 36769 | P03410 | Q96RB7 | -1.153    |
| 36770 | P03410 | Q9P0G3 | -1.254    |
| 36771 | P03410 | O14950 | -0.22578  |
| 36772 | P03410 | Q75976 | -0.82083  |
| 36773 | P03410 | Q8NEP3 | -0.22739  |
| 36774 | P03410 | Q6P1J6 | -0.74814  |
| 36775 | P03410 | Q9NPB9 | -1.3622   |
| 36776 | P03410 | Q8IUF1 | -0.66861  |
| 36777 | P03410 | Q7Z4J2 | -0.60659  |
| 36778 | P03410 | Q9NZI2 | -0.53509  |
| 36779 | P03410 | Q92598 | -0.53121  |
| 36780 | P03410 | P62253 | -0.78554  |
| 36781 | P03410 | P46089 | -1.3529   |
| 36782 | P03410 | P46952 | -0.32446  |
| 36783 | P03410 | Q99759 | -0.74087  |
| 36784 | P03410 | Q16828 | -0.27733  |

|       |        |        |           |
|-------|--------|--------|-----------|
| 36785 | P03410 | Q86YT6 | -0.22733  |
| 36786 | P03410 | Q58FF8 | -0.53132  |
| 36787 | P03410 | A8MUK1 | -0.51062  |
| 36788 | P03410 | P06576 | -0.21151  |
| 36789 | P03410 | P47901 | -1.0183   |
| 36790 | P03410 | Q75746 | -0.33799  |
| 36791 | P03410 | Q8NGB8 | -1.153    |
| 36792 | P03410 | Q9UGV2 | -0.27287  |
| 36793 | P03410 | Q9H479 | -0.46352  |
| 36794 | P03410 | Q8NGN0 | -1.153    |
| 36795 | P03410 | O00469 | -0.69345  |
| 36796 | P03410 | Q15526 | -0.52515  |
| 36797 | P03410 | Q9NYV9 | -1.0339   |
| 36798 | P03410 | Q8N144 | -0.49864  |
| 36799 | P03410 | Q9BYE0 | -0.22589  |
| 36800 | P03410 | Q10469 | -0.59093  |
| 36801 | P03410 | Q8NHV1 | -0.86337  |
| 36802 | P03410 | Q92913 | -0.35514  |
| 36803 | P03410 | P57773 | -0.76864  |
| 36804 | P03410 | Q9C009 | -0.43196  |
| 36805 | P03410 | Q96BI1 | -0.65883  |
| 36806 | P03410 | Q9UPZ9 | -1.2564   |
| 36807 | P03410 | Q693B1 | -0.065532 |
| 36808 | P03410 | Q9H1N7 | -0.25317  |
| 36809 | P03410 | Q9P2M4 | -1.256    |
| 36810 | P03410 | Q8N2U9 | -0.63308  |
| 36811 | P03410 | Q13201 | -0.86937  |
| 36812 | P03410 | Q9HC29 | -0.22722  |
| 36813 | P03410 | P01816 | -0.90565  |
| 36814 | P03410 | Q7Z3J3 | -0.21115  |
| 36815 | P03410 | O43827 | -1.0485   |
| 36816 | P03410 | Q08493 | -0.42039  |
| 36817 | P03410 | Q9Y4F1 | -0.23842  |
| 36818 | P03410 | P0C7U3 | -0.86764  |
| 36819 | P03410 | A6NL26 | -1.153    |
| 36820 | P03410 | Q9NSN8 | -0.2246   |
| 36821 | P03410 | O95758 | -0.62162  |
| 36822 | P03410 | Q8WY64 | -0.22743  |
| 36823 | P03410 | O43194 | -1.4127   |
| 36824 | P03410 | P61599 | -0.17003  |
| 36825 | P03410 | Q9Y4E5 | -0.22449  |
| 36826 | P03410 | Q16557 | -0.71259  |
| 36827 | P03410 | Q9Y574 | -0.26441  |
| 36828 | P03410 | P01286 | -0.4831   |
| 36829 | P03410 | Q6UXY8 | -0.63308  |
| 36830 | P03410 | Q6HA08 | -0.75476  |
| 36831 | P03410 | P23378 | -0.47689  |
| 36832 | P03410 | Q13685 | -0.57877  |
| 36833 | P03410 | Q8NGF7 | -1.153    |
| 36834 | P03410 | A6NKD2 | -0.5628   |
| 36835 | P03410 | P78333 | -1.2128   |
| 36836 | P03410 | Q9UII6 | -0.77216  |
| 36837 | P03410 | Q8NDL9 | -0.29559  |
| 36838 | P03410 | Q9GZX6 | -0.71842  |
| 36839 | P03410 | B2RC85 | -0.086392 |
| 36840 | P03410 | Q5VWJ9 | -0.21805  |
| 36841 | P03410 | Q8IZJ1 | -0.41213  |
| 36842 | P03410 | Q15078 | -0.099903 |
| 36843 | P03410 | Q8NGW6 | -1.153    |
| 36844 | P03410 | Q99467 | -0.80688  |
| 36845 | P03410 | P49748 | -0.31393  |
| 36846 | P03410 | Q7Z5U6 | -0.22767  |
| 36847 | P03410 | Q9H9B4 | -0.64564  |
| 36848 | P03410 | Q86SG7 | -0.70261  |
| 36849 | P03410 | A6NF89 | -1.153    |
| 36850 | P03410 | Q8N3Z0 | -0.74873  |
| 36851 | P03410 | O00767 | -1.0145   |
| 36852 | P03410 | Q86TZ1 | -0.22736  |
| 36853 | P03410 | P15421 | -0.99952  |
| 36854 | P03410 | Q9ULB5 | -1.0468   |
| 36855 | P03410 | Q9UBK8 | -0.3024   |
| 36856 | P03410 | Q09327 | -0.50088  |
| 36857 | P03410 | P06310 | -0.90565  |
| 36858 | P03410 | Q68DC2 | -0.22748  |
| 36859 | P03410 | P28907 | -0.63765  |
| 36860 | P03410 | Q8WZ75 | -0.9542   |

|       |        |        |           |
|-------|--------|--------|-----------|
| 36861 | P03410 | P21333 | -0.22864  |
| 36862 | P03410 | Q5R3K3 | -0.63308  |
| 36863 | P03410 | P01778 | -0.90565  |
| 36864 | P03410 | Q86UW8 | -1.0389   |
| 36865 | P03410 | P35790 | -0.92825  |
| 36866 | P03410 | O95741 | -0.23373  |
| 36867 | P03410 | Q9Y5X9 | -0.82113  |
| 36868 | P03410 | A6NEE1 | -0.1464   |
| 36869 | P03410 | Q9UH62 | -0.45275  |
| 36870 | P03410 | P19105 | -0.22567  |
| 36871 | P03410 | Q8NGR1 | -1.153    |
| 36872 | P03410 | Q9Y572 | -0.28574  |
| 36873 | P03410 | P42694 | -0.52521  |
| 36874 | P03410 | Q7Z4V0 | -0.2274   |
| 36875 | P03410 | P09326 | -0.47838  |
| 36876 | P03410 | P49023 | -0.1373   |
| 36877 | P03410 | Q8NGA4 | -1.2453   |
| 36878 | P03410 | Q8IUH4 | -0.76642  |
| 36879 | P03410 | Q5VYV0 | -0.82744  |
| 36880 | P03410 | Q9P0P0 | -0.49304  |
| 36881 | P03410 | Q96BD6 | -0.031977 |
| 36882 | P03410 | Q9UBX7 | -1.2405   |
| 36883 | P03410 | Q0VAA5 | -0.59937  |
| 36884 | P03410 | Q8NBU5 | -0.63298  |
| 36885 | P03410 | P01815 | -0.90565  |
| 36886 | P03410 | P42331 | -1.0747   |
| 36887 | P03410 | Q99895 | -0.79769  |
| 36888 | P03410 | Q9UJJ9 | -0.55157  |
| 36889 | P03410 | Q8TC57 | -0.69826  |
| 36890 | P03410 | Q9NS00 | -0.99297  |
| 36891 | P03410 | Q6VB85 | -0.49241  |
| 36892 | P03410 | O15229 | -0.5794   |
| 36893 | P03410 | A8MXU0 | -0.69132  |
| 36894 | P03410 | Q6ZNF0 | -0.75402  |
| 36895 | P03410 | P09488 | -0.21793  |
| 36896 | P03410 | Q01453 | -0.24737  |
| 36897 | P03410 | Q5VU65 | -0.63308  |
| 36898 | P03410 | Q9BXB1 | -0.89773  |
| 36899 | P03410 | Q8N9L9 | -0.25567  |
| 36900 | P03410 | Q00722 | -0.50639  |
| 36901 | P03410 | Q00872 | -0.50358  |
| 36902 | P03410 | P32302 | -1.2884   |
| 36903 | P03410 | Q9C0C4 | -0.79281  |
| 36904 | P03410 | Q12802 | -0.22733  |
| 36905 | P03410 | Q8NGQ1 | -1.153    |
| 36906 | P03410 | Q14156 | -0.46445  |
| 36907 | P03410 | Q8IVW6 | -0.19973  |
| 36908 | P03410 | Q8NBJ5 | -0.21108  |
| 36909 | P03410 | Q8NGS6 | -1.153    |
| 36910 | P03410 | Q9NW15 | -0.9244   |
| 36911 | P03410 | P05067 | -0.26395  |
| 36912 | P03410 | Q6UWM7 | -0.69831  |
| 36913 | P03410 | Q6P461 | -1.1483   |
| 36914 | P03410 | Q5BVD1 | -0.7715   |
| 36915 | P03410 | Q9UMX5 | -0.8025   |
| 36916 | P03410 | O15016 | -0.2273   |
| 36917 | P03410 | Q9Y277 | -1.0311   |
| 36918 | P03410 | P20594 | -1.3758   |
| 36919 | P03410 | P31025 | -0.98742  |
| 36920 | P03410 | Q9NPJ1 | -0.13481  |
| 36921 | P03410 | Q6ZMG9 | -0.25661  |
| 36922 | P03410 | Q9H930 | -0.22692  |
| 36923 | P03410 | P41273 | -0.94041  |
| 36924 | P03410 | P11274 | -0.91262  |
| 36925 | P03410 | Q76KP1 | -0.54608  |
| 36926 | P03410 | Q495C1 | -0.15328  |
| 36927 | P03410 | Q86Y13 | -0.23273  |
| 36928 | P03410 | O14562 | -0.12143  |
| 36929 | P03410 | Q9Y5G8 | -1.0719   |
| 36930 | P03410 | Q9Y223 | -0.86954  |
| 36931 | P03410 | P40227 | -0.33335  |
| 36932 | P03410 | Q96MT1 | -0.73225  |
| 36933 | P03410 | Q02643 | -0.34618  |
| 36934 | P03410 | P30101 | -0.27165  |
| 36935 | P03410 | P14061 | -0.66544  |
| 36936 | P03410 | Q8NH73 | -1.153    |

|       |        |        |           |
|-------|--------|--------|-----------|
| 36937 | P03410 | Q9Y450 | -0.71425  |
| 36938 | P03410 | P42229 | -0.22571  |
| 36939 | P03410 | P13688 | -0.80722  |
| 36940 | P03410 | Q15439 | -1.1697   |
| 36941 | P03410 | O75596 | -0.82355  |
| 36942 | P03410 | Q9P2E2 | -0.24673  |
| 36943 | P03410 | P20941 | -0.095097 |
| 36944 | P03410 | P47881 | -1.153    |
| 36945 | P03410 | Q96C36 | -0.71109  |
| 36946 | P03410 | Q16584 | -0.22741  |
| 36947 | P03410 | P80748 | -0.90565  |
| 36948 | P03410 | Q12870 | -0.22837  |
| 36949 | P03410 | O75072 | -0.25935  |
| 36950 | P03410 | Q6ZRR5 | -0.63308  |
| 36951 | P03410 | P61964 | -0.63116  |
| 36952 | P03410 | Q4V9L6 | -0.61257  |
| 36953 | P03410 | P50225 | -0.32559  |
| 36954 | P03410 | Q99943 | -0.62071  |
| 36955 | P03410 | Q86TI2 | -0.34856  |
| 36956 | P03410 | Q9Y2K2 | -0.7629   |
| 36957 | P03410 | Q8N653 | -0.22711  |
| 36958 | P03410 | Q9H2J1 | -0.18728  |
| 36959 | P03410 | O75469 | -0.24549  |
| 36960 | P03410 | P35219 | -0.13613  |
| 36961 | P03410 | P50213 | -0.038683 |
| 36962 | P03410 | P35716 | -0.28003  |
| 36963 | P03410 | Q8N2F6 | -0.61005  |
| 36964 | P03410 | O60512 | -0.33862  |
| 36965 | P03410 | Q7Z2K6 | -1.2354   |
| 36966 | P03410 | P43080 | -0.45119  |
| 36967 | P03410 | Q99757 | -0.25617  |
| 36968 | P03410 | Q02747 | -0.82452  |
| 36969 | P03410 | Q8IWW8 | -0.19824  |
| 36970 | P03410 | Q9H2S9 | -0.31287  |
| 36971 | P03410 | P58513 | -0.24272  |
| 36972 | P03410 | Q16671 | -1.5959   |
| 36973 | P03410 | Q9NX57 | -0.71703  |
| 36974 | P03410 | P32247 | -1.1192   |
| 36975 | P03410 | Q9P126 | -0.44168  |
| 36976 | P03410 | Q9P0S3 | -0.74586  |
| 36977 | P03410 | Q9UJ70 | -0.29947  |
| 36978 | P03410 | P28329 | -0.17408  |
| 36979 | P03410 | O60393 | -0.22402  |
| 36980 | P03410 | Q2M5E4 | -0.59152  |
| 36981 | P03410 | Q8WWX8 | -0.85684  |
| 36982 | P03410 | Q71U36 | -0.17418  |
| 36983 | P03410 | P40879 | -0.52283  |
| 36984 | P03410 | Q5W0N0 | -0.63308  |
| 36985 | P03410 | P18054 | -0.21211  |
| 36986 | P03410 | Q8N100 | -0.22979  |
| 36987 | P03410 | P05015 | -0.71743  |
| 36988 | P03410 | Q9H6S3 | -0.22741  |
| 36989 | P03410 | Q02763 | -0.51699  |
| 36990 | P03410 | P10588 | -0.23355  |
| 36991 | P03410 | Q99674 | -0.89424  |
| 36992 | P03410 | O60218 | -0.45697  |
| 36993 | P03410 | Q7RTP6 | -0.31163  |
| 36994 | P03410 | Q9BUF7 | -0.64335  |
| 36995 | P03410 | Q96JC1 | -0.1611   |
| 36996 | P03410 | Q9H2Z4 | -0.51159  |
| 36997 | P03410 | Q9BPV8 | -1.128    |
| 36998 | P03410 | Q96DZ5 | -0.80914  |
| 36999 | P03410 | P19793 | -0.23836  |
| 37000 | P03410 | P49760 | -0.77702  |
| 37001 | P03410 | P14770 | -1.0376   |
| 37002 | P03410 | O95759 | -1.2921   |
| 37003 | P03410 | Q2TAA8 | -0.53497  |
| 37004 | P03410 | Q6DRA6 | -0.80275  |
| 37005 | P03410 | P11217 | -0.47496  |
| 37006 | P03410 | P51671 | -0.86915  |
| 37007 | P03410 | Q96AX2 | -0.8213   |
| 37008 | P03410 | P31270 | -0.19661  |
| 37009 | P03410 | P02655 | -0.54803  |
| 37010 | P03410 | Q14002 | -0.7925   |
| 37011 | P03410 | Q9BXC0 | -1.1648   |
| 37012 | P03410 | Q32MK0 | -0.93849  |

|       |        |        |           |
|-------|--------|--------|-----------|
| 37013 | P03410 | O00429 | -0.79568  |
| 37014 | P03410 | O95428 | -1.207    |
| 37015 | P03410 | Q8NAT1 | -0.85129  |
| 37016 | P03410 | Q7L0R7 | -0.2342   |
| 37017 | P03410 | O95071 | -0.229    |
| 37018 | P03410 | Q8IZF5 | -1.2876   |
| 37019 | P03410 | P30480 | -0.88938  |
| 37020 | P03410 | Q9H0X9 | -0.93648  |
| 37021 | P03410 | P42679 | -0.7762   |
| 37022 | P03410 | Q07699 | -0.84768  |
| 37023 | P03410 | Q7M4L6 | -0.2274   |
| 37024 | P03410 | Q9Y5R6 | -0.22876  |
| 37025 | P03410 | Q9BR39 | -0.27364  |
| 37026 | P03410 | P52961 | -0.5224   |
| 37027 | P03410 | Q9NUB1 | -0.27761  |
| 37028 | P03410 | Q8IZ83 | -0.45576  |
| 37029 | P03410 | A6NER0 | -1.3577   |
| 37030 | P03410 | P38567 | -0.50804  |
| 37031 | P03410 | P10809 | -0.13167  |
| 37032 | P03410 | Q99788 | -0.85222  |
| 37033 | P03410 | P38484 | -0.94574  |
| 37034 | P03410 | Q96A46 | -0.6556   |
| 37035 | P03410 | A6NKC9 | -0.22741  |
| 37036 | P03410 | Q5JTD7 | -0.20563  |
| 37037 | P03410 | O43251 | -0.31201  |
| 37038 | P03410 | P63096 | -0.42894  |
| 37039 | P03410 | P28161 | -0.2243   |
| 37040 | P03410 | P78314 | -0.22727  |
| 37041 | P03410 | P14653 | -0.22874  |
| 37042 | P03410 | Q8NG68 | -0.69782  |
| 37043 | P03410 | Q5M775 | -0.22749  |
| 37044 | P03410 | Q86YW0 | -0.35954  |
| 37045 | P03410 | P21796 | -0.073814 |
| 37046 | P03410 | Q9NP31 | -0.69948  |
| 37047 | P03410 | Q96PQ0 | -0.63866  |
| 37048 | P03410 | P04275 | -0.22738  |
| 37049 | P03410 | P33151 | -0.55708  |
| 37050 | P03410 | P51841 | -1.4576   |
| 37051 | P03410 | P29475 | -0.22768  |
| 37052 | P03410 | P19022 | -0.55487  |
| 37053 | P03410 | Q641Q3 | -0.71003  |
| 37054 | P03410 | Q9H221 | -0.71449  |
| 37055 | P03410 | Q9Y619 | -0.44562  |
| 37056 | P03410 | Q02325 | -0.71003  |
| 37057 | P03410 | Q4KWH8 | -0.30447  |
| 37058 | P03410 | Q92771 | -0.56194  |
| 37059 | P03410 | Q8NDF8 | -0.17001  |
| 37060 | P03410 | O95857 | -0.83693  |
| 37061 | P03410 | P06309 | -0.90565  |
| 37062 | P03410 | Q96R72 | -1.153    |
| 37063 | P03410 | Q8TCU3 | -0.6768   |
| 37064 | P03410 | P25103 | -0.74969  |
| 37065 | P03410 | P55287 | -1.1091   |
| 37066 | P03410 | P04436 | -0.30149  |
| 37067 | P03410 | P12814 | -0.35353  |
| 37068 | P03410 | P48729 | -0.22741  |
| 37069 | P03410 | Q95047 | -1.153    |
| 37070 | P03410 | Q8N4E4 | -0.16261  |
| 37071 | P03410 | P51843 | -0.2272   |
| 37072 | P03410 | A6NFE2 | -0.63308  |
| 37073 | P03410 | Q68D06 | -0.88002  |
| 37074 | P03410 | Q5VUR7 | -0.22739  |
| 37075 | P03410 | Q6P4A8 | -0.71325  |
| 37076 | P03410 | Q9UN75 | -1.0719   |
| 37077 | P03410 | E7EU14 | -0.21864  |
| 37078 | P03410 | Q8NHB1 | -1.153    |
| 37079 | P03410 | P11487 | -0.39498  |
| 37080 | P03410 | P62195 | -0.60332  |
| 37081 | P03410 | P04433 | -0.90565  |
| 37082 | P03410 | P20592 | -0.3682   |
| 37083 | P03410 | P55081 | -0.85502  |
| 37084 | P03410 | Q6ZU64 | -0.45107  |
| 37085 | P03410 | Q8TDN1 | -0.85728  |
| 37086 | P03410 | Q96PU8 | -0.19912  |
| 37087 | P03410 | P30487 | -0.88938  |
| 37088 | P03410 | Q9P104 | -0.15837  |

|       |        |        |            |
|-------|--------|--------|------------|
| 37089 | P03410 | Q13936 | -0.29091   |
| 37090 | P03410 | Q86WR6 | -0.0011615 |
| 37091 | P03410 | O60292 | -0.81959   |
| 37092 | P03410 | P42785 | -0.25001   |
| 37093 | P03410 | Q96K76 | -0.67544   |
| 37094 | P03410 | A8MWK0 | -1.0263    |
| 37095 | P03410 | P07686 | -0.29187   |
| 37096 | P03410 | P56975 | -1.3428    |
| 37097 | P03410 | O95409 | -0.48187   |
| 37098 | P03410 | Q8IX01 | -0.08148   |
| 37099 | P03410 | Q8NGL7 | -1.153     |
| 37100 | P03410 | Q8NGJ5 | -1.153     |
| 37101 | P03410 | Q6NUS6 | -0.40552   |
| 37102 | P03410 | Q9NQZ7 | -0.65683   |
| 37103 | P03410 | Q3B8N5 | -0.18705   |
| 37104 | P03410 | Q8NGL0 | -1.153     |
| 37105 | P03410 | Q6ZQN5 | -0.75716   |
| 37106 | P03410 | Q8IZS8 | -0.86288   |
| 37107 | P03410 | P39060 | -0.45967   |
| 37108 | P03410 | Q9NQ86 | -0.44827   |
| 37109 | P03410 | Q7Z553 | -0.35818   |
| 37110 | P03410 | Q0IIM8 | -1.3852    |
| 37111 | P03410 | O60547 | -0.72713   |
| 37112 | P03410 | Q9NQF3 | -0.21543   |
| 37113 | P03410 | Q9H845 | -0.53353   |
| 37114 | P03410 | Q29865 | -0.88938   |
| 37115 | P03410 | P06133 | -0.82752   |
| 37116 | P03410 | Q9BW83 | -0.9967    |
| 37117 | P03410 | Q9Y600 | -0.31354   |
| 37118 | P03410 | P19883 | -0.22387   |
| 37119 | P03410 | Q96R28 | -1.153     |
| 37120 | P03410 | O15529 | -1.4027    |
| 37121 | P03410 | P08151 | -0.22717   |
| 37122 | P03410 | Q9UK80 | -0.62935   |
| 37123 | P03410 | Q8WXR4 | -0.96532   |
| 37124 | P03410 | Q9P0V8 | -0.65799   |
| 37125 | P03410 | Q9UQ72 | -0.71618   |
| 37126 | P03410 | P56746 | -0.48903   |
| 37127 | P03410 | P56597 | -0.60277   |
| 37128 | P03410 | Q99946 | -0.6515    |
| 37129 | P03410 | P11150 | -0.76319   |
| 37130 | P03410 | Q96HP0 | -0.053658  |
| 37131 | P03410 | Q8WUU4 | -0.22123   |
| 37132 | P03410 | Q7Z4I7 | -0.1844    |
| 37133 | P03410 | P41180 | -0.74543   |
| 37134 | P03410 | P03905 | -0.56566   |
| 37135 | P03410 | O43164 | -0.32515   |
| 37136 | P03410 | Q8TBF8 | -0.11417   |
| 37137 | P03410 | P01703 | -0.90565   |
| 37138 | P03410 | P31152 | -0.82231   |
| 37139 | P03410 | Q15772 | -1.1837    |
| 37140 | P03410 | P30520 | -0.86172   |
| 37141 | P03410 | Q13126 | -0.075546  |
| 37142 | P03410 | A1KZ92 | -1.0166    |
| 37143 | P03410 | Q70EL4 | -0.66744   |
| 37144 | P03410 | Q8NGX1 | -1.153     |
| 37145 | P03410 | Q8WXF3 | -0.64151   |
| 37146 | P03410 | Q8NGI9 | -1.153     |
| 37147 | P03410 | Q6IE36 | -0.82964   |
| 37148 | P03410 | Q14527 | -0.21804   |
| 37149 | P03410 | P48751 | -1.0246    |
| 37150 | P03410 | Q9NP58 | -0.85184   |
| 37151 | P03410 | Q8IWQ3 | -0.91886   |
| 37152 | P03410 | O15195 | -0.12881   |
| 37153 | P03410 | Q9Y673 | -0.76841   |
| 37154 | P03410 | Q9BXN1 | -0.89688   |
| 37155 | P03410 | P35556 | -0.83166   |
| 37156 | P03410 | Q99571 | -0.50447   |
| 37157 | P03410 | P22455 | -1.0322    |
| 37158 | P03410 | O43707 | -0.38935   |
| 37159 | P03410 | Q8J025 | -0.9607    |
| 37160 | P03410 | Q4VX76 | -0.51159   |
| 37161 | P03410 | O15524 | -0.22739   |
| 37162 | P03410 | Q8WXX4 | -0.3944    |
| 37163 | P03410 | P78410 | -0.67584   |
| 37164 | P03410 | O60494 | -0.22743   |

|       |        |        |           |
|-------|--------|--------|-----------|
| 37165 | P03410 | Q9H4G1 | -0.8833   |
| 37166 | P03410 | Q6NUM6 | -1.0081   |
| 37167 | P03410 | Q8N628 | -1.153    |
| 37168 | P03410 | P55072 | -0.24461  |
| 37169 | P03410 | P05451 | -0.58512  |
| 37170 | P03410 | Q5VV16 | -0.49241  |
| 37171 | P03410 | Q9H8H2 | -0.52105  |
| 37172 | P03410 | Q9NYL4 | -0.76517  |
| 37173 | P03410 | Q5EG05 | -0.43     |
| 37174 | P03410 | P55290 | -0.55582  |
| 37175 | P03410 | Q12952 | -0.69079  |
| 37176 | P03410 | P08174 | -0.97035  |
| 37177 | P03410 | Q86UD3 | -1.1894   |
| 37178 | P03410 | Q9H853 | -0.27238  |
| 37179 | P03410 | Q8NGL9 | -1.153    |
| 37180 | P03410 | P20231 | -1.3874   |
| 37181 | P03410 | Q92563 | -0.92391  |
| 37182 | P03410 | Q9H8M5 | -0.80982  |
| 37183 | P03410 | Q15262 | -0.64262  |
| 37184 | P03410 | Q5RI15 | -0.46903  |
| 37185 | P03410 | Q00574 | -1.2254   |
| 37186 | P03410 | Q8IY34 | -0.69425  |
| 37187 | P03410 | P42857 | -0.081784 |
| 37188 | P03410 | Q12899 | -0.44104  |
| 37189 | P03410 | Q9BYF1 | -0.96704  |
| 37190 | P03410 | Q8TDU5 | -1.1586   |
| 37191 | P03410 | Q8N6Y2 | -0.74565  |
| 37192 | P03410 | P56180 | -1.4093   |
| 37193 | P03410 | P13945 | -0.48805  |
| 37194 | P03410 | P16871 | -0.84358  |
| 37195 | P03410 | P26718 | -0.49307  |
| 37196 | P03410 | Q6DKI2 | -0.039962 |
| 37197 | P03410 | Q5JU00 | -0.22694  |
| 37198 | P03410 | Q08881 | -0.65097  |
| 37199 | P03410 | Q13563 | -0.27857  |
| 37200 | P03410 | Q9Y5W9 | -0.18104  |
| 37201 | P03410 | P80188 | -0.35403  |
| 37202 | P03410 | Q9BYJ1 | -0.44156  |
| 37203 | P03410 | Q13263 | -0.22762  |
| 37204 | P03410 | Q8IYS1 | -0.10158  |
| 37205 | P03410 | Q9GZT6 | -0.45086  |
| 37206 | P03410 | Q8TAK6 | -0.22745  |
| 37207 | P03410 | Q00391 | -1.2051   |
| 37208 | P03410 | P15144 | -0.99567  |
| 37209 | P03410 | P43632 | -0.99952  |
| 37210 | P03410 | Q15391 | -0.20943  |
| 37211 | P03410 | P50336 | -0.5496   |
| 37212 | P03410 | Q14626 | -1.0959   |
| 37213 | P03410 | B5MCN3 | -0.75378  |
| 37214 | P03410 | Q9BVG3 | -0.39568  |
| 37215 | P03410 | Q96CE8 | -0.63308  |
| 37216 | P03410 | Q92915 | -0.38043  |
| 37217 | P03410 | Q5W186 | -0.8833   |
| 37218 | P03410 | Q38SD2 | -1.5562   |
| 37219 | P03410 | P06319 | -0.90565  |
| 37220 | P03410 | P16233 | -0.79605  |
| 37221 | P03410 | Q9UIV8 | -0.51954  |
| 37222 | P03410 | Q86UW2 | -0.65544  |
| 37223 | P03410 | P20849 | -0.69064  |
| 37224 | P03410 | Q5VZP5 | -0.39756  |
| 37225 | P03410 | P16260 | -0.43585  |
| 37226 | P03410 | P58658 | -0.63321  |
| 37227 | P03410 | P16066 | -1.1627   |
| 37228 | P03410 | Q9H156 | -0.73424  |
| 37229 | P03410 | Q9BPY8 | -0.21476  |
| 37230 | P03410 | Q96NZ1 | -0.86351  |
| 37231 | P03410 | Q8TBY0 | -0.67771  |
| 37232 | P03410 | Q9H2C1 | -0.2272   |
| 37233 | P03410 | Q9BZM2 | -0.79957  |
| 37234 | P03410 | Q03405 | -0.81999  |
| 37235 | P03410 | P56559 | -0.45411  |
| 37236 | P03410 | Q13275 | -0.96922  |
| 37237 | P03410 | P0DJD4 | -0.5168   |
| 37238 | P03410 | Q9BWW8 | -0.79635  |
| 37239 | P03410 | Q96MN5 | -0.20245  |
| 37240 | P03410 | Q99075 | -1.1713   |

|       |        |        |           |
|-------|--------|--------|-----------|
| 37241 | P03410 | P08493 | -0.96221  |
| 37242 | P03410 | Q8NA82 | -0.49304  |
| 37243 | P03410 | Q9GZW8 | -0.63308  |
| 37244 | P03410 | P05091 | -0.41646  |
| 37245 | P03410 | Q96T66 | -0.37727  |
| 37246 | P03410 | P01600 | -0.90565  |
| 37247 | P03410 | Q13886 | -0.21995  |
| 37248 | P03410 | P61371 | -0.22763  |
| 37249 | P03410 | Q9NQH7 | -0.49098  |
| 37250 | P03410 | Q7L622 | -0.49302  |
| 37251 | P03410 | A2VCL2 | -0.17666  |
| 37252 | P03410 | Q8IWU4 | -0.56021  |
| 37253 | P03410 | Q8NDX6 | -0.20598  |
| 37254 | P03410 | Q9NYQ3 | -0.30285  |
| 37255 | P03410 | O95944 | -1.1582   |
| 37256 | P03410 | Q6UXP3 | -0.63308  |
| 37257 | P03410 | Q96RV3 | -0.63308  |
| 37258 | P03410 | O43426 | -0.38182  |
| 37259 | P03410 | Q96LB2 | -1.1689   |
| 37260 | P03410 | P26374 | -0.53934  |
| 37261 | P03410 | O43824 | -0.86337  |
| 37262 | P03410 | P51151 | -0.35159  |
| 37263 | P03410 | P17516 | -0.22691  |
| 37264 | P03410 | Q13237 | -1.2326   |
| 37265 | P03410 | Q8TEY7 | -0.40086  |
| 37266 | P03410 | Q9UBX1 | -0.87487  |
| 37267 | P03410 | A6NHN0 | -0.81484  |
| 37268 | P03410 | P46063 | -0.22547  |
| 37269 | P03410 | P59537 | -1.132    |
| 37270 | P03410 | P43631 | -0.86675  |
| 37271 | P03410 | Q9NVP2 | -0.40687  |
| 37272 | P03410 | Q96I15 | -0.25042  |
| 37273 | P03410 | Q9BUA6 | -0.22693  |
| 37274 | P03410 | P07437 | -0.1232   |
| 37275 | P03410 | Q9P0J1 | -0.070716 |
| 37276 | P03410 | P20853 | -0.83248  |
| 37277 | P03410 | Q95460 | -1.3653   |
| 37278 | P03410 | P08603 | -0.80421  |
| 37279 | P03410 | Q6ZRX8 | -0.048234 |
| 37280 | P03410 | Q5JR12 | -0.16913  |
| 37281 | P03410 | Q9Y2U5 | -0.84448  |
| 37282 | P03410 | Q9UKP3 | -0.47698  |
| 37283 | P03410 | P30613 | -0.51304  |
| 37284 | P03410 | Q8WXE0 | -0.22746  |
| 37285 | P03410 | Q86TG1 | -0.77947  |
| 37286 | P03410 | Q6UWF6 | -0.71003  |
| 37287 | P03410 | Q8NEV4 | -0.8208   |
| 37288 | P03410 | Q9HD67 | -0.43497  |
| 37289 | P03410 | O60500 | -0.51704  |
| 37290 | P03410 | Q02750 | -0.22767  |
| 37291 | P03410 | P63267 | -0.35729  |
| 37292 | P03410 | P13637 | -0.65041  |
| 37293 | P03410 | Q8N302 | -0.47893  |
| 37294 | P03410 | Q8TB22 | -1.3385   |
| 37295 | P03410 | P21730 | -1.1953   |
| 37296 | P03410 | P21439 | -1.1543   |
| 37297 | P03410 | Q6H9L7 | -0.31507  |
| 37298 | P03410 | P41279 | -0.59399  |
| 37299 | P03410 | P56179 | -0.22442  |
| 37300 | P03410 | Q9NSB8 | -0.22114  |
| 37301 | P03410 | Q8N461 | -0.2112   |
| 37302 | P03410 | P35368 | -0.87009  |
| 37303 | P03410 | Q13349 | -0.94111  |
| 37304 | P03410 | Q9HCJ2 | -0.22765  |
| 37305 | P03410 | O14977 | -0.082869 |
| 37306 | P03410 | P32314 | -0.74927  |
| 37307 | P03410 | O43435 | -0.53194  |
| 37308 | P03410 | P07237 | -0.34294  |
| 37309 | P03410 | Q8NI36 | -0.22794  |
| 37310 | P03410 | P49418 | -0.22738  |
| 37311 | P03410 | Q8N0Y3 | -1.153    |
| 37312 | P03410 | P46663 | -0.98711  |
| 37313 | P03410 | Q06033 | -0.72413  |
| 37314 | P03410 | O00217 | -0.39484  |
| 37315 | P03410 | P40189 | -0.48144  |
| 37316 | P03410 | Q3LXA3 | -0.96248  |



|       |        |        |           |
|-------|--------|--------|-----------|
| 37317 | P03410 | Q00688 | -0.22994  |
| 37318 | P03410 | Q9NYY1 | -0.7836   |
| 37319 | P03410 | Q99574 | -0.64969  |
| 37320 | P03410 | P18510 | -0.35586  |
| 37321 | P03410 | Q13613 | -0.35886  |
| 37322 | P03410 | Q9H343 | -1.153    |
| 37323 | P03410 | Q53H96 | -0.86438  |
| 37324 | P03410 | Q13724 | -0.74201  |
| 37325 | P03410 | Q9P212 | -0.22741  |
| 37326 | P03410 | Q9BQ75 | -0.22443  |
| 37327 | P03410 | Q13705 | -0.55908  |
| 37328 | P03410 | Q5VYX0 | -1.0218   |
| 37329 | P03410 | P07998 | -0.070605 |
| 37330 | P03410 | Q92570 | -0.24436  |
| 37331 | P03410 | Q3C1V0 | -0.63308  |
| 37332 | P03410 | P17174 | -0.17095  |
| 37333 | P03410 | Q6UXS9 | -0.22264  |
| 37334 | P03410 | Q96GD3 | -0.12308  |
| 37335 | P03410 | Q9Y2E8 | -0.79207  |
| 37336 | P03410 | Q5VTM2 | -1.0553   |
| 37337 | P03410 | Q3SY56 | -0.22053  |
| 37338 | P03410 | Q8NGX5 | -1.153    |
| 37339 | P03410 | Q8IUH8 | -1.0082   |
| 37340 | P03410 | Q12907 | -0.22248  |
| 37341 | P03410 | Q8NFI6 | -1.2178   |
| 37342 | P03410 | O75783 | -1.4928   |
| 37343 | P03410 | Q9UJU6 | -0.53942  |
| 37344 | P03410 | P0C8F1 | -0.84028  |
| 37345 | P03410 | O15399 | -0.72463  |
| 37346 | P03410 | P63119 | -0.52549  |
| 37347 | P03410 | Q9BQY6 | -0.74696  |
| 37348 | P03410 | P0C7H9 | -0.37733  |
| 37349 | P03410 | Q8NFT2 | -1.1398   |
| 37350 | P03410 | Q9BZV2 | -0.61395  |
| 37351 | P03410 | Q2M1P5 | -0.29921  |
| 37352 | P03410 | P19827 | -0.78039  |
| 37353 | P03410 | Q8NBK3 | -0.34953  |
| 37354 | P03410 | Q6ZU82 | -0.28962  |
| 37355 | P03410 | Q92847 | -0.63538  |
| 37356 | P03410 | Q9UHL4 | -1.1394   |
| 37357 | P03410 | Q9NVX7 | -0.22432  |
| 37358 | P03410 | O94826 | -0.22728  |
| 37359 | P03410 | Q8NGC1 | -1.153    |
| 37360 | P03410 | P51677 | -1.19     |
| 37361 | P03410 | Q96QV6 | -0.80275  |
| 37362 | P03410 | P78362 | -0.71539  |
| 37363 | P03410 | Q9NZ53 | -0.38668  |
| 37364 | P03410 | Q9BQL6 | -0.30189  |
| 37365 | P03410 | Q99880 | -0.80275  |
| 37366 | P03410 | Q00535 | -0.21253  |
| 37367 | P03410 | Q92932 | -0.98519  |
| 37368 | P03410 | Q8WUJ1 | -0.64081  |
| 37369 | P03410 | P31391 | -1.319    |
| 37370 | P03410 | Q5RIA9 | -0.66861  |
| 37371 | P03410 | O43570 | -0.83293  |
| 37372 | P03410 | Q8TCU5 | -0.30899  |
| 37373 | P03410 | Q9Y6C5 | -0.65619  |
| 37374 | P03410 | Q9H114 | -0.8833   |
| 37375 | P03410 | Q92637 | -0.98917  |
| 37376 | P03410 | P30495 | -0.88938  |
| 37377 | P03410 | Q8N136 | -0.23741  |
| 37378 | P03410 | Q9NS61 | -0.397    |
| 37379 | P03410 | P01303 | -0.64237  |
| 37380 | P03410 | Q9UKZ9 | -0.7359   |
| 37381 | P03410 | O60237 | -0.22741  |
| 37382 | P03410 | O75936 | -0.23365  |
| 37383 | P03410 | A6NDG6 | -0.21614  |
| 37384 | P03410 | A6NCQ9 | -0.73225  |
| 37385 | P03410 | Q7Z4N8 | -0.48554  |
| 37386 | P03410 | Q5T7N3 | -0.2274   |
| 37387 | P03410 | Q8NAF0 | -0.152    |
| 37388 | P03410 | Q12931 | -0.47554  |
| 37389 | P03410 | P49863 | -1.3874   |
| 37390 | P03410 | Q9Y232 | -0.2167   |
| 37391 | P03410 | Q16678 | -0.76158  |
| 37392 | P03410 | Q9Y5J5 | -0.14268  |

|       |        |        |           |
|-------|--------|--------|-----------|
| 37393 | P03410 | Q9Y5G0 | -1.0719   |
| 37394 | P03410 | O43908 | -0.6201   |
| 37395 | P03410 | Q5T5X7 | -0.074999 |
| 37396 | P03410 | Q8N9W6 | -0.4235   |
| 37397 | P03410 | O95819 | -0.62922  |
| 37398 | P03410 | Q96B21 | -0.63308  |
| 37399 | P03410 | Q9H082 | -0.79285  |
| 37400 | P03410 | P01270 | -0.58637  |
| 37401 | P03410 | Q6ZVH7 | -0.22737  |
| 37402 | P03410 | Q8N130 | -0.8647   |
| 37403 | P03410 | P36941 | -0.22721  |
| 37404 | P03410 | Q5T0N1 | -0.079195 |
| 37405 | P03410 | Q96KC2 | -1.269    |
| 37406 | P03410 | Q86YN1 | -0.71119  |
| 37407 | P03410 | P0CW01 | -0.5628   |
| 37408 | P03410 | P01569 | -0.73299  |
| 37409 | P03410 | Q8TD33 | -0.71003  |
| 37410 | P03410 | Q92523 | -0.68357  |
| 37411 | P03410 | Q86SJ2 | -0.2277   |
| 37412 | P03410 | Q08830 | -1.0523   |
| 37413 | P03410 | Q13163 | -0.3931   |
| 37414 | P03410 | P11362 | -0.32401  |
| 37415 | P03410 | Q9UBQ6 | -1.2235   |
| 37416 | P03410 | Q9BR01 | -0.51011  |
| 37417 | P03410 | Q96LB0 | -1.2185   |
| 37418 | P03410 | O95210 | -0.25869  |
| 37419 | P03410 | O43521 | -0.18462  |
| 37420 | P03410 | Q96RU3 | -0.22741  |
| 37421 | P03410 | Q99447 | -0.41863  |
| 37422 | P03410 | Q07283 | -0.26184  |
| 37423 | P03410 | Q6XE38 | -0.71003  |
| 37424 | P03410 | Q9Y5Y3 | -1.2185   |
| 37425 | P03410 | Q9UBS9 | -0.84337  |
| 37426 | P03410 | P80162 | -1.088    |
| 37427 | P03410 | Q9H0Q0 | -0.25837  |
| 37428 | P03410 | Q9BYJ4 | -0.34825  |
| 37429 | P03410 | Q9NYI0 | -0.22719  |
| 37430 | P03410 | Q99437 | -0.55099  |
| 37431 | P03410 | Q9ULQ1 | -0.40459  |
| 37432 | P03410 | Q5RGS3 | -0.63308  |
| 37433 | P03410 | Q8TE96 | -0.45234  |
| 37434 | P03410 | P63136 | -0.26043  |
| 37435 | P03410 | P47804 | -0.70466  |
| 37436 | P03410 | P28340 | -0.3319   |
| 37437 | P03410 | Q86WD7 | -0.57411  |
| 37438 | P03410 | Q9NRM2 | -0.13329  |
| 37439 | P03410 | O60309 | -0.63308  |
| 37440 | P03410 | Q9BXB5 | -0.44496  |
| 37441 | P03410 | Q9Y330 | -0.21553  |
| 37442 | P03410 | P78509 | -0.64409  |
| 37443 | P03410 | P14550 | -0.32255  |
| 37444 | P03410 | Q14843 | -1.518    |
| 37445 | P03410 | Q9HBJ0 | -0.98112  |
| 37446 | P03410 | P57052 | -0.74815  |
| 37447 | P03410 | Q6ZRF8 | -0.39568  |
| 37448 | P03410 | Q9BXA9 | -0.16435  |
| 37449 | P03410 | Q7Z7C8 | -0.46696  |
| 37450 | P03410 | Q96RW7 | -0.97559  |
| 37451 | P03410 | Q96P53 | -0.22741  |
| 37452 | P03410 | P50747 | -0.42322  |
| 37453 | P03410 | O15357 | -0.22741  |
| 37454 | P03410 | Q03013 | -0.33492  |
| 37455 | P03410 | Q9H3R1 | -0.62605  |
| 37456 | P03410 | P13501 | -0.63365  |
| 37457 | P03410 | Q9NS18 | -0.21437  |
| 37458 | P03410 | O15120 | -0.72594  |
| 37459 | P03410 | Q9P2W3 | -0.37301  |
| 37460 | P03410 | P04229 | -0.51359  |
| 37461 | P03410 | Q96AX9 | -0.22732  |
| 37462 | P03410 | Q6UWJ8 | -0.63308  |
| 37463 | P03410 | A7E2S9 | -0.22741  |
| 37464 | P03410 | P35398 | -0.34114  |
| 37465 | P03410 | Q8TCT1 | -0.2808   |
| 37466 | P03410 | Q7Z408 | -0.797    |
| 37467 | P03410 | P01574 | -0.37505  |
| 37468 | P03410 | Q9H2A3 | -0.22847  |

|       |        |        |          |
|-------|--------|--------|----------|
| 37469 | P03410 | Q86SI9 | -0.71003 |
| 37470 | P03410 | Q9NWH2 | -0.63308 |
| 37471 | P03410 | Q9HAR2 | -1.2656  |
| 37472 | P03410 | Q5MY95 | -1.3184  |
| 37473 | P03410 | Q8NB46 | -0.22717 |
| 37474 | P03410 | Q86XJ0 | -0.63308 |
| 37475 | P03410 | Q9NYQ6 | -1.0726  |
| 37476 | P03410 | Q5FYA8 | -0.65016 |
| 37477 | P03410 | Q53EV4 | -0.2274  |
| 37478 | P03410 | Q99715 | -1.2459  |
| 37479 | P03410 | Q96IC2 | -0.87522 |
| 37480 | P03410 | Q8NEN9 | -0.22741 |
| 37481 | P03410 | Q8WXX1 | -0.3944  |
| 37482 | P03410 | Q9Y2G8 | -0.7962  |
| 37483 | P03410 | A6NNN8 | -0.82916 |
| 37484 | P03410 | P11586 | -0.5532  |
| 37485 | P03410 | A6NGE4 | -0.22745 |
| 37486 | P03410 | P43699 | -0.35342 |
| 37487 | P03410 | Q96S82 | -0.21886 |
| 37488 | P03410 | Q93098 | -0.92317 |
| 37489 | P03410 | Q14957 | -0.66374 |
| 37490 | P03410 | P01909 | -0.73255 |
| 37491 | P03410 | Q8NGH9 | -1.153   |
| 37492 | P03410 | Q02297 | -0.2756  |
| 37493 | P03410 | P80098 | -0.88158 |
| 37494 | P03410 | Q9POM6 | -0.95823 |
| 37495 | P03410 | Q9C030 | -0.34825 |
| 37496 | P03410 | A6NCW0 | -0.40579 |
| 37497 | P03410 | Q9NZM6 | -0.907   |
| 37498 | P03410 | O95704 | -0.2262  |
| 37499 | P03410 | P37088 | -0.40562 |
| 37500 | P03410 | Q9H0X4 | -0.63308 |
| 37501 | P03410 | Q69YU3 | -0.22628 |
| 37502 | P03410 | Q9UKF5 | -1.1697  |
| 37503 | P03410 | Q15393 | -1.756   |
| 37504 | P03410 | Q8TAS1 | -0.5326  |
| 37505 | P14075 | Q6IE36 | -0.80012 |
| 37506 | P14075 | Q9H3H5 | -0.72763 |
| 37507 | P14075 | P10082 | -0.68372 |
| 37508 | P14075 | Q8N271 | -0.88923 |
| 37509 | P14075 | Q9Y2A9 | -0.60804 |
| 37510 | P14075 | Q9NY15 | -0.99644 |
| 37511 | P14075 | A6NDK9 | -0.35868 |
| 37512 | P14075 | P42679 | -0.39184 |
| 37513 | P14075 | Q6DKJ4 | -0.31655 |
| 37514 | P14075 | P20648 | -0.96549 |
| 37515 | P14075 | Q6ZMI0 | -0.38373 |
| 37516 | P14075 | Q9HC58 | -0.9258  |
| 37517 | P14075 | Q9NUA8 | -0.19255 |
| 37518 | P14075 | P09237 | -1.0647  |
| 37519 | P14075 | P09769 | -0.49061 |
| 37520 | P14075 | Q01523 | -0.77994 |
| 37521 | P14075 | A8MT33 | -0.42171 |
| 37522 | P14075 | Q96QH2 | -0.20876 |
| 37523 | P14075 | O00764 | -0.22555 |
| 37524 | P14075 | A6NH00 | -1.1027  |
| 37525 | P14075 | P98153 | -0.92309 |
| 37526 | P14075 | Q5TF21 | -0.86584 |
| 37527 | P14075 | Q5VYX0 | -0.99961 |
| 37528 | P14075 | Q13563 | -0.27982 |
| 37529 | P14075 | Q5T8D3 | -0.85332 |
| 37530 | P14075 | Q13324 | -0.738   |
| 37531 | P14075 | P16519 | -0.26309 |
| 37532 | P14075 | Q03518 | -0.34264 |
| 37533 | P14075 | Q8IV13 | -0.22639 |
| 37534 | P14075 | Q9NQG1 | -0.86584 |
| 37535 | P14075 | Q9UN66 | -1.1297  |
| 37536 | P14075 | P01036 | -0.89477 |
| 37537 | P14075 | A8MWV9 | -0.86584 |
| 37538 | P14075 | P59095 | -0.71621 |
| 37539 | P14075 | O95789 | -0.46756 |
| 37540 | P14075 | Q14BN4 | -0.87863 |
| 37541 | P14075 | P29992 | -0.80937 |
| 37542 | P14075 | Q9NYW4 | -1.0176  |
| 37543 | P14075 | Q12849 | -0.52227 |
| 37544 | P14075 | Q6ZMH5 | -0.8306  |

|       |        |        |           |
|-------|--------|--------|-----------|
| 37545 | P14075 | A6NKC4 | -0.91471  |
| 37546 | P14075 | Q02086 | -0.22559  |
| 37547 | P14075 | P08842 | -0.59619  |
| 37548 | P14075 | Q8N465 | -0.33506  |
| 37549 | P14075 | P01599 | -0.97479  |
| 37550 | P14075 | Q8TDM0 | -0.29487  |
| 37551 | P14075 | Q53GQ0 | -0.57705  |
| 37552 | P14075 | Q9UBH6 | -1.0795   |
| 37553 | P14075 | Q5VTU8 | -0.38814  |
| 37554 | P14075 | O75871 | -1.0003   |
| 37555 | P14075 | Q14975 | -0.66179  |
| 37556 | P14075 | P20701 | -0.80802  |
| 37557 | P14075 | P59536 | -1.0953   |
| 37558 | P14075 | Q8NGE2 | -1.1027   |
| 37559 | P14075 | P05026 | -0.42389  |
| 37560 | P14075 | P17405 | -0.36314  |
| 37561 | P14075 | P42331 | -1.1111   |
| 37562 | P14075 | Q9NUQ9 | -0.085829 |
| 37563 | P14075 | Q86UU9 | -0.86984  |
| 37564 | P14075 | Q06830 | -0.22098  |
| 37565 | P14075 | Q95158 | -0.63567  |
| 37566 | P14075 | P10915 | -1.0915   |
| 37567 | P14075 | Q9UH62 | -0.75284  |
| 37568 | P14075 | Q13387 | -0.23824  |
| 37569 | P14075 | Q13509 | -0.5632   |
| 37570 | P14075 | Q8NH55 | -1.1027   |
| 37571 | P14075 | Q8NFT8 | -0.62741  |
| 37572 | P14075 | P49407 | -0.26341  |
| 37573 | P14075 | Q00604 | -0.69474  |
| 37574 | P14075 | Q12913 | -0.48364  |
| 37575 | P14075 | O43795 | -0.48661  |
| 37576 | P14075 | O95025 | -0.98837  |
| 37577 | P14075 | Q9NX77 | -0.5818   |
| 37578 | P14075 | P25106 | -0.9245   |
| 37579 | P14075 | P41181 | -0.3111   |
| 37580 | P14075 | P19105 | -0.45722  |
| 37581 | P14075 | Q8IWB1 | -0.60442  |
| 37582 | P14075 | Q96B42 | -0.39523  |
| 37583 | P14075 | Q9H4A4 | -0.87281  |
| 37584 | P14075 | Q15403 | -0.97009  |
| 37585 | P14075 | P42566 | -0.22739  |
| 37586 | P14075 | Q6UX65 | -0.83361  |
| 37587 | P14075 | Q99706 | -0.67797  |
| 37588 | P14075 | P55774 | -0.64384  |
| 37589 | P14075 | Q7Z3B1 | -0.35957  |
| 37590 | P14075 | Q9BZD7 | -1.1902   |
| 37591 | P14075 | Q86XS8 | -0.56011  |
| 37592 | P14075 | Q68DE3 | -0.47282  |
| 37593 | P14075 | P04085 | -0.28329  |
| 37594 | P14075 | P55291 | -1.028    |
| 37595 | P14075 | Q5K4E3 | -1.1298   |
| 37596 | P14075 | Q9Y3Q7 | -1.1031   |
| 37597 | P14075 | P51508 | -0.17069  |
| 37598 | P14075 | Q8NGL1 | -1.1027   |
| 37599 | P14075 | Q95455 | -0.98617  |
| 37600 | P14075 | Q86X10 | -0.82177  |
| 37601 | P14075 | Q95866 | -0.87171  |
| 37602 | P14075 | Q9BYS8 | -0.45565  |
| 37603 | P14075 | Q4LDG9 | -0.22741  |
| 37604 | P14075 | P56559 | -0.48533  |
| 37605 | P14075 | P10323 | -0.85199  |
| 37606 | P14075 | P04745 | -0.3734   |
| 37607 | P14075 | Q49AQ9 | -0.35827  |
| 37608 | P14075 | Q96RI0 | -1.1675   |
| 37609 | P14075 | Q86UU1 | -0.5353   |
| 37610 | P14075 | E5RHQ5 | -0.18179  |
| 37611 | P14075 | Q8N8U3 | -0.51948  |
| 37612 | P14075 | Q9NYQ3 | -0.46634  |
| 37613 | P14075 | P10768 | -0.19448  |
| 37614 | P14075 | Q9Y5W5 | -1.0552   |
| 37615 | P14075 | Q9NPI0 | -0.82681  |
| 37616 | P14075 | Q3B8N5 | -0.20387  |
| 37617 | P14075 | Q969E2 | -0.66475  |
| 37618 | P14075 | Q6URK8 | -0.87849  |
| 37619 | P14075 | P06737 | -0.38889  |
| 37620 | P14075 | Q9H3S7 | -0.229    |

|       |        |        |           |
|-------|--------|--------|-----------|
| 37621 | P14075 | Q96IF1 | -0.25585  |
| 37622 | P14075 | Q6NWX9 | -0.22522  |
| 37623 | P14075 | Q8N511 | -0.86584  |
| 37624 | P14075 | Q8IWX4 | -0.56126  |
| 37625 | P14075 | Q9NPG2 | -0.17062  |
| 37626 | P14075 | Q7L622 | -0.25227  |
| 37627 | P14075 | Q5VU65 | -0.86584  |
| 37628 | P14075 | O95970 | -0.22782  |
| 37629 | P14075 | Q8N149 | -0.93627  |
| 37630 | P14075 | P02729 | -0.677    |
| 37631 | P14075 | Q0VGE8 | -0.21172  |
| 37632 | P14075 | Q6AI12 | -0.22741  |
| 37633 | P14075 | P54709 | -0.63134  |
| 37634 | P14075 | P11150 | -0.72322  |
| 37635 | P14075 | Q8NHB7 | -1.1027   |
| 37636 | P14075 | Q7RTY1 | -0.89073  |
| 37637 | P14075 | P59540 | -1.1788   |
| 37638 | P14075 | O14617 | -0.18353  |
| 37639 | P14075 | Q05BW5 | -0.11097  |
| 37640 | P14075 | P23527 | -0.88998  |
| 37641 | P14075 | Q8NGA1 | -1.1027   |
| 37642 | P14075 | A6ND48 | -1.1027   |
| 37643 | P14075 | P59533 | -1.0953   |
| 37644 | P14075 | Q9ULR3 | -0.56275  |
| 37645 | P14075 | Q8TED9 | -0.45364  |
| 37646 | P14075 | Q8NGP8 | -1.1027   |
| 37647 | P14075 | P0C0L5 | -1.0528   |
| 37648 | P14075 | P21462 | -0.8576   |
| 37649 | P14075 | Q8IYT2 | -0.74687  |
| 37650 | P14075 | Q7Z5M8 | -0.40112  |
| 37651 | P14075 | Q9UBY8 | -0.40393  |
| 37652 | P14075 | Q8WXD0 | -0.99787  |
| 37653 | P14075 | Q969T3 | -0.55524  |
| 37654 | P14075 | P31947 | -0.58048  |
| 37655 | P14075 | Q02297 | -0.25128  |
| 37656 | P14075 | Q14164 | -0.22741  |
| 37657 | P14075 | Q6N063 | -0.64822  |
| 37658 | P14075 | Q8N3D4 | -0.22797  |
| 37659 | P14075 | P80421 | -0.88984  |
| 37660 | P14075 | Q9H344 | -1.1027   |
| 37661 | P14075 | O95136 | -1.1152   |
| 37662 | P14075 | Q8NBJ5 | -0.43383  |
| 37663 | P14075 | Q8IV61 | -0.70076  |
| 37664 | P14075 | A2VCK2 | -0.62648  |
| 37665 | P14075 | P49795 | -0.26502  |
| 37666 | P14075 | Q99808 | -0.79107  |
| 37667 | P14075 | Q96QH8 | -0.85255  |
| 37668 | P14075 | P16278 | -0.11478  |
| 37669 | P14075 | P08637 | -1.2376   |
| 37670 | P14075 | Q5T7P6 | -0.86584  |
| 37671 | P14075 | Q16762 | -0.25686  |
| 37672 | P14075 | O75493 | -0.77821  |
| 37673 | P14075 | A6NFQ7 | -0.22587  |
| 37674 | P14075 | Q86TV6 | -0.22715  |
| 37675 | P14075 | P12107 | -0.77542  |
| 37676 | P14075 | P00709 | -0.89303  |
| 37677 | P14075 | P35498 | -0.85639  |
| 37678 | P14075 | P0C0L4 | -1.0528   |
| 37679 | P14075 | P43405 | -0.26248  |
| 37680 | P14075 | Q96MM6 | -0.79654  |
| 37681 | P14075 | A6NKX4 | -0.88737  |
| 37682 | P14075 | O15480 | -0.091484 |
| 37683 | P14075 | Q9BRS2 | -0.95587  |
| 37684 | P14075 | Q8TBE1 | -0.80828  |
| 37685 | P14075 | Q6ZQQ6 | -0.18943  |
| 37686 | P14075 | P01733 | -0.49766  |
| 37687 | P14075 | Q6PIV2 | -0.39119  |
| 37688 | P14075 | Q68CP4 | -0.66606  |
| 37689 | P14075 | Q5VW22 | -0.98969  |
| 37690 | P14075 | O60313 | -0.53745  |
| 37691 | P14075 | O15342 | -0.59562  |
| 37692 | P14075 | Q9BXN1 | -0.98121  |
| 37693 | P14075 | Q8N8V4 | -0.52803  |
| 37694 | P14075 | Q9BYV6 | -0.5263   |
| 37695 | P14075 | Q9ULA0 | -0.64349  |
| 37696 | P14075 | Q9HBW0 | -0.82599  |

|       |        |         |           |
|-------|--------|---------|-----------|
| 37697 | P14075 | Q01718  | -0.83205  |
| 37698 | P14075 | Q6ZMY6  | -0.23022  |
| 37699 | P14075 | Q15833  | -0.21637  |
| 37700 | P14075 | Q43155  | -1.0425   |
| 37701 | P14075 | Q5TD97  | -0.22367  |
| 37702 | P14075 | Q9BXX5  | -0.41602  |
| 37703 | P14075 | P01920  | -0.65982  |
| 37704 | P14075 | Q6P9F5  | -0.73967  |
| 37705 | P14075 | P50053  | -0.32303  |
| 37706 | P14075 | A8MWL7  | -0.86584  |
| 37707 | P14075 | Q8TDX5  | -0.56744  |
| 37708 | P14075 | A5PKW4  | -1.1205   |
| 37709 | P14075 | Q8NGK6  | -1.1027   |
| 37710 | P14075 | Q5SXH7  | -0.5353   |
| 37711 | P14075 | A6NC51  | -0.86584  |
| 37712 | P14075 | Q15243  | -0.62628  |
| 37713 | P14075 | O95461  | -0.65772  |
| 37714 | P14075 | Q8NDL9  | -0.39625  |
| 37715 | P14075 | P00167  | -0.50571  |
| 37716 | P14075 | P03973  | -0.31177  |
| 37717 | P14075 | Q8N8U2  | -0.22647  |
| 37718 | P14075 | Q6NUM6  | -1.012    |
| 37719 | P14075 | P30542  | -0.33891  |
| 37720 | P14075 | Q96GE9  | -0.86584  |
| 37721 | P14075 | Q15056  | -0.22571  |
| 37722 | P14075 | Q03014  | -0.22773  |
| 37723 | P14075 | O43292  | -0.42419  |
| 37724 | P14075 | Q01118  | -0.98688  |
| 37725 | P14075 | Q9NR20  | -0.82569  |
| 37726 | P14075 | Q9P109  | -0.49611  |
| 37727 | P14075 | Q8I WV7 | -0.26933  |
| 37728 | P14075 | Q9UGI8  | -0.44205  |
| 37729 | P14075 | P09936  | -0.17151  |
| 37730 | P14075 | Q8NBV8  | -0.74984  |
| 37731 | P14075 | Q8N4F7  | -0.92811  |
| 37732 | P14075 | Q14847  | -0.22741  |
| 37733 | P14075 | P55107  | -0.71263  |
| 37734 | P14075 | Q5SZL2  | -0.13011  |
| 37735 | P14075 | Q8TC84  | -0.22742  |
| 37736 | P14075 | Q9BXU1  | -0.9088   |
| 37737 | P14075 | Q14956  | -1.0174   |
| 37738 | P14075 | Q6ZRK6  | -0.13548  |
| 37739 | P14075 | Q9UI12  | -0.084199 |
| 37740 | P14075 | Q8WTV0  | -0.39106  |
| 37741 | P14075 | O95696  | -0.37976  |
| 37742 | P14075 | Q96H15  | -0.86584  |
| 37743 | P14075 | Q9Y2K7  | -0.22577  |
| 37744 | P14075 | Q9H8M9  | -1.0625   |
| 37745 | P14075 | Q9C0B1  | -0.37509  |
| 37746 | P14075 | P17174  | -0.20306  |
| 37747 | P14075 | Q0VAA5  | -0.75153  |
| 37748 | P14075 | P55072  | -0.24361  |
| 37749 | P14075 | O00254  | -0.86864  |
| 37750 | P14075 | Q02818  | -0.53069  |
| 37751 | P14075 | P37058  | -0.4599   |
| 37752 | P14075 | P07492  | -1.0548   |
| 37753 | P14075 | Q75864  | -0.4501   |
| 37754 | P14075 | P51970  | -0.15863  |
| 37755 | P14075 | Q8N3P4  | -0.52332  |
| 37756 | P14075 | Q6YBV0  | -0.79063  |
| 37757 | P14075 | Q9BRY0  | -0.8861   |
| 37758 | P14075 | P06729  | -0.72652  |
| 37759 | P14075 | Q6JVE9  | -0.88117  |
| 37760 | P14075 | Q16270  | -0.53415  |
| 37761 | P14075 | P15382  | -0.83212  |
| 37762 | P14075 | O14647  | -0.63045  |
| 37763 | P14075 | C9JPN9  | -0.69644  |
| 37764 | P14075 | Q9H1K4  | -0.71467  |
| 37765 | P14075 | O00124  | -0.45338  |
| 37766 | P14075 | Q8N7S6  | -0.86584  |
| 37767 | P14075 | Q8N1N0  | -0.90338  |
| 37768 | P14075 | P23634  | -0.54011  |
| 37769 | P14075 | A6NMS7  | -0.86584  |
| 37770 | P14075 | A6NN92  | -0.83846  |
| 37771 | P14075 | Q9H0E9  | -0.17815  |
| 37772 | P14075 | Q6JQN1  | -0.64889  |

|       |        |        |           |
|-------|--------|--------|-----------|
| 37773 | P14075 | Q5TDH0 | -0.55277  |
| 37774 | P14075 | P59543 | -1.0953   |
| 37775 | P14075 | P01210 | -0.92087  |
| 37776 | P14075 | O94766 | -0.56041  |
| 37777 | P14075 | Q496M5 | -0.22741  |
| 37778 | P14075 | Q9H2C5 | -1.1027   |
| 37779 | P14075 | O95406 | -0.79326  |
| 37780 | P14075 | P22314 | -0.21861  |
| 37781 | P14075 | O94915 | -0.068463 |
| 37782 | P14075 | Q13162 | -0.22031  |
| 37783 | P14075 | Q16828 | -0.34451  |
| 37784 | P14075 | Q6ZT07 | -1.2794   |
| 37785 | P14075 | Q6NXT4 | -0.76038  |
| 37786 | P14075 | P08048 | -0.21172  |
| 37787 | P14075 | Q96MW7 | -0.33043  |
| 37788 | P14075 | Q4KMG9 | -0.86584  |
| 37789 | P14075 | Q9BWM7 | -0.83915  |
| 37790 | P14075 | Q8N8A6 | -0.4991   |
| 37791 | P14075 | Q13557 | -0.60555  |
| 37792 | P14075 | Q8NDZ6 | -0.86584  |
| 37793 | P14075 | Q5T0B9 | -0.21172  |
| 37794 | P14075 | Q2M385 | -0.86584  |
| 37795 | P14075 | P80192 | -0.35436  |
| 37796 | P14075 | Q9HB63 | -0.8981   |
| 37797 | P14075 | Q9BYW3 | -0.79616  |
| 37798 | P14075 | Q5T3I0 | -0.44783  |
| 37799 | P14075 | Q9NWL6 | -0.25221  |
| 37800 | P14075 | P01189 | -0.53757  |
| 37801 | P14075 | Q8TBY0 | -0.84005  |
| 37802 | P14075 | Q13492 | -0.21453  |
| 37803 | P14075 | Q16659 | -0.2274   |
| 37804 | P14075 | Q9BZM5 | -0.92557  |
| 37805 | P14075 | Q9BX51 | -0.41457  |
| 37806 | P14075 | O15296 | -0.5727   |
| 37807 | P14075 | Q6NSJ0 | -0.65824  |
| 37808 | P14075 | Q6ZRZ4 | -0.87849  |
| 37809 | P14075 | Q96DR8 | -0.90729  |
| 37810 | P14075 | A6NDP7 | -0.86584  |
| 37811 | P14075 | O96015 | -0.36632  |
| 37812 | P14075 | Q9UJN7 | -0.21172  |
| 37813 | P14075 | P78524 | -0.44839  |
| 37814 | P14075 | Q15293 | -0.22235  |
| 37815 | P14075 | Q99759 | -0.44301  |
| 37816 | P14075 | P43378 | -0.24016  |
| 37817 | P14075 | P07498 | -0.84954  |
| 37818 | P14075 | O95274 | -0.90499  |
| 37819 | P14075 | Q9P219 | -0.18921  |
| 37820 | P14075 | Q6IQ23 | -0.22741  |
| 37821 | P14075 | Q8TC94 | -0.30492  |
| 37822 | P14075 | A6NHG4 | -0.37147  |
| 37823 | P14075 | Q6DN12 | -0.87039  |
| 37824 | P14075 | Q8WU17 | -0.53757  |
| 37825 | P14075 | P59901 | -0.31983  |
| 37826 | P14075 | Q96LU7 | -0.87849  |
| 37827 | P14075 | P30460 | -0.93787  |
| 37828 | P14075 | Q52WX2 | -0.85083  |
| 37829 | P14075 | P49903 | -0.93349  |
| 37830 | P14075 | Q14005 | -0.37924  |
| 37831 | P14075 | Q8NC60 | -0.19977  |
| 37832 | P14075 | Q9Y6H6 | -0.89191  |
| 37833 | P14075 | O14508 | -0.22741  |
| 37834 | P14075 | P19099 | -0.43843  |
| 37835 | P14075 | Q9Y5Z6 | -0.79236  |
| 37836 | P14075 | Q6P1N9 | -0.24578  |
| 37837 | P14075 | Q8WWA1 | -0.86584  |
| 37838 | P14075 | Q8IVB5 | -0.16078  |
| 37839 | P14075 | Q8MH63 | -0.85749  |
| 37840 | P14075 | Q7Z7F0 | -0.044987 |
| 37841 | P14075 | Q5BLP8 | -0.87849  |
| 37842 | P14075 | Q6DN72 | -0.86146  |
| 37843 | P14075 | P78362 | -0.36388  |
| 37844 | P14075 | Q9QC07 | -0.48794  |
| 37845 | P14075 | Q96HP0 | -0.31757  |
| 37846 | P14075 | Q14206 | -0.70604  |
| 37847 | P14075 | Q16820 | -1.2696   |
| 37848 | P14075 | Q9HA65 | -1.2307   |

|       |        |        |          |
|-------|--------|--------|----------|
| 37849 | P14075 | Q14651 | -0.50785 |
| 37850 | P14075 | Q9H1J5 | -0.54105 |
| 37851 | P14075 | Q96P26 | -0.42345 |
| 37852 | P14075 | Q8NGB4 | -1.1027  |
| 37853 | P14075 | Q8IZC4 | -0.80399 |
| 37854 | P14075 | Q96RN1 | -0.51653 |
| 37855 | P14075 | Q9Y2Y1 | -0.17519 |
| 37856 | P14075 | Q9HDD0 | -0.32631 |
| 37857 | P14075 | Q86SJ2 | -0.33575 |
| 37858 | P14075 | Q76KP1 | -0.69611 |
| 37859 | P14075 | P18084 | -0.77974 |
| 37860 | P14075 | P15622 | -0.21172 |
| 37861 | P14075 | P00492 | -0.18996 |
| 37862 | P14075 | P36551 | -0.17364 |
| 37863 | P14075 | Q14831 | -0.66537 |
| 37864 | P14075 | Q6UXH1 | -0.3692  |
| 37865 | P14075 | P27448 | -0.47461 |
| 37866 | P14075 | Q9UL17 | -0.47692 |
| 37867 | P14075 | O43812 | -0.19477 |
| 37868 | P14075 | Q9HAP6 | -0.21029 |
| 37869 | P14075 | P01588 | -0.2481  |
| 37870 | P14075 | Q9Y2I9 | -1.0287  |
| 37871 | P14075 | Q8N4T4 | -0.81922 |
| 37872 | P14075 | Q9UNK0 | -0.93974 |
| 37873 | P14075 | P58170 | -1.1027  |
| 37874 | P14075 | Q00888 | -0.86886 |
| 37875 | P14075 | O15457 | -0.45576 |
| 37876 | P14075 | Q9BWX1 | -0.19201 |
| 37877 | P14075 | Q15036 | -0.16759 |
| 37878 | P14075 | Q9UQQ1 | -1.2106  |
| 37879 | P14075 | Q9UKG9 | -0.56051 |
| 37880 | P14075 | Q9H4I0 | -0.3747  |
| 37881 | P14075 | Q9BRX9 | -0.22766 |
| 37882 | P14075 | P54821 | -0.22546 |
| 37883 | P14075 | Q13562 | -0.22744 |
| 37884 | P14075 | P21217 | -0.68353 |
| 37885 | P14075 | Q96J02 | -0.22741 |
| 37886 | P14075 | A6NF34 | -0.8941  |
| 37887 | P14075 | P11055 | -0.50978 |
| 37888 | P14075 | P01704 | -0.97479 |
| 37889 | P14075 | Q14202 | -0.48318 |
| 37890 | P14075 | Q6ZS62 | -0.86584 |
| 37891 | P14075 | P14867 | -0.78023 |
| 37892 | P14075 | P29274 | -0.3025  |
| 37893 | P14075 | Q8IWN7 | -0.15999 |
| 37894 | P14075 | Q9ULH1 | -0.49767 |
| 37895 | P14075 | Q9BQF6 | -0.75272 |
| 37896 | P14075 | O94885 | -0.22545 |
| 37897 | P14075 | P12524 | -0.22741 |
| 37898 | P14075 | Q8WXE0 | -0.22743 |
| 37899 | P14075 | Q12931 | -0.48372 |
| 37900 | P14075 | Q9HCC6 | -0.22489 |
| 37901 | P14075 | O14669 | -1.3916  |
| 37902 | P14075 | Q14CB8 | -0.83952 |
| 37903 | P14075 | Q6P4F2 | -0.36217 |
| 37904 | P14075 | Q8WVT3 | -0.38521 |
| 37905 | P14075 | Q9Y320 | -0.54396 |
| 37906 | P14075 | P48059 | -0.22004 |
| 37907 | P14075 | Q8WWV3 | -0.82157 |
| 37908 | P14075 | P09326 | -0.54385 |
| 37909 | P14075 | Q03989 | -0.19763 |
| 37910 | P14075 | Q95670 | -0.40377 |
| 37911 | P14075 | Q6BAA4 | -0.31773 |
| 37912 | P14075 | Q06055 | -0.7545  |
| 37913 | P14075 | O60896 | -0.30326 |
| 37914 | P14075 | Q9UJS0 | -0.4512  |
| 37915 | P14075 | Q969F0 | -0.85795 |
| 37916 | P14075 | Q8NE09 | -0.66133 |
| 37917 | P14075 | Q8NGF0 | -1.1027  |
| 37918 | P14075 | Q9BYT3 | -0.59039 |
| 37919 | P14075 | P26842 | -0.62981 |
| 37920 | P14075 | Q8N7E2 | -0.63687 |
| 37921 | P14075 | Q0P670 | -0.86584 |
| 37922 | P14075 | P49913 | -0.72778 |
| 37923 | P14075 | P56373 | -0.5564  |
| 37924 | P14075 | P0C7L1 | -0.79897 |



|       |        |        |           |
|-------|--------|--------|-----------|
| 37925 | P14075 | P04637 | -0.22292  |
| 37926 | P14075 | Q6ZMY3 | -0.39639  |
| 37927 | P14075 | Q9UNE0 | -0.59422  |
| 37928 | P14075 | Q12929 | -0.22741  |
| 37929 | P14075 | Q9Y247 | -0.21602  |
| 37930 | P14075 | Q7RTV5 | -0.079648 |
| 37931 | P14075 | C9JXX5 | -0.87849  |
| 37932 | P14075 | Q04826 | -0.88446  |
| 37933 | P14075 | Q9H9S3 | -0.63247  |
| 37934 | P14075 | P09017 | -0.213    |
| 37935 | P14075 | Q8TC26 | -0.79676  |
| 37936 | P14075 | P59190 | -0.98206  |
| 37937 | P14075 | P17752 | -0.47469  |
| 37938 | P14075 | Q96LZ2 | -0.058158 |
| 37939 | P14075 | Q9Y664 | -0.27128  |
| 37940 | P14075 | P16871 | -0.71588  |
| 37941 | P14075 | O14522 | -0.77805  |
| 37942 | P14075 | Q6ZMS4 | -0.73005  |
| 37943 | P14075 | Q13268 | -0.40596  |
| 37944 | P14075 | P49757 | -0.28614  |
| 37945 | P14075 | Q9BZR8 | -0.22725  |
| 37946 | P14075 | Q15075 | -0.21943  |
| 37947 | P14075 | Q9P121 | -0.22827  |
| 37948 | P14075 | P16520 | -0.48042  |
| 37949 | P14075 | Q8N8I0 | -0.22561  |
| 37950 | P14075 | Q9Y337 | -0.77582  |
| 37951 | P14075 | Q6ZUJ8 | -0.37327  |
| 37952 | P14075 | Q14507 | -0.89613  |
| 37953 | P14075 | Q96F25 | -0.86517  |
| 37954 | P14075 | Q8TBF4 | -0.39618  |
| 37955 | P14075 | P04217 | -0.677    |
| 37956 | P14075 | P49685 | -1.2378   |
| 37957 | P14075 | Q96JK4 | -0.51211  |
| 37958 | P14075 | O15488 | -0.11836  |
| 37959 | P14075 | Q8NI36 | -0.22798  |
| 37960 | P14075 | Q8NHW5 | -0.065224 |
| 37961 | P14075 | Q9H6B9 | -0.66345  |
| 37962 | P14075 | Q4L180 | -0.21278  |
| 37963 | P14075 | Q9UPC5 | -0.76887  |
| 37964 | P14075 | Q8NET8 | -0.86611  |
| 37965 | P14075 | A0A5B9 | -0.86584  |
| 37966 | P14075 | P18464 | -0.88446  |
| 37967 | P14075 | Q9BTV5 | -0.22745  |
| 37968 | P14075 | Q9NZR1 | -0.30182  |
| 37969 | P14075 | P61278 | -0.76409  |
| 37970 | P14075 | Q53H54 | -0.33499  |
| 37971 | P14075 | Q9C0C9 | -0.77713  |
| 37972 | P14075 | Q9HCE5 | -0.18919  |
| 37973 | P14075 | Q68D86 | -0.16986  |
| 37974 | P14075 | Q14586 | -0.40272  |
| 37975 | P14075 | Q9H4L7 | -0.21289  |
| 37976 | P14075 | P25089 | -1.1823   |
| 37977 | P14075 | Q6ZN30 | -0.22652  |
| 37978 | P14075 | Q9GIP4 | -0.85749  |
| 37979 | P14075 | Q8N144 | -0.56058  |
| 37980 | P14075 | Q9Y227 | -0.52381  |
| 37981 | P14075 | Q9H6X2 | -0.52123  |
| 37982 | P14075 | O60422 | -0.2264   |
| 37983 | P14075 | Q6UXQ6 | -0.87849  |
| 37984 | P14075 | P51153 | -0.57733  |
| 37985 | P14075 | Q00526 | -0.34056  |
| 37986 | P14075 | Q9NXR8 | -0.22733  |
| 37987 | P14075 | Q99720 | -0.6315   |
| 37988 | P14075 | Q8NGS3 | -1.1027   |
| 37989 | P14075 | Q4VCS5 | -0.22718  |
| 37990 | P14075 | Q8NH74 | -1.1027   |
| 37991 | P14075 | Q92523 | -0.62411  |
| 37992 | P14075 | Q8WVB6 | -0.61779  |
| 37993 | P14075 | P08574 | -0.40776  |
| 37994 | P14075 | A2A368 | -0.019844 |
| 37995 | P14075 | O75146 | -0.20733  |
| 37996 | P14075 | Q92673 | -1.0922   |
| 37997 | P14075 | Q86YJ6 | -0.61521  |
| 37998 | P14075 | Q9H2S1 | -0.8545   |
| 37999 | P14075 | Q9NTI2 | -0.95062  |
| 38000 | P14075 | Q03591 | -0.92592  |

|       |        |        |           |
|-------|--------|--------|-----------|
| 38001 | P14075 | P42765 | -0.20011  |
| 38002 | P14075 | Q5TF58 | -0.079873 |
| 38003 | P14075 | B2RXH2 | -0.14374  |
| 38004 | P14075 | Q9HBT8 | -0.21172  |
| 38005 | P14075 | O94827 | -0.53889  |
| 38006 | P14075 | A6NNH2 | -0.48092  |
| 38007 | P14075 | O14514 | -1.3031   |
| 38008 | P14075 | P21757 | -0.51286  |
| 38009 | P14075 | Q99550 | -0.22268  |
| 38010 | P14075 | Q6ZNG2 | -0.22732  |
| 38011 | P14075 | Q9UBM7 | -0.76502  |
| 38012 | P14075 | Q99624 | -0.8954   |
| 38013 | P14075 | P32418 | -0.48     |
| 38014 | P14075 | Q16832 | -0.87031  |
| 38015 | P14075 | Q05996 | -0.92554  |
| 38016 | P14075 | Q9BZJ4 | -0.7165   |
| 38017 | P14075 | Q9UP65 | -0.73802  |
| 38018 | P14075 | Q9UHR4 | -0.22739  |
| 38019 | P14075 | P52788 | -0.37911  |
| 38020 | P14075 | Q5VWQ8 | -0.27262  |
| 38021 | P14075 | Q13332 | -0.83528  |
| 38022 | P14075 | Q5SRE7 | -0.65938  |
| 38023 | P14075 | Q9BRJ9 | -0.22743  |
| 38024 | P14075 | P85298 | -0.51291  |
| 38025 | P14075 | Q4G0S4 | -0.692    |
| 38026 | P14075 | P63119 | -0.67565  |
| 38027 | P14075 | P48023 | -0.26641  |
| 38028 | P14075 | Q99102 | -1.2193   |
| 38029 | P14075 | Q96KK4 | -1.1027   |
| 38030 | P14075 | O95864 | -0.7862   |
| 38031 | P14075 | Q99525 | -0.70171  |
| 38032 | P14075 | Q96N76 | -0.33419  |
| 38033 | P14075 | P52739 | -0.36618  |
| 38034 | P14075 | Q9UJV9 | -0.51578  |
| 38035 | P14075 | Q9NQR9 | -0.42107  |
| 38036 | P14075 | Q629K1 | -0.93931  |
| 38037 | P14075 | Q56NI9 | -0.35944  |
| 38038 | P14075 | Q53FZ2 | -0.65603  |
| 38039 | P14075 | Q6P589 | -0.42318  |
| 38040 | P14075 | Q9NY33 | -0.30258  |
| 38041 | P14075 | A8MPP1 | -0.67892  |
| 38042 | P14075 | Q6ZRI8 | -1.052    |
| 38043 | P14075 | P55042 | -0.60517  |
| 38044 | P14075 | Q9GZU1 | -0.79119  |
| 38045 | P14075 | Q8NBD8 | -0.86584  |
| 38046 | P14075 | Q01955 | -0.49839  |
| 38047 | P14075 | P08579 | -0.2267   |
| 38048 | P14075 | O75324 | -0.72207  |
| 38049 | P14075 | P50539 | -0.22129  |
| 38050 | P14075 | Q6IFG1 | -1.1027   |
| 38051 | P14075 | P12955 | -0.67928  |
| 38052 | P14075 | Q01064 | -0.22456  |
| 38053 | P14075 | Q9UBP0 | -0.22852  |
| 38054 | P14075 | Q6UWD8 | -0.86584  |
| 38055 | P14075 | Q14004 | -0.07673  |
| 38056 | P14075 | Q9BPX5 | -0.38856  |
| 38057 | P14075 | Q8N5V2 | -0.77791  |
| 38058 | P14075 | Q9H469 | -0.22202  |
| 38059 | P14075 | P35228 | -0.25862  |
| 38060 | P14075 | Q86TB3 | -0.55687  |
| 38061 | P14075 | Q63HQ2 | -0.82975  |
| 38062 | P14075 | O43143 | -0.50952  |
| 38063 | P14075 | Q96JH8 | -0.89989  |
| 38064 | P14075 | Q9Y5F6 | -1.1297   |
| 38065 | P14075 | Q9ULZ0 | -0.20579  |
| 38066 | P14075 | B2RXH4 | -0.22703  |
| 38067 | P14075 | Q3LXA3 | -0.87583  |
| 38068 | P14075 | Q2PPJ7 | -0.42222  |
| 38069 | P14075 | Q9UK99 | -0.2066   |
| 38070 | P14075 | P68543 | -0.32518  |
| 38071 | P14075 | A6NNB3 | -1.0181   |
| 38072 | P14075 | O94989 | -0.48787  |
| 38073 | P14075 | Q6P158 | -0.90954  |
| 38074 | P14075 | O94956 | -0.94604  |
| 38075 | P14075 | Q05952 | -0.95649  |
| 38076 | P14075 | P08294 | -0.21946  |

|       |        |         |           |
|-------|--------|---------|-----------|
| 38077 | P14075 | Q53R12  | -0.93628  |
| 38078 | P14075 | Q5JW98  | -0.86584  |
| 38079 | P14075 | Q08499  | -0.36982  |
| 38080 | P14075 | Q8NEE8  | -0.22737  |
| 38081 | P14075 | Q8IY82  | -0.45102  |
| 38082 | P14075 | Q3KP44  | -0.2274   |
| 38083 | P14075 | Q9H902  | -0.060914 |
| 38084 | P14075 | P28336  | -1.078    |
| 38085 | P14075 | P82673  | -0.10141  |
| 38086 | P14075 | Q8N7X8  | -0.86584  |
| 38087 | P14075 | Q13835  | -0.22777  |
| 38088 | P14075 | Q13619  | -0.22594  |
| 38089 | P14075 | P01876  | -0.46799  |
| 38090 | P14075 | Q96L46  | -0.53682  |
| 38091 | P14075 | O60942  | -0.66801  |
| 38092 | P14075 | Q5JU69  | -0.95411  |
| 38093 | P14075 | Q8N9S9  | -0.38965  |
| 38094 | P14075 | Q9BWT3  | -0.44792  |
| 38095 | P14075 | Q9HBD1  | -0.4501   |
| 38096 | P14075 | P16581  | -0.39903  |
| 38097 | P14075 | Q96P68  | -1.124    |
| 38098 | P14075 | Q9BQT8  | -0.59942  |
| 38099 | P14075 | Q9Y5F1  | -1.1553   |
| 38100 | P14075 | Q9NYV7  | -0.58596  |
| 38101 | P14075 | Q13516  | -0.22745  |
| 38102 | P14075 | Q8TC20  | -0.066072 |
| 38103 | P14075 | P58180  | -1.1027   |
| 38104 | P14075 | Q8TCF1  | -0.52332  |
| 38105 | P14075 | P01737  | -0.49766  |
| 38106 | P14075 | P31275  | -0.22301  |
| 38107 | P14075 | Q6IA17  | -0.50287  |
| 38108 | P14075 | Q9H6Q4  | -0.26817  |
| 38109 | P14075 | Q3YEC7  | -0.22759  |
| 38110 | P14075 | Q8TBF8  | -0.14241  |
| 38111 | P14075 | P24158  | -0.33567  |
| 38112 | P14075 | Q9UIW0  | -0.22733  |
| 38113 | P14075 | Q9UIQ6  | -1.1856   |
| 38114 | P14075 | Q9H165  | -0.227    |
| 38115 | P14075 | Q9Y5I0  | -1.1297   |
| 38116 | P14075 | Q5VTT2  | -0.86584  |
| 38117 | P14075 | Q86WB7  | -0.71859  |
| 38118 | P14075 | O43761  | -0.66816  |
| 38119 | P14075 | Q99574  | -0.67673  |
| 38120 | P14075 | A6NML5  | -0.86584  |
| 38121 | P14075 | O94880  | -0.52332  |
| 38122 | P14075 | Q8IZP1  | -1.2307   |
| 38123 | P14075 | Q16627  | -0.86088  |
| 38124 | P14075 | Q567V2  | -0.74159  |
| 38125 | P14075 | Q9NPB3  | -0.50614  |
| 38126 | P14075 | P30455  | -0.88088  |
| 38127 | P14075 | Q8NFFJ5 | -1.1545   |
| 38128 | P14075 | Q9Y2I1  | -0.4154   |
| 38129 | P14075 | Q86VK4  | -0.21172  |
| 38130 | P14075 | Q9NZ20  | -0.59247  |
| 38131 | P14075 | Q6L8Q7  | -0.2793   |
| 38132 | P14075 | Q9BXX3  | -0.22741  |
| 38133 | P14075 | Q2I0M4  | -0.35947  |
| 38134 | P14075 | Q6PIW4  | -0.45622  |
| 38135 | P14075 | Q5ZPR3  | -0.3641   |
| 38136 | P14075 | Q8N0W4  | -0.39694  |
| 38137 | P14075 | A6NCL1  | -0.084024 |
| 38138 | P14075 | Q96L50  | -0.43639  |
| 38139 | P14075 | Q96LX8  | -0.21172  |
| 38140 | P14075 | P43250  | -0.89635  |
| 38141 | P14075 | Q9BT88  | -0.50677  |
| 38142 | P14075 | Q8NGT1  | -1.1027   |
| 38143 | P14075 | P58513  | -0.14457  |
| 38144 | P14075 | Q9BQG1  | -0.7234   |
| 38145 | P14075 | Q8N2K0  | -0.79446  |
| 38146 | P14075 | Q5SQQ9  | -0.22737  |
| 38147 | P14075 | P47989  | -0.52755  |
| 38148 | P14075 | Q9NVK5  | -0.13136  |
| 38149 | P14075 | P09622  | -0.22399  |
| 38150 | P14075 | O00748  | -0.34183  |
| 38151 | P14075 | Q8TB36  | -0.55087  |
| 38152 | P14075 | Q53GS9  | -0.41227  |

|       |        |        |           |
|-------|--------|--------|-----------|
| 38153 | P14075 | Q9P2B4 | -0.222    |
| 38154 | P14075 | A3QJZ6 | -0.25825  |
| 38155 | P14075 | Q6UWV7 | -0.86584  |
| 38156 | P14075 | Q9UKW4 | -0.30482  |
| 38157 | P14075 | P31751 | -0.17754  |
| 38158 | P14075 | O75808 | -0.692    |
| 38159 | P14075 | Q6ZN04 | -0.22739  |
| 38160 | P14075 | Q8IZ52 | -0.5004   |
| 38161 | P14075 | O94887 | -0.45387  |
| 38162 | P14075 | P10606 | -0.31104  |
| 38163 | P14075 | Q8NHP6 | -0.71371  |
| 38164 | P14075 | Q9NTZ6 | -0.4405   |
| 38165 | P14075 | Q01814 | -0.34038  |
| 38166 | P14075 | P14618 | -0.15448  |
| 38167 | P14075 | Q8IVU3 | -0.38095  |
| 38168 | P14075 | Q14565 | -0.32062  |
| 38169 | P14075 | O76081 | -0.46363  |
| 38170 | P14075 | P17066 | -0.59192  |
| 38171 | P14075 | Q08AF3 | -0.63739  |
| 38172 | P14075 | P59826 | -0.88413  |
| 38173 | P14075 | Q16570 | -1.0635   |
| 38174 | P14075 | Q9NZP2 | -1.1027   |
| 38175 | P14075 | Q5SNT6 | -0.57622  |
| 38176 | P14075 | Q9NS23 | -0.22741  |
| 38177 | P14075 | O60353 | -0.45851  |
| 38178 | P14075 | P19224 | -0.82692  |
| 38179 | P14075 | Q5FWF7 | -0.22443  |
| 38180 | P14075 | P58335 | -0.85327  |
| 38181 | P14075 | Q96NR3 | -0.74565  |
| 38182 | P14075 | Q8WWZ8 | -0.23131  |
| 38183 | P14075 | Q9ULV8 | -0.56954  |
| 38184 | P14075 | Q8NH49 | -1.1027   |
| 38185 | P14075 | Q96AW1 | -0.60309  |
| 38186 | P14075 | P12259 | -0.43428  |
| 38187 | P14075 | Q99536 | -0.93625  |
| 38188 | P14075 | Q9NZH0 | -0.70701  |
| 38189 | P14075 | P36406 | -0.41786  |
| 38190 | P14075 | Q9BYU1 | -0.32524  |
| 38191 | P14075 | O75311 | -0.80243  |
| 38192 | P14075 | Q6IEZ7 | -1.1027   |
| 38193 | P14075 | Q5TF39 | -0.94058  |
| 38194 | P14075 | P21953 | -0.09017  |
| 38195 | P14075 | Q8IX04 | -0.44746  |
| 38196 | P14075 | O00487 | -0.23229  |
| 38197 | P14075 | Q5H8A4 | -0.90189  |
| 38198 | P14075 | Q86Z02 | -0.22741  |
| 38199 | P14075 | O43464 | -0.22629  |
| 38200 | P14075 | Q9Y2W3 | -0.62407  |
| 38201 | P14075 | Q5TCS8 | -0.92052  |
| 38202 | P14075 | Q9UPM9 | -0.2787   |
| 38203 | P14075 | P61018 | -0.90472  |
| 38204 | P14075 | Q9Y5R8 | -0.22822  |
| 38205 | P14075 | A6NGZ7 | -0.86584  |
| 38206 | P14075 | O43511 | -0.82594  |
| 38207 | P14075 | P25189 | -0.95101  |
| 38208 | P14075 | Q5SWH9 | -0.86584  |
| 38209 | P14075 | Q15084 | -0.25475  |
| 38210 | P14075 | Q8TC36 | -0.28488  |
| 38211 | P14075 | Q8NH95 | -1.1027   |
| 38212 | P14075 | O00755 | -0.41685  |
| 38213 | P14075 | Q9NQI0 | -0.47042  |
| 38214 | P14075 | Q6NXT1 | -0.22741  |
| 38215 | P14075 | P50135 | -0.095733 |
| 38216 | P14075 | Q14763 | -0.36505  |
| 38217 | P14075 | Q9GZU5 | -1.0094   |
| 38218 | P14075 | O00214 | -0.3509   |
| 38219 | P14075 | Q12767 | -0.86584  |
| 38220 | P14075 | Q7Z7B7 | -0.84399  |
| 38221 | P14075 | Q02575 | -0.23999  |
| 38222 | P14075 | Q9UDX3 | -1.0664   |
| 38223 | P14075 | Q02127 | -0.58266  |
| 38224 | P14075 | Q8TF42 | -0.26751  |
| 38225 | P14075 | Q9H5X1 | -0.13403  |
| 38226 | P14075 | Q5JVF3 | -0.2989   |
| 38227 | P14075 | Q8WZ04 | -0.47477  |
| 38228 | P14075 | O43502 | -0.2019   |

|       |        |        |           |
|-------|--------|--------|-----------|
| 38229 | P14075 | Q2M3G0 | -1.0602   |
| 38230 | P14075 | P56278 | -0.30188  |
| 38231 | P14075 | Q96JF0 | -0.72399  |
| 38232 | P14075 | Q8NDB2 | -0.43292  |
| 38233 | P14075 | A8MZ36 | -0.20308  |
| 38234 | P14075 | Q08334 | -0.59907  |
| 38235 | P14075 | P10266 | -0.32527  |
| 38236 | P14075 | Q496Y0 | -0.2274   |
| 38237 | P14075 | Q06520 | -0.22447  |
| 38238 | P14075 | Q8TBG4 | -0.41026  |
| 38239 | P14075 | Q16181 | -0.22485  |
| 38240 | P14075 | P10153 | -0.81311  |
| 38241 | P14075 | Q96P67 | -1.1721   |
| 38242 | P14075 | Q9HCQ7 | -0.98582  |
| 38243 | P14075 | P14778 | -0.89146  |
| 38244 | P14075 | Q9Y6G9 | -0.22165  |
| 38245 | P14075 | Q9UKJ0 | -0.46493  |
| 38246 | P14075 | Q9H4T2 | -0.076586 |
| 38247 | P14075 | P04222 | -0.88446  |
| 38248 | P14075 | Q9Y2G8 | -0.8703   |
| 38249 | P14075 | Q12952 | -0.3553   |
| 38250 | P14075 | Q8IYS1 | -0.50416  |
| 38251 | P14075 | P55786 | -0.30046  |
| 38252 | P14075 | P30480 | -0.88446  |
| 38253 | P14075 | Q9P0U4 | -0.22754  |
| 38254 | P14075 | O60346 | -0.22763  |
| 38255 | P14075 | A2VEC9 | -1.0473   |
| 38256 | P14075 | Q4KWH8 | -0.50182  |
| 38257 | P14075 | Q7RTZ2 | -0.32253  |
| 38258 | P14075 | Q9Y6M7 | -0.78564  |
| 38259 | P14075 | P26640 | -0.29415  |
| 38260 | P14075 | Q86VI3 | -0.59087  |
| 38261 | P14075 | Q75369 | -0.4468   |
| 38262 | P14075 | Q92538 | -0.28871  |
| 38263 | P14075 | Q8TAI7 | -0.98849  |
| 38264 | P14075 | A2RU48 | -0.86584  |
| 38265 | P14075 | Q9Y371 | -0.2274   |
| 38266 | P14075 | Q7Z4W1 | -0.6867   |
| 38267 | P14075 | Q6WRI0 | -0.97191  |
| 38268 | P14075 | Q9ULI0 | -0.88399  |
| 38269 | P14075 | Q9NXP7 | -0.42868  |
| 38270 | P14075 | Q8NGS5 | -1.1027   |
| 38271 | P14075 | Q8TDN7 | -0.61474  |
| 38272 | P14075 | Q01628 | -0.76679  |
| 38273 | P14075 | Q86VR7 | -0.86584  |
| 38274 | P14075 | Q6EMB2 | -0.11688  |
| 38275 | P14075 | A7E2Y1 | -0.81259  |
| 38276 | P14075 | Q6AI14 | -0.90671  |
| 38277 | P14075 | Q9BQI6 | -0.22741  |
| 38278 | P14075 | Q96PN6 | -0.58412  |
| 38279 | P14075 | Q9Y696 | -0.21804  |
| 38280 | P14075 | Q7Z2X4 | -0.093862 |
| 38281 | P14075 | Q8NDV3 | -0.5237   |
| 38282 | P14075 | Q92802 | -0.16078  |
| 38283 | P14075 | P22105 | -1.0244   |
| 38284 | P14075 | Q06432 | -0.93545  |
| 38285 | P14075 | Q75084 | -0.52384  |
| 38286 | P14075 | P02686 | -0.72187  |
| 38287 | P14075 | O43909 | -0.75543  |
| 38288 | P14075 | Q8NG80 | -0.91257  |
| 38289 | P14075 | Q9Y6M4 | -0.8032   |
| 38290 | P14075 | Q8IZ83 | -0.69187  |
| 38291 | P14075 | Q93086 | -0.92348  |
| 38292 | P14075 | Q8TAM1 | -0.42335  |
| 38293 | P14075 | O75078 | -1.0077   |
| 38294 | P14075 | Q9Y4F4 | -0.17878  |
| 38295 | P14075 | Q7RTP0 | -0.87713  |
| 38296 | P14075 | Q2WGJ9 | -0.86584  |
| 38297 | P14075 | Q04446 | -0.21407  |
| 38298 | P14075 | A6NKC9 | -0.22741  |
| 38299 | P14075 | Q6T423 | -0.8419   |
| 38300 | P14075 | Q8NGI2 | -1.1027   |
| 38301 | P14075 | Q9H340 | -1.1027   |
| 38302 | P14075 | Q9H6R0 | -0.36505  |
| 38303 | P14075 | Q9HAS3 | -0.77052  |
| 38304 | P14075 | Q93009 | -0.30405  |

|       |        |        |           |
|-------|--------|--------|-----------|
| 38305 | P14075 | Q8N436 | -1.1851   |
| 38306 | P14075 | Q8IZJ6 | -0.77467  |
| 38307 | P14075 | A1A4Y4 | -0.813    |
| 38308 | P14075 | P32322 | -0.50539  |
| 38309 | P14075 | Q13445 | -0.31467  |
| 38310 | P14075 | Q5H8A3 | -0.7968   |
| 38311 | P14075 | P35523 | -0.91522  |
| 38312 | P14075 | O14672 | -0.25698  |
| 38313 | P14075 | O60909 | -0.48757  |
| 38314 | P14075 | Q9NVR0 | -0.87849  |
| 38315 | P14075 | Q6GPH4 | -0.222    |
| 38316 | P14075 | Q8TEW0 | -0.22666  |
| 38317 | P14075 | Q86UV6 | -0.73967  |
| 38318 | P14075 | P08700 | -0.5294   |
| 38319 | P14075 | P30464 | -0.88446  |
| 38320 | P14075 | P12018 | -0.88984  |
| 38321 | P14075 | Q13423 | -0.68764  |
| 38322 | P14075 | Q5XG99 | -0.84623  |
| 38323 | P14075 | A6NM11 | -0.86584  |
| 38324 | P14075 | Q96JP9 | -1.1383   |
| 38325 | P14075 | Q9NZN3 | -0.31951  |
| 38326 | P14075 | Q8WVD5 | -0.30297  |
| 38327 | P14075 | Q9BRQ5 | -0.31983  |
| 38328 | P14075 | Q6UB35 | -0.67087  |
| 38329 | P14075 | O75128 | -0.60515  |
| 38330 | P14075 | Q8IWT1 | -0.78472  |
| 38331 | P14075 | O15547 | -0.73984  |
| 38332 | P14075 | Q5TEA6 | -0.86584  |
| 38333 | P14075 | Q9Y6K8 | -0.44685  |
| 38334 | P14075 | O14683 | -0.86005  |
| 38335 | P14075 | Q8WTT0 | -0.82732  |
| 38336 | P14075 | Q9H3T2 | -0.85839  |
| 38337 | P14075 | Q15078 | -0.076995 |
| 38338 | P14075 | Q5SZI1 | -0.86584  |
| 38339 | P14075 | Q9BQI0 | -0.69945  |
| 38340 | P14075 | Q9NR31 | -0.49962  |
| 38341 | P14075 | Q6ZMZ3 | -0.15684  |
| 38342 | P14075 | P41226 | -0.61122  |
| 38343 | P14075 | O94810 | -0.61356  |
| 38344 | P14075 | Q92953 | -0.86026  |
| 38345 | P14075 | Q9UL26 | -0.48528  |
| 38346 | P14075 | Q96K21 | -0.52332  |
| 38347 | P14075 | Q5DID0 | -1.1363   |
| 38348 | P14075 | O95757 | -0.27431  |
| 38349 | P14075 | Q9H5H4 | -0.15786  |
| 38350 | P14075 | Q9Y548 | -0.84601  |
| 38351 | P14075 | O15466 | -0.56798  |
| 38352 | P14075 | Q9UPY6 | -0.32766  |
| 38353 | P14075 | Q9UBD3 | -1.0738   |
| 38354 | P14075 | B6SEH8 | -0.86584  |
| 38355 | P14075 | Q16348 | -0.39764  |
| 38356 | P14075 | P12694 | -0.11629  |
| 38357 | P14075 | Q8NGR8 | -1.1027   |
| 38358 | P14075 | O60762 | -0.17505  |
| 38359 | P14075 | P09417 | -0.45213  |
| 38360 | P14075 | Q8NGF3 | -1.1027   |
| 38361 | P14075 | P06331 | -0.97479  |
| 38362 | P14075 | Q16620 | -0.41457  |
| 38363 | P14075 | Q8N912 | -0.86584  |
| 38364 | P14075 | Q6BDI9 | -0.5879   |
| 38365 | P14075 | Q3LIE5 | -0.42015  |
| 38366 | P14075 | Q96RA2 | -0.86289  |
| 38367 | P14075 | Q5T6S3 | -0.21929  |
| 38368 | P14075 | Q9C0J1 | -0.5155   |
| 38369 | P14075 | P29401 | -0.18386  |
| 38370 | P14075 | P30046 | -0.40076  |
| 38371 | P14075 | Q63HR2 | -0.22741  |
| 38372 | P14075 | Q8NFY9 | -0.21496  |
| 38373 | P14075 | P60201 | -0.54903  |
| 38374 | P14075 | O95047 | -1.1027   |
| 38375 | P14075 | P01699 | -0.97479  |
| 38376 | P14075 | Q8IZ07 | -0.22741  |
| 38377 | P14075 | Q9UPR6 | -0.69062  |
| 38378 | P14075 | Q6ZWK4 | -0.86584  |
| 38379 | P14075 | Q9H0T7 | -1.1255   |
| 38380 | P14075 | Q02643 | -0.34574  |

|       |        |        |           |
|-------|--------|--------|-----------|
| 38381 | P14075 | Q9BPU6 | -0.25138  |
| 38382 | P14075 | Q6NT55 | -0.82377  |
| 38383 | P14075 | A6NM10 | -0.83009  |
| 38384 | P14075 | P22234 | -0.35418  |
| 38385 | P14075 | O43423 | -0.13386  |
| 38386 | P14075 | Q6IEU7 | -1.1027   |
| 38387 | P14075 | P51553 | -0.077708 |
| 38388 | P14075 | Q9Y263 | -0.22853  |
| 38389 | P14075 | A6NIR3 | -0.98969  |
| 38390 | P14075 | A6NDD2 | -0.84399  |
| 38391 | P14075 | Q16665 | -0.23909  |
| 38392 | P14075 | Q9HAE3 | -0.52751  |
| 38393 | P14075 | Q9H3R0 | -0.20804  |
| 38394 | P14075 | P21554 | -0.62217  |
| 38395 | P14075 | Q6ZUT9 | -0.84703  |
| 38396 | P14075 | P10827 | -0.23065  |
| 38397 | P14075 | A6NL28 | -0.39786  |
| 38398 | P14075 | Q9P2G1 | -0.22741  |
| 38399 | P14075 | Q9HAV5 | -0.55803  |
| 38400 | P14075 | Q8NH06 | -1.1027   |
| 38401 | P14075 | Q92556 | -0.13907  |
| 38402 | P14075 | O95988 | -0.19291  |
| 38403 | P14075 | Q3SXY8 | -0.65922  |
| 38404 | P14075 | Q86T13 | -0.85471  |
| 38405 | P14075 | Q8NGU9 | -1.1721   |
| 38406 | P14075 | P57059 | -0.25702  |
| 38407 | P14075 | P42575 | -0.22523  |
| 38408 | P14075 | Q6ZUX7 | -0.86584  |
| 38409 | P14075 | A6NGB0 | -0.86584  |
| 38410 | P14075 | P04430 | -0.97479  |
| 38411 | P14075 | P19525 | -0.34494  |
| 38412 | P14075 | P51800 | -0.91066  |
| 38413 | P14075 | Q6ZN19 | -0.21172  |
| 38414 | P14075 | P04075 | -0.38223  |
| 38415 | P14075 | B7ZC32 | -0.80242  |
| 38416 | P14075 | Q9ULB1 | -0.40632  |
| 38417 | P14075 | Q8TBB0 | -0.61302  |
| 38418 | P14075 | Q9UIL8 | -0.1872   |
| 38419 | P14075 | Q8NHW4 | -1.0186   |
| 38420 | P14075 | Q13574 | -0.22741  |
| 38421 | P14075 | P11712 | -0.5754   |
| 38422 | P14075 | P30273 | -0.58646  |
| 38423 | P14075 | Q9UHW5 | -0.87111  |
| 38424 | P14075 | Q15762 | -0.66841  |
| 38425 | P14075 | Q9Y6C9 | -0.73185  |
| 38426 | P14075 | Q9Y584 | -0.5076   |
| 38427 | P14075 | Q9UIV8 | -0.54562  |
| 38428 | P14075 | P00742 | -0.71763  |
| 38429 | P14075 | Q8N9Q2 | -0.48379  |
| 38430 | P14075 | P62995 | -0.22446  |
| 38431 | P14075 | P02461 | -0.3793   |
| 38432 | P14075 | Q71RH2 | -0.85795  |
| 38433 | P14075 | Q7RTP6 | -0.61998  |
| 38434 | P14075 | O96001 | -0.54428  |
| 38435 | P14075 | A8MYV0 | -0.62648  |
| 38436 | P14075 | O60548 | -0.31899  |
| 38437 | P14075 | Q9H628 | -1.1358   |
| 38438 | P14075 | P46019 | -0.20873  |
| 38439 | P14075 | Q8N183 | -0.41423  |
| 38440 | P14075 | O60636 | -0.91681  |
| 38441 | P14075 | Q96PN7 | -0.25089  |
| 38442 | P14075 | P01892 | -0.54543  |
| 38443 | P14075 | Q00987 | -0.2163   |
| 38444 | P14075 | Q9NRH2 | -0.81852  |
| 38445 | P14075 | Q8WXA3 | -0.22719  |
| 38446 | P14075 | Q8N1N2 | -0.86584  |
| 38447 | P14075 | Q9C0B9 | -0.47014  |
| 38448 | P14075 | Q9BRI3 | -0.69074  |
| 38449 | P14075 | Q9UL52 | -1.6063   |
| 38450 | P14075 | Q8NFQ5 | -1.0096   |
| 38451 | P14075 | Q4G0P3 | -0.054518 |
| 38452 | P14075 | Q9Y3L3 | -1.0096   |
| 38453 | P14075 | Q8WTR4 | -0.57232  |
| 38454 | P14075 | Q2M296 | -0.79019  |
| 38455 | P14075 | O15213 | -0.22746  |
| 38456 | P14075 | Q9BXA7 | -0.9495   |

|       |        |        |          |
|-------|--------|--------|----------|
| 38457 | P14075 | O43520 | -0.52588 |
| 38458 | P14075 | Q8NGJ4 | -1.1027  |
| 38459 | P14075 | Q8TE58 | -1.2214  |
| 38460 | P14075 | Q8IZK6 | -0.96683 |
| 38461 | P14075 | P46063 | -0.22633 |
| 38462 | P14075 | P45844 | -0.46406 |
| 38463 | P14075 | O95932 | -0.39149 |
| 38464 | P14075 | Q8IYK4 | -0.43383 |
| 38465 | P14075 | O15020 | -0.27373 |
| 38466 | P14075 | Q969R2 | -0.85813 |
| 38467 | P14075 | Q15195 | -0.87849 |
| 38468 | P14075 | P78324 | -1.088   |
| 38469 | P14075 | Q6ZW31 | -0.85933 |
| 38470 | P14075 | Q9NQ36 | -0.95463 |
| 38471 | P14075 | Q7Z4R8 | -0.84685 |
| 38472 | P14075 | Q07000 | -0.88446 |
| 38473 | P14075 | P35914 | -0.40189 |
| 38474 | P14075 | Q13322 | -0.22741 |
| 38475 | P14075 | Q8NGL4 | -1.1027  |
| 38476 | P14075 | P02549 | -0.22741 |
| 38477 | P14075 | Q6NUJ5 | -0.2171  |
| 38478 | P14075 | Q9H9V9 | -0.20668 |
| 38479 | P14075 | P0DM48 | -0.22717 |
| 38480 | P14075 | Q9H0F5 | -0.52332 |
| 38481 | P14075 | Q9UBC0 | -0.22731 |
| 38482 | P14075 | Q67FW5 | -0.45797 |
| 38483 | P14075 | P59510 | -1.0643  |
| 38484 | P14075 | Q8N283 | -0.22739 |
| 38485 | P14075 | Q13724 | -0.84278 |
| 38486 | P14075 | O60894 | -0.31007 |
| 38487 | P14075 | Q9NXL6 | -0.80218 |
| 38488 | P14075 | O60462 | -0.46726 |
| 38489 | P14075 | Q9BVV8 | -0.70674 |
| 38490 | P14075 | O60282 | -0.30384 |
| 38491 | P14075 | O75460 | -0.30332 |
| 38492 | P14075 | P11413 | -0.25086 |
| 38493 | P14075 | P48740 | -0.86416 |
| 38494 | P14075 | Q86XJ1 | -0.45328 |
| 38495 | P14075 | O75563 | -0.53242 |
| 38496 | P14075 | Q9UIR0 | -0.86584 |
| 38497 | P14075 | Q9H7P9 | -0.7546  |
| 38498 | P14075 | Q9NZU7 | -0.22577 |
| 38499 | P14075 | P63132 | -0.43742 |
| 38500 | P14075 | Q13449 | -0.22887 |
| 38501 | P14075 | Q92686 | -0.42923 |
| 38502 | P14075 | O95972 | -0.74206 |
| 38503 | P14075 | Q9BU23 | -0.93931 |
| 38504 | P14075 | Q9BV90 | -0.12505 |
| 38505 | P14075 | Q8N6I4 | -0.86584 |
| 38506 | P14075 | Q8WUH1 | -0.33386 |
| 38507 | P14075 | Q9UGM3 | -0.32248 |
| 38508 | P14075 | Q8NG11 | -0.86584 |
| 38509 | P14075 | Q9H115 | -0.22967 |
| 38510 | P14075 | Q8NEM0 | -0.26075 |
| 38511 | P14075 | O75131 | -0.22812 |
| 38512 | P14075 | A8MXZ1 | -0.48092 |
| 38513 | P14075 | Q9HCU4 | -0.93503 |
| 38514 | P14075 | Q8N8Z6 | -1.0252  |
| 38515 | P14075 | Q9Y6W3 | -0.76024 |
| 38516 | P14075 | P49450 | -0.18395 |
| 38517 | P14075 | Q8WUT9 | -0.7196  |
| 38518 | P14075 | Q8WXH2 | -0.73132 |
| 38519 | P14075 | Q9C0B6 | -0.63156 |
| 38520 | P14075 | P31146 | -0.22743 |
| 38521 | P14075 | O95096 | -0.23052 |
| 38522 | P14075 | Q9UHC9 | -0.39553 |
| 38523 | P14075 | Q9Y2D4 | -0.2454  |
| 38524 | P14075 | Q96LJ7 | -0.86483 |
| 38525 | P14075 | Q9Y6A9 | -0.54988 |
| 38526 | P14075 | P02741 | -0.78003 |
| 38527 | P14075 | Q9BXC1 | -1.124   |
| 38528 | P14075 | P23582 | -0.60606 |
| 38529 | P14075 | Q9Y3B4 | -0.29713 |
| 38530 | P14075 | Q9Y5P4 | -0.22762 |
| 38531 | P14075 | A7E2F4 | -0.43638 |
| 38532 | P14075 | O95868 | -0.71693 |



|       |        |        |          |
|-------|--------|--------|----------|
| 38533 | P14075 | P19823 | -0.75716 |
| 38534 | P14075 | O15244 | -0.80045 |
| 38535 | P14075 | Q9BS40 | -0.2868  |
| 38536 | P14075 | Q05086 | -0.22821 |
| 38537 | P14075 | Q8IZM8 | -0.2274  |
| 38538 | P14075 | Q5T2R2 | -0.42505 |
| 38539 | P14075 | Q5T7M4 | -0.8736  |
| 38540 | P14075 | Q9BQI7 | -0.94046 |
| 38541 | P14075 | Q8NGA6 | -1.1027  |
| 38542 | P14075 | Q6PII5 | -0.47792 |
| 38543 | P14075 | Q9P1P4 | -1.143   |
| 38544 | P14075 | Q9NRD0 | -0.23694 |
| 38545 | P14075 | Q9UIG8 | -0.94223 |
| 38546 | P14075 | Q9H156 | -0.92424 |
| 38547 | P14075 | Q5H9U9 | -0.85822 |
| 38548 | P14075 | Q9GZR7 | -0.49342 |
| 38549 | P14075 | P48681 | -0.15082 |
| 38550 | P14075 | P08709 | -0.78048 |
| 38551 | P14075 | P35462 | -0.34951 |
| 38552 | P14075 | Q9NPA5 | -0.21172 |
| 38553 | P14075 | Q9Y5E4 | -1.1238  |
| 38554 | P14075 | Q5SQN1 | -0.17954 |
| 38555 | P14075 | Q95672 | -1.2366  |
| 38556 | P14075 | Q6P4I2 | -0.18979 |
| 38557 | P14075 | O43169 | -0.72984 |
| 38558 | P14075 | Q6ZT89 | -0.7196  |
| 38559 | P14075 | Q9Y657 | -0.28414 |
| 38560 | P14075 | Q8NEL9 | -0.34291 |
| 38561 | P14075 | Q7Z7B1 | -0.80585 |
| 38562 | P14075 | P34059 | -0.53103 |
| 38563 | P14075 | Q02363 | -0.22749 |
| 38564 | P14075 | Q9NWH2 | -0.86584 |
| 38565 | P14075 | P51677 | -1.1164  |
| 38566 | P14075 | Q9BW72 | -0.81434 |
| 38567 | P14075 | O60682 | -0.22758 |
| 38568 | P14075 | Q9HBY8 | -0.52239 |
| 38569 | P14075 | Q5TGJ6 | -0.18052 |
| 38570 | P14075 | Q9UJ41 | -0.22853 |
| 38571 | P14075 | Q86XH1 | -0.79654 |
| 38572 | P14075 | Q15813 | -0.32453 |
| 38573 | P14075 | Q8TCD5 | -0.30939 |
| 38574 | P14075 | P28827 | -0.60721 |
| 38575 | P14075 | Q5JWR5 | -0.26965 |
| 38576 | P14075 | Q09470 | -0.80566 |
| 38577 | P14075 | Q9UKI2 | -0.58284 |
| 38578 | P14075 | Q86SE8 | -0.11194 |
| 38579 | P14075 | Q969G2 | -0.22773 |
| 38580 | P14075 | P20023 | -0.85876 |
| 38581 | P14075 | Q9HAU4 | -0.22741 |
| 38582 | P14075 | Q8TB45 | -0.22741 |
| 38583 | P14075 | P22301 | -0.38633 |
| 38584 | P14075 | Q8NEG5 | -0.44758 |
| 38585 | P14075 | Q9BX74 | -1.0281  |
| 38586 | P14075 | Q11203 | -0.67184 |
| 38587 | P14075 | Q9H2F3 | -0.78935 |
| 38588 | P14075 | P13236 | -0.90999 |
| 38589 | P14075 | P0CG31 | -0.21172 |
| 38590 | P14075 | Q5VT66 | -0.51768 |
| 38591 | P14075 | Q96PQ0 | -0.85806 |
| 38592 | P14075 | Q96NK8 | -0.22748 |
| 38593 | P14075 | Q9HBL7 | -0.99533 |
| 38594 | P14075 | Q9H4I8 | -0.22056 |
| 38595 | P14075 | O75144 | -0.99352 |
| 38596 | P14075 | Q07617 | -0.76843 |
| 38597 | P14075 | B7ZAQ6 | -0.70435 |
| 38598 | P14075 | P51817 | -0.39078 |
| 38599 | P14075 | Q5VZR4 | -0.81229 |
| 38600 | P14075 | O60469 | -0.79057 |
| 38601 | P14075 | Q96CP2 | -0.16078 |
| 38602 | P14075 | P68133 | -0.20392 |
| 38603 | P14075 | Q6Q0C1 | -0.7196  |
| 38604 | P14075 | Q9ULM0 | -0.54034 |
| 38605 | P14075 | Q9GZP1 | -0.74087 |
| 38606 | P14075 | Q99966 | -0.19085 |
| 38607 | P14075 | P01824 | -0.97479 |
| 38608 | P14075 | Q5SRD1 | -0.20005 |

|       |        |        |           |
|-------|--------|--------|-----------|
| 38609 | P14075 | Q7Z4P5 | -0.22741  |
| 38610 | P14075 | P48047 | -0.33716  |
| 38611 | P14075 | P47901 | -0.92023  |
| 38612 | P14075 | P07360 | -0.88268  |
| 38613 | P14075 | Q14919 | -0.1343   |
| 38614 | P14075 | Q9NPP4 | -0.22737  |
| 38615 | P14075 | Q12967 | -0.74541  |
| 38616 | P14075 | P43363 | -0.083317 |
| 38617 | P14075 | Q8NHV1 | -0.95272  |
| 38618 | P14075 | Q9Y4I5 | -0.40859  |
| 38619 | P14075 | Q9NUY8 | -0.94809  |
| 38620 | P14075 | Q96JK2 | -0.30578  |
| 38621 | P14075 | Q5T5C0 | -0.3922   |
| 38622 | P14075 | Q9BT67 | -0.39827  |
| 38623 | P14075 | P54296 | -0.68406  |
| 38624 | P14075 | Q5T6R2 | -0.19562  |
| 38625 | P14075 | Q7Z7L9 | -0.4097   |
| 38626 | P14075 | Q5SYB0 | -0.36675  |
| 38627 | P14075 | Q96G04 | -0.034293 |
| 38628 | P14075 | P53365 | -0.22087  |
| 38629 | P14075 | P56937 | -1.0533   |
| 38630 | P14075 | Q8NGA0 | -1.1027   |
| 38631 | P14075 | Q8WWF5 | -0.77298  |
| 38632 | P14075 | Q6UXD1 | -0.86584  |
| 38633 | P14075 | Q4G0W2 | -1.0054   |
| 38634 | P14075 | A6NHM9 | -0.71058  |
| 38635 | P14075 | Q13151 | -0.25725  |
| 38636 | P14075 | P52798 | -0.49924  |
| 38637 | P14075 | Q86W33 | -0.95253  |
| 38638 | P14075 | P14923 | -0.55164  |
| 38639 | P14075 | Q7Z2F6 | -0.31656  |
| 38640 | P14075 | Q9UBJ2 | -0.51108  |
| 38641 | P14075 | Q8NAC3 | -0.89333  |
| 38642 | P14075 | Q6ZRR9 | -0.62648  |
| 38643 | P14075 | P63126 | -0.40851  |
| 38644 | P14075 | Q9NX61 | -0.78465  |
| 38645 | P14075 | O75914 | -0.58226  |
| 38646 | P14075 | Q562R1 | -0.65868  |
| 38647 | P14075 | O95057 | -1.1897   |
| 38648 | P14075 | P05230 | -0.24884  |
| 38649 | P14075 | O43868 | -0.95219  |
| 38650 | P14075 | Q15349 | -0.56462  |
| 38651 | P14075 | O75127 | -0.19221  |
| 38652 | P14075 | Q6R6M4 | -0.39606  |
| 38653 | P14075 | Q5BJH7 | -0.86584  |
| 38654 | P14075 | Q9Y5T4 | -0.77712  |
| 38655 | P14075 | P57103 | -0.76906  |
| 38656 | P14075 | Q6UWF9 | -0.87849  |
| 38657 | P14075 | Q5JTH9 | -0.37664  |
| 38658 | P14075 | Q8N6Q3 | -0.57176  |
| 38659 | P14075 | Q8WUU5 | -0.22724  |
| 38660 | P14075 | Q9BXS9 | -0.93799  |
| 38661 | P14075 | P57088 | -0.69135  |
| 38662 | P14075 | P0C617 | -1.1027   |
| 38663 | P14075 | O60478 | -1.0003   |
| 38664 | P14075 | P46721 | -0.77991  |
| 38665 | P14075 | Q8NGH3 | -1.1027   |
| 38666 | P14075 | P04070 | -0.71304  |
| 38667 | P14075 | Q8NDH6 | -0.42034  |
| 38668 | P14075 | P04278 | -0.86866  |
| 38669 | P14075 | Q9GZT4 | -0.58083  |
| 38670 | P14075 | Q92581 | -0.8388   |
| 38671 | P14075 | Q687X5 | -1.176    |
| 38672 | P14075 | Q5SR53 | -0.21147  |
| 38673 | P14075 | Q00325 | -0.81986  |
| 38674 | P14075 | P42229 | -0.22645  |
| 38675 | P14075 | Q92576 | -0.22623  |
| 38676 | P14075 | Q9NRS4 | -1.1635   |
| 38677 | P14075 | Q96E39 | -0.50058  |
| 38678 | P14075 | O95677 | -0.20205  |
| 38679 | P14075 | Q6GPI1 | -1.2738   |
| 38680 | P14075 | Q96MP8 | -0.21842  |
| 38681 | P14075 | Q12951 | -0.32415  |
| 38682 | P14075 | P07911 | -0.68724  |
| 38683 | P14075 | Q96FL8 | -0.7926   |
| 38684 | P14075 | Q53QZ3 | -0.94961  |

|       |        |        |           |
|-------|--------|--------|-----------|
| 38685 | P14075 | A8MXB1 | -0.93176  |
| 38686 | P14075 | P05141 | -0.22913  |
| 38687 | P14075 | Q99832 | -0.39371  |
| 38688 | P14075 | Q9Y2D2 | -0.56261  |
| 38689 | P14075 | Q96HC4 | -0.28592  |
| 38690 | P14075 | Q14610 | -1.0896   |
| 38691 | P14075 | Q96R45 | -1.1027   |
| 38692 | P14075 | P47874 | -0.51799  |
| 38693 | P14075 | Q9H3S1 | -0.81106  |
| 38694 | P14075 | Q12840 | -0.25222  |
| 38695 | P14075 | Q6ZMN8 | -0.41982  |
| 38696 | P14075 | Q8N6L0 | -0.98247  |
| 38697 | P14075 | Q6UW88 | -0.9603   |
| 38698 | P14075 | P04921 | -0.5266   |
| 38699 | P14075 | P25874 | -0.51334  |
| 38700 | P14075 | P02679 | -0.78607  |
| 38701 | P14075 | Q6P0Q8 | -0.40823  |
| 38702 | P14075 | Q8NA23 | -0.22774  |
| 38703 | P14075 | Q5T4I8 | -0.11697  |
| 38704 | P14075 | O14904 | -0.7498   |
| 38705 | P14075 | P55211 | -0.22597  |
| 38706 | P14075 | Q16891 | -0.15853  |
| 38707 | P14075 | Q8NGP9 | -1.1027   |
| 38708 | P14075 | P11766 | -0.38522  |
| 38709 | P14075 | P50219 | -0.22736  |
| 38710 | P14075 | Q6UW49 | -0.58617  |
| 38711 | P14075 | P06865 | -0.45201  |
| 38712 | P14075 | Q5TEU4 | -0.29222  |
| 38713 | P14075 | Q9ULP0 | -0.31614  |
| 38714 | P14075 | Q9NXE4 | -0.55889  |
| 38715 | P14075 | Q92824 | -0.77036  |
| 38716 | P14075 | P52797 | -0.63765  |
| 38717 | P14075 | Q94972 | -0.22741  |
| 38718 | P14075 | Q8NH56 | -1.1027   |
| 38719 | P14075 | Q13410 | -1.3283   |
| 38720 | P14075 | Q5VXH5 | -0.25825  |
| 38721 | P14075 | Q9UI46 | -0.27473  |
| 38722 | P14075 | P12104 | -0.4877   |
| 38723 | P14075 | Q9H9P2 | -0.57281  |
| 38724 | P14075 | Q96M95 | -0.030772 |
| 38725 | P14075 | Q99748 | -0.54793  |
| 38726 | P14075 | Q13477 | -1.0676   |
| 38727 | P14075 | Q16647 | -0.24843  |
| 38728 | P14075 | O00622 | -0.44237  |
| 38729 | P14075 | Q14492 | -0.57799  |
| 38730 | P14075 | O15375 | -0.9422   |
| 38731 | P14075 | P13928 | -0.4332   |
| 38732 | P14075 | Q8NBP7 | -0.34116  |
| 38733 | P14075 | P78413 | -0.22881  |
| 38734 | P14075 | P23919 | -0.42111  |
| 38735 | P14075 | Q9GZS9 | -0.49606  |
| 38736 | P14075 | Q93098 | -0.74051  |
| 38737 | P14075 | P09086 | -0.22741  |
| 38738 | P14075 | Q8IUQ4 | -0.22374  |
| 38739 | P14075 | P0CB47 | -0.36664  |
| 38740 | P14075 | Q6NUQ4 | -0.86584  |
| 38741 | P14075 | Q96EM0 | -0.57737  |
| 38742 | P14075 | P35557 | -0.18289  |
| 38743 | P14075 | Q14002 | -0.92601  |
| 38744 | P14075 | Q9UEY8 | -0.20203  |
| 38745 | P14075 | P01716 | -0.97479  |
| 38746 | P14075 | Q8NGC3 | -1.1027   |
| 38747 | P14075 | Q7RTR8 | -1.0953   |
| 38748 | P14075 | Q6NUN0 | -0.96607  |
| 38749 | P14075 | O43526 | -0.81559  |
| 38750 | P14075 | P41587 | -1.1921   |
| 38751 | P14075 | P11217 | -0.41156  |
| 38752 | P14075 | P0C842 | -0.65844  |
| 38753 | P14075 | Q86YS7 | -0.60496  |
| 38754 | P14075 | P30414 | -0.42096  |
| 38755 | P14075 | P04424 | -0.30784  |
| 38756 | P14075 | Q8TER5 | -0.65503  |
| 38757 | P14075 | P55103 | -0.74186  |
| 38758 | P14075 | Q6ZMB5 | -0.86584  |
| 38759 | P14075 | P84157 | -0.86584  |
| 38760 | P14075 | O60262 | -0.56853  |

|       |        |        |           |
|-------|--------|--------|-----------|
| 38761 | P14075 | Q9Y6N3 | -0.83948  |
| 38762 | P14075 | Q0VAQ4 | -0.44828  |
| 38763 | P14075 | Q8N300 | -0.40816  |
| 38764 | P14075 | Q01432 | -0.2903   |
| 38765 | P14075 | Q99742 | -0.24339  |
| 38766 | P14075 | Q9Y2P0 | -0.21172  |
| 38767 | P14075 | Q147U7 | -0.86584  |
| 38768 | P14075 | Q9Y5F8 | -1.1297   |
| 38769 | P14075 | Q5VV16 | -0.31899  |
| 38770 | P14075 | Q13886 | -0.2249   |
| 38771 | P14075 | Q96N46 | -0.4711   |
| 38772 | P14075 | Q8WTU2 | -0.91752  |
| 38773 | P14075 | Q96M93 | -0.78602  |
| 38774 | P14075 | Q08708 | -1.0533   |
| 38775 | P14075 | Q6UXV3 | -0.87849  |
| 38776 | P14075 | Q9Y6R4 | -0.27015  |
| 38777 | P14075 | P51828 | -0.82828  |
| 38778 | P14075 | Q9HCE0 | -0.45745  |
| 38779 | P14075 | Q6ZU45 | -0.44203  |
| 38780 | P14075 | O94761 | -0.50541  |
| 38781 | P14075 | O60706 | -0.92907  |
| 38782 | P14075 | P45880 | -0.49728  |
| 38783 | P14075 | P60673 | -0.093274 |
| 38784 | P14075 | Q8N3J5 | -0.28317  |
| 38785 | P14075 | Q9NZ45 | -0.8638   |
| 38786 | P14075 | P57771 | -0.66133  |
| 38787 | P14075 | O14495 | -0.33615  |
| 38788 | P14075 | P29622 | -0.72994  |
| 38789 | P14075 | Q8TEB9 | -0.46151  |
| 38790 | P14075 | Q6IQ20 | -0.59793  |
| 38791 | P14075 | Q8IV77 | -1.0951   |
| 38792 | P14075 | Q9H920 | -0.92811  |
| 38793 | P14075 | O75626 | -0.12416  |
| 38794 | P14075 | Q9H799 | -0.86584  |
| 38795 | P14075 | Q15020 | -0.22609  |
| 38796 | P14075 | Q9C0A6 | -0.22594  |
| 38797 | P14075 | P30533 | -0.70494  |
| 38798 | P14075 | Q9BY78 | -0.74488  |
| 38799 | P14075 | Q13277 | -0.26673  |
| 38800 | P14075 | Q15438 | -0.22741  |
| 38801 | P14075 | Q8N766 | -0.8462   |
| 38802 | P14075 | Q9Y4L1 | -0.62935  |
| 38803 | P14075 | Q6IF99 | -1.1027   |
| 38804 | P14075 | P33261 | -0.63025  |
| 38805 | P14075 | P14416 | -0.2612   |
| 38806 | P14075 | Q9Y6J8 | -0.68964  |
| 38807 | P14075 | P25021 | -1.2505   |
| 38808 | P14075 | Q96EY8 | -0.65131  |
| 38809 | P14075 | Q7RTT9 | -0.89638  |
| 38810 | P14075 | Q8N0U2 | -0.86584  |
| 38811 | P14075 | Q9H790 | -0.27349  |
| 38812 | P14075 | Q8NB46 | -0.22734  |
| 38813 | P14075 | Q9GZN2 | -0.23895  |
| 38814 | P14075 | Q3SXM0 | -0.22744  |
| 38815 | P14075 | Q9HCI6 | -0.44783  |
| 38816 | P14075 | P35443 | -0.72683  |
| 38817 | P14075 | P0CF51 | -0.86584  |
| 38818 | P14075 | P61619 | -0.76219  |
| 38819 | P14075 | Q9Y6Q5 | -0.18258  |
| 38820 | P14075 | Q4U2R8 | -0.37649  |
| 38821 | P14075 | Q9H765 | -0.22741  |
| 38822 | P14075 | Q92738 | -0.92707  |
| 38823 | P14075 | Q15825 | -0.86877  |
| 38824 | P14075 | Q6PJG9 | -0.86584  |
| 38825 | P14075 | O60669 | -0.94189  |
| 38826 | P14075 | P24462 | -0.78018  |
| 38827 | P14075 | Q92903 | -0.71165  |
| 38828 | P14075 | Q8NHA8 | -1.1027   |
| 38829 | P14075 | Q9NYF5 | -1.052    |
| 38830 | P14075 | O00330 | -0.19746  |
| 38831 | P14075 | Q5XLA6 | -0.63743  |
| 38832 | P14075 | P13612 | -0.43945  |
| 38833 | P14075 | Q9P267 | -0.39531  |
| 38834 | P14075 | P0C7M7 | -0.82614  |
| 38835 | P14075 | P41594 | -0.68403  |
| 38836 | P14075 | P31644 | -0.76913  |

|       |        |        |           |
|-------|--------|--------|-----------|
| 38837 | P14075 | O95425 | -0.34537  |
| 38838 | P14075 | O43364 | -0.13175  |
| 38839 | P14075 | Q9BXC0 | -1.1333   |
| 38840 | P14075 | Q9H2R5 | -1.2917   |
| 38841 | P14075 | Q8NCL9 | -0.86584  |
| 38842 | P14075 | Q9UIW2 | -0.66628  |
| 38843 | P14075 | Q9BX10 | -0.92929  |
| 38844 | P14075 | Q8N609 | -0.75275  |
| 38845 | P14075 | Q9HD45 | -0.90841  |
| 38846 | P14075 | Q674X7 | -0.22352  |
| 38847 | P14075 | B6SEH9 | -0.86584  |
| 38848 | P14075 | Q9HD87 | -0.86584  |
| 38849 | P14075 | Q7Z398 | -0.21172  |
| 38850 | P14075 | Q9Y586 | -0.2389   |
| 38851 | P14075 | Q6ZMB0 | -0.66736  |
| 38852 | P14075 | Q13424 | -0.22286  |
| 38853 | P14075 | Q9GZQ6 | -1.0789   |
| 38854 | P14075 | Q12860 | -0.51691  |
| 38855 | P14075 | Q8N6Y1 | -1.1297   |
| 38856 | P14075 | Q9Y2H8 | -0.21172  |
| 38857 | P14075 | P20160 | -0.7789   |
| 38858 | P14075 | Q8NGE9 | -1.1027   |
| 38859 | P14075 | P63129 | -0.67565  |
| 38860 | P14075 | Q9H1A7 | -0.25197  |
| 38861 | P14075 | Q9UNI1 | -0.96055  |
| 38862 | P14075 | Q9NRF2 | -0.22741  |
| 38863 | P14075 | Q8N135 | -0.84597  |
| 38864 | P14075 | Q8NC56 | -0.44358  |
| 38865 | P14075 | P07333 | -0.59785  |
| 38866 | P14075 | Q86SP6 | -1.0608   |
| 38867 | P14075 | P21964 | -0.37485  |
| 38868 | P14075 | P26572 | -0.53969  |
| 38869 | P14075 | P14151 | -0.60482  |
| 38870 | P14075 | Q9NQ39 | -0.22441  |
| 38871 | P14075 | Q9UHP7 | -1.0456   |
| 38872 | P14075 | P0CG38 | -0.436    |
| 38873 | P14075 | Q99819 | -0.49212  |
| 38874 | P14075 | Q9Y4D7 | -0.93007  |
| 38875 | P14075 | Q8WXH0 | -0.22821  |
| 38876 | P14075 | P05129 | -0.41387  |
| 38877 | P14075 | Q9BRK0 | -0.86584  |
| 38878 | P14075 | Q9UMN6 | -0.22688  |
| 38879 | P14075 | Q04771 | -0.29939  |
| 38880 | P14075 | Q5T4S7 | -0.42102  |
| 38881 | P14075 | P17858 | -0.22031  |
| 38882 | P14075 | Q01668 | -0.54015  |
| 38883 | P14075 | Q8TAQ9 | -0.84643  |
| 38884 | P14075 | P17024 | -0.21172  |
| 38885 | P14075 | Q9H993 | -0.030894 |
| 38886 | P14075 | P07327 | -0.21194  |
| 38887 | P14075 | Q99447 | -0.42455  |
| 38888 | P14075 | A6NHG9 | -1.1027   |
| 38889 | P14075 | Q969R8 | -0.040626 |
| 38890 | P14075 | O95299 | -0.19385  |
| 38891 | P14075 | Q4VXF1 | -0.86584  |
| 38892 | P14075 | Q9NVR7 | -0.19183  |
| 38893 | P14075 | Q8IZS8 | -0.93295  |
| 38894 | P14075 | Q6ISU1 | -0.31698  |
| 38895 | P14075 | Q9NY97 | -0.43185  |
| 38896 | P14075 | Q15041 | -0.22425  |
| 38897 | P14075 | Q6T310 | -0.38454  |
| 38898 | P14075 | Q8IZ69 | -0.71424  |
| 38899 | P14075 | Q9NQV5 | -0.1484   |
| 38900 | P14075 | Q9BSL1 | -0.31138  |
| 38901 | P14075 | Q16769 | -1.0922   |
| 38902 | P14075 | Q8NGZ3 | -1.1027   |
| 38903 | P14075 | Q9BXR3 | -0.43742  |
| 38904 | P14075 | Q8N697 | -0.68109  |
| 38905 | P14075 | P32242 | -0.3595   |
| 38906 | P14075 | Q9NWM8 | -0.47808  |
| 38907 | P14075 | P54750 | -0.44583  |
| 38908 | P14075 | Q9BVA0 | -0.22924  |
| 38909 | P14075 | Q96LR4 | -0.87849  |
| 38910 | P14075 | Q8IY34 | -0.77737  |
| 38911 | P14075 | P56704 | -0.23384  |
| 38912 | P14075 | Q9H6P5 | -0.71187  |

|       |        |        |           |
|-------|--------|--------|-----------|
| 38913 | P14075 | Q99501 | -0.31975  |
| 38914 | P14075 | P47902 | -0.23592  |
| 38915 | P14075 | P01620 | -0.97479  |
| 38916 | P14075 | Q9ULL1 | -0.78542  |
| 38917 | P14075 | Q00013 | -0.45857  |
| 38918 | P14075 | Q9UBT7 | -0.38572  |
| 38919 | P14075 | A2VDJ0 | -0.86584  |
| 38920 | P14075 | B7ZBB8 | -0.31134  |
| 38921 | P14075 | Q96M32 | -0.54667  |
| 38922 | P14075 | Q8WUX1 | -0.89929  |
| 38923 | P14075 | Q6UWP2 | -1.382    |
| 38924 | P14075 | P59044 | -0.38241  |
| 38925 | P14075 | P11279 | -0.79385  |
| 38926 | P14075 | Q5TGZ0 | -0.53764  |
| 38927 | P14075 | Q8N1G0 | -0.19819  |
| 38928 | P14075 | Q92519 | -0.25169  |
| 38929 | P14075 | Q96RI1 | -0.22879  |
| 38930 | P14075 | P24043 | -0.77494  |
| 38931 | P14075 | Q14112 | -0.68689  |
| 38932 | P14075 | Q9UJZ1 | -0.28659  |
| 38933 | P14075 | Q8NFU1 | -0.66771  |
| 38934 | P14075 | Q9Y2K2 | -0.35421  |
| 38935 | P14075 | Q9H461 | -0.46184  |
| 38936 | P14075 | Q9NZJ6 | -0.23984  |
| 38937 | P14075 | P78382 | -0.53002  |
| 38938 | P14075 | Q8WUH6 | -0.86584  |
| 38939 | P14075 | Q5RGS2 | -0.86584  |
| 38940 | P14075 | P54368 | -0.26402  |
| 38941 | P14075 | Q96EW2 | -0.29487  |
| 38942 | P14075 | A5PLK6 | -0.84533  |
| 38943 | P14075 | P05231 | -0.25108  |
| 38944 | P14075 | P78552 | -0.48091  |
| 38945 | P14075 | Q53R41 | -0.3676   |
| 38946 | P14075 | Q9GZK6 | -1.1027   |
| 38947 | P14075 | Q96NZ1 | -0.43185  |
| 38948 | P14075 | A6NEC2 | -0.81362  |
| 38949 | P14075 | Q9Y5Z0 | -0.83995  |
| 38950 | P14075 | Q15751 | -0.41823  |
| 38951 | P14075 | Q96R54 | -1.1027   |
| 38952 | P14075 | Q9NY57 | -0.9869   |
| 38953 | P14075 | Q8N976 | -0.22293  |
| 38954 | P14075 | P20916 | -0.85315  |
| 38955 | P14075 | Q9BST9 | -0.53254  |
| 38956 | P14075 | Q8NGD4 | -1.1027   |
| 38957 | P14075 | Q9NR82 | -0.98023  |
| 38958 | P14075 | P01816 | -0.97479  |
| 38959 | P14075 | O14638 | -1.0239   |
| 38960 | P14075 | Q99757 | -0.28667  |
| 38961 | P14075 | Q5R3K3 | -0.86584  |
| 38962 | P14075 | A1A4T8 | -0.072457 |
| 38963 | P14075 | Q8IUH2 | -0.9089   |
| 38964 | P14075 | Q9H237 | -0.7851   |
| 38965 | P14075 | P28562 | -0.24243  |
| 38966 | P14075 | P18564 | -0.99576  |
| 38967 | P14075 | Q9UMW8 | -0.46616  |
| 38968 | P14075 | Q8N0S2 | -0.17457  |
| 38969 | P14075 | Q9P2H5 | -0.69644  |
| 38970 | P14075 | Q9HDC9 | -0.72177  |
| 38971 | P14075 | P14621 | -0.2316   |
| 38972 | P14075 | Q92904 | -0.22856  |
| 38973 | P14075 | Q13021 | -0.30792  |
| 38974 | P14075 | Q9Y2E8 | -0.82538  |
| 38975 | P14075 | P78411 | -0.22888  |
| 38976 | P14075 | A8MUM7 | -0.32851  |
| 38977 | P14075 | Q13308 | -0.45118  |
| 38978 | P14075 | P53004 | -0.608    |
| 38979 | P14075 | Q9Y6R7 | -0.22077  |
| 38980 | P14075 | Q0D2K5 | -0.23213  |
| 38981 | P14075 | Q9UIG0 | -0.22637  |
| 38982 | P14075 | Q5SR56 | -0.87101  |
| 38983 | P14075 | Q9NSI5 | -0.55386  |
| 38984 | P14075 | P15328 | -0.9422   |
| 38985 | P14075 | Q8N157 | -0.22741  |
| 38986 | P14075 | O75747 | -0.62039  |
| 38987 | P14075 | Q9UBX5 | -0.47842  |
| 38988 | P14075 | O43194 | -1.3182   |

|       |        |        |           |
|-------|--------|--------|-----------|
| 38989 | P14075 | O95185 | -0.915    |
| 38990 | P14075 | Q9NYC9 | -0.61423  |
| 38991 | P14075 | F2Z398 | -0.31051  |
| 38992 | P14075 | Q9H8M5 | -0.88613  |
| 38993 | P14075 | Q8IWT6 | -0.87926  |
| 38994 | P14075 | Q49A92 | -0.56548  |
| 38995 | P14075 | Q9NQW6 | -0.2093   |
| 38996 | P14075 | P35212 | -0.86168  |
| 38997 | P14075 | P04220 | -0.55431  |
| 38998 | P14075 | Q96PU8 | -0.21318  |
| 38999 | P14075 | O43320 | -0.86394  |
| 39000 | P14075 | Q8NES3 | -0.77713  |
| 39001 | P14075 | Q8NGM8 | -1.1027   |
| 39002 | P14075 | Q96ET8 | -0.86584  |
| 39003 | P14075 | Q8NGF8 | -1.1027   |
| 39004 | P14075 | Q9Y6B7 | -0.15796  |
| 39005 | P14075 | O75469 | -0.23959  |
| 39006 | P14075 | Q12794 | -0.4034   |
| 39007 | P14075 | P10145 | -0.54239  |
| 39008 | P14075 | P01782 | -0.97479  |
| 39009 | P14075 | Q8N0U8 | -0.86584  |
| 39010 | P14075 | A8MYZ6 | -0.30442  |
| 39011 | P14075 | Q9UK00 | -0.86584  |
| 39012 | P14075 | P16949 | -0.67463  |
| 39013 | P14075 | P01732 | -0.71634  |
| 39014 | P14075 | Q7Z7K2 | -0.21172  |
| 39015 | P14075 | Q96SM3 | -1.3157   |
| 39016 | P14075 | P09525 | -0.41259  |
| 39017 | P14075 | P22004 | -0.5615   |
| 39018 | P14075 | P23515 | -0.66498  |
| 39019 | P14075 | Q8N5Y2 | -0.11743  |
| 39020 | P14075 | Q9BR26 | -0.82691  |
| 39021 | P14075 | P22460 | -0.54442  |
| 39022 | P14075 | Q6IEE8 | -0.83517  |
| 39023 | P14075 | Q7Z569 | -0.22741  |
| 39024 | P14075 | P37235 | -0.59239  |
| 39025 | P14075 | P55773 | -1.0375   |
| 39026 | P14075 | Q9H560 | -0.22741  |
| 39027 | P14075 | Q9HBL8 | -0.18872  |
| 39028 | P14075 | Q08043 | -0.30155  |
| 39029 | P14075 | P05109 | -0.28953  |
| 39030 | P14075 | Q96J87 | -0.4705   |
| 39031 | P14075 | Q9Y4D2 | -0.72194  |
| 39032 | P14075 | Q8TDZ2 | -0.22742  |
| 39033 | P14075 | Q6UWN8 | -0.79897  |
| 39034 | P14075 | Q9H347 | -0.22676  |
| 39035 | P14075 | Q96P09 | -0.56677  |
| 39036 | P14075 | O60635 | -0.94123  |
| 39037 | P14075 | Q15126 | -0.5643   |
| 39038 | P14075 | Q9BQE3 | -0.46181  |
| 39039 | P14075 | P62380 | -0.053622 |
| 39040 | P14075 | Q4VC31 | -0.30763  |
| 39041 | P14075 | P0C7M4 | -0.22433  |
| 39042 | P14075 | P46663 | -0.93514  |
| 39043 | P14075 | Q07065 | -0.74991  |
| 39044 | P14075 | Q96PS6 | -0.86584  |
| 39045 | P14075 | P36776 | -0.16191  |
| 39046 | P14075 | Q96P11 | -0.37739  |
| 39047 | P14075 | Q6P161 | -0.097496 |
| 39048 | P14075 | P51993 | -0.68847  |
| 39049 | P14075 | Q8NF37 | -0.56788  |
| 39050 | P14075 | Q9UF11 | -0.83645  |
| 39051 | P14075 | Q6ZN54 | -0.70771  |
| 39052 | P14075 | O00483 | -0.22918  |
| 39053 | P14075 | O60381 | -0.20034  |
| 39054 | P14075 | Q76LX8 | -0.49874  |
| 39055 | P14075 | Q9UPN4 | -0.23553  |
| 39056 | P14075 | Q9BXS0 | -1.3179   |
| 39057 | P14075 | P04433 | -0.97479  |
| 39058 | P14075 | P27658 | -1.0288   |
| 39059 | P14075 | C9JQI7 | -0.86584  |
| 39060 | P14075 | Q9Y2G1 | -0.3867   |
| 39061 | P14075 | P07237 | -0.32228  |
| 39062 | P14075 | Q96GX1 | -0.69815  |
| 39063 | P14075 | Q9Y2G4 | -0.2274   |
| 39064 | P14075 | Q99675 | -0.22696  |

|       |        |         |          |
|-------|--------|---------|----------|
| 39065 | P14075 | Q3SXZ3  | -0.21172 |
| 39066 | P14075 | Q9Y6I7  | -0.22997 |
| 39067 | P14075 | Q12766  | -0.22732 |
| 39068 | P14075 | Q1EHB4  | -0.98044 |
| 39069 | P14075 | Q96P20  | -0.22723 |
| 39070 | P14075 | Q6UXS9  | -0.2534  |
| 39071 | P14075 | P61626  | -0.96746 |
| 39072 | P14075 | Q8NEX9  | -0.67101 |
| 39073 | P14075 | Q6UB99  | -0.25591 |
| 39074 | P14075 | Q53HR8  | -0.40588 |
| 39075 | P14075 | P35858  | -0.76017 |
| 39076 | P14075 | A6NFX1  | -0.85789 |
| 39077 | P14075 | Q8WU68  | -0.50673 |
| 39078 | P14075 | Q674R7  | -0.79668 |
| 39079 | P14075 | Q5VU92  | -0.22693 |
| 39080 | P14075 | Q15583  | -0.23621 |
| 39081 | P14075 | Q96Q45  | -0.84388 |
| 39082 | P14075 | P58182  | -1.1027  |
| 39083 | P14075 | Q10587  | -0.21353 |
| 39084 | P14075 | Q0VG99  | -0.22749 |
| 39085 | P14075 | Q96CU9  | -0.77327 |
| 39086 | P14075 | Q9UNF1  | -0.10287 |
| 39087 | P14075 | P04155  | -0.2432  |
| 39088 | P14075 | Q69YN2  | -0.36877 |
| 39089 | P14075 | Q9HDB9  | -0.40851 |
| 39090 | P14075 | Q9BZY9  | -0.50845 |
| 39091 | P14075 | Q9NQZ8  | -0.17069 |
| 39092 | P14075 | P17612  | -0.22674 |
| 39093 | P14075 | Q96ID5  | -0.87849 |
| 39094 | P14075 | P11230  | -0.79076 |
| 39095 | P14075 | Q53H47  | -0.22447 |
| 39096 | P14075 | O00421  | -1.2165  |
| 39097 | P14075 | Q15394  | -1.0674  |
| 39098 | P14075 | P33778  | -0.88998 |
| 39099 | P14075 | P08861  | -1.3005  |
| 39100 | P14075 | P36508  | -0.16256 |
| 39101 | P14075 | Q14952  | -1.0458  |
| 39102 | P14075 | Q7L1S5  | -0.74692 |
| 39103 | P14075 | Q9BSJ1  | -0.73967 |
| 39104 | P14075 | Q01804  | -0.16078 |
| 39105 | P14075 | Q8WVC6  | -0.63964 |
| 39106 | P14075 | P54315  | -1.0185  |
| 39107 | P14075 | Q92636  | -0.22746 |
| 39108 | P14075 | Q68CR1  | -0.86584 |
| 39109 | P14075 | P22830  | -0.10656 |
| 39110 | P14075 | O15021  | -0.87005 |
| 39111 | P14075 | O75880  | -0.34951 |
| 39112 | P14075 | O75333  | -0.45309 |
| 39113 | P14075 | A6NGE4  | -0.22749 |
| 39114 | P14075 | Q02161  | -0.93117 |
| 39115 | P14075 | Q9NZN5  | -0.33885 |
| 39116 | P14075 | P49642  | -0.26528 |
| 39117 | P14075 | Q15843  | -0.22536 |
| 39118 | P14075 | Q05209  | -0.38755 |
| 39119 | P14075 | Q8NHK3  | -0.93628 |
| 39120 | P14075 | Q9UBP4  | -0.83187 |
| 39121 | P14075 | Q6NTF9  | -0.89011 |
| 39122 | P14075 | Q01415  | -0.60978 |
| 39123 | P14075 | Q9UN42  | -0.3495  |
| 39124 | P14075 | Q6UWT2  | -0.87849 |
| 39125 | P14075 | O14678  | -1.1097  |
| 39126 | P14075 | Q11128  | -0.58357 |
| 39127 | P14075 | P23276  | -0.63242 |
| 39128 | P14075 | Q92521  | -0.77893 |
| 39129 | P14075 | Q8IZM9  | -0.96495 |
| 39130 | P14075 | Q30KQ6  | -0.84399 |
| 39131 | P14075 | Q6ZLNQ3 | -0.22799 |
| 39132 | P14075 | P03905  | -0.56297 |
| 39133 | P14075 | Q6ZMW2  | -0.21172 |
| 39134 | P14075 | Q13608  | -0.27183 |
| 39135 | P14075 | Q6PIF6  | -0.80413 |
| 39136 | P14075 | P13674  | -0.53261 |
| 39137 | P14075 | Q9H0K4  | -0.66064 |
| 39138 | P14075 | Q15432  | -1.0035  |
| 39139 | P14075 | Q8WUD6  | -0.58891 |
| 39140 | P14075 | P04275  | -0.2274  |



|       |        |        |           |
|-------|--------|--------|-----------|
| 39141 | P14075 | Q902F8 | -0.5818   |
| 39142 | P14075 | P15018 | -0.36767  |
| 39143 | P14075 | P60880 | -0.21358  |
| 39144 | P14075 | P62158 | -0.22727  |
| 39145 | P14075 | Q29865 | -0.88446  |
| 39146 | P14075 | Q0P6D2 | -0.93931  |
| 39147 | P14075 | Q0D2H9 | -0.35868  |
| 39148 | P14075 | Q8WYA0 | -0.54093  |
| 39149 | P14075 | Q8N2U0 | -0.86584  |
| 39150 | P14075 | Q9UM47 | -0.2298   |
| 39151 | P14075 | Q70UQ0 | -0.37194  |
| 39152 | P14075 | P48436 | -0.27609  |
| 39153 | P14075 | P30685 | -0.88446  |
| 39154 | P14075 | Q8N8R3 | -0.69008  |
| 39155 | P14075 | O60403 | -1.1027   |
| 39156 | P14075 | P63124 | -0.67565  |
| 39157 | P14075 | P19320 | -0.60997  |
| 39158 | P14075 | Q07954 | -0.36242  |
| 39159 | P14075 | Q9UIF3 | -0.12173  |
| 39160 | P14075 | P41968 | -0.80036  |
| 39161 | P14075 | O60911 | -0.48594  |
| 39162 | P14075 | Q6L9W6 | -0.69611  |
| 39163 | P14075 | O00327 | -0.2274   |
| 39164 | P14075 | P20594 | -1.0593   |
| 39165 | P14075 | Q9H3N8 | -1.1023   |
| 39166 | P14075 | P01771 | -0.97479  |
| 39167 | P14075 | Q8WVE0 | -0.37482  |
| 39168 | P14075 | Q9H3G5 | -0.68627  |
| 39169 | P14075 | P11309 | -0.22758  |
| 39170 | P14075 | P00558 | -0.16213  |
| 39171 | P14075 | Q71H61 | -0.84057  |
| 39172 | P14075 | Q6V0L0 | -0.79339  |
| 39173 | P14075 | Q96HV5 | -0.86584  |
| 39174 | P14075 | O94900 | -0.33321  |
| 39175 | P14075 | Q9BRX5 | -0.25045  |
| 39176 | P14075 | Q8TDV2 | -1.1721   |
| 39177 | P14075 | Q9NSY1 | -0.57907  |
| 39178 | P14075 | Q96HD1 | -0.90919  |
| 39179 | P14075 | Q68D20 | -0.40508  |
| 39180 | P14075 | Q9BTX7 | -0.64958  |
| 39181 | P14075 | Q6ZU80 | -0.18366  |
| 39182 | P14075 | P41134 | -0.22743  |
| 39183 | P14075 | A8MTJ6 | -0.37218  |
| 39184 | P14075 | O75676 | -0.21674  |
| 39185 | P14075 | P61204 | -0.53654  |
| 39186 | P14075 | Q5VT97 | -0.85933  |
| 39187 | P14075 | O43151 | -0.51648  |
| 39188 | P14075 | P00390 | -0.22545  |
| 39189 | P14075 | P09211 | -0.22092  |
| 39190 | P14075 | Q9UHH9 | -0.47362  |
| 39191 | P14075 | Q8NEZ3 | -0.41192  |
| 39192 | P14075 | Q9Y6U3 | -0.37135  |
| 39193 | P14075 | Q8IY33 | -0.38972  |
| 39194 | P14075 | Q96IQ7 | -1.0003   |
| 39195 | P14075 | Q8N4N3 | -0.43639  |
| 39196 | P14075 | Q9H334 | -0.31899  |
| 39197 | P14075 | Q99626 | -0.22806  |
| 39198 | P14075 | O94910 | -0.757    |
| 39199 | P14075 | Q9Y5R4 | -0.31829  |
| 39200 | P14075 | A4QPH2 | -0.60429  |
| 39201 | P14075 | Q70IA6 | -0.17152  |
| 39202 | P14075 | Q9Y5I7 | -0.66877  |
| 39203 | P14075 | Q3LFD5 | -0.69644  |
| 39204 | P14075 | O95897 | -0.87849  |
| 39205 | P14075 | Q5JSP0 | -0.81987  |
| 39206 | P14075 | P01111 | -0.6003   |
| 39207 | P14075 | P50150 | -0.59994  |
| 39208 | P14075 | Q8NGD2 | -1.1027   |
| 39209 | P14075 | Q15119 | -0.094813 |
| 39210 | P14075 | Q5JS13 | -0.70463  |
| 39211 | P14075 | P26439 | -0.74975  |
| 39212 | P14075 | Q96I76 | -0.3991   |
| 39213 | P14075 | P30531 | -0.60136  |
| 39214 | P14075 | Q9NRP7 | -0.263    |
| 39215 | P14075 | Q00G26 | -0.42327  |
| 39216 | P14075 | O95750 | -0.27963  |

|       |        |        |           |
|-------|--------|--------|-----------|
| 39217 | P14075 | Q5NE16 | -0.49945  |
| 39218 | P14075 | P01891 | -0.7844   |
| 39219 | P14075 | Q6J4K2 | -0.959    |
| 39220 | P14075 | Q7Z6R9 | -0.20307  |
| 39221 | P14075 | Q96JJ6 | -0.94087  |
| 39222 | P14075 | P12872 | -0.86165  |
| 39223 | P14075 | Q96FB5 | -0.79048  |
| 39224 | P14075 | O94759 | -0.89164  |
| 39225 | P14075 | Q9BR77 | -0.3067   |
| 39226 | P14075 | Q6P9G0 | -0.47024  |
| 39227 | P14075 | Q6FIF0 | -0.36474  |
| 39228 | P14075 | P22455 | -0.64669  |
| 39229 | P14075 | Q14D04 | -0.69063  |
| 39230 | P14075 | Q9UN73 | -1.4444   |
| 39231 | P14075 | P53007 | -0.27605  |
| 39232 | P14075 | P17812 | -0.48527  |
| 39233 | P14075 | Q14449 | -0.42182  |
| 39234 | P14075 | Q13115 | -0.32905  |
| 39235 | P14075 | Q9Y5G6 | -1.1297   |
| 39236 | P14075 | Q96T54 | -1.0473   |
| 39237 | P14075 | Q8TAF8 | -0.90787  |
| 39238 | P14075 | P07355 | -0.23582  |
| 39239 | P14075 | Q6UX73 | -0.87849  |
| 39240 | P14075 | Q8NGJ8 | -1.1027   |
| 39241 | P14075 | Q9NZJ5 | -0.28771  |
| 39242 | P14075 | P22692 | -0.89094  |
| 39243 | P14075 | O00571 | -0.46323  |
| 39244 | P14075 | P01011 | -0.29566  |
| 39245 | P14075 | E9PQR5 | -0.005937 |
| 39246 | P14075 | Q6UXZ0 | -0.86584  |
| 39247 | P14075 | O95631 | -0.22741  |
| 39248 | P14075 | Q96AG3 | -0.4094   |
| 39249 | P14075 | P84077 | -0.22788  |
| 39250 | P14075 | Q8IVW4 | -0.4766   |
| 39251 | P14075 | Q9Y450 | -0.81319  |
| 39252 | P14075 | O60840 | -0.82958  |
| 39253 | P14075 | P01769 | -0.97479  |
| 39254 | P14075 | Q96MX6 | -0.42131  |
| 39255 | P14075 | O15392 | -0.21498  |
| 39256 | P14075 | O00237 | -0.63305  |
| 39257 | P14075 | P24347 | -1.3093   |
| 39258 | P14075 | Q7Z5Y6 | -0.83739  |
| 39259 | P14075 | O75319 | -0.8316   |
| 39260 | P14075 | Q8TDV0 | -1.1721   |
| 39261 | P14075 | Q8IVN8 | -0.91463  |
| 39262 | P14075 | P17509 | -0.22082  |
| 39263 | P14075 | P49895 | -0.88716  |
| 39264 | P14075 | Q16363 | -1.0577   |
| 39265 | P14075 | Q5EG05 | -0.66583  |
| 39266 | P14075 | Q08209 | -0.18824  |
| 39267 | P14075 | O75015 | -0.9774   |
| 39268 | P14075 | Q9HCK1 | -0.51948  |
| 39269 | P14075 | O94955 | -0.38945  |
| 39270 | P14075 | Q6IAN0 | -0.95111  |
| 39271 | P14075 | P61221 | -0.48586  |
| 39272 | P14075 | Q8TCG2 | -0.52781  |
| 39273 | P14075 | Q495W5 | -0.6755   |
| 39274 | P14075 | P19793 | -0.23453  |
| 39275 | P14075 | Q8NBQ5 | -1.0446   |
| 39276 | P14075 | Q8NBE8 | -0.20833  |
| 39277 | P14075 | Q00722 | -0.63981  |
| 39278 | P14075 | Q9P1Q5 | -1.1027   |
| 39279 | P14075 | P62166 | -0.25831  |
| 39280 | P14075 | A3KFT3 | -1.1027   |
| 39281 | P14075 | Q9BQS2 | -0.93628  |
| 39282 | P14075 | Q96RT1 | -0.23237  |
| 39283 | P14075 | Q8NGX5 | -1.1027   |
| 39284 | P14075 | Q13237 | -0.75835  |
| 39285 | P14075 | Q7LG56 | -0.10275  |
| 39286 | P14075 | Q6UWW9 | -0.86584  |
| 39287 | P14075 | Q9H4Q4 | -0.26169  |
| 39288 | P14075 | Q6ZN80 | -0.45527  |
| 39289 | P14075 | Q8IYJ0 | -0.86584  |
| 39290 | P14075 | Q15858 | -0.90183  |
| 39291 | P14075 | Q494W8 | -0.87307  |
| 39292 | P14075 | Q9BX59 | -0.99793  |

|       |        |        |           |
|-------|--------|--------|-----------|
| 39293 | P14075 | P43034 | -0.22901  |
| 39294 | P14075 | P42830 | -0.92868  |
| 39295 | P14075 | Q86W24 | -1.0192   |
| 39296 | P14075 | Q9BRT8 | -0.79654  |
| 39297 | P14075 | Q8NGH8 | -1.1027   |
| 39298 | P14075 | Q96CP7 | -0.86584  |
| 39299 | P14075 | Q7L5Y1 | -0.27344  |
| 39300 | P14075 | Q70IA8 | -0.47027  |
| 39301 | P14075 | Q86YL7 | -0.68348  |
| 39302 | P14075 | Q16773 | -0.21196  |
| 39303 | P14075 | Q96P56 | -0.53586  |
| 39304 | P14075 | Q15238 | -0.31241  |
| 39305 | P14075 | Q9P0L9 | -0.49846  |
| 39306 | P14075 | Q96EC8 | -0.85795  |
| 39307 | P14075 | Q9UBT3 | -0.71748  |
| 39308 | P14075 | Q8NHH9 | -0.46609  |
| 39309 | P14075 | O00515 | -0.822    |
| 39310 | P14075 | Q6ZMM2 | -0.95528  |
| 39311 | P14075 | Q969V1 | -1.1721   |
| 39312 | P14075 | P03901 | -0.57217  |
| 39313 | P14075 | P46094 | -1.1584   |
| 39314 | P14075 | Q9NYQ8 | -0.78098  |
| 39315 | P14075 | Q9Y232 | -0.22194  |
| 39316 | P14075 | Q02747 | -0.91438  |
| 39317 | P14075 | Q06710 | -0.22714  |
| 39318 | P14075 | Q86X27 | -0.84229  |
| 39319 | P14075 | Q9H1K6 | -0.031059 |
| 39320 | P14075 | Q92888 | -0.34989  |
| 39321 | P14075 | Q9BXS4 | -0.69876  |
| 39322 | P14075 | Q9BUM1 | -0.40693  |
| 39323 | P14075 | Q9ULT0 | -0.3785   |
| 39324 | P14075 | P09651 | -0.2535   |
| 39325 | P14075 | P0C7N1 | -1.1027   |
| 39326 | P14075 | A6NNM8 | -0.42167  |
| 39327 | P14075 | O94808 | -0.19385  |
| 39328 | P14075 | Q0P5N6 | -1.2555   |
| 39329 | P14075 | Q9NX01 | -0.15928  |
| 39330 | P14075 | O75344 | -0.54973  |
| 39331 | P14075 | Q53RY4 | -0.86584  |
| 39332 | P14075 | Q6TAR4 | -0.45271  |
| 39333 | P14075 | Q9BZI1 | -0.22833  |
| 39334 | P14075 | Q9H2Y7 | -0.38773  |
| 39335 | P14075 | Q9BSY9 | -0.55657  |
| 39336 | P14075 | Q5KU26 | -0.63189  |
| 39337 | P14075 | Q5W0Z9 | -0.89944  |
| 39338 | P14075 | Q8N9X5 | -0.86584  |
| 39339 | P14075 | P05305 | -0.27337  |
| 39340 | P14075 | Q6IB77 | -0.20967  |
| 39341 | P14075 | P25800 | -0.24659  |
| 39342 | P14075 | Q5T619 | -0.21172  |
| 39343 | P14075 | Q14213 | -0.85218  |
| 39344 | P14075 | Q9UK59 | -0.21394  |
| 39345 | P14075 | P61086 | -0.43575  |
| 39346 | P14075 | Q96QV6 | -0.88998  |
| 39347 | P14075 | Q9NW75 | -0.48135  |
| 39348 | P14075 | Q8TDJ6 | -0.5207   |
| 39349 | P14075 | P0CG04 | -0.97479  |
| 39350 | P14075 | P10412 | -0.21697  |
| 39351 | P14075 | P43220 | -0.61213  |
| 39352 | P14075 | O94844 | -1.1939   |
| 39353 | P14075 | Q9UJT1 | -0.37941  |
| 39354 | P14075 | Q8NHU3 | -0.69343  |
| 39355 | P14075 | O60806 | -0.37484  |
| 39356 | P14075 | Q14246 | -1.3925   |
| 39357 | P14075 | P29377 | -0.47091  |
| 39358 | P14075 | P58215 | -0.30034  |
| 39359 | P14075 | P13765 | -0.94427  |
| 39360 | P14075 | P0C626 | -1.1152   |
| 39361 | P14075 | Q6ZNL6 | -0.95987  |
| 39362 | P14075 | Q9H8N7 | -0.10867  |
| 39363 | P14075 | O43602 | -0.47521  |
| 39364 | P14075 | P01767 | -0.97479  |
| 39365 | P14075 | Q99807 | -0.30027  |
| 39366 | P14075 | Q4G0N4 | -0.44049  |
| 39367 | P14075 | P11117 | -0.77887  |
| 39368 | P14075 | A8MYJ7 | -0.1688   |

|       |        |        |           |
|-------|--------|--------|-----------|
| 39369 | P14075 | Q8NH16 | -0.91257  |
| 39370 | P14075 | Q9NP84 | -0.52929  |
| 39371 | P14075 | Q92504 | -0.9381   |
| 39372 | P14075 | P21333 | -0.22803  |
| 39373 | P14075 | Q6UY13 | -0.87849  |
| 39374 | P14075 | P40123 | -0.59599  |
| 39375 | P14075 | Q8NFS9 | -0.70373  |
| 39376 | P14075 | Q9NR30 | -0.49836  |
| 39377 | P14075 | P08590 | -0.43914  |
| 39378 | P14075 | Q30KP9 | -0.84399  |
| 39379 | P14075 | A4IF30 | -0.85789  |
| 39380 | P14075 | Q9Y575 | -0.62076  |
| 39381 | P14075 | Q9Y2Z9 | -0.61707  |
| 39382 | P14075 | Q9P2W7 | -0.57756  |
| 39383 | P14075 | Q8TDG2 | -0.30492  |
| 39384 | P14075 | P07099 | -0.87824  |
| 39385 | P14075 | Q8TEA7 | -0.98704  |
| 39386 | P14075 | Q95365 | -0.88446  |
| 39387 | P14075 | P27037 | -0.30844  |
| 39388 | P14075 | Q68CJ6 | -0.51014  |
| 39389 | P14075 | A1L1A6 | -0.86584  |
| 39390 | P14075 | A6NGU5 | -0.69875  |
| 39391 | P14075 | Q6UWM7 | -0.83419  |
| 39392 | P14075 | Q86TI0 | -0.9907   |
| 39393 | P14075 | Q3MIP1 | -0.86584  |
| 39394 | P14075 | Q9NX02 | -0.2273   |
| 39395 | P14075 | Q9H339 | -1.1027   |
| 39396 | P14075 | P17538 | -1.2738   |
| 39397 | P14075 | Q9BSW7 | -0.49325  |
| 39398 | P14075 | P48065 | -0.9674   |
| 39399 | P14075 | P55075 | -0.31694  |
| 39400 | P14075 | Q9H3Y0 | -0.85841  |
| 39401 | P14075 | Q685J3 | -0.58126  |
| 39402 | P14075 | A8MV57 | -0.16401  |
| 39403 | P14075 | Q96AN5 | -0.54355  |
| 39404 | P14075 | P14616 | -1.0618   |
| 39405 | P14075 | Q13790 | -0.97879  |
| 39406 | P14075 | Q5W0N0 | -0.86584  |
| 39407 | P14075 | O94889 | -0.20624  |
| 39408 | P14075 | Q9HCP0 | -0.76191  |
| 39409 | P14075 | Q6UWT4 | -0.87849  |
| 39410 | P14075 | Q8NAA6 | -0.042909 |
| 39411 | P14075 | Q53H96 | -0.8265   |
| 39412 | P14075 | P05814 | -0.84456  |
| 39413 | P14075 | Q8WZA6 | -1.1027   |
| 39414 | P14075 | Q13686 | -0.4159   |
| 39415 | P14075 | Q8TCB7 | -0.37739  |
| 39416 | P14075 | Q71RC9 | -0.86584  |
| 39417 | P14075 | O15321 | -0.88525  |
| 39418 | P14075 | P39059 | -1.3246   |
| 39419 | P14075 | Q9HDB8 | -0.30416  |
| 39420 | P14075 | P0C7W8 | -0.48092  |
| 39421 | P14075 | A0PJZ3 | -0.79008  |
| 39422 | P14075 | A6NNS2 | -1.2508   |
| 39423 | P14075 | Q6EIG7 | -0.78206  |
| 39424 | P14075 | Q9NRX4 | -0.21068  |
| 39425 | P14075 | Q9H2W2 | -0.22298  |
| 39426 | P14075 | Q01629 | -0.76864  |
| 39427 | P14075 | Q9NWH9 | -0.22814  |
| 39428 | P14075 | Q8IXZ3 | -0.28124  |
| 39429 | P14075 | O00399 | -0.11523  |
| 39430 | P14075 | Q14772 | -0.82697  |
| 39431 | P14075 | P85037 | -0.27067  |
| 39432 | P14075 | Q6NZY7 | -0.49789  |
| 39433 | P14075 | P36871 | -0.088399 |
| 39434 | P14075 | Q8IV01 | -0.75287  |
| 39435 | P14075 | Q7Z736 | -0.66252  |
| 39436 | P14075 | Q9NR61 | -0.80771  |
| 39437 | P14075 | O75179 | -0.22751  |
| 39438 | P14075 | Q96P65 | -1.143    |
| 39439 | P14075 | Q7Z4B0 | -0.87849  |
| 39440 | P14075 | O00592 | -0.87733  |
| 39441 | P14075 | O75781 | -0.23554  |
| 39442 | P14075 | Q5TYW1 | -0.21172  |
| 39443 | P14075 | Q9Y4X1 | -0.81906  |
| 39444 | P14075 | P06401 | -0.22742  |

|       |        |        |          |
|-------|--------|--------|----------|
| 39445 | P14075 | P78549 | -0.14195 |
| 39446 | P14075 | Q6ZSJ9 | -0.86584 |
| 39447 | P14075 | Q9UL59 | -0.21172 |
| 39448 | P14075 | Q5ST30 | -0.27312 |
| 39449 | P14075 | Q9H8P0 | -0.64618 |
| 39450 | P14075 | Q9H114 | -0.89477 |
| 39451 | P14075 | P0CB48 | -0.33321 |
| 39452 | P14075 | P55160 | -0.33199 |
| 39453 | P14075 | O60384 | -0.51948 |
| 39454 | P14075 | P13762 | -0.67577 |
| 39455 | P14075 | Q9UBU3 | -0.32397 |
| 39456 | P14075 | Q6PJ69 | -0.73967 |
| 39457 | P14075 | Q9H3S4 | -0.44193 |
| 39458 | P14075 | Q9H6D3 | -0.86584 |
| 39459 | P14075 | Q86X67 | -0.30367 |
| 39460 | P14075 | Q9NZ72 | -0.19831 |
| 39461 | P14075 | Q8IVW6 | -0.20937 |
| 39462 | P14075 | Q9H5V8 | -1.2762  |
| 39463 | P14075 | Q8NC24 | -0.97714 |
| 39464 | P14075 | Q7Z3B0 | -0.86584 |
| 39465 | P14075 | Q8NGJ0 | -1.1027  |
| 39466 | P14075 | Q9Y585 | -1.1027  |
| 39467 | P14075 | Q8NCT1 | -0.576   |
| 39468 | P14075 | P51570 | -0.44051 |
| 39469 | P14075 | P02458 | -0.57368 |
| 39470 | P14075 | Q9H987 | -0.39786 |
| 39471 | P14075 | Q6NT16 | -0.8419  |
| 39472 | P14075 | P01713 | -0.97479 |
| 39473 | P14075 | Q96JQ2 | -0.74698 |
| 39474 | P14075 | P98173 | -0.54538 |
| 39475 | P14075 | Q8WV41 | -0.22741 |
| 39476 | P14075 | Q00872 | -0.99998 |
| 39477 | P14075 | P23510 | -0.42245 |
| 39478 | P14075 | P33763 | -0.36869 |
| 39479 | P14075 | Q7L945 | -0.21172 |
| 39480 | P14075 | A6NJS3 | -0.87849 |
| 39481 | P14075 | Q5VXT5 | -0.85176 |
| 39482 | P14075 | P46736 | -0.24737 |
| 39483 | P14075 | Q14141 | -0.22073 |
| 39484 | P14075 | P06126 | -0.52623 |
| 39485 | P14075 | A6NGB7 | -0.86584 |
| 39486 | P14075 | Q13190 | -0.20941 |
| 39487 | P14075 | Q8TD47 | -0.16176 |
| 39488 | P14075 | Q4QY38 | -0.84399 |
| 39489 | P14075 | Q92565 | -0.4947  |
| 39490 | P14075 | Q8NDV1 | -0.65995 |
| 39491 | P14075 | Q9ULH0 | -0.67044 |
| 39492 | P14075 | Q5NDL2 | -0.41678 |
| 39493 | P14075 | Q9NW61 | -0.5353  |
| 39494 | P14075 | P0CB38 | -0.84005 |
| 39495 | P14075 | Q5VVJ2 | -0.22738 |
| 39496 | P14075 | Q93099 | -0.46405 |
| 39497 | P14075 | P78381 | -0.39119 |
| 39498 | P14075 | Q9H210 | -1.1027  |
| 39499 | P14075 | Q08397 | -1.059   |
| 39500 | P14075 | Q9H4I9 | -0.74159 |
| 39501 | P14075 | Q96R08 | -1.1027  |
| 39502 | P14075 | Q96PD5 | -0.85601 |
| 39503 | P14075 | Q9BZF2 | -0.80455 |
| 39504 | P14075 | Q96Q27 | -0.73205 |
| 39505 | P14075 | Q9H4B4 | -0.22742 |
| 39506 | P14075 | Q9Y5H5 | -1.1297  |
| 39507 | P14075 | Q6SZW1 | -0.61334 |
| 39508 | P14075 | Q4VNC0 | -0.91999 |
| 39509 | P14075 | A6NMX2 | -0.18507 |
| 39510 | P14075 | Q8WVV5 | -0.80748 |
| 39511 | P14075 | P49746 | -0.93817 |
| 39512 | P14075 | Q02224 | -0.24342 |
| 39513 | P14075 | Q6XZB0 | -1.0637  |
| 39514 | P14075 | Q9NQ35 | -0.55277 |
| 39515 | P14075 | P41180 | -0.72562 |
| 39516 | P14075 | Q9NPH3 | -1.4284  |
| 39517 | P14075 | Q10469 | -0.68916 |
| 39518 | P14075 | Q9NPZ5 | -0.56395 |
| 39519 | P14075 | O14654 | -0.81807 |
| 39520 | P14075 | O75431 | -0.23385 |

|       |        |        |           |
|-------|--------|--------|-----------|
| 39521 | P14075 | Q9NYW2 | -0.97792  |
| 39522 | P14075 | O75505 | -0.2208   |
| 39523 | P14075 | P17039 | -0.21172  |
| 39524 | P14075 | Q9Y2U2 | -1.0473   |
| 39525 | P14075 | Q5VSY0 | -0.49482  |
| 39526 | P14075 | Q2VIQ3 | -0.29701  |
| 39527 | P14075 | Q9UK53 | -0.22426  |
| 39528 | P14075 | Q8IZD6 | -0.88737  |
| 39529 | P14075 | Q01970 | -0.49089  |
| 39530 | P14075 | Q9H6S1 | -0.22237  |
| 39531 | P14075 | Q86W42 | -0.33753  |
| 39532 | P14075 | P42356 | -0.44128  |
| 39533 | P14075 | O43613 | -1.2197   |
| 39534 | P14075 | Q68BL7 | -0.86399  |
| 39535 | P14075 | P21453 | -0.75297  |
| 39536 | P14075 | Q8NER1 | -0.99986  |
| 39537 | P14075 | Q9BZ71 | -0.69789  |
| 39538 | P14075 | Q96LR5 | -0.60712  |
| 39539 | P14075 | Q01469 | -0.19191  |
| 39540 | P14075 | Q86WS3 | -0.87849  |
| 39541 | P14075 | A6NI15 | -0.22741  |
| 39542 | P14075 | Q8IUS5 | -0.97121  |
| 39543 | P14075 | Q9ULU8 | -0.041243 |
| 39544 | P14075 | Q8NCG5 | -0.62276  |
| 39545 | P14075 | Q86YT5 | -0.71154  |
| 39546 | P14075 | Q8TDQ1 | -0.93628  |
| 39547 | P14075 | Q8WV28 | -0.2274   |
| 39548 | P14075 | Q8TAU0 | -0.2275   |
| 39549 | P14075 | Q96NE9 | -0.37606  |
| 39550 | P14075 | P16284 | -0.46281  |
| 39551 | P14075 | Q6H8Q1 | -0.2283   |
| 39552 | P14075 | Q86TX2 | -0.0766   |
| 39553 | P14075 | P57052 | -0.61385  |
| 39554 | P14075 | P48443 | -0.2276   |
| 39555 | P14075 | Q9BZ72 | -1.3237   |
| 39556 | P14075 | P22492 | -1.0589   |
| 39557 | P14075 | P32239 | -0.58221  |
| 39558 | P14075 | Q9UQ16 | -0.23059  |
| 39559 | P14075 | Q8N755 | -0.86584  |
| 39560 | P14075 | P38571 | -0.52045  |
| 39561 | P14075 | P37288 | -0.42717  |
| 39562 | P14075 | Q9NRR2 | -1.2797   |
| 39563 | P14075 | Q1HG43 | -0.75204  |
| 39564 | P14075 | Q9H1B5 | -0.66159  |
| 39565 | P14075 | Q96RR1 | -0.26081  |
| 39566 | P14075 | Q9UL19 | -0.48875  |
| 39567 | P14075 | O75022 | -0.61082  |
| 39568 | P14075 | Q6UY11 | -0.91803  |
| 39569 | P14075 | P0C623 | -1.1027   |
| 39570 | P14075 | Q9NZN1 | -0.55427  |
| 39571 | P14075 | Q96CS7 | -0.57001  |
| 39572 | P14075 | Q9H6E5 | -0.22708  |
| 39573 | P14075 | Q8NFV4 | -0.2194   |
| 39574 | P14075 | P23743 | -0.88724  |
| 39575 | P14075 | Q96RJ0 | -1.1148   |
| 39576 | P14075 | Q969W1 | -0.93585  |
| 39577 | P14075 | P31629 | -0.22726  |
| 39578 | P14075 | Q7Z5A8 | -0.87849  |
| 39579 | P14075 | P11509 | -0.66984  |
| 39580 | P14075 | Q6PDB4 | -0.39217  |
| 39581 | P14075 | Q9P283 | -0.92565  |
| 39582 | P14075 | P80419 | -0.88984  |
| 39583 | P14075 | Q9NUQ2 | -0.63146  |
| 39584 | P14075 | Q6DJT9 | -0.19762  |
| 39585 | P14075 | Q9BY08 | -0.89626  |
| 39586 | P14075 | Q9ULP9 | -0.54354  |
| 39587 | P14075 | O76100 | -1.1027   |
| 39588 | P14075 | Q8WUG5 | -0.93452  |
| 39589 | P14075 | Q9UPW5 | -0.21662  |
| 39590 | P14075 | P49715 | -0.21756  |
| 39591 | P14075 | Q9NV70 | -0.30139  |
| 39592 | P14075 | Q9UBV4 | -0.73826  |
| 39593 | P14075 | Q6UXB0 | -0.87849  |
| 39594 | P14075 | P30101 | -0.24251  |
| 39595 | P14075 | Q9Y698 | -0.54938  |
| 39596 | P14075 | Q9BV44 | -0.39051  |

|       |        |        |           |
|-------|--------|--------|-----------|
| 39597 | P14075 | P63252 | -1.1993   |
| 39598 | P14075 | Q6ZSS3 | -0.21172  |
| 39599 | P14075 | Q9UIE0 | -0.21172  |
| 39600 | P14075 | P05093 | -0.43888  |
| 39601 | P14075 | P51160 | -1.0358   |
| 39602 | P14075 | Q13576 | -0.94595  |
| 39603 | P14075 | Q6BEB4 | -0.22411  |
| 39604 | P14075 | P56730 | -1.1083   |
| 39605 | P14075 | Q08211 | -0.2266   |
| 39606 | P14075 | Q9H6H4 | -0.86584  |
| 39607 | P14075 | Q5VV41 | -0.22858  |
| 39608 | P14075 | Q5T9A4 | -0.79084  |
| 39609 | P14075 | O00398 | -1.124    |
| 39610 | P14075 | Q13191 | -0.22741  |
| 39611 | P14075 | P01616 | -0.95485  |
| 39612 | P14075 | Q6ZNH5 | -0.21172  |
| 39613 | P14075 | P68363 | -0.20109  |
| 39614 | P14075 | Q5T2S8 | -0.22784  |
| 39615 | P14075 | Q3SXZ7 | -0.45512  |
| 39616 | P14075 | Q9BQI3 | -0.6343   |
| 39617 | P14075 | P54802 | -0.3716   |
| 39618 | P14075 | Q15120 | -0.22151  |
| 39619 | P14075 | Q86YW0 | -0.39395  |
| 39620 | P14075 | P19634 | -0.2984   |
| 39621 | P14075 | Q9UBC7 | -0.65563  |
| 39622 | P14075 | P30679 | -0.83607  |
| 39623 | P14075 | Q9BW30 | -0.45019  |
| 39624 | P14075 | Q8WX94 | -0.79654  |
| 39625 | P14075 | P28300 | -0.36888  |
| 39626 | P14075 | O95210 | -0.51536  |
| 39627 | P14075 | O14921 | -0.38499  |
| 39628 | P14075 | Q9BYE2 | -1.1635   |
| 39629 | P14075 | Q6ZTR7 | -0.039113 |
| 39630 | P14075 | Q9BUN1 | -0.87849  |
| 39631 | P14075 | P07093 | -0.32854  |
| 39632 | P14075 | Q9Y2T6 | -1.0969   |
| 39633 | P14075 | Q5T124 | -0.30492  |
| 39634 | P14075 | Q75955 | -0.3315   |
| 39635 | P14075 | P35606 | -0.23131  |
| 39636 | P14075 | Q96KA5 | -0.84589  |
| 39637 | P14075 | P30301 | -0.90729  |
| 39638 | P14075 | Q9H7Z6 | -0.20636  |
| 39639 | P14075 | P48050 | -0.47343  |
| 39640 | P14075 | Q15270 | -0.22721  |
| 39641 | P14075 | Q9Y4H2 | -0.19822  |
| 39642 | P14075 | P59542 | -1.0953   |
| 39643 | P14075 | Q5THR3 | -0.22702  |
| 39644 | P14075 | P18858 | -0.28221  |
| 39645 | P14075 | Q9Y376 | -0.15158  |
| 39646 | P14075 | Q5VT79 | -0.49855  |
| 39647 | P14075 | Q9GZQ8 | -0.34859  |
| 39648 | P14075 | P51788 | -0.75324  |
| 39649 | P14075 | Q7L311 | -0.86584  |
| 39650 | P14075 | Q92616 | -0.22506  |
| 39651 | P14075 | Q9C0I1 | -0.50994  |
| 39652 | P14075 | O60844 | -0.64978  |
| 39653 | P14075 | Q92935 | -0.88574  |
| 39654 | P14075 | Q9Y4L5 | -0.22995  |
| 39655 | P14075 | Q8IVL6 | -0.63396  |
| 39656 | P14075 | Q7Z444 | -1.1897   |
| 39657 | P14075 | Q9UFM2 | -0.21602  |
| 39658 | P14075 | Q13461 | -0.31899  |
| 39659 | P14075 | O43525 | -0.89309  |
| 39660 | P14075 | Q8WWY8 | -1.0637   |
| 39661 | P14075 | Q8N8L2 | -0.21172  |
| 39662 | P14075 | A8MUU1 | -0.57941  |
| 39663 | P14075 | P98155 | -0.86989  |
| 39664 | P14075 | P43629 | -1.0565   |
| 39665 | P14075 | Q8NG78 | -1.1027   |
| 39666 | P14075 | Q6NW34 | -0.86584  |
| 39667 | P14075 | Q9NZ42 | -0.41112  |
| 39668 | P14075 | Q58DX5 | -1.0911   |
| 39669 | P14075 | Q6PIU2 | -0.91466  |
| 39670 | P14075 | O75165 | -0.49341  |
| 39671 | P14075 | Q00532 | -0.40126  |
| 39672 | P14075 | Q9H0L4 | -0.79931  |

|       |        |        |           |
|-------|--------|--------|-----------|
| 39673 | P14075 | Q13555 | -0.71796  |
| 39674 | P14075 | Q9Y3A4 | -0.84005  |
| 39675 | P14075 | P01889 | -0.87362  |
| 39676 | P14075 | P78310 | -0.22882  |
| 39677 | P14075 | Q9BWF2 | -0.22735  |
| 39678 | P14075 | A7KAX9 | -0.40339  |
| 39679 | P14075 | P16190 | -0.7844   |
| 39680 | P14075 | P20719 | -0.22084  |
| 39681 | P14075 | Q13444 | -0.60991  |
| 39682 | P14075 | Q9H672 | -0.62076  |
| 39683 | P14075 | P60509 | -0.93628  |
| 39684 | P14075 | Q6P5W5 | -0.77262  |
| 39685 | P14075 | Q96DD7 | -0.86584  |
| 39686 | P14075 | Q1L5Z9 | -0.64479  |
| 39687 | P14075 | Q96MA1 | -0.024693 |
| 39688 | P14075 | O60499 | -0.40254  |
| 39689 | P14075 | Q11201 | -0.64168  |
| 39690 | P14075 | O43424 | -0.61467  |
| 39691 | P14075 | P0C7V8 | -0.22748  |
| 39692 | P14075 | Q9Y256 | -1.0653   |
| 39693 | P14075 | Q99877 | -0.88998  |
| 39694 | P14075 | Q8WXX5 | -0.47218  |
| 39695 | P14075 | P0C7Q6 | -0.86584  |
| 39696 | P14075 | P0C7X4 | -0.43943  |
| 39697 | P14075 | P10451 | -0.72554  |
| 39698 | P14075 | Q8TEQ0 | -0.55072  |
| 39699 | P14075 | Q02779 | -0.5456   |
| 39700 | P14075 | Q9UKB1 | -0.37107  |
| 39701 | P14075 | Q9Y330 | -0.22151  |
| 39702 | P14075 | Q16552 | -0.57272  |
| 39703 | P14075 | Q86UK0 | -1.1208   |
| 39704 | P14075 | Q86XX4 | -1.0388   |
| 39705 | P14075 | P0C7T2 | -1.1027   |
| 39706 | P14075 | O43304 | -0.95278  |
| 39707 | P14075 | Q15040 | -0.70087  |
| 39708 | P14075 | A6NNM3 | -0.22738  |
| 39709 | P14075 | Q9NU63 | -0.3598   |
| 39710 | P14075 | A6NGN9 | -0.87849  |
| 39711 | P14075 | Q16630 | -0.18993  |
| 39712 | P14075 | Q15539 | -0.77549  |
| 39713 | P14075 | Q96C00 | -0.22738  |
| 39714 | P14075 | Q5QJ38 | -0.52751  |
| 39715 | P14075 | Q70JA7 | -0.5004   |
| 39716 | P14075 | Q8WUU4 | -0.22452  |
| 39717 | P14075 | Q9H5K3 | -1.1594   |
| 39718 | P14075 | Q96I25 | -0.20472  |
| 39719 | P14075 | P0CJ71 | -0.72903  |
| 39720 | P14075 | Q92908 | -0.22739  |
| 39721 | P14075 | Q8N4H5 | -0.51772  |
| 39722 | P14075 | Q9Y4F9 | -0.47954  |
| 39723 | P14075 | Q3B7S5 | -0.86584  |
| 39724 | P14075 | Q99788 | -0.82124  |
| 39725 | P14075 | Q9P2J3 | -0.21199  |
| 39726 | P14075 | Q9H0X9 | -1.0379   |
| 39727 | P14075 | A5D8T8 | -0.86789  |
| 39728 | P14075 | Q29974 | -0.53914  |
| 39729 | P14075 | Q03154 | -0.45214  |
| 39730 | P14075 | P13726 | -0.31336  |
| 39731 | P14075 | A6NFE3 | -0.64425  |
| 39732 | P14075 | Q9Y210 | -0.35801  |
| 39733 | P14075 | Q15208 | -0.22739  |
| 39734 | P14075 | Q00631 | -0.75413  |
| 39735 | P14075 | Q6JEL2 | -0.29184  |
| 39736 | P14075 | P55851 | -0.51747  |
| 39737 | P14075 | Q9H9P8 | -0.601    |
| 39738 | P14075 | A6NNL5 | -0.87849  |
| 39739 | P14075 | Q13443 | -0.57415  |
| 39740 | P14075 | Q7Z4G4 | -0.33343  |
| 39741 | P14075 | Q6P5R6 | -0.20594  |
| 39742 | P14075 | O95475 | -0.22753  |
| 39743 | P14075 | Q9NUI1 | -1.0278   |
| 39744 | P14075 | Q9NV96 | -0.32149  |
| 39745 | P14075 | P29466 | -0.22738  |
| 39746 | P14075 | Q07864 | -0.3725   |
| 39747 | P14075 | Q96DZ7 | -0.86584  |
| 39748 | P14075 | O75388 | -1.29     |



|       |        |        |           |
|-------|--------|--------|-----------|
| 39749 | P14075 | P30488 | -0.88446  |
| 39750 | P14075 | P24046 | -0.76989  |
| 39751 | P14075 | Q96MH6 | -0.92269  |
| 39752 | P14075 | P0C6C1 | -0.22741  |
| 39753 | P14075 | Q8NA61 | -0.42034  |
| 39754 | P14075 | Q95847 | -0.72643  |
| 39755 | P14075 | Q9H930 | -0.42119  |
| 39756 | P14075 | P07437 | -0.17749  |
| 39757 | P14075 | Q9NX07 | -0.37589  |
| 39758 | P14075 | P08236 | -0.52832  |
| 39759 | P14075 | Q8N945 | -0.30763  |
| 39760 | P14075 | Q8NGB2 | -1.1027   |
| 39761 | P14075 | Q14721 | -0.3333   |
| 39762 | P14075 | Q92902 | -0.12024  |
| 39763 | P14075 | Q9BTW9 | -0.11261  |
| 39764 | P14075 | P0C2S0 | -0.8462   |
| 39765 | P14075 | P49221 | -0.38345  |
| 39766 | P14075 | P49019 | -1.2378   |
| 39767 | P14075 | Q8TED4 | -0.74011  |
| 39768 | P14075 | P53355 | -0.32049  |
| 39769 | P14075 | P13727 | -0.85936  |
| 39770 | P14075 | P13224 | -0.59651  |
| 39771 | P14075 | Q9BY07 | -0.87719  |
| 39772 | P14075 | P06311 | -0.97479  |
| 39773 | P14075 | Q8NCN2 | -0.22594  |
| 39774 | P14075 | Q8WWF1 | -0.87849  |
| 39775 | P14075 | Q8NB66 | -0.36516  |
| 39776 | P14075 | P23975 | -0.54496  |
| 39777 | P14075 | O15209 | -0.2262   |
| 39778 | P14075 | Q96J84 | -0.70202  |
| 39779 | P14075 | Q9H0A3 | -0.86584  |
| 39780 | P14075 | P57679 | -0.73441  |
| 39781 | P14075 | Q9Y345 | -0.84481  |
| 39782 | P14075 | Q6ZUV0 | -0.25437  |
| 39783 | P14075 | Q7RTV2 | -0.27596  |
| 39784 | P14075 | P26599 | -0.22596  |
| 39785 | P14075 | Q9NY64 | -0.53652  |
| 39786 | P14075 | Q10713 | -0.57622  |
| 39787 | P14075 | Q66K37 | -0.22623  |
| 39788 | P14075 | P12829 | -0.49076  |
| 39789 | P14075 | Q8N3Z3 | -0.82484  |
| 39790 | P14075 | Q8IXK0 | -0.087476 |
| 39791 | P14075 | P36575 | -0.29957  |
| 39792 | P14075 | Q9NXF1 | -0.44128  |
| 39793 | P14075 | Q9Y2R0 | -0.75099  |
| 39794 | P14075 | Q5VYS8 | -0.45262  |
| 39795 | P14075 | Q86WI0 | -0.86584  |
| 39796 | P14075 | Q95944 | -1.147    |
| 39797 | P14075 | Q8NGG0 | -1.1027   |
| 39798 | P14075 | Q6PIS1 | -0.81229  |
| 39799 | P14075 | P49069 | -0.39605  |
| 39800 | P14075 | A4D0S4 | -1.1527   |
| 39801 | P14075 | Q8IY21 | -0.22341  |
| 39802 | P14075 | Q7Z5L0 | -0.85846  |
| 39803 | P14075 | P51451 | -0.96624  |
| 39804 | P14075 | Q14703 | -0.84244  |
| 39805 | P14075 | Q43508 | -0.7986   |
| 39806 | P14075 | Q9H2W1 | -0.86584  |
| 39807 | P14075 | Q7L8C5 | -0.92724  |
| 39808 | P14075 | Q9BTN0 | -0.96434  |
| 39809 | P14075 | P61550 | -0.63565  |
| 39810 | P14075 | Q96I99 | -0.67227  |
| 39811 | P14075 | Q6UWQ5 | -0.85255  |
| 39812 | P14075 | Q7Z6V5 | -0.57065  |
| 39813 | P14075 | Q9Y6I9 | -0.87849  |
| 39814 | P14075 | Q6ZSM3 | -0.89347  |
| 39815 | P14075 | Q01638 | -0.73611  |
| 39816 | P14075 | Q30201 | -0.47023  |
| 39817 | P14075 | Q8NI35 | -0.22627  |
| 39818 | P14075 | Q562E7 | -0.47169  |
| 39819 | P14075 | P18859 | -0.26808  |
| 39820 | P14075 | Q6UXS0 | -0.86789  |
| 39821 | P14075 | Q5T447 | -0.22777  |
| 39822 | P14075 | P15085 | -1.1654   |
| 39823 | P14075 | Q8IU99 | -1.013    |
| 39824 | P14075 | Q9ULD4 | -0.25033  |

|       |        |        |          |
|-------|--------|--------|----------|
| 39825 | P14075 | Q05586 | -0.37791 |
| 39826 | P14075 | Q86YJ7 | -0.22741 |
| 39827 | P14075 | Q9BUJ0 | -0.66035 |
| 39828 | P14075 | P48664 | -0.98196 |
| 39829 | P14075 | Q5SW24 | -0.2133  |
| 39830 | P14075 | O95718 | -0.22742 |
| 39831 | P14075 | Q8IWX8 | -0.25045 |
| 39832 | P14075 | A0AV96 | -0.61616 |
| 39833 | P14075 | P08172 | -0.83205 |
| 39834 | P14075 | P07602 | -0.78472 |
| 39835 | P14075 | O00230 | -0.87331 |
| 39836 | P14075 | Q15582 | -1.1855  |
| 39837 | P14075 | Q13936 | -0.27206 |
| 39838 | P14075 | Q9P1W8 | -0.50935 |
| 39839 | P14075 | Q9P2N6 | -0.52826 |
| 39840 | P14075 | Q9C091 | -0.86584 |
| 39841 | P14075 | Q5T1A1 | -0.86584 |
| 39842 | P14075 | O76071 | -0.2716  |
| 39843 | P14075 | Q9NRX6 | -0.72271 |
| 39844 | P14075 | Q8TEY5 | -0.22713 |
| 39845 | P14075 | O95759 | -1.1611  |
| 39846 | P14075 | P31274 | -0.11617 |
| 39847 | P14075 | Q96SQ9 | -0.77329 |
| 39848 | P14075 | Q9BQ39 | -0.56743 |
| 39849 | P14075 | Q9H400 | -0.68607 |
| 39850 | P14075 | O95260 | -0.10889 |
| 39851 | P14075 | Q9NQT6 | -0.46961 |
| 39852 | P14075 | P21281 | -0.50451 |
| 39853 | P14075 | Q92847 | -0.62047 |
| 39854 | P14075 | Q03828 | -0.22726 |
| 39855 | P14075 | Q99958 | -0.24879 |
| 39856 | P14075 | Q9BY84 | -0.76763 |
| 39857 | P14075 | P21810 | -0.61541 |
| 39858 | P14075 | P48546 | -1.1297  |
| 39859 | P14075 | Q8WVP7 | -0.84656 |
| 39860 | P14075 | O43897 | -1.3579  |
| 39861 | P14075 | P45983 | -0.2274  |
| 39862 | P14075 | Q17R98 | -0.22733 |
| 39863 | P14075 | P08173 | -0.89629 |
| 39864 | P14075 | Q8N6Q1 | -0.86584 |
| 39865 | P14075 | Q5VT98 | -0.25825 |
| 39866 | P14075 | P16444 | -0.43633 |
| 39867 | P14075 | Q9UF47 | -0.54897 |
| 39868 | P14075 | P15814 | -0.94669 |
| 39869 | P14075 | Q14521 | -0.41802 |
| 39870 | P14075 | Q8WUA8 | -0.87849 |
| 39871 | P14075 | Q9H2S9 | -0.2466  |
| 39872 | P14075 | Q5T2D2 | -0.39608 |
| 39873 | P14075 | Q02156 | -0.24683 |
| 39874 | P14075 | Q9P2F9 | -0.21172 |
| 39875 | P14075 | Q6ZU64 | -0.71371 |
| 39876 | P14075 | Q96RG2 | -0.41875 |
| 39877 | P14075 | Q9Y397 | -0.69375 |
| 39878 | P14075 | Q6AWC2 | -0.22741 |
| 39879 | P14075 | Q6UVY6 | -1.0483  |
| 39880 | P14075 | Q14541 | -0.26341 |
| 39881 | P14075 | Q9NP90 | -0.35095 |
| 39882 | P14075 | Q8WVQ1 | -0.88804 |
| 39883 | P14075 | Q9Y2L5 | -0.213   |
| 39884 | P14075 | P10415 | -0.22732 |
| 39885 | P14075 | Q8NHS0 | -0.48297 |
| 39886 | P14075 | P15941 | -0.35708 |
| 39887 | P14075 | Q8N9V6 | -0.22741 |
| 39888 | P14075 | Q92685 | -0.76941 |
| 39889 | P14075 | Q9NY35 | -0.88055 |
| 39890 | P14075 | Q2M2D7 | -0.94809 |
| 39891 | P14075 | O60427 | -0.29778 |
| 39892 | P14075 | Q8NG41 | -0.32387 |
| 39893 | P14075 | Q8NDZ4 | -0.77157 |
| 39894 | P14075 | Q8N852 | -0.86584 |
| 39895 | P14075 | O15269 | -0.35596 |
| 39896 | P14075 | Q9Y2U8 | -0.34335 |
| 39897 | P14075 | Q9BXS1 | -0.38718 |
| 39898 | P14075 | O15144 | -0.12894 |
| 39899 | P14075 | P16662 | -0.85724 |
| 39900 | P14075 | P30491 | -0.88446 |

|       |        |        |           |
|-------|--------|--------|-----------|
| 39901 | P14075 | Q8NFP4 | -0.62705  |
| 39902 | P14075 | O14810 | -0.3514   |
| 39903 | P14075 | Q7Z6M1 | -0.47016  |
| 39904 | P14075 | Q9NR19 | -0.36618  |
| 39905 | P14075 | Q8WW27 | -0.53022  |
| 39906 | P14075 | P26992 | -0.48477  |
| 39907 | P14075 | Q8NCY6 | -0.21602  |
| 39908 | P14075 | Q86UQ5 | -0.86584  |
| 39909 | P14075 | P49862 | -1.2357   |
| 39910 | P14075 | Q9HCJ5 | -0.52332  |
| 39911 | P14075 | Q8IWL1 | -0.94367  |
| 39912 | P14075 | Q96EY7 | -0.25788  |
| 39913 | P14075 | O00203 | -0.21511  |
| 39914 | P14075 | Q92622 | -0.085292 |
| 39915 | P14075 | P01763 | -0.97479  |
| 39916 | P14075 | Q13507 | -0.45789  |
| 39917 | P14075 | Q9NSV4 | -0.27764  |
| 39918 | P14075 | P18089 | -0.52388  |
| 39919 | P14075 | Q6PP77 | -0.93628  |
| 39920 | P14075 | P05111 | -0.4204   |
| 39921 | P14075 | Q8N628 | -1.1027   |
| 39922 | P14075 | P56746 | -0.64451  |
| 39923 | P14075 | P51911 | -0.45622  |
| 39924 | P14075 | Q9Y3R0 | -0.32139  |
| 39925 | P14075 | Q9UQG0 | -0.43742  |
| 39926 | P14075 | P04209 | -0.97479  |
| 39927 | P14075 | Q8TDX9 | -0.66351  |
| 39928 | P14075 | Q60674 | -0.24695  |
| 39929 | P14075 | Q8TDQ0 | -0.86584  |
| 39930 | P14075 | Q8WX77 | -0.84144  |
| 39931 | P14075 | Q13402 | -0.19686  |
| 39932 | P14075 | Q9H972 | -0.87849  |
| 39933 | P14075 | Q6P3W2 | -0.50311  |
| 39934 | P14075 | Q8WZ60 | -0.41653  |
| 39935 | P14075 | P36544 | -0.66943  |
| 39936 | P14075 | Q8TAK6 | -0.22742  |
| 39937 | P14075 | Q9H9B4 | -0.77076  |
| 39938 | P14075 | P18428 | -0.40083  |
| 39939 | P14075 | Q15614 | -1.1027   |
| 39940 | P14075 | Q86UN3 | -0.59787  |
| 39941 | P14075 | Q6UB28 | -0.55417  |
| 39942 | P14075 | Q6UWI4 | -1.0518   |
| 39943 | P14075 | Q9P2T1 | -0.53801  |
| 39944 | P14075 | P28482 | -0.22741  |
| 39945 | P14075 | P47893 | -1.1745   |
| 39946 | P14075 | Q96HP4 | -0.46168  |
| 39947 | P14075 | Q86UE6 | -0.66459  |
| 39948 | P14075 | Q6IQ22 | -0.75268  |
| 39949 | P14075 | B6A8C7 | -0.86584  |
| 39950 | P14075 | Q8NGI1 | -1.1027   |
| 39951 | P14075 | O94806 | -0.22735  |
| 39952 | P14075 | Q63ZE4 | -0.78973  |
| 39953 | P14075 | P16671 | -0.4136   |
| 39954 | P14075 | O75356 | -0.31749  |
| 39955 | P14075 | Q9H6Q3 | -0.22741  |
| 39956 | P14075 | P42694 | -0.61085  |
| 39957 | P14075 | P78424 | -0.2274   |
| 39958 | P14075 | O60292 | -0.94742  |
| 39959 | P14075 | Q86W54 | -0.17623  |
| 39960 | P14075 | Q5SVQ8 | -0.21172  |
| 39961 | P14075 | Q8IU80 | -0.82794  |
| 39962 | P14075 | Q7Z6J0 | -0.22735  |
| 39963 | P14075 | P01374 | -0.65846  |
| 39964 | P14075 | Q96QZ7 | -0.26967  |
| 39965 | P14075 | Q8NGL6 | -1.1027   |
| 39966 | P14075 | Q6GV28 | -0.87839  |
| 39967 | P14075 | Q6ZMQ8 | -0.45402  |
| 39968 | P14075 | Q06033 | -0.75716  |
| 39969 | P14075 | Q8NH07 | -1.1027   |
| 39970 | P14075 | Q96DB2 | -0.20871  |
| 39971 | P14075 | P39748 | -0.14524  |
| 39972 | P14075 | B0YJ81 | -1.3021   |
| 39973 | P14075 | O75608 | -0.1742   |
| 39974 | P14075 | Q9BV97 | -0.31656  |
| 39975 | P14075 | Q5K131 | -0.29487  |
| 39976 | P14075 | Q96CC6 | -0.57218  |

|       |        |        |           |
|-------|--------|--------|-----------|
| 39977 | P14075 | Q16864 | -0.13376  |
| 39978 | P14075 | Q9HBH9 | -0.60593  |
| 39979 | P14075 | Q6KC79 | -0.17018  |
| 39980 | P14075 | Q86SQ0 | -0.5268   |
| 39981 | P14075 | Q96F05 | -0.86584  |
| 39982 | P14075 | O60565 | -0.20557  |
| 39983 | P14075 | P35219 | -0.35206  |
| 39984 | P14075 | Q30KQ9 | -0.84399  |
| 39985 | P14075 | Q8N122 | -0.24751  |
| 39986 | P14075 | Q6ZMJ2 | -0.98357  |
| 39987 | P14075 | P13760 | -0.45349  |
| 39988 | P14075 | P29590 | -0.22693  |
| 39989 | P14075 | Q4W5N1 | -0.2379   |
| 39990 | P14075 | Q14739 | -0.15975  |
| 39991 | P14075 | Q8N614 | -0.86584  |
| 39992 | P14075 | Q6Y288 | -0.76602  |
| 39993 | P14075 | P13688 | -0.65165  |
| 39994 | P14075 | P63125 | -0.67565  |
| 39995 | P14075 | P01574 | -0.44862  |
| 39996 | P14075 | Q16610 | -0.41513  |
| 39997 | P14075 | Q8TDY8 | -0.93628  |
| 39998 | P14075 | P17980 | -0.27452  |
| 39999 | P14075 | Q7Z5A9 | -0.87563  |
| 40000 | P14075 | Q03403 | -0.30886  |
| 40001 | P14075 | P13631 | -0.22969  |
| 40002 | P14075 | Q92613 | -0.48348  |
| 40003 | P14075 | P12235 | -0.23154  |
| 40004 | P14075 | Q7L4E1 | -0.86584  |
| 40005 | P14075 | P47870 | -0.68727  |
| 40006 | P14075 | O95471 | -0.18072  |
| 40007 | P14075 | Q8NBR0 | -0.78299  |
| 40008 | P14075 | Q96KX2 | -0.42113  |
| 40009 | P14075 | Q14594 | -0.76462  |
| 40010 | P14075 | Q9Y581 | -0.58331  |
| 40011 | P14075 | Q9H0Q3 | -0.80195  |
| 40012 | P14075 | P03891 | -0.57378  |
| 40013 | P14075 | Q8NFD2 | -0.9088   |
| 40014 | P14075 | P56747 | -0.65088  |
| 40015 | P14075 | Q92752 | -0.4275   |
| 40016 | P14075 | O00418 | -0.73396  |
| 40017 | P14075 | P43354 | -0.23626  |
| 40018 | P14075 | Q15646 | -0.22321  |
| 40019 | P14075 | Q9BZH6 | -0.71569  |
| 40020 | P14075 | Q96JC1 | -0.2836   |
| 40021 | P14075 | Q8NEW0 | -0.4551   |
| 40022 | P14075 | Q8TE57 | -1.2214   |
| 40023 | P14075 | B1ANS9 | -0.22747  |
| 40024 | P14075 | Q14627 | -0.23943  |
| 40025 | P14075 | Q96EF0 | -0.58187  |
| 40026 | P14075 | Q6PKG0 | -0.4639   |
| 40027 | P14075 | P49914 | -0.51934  |
| 40028 | P14075 | P35609 | -0.79432  |
| 40029 | P14075 | P32455 | -0.92267  |
| 40030 | P14075 | O75071 | -0.52751  |
| 40031 | P14075 | O15194 | -0.11752  |
| 40032 | P14075 | P51878 | -0.82216  |
| 40033 | P14075 | O60224 | -0.097396 |
| 40034 | P14075 | P32942 | -0.71775  |
| 40035 | P14075 | A6NGB9 | -0.51532  |
| 40036 | P14075 | Q9H8H3 | -0.50513  |
| 40037 | P14075 | P19404 | -0.37766  |
| 40038 | P14075 | P21397 | -0.65618  |
| 40039 | P14075 | Q9NRC6 | -0.3477   |
| 40040 | P14075 | P42574 | -0.22632  |
| 40041 | P14075 | Q9BS92 | -0.049583 |
| 40042 | P14075 | P58743 | -0.78681  |
| 40043 | P14075 | Q8TD10 | -0.21602  |
| 40044 | P14075 | Q9BWV2 | -1.0387   |
| 40045 | P14075 | P11277 | -0.22788  |
| 40046 | P14075 | Q13698 | -0.638    |
| 40047 | P14075 | O95522 | -0.25825  |
| 40048 | P14075 | P07711 | -0.48627  |
| 40049 | P14075 | Q15303 | -0.22741  |
| 40050 | P14075 | Q6IPR1 | -0.30763  |
| 40051 | P14075 | Q96PV0 | -0.64767  |
| 40052 | P14075 | Q6P0A1 | -0.86584  |

|       |        |        |           |
|-------|--------|--------|-----------|
| 40053 | P14075 | P24311 | -0.55704  |
| 40054 | P14075 | Q6ZNB6 | -0.34365  |
| 40055 | P14075 | P50454 | -0.26368  |
| 40056 | P14075 | O00341 | -0.89837  |
| 40057 | P14075 | Q7Z401 | -0.16251  |
| 40058 | P14075 | Q96B86 | -0.51019  |
| 40059 | P14075 | Q8IV38 | -0.65419  |
| 40060 | P14075 | Q8TDS7 | -1.1721   |
| 40061 | P14075 | Q9BUB4 | -0.40862  |
| 40062 | P14075 | Q969Y0 | -0.87849  |
| 40063 | P14075 | O75083 | -0.61463  |
| 40064 | P14075 | Q2HXU8 | -0.92288  |
| 40065 | P14075 | P27701 | -0.54753  |
| 40066 | P14075 | Q5FYB1 | -0.76789  |
| 40067 | P14075 | Q08188 | -0.52602  |
| 40068 | P14075 | P52179 | -0.78803  |
| 40069 | P14075 | Q9Y5Y4 | -1.1585   |
| 40070 | P14075 | Q9P0L2 | -0.77342  |
| 40071 | P14075 | Q8NFW8 | -0.18553  |
| 40072 | P14075 | Q8TB24 | -0.34861  |
| 40073 | P14075 | Q9BRH9 | -0.21172  |
| 40074 | P14075 | Q8TDY4 | -0.5443   |
| 40075 | P14075 | Q6NT04 | -0.33043  |
| 40076 | P14075 | Q9UPN6 | -0.28708  |
| 40077 | P14075 | Q5T848 | -1.1721   |
| 40078 | P14075 | Q7L273 | -0.19973  |
| 40079 | P14075 | Q9Y5W3 | -0.22526  |
| 40080 | P14075 | Q8IWR1 | -1.0645   |
| 40081 | P14075 | Q99218 | -1.032    |
| 40082 | P14075 | P35452 | -0.23127  |
| 40083 | P14075 | O60242 | -1.2048   |
| 40084 | P14075 | P20264 | -0.22741  |
| 40085 | P14075 | Q9Y267 | -0.88361  |
| 40086 | P14075 | P49137 | -0.22875  |
| 40087 | P14075 | P33241 | -0.83741  |
| 40088 | P14075 | Q9NWW6 | -0.80687  |
| 40089 | P14075 | Q8NFR3 | -0.42237  |
| 40090 | P14075 | P41161 | -0.058125 |
| 40091 | P14075 | Q08357 | -0.91738  |
| 40092 | P14075 | P43121 | -0.97848  |
| 40093 | P14075 | P63027 | -0.23848  |
| 40094 | P14075 | Q92569 | -0.2274   |
| 40095 | P14075 | Q8N1W0 | -0.86584  |
| 40096 | P14075 | Q9NZM1 | -0.58975  |
| 40097 | P14075 | Q14573 | -0.2219   |
| 40098 | P14075 | Q06210 | -0.177    |
| 40099 | P14075 | Q8NBT0 | -0.24576  |
| 40100 | P14075 | Q96SB3 | -0.22708  |
| 40101 | P14075 | Q86VV4 | -0.60236  |
| 40102 | P14075 | Q2TAA8 | -0.52499  |
| 40103 | P14075 | P49747 | -0.62813  |
| 40104 | P14075 | Q8N112 | -0.86584  |
| 40105 | P14075 | Q09327 | -0.66208  |
| 40106 | P14075 | P48735 | -0.1415   |
| 40107 | P14075 | O43736 | -0.31983  |
| 40108 | P14075 | P0CG41 | -0.86584  |
| 40109 | P14075 | Q3SXP7 | -0.86584  |
| 40110 | P14075 | P01569 | -0.7874   |
| 40111 | P14075 | P48742 | -0.22746  |
| 40112 | P14075 | P35221 | -0.18105  |
| 40113 | P14075 | Q9Y6N9 | -0.22373  |
| 40114 | P14075 | Q49A17 | -0.73041  |
| 40115 | P14075 | A9YTQ3 | -0.25066  |
| 40116 | P14075 | A6NDV4 | -0.15201  |
| 40117 | P14075 | Q969M1 | -0.40357  |
| 40118 | P14075 | P01700 | -0.97479  |
| 40119 | P14075 | P41240 | -0.22743  |
| 40120 | P14075 | P08263 | -0.27596  |
| 40121 | P14075 | Q9H2M9 | -0.66536  |
| 40122 | P14075 | Q8N8A4 | -0.34339  |
| 40123 | P14075 | Q8IUE0 | -0.22945  |
| 40124 | P14075 | Q13418 | -0.28601  |
| 40125 | P14075 | Q96S52 | -0.38974  |
| 40126 | P14075 | P39877 | -0.62601  |
| 40127 | P14075 | O95167 | -0.51765  |
| 40128 | P14075 | Q8IZ81 | -0.73913  |

|       |        |        |           |
|-------|--------|--------|-----------|
| 40129 | P14075 | P04066 | -0.39859  |
| 40130 | P14075 | Q5T6F0 | -0.2265   |
| 40131 | P14075 | P31213 | -0.65633  |
| 40132 | P14075 | P42224 | -0.22669  |
| 40133 | P14075 | Q9NRW1 | -0.63156  |
| 40134 | P14075 | P19957 | -0.76641  |
| 40135 | P14075 | Q8NI60 | -0.68954  |
| 40136 | P14075 | Q8NB78 | -0.47201  |
| 40137 | P14075 | Q5JT82 | -0.22433  |
| 40138 | P14075 | O95007 | -1.1027   |
| 40139 | P14075 | Q15172 | -0.093282 |
| 40140 | P14075 | Q569K4 | -0.50622  |
| 40141 | P14075 | P0CF74 | -0.95485  |
| 40142 | P14075 | Q9C0D6 | -0.49971  |
| 40143 | P14075 | P18505 | -0.90218  |
| 40144 | P14075 | P39060 | -0.46674  |
| 40145 | P14075 | Q16048 | -0.80335  |
| 40146 | P14075 | Q6ZW76 | -0.22741  |
| 40147 | P14075 | Q92563 | -0.94333  |
| 40148 | P14075 | Q8N350 | -0.86584  |
| 40149 | P14075 | P0C672 | -0.86584  |
| 40150 | P14075 | O60241 | -1.1703   |
| 40151 | P14075 | Q14867 | -0.22531  |
| 40152 | P14075 | Q9NQN1 | -1.1027   |
| 40153 | P14075 | Q9H7Y0 | -0.87849  |
| 40154 | P14075 | P01720 | -0.97479  |
| 40155 | P14075 | P58546 | -0.22741  |
| 40156 | P14075 | Q9ULM2 | -0.21172  |
| 40157 | P14075 | Q8N7N1 | -0.088726 |
| 40158 | P14075 | Q8IUA7 | -0.99839  |
| 40159 | P14075 | Q6UXB2 | -1.0661   |
| 40160 | P14075 | O14498 | -1.0545   |
| 40161 | P14075 | Q96KJ4 | -1.0252   |
| 40162 | P14075 | O43187 | -0.22739  |
| 40163 | P14075 | P05164 | -0.26933  |
| 40164 | P14075 | Q8NH00 | -1.1027   |
| 40165 | P14075 | O95479 | -0.69747  |
| 40166 | P14075 | P10826 | -0.23181  |
| 40167 | P14075 | Q8NEM8 | -0.56582  |
| 40168 | P14075 | P25705 | -0.10317  |
| 40169 | P14075 | Q6P988 | -0.8359   |
| 40170 | P14075 | Q5T9C9 | -0.76481  |
| 40171 | P14075 | Q8N8Q8 | -0.51259  |
| 40172 | P14075 | Q86TM3 | -0.66142  |
| 40173 | P14075 | P24394 | -0.83761  |
| 40174 | P14075 | Q9HC78 | -0.045442 |
| 40175 | P14075 | O43719 | -0.21944  |
| 40176 | P14075 | O75074 | -0.84849  |
| 40177 | P14075 | Q16512 | -0.22427  |
| 40178 | P14075 | Q8IXA5 | -0.53248  |
| 40179 | P14075 | O94779 | -0.67647  |
| 40180 | P14075 | Q96N66 | -0.29304  |
| 40181 | P14075 | P28221 | -1.1663   |
| 40182 | P14075 | Q7Z3I7 | -0.21172  |
| 40183 | P14075 | Q2TAY7 | -0.22792  |
| 40184 | P14075 | P19087 | -0.84799  |
| 40185 | P14075 | P54578 | -0.31186  |
| 40186 | P14075 | Q96PU5 | -0.22741  |
| 40187 | P14075 | Q8N2X6 | -0.87849  |
| 40188 | P14075 | Q6PCD5 | -0.22743  |
| 40189 | P14075 | Q96Q91 | -0.77181  |
| 40190 | P14075 | Q96S42 | -0.26777  |
| 40191 | P14075 | Q9GZV9 | -0.80492  |
| 40192 | P14075 | Q14190 | -0.24337  |
| 40193 | P14075 | P43146 | -0.33828  |
| 40194 | P14075 | Q53FP2 | -0.55329  |
| 40195 | P14075 | Q9Y2Q3 | -0.67303  |
| 40196 | P14075 | Q6ZS81 | -0.86584  |
| 40197 | P14075 | A6NL88 | -0.86584  |
| 40198 | P14075 | P42127 | -0.83381  |
| 40199 | P14075 | P62993 | -0.22741  |
| 40200 | P14075 | P02768 | -0.27713  |
| 40201 | P14075 | Q5RL73 | -0.42762  |
| 40202 | P14075 | O75351 | -0.22839  |
| 40203 | P14075 | Q149N8 | -0.74954  |
| 40204 | P14075 | P61160 | -0.80344  |

|       |        |        |           |
|-------|--------|--------|-----------|
| 40205 | P14075 | Q6ZMV9 | -0.25552  |
| 40206 | P14075 | A8TX70 | -1.1454   |
| 40207 | P14075 | P16499 | -0.66076  |
| 40208 | P14075 | Q43908 | -0.84705  |
| 40209 | P14075 | Q8WVX9 | -0.94501  |
| 40210 | P14075 | Q13464 | -0.29764  |
| 40211 | P14075 | Q6JVE6 | -0.87105  |
| 40212 | P14075 | P20674 | -0.31245  |
| 40213 | P14075 | Q9UKY4 | -0.8869   |
| 40214 | P14075 | Q9Y219 | -0.4804   |
| 40215 | P14075 | Q8IZC6 | -0.91188  |
| 40216 | P14075 | Q9UFE4 | -0.44324  |
| 40217 | P14075 | P29803 | -0.44461  |
| 40218 | P14075 | P86790 | -0.6312   |
| 40219 | P14075 | Q9Y5S2 | -0.59604  |
| 40220 | P14075 | Q9NRZ5 | -0.70921  |
| 40221 | P14075 | P46095 | -1.1955   |
| 40222 | P14075 | Q8N8W4 | -0.5536   |
| 40223 | P14075 | Q8N9L9 | -0.42169  |
| 40224 | P14075 | Q92529 | -0.22741  |
| 40225 | P14075 | O00178 | -0.81508  |
| 40226 | P14075 | Q96SL1 | -0.92905  |
| 40227 | P14075 | P17707 | -0.33935  |
| 40228 | P14075 | P23763 | -0.36151  |
| 40229 | P14075 | Q86Y39 | -0.55115  |
| 40230 | P14075 | Q14249 | -0.2079   |
| 40231 | P14075 | P51787 | -0.73798  |
| 40232 | P14075 | Q15347 | -0.87027  |
| 40233 | P14075 | O94905 | -0.25232  |
| 40234 | P14075 | Q6ZS30 | -0.22741  |
| 40235 | P14075 | Q8NGJ7 | -1.1027   |
| 40236 | P14075 | Q9Y5Y7 | -0.74269  |
| 40237 | P14075 | A4FU01 | -0.63886  |
| 40238 | P14075 | Q9NZR4 | -0.22146  |
| 40239 | P14075 | B7Z1M9 | -0.040067 |
| 40240 | P14075 | P98077 | -0.30029  |
| 40241 | P14075 | P59538 | -1.0953   |
| 40242 | P14075 | Q15048 | -0.080684 |
| 40243 | P14075 | Q8NGK2 | -1.1027   |
| 40244 | P14075 | Q9BTD8 | -0.44232  |
| 40245 | P14075 | Q9BZX4 | -0.34029  |
| 40246 | P14075 | Q96R69 | -1.1027   |
| 40247 | P14075 | Q9H078 | -0.52633  |
| 40248 | P14075 | Q96RD2 | -1.1027   |
| 40249 | P14075 | P07098 | -0.78374  |
| 40250 | P14075 | A8MZ26 | -0.52751  |
| 40251 | P14075 | P54108 | -0.72915  |
| 40252 | P14075 | P42658 | -0.82685  |
| 40253 | P14075 | P43251 | -0.62208  |
| 40254 | P14075 | Q8NCA9 | -0.21172  |
| 40255 | P14075 | P36980 | -0.87849  |
| 40256 | P14075 | Q9BVH7 | -0.68746  |
| 40257 | P14075 | B1AJZ9 | -0.15741  |
| 40258 | P14075 | P39656 | -0.26679  |
| 40259 | P14075 | Q5T3U5 | -1.095    |
| 40260 | P14075 | Q68D06 | -0.98392  |
| 40261 | P14075 | Q8IYS5 | -1.2762   |
| 40262 | P14075 | Q96LZ3 | -0.52751  |
| 40263 | P14075 | O95744 | -0.33287  |
| 40264 | P14075 | Q9NPU4 | -0.86584  |
| 40265 | P14075 | Q01101 | -0.22421  |
| 40266 | P14075 | Q96N19 | -0.86584  |
| 40267 | P14075 | P36959 | -0.53156  |
| 40268 | P14075 | P0CJ87 | -0.20043  |
| 40269 | P14075 | Q96FQ6 | -0.22997  |
| 40270 | P14075 | A8MRT5 | -0.86584  |
| 40271 | P14075 | Q9H2X0 | -0.51563  |
| 40272 | P14075 | Q86WD7 | -0.61019  |
| 40273 | P14075 | Q96JJ3 | -0.10781  |
| 40274 | P14075 | Q9H208 | -1.1027   |
| 40275 | P14075 | P35610 | -0.73154  |
| 40276 | P14075 | Q8NHC8 | -1.1027   |
| 40277 | P14075 | Q9H6U8 | -0.76759  |
| 40278 | P14075 | Q5VWJ9 | -0.26319  |
| 40279 | P14075 | Q96M98 | -0.33455  |
| 40280 | P14075 | Q14410 | -0.48366  |

|       |        |        |           |
|-------|--------|--------|-----------|
| 40281 | P14075 | P0CW22 | -0.20594  |
| 40282 | P14075 | Q12864 | -0.92668  |
| 40283 | P14075 | P06576 | -0.21042  |
| 40284 | P14075 | P15538 | -0.44174  |
| 40285 | P14075 | Q6IBW4 | -0.47131  |
| 40286 | P14075 | Q5T5D7 | -0.21172  |
| 40287 | P14075 | Q96KV7 | -0.22777  |
| 40288 | P14075 | Q99490 | -0.69887  |
| 40289 | P14075 | Q8N8E2 | -0.25496  |
| 40290 | P14075 | O15143 | -0.35794  |
| 40291 | P14075 | Q9H0C2 | -0.69745  |
| 40292 | P14075 | P11310 | -0.39643  |
| 40293 | P14075 | B2RU33 | -0.2274   |
| 40294 | P14075 | P26378 | -0.77115  |
| 40295 | P14075 | Q14694 | -0.25728  |
| 40296 | P14075 | Q7Z408 | -0.93628  |
| 40297 | P14075 | Q6P5S2 | -0.87849  |
| 40298 | P14075 | A6NKC0 | -0.48092  |
| 40299 | P14075 | Q8N5I4 | -1.0135   |
| 40300 | P14075 | Q70EL2 | -0.78366  |
| 40301 | P14075 | Q499Y3 | -0.051065 |
| 40302 | P14075 | Q3SY89 | -0.30744  |
| 40303 | P14075 | Q8WXI8 | -0.82732  |
| 40304 | P14075 | P0C7U9 | -0.86584  |
| 40305 | P14075 | Q9Y6N5 | -0.20341  |
| 40306 | P14075 | P17483 | -0.18448  |
| 40307 | P14075 | Q7Z2G1 | -0.82471  |
| 40308 | P14075 | Q6W4X9 | -0.86545  |
| 40309 | P14075 | P98073 | -1.1342   |
| 40310 | P14075 | Q6AW86 | -0.21172  |
| 40311 | P14075 | Q9UHA3 | -0.19303  |
| 40312 | P14075 | Q86VE3 | -0.41082  |
| 40313 | P14075 | Q8IU8  | -1.1914   |
| 40314 | P14075 | Q13572 | -0.89037  |
| 40315 | P14075 | Q96F46 | -0.55272  |
| 40316 | P14075 | A4FU28 | -0.86584  |
| 40317 | P14075 | O60312 | -0.58227  |
| 40318 | P14075 | P28223 | -0.66911  |
| 40319 | P14075 | Q6H9L7 | -0.45259  |
| 40320 | P14075 | O60760 | -0.22626  |
| 40321 | P14075 | Q96BD0 | -0.87829  |
| 40322 | P14075 | Q96QV1 | -0.45594  |
| 40323 | P14075 | Q8TF65 | -0.29487  |
| 40324 | P14075 | Q9Y2A7 | -0.35942  |
| 40325 | P14075 | A1L4K1 | -0.22743  |
| 40326 | P14075 | Q8N8C0 | -0.21172  |
| 40327 | P14075 | P16050 | -0.21877  |
| 40328 | P14075 | Q9BX63 | -0.57351  |
| 40329 | P14075 | Q9H342 | -1.1027   |
| 40330 | P14075 | Q96ND0 | -0.74159  |
| 40331 | P14075 | Q6ZNJ1 | -0.43583  |
| 40332 | P14075 | Q8NBJ7 | -0.43541  |
| 40333 | P14075 | Q92185 | -0.51011  |
| 40334 | P14075 | Q7RTX8 | -0.085687 |
| 40335 | P14075 | Q96S79 | -1.1317   |
| 40336 | P14075 | Q9Y620 | -0.47915  |
| 40337 | P14075 | Q5TGU0 | -0.92824  |
| 40338 | P14075 | O43895 | -0.83312  |
| 40339 | P14075 | Q6VAB6 | -0.52202  |
| 40340 | P14075 | Q14728 | -0.79577  |
| 40341 | P14075 | Q3ZCQ8 | -0.07777  |
| 40342 | P14075 | P78414 | -0.22919  |
| 40343 | P14075 | Q8IUE1 | -0.23043  |
| 40344 | P14075 | O60662 | -0.21802  |
| 40345 | P14075 | Q6UX27 | -0.86584  |
| 40346 | P14075 | P48029 | -0.62041  |
| 40347 | P14075 | P05362 | -0.38282  |
| 40348 | P14075 | Q8NGH6 | -1.1027   |
| 40349 | P14075 | P43243 | -0.12182  |
| 40350 | P14075 | Q92832 | -0.22743  |
| 40351 | P14075 | Q8NG85 | -0.91257  |
| 40352 | P14075 | Q8N8J0 | -0.45987  |
| 40353 | P14075 | Q8WZA0 | -0.50019  |
| 40354 | P14075 | Q8TAS1 | -0.22741  |
| 40355 | P14075 | Q8TBZ3 | -0.22744  |
| 40356 | P14075 | Q6UY01 | -0.22741  |



|       |        |        |           |
|-------|--------|--------|-----------|
| 40357 | P14075 | Q8NBI2 | -0.98818  |
| 40358 | P14075 | Q13733 | -0.96253  |
| 40359 | P14075 | Q05901 | -0.87885  |
| 40360 | P14075 | Q15303 | -1.0938   |
| 40361 | P14075 | Q95196 | -0.57923  |
| 40362 | P14075 | Q9UGF5 | -1.1027   |
| 40363 | P14075 | Q702N8 | -0.43359  |
| 40364 | P14075 | P0C7U2 | -0.44741  |
| 40365 | P14075 | P02649 | -0.26337  |
| 40366 | P14075 | Q9P2P6 | -0.46507  |
| 40367 | P14075 | Q9UIU6 | -0.22745  |
| 40368 | P14075 | Q496F6 | -0.93628  |
| 40369 | P14075 | Q9UIA0 | -0.71889  |
| 40370 | P14075 | Q8N392 | -1.052    |
| 40371 | P14075 | Q53H76 | -0.92109  |
| 40372 | P14075 | Q8NGK5 | -1.1027   |
| 40373 | P14075 | Q43414 | -0.67649  |
| 40374 | P14075 | P0CG13 | -0.2473   |
| 40375 | P14075 | Q94812 | -0.46318  |
| 40376 | P14075 | Q96GX5 | -0.22741  |
| 40377 | P14075 | Q96PZ0 | -0.36852  |
| 40378 | P14075 | Q95998 | -0.80156  |
| 40379 | P14075 | Q6VEQ5 | -0.56037  |
| 40380 | P14075 | Q8NFM4 | -0.48817  |
| 40381 | P14075 | Q9Y616 | -0.22739  |
| 40382 | P14075 | Q8TCX5 | -0.73283  |
| 40383 | P14075 | Q9HC29 | -0.22733  |
| 40384 | P14075 | Q8TEJ3 | -0.52332  |
| 40385 | P14075 | Q8N2Q7 | -0.36918  |
| 40386 | P14075 | P01562 | -0.77017  |
| 40387 | P14075 | Q01518 | -0.32727  |
| 40388 | P14075 | Q96BY6 | -0.65188  |
| 40389 | P14075 | Q9Y5G3 | -1.1297   |
| 40390 | P14075 | Q9BQA9 | -0.31983  |
| 40391 | P14075 | Q9UNG2 | -0.77298  |
| 40392 | P14075 | Q8WYA1 | -0.22741  |
| 40393 | P14075 | P04049 | -0.22788  |
| 40394 | P14075 | Q6PJ21 | -0.62076  |
| 40395 | P14075 | Q76N32 | -0.13071  |
| 40396 | P14075 | P62736 | -0.24279  |
| 40397 | P14075 | Q15916 | -0.21172  |
| 40398 | P14075 | Q75581 | -0.23434  |
| 40399 | P14075 | P29016 | -0.48412  |
| 40400 | P14075 | Q5JTV8 | -0.52106  |
| 40401 | P14075 | Q75712 | -0.8644   |
| 40402 | P14075 | Q9BUR5 | -1.201    |
| 40403 | P14075 | Q15160 | -0.076981 |
| 40404 | P14075 | Q00423 | -0.23432  |
| 40405 | P14075 | Q9BVC4 | -0.22744  |
| 40406 | P14075 | P60484 | -0.22739  |
| 40407 | P14075 | Q96EG3 | -0.21172  |
| 40408 | P14075 | Q8WWW0 | -0.22741  |
| 40409 | P14075 | Q86SI9 | -0.87849  |
| 40410 | P14075 | Q96LL9 | -0.36377  |
| 40411 | P14075 | Q9BWF3 | -0.22946  |
| 40412 | P14075 | Q8TE59 | -1.2214   |
| 40413 | P14075 | Q9H341 | -1.1027   |
| 40414 | P14075 | Q56P42 | -0.063954 |
| 40415 | P14075 | Q15139 | -0.2273   |
| 40416 | P14075 | Q9BUF7 | -0.79066  |
| 40417 | P14075 | Q86TZ1 | -0.2274   |
| 40418 | P14075 | P01764 | -0.97479  |
| 40419 | P14075 | P36952 | -0.12723  |
| 40420 | P14075 | Q8TBE7 | -0.78058  |
| 40421 | P14075 | Q6UXL0 | -0.68872  |
| 40422 | P14075 | P26012 | -1.0514   |
| 40423 | P14075 | Q5SV17 | -0.86584  |
| 40424 | P14075 | Q9BY31 | -0.21172  |
| 40425 | P14075 | Q13882 | -0.44353  |
| 40426 | P14075 | Q9Y5F3 | -1.1297   |
| 40427 | P14075 | P46940 | -0.22741  |
| 40428 | P14075 | Q9UBL9 | -0.50976  |
| 40429 | P14075 | Q75223 | -0.28949  |
| 40430 | P14075 | Q5SY16 | -0.47156  |
| 40431 | P14075 | Q9NXI6 | -0.92811  |
| 40432 | P14075 | Q8TDC3 | -0.50926  |

|       |        |        |           |
|-------|--------|--------|-----------|
| 40433 | P14075 | Q9ULK0 | -0.79004  |
| 40434 | P14075 | Q8TDW0 | -0.93931  |
| 40435 | P14075 | Q16854 | -0.36886  |
| 40436 | P14075 | Q5VYV0 | -0.42607  |
| 40437 | P14075 | P55008 | -0.2952   |
| 40438 | P14075 | Q43660 | -0.23637  |
| 40439 | P14075 | Q9UKJ1 | -0.72983  |
| 40440 | P14075 | Q9Y5X2 | -0.21961  |
| 40441 | P14075 | Q8NGV0 | -1.1027   |
| 40442 | P14075 | Q6E0U4 | -0.91732  |
| 40443 | P14075 | Q9BUD6 | -1.0341   |
| 40444 | P14075 | P42345 | -0.26626  |
| 40445 | P14075 | Q8NCK3 | -0.21172  |
| 40446 | P14075 | A6NDL7 | -0.37739  |
| 40447 | P14075 | P27487 | -0.59903  |
| 40448 | P14075 | Q16623 | -0.34457  |
| 40449 | P14075 | P51684 | -1.0531   |
| 40450 | P14075 | Q14149 | -0.18807  |
| 40451 | P14075 | P86791 | -0.6312   |
| 40452 | P14075 | Q8WVJ2 | -0.58998  |
| 40453 | P14075 | Q8N4Y2 | -0.36521  |
| 40454 | P14075 | P13349 | -0.2274   |
| 40455 | P14075 | Q99728 | -0.22741  |
| 40456 | P14075 | Q8NGR5 | -1.1027   |
| 40457 | P14075 | Q68D42 | -0.86584  |
| 40458 | P14075 | Q8IUH3 | -0.58876  |
| 40459 | P14075 | P00846 | -0.48707  |
| 40460 | P14075 | Q6UXN7 | -0.65075  |
| 40461 | P14075 | Q6UY09 | -0.86584  |
| 40462 | P14075 | P05019 | -0.22681  |
| 40463 | P14075 | Q9NQZ2 | -0.24139  |
| 40464 | P14075 | P46092 | -1.191    |
| 40465 | P14075 | Q43827 | -1.0709   |
| 40466 | P14075 | Q8N6M5 | -0.39579  |
| 40467 | P14075 | B2RNN3 | -0.92264  |
| 40468 | P14075 | Q3V5L5 | -0.72199  |
| 40469 | P14075 | O60431 | -1.1027   |
| 40470 | P14075 | A0AV02 | -0.92964  |
| 40471 | P14075 | P43115 | -1.0087   |
| 40472 | P14075 | Q147X3 | -0.27263  |
| 40473 | P14075 | Q6UWL6 | -0.90543  |
| 40474 | P14075 | Q9P0S9 | -0.73505  |
| 40475 | P14075 | P14384 | -0.35225  |
| 40476 | P14075 | Q8IYU2 | -0.22758  |
| 40477 | P14075 | Q6UX46 | -0.87849  |
| 40478 | P14075 | Q6ISS4 | -0.87849  |
| 40479 | P14075 | Q9Y226 | -0.88361  |
| 40480 | P14075 | Q9BZM6 | -0.62365  |
| 40481 | P14075 | Q68CZ1 | -0.21629  |
| 40482 | P14075 | Q8IWB6 | -0.33202  |
| 40483 | P14075 | Q8TBB6 | -0.85791  |
| 40484 | P14075 | P52566 | -0.66284  |
| 40485 | P14075 | P33260 | -0.7565   |
| 40486 | P14075 | P08246 | -0.52971  |
| 40487 | P14075 | Q5HY92 | -0.64607  |
| 40488 | P14075 | P35568 | -0.20969  |
| 40489 | P14075 | Q00212 | -1.0841   |
| 40490 | P14075 | O60337 | -0.87564  |
| 40491 | P14075 | O60320 | -0.86584  |
| 40492 | P14075 | Q86WT1 | -0.51419  |
| 40493 | P14075 | P50991 | -0.064612 |
| 40494 | P14075 | Q9HBZ2 | -0.22741  |
| 40495 | P14075 | Q9NRW3 | -0.70658  |
| 40496 | P14075 | Q70E73 | -0.7491   |
| 40497 | P14075 | Q9NQ30 | -0.74584  |
| 40498 | P14075 | Q6ZWJ8 | -0.87849  |
| 40499 | P14075 | Q43818 | -0.22996  |
| 40500 | P14075 | Q8TBZ5 | -0.21172  |
| 40501 | P14075 | P46199 | -0.73674  |
| 40502 | P14075 | Q9BQB4 | -0.33517  |
| 40503 | P14075 | P43490 | -0.18292  |
| 40504 | P14075 | O60890 | -0.72222  |
| 40505 | P14075 | P42702 | -0.87504  |
| 40506 | P14075 | P08243 | -0.38668  |
| 40507 | P14075 | Q495M3 | -0.68045  |
| 40508 | P14075 | Q6YI46 | -0.86584  |

|       |        |        |           |
|-------|--------|--------|-----------|
| 40509 | P14075 | P53396 | -0.19264  |
| 40510 | P14075 | O43930 | -0.9088   |
| 40511 | P14075 | P56750 | -0.5828   |
| 40512 | P14075 | Q9NQW8 | -1.2505   |
| 40513 | P14075 | O15400 | -0.85852  |
| 40514 | P14075 | O60542 | -0.71284  |
| 40515 | P14075 | Q9HC96 | -0.72256  |
| 40516 | P14075 | Q86YT9 | -0.82104  |
| 40517 | P14075 | P55145 | -0.27112  |
| 40518 | P14075 | Q9BWT7 | -0.20842  |
| 40519 | P14075 | Q7Z6L0 | -0.92914  |
| 40520 | P14075 | P10276 | -0.23189  |
| 40521 | P14075 | Q9UNX4 | -0.23103  |
| 40522 | P14075 | P12268 | -0.74142  |
| 40523 | P14075 | Q06278 | -0.61834  |
| 40524 | P14075 | Q9Y3C1 | -0.13708  |
| 40525 | P14075 | Q9HAB3 | -1.0026   |
| 40526 | P14075 | Q9UGI6 | -0.8154   |
| 40527 | P14075 | Q9H8J5 | -0.86584  |
| 40528 | P14075 | Q96T66 | -0.36495  |
| 40529 | P14075 | Q8IUN9 | -0.9384   |
| 40530 | P14075 | P0DJD7 | -1.0948   |
| 40531 | P14075 | Q86SM8 | -1.1721   |
| 40532 | P14075 | Q01954 | -0.22355  |
| 40533 | P14075 | Q9Y5K2 | -1.2961   |
| 40534 | P14075 | P50336 | -0.53236  |
| 40535 | P14075 | A6NH57 | -1.2555   |
| 40536 | P14075 | Q7Z2D5 | -0.96323  |
| 40537 | P14075 | Q8TF64 | -0.22474  |
| 40538 | P14075 | Q96MV1 | -0.52887  |
| 40539 | P14075 | Q6ZWH5 | -1.0075   |
| 40540 | P14075 | P18136 | -0.97479  |
| 40541 | P14075 | Q5JTB6 | -0.87849  |
| 40542 | P14075 | P01776 | -0.97479  |
| 40543 | P14075 | Q16774 | -0.55243  |
| 40544 | P14075 | Q9UL51 | -0.90773  |
| 40545 | P14075 | P49716 | -0.22704  |
| 40546 | P14075 | Q9ULJ8 | -0.40229  |
| 40547 | P14075 | P00441 | -0.21896  |
| 40548 | P14075 | Q8NFJ8 | -0.22741  |
| 40549 | P14075 | Q02045 | -0.5063   |
| 40550 | P14075 | Q9Y5F9 | -1.1297   |
| 40551 | P14075 | A6NIL9 | -0.86584  |
| 40552 | P14075 | Q8N9W7 | -0.86584  |
| 40553 | P14075 | Q9UPQ7 | -0.63753  |
| 40554 | P14075 | P07910 | -0.22745  |
| 40555 | P14075 | Q8WVY7 | -0.060945 |
| 40556 | P14075 | Q8NGS6 | -1.1027   |
| 40557 | P14075 | Q6UXB4 | -0.3256   |
| 40558 | P14075 | Q96QK8 | -0.86584  |
| 40559 | P14075 | Q8N9M5 | -0.57862  |
| 40560 | P14075 | Q95396 | -0.13564  |
| 40561 | P14075 | Q9BT40 | -0.22627  |
| 40562 | P14075 | A0ZSE6 | -0.86584  |
| 40563 | P14075 | P48544 | -0.62998  |
| 40564 | P14075 | Q8NGG3 | -1.1027   |
| 40565 | P14075 | Q8TC21 | -0.21172  |
| 40566 | P14075 | Q8NDA2 | -1.0058   |
| 40567 | P14075 | P52943 | -0.45853  |
| 40568 | P14075 | Q9UBE0 | -0.22375  |
| 40569 | P14075 | Q8WX93 | -0.22759  |
| 40570 | P14075 | Q8N3Y3 | -0.71519  |
| 40571 | P14075 | Q96DX7 | -0.22585  |
| 40572 | P14075 | P35368 | -0.68541  |
| 40573 | P14075 | Q17RF5 | -0.87849  |
| 40574 | P14075 | P35625 | -0.34573  |
| 40575 | P14075 | Q8N6P7 | -0.77832  |
| 40576 | P14075 | O60941 | -0.41874  |
| 40577 | P14075 | Q9HC23 | -0.85007  |
| 40578 | P14075 | P02747 | -0.91357  |
| 40579 | P14075 | P10147 | -0.44431  |
| 40580 | P14075 | Q95237 | -0.64629  |
| 40581 | P14075 | P07101 | -0.21843  |
| 40582 | P14075 | Q8N335 | -0.21479  |
| 40583 | P14075 | Q8N9B8 | -0.75221  |
| 40584 | P14075 | Q9BZE3 | -0.22719  |

|       |        |        |           |
|-------|--------|--------|-----------|
| 40585 | P14075 | Q8IY95 | -0.9104   |
| 40586 | P14075 | Q7Z2Y5 | -0.86132  |
| 40587 | P14075 | O14977 | -0.35748  |
| 40588 | P14075 | Q86VE9 | -0.79174  |
| 40589 | P14075 | Q5SWX8 | -0.99512  |
| 40590 | P14075 | Q92879 | -0.23463  |
| 40591 | P14075 | Q9Y3C5 | -0.22867  |
| 40592 | P14075 | Q86UP9 | -0.86584  |
| 40593 | P14075 | Q14914 | -0.70736  |
| 40594 | P14075 | A8MQ14 | -0.21172  |
| 40595 | P14075 | Q8WWN9 | -0.5683   |
| 40596 | P14075 | O43889 | -0.39499  |
| 40597 | P14075 | Q32P44 | -0.31084  |
| 40598 | P14075 | Q15661 | -0.83061  |
| 40599 | P14075 | Q9BWG4 | -0.30015  |
| 40600 | P14075 | Q9NRJ3 | -0.94495  |
| 40601 | P14075 | P50391 | -1.1013   |
| 40602 | P14075 | Q13224 | -0.2744   |
| 40603 | P14075 | Q99811 | -0.21866  |
| 40604 | P14075 | Q99683 | -0.22739  |
| 40605 | P14075 | Q92667 | -0.21958  |
| 40606 | P14075 | Q9UKJ8 | -1.0896   |
| 40607 | P14075 | Q8WXB1 | -0.74687  |
| 40608 | P14075 | Q9UIJ5 | -0.85873  |
| 40609 | P14075 | P16455 | -0.23106  |
| 40610 | P14075 | Q9Y334 | -0.54538  |
| 40611 | P14075 | Q99985 | -0.70302  |
| 40612 | P14075 | Q96CM8 | -0.92107  |
| 40613 | P14075 | Q8WXT5 | -0.31899  |
| 40614 | P14075 | P26717 | -0.59917  |
| 40615 | P14075 | P31937 | -0.40079  |
| 40616 | P14075 | A6NKG5 | -0.98753  |
| 40617 | P14075 | P30520 | -0.66577  |
| 40618 | P14075 | O76061 | -0.7019   |
| 40619 | P14075 | Q9NSJ1 | -0.21172  |
| 40620 | P14075 | Q14671 | -0.14954  |
| 40621 | P14075 | P52907 | -0.56885  |
| 40622 | P14075 | Q8WUA2 | -0.52636  |
| 40623 | P14075 | O43548 | -0.31378  |
| 40624 | P14075 | P00488 | -0.48591  |
| 40625 | P14075 | Q6NXE6 | -0.20672  |
| 40626 | P14075 | Q9UQB9 | -0.40253  |
| 40627 | P14075 | Q9NP77 | -0.026935 |
| 40628 | P14075 | P01701 | -0.97479  |
| 40629 | P14075 | Q8NDY6 | -0.22741  |
| 40630 | P14075 | A6NP81 | -0.43638  |
| 40631 | P14075 | Q99719 | -0.2264   |
| 40632 | P14075 | P09693 | -0.76379  |
| 40633 | P14075 | Q16790 | -0.47497  |
| 40634 | P14075 | Q9H611 | -0.57976  |
| 40635 | P14075 | P43234 | -0.85346  |
| 40636 | P14075 | P0C7X5 | -0.21172  |
| 40637 | P14075 | O60704 | -0.68545  |
| 40638 | P14075 | P0CG32 | -0.51948  |
| 40639 | P14075 | Q9NYL9 | -0.39264  |
| 40640 | P14075 | O15245 | -0.33006  |
| 40641 | P14075 | Q5MCW4 | -0.21172  |
| 40642 | P14075 | Q96EK9 | -0.79654  |
| 40643 | P14075 | A6NCE7 | -0.45414  |
| 40644 | P14075 | P51858 | -0.22066  |
| 40645 | P14075 | P35249 | -0.21181  |
| 40646 | P14075 | P43631 | -0.96614  |
| 40647 | P14075 | Q07820 | -0.22739  |
| 40648 | P14075 | Q13291 | -0.28552  |
| 40649 | P14075 | Q9BR61 | -0.22741  |
| 40650 | P14075 | Q14571 | -0.50878  |
| 40651 | P14075 | Q9Y2Q5 | -0.37674  |
| 40652 | P14075 | Q02641 | -0.58912  |
| 40653 | P14075 | P31994 | -0.44564  |
| 40654 | P14075 | Q5VV63 | -0.88243  |
| 40655 | P14075 | O00221 | -0.2274   |
| 40656 | P14075 | Q9NZK5 | -0.72275  |
| 40657 | P14075 | Q96NY8 | -0.66613  |
| 40658 | P14075 | Q8NGD3 | -1.1027   |
| 40659 | P14075 | Q8NGU2 | -1.1027   |
| 40660 | P14075 | O75072 | -0.42994  |

|       |        |        |          |
|-------|--------|--------|----------|
| 40661 | P14075 | P01703 | -0.97479 |
| 40662 | P14075 | P61296 | -0.2285  |
| 40663 | P14075 | P54829 | -1.2145  |
| 40664 | P14075 | P01130 | -0.39382 |
| 40665 | P14075 | Q5JPF3 | -0.43276 |
| 40666 | P14075 | Q9BWP8 | -1.0121  |
| 40667 | P14075 | Q9H227 | -0.22454 |
| 40668 | P14075 | Q96AM1 | -1.1721  |
| 40669 | P14075 | Q8N7X0 | -0.72995 |
| 40670 | P14075 | Q9C0D0 | -0.32259 |
| 40671 | P14075 | Q13950 | -0.34142 |
| 40672 | P14075 | Q86Y33 | -0.22741 |
| 40673 | P14075 | P49917 | -0.17203 |
| 40674 | P14075 | Q9BQP7 | -0.30763 |
| 40675 | P14075 | Q2M3M2 | -0.98191 |
| 40676 | P14075 | Q14451 | -0.22741 |
| 40677 | P14075 | Q86UW2 | -0.7847  |
| 40678 | P14075 | Q4G1C9 | -0.86584 |
| 40679 | P14075 | Q9H521 | -0.12086 |
| 40680 | P14075 | Q6ZU15 | -0.22473 |
| 40681 | P14075 | Q6P4A7 | -0.87594 |
| 40682 | P14075 | Q8WXS5 | -0.79811 |
| 40683 | P14075 | Q9HBB8 | -1.0288  |
| 40684 | P14075 | Q8N8Q3 | -0.35809 |
| 40685 | P14075 | P54764 | -0.44823 |
| 40686 | P14075 | O95050 | -0.18739 |
| 40687 | P14075 | Q92918 | -0.42716 |
| 40688 | P14075 | P62745 | -0.26008 |
| 40689 | P14075 | Q9C0H5 | -0.51041 |
| 40690 | P14075 | Q9NUP9 | -0.18848 |
| 40691 | P14075 | P0DJJ8 | -1.0948  |
| 40692 | P14075 | Q96L14 | -0.46086 |
| 40693 | P14075 | Q8N2I2 | -0.21172 |
| 40694 | P14075 | P05014 | -0.70934 |
| 40695 | P14075 | Q6P2P2 | -0.21184 |
| 40696 | P14075 | O15455 | -0.28986 |
| 40697 | P14075 | Q9Y3T6 | -0.81148 |
| 40698 | P14075 | Q8WWU7 | -1.0392  |
| 40699 | P14075 | P00395 | -0.24384 |
| 40700 | P14075 | Q10471 | -0.77876 |
| 40701 | P14075 | Q8IWY9 | -0.86584 |
| 40702 | P14075 | O75874 | -0.21609 |
| 40703 | P14075 | Q96G23 | -0.15946 |
| 40704 | P14075 | Q02846 | -1.2064  |
| 40705 | P14075 | Q8NBT3 | -0.86584 |
| 40706 | P14075 | Q9UQ90 | -0.56979 |
| 40707 | P14075 | Q16617 | -1.0706  |
| 40708 | P14075 | Q9BXI3 | -0.39563 |
| 40709 | P14075 | Q9Y6N8 | -1.0566  |
| 40710 | P14075 | Q9ULG6 | -0.70961 |
| 40711 | P14075 | P56715 | -0.12051 |
| 40712 | P14075 | O95755 | -0.77812 |
| 40713 | P14075 | P49223 | -0.79897 |
| 40714 | P14075 | Q9NXB9 | -0.11743 |
| 40715 | P14075 | O43830 | -0.17069 |
| 40716 | P14075 | Q9P272 | -0.47305 |
| 40717 | P14075 | Q9HBV2 | -0.86584 |
| 40718 | P14075 | Q16853 | -0.96439 |
| 40719 | P14075 | P01854 | -0.47543 |
| 40720 | P14075 | Q9NXH9 | -0.38674 |
| 40721 | P14075 | Q68CK6 | -0.69957 |
| 40722 | P14075 | A6NJY4 | -0.86584 |
| 40723 | P14075 | Q13241 | -0.96614 |
| 40724 | P14075 | A8K855 | -0.52751 |
| 40725 | P14075 | P06340 | -0.87018 |
| 40726 | P14075 | Q8NA58 | -0.63418 |
| 40727 | P14075 | Q0D2K0 | -0.91069 |
| 40728 | P14075 | P43320 | -0.44858 |
| 40729 | P14075 | Q9HBL0 | -0.22741 |
| 40730 | P14075 | Q8NH57 | -1.1027  |
| 40731 | P14075 | Q13459 | -0.28404 |
| 40732 | P14075 | Q9C093 | -0.46334 |
| 40733 | P14075 | Q14324 | -0.92689 |
| 40734 | P14075 | Q6VVX0 | -0.67636 |
| 40735 | P14075 | P26715 | -1.0842  |
| 40736 | P14075 | Q9BXY5 | -0.52751 |

|       |        |        |           |
|-------|--------|--------|-----------|
| 40737 | P14075 | Q13422 | -0.15846  |
| 40738 | P14075 | O14905 | -0.50018  |
| 40739 | P14075 | Q16873 | -0.39883  |
| 40740 | P14075 | Q29960 | -1.0763   |
| 40741 | P14075 | Q9NQ03 | -0.2016   |
| 40742 | P14075 | P49286 | -1.1981   |
| 40743 | P14075 | Q9HBW1 | -0.75156  |
| 40744 | P14075 | P31152 | -0.43745  |
| 40745 | P14075 | Q8IUM7 | -0.25212  |
| 40746 | P14075 | Q9UL63 | -0.4315   |
| 40747 | P14075 | Q8N2A8 | -0.63159  |
| 40748 | P14075 | Q9NR90 | -0.72639  |
| 40749 | P14075 | Q8IWR0 | -0.50622  |
| 40750 | P14075 | P28039 | -0.92006  |
| 40751 | P14075 | O75409 | -0.5307   |
| 40752 | P14075 | P17568 | -0.21142  |
| 40753 | P14075 | Q9Y4F3 | -0.72816  |
| 40754 | P14075 | Q4VNC1 | -0.91999  |
| 40755 | P14075 | Q6UW68 | -0.86584  |
| 40756 | P14075 | Q9NY65 | -0.59955  |
| 40757 | P14075 | Q9UGP5 | -0.43299  |
| 40758 | P14075 | Q86XK7 | -0.86584  |
| 40759 | P14075 | Q9H8L6 | -0.46489  |
| 40760 | P14075 | Q96PL5 | -0.75967  |
| 40761 | P14075 | Q96LP6 | -0.029831 |
| 40762 | P14075 | Q96A65 | -0.17552  |
| 40763 | P14075 | P52926 | -0.078438 |
| 40764 | P14075 | P20273 | -0.70532  |
| 40765 | P14075 | Q6IAA8 | -0.36791  |
| 40766 | P14075 | Q9Y5H0 | -1.1297   |
| 40767 | P14075 | Q12999 | -0.90987  |
| 40768 | P14075 | O43521 | -0.20817  |
| 40769 | P14075 | Q58FF3 | -0.39456  |
| 40770 | P14075 | Q5VT25 | -0.22752  |
| 40771 | P14075 | Q9NPQ8 | -0.5795   |
| 40772 | P14075 | Q6IFN5 | -1.1027   |
| 40773 | P14075 | Q9Y6R1 | -0.53667  |
| 40774 | P14075 | Q96LT4 | -0.68814  |
| 40775 | P14075 | P30559 | -0.78182  |
| 40776 | P14075 | Q8NEG7 | -0.43363  |
| 40777 | P14075 | P02818 | -0.52423  |
| 40778 | P14075 | Q86XR5 | -0.7327   |
| 40779 | P14075 | Q7Z7D3 | -0.95902  |
| 40780 | P14075 | Q8NFT2 | -0.96438  |
| 40781 | P14075 | Q8WXF7 | -0.55033  |
| 40782 | P14075 | P41231 | -0.71405  |
| 40783 | P14075 | Q9NR23 | -0.72561  |
| 40784 | P14075 | P61803 | -0.73052  |
| 40785 | P14075 | O94941 | -0.26443  |
| 40786 | P14075 | P48960 | -1.5486   |
| 40787 | P14075 | Q5T1B0 | -0.055526 |
| 40788 | P14075 | Q99439 | -0.24967  |
| 40789 | P14075 | O00222 | -1.0932   |
| 40790 | P14075 | Q8N148 | -1.1027   |
| 40791 | P14075 | Q8TD22 | -0.83432  |
| 40792 | P14075 | Q9NPB1 | -0.56599  |
| 40793 | P14075 | P47804 | -0.81101  |
| 40794 | P14075 | P49771 | -1.2329   |
| 40795 | P14075 | Q96IS3 | -0.20018  |
| 40796 | P14075 | Q8TC12 | -1.0839   |
| 40797 | P14075 | Q5T890 | -0.43778  |
| 40798 | P14075 | Q9Y2H9 | -0.40235  |
| 40799 | P14075 | Q8WU10 | -0.59308  |
| 40800 | P14075 | P14555 | -0.7612   |
| 40801 | P14075 | Q8TF50 | -0.21172  |
| 40802 | P14075 | P00533 | -0.29252  |
| 40803 | P14075 | Q9BY43 | -0.27731  |
| 40804 | P14075 | P13945 | -0.43194  |
| 40805 | P14075 | O76001 | -1.1027   |
| 40806 | P14075 | Q8NGE7 | -1.1027   |
| 40807 | P14075 | O15212 | -0.40269  |
| 40808 | P14075 | Q9P1W3 | -0.86584  |
| 40809 | P14075 | P10620 | -0.22412  |
| 40810 | P14075 | Q96CX3 | -0.21172  |
| 40811 | P14075 | P35998 | -0.30266  |
| 40812 | P14075 | Q9H422 | -0.22768  |

|       |        |        |          |
|-------|--------|--------|----------|
| 40813 | P14075 | Q9NYD6 | -0.28079 |
| 40814 | P14075 | Q8IWU5 | -0.51353 |
| 40815 | P14075 | P02100 | -0.33557 |
| 40816 | P14075 | P61073 | -0.3305  |
| 40817 | P14075 | Q9NSY2 | -0.50535 |
| 40818 | P14075 | Q9UGM1 | -0.83415 |
| 40819 | P14075 | Q96RL6 | -1.0093  |
| 40820 | P14075 | O15431 | -1.0414  |
| 40821 | P14075 | Q86VY9 | -0.86584 |
| 40822 | P14075 | Q5H9R4 | -0.86584 |
| 40823 | P14075 | Q9UN75 | -1.1297  |
| 40824 | P14075 | O43315 | -0.58528 |
| 40825 | P14075 | Q9Y5Q5 | -1.3141  |
| 40826 | P14075 | Q9H324 | -0.46153 |
| 40827 | P14075 | Q8N8Y5 | -0.556   |
| 40828 | P14075 | P29353 | -0.22741 |
| 40829 | P14075 | P29320 | -0.7632  |
| 40830 | P14075 | Q9UDW3 | -0.18083 |
| 40831 | P14075 | Q9H1V8 | -0.74356 |
| 40832 | P14075 | O60741 | -1.0828  |
| 40833 | P14075 | Q8TF17 | -0.53115 |
| 40834 | P14075 | Q13637 | -0.79259 |
| 40835 | P14075 | Q95995 | -0.29655 |
| 40836 | P14075 | Q8N9V3 | -0.45235 |
| 40837 | P14075 | Q9H222 | -0.55441 |
| 40838 | P14075 | P16860 | -0.49898 |
| 40839 | P14075 | O75054 | -0.86584 |
| 40840 | P14075 | Q9BSH3 | -0.22463 |
| 40841 | P14075 | Q96BR9 | -0.22123 |
| 40842 | P14075 | A9Z1Z3 | -0.86584 |
| 40843 | P14075 | Q5XPI4 | -0.4367  |
| 40844 | P14075 | Q9HCJ6 | -0.95104 |
| 40845 | P14075 | P27824 | -0.28537 |
| 40846 | P14075 | A6NDY2 | -0.48092 |
| 40847 | P14075 | Q14534 | -1.0167  |
| 40848 | P14075 | O75594 | -0.69841 |
| 40849 | P14075 | P98172 | -0.16453 |
| 40850 | P14075 | Q92737 | -0.81234 |
| 40851 | P14075 | Q92551 | -0.33935 |
| 40852 | P14075 | O75159 | -0.22738 |
| 40853 | P14075 | Q8NH67 | -1.1027  |
| 40854 | P14075 | P28330 | -0.33687 |
| 40855 | P14075 | Q9UJQ4 | -0.1834  |
| 40856 | P14075 | P63121 | -0.67565 |
| 40857 | P14075 | O43597 | -0.15373 |
| 40858 | P14075 | F5H4A9 | -0.86584 |
| 40859 | P14075 | P42680 | -0.88738 |
| 40860 | P14075 | Q9P0W8 | -0.64708 |
| 40861 | P14075 | Q9UQ07 | -0.61135 |
| 40862 | P14075 | O60281 | -0.22741 |
| 40863 | P14075 | P05181 | -0.49784 |
| 40864 | P14075 | Q9NUJ7 | -0.6447  |
| 40865 | P14075 | Q9H7C9 | -0.23711 |
| 40866 | P14075 | Q6UY14 | -0.31916 |
| 40867 | P14075 | Q6ZRY4 | -0.81148 |
| 40868 | P14075 | Q9NZQ7 | -0.60823 |
| 40869 | P14075 | Q86XD8 | -0.52332 |
| 40870 | P14075 | Q9UQ52 | -0.63282 |
| 40871 | P14075 | Q9H7M9 | -0.86584 |
| 40872 | P14075 | Q92608 | -0.31594 |
| 40873 | P14075 | Q96GJ1 | -0.22317 |
| 40874 | P14075 | Q5T6L9 | -0.86584 |
| 40875 | P14075 | Q86Y22 | -1.1319  |
| 40876 | P14075 | Q92611 | -0.31646 |
| 40877 | P14075 | Q96SE0 | -0.58105 |
| 40878 | P14075 | O15075 | -0.92509 |
| 40879 | P14075 | Q96HH4 | -0.86584 |
| 40880 | P14075 | P28472 | -0.90218 |
| 40881 | P14075 | P23467 | -0.76612 |
| 40882 | P14075 | P21291 | -0.29787 |
| 40883 | P14075 | Q969M7 | -0.22388 |
| 40884 | P14075 | A6NM45 | -0.66509 |
| 40885 | P14075 | Q5TFE4 | -0.43358 |
| 40886 | P14075 | O60733 | -0.2274  |
| 40887 | P14075 | O95399 | -0.61607 |
| 40888 | P14075 | Q8N7Q2 | -0.87849 |

|       |        |         |           |
|-------|--------|---------|-----------|
| 40889 | P14075 | P43686  | -0.30027  |
| 40890 | P14075 | Q12852  | -0.37438  |
| 40891 | P14075 | Q9HCK0  | -0.1921   |
| 40892 | P14075 | P30512  | -0.7844   |
| 40893 | P14075 | P21695  | -0.083697 |
| 40894 | P14075 | Q0P5P2  | -0.87849  |
| 40895 | P14075 | O60882  | -0.85284  |
| 40896 | P14075 | Q14667  | -0.87849  |
| 40897 | P14075 | Q9UHQ4  | -0.6068   |
| 40898 | P14075 | P19237  | -0.46134  |
| 40899 | P14075 | Q9NYP7  | -0.15467  |
| 40900 | P14075 | Q6P2S7  | -0.29487  |
| 40901 | P14075 | Q4G0J3  | -0.22722  |
| 40902 | P14075 | Q92959  | -0.96608  |
| 40903 | P14075 | P20333  | -0.64015  |
| 40904 | P14075 | Q9UNW9  | -0.24856  |
| 40905 | P14075 | Q8IU85  | -0.55244  |
| 40906 | P14075 | Q9Y5I1  | -1.1553   |
| 40907 | P14075 | Q96II8  | -0.87849  |
| 40908 | P14075 | A8MUK1  | -0.4721   |
| 40909 | P14075 | P10109  | -0.31584  |
| 40910 | P14075 | P0C1H6  | -0.70102  |
| 40911 | P14075 | Q43524  | -0.31899  |
| 40912 | P14075 | Q6S8J3  | -0.436    |
| 40913 | P14075 | O15079  | -0.5017   |
| 40914 | P14075 | Q8I WV2 | -0.8732   |
| 40915 | P14075 | Q9NTJ5  | -0.61054  |
| 40916 | P14075 | Q43680  | -0.22764  |
| 40917 | P14075 | P01706  | -0.97479  |
| 40918 | P14075 | Q1MX18  | -0.43486  |
| 40919 | P14075 | Q9UKG1  | -0.22399  |
| 40920 | P14075 | Q9P255  | -0.21172  |
| 40921 | P14075 | A8MY62  | -0.063727 |
| 40922 | P14075 | Q9Y5Y5  | -0.43157  |
| 40923 | P14075 | A8MT70  | -0.73967  |
| 40924 | P14075 | P51798  | -0.94256  |
| 40925 | P14075 | Q9Y4K3  | -0.22728  |
| 40926 | P14075 | Q9UPT6  | -0.22596  |
| 40927 | P14075 | P40938  | -0.20515  |
| 40928 | P14075 | Q8NCU8  | -0.86584  |
| 40929 | P14075 | Q9H205  | -1.1027   |
| 40930 | P14075 | Q96HZ4  | -0.22658  |
| 40931 | P14075 | Q9Y5E9  | -1.1238   |
| 40932 | P14075 | Q9HB90  | -0.7407   |
| 40933 | P14075 | O15240  | -0.5693   |
| 40934 | P14075 | Q9H9P5  | -0.22739  |
| 40935 | P14075 | P04206  | -0.97479  |
| 40936 | P14075 | Q9NR33  | -0.098546 |
| 40937 | P14075 | P34810  | -0.87978  |
| 40938 | P14075 | Q9BZL3  | -0.86584  |
| 40939 | P14075 | A6NMD0  | -0.92914  |
| 40940 | P14075 | A6NJT0  | -0.2094   |
| 40941 | P14075 | Q9H497  | -0.59428  |
| 40942 | P14075 | Q96TA0  | -1.1297   |
| 40943 | P14075 | Q9Y3M8  | -0.31239  |
| 40944 | P14075 | Q9H1E1  | -0.67659  |
| 40945 | P14075 | Q9GZZ0  | -0.2274   |
| 40946 | P14075 | Q9Y5Z7  | -0.22741  |
| 40947 | P14075 | P56975  | -1.1235   |
| 40948 | P14075 | Q2TAA5  | -0.80366  |
| 40949 | P14075 | Q8IUB5  | -0.79897  |
| 40950 | P14075 | Q96PE3  | -0.30575  |
| 40951 | P14075 | P51692  | -0.22669  |
| 40952 | P14075 | P45379  | -0.45593  |
| 40953 | P14075 | Q8IYS2  | -0.86584  |
| 40954 | P14075 | P19652  | -0.8489   |
| 40955 | P14075 | Q96JN8  | -0.20625  |
| 40956 | P14075 | O14939  | -0.2209   |
| 40957 | P14075 | Q14195  | -0.22914  |
| 40958 | P14075 | Q8NBF1  | -0.22717  |
| 40959 | P14075 | P01860  | -0.93808  |
| 40960 | P14075 | Q9H6L5  | -0.75911  |
| 40961 | P14075 | Q8NH42  | -1.1027   |
| 40962 | P14075 | Q6UWE0  | -0.22755  |
| 40963 | P14075 | P20061  | -0.87957  |
| 40964 | P14075 | P23470  | -1.223    |



|       |        |        |             |
|-------|--------|--------|-------------|
| 40965 | P14075 | Q8NGN4 | -1.1027     |
| 40966 | P14075 | P13942 | -0.83274    |
| 40967 | P14075 | Q7Z6W7 | -0.48297    |
| 40968 | P14075 | Q8TCX1 | -0.32747    |
| 40969 | P14075 | P20800 | -0.55216    |
| 40970 | P14075 | Q96P48 | -0.45259    |
| 40971 | P14075 | P07951 | -0.52099    |
| 40972 | P14075 | Q6PKC3 | -0.94864    |
| 40973 | P14075 | O14607 | -0.49674    |
| 40974 | P14075 | P48167 | -0.45462    |
| 40975 | P14075 | P61769 | -0.46461    |
| 40976 | P14075 | P78363 | -1.0187     |
| 40977 | P14075 | Q9NXD2 | -0.63886    |
| 40978 | P14075 | P10398 | -0.25225    |
| 40979 | P14075 | Q8NGI9 | -1.1027     |
| 40980 | P14075 | O15514 | -0.196      |
| 40981 | P14075 | Q96RQ3 | -0.67436    |
| 40982 | P14075 | Q86TI2 | -0.54773    |
| 40983 | P14075 | Q92698 | -0.20421    |
| 40984 | P14075 | P11234 | -0.27693    |
| 40985 | P14075 | Q7Z2Y8 | -0.50082    |
| 40986 | P14075 | Q0VAF6 | -0.44272    |
| 40987 | P14075 | O60879 | -0.27718    |
| 40988 | P14075 | Q9H8W4 | -0.22673    |
| 40989 | P14075 | Q8TDW7 | -1.224      |
| 40990 | P14075 | Q7Z4H8 | -0.17308    |
| 40991 | P14075 | Q8N7C3 | -0.4696     |
| 40992 | P14075 | Q99581 | -0.17633    |
| 40993 | P14075 | Q14679 | -0.49366    |
| 40994 | P14075 | Q14242 | -0.65336    |
| 40995 | P14075 | O75298 | -0.47593    |
| 40996 | P14075 | P49590 | -0.20822    |
| 40997 | P14075 | O75762 | -0.83942    |
| 40998 | P14075 | Q14236 | -0.54588    |
| 40999 | P14075 | P0CJ78 | -0.21172    |
| 41000 | P14075 | Q9Y4A0 | -0.36497    |
| 41001 | P14075 | Q8N5C7 | -0.00073944 |
| 41002 | P14075 | Q96LD8 | -0.77399    |
| 41003 | P14075 | Q8N5D6 | -0.58721    |
| 41004 | P14075 | P53597 | -0.5785     |
| 41005 | P14075 | O60306 | -0.32544    |
| 41006 | P14075 | Q8N387 | -1.2123     |
| 41007 | P14075 | Q00LT1 | -0.85146    |
| 41008 | P14075 | Q8N5X7 | -0.15244    |
| 41009 | P14075 | Q9UBV8 | -0.22743    |
| 41010 | P14075 | Q9NWU2 | -0.21602    |
| 41011 | P14075 | Q13438 | -0.15263    |
| 41012 | P14075 | Q14626 | -1.0896     |
| 41013 | P14075 | Q9NXT0 | -0.21172    |
| 41014 | P14075 | Q9NZA1 | -0.286      |
| 41015 | P14075 | Q6ZS27 | -0.21172    |
| 41016 | P14075 | P80365 | -0.69904    |
| 41017 | P14075 | Q8IVL1 | -0.66782    |
| 41018 | P14075 | Q86VF2 | -0.2277     |
| 41019 | P14075 | Q4G0T1 | -0.82841    |
| 41020 | P14075 | O60447 | -0.22782    |
| 41021 | P14075 | P80108 | -0.4893     |
| 41022 | P14075 | P35749 | -0.49732    |
| 41023 | P14075 | O14949 | -0.24107    |
| 41024 | P14075 | O75354 | -0.95153    |
| 41025 | P14075 | Q6ZVX9 | -0.86584    |
| 41026 | P14075 | P55001 | -0.81944    |
| 41027 | P14075 | Q56UN5 | -0.9088     |
| 41028 | P14075 | O14817 | -1.0565     |
| 41029 | P14075 | Q8NGY0 | -1.1027     |
| 41030 | P14075 | Q6P587 | -0.27559    |
| 41031 | P14075 | Q13873 | -0.37457    |
| 41032 | P14075 | P02656 | -0.56828    |
| 41033 | P14075 | P18433 | -1.208      |
| 41034 | P14075 | Q96EG1 | -0.56833    |
| 41035 | P14075 | P49761 | -0.55936    |
| 41036 | P14075 | O00533 | -1.1599     |
| 41037 | P14075 | P41159 | -0.36486    |
| 41038 | P14075 | Q9UM19 | -0.66563    |
| 41039 | P14075 | Q7Z3T1 | -1.1027     |
| 41040 | P14075 | P21860 | -0.49278    |

|       |        |        |          |
|-------|--------|--------|----------|
| 41041 | P14075 | Q6XUX3 | -0.50914 |
| 41042 | P14075 | O14931 | -1.0824  |
| 41043 | P14075 | O60256 | -0.40051 |
| 41044 | P14075 | Q8NGP6 | -1.1027  |
| 41045 | P14075 | P23677 | -0.79701 |
| 41046 | P14075 | Q9UQ74 | -0.87849 |
| 41047 | P14075 | P43308 | -0.75989 |
| 41048 | P14075 | Q9H6S0 | -0.27573 |
| 41049 | P14075 | Q1X8D7 | -0.22707 |
| 41050 | P14075 | Q6IPT4 | -0.59653 |
| 41051 | P14075 | P28845 | -1.0595  |
| 41052 | P14075 | P33991 | -0.22143 |
| 41053 | P14075 | Q96NZ9 | -0.87849 |
| 41054 | P14075 | Q7Z5N4 | -1.0252  |
| 41055 | P14075 | O43915 | -0.57906 |
| 41056 | P14075 | P09067 | -0.18972 |
| 41057 | P14075 | Q5T2P9 | -0.98969 |
| 41058 | P14075 | P59534 | -1.0953  |
| 41059 | P14075 | P23921 | -0.15962 |
| 41060 | P14075 | Q96MI9 | -0.58722 |
| 41061 | P14075 | P57057 | -0.74011 |
| 41062 | P14075 | B5MCN3 | -0.95278 |
| 41063 | P14075 | A8MT19 | -0.20689 |
| 41064 | P14075 | Q9Y4Z2 | -0.22772 |
| 41065 | P14075 | P53814 | -0.43868 |
| 41066 | P14075 | Q99731 | -0.4623  |
| 41067 | P14075 | Q86Y30 | -0.87849 |
| 41068 | P14075 | P33032 | -0.8173  |
| 41069 | P14075 | Q8N326 | -0.86584 |
| 41070 | P14075 | Q15746 | -0.44336 |
| 41071 | P14075 | O75096 | -0.44395 |
| 41072 | P14075 | A6NDQ2 | -0.73967 |
| 41073 | P14075 | P11498 | -0.54654 |
| 41074 | P14075 | P14679 | -0.4363  |
| 41075 | P14075 | Q8N4G2 | -0.64105 |
| 41076 | P14075 | Q86UQ4 | -1.1035  |
| 41077 | P14075 | O60293 | -0.09526 |
| 41078 | P14075 | O00175 | -0.79598 |
| 41079 | P14075 | O15315 | -0.17384 |
| 41080 | P14075 | Q9UBN1 | -1.0054  |
| 41081 | P14075 | P0DJ93 | -0.86584 |
| 41082 | P14075 | Q9P298 | -0.86584 |
| 41083 | P14075 | P49335 | -0.22741 |
| 41084 | P14075 | Q9UNH6 | -0.55524 |
| 41085 | P14075 | Q13201 | -0.85126 |
| 41086 | P14075 | Q9BXE9 | -1.1149  |
| 41087 | P14075 | Q9Y328 | -0.69357 |
| 41088 | P14075 | Q9HBG7 | -0.87723 |
| 41089 | P14075 | Q5SY68 | -0.55769 |
| 41090 | P14075 | Q5VTH9 | -0.22742 |
| 41091 | P14075 | O60502 | -0.17631 |
| 41092 | P14075 | A6NLI5 | -0.73967 |
| 41093 | P14075 | P62807 | -0.86926 |
| 41094 | P14075 | Q14554 | -0.51956 |
| 41095 | P14075 | Q6A1A2 | -0.78989 |
| 41096 | P14075 | Q96Q42 | -0.46029 |
| 41097 | P14075 | Q9H0H9 | -0.11596 |
| 41098 | P14075 | Q8IZP7 | -0.86433 |
| 41099 | P14075 | Q9H293 | -0.66973 |
| 41100 | P14075 | P80303 | -0.18605 |
| 41101 | P14075 | O14983 | -0.4259  |
| 41102 | P14075 | P11686 | -0.10162 |
| 41103 | P14075 | P36404 | -0.22823 |
| 41104 | P14075 | Q9UEE5 | -0.62513 |
| 41105 | P14075 | Q9HCR9 | -0.36417 |
| 41106 | P14075 | O60488 | -0.68519 |
| 41107 | P14075 | Q5TEV5 | -0.87849 |
| 41108 | P14075 | Q16540 | -0.41226 |
| 41109 | P14075 | Q8WWZ3 | -0.60329 |
| 41110 | P14075 | Q9H361 | -0.60714 |
| 41111 | P14075 | Q96DU7 | -0.40417 |
| 41112 | P14075 | A8MTL0 | -0.22161 |
| 41113 | P14075 | Q9H6L4 | -0.22853 |
| 41114 | P14075 | Q8TAZ6 | -0.51364 |
| 41115 | P14075 | Q9NRZ7 | -0.74293 |
| 41116 | P14075 | P51854 | -0.31028 |

|       |        |         |           |
|-------|--------|---------|-----------|
| 41117 | P14075 | Q8IY49  | -0.72271  |
| 41118 | P14075 | A6NHL2  | -0.59955  |
| 41119 | P14075 | Q14C86  | -0.97503  |
| 41120 | P14075 | P57082  | -0.35062  |
| 41121 | P14075 | P61106  | -0.36632  |
| 41122 | P14075 | D6RBM5  | -0.3595   |
| 41123 | P14075 | P0DJJD3 | -0.23042  |
| 41124 | P14075 | Q8N5Z5  | -0.22267  |
| 41125 | P14075 | O43474  | -0.22558  |
| 41126 | P14075 | P04844  | -0.46972  |
| 41127 | P14075 | Q5HYL7  | -0.86584  |
| 41128 | P14075 | P31483  | -0.23845  |
| 41129 | P14075 | Q9BV36  | -0.36965  |
| 41130 | P14075 | P0CJ89  | -0.20043  |
| 41131 | P14075 | Q12934  | -0.2637   |
| 41132 | P14075 | Q5BKT4  | -0.80436  |
| 41133 | P14075 | Q96I45  | -0.86584  |
| 41134 | P14075 | A6NEK1  | -0.576    |
| 41135 | P14075 | Q96H96  | -0.64958  |
| 41136 | P14075 | Q8TE99  | -0.81732  |
| 41137 | P14075 | Q68CQ4  | -0.2101   |
| 41138 | P14075 | Q9UBX3  | -0.22959  |
| 41139 | P14075 | Q8TBF2  | -0.34049  |
| 41140 | P14075 | Q8N9N7  | -0.2359   |
| 41141 | P14075 | O60237  | -0.50215  |
| 41142 | P14075 | Q6UXB8  | -1.1688   |
| 41143 | P14075 | P05155  | -0.28721  |
| 41144 | P14075 | Q6UQ28  | -0.87068  |
| 41145 | P14075 | Q9H6A0  | -0.43363  |
| 41146 | P14075 | Q8TCD1  | -0.62512  |
| 41147 | P14075 | Q8NH83  | -1.1027   |
| 41148 | P14075 | Q6P2D0  | -0.21172  |
| 41149 | P14075 | P79522  | -0.51948  |
| 41150 | P14075 | P51178  | -0.48541  |
| 41151 | P14075 | O43174  | -0.69761  |
| 41152 | P14075 | P19623  | -0.35185  |
| 41153 | P14075 | Q86SE5  | -0.84005  |
| 41154 | P14075 | P30493  | -0.88446  |
| 41155 | P14075 | Q92508  | -0.89612  |
| 41156 | P14075 | Q9HBJ7  | -0.55356  |
| 41157 | P14075 | Q9H568  | -0.30492  |
| 41158 | P14075 | P50213  | -0.081369 |
| 41159 | P14075 | P01744  | -0.97479  |
| 41160 | P14075 | Q8TBG9  | -0.71609  |
| 41161 | P14075 | Q9UHV8  | -0.43656  |
| 41162 | P14075 | Q9H2G2  | -0.83084  |
| 41163 | P14075 | P0C7M6  | -0.032671 |
| 41164 | P14075 | P14209  | -1.0594   |
| 41165 | P14075 | Q8NH04  | -1.1027   |
| 41166 | P14075 | Q15540  | -0.40218  |
| 41167 | P14075 | Q8IY37  | -0.84361  |
| 41168 | P14075 | Q76003  | -0.22786  |
| 41169 | P14075 | Q96RJ6  | -0.22762  |
| 41170 | P14075 | Q7RTY5  | -1.2917   |
| 41171 | P14075 | Q9HCQ5  | -0.66473  |
| 41172 | P14075 | Q969M2  | -0.85213  |
| 41173 | P14075 | P22894  | -1.2481   |
| 41174 | P14075 | Q8NGH9  | -1.1027   |
| 41175 | P14075 | Q8IU57  | -0.40794  |
| 41176 | P14075 | P16234  | -0.24557  |
| 41177 | P14075 | Q8N6C5  | -0.52487  |
| 41178 | P14075 | Q93038  | -1.1667   |
| 41179 | P14075 | Q9NYW6  | -1.0427   |
| 41180 | P14075 | Q8TD30  | -0.26346  |
| 41181 | P14075 | Q14625  | -1.0531   |
| 41182 | P14075 | Q14590  | -0.21172  |
| 41183 | P14075 | P25067  | -1.0327   |
| 41184 | P14075 | P41229  | -0.45263  |
| 41185 | P14075 | Q6ZVS6  | -0.87849  |
| 41186 | P14075 | P55210  | -0.2251   |
| 41187 | P14075 | A6NGW2  | -0.87849  |
| 41188 | P14075 | Q9BXI9  | -0.97458  |
| 41189 | P14075 | Q6B8I1  | -0.90806  |
| 41190 | P14075 | A6NED2  | -0.37984  |
| 41191 | P14075 | Q01538  | -0.20848  |
| 41192 | P14075 | Q8IWI9  | -0.40031  |

|       |        |        |          |
|-------|--------|--------|----------|
| 41193 | P14075 | Q9GZM6 | -1.1027  |
| 41194 | P14075 | Q8NGJ1 | -1.1027  |
| 41195 | P14075 | Q7Z2Z2 | -0.62853 |
| 41196 | P14075 | O00409 | -0.30939 |
| 41197 | P14075 | P01589 | -0.59498 |
| 41198 | P14075 | Q9UQ13 | -0.24064 |
| 41199 | P14075 | Q9NWU1 | -0.43805 |
| 41200 | P14075 | Q15569 | -0.48623 |
| 41201 | P14075 | Q9H3R2 | -1.2123  |
| 41202 | P14075 | Q8N1W2 | -0.21172 |
| 41203 | P14075 | Q9ULT8 | -0.37041 |
| 41204 | P14075 | O00244 | -0.47867 |
| 41205 | P14075 | P41439 | -0.83126 |
| 41206 | P14075 | Q15615 | -1.1027  |
| 41207 | P14075 | P30505 | -0.88446 |
| 41208 | P14075 | Q86UR1 | -0.22736 |
| 41209 | P14075 | Q9NZP0 | -1.1027  |
| 41210 | P14075 | P09341 | -1.0242  |
| 41211 | P14075 | P10809 | -0.17501 |
| 41212 | P14075 | Q8TF20 | -0.21172 |
| 41213 | P14075 | Q8TD06 | -0.2885  |
| 41214 | P14075 | P78380 | -1.246   |
| 41215 | P14075 | Q9UGV2 | -0.32071 |
| 41216 | P14075 | Q9Y5A9 | -0.41734 |
| 41217 | P14075 | P03951 | -0.72056 |
| 41218 | P14075 | P30486 | -0.7844  |
| 41219 | P14075 | Q96NL1 | -0.88525 |
| 41220 | P14075 | Q13286 | -0.17299 |
| 41221 | P14075 | Q14435 | -0.29693 |
| 41222 | P14075 | Q9Y6D5 | -0.21948 |
| 41223 | P14075 | Q13183 | -1.0556  |
| 41224 | P14075 | Q96A19 | -0.21149 |
| 41225 | P14075 | Q8IVJ1 | -0.96956 |
| 41226 | P14075 | Q9BTF0 | -0.39051 |
| 41227 | P14075 | Q9H4G1 | -0.89477 |
| 41228 | P14075 | Q8N413 | -0.7196  |
| 41229 | P14075 | Q75N03 | -0.24925 |
| 41230 | P14075 | Q8IUR7 | -0.22746 |
| 41231 | P14075 | P29317 | -0.48796 |
| 41232 | P14075 | A4D0T2 | -0.86584 |
| 41233 | P14075 | P05023 | -0.42236 |
| 41234 | P14075 | Q9NR97 | -0.76504 |
| 41235 | P14075 | Q7Z699 | -0.2052  |
| 41236 | P14075 | Q9UKH3 | -0.5818  |
| 41237 | P14075 | Q5T1H1 | -1.0832  |
| 41238 | P14075 | Q8NGX9 | -1.1027  |
| 41239 | P14075 | O14494 | -0.8024  |
| 41240 | P14075 | P30872 | -1.1107  |
| 41241 | P14075 | Q5TIE3 | -0.87849 |
| 41242 | P14075 | Q9NXC5 | -0.22687 |
| 41243 | P14075 | A0PK00 | -0.52887 |
| 41244 | P14075 | Q86WN1 | -0.22739 |
| 41245 | P14075 | Q5XKL5 | -0.22608 |
| 41246 | P14075 | Q9UGC6 | -0.47095 |
| 41247 | P14075 | Q9ULV4 | -0.6709  |
| 41248 | P14075 | Q9NZW5 | -0.22522 |
| 41249 | P14075 | Q3KNW5 | -0.92806 |
| 41250 | P14075 | Q96NL3 | -0.21172 |
| 41251 | P14075 | Q5VYS4 | -0.27481 |
| 41252 | P14075 | Q7RTU9 | -0.56904 |
| 41253 | P14075 | O43609 | -0.37912 |
| 41254 | P14075 | O75339 | -0.85459 |
| 41255 | P14075 | O15230 | -0.48738 |
| 41256 | P14075 | Q96BM0 | -0.86584 |
| 41257 | P14075 | P48594 | -0.60786 |
| 41258 | P14075 | Q7Z553 | -0.62737 |
| 41259 | P14075 | Q07001 | -0.86305 |
| 41260 | P14075 | P40197 | -0.89831 |
| 41261 | P14075 | Q6UXZ4 | -0.92627 |
| 41262 | P14075 | Q9C026 | -0.6655  |
| 41263 | P14075 | P06313 | -0.97479 |
| 41264 | P14075 | Q9UF56 | -0.22217 |
| 41265 | P14075 | Q9Y6W8 | -1.3545  |
| 41266 | P14075 | O75795 | -0.8893  |
| 41267 | P14075 | P46977 | -0.39234 |
| 41268 | P14075 | Q9BV23 | -0.7932  |

|       |        |        |          |
|-------|--------|--------|----------|
| 41269 | P14075 | Q86X19 | -0.85656 |
| 41270 | P14075 | Q8NGP3 | -1.1027  |
| 41271 | P14075 | Q5IJ48 | -1.3364  |
| 41272 | P14075 | P15509 | -1.3707  |
| 41273 | P14075 | P49639 | -0.18701 |
| 41274 | P14075 | Q9UKL2 | -1.2053  |
| 41275 | P14075 | Q9UQ03 | -0.49855 |
| 41276 | P14075 | O43633 | -0.15548 |
| 41277 | P14075 | Q9H5J0 | -0.22732 |
| 41278 | P14075 | Q11130 | -0.67425 |
| 41279 | P14075 | Q5CZ79 | -0.2274  |
| 41280 | P14075 | Q8IY18 | -0.22069 |
| 41281 | P14075 | Q8TD43 | -0.78277 |
| 41282 | P14075 | P23560 | -0.45615 |
| 41283 | P14075 | P0CW20 | -0.52332 |
| 41284 | P14075 | Q9H4Q3 | -0.26169 |
| 41285 | P14075 | Q8N9K5 | -0.21172 |
| 41286 | P14075 | P16402 | -0.77582 |
| 41287 | P14075 | O60336 | -0.42637 |
| 41288 | P14075 | P01762 | -0.97479 |
| 41289 | P14075 | Q8TAX0 | -0.20512 |
| 41290 | P14075 | Q96S82 | -0.22379 |
| 41291 | P14075 | Q8N3I7 | -0.37537 |
| 41292 | P14075 | A6NKT7 | -0.53439 |
| 41293 | P14075 | O95502 | -0.94954 |
| 41294 | P14075 | P01033 | -0.24024 |
| 41295 | P14075 | P07204 | -0.51288 |
| 41296 | P14075 | A8MYU2 | -1.0606  |
| 41297 | P14075 | Q8N8R5 | -0.87849 |
| 41298 | P14075 | P33993 | -0.20214 |
| 41299 | P14075 | P11049 | -0.30173 |
| 41300 | P14075 | P19438 | -0.32372 |
| 41301 | P14075 | Q8NB90 | -0.86852 |
| 41302 | P14075 | Q15788 | -0.25379 |
| 41303 | P14075 | Q969V3 | -0.33142 |
| 41304 | P14075 | Q9BRZ2 | -0.60231 |
| 41305 | P14075 | P25686 | -0.23067 |
| 41306 | P14075 | Q9NP74 | -0.57015 |
| 41307 | P14075 | Q13319 | -0.49052 |
| 41308 | P14075 | P15169 | -1.1688  |
| 41309 | P14075 | Q9Y5E1 | -1.1238  |
| 41310 | P14075 | Q93084 | -0.74689 |
| 41311 | P14075 | Q9Y289 | -0.74852 |
| 41312 | P14075 | Q9NV58 | -0.45957 |
| 41313 | P14075 | Q8NEQ5 | -0.86584 |
| 41314 | P14075 | Q86YS3 | -0.19094 |
| 41315 | P14075 | Q8N966 | -0.89944 |
| 41316 | P14075 | Q71U36 | -0.31938 |
| 41317 | P14075 | B3GLJ2 | -0.87849 |
| 41318 | P14075 | A6NLW8 | -0.21142 |
| 41319 | P14075 | Q9H8M1 | -0.39016 |
| 41320 | P14075 | Q8NGI0 | -1.1027  |
| 41321 | P14075 | Q9NYW3 | -0.97792 |
| 41322 | P14075 | P01023 | -0.22181 |
| 41323 | P14075 | Q9H3U7 | -1.1319  |
| 41324 | P14075 | Q9Y2I2 | -0.24975 |
| 41325 | P14075 | O43559 | -0.67189 |
| 41326 | P14075 | P0C7T3 | -1.1027  |
| 41327 | P14075 | Q6ZWB6 | -0.20107 |
| 41328 | P14075 | Q8N3A8 | -0.64965 |
| 41329 | P14075 | Q6PEY0 | -0.90771 |
| 41330 | P14075 | A8MVG2 | -0.86584 |
| 41331 | P14075 | P17017 | -0.21172 |
| 41332 | P14075 | P29973 | -1.2714  |
| 41333 | P14075 | P0CJ74 | -0.72903 |
| 41334 | P14075 | P12273 | -0.90509 |
| 41335 | P14075 | P05177 | -0.46031 |
| 41336 | P14075 | Q6GQQ9 | -0.16198 |
| 41337 | P14075 | P78348 | -0.64055 |
| 41338 | P14075 | P09681 | -0.4655  |
| 41339 | P14075 | Q8IW45 | -0.39742 |
| 41340 | P14075 | Q8WZ79 | -0.66966 |
| 41341 | P14075 | H3BV60 | -0.86584 |
| 41342 | P14075 | Q9UKP3 | -0.73469 |
| 41343 | P14075 | Q8IV16 | -0.69442 |
| 41344 | P14075 | Q8TC99 | -0.22441 |

|       |        |        |          |
|-------|--------|--------|----------|
| 41345 | P14075 | Q13546 | -0.22741 |
| 41346 | P14075 | Q8TD07 | -0.46331 |
| 41347 | P14075 | Q9H7M6 | -0.52332 |
| 41348 | P14075 | O60858 | -0.54647 |
| 41349 | P14075 | Q49SQ1 | -1.1739  |
| 41350 | P14075 | O95157 | -0.81313 |
| 41351 | P14075 | Q7Z419 | -0.25313 |
| 41352 | P14075 | O75973 | -0.53232 |
| 41353 | P14075 | A6NCM1 | -0.79654 |
| 41354 | P14075 | Q96MU8 | -0.362   |
| 41355 | P14075 | Q14916 | -0.98308 |
| 41356 | P14075 | P56915 | -0.19591 |
| 41357 | P14075 | Q6Pjq5 | -0.39119 |
| 41358 | P14075 | P16442 | -0.87295 |
| 41359 | P14075 | P48058 | -0.86419 |
| 41360 | P14075 | P02788 | -0.19619 |
| 41361 | P14075 | Q5JQS5 | -1.1027  |
| 41362 | P14075 | Q8N3Z0 | -0.97175 |
| 41363 | P14075 | P49146 | -1.0658  |
| 41364 | P14075 | Q15274 | -0.20898 |
| 41365 | P14075 | Q8WYK2 | -0.22608 |
| 41366 | P14075 | Q5QP82 | -0.42996 |
| 41367 | P14075 | Q8N729 | -0.32093 |
| 41368 | P14075 | P01608 | -0.97479 |
| 41369 | P14075 | Q9BTP6 | -0.57958 |
| 41370 | P14075 | Q9P0R6 | -0.29487 |
| 41371 | P14075 | Q8NCS4 | -0.86584 |
| 41372 | P14075 | Q9BZW8 | -0.53015 |
| 41373 | P14075 | P20062 | -0.93821 |
| 41374 | P14075 | Q9UM22 | -0.89691 |
| 41375 | P14075 | Q03013 | -0.42626 |
| 41376 | P14075 | P15248 | -0.7515  |
| 41377 | P14075 | Q5VW38 | -0.86584 |
| 41378 | P14075 | Q6ZSG1 | -0.52332 |
| 41379 | P14075 | Q96L34 | -0.23506 |
| 41380 | P14075 | Q6PDA7 | -0.87849 |
| 41381 | P14075 | Q8N1C3 | -0.75795 |
| 41382 | P14075 | Q6Y2X3 | -0.40786 |
| 41383 | P14075 | Q8NE63 | -0.78975 |
| 41384 | P14075 | P78356 | -0.43265 |
| 41385 | P14075 | O43739 | -0.5777  |
| 41386 | P14075 | Q9NZ53 | -0.6084  |
| 41387 | P14075 | Q8IV53 | -0.21281 |
| 41388 | P14075 | Q8NGS0 | -1.1027  |
| 41389 | P14075 | Q99558 | -0.22741 |
| 41390 | P14075 | Q8NGZ6 | -1.1027  |
| 41391 | P14075 | Q9NRF9 | -0.11332 |
| 41392 | P14075 | Q9NQ75 | -0.58897 |
| 41393 | P14075 | Q8N1T3 | -0.71966 |
| 41394 | P14075 | Q8WYK1 | -1.1581  |
| 41395 | P14075 | Q9UPN3 | -0.22762 |
| 41396 | P14075 | Q96GM1 | -0.94832 |
| 41397 | P14075 | P20309 | -0.58211 |
| 41398 | P14075 | Q8NCQ3 | -0.86584 |
| 41399 | P14075 | Q15758 | -0.80033 |
| 41400 | P14075 | P41271 | -0.64985 |
| 41401 | P14075 | Q9UKL4 | -0.93214 |
| 41402 | P14075 | P00915 | -0.20242 |
| 41403 | P14075 | P07942 | -0.61724 |
| 41404 | P14075 | Q9Y4R7 | -0.46739 |
| 41405 | P14075 | Q6ICI0 | -0.86584 |
| 41406 | P14075 | Q14315 | -0.22796 |
| 41407 | P14075 | Q08345 | -0.70822 |
| 41408 | P14075 | Q5VXU1 | -0.93628 |
| 41409 | P14075 | Q86WZ6 | -0.21172 |
| 41410 | P14075 | P61764 | -0.21628 |
| 41411 | P14075 | P01375 | -0.24266 |
| 41412 | P14075 | Q4G163 | -0.28849 |
| 41413 | P14075 | A6NN73 | -0.35868 |
| 41414 | P14075 | Q86UV5 | -0.31636 |
| 41415 | P14075 | Q9BQ87 | -0.2322  |
| 41416 | P14075 | P41225 | -0.24617 |
| 41417 | P14075 | Q8N4L4 | -0.91139 |
| 41418 | P14075 | Q15973 | -0.21172 |
| 41419 | P14075 | Q8TAP4 | -0.24789 |
| 41420 | P14075 | Q8TAU3 | -0.21172 |

|       |        |        |           |
|-------|--------|--------|-----------|
| 41421 | P14075 | Q58FG1 | -0.58434  |
| 41422 | P14075 | P10635 | -0.4403   |
| 41423 | P14075 | Q96HE8 | -0.86584  |
| 41424 | P14075 | Q96CN5 | -0.3067   |
| 41425 | P14075 | P31277 | -0.31781  |
| 41426 | P14075 | P18577 | -0.93117  |
| 41427 | P14075 | O94804 | -0.3613   |
| 41428 | P14075 | Q7Z692 | -0.86584  |
| 41429 | P14075 | Q8WXI7 | -0.85399  |
| 41430 | P14075 | Q6ZSC3 | -0.84005  |
| 41431 | P14075 | Q8NI32 | -0.60538  |
| 41432 | P14075 | P04350 | -0.25913  |
| 41433 | P14075 | P30492 | -0.88446  |
| 41434 | P14075 | Q8IZ20 | -0.21172  |
| 41435 | P14075 | P30536 | -0.36639  |
| 41436 | P14075 | O95166 | -0.095027 |
| 41437 | P14075 | Q14DG7 | -0.52887  |
| 41438 | P14075 | Q7Z3H4 | -0.2152   |
| 41439 | P14075 | Q9GZN1 | -0.30492  |
| 41440 | P14075 | P03971 | -0.5067   |
| 41441 | P14075 | Q9BT17 | -0.35073  |
| 41442 | P14075 | Q9BRA0 | -0.061576 |
| 41443 | P14075 | Q14833 | -1.1996   |
| 41444 | P14075 | P0CJ86 | -0.20043  |
| 41445 | P14075 | P24588 | -0.094952 |
| 41446 | P14075 | Q5GAN6 | -0.85864  |
| 41447 | P14075 | O60602 | -0.98086  |
| 41448 | P14075 | Q969Z4 | -0.78299  |
| 41449 | P14075 | Q9BSA9 | -0.86584  |
| 41450 | P14075 | Q86YD3 | -1.2762   |
| 41451 | P14075 | O60884 | -0.36599  |
| 41452 | P14075 | Q86V86 | -0.22787  |
| 41453 | P14075 | Q5TBK1 | -0.10241  |
| 41454 | P14075 | Q9HBF4 | -0.22079  |
| 41455 | P14075 | Q9UEF7 | -0.89796  |
| 41456 | P14075 | O43173 | -0.57856  |
| 41457 | P14075 | Q5MY95 | -1.0955   |
| 41458 | P14075 | P47929 | -0.50148  |
| 41459 | P14075 | Q07973 | -0.41957  |
| 41460 | P14075 | Q9UJL4 | -0.58178  |
| 41461 | P14075 | P08174 | -0.98402  |
| 41462 | P14075 | Q8N6F1 | -0.36585  |
| 41463 | P14075 | Q5VY43 | -0.88921  |
| 41464 | P14075 | P30953 | -1.1027   |
| 41465 | P14075 | B4DS77 | -0.84737  |
| 41466 | P14075 | O95231 | -0.22741  |
| 41467 | P14075 | P48448 | -0.65903  |
| 41468 | P14075 | Q5SNT2 | -0.63516  |
| 41469 | P14075 | B5ME19 | -0.17695  |
| 41470 | P14075 | Q3C1W6 | -0.73967  |
| 41471 | P14075 | Q16584 | -0.22741  |
| 41472 | P14075 | Q7Z628 | -0.40969  |
| 41473 | P14075 | Q6AZZ1 | -0.22751  |
| 41474 | P14075 | Q16595 | -0.19863  |
| 41475 | P14075 | Q8IX94 | -0.67504  |
| 41476 | P14075 | Q8N9N8 | -0.21277  |
| 41477 | P14075 | Q15055 | -0.22603  |
| 41478 | P14075 | Q9NW68 | -0.093878 |
| 41479 | P14075 | Q8WZ84 | -1.1027   |
| 41480 | P14075 | Q8TDX6 | -0.40507  |
| 41481 | P14075 | Q9BXX0 | -0.50485  |
| 41482 | P14075 | Q8TCU6 | -0.23688  |
| 41483 | P14075 | P08686 | -0.72085  |
| 41484 | P14075 | Q9H270 | -0.22694  |
| 41485 | P14075 | Q8N412 | -0.12446  |
| 41486 | P14075 | Q86SG6 | -0.91957  |
| 41487 | P14075 | Q9H172 | -1.0466   |
| 41488 | P14075 | Q96CS4 | -0.21172  |
| 41489 | P14075 | Q96NW7 | -0.27193  |
| 41490 | P14075 | Q9BQI4 | -0.87563  |
| 41491 | P14075 | Q6ZNB5 | -0.20887  |
| 41492 | P14075 | P68032 | -0.46017  |
| 41493 | P14075 | Q8IY51 | -0.33043  |
| 41494 | P14075 | Q8NGN2 | -1.1027   |
| 41495 | P14075 | A6NDD5 | -0.77822  |
| 41496 | P14075 | O00628 | -0.2302   |

|       |        |         |            |
|-------|--------|---------|------------|
| 41497 | P14075 | Q92484  | -0.32341   |
| 41498 | P14075 | O00155  | -1.2928    |
| 41499 | P14075 | Q9NY47  | -0.69805   |
| 41500 | P14075 | Q9NV12  | -0.86584   |
| 41501 | P14075 | Q8N531  | -0.57327   |
| 41502 | P14075 | Q14578  | -0.55211   |
| 41503 | P14075 | Q71UI9  | -0.88998   |
| 41504 | P14075 | Q8N0Y5  | -1.1027    |
| 41505 | P14075 | Q96IK5  | -0.21729   |
| 41506 | P14075 | Q9ULW5  | -0.72007   |
| 41507 | P14075 | Q9Y2I7  | -0.22643   |
| 41508 | P14075 | Q9HAY6  | -0.42629   |
| 41509 | P14075 | Q96RU8  | -0.22806   |
| 41510 | P14075 | Q15672  | -0.22763   |
| 41511 | P14075 | Q6ZQX7  | -0.0062554 |
| 41512 | P14075 | P51522  | -0.17069   |
| 41513 | P14075 | O15541  | -0.51948   |
| 41514 | P14075 | Q9NX57  | -0.82194   |
| 41515 | P14075 | O15523  | -0.58467   |
| 41516 | P14075 | P52429  | -1.1046    |
| 41517 | P14075 | P22695  | -0.093622  |
| 41518 | P14075 | Q6UW10  | -0.87849   |
| 41519 | P14075 | Q8NEA6  | -0.22729   |
| 41520 | P14075 | O75335  | -0.096003  |
| 41521 | P14075 | A6NFZ4  | -0.87849   |
| 41522 | P14075 | Q9UJH8  | -0.95472   |
| 41523 | P14075 | Q01484  | -0.22744   |
| 41524 | P14075 | Q8WWZ4  | -1.1035    |
| 41525 | P14075 | P0DJJD1 | -0.53439   |
| 41526 | P14075 | Q8IZP6  | -0.51948   |
| 41527 | P14075 | Q96L73  | -0.22751   |
| 41528 | P14075 | Q9UN86  | -0.89944   |
| 41529 | P14075 | O75473  | -1.2187    |
| 41530 | P14075 | P0CG36  | -0.99941   |
| 41531 | P14075 | D6R901  | -0.69644   |
| 41532 | P14075 | O43166  | -0.25154   |
| 41533 | P14075 | Q6V0I7  | -0.63537   |
| 41534 | P14075 | Q4KMG0  | -0.32419   |
| 41535 | P14075 | Q5TA45  | -0.1918    |
| 41536 | P14075 | Q8NGI3  | -1.1027    |
| 41537 | P14075 | P61026  | -0.62127   |
| 41538 | P14075 | Q8TAC1  | -0.71398   |
| 41539 | P14075 | Q99680  | -1.2928    |
| 41540 | P14075 | Q9UMD9  | -0.79048   |
| 41541 | P14075 | Q8WV44  | -0.22767   |
| 41542 | P14075 | Q6UXT8  | -0.87849   |
| 41543 | P14075 | Q6IEY1  | -1.1027    |
| 41544 | P14075 | A6NH21  | -0.86869   |
| 41545 | P14075 | Q8NDB6  | -0.7792    |
| 41546 | P14075 | Q69384  | -0.5818    |
| 41547 | P14075 | P01008  | -0.20589   |
| 41548 | P14075 | O95198  | -0.21009   |
| 41549 | P14075 | Q13275  | -0.84522   |
| 41550 | P14075 | Q9H2A9  | -0.59641   |
| 41551 | P14075 | Q6UWM5  | -0.87849   |
| 41552 | P14075 | Q9UKR3  | -0.58516   |
| 41553 | P14075 | Q5RI15  | -0.75099   |
| 41554 | P14075 | Q14940  | -0.93992   |
| 41555 | P14075 | Q5M7Z0  | -0.92811   |
| 41556 | P14075 | A6NHA9  | -1.1027    |
| 41557 | P14075 | Q14210  | -0.70833   |
| 41558 | P14075 | Q9BUT1  | -0.64251   |
| 41559 | P14075 | Q6ZMV7  | -0.17717   |
| 41560 | P14075 | A6NM36  | -0.22777   |
| 41561 | P14075 | P32298  | -0.75782   |
| 41562 | P14075 | Q86TW2  | -1.0981    |
| 41563 | P14075 | Q9UNZ2  | -0.61773   |
| 41564 | P14075 | P31785  | -0.76591   |
| 41565 | P14075 | Q8NAA5  | -0.16611   |
| 41566 | P14075 | Q9NPC7  | -0.17069   |
| 41567 | P14075 | P10747  | -0.2811    |
| 41568 | P14075 | P01600  | -0.97479   |
| 41569 | P14075 | Q8IXV7  | -0.29487   |
| 41570 | P14075 | Q8N6V9  | -0.029729  |
| 41571 | P14075 | Q7Z2W7  | -0.79809   |
| 41572 | P14075 | P01612  | -0.97479   |



|       |        |        |           |
|-------|--------|--------|-----------|
| 41573 | P14075 | Q9NW81 | -0.042379 |
| 41574 | P14075 | P51888 | -0.83106  |
| 41575 | P14075 | Q9Y496 | -0.28333  |
| 41576 | P14075 | Q8N146 | -1.1027   |
| 41577 | P14075 | Q969J3 | -0.06043  |
| 41578 | P14075 | Q8N428 | -0.59603  |
| 41579 | P14075 | Q66K64 | -0.43639  |
| 41580 | P14075 | Q99755 | -0.20523  |
| 41581 | P14075 | Q86UW7 | -0.32491  |
| 41582 | P14075 | Q9BT09 | -0.45909  |
| 41583 | P14075 | Q9C0H6 | -0.21132  |
| 41584 | P14075 | Q9Y6X6 | -0.22239  |
| 41585 | P14075 | P17027 | -0.21172  |
| 41586 | P14075 | Q460N5 | -0.22386  |
| 41587 | P14075 | Q86V24 | -0.89134  |
| 41588 | P14075 | Q04912 | -0.65979  |
| 41589 | P14075 | Q9H2J1 | -0.20971  |
| 41590 | P14075 | Q9HBA9 | -0.77514  |
| 41591 | P14075 | Q16558 | -0.96534  |
| 41592 | P14075 | Q9H6B4 | -0.80349  |
| 41593 | P14075 | Q5SSJ5 | -0.79768  |
| 41594 | P14075 | Q9BYN0 | -0.74654  |
| 41595 | P14075 | Q6P6C2 | -0.68788  |
| 41596 | P14075 | P35612 | -0.41742  |
| 41597 | P14075 | Q8NFZ6 | -1.1149   |
| 41598 | P14075 | Q08380 | -1.1982   |
| 41599 | P14075 | Q6ZNF0 | -0.85014  |
| 41600 | P14075 | Q96MC6 | -0.87101  |
| 41601 | P14075 | Q7LGC8 | -0.49454  |
| 41602 | P14075 | P10746 | -0.24871  |
| 41603 | P14075 | Q8IWK6 | -1.1829   |
| 41604 | P14075 | P12724 | -0.69655  |
| 41605 | P14075 | Q99988 | -0.79557  |
| 41606 | P14075 | O60318 | -0.44452  |
| 41607 | P14075 | P35611 | -0.17956  |
| 41608 | P14075 | Q9Y282 | -0.72691  |
| 41609 | P14075 | O94929 | -0.22817  |
| 41610 | P14075 | P02814 | -0.71103  |
| 41611 | P14075 | Q6N069 | -0.22289  |
| 41612 | P14075 | P15514 | -0.62045  |
| 41613 | P14075 | Q96ER9 | -0.34839  |
| 41614 | P14075 | Q9Y2G3 | -0.63939  |
| 41615 | P14075 | Q6ICB4 | -0.093335 |
| 41616 | P14075 | Q8IV76 | -0.41914  |
| 41617 | P14075 | O43405 | -0.41429  |
| 41618 | P14075 | Q6P1L6 | -0.21172  |
| 41619 | P14075 | Q9UH90 | -0.17903  |
| 41620 | P14075 | Q6P093 | -1.1644   |
| 41621 | P14075 | O14782 | -0.46112  |
| 41622 | P14075 | Q99666 | -0.22338  |
| 41623 | P14075 | P05408 | -0.49179  |
| 41624 | P14075 | Q14592 | -0.21172  |
| 41625 | P14075 | P01133 | -0.73906  |
| 41626 | P14075 | P36941 | -0.25692  |
| 41627 | P14075 | P59796 | -1.045    |
| 41628 | P14075 | Q8NGA8 | -1.1027   |
| 41629 | P14075 | Q8IZF0 | -0.97189  |
| 41630 | P14075 | Q6UX98 | -0.89944  |
| 41631 | P14075 | P17026 | -0.16275  |
| 41632 | P14075 | P08648 | -0.31103  |
| 41633 | P14075 | A6NCF6 | -0.15665  |
| 41634 | P14075 | Q9NZN4 | -0.36883  |
| 41635 | P14075 | O43157 | -0.7126   |
| 41636 | P14075 | P01571 | -0.70934  |
| 41637 | P14075 | Q96N68 | -0.86584  |
| 41638 | P14075 | P56703 | -0.44817  |
| 41639 | P14075 | Q8NHS3 | -0.49807  |
| 41640 | P14075 | Q10472 | -0.78132  |
| 41641 | P14075 | Q5TEZ5 | -0.16078  |
| 41642 | P14075 | Q969F2 | -0.18593  |
| 41643 | P14075 | P60507 | -0.71912  |
| 41644 | P14075 | Q92753 | -0.80842  |
| 41645 | P14075 | Q9HBW9 | -1.2062   |
| 41646 | P14075 | Q9P246 | -0.57181  |
| 41647 | P14075 | Q9HBI5 | -0.18391  |
| 41648 | P14075 | P23409 | -0.036631 |

|       |        |        |          |
|-------|--------|--------|----------|
| 41649 | P14075 | Q495N2 | -0.86584 |
| 41650 | P14075 | Q5SY80 | -0.86584 |
| 41651 | P14075 | Q96PJ5 | -0.39621 |
| 41652 | P14075 | Q06187 | -0.22741 |
| 41653 | P14075 | O60309 | -0.86584 |
| 41654 | P14075 | O15354 | -1.3244  |
| 41655 | P14075 | Q9NRP0 | -0.8104  |
| 41656 | P14075 | P02787 | -0.11201 |
| 41657 | P14075 | Q9Y231 | -0.53429 |
| 41658 | P14075 | P00568 | -0.55382 |
| 41659 | P14075 | Q86VR8 | -0.91732 |
| 41660 | P14075 | Q30KQ8 | -0.84399 |
| 41661 | P14075 | P0C7P3 | -0.79654 |
| 41662 | P14075 | P01709 | -0.97479 |
| 41663 | P14075 | Q92614 | -0.12664 |
| 41664 | P14075 | P40933 | -0.22352 |
| 41665 | P14075 | P13569 | -0.30116 |
| 41666 | P14075 | Q6UX41 | -0.31983 |
| 41667 | P14075 | O43824 | -0.95272 |
| 41668 | P14075 | O14792 | -0.45366 |
| 41669 | P14075 | Q99541 | -0.39537 |
| 41670 | P14075 | Q9H299 | -0.13301 |
| 41671 | P14075 | Q96DU3 | -0.94211 |
| 41672 | P14075 | Q9NP94 | -0.95706 |
| 41673 | P14075 | Q9NU19 | -1.2307  |
| 41674 | P14075 | Q8WV74 | -0.30367 |
| 41675 | P14075 | Q9Y6W6 | -0.56345 |
| 41676 | P14075 | A6NK02 | -0.73967 |
| 41677 | P14075 | P01308 | -0.2255  |
| 41678 | P14075 | P62333 | -0.31028 |
| 41679 | P14075 | Q9BVQ7 | -0.77802 |
| 41680 | P14075 | P98198 | -0.88854 |
| 41681 | P14075 | Q86X76 | -0.17714 |
| 41682 | P14075 | Q9NQ78 | -0.38055 |
| 41683 | P14075 | Q9HBG6 | -0.22744 |
| 41684 | P14075 | Q96CN7 | -0.54744 |
| 41685 | P14075 | Q92729 | -0.73422 |
| 41686 | P14075 | A8MV81 | -0.86584 |
| 41687 | P14075 | Q96PU9 | -0.58273 |
| 41688 | P14075 | P08195 | -0.36226 |
| 41689 | P14075 | Q9UIB8 | -1.0985  |
| 41690 | P14075 | O95925 | -0.25483 |
| 41691 | P14075 | Q3KRA9 | -0.3371  |
| 41692 | P14075 | Q9HAU8 | -0.796   |
| 41693 | P14075 | O95415 | -0.86584 |
| 41694 | P14075 | P21854 | -0.66539 |
| 41695 | P14075 | Q9UK12 | -0.21172 |
| 41696 | P14075 | P54257 | -0.1249  |
| 41697 | P14075 | P09104 | -0.24378 |
| 41698 | P14075 | P54710 | -0.92344 |
| 41699 | P14075 | Q9UQC9 | -1.3064  |
| 41700 | P14075 | P23945 | -0.57006 |
| 41701 | P14075 | Q9NRM0 | -0.55758 |
| 41702 | P14075 | P10767 | -0.82939 |
| 41703 | P14075 | Q9NWH7 | -1.1039  |
| 41704 | P14075 | P0C7X1 | -1.2307  |
| 41705 | P14075 | Q8WWI5 | -0.62004 |
| 41706 | P14075 | Q8N3Y1 | -0.22741 |
| 41707 | P14075 | Q9NNZ3 | -0.62188 |
| 41708 | P14075 | Q12981 | -0.15771 |
| 41709 | P14075 | Q8TDB8 | -0.62113 |
| 41710 | P14075 | P10644 | -0.22745 |
| 41711 | P14075 | Q9UJ71 | -0.99716 |
| 41712 | P14075 | Q86WG5 | -0.2274  |
| 41713 | P14075 | Q8WUJ1 | -0.77735 |
| 41714 | P14075 | Q96GP6 | -0.49597 |
| 41715 | P14075 | O43490 | -0.52312 |
| 41716 | P14075 | O00488 | -0.21564 |
| 41717 | P14075 | A6NHS7 | -0.86584 |
| 41718 | P14075 | Q8IV04 | -1.2307  |
| 41719 | P14075 | Q7Z2K6 | -1.1177  |
| 41720 | P14075 | Q6P575 | -0.29574 |
| 41721 | P14075 | Q8NGC5 | -1.1027  |
| 41722 | P14075 | Q8N7P1 | -1.0311  |
| 41723 | P14075 | Q15878 | -0.7599  |
| 41724 | P14075 | Q9Y264 | -0.72675 |

|       |        |        |           |
|-------|--------|--------|-----------|
| 41725 | P14075 | Q6ZP80 | -0.86584  |
| 41726 | P14075 | Q12889 | -0.40348  |
| 41727 | P14075 | P02689 | -0.4376   |
| 41728 | P14075 | Q9P2S5 | -0.2274   |
| 41729 | P14075 | Q14680 | -0.31848  |
| 41730 | P14075 | P36888 | -0.40937  |
| 41731 | P14075 | Q12870 | -0.2277   |
| 41732 | P14075 | Q7Z4L5 | -0.47289  |
| 41733 | P14075 | Q14254 | -0.69991  |
| 41734 | P14075 | O60218 | -0.40561  |
| 41735 | P14075 | O60895 | -0.19428  |
| 41736 | P14075 | Q9H4L5 | -0.45236  |
| 41737 | P14075 | Q9HBE4 | -0.80476  |
| 41738 | P14075 | Q9UGF6 | -1.1027   |
| 41739 | P14075 | Q86V21 | -0.55406  |
| 41740 | P14075 | P08582 | -0.56774  |
| 41741 | P14075 | P04626 | -0.22741  |
| 41742 | P14075 | Q8IWU6 | -0.44211  |
| 41743 | P14075 | Q8NG97 | -1.1027   |
| 41744 | P14075 | O00499 | -0.22745  |
| 41745 | P14075 | O75106 | -0.60803  |
| 41746 | P14075 | Q7L2E3 | -0.22579  |
| 41747 | P14075 | P10643 | -0.8613   |
| 41748 | P14075 | Q5TZJ5 | -0.86584  |
| 41749 | P14075 | O75716 | -0.3337   |
| 41750 | P14075 | Q9Y4B5 | -0.1977   |
| 41751 | P14075 | P47985 | -0.94517  |
| 41752 | P14075 | Q9BQG2 | -0.2769   |
| 41753 | P14075 | P30462 | -0.93787  |
| 41754 | P14075 | Q96T55 | -1.0473   |
| 41755 | P14075 | Q9UHL4 | -1.0023   |
| 41756 | P14075 | Q86YD7 | -0.48092  |
| 41757 | P14075 | P09917 | -0.22648  |
| 41758 | P14075 | Q8WVI7 | -0.19392  |
| 41759 | P14075 | P38570 | -1.022    |
| 41760 | P14075 | P48645 | -0.86977  |
| 41761 | P14075 | P17021 | -0.21172  |
| 41762 | P14075 | P41597 | -0.50353  |
| 41763 | P14075 | Q6NUI6 | -0.94331  |
| 41764 | P14075 | Q8WV48 | -0.86584  |
| 41765 | P14075 | O15481 | -0.014636 |
| 41766 | P14075 | P48230 | -0.80549  |
| 41767 | P14075 | Q8NG75 | -1.1027   |
| 41768 | P14075 | P51801 | -0.95491  |
| 41769 | P14075 | Q5VV43 | -0.52535  |
| 41770 | P14075 | P22362 | -1.0654   |
| 41771 | P14075 | Q5SXM1 | -0.21172  |
| 41772 | P14075 | P13385 | -0.22744  |
| 41773 | P14075 | Q9P107 | -0.49335  |
| 41774 | P14075 | Q6PID8 | -0.22719  |
| 41775 | P14075 | P30203 | -1.1      |
| 41776 | P14075 | Q9Y576 | -0.62789  |
| 41777 | P14075 | Q12982 | -0.17092  |
| 41778 | P14075 | Q9NUM3 | -0.87538  |
| 41779 | P14075 | P13497 | -1.0314   |
| 41780 | P14075 | Q7Z5G4 | -0.38583  |
| 41781 | P14075 | Q9Y2E6 | -0.38281  |
| 41782 | P14075 | P49840 | -0.2275   |
| 41783 | P14075 | Q9NZT1 | -0.65803  |
| 41784 | P14075 | Q53RT3 | -0.99556  |
| 41785 | P14075 | Q13609 | -0.29746  |
| 41786 | P14075 | P20807 | -0.74818  |
| 41787 | P14075 | Q13323 | -0.32363  |
| 41788 | P14075 | Q15904 | -0.81154  |
| 41789 | P14075 | P23471 | -1.2213   |
| 41790 | P14075 | P17540 | -0.7282   |
| 41791 | P14075 | Q9NV23 | -0.55396  |
| 41792 | P14075 | Q96GC9 | -0.45912  |
| 41793 | P14075 | Q5HYI8 | -1.0792   |
| 41794 | P14075 | Q9NR45 | -0.32995  |
| 41795 | P14075 | P08123 | -0.41388  |
| 41796 | P14075 | O60423 | -0.84807  |
| 41797 | P14075 | Q93097 | -0.78619  |
| 41798 | P14075 | Q6NXN4 | -0.86584  |
| 41799 | P14075 | P02144 | -0.46916  |
| 41800 | P14075 | Q8NGJ3 | -1.1027   |

|       |        |        |            |
|-------|--------|--------|------------|
| 41801 | P14075 | Q5VSG8 | -0.67915   |
| 41802 | P14075 | Q9NVP4 | -0.73967   |
| 41803 | P14075 | P0CJ85 | -0.20043   |
| 41804 | P14075 | Q02108 | -0.61177   |
| 41805 | P14075 | Q6UWJ8 | -0.86584   |
| 41806 | P14075 | Q6UX52 | -0.87849   |
| 41807 | P14075 | Q99519 | -0.52288   |
| 41808 | P14075 | Q9P202 | -0.22679   |
| 41809 | P14075 | Q9UI14 | -0.10233   |
| 41810 | P14075 | Q3MIR4 | -0.31698   |
| 41811 | P14075 | Q96R05 | -0.46227   |
| 41812 | P14075 | P12525 | -0.22693   |
| 41813 | P14075 | P08519 | -1.0731    |
| 41814 | P14075 | P25929 | -0.8079    |
| 41815 | P14075 | Q9UGJ1 | -0.037265  |
| 41816 | P14075 | Q567U6 | -0.19256   |
| 41817 | P14075 | P04181 | -0.21445   |
| 41818 | P14075 | P0CG37 | -0.75956   |
| 41819 | P14075 | Q8IUR5 | -0.74159   |
| 41820 | P14075 | Q96QE4 | -0.71569   |
| 41821 | P14075 | P16885 | -0.22741   |
| 41822 | P14075 | P14222 | -0.54107   |
| 41823 | P14075 | Q9NXS3 | -0.2003    |
| 41824 | P14075 | A6NLU0 | -0.52332   |
| 41825 | P14075 | P53816 | -0.13856   |
| 41826 | P14075 | O43278 | -0.78624   |
| 41827 | P14075 | Q05925 | -0.22729   |
| 41828 | P14075 | Q6ZN55 | -0.21172   |
| 41829 | P14075 | H3BPM6 | -0.053059  |
| 41830 | P14075 | Q9NV35 | -0.43358   |
| 41831 | P14075 | H3BUK9 | -0.22734   |
| 41832 | P14075 | Q8NH64 | -1.1027    |
| 41833 | P14075 | Q15415 | -0.53838   |
| 41834 | P14075 | O75051 | -0.95833   |
| 41835 | P14075 | Q8N2R8 | -0.20519   |
| 41836 | P14075 | P35247 | -0.45127   |
| 41837 | P14075 | Q14318 | -0.22776   |
| 41838 | P14075 | P02753 | -0.31283   |
| 41839 | P14075 | Q96HJ9 | -0.30763   |
| 41840 | P14075 | P03886 | -0.19473   |
| 41841 | P14075 | Q9BX68 | -0.4087    |
| 41842 | P14075 | Q03405 | -0.64197   |
| 41843 | P14075 | P35250 | -0.17712   |
| 41844 | P14075 | O75414 | -0.55102   |
| 41845 | P14075 | P55083 | -1.104     |
| 41846 | P14075 | Q86VV8 | -0.59198   |
| 41847 | P14075 | Q92928 | -0.80404   |
| 41848 | P14075 | Q6IE38 | -0.79897   |
| 41849 | P14075 | Q96PV4 | -0.41833   |
| 41850 | P14075 | Q9NWM0 | -0.21874   |
| 41851 | P14075 | Q93096 | -0.54888   |
| 41852 | P14075 | P47883 | -1.1027    |
| 41853 | P14075 | Q9P003 | -0.82088   |
| 41854 | P14075 | P41182 | -0.14262   |
| 41855 | P14075 | Q8IY47 | -0.21132   |
| 41856 | P14075 | Q658N2 | -0.87607   |
| 41857 | P14075 | P20711 | -0.53656   |
| 41858 | P14075 | Q8N7U9 | -0.0086686 |
| 41859 | P14075 | Q8IXE1 | -1.1027    |
| 41860 | P14075 | P06756 | -0.31157   |
| 41861 | P14075 | Q9Y2S0 | -0.082811  |
| 41862 | P14075 | P55916 | -0.45963   |
| 41863 | P14075 | Q8TE77 | -0.70597   |
| 41864 | P14075 | P09382 | -0.57981   |
| 41865 | P14075 | O14732 | -0.33378   |
| 41866 | P14075 | O95971 | -0.66545   |
| 41867 | P14075 | Q7Z5H4 | -1.1149    |
| 41868 | P14075 | Q9NP60 | -1.0257    |
| 41869 | P14075 | Q96BA8 | -0.22682   |
| 41870 | P14075 | P05160 | -0.77576   |
| 41871 | P14075 | Q9Y3A6 | -0.55873   |
| 41872 | P14075 | Q5TZ20 | -1.1027    |
| 41873 | P14075 | Q8N3C7 | -0.22741   |
| 41874 | P14075 | Q8WWH4 | -0.59065   |
| 41875 | P14075 | P21580 | -0.19835   |
| 41876 | P14075 | P01911 | -0.67577   |

|       |        |        |           |
|-------|--------|--------|-----------|
| 41877 | P14075 | Q96P15 | -0.21106  |
| 41878 | P14075 | Q7L0L9 | -0.86584  |
| 41879 | P14075 | P16452 | -0.1052   |
| 41880 | P14075 | P31949 | -0.2275   |
| 41881 | P14075 | Q9Y257 | -1.0191   |
| 41882 | P14075 | Q9UKG4 | -1.0302   |
| 41883 | P14075 | Q96AZ1 | -0.89874  |
| 41884 | P14075 | O43896 | -0.53838  |
| 41885 | P14075 | P48307 | -0.71772  |
| 41886 | P14075 | P51687 | -0.30145  |
| 41887 | P14075 | P15428 | -0.34702  |
| 41888 | P14075 | Q9UBY0 | -0.98063  |
| 41889 | P14075 | Q9NQZ7 | -0.76027  |
| 41890 | P14075 | Q9NWS0 | -0.42638  |
| 41891 | P14075 | P61129 | -0.26173  |
| 41892 | P14075 | Q8IUB3 | -0.85841  |
| 41893 | P14075 | Q8NHM5 | -0.22682  |
| 41894 | P14075 | Q02318 | -0.43403  |
| 41895 | P14075 | P08754 | -0.35859  |
| 41896 | P14075 | Q9H1Z9 | -0.86584  |
| 41897 | P14075 | Q96S97 | -0.86584  |
| 41898 | P14075 | A6NI03 | -0.73967  |
| 41899 | P14075 | O94760 | -0.26644  |
| 41900 | P14075 | Q8NGX3 | -1.1027   |
| 41901 | P14075 | Q9BY50 | -0.72157  |
| 41902 | P14075 | Q684P5 | -0.52328  |
| 41903 | P14075 | Q9NPG4 | -0.98758  |
| 41904 | P14075 | Q86WI1 | -0.83331  |
| 41905 | P14075 | Q9NZC9 | -0.54482  |
| 41906 | P14075 | O14526 | -0.51365  |
| 41907 | P14075 | O00522 | -0.22741  |
| 41908 | P14075 | Q8NH72 | -1.1027   |
| 41909 | P14075 | Q8N5W8 | -0.87849  |
| 41910 | P14075 | O75897 | -0.1984   |
| 41911 | P14075 | P40145 | -0.79588  |
| 41912 | P14075 | P52951 | -0.22719  |
| 41913 | P14075 | Q6ZUB0 | -0.86584  |
| 41914 | P14075 | Q14943 | -1.0367   |
| 41915 | P14075 | Q13261 | -0.48878  |
| 41916 | P14075 | Q495M9 | -0.22741  |
| 41917 | P14075 | Q9NWX5 | -0.27737  |
| 41918 | P14075 | Q59EK9 | -0.52948  |
| 41919 | P14075 | P42892 | -0.58835  |
| 41920 | P14075 | Q96LA9 | -1.1721   |
| 41921 | P14075 | Q9NT68 | -0.63408  |
| 41922 | P14075 | Q96J77 | -0.20284  |
| 41923 | P14075 | Q8TC07 | -0.64497  |
| 41924 | P14075 | Q8N4N8 | -0.28882  |
| 41925 | P14075 | Q92786 | -0.20629  |
| 41926 | P14075 | P51571 | -0.71996  |
| 41927 | P14075 | P08514 | -0.43956  |
| 41928 | P14075 | P53794 | -0.95622  |
| 41929 | P14075 | O43295 | -1.052    |
| 41930 | P14075 | Q7Z5H5 | -0.97078  |
| 41931 | P14075 | Q2M3V2 | -0.22741  |
| 41932 | P14075 | Q9NSI8 | -0.24361  |
| 41933 | P14075 | Q6UX06 | -0.94283  |
| 41934 | P14075 | P09848 | -0.63402  |
| 41935 | P14075 | Q3KQV9 | -0.49134  |
| 41936 | P14075 | Q9UBK5 | -0.9357   |
| 41937 | P14075 | Q969P5 | -0.081485 |
| 41938 | P14075 | O75467 | -0.21172  |
| 41939 | P14075 | Q8NG77 | -1.1027   |
| 41940 | P14075 | P56557 | -0.7086   |
| 41941 | P14075 | P29536 | -0.44328  |
| 41942 | P14075 | P13804 | -0.18368  |
| 41943 | P14075 | Q8WVM8 | -0.2203   |
| 41944 | P14075 | Q9Y6T7 | -0.7897   |
| 41945 | P14075 | Q68CQ1 | -0.86584  |
| 41946 | P14075 | Q495X7 | -0.73967  |
| 41947 | P14075 | P04434 | -0.97479  |
| 41948 | P14075 | P31941 | -0.39742  |
| 41949 | P14075 | P25311 | -0.97468  |
| 41950 | P14075 | Q9UFD9 | -0.22738  |
| 41951 | P14075 | Q8IXH8 | -1.1297   |
| 41952 | P14075 | A6NCV1 | -1.1027   |

|       |        |        |           |
|-------|--------|--------|-----------|
| 41953 | P14075 | Q6X784 | -0.84968  |
| 41954 | P14075 | P11836 | -0.88645  |
| 41955 | P14075 | Q15334 | -0.54516  |
| 41956 | P14075 | P56177 | -0.2255   |
| 41957 | P14075 | Q96MT7 | -0.22742  |
| 41958 | P14075 | Q969F8 | -0.77659  |
| 41959 | P14075 | Q5T4B2 | -0.61457  |
| 41960 | P14075 | Q9Y6X5 | -0.97121  |
| 41961 | P14075 | P53634 | -0.75118  |
| 41962 | P14075 | Q96S16 | -0.11737  |
| 41963 | P14075 | P30485 | -0.88446  |
| 41964 | P14075 | Q6IF42 | -1.1027   |
| 41965 | P14075 | Q6IQ16 | -0.22391  |
| 41966 | P14075 | Q6UWH4 | -0.72271  |
| 41967 | P14075 | Q08495 | -0.22151  |
| 41968 | P14075 | P01761 | -0.97479  |
| 41969 | P14075 | O95922 | -0.2885   |
| 41970 | P14075 | Q9UNX9 | -1.0462   |
| 41971 | P14075 | Q13393 | -0.48221  |
| 41972 | P14075 | Q6ZNA1 | -0.21172  |
| 41973 | P14075 | Q8NGF1 | -1.1027   |
| 41974 | P14075 | Q9UBI6 | -0.59575  |
| 41975 | P14075 | O60508 | -0.23148  |
| 41976 | P14075 | Q8N4Z0 | -1.0972   |
| 41977 | P14075 | P35544 | -0.22652  |
| 41978 | P14075 | Q13636 | -0.8886   |
| 41979 | P14075 | Q719I0 | -0.40115  |
| 41980 | P14075 | Q9Y2W6 | -0.22412  |
| 41981 | P14075 | Q9BUF5 | -0.63498  |
| 41982 | P14075 | P14920 | -0.38633  |
| 41983 | P14075 | O95359 | -0.22517  |
| 41984 | P14075 | Q8WXD2 | -0.63437  |
| 41985 | P14075 | Q95813 | -0.48731  |
| 41986 | P14075 | Q15836 | -0.22375  |
| 41987 | P14075 | P15291 | -0.40383  |
| 41988 | P14075 | Q96M96 | -0.89856  |
| 41989 | P14075 | Q9H4W6 | -0.21792  |
| 41990 | P14075 | Q12802 | -0.22735  |
| 41991 | P14075 | Q5FWF5 | -0.35944  |
| 41992 | P14075 | O95711 | -0.91034  |
| 41993 | P14075 | Q9NPD5 | -0.6841   |
| 41994 | P14075 | Q9Y4W6 | -0.56227  |
| 41995 | P14075 | Q3B7I2 | -0.058168 |
| 41996 | P14075 | A6NIE9 | -1.2917   |
| 41997 | P14075 | Q9H598 | -0.72679  |
| 41998 | P14075 | Q17RY0 | -0.78411  |
| 41999 | P14075 | Q9UNT1 | -1.0496   |
| 42000 | P14075 | Q04741 | -0.23925  |
| 42001 | P14075 | A8MQT2 | -0.43638  |
| 42002 | P14075 | P06326 | -0.97479  |
| 42003 | P14075 | Q2TAL6 | -0.81937  |
| 42004 | P14075 | P57075 | -0.22741  |
| 42005 | P14075 | Q9NQ60 | -0.74794  |
| 42006 | P14075 | P07305 | -0.56385  |
| 42007 | P14075 | Q6UX82 | -0.60538  |
| 42008 | P14075 | Q9H8H2 | -0.51914  |
| 42009 | P14075 | Q01851 | -0.22741  |
| 42010 | P14075 | Q5XXA6 | -0.83854  |
| 42011 | P14075 | Q9C098 | -0.62783  |
| 42012 | P14075 | Q5SW96 | -0.2273   |
| 42013 | P14075 | Q15620 | -1.1027   |
| 42014 | P14075 | A6NN14 | -0.21172  |
| 42015 | P14075 | Q14032 | -0.30649  |
| 42016 | P14075 | Q99470 | -0.93064  |
| 42017 | P14075 | Q9H1E5 | -0.84715  |
| 42018 | P14075 | Q86YB8 | -0.67928  |
| 42019 | P14075 | Q6ZMT1 | -0.6602   |
| 42020 | P14075 | Q5MNZ6 | -0.26238  |
| 42021 | P14075 | Q9BYJ1 | -0.59511  |
| 42022 | P14075 | P34897 | -0.19454  |
| 42023 | P14075 | Q08378 | -0.15344  |
| 42024 | P14075 | Q96FZ5 | -0.88766  |
| 42025 | P14075 | P51688 | -0.5547   |
| 42026 | P14075 | Q9H892 | -0.22462  |
| 42027 | P14075 | P48454 | -0.16672  |
| 42028 | P14075 | Q8WVE6 | -0.86584  |

|       |        |        |           |
|-------|--------|--------|-----------|
| 42029 | P14075 | Q8NBM8 | -0.95283  |
| 42030 | P14075 | Q9NRV9 | -0.80791  |
| 42031 | P14075 | O95490 | -1.0173   |
| 42032 | P14075 | Q53H12 | -0.70838  |
| 42033 | P14075 | Q8N127 | -1.1027   |
| 42034 | P14075 | Q9NSK7 | -0.66679  |
| 42035 | P14075 | Q9HOR1 | -0.060558 |
| 42036 | P14075 | Q8N967 | -0.86584  |
| 42037 | P14075 | Q9HBX9 | -1.0869   |
| 42038 | P14075 | Q9UJW8 | -0.21172  |
| 42039 | P14075 | Q9Y5G1 | -1.1297   |
| 42040 | P14075 | O75907 | -0.51417  |
| 42041 | P14075 | Q9Y6E2 | -0.5199   |
| 42042 | P14075 | A2A2Z9 | -0.22738  |
| 42043 | P14075 | Q765I0 | -0.85703  |
| 42044 | P14075 | P07451 | -0.29832  |
| 42045 | P14075 | Q9NS68 | -0.74213  |
| 42046 | P14075 | Q96DC8 | -0.54094  |
| 42047 | P14075 | Q2PZI1 | -0.86584  |
| 42048 | P14075 | Q9HC57 | -0.59316  |
| 42049 | P14075 | Q9Y484 | -0.26238  |
| 42050 | P14075 | Q6UXQ4 | -0.87849  |
| 42051 | P14075 | Q86WR6 | -0.079551 |
| 42052 | P14075 | O14874 | -0.21963  |
| 42053 | P14075 | O15554 | -0.43997  |
| 42054 | P14075 | Q5W150 | -0.093316 |
| 42055 | P14075 | Q8IYB8 | -0.22686  |
| 42056 | P14075 | Q13454 | -0.77487  |
| 42057 | P14075 | P35558 | -0.40617  |
| 42058 | P14075 | Q96JC4 | -0.21172  |
| 42059 | P14075 | Q10588 | -0.86913  |
| 42060 | P14075 | Q6NYC1 | -0.19738  |
| 42061 | P14075 | P30988 | -0.6188   |
| 42062 | P14075 | Q6VVB1 | -0.22188  |
| 42063 | P14075 | O95104 | -0.41191  |
| 42064 | P14075 | Q9GZM8 | -0.096167 |
| 42065 | P14075 | Q9BYT1 | -0.76074  |
| 42066 | P14075 | Q5W0B7 | -0.86584  |
| 42067 | P14075 | Q8NH53 | -1.1027   |
| 42068 | P14075 | P36542 | -0.21078  |
| 42069 | P14075 | P57053 | -0.86926  |
| 42070 | P14075 | O43820 | -0.70395  |
| 42071 | P14075 | P84085 | -0.30316  |
| 42072 | P14075 | Q92851 | -0.22681  |
| 42073 | P14075 | Q96GD4 | -0.58674  |
| 42074 | P14075 | Q9Y2U9 | -0.22411  |
| 42075 | P14075 | Q8N6G2 | -0.12153  |
| 42076 | P14075 | Q9H223 | -0.26714  |
| 42077 | P14075 | P23526 | -0.14157  |
| 42078 | P14075 | Q8N139 | -1.1035   |
| 42079 | P14075 | P34995 | -1.1995   |
| 42080 | P14075 | P60985 | -0.9248   |
| 42081 | P14075 | Q86Y29 | -0.87849  |
| 42082 | P14075 | Q9NWB1 | -0.25135  |
| 42083 | P14075 | O14684 | -0.73807  |
| 42084 | P14075 | Q96P44 | -0.81639  |
| 42085 | P14075 | Q16342 | -0.23997  |
| 42086 | P14075 | Q969V4 | -0.33477  |
| 42087 | P14075 | P60903 | -0.65557  |
| 42088 | P14075 | O60487 | -0.45094  |
| 42089 | P14075 | Q9BX67 | -0.49264  |
| 42090 | P14075 | Q96SQ7 | -0.22757  |
| 42091 | P14075 | Q9BRB3 | -0.67759  |
| 42092 | P14075 | Q13242 | -0.22699  |
| 42093 | P14075 | Q8IXQ5 | -0.21296  |
| 42094 | P14075 | Q16538 | -1.1721   |
| 42095 | P14075 | Q9NYM9 | -0.38185  |
| 42096 | P14075 | Q8NB14 | -0.69644  |
| 42097 | P14075 | Q9NPY3 | -0.43847  |
| 42098 | P14075 | Q96LA5 | -0.8409   |
| 42099 | P14075 | Q16619 | -0.53149  |
| 42100 | P14075 | Q6SPF0 | -0.72903  |
| 42101 | P14075 | P24387 | -0.33853  |
| 42102 | P14075 | O95825 | -0.80044  |
| 42103 | P14075 | Q15389 | -0.47091  |
| 42104 | P14075 | A6NL08 | -1.1027   |

|       |        |        |           |
|-------|--------|--------|-----------|
| 42105 | P14075 | Q7Z713 | -0.22741  |
| 42106 | P14075 | Q8TEU7 | -0.82893  |
| 42107 | P14075 | Q6UXV1 | -0.86584  |
| 42108 | P14075 | Q969T4 | -0.35447  |
| 42109 | P14075 | Q96R67 | -1.1027   |
| 42110 | P14075 | Q9UEU0 | -0.51168  |
| 42111 | P14075 | Q96KM6 | -0.22683  |
| 42112 | P14075 | O95259 | -0.36607  |
| 42113 | P14075 | Q9H4B7 | -0.61185  |
| 42114 | P14075 | Q9C0I4 | -0.86584  |
| 42115 | P14075 | P23368 | -0.73447  |
| 42116 | P14075 | Q8IZS6 | -0.24736  |
| 42117 | P14075 | Q8IZE3 | -0.22736  |
| 42118 | P14075 | Q96FC9 | -0.63276  |
| 42119 | P14075 | Q9BUV8 | -0.16078  |
| 42120 | P14075 | A4D256 | -0.94237  |
| 42121 | P14075 | Q9NYS7 | -0.62076  |
| 42122 | P14075 | Q8N2I9 | -0.22741  |
| 42123 | P14075 | Q9BT30 | -0.56922  |
| 42124 | P14075 | O75689 | -0.28555  |
| 42125 | P14075 | Q13535 | -0.66259  |
| 42126 | P14075 | Q9Y577 | -0.22885  |
| 42127 | P14075 | P41235 | -0.23661  |
| 42128 | P14075 | Q6DN90 | -0.2156   |
| 42129 | P14075 | O43623 | -0.21379  |
| 42130 | P14075 | Q15678 | -0.72611  |
| 42131 | P14075 | O75317 | -0.34182  |
| 42132 | P14075 | Q9BQ16 | -0.98221  |
| 42133 | P14075 | O75425 | -0.73168  |
| 42134 | P14075 | Q6X4U4 | -0.85812  |
| 42135 | P14075 | P30447 | -0.7844   |
| 42136 | P14075 | Q9Y4F5 | -0.31084  |
| 42137 | P14075 | Q9ULZ3 | -0.17025  |
| 42138 | P14075 | Q9Y5F2 | -1.1424   |
| 42139 | P14075 | Q9UQ26 | -0.22741  |
| 42140 | P14075 | Q8TBQ9 | -0.72271  |
| 42141 | P14075 | Q9Y2F9 | -0.22531  |
| 42142 | P14075 | Q9UN76 | -0.89018  |
| 42143 | P14075 | Q5VUY2 | -0.86431  |
| 42144 | P14075 | Q00887 | -0.88363  |
| 42145 | P14075 | P62683 | -0.40851  |
| 42146 | P14075 | P31513 | -0.83702  |
| 42147 | P14075 | Q96RJ3 | -0.72744  |
| 42148 | P14075 | Q14790 | -0.2266   |
| 42149 | P14075 | Q5T6X4 | -0.86584  |
| 42150 | P14075 | Q02763 | -0.37467  |
| 42151 | P14075 | Q53RE8 | -0.22741  |
| 42152 | P14075 | Q96M94 | -0.43639  |
| 42153 | P14075 | P30838 | -0.36047  |
| 42154 | P14075 | Q5JWF8 | -0.096284 |
| 42155 | P14075 | P04798 | -0.33072  |
| 42156 | P14075 | Q14807 | -1.12     |
| 42157 | P14075 | P06681 | -1.2771   |
| 42158 | P14075 | Q99518 | -0.79333  |
| 42159 | P14075 | Q8N370 | -0.94648  |
| 42160 | P14075 | Q9UBR4 | -0.22769  |
| 42161 | P14075 | Q96I15 | -0.5004   |
| 42162 | P14075 | P09430 | -0.62324  |
| 42163 | P14075 | Q29718 | -0.88446  |
| 42164 | P14075 | Q9HCZ1 | -0.21172  |
| 42165 | P14075 | Q8NFJ6 | -1.1551   |
| 42166 | P14075 | Q13491 | -0.60248  |
| 42167 | P14075 | Q8IU54 | -0.71372  |
| 42168 | P14075 | P39905 | -0.35623  |
| 42169 | P14075 | Q15842 | -0.75701  |
| 42170 | P14075 | Q9NQX3 | -0.64493  |
| 42171 | P14075 | P06312 | -0.97479  |
| 42172 | P14075 | A8MXV6 | -0.86584  |
| 42173 | P14075 | Q8NEV8 | -0.43674  |
| 42174 | P14075 | Q09160 | -0.88088  |
| 42175 | P14075 | P43003 | -0.56338  |
| 42176 | P14075 | P78383 | -0.84053  |
| 42177 | P14075 | P51172 | -0.56725  |
| 42178 | P14075 | P06317 | -0.95485  |
| 42179 | P14075 | Q5JT25 | -0.92564  |
| 42180 | P14075 | Q8N9N2 | -0.21709  |



|       |        |        |           |
|-------|--------|--------|-----------|
| 42181 | P14075 | O95716 | -0.69561  |
| 42182 | P14075 | P07225 | -0.76893  |
| 42183 | P14075 | Q9UMX5 | -0.84546  |
| 42184 | P14075 | P05187 | -1.1029   |
| 42185 | P14075 | O75508 | -0.77926  |
| 42186 | P14075 | Q58WW2 | -0.22741  |
| 42187 | P14075 | Q92784 | -0.2296   |
| 42188 | P14075 | Q9H336 | -0.87849  |
| 42189 | P14075 | Q8WXX0 | -0.6994   |
| 42190 | P14075 | Q9Y5E6 | -1.1424   |
| 42191 | P14075 | P05089 | -0.22582  |
| 42192 | P14075 | P41238 | -0.093693 |
| 42193 | P14075 | Q6PFW1 | -0.24174  |
| 42194 | P14075 | Q86VZ2 | -0.28668  |
| 42195 | P14075 | Q95IE3 | -0.67577  |
| 42196 | P14075 | O94993 | -0.18388  |
| 42197 | P14075 | Q9Y4C8 | -0.52711  |
| 42198 | P14075 | O43665 | -0.35929  |
| 42199 | P14075 | Q7Z5P4 | -1.014    |
| 42200 | P14075 | Q17R60 | -1.0147   |
| 42201 | P14075 | Q8N441 | -0.87334  |
| 42202 | P14075 | Q0P651 | -0.87849  |
| 42203 | P14075 | Q8NFX5 | -0.40974  |
| 42204 | P14075 | Q9H221 | -0.63889  |
| 42205 | P14075 | Q9NWC5 | -0.86584  |
| 42206 | P14075 | Q99661 | -0.29077  |
| 42207 | P14075 | P63244 | -0.22836  |
| 42208 | P14075 | P07108 | -0.42894  |
| 42209 | P14075 | Q08881 | -0.39271  |
| 42210 | P14075 | Q16798 | -0.45407  |
| 42211 | P14075 | Q96L08 | -0.86584  |
| 42212 | P14075 | P30040 | -0.23465  |
| 42213 | P14075 | Q00478 | -0.86584  |
| 42214 | P14075 | Q6NSZ9 | -0.076586 |
| 42215 | P14075 | Q8WZ59 | -0.86584  |
| 42216 | P14075 | Q96N35 | -0.86584  |
| 42217 | P14075 | Q9BYX7 | -0.76823  |
| 42218 | P14075 | Q14990 | -0.51637  |
| 42219 | P14075 | Q8IV08 | -0.44711  |
| 42220 | P14075 | O75752 | -0.76224  |
| 42221 | P14075 | Q96DR5 | -1.0096   |
| 42222 | P14075 | O43506 | -1.0896   |
| 42223 | P14075 | A1L020 | -0.22738  |
| 42224 | P14075 | Q6UWR7 | -1.1987   |
| 42225 | P14075 | Q9UC06 | -0.17069  |
| 42226 | P14075 | Q9NZQ0 | -0.92335  |
| 42227 | P14075 | P01765 | -0.97479  |
| 42228 | P14075 | Q92843 | -0.22725  |
| 42229 | P14075 | Q5JX69 | -0.86584  |
| 42230 | P14075 | Q8N2G6 | -0.51948  |
| 42231 | P14075 | Q9ULC5 | -0.70973  |
| 42232 | P14075 | Q9NPF0 | -0.70095  |
| 42233 | P14075 | Q86Y34 | -1.1905   |
| 42234 | P14075 | Q9P2U8 | -0.74893  |
| 42235 | P14075 | Q99801 | -0.2297   |
| 42236 | P14075 | Q9Y6W5 | -0.42293  |
| 42237 | P14075 | Q9BZR6 | -0.22781  |
| 42238 | P14075 | Q9P0T4 | -0.21172  |
| 42239 | P14075 | Q86UL8 | -0.22667  |
| 42240 | P14075 | O75340 | -0.22924  |
| 42241 | P14075 | P60008 | -0.63161  |
| 42242 | P14075 | Q00258 | -0.55207  |
| 42243 | P14075 | Q6ZT12 | -0.73228  |
| 42244 | P14075 | Q96JP2 | -0.21574  |
| 42245 | P14075 | P14770 | -0.99257  |
| 42246 | P14075 | Q5TDP6 | -0.53197  |
| 42247 | P14075 | P08620 | -0.59152  |
| 42248 | P14075 | Q99965 | -1.0921   |
| 42249 | P14075 | O43639 | -0.22741  |
| 42250 | P14075 | Q6UWP8 | -0.87849  |
| 42251 | P14075 | Q9Y485 | -0.2275   |
| 42252 | P14075 | Q00429 | -0.57769  |
| 42253 | P14075 | Q4VC12 | -0.511    |
| 42254 | P14075 | Q8NC44 | -0.85795  |
| 42255 | P14075 | Q99969 | -0.39974  |
| 42256 | P14075 | Q9NSA0 | -0.68653  |

|       |        |        |           |
|-------|--------|--------|-----------|
| 42257 | P14075 | Q9P2F6 | -1.1111   |
| 42258 | P14075 | Q9HAD4 | -0.22741  |
| 42259 | P14075 | Q8N0V4 | -0.87849  |
| 42260 | P14075 | Q5J5C9 | -0.72627  |
| 42261 | P14075 | A6NH52 | -0.86584  |
| 42262 | P14075 | Q7Z5Q1 | -0.65542  |
| 42263 | P14075 | P54284 | -0.5346   |
| 42264 | P14075 | Q8TBY9 | -0.52751  |
| 42265 | P14075 | P16930 | -0.45234  |
| 42266 | P14075 | P16104 | -0.30417  |
| 42267 | P14075 | Q15049 | -0.20009  |
| 42268 | P14075 | O60243 | -0.63507  |
| 42269 | P14075 | Q96F44 | -0.35539  |
| 42270 | P14075 | Q15777 | -0.35926  |
| 42271 | P14075 | Q9P0K1 | -0.58459  |
| 42272 | P14075 | P30479 | -0.88446  |
| 42273 | P14075 | Q9BW19 | -0.26832  |
| 42274 | P14075 | Q9UNE7 | -0.22609  |
| 42275 | P14075 | Q8NC42 | -0.94237  |
| 42276 | P14075 | O95838 | -1.0432   |
| 42277 | P14075 | Q99595 | -0.43948  |
| 42278 | P14075 | P80362 | -0.97479  |
| 42279 | P14075 | Q86YD5 | -0.89915  |
| 42280 | P14075 | Q86UN6 | -0.34618  |
| 42281 | P14075 | P54762 | -0.50975  |
| 42282 | P14075 | P22223 | -1.0754   |
| 42283 | P14075 | P80075 | -0.91615  |
| 42284 | P14075 | Q8NGQ1 | -1.1027   |
| 42285 | P14075 | Q66K74 | -0.13397  |
| 42286 | P14075 | Q7Z3G6 | -0.31168  |
| 42287 | P14075 | Q8J025 | -0.9591   |
| 42288 | P14075 | Q9Y4A9 | -1.1027   |
| 42289 | P14075 | Q9Y3E2 | -0.73628  |
| 42290 | P14075 | Q14390 | -0.41457  |
| 42291 | P14075 | Q8TEB7 | -0.69345  |
| 42292 | P14075 | A4D1F6 | -0.576    |
| 42293 | P14075 | Q8NG66 | -0.22742  |
| 42294 | P14075 | P20036 | -0.73433  |
| 42295 | P14075 | Q96I24 | -0.2031   |
| 42296 | P14075 | Q9UHF5 | -0.85768  |
| 42297 | P14075 | Q8N109 | -0.93628  |
| 42298 | P14075 | Q96JT2 | -0.8419   |
| 42299 | P14075 | Q17R31 | -0.24578  |
| 42300 | P14075 | Q9BVV7 | -0.32593  |
| 42301 | P14075 | A8MYZ5 | -0.2175   |
| 42302 | P14075 | Q8TE67 | -0.29487  |
| 42303 | P14075 | Q9NQC7 | -0.20677  |
| 42304 | P14075 | P21728 | -0.31124  |
| 42305 | P14075 | O15085 | -0.3127   |
| 42306 | P14075 | P05090 | -0.53938  |
| 42307 | P14075 | Q9NRB3 | -0.48751  |
| 42308 | P14075 | Q07654 | -0.78255  |
| 42309 | P14075 | Q15479 | -0.13892  |
| 42310 | P14075 | Q8NH48 | -1.1027   |
| 42311 | P14075 | Q9UBI4 | -0.51967  |
| 42312 | P14075 | Q15155 | -0.51844  |
| 42313 | P14075 | Q8N567 | -0.55657  |
| 42314 | P14075 | Q8IWX5 | -0.7523   |
| 42315 | P14075 | Q6UXN2 | -0.87849  |
| 42316 | P14075 | Q6QHF9 | -0.43924  |
| 42317 | P14075 | Q9H9L4 | -0.52826  |
| 42318 | P14075 | Q9NWS9 | -0.076586 |
| 42319 | P14075 | O75310 | -0.91913  |
| 42320 | P14075 | P00746 | -0.94202  |
| 42321 | P14075 | Q9NQZ3 | -0.22775  |
| 42322 | P14075 | Q6ZWE6 | -0.74073  |
| 42323 | P14075 | Q9NRR6 | -0.27011  |
| 42324 | P14075 | Q8N2S1 | -0.42809  |
| 42325 | P14075 | P61968 | -0.24514  |
| 42326 | P14075 | O95258 | -0.81422  |
| 42327 | P14075 | Q96L12 | -0.57762  |
| 42328 | P14075 | Q6ZT98 | -0.60661  |
| 42329 | P14075 | P20848 | -0.70542  |
| 42330 | P14075 | Q9NST1 | -0.65045  |
| 42331 | P14075 | Q8IY22 | -0.16176  |
| 42332 | P14075 | P10721 | -0.27693  |

|       |        |        |          |
|-------|--------|--------|----------|
| 42333 | P14075 | P20340 | -0.24479 |
| 42334 | P14075 | P52895 | -0.37586 |
| 42335 | P14075 | Q92874 | -0.84984 |
| 42336 | P14075 | Q9H4Z2 | -0.43954 |
| 42337 | P14075 | Q99645 | -0.88472 |
| 42338 | P14075 | Q99986 | -0.22741 |
| 42339 | P14075 | Q15149 | -0.22759 |
| 42340 | P14075 | P12272 | -0.34315 |
| 42341 | P14075 | Q9NWW5 | -0.40823 |
| 42342 | P14075 | Q9NP08 | -0.22764 |
| 42343 | P14075 | P04054 | -0.50674 |
| 42344 | P14075 | Q08257 | -0.67911 |
| 42345 | P14075 | P51693 | -0.24604 |
| 42346 | P14075 | Q7Z434 | -0.27696 |
| 42347 | P14075 | O15460 | -0.62495 |
| 42348 | P14075 | Q14774 | -0.22796 |
| 42349 | P14075 | Q9NR00 | -0.41833 |
| 42350 | P14075 | P61224 | -0.23972 |
| 42351 | P14075 | Q96SE7 | -0.21172 |
| 42352 | P14075 | P14210 | -0.30167 |
| 42353 | P14075 | P53367 | -0.17613 |
| 42354 | P14075 | P60022 | -0.86514 |
| 42355 | P14075 | Q86U37 | -0.06897 |
| 42356 | P14075 | Q5T764 | -0.31358 |
| 42357 | P14075 | Q8WVZ7 | -0.98817 |
| 42358 | P14075 | Q03701 | -0.22684 |
| 42359 | P14075 | Q69YW2 | -0.86584 |
| 42360 | P14075 | Q9Y2Y6 | -0.85795 |
| 42361 | P14075 | Q86YN1 | -0.78598 |
| 42362 | P14075 | Q99460 | -0.11855 |
| 42363 | P14075 | Q9P1C3 | -0.87849 |
| 42364 | P14075 | P05161 | -0.4774  |
| 42365 | P14075 | Q8TDM6 | -0.52495 |
| 42366 | P14075 | Q9H9S0 | -0.22768 |
| 42367 | P14075 | A6NI28 | -1.1955  |
| 42368 | P14075 | P78368 | -0.70897 |
| 42369 | P14075 | A8MTW9 | -0.87849 |
| 42370 | P14075 | Q96T49 | -0.22741 |
| 42371 | P14075 | P30511 | -0.9507  |
| 42372 | P14075 | Q9BXF9 | -0.33477 |
| 42373 | P14075 | Q13046 | -0.88363 |
| 42374 | P14075 | Q96RE9 | -0.21172 |
| 42375 | P14075 | Q05329 | -0.22976 |
| 42376 | P14075 | P21731 | -0.63997 |
| 42377 | P14075 | P11684 | -0.66649 |
| 42378 | P14075 | Q9P2N4 | -1.2025  |
| 42379 | P14075 | P30038 | -0.39566 |
| 42380 | P14075 | Q8NHC7 | -1.1027  |
| 42381 | P14075 | Q32P51 | -0.24428 |
| 42382 | P14075 | Q9UHF0 | -0.91956 |
| 42383 | P14075 | Q8IYT4 | -0.71132 |
| 42384 | P14075 | Q9Y217 | -0.31576 |
| 42385 | P14075 | Q8N806 | -0.46487 |
| 42386 | P14075 | P16233 | -0.73775 |
| 42387 | P14075 | P0CI25 | -0.73967 |
| 42388 | P14075 | Q96PQ1 | -1.0093  |
| 42389 | P14075 | Q9BXJ5 | -0.88288 |
| 42390 | P14075 | Q6NY19 | -0.22742 |
| 42391 | P14075 | O14645 | -0.19352 |
| 42392 | P14075 | A6NM43 | -0.64477 |
| 42393 | P14075 | P30042 | -0.30763 |
| 42394 | P14075 | Q96D53 | -0.77071 |
| 42395 | P14075 | Q712K3 | -0.66226 |
| 42396 | P14075 | P01614 | -0.97479 |
| 42397 | P14075 | Q6IF63 | -1.1027  |
| 42398 | P14075 | Q8TD17 | -0.22434 |
| 42399 | P14075 | Q99884 | -0.89733 |
| 42400 | P14075 | P50553 | -0.47725 |
| 42401 | P14075 | A6NCW0 | -0.4721  |
| 42402 | P14075 | P32248 | -0.46967 |
| 42403 | P14075 | Q8IYF1 | -0.23804 |
| 42404 | P14075 | Q96SB8 | -0.22174 |
| 42405 | P14075 | Q9BY14 | -0.60604 |
| 42406 | P14075 | O95170 | -0.22826 |
| 42407 | P14075 | O75309 | -1.1297  |
| 42408 | P14075 | Q9NRD5 | -0.22724 |

|       |        |        |           |
|-------|--------|--------|-----------|
| 42409 | P14075 | Q8IVH2 | -0.26175  |
| 42410 | P14075 | Q8N431 | -0.8089   |
| 42411 | P14075 | Q8NCP5 | -0.21172  |
| 42412 | P14075 | Q96EL3 | -0.097496 |
| 42413 | P14075 | Q12979 | -0.78879  |
| 42414 | P14075 | Q9BT81 | -0.22978  |
| 42415 | P14075 | P01602 | -0.97479  |
| 42416 | P14075 | Q9P291 | -0.86584  |
| 42417 | P14075 | Q9UHV5 | -0.79342  |
| 42418 | P14075 | Q8TE96 | -0.54812  |
| 42419 | P14075 | Q7Z3V5 | -0.21172  |
| 42420 | P14075 | Q5TC63 | -1.2307   |
| 42421 | P14075 | Q9Y2I8 | -0.22908  |
| 42422 | P14075 | Q8N9F0 | -0.62109  |
| 42423 | P14075 | Q96NH3 | -1.0495   |
| 42424 | P14075 | Q8IV63 | -0.66364  |
| 42425 | P14075 | O60404 | -1.1027   |
| 42426 | P14075 | Q9NY25 | -0.7992   |
| 42427 | P14075 | P19875 | -0.9946   |
| 42428 | P14075 | Q5T4D3 | -0.86584  |
| 42429 | P14075 | Q6PML9 | -0.50206  |
| 42430 | P14075 | O14960 | -0.86079  |
| 42431 | P14075 | Q6NSJ5 | -0.86584  |
| 42432 | P14075 | O75947 | -0.28167  |
| 42433 | P14075 | Q9NSE2 | -0.22741  |
| 42434 | P14075 | Q16650 | -0.49469  |
| 42435 | P14075 | Q9UBX8 | -0.52543  |
| 42436 | P14075 | O75095 | -0.23242  |
| 42437 | P14075 | O00746 | -0.54282  |
| 42438 | P14075 | P31939 | -0.3528   |
| 42439 | P14075 | Q9H426 | -0.30176  |
| 42440 | P14075 | Q9BXI6 | -0.65453  |
| 42441 | P14075 | Q8NDH3 | -0.71801  |
| 42442 | P14075 | Q92527 | -0.22739  |
| 42443 | P14075 | P22083 | -0.57112  |
| 42444 | P14075 | Q53G44 | -0.37148  |
| 42445 | P14075 | Q86XR7 | -0.45458  |
| 42446 | P14075 | A6NGZ8 | -0.93628  |
| 42447 | P14075 | P17035 | -0.21172  |
| 42448 | P14075 | O75390 | -0.16291  |
| 42449 | P14075 | Q5T7M9 | -0.93931  |
| 42450 | P14075 | O14979 | -0.242    |
| 42451 | P14075 | P04035 | -0.5701   |
| 42452 | P14075 | Q96PD4 | -0.54271  |
| 42453 | P14075 | Q9UJ90 | -0.85205  |
| 42454 | P14075 | Q96IK0 | -0.89063  |
| 42455 | P14075 | P53420 | -0.85842  |
| 42456 | P14075 | Q96JJ7 | -0.81698  |
| 42457 | P14075 | Q99853 | -0.32965  |
| 42458 | P14075 | Q8IXI1 | -0.69476  |
| 42459 | P14075 | Q969T7 | -0.071525 |
| 42460 | P14075 | O43581 | -0.83254  |
| 42461 | P14075 | E7EML9 | -1.2917   |
| 42462 | P14075 | Q6ZUS5 | -0.18814  |
| 42463 | P14075 | P49641 | -0.61366  |
| 42464 | P14075 | Q8IYR6 | -1.0489   |
| 42465 | P14075 | Q8NCM8 | -0.5005   |
| 42466 | P14075 | Q70Z44 | -0.97212  |
| 42467 | P14075 | A6NKF9 | -0.86584  |
| 42468 | P14075 | Q9UID3 | -0.067005 |
| 42469 | P14075 | Q4LDR2 | -0.8462   |
| 42470 | P14075 | P17038 | -0.21172  |
| 42471 | P14075 | P23469 | -0.40014  |
| 42472 | P14075 | P57723 | -0.31382  |
| 42473 | P14075 | Q8IY26 | -0.97121  |
| 42474 | P14075 | Q9NWD8 | -0.86584  |
| 42475 | P14075 | Q86UW8 | -1.0554   |
| 42476 | P14075 | Q96AG4 | -0.92089  |
| 42477 | P14075 | Q96BR1 | -0.75457  |
| 42478 | P14075 | Q8N0Z9 | -0.86584  |
| 42479 | P14075 | Q92535 | -0.83818  |
| 42480 | P14075 | Q8IVP5 | -0.27203  |
| 42481 | P14075 | P07477 | -1.3159   |
| 42482 | P14075 | P01906 | -0.74886  |
| 42483 | P14075 | Q86SG5 | -0.41077  |
| 42484 | P14075 | Q86XI6 | -0.29771  |

|       |        |        |          |
|-------|--------|--------|----------|
| 42485 | P14075 | O15492 | -0.2276  |
| 42486 | P14075 | Q9H106 | -0.87849 |
| 42487 | P14075 | O43488 | -0.22432 |
| 42488 | P14075 | Q86YW7 | -0.85703 |
| 42489 | P14075 | Q9Y5F0 | -1.1238  |
| 42490 | P14075 | Q96LB9 | -0.86249 |
| 42491 | P14075 | Q86W92 | -0.70751 |
| 42492 | P14075 | Q9H609 | -0.21172 |
| 42493 | P14075 | Q6UXU6 | -0.86584 |
| 42494 | P14075 | Q9UGT4 | -0.86355 |
| 42495 | P14075 | Q9Y251 | -0.27085 |
| 42496 | P14075 | P03989 | -0.84773 |
| 42497 | P14075 | Q6B0I6 | -0.1955  |
| 42498 | P14075 | Q86YN6 | -0.22571 |
| 42499 | P14075 | Q14953 | -1.0618  |
| 42500 | P14075 | Q8TCJ2 | -0.70075 |
| 42501 | P14075 | Q9UPQ0 | -0.59681 |
| 42502 | P14075 | Q9Y5N1 | -1.2278  |
| 42503 | P14075 | Q12950 | -0.31899 |
| 42504 | P14075 | O76050 | -0.3051  |
| 42505 | P14075 | Q03431 | -0.75124 |
| 42506 | P14075 | Q8N543 | -0.32762 |
| 42507 | P14075 | Q9H5Z1 | -0.71676 |
| 42508 | P14075 | P06734 | -1.2057  |
| 42509 | P14075 | Q6SJ93 | -0.65844 |
| 42510 | P14075 | Q9HC10 | -0.68982 |
| 42511 | P14075 | P30490 | -0.88446 |
| 42512 | P14075 | Q9H7F4 | -0.86584 |
| 42513 | P14075 | P04062 | -0.4276  |
| 42514 | P14075 | O43353 | -0.22741 |
| 42515 | P14075 | Q96G74 | -0.59291 |
| 42516 | P14075 | P48061 | -0.56345 |
| 42517 | P14075 | Q07812 | -0.22736 |
| 42518 | P14075 | Q13394 | -0.28319 |
| 42519 | P14075 | Q9Y6I3 | -0.15875 |
| 42520 | P14075 | Q9ULJ7 | -0.2274  |
| 42521 | P14075 | O43687 | -0.8302  |
| 42522 | P14075 | Q9HB15 | -0.95255 |
| 42523 | P14075 | Q96J42 | -0.87282 |
| 42524 | P14075 | Q9H4G4 | -0.7676  |
| 42525 | P14075 | Q9Y4D1 | -0.41959 |
| 42526 | P14075 | Q8NGK9 | -1.1027  |
| 42527 | P14075 | P01702 | -0.97479 |
| 42528 | P14075 | P0CJ92 | -0.35868 |
| 42529 | P14075 | Q9NZH8 | -0.7626  |
| 42530 | P14075 | Q9UFP1 | -0.87849 |
| 42531 | P14075 | P21145 | -0.55612 |
| 42532 | P14075 | O60383 | -0.61661 |
| 42533 | P14075 | O00220 | -0.22739 |
| 42534 | P14075 | Q9H773 | -0.51609 |
| 42535 | P14075 | Q9NQS5 | -1.0965  |
| 42536 | P14075 | A2RRH5 | -0.22745 |
| 42537 | P14075 | Q9UKU9 | -1.2179  |
| 42538 | P14075 | Q9H159 | -1.0844  |
| 42539 | P14075 | O60656 | -0.67826 |
| 42540 | P14075 | A6NDA9 | -0.86584 |
| 42541 | P14075 | Q8NE01 | -0.5005  |
| 42542 | P14075 | A6NC42 | -0.48113 |
| 42543 | P14075 | Q8NEX6 | -0.87849 |
| 42544 | P14075 | Q9NPF2 | -0.36898 |
| 42545 | P14075 | P0CW00 | -0.43319 |
| 42546 | P14075 | P12755 | -0.10212 |
| 42547 | P14075 | Q14156 | -0.78629 |
| 42548 | P14075 | P55286 | -1.0987  |
| 42549 | P14075 | Q96EK7 | -0.21882 |
| 42550 | P14075 | P40126 | -0.60487 |
| 42551 | P14075 | P47710 | -0.84627 |
| 42552 | P14075 | Q7Z6J2 | -0.22786 |
| 42553 | P14075 | Q8TDW4 | -0.84491 |
| 42554 | P14075 | Q99735 | -0.65597 |
| 42555 | P14075 | P09544 | -0.42887 |
| 42556 | P14075 | Q9BV94 | -0.77028 |
| 42557 | P14075 | A6NM28 | -0.21172 |
| 42558 | P14075 | Q9Y385 | -1.0632  |
| 42559 | P14075 | O43825 | -0.77811 |
| 42560 | P14075 | P0DI80 | -0.86584 |

|       |        |        |           |
|-------|--------|--------|-----------|
| 42561 | P14075 | Q9Y240 | -0.44948  |
| 42562 | P14075 | P19878 | -0.22743  |
| 42563 | P14075 | A6NCQ9 | -0.92811  |
| 42564 | P14075 | Q8WTQ7 | -1.042    |
| 42565 | P14075 | Q9BZA0 | -0.06663  |
| 42566 | P14075 | Q7L775 | -0.45036  |
| 42567 | P14075 | P98194 | -0.81337  |
| 42568 | P14075 | O15050 | -0.40273  |
| 42569 | P14075 | Q9GZK7 | -1.1027   |
| 42570 | P14075 | Q9NYA3 | -0.35868  |
| 42571 | P14075 | Q6P2N6 | -0.93628  |
| 42572 | P14075 | Q969Q4 | -0.68576  |
| 42573 | P14075 | Q9UG63 | -0.71154  |
| 42574 | P14075 | Q92913 | -0.27277  |
| 42575 | P14075 | P18462 | -0.7844   |
| 42576 | P14075 | Q6PK81 | -0.21172  |
| 42577 | P14075 | Q96QD8 | -0.99389  |
| 42578 | P14075 | P29376 | -1.1486   |
| 42579 | P14075 | Q9H3V2 | -0.86584  |
| 42580 | P14075 | Q8NB37 | -0.87849  |
| 42581 | P14075 | Q9BTT0 | -0.22741  |
| 42582 | P14075 | Q8WTS1 | -0.22536  |
| 42583 | P14075 | P49759 | -0.74493  |
| 42584 | P14075 | P0C7W9 | -0.48092  |
| 42585 | P14075 | O95907 | -0.72517  |
| 42586 | P14075 | O75063 | -0.96513  |
| 42587 | P14075 | Q5TC82 | -0.23109  |
| 42588 | P14075 | Q96EP5 | -0.57358  |
| 42589 | P14075 | Q9BPX6 | -0.51817  |
| 42590 | P14075 | Q8NE62 | -0.47225  |
| 42591 | P14075 | Q8NHR9 | -0.30502  |
| 42592 | P14075 | P51572 | -0.3041   |
| 42593 | P14075 | P35222 | -0.22801  |
| 42594 | P14075 | Q13401 | -0.10189  |
| 42595 | P14075 | Q96T25 | -0.36878  |
| 42596 | P14075 | P16083 | -0.14409  |
| 42597 | P14075 | Q68CZ2 | -0.22741  |
| 42598 | P14075 | Q92482 | -0.48596  |
| 42599 | P14075 | Q99707 | -0.31064  |
| 42600 | P14075 | P60059 | -0.49475  |
| 42601 | P14075 | Q8NH59 | -1.1027   |
| 42602 | P14075 | Q8IVA1 | -0.58902  |
| 42603 | P14075 | O60486 | -0.85468  |
| 42604 | P14075 | Q5VZ72 | -0.88564  |
| 42605 | P14075 | Q96L91 | -0.42162  |
| 42606 | P14075 | Q96CG8 | -0.74351  |
| 42607 | P14075 | O43164 | -0.3738   |
| 42608 | P14075 | Q5VV52 | -0.61367  |
| 42609 | P14075 | P09564 | -0.8933   |
| 42610 | P14075 | Q8N3J2 | -0.41945  |
| 42611 | P14075 | E7ERA6 | -0.92811  |
| 42612 | P14075 | Q8IW52 | -0.92424  |
| 42613 | P14075 | P26022 | -0.83388  |
| 42614 | P14075 | P51686 | -1.1702   |
| 42615 | P14075 | Q9YNA8 | -0.40851  |
| 42616 | P14075 | Q8N7X4 | -0.16078  |
| 42617 | P14075 | O43916 | -0.54145  |
| 42618 | P14075 | A6NCD1 | -0.73967  |
| 42619 | P14075 | Q9NRG7 | -0.80587  |
| 42620 | P14075 | P29371 | -0.85424  |
| 42621 | P14075 | P36268 | -0.58395  |
| 42622 | P14075 | Q8WZB0 | -0.024881 |
| 42623 | P14075 | Q14344 | -0.39623  |
| 42624 | P14075 | Q14204 | -0.2256   |
| 42625 | P14075 | Q8WXS8 | -1.1636   |
| 42626 | P14075 | Q8WZ55 | -0.68129  |
| 42627 | P14075 | Q8N5K1 | -0.42091  |
| 42628 | P14075 | O15409 | -0.31899  |
| 42629 | P14075 | Q7Z5A4 | -1.2917   |
| 42630 | P14075 | Q92952 | -0.80627  |
| 42631 | P14075 | Q6N075 | -0.85789  |
| 42632 | P14075 | P51157 | -1.1259   |
| 42633 | P14075 | Q8N3R9 | -0.22532  |
| 42634 | P14075 | Q96FK6 | -0.22741  |
| 42635 | P14075 | Q66K66 | -0.86584  |
| 42636 | P14075 | P14598 | -0.33528  |

|       |        |        |          |
|-------|--------|--------|----------|
| 42637 | P14075 | Q96PF1 | -0.47133 |
| 42638 | P14075 | P83105 | -1.1938  |
| 42639 | P14075 | Q9H7B7 | -0.87849 |
| 42640 | P14075 | P10696 | -0.88396 |
| 42641 | P14075 | Q8NFZ3 | -0.48676 |
| 42642 | P14075 | A5D8V6 | -0.13637 |
| 42643 | P14075 | P02724 | -0.84491 |
| 42644 | P14075 | Q86TI4 | -0.22764 |
| 42645 | P14075 | P30466 | -0.88446 |
| 42646 | P14075 | Q9BQQ7 | -0.16229 |
| 42647 | P14075 | Q9BXB5 | -0.80455 |
| 42648 | P14075 | Q8N4V1 | -0.76738 |
| 42649 | P14075 | P17542 | -0.22749 |
| 42650 | P14075 | P22059 | -0.5479  |
| 42651 | P14075 | P01222 | -0.64199 |
| 42652 | P14075 | P08235 | -0.22743 |
| 42653 | P14075 | Q9BZW2 | -0.90441 |
| 42654 | P14075 | P35754 | -0.21713 |
| 42655 | P14075 | C9JJH3 | -0.69644 |
| 42656 | P14075 | Q96HU1 | -0.23348 |
| 42657 | P14075 | Q8WUA7 | -1.1688  |
| 42658 | P14075 | P21741 | -0.78561 |
| 42659 | P14075 | Q7Z4S6 | -0.23914 |
| 42660 | P14075 | Q9UHK6 | -0.43603 |
| 42661 | P14075 | P08237 | -0.42703 |
| 42662 | P14075 | P55039 | -0.7779  |
| 42663 | P14075 | P22557 | -0.1111  |
| 42664 | P14075 | Q9Y2Y4 | -0.23151 |
| 42665 | P14075 | Q9UBR5 | -1.0745  |
| 42666 | P14075 | Q8NGI4 | -1.1027  |
| 42667 | P14075 | Q9BTV4 | -0.56037 |
| 42668 | P14075 | P08069 | -0.4271  |
| 42669 | P14075 | Q8NGR9 | -1.1027  |
| 42670 | P14075 | P10075 | -0.47206 |
| 42671 | P14075 | A1A5B4 | -0.99834 |
| 42672 | P14075 | O60658 | -0.22692 |
| 42673 | P14075 | Q86UK7 | -0.73967 |
| 42674 | P14075 | Q9H7F0 | -0.94875 |
| 42675 | P14075 | O60902 | -0.24032 |
| 42676 | P14075 | P61952 | -0.54522 |
| 42677 | P14075 | Q7Z5B4 | -0.7201  |
| 42678 | P14075 | Q58FF7 | -0.58434 |
| 42679 | P14075 | P16188 | -0.88088 |
| 42680 | P14075 | P42338 | -0.32499 |
| 42681 | P14075 | Q9UJ99 | -1.1297  |
| 42682 | P14075 | Q96RR4 | -0.90281 |
| 42683 | P14075 | P57071 | -0.21172 |
| 42684 | P14075 | A6NFU8 | -0.77399 |
| 42685 | P14075 | A8MXU0 | -0.84399 |
| 42686 | P14075 | Q9UJ68 | -0.17863 |
| 42687 | P14075 | Q5JV73 | -0.44826 |
| 42688 | P14075 | P08912 | -0.89589 |
| 42689 | P14075 | Q7Z602 | -1.1721  |
| 42690 | P14075 | Q6BCY4 | -0.54232 |
| 42691 | P14075 | P05997 | -0.8001  |
| 42692 | P14075 | Q53EU6 | -0.68321 |
| 42693 | P14075 | Q96PD2 | -1.0572  |
| 42694 | P14075 | Q6UB98 | -0.22741 |
| 42695 | P14075 | Q96T83 | -0.34361 |
| 42696 | P14075 | Q5VWC8 | -0.97631 |
| 42697 | P14075 | Q8N8S7 | -0.3081  |
| 42698 | P14075 | Q9NT22 | -0.79774 |
| 42699 | P14075 | P06753 | -0.32404 |
| 42700 | P14075 | Q9Y3M9 | -0.21172 |
| 42701 | P14075 | Q9H3M0 | -0.84843 |
| 42702 | P14075 | P22891 | -1.0002  |
| 42703 | P14075 | Q5VV42 | -0.62561 |
| 42704 | P14075 | Q9BS86 | -0.84968 |
| 42705 | P14075 | Q9NRE2 | -0.36611 |
| 42706 | P14075 | Q9UBD6 | -0.71019 |
| 42707 | P14075 | P01591 | -0.88984 |
| 42708 | P14075 | Q9NQX4 | -0.64682 |
| 42709 | P14075 | Q7Z3S9 | -0.92997 |
| 42710 | P14075 | Q08116 | -0.71202 |
| 42711 | P14075 | Q6P1M0 | -0.97802 |
| 42712 | P14075 | P59910 | -0.29548 |

|       |        |        |           |
|-------|--------|--------|-----------|
| 42713 | P14075 | Q8NEJ0 | -0.7984   |
| 42714 | P14075 | Q8NGQ2 | -1.1027   |
| 42715 | P14075 | Q9HAW7 | -0.70141  |
| 42716 | P14075 | Q9GZQ4 | -0.83297  |
| 42717 | P14075 | Q86XP3 | -0.3626   |
| 42718 | P14075 | Q96CT2 | -0.2089   |
| 42719 | P14075 | Q9NUL7 | -0.21744  |
| 42720 | P14075 | Q9NS15 | -0.81218  |
| 42721 | P14075 | P0C2Y1 | -0.29487  |
| 42722 | P14075 | Q9Y2H6 | -0.54247  |
| 42723 | P14075 | Q2TAC2 | -0.074122 |
| 42724 | P14075 | P04439 | -0.93787  |
| 42725 | P14075 | Q9P126 | -0.53856  |
| 42726 | P14075 | Q56A73 | -0.43051  |
| 42727 | P14075 | Q9NRK6 | -0.86555  |
| 42728 | P14075 | P21549 | -0.20732  |
| 42729 | P14075 | Q99784 | -0.22734  |
| 42730 | P14075 | P35052 | -0.76394  |
| 42731 | P14075 | P78536 | -0.30127  |
| 42732 | P14075 | A6NMU1 | -1.1027   |
| 42733 | P14075 | Q6UXE8 | -0.52887  |
| 42734 | P14075 | Q9UBQ6 | -1.0419   |
| 42735 | P14075 | Q9Y679 | -0.60283  |
| 42736 | P14075 | Q9NPL8 | -0.74159  |
| 42737 | P14075 | Q96RF0 | -0.27436  |
| 42738 | P14075 | Q13188 | -0.23047  |
| 42739 | P14075 | Q5SZQ8 | -0.3912   |
| 42740 | P14075 | Q8IXQ8 | -0.22687  |
| 42741 | P14075 | Q02962 | -0.22736  |
| 42742 | P14075 | Q9Y4U1 | -0.30289  |
| 42743 | P14075 | Q9H244 | -0.78256  |
| 42744 | P14075 | O43924 | -0.048865 |
| 42745 | P14075 | Q9UKM7 | -0.83117  |
| 42746 | P14075 | Q6IED9 | -0.44851  |
| 42747 | P14075 | Q9Y6I0 | -0.67565  |
| 42748 | P14075 | B2RD01 | -0.33321  |
| 42749 | P14075 | Q53GG5 | -0.45969  |
| 42750 | P14075 | Q13093 | -0.82819  |
| 42751 | P14075 | Q6ZV70 | -0.65844  |
| 42752 | P14075 | Q9HCC0 | -0.45841  |
| 42753 | P14075 | Q8N4C8 | -0.40218  |
| 42754 | P14075 | O75191 | -0.67175  |
| 42755 | P14075 | Q2NKX8 | -0.44619  |
| 42756 | P14075 | Q6NX49 | -0.21172  |
| 42757 | P14075 | Q05655 | -0.22394  |
| 42758 | P14075 | Q7L513 | -0.78657  |
| 42759 | P14075 | Q8NBL3 | -0.86584  |
| 42760 | P14075 | Q96P69 | -1.1578   |
| 42761 | P14075 | Q5QGZ9 | -0.92288  |
| 42762 | P14075 | Q5MAI5 | -0.51796  |
| 42763 | P14075 | Q6P2I3 | -0.64709  |
| 42764 | P14075 | Q7Z5A7 | -1.2172   |
| 42765 | P14075 | Q16473 | -0.2274   |
| 42766 | P14075 | Q8NGQ3 | -1.1027   |
| 42767 | P14075 | O95857 | -1.0003   |
| 42768 | P14075 | P15586 | -0.20598  |
| 42769 | P14075 | Q3ZCT8 | -0.21543  |
| 42770 | P14075 | Q15700 | -0.18614  |
| 42771 | P14075 | A6NI61 | -0.86584  |
| 42772 | P14075 | Q5VZF2 | -0.15775  |
| 42773 | P14075 | O95861 | -0.36361  |
| 42774 | P14075 | P02750 | -0.73592  |
| 42775 | P14075 | P32247 | -0.99277  |
| 42776 | P14075 | Q9UGU0 | -0.16966  |
| 42777 | P14075 | P11086 | -0.24547  |
| 42778 | P14075 | A8MXY4 | -0.21172  |
| 42779 | P14075 | Q6IFH4 | -1.1027   |
| 42780 | P14075 | P0C221 | -0.020795 |
| 42781 | P14075 | P29034 | -0.42646  |
| 42782 | P14075 | O00192 | -0.22843  |
| 42783 | P14075 | Q9H579 | -0.029664 |
| 42784 | P14075 | Q64LD2 | -0.22762  |
| 42785 | P14075 | Q8IVQ6 | -0.56747  |
| 42786 | P14075 | P09960 | -0.25564  |
| 42787 | P14075 | Q9NPA0 | -0.60838  |
| 42788 | P14075 | Q96I82 | -1.0232   |



|       |        |        |           |
|-------|--------|--------|-----------|
| 42789 | P14075 | P49815 | -0.20674  |
| 42790 | P14075 | Q9H0M4 | -0.52332  |
| 42791 | P14075 | P0CW18 | -0.91901  |
| 42792 | P14075 | Q8WV93 | -0.66622  |
| 42793 | P14075 | Q7Z3T8 | -0.19056  |
| 42794 | P14075 | Q92574 | -0.22721  |
| 42795 | P14075 | P28799 | -0.25697  |
| 42796 | P14075 | P13196 | -0.079094 |
| 42797 | P14075 | Q15915 | -0.32345  |
| 42798 | P14075 | Q5W064 | -0.46243  |
| 42799 | P14075 | Q8WYL5 | -0.45604  |
| 42800 | P14075 | Q9C0K0 | -0.22709  |
| 42801 | P14075 | P52565 | -0.072703 |
| 42802 | P14075 | Q92989 | -0.17065  |
| 42803 | P14075 | Q8N0W3 | -0.8282   |
| 42804 | P14075 | P29074 | -0.31052  |
| 42805 | P14075 | Q8WXS4 | -0.935    |
| 42806 | P14075 | Q8N5H7 | -0.73447  |
| 42807 | P14075 | Q96SI1 | -0.19405  |
| 42808 | P14075 | Q5VTD9 | -0.16283  |
| 42809 | P14075 | Q4G0U5 | -0.51623  |
| 42810 | P14075 | P13796 | -0.61103  |
| 42811 | P14075 | Q9Y2C5 | -0.98274  |
| 42812 | P14075 | Q7Z2R9 | -0.87849  |
| 42813 | P14075 | P04000 | -1.2635   |
| 42814 | P14075 | O95466 | -0.2235   |
| 42815 | P14075 | Q9H819 | -0.86545  |
| 42816 | P14075 | Q2TB10 | -0.22732  |
| 42817 | P14075 | Q9BRF8 | -0.43358  |
| 42818 | P14075 | Q7Z6Z7 | -0.22881  |
| 42819 | P14075 | Q9BS34 | -0.21172  |
| 42820 | P14075 | P38936 | -0.15573  |
| 42821 | P14075 | Q13415 | -0.12449  |
| 42822 | P14075 | Q2MV58 | -0.70437  |
| 42823 | P14075 | Q5VYY2 | -0.85081  |
| 42824 | P14075 | P47888 | -1.1027   |
| 42825 | P14075 | Q6IN97 | -0.22648  |
| 42826 | P14075 | A6NEJ1 | -0.056929 |
| 42827 | P14075 | Q9UKL6 | -0.48855  |
| 42828 | P14075 | A6NGN4 | -0.25825  |
| 42829 | P14075 | Q9BV79 | -0.89324  |
| 42830 | P14075 | O00443 | -0.3657   |
| 42831 | P14075 | Q86VZ5 | -0.41506  |
| 42832 | P14075 | Q66K79 | -1.134    |
| 42833 | P14075 | Q9BRK5 | -0.22462  |
| 42834 | P14075 | P0DJI8 | -0.59938  |
| 42835 | P14075 | Q9H0B3 | -0.30763  |
| 42836 | P14075 | Q13585 | -1.1948   |
| 42837 | P14075 | P33764 | -0.55769  |
| 42838 | P14075 | Q9Y691 | -0.92695  |
| 42839 | P14075 | P02763 | -0.39363  |
| 42840 | P14075 | Q6ICL3 | -0.30763  |
| 42841 | P14075 | Q6UXR4 | -0.70542  |
| 42842 | P14075 | Q8N4C7 | -0.62779  |
| 42843 | P14075 | Q8TCB0 | -0.22763  |
| 42844 | P14075 | P08887 | -0.31943  |
| 42845 | P14075 | P04083 | -0.20633  |
| 42846 | P14075 | Q9GZX3 | -0.51339  |
| 42847 | P14075 | Q86U02 | -0.86584  |
| 42848 | P14075 | Q9Y5J5 | -0.48642  |
| 42849 | P14075 | Q13434 | -0.55601  |
| 42850 | P14075 | Q6ZWK6 | -1.568    |
| 42851 | P14075 | Q6MZZ7 | -1.0319   |
| 42852 | P14075 | Q6QHK4 | -0.23215  |
| 42853 | P14075 | Q8TD26 | -0.20421  |
| 42854 | P14075 | Q6DKI7 | -0.86584  |
| 42855 | P14075 | Q5FYB0 | -0.7695   |
| 42856 | P14075 | Q9H254 | -0.22763  |
| 42857 | P14075 | Q8N3Y7 | -1.1927   |
| 42858 | P14075 | P18206 | -0.20981  |
| 42859 | P14075 | Q96SL4 | -1.045    |
| 42860 | P14075 | Q96Q07 | -0.62854  |
| 42861 | P14075 | Q9NQW7 | -0.51705  |
| 42862 | P14075 | Q969Q1 | -0.64292  |
| 42863 | P14075 | Q6NXT6 | -0.85397  |
| 42864 | P14075 | Q9H061 | -0.60432  |

|       |        |        |           |
|-------|--------|--------|-----------|
| 42865 | P14075 | P07307 | -0.45154  |
| 42866 | P14075 | Q96PL2 | -0.99615  |
| 42867 | P14075 | P36915 | -0.71909  |
| 42868 | P14075 | Q7L2J0 | -0.2765   |
| 42869 | P14075 | Q15599 | -0.22884  |
| 42870 | P14075 | Q96KC2 | -1.2555   |
| 42871 | P14075 | Q8N8P7 | -0.87849  |
| 42872 | P14075 | Q00889 | -0.76089  |
| 42873 | P14075 | Q96G30 | -0.49304  |
| 42874 | P14075 | P80162 | -1.0728   |
| 42875 | P14075 | Q96AX2 | -0.79601  |
| 42876 | P14075 | P49411 | -0.71615  |
| 42877 | P14075 | Q86SJ6 | -1.1632   |
| 42878 | P14075 | Q8WXG8 | -0.52751  |
| 42879 | P14075 | Q6ZW35 | -0.038612 |
| 42880 | P14075 | Q9NYM4 | -1.1171   |
| 42881 | P14075 | Q5T5X7 | -0.14385  |
| 42882 | P14075 | Q14863 | -0.2274   |
| 42883 | P14075 | Q8N2C7 | -0.86584  |
| 42884 | P14075 | P0C628 | -1.1027   |
| 42885 | P14075 | Q8N2M4 | -0.86584  |
| 42886 | P14075 | P20472 | -0.44974  |
| 42887 | P14075 | P48547 | -0.84843  |
| 42888 | P14075 | Q9NRM7 | -0.22741  |
| 42889 | P14075 | P81277 | -0.55238  |
| 42890 | P14075 | Q8NFU3 | -0.093837 |
| 42891 | P14075 | Q8IXK2 | -0.67293  |
| 42892 | P14075 | Q9Y216 | -0.58007  |
| 42893 | P14075 | Q5W0Q7 | -0.47922  |
| 42894 | P14075 | Q9NP86 | -0.40174  |
| 42895 | P14075 | Q8WZ64 | -1.0741   |
| 42896 | P14075 | Q15363 | -0.19475  |
| 42897 | P14075 | P07686 | -0.35642  |
| 42898 | P14075 | Q96DN5 | -0.81472  |
| 42899 | P14075 | Q9BXU9 | -0.70204  |
| 42900 | P14075 | P01225 | -0.13557  |
| 42901 | P14075 | O43819 | -0.33809  |
| 42902 | P14075 | Q14185 | -0.29985  |
| 42903 | P14075 | Q12836 | -1.0978   |
| 42904 | P14075 | P13232 | -0.095445 |
| 42905 | P14075 | Q9GZU3 | -0.86584  |
| 42906 | P14075 | Q13683 | -0.70505  |
| 42907 | P14075 | A6NIK2 | -0.23055  |
| 42908 | P14075 | P48444 | -0.15965  |
| 42909 | P14075 | Q7L576 | -0.18629  |
| 42910 | P14075 | Q8IXJ6 | -0.23477  |
| 42911 | P14075 | Q5VST6 | -0.8359   |
| 42912 | P14075 | A8MQ27 | -0.38281  |
| 42913 | P14075 | O75449 | -0.22832  |
| 42914 | P14075 | O43314 | -0.54012  |
| 42915 | P14075 | P17025 | -0.21172  |
| 42916 | P14075 | O75343 | -0.77667  |
| 42917 | P14075 | Q3SYB3 | -0.31899  |
| 42918 | P14075 | C9JL84 | -0.87849  |
| 42919 | P14075 | P14651 | -0.10691  |
| 42920 | P14075 | Q14766 | -0.43972  |
| 42921 | P14075 | Q5T1M5 | -0.66743  |
| 42922 | P14075 | O60315 | -0.21442  |
| 42923 | P14075 | O15553 | -0.37125  |
| 42924 | P14075 | Q8TBA6 | -0.58469  |
| 42925 | P14075 | Q9H6I2 | -0.19952  |
| 42926 | P14075 | A6ND91 | -0.82356  |
| 42927 | P14075 | Q15063 | -1.1707   |
| 42928 | P14075 | Q86UD4 | -0.21172  |
| 42929 | P14075 | Q8IW00 | -0.93628  |
| 42930 | P14075 | Q86XP1 | -0.53547  |
| 42931 | P14075 | Q6UXX5 | -0.86584  |
| 42932 | P14075 | P55196 | -0.22702  |
| 42933 | P14075 | Q92643 | -0.53392  |
| 42934 | P14075 | Q96F10 | -0.27132  |
| 42935 | P14075 | P51617 | -0.22738  |
| 42936 | P14075 | O75459 | -0.43344  |
| 42937 | P14075 | Q68BL8 | -0.91497  |
| 42938 | P14075 | Q8WW24 | -0.16958  |
| 42939 | P14075 | Q8WXF3 | -0.81791  |
| 42940 | P14075 | Q96RC9 | -1.1027   |

|       |        |         |           |
|-------|--------|---------|-----------|
| 42941 | P14075 | P12236  | -0.23457  |
| 42942 | P14075 | P55345  | -0.22741  |
| 42943 | P14075 | Q05513  | -0.22598  |
| 42944 | P14075 | Q86VZ1  | -1.124    |
| 42945 | P14075 | P47898  | -1.041    |
| 42946 | P14075 | Q7Z429  | -0.86584  |
| 42947 | P14075 | Q6ZUI0  | -0.29487  |
| 42948 | P14075 | O95214  | -0.86584  |
| 42949 | P14075 | Q7Z410  | -1.3271   |
| 42950 | P14075 | P57739  | -0.65088  |
| 42951 | P14075 | Q76B58  | -0.63156  |
| 42952 | P14075 | O75509  | -0.24838  |
| 42953 | P14075 | Q9P2G9  | -0.21344  |
| 42954 | P14075 | Q96P16  | -0.4263   |
| 42955 | P14075 | Q92506  | -0.30671  |
| 42956 | P14075 | Q9UJA2  | -0.57043  |
| 42957 | P14075 | Q9BRL6  | -0.59537  |
| 42958 | P14075 | Q9UBM4  | -0.91897  |
| 42959 | P14075 | Q8TE73  | -0.51695  |
| 42960 | P14075 | Q8IZQ8  | -0.44277  |
| 42961 | P14075 | Q7Z7M0  | -0.22741  |
| 42962 | P14075 | Q5TYW8  | -0.25825  |
| 42963 | P14075 | Q75398  | -0.21871  |
| 42964 | P14075 | P22352  | -0.71364  |
| 42965 | P14075 | A0PK05  | -0.86584  |
| 42966 | P14075 | Q6VB84  | -0.31899  |
| 42967 | P14075 | Q5J TZ9 | -0.31319  |
| 42968 | P14075 | P27216  | -0.67336  |
| 42969 | P14075 | Q9NU02  | -0.52751  |
| 42970 | P14075 | Q9BXJ7  | -0.90235  |
| 42971 | P14075 | Q9NYT6  | -0.21172  |
| 42972 | P14075 | P42857  | -0.36478  |
| 42973 | P14075 | Q8NBP5  | -0.87101  |
| 42974 | P14075 | Q9Y2Y8  | -0.42438  |
| 42975 | P14075 | Q7Z5H3  | -0.24815  |
| 42976 | P14075 | Q9UK23  | -0.52972  |
| 42977 | P14075 | Q9UJU3  | -0.21172  |
| 42978 | P14075 | Q92570  | -0.23916  |
| 42979 | P14075 | Q13885  | -0.5187   |
| 42980 | P14075 | B0I1T2  | -0.7233   |
| 42981 | P14075 | Q5H9K5  | -0.41835  |
| 42982 | P14075 | Q8NEB5  | -0.77446  |
| 42983 | P14075 | Q6UWF7  | -0.87849  |
| 42984 | P14075 | Q9NXH8  | -1.163    |
| 42985 | P14075 | Q99805  | -0.87857  |
| 42986 | P14075 | Q9BTE1  | -0.10805  |
| 42987 | P14075 | Q9BWM5  | -0.21172  |
| 42988 | P14075 | Q9ULC8  | -0.74135  |
| 42989 | P14075 | O43247  | -0.10691  |
| 42990 | P14075 | Q96S21  | -0.87003  |
| 42991 | P14075 | Q9ULI1  | -0.22741  |
| 42992 | P14075 | P62684  | -0.40851  |
| 42993 | P14075 | Q8NH89  | -1.1027   |
| 42994 | P14075 | O15393  | -1.4159   |
| 42995 | P14075 | Q8NH90  | -1.1027   |
| 42996 | P14075 | P50570  | -0.22919  |
| 42997 | P14075 | Q15056  | -0.22692  |
| 42998 | P14075 | Q9H0M0  | -0.22741  |
| 42999 | P14075 | P52735  | -0.22741  |
| 43000 | P14075 | P40617  | -0.23204  |
| 43001 | P14075 | Q5T197  | -0.92811  |
| 43002 | P14075 | Q9H3N1  | -0.85451  |
| 43003 | P14075 | Q9ULC3  | -0.88519  |
| 43004 | P14075 | Q05066  | -0.37142  |
| 43005 | P14075 | Q6PJI1  | -0.44754  |
| 43006 | P14075 | P49023  | -0.22908  |
| 43007 | P14075 | Q6U736  | -1.1116   |
| 43008 | P14075 | Q9UJ78  | -0.29787  |
| 43009 | P14075 | P21817  | -0.59674  |
| 43010 | P14075 | O75056  | -0.81251  |
| 43011 | P14075 | Q8TF61  | -0.69535  |
| 43012 | P14075 | P01298  | -0.86877  |
| 43013 | P14075 | Q9P2S2  | -0.90853  |
| 43014 | P14075 | Q5VT99  | -1.0257   |
| 43015 | P14075 | P11487  | -0.28359  |
| 43016 | P14075 | Q9BT73  | -0.084845 |

|       |        |        |           |
|-------|--------|--------|-----------|
| 43017 | P14075 | Q9Y5B8 | -0.63939  |
| 43018 | P14075 | Q6ZW33 | -0.52839  |
| 43019 | P14075 | P24666 | -0.19529  |
| 43020 | P14075 | O75899 | -0.88061  |
| 43021 | P14075 | Q13085 | -0.25619  |
| 43022 | P14075 | Q8NFU4 | -0.87849  |
| 43023 | P14075 | Q5I7T1 | -0.8079   |
| 43024 | P14075 | Q96LM5 | -0.12769  |
| 43025 | P14075 | O00763 | -0.32178  |
| 43026 | P14075 | P25685 | -0.17926  |
| 43027 | P14075 | Q5QFB9 | -0.93931  |
| 43028 | P14075 | P35442 | -0.85644  |
| 43029 | P14075 | Q6IPR3 | -0.33499  |
| 43030 | P14075 | Q96DN2 | -0.95463  |
| 43031 | P14075 | Q9H479 | -0.42808  |
| 43032 | P14075 | P58062 | -0.2562   |
| 43033 | P14075 | P21283 | -0.20081  |
| 43034 | P14075 | Q96JZ2 | -0.22741  |
| 43035 | P14075 | Q8NH50 | -1.1027   |
| 43036 | P14075 | O00501 | -0.57147  |
| 43037 | P14075 | Q95445 | -0.8329   |
| 43038 | P14075 | P19784 | -0.23499  |
| 43039 | P14075 | Q7L3V2 | -0.14495  |
| 43040 | P14075 | P0CI26 | -0.73967  |
| 43041 | P14075 | Q9Y2P5 | -0.76711  |
| 43042 | P14075 | Q8IV31 | -0.86584  |
| 43043 | P14075 | Q9UN88 | -0.86216  |
| 43044 | P14075 | Q9GZK4 | -1.1027   |
| 43045 | P14075 | P55082 | -0.93628  |
| 43046 | P14075 | Q9Y6C5 | -0.78142  |
| 43047 | P14075 | Q8NI77 | -0.63377  |
| 43048 | P14075 | O95256 | -1.1326   |
| 43049 | P14075 | Q96PZ7 | -0.86584  |
| 43050 | P14075 | O75569 | -0.1915   |
| 43051 | P14075 | P00156 | -0.67633  |
| 43052 | P14075 | Q9P2N5 | -0.25031  |
| 43053 | P14075 | O00562 | -0.38123  |
| 43054 | P14075 | P22303 | -0.22713  |
| 43055 | P14075 | P35499 | -1.0829   |
| 43056 | P14075 | Q5U651 | -0.32994  |
| 43057 | P14075 | A6NE21 | -0.48092  |
| 43058 | P14075 | P22413 | -0.284    |
| 43059 | P14075 | P05000 | -0.78341  |
| 43060 | P14075 | A0PJZ0 | -0.22741  |
| 43061 | P14075 | Q19T08 | -1.0619   |
| 43062 | P14075 | Q13519 | -0.97317  |
| 43063 | P14075 | A8MZ59 | -0.22687  |
| 43064 | P14075 | Q99467 | -0.9539   |
| 43065 | P14075 | Q8N309 | -0.19132  |
| 43066 | P14075 | Q8NGG4 | -1.1027   |
| 43067 | P14075 | Q2MJR0 | -0.65616  |
| 43068 | P14075 | Q8NGV5 | -1.1027   |
| 43069 | P14075 | Q6YHU6 | -0.021636 |
| 43070 | P14075 | Q8IZU9 | -0.71014  |
| 43071 | P14075 | Q7Z2W9 | -0.11411  |
| 43072 | P14075 | P83110 | -0.71944  |
| 43073 | P14075 | Q8N162 | -1.1027   |
| 43074 | P14075 | O76054 | -0.39667  |
| 43075 | P14075 | Q93050 | -0.13953  |
| 43076 | P14075 | O14936 | -0.22925  |
| 43077 | P14075 | Q03393 | -0.11681  |
| 43078 | P14075 | Q4KMZ8 | -0.93628  |
| 43079 | P14075 | A6NFA1 | -0.72431  |
| 43080 | P14075 | P78329 | -0.23522  |
| 43081 | P14075 | P48147 | -0.30701  |
| 43082 | P14075 | Q495A1 | -0.42549  |
| 43083 | P14075 | P48730 | -0.22741  |
| 43084 | P14075 | Q09428 | -0.553    |
| 43085 | P14075 | Q9BYV9 | -0.2264   |
| 43086 | P14075 | Q8TDD1 | -0.26004  |
| 43087 | P14075 | Q8WZ75 | -0.89212  |
| 43088 | P14075 | P14373 | -0.22824  |
| 43089 | P14075 | O95954 | -0.26111  |
| 43090 | P14075 | P16401 | -0.79294  |
| 43091 | P14075 | Q8NGO6 | -0.73967  |
| 43092 | P14075 | Q99679 | -1.2928   |

|       |        |        |           |
|-------|--------|--------|-----------|
| 43093 | P14075 | Q8NGB9 | -1.1027   |
| 43094 | P14075 | Q12799 | -0.35738  |
| 43095 | P14075 | Q5T4T1 | -0.86584  |
| 43096 | P14075 | Q52M75 | -0.00923  |
| 43097 | P14075 | Q9NY28 | -0.67293  |
| 43098 | P14075 | A0AVF1 | -0.51397  |
| 43099 | P14075 | Q08629 | -0.77556  |
| 43100 | P14075 | Q9BXJ2 | -0.72447  |
| 43101 | P14075 | Q9UGH3 | -0.55043  |
| 43102 | P14075 | Q3SY77 | -0.85345  |
| 43103 | P14075 | Q96A54 | -0.93314  |
| 43104 | P14075 | Q8IVF4 | -0.69496  |
| 43105 | P14075 | O14576 | -0.22741  |
| 43106 | P14075 | Q8IYS0 | -0.86584  |
| 43107 | P14075 | P59922 | -1.1027   |
| 43108 | P14075 | Q9Y5P2 | -0.43931  |
| 43109 | P14075 | Q6UXZ3 | -0.39621  |
| 43110 | P14075 | Q6UWM9 | -0.83419  |
| 43111 | P14075 | Q03721 | -0.7989   |
| 43112 | P14075 | Q9Y2B0 | -0.068454 |
| 43113 | P14075 | Q02218 | -0.244    |
| 43114 | P14075 | Q6P4H8 | -0.86584  |
| 43115 | P14075 | Q9NZG7 | -0.97066  |
| 43116 | P14075 | D6RBQ6 | -0.69644  |
| 43117 | P14075 | Q8NG94 | -1.1027   |
| 43118 | P14075 | P30519 | -0.261    |
| 43119 | P14075 | Q71DI3 | -0.56355  |
| 43120 | P14075 | P08588 | -0.64589  |
| 43121 | P14075 | P05067 | -0.25086  |
| 43122 | P14075 | P33992 | -0.20971  |
| 43123 | P14075 | O14793 | -0.45304  |
| 43124 | P14075 | A6NJQ4 | -0.48092  |
| 43125 | P14075 | Q8TBP6 | -0.7196   |
| 43126 | P14075 | O15062 | -0.22242  |
| 43127 | P14075 | Q9H305 | -0.089117 |
| 43128 | P14075 | P28566 | -1.2087   |
| 43129 | P14075 | Q8N687 | -0.84399  |
| 43130 | P14075 | Q9UPZ9 | -0.66934  |
| 43131 | P14075 | P26038 | -0.23169  |
| 43132 | P14075 | Q86T82 | -0.27107  |
| 43133 | P14075 | P05113 | -0.32416  |
| 43134 | P14075 | A6NKG6 | -0.22045  |
| 43135 | P14075 | P06899 | -0.86926  |
| 43136 | P14075 | Q6UXT9 | -0.8145   |
| 43137 | P14075 | Q6ZRR7 | -0.22736  |
| 43138 | P14075 | Q8IYL9 | -1.2109   |
| 43139 | P14075 | P57729 | -0.74354  |
| 43140 | P14075 | O94868 | -0.22744  |
| 43141 | P14075 | Q502X0 | -0.13512  |
| 43142 | P14075 | Q95749 | -0.1997   |
| 43143 | P14075 | P20933 | -0.48985  |
| 43144 | P14075 | Q16288 | -0.79444  |
| 43145 | P14075 | P31641 | -0.93339  |
| 43146 | P14075 | P51649 | -0.37037  |
| 43147 | P14075 | Q9BZM1 | -0.68203  |
| 43148 | P14075 | A6NJL1 | -0.076586 |
| 43149 | P14075 | Q2M3G4 | -0.40841  |
| 43150 | P14075 | P02585 | -0.54865  |
| 43151 | P14075 | Q01726 | -0.5885   |
| 43152 | P14075 | Q9P0K9 | -0.52887  |
| 43153 | P14075 | Q5JTY5 | -0.79654  |
| 43154 | P14075 | Q9Y6H3 | -0.71615  |
| 43155 | P14075 | Q7Z449 | -0.96774  |
| 43156 | P14075 | P17302 | -0.31547  |
| 43157 | P14075 | Q86UT5 | -0.22737  |
| 43158 | P14075 | Q9Y242 | -0.21903  |
| 43159 | P14075 | O60749 | -0.21844  |
| 43160 | P14075 | Q8N1E2 | -0.83332  |
| 43161 | P14075 | P09619 | -0.32334  |
| 43162 | P14075 | P25025 | -0.99618  |
| 43163 | P14075 | Q8IZ02 | -0.22741  |
| 43164 | P14075 | O15090 | -0.22292  |
| 43165 | P14075 | Q8NFA0 | -0.74569  |
| 43166 | P14075 | Q9HBE5 | -0.82116  |
| 43167 | P14075 | Q9Y243 | -0.15741  |
| 43168 | P14075 | P53778 | -0.22741  |

|       |        |        |          |
|-------|--------|--------|----------|
| 43169 | P14075 | Q5JRX3 | -0.34859 |
| 43170 | P14075 | Q86WA9 | -0.86324 |
| 43171 | P14075 | Q86WJ1 | -0.20421 |
| 43172 | P14075 | Q5VXI9 | -0.85081 |
| 43173 | P14075 | Q8NH18 | -1.1027  |
| 43174 | P14075 | Q5JPI9 | -0.37739 |
| 43175 | P14075 | A1L390 | -0.76318 |
| 43176 | P14075 | P57773 | -0.90771 |
| 43177 | P14075 | Q96A58 | -0.73079 |
| 43178 | P14075 | O76064 | -0.22741 |
| 43179 | P14075 | Q06416 | -0.22741 |
| 43180 | P14075 | Q99828 | -0.22838 |
| 43181 | P14075 | Q02817 | -0.34416 |
| 43182 | P14075 | Q9BSC4 | -0.22238 |
| 43183 | P14075 | Q9NVI7 | -0.96393 |
| 43184 | P14075 | Q96GQ5 | -0.86584 |
| 43185 | P14075 | Q9H8X2 | -0.61357 |
| 43186 | P14075 | Q96RK4 | -0.22704 |
| 43187 | P14075 | O43240 | -1.144   |
| 43188 | P14075 | Q6ZVM7 | -0.41642 |
| 43189 | P14075 | Q95365 | -0.3922  |
| 43190 | P14075 | Q14596 | -0.21333 |
| 43191 | P14075 | Q8NI37 | -0.47566 |
| 43192 | P14075 | Q99611 | -0.75643 |
| 43193 | P14075 | Q8N556 | -0.51268 |
| 43194 | P14075 | P60329 | -0.15519 |
| 43195 | P14075 | Q13643 | -0.34194 |
| 43196 | P14075 | Q00535 | -0.19581 |
| 43197 | P14075 | O75879 | -0.52182 |
| 43198 | P14075 | Q8N752 | -0.76191 |
| 43199 | P14075 | Q96GL9 | -0.86584 |
| 43200 | P14075 | Q5HYA8 | -0.31438 |
| 43201 | P14075 | Q06413 | -0.14642 |
| 43202 | P14075 | P51814 | -0.17069 |
| 43203 | P14075 | P38405 | -0.92551 |
| 43204 | P14075 | Q3SX64 | -0.07816 |
| 43205 | P14075 | A0PJX0 | -0.52751 |
| 43206 | P14075 | Q6UXY8 | -0.86584 |
| 43207 | P14075 | P51681 | -0.47002 |
| 43208 | P14075 | Q9Y5X9 | -0.75419 |
| 43209 | P14075 | Q6P4A8 | -0.67686 |
| 43210 | P14075 | P04553 | -0.79783 |
| 43211 | P14075 | P48145 | -0.70396 |
| 43212 | P14075 | P06280 | -0.20533 |
| 43213 | P14075 | Q6AZW8 | -0.21172 |
| 43214 | P14075 | Q7Z7M9 | -0.59757 |
| 43215 | P14075 | Q9NYL2 | -0.22741 |
| 43216 | P14075 | Q96PB1 | -0.86584 |
| 43217 | P14075 | Q5SSG8 | -0.91175 |
| 43218 | P14075 | O60774 | -0.98057 |
| 43219 | P14075 | Q5T700 | -0.86584 |
| 43220 | P14075 | Q15399 | -0.87758 |
| 43221 | P14075 | O75908 | -0.73122 |
| 43222 | P14075 | Q96PG2 | -0.86584 |
| 43223 | P14075 | Q643R3 | -0.73229 |
| 43224 | P14075 | O15503 | -0.46302 |
| 43225 | P14075 | P11597 | -0.63281 |
| 43226 | P14075 | P00491 | -0.39816 |
| 43227 | P14075 | Q96AP7 | -0.79255 |
| 43228 | P14075 | Q9NZM6 | -0.95205 |
| 43229 | P14075 | Q96LK0 | -0.18366 |
| 43230 | P14075 | Q92628 | -0.79654 |
| 43231 | P14075 | Q9H9V4 | -0.83748 |
| 43232 | P14075 | A6NFY4 | -0.86584 |
| 43233 | P14075 | O95936 | -0.54474 |
| 43234 | P14075 | Q16566 | -0.32344 |
| 43235 | P14075 | Q9NNX6 | -0.76991 |
| 43236 | P14075 | P0CJ69 | -0.72903 |
| 43237 | P14075 | Q15113 | -1.1297  |
| 43238 | P14075 | P06127 | -0.54967 |
| 43239 | P14075 | Q9NQY0 | -0.28686 |
| 43240 | P14075 | P01303 | -0.62871 |
| 43241 | P14075 | Q9NSY0 | -0.6496  |
| 43242 | P14075 | Q2VPA4 | -0.77043 |
| 43243 | P14075 | Q7Z4I7 | -0.37662 |
| 43244 | P14075 | Q9Y673 | -0.78276 |

|       |        |        |           |
|-------|--------|--------|-----------|
| 43245 | P14075 | Q6UX40 | -0.59708  |
| 43246 | P14075 | Q95460 | -1.2204   |
| 43247 | P14075 | P81172 | -0.6384   |
| 43248 | P14075 | P30459 | -0.7844   |
| 43249 | P14075 | P04141 | -0.16926  |
| 43250 | P14075 | Q8NGJ5 | -1.1027   |
| 43251 | P14075 | O15231 | -0.35525  |
| 43252 | P14075 | A4UGR9 | -0.45146  |
| 43253 | P14075 | Q13651 | -0.59022  |
| 43254 | P14075 | Q8IYQ7 | -0.15014  |
| 43255 | P14075 | Q13106 | -0.17069  |
| 43256 | P14075 | O60307 | -0.40926  |
| 43257 | P14075 | P13861 | -0.22734  |
| 43258 | P14075 | Q86Y56 | -0.091601 |
| 43259 | P14075 | Q7Z3V4 | -0.45042  |
| 43260 | P14075 | P0C6E5 | -0.6193   |
| 43261 | P14075 | Q06190 | -0.045433 |
| 43262 | P14075 | Q96RI9 | -1.143    |
| 43263 | P14075 | H3BSY2 | -0.35868  |
| 43264 | P14075 | P00367 | -0.19     |
| 43265 | P14075 | Q8TF30 | -0.3584   |
| 43266 | P14075 | Q8NH02 | -1.1027   |
| 43267 | P14075 | Q5VYJ5 | -0.86584  |
| 43268 | P14075 | O75915 | -0.72947  |
| 43269 | P14075 | P63123 | -0.67565  |
| 43270 | P14075 | Q96EQ8 | -0.72093  |
| 43271 | P14075 | P01598 | -0.97479  |
| 43272 | P14075 | Q96A32 | -0.56033  |
| 43273 | P14075 | P33527 | -0.38597  |
| 43274 | P14075 | Q9UFH2 | -0.5687   |
| 43275 | P14075 | A6NDY0 | -0.6758   |
| 43276 | P14075 | Q2M2H8 | -0.77962  |
| 43277 | P14075 | P20783 | -0.51804  |
| 43278 | P14075 | Q8NGL3 | -1.1027   |
| 43279 | P14075 | P19883 | -0.22521  |
| 43280 | P14075 | Q5SXM8 | -0.39487  |
| 43281 | P14075 | A5YM72 | -0.67465  |
| 43282 | P14075 | Q8TC17 | -0.22741  |
| 43283 | P14075 | Q92543 | -0.18279  |
| 43284 | P14075 | P20718 | -0.72084  |
| 43285 | P14075 | Q0P6D6 | -0.3067   |
| 43286 | P14075 | Q7Z3Q1 | -0.84814  |
| 43287 | P14075 | O75380 | -0.25572  |
| 43288 | P14075 | Q9BPV8 | -1.034    |
| 43289 | P14075 | Q9UM01 | -0.94159  |
| 43290 | P14075 | Q2VY69 | -0.21172  |
| 43291 | P14075 | Q8IY50 | -0.85789  |
| 43292 | P14075 | P43681 | -0.65732  |
| 43293 | P14075 | Q9H2K8 | -0.22962  |
| 43294 | P14075 | P04201 | -0.70133  |
| 43295 | P14075 | Q8WUD1 | -0.78574  |
| 43296 | P14075 | Q3BBW0 | -0.29487  |
| 43297 | P14075 | Q9Y661 | -1.0012   |
| 43298 | P14075 | P43116 | -1.1538   |
| 43299 | P14075 | Q9NXA8 | -0.24228  |
| 43300 | P14075 | Q8TB40 | -0.46099  |
| 43301 | P14075 | Q9P2K6 | -0.22297  |
| 43302 | P14075 | Q504Q3 | -0.071425 |
| 43303 | P14075 | Q86U38 | -0.18941  |
| 43304 | P14075 | P56179 | -0.23963  |
| 43305 | P14075 | P25116 | -0.38119  |
| 43306 | P14075 | Q14524 | -0.34057  |
| 43307 | P14075 | Q5VZV1 | -0.37739  |
| 43308 | P14075 | P52272 | -0.2173   |
| 43309 | P14075 | P63096 | -0.26709  |
| 43310 | P14075 | P14780 | -0.40405  |
| 43311 | P14075 | Q86Y13 | -0.22923  |
| 43312 | P14075 | Q12846 | -0.23465  |
| 43313 | P14075 | P98160 | -0.85261  |
| 43314 | P14075 | Q969Z3 | -0.59512  |
| 43315 | P14075 | Q9BZC1 | -0.32845  |
| 43316 | P14075 | Q9NZD1 | -1.1721   |
| 43317 | P14075 | Q6UXU4 | -0.86584  |
| 43318 | P14075 | Q9Y258 | -0.92322  |
| 43319 | P14075 | Q8NH63 | -1.1027   |
| 43320 | P14075 | O00744 | -0.36496  |

|       |        |        |           |
|-------|--------|--------|-----------|
| 43321 | P14075 | Q96EU7 | -0.74561  |
| 43322 | P14075 | Q5TGY1 | -0.86584  |
| 43323 | P14075 | Q6ZN11 | -0.21172  |
| 43324 | P14075 | Q30KQ5 | -0.84399  |
| 43325 | P14075 | Q8NGN6 | -1.1027   |
| 43326 | P14075 | Q95389 | -0.84662  |
| 43327 | P14075 | Q96QI5 | -0.52862  |
| 43328 | P14075 | Q15771 | -0.99778  |
| 43329 | P14075 | Q9NQS3 | -0.37951  |
| 43330 | P14075 | Q96AT9 | -0.29763  |
| 43331 | P14075 | Q8N131 | -0.85525  |
| 43332 | P14075 | Q6UW15 | -0.88105  |
| 43333 | P14075 | Q9NW07 | -0.20177  |
| 43334 | P14075 | Q6P3S6 | -0.22702  |
| 43335 | P14075 | P52732 | -0.27524  |
| 43336 | P14075 | Q96A83 | -0.97928  |
| 43337 | P14075 | Q9H201 | -0.11666  |
| 43338 | P14075 | Q6ZS86 | -0.67596  |
| 43339 | P14075 | Q86Y07 | -0.28963  |
| 43340 | P14075 | P24752 | -0.23526  |
| 43341 | P14075 | Q15218 | -1.1621   |
| 43342 | P14075 | Q9NZK7 | -0.82712  |
| 43343 | P14075 | Q5JZY3 | -0.8784   |
| 43344 | P14075 | Q14796 | -0.62417  |
| 43345 | P14075 | P31151 | -0.19936  |
| 43346 | P14075 | Q30167 | -0.67577  |
| 43347 | P14075 | Q9UK22 | -0.36684  |
| 43348 | P14075 | Q8N4L1 | -0.86584  |
| 43349 | P14075 | Q9BTY2 | -0.78743  |
| 43350 | P14075 | Q92615 | -0.84005  |
| 43351 | P14075 | P32004 | -0.55367  |
| 43352 | P14075 | Q96KN3 | -0.32519  |
| 43353 | P14075 | P05546 | -0.68219  |
| 43354 | P14075 | Q8N394 | -0.85795  |
| 43355 | P14075 | Q6PJW8 | -0.21513  |
| 43356 | P14075 | Q86T26 | -1.568    |
| 43357 | P14075 | Q9H4E7 | -0.22741  |
| 43358 | P14075 | P23458 | -0.48774  |
| 43359 | P14075 | Q2WEN9 | -0.90997  |
| 43360 | P14075 | P63135 | -0.26867  |
| 43361 | P14075 | Q15041 | -0.75469  |
| 43362 | P14075 | Q9Y561 | -0.58262  |
| 43363 | P14075 | Q8N100 | -0.22814  |
| 43364 | P14075 | Q9C0K3 | -0.85413  |
| 43365 | P14075 | Q8TCA0 | -0.22749  |
| 43366 | P14075 | Q5T9L3 | -0.34216  |
| 43367 | P14075 | A8MW95 | -0.29907  |
| 43368 | P14075 | Q9BXJ8 | -0.52887  |
| 43369 | P14075 | Q16563 | -0.82589  |
| 43370 | P14075 | Q15942 | -0.23664  |
| 43371 | P14075 | Q9UH36 | -0.45908  |
| 43372 | P14075 | Q8IW70 | -0.86584  |
| 43373 | P14075 | Q9Y2H2 | -0.40159  |
| 43374 | P14075 | P01775 | -0.97479  |
| 43375 | P14075 | Q96LR9 | -1.3528   |
| 43376 | P14075 | Q9H1K0 | -0.19273  |
| 43377 | P14075 | Q96SA4 | -0.86584  |
| 43378 | P14075 | Q96EH8 | -0.57509  |
| 43379 | P14075 | O43704 | -0.33969  |
| 43380 | P14075 | Q9NQA5 | -0.98469  |
| 43381 | P14075 | Q15034 | -0.42158  |
| 43382 | P14075 | Q75578 | -0.94939  |
| 43383 | P14075 | Q5U5Z8 | -0.56582  |
| 43384 | P14075 | Q5SQ64 | -0.93628  |
| 43385 | P14075 | Q7Z6I8 | -0.00843  |
| 43386 | P14075 | Q9BXT6 | -1.1063   |
| 43387 | P14075 | Q15072 | -1.149    |
| 43388 | P14075 | Q02742 | -0.61772  |
| 43389 | P14075 | Q02153 | -0.75996  |
| 43390 | P14075 | P01597 | -0.97479  |
| 43391 | P14075 | Q5JTN6 | -0.23075  |
| 43392 | P14075 | P19801 | -0.79904  |
| 43393 | P14075 | Q95071 | -0.22772  |
| 43394 | P14075 | Q60825 | -0.077664 |
| 43395 | P14075 | Q15622 | -1.1027   |
| 43396 | P14075 | Q9ULC0 | -1.2762   |



|       |        |        |           |
|-------|--------|--------|-----------|
| 43397 | P14075 | Q5VY80 | -0.64105  |
| 43398 | P14075 | P18440 | -0.28923  |
| 43399 | P14075 | P32302 | -1.1715   |
| 43400 | P14075 | Q7L7V1 | -0.42269  |
| 43401 | P14075 | Q8N568 | -0.77578  |
| 43402 | P14075 | Q29980 | -0.76688  |
| 43403 | P14075 | Q96I51 | -0.2243   |
| 43404 | P14075 | Q04118 | -0.79501  |
| 43405 | P14075 | Q16849 | -0.86515  |
| 43406 | P14075 | O71037 | -0.5818   |
| 43407 | P14075 | Q2M2I8 | -0.72873  |
| 43408 | P14075 | Q12893 | -0.46912  |
| 43409 | P14075 | Q6UWB4 | -1.1792   |
| 43410 | P14075 | Q9Y6S9 | -0.70315  |
| 43411 | P14075 | A6NNF4 | -0.21172  |
| 43412 | P14075 | Q13007 | -0.83451  |
| 43413 | P14075 | P11047 | -0.80069  |
| 43414 | P14075 | Q15738 | -0.85794  |
| 43415 | P14075 | O15178 | -0.3568   |
| 43416 | P14075 | Q96AB6 | -0.087047 |
| 43417 | P14075 | A8MXE2 | -0.74906  |
| 43418 | P14075 | Q9P0P0 | -0.57509  |
| 43419 | P14075 | P01834 | -0.97479  |
| 43420 | P14075 | Q5JUW0 | -0.31656  |
| 43421 | P14075 | Q9ULB5 | -1.0566   |
| 43422 | P14075 | Q6UX71 | -0.31983  |
| 43423 | P14075 | Q96FZ7 | -0.16183  |
| 43424 | P14075 | P61371 | -0.22809  |
| 43425 | P14075 | Q6UWV6 | -0.75272  |
| 43426 | P14075 | Q15907 | -0.69073  |
| 43427 | P14075 | Q5VXJ0 | -0.85081  |
| 43428 | P14075 | Q9NPR9 | -0.86584  |
| 43429 | P14075 | Q9H9A5 | -0.17305  |
| 43430 | P14075 | Q5BVD1 | -0.93931  |
| 43431 | P14075 | Q9H3Q3 | -0.69156  |
| 43432 | P14075 | Q9UBC5 | -0.44792  |
| 43433 | P14075 | Q99967 | -0.15822  |
| 43434 | P14075 | Q5VTL7 | -0.87849  |
| 43435 | P14075 | P20382 | -0.7663   |
| 43436 | P14075 | O95793 | -0.11393  |
| 43437 | P14075 | P01624 | -0.97479  |
| 43438 | P14075 | Q96GS6 | -0.8359   |
| 43439 | P14075 | Q96FE5 | -0.71165  |
| 43440 | P14075 | Q93033 | -0.9515   |
| 43441 | P14075 | P02743 | -0.78951  |
| 43442 | P14075 | O00555 | -0.40193  |
| 43443 | P14075 | Q99797 | -0.53411  |
| 43444 | P14075 | O14520 | -0.5719   |
| 43445 | P14075 | Q7Z7L7 | -0.41386  |
| 43446 | P14075 | P06702 | -0.22785  |
| 43447 | P14075 | Q9NPR2 | -0.92565  |
| 43448 | P14075 | Q01362 | -0.83386  |
| 43449 | P14075 | Q8WTR8 | -0.87849  |
| 43450 | P14075 | Q9Y6V0 | -0.43232  |
| 43451 | P14075 | P02778 | -0.77272  |
| 43452 | P14075 | Q8TC57 | -0.66432  |
| 43453 | P14075 | P29275 | -0.734    |
| 43454 | P14075 | H3BQB6 | -0.62648  |
| 43455 | P14075 | Q9UK96 | -0.45235  |
| 43456 | P14075 | A8MQ11 | -0.33287  |
| 43457 | P14075 | O95428 | -1.0407   |
| 43458 | P14075 | Q14515 | -1.1171   |
| 43459 | P14075 | P55064 | -0.50432  |
| 43460 | P14075 | Q70CQ4 | -0.69644  |
| 43461 | P14075 | Q9H1C4 | -0.71203  |
| 43462 | P14075 | O43555 | -1.109    |
| 43463 | P14075 | Q8NH80 | -1.1027   |
| 43464 | P14075 | Q14627 | -1.0385   |
| 43465 | P14075 | Q86XQ3 | -0.85525  |
| 43466 | P14075 | P33402 | -0.7433   |
| 43467 | P14075 | P09172 | -0.41815  |
| 43468 | P14075 | M0R1G4 | -0.075151 |
| 43469 | P14075 | Q2M5E4 | -0.66133  |
| 43470 | P14075 | P10589 | -0.2328   |
| 43471 | P14075 | Q00796 | -0.66112  |
| 43472 | P14075 | Q8NGT0 | -1.1027   |

|       |        |         |           |
|-------|--------|---------|-----------|
| 43473 | P14075 | Q04828  | -0.23757  |
| 43474 | P14075 | Q9UPS8  | -0.31528  |
| 43475 | P14075 | Q8WUX2  | -0.16078  |
| 43476 | P14075 | P78367  | -0.22782  |
| 43477 | P14075 | Q9NVE7  | -0.64902  |
| 43478 | P14075 | Q86TJ2  | -0.19434  |
| 43479 | P14075 | Q9UPU3  | -0.85806  |
| 43480 | P14075 | Q9UBE8  | -0.22741  |
| 43481 | P14075 | Q9P2B2  | -0.34931  |
| 43482 | P14075 | Q8NC06  | -0.61251  |
| 43483 | P14075 | P32971  | -0.79033  |
| 43484 | P14075 | Q9NZM3  | -0.74804  |
| 43485 | P14075 | P25940  | -0.85299  |
| 43486 | P14075 | Q9Y4E8  | -0.40563  |
| 43487 | P14075 | Q5VUM1  | -0.73628  |
| 43488 | P14075 | Q9NUK0  | -0.27584  |
| 43489 | P14075 | P15173  | -0.22729  |
| 43490 | P14075 | P28161  | -0.38961  |
| 43491 | P14075 | P21266  | -0.36987  |
| 43492 | P14075 | Q49AG3  | -0.57338  |
| 43493 | P14075 | P01623  | -0.97479  |
| 43494 | P14075 | A8MYR8  | -0.052317 |
| 43495 | P14075 | Q6ZNW5  | -0.50214  |
| 43496 | P14075 | P09669  | -0.56658  |
| 43497 | P14075 | P40205  | -0.60582  |
| 43498 | P14075 | Q8IUUK8 | -0.86584  |
| 43499 | P14075 | Q8N3J6  | -1.0264   |
| 43500 | P14075 | P15086  | -1.1649   |
| 43501 | P14075 | Q8N264  | -0.6759   |
| 43502 | P14075 | Q9HB89  | -1.0282   |
| 43503 | P14075 | Q9NSD7  | -1.2438   |
| 43504 | P14075 | Q8WWX0  | -0.62076  |
| 43505 | P14075 | Q6UY27  | -0.91732  |
| 43506 | P14075 | Q96NJ3  | -0.21172  |
| 43507 | P14075 | Q95202  | -0.28531  |
| 43508 | P14075 | Q16539  | -0.22741  |
| 43509 | P14075 | Q8NE35  | -0.75959  |
| 43510 | P14075 | Q12884  | -0.52419  |
| 43511 | P14075 | A8K2U0  | -0.78291  |
| 43512 | P14075 | Q8TEH3  | -0.60492  |
| 43513 | P14075 | P56856  | -0.64451  |
| 43514 | P14075 | Q9H7T0  | -0.92378  |
| 43515 | P14075 | A0PJW8  | -0.48243  |
| 43516 | P14075 | P36537  | -0.93517  |
| 43517 | P14075 | Q9BSA4  | -0.45184  |
| 43518 | P14075 | Q9Y241  | -0.72689  |
| 43519 | P14075 | Q02388  | -0.61678  |
| 43520 | P14075 | Q02985  | -0.91732  |
| 43521 | P14075 | Q8N594  | -0.7159   |
| 43522 | P14075 | P30483  | -0.88446  |
| 43523 | P14075 | Q5JRM2  | -0.86584  |
| 43524 | P14075 | Q8TF66  | -0.86584  |
| 43525 | P14075 | Q9BV35  | -0.78496  |
| 43526 | P14075 | P01833  | -1.3027   |
| 43527 | P14075 | Q9Y508  | -0.97819  |
| 43528 | P14075 | Q8IZW8  | -0.2274   |
| 43529 | P14075 | P0DKX4  | -0.16237  |
| 43530 | P14075 | Q96LM6  | -0.21602  |
| 43531 | P14075 | Q8N1Y9  | -0.86584  |
| 43532 | P14075 | Q16602  | -0.53774  |
| 43533 | P14075 | P49354  | -0.13884  |
| 43534 | P14075 | P02746  | -0.4114   |
| 43535 | P14075 | P42357  | -0.32076  |
| 43536 | P14075 | P32297  | -0.63643  |
| 43537 | P14075 | P51841  | -1.1678   |
| 43538 | P14075 | O43688  | -0.711    |
| 43539 | P14075 | Q9H013  | -1.1299   |
| 43540 | P14075 | Q92839  | -0.82211  |
| 43541 | P14075 | Q03169  | -0.67678  |
| 43542 | P14075 | Q8NE28  | -0.8996   |
| 43543 | P14075 | Q8TBX8  | -0.35709  |
| 43544 | P14075 | Q96DB9  | -0.97385  |
| 43545 | P14075 | Q76G19  | -0.29439  |
| 43546 | P14075 | P05156  | -1.2402   |
| 43547 | P14075 | O95626  | -0.18434  |
| 43548 | P14075 | Q01813  | -0.5489   |

|       |        |        |           |
|-------|--------|--------|-----------|
| 43549 | P14075 | Q9H4E5 | -0.95623  |
| 43550 | P14075 | A8MQB9 | -0.22741  |
| 43551 | P14075 | Q7Z698 | -0.20569  |
| 43552 | P14075 | Q08AE8 | -0.24745  |
| 43553 | P14075 | Q8IUA0 | -0.79897  |
| 43554 | P14075 | Q5TYW2 | -0.52803  |
| 43555 | P14075 | P0C6T2 | -0.86584  |
| 43556 | P14075 | Q8WU79 | -0.35635  |
| 43557 | P14075 | A6NC97 | -0.86584  |
| 43558 | P14075 | Q9UHF4 | -0.86584  |
| 43559 | P14075 | Q9UBU2 | -0.96066  |
| 43560 | P14075 | Q9NRU3 | -1.0157   |
| 43561 | P14075 | Q9Y572 | -0.22741  |
| 43562 | P14075 | Q8IYJ3 | -0.23752  |
| 43563 | P14075 | O95395 | -0.49621  |
| 43564 | P14075 | Q9HCC8 | -0.69917  |
| 43565 | P14075 | Q96JY0 | -0.26365  |
| 43566 | P14075 | P04554 | -0.79783  |
| 43567 | P14075 | P14784 | -0.98533  |
| 43568 | P14075 | Q9H741 | -0.87849  |
| 43569 | P14075 | Q13523 | -0.25874  |
| 43570 | P14075 | Q9GZZ9 | -0.20233  |
| 43571 | P14075 | Q2TB90 | -0.2098   |
| 43572 | P14075 | Q15239 | -0.53536  |
| 43573 | P14075 | Q03167 | -0.3066   |
| 43574 | P14075 | Q9NP99 | -1.2335   |
| 43575 | P14075 | Q9NX74 | -0.60435  |
| 43576 | P14075 | A6NKK6 | -0.86584  |
| 43577 | P14075 | Q9P1U1 | -0.84228  |
| 43578 | P14075 | P04818 | -0.036188 |
| 43579 | P14075 | Q9H9K5 | -0.66345  |
| 43580 | P14075 | Q6P474 | -0.63334  |
| 43581 | P14075 | Q15440 | -0.7818   |
| 43582 | P14075 | P37173 | -0.31299  |
| 43583 | P14075 | Q8N8V8 | -0.86584  |
| 43584 | P14075 | O95674 | -0.55639  |
| 43585 | P14075 | A6NNP5 | -0.01957  |
| 43586 | P14075 | Q9Y215 | -0.24016  |
| 43587 | P14075 | P55061 | -0.6598   |
| 43588 | P14075 | P52952 | -0.27066  |
| 43589 | P14075 | Q6DT37 | -0.27156  |
| 43590 | P14075 | Q9P0P8 | -0.30763  |
| 43591 | P14075 | Q6NX45 | -0.21172  |
| 43592 | P14075 | Q969U6 | -0.22774  |
| 43593 | P14075 | Q969X2 | -0.57304  |
| 43594 | P14075 | Q8IZH2 | -0.16202  |
| 43595 | P14075 | Q6UWP7 | -0.75297  |
| 43596 | P14075 | Q86VI1 | -0.25766  |
| 43597 | P14075 | P47869 | -0.68123  |
| 43598 | P14075 | Q94991 | -0.92424  |
| 43599 | P14075 | Q7L5A8 | -0.76457  |
| 43600 | P14075 | Q7Z6P3 | -0.99828  |
| 43601 | P14075 | Q96HN2 | -0.39609  |
| 43602 | P14075 | O94854 | -0.03948  |
| 43603 | P14075 | Q8NGD5 | -1.1027   |
| 43604 | P14075 | Q86UP8 | -0.15477  |
| 43605 | P14075 | Q9BZ76 | -1.503    |
| 43606 | P14075 | O95926 | -0.18173  |
| 43607 | P14075 | P23352 | -0.56769  |
| 43608 | P14075 | Q6NTE8 | -0.16078  |
| 43609 | P14075 | Q8WV16 | -0.42996  |
| 43610 | P14075 | Q693B1 | -0.1141   |
| 43611 | P14075 | Q9GZV7 | -1.0554   |
| 43612 | P14075 | O00300 | -0.88317  |
| 43613 | P14075 | P0CG40 | -0.25196  |
| 43614 | P14075 | Q6ZMG9 | -0.30336  |
| 43615 | P14075 | P05091 | -0.34965  |
| 43616 | P14075 | O95377 | -0.85709  |
| 43617 | P14075 | P22897 | -0.98372  |
| 43618 | P14075 | O60231 | -0.45532  |
| 43619 | P14075 | Q9H7L2 | -0.87849  |
| 43620 | P14075 | Q9H0D6 | -0.17443  |
| 43621 | P14075 | Q9H3S3 | -1.2486   |
| 43622 | P14075 | A1L453 | -1.2917   |
| 43623 | P14075 | Q7Z7G0 | -0.91265  |
| 43624 | P14075 | O43567 | -0.69932  |

|       |        |        |          |
|-------|--------|--------|----------|
| 43625 | P14075 | Q3KNS6 | -0.21172 |
| 43626 | P14075 | Q2TBF2 | -0.86584 |
| 43627 | P14075 | Q9H939 | -0.30274 |
| 43628 | P14075 | Q9Y5H8 | -1.1553  |
| 43629 | P14075 | P13164 | -0.41602 |
| 43630 | P14075 | Q8WYK0 | -0.23522 |
| 43631 | P14075 | O75027 | -0.73991 |
| 43632 | P14075 | P0C854 | -0.87849 |
| 43633 | P14075 | Q99453 | -0.22589 |
| 43634 | P14075 | Q6V1P9 | -1.1297  |
| 43635 | P14075 | P78504 | -0.49495 |
| 43636 | P14075 | P46459 | -0.23174 |
| 43637 | P14075 | P42685 | -0.4087  |
| 43638 | P14075 | Q86W50 | -0.37739 |
| 43639 | P14075 | Q15413 | -0.70177 |
| 43640 | P14075 | O94911 | -1.0782  |
| 43641 | P14075 | P58753 | -0.22287 |
| 43642 | P14075 | Q13065 | -0.43344 |
| 43643 | P14075 | P02751 | -0.35651 |
| 43644 | P14075 | Q8TDS4 | -0.97173 |
| 43645 | P14075 | Q9NS40 | -0.93206 |
| 43646 | P14075 | Q8TAA9 | -0.45343 |
| 43647 | P14075 | Q7L1T6 | -0.5293  |
| 43648 | P14075 | Q9GZT3 | -0.22602 |
| 43649 | P14075 | Q8IVC4 | -0.21172 |
| 43650 | P14075 | Q9NZ71 | -1.0002  |
| 43651 | P14075 | Q8TAE7 | -0.4855  |
| 43652 | P14075 | Q9Y5L3 | -1.0128  |
| 43653 | P14075 | P86397 | -0.68173 |
| 43654 | P14075 | Q9NXG0 | -0.17876 |
| 43655 | P14075 | A6NMB9 | -0.91185 |
| 43656 | P14075 | Q13451 | -0.3701  |
| 43657 | P14075 | Q63HK5 | -0.22379 |
| 43658 | P14075 | Q9Y5I4 | -1.1553  |
| 43659 | P14075 | Q96LT9 | -0.48752 |
| 43660 | P14075 | Q6UWN0 | -0.60538 |
| 43661 | P14075 | Q9BV81 | -0.8462  |
| 43662 | P14075 | Q6PIU1 | -0.8956  |
| 43663 | P14075 | O94876 | -0.86584 |
| 43664 | P14075 | Q86VW0 | -0.13144 |
| 43665 | P14075 | Q14512 | -0.46149 |
| 43666 | P14075 | O75888 | -0.5728  |
| 43667 | P14075 | Q9BSE4 | -0.74767 |
| 43668 | P14075 | O60229 | -0.84873 |
| 43669 | P14075 | Q6NSJ2 | -0.5353  |
| 43670 | P14075 | Q68DC2 | -0.24946 |
| 43671 | P14075 | P08034 | -0.76734 |
| 43672 | P14075 | O60343 | -1.019   |
| 43673 | P14075 | Q9NRC9 | -0.91124 |
| 43674 | P14075 | Q96LA6 | -0.93628 |
| 43675 | P14075 | Q9NZU1 | -1.0425  |
| 43676 | P14075 | P26447 | -0.22933 |
| 43677 | P14075 | Q9ULS6 | -0.84843 |
| 43678 | P14075 | Q9H1Y3 | -1.0844  |
| 43679 | P14075 | Q7Z5P9 | -0.87242 |
| 43680 | P14075 | Q8IZU8 | -0.82458 |
| 43681 | P14075 | Q8TDM5 | -0.74002 |
| 43682 | P14075 | Q9ULT6 | -0.4767  |
| 43683 | P14075 | Q01974 | -1.0103  |
| 43684 | P14075 | P07992 | -0.17666 |
| 43685 | P14075 | Q6ZTB9 | -0.73005 |
| 43686 | P14075 | Q9H4K7 | -0.72781 |
| 43687 | P14075 | Q86Z14 | -0.73756 |
| 43688 | P14075 | Q14682 | -0.25803 |
| 43689 | P14075 | Q13976 | -0.34546 |
| 43690 | P14075 | P0C629 | -1.1027  |
| 43691 | P14075 | Q9UIK5 | -1.0737  |
| 43692 | P14075 | Q8TB73 | -0.79761 |
| 43693 | P14075 | Q15735 | -0.32998 |
| 43694 | P14075 | Q9NPC2 | -1.0107  |
| 43695 | P14075 | Q9H354 | -0.86584 |
| 43696 | P14075 | P00450 | -0.94654 |
| 43697 | P14075 | Q96I34 | -0.2274  |
| 43698 | P14075 | Q6IBS0 | -0.50394 |
| 43699 | P14075 | Q6GTS8 | -1.2253  |
| 43700 | P14075 | P01595 | -0.97479 |

|       |        |        |           |
|-------|--------|--------|-----------|
| 43701 | P14075 | Q9NVM6 | -0.84144  |
| 43702 | P14075 | O95236 | -0.9662   |
| 43703 | P14075 | P51648 | -0.91904  |
| 43704 | P14075 | O00303 | -0.19982  |
| 43705 | P14075 | P16471 | -0.8735   |
| 43706 | P14075 | Q8NCC3 | -0.78735  |
| 43707 | P14075 | Q7Z478 | -0.43232  |
| 43708 | P14075 | Q99062 | -1.4854   |
| 43709 | P14075 | Q8N4P2 | -0.51419  |
| 43710 | P14075 | P07919 | -0.4125   |
| 43711 | P14075 | A2VCL2 | -0.14391  |
| 43712 | P14075 | P00451 | -0.48834  |
| 43713 | P14075 | Q13395 | -0.076886 |
| 43714 | P14075 | Q9NX09 | -0.35636  |
| 43715 | P14075 | Q8WWI1 | -0.22722  |
| 43716 | P14075 | Q8IZL9 | -0.077995 |
| 43717 | P14075 | Q96JP0 | -0.29946  |
| 43718 | P14075 | P01825 | -0.97479  |
| 43719 | P14075 | Q68D51 | -0.43363  |
| 43720 | P14075 | P25105 | -0.85855  |
| 43721 | P14075 | Q7Z3J3 | -0.53439  |
| 43722 | P14075 | Q5U5Q3 | -0.23772  |
| 43723 | P14075 | Q5VZI3 | -0.86584  |
| 43724 | P14075 | P15918 | -0.22686  |
| 43725 | P14075 | Q69YQ0 | -0.22744  |
| 43726 | P14075 | P46089 | -1.2395   |
| 43727 | P14075 | P04080 | -0.16179  |
| 43728 | P14075 | Q96K80 | -0.19894  |
| 43729 | P14075 | Q9Y3Z3 | -0.13735  |
| 43730 | P14075 | Q13247 | -0.22719  |
| 43731 | P14075 | Q9BT56 | -0.48634  |
| 43732 | P14075 | Q96JG8 | -0.11752  |
| 43733 | P14075 | Q07343 | -0.2228   |
| 43734 | P14075 | Q9NXC2 | -1.382    |
| 43735 | P14075 | P17987 | -0.062299 |
| 43736 | P14075 | Q6ZW05 | -0.51963  |
| 43737 | P14075 | Q9BQ13 | -0.19405  |
| 43738 | P14075 | Q9Y4I1 | -0.3028   |
| 43739 | P14075 | Q8NGZ9 | -1.1027   |
| 43740 | P14075 | O76082 | -0.36387  |
| 43741 | P14075 | Q8TDE3 | -0.76271  |
| 43742 | P14075 | Q9Y5E7 | -1.1424   |
| 43743 | P14075 | Q96MW5 | -0.21338  |
| 43744 | P14075 | Q9H2B4 | -0.81451  |
| 43745 | P14075 | Q6NSW7 | -0.22756  |
| 43746 | P14075 | Q9Y5G0 | -1.1297   |
| 43747 | P14075 | Q8IW03 | -0.32802  |
| 43748 | P14075 | Q8NER5 | -0.78258  |
| 43749 | P14075 | P0CJ70 | -0.72903  |
| 43750 | P14075 | Q8NGC2 | -1.1027   |
| 43751 | P14075 | P61966 | -0.16714  |
| 43752 | P14075 | Q59F38 | -0.070172 |
| 43753 | P14075 | Q86W47 | -0.62584  |
| 43754 | P14075 | Q14197 | -0.1647   |
| 43755 | P14075 | Q96KN8 | -0.12522  |
| 43756 | P14075 | Q9UPU7 | -0.81257  |
| 43757 | P14075 | P27815 | -0.22286  |
| 43758 | P14075 | Q8TC59 | -0.48051  |
| 43759 | P14075 | Q96S53 | -0.56698  |
| 43760 | P14075 | Q96RD7 | -0.75895  |
| 43761 | P14075 | Q14162 | -0.99956  |
| 43762 | P14075 | Q5VWZ2 | -0.11137  |
| 43763 | P14075 | O60519 | -0.17272  |
| 43764 | P14075 | P02766 | -0.19326  |
| 43765 | P14075 | Q14201 | -0.35373  |
| 43766 | P14075 | P83111 | -0.19364  |
| 43767 | P14075 | Q8N158 | -0.863    |
| 43768 | P14075 | P55285 | -0.61003  |
| 43769 | P14075 | P52756 | -0.22605  |
| 43770 | P14075 | Q9NYN1 | -1.1358   |
| 43771 | P14075 | Q96D21 | -0.94485  |
| 43772 | P14075 | Q86XJ0 | -0.86584  |
| 43773 | P14075 | Q5TA89 | -0.22709  |
| 43774 | P14075 | P00739 | -1.0188   |
| 43775 | P14075 | Q6XZF7 | -0.22741  |
| 43776 | P14075 | Q9NUT2 | -0.60257  |

|       |        |        |          |
|-------|--------|--------|----------|
| 43777 | P14075 | Q8NGY9 | -0.91257 |
| 43778 | P14075 | O75829 | -1.1599  |
| 43779 | P14075 | P60891 | -0.42371 |
| 43780 | P14075 | Q68DH5 | -0.86584 |
| 43781 | P14075 | Q6ZNA5 | -0.94512 |
| 43782 | P14075 | Q5EBL8 | -0.22711 |
| 43783 | P14075 | Q4AC99 | -0.55498 |
| 43784 | P14075 | O95361 | -0.22417 |
| 43785 | P14075 | O60258 | -0.82266 |
| 43786 | P14075 | Q15465 | -0.22739 |
| 43787 | P14075 | P0C7N5 | -1.1027  |
| 43788 | P14075 | Q9BY21 | -1.0528  |
| 43789 | P14075 | Q68CL5 | -0.31084 |
| 43790 | P14075 | Q8N5U1 | -0.86584 |
| 43791 | P14075 | P40967 | -0.83376 |
| 43792 | P14075 | P08151 | -0.22732 |
| 43793 | P14075 | Q13304 | -1.1792  |
| 43794 | P14075 | Q5BKY1 | -0.22777 |
| 43795 | P14075 | P55085 | -0.33316 |
| 43796 | P14075 | Q9H6A9 | -0.86584 |
| 43797 | P14075 | Q9Y4G8 | -0.95646 |
| 43798 | P14075 | P01818 | -0.97479 |
| 43799 | P14075 | Q8IXB3 | -0.86137 |
| 43800 | P14075 | Q1XH10 | -0.58277 |
| 43801 | P14075 | P07550 | -0.30626 |
| 43802 | P14075 | Q0Z7S8 | -0.42802 |
| 43803 | P14075 | P47211 | -1.0773  |
| 43804 | P14075 | Q8IWF2 | -0.21072 |
| 43805 | P14075 | O95573 | -0.68396 |
| 43806 | P14075 | A6NGA9 | -0.86584 |
| 43807 | P14075 | Q9BYB4 | -0.22754 |
| 43808 | P14075 | Q9Y2B1 | -1.0003  |
| 43809 | P14075 | P04908 | -0.88998 |
| 43810 | P14075 | Q15035 | -0.16007 |
| 43811 | P14075 | Q9UBM1 | -0.41806 |
| 43812 | P14075 | Q5T011 | -0.2309  |
| 43813 | P14075 | Q8NGM1 | -1.1027  |
| 43814 | P14075 | P60508 | -0.71912 |
| 43815 | P14075 | Q8WWU5 | -1.0387  |
| 43816 | P14075 | Q6ZVZ8 | -0.62076 |
| 43817 | P14075 | Q6ZN92 | -0.40277 |
| 43818 | P14075 | Q99418 | -0.22741 |
| 43819 | P14075 | P01275 | -0.53199 |
| 43820 | P14075 | Q14517 | -0.23061 |
| 43821 | P14075 | O95319 | -0.42595 |
| 43822 | P14075 | Q6PIL6 | -0.89315 |
| 43823 | P14075 | Q9H496 | -0.45036 |
| 43824 | P14075 | P13686 | -0.50506 |
| 43825 | P14075 | P62253 | -0.52287 |
| 43826 | P14075 | B2RPK0 | -0.6193  |
| 43827 | P14075 | Q99614 | -0.22593 |
| 43828 | P14075 | Q5BKU9 | -0.30763 |
| 43829 | P14075 | P57768 | -0.54592 |
| 43830 | P14075 | Q96S06 | -0.67524 |
| 43831 | P14075 | Q14692 | -0.46631 |
| 43832 | P14075 | O43294 | -0.23391 |
| 43833 | P14075 | Q12774 | -0.77972 |
| 43834 | P14075 | P17481 | -0.22236 |
| 43835 | P14075 | Q9NYW0 | -0.97792 |
| 43836 | P14075 | Q4ZHG4 | -0.64605 |
| 43837 | P14075 | Q8N5G0 | -0.86584 |
| 43838 | P14075 | O60755 | -1.0833  |
| 43839 | P14075 | Q8N307 | -0.74466 |
| 43840 | P14075 | P78556 | -1.0028  |
| 43841 | P14075 | P50591 | -0.60364 |
| 43842 | P14075 | Q9UGR2 | -0.22578 |
| 43843 | P14075 | Q96JL9 | -0.21172 |
| 43844 | P14075 | Q9HCE3 | -0.21172 |
| 43845 | P14075 | Q8WUM9 | -1.035   |
| 43846 | P14075 | Q96RD9 | -0.93628 |
| 43847 | P14075 | Q8NFZ4 | -0.61582 |
| 43848 | P14075 | Q9NY84 | -0.39159 |
| 43849 | P14075 | O96005 | -0.6329  |
| 43850 | P14075 | Q9Y365 | -0.64389 |
| 43851 | P14075 | Q8TCC7 | -0.70367 |
| 43852 | P14075 | P00519 | -0.22749 |

|       |        |        |          |
|-------|--------|--------|----------|
| 43853 | P14075 | Q8TBJ4 | -0.94273 |
| 43854 | P14075 | Q2TBC4 | -0.45559 |
| 43855 | P14075 | Q13133 | -0.23015 |
| 43856 | P14075 | Q6IQ55 | -0.37131 |
| 43857 | P14075 | Q96Q15 | -0.42212 |
| 43858 | P14075 | P0C7N4 | -0.86584 |
| 43859 | P14075 | A8MWL6 | -0.86584 |
| 43860 | P14075 | Q9P2K8 | -0.76023 |
| 43861 | P14075 | Q13972 | -0.59574 |
| 43862 | P14075 | Q7Z601 | -0.9653  |
| 43863 | P14075 | P41440 | -0.7206  |
| 43864 | P14075 | Q8IZS7 | -0.92288 |
| 43865 | P14075 | Q9P0N5 | -0.69542 |
| 43866 | P14075 | Q9Y3D6 | -0.24707 |
| 43867 | P14075 | P00736 | -1.3118  |
| 43868 | P14075 | Q9HBH5 | -0.89433 |
| 43869 | P14075 | P21359 | -0.22642 |
| 43870 | P14075 | Q7L4S7 | -0.86584 |
| 43871 | P14075 | O94851 | -0.65864 |
| 43872 | P14075 | P12882 | -0.30548 |
| 43873 | P14075 | Q9H0W7 | -0.39017 |
| 43874 | P14075 | Q9BU70 | -0.29105 |
| 43875 | P14075 | Q8WWX8 | -0.88705 |
| 43876 | P14075 | Q9NQH7 | -0.5858  |
| 43877 | P14075 | Q8NGR1 | -1.1027  |
| 43878 | P14075 | A5D6W6 | -0.72386 |
| 43879 | P14075 | Q8TBB5 | -0.22528 |
| 43880 | P14075 | Q96A05 | -0.46175 |
| 43881 | P14075 | P20813 | -0.70755 |
| 43882 | P14075 | P22888 | -0.50157 |
| 43883 | P14075 | Q14761 | -0.91814 |
| 43884 | P14075 | Q5THJ4 | -0.48011 |
| 43885 | P14075 | Q8NHQ9 | -0.85822 |
| 43886 | P14075 | P10745 | -1.0691  |
| 43887 | P14075 | Q8WWP7 | -1.0661  |
| 43888 | P14075 | P10997 | -0.93923 |
| 43889 | P14075 | P62760 | -0.52751 |
| 43890 | P14075 | Q8N3E9 | -0.56641 |
| 43891 | P14075 | Q9UNQ0 | -0.43704 |
| 43892 | P14075 | Q15319 | -0.22741 |
| 43893 | P14075 | Q9Y3E0 | -0.60638 |
| 43894 | P14075 | O94762 | -0.22664 |
| 43895 | P14075 | Q99442 | -0.7057  |
| 43896 | P14075 | O00623 | -0.45307 |
| 43897 | P14075 | Q12947 | -0.31617 |
| 43898 | P14075 | Q8TE68 | -0.22741 |
| 43899 | P14075 | P11274 | -0.64278 |
| 43900 | P14075 | P0CE71 | -0.52751 |
| 43901 | P14075 | P60763 | -0.55464 |
| 43902 | P14075 | Q96D96 | -0.85839 |
| 43903 | P14075 | P45974 | -0.32211 |
| 43904 | P14075 | Q7L523 | -0.31218 |
| 43905 | P14075 | Q8TDG4 | -0.49841 |
| 43906 | P14075 | Q9NV79 | -0.25582 |
| 43907 | P14075 | Q9NRW7 | -0.22058 |
| 43908 | P14075 | Q15768 | -0.66733 |
| 43909 | P14075 | O60934 | -0.16329 |
| 43910 | P14075 | P57054 | -0.77893 |
| 43911 | P14075 | Q9NZJ9 | -0.34953 |
| 43912 | P14075 | Q9UF72 | -0.87849 |
| 43913 | P14075 | Q7Z6G8 | -0.22744 |
| 43914 | P14075 | O75815 | -0.89817 |
| 43915 | P14075 | Q9Y5X5 | -1.2201  |
| 43916 | P14075 | Q96FT9 | -0.22612 |
| 43917 | P14075 | Q9C029 | -0.22911 |
| 43918 | P14075 | Q9NQL9 | -0.30018 |
| 43919 | P14075 | Q8WVE7 | -0.86584 |
| 43920 | P14075 | Q96PH6 | -0.79879 |
| 43921 | P14075 | Q86SH4 | -0.87849 |
| 43922 | P14075 | O60637 | -0.86584 |
| 43923 | P14075 | Q15345 | -0.43639 |
| 43924 | P14075 | Q6ZTQ4 | -1.1297  |
| 43925 | P14075 | Q15058 | -0.24735 |
| 43926 | P14075 | Q9HAU0 | -0.22741 |
| 43927 | P14075 | Q86WA8 | -0.33715 |
| 43928 | P14075 | Q9NR64 | -0.48143 |

|       |        |        |           |
|-------|--------|--------|-----------|
| 43929 | P14075 | Q8WWF8 | -0.38647  |
| 43930 | P14075 | Q8IWU9 | -0.47452  |
| 43931 | P14075 | Q6XYB7 | -0.23274  |
| 43932 | P14075 | P20853 | -0.83318  |
| 43933 | P14075 | Q86X29 | -0.82135  |
| 43934 | P14075 | Q8NDG6 | -0.55102  |
| 43935 | P14075 | P48723 | -0.84262  |
| 43936 | P14075 | Q8WTR2 | -0.7476   |
| 43937 | P14075 | Q8TEY7 | -0.26752  |
| 43938 | P14075 | P00750 | -0.42066  |
| 43939 | P14075 | Q9UKB3 | -0.48297  |
| 43940 | P14075 | Q16222 | -0.027417 |
| 43941 | P14075 | Q9BW11 | -0.2244   |
| 43942 | P14075 | O95222 | -1.1027   |
| 43943 | P14075 | P08311 | -1.0533   |
| 43944 | P14075 | P0CV99 | -0.43319  |
| 43945 | P14075 | Q13939 | -0.55118  |
| 43946 | P14075 | O15151 | -0.22482  |
| 43947 | P14075 | Q9NU53 | -0.86584  |
| 43948 | P14075 | Q96NM4 | -0.21653  |
| 43949 | P14075 | P33765 | -0.98812  |
| 43950 | P14075 | Q8WXQ8 | -1.1649   |
| 43951 | P14075 | Q9UL36 | -0.17479  |
| 43952 | P14075 | Q16698 | -0.21534  |
| 43953 | P14075 | Q6RFH5 | -0.22741  |
| 43954 | P14075 | Q96N67 | -0.60186  |
| 43955 | P14075 | Q14118 | -0.27814  |
| 43956 | P14075 | A6NI47 | -0.2274   |
| 43957 | P14075 | Q59H18 | -0.22741  |
| 43958 | P14075 | Q9UBG7 | -0.16512  |
| 43959 | P14075 | Q8N688 | -0.84399  |
| 43960 | P14075 | Q5T5M9 | -0.21602  |
| 43961 | P14075 | Q8N6K7 | -0.19457  |
| 43962 | P14075 | Q9UPU5 | -0.69644  |
| 43963 | P14075 | P49683 | -1.1361   |
| 43964 | P14075 | Q9H9J4 | -0.79091  |
| 43965 | P14075 | Q9Y6B6 | -0.47731  |
| 43966 | P14075 | P24844 | -0.41253  |
| 43967 | P14075 | Q9UPP2 | -0.22012  |
| 43968 | P14075 | Q9Y5M8 | -1.0327   |
| 43969 | P14075 | Q96PB7 | -0.83338  |
| 43970 | P14075 | Q15669 | -0.2327   |
| 43971 | P14075 | P25774 | -1.1003   |
| 43972 | P14075 | Q14699 | -0.61793  |
| 43973 | P14075 | Q04609 | -0.92315  |
| 43974 | P14075 | O15031 | -0.89925  |
| 43975 | P14075 | Q92947 | -0.42914  |
| 43976 | P14075 | Q3ZCN5 | -0.19786  |
| 43977 | P14075 | O43293 | -0.32333  |
| 43978 | P14075 | Q8NGG6 | -1.1027   |
| 43979 | P14075 | O00757 | -0.19394  |
| 43980 | P14075 | P37108 | -0.47365  |
| 43981 | P14075 | P51689 | -0.52021  |
| 43982 | P14075 | P49447 | -0.82542  |
| 43983 | P14075 | P52757 | -0.82882  |
| 43984 | P14075 | P59046 | -0.22728  |
| 43985 | P14075 | Q9H2H9 | -0.90795  |
| 43986 | P14075 | Q8TF72 | -0.42302  |
| 43987 | P14075 | P0C864 | -0.041989 |
| 43988 | P14075 | P30086 | -0.36498  |
| 43989 | P14075 | Q9BRN9 | -0.86584  |
| 43990 | P14075 | Q95714 | -0.22834  |
| 43991 | P14075 | Q6AHZ1 | -0.22743  |
| 43992 | P14075 | Q99712 | -1.1314   |
| 43993 | P14075 | O00635 | -0.79669  |
| 43994 | P14075 | Q7RTS6 | -0.86584  |
| 43995 | P14075 | O43196 | -0.63735  |
| 43996 | P14075 | Q68G75 | -0.7792   |
| 43997 | P14075 | Q8N819 | -0.57948  |
| 43998 | P14075 | P08571 | -0.52079  |
| 43999 | P14075 | Q9P0U3 | -0.21961  |
| 44000 | P14075 | Q04656 | -0.22744  |
| 44001 | P14075 | Q68DA7 | -0.29999  |
| 44002 | P14075 | Q9H9R9 | -0.29487  |
| 44003 | P14075 | Q0VAM2 | -0.79901  |
| 44004 | P14075 | Q9Y5X0 | -0.33657  |



|       |        |        |           |
|-------|--------|--------|-----------|
| 44005 | P14075 | C9JI98 | -0.86584  |
| 44006 | P14075 | H3BS89 | -0.86584  |
| 44007 | P14075 | Q5T7P8 | -0.60971  |
| 44008 | P14075 | O00453 | -0.59647  |
| 44009 | P14075 | Q8NGY2 | -1.1027   |
| 44010 | P14075 | Q5JRS4 | -1.1027   |
| 44011 | P14075 | O95235 | -0.25552  |
| 44012 | P14075 | P15812 | -0.91772  |
| 44013 | P14075 | Q12946 | -0.31344  |
| 44014 | P14075 | Q8WUJ0 | -0.67191  |
| 44015 | P14075 | Q9NPH0 | -0.72486  |
| 44016 | P14075 | P34972 | -1.0187   |
| 44017 | P14075 | O75122 | -0.17965  |
| 44018 | P14075 | Q9NW15 | -0.95721  |
| 44019 | P14075 | Q902F9 | -0.5818   |
| 44020 | P14075 | Q8IYY4 | -0.63028  |
| 44021 | P14075 | Q8WTZ4 | -0.35052  |
| 44022 | P14075 | Q96Q05 | -0.321    |
| 44023 | P14075 | P23142 | -0.94012  |
| 44024 | P14075 | P51608 | -0.15865  |
| 44025 | P14075 | B5MD39 | -0.41457  |
| 44026 | P14075 | O95977 | -1.2248   |
| 44027 | P14075 | Q9NX62 | -0.68685  |
| 44028 | P14075 | P47881 | -1.1027   |
| 44029 | P14075 | P12081 | -0.3335   |
| 44030 | P14075 | Q8WWF6 | -0.48297  |
| 44031 | P14075 | Q9NXF8 | -0.78488  |
| 44032 | P14075 | Q8WVF2 | -0.85198  |
| 44033 | P14075 | P36897 | -0.25121  |
| 44034 | P14075 | Q13077 | -0.20069  |
| 44035 | P14075 | Q8N123 | -0.69535  |
| 44036 | P14075 | Q6ZTK2 | -0.049188 |
| 44037 | P14075 | Q16760 | -0.52971  |
| 44038 | P14075 | Q86U06 | -0.60563  |
| 44039 | P14075 | O43246 | -0.80318  |
| 44040 | P14075 | Q86YR7 | -0.78542  |
| 44041 | P14075 | O15533 | -0.4336   |
| 44042 | P14075 | Q9C004 | -0.16686  |
| 44043 | P14075 | O75783 | -1.3262   |
| 44044 | P14075 | Q9NZ09 | -0.29487  |
| 44045 | P14075 | P16260 | -0.53021  |
| 44046 | P14075 | P50851 | -0.5524   |
| 44047 | P14075 | Q3ZCU0 | -0.21536  |
| 44048 | P14075 | Q9HC47 | -0.7958   |
| 44049 | P14075 | P22792 | -0.82816  |
| 44050 | P14075 | P43080 | -0.7866   |
| 44051 | P14075 | Q8N302 | -0.38224  |
| 44052 | P14075 | Q9GZR2 | -0.12509  |
| 44053 | P14075 | P58400 | -0.54957  |
| 44054 | P14075 | Q9P021 | -0.27211  |
| 44055 | P14075 | Q9P265 | -0.33579  |
| 44056 | P14075 | Q9Y5J1 | -0.22744  |
| 44057 | P14075 | Q6ZWJ1 | -0.22741  |
| 44058 | P14075 | A6NFD8 | -0.22728  |
| 44059 | P14075 | Q01459 | -0.49578  |
| 44060 | P14075 | P68106 | -0.22886  |
| 44061 | P14075 | P0C7U0 | -0.83288  |
| 44062 | P14075 | Q9NR80 | -0.35552  |
| 44063 | P14075 | Q76M96 | -0.97264  |
| 44064 | P14075 | Q14566 | -0.17307  |
| 44065 | P14075 | Q9NRJ7 | -1.1238   |
| 44066 | P14075 | Q8N1A6 | -0.023469 |
| 44067 | P14075 | Q5QJU3 | -0.36523  |
| 44068 | P14075 | Q9NX94 | -0.86584  |
| 44069 | P14075 | Q8NCV1 | -0.7017   |
| 44070 | P14075 | Q5VVP1 | -0.86584  |
| 44071 | P14075 | Q9BT76 | -0.93819  |
| 44072 | P14075 | Q3V6T2 | -0.3332   |
| 44073 | P14075 | O95528 | -0.42064  |
| 44074 | P14075 | P61081 | -0.19196  |
| 44075 | P14075 | P17023 | -0.17069  |
| 44076 | P14075 | P49662 | -0.83449  |
| 44077 | P14075 | Q6IWH7 | -0.5738   |
| 44078 | P14075 | Q5VZK9 | -0.22724  |
| 44079 | P14075 | Q8N6G5 | -0.45512  |
| 44080 | P14075 | Q8NGF7 | -1.1027   |

|       |        |        |           |
|-------|--------|--------|-----------|
| 44081 | P14075 | Q6UWX4 | -0.79456  |
| 44082 | P14075 | P08217 | -1.2917   |
| 44083 | P14075 | O60566 | -0.22741  |
| 44084 | P14075 | P37231 | -0.2427   |
| 44085 | P14075 | Q6N022 | -0.47858  |
| 44086 | P14075 | Q5T5U3 | -0.27262  |
| 44087 | P14075 | Q8N635 | -0.25959  |
| 44088 | P14075 | Q7L0J3 | -0.49761  |
| 44089 | P14075 | P06727 | -0.46615  |
| 44090 | P14075 | Q96KT7 | -0.86584  |
| 44091 | P14075 | P53667 | -0.22741  |
| 44092 | P14075 | Q96GF1 | -0.83935  |
| 44093 | P14075 | P36382 | -0.83545  |
| 44094 | P14075 | Q8N957 | -0.22728  |
| 44095 | P14075 | Q96LD4 | -0.35518  |
| 44096 | P14075 | Q96S94 | -0.20918  |
| 44097 | P14075 | P51843 | -0.2273   |
| 44098 | P14075 | Q6ZVE7 | -0.47613  |
| 44099 | P14075 | P18507 | -0.45298  |
| 44100 | P14075 | P54107 | -0.8965   |
| 44101 | P14075 | Q9HD43 | -0.26615  |
| 44102 | P14075 | B1AL88 | -0.86584  |
| 44103 | P14075 | Q13433 | -0.89882  |
| 44104 | P14075 | Q9P286 | -0.514    |
| 44105 | P14075 | Q3MII6 | -0.64281  |
| 44106 | P14075 | O94898 | -0.78299  |
| 44107 | P14075 | Q5QGT7 | -0.86391  |
| 44108 | P14075 | Q9UN71 | -1.1037   |
| 44109 | P14075 | Q8IYW5 | -0.22718  |
| 44110 | P14075 | Q5JQF8 | -0.84005  |
| 44111 | P14075 | Q00688 | -0.36528  |
| 44112 | P14075 | Q5EBL2 | -0.17069  |
| 44113 | P14075 | Q8WWT9 | -0.73913  |
| 44114 | P14075 | Q8IYB7 | -0.13778  |
| 44115 | P14075 | Q6ZN18 | -0.3378   |
| 44116 | P14075 | Q9NR71 | -0.64763  |
| 44117 | P14075 | Q9BW91 | -0.4485   |
| 44118 | P14075 | Q9NPI5 | -0.43185  |
| 44119 | P14075 | Q9Y6I8 | -0.3477   |
| 44120 | P14075 | P09493 | -0.33456  |
| 44121 | P14075 | A6NKP2 | -0.76094  |
| 44122 | P14075 | O00459 | -0.2274   |
| 44123 | P14075 | Q8WXH6 | -1.058    |
| 44124 | P14075 | Q8TDD2 | -0.21488  |
| 44125 | P14075 | P19544 | -0.22467  |
| 44126 | P14075 | Q9Y530 | -0.39111  |
| 44127 | P14075 | Q9BYF1 | -0.76672  |
| 44128 | P14075 | Q99569 | -0.22861  |
| 44129 | P14075 | P13378 | -0.21973  |
| 44130 | P14075 | Q95409 | -0.3947   |
| 44131 | P14075 | Q9BTE0 | -0.34636  |
| 44132 | P14075 | Q15552 | -1.4361   |
| 44133 | P14075 | O00219 | -0.73133  |
| 44134 | P14075 | Q9Y5Y2 | -0.14426  |
| 44135 | P14075 | Q9UBS5 | -0.57472  |
| 44136 | P14075 | P07384 | -0.34273  |
| 44137 | P14075 | Q7Z5L4 | -0.65316  |
| 44138 | P14075 | Q14416 | -1.1522   |
| 44139 | P14075 | Q9Y623 | -0.43968  |
| 44140 | P14075 | Q8IXM2 | -0.23223  |
| 44141 | P14075 | P21918 | -0.65948  |
| 44142 | P14075 | Q8NG95 | -1.1027   |
| 44143 | P14075 | Q15434 | -0.59495  |
| 44144 | P14075 | Q00973 | -0.59052  |
| 44145 | P14075 | Q6F5E8 | -0.22382  |
| 44146 | P14075 | Q6PK57 | -0.58559  |
| 44147 | P14075 | P06318 | -0.97479  |
| 44148 | P14075 | O95072 | -0.35985  |
| 44149 | P14075 | Q8N5I2 | -0.23502  |
| 44150 | P14075 | Q96SN7 | -0.31983  |
| 44151 | P14075 | Q9NVP1 | -0.035214 |
| 44152 | P14075 | Q8N0X4 | -0.53306  |
| 44153 | P14075 | P09543 | -0.50431  |
| 44154 | P14075 | Q8NGS1 | -1.1027   |
| 44155 | P14075 | Q96AQ8 | -0.74159  |
| 44156 | P14075 | Q8IVL0 | -0.63712  |

|       |        |        |           |
|-------|--------|--------|-----------|
| 44157 | P14075 | Q03164 | -0.22708  |
| 44158 | P14075 | Q13177 | -0.2277   |
| 44159 | P14075 | O75438 | -0.50126  |
| 44160 | P14075 | Q9Y3P9 | -0.30085  |
| 44161 | P14075 | Q3KPI0 | -0.86584  |
| 44162 | P14075 | Q6ZN16 | -0.87868  |
| 44163 | P14075 | Q9NQ38 | -0.50995  |
| 44164 | P14075 | Q9UBP9 | -0.56416  |
| 44165 | P14075 | Q5T601 | -0.79039  |
| 44166 | P14075 | Q12926 | -0.25983  |
| 44167 | P14075 | P11801 | -0.51644  |
| 44168 | P14075 | Q8ND94 | -0.86584  |
| 44169 | P14075 | Q8N9I1 | -0.86584  |
| 44170 | P14075 | Q92542 | -0.43228  |
| 44171 | P14075 | Q96G46 | -0.72927  |
| 44172 | P14075 | Q9H1U9 | -0.73185  |
| 44173 | P14075 | Q8N7P7 | -0.11268  |
| 44174 | P14075 | Q16690 | -0.7944   |
| 44175 | P14075 | Q9C037 | -0.6733   |
| 44176 | P14075 | Q9NQ11 | -0.99775  |
| 44177 | P14075 | P12645 | -0.7172   |
| 44178 | P14075 | P17677 | -0.093075 |
| 44179 | P14075 | Q2VYF4 | -0.73075  |
| 44180 | P14075 | P51811 | -0.32625  |
| 44181 | P14075 | O00560 | -0.22736  |
| 44182 | P14075 | P11488 | -0.64852  |
| 44183 | P14075 | Q01196 | -0.28042  |
| 44184 | P14075 | P31997 | -0.8033   |
| 44185 | P14075 | Q969Q5 | -0.23298  |
| 44186 | P14075 | Q14257 | -0.47839  |
| 44187 | P14075 | P05186 | -0.97362  |
| 44188 | P14075 | O75445 | -0.7263   |
| 44189 | P14075 | Q9H3Z4 | -0.49667  |
| 44190 | P14075 | P35398 | -0.30659  |
| 44191 | P14075 | Q99469 | -0.34077  |
| 44192 | P14075 | P06315 | -0.97479  |
| 44193 | P14075 | P17693 | -0.79365  |
| 44194 | P14075 | Q6P4Q7 | -1.0981   |
| 44195 | P14075 | P01607 | -0.97479  |
| 44196 | P14075 | P01609 | -0.97479  |
| 44197 | P14075 | Q9BXW4 | -0.069837 |
| 44198 | P14075 | Q8N8D7 | -0.93628  |
| 44199 | P14075 | Q8TAV3 | -0.72441  |
| 44200 | P14075 | Q9Y5E8 | -1.1553   |
| 44201 | P14075 | A6NFF2 | -0.27891  |
| 44202 | P14075 | Q5GH77 | -0.93628  |
| 44203 | P14075 | Q9H9S5 | -0.96859  |
| 44204 | P14075 | Q8N5I3 | -0.23864  |
| 44205 | P14075 | P01241 | -0.25643  |
| 44206 | P14075 | Q6ZNG9 | -0.30192  |
| 44207 | P14075 | Q13303 | -0.83199  |
| 44208 | P14075 | Q96NS5 | -0.22742  |
| 44209 | P14075 | A1KZ92 | -0.83778  |
| 44210 | P14075 | Q96CN4 | -0.73825  |
| 44211 | P14075 | O60513 | -0.51625  |
| 44212 | P14075 | Q8IUH5 | -0.32247  |
| 44213 | P14075 | Q96K76 | -0.32844  |
| 44214 | P14075 | Q3B8N2 | -0.44203  |
| 44215 | P14075 | Q86XL3 | -0.22396  |
| 44216 | P14075 | Q6ZMD2 | -0.92929  |
| 44217 | P14075 | P52701 | -0.1069   |
| 44218 | P14075 | O75635 | -0.21106  |
| 44219 | P14075 | Q12792 | -0.45268  |
| 44220 | P14075 | P10911 | -0.22693  |
| 44221 | P14075 | P03986 | -1.0279   |
| 44222 | P14075 | Q96CW9 | -0.62956  |
| 44223 | P14075 | Q9NSA2 | -0.8479   |
| 44224 | P14075 | P80188 | -0.45154  |
| 44225 | P14075 | Q8N682 | -0.92066  |
| 44226 | P14075 | Q13002 | -0.51096  |
| 44227 | P14075 | O75936 | -0.34325  |
| 44228 | P14075 | Q8NHM4 | -1.294    |
| 44229 | P14075 | O00476 | -0.70253  |
| 44230 | P14075 | O15439 | -0.82855  |
| 44231 | P14075 | Q8IXB1 | -0.3374   |
| 44232 | P14075 | O75949 | -0.86584  |

|       |        |        |          |
|-------|--------|--------|----------|
| 44233 | P14075 | Q92630 | -0.48349 |
| 44234 | P14075 | Q13285 | -0.22852 |
| 44235 | P14075 | Q5VW36 | -0.30104 |
| 44236 | P14075 | Q9NW64 | -0.51209 |
| 44237 | P14075 | O43681 | -0.20753 |
| 44238 | P14075 | P49961 | -1.2993  |
| 44239 | P14075 | Q8NET6 | -0.50371 |
| 44240 | P14075 | Q13361 | -0.8977  |
| 44241 | P14075 | Q8TEB1 | -0.22791 |
| 44242 | P14075 | Q3SY17 | -0.73185 |
| 44243 | P14075 | P03956 | -1.0749  |
| 44244 | P14075 | Q8WW22 | -0.43933 |
| 44245 | P14075 | Q7RTX7 | -0.8333  |
| 44246 | P14075 | Q9Y259 | -0.57818 |
| 44247 | P14075 | Q6ZP01 | -0.5908  |
| 44248 | P14075 | P48651 | -0.75328 |
| 44249 | P14075 | P13747 | -0.9507  |
| 44250 | P14075 | P60606 | -0.8462  |
| 44251 | P14075 | O75943 | -0.15986 |
| 44252 | P14075 | Q9NX38 | -0.4249  |
| 44253 | P14075 | P47992 | -0.44006 |
| 44254 | P14075 | Q8TBZ2 | -0.22079 |
| 44255 | P14075 | P07947 | -0.58078 |
| 44256 | P14075 | Q9UM44 | -0.52887 |
| 44257 | P14075 | P28358 | -0.31119 |
| 44258 | P14075 | Q9Y5P0 | -1.1027  |
| 44259 | P14075 | Q8N323 | -0.87849 |
| 44260 | P14075 | Q9H4L4 | -0.38771 |
| 44261 | P14075 | Q9H2E6 | -0.42794 |
| 44262 | P14075 | Q9Y388 | -0.84005 |
| 44263 | P14075 | P01243 | -0.98388 |
| 44264 | P14075 | Q9P2L0 | -0.27689 |
| 44265 | P14075 | Q9BVR0 | -0.50371 |
| 44266 | P14075 | Q9NXN4 | -0.43605 |
| 44267 | P14075 | Q86W28 | -0.65523 |
| 44268 | P14075 | Q86SQ9 | -0.10222 |
| 44269 | P14075 | Q8N7P3 | -0.64451 |
| 44270 | P14075 | P19429 | -0.12006 |
| 44271 | P14075 | Q8NFU0 | -0.7029  |
| 44272 | P14075 | Q9UDW1 | -0.31433 |
| 44273 | P14075 | Q6S5H5 | -0.22744 |
| 44274 | P14075 | Q15077 | -1.0462  |
| 44275 | P14075 | A6NGE7 | -0.4219  |
| 44276 | P14075 | Q8WYB5 | -0.32594 |
| 44277 | P14075 | Q8NGZ0 | -1.1027  |
| 44278 | P14075 | Q8N4T0 | -1.1732  |
| 44279 | P14075 | O14863 | -0.61911 |
| 44280 | P14075 | Q6UVW9 | -0.3621  |
| 44281 | P14075 | F5H284 | -0.3788  |
| 44282 | P14075 | Q9NPB9 | -1.2317  |
| 44283 | P14075 | Q9BSE2 | -0.86584 |
| 44284 | P14075 | Q13043 | -0.23003 |
| 44285 | P14075 | Q16816 | -0.48289 |
| 44286 | P14075 | Q96MZ4 | -0.10574 |
| 44287 | P14075 | Q9H3Q1 | -0.47677 |
| 44288 | P14075 | Q5D862 | -0.36485 |
| 44289 | P14075 | P06241 | -0.29906 |
| 44290 | P14075 | Q8N4W6 | -0.86545 |
| 44291 | P14075 | Q8TBM7 | -0.86584 |
| 44292 | P14075 | Q5T2Q4 | -0.44208 |
| 44293 | P14075 | Q9H295 | -0.42598 |
| 44294 | P14075 | Q6P1A2 | -0.66781 |
| 44295 | P14075 | O95841 | -1.0669  |
| 44296 | P14075 | Q86UQ0 | -0.28226 |
| 44297 | P14075 | Q9BXM7 | -0.49953 |
| 44298 | P14075 | P60321 | -0.46121 |
| 44299 | P14075 | Q4ZJI4 | -0.83752 |
| 44300 | P14075 | Q9BXA9 | -0.20524 |
| 44301 | P14075 | Q86WT6 | -0.24382 |
| 44302 | P14075 | Q12974 | -0.85684 |
| 44303 | P14075 | O00204 | -0.21628 |
| 44304 | P14075 | Q6ZST2 | -0.51948 |
| 44305 | P14075 | Q8TCT1 | -0.49012 |
| 44306 | P14075 | Q9UKZ9 | -0.85359 |
| 44307 | P14075 | A4D2P6 | -0.46488 |
| 44308 | P14075 | Q9NRG1 | -0.48019 |

|       |        |        |             |
|-------|--------|--------|-------------|
| 44309 | P14075 | Q9UGN5 | -0.17668    |
| 44310 | P14075 | Q8N9W6 | -0.32462    |
| 44311 | P14075 | P51679 | -1.1584     |
| 44312 | P14075 | Q13467 | -0.38453    |
| 44313 | P14075 | P01712 | -0.97479    |
| 44314 | P14075 | Q8WYG9 | -0.62218    |
| 44315 | P14075 | Q9NZD2 | -0.57082    |
| 44316 | P14075 | Q8NBK3 | -0.42764    |
| 44317 | P14075 | Q5TEJ8 | -0.68939    |
| 44318 | P14075 | A6NNY8 | -0.69644    |
| 44319 | P14075 | Q9Y3C6 | -0.32753    |
| 44320 | P14075 | Q6WQI6 | -0.29487    |
| 44321 | P14075 | Q5T8P6 | -0.29724    |
| 44322 | P14075 | Q5VVY1 | -0.37739    |
| 44323 | P14075 | P62942 | -0.22771    |
| 44324 | P14075 | Q8NGY1 | -1.1027     |
| 44325 | P14075 | Q9BX69 | -0.60545    |
| 44326 | P14075 | Q8WZ82 | -0.26076    |
| 44327 | P14075 | P19235 | -0.9364     |
| 44328 | P14075 | Q9UKS7 | -0.26057    |
| 44329 | P14075 | Q6ZVT0 | -0.2405     |
| 44330 | P14075 | O60333 | -0.24394    |
| 44331 | P14075 | Q9GZM7 | -0.88726    |
| 44332 | P14075 | Q01581 | -0.20195    |
| 44333 | P14075 | Q9P2Y4 | -0.2274     |
| 44334 | P14075 | O15524 | -0.2274     |
| 44335 | P14075 | A8MWC7 | -0.012233   |
| 44336 | P14075 | P03915 | -0.54257    |
| 44337 | P14075 | Q14031 | -1.0202     |
| 44338 | P14075 | O60479 | -0.22086    |
| 44339 | P14075 | P35580 | -0.10949    |
| 44340 | P14075 | Q9H832 | -0.26229    |
| 44341 | P14075 | Q5VVM6 | -0.00021428 |
| 44342 | P14075 | Q9BUA6 | -0.39423    |
| 44343 | P14075 | Q5VZ52 | -0.16885    |
| 44344 | P14075 | O14543 | -0.24509    |
| 44345 | P14075 | P42681 | -0.43218    |
| 44346 | P14075 | Q8NGC6 | -1.1027     |
| 44347 | P14075 | Q8NDV2 | -1.1578     |
| 44348 | P14075 | Q01780 | -0.2156     |
| 44349 | P14075 | Q13336 | -0.9149     |
| 44350 | P14075 | Q86TH1 | -0.57315    |
| 44351 | P14075 | Q9GZN6 | -0.94455    |
| 44352 | P14075 | O60609 | -0.45255    |
| 44353 | P14075 | P49765 | -0.57412    |
| 44354 | P14075 | A6NDE4 | -0.23036    |
| 44355 | P14075 | Q15828 | -0.82527    |
| 44356 | P14075 | O43921 | -0.38755    |
| 44357 | P14075 | Q3MIW9 | -0.86584    |
| 44358 | P14075 | Q8NH54 | -1.1027     |
| 44359 | P14075 | P49802 | -0.48555    |
| 44360 | P14075 | Q9H1F0 | -0.79897    |
| 44361 | P14075 | Q8NGN7 | -1.1027     |
| 44362 | P14075 | O95372 | -0.3318     |
| 44363 | P14075 | Q6NW40 | -0.73179    |
| 44364 | P14075 | O14966 | -0.95322    |
| 44365 | P14075 | Q96JQ0 | -1.1037     |
| 44366 | P14075 | Q9Y2T5 | -1.2928     |
| 44367 | P14075 | Q9P243 | -0.20611    |
| 44368 | P14075 | P33897 | -0.23944    |
| 44369 | P14075 | Q9UPW0 | -0.42664    |
| 44370 | P14075 | Q96NR8 | -1.1968     |
| 44371 | P14075 | Q9BQE5 | -1.0921     |
| 44372 | P14075 | A8MTJ3 | -0.71553    |
| 44373 | P14075 | Q8ND82 | -0.2385     |
| 44374 | P14075 | Q6P2C0 | -0.4056     |
| 44375 | P14075 | Q8ND71 | -0.22925    |
| 44376 | P14075 | E2RYF6 | -0.86584    |
| 44377 | P14075 | P50990 | -0.34071    |
| 44378 | P14075 | A6NJW9 | -0.93628    |
| 44379 | P14075 | Q8WVV4 | -0.53859    |
| 44380 | P14075 | Q8NGY7 | -1.1027     |
| 44381 | P14075 | O95967 | -0.55905    |
| 44382 | P14075 | Q9BZ11 | -1.0975     |
| 44383 | P14075 | Q86SM5 | -1.1721     |
| 44384 | P14075 | P43005 | -0.79752    |

|       |        |        |           |
|-------|--------|--------|-----------|
| 44385 | P14075 | Q8TEW6 | -0.41303  |
| 44386 | P14075 | Q9Y336 | -1.1589   |
| 44387 | P14075 | Q8WWW8 | -0.5353   |
| 44388 | P14075 | Q8NCS7 | -0.74018  |
| 44389 | P14075 | Q8WY98 | -0.86584  |
| 44390 | P14075 | Q8IYD9 | -0.87849  |
| 44391 | P14075 | P30443 | -0.91674  |
| 44392 | P14075 | Q9H0V1 | -0.84601  |
| 44393 | P14075 | Q9NS39 | -0.18472  |
| 44394 | P14075 | P30084 | -0.12817  |
| 44395 | P14075 | Q8NA97 | -0.18284  |
| 44396 | P14075 | Q8N3T6 | -0.52887  |
| 44397 | P14075 | P43366 | -0.091777 |
| 44398 | P14075 | Q08AH1 | -0.8113   |
| 44399 | P14075 | Q7Z572 | -0.52751  |
| 44400 | P14075 | Q8NDX5 | -0.5862   |
| 44401 | P14075 | P35243 | -0.75509  |
| 44402 | P14075 | Q96DD0 | -0.26006  |
| 44403 | P14075 | P12931 | -0.22951  |
| 44404 | P14075 | Q9BX93 | -0.9673   |
| 44405 | P14075 | P54886 | -0.54195  |
| 44406 | P14075 | Q8IWB9 | -0.88061  |
| 44407 | P14075 | Q9NP78 | -0.66984  |
| 44408 | P14075 | Q6J9G0 | -1.1728   |
| 44409 | P14075 | Q6ZT52 | -0.08754  |
| 44410 | P14075 | Q86WS5 | -1.1792   |
| 44411 | P14075 | Q96Q77 | -0.52751  |
| 44412 | P14075 | P0C8F1 | -0.84231  |
| 44413 | P14075 | P63145 | -0.40851  |
| 44414 | P14075 | Q8TDI0 | -0.4891   |
| 44415 | P14075 | Q7Z4L9 | -0.3263   |
| 44416 | P14075 | P55055 | -0.23288  |
| 44417 | P14075 | Q96R30 | -1.1027   |
| 44418 | P14075 | P43365 | -0.16078  |
| 44419 | P14075 | Q8NFO8 | -0.63454  |
| 44420 | P14075 | Q8N119 | -1.3145   |
| 44421 | P14075 | Q8IXS6 | -0.62171  |
| 44422 | P14075 | Q8IZJ4 | -0.7559   |
| 44423 | P14075 | Q92522 | -0.79768  |
| 44424 | P14075 | Q9UKA9 | -0.51473  |
| 44425 | P14075 | P06703 | -0.23012  |
| 44426 | P14075 | P58107 | -0.18552  |
| 44427 | P14075 | Q08426 | -0.44559  |
| 44428 | P14075 | O94964 | -0.89609  |
| 44429 | P14075 | P52789 | -0.33193  |
| 44430 | P14075 | Q6IMN6 | -0.2709   |
| 44431 | P14075 | P14735 | -0.31111  |
| 44432 | P14075 | Q9NQL2 | -0.51798  |
| 44433 | P14075 | Q6XYQ8 | -0.79731  |
| 44434 | P14075 | P07988 | -0.63223  |
| 44435 | P14075 | Q6T4P5 | -0.94832  |
| 44436 | P14075 | Q9UKN7 | -0.64341  |
| 44437 | P14075 | Q9NQ25 | -0.97735  |
| 44438 | P14075 | P51511 | -0.79087  |
| 44439 | P14075 | P05538 | -0.68602  |
| 44440 | P14075 | Q7Z2K8 | -0.68254  |
| 44441 | P14075 | O00168 | -1.05     |
| 44442 | P14075 | Q96DG6 | -0.18671  |
| 44443 | P14075 | P78330 | -0.46633  |
| 44444 | P14075 | Q9UJ04 | -0.27891  |
| 44445 | P14075 | P47756 | -0.21963  |
| 44446 | P14075 | Q8NEA9 | -0.21973  |
| 44447 | P14075 | Q9NYI0 | -0.55826  |
| 44448 | P14075 | Q9NUQ8 | -0.8667   |
| 44449 | P14075 | Q8NHP7 | -0.67859  |
| 44450 | P14075 | O00548 | -0.51758  |
| 44451 | P14075 | Q86UF2 | -0.67504  |
| 44452 | P14075 | Q86UP0 | -0.91871  |
| 44453 | P14075 | Q96NI6 | -0.86584  |
| 44454 | P14075 | Q96DL1 | -0.86584  |
| 44455 | P14075 | Q9P0N8 | -0.99198  |
| 44456 | P14075 | P02749 | -0.44028  |
| 44457 | P14075 | P19622 | -0.22726  |
| 44458 | P14075 | Q3SXY7 | -0.86584  |
| 44459 | P14075 | Q14296 | -0.22716  |
| 44460 | P14075 | Q9NVD7 | -0.22744  |

|       |        |        |           |
|-------|--------|--------|-----------|
| 44461 | P14075 | Q5JR12 | -0.47048  |
| 44462 | P14075 | Q86UL3 | -0.54903  |
| 44463 | P14075 | Q6P3W7 | -0.22741  |
| 44464 | P14075 | Q76075 | -0.14033  |
| 44465 | P14075 | Q8NH76 | -1.1027   |
| 44466 | P14075 | Q96QZ0 | -0.84725  |
| 44467 | P14075 | P18031 | -0.4302   |
| 44468 | P14075 | P28067 | -0.67654  |
| 44469 | P14075 | P07306 | -0.50143  |
| 44470 | P14075 | P0CG05 | -0.95485  |
| 44471 | P14075 | Q5J8X5 | -0.86584  |
| 44472 | P14075 | Q9H0H3 | -0.29487  |
| 44473 | P14075 | P49593 | -0.14256  |
| 44474 | P14075 | Q9H5L6 | -0.57338  |
| 44475 | P14075 | Q8NFR9 | -0.52881  |
| 44476 | P14075 | Q96S15 | -0.49208  |
| 44477 | P14075 | Q7Z3J2 | -0.86584  |
| 44478 | P14075 | P48736 | -0.30679  |
| 44479 | P14075 | P87889 | -0.24566  |
| 44480 | P14075 | P30487 | -0.88446  |
| 44481 | P14075 | Q8NGL0 | -1.1027   |
| 44482 | P14075 | Q9NXL9 | -0.66077  |
| 44483 | P14075 | Q9UMX9 | -0.9655   |
| 44484 | P14075 | Q14993 | -1.104    |
| 44485 | P14075 | Q6ZRH7 | -1.0137   |
| 44486 | P14075 | Q9BYV7 | -0.64041  |
| 44487 | P14075 | Q96G97 | -0.56482  |
| 44488 | P14075 | Q14642 | -0.53648  |
| 44489 | P14075 | Q95604 | -0.88446  |
| 44490 | P14075 | O95715 | -0.90306  |
| 44491 | P14075 | Q6DHY5 | -1.2307   |
| 44492 | P14075 | Q9Y4D8 | -0.71808  |
| 44493 | P14075 | Q9P0I2 | -0.51959  |
| 44494 | P14075 | Q9H2X3 | -0.77447  |
| 44495 | P14075 | P59665 | -0.92477  |
| 44496 | P14075 | Q86UP6 | -0.5739   |
| 44497 | P14075 | Q9UHP6 | -0.21313  |
| 44498 | P14075 | Q99946 | -0.86137  |
| 44499 | P14075 | Q9NYW1 | -0.97792  |
| 44500 | P14075 | Q8NGJ2 | -1.1027   |
| 44501 | P14075 | Q8TC29 | -0.4845   |
| 44502 | P14075 | P15311 | -0.23096  |
| 44503 | P14075 | Q9NRM6 | -1.1427   |
| 44504 | P14075 | Q9Y2T4 | -0.49131  |
| 44505 | P14075 | Q6ZMJ4 | -0.72357  |
| 44506 | P14075 | Q96DT7 | -0.22577  |
| 44507 | P14075 | Q96EE4 | -0.87849  |
| 44508 | P14075 | Q68DD2 | -0.40172  |
| 44509 | P14075 | P69892 | -0.34646  |
| 44510 | P14075 | Q2VWP7 | -0.98753  |
| 44511 | P14075 | Q9BZC7 | -0.8826   |
| 44512 | P14075 | Q7Z3Z2 | -0.52991  |
| 44513 | P14075 | Q9BS91 | -0.68551  |
| 44514 | P14075 | O00232 | -0.1166   |
| 44515 | P14075 | Q02487 | -0.93751  |
| 44516 | P14075 | P26583 | -0.23007  |
| 44517 | P14075 | Q24JQ0 | -0.86584  |
| 44518 | P14075 | Q9P289 | -0.23431  |
| 44519 | P14075 | Q9NZ94 | -0.34661  |
| 44520 | P14075 | O75764 | -0.087654 |
| 44521 | P14075 | Q14003 | -0.69003  |
| 44522 | P14075 | P25325 | -0.20466  |
| 44523 | P14075 | Q6S5H4 | -0.22735  |
| 44524 | P14075 | Q9NSD5 | -0.96355  |
| 44525 | P14075 | Q8N6D2 | -0.36149  |
| 44526 | P14075 | Q96KR6 | -0.86584  |
| 44527 | P14075 | A2RRL7 | -0.86584  |
| 44528 | P14075 | Q71RS6 | -0.87597  |
| 44529 | P14075 | P01777 | -0.97479  |
| 44530 | P14075 | Q9Y617 | -0.45928  |
| 44531 | P14075 | Q8IWZ8 | -0.15098  |
| 44532 | P14075 | Q96A47 | -0.39022  |
| 44533 | P14075 | Q6N021 | -0.52144  |
| 44534 | P14075 | P52849 | -0.5651   |
| 44535 | P14075 | E7EU14 | -0.22063  |
| 44536 | P14075 | Q8WW59 | -0.22821  |

|       |        |        |          |
|-------|--------|--------|----------|
| 44537 | P14075 | Q6V1X1 | -0.28246 |
| 44538 | P14075 | P24593 | -0.36625 |
| 44539 | P14075 | P01605 | -0.97479 |
| 44540 | P14075 | Q7Z5L7 | -0.78664 |
| 44541 | P14075 | Q9H0V9 | -0.54242 |
| 44542 | P14075 | Q96DA2 | -0.93777 |
| 44543 | P14075 | Q8IV42 | -0.67026 |
| 44544 | P14075 | Q99445 | -0.54022 |
| 44545 | P14075 | Q8NHJ6 | -0.52198 |
| 44546 | P14075 | P17516 | -0.26769 |
| 44547 | P14075 | P05154 | -0.50393 |
| 44548 | P14075 | Q9NQC8 | -0.1137  |
| 44549 | P14075 | O76099 | -1.103   |
| 44550 | P14075 | Q8NAB2 | -0.21004 |
| 44551 | P14075 | Q8IZT6 | -0.22741 |
| 44552 | P14075 | P10619 | -0.27649 |
| 44553 | P14075 | P49257 | -0.11174 |
| 44554 | P14075 | Q6ZVL6 | -0.86584 |
| 44555 | P14075 | O76041 | -0.22744 |
| 44556 | P14075 | Q9UHC6 | -0.77286 |
| 44557 | P14075 | Q9BUY7 | -0.52751 |
| 44558 | P14075 | Q9BZJ3 | -1.2917  |
| 44559 | P14075 | Q9NQA3 | -0.36048 |
| 44560 | P14075 | P43119 | -0.95155 |
| 44561 | P14075 | Q8TF46 | -0.14805 |
| 44562 | P14075 | P35575 | -0.38576 |
| 44563 | P14075 | Q86VF5 | -0.73989 |
| 44564 | P14075 | Q9Y286 | -1.1267  |
| 44565 | P14075 | O60259 | -0.52267 |
| 44566 | P14075 | P18075 | -0.22741 |
| 44567 | P14075 | Q9H0E7 | -0.23751 |
| 44568 | P14075 | Q8IUC4 | -0.55808 |
| 44569 | P14075 | Q9UJ14 | -0.69875 |
| 44570 | P14075 | O75891 | -0.41128 |
| 44571 | P14075 | Q9BQ08 | -0.6052  |
| 44572 | P14075 | O43556 | -0.7895  |
| 44573 | P14075 | Q6ZRF8 | -0.73967 |
| 44574 | P14075 | Q99489 | -0.41996 |
| 44575 | P14075 | P0C7Q5 | -0.86584 |
| 44576 | P14075 | P56706 | -0.41603 |
| 44577 | P14075 | P12074 | -0.25619 |
| 44578 | P14075 | Q96DN0 | -0.40286 |
| 44579 | P14075 | P0C091 | -1.4889  |
| 44580 | P14075 | P54687 | -0.28677 |
| 44581 | P14075 | O60361 | -0.76477 |
| 44582 | P14075 | Q12805 | -0.28276 |
| 44583 | P14075 | Q9NS62 | -1.0638  |
| 44584 | P14075 | Q6W5P4 | -1.0063  |
| 44585 | P14075 | Q9NU22 | -0.47006 |
| 44586 | P14075 | Q9Y6Y8 | -0.37968 |
| 44587 | P14075 | Q86V85 | -0.86584 |
| 44588 | P14075 | Q8NH94 | -1.1027  |
| 44589 | P14075 | A6NHN6 | -0.87849 |
| 44590 | P14075 | Q8TE12 | -0.2294  |
| 44591 | P14075 | O14880 | -0.88962 |
| 44592 | P14075 | P21709 | -0.87272 |
| 44593 | P14075 | Q7Z769 | -0.86584 |
| 44594 | P14075 | Q9UDX5 | -0.70233 |
| 44595 | P14075 | O14653 | -0.36476 |
| 44596 | P14075 | P10071 | -0.22732 |
| 44597 | P14075 | P00439 | -0.50362 |
| 44598 | P14075 | A6NER0 | -1.2307  |
| 44599 | P14075 | Q15506 | -0.42746 |
| 44600 | P14075 | Q63HM2 | -0.86584 |
| 44601 | P14075 | Q92626 | -1.0634  |
| 44602 | P14075 | O95948 | -0.22734 |
| 44603 | P14075 | P20039 | -0.7302  |
| 44604 | P14075 | Q86UD3 | -0.994   |
| 44605 | P14075 | Q641Q3 | -0.87849 |
| 44606 | P14075 | A8MPS7 | -0.29428 |
| 44607 | P14075 | Q13907 | -0.30048 |
| 44608 | P14075 | Q5VX71 | -0.86584 |
| 44609 | P14075 | Q9Y2C3 | -0.75486 |
| 44610 | P14075 | O00142 | -0.51254 |
| 44611 | P14075 | P15954 | -0.56658 |
| 44612 | P14075 | Q92772 | -0.37317 |



|       |        |        |           |
|-------|--------|--------|-----------|
| 44613 | P14075 | Q96NB2 | -0.83432  |
| 44614 | P14075 | P38398 | -0.22726  |
| 44615 | P14075 | Q8N5M4 | -0.22635  |
| 44616 | P14075 | O43708 | -0.22725  |
| 44617 | P14075 | P35555 | -0.69027  |
| 44618 | P14075 | P15121 | -0.22499  |
| 44619 | P14075 | P98174 | -0.89491  |
| 44620 | P14075 | Q9Y303 | -0.2927   |
| 44621 | P14075 | Q96S99 | -0.1867   |
| 44622 | P14075 | Q9Y446 | -0.26742  |
| 44623 | P14075 | Q8TF76 | -0.54095  |
| 44624 | P14075 | P31645 | -0.33302  |
| 44625 | P14075 | A6PVI3 | -0.81148  |
| 44626 | P14075 | Q8TEF2 | -0.86584  |
| 44627 | P14075 | P34130 | -0.73149  |
| 44628 | P14075 | Q8TB61 | -0.78581  |
| 44629 | P14075 | P55273 | -0.2274   |
| 44630 | P14075 | O60507 | -0.73474  |
| 44631 | P14075 | Q9Y230 | -0.22724  |
| 44632 | P14075 | Q9BYZ8 | -0.86789  |
| 44633 | P14075 | A8MUP2 | -0.26155  |
| 44634 | P14075 | O75386 | -0.1795   |
| 44635 | P14075 | P01611 | -0.97479  |
| 44636 | P14075 | Q13421 | -0.5321   |
| 44637 | P14075 | Q92805 | -0.27132  |
| 44638 | P14075 | P17706 | -0.23713  |
| 44639 | P14075 | Q9NQV7 | -0.21742  |
| 44640 | P14075 | Q9Y6Q2 | -0.29455  |
| 44641 | P14075 | Q9NQ34 | -0.99509  |
| 44642 | P14075 | Q5T215 | -0.3115   |
| 44643 | P14075 | Q8NGP0 | -1.1027   |
| 44644 | P14075 | Q1KMD3 | -0.22556  |
| 44645 | P14075 | Q9H000 | -0.60353  |
| 44646 | P14075 | Q92618 | -0.21172  |
| 44647 | P14075 | O95835 | -0.22737  |
| 44648 | P14075 | Q6UX01 | -0.98249  |
| 44649 | P14075 | Q5VZM2 | -0.48455  |
| 44650 | P14075 | Q8TDI7 | -0.86584  |
| 44651 | P14075 | Q7L8A9 | -0.56768  |
| 44652 | P14075 | Q13740 | -1.0558   |
| 44653 | P14075 | Q9ULF5 | -0.87538  |
| 44654 | P14075 | O76090 | -0.7874   |
| 44655 | P14075 | Q99676 | -0.21172  |
| 44656 | P14075 | P00352 | -0.32559  |
| 44657 | P14075 | O76096 | -0.75872  |
| 44658 | P14075 | Q9Y3R4 | -0.23114  |
| 44659 | P14075 | Q71RG4 | -0.86584  |
| 44660 | P14075 | Q9UNF0 | -0.2309   |
| 44661 | P14075 | Q86UD5 | -0.806    |
| 44662 | P14075 | Q9C0E8 | -0.89101  |
| 44663 | P14075 | O15197 | -1.3407   |
| 44664 | P14075 | Q5VUY0 | -0.50416  |
| 44665 | P14075 | Q86TE4 | -0.87849  |
| 44666 | P14075 | O94923 | -0.43591  |
| 44667 | P14075 | Q8NA29 | -0.99009  |
| 44668 | P14075 | O43296 | -0.21172  |
| 44669 | P14075 | Q8NH81 | -1.1027   |
| 44670 | P14075 | O43826 | -0.31486  |
| 44671 | P14075 | P10632 | -0.68951  |
| 44672 | P14075 | Q9Y5P6 | -0.66009  |
| 44673 | P14075 | Q9P0M2 | -0.031499 |
| 44674 | P14075 | Q13283 | -0.23012  |
| 44675 | P14075 | P16189 | -0.7844   |
| 44676 | P14075 | Q9UHG0 | -0.53836  |
| 44677 | P14075 | Q9Y5K8 | -0.13506  |
| 44678 | P14075 | Q96LC7 | -1.3882   |
| 44679 | P14075 | Q99942 | -0.38793  |
| 44680 | P14075 | P30926 | -0.78903  |
| 44681 | P14075 | Q8TD55 | -0.5353   |
| 44682 | P14075 | P11464 | -0.88363  |
| 44683 | P14075 | Q96DR7 | -0.97333  |
| 44684 | P14075 | P18465 | -0.88446  |
| 44685 | P14075 | P48764 | -0.54606  |
| 44686 | P14075 | Q7Z404 | -0.86584  |
| 44687 | P14075 | O60331 | -0.40727  |
| 44688 | P14075 | Q01524 | -0.85472  |

|       |        |        |           |
|-------|--------|--------|-----------|
| 44689 | P14075 | P01773 | -0.97479  |
| 44690 | P14075 | Q16518 | -0.59586  |
| 44691 | P14075 | P04271 | -0.74286  |
| 44692 | P14075 | P21730 | -1.0704   |
| 44693 | P14075 | Q5JTW2 | -0.22541  |
| 44694 | P14075 | Q75951 | -0.85255  |
| 44695 | P14075 | Q99437 | -0.64408  |
| 44696 | P14075 | Q9UBS9 | -0.87537  |
| 44697 | P14075 | Q96LW4 | -0.45345  |
| 44698 | P14075 | Q5SRD3 | -0.98969  |
| 44699 | P14075 | Q43709 | -0.31746  |
| 44700 | P14075 | Q13797 | -0.79129  |
| 44701 | P14075 | P54851 | -0.83835  |
| 44702 | P14075 | Q8N1F8 | -0.34957  |
| 44703 | P14075 | P21452 | -1.2322   |
| 44704 | P14075 | Q96I85 | -0.87849  |
| 44705 | P14075 | Q6IC98 | -0.72588  |
| 44706 | P14075 | Q8N8J6 | -0.21172  |
| 44707 | P14075 | P55259 | -0.95116  |
| 44708 | P14075 | A8MVZ5 | -0.86584  |
| 44709 | P14075 | P51784 | -0.3067   |
| 44710 | P14075 | Q9BUI4 | -0.093637 |
| 44711 | P14075 | Q9C0B7 | -0.86584  |
| 44712 | P14075 | Q92730 | -0.41111  |
| 44713 | P14075 | Q8ND23 | -0.29487  |
| 44714 | P14075 | Q6UXP3 | -0.86584  |
| 44715 | P14075 | P12838 | -0.85472  |
| 44716 | P14075 | Q9BR11 | -0.29787  |
| 44717 | P14075 | Q96JP5 | -0.39322  |
| 44718 | P14075 | O15382 | -0.08324  |
| 44719 | P14075 | Q13571 | -1.0489   |
| 44720 | P14075 | Q9H2S5 | -0.24278  |
| 44721 | P14075 | P40939 | -0.13865  |
| 44722 | P14075 | Q9NVA2 | -0.22719  |
| 44723 | P14075 | Q96JM4 | -0.22636  |
| 44724 | P14075 | P63218 | -0.58415  |
| 44725 | P14075 | Q86YH6 | -0.26104  |
| 44726 | P14075 | Q0D2I5 | -0.11137  |
| 44727 | P14075 | Q9Y6A2 | -0.81151  |
| 44728 | P14075 | Q9UKV5 | -0.27006  |
| 44729 | P14075 | Q969S9 | -0.61346  |
| 44730 | P14075 | P49448 | -0.65421  |
| 44731 | P14075 | Q5TGY3 | -0.54186  |
| 44732 | P14075 | P60323 | -0.31173  |
| 44733 | P14075 | Q86V35 | -0.70204  |
| 44734 | P14075 | P61647 | -0.59639  |
| 44735 | P14075 | Q8NGV7 | -1.1027   |
| 44736 | P14075 | Q8IVH8 | -0.41071  |
| 44737 | P14075 | P22570 | -0.18762  |
| 44738 | P14075 | Q43866 | -0.88367  |
| 44739 | P14075 | Q13017 | -0.78259  |
| 44740 | P14075 | Q5VUR7 | -0.2274   |
| 44741 | P14075 | O00526 | -0.99706  |
| 44742 | P14075 | Q5JXB2 | -0.15124  |
| 44743 | P14075 | P16070 | -0.29051  |
| 44744 | P14075 | Q9HBR0 | -0.96495  |
| 44745 | P14075 | Q9P0J7 | -0.78396  |
| 44746 | P14075 | Q9Y6J6 | -0.99588  |
| 44747 | P14075 | Q8NC96 | -0.39341  |
| 44748 | P14075 | Q07075 | -0.85574  |
| 44749 | P14075 | Q8NB49 | -0.57608  |
| 44750 | P14075 | Q7Z3U7 | -0.17325  |
| 44751 | P14075 | Q9UN67 | -1.1238   |
| 44752 | P14075 | P01138 | -0.41692  |
| 44753 | P14075 | Q6ZNI0 | -0.71885  |
| 44754 | P14075 | Q96MU6 | -0.21172  |
| 44755 | P14075 | O00337 | -0.87444  |
| 44756 | P14075 | Q8TD57 | -0.6994   |
| 44757 | P14075 | Q8NGI7 | -1.1027   |
| 44758 | P14075 | Q4G0F5 | -0.13648  |
| 44759 | P14075 | Q9BZQ4 | -0.14635  |
| 44760 | P14075 | Q96PX6 | -0.1772   |
| 44761 | P14075 | Q96E52 | -0.7389   |
| 44762 | P14075 | Q8N5Z0 | -0.23769  |
| 44763 | P14075 | Q8TD86 | -0.22598  |
| 44764 | P14075 | P15421 | -1.0706   |

|       |        |        |           |
|-------|--------|--------|-----------|
| 44765 | P14075 | Q8NBF6 | -0.82196  |
| 44766 | P14075 | Q9Y5Q0 | -0.79662  |
| 44767 | P14075 | Q96KX0 | -0.83907  |
| 44768 | P14075 | A8MZ97 | -0.86584  |
| 44769 | P14075 | P20337 | -0.7896   |
| 44770 | P14075 | A6NLP5 | -0.21734  |
| 44771 | P14075 | P15498 | -0.22741  |
| 44772 | P14075 | Q96FN5 | -0.68836  |
| 44773 | P14075 | Q8NCF0 | -0.86789  |
| 44774 | P14075 | O96024 | -0.74788  |
| 44775 | P14075 | O60547 | -0.84365  |
| 44776 | P14075 | Q92859 | -0.78324  |
| 44777 | P14075 | Q8N184 | -0.21172  |
| 44778 | P14075 | O94886 | -1.2031   |
| 44779 | P14075 | Q9NUJ1 | -0.52967  |
| 44780 | P14075 | Q5VWK5 | -0.52374  |
| 44781 | P14075 | Q96HH6 | -0.86584  |
| 44782 | P14075 | Q9BSG5 | -0.87849  |
| 44783 | P14075 | P20132 | -0.14212  |
| 44784 | P14075 | Q09472 | -0.19136  |
| 44785 | P14075 | P26232 | -0.18642  |
| 44786 | P14075 | Q9Y662 | -0.60238  |
| 44787 | P14075 | Q9Y297 | -0.25461  |
| 44788 | P14075 | Q8WXX4 | -0.62076  |
| 44789 | P14075 | Q9NPA1 | -1.0014   |
| 44790 | P14075 | Q9Y600 | -0.51279  |
| 44791 | P14075 | P55087 | -0.56589  |
| 44792 | P14075 | Q9UBX2 | -0.20043  |
| 44793 | P14075 | Q9H228 | -1.0808   |
| 44794 | P14075 | Q9BX73 | -0.86584  |
| 44795 | P14075 | Q8N4Q0 | -0.69585  |
| 44796 | P14075 | Q7RTU3 | -0.22744  |
| 44797 | P14075 | O00445 | -0.60581  |
| 44798 | P14075 | Q99677 | -1.3095   |
| 44799 | P14075 | Q9C030 | -0.50212  |
| 44800 | P14075 | Q96R27 | -1.1027   |
| 44801 | P14075 | Q8NGT7 | -1.1027   |
| 44802 | P14075 | Q9H3U5 | -0.8419   |
| 44803 | P14075 | P52790 | -0.32794  |
| 44804 | P14075 | Q6T311 | -1.2555   |
| 44805 | P14075 | Q9Y5W9 | -0.59455  |
| 44806 | P14075 | P38484 | -0.97254  |
| 44807 | P14075 | Q504Y2 | -0.69023  |
| 44808 | P14075 | P50395 | -0.16173  |
| 44809 | P14075 | A4D2H0 | -0.064772 |
| 44810 | P14075 | A8MZH6 | -0.87849  |
| 44811 | P14075 | Q9NRY7 | -0.95884  |
| 44812 | P14075 | Q8IZJ0 | -0.89136  |
| 44813 | P14075 | Q9BPW5 | -1.1358   |
| 44814 | P14075 | Q4VX76 | -0.7765   |
| 44815 | P14075 | P0CG30 | -0.22527  |
| 44816 | P14075 | P48169 | -0.78927  |
| 44817 | P14075 | A2RUS2 | -0.42005  |
| 44818 | P14075 | P19827 | -0.83798  |
| 44819 | P14075 | O14843 | -1.3695   |
| 44820 | P14075 | Q10981 | -0.58395  |
| 44821 | P14075 | Q9BTC0 | -0.22731  |
| 44822 | P14075 | Q2NL67 | -0.45204  |
| 44823 | P14075 | O76094 | -0.21558  |
| 44824 | P14075 | Q8NCW0 | -0.82796  |
| 44825 | P14075 | Q9UL25 | -0.39859  |
| 44826 | P14075 | P49959 | -0.097676 |
| 44827 | P14075 | Q8NFL0 | -0.5155   |
| 44828 | P14075 | O15535 | -0.076586 |
| 44829 | P14075 | O15016 | -0.31686  |
| 44830 | P14075 | Q53LP3 | -0.22741  |
| 44831 | P14075 | Q9NP91 | -0.98287  |
| 44832 | P14075 | Q8TEX9 | -0.22588  |
| 44833 | P14075 | Q16589 | -0.21634  |
| 44834 | P14075 | Q8N960 | -0.19873  |
| 44835 | P14075 | Q99578 | -0.89194  |
| 44836 | P14075 | P01606 | -0.97479  |
| 44837 | P14075 | Q9P0S2 | -0.43663  |
| 44838 | P14075 | Q8WWG1 | -1.1984   |
| 44839 | P14075 | Q9Y6Z7 | -0.76957  |
| 44840 | P14075 | P13716 | -0.36459  |

|       |        |        |           |
|-------|--------|--------|-----------|
| 44841 | P14075 | Q8IYG6 | -0.13355  |
| 44842 | P14075 | Q9H2B2 | -0.76142  |
| 44843 | P14075 | Q9UBU6 | -0.86584  |
| 44844 | P14075 | P25713 | -0.18518  |
| 44845 | P14075 | Q13316 | -0.48242  |
| 44846 | P14075 | Q9BX97 | -0.63355  |
| 44847 | P14075 | Q86UT6 | -0.22172  |
| 44848 | P14075 | P48549 | -0.59128  |
| 44849 | P14075 | Q9C0B5 | -0.95194  |
| 44850 | P14075 | O15130 | -0.9662   |
| 44851 | P14075 | P82279 | -1.0879   |
| 44852 | P14075 | Q9GZX6 | -0.79589  |
| 44853 | P14075 | Q9NQX7 | -0.31814  |
| 44854 | P14075 | A0PJK1 | -0.928    |
| 44855 | P14075 | P43007 | -0.46554  |
| 44856 | P14075 | Q92823 | -0.74881  |
| 44857 | P14075 | Q8NCW6 | -0.56906  |
| 44858 | P14075 | Q7RTU4 | -0.22748  |
| 44859 | P14075 | Q99935 | -0.81396  |
| 44860 | P14075 | Q8NI22 | -0.57739  |
| 44861 | P14075 | Q92526 | -0.44512  |
| 44862 | P14075 | Q9UHG2 | -0.74472  |
| 44863 | P14075 | Q86Y28 | -0.87849  |
| 44864 | P14075 | Q9NVH0 | -0.67859  |
| 44865 | P14075 | O43847 | -0.2947   |
| 44866 | P14075 | Q86WU2 | -0.11989  |
| 44867 | P14075 | P32246 | -0.66144  |
| 44868 | P14075 | Q400G9 | -0.83564  |
| 44869 | P14075 | Q9P232 | -0.68595  |
| 44870 | P14075 | Q9Y5Z9 | -0.42246  |
| 44871 | P14075 | P22676 | -0.39295  |
| 44872 | P14075 | Q9NX52 | -1.1493   |
| 44873 | P14075 | P61366 | -1.0261   |
| 44874 | P14075 | Q99674 | -0.9476   |
| 44875 | P14075 | Q16850 | -0.91097  |
| 44876 | P14075 | Q9P1Z9 | -0.86584  |
| 44877 | P14075 | Q9Y6K0 | -0.50072  |
| 44878 | P14075 | Q6ZQW0 | -0.33596  |
| 44879 | P14075 | Q9P2E8 | -0.79424  |
| 44880 | P14075 | Q92954 | -0.8561   |
| 44881 | P14075 | A2A2V5 | -0.86584  |
| 44882 | P14075 | Q9NX24 | -0.22439  |
| 44883 | P14075 | P04196 | -0.3113   |
| 44884 | P14075 | P49356 | -0.045643 |
| 44885 | P14075 | P01579 | -0.27454  |
| 44886 | P14075 | Q96PS8 | -0.85361  |
| 44887 | P14075 | Q8NA54 | -0.35479  |
| 44888 | P14075 | Q8NBL1 | -0.352    |
| 44889 | P14075 | Q9NQ66 | -0.27878  |
| 44890 | P14075 | P17252 | -0.21921  |
| 44891 | P14075 | Q8N4B1 | -0.22729  |
| 44892 | P14075 | P07205 | -0.5088   |
| 44893 | P14075 | Q9NRF8 | -0.44389  |
| 44894 | P14075 | Q6ICL7 | -0.86584  |
| 44895 | P14075 | O95279 | -1.0332   |
| 44896 | P14075 | Q8NFW9 | -0.21333  |
| 44897 | P14075 | A6NEE1 | -0.5353   |
| 44898 | P14075 | Q9UQ05 | -0.88061  |
| 44899 | P14075 | Q8WWA0 | -1.0232   |
| 44900 | P14075 | P18085 | -0.37536  |
| 44901 | P14075 | Q9UHY1 | -0.22741  |
| 44902 | P14075 | P0C0P6 | -0.8335   |
| 44903 | P14075 | Q99758 | -0.9965   |
| 44904 | P14075 | Q9P2N7 | -0.19831  |
| 44905 | P14075 | Q86UF1 | -0.86584  |
| 44906 | P14075 | Q6PIF2 | -0.21317  |
| 44907 | P14075 | Q14582 | -0.2274   |
| 44908 | P14075 | Q96MV8 | -0.81063  |
| 44909 | P14075 | Q8N7R0 | -0.22804  |
| 44910 | P14075 | Q7Z442 | -1.0019   |
| 44911 | P14075 | Q9UNA0 | -0.23106  |
| 44912 | P14075 | Q9UGM5 | -0.74389  |
| 44913 | P14075 | O95239 | -0.25301  |
| 44914 | P14075 | Q14289 | -0.22741  |
| 44915 | P14075 | Q9NPH9 | -0.49787  |
| 44916 | P14075 | Q92838 | -0.76261  |

|       |        |        |          |
|-------|--------|--------|----------|
| 44917 | P14075 | Q8NGD0 | -1.1027  |
| 44918 | P14075 | Q7Z6J4 | -0.98291 |
| 44919 | P14075 | P01779 | -0.97479 |
| 44920 | P14075 | Q15417 | -0.49888 |
| 44921 | P14075 | O15066 | -0.31136 |
| 44922 | P14075 | Q15027 | -0.92215 |
| 44923 | P14075 | O95427 | -0.94539 |
| 44924 | P14075 | Q96NC0 | -0.61367 |
| 44925 | P14075 | Q5U4P2 | -0.89197 |
| 44926 | P14075 | Q3I5F7 | -0.18501 |
| 44927 | P14075 | Q9P0K8 | -0.31899 |
| 44928 | P14075 | Q8NHQ8 | -0.576   |
| 44929 | P14075 | Q9HBT6 | -1.0844  |
| 44930 | P14075 | P01042 | -0.63924 |
| 44931 | P14075 | Q96BQ3 | -0.73967 |
| 44932 | P14075 | Q5XX13 | -0.22757 |
| 44933 | P14075 | O95994 | -0.1768  |
| 44934 | P14075 | Q9NPE2 | -0.63952 |
| 44935 | P14075 | O00116 | -0.61136 |
| 44936 | P14075 | Q13163 | -0.22876 |
| 44937 | P14075 | B1AKI9 | -0.87849 |
| 44938 | P14075 | P19022 | -0.53233 |
| 44939 | P14075 | Q92544 | -0.86584 |
| 44940 | P14075 | Q969K4 | -0.22729 |
| 44941 | P14075 | G3V0H7 | -0.89134 |
| 44942 | P14075 | Q495T6 | -1.2756  |
| 44943 | P14075 | O60285 | -0.26922 |
| 44944 | P14075 | P15309 | -1.1298  |
| 44945 | P14075 | Q6UXH8 | -1.0124  |
| 44946 | P14075 | Q06141 | -0.87402 |
| 44947 | P14075 | P81534 | -0.83984 |
| 44948 | P14075 | Q86UP2 | -0.88407 |
| 44949 | P14075 | Q8IXT5 | -0.22782 |
| 44950 | P14075 | Q86VF7 | -0.56104 |
| 44951 | P14075 | Q96C19 | -0.61775 |
| 44952 | P14075 | Q8NI99 | -1.2031  |
| 44953 | P14075 | Q9NVE5 | -0.69644 |
| 44954 | P14075 | Q92485 | -0.88373 |
| 44955 | P14075 | O94772 | -0.45149 |
| 44956 | P14075 | A8MXK1 | -0.86584 |
| 44957 | P14075 | Q9Y6X0 | -0.33321 |
| 44958 | P14075 | Q9H1Z8 | -0.80773 |
| 44959 | P14075 | Q5T089 | -0.13512 |
| 44960 | P14075 | O95876 | -0.49052 |
| 44961 | P14075 | Q8TDR2 | -0.4747  |
| 44962 | P14075 | O75881 | -0.61495 |
| 44963 | P14075 | P12644 | -0.22741 |
| 44964 | P14075 | Q9Y5Y6 | -1.4561  |
| 44965 | P14075 | O00468 | -0.451   |
| 44966 | P14075 | Q14924 | -0.46725 |
| 44967 | P14075 | P56645 | -0.22656 |
| 44968 | P14075 | Q96LB4 | -0.51032 |
| 44969 | P14075 | Q13627 | -0.22741 |
| 44970 | P14075 | Q96S90 | -0.43278 |
| 44971 | P14075 | O00408 | -0.22606 |
| 44972 | P14075 | Q96DS6 | -0.86584 |
| 44973 | P14075 | Q96A37 | -0.73967 |
| 44974 | P14075 | O75882 | -1.2272  |
| 44975 | P14075 | Q7RTM1 | -1.1841  |
| 44976 | P14075 | Q96J01 | -0.22727 |
| 44977 | P14075 | Q96P50 | -1.1475  |
| 44978 | P14075 | P09429 | -0.22901 |
| 44979 | P14075 | P59025 | -0.86391 |
| 44980 | P14075 | Q92536 | -0.92345 |
| 44981 | P14075 | P82251 | -0.903   |
| 44982 | P14075 | Q8NGS2 | -1.1027  |
| 44983 | P14075 | P15976 | -0.22739 |
| 44984 | P14075 | Q96K62 | -0.21172 |
| 44985 | P14075 | Q9Y619 | -0.58668 |
| 44986 | P14075 | Q96J92 | -0.69186 |
| 44987 | P14075 | Q9HBI6 | -0.99234 |
| 44988 | P14075 | O43670 | -0.20747 |
| 44989 | P14075 | O43432 | -0.30264 |
| 44990 | P14075 | O00311 | -0.22741 |
| 44991 | P14075 | Q9Y5P1 | -1.1027  |
| 44992 | P14075 | O95996 | -0.22716 |

|       |        |        |          |
|-------|--------|--------|----------|
| 44993 | P14075 | A8MS94 | -0.35868 |
| 44994 | P14075 | Q96L93 | -0.686   |
| 44995 | P14075 | P20839 | -0.44777 |
| 44996 | P14075 | I6L899 | -0.35868 |
| 44997 | P14075 | Q9NZT2 | -0.10989 |
| 44998 | P14075 | Q9NQX6 | -0.21172 |
| 44999 | P14075 | Q9Y3S1 | -0.87123 |
| 45000 | P14075 | Q9H898 | -0.61367 |
| 45001 | P14075 | Q8N9I0 | -0.68051 |
| 45002 | P14075 | Q93088 | -0.1673  |
| 45003 | P14075 | O60575 | -0.79897 |
| 45004 | P14075 | P01770 | -0.97479 |
| 45005 | P14075 | Q8NCC5 | -0.74011 |
| 45006 | P14075 | O43766 | -0.60824 |
| 45007 | P14075 | P32970 | -0.53615 |
| 45008 | P14075 | P51956 | -0.22741 |
| 45009 | P14075 | Q96F85 | -0.18318 |
| 45010 | P14075 | P30085 | -0.32893 |
| 45011 | P14075 | P43088 | -1.2734  |
| 45012 | P14075 | Q9BWW7 | -0.20561 |
| 45013 | P14075 | Q08830 | -1.04    |
| 45014 | P14075 | Q6N043 | -0.2385  |
| 45015 | P14075 | Q401N2 | -0.93157 |
| 45016 | P14075 | Q9NXR5 | -0.22741 |
| 45017 | P14075 | Q96D71 | -0.21135 |
| 45018 | P14075 | Q96DT6 | -0.68716 |
| 45019 | P14075 | Q9H427 | -0.95255 |
| 45020 | P14075 | Q7Z5S9 | -0.86584 |
| 45021 | P14075 | Q13315 | -0.34533 |
| 45022 | P14075 | Q7Z4H3 | -0.14259 |
| 45023 | P14075 | Q13126 | -0.14023 |
| 45024 | P14075 | Q9UK33 | -0.21306 |
| 45025 | P14075 | P55809 | -0.21003 |
| 45026 | P14075 | Q9H252 | -0.88642 |
| 45027 | P14075 | Q9BQD7 | -0.86584 |
| 45028 | P14075 | Q8N8U9 | -0.76835 |
| 45029 | P14075 | Q6UX34 | -0.86584 |
| 45030 | P14075 | Q8NAA4 | -0.228   |
| 45031 | P14075 | Q6P9A3 | -0.21172 |
| 45032 | P14075 | Q9NVX7 | -0.22483 |
| 45033 | P14075 | P23378 | -0.62006 |
| 45034 | P14075 | Q9UBP5 | -0.22696 |
| 45035 | P14075 | Q9BQP9 | -1.0096  |
| 45036 | P14075 | Q93052 | -0.22859 |
| 45037 | P14075 | Q15217 | -0.23366 |
| 45038 | P14075 | Q16718 | -0.22427 |
| 45039 | P14075 | Q9HD89 | -0.58084 |
| 45040 | P14075 | Q8N339 | -0.12778 |
| 45041 | P14075 | P0CJ72 | -0.72903 |
| 45042 | P14075 | Q9P2N2 | -0.66586 |
| 45043 | P14075 | Q9Y2C2 | -0.51953 |
| 45044 | P14075 | Q6NSX1 | -0.95341 |
| 45045 | P14075 | Q16572 | -0.87044 |
| 45046 | P14075 | Q8N126 | -0.86358 |
| 45047 | P14075 | P56202 | -0.79571 |
| 45048 | P14075 | Q9UK55 | -0.53579 |
| 45049 | P14075 | P52945 | -0.36861 |
| 45050 | P14075 | P42336 | -0.28826 |
| 45051 | P14075 | O14618 | -0.22712 |
| 45052 | P14075 | Q9NZI2 | -0.60977 |
| 45053 | P14075 | Q7L985 | -0.86584 |
| 45054 | P14075 | Q14767 | -0.91557 |
| 45055 | P14075 | Q9NRH3 | -0.29433 |
| 45056 | P14075 | Q8N2G8 | -0.14676 |
| 45057 | P14075 | Q5FVE4 | -0.86256 |
| 45058 | P14075 | Q6SA08 | -0.53454 |
| 45059 | P14075 | Q14623 | -0.39519 |
| 45060 | P14075 | P20396 | -0.43035 |
| 45061 | P14075 | Q9BVJ7 | -0.56593 |
| 45062 | P14075 | Q6UW02 | -0.95311 |
| 45063 | P14075 | Q8N883 | -0.21172 |
| 45064 | P14075 | P63131 | -0.67565 |
| 45065 | P14075 | Q5GAN4 | -0.85864 |
| 45066 | P14075 | O00444 | -0.22741 |
| 45067 | P14075 | P51810 | -0.49995 |
| 45068 | P14075 | Q4L235 | -1.0247  |

|       |        |        |           |
|-------|--------|--------|-----------|
| 45069 | P14075 | Q76NI1 | -0.57711  |
| 45070 | P14075 | P07148 | -0.21936  |
| 45071 | P14075 | P49763 | -0.77129  |
| 45072 | P14075 | Q96013 | -0.56695  |
| 45073 | P14075 | Q14591 | -0.21172  |
| 45074 | P14075 | Q15247 | -0.72512  |
| 45075 | P14075 | Q7RTR0 | -0.65523  |
| 45076 | P14075 | P36957 | -0.1875   |
| 45077 | P14075 | Q9NQC3 | -0.2136   |
| 45078 | P14075 | Q8N129 | -0.94064  |
| 45079 | P14075 | Q9HC21 | -0.69008  |
| 45080 | P14075 | Q92747 | -0.37192  |
| 45081 | P14075 | A8K4G0 | -0.93628  |
| 45082 | P14075 | Q9Y5I3 | -1.4444   |
| 45083 | P14075 | Q9BQB6 | -0.93052  |
| 45084 | P14075 | Q9Y570 | -0.37223  |
| 45085 | P14075 | Q9UHD0 | -0.87481  |
| 45086 | P14075 | P28329 | -0.20006  |
| 45087 | P14075 | Q6P1Q0 | -0.23376  |
| 45088 | P14075 | Q7L2Z9 | -0.28467  |
| 45089 | P14075 | Q9Y5Q9 | -0.22721  |
| 45090 | P14075 | Q96MX3 | -0.21172  |
| 45091 | P14075 | Q92561 | -0.10818  |
| 45092 | P14075 | Q8N4P6 | -0.22725  |
| 45093 | P14075 | P02790 | -0.27705  |
| 45094 | P14075 | Q9P203 | -0.22488  |
| 45095 | P14075 | Q9Y5E2 | -1.1037   |
| 45096 | P14075 | Q96M20 | -0.22556  |
| 45097 | P14075 | Q14548 | -0.27516  |
| 45098 | P14075 | P04040 | -0.37992  |
| 45099 | P14075 | Q8TDU6 | -1.1721   |
| 45100 | P14075 | P51606 | -0.40219  |
| 45101 | P14075 | Q496J9 | -0.67864  |
| 45102 | P14075 | Q02252 | -0.25681  |
| 45103 | P14075 | Q86XT4 | -0.68348  |
| 45104 | P14075 | A6NNZ2 | -0.67265  |
| 45105 | P14075 | Q8NHL6 | -0.33564  |
| 45106 | P14075 | Q8NGI6 | -1.1027   |
| 45107 | P14075 | Q75116 | -0.22723  |
| 45108 | P14075 | P32856 | -0.26704  |
| 45109 | P14075 | Q8NDY8 | -0.86584  |
| 45110 | P14075 | P0CAP1 | -0.34347  |
| 45111 | P14075 | Q43603 | -1.0393   |
| 45112 | P14075 | Q00056 | -0.18241  |
| 45113 | P14075 | Q16134 | -0.40915  |
| 45114 | P14075 | Q9UNP4 | -0.64432  |
| 45115 | P14075 | P0DJJ0 | -0.38722  |
| 45116 | P14075 | Q00451 | -0.47889  |
| 45117 | P14075 | Q95665 | -1.2105   |
| 45118 | P14075 | Q9BY10 | -0.83378  |
| 45119 | P14075 | P15090 | -0.19921  |
| 45120 | P14075 | Q6ZXV5 | -0.86584  |
| 45121 | P14075 | Q75912 | -0.22741  |
| 45122 | P14075 | Q9NWW0 | -0.061576 |
| 45123 | P14075 | Q9HB31 | -0.22713  |
| 45124 | P14075 | Q8N3K9 | -0.28764  |
| 45125 | P14075 | Q9Y6N7 | -0.48444  |
| 45126 | P14075 | Q9BY67 | -0.4037   |
| 45127 | P14075 | Q8N808 | -0.86584  |
| 45128 | P14075 | Q96F45 | -0.16687  |
| 45129 | P14075 | P63127 | -0.67565  |
| 45130 | P14075 | Q8N3F9 | -0.86584  |
| 45131 | P14075 | Q9UPR5 | -0.81708  |
| 45132 | P14075 | Q8TAM2 | -0.2269   |
| 45133 | P14075 | Q8NGK4 | -1.1027   |
| 45134 | P14075 | P11215 | -0.30865  |
| 45135 | P14075 | Q9BRL7 | -0.61576  |
| 45136 | P14075 | P01282 | -0.71341  |
| 45137 | P14075 | Q9P244 | -0.72432  |
| 45138 | P14075 | Q15522 | -0.24375  |
| 45139 | P14075 | Q8N9X3 | -0.21262  |
| 45140 | P14075 | Q96MA6 | -0.60276  |
| 45141 | P14075 | P11216 | -0.24876  |
| 45142 | P14075 | Q9BXN2 | -0.54975  |
| 45143 | P14075 | P51857 | -0.30828  |
| 45144 | P14075 | Q14841 | -0.651    |

|       |        |        |           |
|-------|--------|--------|-----------|
| 45145 | P14075 | Q96TA2 | -1.0639   |
| 45146 | P14075 | Q9Y5H7 | -1.1553   |
| 45147 | P14075 | Q9BXL7 | -0.22721  |
| 45148 | P14075 | Q9Y6X9 | -0.19868  |
| 45149 | P14075 | Q3B7T3 | -0.77465  |
| 45150 | P14075 | Q4G0X9 | -0.33297  |
| 45151 | P14075 | Q9NP73 | -0.40884  |
| 45152 | P14075 | Q16825 | -0.77358  |
| 45153 | P14075 | P49916 | -0.22377  |
| 45154 | P14075 | P48060 | -1.1065   |
| 45155 | P14075 | Q9UJA3 | -0.33265  |
| 45156 | P14075 | Q4G0I0 | -0.86584  |
| 45157 | P14075 | P35318 | -0.25946  |
| 45158 | P14075 | P83593 | -0.95485  |
| 45159 | P14075 | P37268 | -0.82745  |
| 45160 | P14075 | P46059 | -0.8081   |
| 45161 | P14075 | Q8NB59 | -0.77465  |
| 45162 | P14075 | Q9H477 | -0.68169  |
| 45163 | P14075 | O43316 | -0.22581  |
| 45164 | P14075 | P13611 | -0.88679  |
| 45165 | P14075 | A7XYQ1 | -0.55032  |
| 45166 | P14075 | Q96NT0 | -0.53753  |
| 45167 | P14075 | Q4G148 | -0.549    |
| 45168 | P14075 | O14657 | -0.28888  |
| 45169 | P14075 | Q9H094 | -0.29487  |
| 45170 | P14075 | Q96EX3 | -0.29487  |
| 45171 | P14075 | Q8WYR4 | -0.15346  |
| 45172 | P14075 | Q96MZ0 | -0.22412  |
| 45173 | P14075 | Q9BS26 | -0.35603  |
| 45174 | P14075 | Q6UXA7 | -0.60046  |
| 45175 | P14075 | Q8IWG1 | -0.15667  |
| 45176 | P14075 | O75197 | -0.25247  |
| 45177 | P14075 | A6NLX4 | -0.86584  |
| 45178 | P14075 | P08100 | -0.62668  |
| 45179 | P14075 | Q96E35 | -0.49852  |
| 45180 | P14075 | O15164 | -0.22732  |
| 45181 | P14075 | Q96GW7 | -0.78711  |
| 45182 | P14075 | P36222 | -0.53431  |
| 45183 | P14075 | A2RUR9 | -0.14385  |
| 45184 | P14075 | Q5SQI0 | -0.44947  |
| 45185 | P14075 | Q9BUB5 | -0.2275   |
| 45186 | P14075 | O00264 | -0.2188   |
| 45187 | P14075 | A6NMK7 | -0.52453  |
| 45188 | P14075 | P53621 | -0.23003  |
| 45189 | P14075 | Q9P2P1 | -0.50102  |
| 45190 | P14075 | Q9BZQ6 | -0.46368  |
| 45191 | P14075 | P33947 | -0.48782  |
| 45192 | P14075 | Q9UBZ4 | -0.15234  |
| 45193 | P14075 | O94953 | -0.19459  |
| 45194 | P14075 | P51151 | -0.49271  |
| 45195 | P14075 | Q9NUD9 | -0.76317  |
| 45196 | P14075 | P53539 | -0.092779 |
| 45197 | P14075 | Q7Z388 | -0.86584  |
| 45198 | P14075 | A6NIJ9 | -1.1027   |
| 45199 | P14075 | Q6YHK3 | -0.86991  |
| 45200 | P14075 | P08138 | -0.30446  |
| 45201 | P14075 | O43150 | -0.3896   |
| 45202 | P14075 | O94819 | -0.21877  |
| 45203 | P14075 | Q8IZV5 | -0.67364  |
| 45204 | P14075 | P61006 | -0.60635  |
| 45205 | P14075 | P30405 | -0.21798  |
| 45206 | P14075 | P30495 | -0.88446  |
| 45207 | P14075 | Q9Y672 | -0.6826   |
| 45208 | P14075 | P04234 | -0.55717  |
| 45209 | P14075 | Q96MG2 | -0.60521  |
| 45210 | P14075 | Q9Y3D8 | -0.19726  |
| 45211 | P14075 | Q9H2X8 | -0.86584  |
| 45212 | P14075 | Q9BXT2 | -0.90487  |
| 45213 | P14075 | P51674 | -0.76166  |
| 45214 | P14075 | Q9UMR2 | -0.11743  |
| 45215 | P14075 | Q8NBP0 | -0.22738  |
| 45216 | P14075 | C9JDP6 | -0.66509  |
| 45217 | P14075 | O95500 | -0.63885  |
| 45218 | P14075 | P40189 | -0.40093  |
| 45219 | P14075 | Q8NG81 | -1.1027   |
| 45220 | P14075 | Q8IXI2 | -0.58096  |



|       |        |        |          |
|-------|--------|--------|----------|
| 45221 | P14075 | Q16663 | -1.0483  |
| 45222 | P14075 | P50579 | -0.51434 |
| 45223 | P14075 | Q70Z35 | -0.72634 |
| 45224 | P14075 | O75526 | -0.34907 |
| 45225 | P14075 | O43854 | -1.2077  |
| 45226 | P14075 | Q14545 | -0.69469 |
| 45227 | P14075 | P32745 | -0.54756 |
| 45228 | P14075 | Q9H4G0 | -0.29797 |
| 45229 | P14075 | P33176 | -0.23388 |
| 45230 | P14075 | Q8TDI8 | -0.91739 |
| 45231 | P14075 | O60522 | -0.66996 |
| 45232 | P14075 | Q8NI28 | -0.86584 |
| 45233 | P14075 | Q2M3X9 | -0.21172 |
| 45234 | P14075 | Q05315 | -0.58225 |
| 45235 | P14075 | Q8WXH4 | -0.62076 |
| 45236 | P14075 | Q6NUK4 | -0.86584 |
| 45237 | P14075 | Q9Y547 | -0.60127 |
| 45238 | P14075 | P09601 | -0.2262  |
| 45239 | P14075 | Q16763 | -0.31232 |
| 45240 | P14075 | Q96AC1 | -0.21252 |
| 45241 | P14075 | Q96PT4 | -0.21195 |
| 45242 | P14075 | Q9BZW5 | -0.6579  |
| 45243 | P14075 | Q8N5T2 | -1.2307  |
| 45244 | P14075 | O00144 | -0.68731 |
| 45245 | P14075 | O75019 | -0.94458 |
| 45246 | P14075 | Q9HAU6 | -0.41833 |
| 45247 | P14075 | Q96H55 | -0.51489 |
| 45248 | P14075 | O43149 | -0.60656 |
| 45249 | P14075 | Q6QNK2 | -1.1905  |
| 45250 | P14075 | P19447 | -0.16106 |
| 45251 | P14075 | Q9H6D8 | -0.92806 |
| 45252 | P14075 | Q07011 | -0.93642 |
| 45253 | P14075 | A6NDL8 | -1.1027  |
| 45254 | P14075 | Q2M2E3 | -0.96938 |
| 45255 | P14075 | Q8TCZ2 | -1.0195  |
| 45256 | P14075 | Q12899 | -0.56317 |
| 45257 | P14075 | Q96HY7 | -0.39873 |
| 45258 | P14075 | Q96PR1 | -0.65175 |
| 45259 | P14075 | Q6ZRF7 | -0.21172 |
| 45260 | P14075 | Q9C0D4 | -0.22742 |
| 45261 | P14075 | Q7Z5Q5 | -0.26572 |
| 45262 | P14075 | O95263 | -0.22689 |
| 45263 | P14075 | P49908 | -0.85441 |
| 45264 | P14075 | Q9BPY8 | -0.22334 |
| 45265 | P14075 | A2RU54 | -0.22962 |
| 45266 | P14075 | Q9NX65 | -0.21172 |
| 45267 | P14075 | Q9Y6Q6 | -0.25946 |
| 45268 | P14075 | Q8WUU8 | -0.86584 |
| 45269 | P14075 | P15692 | -0.26101 |
| 45270 | P14075 | P46439 | -0.42005 |
| 45271 | P14075 | Q9BYH1 | -0.93931 |
| 45272 | P14075 | P20908 | -0.78821 |
| 45273 | P14075 | Q0WX57 | -0.32253 |
| 45274 | P14075 | Q2KHT4 | -0.91741 |
| 45275 | P14075 | O95343 | -0.22765 |
| 45276 | P14075 | Q7Z4W2 | -0.85255 |
| 45277 | P14075 | Q9H2X9 | -0.83867 |
| 45278 | P14075 | Q15198 | -0.64891 |
| 45279 | P14075 | O15327 | -0.30575 |
| 45280 | P14075 | P05166 | -0.42733 |
| 45281 | P14075 | P30508 | -0.93787 |
| 45282 | P14075 | Q9Y271 | -1.1713  |
| 45283 | P14075 | P01019 | -0.26216 |
| 45284 | P14075 | P78325 | -0.42164 |
| 45285 | P14075 | Q9BSD7 | -0.8446  |
| 45286 | P14075 | Q9BYP7 | -0.26665 |
| 45287 | P14075 | O76027 | -0.39174 |
| 45288 | P14075 | P01705 | -0.97479 |
| 45289 | P14075 | Q5GH73 | -0.86584 |
| 45290 | P14075 | A6NJW4 | -0.86584 |
| 45291 | P14075 | P30532 | -0.89524 |
| 45292 | P14075 | P0CL85 | -0.21602 |
| 45293 | P14075 | Q8NFX7 | -0.67409 |
| 45294 | P14075 | Q7Z2H8 | -0.77384 |
| 45295 | P14075 | P55089 | -0.42483 |
| 45296 | P14075 | Q9NQF3 | -0.21969 |

|       |        |        |          |
|-------|--------|--------|----------|
| 45297 | P14075 | Q86UZ6 | -0.22721 |
| 45298 | P14075 | Q7Z494 | -0.2272  |
| 45299 | P14075 | P31944 | -0.41232 |
| 45300 | P14075 | A6NKF7 | -0.86584 |
| 45301 | P14075 | Q96PD6 | -0.72412 |
| 45302 | P14075 | Q5W5W9 | -0.72209 |
| 45303 | P14075 | P0CB46 | -0.77581 |
| 45304 | P14075 | Q7Z5J4 | -0.19751 |
| 45305 | P14075 | P43362 | -0.16078 |
| 45306 | P14075 | A8MV23 | -0.70542 |
| 45307 | P14075 | O15537 | -0.98761 |
| 45308 | P14075 | Q6IPM2 | -0.30763 |
| 45309 | P14075 | P59827 | -0.85949 |
| 45310 | P14075 | P09958 | -0.42804 |
| 45311 | P14075 | Q15223 | -0.39245 |
| 45312 | P14075 | Q9BWW3 | -0.70886 |
| 45313 | P14075 | O15399 | -0.71716 |
| 45314 | P14075 | P58549 | -0.92183 |
| 45315 | P14075 | Q9BXA6 | -0.62031 |
| 45316 | P14075 | Q8NEZ4 | -0.32569 |
| 45317 | P14075 | Q9HC97 | -1.2928  |
| 45318 | P14075 | Q6NUS6 | -0.73035 |
| 45319 | P14075 | P24298 | -0.21132 |
| 45320 | P14075 | Q9NX14 | -0.55115 |
| 45321 | P14075 | Q9HC24 | -0.21884 |
| 45322 | P14075 | Q9UKR0 | -1.3088  |
| 45323 | P14075 | Q9BYX2 | -0.67734 |
| 45324 | P14075 | Q32VQ0 | -1.1027  |
| 45325 | P14075 | Q5TAQ9 | -0.22743 |
| 45326 | P14075 | Q5SSQ6 | -0.13007 |
| 45327 | P14075 | P15516 | -0.84518 |
| 45328 | P14075 | Q96BQ1 | -0.78571 |
| 45329 | P14075 | Q96PD7 | -0.34538 |
| 45330 | P14075 | Q6ZMU1 | -0.4906  |
| 45331 | P14075 | P30039 | -0.24653 |
| 45332 | P14075 | Q9NY37 | -0.9365  |
| 45333 | P14075 | Q6UXG2 | -0.7797  |
| 45334 | P14075 | Q8NHS1 | -0.86584 |
| 45335 | P14075 | Q96PQ7 | -0.24751 |
| 45336 | P14075 | P57738 | -0.86584 |
| 45337 | P14075 | Q6P1Q9 | -0.37739 |
| 45338 | P14075 | O14894 | -1.0003  |
| 45339 | P14075 | A1L157 | -0.86584 |
| 45340 | P14075 | Q86TL0 | -0.46416 |
| 45341 | P14075 | Q8TEC5 | -0.2274  |
| 45342 | P14075 | P11226 | -0.52562 |
| 45343 | P14075 | Q4W5G0 | -0.33043 |
| 45344 | P14075 | Q9H4Y5 | -0.34107 |
| 45345 | P14075 | P01730 | -0.3862  |
| 45346 | P14075 | O75678 | -0.52332 |
| 45347 | P14075 | Q6DKI1 | -0.22441 |
| 45348 | P14075 | Q96P47 | -1.0207  |
| 45349 | P14075 | Q9H7X3 | -0.21172 |
| 45350 | P14075 | Q9P0V9 | -0.47514 |
| 45351 | P14075 | Q9C0B0 | -0.51948 |
| 45352 | P14075 | Q96EQ0 | -0.22708 |
| 45353 | P14075 | P54792 | -0.6738  |
| 45354 | P14075 | O43572 | -0.35568 |
| 45355 | P14075 | P15391 | -1.044   |
| 45356 | P14075 | Q9Y6C2 | -0.63459 |
| 45357 | P14075 | Q6Q8B3 | -0.86584 |
| 45358 | P14075 | Q9Y3Q4 | -1.0022  |
| 45359 | P14075 | Q9Y4X4 | -0.22524 |
| 45360 | P14075 | O43900 | -0.23541 |
| 45361 | P14075 | P12429 | -0.44838 |
| 45362 | P14075 | P48775 | -0.44316 |
| 45363 | P14075 | Q96C24 | -0.23025 |
| 45364 | P14075 | Q9NP70 | -0.99001 |
| 45365 | P14075 | Q5U3C3 | -0.86584 |
| 45366 | P14075 | Q9UNA4 | -0.14901 |
| 45367 | P14075 | Q8N130 | -0.79953 |
| 45368 | P14075 | Q9NRC1 | -0.86584 |
| 45369 | P14075 | Q4J6C6 | -0.57049 |
| 45370 | P14075 | Q9P2U7 | -0.64037 |
| 45371 | P14075 | P21815 | -0.99958 |
| 45372 | P14075 | P55290 | -0.46852 |

|       |        |        |            |
|-------|--------|--------|------------|
| 45373 | P14075 | Q8N565 | -0.58433   |
| 45374 | P14075 | P49748 | -0.35681   |
| 45375 | P14075 | Q86Z23 | -0.92264   |
| 45376 | P14075 | Q99538 | -0.65352   |
| 45377 | P14075 | O75631 | -0.77465   |
| 45378 | P14075 | P35504 | -0.96597   |
| 45379 | P14075 | Q5TCZ1 | -0.22741   |
| 45380 | P14075 | Q5VVX9 | -0.77713   |
| 45381 | P14075 | Q495C1 | -0.52332   |
| 45382 | P14075 | Q70EL3 | -0.3595    |
| 45383 | P14075 | Q5JQD4 | -0.85703   |
| 45384 | P14075 | Q30KQ4 | -0.84399   |
| 45385 | P14075 | P63215 | -0.49736   |
| 45386 | P14075 | O43379 | -0.22792   |
| 45387 | P14075 | Q8TF44 | -0.20851   |
| 45388 | P14075 | Q15008 | -0.15168   |
| 45389 | P14075 | Q9Y2V3 | -0.32372   |
| 45390 | P14075 | P35913 | -0.58885   |
| 45391 | P14075 | Q8WUY9 | -0.99933   |
| 45392 | P14075 | Q18PE1 | -0.64563   |
| 45393 | P14075 | P01778 | -0.97479   |
| 45394 | P14075 | Q9NS66 | -1.1721    |
| 45395 | P14075 | Q9NT99 | -0.85058   |
| 45396 | P14075 | Q7Z2Q7 | -0.86584   |
| 45397 | P14075 | Q96NU1 | -0.21602   |
| 45398 | P14075 | P01912 | -0.6502    |
| 45399 | P14075 | Q9UDV7 | -0.16549   |
| 45400 | P14075 | Q8WUK0 | -0.81114   |
| 45401 | P14075 | O15146 | -0.67695   |
| 45402 | P14075 | Q9BXJ3 | -0.87849   |
| 45403 | P14075 | Q86UA1 | -0.25339   |
| 45404 | P14075 | Q6PIY7 | -0.4407    |
| 45405 | P14075 | P25098 | -0.31348   |
| 45406 | P14075 | Q96RU3 | -0.22741   |
| 45407 | P14075 | Q8NGN5 | -1.1027    |
| 45408 | P14075 | P06881 | -0.23738   |
| 45409 | P14075 | Q3SXM5 | -0.88939   |
| 45410 | P14075 | Q96M86 | -0.39787   |
| 45411 | P14075 | Q9UKK9 | -0.6119    |
| 45412 | P14075 | P05413 | -0.20807   |
| 45413 | P14075 | Q9NYT0 | -0.57084   |
| 45414 | P14075 | P17844 | -0.34379   |
| 45415 | P14075 | Q9UH73 | -0.18431   |
| 45416 | P14075 | P48741 | -0.59192   |
| 45417 | P14075 | Q8N2Y8 | -0.22696   |
| 45418 | P14075 | Q03924 | -0.17069   |
| 45419 | P14075 | A8MTQ0 | -0.2274    |
| 45420 | P14075 | P51884 | -0.61605   |
| 45421 | P14075 | Q53S99 | -0.50956   |
| 45422 | P14075 | Q9BSN8 | -0.31656   |
| 45423 | P14075 | Q6ZNR0 | -0.53317   |
| 45424 | P14075 | Q8WW62 | -0.92889   |
| 45425 | P14075 | Q9UNA1 | -0.39396   |
| 45426 | P14075 | Q9GZM3 | -0.25197   |
| 45427 | P14075 | Q9P2D7 | -0.53593   |
| 45428 | P14075 | Q15256 | -0.57227   |
| 45429 | P14075 | Q8IYD2 | -0.22606   |
| 45430 | P14075 | Q9BYG3 | -0.22524   |
| 45431 | P14075 | P55795 | -0.0080742 |
| 45432 | P14075 | Q86YR5 | -0.22434   |
| 45433 | P14075 | E9PGG2 | -0.22816   |
| 45434 | P14075 | Q7L0R7 | -0.52332   |
| 45435 | P14075 | P51148 | -0.79336   |
| 45436 | P14075 | Q9Y3B3 | -0.51701   |
| 45437 | P14075 | P60981 | -0.50799   |
| 45438 | P14075 | P54852 | -0.89238   |
| 45439 | P14075 | Q9HAR2 | -1.168     |
| 45440 | P14075 | Q13938 | -0.22302   |
| 45441 | P14075 | Q5TGL8 | -0.55072   |
| 45442 | P14075 | Q86YQ8 | -0.22861   |
| 45443 | P14075 | O75695 | -0.48433   |
| 45444 | P14075 | Q9HB40 | -0.95633   |
| 45445 | P14075 | P58658 | -0.85471   |
| 45446 | P14075 | Q9UMZ3 | -1.1722    |
| 45447 | P14075 | Q9H306 | -1.2834    |
| 45448 | P14075 | Q9NP80 | -0.53829   |

|       |        |        |           |
|-------|--------|--------|-----------|
| 45449 | P14075 | O75506 | -0.29038  |
| 45450 | P14075 | P30484 | -0.88446  |
| 45451 | P14075 | Q9NP72 | -1.2059   |
| 45452 | P14075 | Q8IYE1 | -0.069655 |
| 45453 | P14075 | P83859 | -0.64899  |
| 45454 | P14075 | Q8NDC4 | -0.15182  |
| 45455 | P14075 | Q8WZ19 | -0.083775 |
| 45456 | P14075 | Q13748 | -0.20039  |
| 45457 | P14075 | B2RXF0 | -0.5197   |
| 45458 | P14075 | P50458 | -0.22741  |
| 45459 | P14075 | P06887 | -0.97479  |
| 45460 | P14075 | O95872 | -0.44783  |
| 45461 | P14075 | Q9Y536 | -0.24989  |
| 45462 | P14075 | Q96DA0 | -0.86789  |
| 45463 | P14075 | Q8WWZ7 | -0.86729  |
| 45464 | P14075 | Q8N690 | -0.84399  |
| 45465 | P14075 | Q9BYB0 | -0.22741  |
| 45466 | P14075 | Q13326 | -0.615    |
| 45467 | P14075 | Q8IU5  | -0.2515   |
| 45468 | P14075 | Q5TFQ8 | -0.86584  |
| 45469 | P14075 | Q99542 | -1.1794   |
| 45470 | P14075 | Q8N841 | -0.15597  |
| 45471 | P14075 | P06319 | -0.97479  |
| 45472 | P14075 | P63316 | -0.2254   |
| 45473 | P14075 | Q9NS82 | -0.9234   |
| 45474 | P14075 | Q9UHF3 | -0.85339  |
| 45475 | P14075 | Q8N9I9 | -0.38281  |
| 45476 | P14075 | P09914 | -0.20255  |
| 45477 | P14075 | Q3LI77 | -0.11137  |
| 45478 | P14075 | Q8WV22 | -0.22346  |
| 45479 | P14075 | Q9BRQ8 | -0.54147  |
| 45480 | P14075 | Q8NB12 | -0.20278  |
| 45481 | P14075 | Q7Z6I6 | -1.0002   |
| 45482 | P14075 | Q92478 | -0.98489  |
| 45483 | P14075 | Q9H841 | -0.82716  |
| 45484 | P14075 | Q86UP3 | -0.22611  |
| 45485 | P14075 | Q9UKZ4 | -0.95993  |
| 45486 | P14075 | Q5T4F7 | -0.72843  |
| 45487 | P14075 | Q9UJU6 | -0.70532  |
| 45488 | P14075 | Q8NBH2 | -0.50661  |
| 45489 | P14075 | Q9C040 | -0.22741  |
| 45490 | P14075 | Q9P2K5 | -0.28173  |
| 45491 | P14075 | A6NKB5 | -0.86584  |
| 45492 | P14075 | O15155 | -0.037468 |
| 45493 | P14075 | Q6H3X3 | -0.44901  |
| 45494 | P14075 | Q96PL1 | -0.87849  |
| 45495 | P14075 | Q8WWQ8 | -0.69534  |
| 45496 | P14075 | Q9UHA4 | -0.23368  |
| 45497 | P14075 | Q9Y5W8 | -0.66562  |
| 45498 | P14075 | A2RU14 | -0.86584  |
| 45499 | P14075 | O43252 | -0.7451   |
| 45500 | P14075 | Q9H9E1 | -0.22741  |
| 45501 | P14075 | P19835 | -0.54142  |
| 45502 | P14075 | Q8N6S5 | -0.86584  |
| 45503 | P14075 | Q8NGJ6 | -1.1027   |
| 45504 | P14075 | Q9BV99 | -0.22739  |
| 45505 | P14075 | P30049 | -0.22198  |
| 45506 | P14075 | P13639 | -0.36257  |
| 45507 | P14075 | P08575 | -0.34928  |
| 45508 | P14075 | Q5VVW2 | -0.8952   |
| 45509 | P14075 | Q8NGY6 | -1.1027   |
| 45510 | P14075 | P0CW01 | -0.43319  |
| 45511 | P14075 | Q5T481 | -0.79877  |
| 45512 | P14075 | Q99972 | -0.81231  |
| 45513 | P14075 | Q6ZPD9 | -0.86584  |
| 45514 | P14075 | Q14165 | -0.73881  |
| 45515 | P14075 | Q92882 | -0.70665  |
| 45516 | P14075 | Q14406 | -0.71371  |
| 45517 | P14075 | Q6P4F7 | -1.052    |
| 45518 | P14075 | Q8N0Y3 | -1.1027   |
| 45519 | P14075 | Q70CQ3 | -0.88812  |
| 45520 | P14075 | Q7L3B6 | -0.29487  |
| 45521 | P14075 | P35556 | -0.81933  |
| 45522 | P14075 | O60928 | -0.95136  |
| 45523 | P14075 | Q3C1V0 | -0.86584  |
| 45524 | P14075 | Q9UKQ2 | -1.4438   |

|       |        |        |           |
|-------|--------|--------|-----------|
| 45525 | P14075 | Q8NHC6 | -1.1027   |
| 45526 | P14075 | Q92949 | -0.30442  |
| 45527 | P14075 | P51797 | -0.95191  |
| 45528 | P14075 | Q8IU81 | -0.10996  |
| 45529 | P14075 | A6NMT0 | -0.22759  |
| 45530 | P14075 | Q9UIH9 | -0.2105   |
| 45531 | P14075 | A6NCF5 | -0.22425  |
| 45532 | P14075 | Q8N6M6 | -0.64391  |
| 45533 | P14075 | Q8TB37 | -0.76431  |
| 45534 | P14075 | Q309B1 | -0.29487  |
| 45535 | P14075 | Q06730 | -0.17069  |
| 45536 | P14075 | A0PJX8 | -0.86584  |
| 45537 | P14075 | O95352 | -0.21114  |
| 45538 | P14075 | P30041 | -0.24179  |
| 45539 | P14075 | Q9Y366 | -0.36641  |
| 45540 | P14075 | P29375 | -0.25754  |
| 45541 | P14075 | A8MWE9 | -0.52751  |
| 45542 | P14075 | Q9HD23 | -0.79465  |
| 45543 | P14075 | Q14957 | -0.63913  |
| 45544 | P14075 | Q9NPJ1 | -0.20525  |
| 45545 | P14075 | Q5T0T0 | -0.82033  |
| 45546 | P14075 | Q96IC2 | -0.83343  |
| 45547 | P14075 | Q9Y6I4 | -0.38786  |
| 45548 | P14075 | Q9NP58 | -0.71331  |
| 45549 | P14075 | Q9Y5G8 | -1.1297   |
| 45550 | P14075 | Q8NGE0 | -1.1027   |
| 45551 | P14075 | Q60I27 | -0.83965  |
| 45552 | P14075 | P15531 | -0.18623  |
| 45553 | P14075 | P15735 | -0.41056  |
| 45554 | P14075 | Q7Z695 | -0.95505  |
| 45555 | P14075 | P08962 | -0.61738  |
| 45556 | P14075 | Q96NT5 | -0.46516  |
| 45557 | P14075 | A6NNE9 | -0.87916  |
| 45558 | P14075 | Q8NB15 | -0.22675  |
| 45559 | P14075 | Q9UN70 | -1.1037   |
| 45560 | P14075 | Q9HAV0 | -0.49303  |
| 45561 | P14075 | Q9GZY0 | -0.35855  |
| 45562 | P14075 | Q9BS16 | -0.22233  |
| 45563 | P14075 | Q68EM7 | -0.39051  |
| 45564 | P14075 | O43306 | -0.49623  |
| 45565 | P14075 | Q9P2H3 | -0.47821  |
| 45566 | P14075 | P10314 | -0.7844   |
| 45567 | P14075 | Q3MIN7 | -0.90905  |
| 45568 | P14075 | P78334 | -0.8097   |
| 45569 | P14075 | Q38SD2 | -1.0667   |
| 45570 | P14075 | Q9BZR9 | -0.2274   |
| 45571 | P14075 | P01566 | -0.7874   |
| 45572 | P14075 | Q96EK2 | -0.52332  |
| 45573 | P14075 | Q9UBF9 | -0.22765  |
| 45574 | P14075 | Q95371 | -1.0738   |
| 45575 | P14075 | P45381 | -0.16576  |
| 45576 | P14075 | Q9HBJ0 | -0.74849  |
| 45577 | P14075 | Q8NGL9 | -1.1027   |
| 45578 | P14075 | P23280 | -0.74986  |
| 45579 | P14075 | P09884 | -0.24223  |
| 45580 | P14075 | Q6XE24 | -0.72901  |
| 45581 | P14075 | Q96IX9 | -0.19557  |
| 45582 | P14075 | P69891 | -0.34646  |
| 45583 | P14075 | Q8NGG1 | -1.0442   |
| 45584 | P14075 | Q9Y6F1 | -0.20977  |
| 45585 | P14075 | Q9BYG7 | -0.18567  |
| 45586 | P14075 | Q9Y2H1 | -0.27171  |
| 45587 | P14075 | Q8NFI4 | -0.29487  |
| 45588 | P14075 | Q96QB1 | -0.26516  |
| 45589 | P14075 | Q8NGE1 | -1.1027   |
| 45590 | P14075 | Q9NPC4 | -0.73712  |
| 45591 | P14075 | P82987 | -1.0838   |
| 45592 | P14075 | Q16625 | -0.22558  |
| 45593 | P14075 | P0DJD0 | -0.53439  |
| 45594 | P14075 | Q9NP85 | -0.088281 |
| 45595 | P14075 | P18074 | -0.35629  |
| 45596 | P14075 | Q8IYB5 | -0.84966  |
| 45597 | P14075 | A8MZ25 | -0.17899  |
| 45598 | P14075 | Q04759 | -0.21837  |
| 45599 | P14075 | Q8N7S2 | -0.54897  |
| 45600 | P14075 | Q8NH79 | -1.1027   |

|       |        |        |            |
|-------|--------|--------|------------|
| 45601 | P14075 | P08218 | -1.2917    |
| 45602 | P14075 | Q58EX2 | -1.0252    |
| 45603 | P14075 | Q6PUV4 | -0.33695   |
| 45604 | P14075 | A8K7I4 | -1.1645    |
| 45605 | P14075 | Q5VZ19 | -0.84005   |
| 45606 | P14075 | P30626 | -0.30389   |
| 45607 | P14075 | O14976 | -0.50968   |
| 45608 | P14075 | Q9GZN4 | -1.2917    |
| 45609 | P14075 | Q15311 | -0.41697   |
| 45610 | P14075 | Q13118 | -0.22554   |
| 45611 | P14075 | P0CH98 | -0.002798  |
| 45612 | P14075 | Q9BX84 | -0.64684   |
| 45613 | P14075 | Q9Y4G6 | -0.22759   |
| 45614 | P14075 | Q96IZ6 | -0.37739   |
| 45615 | P14075 | B3SHH9 | -0.93628   |
| 45616 | P14075 | P17787 | -0.45904   |
| 45617 | P14075 | Q12778 | -0.29382   |
| 45618 | P14075 | P00748 | -0.60052   |
| 45619 | P14075 | Q9Y6F7 | -0.34275   |
| 45620 | P14075 | Q9UM73 | -1.0822    |
| 45621 | P14075 | Q9UN19 | -0.82016   |
| 45622 | P14075 | A0FGR8 | -0.93628   |
| 45623 | P14075 | Q15519 | -0.2231    |
| 45624 | P14075 | Q9NXJ0 | -0.86584   |
| 45625 | P14075 | Q9UKA8 | -0.76739   |
| 45626 | P14075 | P07948 | -0.22915   |
| 45627 | P14075 | Q8NH85 | -1.1027    |
| 45628 | P14075 | Q8NHP8 | -0.58777   |
| 45629 | P14075 | Q2WGX6 | -0.20967   |
| 45630 | P14075 | Q86X59 | -0.0093473 |
| 45631 | P14075 | O75841 | -0.68228   |
| 45632 | P14075 | Q9P2J8 | -0.21172   |
| 45633 | P14075 | Q8TB92 | -0.49374   |
| 45634 | P14075 | O14764 | -0.93643   |
| 45635 | P14075 | Q6UX39 | -0.81814   |
| 45636 | P14075 | A8MVS5 | -0.86584   |
| 45637 | P14075 | A8MU46 | -0.22813   |
| 45638 | P14075 | Q15262 | -0.6365    |
| 45639 | P14075 | Q96K49 | -0.86584   |
| 45640 | P14075 | Q07889 | -0.36809   |
| 45641 | P14075 | P07858 | -0.26599   |
| 45642 | P14075 | Q96BJ8 | -0.44669   |
| 45643 | P14075 | P17342 | -0.79503   |
| 45644 | P14075 | Q6UXN9 | -0.37067   |
| 45645 | P14075 | Q14524 | -0.6579    |
| 45646 | P14075 | Q9BRT3 | -0.26399   |
| 45647 | P14075 | P07478 | -0.88301   |
| 45648 | P14075 | Q5RIA9 | -0.79654   |
| 45649 | P14075 | Q96KS9 | -0.17049   |
| 45650 | P14075 | P01742 | -0.97479   |
| 45651 | P14075 | P31942 | -0.28598   |
| 45652 | P14075 | Q60271 | -0.27849   |
| 45653 | P14075 | Q86UG4 | -0.89134   |
| 45654 | P14075 | P40259 | -0.61996   |
| 45655 | P14075 | Q9BWS9 | -0.80658   |
| 45656 | P14075 | O75052 | -0.22381   |
| 45657 | P14075 | Q9H0K6 | -0.36852   |
| 45658 | P14075 | A8MX19 | -0.48092   |
| 45659 | P14075 | Q9BYC2 | -0.39139   |
| 45660 | P14075 | Q86W26 | -0.79654   |
| 45661 | P14075 | P43652 | -0.86953   |
| 45662 | P14075 | Q9Y5Z4 | -0.15369   |
| 45663 | P14075 | P85299 | -0.29044   |
| 45664 | P14075 | P04183 | -0.59373   |
| 45665 | P14075 | P51793 | -0.97109   |
| 45666 | P14075 | Q494U1 | -0.5353    |
| 45667 | P14075 | Q9H813 | -0.86584   |
| 45668 | P14075 | P00738 | -0.82064   |
| 45669 | P14075 | Q8TBZ6 | -0.37739   |
| 45670 | P14075 | O43612 | -0.47301   |
| 45671 | P14075 | C9JDV5 | -0.042017  |
| 45672 | P14075 | O14957 | -0.60065   |
| 45673 | P14075 | Q6UW78 | -0.87849   |
| 45674 | P14075 | P07359 | -0.52081   |
| 45675 | P14075 | Q9BZG1 | -0.84841   |
| 45676 | P14075 | Q92637 | -0.98178   |

|       |        |        |          |
|-------|--------|--------|----------|
| 45677 | P14075 | Q12797 | -0.46497 |
| 45678 | P14075 | P46098 | -0.87452 |
| 45679 | P14075 | Q8NH08 | -1.1027  |
| 45680 | P14075 | O75426 | -0.45235 |
| 45681 | P14075 | Q96JB1 | -0.61814 |
| 45682 | P14075 | Q147U1 | -0.21172 |
| 45683 | P14075 | Q6PI47 | -0.19405 |
| 45684 | P14075 | P48051 | -0.43542 |
| 45685 | P14075 | P01848 | -0.91504 |
| 45686 | P14075 | Q8WW35 | -0.21382 |
| 45687 | P14075 | O60412 | -1.1027  |
| 45688 | P14075 | Q9NPC1 | -1.2522  |
| 45689 | P14075 | B4DJY2 | -0.86137 |
| 45690 | P14075 | Q96RW7 | -1.0992  |
| 45691 | P14075 | Q96JG9 | -0.22746 |
| 45692 | P14075 | P22749 | -0.83697 |
| 45693 | P14075 | O95302 | -0.59571 |
| 45694 | P14075 | P22748 | -0.19485 |
| 45695 | P14075 | Q9ULG1 | -0.20562 |
| 45696 | P14075 | Q8NG50 | -0.15564 |
| 45697 | P14075 | P0DJD9 | -1.0948  |
| 45698 | P14075 | Q4G176 | -0.95313 |
| 45699 | P14075 | Q86TC9 | -0.22763 |
| 45700 | P14075 | A4D1N5 | -0.1502  |
| 45701 | P14075 | Q9Y5G9 | -1.1335  |
| 45702 | P14075 | Q8WVB3 | -0.17776 |
| 45703 | P14075 | O75603 | -0.24927 |
| 45704 | P14075 | Q16674 | -0.82284 |
| 45705 | P14075 | A0AVT1 | -0.22382 |
| 45706 | P14075 | Q9HCP6 | -0.83291 |
| 45707 | P14075 | A6NJZ3 | -1.1027  |
| 45708 | P14075 | Q8IY17 | -0.74628 |
| 45709 | P14075 | Q9NYY8 | -0.3676  |
| 45710 | P14075 | P35070 | -1.0282  |
| 45711 | P14075 | Q2I0M5 | -0.92069 |
| 45712 | P14075 | O15550 | -0.73119 |
| 45713 | P14075 | Q5QJ74 | -0.30492 |
| 45714 | P14075 | Q9H0F7 | -0.66171 |
| 45715 | P14075 | P20151 | -1.257   |
| 45716 | P14075 | Q5JWF2 | -0.64435 |
| 45717 | P14075 | P01594 | -0.97479 |
| 45718 | P14075 | O00482 | -0.22882 |
| 45719 | P14075 | P03923 | -0.5784  |
| 45720 | P14075 | Q9Y6Y1 | -0.2274  |
| 45721 | P14075 | Q13370 | -0.36304 |
| 45722 | P14075 | Q6EMK4 | -1.2172  |
| 45723 | P14075 | Q6ZR08 | -0.69496 |
| 45724 | P14075 | Q9P2M4 | -1.145   |
| 45725 | P14075 | Q9UBN7 | -0.22171 |
| 45726 | P14075 | Q9NVG8 | -1.2307  |
| 45727 | P14075 | Q8NGK0 | -1.1027  |
| 45728 | P14075 | A6NN79 | -0.86584 |
| 45729 | P14075 | P48553 | -0.16756 |
| 45730 | P14075 | O15260 | -0.24882 |
| 45731 | P14075 | O00506 | -0.38606 |
| 45732 | P14075 | Q9H1X1 | -0.45084 |
| 45733 | P14075 | Q5GLZ8 | -0.52661 |
| 45734 | P14075 | P30510 | -0.93787 |
| 45735 | P14075 | A6NNT2 | -0.1802  |
| 45736 | P14075 | Q8IZP9 | -1.1711  |
| 45737 | P14075 | Q9Y5X4 | -0.37752 |
| 45738 | P14075 | Q9Y6A1 | -0.84115 |
| 45739 | P14075 | Q8NEK5 | -0.21172 |
| 45740 | P14075 | P35408 | -0.53875 |
| 45741 | P14075 | Q86TJ5 | -0.21172 |
| 45742 | P14075 | Q8TAW3 | -0.21172 |
| 45743 | P14075 | P55157 | -0.49757 |
| 45744 | P14075 | Q96A25 | -0.52887 |
| 45745 | P14075 | Q07699 | -0.76242 |
| 45746 | P14075 | P14061 | -0.63882 |
| 45747 | P14075 | Q53GA4 | -0.38232 |
| 45748 | P14075 | Q8N8Q1 | -0.86399 |
| 45749 | P14075 | P08913 | -0.25053 |
| 45750 | P14075 | Q8WXA2 | -0.87849 |
| 45751 | P14075 | Q7L5Y6 | -0.21602 |
| 45752 | P14075 | Q9H3S5 | -0.76317 |

|       |        |        |           |
|-------|--------|--------|-----------|
| 45753 | P14075 | O75541 | -0.23064  |
| 45754 | P14075 | Q6FHJ7 | -0.4134   |
| 45755 | P14075 | Q96G01 | -0.18065  |
| 45756 | P14075 | P49674 | -0.22741  |
| 45757 | P14075 | P10070 | -0.2273   |
| 45758 | P14075 | O95563 | -0.73185  |
| 45759 | P14075 | P67812 | -0.72157  |
| 45760 | P14075 | Q6ZSU1 | -0.59109  |
| 45761 | P14075 | O00585 | -0.50463  |
| 45762 | P14075 | P41145 | -0.809    |
| 45763 | P14075 | Q9H310 | -0.73641  |
| 45764 | P14075 | Q13153 | -0.22767  |
| 45765 | P14075 | Q96PC5 | -0.87849  |
| 45766 | P14075 | P41586 | -0.4878   |
| 45767 | P14075 | Q15649 | -0.35726  |
| 45768 | P14075 | Q6P1S2 | -0.84102  |
| 45769 | P14075 | Q9UKR5 | -0.70909  |
| 45770 | P14075 | Q5T442 | -0.74224  |
| 45771 | P14075 | O00206 | -0.22741  |
| 45772 | P14075 | P35372 | -0.4251   |
| 45773 | P14075 | P61566 | -0.5818   |
| 45774 | P14075 | Q53TN4 | -0.85928  |
| 45775 | P14075 | Q2VIR3 | -0.75862  |
| 45776 | P14075 | Q9Y3D2 | -0.29887  |
| 45777 | P14075 | Q8N6K0 | -0.86584  |
| 45778 | P14075 | Q07108 | -0.98201  |
| 45779 | P14075 | O00587 | -0.82311  |
| 45780 | P14075 | Q4AC94 | -0.39602  |
| 45781 | P14075 | Q15382 | -1.1163   |
| 45782 | P14075 | Q8TDW5 | -0.2334   |
| 45783 | P14075 | P00973 | -0.54948  |
| 45784 | P14075 | P55081 | -0.68967  |
| 45785 | P14075 | P48506 | -0.33808  |
| 45786 | P14075 | Q5GH76 | -0.86584  |
| 45787 | P14075 | Q96GR2 | -0.76157  |
| 45788 | P14075 | Q9UKD2 | -0.090975 |
| 45789 | P14075 | Q8WTX9 | -0.79965  |
| 45790 | P14075 | Q02325 | -0.87849  |
| 45791 | P14075 | Q96JN2 | -0.74159  |
| 45792 | P14075 | Q9BTX3 | -0.86584  |
| 45793 | P14075 | Q15118 | -0.50016  |
| 45794 | P14075 | P01617 | -0.97479  |
| 45795 | P14075 | Q8IVT5 | -0.26662  |
| 45796 | P14075 | Q8NG57 | -0.30744  |
| 45797 | P14075 | P51170 | -0.60078  |
| 45798 | P14075 | Q9HB20 | -0.45933  |
| 45799 | P14075 | Q8N3H0 | -0.29487  |
| 45800 | P14075 | Q92623 | -0.21219  |
| 45801 | P14075 | Q96BZ4 | -0.78649  |
| 45802 | P14075 | Q16513 | -0.22398  |
| 45803 | P14075 | Q8NBI5 | -0.84814  |
| 45804 | P14075 | Q9Y5K1 | -0.57911  |
| 45805 | P14075 | O95992 | -0.7675   |
| 45806 | P14075 | Q86VU5 | -0.5957   |
| 45807 | P14075 | Q9H6Y5 | -0.22708  |
| 45808 | P14075 | O14958 | -0.51508  |
| 45809 | P14075 | Q9H792 | -0.35909  |
| 45810 | P14075 | Q96LB8 | -0.86249  |
| 45811 | P14075 | Q7Z5L2 | -0.80587  |
| 45812 | P14075 | P0C5Y9 | -0.85404  |
| 45813 | P14075 | Q9Y233 | -0.67829  |
| 45814 | P14075 | Q2TAC6 | -0.68836  |
| 45815 | P14075 | Q15784 | -0.22751  |
| 45816 | P14075 | Q8TDF6 | -0.50313  |
| 45817 | P14075 | Q9NZC2 | -1.1177   |
| 45818 | P14075 | P30457 | -0.7844   |
| 45819 | P14075 | P60852 | -1.155    |
| 45820 | P14075 | P48507 | -0.33863  |
| 45821 | P14075 | Q96ER3 | -0.83545  |
| 45822 | P14075 | P52848 | -0.44246  |
| 45823 | P14075 | Q8IUX7 | -0.52085  |
| 45824 | P14075 | Q8NHY3 | -0.41932  |
| 45825 | P14075 | Q8NF91 | -0.229    |
| 45826 | P14075 | P40616 | -0.74345  |
| 45827 | P14075 | Q9Y5H4 | -1.1297   |
| 45828 | P14075 | Q06945 | -0.23453  |



|       |        |        |           |
|-------|--------|--------|-----------|
| 45829 | P14075 | Q9H173 | -0.19435  |
| 45830 | P14075 | Q9HBK9 | -0.071412 |
| 45831 | P14075 | Q96A84 | -0.85842  |
| 45832 | P14075 | Q95968 | -0.91732  |
| 45833 | P14075 | P51149 | -0.42276  |
| 45834 | P14075 | Q14654 | -0.54109  |
| 45835 | P14075 | Q9Y689 | -1.2555   |
| 45836 | P14075 | Q9UHV6 | -0.54658  |
| 45837 | P14075 | Q9NRR1 | -0.86851  |
| 45838 | P14075 | P63267 | -0.60293  |
| 45839 | P14075 | Q6UW56 | -0.22579  |
| 45840 | P14075 | Q9UBT2 | -0.2175   |
| 45841 | P14075 | P29965 | -0.85446  |
| 45842 | P14075 | Q9Y6Q3 | -0.25727  |
| 45843 | P14075 | Q6QN14 | -0.33924  |
| 45844 | P14075 | Q8TBP0 | -1.2307   |
| 45845 | P14075 | Q58FF6 | -0.58434  |
| 45846 | P14075 | A2A3K4 | -0.93685  |
| 45847 | P14075 | Q8IWB7 | -0.22744  |
| 45848 | P14075 | Q9P2W9 | -0.043334 |
| 45849 | P14075 | Q6P6B7 | -0.22741  |
| 45850 | P14075 | Q9H7V2 | -0.76098  |
| 45851 | P14075 | Q96JA4 | -0.86584  |
| 45852 | P14075 | P41247 | -0.24895  |
| 45853 | P14075 | Q9BYW1 | -0.66542  |
| 45854 | P14075 | P98196 | -0.56576  |
| 45855 | P14075 | Q9H3E2 | -0.37527  |
| 45856 | P14075 | Q02509 | -0.60048  |
| 45857 | P14075 | P32121 | -0.29733  |
| 45858 | P14075 | P67936 | -0.57509  |
| 45859 | P14075 | Q8IUW5 | -0.80825  |
| 45860 | P14075 | Q17RB8 | -0.64479  |
| 45861 | P14075 | P0CG08 | -0.67293  |
| 45862 | P14075 | Q08431 | -0.72541  |
| 45863 | P14075 | Q9Y442 | -0.86584  |
| 45864 | P14075 | Q6PIV7 | -0.73185  |
| 45865 | P14075 | P06276 | -0.66253  |
| 45866 | P14075 | Q9Y5L2 | -0.9558   |
| 45867 | P14075 | P04435 | -0.49766  |
| 45868 | P14075 | Q9NRE1 | -1.1909   |
| 45869 | P14075 | Q8WY36 | -0.22719  |
| 45870 | P14075 | Q8TC44 | -0.22783  |
| 45871 | P14075 | Q95076 | -0.2274   |
| 45872 | P14075 | P84996 | -0.79975  |
| 45873 | P14075 | Q9H0I2 | -0.48317  |
| 45874 | P14075 | Q8IYP2 | -1.2917   |
| 45875 | P14075 | Q68DI1 | -0.21172  |
| 45876 | P14075 | Q9UM21 | -0.80889  |
| 45877 | P14075 | P01031 | -0.73185  |
| 45878 | P14075 | Q5BJD5 | -0.86584  |
| 45879 | P14075 | Q86T29 | -0.21172  |
| 45880 | P14075 | Q9NWW9 | -0.32473  |
| 45881 | P14075 | Q15848 | -0.25445  |
| 45882 | P14075 | Q9C0I9 | -0.22784  |
| 45883 | P14075 | Q9ULZ1 | -0.66717  |
| 45884 | P14075 | Q9H3Z7 | -0.40663  |
| 45885 | P14075 | Q8N8L6 | -1.2555   |
| 45886 | P14075 | O60347 | -1.2307   |
| 45887 | P14075 | Q8WVY7 | -0.78098  |
| 45888 | P14075 | Q9NUZ1 | -0.5006   |
| 45889 | P14075 | Q8NDX1 | -0.77606  |
| 45890 | P14075 | Q12756 | -0.39206  |
| 45891 | P14075 | A6NDI0 | -0.73967  |
| 45892 | P14075 | Q6ZSS7 | -0.84814  |
| 45893 | P14075 | Q8NDW4 | -0.21172  |
| 45894 | P14075 | Q9BX46 | -0.41372  |
| 45895 | P14075 | Q76FK4 | -0.22765  |
| 45896 | P14075 | P52824 | -0.22741  |
| 45897 | P14075 | Q9UHF1 | -1.0465   |
| 45898 | P14075 | Q9NR16 | -1.2592   |
| 45899 | P14075 | P10265 | -0.37415  |
| 45900 | P14075 | Q96LL3 | -0.86584  |
| 45901 | P14075 | Q9NPF8 | -0.70274  |
| 45902 | P14075 | P09923 | -1.1216   |
| 45903 | P14075 | Q9Y5L4 | -0.32675  |
| 45904 | P14075 | Q95816 | -0.42356  |

|       |        |        |           |
|-------|--------|--------|-----------|
| 45905 | P14075 | P34913 | -0.46021  |
| 45906 | P14075 | P04150 | -0.22744  |
| 45907 | P14075 | Q8IZA3 | -0.60398  |
| 45908 | P14075 | P55899 | -0.89895  |
| 45909 | P14075 | Q8WZA2 | -0.28523  |
| 45910 | P14075 | Q5ZEY9 | -0.44873  |
| 45911 | P14075 | P35613 | -0.22742  |
| 45912 | P14075 | P43628 | -0.60113  |
| 45913 | P14075 | Q9BY15 | -1.4936   |
| 45914 | P14075 | P0CG21 | -0.22494  |
| 45915 | P14075 | Q8WWV6 | -0.90561  |
| 45916 | P14075 | Q99726 | -0.73247  |
| 45917 | P14075 | Q9Y6Q9 | -0.33863  |
| 45918 | P14075 | O14686 | -0.26832  |
| 45919 | P14075 | Q8TE23 | -1.0864   |
| 45920 | P14075 | Q9UKA4 | -0.15575  |
| 45921 | P14075 | P20929 | -0.47142  |
| 45922 | P14075 | O15530 | -0.2263   |
| 45923 | P14075 | Q9HCX3 | -0.21172  |
| 45924 | P14075 | Q9P1U0 | -0.10123  |
| 45925 | P14075 | O00602 | -1.1463   |
| 45926 | P14075 | Q9GIY3 | -0.67577  |
| 45927 | P14075 | Q8IWT3 | -0.22683  |
| 45928 | P14075 | Q96KC8 | -0.25738  |
| 45929 | P14075 | O95600 | -0.21958  |
| 45930 | P14075 | Q05707 | -1.0011   |
| 45931 | P14075 | Q86TM6 | -0.22878  |
| 45932 | P14075 | B2RTY4 | -0.92629  |
| 45933 | P14075 | Q07325 | -1.0206   |
| 45934 | P14075 | O14967 | -0.85459  |
| 45935 | P14075 | Q13113 | -0.86584  |
| 45936 | P14075 | Q8NEW7 | -0.92901  |
| 45937 | P14075 | Q9Y4B4 | -0.56895  |
| 45938 | P14075 | Q6ZMP0 | -0.96701  |
| 45939 | P14075 | Q96FC7 | -0.20567  |
| 45940 | P14075 | Q92604 | -0.52474  |
| 45941 | P14075 | P47972 | -0.73418  |
| 45942 | P14075 | Q99983 | -0.86646  |
| 45943 | P14075 | Q8IVF2 | -0.21602  |
| 45944 | P14075 | Q8NA56 | -0.070092 |
| 45945 | P14075 | P28906 | -0.48421  |
| 45946 | P14075 | Q9HCS5 | -0.24491  |
| 45947 | P14075 | Q92876 | -0.26028  |
| 45948 | P14075 | O75061 | -0.49346  |
| 45949 | P14075 | Q9Y6X1 | -0.50292  |
| 45950 | P14075 | Q2M1Z3 | -1.17     |
| 45951 | P14075 | Q9NQ94 | -0.24189  |
| 45952 | P14075 | P49238 | -0.59054  |
| 45953 | P14075 | Q96EB6 | -0.56539  |
| 45954 | P14075 | Q8IUH4 | -0.78598  |
| 45955 | P14075 | Q96IU4 | -0.18624  |
| 45956 | P14075 | Q9C0A1 | -0.2274   |
| 45957 | P14075 | P50583 | -0.70307  |
| 45958 | P14075 | P03952 | -0.70746  |
| 45959 | P14075 | Q9NZC7 | -0.22741  |
| 45960 | P14075 | Q96N58 | -0.21172  |
| 45961 | P14075 | Q9H967 | -0.22722  |
| 45962 | P14075 | Q16611 | -0.23651  |
| 45963 | P14075 | O94830 | -0.21676  |
| 45964 | P14075 | Q06136 | -1.0517   |
| 45965 | P14075 | Q6UXX5 | -0.7817   |
| 45966 | P14075 | Q31612 | -0.88446  |
| 45967 | P14075 | P43657 | -1.124    |
| 45968 | P14075 | E7ETH6 | -0.17187  |
| 45969 | P14075 | Q96BZ9 | -1.3001   |
| 45970 | P14075 | A1IGU5 | -0.57571  |
| 45971 | P14075 | Q96QD5 | -0.21444  |
| 45972 | P14075 | P55263 | -0.49069  |
| 45973 | P14075 | P15144 | -0.82103  |
| 45974 | P14075 | O60494 | -0.27819  |
| 45975 | P14075 | Q9TNN7 | -0.88446  |
| 45976 | P14075 | A8MT79 | -0.93176  |
| 45977 | P14075 | Q9UQ72 | -0.88363  |
| 45978 | P14075 | P59861 | -0.84399  |
| 45979 | P14075 | Q6PCT2 | -0.63334  |
| 45980 | P14075 | P78410 | -0.7958   |

|       |        |        |           |
|-------|--------|--------|-----------|
| 45981 | P14075 | Q9HCG7 | -0.75521  |
| 45982 | P14075 | P24855 | -0.061982 |
| 45983 | P14075 | Q75V66 | -0.91043  |
| 45984 | P14075 | Q8NGR3 | -1.1027   |
| 45985 | P14075 | Q8IXL9 | -0.21834  |
| 45986 | P14075 | Q8NET5 | -0.97694  |
| 45987 | P14075 | Q13219 | -1.1867   |
| 45988 | P14075 | Q96A98 | -0.87465  |
| 45989 | P14075 | Q9NS67 | -1.1721   |
| 45990 | P14075 | P01714 | -0.97479  |
| 45991 | P14075 | A6NMV5 | -0.25825  |
| 45992 | P14075 | Q8WZ94 | -1.1027   |
| 45993 | P14075 | O60861 | -0.26275  |
| 45994 | P14075 | P04229 | -0.54343  |
| 45995 | P14075 | Q6UX72 | -0.74906  |
| 45996 | P14075 | Q96SJ8 | -0.86584  |
| 45997 | P14075 | O00110 | -0.18176  |
| 45998 | P14075 | P30989 | -1.1632   |
| 45999 | P14075 | Q96LD1 | -0.60374  |
| 46000 | P14075 | Q9H4A9 | -0.80611  |
| 46001 | P14075 | Q9NUM4 | -0.59837  |
| 46002 | P14075 | P47974 | -0.19946  |
| 46003 | P14075 | Q7Z4M0 | -0.3778   |
| 46004 | P14075 | O95150 | -1.2362   |
| 46005 | P14075 | P15056 | -0.29313  |
| 46006 | P14075 | Q4VXU2 | -0.84005  |
| 46007 | P14075 | Q8WY07 | -0.81588  |
| 46008 | P14075 | P43307 | -0.61583  |
| 46009 | P14075 | Q13103 | -0.8358   |
| 46010 | P14075 | Q96C92 | -0.29487  |
| 46011 | P14075 | Q9BR01 | -0.37543  |
| 46012 | P14075 | Q4V339 | -0.79654  |
| 46013 | P14075 | Q9NZW4 | -1.0803   |
| 46014 | P14075 | A6NCW7 | -0.25572  |
| 46015 | P14075 | Q9Y228 | -0.31983  |
| 46016 | P14075 | P01622 | -0.97479  |
| 46017 | P14075 | Q6NUT3 | -0.85789  |
| 46018 | P14075 | Q9BQQ3 | -0.06881  |
| 46019 | P14075 | Q96A46 | -0.86516  |
| 46020 | P14075 | Q96GE6 | -0.52751  |
| 46021 | P14075 | Q9BPW4 | -0.90519  |
| 46022 | P14075 | Q2WQJ8 | -0.86584  |
| 46023 | P14075 | Q6MZW2 | -0.95463  |
| 46024 | P14075 | P30043 | -0.22087  |
| 46025 | P14075 | Q8IZP0 | -0.22814  |
| 46026 | P14075 | Q86SG2 | -0.22741  |
| 46027 | P14075 | Q8N1H7 | -0.43266  |
| 46028 | P14075 | P59047 | -0.22711  |
| 46029 | P14075 | Q12768 | -0.3474   |
| 46030 | P14075 | Q9NZH6 | -0.42774  |
| 46031 | P14075 | Q8IYM9 | -0.22734  |
| 46032 | P14075 | Q9Y3P4 | -0.89011  |
| 46033 | P14075 | P17014 | -0.16549  |
| 46034 | P14075 | O00462 | -0.47693  |
| 46035 | P14075 | P00751 | -1.2261   |
| 46036 | P14075 | P08567 | -0.22741  |
| 46037 | P14075 | Q95292 | -0.15264  |
| 46038 | P14075 | Q9H8U3 | -0.63334  |
| 46039 | P14075 | O15428 | -0.2274   |
| 46040 | P14075 | Q9UGI9 | -0.91944  |
| 46041 | P14075 | O75995 | -0.22738  |
| 46042 | P14075 | Q05BV3 | -0.31084  |
| 46043 | P14075 | Q9Y2D0 | -0.27125  |
| 46044 | P14075 | P78423 | -0.50446  |
| 46045 | P14075 | Q14117 | -0.20953  |
| 46046 | P14075 | P22680 | -0.65289  |
| 46047 | P14075 | Q96NF6 | -0.86584  |
| 46048 | P14075 | Q9UQ53 | -0.55519  |
| 46049 | P14075 | P23946 | -1.3423   |
| 46050 | P14075 | O43298 | -0.21172  |
| 46051 | P14075 | A6NLF2 | -0.30744  |
| 46052 | P14075 | Q9HCH3 | -0.51392  |
| 46053 | P14075 | Q92914 | -0.37542  |
| 46054 | P14075 | Q9NRS6 | -0.16385  |
| 46055 | P14075 | P59541 | -1.0953   |
| 46056 | P14075 | Q7Z5R6 | -0.58767  |

|       |        |        |          |
|-------|--------|--------|----------|
| 46057 | P14075 | Q8NHW3 | -0.13352 |
| 46058 | P14075 | Q96BF6 | -0.22532 |
| 46059 | P14075 | Q00341 | -0.46084 |
| 46060 | P14075 | A6NEL2 | -0.22741 |
| 46061 | P14075 | Q8TAV4 | -1.0375  |
| 46062 | P14075 | Q8IZ26 | -0.21172 |
| 46063 | P14075 | O75592 | -0.22653 |
| 46064 | P14075 | Q9UBC3 | -0.22344 |
| 46065 | P14075 | O76039 | -0.29256 |
| 46066 | P14075 | P51685 | -1.2425  |
| 46067 | P14075 | Q92911 | -0.6822  |
| 46068 | P14075 | Q9BV10 | -0.73881 |
| 46069 | P14075 | Q8NCI6 | -0.43405 |
| 46070 | P14075 | Q8IWX6 | -0.16522 |
| 46071 | P14075 | Q8WXG1 | -0.14096 |
| 46072 | P14075 | A2A2Y4 | -0.62023 |
| 46073 | P14075 | Q96JF6 | -0.21172 |
| 46074 | P14075 | Q4G0N8 | -0.9235  |
| 46075 | P14075 | Q6ZU82 | -0.43276 |
| 46076 | P14075 | O00270 | -1.2928  |
| 46077 | P14075 | Q96SI9 | -0.69726 |
| 46078 | P14075 | Q6PJF5 | -0.84439 |
| 46079 | P14075 | Q9HA92 | -0.52318 |
| 46080 | P14075 | Q8TED1 | -0.99555 |
| 46081 | P14075 | Q6PI78 | -0.74159 |
| 46082 | P14075 | Q8IVL5 | -0.602   |
| 46083 | P14075 | Q9ULI4 | -0.54692 |
| 46084 | P14075 | Q9Y2S2 | -0.39179 |
| 46085 | P14075 | A6NC86 | -0.85844 |
| 46086 | P14075 | Q8N9S7 | -0.86584 |
| 46087 | P14075 | O43497 | -0.77369 |
| 46088 | P14075 | Q5JXX7 | -0.86584 |
| 46089 | P14075 | Q92186 | -0.37991 |
| 46090 | P14075 | Q9NUN5 | -0.76875 |
| 46091 | P14075 | Q9Y3B1 | -0.30763 |
| 46092 | P14075 | Q9HCF6 | -0.88508 |
| 46093 | P14075 | Q5HYM0 | -0.46549 |
| 46094 | P14075 | Q15831 | -0.25684 |
| 46095 | P14075 | Q8NGC7 | -1.1027  |
| 46096 | P14075 | Q14542 | -0.42415 |
| 46097 | P14075 | P42081 | -0.26675 |
| 46098 | P14075 | Q9UPE1 | -0.83996 |
| 46099 | P14075 | Q8WYN0 | -0.45449 |
| 46100 | P14075 | Q75WM6 | -1.065   |
| 46101 | P14075 | Q9NZU5 | -0.28435 |
| 46102 | P14075 | Q6UWE3 | -0.87168 |
| 46103 | P14075 | O15042 | -0.22666 |
| 46104 | P14075 | P79483 | -0.77384 |
| 46105 | P14075 | P26367 | -0.2225  |
| 46106 | P14075 | P12319 | -0.90385 |
| 46107 | P14075 | Q0D2K2 | -0.21177 |
| 46108 | P14075 | P02765 | -0.65999 |
| 46109 | P14075 | Q5NUL3 | -1.0294  |
| 46110 | P14075 | Q5H913 | -1.2152  |
| 46111 | P14075 | Q96IZ2 | -0.93628 |
| 46112 | P14075 | Q86T65 | -0.46799 |
| 46113 | P14075 | O60763 | -0.2134  |
| 46114 | P14075 | Q9H6B1 | -0.50622 |
| 46115 | P14075 | P25942 | -0.52051 |
| 46116 | P14075 | P16415 | -0.21172 |
| 46117 | P14075 | P78364 | -0.18806 |
| 46118 | P14075 | Q70HW3 | -0.3292  |
| 46119 | P14075 | Q49MI3 | -0.30011 |
| 46120 | P14075 | Q9NS28 | -0.67499 |
| 46121 | P14075 | P53350 | -0.22741 |
| 46122 | P14075 | P51805 | -0.86178 |
| 46123 | P14075 | Q9HCM4 | -0.24788 |
| 46124 | P14075 | Q9NWX6 | -0.56866 |
| 46125 | P14075 | Q5JVG2 | -0.21172 |
| 46126 | P14075 | O75840 | -0.22619 |
| 46127 | P14075 | B2RXF5 | -0.22016 |
| 46128 | P14075 | Q96QS1 | -0.82353 |
| 46129 | P14075 | A8MUP6 | -0.86584 |
| 46130 | P14075 | Q9UPX6 | -0.86584 |
| 46131 | P14075 | Q8IV48 | -0.14396 |
| 46132 | P14075 | Q14697 | -0.29977 |

|       |        |        |           |
|-------|--------|--------|-----------|
| 46133 | P14075 | P04207 | -0.97479  |
| 46134 | P14075 | Q9HCN3 | -0.9358   |
| 46135 | P14075 | Q86T23 | -0.045444 |
| 46136 | P14075 | Q96K83 | -0.45551  |
| 46137 | P14075 | A6NMC2 | -0.25825  |
| 46138 | P14075 | P50151 | -0.58415  |
| 46139 | P14075 | P55011 | -0.79456  |
| 46140 | P14075 | O75553 | -0.44582  |
| 46141 | P14075 | Q76EJ3 | -0.45815  |
| 46142 | P14075 | Q96AA3 | -0.78874  |
| 46143 | P14075 | Q9Y278 | -0.55636  |
| 46144 | P14075 | O43805 | -0.21403  |
| 46145 | P14075 | Q17RR3 | -0.90503  |
| 46146 | P14075 | P54317 | -0.82403  |
| 46147 | P14075 | Q5BKX8 | -0.15871  |
| 46148 | P14075 | Q16696 | -0.77329  |
| 46149 | P14075 | P62699 | -0.5528   |
| 46150 | P14075 | Q96G75 | -0.016843 |
| 46151 | P14075 | Q12965 | -0.17674  |
| 46152 | P14075 | Q9BWQ8 | -0.55755  |
| 46153 | P14075 | Q9HD20 | -0.60765  |
| 46154 | P14075 | Q9Y4C4 | -0.2287   |
| 46155 | P14075 | P37840 | -0.21225  |
| 46156 | P14075 | O43251 | -0.26703  |
| 46157 | P14075 | Q6P9H4 | -0.35708  |
| 46158 | P14075 | Q86SQ6 | -1.0654   |
| 46159 | P14075 | O95741 | -0.5836   |
| 46160 | P14075 | Q96008 | -0.52526  |
| 46161 | P14075 | Q14849 | -0.78405  |
| 46162 | P14075 | P32929 | -0.21453  |
| 46163 | P14075 | Q9UKU6 | -1.1963   |
| 46164 | P14075 | P01148 | -0.89266  |
| 46165 | P14075 | Q9NX45 | -0.28338  |
| 46166 | P14075 | P47224 | -0.47858  |
| 46167 | P14075 | Q6UDR6 | -0.79897  |
| 46168 | P14075 | Q6PKH6 | -1.382    |
| 46169 | P14075 | Q8NH93 | -1.1027   |
| 46170 | P14075 | Q8WUN7 | -0.22098  |
| 46171 | P14075 | P09105 | -0.42947  |
| 46172 | P14075 | Q03052 | -0.22741  |
| 46173 | P14075 | P51864 | -0.63614  |
| 46174 | P14075 | P05165 | -0.64477  |
| 46175 | P14075 | Q6UX04 | -0.17751  |
| 46176 | P14075 | P00414 | -0.53695  |
| 46177 | P14075 | Q8N6G6 | -1.0566   |
| 46178 | P14075 | Q9NS84 | -0.50772  |
| 46179 | P14075 | Q9NPH5 | -0.67854  |
| 46180 | P14075 | Q9UBP8 | -0.38602  |
| 46181 | P14075 | P58417 | -0.94064  |
| 46182 | P14075 | Q96IJ6 | -0.69053  |
| 46183 | P14075 | P05976 | -0.5874   |
| 46184 | P14075 | Q9H0H0 | -0.19184  |
| 46185 | P14075 | Q3MUY2 | -0.95947  |
| 46186 | P14075 | P11233 | -0.24037  |
| 46187 | P14075 | Q12988 | -0.20993  |
| 46188 | P14075 | Q8NH92 | -1.1027   |
| 46189 | P14075 | P98161 | -0.27928  |
| 46190 | P14075 | P33681 | -0.30812  |
| 46191 | P14075 | Q9NNX1 | -0.86951  |
| 46192 | P14075 | Q8N4S7 | -0.86584  |
| 46193 | P14075 | Q495B1 | -0.576    |
| 46194 | P14075 | C9JYQ0 | -0.22741  |
| 46195 | P14075 | O43593 | -0.071027 |
| 46196 | P14075 | P10321 | -0.88446  |
| 46197 | P14075 | Q9BXX2 | -0.22741  |
| 46198 | P14075 | P27930 | -0.74629  |
| 46199 | P14075 | Q86VD9 | -0.82574  |
| 46200 | P14075 | Q99640 | -0.22741  |
| 46201 | P14075 | Q15493 | -0.23112  |
| 46202 | P14075 | Q6IQ26 | -0.41711  |
| 46203 | P14075 | Q9Y6L7 | -1.361    |
| 46204 | P14075 | Q8NE79 | -0.68791  |
| 46205 | P14075 | P35346 | -0.96751  |
| 46206 | P14075 | Q9NYR9 | -0.87099  |
| 46207 | P14075 | Q96P66 | -1.1721   |
| 46208 | P14075 | P0C5Z0 | -0.85404  |

|       |        |        |           |
|-------|--------|--------|-----------|
| 46209 | P14075 | P01774 | -0.97479  |
| 46210 | P14075 | P21796 | -0.3089   |
| 46211 | P14075 | P08631 | -0.23843  |
| 46212 | P14075 | O60673 | -0.93494  |
| 46213 | P14075 | Q14439 | -1.3248   |
| 46214 | P14075 | Q9UJV8 | -0.33321  |
| 46215 | P14075 | Q9UNE2 | -0.31631  |
| 46216 | P14075 | Q5T7R7 | -0.86584  |
| 46217 | P14075 | P34998 | -0.56096  |
| 46218 | P14075 | Q5TFG8 | -0.47027  |
| 46219 | P14075 | Q9UBU7 | -0.030419 |
| 46220 | P14075 | Q92629 | -0.58559  |
| 46221 | P14075 | P27539 | -0.7407   |
| 46222 | P14075 | Q9NS93 | -0.93628  |
| 46223 | P14075 | O75820 | -0.15809  |
| 46224 | P14075 | Q9HCD6 | -0.39767  |
| 46225 | P14075 | P15151 | -0.32538  |
| 46226 | P14075 | Q7Z6K4 | -0.48668  |
| 46227 | P14075 | Q9H195 | -0.85042  |
| 46228 | P14075 | O15119 | -0.54474  |
| 46229 | P14075 | P26045 | -0.28792  |
| 46230 | P14075 | O95661 | -0.6672   |
| 46231 | P14075 | Q9Y3N9 | -1.1027   |
| 46232 | P14075 | P09683 | -0.73321  |
| 46233 | P14075 | E2RYF7 | -0.87849  |
| 46234 | P14075 | Q6E213 | -0.78951  |
| 46235 | P14075 | Q9H7B4 | -0.22711  |
| 46236 | P14075 | Q96K12 | -1.0049   |
| 46237 | P14075 | Q9GZK3 | -1.1027   |
| 46238 | P14075 | O00442 | -0.55802  |
| 46239 | P14075 | Q14966 | -0.1347   |
| 46240 | P14075 | Q6GPH6 | -0.86584  |
| 46241 | P14075 | P19961 | -0.85736  |
| 46242 | P14075 | Q4ADV7 | -0.86584  |
| 46243 | P14075 | Q8TCN5 | -0.21172  |
| 46244 | P14075 | Q9UBX7 | -1.2103   |
| 46245 | P14075 | Q14353 | -0.2201   |
| 46246 | P14075 | A8MPX8 | -0.65844  |
| 46247 | P14075 | O15374 | -0.97009  |
| 46248 | P14075 | P07954 | -0.067999 |
| 46249 | P14075 | O95398 | -0.44133  |
| 46250 | P14075 | Q9GZT5 | -0.7946   |
| 46251 | P14075 | O95006 | -1.1027   |
| 46252 | P14075 | O60266 | -0.57112  |
| 46253 | P14075 | Q8TE82 | -0.28887  |
| 46254 | P14075 | O95484 | -0.64451  |
| 46255 | P14075 | Q6UX07 | -1.382    |
| 46256 | P14075 | O60235 | -1.4823   |
| 46257 | P14075 | Q9UJ70 | -0.23765  |
| 46258 | P14075 | Q9NS61 | -0.47057  |
| 46259 | P14075 | Q8NBN7 | -1.0135   |
| 46260 | P14075 | Q9Y2L6 | -0.39372  |
| 46261 | P14075 | Q9NX00 | -0.74159  |
| 46262 | P14075 | Q6P1R4 | -0.64448  |
| 46263 | P14075 | A1Z1Q3 | -0.3955   |
| 46264 | P14075 | Q9Y5Y9 | -0.8613   |
| 46265 | P14075 | C9JQL5 | -0.86137  |
| 46266 | P14075 | Q53EL9 | -0.85175  |
| 46267 | P14075 | P62330 | -0.43165  |
| 46268 | P14075 | Q92804 | -0.19675  |
| 46269 | P14075 | P58397 | -1.2214   |
| 46270 | P14075 | Q6PEW1 | -0.1108   |
| 46271 | P14075 | Q8NH10 | -1.1027   |
| 46272 | P14075 | Q8N4A0 | -0.51238  |
| 46273 | P14075 | Q8WYQ9 | -0.61207  |
| 46274 | P14075 | P01037 | -0.89477  |
| 46275 | P14075 | Q9UQC2 | -0.22738  |
| 46276 | P14075 | P35716 | -0.23871  |
| 46277 | P14075 | Q8N4E7 | -0.2069   |
| 46278 | P14075 | Q99962 | -0.22783  |
| 46279 | P14075 | Q96K58 | -0.21172  |
| 46280 | P14075 | Q8NFX8 | -1.0252   |
| 46281 | P14075 | Q9UJV3 | -0.37437  |
| 46282 | P14075 | P01601 | -0.97479  |
| 46283 | P14075 | Q8N434 | -0.78973  |
| 46284 | P14075 | Q8WXA8 | -0.90812  |

|       |        |        |            |
|-------|--------|--------|------------|
| 46285 | P14075 | Q9UI33 | -0.97613   |
| 46286 | P14075 | Q6UXV0 | -0.91447   |
| 46287 | P14075 | P24723 | -0.67271   |
| 46288 | P14075 | Q86UE8 | -0.22741   |
| 46289 | P14075 | Q8N205 | -0.68435   |
| 46290 | P14075 | P0C264 | -0.9088    |
| 46291 | P14075 | Q9BZJ7 | -0.97774   |
| 46292 | P14075 | P23435 | -0.73414   |
| 46293 | P14075 | Q969Y2 | -0.86679   |
| 46294 | P14075 | P98066 | -0.72427   |
| 46295 | P14075 | Q8IYU4 | -0.0093799 |
| 46296 | P14075 | Q9NZ32 | -0.32984   |
| 46297 | P14075 | Q9Y5U9 | -0.82946   |
| 46298 | P14075 | Q5JS37 | -0.87849   |
| 46299 | P14075 | O00624 | -0.98274   |
| 46300 | P14075 | P01781 | -0.97479   |
| 46301 | P14075 | Q5TON5 | -0.22741   |
| 46302 | P14075 | O43422 | -0.48534   |
| 46303 | P14075 | Q86U44 | -0.14358   |
| 46304 | P14075 | P14138 | -0.65201   |
| 46305 | P14075 | Q92915 | -0.27546   |
| 46306 | P14075 | P40426 | -0.23553   |
| 46307 | P14075 | Q15204 | -1.0652    |
| 46308 | P14075 | A6NKL6 | -0.86584   |
| 46309 | P14075 | O94768 | -0.76239   |
| 46310 | P14075 | P05455 | -0.46795   |
| 46311 | P14075 | P48449 | -0.51111   |
| 46312 | P14075 | P40313 | -0.95884   |
| 46313 | P14075 | Q9BXU0 | -0.42288   |
| 46314 | P14075 | Q86VL8 | -0.84766   |
| 46315 | P14075 | Q9UKP4 | -1.1807    |
| 46316 | P14075 | P07288 | -0.85051   |
| 46317 | P14075 | Q9BYT8 | -0.45525   |
| 46318 | P14075 | O75923 | -0.79171   |
| 46319 | P14075 | P61019 | -0.60797   |
| 46320 | P14075 | Q16553 | -0.67199   |
| 46321 | P14075 | Q9NS18 | -0.2202    |
| 46322 | P14075 | P13995 | -0.72691   |
| 46323 | P14075 | Q5JSH3 | -0.22743   |
| 46324 | P14075 | Q92562 | -0.17834   |
| 46325 | P14075 | Q6ZT21 | -0.81103   |
| 46326 | P14075 | Q4KMP7 | -1.1028    |
| 46327 | P14075 | O00469 | -0.70759   |
| 46328 | P14075 | Q86SH2 | -0.46768   |
| 46329 | P14075 | Q9UKT6 | -0.47433   |
| 46330 | P14075 | Q4AE62 | -0.45869   |
| 46331 | P14075 | Q5GFL6 | -0.94502   |
| 46332 | P14075 | Q16281 | -1.2188    |
| 46333 | P14075 | Q13822 | -0.97929   |
| 46334 | P14075 | P61011 | -0.44824   |
| 46335 | P14075 | Q6WKZ4 | -0.28849   |
| 46336 | P14075 | Q4UJ75 | -0.2274    |
| 46337 | P14075 | Q8IX29 | -0.21317   |
| 46338 | P14075 | O00292 | -0.67835   |
| 46339 | P14075 | Q96B96 | -0.86584   |
| 46340 | P14075 | Q8IZC7 | -0.21172   |
| 46341 | P14075 | Q587I9 | -0.62877   |
| 46342 | P14075 | Q9BW62 | -0.71132   |
| 46343 | P14075 | Q9BZE0 | -0.22715   |
| 46344 | P14075 | P63130 | -0.40851   |
| 46345 | P14075 | Q96MX0 | -0.88766   |
| 46346 | P14075 | Q0ZGT2 | -0.42448   |
| 46347 | P14075 | P68366 | -0.58088   |
| 46348 | P14075 | Q8NA82 | -0.57509   |
| 46349 | P14075 | Q13702 | -0.35255   |
| 46350 | P14075 | Q8N239 | -0.21608   |
| 46351 | P14075 | Q9HA64 | -0.53723   |
| 46352 | P14075 | Q8N0X2 | -0.2289    |
| 46353 | P14075 | P21941 | -0.38934   |
| 46354 | P14075 | P78540 | -0.21267   |
| 46355 | P14075 | Q6ZT77 | -0.21172   |
| 46356 | P14075 | Q86WC6 | -0.22741   |
| 46357 | P14075 | Q9HAW9 | -0.65585   |
| 46358 | P14075 | Q9UKP5 | -1.2214    |
| 46359 | P14075 | Q8WUT4 | -0.86584   |
| 46360 | P14075 | Q3KQV3 | -0.21172   |

|       |        |        |          |
|-------|--------|--------|----------|
| 46361 | P14075 | P40200 | -1.2141  |
| 46362 | P14075 | Q92633 | -0.39804 |
| 46363 | P14075 | Q9BRR3 | -0.86584 |
| 46364 | P14075 | Q8NH09 | -1.1027  |
| 46365 | P14075 | Q96SB4 | -0.22741 |
| 46366 | P14075 | P46109 | -0.22741 |
| 46367 | P14075 | P13521 | -0.61018 |
| 46368 | P14075 | Q6IEE7 | -0.86584 |
| 46369 | P14075 | Q14314 | -1.0656  |
| 46370 | P14075 | P49675 | -0.45284 |
| 46371 | P14075 | Q11206 | -0.65767 |
| 46372 | P14075 | Q9UPV7 | -0.55769 |
| 46373 | P14075 | Q86YM7 | -0.40453 |
| 46374 | P14075 | Q9BQK8 | -0.25193 |
| 46375 | P14075 | Q86WK7 | -1.0067  |
| 46376 | P14075 | Q01344 | -0.50714 |
| 46377 | P14075 | P53674 | -0.59147 |
| 46378 | P14075 | Q5TCH4 | -0.78764 |
| 46379 | P14075 | P49585 | -0.43218 |
| 46380 | P14075 | Q9UDY8 | -0.22744 |
| 46381 | P14075 | Q8N2H3 | -0.59308 |
| 46382 | P14075 | Q8NEV1 | -0.8995  |
| 46383 | P14075 | Q92820 | -0.67259 |
| 46384 | P14075 | P61916 | -0.51146 |
| 46385 | P14075 | P20591 | -0.23134 |
| 46386 | P14075 | Q6UW01 | -0.78985 |
| 46387 | P14075 | Q14624 | -0.65388 |
| 46388 | P14075 | Q9UN74 | -1.1553  |
| 46389 | P14075 | O75355 | -1.0482  |
| 46390 | P14075 | O00767 | -0.93657 |
| 46391 | P14075 | Q9H582 | -0.21172 |
| 46392 | P14075 | Q9BQS8 | -0.317   |
| 46393 | P14075 | Q8WZ73 | -0.38427 |
| 46394 | P14075 | Q8N9L1 | -0.61367 |
| 46395 | P14075 | Q30KP8 | -0.84399 |
| 46396 | P14075 | O75293 | -0.4233  |
| 46397 | P14075 | Q8WUP2 | -0.48926 |
| 46398 | P14075 | Q13496 | -0.53848 |
| 46399 | P14075 | O95013 | -1.1027  |
| 46400 | P14075 | Q5JSL3 | -0.55925 |
| 46401 | P14075 | Q6ZU69 | -0.86584 |
| 46402 | P14075 | Q8IZJ1 | -0.478   |
| 46403 | P14075 | Q9HA38 | -0.10407 |
| 46404 | P14075 | Q8IZA0 | -0.31698 |
| 46405 | P14075 | P32314 | -0.39901 |
| 46406 | P14075 | Q8TD16 | -0.17401 |
| 46407 | P14075 | Q5T292 | -0.86584 |
| 46408 | P14075 | Q499Z3 | -0.79654 |
| 46409 | P14075 | P98170 | -0.22739 |
| 46410 | P14075 | Q95168 | -0.53425 |
| 46411 | P14075 | Q15165 | -0.67379 |
| 46412 | P14075 | Q75604 | -0.28908 |
| 46413 | P14075 | P49736 | -0.20823 |
| 46414 | P14075 | Q5VTT5 | -0.43127 |
| 46415 | P14075 | Q9NS86 | -0.36042 |
| 46416 | P14075 | Q8TCG5 | -0.75053 |
| 46417 | P14075 | Q8WY64 | -0.22741 |
| 46418 | P14075 | Q9H0R3 | -0.86584 |
| 46419 | P14075 | P52564 | -0.22834 |
| 46420 | P14075 | O00115 | -0.61199 |
| 46421 | P14075 | Q96LB1 | -1.1237  |
| 46422 | P14075 | Q8ND30 | -0.67181 |
| 46423 | P14075 | O75643 | -0.22703 |
| 46424 | P14075 | Q8WX39 | -0.82728 |
| 46425 | P14075 | Q96FV3 | -0.8322  |
| 46426 | P14075 | Q9BZV3 | -0.97822 |
| 46427 | P14075 | Q9Y463 | -0.22741 |
| 46428 | P14075 | A6NKZ8 | -0.59955 |
| 46429 | P14075 | Q13003 | -0.79762 |
| 46430 | P14075 | Q9Y5X1 | -0.23366 |
| 46431 | P14075 | B5MCY1 | -0.44924 |
| 46432 | P14075 | P61225 | -0.87011 |
| 46433 | P14075 | A4D0T7 | -0.86584 |
| 46434 | P14075 | O75503 | -0.34425 |
| 46435 | P14075 | P04179 | -0.19963 |
| 46436 | P14075 | Q8NGT2 | -1.1027  |



|       |        |        |           |
|-------|--------|--------|-----------|
| 46437 | P14075 | P20393 | -0.63884  |
| 46438 | P14075 | Q96DT0 | -0.16028  |
| 46439 | P14075 | Q9P2D1 | -0.20347  |
| 46440 | P14075 | P50416 | -0.39032  |
| 46441 | P14075 | P0CG33 | -0.35868  |
| 46442 | P14075 | P23141 | -0.4366   |
| 46443 | P14075 | P51168 | -0.49986  |
| 46444 | P14075 | Q9BZM3 | -0.28281  |
| 46445 | P14075 | Q02094 | -0.74953  |
| 46446 | P14075 | P05015 | -0.77017  |
| 46447 | P14075 | A6NJI9 | -0.18848  |
| 46448 | P14075 | A6NDR6 | -0.21321  |
| 46449 | P14075 | Q05940 | -0.53349  |
| 46450 | P14075 | P25100 | -1.0098   |
| 46451 | P14075 | Q96P53 | -0.47027  |
| 46452 | P14075 | Q6ZMR5 | -1.4597   |
| 46453 | P14075 | O75533 | -0.22572  |
| 46454 | P14075 | Q7Z5J1 | -1.382    |
| 46455 | P14075 | Q8IZR5 | -0.88766  |
| 46456 | P14075 | Q13117 | -0.72731  |
| 46457 | P14075 | P78527 | -0.30107  |
| 46458 | P14075 | P13591 | -1.0158   |
| 46459 | P14075 | A2RUH7 | -0.22861  |
| 46460 | P14075 | Q9NYZ1 | -0.86584  |
| 46461 | P14075 | Q96RT6 | -0.67504  |
| 46462 | P14075 | Q6ZVH7 | -0.2274   |
| 46463 | P14075 | Q6ZPD8 | -0.84475  |
| 46464 | P14075 | P35670 | -0.3297   |
| 46465 | P14075 | Q86XS5 | -1.092    |
| 46466 | P14075 | P0C263 | -0.9088   |
| 46467 | P14075 | Q7L5N7 | -0.68732  |
| 46468 | P14075 | Q13409 | -0.22741  |
| 46469 | P14075 | Q8IYU8 | -0.39423  |
| 46470 | P14075 | P04118 | -0.71963  |
| 46471 | P14075 | Q9UQ49 | -0.50077  |
| 46472 | P14075 | O75610 | -0.78005  |
| 46473 | P14075 | P56556 | -0.28478  |
| 46474 | P14075 | Q6P4F1 | -0.5003   |
| 46475 | P14075 | Q16739 | -0.56305  |
| 46476 | P14075 | O76093 | -0.56516  |
| 46477 | P14075 | Q6XPR3 | -0.95132  |
| 46478 | P14075 | Q9P0V8 | -0.87108  |
| 46479 | P14075 | Q9NYL4 | -0.81636  |
| 46480 | P14075 | Q96PE6 | -0.21172  |
| 46481 | P14075 | Q03426 | -0.64633  |
| 46482 | P14075 | P00918 | -0.26533  |
| 46483 | P14075 | P53611 | -0.15708  |
| 46484 | P14075 | Q9BZJ0 | -0.21217  |
| 46485 | P14075 | P21439 | -0.88612  |
| 46486 | P14075 | Q9NS87 | -0.27256  |
| 46487 | P14075 | P20930 | -0.30554  |
| 46488 | P14075 | Q9UGF7 | -1.1027   |
| 46489 | P14075 | Q53GL0 | -0.30561  |
| 46490 | P14075 | Q13325 | -0.22025  |
| 46491 | P14075 | Q58A45 | -0.21164  |
| 46492 | P14075 | P78314 | -0.22736  |
| 46493 | P14075 | Q75845 | -0.79175  |
| 46494 | P14075 | Q8N6F8 | -0.065921 |
| 46495 | P14075 | Q14094 | -0.48746  |
| 46496 | P14075 | Q8WVH0 | -0.37356  |
| 46497 | P14075 | P35916 | -0.41414  |
| 46498 | P14075 | P06239 | -0.24112  |
| 46499 | P14075 | Q8NGF6 | -1.1027   |
| 46500 | P14075 | Q9H853 | -0.60568  |
| 46501 | P14075 | P20155 | -0.77366  |
| 46502 | P14075 | P45452 | -0.8538   |
| 46503 | P14075 | P59282 | -0.29487  |
| 46504 | P14075 | Q50LG9 | -0.86584  |
| 46505 | P14075 | Q8NGS7 | -1.1027   |
| 46506 | P14075 | Q9NP62 | -0.13269  |
| 46507 | P14075 | Q6ZQQ2 | -0.86584  |
| 46508 | P14075 | P52569 | -0.68627  |
| 46509 | P14075 | Q9BSK4 | -0.30663  |
| 46510 | P14075 | Q86VQ3 | -0.25163  |
| 46511 | P14075 | Q86SK9 | -0.97446  |
| 46512 | P14075 | P54652 | -0.22381  |

|       |        |        |           |
|-------|--------|--------|-----------|
| 46513 | P14075 | P16035 | -0.78043  |
| 46514 | P14075 | Q02505 | -1.1007   |
| 46515 | P14075 | Q14028 | -1.0828   |
| 46516 | P14075 | Q16581 | -0.92946  |
| 46517 | P14075 | Q96G61 | -0.41353  |
| 46518 | P14075 | Q9P1V8 | -0.21461  |
| 46519 | P14075 | A8MWS5 | -0.063769 |
| 46520 | P14075 | Q9UPG8 | -0.1513   |
| 46521 | P14075 | Q6IMI4 | -0.34485  |
| 46522 | P14075 | Q5VWM4 | -0.25825  |
| 46523 | P14075 | P0C1S8 | -0.3832   |
| 46524 | P14075 | Q96B54 | -0.73967  |
| 46525 | P14075 | Q9H3Y6 | -0.93793  |
| 46526 | P14075 | Q9H2P9 | -0.38077  |
| 46527 | P14075 | P60174 | -0.088689 |
| 46528 | P14075 | A6NGG8 | -0.71825  |
| 46529 | P14075 | A6NJ69 | -0.87849  |
| 46530 | P14075 | O75900 | -1.231    |
| 46531 | P14075 | Q96KN7 | -0.15788  |
| 46532 | P14075 | A6NE02 | -0.70406  |
| 46533 | P14075 | Q9Y478 | -0.21316  |
| 46534 | P14075 | Q9BZA8 | -1.1297   |
| 46535 | P14075 | Q6NTF7 | -0.36752  |
| 46536 | P14075 | Q9UPW8 | -0.28089  |
| 46537 | P14075 | Q16586 | -0.68398  |
| 46538 | P14075 | Q9H269 | -0.50296  |
| 46539 | P14075 | Q9UJL9 | -0.17069  |
| 46540 | P14075 | Q8WXF0 | -0.44414  |
| 46541 | P14075 | Q8N6S4 | -0.56568  |
| 46542 | P14075 | Q8N442 | -0.66155  |
| 46543 | P14075 | Q13948 | -0.67414  |
| 46544 | P14075 | Q9NRQ2 | -0.47507  |
| 46545 | P14075 | Q008S8 | -0.7066   |
| 46546 | P14075 | Q9Y5H6 | -1.1553   |
| 46547 | P14075 | Q9BV87 | -0.83933  |
| 46548 | P14075 | Q9Y566 | -0.22742  |
| 46549 | P14075 | Q9UG01 | -0.65967  |
| 46550 | P14075 | Q8N7C4 | -0.86584  |
| 46551 | P14075 | Q9UMQ6 | -0.9983   |
| 46552 | P14075 | Q13072 | -0.87849  |
| 46553 | P14075 | Q15391 | -0.29165  |
| 46554 | P14075 | Q4VX67 | -0.86584  |
| 46555 | P14075 | P50542 | -0.22729  |
| 46556 | P14075 | Q16549 | -0.97441  |
| 46557 | P14075 | P35542 | -0.8156   |
| 46558 | P14075 | Q8NGG5 | -1.1027   |
| 46559 | P14075 | Q96T91 | -0.85703  |
| 46560 | P14075 | P35626 | -0.9455   |
| 46561 | P14075 | Q9Y3Q0 | -1.0877   |
| 46562 | P14075 | P17213 | -0.87127  |
| 46563 | P14075 | A8MXD5 | -0.5138   |
| 46564 | P14075 | A4FU49 | -0.22614  |
| 46565 | P14075 | P63120 | -0.67565  |
| 46566 | P14075 | Q9UEW8 | -0.5457   |
| 46567 | P14075 | Q9UL62 | -0.46731  |
| 46568 | P14075 | Q8N446 | -0.73005  |
| 46569 | P14075 | Q96JM2 | -0.22753  |
| 46570 | P14075 | Q95786 | -0.22708  |
| 46571 | P14075 | Q8NAT1 | -0.87088  |
| 46572 | P14075 | Q9Y4C0 | -1.0347   |
| 46573 | P14075 | Q8NGE3 | -1.1027   |
| 46574 | P14075 | Q94875 | -0.22779  |
| 46575 | P14075 | Q8WXI2 | -0.4485   |
| 46576 | P14075 | Q6UWH6 | -0.78141  |
| 46577 | P14075 | Q15283 | -0.48136  |
| 46578 | P14075 | Q8WY21 | -0.34611  |
| 46579 | P14075 | Q14656 | -0.10844  |
| 46580 | P14075 | Q9H4Z3 | -0.18321  |
| 46581 | P14075 | Q16706 | -0.5078   |
| 46582 | P14075 | Q9HBI0 | -0.6172   |
| 46583 | P14075 | Q14409 | -0.48366  |
| 46584 | P14075 | Q5T3F8 | -1.1445   |
| 46585 | P14075 | Q8IZN7 | -0.84399  |
| 46586 | P14075 | Q00507 | -0.55853  |
| 46587 | P14075 | Q9NYQ6 | -0.90699  |
| 46588 | P14075 | Q8TEQ8 | -0.83273  |

|       |        |        |           |
|-------|--------|--------|-----------|
| 46589 | P14075 | Q96G42 | -0.21633  |
| 46590 | P14075 | A6NE01 | -0.19779  |
| 46591 | P14075 | Q9UHG3 | -0.60991  |
| 46592 | P14075 | P30499 | -0.93787  |
| 46593 | P14075 | Q9NPG8 | -0.89944  |
| 46594 | P14075 | Q9Y2T1 | -0.69431  |
| 46595 | P14075 | Q9H4P4 | -0.22736  |
| 46596 | P14075 | O95169 | -0.50235  |
| 46597 | P14075 | O60729 | -0.36058  |
| 46598 | P14075 | Q6P9A2 | -0.7101   |
| 46599 | P14075 | Q5VTJ3 | -0.86584  |
| 46600 | P14075 | Q86VQ6 | -0.58068  |
| 46601 | P14075 | P62834 | -0.34096  |
| 46602 | P14075 | Q13685 | -0.58     |
| 46603 | P14075 | P30154 | -0.22318  |
| 46604 | P14075 | P20941 | -0.34751  |
| 46605 | P14075 | Q3MIX3 | -0.77071  |
| 46606 | P14075 | Q8N6Q8 | -0.37739  |
| 46607 | P14075 | O60938 | -0.72363  |
| 46608 | P14075 | Q9Y5U4 | -0.36143  |
| 46609 | P14075 | O95863 | -0.22334  |
| 46610 | P14075 | O95297 | -0.27506  |
| 46611 | P14075 | Q96AE7 | -0.22348  |
| 46612 | P14075 | P35030 | -0.868    |
| 46613 | P14075 | Q8IY67 | -0.44232  |
| 46614 | P14075 | Q14527 | -0.22417  |
| 46615 | P14075 | Q7Z6B7 | -0.64431  |
| 46616 | P14075 | P17032 | -0.17069  |
| 46617 | P14075 | Q8NE86 | -0.33335  |
| 46618 | P14075 | Q2KHN1 | -0.33859  |
| 46619 | P14075 | Q9HAS0 | -0.28488  |
| 46620 | P14075 | O14926 | -0.59175  |
| 46621 | P14075 | C9JLJ4 | -0.69644  |
| 46622 | P14075 | B1AK53 | -0.5657   |
| 46623 | P14075 | Q9H093 | -0.38119  |
| 46624 | P14075 | P36969 | -0.528    |
| 46625 | P14075 | Q13610 | -0.22742  |
| 46626 | P14075 | Q8NGP2 | -1.1027   |
| 46627 | P14075 | Q69YZ2 | -0.86584  |
| 46628 | P14075 | Q8TF68 | -0.063299 |
| 46629 | P14075 | Q86TD4 | -0.56322  |
| 46630 | P14075 | Q9BYM8 | -0.22702  |
| 46631 | P14075 | Q8WV15 | -0.86584  |
| 46632 | P14075 | Q8IX07 | -0.22736  |
| 46633 | P14075 | Q03181 | -0.27982  |
| 46634 | P14075 | Q9NY56 | -0.75124  |
| 46635 | P14075 | Q86UX2 | -0.7817   |
| 46636 | P14075 | Q9UHY7 | -0.19926  |
| 46637 | P14075 | A6NLB4 | -0.22494  |
| 46638 | P14075 | P29374 | -0.21697  |
| 46639 | P14075 | Q9HAT1 | -0.8057   |
| 46640 | P14075 | Q8IUB2 | -0.79897  |
| 46641 | P14075 | O43147 | -0.94809  |
| 46642 | P14075 | Q96N28 | -0.30763  |
| 46643 | P14075 | Q2QD12 | -0.4843   |
| 46644 | P14075 | Q9NR99 | -0.87849  |
| 46645 | P14075 | O60500 | -0.55441  |
| 46646 | P14075 | Q5JPB2 | -0.73005  |
| 46647 | P14075 | P01850 | -0.87483  |
| 46648 | P14075 | P17927 | -0.84734  |
| 46649 | P14075 | A2RU67 | -0.86584  |
| 46650 | P14075 | P18627 | -0.82801  |
| 46651 | P14075 | Q8IZT8 | -0.15471  |
| 46652 | P14075 | Q7LGA3 | -0.53818  |
| 46653 | P14075 | P10645 | -0.76023  |
| 46654 | P14075 | Q6ZNC4 | -0.73967  |
| 46655 | P14075 | P05937 | -0.22717  |
| 46656 | P14075 | A6NKK0 | -1.1027   |
| 46657 | P14075 | Q8NHY0 | -0.64315  |
| 46658 | P14075 | Q8NGA4 | -1.1739   |
| 46659 | P14075 | P01861 | -0.93808  |
| 46660 | P14075 | Q96P64 | -0.98969  |
| 46661 | P14075 | Q9NSC7 | -0.70111  |
| 46662 | P14075 | Q9C0K1 | -0.90245  |
| 46663 | P14075 | O43586 | -0.9439   |
| 46664 | P14075 | Q6IMI6 | -0.36808  |

|       |        |        |           |
|-------|--------|--------|-----------|
| 46665 | P14075 | P41743 | -0.22339  |
| 46666 | P14075 | Q92766 | -0.21766  |
| 46667 | P14075 | Q96NX5 | -0.76562  |
| 46668 | P14075 | Q9H867 | -0.1909   |
| 46669 | P14075 | O14829 | -0.22457  |
| 46670 | P14075 | Q8IZD9 | -0.20745  |
| 46671 | P14075 | P59539 | -1.0953   |
| 46672 | P14075 | P04211 | -0.97479  |
| 46673 | P14075 | Q8IUZ0 | -0.31084  |
| 46674 | P14075 | Q92781 | -1.0127   |
| 46675 | P14075 | P02774 | -0.74009  |
| 46676 | P14075 | P31327 | -0.17102  |
| 46677 | P14075 | P61568 | -0.30416  |
| 46678 | P14075 | P30048 | -0.21315  |
| 46679 | P14075 | Q969W9 | -0.81502  |
| 46680 | P14075 | P20963 | -0.14561  |
| 46681 | P14075 | O43301 | -0.79654  |
| 46682 | P14075 | O14836 | -0.53129  |
| 46683 | P14075 | Q7L5L3 | -0.80507  |
| 46684 | P14075 | O95140 | -0.70045  |
| 46685 | P14075 | B7Z8K6 | -0.86584  |
| 46686 | P14075 | P49189 | -0.3049   |
| 46687 | P14075 | P36507 | -0.22762  |
| 46688 | P14075 | O43781 | -0.84315  |
| 46689 | P14075 | O14901 | -0.20819  |
| 46690 | P14075 | Q7Z353 | -0.13002  |
| 46691 | P14075 | Q9UII6 | -0.99108  |
| 46692 | P14075 | Q9NUH8 | -0.86584  |
| 46693 | P14075 | Q9Y2K3 | -0.62094  |
| 46694 | P14075 | Q96KP4 | -0.52479  |
| 46695 | P14075 | Q6YN16 | -0.73418  |
| 46696 | P14075 | Q5GH72 | -0.86584  |
| 46697 | P14075 | Q6P3S1 | -0.21281  |
| 46698 | P14075 | P10144 | -0.2725   |
| 46699 | P14075 | Q8TAT2 | -0.82398  |
| 46700 | P14075 | Q15019 | -0.2272   |
| 46701 | P14075 | E0CX11 | -0.87849  |
| 46702 | P14075 | Q9H161 | -0.21942  |
| 46703 | P14075 | Q9UDR5 | -0.59772  |
| 46704 | P14075 | Q15391 | -1.1074   |
| 46705 | P14075 | P50993 | -0.5137   |
| 46706 | P14075 | P0CG24 | -0.21172  |
| 46707 | P14075 | Q8IZY2 | -0.75787  |
| 46708 | P14075 | Q06418 | -0.55014  |
| 46709 | P14075 | Q9P0Z9 | -0.65881  |
| 46710 | P14075 | Q13530 | -0.7989   |
| 46711 | P14075 | P51812 | -0.22466  |
| 46712 | P14075 | Q92878 | -0.21454  |
| 46713 | P14075 | Q14119 | -0.11215  |
| 46714 | P14075 | Q9BXB7 | -0.62747  |
| 46715 | P14075 | O00241 | -0.71214  |
| 46716 | P14075 | Q9H511 | -0.20899  |
| 46717 | P14075 | Q8TE54 | -0.52442  |
| 46718 | P14075 | Q9H1P6 | -0.099181 |
| 46719 | P14075 | Q96SZ6 | -0.47548  |
| 46720 | P14075 | Q15125 | -0.77791  |
| 46721 | P14075 | Q95436 | -0.80193  |
| 46722 | P14075 | Q709F0 | -0.53052  |
| 46723 | P14075 | Q5H8C1 | -1.4266   |
| 46724 | P14075 | P01877 | -0.55431  |
| 46725 | P14075 | Q99612 | -0.22616  |
| 46726 | P14075 | Q8N103 | -0.83099  |
| 46727 | P14075 | Q15393 | -0.15507  |
| 46728 | P14075 | Q92930 | -0.6059   |
| 46729 | P14075 | P06858 | -0.44113  |
| 46730 | P14075 | Q9NUG4 | -0.16078  |
| 46731 | P14075 | Q9H2V7 | -0.31721  |
| 46732 | P14075 | Q9P2F8 | -0.94742  |
| 46733 | P14075 | P12544 | -0.36887  |
| 46734 | P14075 | Q96A11 | -0.63617  |
| 46735 | P14075 | Q9Y615 | -0.079234 |
| 46736 | P14075 | Q9UQF0 | -0.61341  |
| 46737 | P14075 | P49190 | -1.2827   |
| 46738 | P14075 | Q6P5X7 | -0.86584  |
| 46739 | P14075 | Q969D9 | -0.87365  |
| 46740 | P14075 | P05062 | -0.2151   |

|       |        |        |           |
|-------|--------|--------|-----------|
| 46741 | P14075 | Q86UY6 | -0.41082  |
| 46742 | P14075 | Q9BTT6 | -0.37554  |
| 46743 | P14075 | Q8NCL8 | -0.52887  |
| 46744 | P14075 | Q9NS56 | -0.2274   |
| 46745 | P14075 | O15544 | -0.045394 |
| 46746 | P14075 | P62068 | -0.34298  |
| 46747 | P14075 | Q07912 | -0.35476  |
| 46748 | P14075 | Q32ZL2 | -0.97121  |
| 46749 | P14075 | Q58FG0 | -0.58434  |
| 46750 | P14075 | Q9Y4K0 | -0.33414  |
| 46751 | P14075 | O95199 | -0.43285  |
| 46752 | P14075 | Q53GT1 | -0.23542  |
| 46753 | P14075 | Q155Q3 | -0.22741  |
| 46754 | P14075 | Q6UW60 | -0.99309  |
| 46755 | P14075 | Q96M89 | -0.090129 |
| 46756 | P14075 | P00740 | -1.0925   |
| 46757 | P14075 | Q9NYG2 | -0.69993  |
| 46758 | P14075 | P21912 | -0.11394  |
| 46759 | P14075 | Q15555 | -0.071346 |
| 46760 | P14075 | Q9NZL9 | -0.13335  |
| 46761 | P14075 | Q96FM1 | -0.73644  |
| 46762 | P14075 | Q5W0U4 | -0.22755  |
| 46763 | P14075 | Q9C0C7 | -0.22749  |
| 46764 | P14075 | Q96Q40 | -0.71556  |
| 46765 | P14075 | Q92619 | -1.0348   |
| 46766 | P14075 | P06316 | -0.97479  |
| 46767 | P14075 | Q9H9A6 | -0.22867  |
| 46768 | P14075 | A6NGJ6 | -0.73967  |
| 46769 | P14075 | Q6P995 | -0.96404  |
| 46770 | P14075 | Q96GZ6 | -0.90918  |
| 46771 | P14075 | Q6ZV73 | -0.75138  |
| 46772 | P14075 | Q9P1Z3 | -1.1441   |
| 46773 | P14075 | Q06643 | -0.72368  |
| 46774 | P14075 | Q96KG7 | -0.80146  |
| 46775 | P14075 | Q9UQV4 | -0.89095  |
| 46776 | P14075 | Q9UDY6 | -0.42407  |
| 46777 | P14075 | Q9UL54 | -0.5252   |
| 46778 | P14075 | Q8IWW8 | -0.29101  |
| 46779 | P14075 | P55040 | -0.49695  |
| 46780 | P14075 | Q15743 | -1.3209   |
| 46781 | P14075 | Q9H082 | -0.84267  |
| 46782 | P14075 | Q96SZ5 | -0.51929  |
| 46783 | P14075 | Q9HBH0 | -0.97135  |
| 46784 | P14075 | Q7Z7G1 | -0.63478  |
| 46785 | P14075 | Q9N2K0 | -0.40288  |
| 46786 | P14075 | Q7LBE3 | -0.82496  |
| 46787 | P14075 | Q5K4L6 | -1.1349   |
| 46788 | P14075 | P01604 | -0.97479  |
| 46789 | P14075 | P51636 | -0.22552  |
| 46790 | P14075 | Q9C0E4 | -0.43401  |
| 46791 | P14075 | Q9ULI2 | -0.74692  |
| 46792 | P14075 | P32249 | -1.1048   |
| 46793 | P14075 | Q9UQM7 | -0.33248  |
| 46794 | P14075 | Q9P2E9 | -0.6131   |
| 46795 | P14075 | P54868 | -0.30969  |
| 46796 | P14075 | A2RRD8 | -0.21172  |
| 46797 | P14075 | Q96JA1 | -0.86584  |
| 46798 | P14075 | Q14494 | -0.26941  |
| 46799 | P14075 | Q14CZ7 | -0.3676   |
| 46800 | P14075 | Q8IWB4 | -0.86584  |
| 46801 | P14075 | O15258 | -0.57903  |
| 46802 | P14075 | Q9H0R4 | -0.52934  |
| 46803 | P14075 | P07202 | -0.86729  |
| 46804 | P14075 | Q8NHX9 | -0.51191  |
| 46805 | P14075 | O94826 | -0.22731  |
| 46806 | P14075 | Q86XE0 | -0.38965  |
| 46807 | P14075 | A6NHT5 | -0.23708  |
| 46808 | P14075 | Q01959 | -0.35099  |
| 46809 | P14075 | P18827 | -0.45362  |
| 46810 | P14075 | Q96M78 | -0.11316  |
| 46811 | P14075 | Q9NZ01 | -0.49221  |
| 46812 | P14075 | Q6ZWT7 | -0.69084  |
| 46813 | P14075 | Q15835 | -0.86667  |
| 46814 | P14075 | Q9NSN8 | -0.29611  |
| 46815 | P14075 | Q8NBZ7 | -0.95634  |
| 46816 | P14075 | Q5T2P8 | -0.49855  |

|       |        |        |            |
|-------|--------|--------|------------|
| 46817 | P14075 | P22459 | -0.58044   |
| 46818 | P14075 | Q9Y624 | -0.63457   |
| 46819 | P14075 | Q8TCP9 | -0.85296   |
| 46820 | P14075 | Q96A08 | -0.8091    |
| 46821 | P14075 | Q96NL6 | -0.24399   |
| 46822 | P14075 | Q05C16 | -0.22775   |
| 46823 | P14075 | Q16667 | -0.21394   |
| 46824 | P14075 | P30501 | -0.93787   |
| 46825 | P14075 | Q9UNI6 | -0.70398   |
| 46826 | P14075 | P25391 | -0.71522   |
| 46827 | P14075 | Q96DU9 | -0.6758    |
| 46828 | P14075 | P01708 | -0.97479   |
| 46829 | P14075 | Q5VU36 | -0.86584   |
| 46830 | P14075 | Q96KR4 | -0.46755   |
| 46831 | P14075 | P04632 | -0.22926   |
| 46832 | P14075 | Q6P5Z2 | -0.24307   |
| 46833 | P14075 | Q6DHV7 | -0.30612   |
| 46834 | P14075 | Q8NA66 | -0.16009   |
| 46835 | P14075 | Q08554 | -1.03      |
| 46836 | P14075 | Q969G9 | -0.21602   |
| 46837 | P14075 | Q86X45 | -0.34295   |
| 46838 | P14075 | O43903 | -0.24431   |
| 46839 | P14075 | P06850 | -0.4728    |
| 46840 | P14075 | Q96NR7 | -0.0064115 |
| 46841 | P14075 | Q9Y5W7 | -0.74647   |
| 46842 | P14075 | Q7RTW8 | -1.0449    |
| 46843 | P14075 | P21781 | -0.50349   |
| 46844 | P14075 | P45985 | -0.22837   |
| 46845 | P14075 | Q6UXX9 | -0.77202   |
| 46846 | P14075 | P31391 | -1.2173    |
| 46847 | P14075 | Q9NRN5 | -1.0254    |
| 46848 | P14075 | Q5BJH2 | -0.52887   |
| 46849 | P14075 | P12110 | -0.50224   |
| 46850 | P14075 | Q96AJ9 | -0.3648    |
| 46851 | P14075 | A6NEQ0 | -0.59537   |
| 46852 | P14075 | Q9Y6F9 | -0.74      |
| 46853 | P14075 | Q8NG83 | -1.1027    |
| 46854 | P14075 | Q9UK05 | -0.22741   |
| 46855 | P14075 | P48066 | -0.94061   |
| 46856 | P14075 | Q9UHN6 | -0.98753   |
| 46857 | P14075 | P52333 | -0.32301   |
| 46858 | P14075 | Q6UXI9 | -1.0428    |
| 46859 | P14075 | Q9H7D7 | -0.22741   |
| 46860 | P14075 | Q6NUM9 | -0.61981   |
| 46861 | P14075 | Q9H4B8 | -0.70412   |
| 46862 | P14075 | Q01433 | -0.22411   |
| 46863 | P14075 | P49638 | -0.41308   |
| 46864 | P14075 | Q13586 | -0.45985   |
| 46865 | P14075 | O60393 | -0.22577   |
| 46866 | P14075 | Q95772 | -0.83273   |
| 46867 | P14075 | O43852 | -0.22685   |
| 46868 | P14075 | P52961 | -0.64086   |
| 46869 | P14075 | P46926 | -0.1672    |
| 46870 | P14075 | P24821 | -1.0239    |
| 46871 | P14075 | P14653 | -0.22709   |
| 46872 | P14075 | Q8TCE9 | -0.22542   |
| 46873 | P14075 | A8K0R7 | -0.73967   |
| 46874 | P14075 | Q7Z4F1 | -0.90144   |
| 46875 | P14075 | P39900 | -1.207     |
| 46876 | P14075 | Q8WVN8 | -0.5948    |
| 46877 | P14075 | Q96CM4 | -0.17452   |
| 46878 | P14075 | P08603 | -0.89215   |
| 46879 | P14075 | Q5TH69 | -0.90368   |
| 46880 | P14075 | Q9H756 | -0.86584   |
| 46881 | P14075 | O95544 | -0.6655    |
| 46882 | P14075 | P59074 | -0.27428   |
| 46883 | P14075 | O14813 | -0.17922   |
| 46884 | P14075 | Q9H069 | -0.29487   |
| 46885 | P14075 | P69849 | -0.83538   |
| 46886 | P14075 | Q9Y2U5 | -0.58588   |
| 46887 | P14075 | Q96FE7 | -0.79698   |
| 46888 | P14075 | A8MT66 | -0.052915  |
| 46889 | P14075 | Q13887 | -0.22469   |
| 46890 | P14075 | Q86T03 | -0.85964   |
| 46891 | P14075 | Q8IZV2 | -0.88766   |
| 46892 | P14075 | Q8N111 | -0.86584   |

|       |        |        |           |
|-------|--------|--------|-----------|
| 46893 | P14075 | P02462 | -0.47341  |
| 46894 | P14075 | Q8N3F8 | -0.22773  |
| 46895 | P14075 | Q13164 | -0.22741  |
| 46896 | P14075 | Q43312 | -0.31873  |
| 46897 | P14075 | Q13107 | -0.2871   |
| 46898 | P14075 | O60359 | -0.952    |
| 46899 | P14075 | Q8NGH5 | -1.1027   |
| 46900 | P14075 | Q9Y2J0 | -0.23397  |
| 46901 | P14075 | O15438 | -0.96695  |
| 46902 | P14075 | A8MPY1 | -0.65085  |
| 46903 | P14075 | O00187 | -0.91411  |
| 46904 | P14075 | Q5SVS4 | -0.52568  |
| 46905 | P14075 | Q86SF2 | -0.56391  |
| 46906 | P14075 | O43361 | -0.21172  |
| 46907 | P14075 | P24001 | -1.0381   |
| 46908 | P14075 | Q9HCL2 | -0.42628  |
| 46909 | P14075 | Q9P2E5 | -0.47365  |
| 46910 | P14075 | O75717 | -0.22809  |
| 46911 | P14075 | Q15052 | -0.50379  |
| 46912 | P14075 | Q9NTJ3 | -0.22448  |
| 46913 | P14075 | P61163 | -0.2622   |
| 46914 | P14075 | Q86VD1 | -0.57066  |
| 46915 | P14075 | P28676 | -0.55154  |
| 46916 | P14075 | B4E2M5 | -0.22741  |
| 46917 | P14075 | Q9UPT8 | -0.51948  |
| 46918 | P14075 | Q14954 | -0.96614  |
| 46919 | P14075 | P53708 | -0.77452  |
| 46920 | P14075 | A5PLL7 | -0.93931  |
| 46921 | P14075 | Q9BXR6 | -0.85879  |
| 46922 | P14075 | E9PKD4 | -0.051589 |
| 46923 | P14075 | P36894 | -0.30059  |
| 46924 | P14075 | Q8IYM0 | -0.3693   |
| 46925 | P14075 | Q99814 | -0.2317   |
| 46926 | P14075 | Q13474 | -0.50164  |
| 46927 | P14075 | O43813 | -0.69403  |
| 46928 | P14075 | Q9BXT4 | -0.54369  |
| 46929 | P14075 | Q96K37 | -0.85789  |
| 46930 | P14075 | Q30KQ2 | -0.84399  |
| 46931 | P14075 | Q9P2J2 | -0.85902  |
| 46932 | P14075 | Q9UKR8 | -0.86584  |
| 46933 | P14075 | P29120 | -0.3643   |
| 46934 | P14075 | Q96AY4 | -0.22741  |
| 46935 | P14075 | Q13098 | -0.18291  |
| 46936 | P14075 | Q9BQD1 | -0.23759  |
| 46937 | P14075 | Q13263 | -0.22747  |
| 46938 | P14075 | Q96JQ5 | -0.86584  |
| 46939 | P14075 | O75023 | -0.90121  |
| 46940 | P14075 | Q86SG3 | -0.72639  |
| 46941 | P14075 | Q07092 | -0.58746  |
| 46942 | P14075 | P0CG39 | -0.436    |
| 46943 | P14075 | Q8NCH0 | -0.49357  |
| 46944 | P14075 | Q8NC69 | -0.19405  |
| 46945 | P14075 | P60842 | -0.099069 |
| 46946 | P14075 | P04114 | -0.31032  |
| 46947 | P14075 | Q9NRA0 | -0.22835  |
| 46948 | P14075 | O94907 | -0.35903  |
| 46949 | P14075 | Q8IUE6 | -0.88998  |
| 46950 | P14075 | Q9UK97 | -0.45235  |
| 46951 | P14075 | O75677 | -0.52332  |
| 46952 | P14075 | O14791 | -0.54339  |
| 46953 | P14075 | Q24JP5 | -0.54696  |
| 46954 | P14075 | P45378 | -0.50281  |
| 46955 | P14075 | Q92560 | -0.14846  |
| 46956 | P14075 | Q9H0K1 | -0.32505  |
| 46957 | P14075 | O15169 | -0.24502  |
| 46958 | P14075 | Q9NSP4 | -0.16552  |
| 46959 | P14075 | Q6GMV1 | -0.45797  |
| 46960 | P14075 | Q96IX5 | -0.73489  |
| 46961 | P14075 | P61158 | -0.20546  |
| 46962 | P14075 | Q15131 | -0.29383  |
| 46963 | P14075 | Q9HC73 | -1.2762   |
| 46964 | P14075 | P20823 | -0.21937  |
| 46965 | P14075 | P51654 | -0.5466   |
| 46966 | P14075 | Q09328 | -0.64969  |
| 46967 | P14075 | P34981 | -1.1084   |
| 46968 | P14075 | Q12788 | -0.23314  |

|       |        |        |           |
|-------|--------|--------|-----------|
| 46969 | P14075 | A8MTI9 | -1.6001   |
| 46970 | P14075 | P13797 | -0.48349  |
| 46971 | P14075 | P28325 | -0.35193  |
| 46972 | P14075 | Q2TV78 | -1.1937   |
| 46973 | P14075 | A8MWK0 | -0.93241  |
| 46974 | P14075 | P56381 | -0.18862  |
| 46975 | P14075 | B7U540 | -1.0159   |
| 46976 | P14075 | Q9HD36 | -0.22451  |
| 46977 | P14075 | P59773 | -0.86584  |
| 46978 | P14075 | P16870 | -0.74736  |
| 46979 | P14075 | O95206 | -1.0198   |
| 46980 | P14075 | Q9NPH2 | -0.61121  |
| 46981 | P14075 | Q8IYM1 | -0.22584  |
| 46982 | P14075 | A6NM62 | -0.81528  |
| 46983 | P14075 | Q68DQ2 | -0.44203  |
| 46984 | P14075 | Q96AD5 | -0.67707  |
| 46985 | P14075 | P04843 | -0.57533  |
| 46986 | P14075 | Q15485 | -1.1151   |
| 46987 | P14075 | Q9BSK1 | -0.21172  |
| 46988 | P14075 | A6NJG2 | -0.22741  |
| 46989 | P14075 | P17030 | -0.21172  |
| 46990 | P14075 | Q14393 | -0.2637   |
| 46991 | P14075 | Q9H2X6 | -0.22741  |
| 46992 | P14075 | O15498 | -0.27988  |
| 46993 | P14075 | A6NJ46 | -0.22744  |
| 46994 | P14075 | Q1A5X7 | -0.075149 |
| 46995 | P14075 | P47755 | -0.58933  |
| 46996 | P14075 | Q9P2E7 | -1.1297   |
| 46997 | P14075 | P09919 | -0.81957  |
| 46998 | P14075 | Q7Z7J9 | -0.48521  |
| 46999 | P14075 | Q92932 | -1.0076   |
| 47000 | P14075 | Q9BVW6 | -0.86584  |
| 47001 | P14075 | Q96CB5 | -0.10518  |
| 47002 | P14075 | P0C2L3 | -0.86584  |
| 47003 | P14075 | A6NM76 | -1.1027   |
| 47004 | P14075 | P29033 | -0.75195  |
| 47005 | P14075 | Q8WV60 | -0.29766  |
| 47006 | P14075 | Q16658 | -0.0614   |
| 47007 | P14075 | Q86YH2 | -0.2385   |
| 47008 | P14075 | Q13630 | -0.77523  |
| 47009 | P14075 | Q16880 | -0.68036  |
| 47010 | P14075 | Q9NQ76 | -0.46204  |
| 47011 | P14075 | Q8N1D0 | -0.16078  |
| 47012 | P14075 | O95248 | -0.96469  |
| 47013 | P14075 | O75629 | -0.60915  |
| 47014 | P14075 | Q6IEV9 | -1.1027   |
| 47015 | P14075 | Q6UXR6 | -0.87849  |
| 47016 | P14075 | Q86SX6 | -0.26501  |
| 47017 | P14075 | Q14896 | -0.77589  |
| 47018 | P14075 | Q9Y2B2 | -0.78386  |
| 47019 | P14075 | P29279 | -0.30201  |
| 47020 | P14075 | Q86YV5 | -0.93793  |
| 47021 | P14075 | Q9NYB9 | -0.37633  |
| 47022 | P14075 | Q9BXL6 | -0.51456  |
| 47023 | P14075 | P50876 | -0.85454  |
| 47024 | P14075 | Q9Y4F1 | -0.58562  |
| 47025 | P14075 | Q16651 | -0.95909  |
| 47026 | P14075 | Q15811 | -0.42789  |
| 47027 | P14075 | Q8NGL7 | -1.1027   |
| 47028 | P14075 | Q6S545 | -0.22741  |
| 47029 | P14075 | P0CJ68 | -0.72903  |
| 47030 | P14075 | Q96LU5 | -0.48236  |
| 47031 | P14075 | P42261 | -0.5081   |
| 47032 | P14075 | P81133 | -0.32345  |
| 47033 | P14075 | Q9H1M4 | -0.71875  |
| 47034 | P14075 | P0DJD4 | -0.59537  |
| 47035 | P14075 | P0C7H9 | -0.25914  |
| 47036 | P14075 | Q9NYQ7 | -0.93696  |
| 47037 | P14075 | Q9UFV1 | -0.94809  |
| 47038 | P14075 | O60684 | -0.22689  |
| 47039 | P14075 | P0C851 | -0.86584  |
| 47040 | P14075 | O14544 | -0.27575  |
| 47041 | P14075 | Q8N3T1 | -0.65891  |
| 47042 | P14075 | Q96NN9 | -0.22093  |
| 47043 | P14075 | Q9NRN9 | -0.37482  |
| 47044 | P14075 | Q9P0J1 | -0.24633  |



|       |        |        |           |
|-------|--------|--------|-----------|
| 47045 | P14075 | A4D2B8 | -0.36757  |
| 47046 | P14075 | Q6WCQ1 | -0.48323  |
| 47047 | P14075 | P11137 | -0.098929 |
| 47048 | P14075 | Q3ZCX4 | -0.21172  |
| 47049 | P14075 | P60468 | -0.30266  |
| 47050 | P14075 | Q7RTS3 | -0.22807  |
| 47051 | P14075 | Q99598 | -0.223    |
| 47052 | P14075 | Q8N7I0 | -0.21969  |
| 47053 | P14075 | P27361 | -0.22739  |
| 47054 | P14075 | Q9P0T7 | -0.67885  |
| 47055 | P14075 | Q14773 | -0.20102  |
| 47056 | P14075 | Q92819 | -0.69545  |
| 47057 | P14075 | Q8N257 | -0.88998  |
| 47058 | P14075 | P40227 | -0.49683  |
| 47059 | P14075 | O75554 | -0.16633  |
| 47060 | P14075 | A6NIV6 | -0.25189  |
| 47061 | P14075 | Q6ZRP7 | -0.98967  |
| 47062 | P14075 | P22309 | -0.48376  |
| 47063 | P14075 | Q96MD7 | -0.20908  |
| 47064 | P14075 | A6NK06 | -0.41671  |
| 47065 | P14075 | P12883 | -0.12765  |
| 47066 | P14075 | O95264 | -0.99689  |
| 47067 | P14075 | P48637 | -0.46644  |
| 47068 | P14075 | P49368 | -0.20352  |
| 47069 | P14075 | Q8NCR9 | -0.86584  |
| 47070 | P14075 | P24310 | -0.70598  |
| 47071 | P14075 | Q8NEV9 | -0.83217  |
| 47072 | P14075 | Q92828 | -0.49326  |
| 47073 | P14075 | A6NMB1 | -1.0093   |
| 47074 | P14075 | A6NC98 | -0.25005  |
| 47075 | P14075 | Q5JNZ3 | -0.21172  |
| 47076 | P14075 | Q8NI38 | -0.23983  |
| 47077 | P14075 | P50148 | -0.65574  |
| 47078 | P14075 | Q5TGI4 | -0.22715  |
| 47079 | P14075 | Q6ZWL3 | -1.0753   |
| 47080 | P14075 | Q6PEW0 | -0.94312  |
| 47081 | P14075 | Q96SC8 | -0.079372 |
| 47082 | P14075 | Q15043 | -0.85654  |
| 47083 | P14075 | P58418 | -0.92524  |
| 47084 | P14075 | P23771 | -0.22739  |
| 47085 | P14075 | Q9UGJ0 | -0.68003  |
| 47086 | P14075 | P48163 | -0.20906  |
| 47087 | P14075 | Q9P227 | -1.1258   |
| 47088 | P14075 | Q6UXV4 | -0.72059  |
| 47089 | P14075 | P43403 | -0.39073  |
| 47090 | P14075 | Q06889 | -0.21808  |
| 47091 | P14075 | Q6W3E5 | -0.80507  |
| 47092 | P14075 | P42263 | -0.73788  |
| 47093 | P14075 | P57789 | -1.1201   |
| 47094 | P14075 | Q9BWQ6 | -0.84601  |
| 47095 | P14075 | Q8N9F7 | -0.66403  |
| 47096 | P14075 | Q96MK3 | -0.87849  |
| 47097 | P14075 | Q3B7J2 | -1.3339   |
| 47098 | P14075 | P01768 | -0.97479  |
| 47099 | P14075 | P0C7I0 | -0.27318  |
| 47100 | P14075 | Q9UPM8 | -0.17961  |
| 47101 | P14075 | Q76I76 | -0.84181  |
| 47102 | P14075 | Q8N1I0 | -0.20576  |
| 47103 | P14075 | Q9GZY4 | -0.75099  |
| 47104 | P14075 | Q13214 | -0.858    |
| 47105 | P14075 | Q9BVA6 | -0.9448   |
| 47106 | P14075 | Q69YJ1 | -0.74073  |
| 47107 | P14075 | P46379 | -0.22626  |
| 47108 | P14075 | Q9H694 | -0.65451  |
| 47109 | P14075 | Q14562 | -0.15282  |
| 47110 | P14075 | Q02535 | -0.22469  |
| 47111 | P14075 | Q9HA72 | -0.86584  |
| 47112 | P14075 | Q68D91 | -0.43358  |
| 47113 | P14075 | Q63HM9 | -0.75153  |
| 47114 | P14075 | P11021 | -0.22311  |
| 47115 | P14075 | P27707 | -0.43807  |
| 47116 | P14075 | Q9H0A6 | -0.22677  |
| 47117 | P14075 | P05981 | -0.44131  |
| 47118 | P14075 | Q6PF15 | -0.2238   |
| 47119 | P14075 | P20339 | -0.49717  |
| 47120 | P14075 | P15260 | -0.99695  |

|       |        |        |           |
|-------|--------|--------|-----------|
| 47121 | P14075 | Q8NHC5 | -1.1027   |
| 47122 | P14075 | Q96QF7 | -0.21602  |
| 47123 | P14075 | Q9NQ69 | -0.22741  |
| 47124 | P14075 | Q0VDF9 | -0.22304  |
| 47125 | P14075 | P30450 | -0.7844   |
| 47126 | P14075 | O95156 | -0.75225  |
| 47127 | P14075 | Q9P0K7 | -0.22745  |
| 47128 | P14075 | Q8N1V2 | -0.22755  |
| 47129 | P14075 | P22794 | -0.87983  |
| 47130 | P14075 | P14927 | -0.32605  |
| 47131 | P14075 | Q86UY8 | -0.22172  |
| 47132 | P14075 | P0DKB6 | -0.86584  |
| 47133 | P14075 | Q8NCQ5 | -0.45914  |
| 47134 | P14075 | P43694 | -0.22739  |
| 47135 | P14075 | Q6P2D8 | -0.22741  |
| 47136 | P14075 | Q9Y694 | -0.94984  |
| 47137 | P14075 | Q86UV7 | -0.73967  |
| 47138 | P14075 | Q8N954 | -0.44783  |
| 47139 | P14075 | Q9BYC5 | -0.51316  |
| 47140 | P14075 | Q02223 | -1.0827   |
| 47141 | P14075 | Q6PL18 | -0.23137  |
| 47142 | P14075 | Q9UI38 | -0.69536  |
| 47143 | P14075 | P55283 | -1.0557   |
| 47144 | P14075 | Q8N7Z5 | -0.22741  |
| 47145 | P14075 | P57737 | -0.49745  |
| 47146 | P14075 | Q9GZM5 | -0.72784  |
| 47147 | P14075 | Q92692 | -0.25351  |
| 47148 | P14075 | Q95070 | -0.42282  |
| 47149 | P14075 | Q8NGL2 | -1.1027   |
| 47150 | P14075 | A6ND01 | -0.85847  |
| 47151 | P14075 | Q86TN4 | -0.45819  |
| 47152 | P14075 | Q9BZ29 | -0.22625  |
| 47153 | P14075 | Q75962 | -0.45899  |
| 47154 | P14075 | Q9NSB8 | -0.45287  |
| 47155 | P14075 | Q15444 | -0.98826  |
| 47156 | P14075 | P0C0S5 | -0.93307  |
| 47157 | P14075 | Q96ES6 | -0.8419   |
| 47158 | P14075 | Q96PX9 | -0.76318  |
| 47159 | P14075 | Q75396 | -0.14557  |
| 47160 | P14075 | Q15726 | -0.26122  |
| 47161 | P14075 | Q9NYW7 | -1.0176   |
| 47162 | P14075 | Q96MU5 | -0.87849  |
| 47163 | P14075 | Q9BPX1 | -0.070901 |
| 47164 | P14075 | Q7Z7G8 | -0.31296  |
| 47165 | P14075 | Q5T1Q4 | -0.85789  |
| 47166 | P14075 | Q9BZ81 | -0.16078  |
| 47167 | P14075 | P32019 | -0.43526  |
| 47168 | P14075 | I1YAP6 | -0.22676  |
| 47169 | P14075 | O43614 | -1.1834   |
| 47170 | P14075 | P04432 | -0.97479  |
| 47171 | P14075 | Q86YB7 | -0.66953  |
| 47172 | P14075 | P31930 | -0.52465  |
| 47173 | P14075 | Q14917 | -0.63537  |
| 47174 | P14075 | O43193 | -1.2529   |
| 47175 | P14075 | Q9H2I8 | -0.22728  |
| 47176 | P14075 | P28222 | -0.78168  |
| 47177 | P14075 | Q8N393 | -0.21172  |
| 47178 | P14075 | Q504Y3 | -0.52332  |
| 47179 | P14075 | P09630 | -0.22704  |
| 47180 | P14075 | Q96HD9 | -0.41741  |
| 47181 | P14075 | Q9NRW4 | -0.74671  |
| 47182 | P14075 | Q9BV68 | -0.22984  |
| 47183 | P14075 | Q9NQ84 | -1.0997   |
| 47184 | P14075 | Q9NPJ3 | -0.14218  |
| 47185 | P14075 | Q16322 | -0.82927  |
| 47186 | P14075 | Q86SG7 | -0.83332  |
| 47187 | P14075 | P06310 | -0.97479  |
| 47188 | P14075 | Q9H1H1 | -0.47027  |
| 47189 | P14075 | P05549 | -0.20859  |
| 47190 | P14075 | Q15818 | -0.54276  |
| 47191 | P14075 | Q96B21 | -0.86584  |
| 47192 | P14075 | Q5VUB5 | -0.86584  |
| 47193 | P14075 | P31270 | -0.22545  |
| 47194 | P14075 | Q8IXF9 | -0.83009  |
| 47195 | P14075 | Q9H6E4 | -0.87849  |
| 47196 | P14075 | Q99795 | -1.0723   |

|       |        |        |           |
|-------|--------|--------|-----------|
| 47197 | P14075 | Q9NZH7 | -0.87529  |
| 47198 | P14075 | Q8IU89 | -0.30377  |
| 47199 | P14075 | Q8N6Y2 | -0.81555  |
| 47200 | P14075 | C9JRZ8 | -0.59308  |
| 47201 | P14075 | Q9H3U1 | -0.23338  |
| 47202 | P14075 | Q6PH85 | -0.018842 |
| 47203 | P14075 | Q16643 | -0.67343  |
| 47204 | P14075 | P51582 | -1.0044   |
| 47205 | P14075 | P59768 | -0.51126  |
| 47206 | P14075 | O60397 | -0.40431  |
| 47207 | P14075 | Q9NRZ9 | -0.20492  |
| 47208 | P14075 | P51690 | -0.50849  |
| 47209 | P14075 | Q8NH73 | -1.1027   |
| 47210 | P14075 | Q9BQ51 | -1.0733   |
| 47211 | P14075 | Q0VAA2 | -0.22741  |
| 47212 | P14075 | Q5EB52 | -0.97809  |
| 47213 | P14075 | A0AVI2 | -0.86584  |
| 47214 | P14075 | Q9Y6G1 | -0.86584  |
| 47215 | P14075 | O60341 | -0.2264   |
| 47216 | P14075 | Q15797 | -0.13385  |
| 47217 | P14075 | P15882 | -0.81283  |
| 47218 | P14075 | Q96BS2 | -0.22796  |
| 47219 | P14075 | Q14444 | -0.49986  |
| 47220 | P14075 | Q6EKJ0 | -0.15477  |
| 47221 | P14075 | Q9Y223 | -0.67944  |
| 47222 | P14075 | Q96JM3 | -0.22726  |
| 47223 | P14075 | Q86WC4 | -0.83446  |
| 47224 | P14075 | Q9BZG2 | -0.79461  |
| 47225 | P14075 | Q14114 | -0.74791  |
| 47226 | P14075 | Q9UHI5 | -0.402    |
| 47227 | P14075 | O95754 | -0.74678  |
| 47228 | P14075 | P02730 | -0.36324  |
| 47229 | P14075 | Q9H346 | -1.1027   |
| 47230 | P14075 | Q16204 | -0.32147  |
| 47231 | P14075 | Q8WU67 | -0.4518   |
| 47232 | P14075 | P43626 | -0.59537  |
| 47233 | P14075 | Q9Y284 | -0.86584  |
| 47234 | P14075 | P0CF97 | -0.44783  |
| 47235 | P14075 | Q8N9H8 | -0.67859  |
| 47236 | P14075 | P47872 | -1.2413   |
| 47237 | P14075 | O43491 | -0.25621  |
| 47238 | P14075 | Q8WW43 | -0.39909  |
| 47239 | P14075 | O43927 | -0.66687  |
| 47240 | P14075 | A1KXE4 | -0.82856  |
| 47241 | P14075 | O60814 | -0.86926  |
| 47242 | P14075 | Q9H649 | -0.37739  |
| 47243 | P14075 | Q9UKA1 | -0.22674  |
| 47244 | P14075 | Q92537 | -0.52887  |
| 47245 | P14075 | Q5TAH2 | -0.9446   |
| 47246 | P14075 | P42773 | -0.2274   |
| 47247 | P14075 | Q6B9Z1 | -0.87849  |
| 47248 | P14075 | Q8NHA4 | -1.1027   |
| 47249 | P14075 | Q05682 | -0.49093  |
| 47250 | P14075 | Q16378 | -1.016    |
| 47251 | P14075 | Q5SYC1 | -0.60325  |
| 47252 | P14075 | Q9H6X4 | -0.86584  |
| 47253 | P14075 | Q96NU0 | -1.1581   |
| 47254 | P14075 | A0PJX4 | -1.0518   |
| 47255 | P14075 | Q9BUK6 | -0.1309   |
| 47256 | P14075 | Q6DD88 | -0.86299  |
| 47257 | P14075 | P41732 | -0.85769  |
| 47258 | P14075 | P21506 | -0.21172  |
| 47259 | P14075 | A6NCC3 | -0.35868  |
| 47260 | P14075 | Q8IVH4 | -0.85532  |
| 47261 | P14075 | P61570 | -0.5818   |
| 47262 | P14075 | Q15814 | -0.30656  |
| 47263 | P14075 | Q96S38 | -0.5065   |
| 47264 | P14075 | F8VTS6 | -0.52332  |
| 47265 | P14075 | Q8WW36 | -0.51948  |
| 47266 | P14075 | Q8N2H9 | -0.39763  |
| 47267 | P14075 | Q9H300 | -0.72391  |
| 47268 | P14075 | Q9NV64 | -0.86584  |
| 47269 | P14075 | P43246 | -0.17394  |
| 47270 | P14075 | Q7Z469 | -0.73185  |
| 47271 | P14075 | Q9BVG9 | -0.85495  |
| 47272 | P14075 | P20849 | -0.65197  |

|       |        |        |          |
|-------|--------|--------|----------|
| 47273 | P14075 | Q8WXJ9 | -0.62076 |
| 47274 | P14075 | Q96BX8 | -0.69322 |
| 47275 | P14075 | P16562 | -0.91732 |
| 47276 | P14075 | A2VDF0 | -0.37365 |
| 47277 | P14075 | Q9UJ83 | -0.88673 |
| 47278 | P14075 | Q9NQ86 | -0.62301 |
| 47279 | P14075 | Q9BWL3 | -0.82646 |
| 47280 | P14075 | Q8IUQ0 | -0.60325 |
| 47281 | P14075 | Q5VT52 | -0.43262 |
| 47282 | P14075 | Q9UKI8 | -0.54447 |
| 47283 | P14075 | Q9UGB7 | -0.38019 |
| 47284 | P14075 | Q9BX79 | -0.45892 |
| 47285 | P14075 | P20592 | -0.45693 |
| 47286 | P14075 | P31639 | -0.64627 |
| 47287 | P14075 | Q9UBD9 | -0.32869 |
| 47288 | P14075 | P16112 | -0.71541 |
| 47289 | P14075 | P55056 | -0.89985 |
| 47290 | P14075 | Q5TC84 | -0.53928 |
| 47291 | P14075 | Q9H1J7 | -0.78013 |
| 47292 | P14075 | Q05D32 | -0.57214 |
| 47293 | P14075 | A6NHZ5 | -0.22601 |
| 47294 | P14075 | Q08623 | -0.3412  |
| 47295 | P14075 | Q14569 | -0.86399 |
| 47296 | P14075 | P11362 | -0.25881 |
| 47297 | P14075 | O14668 | -1.3916  |
| 47298 | P14075 | Q4FZB7 | -0.21436 |
| 47299 | P14075 | Q07002 | -0.67728 |
| 47300 | P14075 | P07949 | -0.56747 |
| 47301 | P14075 | O15528 | -0.36315 |
| 47302 | P14075 | P27169 | -0.76214 |
| 47303 | P14075 | P30411 | -0.58782 |
| 47304 | P14075 | Q9UQQ2 | -0.48535 |
| 47305 | P14075 | Q9BWE0 | -0.65561 |
| 47306 | P14075 | Q02880 | -0.18652 |
| 47307 | P14075 | P56178 | -0.2204  |
| 47308 | P14075 | Q9Y543 | -0.22616 |
| 47309 | P14075 | Q9HCS4 | -0.20508 |
| 47310 | P14075 | Q8N7G0 | -0.22706 |
| 47311 | P14075 | P16410 | -0.36523 |
| 47312 | P14075 | P41595 | -0.43005 |
| 47313 | P14075 | Q9BQT9 | -0.95972 |
| 47314 | P14075 | P49863 | -1.2917  |
| 47315 | P14075 | P14649 | -0.22655 |
| 47316 | P14075 | Q9UPT9 | -0.30348 |
| 47317 | P14075 | Q8TCU3 | -0.84875 |
| 47318 | P14075 | Q9Y644 | -0.83089 |
| 47319 | P14075 | Q99973 | -0.51899 |
| 47320 | P14075 | P48995 | -0.32666 |
| 47321 | P14075 | Q13368 | -0.42296 |
| 47322 | P14075 | A6NF89 | -1.1027  |
| 47323 | P14075 | Q9NVW2 | -0.23028 |
| 47324 | P14075 | Q8NGY5 | -1.1027  |
| 47325 | P14075 | O60603 | -0.25359 |
| 47326 | P14075 | Q96N87 | -0.98057 |
| 47327 | P14075 | Q13753 | -1.0932  |
| 47328 | P14075 | Q9UBK2 | -0.48629 |
| 47329 | P14075 | Q8TEU8 | -0.71788 |
| 47330 | P14075 | P27987 | -0.73346 |
| 47331 | P14075 | P0DKB5 | -0.86584 |
| 47332 | P14075 | P42262 | -0.80323 |
| 47333 | P14075 | Q9NY72 | -0.58636 |
| 47334 | P14075 | Q96B77 | -0.74159 |
| 47335 | P14075 | Q7Z4K8 | -0.73967 |
| 47336 | P14075 | Q03692 | -1.0009  |
| 47337 | P14075 | P0C869 | -0.54263 |
| 47338 | P14075 | Q96PE5 | -0.85301 |
| 47339 | P14075 | O14986 | -0.22336 |
| 47340 | P14075 | O75787 | -0.35283 |
| 47341 | P14075 | P63136 | -0.43742 |
| 47342 | P14075 | Q13554 | -0.57705 |
| 47343 | P14075 | Q96H78 | -0.7196  |
| 47344 | P14075 | P35240 | -0.23054 |
| 47345 | P14075 | Q8N1S5 | -0.87538 |
| 47346 | P14075 | Q96KP6 | -0.4586  |
| 47347 | P14075 | P46020 | -0.27691 |
| 47348 | P14075 | P00749 | -0.63551 |

|       |        |        |            |
|-------|--------|--------|------------|
| 47349 | P14075 | Q8IZF4 | -1.1905    |
| 47350 | P14075 | P09038 | -0.27255   |
| 47351 | P14075 | Q8IVY1 | -0.86584   |
| 47352 | P14075 | A4QPB2 | -0.41937   |
| 47353 | P14075 | Q8NG08 | -0.70211   |
| 47354 | P14075 | Q9Y2K9 | -0.50288   |
| 47355 | P14075 | P01718 | -0.97479   |
| 47356 | P14075 | Q8N8J7 | -0.86584   |
| 47357 | P14075 | Q5T6X5 | -1.0826    |
| 47358 | P14075 | Q8N539 | -1.0353    |
| 47359 | P14075 | Q9WJR5 | -0.43742   |
| 47360 | P14075 | O76024 | -0.53572   |
| 47361 | P14075 | Q8N5S1 | -0.7196    |
| 47362 | P14075 | Q13362 | -0.074014  |
| 47363 | P14075 | Q9P0X4 | -0.61165   |
| 47364 | P14075 | Q7Z6K3 | -0.43601   |
| 47365 | P14075 | Q9ULW2 | -0.67434   |
| 47366 | P14075 | Q9Y6R0 | -0.22679   |
| 47367 | P14075 | O95081 | -0.33373   |
| 47368 | P14075 | P40879 | -0.50858   |
| 47369 | P14075 | Q969X5 | -0.13986   |
| 47370 | P14075 | Q9H8X3 | -0.0062491 |
| 47371 | P14075 | Q99527 | -1.0587    |
| 47372 | P14075 | P20702 | -0.48945   |
| 47373 | P14075 | P43166 | -0.26491   |
| 47374 | P14075 | Q9NY46 | -0.83722   |
| 47375 | P14075 | Q5T2E6 | -0.86584   |
| 47376 | P14075 | Q16206 | -1.0656    |
| 47377 | P14075 | Q8N5B7 | -0.30336   |
| 47378 | P14075 | A2RU49 | -0.39957   |
| 47379 | P14075 | O75916 | -0.55941   |
| 47380 | P14075 | P10316 | -0.7844    |
| 47381 | P14075 | Q9BS31 | -0.21172   |
| 47382 | P14075 | Q9BR76 | -0.22742   |
| 47383 | P14075 | P0CJ77 | -0.72903   |
| 47384 | P14075 | Q9UPR0 | -0.61836   |
| 47385 | P14075 | O14581 | -1.1027    |
| 47386 | P14075 | P10253 | -0.39674   |
| 47387 | P14075 | A6NHQ2 | -0.11007   |
| 47388 | P14075 | Q6URH7 | -0.026209  |
| 47389 | P14075 | Q96MM3 | -0.22748   |
| 47390 | P14075 | Q9Y4K4 | -0.34475   |
| 47391 | P14075 | P29475 | -0.22763   |
| 47392 | P14075 | O95180 | -0.74099   |
| 47393 | P14075 | Q9Y5G5 | -1.1297    |
| 47394 | P14075 | Q86WN2 | -0.85594   |
| 47395 | P14075 | Q04743 | -0.22694   |
| 47396 | P14075 | Q99435 | -0.42859   |
| 47397 | P14075 | O95476 | -0.20279   |
| 47398 | P14075 | Q6ZMU5 | -0.42153   |
| 47399 | P14075 | Q8WVX3 | -0.86584   |
| 47400 | P14075 | Q9H977 | -0.22738   |
| 47401 | P14075 | Q9Y2L9 | -0.23911   |
| 47402 | P14075 | A6NCL7 | -0.22742   |
| 47403 | P14075 | P28715 | -0.12263   |
| 47404 | P14075 | O00591 | -0.72975   |
| 47405 | P14075 | O43281 | -0.51036   |
| 47406 | P14075 | Q15116 | -0.64057   |
| 47407 | P14075 | Q9H2C2 | -0.84432   |
| 47408 | P14075 | Q00537 | -0.6365    |
| 47409 | P14075 | Q9NZL6 | -0.61593   |
| 47410 | P14075 | P04438 | -0.97479   |
| 47411 | P14075 | Q96A28 | -0.87108   |
| 47412 | P14075 | Q6ZRX8 | -0.11696   |
| 47413 | P14075 | O75121 | -0.93628   |
| 47414 | P14075 | P05771 | -0.22166   |
| 47415 | P14075 | P05112 | -0.21051   |
| 47416 | P14075 | A2RUU4 | -0.87168   |
| 47417 | P14075 | P25490 | -0.2118    |
| 47418 | P14075 | Q31610 | -0.88446   |
| 47419 | P14075 | Q8WZ42 | -0.30198   |
| 47420 | P14075 | Q99497 | -0.069983  |
| 47421 | P14075 | Q14247 | -0.22893   |
| 47422 | P14075 | Q8TCT0 | -0.58477   |
| 47423 | P14075 | Q9NVV0 | -0.8464    |
| 47424 | P14075 | Q96D31 | -0.52277   |

|       |        |        |          |
|-------|--------|--------|----------|
| 47425 | P14075 | A4D1Z8 | -0.44203 |
| 47426 | P14075 | Q9UKT8 | -0.22965 |
| 47427 | P14075 | A1E959 | -0.82136 |
| 47428 | P14075 | A6NL99 | -0.83009 |
| 47429 | P14075 | E5RQL4 | -0.54583 |
| 47430 | P14075 | O00194 | -0.6836  |
| 47431 | P14075 | P01350 | -0.99868 |
| 47432 | P14075 | Q53S58 | -0.86584 |
| 47433 | P14075 | Q9UHA7 | -0.92615 |
| 47434 | P14075 | A6NEH6 | -0.85795 |
| 47435 | P14075 | Q9H992 | -0.57509 |
| 47436 | P14075 | Q7L591 | -0.53641 |
| 47437 | P14075 | P08910 | -0.54399 |
| 47438 | P14075 | Q6UWB1 | -0.92815 |
| 47439 | P14075 | Q99959 | -0.19549 |
| 47440 | P14075 | Q9UBL3 | -0.22125 |
| 47441 | P14075 | Q5VUD6 | -0.93931 |
| 47442 | P14075 | Q6ZQY3 | -0.63334 |
| 47443 | P14075 | Q07283 | -0.28994 |
| 47444 | P14075 | Q6ZUK4 | -0.86584 |
| 47445 | P14075 | Q96NW4 | -0.23788 |
| 47446 | P14075 | Q9H343 | -1.1027  |
| 47447 | P14075 | Q9P225 | -0.65174 |
| 47448 | P14075 | Q8IWZ4 | -0.73967 |
| 47449 | P14075 | Q9H5N1 | -0.49747 |
| 47450 | P14075 | P0C7P0 | -0.48994 |
| 47451 | P14075 | Q9UQE7 | -0.22582 |
| 47452 | P14075 | P57078 | -0.25848 |
| 47453 | P14075 | Q8NG04 | -0.80655 |
| 47454 | P14075 | Q86UX6 | -0.9869  |
| 47455 | P14075 | Q9BYV1 | -0.25007 |
| 47456 | P14075 | Q14012 | -0.23325 |
| 47457 | P14075 | Q8NGG2 | -1.1027  |
| 47458 | P14075 | P33908 | -0.70041 |
| 47459 | P14075 | Q969I6 | -0.98254 |
| 47460 | P14075 | Q8NGN1 | -1.1027  |
| 47461 | P14075 | Q96NX9 | -0.31279 |
| 47462 | P14075 | Q9NS00 | -0.84027 |
| 47463 | P14075 | Q9BZX2 | -0.54641 |
| 47464 | P14075 | Q96C10 | -0.227   |
| 47465 | P14075 | O15534 | -0.22759 |
| 47466 | P14075 | Q8NGX8 | -1.1027  |
| 47467 | P14075 | Q149M9 | -0.79654 |
| 47468 | P14075 | Q15486 | -0.32243 |
| 47469 | P14075 | O95473 | -0.86584 |
| 47470 | P14075 | P13798 | -0.39554 |
| 47471 | P14075 | Q9ULI3 | -0.80126 |
| 47472 | P14075 | P0C6E6 | -0.20594 |
| 47473 | P14075 | Q9BXB4 | -0.80455 |
| 47474 | P14075 | Q99836 | -0.2274  |
| 47475 | P14075 | Q8IZQ5 | -0.45307 |
| 47476 | P14075 | Q6IQ21 | -0.21172 |
| 47477 | P14075 | Q8N4L2 | -0.85964 |
| 47478 | P14075 | Q7L014 | -0.53174 |
| 47479 | P14075 | Q8IW93 | -0.82402 |
| 47480 | P14075 | P45877 | -0.32291 |
| 47481 | P14075 | Q7Z6A9 | -0.96522 |
| 47482 | P14075 | Q96AC6 | -0.68836 |
| 47483 | P14075 | O14640 | -0.17334 |
| 47484 | P14075 | C4AMC7 | -0.58563 |
| 47485 | P14075 | Q96EP0 | -0.20778 |
| 47486 | P14075 | Q9NP59 | -0.38536 |
| 47487 | P14075 | Q8TET4 | -0.44256 |
| 47488 | P14075 | Q8IXU6 | -0.51283 |
| 47489 | P14075 | P61599 | -0.25559 |
| 47490 | P14075 | Q8NGQ4 | -1.1027  |
| 47491 | P14075 | Q9Y5G2 | -1.1297  |
| 47492 | P14075 | Q14508 | -0.92274 |
| 47493 | P14075 | Q9ULZ9 | -1.3648  |
| 47494 | P14075 | Q6UXC1 | -0.66148 |
| 47495 | P14075 | Q96RV3 | -0.86584 |
| 47496 | P14075 | Q6A555 | -0.44613 |
| 47497 | P14075 | Q5VTB9 | -0.45386 |
| 47498 | P14075 | P62491 | -0.25316 |
| 47499 | P14075 | P23415 | -0.52108 |
| 47500 | P14075 | Q8NGB6 | -1.1027  |

|       |        |        |            |
|-------|--------|--------|------------|
| 47501 | P14075 | Q8WXI3 | -0.62076   |
| 47502 | P14075 | Q9BQ04 | -0.43388   |
| 47503 | P14075 | Q96SD1 | -0.16627   |
| 47504 | P14075 | O75173 | -0.77597   |
| 47505 | P14075 | Q9BRQ0 | -0.30335   |
| 47506 | P14075 | Q5JXA9 | -0.86584   |
| 47507 | P14075 | Q96KE9 | -0.2473    |
| 47508 | P14075 | P01766 | -0.97479   |
| 47509 | P14075 | Q01082 | -0.22761   |
| 47510 | P14075 | P02655 | -0.52954   |
| 47511 | P14075 | P14091 | -0.6393    |
| 47512 | P14075 | Q9NX31 | -0.0070769 |
| 47513 | P14075 | P60983 | -0.74323   |
| 47514 | P14075 | Q9H6R6 | -0.96605   |
| 47515 | P14075 | Q9NRY6 | -0.57963   |
| 47516 | P14075 | P04180 | -0.31468   |
| 47517 | P14075 | Q63ZY6 | -0.37739   |
| 47518 | P14075 | P80404 | -0.3322    |
| 47519 | P14075 | Q14562 | -0.21374   |
| 47520 | P14075 | Q8IUD6 | -0.22779   |
| 47521 | P14075 | Q2M218 | -0.21172   |
| 47522 | P14075 | Q9NQW5 | -0.33953   |
| 47523 | P14075 | Q9UJQ7 | -0.43283   |
| 47524 | P14075 | Q13595 | -0.52931   |
| 47525 | P14075 | Q5SRD0 | -0.45254   |
| 47526 | P14075 | Q14520 | -1.3953    |
| 47527 | P14075 | Q9UNN8 | -0.37118   |
| 47528 | P14075 | P01185 | -0.40133   |
| 47529 | P14075 | Q8NCQ7 | -0.53158   |
| 47530 | P14075 | P35968 | -0.31545   |
| 47531 | P14075 | A5A3E0 | -0.29454   |
| 47532 | P14075 | O43347 | -0.31449   |
| 47533 | P14075 | Q58EX7 | -0.78542   |
| 47534 | P14075 | P50895 | -1.1435    |
| 47535 | P14075 | O60291 | -0.2274    |
| 47536 | P14075 | P12643 | -0.22741   |
| 47537 | P14075 | Q96S86 | -1.0554    |
| 47538 | P14075 | Q00169 | -0.72935   |
| 47539 | P14075 | A8K0Z3 | -0.16867   |
| 47540 | P14075 | P25092 | -0.77708   |
| 47541 | P14075 | Q2L4Q9 | -1.2917    |
| 47542 | P14075 | Q8WUS8 | -1.0344    |
| 47543 | P14075 | O75373 | -0.21172   |
| 47544 | P14075 | Q96SQ5 | -0.21172   |
| 47545 | P14075 | Q9BSE5 | -0.23541   |
| 47546 | P14075 | Q8NFM7 | -0.64716   |
| 47547 | P14075 | Q9NVD3 | -0.040336  |
| 47548 | P14075 | A8K0S8 | -0.21692   |
| 47549 | P14075 | Q92564 | -0.16078   |
| 47550 | P14075 | Q12923 | -0.24797   |
| 47551 | P14075 | Q9H0J4 | -0.20942   |
| 47552 | P14075 | Q14142 | -0.43552   |
| 47553 | P14075 | P51449 | -0.40052   |
| 47554 | P14075 | O15018 | -0.59126   |
| 47555 | P14075 | A6NDX5 | -0.21172   |
| 47556 | P14075 | P0CL84 | -0.21602   |
| 47557 | P14075 | Q9BUU2 | -0.37739   |
| 47558 | P14075 | Q9BSN7 | -0.75016   |
| 47559 | P14075 | O75326 | -0.25143   |
| 47560 | P14075 | Q9NTQ9 | -0.85917   |
| 47561 | P14075 | Q9H903 | -0.70965   |
| 47562 | P14075 | P14207 | -0.93473   |
| 47563 | P14075 | Q8N9F8 | -0.21172   |
| 47564 | P14075 | Q9UL12 | -0.22039   |
| 47565 | P14075 | Q12891 | -0.20714   |
| 47566 | P14075 | P39210 | -0.56147   |
| 47567 | P14075 | Q8WXX3 | -0.2274    |
| 47568 | P14075 | Q12770 | -0.30985   |
| 47569 | P14075 | Q9HCU0 | -0.6004    |
| 47570 | P14075 | O75093 | -0.63478   |
| 47571 | P14075 | Q9BX95 | -0.70236   |
| 47572 | P14075 | P19397 | -0.48462   |
| 47573 | P14075 | Q8NBB2 | -0.13496   |
| 47574 | P14075 | P43361 | -0.16078   |
| 47575 | P14075 | P30556 | -0.50239   |
| 47576 | P14075 | Q7Z3D4 | -0.84623   |

|       |        |        |          |
|-------|--------|--------|----------|
| 47577 | P14075 | Q8IXF0 | -0.23839 |
| 47578 | P14075 | P63211 | -0.7594  |
| 47579 | P14075 | P26436 | -0.58892 |
| 47580 | P14075 | P48551 | -0.707   |
| 47581 | P14075 | A6NNN8 | -0.96495 |
| 47582 | P14075 | Q9Y277 | -0.9349  |
| 47583 | P14075 | P21754 | -0.34259 |
| 47584 | P14075 | O00238 | -0.55517 |
| 47585 | P14075 | Q9Y6A5 | -0.13276 |
| 47586 | P14075 | Q9NXZ2 | -1.0458  |
| 47587 | P14075 | Q15617 | -1.1027  |
| 47588 | P14075 | Q15018 | -0.45066 |
| 47589 | P14075 | P33981 | -0.65634 |
| 47590 | P14075 | C9JVI0 | -0.69644 |
| 47591 | P14075 | Q6NZ63 | -0.86584 |
| 47592 | P14075 | Q5H9E4 | -0.73185 |
| 47593 | P14075 | O43914 | -0.59683 |
| 47594 | P14075 | P02452 | -0.30048 |
| 47595 | P14075 | P47887 | -1.1745  |
| 47596 | P14075 | P34969 | -1.1633  |
| 47597 | P14075 | P05162 | -0.43618 |
| 47598 | P14075 | Q9Y487 | -0.34183 |
| 47599 | P14075 | P56199 | -0.44772 |
| 47600 | P14075 | Q8N8Y2 | -0.19897 |
| 47601 | P14075 | Q8NHA6 | -1.1027  |
| 47602 | P14075 | Q9H015 | -0.44847 |
| 47603 | P14075 | Q6ZRU5 | -0.87849 |
| 47604 | P14075 | Q14981 | -0.5223  |
| 47605 | P14075 | P10636 | -0.10034 |
| 47606 | P14075 | Q96RP8 | -0.84843 |
| 47607 | P14075 | Q30KQ7 | -0.84399 |
| 47608 | P14075 | Q6UX53 | -0.47305 |
| 47609 | P14075 | Q9GZP0 | -0.87801 |
| 47610 | P14075 | Q8TCT9 | -0.55469 |
| 47611 | P14075 | P38567 | -0.69732 |
| 47612 | P14075 | P16389 | -0.8014  |
| 47613 | P14075 | Q8N5G2 | -0.53823 |
| 47614 | P14075 | Q93045 | -0.16893 |
| 47615 | P14075 | Q9NQX0 | -0.15283 |
| 47616 | P14075 | Q9HCY8 | -0.33922 |
| 47617 | P14075 | Q9UBY5 | -1.1786  |
| 47618 | P14075 | Q8NFO6 | -1.0502  |
| 47619 | P14075 | Q9BYZ6 | -1.1939  |
| 47620 | P14075 | P43699 | -0.27093 |
| 47621 | P14075 | O75417 | -0.64803 |
| 47622 | P14075 | P11511 | -0.35232 |
| 47623 | P14075 | O60449 | -1.0741  |
| 47624 | P14075 | Q9UIJ7 | -0.58976 |
| 47625 | P14075 | Q8WWG9 | -0.94617 |
| 47626 | P14075 | Q3BBV0 | -0.29487 |
| 47627 | P14075 | Q6UXU1 | -0.87849 |
| 47628 | P14075 | Q5CZA5 | -0.21172 |
| 47629 | P14075 | P19075 | -1.0498  |
| 47630 | P14075 | Q9H3P7 | -0.63018 |
| 47631 | P14075 | Q86U10 | -0.4301  |
| 47632 | P14075 | Q8N9U0 | -0.21602 |
| 47633 | P14075 | Q6P3X3 | -0.22697 |
| 47634 | P14075 | Q8NGE8 | -1.1027  |
| 47635 | P14075 | Q9NR96 | -0.48773 |
| 47636 | P14075 | P31267 | -0.22568 |
| 47637 | P14075 | Q9UJ55 | -0.16078 |
| 47638 | P14075 | Q9H4F1 | -0.48366 |
| 47639 | P14075 | Q9Y6H8 | -0.82695 |
| 47640 | P14075 | Q96D03 | -0.29298 |
| 47641 | P14075 | Q8WU76 | -0.17951 |
| 47642 | P14075 | Q8NH37 | -1.1027  |
| 47643 | P14075 | Q9NYA4 | -0.55208 |
| 47644 | P14075 | Q9NUU7 | -0.11487 |
| 47645 | P14075 | Q92791 | -0.22527 |
| 47646 | P14075 | Q9Y3E1 | -0.21543 |
| 47647 | P14075 | Q8N1G4 | -0.22752 |
| 47648 | P14075 | Q96MR6 | -0.22762 |
| 47649 | P14075 | Q8IYR2 | -0.52332 |
| 47650 | P14075 | Q8IZ21 | -0.60093 |
| 47651 | P14075 | Q9BRP7 | -0.39868 |
| 47652 | P14075 | Q8IWF7 | -0.44582 |



|       |        |        |           |
|-------|--------|--------|-----------|
| 47653 | P14075 | Q9NYY3 | -0.30748  |
| 47654 | P14075 | Q9HC98 | -0.22816  |
| 47655 | P14075 | Q8NCL4 | -0.60578  |
| 47656 | P14075 | Q15612 | -0.97532  |
| 47657 | P14075 | Q8IYN0 | -0.21172  |
| 47658 | P14075 | Q00266 | -0.60364  |
| 47659 | P14075 | Q9HC36 | -0.20088  |
| 47660 | P14075 | Q9BT22 | -0.78453  |
| 47661 | P14075 | Q96F81 | -0.71465  |
| 47662 | P14075 | P21589 | -0.4959   |
| 47663 | P14075 | A6NFR6 | -0.86584  |
| 47664 | P14075 | P0C862 | -0.89987  |
| 47665 | P14075 | Q9UJ72 | -0.33831  |
| 47666 | P14075 | Q587J8 | -0.33371  |
| 47667 | P14075 | Q01167 | -0.29235  |
| 47668 | P14075 | P30419 | -0.19939  |
| 47669 | P14075 | Q6UXH0 | -0.29044  |
| 47670 | P14075 | Q9Y5K6 | -0.22746  |
| 47671 | P14075 | Q8N427 | -0.56635  |
| 47672 | P14075 | Q96E17 | -0.86697  |
| 47673 | P14075 | A1X283 | -0.22741  |
| 47674 | P14075 | Q86UW1 | -0.87558  |
| 47675 | P14075 | A6NMS3 | -1.1027   |
| 47676 | P14075 | Q7L9B9 | -0.45271  |
| 47677 | P14075 | Q9NUD5 | -0.51948  |
| 47678 | P14075 | Q9BWW9 | -0.85147  |
| 47679 | P14075 | P46060 | -0.22626  |
| 47680 | P14075 | Q8N6N2 | -0.16078  |
| 47681 | P14075 | Q8NGG7 | -1.1027   |
| 47682 | P14075 | Q8NHH1 | -0.46522  |
| 47683 | P14075 | Q96PB8 | -0.86584  |
| 47684 | P14075 | O14531 | -0.21009  |
| 47685 | P14075 | Q8TBC5 | -0.076586 |
| 47686 | P14075 | Q494R4 | -0.10649  |
| 47687 | P14075 | Q8TDN1 | -0.84843  |
| 47688 | P14075 | Q5VWM3 | -0.25825  |
| 47689 | P14075 | Q6NXP0 | -0.52751  |
| 47690 | P14075 | Q06203 | -0.50853  |
| 47691 | P14075 | O95405 | -0.20122  |
| 47692 | P14075 | A6NL26 | -1.1027   |
| 47693 | P14075 | Q6ZVK1 | -0.86584  |
| 47694 | P14075 | P01567 | -0.65335  |
| 47695 | P14075 | Q8TDU5 | -1.1149   |
| 47696 | P14075 | Q8IZ96 | -0.88766  |
| 47697 | P14075 | Q9UGQ2 | -0.50736  |
| 47698 | P14075 | Q5W188 | -0.89477  |
| 47699 | P14075 | Q8IWD5 | -0.86584  |
| 47700 | P14075 | Q01740 | -0.72687  |
| 47701 | P14075 | O75094 | -0.66057  |
| 47702 | P14075 | Q9H6F2 | -0.61049  |
| 47703 | P14075 | Q66LE6 | -0.18828  |
| 47704 | P14075 | Q9BY66 | -0.87804  |
| 47705 | P14075 | Q99956 | -0.95832  |
| 47706 | P14075 | Q14964 | -0.76754  |
| 47707 | P14075 | O43869 | -1.1027   |
| 47708 | P14075 | Q9Y279 | -0.28982  |
| 47709 | P14075 | Q5TCY1 | -0.57205  |
| 47710 | P14075 | Q9Y6A4 | -0.60582  |
| 47711 | P14075 | Q9Y5R6 | -0.14915  |
| 47712 | P14075 | P58401 | -1.0252   |
| 47713 | P14075 | Q8NHB1 | -1.1027   |
| 47714 | P14075 | O76038 | -0.72437  |
| 47715 | P14075 | Q9H6D5 | -0.86584  |
| 47716 | P14075 | Q9UJD0 | -0.29942  |
| 47717 | P14075 | Q8IUC8 | -0.66473  |
| 47718 | P14075 | Q8N4E4 | -0.19563  |
| 47719 | P14075 | P12830 | -0.34895  |
| 47720 | P14075 | P47871 | -0.80099  |
| 47721 | P14075 | Q9HCE9 | -0.99834  |
| 47722 | P14075 | P32238 | -0.66905  |
| 47723 | P14075 | Q8NG76 | -1.1027   |
| 47724 | P14075 | Q6ZNC8 | -0.69336  |
| 47725 | P14075 | Q96R48 | -1.1027   |
| 47726 | P14075 | O75711 | -0.82891  |
| 47727 | P14075 | Q8N1W1 | -0.78501  |
| 47728 | P14075 | Q99798 | -0.15089  |

|       |        |        |           |
|-------|--------|--------|-----------|
| 47729 | P14075 | Q8N807 | -0.68886  |
| 47730 | P14075 | O60906 | -0.69796  |
| 47731 | P14075 | P09871 | -1.2726   |
| 47732 | P14075 | P42695 | -0.17081  |
| 47733 | P14075 | P55268 | -0.70289  |
| 47734 | P14075 | A6NHN0 | -0.92264  |
| 47735 | P14075 | A6NLU5 | -0.86584  |
| 47736 | P14075 | Q15431 | -0.28525  |
| 47737 | P14075 | A0M8Q6 | -0.95485  |
| 47738 | P14075 | Q96JB8 | -0.26891  |
| 47739 | P14075 | Q86VZ6 | -0.22728  |
| 47740 | P14075 | P49755 | -0.17932  |
| 47741 | P14075 | Q92481 | -0.18931  |
| 47742 | P14075 | A6NMY6 | -0.80091  |
| 47743 | P14075 | Q9H489 | -0.27891  |
| 47744 | P14075 | Q7RTS5 | -0.89466  |
| 47745 | P14075 | Q9Y490 | -0.22906  |
| 47746 | P14075 | Q9Y6E0 | -0.2299   |
| 47747 | P14075 | Q99440 | -0.36171  |
| 47748 | P14075 | Q14CZ8 | -0.69964  |
| 47749 | P14075 | Q9UF02 | -0.74813  |
| 47750 | P14075 | P17301 | -0.25378  |
| 47751 | P14075 | Q9BY11 | -0.29065  |
| 47752 | P14075 | P55316 | -0.31899  |
| 47753 | P14075 | Q9H1C0 | -0.80498  |
| 47754 | P14075 | A2A3N6 | -0.32875  |
| 47755 | P14075 | P84095 | -0.37788  |
| 47756 | P14075 | Q49AM3 | -0.22602  |
| 47757 | P14075 | Q9H596 | -0.67542  |
| 47758 | P14075 | Q9NUV7 | -0.78401  |
| 47759 | P14075 | P49760 | -0.39308  |
| 47760 | P14075 | Q7Z3S7 | -0.94813  |
| 47761 | P14075 | Q9NPH6 | -0.75124  |
| 47762 | P14075 | A6NDN3 | -0.35868  |
| 47763 | P14075 | P62820 | -0.73875  |
| 47764 | P14075 | Q13634 | -1.0987   |
| 47765 | P14075 | O94933 | -0.92424  |
| 47766 | P14075 | Q96JA3 | -0.34607  |
| 47767 | P14075 | Q8NGR4 | -1.1027   |
| 47768 | P14075 | Q969M3 | -0.52664  |
| 47769 | P14075 | Q9ULK5 | -0.39904  |
| 47770 | P14075 | P46108 | -0.22741  |
| 47771 | P14075 | Q8IYK8 | -1.1897   |
| 47772 | P14075 | P78426 | -0.22816  |
| 47773 | P14075 | O00182 | -0.85043  |
| 47774 | P14075 | Q15822 | -0.91138  |
| 47775 | P14075 | Q96ME7 | -0.2385   |
| 47776 | P14075 | P35790 | -0.65323  |
| 47777 | P14075 | P63122 | -0.67565  |
| 47778 | P14075 | P36021 | -0.87345  |
| 47779 | P14075 | O95985 | -0.7273   |
| 47780 | P14075 | Q6ZUB1 | -0.86584  |
| 47781 | P14075 | P07998 | -0.24447  |
| 47782 | P14075 | P98171 | -0.22793  |
| 47783 | P14075 | Q8NDW8 | -0.024644 |
| 47784 | P14075 | Q9UQD0 | -0.83857  |
| 47785 | P14075 | C9JG80 | -0.13148  |
| 47786 | P14075 | Q5YKI7 | -0.58963  |
| 47787 | P14075 | P62195 | -0.52474  |
| 47788 | P14075 | Q6QHC5 | -0.76827  |
| 47789 | P14075 | P12109 | -0.8682   |
| 47790 | P14075 | Q9C0D5 | -0.50486  |
| 47791 | P14075 | P30498 | -0.88446  |
| 47792 | P14075 | Q7Z6E9 | -0.20769  |
| 47793 | P14075 | Q08AH3 | -0.80792  |
| 47794 | P14075 | Q8WUR7 | -0.14634  |
| 47795 | P14075 | Q96KK5 | -0.88998  |
| 47796 | P14075 | Q02246 | -0.46455  |
| 47797 | P14075 | P17735 | -0.24413  |
| 47798 | P14075 | P29122 | -0.87359  |
| 47799 | P14075 | Q02809 | -0.67029  |
| 47800 | P14075 | P10176 | -0.56658  |
| 47801 | P14075 | P34910 | -0.85214  |
| 47802 | P14075 | Q8NCG7 | -0.79772  |
| 47803 | P14075 | Q16600 | -0.20235  |
| 47804 | P14075 | Q99928 | -0.72727  |

|       |        |        |           |
|-------|--------|--------|-----------|
| 47805 | P14075 | Q13232 | -0.58952  |
| 47806 | P14075 | Q8TC27 | -0.96155  |
| 47807 | P14075 | P60709 | -0.064954 |
| 47808 | P14075 | P30530 | -0.50685  |
| 47809 | P14075 | Q14126 | -0.87015  |
| 47810 | P14075 | Q99895 | -0.91901  |
| 47811 | P14075 | Q96RD6 | -0.75376  |
| 47812 | P14075 | Q9Y6M1 | -0.2264   |
| 47813 | P14075 | P11717 | -0.29046  |
| 47814 | P14075 | P0C6A0 | -0.24742  |
| 47815 | P14075 | P01715 | -0.97479  |
| 47816 | P14075 | Q9Y5U5 | -1.2951   |
| 47817 | P14075 | Q92889 | -0.13186  |
| 47818 | P14075 | P46952 | -0.33045  |
| 47819 | P14075 | Q9HDC5 | -0.76247  |
| 47820 | P14075 | P61009 | -0.69098  |
| 47821 | P14075 | Q16777 | -0.88998  |
| 47822 | P14075 | Q7Z570 | -0.73967  |
| 47823 | P14075 | Q15123 | -0.47456  |
| 47824 | P14075 | Q4KMQ2 | -0.86651  |
| 47825 | P14075 | Q8IUZ5 | -0.59157  |
| 47826 | P14075 | Q9H1R3 | -0.25332  |
| 47827 | P14075 | Q96PP9 | -0.58408  |
| 47828 | P14075 | Q9Y5C1 | -0.61027  |
| 47829 | P14075 | P56880 | -0.64451  |
| 47830 | P14075 | Q8WY91 | -0.57338  |
| 47831 | P14075 | Q86U17 | -0.70542  |
| 47832 | P14075 | Q9NR11 | -0.21172  |
| 47833 | P14075 | A1L4H1 | -0.91752  |
| 47834 | P14075 | Q9NQV8 | -0.32554  |
| 47835 | P14075 | Q9H0H5 | -0.23289  |
| 47836 | P14075 | P04001 | -1.2635   |
| 47837 | P14075 | Q9Y4P3 | -0.22749  |
| 47838 | P14075 | Q8WVZ1 | -0.89944  |
| 47839 | P14075 | Q9NUE0 | -0.91341  |
| 47840 | P14075 | P31271 | -0.18399  |
| 47841 | P14075 | P30475 | -0.93787  |
| 47842 | P14075 | O43451 | -0.65173  |
| 47843 | P14075 | Q8IVW8 | -0.92929  |
| 47844 | P14075 | Q01973 | -0.66755  |
| 47845 | P14075 | P40394 | -0.64144  |
| 47846 | P14075 | Q9ULJ1 | -0.3067   |
| 47847 | P14075 | Q8N4K4 | -0.86584  |
| 47848 | P14075 | Q9H9Q2 | -0.16667  |
| 47849 | P14075 | Q6ZQY2 | -0.22736  |
| 47850 | P14075 | Q9GZP7 | -1.0439   |
| 47851 | P14075 | Q15109 | -0.72953  |
| 47852 | P14075 | P11678 | -0.68173  |
| 47853 | P14075 | P56962 | -0.73572  |
| 47854 | P14075 | P63151 | -0.21226  |
| 47855 | P14075 | Q14584 | -0.21172  |
| 47856 | P14075 | Q9H1P3 | -0.71621  |
| 47857 | P14075 | Q8NFX9 | -0.20259  |
| 47858 | P14075 | Q9Y6F8 | -0.34275  |
| 47859 | P14075 | A1L3Z2 | -0.071383 |
| 47860 | P14075 | O95450 | -1.116    |
| 47861 | P14075 | P05120 | -0.55291  |
| 47862 | P14075 | Q16671 | -1.086    |
| 47863 | P14075 | Q16795 | -0.10899  |
| 47864 | P14075 | Q5JU85 | -0.2325   |
| 47865 | P14075 | Q96L58 | -0.53457  |
| 47866 | P14075 | Q9NYY1 | -0.84631  |
| 47867 | P14075 | Q86XN8 | -0.22731  |
| 47868 | P14075 | Q96HR9 | -0.86584  |
| 47869 | P14075 | Q8N7C7 | -0.92811  |
| 47870 | P14075 | Q9H2C1 | -0.22757  |
| 47871 | P14075 | Q9Y625 | -0.95452  |
| 47872 | P14075 | Q8IUI8 | -0.22592  |
| 47873 | P14075 | Q15499 | -0.152    |
| 47874 | P14075 | P20742 | -0.80353  |
| 47875 | P14075 | P51809 | -0.21456  |
| 47876 | P14075 | Q6UXQ8 | -0.87849  |
| 47877 | P14075 | Q8WWZ1 | -0.83449  |
| 47878 | P14075 | Q8NFX0 | -0.69527  |
| 47879 | P14075 | Q92886 | -0.22794  |
| 47880 | P14075 | Q16720 | -0.95823  |

|       |        |        |           |
|-------|--------|--------|-----------|
| 47881 | P14075 | O75129 | -0.86584  |
| 47882 | P14075 | Q9BRP9 | -0.075061 |
| 47883 | P14075 | P14902 | -0.31615  |
| 47884 | P14075 | Q9Y274 | -0.43942  |
| 47885 | P14075 | Q6U841 | -0.74415  |
| 47886 | P14075 | A8MWX3 | -0.58712  |
| 47887 | P14075 | Q9NY59 | -0.34465  |
| 47888 | P14075 | Q7LDI9 | -0.40851  |
| 47889 | P14075 | Q9UBT6 | -0.31958  |
| 47890 | P14075 | Q9NRJ5 | -0.2881   |
| 47891 | P14075 | Q8NHE4 | -0.65137  |
| 47892 | P14075 | P10092 | -0.94563  |
| 47893 | P14075 | Q9H9B1 | -0.22741  |
| 47894 | P14075 | Q9NZV5 | -0.26943  |
| 47895 | P14075 | Q9Y4X0 | -0.16078  |
| 47896 | P14075 | O42043 | -0.5818   |
| 47897 | P14075 | Q92858 | -0.22785  |
| 47898 | P14075 | Q13061 | -0.73622  |
| 47899 | P14075 | Q9HDB5 | -0.98924  |
| 47900 | P14075 | Q7KYR7 | -0.89303  |
| 47901 | P14075 | Q6P5S7 | -0.63518  |
| 47902 | P14075 | P29017 | -0.94754  |
| 47903 | P14075 | Q96K78 | -1.1905   |
| 47904 | P14075 | P35270 | -0.22869  |
| 47905 | P14075 | Q99835 | -0.24247  |
| 47906 | P14075 | Q969N2 | -0.2209   |
| 47907 | P14075 | P10072 | -0.40272  |
| 47908 | P14075 | Q9UHX3 | -1.2205   |
| 47909 | P14075 | Q96P63 | -0.21491  |
| 47910 | P14075 | Q0GE19 | -0.96014  |
| 47911 | P14075 | Q14161 | -0.26161  |
| 47912 | P14075 | Q969J5 | -0.76639  |
| 47913 | P14075 | P53671 | -0.75811  |
| 47914 | P14075 | Q9C0D7 | -0.46549  |
| 47915 | P14075 | Q08648 | -0.78982  |
| 47916 | P14075 | Q12772 | -0.22736  |
| 47917 | P14075 | A6NNC1 | -0.86584  |
| 47918 | P14075 | Q6AZY7 | -0.81466  |
| 47919 | P14075 | Q9H0X4 | -0.86584  |
| 47920 | P14075 | P29728 | -0.31679  |
| 47921 | P14075 | Q9HBX8 | -1.143    |
| 47922 | P14075 | P01213 | -0.88576  |
| 47923 | P14075 | Q9Y597 | -0.19405  |
| 47924 | P14075 | Q9Y520 | -0.41025  |
| 47925 | P14075 | P59817 | -0.2385   |
| 47926 | P14075 | Q15392 | -0.3982   |
| 47927 | P14075 | O75352 | -0.79402  |
| 47928 | P14075 | P01717 | -0.97479  |
| 47929 | P14075 | Q92956 | -0.45021  |
| 47930 | P14075 | Q2TBE0 | -0.65844  |
| 47931 | P14075 | P0DH78 | -0.52332  |
| 47932 | P14075 | Q9UKF7 | -0.32622  |
| 47933 | P14075 | Q99944 | -1.1859   |
| 47934 | P14075 | P48067 | -0.8768   |
| 47935 | P14075 | Q765P7 | -0.75806  |
| 47936 | P14075 | Q6ZNG0 | -0.21172  |
| 47937 | P14075 | Q9Y5Y0 | -0.42192  |
| 47938 | P14075 | Q9P035 | -1.0283   |
| 47939 | P14075 | Q9H0Q0 | -0.66064  |
| 47940 | P14075 | Q9HAW8 | -0.8365   |
| 47941 | P14075 | Q9H857 | -0.43358  |
| 47942 | P14075 | Q9UPZ6 | -1.2447   |
| 47943 | P14075 | Q5J8M3 | -0.82686  |
| 47944 | P14075 | P34096 | -0.74826  |
| 47945 | P14075 | Q9Y2R4 | -0.51914  |
| 47946 | P14075 | Q8NFT6 | -0.21979  |
| 47947 | P14075 | Q9NZP5 | -1.1027   |
| 47948 | P14075 | Q04844 | -0.96238  |
| 47949 | P14075 | O60330 | -1.1297   |
| 47950 | P14075 | Q7RTU7 | -0.23038  |
| 47951 | P14075 | P54219 | -0.50749  |
| 47952 | P14075 | P05106 | -0.30815  |
| 47953 | P14075 | Q9Y680 | -0.54767  |
| 47954 | P14075 | Q9UBG0 | -0.90338  |
| 47955 | P14075 | Q8WVS4 | -0.22276  |
| 47956 | P14075 | Q96T52 | -0.54541  |

|       |        |        |           |
|-------|--------|--------|-----------|
| 47957 | P14075 | O00559 | -0.76002  |
| 47958 | P14075 | Q8NBI6 | -0.88449  |
| 47959 | P14075 | Q9NRM1 | -0.98363  |
| 47960 | P14075 | O00294 | -0.36162  |
| 47961 | P14075 | Q8TCU5 | -0.35549  |
| 47962 | P14075 | P60033 | -0.30536  |
| 47963 | P14075 | Q9HAZ1 | -0.85572  |
| 47964 | P14075 | O00626 | -0.98017  |
| 47965 | P14075 | Q9N2J8 | -0.71912  |
| 47966 | P14075 | A6NJ16 | -0.87849  |
| 47967 | P14075 | Q8NDX2 | -0.77746  |
| 47968 | P14075 | O60880 | -0.22741  |
| 47969 | P14075 | Q9NPC3 | -0.096713 |
| 47970 | P14075 | P31025 | -1.0175   |
| 47971 | P14075 | O75379 | -0.68227  |
| 47972 | P14075 | Q9Y5T5 | -0.26164  |
| 47973 | P14075 | P01116 | -0.3013   |
| 47974 | P14075 | Q9H0U3 | -0.98182  |
| 47975 | P14075 | Q9UI47 | -0.21018  |
| 47976 | P14075 | P41279 | -0.23187  |
| 47977 | P14075 | P47884 | -1.1775   |
| 47978 | P14075 | P15848 | -0.3751   |
| 47979 | P14075 | Q9NYB5 | -0.94223  |
| 47980 | P14075 | Q8N2U9 | -0.86584  |
| 47981 | P14075 | A6QL63 | -0.93238  |
| 47982 | P14075 | Q8N1E6 | -0.22638  |
| 47983 | P14075 | Q96DZ5 | -0.68515  |
| 47984 | P14075 | Q3ZCM7 | -0.67265  |
| 47985 | P14075 | Q5TGI0 | -0.86584  |
| 47986 | P14075 | P01178 | -0.39112  |
| 47987 | P14075 | Q9UNU6 | -0.88299  |
| 47988 | P14075 | Q9HD90 | -0.22757  |
| 47989 | P14075 | Q9UI17 | -0.25335  |
| 47990 | P14075 | Q96IQ9 | -0.2385   |
| 47991 | P14075 | Q9Y5X3 | -0.63017  |
| 47992 | P14075 | Q14376 | -0.42023  |
| 47993 | P14075 | Q9H5U6 | -0.4464   |
| 47994 | P14075 | Q9NRX5 | -0.47103  |
| 47995 | P14075 | Q6VB85 | -0.31899  |
| 47996 | P14075 | Q8NGC9 | -1.1027   |
| 47997 | P14075 | P02675 | -0.76602  |
| 47998 | P14075 | Q9Y5J3 | -0.22683  |
| 47999 | P14075 | O15195 | -0.41477  |
| 48000 | P14075 | Q9NU39 | -0.31899  |
| 48001 | P14075 | Q8NG92 | -1.1027   |
| 48002 | P14075 | Q96AP4 | -0.73967  |
| 48003 | P14075 | Q5VVQ6 | -0.40093  |
| 48004 | P14075 | Q8NGX1 | -1.1027   |
| 48005 | P14075 | Q9BZL6 | -0.26037  |
| 48006 | P14075 | P32321 | -0.4756   |
| 48007 | P14075 | Q9UBN4 | -0.23995  |
| 48008 | P14075 | Q6P9H5 | -0.95272  |
| 48009 | P14075 | P0CAT3 | -0.030335 |
| 48010 | P14075 | Q9UKA2 | -0.22277  |
| 48011 | P14075 | Q8NI17 | -0.53607  |
| 48012 | P14075 | Q8IU17 | -0.79654  |
| 48013 | P14075 | Q9NVF9 | -0.51206  |
| 48014 | P14075 | Q9UHQ9 | -0.81002  |
| 48015 | P14075 | P18065 | -0.38907  |
| 48016 | P14075 | O14727 | -0.22939  |
| 48017 | P14075 | Q9UL68 | -0.20848  |
| 48018 | P14075 | P28340 | -0.2276   |
| 48019 | P14075 | A6NIJ5 | -0.48092  |
| 48020 | P14075 | Q8IW92 | -0.78258  |
| 48021 | P14075 | Q96CE8 | -0.86584  |
| 48022 | P14075 | Q03113 | -0.52843  |
| 48023 | P14075 | Q9BVS4 | -0.94636  |
| 48024 | P14075 | Q9NYV9 | -0.97792  |
| 48025 | P14075 | Q6EBC2 | -0.87365  |
| 48026 | P14075 | P14317 | -0.22816  |
| 48027 | P14075 | Q6TCH7 | -0.72271  |
| 48028 | P14075 | Q02413 | -0.70688  |
| 48029 | P14075 | Q5VYP0 | -0.86584  |
| 48030 | P14075 | Q8NGT9 | -1.1027   |
| 48031 | P14075 | Q9NRG0 | -0.45441  |
| 48032 | P14075 | P0C870 | -0.14173  |

|       |        |        |           |
|-------|--------|--------|-----------|
| 48033 | P14075 | P57735 | -0.43884  |
| 48034 | P14075 | Q6WN34 | -0.68441  |
| 48035 | P14075 | Q5M8T2 | -0.78743  |
| 48036 | P14075 | P46597 | -0.18003  |
| 48037 | P14075 | A6BM72 | -0.81305  |
| 48038 | P14075 | P43026 | -0.48423  |
| 48039 | P14075 | P13533 | -0.27673  |
| 48040 | P14075 | Q5GAN3 | -0.85864  |
| 48041 | P14075 | O76036 | -1.0046   |
| 48042 | P14075 | Q52LC2 | -0.7821   |
| 48043 | P14075 | P01160 | -0.37116  |
| 48044 | P14075 | Q49A26 | -0.65467  |
| 48045 | P14075 | P46821 | -0.16782  |
| 48046 | P14075 | O60506 | -0.24161  |
| 48047 | P14075 | Q8IWW6 | -1.1111   |
| 48048 | P14075 | Q9Y3Q3 | -0.54485  |
| 48049 | P14075 | Q6P2M8 | -0.56441  |
| 48050 | P14075 | P35218 | -0.27125  |
| 48051 | P14075 | Q9NYV8 | -1.0176   |
| 48052 | P14075 | Q2V2M9 | -0.22303  |
| 48053 | P14075 | Q92813 | -0.77756  |
| 48054 | P14075 | Q8IYX8 | -0.087931 |
| 48055 | P14075 | P59537 | -1.067    |
| 48056 | P14075 | Q9BTV6 | -0.43276  |
| 48057 | P14075 | Q14994 | -0.22757  |
| 48058 | P14075 | Q9UMY4 | -0.22098  |
| 48059 | P14075 | Q9BZW4 | -0.6579   |
| 48060 | P14075 | Q8TD94 | -0.22537  |
| 48061 | P14075 | Q9UP52 | -0.98738  |
| 48062 | P14075 | Q15648 | -0.13848  |
| 48063 | P14075 | P16615 | -0.85853  |
| 48064 | P14075 | Q9NPG1 | -0.47748  |
| 48065 | P14075 | P54756 | -0.74844  |
| 48066 | P14075 | P42701 | -0.65407  |
| 48067 | P14075 | Q96HE7 | -0.55677  |
| 48068 | P14075 | Q6ZRS2 | -0.20934  |
| 48069 | P14075 | Q969E1 | -0.858    |
| 48070 | P14075 | Q9NS75 | -1.025    |
| 48071 | P14075 | P56696 | -0.84475  |
| 48072 | P14075 | Q8NGC1 | -1.1027   |
| 48073 | P14075 | Q5T7N3 | -0.29487  |
| 48074 | P14075 | Q8NA75 | -0.22739  |
| 48075 | P14075 | Q8WU20 | -0.21932  |
| 48076 | P14075 | Q9H1M0 | -0.2021   |
| 48077 | P14075 | Q9BSK2 | -0.73185  |
| 48078 | P14075 | P0C7W6 | -0.12302  |
| 48079 | P14075 | Q6XPS3 | -1.0039   |
| 48080 | P14075 | Q86YT6 | -0.22738  |
| 48081 | P14075 | Q6TCH4 | -0.86584  |
| 48082 | P14075 | Q86T20 | -0.87849  |
| 48083 | P14075 | Q8N4Q1 | -0.12625  |
| 48084 | P14075 | A6NC57 | -0.22741  |
| 48085 | P14075 | P04053 | -0.051564 |
| 48086 | P14075 | Q6NT52 | -0.85703  |
| 48087 | P14075 | Q9UBK8 | -0.29549  |
| 48088 | P14075 | P43632 | -1.0706   |
| 48089 | P14075 | Q9Y471 | -0.41396  |
| 48090 | P14075 | Q5VVB8 | -0.86584  |
| 48091 | P14075 | Q5SZK8 | -1.229    |
| 48092 | P14075 | Q86X24 | -0.48463  |
| 48093 | P14075 | Q07869 | -0.23559  |
| 48094 | P14075 | Q8IVP9 | -0.21172  |
| 48095 | P14075 | P12277 | -0.14465  |
| 48096 | P14075 | Q9Y2P4 | -1.1276   |
| 48097 | P14075 | Q6PF04 | -0.21172  |
| 48098 | P14075 | Q9UMZ2 | -0.25741  |
| 48099 | P14075 | Q7Z406 | -0.45579  |
| 48100 | P14075 | P51530 | -0.23118  |
| 48101 | P14075 | P53677 | -0.070488 |
| 48102 | P14075 | Q9UJW2 | -1.4201   |
| 48103 | P14075 | O43557 | -0.5825   |
| 48104 | P14075 | Q96BW5 | -0.48656  |
| 48105 | P14075 | Q9HCL0 | -1.1861   |
| 48106 | P14075 | O96011 | -0.19126  |
| 48107 | P14075 | Q6PKX4 | -0.52406  |
| 48108 | P14075 | Q08477 | -0.84539  |

|       |        |        |            |
|-------|--------|--------|------------|
| 48109 | P14075 | Q5M775 | -0.22745   |
| 48110 | P14075 | P13761 | -0.37101   |
| 48111 | P14075 | Q86X52 | -0.72755   |
| 48112 | P14075 | P57087 | -0.44751   |
| 48113 | P14075 | Q6ZMW3 | -0.31084   |
| 48114 | P14075 | O94813 | -0.26941   |
| 48115 | P14075 | Q8IXX5 | -0.86584   |
| 48116 | P14075 | P42126 | -0.37482   |
| 48117 | P14075 | Q9P218 | -0.96006   |
| 48118 | P14075 | Q8NES8 | -0.84399   |
| 48119 | P14075 | Q8N4P3 | -0.62208   |
| 48120 | P14075 | P28907 | -0.61147   |
| 48121 | P14075 | A8MTB9 | -0.86584   |
| 48122 | P14075 | Q9NYS0 | -0.87099   |
| 48123 | P14075 | Q9H720 | -0.84625   |
| 48124 | P14075 | Q8N2E2 | -0.87849   |
| 48125 | P14075 | A2RUC4 | -0.55821   |
| 48126 | P14075 | Q08117 | -0.28437   |
| 48127 | P14075 | P32119 | -0.42129   |
| 48128 | P14075 | C9JUS6 | -0.87849   |
| 48129 | P14075 | Q5W041 | -0.22758   |
| 48130 | P14075 | Q9Y4C1 | -0.24493   |
| 48131 | P14075 | Q969V5 | -0.22739   |
| 48132 | P14075 | Q9H169 | -0.50545   |
| 48133 | P14075 | P24530 | -0.75247   |
| 48134 | P14075 | O95197 | -0.57452   |
| 48135 | P14075 | P01621 | -0.97479   |
| 48136 | P14075 | Q9Y5G4 | -1.1297    |
| 48137 | P14075 | Q8IZD2 | -0.22743   |
| 48138 | P14075 | P41221 | -0.22982   |
| 48139 | P14075 | Q8NEC7 | -0.16361   |
| 48140 | P14075 | Q9H7Z7 | -0.30949   |
| 48141 | P14075 | P51159 | -0.28656   |
| 48142 | P14075 | Q9C0D9 | -0.77108   |
| 48143 | P14075 | Q9UH65 | -0.62437   |
| 48144 | P14075 | A5D8V7 | -0.046401  |
| 48145 | P14075 | Q5JTD7 | -0.21679   |
| 48146 | P14075 | Q8NCJ5 | -0.1984    |
| 48147 | P14075 | Q9BUH8 | -0.22739   |
| 48148 | P14075 | P01613 | -0.97479   |
| 48149 | P14075 | Q9BVG8 | -0.37999   |
| 48150 | P14075 | O43934 | -0.52887   |
| 48151 | P14075 | P59894 | -0.62648   |
| 48152 | P14075 | Q96BM1 | -0.22741   |
| 48153 | P14075 | Q96KV6 | -0.86584   |
| 48154 | P14075 | Q8NGS9 | -1.1027    |
| 48155 | P14075 | P24592 | -0.74781   |
| 48156 | P14075 | O15232 | -0.54278   |
| 48157 | P14075 | Q7Z5J8 | -0.86584   |
| 48158 | P14075 | Q460N3 | -0.21427   |
| 48159 | P14075 | P07316 | -0.18006   |
| 48160 | P14075 | Q8N461 | -0.219     |
| 48161 | P14075 | P0CG01 | -0.87849   |
| 48162 | P14075 | Q13049 | -0.2274    |
| 48163 | P14075 | Q9HBU1 | -0.22739   |
| 48164 | P14075 | P21926 | -0.57575   |
| 48165 | P14075 | Q9Y2Q0 | -0.49384   |
| 48166 | P14075 | Q06481 | -0.28885   |
| 48167 | P14075 | Q99463 | -1.194     |
| 48168 | P14075 | Q96G79 | -0.62947   |
| 48169 | P14075 | Q7Z4Y8 | -0.44749   |
| 48170 | P14075 | P06889 | -0.97479   |
| 48171 | P14075 | Q8N910 | -0.0084122 |
| 48172 | P14075 | Q7Z4J2 | -0.67287   |
| 48173 | P14075 | A6NNA5 | -0.09592   |
| 48174 | P14075 | P09238 | -1.2285    |
| 48175 | P14075 | Q96PT3 | -0.20118   |
| 48176 | P14075 | Q8N8F7 | -0.86584   |
| 48177 | P14075 | Q9UP38 | -0.37711   |
| 48178 | P14075 | Q96MP5 | -0.52332   |
| 48179 | P14075 | Q9BVA1 | -0.17578   |
| 48180 | P14075 | Q658P3 | -0.52726   |
| 48181 | P14075 | Q5VTY9 | -1.3144    |
| 48182 | P14075 | P35125 | -0.51346   |
| 48183 | P14075 | Q8NCM2 | -0.82925   |
| 48184 | P14075 | Q13591 | -0.85472   |

|       |        |        |           |
|-------|--------|--------|-----------|
| 48185 | P14075 | P49643 | -0.40479  |
| 48186 | P14075 | Q7Z4V0 | -0.2274   |
| 48187 | P14075 | P49184 | -0.45954  |
| 48188 | P14075 | Q13202 | -0.87151  |
| 48189 | P14075 | P22760 | -0.87856  |
| 48190 | P14075 | P49619 | -0.82775  |
| 48191 | P14075 | Q9BTU6 | -0.29552  |
| 48192 | P14075 | Q69YU3 | -0.29487  |
| 48193 | P14075 | Q99767 | -0.22737  |
| 48194 | P14075 | A6NJU9 | -0.86584  |
| 48195 | P14075 | Q9H488 | -0.1171   |
| 48196 | P14075 | Q5VZ03 | -0.17765  |
| 48197 | P14075 | Q02386 | -0.22251  |
| 48198 | P14075 | O00180 | -0.85968  |
| 48199 | P14075 | Q6ZNB7 | -0.93131  |
| 48200 | P14075 | O75937 | -0.24513  |
| 48201 | P14075 | Q5EBM4 | -0.21172  |
| 48202 | P14075 | Q8WXG6 | -0.32347  |
| 48203 | P14075 | O95639 | -0.22226  |
| 48204 | P14075 | Q9HC56 | -1.0841   |
| 48205 | P14075 | Q9BYV2 | -0.8443   |
| 48206 | P14075 | P49326 | -0.91705  |
| 48207 | P14075 | P29373 | -0.20833  |
| 48208 | P14075 | Q9UMR7 | -1.1298   |
| 48209 | P14075 | Q16649 | -0.18292  |
| 48210 | P14075 | Q9NQZ6 | -0.47027  |
| 48211 | P14075 | O95238 | -0.095432 |
| 48212 | P14075 | Q9BV38 | -0.60582  |
| 48213 | P14075 | Q6XD76 | -0.22749  |
| 48214 | P14075 | P59020 | -0.16078  |
| 48215 | P14075 | Q16842 | -0.54535  |
| 48216 | P14075 | Q16661 | -0.76645  |
| 48217 | P14075 | Q7Z4V5 | -0.25894  |
| 48218 | P14075 | Q9NZP8 | -1.2895   |
| 48219 | P14075 | Q9Y467 | -0.22742  |
| 48220 | P14075 | P19971 | -0.45338  |
| 48221 | P14075 | Q16644 | -0.22876  |
| 48222 | P14075 | Q9H1U4 | -0.74466  |
| 48223 | P14075 | P28068 | -0.88115  |
| 48224 | P14075 | Q9BXW6 | -0.22741  |
| 48225 | P14075 | Q96B02 | -0.39492  |
| 48226 | P14075 | Q9GZP9 | -0.25677  |
| 48227 | P14075 | O60779 | -0.59726  |
| 48228 | P14075 | Q9ULD6 | -0.31269  |
| 48229 | P14075 | Q6ZMK1 | -0.21953  |
| 48230 | P14075 | Q9UBV2 | -0.37397  |
| 48231 | P14075 | C9J442 | -0.87849  |
| 48232 | P14075 | Q6ZWI9 | -0.52332  |
| 48233 | P14075 | Q15147 | -0.33185  |
| 48234 | P14075 | O60676 | -0.73088  |
| 48235 | P14075 | Q9HCM2 | -0.63462  |
| 48236 | P14075 | O60279 | -1.006    |
| 48237 | P14075 | Q96SF7 | -0.44914  |
| 48238 | P14075 | Q2QL34 | -0.8204   |
| 48239 | P14075 | P17931 | -0.21055  |
| 48240 | P14075 | O95294 | -0.54707  |
| 48241 | P14075 | Q8N6N7 | -0.61251  |
| 48242 | P14075 | Q15884 | -0.52887  |
| 48243 | P14075 | Q5T2T1 | -0.22521  |
| 48244 | P14075 | A6NFA0 | -0.86584  |
| 48245 | P14075 | O00338 | -0.31058  |
| 48246 | P14075 | P98187 | -0.90248  |
| 48247 | P14075 | P11182 | -0.18651  |
| 48248 | P14075 | Q8IWX7 | -0.41174  |
| 48249 | P14075 | Q9UGL1 | -0.24319  |
| 48250 | P14075 | Q6DN03 | -0.88998  |
| 48251 | P14075 | P58304 | -0.22722  |
| 48252 | P14075 | P60568 | -0.43087  |
| 48253 | P14075 | Q86VZ4 | -0.86584  |
| 48254 | P14075 | Q6P1J6 | -0.70104  |
| 48255 | P14075 | P56470 | -0.6121   |
| 48256 | P14075 | Q6P461 | -1.0629   |
| 48257 | P14075 | Q9HAQ2 | -0.67441  |
| 48258 | P14075 | Q15849 | -0.40556  |
| 48259 | P14075 | Q6UXY1 | -0.73461  |
| 48260 | P14075 | Q13356 | -0.05148  |



|       |        |        |           |
|-------|--------|--------|-----------|
| 48261 | P14075 | Q99592 | -0.22901  |
| 48262 | P14075 | Q06828 | -0.89386  |
| 48263 | P14075 | O95249 | -0.41046  |
| 48264 | P14075 | Q16635 | -0.51764  |
| 48265 | P14075 | Q5JPE7 | -0.41813  |
| 48266 | P14075 | Q86Y38 | -0.9377   |
| 48267 | P14075 | O94985 | -0.98278  |
| 48268 | P14075 | Q16143 | -0.21099  |
| 48269 | P14075 | Q5VYY1 | -0.22741  |
| 48270 | P14075 | P49796 | -0.51898  |
| 48271 | P14075 | Q96NZ8 | -0.76449  |
| 48272 | P14075 | Q8N7R7 | -0.44208  |
| 48273 | P14075 | Q4G0M1 | -0.87849  |
| 48274 | P14075 | Q3ZAQ7 | -0.84368  |
| 48275 | P14075 | O75365 | -0.95843  |
| 48276 | P14075 | Q12879 | -0.27271  |
| 48277 | P14075 | Q16875 | -0.44358  |
| 48278 | P14075 | P56180 | -1.3526   |
| 48279 | P14075 | P13598 | -1.0872   |
| 48280 | P14075 | P78312 | -0.37984  |
| 48281 | P14075 | Q2TAA2 | -0.46243  |
| 48282 | P14075 | P01815 | -0.97479  |
| 48283 | P14075 | Q9HB58 | -0.19514  |
| 48284 | P14075 | Q969X1 | -0.84718  |
| 48285 | P14075 | P02792 | -0.093442 |
| 48286 | P14075 | Q9UKY3 | -0.80756  |
| 48287 | P14075 | P0C0E4 | -0.75906  |
| 48288 | P14075 | Q99426 | -0.2201   |
| 48289 | P14075 | Q96E66 | -0.29487  |
| 48290 | P14075 | Q6P3V2 | -0.099256 |
| 48291 | P14075 | P21579 | -0.29051  |
| 48292 | P14075 | Q9Y5H3 | -1.1297   |
| 48293 | P14075 | Q8NDX6 | -0.22071  |
| 48294 | P14075 | O75462 | -0.24721  |
| 48295 | P14075 | Q9P212 | -0.29339  |
| 48296 | P14075 | O95760 | -0.18899  |
| 48297 | P14075 | O14756 | -1.0414   |
| 48298 | P14075 | P59544 | -1.0953   |
| 48299 | P14075 | Q8IV50 | -0.43278  |
| 48300 | P14075 | Q9HCB6 | -0.61416  |
| 48301 | P14075 | Q8NAM6 | -0.32648  |
| 48302 | P14075 | Q9H0X6 | -0.52332  |
| 48303 | P14075 | Q53RD9 | -1.1707   |
| 48304 | P14075 | Q9UJ42 | -1.1721   |
| 48305 | P14075 | Q86XA0 | -0.74687  |
| 48306 | P14075 | Q8WVD3 | -0.74395  |
| 48307 | P14075 | Q9Y276 | -0.49403  |
| 48308 | P14075 | O14753 | -0.32365  |
| 48309 | P14075 | Q9Y4G2 | -0.39109  |
| 48310 | P14075 | Q9NPE6 | -0.56168  |
| 48311 | P14075 | Q9BY79 | -0.72123  |
| 48312 | P14075 | Q99593 | -0.46692  |
| 48313 | P14075 | Q8TDU9 | -1.1437   |
| 48314 | P14075 | P22310 | -0.82692  |
| 48315 | P14075 | Q6UWS5 | -0.30763  |
| 48316 | P14075 | P10275 | -0.22742  |
| 48317 | P14075 | Q8IWQ3 | -0.5791   |
| 48318 | P14075 | P68431 | -0.53969  |
| 48319 | P14075 | A6NFH5 | -0.57941  |
| 48320 | P14075 | Q9H5I5 | -0.96063  |
| 48321 | P14075 | Q14093 | -0.55118  |
| 48322 | P14075 | Q969S2 | -0.28227  |
| 48323 | P14075 | Q9UI32 | -0.22739  |
| 48324 | P14075 | Q96RD3 | -1.1027   |
| 48325 | P14075 | Q8N2A0 | -0.22518  |
| 48326 | P14075 | Q6NV75 | -1.1721   |
| 48327 | P14075 | P0CJ90 | -0.20043  |
| 48328 | P14075 | Q5JVL4 | -0.49662  |
| 48329 | P14075 | P22102 | -0.50308  |
| 48330 | P14075 | Q9H772 | -0.84337  |
| 48331 | P14075 | P42330 | -0.24463  |
| 48332 | P14075 | P30740 | -0.24656  |
| 48333 | P14075 | P49682 | -1.0271   |
| 48334 | P14075 | Q8NHV9 | -0.22235  |
| 48335 | P14075 | Q8IW41 | -0.22758  |
| 48336 | P14075 | Q68CR7 | -0.86584  |

|       |        |        |           |
|-------|--------|--------|-----------|
| 48337 | P14075 | Q86W25 | -0.79654  |
| 48338 | P14075 | Q8NGN3 | -1.1027   |
| 48339 | P14075 | P04431 | -0.97479  |
| 48340 | P14075 | Q14842 | -0.98803  |
| 48341 | P14075 | Q9UBX1 | -0.86833  |
| 48342 | P14075 | Q5VXU9 | -0.043452 |
| 48343 | P14075 | Q9BXI2 | -0.58724  |
| 48344 | P14075 | Q8IZF7 | -1.1905   |
| 48345 | P14075 | Q95819 | -0.26691  |
| 48346 | P14075 | Q6GMR7 | -0.79358  |
| 48347 | P14075 | Q6P9G4 | -0.86584  |
| 48348 | P14075 | P49588 | -0.25508  |
| 48349 | P14075 | P51955 | -0.22741  |
| 48350 | P14075 | Q8IVV8 | -0.93628  |
| 48351 | P14075 | Q96CF2 | -0.05113  |
| 48352 | P14075 | Q7L099 | -0.67326  |
| 48353 | P14075 | A6NHI5 | -0.86584  |
| 48354 | P14075 | Q9Y6N1 | -0.69729  |
| 48355 | P14075 | Q96NA8 | -0.81863  |
| 48356 | P14075 | Q96I27 | -0.21172  |
| 48357 | P14075 | Q5VZ18 | -0.22741  |
| 48358 | P14075 | Q9BY32 | -0.57287  |
| 48359 | P14075 | Q02446 | -0.18666  |
| 48360 | P14075 | P08185 | -0.84395  |
| 48361 | P14075 | P01625 | -0.97479  |
| 48362 | P14075 | Q14CX5 | -0.86584  |
| 48363 | P14075 | Q96PC3 | -0.15353  |
| 48364 | P14075 | Q2MKA7 | -0.24882  |
| 48365 | P14075 | Q6NXP6 | -0.57206  |
| 48366 | P14075 | Q9HB29 | -1.0662   |
| 48367 | P14075 | Q8WU66 | -0.75739  |
| 48368 | P14075 | Q8NGS8 | -1.1027   |
| 48369 | P14075 | Q96MS0 | -0.84088  |
| 48370 | P14075 | Q8N6R1 | -0.75275  |
| 48371 | P14075 | Q5TIA1 | -0.42575  |
| 48372 | P14075 | Q5I0X7 | -0.46086  |
| 48373 | P14075 | Q658T7 | -0.048815 |
| 48374 | P14075 | P03979 | -0.54698  |
| 48375 | P14075 | Q9UNH7 | -0.17391  |
| 48376 | P14075 | Q27J81 | -0.225    |
| 48377 | P14075 | Q6TDP4 | -0.58145  |
| 48378 | P14075 | Q9H112 | -0.22584  |
| 48379 | P14075 | Q12829 | -1.058    |
| 48380 | P14075 | Q14168 | -0.71044  |
| 48381 | P14075 | Q8N2G4 | -0.60538  |
| 48382 | P14075 | Q99704 | -0.057289 |
| 48383 | P14075 | P23942 | -1.0376   |
| 48384 | P14075 | Q71RG6 | -0.87849  |
| 48385 | P14075 | O43763 | -0.22783  |
| 48386 | P14075 | P01127 | -0.27803  |
| 48387 | P14075 | Q8IVM8 | -0.8419   |
| 48388 | P14075 | Q96M27 | -0.35868  |
| 48389 | P14075 | P63098 | -0.28092  |
| 48390 | P14075 | Q8IY45 | -0.21352  |
| 48391 | P14075 | Q9NUX5 | -0.14546  |
| 48392 | P14075 | P04437 | -0.49766  |
| 48393 | P14075 | Q6ZSZ6 | -0.2259   |
| 48394 | P14075 | Q95069 | -1.0047   |
| 48395 | P14075 | Q92794 | -0.29517  |
| 48396 | P14075 | Q96DH6 | -0.6758   |
| 48397 | P14075 | Q5QNW6 | -0.88998  |
| 48398 | P14075 | Q9Y2W7 | -0.26459  |
| 48399 | P14075 | P0C645 | -1.1027   |
| 48400 | P14075 | Q5HYK9 | -0.21172  |
| 48401 | P14075 | Q8IVF6 | -0.22739  |
| 48402 | P14075 | Q8TF21 | -0.22743  |
| 48403 | P14075 | Q7Z402 | -0.86584  |
| 48404 | P14075 | Q9HCE7 | -0.22741  |
| 48405 | P14075 | Q96G91 | -1.0682   |
| 48406 | P14075 | Q9Y394 | -1.0135   |
| 48407 | P14075 | A8MT82 | -0.98969  |
| 48408 | P14075 | Q9NS85 | -0.32918  |
| 48409 | P14075 | P20366 | -0.72536  |
| 48410 | P14075 | Q96D09 | -0.28875  |
| 48411 | P14075 | A2CJ06 | -0.6854   |
| 48412 | P14075 | P98179 | -0.46997  |

|       |        |        |           |
|-------|--------|--------|-----------|
| 48413 | P14075 | Q96DX4 | -0.96187  |
| 48414 | P14075 | Q7Z304 | -0.89984  |
| 48415 | P14075 | O00295 | -0.84071  |
| 48416 | P14075 | Q9H0E2 | -0.22516  |
| 48417 | P14075 | P00747 | -0.39402  |
| 48418 | P14075 | O95382 | -0.9989   |
| 48419 | P14075 | Q96MC5 | -0.071387 |
| 48420 | P14075 | Q9H158 | -1.1553   |
| 48421 | P14075 | A0PJY2 | -0.268    |
| 48422 | P14075 | P00797 | -0.80594  |
| 48423 | P14075 | Q01968 | -0.34239  |
| 48424 | P14075 | O95870 | -0.81246  |
| 48425 | P14075 | Q9BXA5 | -1.0528   |
| 48426 | P14075 | Q6ZTQ3 | -0.17937  |
| 48427 | P14075 | Q6PCB0 | -0.99416  |
| 48428 | P14075 | Q9UHI8 | -1.1226   |
| 48429 | P14075 | P30305 | -0.17915  |
| 48430 | P14075 | Q8IVF7 | -0.26343  |
| 48431 | P14075 | Q9UKB5 | -0.88725  |
| 48432 | P14075 | Q9BYD5 | -0.2882   |
| 48433 | P14075 | Q12791 | -0.62281  |
| 48434 | P14075 | P50461 | -0.22806  |
| 48435 | P14075 | Q580R0 | -0.017642 |
| 48436 | P14075 | Q12866 | -0.48193  |
| 48437 | P14075 | O95460 | -0.38262  |
| 48438 | P14075 | O77932 | -0.84642  |
| 48439 | P14075 | O95832 | -0.74106  |
| 48440 | P14075 | Q8WWF3 | -0.86584  |
| 48441 | P14075 | Q13823 | -0.40682  |
| 48442 | P14075 | O15389 | -1.0093   |
| 48443 | P14075 | P53602 | -0.56773  |
| 48444 | P14075 | O14994 | -0.86567  |
| 48445 | P14075 | Q96B33 | -0.64451  |
| 48446 | P14075 | Q8TAL6 | -0.79238  |
| 48447 | P14075 | A8MTL9 | -0.79897  |
| 48448 | P14075 | P10909 | -0.067973 |
| 48449 | P14075 | Q9UHC7 | -0.22383  |
| 48450 | P14075 | Q86W74 | -0.86584  |
| 48451 | P14075 | P00326 | -0.65633  |
| 48452 | P14075 | Q86YR6 | -0.60442  |
| 48453 | P14075 | Q7Z3Z3 | -0.51985  |
| 48454 | P14075 | P57073 | -0.29841  |
| 48455 | P14075 | Q17RP2 | -0.33043  |
| 48456 | P14075 | Q9H2D1 | -0.51716  |
| 48457 | P14075 | Q96SU4 | -0.80455  |
| 48458 | P14075 | Q8IUX1 | -0.52887  |
| 48459 | P14075 | Q14240 | -0.083469 |
| 48460 | P14075 | Q9BUQ8 | -0.33419  |
| 48461 | P14075 | Q9NRJ4 | -0.22492  |
| 48462 | P14075 | Q9BRP0 | -0.2225   |
| 48463 | P14075 | P21917 | -0.45273  |
| 48464 | P14075 | Q9BZZ2 | -1.3276   |
| 48465 | P14075 | Q14CN2 | -1.2555   |
| 48466 | P14075 | Q9NXJ5 | -0.53879  |
| 48467 | P14075 | A5PLL1 | -0.22741  |
| 48468 | P14075 | Q96QU1 | -1.2237   |
| 48469 | P14075 | P06028 | -1.0706   |
| 48470 | P14075 | Q8TAM6 | -0.50717  |
| 48471 | P14075 | O95833 | -0.21289  |
| 48472 | P14075 | Q8NGX6 | -1.1027   |
| 48473 | P14075 | Q9H3W5 | -0.88011  |
| 48474 | P14075 | P59089 | -0.027698 |
| 48475 | P14075 | Q6IF00 | -1.1027   |
| 48476 | P14075 | A2A3L6 | -0.22544  |
| 48477 | P14075 | Q8N8M0 | -0.41082  |
| 48478 | P14075 | Q6VN20 | -0.22449  |
| 48479 | P14075 | Q6ZQT0 | -0.032237 |
| 48480 | P14075 | Q96FT7 | -1.0532   |
| 48481 | P14075 | P56134 | -0.52999  |
| 48482 | P14075 | Q9UBR1 | -0.30816  |
| 48483 | P14075 | Q9NP55 | -0.85725  |
| 48484 | P14075 | Q6S8J7 | -0.22717  |
| 48485 | P14075 | Q17RD7 | -0.57056  |
| 48486 | P14075 | Q8NGM9 | -1.1027   |
| 48487 | P14075 | Q8NFW1 | -0.77782  |
| 48488 | P14075 | P63128 | -0.55458  |

|       |        |        |          |
|-------|--------|--------|----------|
| 48489 | P14075 | P04216 | -0.25889 |
| 48490 | P14075 | Q9NZS2 | -1.0036  |
| 48491 | P14075 | P80748 | -0.97479 |
| 48492 | P14075 | Q9Y4E5 | -0.2385  |
| 48493 | P14075 | P50607 | -0.51373 |
| 48494 | P14075 | Q17R26 | -0.31656 |
| 48495 | P14075 | Q68CQ7 | -0.72851 |
| 48496 | P14075 | Q6ZS82 | -0.94295 |
| 48497 | P14075 | Q9ULL8 | -0.30924 |
| 48498 | P14075 | Q96FG2 | -0.5735  |
| 48499 | P14075 | Q96E93 | -0.94953 |
| 48500 | P14075 | Q96GD3 | -0.11486 |
| 48501 | P14075 | Q8TBZ8 | -0.21172 |
| 48502 | P14075 | Q8IYB4 | -0.34807 |
| 48503 | P14075 | Q6IPX1 | -1.2307  |
| 48504 | P14075 | P27482 | -0.52751 |
| 48505 | P14075 | P80098 | -0.9002  |
| 48506 | P14075 | Q8TDF5 | -0.94969 |
| 48507 | P14075 | P0C7N8 | -1.1027  |
| 48508 | P14075 | P80422 | -0.88984 |
| 48509 | P14075 | P39086 | -0.5877  |
| 48510 | P14075 | Q8NCN4 | -0.24629 |
| 48511 | P14075 | P51114 | -0.11132 |
| 48512 | P14075 | Q9Y6U7 | -0.92811 |
| 48513 | P14075 | Q86VB7 | -0.88904 |
| 48514 | P14075 | Q99678 | -1.2928  |
| 48515 | P14075 | P24468 | -0.23786 |
| 48516 | P14075 | P49915 | -0.46459 |
| 48517 | P14075 | P50225 | -0.33247 |
| 48518 | P14075 | Q8NFF2 | -0.95275 |
| 48519 | P14075 | Q8NGW6 | -1.1027  |
| 48520 | P14075 | O75830 | -0.68755 |
| 48521 | P14075 | Q9H0U4 | -0.59276 |
| 48522 | P14075 | O15068 | -0.54852 |
| 48523 | P14075 | Q01650 | -0.69306 |
| 48524 | P14075 | Q53EV4 | -0.22741 |
| 48525 | P14075 | O95477 | -0.40567 |
| 48526 | P14075 | A2BFH1 | -0.24989 |
| 48527 | P14075 | O43374 | -0.56135 |
| 48528 | P14075 | Q16609 | -0.54538 |
| 48529 | P14075 | P49753 | -0.3249  |
| 48530 | P14075 | Q13795 | -0.58666 |
| 48531 | P14075 | Q96H72 | -0.58115 |
| 48532 | P14075 | Q9HC07 | -0.78058 |
| 48533 | P14075 | Q9P2J9 | -0.17743 |
| 48534 | P14075 | Q5SRN2 | -0.86584 |
| 48535 | P14075 | Q9GZS0 | -0.28953 |
| 48536 | P14075 | Q6PJI9 | -0.2274  |
| 48537 | P14075 | Q9BYT9 | -0.85455 |
| 48538 | P14075 | O60687 | -0.36909 |
| 48539 | P14075 | Q6NXG1 | -0.51901 |
| 48540 | P14075 | P14415 | -0.36107 |
| 48541 | P14075 | Q5VW32 | -0.52476 |
| 48542 | P14075 | Q7Z4L0 | -0.71261 |
| 48543 | P14075 | O43248 | -0.22267 |
| 48544 | P14075 | P20794 | -0.22547 |
| 48545 | P14075 | Q86XE3 | -0.93591 |
| 48546 | P14075 | Q8N6M9 | -0.13827 |
| 48547 | P14075 | Q8NG84 | -1.1027  |
| 48548 | P14075 | Q68J44 | -0.90806 |
| 48549 | P14075 | Q86XF0 | -0.36274 |
| 48550 | P14075 | P0C7Q3 | -0.13505 |
| 48551 | P14075 | Q6IE37 | -0.80012 |
| 48552 | P14075 | Q96AX9 | -0.22738 |
| 48553 | P14075 | Q96QE3 | -0.69823 |
| 48554 | P14075 | Q8IYD8 | -0.22688 |
| 48555 | P14075 | P0CJ76 | -0.72903 |
| 48556 | P14075 | Q8N104 | -0.84399 |
| 48557 | P14075 | O95139 | -0.23149 |
| 48558 | P14075 | Q9Y693 | -0.96404 |
| 48559 | P14075 | A8MW92 | -0.52332 |
| 48560 | P14075 | Q05215 | -0.22066 |
| 48561 | P14075 | Q8NBF4 | -0.10826 |
| 48562 | P14075 | Q9Y2C4 | -0.21555 |
| 48563 | P14075 | P36955 | -0.78071 |
| 48564 | P14075 | P23083 | -0.88984 |

|       |        |        |            |
|-------|--------|--------|------------|
| 48565 | P14075 | Q14500 | -1.0151    |
| 48566 | P14075 | Q8N695 | -0.96937   |
| 48567 | P14075 | O75628 | -1.0545    |
| 48568 | P14075 | Q99523 | -0.34698   |
| 48569 | P14075 | Q8NCB2 | -0.58809   |
| 48570 | P14075 | P35503 | -0.83433   |
| 48571 | P14075 | Q9BWT6 | -0.27516   |
| 48572 | P14075 | Q6W0C5 | -0.23292   |
| 48573 | P14075 | Q6PL45 | -0.86584   |
| 48574 | P14075 | Q13614 | -0.22322   |
| 48575 | P14075 | P37059 | -1.0412    |
| 48576 | P14075 | P20336 | -0.33559   |
| 48577 | P14075 | Q8WWL2 | -0.3912    |
| 48578 | P14075 | P32926 | -0.92742   |
| 48579 | P14075 | P42696 | -0.4405    |
| 48580 | P14075 | O75718 | -0.89736   |
| 48581 | P14075 | P00966 | -0.18821   |
| 48582 | P14075 | Q8NBJ9 | -0.87122   |
| 48583 | P14075 | Q32M45 | -0.85455   |
| 48584 | P14075 | Q9BWX5 | -0.22739   |
| 48585 | P14075 | Q8N3R3 | -0.30763   |
| 48586 | P14075 | P08319 | -0.37209   |
| 48587 | P14075 | P47897 | -0.2485    |
| 48588 | P14075 | Q8N9I5 | -0.96508   |
| 48589 | P14075 | O60493 | -0.22325   |
| 48590 | P14075 | Q9UM54 | -0.055999  |
| 48591 | P14075 | Q06495 | -0.49862   |
| 48592 | P14075 | Q5H943 | -0.93628   |
| 48593 | P14075 | O15496 | -0.58087   |
| 48594 | P14075 | Q96ILO | -0.24726   |
| 48595 | P14075 | Q9UF33 | -0.797     |
| 48596 | P14075 | P59666 | -0.8478    |
| 48597 | P14075 | Q8N0Z6 | -0.20472   |
| 48598 | P14075 | Q99584 | -0.23466   |
| 48599 | P14075 | Q9H7X7 | -1.0792    |
| 48600 | P14075 | P22307 | -0.20799   |
| 48601 | P14075 | Q32P28 | -0.52665   |
| 48602 | P14075 | Q86XP0 | -0.39042   |
| 48603 | P14075 | Q8IXZ2 | -0.20361   |
| 48604 | P14075 | Q6P3R8 | -0.9869    |
| 48605 | P14075 | Q96PQ5 | -0.30292   |
| 48606 | P14075 | Q15386 | -0.22882   |
| 48607 | P14075 | Q14644 | -0.62006   |
| 48608 | P14075 | Q96KR7 | -0.33444   |
| 48609 | P14075 | Q6ZVW7 | -0.014435  |
| 48610 | P14075 | A6NFC9 | -1.1027    |
| 48611 | P14075 | P32881 | -0.7874    |
| 48612 | P14075 | P24903 | -0.76256   |
| 48613 | P14075 | P13746 | -0.88088   |
| 48614 | P14075 | Q2M243 | -0.0046616 |
| 48615 | P14075 | Q0VDD8 | -0.65655   |
| 48616 | P14075 | Q13349 | -0.97633   |
| 48617 | P14075 | Q9H257 | -0.30225   |
| 48618 | P14075 | P05121 | -0.15936   |
| 48619 | P14075 | Q9H4F8 | -1.1398    |
| 48620 | P14075 | Q3T906 | -0.52883   |
| 48621 | P14075 | Q92887 | -0.72431   |
| 48622 | P14075 | Q9P2E2 | -0.4095    |
| 48623 | P14075 | Q8IWE4 | -0.17518   |
| 48624 | P14075 | Q7Z7B8 | -0.84399   |
| 48625 | P14075 | Q9Y6Y9 | -0.11342   |
| 48626 | P14075 | Q96C01 | -0.15369   |
| 48627 | P14075 | Q8NF86 | -1.3088    |
| 48628 | P14075 | Q15375 | -0.5526    |
| 48629 | P14075 | Q8TBH0 | -0.22009   |
| 48630 | P14075 | P08949 | -0.73058   |
| 48631 | P14075 | Q15166 | -0.77095   |
| 48632 | P14075 | Q9UI09 | -0.16051   |
| 48633 | P14075 | O95155 | -0.19504   |
| 48634 | P14075 | Q5SGD2 | -0.69722   |
| 48635 | P14075 | P30481 | -0.88446   |
| 48636 | P14075 | P0DJR0 | -0.95272   |
| 48637 | P14075 | Q0VAK6 | -0.30255   |
| 48638 | P14075 | P02708 | -0.69571   |
| 48639 | P14075 | A7MBM2 | -0.60113   |
| 48640 | P14075 | Q99715 | -1.0969    |

|       |        |        |           |
|-------|--------|--------|-----------|
| 48641 | P14075 | Q6NZ36 | -0.11031  |
| 48642 | P14075 | Q8N2K1 | -0.95699  |
| 48643 | P14075 | Q8TED0 | -0.22751  |
| 48644 | P14075 | P50052 | -0.71063  |
| 48645 | P14075 | Q9NYZ4 | -0.62261  |
| 48646 | P14075 | P00403 | -0.5883   |
| 48647 | P14075 | Q9BXX1 | -0.22009  |
| 48648 | P14075 | Q5T4W7 | -0.83344  |
| 48649 | P14075 | O60503 | -0.91815  |
| 48650 | P14075 | Q86WK6 | -1.0776   |
| 48651 | P14075 | P01721 | -0.97479  |
| 48652 | P14075 | P55058 | -1.035    |
| 48653 | P14075 | Q8NBU5 | -0.62107  |
| 48654 | P14075 | A6NK58 | -0.28928  |
| 48655 | P14075 | Q96T60 | -0.46669  |
| 48656 | P14075 | P16591 | -0.38919  |
| 48657 | P14075 | Q9Y6V7 | -0.85822  |
| 48658 | P14075 | Q9NVN3 | -0.20328  |
| 48659 | P14075 | A8MWS1 | -0.87849  |
| 48660 | P14075 | Q5JSS6 | -0.35097  |
| 48661 | P14075 | A6NFN3 | -0.87391  |
| 48662 | P14075 | Q9BWW7 | -0.42167  |
| 48663 | P14075 | P49768 | -0.22731  |
| 48664 | P14075 | O75452 | -1.291    |
| 48665 | P14075 | Q8NBW4 | -0.96495  |
| 48666 | P14075 | P55884 | -0.22103  |
| 48667 | P14075 | P48146 | -0.67299  |
| 48668 | P14075 | Q9Y5H2 | -1.1297   |
| 48669 | P14075 | O75596 | -0.9472   |
| 48670 | P14075 | P19876 | -0.99499  |
| 48671 | P14075 | Q6UWN5 | -0.60538  |
| 48672 | P14075 | Q08493 | -0.61902  |
| 48673 | P14075 | Q96EV2 | -0.84005  |
| 48674 | P14075 | P01024 | -0.64154  |
| 48675 | P14075 | Q8NAF0 | -0.21172  |
| 48676 | P14075 | Q8IYV9 | -0.9284   |
| 48677 | P14075 | Q96IV6 | -0.93388  |
| 48678 | P14075 | P04003 | -0.28885  |
| 48679 | P14075 | P40937 | -0.1775   |
| 48680 | P14075 | Q8N414 | -0.86584  |
| 48681 | P14075 | Q8N6U8 | -1.262    |
| 48682 | P14075 | Q7Z6Z6 | -0.5536   |
| 48683 | P14075 | Q02539 | -0.83249  |
| 48684 | P14075 | Q15435 | -0.22741  |
| 48685 | P14075 | Q9BQ67 | -0.22741  |
| 48686 | P14075 | P06309 | -0.97479  |
| 48687 | P14075 | D3W0D1 | -0.49237  |
| 48688 | P14075 | Q92765 | -0.59371  |
| 48689 | P14075 | Q53FA7 | -0.71046  |
| 48690 | P14075 | P51161 | -0.22046  |
| 48691 | P14075 | P56817 | -0.81776  |
| 48692 | P14075 | Q03135 | -0.22647  |
| 48693 | P14075 | Q9ULS5 | -0.86584  |
| 48694 | P14075 | Q8IYA2 | -0.19911  |
| 48695 | P14075 | P61328 | -0.3276   |
| 48696 | P14075 | P01909 | -0.74886  |
| 48697 | P14075 | Q9Y6N6 | -1.0212   |
| 48698 | P14075 | Q8N573 | -0.090902 |
| 48699 | P14075 | Q13207 | -0.44084  |
| 48700 | P14075 | Q14108 | -1.1458   |
| 48701 | P14075 | P01583 | -0.209    |
| 48702 | P14075 | Q8WUY1 | -0.87849  |
| 48703 | P14075 | A6NIM6 | -0.63836  |
| 48704 | P14075 | Q9Y653 | -1.3579   |
| 48705 | P14075 | P30825 | -1.0155   |
| 48706 | P14075 | Q8IWU2 | -0.59062  |
| 48707 | P14075 | Q5R372 | -0.95709  |
| 48708 | P14075 | Q0P6H9 | -0.86584  |
| 48709 | P14075 | Q96PX1 | -0.52332  |
| 48710 | P14075 | Q8IWA4 | -0.87588  |
| 48711 | P14075 | Q3SY69 | -0.41488  |
| 48712 | P14075 | Q2M3C6 | -0.86584  |
| 48713 | P14075 | O43237 | -0.20849  |
| 48714 | P14075 | P26006 | -0.42448  |
| 48715 | P14075 | Q9UJA9 | -1.3738   |
| 48716 | P14075 | P49773 | -0.39224  |

|       |        |        |           |
|-------|--------|--------|-----------|
| 48717 | P14075 | Q9H5V7 | -0.22804  |
| 48718 | P14075 | Q92817 | -0.21573  |
| 48719 | P14075 | Q99952 | -0.58395  |
| 48720 | P14075 | P12532 | -0.70248  |
| 48721 | P14075 | Q8TE60 | -1.2214   |
| 48722 | P14075 | Q8WVN6 | -1.2422   |
| 48723 | P14075 | Q5S007 | -0.34798  |
| 48724 | P14075 | Q16778 | -0.86926  |
| 48725 | P14075 | Q66K14 | -1.4819   |
| 48726 | P14075 | P10646 | -0.73546  |
| 48727 | P14075 | Q9Y580 | -0.81033  |
| 48728 | P14075 | Q8WXH5 | -0.59538  |
| 48729 | P14075 | Q68DV7 | -0.43147  |
| 48730 | P14075 | Q9HC16 | -0.13993  |
| 48731 | P14075 | Q8NGV6 | -1.1027   |
| 48732 | P14075 | P41223 | -0.098453 |
| 48733 | P14075 | Q96M69 | -0.8114   |
| 48734 | P14075 | P13987 | -0.44884  |
| 48735 | P14075 | O94823 | -0.51989  |
| 48736 | P14075 | Q8WV83 | -0.85789  |
| 48737 | P14075 | O60496 | -0.55931  |
| 48738 | P14075 | O95822 | -0.46673  |
| 48739 | P14075 | Q3MIT2 | -0.36852  |
| 48740 | P14075 | O14745 | -0.7047   |
| 48741 | P14075 | P40238 | -0.9312   |
| 48742 | P14075 | P35236 | -0.70705  |
| 48743 | P14075 | O15182 | -0.22634  |
| 48744 | P14075 | P61925 | -0.10534  |
| 48745 | P14075 | P28360 | -0.19404  |
| 48746 | P14075 | Q8NGT5 | -1.1027   |
| 48747 | P14075 | O60268 | -0.29487  |
| 48748 | P14075 | Q7Z5Y7 | -0.19405  |
| 48749 | P14075 | Q96BP3 | -0.15213  |
| 48750 | P14075 | Q96RP3 | -0.77853  |
| 48751 | P14075 | Q2TB18 | -0.37406  |
| 48752 | P14075 | Q17RQ9 | -0.86584  |
| 48753 | P14075 | Q6ZMN7 | -0.55362  |
| 48754 | P14075 | Q6PK18 | -0.94629  |
| 48755 | P14075 | P16066 | -0.99965  |
| 48756 | P14075 | Q8NAT2 | -0.62329  |
| 48757 | P14075 | Q6UWU4 | -0.71372  |
| 48758 | P14075 | Q9UBF8 | -0.65287  |
| 48759 | P14075 | Q53EP0 | -0.82382  |
| 48760 | P14075 | Q8N653 | -0.22726  |
| 48761 | P14075 | Q9NWR8 | -0.86584  |
| 48762 | P14075 | A6NDJ8 | -0.92564  |
| 48763 | P14075 | P08493 | -0.851    |
| 48764 | P14075 | P50120 | -0.2809   |
| 48765 | P14075 | Q96C23 | -0.23887  |
| 48766 | P14075 | Q02978 | -0.43457  |
| 48767 | P14075 | O15211 | -0.80551  |
| 48768 | P14075 | Q8NEN0 | -0.18344  |
| 48769 | P14075 | P0CG06 | -0.95485  |
| 48770 | P14075 | Q07960 | -0.41727  |
| 48771 | P14075 | Q96KG9 | -0.22741  |
| 48772 | P14075 | O15091 | -0.26547  |
| 48773 | P14075 | Q8TF71 | -0.88723  |
| 48774 | P14075 | Q9UJF2 | -0.58829  |
| 48775 | P14075 | P51991 | -0.23401  |
| 48776 | P14075 | Q9UJM8 | -0.66015  |
| 48777 | P14075 | O95803 | -0.76419  |
| 48778 | P14075 | Q13564 | -0.30389  |
| 48779 | P14075 | P37023 | -0.29389  |
| 48780 | P14075 | Q8WZ71 | -0.86584  |
| 48781 | P14075 | Q8NHP1 | -0.59308  |
| 48782 | P14075 | Q6ZR37 | -0.76318  |
| 48783 | P14075 | Q9BXP8 | -1.3494   |
| 48784 | P14075 | A6NND4 | -1.1027   |
| 48785 | P14075 | Q8IZP2 | -0.29487  |
| 48786 | P14075 | O95154 | -0.38624  |
| 48787 | P14075 | O60812 | -0.51753  |
| 48788 | P14075 | P40818 | -0.28164  |
| 48789 | P14075 | P09466 | -0.98476  |
| 48790 | P14075 | Q6PL24 | -0.78733  |
| 48791 | P14075 | Q96E22 | -0.6866   |
| 48792 | P14075 | P17020 | -0.21172  |

|       |        |        |           |
|-------|--------|--------|-----------|
| 48793 | P14075 | Q9NWF4 | -1.0026   |
| 48794 | P14075 | Q15695 | -0.48097  |
| 48795 | P14075 | Q969P0 | -0.31114  |
| 48796 | P14075 | Q9UKY1 | -0.2274   |
| 48797 | P14075 | Q9BWH2 | -0.30763  |
| 48798 | P14075 | Q9BWU1 | -0.6365   |
| 48799 | P14075 | P47890 | -1.1027   |
| 48800 | P14075 | Q9NSE7 | -0.58945  |
| 48801 | P14075 | O76083 | -0.22616  |
| 48802 | P14075 | P50226 | -0.33087  |
| 48803 | P14075 | Q9NP95 | -0.77798  |
| 48804 | P14075 | Q14183 | -0.23681  |
| 48805 | P14075 | Q8TAT5 | -0.55867  |
| 48806 | P14075 | Q8IXN7 | -0.76322  |
| 48807 | P14075 | P82980 | -0.46227  |
| 48808 | P14075 | Q9Y2V7 | -0.20299  |
| 48809 | P14075 | P48039 | -1.1042   |
| 48810 | P14075 | Q9P2P5 | -0.45042  |
| 48811 | P14075 | P60827 | -0.92264  |
| 48812 | P14075 | O43300 | -0.75156  |
| 48813 | P14075 | P50406 | -0.8555   |
| 48814 | P14075 | Q9NNZ6 | -0.6881   |
| 48815 | P14075 | Q5T6J7 | -0.34708  |
| 48816 | P14075 | O14609 | -0.86372  |
| 48817 | P14075 | Q6UWY0 | -0.7695   |
| 48818 | P14075 | O15484 | -0.97717  |
| 48819 | P14075 | Q9BQY6 | -0.79897  |
| 48820 | P14075 | P09327 | -0.20752  |
| 48821 | P14075 | P48165 | -0.99914  |
| 48822 | P14075 | O95935 | -0.44017  |
| 48823 | P14075 | P27144 | -0.5567   |
| 48824 | P14075 | Q8NFF5 | -0.60442  |
| 48825 | P14075 | Q7RTY7 | -1.3299   |
| 48826 | P14075 | Q9NRD9 | -0.86263  |
| 48827 | P14075 | P20585 | -0.052951 |
| 48828 | P14075 | O00634 | -0.54     |
| 48829 | P14075 | Q96KJ9 | -0.46505  |
| 48830 | P14075 | Q7RTU1 | -0.38946  |
| 48831 | P14075 | P20671 | -0.88998  |
| 48832 | P14075 | Q3KNT9 | -0.86584  |
| 48833 | P14075 | O75746 | -0.39293  |
| 48834 | P14075 | Q969H8 | -0.70049  |
| 48835 | P14075 | Q13488 | -0.68602  |
| 48836 | P14075 | Q15057 | -0.98969  |
| 48837 | P14075 | P56851 | -0.76062  |
| 48838 | P14075 | Q92806 | -0.61863  |
| 48839 | P14075 | Q92963 | -0.57707  |
| 48840 | P14075 | Q15061 | -0.22753  |
| 48841 | P14075 | Q99424 | -0.64134  |
| 48842 | P14075 | Q4G0X4 | -0.19405  |
| 48843 | P14075 | A8MWD9 | -0.18     |
| 48844 | P14075 | Q9H0Y0 | -0.38361  |
| 48845 | P14075 | Q8TDV5 | -1.2026   |
| 48846 | P14075 | P49703 | -0.22771  |
| 48847 | P14075 | Q7Z6W1 | -0.86584  |
| 48848 | P14075 | Q9BZJ8 | -0.97774  |
| 48849 | P14075 | Q03519 | -0.29834  |
| 48850 | P14075 | Q96R47 | -1.1027   |
| 48851 | P14075 | Q96RQ9 | -0.96165  |
| 48852 | P14075 | Q86V40 | -1.086    |
| 48853 | P14075 | Q7RTU0 | -0.22741  |
| 48854 | P14075 | O94892 | -0.21172  |
| 48855 | P14075 | Q8TER0 | -0.89691  |
| 48856 | P14075 | Q9H2Q1 | -0.86584  |
| 48857 | P14075 | Q709C8 | -0.48011  |
| 48858 | P14075 | Q96S96 | -0.53675  |
| 48859 | P14075 | Q9HCN4 | -0.97682  |
| 48860 | P14075 | Q8N145 | -0.64999  |
| 48861 | P14075 | P0C7T8 | -0.86584  |
| 48862 | P14075 | Q9UHD2 | -0.22741  |
| 48863 | P14075 | P0C7A2 | -0.2034   |
| 48864 | P14075 | Q05823 | -0.3571   |
| 48865 | P14075 | Q7L3S4 | -0.21172  |
| 48866 | P14075 | P51124 | -1.1506   |
| 48867 | P14075 | Q96QE2 | -0.74052  |
| 48868 | P14075 | Q04756 | -1.1269   |



|       |        |        |           |
|-------|--------|--------|-----------|
| 48869 | P14075 | Q9Y3A0 | -0.38523  |
| 48870 | P14075 | Q9Y666 | -0.99714  |
| 48871 | P14075 | Q8IX30 | -0.22746  |
| 48872 | P14075 | Q5VW00 | -0.22735  |
| 48873 | P14075 | A6NGY5 | -1.1027   |
| 48874 | P14075 | P49279 | -0.38372  |
| 48875 | P14075 | Q8WTP8 | -0.24321  |
| 48876 | P14075 | A6NM15 | -0.79654  |
| 48877 | P14075 | P51786 | -0.15809  |
| 48878 | P14075 | Q8NGN0 | -1.1027   |
| 48879 | P14075 | Q15645 | -0.2281   |
| 48880 | P14075 | Q9C009 | -0.2981   |
| 48881 | P14075 | Q92934 | -0.091123 |
| 48882 | P14075 | Q6ZQN7 | -0.97339  |
| 48883 | P14075 | P01233 | -0.71873  |
| 48884 | P14075 | P10600 | -0.22741  |
| 48885 | P14075 | Q9H2L4 | -0.86584  |
| 48886 | P14075 | O75771 | -0.22013  |
| 48887 | P14075 | Q9BY19 | -0.86584  |
| 48888 | P14075 | P01711 | -0.97479  |
| 48889 | P14075 | Q9C0J9 | -0.22639  |
| 48890 | P14075 | Q3MJ13 | -0.22776  |
| 48891 | P14075 | P22914 | -0.43291  |
| 48892 | P14075 | P21583 | -0.44203  |
| 48893 | P14075 | Q92696 | -0.56042  |
| 48894 | P14075 | Q7M4L6 | -0.41833  |
| 48895 | P14075 | Q96MS3 | -0.71382  |
| 48896 | P14075 | Q9Y573 | -0.40503  |
| 48897 | P14075 | A8MTL3 | -0.52332  |
| 48898 | P14075 | P23434 | -0.2965   |
| 48899 | P14075 | Q5U5R9 | -0.45042  |
| 48900 | P14075 | P29400 | -0.86409  |
| 48901 | P14075 | Q8NH41 | -1.1027   |
| 48902 | P14075 | Q9NQ88 | -0.79597  |
| 48903 | P14075 | P35225 | -0.24559  |
| 48904 | P14075 | Q96P88 | -1.1147   |
| 48905 | P14075 | Q9H2J7 | -0.93552  |
| 48906 | P14075 | Q8NGZ4 | -1.1027   |
| 48907 | P14075 | Q8NCW5 | -0.35914  |
| 48908 | P14075 | Q5EBN2 | -0.73967  |
| 48909 | P14075 | P15313 | -0.38628  |
| 48910 | P14075 | O15229 | -0.57256  |
| 48911 | P14075 | O15228 | -0.47132  |
| 48912 | P14075 | Q7Z3E5 | -0.22732  |
| 48913 | P14075 | Q96GD0 | -0.11309  |
| 48914 | P14075 | Q8WV19 | -0.62877  |
| 48915 | P14075 | Q8TF05 | -0.17233  |
| 48916 | P14075 | Q9NYK1 | -0.55011  |
| 48917 | P14075 | Q9UJW7 | -0.21172  |
| 48918 | P14075 | Q9Y5Y3 | -1.1721   |
| 48919 | P14075 | Q6QEF8 | -0.48053  |
| 48920 | P14075 | A6NDX4 | -0.86584  |
| 48921 | P14075 | Q92771 | -0.7015   |
| 48922 | P14075 | Q8TEW8 | -0.227    |
| 48923 | P14075 | Q13607 | -1.1027   |
| 48924 | P14075 | O95727 | -0.8639   |
| 48925 | P14075 | P09131 | -0.8119   |
| 48926 | P14075 | O75751 | -0.40673  |
| 48927 | P14075 | Q6TFL4 | -0.4703   |
| 48928 | P14075 | Q7RTY3 | -0.91901  |
| 48929 | P14075 | Q96BY9 | -0.44597  |
| 48930 | P14075 | Q9BVI0 | -0.39381  |
| 48931 | P14075 | P46091 | -1.2928   |
| 48932 | P14075 | Q96PZ2 | -0.65844  |
| 48933 | P14075 | Q5VWW1 | -0.90124  |
| 48934 | P14075 | P24386 | -0.79238  |
| 48935 | P14075 | P22612 | -0.41405  |
| 48936 | P14075 | Q29983 | -0.6415   |
| 48937 | P14075 | P07332 | -0.56277  |
| 48938 | P14075 | P23786 | -0.099304 |
| 48939 | P14075 | Q86VD7 | -0.60007  |
| 48940 | P14075 | P36954 | -0.18477  |
| 48941 | P14075 | O75200 | -0.87849  |
| 48942 | P14075 | P29322 | -0.90603  |
| 48943 | P14075 | Q6NUS8 | -0.85345  |
| 48944 | P14075 | Q29836 | -0.88446  |

|       |        |        |          |
|-------|--------|--------|----------|
| 48945 | P14075 | P58181 | -1.1027  |
| 48946 | P14075 | P58294 | -0.69342 |
| 48947 | P14075 | Q9UMR5 | -0.44522 |
| 48948 | P14075 | Q15264 | -0.22741 |
| 48949 | P14075 | Q7L7X3 | -0.51875 |
| 48950 | P14075 | A7E2S9 | -0.22741 |
| 48951 | P14075 | Q9NNW7 | -0.22489 |
| 48952 | P14075 | Q9BXP2 | -0.88229 |
| 48953 | P14075 | Q86XU0 | -0.21172 |
| 48954 | P14075 | Q9BXJ4 | -0.38134 |
| 48955 | P14075 | P84351 | -0.97846 |
| 48956 | P14075 | Q9UGM6 | -0.20393 |
| 48957 | P14075 | Q9UGN4 | -1.0869  |
| 48958 | P14075 | P0C7U3 | -0.89944 |
| 48959 | P14075 | Q7RTY0 | -0.89347 |
| 48960 | P14075 | Q96AX1 | -0.19689 |
| 48961 | P14075 | Q96CP6 | -0.86584 |
| 48962 | P14075 | O95183 | -0.94085 |
| 48963 | P14075 | Q9P0M6 | -0.96746 |
| 48964 | P14075 | O75044 | -0.22841 |
| 48965 | P14075 | Q14827 | -0.75463 |
| 48966 | P14075 | Q16799 | -0.53495 |
| 48967 | P14075 | Q00975 | -0.69101 |
| 48968 | P14075 | P42684 | -0.42607 |
| 48969 | P14075 | P02760 | -0.70131 |
| 48970 | P14075 | P13667 | -0.24294 |
| 48971 | P14075 | Q9NZI8 | -0.22667 |
| 48972 | P14075 | Q6ZUQ5 | -0.23072 |
| 48973 | P14075 | P04628 | -0.22741 |
| 48974 | P14075 | Q16877 | -0.45605 |
| 48975 | P14075 | Q9NZS9 | -0.90753 |
| 48976 | P14075 | Q96A23 | -0.22704 |
| 48977 | P14075 | Q96PW8 | -0.21777 |
| 48978 | P14075 | Q9NRI6 | -0.85703 |
| 48979 | P14075 | Q14788 | -0.54969 |
| 48980 | P14075 | O00305 | -0.22717 |
| 48981 | P14075 | Q9BZF1 | -0.80455 |
| 48982 | P14075 | Q2M3R5 | -0.86584 |
| 48983 | P14075 | B2RC85 | -0.16851 |
| 48984 | P14075 | Q86W10 | -1.0415  |
| 48985 | P14075 | Q8WVL7 | -0.23649 |
| 48986 | P14075 | P01040 | -0.30008 |
| 48987 | P14075 | P33151 | -0.49426 |
| 48988 | P14075 | Q8NEA4 | -0.14191 |
| 48989 | P14075 | Q5T7B8 | -0.29078 |
| 48990 | P14075 | Q8NGU1 | -1.1027  |
| 48991 | P14075 | Q14643 | -0.29009 |
| 48992 | P14075 | P10588 | -0.23095 |
| 48993 | P14075 | Q9BU40 | -0.85589 |
| 48994 | P14075 | Q6ZV29 | -0.63423 |
| 48995 | P14075 | P48052 | -1.0972  |
| 48996 | P14075 | P34931 | -0.61285 |
| 48997 | P14075 | Q9BVX2 | -0.59863 |
| 48998 | P14075 | Q8N475 | -0.95463 |
| 48999 | P14075 | Q9BX66 | -0.22718 |
| 49000 | P14075 | Q9NZ43 | -0.22741 |
| 49001 | P14075 | P13866 | -0.14999 |
| 49002 | P14075 | Q30134 | -0.67577 |
| 49003 | P14075 | P06314 | -0.97479 |
| 49004 | P14075 | Q04671 | -0.25064 |
| 49005 | P14075 | O43184 | -0.63739 |
| 49006 | P14075 | Q95255 | -1.0799  |
| 49007 | P14075 | Q8NHG8 | -0.60833 |
| 49008 | P14075 | P45954 | -0.48992 |
| 49009 | P14075 | Q96A99 | -0.91662 |
| 49010 | P14075 | Q9NTU7 | -0.77164 |
| 49011 | P14075 | Q9UBV7 | -0.50814 |
| 49012 | P14075 | P54849 | -1.0046  |
| 49013 | P14075 | Q96IY4 | -0.94911 |
| 49014 | P14075 | Q9BSR8 | -0.77794 |
| 49015 | P14075 | O43175 | -0.77654 |
| 49016 | P14075 | A6PVC2 | -0.4674  |
| 49017 | P14075 | P38435 | -0.79484 |
| 49018 | P14075 | O75147 | -0.37132 |
| 49019 | P14075 | P08183 | -0.38548 |
| 49020 | P14075 | Q8NGU4 | -1.1027  |

|       |        |        |            |
|-------|--------|--------|------------|
| 49021 | P14075 | Q8N2E6 | -1.1327    |
| 49022 | P14075 | Q8N6W0 | -0.43386   |
| 49023 | P14075 | Q9HCT0 | -0.63646   |
| 49024 | P14075 | P11388 | -0.15509   |
| 49025 | P14075 | Q9UFB7 | -0.21172   |
| 49026 | P14075 | Q96PE2 | -0.66532   |
| 49027 | P14075 | P17031 | -0.21172   |
| 49028 | P14075 | Q9H0D2 | -0.33225   |
| 49029 | P14075 | Q15286 | -0.52175   |
| 49030 | P14075 | Q8NFY4 | -0.66981   |
| 49031 | P14075 | Q5F1R6 | -0.0069336 |
| 49032 | P14075 | P56539 | -0.22458   |
| 49033 | P14075 | Q9C019 | -0.72401   |
| 49034 | P14075 | Q15427 | -0.67903   |
| 49035 | P14075 | Q9NYU1 | -0.41303   |
| 49036 | P14075 | Q8TCD6 | -0.70241   |
| 49037 | P14075 | P01893 | -1.0633    |
| 49038 | P14075 | Q8N7U7 | -0.34845   |
| 49039 | P14075 | P53609 | -0.49163   |
| 49040 | P14075 | Q8NGR6 | -1.1027    |
| 49041 | P14075 | Q6P7N7 | -0.86584   |
| 49042 | P14075 | Q9BZM4 | -0.52202   |
| 49043 | P14075 | Q9H2M3 | -0.29012   |
| 49044 | P14075 | Q9BQR3 | -1.2917    |
| 49045 | P14075 | Q9P2R3 | -0.3739    |
| 49046 | P14075 | Q13258 | -0.67936   |
| 49047 | P14075 | Q9NTN9 | -0.9811    |
| 49048 | P14075 | Q9H4A3 | -0.35026   |
| 49049 | P14075 | Q8WWQ2 | -0.83826   |
| 49050 | P14075 | Q6ZUS6 | -0.16615   |
| 49051 | P14075 | Q96MT1 | -0.92811   |
| 49052 | P14075 | O94916 | -0.13303   |
| 49053 | P14075 | P22304 | -0.57424   |
| 49054 | P14075 | P04839 | -0.60367   |
| 49055 | P14075 | P01817 | -0.97479   |
| 49056 | P14075 | Q6UWY5 | -0.87849   |
| 49057 | P14075 | Q8IYH5 | -0.21231   |
| 49058 | P14075 | Q9UHE5 | -0.84261   |
| 49059 | P14075 | Q8TAA1 | -0.76271   |
| 49060 | P14075 | Q9NVZ3 | -0.55103   |
| 49061 | P14075 | Q7Z6J6 | -0.33424   |
| 49062 | P14075 | P54793 | -0.7695    |
| 49063 | P14075 | Q14815 | -0.94211   |
| 49064 | P14075 | Q5R3F8 | -0.83288   |
| 49065 | P14075 | P56545 | -0.27608   |
| 49066 | P14075 | Q9HCJ3 | -0.44232   |
| 49067 | P14075 | Q13255 | -0.87439   |
| 49068 | P14075 | Q9H4S2 | -0.19029   |
| 49069 | P14075 | A6NMD2 | -0.35868   |
| 49070 | P14075 | Q8NBX0 | -0.64005   |
| 49071 | P14075 | Q9Y236 | -0.25505   |
| 49072 | P14075 | Q9NXG6 | -1.0571    |
| 49073 | P14075 | Q9BWD1 | -0.20106   |
| 49074 | P14075 | Q6ICH7 | -0.89197   |
| 49075 | P14075 | Q9Y5E3 | -1.1424    |
| 49076 | P14075 | P27105 | -0.32659   |
| 49077 | P14075 | Q8WW52 | -0.6579    |
| 49078 | P14075 | Q16772 | -0.27596   |
| 49079 | P14075 | P04899 | -0.27381   |
| 49080 | P14075 | O00754 | -0.52766   |
| 49081 | P14075 | Q5TB30 | -0.1824    |
| 49082 | P14075 | Q7Z3D6 | -0.078548  |
| 49083 | P14075 | Q969K7 | -0.52887   |
| 49084 | P14075 | Q9HCJ2 | -0.31695   |
| 49085 | P14075 | Q8IUL8 | -0.83161   |
| 49086 | P14075 | Q9Y2K1 | -0.21172   |
| 49087 | P14075 | Q8TBJ5 | -0.2316    |
| 49088 | P14075 | Q8NH60 | -1.1027    |
| 49089 | P14075 | P10114 | -0.50999   |
| 49090 | P14075 | Q9Y5V0 | -0.73967   |
| 49091 | P14075 | Q6ZN57 | -0.21172   |
| 49092 | P14075 | Q93079 | -0.88998   |
| 49093 | P14075 | Q96HH9 | -0.18279   |
| 49094 | P14075 | Q9C0H2 | -0.90773   |
| 49095 | P14075 | Q5VUJ5 | -0.98969   |
| 49096 | P14075 | Q86UB9 | -0.904     |

|       |        |        |           |
|-------|--------|--------|-----------|
| 49097 | P14075 | Q9BQJ4 | -0.78442  |
| 49098 | P14075 | O15520 | -0.28018  |
| 49099 | P14075 | Q7Z6M2 | -0.43639  |
| 49100 | P14075 | Q8NEY4 | -0.46057  |
| 49101 | P14075 | O15034 | -0.52184  |
| 49102 | P14075 | Q8NC01 | -1.1451   |
| 49103 | P14075 | P28331 | -0.16459  |
| 49104 | P14075 | Q969S6 | -0.86584  |
| 49105 | P14075 | Q96PE1 | -1.0416   |
| 49106 | P14075 | P34947 | -0.38562  |
| 49107 | P14075 | Q6UX15 | -0.87837  |
| 49108 | P14075 | Q96CX2 | -0.20107  |
| 49109 | P14075 | Q9NY93 | -0.54608  |
| 49110 | P14075 | O75112 | -0.28066  |
| 49111 | P14075 | P13284 | -0.99912  |
| 49112 | P14075 | Q9H3K2 | -0.021991 |
| 49113 | P14075 | C9J2P7 | -0.69644  |
| 49114 | P14075 | Q9ULH4 | -0.75156  |
| 49115 | P14075 | Q6PEZ8 | -0.90186  |
| 49116 | P14075 | O60721 | -0.66125  |
| 49117 | P14075 | P52740 | -0.17069  |
| 49118 | P14075 | Q9Y272 | -0.76681  |
| 49119 | P14075 | C9J798 | -0.91354  |
| 49120 | P14075 | Q6ZMR3 | -0.3134   |
| 49121 | P14075 | P32245 | -0.56095  |
| 49122 | P14075 | Q96N03 | -0.22808  |
| 49123 | P14075 | P12034 | -0.60991  |
| 49124 | P14075 | P0C7U1 | -0.11893  |
| 49125 | P14075 | Q9ULV1 | -0.48123  |
| 49126 | P14075 | P62070 | -0.74599  |
| 49127 | P14075 | Q8N0W7 | -0.68626  |
| 49128 | P14075 | P03897 | -0.2481   |
| 49129 | P14075 | A6NIZ1 | -0.96444  |
| 49130 | P14075 | Q8IVW1 | -0.92764  |
| 49131 | P14075 | A2PYH4 | -0.84361  |
| 49132 | P14075 | O43692 | -0.68066  |
| 49133 | P14075 | P25024 | -1.0484   |
| 49134 | P14075 | O60610 | -0.22727  |
| 49135 | P14075 | Q5PT55 | -0.93759  |
| 49136 | P14075 | Q5XG87 | -0.16058  |
| 49137 | P14075 | Q9H0N0 | -0.5249   |
| 49138 | P14075 | Q9UHL0 | -0.51292  |
| 49139 | P14075 | Q9NQ90 | -0.53619  |
| 49140 | P14075 | Q9P273 | -0.95079  |
| 49141 | P14075 | Q9H665 | -0.39621  |
| 49142 | P14075 | Q13018 | -1.0658   |
| 49143 | P14075 | A6NC78 | -0.43638  |
| 49144 | P14075 | Q8IVS2 | -0.64745  |
| 49145 | P14075 | Q9UKF2 | -1.0975   |
| 49146 | P14075 | A6NHR9 | -0.67046  |
| 49147 | P14075 | Q8WVN8 | -0.86965  |
| 49148 | P14075 | P27918 | -0.9223   |
| 49149 | P14075 | Q6UXX2 | -0.90149  |
| 49150 | P14075 | Q9H0R6 | -0.53322  |
| 49151 | P14075 | Q96C12 | -0.10387  |
| 49152 | P14075 | Q8IZ41 | -0.82468  |
| 49153 | P14075 | P31321 | -0.33069  |
| 49154 | P14075 | Q5VV67 | -0.22449  |
| 49155 | P14075 | Q9Y265 | -0.29556  |
| 49156 | P14075 | Q6NUK1 | -0.78496  |
| 49157 | P14075 | P0C7Q2 | -0.15833  |
| 49158 | P14075 | P04920 | -0.72275  |
| 49159 | P14075 | Q9BUP0 | -0.3325   |
| 49160 | P14075 | Q8TBR7 | -0.93628  |
| 49161 | P14075 | P49281 | -0.23582  |
| 49162 | P14075 | Q8N1Q1 | -0.39077  |
| 49163 | P14075 | Q9UK32 | -0.6163   |
| 49164 | P14075 | P42166 | -0.19289  |
| 49165 | P14075 | A8MXQ7 | -0.22741  |
| 49166 | P14075 | Q9NV66 | -1.012    |
| 49167 | P14075 | P48745 | -0.97744  |
| 49168 | P14075 | P32241 | -0.808    |
| 49169 | P14075 | Q9NXL2 | -0.7066   |
| 49170 | P14075 | P30461 | -0.88446  |
| 49171 | P14075 | P0C7X0 | -0.48092  |
| 49172 | P14075 | Q6NT32 | -0.74032  |

|       |        |        |          |
|-------|--------|--------|----------|
| 49173 | P14075 | O14795 | -0.40805 |
| 49174 | P14075 | Q7KZN9 | -0.71965 |
| 49175 | P14075 | Q8TBC3 | -0.19405 |
| 49176 | P14075 | Q969P6 | -0.51136 |
| 49177 | P14075 | P63133 | -0.43742 |
| 49178 | P14075 | O75636 | -0.57558 |
| 49179 | P14075 | Q70SY1 | -0.2251  |
| 49180 | P14075 | P20815 | -0.71887 |
| 49181 | P14075 | Q96P31 | -0.93628 |
| 49182 | P14075 | Q3KRB8 | -1.052   |
| 49183 | P14075 | Q9UBN6 | -0.88558 |
| 49184 | P14075 | Q9Y2D5 | -0.4356  |
| 49185 | P14075 | Q5JUK3 | -1.1407  |
| 49186 | P14075 | O76080 | -0.24455 |
| 49187 | P14075 | Q8NEN9 | -0.42623 |
| 49188 | P14075 | Q08828 | -0.61836 |
| 49189 | P14075 | O14717 | -0.25069 |
| 49190 | P14075 | Q9P2D0 | -0.22737 |
| 49191 | P14075 | Q07326 | -0.82485 |
| 49192 | P14075 | P68400 | -0.32874 |
| 49193 | P14075 | Q9H4M9 | -0.41568 |
| 49194 | P14075 | P11245 | -0.28923 |
| 49195 | P14075 | Q70J99 | -0.22906 |
| 49196 | P14075 | P08572 | -0.45737 |
| 49197 | P14075 | P25445 | -0.22726 |
| 49198 | P14075 | P54577 | -0.29245 |
| 49199 | P14075 | Q8IX95 | -0.28887 |
| 49200 | P14075 | A6NKQ9 | -0.85703 |
| 49201 | P14075 | O14830 | -0.22287 |
| 49202 | P14075 | P13671 | -0.28263 |
| 49203 | P14075 | Q12887 | -0.55296 |
| 49204 | P14075 | O15551 | -0.78541 |
| 49205 | P14075 | Q96RD0 | -1.1027  |
| 49206 | P14075 | Q8NBS3 | -0.63218 |
| 49207 | P14075 | Q96DR4 | -0.71621 |
| 49208 | P14075 | Q9H190 | -0.25748 |
| 49209 | P14075 | Q8TF45 | -0.21172 |
| 49210 | P14075 | Q6P4E1 | -0.86584 |
| 49211 | P14075 | Q86XT2 | -0.11924 |
| 49212 | P14075 | Q9P0W0 | -0.52139 |
| 49213 | P14075 | Q0VGL1 | -0.63718 |
| 49214 | P14075 | Q92871 | -0.45311 |
| 49215 | P14075 | Q14714 | -0.94791 |
| 49216 | P14075 | Q13029 | -0.22728 |
| 49217 | P14075 | O94778 | -0.87403 |
| 49218 | P14075 | Q99743 | -0.2286  |
| 49219 | P14075 | Q86X40 | -0.22811 |
| 49220 | P14075 | Q9H6S3 | -0.37984 |
| 49221 | P14075 | Q2KJY2 | -0.76169 |
| 49222 | P14075 | Q9H1D0 | -0.98287 |
| 49223 | P14075 | Q6GMV3 | -0.69639 |
| 49224 | P14075 | P14854 | -0.24108 |
| 49225 | P14075 | O15118 | -0.56558 |
| 49226 | P14075 | P58872 | -1.1526  |
| 49227 | P14075 | P53680 | -0.16749 |
| 49228 | P14075 | Q99705 | -1.0417  |
| 49229 | P14075 | P03950 | -0.28273 |
| 49230 | P14075 | Q504Y0 | -0.87538 |
| 49231 | P14075 | Q8NGX2 | -1.1027  |
| 49232 | P14075 | A6NCI5 | -0.86584 |
| 49233 | P14075 | Q9UIM3 | -0.36858 |
| 49234 | P14075 | Q16740 | -0.33535 |
| 49235 | P14075 | O15156 | -0.2478  |
| 49236 | P14075 | A1XBS5 | -0.13235 |
| 49237 | P14075 | Q15760 | -1.2928  |
| 49238 | P14075 | P25054 | -0.22702 |
| 49239 | P14075 | Q8NAG6 | -0.35498 |
| 49240 | P14075 | Q5W0B1 | -0.52332 |
| 49241 | P14075 | Q9NPC8 | -0.22942 |
| 49242 | P14075 | P46734 | -0.22776 |
| 49243 | P14075 | P49788 | -0.88408 |
| 49244 | P14075 | Q9Y6Q1 | -0.43809 |
| 49245 | P14075 | Q8NGW1 | -1.1027  |
| 49246 | P14075 | Q9HBY0 | -0.75613 |
| 49247 | P14075 | Q8NFA2 | -0.38063 |
| 49248 | P14075 | P09486 | -0.28607 |

|       |        |        |           |
|-------|--------|--------|-----------|
| 49249 | P14075 | Q96SK2 | -0.86584  |
| 49250 | P14075 | Q9Y4C5 | -0.58829  |
| 49251 | P14075 | Q9NZ08 | -0.57056  |
| 49252 | P14075 | P27449 | -0.2649   |
| 49253 | P14075 | O60568 | -0.27398  |
| 49254 | P14075 | P55289 | -1.0566   |
| 49255 | P14075 | P57727 | -1.1971   |
| 49256 | P14075 | P02647 | -0.29094  |
| 49257 | P14075 | P58012 | -0.31899  |
| 49258 | P14075 | Q6UVK1 | -0.89189  |
| 49259 | P14075 | P60520 | -0.10983  |
| 49260 | P14075 | A0AVI4 | -0.52887  |
| 49261 | P14075 | Q9UK80 | -0.31729  |
| 49262 | P14075 | P08559 | -0.30077  |
| 49263 | P14075 | Q96L15 | -0.80255  |
| 49264 | P14075 | Q8WUW1 | -0.17321  |
| 49265 | P14075 | Q96JW4 | -0.96956  |
| 49266 | P14075 | Q7L8L6 | -0.3676   |
| 49267 | P14075 | P49888 | -0.20863  |
| 49268 | P14075 | Q96DZ9 | -0.88766  |
| 49269 | P14075 | Q99616 | -0.99985  |
| 49270 | P14075 | O94988 | -1.052    |
| 49271 | P14075 | Q13480 | -0.22727  |
| 49272 | P14075 | Q9NW97 | -0.86584  |
| 49273 | P14075 | O60245 | -1.2445   |
| 49274 | P14075 | O94966 | -0.64102  |
| 49275 | P14075 | P43304 | -0.28992  |
| 49276 | P14075 | Q8N6T3 | -0.27005  |
| 49277 | P14075 | Q9GZV1 | -0.7072   |
| 49278 | P14075 | Q6UWY2 | -1.2917   |
| 49279 | P14075 | Q8NGF9 | -1.1027   |
| 49280 | P14075 | Q05469 | -0.22116  |
| 49281 | P14075 | Q76076 | -0.96543  |
| 49282 | P14075 | Q3SYC2 | -0.7205   |
| 49283 | P14075 | Q9BV40 | -0.62496  |
| 49284 | P14075 | Q9NY99 | -0.42777  |
| 49285 | P14075 | Q9NWQ8 | -0.50564  |
| 49286 | P14075 | Q9Y5H9 | -1.1553   |
| 49287 | P14075 | Q9C0J8 | -0.2274   |
| 49288 | P14075 | Q96GK7 | -0.64709  |
| 49289 | P14075 | P18545 | -0.44454  |
| 49290 | P14075 | Q96SR6 | -0.16549  |
| 49291 | P14075 | Q9BYG0 | -0.85902  |
| 49292 | P14075 | Q93008 | -0.31266  |
| 49293 | P14075 | P60660 | -0.22664  |
| 49294 | P14075 | O95881 | -0.5611   |
| 49295 | P14075 | Q9H553 | -0.19147  |
| 49296 | P14075 | P98088 | -0.98968  |
| 49297 | P14075 | Q8N987 | -0.075224 |
| 49298 | P14075 | P98082 | -0.22612  |
| 49299 | P14075 | O43566 | -0.22791  |
| 49300 | P14075 | P31512 | -0.99237  |
| 49301 | P14075 | Q9NZQ8 | -0.94188  |
| 49302 | P14075 | Q6UXF1 | -0.52887  |
| 49303 | P14075 | Q9NP31 | -0.68214  |
| 49304 | P14075 | Q14D33 | -0.86584  |
| 49305 | P14075 | Q15042 | -0.41204  |
| 49306 | P14075 | Q8WVF1 | -0.5939   |
| 49307 | P14075 | Q5VST9 | -0.71861  |
| 49308 | P14075 | O00400 | -0.83932  |
| 49309 | P14075 | P57730 | -0.63549  |
| 49310 | P14075 | P0CW19 | -0.37384  |
| 49311 | P14075 | P16619 | -1.0277   |
| 49312 | P14075 | Q15353 | -0.29685  |
| 49313 | P14075 | Q96IW7 | -0.59138  |
| 49314 | P14075 | Q7RTR2 | -0.44148  |
| 49315 | P14075 | P48357 | -0.85029  |
| 49316 | P14075 | Q96RT8 | -0.16861  |
| 49317 | P14075 | Q05923 | -0.35833  |
| 49318 | P14075 | Q9P1P5 | -1.143    |
| 49319 | P14075 | Q9BY49 | -0.9134   |
| 49320 | P14075 | Q9P2V4 | -0.6774   |
| 49321 | P14075 | O95393 | -0.25173  |
| 49322 | P14075 | Q8NGZ2 | -1.1027   |
| 49323 | P14075 | Q96PG1 | -0.86584  |
| 49324 | P14075 | P57682 | -0.35845  |

|       |        |        |          |
|-------|--------|--------|----------|
| 49325 | P14075 | Q6UW63 | -0.40286 |
| 49326 | P14075 | P51813 | -0.64122 |
| 49327 | P14075 | Q9P241 | -0.57608 |
| 49328 | P14075 | Q96CX6 | -0.22951 |
| 49329 | P14075 | Q16568 | -0.31051 |
| 49330 | P14075 | Q9P104 | -0.41303 |
| 49331 | P14075 | O14735 | -0.60949 |
| 49332 | P14075 | Q8N816 | -0.86584 |
| 49333 | P14075 | F2Z333 | -0.86584 |
| 49334 | P14075 | Q9UI42 | -0.98703 |
| 49335 | P14075 | Q6ZSZ5 | -0.61009 |
| 49336 | P14075 | Q2Y0W8 | -0.87307 |
| 49337 | P14075 | Q14432 | -0.61623 |
| 49338 | P14075 | Q96A33 | -0.25307 |
| 49339 | P14075 | Q9H8S5 | -0.41982 |
| 49340 | P14075 | Q86Y91 | -0.28511 |
| 49341 | P14075 | Q9HC35 | -0.37046 |
| 49342 | P14075 | Q15722 | -1.3942  |
| 49343 | P14075 | Q13206 | -0.80007 |
| 49344 | P14075 | O95976 | -1.0608  |
| 49345 | P14075 | P26440 | -0.44788 |
| 49346 | P14075 | Q9NY30 | -0.36874 |
| 49347 | P14075 | Q9HBL6 | -0.86584 |
| 49348 | P14075 | Q9GZV3 | -0.89448 |
| 49349 | P14075 | Q9NZV8 | -0.69511 |
| 49350 | P14075 | P07203 | -0.29955 |
| 49351 | P14075 | Q6PCB8 | -1.0252  |
| 49352 | P14075 | Q9HCM3 | -0.86584 |
| 49353 | P14075 | Q8IZF6 | -1.1905  |
| 49354 | P14075 | Q96R09 | -1.1027  |
| 49355 | P14075 | P48304 | -0.84692 |
| 49356 | P14075 | O94788 | -0.61859 |
| 49357 | P14075 | P61565 | -0.5818  |
| 49358 | P14075 | Q14011 | -0.22471 |
| 49359 | P14075 | Q9HBU9 | -0.6579  |
| 49360 | P14075 | P29508 | -0.58014 |
| 49361 | P14075 | Q14330 | -1.124   |
| 49362 | P14075 | Q6NUI2 | -0.59102 |
| 49363 | P14075 | P28908 | -0.69299 |
| 49364 | P14075 | O95470 | -0.33234 |
| 49365 | P14075 | P43155 | -0.46208 |
| 49366 | P14075 | O75616 | -0.71414 |
| 49367 | P14075 | O75366 | -0.37324 |
| 49368 | P14075 | Q9HCJ0 | -0.5482  |
| 49369 | P14075 | P11908 | -0.63076 |
| 49370 | P14075 | Q99698 | -0.22741 |
| 49371 | P14075 | P30613 | -0.3864  |
| 49372 | P14075 | Q9UBX0 | -0.20927 |
| 49373 | P14075 | Q32M88 | -0.46404 |
| 49374 | P14075 | Q9C0A0 | -1.1581  |
| 49375 | P14075 | Q08174 | -0.9346  |
| 49376 | P14075 | Q86VH5 | -0.86584 |
| 49377 | P14075 | Q96RP9 | -0.73365 |
| 49378 | P14075 | O15165 | -0.71859 |
| 49379 | P14075 | Q6QAJ8 | -0.86584 |
| 49380 | P14075 | P49798 | -0.54383 |
| 49381 | P14075 | Q9HB14 | -1.0473  |
| 49382 | P14075 | Q86Y82 | -0.3059  |
| 49383 | P14075 | O00322 | -0.82073 |
| 49384 | P14075 | Q8N6D5 | -0.22741 |
| 49385 | P14075 | Q8N138 | -0.40635 |
| 49386 | P14075 | Q9H871 | -0.16302 |
| 49387 | P14075 | O43307 | -0.6733  |
| 49388 | P14075 | Q93077 | -0.88998 |
| 49389 | P14075 | O95747 | -0.90348 |
| 49390 | P14075 | Q9H8V3 | -0.22773 |
| 49391 | P14075 | Q8NB25 | -0.16078 |
| 49392 | P14075 | Q15717 | -0.37428 |
| 49393 | P14075 | Q14191 | -0.25025 |
| 49394 | P14075 | Q9H0R5 | -0.83224 |
| 49395 | P14075 | P0CG23 | -0.73005 |
| 49396 | P14075 | Q14088 | -0.46426 |
| 49397 | P14075 | P60153 | -0.85864 |
| 49398 | P14075 | Q6KCM7 | -0.78496 |
| 49399 | P14075 | Q6UXP8 | -0.87849 |
| 49400 | P14075 | P17181 | -0.87453 |

|       |        |        |          |
|-------|--------|--------|----------|
| 49401 | P14075 | Q9UJP4 | -0.20986 |
| 49402 | P14075 | P08134 | -0.23306 |
| 49403 | P14075 | Q96RB7 | -1.1027  |
| 49404 | P14075 | P30874 | -0.42656 |
| 49405 | P14075 | P18054 | -0.21769 |
| 49406 | P14075 | Q6PEY2 | -0.62988 |
| 49407 | P14075 | Q3KNS1 | -0.61352 |
| 49408 | P14075 | Q8N907 | -0.65515 |
| 49409 | P14075 | Q9P0M4 | -0.85335 |
| 49410 | P14075 | Q9C0G0 | -0.21172 |
| 49411 | P14075 | P78357 | -0.53849 |
| 49412 | P14075 | Q2TAL5 | -0.22782 |
| 49413 | P14075 | Q96S44 | -0.32677 |
| 49414 | P14075 | Q7Z407 | -0.93628 |
| 49415 | P14075 | P30622 | -0.22693 |
| 49416 | P14075 | A6NI56 | -0.04064 |
| 49417 | P14075 | O14511 | -1.1414  |
| 49418 | P14075 | O75970 | -0.22709 |
| 49419 | P14075 | Q96IR7 | -0.6212  |
| 49420 | P14075 | P11912 | -0.86054 |
| 49421 | P14075 | Q8WXA9 | -0.29676 |
| 49422 | P14075 | Q9NP87 | -0.20293 |
| 49423 | P14075 | Q02548 | -0.22735 |
| 49424 | P14075 | P28328 | -0.30946 |
| 49425 | P14075 | Q7RTX9 | -0.89347 |
| 49426 | P14075 | Q9NQU5 | -0.30765 |
| 49427 | P14075 | Q6ZRR5 | -0.86584 |
| 49428 | P14075 | Q96S66 | -0.42188 |
| 49429 | P14075 | Q8IVI9 | -0.22725 |
| 49430 | P14075 | Q86YL5 | -0.16078 |
| 49431 | P14075 | P01859 | -0.93808 |
| 49432 | P14075 | Q9NRA2 | -1.0021  |
| 49433 | P14075 | Q8IX01 | -0.24061 |
| 49434 | P14075 | P23443 | -0.21571 |
| 49435 | P14075 | Q14894 | -0.29327 |
| 49436 | P14075 | Q9UKX5 | -0.88325 |
| 49437 | P14075 | P26718 | -0.54132 |
| 49438 | P14075 | Q96B70 | -0.77771 |
| 49439 | P14075 | Q92688 | -0.18471 |
| 49440 | P14075 | Q9NPF4 | -0.42145 |
| 49441 | P14075 | P29218 | -0.18671 |
| 49442 | P14075 | Q9NQW1 | -0.27748 |
| 49443 | P14075 | Q9H2P0 | -0.20522 |
| 49444 | P14075 | P84243 | -1.1421  |
| 49445 | P14075 | P31150 | -0.10841 |
| 49446 | P14075 | P41273 | -0.88525 |
| 49447 | P14075 | Q9H7X2 | -0.86584 |
| 49448 | P14075 | Q92835 | -0.22741 |
| 49449 | P14075 | Q6PI73 | -0.86584 |
| 49450 | P14075 | P01570 | -0.7874  |
| 49451 | P14075 | Q86VW2 | -0.72782 |
| 49452 | P14075 | Q8IYR0 | -0.13487 |
| 49453 | P14075 | Q96A61 | -0.73967 |
| 49454 | P14075 | Q96M43 | -0.29487 |
| 49455 | P14075 | Q13615 | -0.25951 |
| 49456 | P14075 | Q14656 | -0.64446 |
| 49457 | P14075 | Q9HCN8 | -0.476   |
| 49458 | P14075 | Q32MK0 | -0.61761 |
| 49459 | P14075 | O43286 | -0.52848 |
| 49460 | P14075 | Q6PIZ9 | -0.91632 |
| 49461 | P14075 | Q4V348 | -0.21172 |
| 49462 | P14075 | Q8NGK1 | -1.1027  |
| 49463 | P14075 | P56597 | -0.5046  |
| 49464 | P14075 | P01270 | -0.60688 |
| 49465 | P14075 | A0MZ66 | -0.59586 |
| 49466 | P14075 | P81605 | -1.0403  |
| 49467 | P14075 | Q9H8Y5 | -0.21579 |
| 49468 | P14075 | D6RA61 | -0.69644 |
| 49469 | P14075 | Q0VF96 | -0.22641 |
| 49470 | P14075 | P78562 | -0.9726  |
| 49471 | P14075 | P60893 | -1.1721  |
| 49472 | P14075 | Q02221 | -0.38401 |
| 49473 | P14075 | Q9H1Z4 | -0.22741 |
| 49474 | P14075 | P62685 | -0.40851 |
| 49475 | P14075 | Q9NWS6 | -0.86584 |
| 49476 | P14075 | Q96QS6 | -0.9088  |



|       |        |        |          |
|-------|--------|--------|----------|
| 49477 | P14075 | Q9BZD6 | -0.95742 |
| 49478 | P14075 | Q16676 | -0.31899 |
| 49479 | P14075 | P09471 | -0.76117 |
| 49480 | P14075 | Q96T92 | -0.22682 |
| 49481 | P14075 | O43313 | -0.22741 |
| 49482 | P14075 | Q16527 | -0.4259  |
| 49483 | P14075 | Q8NBF2 | -0.22153 |
| 49484 | P14075 | Q8NGJ9 | -1.1027  |
| 49485 | P14075 | Q53GD3 | -0.74018 |
| 49486 | P14075 | Q9BRR9 | -1.1111  |
| 49487 | P14075 | P52954 | -0.22925 |
| 49488 | P14075 | Q9H5Y7 | -0.92424 |
| 49489 | P14075 | O95843 | -0.7493  |
| 49490 | P14075 | Q9BUZ4 | -0.22734 |
| 49491 | P14075 | Q8N8X6 | -0.35868 |
| 49492 | P14075 | P0CK96 | -0.86584 |
| 49493 | P14075 | P25090 | -1.3114  |
| 49494 | P14075 | Q96LR1 | -0.87849 |
| 49495 | P14075 | P04090 | -0.86206 |
| 49496 | P14075 | A6NKD2 | -0.43319 |
| 49497 | P14075 | Q9NQV6 | -0.21172 |
| 49498 | P14075 | P22681 | -0.22741 |
| 49499 | P14075 | Q3KQZ1 | -0.73185 |
| 49500 | P14075 | P08908 | -1.0562  |
| 49501 | P14075 | A6H8M9 | -1.1297  |
| 49502 | P14075 | O75443 | -0.98374 |
| 49503 | P14075 | Q99650 | -0.67337 |
| 49504 | P14075 | Q96KF7 | -0.86584 |
| 49505 | P14075 | Q8NGB8 | -1.1027  |
| 49506 | P14075 | O60512 | -0.39385 |
| 49507 | P14075 | Q04721 | -0.22742 |
| 49508 | P14075 | Q6ZUX3 | -0.14136 |
| 49509 | P14075 | P25103 | -0.75379 |
| 49510 | P14075 | Q5SQS7 | -0.22741 |
| 49511 | P14075 | O43638 | -0.29441 |
| 49512 | P14075 | Q96C45 | -0.9088  |
| 49513 | P14075 | Q8IXY8 | -0.3788  |
| 49514 | P14075 | Q9H9S4 | -0.52163 |
| 49515 | P14075 | A6NDG6 | -0.553   |
| 49516 | P14075 | Q6NVV3 | -0.91069 |
| 49517 | P14075 | A6NCS4 | -0.24681 |
| 49518 | P14075 | P28288 | -0.62954 |
| 49519 | P14075 | Q8IX18 | -0.84361 |
| 49520 | P14075 | P0C5W0 | -0.29487 |
| 49521 | P14075 | Q9NX36 | -0.49341 |
| 49522 | P14075 | P20142 | -0.74462 |
| 49523 | P14075 | P40261 | -0.18978 |
| 49524 | P14075 | D6R9N7 | -0.69644 |
| 49525 | P14075 | Q8N884 | -0.47397 |
| 49526 | P14075 | P12821 | -0.69392 |
| 49527 | P14075 | Q99727 | -0.77076 |
| 49528 | P14075 | Q9UBM8 | -0.56559 |
| 49529 | P14075 | P62502 | -0.87851 |
| 49530 | P14075 | Q9NWQ9 | -0.30763 |
| 49531 | P14075 | P08476 | -0.22919 |
| 49532 | P14075 | Q8TB22 | -1.1352  |
| 49533 | P14075 | P02745 | -0.34908 |
| 49534 | P14075 | Q86W34 | -0.83564 |
| 49535 | P14075 | Q30KR1 | -0.84399 |
| 49536 | P14075 | B9EJG8 | -0.86584 |
| 49537 | P14075 | Q9BXC9 | -0.2334  |
| 49538 | P14075 | Q969N4 | -1.143   |
| 49539 | P14075 | O60667 | -0.79712 |
| 49540 | P14075 | P18283 | -0.41613 |
| 49541 | P14075 | Q9C0G6 | -0.69496 |
| 49542 | P14075 | Q9UPQ3 | -1.286   |
| 49543 | P14075 | P21246 | -0.7029  |
| 49544 | P14075 | Q7Z3H0 | -0.22741 |
| 49545 | P14075 | Q14775 | -0.52122 |
| 49546 | P14075 | Q96MM7 | -0.59622 |
| 49547 | P14075 | Q8IVG5 | -0.02702 |
| 49548 | P14075 | Q9NYW5 | -1.1212  |
| 49549 | P14075 | Q7Z7J7 | -0.86584 |
| 49550 | P14075 | Q14832 | -0.96899 |
| 49551 | P14075 | Q8N6L7 | -0.86584 |
| 49552 | P14075 | Q9H2F9 | -0.1725  |

|       |        |        |           |
|-------|--------|--------|-----------|
| 49553 | P14075 | Q8TD84 | -0.87884  |
| 49554 | P14075 | O60830 | -0.46603  |
| 49555 | P14075 | Q9H8W5 | -0.22741  |
| 49556 | P14075 | P05452 | -0.8601   |
| 49557 | P14075 | Q9BRG2 | -0.82108  |
| 49558 | P14075 | Q15475 | -0.22726  |
| 49559 | P14075 | P52209 | -0.26347  |
| 49560 | P14075 | Q9Y6L6 | -0.8095   |
| 49561 | P14075 | Q5T0U0 | -0.078235 |
| 49562 | P14075 | Q6ZP29 | -0.80391  |
| 49563 | P14075 | P15104 | -0.60207  |
| 49564 | P14075 | Q8NH21 | -1.1027   |
| 49565 | P14075 | Q6UXN8 | -0.86768  |
| 49566 | P14075 | Q9UK17 | -0.96505  |
| 49567 | P14075 | Q9P299 | -0.070789 |
| 49568 | P14075 | Q9H1X3 | -0.86545  |
| 49569 | P14075 | P0C7V7 | -1.0477   |
| 49570 | P14075 | O75325 | -1.1179   |
| 49571 | P14075 | Q6ZN66 | -0.92929  |
| 49572 | P14075 | P61266 | -0.80703  |
| 49573 | P14075 | Q9UBQ7 | -0.57634  |
| 49574 | P14075 | P78412 | -0.22854  |
| 49575 | P14075 | P35713 | -0.27071  |
| 49576 | P14075 | P0C7V4 | -0.48092  |
| 49577 | P14075 | Q5JXM2 | -0.77979  |
| 49578 | P14075 | O75911 | -1.2915   |
| 49579 | P14075 | Q9NR48 | -0.22737  |
| 49580 | P14075 | Q9UQP3 | -0.81134  |
| 49581 | P14075 | Q9H1M3 | -0.84399  |
| 49582 | P14075 | Q8TDQ7 | -0.12913  |
| 49583 | P14075 | P13637 | -0.62766  |
| 49584 | P14075 | Q8IXT2 | -0.10679  |
| 49585 | P14075 | Q9H2H0 | -0.17921  |
| 49586 | P14075 | Q9ULK6 | -0.92811  |
| 49587 | P14075 | P21108 | -0.63446  |
| 49588 | P14075 | P35348 | -0.57783  |
| 49589 | P14075 | Q96J65 | -0.96498  |
| 49590 | P14075 | Q9NQQ7 | -0.85789  |
| 49591 | P14075 | Q16560 | -0.48752  |
| 49592 | P14075 | P40692 | -0.052866 |
| 49593 | P14075 | Q8NG99 | -1.1027   |
| 49594 | P14075 | Q9NRY4 | -0.3749   |
| 49595 | P14075 | A8MZ06 | -0.35868  |
| 49596 | P14075 | P01258 | -0.4997   |
| 49597 | P14075 | Q6P597 | -0.10071  |
| 49598 | P14075 | Q7LC44 | -0.44383  |
| 49599 | P14075 | Q86YC3 | -0.86584  |
| 49600 | P14075 | Q86UN2 | -0.59787  |
| 49601 | P14075 | Q8N8N7 | -0.74911  |
| 49602 | P14075 | Q9NVM4 | -0.20393  |
| 49603 | P14075 | Q9P253 | -0.11413  |
| 49604 | P14075 | Q8IZ57 | -0.75625  |
| 49605 | P14075 | Q9P2Q2 | -0.26469  |
| 49606 | P14075 | Q9P2A4 | -0.22742  |
| 49607 | P14075 | Q9UK85 | -0.98973  |
| 49608 | P14075 | Q7Z333 | -0.23489  |
| 49609 | P14075 | Q8IZN3 | -0.89944  |
| 49610 | P14075 | P17813 | -0.20716  |
| 49611 | P14075 | Q5T0N1 | -0.16492  |
| 49612 | P14075 | Q9BQW3 | -0.17031  |
| 49613 | P14075 | Q05397 | -0.22741  |
| 49614 | P14075 | Q8IYJ1 | -0.22829  |
| 49615 | P14075 | Q8N8D0 | -0.86584  |
| 49616 | P14075 | Q96IZ5 | -0.84005  |
| 49617 | P14075 | O15121 | -0.81046  |
| 49618 | P14075 | Q5VU13 | -0.86584  |
| 49619 | P14075 | Q7L0Q8 | -0.52491  |
| 49620 | P14075 | Q9NYZ2 | -0.86516  |
| 49621 | P14075 | P49441 | -0.53245  |
| 49622 | P14075 | Q96B97 | -0.2276   |
| 49623 | P14075 | P47712 | -0.22756  |
| 49624 | P14075 | A8MYB1 | -0.86584  |
| 49625 | P14075 | Q7Z443 | -0.81043  |
| 49626 | P14075 | C9JCN9 | -0.33089  |
| 49627 | P14075 | Q9BY60 | -0.31084  |
| 49628 | P14075 | Q9NUB1 | -0.23378  |

|       |        |        |           |
|-------|--------|--------|-----------|
| 49629 | P14075 | O00339 | -0.28262  |
| 49630 | P14075 | P04440 | -0.693    |
| 49631 | P14075 | Q8N2F6 | -0.81192  |
| 49632 | P14075 | Q6PHR2 | -0.35969  |
| 49633 | P14075 | Q16280 | -1.0951   |
| 49634 | P14075 | Q7KZI7 | -0.52113  |
| 49635 | P14075 | O75420 | -0.43008  |
| 49636 | P14075 | Q5T7W0 | -0.22452  |
| 49637 | P14075 | P55073 | -0.6952   |
| 49638 | P14075 | Q96EP9 | -0.93759  |
| 49639 | P14075 | Q04900 | -1.0189   |
| 49640 | P14075 | Q15012 | -0.81629  |
| 49641 | P14075 | Q96JB6 | -0.53889  |
| 49642 | P14075 | Q8N0X7 | -0.22932  |
| 49643 | P14075 | Q9UP95 | -0.96471  |
| 49644 | P14075 | P25101 | -0.44549  |
| 49645 | P14075 | Q8N680 | -0.21172  |
| 49646 | P14075 | Q9UNW1 | -0.52951  |
| 49647 | P14075 | Q53T59 | -0.55072  |
| 49648 | P14075 | Q96SK3 | -0.21172  |
| 49649 | P14075 | Q4VC39 | -0.86584  |
| 49650 | P14075 | P57058 | -1.1099   |
| 49651 | P14075 | Q99880 | -0.88998  |
| 49652 | P14075 | Q6PHW0 | -0.88389  |
| 49653 | P14075 | Q99571 | -0.46374  |
| 49654 | P14075 | O94967 | -0.47255  |
| 49655 | P14075 | Q8IYA7 | -0.24291  |
| 49656 | P14075 | Q6ZRG5 | -0.12034  |
| 49657 | P14075 | P40198 | -0.86584  |
| 49658 | P14075 | Q9Y2B9 | -0.54304  |
| 49659 | P14075 | Q07817 | -0.22734  |
| 49660 | P14075 | O95633 | -0.22384  |
| 49661 | P14075 | Q9BU19 | -0.21172  |
| 49662 | P14075 | Q96BH1 | -0.27829  |
| 49663 | P14075 | Q8NGZ5 | -1.1027   |
| 49664 | P14075 | Q9P2E3 | -0.47027  |
| 49665 | P14075 | Q9BYL1 | -0.13264  |
| 49666 | P14075 | Q9H2Y9 | -0.89134  |
| 49667 | P14075 | Q96LZ7 | -0.46632  |
| 49668 | P14075 | Q53SF7 | -0.53859  |
| 49669 | P14075 | Q9BWV1 | -0.45653  |
| 49670 | P14075 | Q9BUE6 | -0.24489  |
| 49671 | P14075 | Q9P2Z0 | -0.57338  |
| 49672 | P14075 | Q9NXX6 | -1.0636   |
| 49673 | P14075 | Q6ZSK4 | -0.044969 |
| 49674 | P14075 | Q8N118 | -0.8263   |
| 49675 | P14075 | O95837 | -0.92896  |
| 49676 | P14075 | Q14587 | -0.17069  |
| 49677 | P14075 | O43772 | -0.5122   |
| 49678 | P14075 | P00734 | -0.48946  |
| 49679 | P14075 | P33121 | -0.69839  |
| 49680 | P14075 | Q9UF12 | -0.41472  |
| 49681 | P14075 | Q7Z6L1 | -0.56722  |
| 49682 | P14075 | Q9UPX0 | -0.93628  |
| 49683 | P14075 | P12111 | -0.79666  |
| 49684 | P14075 | Q8IW40 | -0.2508   |
| 49685 | P14075 | P01112 | -0.22772  |
| 49686 | P14075 | Q9BXJ1 | -0.92264  |
| 49687 | P14075 | Q15940 | -0.73005  |
| 49688 | P14075 | P23219 | -0.392    |
| 49689 | P14075 | Q8IVU1 | -0.97042  |
| 49690 | P14075 | Q0JRZ9 | -0.22535  |
| 49691 | P14075 | O75674 | -0.17514  |
| 49692 | P14075 | Q8N0S6 | -0.33472  |
| 49693 | P14075 | Q14865 | -0.21632  |
| 49694 | P14075 | A1L4M7 | -0.036988 |
| 49695 | P14075 | P07358 | -0.91334  |
| 49696 | P14075 | Q9P0L0 | -0.23594  |
| 49697 | P14075 | Q9UJJ9 | -0.78962  |
| 49698 | P14075 | P28289 | -0.25547  |
| 49699 | P14075 | Q58FF8 | -0.58434  |
| 49700 | P14075 | Q9BTM1 | -0.88998  |
| 49701 | P14075 | Q8IYP9 | -0.89944  |
| 49702 | P14075 | Q5TBA9 | -0.47154  |
| 49703 | P14075 | Q8N114 | -0.56292  |
| 49704 | P14075 | Q9H9Y4 | -0.61034  |

|       |        |        |          |
|-------|--------|--------|----------|
| 49705 | P14075 | Q8NF50 | -0.49603 |
| 49706 | P14075 | Q8WUF8 | -0.87563 |
| 49707 | P14075 | Q8IW75 | -0.65259 |
| 49708 | P14075 | Q9NVQ4 | -0.24057 |
| 49709 | P14075 | P42285 | -0.22371 |
| 49710 | P14075 | Q9NRA1 | -0.35871 |
| 49711 | P14075 | P23229 | -0.34564 |
| 49712 | P14075 | O15381 | -0.38476 |
| 49713 | P14075 | Q8NG27 | -0.23129 |
| 49714 | P14075 | P13805 | -0.39196 |
| 49715 | P14075 | O95562 | -0.62877 |
| 49716 | P14075 | P15813 | -0.58894 |
| 49717 | P14075 | P08F94 | -0.21624 |
| 49718 | P14075 | O15033 | -0.68089 |
| 49719 | P14075 | P59535 | -1.0953  |
| 49720 | P14075 | P02771 | -0.63256 |
| 49721 | P14075 | P53779 | -0.2274  |
| 49722 | P14075 | Q96N64 | -0.2188  |
| 49723 | P14075 | Q6DRA6 | -0.88998 |
| 49724 | P14075 | Q9HAK2 | -0.21792 |
| 49725 | P14075 | P26927 | -0.75967 |
| 49726 | P14075 | O95164 | -0.78629 |
| 49727 | P14075 | Q96PC2 | -0.43002 |
| 49728 | P14075 | Q8NH19 | -1.1027  |
| 49729 | P14075 | Q8N7C0 | -1.0257  |
| 49730 | P14075 | P78415 | -0.23165 |
| 49731 | P14075 | Q92834 | -0.22483 |
| 49732 | P14075 | Q96LW2 | -0.9088  |
| 49733 | P14075 | Q9BZJ6 | -0.95911 |
| 49734 | P14075 | P06493 | -0.21651 |
| 49735 | P14075 | Q6UWQ7 | -0.87849 |
| 49736 | P14075 | P78333 | -0.99364 |
| 49737 | P14075 | Q9NXR1 | -0.22717 |
| 49738 | P14075 | Q16878 | -0.35395 |
| 49739 | P14075 | Q5T2L2 | -0.44296 |
| 49740 | P14075 | Q8WZA1 | -0.6961  |
| 49741 | P14075 | P06213 | -0.24368 |
| 49742 | P14075 | Q70EK9 | -0.78366 |
| 49743 | P14075 | Q5VZB9 | -0.10679 |
| 49744 | P14075 | O60344 | -0.83346 |
| 49745 | P14075 | O95630 | -0.23826 |
| 49746 | P14075 | Q05193 | -0.36979 |
| 49747 | P14075 | Q9BTZ2 | -0.67473 |
| 49748 | P14075 | Q9NSU2 | -0.13188 |
| 49749 | P14075 | Q9NS91 | -0.22742 |
| 49750 | P14075 | Q9BSJ8 | -0.86584 |
| 49751 | P14075 | Q8IXL6 | -0.92072 |
| 49752 | P14075 | Q6ZST4 | -0.15026 |
| 49753 | P14075 | Q9P2W3 | -0.56828 |
| 49754 | P14075 | D6RF30 | -0.35868 |
| 49755 | P14075 | Q9C0K7 | -0.22839 |
| 49756 | P14075 | Q14974 | -0.22741 |
| 49757 | P14075 | P48201 | -0.70051 |
| 49758 | P14075 | Q13489 | -0.22741 |
| 49759 | P14075 | Q9BRX8 | -0.245   |
| 49760 | P14075 | Q9GZZ7 | -0.95946 |
| 49761 | P14075 | P01615 | -0.97479 |
| 49762 | P14075 | P0CV98 | -0.43319 |
| 49763 | P14075 | O14649 | -0.96931 |
| 49764 | P14075 | P47900 | -0.76607 |
| 49765 | P14075 | Q8NCK7 | -0.89347 |
| 49766 | P14075 | Q7Z4N2 | -1.1464  |
| 49767 | P14075 | Q9UPY5 | -0.67986 |
| 49768 | P14075 | P51795 | -0.88783 |
| 49769 | P14075 | O15335 | -0.88053 |
| 49770 | P14075 | Q6Q4G3 | -1.1291  |
| 49771 | P14075 | Q86SR1 | -0.68285 |
| 49772 | P14075 | Q8TF62 | -0.94526 |
| 49773 | P14075 | Q8WV92 | -0.20054 |
| 49774 | P14075 | O15120 | -0.65929 |
| 49775 | P14075 | Q9UKX3 | -0.62462 |
| 49776 | P14075 | Q14765 | -0.2268  |
| 49777 | P14075 | O75439 | -0.64926 |
| 49778 | P14075 | P43627 | -0.9357  |
| 49779 | P14075 | Q13641 | -0.99363 |
| 49780 | P14075 | Q96LB2 | -1.1257  |

|       |        |        |           |
|-------|--------|--------|-----------|
| 49781 | P14075 | P46695 | -0.17819  |
| 49782 | P14075 | A6NCX1 | -0.12701  |
| 49783 | P14075 | Q49AN0 | -0.17363  |
| 49784 | P14075 | Q6PCB7 | -0.56215  |
| 49785 | P14075 | Q8NGS4 | -1.1027   |
| 49786 | P14075 | P53701 | -0.47749  |
| 49787 | P14075 | Q6PEV8 | -0.022004 |
| 49788 | P14075 | Q5VSP4 | -0.87849  |
| 49789 | P14075 | Q9HAT0 | -0.56548  |
| 49790 | P14075 | Q96L11 | -0.87849  |
| 49791 | P14075 | Q969X0 | -0.31331  |
| 49792 | P14075 | P00995 | -0.26055  |
| 49793 | P14075 | Q9BYW2 | -0.22659  |
| 49794 | P14075 | P55084 | -0.19729  |
| 49795 | P14075 | O43182 | -0.6783   |
| 49796 | P14075 | O94822 | -0.16045  |
| 49797 | P14075 | Q9Y235 | -0.65067  |
| 49798 | P14075 | Q8NFP9 | -0.43401  |
| 49799 | P14075 | P32927 | -0.61607  |
| 49800 | P14075 | Q6ZS02 | -0.15172  |
| 49801 | P14075 | O75382 | -0.22741  |
| 49802 | P14075 | Q9H0C1 | -0.73967  |
| 49803 | P14075 | P22735 | -0.11666  |
| 49804 | P14075 | B9A064 | -0.87849  |
| 49805 | P14075 | Q9NWX3 | -0.22734  |
| 49806 | P14075 | Q96RD1 | -1.1027   |
| 49807 | P14075 | Q8ND25 | -0.23031  |
| 49808 | P14075 | Q8N8B7 | -0.2095   |
| 49809 | P14075 | O94979 | -0.32565  |
| 49810 | P14075 | P01034 | -0.29943  |
| 49811 | P14075 | Q16881 | -0.22311  |
| 49812 | P14075 | Q8N474 | -0.29929  |
| 49813 | P14075 | Q96M19 | -0.86584  |
| 49814 | P14075 | Q8N8A2 | -0.22739  |
| 49815 | P14075 | Q5VWK0 | -0.29487  |
| 49816 | P14075 | Q5FWF4 | -0.38405  |
| 49817 | P14075 | O60931 | -0.89926  |
| 49818 | P14075 | P18825 | -0.37036  |
| 49819 | P14075 | Q96IW2 | -0.22741  |
| 49820 | P14075 | Q8WV35 | -0.21149  |
| 49821 | P14075 | Q99963 | -0.28724  |
| 49822 | P14075 | O60284 | -0.055544 |
| 49823 | P14075 | Q5T5W8 | -0.86584  |
| 49824 | P14075 | Q9UPY3 | -0.21586  |
| 49825 | P14075 | P16152 | -0.75173  |
| 49826 | P14075 | O60725 | -0.52185  |
| 49827 | P14075 | Q16394 | -0.48324  |
| 49828 | P14075 | Q5SWL8 | -0.25825  |
| 49829 | P14075 | Q9P275 | -0.34764  |
| 49830 | P14075 | Q8WXD9 | -0.41539  |
| 49831 | P14075 | Q15397 | -0.093288 |
| 49832 | P14075 | Q96RI8 | -1.143    |
| 49833 | P14075 | O75342 | -0.77669  |
| 49834 | P14075 | Q9NPD7 | -0.52521  |
| 49835 | P14075 | Q8TAC2 | -0.7362   |
| 49836 | P14075 | Q13613 | -0.58448  |
| 49837 | P14075 | Q9UKE5 | -0.23442  |
| 49838 | P14075 | P18509 | -0.65735  |
| 49839 | P14075 | P28476 | -0.89566  |
| 49840 | P14075 | Q5VTM2 | -1.0284   |
| 49841 | P14075 | O00160 | -0.50631  |
| 49842 | P14075 | Q96BD6 | -0.27737  |
| 49843 | P14075 | Q8NGC4 | -1.1027   |
| 49844 | P14075 | P62805 | -0.43467  |
| 49845 | P14075 | Q96RP7 | -0.60185  |
| 49846 | P14075 | Q96L33 | -1.1764   |
| 49847 | P14075 | Q5TAT6 | -0.79965  |
| 49848 | P14075 | P01135 | -0.24817  |
| 49849 | P14075 | Q15477 | -0.50114  |
| 49850 | P14075 | O43815 | -0.22753  |
| 49851 | P14075 | Q6ZSI9 | -1.0319   |
| 49852 | P14075 | Q8NA19 | -0.21829  |
| 49853 | P14075 | P19174 | -0.22741  |
| 49854 | P14075 | Q5H9T9 | -0.57765  |
| 49855 | P14075 | Q6PI25 | -0.40559  |
| 49856 | P14075 | Q6WRX3 | -0.13092  |

|       |        |         |           |
|-------|--------|---------|-----------|
| 49857 | P14075 | Q9H329  | -0.23804  |
| 49858 | P14075 | Q9NUR3  | -0.86584  |
| 49859 | P14075 | O75487  | -0.91918  |
| 49860 | P14075 | Q8IUUY3 | -0.86584  |
| 49861 | P14075 | Q8NEC5  | -0.56131  |
| 49862 | P14075 | Q92974  | -0.22743  |
| 49863 | P14075 | Q8NGC8  | -1.1027   |
| 49864 | P14075 | Q6B0K9  | -0.42947  |
| 49865 | P14075 | B7ZAP0  | -0.069211 |
| 49866 | P14075 | Q1AE95  | -0.86584  |
| 49867 | P14075 | P00540  | -0.8841   |
| 49868 | P14075 | P58499  | -0.82761  |
| 49869 | P14075 | P26010  | -1.0949   |
| 49870 | P14075 | P43004  | -0.54404  |
| 49871 | P14075 | Q5XG92  | -0.8145   |
| 49872 | P14075 | Q8WUA4  | -0.22738  |
| 49873 | P14075 | Q9P2W1  | -0.17462  |
| 49874 | P14075 | Q9NXS2  | -0.92258  |
| 49875 | P14075 | P37088  | -0.57989  |
| 49876 | P14075 | Q8NFK1  | -0.87357  |
| 49877 | P14075 | P32456  | -0.46866  |
| 49878 | P14075 | Q9UKU0  | -0.83912  |
| 49879 | P14075 | Q6UXD5  | -1.0066   |
| 49880 | P14075 | A8K979  | -0.71823  |
| 49881 | P14075 | Q9UNW8  | -1.091    |
| 49882 | P14075 | Q8N2R0  | -0.23983  |
| 49883 | P14075 | Q8IUX4  | -0.54631  |
| 49884 | P14075 | Q9H3R1  | -0.76419  |
| 49885 | P14075 | Q9NQT5  | -0.28581  |
| 49886 | P14075 | Q9NZQ9  | -0.44552  |
| 49887 | P14075 | P98169  | -0.050765 |
| 49888 | P14075 | Q13011  | -0.16942  |
| 49889 | P14075 | Q8IVE3  | -0.78212  |
| 49890 | P14075 | P04436  | -0.5974   |
| 49891 | P14075 | Q9UQ84  | -0.17106  |
| 49892 | P14075 | Q9H2U1  | -0.22288  |
| 49893 | P14075 | P0C6P0  | -0.16733  |
| 49894 | P14075 | Q16478  | -0.6174   |
| 49895 | P14075 | O14595  | -0.047767 |
| 49896 | P14075 | Q13136  | -0.22707  |
| 49897 | P14075 | Q8N8Q9  | -0.96307  |
| 49898 | P14075 | P61020  | -0.52749  |
| 49899 | P14075 | Q8TCV5  | -0.79897  |
| 49900 | P14075 | P59646  | -0.91828  |
| 49901 | P14075 | A4FU69  | -0.52751  |
| 49902 | P14075 | Q8NHB8  | -1.1027   |
| 49903 | P14075 | O00463  | -0.22734  |
| 49904 | P14075 | Q5T1V6  | -1.0505   |
| 49905 | P14075 | P54646  | -0.2504   |
| 49906 | P14075 | Q8WYP3  | -0.75828  |
| 49907 | P14075 | Q13670  | -0.36757  |
| 49908 | P14075 | Q9UGI0  | -0.22174  |
| 49909 | P14075 | Q58HT5  | -0.82576  |
| 49910 | P14075 | Q9BY12  | -0.53082  |
| 49911 | P14075 | P01266  | -0.63161  |
| 49912 | P14075 | Q9UN72  | -1.1553   |
| 49913 | P14075 | P05107  | -0.86968  |
| 49914 | P14075 | Q6UWJ1  | -0.9169   |
| 49915 | P14075 | P29762  | -0.69567  |
| 49916 | P14075 | Q86T24  | -0.31898  |
| 49917 | P14075 | Q12908  | -0.748    |
| 49918 | P14075 | Q86Y25  | -0.21172  |
| 49919 | P14075 | O95785  | -0.51636  |
| 49920 | P14075 | Q9P0S3  | -0.91354  |
| 49921 | P14075 | Q14166  | -0.39004  |
| 49922 | P14075 | Q9Y663  | -0.52862  |
| 49923 | P14075 | P34820  | -0.89933  |
| 49924 | P14075 | P32754  | -0.44336  |
| 49925 | P14075 | Q8TAD2  | -0.92958  |
| 49926 | P14075 | P05451  | -0.71101  |
| 49927 | P14075 | P01286  | -0.49363  |
| 49928 | P14075 | Q86SQ4  | -1.1905   |
| 49929 | P14075 | O00329  | -0.3064   |
| 49930 | P14075 | Q5TAG4  | -0.29487  |
| 49931 | P14075 | Q6S5L8  | -0.51475  |
| 49932 | P14075 | Q8IZ73  | -0.19121  |

|       |        |        |            |
|-------|--------|--------|------------|
| 49933 | P14075 | Q9UDX4 | -1.0664    |
| 49934 | P14075 | O43822 | -0.2273    |
| 49935 | P14075 | Q6NUJ1 | -0.97115   |
| 49936 | P14075 | Q7RTN6 | -0.32556   |
| 49937 | P14075 | Q9NQX5 | -0.86584   |
| 49938 | P14075 | P61421 | -0.20811   |
| 49939 | P14075 | O75602 | -0.3404    |
| 49940 | P14075 | P13929 | -0.075943  |
| 49941 | P14075 | Q96MT0 | -0.033209  |
| 49942 | P14075 | Q9P055 | -0.78987   |
| 49943 | P14075 | P20292 | -0.16149   |
| 49944 | P14075 | Q9H1C3 | -0.84276   |
| 49945 | P14075 | A2RUT3 | -0.86584   |
| 49946 | P14075 | Q8IZU2 | -0.22764   |
| 49947 | P14075 | Q499Z4 | -0.21172   |
| 49948 | P14075 | O94832 | -0.65843   |
| 49949 | P14075 | Q92520 | -0.76415   |
| 49950 | P14075 | Q9P215 | -0.39401   |
| 49951 | P14075 | Q96NG8 | -0.21172   |
| 49952 | P14075 | P01880 | -1.2614    |
| 49953 | P14075 | Q96CH1 | -1.1721    |
| 49954 | P14075 | P35590 | -0.78008   |
| 49955 | P14075 | P51452 | -0.27422   |
| 49956 | P14075 | Q96DA6 | -0.63212   |
| 49957 | P14075 | Q9NYH9 | -0.28306   |
| 49958 | P14075 | Q969S0 | -0.58406   |
| 49959 | P14075 | Q86XG9 | -0.29487   |
| 49960 | P14075 | Q8N7H1 | -0.0063018 |
| 49961 | P14075 | Q9H3D4 | -0.22723   |
| 49962 | P14075 | Q9NXG2 | -0.4711    |
| 49963 | P14075 | Q16559 | -0.22747   |
| 49964 | P14075 | Q9P0B6 | -0.86584   |
| 49965 | P14075 | Q5HYJ1 | -0.80686   |
| 49966 | P14075 | P17041 | -0.21172   |
| 49967 | P14075 | O43272 | -0.25248   |
| 49968 | P14075 | Q8TBE3 | -0.86584   |
| 49969 | P14075 | Q6UWU2 | -0.78258   |
| 49970 | P14075 | O75140 | -0.62648   |
| 49971 | P14075 | P02008 | -0.41125   |
| 49972 | P14075 | Q9BT43 | -0.23704   |
| 49973 | P14075 | Q6P9F7 | -0.86584   |
| 49974 | P14075 | Q6ZR62 | -0.51948   |
| 49975 | P14075 | Q9GZZ6 | -0.81805   |
| 49976 | P14075 | P40225 | -0.72608   |
| 49977 | P14075 | Q9Y546 | -0.18717   |
| 49978 | P14075 | Q8TAG5 | -0.87849   |
| 49979 | P14075 | Q9ULV0 | -0.20347   |
| 49980 | P14075 | P07766 | -0.62731   |
| 49981 | P14075 | Q6Q0C0 | -0.23721   |
| 49982 | P14075 | Q9UNK4 | -0.82712   |
| 49983 | P14075 | Q8NGK3 | -1.1027    |
| 49984 | P14075 | Q14662 | -0.28656   |
| 49985 | P14075 | Q14807 | -0.26584   |
| 49986 | P14075 | Q8N8V2 | -0.95159   |
| 49987 | P14075 | Q9GZN0 | -1.0616    |
| 49988 | P14075 | Q14050 | -0.75445   |
| 49989 | P14075 | O75521 | -0.8632    |
| 49990 | P14075 | O75964 | -0.27386   |
| 49991 | P14075 | O15067 | -0.55509   |
| 49992 | P14075 | Q86UE3 | -0.21172   |
| 49993 | P14075 | Q9NQG6 | -0.23148   |
| 49994 | P14075 | Q8NAP8 | -0.2385    |
| 49995 | P14075 | P41146 | -1.1151    |
| 49996 | P14075 | C9JJ37 | -0.22217   |
| 49997 | P14075 | Q8N2C3 | -0.62648   |
| 49998 | P14075 | Q9Y225 | -0.7734    |
| 49999 | P14075 | Q9NYX4 | -0.94417   |
| 50000 | P14075 | Q8TBF5 | -0.84382   |
| 50001 | P14075 | P16219 | -0.42682   |
| 50002 | P14075 | P51589 | -0.65831   |
| 50003 | P14075 | A0PG75 | -0.022662  |
| 50004 | P14075 | P61812 | -0.22741   |
| 50005 | P14075 | Q9NZR2 | -0.81796   |
| 50006 | P14075 | P98164 | -0.33606   |
| 50007 | P14075 | Q9NVA4 | -0.86584   |
| 50008 | P14075 | Q9Y646 | -0.85365   |

|       |        |        |          |
|-------|--------|--------|----------|
| 50009 | P14075 | P24557 | -0.80902 |
| 50010 | P14075 | O14828 | -0.50485 |
| 50011 | P14075 | Q8N961 | -0.32204 |
| 50012 | P14075 | Q75679 | -0.52332 |
| 50013 | P14075 | Q6UX68 | -0.86584 |
| 50014 | P14075 | O43323 | -0.75561 |
| 50015 | P14075 | P0CJ73 | -0.72903 |
| 50016 | P14075 | Q7Z7E8 | -0.22716 |
| 50017 | P14075 | Q70EL4 | -0.69644 |
| 50018 | P14075 | Q86TG1 | -0.91447 |
| 50019 | P14075 | Q08722 | -0.49186 |
| 50020 | P14075 | Q9UBR2 | -0.86222 |
| 50021 | P14075 | Q86XR2 | -0.5353  |
| 50022 | P14075 | Q7Z3Z4 | -0.31462 |
| 50023 | P14075 | P11465 | -0.60966 |
| 50024 | P14075 | Q9BRV3 | -0.48802 |
| 50025 | P14075 | Q8TDN2 | -0.84843 |
| 50026 | P14075 | A6NJY1 | -0.84238 |
| 50027 | P14075 | Q9H6R3 | -0.8584  |
| 50028 | P14075 | Q96FV0 | -0.22725 |
| 50029 | P14075 | Q96N96 | -0.22751 |
| 50030 | P14075 | Q8WZ74 | -0.65185 |
| 50031 | P14075 | Q4W5P6 | -0.87849 |
| 50032 | P14075 | Q9UPM6 | -0.24495 |
| 50033 | P14075 | Q9Y3L5 | -0.80808 |
| 50034 | P14075 | Q7Z412 | -0.26098 |
| 50035 | P14075 | Q75T13 | -0.52048 |
| 50036 | P14075 | Q9UJ96 | -0.6626  |
| 50037 | P14075 | Q7Z7G2 | -0.39612 |
| 50038 | P14075 | Q96A59 | -0.72684 |
| 50039 | P14075 | P78369 | -0.78522 |
| 50040 | P14075 | Q9GZX9 | -0.83278 |
| 50041 | P14075 | Q0VDG4 | -0.56216 |
| 50042 | P14075 | Q15761 | -0.91899 |
| 50043 | P14075 | Q96GR4 | -0.89944 |
| 50044 | P14075 | Q9HCJ1 | -0.89807 |
| 50045 | P14075 | Q99466 | -0.32276 |
| 50046 | P14075 | Q95452 | -0.96911 |
| 50047 | P14075 | Q9HCI7 | -0.53142 |
| 50048 | P14075 | P54277 | -0.20565 |
| 50049 | P14075 | P62079 | -0.86584 |
| 50050 | P14075 | Q8NH05 | -1.1027  |
| 50051 | P14075 | Q95219 | -0.21281 |
| 50052 | P14075 | Q9UK08 | -0.79272 |
| 50053 | P14075 | F8WCM5 | -0.65351 |
| 50054 | P14075 | P13473 | -0.70781 |
| 50055 | P14075 | Q9NR83 | -0.14397 |
| 50056 | P14075 | Q16517 | -0.51742 |
| 50057 | P14075 | Q9H2Z4 | -0.32557 |
| 50058 | P14075 | Q15111 | -0.62893 |
| 50059 | P14075 | Q96Q04 | -0.77148 |
| 50060 | P14075 | A6NDN8 | -0.20281 |
| 50061 | P14075 | Q96PN8 | -1.1113  |
| 50062 | P14075 | O43426 | -0.37672 |
| 50063 | P14075 | Q86VR2 | -0.86584 |
| 50064 | P14075 | P63261 | -0.14523 |
| 50065 | P14075 | Q5JRA6 | -0.17999 |
| 50066 | P14075 | P46093 | -1.2928  |
| 50067 | P14075 | P53582 | -0.50852 |
| 50068 | P14075 | Q5K651 | -0.36951 |
| 50069 | P14075 | Q8IUH8 | -0.93896 |
| 50070 | P14075 | Q96AH8 | -0.70724 |
| 50071 | P14075 | Q92982 | -0.8727  |
| 50072 | P14075 | Q9BV47 | -0.2635  |
| 50073 | P14075 | Q96J88 | -0.16768 |
| 50074 | P14075 | P30954 | -1.1609  |
| 50075 | P14075 | Q9H2C8 | -1.1027  |
| 50076 | P14075 | O60683 | -0.22742 |
| 50077 | P14075 | A6NFU0 | -0.86584 |
| 50078 | P14075 | Q8N6R0 | -0.47305 |
| 50079 | P14075 | A5LHX3 | -0.16971 |
| 50080 | P14075 | P36383 | -0.88706 |
| 50081 | P14075 | Q96Q80 | -0.37415 |
| 50082 | P14075 | Q17RS7 | -0.33995 |
| 50083 | P14075 | Q9H2S6 | -0.79575 |
| 50084 | P14075 | Q9HBA0 | -0.42623 |



|       |        |        |           |
|-------|--------|--------|-----------|
| 50085 | P14075 | Q8TD20 | -0.50057  |
| 50086 | P14075 | Q9BXT8 | -0.41762  |
| 50087 | P14075 | O95704 | -0.30356  |
| 50088 | P14075 | P22607 | -0.30636  |
| 50089 | P14075 | Q9UJT9 | -0.22735  |
| 50090 | P14075 | Q9H707 | -0.21172  |
| 50091 | P14075 | P54132 | -0.22603  |
| 50092 | P14075 | O00391 | -1.0273   |
| 50093 | P14075 | Q8N9V2 | -0.72121  |
| 50094 | P14075 | Q9Y283 | -0.22742  |
| 50095 | P14075 | Q9Y3I0 | -0.55766  |
| 50096 | P14075 | Q9P2C4 | -0.82152  |
| 50097 | P14075 | P52823 | -0.60577  |
| 50098 | P14075 | P31358 | -0.68461  |
| 50099 | P14075 | Q08AI6 | -0.96495  |
| 50100 | P14075 | Q9NW08 | -0.13908  |
| 50101 | P14075 | O94901 | -0.1835   |
| 50102 | P14075 | P20851 | -0.93782  |
| 50103 | P14075 | Q7Z7L1 | -0.60826  |
| 50104 | P14075 | Q9UPU9 | -0.36161  |
| 50105 | P14075 | P55344 | -0.76681  |
| 50106 | P14075 | O15467 | -0.95053  |
| 50107 | P14075 | P22694 | -0.22694  |
| 50108 | P14075 | Q96JH7 | -0.49469  |
| 50109 | P14075 | Q4G0S7 | -0.093478 |
| 50110 | P14075 | Q5GH70 | -0.86584  |
| 50111 | P14075 | Q9P2K1 | -0.38312  |
| 50112 | P14075 | Q96AZ6 | -0.30695  |
| 50113 | P14075 | Q8N357 | -0.40222  |
| 50114 | P14075 | O43529 | -0.68754  |
| 50115 | P14075 | Q17R89 | -0.42685  |
| 50116 | P14075 | A6NIU2 | -0.18051  |
| 50117 | P14075 | Q15406 | -0.25652  |
| 50118 | P14075 | Q86XW9 | -0.31442  |
| 50119 | P14075 | P09912 | -0.35243  |
| 50120 | P14075 | Q6DN14 | -0.87039  |
| 50121 | P14075 | Q7Z3F1 | -0.96705  |
| 50122 | P14075 | P36269 | -0.78391  |
| 50123 | P14075 | Q9NZC4 | -0.13737  |
| 50124 | P14075 | Q9BSG0 | -0.87849  |
| 50125 | P14075 | Q15744 | -0.22739  |
| 50126 | P14075 | P01707 | -0.97479  |
| 50127 | P14075 | B0FP48 | -0.86584  |
| 50128 | P14075 | Q15696 | -0.18045  |
| 50129 | P14075 | Q8IVL8 | -1.1649   |
| 50130 | P14075 | Q9BXJ0 | -0.92264  |
| 50131 | P14075 | P61165 | -0.86584  |
| 50132 | P14075 | Q9NTJ4 | -0.51766  |
| 50133 | P14075 | Q9H490 | -0.7764   |
| 50134 | P14075 | Q5JXX5 | -0.8104   |
| 50135 | P14075 | Q5T9S5 | -0.1532   |
| 50136 | P14075 | Q5VZY2 | -0.86156  |
| 50137 | P14075 | Q9H6T3 | -0.2273   |
| 50138 | P14075 | Q15427 | -0.23759  |
| 50139 | P14075 | P14652 | -0.161    |
| 50140 | P14075 | Q70CQ2 | -0.31048  |
| 50141 | P14075 | P16473 | -0.66399  |
| 50142 | P14075 | Q9BRR6 | -0.72796  |
| 50143 | P14075 | Q8TCW9 | -1.143    |
| 50144 | P14075 | Q68DU8 | -0.20107  |
| 50145 | P14075 | Q96CA5 | -0.22741  |
| 50146 | P14075 | Q96K19 | -1.0296   |
| 50147 | P14075 | Q96A57 | -0.86584  |
| 50148 | P14075 | Q9BVK2 | -0.76846  |
| 50149 | P14075 | Q9BRK3 | -0.86584  |
| 50150 | P14075 | O76062 | -0.94978  |
| 50151 | P14075 | Q8NH61 | -1.1027   |
| 50152 | P14075 | Q32NB8 | -0.69476  |
| 50153 | P14075 | Q9BXY4 | -0.85119  |
| 50154 | P14075 | Q13905 | -0.31487  |
| 50155 | P14075 | Q9UMF0 | -1.1364   |
| 50156 | P14075 | O95620 | -0.64448  |
| 50157 | P14075 | Q9Y5G7 | -1.1297   |
| 50158 | P14075 | P0C604 | -1.1027   |
| 50159 | P14075 | P30518 | -0.74814  |
| 50160 | P14075 | Q3KNW1 | -0.20896  |

|       |        |        |            |
|-------|--------|--------|------------|
| 50161 | P14075 | Q96MF2 | -0.66906   |
| 50162 | P14075 | Q2TBA0 | -0.213     |
| 50163 | P14075 | Q8TAG9 | -0.31021   |
| 50164 | P14075 | Q07507 | -1.1206    |
| 50165 | P14075 | Q6YP21 | -0.36796   |
| 50166 | P14075 | Q9UMX2 | -0.014802  |
| 50167 | P14075 | A6NEW6 | -0.48092   |
| 50168 | P14075 | P38606 | -0.61897   |
| 50169 | P14075 | A6NET4 | -1.1027    |
| 50170 | P14075 | Q13253 | -0.30692   |
| 50171 | P14075 | Q13705 | -0.38263   |
| 50172 | P14075 | Q86UX7 | -0.68674   |
| 50173 | P14075 | O95497 | -0.66724   |
| 50174 | P14075 | Q8N165 | -0.75438   |
| 50175 | P14075 | P16157 | -0.22744   |
| 50176 | P14075 | P61567 | -0.5818    |
| 50177 | P14075 | P48643 | -0.17571   |
| 50178 | P14075 | Q9H213 | -0.28091   |
| 50179 | P14075 | Q01453 | -0.44536   |
| 50180 | P14075 | Q9BXB1 | -0.90494   |
| 50181 | P14075 | P35520 | -0.22528   |
| 50182 | P14075 | Q9NZJ4 | -0.063411  |
| 50183 | P14075 | Q8IX06 | -0.28678   |
| 50184 | P14075 | O60641 | -0.5321    |
| 50185 | P14075 | P0CJ79 | -0.21172   |
| 50186 | P14075 | Q8IVB4 | -0.87959   |
| 50187 | P14075 | Q7Z5L3 | -0.94408   |
| 50188 | P14075 | Q9NRM2 | -0.19624   |
| 50189 | P14075 | Q13371 | -0.73606   |
| 50190 | P14075 | Q76MJ5 | -0.69048   |
| 50191 | P14075 | Q8NGC0 | -1.1027    |
| 50192 | P14075 | P23759 | -0.22405   |
| 50193 | P14075 | Q15013 | -0.42851   |
| 50194 | P14075 | Q16612 | -0.06027   |
| 50195 | P14075 | Q14973 | -0.84219   |
| 50196 | P14075 | Q9Y2E5 | -0.8222    |
| 50197 | P14075 | P98177 | -0.30333   |
| 50198 | P14075 | P29323 | -0.62699   |
| 50199 | P14075 | P51575 | -0.49941   |
| 50200 | P14075 | Q8N815 | -0.0055974 |
| 50201 | P14075 | P40763 | -0.22692   |
| 50202 | P14075 | E9PIF3 | -0.013198  |
| 50203 | P14075 | Q9Y4E6 | -0.22746   |
| 50204 | P14075 | Q8IZI9 | -0.89136   |
| 50205 | P14075 | Q8TCW7 | -0.86584   |
| 50206 | P14075 | Q96QS3 | -0.19593   |
| 50207 | P14075 | Q6NUJ2 | -0.86584   |
| 50208 | P14075 | O95721 | -0.21841   |
| 50209 | P14075 | P42858 | -0.14315   |
| 50210 | P14075 | Q9BYJ4 | -0.50212   |
| 50211 | P14075 | Q16831 | -0.28101   |
| 50212 | P14075 | Q92617 | -0.52887   |
| 50213 | P14075 | Q6HA08 | -0.70098   |
| 50214 | P14075 | Q6NS38 | -0.32826   |
| 50215 | P14075 | Q9NR21 | -0.45204   |
| 50216 | P14075 | O95084 | -1.0632    |
| 50217 | P14075 | Q9Y651 | -0.23128   |
| 50218 | P14075 | Q8IX19 | -0.86584   |
| 50219 | P14075 | O60701 | -0.71876   |
| 50220 | P14075 | Q96CD2 | -0.41023   |
| 50221 | P14075 | P55010 | -0.41595   |
| 50222 | P14075 | Q4ZIN3 | -0.71569   |
| 50223 | P14075 | P17050 | -0.32625   |
| 50224 | P14075 | B2RUY7 | -0.83956   |
| 50225 | P14075 | Q96KN9 | -0.90771   |
| 50226 | P14075 | P35680 | -0.22342   |
| 50227 | P14075 | Q9H2A2 | -0.70402   |
| 50228 | P14075 | Q14332 | -0.54783   |
| 50229 | P14075 | Q13472 | -0.19784   |
| 50230 | P14075 | Q13588 | -0.22741   |
| 50231 | P14075 | Q5Y7A7 | -0.67577   |
| 50232 | P14075 | Q92968 | -0.26131   |
| 50233 | P14075 | Q8IYX4 | -0.62496   |
| 50234 | P14075 | A1L167 | -0.77713   |
| 50235 | P14075 | Q6UE05 | -0.86584   |
| 50236 | P14075 | P20827 | -0.4089    |

|       |        |        |          |
|-------|--------|--------|----------|
| 50237 | P14075 | Q9Y3B8 | -0.30297 |
| 50238 | P14075 | Q92826 | -0.22727 |
| 50239 | P14075 | Q9H3T3 | -0.95791 |
| 50240 | P14075 | P0CJ75 | -0.72903 |
| 50241 | P14075 | P0C881 | -0.16851 |
| 50242 | P14075 | Q96D59 | -0.92811 |
| 50243 | P14075 | O15294 | -0.22683 |
| 50244 | P14075 | Q5VXM1 | -0.87849 |
| 50245 | P14075 | Q08AM6 | -0.22733 |
| 50246 | P14075 | P61109 | -0.87849 |
| 50247 | P14075 | Q6UWF6 | -0.87849 |
| 50248 | P14075 | Q99075 | -0.92994 |
| 50249 | P14075 | Q9H0I9 | -0.53665 |
| 50250 | P14075 | A4D1S0 | -0.85471 |
| 50251 | P14075 | A8MVU1 | -0.41347 |
| 50252 | P14075 | P29350 | -0.22741 |
| 50253 | P14075 | Q68DY9 | -0.21172 |
| 50254 | P14075 | Q16819 | -1.1823  |
| 50255 | P14075 | Q9NV06 | -0.22743 |
| 50256 | P14075 | Q6YFQ2 | -0.2849  |
| 50257 | P14075 | Q969K3 | -0.44801 |
| 50258 | P14075 | Q6NVY1 | -0.14537 |
| 50259 | P14075 | P26374 | -0.74824 |
| 50260 | P14075 | Q8IU68 | -0.93931 |
| 50261 | P14075 | P09455 | -0.49492 |
| 50262 | P14075 | Q9UEW3 | -0.97762 |
| 50263 | P14075 | Q8IVF5 | -0.83722 |
| 50264 | P14075 | Q9UEG4 | -0.21172 |
| 50265 | P14075 | O15305 | -0.4504  |
| 50266 | P14075 | O15273 | -0.13723 |
| 50267 | P14075 | Q9HBJ8 | -0.95243 |
| 50268 | P14075 | Q92777 | -0.63609 |
| 50269 | P14075 | Q95918 | -1.0524  |
| 50270 | P14075 | O75123 | -0.21172 |
| 50271 | P14075 | Q9NP61 | -0.214   |
| 50272 | P14075 | Q6Y7W6 | -0.3127  |
| 50273 | P14075 | P57105 | -0.68975 |
| 50274 | P14075 | Q13813 | -0.22741 |
| 50275 | P14075 | P31431 | -0.62228 |
| 50276 | P14075 | O15060 | -0.21172 |
| 50277 | P14075 | Q99653 | -0.22847 |
| 50278 | P14075 | Q8IWA5 | -0.80412 |
| 50279 | P14075 | Q6XR72 | -0.94638 |
| 50280 | P14075 | O14626 | -1.124   |
| 50281 | P14075 | P10523 | -0.938   |
| 50282 | P14075 | P04279 | -0.18893 |
| 50283 | P14075 | Q9H7D0 | -0.46442 |
| 50284 | P14075 | Q9BZV2 | -0.65954 |
| 50285 | P14075 | P09668 | -0.25391 |
| 50286 | P14075 | Q8TD90 | -0.1235  |
| 50287 | P14075 | P29972 | -0.22719 |
| 50288 | P14075 | Q9UPX8 | -0.22741 |
| 50289 | P14075 | Q14123 | -0.46    |
| 50290 | P14075 | Q13203 | -0.78961 |
| 50291 | P14075 | Q8N6H7 | -0.22996 |
| 50292 | P14075 | Q9HCU5 | -0.22742 |
| 50293 | P14075 | Q95965 | -0.98719 |
| 50294 | P14075 | P56749 | -0.64451 |
| 50295 | P14075 | Q53HC9 | -0.2273  |
| 50296 | P14075 | O75838 | -0.52751 |
| 50297 | P14075 | O75688 | -0.16774 |
| 50298 | P14075 | Q9H2A7 | -1.0707  |
| 50299 | P14075 | O75954 | -1.0003  |
| 50300 | P14075 | Q6ZRI0 | -0.79086 |
| 50301 | P14075 | Q02383 | -0.70831 |
| 50302 | P14075 | P35410 | -0.65198 |
| 50303 | P14075 | Q4ZG55 | -0.86584 |
| 50304 | P14075 | Q96HA4 | -0.86584 |
| 50305 | P14075 | Q9H6L2 | -0.85656 |
| 50306 | P14075 | Q8NA92 | -0.57338 |
| 50307 | P14075 | Q13239 | -0.30472 |
| 50308 | P14075 | P36405 | -0.22804 |
| 50309 | P14075 | Q7RTX1 | -1.1137  |
| 50310 | P14075 | Q7RTT4 | -0.16388 |
| 50311 | P14075 | Q13796 | -0.2272  |
| 50312 | P14075 | Q75LS8 | -0.52542 |

|       |        |        |           |
|-------|--------|--------|-----------|
| 50313 | P14075 | Q86XP6 | -0.87849  |
| 50314 | P14075 | P15088 | -0.71239  |
| 50315 | P14075 | P49418 | -0.2274   |
| 50316 | P14075 | P09603 | -0.51544  |
| 50317 | P14075 | C9JVV0 | -0.86584  |
| 50318 | P14075 | P18463 | -0.88446  |
| 50319 | P14075 | P34741 | -0.30605  |
| 50320 | P14075 | Q9UKS6 | -0.22741  |
| 50321 | P14075 | Q95171 | -0.096045 |
| 50322 | P14075 | Q13621 | -0.79259  |
| 50323 | P14075 | Q9UNA3 | -0.63344  |
| 50324 | P14075 | P15374 | -0.39423  |
| 50325 | P14075 | Q92731 | -0.22744  |
| 50326 | P14075 | Q16654 | -0.35202  |
| 50327 | P14075 | Q96A70 | -0.36747  |
| 50328 | P14075 | F8WBI6 | -0.35868  |
| 50329 | P14075 | Q5SQ80 | -0.2274   |
| 50330 | P14075 | P05543 | -0.66949  |
| 50331 | P14075 | P0CE72 | -0.55769  |
| 50332 | P14075 | Q6PEX7 | -0.86584  |
| 50333 | P14075 | Q9NQE7 | -0.78024  |
| 50334 | P14075 | Q9BW04 | -0.37984  |
| 50335 | P14075 | Q8TCU4 | -0.17877  |
| 50336 | P14075 | P30711 | -0.2673   |
| 50337 | P14075 | Q8NHS4 | -0.1255   |
| 50338 | P14075 | Q9H0B8 | -0.92736  |
| 50339 | P14075 | P20936 | -0.23838  |
| 50340 | P14075 | Q9H2U9 | -0.99505  |
| 50341 | P14075 | P08581 | -0.35449  |
| 50342 | P14075 | P51460 | -0.55413  |
| 50343 | P14075 | Q96PE7 | -0.10845  |
| 50344 | P14075 | Q8IZ13 | -0.30763  |
| 50345 | P14075 | Q8IV45 | -0.82169  |
| 50346 | P14075 | Q8TB68 | -0.75156  |
| 50347 | P14075 | Q5VU97 | -0.92183  |
| 50348 | P14075 | P54803 | -0.35019  |
| 50349 | P14075 | Q17R55 | -0.86584  |
| 50350 | P14075 | Q75N90 | -0.98791  |
| 50351 | P14075 | Q9H0P0 | -0.35547  |
| 50352 | P14075 | Q3KR16 | -0.28355  |
| 50353 | P14075 | O75387 | -1.0082   |
| 50354 | P14075 | P13682 | -0.18529  |
| 50355 | P14075 | O00159 | -0.14893  |
| 50356 | P14075 | Q13145 | -0.52991  |
| 50357 | P14075 | C9JH25 | -0.86584  |
| 50358 | P14075 | Q96HL8 | -0.41268  |
| 50359 | P14075 | Q7L0X0 | -0.7671   |
| 50360 | P14075 | Q9Y4X5 | -0.20862  |
| 50361 | P14075 | Q92599 | -0.20672  |
| 50362 | P14075 | Q075Z2 | -0.87851  |
| 50363 | P14075 | A1YPR0 | -0.73005  |
| 50364 | P14075 | Q8NGF4 | -1.1027   |
| 50365 | P14075 | Q587J7 | -0.23826  |
| 50366 | P14075 | P17936 | -0.22692  |
| 50367 | P14075 | P80511 | -0.22836  |
| 50368 | P14075 | Q8N6M8 | -0.22579  |
| 50369 | P14075 | A6NI73 | -1.182    |
| 50370 | P14075 | P52803 | -0.45673  |
| 50371 | P14075 | Q15772 | -0.73033  |
| 50372 | P14075 | Q8TD91 | -0.13601  |
| 50373 | P14075 | P15289 | -0.64587  |
| 50374 | P14075 | Q96BH3 | -0.87851  |
| 50375 | P14075 | Q8WVF5 | -0.19405  |
| 50376 | P14075 | P01563 | -0.32939  |
| 50377 | P14075 | P08922 | -0.94354  |
| 50378 | P14075 | Q8N7F7 | -0.29487  |
| 50379 | P14075 | P41091 | -0.11732  |
| 50380 | P14075 | O14525 | -0.78982  |
| 50381 | P14075 | Q9P2S6 | -0.52332  |
| 50382 | P14075 | Q6IF82 | -1.1027   |
| 50383 | P14075 | Q14563 | -0.54618  |
| 50384 | P14075 | Q9Y4X3 | -0.89852  |
| 50385 | P14075 | Q16555 | -0.2053   |
| 50386 | P14075 | O00358 | -0.31899  |
| 50387 | P14075 | Q9BTV7 | -0.1133   |
| 50388 | P14075 | Q9NTX5 | -0.49588  |

|       |        |        |           |
|-------|--------|--------|-----------|
| 50389 | P14075 | Q5T742 | -0.87849  |
| 50390 | P14075 | P01593 | -0.97479  |
| 50391 | P14075 | P10319 | -0.88446  |
| 50392 | P14075 | Q8WUJ3 | -0.29487  |
| 50393 | P14075 | Q8N4T8 | -0.30122  |
| 50394 | P14075 | Q9UIX4 | -0.87566  |
| 50395 | P14075 | O00750 | -0.22745  |
| 50396 | P14075 | Q9BZ67 | -0.44826  |
| 50397 | P14075 | Q13470 | -0.54773  |
| 50398 | P14075 | Q13465 | -0.056952 |
| 50399 | P14075 | Q14116 | -0.32765  |
| 50400 | P14075 | Q9NYR8 | -1.1072   |
| 50401 | P14075 | O43741 | -0.51418  |
| 50402 | P14075 | Q9UIK4 | -0.65651  |
| 50403 | P14075 | Q6GYQ0 | -0.20503  |
| 50404 | P14075 | Q6PIY2 | -0.60957  |
| 50405 | P14075 | Q16821 | -0.70584  |
| 50406 | P14075 | Q969G6 | -0.40215  |
| 50407 | P14075 | Q86YS6 | -0.99828  |
| 50408 | P14075 | O15054 | -0.50837  |
| 50409 | P14075 | P02748 | -0.98868  |
| 50410 | P14075 | Q7Z7A4 | -0.82719  |
| 50411 | P14075 | Q96D42 | -0.7235   |
| 50412 | P14075 | Q96H35 | -0.84005  |
| 50413 | P14075 | Q8N5P1 | -0.199    |
| 50414 | P14075 | O15259 | -0.22741  |
| 50415 | P14075 | Q8TD46 | -0.63099  |
| 50416 | P14075 | Q7Z7M1 | -1.1905   |
| 50417 | P14075 | Q9H3Y8 | -0.663    |
| 50418 | P14075 | Q6ZP82 | -0.2272   |
| 50419 | P14075 | P01584 | -0.24007  |
| 50420 | P14075 | P00813 | -0.20376  |
| 50421 | P14075 | Q9Y5Q6 | -0.67458  |
| 50422 | P14075 | Q52LW3 | -0.91122  |
| 50423 | P14075 | Q9UHM6 | -1.0646   |
| 50424 | P14075 | Q8TCG1 | -0.23672  |
| 50425 | P14075 | Q9H207 | -1.1027   |
| 50426 | P14075 | P20138 | -1.189    |
| 50427 | P14075 | P56589 | -0.20246  |
| 50428 | P14075 | Q9BYE9 | -0.58623  |
| 50429 | P14075 | Q8N8Z8 | -0.21172  |
| 50430 | P14075 | Q8NBM4 | -0.86584  |
| 50431 | P14075 | Q9HC38 | -0.30763  |
| 50432 | P14075 | P27708 | -0.4022   |
| 50433 | P14075 | Q8N878 | -0.44826  |
| 50434 | P14075 | Q15526 | -0.67379  |
| 50435 | P14075 | Q8N8F6 | -0.93931  |
| 50436 | P14075 | Q16678 | -0.70823  |
| 50437 | P14075 | O95267 | -0.77765  |
| 50438 | P14075 | P12271 | -0.8075   |
| 50439 | P14075 | Q8NHC4 | -1.1027   |
| 50440 | P14075 | Q95147 | -1.0684   |
| 50441 | P14075 | Q9P1Z0 | -0.22122  |
| 50442 | P14075 | Q9NVP2 | -0.27128  |
| 50443 | P14075 | Q8TEZ7 | -1.1105   |
| 50444 | P14075 | A6NCK2 | -0.73967  |
| 50445 | P14075 | Q5TZF3 | -0.22741  |
| 50446 | P14075 | Q14669 | -0.22778  |
| 50447 | P14075 | P16403 | -0.78043  |
| 50448 | P14075 | P50747 | -0.40177  |
| 50449 | P14075 | Q68G74 | -0.22742  |
| 50450 | P14075 | P09758 | -0.84852  |
| 50451 | P14075 | Q9Y5E5 | -0.98639  |
| 50452 | P14075 | Q8IX05 | -0.77684  |
| 50453 | P14075 | P35475 | -0.48932  |
| 50454 | P14075 | A6NL05 | -0.86584  |
| 50455 | P14075 | Q7Z7H5 | -0.86938  |
| 50456 | P14075 | P48729 | -0.22741  |
| 50457 | P14075 | Q6UXU0 | -0.87849  |
| 50458 | P14075 | P35663 | -0.41505  |
| 50459 | P14075 | P16422 | -0.22685  |
| 50460 | P14075 | Q8NGP4 | -1.1027   |
| 50461 | P14075 | Q59GR2 | -0.078626 |
| 50462 | P14075 | Q9HA47 | -0.65832  |
| 50463 | P14075 | O96009 | -1.0549   |
| 50464 | P14075 | A6NK75 | -0.21172  |

|       |        |        |           |
|-------|--------|--------|-----------|
| 50465 | P14075 | Q17RG1 | -0.19405  |
| 50466 | P14075 | P01568 | -0.7874   |
| 50467 | P14075 | Q86Y78 | -0.87849  |
| 50468 | P14075 | Q9BQ24 | -0.41802  |
| 50469 | P14075 | P20645 | -0.89098  |
| 50470 | P14075 | P30044 | -0.34794  |
| 50471 | P14075 | Q16515 | -0.70349  |
| 50472 | P14075 | Q6Q788 | -0.39309  |
| 50473 | P14075 | O43448 | -0.8566   |
| 50474 | P14075 | Q9GZX7 | -0.12189  |
| 50475 | P14075 | Q6ZP65 | -0.11478  |
| 50476 | P14075 | Q9UHD8 | -0.22544  |
| 50477 | P14075 | Q9NR34 | -0.70695  |
| 50478 | P14075 | Q7L211 | -0.81246  |
| 50479 | P14075 | Q9BQ49 | -0.86584  |
| 50480 | P14075 | Q7RTY9 | -0.96482  |
| 50481 | P14075 | P51957 | -0.30642  |
| 50482 | P14075 | Q6KF10 | -0.63113  |
| 50483 | P14075 | Q9UHP3 | -0.27522  |
| 50484 | P14075 | Q9P1A2 | -0.16078  |
| 50485 | P14075 | Q8WWM9 | -0.4268   |
| 50486 | P14075 | P31153 | -0.58432  |
| 50487 | P14075 | Q8N423 | -0.42559  |
| 50488 | P14075 | P58173 | -1.1027   |
| 50489 | P14075 | O95758 | -0.57231  |
| 50490 | P14075 | Q5M9N0 | -0.11777  |
| 50491 | P14075 | P02652 | -0.31299  |
| 50492 | P14075 | Q6NSI1 | -0.2274   |
| 50493 | P14075 | P04004 | -0.80232  |
| 50494 | P14075 | Q53HC5 | -0.20343  |
| 50495 | P14075 | Q07890 | -0.34984  |
| 50496 | P14075 | P04233 | -0.41151  |
| 50497 | P14075 | Q95817 | -0.22739  |
| 50498 | P14075 | Q9H936 | -0.33532  |
| 50499 | P14075 | Q9P2K2 | -0.88517  |
| 50500 | P14075 | Q96J94 | -0.2266   |
| 50501 | P14075 | O60391 | -0.73725  |
| 50502 | P14075 | Q14995 | -0.27049  |
| 50503 | P14075 | Q52M93 | -0.099256 |
| 50504 | P14075 | P52198 | -0.7242   |
| 50505 | P14075 | Q9NUV9 | -0.32264  |
| 50506 | P14075 | Q7Z7M8 | -0.6821   |
| 50507 | P14075 | Q9UGP8 | -0.74193  |
| 50508 | P14075 | Q86U28 | -0.24489  |
| 50509 | P14075 | P84074 | -0.60041  |
| 50510 | P14075 | P68371 | -0.29618  |
| 50511 | P14075 | Q8NDI1 | -0.37554  |
| 50512 | P14075 | Q9ULX5 | -0.6362   |
| 50513 | P14075 | P19256 | -0.63093  |
| 50514 | P14075 | Q9Y5S8 | -0.39958  |
| 50515 | P14075 | Q13131 | -0.25183  |
| 50516 | P14075 | Q9HAC8 | -0.21386  |
| 50517 | P14075 | Q15005 | -0.69098  |
| 50518 | P14075 | Q15642 | -0.77285  |
| 50519 | P14075 | Q99259 | -0.38768  |
| 50520 | P14075 | Q9Y5S1 | -0.73256  |
| 50521 | P14075 | P30456 | -0.7844   |
| 50522 | P14075 | Q9UBA6 | -0.13223  |
| 50523 | P14075 | Q9BSJ5 | -0.86584  |
| 50524 | P14075 | O43929 | -0.13968  |
| 50525 | P14075 | Q92664 | -0.025125 |
| 50526 | P14075 | Q9H8M2 | -0.13903  |
| 50527 | P14075 | O14944 | -0.40842  |
| 50528 | P14075 | Q2M1V0 | -0.21192  |
| 50529 | P14075 | Q9BXW7 | -0.38805  |
| 50530 | P14075 | P54289 | -0.875    |
| 50531 | P14075 | Q8NEB9 | -0.3415   |
| 50532 | P14075 | P42785 | -0.34532  |
| 50533 | P14075 | Q14147 | -1.0216   |
| 50534 | P14075 | Q9NW82 | -0.22743  |
| 50535 | P14075 | P55000 | -1.0133   |
| 50536 | P14075 | Q76N89 | -0.29066  |
| 50537 | P14075 | Q9HCE6 | -0.57571  |
| 50538 | P14075 | Q9Y2T3 | -0.47097  |
| 50539 | P14075 | A5X5Y0 | -0.90812  |
| 50540 | P14075 | Q96A72 | -0.19754  |

|       |        |        |          |
|-------|--------|--------|----------|
| 50541 | P14075 | P17948 | -0.3793  |
| 50542 | P14075 | Q86T96 | -0.67301 |
| 50543 | P14075 | P20020 | -0.68252 |
| 50544 | P14075 | O95388 | -0.88687 |
| 50545 | P14075 | O43435 | -0.54474 |
| 50546 | P14075 | Q9BXU8 | -0.43943 |
| 50547 | P14075 | Q3ZCQ3 | -0.86584 |
| 50548 | P14075 | O95568 | -0.20721 |
| 50549 | P14075 | Q96JY6 | -0.22733 |
| 50550 | P14075 | Q53FV1 | -0.91354 |
| 50551 | P14075 | O43808 | -0.2537  |
| 50552 | P14075 | Q9Y2Z0 | -0.22707 |
| 50553 | P14075 | Q9UL45 | -0.12211 |
| 50554 | P14075 | A8K010 | -0.36031 |
| 50555 | P14075 | Q86XT9 | -0.90998 |
| 50556 | P14075 | P48426 | -0.27164 |
| 50557 | P14075 | O95221 | -1.1027  |
| 50558 | P14075 | Q7Z475 | -0.85749 |
| 50559 | P14075 | P00374 | -0.17578 |
| 50560 | P14075 | Q8NH70 | -1.1027  |
| 50561 | P14075 | Q9GZY6 | -0.48947 |
| 50562 | P14075 | Q96L96 | -0.55578 |
| 50563 | P14075 | Q6ZVD8 | -0.24576 |
| 50564 | P14075 | Q8TDY3 | -0.30492 |
| 50565 | P14075 | Q9HCK4 | -0.42337 |
| 50566 | P14075 | Q6ZV89 | -0.21037 |
| 50567 | P14075 | P02786 | -0.60937 |
| 50568 | P14075 | P27352 | -0.90048 |
| 50569 | P14075 | Q9NPB0 | -0.80884 |
| 50570 | P14075 | Q9HA82 | -0.30336 |
| 50571 | P14075 | Q92503 | -0.80813 |
| 50572 | P14075 | P50552 | -0.21116 |
| 50573 | P14075 | P55317 | -0.31899 |
| 50574 | P14075 | Q9UHC3 | -0.60411 |
| 50575 | P14075 | Q9Y5I2 | -1.4444  |
| 50576 | P14075 | Q7Z340 | -0.21172 |
| 50577 | P14075 | Q6NVV9 | -0.59433 |
| 50578 | P14075 | P0DJI9 | -0.8156  |
| 50579 | P14075 | O15172 | -0.4231  |
| 50580 | P14075 | P02489 | -0.20195 |
| 50581 | P14075 | P09016 | -0.1773  |
| 50582 | P14075 | Q86UK5 | -0.62999 |
| 50583 | P14075 | Q8NH51 | -1.1027  |
| 50584 | P14075 | Q8NGQ5 | -1.1027  |
| 50585 | P14075 | O96014 | -0.39732 |
| 50586 | P14075 | P05423 | -0.17587 |
| 50587 | P14075 | Q68D85 | -0.72744 |
| 50588 | P14075 | Q8NH03 | -1.1027  |
| 50589 | P14075 | A8MUN3 | -0.87849 |
| 50590 | P14075 | Q8N9W4 | -0.16297 |
| 50591 | P14075 | Q8IY85 | -0.22683 |
| 50592 | P14075 | Q8NG35 | -0.84399 |
| 50593 | P14075 | O14718 | -1.2099  |
| 50594 | P14075 | O75385 | -0.38251 |
| 50595 | P14075 | Q9BZ97 | -0.86584 |
| 50596 | P14075 | Q8N6C8 | -1.0333  |
| 50597 | P14075 | Q0VD83 | -0.70666 |
| 50598 | P14075 | O15047 | -0.22617 |
| 50599 | P14075 | P17655 | -0.29067 |
| 50600 | P14075 | Q9BQ31 | -0.52055 |
| 50601 | P14075 | Q9Y5F7 | -1.1297  |
| 50602 | P14075 | Q8NH40 | -1.1027  |
| 50603 | P14075 | Q9P2D8 | -0.86584 |
| 50604 | P14075 | Q8N201 | -0.50274 |
| 50605 | P14075 | Q8ND24 | -0.52332 |
| 50606 | P14075 | Q9UHE8 | -0.98993 |
| 50607 | P14075 | Q03395 | -1.2002  |
| 50608 | P14075 | Q5T4F4 | -0.36134 |
| 50609 | P14075 | P37287 | -0.36997 |
| 50610 | P14075 | Q8TDS5 | -1.0612  |
| 50611 | P14075 | Q7Z624 | -0.22651 |
| 50612 | P14075 | Q7RTS1 | -0.22758 |
| 50613 | P14075 | P68402 | -0.33112 |
| 50614 | P14075 | P13725 | -0.49487 |
| 50615 | P14075 | A2RUG3 | -0.86584 |
| 50616 | P14075 | Q8WXR4 | -0.8093  |

|       |        |        |          |
|-------|--------|--------|----------|
| 50617 | P14075 | O43653 | -0.60538 |
| 50618 | P14075 | Q6ZNL0 | -0.86263 |
| 50619 | P14075 | O60234 | -0.67785 |
| 50620 | P14075 | P01760 | -0.97479 |
| 50621 | P14075 | P21128 | -0.77234 |
| 50622 | P14075 | Q96BF3 | -0.93628 |
| 50623 | P14075 | Q96KN2 | -1.1503  |
| 50624 | P14075 | Q8N468 | -0.8419  |
| 50625 | P14075 | Q8TD33 | -0.87849 |
| 50626 | P14075 | Q96KB5 | -0.22741 |
| 50627 | P14075 | Q9P1W9 | -0.52518 |
| 50628 | P14075 | Q96DT5 | -0.67619 |
| 50629 | P14075 | Q9NZJ7 | -0.27057 |
| 50630 | P14075 | Q6UWK7 | -0.87849 |
| 50631 | P14075 | P22736 | -0.22906 |
| 50632 | P14075 | O76070 | -0.30353 |
| 50633 | P14075 | Q8WW34 | -0.86584 |
| 50634 | P14075 | P41143 | -0.50946 |
| 50635 | P14075 | B7Z6K7 | -0.39217 |
| 50636 | P14075 | Q9H8X9 | -0.89944 |
| 50637 | P14075 | P0C7P1 | -0.59537 |
| 50638 | P14075 | Q9Y342 | -0.89096 |
| 50639 | P14075 | Q9NUN7 | -0.4458  |
| 50640 | P14075 | O43610 | -0.40512 |
| 50641 | P14075 | O15145 | -0.12489 |
| 50642 | P14075 | Q8N136 | -0.58436 |
| 50643 | P14075 | O95407 | -0.29651 |
| 50644 | P14075 | Q9P0G3 | -1.1305  |
| 50645 | P14075 | Q96FN4 | -0.22759 |
| 50646 | P14075 | Q9BZF3 | -0.26408 |
| 50647 | P14075 | P19086 | -0.90363 |
| 50648 | P14075 | Q5XKR4 | -0.17571 |
| 50649 | P14075 | O00253 | -0.81898 |
| 50650 | P14075 | P80370 | -0.72598 |
| 50651 | P14075 | P47736 | -0.32325 |
| 50652 | P14075 | Q8NGA2 | -1.1027  |
| 50653 | P14075 | Q05639 | -0.44539 |
| 50654 | P14075 | Q7Z2T5 | -0.65757 |
| 50655 | P14075 | A4D1P6 | -0.22745 |
| 50656 | P14075 | Q96EN8 | -0.34136 |
| 50657 | P14075 | A6NHY2 | -0.576   |
| 50658 | P14075 | Q9NRD8 | -0.74053 |
| 50659 | P14075 | Q6PIY5 | -0.17617 |
| 50660 | P14075 | Q9HBV1 | -0.6579  |
| 50661 | P14075 | Q8N1P7 | -0.44203 |
| 50662 | P14075 | Q96MN2 | -0.79654 |
| 50663 | P14075 | Q8IWA0 | -0.22802 |
| 50664 | P14075 | Q96EX2 | -0.92811 |
| 50665 | P14075 | O75110 | -0.86794 |
| 50666 | P14075 | Q96DC9 | -0.65183 |
| 50667 | P14075 | Q8N3C0 | -0.22721 |
| 50668 | P14075 | P51587 | -0.1714  |
| 50669 | P14075 | A6NC05 | -0.42433 |
| 50670 | P14075 | Q96T68 | -0.32933 |
| 50671 | P14075 | Q9NS98 | -1.0537  |
| 50672 | P14075 | P10916 | -0.22647 |
| 50673 | P14075 | P08118 | -0.49597 |
| 50674 | P14075 | P01710 | -0.97479 |
| 50675 | P14075 | O94856 | -0.86743 |
| 50676 | P14075 | P04808 | -0.97664 |
| 50677 | P14075 | Q96DX8 | -0.16229 |
| 50678 | P14075 | P50224 | -0.29153 |
| 50679 | P14075 | Q6ZUM4 | -0.91582 |
| 50680 | P14075 | Q2UY09 | -1.0331  |
| 50681 | P14075 | P49640 | -0.2272  |
| 50682 | P14075 | P03999 | -1.227   |
| 50683 | P14075 | P50443 | -1.0203  |
| 50684 | P14075 | Q8N5C1 | -0.86584 |
| 50685 | P14075 | Q8NH43 | -1.1027  |
| 50686 | P14075 | Q8TE49 | -0.58312 |
| 50687 | P14075 | Q9NRX1 | -0.11118 |
| 50688 | P14075 | Q9NZN9 | -0.21705 |
| 50689 | P14075 | P11586 | -0.43495 |
| 50690 | P14075 | Q96IG2 | -0.29487 |
| 50691 | P14075 | Q9NUQ7 | -0.40752 |
| 50692 | P14075 | Q96R28 | -1.1027  |



|       |        |        |           |
|-------|--------|--------|-----------|
| 50693 | P14075 | Q9P2K9 | -0.5887   |
| 50694 | P14075 | Q92743 | -0.9308   |
| 50695 | P14075 | Q14574 | -1.0091   |
| 50696 | P14075 | P62341 | -0.47318  |
| 50697 | P14075 | O15270 | -0.66999  |
| 50698 | P14075 | O43280 | -0.43756  |
| 50699 | P14075 | P08758 | -0.43719  |
| 50700 | P14075 | A8MXJ8 | -0.48092  |
| 50701 | P14075 | Q9NTN3 | -0.61119  |
| 50702 | P14075 | P24071 | -1.3708   |
| 50703 | P14075 | Q15124 | -0.10689  |
| 50704 | P14075 | Q6IS24 | -0.7101   |
| 50705 | P14075 | Q8N7U6 | -0.52751  |
| 50706 | P14075 | Q9BVK6 | -0.15024  |
| 50707 | P14075 | Q9H267 | -0.18072  |
| 50708 | P14075 | P49758 | -0.66769  |
| 50709 | P14075 | A6NMZ2 | -0.66242  |
| 50710 | P14075 | P62955 | -0.86627  |
| 50711 | P14075 | Q16585 | -0.69263  |
| 50712 | P14075 | P13584 | -0.70951  |
| 50713 | P14075 | P01780 | -0.97479  |
| 50714 | P14075 | Q30KQ1 | -0.84399  |
| 50715 | P14075 | Q02338 | -0.34511  |
| 50716 | P14075 | Q8N456 | -0.29487  |
| 50717 | P14075 | Q99961 | -0.26912  |
| 50718 | P14075 | Q6NXT2 | -0.88998  |
| 50719 | P14075 | Q969G5 | -0.41147  |
| 50720 | P14075 | P51512 | -1.4022   |
| 50721 | P14075 | P54760 | -0.8461   |
| 50722 | P14075 | Q12918 | -0.96937  |
| 50723 | P14075 | Q8TCT8 | -0.57192  |
| 50724 | P14075 | Q29940 | -0.88446  |
| 50725 | P14075 | Q9UIG5 | -0.10155  |
| 50726 | P14075 | Q6ZTA4 | -0.58377  |
| 50727 | P14075 | Q9UBH0 | -0.83449  |
| 50728 | P14075 | P30566 | -0.25451  |
| 50729 | P14075 | Q9Y261 | -0.27204  |
| 50730 | P14075 | O75715 | -1.0628   |
| 50731 | P14075 | O15344 | -0.47862  |
| 50732 | P14075 | Q9BXU3 | -0.73967  |
| 50733 | P14075 | Q15269 | -0.22619  |
| 50734 | P14075 | P51513 | -0.25507  |
| 50735 | P14075 | Q9UL01 | -0.44429  |
| 50736 | P14075 | P01719 | -0.97479  |
| 50737 | P14075 | Q8TF08 | -0.69769  |
| 50738 | P14075 | O43242 | -0.12024  |
| 50739 | P14075 | Q6PF18 | -0.067806 |
| 50740 | P14075 | P20338 | -0.28686  |
| 50741 | P14075 | Q7L7L0 | -0.88998  |
| 50742 | P14075 | P32320 | -0.6532   |
| 50743 | P14075 | Q9UH17 | -0.77806  |
| 50744 | P14075 | Q4G0G5 | -0.87849  |
| 50745 | P14075 | Q8WYJ6 | -0.22121  |
| 50746 | P14075 | Q8TDD5 | -0.82991  |
| 50747 | P14075 | Q8NA70 | -0.03722  |
| 50748 | P14075 | O00370 | -0.42031  |
| 50749 | P14075 | Q8N5M9 | -0.93931  |
| 50750 | P14075 | Q8N4X5 | -0.3557   |
| 50751 | P14075 | O60443 | -0.34603  |
| 50752 | P14075 | P00387 | -0.36383  |
| 50753 | P14075 | Q14641 | -1.0414   |
| 50754 | P14075 | Q8N554 | -0.21172  |
| 50755 | P14075 | Q9NZC3 | -0.6506   |
| 50756 | P14075 | Q8NGA5 | -0.91257  |
| 50757 | P14075 | P48048 | -1.167    |
| 50758 | P14075 | Q96DV4 | -0.16032  |
| 50759 | P14075 | P48751 | -0.94796  |
| 50760 | P14075 | P06307 | -0.67415  |
| 50761 | P14075 | P15907 | -0.79665  |
| 50762 | P14075 | Q92736 | -0.35571  |
| 50763 | P14075 | Q9Y483 | -0.26058  |
| 50764 | P14075 | P54707 | -0.86687  |
| 50765 | P14075 | Q8NCR0 | -0.74906  |
| 50766 | P14075 | Q8NEX5 | -0.87849  |
| 50767 | P14075 | Q14722 | -0.84763  |
| 50768 | P14075 | Q2WGN9 | -0.5353   |

|       |        |        |          |
|-------|--------|--------|----------|
| 50769 | P14075 | A6PVS8 | -0.22645 |
| 50770 | P14075 | Q9NYG8 | -1.0473  |
| 50771 | P14075 | Q9UNL2 | -0.69706 |
| 50772 | P14075 | Q9Y6M5 | -0.72385 |
| 50773 | P14075 | Q15404 | -0.53893 |
| 50774 | P14075 | P43235 | -0.67575 |
| 50775 | P14075 | O75952 | -0.29309 |
| 50776 | P14075 | Q14689 | -0.2065  |
| 50777 | P14075 | Q71RC2 | -0.71592 |
| 50778 | P14075 | Q9HCX4 | -0.2265  |
| 50779 | P14075 | Q9HC84 | -0.53893 |
| 50780 | P14075 | Q9NZ56 | -0.5398  |
| 50781 | P14075 | Q6UXB3 | -0.60538 |
| 50782 | P14075 | Q9NQZ5 | -0.30763 |
| 50783 | P14075 | Q96NJ5 | -0.20421 |
| 50784 | P14075 | Q92997 | -0.2042  |
| 50785 | P14075 | Q9UHB6 | -0.52974 |
| 50786 | P14075 | Q9ULY5 | -0.8681  |
| 50787 | P14075 | P10966 | -0.72449 |
| 50788 | P14075 | Q86SU0 | -0.69773 |
| 50789 | P14075 | Q5TCX8 | -0.77867 |
| 50790 | P14075 | O43283 | -0.33198 |
| 50791 | P14075 | Q8IYM2 | -0.436   |
| 50792 | P14075 | O43760 | -0.81822 |
| 50793 | P14075 | Q96JX3 | -0.68692 |
| 50794 | P14075 | Q9BYD9 | -0.07519 |
| 50795 | P14075 | Q14055 | -0.84798 |
| 50796 | P14075 | P43489 | -0.78817 |
| 50797 | P14075 | P22079 | -0.97622 |
| 50798 | P14075 | Q6PCB6 | -0.40663 |
| 50799 | P14075 | Q0VDI3 | -0.86584 |
| 50800 | P14075 | P01619 | -0.95485 |
| 50801 | P14075 | Q9Y614 | -0.29993 |
| 50802 | P14075 | P09210 | -0.27596 |
| 50803 | P14075 | Q9H4M7 | -0.39675 |
| 50804 | P14075 | Q8NFB2 | -0.86584 |
| 50805 | P14075 | Q14681 | -0.19405 |
| 50806 | P14075 | Q86VW1 | -0.83438 |
| 50807 | P14075 | Q9BU79 | -0.86584 |
| 50808 | P14075 | Q9NQB0 | -0.22155 |
| 50809 | P14075 | O15254 | -0.62202 |
| 50810 | P14075 | Q9UKM9 | -0.4299  |
| 50811 | P14075 | Q8TDT2 | -1.1721  |
| 50812 | P14075 | P07996 | -0.29513 |
| 50813 | P14075 | Q9NPF7 | -0.43065 |
| 50814 | P14075 | P01903 | -0.7302  |
| 50815 | P14075 | Q6UXF7 | -0.86789 |
| 50816 | P14075 | Q8N349 | -0.62965 |
| 50817 | P14075 | Q2M2E5 | -0.87849 |
| 50818 | P14075 | Q8TDX7 | -0.70859 |
| 50819 | P14075 | Q00444 | -0.22644 |
| 50820 | P14075 | A6NMZ7 | -1.1454  |
| 50821 | P14075 | P28356 | -0.22729 |
| 50822 | P14075 | P62191 | -0.30281 |
| 50823 | P14075 | P50281 | -0.36436 |
| 50824 | P14075 | Q8NB16 | -0.22741 |
| 50825 | P14075 | Q92610 | -0.15816 |
| 50826 | P14075 | Q9UI15 | -0.21228 |
| 50827 | P14075 | Q86TY3 | -0.86584 |
| 50828 | P14075 | P43353 | -0.50761 |
| 50829 | P14075 | B3KVV0 | -0.86584 |
| 50830 | P14075 | Q8NGX0 | -1.1027  |
| 50831 | P14075 | Q14CM0 | -0.22741 |
| 50832 | P14075 | P56159 | -0.50267 |
| 50833 | P14075 | Q5DT21 | -0.25373 |
| 50834 | P14075 | Q5MNZ9 | -0.2274  |
| 50835 | P14075 | P47895 | -0.36059 |
| 50836 | P14075 | O75038 | -0.41293 |
| 50837 | P14075 | Q6P1K1 | -0.79227 |
| 50838 | P14075 | Q96I36 | -0.73489 |
| 50839 | P14075 | Q53F39 | -0.47133 |
| 50840 | P14075 | Q17RW2 | -0.93361 |
| 50841 | P14075 | Q6MZM9 | -0.87849 |
| 50842 | P14075 | Q6P531 | -0.69875 |
| 50843 | P14075 | Q5JQC9 | -0.43253 |
| 50844 | P14075 | Q9NYL5 | -0.65897 |

|       |        |        |            |
|-------|--------|--------|------------|
| 50845 | P14075 | O14493 | -0.7359    |
| 50846 | P14075 | Q06732 | -0.17069   |
| 50847 | P14075 | Q8TC41 | -0.9974    |
| 50848 | P14075 | Q06124 | -0.22741   |
| 50849 | P14075 | O75077 | -1.1002    |
| 50850 | P14075 | O00217 | -0.42421   |
| 50851 | P14075 | Q92496 | -0.95108   |
| 50852 | P14075 | Q8NGH7 | -1.1027    |
| 50853 | P14075 | P58876 | -0.88998   |
| 50854 | P14075 | O75575 | -0.6252    |
| 50855 | P14075 | Q15464 | -0.67254   |
| 50856 | P14075 | Q9Y493 | -1.0321    |
| 50857 | P14075 | O15357 | -0.22741   |
| 50858 | P14075 | Q01085 | -0.34681   |
| 50859 | P14075 | Q56UQ5 | -0.10218   |
| 50860 | P14075 | Q03001 | -0.22805   |
| 50861 | P14075 | P06888 | -0.97479   |
| 50862 | P14075 | A4D126 | -0.49075   |
| 50863 | P14075 | Q9UJX0 | -0.50043   |
| 50864 | P14075 | H7BZ55 | -0.13249   |
| 50865 | P14075 | Q9UL15 | -0.31905   |
| 50866 | P14075 | O75364 | -0.20076   |
| 50867 | P14075 | Q08289 | -0.41645   |
| 50868 | P14075 | Q9H209 | -1.1027    |
| 50869 | P14075 | Q92583 | -1.1063    |
| 50870 | P14075 | Q9NWT1 | -0.22814   |
| 50871 | P14075 | Q13231 | -0.77271   |
| 50872 | P14075 | Q8WZ92 | -1.1027    |
| 50873 | P14075 | Q86Y37 | -0.1083    |
| 50874 | P14075 | P02042 | -0.34646   |
| 50875 | P14075 | Q2TVT4 | -0.38229   |
| 50876 | P14075 | Q6UWW8 | -0.34921   |
| 50877 | P14075 | P0CK97 | -0.86584   |
| 50878 | P14075 | Q99943 | -0.60924   |
| 50879 | P14075 | P0C5K7 | -0.0093557 |
| 50880 | P14075 | Q5DX21 | -1.0684    |
| 50881 | P14075 | P17643 | -0.45388   |
| 50882 | P14075 | Q9NW13 | -0.32302   |
| 50883 | P14075 | Q96T37 | -0.22904   |
| 50884 | P14075 | Q96L42 | -0.84621   |
| 50885 | P14075 | Q3SY52 | -0.21172   |
| 50886 | P14075 | A8MYG8 | -0.22741   |
| 50887 | P14075 | Q9Y5K3 | -0.40002   |
| 50888 | P14075 | Q9UKU7 | -0.23617   |
| 50889 | P14075 | Q9H330 | -0.6579    |
| 50890 | P14075 | Q9NUG6 | -0.30967   |
| 50891 | P14075 | Q8NEE6 | -0.22127   |
| 50892 | P14075 | A8MWA6 | -0.48092   |
| 50893 | P14075 | Q96HS1 | -0.6601    |
| 50894 | P14075 | Q96GQ7 | -0.64766   |
| 50895 | P14075 | Q9P2X0 | -0.25535   |
| 50896 | P14075 | P26951 | -0.88295   |
| 50897 | P14075 | Q16445 | -0.73183   |
| 50898 | P14075 | O43291 | -0.90037   |
| 50899 | P14075 | Q5T2D3 | -0.054622  |
| 50900 | P14075 | Q9H0J9 | -0.31438   |
| 50901 | P14075 | Q9Y3D7 | -0.21797   |
| 50902 | P14075 | Q9NZB8 | -0.65669   |
| 50903 | P14075 | Q14558 | -0.39183   |
| 50904 | P14075 | P30939 | -1.2087    |
| 50905 | P14075 | P15153 | -0.67688   |
| 50906 | P14075 | P30291 | -0.22741   |
| 50907 | P14075 | P98175 | -0.55651   |
| 50908 | P14075 | Q9UQ10 | -0.7261    |
| 50909 | P14075 | Q9NQ40 | -1.0109    |
| 50910 | P14075 | Q5TAA0 | -0.058386  |
| 50911 | P14075 | Q9Y426 | -0.55694   |
| 50912 | P14075 | Q99570 | -0.29483   |
| 50913 | P14075 | O60551 | -0.2688    |
| 50914 | P14075 | Q9BWW8 | -0.91549   |
| 50915 | P14075 | P09228 | -0.89477   |
| 50916 | P14075 | Q7Z4H4 | -0.75252   |
| 50917 | P14075 | P51164 | -0.84313   |
| 50918 | P14075 | Q8TE56 | -1.2214    |
| 50919 | P14075 | Q9NSK0 | -0.2671    |
| 50920 | P14075 | P40199 | -0.2785    |

|       |        |        |          |
|-------|--------|--------|----------|
| 50921 | P14075 | Q2M389 | -0.40387 |
| 50922 | P14075 | Q13217 | -0.20372 |
| 50923 | P14075 | Q9NXU5 | -1.2555  |
| 50924 | P14075 | P09110 | -0.21812 |
| 50925 | P14075 | Q6ZN44 | -0.93114 |
| 50926 | P14075 | Q96MG8 | -0.25582 |
| 50927 | P14075 | Q8NHU6 | -0.20813 |
| 50928 | P14075 | Q9H999 | -0.64902 |
| 50929 | P14075 | Q9UJU2 | -0.21158 |
| 50930 | P14075 | Q96PH1 | -0.71636 |
| 50931 | P14075 | O75348 | -0.52253 |
| 50932 | P14075 | O94919 | -0.81248 |
| 50933 | P14075 | A6NLE4 | -0.93628 |
| 50934 | P14075 | Q9NY26 | -0.93358 |
| 50935 | P14075 | Q7RTX0 | -1.06    |
| 50936 | P14075 | A6NHC0 | -0.81099 |
| 50937 | P14075 | P31323 | -0.2272  |
| 50938 | P14075 | Q63HN8 | -0.79202 |
| 50939 | P14075 | Q5RGS3 | -0.86584 |
| 50940 | P14075 | Q53H82 | -0.30367 |
| 50941 | P14075 | Q99941 | -0.35793 |
| 50942 | P14075 | O95416 | -0.24358 |
| 50943 | P14075 | Q8WWB7 | -0.51637 |
| 50944 | P14075 | Q8IZD0 | -0.11896 |
| 50945 | P14075 | O15173 | -0.9819  |
| 50946 | P14075 | Q7Z6M3 | -1.0197  |
| 50947 | P14075 | Q4VXA5 | -0.87142 |
| 50948 | P14075 | P14060 | -0.73425 |
| 50949 | P14075 | P19113 | -0.57326 |
| 50950 | P14075 | Q5R387 | -0.91899 |
| 50951 | P14075 | P29460 | -0.26013 |
| 50952 | P14075 | Q5T1S8 | -0.94863 |
| 50953 | P14075 | Q5VUJ6 | -0.23275 |
| 50954 | P14075 | Q6UWF5 | -0.86584 |
| 50955 | P14075 | P61587 | -1.1341  |
| 50956 | P14075 | Q96PM9 | -0.18715 |
| 50957 | P14075 | Q9BR10 | -0.68475 |
| 50958 | P14075 | A6NDS4 | -1.2307  |
| 50959 | P14075 | O15516 | -0.22743 |
| 50960 | P14075 | P63092 | -0.57541 |
| 50961 | P14075 | Q9H0M5 | -0.21172 |
| 50962 | P14075 | O43683 | -0.22741 |
| 50963 | P14075 | Q7LDG7 | -0.70928 |
| 50964 | P14075 | Q13351 | -0.22628 |
| 50965 | P14075 | O43837 | -0.17621 |
| 50966 | P14075 | Q69YU5 | -0.87849 |
| 50967 | P14075 | Q3MJ16 | -0.48804 |
| 50968 | P14075 | Q7Z4S9 | -0.2273  |
| 50969 | P14075 | Q2VWA4 | -0.05009 |
| 50970 | P14075 | Q14529 | -0.22741 |
| 50971 | P14075 | P21802 | -0.24461 |
| 50972 | P14075 | Q5VTE0 | -0.60286 |
| 50973 | P14075 | P59780 | -0.10138 |
| 50974 | P14075 | Q96PF2 | -0.53007 |
| 50975 | P14075 | P20774 | -0.33144 |
| 50976 | P14075 | Q9BU20 | -0.91903 |
| 50977 | P14075 | O60240 | -0.49032 |
| 50978 | P14075 | Q9UHD1 | -0.15072 |
| 50979 | P14075 | Q15782 | -0.73156 |
| 50980 | P14075 | Q14982 | -0.84392 |
| 50981 | P14075 | P59551 | -1.0686  |
| 50982 | P14075 | Q99665 | -0.84521 |
| 50983 | P14075 | O15320 | -0.46032 |
| 50984 | P14075 | Q93070 | -0.57217 |
| 50985 | P14075 | Q7L1I2 | -0.67387 |
| 50986 | P14075 | Q7L1W4 | -0.86584 |
| 50987 | P14075 | Q9H0C3 | -0.64779 |
| 50988 | P14075 | Q86YV0 | -0.58829 |
| 50989 | P14075 | Q4JDL3 | -0.52862 |
| 50990 | P14075 | O75204 | -0.66818 |
| 50991 | P14075 | Q8TEA1 | -0.39051 |
| 50992 | P14075 | A4D1S5 | -0.99828 |
| 50993 | P14075 | Q8N4C9 | -0.86584 |
| 50994 | P14075 | P56748 | -0.65111 |
| 50995 | P14075 | Q2M1P5 | -0.37582 |
| 50996 | P14075 | P22001 | -0.82166 |

|       |        |        |          |
|-------|--------|--------|----------|
| 50997 | P14075 | Q9BR39 | -0.42885 |
| 50998 | P14075 | Q9NR81 | -0.57936 |
| 50999 | P14075 | Q96K75 | -0.21172 |
| 51000 | P14075 | Q6UXI7 | -0.89407 |
| 51001 | P14075 | P01236 | -0.78365 |
| 51002 | P14075 | Q9NR12 | -0.29502 |
| 51003 | P14075 | Q92896 | -0.71462 |
| 51004 | P14075 | Q8NAN2 | -0.86584 |
| 51005 | P14075 | Q9Y574 | -0.36478 |
| 51006 | P14075 | Q5FWE3 | -0.86584 |
| 51007 | P14075 | Q8N608 | -0.96259 |
| 51008 | P14075 | Q7Z5M5 | -0.86584 |
| 51009 | P14075 | Q86V25 | -0.27318 |
| 51010 | P14075 | Q8TDL5 | -1.0427  |
| 51011 | P14075 | O43345 | -0.21172 |
| 51012 | P14075 | Q8N5C6 | -0.51289 |
| 51013 | P14075 | Q9UJQ1 | -0.79327 |
| 51014 | P14075 | Q5T013 | -0.39131 |
| 51015 | P14075 | Q9NZU0 | -1.0425  |
| 51016 | P14075 | Q8NGG8 | -1.1027  |
| 51017 | P14075 | Q92598 | -0.4583  |
| 51018 | P14075 | Q92502 | -0.98714 |
| 51019 | P14075 | P55318 | -0.34215 |
| 51020 | P14075 | P07510 | -0.96633 |
| 51021 | P14075 | Q8NH01 | -1.1027  |
| 51022 | P14075 | Q96B18 | -0.35509 |
| 51023 | P14075 | P08247 | -0.53188 |
| 51024 | P14075 | P35414 | -1.0305  |
| 51025 | P14075 | Q9NRJ1 | -0.53327 |
| 51026 | P14075 | Q13671 | -0.38499 |
| 51027 | P14075 | P84550 | -0.10516 |
| 51028 | P14075 | Q08170 | -0.22742 |
| 51029 | P14075 | P14314 | -0.63088 |
| 51030 | P14075 | Q14568 | -0.58434 |
| 51031 | P14075 | Q86VH2 | -0.72602 |
| 51032 | P14075 | Q9NZV6 | -0.32453 |
| 51033 | P14075 | Q9H5Q3 | -0.86584 |
| 51034 | P14075 | Q13635 | -0.27314 |
| 51035 | P14075 | Q92620 | -0.22607 |
| 51036 | P14075 | Q14804 | -1.2911  |
| 51037 | P14075 | Q8N7X1 | -0.84005 |
| 51038 | P14075 | P16150 | -0.80944 |
| 51039 | P14075 | Q8NGD1 | -1.1027  |
| 51040 | P14075 | Q6UVM3 | -1.0998  |
| 51041 | P14075 | Q8TCT6 | -0.90742 |
| 51042 | P14075 | Q96T75 | -0.21176 |
| 51043 | P14075 | P78509 | -0.53773 |
| 51044 | P14075 | P50479 | -0.22741 |
| 51045 | P14075 | Q14576 | -0.9415  |
| 51046 | P14075 | P21399 | -0.14657 |
| 51047 | P14075 | Q8NEP7 | -0.20722 |
| 51048 | P14075 | Q9H0R8 | -0.21568 |
| 51049 | P14075 | O00154 | -0.26204 |
| 51050 | P14075 | P26441 | -0.30507 |
| 51051 | P14075 | Q8NGI8 | -1.1027  |
| 51052 | P14075 | Q6ZTW0 | -0.4516  |
| 51053 | P14075 | Q96PX8 | -0.92424 |
| 51054 | P14075 | Q9BY64 | -0.94099 |
| 51055 | P14075 | Q96PY5 | -0.27555 |
| 51056 | P14075 | Q5VZ66 | -0.32231 |
| 51057 | P14075 | P0C646 | -1.1027  |
| 51058 | P14075 | A6PVL3 | -0.75197 |
| 51059 | P14075 | P12004 | -0.19005 |
| 51060 | P14075 | P19440 | -0.28599 |
| 51061 | P14075 | A3KMH1 | -1.0841  |
| 51062 | P14075 | Q96C36 | -0.68918 |
| 51063 | P14075 | Q95859 | -0.99722 |
| 51064 | P14075 | Q8IVJ8 | -0.86584 |
| 51065 | P14075 | P49810 | -0.22123 |
| 51066 | P14075 | P31260 | -0.22714 |
| 51067 | P14075 | A6NGH8 | -0.2274  |
| 51068 | P14075 | P10586 | -0.81492 |
| 51069 | P14075 | P31995 | -0.30665 |
| 51070 | P14075 | Q9HCS2 | -0.61456 |
| 51071 | P14075 | Q58G82 | -0.20204 |
| 51072 | P14075 | Q13825 | -0.40022 |

|       |        |        |           |
|-------|--------|--------|-----------|
| 51073 | P14075 | Q9UKI3 | -0.45036  |
| 51074 | P14075 | Q7Z6G3 | -0.22372  |
| 51075 | P14075 | Q99697 | -0.20411  |
| 51076 | P14075 | Q8IZF5 | -1.1905   |
| 51077 | P14075 | Q6MZM0 | -1.0332   |
| 51078 | P14075 | P02671 | -0.42702  |
| 51079 | P14075 | Q9ULD8 | -0.88619  |
| 51080 | P14075 | Q9BZS1 | -0.27799  |
| 51081 | P14075 | Q01449 | -0.4087   |
| 51082 | P14075 | Q6DKI2 | -0.44203  |
| 51083 | P14075 | O60883 | -0.63906  |
| 51084 | P14075 | Q9HCN6 | -0.45178  |
| 51085 | P14075 | Q9UI40 | -0.91168  |
| 51086 | P14075 | O14733 | -0.22881  |
| 51087 | P14075 | P62873 | -0.41417  |
| 51088 | P14075 | A0PK11 | -0.86584  |
| 51089 | P14075 | P19526 | -0.69708  |
| 51090 | P14075 | Q9BQL6 | -0.62665  |
| 51091 | P14075 | Q695T7 | -0.98607  |
| 51092 | P14075 | Q9Y6J0 | -0.048548 |
| 51093 | P14075 | Q86XM0 | -0.91138  |
| 51094 | P14075 | Q7Z4N8 | -0.60696  |
| 51095 | P14075 | Q5UAW9 | -1.2026   |
| 51096 | P14075 | Q01151 | -0.95146  |
| 51097 | P14075 | Q96RQ1 | -0.38967  |
| 51098 | P14075 | O75153 | -0.29487  |
| 51099 | P14075 | Q9NY91 | -0.84782  |
| 51100 | P14075 | Q8TAX9 | -0.29487  |
| 51101 | P14075 | Q99487 | -0.40428  |
| 51102 | P14075 | Q9NVX2 | -0.22798  |
| 51103 | P14075 | Q8N3G9 | -0.72271  |
| 51104 | P14075 | Q96NY7 | -0.64739  |
| 51105 | P14075 | Q9H5P4 | -0.22239  |
| 51106 | P14075 | P01871 | -1.2614   |
| 51107 | P14075 | Q7Z5U6 | -0.22762  |
| 51108 | P14075 | Q7Z7K0 | -0.33596  |
| 51109 | P14075 | O43759 | -0.62798  |
| 51110 | P14075 | Q9P217 | -0.52332  |
| 51111 | P14075 | Q8TB52 | -0.55362  |
| 51112 | P14075 | P17658 | -0.84843  |
| 51113 | P14075 | O75064 | -0.35559  |
| 51114 | P14075 | Q8NEB7 | -0.53357  |
| 51115 | P14075 | Q9NPA2 | -1.2773   |
| 51116 | P14075 | Q96LB0 | -1.1721   |
| 51117 | P14075 | P49841 | -0.22752  |
| 51118 | P14075 | P35241 | -0.23009  |
| 51119 | P14075 | O75037 | -0.68836  |
| 51120 | P14075 | Q14773 | -1.3261   |
| 51121 | P14075 | Q96KK3 | -0.47536  |
| 51122 | P14075 | P34932 | -0.22549  |
| 51123 | P14075 | Q86YW5 | -0.18948  |
| 51124 | P14075 | P49821 | -0.40056  |
| 51125 | P14075 | P46531 | -0.22762  |
| 51126 | P14075 | Q96F15 | -0.79111  |
| 51127 | P14075 | Q07837 | -0.88333  |
| 51128 | P14075 | P35367 | -0.68576  |
| 51129 | P14075 | Q8NET1 | -0.84399  |
| 51130 | P14075 | Q9UKF5 | -1.0911   |
| 51131 | P14075 | O95467 | -0.70669  |
| 51132 | P14075 | Q9HAT2 | -0.87201  |
| 51133 | P14075 | Q8NBS9 | -0.28459  |
| 51134 | P14075 | Q6XE38 | -0.87849  |
| 51135 | P14075 | Q9P2G3 | -0.46443  |
| 51136 | P14075 | Q96QU6 | -0.50184  |
| 51137 | P14075 | P07357 | -1.1824   |
| 51138 | P14075 | P09529 | -0.22741  |
| 51139 | P14075 | Q9BXR5 | -1.1278   |
| 51140 | P14075 | Q7Z7N9 | -0.86584  |
| 51141 | P14075 | Q15080 | -0.45611  |
| 51142 | P14075 | P15170 | -0.36253  |
| 51143 | P14075 | Q6ZNE9 | -0.47027  |
| 51144 | P14075 | P06133 | -0.87714  |
| 51145 | P14075 | Q12882 | -0.55865  |
| 51146 | P14075 | Q13099 | -0.24776  |
| 51147 | P14075 | O75264 | -0.86584  |
| 51148 | P14075 | Q8N7A1 | -0.29487  |

|       |        |        |          |
|-------|--------|--------|----------|
| 51149 | P14075 | Q9HBU6 | -0.61241 |
| 51150 | P14075 | Q6UY18 | -0.86584 |
| 51151 | P14075 | P58550 | -0.96683 |
| 51152 | P14075 | Q8IWY4 | -0.82246 |
| 51153 | P14075 | C9JR72 | -0.29487 |
| 51154 | P14075 | P05534 | -0.7844  |
| 51155 | P14075 | Q7Z7B0 | -0.22156 |
| 51156 | P14075 | Q5XUX1 | -0.22741 |
| 51157 | P14075 | Q14194 | -0.21201 |
| 51158 | P14075 | Q96EY9 | -0.57065 |
| 51159 | P14075 | Q96RT7 | -0.20835 |
| 51160 | P14075 | Q9NP56 | -0.61354 |
| 51161 | P14075 | Q9UKP6 | -0.84188 |
| 51162 | P14075 | Q6PID6 | -0.22736 |
| 51163 | P14075 | Q02790 | -0.29909 |
| 51164 | P14075 | P24390 | -0.55933 |
| 51165 | P14075 | Q96RU2 | -0.37422 |
| 51166 | P14075 | O95342 | -0.80175 |
| 51167 | P14075 | O76074 | -0.48681 |
| 51168 | P14075 | O15482 | -0.6579  |
| 51169 | P14075 | Q6P996 | -0.63334 |
| 51170 | P14075 | O95980 | -0.52393 |
| 51171 | P14075 | P30408 | -0.79046 |
| 51172 | P14075 | Q14549 | -0.22729 |
| 51173 | P14075 | Q96T88 | -0.22741 |
| 51174 | P14075 | Q8IXL7 | -0.65733 |
| 51175 | P14075 | Q6UXM1 | -0.86584 |
| 51176 | P14075 | Q9UPQ4 | -0.22737 |
| 51177 | P14075 | Q5VZ89 | -0.7541  |
| 51178 | P14075 | Q5FYA8 | -0.71677 |
| 51179 | P14075 | O43933 | -0.24742 |
| 51180 | P14075 | Q96I13 | -0.61717 |
| 51181 | P14075 | Q15846 | -0.77931 |
| 51182 | P14075 | O96033 | -0.39115 |
| 51183 | P14075 | Q6ZW34 | -0.86584 |
| 51184 | P14075 | Q9ULD2 | -0.22558 |
| 51185 | P14075 | Q9UDT6 | -0.37062 |
| 51186 | P14075 | Q8IY84 | -0.98913 |
| 51187 | P14075 | P48739 | -0.46139 |
| 51188 | P14075 | Q92995 | -0.23011 |
| 51189 | P14075 | Q9GZT6 | -0.74159 |
| 51190 | P14075 | P05013 | -0.64227 |
| 51191 | P14075 | Q96AY3 | -0.54767 |
| 51192 | P14075 | Q8IUK5 | -0.69345 |
| 51193 | P14075 | Q9BYH8 | -0.22731 |
| 51194 | P14075 | P06732 | -0.62898 |
| 51195 | P14075 | O43716 | -0.52659 |
| 51196 | P14075 | P78332 | -0.87267 |
| 51197 | P14075 | P29459 | -0.21225 |
| 51198 | P14075 | Q14559 | -0.24985 |
| 51199 | P14075 | Q9ULB4 | -0.93902 |
| 51200 | P14075 | B2RN74 | -1.1027  |
| 51201 | P14075 | P09093 | -0.95573 |
| 51202 | P14075 | A6NFN9 | -0.22739 |
| 51203 | P14075 | Q6P2H8 | -0.86584 |
| 51204 | P14075 | Q00765 | -0.1403  |
| 51205 | P14075 | P27544 | -0.56521 |
| 51206 | P14075 | Q05932 | -0.27316 |
| 51207 | P14075 | Q8NC67 | -0.86584 |
| 51208 | P14075 | P34925 | -0.40777 |
| 51209 | P14075 | Q8IZU3 | -0.22159 |
| 51210 | P14075 | Q2NKQ1 | -0.86094 |
| 51211 | P14075 | Q9UKY0 | -0.39799 |
| 51212 | P14075 | P47775 | -1.2559  |
| 51213 | P14075 | P02776 | -0.66372 |
| 51214 | P14075 | Q5TG30 | -1.052   |
| 51215 | P14075 | Q99685 | -0.45382 |
| 51216 | P14075 | Q96FS4 | -0.21893 |
| 51217 | P14075 | Q6GTX8 | -0.39621 |
| 51218 | P14075 | O75600 | -0.33598 |
| 51219 | P14075 | Q8N4V2 | -0.6818  |
| 51220 | P14075 | P01857 | -0.44934 |
| 51221 | P14075 | O43462 | -0.77686 |
| 51222 | P14075 | Q9H7X0 | -0.25935 |
| 51223 | P14075 | Q9NPI9 | -1.0462  |
| 51224 | P14075 | Q13596 | -0.22574 |

|       |        |        |          |
|-------|--------|--------|----------|
| 51225 | P14075 | O75976 | -0.78967 |
| 51226 | P14075 | Q99829 | -0.2275  |
| 51227 | P14075 | Q7Z403 | -0.93931 |
| 51228 | P14075 | Q8TBE9 | -0.26967 |
| 51229 | P14075 | Q8WTQ1 | -0.84399 |
| 51230 | P14075 | Q6DD87 | -0.21172 |
| 51231 | P14075 | Q86T90 | -0.21563 |
| 51232 | P14075 | Q8NAU1 | -0.9718  |
| 51233 | P14075 | A0PJW6 | -0.74159 |
| 51234 | P14075 | Q8NFP7 | -0.25513 |
| 51235 | P14075 | O75069 | -0.31983 |
| 51236 | P14075 | Q9BZ68 | -0.44826 |
| 51237 | P14075 | Q6Q6R5 | -0.36685 |
| 51238 | P14075 | Q8N5Y8 | -0.59178 |
| 51239 | P14075 | Q9BY76 | -0.3965  |
| 51240 | P14075 | P08833 | -0.82908 |
| 51241 | P14075 | Q13508 | -0.70149 |
| 51242 | P14075 | Q93091 | -0.70085 |
| 51243 | P14075 | O43865 | -0.18115 |
| 51244 | P14075 | Q9BW83 | -1.0033  |
| 51245 | P14075 | Q15067 | -0.46999 |
| 51246 | P14075 | O95800 | -1.2928  |
| 51247 | P14075 | O00308 | -0.22741 |
| 51248 | P14075 | P04746 | -0.78736 |
| 51249 | P14075 | P06870 | -0.69598 |
| 51250 | P14075 | Q9H4G8 | -0.47027 |
| 51251 | P14075 | Q12955 | -0.22741 |
| 51252 | P14075 | P02654 | -0.57992 |
| 51253 | P14075 | O75185 | -0.59309 |
| 51254 | P14075 | Q8TAD4 | -0.46997 |
| 51255 | P14075 | Q5VU57 | -0.58722 |
| 51256 | P14075 | Q96R84 | -1.1027  |
| 51257 | P14075 | Q9NYJ7 | -0.83958 |
| 51258 | P14075 | Q96QT4 | -1.0497  |
| 51259 | P14075 | P08254 | -0.80235 |
| 51260 | P14075 | Q8N8N0 | -0.91878 |
| 51261 | P14075 | P51790 | -0.37472 |
| 51262 | P14075 | P12814 | -0.31098 |
| 51263 | P14075 | P22466 | -0.36273 |
| 51264 | P14075 | Q02750 | -0.22749 |
| 51265 | P14075 | Q6ZUT3 | -0.55304 |
| 51266 | P14075 | P14543 | -1.0182  |
| 51267 | P14075 | P54819 | -0.53107 |
| 51268 | P14075 | Q9Y5R2 | -1.5364  |
| 51269 | P14075 | Q9UKN1 | -0.83525 |
| 51270 | P14075 | P41222 | -0.3099  |
| 51271 | P14075 | Q8NDY3 | -0.40345 |
| 51272 | P14075 | Q9Y458 | -0.54474 |
| 51273 | P14075 | Q9H1C7 | -0.86584 |
| 51274 | P14075 | Q8N4F4 | -0.94043 |
| 51275 | P14075 | P0C7P4 | -0.67713 |
| 51276 | P14075 | Q969L2 | -0.27874 |
| 51277 | P14075 | Q9UKQ9 | -1.2917  |
| 51278 | P14075 | O60811 | -0.25825 |
| 51279 | P14075 | Q96RY7 | -0.41721 |
| 51280 | P14075 | Q9UGU5 | -0.31128 |
| 51281 | P14075 | Q15911 | -0.2274  |
| 51282 | P14075 | P08240 | -0.87338 |
| 51283 | P14075 | Q9NR55 | -0.19893 |
| 51284 | P14075 | P52306 | -0.59297 |
| 51285 | P14075 | Q8N386 | -0.86584 |
| 51286 | P14075 | Q86UD7 | -1.2307  |
| 51287 | P14075 | P31415 | -0.21386 |
| 51288 | P14075 | Q9NZV1 | -0.96619 |
| 51289 | P14075 | Q8IVV2 | -0.62698 |
| 51290 | P14075 | Q8WTU0 | -0.55277 |
| 51291 | P14075 | Q6ZMT4 | -0.22942 |
| 51292 | P14075 | Q9BZD2 | -0.83154 |
| 51293 | P14075 | P0C7M8 | -0.85471 |
| 51294 | P14075 | Q9Y234 | -0.44549 |
| 51295 | P14075 | Q92187 | -0.47772 |
| 51296 | P14075 | D6RCP7 | -0.69644 |
| 51297 | P14075 | A8MVX0 | -0.7066  |
| 51298 | P14075 | P08684 | -0.53767 |
| 51299 | P14075 | Q6UXG8 | -0.86584 |
| 51300 | P14075 | P15529 | -0.5976  |



|       |        |        |           |
|-------|--------|--------|-----------|
| 51301 | P14075 | Q6RI45 | -0.38284  |
| 51302 | P14075 | P01772 | -0.97479  |
| 51303 | P14075 | O43570 | -0.87106  |
| 51304 | P14075 | Q15291 | -0.22752  |
| 51305 | P14075 | Q9BXM9 | -0.16078  |
| 51306 | P14075 | P10720 | -0.91859  |
| 51307 | P14075 | Q9UG22 | -1.1125   |
| 51308 | P14075 | Q96KW9 | -0.87278  |
| 51309 | P14075 | P10912 | -0.27006  |
| 51310 | P14075 | P16298 | -0.23377  |
| 51311 | P14075 | O43707 | -0.30884  |
| 51312 | P14075 | P15863 | -0.22696  |
| 51313 | P14075 | Q9NVC3 | -0.6745   |
| 51314 | P14075 | Q9ULE3 | -0.42719  |
| 51315 | P14075 | Q9BZ19 | -0.2274   |
| 51316 | P14075 | Q86WV6 | -0.086019 |
| 51317 | P14075 | O43396 | -0.22784  |
| 51318 | P14075 | Q13946 | -0.40949  |
| 51319 | P14075 | Q99217 | -0.58228  |
| 51320 | P14075 | Q14802 | -0.97937  |
| 51321 | P14075 | Q9ULX7 | -0.85141  |
| 51322 | P14075 | Q6P087 | -0.44749  |
| 51323 | P14075 | Q86Y27 | -0.87849  |
| 51324 | P14075 | A4D1B5 | -0.27642  |
| 51325 | P14075 | Q13087 | -0.26301  |
| 51326 | P14075 | Q8IYT3 | -0.011245 |
| 51327 | P14075 | Q9UPI3 | -0.84692  |
| 51328 | P14075 | P10163 | -0.677    |
| 51329 | P14075 | Q69YG0 | -0.86584  |
| 51330 | P14075 | P27338 | -0.57344  |
| 51331 | P14075 | P26885 | -0.22835  |
| 51332 | P14075 | Q5T5P2 | -0.32964  |
| 51333 | P14075 | Q8N142 | -0.62896  |
| 51334 | P14075 | P03928 | -0.49695  |
| 51335 | P14075 | O94769 | -0.84532  |
| 51336 | P14075 | Q9NQC1 | -0.48348  |
| 51337 | P14075 | Q9UI08 | -0.20936  |
| 51338 | P14075 | Q99572 | -0.263    |
| 51339 | P14075 | Q9P281 | -0.54186  |
| 51340 | P14075 | Q9ULQ1 | -0.51182  |
| 51341 | P14075 | A6NFE2 | -0.86584  |
| 51342 | P14075 | Q8NGQ6 | -1.1027   |
| 51343 | P14075 | Q9UHI7 | -0.32512  |
| 51344 | P14075 | Q8NBR9 | -0.13653  |
| 51345 | P14075 | Q96EX1 | -0.86584  |
| 51346 | P14075 | P23468 | -0.72568  |
| 51347 | P14075 | Q14929 | -0.17069  |
| 51348 | P14075 | I3L1E1 | -0.419    |
| 51349 | P14075 | P01137 | -0.22741  |
| 51350 | P14075 | Q9H239 | -1.3168   |
| 51351 | P14075 | O60678 | -0.22854  |
| 51352 | P14075 | Q9BQS7 | -1.0254   |
| 51353 | P14075 | A6NMZ5 | -1.1027   |
| 51354 | P14075 | Q9BZ95 | -0.31968  |
| 51355 | P14075 | Q8N1M1 | -0.6922   |
| 51356 | P14075 | P05556 | -0.23807  |
| 51357 | P14075 | Q9BT23 | -0.52332  |
| 51358 | P14075 | P52888 | -0.58101  |
| 51359 | P14075 | Q2T9K0 | -0.86584  |
| 51360 | P14075 | P41217 | -0.56136  |
| 51361 | P14075 | Q8WUB8 | -0.23135  |
| 51362 | P14075 | Q9UHW9 | -0.78625  |
| 51363 | P14075 | Q9C0D3 | -0.20358  |
| 51364 | P14075 | Q9H1R2 | -0.49175  |
| 51365 | P14075 | P06731 | -0.6716   |
| 51366 | P14075 | Q9Y6M0 | -0.82397  |
| 51367 | P14075 | Q14184 | -0.43102  |
| 51368 | P14075 | Q9Y639 | -0.80318  |
| 51369 | P14075 | O95278 | -0.23442  |
| 51370 | P14075 | Q9Y587 | -0.16694  |
| 51371 | P14075 | A6NNJ1 | -0.48092  |
| 51372 | P14075 | Q8IZF3 | -1.1905   |
| 51373 | P14075 | P01610 | -0.97479  |
| 51374 | P14075 | Q96FL9 | -0.56906  |
| 51375 | P14075 | P03372 | -0.22745  |
| 51376 | P14075 | Q5VXU3 | -0.56066  |

|       |        |        |          |
|-------|--------|--------|----------|
| 51377 | P14075 | Q96MI6 | -0.28641 |
| 51378 | P14075 | O76000 | -1.1027  |
| 51379 | P14075 | Q9NVJ2 | -0.56435 |
| 51380 | P14075 | Q6PXP3 | -0.66542 |
| 51381 | P14075 | Q9Y2C9 | -0.66103 |
| 51382 | P14075 | Q96A29 | -0.64266 |
| 51383 | P14075 | Q8TC92 | -1.2683  |
| 51384 | P14075 | P30550 | -1.0815  |
| 51385 | P14075 | Q96BM9 | -0.54039 |
| 51386 | P14075 | Q13606 | -1.1027  |
| 51387 | P14075 | Q09019 | -0.22766 |
| 51388 | P14075 | Q4V9L6 | -0.52887 |
| 51389 | P14075 | Q2T9J0 | -0.66481 |
| 51390 | P14075 | Q01113 | -1.3555  |
| 51391 | P14075 | P04208 | -0.97479 |
| 51392 | P14075 | Q9NX76 | -0.88766 |
| 51393 | P14075 | Q9UJT0 | -0.51127 |
| 51394 | P14075 | P50897 | -0.34267 |
| 51395 | P14075 | O15263 | -0.93882 |
| 51396 | P14075 | Q12841 | -0.98975 |
| 51397 | P14075 | Q7Z4T8 | -0.73341 |
| 51398 | P14075 | Q6X9E4 | -0.16705 |
| 51399 | P14075 | Q8TBM8 | -0.86545 |
| 51400 | P14075 | P51671 | -0.90635 |
| 51401 | P14075 | Q9H089 | -0.27902 |
| 51402 | P14075 | Q86VQ1 | -0.29487 |
| 51403 | P14075 | Q5QGS0 | -0.24186 |
| 51404 | P14075 | Q8IZJ3 | -0.87838 |
| 51405 | P14075 | P0C2W1 | -0.21201 |
| 51406 | P14075 | Q93063 | -0.55665 |
| 51407 | P14075 | Q9Y6M9 | -0.28702 |
| 51408 | P14075 | P36896 | -0.35156 |
| 51409 | P14075 | P12318 | -0.91471 |
| 51410 | P14075 | Q6ZMC9 | -0.86584 |
| 51411 | P14075 | Q6P499 | -0.82716 |
| 51412 | P14075 | P09488 | -0.2776  |
| 51413 | P14075 | Q9NR63 | -0.5781  |
| 51414 | P14075 | Q9Y239 | -0.2274  |
| 51415 | P14075 | P50238 | -0.38552 |
| 51416 | P14075 | Q6UXD7 | -0.8419  |
| 51417 | P14075 | Q9NPB8 | -0.18358 |
| 51418 | P14075 | Q969H4 | -0.22739 |
| 51419 | P14075 | Q9UD57 | -0.22735 |
| 51420 | P14075 | P13693 | -0.1699  |
| 51421 | P14075 | A6NNX1 | -0.56548 |
| 51422 | P14075 | Q08ET2 | -1.0691  |
| 51423 | P14075 | Q6JVE5 | -0.86389 |
| 51424 | P14075 | O43749 | -1.1027  |
| 51425 | P14075 | Q9UP79 | -1.1882  |
| 51426 | P14075 | P31273 | -0.43562 |
| 51427 | P14075 | Q99714 | -0.21749 |
| 51428 | P14075 | Q6NXR0 | -0.87382 |
| 51429 | P14075 | Q9NXW2 | -0.86545 |
| 51430 | P14075 | O43181 | -0.25354 |
| 51431 | P14075 | B4DU55 | -0.21172 |
| 51432 | P14075 | P57775 | -0.30582 |
| 51433 | P14075 | Q15032 | -0.44783 |
| 51434 | P14075 | Q16695 | -0.2467  |
| 51435 | P14075 | P18135 | -0.97479 |
| 51436 | P14075 | P0C024 | -0.42232 |
| 51437 | P14075 | Q9HB55 | -0.77329 |
| 51438 | P14075 | P23416 | -0.7433  |
| 51439 | P14075 | P02775 | -0.60874 |
| 51440 | P14075 | Q8NHW6 | -0.93164 |
| 51441 | P14075 | P0CJ88 | -0.20043 |
| 51442 | P14075 | Q7Z3E1 | -0.42395 |
| 51443 | P14075 | Q99999 | -0.67201 |
| 51444 | P14075 | Q5T9Z0 | -0.86584 |
| 51445 | P14075 | P18510 | -0.41425 |
| 51446 | P14075 | O95208 | -0.36002 |
| 51447 | P14075 | Q96C55 | -0.22051 |
| 51448 | P14075 | Q14392 | -0.91266 |
| 51449 | P14075 | P0CG29 | -0.22527 |
| 51450 | P14075 | P17900 | -0.18866 |
| 51451 | P14075 | Q9NRP4 | -0.28874 |
| 51452 | P14075 | Q07444 | -0.84923 |

|       |        |        |           |
|-------|--------|--------|-----------|
| 51453 | P14075 | Q4KMX7 | -0.002798 |
| 51454 | P14075 | Q2TVT3 | -0.38229  |
| 51455 | P14075 | Q8N5S9 | -0.58869  |
| 51456 | P14075 | P08473 | -0.50824  |
| 51457 | P14075 | P01722 | -0.97479  |
| 51458 | P14075 | P29144 | -0.27332  |
| 51459 | P14075 | Q8NGY3 | -1.1027   |
| 51460 | P14075 | Q6ZMT9 | -0.576    |
| 51461 | P14075 | Q96NG3 | -0.29487  |
| 51462 | P14075 | O94782 | -0.32133  |
| 51463 | P14075 | A8MW99 | -0.61053  |
| 51464 | P14075 | Q1ZYL8 | -0.87849  |
| 51465 | P14075 | Q8IZ08 | -1.1721   |
| 51466 | P14075 | O00590 | -1.23     |
| 51467 | P14075 | Q6UXB1 | -0.87849  |
| 51468 | P14075 | P34903 | -0.80184  |
| 51469 | P14075 | P16144 | -0.62167  |
| 51470 | P14075 | Q96L03 | -0.23006  |
| 51471 | P14075 | Q5JRV8 | -0.86584  |
| 51472 | P14075 | Q969E3 | -0.74657  |
| 51473 | P14075 | Q92609 | -0.72282  |
| 51474 | P14075 | Q8N7B9 | -0.52751  |
| 51475 | P14075 | O60264 | -0.20562  |
| 51476 | P14075 | Q5I0G3 | -0.53444  |
| 51477 | P14075 | P55017 | -0.4609   |
| 51478 | P14075 | O95969 | -0.91732  |
| 51479 | P14075 | P12314 | -0.65895  |
| 51480 | P14075 | Q9NX47 | -0.36886  |
| 51481 | P14075 | A8MVW0 | -0.86584  |
| 51482 | P14075 | P14550 | -0.43878  |
| 51483 | P14075 | Q9GZW8 | -0.86584  |
| 51484 | P14075 | Q96JB3 | -0.081673 |
| 51485 | P14075 | Q6UWW0 | -0.86396  |
| 51486 | P14075 | A6NM03 | -1.1027   |
| 51487 | P14075 | P29597 | -0.68573  |
| 51488 | P14075 | Q96FI4 | -0.38685  |
| 51489 | P14075 | Q8NBN3 | -0.86584  |
| 51490 | P14075 | Q9H1N7 | -0.59285  |
| 51491 | P14075 | Q8N1L4 | -0.89535  |
| 51492 | P14075 | P17600 | -0.60651  |
| 51493 | P14075 | P28335 | -0.92343  |
| 51494 | P14075 | Q96T51 | -0.18415  |
| 51495 | P14075 | Q6Y1H2 | -0.51582  |
| 51496 | P14075 | Q8NA34 | -0.10127  |
| 51497 | P14075 | Q8TDB6 | -0.22741  |
| 51498 | P14075 | Q8NBV4 | -0.74279  |
| 51499 | P14075 | Q7RTY8 | -1.2263   |
| 51500 | P14075 | Q8N4F0 | -1.0096   |
| 51501 | P14075 | P43630 | -1.0407   |
| 51502 | P14075 | Q9BR09 | -0.27149  |
| 51503 | P14075 | Q9UH03 | -0.22376  |
| 51504 | P14075 | Q75844 | -0.91531  |
| 51505 | P14075 | Q15619 | -1.1027   |
| 51506 | P14075 | Q16587 | -0.23772  |
| 51507 | P14075 | Q5JU00 | -0.22723  |
| 51508 | P14075 | Q9Y4J8 | -0.2271   |
| 51509 | P14075 | Q9BVK8 | -0.93931  |
| 51510 | P14075 | Q86YJ5 | -0.83898  |
| 51511 | P14075 | Q8WYQ4 | -0.19583  |
| 51512 | P14075 | P52738 | -0.17069  |
| 51513 | P14075 | Q5UCC4 | -1.1868   |
| 51514 | P14075 | P31371 | -0.57287  |
| 51515 | P14075 | Q9HAC7 | -0.55324  |
| 51516 | P14075 | A6NK59 | -0.62076  |
| 51517 | P14075 | A6NJZ7 | -0.22738  |
| 51518 | P14075 | Q70CQ1 | -0.4179   |
| 51519 | P14075 | Q9H4D0 | -0.95972  |
| 51520 | P14075 | P16435 | -0.85271  |
| 51521 | P14075 | O00584 | -0.81245  |
| 51522 | P14075 | Q8NHS2 | -0.41606  |
| 51523 | P14075 | A1A5C7 | -0.85457  |
| 51524 | P14075 | Q08462 | -0.69624  |
| 51525 | P14075 | Q9Y2I6 | -0.1882   |
| 51526 | P14075 | Q96PP8 | -0.78189  |
| 51527 | P14075 | Q8IWL2 | -0.99664  |
| 51528 | P14075 | Q96QP1 | -0.55687  |

|       |        |        |          |
|-------|--------|--------|----------|
| 51529 | P14075 | Q6ZMI3 | -1.0172  |
| 51530 | P14075 | Q6FI13 | -0.88998 |
| 51531 | P14075 | Q6IS14 | -0.18648 |
| 51532 | P14075 | Q96BI3 | -0.39389 |
| 51533 | P14075 | Q86VH4 | -0.86584 |
| 51534 | P14075 | Q9Y2R2 | -0.22881 |
| 51535 | P14075 | Q5SRR4 | -0.87849 |
| 51536 | P14075 | Q14155 | -0.36924 |
| 51537 | P14075 | Q5W186 | -0.89477 |
| 51538 | P14075 | Q8WXX1 | -0.62076 |
| 51539 | P14075 | P54855 | -0.8836  |
| 51540 | P14075 | P07585 | -0.52333 |
| 51541 | P14075 | O95340 | -0.71033 |
| 51542 | P14075 | Q9P1Y6 | -0.22742 |
| 51543 | P14075 | E5RJM6 | -0.22741 |
| 51544 | P14075 | Q5VZP5 | -0.80303 |
| 51545 | P14075 | Q99879 | -0.88998 |
| 51546 | P14075 | Q6ZS11 | -0.89338 |
| 51547 | P14075 | Q9BZP6 | -0.5399  |
| 51548 | P14075 | O95622 | -0.66326 |
| 51549 | P14075 | Q15800 | -0.85225 |
| 51550 | P14075 | Q7LFX5 | -0.50289 |
| 51551 | P14075 | A6NGC4 | -0.86584 |
| 51552 | P14075 | O00141 | -0.44678 |
| 51553 | P14075 | Q8NGE5 | -1.1027  |
| 51554 | P14075 | Q13520 | -0.75531 |
| 51555 | P14075 | Q12996 | -0.10299 |
| 51556 | P14075 | Q8TCB6 | -1.1027  |
| 51557 | P14075 | A1A4S6 | -0.29381 |
| 51558 | P14075 | Q96MN5 | -0.25894 |
| 51559 | P14075 | P53384 | -0.28085 |
| 51560 | P14075 | Q6PRD1 | -1.2569  |
| 51561 | P14075 | Q5JUK2 | -0.2028  |
| 51562 | P14075 | Q8IV35 | -0.22751 |
| 51563 | P14075 | Q9NYU2 | -0.39641 |
| 51564 | P14075 | P04629 | -0.45354 |
| 51565 | P14075 | P61923 | -0.12619 |
| 51566 | P14075 | A8MUH7 | -0.22925 |
| 51567 | P14075 | Q96BV0 | -0.21172 |
| 51568 | P14075 | Q1L6U9 | -0.87849 |
| 51569 | P14075 | Q8WXI4 | -0.25007 |
| 51570 | P14075 | Q9NTG1 | -1.0383  |
| 51571 | P14075 | P08253 | -0.6485  |
| 51572 | P14075 | Q99729 | -0.23588 |
| 51573 | P14075 | Q96GA7 | -0.14976 |
| 51574 | P14075 | O14798 | -0.82473 |
| 51575 | P14075 | Q99643 | -0.42298 |
| 51576 | P14075 | Q8NH87 | -1.1027  |
| 51577 | P14075 | P17097 | -0.40272 |
| 51578 | P14075 | P48431 | -0.26599 |
| 51579 | P14075 | Q6NUT2 | -1.0373  |
| 51580 | P14075 | Q9H492 | -0.14807 |
| 51581 | P14075 | P18405 | -0.35604 |
| 51582 | P14075 | Q86YV6 | -0.9088  |
| 51583 | P14075 | O95867 | -0.60538 |
| 51584 | P14075 | Q9UBG3 | -0.36485 |
| 51585 | P14075 | P51659 | -0.60985 |
| 51586 | P14075 | Q49AH0 | -0.80645 |
| 51587 | P14075 | P10301 | -0.64289 |
| 51588 | P14075 | Q9UPQ8 | -0.72625 |
| 51589 | P14075 | P52799 | -0.72152 |
| 51590 | P14075 | Q6ZS10 | -0.84147 |
| 51591 | P14075 | Q6ZN68 | -0.86584 |
| 51592 | P14075 | Q9Y2X7 | -0.25445 |
| 51593 | P14075 | Q6UWL2 | -0.93591 |
| 51594 | P14075 | Q9UII4 | -0.2834  |
| 51595 | P14075 | A6NCI4 | -0.87849 |
| 51596 | P14075 | O75593 | -0.27959 |
| 51597 | P14075 | Q9C056 | -0.24635 |
| 51598 | P14075 | Q14019 | -0.16614 |
| 51599 | P14075 | Q9P0N9 | -0.50134 |
| 51600 | P14075 | A6NK97 | -0.88737 |
| 51601 | P14075 | P0C874 | -0.86584 |
| 51602 | P14075 | P78508 | -0.58524 |
| 51603 | P14075 | Q86UR5 | -0.28877 |
| 51604 | P14075 | Q9HBG4 | -0.42613 |

|       |        |        |           |
|-------|--------|--------|-----------|
| 51605 | P14075 | Q16099 | -0.72726  |
| 51606 | P14075 | P0C0S8 | -0.88697  |
| 51607 | P14075 | P11177 | -0.25517  |
| 51608 | P14075 | Q9BZB8 | -0.51867  |
| 51609 | P14075 | Q06430 | -0.80487  |
| 51610 | P14075 | A8MWY0 | -0.86584  |
| 51611 | P14075 | O76002 | -1.1027   |
| 51612 | P14075 | Q96CQ1 | -0.6938   |
| 51613 | P14075 | Q9HD67 | -0.50747  |
| 51614 | P14075 | P98095 | -0.97737  |
| 51615 | P14075 | Q8NGR2 | -1.1027   |
| 51616 | P14075 | Q8N743 | -0.93628  |
| 51617 | P14075 | P01603 | -0.97479  |
| 51618 | P14075 | B8ZZ34 | -0.86584  |
| 51619 | P14075 | P01242 | -0.83766  |
| 51620 | P14075 | Q9BY71 | -0.31983  |
| 51621 | P14075 | Q6ZSY5 | -0.80007  |
| 51622 | P14075 | Q9H6Y7 | -0.28839  |
| 51623 | P14075 | Q6UXG3 | -0.86727  |
| 51624 | P14075 | Q01995 | -0.33648  |
| 51625 | P14075 | Q15785 | -0.60831  |
| 51626 | P14075 | C9J202 | -0.45797  |
| 51627 | P14075 | Q99633 | -0.13729  |
| 51628 | P14075 | Q9P296 | -0.57253  |
| 51629 | P14075 | Q8N4S9 | -0.83686  |
| 51630 | P14075 | Q6ZMZ0 | -0.42419  |
| 51631 | P14075 | O95390 | -0.55859  |
| 51632 | P14075 | P35354 | -0.27198  |
| 51633 | P14075 | Q6ZSA7 | -1.0257   |
| 51634 | P14075 | P11229 | -0.70335  |
| 51635 | P14075 | O95379 | -0.27628  |
| 51636 | P14075 | Q86YZ3 | -0.70565  |
| 51637 | P14075 | Q96FJ0 | -0.32052  |
| 51638 | P14075 | O15417 | -0.54186  |
| 51639 | P14075 | A4D1T9 | -1.1378   |
| 51640 | P14075 | A0FGR9 | -0.93628  |
| 51641 | P14075 | Q86V88 | -0.83848  |
| 51642 | P14075 | Q9NVT9 | -0.33156  |
| 51643 | P14075 | A1L0T0 | -0.70183  |
| 51644 | P14075 | Q8IZF2 | -1.1905   |
| 51645 | P14075 | P14410 | -0.54221  |
| 51646 | P14075 | A6NDH6 | -1.1027   |
| 51647 | P14075 | Q13478 | -1.103    |
| 51648 | P14075 | O96028 | -0.22741  |
| 51649 | P14075 | Q9UJC3 | -0.17742  |
| 51650 | P14075 | Q13751 | -0.67829  |
| 51651 | P14075 | P55287 | -1.0801   |
| 51652 | P14075 | Q9C0C4 | -0.64174  |
| 51653 | P14075 | P13500 | -0.36844  |
| 51654 | P14075 | Q96L16 | -0.069954 |
| 51655 | P14075 | Q15546 | -0.99456  |
| 51656 | P14075 | Q6DWJ6 | -1.1721   |
| 51657 | P14075 | Q9UBK7 | -1.0496   |
| 51658 | P14075 | Q53F19 | -0.80587  |
| 51659 | P14075 | E5RG02 | -0.91901  |
| 51660 | P14075 | P19021 | -0.69632  |
| 51661 | P14075 | A0PJE2 | -1.0135   |
| 51662 | P14075 | Q96Q11 | -0.50916  |
| 51663 | P14075 | Q96HQ0 | -0.21172  |
| 51664 | P14075 | O75367 | -0.35622  |
| 51665 | P14075 | Q9GZV8 | -0.22029  |
| 51666 | P14075 | P22003 | -0.51131  |
| 51667 | P14075 | Q29963 | -0.88446  |
| 51668 | P14075 | Q5JUR7 | -0.028325 |
| 51669 | P14075 | Q9BV86 | -0.14886  |
| 51670 | P14075 | Q9UBC2 | -0.38787  |
| 51671 | P14075 | Q9BXU7 | -0.25185  |
| 51672 | P14075 | Q15517 | -0.81078  |
| 51673 | P14075 | P07339 | -1.0123   |
| 51674 | P14075 | Q9UQB8 | -0.22738  |
| 51675 | P14075 | Q6ZQN5 | -0.37218  |
| 51676 | P14075 | Q1W4C9 | -0.79897  |
| 51677 | P14075 | Q12851 | -0.24227  |
| 51678 | P14075 | Q86YQ2 | -1.0096   |
| 51679 | P14075 | Q6UWV2 | -0.50251  |
| 51680 | P14075 | Q8WU08 | -0.9869   |

|       |        |        |          |
|-------|--------|--------|----------|
| 51681 | P14075 | Q8NGN8 | -1.1027  |
| 51682 | P14075 | Q86WA6 | -0.31421 |
| 51683 | P14075 | Q6ZSB9 | -0.21172 |
| 51684 | P14075 | Q12907 | -0.54585 |
| 51685 | P14075 | O43543 | -0.18184 |
| 51686 | P14075 | P23109 | -0.27597 |
| 51687 | P14075 | Q9HBI1 | -0.5829  |
| 51688 | P14075 | Q9H2D6 | -0.23562 |
| 51689 | P14075 | O14950 | -0.31531 |
| 51690 | P14075 | P53985 | -0.5445  |
| 51691 | P14075 | P13535 | -0.41828 |
| 51692 | P14075 | Q8N143 | -0.58296 |
| 51693 | P14075 | O60939 | -0.80849 |
| 51694 | P14075 | P78539 | -0.67831 |
| 51695 | P14075 | Q96QG7 | -0.21067 |
| 51696 | P14075 | P01344 | -0.22519 |
| 51697 | P14075 | O00299 | -0.19694 |
| 51698 | P14075 | O95947 | -0.54474 |
| 51699 | P14075 | P28332 | -0.5316  |
| 51700 | P14075 | A8MX76 | -1.0319  |
| 51701 | P14075 | Q9TQE0 | -0.54343 |
| 51702 | P14075 | Q86SS6 | -0.72976 |
| 51703 | P14075 | P0C6S8 | -0.86584 |
| 51704 | P14075 | P57764 | -0.41312 |
| 51705 | P14075 | Q8NFN8 | -1.143   |
| 51706 | P14075 | O43699 | -1.4036  |
| 51707 | P14075 | Q8N9B4 | -0.22741 |
| 51708 | P14075 | Q5T1R4 | -0.22737 |
| 51709 | P14075 | P46934 | -0.22741 |
| 51710 | P14075 | Q99500 | -1.0768  |
| 51711 | P14075 | Q9BPW9 | -0.83447 |
| 51712 | P14075 | P49767 | -0.33409 |
| 51713 | P14075 | Q9Y2K6 | -0.50938 |
| 51714 | P14075 | Q8N292 | -0.91464 |
| 51715 | P14075 | P29558 | -0.23884 |
| 51716 | P14075 | Q9UMX6 | -0.66518 |
| 51717 | P14075 | P31268 | -0.27059 |
| 51718 | P14075 | O14730 | -0.3907  |
| 51719 | P14075 | Q0IIM8 | -1.2794  |
| 51720 | P14075 | Q9Y237 | -0.15783 |
| 51721 | P14075 | Q16653 | -1.0702  |
| 51722 | P14075 | Q5BKX6 | -0.85789 |
| 51723 | P14075 | Q6UXH9 | -1.098   |
| 51724 | P14075 | Q13009 | -0.64891 |
| 51725 | P14075 | O00574 | -1.1245  |
| 51726 | P14075 | O00519 | -0.72451 |
| 51727 | P14075 | O60759 | -0.22746 |
| 51728 | P14075 | P35453 | -0.22739 |
| 51729 | P14075 | Q9BQ75 | -0.53425 |
| 51730 | P14075 | Q5JX71 | -0.86584 |
| 51731 | P14075 | Q04941 | -0.6145  |
| 51732 | P14075 | P05496 | -0.6202  |
| 51733 | P14075 | Q9NVH1 | -0.35956 |
| 51734 | P14075 | Q8TCQ1 | -0.8601  |
| 51735 | P14075 | P01743 | -0.97479 |
| 51736 | P14075 | Q8N1G1 | -0.29137 |
| 51737 | P14075 | O95498 | -0.51005 |
| 51738 | P14075 | Q8TD08 | -1.0765  |
| 51739 | P14075 | Q9BYX4 | -0.22712 |
| 51740 | P14075 | Q9NQ79 | -0.97418 |
| 51741 | P14075 | Q6PEY1 | -0.86584 |
| 51742 | P14075 | Q9Y2H5 | -0.5353  |
| 51743 | P14075 | Q9H251 | -0.54352 |
| 51744 | P14075 | O00151 | -0.22741 |
| 51745 | P14075 | Q96BI1 | -0.7285  |
| 51746 | P14075 | Q3SY56 | -0.22494 |
| 51747 | P14075 | P30837 | -0.31864 |
| 51748 | P14075 | P51665 | -0.21822 |
| 51749 | P14075 | P14174 | -0.27745 |
| 51750 | P14075 | Q8NEV4 | -0.72008 |
| 51751 | P14075 | Q9BUL5 | -0.52332 |
| 51752 | P14075 | Q9NYA1 | -0.20843 |
| 51753 | P14075 | Q9C000 | -0.22739 |
| 51754 | P14075 | Q96SF2 | -0.60894 |
| 51755 | P14075 | P30968 | -1.277   |
| 51756 | P14075 | P30504 | -0.88446 |

|       |        |        |          |
|-------|--------|--------|----------|
| 51757 | P14075 | Q4LDE5 | -0.81845 |
| 51758 | P14075 | Q9H313 | -0.7675  |
| 51759 | P14075 | C9J1S8 | -0.73967 |
| 51760 | P14075 | Q9Y466 | -0.22801 |
| 51761 | P14075 | P20231 | -1.2917  |
| 51762 | P14075 | P23258 | -0.21445 |
| 51763 | P14075 | Q9UBS0 | -0.48965 |
| 51764 | P14075 | P58166 | -0.76066 |
| 51765 | P14075 | Q8TCT7 | -0.38509 |
| 51766 | P14075 | Q5TC79 | -0.2271  |
| 51767 | P14075 | Q12912 | -0.9032  |
| 51768 | P14075 | Q12809 | -0.64378 |
| 51769 | P14075 | Q9H845 | -0.52255 |
| 51770 | P14075 | Q14469 | -0.22683 |
| 51771 | P14075 | Q2Q1W2 | -0.69352 |
| 51772 | P14075 | Q8IYX1 | -1.2307  |
| 51773 | P14075 | Q96RS6 | -0.1517  |
| 51774 | P14075 | P01596 | -0.97479 |
| 51775 | P14075 | Q8TCY5 | -0.62644 |
| 51776 | P14075 | P13498 | -0.32738 |
| 51777 | P14075 | Q43861 | -0.77821 |
| 51778 | P14075 | Q96M02 | -0.17297 |
| 51779 | P14075 | Q13639 | -0.95957 |
| 51780 | P14075 | Q96KQ7 | -0.22741 |
| 51781 | P14075 | Q7RTZ1 | -1.3299  |
| 51782 | P14075 | P78563 | -0.19918 |
| 51783 | P14075 | Q8NG68 | -0.6647  |
| 51784 | P14075 | P57796 | -0.78752 |
| 51785 | P14075 | Q10589 | -0.38238 |
| 51786 | P14075 | Q96HF1 | -0.27719 |
| 51787 | P14075 | Q86WK9 | -1.1105  |
| 51788 | P14075 | Q96HU8 | -1.1897  |
| 51789 | P14075 | P01229 | -0.79137 |
| 51790 | P14075 | P36956 | -0.22734 |
| 51791 | P14075 | Q9BVG3 | -0.73967 |
| 51792 | P14075 | Q9UGQ3 | -0.51436 |
| 51793 | P14075 | Q9Y275 | -0.66945 |
| 51794 | P14075 | P01814 | -0.97479 |
| 51795 | P14075 | Q9NSA1 | -0.28981 |
| 51796 | P14075 | Q5KSL6 | -0.76004 |
| 51797 | P14075 | Q9UPS6 | -0.22706 |
| 51798 | P14075 | O15529 | -1.2928  |
| 51799 | P14075 | Q96D15 | -0.22675 |
| 51800 | P14075 | Q13075 | -0.30608 |
| 51801 | P14075 | Q96T53 | -0.80047 |
| 51802 | P14075 | O95807 | -0.71866 |
| 51803 | P14075 | Q8NEP3 | -0.26608 |
| 51804 | P14075 | Q5T4J0 | -0.71885 |
| 51805 | P14075 | Q15418 | -0.21972 |
| 51806 | P14075 | Q8NDP4 | -0.21172 |
| 51807 | P14075 | Q9BZG9 | -1.1086  |
| 51808 | P14075 | Q9BRT2 | -0.1559  |
| 51809 | P14075 | Q2M3T9 | -0.77522 |
| 51810 | P14075 | Q8NEA5 | -0.86584 |
| 51811 | P14075 | P78417 | -0.35416 |
| 51812 | P14075 | P00325 | -0.64316 |
| 51813 | P14075 | Q75828 | -0.35876 |
| 51814 | P14075 | P11926 | -0.26301 |
| 51815 | P14075 | Q08ER8 | -0.21172 |
| 51816 | P14075 | Q9P127 | -0.21602 |
| 51817 | P14075 | Q8NBI3 | -0.77939 |
| 51818 | P14075 | Q14908 | -0.22735 |
| 51819 | P14075 | O00481 | -0.35963 |
| 51820 | P14075 | Q8TBP5 | -0.86584 |
| 51821 | P14075 | Q9NSD4 | -0.21172 |
| 51822 | P14075 | Q9BZA7 | -1.2406  |
| 51823 | P14075 | Q8NOV5 | -0.70373 |
| 51824 | P14075 | Q6P5Q4 | -0.53182 |
| 51825 | P14075 | Q92625 | -0.22741 |
| 51826 | P14075 | Q6IA69 | -0.50206 |
| 51827 | P14075 | Q5T2N8 | -0.91185 |
| 51828 | P14075 | P05108 | -0.2961  |
| 51829 | P14075 | O60476 | -0.56671 |
| 51830 | P14075 | Q16557 | -0.86886 |
| 51831 | P14075 | Q96AK3 | -0.7894  |
| 51832 | P14075 | Q9UJU5 | -0.3256  |

|       |        |        |           |
|-------|--------|--------|-----------|
| 51833 | P14075 | Q96JD6 | -0.43633  |
| 51834 | P14075 | Q9Y519 | -0.86584  |
| 51835 | P14075 | Q9Y5H1 | -1.1297   |
| 51836 | P14075 | P0CG22 | -0.92086  |
| 51837 | P14075 | Q09013 | -0.29451  |
| 51838 | P14075 | Q96BT7 | -0.20086  |
| 51839 | P14075 | Q16827 | -0.56214  |
| 51840 | P14075 | Q96DW6 | -0.69731  |
| 51841 | P14075 | P00505 | -0.21931  |
| 51842 | P14075 | P00480 | -0.15247  |
| 51843 | P14075 | Q30154 | -0.67577  |
| 51844 | P14075 | Q96H86 | -0.21172  |
| 51845 | P14075 | Q9NUB4 | -0.86584  |
| 51846 | P14075 | P30453 | -0.7844   |
| 51847 | P14075 | Q8NFW5 | -0.2073   |
| 51848 | P14075 | P58317 | -0.21172  |
| 51849 | P14075 | Q9HB21 | -0.22741  |
| 51850 | P14075 | P55201 | -0.28965  |
| 51851 | P14075 | Q6ZR52 | -0.21172  |
| 51852 | P14075 | O43657 | -0.99509  |
| 51853 | P14075 | Q5JUX0 | -0.43051  |
| 51854 | P14075 | Q8NBQ7 | -0.44122  |
| 51855 | P14075 | Q8TAB3 | -1.1297   |
| 51856 | P14075 | Q13956 | -0.52348  |
| 51857 | P14075 | Q4G0Z9 | -0.57707  |
| 51858 | P14075 | Q7LFL8 | -0.4371   |
| 51859 | P14075 | Q96R72 | -1.1027   |
| 51860 | P14075 | Q9BRC7 | -0.57501  |
| 51861 | P14075 | Q7Z418 | -1.0402   |
| 51862 | P14075 | O43731 | -0.6043   |
| 51863 | P14075 | A6NI72 | -0.41347  |
| 51864 | P14075 | Q3KR37 | -0.86584  |
| 51865 | P14075 | P59045 | -0.8502   |
| 51866 | P14075 | D6RJB6 | -0.69644  |
| 51867 | P14075 | Q9H2A3 | -0.22773  |
| 51868 | P14075 | Q6P179 | -1.0468   |
| 51869 | P14075 | Q99954 | -0.87849  |
| 51870 | P14075 | Q6ZSB3 | -0.031966 |
| 51871 | P14075 | Q9H2K2 | -0.22741  |
| 51872 | P14075 | Q4G0N0 | -0.55735  |
| 51873 | P14075 | O43561 | -0.35967  |
| 51874 | P14075 | O14715 | -0.1936   |
| 51875 | P14075 | Q8TF27 | -0.98969  |
| 51876 | P14075 | Q8IWZ5 | -0.73967  |
| 51877 | P14075 | Q6PJE2 | -0.16078  |
| 51878 | P14075 | Q99929 | -0.23077  |
| 51879 | P14075 | Q96L94 | -0.55524  |
| 51880 | P14075 | Q3ZCW2 | -0.65626  |
| 51881 | P14075 | Q9Y2E4 | -0.33579  |
| 51882 | P14075 | Q8TBC4 | -0.22563  |
| 51883 | P14075 | Q96CK0 | -0.33383  |
| 51884 | P14075 | Q8N9C0 | -0.22754  |
| 51885 | P14075 | Q9H0W5 | -0.55652  |
| 51886 | P14075 | P40121 | -0.15814  |
| 51887 | P14075 | P56705 | -0.2908   |
| 51888 | P14075 | Q96J66 | -1.095    |
| 51889 | P14075 | Q12948 | -0.25534  |
| 51890 | P14075 | A6NE52 | -0.22746  |
| 51891 | P14075 | Q92833 | -0.35057  |
| 51892 | P14075 | Q5VUJ9 | -0.52751  |
| 51893 | P14075 | Q9H0Z9 | -0.29974  |
| 51894 | P14075 | Q8NCE2 | -0.52483  |
| 51895 | P14075 | Q9BYJ0 | -0.87382  |
| 51896 | P14075 | Q16829 | -0.28479  |
| 51897 | P14075 | Q9ULL4 | -0.61164  |
| 51898 | P14075 | Q99878 | -0.88998  |
| 51899 | P14075 | A4D2G3 | -1.1027   |
| 51900 | P14075 | Q8TAV5 | -0.87849  |
| 51901 | P14075 | Q04917 | -0.19552  |
| 51902 | P14075 | Q16787 | -0.97831  |
| 51903 | P14075 | P30990 | -0.90712  |
| 51904 | P14075 | Q8NG98 | -1.1027   |
| 51905 | P14075 | P54753 | -0.71981  |
| 51906 | P14075 | Q8N4M1 | -0.74018  |
| 51907 | P14075 | O60688 | -0.22443  |
| 51908 | P14075 | Q9UFC0 | -0.32561  |



|       |        |        |           |
|-------|--------|--------|-----------|
| 51909 | P14075 | Q9H255 | -1.1027   |
| 51910 | P14075 | Q659C4 | -0.4711   |
| 51911 | P14075 | P42898 | -0.48036  |
| 51912 | P14075 | Q8NEY1 | -0.87081  |
| 51913 | P14075 | A6NFI3 | -0.21172  |
| 51914 | P14075 | A6NG13 | -0.72625  |
| 51915 | P14075 | P34982 | -1.1608   |
| 51916 | P14075 | Q02928 | -0.50415  |
| 51917 | P14075 | Q9BQ50 | -0.35652  |
| 51918 | P14075 | P16109 | -0.23606  |
| 51919 | P14075 | Q9BZM2 | -0.68346  |
| 51920 | P14075 | Q8IYT8 | -0.5064   |
| 51921 | P14075 | Q9UJ37 | -0.66668  |
| 51922 | P14075 | Q9UBL6 | -0.48362  |
| 51923 | P14075 | Q8TB96 | -1.2172   |
| 51924 | P14075 | Q96S37 | -0.73772  |
| 51925 | P14075 | Q9BYE0 | -0.22658  |
| 51926 | P14075 | Q86SQ3 | -1.2353   |
| 51927 | P0C214 | Q8TCY5 | -0.62558  |
| 51928 | P0C214 | Q9BVX2 | -0.69811  |
| 51929 | P0C214 | Q6DN12 | -0.94481  |
| 51930 | P0C214 | Q2M3T9 | -0.72453  |
| 51931 | P0C214 | P41222 | -0.23213  |
| 51932 | P0C214 | Q9BQ13 | -0.14994  |
| 51933 | P0C214 | Q13394 | -0.21605  |
| 51934 | P0C214 | Q14117 | -0.21081  |
| 51935 | P0C214 | P55017 | -0.457    |
| 51936 | P0C214 | Q6UWI2 | -0.3551   |
| 51937 | P0C214 | Q8N3J3 | -0.056928 |
| 51938 | P0C214 | Q6PDA7 | -0.91736  |
| 51939 | P0C214 | P01625 | -1.0022   |
| 51940 | P0C214 | Q8NHS1 | -0.98681  |
| 51941 | P0C214 | Q8N3K9 | -0.22784  |
| 51942 | P0C214 | P61568 | -0.29248  |
| 51943 | P0C214 | Q95237 | -0.64727  |
| 51944 | P0C214 | Q9BXW7 | -0.1718   |
| 51945 | P0C214 | Q8TCZ2 | -1.1806   |
| 51946 | P0C214 | Q86SG4 | -0.60435  |
| 51947 | P0C214 | Q9H8W2 | -0.26084  |
| 51948 | P0C214 | P38435 | -0.79499  |
| 51949 | P0C214 | P16389 | -0.92837  |
| 51950 | P0C214 | Q96NE9 | -0.27877  |
| 51951 | P0C214 | Q15526 | -0.63224  |
| 51952 | P0C214 | P51170 | -0.72052  |
| 51953 | P0C214 | Q96I36 | -0.76136  |
| 51954 | P0C214 | P04211 | -1.0022   |
| 51955 | P0C214 | P59095 | -0.83993  |
| 51956 | P0C214 | P53673 | -0.37588  |
| 51957 | P0C214 | P43354 | -0.25547  |
| 51958 | P0C214 | P29992 | -0.81062  |
| 51959 | P0C214 | P0C5W0 | -0.20758  |
| 51960 | P0C214 | P32971 | -0.86202  |
| 51961 | P0C214 | O00506 | -0.62029  |
| 51962 | P0C214 | P24347 | -1.4695   |
| 51963 | P0C214 | Q6UXI9 | -1.142    |
| 51964 | P0C214 | P24311 | -0.46816  |
| 51965 | P0C214 | Q7L591 | -0.51214  |
| 51966 | P0C214 | Q14756 | -0.8737   |
| 51967 | P0C214 | Q9NZJ9 | -0.26229  |
| 51968 | P0C214 | Q7Z3V4 | -0.22775  |
| 51969 | P0C214 | Q17RW2 | -0.95977  |
| 51970 | P0C214 | Q96LL3 | -0.98681  |
| 51971 | P0C214 | O00623 | -0.53902  |
| 51972 | P0C214 | Q6ZSZ6 | -0.22488  |
| 51973 | P0C214 | Q9UPQ8 | -0.80964  |
| 51974 | P0C214 | Q1EHB4 | -1.2372   |
| 51975 | P0C214 | Q7Z443 | -0.99681  |
| 51976 | P0C214 | Q96M20 | -0.22599  |
| 51977 | P0C214 | Q8WUP2 | -0.34229  |
| 51978 | P0C214 | Q8ND23 | -0.2269   |
| 51979 | P0C214 | Q8N302 | -0.43773  |
| 51980 | P0C214 | Q9Y217 | -0.22567  |
| 51981 | P0C214 | P84157 | -0.98681  |
| 51982 | P0C214 | Q9UI14 | -0.14128  |
| 51983 | P0C214 | Q8N0Z9 | -0.98681  |
| 51984 | P0C214 | O75179 | -0.22762  |

|       |        |         |           |
|-------|--------|---------|-----------|
| 51985 | P0C214 | Q15672  | -0.22786  |
| 51986 | P0C214 | Q8NHA4  | -1.2952   |
| 51987 | P0C214 | Q6ZS11  | -0.93479  |
| 51988 | P0C214 | Q8NFZ6  | -1.3002   |
| 51989 | P0C214 | Q02246  | -0.50111  |
| 51990 | P0C214 | Q8NA34  | -0.26915  |
| 51991 | P0C214 | Q8WVT3  | -0.37227  |
| 51992 | P0C214 | Q96LM5  | -0.093887 |
| 51993 | P0C214 | Q9H7T3  | -0.24279  |
| 51994 | P0C214 | O60281  | -0.22741  |
| 51995 | P0C214 | Q96BS2  | -0.22752  |
| 51996 | P0C214 | P55085  | -0.34191  |
| 51997 | P0C214 | P09341  | -1.0247   |
| 51998 | P0C214 | Q00266  | -0.40804  |
| 51999 | P0C214 | P06309  | -1.0022   |
| 52000 | P0C214 | Q96MF0  | -0.17007  |
| 52001 | P0C214 | Q49AQ9  | -0.26574  |
| 52002 | P0C214 | Q13402  | -0.080795 |
| 52003 | P0C214 | Q96T55  | -1.2288   |
| 52004 | P0C214 | Q5TBA9  | -0.50624  |
| 52005 | P0C214 | P05166  | -0.17934  |
| 52006 | P0C214 | Q8NGT2  | -1.2952   |
| 52007 | P0C214 | Q9H4Q4  | -0.22779  |
| 52008 | P0C214 | Q12768  | -0.40065  |
| 52009 | P0C214 | P47972  | -0.79863  |
| 52010 | P0C214 | Q96JH7  | -0.41044  |
| 52011 | P0C214 | P03999  | -1.4089   |
| 52012 | P0C214 | Q8N427  | -0.63992  |
| 52013 | P0C214 | Q6GMV3  | -0.55297  |
| 52014 | P0C214 | O95389  | -0.84812  |
| 52015 | P0C214 | Q86YJ6  | -0.63252  |
| 52016 | P0C214 | Q8NGB6  | -1.2952   |
| 52017 | P0C214 | Q8WZ64  | -0.93277  |
| 52018 | P0C214 | Q9UNE0  | -0.70257  |
| 52019 | P0C214 | Q8N6N6  | -0.010531 |
| 52020 | P0C214 | O75153  | -0.20758  |
| 52021 | P0C214 | Q8IZ52  | -0.47511  |
| 52022 | P0C214 | I6L899  | -0.2859   |
| 52023 | P0C214 | P22692  | -0.93258  |
| 52024 | P0C214 | Q9UK08  | -0.7637   |
| 52025 | P0C214 | P11150  | -0.69059  |
| 52026 | P0C214 | Q8NHB7  | -1.2952   |
| 52027 | P0C214 | Q6AZZ1  | -0.22798  |
| 52028 | P0C214 | Q8NGR1  | -1.2952   |
| 52029 | P0C214 | Q96DA6  | -0.6468   |
| 52030 | P0C214 | Q9Y6X0  | -0.2113   |
| 52031 | P0C214 | Q2WGGJ9 | -0.98681  |
| 52032 | P0C214 | Q6W0C5  | -0.17577  |
| 52033 | P0C214 | Q9H841  | -0.9408   |
| 52034 | P0C214 | A6NMS7  | -0.98681  |
| 52035 | P0C214 | Q9H269  | -0.56008  |
| 52036 | P0C214 | Q02045  | -0.39347  |
| 52037 | P0C214 | Q3SXY8  | -0.62062  |
| 52038 | P0C214 | P21462  | -0.97629  |
| 52039 | P0C214 | H3BS89  | -0.98681  |
| 52040 | P0C214 | Q96CC6  | -0.7118   |
| 52041 | P0C214 | Q7Z5M8  | -0.32389  |
| 52042 | P0C214 | Q9NRX4  | -0.15596  |
| 52043 | P0C214 | O60218  | -0.37593  |
| 52044 | P0C214 | Q9Y5Z0  | -0.92673  |
| 52045 | P0C214 | Q15822  | -1.0996   |
| 52046 | P0C214 | Q86SM8  | -1.3693   |
| 52047 | P0C214 | Q7Z5P4  | -1.0162   |
| 52048 | P0C214 | Q8NEE8  | -0.22729  |
| 52049 | P0C214 | Q13113  | -0.98681  |
| 52050 | P0C214 | Q29836  | -1.0367   |
| 52051 | P0C214 | Q5GAN4  | -0.89568  |
| 52052 | P0C214 | Q9H344  | -1.2952   |
| 52053 | P0C214 | O95136  | -1.3093   |
| 52054 | P0C214 | Q6NW40  | -0.7227   |
| 52055 | P0C214 | Q9HB20  | -0.51215  |
| 52056 | P0C214 | O00212  | -0.86209  |
| 52057 | P0C214 | Q9HAW7  | -0.71102  |
| 52058 | P0C214 | Q8NGB8  | -1.2952   |
| 52059 | P0C214 | Q8IZ83  | -0.5208   |
| 52060 | P0C214 | Q9ULY5  | -0.97557  |

|       |        |        |          |
|-------|--------|--------|----------|
| 52061 | P0C214 | P48050 | -0.58349 |
| 52062 | P0C214 | A1IGU5 | -0.5208  |
| 52063 | P0C214 | P10266 | -0.25521 |
| 52064 | P0C214 | Q9NQG6 | -0.1697  |
| 52065 | P0C214 | Q8IXV7 | -0.21726 |
| 52066 | P0C214 | Q96NX9 | -0.23927 |
| 52067 | P0C214 | P61158 | -0.16844 |
| 52068 | P0C214 | P00709 | -0.8894  |
| 52069 | P0C214 | P49335 | -0.22741 |
| 52070 | P0C214 | P55011 | -0.97674 |
| 52071 | P0C214 | Q9BRS2 | -1.1207  |
| 52072 | P0C214 | P10589 | -0.24603 |
| 52073 | P0C214 | Q8WTQ7 | -1.337   |
| 52074 | P0C214 | Q53T59 | -0.54533 |
| 52075 | P0C214 | Q14914 | -0.61435 |
| 52076 | P0C214 | Q9BVM4 | -0.39817 |
| 52077 | P0C214 | Q5GH76 | -0.98681 |
| 52078 | P0C214 | O43164 | -0.26621 |
| 52079 | P0C214 | Q8NBI3 | -0.85971 |
| 52080 | P0C214 | Q6P9G0 | -0.42549 |
| 52081 | P0C214 | Q9UBE0 | -0.2204  |
| 52082 | P0C214 | Q9ULM0 | -0.54358 |
| 52083 | P0C214 | Q5VV11 | -0.8305  |
| 52084 | P0C214 | Q8TDD1 | -0.13158 |
| 52085 | P0C214 | Q9H0W5 | -0.51788 |
| 52086 | P0C214 | Q9C0A0 | -1.3356  |
| 52087 | P0C214 | O95382 | -1.2985  |
| 52088 | P0C214 | Q9UJU5 | -0.4557  |
| 52089 | P0C214 | Q6ZVZ8 | -0.5331  |
| 52090 | P0C214 | Q9ULL8 | -0.22692 |
| 52091 | P0C214 | Q8N4U5 | -0.12795 |
| 52092 | P0C214 | Q9NRA1 | -0.28245 |
| 52093 | P0C214 | Q6ZUB1 | -0.98681 |
| 52094 | P0C214 | P48061 | -0.54331 |
| 52095 | P0C214 | Q9P0L9 | -0.54208 |
| 52096 | P0C214 | P42338 | -0.47553 |
| 52097 | P0C214 | Q8IZV5 | -0.59519 |
| 52098 | P0C214 | Q96S96 | -0.53175 |
| 52099 | P0C214 | O00592 | -1.0199  |
| 52100 | P0C214 | A6NC51 | -0.98681 |
| 52101 | P0C214 | P17693 | -0.88306 |
| 52102 | P0C214 | O00258 | -0.45437 |
| 52103 | P0C214 | Q4LDE5 | -0.79696 |
| 52104 | P0C214 | P13761 | -0.43513 |
| 52105 | P0C214 | Q14318 | -0.22814 |
| 52106 | P0C214 | P08118 | -0.43731 |
| 52107 | P0C214 | P32242 | -0.57293 |
| 52108 | P0C214 | P0C6P0 | -0.14969 |
| 52109 | P0C214 | Q96T68 | -0.36289 |
| 52110 | P0C214 | Q8WXI2 | -0.43172 |
| 52111 | P0C214 | Q03013 | -0.2604  |
| 52112 | P0C214 | Q96LB9 | -0.89542 |
| 52113 | P0C214 | Q9BY12 | -0.36406 |
| 52114 | P0C214 | Q9Y2Z9 | -0.39685 |
| 52115 | P0C214 | Q6JEL2 | -0.22498 |
| 52116 | P0C214 | Q5VZ19 | -0.83638 |
| 52117 | P0C214 | Q86UX6 | -1.3207  |
| 52118 | P0C214 | O43292 | -0.67951 |
| 52119 | P0C214 | Q96NG3 | -0.21735 |
| 52120 | P0C214 | Q9NVF9 | -0.45943 |
| 52121 | P0C214 | Q9NU19 | -1.2827  |
| 52122 | P0C214 | Q5VWQ8 | -0.24747 |
| 52123 | P0C214 | B5MCN3 | -1.1656  |
| 52124 | P0C214 | Q8IYM9 | -0.22739 |
| 52125 | P0C214 | Q99748 | -0.53774 |
| 52126 | P0C214 | Q96A65 | -0.15798 |
| 52127 | P0C214 | Q6IEZ7 | -1.2952  |
| 52128 | P0C214 | P36955 | -0.80499 |
| 52129 | P0C214 | Q8IWY9 | -0.98681 |
| 52130 | P0C214 | Q3MJ40 | -0.12912 |
| 52131 | P0C214 | A1X283 | -0.22741 |
| 52132 | P0C214 | Q6UWF5 | -0.98681 |
| 52133 | P0C214 | Q96H15 | -0.98681 |
| 52134 | P0C214 | Q9Y2K7 | -0.22484 |
| 52135 | P0C214 | Q9H8M9 | -1.0982  |
| 52136 | P0C214 | Q8NGK1 | -1.2952  |

|       |        |        |           |
|-------|--------|--------|-----------|
| 52137 | P0C214 | Q08174 | -1.0774   |
| 52138 | P0C214 | Q8N966 | -1.0453   |
| 52139 | P0C214 | Q9ULI0 | -0.92296  |
| 52140 | P0C214 | Q8N912 | -0.98681  |
| 52141 | P0C214 | Q6NUT3 | -1.0564   |
| 52142 | P0C214 | P09564 | -1.0085   |
| 52143 | P0C214 | Q6ZMV9 | -0.34215  |
| 52144 | P0C214 | Q9Y2K5 | -0.078934 |
| 52145 | P0C214 | P01594 | -1.0022   |
| 52146 | P0C214 | Q6W4X9 | -0.90198  |
| 52147 | P0C214 | P01568 | -0.71883  |
| 52148 | P0C214 | E5RHQ5 | -0.19185  |
| 52149 | P0C214 | P61011 | -0.24588  |
| 52150 | P0C214 | Q9NPQ8 | -0.55643  |
| 52151 | P0C214 | Q6T311 | -1.2665   |
| 52152 | P0C214 | P18859 | -0.19485  |
| 52153 | P0C214 | Q9NRA2 | -1.2282   |
| 52154 | P0C214 | Q13163 | -0.25073  |
| 52155 | P0C214 | Q9BQB6 | -0.91271  |
| 52156 | P0C214 | Q8N9S7 | -0.98681  |
| 52157 | P0C214 | Q9Y2R2 | -0.23011  |
| 52158 | P0C214 | P58743 | -0.88772  |
| 52159 | P0C214 | P27987 | -0.82147  |
| 52160 | P0C214 | Q6ZVD7 | -0.42809  |
| 52161 | P0C214 | Q9NPI0 | -0.95467  |
| 52162 | P0C214 | Q5JT25 | -0.96157  |
| 52163 | P0C214 | Q8N2C3 | -0.55123  |
| 52164 | P0C214 | Q43759 | -0.70282  |
| 52165 | P0C214 | Q9NQF3 | -0.22041  |
| 52166 | P0C214 | Q6WRX3 | -0.23025  |
| 52167 | P0C214 | A0PJE2 | -0.87464  |
| 52168 | P0C214 | Q5H9E4 | -0.80997  |
| 52169 | P0C214 | Q92545 | -0.68883  |
| 52170 | P0C214 | Q99879 | -0.85588  |
| 52171 | P0C214 | P0C6S8 | -0.98681  |
| 52172 | P0C214 | P22314 | -0.21007  |
| 52173 | P0C214 | P10253 | -0.29796  |
| 52174 | P0C214 | C9JLR9 | -0.66454  |
| 52175 | P0C214 | Q9H3T2 | -1.0535   |
| 52176 | P0C214 | Q6UXR4 | -0.63505  |
| 52177 | P0C214 | Q92581 | -0.96945  |
| 52178 | P0C214 | P08048 | -0.083723 |
| 52179 | P0C214 | Q9UJM8 | -0.51815  |
| 52180 | P0C214 | Q9BY15 | -1.6897   |
| 52181 | P0C214 | Q43613 | -1.3887   |
| 52182 | P0C214 | Q9NUI1 | -0.92896  |
| 52183 | P0C214 | Q6PIY2 | -0.47338  |
| 52184 | P0C214 | Q8NDZ6 | -0.98681  |
| 52185 | P0C214 | C9JR72 | -0.20826  |
| 52186 | P0C214 | Q95395 | -0.51068  |
| 52187 | P0C214 | P80192 | -0.48984  |
| 52188 | P0C214 | P06493 | -0.21382  |
| 52189 | P0C214 | Q9BYW3 | -0.84189  |
| 52190 | P0C214 | Q7KZI7 | -0.7235   |
| 52191 | P0C214 | P10109 | -0.1987   |
| 52192 | P0C214 | Q8N1V8 | -0.13575  |
| 52193 | P0C214 | Q95866 | -0.94846  |
| 52194 | P0C214 | Q9HDB8 | -0.29248  |
| 52195 | P0C214 | Q9Y587 | -0.2073   |
| 52196 | P0C214 | P14621 | -0.31124  |
| 52197 | P0C214 | Q9BX51 | -0.36935  |
| 52198 | P0C214 | Q9UF47 | -0.4424   |
| 52199 | P0C214 | Q9NZ38 | -0.084503 |
| 52200 | P0C214 | Q9N2J8 | -0.93452  |
| 52201 | P0C214 | Q8WXG9 | -0.67232  |
| 52202 | P0C214 | Q8NEM7 | -0.92974  |
| 52203 | P0C214 | A6NFN9 | -0.22736  |
| 52204 | P0C214 | Q6NYC8 | -0.23724  |
| 52205 | P0C214 | P30486 | -0.91186  |
| 52206 | P0C214 | Q99999 | -0.69139  |
| 52207 | P0C214 | P0C7P1 | -0.53354  |
| 52208 | P0C214 | Q6P1K1 | -0.98817  |
| 52209 | P0C214 | Q8NGW6 | -1.2952   |
| 52210 | P0C214 | Q8WXG6 | -0.32135  |
| 52211 | P0C214 | P62805 | -0.39821  |
| 52212 | P0C214 | A6NHG4 | -0.30012  |

|       |        |        |           |
|-------|--------|--------|-----------|
| 52213 | P0C214 | Q9H0K6 | -0.28338  |
| 52214 | P0C214 | Q05952 | -1.0334   |
| 52215 | P0C214 | Q9BXM7 | -0.5656   |
| 52216 | P0C214 | P62807 | -0.83614  |
| 52217 | P0C214 | P30460 | -1.0938   |
| 52218 | P0C214 | P30874 | -0.52272  |
| 52219 | P0C214 | Q9BRQ0 | -0.24285  |
| 52220 | P0C214 | Q70E73 | -0.80167  |
| 52221 | P0C214 | Q14005 | -0.22277  |
| 52222 | P0C214 | O94772 | -0.41602  |
| 52223 | P0C214 | Q7RTS5 | -1.0394   |
| 52224 | P0C214 | Q14626 | -1.2308   |
| 52225 | P0C214 | P19652 | -0.88728  |
| 52226 | P0C214 | Q13068 | -0.33199  |
| 52227 | P0C214 | A6NDI0 | -0.71534  |
| 52228 | P0C214 | Q9Y2B9 | -0.55844  |
| 52229 | P0C214 | Q8NBT3 | -0.98681  |
| 52230 | P0C214 | Q7Z4S6 | -0.26708  |
| 52231 | P0C214 | P78362 | -0.4804   |
| 52232 | P0C214 | P22748 | -0.18234  |
| 52233 | P0C214 | Q5T5P2 | -0.34879  |
| 52234 | P0C214 | Q9NQ39 | -0.14679  |
| 52235 | P0C214 | Q8TD33 | -0.91736  |
| 52236 | P0C214 | Q96JQ0 | -1.2131   |
| 52237 | P0C214 | Q9NYF3 | -0.10853  |
| 52238 | P0C214 | Q29963 | -1.0367   |
| 52239 | P0C214 | Q6IBS0 | -0.43587  |
| 52240 | P0C214 | B7Z8K6 | -0.98681  |
| 52241 | P0C214 | Q96RN1 | -0.72473  |
| 52242 | P0C214 | A6NMN3 | -0.059063 |
| 52243 | P0C214 | Q92968 | -0.35206  |
| 52244 | P0C214 | O60237 | -0.46085  |
| 52245 | P0C214 | Q86YM7 | -0.36794  |
| 52246 | P0C214 | P18084 | -0.92528  |
| 52247 | P0C214 | Q9Y4K0 | -0.39545  |
| 52248 | P0C214 | P24855 | -0.21831  |
| 52249 | P0C214 | Q8NGN4 | -1.2952   |
| 52250 | P0C214 | P68366 | -0.41598  |
| 52251 | P0C214 | Q96B77 | -0.75609  |
| 52252 | P0C214 | Q5BJD5 | -0.98681  |
| 52253 | P0C214 | Q86W33 | -1.0771   |
| 52254 | P0C214 | Q9HCQ5 | -0.72252  |
| 52255 | P0C214 | Q9BWW7 | -0.19463  |
| 52256 | P0C214 | Q9BYE3 | -0.38015  |
| 52257 | P0C214 | Q9H0K4 | -0.60268  |
| 52258 | P0C214 | Q53S58 | -0.98681  |
| 52259 | P0C214 | Q9UJX0 | -0.54222  |
| 52260 | P0C214 | A2RUG3 | -0.98681  |
| 52261 | P0C214 | P50993 | -0.55218  |
| 52262 | P0C214 | Q43869 | -1.2952   |
| 52263 | P0C214 | Q9H255 | -1.2952   |
| 52264 | P0C214 | Q96HP0 | -0.094025 |
| 52265 | P0C214 | Q8TBJ5 | -0.2425   |
| 52266 | P0C214 | Q9GZM7 | -0.90016  |
| 52267 | P0C214 | P08887 | -0.32927  |
| 52268 | P0C214 | Q9NQX3 | -0.52725  |
| 52269 | P0C214 | Q92613 | -0.4489   |
| 52270 | P0C214 | Q9Y2B4 | -0.31002  |
| 52271 | P0C214 | P54821 | -0.22305  |
| 52272 | P0C214 | P35249 | -0.25134  |
| 52273 | P0C214 | Q13630 | -0.58418  |
| 52274 | P0C214 | Q68CR7 | -0.98681  |
| 52275 | P0C214 | Q8WWF3 | -0.98681  |
| 52276 | P0C214 | Q6PIU1 | -1.0296   |
| 52277 | P0C214 | Q9NYB5 | -1.1989   |
| 52278 | P0C214 | Q9P296 | -0.7107   |
| 52279 | P0C214 | Q9BYC2 | -0.23545  |
| 52280 | P0C214 | O14965 | -0.22796  |
| 52281 | P0C214 | P14867 | -0.92289  |
| 52282 | P0C214 | Q16676 | -0.41532  |
| 52283 | P0C214 | Q9H5V8 | -1.511    |
| 52284 | P0C214 | Q9Y277 | -1.0818   |
| 52285 | P0C214 | Q8NEV1 | -1.2121   |
| 52286 | P0C214 | Q8IVM8 | -1.0455   |
| 52287 | P0C214 | P32239 | -0.57566  |
| 52288 | P0C214 | Q92886 | -0.22857  |

|       |        |        |           |
|-------|--------|--------|-----------|
| 52289 | P0C214 | Q969J3 | -0.16537  |
| 52290 | P0C214 | Q02221 | -0.24826  |
| 52291 | P0C214 | Q9Y5R2 | -1.7662   |
| 52292 | P0C214 | Q9Y2K6 | -0.49344  |
| 52293 | P0C214 | Q92982 | -0.98505  |
| 52294 | P0C214 | Q96E17 | -0.80462  |
| 52295 | P0C214 | Q9Y320 | -0.69202  |
| 52296 | P0C214 | Q9H8W3 | -0.1329   |
| 52297 | P0C214 | O43529 | -0.73249  |
| 52298 | P0C214 | Q96DN2 | -0.95313  |
| 52299 | P0C214 | O95670 | -0.25958  |
| 52300 | P0C214 | Q9H336 | -0.91736  |
| 52301 | P0C214 | Q8NB91 | -0.5253   |
| 52302 | P0C214 | Q9H1C4 | -0.76321  |
| 52303 | P0C214 | Q96FQ7 | -0.34756  |
| 52304 | P0C214 | Q3KQZ1 | -0.80997  |
| 52305 | P0C214 | P23634 | -0.54417  |
| 52306 | P0C214 | Q86UL8 | -0.22591  |
| 52307 | P0C214 | Q8N3Y1 | -0.22741  |
| 52308 | P0C214 | Q8N0U7 | -0.43585  |
| 52309 | P0C214 | Q9Y2A7 | -0.37145  |
| 52310 | P0C214 | P53350 | -0.22741  |
| 52311 | P0C214 | Q15612 | -1.1297   |
| 52312 | P0C214 | P04637 | -0.22145  |
| 52313 | P0C214 | Q6ZMY3 | -0.31797  |
| 52314 | P0C214 | Q96HD1 | -0.98286  |
| 52315 | P0C214 | Q5JTD7 | -0.21925  |
| 52316 | P0C214 | Q2TAA5 | -0.83618  |
| 52317 | P0C214 | Q14507 | -0.88043  |
| 52318 | P0C214 | Q9BYT5 | -0.49292  |
| 52319 | P0C214 | Q8IXN7 | -0.61645  |
| 52320 | P0C214 | P0CG01 | -0.91736  |
| 52321 | P0C214 | Q9ULC5 | -0.54297  |
| 52322 | P0C214 | Q9UM19 | -0.59249  |
| 52323 | P0C214 | Q8TBF5 | -0.88976  |
| 52324 | P0C214 | P51800 | -1.084    |
| 52325 | P0C214 | A8MWC7 | -0.37226  |
| 52326 | P0C214 | Q9BU23 | -1.0037   |
| 52327 | P0C214 | P54855 | -0.89351  |
| 52328 | P0C214 | P55290 | -0.53552  |
| 52329 | P0C214 | P55263 | -0.33858  |
| 52330 | P0C214 | Q99759 | -0.54926  |
| 52331 | P0C214 | Q0VF96 | -0.22494  |
| 52332 | P0C214 | Q6NUM9 | -0.44095  |
| 52333 | P0C214 | Q96MX0 | -0.94069  |
| 52334 | P0C214 | P01601 | -1.0022   |
| 52335 | P0C214 | Q8TDG4 | -0.31291  |
| 52336 | P0C214 | O60548 | -0.41532  |
| 52337 | P0C214 | Q06124 | -0.22741  |
| 52338 | P0C214 | P84085 | -0.22821  |
| 52339 | P0C214 | P00736 | -1.3889   |
| 52340 | P0C214 | O94830 | -0.10358  |
| 52341 | P0C214 | P43631 | -1.0817   |
| 52342 | P0C214 | P10619 | -0.22635  |
| 52343 | P0C214 | Q6XLA1 | -0.46285  |
| 52344 | P0C214 | Q9HBX9 | -1.2894   |
| 52345 | P0C214 | Q05586 | -0.43274  |
| 52346 | P0C214 | P56159 | -0.4686   |
| 52347 | P0C214 | Q9NYZ4 | -0.70513  |
| 52348 | P0C214 | Q9H0H3 | -0.20758  |
| 52349 | P0C214 | Q9UH64 | -0.59455  |
| 52350 | P0C214 | O94851 | -0.49479  |
| 52351 | P0C214 | P57088 | -0.77442  |
| 52352 | P0C214 | O95158 | -0.71423  |
| 52353 | P0C214 | Q5TEV5 | -0.91736  |
| 52354 | P0C214 | Q9UKJ0 | -0.50918  |
| 52355 | P0C214 | Q96MP5 | -0.50512  |
| 52356 | P0C214 | Q6ZW35 | -0.5568   |
| 52357 | P0C214 | O75845 | -0.72303  |
| 52358 | P0C214 | Q6UXQ6 | -0.91736  |
| 52359 | P0C214 | P51153 | -0.5875   |
| 52360 | P0C214 | Q8N412 | -0.15531  |
| 52361 | P0C214 | Q5T089 | -0.089811 |
| 52362 | P0C214 | Q8WXD0 | -1.1767   |
| 52363 | P0C214 | Q96Q42 | -0.4518   |
| 52364 | P0C214 | Q8NH74 | -1.2952   |

|       |        |        |          |
|-------|--------|--------|----------|
| 52365 | P0C214 | Q92523 | -0.61924 |
| 52366 | P0C214 | Q6P4Q7 | -1.356   |
| 52367 | P0C214 | Q6UXF1 | -0.68883 |
| 52368 | P0C214 | P10745 | -1.2125  |
| 52369 | P0C214 | P29377 | -0.40525 |
| 52370 | P0C214 | Q15239 | -0.45884 |
| 52371 | P0C214 | Q92673 | -1.2945  |
| 52372 | P0C214 | Q9BTY2 | -0.66675 |
| 52373 | P0C214 | Q8IZF0 | -1.1486  |
| 52374 | P0C214 | Q8N1Y9 | -0.98681 |
| 52375 | P0C214 | Q96S79 | -1.1349  |
| 52376 | P0C214 | P0C264 | -1.2407  |
| 52377 | P0C214 | P30499 | -1.0938  |
| 52378 | P0C214 | Q8N2X6 | -0.91736 |
| 52379 | P0C214 | O75452 | -1.2785  |
| 52380 | P0C214 | P01616 | -0.99256 |
| 52381 | P0C214 | Q15126 | -0.43827 |
| 52382 | P0C214 | Q9BQL6 | -0.53065 |
| 52383 | P0C214 | P09093 | -1.0202  |
| 52384 | P0C214 | P53708 | -0.93208 |
| 52385 | P0C214 | P19878 | -0.2274  |
| 52386 | P0C214 | Q8WWI1 | -0.227   |
| 52387 | P0C214 | Q8IVW4 | -0.81251 |
| 52388 | P0C214 | Q16619 | -0.49416 |
| 52389 | P0C214 | Q68DA7 | -0.21972 |
| 52390 | P0C214 | Q05996 | -1.044   |
| 52391 | P0C214 | P01275 | -0.50298 |
| 52392 | P0C214 | Q5T7N8 | -0.59617 |
| 52393 | P0C214 | Q9UP65 | -0.56141 |
| 52394 | P0C214 | P06340 | -0.99433 |
| 52395 | P0C214 | P0CG13 | -0.22144 |
| 52396 | P0C214 | Q8NGY5 | -1.2952  |
| 52397 | P0C214 | P12872 | -0.94475 |
| 52398 | P0C214 | P52888 | -0.56489 |
| 52399 | P0C214 | P63119 | -0.6957  |
| 52400 | P0C214 | B6A8C7 | -0.98681 |
| 52401 | P0C214 | O75425 | -0.94097 |
| 52402 | P0C214 | P02675 | -0.6722  |
| 52403 | P0C214 | Q99447 | -0.28804 |
| 52404 | P0C214 | Q99884 | -1.0758  |
| 52405 | P0C214 | Q6P0Q8 | -0.65489 |
| 52406 | P0C214 | Q9NPE2 | -0.72704 |
| 52407 | P0C214 | Q86VH5 | -0.98681 |
| 52408 | P0C214 | P48058 | -1.0441  |
| 52409 | P0C214 | Q5T0J7 | -0.14058 |
| 52410 | P0C214 | Q8NHH9 | -0.43049 |
| 52411 | P0C214 | P0CJ77 | -0.73145 |
| 52412 | P0C214 | P35443 | -0.7415  |
| 52413 | P0C214 | Q69YN2 | -0.29527 |
| 52414 | P0C214 | A8MPP1 | -0.45919 |
| 52415 | P0C214 | P21941 | -0.41184 |
| 52416 | P0C214 | P08240 | -0.93654 |
| 52417 | P0C214 | Q9H4B8 | -0.73088 |
| 52418 | P0C214 | Q7Z3J2 | -0.98681 |
| 52419 | P0C214 | Q8N0X2 | -0.2288  |
| 52420 | P0C214 | Q01518 | -0.14797 |
| 52421 | P0C214 | Q9NR83 | -0.1267  |
| 52422 | P0C214 | O15431 | -1.2612  |
| 52423 | P0C214 | P27037 | -0.43125 |
| 52424 | P0C214 | P61565 | -0.85122 |
| 52425 | P0C214 | Q8WVD5 | -0.29314 |
| 52426 | P0C214 | Q9HB55 | -0.62217 |
| 52427 | P0C214 | Q8NHC4 | -1.2952  |
| 52428 | P0C214 | Q8WZB0 | -0.17894 |
| 52429 | P0C214 | P17152 | -0.17075 |
| 52430 | P0C214 | Q9BRT8 | -0.79608 |
| 52431 | P0C214 | Q96RT1 | -0.24454 |
| 52432 | P0C214 | Q96PQ1 | -1.1462  |
| 52433 | P0C214 | Q9UGI0 | -0.21515 |
| 52434 | P0C214 | O95169 | -0.36606 |
| 52435 | P0C214 | Q8NEW7 | -1.027   |
| 52436 | P0C214 | O15321 | -1.0525  |
| 52437 | P0C214 | Q96JH8 | -0.96616 |
| 52438 | P0C214 | Q9ULV1 | -0.5543  |
| 52439 | P0C214 | P0CW19 | -0.32044 |
| 52440 | P0C214 | Q9Y5P4 | -0.2284  |

|       |        |        |           |
|-------|--------|--------|-----------|
| 52441 | P0C214 | Q92871 | -0.14834  |
| 52442 | P0C214 | Q9Y5R4 | -0.22187  |
| 52443 | P0C214 | Q8IZF2 | -1.3853   |
| 52444 | P0C214 | Q92911 | -0.76321  |
| 52445 | P0C214 | Q9ULQ1 | -0.6477   |
| 52446 | P0C214 | Q8NGV5 | -1.2952   |
| 52447 | P0C214 | Q9NP72 | -1.3303   |
| 52448 | P0C214 | Q53GS9 | -0.29653  |
| 52449 | P0C214 | Q86V85 | -0.98681  |
| 52450 | P0C214 | Q5JW98 | -0.98681  |
| 52451 | P0C214 | Q08881 | -0.44408  |
| 52452 | P0C214 | Q7Z692 | -0.98681  |
| 52453 | P0C214 | Q9BZF2 | -0.96432  |
| 52454 | P0C214 | Q96EL1 | -0.39098  |
| 52455 | P0C214 | Q16552 | -0.50875  |
| 52456 | P0C214 | A6NDN3 | -0.2859   |
| 52457 | P0C214 | P41221 | -0.23103  |
| 52458 | P0C214 | Q9Y261 | -0.36066  |
| 52459 | P0C214 | Q6UWV2 | -0.56481  |
| 52460 | P0C214 | Q9NRM6 | -1.3187   |
| 52461 | P0C214 | Q5TEZ5 | -0.18353  |
| 52462 | P0C214 | O95843 | -0.68105  |
| 52463 | P0C214 | Q86VH4 | -0.98681  |
| 52464 | P0C214 | Q7Z434 | -0.2663   |
| 52465 | P0C214 | P08631 | -0.27331  |
| 52466 | P0C214 | Q9P266 | -0.41336  |
| 52467 | P0C214 | Q96S37 | -0.91119  |
| 52468 | P0C214 | Q96NI6 | -0.98681  |
| 52469 | P0C214 | O94991 | -1.0742   |
| 52470 | P0C214 | P01818 | -1.0022   |
| 52471 | P0C214 | Q9UGM3 | -0.39752  |
| 52472 | P0C214 | Q00888 | -0.91029  |
| 52473 | P0C214 | P13942 | -0.85845  |
| 52474 | P0C214 | Q8NDX9 | -0.64701  |
| 52475 | P0C214 | Q008S8 | -0.68275  |
| 52476 | P0C214 | E9PJ23 | -0.072593 |
| 52477 | P0C214 | P0CG37 | -0.89373  |
| 52478 | P0C214 | P21754 | -0.32752  |
| 52479 | P0C214 | Q9Y286 | -1.2686   |
| 52480 | P0C214 | P43304 | -0.22669  |
| 52481 | P0C214 | O43147 | -0.96894  |
| 52482 | P0C214 | P06734 | -1.4028   |
| 52483 | P0C214 | Q8N695 | -1.1496   |
| 52484 | P0C214 | Q6ZST2 | -0.5018   |
| 52485 | P0C214 | P08493 | -0.88261  |
| 52486 | P0C214 | P30456 | -0.91186  |
| 52487 | P0C214 | P23352 | -0.48385  |
| 52488 | P0C214 | Q8TF17 | -0.4914   |
| 52489 | P0C214 | Q99500 | -1.2644   |
| 52490 | P0C214 | Q96HH6 | -0.98681  |
| 52491 | P0C214 | Q8TEC5 | -0.2274   |
| 52492 | P0C214 | Q9Y2I1 | -0.23622  |
| 52493 | P0C214 | P0C7H9 | -0.30127  |
| 52494 | P0C214 | Q8WWX0 | -0.5331   |
| 52495 | P0C214 | Q96NZ8 | -0.74433  |
| 52496 | P0C214 | O95057 | -1.1932   |
| 52497 | P0C214 | Q9P2N6 | -0.45156  |
| 52498 | P0C214 | O00628 | -0.22728  |
| 52499 | P0C214 | P16870 | -0.72665  |
| 52500 | P0C214 | Q13683 | -0.75191  |
| 52501 | P0C214 | Q96PP8 | -0.73764  |
| 52502 | P0C214 | P0C091 | -1.7916   |
| 52503 | P0C214 | P05362 | -0.38683  |
| 52504 | P0C214 | Q7Z5A8 | -0.91736  |
| 52505 | P0C214 | Q6PJE2 | -0.18353  |
| 52506 | P0C214 | Q9NZ42 | -0.35603  |
| 52507 | P0C214 | Q86XN8 | -0.22721  |
| 52508 | P0C214 | O60682 | -0.22776  |
| 52509 | P0C214 | P61812 | -0.22741  |
| 52510 | P0C214 | Q96AH8 | -0.80631  |
| 52511 | P0C214 | Q8NH02 | -1.2952   |
| 52512 | P0C214 | Q8NCJ5 | -0.18186  |
| 52513 | P0C214 | P11597 | -0.6738   |
| 52514 | P0C214 | Q96SI1 | -0.17704  |
| 52515 | P0C214 | Q8TE60 | -1.3603   |
| 52516 | P0C214 | Q96F46 | -0.60753  |



|       |        |         |           |
|-------|--------|---------|-----------|
| 52517 | P0C214 | Q96HU1  | -0.24722  |
| 52518 | P0C214 | Q8N0V4  | -0.91736  |
| 52519 | P0C214 | P42330  | -0.22238  |
| 52520 | P0C214 | Q5SRD1  | -0.29462  |
| 52521 | P0C214 | Q96A83  | -1.0057   |
| 52522 | P0C214 | Q8N9S9  | -0.46674  |
| 52523 | P0C214 | Q9H2X6  | -0.22741  |
| 52524 | P0C214 | P10606  | -0.40072  |
| 52525 | P0C214 | Q9NTZ6  | -0.30328  |
| 52526 | P0C214 | O00451  | -0.44844  |
| 52527 | P0C214 | Q9UJS0  | -0.37362  |
| 52528 | P0C214 | P53779  | -0.2274   |
| 52529 | P0C214 | P54803  | -0.20668  |
| 52530 | P0C214 | Q9P225  | -0.66304  |
| 52531 | P0C214 | P12272  | -0.27016  |
| 52532 | P0C214 | Q6T4R5  | -0.17862  |
| 52533 | P0C214 | Q8NGL0  | -1.2952   |
| 52534 | P0C214 | P0DJJD1 | -0.46678  |
| 52535 | P0C214 | Q96PS8  | -1.0821   |
| 52536 | P0C214 | A8MWL6  | -0.98681  |
| 52537 | P0C214 | Q24JQ0  | -0.98681  |
| 52538 | P0C214 | P10523  | -0.96279  |
| 52539 | P0C214 | P60568  | -0.40311  |
| 52540 | P0C214 | O76027  | -0.15259  |
| 52541 | P0C214 | Q86UQ5  | -0.98681  |
| 52542 | P0C214 | Q7Z4F1  | -1.0388   |
| 52543 | P0C214 | Q96NR3  | -0.88025  |
| 52544 | P0C214 | Q75093  | -0.66343  |
| 52545 | P0C214 | Q9ULV8  | -0.45721  |
| 52546 | P0C214 | Q8NGZ3  | -1.2952   |
| 52547 | P0C214 | Q8IZA3  | -0.4939   |
| 52548 | P0C214 | P12259  | -0.25565  |
| 52549 | P0C214 | A6NHL2  | -0.61482  |
| 52550 | P0C214 | O60313  | -0.47989  |
| 52551 | P0C214 | O43497  | -0.8954   |
| 52552 | P0C214 | Q9ULB5  | -1.1619   |
| 52553 | P0C214 | O43929  | -0.090331 |
| 52554 | P0C214 | P01619  | -0.99256  |
| 52555 | P0C214 | Q96CM8  | -0.70526  |
| 52556 | P0C214 | O95600  | -0.21031  |
| 52557 | P0C214 | Q6N022  | -0.44746  |
| 52558 | P0C214 | Q86SF2  | -0.58231  |
| 52559 | P0C214 | Q96R30  | -1.2952   |
| 52560 | P0C214 | Q8TCU3  | -1.0357   |
| 52561 | P0C214 | P51809  | -0.21069  |
| 52562 | P0C214 | Q9UPM9  | -0.24048  |
| 52563 | P0C214 | Q8TAG5  | -0.91736  |
| 52564 | P0C214 | Q902F9  | -0.85122  |
| 52565 | P0C214 | P55157  | -0.50573  |
| 52566 | P0C214 | A6NGG8  | -0.72868  |
| 52567 | P0C214 | P60008  | -0.70518  |
| 52568 | P0C214 | Q92747  | -0.26646  |
| 52569 | P0C214 | O15533  | -0.42754  |
| 52570 | P0C214 | Q5TYW2  | -0.48287  |
| 52571 | P0C214 | A9Z1Z3  | -0.98681  |
| 52572 | P0C214 | P55774  | -0.65417  |
| 52573 | P0C214 | A8MZ25  | -0.85015  |
| 52574 | P0C214 | P27930  | -0.87422  |
| 52575 | P0C214 | P59537  | -1.2658   |
| 52576 | P0C214 | Q14582  | -0.22739  |
| 52577 | P0C214 | Q13449  | -0.22849  |
| 52578 | P0C214 | Q9NQ11  | -1.1253   |
| 52579 | P0C214 | Q9Y471  | -0.56696  |
| 52580 | P0C214 | Q9HBY0  | -0.75529  |
| 52581 | P0C214 | P31371  | -0.63226  |
| 52582 | P0C214 | Q9UIB8  | -1.2047   |
| 52583 | P0C214 | Q8IY95  | -1.0707   |
| 52584 | P0C214 | Q6EIG7  | -0.88116  |
| 52585 | P0C214 | Q8IWG1  | -0.099017 |
| 52586 | P0C214 | Q96DR8  | -0.94838  |
| 52587 | P0C214 | Q9H741  | -0.91736  |
| 52588 | P0C214 | Q9NYZ1  | -0.98681  |
| 52589 | P0C214 | P58511  | -0.68883  |
| 52590 | P0C214 | Q9BXJ8  | -0.68883  |
| 52591 | P0C214 | Q7Z7H3  | -0.14789  |
| 52592 | P0C214 | O75829  | -1.4643   |

|       |        |        |          |
|-------|--------|--------|----------|
| 52593 | P0C214 | Q969D9 | -0.84118 |
| 52594 | P0C214 | Q9UBF8 | -0.60097 |
| 52595 | P0C214 | Q93033 | -1.0862  |
| 52596 | P0C214 | Q9NRP4 | -0.13466 |
| 52597 | P0C214 | Q8NFK1 | -0.97879 |
| 52598 | P0C214 | Q13325 | -0.22286 |
| 52599 | P0C214 | P51587 | -0.1584  |
| 52600 | P0C214 | Q9H6I2 | -0.15461 |
| 52601 | P0C214 | P41235 | -0.25802 |
| 52602 | P0C214 | Q5J8M3 | -0.88049 |
| 52603 | P0C214 | P0CG21 | -0.22522 |
| 52604 | P0C214 | P20809 | -0.18275 |
| 52605 | P0C214 | P47884 | -1.3682  |
| 52606 | P0C214 | Q76KP1 | -0.76772 |
| 52607 | P0C214 | Q53TN4 | -0.89333 |
| 52608 | P0C214 | Q495M3 | -0.81962 |
| 52609 | P0C214 | O75078 | -1.2053  |
| 52610 | P0C214 | Q9BV87 | -0.97049 |
| 52611 | P0C214 | P13385 | -0.22748 |
| 52612 | P0C214 | A8MTL3 | -0.50512 |
| 52613 | P0C214 | Q9Y4D8 | -0.57912 |
| 52614 | P0C214 | Q04756 | -1.1706  |
| 52615 | P0C214 | Q8NHA6 | -1.2952  |
| 52616 | P0C214 | Q6UWU4 | -0.78927 |
| 52617 | P0C214 | Q7RTZ2 | -0.30073 |
| 52618 | P0C214 | Q9UEF7 | -0.9287  |
| 52619 | P0C214 | Q86VY9 | -0.98681 |
| 52620 | P0C214 | Q96HN2 | -0.32122 |
| 52621 | P0C214 | P47944 | -0.33287 |
| 52622 | P0C214 | P98194 | -0.87091 |
| 52623 | P0C214 | Q9NRV9 | -0.85992 |
| 52624 | P0C214 | Q96TA0 | -1.2424  |
| 52625 | P0C214 | Q8TDU5 | -1.3002  |
| 52626 | P0C214 | O14543 | -0.22741 |
| 52627 | P0C214 | P61204 | -0.42778 |
| 52628 | P0C214 | O43861 | -0.75187 |
| 52629 | P0C214 | Q00722 | -0.45286 |
| 52630 | P0C214 | A6NMD2 | -0.2859  |
| 52631 | P0C214 | Q9UBV8 | -0.22748 |
| 52632 | P0C214 | Q504Y0 | -1.0836  |
| 52633 | P0C214 | Q9NXP7 | -0.38101 |
| 52634 | P0C214 | Q71RC9 | -0.98681 |
| 52635 | P0C214 | P0CJ69 | -0.73145 |
| 52636 | P0C214 | Q7Z3Z4 | -0.31573 |
| 52637 | P0C214 | P78381 | -0.43516 |
| 52638 | P0C214 | Q9NPC8 | -0.23242 |
| 52639 | P0C214 | Q96PN6 | -0.49227 |
| 52640 | P0C214 | O60673 | -0.85363 |
| 52641 | P0C214 | P24071 | -1.588   |
| 52642 | P0C214 | Q96IK5 | -0.21117 |
| 52643 | P0C214 | Q5VU97 | -1.1355  |
| 52644 | P0C214 | Q6ZVW7 | -0.12787 |
| 52645 | P0C214 | Q9Y2W3 | -0.83257 |
| 52646 | P0C214 | Q06432 | -1.1164  |
| 52647 | P0C214 | Q96QZ7 | -0.29765 |
| 52648 | P0C214 | Q9NUU6 | -0.40374 |
| 52649 | P0C214 | Q9H4G1 | -0.90522 |
| 52650 | P0C214 | Q93086 | -1.0992  |
| 52651 | P0C214 | Q8TAM1 | -0.4103  |
| 52652 | P0C214 | Q5NDL2 | -0.40636 |
| 52653 | P0C214 | Q9Y4F4 | -0.15862 |
| 52654 | P0C214 | O00175 | -0.80576 |
| 52655 | P0C214 | Q8N6V4 | -0.16038 |
| 52656 | P0C214 | P30510 | -1.0938  |
| 52657 | P0C214 | A6NKC9 | -0.22741 |
| 52658 | P0C214 | Q8NGI2 | -1.2952  |
| 52659 | P0C214 | P01019 | -0.27225 |
| 52660 | P0C214 | Q9NS18 | -0.21569 |
| 52661 | P0C214 | Q9BXC1 | -1.3112  |
| 52662 | P0C214 | Q8WZ82 | -0.14656 |
| 52663 | P0C214 | P01920 | -0.6992  |
| 52664 | P0C214 | Q5T890 | -0.27727 |
| 52665 | P0C214 | Q9P1Z0 | -0.21722 |
| 52666 | P0C214 | Q8NCQ7 | -0.44516 |
| 52667 | P0C214 | Q6UXF7 | -0.90767 |
| 52668 | P0C214 | Q9H0D6 | -0.13546 |

|       |        |        |           |
|-------|--------|--------|-----------|
| 52669 | P0C214 | Q8N8G6 | -0.055391 |
| 52670 | P0C214 | Q8TDI8 | -1.01     |
| 52671 | P0C214 | Q8NEW0 | -0.53491  |
| 52672 | P0C214 | O75473 | -1.4073   |
| 52673 | P0C214 | P33763 | -0.25127  |
| 52674 | P0C214 | Q7Z4I7 | -0.24921  |
| 52675 | P0C214 | Q2HXU8 | -1.0559   |
| 52676 | P0C214 | P30988 | -0.70744  |
| 52677 | P0C214 | Q7Z7E8 | -0.2095   |
| 52678 | P0C214 | P11117 | -0.89303  |
| 52679 | P0C214 | A6NGA9 | -0.98681  |
| 52680 | P0C214 | P28476 | -1.0542   |
| 52681 | P0C214 | Q9NWQ8 | -0.52919  |
| 52682 | P0C214 | Q580R0 | -0.72903  |
| 52683 | P0C214 | Q14012 | -0.38364  |
| 52684 | P0C214 | Q96RR1 | -0.14904  |
| 52685 | P0C214 | Q9BRQ5 | -0.35508  |
| 52686 | P0C214 | Q7L4S7 | -0.98681  |
| 52687 | P0C214 | Q8N143 | -0.54263  |
| 52688 | P0C214 | Q9Y694 | -1.1554   |
| 52689 | P0C214 | Q6ZU80 | -0.1474   |
| 52690 | P0C214 | Q9BVG8 | -0.35626  |
| 52691 | P0C214 | P01707 | -1.0022   |
| 52692 | P0C214 | P84095 | -0.19627  |
| 52693 | P0C214 | Q9H013 | -1.3376   |
| 52694 | P0C214 | Q8WXH5 | -0.51543  |
| 52695 | P0C214 | Q02985 | -0.90112  |
| 52696 | P0C214 | Q8TBC3 | -0.19071  |
| 52697 | P0C214 | O14924 | -0.37143  |
| 52698 | P0C214 | Q92953 | -1.0087   |
| 52699 | P0C214 | P23229 | -0.32055  |
| 52700 | P0C214 | Q9P0L2 | -1.003    |
| 52701 | P0C214 | Q5DID0 | -1.2499   |
| 52702 | P0C214 | Q86T23 | -0.010159 |
| 52703 | P0C214 | Q5T2D2 | -0.45734  |
| 52704 | P0C214 | Q8N8X6 | -0.2859   |
| 52705 | P0C214 | Q7Z6V5 | -0.45753  |
| 52706 | P0C214 | Q9NVV5 | -0.35508  |
| 52707 | P0C214 | Q8TE99 | -0.82737  |
| 52708 | P0C214 | Q6ZUF6 | -0.19053  |
| 52709 | P0C214 | Q9NQX0 | -0.10843  |
| 52710 | P0C214 | Q07869 | -0.24569  |
| 52711 | P0C214 | P61006 | -0.67264  |
| 52712 | P0C214 | Q8NFX9 | -0.15702  |
| 52713 | P0C214 | Q9UKS6 | -0.22742  |
| 52714 | P0C214 | P0C7L1 | -0.77749  |
| 52715 | P0C214 | Q96NF6 | -0.98681  |
| 52716 | P0C214 | Q5H9S7 | -0.39093  |
| 52717 | P0C214 | Q96PL1 | -0.91736  |
| 52718 | P0C214 | Q92633 | -0.44034  |
| 52719 | P0C214 | Q9P1Y6 | -0.22742  |
| 52720 | P0C214 | Q8TAC1 | -0.59839  |
| 52721 | P0C214 | Q13702 | -0.31665  |
| 52722 | P0C214 | P17787 | -0.50585  |
| 52723 | P0C214 | P01769 | -1.0022   |
| 52724 | P0C214 | Q9NRF2 | -0.22741  |
| 52725 | P0C214 | Q53RD9 | -1.2143   |
| 52726 | P0C214 | Q8TCU5 | -0.46713  |
| 52727 | P0C214 | O95047 | -1.2952   |
| 52728 | P0C214 | Q14994 | -0.22776  |
| 52729 | P0C214 | A8MWK0 | -0.89287  |
| 52730 | P0C214 | Q8NGX0 | -1.2952   |
| 52731 | P0C214 | Q13370 | -0.24678  |
| 52732 | P0C214 | Q8NGS5 | -1.2952   |
| 52733 | P0C214 | O75095 | -0.22762  |
| 52734 | P0C214 | O95837 | -0.91837  |
| 52735 | P0C214 | Q8TC36 | -0.31184  |
| 52736 | P0C214 | Q92915 | -0.32004  |
| 52737 | P0C214 | A8MUI8 | -0.0923   |
| 52738 | P0C214 | Q9HAU8 | -0.84297  |
| 52739 | P0C214 | Q8N3Y7 | -1.2001   |
| 52740 | P0C214 | Q93097 | -0.83892  |
| 52741 | P0C214 | Q6IEY1 | -1.2952   |
| 52742 | P0C214 | I3L273 | -0.81826  |
| 52743 | P0C214 | Q9HAE3 | -0.43585  |
| 52744 | P0C214 | O15335 | -0.91595  |

|       |        |        |           |
|-------|--------|--------|-----------|
| 52745 | P0C214 | Q7Z444 | -1.1932   |
| 52746 | P0C214 | Q96RD6 | -0.94876  |
| 52747 | P0C214 | P83110 | -0.80807  |
| 52748 | P0C214 | Q494U1 | -0.52301  |
| 52749 | P0C214 | Q8IV45 | -0.92515  |
| 52750 | P0C214 | P10827 | -0.2354   |
| 52751 | P0C214 | Q9Y2D0 | -0.20853  |
| 52752 | P0C214 | Q9P2G1 | -0.22741  |
| 52753 | P0C214 | Q5VYY2 | -0.83953  |
| 52754 | P0C214 | Q8N139 | -1.3439   |
| 52755 | P0C214 | B4DYI2 | -0.6241   |
| 52756 | P0C214 | Q9H324 | -0.61228  |
| 52757 | P0C214 | P09919 | -0.78662  |
| 52758 | P0C214 | Q9H2C8 | -1.2952   |
| 52759 | P0C214 | Q96EK9 | -0.79608  |
| 52760 | P0C214 | Q15058 | -0.30878  |
| 52761 | P0C214 | A6NHS7 | -0.98681  |
| 52762 | P0C214 | Q2M2I3 | -0.35873  |
| 52763 | P0C214 | P23141 | -0.27201  |
| 52764 | P0C214 | Q9UKB1 | -0.56039  |
| 52765 | P0C214 | Q5TFQ8 | -0.98681  |
| 52766 | P0C214 | P54257 | -0.11873  |
| 52767 | P0C214 | Q8TAP4 | -0.31482  |
| 52768 | P0C214 | Q00872 | -0.65195  |
| 52769 | P0C214 | A8MZH6 | -0.91736  |
| 52770 | P0C214 | Q8IWT0 | -0.059776 |
| 52771 | P0C214 | Q6ZPD9 | -0.98681  |
| 52772 | P0C214 | Q6P531 | -0.76946  |
| 52773 | P0C214 | Q5T9L3 | -0.41935  |
| 52774 | P0C214 | P49765 | -0.53568  |
| 52775 | P0C214 | Q6UXS9 | -0.22443  |
| 52776 | P0C214 | P54646 | -0.29185  |
| 52777 | P0C214 | A8MPX8 | -0.50812  |
| 52778 | P0C214 | A6NIU2 | -0.16956  |
| 52779 | P0C214 | Q76038 | -0.72984  |
| 52780 | P0C214 | Q96JM2 | -0.22787  |
| 52781 | P0C214 | Q6ZR62 | -0.5018   |
| 52782 | P0C214 | Q96MN2 | -0.79608  |
| 52783 | P0C214 | Q9Y584 | -0.55212  |
| 52784 | P0C214 | Q8WYK2 | -0.22414  |
| 52785 | P0C214 | Q9Y3E2 | -0.67278  |
| 52786 | P0C214 | P34096 | -0.75429  |
| 52787 | P0C214 | Q8N4V1 | -0.88316  |
| 52788 | P0C214 | Q9NXS3 | -0.18444  |
| 52789 | P0C214 | Q43704 | -0.21552  |
| 52790 | P0C214 | P09455 | -0.60239  |
| 52791 | P0C214 | Q60359 | -1.1082   |
| 52792 | P0C214 | Q9UQ05 | -1.0366   |
| 52793 | P0C214 | Q9H339 | -1.2952   |
| 52794 | P0C214 | Q5H8A4 | -0.87559  |
| 52795 | P0C214 | Q9NR99 | -0.91736  |
| 52796 | P0C214 | P51828 | -0.88442  |
| 52797 | P0C214 | Q00217 | -0.21848  |
| 52798 | P0C214 | Q6Q8B3 | -0.98681  |
| 52799 | P0C214 | Q99683 | -0.23858  |
| 52800 | P0C214 | Q9NQ32 | -0.19123  |
| 52801 | P0C214 | Q9BRI3 | -0.85025  |
| 52802 | P0C214 | Q14684 | -0.80094  |
| 52803 | P0C214 | Q9BXP8 | -1.4913   |
| 52804 | P0C214 | Q96QP1 | -0.77619  |
| 52805 | P0C214 | Q8IWX5 | -0.66907  |
| 52806 | P0C214 | Q15620 | -1.2952   |
| 52807 | P0C214 | Q60245 | -1.364    |
| 52808 | P0C214 | P08311 | -1.1467   |
| 52809 | P0C214 | Q96LU7 | -0.91736  |
| 52810 | P0C214 | Q496J9 | -0.91777  |
| 52811 | P0C214 | Q9BVW6 | -0.98681  |
| 52812 | P0C214 | P15586 | -0.22421  |
| 52813 | P0C214 | P13236 | -0.91621  |
| 52814 | P0C214 | Q8IYK4 | -0.31943  |
| 52815 | P0C214 | Q75409 | -0.52523  |
| 52816 | P0C214 | Q86UV6 | -0.71534  |
| 52817 | P0C214 | P78324 | -1.1982   |
| 52818 | P0C214 | Q16513 | -0.21993  |
| 52819 | P0C214 | P24844 | -0.22581  |
| 52820 | P0C214 | Q8N2I9 | -0.22742  |

|       |        |        |           |
|-------|--------|--------|-----------|
| 52821 | P0C214 | Q7Z4R8 | -0.82509  |
| 52822 | P0C214 | P35914 | -0.2307   |
| 52823 | P0C214 | Q6ZNA5 | -0.97246  |
| 52824 | P0C214 | P02549 | -0.22741  |
| 52825 | P0C214 | A6NGZ7 | -0.98681  |
| 52826 | P0C214 | O43933 | -0.2624   |
| 52827 | P0C214 | Q4KMX7 | -0.48586  |
| 52828 | P0C214 | Q9UNI6 | -0.37723  |
| 52829 | P0C214 | Q9H4I3 | -0.2211   |
| 52830 | P0C214 | P21266 | -0.2787   |
| 52831 | P0C214 | P86434 | -0.63292  |
| 52832 | P0C214 | Q6HA08 | -0.7359   |
| 52833 | P0C214 | Q8NGR8 | -1.2952   |
| 52834 | P0C214 | O75487 | -0.90345  |
| 52835 | P0C214 | O43711 | -0.22824  |
| 52836 | P0C214 | Q9H2F3 | -0.69998  |
| 52837 | P0C214 | Q13563 | -0.28955  |
| 52838 | P0C214 | P21246 | -0.64068  |
| 52839 | P0C214 | P49773 | -0.13561  |
| 52840 | P0C214 | Q03431 | -0.82704  |
| 52841 | P0C214 | P57073 | -0.39072  |
| 52842 | P0C214 | Q15063 | -1.2867   |
| 52843 | P0C214 | Q9UM44 | -0.68883  |
| 52844 | P0C214 | P01037 | -0.90522  |
| 52845 | P0C214 | Q86W24 | -1.1699   |
| 52846 | P0C214 | P82987 | -1.186    |
| 52847 | P0C214 | P63130 | -0.45806  |
| 52848 | P0C214 | Q14442 | -0.30363  |
| 52849 | P0C214 | P22736 | -0.23144  |
| 52850 | P0C214 | Q00796 | -0.50131  |
| 52851 | P0C214 | Q9H6A0 | -0.38397  |
| 52852 | P0C214 | Q9H7Z3 | -0.18353  |
| 52853 | P0C214 | O60502 | -0.24913  |
| 52854 | P0C214 | Q9C0J1 | -0.48519  |
| 52855 | P0C214 | Q9ULA0 | -0.65507  |
| 52856 | P0C214 | Q68EN5 | -0.046178 |
| 52857 | P0C214 | Q9H115 | -0.22456  |
| 52858 | P0C214 | Q8WXX0 | -0.72948  |
| 52859 | P0C214 | Q5SYB0 | -0.2274   |
| 52860 | P0C214 | O94886 | -1.4225   |
| 52861 | P0C214 | Q13939 | -0.64311  |
| 52862 | P0C214 | Q8N8Z6 | -1.1636   |
| 52863 | P0C214 | Q9Y2F9 | -0.22448  |
| 52864 | P0C214 | P27169 | -0.72527  |
| 52865 | P0C214 | P57730 | -0.5923   |
| 52866 | P0C214 | Q9C0B6 | -0.62618  |
| 52867 | P0C214 | O95711 | -0.84864  |
| 52868 | P0C214 | Q9Y693 | -1.1051   |
| 52869 | P0C214 | P11230 | -0.944    |
| 52870 | P0C214 | Q9Y2D4 | -0.31639  |
| 52871 | P0C214 | Q9ULJ1 | -0.23148  |
| 52872 | P0C214 | Q16787 | -1.1211   |
| 52873 | P0C214 | A7MBM2 | -0.73557  |
| 52874 | P0C214 | P23582 | -0.60972  |
| 52875 | P0C214 | P43246 | -0.1794   |
| 52876 | P0C214 | Q9Y2V0 | -0.26803  |
| 52877 | P0C214 | P84351 | -1.0114   |
| 52878 | P0C214 | P49961 | -1.4293   |
| 52879 | P0C214 | Q14515 | -1.0861   |
| 52880 | P0C214 | Q9NPA1 | -1.1518   |
| 52881 | P0C214 | Q9P2K6 | -0.22011  |
| 52882 | P0C214 | Q6UXP3 | -0.98681  |
| 52883 | P0C214 | Q8IZM8 | -0.22739  |
| 52884 | P0C214 | P20742 | -0.71635  |
| 52885 | P0C214 | P13284 | -0.99847  |
| 52886 | P0C214 | P0C875 | -0.39646  |
| 52887 | P0C214 | Q9UKR0 | -1.3937   |
| 52888 | P0C214 | Q17R98 | -0.22734  |
| 52889 | P0C214 | Q9NRD0 | -0.22632  |
| 52890 | P0C214 | P21217 | -0.75697  |
| 52891 | P0C214 | Q7Z3Q1 | -0.97586  |
| 52892 | P0C214 | Q8NH01 | -1.2952   |
| 52893 | P0C214 | Q7LGA3 | -0.51522  |
| 52894 | P0C214 | Q99489 | -0.33469  |
| 52895 | P0C214 | P04746 | -0.56857  |
| 52896 | P0C214 | Q99624 | -1.0682   |

|       |        |        |           |
|-------|--------|--------|-----------|
| 52897 | P0C214 | Q9NRC1 | -0.98681  |
| 52898 | P0C214 | Q6P2P2 | -0.18933  |
| 52899 | P0C214 | Q719I0 | -0.33611  |
| 52900 | P0C214 | Q8IVB5 | -0.38127  |
| 52901 | P0C214 | P03989 | -0.99122  |
| 52902 | P0C214 | Q9NWM8 | -0.29406  |
| 52903 | P0C214 | Q9NPA5 | -0.083723 |
| 52904 | P0C214 | Q9Y5E4 | -1.2126   |
| 52905 | P0C214 | Q9H2I8 | -0.22722  |
| 52906 | P0C214 | Q6UXD5 | -1.086    |
| 52907 | P0C214 | Q9NQS5 | -1.3089   |
| 52908 | P0C214 | O15344 | -0.38032  |
| 52909 | P0C214 | Q6DKJ4 | -0.058028 |
| 52910 | P0C214 | B1ANH7 | -0.60856  |
| 52911 | P0C214 | A6NMA1 | -0.35747  |
| 52912 | P0C214 | P17927 | -0.9549   |
| 52913 | P0C214 | P51787 | -0.84693  |
| 52914 | P0C214 | O95816 | -0.34836  |
| 52915 | P0C214 | Q00LT1 | -0.94233  |
| 52916 | P0C214 | Q9ULK5 | -0.45837  |
| 52917 | P0C214 | Q9Y2T1 | -0.75382  |
| 52918 | P0C214 | Q9H4W6 | -0.13047  |
| 52919 | P0C214 | P01024 | -0.62119  |
| 52920 | P0C214 | P20592 | -0.23901  |
| 52921 | P0C214 | P12111 | -0.73219  |
| 52922 | P0C214 | A6NLU0 | -0.50512  |
| 52923 | P0C214 | Q8NC96 | -0.45396  |
| 52924 | P0C214 | Q9BRN9 | -0.98681  |
| 52925 | P0C214 | Q5JWR5 | -0.30785  |
| 52926 | P0C214 | P10912 | -0.24612  |
| 52927 | P0C214 | P98088 | -1.037    |
| 52928 | P0C214 | Q6UWE0 | -0.22789  |
| 52929 | P0C214 | Q9Y2B2 | -0.80135  |
| 52930 | P0C214 | P05014 | -0.63257  |
| 52931 | P0C214 | Q70SY1 | -0.19013  |
| 52932 | P0C214 | Q8NCM2 | -0.97452  |
| 52933 | P0C214 | Q14563 | -0.65653  |
| 52934 | P0C214 | P09630 | -0.22701  |
| 52935 | P0C214 | Q9UBX7 | -1.3206   |
| 52936 | P0C214 | Q9BX74 | -1.0981   |
| 52937 | P0C214 | P13612 | -0.47601  |
| 52938 | P0C214 | O95007 | -1.2952   |
| 52939 | P0C214 | Q9BXA6 | -0.98559  |
| 52940 | P0C214 | A1L4M7 | -0.54156  |
| 52941 | P0C214 | Q8WWU7 | -1.1131   |
| 52942 | P0C214 | Q13474 | -0.47787  |
| 52943 | P0C214 | Q8WZ26 | -0.51574  |
| 52944 | P0C214 | Q15464 | -0.69894  |
| 52945 | P0C214 | Q7L0R7 | -0.50512  |
| 52946 | P0C214 | Q9UHQ4 | -0.63005  |
| 52947 | P0C214 | Q9HBL7 | -1.0549   |
| 52948 | P0C214 | Q7Z7L1 | -0.51721  |
| 52949 | P0C214 | P21917 | -0.50829  |
| 52950 | P0C214 | P0CAT3 | -0.21457  |
| 52951 | P0C214 | B7ZAQ6 | -0.85342  |
| 52952 | P0C214 | Q96PG2 | -0.98681  |
| 52953 | P0C214 | Q92496 | -1.0274   |
| 52954 | P0C214 | Q8NBP0 | -0.22733  |
| 52955 | P0C214 | P32926 | -0.80152  |
| 52956 | P0C214 | Q86WS5 | -1.3887   |
| 52957 | P0C214 | P54107 | -0.88061  |
| 52958 | P0C214 | Q6Q0C1 | -0.80565  |
| 52959 | P0C214 | Q9GZP1 | -0.92021  |
| 52960 | P0C214 | Q92551 | -0.30625  |
| 52961 | P0C214 | P50851 | -0.66748  |
| 52962 | P0C214 | O43677 | -0.42419  |
| 52963 | P0C214 | Q9UNL2 | -0.66661  |
| 52964 | P0C214 | P24390 | -0.61593  |
| 52965 | P0C214 | Q9H2H9 | -1.0887   |
| 52966 | P0C214 | P11684 | -0.71414  |
| 52967 | P0C214 | Q6UWL6 | -1.0431   |
| 52968 | P0C214 | P57059 | -0.3836   |
| 52969 | P0C214 | Q7Z624 | -0.15425  |
| 52970 | P0C214 | Q9BXX1 | -0.21144  |
| 52971 | P0C214 | P30479 | -1.0367   |
| 52972 | P0C214 | O43566 | -0.22883  |

|       |        |         |            |
|-------|--------|---------|------------|
| 52973 | P0C214 | P35218  | -0.13577   |
| 52974 | P0C214 | Q96LA9  | -1.3693    |
| 52975 | P0C214 | Q8N148  | -1.2952    |
| 52976 | P0C214 | Q8NFXJ5 | -1.3088    |
| 52977 | P0C214 | Q8NGA0  | -1.2952    |
| 52978 | P0C214 | P48047  | -0.2846    |
| 52979 | P0C214 | Q99877  | -0.85588   |
| 52980 | P0C214 | Q969K7  | -0.73074   |
| 52981 | P0C214 | Q9HAT1  | -0.91596   |
| 52982 | P0C214 | Q4G0W2  | -0.78481   |
| 52983 | P0C214 | C9JXX5  | -0.91736   |
| 52984 | P0C214 | P05165  | -0.36953   |
| 52985 | P0C214 | A6NGZ8  | -1.0708    |
| 52986 | P0C214 | A8MQT2  | -0.37981   |
| 52987 | P0C214 | Q04759  | -0.20639   |
| 52988 | P0C214 | P49757  | -0.25601   |
| 52989 | P0C214 | Q96M02  | -0.098461  |
| 52990 | P0C214 | Q9UN70  | -1.2131    |
| 52991 | P0C214 | Q8NAT2  | -0.72721   |
| 52992 | P0C214 | P78368  | -0.77029   |
| 52993 | P0C214 | Q8N6N2  | -0.18353   |
| 52994 | P0C214 | Q8NEJ0  | -0.4306    |
| 52995 | P0C214 | Q75914  | -0.77199   |
| 52996 | P0C214 | Q99595  | -0.46637   |
| 52997 | P0C214 | A6NJ64  | -0.065644  |
| 52998 | P0C214 | Q8IU54  | -0.71356   |
| 52999 | P0C214 | P07942  | -0.68656   |
| 53000 | P0C214 | Q9NZU5  | -0.4585    |
| 53001 | P0C214 | Q9UPR5  | -0.93282   |
| 53002 | P0C214 | Q5VZ46  | -0.0064175 |
| 53003 | P0C214 | Q9UI15  | -0.18701   |
| 53004 | P0C214 | P50226  | -0.19163   |
| 53005 | P0C214 | A6NFZ4  | -0.91736   |
| 53006 | P0C214 | Q86X76  | -0.16747   |
| 53007 | P0C214 | Q14774  | -0.22855   |
| 53008 | P0C214 | Q8NI17  | -0.58017   |
| 53009 | P0C214 | Q9P0N8  | -1.0735    |
| 53010 | P0C214 | Q8IXA5  | -0.64834   |
| 53011 | P0C214 | Q9H772  | -0.81049   |
| 53012 | P0C214 | Q9BXS9  | -1.0906    |
| 53013 | P0C214 | Q9BX68  | -0.15876   |
| 53014 | P0C214 | Q9NUL7  | -0.13129   |
| 53015 | P0C214 | Q86UP9  | -0.98681   |
| 53016 | P0C214 | Q8N5B7  | -0.23549   |
| 53017 | P0C214 | Q9H672  | -0.5331    |
| 53018 | P0C214 | Q14CM0  | -0.22741   |
| 53019 | P0C214 | P04070  | -0.65981   |
| 53020 | P0C214 | Q9HAU0  | -0.22741   |
| 53021 | P0C214 | O15259  | -0.22741   |
| 53022 | P0C214 | P01127  | -0.32542   |
| 53023 | P0C214 | Q96IC2  | -0.76784   |
| 53024 | P0C214 | A6NH00  | -1.2952    |
| 53025 | P0C214 | Q8TC92  | -1.1991    |
| 53026 | P0C214 | Q8N0Z8  | -0.28338   |
| 53027 | P0C214 | Q5SR53  | -0.2061    |
| 53028 | P0C214 | O95800  | -1.4957    |
| 53029 | P0C214 | Q96L94  | -0.68393   |
| 53030 | P0C214 | Q9Y343  | -0.68393   |
| 53031 | P0C214 | Q92576  | -0.22197   |
| 53032 | P0C214 | Q9NRS4  | -1.3621    |
| 53033 | P0C214 | Q96MT7  | -0.22739   |
| 53034 | P0C214 | Q03169  | -0.70208   |
| 53035 | P0C214 | Q9Y3B4  | -0.22499   |
| 53036 | P0C214 | Q8IY67  | -0.31203   |
| 53037 | P0C214 | Q7RTS3  | -0.22885   |
| 53038 | P0C214 | Q9NUV7  | -0.69316   |
| 53039 | P0C214 | P0C7P3  | -0.79608   |
| 53040 | P0C214 | Q7RTS1  | -0.22776   |
| 53041 | P0C214 | Q8WV93  | -0.56474   |
| 53042 | P0C214 | Q6B0I6  | -0.18055   |
| 53043 | P0C214 | Q86SG3  | -0.75801   |
| 53044 | P0C214 | Q9H568  | -0.23577   |
| 53045 | P0C214 | Q9Y3C8  | -0.24221   |
| 53046 | P0C214 | Q9NZ43  | -0.26503   |
| 53047 | P0C214 | Q8IZA0  | -0.35115   |
| 53048 | P0C214 | P25874  | -0.52738   |

|       |        |        |           |
|-------|--------|--------|-----------|
| 53049 | P0C214 | C9J202 | -0.41123  |
| 53050 | P0C214 | Q8NBF1 | -0.22706  |
| 53051 | P0C214 | P61567 | -0.85122  |
| 53052 | P0C214 | Q14904 | -0.84892  |
| 53053 | P0C214 | Q13418 | -0.32161  |
| 53054 | P0C214 | Q9P0L0 | -0.26381  |
| 53055 | P0C214 | Q03405 | -0.68638  |
| 53056 | P0C214 | O95365 | -0.42305  |
| 53057 | P0C214 | O43426 | -0.24715  |
| 53058 | P0C214 | P29144 | -0.051199 |
| 53059 | P0C214 | Q13889 | -0.301    |
| 53060 | P0C214 | Q9NY65 | -0.61482  |
| 53061 | P0C214 | Q07954 | -0.36386  |
| 53062 | P0C214 | O15484 | -1.017    |
| 53063 | P0C214 | Q96P68 | -1.3112   |
| 53064 | P0C214 | Q96AX1 | -0.18926  |
| 53065 | P0C214 | Q8NH56 | -1.2952   |
| 53066 | P0C214 | P49619 | -0.82659  |
| 53067 | P0C214 | Q9Y2D2 | -0.69414  |
| 53068 | P0C214 | Q9BQE5 | -1.2769   |
| 53069 | P0C214 | P12104 | -0.5425   |
| 53070 | P0C214 | P0C5Z0 | -0.83668  |
| 53071 | P0C214 | P15328 | -0.96904  |
| 53072 | P0C214 | Q9Y547 | -0.55751  |
| 53073 | P0C214 | P48739 | -0.40083  |
| 53074 | P0C214 | Q499Y3 | -0.27703  |
| 53075 | P0C214 | Q9C0K3 | -0.83507  |
| 53076 | P0C214 | Q96GR4 | -1.0453   |
| 53077 | P0C214 | Q9P286 | -0.62687  |
| 53078 | P0C214 | Q6URK8 | -0.91736  |
| 53079 | P0C214 | O60858 | -0.52293  |
| 53080 | P0C214 | O15079 | -0.52192  |
| 53081 | P0C214 | Q6MZM9 | -0.91736  |
| 53082 | P0C214 | Q86Y27 | -0.91736  |
| 53083 | P0C214 | A6NMB9 | -0.95254  |
| 53084 | P0C214 | Q6NUQ4 | -0.98681  |
| 53085 | P0C214 | Q9NUJ3 | -0.36351  |
| 53086 | P0C214 | O14990 | -0.33582  |
| 53087 | P0C214 | O75023 | -1.0175   |
| 53088 | P0C214 | Q9BZA0 | -0.71876  |
| 53089 | P0C214 | Q8NEX9 | -0.45865  |
| 53090 | P0C214 | Q6QAJ8 | -0.98681  |
| 53091 | P0C214 | Q9H343 | -1.2952   |
| 53092 | P0C214 | Q9Y5F7 | -1.2424   |
| 53093 | P0C214 | P78330 | -0.2119   |
| 53094 | P0C214 | Q86Y28 | -0.91736  |
| 53095 | P0C214 | O43526 | -0.94075  |
| 53096 | P0C214 | O60241 | -1.3876   |
| 53097 | P0C214 | Q9UNF1 | -0.056105 |
| 53098 | P0C214 | Q96013 | -0.8136   |
| 53099 | P0C214 | Q9UJ42 | -1.3693   |
| 53100 | P0C214 | Q8TER5 | -0.63493  |
| 53101 | P0C214 | Q99944 | -1.344    |
| 53102 | P0C214 | O43847 | -0.18348  |
| 53103 | P0C214 | Q6ZMU5 | -0.45495  |
| 53104 | P0C214 | P30459 | -0.91186  |
| 53105 | P0C214 | Q8NGH9 | -1.2952   |
| 53106 | P0C214 | Q9BPY3 | -0.19792  |
| 53107 | P0C214 | Q70CQ2 | -0.39806  |
| 53108 | P0C214 | P02774 | -0.53874  |
| 53109 | P0C214 | P55285 | -0.53723  |
| 53110 | P0C214 | P25100 | -1.2226   |
| 53111 | P0C214 | P13746 | -1.018    |
| 53112 | P0C214 | C9J798 | -0.72599  |
| 53113 | P0C214 | P30838 | -0.27074  |
| 53114 | P0C214 | P45880 | -0.55854  |
| 53115 | P0C214 | Q9Y5R8 | -0.13606  |
| 53116 | P0C214 | Q9UL49 | -0.21646  |
| 53117 | P0C214 | Q96CN5 | -0.23148  |
| 53118 | P0C214 | Q9H0X4 | -0.98681  |
| 53119 | P0C214 | A0PJK1 | -1.1744   |
| 53120 | P0C214 | Q8NGI6 | -1.2952   |
| 53121 | P0C214 | Q2I0M4 | -0.4675   |
| 53122 | P0C214 | Q8IZN7 | -0.88056  |
| 53123 | P0C214 | Q6UXD1 | -0.98681  |
| 53124 | P0C214 | O96002 | -0.18353  |



|       |        |        |          |
|-------|--------|--------|----------|
| 53125 | P0C214 | O14495 | -0.27103 |
| 53126 | P0C214 | Q8NEV9 | -0.82089 |
| 53127 | P0C214 | O14804 | -1.4683  |
| 53128 | P0C214 | Q6PCB0 | -1.1125  |
| 53129 | P0C214 | Q14449 | -0.22741 |
| 53130 | P0C214 | Q8IY84 | -1.3031  |
| 53131 | P0C214 | Q8IV77 | -1.345   |
| 53132 | P0C214 | Q8NEV8 | -0.39534 |
| 53133 | P0C214 | O60602 | -1.0988  |
| 53134 | P0C214 | P51955 | -0.22741 |
| 53135 | P0C214 | P57735 | -0.50072 |
| 53136 | P0C214 | P25311 | -1.0345  |
| 53137 | P0C214 | Q13277 | -0.29886 |
| 53138 | P0C214 | Q6ZUS5 | -0.58883 |
| 53139 | P0C214 | Q8N766 | -0.96345 |
| 53140 | P0C214 | P00387 | -0.21566 |
| 53141 | P0C214 | Q6IF99 | -1.2952  |
| 53142 | P0C214 | P01298 | -0.91555 |
| 53143 | P0C214 | Q6PCB5 | -0.27375 |
| 53144 | P0C214 | Q9Y6J8 | -0.52135 |
| 53145 | P0C214 | Q8WY07 | -0.99099 |
| 53146 | P0C214 | Q9Y5G9 | -1.2732  |
| 53147 | P0C214 | Q96FX8 | -0.19499 |
| 53148 | P0C214 | Q6UWL2 | -1.0175  |
| 53149 | P0C214 | O60243 | -0.64339 |
| 53150 | P0C214 | Q6IPX1 | -1.2827  |
| 53151 | P0C214 | P26885 | -0.22987 |
| 53152 | P0C214 | A6H8M9 | -1.2424  |
| 53153 | P0C214 | Q92482 | -0.64054 |
| 53154 | P0C214 | O60320 | -0.98681 |
| 53155 | P0C214 | P00747 | -0.50543 |
| 53156 | P0C214 | O95859 | -1.1289  |
| 53157 | P0C214 | Q4U2R8 | -0.45584 |
| 53158 | P0C214 | P35219 | -0.30153 |
| 53159 | P0C214 | Q30KQ4 | -0.88056 |
| 53160 | P0C214 | Q9UBK2 | -0.55894 |
| 53161 | P0C214 | Q8N7R0 | -0.22873 |
| 53162 | P0C214 | P23515 | -0.66641 |
| 53163 | P0C214 | P04434 | -1.0022  |
| 53164 | P0C214 | P04207 | -1.0022  |
| 53165 | P0C214 | Q4W5P6 | -0.91736 |
| 53166 | P0C214 | O00238 | -0.76035 |
| 53167 | P0C214 | Q8WVN8 | -0.44172 |
| 53168 | P0C214 | Q86SJ6 | -1.342   |
| 53169 | P0C214 | P01579 | -0.25868 |
| 53170 | P0C214 | Q8IZY2 | -0.89681 |
| 53171 | P0C214 | P53582 | -0.48971 |
| 53172 | P0C214 | Q8NBI6 | -0.93902 |
| 53173 | P0C214 | Q9UIM3 | -0.25429 |
| 53174 | P0C214 | Q6NT16 | -1.0455  |
| 53175 | P0C214 | Q9BY60 | -0.21344 |
| 53176 | P0C214 | P48729 | -0.22741 |
| 53177 | P0C214 | B2RTY4 | -0.81825 |
| 53178 | P0C214 | P24530 | -0.86243 |
| 53179 | P0C214 | Q99675 | -0.22669 |
| 53180 | P0C214 | Q8TB61 | -0.95869 |
| 53181 | P0C214 | P00813 | -0.21244 |
| 53182 | P0C214 | Q9H2J1 | -0.21472 |
| 53183 | P0C214 | B6SEH9 | -0.98681 |
| 53184 | P0C214 | Q6IQ55 | -0.64697 |
| 53185 | P0C214 | P24903 | -0.62891 |
| 53186 | P0C214 | O60636 | -1.0557  |
| 53187 | P0C214 | Q6ZMB0 | -0.7252  |
| 53188 | P0C214 | Q8TCP9 | -0.96738 |
| 53189 | P0C214 | Q9NPH9 | -0.30514 |
| 53190 | P0C214 | Q8N6Y1 | -1.2424  |
| 53191 | P0C214 | Q9BQ31 | -0.55596 |
| 53192 | P0C214 | P68431 | -0.51888 |
| 53193 | P0C214 | Q9BYX2 | -0.64917 |
| 53194 | P0C214 | Q8NGN5 | -1.2952  |
| 53195 | P0C214 | Q5VTU8 | -0.32335 |
| 53196 | P0C214 | Q8WVZ1 | -1.0453  |
| 53197 | P0C214 | Q8IXL7 | -0.42415 |
| 53198 | P0C214 | Q1X8D7 | -0.22678 |
| 53199 | P0C214 | P09110 | -0.18304 |
| 53200 | P0C214 | C9JDP6 | -0.86667 |

|       |        |        |           |
|-------|--------|--------|-----------|
| 53201 | P0C214 | Q9H7V2 | -0.8951   |
| 53202 | P0C214 | O94956 | -1.1987   |
| 53203 | P0C214 | P46952 | -0.15321  |
| 53204 | P0C214 | P21549 | -0.19392  |
| 53205 | P0C214 | Q6ZS72 | -0.15111  |
| 53206 | P0C214 | Q49AR2 | -0.10791  |
| 53207 | P0C214 | Q9HCJ2 | -0.35114  |
| 53208 | P0C214 | Q0P6D6 | -0.31639  |
| 53209 | P0C214 | P55211 | -0.22493  |
| 53210 | P0C214 | P09936 | -0.13629  |
| 53211 | P0C214 | Q04771 | -0.36634  |
| 53212 | P0C214 | Q96PH1 | -0.69851  |
| 53213 | P0C214 | Q5T2P8 | -0.40498  |
| 53214 | P0C214 | O43914 | -0.63405  |
| 53215 | P0C214 | P11229 | -0.79549  |
| 53216 | P0C214 | P08174 | -1.0187   |
| 53217 | P0C214 | Q86X40 | -0.22986  |
| 53218 | P0C214 | Q8NEA6 | -0.22722  |
| 53219 | P0C214 | P22223 | -1.1792   |
| 53220 | P0C214 | Q9HBU1 | -0.22739  |
| 53221 | P0C214 | O00591 | -0.89953  |
| 53222 | P0C214 | P59542 | -1.2886   |
| 53223 | P0C214 | O60760 | -0.22526  |
| 53224 | P0C214 | Q9Y5C1 | -0.5966   |
| 53225 | P0C214 | Q8IZ69 | -0.7067   |
| 53226 | P0C214 | Q6P5S2 | -0.91736  |
| 53227 | P0C214 | Q12792 | -0.35283  |
| 53228 | P0C214 | A6NN92 | -0.98604  |
| 53229 | P0C214 | Q6ZMJ2 | -1.1952   |
| 53230 | P0C214 | Q9BYZ6 | -1.0009   |
| 53231 | P0C214 | Q9HBV1 | -0.81299  |
| 53232 | P0C214 | Q147U7 | -0.98681  |
| 53233 | P0C214 | Q9P1W3 | -0.98681  |
| 53234 | P0C214 | P35398 | -0.46891  |
| 53235 | P0C214 | Q8IU80 | -0.96077  |
| 53236 | P0C214 | O00764 | -0.21127  |
| 53237 | P0C214 | P06888 | -1.0022   |
| 53238 | P0C214 | P42681 | -0.54922  |
| 53239 | P0C214 | Q8NBZ7 | -0.97651  |
| 53240 | P0C214 | P10826 | -0.23805  |
| 53241 | P0C214 | Q9Y5E9 | -1.2126   |
| 53242 | P0C214 | Q8WVL7 | -0.2274   |
| 53243 | P0C214 | A4QN01 | -0.44781  |
| 53244 | P0C214 | Q8WXX5 | -0.35779  |
| 53245 | P0C214 | A4D1S0 | -0.97467  |
| 53246 | P0C214 | Q13066 | -0.47295  |
| 53247 | P0C214 | Q14191 | -0.22696  |
| 53248 | P0C214 | Q5TC79 | -0.22699  |
| 53249 | P0C214 | Q9UBT7 | -0.25855  |
| 53250 | P0C214 | Q15782 | -0.61613  |
| 53251 | P0C214 | Q8N2S1 | -0.41258  |
| 53252 | P0C214 | B9A014 | -0.23353  |
| 53253 | P0C214 | P01243 | -1.0489   |
| 53254 | P0C214 | Q99466 | -0.28047  |
| 53255 | P0C214 | Q96S16 | -0.069378 |
| 53256 | P0C214 | Q13454 | -0.80082  |
| 53257 | P0C214 | P19883 | -0.22499  |
| 53258 | P0C214 | Q8TE57 | -1.3603   |
| 53259 | P0C214 | Q9Y663 | -0.50637  |
| 53260 | P0C214 | P24043 | -0.88686  |
| 53261 | P0C214 | Q9C0I4 | -0.98681  |
| 53262 | P0C214 | Q6ZS86 | -0.7387   |
| 53263 | P0C214 | Q9H1M4 | -0.75539  |
| 53264 | P0C214 | Q8IYW2 | -0.97157  |
| 53265 | P0C214 | Q9H461 | -0.56568  |
| 53266 | P0C214 | Q3SXM0 | -0.22745  |
| 53267 | P0C214 | Q9NSY1 | -0.78084  |
| 53268 | P0C214 | O60397 | -0.26199  |
| 53269 | P0C214 | Q5VW32 | -0.48769  |
| 53270 | P0C214 | P31644 | -0.90821  |
| 53271 | P0C214 | P02144 | -0.50754  |
| 53272 | P0C214 | Q8NGA2 | -1.2952   |
| 53273 | P0C214 | Q7Z4K8 | -0.71534  |
| 53274 | P0C214 | P78552 | -0.52818  |
| 53275 | P0C214 | Q9BYZ8 | -0.90767  |
| 53276 | P0C214 | A6NC42 | -0.47069  |

|       |        |        |           |
|-------|--------|--------|-----------|
| 53277 | P0C214 | Q92628 | -0.79608  |
| 53278 | P0C214 | Q5JXA9 | -0.98681  |
| 53279 | P0C214 | Q9Y6E2 | -0.55955  |
| 53280 | P0C214 | Q9H2S1 | -0.99889  |
| 53281 | P0C214 | Q15614 | -1.2952   |
| 53282 | P0C214 | P01303 | -0.62977  |
| 53283 | P0C214 | A6NJY1 | -0.96707  |
| 53284 | P0C214 | Q0VD83 | -0.77834  |
| 53285 | P0C214 | Q4VXA5 | -0.98417  |
| 53286 | P0C214 | P01776 | -1.0022   |
| 53287 | P0C214 | P51857 | -0.22504  |
| 53288 | P0C214 | Q8WW62 | -1.068    |
| 53289 | P0C214 | A1A4T8 | -0.38427  |
| 53290 | P0C214 | Q08AE8 | -0.16987  |
| 53291 | P0C214 | P50542 | -0.22715  |
| 53292 | P0C214 | P28562 | -0.23999  |
| 53293 | P0C214 | Q8WV22 | -0.2209   |
| 53294 | P0C214 | Q8NEL9 | -0.22008  |
| 53295 | P0C214 | Q07960 | -0.23205  |
| 53296 | P0C214 | Q8TBF4 | -0.36541  |
| 53297 | P0C214 | Q92904 | -0.23094  |
| 53298 | P0C214 | Q13021 | -0.32201  |
| 53299 | P0C214 | Q9NUN5 | -1.0146   |
| 53300 | P0C214 | Q8NEE6 | -0.21688  |
| 53301 | P0C214 | P63122 | -0.6957   |
| 53302 | P0C214 | Q6ZQX7 | -0.063553 |
| 53303 | P0C214 | Q13308 | -0.58493  |
| 53304 | P0C214 | P53004 | -0.25408  |
| 53305 | P0C214 | P02751 | -0.29993  |
| 53306 | P0C214 | Q9UJU6 | -0.62325  |
| 53307 | P0C214 | Q8NGP3 | -1.2952   |
| 53308 | P0C214 | Q9UGQ3 | -0.77519  |
| 53309 | P0C214 | P31941 | -0.20892  |
| 53310 | P0C214 | P62820 | -0.69881  |
| 53311 | P0C214 | Q147X3 | -0.21319  |
| 53312 | P0C214 | Q9UMX9 | -1.0938   |
| 53313 | P0C214 | Q9NQW6 | -0.2177   |
| 53314 | P0C214 | Q96PU8 | -0.20108  |
| 53315 | P0C214 | P04183 | -0.47137  |
| 53316 | P0C214 | Q5W0B7 | -0.98681  |
| 53317 | P0C214 | Q8TD55 | -0.52301  |
| 53318 | P0C214 | Q9NRN5 | -1.143    |
| 53319 | P0C214 | Q8N387 | -1.4229   |
| 53320 | P0C214 | P57058 | -1.5062   |
| 53321 | P0C214 | Q9NYM4 | -1.3022   |
| 53322 | P0C214 | Q9Y496 | -0.4418   |
| 53323 | P0C214 | Q9Y6F8 | -0.22396  |
| 53324 | P0C214 | Q8NBR9 | -0.246    |
| 53325 | P0C214 | Q8N468 | -1.0455   |
| 53326 | P0C214 | P63132 | -0.33459  |
| 53327 | P0C214 | Q9HAZ1 | -1.1077   |
| 53328 | P0C214 | Q9BXU8 | -0.29051  |
| 53329 | P0C214 | Q8N0U8 | -0.98681  |
| 53330 | P0C214 | Q8TCU4 | -0.094994 |
| 53331 | P0C214 | Q9H6D8 | -1.0001   |
| 53332 | P0C214 | Q01718 | -0.95482  |
| 53333 | P0C214 | Q96JC1 | -0.3301   |
| 53334 | P0C214 | Q96JX3 | -0.65392  |
| 53335 | P0C214 | Q96A29 | -0.80117  |
| 53336 | P0C214 | Q9C0K7 | -0.22943  |
| 53337 | P0C214 | Q9H7X2 | -0.98681  |
| 53338 | P0C214 | Q15553 | -0.22994  |
| 53339 | P0C214 | P15151 | -0.28036  |
| 53340 | P0C214 | Q14289 | -0.23159  |
| 53341 | P0C214 | Q8N5M4 | -0.22541  |
| 53342 | P0C214 | P22460 | -0.63102  |
| 53343 | P0C214 | Q7Z569 | -0.2274   |
| 53344 | P0C214 | Q495W5 | -0.74323  |
| 53345 | P0C214 | P49771 | -1.3882   |
| 53346 | P0C214 | Q9NZW4 | -1.1777   |
| 53347 | P0C214 | Q9BV40 | -0.62853  |
| 53348 | P0C214 | P30939 | -1.3718   |
| 53349 | P0C214 | P01605 | -1.0022   |
| 53350 | P0C214 | P55089 | -0.47832  |
| 53351 | P0C214 | Q8N1F1 | -0.15381  |
| 53352 | P0C214 | Q9Y5G7 | -1.2424   |

|       |        |        |           |
|-------|--------|--------|-----------|
| 53353 | P0C214 | Q16790 | -0.42189  |
| 53354 | P0C214 | O60635 | -1.1098   |
| 53355 | P0C214 | P01614 | -1.0022   |
| 53356 | P0C214 | A4D1Z8 | -0.39457  |
| 53357 | P0C214 | P03979 | -0.49626  |
| 53358 | P0C214 | Q9Y508 | -1.1027   |
| 53359 | P0C214 | Q8WUX1 | -1.0398   |
| 53360 | P0C214 | O75970 | -0.22692  |
| 53361 | P0C214 | Q8WTT0 | -0.93265  |
| 53362 | P0C214 | O00767 | -0.8899   |
| 53363 | P0C214 | Q13046 | -0.9261   |
| 53364 | P0C214 | P41240 | -0.22745  |
| 53365 | P0C214 | Q9UPS8 | -0.25053  |
| 53366 | P0C214 | P02679 | -0.69048  |
| 53367 | P0C214 | Q5VVW2 | -0.86796  |
| 53368 | P0C214 | O94885 | -0.23214  |
| 53369 | P0C214 | O95274 | -1.0317   |
| 53370 | P0C214 | P01880 | -1.4762   |
| 53371 | P0C214 | Q71RH2 | -0.91465  |
| 53372 | P0C214 | O14625 | -1.0785   |
| 53373 | P0C214 | Q9BXS0 | -1.5004   |
| 53374 | P0C214 | P09016 | -0.15808  |
| 53375 | P0C214 | Q15197 | -1.6843   |
| 53376 | P0C214 | Q6GTX8 | -0.44182  |
| 53377 | P0C214 | Q6ZNG2 | -0.22722  |
| 53378 | P0C214 | P07237 | -0.25865  |
| 53379 | P0C214 | Q9H207 | -1.2952   |
| 53380 | P0C214 | O95222 | -1.2952   |
| 53381 | P0C214 | Q13835 | -0.22799  |
| 53382 | P0C214 | Q5ZPR3 | -0.40573  |
| 53383 | P0C214 | Q6UWU2 | -0.66157  |
| 53384 | P0C214 | P0CJ70 | -0.73145  |
| 53385 | P0C214 | Q96LC7 | -1.6336   |
| 53386 | P0C214 | P60763 | -0.41561  |
| 53387 | P0C214 | Q14647 | -0.52037  |
| 53388 | P0C214 | Q6ZUV0 | -0.14242  |
| 53389 | P0C214 | Q00526 | -0.64973  |
| 53390 | P0C214 | Q7Z5L3 | -1.0186   |
| 53391 | P0C214 | H7BZ55 | -0.068611 |
| 53392 | P0C214 | Q6VVX0 | -0.54747  |
| 53393 | P0C214 | Q6ZN68 | -0.98681  |
| 53394 | P0C214 | Q96R67 | -1.2952   |
| 53395 | P0C214 | Q8NGJ6 | -1.2952   |
| 53396 | P0C214 | P58182 | -1.2952   |
| 53397 | P0C214 | O60268 | -0.20758  |
| 53398 | P0C214 | Q0VDD8 | -0.65916  |
| 53399 | P0C214 | Q2Q1W2 | -0.70431  |
| 53400 | P0C214 | O00469 | -0.58702  |
| 53401 | P0C214 | Q9P2K5 | -0.13467  |
| 53402 | P0C214 | Q13936 | -0.29042  |
| 53403 | P0C214 | Q9BZY9 | -0.33215  |
| 53404 | P0C214 | P04083 | -0.20869  |
| 53405 | P0C214 | Q6PIS1 | -1.0436   |
| 53406 | P0C214 | P17612 | -0.22594  |
| 53407 | P0C214 | Q96ID5 | -0.91736  |
| 53408 | P0C214 | P29803 | -0.20591  |
| 53409 | P0C214 | Q5BJH7 | -0.98681  |
| 53410 | P0C214 | Q9Y2G1 | -0.4108   |
| 53411 | P0C214 | B3SHH9 | -1.0708   |
| 53412 | P0C214 | P0DKB5 | -0.98681  |
| 53413 | P0C214 | O15394 | -1.2366   |
| 53414 | P0C214 | Q43766 | -0.45168  |
| 53415 | P0C214 | P03973 | -0.25542  |
| 53416 | P0C214 | O95562 | -0.77158  |
| 53417 | P0C214 | Q9Y5H7 | -1.2636   |
| 53418 | P0C214 | Q5XPI4 | -0.35899  |
| 53419 | P0C214 | Q9Y5H9 | -1.2636   |
| 53420 | P0C214 | P26583 | -0.232    |
| 53421 | P0C214 | A6NKF7 | -0.98681  |
| 53422 | P0C214 | P21757 | -0.42331  |
| 53423 | P0C214 | P27707 | -0.27911  |
| 53424 | P0C214 | Q9Y5G8 | -1.2424   |
| 53425 | P0C214 | O15021 | -1.1688   |
| 53426 | P0C214 | P35221 | -0.19457  |
| 53427 | P0C214 | O15119 | -0.47529  |
| 53428 | P0C214 | B7ZAP0 | -0.1849   |

|       |        |        |           |
|-------|--------|--------|-----------|
| 53429 | P0C214 | Q9NZN5 | -0.22741  |
| 53430 | P0C214 | Q96JE9 | -0.24563  |
| 53431 | P0C214 | Q9H1C3 | -0.95532  |
| 53432 | P0C214 | Q99592 | -0.31263  |
| 53433 | P0C214 | P30408 | -0.95083  |
| 53434 | P0C214 | P40259 | -0.56825  |
| 53435 | P0C214 | Q9NYQ8 | -0.79056  |
| 53436 | P0C214 | P05090 | -0.56143  |
| 53437 | P0C214 | Q4G0X4 | -0.1713   |
| 53438 | P0C214 | O95925 | -0.21595  |
| 53439 | P0C214 | Q9HCX4 | -0.22614  |
| 53440 | P0C214 | Q6NY19 | -0.22744  |
| 53441 | P0C214 | O15263 | -0.96793  |
| 53442 | P0C214 | P47888 | -1.2952   |
| 53443 | P0C214 | P23276 | -0.74498  |
| 53444 | P0C214 | Q16584 | -0.2453   |
| 53445 | P0C214 | Q8WUD6 | -0.58171  |
| 53446 | P0C214 | P03905 | -0.43994  |
| 53447 | P0C214 | P51681 | -0.52564  |
| 53448 | P0C214 | Q8TC99 | -0.25311  |
| 53449 | P0C214 | Q14966 | -1.0172   |
| 53450 | P0C214 | O15432 | -1.21     |
| 53451 | P0C214 | P04220 | -0.50976  |
| 53452 | P0C214 | A6NDG6 | -0.36408  |
| 53453 | P0C214 | O95292 | -0.094704 |
| 53454 | P0C214 | Q5VT97 | -0.66144  |
| 53455 | P0C214 | Q9NTQ9 | -1.0074   |
| 53456 | P0C214 | Q5VUJ6 | -0.24552  |
| 53457 | P0C214 | P01778 | -1.0022   |
| 53458 | P0C214 | Q0D2H9 | -0.2859   |
| 53459 | P0C214 | P0DKX4 | -0.22653  |
| 53460 | P0C214 | Q9C0I9 | -0.22889  |
| 53461 | P0C214 | Q9NUM4 | -0.78957  |
| 53462 | P0C214 | Q15036 | -0.17267  |
| 53463 | P0C214 | Q6NXT2 | -0.85588  |
| 53464 | P0C214 | Q8TAS1 | -0.39441  |
| 53465 | P0C214 | O60403 | -1.2952   |
| 53466 | P0C214 | O75556 | -0.83995  |
| 53467 | P0C214 | P19320 | -0.69809  |
| 53468 | P0C214 | Q9NUK0 | -0.2157   |
| 53469 | P0C214 | P43378 | -0.23003  |
| 53470 | P0C214 | Q9H3N8 | -1.3201   |
| 53471 | P0C214 | Q8WVE0 | -0.3351   |
| 53472 | P0C214 | O95502 | -1.0418   |
| 53473 | P0C214 | Q9P244 | -0.84475  |
| 53474 | P0C214 | Q8N129 | -0.99166  |
| 53475 | P0C214 | Q6ZVL6 | -0.98681  |
| 53476 | P0C214 | Q71H61 | -0.98865  |
| 53477 | P0C214 | P14780 | -0.41207  |
| 53478 | P0C214 | P01770 | -1.0022   |
| 53479 | P0C214 | O75679 | -0.50512  |
| 53480 | P0C214 | Q12951 | -0.35259  |
| 53481 | P0C214 | P06318 | -1.0022   |
| 53482 | P0C214 | O75469 | -0.25536  |
| 53483 | P0C214 | Q9UNAL | -0.29282  |
| 53484 | P0C214 | Q8TC41 | -1.0875   |
| 53485 | P0C214 | P56915 | -0.15762  |
| 53486 | P0C214 | Q9BX46 | -0.30598  |
| 53487 | P0C214 | Q99542 | -1.3041   |
| 53488 | P0C214 | Q8N4S7 | -0.98681  |
| 53489 | P0C214 | Q9Y6N8 | -1.1619   |
| 53490 | P0C214 | Q06190 | -0.12854  |
| 53491 | P0C214 | Q8NEV4 | -0.87743  |
| 53492 | P0C214 | P01771 | -1.0022   |
| 53493 | P0C214 | Q6PKH6 | -1.3244   |
| 53494 | P0C214 | Q15404 | -0.31328  |
| 53495 | P0C214 | Q9UHH9 | -0.47862  |
| 53496 | P0C214 | O60449 | -1.2173   |
| 53497 | P0C214 | Q12840 | -0.33521  |
| 53498 | P0C214 | O14617 | -0.14233  |
| 53499 | P0C214 | P82980 | -0.55641  |
| 53500 | P0C214 | Q9H4Z3 | -0.13253  |
| 53501 | P0C214 | Q14004 | -0.20399  |
| 53502 | P0C214 | Q9UF33 | -1.1569   |
| 53503 | P0C214 | Q9GZN8 | -0.18353  |
| 53504 | P0C214 | P0CB47 | -0.29699  |

|       |        |        |           |
|-------|--------|--------|-----------|
| 53505 | P0C214 | Q8NFY9 | -0.2094   |
| 53506 | P0C214 | O15016 | -0.22732  |
| 53507 | P0C214 | P04431 | -1.0022   |
| 53508 | P0C214 | Q99729 | -0.24814  |
| 53509 | P0C214 | O43826 | -0.32911  |
| 53510 | P0C214 | A2A2Z9 | -0.22735  |
| 53511 | P0C214 | Q9Y5I7 | -0.92966  |
| 53512 | P0C214 | Q5T7M9 | -1.0037   |
| 53513 | P0C214 | Q9UQ10 | -0.59209  |
| 53514 | P0C214 | Q14896 | -0.56805  |
| 53515 | P0C214 | Q9BXX2 | -0.22742  |
| 53516 | P0C214 | Q8NCB2 | -0.70841  |
| 53517 | P0C214 | Q6NUJ5 | -0.21539  |
| 53518 | P0C214 | Q8NG99 | -1.2952   |
| 53519 | P0C214 | Q8NGQ1 | -1.2952   |
| 53520 | P0C214 | Q96JP9 | -1.2409   |
| 53521 | P0C214 | Q14953 | -1.1874   |
| 53522 | P0C214 | Q9NSI8 | -0.23982  |
| 53523 | P0C214 | Q3SY05 | -0.039137 |
| 53524 | P0C214 | P01765 | -1.0022   |
| 53525 | P0C214 | P61570 | -0.85122  |
| 53526 | P0C214 | P78424 | -0.2274   |
| 53527 | P0C214 | Q9H3M0 | -0.98724  |
| 53528 | P0C214 | Q02161 | -1.0475   |
| 53529 | P0C214 | Q13422 | -0.13929  |
| 53530 | P0C214 | Q14249 | -0.055606 |
| 53531 | P0C214 | Q99685 | -0.35384  |
| 53532 | P0C214 | Q92806 | -0.73081  |
| 53533 | P0C214 | Q9HC96 | -0.56991  |
| 53534 | P0C214 | Q92570 | -0.2647   |
| 53535 | P0C214 | Q5W041 | -0.22782  |
| 53536 | P0C214 | Q8N326 | -0.98681  |
| 53537 | P0C214 | Q9UBV7 | -0.47383  |
| 53538 | P0C214 | O60831 | -0.72835  |
| 53539 | P0C214 | P21108 | -0.70398  |
| 53540 | P0C214 | Q6ICH7 | -0.90754  |
| 53541 | P0C214 | Q8IVG5 | -0.29337  |
| 53542 | P0C214 | Q5EG05 | -0.58989  |
| 53543 | P0C214 | P42081 | -0.26371  |
| 53544 | P0C214 | P07355 | -0.20126  |
| 53545 | P0C214 | Q9BS26 | -0.2403   |
| 53546 | P0C214 | P23945 | -0.68136  |
| 53547 | P0C214 | Q92819 | -0.7501   |
| 53548 | P0C214 | Q53GD3 | -0.79755  |
| 53549 | P0C214 | Q5JPI9 | -0.33624  |
| 53550 | P0C214 | Q9GZM8 | -0.10982  |
| 53551 | P0C214 | Q8N543 | -0.11913  |
| 53552 | P0C214 | P62683 | -0.45806  |
| 53553 | P0C214 | Q6ZVN7 | -0.42702  |
| 53554 | P0C214 | Q6ZU69 | -0.98681  |
| 53555 | P0C214 | O14936 | -0.23119  |
| 53556 | P0C214 | Q9NVL1 | -0.45948  |
| 53557 | P0C214 | Q8IYM2 | -0.38765  |
| 53558 | P0C214 | Q9NVQ4 | -0.70909  |
| 53559 | P0C214 | A8MXK1 | -0.98681  |
| 53560 | P0C214 | Q9Y6N1 | -0.69773  |
| 53561 | P0C214 | Q4AE62 | -0.58555  |
| 53562 | P0C214 | Q66K64 | -0.37066  |
| 53563 | P0C214 | P04921 | -0.57588  |
| 53564 | P0C214 | O43149 | -0.54839  |
| 53565 | P0C214 | Q7Z5Y6 | -0.86504  |
| 53566 | P0C214 | Q8IXI1 | -0.43236  |
| 53567 | P0C214 | Q13796 | -0.22719  |
| 53568 | P0C214 | Q9H497 | -0.48161  |
| 53569 | P0C214 | P07358 | -0.89612  |
| 53570 | P0C214 | Q04900 | -1.2411   |
| 53571 | P0C214 | P40938 | -0.2068   |
| 53572 | P0C214 | Q6JVE6 | -0.98677  |
| 53573 | P0C214 | P98095 | -1.0049   |
| 53574 | P0C214 | Q9ULF5 | -1.0836   |
| 53575 | P0C214 | P04201 | -0.81109  |
| 53576 | P0C214 | Q9Y662 | -0.58994  |
| 53577 | P0C214 | P51172 | -0.69912  |
| 53578 | P0C214 | O95452 | -1.0853   |
| 53579 | P0C214 | P04150 | -0.22751  |
| 53580 | P0C214 | Q96EL3 | -0.31848  |

|       |        |        |           |
|-------|--------|--------|-----------|
| 53581 | P0C214 | Q8NBQ5 | -0.94433  |
| 53582 | P0C214 | Q9H582 | -0.19047  |
| 53583 | P0C214 | Q13434 | -0.51207  |
| 53584 | P0C214 | Q9NR80 | -0.22754  |
| 53585 | P0C214 | Q96IX5 | -0.76136  |
| 53586 | P0C214 | Q9NRQ5 | -0.68883  |
| 53587 | P0C214 | Q9Y570 | -0.30704  |
| 53588 | P0C214 | Q9BQS2 | -1.0708   |
| 53589 | P0C214 | Q08397 | -1.0054   |
| 53590 | P0C214 | P50583 | -0.58431  |
| 53591 | P0C214 | P53609 | -0.41828  |
| 53592 | P0C214 | P13928 | -0.28897  |
| 53593 | P0C214 | P01717 | -1.0022   |
| 53594 | P0C214 | Q496M5 | -0.22741  |
| 53595 | P0C214 | P98082 | -0.22727  |
| 53596 | P0C214 | Q68DV7 | -0.33872  |
| 53597 | P0C214 | Q9Y2W7 | -0.23817  |
| 53598 | P0C214 | Q7RTR2 | -0.42673  |
| 53599 | P0C214 | O60656 | -0.63804  |
| 53600 | P0C214 | Q9C0E4 | -0.22536  |
| 53601 | P0C214 | Q70IA8 | -0.42254  |
| 53602 | P0C214 | Q9UL19 | -0.44488  |
| 53603 | P0C214 | P30049 | -0.16062  |
| 53604 | P0C214 | P0C7X1 | -1.2827   |
| 53605 | P0C214 | Q00887 | -0.9261   |
| 53606 | P0C214 | P01815 | -1.0022   |
| 53607 | P0C214 | Q9Y2K1 | -0.10296  |
| 53608 | P0C214 | Q9BXJ7 | -1.0299   |
| 53609 | P0C214 | Q5TC84 | -0.50523  |
| 53610 | P0C214 | P20800 | -0.53907  |
| 53611 | P0C214 | Q6WCQ1 | -0.41615  |
| 53612 | P0C214 | Q8NC60 | -0.025123 |
| 53613 | P0C214 | P00973 | -0.31114  |
| 53614 | P0C214 | A3KFT3 | -1.2952   |
| 53615 | P0C214 | P35348 | -0.6148   |
| 53616 | P0C214 | P40198 | -0.98681  |
| 53617 | P0C214 | Q92888 | -0.22787  |
| 53618 | P0C214 | Q96QB1 | -0.30486  |
| 53619 | P0C214 | Q6P2S7 | -0.20758  |
| 53620 | P0C214 | Q9BRV3 | -0.54621  |
| 53621 | P0C214 | Q8IVQ6 | -0.58089  |
| 53622 | P0C214 | Q13324 | -0.82178  |
| 53623 | P0C214 | P09651 | -0.28617  |
| 53624 | P0C214 | P06889 | -1.0022   |
| 53625 | P0C214 | Q96A32 | -0.44474  |
| 53626 | P0C214 | O94808 | -0.12236  |
| 53627 | P0C214 | P36405 | -0.22978  |
| 53628 | P0C214 | O75344 | -0.4987   |
| 53629 | P0C214 | O95926 | -0.22843  |
| 53630 | P0C214 | Q96JP0 | -0.22746  |
| 53631 | P0C214 | Q86V88 | -0.67406  |
| 53632 | P0C214 | Q95965 | -1.0291   |
| 53633 | P0C214 | Q12756 | -0.30569  |
| 53634 | P0C214 | Q96P67 | -1.3693   |
| 53635 | P0C214 | O43707 | -0.42895  |
| 53636 | P0C214 | P08173 | -1.065    |
| 53637 | P0C214 | Q92629 | -0.63136  |
| 53638 | P0C214 | A6ND48 | -1.2952   |
| 53639 | P0C214 | Q96HS1 | -0.62815  |
| 53640 | P0C214 | Q8NDX6 | -0.22172  |
| 53641 | P0C214 | O75844 | -0.99686  |
| 53642 | P0C214 | O95406 | -0.84348  |
| 53643 | P0C214 | Q96RI1 | -0.23084  |
| 53644 | P0C214 | Q9H5K3 | -1.4922   |
| 53645 | P0C214 | Q86VR2 | -0.98681  |
| 53646 | P0C214 | Q9ULX7 | -0.92076  |
| 53647 | P0C214 | Q6FI13 | -0.85588  |
| 53648 | P0C214 | Q8TD10 | -0.26452  |
| 53649 | P0C214 | Q8WXQ8 | -1.287    |
| 53650 | P0C214 | Q9UJT1 | -0.38439  |
| 53651 | P0C214 | Q5VTM2 | -1.0303   |
| 53652 | P0C214 | Q6W5P4 | -1.1554   |
| 53653 | P0C214 | Q8TB33 | -0.6185   |
| 53654 | P0C214 | Q13007 | -0.74519  |
| 53655 | P0C214 | Q14246 | -1.5665   |
| 53656 | P0C214 | O15151 | -0.22307  |

|       |        |        |          |
|-------|--------|--------|----------|
| 53657 | P0C214 | Q01973 | -0.96504 |
| 53658 | P0C214 | P48023 | -0.25473 |
| 53659 | P0C214 | P62745 | -0.22779 |
| 53660 | P0C214 | Q6ZNL6 | -1.0679  |
| 53661 | P0C214 | Q93063 | -0.55951 |
| 53662 | P0C214 | Q6S5H4 | -0.22728 |
| 53663 | P0C214 | Q9UIJ7 | -0.56289 |
| 53664 | P0C214 | P56385 | -0.17244 |
| 53665 | P0C214 | Q6NUM6 | -0.85577 |
| 53666 | P0C214 | Q9BSK2 | -0.80997 |
| 53667 | P0C214 | A6NDE4 | -0.23457 |
| 53668 | P0C214 | Q9NYV8 | -1.1936  |
| 53669 | P0C214 | Q07889 | -0.22745 |
| 53670 | P0C214 | P59534 | -1.2886  |
| 53671 | P0C214 | Q13496 | -0.37437 |
| 53672 | P0C214 | P07451 | -0.1569  |
| 53673 | P0C214 | Q6PRD7 | -0.20758 |
| 53674 | P0C214 | A8K2U0 | -0.69181 |
| 53675 | P0C214 | Q8NB49 | -0.58105 |
| 53676 | P0C214 | P01612 | -1.0022  |
| 53677 | P0C214 | P19224 | -0.7913  |
| 53678 | P0C214 | P06239 | -0.25555 |
| 53679 | P0C214 | Q92485 | -0.80753 |
| 53680 | P0C214 | Q6PIY5 | -1.0157  |
| 53681 | P0C214 | Q9Y6L6 | -0.97658 |
| 53682 | P0C214 | Q95365 | -1.0367  |
| 53683 | P0C214 | Q9BTX7 | -0.709   |
| 53684 | P0C214 | Q9BPV8 | -1.1807  |
| 53685 | P0C214 | Q68CJ6 | -0.32869 |
| 53686 | P0C214 | Q08554 | -1.1478  |
| 53687 | P0C214 | Q53EP0 | -0.87582 |
| 53688 | P0C214 | Q9BTV6 | -0.38316 |
| 53689 | P0C214 | Q8NHC5 | -1.2952  |
| 53690 | P0C214 | Q9Y619 | -0.58858 |
| 53691 | P0C214 | P01589 | -0.62736 |
| 53692 | P0C214 | Q3MIP1 | -0.98681 |
| 53693 | P0C214 | Q9NX02 | -0.22719 |
| 53694 | P0C214 | Q8N123 | -0.66454 |
| 53695 | P0C214 | Q63HM9 | -0.68628 |
| 53696 | P0C214 | O75864 | -0.41268 |
| 53697 | P0C214 | Q6ZP98 | -0.14099 |
| 53698 | P0C214 | P48065 | -1.1377  |
| 53699 | P0C214 | Q53FV1 | -0.97513 |
| 53700 | P0C214 | Q9UNX9 | -1.2272  |
| 53701 | P0C214 | Q6P5Q4 | -0.46218 |
| 53702 | P0C214 | Q6NUK1 | -0.83715 |
| 53703 | P0C214 | O00295 | -0.83474 |
| 53704 | P0C214 | O75716 | -0.55405 |
| 53705 | P0C214 | P36383 | -1.0722  |
| 53706 | P0C214 | Q5W0N0 | -0.99899 |
| 53707 | P0C214 | O94889 | -0.19462 |
| 53708 | P0C214 | P51570 | -0.23402 |
| 53709 | P0C214 | P26572 | -0.55251 |
| 53710 | P0C214 | Q8NAA6 | -0.27593 |
| 53711 | P0C214 | Q53H96 | -0.75231 |
| 53712 | P0C214 | Q567U6 | -0.22469 |
| 53713 | P0C214 | Q8WZA6 | -1.2952  |
| 53714 | P0C214 | Q9UPN3 | -0.22794 |
| 53715 | P0C214 | Q8N6R0 | -0.39362 |
| 53716 | P0C214 | Q5TON1 | -0.10701 |
| 53717 | P0C214 | Q6ZN80 | -0.25333 |
| 53718 | P0C214 | P01116 | -0.22801 |
| 53719 | P0C214 | P0C7W8 | -0.4589  |
| 53720 | P0C214 | Q1T7F1 | -0.59402 |
| 53721 | P0C214 | O43822 | -0.22723 |
| 53722 | P0C214 | Q5VXM1 | -0.91736 |
| 53723 | P0C214 | Q9HCQ7 | -1.0554  |
| 53724 | P0C214 | Q9H2W2 | -0.21704 |
| 53725 | P0C214 | Q9Y6B6 | -0.28937 |
| 53726 | P0C214 | Q13232 | -0.55386 |
| 53727 | P0C214 | Q6DD88 | -0.88583 |
| 53728 | P0C214 | Q16099 | -0.82581 |
| 53729 | P0C214 | Q96AC1 | -0.20983 |
| 53730 | P0C214 | P03886 | -0.31307 |
| 53731 | P0C214 | O43511 | -0.97903 |
| 53732 | P0C214 | Q96LM6 | -0.13415 |



|       |        |        |            |
|-------|--------|--------|------------|
| 53733 | P0C214 | Q6ZUB0 | -0.98681   |
| 53734 | P0C214 | Q96S86 | -1.1017    |
| 53735 | P0C214 | Q7L5L3 | -0.87221   |
| 53736 | P0C214 | Q6UX07 | -1.3244    |
| 53737 | P0C214 | Q8TF72 | -0.39985   |
| 53738 | P0C214 | Q8NGZ4 | -1.2952    |
| 53739 | P0C214 | Q86UW2 | -1.0152    |
| 53740 | P0C214 | Q9UBL3 | -0.22103   |
| 53741 | P0C214 | O95704 | -0.22638   |
| 53742 | P0C214 | Q96PL5 | -0.85776   |
| 53743 | P0C214 | P06401 | -0.22743   |
| 53744 | P0C214 | P09603 | -0.55436   |
| 53745 | P0C214 | Q8IWW8 | -0.06529   |
| 53746 | P0C214 | Q8NGG4 | -1.2952    |
| 53747 | P0C214 | A6NCC3 | -0.2859    |
| 53748 | P0C214 | P01210 | -0.98812   |
| 53749 | P0C214 | Q96KX2 | -0.32512   |
| 53750 | P0C214 | P16066 | -1.1243    |
| 53751 | P0C214 | Q9P2Y4 | -0.22739   |
| 53752 | P0C214 | Q6UXQ8 | -0.91736   |
| 53753 | P0C214 | O95294 | -0.49022   |
| 53754 | P0C214 | P13762 | -0.71588   |
| 53755 | P0C214 | Q9BRR3 | -0.98681   |
| 53756 | P0C214 | Q6PJ69 | -0.71534   |
| 53757 | P0C214 | Q9BSD7 | -0.8639    |
| 53758 | P0C214 | C9JG80 | -0.22936   |
| 53759 | P0C214 | P43363 | -0.035087  |
| 53760 | P0C214 | P25325 | -0.20574   |
| 53761 | P0C214 | O96005 | -0.78958   |
| 53762 | P0C214 | Q6ZMN7 | -0.48694   |
| 53763 | P0C214 | Q96LD1 | -0.6682    |
| 53764 | P0C214 | P55040 | -0.3871    |
| 53765 | P0C214 | Q9HBW9 | -1.3628    |
| 53766 | P0C214 | Q4G0N0 | -0.57785   |
| 53767 | P0C214 | Q6UWM7 | -0.79736   |
| 53768 | P0C214 | Q9Y639 | -0.89937   |
| 53769 | P0C214 | Q96BA8 | -0.22632   |
| 53770 | P0C214 | P01713 | -1.0022    |
| 53771 | P0C214 | A8MPS7 | -0.19728   |
| 53772 | P0C214 | A1L429 | -0.47295   |
| 53773 | P0C214 | Q8N4Q0 | -0.58644   |
| 53774 | P0C214 | Q99706 | -0.75861   |
| 53775 | P0C214 | Q5JTB6 | -0.91736   |
| 53776 | P0C214 | Q6UW32 | -0.28403   |
| 53777 | P0C214 | Q9ULW2 | -0.80184   |
| 53778 | P0C214 | Q5VXT5 | -1.0953    |
| 53779 | P0C214 | Q9H015 | -0.52446   |
| 53780 | P0C214 | Q9BUY7 | -0.43585   |
| 53781 | P0C214 | P18065 | -0.38554   |
| 53782 | P0C214 | P05164 | -0.22471   |
| 53783 | P0C214 | Q92743 | -0.83133   |
| 53784 | P0C214 | P20711 | -0.43421   |
| 53785 | P0C214 | Q14586 | -0.35691   |
| 53786 | P0C214 | Q5R3I4 | -0.0084148 |
| 53787 | P0C214 | Q6ZMY6 | -0.23097   |
| 53788 | P0C214 | Q9NP60 | -1.1382    |
| 53789 | P0C214 | Q6ZWK4 | -0.98681   |
| 53790 | P0C214 | Q9NW61 | -0.52301   |
| 53791 | P0C214 | Q9UPN6 | -0.21955   |
| 53792 | P0C214 | Q9P0V8 | -0.992     |
| 53793 | P0C214 | Q6UXB1 | -0.91736   |
| 53794 | P0C214 | P18428 | -0.43932   |
| 53795 | P0C214 | P62079 | -0.98681   |
| 53796 | P0C214 | P18462 | -0.91186   |
| 53797 | P0C214 | Q5SWH9 | -0.98681   |
| 53798 | P0C214 | A6NDY2 | -0.4589    |
| 53799 | P0C214 | Q6MZW2 | -0.95313   |
| 53800 | P0C214 | Q13795 | -0.51682   |
| 53801 | P0C214 | Q15661 | -0.90887   |
| 53802 | P0C214 | P58173 | -1.2952    |
| 53803 | P0C214 | O75477 | -0.3845    |
| 53804 | P0C214 | Q30134 | -0.71588   |
| 53805 | P0C214 | P34820 | -0.93595   |
| 53806 | P0C214 | Q07325 | -1.0457    |
| 53807 | P0C214 | O43320 | -0.8433    |
| 53808 | P0C214 | Q6SZW1 | -0.53596   |

|       |        |        |           |
|-------|--------|--------|-----------|
| 53809 | P0C214 | P20396 | -0.40445  |
| 53810 | P0C214 | Q16891 | -0.099282 |
| 53811 | P0C214 | O60487 | -0.52632  |
| 53812 | P0C214 | P54296 | -0.62038  |
| 53813 | P0C214 | Q8TBZ6 | -0.33624  |
| 53814 | P0C214 | A6NDJ8 | -0.96157  |
| 53815 | P0C214 | Q8NGP2 | -1.2952   |
| 53816 | P0C214 | Q9NPZ5 | -0.55038  |
| 53817 | P0C214 | P49327 | -0.45426  |
| 53818 | P0C214 | Q9NYA4 | -0.21851  |
| 53819 | P0C214 | Q96B54 | -0.71534  |
| 53820 | P0C214 | P01764 | -1.0022   |
| 53821 | P0C214 | Q3V6T2 | -0.17081  |
| 53822 | P0C214 | Q86XJ1 | -0.40824  |
| 53823 | P0C214 | Q9HCC0 | -0.24364  |
| 53824 | P0C214 | Q92564 | -0.18353  |
| 53825 | P0C214 | Q9UP95 | -1.1803   |
| 53826 | P0C214 | Q96F15 | -0.86834  |
| 53827 | P0C214 | Q8NA82 | -0.52994  |
| 53828 | P0C214 | P24001 | -1.0099   |
| 53829 | P0C214 | P11464 | -0.9261   |
| 53830 | P0C214 | Q9H4M9 | -0.35289  |
| 53831 | P0C214 | Q8IZP2 | -0.22653  |
| 53832 | P0C214 | Q9UHD2 | -0.22741  |
| 53833 | P0C214 | Q6PIU2 | -0.88048  |
| 53834 | P0C214 | P33765 | -1.145    |
| 53835 | P0C214 | Q8NER1 | -1.2053   |
| 53836 | P0C214 | P84074 | -0.47403  |
| 53837 | P0C214 | A6NMK7 | -0.4999   |
| 53838 | P0C214 | Q9NW75 | -0.43964  |
| 53839 | P0C214 | O60333 | -0.28694  |
| 53840 | P0C214 | Q8NHA8 | -1.2952   |
| 53841 | P0C214 | Q8NH55 | -1.2952   |
| 53842 | P0C214 | Q9P2D0 | -0.22734  |
| 53843 | P0C214 | P78509 | -0.58312  |
| 53844 | P0C214 | Q15746 | -0.51498  |
| 53845 | P0C214 | Q969U6 | -0.22788  |
| 53846 | P0C214 | Q8TDQ1 | -1.0708   |
| 53847 | P0C214 | Q9BXJ0 | -0.96884  |
| 53848 | P0C214 | Q9HCE3 | -0.11138  |
| 53849 | P0C214 | Q68CQ4 | -0.09979  |
| 53850 | P0C214 | Q8NFC6 | -0.51359  |
| 53851 | P0C214 | A0AVT1 | -0.2203   |
| 53852 | P0C214 | Q9BZ72 | -1.4858   |
| 53853 | P0C214 | Q9UQ16 | -0.2341   |
| 53854 | P0C214 | P32297 | -0.76588  |
| 53855 | P0C214 | Q9BZH6 | -0.78894  |
| 53856 | P0C214 | P0CJ68 | -0.73145  |
| 53857 | P0C214 | Q96MI6 | -0.018316 |
| 53858 | P0C214 | Q9Y467 | -0.22745  |
| 53859 | P0C214 | Q9H1B5 | -0.68982  |
| 53860 | P0C214 | Q96N19 | -0.98681  |
| 53861 | P0C214 | P51451 | -1.2155   |
| 53862 | P0C214 | Q5TZJ5 | -0.98681  |
| 53863 | P0C214 | Q86X60 | -0.012516 |
| 53864 | P0C214 | Q6UY11 | -1.0202   |
| 53865 | P0C214 | P0C623 | -1.2952   |
| 53866 | P0C214 | Q8NH85 | -1.2952   |
| 53867 | P0C214 | Q5VV42 | -0.69593  |
| 53868 | P0C214 | Q8NFV4 | -0.22203  |
| 53869 | P0C214 | Q8NHK3 | -1.0708   |
| 53870 | P0C214 | P60880 | -0.20483  |
| 53871 | P0C214 | Q58WW2 | -0.22739  |
| 53872 | P0C214 | Q95833 | -0.20814  |
| 53873 | P0C214 | Q8NGI9 | -1.2952   |
| 53874 | P0C214 | Q8WZA1 | -0.76713  |
| 53875 | P0C214 | Q5VT79 | -0.40498  |
| 53876 | P0C214 | Q9BTT6 | -0.30231  |
| 53877 | P0C214 | Q10589 | -0.43908  |
| 53878 | P0C214 | Q96T83 | -0.41445  |
| 53879 | P0C214 | Q16620 | -0.47733  |
| 53880 | P0C214 | P78334 | -0.97646  |
| 53881 | P0C214 | P30461 | -1.0367   |
| 53882 | P0C214 | Q9BZM4 | -0.49853  |
| 53883 | P0C214 | Q8IY34 | -1.0406   |
| 53884 | P0C214 | Q6NXP6 | -0.53646  |

|       |        |        |           |
|-------|--------|--------|-----------|
| 53885 | P0C214 | Q9H6X5 | -0.08733  |
| 53886 | P0C214 | Q12889 | -0.29789  |
| 53887 | P0C214 | P59539 | -1.2886   |
| 53888 | P0C214 | Q9BT67 | -0.43686  |
| 53889 | P0C214 | P30989 | -1.2624   |
| 53890 | P0C214 | Q96HF1 | -0.28419  |
| 53891 | P0C214 | Q9NV70 | -0.37362  |
| 53892 | P0C214 | Q9UBV4 | -0.78626  |
| 53893 | P0C214 | Q8WWV6 | -1.0257   |
| 53894 | P0C214 | P30101 | -0.25805  |
| 53895 | P0C214 | Q7Z7M9 | -0.66268  |
| 53896 | P0C214 | Q6DKI7 | -0.98681  |
| 53897 | P0C214 | Q5R372 | -0.92662  |
| 53898 | P0C214 | Q6GPH6 | -0.98681  |
| 53899 | P0C214 | Q9P2J2 | -1.0897   |
| 53900 | P0C214 | Q8IZF3 | -1.3853   |
| 53901 | P0C214 | P02786 | -0.68397  |
| 53902 | P0C214 | Q92956 | -0.4949   |
| 53903 | P0C214 | Q9H6H4 | -0.98681  |
| 53904 | P0C214 | Q6Q4G3 | -1.3378   |
| 53905 | P0C214 | Q9H0F7 | -0.6832   |
| 53906 | P0C214 | P04350 | -0.15584  |
| 53907 | P0C214 | P31146 | -0.22741  |
| 53908 | P0C214 | P68363 | -0.18165  |
| 53909 | P0C214 | Q93088 | -0.18706  |
| 53910 | P0C214 | Q9Y5Q5 | -1.5585   |
| 53911 | P0C214 | P54802 | -0.38614  |
| 53912 | P0C214 | Q8WWV3 | -0.64155  |
| 53913 | P0C214 | P60323 | -0.33002  |
| 53914 | P0C214 | P61769 | -0.42536  |
| 53915 | P0C214 | Q969R8 | -0.1431   |
| 53916 | P0C214 | P29218 | -0.1995   |
| 53917 | P0C214 | P30679 | -0.82768  |
| 53918 | P0C214 | Q96MD2 | -0.21528  |
| 53919 | P0C214 | P50539 | -0.21943  |
| 53920 | P0C214 | Q8WX94 | -0.79608  |
| 53921 | P0C214 | Q8NGT1 | -1.2952   |
| 53922 | P0C214 | Q6DN03 | -0.85588  |
| 53923 | P0C214 | O43374 | -0.35832  |
| 53924 | P0C214 | P49863 | -1.4261   |
| 53925 | P0C214 | P18463 | -1.0367   |
| 53926 | P0C214 | O96015 | -0.27545  |
| 53927 | P0C214 | H3BRN8 | -0.024831 |
| 53928 | P0C214 | Q96KA5 | -0.90122  |
| 53929 | P0C214 | O15085 | -0.22741  |
| 53930 | P0C214 | Q14435 | -0.1705   |
| 53931 | P0C214 | Q9P0B6 | -0.98681  |
| 53932 | P0C214 | Q86XR5 | -0.83862  |
| 53933 | P0C214 | Q8IV76 | -0.31267  |
| 53934 | P0C214 | Q4G0T1 | -0.932    |
| 53935 | P0C214 | Q6PJI1 | -0.41839  |
| 53936 | P0C214 | Q9NZ53 | -0.66879  |
| 53937 | P0C214 | Q9BY66 | -0.88498  |
| 53938 | P0C214 | Q6PRD1 | -1.4609   |
| 53939 | P0C214 | Q86W25 | -0.79608  |
| 53940 | P0C214 | Q8N7G0 | -0.22694  |
| 53941 | P0C214 | P51679 | -1.3153   |
| 53942 | P0C214 | Q6PKC3 | -1.0048   |
| 53943 | P0C214 | Q9H5I5 | -1.1772   |
| 53944 | P0C214 | Q9H2B4 | -0.99441  |
| 53945 | P0C214 | Q9HAR2 | -1.3591   |
| 53946 | P0C214 | Q8NDC4 | -0.10929  |
| 53947 | P0C214 | Q8TCG1 | -0.23613  |
| 53948 | P0C214 | Q9NP86 | -0.22348  |
| 53949 | P0C214 | A4D161 | -0.60599  |
| 53950 | P0C214 | Q8NBW4 | -1.1771   |
| 53951 | P0C214 | B2RU33 | -0.2274   |
| 53952 | P0C214 | P83859 | -0.69195  |
| 53953 | P0C214 | Q9BV81 | -0.96345  |
| 53954 | P0C214 | O43680 | -0.22789  |
| 53955 | P0C214 | Q9UKX3 | -0.50969  |
| 53956 | P0C214 | P30291 | -0.22741  |
| 53957 | P0C214 | Q7RTR0 | -0.62484  |
| 53958 | P0C214 | P30493 | -1.0367   |
| 53959 | P0C214 | Q96AE7 | -0.22218  |
| 53960 | P0C214 | Q59EK9 | -0.48718  |

|       |        |        |           |
|-------|--------|--------|-----------|
| 53961 | P0C214 | Q9UJ71 | -1.1514   |
| 53962 | P0C214 | P98077 | -0.22741  |
| 53963 | P0C214 | Q9Y3A4 | -0.83638  |
| 53964 | P0C214 | Q5VW22 | -1.0294   |
| 53965 | P0C214 | Q8N6Q1 | -0.98681  |
| 53966 | P0C214 | Q99878 | -0.85588  |
| 53967 | P0C214 | O15172 | -0.39176  |
| 53968 | P0C214 | P51530 | -0.2314   |
| 53969 | P0C214 | O75626 | -0.097279 |
| 53970 | P0C214 | Q7RTX0 | -1.2625   |
| 53971 | P0C214 | Q9BSG0 | -0.91736  |
| 53972 | P0C214 | Q9Y5H3 | -1.2424   |
| 53973 | P0C214 | Q15848 | -0.26122  |
| 53974 | P0C214 | Q96G91 | -1.214    |
| 53975 | P0C214 | Q6P5W5 | -0.95021  |
| 53976 | P0C214 | Q96DD7 | -0.98681  |
| 53977 | P0C214 | Q07002 | -1.0716   |
| 53978 | P0C214 | Q8NFS9 | -0.77564  |
| 53979 | P0C214 | Q9BXA9 | -0.1904   |
| 53980 | P0C214 | Q8TCB0 | -0.21489  |
| 53981 | P0C214 | Q7M4L6 | -0.33895  |
| 53982 | P0C214 | O15230 | -0.54248  |
| 53983 | P0C214 | Q8TF62 | -1.0386   |
| 53984 | P0C214 | H3BQB6 | -0.55123  |
| 53985 | P0C214 | P16442 | -0.9789   |
| 53986 | P0C214 | Q8N205 | -0.65902  |
| 53987 | P0C214 | Q9UHW5 | -0.89145  |
| 53988 | P0C214 | Q8WYB5 | -0.42965  |
| 53989 | P0C214 | Q6ZUT9 | -0.96427  |
| 53990 | P0C214 | Q8TEB7 | -0.64845  |
| 53991 | P0C214 | P10451 | -0.74836  |
| 53992 | P0C214 | Q8TEQ0 | -0.54533  |
| 53993 | P0C214 | Q5T742 | -0.91736  |
| 53994 | P0C214 | O14562 | -0.13562  |
| 53995 | P0C214 | Q9Y6X5 | -0.96166  |
| 53996 | P0C214 | O43521 | -0.30033  |
| 53997 | P0C214 | Q06495 | -0.60803  |
| 53998 | P0C214 | Q9NU63 | -0.35768  |
| 53999 | P0C214 | Q60I27 | -0.84531  |
| 54000 | P0C214 | P17735 | -0.2098   |
| 54001 | P0C214 | Q9UJA9 | -1.4966   |
| 54002 | P0C214 | Q6ZVH7 | -0.22738  |
| 54003 | P0C214 | Q969L2 | -0.2815   |
| 54004 | P0C214 | P51993 | -0.76172  |
| 54005 | P0C214 | P17066 | -0.49158  |
| 54006 | P0C214 | Q70JA7 | -0.47511  |
| 54007 | P0C214 | Q96T75 | -0.21077  |
| 54008 | P0C214 | P15169 | -1.2427   |
| 54009 | P0C214 | O43151 | -0.39625  |
| 54010 | P0C214 | Q15052 | -0.31862  |
| 54011 | P0C214 | Q7Z449 | -0.94118  |
| 54012 | P0C214 | A1L020 | -0.22734  |
| 54013 | P0C214 | P10720 | -0.95797  |
| 54014 | P0C214 | Q96RL6 | -1.1462   |
| 54015 | P0C214 | Q5W5W9 | -0.67827  |
| 54016 | P0C214 | Q29974 | -0.56715  |
| 54017 | P0C214 | Q14DG7 | -0.68883  |
| 54018 | P0C214 | P33897 | -0.22819  |
| 54019 | P0C214 | P21453 | -0.84832  |
| 54020 | P0C214 | Q9BU40 | -0.98555  |
| 54021 | P0C214 | Q01101 | -0.22203  |
| 54022 | P0C214 | Q96L33 | -1.0225   |
| 54023 | P0C214 | Q9C037 | -0.62763  |
| 54024 | P0C214 | Q96AJ9 | -0.44775  |
| 54025 | P0C214 | P12821 | -0.77771  |
| 54026 | P0C214 | Q13443 | -0.64523  |
| 54027 | P0C214 | P05108 | -0.26138  |
| 54028 | P0C214 | O75083 | -0.26995  |
| 54029 | P0C214 | Q96HU8 | -1.1932   |
| 54030 | P0C214 | Q07864 | -0.29326  |
| 54031 | P0C214 | Q16558 | -1.1248   |
| 54032 | P0C214 | Q709F0 | -0.31839  |
| 54033 | P0C214 | A8MTW9 | -0.91736  |
| 54034 | P0C214 | Q9NYJ7 | -1.0192   |
| 54035 | P0C214 | Q5VY43 | -1.0144   |
| 54036 | P0C214 | Q8TD22 | -0.97609  |

|       |        |        |           |
|-------|--------|--------|-----------|
| 54037 | P0C214 | A2A3N6 | -0.25496  |
| 54038 | P0C214 | Q13608 | -0.26377  |
| 54039 | P0C214 | Q8TDT2 | -1.3693   |
| 54040 | P0C214 | Q9NXH9 | -0.35921  |
| 54041 | P0C214 | Q8N945 | -0.15381  |
| 54042 | P0C214 | Q16665 | -0.24998  |
| 54043 | P0C214 | Q6PID6 | -0.22731  |
| 54044 | P0C214 | O15264 | -0.22741  |
| 54045 | P0C214 | Q8NGF8 | -1.2952   |
| 54046 | P0C214 | P56817 | -0.89889  |
| 54047 | P0C214 | Q30KQ2 | -1.0072   |
| 54048 | P0C214 | O75648 | -0.34576  |
| 54049 | P0C214 | Q8NEM0 | -0.21268  |
| 54050 | P0C214 | Q14432 | -0.5151   |
| 54051 | P0C214 | Q8N7A1 | -0.2272   |
| 54052 | P0C214 | Q9NYU2 | -0.25104  |
| 54053 | P0C214 | Q9UKE5 | -0.24272  |
| 54054 | P0C214 | P01225 | -0.41202  |
| 54055 | P0C214 | Q5NE16 | -0.45847  |
| 54056 | P0C214 | O00409 | -0.39562  |
| 54057 | P0C214 | Q70EL2 | -0.79619  |
| 54058 | P0C214 | Q8NGX1 | -1.2952   |
| 54059 | P0C214 | Q15209 | -0.22517  |
| 54060 | P0C214 | Q9UBU3 | -0.31199  |
| 54061 | P0C214 | Q6P996 | -0.55411  |
| 54062 | P0C214 | O95415 | -0.98681  |
| 54063 | P0C214 | Q9H8H3 | -0.3833   |
| 54064 | P0C214 | Q7RTV2 | -0.22443  |
| 54065 | P0C214 | P30613 | -0.1643   |
| 54066 | P0C214 | Q9Y6N3 | -0.90887  |
| 54067 | P0C214 | Q6ZUC2 | -0.19424  |
| 54068 | P0C214 | Q9NX47 | -0.23148  |
| 54069 | P0C214 | Q9NZH0 | -0.71742  |
| 54070 | P0C214 | P12829 | -0.22543  |
| 54071 | P0C214 | Q7Z5A7 | -1.4408   |
| 54072 | P0C214 | Q9C0D6 | -0.40807  |
| 54073 | P0C214 | Q96BH1 | -0.20395  |
| 54074 | P0C214 | P61221 | -0.3821   |
| 54075 | P0C214 | Q9NU39 | -0.41532  |
| 54076 | P0C214 | P63127 | -0.6957   |
| 54077 | P0C214 | Q96EP5 | -0.56533  |
| 54078 | P0C214 | Q5T1A1 | -0.98681  |
| 54079 | P0C214 | Q6UVM3 | -1.3287   |
| 54080 | P0C214 | Q9HBX8 | -1.3342   |
| 54081 | P0C214 | Q92791 | -0.053327 |
| 54082 | P0C214 | Q15849 | -0.53556  |
| 54083 | P0C214 | O60729 | -0.22742  |
| 54084 | P0C214 | P12018 | -0.91671  |
| 54085 | P0C214 | Q9P2C4 | -0.93423  |
| 54086 | P0C214 | P27105 | -0.21152  |
| 54087 | P0C214 | P12838 | -0.84231  |
| 54088 | P0C214 | A0AV02 | -1.149    |
| 54089 | P0C214 | A0M8Q6 | -0.99256  |
| 54090 | P0C214 | Q5K4E3 | -1.2167   |
| 54091 | P0C214 | Q96BI1 | -0.91737  |
| 54092 | P0C214 | Q6ZSM3 | -1.1032   |
| 54093 | P0C214 | P04844 | -0.34599  |
| 54094 | P0C214 | Q53GL0 | -0.19622  |
| 54095 | P0C214 | P02760 | -0.71607  |
| 54096 | P0C214 | P30466 | -1.0367   |
| 54097 | P0C214 | Q6ZST4 | -0.15644  |
| 54098 | P0C214 | Q9P2W1 | -0.14618  |
| 54099 | P0C214 | Q16288 | -1.0414   |
| 54100 | P0C214 | Q96T60 | -0.34531  |
| 54101 | P0C214 | Q5EBL8 | -0.22679  |
| 54102 | P0C214 | Q9NYQ6 | -1.0274   |
| 54103 | P0C214 | Q9NXI6 | -1.0783   |
| 54104 | P0C214 | Q8IWX8 | -0.14364  |
| 54105 | P0C214 | Q7Z7J9 | -0.51456  |
| 54106 | P0C214 | Q8NGQ3 | -1.2952   |
| 54107 | P0C214 | Q92887 | -0.90205  |
| 54108 | P0C214 | A6NK02 | -0.71534  |
| 54109 | P0C214 | Q7Z6P3 | -1.0384   |
| 54110 | P0C214 | Q14831 | -0.72498  |
| 54111 | P0C214 | P55000 | -0.99476  |
| 54112 | P0C214 | O75064 | -0.28497  |

|       |        |        |          |
|-------|--------|--------|----------|
| 54113 | P0C214 | Q53G44 | -0.27496 |
| 54114 | P0C214 | Q8N474 | -0.37491 |
| 54115 | P0C214 | Q9UK59 | -0.22254 |
| 54116 | P0C214 | P21281 | -0.44445 |
| 54117 | P0C214 | Q9UBX0 | -0.18477 |
| 54118 | P0C214 | Q86TH1 | -0.6508  |
| 54119 | P0C214 | Q6AI14 | -1.1231  |
| 54120 | P0C214 | Q99958 | -0.27713 |
| 54121 | P0C214 | P59551 | -1.2559  |
| 54122 | P0C214 | O14733 | -0.23029 |
| 54123 | P0C214 | O95696 | -0.30886 |
| 54124 | P0C214 | Q96B42 | -0.38728 |
| 54125 | P0C214 | Q15195 | -0.91736 |
| 54126 | P0C214 | P45983 | -0.22741 |
| 54127 | P0C214 | Q8WWT9 | -0.91141 |
| 54128 | P0C214 | P62502 | -0.92043 |
| 54129 | P0C214 | Q6SJ93 | -0.50812 |
| 54130 | P0C214 | O96001 | -0.58534 |
| 54131 | P0C214 | P15814 | -0.98158 |
| 54132 | P0C214 | P20061 | -0.99811 |
| 54133 | P0C214 | Q8WUA8 | -0.91736 |
| 54134 | P0C214 | Q5TGP6 | -0.87823 |
| 54135 | P0C214 | Q9H2S9 | -0.30824 |
| 54136 | P0C214 | P08473 | -0.59463 |
| 54137 | P0C214 | P59773 | -0.98681 |
| 54138 | P0C214 | Q02156 | -0.23428 |
| 54139 | P0C214 | Q9H496 | -0.33805 |
| 54140 | P0C214 | O75387 | -1.2168  |
| 54141 | P0C214 | O60443 | -0.25199 |
| 54142 | P0C214 | Q9UNI1 | -1.0713  |
| 54143 | P0C214 | Q6ZN30 | -0.22588 |
| 54144 | P0C214 | Q9P104 | -0.39463 |
| 54145 | P0C214 | Q52LC2 | -0.88556 |
| 54146 | P0C214 | O60840 | -0.97571 |
| 54147 | P0C214 | Q8NH57 | -1.2952  |
| 54148 | P0C214 | Q6ZT07 | -1.2916  |
| 54149 | P0C214 | Q9NS62 | -1.2392  |
| 54150 | P0C214 | Q9GZN4 | -1.4261  |
| 54151 | P0C214 | Q9BU79 | -0.98681 |
| 54152 | P0C214 | P09681 | -0.46205 |
| 54153 | P0C214 | Q15619 | -1.2952  |
| 54154 | P0C214 | Q8N852 | -0.98681 |
| 54155 | P0C214 | Q9BZJ4 | -0.79231 |
| 54156 | P0C214 | Q05923 | -0.23222 |
| 54157 | P0C214 | Q68DH5 | -0.98681 |
| 54158 | P0C214 | Q96P56 | -0.70256 |
| 54159 | P0C214 | Q9H892 | -0.21857 |
| 54160 | P0C214 | P47871 | -0.91744 |
| 54161 | P0C214 | P20138 | -1.4136  |
| 54162 | P0C214 | Q8NFP4 | -0.7231  |
| 54163 | P0C214 | P31942 | -0.18563 |
| 54164 | P0C214 | Q8TCG5 | -0.73797 |
| 54165 | P0C214 | Q9NR19 | -0.20492 |
| 54166 | P0C214 | A4D1S5 | -1.0384  |
| 54167 | P0C214 | Q9UPZ6 | -1.5108  |
| 54168 | P0C214 | P26992 | -0.4607  |
| 54169 | P0C214 | Q6XPS3 | -0.88289 |
| 54170 | P0C214 | Q99742 | -0.25827 |
| 54171 | P0C214 | Q4VC39 | -0.98681 |
| 54172 | P0C214 | Q96QT4 | -1.3975  |
| 54173 | P0C214 | P51795 | -1.0631  |
| 54174 | P0C214 | Q6PKX4 | -0.51203 |
| 54175 | P0C214 | Q92772 | -0.66206 |
| 54176 | P0C214 | Q96EY7 | -0.17559 |
| 54177 | P0C214 | Q59H18 | -0.36271 |
| 54178 | P0C214 | Q5TZ20 | -1.2952  |
| 54179 | P0C214 | P46109 | -0.22741 |
| 54180 | P0C214 | Q9H1J5 | -0.56066 |
| 54181 | P0C214 | Q96Q15 | -0.68826 |
| 54182 | P0C214 | Q13507 | -0.501   |
| 54183 | P0C214 | Q8NGE9 | -1.2952  |
| 54184 | P0C214 | Q9Y4F1 | -0.57251 |
| 54185 | P0C214 | Q96DZ7 | -0.98681 |
| 54186 | P0C214 | P53674 | -0.54312 |
| 54187 | P0C214 | Q9H0M4 | -0.50512 |
| 54188 | P0C214 | Q9NRE1 | -1.3256  |

|       |        |        |          |
|-------|--------|--------|----------|
| 54189 | P0C214 | P01286 | -0.49354 |
| 54190 | P0C214 | P50579 | -0.49763 |
| 54191 | P0C214 | O43272 | -0.26914 |
| 54192 | P0C214 | Q8NBL3 | -0.98681 |
| 54193 | P0C214 | Q8IY49 | -0.79982 |
| 54194 | P0C214 | Q7RTX7 | -1.0372  |
| 54195 | P0C214 | O60674 | -0.24871 |
| 54196 | P0C214 | Q6NSW7 | -0.22773 |
| 54197 | P0C214 | Q16348 | -0.52603 |
| 54198 | P0C214 | P31997 | -0.7203  |
| 54199 | P0C214 | Q9H972 | -0.91736 |
| 54200 | P0C214 | O75084 | -0.60714 |
| 54201 | P0C214 | P29762 | -0.86952 |
| 54202 | P0C214 | Q8NEN0 | -0.18262 |
| 54203 | P0C214 | Q9H9B4 | -0.89675 |
| 54204 | P0C214 | Q7Z4N8 | -0.4482  |
| 54205 | P0C214 | O94907 | -0.361   |
| 54206 | P0C214 | P59901 | -0.35508 |
| 54207 | P0C214 | Q8N6G6 | -1.1337  |
| 54208 | P0C214 | Q9BXT8 | -0.41574 |
| 54209 | P0C214 | P28482 | -0.22741 |
| 54210 | P0C214 | Q6ZUQ5 | -0.91336 |
| 54211 | P0C214 | Q9BV94 | -0.61457 |
| 54212 | P0C214 | Q9BRL7 | -0.68977 |
| 54213 | P0C214 | Q9Y490 | -0.22781 |
| 54214 | P0C214 | Q9BSN7 | -0.85675 |
| 54215 | P0C214 | A6NM66 | -0.89982 |
| 54216 | P0C214 | Q9H0I9 | -0.37227 |
| 54217 | P0C214 | Q2TVT3 | -0.29955 |
| 54218 | P0C214 | P98174 | -0.87975 |
| 54219 | P0C214 | Q2KHM9 | -0.06782 |
| 54220 | P0C214 | P42694 | -0.49091 |
| 54221 | P0C214 | Q8N594 | -0.73804 |
| 54222 | P0C214 | Q8N5Z5 | -0.16371 |
| 54223 | P0C214 | Q8NC01 | -1.262   |
| 54224 | P0C214 | Q8NFX0 | -0.93257 |
| 54225 | P0C214 | Q9BXU1 | -1.2407  |
| 54226 | P0C214 | Q02880 | -0.16192 |
| 54227 | P0C214 | Q8NGL6 | -1.2952  |
| 54228 | P0C214 | Q14714 | -1.0888  |
| 54229 | P0C214 | Q13823 | -0.26801 |
| 54230 | P0C214 | Q6V1P9 | -1.2424  |
| 54231 | P0C214 | Q9UHA4 | -0.27239 |
| 54232 | P0C214 | Q6ZMQ8 | -0.65599 |
| 54233 | P0C214 | O43379 | -0.22796 |
| 54234 | P0C214 | Q8N565 | -0.57276 |
| 54235 | P0C214 | Q16816 | -0.46926 |
| 54236 | P0C214 | O75871 | -1.128   |
| 54237 | P0C214 | Q658P3 | -0.58839 |
| 54238 | P0C214 | Q9NR64 | -0.4273  |
| 54239 | P0C214 | Q9NZD1 | -1.3693  |
| 54240 | P0C214 | Q99805 | -1.0503  |
| 54241 | P0C214 | Q86SQ0 | -0.49911 |
| 54242 | P0C214 | Q9Y689 | -1.2665  |
| 54243 | P0C214 | P52756 | -0.22506 |
| 54244 | P0C214 | Q30KQ9 | -0.88056 |
| 54245 | P0C214 | Q6NVU6 | -0.34709 |
| 54246 | P0C214 | P55081 | -0.76987 |
| 54247 | P0C214 | P24158 | -0.46643 |
| 54248 | P0C214 | P29590 | -0.22654 |
| 54249 | P0C214 | P01375 | -0.24327 |
| 54250 | P0C214 | A6NL08 | -1.2952  |
| 54251 | P0C214 | P31947 | -0.55641 |
| 54252 | P0C214 | P13688 | -0.80396 |
| 54253 | P0C214 | Q8TBG4 | -0.27193 |
| 54254 | P0C214 | C9JTO0 | -0.22741 |
| 54255 | P0C214 | Q99572 | -0.27225 |
| 54256 | P0C214 | O43312 | -0.29208 |
| 54257 | P0C214 | O60336 | -0.37596 |
| 54258 | P0C214 | P02008 | -0.46567 |
| 54259 | P0C214 | P39060 | -0.51425 |
| 54260 | P0C214 | Q5TGL8 | -0.54533 |
| 54261 | P0C214 | O00116 | -0.35145 |
| 54262 | P0C214 | Q4KWH8 | -0.25445 |
| 54263 | P0C214 | P36959 | -0.14684 |
| 54264 | P0C214 | Q7L4E1 | -0.98681 |

|       |        |        |          |
|-------|--------|--------|----------|
| 54265 | P0C214 | O76062 | -0.91117 |
| 54266 | P0C214 | Q9UBP4 | -0.9026  |
| 54267 | P0C214 | Q12955 | -0.22741 |
| 54268 | P0C214 | Q9BSK4 | -0.22749 |
| 54269 | P0C214 | Q2VPA4 | -0.78121 |
| 54270 | P0C214 | Q9Y581 | -0.60828 |
| 54271 | P0C214 | Q9NZN4 | -0.22664 |
| 54272 | P0C214 | O00444 | -0.22741 |
| 54273 | P0C214 | P11234 | -0.23745 |
| 54274 | P0C214 | P19237 | -0.18071 |
| 54275 | P0C214 | P19525 | -0.42085 |
| 54276 | P0C214 | Q5T197 | -1.0783  |
| 54277 | P0C214 | Q13464 | -0.30785 |
| 54278 | P0C214 | Q92752 | -0.39116 |
| 54279 | P0C214 | P05305 | -0.27464 |
| 54280 | P0C214 | Q96L12 | -0.43952 |
| 54281 | P0C214 | Q7L7X3 | -0.57651 |
| 54282 | P0C214 | Q15645 | -0.22874 |
| 54283 | P0C214 | P36537 | -0.92752 |
| 54284 | P0C214 | Q92949 | -0.38543 |
| 54285 | P0C214 | P48764 | -0.68489 |
| 54286 | P0C214 | O76061 | -0.74653 |
| 54287 | P0C214 | E2RYF6 | -0.98681 |
| 54288 | P0C214 | Q6ICL7 | -0.98681 |
| 54289 | P0C214 | P04000 | -1.453   |
| 54290 | P0C214 | Q96E39 | -0.44003 |
| 54291 | P0C214 | O75071 | -0.43585 |
| 54292 | P0C214 | P32248 | -0.50702 |
| 54293 | P0C214 | Q5TGU0 | -1.0688  |
| 54294 | P0C214 | Q8NGS8 | -1.2952  |
| 54295 | P0C214 | P34741 | -0.30378 |
| 54296 | P0C214 | Q86YT6 | -0.22735 |
| 54297 | P0C214 | Q15646 | -0.2156  |
| 54298 | P0C214 | Q70UQ0 | -0.34738 |
| 54299 | P0C214 | Q9NZP8 | -1.3664  |
| 54300 | P0C214 | Q9Y5X5 | -1.4189  |
| 54301 | P0C214 | Q13557 | -0.65284 |
| 54302 | P0C214 | O94856 | -0.95794 |
| 54303 | P0C214 | Q6UWI4 | -1.1983  |
| 54304 | P0C214 | Q86XE3 | -1.0175  |
| 54305 | P0C214 | A6NEN9 | -0.19467 |
| 54306 | P0C214 | P05156 | -1.3079  |
| 54307 | P0C214 | O95279 | -1.2188  |
| 54308 | P0C214 | Q9Y238 | -0.30929 |
| 54309 | P0C214 | Q96PV0 | -0.6626  |
| 54310 | P0C214 | Q9Y4E5 | -0.22472 |
| 54311 | P0C214 | Q96LT9 | -0.42505 |
| 54312 | P0C214 | Q86TI2 | -0.37321 |
| 54313 | P0C214 | O95150 | -1.3817  |
| 54314 | P0C214 | Q8N8V4 | -0.48287 |
| 54315 | P0C214 | Q5SSQ6 | -0.13628 |
| 54316 | P0C214 | P55317 | -0.41532 |
| 54317 | P0C214 | O94810 | -0.58404 |
| 54318 | P0C214 | Q8NBV8 | -0.9647  |
| 54319 | P0C214 | Q6MZZ7 | -1.0212  |
| 54320 | P0C214 | Q5T0D9 | -0.41331 |
| 54321 | P0C214 | P14060 | -0.51651 |
| 54322 | P0C214 | Q9H6S0 | -0.2274  |
| 54323 | P0C214 | P08700 | -0.4718  |
| 54324 | P0C214 | Q92896 | -0.81147 |
| 54325 | P0C214 | Q6ZWK6 | -1.8686  |
| 54326 | P0C214 | Q95674 | -0.48472 |
| 54327 | P0C214 | Q9YNA8 | -0.45806 |
| 54328 | P0C214 | Q96FM1 | -0.75109 |
| 54329 | P0C214 | Q9BUA6 | -0.227   |
| 54330 | P0C214 | Q8TB24 | -0.46504 |
| 54331 | P0C214 | Q8WXI3 | -0.5331  |
| 54332 | P0C214 | Q00G26 | -0.37118 |
| 54333 | P0C214 | Q6PI73 | -0.98681 |
| 54334 | P0C214 | Q8IXE1 | -1.2952  |
| 54335 | P0C214 | Q6ZSC3 | -0.83638 |
| 54336 | P0C214 | Q8N436 | -1.269   |
| 54337 | P0C214 | P15976 | -0.22739 |
| 54338 | P0C214 | A6NH57 | -1.2665  |
| 54339 | P0C214 | Q3KNS1 | -0.74901 |
| 54340 | P0C214 | O14905 | -0.54299 |



|       |        |        |           |
|-------|--------|--------|-----------|
| 54341 | P0C214 | Q6IAN0 | -1.0384   |
| 54342 | P0C214 | P49137 | -0.23     |
| 54343 | P0C214 | Q9UJ99 | -1.2424   |
| 54344 | P0C214 | Q9NWW6 | -0.9049   |
| 54345 | P0C214 | Q7Z7B1 | -0.8498   |
| 54346 | P0C214 | Q9Y233 | -0.39581  |
| 54347 | P0C214 | P49840 | -0.22766  |
| 54348 | P0C214 | O00587 | -0.92345  |
| 54349 | P0C214 | Q9BZW4 | -0.81299  |
| 54350 | P0C214 | P20839 | -0.20466  |
| 54351 | P0C214 | P47902 | -0.2767   |
| 54352 | P0C214 | Q6H9L7 | -0.344    |
| 54353 | P0C214 | Q8N1W0 | -0.98681  |
| 54354 | P0C214 | O75908 | -0.77783  |
| 54355 | P0C214 | Q6ZS10 | -0.97565  |
| 54356 | P0C214 | P03891 | -0.40915  |
| 54357 | P0C214 | Q96NC0 | -0.53447  |
| 54358 | P0C214 | P20591 | -0.23501  |
| 54359 | P0C214 | Q86YL5 | -0.18353  |
| 54360 | P0C214 | P0C0E4 | -0.67543  |
| 54361 | P0C214 | Q9NYI0 | -0.54475  |
| 54362 | P0C214 | Q8IUW5 | -0.91185  |
| 54363 | P0C214 | P34913 | -0.25456  |
| 54364 | P0C214 | Q8NH54 | -1.2952   |
| 54365 | P0C214 | A6NET4 | -1.2952   |
| 54366 | P0C214 | Q68J44 | -0.65149  |
| 54367 | P0C214 | Q07001 | -1.0366   |
| 54368 | P0C214 | Q9H6U8 | -0.80693  |
| 54369 | P0C214 | Q96EK5 | -0.32893  |
| 54370 | P0C214 | Q6IE38 | -0.77749  |
| 54371 | P0C214 | P31629 | -0.22732  |
| 54372 | P0C214 | P08235 | -0.22746  |
| 54373 | P0C214 | Q7Z4T8 | -0.80988  |
| 54374 | P0C214 | Q6XR72 | -1.1669   |
| 54375 | P0C214 | Q8TC26 | -0.96078  |
| 54376 | P0C214 | Q9P2W7 | -0.56921  |
| 54377 | P0C214 | Q8IUE0 | -0.23201  |
| 54378 | P0C214 | Q13296 | -0.24721  |
| 54379 | P0C214 | A6NM76 | -1.2952   |
| 54380 | P0C214 | P0CW20 | -0.50512  |
| 54381 | P0C214 | Q9H799 | -0.98681  |
| 54382 | P0C214 | Q8IW75 | -0.55155  |
| 54383 | P0C214 | Q8N9V2 | -0.75157  |
| 54384 | P0C214 | Q15392 | -0.21945  |
| 54385 | P0C214 | P17302 | -0.31533  |
| 54386 | P0C214 | P43307 | -0.56734  |
| 54387 | P0C214 | Q9GZK4 | -1.2952   |
| 54388 | P0C214 | P19957 | -0.7173   |
| 54389 | P0C214 | Q15506 | -0.39948  |
| 54390 | P0C214 | P10092 | -1.001    |
| 54391 | P0C214 | Q15208 | -0.26434  |
| 54392 | P0C214 | Q8TE73 | -0.5502   |
| 54393 | P0C214 | Q2M3V2 | -0.22741  |
| 54394 | P0C214 | Q16617 | -1.2123   |
| 54395 | P0C214 | F5H4A9 | -0.98681  |
| 54396 | P0C214 | P18505 | -1.0759   |
| 54397 | P0C214 | Q9P2H0 | -0.44389  |
| 54398 | P0C214 | Q07654 | -0.84074  |
| 54399 | P0C214 | O00370 | -0.36061  |
| 54400 | P0C214 | Q8NCT1 | -0.55184  |
| 54401 | P0C214 | Q9UN73 | -1.6431   |
| 54402 | P0C214 | Q8NCG7 | -0.8058   |
| 54403 | P0C214 | Q86UY6 | -0.3819   |
| 54404 | P0C214 | Q15399 | -0.98545  |
| 54405 | P0C214 | Q9UBV2 | -0.34821  |
| 54406 | P0C214 | Q96PG1 | -0.98681  |
| 54407 | P0C214 | Q15042 | -0.31761  |
| 54408 | P0C214 | Q69YU3 | -0.22684  |
| 54409 | P0C214 | Q86SR1 | -0.74358  |
| 54410 | P0C214 | P42126 | -0.034152 |
| 54411 | P0C214 | Q9UBN1 | -1.1575   |
| 54412 | P0C214 | Q9NVA2 | -0.22707  |
| 54413 | P0C214 | Q9NRI6 | -0.89474  |
| 54414 | P0C214 | Q8TCQ1 | -0.93921  |
| 54415 | P0C214 | Q6NXR0 | -0.83264  |
| 54416 | P0C214 | P07947 | -0.59845  |

|       |        |        |           |
|-------|--------|--------|-----------|
| 54417 | P0C214 | Q8IUA7 | -1.1453   |
| 54418 | P0C214 | B2RD01 | -0.2113   |
| 54419 | P0C214 | Q5VWC8 | -1.0115   |
| 54420 | P0C214 | P0C0L5 | -1.0394   |
| 54421 | P0C214 | A8K4G0 | -1.0708   |
| 54422 | P0C214 | Q09MP3 | -0.023296 |
| 54423 | P0C214 | O43490 | -0.57694  |
| 54424 | P0C214 | Q8NBI2 | -1.061    |
| 54425 | P0C214 | A2RUT3 | -0.98681  |
| 54426 | P0C214 | B7ZC32 | -0.80119  |
| 54427 | P0C214 | Q9NZC9 | -0.47945  |
| 54428 | P0C214 | P35125 | -0.50032  |
| 54429 | P0C214 | Q92930 | -0.58923  |
| 54430 | P0C214 | P52757 | -0.64843  |
| 54431 | P0C214 | Q7Z6J8 | -0.23177  |
| 54432 | P0C214 | Q6ZU64 | -0.90908  |
| 54433 | P0C214 | Q5VZR4 | -1.0436   |
| 54434 | P0C214 | Q1XH10 | -0.48387  |
| 54435 | P0C214 | P50607 | -0.26587  |
| 54436 | P0C214 | Q8WZ55 | -0.76642  |
| 54437 | P0C214 | P51636 | -0.22504  |
| 54438 | P0C214 | Q16586 | -0.7354   |
| 54439 | P0C214 | Q3B8N2 | -0.39457  |
| 54440 | P0C214 | O43930 | -1.2407   |
| 54441 | P0C214 | A8MZ97 | -0.98681  |
| 54442 | P0C214 | Q9BW30 | -0.30302  |
| 54443 | P0C214 | O43347 | -0.36507  |
| 54444 | P0C214 | Q495T6 | -1.46     |
| 54445 | P0C214 | P41180 | -0.84305  |
| 54446 | P0C214 | P17050 | -0.15984  |
| 54447 | P0C214 | Q92995 | -0.23372  |
| 54448 | P0C214 | Q7Z2G1 | -0.76613  |
| 54449 | P0C214 | Q53FP2 | -0.71809  |
| 54450 | P0C214 | O95264 | -1.1925   |
| 54451 | P0C214 | A6NFO0 | -0.98681  |
| 54452 | P0C214 | Q5H9K5 | -0.29385  |
| 54453 | P0C214 | E9PJI5 | -0.025401 |
| 54454 | P0C214 | Q8NAM6 | -0.23638  |
| 54455 | P0C214 | P20337 | -0.69799  |
| 54456 | P0C214 | O00110 | -0.15503  |
| 54457 | P0C214 | Q30KQ6 | -0.88056  |
| 54458 | P0C214 | Q96CQ1 | -0.77459  |
| 54459 | P0C214 | Q96JT2 | -1.0455   |
| 54460 | P0C214 | P01593 | -1.0022   |
| 54461 | P0C214 | Q9Y2J2 | -0.29068  |
| 54462 | P0C214 | Q9HBY8 | -0.72377  |
| 54463 | P0C214 | Q86UE6 | -0.79204  |
| 54464 | P0C214 | Q9UFM2 | -0.89114  |
| 54465 | P0C214 | Q8N5Y2 | -0.12179  |
| 54466 | P0C214 | Q92565 | -0.38734  |
| 54467 | P0C214 | Q9H334 | -0.41532  |
| 54468 | P0C214 | Q95497 | -0.71742  |
| 54469 | P0C214 | Q5VUM1 | -0.67278  |
| 54470 | P0C214 | O60883 | -0.77637  |
| 54471 | P0C214 | Q9UBC7 | -0.7138   |
| 54472 | P0C214 | Q9Y6H3 | -0.73839  |
| 54473 | P0C214 | Q8N609 | -0.8855   |
| 54474 | P0C214 | O95758 | -0.56471  |
| 54475 | P0C214 | O00178 | -0.58549  |
| 54476 | P0C214 | Q587J8 | -0.42685  |
| 54477 | P0C214 | Q86Y39 | -0.45988  |
| 54478 | P0C214 | Q8WVX3 | -0.98681  |
| 54479 | P0C214 | Q12791 | -0.7169   |
| 54480 | P0C214 | Q15347 | -0.8594   |
| 54481 | P0C214 | Q9NR16 | -1.4817   |
| 54482 | P0C214 | O60662 | -0.21323  |
| 54483 | P0C214 | A4FU01 | -0.55121  |
| 54484 | P0C214 | Q14596 | -0.20889  |
| 54485 | P0C214 | Q8TCA0 | -0.22769  |
| 54486 | P0C214 | P49841 | -0.22766  |
| 54487 | P0C214 | P98177 | -0.40394  |
| 54488 | P0C214 | Q8IUX1 | -0.68883  |
| 54489 | P0C214 | Q86W92 | -0.67466  |
| 54490 | P0C214 | Q16527 | -0.46932  |
| 54491 | P0C214 | Q9H0F5 | -0.50512  |
| 54492 | P0C214 | P55283 | -1.1401   |

|       |        |        |           |
|-------|--------|--------|-----------|
| 54493 | P0C214 | Q9H0E7 | -0.24815  |
| 54494 | P0C214 | O43155 | -1.1933   |
| 54495 | P0C214 | Q6NV75 | -1.3693   |
| 54496 | P0C214 | P16860 | -0.44388  |
| 54497 | P0C214 | O75712 | -0.97781  |
| 54498 | P0C214 | P08172 | -0.96679  |
| 54499 | P0C214 | P33778 | -0.85588  |
| 54500 | P0C214 | P63120 | -0.6957   |
| 54501 | P0C214 | P43251 | -0.56603  |
| 54502 | P0C214 | A6ND36 | -0.22757  |
| 54503 | P0C214 | Q8NH83 | -1.2952   |
| 54504 | P0C214 | Q8IYU8 | -0.2087   |
| 54505 | P0C214 | P36269 | -0.87817  |
| 54506 | P0C214 | O00584 | -0.74441  |
| 54507 | P0C214 | O15438 | -1.1351   |
| 54508 | P0C214 | Q01970 | -0.27852  |
| 54509 | P0C214 | Q8NEA9 | -0.21434  |
| 54510 | P0C214 | Q8IYS5 | -1.511    |
| 54511 | P0C214 | O95744 | -0.27729  |
| 54512 | P0C214 | Q92544 | -0.98681  |
| 54513 | P0C214 | Q8WU67 | -0.57309  |
| 54514 | P0C214 | Q5VT33 | -0.26047  |
| 54515 | P0C214 | P0CJ87 | -0.16414  |
| 54516 | P0C214 | Q8NGA6 | -1.2952   |
| 54517 | P0C214 | Q96A25 | -0.68883  |
| 54518 | P0C214 | P80162 | -1.1247   |
| 54519 | P0C214 | Q9Y3B1 | -0.15381  |
| 54520 | P0C214 | Q9H2X0 | -0.56084  |
| 54521 | P0C214 | P61952 | -0.47184  |
| 54522 | P0C214 | Q9UNT1 | -1.0349   |
| 54523 | P0C214 | P26022 | -0.87259  |
| 54524 | P0C214 | A8MXU0 | -0.88056  |
| 54525 | P0C214 | Q8N6M3 | -0.45388  |
| 54526 | P0C214 | Q9Y227 | -0.51968  |
| 54527 | P0C214 | P08913 | -0.2411   |
| 54528 | P0C214 | Q96GM1 | -0.93907  |
| 54529 | P0C214 | Q6UWE3 | -0.91664  |
| 54530 | P0C214 | Q2YD98 | -0.079752 |
| 54531 | P0C214 | Q6PI47 | -0.10477  |
| 54532 | P0C214 | P06576 | -0.14372  |
| 54533 | P0C214 | Q8NDV1 | -0.72533  |
| 54534 | P0C214 | Q8WWA1 | -0.98681  |
| 54535 | P0C214 | O00507 | -0.54891  |
| 54536 | P0C214 | P14550 | -0.22561  |
| 54537 | P0C214 | Q8N6I4 | -0.98681  |
| 54538 | P0C214 | Q86SX6 | -0.21297  |
| 54539 | P0C214 | A6NMU1 | -1.2952   |
| 54540 | P0C214 | Q96SJ8 | -0.98681  |
| 54541 | P0C214 | Q9H0C2 | -0.81657  |
| 54542 | P0C214 | Q8WXX1 | -0.5331   |
| 54543 | P0C214 | Q9BY19 | -0.98681  |
| 54544 | P0C214 | Q9NX76 | -0.94069  |
| 54545 | P0C214 | Q3LI77 | -0.20166  |
| 54546 | P0C214 | P48740 | -0.87654  |
| 54547 | P0C214 | O14662 | -0.3109   |
| 54548 | P0C214 | Q96LR1 | -0.91736  |
| 54549 | P0C214 | P47874 | -0.4474   |
| 54550 | P0C214 | Q02083 | -0.27211  |
| 54551 | P0C214 | Q8WXI8 | -0.93265  |
| 54552 | P0C214 | A1L3X4 | -0.42254  |
| 54553 | P0C214 | Q8NBF4 | -0.82703  |
| 54554 | P0C214 | Q95139 | -0.59947  |
| 54555 | P0C214 | O95154 | -0.22092  |
| 54556 | P0C214 | Q9Y2L5 | -0.1706   |
| 54557 | P0C214 | A2RU37 | -0.1989   |
| 54558 | P0C214 | A6NDR6 | -0.21675  |
| 54559 | P0C214 | Q9H7F0 | -1.0403   |
| 54560 | P0C214 | P02771 | -0.65138  |
| 54561 | P0C214 | Q8N2Y8 | -0.22675  |
| 54562 | P0C214 | P30711 | -0.22163  |
| 54563 | P0C214 | Q9NYD6 | -0.43108  |
| 54564 | P0C214 | Q6Y1H2 | -0.48438  |
| 54565 | P0C214 | Q5TZK3 | -0.04921  |
| 54566 | P0C214 | P05976 | -0.29106  |
| 54567 | P0C214 | A6NNJ1 | -0.4589   |
| 54568 | P0C214 | Q5VUJ9 | -0.43585  |

|       |        |        |           |
|-------|--------|--------|-----------|
| 54569 | P0C214 | A6NFK2 | -0.03943  |
| 54570 | P0C214 | Q5T8D3 | -1.1067   |
| 54571 | P0C214 | Q9P0X4 | -0.62558  |
| 54572 | P0C214 | Q15522 | -0.26095  |
| 54573 | P0C214 | P09529 | -0.22741  |
| 54574 | P0C214 | Q9BZC1 | -0.25654  |
| 54575 | P0C214 | P0C7Q2 | -0.69741  |
| 54576 | P0C214 | Q8IWR1 | -1.2061   |
| 54577 | P0C214 | P01877 | -0.50976  |
| 54578 | P0C214 | P00533 | -0.31243  |
| 54579 | P0C214 | Q96S38 | -0.80899  |
| 54580 | P0C214 | Q5T4F7 | -0.77675  |
| 54581 | P0C214 | Q8NA58 | -0.63526  |
| 54582 | P0C214 | Q4KMG0 | -0.35849  |
| 54583 | P0C214 | O60941 | -0.32008  |
| 54584 | P0C214 | Q9H8S5 | -0.39247  |
| 54585 | P0C214 | Q9Y4C5 | -0.63479  |
| 54586 | P0C214 | Q8IX18 | -0.77805  |
| 54587 | P0C214 | O43852 | -0.22573  |
| 54588 | P0C214 | Q96N68 | -0.98681  |
| 54589 | P0C214 | Q8IV56 | -0.638    |
| 54590 | P0C214 | Q5VWM4 | -0.18615  |
| 54591 | P0C214 | Q9P2R3 | -0.27985  |
| 54592 | P0C214 | Q8TCT6 | -0.99257  |
| 54593 | P0C214 | Q6UX27 | -0.98681  |
| 54594 | P0C214 | A6NER3 | -0.60816  |
| 54595 | P0C214 | Q8NGH6 | -1.2952   |
| 54596 | P0C214 | Q15884 | -0.68883  |
| 54597 | P0C214 | P01779 | -1.0022   |
| 54598 | P0C214 | Q9NYL5 | -0.528    |
| 54599 | P0C214 | P20908 | -0.85753  |
| 54600 | P0C214 | Q9GZS9 | -0.47617  |
| 54601 | P0C214 | Q9Y5X0 | -0.40463  |
| 54602 | P0C214 | Q8NGS6 | -1.2952   |
| 54603 | P0C214 | P00748 | -0.60146  |
| 54604 | P0C214 | P0CG39 | -0.38765  |
| 54605 | P0C214 | Q9P2J3 | -0.20255  |
| 54606 | P0C214 | A1L167 | -0.67194  |
| 54607 | P0C214 | O43614 | -1.3518   |
| 54608 | P0C214 | Q8NH70 | -1.2952   |
| 54609 | P0C214 | P56856 | -0.848    |
| 54610 | P0C214 | Q8NEA4 | -0.11517  |
| 54611 | P0C214 | Q8N142 | -0.39547  |
| 54612 | P0C214 | P57057 | -0.97443  |
| 54613 | P0C214 | P04004 | -0.82366  |
| 54614 | P0C214 | Q96QU1 | -1.3225   |
| 54615 | P0C214 | Q99954 | -0.91736  |
| 54616 | P0C214 | Q9NY84 | -0.33234  |
| 54617 | P0C214 | P56589 | -0.12578  |
| 54618 | P0C214 | Q8WUD1 | -0.77833  |
| 54619 | P0C214 | P15863 | -0.22682  |
| 54620 | P0C214 | Q15296 | -0.46936  |
| 54621 | P0C214 | Q5SZK8 | -1.4536   |
| 54622 | P0C214 | Q8N1M1 | -0.91971  |
| 54623 | P0C214 | Q9NPH2 | -0.54033  |
| 54624 | P0C214 | Q8N7N1 | -0.055554 |
| 54625 | P0C214 | Q9H8H2 | -0.338    |
| 54626 | P0C214 | A6NJU9 | -0.98681  |
| 54627 | P0C214 | Q9NTX9 | -0.04622  |
| 54628 | P0C214 | Q86T90 | -0.20707  |
| 54629 | P0C214 | Q6ZRI0 | -0.66955  |
| 54630 | P0C214 | P42701 | -0.73672  |
| 54631 | P0C214 | P18206 | -0.20775  |
| 54632 | P0C214 | Q9Y397 | -0.70848  |
| 54633 | P0C214 | Q9Y5G3 | -1.2424   |
| 54634 | P0C214 | O15544 | -0.67091  |
| 54635 | P0C214 | Q8NCM8 | -0.43246  |
| 54636 | P0C214 | P27487 | -0.70014  |
| 54637 | P0C214 | Q15245 | -0.40297  |
| 54638 | P0C214 | Q9H7Y2 | -0.27824  |
| 54639 | P0C214 | A6ND91 | -0.7364   |
| 54640 | P0C214 | Q14161 | -0.23698  |
| 54641 | P0C214 | O14753 | -0.29421  |
| 54642 | P0C214 | P29016 | -0.62997  |
| 54643 | P0C214 | Q9NXS2 | -1.0945   |
| 54644 | P0C214 | Q6IWH7 | -0.45612  |

|       |        |        |           |
|-------|--------|--------|-----------|
| 54645 | P0C214 | Q4W4Y0 | -0.63884  |
| 54646 | P0C214 | P08575 | -0.34371  |
| 54647 | P0C214 | O75355 | -1.1801   |
| 54648 | P0C214 | Q14451 | -0.22741  |
| 54649 | P0C214 | P35790 | -0.61618  |
| 54650 | P0C214 | Q9H341 | -1.2952   |
| 54651 | P0C214 | Q9BYP7 | -0.45398  |
| 54652 | P0C214 | Q6P4A8 | -0.45052  |
| 54653 | P0C214 | Q86VD7 | -0.66584  |
| 54654 | P0C214 | P04196 | -0.28551  |
| 54655 | P0C214 | Q9H4E7 | -0.22741  |
| 54656 | P0C214 | Q8N954 | -0.39914  |
| 54657 | P0C214 | P26012 | -1.2383   |
| 54658 | P0C214 | Q9H205 | -1.2952   |
| 54659 | P0C214 | D6RJB6 | -0.68518  |
| 54660 | P0C214 | Q5K131 | -0.20758  |
| 54661 | P0C214 | Q9NZV6 | -0.13595  |
| 54662 | P0C214 | A6NI61 | -0.98681  |
| 54663 | P0C214 | Q6P2H8 | -0.98681  |
| 54664 | P0C214 | Q9H427 | -1.1424   |
| 54665 | P0C214 | A5D6W6 | -0.77048  |
| 54666 | P0C214 | Q96IK1 | -0.012134 |
| 54667 | P0C214 | Q6ZMI3 | -1.2082   |
| 54668 | P0C214 | Q8TDW0 | -1.0037   |
| 54669 | P0C214 | Q96AM1 | -1.3693   |
| 54670 | P0C214 | Q99538 | -0.64768  |
| 54671 | P0C214 | P51858 | -0.21171  |
| 54672 | P0C214 | Q8N0S2 | -0.16346  |
| 54673 | P0C214 | Q6ZS82 | -1.0698   |
| 54674 | P0C214 | O43396 | -0.22825  |
| 54675 | P0C214 | P25445 | -0.22727  |
| 54676 | P0C214 | Q9NP91 | -1.1842   |
| 54677 | P0C214 | A6NL28 | -0.29368  |
| 54678 | P0C214 | Q96BI3 | -0.34109  |
| 54679 | P0C214 | P51684 | -1.1744   |
| 54680 | P0C214 | Q9UKY0 | -0.34335  |
| 54681 | P0C214 | Q9Y5B8 | -0.70715  |
| 54682 | P0C214 | O75459 | -0.38374  |
| 54683 | P0C214 | Q14517 | -0.23434  |
| 54684 | P0C214 | O75335 | -0.1517   |
| 54685 | P0C214 | Q9UKY1 | -0.2274   |
| 54686 | P0C214 | P15173 | -0.22736  |
| 54687 | P0C214 | Q53F39 | -0.51572  |
| 54688 | P0C214 | Q9NZR1 | -0.21917  |
| 54689 | P0C214 | Q8N0W3 | -0.93952  |
| 54690 | P0C214 | P28039 | -0.88145  |
| 54691 | P0C214 | P60896 | -0.15849  |
| 54692 | P0C214 | Q9BRR6 | -0.77432  |
| 54693 | P0C214 | Q96FT7 | -1.2399   |
| 54694 | P0C214 | Q7Z601 | -1.128    |
| 54695 | P0C214 | Q15040 | -0.72233  |
| 54696 | P0C214 | P19526 | -0.7367   |
| 54697 | P0C214 | Q9NP73 | -0.28612  |
| 54698 | P0C214 | Q8WUZ0 | -0.33895  |
| 54699 | P0C214 | Q8IYU2 | -0.22782  |
| 54700 | P0C214 | Q6ZU45 | -0.39457  |
| 54701 | P0C214 | Q8N0X7 | -0.13672  |
| 54702 | P0C214 | Q9NYA1 | -0.26894  |
| 54703 | P0C214 | Q13261 | -0.4352   |
| 54704 | P0C214 | Q8WW52 | -0.81299  |
| 54705 | P0C214 | Q8TDU9 | -1.335    |
| 54706 | P0C214 | Q6XYQ8 | -1.0629   |
| 54707 | P0C214 | A4D250 | -0.33675  |
| 54708 | P0C214 | Q9P2X3 | -0.18101  |
| 54709 | P0C214 | Q8IY17 | -0.71611  |
| 54710 | P0C214 | Q15717 | -0.57001  |
| 54711 | P0C214 | Q9UPQ4 | -0.22779  |
| 54712 | P0C214 | P51788 | -0.90934  |
| 54713 | P0C214 | Q9Y485 | -0.22743  |
| 54714 | P0C214 | Q9P035 | -1.0869   |
| 54715 | P0C214 | P40933 | -0.27067  |
| 54716 | P0C214 | Q8NH03 | -1.2952   |
| 54717 | P0C214 | B1AK53 | -0.51673  |
| 54718 | P0C214 | Q8NDZ4 | -0.83496  |
| 54719 | P0C214 | P0C7W6 | -0.13802  |
| 54720 | P0C214 | Q9BQD1 | -0.56791  |

|       |        |        |           |
|-------|--------|--------|-----------|
| 54721 | P0C214 | P43007 | -0.54743  |
| 54722 | P0C214 | Q8NGJ4 | -1.2952   |
| 54723 | P0C214 | Q96HR9 | -0.98681  |
| 54724 | P0C214 | O75509 | -0.22578  |
| 54725 | P0C214 | Q9Y3S2 | -0.10903  |
| 54726 | P0C214 | Q13315 | -0.44317  |
| 54727 | P0C214 | Q5T700 | -0.98681  |
| 54728 | P0C214 | Q8TF05 | -0.15402  |
| 54729 | P0C214 | Q9Y6A9 | -0.53438  |
| 54730 | P0C214 | Q96A70 | -0.038898 |
| 54731 | P0C214 | Q9H9L4 | -0.45156  |
| 54732 | P0C214 | P19438 | -0.31578  |
| 54733 | P0C214 | D6RCP7 | -0.68518  |
| 54734 | P0C214 | O43175 | -0.51586  |
| 54735 | P0C214 | Q6PL45 | -0.98681  |
| 54736 | P0C214 | Q5T292 | -0.98681  |
| 54737 | P0C214 | Q9NXL6 | -0.91092  |
| 54738 | P0C214 | Q9P2D8 | -0.98681  |
| 54739 | P0C214 | P32119 | -0.29039  |
| 54740 | P0C214 | Q7Z6L0 | -1.064    |
| 54741 | P0C214 | O00400 | -0.94595  |
| 54742 | P0C214 | P15502 | -0.14543  |
| 54743 | P0C214 | P21583 | -0.45765  |
| 54744 | P0C214 | P29353 | -0.22741  |
| 54745 | P0C214 | Q9Y3C1 | -0.18063  |
| 54746 | P0C214 | Q5VXD3 | -0.0332   |
| 54747 | P0C214 | Q92753 | -1.033    |
| 54748 | P0C214 | Q9H9Y4 | -0.6802   |
| 54749 | P0C214 | Q7Z5P9 | -0.90685  |
| 54750 | P0C214 | P19447 | -0.14629  |
| 54751 | P0C214 | Q7Z7K0 | -0.18613  |
| 54752 | P0C214 | Q15831 | -0.26695  |
| 54753 | P0C214 | Q9H8K7 | -0.43972  |
| 54754 | P0C214 | Q3B7T3 | -0.87241  |
| 54755 | P0C214 | Q6P6C2 | -0.57832  |
| 54756 | P0C214 | Q92913 | -0.31486  |
| 54757 | P0C214 | Q96RD0 | -1.2952   |
| 54758 | P0C214 | Q13585 | -1.4161   |
| 54759 | P0C214 | O15403 | -1.1703   |
| 54760 | P0C214 | Q8TF64 | -0.22484  |
| 54761 | P0C214 | Q96B70 | -0.67915  |
| 54762 | P0C214 | Q96MV1 | -0.68883  |
| 54763 | P0C214 | P28328 | -0.3544   |
| 54764 | P0C214 | P13686 | -0.39267  |
| 54765 | P0C214 | Q49AG3 | -0.55088  |
| 54766 | P0C214 | Q16696 | -0.62217  |
| 54767 | P0C214 | Q9P2X8 | -0.35071  |
| 54768 | P0C214 | C9JUS6 | -1.1259   |
| 54769 | P0C214 | Q9H8M1 | -0.23946  |
| 54770 | P0C214 | Q12774 | -0.75885  |
| 54771 | P0C214 | Q15118 | -0.46314  |
| 54772 | P0C214 | Q9ULJ8 | -0.41778  |
| 54773 | P0C214 | Q9BSJ5 | -0.98681  |
| 54774 | P0C214 | Q9GZZ7 | -1.0094   |
| 54775 | P0C214 | P13747 | -1.0692   |
| 54776 | P0C214 | P48553 | -0.17947  |
| 54777 | P0C214 | Q8IYD2 | -0.22522  |
| 54778 | P0C214 | Q6IEE8 | -0.95194  |
| 54779 | P0C214 | Q9UPQ7 | -0.56751  |
| 54780 | P0C214 | P28799 | -0.22794  |
| 54781 | P0C214 | P22105 | -1.0596   |
| 54782 | P0C214 | Q08AF8 | -0.2859   |
| 54783 | P0C214 | Q96J94 | -0.2263   |
| 54784 | P0C214 | O43609 | -0.26657  |
| 54785 | P0C214 | Q9Y6G1 | -0.98681  |
| 54786 | P0C214 | Q9HB14 | -1.2288   |
| 54787 | P0C214 | P52943 | -0.44     |
| 54788 | P0C214 | Q8NGX9 | -1.2952   |
| 54789 | P0C214 | P48544 | -0.7323   |
| 54790 | P0C214 | Q8NGG3 | -1.2952   |
| 54791 | P0C214 | Q6ZNJ1 | -0.32342  |
| 54792 | P0C214 | Q6MZN7 | -0.38852  |
| 54793 | P0C214 | Q8IUH8 | -1.0278   |
| 54794 | P0C214 | Q8N5G2 | -0.62213  |
| 54795 | P0C214 | Q6UXM1 | -0.98681  |
| 54796 | P0C214 | Q9H330 | -0.81299  |

|       |        |        |          |
|-------|--------|--------|----------|
| 54797 | P0C214 | Q96D21 | -0.94485 |
| 54798 | P0C214 | Q07283 | -0.29861 |
| 54799 | P0C214 | O00254 | -0.97288 |
| 54800 | P0C214 | Q02809 | -0.55149 |
| 54801 | P0C214 | Q14761 | -1.0489  |
| 54802 | P0C214 | Q6GV28 | -1.0024  |
| 54803 | P0C214 | Q9UKV5 | -0.22823 |
| 54804 | P0C214 | Q96Q07 | -0.58994 |
| 54805 | P0C214 | Q9BZG1 | -0.91772 |
| 54806 | P0C214 | Q8N9B8 | -0.73193 |
| 54807 | P0C214 | Q5TCZ1 | -0.22741 |
| 54808 | P0C214 | P37231 | -0.26157 |
| 54809 | P0C214 | P02766 | -0.17288 |
| 54810 | P0C214 | Q86U37 | -0.60229 |
| 54811 | P0C214 | O14944 | -0.48145 |
| 54812 | P0C214 | Q12923 | -0.22741 |
| 54813 | P0C214 | O43315 | -0.67302 |
| 54814 | P0C214 | Q96QV6 | -0.85588 |
| 54815 | P0C214 | Q96IY4 | -0.94716 |
| 54816 | P0C214 | Q9UN42 | -0.35144 |
| 54817 | P0C214 | Q8IZT8 | -0.27647 |
| 54818 | P0C214 | Q96R72 | -1.2952  |
| 54819 | P0C214 | Q6ZNC8 | -0.69218 |
| 54820 | P0C214 | Q9NRD8 | -0.76447 |
| 54821 | P0C214 | Q92903 | -0.74839 |
| 54822 | P0C214 | O60934 | -0.15931 |
| 54823 | P0C214 | Q5VTH9 | -0.22744 |
| 54824 | P0C214 | A6NC97 | -0.98681 |
| 54825 | P0C214 | P0C7X0 | -0.4589  |
| 54826 | P0C214 | Q9UKJ8 | -1.2887  |
| 54827 | P0C214 | Q8NGE3 | -1.2952  |
| 54828 | P0C214 | Q9UIJ5 | -0.99572 |
| 54829 | P0C214 | Q68CL5 | -0.21344 |
| 54830 | P0C214 | Q96MM6 | -0.79608 |
| 54831 | P0C214 | Q9Y334 | -0.64701 |
| 54832 | P0C214 | Q92902 | -0.52211 |
| 54833 | P0C214 | Q92989 | -0.15957 |
| 54834 | P0C214 | Q96JB1 | -0.62964 |
| 54835 | P0C214 | Q9NYV7 | -0.64542 |
| 54836 | P0C214 | Q6ZN44 | -1.0433  |
| 54837 | P0C214 | Q9BWX5 | -0.22739 |
| 54838 | P0C214 | Q9H6D3 | -0.98681 |
| 54839 | P0C214 | Q3B7I2 | -0.17461 |
| 54840 | P0C214 | Q6GMR7 | -0.87595 |
| 54841 | P0C214 | Q8N423 | -0.45701 |
| 54842 | P0C214 | A8MTJ3 | -0.73361 |
| 54843 | P0C214 | B7U540 | -1.2189  |
| 54844 | P0C214 | Q8WUA2 | -0.38077 |
| 54845 | P0C214 | Q8NH93 | -1.2952  |
| 54846 | P0C214 | Q8N6D5 | -0.2274  |
| 54847 | P0C214 | Q9H5Q3 | -0.98681 |
| 54848 | P0C214 | Q6NXE6 | -0.21549 |
| 54849 | P0C214 | Q9UQB9 | -0.57814 |
| 54850 | P0C214 | Q6E213 | -0.79857 |
| 54851 | P0C214 | P01701 | -1.0022  |
| 54852 | P0C214 | A6NP81 | -0.37981 |
| 54853 | P0C214 | Q6ZVS7 | -0.43859 |
| 54854 | P0C214 | Q96BY6 | -0.66174 |
| 54855 | P0C214 | Q8NGC0 | -1.2952  |
| 54856 | P0C214 | P05162 | -0.39028 |
| 54857 | P0C214 | Q9BVM2 | -0.2822  |
| 54858 | P0C214 | Q15551 | -0.99197 |
| 54859 | P0C214 | P01350 | -1.0655  |
| 54860 | P0C214 | P51693 | -0.26061 |
| 54861 | P0C214 | Q9UNP4 | -0.67456 |
| 54862 | P0C214 | P22792 | -0.86564 |
| 54863 | P0C214 | Q86UP0 | -1.023   |
| 54864 | P0C214 | Q8NGI4 | -1.2952  |
| 54865 | P0C214 | Q9NYL9 | -0.29166 |
| 54866 | P0C214 | Q8WUU5 | -0.2272  |
| 54867 | P0C214 | O00476 | -0.77711 |
| 54868 | P0C214 | Q494W8 | -1.0778  |
| 54869 | P0C214 | Q5SY16 | -0.45053 |
| 54870 | P0C214 | Q8N8V8 | -0.98681 |
| 54871 | P0C214 | Q96HP4 | -0.22348 |
| 54872 | P0C214 | Q14512 | -0.57483 |

|       |        |        |           |
|-------|--------|--------|-----------|
| 54873 | P0C214 | Q9H930 | -0.34114  |
| 54874 | P0C214 | Q9BR61 | -0.22741  |
| 54875 | P0C214 | Q06416 | -0.22741  |
| 54876 | P0C214 | Q95180 | -0.85048  |
| 54877 | P0C214 | Q96KN9 | -1.0688   |
| 54878 | P0C214 | Q02641 | -0.6176   |
| 54879 | P0C214 | Q4G0X9 | -0.32204  |
| 54880 | P0C214 | P35228 | -0.32354  |
| 54881 | P0C214 | Q86XH1 | -0.79608  |
| 54882 | P0C214 | Q9Y546 | -0.17029  |
| 54883 | P0C214 | Q14672 | -0.28932  |
| 54884 | P0C214 | Q96A26 | -0.18073  |
| 54885 | P0C214 | A1L4H1 | -0.95759  |
| 54886 | P0C214 | Q15260 | -0.19661  |
| 54887 | P0C214 | Q00519 | -0.82548  |
| 54888 | P0C214 | Q96SF7 | -0.41663  |
| 54889 | P0C214 | P01130 | -0.44573  |
| 54890 | P0C214 | Q3YBM2 | -0.52355  |
| 54891 | P0C214 | P57771 | -0.61728  |
| 54892 | P0C214 | Q94832 | -0.6045   |
| 54893 | P0C214 | Q02127 | -0.4165   |
| 54894 | P0C214 | P57723 | -0.24946  |
| 54895 | P0C214 | A0PJW8 | -0.44169  |
| 54896 | P0C214 | Q8NHP7 | -0.60515  |
| 54897 | P0C214 | Q95631 | -0.22741  |
| 54898 | P0C214 | Q1ZYL8 | -0.91736  |
| 54899 | P0C214 | Q9HCP0 | -1.0717   |
| 54900 | P0C214 | Q4G1C9 | -0.98681  |
| 54901 | P0C214 | P12931 | -0.23173  |
| 54902 | P0C214 | Q9BTT0 | -0.22741  |
| 54903 | P0C214 | Q8NH64 | -1.2952   |
| 54904 | P0C214 | Q8NF86 | -1.3937   |
| 54905 | P0C214 | H0YL14 | -0.46493  |
| 54906 | P0C214 | Q6EMB2 | -0.12486  |
| 54907 | P0C214 | Q8IUC0 | -0.077263 |
| 54908 | P0C214 | Q96EG1 | -0.32979  |
| 54909 | P0C214 | Q7Z4P5 | -0.22741  |
| 54910 | P0C214 | P61106 | -0.29701  |
| 54911 | P0C214 | Q8NEM8 | -0.38962  |
| 54912 | P0C214 | P15382 | -0.97232  |
| 54913 | P0C214 | P31639 | -0.83341  |
| 54914 | P0C214 | Q96RM1 | -0.2479   |
| 54915 | P0C214 | Q76EJ3 | -0.63179  |
| 54916 | P0C214 | Q15622 | -1.2952   |
| 54917 | P0C214 | Q15813 | -0.24792  |
| 54918 | P0C214 | P51689 | -0.33781  |
| 54919 | P0C214 | P10916 | -0.22543  |
| 54920 | P0C214 | P37840 | -0.2117   |
| 54921 | P0C214 | P08123 | -0.37949  |
| 54922 | P0C214 | P0CF97 | -0.39914  |
| 54923 | P0C214 | Q8WY64 | -0.22742  |
| 54924 | P0C214 | Q9C0H6 | -0.20046  |
| 54925 | P0C214 | Q9NS00 | -1.016    |
| 54926 | P0C214 | P10071 | -0.22724  |
| 54927 | P0C214 | Q9NZU0 | -1.1933   |
| 54928 | P0C214 | P01258 | -0.46969  |
| 54929 | P0C214 | Q6ZSA7 | -1.2564   |
| 54930 | P0C214 | Q95500 | -0.80401  |
| 54931 | P0C214 | Q8NCV1 | -0.65956  |
| 54932 | P0C214 | Q13698 | -0.72834  |
| 54933 | P0C214 | P48059 | -0.23212  |
| 54934 | P0C214 | Q9UDX3 | -1.3284   |
| 54935 | P0C214 | P56715 | -0.17384  |
| 54936 | P0C214 | Q95755 | -0.85165  |
| 54937 | P0C214 | A1L162 | -0.32998  |
| 54938 | P0C214 | Q95976 | -1.1759   |
| 54939 | P0C214 | Q13753 | -1.1361   |
| 54940 | P0C214 | P01854 | -0.41729  |
| 54941 | P0C214 | P58872 | -1.3684   |
| 54942 | P0C214 | Q7Z6Z6 | -0.42901  |
| 54943 | P0C214 | Q43934 | -0.68883  |
| 54944 | P0C214 | P0C870 | -0.11471  |
| 54945 | P0C214 | Q96EH8 | -0.52994  |
| 54946 | P0C214 | P62995 | -0.2225   |
| 54947 | P0C214 | Q12952 | -0.4103   |
| 54948 | P0C214 | Q15479 | -0.15913  |



|       |        |        |           |
|-------|--------|--------|-----------|
| 54949 | P0C214 | P63123 | -0.6957   |
| 54950 | P0C214 | Q9P2E7 | -1.2424   |
| 54951 | P0C214 | Q8WVS4 | -0.21896  |
| 54952 | P0C214 | Q9NSE2 | -0.22741  |
| 54953 | P0C214 | Q8TDF5 | -1.1387   |
| 54954 | P0C214 | Q96SB8 | -0.21361  |
| 54955 | P0C214 | P13637 | -0.61238  |
| 54956 | P0C214 | Q9HD20 | -0.7304   |
| 54957 | P0C214 | Q96MF4 | -0.028992 |
| 54958 | P0C214 | O75880 | -0.21635  |
| 54959 | P0C214 | Q8NGR2 | -1.2952   |
| 54960 | P0C214 | P07437 | -0.14313  |
| 54961 | P0C214 | Q96RG2 | -0.62952  |
| 54962 | P0C214 | Q7Z6B7 | -0.43873  |
| 54963 | P0C214 | Q07507 | -1.173    |
| 54964 | P0C214 | Q8N2A8 | -0.55256  |
| 54965 | P0C214 | Q9NR90 | -0.75801  |
| 54966 | P0C214 | Q8N688 | -0.88056  |
| 54967 | P0C214 | Q9NZQ7 | -0.70382  |
| 54968 | P0C214 | Q9BYE0 | -0.22636  |
| 54969 | P0C214 | Q9NYY8 | -0.32177  |
| 54970 | P0C214 | Q9BX10 | -0.90266  |
| 54971 | P0C214 | Q96MK3 | -0.91736  |
| 54972 | P0C214 | Q8NG85 | -1.1265   |
| 54973 | P0C214 | Q9UKH3 | -0.85122  |
| 54974 | P0C214 | Q9Y4E6 | -0.22747  |
| 54975 | P0C214 | Q9P0M4 | -0.87194  |
| 54976 | P0C214 | O60879 | -0.2217   |
| 54977 | P0C214 | Q9H9A6 | -0.2317   |
| 54978 | P0C214 | Q12766 | -0.23444  |
| 54979 | P0C214 | P52926 | -0.062532 |
| 54980 | P0C214 | Q6IAA8 | -0.40903  |
| 54981 | P0C214 | Q12912 | -0.93608  |
| 54982 | P0C214 | Q9NVJ2 | -0.59293  |
| 54983 | P0C214 | P51654 | -0.47063  |
| 54984 | P0C214 | P35325 | -0.2479   |
| 54985 | P0C214 | A6NK06 | -0.36882  |
| 54986 | P0C214 | Q5T7N3 | -0.2274   |
| 54987 | P0C214 | P32004 | -0.65588  |
| 54988 | P0C214 | Q9BUN5 | -0.63945  |
| 54989 | P0C214 | Q6IFN5 | -1.2952   |
| 54990 | P0C214 | Q9C0J9 | -0.22559  |
| 54991 | P0C214 | Q6P3S1 | -0.12681  |
| 54992 | P0C214 | Q96NB2 | -0.97609  |
| 54993 | P0C214 | Q9BZJ7 | -1.1924   |
| 54994 | P0C214 | P46597 | -0.16205  |
| 54995 | P0C214 | P02818 | -0.55584  |
| 54996 | P0C214 | Q7Z7D3 | -1.101    |
| 54997 | P0C214 | Q15915 | -0.31424  |
| 54998 | P0C214 | Q9H2H0 | -0.19418  |
| 54999 | P0C214 | Q9Y6F7 | -0.22365  |
| 55000 | P0C214 | O60486 | -0.99272  |
| 55001 | P0C214 | Q9HB31 | -0.22681  |
| 55002 | P0C214 | Q8NH41 | -1.2952   |
| 55003 | P0C214 | P10644 | -0.22757  |
| 55004 | P0C214 | Q9BWE0 | -0.58982  |
| 55005 | P0C214 | Q6ZMW3 | -0.22759  |
| 55006 | P0C214 | P28222 | -0.8663   |
| 55007 | P0C214 | Q53GG5 | -0.41219  |
| 55008 | P0C214 | Q9NVS9 | -0.027624 |
| 55009 | P0C214 | Q969X1 | -0.98989  |
| 55010 | P0C214 | Q99439 | -0.2082   |
| 55011 | P0C214 | Q8N4F7 | -1.0783   |
| 55012 | P0C214 | P56705 | -0.30212  |
| 55013 | P0C214 | Q2KJY2 | -0.80519  |
| 55014 | P0C214 | P52803 | -0.49682  |
| 55015 | P0C214 | Q8TDL5 | -1.0742   |
| 55016 | P0C214 | Q6ZMT4 | -0.22913  |
| 55017 | P0C214 | Q9UGL1 | -0.26184  |
| 55018 | P0C214 | Q9Y365 | -0.74002  |
| 55019 | P0C214 | P0C0S5 | -0.92069  |
| 55020 | P0C214 | Q8IWB4 | -0.98681  |
| 55021 | P0C214 | Q8IY26 | -0.96166  |
| 55022 | P0C214 | P25101 | -0.48302  |
| 55023 | P0C214 | Q9ULU8 | -0.11091  |
| 55024 | P0C214 | Q8WUT9 | -0.80565  |

|       |        |        |           |
|-------|--------|--------|-----------|
| 55025 | P0C214 | Q687X5 | -1.3336   |
| 55026 | P0C214 | Q9H0W7 | -0.32228  |
| 55027 | P0C214 | Q9NX78 | -0.98681  |
| 55028 | P0C214 | Q99726 | -0.90508  |
| 55029 | P0C214 | P49441 | -0.46325  |
| 55030 | P0C214 | Q9NVR7 | -0.17738  |
| 55031 | P0C214 | Q6BEB4 | -0.2213   |
| 55032 | P0C214 | Q5TCY1 | -0.82205  |
| 55033 | P0C214 | P09601 | -0.1228   |
| 55034 | P0C214 | P29371 | -0.92965  |
| 55035 | P0C214 | A9YTQ3 | -0.27229  |
| 55036 | P0C214 | Q5JT82 | -0.22177  |
| 55037 | P0C214 | P78312 | -0.29935  |
| 55038 | P0C214 | Q8NBL1 | -0.2348   |
| 55039 | P0C214 | P63096 | -0.3141   |
| 55040 | P0C214 | Q9C0D4 | -0.22744  |
| 55041 | P0C214 | Q9Y241 | -0.82147  |
| 55042 | P0C214 | P08842 | -0.51189  |
| 55043 | P0C214 | P14207 | -0.98281  |
| 55044 | P0C214 | Q5H9R4 | -0.98681  |
| 55045 | P0C214 | Q6NXP0 | -0.95381  |
| 55046 | P0C214 | O15460 | -0.47484  |
| 55047 | P0C214 | P84077 | -0.22902  |
| 55048 | P0C214 | Q9Y696 | -0.22286  |
| 55049 | P0C214 | Q8NFX3 | -0.55617  |
| 55050 | P0C214 | P29320 | -0.94117  |
| 55051 | P0C214 | Q8IX95 | -0.28306  |
| 55052 | P0C214 | Q9Y5X1 | -0.2793   |
| 55053 | P0C214 | Q03135 | -0.22638  |
| 55054 | P0C214 | Q8N9H6 | -0.034833 |
| 55055 | P0C214 | Q96N46 | -0.4166   |
| 55056 | P0C214 | Q9Y228 | -0.35508  |
| 55057 | P0C214 | A8MQB9 | -0.22741  |
| 55058 | P0C214 | Q96GY3 | -0.45808  |
| 55059 | P0C214 | P39210 | -0.58066  |
| 55060 | P0C214 | Q96NS8 | -0.018396 |
| 55061 | P0C214 | Q01968 | -0.22792  |
| 55062 | P0C214 | Q9H7D0 | -0.40717  |
| 55063 | P0C214 | O14843 | -1.6115   |
| 55064 | P0C214 | P31260 | -0.22701  |
| 55065 | P0C214 | Q8NH67 | -1.2952   |
| 55066 | P0C214 | A2A2Y4 | -0.68387  |
| 55067 | P0C214 | Q8N4P2 | -0.50241  |
| 55068 | P0C214 | Q8N3J2 | -0.36903  |
| 55069 | P0C214 | Q67FW5 | -0.41123  |
| 55070 | P0C214 | Q9BYV7 | -0.46619  |
| 55071 | P0C214 | Q96AX2 | -0.89422  |
| 55072 | P0C214 | P0DJR0 | -0.96471  |
| 55073 | P0C214 | Q9UQ07 | -1.0007   |
| 55074 | P0C214 | P51397 | -0.21764  |
| 55075 | P0C214 | Q9NXN4 | -0.38751  |
| 55076 | P0C214 | Q02763 | -0.47591  |
| 55077 | P0C214 | Q14541 | -0.38874  |
| 55078 | P0C214 | P55786 | -0.32617  |
| 55079 | P0C214 | Q8WUY1 | -0.91736  |
| 55080 | P0C214 | P13631 | -0.23293  |
| 55081 | P0C214 | Q5T4S7 | -0.35117  |
| 55082 | P0C214 | O14678 | -1.3375   |
| 55083 | P0C214 | Q9H2U9 | -1.1794   |
| 55084 | P0C214 | Q5HYJ1 | -0.76161  |
| 55085 | P0C214 | Q96EV2 | -0.83638  |
| 55086 | P0C214 | A6NCV1 | -1.2952   |
| 55087 | P0C214 | P15086 | -1.287    |
| 55088 | P0C214 | A6NHN0 | -0.96884  |
| 55089 | P0C214 | P01825 | -1.0022   |
| 55090 | P0C214 | Q9UKA8 | -0.78337  |
| 55091 | P0C214 | Q94778 | -1.0787   |
| 55092 | P0C214 | Q96MR6 | -0.22769  |
| 55093 | P0C214 | Q96SE0 | -0.69679  |
| 55094 | P0C214 | P63215 | -0.41166  |
| 55095 | P0C214 | Q99853 | -0.41085  |
| 55096 | P0C214 | Q16827 | -0.53797  |
| 55097 | P0C214 | P28907 | -0.64576  |
| 55098 | P0C214 | Q9UGT4 | -0.96099  |
| 55099 | P0C214 | P08100 | -0.71432  |
| 55100 | P0C214 | Q9Y282 | -0.78142  |

|       |        |        |          |
|-------|--------|--------|----------|
| 55101 | P0C214 | Q9NYS0 | -0.84929 |
| 55102 | P0C214 | Q8IYM1 | -0.22475 |
| 55103 | P0C214 | O95399 | -0.59883 |
| 55104 | P0C214 | Q5JTV8 | -0.51115 |
| 55105 | P0C214 | Q99519 | -0.4571  |
| 55106 | P0C214 | Q99678 | -1.4957  |
| 55107 | P0C214 | P30512 | -0.91186 |
| 55108 | P0C214 | Q12948 | -0.29235 |
| 55109 | P0C214 | A6NMD0 | -1.064   |
| 55110 | P0C214 | Q13151 | -0.26254 |
| 55111 | P0C214 | O60882 | -0.85194 |
| 55112 | P0C214 | Q14667 | -0.91736 |
| 55113 | P0C214 | Q9BYC5 | -0.54985 |
| 55114 | P0C214 | Q9UNG2 | -0.86667 |
| 55115 | P0C214 | P41181 | -0.34079 |
| 55116 | P0C214 | Q8N1W1 | -0.8064  |
| 55117 | P0C214 | P05455 | -0.3878  |
| 55118 | P0C214 | Q9P273 | -1.1028  |
| 55119 | P0C214 | Q9P241 | -0.58105 |
| 55120 | P0C214 | Q4G0J3 | -0.22017 |
| 55121 | P0C214 | Q6ZU15 | -0.22368 |
| 55122 | P0C214 | Q96M34 | -0.09465 |
| 55123 | P0C214 | P01744 | -1.0022  |
| 55124 | P0C214 | P30464 | -1.0367  |
| 55125 | P0C214 | Q13470 | -0.7828  |
| 55126 | P0C214 | Q8WU08 | -1.3207  |
| 55127 | P0C214 | Q8NGE0 | -1.2952  |
| 55128 | P0C214 | Q9Y698 | -0.63528 |
| 55129 | P0C214 | O76002 | -1.2952  |
| 55130 | P0C214 | O00294 | -0.36848 |
| 55131 | P0C214 | P48547 | -0.98724 |
| 55132 | P0C214 | Q9NTJ5 | -0.52247 |
| 55133 | P0C214 | P0C2L3 | -0.98681 |
| 55134 | P0C214 | Q8N465 | -0.20576 |
| 55135 | P0C214 | P01706 | -1.0022  |
| 55136 | P0C214 | P35503 | -0.8501  |
| 55137 | P0C214 | P01566 | -0.71883 |
| 55138 | P0C214 | Q13241 | -1.0935  |
| 55139 | P0C214 | Q96MA6 | -0.47964 |
| 55140 | P0C214 | Q6UWJ8 | -0.98681 |
| 55141 | P0C214 | Q9Y5Y5 | -0.44781 |
| 55142 | P0C214 | P07585 | -0.49159 |
| 55143 | P0C214 | Q5T751 | -0.38015 |
| 55144 | P0C214 | Q9Y4K3 | -0.22725 |
| 55145 | P0C214 | P51571 | -0.65893 |
| 55146 | P0C214 | O75443 | -0.99641 |
| 55147 | P0C214 | Q9Y3S1 | -1.1702  |
| 55148 | P0C214 | O75881 | -0.51397 |
| 55149 | P0C214 | P49674 | -0.22741 |
| 55150 | P0C214 | Q504U0 | -0.27328 |
| 55151 | P0C214 | Q9H6D5 | -0.98681 |
| 55152 | P0C214 | Q0ZGT2 | -0.35338 |
| 55153 | P0C214 | A6NDA9 | -0.98681 |
| 55154 | P0C214 | Q9UH36 | -0.41298 |
| 55155 | P0C214 | P06326 | -1.0022  |
| 55156 | P0C214 | Q86T96 | -0.58527 |
| 55157 | P0C214 | Q93098 | -0.80171 |
| 55158 | P0C214 | P63092 | -0.54439 |
| 55159 | P0C214 | Q96SK2 | -0.98681 |
| 55160 | P0C214 | Q9H977 | -0.22736 |
| 55161 | P0C214 | Q6IEE7 | -0.98681 |
| 55162 | P0C214 | Q9BUF7 | -0.92813 |
| 55163 | P0C214 | Q96H78 | -0.80565 |
| 55164 | P0C214 | Q08648 | -0.88362 |
| 55165 | P0C214 | P20827 | -0.46321 |
| 55166 | P0C214 | P35556 | -0.83671 |
| 55167 | P0C214 | Q16134 | -0.22056 |
| 55168 | P0C214 | P30533 | -0.7323  |
| 55169 | P0C214 | P23280 | -0.68336 |
| 55170 | P0C214 | Q9NRW1 | -0.63446 |
| 55171 | P0C214 | Q15057 | -1.0294  |
| 55172 | P0C214 | Q9HC24 | -0.19929 |
| 55173 | P0C214 | Q96I45 | -0.98681 |
| 55174 | P0C214 | Q9NXD2 | -0.55121 |
| 55175 | P0C214 | Q86X53 | -0.14321 |
| 55176 | P0C214 | Q4UJ75 | -0.2274  |

|       |        |        |           |
|-------|--------|--------|-----------|
| 55177 | P0C214 | Q8N414 | -0.98681  |
| 55178 | P0C214 | Q6UWT4 | -0.91736  |
| 55179 | P0C214 | A6NE21 | -0.4589   |
| 55180 | P0C214 | Q96GE9 | -0.98681  |
| 55181 | P0C214 | Q6FIF0 | -0.55518  |
| 55182 | P0C214 | O94761 | -0.41373  |
| 55183 | P0C214 | P40305 | -0.51242  |
| 55184 | P0C214 | Q5R3F8 | -0.95344  |
| 55185 | P0C214 | Q7Z3H0 | -0.2274   |
| 55186 | P0C214 | Q96AZ6 | -0.19409  |
| 55187 | P0C214 | Q5FWF4 | -0.22387  |
| 55188 | P0C214 | Q9BT09 | -0.32649  |
| 55189 | P0C214 | O14523 | -0.68883  |
| 55190 | P0C214 | P35346 | -1.1308   |
| 55191 | P0C214 | P25054 | -0.22681  |
| 55192 | P0C214 | O14979 | -0.26095  |
| 55193 | P0C214 | Q9H579 | -0.079275 |
| 55194 | P0C214 | P08910 | -0.66325  |
| 55195 | P0C214 | Q8NG04 | -0.99304  |
| 55196 | P0C214 | Q9H1X1 | -0.44205  |
| 55197 | P0C214 | Q02446 | -0.13842  |
| 55198 | P0C214 | P36954 | -0.16568  |
| 55199 | P0C214 | Q53S99 | -0.5499   |
| 55200 | P0C214 | P62491 | -0.27995  |
| 55201 | P0C214 | Q96CG8 | -0.73068  |
| 55202 | P0C214 | Q9C0D9 | -0.80792  |
| 55203 | P0C214 | Q8TDW7 | -1.4117   |
| 55204 | P0C214 | P55061 | -0.51254  |
| 55205 | P0C214 | Q9C0H9 | -0.12792  |
| 55206 | P0C214 | Q9Y5F2 | -1.2282   |
| 55207 | P0C214 | P51606 | -0.27424  |
| 55208 | P0C214 | P20930 | -0.40867  |
| 55209 | P0C214 | Q96NL6 | -0.14957  |
| 55210 | P0C214 | Q9UK28 | -0.79982  |
| 55211 | P0C214 | P35504 | -0.97135  |
| 55212 | P0C214 | O75298 | -0.46631  |
| 55213 | P0C214 | O15041 | -0.85205  |
| 55214 | P0C214 | Q9UIG8 | -1.1989   |
| 55215 | P0C214 | P47869 | -0.82539  |
| 55216 | P0C214 | Q06710 | -0.22707  |
| 55217 | P0C214 | Q52LW3 | -0.72533  |
| 55218 | P0C214 | Q92947 | -0.24005  |
| 55219 | P0C214 | Q8N5D6 | -0.6078   |
| 55220 | P0C214 | Q6PI78 | -0.75609  |
| 55221 | P0C214 | O95372 | -0.19563  |
| 55222 | P0C214 | P01876 | -0.41163  |
| 55223 | P0C214 | P19876 | -0.97179  |
| 55224 | P0C214 | O14627 | -0.29666  |
| 55225 | P0C214 | Q6UXN2 | -0.91736  |
| 55226 | P0C214 | Q8N8F6 | -1.0037   |
| 55227 | P0C214 | Q8NCW6 | -0.5869   |
| 55228 | P0C214 | P55268 | -0.80007  |
| 55229 | P0C214 | Q96J84 | -0.81456  |
| 55230 | P0C214 | Q96IG2 | -0.22598  |
| 55231 | P0C214 | Q8IW40 | -0.18192  |
| 55232 | P0C214 | O75037 | -0.67393  |
| 55233 | P0C214 | Q8WWU5 | -1.3128   |
| 55234 | P0C214 | O00151 | -0.22741  |
| 55235 | P0C214 | A6NM03 | -1.2952   |
| 55236 | P0C214 | P29275 | -0.82343  |
| 55237 | P0C214 | Q9NZB2 | -0.37969  |
| 55238 | P0C214 | Q8WWB3 | -0.013127 |
| 55239 | P0C214 | P57768 | -0.68853  |
| 55240 | P0C214 | Q5JXC2 | -0.4392   |
| 55241 | P0C214 | Q9HBL6 | -0.98681  |
| 55242 | P0C214 | P49746 | -0.94297  |
| 55243 | P0C214 | Q8NG98 | -1.2952   |
| 55244 | P0C214 | Q12967 | -0.54874  |
| 55245 | P0C214 | Q5VUB5 | -0.98681  |
| 55246 | P0C214 | Q9HCF6 | -1.0811   |
| 55247 | P0C214 | Q8N9C0 | -0.22749  |
| 55248 | P0C214 | Q6S8J3 | -0.38765  |
| 55249 | P0C214 | Q96K78 | -1.3853   |
| 55250 | P0C214 | Q9NXR8 | -0.22728  |
| 55251 | P0C214 | O95665 | -1.3975   |
| 55252 | P0C214 | A6PVI3 | -0.8081   |

|       |        |        |           |
|-------|--------|--------|-----------|
| 55253 | P0C214 | Q6DCA0 | -0.071313 |
| 55254 | P0C214 | P49761 | -0.7439   |
| 55255 | P0C214 | Q9NQZ6 | -0.42254  |
| 55256 | P0C214 | Q9BXJ2 | -0.68193  |
| 55257 | P0C214 | P55851 | -0.50535  |
| 55258 | P0C214 | P21860 | -0.61908  |
| 55259 | P0C214 | Q9BYI3 | -0.48045  |
| 55260 | P0C214 | Q9BSL1 | -0.2225   |
| 55261 | P0C214 | Q86XR2 | -0.52301  |
| 55262 | P0C214 | Q8NGJ3 | -1.2952   |
| 55263 | P0C214 | Q04844 | -1.1406   |
| 55264 | P0C214 | P29558 | -0.25391  |
| 55265 | P0C214 | P07919 | -0.41924  |
| 55266 | P0C214 | Q6NWX9 | -0.22341  |
| 55267 | P0C214 | P33991 | -0.21948  |
| 55268 | P0C214 | Q5T2P9 | -1.0294   |
| 55269 | P0C214 | Q9UGN4 | -1.2382   |
| 55270 | P0C214 | P0C7X4 | -0.29051  |
| 55271 | P0C214 | Q16706 | -0.46346  |
| 55272 | P0C214 | Q504Y2 | -0.99732  |
| 55273 | P0C214 | Q4G0U5 | -0.50373  |
| 55274 | P0C214 | P62330 | -0.42603  |
| 55275 | P0C214 | Q86UW1 | -1.0595   |
| 55276 | P0C214 | Q96EW2 | -0.20758  |
| 55277 | P0C214 | Q6UW15 | -0.91675  |
| 55278 | P0C214 | O95907 | -0.78934  |
| 55279 | P0C214 | Q13188 | -0.24039  |
| 55280 | P0C214 | Q70Z35 | -0.72616  |
| 55281 | P0C214 | Q8NDH2 | -0.087275 |
| 55282 | P0C214 | P56975 | -1.2829   |
| 55283 | P0C214 | Q969X0 | -0.041018 |
| 55284 | P0C214 | Q8NAA5 | -0.16402  |
| 55285 | P0C214 | Q68DD2 | -0.22907  |
| 55286 | P0C214 | Q8WYK1 | -1.3356   |
| 55287 | P0C214 | O95935 | -0.40485  |
| 55288 | P0C214 | O75678 | -0.50512  |
| 55289 | P0C214 | Q5TH69 | -0.97523  |
| 55290 | P0C214 | Q9BXE9 | -1.3002   |
| 55291 | P0C214 | Q9N2K0 | -0.62374  |
| 55292 | P0C214 | P0CF75 | -0.05181  |
| 55293 | P0C214 | Q96NU1 | -0.065644 |
| 55294 | P0C214 | A6NGH8 | -0.2274   |
| 55295 | P0C214 | O14791 | -0.84038  |
| 55296 | P0C214 | Q8TDU6 | -1.3693   |
| 55297 | P0C214 | Q08043 | -0.41091  |
| 55298 | P0C214 | P10768 | -0.2313   |
| 55299 | P0C214 | O00548 | -0.62392  |
| 55300 | P0C214 | Q96AN5 | -0.59727  |
| 55301 | P0C214 | A8MXZ1 | -0.4589   |
| 55302 | P0C214 | Q8IVS8 | -0.12937  |
| 55303 | P0C214 | Q8NGT0 | -1.2952   |
| 55304 | P0C214 | Q9H0H9 | -0.22861  |
| 55305 | P0C214 | Q15113 | -1.2719   |
| 55306 | P0C214 | Q9NWL6 | -0.23283  |
| 55307 | P0C214 | Q9BXL8 | -0.065644 |
| 55308 | P0C214 | P20594 | -1.2521   |
| 55309 | P0C214 | Q6UXR6 | -0.91736  |
| 55310 | P0C214 | A4FU49 | -0.22483  |
| 55311 | P0C214 | P47224 | -0.55593  |
| 55312 | P0C214 | Q9ULH4 | -0.8702   |
| 55313 | P0C214 | P07316 | -0.074931 |
| 55314 | P0C214 | Q13387 | -0.26117  |
| 55315 | P0C214 | Q9BPW9 | -0.70001  |
| 55316 | P0C214 | Q8N3G9 | -0.79982  |
| 55317 | P0C214 | Q9HCR9 | -0.22587  |
| 55318 | P0C214 | A2PYH4 | -0.77805  |
| 55319 | P0C214 | Q5T754 | -0.38015  |
| 55320 | P0C214 | Q9NR97 | -0.82876  |
| 55321 | P0C214 | Q9P055 | -0.77396  |
| 55322 | P0C214 | P09486 | -0.2232   |
| 55323 | P0C214 | Q8N9U9 | -0.50481  |
| 55324 | P0C214 | Q6UX34 | -0.98681  |
| 55325 | P0C214 | Q9H0P7 | -0.33991  |
| 55326 | P0C214 | O43548 | -0.22123  |
| 55327 | P0C214 | Q96DS6 | -0.98681  |
| 55328 | P0C214 | Q8N157 | -0.22741  |

|       |        |        |          |
|-------|--------|--------|----------|
| 55329 | P0C214 | Q14165 | -0.72231 |
| 55330 | P0C214 | Q8N1N0 | -1.0387  |
| 55331 | P0C214 | Q8TCB6 | -1.2952  |
| 55332 | P0C214 | Q92729 | -0.75328 |
| 55333 | P0C214 | P0C6A0 | -0.35406 |
| 55334 | P0C214 | P11279 | -0.93405 |
| 55335 | P0C214 | P45381 | -0.13205 |
| 55336 | P0C214 | Q14C86 | -0.83355 |
| 55337 | P0C214 | Q8NGA1 | -1.2952  |
| 55338 | P0C214 | O76082 | -0.47556 |
| 55339 | P0C214 | Q9H213 | -0.17723 |
| 55340 | P0C214 | Q5TDP6 | -0.43351 |
| 55341 | P0C214 | Q96N35 | -0.98681 |
| 55342 | P0C214 | P01160 | -0.27483 |
| 55343 | P0C214 | Q9Y279 | -0.31126 |
| 55344 | P0C214 | Q86YW7 | -0.89474 |
| 55345 | P0C214 | P51161 | -0.22276 |
| 55346 | P0C214 | O00462 | -0.30466 |
| 55347 | P0C214 | Q13705 | -0.50344 |
| 55348 | P0C214 | P52849 | -0.45822 |
| 55349 | P0C214 | Q86YD7 | -0.4589  |
| 55350 | P0C214 | Q15070 | -0.1578  |
| 55351 | P0C214 | Q8IVH2 | -0.25868 |
| 55352 | P0C214 | O43294 | -0.34035 |
| 55353 | P0C214 | Q8N2G4 | -0.5764  |
| 55354 | P0C214 | Q13444 | -0.7385  |
| 55355 | P0C214 | P25189 | -1.1355  |
| 55356 | P0C214 | P49019 | -1.4303  |
| 55357 | P0C214 | Q99705 | -1.2101  |
| 55358 | P0C214 | Q9NTU7 | -0.76207 |
| 55359 | P0C214 | O15498 | -0.18567 |
| 55360 | P0C214 | Q8TEJ3 | -0.50512 |
| 55361 | P0C214 | Q70CQ1 | -0.31198 |
| 55362 | P0C214 | Q5TA76 | -0.38015 |
| 55363 | P0C214 | Q9C0B1 | -0.23129 |
| 55364 | P0C214 | O60667 | -0.90345 |
| 55365 | P0C214 | Q9BR10 | -0.89158 |
| 55366 | P0C214 | O60861 | -0.34896 |
| 55367 | P0C214 | Q8TCD1 | -0.61485 |
| 55368 | P0C214 | Q3KRB8 | -0.86358 |
| 55369 | P0C214 | Q12794 | -0.33847 |
| 55370 | P0C214 | Q10713 | -0.40299 |
| 55371 | P0C214 | O95177 | -0.18353 |
| 55372 | P0C214 | P18074 | -0.28613 |
| 55373 | P0C214 | P53778 | -0.22741 |
| 55374 | P0C214 | A0AV96 | -0.52274 |
| 55375 | P0C214 | A3QJZ6 | -0.18615 |
| 55376 | P0C214 | Q86XD8 | -0.50512 |
| 55377 | P0C214 | Q0P651 | -0.91736 |
| 55378 | P0C214 | Q07973 | -0.22911 |
| 55379 | P0C214 | Q9NUQ8 | -0.87884 |
| 55380 | P0C214 | P00734 | -0.45085 |
| 55381 | P0C214 | Q8NFD4 | -0.30518 |
| 55382 | P0C214 | Q8TBG9 | -0.94619 |
| 55383 | P0C214 | Q9H329 | -0.25073 |
| 55384 | P0C214 | Q5H9T9 | -0.5213  |
| 55385 | P0C214 | Q9NZJ5 | -0.3484  |
| 55386 | P0C214 | Q969K4 | -0.22725 |
| 55387 | P0C214 | O60830 | -0.50724 |
| 55388 | P0C214 | P08319 | -0.20261 |
| 55389 | P0C214 | O94782 | -0.42029 |
| 55390 | P0C214 | O43908 | -0.96426 |
| 55391 | P0C214 | P25024 | -1.2132  |
| 55392 | P0C214 | Q5SYC1 | -0.69334 |
| 55393 | P0C214 | Q7Z5B4 | -0.71488 |
| 55394 | P0C214 | Q8N6C5 | -0.65285 |
| 55395 | P0C214 | Q96II8 | -0.91736 |
| 55396 | P0C214 | Q9BWW8 | -1.0734  |
| 55397 | P0C214 | P41586 | -0.59151 |
| 55398 | P0C214 | Q6UWF3 | -0.34152 |
| 55399 | P0C214 | Q8TD30 | -0.19922 |
| 55400 | P0C214 | P28329 | -0.18886 |
| 55401 | P0C214 | Q9ULL4 | -0.7135  |
| 55402 | P0C214 | Q86WIO | -0.98681 |
| 55403 | P0C214 | Q6P575 | -0.19901 |
| 55404 | P0C214 | P52198 | -0.70255 |

|       |        |        |           |
|-------|--------|--------|-----------|
| 55405 | P0C214 | Q9BQI3 | -0.84511  |
| 55406 | P0C214 | Q9UN74 | -1.2636   |
| 55407 | P0C214 | Q7L0Q8 | -0.36903  |
| 55408 | P0C214 | P40199 | -0.25911  |
| 55409 | P0C214 | Q96Q27 | -0.66772  |
| 55410 | P0C214 | Q9UQD0 | -0.9573   |
| 55411 | P0C214 | O60331 | -0.35222  |
| 55412 | P0C214 | Q9NT99 | -1.0004   |
| 55413 | P0C214 | Q8NGP8 | -1.2952   |
| 55414 | P0C214 | Q8IWI9 | -0.4242   |
| 55415 | P0C214 | Q9BYN0 | -0.47116  |
| 55416 | P0C214 | Q96FC9 | -0.38741  |
| 55417 | P0C214 | Q9BZ19 | -0.2274   |
| 55418 | P0C214 | A8MWA6 | -0.4589   |
| 55419 | P0C214 | Q8N999 | -0.090687 |
| 55420 | P0C214 | Q9BYB0 | -0.22741  |
| 55421 | P0C214 | Q9H649 | -0.33624  |
| 55422 | P0C214 | Q9NQ34 | -1.154    |
| 55423 | P0C214 | Q5VU13 | -0.98681  |
| 55424 | P0C214 | P0CG40 | -0.19253  |
| 55425 | P0C214 | Q6UWN0 | -0.5764   |
| 55426 | P0C214 | P34810 | -1.0275   |
| 55427 | P0C214 | Q96RK4 | -0.22665  |
| 55428 | P0C214 | P30505 | -1.0367   |
| 55429 | P0C214 | Q4KMQ1 | -0.45897  |
| 55430 | P0C214 | Q9Y6U3 | -0.29323  |
| 55431 | P0C214 | P78380 | -1.4301   |
| 55432 | P0C214 | A4D2B8 | -0.39214  |
| 55433 | P0C214 | Q9UHL3 | -0.11791  |
| 55434 | P0C214 | Q9UKL4 | -1.0832   |
| 55435 | P0C214 | O60266 | -0.56609  |
| 55436 | P0C214 | Q8NFM7 | -0.69272  |
| 55437 | P0C214 | Q13286 | -0.17968  |
| 55438 | P0C214 | Q9NUT2 | -0.62919  |
| 55439 | P0C214 | P22897 | -1.1051   |
| 55440 | P0C214 | Q8N109 | -1.0708   |
| 55441 | P0C214 | Q8IVJ1 | -1.1971   |
| 55442 | P0C214 | P14174 | -0.25109  |
| 55443 | P0C214 | Q8N413 | -0.80565  |
| 55444 | P0C214 | P56851 | -0.82364  |
| 55445 | P0C214 | Q92504 | -1.1479   |
| 55446 | P0C214 | Q86UU1 | -0.52301  |
| 55447 | P0C214 | Q99963 | -0.31555  |
| 55448 | P0C214 | Q5T5W8 | -0.98681  |
| 55449 | P0C214 | P42262 | -0.93198  |
| 55450 | P0C214 | Q00765 | -0.21357  |
| 55451 | P0C214 | Q96BJ3 | -0.45398  |
| 55452 | P0C214 | Q8IZS8 | -1.1135   |
| 55453 | P0C214 | Q9NZR4 | -0.21336  |
| 55454 | P0C214 | Q6UWD8 | -0.98681  |
| 55455 | P0C214 | Q8NGS4 | -1.2952   |
| 55456 | P0C214 | Q9Y2C4 | -0.098871 |
| 55457 | P0C214 | P17948 | -0.48463  |
| 55458 | P0C214 | P22888 | -0.52893  |
| 55459 | P0C214 | Q8N6L1 | -0.67463  |
| 55460 | P0C214 | P01571 | -0.63257  |
| 55461 | P0C214 | Q9NXC5 | -0.2263   |
| 55462 | P0C214 | O15243 | -0.68545  |
| 55463 | P0C214 | Q5XKL5 | -0.22537  |
| 55464 | P0C214 | Q9P0S3 | -0.97513  |
| 55465 | P0C214 | Q8IY45 | -0.20179  |
| 55466 | P0C214 | P55316 | -0.41532  |
| 55467 | P0C214 | O60906 | -0.73662  |
| 55468 | P0C214 | Q9H8W4 | -0.22562  |
| 55469 | P0C214 | P51797 | -1.158    |
| 55470 | P0C214 | Q9UHF4 | -0.98681  |
| 55471 | P0C214 | P40227 | -0.19434  |
| 55472 | P0C214 | Q9UK32 | -0.65843  |
| 55473 | P0C214 | Q96BM0 | -0.98681  |
| 55474 | P0C214 | Q4KMZ1 | -0.07769  |
| 55475 | P0C214 | Q8NCY6 | -0.065644 |
| 55476 | P0C214 | Q9BVV8 | -0.77898  |
| 55477 | P0C214 | Q9NVC3 | -0.81407  |
| 55478 | P0C214 | Q01726 | -0.67961  |
| 55479 | P0C214 | P32942 | -0.79922  |
| 55480 | P0C214 | Q15777 | -0.27613  |

|       |        |        |           |
|-------|--------|--------|-----------|
| 55481 | P0C214 | A1L390 | -0.76296  |
| 55482 | P0C214 | P57739 | -0.86549  |
| 55483 | P0C214 | P43681 | -0.76936  |
| 55484 | P0C214 | O75106 | -0.49297  |
| 55485 | P0C214 | P16591 | -0.41626  |
| 55486 | P0C214 | Q8WXI4 | -0.1301   |
| 55487 | P0C214 | Q11130 | -0.74525  |
| 55488 | P0C214 | O75386 | -0.21406  |
| 55489 | P0C214 | Q5CZ79 | -0.2274   |
| 55490 | P0C214 | Q9BSY9 | -0.53893  |
| 55491 | P0C214 | P80365 | -0.52984  |
| 55492 | P0C214 | Q8NHV1 | -0.96471  |
| 55493 | P0C214 | A8MVX0 | -0.68275  |
| 55494 | P0C214 | Q8N6N7 | -0.61775  |
| 55495 | P0C214 | Q9H0A3 | -0.98681  |
| 55496 | P0C214 | Q6XYB7 | -0.23836  |
| 55497 | P0C214 | Q8NEB5 | -0.76763  |
| 55498 | P0C214 | Q7Z3D6 | -0.062882 |
| 55499 | P0C214 | P56597 | -0.59328  |
| 55500 | P0C214 | P04080 | -0.17231  |
| 55501 | P0C214 | Q6UB35 | -0.49711  |
| 55502 | P0C214 | Q96CB5 | -0.43914  |
| 55503 | P0C214 | P08572 | -0.49069  |
| 55504 | P0C214 | Q5GJ75 | -0.094191 |
| 55505 | P0C214 | Q8N7U9 | -0.35272  |
| 55506 | P0C214 | Q7RTM1 | -1.3715   |
| 55507 | P0C214 | Q6A1A2 | -1.0987   |
| 55508 | P0C214 | Q8NBQ7 | -0.404    |
| 55509 | P0C214 | Q5VZY2 | -0.89108  |
| 55510 | P0C214 | P07098 | -0.81637  |
| 55511 | P0C214 | Q96RJ3 | -0.81742  |
| 55512 | P0C214 | Q9H6L4 | -0.22958  |
| 55513 | P0C214 | Q96RP7 | -0.68678  |
| 55514 | P0C214 | Q8N461 | -0.21264  |
| 55515 | P0C214 | Q9H4F1 | -0.456    |
| 55516 | P0C214 | Q9C0B9 | -0.46091  |
| 55517 | P0C214 | Q8IVV2 | -0.59014  |
| 55518 | P0C214 | Q8WUT4 | -0.98681  |
| 55519 | P0C214 | Q6P499 | -0.9408   |
| 55520 | P0C214 | Q8NH48 | -1.2952   |
| 55521 | P0C214 | Q9NV58 | -0.45601  |
| 55522 | P0C214 | P50148 | -0.62887  |
| 55523 | P0C214 | O15537 | -1.0432   |
| 55524 | P0C214 | P01282 | -0.72436  |
| 55525 | P0C214 | Q9HAY6 | -0.15109  |
| 55526 | P0C214 | Q9Y4C0 | -1.1247   |
| 55527 | P0C214 | B3GLJ2 | -0.91736  |
| 55528 | P0C214 | Q9H1C7 | -0.98681  |
| 55529 | P0C214 | Q6ZUX7 | -0.98681  |
| 55530 | P0C214 | Q14002 | -1.0566   |
| 55531 | P0C214 | Q03426 | -0.53028  |
| 55532 | P0C214 | A6NNT2 | -0.15955  |
| 55533 | P0C214 | P78310 | -0.22741  |
| 55534 | P0C214 | O60507 | -0.82621  |
| 55535 | P0C214 | Q9NXF1 | -0.36648  |
| 55536 | P0C214 | P30273 | -0.61977  |
| 55537 | P0C214 | Q8IYQ7 | -0.29392  |
| 55538 | P0C214 | P51452 | -0.27686  |
| 55539 | P0C214 | P0CW22 | -0.14511  |
| 55540 | P0C214 | Q969G2 | -0.22903  |
| 55541 | P0C214 | Q8IZY5 | -0.60118  |
| 55542 | P0C214 | O60447 | -0.23782  |
| 55543 | P0C214 | Q9H4I9 | -0.75609  |
| 55544 | P0C214 | P12273 | -0.94318  |
| 55545 | P0C214 | Q6GQQ9 | -0.17249  |
| 55546 | P0C214 | P78348 | -0.75593  |
| 55547 | P0C214 | Q9BRB3 | -0.7212   |
| 55548 | P0C214 | O43657 | -1.154    |
| 55549 | P0C214 | Q9BQI0 | -0.66562  |
| 55550 | P0C214 | P10265 | -0.45132  |
| 55551 | P0C214 | Q8NFT2 | -0.94113  |
| 55552 | P0C214 | Q8TAD2 | -0.9145   |
| 55553 | P0C214 | Q8ND24 | -0.50512  |
| 55554 | P0C214 | P17081 | -0.7563   |
| 55555 | P0C214 | Q9H665 | -0.44182  |
| 55556 | P0C214 | P10915 | -1.1652   |



|       |        |        |           |
|-------|--------|--------|-----------|
| 55557 | P0C214 | Q76M96 | -1.0902   |
| 55558 | P0C214 | Q3YEC7 | -0.22776  |
| 55559 | P0C214 | O14764 | -1.1117   |
| 55560 | P0C214 | Q96MU8 | -0.42098  |
| 55561 | P0C214 | P02814 | -0.74179  |
| 55562 | P0C214 | Q6IQ22 | -0.84939  |
| 55563 | P0C214 | Q7Z2Z2 | -0.54444  |
| 55564 | P0C214 | Q6ZWJ8 | -0.91736  |
| 55565 | P0C214 | A0PJZ3 | -0.89283  |
| 55566 | P0C214 | Q6EKJ0 | -0.033359 |
| 55567 | P0C214 | O75891 | -0.37809  |
| 55568 | P0C214 | Q8N1D0 | -0.18353  |
| 55569 | P0C214 | P54792 | -0.70996  |
| 55570 | P0C214 | Q8N3Z0 | -0.85532  |
| 55571 | P0C214 | Q8WV74 | -0.12345  |
| 55572 | P0C214 | Q5T481 | -0.77181  |
| 55573 | P0C214 | Q9BY21 | -1.2541   |
| 55574 | P0C214 | A6NNE9 | -0.99403  |
| 55575 | P0C214 | Q8NCU8 | -0.98681  |
| 55576 | P0C214 | O43897 | -1.5367   |
| 55577 | P0C214 | Q00688 | -0.2282   |
| 55578 | P0C214 | Q14195 | -0.20787  |
| 55579 | P0C214 | Q9BZW8 | -0.56862  |
| 55580 | P0C214 | P49715 | -0.21211  |
| 55581 | P0C214 | Q9H4A9 | -0.83922  |
| 55582 | P0C214 | Q86U44 | -0.20565  |
| 55583 | P0C214 | Q96CW9 | -0.74489  |
| 55584 | P0C214 | Q9NUD7 | -0.30544  |
| 55585 | P0C214 | Q8WU20 | -0.18786  |
| 55586 | P0C214 | Q7Z572 | -0.43585  |
| 55587 | P0C214 | C9JL84 | -0.91736  |
| 55588 | P0C214 | P01135 | -0.22743  |
| 55589 | P0C214 | Q9Y2C2 | -0.49798  |
| 55590 | P0C214 | P22794 | -0.99432  |
| 55591 | P0C214 | P35611 | -0.17967  |
| 55592 | P0C214 | Q8IXM7 | -0.17324  |
| 55593 | P0C214 | Q8IV53 | -0.12507  |
| 55594 | P0C214 | Q8NGS0 | -1.2952   |
| 55595 | P0C214 | Q96T59 | -0.50624  |
| 55596 | P0C214 | Q0P5P2 | -0.91736  |
| 55597 | P0C214 | Q6ZW76 | -0.22742  |
| 55598 | P0C214 | Q15735 | -0.2256   |
| 55599 | P0C214 | Q9H4B4 | -0.22742  |
| 55600 | P0C214 | Q96N96 | -0.2277   |
| 55601 | P0C214 | Q9H0V1 | -0.96338  |
| 55602 | P0C214 | P04920 | -0.92285  |
| 55603 | P0C214 | P83593 | -0.99256  |
| 55604 | P0C214 | Q6XE24 | -0.67287  |
| 55605 | P0C214 | Q8MH63 | -0.9751   |
| 55606 | P0C214 | Q9NVE5 | -0.68518  |
| 55607 | P0C214 | Q14CB8 | -0.56933  |
| 55608 | P0C214 | Q86YR6 | -0.5751   |
| 55609 | P0C214 | P04179 | -0.16726  |
| 55610 | P0C214 | Q8N9H8 | -0.60515  |
| 55611 | P0C214 | Q9H1X3 | -0.91173  |
| 55612 | P0C214 | Q08345 | -0.93167  |
| 55613 | P0C214 | Q43150 | -0.35816  |
| 55614 | P0C214 | Q99985 | -0.74953  |
| 55615 | P0C214 | Q9NUQ7 | -0.35609  |
| 55616 | P0C214 | P15291 | -0.42677  |
| 55617 | P0C214 | P41225 | -0.26678  |
| 55618 | P0C214 | Q99666 | -0.21779  |
| 55619 | P0C214 | Q16363 | -1.1593   |
| 55620 | P0C214 | Q9NX00 | -0.75609  |
| 55621 | P0C214 | Q07000 | -1.0367   |
| 55622 | P0C214 | P78504 | -0.57478  |
| 55623 | P0C214 | Q9H1Y3 | -1.2376   |
| 55624 | P0C214 | Q13609 | -0.13425  |
| 55625 | P0C214 | Q9UPT6 | -0.22629  |
| 55626 | P0C214 | P10646 | -0.59093  |
| 55627 | P0C214 | Q13613 | -0.23225  |
| 55628 | P0C214 | Q8N9L1 | -0.53447  |
| 55629 | P0C214 | Q6P1R4 | -0.44612  |
| 55630 | P0C214 | Q9NQ36 | -0.95313  |
| 55631 | P0C214 | Q12879 | -0.29507  |
| 55632 | P0C214 | Q96SN7 | -0.35508  |

|       |        |        |           |
|-------|--------|--------|-----------|
| 55633 | P0C214 | Q6UW63 | -0.25992  |
| 55634 | P0C214 | Q6X9E4 | -0.12411  |
| 55635 | P0C214 | A8K0Z3 | -0.21396  |
| 55636 | P0C214 | Q8NCL9 | -0.98681  |
| 55637 | P0C214 | P16562 | -0.90112  |
| 55638 | P0C214 | Q8IZ20 | -0.19131  |
| 55639 | P0C214 | Q68D51 | -0.38397  |
| 55640 | P0C214 | P0C7V4 | -0.4589   |
| 55641 | P0C214 | Q8NCR9 | -0.98681  |
| 55642 | P0C214 | P22001 | -0.95352  |
| 55643 | P0C214 | Q9NQN1 | -1.2952   |
| 55644 | P0C214 | O15354 | -1.475    |
| 55645 | P0C214 | Q9BT17 | -0.10278  |
| 55646 | P0C214 | P30530 | -0.63499  |
| 55647 | P0C214 | P63267 | -0.39475  |
| 55648 | P0C214 | Q9NZQ0 | -0.78863  |
| 55649 | P0C214 | P40200 | -1.3578   |
| 55650 | P0C214 | P25021 | -1.4311   |
| 55651 | P0C214 | Q16549 | -1.1837   |
| 55652 | P0C214 | Q5JT18 | -0.33506  |
| 55653 | P0C214 | Q9NVR0 | -0.91736  |
| 55654 | P0C214 | Q8IVK1 | -0.49956  |
| 55655 | P0C214 | Q9Y446 | -0.22807  |
| 55656 | P0C214 | Q9Y6F9 | -0.82324  |
| 55657 | P0C214 | Q5JQD4 | -0.89474  |
| 55658 | P0C214 | Q9C0D3 | -0.19963  |
| 55659 | P0C214 | P31275 | -0.23315  |
| 55660 | P0C214 | Q43173 | -0.62377  |
| 55661 | P0C214 | P04233 | -0.44278  |
| 55662 | P0C214 | Q9HCJ1 | -1.0667   |
| 55663 | P0C214 | Q5TON5 | -0.22741  |
| 55664 | P0C214 | Q8NH90 | -1.2952   |
| 55665 | P0C214 | P47929 | -0.33693  |
| 55666 | P0C214 | P33032 | -0.93647  |
| 55667 | P0C214 | Q8NGK2 | -1.2952   |
| 55668 | P0C214 | Q2PZI1 | -0.98681  |
| 55669 | P0C214 | Q8N4T4 | -0.83157  |
| 55670 | P0C214 | Q75019 | -1.0697   |
| 55671 | P0C214 | Q502X0 | -0.089811 |
| 55672 | P0C214 | Q8NAF0 | -0.17447  |
| 55673 | P0C214 | Q9NUD5 | -0.5018   |
| 55674 | P0C214 | Q6ZV70 | -0.50812  |
| 55675 | P0C214 | Q86XP3 | -0.54177  |
| 55676 | P0C214 | Q5JRS4 | -1.2952   |
| 55677 | P0C214 | Q6ZRH7 | -1.2794   |
| 55678 | P0C214 | Q13326 | -0.66587  |
| 55679 | P0C214 | Q9BVK2 | -0.79911  |
| 55680 | P0C214 | P17542 | -0.22758  |
| 55681 | P0C214 | Q3Y452 | -0.46478  |
| 55682 | P0C214 | Q8NH94 | -1.2952   |
| 55683 | P0C214 | Q13371 | -0.72785  |
| 55684 | P0C214 | Q8WXX3 | -0.22738  |
| 55685 | P0C214 | Q9BZ11 | -1.2972   |
| 55686 | P0C214 | Q86SS6 | -0.97361  |
| 55687 | P0C214 | Q96GZ6 | -1.038    |
| 55688 | P0C214 | Q76G19 | -0.22714  |
| 55689 | P0C214 | Q15169 | -0.26837  |
| 55690 | P0C214 | Q6VAB6 | -0.65559  |
| 55691 | P0C214 | Q9H172 | -1.282    |
| 55692 | P0C214 | O14686 | -0.31136  |
| 55693 | P0C214 | Q96PE5 | -0.95779  |
| 55694 | P0C214 | Q8IXZ3 | -0.19149  |
| 55695 | P0C214 | Q8WWI5 | -0.65723  |
| 55696 | P0C214 | P48995 | -0.39075  |
| 55697 | P0C214 | Q14185 | -0.22741  |
| 55698 | P0C214 | Q86VR8 | -0.90112  |
| 55699 | P0C214 | Q43306 | -0.54532  |
| 55700 | P0C214 | Q9H2Y7 | -0.23322  |
| 55701 | P0C214 | Q99829 | -0.22759  |
| 55702 | P0C214 | Q96FV0 | -0.22716  |
| 55703 | P0C214 | P78563 | -0.091103 |
| 55704 | P0C214 | Q6P087 | -0.39607  |
| 55705 | P0C214 | P0C7M4 | -0.22057  |
| 55706 | P0C214 | Q9UGB7 | -0.24495  |
| 55707 | P0C214 | O14578 | -0.83074  |
| 55708 | P0C214 | Q9BXY4 | -0.93273  |

|       |        |        |          |
|-------|--------|--------|----------|
| 55709 | P0C214 | Q7LGC8 | -0.47791 |
| 55710 | P0C214 | Q96LJ7 | -0.5721  |
| 55711 | P0C214 | P0C646 | -1.2952  |
| 55712 | P0C214 | Q14901 | -0.18545 |
| 55713 | P0C214 | Q6UXH1 | -0.22741 |
| 55714 | P0C214 | Q96JJ7 | -0.84447 |
| 55715 | P0C214 | Q9P0N9 | -0.5022  |
| 55716 | P0C214 | P83105 | -1.3147  |
| 55717 | P0C214 | Q07092 | -0.60918 |
| 55718 | P0C214 | P14210 | -0.31594 |
| 55719 | P0C214 | Q9NWX1 | -0.22556 |
| 55720 | P0C214 | Q8TEY5 | -0.22704 |
| 55721 | P0C214 | O95159 | -0.35106 |
| 55722 | P0C214 | Q86Z14 | -0.74672 |
| 55723 | P0C214 | Q14168 | -0.71318 |
| 55724 | P0C214 | Q03828 | -0.22753 |
| 55725 | P0C214 | Q96LB1 | -1.3159  |
| 55726 | P0C214 | Q96S97 | -0.98681 |
| 55727 | P0C214 | Q6UXB3 | -0.5764  |
| 55728 | P0C214 | Q2M2E5 | -0.91736 |
| 55729 | P0C214 | P15391 | -1.1769  |
| 55730 | P0C214 | Q8N6S5 | -0.98681 |
| 55731 | P0C214 | Q2M3G0 | -1.2688  |
| 55732 | P0C214 | Q7Z7G8 | -0.36311 |
| 55733 | P0C214 | Q9BYV9 | -0.22597 |
| 55734 | P0C214 | Q8TCX1 | -0.19362 |
| 55735 | P0C214 | Q86YD3 | -1.511   |
| 55736 | P0C214 | Q8IZR5 | -0.94069 |
| 55737 | P0C214 | Q16270 | -0.55231 |
| 55738 | P0C214 | Q8TCE9 | -0.17131 |
| 55739 | P0C214 | Q6UXT8 | -0.91736 |
| 55740 | P0C214 | P48029 | -0.76633 |
| 55741 | P0C214 | P31327 | -0.15936 |
| 55742 | P0C214 | Q9H8Y1 | -0.4962  |
| 55743 | P0C214 | Q8N2C7 | -0.98681 |
| 55744 | P0C214 | A8MS94 | -0.3285  |
| 55745 | P0C214 | Q96S52 | -0.3681  |
| 55746 | P0C214 | Q92637 | -1.1172  |
| 55747 | P0C214 | Q8NFD2 | -1.2407  |
| 55748 | P0C214 | Q9UKR3 | -0.594   |
| 55749 | P0C214 | Q8N441 | -1.0398  |
| 55750 | P0C214 | Q5M7Z0 | -1.0783  |
| 55751 | P0C214 | Q8IVH4 | -0.77976 |
| 55752 | P0C214 | Q96P64 | -1.0294  |
| 55753 | P0C214 | Q14210 | -0.70398 |
| 55754 | P0C214 | Q99424 | -0.46064 |
| 55755 | P0C214 | Q6ZMV7 | -0.18126 |
| 55756 | P0C214 | P32298 | -0.88068 |
| 55757 | P0C214 | Q15700 | -0.19957 |
| 55758 | P0C214 | Q9P298 | -0.98681 |
| 55759 | P0C214 | Q86YT5 | -0.89276 |
| 55760 | P0C214 | Q8NEP3 | -0.2274  |
| 55761 | P0C214 | Q15818 | -0.56528 |
| 55762 | P0C214 | O95672 | -1.394   |
| 55763 | P0C214 | P01600 | -1.0022  |
| 55764 | P0C214 | Q8N8I0 | -0.22625 |
| 55765 | P0C214 | Q71DI3 | -0.54189 |
| 55766 | P0C214 | P53355 | -0.50642 |
| 55767 | P0C214 | P01892 | -0.68929 |
| 55768 | P0C214 | O75610 | -0.81139 |
| 55769 | P0C214 | Q6ZQN7 | -1.3356  |
| 55770 | P0C214 | Q16602 | -0.59452 |
| 55771 | P0C214 | P78364 | -0.13721 |
| 55772 | P0C214 | Q17RY0 | -0.7704  |
| 55773 | P0C214 | Q99755 | -0.20266 |
| 55774 | P0C214 | Q13905 | -0.22745 |
| 55775 | P0C214 | Q04743 | -0.22649 |
| 55776 | P0C214 | P62068 | -0.46476 |
| 55777 | P0C214 | Q92839 | -0.85236 |
| 55778 | P0C214 | P49768 | -0.22289 |
| 55779 | P0C214 | Q14766 | -0.43122 |
| 55780 | P0C214 | A6NCW7 | -0.30213 |
| 55781 | P0C214 | A2A3K4 | -0.71613 |
| 55782 | P0C214 | P30301 | -1.1216  |
| 55783 | P0C214 | P28290 | -0.35638 |
| 55784 | P0C214 | Q9HBR0 | -1.1771  |

|       |        |        |           |
|-------|--------|--------|-----------|
| 55785 | P0C214 | O95450 | -1.2613   |
| 55786 | P0C214 | P13797 | -0.32347  |
| 55787 | P0C214 | Q9H1Z8 | -0.80456  |
| 55788 | P0C214 | P03901 | -0.42752  |
| 55789 | P0C214 | Q9BW04 | -0.29935  |
| 55790 | P0C214 | Q8NGR6 | -1.2952   |
| 55791 | P0C214 | Q6ZUX3 | -0.097719 |
| 55792 | P0C214 | Q99988 | -0.77866  |
| 55793 | P0C214 | Q86WT1 | -0.50241  |
| 55794 | P0C214 | Q96A59 | -0.84376  |
| 55795 | P0C214 | Q16563 | -0.98975  |
| 55796 | P0C214 | A6NCM1 | -0.79608  |
| 55797 | P0C214 | Q9H5L6 | -0.55088  |
| 55798 | P0C214 | Q8IUS5 | -0.96166  |
| 55799 | P0C214 | O76039 | -0.49198  |
| 55800 | P0C214 | Q8N1L4 | -0.97132  |
| 55801 | P0C214 | O75385 | -0.4743   |
| 55802 | P0C214 | Q7Z6K5 | -0.23568  |
| 55803 | P0C214 | O43464 | -0.22471  |
| 55804 | P0C214 | P08912 | -1.0465   |
| 55805 | P0C214 | Q15811 | -0.31503  |
| 55806 | P0C214 | O60262 | -0.51873  |
| 55807 | P0C214 | Q9UIY3 | -0.29624  |
| 55808 | P0C214 | Q96IZ6 | -0.33624  |
| 55809 | P0C214 | P61366 | -1.1198   |
| 55810 | P0C214 | P61626 | -0.86778  |
| 55811 | P0C214 | P40197 | -0.92253  |
| 55812 | P0C214 | P00505 | -0.20588  |
| 55813 | P0C214 | A6NCJ1 | -0.3091   |
| 55814 | P0C214 | Q4VX62 | -0.1487   |
| 55815 | P0C214 | Q13003 | -0.94341  |
| 55816 | P0C214 | Q07108 | -1.099    |
| 55817 | P0C214 | Q9Y616 | -0.30805  |
| 55818 | P0C214 | Q7Z5M5 | -0.98681  |
| 55819 | P0C214 | O43157 | -0.83634  |
| 55820 | P0C214 | Q9BPW4 | -1.0671   |
| 55821 | P0C214 | Q86VL8 | -1.0494   |
| 55822 | P0C214 | A6NC86 | -0.89611  |
| 55823 | P0C214 | O75051 | -1.123    |
| 55824 | P0C214 | Q96IX9 | -0.16285  |
| 55825 | P0C214 | Q8N3Z3 | -0.74164  |
| 55826 | P0C214 | O96009 | -1.1301   |
| 55827 | P0C214 | F7VJQ1 | -0.42406  |
| 55828 | P0C214 | O95164 | -0.74538  |
| 55829 | P0C214 | Q15760 | -1.4957   |
| 55830 | P0C214 | F2Z398 | -0.41303  |
| 55831 | P0C214 | Q7Z4H8 | -0.1732   |
| 55832 | P0C214 | P09544 | -0.43968  |
| 55833 | P0C214 | Q9P246 | -0.61618  |
| 55834 | P0C214 | Q9BY76 | -0.37622  |
| 55835 | P0C214 | O95379 | -0.1799   |
| 55836 | P0C214 | P63218 | -0.4962   |
| 55837 | P0C214 | Q16342 | -0.16744  |
| 55838 | P0C214 | O95715 | -0.89554  |
| 55839 | P0C214 | P08218 | -1.4261   |
| 55840 | P0C214 | Q6BCY4 | -0.34316  |
| 55841 | P0C214 | P58753 | -0.22054  |
| 55842 | P0C214 | O00602 | -1.1459   |
| 55843 | P0C214 | P51911 | -0.38086  |
| 55844 | P0C214 | Q8IVF2 | -0.20826  |
| 55845 | P0C214 | P62191 | -0.35984  |
| 55846 | P0C214 | P16401 | -0.72649  |
| 55847 | P0C214 | Q9ULI3 | -0.96819  |
| 55848 | P0C214 | Q969X2 | -0.61243  |
| 55849 | P0C214 | A3KMH1 | -1.0829   |
| 55850 | P0C214 | Q7L8L6 | -0.32177  |
| 55851 | P0C214 | Q8WXH0 | -0.22951  |
| 55852 | P0C214 | P29972 | -0.22715  |
| 55853 | P0C214 | P43632 | -1.2123   |
| 55854 | P0C214 | Q96KB5 | -0.4858   |
| 55855 | P0C214 | Q9ULT0 | -0.32174  |
| 55856 | P0C214 | Q6UX41 | -0.35508  |
| 55857 | P0C214 | O43824 | -0.96471  |
| 55858 | P0C214 | Q9Y210 | -0.39204  |
| 55859 | P0C214 | P21796 | -0.30218  |
| 55860 | P0C214 | P46199 | -0.58895  |

|       |        |        |           |
|-------|--------|--------|-----------|
| 55861 | P0C214 | Q9HC56 | -1.1927   |
| 55862 | P0C214 | O94779 | -0.59994  |
| 55863 | P0C214 | O43524 | -0.41532  |
| 55864 | P0C214 | Q8NBX0 | -0.43884  |
| 55865 | P0C214 | Q9UBL6 | -0.5363   |
| 55866 | P0C214 | Q9UPX6 | -0.98681  |
| 55867 | P0C214 | Q2M329 | -0.029736 |
| 55868 | P0C214 | Q6B0K9 | -0.45631  |
| 55869 | P0C214 | A2RU67 | -0.98681  |
| 55870 | P0C214 | Q14624 | -0.57174  |
| 55871 | P0C214 | A6NDS4 | -1.2827   |
| 55872 | P0C214 | P04275 | -0.22739  |
| 55873 | P0C214 | P49640 | -0.22759  |
| 55874 | P0C214 | Q92696 | -0.51284  |
| 55875 | P0C214 | Q9HBG6 | -0.22744  |
| 55876 | P0C214 | Q01167 | -0.36066  |
| 55877 | P0C214 | O95477 | -0.43326  |
| 55878 | P0C214 | Q2VIR3 | -0.6952   |
| 55879 | P0C214 | Q96QZ0 | -1.0838   |
| 55880 | P0C214 | Q9H6S1 | -0.052705 |
| 55881 | P0C214 | Q94933 | -1.0742   |
| 55882 | P0C214 | Q3KRA9 | -0.10644  |
| 55883 | P0C214 | Q9H7Z6 | -0.18465  |
| 55884 | P0C214 | Q9BQ24 | -0.42806  |
| 55885 | P0C214 | Q96HH9 | -0.25422  |
| 55886 | P0C214 | Q5TAG4 | -0.36785  |
| 55887 | P0C214 | Q9Y5W3 | -0.22321  |
| 55888 | P0C214 | Q6ZRP7 | -0.97665  |
| 55889 | P0C214 | Q96SL1 | -1.1692   |
| 55890 | P0C214 | Q8N7Q2 | -0.91736  |
| 55891 | P0C214 | Q86TM6 | -0.23017  |
| 55892 | P0C214 | Q12981 | -0.10322  |
| 55893 | P0C214 | Q8WZ94 | -1.2952   |
| 55894 | P0C214 | Q9Y230 | -0.22743  |
| 55895 | P0C214 | Q16777 | -0.85588  |
| 55896 | P0C214 | Q86WG5 | -0.22743  |
| 55897 | P0C214 | A6NNH2 | -0.4589   |
| 55898 | P0C214 | Q5JPE7 | -1.0413   |
| 55899 | P0C214 | Q86Y07 | -0.43576  |
| 55900 | P0C214 | Q9NSI5 | -0.65093  |
| 55901 | P0C214 | Q5TIA1 | -0.52657  |
| 55902 | P0C214 | Q8WXE0 | -0.22745  |
| 55903 | P0C214 | Q9H8W5 | -0.22742  |
| 55904 | P0C214 | Q8NGC1 | -1.2952   |
| 55905 | P0C214 | Q8IV04 | -1.2827   |
| 55906 | P0C214 | Q8N6Q3 | -0.50559  |
| 55907 | P0C214 | O95050 | -0.16927  |
| 55908 | P0C214 | O60519 | -0.14698  |
| 55909 | P0C214 | Q14995 | -0.37837  |
| 55910 | P0C214 | Q8NGX8 | -1.2952   |
| 55911 | P0C214 | Q6WRI0 | -1.1127   |
| 55912 | P0C214 | P55010 | -0.10332  |
| 55913 | P0C214 | O15244 | -0.93928  |
| 55914 | P0C214 | Q16880 | -0.70214  |
| 55915 | P0C214 | Q9Y264 | -0.73807  |
| 55916 | P0C214 | O95832 | -0.97302  |
| 55917 | P0C214 | Q03154 | -0.24963  |
| 55918 | P0C214 | B1AJZ9 | -0.12634  |
| 55919 | P0C214 | P01133 | -0.76051  |
| 55920 | P0C214 | Q86YR5 | -0.22223  |
| 55921 | P0C214 | Q96EU7 | -0.82951  |
| 55922 | P0C214 | Q8WVF2 | -0.82884  |
| 55923 | P0C214 | A6PVY3 | -0.52617  |
| 55924 | P0C214 | Q9NQT5 | -0.44261  |
| 55925 | P0C214 | P06317 | -0.99256  |
| 55926 | P0C214 | A8MXB1 | -0.96491  |
| 55927 | P0C214 | Q5I7T1 | -0.89636  |
| 55928 | P0C214 | Q05397 | -0.22741  |
| 55929 | P0C214 | Q9UGF6 | -1.2952   |
| 55930 | P0C214 | Q9BZ81 | -0.18353  |
| 55931 | P0C214 | P56730 | -1.2241   |
| 55932 | P0C214 | Q8N118 | -0.70829  |
| 55933 | P0C214 | O14610 | -1.1179   |
| 55934 | P0C214 | Q7Z5H5 | -1.1124   |
| 55935 | P0C214 | Q8NG97 | -1.2952   |
| 55936 | P0C214 | Q9BQM9 | -0.59359  |

|       |        |        |           |
|-------|--------|--------|-----------|
| 55937 | P0C214 | Q86UK0 | -1.3672   |
| 55938 | P0C214 | Q16394 | -0.46165  |
| 55939 | P0C214 | O76100 | -1.2952   |
| 55940 | P0C214 | Q5JU85 | -0.21972  |
| 55941 | P0C214 | Q9UBK5 | -1.069    |
| 55942 | P0C214 | Q8N680 | -0.083723 |
| 55943 | P0C214 | P35367 | -0.68735  |
| 55944 | P0C214 | Q5T5X7 | -0.11998  |
| 55945 | P0C214 | P43166 | -0.19393  |
| 55946 | P0C214 | Q9NUQ2 | -0.52759  |
| 55947 | P0C214 | Q06187 | -0.22741  |
| 55948 | P0C214 | P50990 | -0.089292 |
| 55949 | P0C214 | Q99490 | -0.59454  |
| 55950 | P0C214 | Q9HA65 | -1.2827   |
| 55951 | P0C214 | P30455 | -1.018    |
| 55952 | P0C214 | Q7RTP6 | -0.49057  |
| 55953 | P0C214 | Q9NQH7 | -0.52668  |
| 55954 | P0C214 | P41597 | -0.52006  |
| 55955 | P0C214 | Q969T7 | -0.047656 |
| 55956 | P0C214 | O60603 | -0.24827  |
| 55957 | P0C214 | Q5JUX0 | -0.37965  |
| 55958 | P0C214 | A6NH21 | -0.97303  |
| 55959 | P0C214 | Q7Z7L7 | -0.3221   |
| 55960 | P0C214 | Q9Y5S2 | -0.79283  |
| 55961 | P0C214 | P13805 | -0.17034  |
| 55962 | P0C214 | Q8N7B9 | -0.43585  |
| 55963 | P0C214 | Q96KC8 | -0.28155  |
| 55964 | P0C214 | P11498 | -0.42457  |
| 55965 | P0C214 | Q9Y576 | -0.63766  |
| 55966 | P0C214 | Q9NX31 | -0.11226  |
| 55967 | P0C214 | Q3SY77 | -0.90861  |
| 55968 | P0C214 | Q9NUM3 | -1.0836   |
| 55969 | P0C214 | Q7Z5L7 | -0.77568  |
| 55970 | P0C214 | Q9NYZ2 | -0.99956  |
| 55971 | P0C214 | Q99523 | -0.36449  |
| 55972 | P0C214 | Q96PQ0 | -0.98757  |
| 55973 | P0C214 | Q9NYS7 | -0.5331   |
| 55974 | P0C214 | Q9Y239 | -0.22739  |
| 55975 | P0C214 | O60565 | -0.22808  |
| 55976 | P0C214 | Q7Z3F1 | -1.0676   |
| 55977 | P0C214 | Q8NHV9 | -0.21683  |
| 55978 | P0C214 | Q8IYK8 | -1.1932   |
| 55979 | P0C214 | Q13077 | -0.17747  |
| 55980 | P0C214 | P57053 | -0.83614  |
| 55981 | P0C214 | P0C864 | -0.44883  |
| 55982 | P0C214 | Q6NT55 | -0.69915  |
| 55983 | P0C214 | Q8TCT7 | -0.41742  |
| 55984 | P0C214 | Q9H1P6 | -0.18083  |
| 55985 | P0C214 | Q6PJ21 | -0.5331   |
| 55986 | P0C214 | Q9H374 | -0.72842  |
| 55987 | P0C214 | Q9Y328 | -0.7787   |
| 55988 | P0C214 | A6NML5 | -0.98681  |
| 55989 | P0C214 | Q6NXN4 | -0.98681  |
| 55990 | P0C214 | Q9H0I2 | -0.45105  |
| 55991 | P0C214 | Q9Y225 | -0.87608  |
| 55992 | P0C214 | P02462 | -0.51698  |
| 55993 | P0C214 | Q9Y644 | -1.0555   |
| 55994 | P0C214 | P0CJ85 | -0.16414  |
| 55995 | P0C214 | Q5VUJ5 | -1.0294   |
| 55996 | P0C214 | Q8TDN7 | -0.60836  |
| 55997 | P0C214 | Q92620 | -0.22361  |
| 55998 | P0C214 | Q9NYQ7 | -1.0944   |
| 55999 | P0C214 | Q03014 | -0.22807  |
| 56000 | P0C214 | A6NDX4 | -0.98681  |
| 56001 | P0C214 | Q8NBE8 | -0.19752  |
| 56002 | P0C214 | Q7Z429 | -0.98681  |
| 56003 | P0C214 | Q3MIR4 | -0.35115  |
| 56004 | P0C214 | Q68CQ7 | -0.74069  |
| 56005 | P0C214 | P08519 | -1.1816   |
| 56006 | P0C214 | Q8N511 | -0.98681  |
| 56007 | P0C214 | Q9NYQ3 | -0.25089  |
| 56008 | P0C214 | Q14254 | -0.72551  |
| 56009 | P0C214 | Q6IQ23 | -0.22741  |
| 56010 | P0C214 | Q9C0B2 | -0.12572  |
| 56011 | P0C214 | Q8IUR5 | -0.75609  |
| 56012 | P0C214 | P50150 | -0.54426  |

|       |        |        |           |
|-------|--------|--------|-----------|
| 56013 | P0C214 | Q9NS64 | -0.80271  |
| 56014 | P0C214 | O00501 | -0.7858   |
| 56015 | P0C214 | Q8TED9 | -0.46227  |
| 56016 | P0C214 | Q95343 | -0.22794  |
| 56017 | P0C214 | Q9NRJ5 | -0.17595  |
| 56018 | P0C214 | P15515 | -0.31476  |
| 56019 | P0C214 | Q9BYG8 | -0.14848  |
| 56020 | P0C214 | P36575 | -0.45306  |
| 56021 | P0C214 | P00395 | -0.075708 |
| 56022 | P0C214 | H3BUK9 | -0.22725  |
| 56023 | P0C214 | Q8WWF6 | -0.36558  |
| 56024 | P0C214 | Q99645 | -0.92179  |
| 56025 | P0C214 | Q7L1W4 | -0.98681  |
| 56026 | P0C214 | Q9BXI9 | -0.99998  |
| 56027 | P0C214 | Q9BYJ0 | -0.86444  |
| 56028 | P0C214 | Q86Y34 | -1.3853   |
| 56029 | P0C214 | P35247 | -0.43654  |
| 56030 | P0C214 | O95760 | -0.38649  |
| 56031 | P0C214 | Q8N531 | -0.51574  |
| 56032 | P0C214 | Q6DN72 | -0.97947  |
| 56033 | P0C214 | Q8N9M1 | -0.023837 |
| 56034 | P0C214 | Q8N6F1 | -0.44274  |
| 56035 | P0C214 | Q96S15 | -0.45616  |
| 56036 | P0C214 | Q9UH65 | -0.56066  |
| 56037 | P0C214 | Q15942 | -0.32073  |
| 56038 | P0C214 | Q8IZP1 | -1.2827   |
| 56039 | P0C214 | P55083 | -1.2222   |
| 56040 | P0C214 | Q9NPJ1 | -0.15858  |
| 56041 | P0C214 | O43610 | -0.43155  |
| 56042 | P0C214 | Q9HAP6 | -0.19381  |
| 56043 | P0C214 | Q9H305 | -0.07579  |
| 56044 | P0C214 | Q7Z6W1 | -0.98681  |
| 56045 | P0C214 | Q96PZ7 | -0.98681  |
| 56046 | P0C214 | Q9HAW9 | -0.659    |
| 56047 | P0C214 | Q96PY6 | -0.22741  |
| 56048 | P0C214 | Q8IY47 | -0.20258  |
| 56049 | P0C214 | P08F94 | -0.23083  |
| 56050 | P0C214 | P08243 | -0.20259  |
| 56051 | P0C214 | Q8NH61 | -1.2952   |
| 56052 | P0C214 | P55916 | -0.43517  |
| 56053 | P0C214 | P39656 | -0.19615  |
| 56054 | P0C214 | O14732 | -0.2329   |
| 56055 | P0C214 | P52566 | -0.51291  |
| 56056 | P0C214 | Q499Z3 | -0.79608  |
| 56057 | P0C214 | Q9UHI8 | -1.306    |
| 56058 | P0C214 | Q8IXI2 | -0.33467  |
| 56059 | P0C214 | Q02223 | -1.3232   |
| 56060 | P0C214 | A6NIZ1 | -0.74546  |
| 56061 | P0C214 | A6NHG9 | -1.2952   |
| 56062 | P0C214 | A6NC78 | -0.37981  |
| 56063 | P0C214 | Q8TDV0 | -1.3693   |
| 56064 | P0C214 | Q92858 | -0.22837  |
| 56065 | P0C214 | Q9NYY3 | -0.46682  |
| 56066 | P0C214 | P21580 | -0.18354  |
| 56067 | P0C214 | P01911 | -0.71588  |
| 56068 | P0C214 | P19875 | -0.97131  |
| 56069 | P0C214 | Q14718 | -1.3888   |
| 56070 | P0C214 | Q9H1V8 | -0.9145   |
| 56071 | P0C214 | O00206 | -0.22742  |
| 56072 | P0C214 | Q13231 | -0.66532  |
| 56073 | P0C214 | Q6ZVT6 | -0.23216  |
| 56074 | P0C214 | Q96AZ1 | -0.99999  |
| 56075 | P0C214 | P13995 | -0.45865  |
| 56076 | P0C214 | P56470 | -0.36605  |
| 56077 | P0C214 | P63121 | -0.6957   |
| 56078 | P0C214 | O75398 | -0.21524  |
| 56079 | P0C214 | Q8NAS9 | -0.40345  |
| 56080 | P0C214 | Q9H4E5 | -0.75858  |
| 56081 | P0C214 | A6NGB7 | -0.98681  |
| 56082 | P0C214 | Q9H346 | -1.2952   |
| 56083 | P0C214 | A6QL63 | -1.0965   |
| 56084 | P0C214 | Q99581 | -0.22999  |
| 56085 | P0C214 | Q9UBI6 | -0.54035  |
| 56086 | P0C214 | Q5VSG8 | -0.72357  |
| 56087 | P0C214 | Q53FA7 | -0.64036  |
| 56088 | P0C214 | P63131 | -0.6957   |

|       |        |        |          |
|-------|--------|--------|----------|
| 56089 | P0C214 | P01742 | -1.0022  |
| 56090 | P0C214 | P16233 | -0.61422 |
| 56091 | P0C214 | Q53GA4 | -0.31925 |
| 56092 | P0C214 | Q9H756 | -0.98681 |
| 56093 | P0C214 | Q9H3D4 | -0.22717 |
| 56094 | P0C214 | Q68D85 | -0.93944 |
| 56095 | P0C214 | Q9NTI2 | -1.0697  |
| 56096 | P0C214 | Q9NPG4 | -1.1035  |
| 56097 | P0C214 | P46940 | -0.22741 |
| 56098 | P0C214 | Q96C23 | -0.2328  |
| 56099 | P0C214 | P43250 | -1.191   |
| 56100 | P0C214 | Q8N5W8 | -0.91736 |
| 56101 | P0C214 | Q6P1J6 | -0.71654 |
| 56102 | P0C214 | Q9NY15 | -1.1582  |
| 56103 | P0C214 | P52951 | -0.22726 |
| 56104 | P0C214 | Q8N8Z3 | -0.35672 |
| 56105 | P0C214 | Q8IXK2 | -0.73137 |
| 56106 | P0C214 | Q9GZT4 | -0.4994  |
| 56107 | P0C214 | Q9UMW8 | -0.45297 |
| 56108 | P0C214 | Q8TC59 | -0.55926 |
| 56109 | P0C214 | Q9NS85 | -0.34215 |
| 56110 | P0C214 | P35626 | -1.2544  |
| 56111 | P0C214 | Q9H1H9 | -0.33521 |
| 56112 | P0C214 | Q86XK7 | -0.98681 |
| 56113 | P0C214 | P42696 | -0.30328 |
| 56114 | P0C214 | Q96MH6 | -1.0001  |
| 56115 | P0C214 | Q5VZ03 | -0.16181 |
| 56116 | P0C214 | Q3SXM5 | -0.65351 |
| 56117 | P0C214 | O43603 | -1.2345  |
| 56118 | P0C214 | O43295 | -0.86358 |
| 56119 | P0C214 | P19622 | -0.22748 |
| 56120 | P0C214 | Q8TAA9 | -0.57308 |
| 56121 | P0C214 | P12235 | -0.24664 |
| 56122 | P0C214 | Q99611 | -0.81175 |
| 56123 | P0C214 | Q8TBJ4 | -0.95698 |
| 56124 | P0C214 | Q7Z3J3 | -0.46678 |
| 56125 | P0C214 | Q08AI6 | -1.1771  |
| 56126 | P0C214 | Q15768 | -0.86965 |
| 56127 | P0C214 | O75808 | -0.76793 |
| 56128 | P0C214 | Q9Y388 | -0.83638 |
| 56129 | P0C214 | Q9H2M3 | -0.2509  |
| 56130 | P0C214 | Q68CQ1 | -0.98681 |
| 56131 | P0C214 | P16471 | -1.0108  |
| 56132 | P0C214 | O14976 | -0.80176 |
| 56133 | P0C214 | O43665 | -0.22833 |
| 56134 | P0C214 | O14653 | -0.48683 |
| 56135 | P0C214 | A6NM11 | -0.98681 |
| 56136 | P0C214 | Q9ULZ1 | -0.63641 |
| 56137 | P0C214 | Q6X784 | -0.89281 |
| 56138 | P0C214 | Q86TD4 | -0.49826 |
| 56139 | P0C214 | A6NJZ7 | -0.22738 |
| 56140 | P0C214 | P60509 | -1.0708  |
| 56141 | P0C214 | Q9Y575 | -0.5331  |
| 56142 | P0C214 | Q9HBE4 | -0.79696 |
| 56143 | P0C214 | Q6B8I1 | -0.65149 |
| 56144 | P0C214 | Q9Y2G8 | -0.9083  |
| 56145 | P0C214 | Q8IWU4 | -0.67442 |
| 56146 | P0C214 | P19174 | -0.22741 |
| 56147 | P0C214 | P10082 | -0.69632 |
| 56148 | P0C214 | Q9ULS6 | -0.98724 |
| 56149 | P0C214 | Q9H2B2 | -0.92564 |
| 56150 | P0C214 | P32881 | -0.71883 |
| 56151 | P0C214 | P21728 | -0.32528 |
| 56152 | P0C214 | Q96P20 | -0.22707 |
| 56153 | P0C214 | Q8IWW6 | -0.95761 |
| 56154 | P0C214 | Q96Q04 | -1.2112  |
| 56155 | P0C214 | Q9Y2L9 | -0.26704 |
| 56156 | P0C214 | Q8N8F7 | -0.98681 |
| 56157 | P0C214 | Q96QV1 | -0.42496 |
| 56158 | P0C214 | O15539 | -0.76174 |
| 56159 | P0C214 | P56199 | -0.48965 |
| 56160 | P0C214 | Q9H920 | -1.0783  |
| 56161 | P0C214 | Q13107 | -0.35011 |
| 56162 | P0C214 | Q9HCE6 | -0.5208  |
| 56163 | P0C214 | Q6WN34 | -0.69393 |
| 56164 | P0C214 | P01733 | -0.44807 |



|       |        |        |           |
|-------|--------|--------|-----------|
| 56165 | P0C214 | Q9BYV6 | -0.42268  |
| 56166 | P0C214 | Q08493 | -0.40623  |
| 56167 | P0C214 | P05107 | -0.96759  |
| 56168 | P0C214 | P01859 | -0.96791  |
| 56169 | P0C214 | O95813 | -0.51159  |
| 56170 | P0C214 | A6NHY6 | -0.6185   |
| 56171 | P0C214 | Q9P2M4 | -1.2074   |
| 56172 | P0C214 | A0PJX0 | -0.43585  |
| 56173 | P0C214 | P09543 | -0.26699  |
| 56174 | P0C214 | Q8IVN8 | -0.96066  |
| 56175 | P0C214 | Q9BUB4 | -0.3325   |
| 56176 | P0C214 | Q8TEH3 | -0.63923  |
| 56177 | P0C214 | Q9NPD5 | -0.81625  |
| 56178 | P0C214 | Q7Z698 | -0.20177  |
| 56179 | P0C214 | Q9P0K1 | -0.69024  |
| 56180 | P0C214 | O95630 | -0.24974  |
| 56181 | P0C214 | Q5SQQ9 | -0.3036   |
| 56182 | P0C214 | O43900 | -0.26954  |
| 56183 | P0C214 | Q02388 | -0.62042  |
| 56184 | P0C214 | O95528 | -0.60707  |
| 56185 | P0C214 | P00450 | -0.94146  |
| 56186 | P0C214 | Q8TB73 | -0.86415  |
| 56187 | P0C214 | Q7L014 | -0.60027  |
| 56188 | P0C214 | Q9H5Y0 | -0.2859   |
| 56189 | P0C214 | O60488 | -0.56616  |
| 56190 | P0C214 | Q9NYA3 | -0.2859   |
| 56191 | P0C214 | Q8N568 | -1.0774   |
| 56192 | P0C214 | A6NGC4 | -0.98681  |
| 56193 | P0C214 | Q8IX94 | -0.81992  |
| 56194 | P0C214 | Q5QJ74 | -0.23577  |
| 56195 | P0C214 | O75912 | -0.22741  |
| 56196 | P0C214 | O14830 | -0.21772  |
| 56197 | P0C214 | Q9UKP6 | -0.96774  |
| 56198 | P0C214 | Q96MM7 | -0.59466  |
| 56199 | P0C214 | Q5T5C0 | -0.52894  |
| 56200 | P0C214 | P06312 | -1.0022   |
| 56201 | P0C214 | P0C645 | -1.2952   |
| 56202 | P0C214 | Q5TF58 | -0.084201 |
| 56203 | P0C214 | Q9Y5X3 | -0.79611  |
| 56204 | P0C214 | Q5T6X5 | -1.2746   |
| 56205 | P0C214 | Q969P0 | -0.34763  |
| 56206 | P0C214 | P78417 | -0.2242   |
| 56207 | P0C214 | Q9BYJ1 | -0.48697  |
| 56208 | P0C214 | A8MWD9 | -0.16074  |
| 56209 | P0C214 | P15813 | -0.67056  |
| 56210 | P0C214 | Q5XXA6 | -1.0542   |
| 56211 | P0C214 | Q96J65 | -1.1097   |
| 56212 | P0C214 | O14545 | -0.66741  |
| 56213 | P0C214 | O95490 | -1.1827   |
| 56214 | P0C214 | Q9H3S4 | -0.28538  |
| 56215 | P0C214 | Q6PFW1 | -0.064016 |
| 56216 | P0C214 | Q8NCN4 | -0.17709  |
| 56217 | P0C214 | P0DJD9 | -1.1989   |
| 56218 | P0C214 | O15520 | -0.32915  |
| 56219 | P0C214 | Q9H9J4 | -0.84851  |
| 56220 | P0C214 | P01906 | -0.79506  |
| 56221 | P0C214 | Q8TCW9 | -1.3342   |
| 56222 | P0C214 | P07099 | -0.8671   |
| 56223 | P0C214 | Q4VC12 | -0.49269  |
| 56224 | P0C214 | Q6ZWB6 | -0.19644  |
| 56225 | P0C214 | P04208 | -1.0022   |
| 56226 | P0C214 | P01766 | -1.0022   |
| 56227 | P0C214 | Q8NE28 | -1.0731   |
| 56228 | P0C214 | Q8NGF0 | -1.2952   |
| 56229 | P0C214 | Q86XQ3 | -1.0332   |
| 56230 | P0C214 | Q86WR6 | -0.15272  |
| 56231 | P0C214 | P43627 | -1.069    |
| 56232 | P0C214 | P32856 | -0.30568  |
| 56233 | P0C214 | Q969N2 | -0.63272  |
| 56234 | P0C214 | H3BV60 | -0.98681  |
| 56235 | P0C214 | Q9Y6Y8 | -0.25888  |
| 56236 | P0C214 | Q16204 | -0.29368  |
| 56237 | P0C214 | Q8TE82 | -0.28306  |
| 56238 | P0C214 | Q08477 | -0.81459  |
| 56239 | P0C214 | Q96Q45 | -0.98089  |
| 56240 | P0C214 | Q8WV92 | -0.19003  |

|       |        |        |           |
|-------|--------|--------|-----------|
| 56241 | P0C214 | Q14956 | -1.1556   |
| 56242 | P0C214 | P62195 | -0.75491  |
| 56243 | P0C214 | Q9BR26 | -0.97085  |
| 56244 | P0C214 | Q9P1P4 | -1.3342   |
| 56245 | P0C214 | Q8WU79 | -0.20154  |
| 56246 | P0C214 | Q96FG2 | -0.55394  |
| 56247 | P0C214 | Q9UJ96 | -0.75544  |
| 56248 | P0C214 | O15013 | -0.22782  |
| 56249 | P0C214 | Q9NSU2 | -0.20404  |
| 56250 | P0C214 | Q8IVL5 | -0.50451  |
| 56251 | P0C214 | P52739 | -0.56039  |
| 56252 | P0C214 | P34998 | -0.63061  |
| 56253 | P0C214 | Q8N475 | -0.95313  |
| 56254 | P0C214 | Q53FE4 | -0.28004  |
| 56255 | P0C214 | Q3MIN7 | -0.90137  |
| 56256 | P0C214 | Q9GZQ6 | -1.2964   |
| 56257 | P0C214 | Q9Y2U9 | -0.22274  |
| 56258 | P0C214 | P19544 | -0.22188  |
| 56259 | P0C214 | Q6UXH8 | -1.0874   |
| 56260 | P0C214 | Q8NGK4 | -1.2952   |
| 56261 | P0C214 | Q9NRM2 | -0.14987  |
| 56262 | P0C214 | Q8NGF3 | -1.2952   |
| 56263 | P0C214 | Q8N682 | -1.0165   |
| 56264 | P0C214 | Q96G61 | -0.3229   |
| 56265 | P0C214 | Q9NP62 | -0.14663  |
| 56266 | P0C214 | Q93038 | -1.1264   |
| 56267 | P0C214 | P60985 | -1.0044   |
| 56268 | P0C214 | Q5T0U0 | -0.039041 |
| 56269 | P0C214 | Q9BZM5 | -0.92749  |
| 56270 | P0C214 | A6NMV5 | -0.18615  |
| 56271 | P0C214 | Q86VI3 | -0.56789  |
| 56272 | P0C214 | Q8WU10 | -0.45045  |
| 56273 | P0C214 | Q96BM1 | -0.22741  |
| 56274 | P0C214 | Q96H72 | -0.67567  |
| 56275 | P0C214 | Q6NVV9 | -0.61462  |
| 56276 | P0C214 | Q8N7X0 | -0.72692  |
| 56277 | P0C214 | Q9UHF3 | -1.0398   |
| 56278 | P0C214 | Q6UXB8 | -1.3474   |
| 56279 | P0C214 | Q14623 | -0.42761  |
| 56280 | P0C214 | Q13242 | -0.22676  |
| 56281 | P0C214 | Q9UDT6 | -0.27174  |
| 56282 | P0C214 | P52895 | -0.26441  |
| 56283 | P0C214 | Q8NCS4 | -0.98681  |
| 56284 | P0C214 | Q14003 | -0.79179  |
| 56285 | P0C214 | Q96T92 | -0.22641  |
| 56286 | P0C214 | Q9UNF0 | -0.22743  |
| 56287 | P0C214 | Q96MZ4 | -0.14997  |
| 56288 | P0C214 | Q6ZMK1 | -0.12514  |
| 56289 | P0C214 | Q9UJ14 | -0.76946  |
| 56290 | P0C214 | Q6SPF0 | -0.73145  |
| 56291 | P0C214 | Q15125 | -0.77634  |
| 56292 | P0C214 | Q7LFL8 | -0.36208  |
| 56293 | P0C214 | Q7RTY8 | -1.4419   |
| 56294 | P0C214 | P54707 | -0.95709  |
| 56295 | P0C214 | Q8TBR5 | -0.20875  |
| 56296 | P0C214 | Q9NRC9 | -0.9204   |
| 56297 | P0C214 | P51677 | -1.3408   |
| 56298 | P0C214 | Q9BY71 | -0.35508  |
| 56299 | P0C214 | Q9UEU0 | -0.62122  |
| 56300 | P0C214 | Q7L273 | -0.2117   |
| 56301 | P0C214 | O95259 | -0.38823  |
| 56302 | P0C214 | P01768 | -1.0022   |
| 56303 | P0C214 | Q7Z5S9 | -0.98681  |
| 56304 | P0C214 | P60484 | -0.22739  |
| 56305 | P0C214 | Q8IWU9 | -0.2294   |
| 56306 | P0C214 | Q9BZZ2 | -1.5681   |
| 56307 | P0C214 | Q49A17 | -0.80764  |
| 56308 | P0C214 | Q8TAT5 | -0.40007  |
| 56309 | P0C214 | P49286 | -1.3756   |
| 56310 | P0C214 | Q9BUL5 | -0.50512  |
| 56311 | P0C214 | Q8IW70 | -0.98681  |
| 56312 | P0C214 | Q6ZUT6 | -0.4296   |
| 56313 | P0C214 | A1KZ92 | -0.71673  |
| 56314 | P0C214 | Q5BJF2 | -0.15223  |
| 56315 | P0C214 | P0CL85 | -0.065644 |
| 56316 | P0C214 | Q13361 | -0.93513  |

|       |        |        |           |
|-------|--------|--------|-----------|
| 56317 | P0C214 | Q9Y574 | -0.25653  |
| 56318 | P0C214 | Q5VV16 | -0.41532  |
| 56319 | P0C214 | Q5TCS8 | -0.94586  |
| 56320 | P0C214 | Q15381 | -0.27046  |
| 56321 | P0C214 | Q75317 | -0.46237  |
| 56322 | P0C214 | Q9Y5P0 | -1.2952   |
| 56323 | P0C214 | A6NC05 | -0.36334  |
| 56324 | P0C214 | Q96CD2 | -0.10744  |
| 56325 | P0C214 | Q9NZD2 | -0.65276  |
| 56326 | P0C214 | P30447 | -0.91186  |
| 56327 | P0C214 | Q9ULZ3 | -0.14901  |
| 56328 | P0C214 | Q8NH95 | -1.2952   |
| 56329 | P0C214 | Q401N2 | -1.149    |
| 56330 | P0C214 | Q03164 | -0.22673  |
| 56331 | P0C214 | Q8IV61 | -0.63138  |
| 56332 | P0C214 | P11717 | -0.34071  |
| 56333 | P0C214 | Q0VAQ4 | -0.43311  |
| 56334 | P0C214 | Q93079 | -0.85588  |
| 56335 | P0C214 | Q6UXV3 | -0.91736  |
| 56336 | P0C214 | O00341 | -1.105    |
| 56337 | P0C214 | Q9Y5I1 | -1.2636   |
| 56338 | P0C214 | O95870 | -0.89757  |
| 56339 | P0C214 | Q14983 | -0.39082  |
| 56340 | P0C214 | Q03519 | -0.32136  |
| 56341 | P0C214 | O76054 | -0.42584  |
| 56342 | P0C214 | P41440 | -0.8315   |
| 56343 | P0C214 | P16402 | -0.7115   |
| 56344 | P0C214 | Q5BKY1 | -0.22864  |
| 56345 | P0C214 | Q12778 | -0.39177  |
| 56346 | P0C214 | Q9BRQ8 | -0.24394  |
| 56347 | P0C214 | Q8N370 | -1.1665   |
| 56348 | P0C214 | P41279 | -0.3634   |
| 56349 | P0C214 | Q99828 | -0.22702  |
| 56350 | P0C214 | P21579 | -0.33694  |
| 56351 | P0C214 | Q93052 | -0.3149   |
| 56352 | P0C214 | Q9NXA8 | -0.26715  |
| 56353 | P0C214 | P0C626 | -1.3005   |
| 56354 | P0C214 | Q6F5E8 | -0.22186  |
| 56355 | P0C214 | Q13491 | -0.83661  |
| 56356 | P0C214 | Q92563 | -0.96627  |
| 56357 | P0C214 | Q8IYD9 | -0.91736  |
| 56358 | P0C214 | P39905 | -0.34643  |
| 56359 | P0C214 | Q8IX01 | -0.1394   |
| 56360 | P0C214 | Q99797 | -0.42084  |
| 56361 | P0C214 | Q13748 | -0.18063  |
| 56362 | P0C214 | Q09160 | -1.018    |
| 56363 | P0C214 | Q96L16 | -0.075298 |
| 56364 | P0C214 | Q13651 | -0.68216  |
| 56365 | P0C214 | O00305 | -0.22706  |
| 56366 | P0C214 | Q7L0X2 | -0.039107 |
| 56367 | P0C214 | Q7L5Y1 | -0.18624  |
| 56368 | P0C214 | P21802 | -0.25737  |
| 56369 | P0C214 | O95716 | -0.70188  |
| 56370 | P0C214 | Q8TE54 | -0.64135  |
| 56371 | P0C214 | Q8NHY3 | -0.37289  |
| 56372 | P0C214 | O75508 | -1.0185   |
| 56373 | P0C214 | Q05925 | -0.22769  |
| 56374 | P0C214 | Q8IZC6 | -0.93724  |
| 56375 | P0C214 | Q96DX7 | -0.23323  |
| 56376 | P0C214 | Q30KQ1 | -0.88056  |
| 56377 | P0C214 | P30453 | -0.91186  |
| 56378 | P0C214 | Q9UBN6 | -0.94673  |
| 56379 | P0C214 | Q96KN3 | -0.42949  |
| 56380 | P0C214 | Q9NZP2 | -1.2952   |
| 56381 | P0C214 | Q96CP2 | -0.18353  |
| 56382 | P0C214 | Q8N539 | -1.1483   |
| 56383 | P0C214 | Q8N5V2 | -0.71267  |
| 56384 | P0C214 | Q96DU3 | -1.0766   |
| 56385 | P0C214 | O60706 | -1.1151   |
| 56386 | P0C214 | Q96IW7 | -0.69153  |
| 56387 | P0C214 | O95297 | -0.41522  |
| 56388 | P0C214 | Q86VW1 | -1.0894   |
| 56389 | P0C214 | Q9P1A2 | -0.18353  |
| 56390 | P0C214 | Q8TEY7 | -0.30985  |
| 56391 | P0C214 | P05538 | -0.72792  |
| 56392 | P0C214 | P51798 | -1.213    |

|       |        |        |           |
|-------|--------|--------|-----------|
| 56393 | P0C214 | Q9NRQ2 | -0.46421  |
| 56394 | P0C214 | Q00169 | -0.75491  |
| 56395 | P0C214 | Q96FW1 | -0.34853  |
| 56396 | P0C214 | P59768 | -0.42637  |
| 56397 | P0C214 | Q96L08 | -0.98681  |
| 56398 | P0C214 | Q9BRJ9 | -0.22746  |
| 56399 | P0C214 | Q96MI9 | -0.40882  |
| 56400 | P0C214 | Q9ULK0 | -0.9926   |
| 56401 | P0C214 | Q8WZ59 | -0.98681  |
| 56402 | P0C214 | Q8IZP7 | -0.98938  |
| 56403 | P0C214 | Q14990 | -0.69178  |
| 56404 | P0C214 | Q8NGY1 | -1.2952   |
| 56405 | P0C214 | A6NJY4 | -0.98681  |
| 56406 | P0C214 | P0C842 | -0.50812  |
| 56407 | P0C214 | Q96DR5 | -1.0961   |
| 56408 | P0C214 | Q03167 | -0.3154   |
| 56409 | P0C214 | Q8NFM4 | -0.48657  |
| 56410 | P0C214 | Q2NKQ1 | -0.86088  |
| 56411 | P0C214 | Q8NI38 | -0.2274   |
| 56412 | P0C214 | P08574 | -0.31147  |
| 56413 | P0C214 | Q9Y6M9 | -0.10079  |
| 56414 | P0C214 | Q8N9L7 | -0.096032 |
| 56415 | P0C214 | Q49AM3 | -0.22296  |
| 56416 | P0C214 | Q13574 | -0.22741  |
| 56417 | P0C214 | Q9Y6W5 | -0.40198  |
| 56418 | P0C214 | Q9BZR6 | -0.22836  |
| 56419 | P0C214 | P09430 | -0.66761  |
| 56420 | P0C214 | P0C024 | -0.40979  |
| 56421 | P0C214 | O43825 | -0.86578  |
| 56422 | P0C214 | Q9Y5X2 | -0.22368  |
| 56423 | P0C214 | P13569 | -0.35194  |
| 56424 | P0C214 | Q6ZT12 | -0.74748  |
| 56425 | P0C214 | Q9H161 | -0.2086   |
| 56426 | P0C214 | P13500 | -0.35805  |
| 56427 | P0C214 | Q99965 | -1.2675   |
| 56428 | P0C214 | Q86VQ1 | -0.20758  |
| 56429 | P0C214 | Q9NZW5 | -0.22447  |
| 56430 | P0C214 | Q8N8D9 | -0.26274  |
| 56431 | P0C214 | Q10981 | -0.61609  |
| 56432 | P0C214 | Q96PD2 | -1.2103   |
| 56433 | P0C214 | Q5GFL6 | -1.0397   |
| 56434 | P0C214 | Q9UL51 | -1.0745   |
| 56435 | P0C214 | Q9NZS2 | -1.1246   |
| 56436 | P0C214 | Q9ULZ9 | -1.4363   |
| 56437 | P0C214 | P15260 | -1.1256   |
| 56438 | P0C214 | Q9BXJ5 | -0.89844  |
| 56439 | P0C214 | Q969J5 | -0.55068  |
| 56440 | P0C214 | P61647 | -0.64427  |
| 56441 | P0C214 | A6NH52 | -0.98681  |
| 56442 | P0C214 | Q96A84 | -0.82118  |
| 56443 | P0C214 | P16930 | -0.082264 |
| 56444 | P0C214 | Q6PL24 | -0.9667   |
| 56445 | P0C214 | P29033 | -0.92759  |
| 56446 | P0C214 | Q9H521 | -0.31852  |
| 56447 | P0C214 | Q8NB59 | -0.87241  |
| 56448 | P0C214 | Q00056 | -0.19897  |
| 56449 | P0C214 | Q86XW9 | -0.25528  |
| 56450 | P0C214 | Q6EBC2 | -0.84118  |
| 56451 | P0C214 | Q8NG48 | -0.014629 |
| 56452 | P0C214 | Q8N2U0 | -0.98681  |
| 56453 | P0C214 | A6NEK1 | -0.55184  |
| 56454 | P0C214 | Q38SD2 | -1.2772   |
| 56455 | P0C214 | Q8N1P7 | -0.39457  |
| 56456 | P0C214 | Q86UF1 | -0.98681  |
| 56457 | P0C214 | Q86UN6 | -0.30142  |
| 56458 | P0C214 | O14957 | -0.53346  |
| 56459 | P0C214 | Q13509 | -0.53623  |
| 56460 | P0C214 | Q8NE62 | -0.25222  |
| 56461 | P0C214 | Q8IXQ8 | -0.22647  |
| 56462 | P0C214 | F8WBI6 | -0.2859   |
| 56463 | P0C214 | O15375 | -1.1327   |
| 56464 | P0C214 | O15482 | -0.81299  |
| 56465 | P0C214 | P20382 | -0.80495  |
| 56466 | P0C214 | Q99819 | -0.27851  |
| 56467 | P0C214 | Q6ZWT7 | -0.69221  |
| 56468 | P0C214 | A6NKG5 | -1.1925   |

|       |        |        |          |
|-------|--------|--------|----------|
| 56469 | P0C214 | P01816 | -1.0022  |
| 56470 | P0C214 | Q9UMX5 | -0.8028  |
| 56471 | P0C214 | O76081 | -0.34338 |
| 56472 | P0C214 | Q5SRD3 | -1.0294  |
| 56473 | P0C214 | P53801 | -0.27593 |
| 56474 | P0C214 | Q9NP85 | -0.11281 |
| 56475 | P0C214 | Q96DU9 | -0.63654 |
| 56476 | P0C214 | Q8N7X4 | -0.18353 |
| 56477 | P0C214 | Q8TAV3 | -0.54602 |
| 56478 | P0C214 | P29350 | -0.22742 |
| 56479 | P0C214 | Q71RG6 | -0.91736 |
| 56480 | P0C214 | Q9NY28 | -0.73137 |
| 56481 | P0C214 | Q86YJ7 | -0.22741 |
| 56482 | P0C214 | Q9H553 | -0.20747 |
| 56483 | P0C214 | P35523 | -1.0959  |
| 56484 | P0C214 | O15534 | -0.22837 |
| 56485 | P0C214 | A6NLU5 | -0.98681 |
| 56486 | P0C214 | O60422 | -0.22585 |
| 56487 | P0C214 | Q14088 | -0.41731 |
| 56488 | P0C214 | Q99680 | -1.4957  |
| 56489 | P0C214 | O75310 | -0.92981 |
| 56490 | P0C214 | Q96ER9 | -0.19547 |
| 56491 | P0C214 | Q9UPS6 | -0.2267  |
| 56492 | P0C214 | P07478 | -0.93063 |
| 56493 | P0C214 | P01893 | -1.1888  |
| 56494 | P0C214 | Q14156 | -0.74538 |
| 56495 | P0C214 | Q8N4L4 | -1.146   |
| 56496 | P0C214 | P18465 | -1.0367  |
| 56497 | P0C214 | Q9Y4C8 | -0.44767 |
| 56498 | P0C214 | Q56UN5 | -1.2407  |
| 56499 | P0C214 | Q3KNT9 | -0.98681 |
| 56500 | P0C214 | O60309 | -0.98681 |
| 56501 | P0C214 | Q3C1V0 | -0.98681 |
| 56502 | P0C214 | Q9UMR7 | -1.256   |
| 56503 | P0C214 | P30046 | -0.33761 |
| 56504 | P0C214 | Q8N6U8 | -1.5294  |
| 56505 | P0C214 | P23468 | -0.65804 |
| 56506 | P0C214 | Q5T4I8 | -0.12418 |
| 56507 | P0C214 | P48549 | -0.69506 |
| 56508 | P0C214 | Q6S5L8 | -0.46613 |
| 56509 | P0C214 | Q7Z407 | -1.0708  |
| 56510 | P0C214 | P20823 | -0.21892 |
| 56511 | P0C214 | Q96AA8 | -0.27651 |
| 56512 | P0C214 | O75947 | -0.24175 |
| 56513 | P0C214 | Q05901 | -1.0568  |
| 56514 | P0C214 | Q9NY57 | -1.3207  |
| 56515 | P0C214 | Q96R28 | -1.2952  |
| 56516 | P0C214 | Q9P283 | -1.1497  |
| 56517 | P0C214 | O00522 | -0.22741 |
| 56518 | P0C214 | Q92731 | -0.22749 |
| 56519 | P0C214 | E5RQL4 | -0.46622 |
| 56520 | P0C214 | P41732 | -1.0035  |
| 56521 | P0C214 | P31321 | -0.22748 |
| 56522 | P0C214 | A8MVP8 | -0.29955 |
| 56523 | P0C214 | Q9HBA0 | -0.49373 |
| 56524 | P0C214 | O75354 | -1.0684  |
| 56525 | P0C214 | A8MZ59 | -0.22664 |
| 56526 | P0C214 | A8K7I4 | -1.3608  |
| 56527 | P0C214 | Q9P1C3 | -0.91736 |
| 56528 | P0C214 | P22309 | -0.47362 |
| 56529 | P0C214 | P0DKV0 | -0.17755 |
| 56530 | P0C214 | Q6ZVM7 | -0.43437 |
| 56531 | P0C214 | Q8NA92 | -0.55088 |
| 56532 | P0C214 | P21918 | -0.73606 |
| 56533 | P0C214 | A6NI28 | -1.2409  |
| 56534 | P0C214 | Q13131 | -0.26509 |
| 56535 | P0C214 | Q9H0U4 | -0.55323 |
| 56536 | P0C214 | P21452 | -1.4252  |
| 56537 | P0C214 | O00221 | -0.2274  |
| 56538 | P0C214 | Q8NCI6 | -0.2362  |
| 56539 | P0C214 | Q96HY6 | -0.48228 |
| 56540 | P0C214 | Q9NP95 | -0.84743 |
| 56541 | P0C214 | Q4VX67 | -1.0164  |
| 56542 | P0C214 | Q14032 | -0.30128 |
| 56543 | P0C214 | Q8TAA1 | -0.7704  |
| 56544 | P0C214 | Q32P51 | -0.26901 |

|       |        |         |           |
|-------|--------|---------|-----------|
| 56545 | P0C214 | Q9H5L9  | -0.42029  |
| 56546 | P0C214 | Q9UH73  | -0.15152  |
| 56547 | P0C214 | Q9NQA5  | -1.185    |
| 56548 | P0C214 | Q0IIM8  | -1.2916   |
| 56549 | P0C214 | Q9BWJ2  | -0.24168  |
| 56550 | P0C214 | Q5MY95  | -1.2587   |
| 56551 | P0C214 | P0CI25  | -0.71534  |
| 56552 | P0C214 | Q969I6  | -1.1946   |
| 56553 | P0C214 | Q8IUXX8 | -1.3509   |
| 56554 | P0C214 | Q9BY11  | -0.26893  |
| 56555 | P0C214 | P32970  | -0.56707  |
| 56556 | P0C214 | A6NM43  | -0.60376  |
| 56557 | P0C214 | P08571  | -0.47322  |
| 56558 | P0C214 | O43278  | -0.78188  |
| 56559 | P0C214 | Q14863  | -0.2274   |
| 56560 | P0C214 | A6NFX1  | -1.0564   |
| 56561 | P0C214 | A6NKZ8  | -0.61482  |
| 56562 | P0C214 | B2RUY7  | -0.8161   |
| 56563 | P0C214 | Q9NUX5  | -0.21578  |
| 56564 | P0C214 | A2RU48  | -0.98681  |
| 56565 | P0C214 | Q6ZQY3  | -0.55411  |
| 56566 | P0C214 | Q52LG2  | -0.083808 |
| 56567 | P0C214 | Q92771  | -0.56283  |
| 56568 | P0C214 | P28223  | -0.72678  |
| 56569 | P0C214 | Q8NB78  | -0.40336  |
| 56570 | P0C214 | O75309  | -1.2424   |
| 56571 | P0C214 | Q58A44  | -0.20758  |
| 56572 | P0C214 | P30483  | -1.0367   |
| 56573 | P0C214 | O43196  | -0.64946  |
| 56574 | P0C214 | Q6ICG6  | -0.42094  |
| 56575 | P0C214 | O00515  | -0.962    |
| 56576 | P0C214 | Q96BW5  | -0.42852  |
| 56577 | P0C214 | P06870  | -0.6587   |
| 56578 | P0C214 | Q12979  | -0.67197  |
| 56579 | P0C214 | Q9BXN2  | -0.60505  |
| 56580 | P0C214 | Q7Z2K8  | -0.72032  |
| 56581 | P0C214 | Q01638  | -0.79668  |
| 56582 | P0C214 | Q5TDH0  | -0.54994  |
| 56583 | P0C214 | Q29718  | -1.0367   |
| 56584 | P0C214 | Q9H9P2  | -0.57797  |
| 56585 | P0C214 | Q9Y2I8  | -0.22939  |
| 56586 | P0C214 | Q5TGY3  | -0.51359  |
| 56587 | P0C214 | P09493  | -0.22851  |
| 56588 | P0C214 | Q8IV63  | -0.75128  |
| 56589 | P0C214 | O60404  | -1.2952   |
| 56590 | P0C214 | Q5T4D3  | -0.98681  |
| 56591 | P0C214 | Q9NQ75  | -0.60067  |
| 56592 | P0C214 | P01721  | -1.0022   |
| 56593 | P0C214 | Q8N4C0  | -0.597    |
| 56594 | P0C214 | Q7Z736  | -0.68854  |
| 56595 | P0C214 | Q9BWV7  | -0.31355  |
| 56596 | P0C214 | A6NGW2  | -0.91736  |
| 56597 | P0C214 | Q8I WV1 | -0.15386  |
| 56598 | P0C214 | Q8TF42  | -0.22741  |
| 56599 | P0C214 | P01700  | -1.0022   |
| 56600 | P0C214 | P04553  | -0.86868  |
| 56601 | P0C214 | Q14796  | -0.57563  |
| 56602 | P0C214 | P02768  | -0.23646  |
| 56603 | P0C214 | Q7Z5Q5  | -0.2028   |
| 56604 | P0C214 | Q8NDH3  | -0.69617  |
| 56605 | P0C214 | Q8NES8  | -0.88056  |
| 56606 | P0C214 | Q9HCC8  | -0.74627  |
| 56607 | P0C214 | P02708  | -0.83264  |
| 56608 | P0C214 | Q9UL52  | -1.9114   |
| 56609 | P0C214 | P08581  | -0.41378  |
| 56610 | P0C214 | Q9GZV7  | -1.1017   |
| 56611 | P0C214 | Q9P0K8  | -0.41532  |
| 56612 | P0C214 | P08962  | -0.66187  |
| 56613 | P0C214 | P51793  | -1.2113   |
| 56614 | P0C214 | P04035  | -0.49233  |
| 56615 | P0C214 | Q5T7P6  | -0.98681  |
| 56616 | P0C214 | P19823  | -0.7148   |
| 56617 | P0C214 | Q8TAP8  | -0.41268  |
| 56618 | P0C214 | Q9H237  | -0.81816  |
| 56619 | P0C214 | Q9HBW1  | -0.8702   |
| 56620 | P0C214 | Q13166  | -0.18353  |

|       |        |        |           |
|-------|--------|--------|-----------|
| 56621 | P0C214 | P35968 | -0.40546  |
| 56622 | P0C214 | Q3SXR2 | -0.13793  |
| 56623 | P0C214 | Q9Y6Z4 | -0.18353  |
| 56624 | P0C214 | Q3KR16 | -0.27187  |
| 56625 | P0C214 | Q9H6B4 | -0.93734  |
| 56626 | P0C214 | Q6PK57 | -0.51649  |
| 56627 | P0C214 | Q9NXH8 | -1.3648   |
| 56628 | P0C214 | Q8N3H0 | -0.21942  |
| 56629 | P0C214 | O76036 | -1.1556   |
| 56630 | P0C214 | O60330 | -1.2424   |
| 56631 | P0C214 | P19801 | -0.78171  |
| 56632 | P0C214 | Q4LDR2 | -0.96345  |
| 56633 | P0C214 | A6NMZ2 | -0.62021  |
| 56634 | P0C214 | Q92643 | -0.55917  |
| 56635 | P0C214 | Q86XM0 | -1.1226   |
| 56636 | P0C214 | Q13886 | -0.22257  |
| 56637 | P0C214 | Q96BR1 | -0.98868  |
| 56638 | P0C214 | Q9P0G3 | -1.2042   |
| 56639 | P0C214 | Q96HE8 | -0.98681  |
| 56640 | P0C214 | Q9NXK6 | -1.3343   |
| 56641 | P0C214 | Q8IVP5 | -0.5914   |
| 56642 | P0C214 | P0CG06 | -0.99256  |
| 56643 | P0C214 | Q8TDN1 | -0.98724  |
| 56644 | P0C214 | Q13465 | -0.06711  |
| 56645 | P0C214 | Q07837 | -1.0008   |
| 56646 | P0C214 | Q9BRK3 | -0.98681  |
| 56647 | P0C214 | P48436 | -0.33852  |
| 56648 | P0C214 | Q5JQF8 | -0.83638  |
| 56649 | P0C214 | Q8IV13 | -0.22541  |
| 56650 | P0C214 | P49753 | -0.19267  |
| 56651 | P0C214 | Q155Q3 | -0.22741  |
| 56652 | P0C214 | Q9Y5J5 | -0.4467   |
| 56653 | P0C214 | P22914 | -0.39725  |
| 56654 | P0C214 | Q8IV16 | -0.81515  |
| 56655 | P0C214 | Q86W74 | -0.98681  |
| 56656 | P0C214 | P21815 | -1.0259   |
| 56657 | P0C214 | O00755 | -0.43025  |
| 56658 | P0C214 | Q96RU3 | -0.22741  |
| 56659 | P0C214 | A6NJW4 | -0.98681  |
| 56660 | P0C214 | P16109 | -0.22741  |
| 56661 | P0C214 | P08134 | -0.2266   |
| 56662 | P0C214 | Q8NFT8 | -0.66831  |
| 56663 | P0C214 | Q6PH81 | -0.58592  |
| 56664 | P0C214 | Q9UPQ0 | -0.54303  |
| 56665 | P0C214 | Q15012 | -0.99539  |
| 56666 | P0C214 | Q9BXI3 | -0.12492  |
| 56667 | P0C214 | Q96GR2 | -0.59933  |
| 56668 | P0C214 | Q06889 | -0.20822  |
| 56669 | P0C214 | Q9H5Z1 | -0.68438  |
| 56670 | P0C214 | A6NGB0 | -0.98681  |
| 56671 | P0C214 | P59536 | -1.2886   |
| 56672 | P0C214 | O43474 | -0.22382  |
| 56673 | P0C214 | Q6TFL4 | -0.45485  |
| 56674 | P0C214 | P30490 | -1.0367   |
| 56675 | P0C214 | P58658 | -0.97467  |
| 56676 | P0C214 | Q9H106 | -0.91736  |
| 56677 | P0C214 | Q9U1L4 | -0.56416  |
| 56678 | P0C214 | Q8IYS2 | -0.98681  |
| 56679 | P0C214 | Q8WYQ4 | -0.1517   |
| 56680 | P0C214 | Q9UKZ9 | -0.91859  |
| 56681 | P0C214 | P05160 | -0.74797  |
| 56682 | P0C214 | Q15878 | -0.88     |
| 56683 | P0C214 | O43687 | -0.82381  |
| 56684 | P0C214 | Q96J42 | -0.98246  |
| 56685 | P0C214 | Q8IYV9 | -1.0373   |
| 56686 | P0C214 | Q8WWX8 | -1.0667   |
| 56687 | P0C214 | Q8WZ92 | -1.2952   |
| 56688 | P0C214 | Q9Y5K8 | -0.053501 |
| 56689 | P0C214 | Q9NZH8 | -0.76206  |
| 56690 | P0C214 | Q8N394 | -0.91465  |
| 56691 | P0C214 | P58294 | -0.67338  |
| 56692 | P0C214 | P07911 | -0.71457  |
| 56693 | P0C214 | O95427 | -0.91739  |
| 56694 | P0C214 | P60903 | -0.60553  |
| 56695 | P0C214 | Q66K79 | -1.2505   |
| 56696 | P0C214 | Q9Y2R0 | -0.77831  |

|       |        |        |           |
|-------|--------|--------|-----------|
| 56697 | P0C214 | Q6PJF5 | -1.045    |
| 56698 | P0C214 | O95803 | -0.7345   |
| 56699 | P0C214 | Q9BUQ8 | -0.4773   |
| 56700 | P0C214 | Q05823 | -0.22741  |
| 56701 | P0C214 | Q6XZB0 | -1.0115   |
| 56702 | P0C214 | O14626 | -1.3112   |
| 56703 | P0C214 | Q9C0D5 | -0.52269  |
| 56704 | P0C214 | Q86U10 | -0.36155  |
| 56705 | P0C214 | Q96BX8 | -0.63993  |
| 56706 | P0C214 | Q8NGH3 | -1.2952   |
| 56707 | P0C214 | P33241 | -0.80234  |
| 56708 | P0C214 | Q9UBC0 | -0.22724  |
| 56709 | P0C214 | A6NKT7 | -0.46678  |
| 56710 | P0C214 | Q96BR5 | -0.18802  |
| 56711 | P0C214 | Q96JG9 | -0.22753  |
| 56712 | P0C214 | Q96HJ9 | -0.32942  |
| 56713 | P0C214 | P40205 | -0.638    |
| 56714 | P0C214 | Q96JA4 | -0.98681  |
| 56715 | P0C214 | Q9BST9 | -0.49451  |
| 56716 | P0C214 | O75096 | -0.5301   |
| 56717 | P0C214 | Q86X10 | -0.82271  |
| 56718 | P0C214 | Q5T8P6 | -0.2858   |
| 56719 | P0C214 | Q13480 | -0.22733  |
| 56720 | P0C214 | P46059 | -1.0192   |
| 56721 | P0C214 | Q8NEY4 | -0.35575  |
| 56722 | P0C214 | Q9NWS6 | -0.98681  |
| 56723 | P0C214 | Q9Y240 | -0.36922  |
| 56724 | P0C214 | Q14908 | -0.22735  |
| 56725 | P0C214 | A6NCQ9 | -1.0783   |
| 56726 | P0C214 | Q7Z2K6 | -1.2466   |
| 56727 | P0C214 | Q92908 | -0.22739  |
| 56728 | P0C214 | O14977 | -0.10586  |
| 56729 | P0C214 | Q8N8Q1 | -0.97411  |
| 56730 | P0C214 | A6NDK9 | -0.2859   |
| 56731 | P0C214 | Q9GZK7 | -1.2952   |
| 56732 | P0C214 | Q96BD0 | -1.112    |
| 56733 | P0C214 | Q2M3R5 | -0.98681  |
| 56734 | P0C214 | Q969Q4 | -0.65148  |
| 56735 | P0C214 | Q96BF3 | -1.0708   |
| 56736 | P0C214 | Q8WU43 | -0.29196  |
| 56737 | P0C214 | P29376 | -1.4188   |
| 56738 | P0C214 | Q8NGL3 | -1.2952   |
| 56739 | P0C214 | P35326 | -0.33953  |
| 56740 | P0C214 | Q9H1U9 | -0.80997  |
| 56741 | P0C214 | Q86UK5 | -0.66673  |
| 56742 | P0C214 | Q9Y484 | -0.22705  |
| 56743 | P0C214 | O15173 | -1.1777   |
| 56744 | P0C214 | Q9ULB4 | -1.0552   |
| 56745 | P0C214 | Q01453 | -0.52316  |
| 56746 | P0C214 | Q9BRC7 | -0.38281  |
| 56747 | P0C214 | P35212 | -1.0796   |
| 56748 | P0C214 | P20916 | -0.93212  |
| 56749 | P0C214 | Q07699 | -0.84893  |
| 56750 | P0C214 | Q13401 | -0.080441 |
| 56751 | P0C214 | A0A183 | -0.38015  |
| 56752 | P0C214 | Q15847 | -0.18353  |
| 56753 | P0C214 | Q5TIE3 | -0.91736  |
| 56754 | P0C214 | Q9P2U8 | -0.94409  |
| 56755 | P0C214 | Q9UMR5 | -0.37336  |
| 56756 | P0C214 | Q641Q3 | -0.91736  |
| 56757 | P0C214 | Q13263 | -0.22755  |
| 56758 | P0C214 | Q15523 | -0.55575  |
| 56759 | P0C214 | Q8ND25 | -0.23349  |
| 56760 | P0C214 | Q00532 | -0.72064  |
| 56761 | P0C214 | Q6NXT6 | -1.0253   |
| 56762 | P0C214 | Q9Y580 | -0.80512  |
| 56763 | P0C214 | Q9H173 | -0.16053  |
| 56764 | P0C214 | O43174 | -0.58523  |
| 56765 | P0C214 | Q8WY91 | -0.55088  |
| 56766 | P0C214 | P49703 | -0.22836  |
| 56767 | P0C214 | O75581 | -0.23744  |
| 56768 | P0C214 | Q0GE19 | -1.1717   |
| 56769 | P0C214 | P0CG04 | -1.0022   |
| 56770 | P0C214 | Q14576 | -1.0438   |
| 56771 | P0C214 | Q8WXS8 | -1.2984   |
| 56772 | P0C214 | O15269 | -0.24879  |



|       |        |        |           |
|-------|--------|--------|-----------|
| 56773 | P0C214 | Q9NVX2 | -0.22815  |
| 56774 | P0C214 | O60637 | -0.98681  |
| 56775 | P0C214 | Q96G79 | -0.77704  |
| 56776 | P0C214 | P25067 | -1.1165   |
| 56777 | P0C214 | Q9BXJ4 | -0.39187  |
| 56778 | P0C214 | P0CJ72 | -0.73145  |
| 56779 | P0C214 | Q9BUN8 | -0.088704 |
| 56780 | P0C214 | P50406 | -0.9619   |
| 56781 | P0C214 | Q96FK6 | -0.2274   |
| 56782 | P0C214 | P11473 | -0.23013  |
| 56783 | P0C214 | Q5FYB0 | -0.62048  |
| 56784 | P0C214 | Q9H7B7 | -0.91736  |
| 56785 | P0C214 | P0DJH9 | -0.36874  |
| 56786 | P0C214 | P50479 | -0.22743  |
| 56787 | P0C214 | Q9NXC2 | -1.3244   |
| 56788 | P0C214 | Q86TI4 | -0.22784  |
| 56789 | P0C214 | P33260 | -0.61003  |
| 56790 | P0C214 | Q15726 | -0.42535  |
| 56791 | P0C214 | Q76MJ5 | -0.77898  |
| 56792 | P0C214 | Q86VQ0 | -0.21461  |
| 56793 | P0C214 | Q71RG4 | -0.98681  |
| 56794 | P0C214 | Q8N1Q1 | -0.178    |
| 56795 | P0C214 | Q9GZM5 | -0.82558  |
| 56796 | P0C214 | Q9Y6Y9 | -0.15961  |
| 56797 | P0C214 | Q86YB8 | -0.47015  |
| 56798 | P0C214 | Q9Y3L5 | -0.63704  |
| 56799 | P0C214 | Q9UQQ1 | -1.3264   |
| 56800 | P0C214 | Q9NRZ5 | -0.6628   |
| 56801 | P0C214 | Q7Z6W7 | -0.36558  |
| 56802 | P0C214 | Q0VAA2 | -0.22741  |
| 56803 | P0C214 | P31645 | -0.32088  |
| 56804 | P0C214 | P08237 | -0.41657  |
| 56805 | P0C214 | A6NEQ0 | -0.53354  |
| 56806 | P0C214 | Q6UWY5 | -0.91736  |
| 56807 | P0C214 | Q2TAP0 | -0.32008  |
| 56808 | P0C214 | O00264 | -0.12451  |
| 56809 | P0C214 | E9PQX1 | -0.65042  |
| 56810 | P0C214 | Q92835 | -0.22741  |
| 56811 | P0C214 | Q96IZ5 | -0.83638  |
| 56812 | P0C214 | O60902 | -0.33515  |
| 56813 | P0C214 | P24394 | -0.91795  |
| 56814 | P0C214 | Q6ZS02 | -0.12092  |
| 56815 | P0C214 | P32302 | -1.3406   |
| 56816 | P0C214 | P21283 | -0.21815  |
| 56817 | P0C214 | P35475 | -0.36809  |
| 56818 | P0C214 | P78329 | -0.22885  |
| 56819 | P0C214 | Q9HAV5 | -0.69777  |
| 56820 | P0C214 | Q9UBP5 | -0.22678  |
| 56821 | P0C214 | Q8TDI7 | -0.98681  |
| 56822 | P0C214 | Q9BW83 | -1.0269   |
| 56823 | P0C214 | Q6P4F7 | -0.86358  |
| 56824 | P0C214 | P39059 | -1.6648   |
| 56825 | P0C214 | Q9HD89 | -0.48908  |
| 56826 | P0C214 | Q9NRH3 | -0.20461  |
| 56827 | P0C214 | P17405 | -0.25705  |
| 56828 | P0C214 | P33261 | -0.51317  |
| 56829 | P0C214 | O00461 | -0.32385  |
| 56830 | P0C214 | Q8WXA9 | -0.2202   |
| 56831 | P0C214 | P16150 | -0.8832   |
| 56832 | P0C214 | P22459 | -0.66251  |
| 56833 | P0C214 | Q96N87 | -1.2008   |
| 56834 | P0C214 | Q9Y2E5 | -0.73826  |
| 56835 | P0C214 | Q3KPI0 | -0.98681  |
| 56836 | P0C214 | Q9BQI4 | -0.85092  |
| 56837 | P0C214 | Q9BQP9 | -1.0961   |
| 56838 | P0C214 | Q9H2L4 | -0.98681  |
| 56839 | P0C214 | A6NLI3 | -0.2579   |
| 56840 | P0C214 | Q9BTC0 | -0.2272   |
| 56841 | P0C214 | Q9NUB1 | -0.26997  |
| 56842 | P0C214 | Q96LB0 | -1.3693   |
| 56843 | P0C214 | P25942 | -0.56077  |
| 56844 | P0C214 | P61165 | -0.98681  |
| 56845 | P0C214 | Q9Y5L2 | -1.0637   |
| 56846 | P0C214 | P49917 | -0.15629  |
| 56847 | P0C214 | Q9Y5V0 | -0.71534  |
| 56848 | P0C214 | B5MCY1 | -0.39253  |

|       |        |        |          |
|-------|--------|--------|----------|
| 56849 | P0C214 | Q9UBY8 | -0.38494 |
| 56850 | P0C214 | O15496 | -0.52992 |
| 56851 | P0C214 | Q9H6X2 | -0.58748 |
| 56852 | P0C214 | O60609 | -0.40086 |
| 56853 | P0C214 | Q8WUS8 | -1.0418  |
| 56854 | P0C214 | Q9NRR1 | -0.86809 |
| 56855 | P0C214 | O00230 | -0.83952 |
| 56856 | P0C214 | Q8NDI1 | -0.30231 |
| 56857 | P0C214 | A6BM72 | -0.93909 |
| 56858 | P0C214 | Q13049 | -0.2274  |
| 56859 | P0C214 | Q9NUQ9 | -0.17363 |
| 56860 | P0C214 | O60431 | -1.2952  |
| 56861 | P0C214 | Q9BXL6 | -0.43668 |
| 56862 | P0C214 | Q5M8T2 | -0.98931 |
| 56863 | P0C214 | Q05513 | -0.22408 |
| 56864 | P0C214 | P55286 | -1.2098  |
| 56865 | P0C214 | P43088 | -1.4847  |
| 56866 | P0C214 | Q969W1 | -0.95894 |
| 56867 | P0C214 | P54710 | -1.1483  |
| 56868 | P0C214 | Q9Y278 | -0.55242 |
| 56869 | P0C214 | P49914 | -0.30417 |
| 56870 | P0C214 | Q9BWF2 | -0.22731 |
| 56871 | P0C214 | Q6ZP29 | -0.99853 |
| 56872 | P0C214 | Q6YN16 | -0.57643 |
| 56873 | P0C214 | Q14644 | -0.57851 |
| 56874 | P0C214 | Q9Y679 | -0.49781 |
| 56875 | P0C214 | P13611 | -0.89908 |
| 56876 | P0C214 | Q9NPF4 | -0.36446 |
| 56877 | P0C214 | O15217 | -0.22317 |
| 56878 | P0C214 | P29400 | -0.90194 |
| 56879 | P0C214 | Q6SA08 | -0.86847 |
| 56880 | P0C214 | A8MWY0 | -0.98681 |
| 56881 | P0C214 | Q8NHX9 | -0.6398  |
| 56882 | P0C214 | Q9UKM7 | -0.78642 |
| 56883 | P0C214 | Q8IXT5 | -0.17584 |
| 56884 | P0C214 | Q8IVS2 | -0.4072  |
| 56885 | P0C214 | P32249 | -1.2554  |
| 56886 | P0C214 | Q15027 | -0.98674 |
| 56887 | P0C214 | Q6UXG2 | -0.92414 |
| 56888 | P0C214 | Q8N1G4 | -0.22783 |
| 56889 | P0C214 | P18627 | -0.93049 |
| 56890 | P0C214 | P00846 | -0.48438 |
| 56891 | P0C214 | P59089 | -0.38995 |
| 56892 | P0C214 | A8TX70 | -1.2262  |
| 56893 | P0C214 | Q9NVV0 | -0.95394 |
| 56894 | P0C214 | Q05655 | -0.21935 |
| 56895 | P0C214 | P55075 | -0.31592 |
| 56896 | P0C214 | Q96B33 | -0.848   |
| 56897 | P0C214 | A0PK11 | -0.98681 |
| 56898 | P0C214 | O75636 | -0.55707 |
| 56899 | P0C214 | O00214 | -0.21994 |
| 56900 | P0C214 | Q96HA4 | -0.98681 |
| 56901 | P0C214 | Q8N5S1 | -0.80565 |
| 56902 | P0C214 | Q5R387 | -0.92338 |
| 56903 | P0C214 | Q6N063 | -0.55024 |
| 56904 | P0C214 | Q3ZCT8 | -0.21035 |
| 56905 | P0C214 | Q9H347 | -0.2257  |
| 56906 | P0C214 | Q16828 | -0.29315 |
| 56907 | P0C214 | Q9H0J9 | -0.22261 |
| 56908 | P0C214 | Q9Y3L3 | -0.9836  |
| 56909 | P0C214 | O95754 | -0.89599 |
| 56910 | P0C214 | Q8N2M4 | -0.98681 |
| 56911 | P0C214 | Q6ZN92 | -0.32541 |
| 56912 | P0C214 | P08195 | -0.36853 |
| 56913 | P0C214 | Q9BQJ4 | -0.93253 |
| 56914 | P0C214 | Q8IZ02 | -0.22741 |
| 56915 | P0C214 | P58418 | -1.0235  |
| 56916 | P0C214 | P19021 | -0.68937 |
| 56917 | P0C214 | Q6UVK1 | -1.0703  |
| 56918 | P0C214 | Q8IV31 | -0.98681 |
| 56919 | P0C214 | Q6UXL0 | -0.77836 |
| 56920 | P0C214 | Q8WUJ1 | -0.8098  |
| 56921 | P0C214 | Q14558 | -0.33963 |
| 56922 | P0C214 | Q2TAL5 | -0.22837 |
| 56923 | P0C214 | Q96I82 | -1.1787  |
| 56924 | P0C214 | P11047 | -0.85906 |

|       |        |        |            |
|-------|--------|--------|------------|
| 56925 | P0C214 | Q8ND99 | -0.62592   |
| 56926 | P0C214 | P01308 | -0.22543   |
| 56927 | P0C214 | Q8IUQ0 | -0.69334   |
| 56928 | P0C214 | Q15005 | -0.68473   |
| 56929 | P0C214 | Q9UKG9 | -0.5013    |
| 56930 | P0C214 | P0CL81 | -0.47295   |
| 56931 | P0C214 | Q96LR4 | -0.91736   |
| 56932 | P0C214 | P78414 | -0.23115   |
| 56933 | P0C214 | Q9P2A4 | -0.22744   |
| 56934 | P0C214 | P14854 | -0.20576   |
| 56935 | P0C214 | A2CJ06 | -0.68992   |
| 56936 | P0C214 | Q8WXS4 | -1.1205    |
| 56937 | P0C214 | O43903 | -0.19344   |
| 56938 | P0C214 | P43353 | -0.32775   |
| 56939 | P0C214 | Q96PS6 | -0.98681   |
| 56940 | P0C214 | Q8N5S9 | -0.6247    |
| 56941 | P0C214 | Q8NBM4 | -0.98681   |
| 56942 | P0C214 | Q7Z2R9 | -0.91736   |
| 56943 | P0C214 | Q15198 | -0.71862   |
| 56944 | P0C214 | Q9UFH2 | -0.55071   |
| 56945 | P0C214 | P16189 | -0.91186   |
| 56946 | P0C214 | Q5T4W7 | -0.80412   |
| 56947 | P0C214 | Q7Z6I8 | -0.0025519 |
| 56948 | P0C214 | Q96D59 | -1.0783    |
| 56949 | P0C214 | Q2MV58 | -0.74419   |
| 56950 | P0C214 | Q16720 | -1.0389    |
| 56951 | P0C214 | P0C2Y1 | -0.20758   |
| 56952 | P0C214 | P01860 | -0.96791   |
| 56953 | P0C214 | P31391 | -1.4308    |
| 56954 | P0C214 | O14525 | -0.91852   |
| 56955 | P0C214 | Q9UKL6 | -0.38044   |
| 56956 | P0C214 | Q5T750 | -0.24148   |
| 56957 | P0C214 | Q5T3I0 | -0.39914   |
| 56958 | P0C214 | Q9BV79 | -0.71656   |
| 56959 | P0C214 | Q8N0U2 | -0.98681   |
| 56960 | P0C214 | Q9P0W0 | -0.4954    |
| 56961 | P0C214 | Q13203 | -0.72676   |
| 56962 | P0C214 | P52961 | -0.64523   |
| 56963 | P0C214 | Q8WU68 | -0.47477   |
| 56964 | P0C214 | P08709 | -0.77271   |
| 56965 | P0C214 | Q9NXF8 | -0.89424   |
| 56966 | P0C214 | Q7Z5H4 | -1.3002    |
| 56967 | P0C214 | Q8NCG5 | -0.67756   |
| 56968 | P0C214 | Q9UBK8 | -0.41792   |
| 56969 | P0C214 | Q5T699 | -1.0034    |
| 56970 | P0C214 | Q99714 | -0.20807   |
| 56971 | P0C214 | P26374 | -0.71507   |
| 56972 | P0C214 | P06756 | -0.31843   |
| 56973 | P0C214 | P11908 | -0.67952   |
| 56974 | P0C214 | P28068 | -1.0142    |
| 56975 | P0C214 | Q9Y6H6 | -1.0671    |
| 56976 | P0C214 | Q3ZCN5 | -0.20886   |
| 56977 | P0C214 | Q96CH1 | -1.3693    |
| 56978 | P0C214 | P31937 | -0.12252   |
| 56979 | P0C214 | P30532 | -1.085     |
| 56980 | P0C214 | Q9NVA4 | -0.98681   |
| 56981 | P0C214 | P30872 | -1.3321    |
| 56982 | P0C214 | P51159 | -0.25166   |
| 56983 | P0C214 | Q13183 | -1.2986    |
| 56984 | P0C214 | Q7Z475 | -0.9751    |
| 56985 | P0C214 | Q96NR2 | -0.59347   |
| 56986 | P0C214 | Q15182 | -0.22416   |
| 56987 | P0C214 | Q53R12 | -1.0708    |
| 56988 | P0C214 | Q6Y288 | -0.77803   |
| 56989 | P0C214 | Q92882 | -0.64953   |
| 56990 | P0C214 | Q96HE9 | -0.19276   |
| 56991 | P0C214 | Q8N7P1 | -1.0554    |
| 56992 | P0C214 | Q9NQZ5 | -0.15381   |
| 56993 | P0C214 | E9PIF3 | -0.11752   |
| 56994 | P0C214 | Q9ULK6 | -1.0783    |
| 56995 | P0C214 | Q9HBA9 | -0.67629   |
| 56996 | P0C214 | P61020 | -0.51876   |
| 56997 | P0C214 | Q8TB52 | -0.48694   |
| 56998 | P0C214 | Q15067 | -0.29615   |
| 56999 | P0C214 | Q8NFR9 | -0.6222    |
| 57000 | P0C214 | Q96PN8 | -1.5252    |

|       |        |        |           |
|-------|--------|--------|-----------|
| 57001 | P0C214 | P27658 | -1.1099   |
| 57002 | P0C214 | A4D1N5 | -0.26924  |
| 57003 | P0C214 | Q8N7R7 | -0.41202  |
| 57004 | P0C214 | P61073 | -0.3511   |
| 57005 | P0C214 | Q8TF71 | -1.1119   |
| 57006 | P0C214 | B1AJZ1 | -0.18448  |
| 57007 | P0C214 | P11215 | -0.27738  |
| 57008 | P0C214 | O75364 | -0.16986  |
| 57009 | P0C214 | Q13351 | -0.22514  |
| 57010 | P0C214 | O60678 | -0.048307 |
| 57011 | P0C214 | P26441 | -0.17011  |
| 57012 | P0C214 | Q8NGN3 | -1.2952   |
| 57013 | P0C214 | Q8IZQ5 | -0.39579  |
| 57014 | P0C214 | Q8TC17 | -0.22741  |
| 57015 | P0C214 | Q8IZO8 | -1.3693   |
| 57016 | P0C214 | Q02487 | -1.0392   |
| 57017 | P0C214 | Q86SM5 | -1.3693   |
| 57018 | P0C214 | Q9Y216 | -0.24236  |
| 57019 | P0C214 | Q9Y2U8 | -0.33294  |
| 57020 | P0C214 | Q8WXC6 | -0.12285  |
| 57021 | P0C214 | Q96M78 | -0.21391  |
| 57022 | P0C214 | P21964 | -0.21512  |
| 57023 | P0C214 | Q96DN5 | -0.81232  |
| 57024 | P0C214 | Q9NZH7 | -0.83332  |
| 57025 | P0C214 | Q9BXU9 | -0.7088   |
| 57026 | P0C214 | Q02952 | -0.053008 |
| 57027 | P0C214 | O75677 | -0.50512  |
| 57028 | P0C214 | Q8TD94 | -0.2232   |
| 57029 | P0C214 | P50281 | -0.38837  |
| 57030 | P0C214 | Q96PH6 | -0.84579  |
| 57031 | P0C214 | A8MV81 | -0.98681  |
| 57032 | P0C214 | Q8TBE1 | -0.89154  |
| 57033 | P0C214 | O75366 | -0.30823  |
| 57034 | P0C214 | Q9NS61 | -0.48476  |
| 57035 | P0C214 | Q69YW2 | -0.98681  |
| 57036 | P0C214 | P36222 | -0.44235  |
| 57037 | P0C214 | Q8N1D5 | -0.059187 |
| 57038 | P0C214 | Q3SY89 | -0.24711  |
| 57039 | P0C214 | Q5TYM5 | -0.062667 |
| 57040 | P0C214 | Q9NZ72 | -0.15638  |
| 57041 | P0C214 | Q6P2I7 | -0.47397  |
| 57042 | P0C214 | Q8NGR4 | -1.2952   |
| 57043 | P0C214 | P40238 | -0.99564  |
| 57044 | P0C214 | Q9H477 | -0.74478  |
| 57045 | P0C214 | Q9ULB1 | -0.44193  |
| 57046 | P0C214 | Q71RS6 | -1.0528   |
| 57047 | P0C214 | Q2Y0W8 | -1.0929   |
| 57048 | P0C214 | Q5VYS4 | -0.18791  |
| 57049 | P0C214 | Q14849 | -0.95437  |
| 57050 | P0C214 | O75521 | -0.68204  |
| 57051 | P0C214 | Q9HAA7 | -0.44367  |
| 57052 | P0C214 | P05230 | -0.27422  |
| 57053 | P0C214 | P55196 | -0.22661  |
| 57054 | P0C214 | Q9C093 | -0.4059   |
| 57055 | P0C214 | Q9H425 | -0.20758  |
| 57056 | P0C214 | Q9H2A2 | -0.52227  |
| 57057 | P0C214 | Q7Z442 | -1.1823   |
| 57058 | P0C214 | Q9Y5W8 | -0.8      |
| 57059 | P0C214 | Q6ZSV7 | -0.44876  |
| 57060 | P0C214 | Q9Y6F1 | -0.19572  |
| 57061 | P0C214 | O60391 | -0.89531  |
| 57062 | P0C214 | P68371 | -0.13367  |
| 57063 | P0C214 | Q9Y5Q9 | -0.22695  |
| 57064 | P0C214 | Q96NR8 | -1.0826   |
| 57065 | P0C214 | Q6PCB8 | -1.1636   |
| 57066 | P0C214 | Q9UGV2 | -0.3391   |
| 57067 | P0C214 | Q12849 | -0.41542  |
| 57068 | P0C214 | Q6ZUI0 | -0.28532  |
| 57069 | P0C214 | A8MUK1 | -0.35707  |
| 57070 | P0C214 | P51572 | -0.18514  |
| 57071 | P0C214 | Q6PEZ8 | -0.93653  |
| 57072 | P0C214 | Q5VW38 | -0.98681  |
| 57073 | P0C214 | Q96P16 | -0.37824  |
| 57074 | P0C214 | Q92506 | -0.19799  |
| 57075 | P0C214 | Q9NWH9 | -0.22906  |
| 57076 | P0C214 | Q9UBM4 | -0.95759  |

|       |        |        |          |
|-------|--------|--------|----------|
| 57077 | P0C214 | Q8NH49 | -1.2952  |
| 57078 | P0C214 | P10600 | -0.22741 |
| 57079 | P0C214 | Q9UKF5 | -1.3014  |
| 57080 | P0C214 | Q58DX5 | -1.3073  |
| 57081 | P0C214 | Q9UKS7 | -0.34909 |
| 57082 | P0C214 | P57775 | -0.30261 |
| 57083 | P0C214 | Q6ZW31 | -0.66144 |
| 57084 | P0C214 | Q9NTG1 | -1.2256  |
| 57085 | P0C214 | Q8NGN1 | -1.2952  |
| 57086 | P0C214 | Q15391 | -1.2771  |
| 57087 | P0C214 | Q9NU02 | -0.43585 |
| 57088 | P0C214 | Q7Z3S7 | -1.1335  |
| 57089 | P0C214 | P61160 | -0.78454 |
| 57090 | P0C214 | P06681 | -1.3511  |
| 57091 | P0C214 | O95819 | -0.49968 |
| 57092 | P0C214 | Q9UN76 | -1.0807  |
| 57093 | P0C214 | P46721 | -0.94433 |
| 57094 | P0C214 | Q9UK23 | -0.50107 |
| 57095 | P0C214 | Q15139 | -0.22717 |
| 57096 | P0C214 | O76090 | -0.80873 |
| 57097 | P0C214 | Q16627 | -0.79531 |
| 57098 | P0C214 | P61026 | -0.67132 |
| 57099 | P0C214 | P17097 | -0.35691 |
| 57100 | P0C214 | P43116 | -1.3281  |
| 57101 | P0C214 | P16152 | -0.60405 |
| 57102 | P0C214 | P51864 | -0.59993 |
| 57103 | P0C214 | Q68D42 | -0.98681 |
| 57104 | P0C214 | Q9BZQ6 | -0.26439 |
| 57105 | P0C214 | P05231 | -0.23998 |
| 57106 | P0C214 | Q9ULC8 | -0.79777 |
| 57107 | P0C214 | Q96N66 | -0.22528 |
| 57108 | P0C214 | Q8IWB1 | -0.5751  |
| 57109 | P0C214 | P0C6T2 | -0.98681 |
| 57110 | P0C214 | O43827 | -1.1458  |
| 57111 | P0C214 | Q9HCD6 | -0.34046 |
| 57112 | P0C214 | Q9BXX3 | -0.22742 |
| 57113 | P0C214 | P54829 | -1.1357  |
| 57114 | P0C214 | P57727 | -1.3297  |
| 57115 | P0C214 | Q13516 | -0.2275  |
| 57116 | P0C214 | P59826 | -0.94974 |
| 57117 | P0C214 | Q5T7B8 | -0.45564 |
| 57118 | P0C214 | Q9P0P0 | -0.52994 |
| 57119 | P0C214 | P22059 | -0.63518 |
| 57120 | P0C214 | Q9H2X9 | -0.96961 |
| 57121 | P0C214 | Q07812 | -0.22733 |
| 57122 | P0C214 | P01714 | -1.0022  |
| 57123 | P0C214 | Q6UWF9 | -0.91736 |
| 57124 | P0C214 | P49023 | -0.31941 |
| 57125 | P0C214 | Q96DB9 | -1.1471  |
| 57126 | P0C214 | Q9Y6Z2 | -0.18353 |
| 57127 | P0C214 | A6NCE7 | -0.40799 |
| 57128 | P0C214 | Q9H720 | -0.9635  |
| 57129 | P0C214 | Q5VT99 | -1.2564  |
| 57130 | P0C214 | P37288 | -0.45775 |
| 57131 | P0C214 | Q9BT73 | -0.22509 |
| 57132 | P0C214 | Q6ZW33 | -0.6273  |
| 57133 | P0C214 | A0PK05 | -0.98681 |
| 57134 | P0C214 | Q8NEG7 | -0.38397 |
| 57135 | P0C214 | Q5T2E6 | -0.98681 |
| 57136 | P0C214 | Q6BDI9 | -0.5843  |
| 57137 | P0C214 | Q12788 | -0.23371 |
| 57138 | P0C214 | Q8TBB0 | -0.60772 |
| 57139 | P0C214 | P30042 | -0.15381 |
| 57140 | P0C214 | Q9H9S4 | -0.31486 |
| 57141 | P0C214 | Q07627 | -0.51312 |
| 57142 | P0C214 | Q5QFB9 | -1.0037  |
| 57143 | P0C214 | Q5H913 | -1.2248  |
| 57144 | P0C214 | Q9BZG2 | -0.87712 |
| 57145 | P0C214 | Q1HG44 | -0.8855  |
| 57146 | P0C214 | Q9NWX6 | -0.47998 |
| 57147 | P0C214 | Q9Y6K8 | -0.30556 |
| 57148 | P0C214 | Q8NBF2 | -0.22587 |
| 57149 | P0C214 | Q9P021 | -0.2624  |
| 57150 | P0C214 | Q9NWU2 | -0.07604 |
| 57151 | P0C214 | O95881 | -0.34385 |
| 57152 | P0C214 | Q9P2X7 | -0.45921 |

|       |        |        |           |
|-------|--------|--------|-----------|
| 57153 | P0C214 | Q7L3V2 | -0.22198  |
| 57154 | P0C214 | O75783 | -1.5642   |
| 57155 | P0C214 | Q9Y2P5 | -0.70345  |
| 57156 | P0C214 | P10997 | -0.94041  |
| 57157 | P0C214 | Q9UN88 | -1.034    |
| 57158 | P0C214 | O60890 | -0.6495   |
| 57159 | P0C214 | Q96M86 | -0.35295  |
| 57160 | P0C214 | Q9NYH9 | -0.10372  |
| 57161 | P0C214 | Q6UXY8 | -0.98681  |
| 57162 | P0C214 | Q537H7 | -0.28877  |
| 57163 | P0C214 | Q96L93 | -0.79615  |
| 57164 | P0C214 | Q7Z5L4 | -0.67724  |
| 57165 | P0C214 | O95573 | -0.55281  |
| 57166 | P0C214 | O14807 | -1.1543   |
| 57167 | P0C214 | P21554 | -0.70555  |
| 57168 | P0C214 | Q5TGZ0 | -0.57527  |
| 57169 | P0C214 | Q9NWH7 | -1.2928   |
| 57170 | P0C214 | Q8WZ42 | -0.28412  |
| 57171 | P0C214 | Q8WWG9 | -1.1388   |
| 57172 | P0C214 | Q8TER0 | -0.88725  |
| 57173 | P0C214 | Q19T08 | -1.3086   |
| 57174 | P0C214 | Q969T3 | -0.68393  |
| 57175 | P0C214 | P02748 | -1.0859   |
| 57176 | P0C214 | Q99467 | -1.0908   |
| 57177 | P0C214 | P49221 | -0.36564  |
| 57178 | P0C214 | Q2TBA0 | -0.20516  |
| 57179 | P0C214 | O95858 | -1.128    |
| 57180 | P0C214 | Q2MJR0 | -0.69609  |
| 57181 | P0C214 | P59535 | -1.2886   |
| 57182 | P0C214 | P42356 | -0.36356  |
| 57183 | P0C214 | Q8N268 | -0.14335  |
| 57184 | P0C214 | Q8N4T8 | -0.19805  |
| 57185 | P0C214 | Q3KNW5 | -1.1296   |
| 57186 | P0C214 | Q8NGS1 | -1.2952   |
| 57187 | P0C214 | Q9P2G3 | -0.21496  |
| 57188 | P0C214 | Q8NFQ5 | -1.0961   |
| 57189 | P0C214 | Q5JST6 | -0.43585  |
| 57190 | P0C214 | Q96RI8 | -1.3342   |
| 57191 | P0C214 | Q5JSH3 | -0.22744  |
| 57192 | P0C214 | Q4KMZ8 | -1.0708   |
| 57193 | P0C214 | A6NFA1 | -0.80095  |
| 57194 | P0C214 | Q8TE12 | -0.23743  |
| 57195 | P0C214 | P04075 | -0.19536  |
| 57196 | P0C214 | Q13214 | -0.9244   |
| 57197 | P0C214 | Q6IF42 | -1.2952   |
| 57198 | P0C214 | A6NEH8 | -0.088428 |
| 57199 | P0C214 | Q7L523 | -0.31803  |
| 57200 | P0C214 | Q9NPC1 | -1.4416   |
| 57201 | P0C214 | O95954 | -0.19489  |
| 57202 | P0C214 | P22894 | -1.3074   |
| 57203 | P0C214 | P51692 | -0.22654  |
| 57204 | P0C214 | P40616 | -0.68224  |
| 57205 | P0C214 | Q8WUY9 | -0.79695  |
| 57206 | P0C214 | Q12799 | -0.099127 |
| 57207 | P0C214 | Q9Y5M6 | -0.50123  |
| 57208 | P0C214 | Q6P9F5 | -0.71534  |
| 57209 | P0C214 | Q9NR12 | -0.51672  |
| 57210 | P0C214 | O95841 | -1.0887   |
| 57211 | P0C214 | Q9BQF6 | -0.68518  |
| 57212 | P0C214 | Q9HDD0 | -0.22419  |
| 57213 | P0C214 | O43405 | -0.37614  |
| 57214 | P0C214 | Q8NA66 | -0.22455  |
| 57215 | P0C214 | Q9UGH3 | -0.66345  |
| 57216 | P0C214 | Q9H6K1 | -0.18353  |
| 57217 | P0C214 | O75593 | -0.34874  |
| 57218 | P0C214 | P36915 | -0.53513  |
| 57219 | P0C214 | Q7Z402 | -0.98681  |
| 57220 | P0C214 | Q8NCN2 | -0.22481  |
| 57221 | P0C214 | Q6UXZ3 | -0.44182  |
| 57222 | P0C214 | Q03721 | -0.92661  |
| 57223 | P0C214 | P15421 | -1.2123   |
| 57224 | P0C214 | Q4V328 | -0.25474  |
| 57225 | P0C214 | O00748 | -0.22734  |
| 57226 | P0C214 | D6RBQ6 | -0.68518  |
| 57227 | P0C214 | Q5VST6 | -0.84626  |
| 57228 | P0C214 | Q15155 | -0.67118  |

|       |        |        |          |
|-------|--------|--------|----------|
| 57229 | P0C214 | Q9H400 | -0.80654 |
| 57230 | P0C214 | Q96PD5 | -0.87081 |
| 57231 | P0C214 | A8MTQ0 | -0.22739 |
| 57232 | P0C214 | P61018 | -0.83736 |
| 57233 | P0C214 | Q8N3F9 | -1.0549  |
| 57234 | P0C214 | A6NJQ4 | -0.4589  |
| 57235 | P0C214 | Q8TBP6 | -0.80565 |
| 57236 | P0C214 | P56539 | -0.22377 |
| 57237 | P0C214 | Q96HV5 | -0.98681 |
| 57238 | P0C214 | P01023 | -0.30843 |
| 57239 | P0C214 | Q9UPZ9 | -0.84739 |
| 57240 | P0C214 | Q9UGM5 | -0.78004 |
| 57241 | P0C214 | Q0VAF6 | -0.45397 |
| 57242 | P0C214 | Q9UBD3 | -1.0484  |
| 57243 | P0C214 | O75911 | -1.3241  |
| 57244 | P0C214 | Q9BQG2 | -0.2274  |
| 57245 | P0C214 | O95461 | -0.72289 |
| 57246 | P0C214 | Q10469 | -0.75361 |
| 57247 | P0C214 | Q14722 | -0.9791  |
| 57248 | P0C214 | Q16557 | -0.91029 |
| 57249 | P0C214 | O75751 | -0.48164 |
| 57250 | P0C214 | O43166 | -0.26989 |
| 57251 | P0C214 | Q8NHG8 | -0.63445 |
| 57252 | P0C214 | A6NI03 | -0.71534 |
| 57253 | P0C214 | Q9C056 | -0.36152 |
| 57254 | P0C214 | Q8WVI7 | -0.18188 |
| 57255 | P0C214 | Q8NES3 | -0.95552 |
| 57256 | P0C214 | P27824 | -0.18574 |
| 57257 | P0C214 | Q8TC94 | -0.23577 |
| 57258 | P0C214 | Q2PPJ7 | -0.18174 |
| 57259 | P0C214 | Q8WYQ9 | -0.63395 |
| 57260 | P0C214 | Q13099 | -0.24323 |
| 57261 | P0C214 | P48201 | -0.84022 |
| 57262 | P0C214 | P60059 | -0.54239 |
| 57263 | P0C214 | Q9UPT8 | -0.5018  |
| 57264 | P0C214 | P00414 | -0.45338 |
| 57265 | P0C214 | A6NDL8 | -1.2952  |
| 57266 | P0C214 | Q10471 | -0.86828 |
| 57267 | P0C214 | Q6UXA7 | -0.72233 |
| 57268 | P0C214 | Q99967 | -0.14545 |
| 57269 | P0C214 | P55008 | -0.2271  |
| 57270 | P0C214 | Q13368 | -0.38545 |
| 57271 | P0C214 | Q99661 | -0.44179 |
| 57272 | P0C214 | Q96GX5 | -0.23776 |
| 57273 | P0C214 | O95167 | -0.42419 |
| 57274 | P0C214 | Q9NQ69 | -0.22741 |
| 57275 | P0C214 | Q5GH70 | -0.98681 |
| 57276 | P0C214 | Q8NFA0 | -0.69557 |
| 57277 | P0C214 | P06703 | -0.23667 |
| 57278 | P0C214 | Q495B1 | -0.55184 |
| 57279 | P0C214 | P24386 | -0.78873 |
| 57280 | P0C214 | Q8NGY0 | -1.2952  |
| 57281 | P0C214 | Q8NGS9 | -1.2952  |
| 57282 | P0C214 | O95969 | -0.90112 |
| 57283 | P0C214 | Q9NP31 | -0.76499 |
| 57284 | P0C214 | Q6YFQ2 | -0.13576 |
| 57285 | P0C214 | Q9P2X0 | -0.38959 |
| 57286 | P0C214 | Q5VU92 | -0.22641 |
| 57287 | P0C214 | Q13061 | -0.82617 |
| 57288 | P0C214 | Q8WXT5 | -0.41532 |
| 57289 | P0C214 | Q96GQ5 | -0.98681 |
| 57290 | P0C214 | Q9H8X2 | -0.60161 |
| 57291 | P0C214 | O75417 | -0.61325 |
| 57292 | P0C214 | Q6P4F2 | -0.17966 |
| 57293 | P0C214 | Q8NGU1 | -1.2952  |
| 57294 | P0C214 | Q96DN0 | -0.25992 |
| 57295 | P0C214 | Q96EQ0 | -0.22632 |
| 57296 | P0C214 | Q8NDV3 | -0.49561 |
| 57297 | P0C214 | Q30KP9 | -0.88056 |
| 57298 | P0C214 | P01912 | -0.68789 |
| 57299 | P0C214 | Q96GP6 | -0.54368 |
| 57300 | P0C214 | Q52M75 | -1.1701  |
| 57301 | P0C214 | P51460 | -0.5488  |
| 57302 | P0C214 | Q01995 | -0.18759 |
| 57303 | P0C214 | Q17RS7 | -0.12758 |
| 57304 | P0C214 | Q7L5Y6 | -0.30612 |

|       |        |        |          |
|-------|--------|--------|----------|
| 57305 | P0C214 | Q12805 | -0.22786 |
| 57306 | P0C214 | P15309 | -1.2891  |
| 57307 | P0C214 | Q15382 | -1.0202  |
| 57308 | P0C214 | P04049 | -0.22741 |
| 57309 | P0C214 | Q5VV43 | -0.66047 |
| 57310 | P0C214 | Q75356 | -0.36964 |
| 57311 | P0C214 | Q9UK53 | -0.22405 |
| 57312 | P0C214 | Q5TFE4 | -0.35349 |
| 57313 | P0C214 | Q86YV6 | -1.2407  |
| 57314 | P0C214 | Q14116 | -0.28399 |
| 57315 | P0C214 | P46094 | -1.3327  |
| 57316 | P0C214 | Q9Y345 | -1.0072  |
| 57317 | P0C214 | Q8NCK7 | -1.1032  |
| 57318 | P0C214 | Q15319 | -0.22741 |
| 57319 | P0C214 | Q6NSI1 | -0.22739 |
| 57320 | P0C214 | P48426 | -0.19967 |
| 57321 | P0C214 | A6NC98 | -0.20471 |
| 57322 | P0C214 | Q14141 | -0.21782 |
| 57323 | P0C214 | Q08708 | -1.1841  |
| 57324 | P0C214 | A6NGE4 | -0.22745 |
| 57325 | P0C214 | A6NE02 | -0.693   |
| 57326 | P0C214 | P0C7T3 | -1.2952  |
| 57327 | P0C214 | Q6J9G0 | -1.5863  |
| 57328 | P0C214 | Q13508 | -0.67788 |
| 57329 | P0C214 | Q5T2T1 | -0.22443 |
| 57330 | P0C214 | Q96IJ6 | -0.51284 |
| 57331 | P0C214 | P05981 | -0.64203 |
| 57332 | P0C214 | P55107 | -0.66377 |
| 57333 | P0C214 | P01903 | -0.77415 |
| 57334 | P0C214 | Q8TET4 | -0.25277 |
| 57335 | P0C214 | Q96AP7 | -0.87967 |
| 57336 | P0C214 | Q15020 | -0.22584 |
| 57337 | P0C214 | A6NFY4 | -0.98681 |
| 57338 | P0C214 | P01604 | -1.0022  |
| 57339 | P0C214 | Q8TDW5 | -0.239   |
| 57340 | P0C214 | Q9NPC4 | -0.80455 |
| 57341 | P0C214 | O43815 | -0.22765 |
| 57342 | P0C214 | Q8WXH6 | -1.0449  |
| 57343 | P0C214 | Q8N3D4 | -0.22871 |
| 57344 | P0C214 | Q9H936 | -0.26618 |
| 57345 | P0C214 | Q27J81 | -0.2245  |
| 57346 | P0C214 | Q8NBZ9 | -0.10521 |
| 57347 | P0C214 | Q9UPU3 | -0.98757 |
| 57348 | P0C214 | Q8IZP6 | -0.5018  |
| 57349 | P0C214 | P81172 | -0.62557 |
| 57350 | P0C214 | P24046 | -0.92007 |
| 57351 | P0C214 | Q6PIV2 | -0.44534 |
| 57352 | P0C214 | Q8NGJ5 | -1.2952  |
| 57353 | P0C214 | Q06430 | -0.94701 |
| 57354 | P0C214 | Q6P3S6 | -0.22683 |
| 57355 | P0C214 | Q9P2E3 | -0.42254 |
| 57356 | P0C214 | Q9BPY8 | -0.21728 |
| 57357 | P0C214 | Q5JS13 | -0.68404 |
| 57358 | P0C214 | Q9H4I0 | -0.25655 |
| 57359 | P0C214 | A2VDJ0 | -0.98681 |
| 57360 | P0C214 | P49736 | -0.19675 |
| 57361 | P0C214 | Q5JR12 | -0.26537 |
| 57362 | P0C214 | P0C6E5 | -0.50386 |
| 57363 | P0C214 | O95070 | -0.41577 |
| 57364 | P0C214 | Q16854 | -0.18203 |
| 57365 | P0C214 | Q9GZP4 | -0.09655 |
| 57366 | P0C214 | Q96KP1 | -0.20697 |
| 57367 | P0C214 | P25490 | -0.2013  |
| 57368 | P0C214 | Q9NX38 | -0.37671 |
| 57369 | P0C214 | P56703 | -0.46708 |
| 57370 | P0C214 | Q969G9 | -0.21713 |
| 57371 | P0C214 | Q0P6D2 | -1.0037  |
| 57372 | P0C214 | Q02318 | -0.23973 |
| 57373 | P0C214 | P49760 | -0.58542 |
| 57374 | P0C214 | Q8TCD6 | -0.55639 |
| 57375 | P0C214 | P58550 | -1.1877  |
| 57376 | P0C214 | Q8WUD4 | -0.15045 |
| 57377 | P0C214 | Q587J7 | -0.24902 |
| 57378 | P0C214 | P41968 | -0.91876 |
| 57379 | P0C214 | Q15738 | -0.78894 |
| 57380 | P0C214 | P23083 | -0.91671 |



|       |        |        |           |
|-------|--------|--------|-----------|
| 57381 | P0C214 | Q9NXW2 | -0.91173  |
| 57382 | P0C214 | Q8NFA2 | -0.41855  |
| 57383 | P0C214 | A6NC62 | -0.14635  |
| 57384 | P0C214 | P46098 | -1.0356   |
| 57385 | P0C214 | A5YM72 | -0.64943  |
| 57386 | P0C214 | Q32VQ0 | -1.2952   |
| 57387 | P0C214 | A8MVS5 | -0.98681  |
| 57388 | P0C214 | Q15858 | -1.0477   |
| 57389 | P0C214 | Q9Y276 | -0.49959  |
| 57390 | P0C214 | Q8IYA2 | -0.18779  |
| 57391 | P0C214 | P46095 | -1.3791   |
| 57392 | P0C214 | Q9BWQ8 | -0.61144  |
| 57393 | P0C214 | P06307 | -0.66244  |
| 57394 | P0C214 | Q03395 | -1.3333   |
| 57395 | P0C214 | P78415 | -0.23624  |
| 57396 | P0C214 | Q9H3U1 | -0.2266   |
| 57397 | P0C214 | Q9ULR3 | -0.37063  |
| 57398 | P0C214 | O15550 | -0.59801  |
| 57399 | P0C214 | Q3LFD5 | -0.68518  |
| 57400 | P0C214 | Q13304 | -1.3601   |
| 57401 | P0C214 | P01705 | -1.0022   |
| 57402 | P0C214 | Q8NCC3 | -0.76528  |
| 57403 | P0C214 | Q7Z5L0 | -0.89613  |
| 57404 | P0C214 | Q96F10 | -0.2137   |
| 57405 | P0C214 | Q9H4L4 | -0.31564  |
| 57406 | P0C214 | P35568 | -0.21502  |
| 57407 | P0C214 | Q9HC57 | -0.54012  |
| 57408 | P0C214 | P0C7P2 | -0.056166 |
| 57409 | P0C214 | Q8WXD2 | -0.56866  |
| 57410 | P0C214 | O95361 | -0.23367  |
| 57411 | P0C214 | Q99259 | -0.28328  |
| 57412 | P0C214 | Q8N4F4 | -1.1693   |
| 57413 | P0C214 | Q7Z6J6 | -0.43702  |
| 57414 | P0C214 | Q8TED1 | -1.0431   |
| 57415 | P0C214 | Q9Y5L3 | -1.1393   |
| 57416 | P0C214 | Q14416 | -1.2984   |
| 57417 | P0C214 | Q8NGC9 | -1.2952   |
| 57418 | P0C214 | Q9NPE6 | -0.72749  |
| 57419 | P0C214 | O75600 | -0.064663 |
| 57420 | P0C214 | B1AKI9 | -0.91736  |
| 57421 | P0C214 | Q9BV68 | -0.23163  |
| 57422 | P0C214 | P04280 | -0.76523  |
| 57423 | P0C214 | Q99758 | -1.2329   |
| 57424 | P0C214 | P18135 | -1.0022   |
| 57425 | P0C214 | O00744 | -0.37519  |
| 57426 | P0C214 | P41143 | -0.5636   |
| 57427 | P0C214 | Q8NGQ5 | -1.2952   |
| 57428 | P0C214 | Q5TAH2 | -1.1537   |
| 57429 | P0C214 | Q9Y6R1 | -0.68928  |
| 57430 | P0C214 | Q9NQS3 | -0.4145   |
| 57431 | P0C214 | P07332 | -0.68051  |
| 57432 | P0C214 | P02749 | -0.48457  |
| 57433 | P0C214 | Q8TCH9 | -0.46227  |
| 57434 | P0C214 | Q6ZP01 | -0.5324   |
| 57435 | P0C214 | Q14C87 | -0.24866  |
| 57436 | P0C214 | Q8NFW5 | -0.22232  |
| 57437 | P0C214 | Q4G163 | -0.18189  |
| 57438 | P0C214 | Q86VE9 | -0.81033  |
| 57439 | P0C214 | Q86UK7 | -0.71534  |
| 57440 | P0C214 | Q8NET5 | -1.0967   |
| 57441 | P0C214 | Q5HYM0 | -0.41772  |
| 57442 | P0C214 | O95156 | -0.81812  |
| 57443 | P0C214 | Q9UHX3 | -1.4032   |
| 57444 | P0C214 | Q6NUN0 | -0.74139  |
| 57445 | P0C214 | O95219 | -0.22579  |
| 57446 | P0C214 | P46736 | -0.2687   |
| 57447 | P0C214 | P31151 | -0.21489  |
| 57448 | P0C214 | Q9BY67 | -0.50459  |
| 57449 | P0C214 | Q6QHC5 | -0.68474  |
| 57450 | P0C214 | Q8N4B5 | -0.33805  |
| 57451 | P0C214 | O75131 | -0.2288   |
| 57452 | P0C214 | Q9BZV2 | -0.77633  |
| 57453 | P0C214 | Q8NG76 | -1.2952   |
| 57454 | P0C214 | A2RUC4 | -0.43896  |
| 57455 | P0C214 | Q9GZV1 | -0.59847  |
| 57456 | P0C214 | Q8NDY3 | -0.31692  |

|       |        |        |           |
|-------|--------|--------|-----------|
| 57457 | P0C214 | Q8N114 | -0.46954  |
| 57458 | P0C214 | P05155 | -0.31479  |
| 57459 | P0C214 | Q5TCM9 | -0.38015  |
| 57460 | P0C214 | P63135 | -0.22742  |
| 57461 | P0C214 | A6NKW6 | -0.98681  |
| 57462 | P0C214 | Q8NGL4 | -1.2952   |
| 57463 | P0C214 | O15294 | -0.22597  |
| 57464 | P0C214 | Q9UJC3 | -0.17143  |
| 57465 | P0C214 | Q8N283 | -0.22737  |
| 57466 | P0C214 | Q5TGY1 | -0.98681  |
| 57467 | P0C214 | Q495N2 | -0.98681  |
| 57468 | P0C214 | O14669 | -1.5798   |
| 57469 | P0C214 | Q8NGP4 | -1.2952   |
| 57470 | P0C214 | O75352 | -0.81604  |
| 57471 | P0C214 | P21810 | -0.63763  |
| 57472 | P0C214 | Q9UP79 | -1.3633   |
| 57473 | P0C214 | Q5TZF3 | -0.22741  |
| 57474 | P0C214 | Q92781 | -0.8425   |
| 57475 | P0C214 | Q86VQ3 | -0.22796  |
| 57476 | P0C214 | Q5T442 | -0.89403  |
| 57477 | P0C214 | Q9H5J0 | -0.22732  |
| 57478 | P0C214 | P01591 | -0.91671  |
| 57479 | P0C214 | Q08495 | -0.21514  |
| 57480 | P0C214 | Q5SQ64 | -1.0708   |
| 57481 | P0C214 | P78383 | -0.96729  |
| 57482 | P0C214 | Q9Y6N5 | -0.27893  |
| 57483 | P0C214 | P53634 | -0.78226  |
| 57484 | P0C214 | Q02153 | -0.74508  |
| 57485 | P0C214 | P27216 | -0.64025  |
| 57486 | P0C214 | Q5JTN6 | -0.23115  |
| 57487 | P0C214 | Q02383 | -0.76599  |
| 57488 | P0C214 | Q96AC6 | -0.67393  |
| 57489 | P0C214 | P59020 | -0.51845  |
| 57490 | P0C214 | Q96B21 | -0.98681  |
| 57491 | P0C214 | Q86Y91 | -0.4486   |
| 57492 | P0C214 | Q05707 | -1.0169   |
| 57493 | P0C214 | Q0D2K5 | -0.23292  |
| 57494 | P0C214 | P32455 | -0.73478  |
| 57495 | P0C214 | Q96AQ2 | -0.68883  |
| 57496 | P0C214 | P00519 | -0.22758  |
| 57497 | P0C214 | P18440 | -0.30434  |
| 57498 | P0C214 | Q92609 | -0.73605  |
| 57499 | P0C214 | Q7L7V1 | -0.21872  |
| 57500 | P0C214 | Q16667 | -0.21487  |
| 57501 | P0C214 | Q9UKQ9 | -1.4261   |
| 57502 | P0C214 | Q5VVJ2 | -0.22736  |
| 57503 | P0C214 | Q14500 | -1.1803   |
| 57504 | P0C214 | Q16849 | -0.83539  |
| 57505 | P0C214 | O71037 | -0.85122  |
| 57506 | P0C214 | P41439 | -0.87028  |
| 57507 | P0C214 | Q8IZ16 | -0.032705 |
| 57508 | P0C214 | Q8TAM6 | -0.45621  |
| 57509 | P0C214 | Q9BW91 | -0.29085  |
| 57510 | P0C214 | Q7Z6M1 | -0.38444  |
| 57511 | P0C214 | P24821 | -1.0902   |
| 57512 | P0C214 | Q5JSQ8 | -0.037577 |
| 57513 | P0C214 | P0CB38 | -0.83638  |
| 57514 | P0C214 | Q86VV8 | -0.66092  |
| 57515 | P0C214 | Q9Y275 | -0.73341  |
| 57516 | P0C214 | Q16678 | -0.60876  |
| 57517 | P0C214 | Q13093 | -0.8167   |
| 57518 | P0C214 | Q9H0X6 | -0.50512  |
| 57519 | P0C214 | P01834 | -1.0022   |
| 57520 | P0C214 | P23443 | -0.20186  |
| 57521 | P0C214 | Q9UJQ1 | -0.93949  |
| 57522 | P0C214 | Q8IYR6 | -1.2649   |
| 57523 | P0C214 | P07996 | -0.2893   |
| 57524 | P0C214 | Q6PID8 | -0.22705  |
| 57525 | P0C214 | Q8N806 | -0.44553  |
| 57526 | P0C214 | Q96FZ7 | -0.02421  |
| 57527 | P0C214 | Q6P9H4 | -0.29432  |
| 57528 | P0C214 | Q96IQ9 | -0.22733  |
| 57529 | P0C214 | A4FU28 | -0.98681  |
| 57530 | P0C214 | Q5VTB9 | -0.34469  |
| 57531 | P0C214 | Q6ZN04 | -0.22737  |
| 57532 | P0C214 | Q8IY37 | -0.77805  |

|       |        |        |           |
|-------|--------|--------|-----------|
| 57533 | P0C214 | P04209 | -1.0022   |
| 57534 | P0C214 | O95006 | -1.2952   |
| 57535 | P0C214 | Q9UBC5 | -0.37913  |
| 57536 | P0C214 | Q5VTL7 | -0.91736  |
| 57537 | P0C214 | P24298 | -0.20376  |
| 57538 | P0C214 | Q9H1F0 | -0.77749  |
| 57539 | P0C214 | P48681 | -0.20826  |
| 57540 | P0C214 | Q93045 | -0.29807  |
| 57541 | P0C214 | Q9HBH9 | -0.76109  |
| 57542 | P0C214 | P30488 | -1.0367   |
| 57543 | P0C214 | Q7Z4V0 | -0.2274   |
| 57544 | P0C214 | Q6XPR3 | -0.94711  |
| 57545 | P0C214 | P21731 | -0.69905  |
| 57546 | P0C214 | Q8N8Y5 | -0.58435  |
| 57547 | P0C214 | P35452 | -0.26675  |
| 57548 | P0C214 | Q14520 | -0.72868  |
| 57549 | P0C214 | Q8NEB7 | -0.64486  |
| 57550 | P0C214 | P06702 | -0.22859  |
| 57551 | P0C214 | Q9NXL2 | -0.68275  |
| 57552 | P0C214 | Q8WWH5 | -0.2851   |
| 57553 | P0C214 | Q15204 | -1.1815   |
| 57554 | P0C214 | O00391 | -1.0556   |
| 57555 | P0C214 | A6NFE3 | -0.5815   |
| 57556 | P0C214 | Q56UQ5 | -0.042835 |
| 57557 | P0C214 | O60928 | -1.1408   |
| 57558 | P0C214 | Q6S545 | -0.2274   |
| 57559 | P0C214 | P40394 | -0.45865  |
| 57560 | P0C214 | Q9H761 | -0.21839  |
| 57561 | P0C214 | Q9H845 | -0.61089  |
| 57562 | P0C214 | Q8TBE7 | -0.87155  |
| 57563 | P0C214 | Q96JP2 | -0.19258  |
| 57564 | P0C214 | O95428 | -1.1255   |
| 57565 | P0C214 | Q8IWT6 | -1.0362   |
| 57566 | P0C214 | Q6UW56 | -0.22678  |
| 57567 | P0C214 | O43555 | -1.2442   |
| 57568 | P0C214 | P01222 | -0.6599   |
| 57569 | P0C214 | Q6ZTK2 | -0.28751  |
| 57570 | P0C214 | Q5JQS5 | -1.2952   |
| 57571 | P0C214 | Q5TD97 | -0.23332  |
| 57572 | P0C214 | Q8N1A6 | -0.036335 |
| 57573 | P0C214 | A8MYX2 | -0.9406   |
| 57574 | P0C214 | Q96I34 | -0.22739  |
| 57575 | P0C214 | P0C7Q6 | -0.98681  |
| 57576 | P0C214 | Q9UK33 | -0.19994  |
| 57577 | P0C214 | O95568 | -0.13433  |
| 57578 | P0C214 | Q9NTJ4 | -0.36117  |
| 57579 | P0C214 | P61371 | -0.23006  |
| 57580 | P0C214 | Q9NZK5 | -0.59977  |
| 57581 | P0C214 | Q5SRE7 | -0.53741  |
| 57582 | P0C214 | Q6ZUJ4 | -0.068621 |
| 57583 | P0C214 | Q8NFM4 | -0.91736  |
| 57584 | P0C214 | Q5QGT7 | -0.99964  |
| 57585 | P0C214 | O60496 | -0.37467  |
| 57586 | P0C214 | P32314 | -0.3943   |
| 57587 | P0C214 | Q96F45 | -0.13624  |
| 57588 | P0C214 | Q14324 | -0.62262  |
| 57589 | P0C214 | Q9UPM8 | -0.12433  |
| 57590 | P0C214 | P48539 | -0.35719  |
| 57591 | P0C214 | Q9NP61 | -0.032796 |
| 57592 | P0C214 | P01909 | -0.79506  |
| 57593 | P0C214 | Q86X67 | -0.12345  |
| 57594 | P0C214 | P56202 | -0.8152   |
| 57595 | P0C214 | Q9Y646 | -0.82803  |
| 57596 | P0C214 | Q96Q77 | -0.43585  |
| 57597 | P0C214 | P47883 | -1.2952   |
| 57598 | P0C214 | Q8TCB7 | -0.33624  |
| 57599 | P0C214 | Q86TL2 | -0.68883  |
| 57600 | P0C214 | Q11203 | -0.70296  |
| 57601 | P0C214 | P08069 | -0.53918  |
| 57602 | P0C214 | Q6ZNW5 | -0.41581  |
| 57603 | P0C214 | Q6UWQ5 | -0.82212  |
| 57604 | P0C214 | B7Z1M9 | -0.042488 |
| 57605 | P0C214 | Q9BPU6 | -0.21549  |
| 57606 | P0C214 | B2RXH4 | -0.22694  |
| 57607 | P0C214 | Q8IYR2 | -0.50512  |
| 57608 | P0C214 | O94915 | -0.1182   |

|       |        |        |          |
|-------|--------|--------|----------|
| 57609 | P0C214 | Q9NS93 | -1.0708  |
| 57610 | P0C214 | Q9Y256 | -1.1463  |
| 57611 | P0C214 | Q8NHY0 | -0.69956 |
| 57612 | P0C214 | Q15835 | -1.034   |
| 57613 | P0C214 | P60329 | -0.26992 |
| 57614 | P0C214 | Q9BXU7 | -0.27463 |
| 57615 | P0C214 | P62158 | -0.22702 |
| 57616 | P0C214 | P28702 | -0.22897 |
| 57617 | P0C214 | O60701 | -0.30969 |
| 57618 | P0C214 | Q7Z412 | -0.80704 |
| 57619 | P0C214 | Q96NS5 | -0.22744 |
| 57620 | P0C214 | A6NM15 | -0.79608 |
| 57621 | P0C214 | Q9BYW2 | -0.22573 |
| 57622 | P0C214 | Q15546 | -1.1516  |
| 57623 | P0C214 | Q14692 | -0.31963 |
| 57624 | P0C214 | Q04741 | -0.30996 |
| 57625 | P0C214 | P98073 | -1.3267  |
| 57626 | P0C214 | Q8TBA6 | -0.64324 |
| 57627 | P0C214 | Q8N9X3 | -0.25137 |
| 57628 | P0C214 | A8MTI9 | -1.7718  |
| 57629 | P0C214 | P15248 | -0.68259 |
| 57630 | P0C214 | O95857 | -1.128   |
| 57631 | P0C214 | P30475 | -1.0938  |
| 57632 | P0C214 | P47712 | -0.22774 |
| 57633 | P0C214 | Q9NRA0 | -0.30053 |
| 57634 | P0C214 | Q8IZW8 | -0.2274  |
| 57635 | P0C214 | P10276 | -0.23836 |
| 57636 | P0C214 | Q9HCS2 | -0.58141 |
| 57637 | P0C214 | Q8WVC6 | -0.5443  |
| 57638 | P0C214 | Q86XR7 | -0.38606 |
| 57639 | P0C214 | A8MUM7 | -0.27488 |
| 57640 | P0C214 | Q12770 | -0.27504 |
| 57641 | P0C214 | P42357 | -0.24149 |
| 57642 | P0C214 | P28335 | -1.0508  |
| 57643 | P0C214 | Q9BVR0 | -0.40678 |
| 57644 | P0C214 | Q8WZA0 | -0.46737 |
| 57645 | P0C214 | O43688 | -0.65951 |
| 57646 | P0C214 | Q3B7S5 | -0.98681 |
| 57647 | P0C214 | Q8WXH4 | -0.5331  |
| 57648 | P0C214 | Q14807 | -0.37475 |
| 57649 | P0C214 | Q1L5Z9 | -0.67205 |
| 57650 | P0C214 | P23560 | -0.44905 |
| 57651 | P0C214 | Q14802 | -1.1638  |
| 57652 | P0C214 | Q8TDR2 | -0.67151 |
| 57653 | P0C214 | O95626 | -0.15446 |
| 57654 | P0C214 | P01603 | -1.0022  |
| 57655 | P0C214 | P01814 | -1.0022  |
| 57656 | P0C214 | P51970 | -0.22035 |
| 57657 | P0C214 | Q6ZMZO | -0.4563  |
| 57658 | P0C214 | P52790 | -0.17124 |
| 57659 | P0C214 | Q75N03 | -0.19709 |
| 57660 | P0C214 | Q7RTN6 | -0.42881 |
| 57661 | P0C214 | Q9HCH3 | -0.49202 |
| 57662 | P0C214 | Q8WY21 | -0.3956  |
| 57663 | P0C214 | Q9P0W8 | -0.64801 |
| 57664 | P0C214 | Q8IYJ3 | -0.24701 |
| 57665 | P0C214 | P55289 | -1.1619  |
| 57666 | P0C214 | P54851 | -0.9719  |
| 57667 | P0C214 | Q96M96 | -0.8624  |
| 57668 | P0C214 | Q9H6R6 | -1.0567  |
| 57669 | P0C214 | Q9H2M9 | -0.80888 |
| 57670 | P0C214 | Q5VYV0 | -0.44827 |
| 57671 | P0C214 | Q9P2K1 | -0.36313 |
| 57672 | P0C214 | Q5TA78 | -0.38015 |
| 57673 | P0C214 | Q96SI9 | -0.71148 |
| 57674 | P0C214 | Q6KF10 | -0.54129 |
| 57675 | P0C214 | Q13523 | -0.42834 |
| 57676 | P0C214 | Q96L46 | -0.43537 |
| 57677 | P0C214 | Q2TB90 | -0.18552 |
| 57678 | P0C214 | Q9P2E8 | -0.83702 |
| 57679 | P0C214 | Q496A3 | -0.16483 |
| 57680 | P0C214 | Q96HA9 | -0.39665 |
| 57681 | P0C214 | O43820 | -0.65374 |
| 57682 | P0C214 | Q9P1U1 | -0.83834 |
| 57683 | P0C214 | Q9UBR1 | -0.11473 |
| 57684 | P0C214 | Q8IUB3 | -0.86154 |

|       |        |        |           |
|-------|--------|--------|-----------|
| 57685 | P0C214 | Q9H9K5 | -0.85618  |
| 57686 | P0C214 | Q6P474 | -0.55411  |
| 57687 | P0C214 | Q17RD7 | -0.5826   |
| 57688 | P0C214 | P37173 | -0.3788   |
| 57689 | P0C214 | Q86SP6 | -1.2345   |
| 57690 | P0C214 | P09131 | -0.97924  |
| 57691 | P0C214 | Q9Y215 | -0.26098  |
| 57692 | P0C214 | Q02297 | -0.24042  |
| 57693 | P0C214 | Q9NX45 | -0.28248  |
| 57694 | P0C214 | Q8NHM4 | -1.4228   |
| 57695 | P0C214 | Q9BQ04 | -0.3756   |
| 57696 | P0C214 | Q5TFG8 | -0.42254  |
| 57697 | P0C214 | P09668 | -0.26448  |
| 57698 | P0C214 | Q96MT0 | -0.82964  |
| 57699 | P0C214 | P20231 | -1.4261   |
| 57700 | P0C214 | P0C617 | -1.2952   |
| 57701 | P0C214 | Q8N264 | -0.65552  |
| 57702 | P0C214 | Q9UPP2 | -0.22151  |
| 57703 | P0C214 | P98196 | -0.57266  |
| 57704 | P0C214 | Q86VW2 | -0.5316   |
| 57705 | P0C214 | Q9BY14 | -0.57847  |
| 57706 | P0C214 | Q8NGD5 | -1.2952   |
| 57707 | P0C214 | Q15048 | -0.081656 |
| 57708 | P0C214 | A6PVL3 | -0.8356   |
| 57709 | P0C214 | Q6ZT52 | -0.095745 |
| 57710 | P0C214 | Q8N138 | -0.3905   |
| 57711 | P0C214 | Q96DR4 | -0.83993  |
| 57712 | P0C214 | P13861 | -0.22738  |
| 57713 | P0C214 | Q08431 | -0.75718  |
| 57714 | P0C214 | Q15758 | -0.92561  |
| 57715 | P0C214 | Q5VYX0 | -0.94412  |
| 57716 | P0C214 | Q9UL26 | -0.51533  |
| 57717 | P0C214 | Q9UPY6 | -0.23491  |
| 57718 | P0C214 | Q9H2S6 | -0.9339   |
| 57719 | P0C214 | Q99959 | -0.19076  |
| 57720 | P0C214 | Q9H2X8 | -0.98681  |
| 57721 | P0C214 | Q9NQI0 | -0.5357   |
| 57722 | P0C214 | Q9H313 | -0.88043  |
| 57723 | P0C214 | Q7L8A9 | -0.56367  |
| 57724 | P0C214 | Q15751 | -0.23878  |
| 57725 | P0C214 | Q5TA77 | -0.38015  |
| 57726 | P0C214 | Q9UJT0 | -0.5434   |
| 57727 | P0C214 | Q5T1H1 | -1.0955   |
| 57728 | P0C214 | Q8TDV5 | -1.4282   |
| 57729 | P0C214 | Q2TBF2 | -0.98681  |
| 57730 | P0C214 | P20702 | -0.49968  |
| 57731 | P0C214 | Q13070 | -0.60816  |
| 57732 | P0C214 | Q02575 | -0.22672  |
| 57733 | P0C214 | Q6ZS81 | -0.98681  |
| 57734 | P0C214 | Q8NE00 | -0.68883  |
| 57735 | P0C214 | Q8N4C9 | -0.98681  |
| 57736 | P0C214 | P28340 | -0.23906  |
| 57737 | P0C214 | Q9BQI6 | -0.22741  |
| 57738 | P0C214 | Q6PCB7 | -0.49478  |
| 57739 | P0C214 | Q8NAP8 | -0.2229   |
| 57740 | P0C214 | P59796 | -1.0082   |
| 57741 | P0C214 | Q9Y5K2 | -1.4252   |
| 57742 | P0C214 | Q7Z4B0 | -0.91736  |
| 57743 | P0C214 | P04180 | -0.25711  |
| 57744 | P0C214 | Q9BZV3 | -1.1163   |
| 57745 | P0C214 | Q96PP9 | -0.43752  |
| 57746 | P0C214 | P14222 | -0.56351  |
| 57747 | P0C214 | Q8N8S7 | -0.22548  |
| 57748 | P0C214 | Q96F81 | -0.85341  |
| 57749 | P0C214 | Q15911 | -0.22739  |
| 57750 | P0C214 | Q16825 | -0.55435  |
| 57751 | P0C214 | Q7L1T6 | -0.39715  |
| 57752 | P0C214 | Q9NSY2 | -0.35043  |
| 57753 | P0C214 | Q9NXE4 | -0.51086  |
| 57754 | P0C214 | P41159 | -0.35821  |
| 57755 | P0C214 | C9J442 | -0.91736  |
| 57756 | P0C214 | O60307 | -0.68525  |
| 57757 | P0C214 | Q9HCN6 | -0.40071  |
| 57758 | P0C214 | P49821 | -0.23733  |
| 57759 | P0C214 | Q13451 | -0.55893  |
| 57760 | P0C214 | Q8TF65 | -0.22582  |

|       |        |        |           |
|-------|--------|--------|-----------|
| 57761 | P0C214 | Q58EX2 | -1.1636   |
| 57762 | P0C214 | A6NGB9 | -0.51507  |
| 57763 | P0C214 | Q8NA97 | -0.26086  |
| 57764 | P0C214 | Q9UNK0 | -1.069    |
| 57765 | P0C214 | P60368 | -0.030516 |
| 57766 | P0C214 | Q9H1H1 | -0.42254  |
| 57767 | P0C214 | P13164 | -0.45779  |
| 57768 | P0C214 | Q9C010 | -0.39742  |
| 57769 | P0C214 | P12236 | -0.25624  |
| 57770 | P0C214 | O94988 | -0.86358  |
| 57771 | P0C214 | P01850 | -0.98194  |
| 57772 | P0C214 | A0A5B9 | -0.98681  |
| 57773 | P0C214 | Q96KE9 | -0.2231   |
| 57774 | P0C214 | O60229 | -0.89902  |
| 57775 | P0C214 | Q6QHF9 | -0.32232  |
| 57776 | P0C214 | Q8NGS2 | -1.2952   |
| 57777 | P0C214 | Q9BZA7 | -1.3622   |
| 57778 | P0C214 | P19075 | -1.2445   |
| 57779 | P0C214 | Q9NZU1 | -1.1933   |
| 57780 | P0C214 | Q9UNQ0 | -0.51099  |
| 57781 | P0C214 | Q8IY51 | -0.21333  |
| 57782 | P0C214 | O60704 | -0.70542  |
| 57783 | P0C214 | Q5JXX7 | -0.98681  |
| 57784 | P0C214 | A8MXV4 | -0.2108   |
| 57785 | P0C214 | Q96BN8 | -0.13923  |
| 57786 | P0C214 | Q8N884 | -0.42082  |
| 57787 | P0C214 | Q7L0X0 | -0.86716  |
| 57788 | P0C214 | Q9H0R4 | -0.40972  |
| 57789 | P0C214 | Q96BM9 | -0.53028  |
| 57790 | P0C214 | P30990 | -0.97371  |
| 57791 | P0C214 | P23109 | -0.10416  |
| 57792 | P0C214 | Q6XZF7 | -0.22742  |
| 57793 | P0C214 | Q6UXH0 | -0.28146  |
| 57794 | P0C214 | Q6NSJ2 | -0.52301  |
| 57795 | P0C214 | Q9C004 | -0.1659   |
| 57796 | P0C214 | Q8NGL2 | -1.2952   |
| 57797 | P0C214 | Q5W064 | -0.36863  |
| 57798 | P0C214 | P22466 | -0.37306  |
| 57799 | P0C214 | Q6J4K2 | -1.1847   |
| 57800 | P0C214 | Q14952 | -1.183    |
| 57801 | P0C214 | Q8N7X8 | -1.15     |
| 57802 | P0C214 | Q9Y6I8 | -0.41897  |
| 57803 | P0C214 | Q7Z478 | -0.22323  |
| 57804 | P0C214 | Q9BZX2 | -0.41858  |
| 57805 | P0C214 | Q9H7P9 | -0.55877  |
| 57806 | P0C214 | Q8N349 | -0.76795  |
| 57807 | P0C214 | A2VCL2 | -0.31915  |
| 57808 | P0C214 | Q9NX14 | -0.45988  |
| 57809 | P0C214 | Q9NX09 | -0.2456   |
| 57810 | P0C214 | P43034 | -0.22957  |
| 57811 | P0C214 | Q96LB4 | -0.41049  |
| 57812 | P0C214 | Q95398 | -0.37806  |
| 57813 | P0C214 | P26010 | -1.2841   |
| 57814 | P0C214 | P05026 | -0.53512  |
| 57815 | P0C214 | P55042 | -0.55446  |
| 57816 | P0C214 | Q9H361 | -0.55099  |
| 57817 | P0C214 | Q8TF61 | -0.66454  |
| 57818 | P0C214 | Q9Y5G2 | -1.2424   |
| 57819 | P0C214 | Q99674 | -1.0281   |
| 57820 | P0C214 | Q9BRR9 | -0.95761  |
| 57821 | P0C214 | P36980 | -0.91736  |
| 57822 | P0C214 | Q9BT56 | -0.3835   |
| 57823 | P0C214 | Q96HM7 | -0.32696  |
| 57824 | P0C214 | Q5VSY0 | -0.44912  |
| 57825 | P0C214 | Q9BT40 | -0.2254   |
| 57826 | P0C214 | Q9Y5T5 | -0.29799  |
| 57827 | P0C214 | Q9HB21 | -0.22741  |
| 57828 | P0C214 | Q08050 | -0.40394  |
| 57829 | P0C214 | P26367 | -0.2165   |
| 57830 | P0C214 | O14544 | -0.22711  |
| 57831 | P0C214 | Q99928 | -0.876    |
| 57832 | P0C214 | Q86SU0 | -0.55554  |
| 57833 | P0C214 | A6NG13 | -0.71199  |
| 57834 | P0C214 | A6NCD1 | -0.71534  |
| 57835 | P0C214 | P43630 | -1.1765   |
| 57836 | P0C214 | Q15413 | -0.76851  |

|       |        |        |            |
|-------|--------|--------|------------|
| 57837 | P0C214 | Q9Y2R4 | -0.338     |
| 57838 | P0C214 | P35612 | -0.43403   |
| 57839 | P0C214 | P07858 | -0.26445   |
| 57840 | P0C214 | P59533 | -1.2886    |
| 57841 | P0C214 | Q6FHJ7 | -0.42907   |
| 57842 | P0C214 | P51884 | -0.54529   |
| 57843 | P0C214 | Q9H3Q3 | -0.78983   |
| 57844 | P0C214 | P0CG22 | -0.81698   |
| 57845 | P0C214 | Q5HYI8 | -1.1039    |
| 57846 | P0C214 | Q6GMV1 | -0.41123   |
| 57847 | P0C214 | Q8NER5 | -1.0054    |
| 57848 | P0C214 | Q8NE35 | -0.74176   |
| 57849 | P0C214 | Q9NR96 | -0.529     |
| 57850 | P0C214 | Q14183 | -0.24669   |
| 57851 | P0C214 | P0C7V8 | -0.22746   |
| 57852 | P0C214 | Q9UKN7 | -0.58125   |
| 57853 | P0C214 | O75044 | -0.22933   |
| 57854 | P0C214 | P29017 | -1.0736    |
| 57855 | P0C214 | Q9UP52 | -1.141     |
| 57856 | P0C214 | P10070 | -0.22718   |
| 57857 | P0C214 | Q5T1B0 | -0.0034471 |
| 57858 | P0C214 | Q9UJJ9 | -0.80492   |
| 57859 | P0C214 | Q9Y4G8 | -0.92488   |
| 57860 | P0C214 | Q15527 | -0.2406    |
| 57861 | P0C214 | Q6P9A2 | -0.78421   |
| 57862 | P0C214 | O95484 | -0.848     |
| 57863 | P0C214 | P19835 | -0.30503   |
| 57864 | P0C214 | Q9NVG8 | -1.2827    |
| 57865 | P0C214 | Q6NVV3 | -1.1214    |
| 57866 | P0C214 | Q2NL67 | -0.40719   |
| 57867 | P0C214 | P61968 | -0.3106    |
| 57868 | P0C214 | Q86XJ0 | -0.98681   |
| 57869 | P0C214 | Q76I76 | -0.60764   |
| 57870 | P0C214 | Q68CP4 | -0.71308   |
| 57871 | P0C214 | P14410 | -0.46629   |
| 57872 | P0C214 | C9JQL5 | -0.98316   |
| 57873 | P0C214 | P23975 | -0.64521   |
| 57874 | P0C214 | P21439 | -0.9747    |
| 57875 | P0C214 | Q8WUK0 | -0.56534   |
| 57876 | P0C214 | Q13069 | -0.60816   |
| 57877 | P0C214 | Q9NZB8 | -0.31876   |
| 57878 | P0C214 | A1Z1Q3 | -0.35785   |
| 57879 | P0C214 | P61278 | -0.78624   |
| 57880 | P0C214 | Q8WWF5 | -0.87596   |
| 57881 | P0C214 | Q13237 | -0.80852   |
| 57882 | P0C214 | P09923 | -1.1396    |
| 57883 | P0C214 | P18405 | -0.31932   |
| 57884 | P0C214 | Q9BRP0 | -0.22047   |
| 57885 | P0C214 | P62952 | -0.27766   |
| 57886 | P0C214 | Q8IVB4 | -1.0681    |
| 57887 | P0C214 | Q8TCU6 | -0.22794   |
| 57888 | P0C214 | Q9Y620 | -0.34322   |
| 57889 | P0C214 | Q9Y4A9 | -1.2952    |
| 57890 | P0C214 | Q6VEQ5 | -0.59452   |
| 57891 | P0C214 | Q8WX93 | -0.2275    |
| 57892 | P0C214 | P11217 | -0.10682   |
| 57893 | P0C214 | Q9HBU9 | -0.81299   |
| 57894 | P0C214 | Q00537 | -1.0323    |
| 57895 | P0C214 | A5A3E0 | -0.21848   |
| 57896 | P0C214 | Q96KN7 | -0.11886   |
| 57897 | P0C214 | Q8IV20 | -0.013598  |
| 57898 | P0C214 | Q05329 | -0.23573   |
| 57899 | P0C214 | Q9UHG3 | -0.52882   |
| 57900 | P0C214 | Q9Y6R4 | -0.43943   |
| 57901 | P0C214 | Q9BZD3 | -0.19014   |
| 57902 | P0C214 | P56378 | -0.4993    |
| 57903 | P0C214 | Q96DY2 | -0.076435  |
| 57904 | P0C214 | Q7Z7H5 | -1.0332    |
| 57905 | P0C214 | O15123 | -0.49971   |
| 57906 | P0C214 | A6NHY2 | -0.55184   |
| 57907 | P0C214 | Q8TCW7 | -0.98681   |
| 57908 | P0C214 | O95013 | -1.2952    |
| 57909 | P0C214 | Q7Z7G0 | -0.96067   |
| 57910 | P0C214 | Q9UBP8 | -0.34077   |
| 57911 | P0C214 | Q8N9W7 | -0.98681   |
| 57912 | P0C214 | Q9Y6W8 | -1.5659    |

|       |        |        |           |
|-------|--------|--------|-----------|
| 57913 | P0C214 | Q6UXN7 | -0.64908  |
| 57914 | P0C214 | Q92604 | -0.47203  |
| 57915 | P0C214 | P25705 | -0.015048 |
| 57916 | P0C214 | P0C7T8 | -0.98681  |
| 57917 | P0C214 | P40225 | -0.66891  |
| 57918 | P0C214 | P52564 | -0.22931  |
| 57919 | P0C214 | P0C7V7 | -1.2604   |
| 57920 | P0C214 | O00631 | -0.85324  |
| 57921 | P0C214 | Q9H8N7 | -0.10253  |
| 57922 | P0C214 | A8MWX3 | -0.6075   |
| 57923 | P0C214 | Q8N755 | -0.98681  |
| 57924 | P0C214 | Q9NTN3 | -0.65686  |
| 57925 | P0C214 | Q13571 | -1.2908   |
| 57926 | P0C214 | Q5BKU9 | -0.15381  |
| 57927 | P0C214 | O95069 | -1.1755   |
| 57928 | P0C214 | Q68DN1 | -0.059973 |
| 57929 | P0C214 | Q6JQN1 | -0.42723  |
| 57930 | P0C214 | P08263 | -0.22399  |
| 57931 | P0C214 | Q8N7C3 | -0.39168  |
| 57932 | P0C214 | Q9C0A1 | -0.2274   |
| 57933 | P0C214 | P23416 | -0.89923  |
| 57934 | P0C214 | P98153 | -1.0499   |
| 57935 | P0C214 | Q8N307 | -0.80786  |
| 57936 | P0C214 | P78556 | -1.0265   |
| 57937 | P0C214 | Q9H560 | -0.2274   |
| 57938 | P0C214 | Q9UJF2 | -0.54886  |
| 57939 | P0C214 | Q92823 | -0.85126  |
| 57940 | P0C214 | Q8WUM9 | -1.2279   |
| 57941 | P0C214 | Q9Y661 | -1.1658   |
| 57942 | P0C214 | P17181 | -0.96343  |
| 57943 | P0C214 | Q8WUF8 | -0.85092  |
| 57944 | P0C214 | Q8TCC7 | -0.89771  |
| 57945 | P0C214 | P29375 | -0.28921  |
| 57946 | P0C214 | Q6IPT4 | -0.46458  |
| 57947 | P0C214 | Q9UHR4 | -0.22738  |
| 57948 | P0C214 | Q96M94 | -0.37066  |
| 57949 | P0C214 | O14735 | -0.5782   |
| 57950 | P0C214 | Q6ZSS7 | -0.97586  |
| 57951 | P0C214 | P58166 | -0.75674  |
| 57952 | P0C214 | Q7LDG7 | -0.53963  |
| 57953 | P0C214 | A8MY62 | -0.56454  |
| 57954 | P0C214 | P07602 | -0.77267  |
| 57955 | P0C214 | Q9P0N5 | -0.80004  |
| 57956 | P0C214 | Q9Y3D6 | -0.31997  |
| 57957 | P0C214 | A6NNN8 | -1.1771   |
| 57958 | P0C214 | Q8TDX5 | -0.22982  |
| 57959 | P0C214 | Q969M3 | -0.58662  |
| 57960 | P0C214 | Q86UV5 | -0.42196  |
| 57961 | P0C214 | Q6U841 | -0.93477  |
| 57962 | P0C214 | Q07444 | -0.95931  |
| 57963 | P0C214 | Q5JX71 | -0.98681  |
| 57964 | P0C214 | P16671 | -0.436    |
| 57965 | P0C214 | O43572 | -0.22192  |
| 57966 | P0C214 | Q8N0Y5 | -1.2952   |
| 57967 | P0C214 | O14524 | -0.81299  |
| 57968 | P0C214 | Q6ZWI9 | -0.50512  |
| 57969 | P0C214 | Q8NGK5 | -1.2952   |
| 57970 | P0C214 | O95319 | -0.32745  |
| 57971 | P0C214 | Q5RIA9 | -0.79608  |
| 57972 | P0C214 | Q5THJ4 | -0.44445  |
| 57973 | P0C214 | Q6UQ28 | -0.98972  |
| 57974 | P0C214 | Q6ZMS4 | -0.70722  |
| 57975 | P0C214 | Q8NHQ9 | -0.79344  |
| 57976 | P0C214 | Q9Y2T6 | -1.2622   |
| 57977 | P0C214 | A4D1B5 | -0.19145  |
| 57978 | P0C214 | P15509 | -1.5915   |
| 57979 | P0C214 | Q8N3E9 | -0.48973  |
| 57980 | P0C214 | O75063 | -1.1848   |
| 57981 | P0C214 | Q6ZS62 | -0.98681  |
| 57982 | P0C214 | Q9BTV4 | -0.48428  |
| 57983 | P0C214 | O94762 | -0.22596  |
| 57984 | P0C214 | Q99442 | -0.82558  |
| 57985 | P0C214 | Q6IEU7 | -1.2952   |
| 57986 | P0C214 | Q12947 | -0.40954  |
| 57987 | P0C214 | P0C5Y9 | -0.83668  |
| 57988 | P0C214 | Q96KS9 | -0.18718  |



|       |        |        |           |
|-------|--------|--------|-----------|
| 57989 | P0C214 | Q9H354 | -0.98681  |
| 57990 | P0C214 | Q8NB15 | -0.22657  |
| 57991 | P0C214 | Q70Z44 | -1.1949   |
| 57992 | P0C214 | Q9BTX1 | -0.24211  |
| 57993 | P0C214 | P16104 | -0.43637  |
| 57994 | P0C214 | A2RRL7 | -0.98681  |
| 57995 | P0C214 | Q9GZN0 | -1.2614   |
| 57996 | P0C214 | Q7L311 | -0.98681  |
| 57997 | P0C214 | Q9P2S6 | -0.50512  |
| 57998 | P0C214 | A8MUU1 | -0.69029  |
| 57999 | P0C214 | Q8N3T1 | -0.71565  |
| 58000 | P0C214 | Q9UPA5 | -0.17256  |
| 58001 | P0C214 | Q9UGI6 | -0.95167  |
| 58002 | P0C214 | P0CAP2 | -0.12791  |
| 58003 | P0C214 | Q8NI32 | -0.5764   |
| 58004 | P0C214 | Q6UXB2 | -1.2176   |
| 58005 | P0C214 | Q9C029 | -0.23426  |
| 58006 | P0C214 | P29323 | -0.81265  |
| 58007 | P0C214 | P22362 | -1.0201   |
| 58008 | P0C214 | Q8NFN8 | -1.3342   |
| 58009 | P0C214 | Q8NHS2 | -0.28731  |
| 58010 | P0C214 | Q15345 | -0.37066  |
| 58011 | P0C214 | Q95972 | -0.67709  |
| 58012 | P0C214 | Q14206 | -0.72323  |
| 58013 | P0C214 | Q8N9Q2 | -0.48942  |
| 58014 | P0C214 | Q9Y289 | -0.88999  |
| 58015 | P0C214 | Q8NDG6 | -0.52874  |
| 58016 | P0C214 | P41587 | -1.4007   |
| 58017 | P0C214 | P54849 | -1.2308   |
| 58018 | P0C214 | P25391 | -0.75163  |
| 58019 | P0C214 | Q9BZW5 | -0.81299  |
| 58020 | P0C214 | Q9NRS6 | -0.1712   |
| 58021 | P0C214 | A6NHC0 | -0.74793  |
| 58022 | P0C214 | P58335 | -0.95313  |
| 58023 | P0C214 | Q4L180 | -0.20678  |
| 58024 | P0C214 | Q4JDL3 | -0.23522  |
| 58025 | P0C214 | Q86YJ5 | -0.95236  |
| 58026 | P0C214 | Q5VXU9 | -0.93834  |
| 58027 | P0C214 | Q9Y3R0 | -0.22554  |
| 58028 | P0C214 | P09105 | -0.45631  |
| 58029 | P0C214 | P0CJ73 | -0.73145  |
| 58030 | P0C214 | Q8TBH0 | -0.22444  |
| 58031 | P0C214 | Q96N67 | -0.71496  |
| 58032 | P0C214 | Q9UHW9 | -1.0097   |
| 58033 | P0C214 | A6NI47 | -0.22739  |
| 58034 | P0C214 | Q5RGS3 | -0.98681  |
| 58035 | P0C214 | P51512 | -1.6246   |
| 58036 | P0C214 | Q8WWZ4 | -1.3439   |
| 58037 | P0C214 | Q969N4 | -1.3342   |
| 58038 | P0C214 | Q9P003 | -0.85677  |
| 58039 | P0C214 | O75112 | -0.45501  |
| 58040 | P0C214 | P61925 | -0.46139  |
| 58041 | P0C214 | P43489 | -0.8927   |
| 58042 | P0C214 | Q6WKZ4 | -0.29898  |
| 58043 | P0C214 | Q8WVQ1 | -0.90335  |
| 58044 | P0C214 | P63126 | -0.45806  |
| 58045 | P0C214 | Q9ULD4 | -0.22394  |
| 58046 | P0C214 | Q8WVF5 | -0.15065  |
| 58047 | P0C214 | P22303 | -0.22719  |
| 58048 | P0C214 | P38398 | -0.22715  |
| 58049 | P0C214 | P08588 | -0.68468  |
| 58050 | P0C214 | Q9BV29 | -0.19718  |
| 58051 | P0C214 | Q13555 | -0.83965  |
| 58052 | P0C214 | P34931 | -0.52735  |
| 58053 | P0C214 | Q5VT66 | -0.27014  |
| 58054 | P0C214 | Q9H2Q1 | -0.98681  |
| 58055 | P0C214 | Q15485 | -1.1188   |
| 58056 | P0C214 | Q9UJW2 | -1.544    |
| 58057 | P0C214 | A6NFD8 | -0.22715  |
| 58058 | P0C214 | Q15406 | -0.38318  |
| 58059 | P0C214 | Q9Y251 | -0.17222  |
| 58060 | P0C214 | Q16611 | -0.22721  |
| 58061 | P0C214 | Q32NC0 | -0.034374 |
| 58062 | P0C214 | P50336 | -0.32489  |
| 58063 | P0C214 | Q9UNA3 | -0.67308  |
| 58064 | P0C214 | P05997 | -0.87319  |

|       |        |        |           |
|-------|--------|--------|-----------|
| 58065 | P0C214 | Q6ZSB3 | -0.29062  |
| 58066 | P0C214 | Q8NGJ0 | -1.2952   |
| 58067 | P0C214 | Q5H8A3 | -0.83443  |
| 58068 | P0C214 | Q8NBR0 | -0.87046  |
| 58069 | P0C214 | Q9Y6N6 | -1.1474   |
| 58070 | P0C214 | Q8WXK4 | -0.5331   |
| 58071 | P0C214 | Q8TAL6 | -0.74706  |
| 58072 | P0C214 | Q9UJA2 | -0.4995   |
| 58073 | P0C214 | C9JI98 | -0.98681  |
| 58074 | P0C214 | Q9NXH3 | -0.25136  |
| 58075 | P0C214 | Q02742 | -0.62442  |
| 58076 | P0C214 | Q9BXI6 | -0.70979  |
| 58077 | P0C214 | Q99983 | -0.83603  |
| 58078 | P0C214 | A6NN73 | -0.2859   |
| 58079 | P0C214 | Q9NPH0 | -0.63078  |
| 58080 | P0C214 | P34972 | -1.2021   |
| 58081 | P0C214 | Q6U736 | -1.287    |
| 58082 | P0C214 | P48741 | -0.49158  |
| 58083 | P0C214 | Q02218 | -0.14958  |
| 58084 | P0C214 | Q8N4L8 | -0.35212  |
| 58085 | P0C214 | O76080 | -0.3062   |
| 58086 | P0C214 | Q99453 | -0.22422  |
| 58087 | P0C214 | Q8N6H7 | -0.17228  |
| 58088 | P0C214 | P13501 | -0.72551  |
| 58089 | P0C214 | P13726 | -0.31884  |
| 58090 | P0C214 | A6NJ46 | -0.22748  |
| 58091 | P0C214 | Q9H000 | -0.61119  |
| 58092 | P0C214 | Q9HC29 | -0.22726  |
| 58093 | P0C214 | Q75V66 | -1.0492   |
| 58094 | P0C214 | Q8NHG7 | -0.32953  |
| 58095 | P0C214 | O60896 | -0.42442  |
| 58096 | P0C214 | P27448 | -0.7539   |
| 58097 | P0C214 | Q8WVE7 | -0.98681  |
| 58098 | P0C214 | P16473 | -0.77451  |
| 58099 | P0C214 | Q9NY99 | -0.37631  |
| 58100 | P0C214 | Q96H22 | -0.073607 |
| 58101 | P0C214 | Q6ZRG5 | -0.41632  |
| 58102 | P0C214 | Q9BXB1 | -1.0367   |
| 58103 | P0C214 | Q9NYK1 | -0.57972  |
| 58104 | P0C214 | Q14654 | -0.54036  |
| 58105 | P0C214 | O75191 | -0.73409  |
| 58106 | P0C214 | Q9UBK7 | -1.0349   |
| 58107 | P0C214 | O43182 | -0.53936  |
| 58108 | P0C214 | Q6UWN8 | -0.77749  |
| 58109 | P0C214 | A6NGE7 | -0.43983  |
| 58110 | P0C214 | O95936 | -0.47529  |
| 58111 | P0C214 | Q9NVI7 | -1.044    |
| 58112 | P0C214 | Q96J86 | -0.81299  |
| 58113 | P0C214 | P53794 | -1.1719   |
| 58114 | P0C214 | P00403 | -0.49109  |
| 58115 | P0C214 | Q58EX7 | -0.79655  |
| 58116 | P0C214 | Q7Z5J8 | -0.98681  |
| 58117 | P0C214 | O14810 | -0.25259  |
| 58118 | P0C214 | Q8N431 | -0.7805   |
| 58119 | P0C214 | Q86WK6 | -1.3538   |
| 58120 | P0C214 | P68106 | -0.23081  |
| 58121 | P0C214 | Q0VAK6 | -0.23552  |
| 58122 | P0C214 | O75602 | -0.2949   |
| 58123 | P0C214 | O43451 | -0.57168  |
| 58124 | P0C214 | Q9BYX7 | -0.52329  |
| 58125 | P0C214 | O75746 | -0.28101  |
| 58126 | P0C214 | Q6UW60 | -1.2216   |
| 58127 | P0C214 | Q9UKY3 | -0.80168  |
| 58128 | P0C214 | Q02224 | -0.28882  |
| 58129 | P0C214 | Q86VR7 | -0.98681  |
| 58130 | P0C214 | Q9NTX5 | -0.1358   |
| 58131 | P0C214 | Q68BL8 | -0.9878   |
| 58132 | P0C214 | A4QP2  | -0.37285  |
| 58133 | P0C214 | Q99677 | -1.5387   |
| 58134 | P0C214 | P07492 | -1.0815   |
| 58135 | P0C214 | Q9Y2E8 | -0.9831   |
| 58136 | P0C214 | Q96RP8 | -0.98724  |
| 58137 | P0C214 | Q50LG9 | -0.98681  |
| 58138 | P0C214 | P49662 | -0.79329  |
| 58139 | P0C214 | Q8N6G5 | -0.43428  |
| 58140 | P0C214 | Q6UWX4 | -0.72827  |

|       |        |        |            |
|-------|--------|--------|------------|
| 58141 | P0C214 | Q9BU19 | -0.11618   |
| 58142 | P0C214 | P19022 | -0.5935    |
| 58143 | P0C214 | O60566 | -0.2274    |
| 58144 | P0C214 | P49585 | -0.16451   |
| 58145 | P0C214 | O94875 | -0.22877   |
| 58146 | P0C214 | P24666 | -0.15017   |
| 58147 | P0C214 | Q16626 | -0.27831   |
| 58148 | P0C214 | Q9BYU5 | -0.051359  |
| 58149 | P0C214 | P06727 | -0.48148   |
| 58150 | P0C214 | Q6YBV0 | -0.96365   |
| 58151 | P0C214 | P53667 | -0.22741   |
| 58152 | P0C214 | P05141 | -0.23887   |
| 58153 | P0C214 | Q8WV4  | -0.44956   |
| 58154 | P0C214 | Q5TEA3 | -0.48919   |
| 58155 | P0C214 | Q9BQE6 | -0.0097204 |
| 58156 | P0C214 | A2RU54 | -0.23992   |
| 58157 | P0C214 | Q96LD4 | -0.22727   |
| 58158 | P0C214 | A6NM10 | -1.0569    |
| 58159 | P0C214 | P51843 | -0.22729   |
| 58160 | P0C214 | Q8IVJ8 | -0.98681   |
| 58161 | P0C214 | Q8IYJ0 | -0.98681   |
| 58162 | P0C214 | Q9NYB9 | -0.24942   |
| 58163 | P0C214 | P51168 | -0.61334   |
| 58164 | P0C214 | Q9HD43 | -0.22742   |
| 58165 | P0C214 | Q99518 | -0.74369   |
| 58166 | P0C214 | Q96QD5 | -0.053741  |
| 58167 | P0C214 | Q8IUX7 | -0.51462   |
| 58168 | P0C214 | O43739 | -0.55402   |
| 58169 | P0C214 | O43323 | -0.8348    |
| 58170 | P0C214 | A8MWP4 | -0.3609    |
| 58171 | P0C214 | Q8WUY8 | -0.32831   |
| 58172 | P0C214 | Q92826 | -0.22719   |
| 58173 | P0C214 | Q9NY72 | -0.65737   |
| 58174 | P0C214 | Q9NX52 | -1.4087    |
| 58175 | P0C214 | Q86YS7 | -0.53241   |
| 58176 | P0C214 | Q7L4P6 | -0.2859    |
| 58177 | P0C214 | P30968 | -1.5476    |
| 58178 | P0C214 | Q8TDJ6 | -0.54172   |
| 58179 | P0C214 | Q9Y6M0 | -0.84079   |
| 58180 | P0C214 | Q6ZN18 | -0.42912   |
| 58181 | P0C214 | Q8TBZ2 | -0.30406   |
| 58182 | P0C214 | Q96Q40 | -1.1107    |
| 58183 | P0C214 | O43423 | -0.094548  |
| 58184 | P0C214 | Q9Y5R6 | -0.19497   |
| 58185 | P0C214 | Q9Y6C2 | -0.70102   |
| 58186 | P0C214 | Q8TBF8 | -0.22471   |
| 58187 | P0C214 | Q9BTD8 | -0.31203   |
| 58188 | P0C214 | A6NIR3 | -1.0294    |
| 58189 | P0C214 | O15120 | -0.58189   |
| 58190 | P0C214 | Q86Y33 | -0.22741   |
| 58191 | P0C214 | P43155 | -0.30326   |
| 58192 | P0C214 | Q96RR4 | -1.1055    |
| 58193 | P0C214 | O43543 | -0.15601   |
| 58194 | P0C214 | P08949 | -0.79496   |
| 58195 | P0C214 | Q9P260 | -0.34015   |
| 58196 | P0C214 | O95749 | -0.11402   |
| 58197 | P0C214 | Q9NXU5 | -1.2665    |
| 58198 | P0C214 | Q5JPF3 | -0.38316   |
| 58199 | P0C214 | Q6IPR3 | -0.28525   |
| 58200 | P0C214 | P60468 | -0.30891   |
| 58201 | P0C214 | Q9HCL2 | -0.34122   |
| 58202 | P0C214 | Q9NQ79 | -0.9698    |
| 58203 | P0C214 | Q9NYW7 | -1.1937    |
| 58204 | P0C214 | O75541 | -0.2376    |
| 58205 | P0C214 | Q13461 | -0.41532   |
| 58206 | P0C214 | P13716 | -0.21765   |
| 58207 | P0C214 | Q16553 | -0.64893   |
| 58208 | P0C214 | P56278 | -0.16956   |
| 58209 | P0C214 | Q5VVP1 | -0.98681   |
| 58210 | P0C214 | Q0VAM2 | -0.78937   |
| 58211 | P0C214 | A6NC57 | -0.2274    |
| 58212 | P0C214 | Q8N1H7 | -0.50691   |
| 58213 | P0C214 | Q9NU23 | -0.2401    |
| 58214 | P0C214 | Q5DT21 | -0.22598   |
| 58215 | P0C214 | Q8NB90 | -0.93183   |
| 58216 | P0C214 | Q6NSJ0 | -0.57304   |

|       |        |        |          |
|-------|--------|--------|----------|
| 58217 | P0C214 | Q32ZL2 | -0.96166 |
| 58218 | P0C214 | Q9NZV5 | -0.2557  |
| 58219 | P0C214 | A7XYQ1 | -0.48597 |
| 58220 | P0C214 | Q9UFE4 | -0.43475 |
| 58221 | P0C214 | Q8NH72 | -1.2952  |
| 58222 | P0C214 | Q5SZQ8 | -0.31591 |
| 58223 | P0C214 | Q9UBL9 | -0.59928 |
| 58224 | P0C214 | Q8NHH1 | -0.39741 |
| 58225 | P0C214 | O00187 | -0.97981 |
| 58226 | P0C214 | Q5VWW1 | -0.94604 |
| 58227 | P0C214 | B2RUZ4 | -0.98681 |
| 58228 | P0C214 | Q12926 | -0.30258 |
| 58229 | P0C214 | Q9Y4L1 | -0.52541 |
| 58230 | P0C214 | Q4G0N8 | -1.1855  |
| 58231 | P0C214 | O75319 | -0.55983 |
| 58232 | P0C214 | Q7Z769 | -0.98681 |
| 58233 | P0C214 | P47211 | -1.2642  |
| 58234 | P0C214 | P60606 | -0.96345 |
| 58235 | P0C214 | Q14190 | -0.25638 |
| 58236 | P0C214 | P06133 | -0.88715 |
| 58237 | P0C214 | Q9HBI5 | -0.22463 |
| 58238 | P0C214 | Q06413 | -0.10239 |
| 58239 | P0C214 | P53420 | -0.89557 |
| 58240 | P0C214 | Q86Y38 | -1.0304  |
| 58241 | P0C214 | O14967 | -0.84562 |
| 58242 | P0C214 | O75643 | -0.22657 |
| 58243 | P0C214 | P04629 | -0.60742 |
| 58244 | P0C214 | Q01196 | -0.45246 |
| 58245 | P0C214 | Q9Y6T7 | -0.77528 |
| 58246 | P0C214 | Q4V339 | -0.79608 |
| 58247 | P0C214 | P48775 | -0.15698 |
| 58248 | P0C214 | Q9H4D0 | -0.97835 |
| 58249 | P0C214 | Q15041 | -0.19213 |
| 58250 | P0C214 | Q5VWZ2 | -0.18058 |
| 58251 | P0C214 | Q9BXX0 | -0.53706 |
| 58252 | P0C214 | Q2M3C6 | -0.98681 |
| 58253 | P0C214 | Q86V40 | -1.2185  |
| 58254 | P0C214 | P01137 | -0.22741 |
| 58255 | P0C214 | Q13275 | -0.88073 |
| 58256 | P0C214 | A6NLI5 | -0.71534 |
| 58257 | P0C214 | P55064 | -0.61551 |
| 58258 | P0C214 | P01609 | -1.0022  |
| 58259 | P0C214 | Q68DQ2 | -0.39457 |
| 58260 | P0C214 | A6NKP2 | -0.60766 |
| 58261 | P0C214 | Q8N8D7 | -1.0708  |
| 58262 | P0C214 | Q6ZNE9 | -0.42254 |
| 58263 | P0C214 | O15327 | -0.22991 |
| 58264 | P0C214 | Q8N8R5 | -0.91736 |
| 58265 | P0C214 | Q8NG35 | -0.88056 |
| 58266 | P0C214 | Q9NQW8 | -1.5169  |
| 58267 | P0C214 | Q18PE1 | -0.71558 |
| 58268 | P0C214 | Q8NFB2 | -0.98681 |
| 58269 | P0C214 | Q9BS40 | -0.74313 |
| 58270 | P0C214 | P09326 | -0.58723 |
| 58271 | P0C214 | Q9NZ32 | -0.27304 |
| 58272 | P0C214 | P12034 | -0.59828 |
| 58273 | P0C214 | Q04609 | -0.89801 |
| 58274 | P0C214 | Q5SWX8 | -1.0515  |
| 58275 | P0C214 | Q13133 | -0.23393 |
| 58276 | P0C214 | P14543 | -1.0856  |
| 58277 | P0C214 | Q9HAQ2 | -0.63838 |
| 58278 | P0C214 | Q6N075 | -1.0564  |
| 58279 | P0C214 | Q9NZR2 | -0.90399 |
| 58280 | P0C214 | Q6PHR2 | -0.61016 |
| 58281 | P0C214 | Q96D09 | -0.20563 |
| 58282 | P0C214 | Q9H3S3 | -1.4726  |
| 58283 | P0C214 | Q9NSA2 | -1.0245  |
| 58284 | P0C214 | Q7Z4Y8 | -0.4251  |
| 58285 | P0C214 | P60508 | -0.93452 |
| 58286 | P0C214 | P07510 | -1.1474  |
| 58287 | P0C214 | Q86SG5 | -0.28944 |
| 58288 | P0C214 | A0PJZ0 | -0.22741 |
| 58289 | P0C214 | Q86YD5 | -1.0181  |
| 58290 | P0C214 | O14921 | -0.2281  |
| 58291 | P0C214 | E5RJM6 | -0.22741 |
| 58292 | P0C214 | P0C7H8 | -0.38191 |

|       |        |        |          |
|-------|--------|--------|----------|
| 58293 | P0C214 | A6PVS8 | -0.22683 |
| 58294 | P0C214 | Q86WA9 | -1.0182  |
| 58295 | P0C214 | O75949 | -0.98681 |
| 58296 | P0C214 | Q6MZQ0 | -0.28468 |
| 58297 | P0C214 | Q5T6L9 | -0.98681 |
| 58298 | P0C214 | Q86XT2 | -0.13694 |
| 58299 | P0C214 | Q9H7F4 | -0.98681 |
| 58300 | P0C214 | Q9HCE0 | -0.41005 |
| 58301 | P0C214 | A6NDD5 | -0.87079 |
| 58302 | P0C214 | Q9UEW8 | -0.76611 |
| 58303 | P0C214 | Q8IWU2 | -0.85652 |
| 58304 | P0C214 | Q8N4Z0 | -1.1234  |
| 58305 | P0C214 | Q9UIW2 | -0.73943 |
| 58306 | P0C214 | Q7L2Z9 | -0.22407 |
| 58307 | P0C214 | Q8IY21 | -0.22021 |
| 58308 | P0C214 | P51991 | -0.24402 |
| 58309 | P0C214 | P22103 | -0.22149 |
| 58310 | P0C214 | O75127 | -0.1854  |
| 58311 | P0C214 | Q9UBX2 | -0.16414 |
| 58312 | P0C214 | P22003 | -0.53796 |
| 58313 | P0C214 | P19087 | -0.873   |
| 58314 | P0C214 | Q9C0B0 | -0.5018  |
| 58315 | P0C214 | Q14789 | -0.2442  |
| 58316 | P0C214 | P48651 | -0.73126 |
| 58317 | P0C214 | P28358 | -0.5444  |
| 58318 | P0C214 | O60235 | -1.7708  |
| 58319 | P0C214 | P01242 | -0.87422 |
| 58320 | P0C214 | Q8N9V3 | -0.34682 |
| 58321 | P0C214 | Q5TA50 | -0.19377 |
| 58322 | P0C214 | P39900 | -1.2684  |
| 58323 | P0C214 | Q8IX29 | -0.20685 |
| 58324 | P0C214 | P29317 | -0.60857 |
| 58325 | P0C214 | Q969W9 | -0.9188  |
| 58326 | P0C214 | P00918 | -0.16506 |
| 58327 | P0C214 | P31994 | -0.5093  |
| 58328 | P0C214 | Q149N8 | -0.615   |
| 58329 | P0C214 | Q8N7P3 | -0.848   |
| 58330 | P0C214 | P19404 | -0.14809 |
| 58331 | P0C214 | Q9H8M5 | -1.1033  |
| 58332 | P0C214 | P31277 | -0.37299 |
| 58333 | P0C214 | O76093 | -0.55901 |
| 58334 | P0C214 | O95741 | -0.50707 |
| 58335 | P0C214 | P43119 | -0.96897 |
| 58336 | P0C214 | Q9GZQ8 | -0.29985 |
| 58337 | P0C214 | P48507 | -0.16224 |
| 58338 | P0C214 | Q2TVT4 | -0.31719 |
| 58339 | P0C214 | Q96C24 | -0.23339 |
| 58340 | P0C214 | Q92567 | -0.24013 |
| 58341 | P0C214 | Q8N6K7 | -0.21363 |
| 58342 | P0C214 | P0CF74 | -0.99256 |
| 58343 | P0C214 | Q6UXY1 | -0.80615 |
| 58344 | P0C214 | P30953 | -1.2952  |
| 58345 | P0C214 | Q9H0J4 | -0.19349 |
| 58346 | P0C214 | Q96LW2 | -1.2407  |
| 58347 | P0C214 | P32456 | -0.19913 |
| 58348 | P0C214 | Q5VZ89 | -0.66379 |
| 58349 | P0C214 | Q9NPB9 | -1.404   |
| 58350 | P0C214 | Q9BQT9 | -0.97835 |
| 58351 | P0C214 | Q9NT68 | -0.73874 |
| 58352 | P0C214 | P11509 | -0.54126 |
| 58353 | P0C214 | Q9C0C4 | -0.81561 |
| 58354 | P0C214 | Q9H3Q1 | -0.45126 |
| 58355 | P0C214 | Q9Y4E8 | -0.3907  |
| 58356 | P0C214 | P22492 | -1.0963  |
| 58357 | P0C214 | Q8TBM7 | -0.98681 |
| 58358 | P0C214 | P02729 | -0.76523 |
| 58359 | P0C214 | Q6ZMJ4 | -0.64421 |
| 58360 | P0C214 | Q9H0Y0 | -0.36972 |
| 58361 | P0C214 | P08686 | -0.61302 |
| 58362 | P0C214 | Q12836 | -1.2481  |
| 58363 | P0C214 | Q8IVE3 | -0.90468 |
| 58364 | P0C214 | Q9NS69 | -0.2664  |
| 58365 | P0C214 | Q6P1M0 | -1.0494  |
| 58366 | P0C214 | Q8NBH2 | -0.48257 |
| 58367 | P0C214 | Q15762 | -0.76609 |
| 58368 | P0C214 | Q12907 | -0.62006 |

|       |        |        |          |
|-------|--------|--------|----------|
| 58369 | P0C214 | P42857 | -0.34341 |
| 58370 | P0C214 | P0C0L4 | -1.0394  |
| 58371 | P0C214 | Q6ZSZ5 | -0.44861 |
| 58372 | P0C214 | Q7Z5U6 | -0.22765 |
| 58373 | P0C214 | P04217 | -0.76523 |
| 58374 | P0C214 | O60542 | -0.6551  |
| 58375 | P0C214 | P46531 | -0.22784 |
| 58376 | P0C214 | P47992 | -0.43267 |
| 58377 | P0C214 | Q8NGD1 | -1.2952  |
| 58378 | P0C214 | Q13467 | -0.44655 |
| 58379 | P0C214 | Q13478 | -1.2179  |
| 58380 | P0C214 | Q8TBC4 | -0.22363 |
| 58381 | P0C214 | P27144 | -0.52417 |
| 58382 | P0C214 | Q8N816 | -0.98681 |
| 58383 | P0C214 | Q8NGH8 | -1.2952  |
| 58384 | P0C214 | Q9NQC7 | -0.20277 |
| 58385 | P0C214 | Q96DT6 | -0.64075 |
| 58386 | P0C214 | P47900 | -0.85112 |
| 58387 | P0C214 | Q8NGH7 | -1.2952  |
| 58388 | P0C214 | Q8TD91 | -0.11371 |
| 58389 | P0C214 | Q96SQ7 | -0.22774 |
| 58390 | P0C214 | Q8IVL0 | -0.58117 |
| 58391 | P0C214 | Q9BX69 | -0.50844 |
| 58392 | P0C214 | Q8IZL9 | -0.30615 |
| 58393 | P0C214 | Q8WTR4 | -0.62437 |
| 58394 | P0C214 | Q6EMK4 | -1.4408  |
| 58395 | P0C214 | Q96M15 | -0.47517 |
| 58396 | P0C214 | P61109 | -0.91736 |
| 58397 | P0C214 | Q8N122 | -0.22741 |
| 58398 | P0C214 | Q01581 | -0.17852 |
| 58399 | P0C214 | P03915 | -0.39007 |
| 58400 | P0C214 | Q9BSJ8 | -0.98681 |
| 58401 | P0C214 | Q12802 | -0.22739 |
| 58402 | P0C214 | Q7Z4G4 | -0.28539 |
| 58403 | P0C214 | Q9NZC4 | -0.12587 |
| 58404 | P0C214 | Q14680 | -0.52331 |
| 58405 | P0C214 | Q9H4K7 | -0.593   |
| 58406 | P0C214 | Q8N5K1 | -0.34688 |
| 58407 | P0C214 | O95807 | -0.73221 |
| 58408 | P0C214 | Q8NBN7 | -0.87464 |
| 58409 | P0C214 | Q96FS4 | -0.22048 |
| 58410 | P0C214 | Q96PB1 | -0.98681 |
| 58411 | P0C214 | P98066 | -0.75985 |
| 58412 | P0C214 | Q8N878 | -0.41401 |
| 58413 | P0C214 | Q9UKA9 | -0.46118 |
| 58414 | P0C214 | Q8NEY1 | -0.96587 |
| 58415 | P0C214 | Q9BRK5 | -0.22345 |
| 58416 | P0C214 | Q15828 | -0.85659 |
| 58417 | P0C214 | P34981 | -1.2789  |
| 58418 | P0C214 | P18577 | -1.0475  |
| 58419 | P0C214 | A6NCX1 | -0.23413 |
| 58420 | P0C214 | Q14767 | -0.92043 |
| 58421 | P0C214 | Q8WZ84 | -1.2952  |
| 58422 | P0C214 | Q9NQV5 | -0.17692 |
| 58423 | P0C214 | P49802 | -0.37013 |
| 58424 | P0C214 | Q03591 | -0.91147 |
| 58425 | P0C214 | C9JDV5 | -0.1921  |
| 58426 | P0C214 | Q5TEA6 | -0.98681 |
| 58427 | P0C214 | Q9H3Y8 | -0.73777 |
| 58428 | P0C214 | P49759 | -0.97718 |
| 58429 | P0C214 | Q5T5A8 | -0.38015 |
| 58430 | P0C214 | Q9H2J7 | -1.1147  |
| 58431 | P0C214 | P01111 | -0.53683 |
| 58432 | P0C214 | Q9NZ45 | -0.89063 |
| 58433 | P0C214 | Q9NQ88 | -0.62213 |
| 58434 | P0C214 | Q8N4E4 | -0.17411 |
| 58435 | P0C214 | Q9UHV5 | -0.77163 |
| 58436 | P0C214 | P62955 | -1.0316  |
| 58437 | P0C214 | Q8NFR3 | -0.39547 |
| 58438 | P0C214 | P01767 | -1.0022  |
| 58439 | P0C214 | Q5VTJ3 | -0.98681 |
| 58440 | P0C214 | Q6PL18 | -0.23378 |
| 58441 | P0C214 | Q9UHP6 | -0.20133 |
| 58442 | P0C214 | Q8ND82 | -0.22703 |
| 58443 | P0C214 | Q8IYG6 | -0.1026  |
| 58444 | P0C214 | P24752 | -0.16481 |

|       |        |        |           |
|-------|--------|--------|-----------|
| 58445 | P0C214 | Q8NGG5 | -1.2952   |
| 58446 | P0C214 | Q96PD7 | -0.20448  |
| 58447 | P0C214 | Q14627 | -1.1441   |
| 58448 | P0C214 | Q11128 | -0.61567  |
| 58449 | P0C214 | Q9Y483 | -0.22815  |
| 58450 | P0C214 | Q9NQ60 | -0.85506  |
| 58451 | P0C214 | Q8N162 | -1.2952   |
| 58452 | P0C214 | Q96IQ7 | -1.128    |
| 58453 | P0C214 | P01621 | -1.0022   |
| 58454 | P0C214 | Q8TEW6 | -0.39463  |
| 58455 | P0C214 | Q6ZV73 | -0.8217   |
| 58456 | P0C214 | Q8WWW8 | -0.52301  |
| 58457 | P0C214 | A6NGQ2 | -0.12844  |
| 58458 | P0C214 | P20648 | -1.0746   |
| 58459 | P0C214 | Q9Y4D7 | -1.1054   |
| 58460 | P0C214 | P35544 | -0.22496  |
| 58461 | P0C214 | Q09428 | -0.61425  |
| 58462 | P0C214 | Q8N3T6 | -0.68883  |
| 58463 | P0C214 | P43366 | -0.061241 |
| 58464 | P0C214 | Q08AH1 | -0.60716  |
| 58465 | P0C214 | P35453 | -0.22739  |
| 58466 | P0C214 | O75828 | -0.22665  |
| 58467 | P0C214 | Q8NDX5 | -0.59071  |
| 58468 | P0C214 | P33151 | -0.57199  |
| 58469 | P0C214 | Q8NH51 | -1.2952   |
| 58470 | P0C214 | Q5SR56 | -1.113    |
| 58471 | P0C214 | Q9UHG2 | -0.70959  |
| 58472 | P0C214 | Q9H0R6 | -0.40671  |
| 58473 | P0C214 | P20719 | -0.35272  |
| 58474 | P0C214 | Q9BYB4 | -0.22763  |
| 58475 | P0C214 | Q96L11 | -0.91736  |
| 58476 | P0C214 | Q9Y5U5 | -1.424    |
| 58477 | P0C214 | Q6PJQ5 | -0.40151  |
| 58478 | P0C214 | A6NNM3 | -0.22738  |
| 58479 | P0C214 | P07339 | -1.0649   |
| 58480 | P0C214 | P18509 | -0.71199  |
| 58481 | P0C214 | Q9P1Z9 | -0.98681  |
| 58482 | P0C214 | Q6UX15 | -1.0577   |
| 58483 | P0C214 | P0C869 | -0.36336  |
| 58484 | P0C214 | Q13671 | -0.35863  |
| 58485 | P0C214 | P18283 | -0.42939  |
| 58486 | P0C214 | Q9NR31 | -0.40092  |
| 58487 | P0C214 | Q92859 | -0.87855  |
| 58488 | P0C214 | Q86UV7 | -0.71534  |
| 58489 | P0C214 | O42043 | -0.85122  |
| 58490 | P0C214 | Q08426 | -0.051189 |
| 58491 | P0C214 | Q8IUG1 | -0.50416  |
| 58492 | P0C214 | P45954 | -0.25871  |
| 58493 | P0C214 | Q8IX21 | -0.22116  |
| 58494 | P0C214 | Q99880 | -0.85588  |
| 58495 | P0C214 | Q8WY98 | -0.98681  |
| 58496 | P0C214 | P12532 | -0.6456   |
| 58497 | P0C214 | P46663 | -1.0436   |
| 58498 | P0C214 | Q9UFD9 | -0.22738  |
| 58499 | P0C214 | P61916 | -0.48101  |
| 58500 | P0C214 | Q63ZE4 | -0.99951  |
| 58501 | P0C214 | Q9NQ25 | -1.1069   |
| 58502 | P0C214 | Q9H4K1 | -0.10696  |
| 58503 | P0C214 | A6NM45 | -0.86667  |
| 58504 | P0C214 | Q5TCX8 | -1.0642   |
| 58505 | P0C214 | P06127 | -0.60298  |
| 58506 | P0C214 | Q92484 | -0.2328   |
| 58507 | P0C214 | P51157 | -1.1241   |
| 58508 | P0C214 | Q8WTY6 | -0.38256  |
| 58509 | P0C214 | P47756 | -0.082911 |
| 58510 | P0C214 | Q9BWP8 | -1.1281   |
| 58511 | P0C214 | P24723 | -0.74111  |
| 58512 | P0C214 | A8MQB3 | -0.1406   |
| 58513 | P0C214 | Q92617 | -0.68883  |
| 58514 | P0C214 | Q9Y265 | -0.40109  |
| 58515 | P0C214 | Q9UQG0 | -0.33459  |
| 58516 | P0C214 | Q495D7 | -0.11188  |
| 58517 | P0C214 | Q15493 | -0.16232  |
| 58518 | P0C214 | O95340 | -0.51031  |
| 58519 | P0C214 | Q7Z4W1 | -0.53508  |
| 58520 | P0C214 | Q702N8 | -0.40086  |

|       |        |        |           |
|-------|--------|--------|-----------|
| 58521 | P0C214 | Q86W28 | -0.62484  |
| 58522 | P0C214 | Q92692 | -0.28692  |
| 58523 | P0C214 | Q9NUH8 | -0.98681  |
| 58524 | P0C214 | Q9NPG8 | -1.0453   |
| 58525 | P0C214 | Q96NA8 | -0.89246  |
| 58526 | P0C214 | Q15303 | -1.2281   |
| 58527 | P0C214 | Q6UY27 | -0.90112  |
| 58528 | P0C214 | Q4VNC1 | -1.0065   |
| 58529 | P0C214 | Q95994 | -0.16024  |
| 58530 | P0C214 | P18031 | -0.23843  |
| 58531 | P0C214 | P28067 | -0.76844  |
| 58532 | P0C214 | Q8NGU2 | -1.2952   |
| 58533 | P0C214 | Q8N614 | -0.98681  |
| 58534 | P0C214 | O43424 | -0.76144  |
| 58535 | P0C214 | O75771 | -0.21515  |
| 58536 | P0C214 | Q4QY38 | -0.88056  |
| 58537 | P0C214 | O43854 | -1.292    |
| 58538 | P0C214 | Q8NDZ2 | -0.026821 |
| 58539 | P0C214 | Q9NZC3 | -0.67176  |
| 58540 | P0C214 | P30487 | -1.0367   |
| 58541 | P0C214 | P07988 | -0.63104  |
| 58542 | P0C214 | Q9NR00 | -0.33895  |
| 58543 | P0C214 | Q8WTX9 | -0.98158  |
| 58544 | P0C214 | P43628 | -0.65123  |
| 58545 | P0C214 | A8MT82 | -1.0294   |
| 58546 | P0C214 | P57773 | -1.0688   |
| 58547 | P0C214 | Q14943 | -1.1585   |
| 58548 | P0C214 | P61764 | -0.21157  |
| 58549 | P0C214 | O60669 | -1.1322   |
| 58550 | P0C214 | Q13950 | -0.56875  |
| 58551 | P0C214 | Q96MF2 | -0.62663  |
| 58552 | P0C214 | Q9P0I2 | -0.67463  |
| 58553 | P0C214 | Q10571 | -0.19051  |
| 58554 | P0C214 | P59665 | -0.92551  |
| 58555 | P0C214 | C9JQI7 | -0.98681  |
| 58556 | P0C214 | O75781 | -0.21302  |
| 58557 | P0C214 | Q14954 | -1.0817   |
| 58558 | P0C214 | Q9UL01 | -0.34591  |
| 58559 | P0C214 | Q13442 | -0.55591  |
| 58560 | P0C214 | A5PLK6 | -0.95991  |
| 58561 | P0C214 | Q9BX73 | -0.98681  |
| 58562 | P0C214 | Q9NQB0 | -0.20847  |
| 58563 | P0C214 | Q9C026 | -0.65512  |
| 58564 | P0C214 | Q5SRI9 | -0.64391  |
| 58565 | P0C214 | Q6PCT2 | -0.63955  |
| 58566 | P0C214 | Q14847 | -0.22741  |
| 58567 | P0C214 | P42229 | -0.22616  |
| 58568 | P0C214 | Q9H2S5 | -0.23901  |
| 58569 | P0C214 | Q9BSE2 | -0.98681  |
| 58570 | P0C214 | C9J069 | -0.18239  |
| 58571 | P0C214 | Q14694 | -0.29278  |
| 58572 | P0C214 | Q9BZC7 | -1.0931   |
| 58573 | P0C214 | Q92608 | -0.2247   |
| 58574 | P0C214 | Q5NUL3 | -1.2147   |
| 58575 | P0C214 | O43749 | -1.2952   |
| 58576 | P0C214 | Q9P202 | -0.22632  |
| 58577 | P0C214 | Q6ZMM2 | -1.0374   |
| 58578 | P0C214 | Q92619 | -0.84214  |
| 58579 | P0C214 | P39877 | -0.57849  |
| 58580 | P0C214 | Q96BR9 | -0.21636  |
| 58581 | P0C214 | Q8NHW4 | -0.99458  |
| 58582 | P0C214 | Q96M93 | -0.81227  |
| 58583 | P0C214 | P01777 | -1.0022   |
| 58584 | P0C214 | Q9BXT4 | -0.70259  |
| 58585 | P0C214 | Q8WUH1 | -0.32241  |
| 58586 | P0C214 | P19105 | -0.349    |
| 58587 | P0C214 | Q96P88 | -1.2999   |
| 58588 | P0C214 | P80098 | -0.92459  |
| 58589 | P0C214 | P24593 | -0.34365  |
| 58590 | P0C214 | P04808 | -1.0407   |
| 58591 | P0C214 | Q9NYC9 | -0.63309  |
| 58592 | P0C214 | Q6NT32 | -0.74652  |
| 58593 | P0C214 | P00488 | -0.35931  |
| 58594 | P0C214 | Q7Z602 | -1.3693   |
| 58595 | P0C214 | O00244 | -0.35545  |
| 58596 | P0C214 | P20151 | -1.3911   |



|       |        |        |          |
|-------|--------|--------|----------|
| 58597 | P0C214 | Q86YN6 | -0.22551 |
| 58598 | P0C214 | Q5BKX6 | -1.0564  |
| 58599 | P0C214 | Q9H4A3 | -0.57538 |
| 58600 | P0C214 | O76099 | -1.3159  |
| 58601 | P0C214 | Q9H3P7 | -0.6706  |
| 58602 | P0C214 | Q1AE95 | -0.98681 |
| 58603 | P0C214 | O14683 | -0.9954  |
| 58604 | P0C214 | Q49MI3 | -0.41869 |
| 58605 | P0C214 | P01595 | -1.0022  |
| 58606 | P0C214 | P29074 | -0.22756 |
| 58607 | P0C214 | Q8TDQ7 | -0.10821 |
| 58608 | P0C214 | P03952 | -0.71386 |
| 58609 | P0C214 | P62699 | -0.46159 |
| 58610 | P0C214 | Q9P0K9 | -0.68883 |
| 58611 | P0C214 | Q14201 | -0.31361 |
| 58612 | P0C214 | Q8IUZ0 | -0.2274  |
| 58613 | P0C214 | O00270 | -1.4957  |
| 58614 | P0C214 | O95210 | -0.57119 |
| 58615 | P0C214 | Q9BPX5 | -0.28639 |
| 58616 | P0C214 | Q9BXR6 | -0.89655 |
| 58617 | P0C214 | Q8N100 | -0.2291  |
| 58618 | P0C214 | Q6UXS0 | -0.90767 |
| 58619 | P0C214 | Q86VF5 | -0.71887 |
| 58620 | P0C214 | Q86VI4 | -0.70526 |
| 58621 | P0C214 | Q9P227 | -1.1547  |
| 58622 | P0C214 | P18075 | -0.22741 |
| 58623 | P0C214 | Q9H422 | -0.35295 |
| 58624 | P0C214 | P53365 | -0.21937 |
| 58625 | P0C214 | P15812 | -1.0391  |
| 58626 | P0C214 | P80421 | -0.91671 |
| 58627 | P0C214 | Q5T2S8 | -0.22834 |
| 58628 | P0C214 | P10301 | -0.58793 |
| 58629 | P0C214 | P28336 | -1.2265  |
| 58630 | P0C214 | Q6W3E5 | -0.87221 |
| 58631 | P0C214 | Q9P2N2 | -0.36183 |
| 58632 | P0C214 | P0C7Q5 | -0.98681 |
| 58633 | P0C214 | O15457 | -0.43687 |
| 58634 | P0C214 | Q13520 | -0.94819 |
| 58635 | P0C214 | Q9Y5Z4 | -0.41877 |
| 58636 | P0C214 | P35410 | -0.64774 |
| 58637 | P0C214 | O60361 | -0.85582 |
| 58638 | P0C214 | P0C7U3 | -1.0453  |
| 58639 | P0C214 | Q6UWM5 | -0.91736 |
| 58640 | P0C214 | Q5T764 | -0.4142  |
| 58641 | P0C214 | A6NCL2 | -0.3956  |
| 58642 | P0C214 | Q6ZNB7 | -0.91692 |
| 58643 | P0C214 | Q7RTY3 | -0.97208 |
| 58644 | P0C214 | A6NHN6 | -0.91736 |
| 58645 | P0C214 | Q16819 | -1.3369  |
| 58646 | P0C214 | A6NJI1 | -0.14335 |
| 58647 | P0C214 | Q6UX72 | -0.82935 |
| 58648 | P0C214 | Q9H4Y5 | -0.21189 |
| 58649 | P0C214 | Q6NTF7 | -0.17305 |
| 58650 | P0C214 | Q9Y2K9 | -0.64131 |
| 58651 | P0C214 | O60242 | -1.4279  |
| 58652 | P0C214 | Q14376 | -0.39345 |
| 58653 | P0C214 | O00746 | -0.48701 |
| 58654 | P0C214 | O76076 | -1.0305  |
| 58655 | P0C214 | A1A5C7 | -1.114   |
| 58656 | P0C214 | Q96A23 | -0.22688 |
| 58657 | P0C214 | Q92626 | -0.99098 |
| 58658 | P0C214 | P56962 | -0.80484 |
| 58659 | P0C214 | P20039 | -0.77415 |
| 58660 | P0C214 | Q06141 | -0.91251 |
| 58661 | P0C214 | O94768 | -0.92184 |
| 58662 | P0C214 | P01730 | -0.42223 |
| 58663 | P0C214 | Q6AWC2 | -0.2274  |
| 58664 | P0C214 | A6NI15 | -0.22742 |
| 58665 | P0C214 | Q9Y2C3 | -0.7862  |
| 58666 | P0C214 | Q7Z5N4 | -1.1636  |
| 58667 | P0C214 | Q9UKY4 | -0.94854 |
| 58668 | P0C214 | Q07912 | -0.50207 |
| 58669 | P0C214 | Q7Z5Q1 | -0.61476 |
| 58670 | P0C214 | A6NFC5 | -0.63935 |
| 58671 | P0C214 | Q6PJG9 | -0.98681 |
| 58672 | P0C214 | P49638 | -0.2749  |

|       |        |        |           |
|-------|--------|--------|-----------|
| 58673 | P0C214 | Q8N6R1 | -0.8855   |
| 58674 | P0C214 | Q9NS75 | -1.2009   |
| 58675 | P0C214 | Q9UBU6 | -0.98681  |
| 58676 | P0C214 | Q32NB8 | -0.44167  |
| 58677 | P0C214 | P04181 | -0.11355  |
| 58678 | P0C214 | Q6MZM0 | -1.1692   |
| 58679 | P0C214 | Q8NGS3 | -1.2952   |
| 58680 | P0C214 | Q7Z3E5 | -0.22725  |
| 58681 | P0C214 | P26232 | -0.19511  |
| 58682 | P0C214 | Q8TB68 | -0.8702   |
| 58683 | P0C214 | Q15516 | -0.22746  |
| 58684 | P0C214 | Q9P0P8 | -0.16493  |
| 58685 | P0C214 | Q9UH17 | -0.63065  |
| 58686 | P0C214 | Q92630 | -0.57297  |
| 58687 | P0C214 | Q8NB46 | -0.22727  |
| 58688 | P0C214 | Q5QNW6 | -0.85588  |
| 58689 | P0C214 | Q5W0Q7 | -0.4245   |
| 58690 | P0C214 | P04003 | -0.24628  |
| 58691 | P0C214 | Q9Y5H8 | -1.2636   |
| 58692 | P0C214 | P12814 | -0.38437  |
| 58693 | P0C214 | P50395 | -0.18015  |
| 58694 | P0C214 | Q9BZD2 | -1.0466   |
| 58695 | P0C214 | P56880 | -0.848    |
| 58696 | P0C214 | Q6UXV4 | -0.64121  |
| 58697 | P0C214 | P47887 | -1.3632   |
| 58698 | P0C214 | P55082 | -1.0708   |
| 58699 | P0C214 | P02808 | -0.39253  |
| 58700 | P0C214 | Q8NGX5 | -1.2952   |
| 58701 | P0C214 | P06865 | -0.36819  |
| 58702 | P0C214 | Q8N5M9 | -1.0037   |
| 58703 | P0C214 | P05408 | -0.51635  |
| 58704 | P0C214 | Q6NXT4 | -0.92625  |
| 58705 | P0C214 | Q9P2L0 | -0.25922  |
| 58706 | P0C214 | Q14147 | -0.96587  |
| 58707 | P0C214 | Q9H093 | -0.58764  |
| 58708 | P0C214 | Q6P1S2 | -0.94266  |
| 58709 | P0C214 | Q93070 | -0.58358  |
| 58710 | P0C214 | Q92478 | -1.1114   |
| 58711 | P0C214 | Q95967 | -0.52751  |
| 58712 | P0C214 | P78411 | -0.23031  |
| 58713 | P0C214 | Q6ZMZ3 | -0.13546  |
| 58714 | P0C214 | M0R1G4 | -0.28864  |
| 58715 | P0C214 | P62873 | -0.31583  |
| 58716 | P0C214 | P21854 | -0.71785  |
| 58717 | P0C214 | Q14894 | -0.15898  |
| 58718 | P0C214 | Q15066 | -0.52976  |
| 58719 | P0C214 | Q9NSY0 | -0.76485  |
| 58720 | P0C214 | Q86UY5 | -0.032237 |
| 58721 | P0C214 | Q9C0B5 | -1.1081   |
| 58722 | P0C214 | Q7Z5L2 | -0.80154  |
| 58723 | P0C214 | P06126 | -0.55617  |
| 58724 | P0C214 | Q8NG41 | -0.32653  |
| 58725 | P0C214 | Q6UXB0 | -0.91736  |
| 58726 | P0C214 | Q9UIR0 | -0.98681  |
| 58727 | P0C214 | Q5VUY0 | -0.3834   |
| 58728 | P0C214 | Q08357 | -1.1504   |
| 58729 | P0C214 | Q8N5S3 | -0.60942  |
| 58730 | P0C214 | Q00194 | -0.67031  |
| 58731 | P0C214 | Q5JPI3 | -0.33895  |
| 58732 | P0C214 | Q9BQD7 | -0.98681  |
| 58733 | P0C214 | Q60493 | -0.22187  |
| 58734 | P0C214 | Q7Z422 | -0.37625  |
| 58735 | P0C214 | Q9P2F8 | -0.92569  |
| 58736 | P0C214 | Q10588 | -0.90311  |
| 58737 | P0C214 | Q8WZ79 | -0.68053  |
| 58738 | P0C214 | P30926 | -0.92547  |
| 58739 | P0C214 | Q94777 | -0.29726  |
| 58740 | P0C214 | P47881 | -1.2952   |
| 58741 | P0C214 | P51801 | -1.1375   |
| 58742 | P0C214 | Q9NS71 | -0.49061  |
| 58743 | P0C214 | Q9NSE7 | -0.67289  |
| 58744 | P0C214 | P02724 | -1.0001   |
| 58745 | P0C214 | Q9HD90 | -0.22781  |
| 58746 | P0C214 | P01773 | -1.0022   |
| 58747 | P0C214 | A8MYU2 | -1.2685   |
| 58748 | P0C214 | Q4G148 | -0.53813  |

|       |        |        |          |
|-------|--------|--------|----------|
| 58749 | P0C214 | O00750 | -0.22751 |
| 58750 | P0C214 | Q13136 | -0.22668 |
| 58751 | P0C214 | Q16280 | -1.3451  |
| 58752 | P0C214 | Q9HDB9 | -0.45806 |
| 58753 | P0C214 | Q8NGP9 | -1.2952  |
| 58754 | P0C214 | Q31610 | -1.0367  |
| 58755 | P0C214 | O14569 | -0.97411 |
| 58756 | P0C214 | O96024 | -0.82932 |
| 58757 | P0C214 | Q13087 | -0.3046  |
| 58758 | P0C214 | A0AVI4 | -0.68883 |
| 58759 | P0C214 | Q969S2 | -0.10412 |
| 58760 | P0C214 | Q3SY56 | -0.2224  |
| 58761 | P0C214 | O14638 | -1.038   |
| 58762 | P0C214 | P51784 | -0.39029 |
| 58763 | P0C214 | P32927 | -0.68335 |
| 58764 | P0C214 | Q2M389 | -0.35506 |
| 58765 | P0C214 | Q99941 | -0.28202 |
| 58766 | P0C214 | Q9Y6Z7 | -0.78558 |
| 58767 | P0C214 | Q9H0T7 | -1.2189  |
| 58768 | P0C214 | Q5K4L6 | -1.0854  |
| 58769 | P0C214 | Q969H8 | -0.77961 |
| 58770 | P0C214 | Q9H0V9 | -0.54179 |
| 58771 | P0C214 | Q02846 | -1.4609  |
| 58772 | P0C214 | P12268 | -0.50534 |
| 58773 | P0C214 | Q6UX65 | -0.88572 |
| 58774 | P0C214 | P05534 | -0.91186 |
| 58775 | P0C214 | P21333 | -0.22895 |
| 58776 | P0C214 | P46093 | -1.4957  |
| 58777 | P0C214 | P41217 | -0.64294 |
| 58778 | P0C214 | Q86YH6 | -0.15166 |
| 58779 | P0C214 | Q8TDI0 | -0.35478 |
| 58780 | P0C214 | Q9H159 | -1.1908  |
| 58781 | P0C214 | Q6ZRU5 | -0.91736 |
| 58782 | P0C214 | Q969S9 | -0.47157 |
| 58783 | P0C214 | P49448 | -0.47675 |
| 58784 | P0C214 | Q9H0R5 | -0.77257 |
| 58785 | P0C214 | P24462 | -0.63687 |
| 58786 | P0C214 | P01861 | -0.96791 |
| 58787 | P0C214 | Q86V35 | -0.7088  |
| 58788 | P0C214 | Q8IXS8 | -0.60268 |
| 58789 | P0C214 | P06028 | -1.2123  |
| 58790 | P0C214 | Q9ULI4 | -0.4556  |
| 58791 | P0C214 | P0C7W9 | -0.4589  |
| 58792 | P0C214 | Q9NS68 | -0.76292 |
| 58793 | P0C214 | Q15615 | -1.2952  |
| 58794 | P0C214 | Q8IZJ4 | -0.73269 |
| 58795 | P0C214 | Q9UBM7 | -0.75124 |
| 58796 | P0C214 | Q86WK9 | -1.3884  |
| 58797 | P0C214 | Q9H094 | -0.20758 |
| 58798 | P0C214 | Q9H244 | -0.7961  |
| 58799 | P0C214 | Q5VUR7 | -0.2274  |
| 58800 | P0C214 | A4D126 | -0.39539 |
| 58801 | P0C214 | Q96QK8 | -0.98681 |
| 58802 | P0C214 | A2RU14 | -0.98681 |
| 58803 | P0C214 | O75165 | -0.43259 |
| 58804 | P0C214 | Q96EP0 | -0.18411 |
| 58805 | P0C214 | Q9BXB5 | -0.96432 |
| 58806 | P0C214 | Q9H209 | -1.2952  |
| 58807 | P0C214 | P63128 | -0.53554 |
| 58808 | P0C214 | Q9NX24 | -0.22184 |
| 58809 | P0C214 | Q8NCW5 | -0.22714 |
| 58810 | P0C214 | P37287 | -0.3416  |
| 58811 | P0C214 | Q8NGI7 | -1.2952  |
| 58812 | P0C214 | O43896 | -0.44608 |
| 58813 | P0C214 | O43795 | -0.40414 |
| 58814 | P0C214 | Q9BTD3 | -0.68883 |
| 58815 | P0C214 | O75414 | -0.51811 |
| 58816 | P0C214 | Q8ND30 | -0.68202 |
| 58817 | P0C214 | Q9P2P5 | -0.22742 |
| 58818 | P0C214 | P48165 | -1.2     |
| 58819 | P0C214 | Q15784 | -0.22764 |
| 58820 | P0C214 | Q96I15 | -0.16617 |
| 58821 | P0C214 | Q9Y5H6 | -1.2636  |
| 58822 | P0C214 | Q9UJV8 | -0.2113  |
| 58823 | P0C214 | Q96KX0 | -0.87558 |
| 58824 | P0C214 | Q8TBM8 | -0.91173 |

|       |        |        |           |
|-------|--------|--------|-----------|
| 58825 | P0C214 | P11182 | -0.083346 |
| 58826 | P0C214 | Q86VK4 | -0.19606  |
| 58827 | P0C214 | Q9BS92 | -0.11175  |
| 58828 | P0C214 | Q9UF56 | -0.21769  |
| 58829 | P0C214 | Q8NGU9 | -1.3693   |
| 58830 | P0C214 | Q8NCF0 | -0.90767  |
| 58831 | P0C214 | Q96HH4 | -0.98681  |
| 58832 | P0C214 | P33981 | -0.90314  |
| 58833 | P0C214 | P0CK97 | -0.98681  |
| 58834 | P0C214 | Q6NUJ2 | -0.98681  |
| 58835 | P0C214 | O75129 | -0.98681  |
| 58836 | P0C214 | O76094 | -0.21073  |
| 58837 | P0C214 | Q8N1T3 | -0.64873  |
| 58838 | P0C214 | Q6V0L0 | -0.80782  |
| 58839 | P0C214 | Q9UHH6 | -0.59418  |
| 58840 | P0C214 | O14715 | -0.1489   |
| 58841 | P0C214 | Q9BSG5 | -0.91736  |
| 58842 | P0C214 | P34995 | -1.3838   |
| 58843 | P0C214 | P15056 | -0.29091  |
| 58844 | P0C214 | O15055 | -0.22665  |
| 58845 | P0C214 | Q00535 | -0.20549  |
| 58846 | P0C214 | Q8NG68 | -0.59526  |
| 58847 | P0C214 | Q9BW62 | -0.68331  |
| 58848 | P0C214 | O00337 | -1.0394   |
| 58849 | P0C214 | Q9Y600 | -0.38794  |
| 58850 | P0C214 | Q17RF5 | -0.91736  |
| 58851 | P0C214 | Q96P47 | -0.94779  |
| 58852 | P0C214 | Q92686 | -0.39124  |
| 58853 | P0C214 | P78369 | -1.0111   |
| 58854 | P0C214 | Q96K37 | -1.0564   |
| 58855 | P0C214 | O00445 | -0.76615  |
| 58856 | P0C214 | P31995 | -0.29636  |
| 58857 | P0C214 | Q8WW43 | -0.42687  |
| 58858 | P0C214 | Q9HDC5 | -0.80789  |
| 58859 | P0C214 | Q96RD7 | -0.86858  |
| 58860 | P0C214 | Q8NA54 | -0.3041   |
| 58861 | P0C214 | Q53RE8 | -0.22741  |
| 58862 | P0C214 | O75976 | -0.87617  |
| 58863 | P0C214 | Q9NZS9 | -0.99429  |
| 58864 | P0C214 | Q9UL62 | -0.56157  |
| 58865 | P0C214 | Q9Y5K3 | -0.22837  |
| 58866 | P0C214 | P51649 | -0.3688   |
| 58867 | P0C214 | P11274 | -0.67185  |
| 58868 | P0C214 | Q96DA0 | -0.90767  |
| 58869 | P0C214 | Q96GE4 | -0.16815  |
| 58870 | P0C214 | Q6UW68 | -0.98681  |
| 58871 | P0C214 | A2RUS2 | -0.37042  |
| 58872 | P0C214 | Q9GZP0 | -0.94692  |
| 58873 | P0C214 | Q8WXG8 | -0.43585  |
| 58874 | P0C214 | Q9UHD8 | -0.2241   |
| 58875 | P0C214 | P01031 | -0.72365  |
| 58876 | P0C214 | Q6ZUM4 | -0.91513  |
| 58877 | P0C214 | Q3SXZ7 | -0.37005  |
| 58878 | P0C214 | Q4LDG9 | -0.22741  |
| 58879 | P0C214 | Q8N9W5 | -0.46872  |
| 58880 | P0C214 | Q8NBS9 | -0.29094  |
| 58881 | P0C214 | Q53LP3 | -0.22741  |
| 58882 | P0C214 | Q13322 | -0.22741  |
| 58883 | P0C214 | Q8J025 | -1.0858   |
| 58884 | P0C214 | P04278 | -0.92799  |
| 58885 | P0C214 | Q13948 | -0.81273  |
| 58886 | P0C214 | Q96IV6 | -0.96021  |
| 58887 | P0C214 | P01606 | -1.0022   |
| 58888 | P0C214 | Q13072 | -0.91736  |
| 58889 | P0C214 | Q9BVK8 | -1.0037   |
| 58890 | P0C214 | Q08289 | -0.39709  |
| 58891 | P0C214 | Q8N8Q9 | -1.1838   |
| 58892 | P0C214 | P58180 | -1.2952   |
| 58893 | P0C214 | P48039 | -1.2864   |
| 58894 | P0C214 | Q86Z02 | -0.22741  |
| 58895 | P0C214 | P23677 | -0.89976  |
| 58896 | P0C214 | Q9BWG4 | -0.17545  |
| 58897 | P0C214 | Q9Y4I5 | -0.40289  |
| 58898 | P0C214 | Q16610 | -0.43568  |
| 58899 | P0C214 | Q86UT6 | -0.21772  |
| 58900 | P0C214 | P02671 | -0.29688  |

|       |        |        |          |
|-------|--------|--------|----------|
| 58901 | P0C214 | O14609 | -0.98608 |
| 58902 | P0C214 | Q5XG87 | -0.1508  |
| 58903 | P0C214 | Q6NUK4 | -0.98681 |
| 58904 | P0C214 | P82279 | -1.2827  |
| 58905 | P0C214 | A8MZ36 | -0.19986 |
| 58906 | P0C214 | A8K979 | -0.6751  |
| 58907 | P0C214 | Q8IWF7 | -0.37641 |
| 58908 | P0C214 | P51164 | -1.0206  |
| 58909 | P0C214 | Q5JQC9 | -0.40998 |
| 58910 | P0C214 | Q8IVH8 | -0.63911 |
| 58911 | P0C214 | Q8NHU3 | -0.76131 |
| 58912 | P0C214 | Q92526 | -0.38362 |
| 58913 | P0C214 | P20933 | -0.40973 |
| 58914 | P0C214 | Q9NVH0 | -0.60515 |
| 58915 | P0C214 | P31270 | -0.26069 |
| 58916 | P0C214 | Q8IUR7 | -0.22754 |
| 58917 | P0C214 | Q01814 | -0.33129 |
| 58918 | P0C214 | P09565 | -0.28135 |
| 58919 | P0C214 | Q16873 | -0.39627 |
| 58920 | P0C214 | Q8WW36 | -0.5018  |
| 58921 | P0C214 | Q15229 | -0.29186 |
| 58922 | P0C214 | Q68DC2 | -0.22745 |
| 58923 | P0C214 | Q13393 | -0.36481 |
| 58924 | P0C214 | Q9Y548 | -0.96338 |
| 58925 | P0C214 | Q969V3 | -0.25381 |
| 58926 | P0C214 | Q8NHB1 | -1.2952  |
| 58927 | P0C214 | Q13219 | -1.3386  |
| 58928 | P0C214 | Q6UVY6 | -1.0123  |
| 58929 | P0C214 | Q6UW49 | -0.63373 |
| 58930 | P0C214 | P09619 | -0.38816 |
| 58931 | P0C214 | O75505 | -0.21227 |
| 58932 | P0C214 | O60547 | -0.77772 |
| 58933 | P0C214 | Q8IWA5 | -0.94924 |
| 58934 | P0C214 | Q96RW7 | -1.1786  |
| 58935 | P0C214 | Q4G0I0 | -0.98681 |
| 58936 | P0C214 | Q6DT37 | -0.47412 |
| 58937 | P0C214 | Q96NY8 | -0.83437 |
| 58938 | P0C214 | Q8N4B1 | -0.22729 |
| 58939 | P0C214 | Q9HAC8 | -0.19406 |
| 58940 | P0C214 | Q15228 | -0.3382  |
| 58941 | P0C214 | Q01484 | -0.22749 |
| 58942 | P0C214 | P14784 | -1.1694  |
| 58943 | P0C214 | Q6UXI7 | -0.95888 |
| 58944 | P0C214 | Q6UWM9 | -0.88766 |
| 58945 | P0C214 | Q5TGJ6 | -0.16634 |
| 58946 | P0C214 | A6NEE1 | -0.52301 |
| 58947 | P0C214 | Q9P291 | -0.98681 |
| 58948 | P0C214 | Q9BUF5 | -0.63454 |
| 58949 | P0C214 | Q5JRM2 | -0.98681 |
| 58950 | P0C214 | Q86W34 | -0.88599 |
| 58951 | P0C214 | O60812 | -0.42686 |
| 58952 | P0C214 | Q6UXU6 | -0.98681 |
| 58953 | P0C214 | Q6UX06 | -0.84407 |
| 58954 | P0C214 | O94766 | -0.55556 |
| 58955 | P0C214 | Q8NHR9 | -0.18153 |
| 58956 | P0C214 | O15320 | -0.4218  |
| 58957 | P0C214 | Q6VB84 | -0.41532 |
| 58958 | P0C214 | P16050 | -0.20984 |
| 58959 | P0C214 | Q9UKX5 | -0.96686 |
| 58960 | P0C214 | Q9UNA0 | -0.2361  |
| 58961 | P0C214 | Q96PU9 | -0.6615  |
| 58962 | P0C214 | Q9NS98 | -1.1751  |
| 58963 | P0C214 | Q15032 | -0.39914 |
| 58964 | P0C214 | Q95977 | -1.4227  |
| 58965 | P0C214 | Q13247 | -0.22755 |
| 58966 | P0C214 | Q96MS3 | -0.70871 |
| 58967 | P0C214 | Q86UN3 | -0.58659 |
| 58968 | P0C214 | A6NCI5 | -0.98681 |
| 58969 | P0C214 | P0CJ74 | -0.73145 |
| 58970 | P0C214 | Q15417 | -0.50252 |
| 58971 | P0C214 | O14880 | -0.90449 |
| 58972 | P0C214 | Q92786 | -0.22075 |
| 58973 | P0C214 | Q9UID3 | -0.107   |
| 58974 | P0C214 | O00590 | -1.4453  |
| 58975 | P0C214 | O43909 | -0.78849 |
| 58976 | P0C214 | P49913 | -0.58242 |

|       |        |        |           |
|-------|--------|--------|-----------|
| 58977 | P0C214 | Q9Y6A4 | -0.638    |
| 58978 | P0C214 | P04054 | -0.46902  |
| 58979 | P0C214 | Q8TF44 | -0.21436  |
| 58980 | P0C214 | O43283 | -0.52765  |
| 58981 | P0C214 | P30039 | -0.1792   |
| 58982 | P0C214 | P53814 | -0.30812  |
| 58983 | P0C214 | P11678 | -0.57571  |
| 58984 | P0C214 | Q92851 | -0.2261   |
| 58985 | P0C214 | Q96A37 | -0.71534  |
| 58986 | P0C214 | Q5VZV1 | -0.33624  |
| 58987 | P0C214 | Q0JRZ9 | -0.2249   |
| 58988 | P0C214 | O43709 | -0.41157  |
| 58989 | P0C214 | Q8N7C4 | -0.98681  |
| 58990 | P0C214 | P62333 | -0.3823   |
| 58991 | P0C214 | Q9UBI9 | -0.45609  |
| 58992 | P0C214 | Q86WC4 | -0.7827   |
| 58993 | P0C214 | Q6ZVT0 | -0.10503  |
| 58994 | P0C214 | P51617 | -0.22736  |
| 58995 | P0C214 | Q99640 | -0.22741  |
| 58996 | P0C214 | Q9UHC9 | -0.41179  |
| 58997 | P0C214 | Q9UJA3 | -0.29205  |
| 58998 | P0C214 | P13674 | -0.30923  |
| 58999 | P0C214 | Q9UPY3 | -0.20869  |
| 59000 | P0C214 | Q6ZUS6 | -0.15789  |
| 59001 | P0C214 | O43781 | -1.0767   |
| 59002 | P0C214 | O15020 | -0.22805  |
| 59003 | P0C214 | P09884 | -0.2728   |
| 59004 | P0C214 | Q15077 | -1.229    |
| 59005 | P0C214 | Q96RQ3 | -0.42686  |
| 59006 | P0C214 | P04745 | -0.22745  |
| 59007 | P0C214 | O43818 | -0.23051  |
| 59008 | P0C214 | Q96FL8 | -0.97657  |
| 59009 | P0C214 | Q9NWT1 | -0.22851  |
| 59010 | P0C214 | O95876 | -0.49725  |
| 59011 | P0C214 | Q6UXU0 | -0.91736  |
| 59012 | P0C214 | Q9H6S3 | -0.29935  |
| 59013 | P0C214 | Q8N907 | -0.68109  |
| 59014 | P0C214 | P01112 | -0.22806  |
| 59015 | P0C214 | O95996 | -0.22726  |
| 59016 | P0C214 | P49862 | -1.3677   |
| 59017 | P0C214 | Q8N126 | -1.0027   |
| 59018 | P0C214 | Q96RB7 | -1.2952   |
| 59019 | P0C214 | Q96MG8 | -0.12875  |
| 59020 | P0C214 | Q8NAU1 | -1.1553   |
| 59021 | P0C214 | Q99836 | -0.2274   |
| 59022 | P0C214 | O00408 | -0.22626  |
| 59023 | P0C214 | O15165 | -0.88899  |
| 59024 | P0C214 | Q12866 | -0.63239  |
| 59025 | P0C214 | P08637 | -1.4426   |
| 59026 | P0C214 | P09429 | -0.22916  |
| 59027 | P0C214 | Q8N5I2 | -0.25764  |
| 59028 | P0C214 | P20813 | -0.56608  |
| 59029 | P0C214 | Q8TDM6 | -0.50325  |
| 59030 | P0C214 | P82251 | -1.0669   |
| 59031 | P0C214 | Q9BWT3 | -0.36268  |
| 59032 | P0C214 | Q4G0N4 | -0.36233  |
| 59033 | P0C214 | Q9UJZ1 | -0.12497  |
| 59034 | P0C214 | Q6ZMB5 | -0.98681  |
| 59035 | P0C214 | O95897 | -0.91736  |
| 59036 | P0C214 | Q8TAV5 | -0.91736  |
| 59037 | P0C214 | Q8TD57 | -0.72948  |
| 59038 | P0C214 | Q5HYL7 | -0.98681  |
| 59039 | P0C214 | Q96A72 | -0.13524  |
| 59040 | P0C214 | Q6ZVU0 | -0.43096  |
| 59041 | P0C214 | Q9BXA5 | -1.2541   |
| 59042 | P0C214 | Q9NV66 | -0.85577  |
| 59043 | P0C214 | Q9UJ90 | -0.96932  |
| 59044 | P0C214 | O60687 | -0.36851  |
| 59045 | P0C214 | P04141 | -0.067625 |
| 59046 | P0C214 | Q5TEU4 | -0.14663  |
| 59047 | P0C214 | P43235 | -0.65747  |
| 59048 | P0C214 | Q9Y2K2 | -0.61591  |
| 59049 | P0C214 | P0CG23 | -0.70722  |
| 59050 | P0C214 | Q8TBZ3 | -0.22742  |
| 59051 | P0C214 | Q9H6P5 | -0.71493  |
| 59052 | P0C214 | Q96NW4 | -0.22741  |

|       |        |        |          |
|-------|--------|--------|----------|
| 59053 | P0C214 | Q8NGE8 | -1.2952  |
| 59054 | P0C214 | Q5EBN2 | -0.71534 |
| 59055 | P0C214 | Q5T2D3 | -0.27276 |
| 59056 | P0C214 | Q75747 | -0.59482 |
| 59057 | P0C214 | P04222 | -1.0367  |
| 59058 | P0C214 | Q9NQY0 | -0.46246 |
| 59059 | P0C214 | Q8WX39 | -0.96833 |
| 59060 | P0C214 | Q9NXR5 | -0.22741 |
| 59061 | P0C214 | Q9BT04 | -0.26742 |
| 59062 | P0C214 | Q8NGC3 | -1.2952  |
| 59063 | P0C214 | Q96I13 | -0.44049 |
| 59064 | P0C214 | A6NGY5 | -1.2952  |
| 59065 | P0C214 | O60306 | -0.42828 |
| 59066 | P0C214 | P78524 | -0.40279 |
| 59067 | P0C214 | Q9H252 | -1.0585  |
| 59068 | P0C214 | Q9NUY8 | -0.96894 |
| 59069 | P0C214 | P98172 | -0.22035 |
| 59070 | P0C214 | Q99650 | -0.7488  |
| 59071 | P0C214 | Q9NPA0 | -0.69313 |
| 59072 | P0C214 | Q9GZZ6 | -0.9883  |
| 59073 | P0C214 | Q9BT88 | -0.64021 |
| 59074 | P0C214 | A6NMB1 | -1.1462  |
| 59075 | P0C214 | Q9H270 | -0.22652 |
| 59076 | P0C214 | P53597 | -0.31887 |
| 59077 | P0C214 | Q8NI60 | -0.80172 |
| 59078 | P0C214 | Q13882 | -0.61879 |
| 59079 | P0C214 | Q6ZQW0 | -0.20662 |
| 59080 | P0C214 | P57682 | -0.36272 |
| 59081 | P0C214 | Q8IX05 | -0.89169 |
| 59082 | P0C214 | Q9H9P5 | -0.22738 |
| 59083 | P0C214 | Q01449 | -0.31432 |
| 59084 | P0C214 | Q8N339 | -0.11625 |
| 59085 | P0C214 | P63316 | -0.2222  |
| 59086 | P0C214 | Q15166 | -0.72536 |
| 59087 | P0C214 | Q8N3C7 | -0.22741 |
| 59088 | P0C214 | Q9NQ03 | -0.18848 |
| 59089 | P0C214 | Q9UFV1 | -0.96894 |
| 59090 | P0C214 | Q99811 | -0.20778 |
| 59091 | P0C214 | Q9Y6D0 | -0.48849 |
| 59092 | P0C214 | O43307 | -0.46436 |
| 59093 | P0C214 | Q00604 | -0.67758 |
| 59094 | P0C214 | P20333 | -0.71065 |
| 59095 | P0C214 | Q9NZI2 | -0.66097 |
| 59096 | P0C214 | Q7L985 | -0.98681 |
| 59097 | P0C214 | Q64LD2 | -0.22767 |
| 59098 | P0C214 | A6NIJ9 | -1.2952  |
| 59099 | P0C214 | P51688 | -0.37579 |
| 59100 | P0C214 | P00352 | -0.39366 |
| 59101 | P0C214 | O96011 | -0.13781 |
| 59102 | P0C214 | P0CG38 | -0.38765 |
| 59103 | P0C214 | Q2UY09 | -1.0408  |
| 59104 | P0C214 | Q96T91 | -0.89474 |
| 59105 | P0C214 | Q502W7 | -0.1699  |
| 59106 | P0C214 | P20020 | -0.71192 |
| 59107 | P0C214 | Q7Z410 | -1.5452  |
| 59108 | P0C214 | Q96PP4 | -0.37697 |
| 59109 | P0C214 | Q3V5L5 | -0.79693 |
| 59110 | P0C214 | P61019 | -0.55154 |
| 59111 | P0C214 | O60234 | -0.61445 |
| 59112 | P0C214 | O15247 | -0.78548 |
| 59113 | P0C214 | O43432 | -0.11272 |
| 59114 | P0C214 | Q32M88 | -0.24741 |
| 59115 | P0C214 | Q96NL1 | -1.0525  |
| 59116 | P0C214 | Q9NQC3 | -0.1988  |
| 59117 | P0C214 | Q9HC21 | -0.7711  |
| 59118 | P0C214 | A6NE01 | -0.18471 |
| 59119 | P0C214 | Q14554 | -0.2931  |
| 59120 | P0C214 | Q6P1Q9 | -0.33624 |
| 59121 | P0C214 | O15466 | -0.59339 |
| 59122 | P0C214 | Q99727 | -0.78669 |
| 59123 | P0C214 | Q2M296 | -0.78823 |
| 59124 | P0C214 | P43626 | -0.64384 |
| 59125 | P0C214 | O75204 | -0.80219 |
| 59126 | P0C214 | Q8N8P7 | -0.91736 |
| 59127 | P0C214 | Q16635 | -0.44329 |
| 59128 | P0C214 | Q92561 | -0.24976 |

|       |        |        |           |
|-------|--------|--------|-----------|
| 59129 | P0C214 | Q8N4P6 | -0.22712  |
| 59130 | P0C214 | Q13639 | -1.0732   |
| 59131 | P0C214 | Q7Z5J4 | -0.17219  |
| 59132 | P0C214 | P35499 | -1.244    |
| 59133 | P0C214 | P01602 | -1.0022   |
| 59134 | P0C214 | Q9H5Y7 | -1.0742   |
| 59135 | P0C214 | P04040 | -0.23764  |
| 59136 | P0C214 | Q86YS3 | -0.17288  |
| 59137 | P0C214 | Q02252 | -0.28978  |
| 59138 | P0C214 | Q16853 | -1.0178   |
| 59139 | P0C214 | Q9NX61 | -0.89279  |
| 59140 | P0C214 | Q8NHL6 | -0.34277  |
| 59141 | P0C214 | O75116 | -0.23441  |
| 59142 | P0C214 | Q86UP3 | -0.22535  |
| 59143 | P0C214 | P20023 | -0.9393   |
| 59144 | P0C214 | P0DJJ0 | -0.3618   |
| 59145 | P0C214 | P0CJ71 | -0.73145  |
| 59146 | P0C214 | Q15438 | -0.22741  |
| 59147 | P0C214 | Q9H8G2 | -0.33895  |
| 59148 | P0C214 | Q9NUE0 | -1.0846   |
| 59149 | P0C214 | Q9H257 | -0.2464   |
| 59150 | P0C214 | Q96AD5 | -0.5088   |
| 59151 | P0C214 | P14923 | -0.57988  |
| 59152 | P0C214 | P08246 | -0.59829  |
| 59153 | P0C214 | Q15761 | -1.0169   |
| 59154 | P0C214 | Q8IUE1 | -0.23401  |
| 59155 | P0C214 | Q92805 | -0.20985  |
| 59156 | P0C214 | Q8NC69 | -0.12074  |
| 59157 | P0C214 | Q9P0U4 | -0.22734  |
| 59158 | P0C214 | Q16644 | -0.23001  |
| 59159 | P0C214 | O75882 | -1.3756   |
| 59160 | P0C214 | Q9UJV9 | -0.54575  |
| 59161 | P0C214 | Q5JWF2 | -0.59958  |
| 59162 | P0C214 | Q14916 | -1.1749   |
| 59163 | P0C214 | Q14508 | -0.9006   |
| 59164 | P0C214 | P02775 | -0.46181  |
| 59165 | P0C214 | Q86YT9 | -0.91298  |
| 59166 | P0C214 | Q5T7P2 | -0.38015  |
| 59167 | P0C214 | Q562R1 | -0.64552  |
| 59168 | P0C214 | Q96PL2 | -1.0426   |
| 59169 | P0C214 | Q9P289 | -0.27693  |
| 59170 | P0C214 | Q7Z404 | -0.98681  |
| 59171 | P0C214 | O00292 | -0.5721   |
| 59172 | P0C214 | Q8NGZ6 | -1.2952   |
| 59173 | P0C214 | Q6ZSY5 | -0.9091   |
| 59174 | P0C214 | P03956 | -1.1576   |
| 59175 | P0C214 | O14841 | -0.31578  |
| 59176 | P0C214 | Q96TA2 | -1.1947   |
| 59177 | P0C214 | O95677 | -0.048645 |
| 59178 | P0C214 | Q9Y3P9 | -0.22934  |
| 59179 | P0C214 | Q9BXL7 | -0.22707  |
| 59180 | P0C214 | Q96E66 | -0.22741  |
| 59181 | P0C214 | P30501 | -1.0938   |
| 59182 | P0C214 | Q8N8N0 | -0.94619  |
| 59183 | P0C214 | P50895 | -1.3028   |
| 59184 | P0C214 | Q16625 | -0.22356  |
| 59185 | P0C214 | Q8TB92 | -0.1458   |
| 59186 | P0C214 | Q9GZP9 | -0.15163  |
| 59187 | P0C214 | O95342 | -0.9394   |
| 59188 | P0C214 | Q6UW88 | -1.0779   |
| 59189 | P0C214 | P62834 | -0.2286   |
| 59190 | P0C214 | Q99218 | -1.1894   |
| 59191 | P0C214 | Q8NG11 | -0.98681  |
| 59192 | P0C214 | Q8NOV5 | -0.77564  |
| 59193 | P0C214 | P0CJ76 | -0.73145  |
| 59194 | P0C214 | Q96NZ9 | -0.91736  |
| 59195 | P0C214 | Q53QZ3 | -0.78689  |
| 59196 | P0C214 | O95377 | -1.0092   |
| 59197 | P0C214 | Q04118 | -0.85734  |
| 59198 | P0C214 | P51648 | -0.90514  |
| 59199 | P0C214 | Q16878 | -0.13715  |
| 59200 | P0C214 | Q8N976 | -0.22163  |
| 59201 | P0C214 | Q9Y385 | -1.0739   |
| 59202 | P0C214 | Q16661 | -0.80205  |
| 59203 | P0C214 | Q8IWT3 | -0.22627  |
| 59204 | P0C214 | P20941 | -0.15141  |



|       |        |        |           |
|-------|--------|--------|-----------|
| 59205 | P0C214 | Q9BSJ1 | -0.71534  |
| 59206 | P0C214 | P10412 | -0.09292  |
| 59207 | P0C214 | Q6GTS8 | -1.2901   |
| 59208 | P0C214 | Q14574 | -1.1591   |
| 59209 | P0C214 | Q02643 | -0.3731   |
| 59210 | P0C214 | Q9NXG6 | -1.0474   |
| 59211 | P0C214 | Q9H992 | -0.52994  |
| 59212 | P0C214 | Q96E35 | -0.43131  |
| 59213 | P0C214 | Q6JVE9 | -0.99438  |
| 59214 | P0C214 | Q01469 | -0.1944   |
| 59215 | P0C214 | Q5FVE4 | -0.77049  |
| 59216 | P0C214 | Q96NZ1 | -0.46667  |
| 59217 | P0C214 | P53621 | -0.23063  |
| 59218 | P0C214 | Q8IZF7 | -1.3853   |
| 59219 | P0C214 | Q9P0K7 | -0.22749  |
| 59220 | P0C214 | Q6ZNC4 | -0.71534  |
| 59221 | P0C214 | P31431 | -0.70992  |
| 59222 | P0C214 | Q6ZVS6 | -0.91736  |
| 59223 | P0C214 | Q95409 | -0.39612  |
| 59224 | P0C214 | Q9NZM1 | -0.6047   |
| 59225 | P0C214 | A8MWE9 | -0.43585  |
| 59226 | P0C214 | P30038 | -0.25989  |
| 59227 | P0C214 | P0C5K7 | -0.30515  |
| 59228 | P0C214 | Q95183 | -1.0849   |
| 59229 | P0C214 | O75369 | -0.40131  |
| 59230 | P0C214 | Q9NPG1 | -0.57492  |
| 59231 | P0C214 | Q969M1 | -0.53935  |
| 59232 | P0C214 | P52952 | -0.31622  |
| 59233 | P0C214 | P87889 | -0.33852  |
| 59234 | P0C214 | Q96T53 | -0.83243  |
| 59235 | P0C214 | Q9UEY8 | -0.19782  |
| 59236 | P0C214 | Q6UXZ4 | -1.0577   |
| 59237 | P0C214 | Q96NR7 | -0.35434  |
| 59238 | P0C214 | Q9BQY6 | -0.77749  |
| 59239 | P0C214 | Q8NGD3 | -1.2952   |
| 59240 | P0C214 | Q96MG2 | -0.52054  |
| 59241 | P0C214 | Q9P2D1 | -0.1783   |
| 59242 | P0C214 | O76071 | -0.22775  |
| 59243 | P0C214 | P49916 | -0.22166  |
| 59244 | P0C214 | P56179 | -0.3119   |
| 59245 | P0C214 | Q6ZN16 | -1.1794   |
| 59246 | P0C214 | Q9UL16 | -0.2258   |
| 59247 | P0C214 | Q8N554 | -0.19753  |
| 59248 | P0C214 | P30685 | -1.0367   |
| 59249 | P0C214 | Q96P11 | -0.33624  |
| 59250 | P0C214 | Q9Y6M5 | -0.86525  |
| 59251 | P0C214 | Q86YV5 | -1.2129   |
| 59252 | P0C214 | A8MVZ5 | -0.98681  |
| 59253 | P0C214 | Q8N6P7 | -0.91469  |
| 59254 | P0C214 | O75038 | -0.39456  |
| 59255 | P0C214 | Q6JBY9 | -0.44608  |
| 59256 | P0C214 | Q9H7H1 | -0.11151  |
| 59257 | P0C214 | P23142 | -0.99996  |
| 59258 | P0C214 | P13796 | -0.47358  |
| 59259 | P0C214 | Q8NCH0 | -0.47393  |
| 59260 | P0C214 | Q9NRH2 | -1.0596   |
| 59261 | P0C214 | P59510 | -1.1449   |
| 59262 | P0C214 | Q9NV23 | -0.4273   |
| 59263 | P0C214 | Q49AJ0 | -0.040748 |
| 59264 | P0C214 | Q8NI28 | -0.98681  |
| 59265 | P0C214 | Q9BVV7 | -0.44255  |
| 59266 | P0C214 | Q8IYR0 | -0.093793 |
| 59267 | P0C214 | P32247 | -1.1408   |
| 59268 | P0C214 | P08138 | -0.2688   |
| 59269 | P0C214 | Q05315 | -0.57537  |
| 59270 | P0C214 | Q9UQ03 | -0.41681  |
| 59271 | P0C214 | Q8N135 | -0.82811  |
| 59272 | P0C214 | Q9NR23 | -0.69184  |
| 59273 | P0C214 | Q9NW13 | -0.24404  |
| 59274 | P0C214 | P08236 | -0.351    |
| 59275 | P0C214 | Q68CK6 | -0.43986  |
| 59276 | P0C214 | Q9UIF3 | -0.078342 |
| 59277 | P0C214 | Q8NCL4 | -0.6349   |
| 59278 | P0C214 | P06310 | -1.0022   |
| 59279 | P0C214 | O75311 | -0.95022  |
| 59280 | P0C214 | P27544 | -0.51699  |

|       |        |        |            |
|-------|--------|--------|------------|
| 59281 | P0C214 | Q9NZP0 | -1.2952    |
| 59282 | P0C214 | P16234 | -0.28659   |
| 59283 | P0C214 | Q6ISU1 | -0.35115   |
| 59284 | P0C214 | O75815 | -0.88961   |
| 59285 | P0C214 | Q96DT0 | -0.22013   |
| 59286 | P0C214 | Q16695 | -0.20191   |
| 59287 | P0C214 | P13378 | -0.30838   |
| 59288 | P0C214 | P43365 | -0.18353   |
| 59289 | P0C214 | Q9Y2W6 | -0.22107   |
| 59290 | P0C214 | Q2M2E3 | -1.226     |
| 59291 | P0C214 | Q9Y5F6 | -1.2424    |
| 59292 | P0C214 | Q12899 | -0.57947   |
| 59293 | P0C214 | Q96PR1 | -0.74428   |
| 59294 | P0C214 | Q14093 | -0.64311   |
| 59295 | P0C214 | Q92625 | -0.22741   |
| 59296 | P0C214 | A6NNC1 | -0.98681   |
| 59297 | P0C214 | Q16650 | -0.44853   |
| 59298 | P0C214 | O95263 | -0.22714   |
| 59299 | P0C214 | Q6UB99 | -0.22742   |
| 59300 | P0C214 | Q8WUU8 | -0.98681   |
| 59301 | P0C214 | P55344 | -0.90983   |
| 59302 | P0C214 | Q8N9L9 | -0.38803   |
| 59303 | P0C214 | Q9Y6R0 | -0.22672   |
| 59304 | P0C214 | P59046 | -0.22713   |
| 59305 | P0C214 | Q5VZT2 | -0.0031734 |
| 59306 | P0C214 | O14842 | -1.1461    |
| 59307 | P0C214 | Q0WX57 | -0.35707   |
| 59308 | P0C214 | Q9BWQ6 | -0.96338   |
| 59309 | P0C214 | Q4ZG55 | -0.98681   |
| 59310 | P0C214 | Q9UQM7 | -0.39044   |
| 59311 | P0C214 | P25929 | -0.81636   |
| 59312 | P0C214 | Q8TE68 | -0.22741   |
| 59313 | P0C214 | P0CAP1 | -0.33165   |
| 59314 | P0C214 | Q9NX77 | -0.85122   |
| 59315 | P0C214 | A6NED2 | -0.29935   |
| 59316 | P0C214 | P79483 | -0.8317    |
| 59317 | P0C214 | Q92828 | -0.40999   |
| 59318 | P0C214 | Q8NGI1 | -1.2952    |
| 59319 | P0C214 | Q9UJQ4 | -0.16609   |
| 59320 | P0C214 | Q96F05 | -0.98681   |
| 59321 | P0C214 | Q99437 | -0.79253   |
| 59322 | P0C214 | P11511 | -0.26759   |
| 59323 | P0C214 | O14493 | -0.92847   |
| 59324 | P0C214 | Q496H8 | -0.49108   |
| 59325 | P0C214 | Q9HBH0 | -0.74421   |
| 59326 | P0C214 | Q8WU66 | -0.79851   |
| 59327 | P0C214 | Q9HAS3 | -0.94311   |
| 59328 | P0C214 | Q5VWM3 | -0.18615   |
| 59329 | P0C214 | Q6ZMU1 | -0.37307   |
| 59330 | P0C214 | Q5SQS7 | -0.22741   |
| 59331 | P0C214 | P06753 | -0.23635   |
| 59332 | P0C214 | Q9UM47 | -0.23231   |
| 59333 | P0C214 | P07766 | -0.71756   |
| 59334 | P0C214 | F8VTS6 | -0.50512   |
| 59335 | P0C214 | P55273 | -0.2274    |
| 59336 | P0C214 | Q9HA72 | -0.98681   |
| 59337 | P0C214 | Q9NR71 | -0.55065   |
| 59338 | P0C214 | Q92874 | -0.84329   |
| 59339 | P0C214 | P01042 | -0.54476   |
| 59340 | P0C214 | Q68CZ1 | -0.20942   |
| 59341 | P0C214 | O60312 | -0.58738   |
| 59342 | P0C214 | Q969W0 | -0.39547   |
| 59343 | P0C214 | Q8N769 | -0.19674   |
| 59344 | P0C214 | Q96Q91 | -0.99206   |
| 59345 | P0C214 | Q96KC2 | -1.2665    |
| 59346 | P0C214 | Q9Y5G0 | -1.2424    |
| 59347 | P0C214 | Q8WXR4 | -1.0428    |
| 59348 | P0C214 | Q6UXU4 | -0.98681   |
| 59349 | P0C214 | Q9UF02 | -0.90264   |
| 59350 | P0C214 | Q93099 | -0.13717   |
| 59351 | P0C214 | P52429 | -1.2589    |
| 59352 | P0C214 | Q6ZQY2 | -0.22732   |
| 59353 | P0C214 | P68032 | -0.29169   |
| 59354 | P0C214 | P20273 | -0.77956   |
| 59355 | P0C214 | Q96ET8 | -0.98681   |
| 59356 | P0C214 | Q9NRT5 | -0.22148   |

|       |        |        |           |
|-------|--------|--------|-----------|
| 59357 | P0C214 | Q96JK4 | -0.50785  |
| 59358 | P0C214 | P59666 | -0.83343  |
| 59359 | P0C214 | O14827 | -0.51451  |
| 59360 | P0C214 | Q96RT6 | -0.81992  |
| 59361 | P0C214 | O00459 | -0.2274   |
| 59362 | P0C214 | O14960 | -0.82411  |
| 59363 | P0C214 | Q96M42 | -0.7605   |
| 59364 | P0C214 | O75493 | -0.81949  |
| 59365 | P0C214 | Q9BUT1 | -0.41423  |
| 59366 | P0C214 | Q8N9P0 | -0.17328  |
| 59367 | P0C214 | Q9NQ76 | -0.38709  |
| 59368 | P0C214 | A7MD48 | -0.20971  |
| 59369 | P0C214 | Q6UY09 | -0.98681  |
| 59370 | P0C214 | O00763 | -0.27983  |
| 59371 | P0C214 | Q14832 | -1.1208   |
| 59372 | P0C214 | Q86TL0 | -0.53008  |
| 59373 | P0C214 | A0AVF1 | -0.5056   |
| 59374 | P0C214 | Q8WWB7 | -0.44616  |
| 59375 | P0C214 | A2VCK2 | -0.55123  |
| 59376 | P0C214 | P30457 | -0.91186  |
| 59377 | P0C214 | Q6UX73 | -0.91736  |
| 59378 | P0C214 | Q9Y4D1 | -0.30104  |
| 59379 | P0C214 | Q16623 | -0.42233  |
| 59380 | P0C214 | P01615 | -1.0022   |
| 59381 | P0C214 | Q8IVA1 | -0.57589  |
| 59382 | P0C214 | A6NJW9 | -1.0708   |
| 59383 | P0C214 | Q8TE96 | -0.40379  |
| 59384 | P0C214 | P06316 | -1.0022   |
| 59385 | P0C214 | A6NHZ5 | -0.22584  |
| 59386 | P0C214 | P38484 | -1.0288   |
| 59387 | P0C214 | P58549 | -1.1295   |
| 59388 | P0C214 | Q8N4V2 | -0.89213  |
| 59389 | P0C214 | P41226 | -0.31936  |
| 59390 | P0C214 | Q8NH79 | -1.2952   |
| 59391 | P0C214 | Q9BXI2 | -0.58693  |
| 59392 | P0C214 | Q6ZNF0 | -0.86099  |
| 59393 | P0C214 | A5X5Y0 | -1.1179   |
| 59394 | P0C214 | Q6P5X7 | -0.98681  |
| 59395 | P0C214 | Q9NSC7 | -0.77405  |
| 59396 | P0C214 | Q5SGD2 | -0.59902  |
| 59397 | P0C214 | Q17R89 | -0.31628  |
| 59398 | P0C214 | Q14D04 | -0.69773  |
| 59399 | P0C214 | Q9UI42 | -1.1069   |
| 59400 | P0C214 | Q5VWJ9 | -0.30777  |
| 59401 | P0C214 | Q5U4N7 | -0.15381  |
| 59402 | P0C214 | P58401 | -1.1636   |
| 59403 | P0C214 | P04066 | -0.22376  |
| 59404 | P0C214 | Q9BRK0 | -0.98681  |
| 59405 | P0C214 | O15427 | -0.71669  |
| 59406 | P0C214 | P31153 | -0.41969  |
| 59407 | P0C214 | Q6UXP9 | -0.46051  |
| 59408 | P0C214 | Q9BXR3 | -0.33459  |
| 59409 | P0C214 | Q8NBF6 | -0.94627  |
| 59410 | P0C214 | P43405 | -0.26478  |
| 59411 | P0C214 | Q5VVX9 | -0.67194  |
| 59412 | P0C214 | Q8NH07 | -1.2952   |
| 59413 | P0C214 | Q13303 | -0.95274  |
| 59414 | P0C214 | O95424 | -0.24982  |
| 59415 | P0C214 | Q86WA6 | -0.18627  |
| 59416 | P0C214 | A6NKL6 | -0.98681  |
| 59417 | P0C214 | Q9Y5I3 | -1.6431   |
| 59418 | P0C214 | P22528 | -0.20394  |
| 59419 | P0C214 | P35913 | -0.35491  |
| 59420 | P0C214 | Q96PV4 | -0.33895  |
| 59421 | P0C214 | Q9H943 | -0.3353   |
| 59422 | P0C214 | Q96AW1 | -0.68292  |
| 59423 | P0C214 | Q9NRZ7 | -0.66527  |
| 59424 | P0C214 | A2RUU4 | -0.91664  |
| 59425 | P0C214 | Q08499 | -0.22387  |
| 59426 | P0C214 | P10398 | -0.25073  |
| 59427 | P0C214 | P0C7U1 | -0.058913 |
| 59428 | P0C214 | P28676 | -0.47953  |
| 59429 | P0C214 | Q8NDY8 | -0.98681  |
| 59430 | P0C214 | Q9BYG7 | -0.18931  |
| 59431 | P0C214 | Q5M9N0 | -0.15933  |
| 59432 | P0C214 | Q86UA1 | -0.12373  |

|       |        |        |           |
|-------|--------|--------|-----------|
| 59433 | P0C214 | Q99578 | -0.79235  |
| 59434 | P0C214 | P13671 | -0.22741  |
| 59435 | P0C214 | P30485 | -1.0367   |
| 59436 | P0C214 | Q9UHM6 | -1.2418   |
| 59437 | P0C214 | Q9Y5Y3 | -1.3693   |
| 59438 | P0C214 | Q96G46 | -0.57131  |
| 59439 | P0C214 | Q6Q6R5 | -0.31459  |
| 59440 | P0C214 | Q92667 | -0.21612  |
| 59441 | P0C214 | Q5T2R2 | -0.34735  |
| 59442 | P0C214 | Q9UKP4 | -1.3248   |
| 59443 | P0C214 | Q5VWK5 | -0.57664  |
| 59444 | P0C214 | Q8N8N7 | -0.64245  |
| 59445 | P0C214 | Q9BWS9 | -0.77617  |
| 59446 | P0C214 | P60321 | -0.50073  |
| 59447 | P0C214 | A8MT19 | -0.20189  |
| 59448 | P0C214 | P53007 | -0.29098  |
| 59449 | P0C214 | P78426 | -0.22896  |
| 59450 | P0C214 | Q9H773 | -0.27115  |
| 59451 | P0C214 | Q9HCN8 | -0.34835  |
| 59452 | P0C214 | Q9BRT6 | -0.02845  |
| 59453 | P0C214 | P34059 | -0.35343  |
| 59454 | P0C214 | Q8N149 | -1.0787   |
| 59455 | P0C214 | Q96EC8 | -0.91465  |
| 59456 | P0C214 | Q9H9S0 | -0.22798  |
| 59457 | P0C214 | Q6IQ26 | -0.35768  |
| 59458 | P0C214 | Q9UHC7 | -0.22043  |
| 59459 | P0C214 | P60981 | -0.37618  |
| 59460 | P0C214 | Q75715 | -1.0163   |
| 59461 | P0C214 | Q9NP74 | -0.55686  |
| 59462 | P0C214 | Q8N119 | -1.3874   |
| 59463 | P0C214 | Q969X5 | -0.10064  |
| 59464 | P0C214 | O15054 | -0.43018  |
| 59465 | P0C214 | Q9NSV4 | -0.21962  |
| 59466 | P0C214 | Q9HB40 | -0.86006  |
| 59467 | P0C214 | P10620 | -0.047553 |
| 59468 | P0C214 | Q05066 | -0.5599   |
| 59469 | P0C214 | Q9NP80 | -0.43743  |
| 59470 | P0C214 | P98164 | -0.29072  |
| 59471 | P0C214 | Q6IFG1 | -1.2952   |
| 59472 | P0C214 | Q6P9G4 | -0.98681  |
| 59473 | P0C214 | Q6NSJ5 | -0.98681  |
| 59474 | P0C214 | P00739 | -0.96068  |
| 59475 | P0C214 | Q94823 | -0.51471  |
| 59476 | P0C214 | Q5BJH2 | -0.68883  |
| 59477 | P0C214 | Q01524 | -0.84231  |
| 59478 | P0C214 | B2RXF0 | -0.673    |
| 59479 | P0C214 | O15273 | -0.22586  |
| 59480 | P0C214 | P06887 | -1.0022   |
| 59481 | P0C214 | O95872 | -0.39914  |
| 59482 | P0C214 | Q9H790 | -0.2961   |
| 59483 | P0C214 | Q8TCT0 | -0.57809  |
| 59484 | P0C214 | P0CL82 | -0.47295  |
| 59485 | P0C214 | P41231 | -0.80099  |
| 59486 | P0C214 | Q8N690 | -0.88056  |
| 59487 | P0C214 | Q5SSG8 | -1.0334   |
| 59488 | P0C214 | Q9UHQ9 | -0.74657  |
| 59489 | P0C214 | Q14296 | -0.49203  |
| 59490 | P0C214 | Q8NGB9 | -1.2952   |
| 59491 | P0C214 | Q9H6F2 | -0.67248  |
| 59492 | P0C214 | P0C7M3 | -0.50624  |
| 59493 | P0C214 | Q8N841 | -0.18088  |
| 59494 | P0C214 | Q9UNU6 | -0.85496  |
| 59495 | P0C214 | Q96D05 | -0.98681  |
| 59496 | P0C214 | P08559 | -0.17318  |
| 59497 | P0C214 | Q9UPT9 | -0.38371  |
| 59498 | P0C214 | A6NKC4 | -1.0451   |
| 59499 | P0C214 | Q8TDV2 | -1.3693   |
| 59500 | P0C214 | P30085 | -0.14308  |
| 59501 | P0C214 | Q95604 | -1.0367   |
| 59502 | P0C214 | Q96L42 | -0.99471  |
| 59503 | P0C214 | O75445 | -0.84211  |
| 59504 | P0C214 | P59817 | -0.22717  |
| 59505 | P0C214 | P13224 | -0.56298  |
| 59506 | P0C214 | Q5T5U3 | -0.24225  |
| 59507 | P0C214 | Q9UPU7 | -0.85726  |
| 59508 | P0C214 | Q9NQX5 | -0.98681  |

|       |        |        |           |
|-------|--------|--------|-----------|
| 59509 | P0C214 | Q8WZ73 | -0.28164  |
| 59510 | P0C214 | Q9HCC6 | -0.22097  |
| 59511 | P0C214 | P48509 | -0.50029  |
| 59512 | P0C214 | Q9UKZ4 | -1.0978   |
| 59513 | P0C214 | Q01113 | -1.549    |
| 59514 | P0C214 | Q2TAL6 | -0.86715  |
| 59515 | P0C214 | A8MYZ6 | -0.38543  |
| 59516 | P0C214 | P13232 | -0.22371  |
| 59517 | P0C214 | P12724 | -0.7014   |
| 59518 | P0C214 | Q6DHV5 | -0.076898 |
| 59519 | P0C214 | Q6H3X3 | -0.48485  |
| 59520 | P0C214 | P18858 | -0.20748  |
| 59521 | P0C214 | Q8WWQ8 | -0.69581  |
| 59522 | P0C214 | P49407 | -0.35872  |
| 59523 | P0C214 | Q5XG99 | -0.96348  |
| 59524 | P0C214 | P47893 | -1.3632   |
| 59525 | P0C214 | Q8NGJ8 | -1.2952   |
| 59526 | P0C214 | Q15393 | -0.11639  |
| 59527 | P0C214 | Q8IZM0 | -0.065125 |
| 59528 | P0C214 | P0C866 | -0.098172 |
| 59529 | P0C214 | P10747 | -0.24619  |
| 59530 | P0C214 | Q9BZS1 | -0.33119  |
| 59531 | P0C214 | Q9BUN1 | -0.91736  |
| 59532 | P0C214 | Q86UT5 | -0.22766  |
| 59533 | P0C214 | P51582 | -1.1695   |
| 59534 | P0C214 | P45378 | -0.2644   |
| 59535 | P0C214 | O43819 | -0.24065  |
| 59536 | P0C214 | Q9Y4X1 | -0.88575  |
| 59537 | P0C214 | Q9Y2B0 | -0.53657  |
| 59538 | P0C214 | Q9H993 | -0.12578  |
| 59539 | P0C214 | Q8NDA2 | -1.0217   |
| 59540 | P0C214 | Q9P2F5 | -0.22674  |
| 59541 | P0C214 | Q75069 | -0.35508  |
| 59542 | P0C214 | P35716 | -0.25004  |
| 59543 | P0C214 | Q9BQ75 | -0.47998  |
| 59544 | P0C214 | Q5QP82 | -0.36625  |
| 59545 | P0C214 | O15514 | -0.1228   |
| 59546 | P0C214 | P48067 | -1.0497   |
| 59547 | P0C214 | Q6TAR4 | -0.39434  |
| 59548 | P0C214 | Q13319 | -0.47018  |
| 59549 | P0C214 | O95479 | -0.40749  |
| 59550 | P0C214 | Q86XG9 | -0.20758  |
| 59551 | P0C214 | Q96PN7 | -0.23838  |
| 59552 | P0C214 | Q9HCM2 | -0.77825  |
| 59553 | P0C214 | Q75077 | -1.3161   |
| 59554 | P0C214 | Q8TDC3 | -0.70686  |
| 59555 | P0C214 | Q5JSP0 | -0.75767  |
| 59556 | P0C214 | Q674R7 | -0.91602  |
| 59557 | P0C214 | P20309 | -0.65574  |
| 59558 | P0C214 | A6NDH6 | -1.2952   |
| 59559 | P0C214 | O95990 | -0.17084  |
| 59560 | P0C214 | A6NCF5 | -0.22289  |
| 59561 | P0C214 | Q8NC54 | -0.98681  |
| 59562 | P0C214 | O94967 | -0.45494  |
| 59563 | P0C214 | P56706 | -0.4493   |
| 59564 | P0C214 | Q2KHN1 | -0.23634  |
| 59565 | P0C214 | Q969V1 | -1.3693   |
| 59566 | P0C214 | Q9BQI7 | -1.0788   |
| 59567 | P0C214 | O95199 | -0.38325  |
| 59568 | P0C214 | Q6P7N7 | -0.98681  |
| 59569 | P0C214 | Q6P0A1 | -0.98681  |
| 59570 | P0C214 | Q13797 | -0.87281  |
| 59571 | P0C214 | Q9BV36 | -0.31618  |
| 59572 | P0C214 | Q8NCQ3 | -0.98681  |
| 59573 | P0C214 | Q8IYB4 | -0.22668  |
| 59574 | P0C214 | Q9Y2C5 | -1.1652   |
| 59575 | P0C214 | Q5SQI0 | -0.41019  |
| 59576 | P0C214 | Q5T0T0 | -0.90226  |
| 59577 | P0C214 | Q9H999 | -0.72671  |
| 59578 | P0C214 | Q9NSK0 | -0.18204  |
| 59579 | P0C214 | A6NJ69 | -0.91736  |
| 59580 | P0C214 | Q9NQ66 | -0.22702  |
| 59581 | P0C214 | Q96DL1 | -0.98681  |
| 59582 | P0C214 | Q92820 | -0.42269  |
| 59583 | P0C214 | Q6ZSR9 | -0.74083  |
| 59584 | P0C214 | O15528 | -0.26868  |

|       |        |        |           |
|-------|--------|--------|-----------|
| 59585 | P0C214 | Q5VU57 | -0.40882  |
| 59586 | P0C214 | Q969K3 | -0.29558  |
| 59587 | P0C214 | Q8WWN8 | -0.82081  |
| 59588 | P0C214 | Q99932 | -0.39041  |
| 59589 | P0C214 | Q2T9L4 | -0.069472 |
| 59590 | P0C214 | Q9NQ30 | -0.74643  |
| 59591 | P0C214 | Q9UHK6 | -0.37907  |
| 59592 | P0C214 | Q5BIV9 | -0.5764   |
| 59593 | P0C214 | Q3ZCW2 | -0.60214  |
| 59594 | P0C214 | Q5VZ18 | -0.22741  |
| 59595 | P0C214 | Q8NGK0 | -1.2952   |
| 59596 | P0C214 | P63252 | -1.4294   |
| 59597 | P0C214 | P01229 | -0.81931  |
| 59598 | P0C214 | Q14162 | -1.0636   |
| 59599 | P0C214 | P10314 | -0.91186  |
| 59600 | P0C214 | Q8IVF6 | -0.22737  |
| 59601 | P0C214 | O60341 | -0.22591  |
| 59602 | P0C214 | Q9NQM4 | -0.11086  |
| 59603 | P0C214 | Q53EV4 | -0.22741  |
| 59604 | P0C214 | P0DJI9 | -0.83284  |
| 59605 | P0C214 | Q15255 | -0.44164  |
| 59606 | P0C214 | Q92813 | -0.74877  |
| 59607 | P0C214 | Q9BXJ1 | -0.96884  |
| 59608 | P0C214 | Q96LU5 | -0.48357  |
| 59609 | P0C214 | Q502W6 | -0.2309   |
| 59610 | P0C214 | P46695 | -0.34876  |
| 59611 | P0C214 | Q9HBJ0 | -0.88595  |
| 59612 | P0C214 | Q8NGL9 | -1.2952   |
| 59613 | P0C214 | Q8IVY1 | -0.98681  |
| 59614 | P0C214 | Q16850 | -0.89801  |
| 59615 | P0C214 | P07711 | -0.50293  |
| 59616 | P0C214 | P56696 | -0.95554  |
| 59617 | P0C214 | A6NIL9 | -0.98681  |
| 59618 | P0C214 | Q86XT4 | -0.59602  |
| 59619 | P0C214 | Q7Z392 | -0.25923  |
| 59620 | P0C214 | P52732 | -0.42261  |
| 59621 | P0C214 | Q86XT9 | -0.97263  |
| 59622 | P0C214 | Q2M3M2 | -1.2381   |
| 59623 | P0C214 | O15541 | -0.5018   |
| 59624 | P0C214 | H3BSY2 | -0.2859   |
| 59625 | P0C214 | Q7Z4L5 | -0.46326  |
| 59626 | P0C214 | P47870 | -0.68212  |
| 59627 | P0C214 | P49788 | -1.039    |
| 59628 | P0C214 | Q9BYE9 | -0.64053  |
| 59629 | P0C214 | Q96B86 | -0.4023   |
| 59630 | P0C214 | A8MWS1 | -0.91736  |
| 59631 | P0C214 | P61009 | -0.68473  |
| 59632 | P0C214 | Q8IYB5 | -0.82395  |
| 59633 | P0C214 | Q8IWZ6 | -0.19818  |
| 59634 | P0C214 | Q96KF7 | -0.98681  |
| 59635 | P0C214 | Q96FE5 | -0.82234  |
| 59636 | P0C214 | Q96LB2 | -1.3006   |
| 59637 | P0C214 | Q99463 | -1.3776   |
| 59638 | P0C214 | Q9H3W5 | -1.0099   |
| 59639 | P0C214 | P0C221 | -0.41083  |
| 59640 | P0C214 | Q92794 | -0.3665   |
| 59641 | P0C214 | Q00341 | -0.4405   |
| 59642 | P0C214 | O75348 | -0.41987  |
| 59643 | P0C214 | Q15311 | -0.28003  |
| 59644 | P0C214 | Q13118 | -0.22351  |
| 59645 | P0C214 | P20339 | -0.53704  |
| 59646 | P0C214 | Q9Y4G6 | -0.22781  |
| 59647 | P0C214 | Q8N2Q7 | -0.40319  |
| 59648 | P0C214 | P20671 | -0.85588  |
| 59649 | P0C214 | P11309 | -0.4012   |
| 59650 | P0C214 | Q6Q788 | -0.4203   |
| 59651 | P0C214 | Q9NPL8 | -0.75609  |
| 59652 | P0C214 | P49748 | -0.27403  |
| 59653 | P0C214 | Q9UN19 | -0.58179  |
| 59654 | P0C214 | P04433 | -1.0022   |
| 59655 | P0C214 | J3KSC0 | -1.1933   |
| 59656 | P0C214 | Q99961 | -0.27345  |
| 59657 | P0C214 | P07948 | -0.23099  |
| 59658 | P0C214 | A6NNB3 | -1.2263   |
| 59659 | P0C214 | Q8NHP8 | -0.55525  |
| 59660 | P0C214 | A4D0T7 | -0.98681  |

|       |        |        |           |
|-------|--------|--------|-----------|
| 59661 | P0C214 | Q86X59 | -0.3283   |
| 59662 | P0C214 | Q7Z3T1 | -1.2952   |
| 59663 | P0C214 | A8MT66 | -0.18211  |
| 59664 | P0C214 | Q6UX39 | -0.91851  |
| 59665 | P0C214 | Q9HBG7 | -1.0225   |
| 59666 | P0C214 | Q5XX13 | -0.22773  |
| 59667 | P0C214 | Q5BN46 | -0.32404  |
| 59668 | P0C214 | A1L0T0 | -0.77012  |
| 59669 | P0C214 | Q86UZ6 | -0.22761  |
| 59670 | P0C214 | P17342 | -0.87465  |
| 59671 | P0C214 | Q7Z3G6 | -0.55388  |
| 59672 | P0C214 | Q8IZS7 | -1.0559   |
| 59673 | P0C214 | P58107 | -0.18161  |
| 59674 | P0C214 | Q9H490 | -0.80803  |
| 59675 | P0C214 | P01720 | -1.0022   |
| 59676 | P0C214 | Q9Y5K1 | -0.47213  |
| 59677 | P0C214 | Q96D96 | -1.0392   |
| 59678 | P0C214 | P63098 | -0.22761  |
| 59679 | P0C214 | Q9C0A6 | -0.22441  |
| 59680 | P0C214 | Q9Y6M4 | -1.0763   |
| 59681 | P0C214 | Q8IZS5 | -0.085063 |
| 59682 | P0C214 | P59045 | -0.80652  |
| 59683 | P0C214 | Q9BV99 | -0.22739  |
| 59684 | P0C214 | A8MTL9 | -0.77749  |
| 59685 | P0C214 | Q92990 | -0.025146 |
| 59686 | P0C214 | P54760 | -1.1767   |
| 59687 | P0C214 | Q8N3Y3 | -0.78836  |
| 59688 | P0C214 | Q86VE3 | -0.3819   |
| 59689 | P0C214 | Q9UHV8 | -0.36348  |
| 59690 | P0C214 | Q8NBT0 | -0.22836  |
| 59691 | P0C214 | P04839 | -0.56669  |
| 59692 | P0C214 | Q14CX5 | -0.98681  |
| 59693 | P0C214 | P01772 | -1.0022   |
| 59694 | P0C214 | P11226 | -0.50688  |
| 59695 | P0C214 | O43612 | -0.44835  |
| 59696 | P0C214 | P31641 | -1.1205   |
| 59697 | P0C214 | Q9Y4C1 | -0.080765 |
| 59698 | P0C214 | O60344 | -0.9163   |
| 59699 | P0C214 | P07359 | -0.49487  |
| 59700 | P0C214 | Q9H0C1 | -0.71534  |
| 59701 | P0C214 | H3BMG3 | -0.078329 |
| 59702 | P0C214 | Q5JYT7 | -0.064666 |
| 59703 | P0C214 | Q96MC5 | -0.25456  |
| 59704 | P0C214 | Q2WJ6  | -0.1955   |
| 59705 | P0C214 | P28566 | -1.3718   |
| 59706 | P0C214 | Q02750 | -0.22757  |
| 59707 | P0C214 | O95407 | -0.22673  |
| 59708 | P0C214 | Q6PCB6 | -0.32696  |
| 59709 | P0C214 | A6NI73 | -1.3884   |
| 59710 | P0C214 | Q86U28 | -0.17746  |
| 59711 | P0C214 | Q9UBC2 | -0.23314  |
| 59712 | P0C214 | O60412 | -1.2952   |
| 59713 | P0C214 | Q7L1I2 | -0.90889  |
| 59714 | P0C214 | A2RUB6 | -0.046871 |
| 59715 | P0C214 | Q8N1F8 | -0.2985   |
| 59716 | P0C214 | Q9BQE9 | -0.34253  |
| 59717 | P0C214 | Q9NQX7 | -0.35311  |
| 59718 | P0C214 | Q9Y2H1 | -0.37888  |
| 59719 | P0C214 | P19784 | -0.24296  |
| 59720 | P0C214 | Q9Y672 | -0.71492  |
| 59721 | P0C214 | A8MTB9 | -0.98681  |
| 59722 | P0C214 | Q7Z6A9 | -1.0878   |
| 59723 | P0C214 | Q9BXL5 | -0.34775  |
| 59724 | P0C214 | O95081 | -0.38299  |
| 59725 | P0C214 | O95825 | -0.53568  |
| 59726 | P0C214 | Q15722 | -1.6012   |
| 59727 | P0C214 | Q6PEV8 | -0.11107  |
| 59728 | P0C214 | Q9P109 | -0.51097  |
| 59729 | P0C214 | Q5FWE3 | -0.98681  |
| 59730 | P0C214 | A6NJZ3 | -1.2952   |
| 59731 | P0C214 | P50225 | -0.20418  |
| 59732 | P0C214 | Q8N9B4 | -0.22741  |
| 59733 | P0C214 | Q9UKP5 | -1.3603   |
| 59734 | P0C214 | P16188 | -1.018    |
| 59735 | P0C214 | Q92623 | -0.20078  |
| 59736 | P0C214 | P23219 | -0.23865  |

|       |        |        |             |
|-------|--------|--------|-------------|
| 59737 | P0C214 | Q6ZMT9 | -0.55184    |
| 59738 | P0C214 | Q9Y342 | -1.088      |
| 59739 | P0C214 | P80748 | -1.0022     |
| 59740 | P0C214 | C9JVV0 | -0.98681    |
| 59741 | P0C214 | Q8NDV2 | -1.352      |
| 59742 | P0C214 | Q8WVY8 | -1.0115     |
| 59743 | P0C214 | Q9H3Y6 | -1.2129     |
| 59744 | P0C214 | P36888 | -0.51399    |
| 59745 | P0C214 | Q8IVG9 | -0.27115    |
| 59746 | P0C214 | Q13562 | -0.22749    |
| 59747 | P0C214 | Q9UBN7 | -0.21496    |
| 59748 | P0C214 | P05129 | -0.41255    |
| 59749 | P0C214 | P01889 | -1.0184     |
| 59750 | P0C214 | P48443 | -0.22801    |
| 59751 | P0C214 | Q9UN75 | -1.2424     |
| 59752 | P0C214 | P02656 | -0.61007    |
| 59753 | P0C214 | P0CW18 | -0.97208    |
| 59754 | P0C214 | Q14050 | -0.75276    |
| 59755 | P0C214 | P04279 | -0.40514    |
| 59756 | P0C214 | P78325 | -0.45258    |
| 59757 | P0C214 | P25025 | -1.0567     |
| 59758 | P0C214 | A6NGS2 | -0.083943   |
| 59759 | P0C214 | Q15120 | -0.22438    |
| 59760 | P0C214 | Q8NG66 | -0.30953    |
| 59761 | P0C214 | Q6ZVK1 | -0.98681    |
| 59762 | P0C214 | P04271 | -0.79819    |
| 59763 | P0C214 | Q29940 | -1.0367     |
| 59764 | P0C214 | Q96A54 | -1.0959     |
| 59765 | P0C214 | Q8WU58 | -0.00081749 |
| 59766 | P0C214 | P25103 | -0.85877    |
| 59767 | P0C214 | P84243 | -1.1796     |
| 59768 | P0C214 | Q8N485 | -0.025613   |
| 59769 | P0C214 | P14061 | -0.22531    |
| 59770 | P0C214 | Q6ZWL3 | -1.1005     |
| 59771 | P0C214 | Q43364 | -0.084335   |
| 59772 | P0C214 | Q8WXA2 | -0.91736    |
| 59773 | P0C214 | Q9H5N1 | -0.52297    |
| 59774 | P0C214 | Q969Y0 | -0.91736    |
| 59775 | P0C214 | O43286 | -0.50787    |
| 59776 | P0C214 | Q9H6B9 | -0.64322    |
| 59777 | P0C214 | Q9Y657 | -0.31723    |
| 59778 | P0C214 | Q16559 | -0.22757    |
| 59779 | P0C214 | Q14730 | -0.5601     |
| 59780 | P0C214 | Q8IYT8 | -0.74504    |
| 59781 | P0C214 | Q6ZSU1 | -0.51656    |
| 59782 | P0C214 | P27701 | -0.60306    |
| 59783 | P0C214 | Q13554 | -0.66485    |
| 59784 | P0C214 | Q8N4Y2 | -0.24565    |
| 59785 | P0C214 | O60258 | -0.87365    |
| 59786 | P0C214 | Q00488 | -0.21299    |
| 59787 | P0C214 | Q9UKR5 | -0.78823    |
| 59788 | P0C214 | P08514 | -0.40616    |
| 59789 | P0C214 | Q9H6R3 | -0.66055    |
| 59790 | P0C214 | Q2LD37 | -0.28719    |
| 59791 | P0C214 | P02728 | -0.18353    |
| 59792 | P0C214 | Q15940 | -0.70722    |
| 59793 | P0C214 | Q9BVA1 | -0.14048    |
| 59794 | P0C214 | Q15072 | -1.2998     |
| 59795 | P0C214 | A0FGR9 | -1.0708     |
| 59796 | P0C214 | Q9H3E2 | -0.44069    |
| 59797 | P0C214 | Q6ZQQ6 | -0.18678    |
| 59798 | P0C214 | P53602 | -0.37109    |
| 59799 | P0C214 | Q8N6K0 | -0.98681    |
| 59800 | P0C214 | Q96CP6 | -0.98681    |
| 59801 | P0C214 | P30837 | -0.41609    |
| 59802 | P0C214 | Q8N7S6 | -0.98681    |
| 59803 | P0C214 | Q969Q1 | -0.47116    |
| 59804 | P0C214 | P01722 | -1.0022     |
| 59805 | P0C214 | Q2M3G4 | -0.29577    |
| 59806 | P0C214 | Q9Y4W6 | -0.60568    |
| 59807 | P0C214 | O15342 | -0.71604    |
| 59808 | P0C214 | O75197 | -0.26815    |
| 59809 | P0C214 | O43683 | -0.22741    |
| 59810 | P0C214 | Q9BU70 | -0.22636    |
| 59811 | P0C214 | Q96JN2 | -0.75609    |
| 59812 | P0C214 | Q9UQB8 | -0.22738    |



|       |        |        |          |
|-------|--------|--------|----------|
| 59813 | P0C214 | Q4KMQ2 | -1.0545  |
| 59814 | P0C214 | Q5KSL6 | -0.79503 |
| 59815 | P0C214 | Q8IVT5 | -0.29705 |
| 59816 | P0C214 | P47755 | -0.36627 |
| 59817 | P0C214 | Q05BV3 | -0.22783 |
| 59818 | P0C214 | Q5T4T1 | -0.98681 |
| 59819 | P0C214 | Q9BXN1 | -1.0564  |
| 59820 | P0C214 | Q96HL8 | -0.3813  |
| 59821 | P0C214 | O43927 | -0.70509 |
| 59822 | P0C214 | Q6P2N6 | -1.0708  |
| 59823 | P0C214 | Q68EM7 | -0.35274 |
| 59824 | P0C214 | Q9BXJ3 | -0.91736 |
| 59825 | P0C214 | P0C7A2 | -0.70127 |
| 59826 | P0C214 | P63125 | -0.6957  |
| 59827 | P0C214 | Q8NA70 | -0.55399 |
| 59828 | P0C214 | Q9H6Y5 | -0.22646 |
| 59829 | P0C214 | A6NCL7 | -0.22742 |
| 59830 | P0C214 | Q9H792 | -0.59641 |
| 59831 | P0C214 | Q8IX30 | -0.22752 |
| 59832 | P0C214 | Q5TC63 | -1.2827  |
| 59833 | P0C214 | Q9UF12 | -0.19351 |
| 59834 | P0C214 | P0C7N8 | -1.2952  |
| 59835 | P0C214 | P60852 | -1.3623  |
| 59836 | P0C214 | Q12931 | -0.33587 |
| 59837 | P0C214 | P16581 | -0.40101 |
| 59838 | P0C214 | O95076 | -0.2274  |
| 59839 | P0C214 | Q9HC35 | -0.55959 |
| 59840 | P0C214 | Q95864 | -0.68445 |
| 59841 | P0C214 | Q6ZRX8 | -0.30864 |
| 59842 | P0C214 | Q8NGF1 | -1.2952  |
| 59843 | P0C214 | Q9P127 | -0.1405  |
| 59844 | P0C214 | P35240 | -0.23472 |
| 59845 | P0C214 | Q99986 | -0.22741 |
| 59846 | P0C214 | Q9Y5H4 | -1.2424  |
| 59847 | P0C214 | Q06945 | -0.23898 |
| 59848 | P0C214 | P15531 | -0.17529 |
| 59849 | P0C214 | P51149 | -0.44131 |
| 59850 | P0C214 | P12955 | -0.7011  |
| 59851 | P0C214 | O14594 | -0.70334 |
| 59852 | P0C214 | Q53F19 | -0.80154 |
| 59853 | P0C214 | Q8NGR9 | -1.2952  |
| 59854 | P0C214 | P15144 | -0.91388 |
| 59855 | P0C214 | Q96RD1 | -1.2952  |
| 59856 | P0C214 | Q5JSL3 | -0.35511 |
| 59857 | P0C214 | P50461 | -0.23083 |
| 59858 | P0C214 | P22732 | -0.3335  |
| 59859 | P0C214 | Q7LFX5 | -0.48274 |
| 59860 | P0C214 | Q04826 | -1.0367  |
| 59861 | P0C214 | Q9UK00 | -0.98681 |
| 59862 | P0C214 | Q16570 | -1.234   |
| 59863 | P0C214 | Q96I85 | -0.91736 |
| 59864 | P0C214 | Q9P2W3 | -0.53164 |
| 59865 | P0C214 | Q16538 | -1.3693  |
| 59866 | P0C214 | P41247 | -0.19385 |
| 59867 | P0C214 | Q13572 | -0.7119  |
| 59868 | P0C214 | P16298 | -0.14117 |
| 59869 | P0C214 | P32245 | -0.64659 |
| 59870 | P0C214 | Q8NAV2 | -0.20134 |
| 59871 | P0C214 | O15315 | -0.14567 |
| 59872 | P0C214 | Q9BR39 | -0.4298  |
| 59873 | P0C214 | Q9C0I1 | -0.38726 |
| 59874 | P0C214 | Q9Y442 | -0.98681 |
| 59875 | P0C214 | Q93091 | -0.70603 |
| 59876 | P0C214 | P07357 | -1.3231  |
| 59877 | P0C214 | Q9H069 | -0.22739 |
| 59878 | P0C214 | Q9Y4B5 | -0.19275 |
| 59879 | P0C214 | Q8IZU2 | -0.22774 |
| 59880 | P0C214 | P84996 | -0.84309 |
| 59881 | P0C214 | P20132 | -0.15613 |
| 59882 | P0C214 | P80362 | -1.0022  |
| 59883 | P0C214 | Q9BZW2 | -1.132   |
| 59884 | P0C214 | P01857 | -0.4362  |
| 59885 | P0C214 | P45974 | -0.31364 |
| 59886 | P0C214 | O00453 | -0.66991 |
| 59887 | P0C214 | Q02509 | -0.65699 |
| 59888 | P0C214 | Q8IWT1 | -0.89379 |

|       |        |        |           |
|-------|--------|--------|-----------|
| 59889 | P0C214 | Q8N2A0 | -0.22581  |
| 59890 | P0C214 | Q6UWW9 | -0.98681  |
| 59891 | P0C214 | Q9BY32 | -0.50944  |
| 59892 | P0C214 | D3W0D1 | -0.52701  |
| 59893 | P0C214 | O94887 | -0.25385  |
| 59894 | P0C214 | P54578 | -0.40089  |
| 59895 | P0C214 | Q9Y463 | -0.26483  |
| 59896 | P0C214 | Q14242 | -0.69243  |
| 59897 | P0C214 | Q8NGL7 | -1.2952   |
| 59898 | P0C214 | Q8TBP0 | -1.2827   |
| 59899 | P0C214 | Q02086 | -0.22374  |
| 59900 | P0C214 | O43414 | -0.60928  |
| 59901 | P0C214 | O95968 | -0.90112  |
| 59902 | P0C214 | Q9Y3E0 | -0.68189  |
| 59903 | P0C214 | Q96S42 | -0.26719  |
| 59904 | P0C214 | Q96T49 | -0.2274   |
| 59905 | P0C214 | Q15583 | -0.24565  |
| 59906 | P0C214 | Q8N743 | -1.0708   |
| 59907 | P0C214 | P59103 | -0.039352 |
| 59908 | P0C214 | Q9NRN9 | -0.3351   |
| 59909 | P0C214 | Q8IXB3 | -0.98316  |
| 59910 | P0C214 | P49184 | -0.36519  |
| 59911 | P0C214 | P16260 | -0.54948  |
| 59912 | P0C214 | Q8NGI3 | -1.2952   |
| 59913 | P0C214 | Q9Y3B3 | -0.59766  |
| 59914 | P0C214 | P10586 | -0.85103  |
| 59915 | P0C214 | Q9NYF5 | -0.86358  |
| 59916 | P0C214 | Q8NE01 | -0.6495   |
| 59917 | P0C214 | Q9Y4K4 | -0.57699  |
| 59918 | P0C214 | Q8TE23 | -1.2954   |
| 59919 | P0C214 | Q63HQ2 | -0.92011  |
| 59920 | P0C214 | Q9UKA4 | -0.10302  |
| 59921 | P0C214 | P20929 | -0.22603  |
| 59922 | P0C214 | P00742 | -0.72164  |
| 59923 | P0C214 | P63133 | -0.33459  |
| 59924 | P0C214 | A6NFE2 | -0.98681  |
| 59925 | P0C214 | Q86YB7 | -0.43407  |
| 59926 | P0C214 | O00160 | -0.46699  |
| 59927 | P0C214 | Q9H342 | -1.2952   |
| 59928 | P0C214 | Q8N715 | -0.55577  |
| 59929 | P0C214 | Q9Y5H0 | -1.2424   |
| 59930 | P0C214 | Q9GIY3 | -0.71588  |
| 59931 | P0C214 | A6NKQ9 | -0.89474  |
| 59932 | P0C214 | Q9BUJ0 | -0.69472  |
| 59933 | P0C214 | Q86UW8 | -1.1017   |
| 59934 | P0C214 | Q6V1X1 | -0.19772  |
| 59935 | P0C214 | Q9H2K8 | -0.32636  |
| 59936 | P0C214 | Q9NXJ5 | -0.32091  |
| 59937 | P0C214 | Q96J77 | -0.2013   |
| 59938 | P0C214 | Q71RC2 | -0.68605  |
| 59939 | P0C214 | Q9GZW8 | -0.98681  |
| 59940 | P0C214 | Q86V25 | -0.3411   |
| 59941 | P0C214 | Q8NGD0 | -1.2952   |
| 59942 | P0C214 | P23368 | -0.38863  |
| 59943 | P0C214 | B9A064 | -0.91736  |
| 59944 | P0C214 | P0C8F1 | -0.86109  |
| 59945 | P0C214 | Q96L91 | -0.33678  |
| 59946 | P0C214 | Q9UD57 | -0.22732  |
| 59947 | P0C214 | Q9UBS9 | -0.99756  |
| 59948 | P0C214 | Q8NGE5 | -1.2952   |
| 59949 | P0C214 | Q9NS66 | -1.3693   |
| 59950 | P0C214 | O75061 | -0.22646  |
| 59951 | P0C214 | Q9Y6X1 | -0.51414  |
| 59952 | P0C214 | Q08257 | -0.39255  |
| 59953 | P0C214 | Q9H0U3 | -1.1156   |
| 59954 | P0C214 | Q6P1Q0 | -0.17026  |
| 59955 | P0C214 | Q86UN2 | -0.58659  |
| 59956 | P0C214 | Q15907 | -0.71825  |
| 59957 | P0C214 | Q14320 | -0.095385 |
| 59958 | P0C214 | Q15785 | -0.55908  |
| 59959 | P0C214 | P43320 | -0.50412  |
| 59960 | P0C214 | Q53RT3 | -1.1699   |
| 59961 | P0C214 | Q8NFX7 | -0.70306  |
| 59962 | P0C214 | P56177 | -0.22523  |
| 59963 | P0C214 | Q9BRZ2 | -0.49665  |
| 59964 | P0C214 | P05111 | -0.44896  |

|       |        |        |           |
|-------|--------|--------|-----------|
| 59965 | P0C214 | P59827 | -0.90901  |
| 59966 | P0C214 | Q6ZVN6 | -0.063759 |
| 59967 | P0C214 | Q9Y691 | -1.0621   |
| 59968 | P0C214 | Q9P218 | -0.96241  |
| 59969 | P0C214 | Q6ZSN7 | -0.054475 |
| 59970 | P0C214 | Q75339 | -0.83728  |
| 59971 | P0C214 | Q96FI4 | -0.23603  |
| 59972 | P0C214 | Q96CE8 | -0.98681  |
| 59973 | P0C214 | Q9Y283 | -0.22743  |
| 59974 | P0C214 | Q8NH81 | -1.2952   |
| 59975 | P0C214 | A8MT79 | -0.96491  |
| 59976 | P0C214 | Q9UQ72 | -0.9261   |
| 59977 | P0C214 | P01775 | -1.0022   |
| 59978 | P0C214 | Q6ZTB9 | -0.70722  |
| 59979 | P0C214 | Q9HCG7 | -0.70337  |
| 59980 | P0C214 | P41146 | -1.2835   |
| 59981 | P0C214 | Q86YH2 | -0.23474  |
| 59982 | P0C214 | P07306 | -0.52429  |
| 59983 | P0C214 | Q6YI46 | -0.98681  |
| 59984 | P0C214 | Q6Q0C0 | -0.24494  |
| 59985 | P0C214 | Q14657 | -0.19303  |
| 59986 | P0C214 | O94964 | -0.88039  |
| 59987 | P0C214 | Q6UX82 | -0.5764   |
| 59988 | P0C214 | Q9HBV2 | -0.98681  |
| 59989 | P0C214 | Q02818 | -0.4012   |
| 59990 | P0C214 | Q9UGF5 | -1.2952   |
| 59991 | P0C214 | Q7Z5R6 | -0.44775  |
| 59992 | P0C214 | P04229 | -0.57171  |
| 59993 | P0C214 | Q9BX59 | -1.0672   |
| 59994 | P0C214 | Q9BZM6 | -0.54542  |
| 59995 | P0C214 | O75449 | -0.22894  |
| 59996 | P0C214 | O95522 | -0.18615  |
| 59997 | P0C214 | Q6T423 | -1.0455   |
| 59998 | P0C214 | Q9UHF5 | -0.86175  |
| 59999 | P0C214 | Q9BQ16 | -0.96216  |
| 60000 | P0C214 | P30443 | -1.0679   |
| 60001 | P0C214 | Q8NA96 | -0.50624  |
| 60002 | P0C214 | Q8NGJ1 | -1.2952   |
| 60003 | P0C214 | Q99075 | -1.0464   |
| 60004 | P0C214 | A8MTL0 | -0.21411  |
| 60005 | P0C214 | Q8NGV6 | -1.2952   |
| 60006 | P0C214 | P55809 | -0.22976  |
| 60007 | P0C214 | P04798 | -0.27037  |
| 60008 | P0C214 | P22307 | -0.19494  |
| 60009 | P0C214 | Q8NGX2 | -1.2952   |
| 60010 | P0C214 | Q8NGD4 | -1.2952   |
| 60011 | P0C214 | O14792 | -0.40253  |
| 60012 | P0C214 | Q8IWQ3 | -0.79982  |
| 60013 | P0C214 | Q8WZ60 | -0.36758  |
| 60014 | P0C214 | P26439 | -0.52499  |
| 60015 | P0C214 | Q9NWW5 | -0.37015  |
| 60016 | P0C214 | P28356 | -0.22728  |
| 60017 | P0C214 | P35610 | -0.77818  |
| 60018 | P0C214 | P56746 | -0.848    |
| 60019 | P0C214 | Q8N7X1 | -0.83638  |
| 60020 | P0C214 | Q6ZPB5 | -0.22921  |
| 60021 | P0C214 | Q9NQ76 | -0.49457  |
| 60022 | P0C214 | Q8N2G6 | -0.5018   |
| 60023 | P0C214 | Q8N2R8 | -0.21842  |
| 60024 | P0C214 | P24310 | -0.70409  |
| 60025 | P0C214 | Q96C19 | -0.54229  |
| 60026 | P0C214 | Q9Y6I4 | -0.36108  |
| 60027 | P0C214 | Q9NR45 | -0.089076 |
| 60028 | P0C214 | Q8WTQ4 | -0.22348  |
| 60029 | P0C214 | O75144 | -1.1327   |
| 60030 | P0C214 | Q30154 | -0.71588  |
| 60031 | P0C214 | O60478 | -1.128    |
| 60032 | P0C214 | P31271 | -0.14474  |
| 60033 | P0C214 | Q06210 | -0.090953 |
| 60034 | P0C214 | Q9HC38 | -0.15381  |
| 60035 | P0C214 | Q75N90 | -0.98853  |
| 60036 | P0C214 | Q8NDL9 | -0.14674  |
| 60037 | P0C214 | Q96T51 | -0.13233  |
| 60038 | P0C214 | Q8NGF7 | -1.2952   |
| 60039 | P0C214 | Q9HAT2 | -0.92066  |
| 60040 | P0C214 | Q9H8U3 | -0.63955  |

|       |        |        |           |
|-------|--------|--------|-----------|
| 60041 | P0C214 | Q7L622 | -0.20692  |
| 60042 | P0C214 | P23942 | -1.1508   |
| 60043 | P0C214 | P22301 | -0.36467  |
| 60044 | P0C214 | Q13510 | -0.31352  |
| 60045 | P0C214 | Q9UBR2 | -0.82943  |
| 60046 | P0C214 | Q96QS6 | -1.2407   |
| 60047 | P0C214 | Q13424 | -0.21821  |
| 60048 | P0C214 | Q8NGL1 | -1.2952   |
| 60049 | P0C214 | Q14728 | -0.92388  |
| 60050 | P0C214 | Q8IUZ5 | -0.38794  |
| 60051 | P0C214 | Q9ULP9 | -0.54601  |
| 60052 | P0C214 | Q9UQ53 | -0.56505  |
| 60053 | P0C214 | Q9Y6W6 | -0.29364  |
| 60054 | P0C214 | Q99616 | -1.0172   |
| 60055 | P0C214 | Q8IZU9 | -0.85366  |
| 60056 | P0C214 | Q92914 | -0.34601  |
| 60057 | P0C214 | Q9UBH6 | -1.2129   |
| 60058 | P0C214 | P14735 | -0.17541  |
| 60059 | P0C214 | Q8NGZ2 | -1.2952   |
| 60060 | P0C214 | Q8NGE7 | -1.2952   |
| 60061 | P0C214 | A6NEL2 | -0.22741  |
| 60062 | P0C214 | Q8TAV4 | -1.1973   |
| 60063 | P0C214 | Q9UGP8 | -0.80537  |
| 60064 | P0C214 | A6NLB4 | -0.2273   |
| 60065 | P0C214 | Q9BRG2 | -0.77048  |
| 60066 | P0C214 | Q86T26 | -1.8686   |
| 60067 | P0C214 | P0DM63 | -0.025401 |
| 60068 | P0C214 | Q6ZRZ4 | -0.91736  |
| 60069 | P0C214 | O60749 | -0.22287  |
| 60070 | P0C214 | Q9GZT3 | -0.22522  |
| 60071 | P0C214 | Q14641 | -1.1673   |
| 60072 | P0C214 | Q8NA23 | -0.22758  |
| 60073 | P0C214 | Q9Y235 | -0.56138  |
| 60074 | P0C214 | Q9UBA6 | -0.28637  |
| 60075 | P0C214 | Q9H596 | -0.27056  |
| 60076 | P0C214 | P11245 | -0.33141  |
| 60077 | P0C214 | Q96A47 | -0.44456  |
| 60078 | P0C214 | Q9H114 | -0.90522  |
| 60079 | P0C214 | Q9UKB3 | -0.36558  |
| 60080 | P0C214 | O95838 | -1.1873   |
| 60081 | P0C214 | Q8NH08 | -1.2952   |
| 60082 | P0C214 | Q8WXF7 | -0.5764   |
| 60083 | P0C214 | Q9UG01 | -0.7163   |
| 60084 | P0C214 | Q9UEE5 | -0.79208  |
| 60085 | P0C214 | B2RPK0 | -0.50386  |
| 60086 | P0C214 | Q96C10 | -0.22673  |
| 60087 | P0C214 | Q8NEL0 | -0.063905 |
| 60088 | P0C214 | Q8TF76 | -0.75323  |
| 60089 | P0C214 | Q9NVL8 | -0.68274  |
| 60090 | P0C214 | Q13283 | -0.23319  |
| 60091 | P0C214 | Q6UWH4 | -0.79982  |
| 60092 | P0C214 | Q14703 | -0.93234  |
| 60093 | P0C214 | Q30167 | -0.71588  |
| 60094 | P0C214 | Q03113 | -0.49926  |
| 60095 | P0C214 | Q96FN5 | -0.67393  |
| 60096 | P0C214 | Q9H3U7 | -1.2387   |
| 60097 | P0C214 | B0I1T2 | -0.65584  |
| 60098 | P0C214 | P22676 | -0.27188  |
| 60099 | P0C214 | Q5H9J9 | -0.33267  |
| 60100 | P0C214 | O43772 | -0.48567  |
| 60101 | P0C214 | Q13546 | -0.22741  |
| 60102 | P0C214 | Q13751 | -0.81284  |
| 60103 | P0C214 | Q9BSR8 | -0.80792  |
| 60104 | P0C214 | P49682 | -1.0879   |
| 60105 | P0C214 | Q8N5Y8 | -0.51648  |
| 60106 | P0C214 | Q99808 | -0.9399   |
| 60107 | P0C214 | Q5RGS2 | -0.98681  |
| 60108 | P0C214 | Q9UIX4 | -1.0018   |
| 60109 | P0C214 | Q5H943 | -1.0708   |
| 60110 | P0C214 | Q96L50 | -0.37066  |
| 60111 | P0C214 | Q5T8R8 | -0.71949  |
| 60112 | P0C214 | Q5SQ80 | -0.2274   |
| 60113 | P0C214 | Q86YW0 | -0.25783  |
| 60114 | P0C214 | P12319 | -1.0323   |
| 60115 | P0C214 | Q6UX68 | -0.98681  |
| 60116 | P0C214 | Q96L58 | -0.52966  |

|       |        |        |           |
|-------|--------|--------|-----------|
| 60117 | P0C214 | Q5VXJ0 | -0.83953  |
| 60118 | P0C214 | Q96BU1 | -0.19401  |
| 60119 | P0C214 | Q86T65 | -0.36965  |
| 60120 | P0C214 | Q6QHK4 | -0.23655  |
| 60121 | P0C214 | Q6AHZ1 | -0.22764  |
| 60122 | P0C214 | P49815 | -0.20406  |
| 60123 | P0C214 | Q8NGC8 | -1.2952   |
| 60124 | P0C214 | Q9UQP3 | -0.90639  |
| 60125 | P0C214 | Q8NDX2 | -0.93704  |
| 60126 | P0C214 | Q6UWK7 | -0.91736  |
| 60127 | P0C214 | Q9P2U7 | -0.76757  |
| 60128 | P0C214 | Q53HR8 | -0.33977  |
| 60129 | P0C214 | O75840 | -0.2251   |
| 60130 | P0C214 | Q96P44 | -0.83259  |
| 60131 | P0C214 | Q96QS1 | -0.97725  |
| 60132 | P0C214 | A8MUP6 | -0.98681  |
| 60133 | P0C214 | P30048 | -0.20127  |
| 60134 | P0C214 | Q96BH3 | -0.92043  |
| 60135 | P0C214 | Q96K12 | -0.95568  |
| 60136 | P0C214 | P10144 | -0.37179  |
| 60137 | P0C214 | P08908 | -1.2177   |
| 60138 | P0C214 | Q8IWF9 | -0.65436  |
| 60139 | P0C214 | Q5K651 | -0.2658   |
| 60140 | P0C214 | P04843 | -0.50092  |
| 60141 | P0C214 | O00499 | -0.22749  |
| 60142 | P0C214 | Q15418 | -0.21062  |
| 60143 | P0C214 | Q6B9Z1 | -0.91736  |
| 60144 | P0C214 | Q5UAW9 | -1.3945   |
| 60145 | P0C214 | Q6UVW9 | -0.38829  |
| 60146 | P0C214 | Q8TD26 | -0.17981  |
| 60147 | P0C214 | P50151 | -0.4962   |
| 60148 | P0C214 | Q8NHS0 | -0.36558  |
| 60149 | P0C214 | P48730 | -0.22741  |
| 60150 | P0C214 | Q13492 | -0.20343  |
| 60151 | P0C214 | Q12908 | -0.80088  |
| 60152 | P0C214 | Q8WVH0 | -0.28212  |
| 60153 | P0C214 | Q9Y6I9 | -0.91736  |
| 60154 | P0C214 | Q9BWH2 | -0.15381  |
| 60155 | P0C214 | Q17RR3 | -0.84917  |
| 60156 | P0C214 | Q9Y236 | -0.56583  |
| 60157 | P0C214 | Q9HBI0 | -0.58885  |
| 60158 | P0C214 | O60688 | -0.087935 |
| 60159 | P0C214 | P23471 | -1.2265   |
| 60160 | P0C214 | Q9NPU4 | -0.98681  |
| 60161 | P0C214 | Q8N7E2 | -0.56552  |
| 60162 | P0C214 | P23527 | -0.85588  |
| 60163 | P0C214 | A0ZSE6 | -0.98681  |
| 60164 | P0C214 | Q9NVA1 | -0.19015  |
| 60165 | P0C214 | Q9NQ40 | -1.1763   |
| 60166 | P0C214 | A8MX19 | -0.4589   |
| 60167 | P0C214 | Q9NRM1 | -1.1297   |
| 60168 | P0C214 | Q8WWZ1 | -0.80399  |
| 60169 | P0C214 | Q9UKU6 | -1.4374   |
| 60170 | P0C214 | Q49SQ1 | -1.3692   |
| 60171 | P0C214 | P78363 | -1.2112   |
| 60172 | P0C214 | Q9NPF0 | -0.74199  |
| 60173 | P0C214 | Q6UDR6 | -0.77749  |
| 60174 | P0C214 | Q99418 | -0.22741  |
| 60175 | P0C214 | A6NHR9 | -0.64534  |
| 60176 | P0C214 | Q9BXN6 | -0.36442  |
| 60177 | P0C214 | Q86XA0 | -0.85348  |
| 60178 | P0C214 | Q96NT0 | -0.55394  |
| 60179 | P0C214 | O75879 | -0.39794  |
| 60180 | P0C214 | O94788 | -0.54901  |
| 60181 | P0C214 | Q7Z5A9 | -0.85092  |
| 60182 | P0C214 | Q5KU26 | -0.67378  |
| 60183 | P0C214 | Q9NQA3 | -0.42637  |
| 60184 | P0C214 | P25800 | -0.30931  |
| 60185 | P0C214 | Q495A1 | -0.49133  |
| 60186 | P0C214 | Q9NPH5 | -0.68089  |
| 60187 | P0C214 | Q9H223 | -0.23386  |
| 60188 | P0C214 | Q15349 | -0.61109  |
| 60189 | P0C214 | Q9Y2E6 | -0.29901  |
| 60190 | P0C214 | P23467 | -0.66822  |
| 60191 | P0C214 | Q9H340 | -1.2952   |
| 60192 | P0C214 | Q8TAC2 | -0.7643   |

|       |        |        |          |
|-------|--------|--------|----------|
| 60193 | P0C214 | Q9BWV3 | -0.56271 |
| 60194 | P0C214 | Q99570 | -0.33325 |
| 60195 | P0C214 | Q06418 | -0.69579 |
| 60196 | P0C214 | Q6PI97 | -0.65379 |
| 60197 | P0C214 | Q5SQ13 | -0.15789 |
| 60198 | P0C214 | P33681 | -0.33566 |
| 60199 | P0C214 | A8MUP2 | -0.23354 |
| 60200 | P0C214 | P78412 | -0.22977 |
| 60201 | P0C214 | Q9P2S2 | -1.0028  |
| 60202 | P0C214 | Q86TI0 | -0.95664 |
| 60203 | P0C214 | P30450 | -0.91186 |
| 60204 | P0C214 | Q9H221 | -0.73598 |
| 60205 | P0C214 | Q16206 | -0.85306 |
| 60206 | P0C214 | Q7Z5Y7 | -0.10477 |
| 60207 | P0C214 | Q9BTE0 | -0.32661 |
| 60208 | P0C214 | P55259 | -1.0121  |
| 60209 | P0C214 | Q6IC98 | -0.69814 |
| 60210 | P0C214 | Q96JW4 | -1.1971  |
| 60211 | P0C214 | Q6P9H5 | -0.96471 |
| 60212 | P0C214 | Q6ZSI9 | -1.0212  |
| 60213 | P0C214 | Q8WXI7 | -1.4815  |
| 60214 | P0C214 | Q86TM3 | -0.55253 |
| 60215 | P0C214 | Q15904 | -0.99515 |
| 60216 | P0C214 | Q2M385 | -0.98681 |
| 60217 | P0C214 | Q14439 | -1.5077  |
| 60218 | P0C214 | Q07065 | -0.76152 |
| 60219 | P0C214 | P0CB48 | -0.2113  |
| 60220 | P0C214 | P58215 | -0.43526 |
| 60221 | P0C214 | P52954 | -0.23118 |
| 60222 | P0C214 | Q29980 | -0.8641  |
| 60223 | P0C214 | P06241 | -0.27863 |
| 60224 | P0C214 | Q8IY82 | -0.46317 |
| 60225 | P0C214 | Q09013 | -0.27531 |
| 60226 | P0C214 | Q8IU99 | -1.1911  |
| 60227 | P0C214 | O00182 | -0.88769 |
| 60228 | P0C214 | Q9BQS8 | -0.44943 |
| 60229 | P0C214 | P26045 | -0.22759 |
| 60230 | P0C214 | A2RRP1 | -0.40824 |
| 60231 | P0C214 | Q9Y3N9 | -1.2952  |
| 60232 | P0C214 | Q9Y5Y7 | -0.82481 |
| 60233 | P0C214 | Q96JQ2 | -0.83481 |
| 60234 | P0C214 | Q9HCJ5 | -0.50512 |
| 60235 | P0C214 | A1A5B4 | -1.1866  |
| 60236 | P0C214 | Q9NYM9 | -0.42191 |
| 60237 | P0C214 | P04440 | -0.73529 |
| 60238 | P0C214 | Q3KP44 | -0.22739 |
| 60239 | P0C214 | Q8TDQ0 | -0.98681 |
| 60240 | P0C214 | O15530 | -0.22499 |
| 60241 | P0C214 | Q68G75 | -0.88126 |
| 60242 | P0C214 | Q9H295 | -0.43433 |
| 60243 | P0C214 | Q9NS82 | -1.0834  |
| 60244 | P0C214 | Q9UFG5 | -0.928   |
| 60245 | P0C214 | Q96QE4 | -0.78894 |
| 60246 | P0C214 | A0FGR8 | -1.0708  |
| 60247 | P0C214 | P58417 | -0.99166 |
| 60248 | P0C214 | Q8TDM0 | -0.20758 |
| 60249 | P0C214 | Q16595 | -0.17444 |
| 60250 | P0C214 | P14927 | -0.11303 |
| 60251 | P0C214 | Q5U5R9 | -0.22991 |
| 60252 | P0C214 | A1XBS5 | -0.21792 |
| 60253 | P0C214 | Q99593 | -0.41451 |
| 60254 | P0C214 | Q9BYV2 | -0.87653 |
| 60255 | P0C214 | P86397 | -0.41186 |
| 60256 | P0C214 | Q96J01 | -0.22713 |
| 60257 | P0C214 | P03950 | -0.27496 |
| 60258 | P0C214 | Q5T4B2 | -0.49215 |
| 60259 | P0C214 | Q8NBK3 | -0.33488 |
| 60260 | P0C214 | Q9UJ70 | -0.29261 |
| 60261 | P0C214 | O15440 | -0.85078 |
| 60262 | P0C214 | Q8NBI5 | -0.97586 |
| 60263 | P0C214 | Q6PML9 | -0.61734 |
| 60264 | P0C214 | Q7L7L0 | -0.85588 |
| 60265 | P0C214 | P09912 | -0.30029 |
| 60266 | P0C214 | Q9Y4I1 | -0.2704  |
| 60267 | P0C214 | O43293 | -0.42441 |
| 60268 | P0C214 | Q6UWV7 | -0.98681 |

|       |        |        |           |
|-------|--------|--------|-----------|
| 60269 | P0C214 | Q92802 | -0.18353  |
| 60270 | P0C214 | Q7L211 | -0.89757  |
| 60271 | P0C214 | P0CZ25 | -0.5466   |
| 60272 | P0C214 | Q75200 | -0.91736  |
| 60273 | P0C214 | A2RUH7 | -0.22804  |
| 60274 | P0C214 | P23470 | -1.2238   |
| 60275 | P0C214 | Q8IXX5 | -0.98681  |
| 60276 | P0C214 | Q6UX40 | -0.81336  |
| 60277 | P0C214 | P07307 | -0.52871  |
| 60278 | P0C214 | Q13576 | -0.89532  |
| 60279 | P0C214 | Q96RU8 | -0.22884  |
| 60280 | P0C214 | Q93050 | -0.15009  |
| 60281 | P0C214 | Q96BZ9 | -1.5759   |
| 60282 | P0C214 | Q13596 | -0.22763  |
| 60283 | P0C214 | Q9Y259 | -0.49087  |
| 60284 | P0C214 | Q9UJV3 | -0.31914  |
| 60285 | P0C214 | Q8NGI0 | -1.2952   |
| 60286 | P0C214 | Q6NZ63 | -0.98681  |
| 60287 | P0C214 | Q8WXA8 | -1.1179   |
| 60288 | P0C214 | Q6UXV0 | -1.0449   |
| 60289 | P0C214 | Q10472 | -0.86999  |
| 60290 | P0C214 | P51151 | -0.49322  |
| 60291 | P0C214 | Q75121 | -1.0708   |
| 60292 | P0C214 | Q86UE8 | -0.22741  |
| 60293 | P0C214 | Q9Y478 | -0.39722  |
| 60294 | P0C214 | A1L4Q6 | -0.90979  |
| 60295 | P0C214 | Q13607 | -1.2952   |
| 60296 | P0C214 | Q3SYC2 | -0.70328  |
| 60297 | P0C214 | Q5H8C1 | -1.739    |
| 60298 | P0C214 | Q8NH42 | -1.2952   |
| 60299 | P0C214 | Q9NR63 | -0.49624  |
| 60300 | P0C214 | Q9Y5U9 | -0.86367  |
| 60301 | P0C214 | Q9BTK6 | -0.43998  |
| 60302 | P0C214 | O60931 | -1.117    |
| 60303 | P0C214 | Q02325 | -0.91736  |
| 60304 | P0C214 | P19397 | -0.57064  |
| 60305 | P0C214 | Q86VD9 | -0.8754   |
| 60306 | P0C214 | O43422 | -0.42323  |
| 60307 | P0C214 | Q5D862 | -0.35751  |
| 60308 | P0C214 | A8MUH7 | -0.23421  |
| 60309 | P0C214 | Q05D60 | -0.036111 |
| 60310 | P0C214 | Q9NRG1 | -0.2716   |
| 60311 | P0C214 | D6RF30 | -0.2859   |
| 60312 | P0C214 | Q9GZT5 | -0.85995  |
| 60313 | P0C214 | Q9BXU0 | -0.37203  |
| 60314 | P0C214 | Q96A58 | -0.50412  |
| 60315 | P0C214 | P30559 | -0.8797   |
| 60316 | P0C214 | Q8N8E2 | -0.14951  |
| 60317 | P0C214 | P18464 | -1.0367   |
| 60318 | P0C214 | Q96AG3 | -0.5302   |
| 60319 | P0C214 | P42858 | -0.11854  |
| 60320 | P0C214 | Q9BYT8 | -0.34198  |
| 60321 | P0C214 | Q9Y263 | -0.22893  |
| 60322 | P0C214 | Q14153 | -0.18353  |
| 60323 | P0C214 | O76095 | -0.030794 |
| 60324 | P0C214 | Q96MV8 | -0.93751  |
| 60325 | P0C214 | Q13201 | -0.76453  |
| 60326 | P0C214 | O75363 | -0.20758  |
| 60327 | P0C214 | Q6UXG3 | -1.0088   |
| 60328 | P0C214 | Q8N5G0 | -0.98681  |
| 60329 | P0C214 | Q11201 | -0.67131  |
| 60330 | P0C214 | Q6UXX9 | -0.86943  |
| 60331 | P0C214 | Q8NDB6 | -0.88126  |
| 60332 | P0C214 | P16662 | -0.85007  |
| 60333 | P0C214 | O60347 | -1.2827   |
| 60334 | P0C214 | Q92736 | -0.41555  |
| 60335 | P0C214 | Q8N7C7 | -1.0783   |
| 60336 | P0C214 | Q53H12 | -0.70444  |
| 60337 | P0C214 | Q86V21 | -0.34004  |
| 60338 | P0C214 | P38606 | -0.50528  |
| 60339 | P0C214 | Q8TDE3 | -0.7704   |
| 60340 | P0C214 | Q9BXT6 | -1.1627   |
| 60341 | P0C214 | P0C025 | -0.35349  |
| 60342 | P0C214 | Q9UKL2 | -1.3944   |
| 60343 | P0C214 | Q4J6C6 | -0.42336  |
| 60344 | P0C214 | P58170 | -1.2952   |

|       |        |        |          |
|-------|--------|--------|----------|
| 60345 | P0C214 | Q15695 | -0.44228 |
| 60346 | P0C214 | Q6ZVD8 | -0.23026 |
| 60347 | P0C214 | Q496Y0 | -0.22738 |
| 60348 | P0C214 | Q9BTK2 | -0.23705 |
| 60349 | P0C214 | Q8N0Y3 | -1.2952  |
| 60350 | P0C214 | Q96KK4 | -1.2952  |
| 60351 | P0C214 | Q9BZE0 | -0.22704 |
| 60352 | P0C214 | O14836 | -0.64637 |
| 60353 | P0C214 | P32246 | -0.76362 |
| 60354 | P0C214 | Q8N661 | -0.60617 |
| 60355 | P0C214 | P85037 | -0.31617 |
| 60356 | P0C214 | Q8N239 | -0.2083  |
| 60357 | P0C214 | Q9Y5Y4 | -1.3226  |
| 60358 | P0C214 | Q8TAX0 | -0.19029 |
| 60359 | P0C214 | Q99801 | -0.23212 |
| 60360 | P0C214 | Q9BYG0 | -0.96937 |
| 60361 | P0C214 | Q8TD46 | -0.7865  |
| 60362 | P0C214 | O14917 | -0.67005 |
| 60363 | P0C214 | P78540 | -0.20876 |
| 60364 | P0C214 | Q5T3Y7 | -0.12429 |
| 60365 | P0C214 | Q9UBT3 | -0.85855 |
| 60366 | P0C214 | Q96BJ8 | -0.39373 |
| 60367 | P0C214 | Q5T5B0 | -0.38015 |
| 60368 | P0C214 | Q1W4C9 | -0.77749 |
| 60369 | P0C214 | Q9GZN2 | -0.25232 |
| 60370 | P0C214 | Q8N697 | -0.89269 |
| 60371 | P0C214 | P00750 | -0.40694 |
| 60372 | P0C214 | P59910 | -0.22388 |
| 60373 | P0C214 | P13521 | -0.57905 |
| 60374 | P0C214 | Q14392 | -1.0231  |
| 60375 | P0C214 | Q9BQG1 | -0.93943 |
| 60376 | P0C214 | Q9H3R2 | -1.4311  |
| 60377 | P0C214 | Q96I51 | -0.22357 |
| 60378 | P0C214 | A6NM36 | -0.22864 |
| 60379 | P0C214 | Q8TF27 | -1.0294  |
| 60380 | P0C214 | Q6TCH4 | -0.98681 |
| 60381 | P0C214 | Q9UPV7 | -0.47015 |
| 60382 | P0C214 | Q9Y5N1 | -1.4163  |
| 60383 | P0C214 | O43491 | -0.2907  |
| 60384 | P0C214 | Q9BZL3 | -0.98681 |
| 60385 | P0C214 | P54317 | -0.68207 |
| 60386 | P0C214 | Q9GZL8 | -0.18353 |
| 60387 | P0C214 | Q9Y5W9 | -0.72553 |
| 60388 | P0C214 | Q9H6A9 | -0.98681 |
| 60389 | P0C214 | Q86SH2 | -0.46478 |
| 60390 | P0C214 | Q4KMG9 | -0.98681 |
| 60391 | P0C214 | Q8N4S9 | -0.94131 |
| 60392 | P0C214 | Q9ULI1 | -0.22741 |
| 60393 | P0C214 | Q7Z7B7 | -0.88056 |
| 60394 | P0C214 | Q5J5C9 | -0.78421 |
| 60395 | P0C214 | A1A4Y4 | -0.80254 |
| 60396 | P0C214 | Q5T848 | -1.3693  |
| 60397 | P0C214 | O00622 | -0.46633 |
| 60398 | P0C214 | Q9C098 | -0.87245 |
| 60399 | P0C214 | Q16647 | -0.22756 |
| 60400 | P0C214 | Q8NA61 | -0.3659  |
| 60401 | P0C214 | Q7LBE3 | -0.95387 |
| 60402 | P0C214 | P20774 | -0.22763 |
| 60403 | P0C214 | Q30KP8 | -0.88056 |
| 60404 | P0C214 | Q6IED9 | -0.37052 |
| 60405 | P0C214 | O43763 | -0.22828 |
| 60406 | P0C214 | Q6ZVH6 | -0.85428 |
| 60407 | P0C214 | Q6KC79 | -0.18408 |
| 60408 | P0C214 | P32321 | -0.14203 |
| 60409 | P0C214 | O95214 | -0.98681 |
| 60410 | P0C214 | P01607 | -1.0022  |
| 60411 | P0C214 | P48736 | -0.42836 |
| 60412 | P0C214 | Q3ZCM7 | -0.7021  |
| 60413 | P0C214 | Q9NQZ3 | -0.22897 |
| 60414 | P0C214 | Q14202 | -0.45952 |
| 60415 | P0C214 | Q5VXI9 | -0.83953 |
| 60416 | P0C214 | Q8N6M5 | -0.32094 |
| 60417 | P0C214 | Q9Y5H2 | -1.2424  |
| 60418 | P0C214 | Q99795 | -1.2137  |
| 60419 | P0C214 | P49895 | -0.82482 |
| 60420 | P0C214 | O75604 | -0.3542  |



|       |        |        |           |
|-------|--------|--------|-----------|
| 60421 | P0C214 | Q16581 | -1.053    |
| 60422 | P0C214 | O94827 | -0.32099  |
| 60423 | P0C214 | P25713 | -0.1654   |
| 60424 | P0C214 | Q8IW45 | -0.37628  |
| 60425 | P0C214 | Q9NS86 | -0.023407 |
| 60426 | P0C214 | P51687 | -0.19425  |
| 60427 | P0C214 | Q96CP7 | -0.98681  |
| 60428 | P0C214 | Q400G9 | -0.88599  |
| 60429 | P0C214 | Q9H0R3 | -0.98681  |
| 60430 | P0C214 | P55039 | -0.67546  |
| 60431 | P0C214 | Q9NRD9 | -0.89275  |
| 60432 | P0C214 | O95166 | -0.040844 |
| 60433 | P0C214 | Q13258 | -0.79595  |
| 60434 | P0C214 | O00220 | -0.22739  |
| 60435 | P0C214 | Q2VIQ3 | -0.47806  |
| 60436 | P0C214 | Q6ZRR7 | -0.22733  |
| 60437 | P0C214 | Q5VUY2 | -0.90743  |
| 60438 | P0C214 | Q96M19 | -0.98681  |
| 60439 | P0C214 | Q9HBG4 | -0.50108  |
| 60440 | P0C214 | P02790 | -0.30031  |
| 60441 | P0C214 | Q5T6F0 | -0.22569  |
| 60442 | P0C214 | Q6P093 | -1.2942   |
| 60443 | P0C214 | P09210 | -0.2249   |
| 60444 | P0C214 | O14795 | -0.38023  |
| 60445 | P0C214 | A1E959 | -0.88688  |
| 60446 | P0C214 | Q8NEM2 | -0.36387  |
| 60447 | P0C214 | Q8IXM6 | -0.40352  |
| 60448 | P0C214 | P54652 | -0.21954  |
| 60449 | P0C214 | P01036 | -0.90522  |
| 60450 | P0C214 | Q8WY22 | -0.77937  |
| 60451 | P0C214 | P09871 | -1.3527   |
| 60452 | P0C214 | O95988 | -0.2674   |
| 60453 | P0C214 | P36969 | -0.36746  |
| 60454 | P0C214 | Q9BX93 | -0.97031  |
| 60455 | P0C214 | A6NEH6 | -0.91465  |
| 60456 | P0C214 | O95661 | -0.6312   |
| 60457 | P0C214 | Q9UHP9 | -0.43691  |
| 60458 | P0C214 | Q96PB8 | -0.98681  |
| 60459 | P0C214 | O94880 | -0.50512  |
| 60460 | P0C214 | A6NJI9 | -0.18432  |
| 60461 | P0C214 | A6NL05 | -0.98681  |
| 60462 | P0C214 | Q8N635 | -0.17775  |
| 60463 | P0C214 | Q96P53 | -0.42254  |
| 60464 | P0C214 | Q99487 | -0.32021  |
| 60465 | P0C214 | P14151 | -0.64037  |
| 60466 | P0C214 | Q9UPN4 | -0.15802  |
| 60467 | P0C214 | Q16518 | -0.48158  |
| 60468 | P0C214 | Q9Y585 | -1.2952   |
| 60469 | P0C214 | Q14247 | -0.23052  |
| 60470 | P0C214 | Q8IW92 | -0.66157  |
| 60471 | P0C214 | P13591 | -1.2241   |
| 60472 | P0C214 | Q8NGN2 | -1.2952   |
| 60473 | P0C214 | Q76N32 | -0.058732 |
| 60474 | P0C214 | O60733 | -0.2274   |
| 60475 | P0C214 | Q9NZP5 | -1.2952   |
| 60476 | P0C214 | P23743 | -0.75483  |
| 60477 | P0C214 | Q8IVW6 | -0.20714  |
| 60478 | P0C214 | Q8IVF7 | -0.21427  |
| 60479 | P0C214 | Q86XS5 | -1.1139   |
| 60480 | P0C214 | Q86UG4 | -1.1281   |
| 60481 | P0C214 | Q6UE05 | -0.98681  |
| 60482 | P0C214 | P01617 | -1.0022   |
| 60483 | P0C214 | Q66K14 | -1.6659   |
| 60484 | P0C214 | P04118 | -0.69145  |
| 60485 | P0C214 | Q9UQ49 | -0.31194  |
| 60486 | P0C214 | Q6NXG1 | -0.43211  |
| 60487 | P0C214 | Q4VCS5 | -0.18666  |
| 60488 | P0C214 | P55056 | -1.0218   |
| 60489 | P0C214 | Q6P4F1 | -0.52685  |
| 60490 | P0C214 | A8MXK9 | -0.27831  |
| 60491 | P0C214 | Q16739 | -0.55755  |
| 60492 | P0C214 | Q49A92 | -0.54206  |
| 60493 | P0C214 | Q9BZJ3 | -1.4261   |
| 60494 | P0C214 | Q9NUD9 | -0.79006  |
| 60495 | P0C214 | Q92685 | -0.80007  |
| 60496 | P0C214 | O95750 | -0.32808  |

|       |        |        |          |
|-------|--------|--------|----------|
| 60497 | P0C214 | B1AMM8 | -0.15286 |
| 60498 | P0C214 | P17858 | -0.0758  |
| 60499 | P0C214 | P00749 | -0.65035 |
| 60500 | P0C214 | P53611 | -0.12805 |
| 60501 | P0C214 | A6NKX4 | -1.1214  |
| 60502 | P0C214 | O75578 | -1.0661  |
| 60503 | P0C214 | P19971 | -0.29253 |
| 60504 | P0C214 | P31213 | -0.59374 |
| 60505 | P0C214 | Q9BSE5 | -0.18281 |
| 60506 | P0C214 | P10075 | -0.45415 |
| 60507 | P0C214 | Q14524 | -0.36614 |
| 60508 | P0C214 | P02746 | -0.40958 |
| 60509 | P0C214 | Q14697 | -0.17865 |
| 60510 | P0C214 | Q8N3A8 | -0.59768 |
| 60511 | P0C214 | Q6P461 | -0.87931 |
| 60512 | P0C214 | Q6UXP8 | -0.91736 |
| 60513 | P0C214 | Q16517 | -0.60207 |
| 60514 | P0C214 | P43686 | -0.36354 |
| 60515 | P0C214 | Q96FZ5 | -0.94069 |
| 60516 | P0C214 | P29374 | -0.21621 |
| 60517 | P0C214 | Q6S9Z5 | -0.50512 |
| 60518 | P0C214 | P11488 | -0.68045 |
| 60519 | P0C214 | Q14406 | -0.79733 |
| 60520 | P0C214 | Q8NGS7 | -1.2952  |
| 60521 | P0C214 | A8MU46 | -0.2292  |
| 60522 | P0C214 | Q86SK9 | -0.93903 |
| 60523 | P0C214 | Q9Y6X6 | -0.21044 |
| 60524 | P0C214 | P35372 | -0.44284 |
| 60525 | P0C214 | Q7Z3T8 | -0.14649 |
| 60526 | P0C214 | O95922 | -0.17051 |
| 60527 | P0C214 | P11277 | -0.22857 |
| 60528 | P0C214 | P49908 | -0.85831 |
| 60529 | P0C214 | Q8NH80 | -1.2952  |
| 60530 | P0C214 | Q9UNW8 | -1.2565  |
| 60531 | P0C214 | O75054 | -0.98681 |
| 60532 | P0C214 | O95473 | -0.98681 |
| 60533 | P0C214 | Q9UPQ3 | -1.3868  |
| 60534 | P0C214 | Q8NHU2 | -0.19159 |
| 60535 | P0C214 | Q07075 | -1.0471  |
| 60536 | P0C214 | Q96S82 | -0.21885 |
| 60537 | P0C214 | P27482 | -0.43585 |
| 60538 | P0C214 | Q92186 | -0.34334 |
| 60539 | P0C214 | P30484 | -1.0367  |
| 60540 | P0C214 | A6NFA0 | -0.98681 |
| 60541 | P0C214 | O75900 | -1.3808  |
| 60542 | P0C214 | P11801 | -0.70015 |
| 60543 | P0C214 | Q9H478 | -0.18353 |
| 60544 | P0C214 | Q9BZA8 | -1.2424  |
| 60545 | P0C214 | P37023 | -0.36695 |
| 60546 | P0C214 | P48167 | -0.52704 |
| 60547 | P0C214 | Q86UD3 | -1.1768  |
| 60548 | P0C214 | Q9BSA4 | -0.5774  |
| 60549 | P0C214 | Q02363 | -0.22759 |
| 60550 | P0C214 | Q5T011 | -0.53172 |
| 60551 | P0C214 | Q9UBE8 | -0.22741 |
| 60552 | P0C214 | Q9UBM8 | -0.57577 |
| 60553 | P0C214 | P17174 | -0.17601 |
| 60554 | P0C214 | P48546 | -1.3115  |
| 60555 | P0C214 | Q9C019 | -0.70043 |
| 60556 | P0C214 | Q6UXH9 | -1.0738  |
| 60557 | P0C214 | P09525 | -0.30992 |
| 60558 | P0C214 | Q53H47 | -0.2214  |
| 60559 | P0C214 | O15213 | -0.22746 |
| 60560 | P0C214 | Q96PW8 | -0.2266  |
| 60561 | P0C214 | P33764 | -0.47015 |
| 60562 | P0C214 | Q9BSA9 | -0.98681 |
| 60563 | P0C214 | P49146 | -1.2184  |
| 60564 | P0C214 | Q8IUQ4 | -0.22343 |
| 60565 | P0C214 | Q9NRZ9 | -0.18407 |
| 60566 | P0C214 | Q9Y3Q4 | -1.1458  |
| 60567 | P0C214 | Q96EQ8 | -0.62342 |
| 60568 | P0C214 | Q9H239 | -1.3865  |
| 60569 | P0C214 | A8MXD5 | -0.50785 |
| 60570 | P0C214 | Q8NAA4 | -0.22801 |
| 60571 | P0C214 | P16190 | -0.91186 |
| 60572 | P0C214 | P43699 | -0.31674 |

|       |        |        |           |
|-------|--------|--------|-----------|
| 60573 | P0C214 | Q9BWW2 | -1.3128   |
| 60574 | P0C214 | Q6ZRK6 | -0.060003 |
| 60575 | P0C214 | Q8IX19 | -0.98681  |
| 60576 | P0C214 | Q8NCP5 | -0.19424  |
| 60577 | P0C214 | Q9H6F5 | -0.74205  |
| 60578 | P0C214 | Q43670 | -0.20317  |
| 60579 | P0C214 | Q7L8C5 | -1.0066   |
| 60580 | P0C214 | Q5HY92 | -0.60835  |
| 60581 | P0C214 | Q5IJ48 | -1.5329   |
| 60582 | P0C214 | Q6ZNL0 | -0.98799  |
| 60583 | P0C214 | P0C7M7 | -0.59852  |
| 60584 | P0C214 | Q7L9B9 | -0.39434  |
| 60585 | P0C214 | P32241 | -0.79667  |
| 60586 | P0C214 | Q99929 | -0.23475  |
| 60587 | P0C214 | Q96GY0 | -0.42254  |
| 60588 | P0C214 | Q5DX21 | -1.215    |
| 60589 | P0C214 | Q86UU5 | -0.40508  |
| 60590 | P0C214 | O00330 | -0.16512  |
| 60591 | P0C214 | O60393 | -0.22394  |
| 60592 | P0C214 | Q9NXL9 | -0.56442  |
| 60593 | P0C214 | Q14939 | -0.21709  |
| 60594 | P0C214 | O00585 | -0.50656  |
| 60595 | P0C214 | Q95861 | -0.22233  |
| 60596 | P0C214 | Q8WUJ3 | -0.21791  |
| 60597 | P0C214 | Q96NJ5 | -0.19302  |
| 60598 | P0C214 | Q6N069 | -0.21932  |
| 60599 | P0C214 | P41273 | -0.93657  |
| 60600 | P0C214 | Q5SRR4 | -0.91736  |
| 60601 | P0C214 | Q8N6M6 | -0.65549  |
| 60602 | P0C214 | Q13438 | -0.18023  |
| 60603 | P0C214 | Q5MAI5 | -0.90164  |
| 60604 | P0C214 | O15195 | -0.32043  |
| 60605 | P0C214 | Q7KYR7 | -1.0204   |
| 60606 | P0C214 | Q96QI5 | -0.50637  |
| 60607 | P0C214 | Q9NZG7 | -1.0853   |
| 60608 | P0C214 | O00398 | -1.3112   |
| 60609 | P0C214 | B0FP48 | -0.98681  |
| 60610 | P0C214 | Q3MIX3 | -0.97857  |
| 60611 | P0C214 | O60938 | -0.7126   |
| 60612 | P0C214 | Q9HD23 | -0.89696  |
| 60613 | P0C214 | P02452 | -0.27089  |
| 60614 | P0C214 | Q14982 | -0.8297   |
| 60615 | P0C214 | Q8WWP7 | -1.1483   |
| 60616 | P0C214 | Q6ZN03 | -0.38114  |
| 60617 | P0C214 | Q9UQ52 | -0.58825  |
| 60618 | P0C214 | Q9HAS0 | -0.31184  |
| 60619 | P0C214 | Q9Y6M7 | -0.99234  |
| 60620 | P0C214 | P20160 | -0.791    |
| 60621 | P0C214 | O14926 | -0.55168  |
| 60622 | P0C214 | Q9NRJ3 | -0.90487  |
| 60623 | P0C214 | P10114 | -0.37743  |
| 60624 | P0C214 | Q96A05 | -0.36222  |
| 60625 | P0C214 | Q95863 | -0.22161  |
| 60626 | P0C214 | P86791 | -0.64424  |
| 60627 | P0C214 | Q86SH4 | -0.91736  |
| 60628 | P0C214 | P31358 | -0.64207  |
| 60629 | P0C214 | Q69YZ2 | -0.98681  |
| 60630 | P0C214 | Q9NVM6 | -0.76853  |
| 60631 | P0C214 | Q08AF3 | -0.59023  |
| 60632 | P0C214 | Q9Y6A1 | -0.93198  |
| 60633 | P0C214 | O75888 | -0.3812   |
| 60634 | P0C214 | Q01432 | -0.10237  |
| 60635 | P0C214 | P54219 | -0.60814  |
| 60636 | P0C214 | Q86UX2 | -0.76087  |
| 60637 | P0C214 | Q5SV17 | -0.98681  |
| 60638 | P0C214 | Q9Y519 | -0.98681  |
| 60639 | P0C214 | Q63HR2 | -0.22741  |
| 60640 | P0C214 | Q9BWU1 | -1.0323   |
| 60641 | P0C214 | Q8IUB2 | -0.77749  |
| 60642 | P0C214 | Q8NFF0 | -0.56525  |
| 60643 | P0C214 | P05161 | -0.28883  |
| 60644 | P0C214 | Q9Y2C9 | -0.72645  |
| 60645 | P0C214 | P08603 | -0.87028  |
| 60646 | P0C214 | Q14679 | -0.41566  |
| 60647 | P0C214 | Q9NY25 | -0.95567  |
| 60648 | P0C214 | Q5XLA6 | -0.5769   |

|       |        |        |           |
|-------|--------|--------|-----------|
| 60649 | P0C214 | Q13740 | -1.2341   |
| 60650 | P0C214 | P24387 | -0.3303   |
| 60651 | P0C214 | Q92974 | -0.22747  |
| 60652 | P0C214 | Q12797 | -0.46638  |
| 60653 | P0C214 | O94769 | -0.92394  |
| 60654 | P0C214 | Q8N9I0 | -0.80386  |
| 60655 | P0C214 | Q8N103 | -0.62264  |
| 60656 | P0C214 | O14949 | -0.17866  |
| 60657 | P0C214 | Q8NGF6 | -1.2952   |
| 60658 | P0C214 | Q5GAN6 | -0.89568  |
| 60659 | P0C214 | Q8WXX7 | -0.18353  |
| 60660 | P0C214 | P54756 | -0.97761  |
| 60661 | P0C214 | P0DJD0 | -0.46678  |
| 60662 | P0C214 | P51511 | -0.84837  |
| 60663 | P0C214 | Q9BT76 | -1.0733   |
| 60664 | P0C214 | Q8TBX8 | -0.34249  |
| 60665 | P0C214 | Q9UGP5 | -0.28799  |
| 60666 | P0C214 | P41743 | -0.21807  |
| 60667 | P0C214 | Q6ZTR7 | -0.049286 |
| 60668 | P0C214 | Q17R60 | -1.0446   |
| 60669 | P0C214 | Q86WI1 | -0.68218  |
| 60670 | P0C214 | Q9UBX8 | -0.50449  |
| 60671 | P0C214 | Q96G97 | -0.61074  |
| 60672 | P0C214 | Q8TD43 | -0.88719  |
| 60673 | P0C214 | P80404 | -0.19671  |
| 60674 | P0C214 | Q9NSA0 | -0.85146  |
| 60675 | P0C214 | Q92519 | -0.23013  |
| 60676 | P0C214 | Q08170 | -0.228    |
| 60677 | P0C214 | Q5TA89 | -0.22669  |
| 60678 | P0C214 | Q86XS8 | -0.46195  |
| 60679 | P0C214 | P20963 | -0.20065  |
| 60680 | P0C214 | O14782 | -0.35344  |
| 60681 | P0C214 | Q43301 | -0.79608  |
| 60682 | P0C214 | Q6UWT2 | -0.91736  |
| 60683 | P0C214 | P09017 | -0.26539  |
| 60684 | P0C214 | O95140 | -0.55897  |
| 60685 | P0C214 | P01710 | -1.0022   |
| 60686 | P0C214 | Q16512 | -0.22055  |
| 60687 | P0C214 | Q92932 | -0.95619  |
| 60688 | P0C214 | Q9Y3Q7 | -1.4133   |
| 60689 | P0C214 | Q96D71 | -0.21409  |
| 60690 | P0C214 | Q9NYN1 | -1.1356   |
| 60691 | P0C214 | Q9BX63 | -0.41374  |
| 60692 | P0C214 | P57729 | -0.77661  |
| 60693 | P0C214 | Q5GH72 | -0.98681  |
| 60694 | P0C214 | Q8TAT2 | -0.89526  |
| 60695 | P0C214 | Q9NZ01 | -0.20573  |
| 60696 | P0C214 | Q8NGA4 | -1.3692   |
| 60697 | P0C214 | Q95IE3 | -0.71588  |
| 60698 | P0C214 | Q96N64 | -0.21554  |
| 60699 | P0C214 | O75629 | -0.65032  |
| 60700 | P0C214 | Q9UDR5 | -0.23363  |
| 60701 | P0C214 | Q9P2E9 | -0.67696  |
| 60702 | P0C214 | P43004 | -0.63188  |
| 60703 | P0C214 | Q86TZ1 | -0.22738  |
| 60704 | P0C214 | P46734 | -0.22809  |
| 60705 | P0C214 | O94844 | -1.0009   |
| 60706 | P0C214 | O75343 | -0.73008  |
| 60707 | P0C214 | Q13530 | -0.89161  |
| 60708 | P0C214 | P51812 | -0.22141  |
| 60709 | P0C214 | Q9NQL9 | -0.31794  |
| 60710 | P0C214 | Q56NI9 | -0.30248  |
| 60711 | P0C214 | A6NK59 | -0.5331   |
| 60712 | P0C214 | O15232 | -0.51485  |
| 60713 | P0C214 | A6NLP5 | -0.2106   |
| 60714 | P0C214 | Q96KN4 | -0.074371 |
| 60715 | P0C214 | Q96RP3 | -0.77446  |
| 60716 | P0C214 | Q8N8J0 | -0.41582  |
| 60717 | P0C214 | P48051 | -0.51229  |
| 60718 | P0C214 | O95436 | -0.95034  |
| 60719 | P0C214 | P12645 | -0.75736  |
| 60720 | P0C214 | Q31612 | -1.0367   |
| 60721 | P0C214 | O14717 | -0.1531   |
| 60722 | P0C214 | Q9NW82 | -0.2274   |
| 60723 | P0C214 | Q13362 | -0.058908 |
| 60724 | P0C214 | P48048 | -1.373    |

|       |        |        |           |
|-------|--------|--------|-----------|
| 60725 | P0C214 | O94955 | -0.37922  |
| 60726 | P0C214 | Q5VTY9 | -1.5115   |
| 60727 | P0C214 | Q08830 | -1.0607   |
| 60728 | P0C214 | Q9NUG4 | -0.18353  |
| 60729 | P0C214 | Q9NUJ1 | -0.30201  |
| 60730 | P0C214 | Q9H2V7 | -0.36467  |
| 60731 | P0C214 | P30508 | -1.0938   |
| 60732 | P0C214 | P12544 | -0.45952  |
| 60733 | P0C214 | Q6IMI6 | -0.30984  |
| 60734 | P0C214 | Q96KX1 | -0.39768  |
| 60735 | P0C214 | P00568 | -0.3946   |
| 60736 | P0C214 | Q8WUA4 | -0.22734  |
| 60737 | P0C214 | Q9Y272 | -0.65816  |
| 60738 | P0C214 | Q9Y226 | -1.0166   |
| 60739 | P0C214 | Q09472 | -0.14113  |
| 60740 | P0C214 | Q9H5U6 | -0.43498  |
| 60741 | P0C214 | O75915 | -0.76078  |
| 60742 | P0C214 | Q9H0L4 | -0.71824  |
| 60743 | P0C214 | P56750 | -0.76002  |
| 60744 | P0C214 | Q15119 | -0.1461   |
| 60745 | P0C214 | P54132 | -0.22472  |
| 60746 | P0C214 | O00168 | -1.2533   |
| 60747 | P0C214 | Q9H2E6 | -0.49572  |
| 60748 | P0C214 | Q16560 | -0.42505  |
| 60749 | P0C214 | Q00444 | -0.23213  |
| 60750 | P0C214 | Q8NBJ5 | -0.31943  |
| 60751 | P0C214 | P35555 | -0.69508  |
| 60752 | P0C214 | Q86U02 | -0.98681  |
| 60753 | P0C214 | Q9BXS4 | -0.77134  |
| 60754 | P0C214 | Q96BQ1 | -0.78969  |
| 60755 | P0C214 | Q86W26 | -0.79608  |
| 60756 | P0C214 | P00740 | -1.1023   |
| 60757 | P0C214 | P49810 | -0.2186   |
| 60758 | P0C214 | Q9UI46 | -0.22755  |
| 60759 | P0C214 | Q8N350 | -0.98681  |
| 60760 | P0C214 | Q9Y257 | -1.1924   |
| 60761 | P0C214 | P54284 | -0.40469  |
| 60762 | P0C214 | Q8N300 | -0.36485  |
| 60763 | P0C214 | O15467 | -0.9721   |
| 60764 | P0C214 | Q1KMD3 | -0.22476  |
| 60765 | P0C214 | O15552 | -1.7064   |
| 60766 | P0C214 | Q8N4K4 | -0.98681  |
| 60767 | P0C214 | Q9UM21 | -0.89266  |
| 60768 | P0C214 | Q9GZX6 | -0.79305  |
| 60769 | P0C214 | Q8WWG1 | -1.3875   |
| 60770 | P0C214 | Q9Y2H9 | -0.63651  |
| 60771 | P0C214 | Q9UNZ2 | -0.52062  |
| 60772 | P0C214 | P59538 | -1.2886   |
| 60773 | P0C214 | A6NMT0 | -0.25028  |
| 60774 | P0C214 | Q9H1E5 | -0.94269  |
| 60775 | P0C214 | Q9GZR7 | -0.35168  |
| 60776 | P0C214 | Q9UQV4 | -1.0641   |
| 60777 | P0C214 | Q9UDY6 | -0.42404  |
| 60778 | P0C214 | Q9UK96 | -0.34682  |
| 60779 | P0C214 | Q9UKF2 | -1.2972   |
| 60780 | P0C214 | Q6UWP7 | -0.72337  |
| 60781 | P0C214 | Q15743 | -1.5366   |
| 60782 | P0C214 | Q9H082 | -0.92685  |
| 60783 | P0C214 | P35241 | -0.23368  |
| 60784 | P0C214 | Q8N8P6 | -0.1303   |
| 60785 | P0C214 | Q6ZV80 | -0.53388  |
| 60786 | P0C214 | P50458 | -0.22741  |
| 60787 | P0C214 | Q9UJ83 | -0.82117  |
| 60788 | P0C214 | P07477 | -1.4064   |
| 60789 | P0C214 | P54108 | -0.77136  |
| 60790 | P0C214 | Q99569 | -0.2302   |
| 60791 | P0C214 | Q9Y5Q6 | -0.74882  |
| 60792 | P0C214 | Q8NGX3 | -1.2952   |
| 60793 | P0C214 | P17707 | -0.084395 |
| 60794 | P0C214 | Q12891 | -0.23783  |
| 60795 | P0C214 | P40818 | -0.33896  |
| 60796 | P0C214 | Q96NT5 | -0.57341  |
| 60797 | P0C214 | Q86T20 | -0.91736  |
| 60798 | P0C214 | Q14CZ7 | -0.32177  |
| 60799 | P0C214 | Q9BXM8 | -0.18353  |
| 60800 | P0C214 | Q13588 | -0.22741  |

|       |        |        |           |
|-------|--------|--------|-----------|
| 60801 | P0C214 | Q8IWD5 | -0.98681  |
| 60802 | P0C214 | Q8IYM0 | -0.41808  |
| 60803 | P0C214 | O95847 | -0.80455  |
| 60804 | P0C214 | Q8NH89 | -1.2952   |
| 60805 | P0C214 | A6NHT5 | -0.30546  |
| 60806 | P0C214 | Q7Z388 | -0.98681  |
| 60807 | P0C214 | Q6UXD7 | -1.0455   |
| 60808 | P0C214 | Q13591 | -1.0766   |
| 60809 | P0C214 | Q9P1W8 | -0.53676  |
| 60810 | P0C214 | Q96A00 | -0.25136  |
| 60811 | P0C214 | Q9BQA9 | -0.35508  |
| 60812 | P0C214 | P31513 | -0.78579  |
| 60813 | P0C214 | Q14565 | -0.3482   |
| 60814 | P0C214 | Q9Y624 | -0.74566  |
| 60815 | P0C214 | Q9Y2Q3 | -0.55333  |
| 60816 | P0C214 | O94905 | -0.20244  |
| 60817 | P0C214 | Q5VT98 | -0.18615  |
| 60818 | P0C214 | Q9Y5U4 | -0.34595  |
| 60819 | P0C214 | Q6IQ20 | -0.55661  |
| 60820 | P0C214 | Q9ULL5 | -0.51359  |
| 60821 | P0C214 | Q14CZ8 | -0.88676  |
| 60822 | P0C214 | P06850 | -0.45323  |
| 60823 | P0C214 | O43889 | -0.42701  |
| 60824 | P0C214 | Q15569 | -0.62664  |
| 60825 | P0C214 | Q9NXJ0 | -0.98681  |
| 60826 | P0C214 | P13725 | -0.45221  |
| 60827 | P0C214 | Q96SB3 | -0.22699  |
| 60828 | P0C214 | O75147 | -0.29413  |
| 60829 | P0C214 | O75995 | -0.22736  |
| 60830 | P0C214 | Q7RTW8 | -1.0777   |
| 60831 | P0C214 | A5PL33 | -0.18353  |
| 60832 | P0C214 | Q92527 | -0.22738  |
| 60833 | P0C214 | Q12841 | -0.97017  |
| 60834 | P0C214 | P33947 | -0.51997  |
| 60835 | P0C214 | A2RRH5 | -0.22744  |
| 60836 | P0C214 | Q13873 | -0.51701  |
| 60837 | P0C214 | Q05469 | -0.22354  |
| 60838 | P0C214 | Q12918 | -1.1003   |
| 60839 | P0C214 | Q9BZM3 | -0.31995  |
| 60840 | P0C214 | P48742 | -0.22767  |
| 60841 | P0C214 | Q96L14 | -0.43972  |
| 60842 | P0C214 | Q8NG83 | -1.2952   |
| 60843 | P0C214 | Q14134 | -0.55282  |
| 60844 | P0C214 | P48066 | -1.1114   |
| 60845 | P0C214 | A5D8W1 | -0.34745  |
| 60846 | P0C214 | Q9UHN6 | -1.1925   |
| 60847 | P0C214 | P52333 | -0.34399  |
| 60848 | P0C214 | Q15477 | -0.30255  |
| 60849 | P0C214 | Q9Y5K6 | -0.22748  |
| 60850 | P0C214 | Q8IWY4 | -0.81498  |
| 60851 | P0C214 | P28289 | -0.21992  |
| 60852 | P0C214 | Q2TAA8 | -0.57227  |
| 60853 | P0C214 | Q7Z2Y5 | -1.1776   |
| 60854 | P0C214 | Q5JVL4 | -0.43294  |
| 60855 | P0C214 | O15442 | -0.10632  |
| 60856 | P0C214 | O95772 | -0.94701  |
| 60857 | P0C214 | P54315 | -0.9318   |
| 60858 | P0C214 | P46926 | -0.045895 |
| 60859 | P0C214 | Q9H2P9 | -0.31992  |
| 60860 | P0C214 | Q6DWJ6 | -1.3693   |
| 60861 | P0C214 | Q8TE67 | -0.22741  |
| 60862 | P0C214 | Q8WXH2 | -0.8078   |
| 60863 | P0C214 | O14548 | -0.38502  |
| 60864 | P0C214 | P80511 | -0.22971  |
| 60865 | P0C214 | Q96LT4 | -0.71648  |
| 60866 | P0C214 | Q9P1Q5 | -1.2952   |
| 60867 | P0C214 | Q9HAB3 | -1.2027   |
| 60868 | P0C214 | Q8N257 | -0.85588  |
| 60869 | P0C214 | Q96C36 | -0.55536  |
| 60870 | P0C214 | P01848 | -1.0302   |
| 60871 | P0C214 | Q86XX4 | -1.2258   |
| 60872 | P0C214 | Q14573 | -0.22384  |
| 60873 | P0C214 | P59074 | -0.23454  |
| 60874 | P0C214 | Q8IV42 | -0.66369  |
| 60875 | P0C214 | A5PKW4 | -1.323    |
| 60876 | P0C214 | Q5VV67 | -0.22464  |

|       |        |        |           |
|-------|--------|--------|-----------|
| 60877 | P0C214 | Q96SQ9 | -0.62217  |
| 60878 | P0C214 | Q8IXS6 | -0.59292  |
| 60879 | P0C214 | Q9H6Q3 | -0.22741  |
| 60880 | P0C214 | Q5T9C9 | -0.86996  |
| 60881 | P0C214 | P09769 | -0.48414  |
| 60882 | P0C214 | P04628 | -0.22741  |
| 60883 | P0C214 | Q13164 | -0.22741  |
| 60884 | P0C214 | Q86SJ2 | -0.29877  |
| 60885 | P0C214 | Q96QG7 | -0.21859  |
| 60886 | P0C214 | Q8IYT3 | -0.60802  |
| 60887 | P0C214 | P33992 | -0.19614  |
| 60888 | P0C214 | Q9Y5H5 | -1.2424   |
| 60889 | P0C214 | Q9BUZ4 | -0.22731  |
| 60890 | P0C214 | Q8NF50 | -0.23771  |
| 60891 | P0C214 | Q5SVS4 | -0.63713  |
| 60892 | P0C214 | Q0VDG4 | -0.55998  |
| 60893 | P0C214 | P07333 | -0.75413  |
| 60894 | P0C214 | Q9UP38 | -0.44274  |
| 60895 | P0C214 | Q12934 | -0.50791  |
| 60896 | P0C214 | Q8NFL0 | -0.48519  |
| 60897 | P0C214 | P30462 | -1.0938   |
| 60898 | P0C214 | P14555 | -0.67982  |
| 60899 | P0C214 | Q9BZL6 | -0.33078  |
| 60900 | P0C214 | Q9UKR8 | -0.98681  |
| 60901 | P0C214 | Q6NZY7 | -0.44237  |
| 60902 | P0C214 | Q8NH50 | -1.2952   |
| 60903 | P0C214 | A6NF34 | -1.0181   |
| 60904 | P0C214 | Q86VD1 | -0.61913  |
| 60905 | P0C214 | Q08380 | -1.2402   |
| 60906 | P0C214 | O15547 | -0.9      |
| 60907 | P0C214 | Q96PE2 | -0.44333  |
| 60908 | P0C214 | Q8IWR0 | -0.39712  |
| 60909 | P0C214 | Q5T1S8 | -1.0698   |
| 60910 | P0C214 | A6NH13 | -0.21828  |
| 60911 | P0C214 | Q8N4C7 | -0.53471  |
| 60912 | P0C214 | Q8N5C6 | -0.44044  |
| 60913 | P0C214 | P22680 | -0.52071  |
| 60914 | P0C214 | Q13253 | -0.31741  |
| 60915 | P0C214 | Q15555 | -0.096946 |
| 60916 | P0C214 | Q9HBJ7 | -0.51452  |
| 60917 | P0C214 | P51685 | -1.4197   |
| 60918 | P0C214 | Q6RI45 | -0.31746  |
| 60919 | P0C214 | P07992 | -0.16964  |
| 60920 | P0C214 | P32745 | -0.66979  |
| 60921 | P0C214 | E7EU14 | -0.2191   |
| 60922 | P0C214 | Q9NW64 | -0.5086   |
| 60923 | P0C214 | P59025 | -0.99964  |
| 60924 | P0C214 | A6NCS4 | -0.26727  |
| 60925 | P0C214 | Q8NAB2 | -0.19988  |
| 60926 | P0C214 | Q8WWM9 | -0.4509   |
| 60927 | P0C214 | Q99541 | -0.19987  |
| 60928 | P0C214 | Q9NUR3 | -0.98681  |
| 60929 | P0C214 | Q9UHP3 | -0.32562  |
| 60930 | P0C214 | O43508 | -0.87628  |
| 60931 | P0C214 | Q96R05 | -0.55641  |
| 60932 | P0C214 | P04114 | -0.29724  |
| 60933 | P0C214 | P05771 | -0.21485  |
| 60934 | P0C214 | P61328 | -0.28213  |
| 60935 | P0C214 | Q9GZQ4 | -0.98739  |
| 60936 | P0C214 | Q8IVF5 | -0.66968  |
| 60937 | P0C214 | O15540 | -0.4594   |
| 60938 | P0C214 | Q9BZF3 | -0.38206  |
| 60939 | P0C214 | Q8IUY3 | -0.98681  |
| 60940 | P0C214 | A6NK44 | -0.015437 |
| 60941 | P0C214 | Q24JP5 | -0.62772  |
| 60942 | P0C214 | Q92730 | -0.22738  |
| 60943 | P0C214 | Q13043 | -0.23278  |
| 60944 | P0C214 | P22083 | -0.61542  |
| 60945 | P0C214 | A6NEW6 | -0.4589   |
| 60946 | P0C214 | Q01650 | -0.74515  |
| 60947 | P0C214 | Q9Y5E8 | -1.2636   |
| 60948 | P0C214 | Q9H6E5 | -0.22682  |
| 60949 | P0C214 | Q9GZY6 | -0.62389  |
| 60950 | P0C214 | Q12852 | -0.4318   |
| 60951 | P0C214 | Q9NPI7 | -0.26819  |
| 60952 | P0C214 | Q15131 | -0.60706  |

|       |        |        |          |
|-------|--------|--------|----------|
| 60953 | P0C214 | P78367 | -0.22827 |
| 60954 | P0C214 | P02689 | -0.51177 |
| 60955 | P0C214 | Q75T13 | -0.54428 |
| 60956 | P0C214 | Q60610 | -0.22717 |
| 60957 | P0C214 | B2RXH2 | -0.10431 |
| 60958 | P0C214 | P01761 | -1.0022  |
| 60959 | P0C214 | P35557 | -0.15473 |
| 60960 | P0C214 | Q4G0P3 | -0.294   |
| 60961 | P0C214 | P28325 | -0.31671 |
| 60962 | P0C214 | Q9P1V8 | -0.22361 |
| 60963 | P0C214 | Q9GZX9 | -0.90861 |
| 60964 | P0C214 | P56381 | -0.21557 |
| 60965 | P0C214 | Q9GZV9 | -0.80987 |
| 60966 | P0C214 | O43281 | -0.43357 |
| 60967 | P0C214 | P0CH98 | -0.48586 |
| 60968 | P0C214 | Q03518 | -0.30046 |
| 60969 | P0C214 | B4DJY2 | -0.98316 |
| 60970 | P0C214 | P0CG08 | -0.82137 |
| 60971 | P0C214 | P41595 | -0.47948 |
| 60972 | P0C214 | Q01974 | -1.3159  |
| 60973 | P0C214 | Q9NQ90 | -0.58268 |
| 60974 | P0C214 | A6NM62 | -0.92718 |
| 60975 | P0C214 | Q9Y5F1 | -1.2636  |
| 60976 | P0C214 | Q9UBG7 | -0.153   |
| 60977 | P0C214 | Q8TCJ2 | -0.69786 |
| 60978 | P0C214 | Q8WYJ6 | -0.21737 |
| 60979 | P0C214 | P21741 | -0.88659 |
| 60980 | P0C214 | Q8N4G2 | -0.61517 |
| 60981 | P0C214 | Q9NRU3 | -1.2497  |
| 60982 | P0C214 | Q8NGB4 | -1.2952  |
| 60983 | P0C214 | Q8WVJ2 | -0.54691 |
| 60984 | P0C214 | Q9NRR6 | -0.22614 |
| 60985 | P0C214 | A8MXV6 | -0.98681 |
| 60986 | P0C214 | Q15434 | -0.50978 |
| 60987 | P0C214 | Q9BYJ4 | -0.47551 |
| 60988 | P0C214 | P14314 | -0.43991 |
| 60989 | P0C214 | P12314 | -0.74254 |
| 60990 | P0C214 | P06315 | -1.0022  |
| 60991 | P0C214 | P09237 | -1.115   |
| 60992 | P0C214 | Q15492 | -0.22907 |
| 60993 | P0C214 | Q8TDY8 | -1.0708  |
| 60994 | P0C214 | Q8NB14 | -0.68518 |
| 60995 | P0C214 | P51608 | -0.13412 |
| 60996 | P0C214 | Q9BUU2 | -0.33624 |
| 60997 | P0C214 | P11836 | -0.95759 |
| 60998 | P0C214 | P48146 | -0.78617 |
| 60999 | P0C214 | Q9NWD8 | -0.98681 |
| 61000 | P0C214 | Q9Y5M8 | -1.0289  |
| 61001 | P0C214 | O95248 | -0.94644 |
| 61002 | P0C214 | Q14494 | -0.27444 |
| 61003 | P0C214 | Q6ZQQ2 | -0.98681 |
| 61004 | P0C214 | Q9NPB1 | -0.36032 |
| 61005 | P0C214 | Q8NCW0 | -0.94647 |
| 61006 | P0C214 | Q8NGC4 | -1.2952  |
| 61007 | P0C214 | Q96LA6 | -1.0708  |
| 61008 | P0C214 | P08183 | -0.4488  |
| 61009 | P0C214 | Q8N2U9 | -0.98681 |
| 61010 | P0C214 | Q9UH03 | -0.2204  |
| 61011 | P0C214 | Q8IWL1 | -0.93581 |
| 61012 | P0C214 | Q7Z4S9 | -0.22729 |
| 61013 | P0C214 | O43448 | -0.9823  |
| 61014 | P0C214 | P59091 | -0.17614 |
| 61015 | P0C214 | Q6PP77 | -1.0708  |
| 61016 | P0C214 | Q16649 | -0.14438 |
| 61017 | P0C214 | Q6IBW4 | -0.33021 |
| 61018 | P0C214 | Q8NHW6 | -0.94096 |
| 61019 | P0C214 | Q9Y5T4 | -0.78305 |
| 61020 | P0C214 | P85299 | -0.29907 |
| 61021 | P0C214 | P01620 | -1.0022  |
| 61022 | P0C214 | Q5JRX3 | -0.17953 |
| 61023 | P0C214 | A8MV57 | -0.37918 |
| 61024 | P0C214 | O75838 | -0.43585 |
| 61025 | P0C214 | A6NMY6 | -0.76787 |
| 61026 | P0C214 | P48664 | -1.1602  |
| 61027 | P0C214 | P11926 | -0.13907 |
| 61028 | P0C214 | Q9NYP8 | -0.33522 |



|       |        |        |           |
|-------|--------|--------|-----------|
| 61029 | P0C214 | Q8IZ41 | -0.7679   |
| 61030 | P0C214 | P02788 | -0.23524  |
| 61031 | P0C214 | P29460 | -0.2505   |
| 61032 | P0C214 | P0C851 | -0.98681  |
| 61033 | P0C214 | Q9HBE5 | -0.92414  |
| 61034 | P0C214 | Q96KM6 | -0.22688  |
| 61035 | P0C214 | Q13224 | -0.29503  |
| 61036 | P0C214 | Q96PB7 | -0.80164  |
| 61037 | P0C214 | Q9H7B4 | -0.22689  |
| 61038 | P0C214 | Q9NUJ7 | -0.56823  |
| 61039 | P0C214 | P11137 | -0.11891  |
| 61040 | P0C214 | Q9ULC0 | -1.511    |
| 61041 | P0C214 | Q9Y2Q0 | -0.5044   |
| 61042 | P0C214 | Q9C091 | -0.98681  |
| 61043 | P0C214 | Q9NSN8 | -0.22525  |
| 61044 | P0C214 | Q99626 | -0.24241  |
| 61045 | P0C214 | P69849 | -0.95165  |
| 61046 | P0C214 | Q8N910 | -0.075781 |
| 61047 | P0C214 | I1YAP6 | -0.22725  |
| 61048 | P0C214 | Q9UBC3 | -0.22152  |
| 61049 | P0C214 | P32322 | -0.24782  |
| 61050 | P0C214 | Q9Y243 | -0.31042  |
| 61051 | P0C214 | P14415 | -0.42036  |
| 61052 | P0C214 | Q8NGC7 | -1.2952   |
| 61053 | P0C214 | Q68D86 | -0.19459  |
| 61054 | P0C214 | O75554 | -0.13967  |
| 61055 | P0C214 | A6NIV6 | -0.31075  |
| 61056 | P0C214 | Q9Y450 | -0.75118  |
| 61057 | P0C214 | P21709 | -1.1086   |
| 61058 | P0C214 | P0DJJ8 | -1.1989   |
| 61059 | P0C214 | Q9BX95 | -0.57675  |
| 61060 | P0C214 | Q1MX18 | -0.4695   |
| 61061 | P0C214 | Q96E40 | -0.14648  |
| 61062 | P0C214 | Q8WWH4 | -0.6769   |
| 61063 | P0C214 | Q9NPB0 | -0.92907  |
| 61064 | P0C214 | O43719 | -0.21164  |
| 61065 | P0C214 | Q8NI99 | -1.3341   |
| 61066 | P0C214 | Q9HCJ6 | -0.8716   |
| 61067 | P0C214 | Q5T1M5 | -0.6999   |
| 61068 | P0C214 | Q9P2Z0 | -0.55088  |
| 61069 | P0C214 | Q96MM3 | -0.22759  |
| 61070 | P0C214 | Q9H3H5 | -0.74169  |
| 61071 | P0C214 | P53816 | -0.18852  |
| 61072 | P0C214 | Q6ZR08 | -0.7095   |
| 61073 | P0C214 | Q9HCU4 | -1.0892   |
| 61074 | P0C214 | Q96EN8 | -0.17185  |
| 61075 | P0C214 | Q9NQ86 | -0.59083  |
| 61076 | P0C214 | Q8WTR8 | -0.91736  |
| 61077 | P0C214 | Q6P4H8 | -0.98681  |
| 61078 | P0C214 | Q9UBS5 | -0.67453  |
| 61079 | P0C214 | Q15043 | -0.99441  |
| 61080 | P0C214 | Q6YHK3 | -0.79464  |
| 61081 | P0C214 | Q8N0W5 | -0.11721  |
| 61082 | P0C214 | Q96JK2 | -0.22741  |
| 61083 | P0C214 | Q8TC29 | -0.44873  |
| 61084 | P0C214 | Q8IZD6 | -1.1214   |
| 61085 | P0C214 | Q8NH04 | -1.2952   |
| 61086 | P0C214 | Q96JB8 | -0.22447  |
| 61087 | P0C214 | Q92535 | -0.99497  |
| 61088 | P0C214 | P61296 | -0.22965  |
| 61089 | P0C214 | Q8N9R6 | -0.45193  |
| 61090 | P0C214 | Q8NEP7 | -0.21429  |
| 61091 | P0C214 | Q9NP84 | -0.6361   |
| 61092 | P0C214 | P53985 | -0.53097  |
| 61093 | P0C214 | Q9NPR2 | -1.1497   |
| 61094 | P0C214 | Q8N1S5 | -1.0836   |
| 61095 | P0C214 | P57789 | -1.3216   |
| 61096 | P0C214 | P55808 | -1.0271   |
| 61097 | P0C214 | Q95932 | -0.34466  |
| 61098 | P0C214 | Q9H4H8 | -0.26726  |
| 61099 | P0C214 | Q9NRY4 | -0.24885  |
| 61100 | P0C214 | Q15084 | -0.27935  |
| 61101 | P0C214 | Q9ULV4 | -0.61794  |
| 61102 | P0C214 | Q2VWP7 | -1.1925   |
| 61103 | P0C214 | O95206 | -1.158    |
| 61104 | P0C214 | Q9ULC3 | -0.98529  |

|       |        |         |           |
|-------|--------|---------|-----------|
| 61105 | P0C214 | Q96NW7  | -0.23466  |
| 61106 | P0C214 | Q9Y5Z9  | -0.25813  |
| 61107 | P0C214 | Q7Z494  | -0.2271   |
| 61108 | P0C214 | P0CE71  | -0.43585  |
| 61109 | P0C214 | Q8N2K1  | -0.89756  |
| 61110 | P0C214 | P20783  | -0.53475  |
| 61111 | P0C214 | P57796  | -0.59184  |
| 61112 | P0C214 | P11021  | -0.21822  |
| 61113 | P0C214 | Q16671  | -1.4543   |
| 61114 | P0C214 | Q8NEA5  | -0.98681  |
| 61115 | P0C214 | Q9NWQ9  | -0.32561  |
| 61116 | P0C214 | P11912  | -0.96561  |
| 61117 | P0C214 | Q14393  | -0.26086  |
| 61118 | P0C214 | Q86TB3  | -0.77619  |
| 61119 | P0C214 | A8K0R7  | -0.71534  |
| 61120 | P0C214 | Q0VAA5  | -0.68628  |
| 61121 | P0C214 | Q9Y3T6  | -0.8081   |
| 61122 | P0C214 | Q96QF7  | -0.065644 |
| 61123 | P0C214 | Q8IUUK5 | -0.77852  |
| 61124 | P0C214 | O00571  | -0.53402  |
| 61125 | P0C214 | P25092  | -0.94632  |
| 61126 | P0C214 | Q2KHT4  | -0.97981  |
| 61127 | P0C214 | P16615  | -0.895    |
| 61128 | P0C214 | Q05193  | -0.30874  |
| 61129 | P0C214 | P01562  | -0.70371  |
| 61130 | P0C214 | P58512  | -0.33805  |
| 61131 | P0C214 | P24588  | -0.18146  |
| 61132 | P0C214 | P0DKB6  | -0.98681  |
| 61133 | P0C214 | Q8NCQ5  | -0.41305  |
| 61134 | P0C214 | P43694  | -0.22739  |
| 61135 | P0C214 | P15941  | -0.35943  |
| 61136 | P0C214 | Q9NZJ6  | -0.14403  |
| 61137 | P0C214 | P51811  | -0.46844  |
| 61138 | P0C214 | Q9NS87  | -0.25829  |
| 61139 | P0C214 | P04908  | -0.85588  |
| 61140 | P0C214 | Q9Y561  | -0.65839  |
| 61141 | P0C214 | Q5VYJ5  | -0.98681  |
| 61142 | P0C214 | Q9C040  | -0.22741  |
| 61143 | P0C214 | Q8WVV5  | -0.91753  |
| 61144 | P0C214 | Q8WVM8  | -0.21484  |
| 61145 | P0C214 | Q8N4H0  | -0.55832  |
| 61146 | P0C214 | Q9UPR6  | -0.66238  |
| 61147 | P0C214 | P57737  | -0.35025  |
| 61148 | P0C214 | Q9P2N4  | -1.3339   |
| 61149 | P0C214 | Q94923  | -0.39261  |
| 61150 | P0C214 | Q9NU53  | -0.98681  |
| 61151 | P0C214 | O14815  | -0.94915  |
| 61152 | P0C214 | Q96FC7  | -0.21259  |
| 61153 | P0C214 | P05067  | -0.22314  |
| 61154 | P0C214 | Q9Y247  | -0.072295 |
| 61155 | P0C214 | Q9P2T1  | -0.14099  |
| 61156 | P0C214 | P30481  | -1.0367   |
| 61157 | P0C214 | Q96ES6  | -1.0455   |
| 61158 | P0C214 | P10767  | -0.92773  |
| 61159 | P0C214 | Q8N8W4  | -0.42901  |
| 61160 | P0C214 | Q5T8I3  | -0.23333  |
| 61161 | P0C214 | Q99470  | -0.92604  |
| 61162 | P0C214 | P23434  | -0.1623   |
| 61163 | P0C214 | O43169  | -0.73973  |
| 61164 | P0C214 | Q9NQZ2  | -0.20642  |
| 61165 | P0C214 | Q9HBI6  | -0.97546  |
| 61166 | P0C214 | Q16663  | -1.0924   |
| 61167 | P0C214 | Q5VV41  | -0.23084  |
| 61168 | P0C214 | Q01538  | -0.25482  |
| 61169 | P0C214 | P48431  | -0.31436  |
| 61170 | P0C214 | Q5VYP0  | -0.98681  |
| 61171 | P0C214 | Q9HA64  | -0.64886  |
| 61172 | P0C214 | O95388  | -0.90658  |
| 61173 | P0C214 | Q6PIL6  | -0.946    |
| 61174 | P0C214 | P08833  | -0.84413  |
| 61175 | P0C214 | P31930  | -0.36097  |
| 61176 | P0C214 | Q14957  | -0.76554  |
| 61177 | P0C214 | Q96JG8  | -0.10245  |
| 61178 | P0C214 | P03986  | -1.1381   |
| 61179 | P0C214 | Q504Y3  | -0.50512  |
| 61180 | P0C214 | B4DZS4  | -0.23997  |

|       |        |        |           |
|-------|--------|--------|-----------|
| 61181 | P0C214 | Q96HD9 | -0.3288   |
| 61182 | P0C214 | Q9Y5I2 | -1.6431   |
| 61183 | P0C214 | Q13724 | -0.77669  |
| 61184 | P0C214 | P56704 | -0.23727  |
| 61185 | P0C214 | E5RG02 | -0.97208  |
| 61186 | P0C214 | Q86SG7 | -0.80382  |
| 61187 | P0C214 | Q5TC82 | -0.2274   |
| 61188 | P0C214 | O76024 | -0.54635  |
| 61189 | P0C214 | O00481 | -0.38398  |
| 61190 | P0C214 | P28827 | -0.57544  |
| 61191 | P0C214 | Q6ZT89 | -0.80565  |
| 61192 | P0C214 | A6NIK2 | -0.23874  |
| 61193 | P0C214 | P15516 | -0.9112   |
| 61194 | P0C214 | A6NI56 | -0.13422  |
| 61195 | P0C214 | O95466 | -0.22059  |
| 61196 | P0C214 | Q7Z7F0 | -0.040079 |
| 61197 | P0C214 | Q8WYA0 | -0.62263  |
| 61198 | P0C214 | Q92574 | -0.22714  |
| 61199 | P0C214 | P81534 | -0.87355  |
| 61200 | P0C214 | Q8TF21 | -0.22746  |
| 61201 | P0C214 | P42702 | -0.98563  |
| 61202 | P0C214 | Q9Y4H4 | -0.17459  |
| 61203 | P0C214 | Q9HA38 | -0.060735 |
| 61204 | P0C214 | Q92520 | -0.86004  |
| 61205 | P0C214 | O00443 | -0.32796  |
| 61206 | P0C214 | Q9UBX5 | -0.43169  |
| 61207 | P0C214 | P49763 | -0.88714  |
| 61208 | P0C214 | O00483 | -0.035368 |
| 61209 | P0C214 | Q9BZP3 | -0.18353  |
| 61210 | P0C214 | Q9Y5E5 | -1.0345   |
| 61211 | P0C214 | Q8NBA8 | -0.040189 |
| 61212 | P0C214 | O95267 | -0.54763  |
| 61213 | P0C214 | Q68BL7 | -0.91902  |
| 61214 | P0C214 | P33121 | -0.59614  |
| 61215 | P0C214 | P01040 | -0.19078  |
| 61216 | P0C214 | O60811 | -0.18615  |
| 61217 | P0C214 | Q9UBD6 | -0.86926  |
| 61218 | P0C214 | Q9P0Z9 | -0.5605   |
| 61219 | P0C214 | Q9HCP6 | -0.85664  |
| 61220 | P0C214 | O14492 | -0.38835  |
| 61221 | P0C214 | Q96GL9 | -0.98681  |
| 61222 | P0C214 | P15882 | -0.65361  |
| 61223 | P0C214 | Q96IK0 | -1.0528   |
| 61224 | P0C214 | Q9NY37 | -1.1156   |
| 61225 | P0C214 | Q69YW0 | -0.40716  |
| 61226 | P0C214 | A5PLL1 | -0.22742  |
| 61227 | P0C214 | O94989 | -0.47814  |
| 61228 | P0C214 | P59541 | -1.2886   |
| 61229 | P0C214 | Q96A08 | -0.7893   |
| 61230 | P0C214 | P12830 | -0.49054  |
| 61231 | P0C214 | Q8NFI6 | -1.3597   |
| 61232 | P0C214 | Q9NS84 | -0.49233  |
| 61233 | P0C214 | Q9Y5X4 | -0.50932  |
| 61234 | P0C214 | P02730 | -0.40568  |
| 61235 | P0C214 | Q0D2K0 | -1.1214   |
| 61236 | P0C214 | O95371 | -1.2605   |
| 61237 | P0C214 | Q8N998 | -0.19064  |
| 61238 | P0C214 | Q9NQ84 | -1.2088   |
| 61239 | P0C214 | Q9Y284 | -0.98681  |
| 61240 | P0C214 | Q9H190 | -0.22742  |
| 61241 | P0C214 | O75094 | -0.65283  |
| 61242 | P0C214 | P10645 | -0.79962  |
| 61243 | P0C214 | P14209 | -1.1723   |
| 61244 | P0C214 | Q9H598 | -0.87341  |
| 61245 | P0C214 | Q8WUB2 | -0.020019 |
| 61246 | P0C214 | Q5T6V5 | -0.18353  |
| 61247 | P0C214 | Q9H210 | -1.2952   |
| 61248 | P0C214 | B1ATL7 | -0.10017  |
| 61249 | P0C214 | Q7L1S5 | -0.80135  |
| 61250 | P0C214 | Q96PG8 | -0.10825  |
| 61251 | P0C214 | Q8WUU4 | -0.22305  |
| 61252 | P0C214 | Q9NV29 | -0.68883  |
| 61253 | P0C214 | P49642 | -0.22372  |
| 61254 | P0C214 | Q8IYT4 | -0.68331  |
| 61255 | P0C214 | Q09019 | -0.22769  |
| 61256 | P0C214 | Q4AC99 | -0.44405  |

|       |        |        |           |
|-------|--------|--------|-----------|
| 61257 | P0C214 | Q04760 | -0.096786 |
| 61258 | P0C214 | Q9Y5F8 | -1.2424   |
| 61259 | P0C214 | Q96N11 | -0.20575  |
| 61260 | P0C214 | P58012 | -0.41532  |
| 61261 | P0C214 | P48723 | -0.76965  |
| 61262 | P0C214 | Q9BYE2 | -1.3621   |
| 61263 | P0C214 | Q15435 | -0.22741  |
| 61264 | P0C214 | P57738 | -0.98681  |
| 61265 | P0C214 | Q6ZTQ3 | -0.24956  |
| 61266 | P0C214 | P45844 | -0.48981  |
| 61267 | P0C214 | P09683 | -0.78136  |
| 61268 | P0C214 | Q15814 | -0.16931  |
| 61269 | P0C214 | Q9NZT1 | -0.60146  |
| 61270 | P0C214 | P51690 | -0.3066   |
| 61271 | P0C214 | Q9C0H5 | -0.22794  |
| 61272 | P0C214 | Q6ZTA4 | -0.5412   |
| 61273 | P0C214 | Q8N4N8 | -0.44859  |
| 61274 | P0C214 | Q96JA1 | -0.98681  |
| 61275 | P0C214 | P51674 | -0.90319  |
| 61276 | P0C214 | O00468 | -0.46974  |
| 61277 | P0C214 | Q9UHC6 | -0.92926  |
| 61278 | P0C214 | Q7Z4W2 | -0.82212  |
| 61279 | P0C214 | P31512 | -0.99723  |
| 61280 | P0C214 | P49069 | -0.39363  |
| 61281 | P0C214 | O15212 | -0.29975  |
| 61282 | P0C214 | Q96GJ1 | -0.086424 |
| 61283 | P0C214 | Q9Y3P8 | -0.28452  |
| 61284 | P0C214 | Q9ULJ7 | -0.2274   |
| 61285 | P0C214 | Q8NC56 | -0.39854  |
| 61286 | P0C214 | Q9Y2H6 | -0.4426   |
| 61287 | P0C214 | Q8NG95 | -1.2952   |
| 61288 | P0C214 | P43146 | -0.28335  |
| 61289 | P0C214 | Q5MJ08 | -0.26206  |
| 61290 | P0C214 | Q86YR7 | -0.79655  |
| 61291 | P0C214 | Q7Z7M1 | -1.3853   |
| 61292 | P0C214 | Q9BWL3 | -0.79213  |
| 61293 | P0C214 | P30622 | -0.22674  |
| 61294 | P0C214 | P35030 | -0.88528  |
| 61295 | P0C214 | Q96H55 | -0.36174  |
| 61296 | P0C214 | P43003 | -0.66272  |
| 61297 | P0C214 | Q09328 | -0.70415  |
| 61298 | P0C214 | Q9BX79 | -0.53817  |
| 61299 | P0C214 | P54852 | -1.0528   |
| 61300 | P0C214 | P16112 | -0.74147  |
| 61301 | P0C214 | Q15078 | -0.14054  |
| 61302 | P0C214 | Q12870 | -0.22805  |
| 61303 | P0C214 | Q9H1J7 | -0.86562  |
| 61304 | P0C214 | Q16555 | -0.20652  |
| 61305 | P0C214 | Q96PY0 | -0.4119   |
| 61306 | P0C214 | Q08623 | -0.3112   |
| 61307 | P0C214 | Q99946 | -0.98316  |
| 61308 | P0C214 | Q9HB63 | -0.93595  |
| 61309 | P0C214 | P59543 | -1.2886   |
| 61310 | P0C214 | Q9NUV9 | -0.20374  |
| 61311 | P0C214 | Q4FZB7 | -0.21357  |
| 61312 | P0C214 | O15270 | -0.52959  |
| 61313 | P0C214 | P57087 | -0.49778  |
| 61314 | P0C214 | Q9Y2G3 | -0.63531  |
| 61315 | P0C214 | A6NGR9 | -0.18194  |
| 61316 | P0C214 | Q15238 | -0.30824  |
| 61317 | P0C214 | Q96QH8 | -0.82212  |
| 61318 | P0C214 | P01624 | -1.0022   |
| 61319 | P0C214 | P01148 | -1.0038   |
| 61320 | P0C214 | P46439 | -0.25923  |
| 61321 | P0C214 | Q9H1Z9 | -0.98681  |
| 61322 | P0C214 | Q8NGN8 | -1.2952   |
| 61323 | P0C214 | O43304 | -1.1656   |
| 61324 | P0C214 | Q5T036 | -0.13395  |
| 61325 | P0C214 | Q86Y29 | -0.91736  |
| 61326 | P0C214 | P01871 | -1.4762   |
| 61327 | P0C214 | Q71UI9 | -0.85588  |
| 61328 | P0C214 | Q969Z3 | -0.37521  |
| 61329 | P0C214 | Q7KZN9 | -0.65075  |
| 61330 | P0C214 | P04632 | -0.23231  |
| 61331 | P0C214 | P0C7I0 | -0.3275   |
| 61332 | P0C214 | P20340 | -0.2631   |

|       |        |        |           |
|-------|--------|--------|-----------|
| 61333 | P0C214 | O43567 | -0.66404  |
| 61334 | P0C214 | Q9NQX4 | -0.56764  |
| 61335 | P0C214 | Q9Y4X3 | -0.8878   |
| 61336 | P0C214 | Q92824 | -0.92917  |
| 61337 | P0C214 | Q99715 | -1.1176   |
| 61338 | P0C214 | E0CX11 | -0.91736  |
| 61339 | P0C214 | Q02790 | -0.39387  |
| 61340 | P0C214 | Q8N357 | -0.32723  |
| 61341 | P0C214 | Q8NBD8 | -0.98681  |
| 61342 | P0C214 | P22532 | -0.2479   |
| 61343 | P0C214 | Q9HC97 | -1.4957   |
| 61344 | P0C214 | Q08117 | -0.40302  |
| 61345 | P0C214 | O75503 | -0.42015  |
| 61346 | P0C214 | P17655 | -0.24973  |
| 61347 | P0C214 | O60494 | -0.22742  |
| 61348 | P0C214 | Q9Y234 | -0.22492  |
| 61349 | P0C214 | O14986 | -0.20389  |
| 61350 | P0C214 | Q9BZ95 | -0.27756  |
| 61351 | P0C214 | Q9UPU5 | -0.68518  |
| 61352 | P0C214 | Q14562 | -0.20326  |
| 61353 | P0C214 | Q4G0S7 | -0.1341   |
| 61354 | P0C214 | Q9UL54 | -0.67512  |
| 61355 | P0C214 | Q9BVH7 | -0.75822  |
| 61356 | P0C214 | P00915 | -0.17444  |
| 61357 | P0C214 | Q6P2D8 | -0.22741  |
| 61358 | P0C214 | Q96KP6 | -0.44024  |
| 61359 | P0C214 | Q6UWF6 | -0.91736  |
| 61360 | P0C214 | P52799 | -0.9526   |
| 61361 | P0C214 | P13798 | -0.37169  |
| 61362 | P0C214 | Q8NG08 | -0.64553  |
| 61363 | P0C214 | Q8N9W6 | -0.38145  |
| 61364 | P0C214 | P14652 | -0.20141  |
| 61365 | P0C214 | P01718 | -1.0022   |
| 61366 | P0C214 | Q8N8J7 | -0.98681  |
| 61367 | P0C214 | Q6PJW8 | -0.24248  |
| 61368 | P0C214 | A6NF36 | -0.22131  |
| 61369 | P0C214 | P01233 | -0.68516  |
| 61370 | P0C214 | A0AUK8 | -0.023915 |
| 61371 | P0C214 | Q96FV3 | -0.88648  |
| 61372 | P0C214 | Q14581 | -1.2952   |
| 61373 | P0C214 | Q7Z6K3 | -0.39912  |
| 61374 | P0C214 | Q8N8A8 | -0.36696  |
| 61375 | P0C214 | Q4KMP7 | -1.1251   |
| 61376 | P0C214 | O95231 | -0.2274   |
| 61377 | P0C214 | O95471 | -0.31451  |
| 61378 | P0C214 | Q9Y680 | -0.36406  |
| 61379 | P0C214 | P12318 | -1.0451   |
| 61380 | P0C214 | Q3MJ16 | -0.24757  |
| 61381 | P0C214 | Q6UXZ0 | -0.98681  |
| 61382 | P0C214 | P10145 | -0.52878  |
| 61383 | P0C214 | Q63ZY6 | -0.33624  |
| 61384 | P0C214 | Q86VQ6 | -0.44006  |
| 61385 | P0C214 | Q9H0D2 | -0.34448  |
| 61386 | P0C214 | Q8TDG2 | -0.23577  |
| 61387 | P0C214 | P22102 | -0.26066  |
| 61388 | P0C214 | O15143 | -0.25836  |
| 61389 | P0C214 | Q8NHB8 | -1.2952   |
| 61390 | P0C214 | A0PK00 | -0.68883  |
| 61391 | P0C214 | Q86UD5 | -0.9312   |
| 61392 | P0C214 | Q5TA81 | -0.38015  |
| 61393 | P0C214 | Q96T25 | -0.42813  |
| 61394 | P0C214 | P01782 | -1.0022   |
| 61395 | P0C214 | Q96DZ9 | -0.94069  |
| 61396 | P0C214 | O00253 | -0.81334  |
| 61397 | P0C214 | Q9UPR0 | -0.55141  |
| 61398 | P0C214 | P13693 | -0.13386  |
| 61399 | P0C214 | Q9NZL6 | -0.36825  |
| 61400 | P0C214 | Q5TF39 | -1.1761   |
| 61401 | P0C214 | Q6URH7 | -0.39979  |
| 61402 | P0C214 | Q9H611 | -0.47971  |
| 61403 | P0C214 | Q9UEW3 | -1.0808   |
| 61404 | P0C214 | O60774 | -0.9782   |
| 61405 | P0C214 | Q96PX1 | -0.50512  |
| 61406 | P0C214 | Q7Z6M3 | -1.1528   |
| 61407 | P0C214 | P60328 | -0.80609  |
| 61408 | P0C214 | Q8N309 | -0.20759  |

|       |        |        |           |
|-------|--------|--------|-----------|
| 61409 | P0C214 | A4D1F6 | -0.55184  |
| 61410 | P0C214 | A6NGN9 | -0.91736  |
| 61411 | P0C214 | O00358 | -0.41532  |
| 61412 | P0C214 | A6NDQ2 | -0.71534  |
| 61413 | P0C214 | Q15744 | -0.22736  |
| 61414 | P0C214 | Q53H54 | -0.28525  |
| 61415 | P0C214 | A6NJT0 | -0.18963  |
| 61416 | P0C214 | P62341 | -0.42124  |
| 61417 | P0C214 | Q9H195 | -0.95999  |
| 61418 | P0C214 | Q96E93 | -1.0823   |
| 61419 | P0C214 | Q9H2C2 | -0.94876  |
| 61420 | P0C214 | Q9UHE8 | -1.0911   |
| 61421 | P0C214 | Q96A28 | -0.992    |
| 61422 | P0C214 | Q5VWP2 | -0.17957  |
| 61423 | P0C214 | Q8WTV0 | -0.42779  |
| 61424 | P0C214 | Q9BY78 | -0.92274  |
| 61425 | P0C214 | P05112 | -0.21121  |
| 61426 | P0C214 | Q9H4Z2 | -0.72578  |
| 61427 | P0C214 | P08247 | -0.66851  |
| 61428 | P0C214 | P54819 | -0.45802  |
| 61429 | P0C214 | Q52WX2 | -1.1637   |
| 61430 | P0C214 | Q8NGF4 | -1.2952   |
| 61431 | P0C214 | Q9UKU7 | -0.25861  |
| 61432 | P0C214 | Q01362 | -0.95657  |
| 61433 | P0C214 | Q96D31 | -0.61773  |
| 61434 | P0C214 | P15085 | -1.2394   |
| 61435 | P0C214 | Q9UK05 | -0.22741  |
| 61436 | P0C214 | B1ANS9 | -0.22748  |
| 61437 | P0C214 | Q9H4G4 | -0.78213  |
| 61438 | P0C214 | Q8TDN2 | -0.98724  |
| 61439 | P0C214 | Q8N6C8 | -1.098    |
| 61440 | P0C214 | P51160 | -0.97145  |
| 61441 | P0C214 | Q9BPX7 | -0.07966  |
| 61442 | P0C214 | Q5SXM8 | -0.27587  |
| 61443 | P0C214 | P13584 | -0.59413  |
| 61444 | P0C214 | Q13621 | -0.97983  |
| 61445 | P0C214 | Q06278 | -0.46925  |
| 61446 | P0C214 | Q9BY08 | -0.95678  |
| 61447 | P0C214 | Q9H6R7 | -0.054721 |
| 61448 | P0C214 | Q5VUE5 | -0.085121 |
| 61449 | P0C214 | Q8NGG8 | -1.2952   |
| 61450 | P0C214 | Q9UF11 | -1.0116   |
| 61451 | P0C214 | P0C854 | -0.91736  |
| 61452 | P0C214 | Q9NPF8 | -0.75279  |
| 61453 | P0C214 | Q9BYT1 | -1.0171   |
| 61454 | P0C214 | Q9NVT9 | -0.18621  |
| 61455 | P0C214 | A6NHA9 | -1.2952   |
| 61456 | P0C214 | P12524 | -0.2274   |
| 61457 | P0C214 | Q9P0U3 | -0.14662  |
| 61458 | P0C214 | A8K010 | -0.27376  |
| 61459 | P0C214 | P0C7P0 | -0.34647  |
| 61460 | P0C214 | Q9UQE7 | -0.22416  |
| 61461 | P0C214 | Q6JVE5 | -0.99317  |
| 61462 | P0C214 | Q8IZF4 | -1.3853   |
| 61463 | P0C214 | O60282 | -0.50269  |
| 61464 | P0C214 | P41238 | -0.080741 |
| 61465 | P0C214 | Q8NGG2 | -1.2952   |
| 61466 | P0C214 | Q9NRP7 | -0.459    |
| 61467 | P0C214 | A8MYP8 | -0.1072   |
| 61468 | P0C214 | Q495C1 | -0.50512  |
| 61469 | P0C214 | O75324 | -0.72701  |
| 61470 | P0C214 | Q9BQ49 | -0.98681  |
| 61471 | P0C214 | Q5JU69 | -0.9465   |
| 61472 | P0C214 | P28906 | -0.53924  |
| 61473 | P0C214 | Q9Y2X7 | -0.22741  |
| 61474 | P0C214 | P30511 | -1.0692   |
| 61475 | P0C214 | Q8WU76 | -0.15366  |
| 61476 | P0C214 | P0CF51 | -0.98681  |
| 61477 | P0C214 | Q9H7M9 | -0.98681  |
| 61478 | P0C214 | Q6E0U4 | -0.90112  |
| 61479 | P0C214 | Q969H4 | -0.22739  |
| 61480 | P0C214 | Q9Y5W5 | -1.1873   |
| 61481 | P0C214 | P54753 | -0.94833  |
| 61482 | P0C214 | P07498 | -0.88617  |
| 61483 | P0C214 | Q8N4L2 | -0.98597  |
| 61484 | P0C214 | Q6DN14 | -0.94481  |

|       |        |        |           |
|-------|--------|--------|-----------|
| 61485 | P0C214 | Q8IW93 | -0.83691  |
| 61486 | P0C214 | Q9BTU6 | -0.36875  |
| 61487 | P0C214 | Q6ZST8 | -0.58618  |
| 61488 | P0C214 | Q75695 | -0.49572  |
| 61489 | P0C214 | Q96QD8 | -1.1785   |
| 61490 | P0C214 | C4AMC7 | -0.63212  |
| 61491 | P0C214 | O43623 | -0.20827  |
| 61492 | P0C214 | Q9H208 | -1.2952   |
| 61493 | P0C214 | Q8IXU6 | -0.74758  |
| 61494 | P0C214 | Q9Y330 | -0.22177  |
| 61495 | P0C214 | Q49AS3 | -0.30267  |
| 61496 | P0C214 | Q92833 | -0.38969  |
| 61497 | P0C214 | Q00889 | -0.82513  |
| 61498 | P0C214 | P21397 | -0.55815  |
| 61499 | P0C214 | Q14520 | -1.4857   |
| 61500 | P0C214 | Q96RV3 | -0.98681  |
| 61501 | P0C214 | P0C7T2 | -1.2952   |
| 61502 | P0C214 | P05181 | -0.34882  |
| 61503 | P0C214 | Q2I0M5 | -1.012    |
| 61504 | P0C214 | O77932 | -0.8455   |
| 61505 | P0C214 | Q8NEZ3 | -0.39358  |
| 61506 | P0C214 | P05186 | -0.96399  |
| 61507 | P0C214 | Q01415 | -0.61475  |
| 61508 | P0C214 | P20366 | -0.76549  |
| 61509 | P0C214 | O43602 | -0.37035  |
| 61510 | P0C214 | Q8NH10 | -1.2952   |
| 61511 | P0C214 | P02458 | -0.58141  |
| 61512 | P0C214 | A8MT69 | -0.38398  |
| 61513 | P0C214 | Q6TCH7 | -0.79982  |
| 61514 | P0C214 | P14770 | -1.0279   |
| 61515 | P0C214 | A8MYV0 | -0.55123  |
| 61516 | P0C214 | P14091 | -0.64557  |
| 61517 | P0C214 | Q9BZI1 | -0.22922  |
| 61518 | P0C214 | Q5JUK3 | -1.3754   |
| 61519 | P0C214 | Q8WWN9 | -0.55057  |
| 61520 | P0C214 | Q9NRY6 | -0.625    |
| 61521 | P0C214 | O60479 | -0.24015  |
| 61522 | P0C214 | P01611 | -1.0022   |
| 61523 | P0C214 | Q96CN7 | -0.46967  |
| 61524 | P0C214 | P57052 | -0.66602  |
| 61525 | P0C214 | Q9P232 | -0.66331  |
| 61526 | P0C214 | Q13595 | -0.45681  |
| 61527 | P0C214 | Q5SRD0 | -0.4155   |
| 61528 | P0C214 | O15409 | -0.41532  |
| 61529 | P0C214 | Q4ZJI4 | -1.0337   |
| 61530 | P0C214 | P0C1S8 | -0.49562  |
| 61531 | P0C214 | O75052 | -0.22327  |
| 61532 | P0C214 | P49915 | -0.21637  |
| 61533 | P0C214 | P26006 | -0.44221  |
| 61534 | P0C214 | Q75342 | -0.60411  |
| 61535 | P0C214 | Q8TBY0 | -0.83638  |
| 61536 | P0C214 | Q6UWV6 | -0.71366  |
| 61537 | P0C214 | Q9UBD9 | -0.27793  |
| 61538 | P0C214 | Q2L4Q9 | -1.4261   |
| 61539 | P0C214 | Q6DJT9 | -0.13752  |
| 61540 | P0C214 | Q8N3P4 | -0.50512  |
| 61541 | P0C214 | Q01954 | -0.22162  |
| 61542 | P0C214 | Q9P212 | -0.22741  |
| 61543 | P0C214 | P23469 | -0.23077  |
| 61544 | P0C214 | Q9HDB5 | -1.1271   |
| 61545 | P0C214 | A8K0S8 | -0.2194   |
| 61546 | P0C214 | Q96K49 | -0.98681  |
| 61547 | P0C214 | Q8NDB2 | -0.38333  |
| 61548 | P0C214 | P51449 | -0.60165  |
| 61549 | P0C214 | A0PJY2 | -0.26809  |
| 61550 | P0C214 | Q12887 | -0.56792  |
| 61551 | P0C214 | P00966 | -0.098335 |
| 61552 | P0C214 | Q9UBJ2 | -0.40671  |
| 61553 | P0C214 | Q14828 | -0.64242  |
| 61554 | P0C214 | Q5VZ52 | -0.14328  |
| 61555 | P0C214 | Q5VZM2 | -0.50845  |
| 61556 | P0C214 | Q9UK97 | -0.34682  |
| 61557 | P0C214 | Q5T5N4 | -0.041902 |
| 61558 | P0C214 | P46019 | -0.26097  |
| 61559 | P0C214 | Q96GC9 | -0.45655  |
| 61560 | P0C214 | P47872 | -1.4256   |

|       |        |        |           |
|-------|--------|--------|-----------|
| 61561 | P0C214 | P26718 | -0.60099  |
| 61562 | P0C214 | P14920 | -0.16305  |
| 61563 | P0C214 | O14763 | -0.35987  |
| 61564 | P0C214 | Q9HCU0 | -0.66737  |
| 61565 | P0C214 | Q15642 | -0.71683  |
| 61566 | P0C214 | Q8TBB6 | -1.0451   |
| 61567 | P0C214 | Q9UIG0 | -0.22517  |
| 61568 | P0C214 | P43220 | -0.66043  |
| 61569 | P0C214 | O60256 | -0.34413  |
| 61570 | P0C214 | O60894 | -0.37171  |
| 61571 | P0C214 | P30556 | -0.56654  |
| 61572 | P0C214 | Q7Z3D4 | -0.96348  |
| 61573 | P0C214 | Q13145 | -0.54858  |
| 61574 | P0C214 | Q9HC73 | -1.511    |
| 61575 | P0C214 | Q5PT55 | -1.1427   |
| 61576 | P0C214 | P27449 | -0.3292   |
| 61577 | P0C214 | Q4V326 | -0.60816  |
| 61578 | P0C214 | Q8NGU4 | -1.2952   |
| 61579 | P0C214 | Q9GZP8 | -0.10017  |
| 61580 | P0C214 | Q53RY4 | -0.98681  |
| 61581 | P0C214 | Q14114 | -0.87991  |
| 61582 | P0C214 | Q8NET1 | -0.88056  |
| 61583 | P0C214 | P55899 | -1.0102   |
| 61584 | P0C214 | Q9H165 | -0.22676  |
| 61585 | P0C214 | Q8NGA5 | -1.1265   |
| 61586 | P0C214 | Q8WU17 | -0.53035  |
| 61587 | P0C214 | P02810 | -0.28403  |
| 61588 | P0C214 | Q04671 | -0.33357  |
| 61589 | P0C214 | P0C0S8 | -0.85329  |
| 61590 | P0C214 | Q9BZ29 | -0.22637  |
| 61591 | P0C214 | Q9UKW4 | -0.22741  |
| 61592 | P0C214 | Q8N1C3 | -0.9082   |
| 61593 | P0C214 | Q8NCR0 | -0.82935  |
| 61594 | P0C214 | P29475 | -0.22818  |
| 61595 | P0C214 | Q75367 | -0.81878  |
| 61596 | P0C214 | Q9H061 | -0.63373  |
| 61597 | P0C214 | Q5U5Q3 | -0.22737  |
| 61598 | P0C214 | Q8N8Y2 | -0.22725  |
| 61599 | P0C214 | Q03001 | -0.229    |
| 61600 | P0C214 | Q75379 | -0.74904  |
| 61601 | P0C214 | O14981 | -0.4583   |
| 61602 | P0C214 | P10636 | -0.087915 |
| 61603 | P0C214 | Q6UX98 | -1.0453   |
| 61604 | P0C214 | C9JPN9 | -0.68518  |
| 61605 | P0C214 | Q70EL3 | -0.35048  |
| 61606 | P0C214 | Q8TCT9 | -0.59681  |
| 61607 | P0C214 | Q92928 | -0.88032  |
| 61608 | P0C214 | Q96G27 | -0.2086   |
| 61609 | P0C214 | P33176 | -0.25223  |
| 61610 | P0C214 | Q3ZCQ3 | -0.98681  |
| 61611 | P0C214 | Q8NFQ6 | -1.166    |
| 61612 | P0C214 | Q95622 | -0.7416   |
| 61613 | P0C214 | Q9H939 | -0.22083  |
| 61614 | P0C214 | P17936 | -0.22758  |
| 61615 | P0C214 | Q8WUQ7 | -0.092939 |
| 61616 | P0C214 | P61587 | -1.0848   |
| 61617 | P0C214 | Q9NS67 | -1.3693   |
| 61618 | P0C214 | Q9GZU5 | -1.0908   |
| 61619 | P0C214 | P51956 | -0.22741  |
| 61620 | P0C214 | Q9Y219 | -0.59013  |
| 61621 | P0C214 | P17813 | -0.21832  |
| 61622 | P0C214 | Q9H8P0 | -0.52841  |
| 61623 | P0C214 | P01702 | -1.0022   |
| 61624 | P0C214 | Q13217 | -0.17456  |
| 61625 | P0C214 | Q6P3X3 | -0.22645  |
| 61626 | P0C214 | P08034 | -0.90916  |
| 61627 | P0C214 | P31267 | -0.22643  |
| 61628 | P0C214 | O95868 | -0.72814  |
| 61629 | P0C214 | Q6UWY2 | -1.4261   |
| 61630 | P0C214 | Q6PEW0 | -0.87965  |
| 61631 | P0C214 | Q8N323 | -0.91736  |
| 61632 | P0C214 | P37235 | -0.43585  |
| 61633 | P0C214 | P01584 | -0.22523  |
| 61634 | P0C214 | Q9H3Y0 | -0.86154  |
| 61635 | P0C214 | Q6ZMI0 | -0.33425  |
| 61636 | P0C214 | Q86TG1 | -1.0449   |



|       |        |         |           |
|-------|--------|---------|-----------|
| 61637 | P0C214 | Q9H2A7  | -1.1852   |
| 61638 | P0C214 | Q14094  | -0.47383  |
| 61639 | P0C214 | Q9H6R0  | -0.22022  |
| 61640 | P0C214 | Q66K66  | -0.98681  |
| 61641 | P0C214 | Q8TBQ9  | -0.79982  |
| 61642 | P0C214 | Q9HC98  | -0.34694  |
| 61643 | P0C214 | Q9Y3P4  | -1.0431   |
| 61644 | P0C214 | P30040  | -0.045105 |
| 61645 | P0C214 | O95236  | -1.1561   |
| 61646 | P0C214 | Q96KW9  | -0.91427  |
| 61647 | P0C214 | Q5SZJ8  | -0.29016  |
| 61648 | P0C214 | Q9HC36  | -0.13141  |
| 61649 | P0C214 | Q8NHS9  | -0.050876 |
| 61650 | P0C214 | P21589  | -0.41119  |
| 61651 | P0C214 | Q9Y6J6  | -1.1948   |
| 61652 | P0C214 | Q8TD08  | -1.3195   |
| 61653 | P0C214 | P22004  | -0.58914  |
| 61654 | P0C214 | Q6ZLNQ3 | -0.22938  |
| 61655 | P0C214 | Q92508  | -1.0333   |
| 61656 | P0C214 | Q06136  | -0.9396   |
| 61657 | P0C214 | Q94919  | -0.8198   |
| 61658 | P0C214 | Q5JXM2  | -0.8201   |
| 61659 | P0C214 | Q9Y5I0  | -1.2424   |
| 61660 | P0C214 | A1A4F0  | -0.25499  |
| 61661 | P0C214 | Q9NYT0  | -0.55868  |
| 61662 | P0C214 | P14406  | -0.26199  |
| 61663 | P0C214 | O76087  | -0.47295  |
| 61664 | P0C214 | Q9H2X3  | -0.96142  |
| 61665 | P0C214 | Q99719  | -0.2257   |
| 61666 | P0C214 | Q96S53  | -0.77467  |
| 61667 | P0C214 | P81277  | -0.54872  |
| 61668 | P0C214 | Q9GZY0  | -0.30896  |
| 61669 | P0C214 | Q8NGG7  | -1.2952   |
| 61670 | P0C214 | Q96MA1  | -0.12372  |
| 61671 | P0C214 | P35052  | -0.72652  |
| 61672 | P0C214 | P02686  | -0.70739  |
| 61673 | P0C214 | Q04912  | -0.88566  |
| 61674 | P0C214 | Q8N8Q8  | -0.50999  |
| 61675 | P0C214 | Q7RTU7  | -0.2335   |
| 61676 | P0C214 | Q6PUV4  | -0.26424  |
| 61677 | P0C214 | Q9UMR3  | -0.67786  |
| 61678 | P0C214 | O60500  | -0.63823  |
| 61679 | P0C214 | Q9BZ71  | -0.82366  |
| 61680 | P0C214 | Q99697  | -0.17716  |
| 61681 | P0C214 | P04436  | -0.55951  |
| 61682 | P0C214 | Q13423  | -0.54555  |
| 61683 | P0C214 | Q96CK0  | -0.43849  |
| 61684 | P0C214 | Q8IZ96  | -0.94069  |
| 61685 | P0C214 | Q9H6X4  | -0.98681  |
| 61686 | P0C214 | P98187  | -0.87347  |
| 61687 | P0C214 | Q9NYW6  | -1.2243   |
| 61688 | P0C214 | Q8WXF0  | -0.38228  |
| 61689 | P0C214 | O95185  | -1.0283   |
| 61690 | P0C214 | O60343  | -1.0001   |
| 61691 | P0C214 | Q9P126  | -0.58649  |
| 61692 | P0C214 | Q8NA75  | -0.2273   |
| 61693 | P0C214 | P02647  | -0.28943  |
| 61694 | P0C214 | O43916  | -0.53588  |
| 61695 | P0C214 | Q99571  | -0.52732  |
| 61696 | P0C214 | Q8TED4  | -0.97443  |
| 61697 | P0C214 | Q9NSB8  | -0.43918  |
| 61698 | P0C214 | Q14964  | -0.90863  |
| 61699 | P0C214 | Q93096  | -0.3933   |
| 61700 | P0C214 | P0C629  | -1.2952   |
| 61701 | P0C214 | Q5JTY5  | -0.79608  |
| 61702 | P0C214 | Q9Y5Z6  | -0.88377  |
| 61703 | P0C214 | Q96IW2  | -0.2274   |
| 61704 | P0C214 | Q9NPF7  | -0.40724  |
| 61705 | P0C214 | Q96L73  | -0.22761  |
| 61706 | P0C214 | Q8IWU5  | -0.35728  |
| 61707 | P0C214 | Q68D20  | -0.35709  |
| 61708 | P0C214 | Q8NG92  | -1.2952   |
| 61709 | P0C214 | Q9BXR5  | -1.2526   |
| 61710 | P0C214 | Q4V321  | -0.60816  |
| 61711 | P0C214 | O95171  | -0.13647  |
| 61712 | P0C214 | P04216  | -0.24273  |

|       |        |        |           |
|-------|--------|--------|-----------|
| 61713 | P0C214 | P37058 | -0.36872  |
| 61714 | P0C214 | O60741 | -1.2657   |
| 61715 | P0C214 | Q9BZ68 | -0.41401  |
| 61716 | P0C214 | Q9H112 | -0.25685  |
| 61717 | P0C214 | P25116 | -0.40909  |
| 61718 | P0C214 | O94854 | -0.69316  |
| 61719 | P0C214 | B2CW77 | -0.12338  |
| 61720 | P0C214 | D6RBM5 | -0.26345  |
| 61721 | P0C214 | Q8N2F6 | -0.77977  |
| 61722 | P0C214 | Q8WWL2 | -0.36189  |
| 61723 | P0C214 | Q8N807 | -0.70486  |
| 61724 | P0C214 | Q9H3N1 | -0.89894  |
| 61725 | P0C214 | Q8WV48 | -0.98681  |
| 61726 | P0C214 | Q8TB37 | -0.64711  |
| 61727 | P0C214 | Q96DR7 | -1.055    |
| 61728 | P0C214 | Q9UDW1 | -0.2742   |
| 61729 | P0C214 | Q96NX5 | -0.91618  |
| 61730 | P0C214 | Q15771 | -1.0026   |
| 61731 | P0C214 | O15146 | -0.93858  |
| 61732 | P0C214 | Q8IWA6 | -0.084943 |
| 61733 | P0C214 | P49755 | -0.17427  |
| 61734 | P0C214 | Q92481 | -0.17559  |
| 61735 | P0C214 | P00746 | -0.89564  |
| 61736 | P0C214 | Q8N392 | -0.86358  |
| 61737 | P0C214 | Q8IZV2 | -0.94069  |
| 61738 | P0C214 | P05549 | -0.20143  |
| 61739 | P0C214 | Q9BZB8 | -0.54106  |
| 61740 | P0C214 | Q6ZT98 | -0.64891  |
| 61741 | P0C214 | Q9Y366 | -0.33361  |
| 61742 | P0C214 | Q8NI36 | -0.22799  |
| 61743 | P0C214 | Q8N428 | -0.62522  |
| 61744 | P0C214 | Q86UR1 | -0.22736  |
| 61745 | P0C214 | Q14772 | -0.81367  |
| 61746 | P0C214 | Q4G0G5 | -0.91736  |
| 61747 | P0C214 | Q8NH00 | -1.2952   |
| 61748 | P0C214 | Q9H1C0 | -1.0189   |
| 61749 | P0C214 | Q6IQ16 | -0.22142  |
| 61750 | P0C214 | A6NIE9 | -1.4261   |
| 61751 | P0C214 | A1L453 | -1.4261   |
| 61752 | P0C214 | Q8TAI7 | -0.96032  |
| 61753 | P0C214 | Q9NV35 | -0.35349  |
| 61754 | P0C214 | Q92542 | -0.40646  |
| 61755 | P0C214 | A6NIM6 | -0.84468  |
| 61756 | P0C214 | P43121 | -1.1288   |
| 61757 | P0C214 | P54826 | -0.16006  |
| 61758 | P0C214 | Q5T9A4 | -0.72265  |
| 61759 | P0C214 | Q8NG06 | -0.71534  |
| 61760 | P0C214 | Q15018 | -0.40763  |
| 61761 | P0C214 | Q8N8B7 | -0.085218 |
| 61762 | P0C214 | Q96LP2 | -0.033785 |
| 61763 | P0C214 | Q9HCU5 | -0.22741  |
| 61764 | P0C214 | Q13634 | -1.2098   |
| 61765 | P0C214 | Q7L5N7 | -0.6063   |
| 61766 | P0C214 | Q05C16 | -0.22856  |
| 61767 | P0C214 | A6NEA5 | -0.35323  |
| 61768 | P0C214 | P30086 | -0.32268  |
| 61769 | P0C214 | Q14863 | -0.74201  |
| 61770 | P0C214 | Q9NV12 | -0.98681  |
| 61771 | P0C214 | P26378 | -0.78472  |
| 61772 | P0C214 | P61129 | -0.32191  |
| 61773 | P0C214 | Q9H3U5 | -1.0455   |
| 61774 | P0C214 | Q8WV35 | -0.1996   |
| 61775 | P0C214 | P26038 | -0.23742  |
| 61776 | P0C214 | Q96ME7 | -0.19716  |
| 61777 | P0C214 | Q99679 | -1.4957   |
| 61778 | P0C214 | P36021 | -1.0774   |
| 61779 | P0C214 | Q95985 | -0.65207  |
| 61780 | P0C214 | Q8IUM7 | -0.27227  |
| 61781 | P0C214 | Q13519 | -1.0149   |
| 61782 | P0C214 | Q96RY7 | -0.40545  |
| 61783 | P0C214 | Q9H7M6 | -0.50512  |
| 61784 | P0C214 | Q9UJQ7 | -0.38327  |
| 61785 | P0C214 | Q69384 | -0.85122  |
| 61786 | P0C214 | Q5YKI7 | -0.64697  |
| 61787 | P0C214 | Q6IPM2 | -0.15814  |
| 61788 | P0C214 | P08590 | -0.22505  |

|       |        |         |          |
|-------|--------|---------|----------|
| 61789 | P0C214 | Q9HB89  | -1.1877  |
| 61790 | P0C214 | Q5T2L2  | -0.26052 |
| 61791 | P0C214 | A6NHM9  | -0.5545  |
| 61792 | P0C214 | Q9UBY0  | -1.1989  |
| 61793 | P0C214 | P05089  | -0.17761 |
| 61794 | P0C214 | Q8NH60  | -1.2952  |
| 61795 | P0C214 | Q8WUR7  | -0.17088 |
| 61796 | P0C214 | Q9UQC9  | -1.5979  |
| 61797 | P0C214 | Q15262  | -0.69496 |
| 61798 | P0C214 | Q86T24  | -0.41709 |
| 61799 | P0C214 | P10176  | -0.47996 |
| 61800 | P0C214 | Q86UU9  | -0.91369 |
| 61801 | P0C214 | P42680  | -0.99872 |
| 61802 | P0C214 | Q9H2U6  | -0.13143 |
| 61803 | P0C214 | O43760  | -0.9654  |
| 61804 | P0C214 | Q9Y5P6  | -0.57655 |
| 61805 | P0C214 | Q8TC27  | -1.1427  |
| 61806 | P0C214 | A6NFM8  | -0.80492 |
| 61807 | P0C214 | Q5QGZ9  | -1.0559  |
| 61808 | P0C214 | Q96RU2  | -0.56897 |
| 61809 | P0C214 | Q9NPH6  | -0.88521 |
| 61810 | P0C214 | O95467  | -0.77711 |
| 61811 | P0C214 | Q14332  | -0.64616 |
| 61812 | P0C214 | Q8N7I0  | -0.21836 |
| 61813 | P0C214 | Q3B7J2  | -1.3475  |
| 61814 | P0C214 | Q03403  | -0.25714 |
| 61815 | P0C214 | P13498  | -0.27805 |
| 61816 | P0C214 | P54764  | -0.59769 |
| 61817 | P0C214 | Q9Y5J1  | -0.22741 |
| 61818 | P0C214 | Q658T7  | -0.03919 |
| 61819 | P0C214 | Q02978  | -0.34908 |
| 61820 | P0C214 | Q7Z570  | -0.71534 |
| 61821 | P0C214 | B5MD39  | -0.36935 |
| 61822 | P0C214 | Q14833  | -1.3478  |
| 61823 | P0C214 | Q16048  | -0.84729 |
| 61824 | P0C214 | Q8WZ75  | -1.1001  |
| 61825 | P0C214 | Q99525  | -0.62776 |
| 61826 | P0C214 | Q99250  | -1.0452  |
| 61827 | P0C214 | P0C862  | -0.94469 |
| 61828 | P0C214 | P49641  | -0.56409 |
| 61829 | P0C214 | Q9UQ74  | -0.91736 |
| 61830 | P0C214 | Q8WV16  | -0.36625 |
| 61831 | P0C214 | Q9H0H5  | -0.23866 |
| 61832 | P0C214 | P04001  | -1.453   |
| 61833 | P0C214 | Q9NFP99 | -1.3691  |
| 61834 | P0C214 | Q969Y2  | -0.72533 |
| 61835 | P0C214 | P29279  | -0.22982 |
| 61836 | P0C214 | P35225  | -0.30138 |
| 61837 | P0C214 | Q13586  | -0.46988 |
| 61838 | P0C214 | Q9H819  | -0.91173 |
| 61839 | P0C214 | P56557  | -0.81502 |
| 61840 | P0C214 | Q14940  | -1.143   |
| 61841 | P0C214 | Q5BVD1  | -1.0037  |
| 61842 | P0C214 | Q92737  | -0.69653 |
| 61843 | P0C214 | O95256  | -1.2583  |
| 61844 | P0C214 | Q6DKI1  | -0.14679 |
| 61845 | P0C214 | Q76003  | -0.22822 |
| 61846 | P0C214 | Q9NSD7  | -1.4393  |
| 61847 | P0C214 | Q08AH3  | -0.58919 |
| 61848 | P0C214 | Q92918  | -0.66661 |
| 61849 | P0C214 | Q86VI1  | -0.27786 |
| 61850 | P0C214 | A6NFR6  | -0.98681 |
| 61851 | P0C214 | P13473  | -0.73857 |
| 61852 | P0C214 | O00322  | -0.87109 |
| 61853 | P0C214 | Q13433  | -1.0327  |
| 61854 | P0C214 | O75365  | -0.80728 |
| 61855 | P0C214 | Q9UIA0  | -0.68507 |
| 61856 | P0C214 | P17252  | -0.20835 |
| 61857 | P0C214 | Q9BZG9  | -1.2036  |
| 61858 | P0C214 | Q8NH19  | -1.2952  |
| 61859 | P0C214 | O95255  | -1.3288  |
| 61860 | P0C214 | Q8IY33  | -0.367   |
| 61861 | P0C214 | O43525  | -1.0334  |
| 61862 | P0C214 | P07205  | -0.34273 |
| 61863 | P0C214 | P21730  | -1.2144  |
| 61864 | P0C214 | B4E2M5  | -0.22741 |

|       |        |        |          |
|-------|--------|--------|----------|
| 61865 | P0C214 | Q9H2C1 | -0.22827 |
| 61866 | P0C214 | Q8IUI8 | -0.22921 |
| 61867 | P0C214 | Q16654 | -0.25921 |
| 61868 | P0C214 | Q8WWA0 | -1.0882  |
| 61869 | P0C214 | Q86XP1 | -0.49044 |
| 61870 | P0C214 | Q96HE7 | -0.35459 |
| 61871 | P0C214 | Q5FWF5 | -0.30248 |
| 61872 | P0C214 | Q9NXG2 | -0.4166  |
| 61873 | P0C214 | Q6ZU82 | -0.4203  |
| 61874 | P0C214 | Q9ULT6 | -0.4484  |
| 61875 | P0C214 | A4D2P6 | -0.40437 |
| 61876 | P0C214 | Q8NGY3 | -1.2952  |
| 61877 | P0C214 | Q8IWN7 | -0.27486 |
| 61878 | P0C214 | Q96JJ6 | -1.014   |
| 61879 | P0C214 | Q13255 | -0.97397 |
| 61880 | P0C214 | Q0VDE8 | -0.42896 |
| 61881 | P0C214 | Q02548 | -0.22732 |
| 61882 | P0C214 | P48304 | -0.90208 |
| 61883 | P0C214 | Q92838 | -0.91476 |
| 61884 | P0C214 | Q9NY64 | -0.73655 |
| 61885 | P0C214 | Q9BUB5 | -0.22759 |
| 61886 | P0C214 | Q6PIF2 | -0.20994 |
| 61887 | P0C214 | P51790 | -0.48316 |
| 61888 | P0C214 | P43115 | -1.1497  |
| 61889 | P0C214 | Q765I0 | -0.89474 |
| 61890 | P0C214 | P35680 | -0.22366 |
| 61891 | P0C214 | Q9H9B1 | -0.22741 |
| 61892 | P0C214 | Q9Y2Y8 | -0.37458 |
| 61893 | P0C214 | P27708 | -0.29119 |
| 61894 | P0C214 | P10072 | -0.35691 |
| 61895 | P0C214 | P09228 | -0.90522 |
| 61896 | P0C214 | O00635 | -0.82172 |
| 61897 | P0C214 | Q14123 | -0.22577 |
| 61898 | P0C214 | Q9Y6E0 | -0.23444 |
| 61899 | P0C214 | Q05D32 | -0.43739 |
| 61900 | P0C214 | Q9UPW0 | -0.43025 |
| 61901 | P0C214 | P00439 | -0.2226  |
| 61902 | P0C214 | Q96H96 | -0.66817 |
| 61903 | P0C214 | O15031 | -1.0501  |
| 61904 | P0C214 | Q02413 | -0.61635 |
| 61905 | P0C214 | Q9Y597 | -0.19081 |
| 61906 | P0C214 | P52789 | -0.17534 |
| 61907 | P0C214 | Q9NZN9 | -0.20835 |
| 61908 | P0C214 | O43556 | -0.82668 |
| 61909 | P0C214 | O95998 | -0.94867 |
| 61910 | P0C214 | Q9Y231 | -0.55909 |
| 61911 | P0C214 | Q8ND94 | -0.98681 |
| 61912 | P0C214 | P21781 | -0.49991 |
| 61913 | P0C214 | Q9UIK4 | -0.85215 |
| 61914 | P0C214 | Q9BYV1 | -0.12107 |
| 61915 | P0C214 | P46459 | -0.23386 |
| 61916 | P0C214 | Q9NX07 | -0.22999 |
| 61917 | P0C214 | Q15109 | -0.82894 |
| 61918 | P0C214 | P0C7N1 | -1.2952  |
| 61919 | P0C214 | P58546 | -0.22741 |
| 61920 | P0C214 | Q8TDF6 | -0.44959 |
| 61921 | P0C214 | Q9HAW8 | -0.84404 |
| 61922 | P0C214 | Q9BZ97 | -0.98681 |
| 61923 | P0C214 | Q5W0B1 | -0.50512 |
| 61924 | P0C214 | P13727 | -0.92438 |
| 61925 | P0C214 | Q9H3S5 | -0.79006 |
| 61926 | P0C214 | Q15836 | -0.2388  |
| 61927 | P0C214 | O43506 | -1.2887  |
| 61928 | P0C214 | P14138 | -0.69695 |
| 61929 | P0C214 | P05106 | -0.30888 |
| 61930 | P0C214 | Q969R2 | -1.0239  |
| 61931 | P0C214 | Q86UP2 | -0.96943 |
| 61932 | P0C214 | P43362 | -0.18353 |
| 61933 | P0C214 | P78410 | -0.9365  |
| 61934 | P0C214 | Q7Z7M8 | -0.7423  |
| 61935 | P0C214 | Q96T54 | -1.2288  |
| 61936 | P0C214 | Q8TDS4 | -1.061   |
| 61937 | P0C214 | Q9NZQ8 | -1.1125  |
| 61938 | P0C214 | P01567 | -0.60159 |
| 61939 | P0C214 | P43308 | -0.74999 |
| 61940 | P0C214 | P02763 | -0.58473 |

|       |        |        |           |
|-------|--------|--------|-----------|
| 61941 | P0C214 | P60033 | -0.37029  |
| 61942 | P0C214 | Q9UPI3 | -1.0438   |
| 61943 | P0C214 | Q9UGQ2 | -0.65043  |
| 61944 | P0C214 | Q8N9I1 | -0.98681  |
| 61945 | P0C214 | Q7Z6G8 | -0.22748  |
| 61946 | P0C214 | Q96NY7 | -0.76374  |
| 61947 | P0C214 | A6NFN3 | -0.85609  |
| 61948 | P0C214 | Q99527 | -1.1783   |
| 61949 | P0C214 | Q9BUE6 | -0.17746  |
| 61950 | P0C214 | P05093 | -0.3922   |
| 61951 | P0C214 | Q7Z4L9 | -0.23392  |
| 61952 | P0C214 | Q7L5A8 | -0.72354  |
| 61953 | P0C214 | P15498 | -0.22741  |
| 61954 | P0C214 | P56180 | -1.3633   |
| 61955 | P0C214 | Q96A98 | -0.91878  |
| 61956 | P0C214 | Q13316 | -0.36071  |
| 61957 | P0C214 | P15848 | -0.20635  |
| 61958 | P0C214 | Q6DN90 | -0.21363  |
| 61959 | P0C214 | P22760 | -0.82909  |
| 61960 | P0C214 | O00155 | -1.4957   |
| 61961 | P0C214 | Q9Y2I6 | -0.13769  |
| 61962 | P0C214 | P01178 | -0.38866  |
| 61963 | P0C214 | Q4W5N1 | -0.2609   |
| 61964 | P0C214 | Q9P2D7 | -0.51796  |
| 61965 | P0C214 | Q06250 | -0.18353  |
| 61966 | P0C214 | Q8NGN7 | -1.2952   |
| 61967 | P0C214 | P26717 | -0.66985  |
| 61968 | P0C214 | Q9UBF9 | -0.22754  |
| 61969 | P0C214 | Q86YL7 | -0.83036  |
| 61970 | P0C214 | Q8TEB9 | -0.48132  |
| 61971 | P0C214 | Q9NRX5 | -0.45791  |
| 61972 | P0C214 | Q6VB85 | -0.41532  |
| 61973 | P0C214 | Q8N8A4 | -0.4835   |
| 61974 | P0C214 | Q3T906 | -0.58251  |
| 61975 | P0C214 | Q8N4T0 | -1.2901   |
| 61976 | P0C214 | A6NEL3 | -0.061144 |
| 61977 | P0C214 | P28330 | -0.29065  |
| 61978 | P0C214 | Q96AQ8 | -0.75609  |
| 61979 | P0C214 | Q96KN2 | -1.2131   |
| 61980 | P0C214 | P30504 | -1.0367   |
| 61981 | P0C214 | Q15465 | -0.22739  |
| 61982 | P0C214 | P42345 | -0.34397  |
| 61983 | P0C214 | Q7Z2D5 | -1.0215   |
| 61984 | P0C214 | Q9BZJ6 | -1.1819   |
| 61985 | P0C214 | Q99720 | -0.7055   |
| 61986 | P0C214 | Q9H293 | -0.65518  |
| 61987 | P0C214 | P0C7P4 | -0.89856  |
| 61988 | P0C214 | Q9BZ76 | -1.797    |
| 61989 | P0C214 | Q9NRD5 | -0.2272   |
| 61990 | P0C214 | Q8N9I5 | -0.95873  |
| 61991 | P0C214 | P62760 | -0.43585  |
| 61992 | P0C214 | Q92569 | -0.2274   |
| 61993 | P0C214 | Q9UKI8 | -0.79879  |
| 61994 | P0C214 | Q08334 | -0.68112  |
| 61995 | P0C214 | Q494R4 | -0.14976  |
| 61996 | P0C214 | Q9UL68 | -0.25482  |
| 61997 | P0C214 | Q8TAG9 | -0.38003  |
| 61998 | P0C214 | Q8NHC6 | -1.2952   |
| 61999 | P0C214 | Q9UIU6 | -0.2275   |
| 62000 | P0C214 | P01598 | -1.0022   |
| 62001 | P0C214 | Q92963 | -0.52345  |
| 62002 | P0C214 | Q9NQ38 | -0.31961  |
| 62003 | P0C214 | Q7Z628 | -0.2319   |
| 62004 | P0C214 | Q9NYV9 | -1.1716   |
| 62005 | P0C214 | Q9NTJ3 | -0.22228  |
| 62006 | P0C214 | P14317 | -0.22897  |
| 62007 | P0C214 | Q9ULD8 | -1.0452   |
| 62008 | P0C214 | P55055 | -0.2391   |
| 62009 | P0C214 | P47895 | -0.3989   |
| 62010 | P0C214 | O94941 | -0.20402  |
| 62011 | P0C214 | O00487 | -0.23749  |
| 62012 | P0C214 | P15088 | -0.76175  |
| 62013 | P0C214 | Q86W42 | -0.35048  |
| 62014 | P0C214 | Q13009 | -0.514    |
| 62015 | P0C214 | Q9Y5E6 | -1.2282   |
| 62016 | P0C214 | Q99633 | -0.17762  |

|       |        |        |           |
|-------|--------|--------|-----------|
| 62017 | P0C214 | O60725 | -0.51205  |
| 62018 | P0C214 | Q12974 | -0.67385  |
| 62019 | P0C214 | Q15165 | -0.59452  |
| 62020 | P0C214 | Q8WZ04 | -0.50542  |
| 62021 | P0C214 | Q8TD20 | -0.68886  |
| 62022 | P0C214 | Q6F5E7 | -0.49979  |
| 62023 | P0C214 | O95867 | -0.5764   |
| 62024 | P0C214 | Q96R48 | -1.2952   |
| 62025 | P0C214 | A4D263 | -0.18353  |
| 62026 | P0C214 | Q6P2M8 | -0.78694  |
| 62027 | P0C214 | P36896 | -0.47931  |
| 62028 | P0C214 | Q6ICL3 | -0.31539  |
| 62029 | P0C214 | Q9Y2I7 | -0.22534  |
| 62030 | P0C214 | Q96QR1 | -0.7977   |
| 62031 | P0C214 | Q8TDD5 | -1.0011   |
| 62032 | P0C214 | P19793 | -0.25148  |
| 62033 | P0C214 | P07101 | -0.21786  |
| 62034 | P0C214 | Q8IYS1 | -0.46149  |
| 62035 | P0C214 | Q96ND0 | -0.75609  |
| 62036 | P0C214 | Q96CN4 | -0.75192  |
| 62037 | P0C214 | Q643R3 | -0.63411  |
| 62038 | P0C214 | P34903 | -0.9496   |
| 62039 | P0C214 | P63302 | -0.21961  |
| 62040 | P0C214 | B9EJG8 | -0.98681  |
| 62041 | P0C214 | Q9NP58 | -0.77673  |
| 62042 | P0C214 | Q8N292 | -1.0451   |
| 62043 | P0C214 | Q15648 | -0.15635  |
| 62044 | P0C214 | Q8IYT2 | -0.85348  |
| 62045 | P0C214 | P35670 | -0.26717  |
| 62046 | P0C214 | P43005 | -0.92967  |
| 62047 | P0C214 | P85298 | -0.30726  |
| 62048 | P0C214 | O43247 | -0.24694  |
| 62049 | P0C214 | Q8IU57 | -0.46682  |
| 62050 | P0C214 | O95352 | -0.19674  |
| 62051 | P0C214 | P07360 | -0.91117  |
| 62052 | P0C214 | Q9UKG4 | -1.2657   |
| 62053 | P0C214 | B2RC85 | -0.13023  |
| 62054 | P0C214 | O60755 | -1.2384   |
| 62055 | P0C214 | Q9Y6D5 | -0.21455  |
| 62056 | P0C214 | P48637 | -0.25912  |
| 62057 | P0C214 | O60939 | -0.90867  |
| 62058 | P0C214 | O94900 | -0.21668  |
| 62059 | P0C214 | P17481 | -0.22385  |
| 62060 | P0C214 | Q8N9F0 | -0.5759   |
| 62061 | P0C214 | Q6ZMP0 | -1.0371   |
| 62062 | P0C214 | Q9BTF0 | -0.34444  |
| 62063 | P0C214 | Q9UG22 | -1.2576   |
| 62064 | P0C214 | Q96MZ0 | -0.22113  |
| 62065 | P0C214 | Q9NY56 | -0.88521  |
| 62066 | P0C214 | Q96JB6 | -0.47533  |
| 62067 | P0C214 | Q16322 | -0.96381  |
| 62068 | P0C214 | Q8NBJ4 | -0.41284  |
| 62069 | P0C214 | Q9H609 | -0.083723 |
| 62070 | P0C214 | Q9NPI5 | -0.47163  |
| 62071 | P0C214 | O95759 | -1.1406   |
| 62072 | P0C214 | Q9BSF4 | -0.32537  |
| 62073 | P0C214 | O95498 | -0.44549  |
| 62074 | P0C214 | Q6NTF9 | -1.0431   |
| 62075 | P0C214 | Q96ER3 | -0.85388  |
| 62076 | P0C214 | Q6V0I7 | -0.67005  |
| 62077 | P0C214 | P42261 | -0.59616  |
| 62078 | P0C214 | P60893 | -1.3693   |
| 62079 | P0C214 | P30491 | -1.0367   |
| 62080 | P0C214 | Q8TCF1 | -0.50512  |
| 62081 | P0C214 | P31944 | -0.33708  |
| 62082 | P0C214 | Q52LD8 | -0.5751   |
| 62083 | P0C214 | Q6ZNB5 | -0.066493 |
| 62084 | P0C214 | Q9HCL0 | -1.3189   |
| 62085 | P0C214 | Q9H3V2 | -0.98681  |
| 62086 | P0C214 | Q9Y5Y6 | -1.6954   |
| 62087 | P0C214 | Q96FN4 | -0.2278   |
| 62088 | P0C214 | P34910 | -0.93403  |
| 62089 | P0C214 | Q86VV4 | -0.54017  |
| 62090 | P0C214 | Q8TEF2 | -0.98681  |
| 62091 | P0C214 | Q8NGR5 | -1.2952   |
| 62092 | P0C214 | P0C672 | -0.98681  |

|       |        |         |          |
|-------|--------|---------|----------|
| 62093 | P0C214 | Q86X52  | -0.77467 |
| 62094 | P0C214 | O75056  | -0.89365 |
| 62095 | P0C214 | Q9Y5Y0  | -0.56139 |
| 62096 | P0C214 | A6NMZ5  | -1.2952  |
| 62097 | P0C214 | Q8IZ21  | -0.57861 |
| 62098 | P0C214 | P51513  | -0.11326 |
| 62099 | P0C214 | Q8N4P3  | -0.45797 |
| 62100 | P0C214 | Q9Y2I9  | -1.0588  |
| 62101 | P0C214 | Q12999  | -1.0013  |
| 62102 | P0C214 | O00574  | -1.3043  |
| 62103 | P0C214 | Q5QJU3  | -0.30929 |
| 62104 | P0C214 | Q8N2E2  | -0.91736 |
| 62105 | P0C214 | O15374  | -1.1703  |
| 62106 | P0C214 | P18827  | -0.5057  |
| 62107 | P0C214 | Q8N158  | -0.78821 |
| 62108 | P0C214 | Q96C92  | -0.20758 |
| 62109 | P0C214 | P11169  | -0.25754 |
| 62110 | P0C214 | Q8NFQ8  | -0.55384 |
| 62111 | P0C214 | Q9ULE3  | -0.37876 |
| 62112 | P0C214 | Q969V5  | -0.22738 |
| 62113 | P0C214 | Q9H169  | -0.49388 |
| 62114 | P0C214 | Q9BQB4  | -0.31578 |
| 62115 | P0C214 | Q8NEZ4  | -0.42907 |
| 62116 | P0C214 | Q8N808  | -0.98681 |
| 62117 | P0C214 | P04435  | -0.44807 |
| 62118 | P0C214 | O95197  | -0.53549 |
| 62119 | P0C214 | O75575  | -0.52054 |
| 62120 | P0C214 | Q9P0V9  | -0.50082 |
| 62121 | P0C214 | Q6NW34  | -0.98681 |
| 62122 | P0C214 | Q9H9V4  | -0.89683 |
| 62123 | P0C214 | Q9H7Z7  | -0.2042  |
| 62124 | P0C214 | Q99788  | -0.92347 |
| 62125 | P0C214 | Q969E3  | -0.74949 |
| 62126 | P0C214 | Q9BR01  | -0.41501 |
| 62127 | P0C214 | Q9Y530  | -0.31862 |
| 62128 | P0C214 | Q96K83  | -0.45397 |
| 62129 | P0C214 | P04432  | -1.0022  |
| 62130 | P0C214 | P01613  | -1.0022  |
| 62131 | P0C214 | Q14142  | -0.43612 |
| 62132 | P0C214 | Q9H0R8  | -0.21577 |
| 62133 | P0C214 | P01185  | -0.38312 |
| 62134 | P0C214 | P0C604  | -1.2952  |
| 62135 | P0C214 | Q96KV6  | -0.98681 |
| 62136 | P0C214 | Q96FT9  | -0.26815 |
| 62137 | P0C214 | A7E2F4  | -0.37981 |
| 62138 | P0C214 | P04090  | -0.90326 |
| 62139 | P0C214 | Q5J TZ5 | -0.26856 |
| 62140 | P0C214 | O60575  | -0.77749 |
| 62141 | P0C214 | P24468  | -0.2639  |
| 62142 | P0C214 | P60507  | -0.93452 |
| 62143 | P0C214 | Q9UHA7  | -0.90077 |
| 62144 | P0C214 | Q9NX62  | -0.75193 |
| 62145 | P0C214 | Q8N5C1  | -0.98681 |
| 62146 | P0C214 | Q96F85  | -0.24873 |
| 62147 | P0C214 | P35575  | -0.28106 |
| 62148 | P0C214 | P00540  | -1.2051  |
| 62149 | P0C214 | P18433  | -1.2221  |
| 62150 | P0C214 | Q06481  | -0.28583 |
| 62151 | P0C214 | Q02505  | -1.2878  |
| 62152 | P0C214 | O95084  | -1.1069  |
| 62153 | P0C214 | P55318  | -0.43412 |
| 62154 | P0C214 | Q8NC06  | -0.61775 |
| 62155 | P0C214 | Q9NV96  | -0.29776 |
| 62156 | P0C214 | P09238  | -1.2602  |
| 62157 | P0C214 | Q7Z2Y8  | -0.16614 |
| 62158 | P0C214 | Q95460  | -1.3698  |
| 62159 | P0C214 | P26440  | -0.26036 |
| 62160 | P0C214 | Q9GZV3  | -1.0884  |
| 62161 | P0C214 | Q6X4U4  | -0.85405 |
| 62162 | P0C214 | A0PJX8  | -0.98681 |
| 62163 | P0C214 | Q96JF0  | -0.77192 |
| 62164 | P0C214 | Q5THK1  | -0.34727 |
| 62165 | P0C214 | Q96EY8  | -0.5703  |
| 62166 | P0C214 | P49643  | -0.36475 |
| 62167 | P0C214 | B6SEH8  | -0.98681 |
| 62168 | P0C214 | Q08188  | -0.39538 |

|       |        |        |           |
|-------|--------|--------|-----------|
| 62169 | P0C214 | Q96I76 | -0.37836  |
| 62170 | P0C214 | Q8NGC6 | -1.2952   |
| 62171 | P0C214 | Q8TB22 | -1.2595   |
| 62172 | P0C214 | Q5U649 | -0.29831  |
| 62173 | P0C214 | Q7Z5G4 | -0.32008  |
| 62174 | P0C214 | Q9BSK0 | -0.43569  |
| 62175 | P0C214 | Q9UK22 | -0.12553  |
| 62176 | P0C214 | A6NGY3 | -0.090987 |
| 62177 | P0C214 | Q8NGF9 | -1.2952   |
| 62178 | P0C214 | O00180 | -0.99359  |
| 62179 | P0C214 | Q969Q5 | -0.23819  |
| 62180 | P0C214 | Q8TAF8 | -1.0109   |
| 62181 | P0C214 | Q9P107 | -0.28245  |
| 62182 | P0C214 | P50454 | -0.27135  |
| 62183 | P0C214 | P31152 | -0.71714  |
| 62184 | P0C214 | P49326 | -0.92939  |
| 62185 | P0C214 | Q96AB6 | -0.13865  |
| 62186 | P0C214 | Q68D91 | -0.35349  |
| 62187 | P0C214 | Q86YZ3 | -0.72857  |
| 62188 | P0C214 | P20936 | -0.22741  |
| 62189 | P0C214 | P15311 | -0.23571  |
| 62190 | P0C214 | O15050 | -0.3254   |
| 62191 | P0C214 | Q8TAL5 | -0.29858  |
| 62192 | P0C214 | P30044 | -0.21261  |
| 62193 | P0C214 | A6NDB9 | -0.045488 |
| 62194 | P0C214 | Q16842 | -0.52136  |
| 62195 | P0C214 | Q6UY18 | -0.98681  |
| 62196 | P0C214 | Q16651 | -1.1243   |
| 62197 | P0C214 | Q8N801 | -0.13674  |
| 62198 | P0C214 | Q8IVL6 | -0.51671  |
| 62199 | P0C214 | P00390 | -0.22268  |
| 62200 | P0C214 | Q9H1U4 | -0.85077  |
| 62201 | P0C214 | P32418 | -0.51248  |
| 62202 | P0C214 | Q8IUG5 | -0.05188  |
| 62203 | P0C214 | Q9ULD6 | -0.30859  |
| 62204 | P0C214 | P20848 | -0.63505  |
| 62205 | P0C214 | O60303 | -0.24297  |
| 62206 | P0C214 | Q6ZSG1 | -0.50512  |
| 62207 | P0C214 | Q13103 | -0.86851  |
| 62208 | P0C214 | Q15147 | -0.22666  |
| 62209 | P0C214 | Q96PE3 | -0.17151  |
| 62210 | P0C214 | P63027 | -0.21372  |
| 62211 | P0C214 | O60279 | -1.1413   |
| 62212 | P0C214 | Q8N2H3 | -0.45045  |
| 62213 | P0C214 | Q8TE49 | -0.53998  |
| 62214 | P0C214 | Q8IVV8 | -1.0708   |
| 62215 | P0C214 | Q9H0Q3 | -1.0627   |
| 62216 | P0C214 | P34982 | -1.3341   |
| 62217 | P0C214 | P83111 | -0.37189  |
| 62218 | P0C214 | Q9HCT0 | -0.5911   |
| 62219 | P0C214 | Q9Y6S9 | -0.99026  |
| 62220 | P0C214 | Q8N8A6 | -0.3224   |
| 62221 | P0C214 | P03372 | -0.22751  |
| 62222 | P0C214 | Q86WN2 | -0.82356  |
| 62223 | P0C214 | A0AUZ9 | -0.30478  |
| 62224 | P0C214 | P0C7N4 | -0.98681  |
| 62225 | P0C214 | Q8IZS6 | -0.20085  |
| 62226 | P0C214 | Q9UKM9 | -0.37711  |
| 62227 | P0C214 | A4D2H0 | -0.04927  |
| 62228 | P0C214 | O43298 | -0.18112  |
| 62229 | P0C214 | P48307 | -0.62998  |
| 62230 | P0C214 | Q8WWZ3 | -0.66334  |
| 62231 | P0C214 | Q96MK2 | -0.077224 |
| 62232 | P0C214 | Q14344 | -0.33961  |
| 62233 | P0C214 | O75563 | -0.3806   |
| 62234 | P0C214 | Q07011 | -1.0736   |
| 62235 | P0C214 | Q13153 | -0.22792  |
| 62236 | P0C214 | Q9UQF0 | -0.8398   |
| 62237 | P0C214 | Q717R9 | -0.065495 |
| 62238 | P0C214 | O14633 | -0.23828  |
| 62239 | P0C214 | G3V0H7 | -1.1281   |
| 62240 | P0C214 | Q8NGZ5 | -1.2952   |
| 62241 | P0C214 | P23415 | -0.57781  |
| 62242 | P0C214 | Q13098 | -0.15499  |
| 62243 | P0C214 | P49796 | -0.22742  |
| 62244 | P0C214 | P31274 | -0.055769 |



|       |        |        |           |
|-------|--------|--------|-----------|
| 62245 | P0C214 | Q49A26 | -0.46091  |
| 62246 | P0C214 | Q96PJ5 | -0.44182  |
| 62247 | P0C214 | Q53GQ0 | -0.4318   |
| 62248 | P0C214 | Q3ZAQ7 | -0.93777  |
| 62249 | P0C214 | Q9UBG3 | -0.26717  |
| 62250 | P0C214 | P35542 | -0.83284  |
| 62251 | P0C214 | Q9Y2U5 | -0.64249  |
| 62252 | P0C214 | Q9Y4P3 | -0.22747  |
| 62253 | P0C214 | Q9Y6F6 | -0.41922  |
| 62254 | P0C214 | Q5JSS6 | -0.28713  |
| 62255 | P0C214 | Q7Z353 | -0.12424  |
| 62256 | P0C214 | Q6ZN54 | -0.66542  |
| 62257 | P0C214 | Q8NHP1 | -0.45045  |
| 62258 | P0C214 | O60814 | -0.83614  |
| 62259 | P0C214 | Q8NET8 | -1.0583   |
| 62260 | P0C214 | Q8IY22 | -0.14017  |
| 62261 | P0C214 | P04155 | -0.35376  |
| 62262 | P0C214 | Q9Y2H2 | -0.32439  |
| 62263 | P0C214 | P59544 | -1.2886   |
| 62264 | P0C214 | Q8NG77 | -1.2952   |
| 62265 | P0C214 | A6NND4 | -1.2952   |
| 62266 | P0C214 | P11049 | -0.33136  |
| 62267 | P0C214 | Q9BWT6 | -0.15303  |
| 62268 | P0C214 | Q7L0L9 | -0.98681  |
| 62269 | P0C214 | Q12860 | -0.48491  |
| 62270 | P0C214 | Q8WVD3 | -0.71446  |
| 62271 | P0C214 | Q9Y4G2 | -0.32763  |
| 62272 | P0C214 | Q9Y258 | -0.94926  |
| 62273 | P0C214 | Q9BPX6 | -0.51125  |
| 62274 | P0C214 | Q9NZK7 | -0.7773   |
| 62275 | P0C214 | Q9Y2J0 | -0.24088  |
| 62276 | P0C214 | Q9Y4P9 | -0.1465   |
| 62277 | P0C214 | Q9BY79 | -0.85679  |
| 62278 | P0C214 | O15156 | -0.20752  |
| 62279 | P0C214 | Q99501 | -0.25882  |
| 62280 | P0C214 | Q6L9W6 | -0.76772  |
| 62281 | P0C214 | P10275 | -0.22745  |
| 62282 | P0C214 | Q5VST9 | -0.80206  |
| 62283 | P0C214 | Q8WWF1 | -0.91736  |
| 62284 | P0C214 | A6NFH5 | -0.69029  |
| 62285 | P0C214 | O75951 | -0.82212  |
| 62286 | P0C214 | O75506 | -0.23364  |
| 62287 | P0C214 | Q96RD3 | -1.2952   |
| 62288 | P0C214 | Q9BQ50 | -0.17744  |
| 62289 | P0C214 | P15428 | -0.21354  |
| 62290 | P0C214 | P29373 | -0.20804  |
| 62291 | P0C214 | Q9HCK4 | -0.54988  |
| 62292 | P0C214 | Q86UW7 | -0.44309  |
| 62293 | P0C214 | P62942 | -0.22826  |
| 62294 | P0C214 | Q9Y614 | -0.24088  |
| 62295 | P0C214 | Q96DT5 | -0.6897   |
| 62296 | P0C214 | P51575 | -0.53538  |
| 62297 | P0C214 | Q969F2 | -0.20183  |
| 62298 | P0C214 | P17931 | -0.20463  |
| 62299 | P0C214 | Q9UBX1 | -0.94093  |
| 62300 | P0C214 | Q7Z4V5 | -0.14694  |
| 62301 | P0C214 | Q9GIP4 | -0.9751   |
| 62302 | P0C214 | O94760 | -0.053264 |
| 62303 | P0C214 | Q9H7Y0 | -0.91736  |
| 62304 | P0C214 | Q04828 | -0.226    |
| 62305 | P0C214 | Q5SXH7 | -0.52301  |
| 62306 | P0C214 | Q8IYA7 | -0.25973  |
| 62307 | P0C214 | Q6QNK2 | -1.3853   |
| 62308 | P0C214 | Q8NGY9 | -1.1265   |
| 62309 | P0C214 | O95405 | -0.17771  |
| 62310 | P0C214 | Q6UWW8 | -0.22733  |
| 62311 | P0C214 | Q00975 | -0.83051  |
| 62312 | P0C214 | Q9HCK0 | -0.18036  |
| 62313 | P0C214 | Q13606 | -1.2952   |
| 62314 | P0C214 | P17752 | -0.22566  |
| 62315 | P0C214 | P08185 | -0.87306  |
| 62316 | P0C214 | P15907 | -0.87491  |
| 62317 | P0C214 | Q13610 | -0.22742  |
| 62318 | P0C214 | Q96AA3 | -0.98697  |
| 62319 | P0C214 | Q9HB29 | -1.175    |
| 62320 | P0C214 | Q5TC04 | -0.12562  |

|       |        |        |           |
|-------|--------|--------|-----------|
| 62321 | P0C214 | Q6IA69 | -0.25408  |
| 62322 | P0C214 | Q5T6J7 | -0.41296  |
| 62323 | P0C214 | P08567 | -0.22741  |
| 62324 | P0C214 | Q5VW00 | -0.22729  |
| 62325 | P0C214 | Q9ULT8 | -0.55989  |
| 62326 | P0C214 | P54619 | -0.35538  |
| 62327 | P0C214 | Q9NS15 | -0.82234  |
| 62328 | P0C214 | Q9HBJ8 | -1.1174   |
| 62329 | P0C214 | Q9Y2V3 | -0.35696  |
| 62330 | P0C214 | Q5T1Q4 | -1.0564   |
| 62331 | P0C214 | Q96P31 | -1.0708   |
| 62332 | P0C214 | Q6PCD5 | -0.22746  |
| 62333 | P0C214 | A4QPH2 | -0.72226  |
| 62334 | P0C214 | P67936 | -0.29612  |
| 62335 | P0C214 | Q96LD8 | -0.80492  |
| 62336 | P0C214 | Q9C0B7 | -0.98681  |
| 62337 | P0C214 | Q14031 | -1.172    |
| 62338 | P0C214 | Q9Y653 | -1.5986   |
| 62339 | P0C214 | P50553 | -0.52978  |
| 62340 | P0C214 | Q96M27 | -0.2859   |
| 62341 | P0C214 | Q00237 | -0.60543  |
| 62342 | P0C214 | Q6UWP8 | -0.91736  |
| 62343 | P0C214 | P20155 | -0.72998  |
| 62344 | P0C214 | P04437 | -0.44807  |
| 62345 | P0C214 | Q6ZRY4 | -0.8081   |
| 62346 | P0C214 | Q8WUA7 | -1.2036   |
| 62347 | P0C214 | Q9NQQ7 | -1.0564   |
| 62348 | P0C214 | Q7RTX9 | -1.1032   |
| 62349 | P0C214 | Q9H306 | -1.351    |
| 62350 | P0C214 | Q9NYG2 | -0.78738  |
| 62351 | P0C214 | Q96DH6 | -0.63654  |
| 62352 | P0C214 | Q86TN4 | -0.46849  |
| 62353 | P0C214 | Q8IXT2 | -0.041739 |
| 62354 | P0C214 | Q9HC47 | -0.9365   |
| 62355 | P0C214 | Q17RG1 | -0.13618  |
| 62356 | P0C214 | Q969G6 | -0.17948  |
| 62357 | P0C214 | Q96JY0 | -0.2661   |
| 62358 | P0C214 | Q86SQ6 | -1.2161   |
| 62359 | P0C214 | Q9Y394 | -0.87464  |
| 62360 | P0C214 | Q96LL9 | -0.42838  |
| 62361 | P0C214 | Q96G74 | -0.42992  |
| 62362 | P0C214 | P10415 | -0.22725  |
| 62363 | P0C214 | P98179 | -0.38736  |
| 62364 | P0C214 | Q53HC5 | -0.19378  |
| 62365 | P0C214 | P58513 | -0.86125  |
| 62366 | P0C214 | Q15772 | -0.99364  |
| 62367 | P0C214 | Q9UJH8 | -1.0419   |
| 62368 | P0C214 | F8WCM5 | -0.6047   |
| 62369 | P0C214 | Q8N6T3 | -0.047639 |
| 62370 | P0C214 | P49767 | -0.29719  |
| 62371 | P0C214 | P80108 | -0.46629  |
| 62372 | P0C214 | Q43586 | -0.66654  |
| 62373 | P0C214 | Q95096 | -0.23383  |
| 62374 | P0C214 | Q15678 | -0.51748  |
| 62375 | P0C214 | P30519 | -0.152    |
| 62376 | P0C214 | Q00222 | -1.2629   |
| 62377 | P0C214 | Q15669 | -0.2266   |
| 62378 | P0C214 | Q8IUH3 | -0.57728  |
| 62379 | P0C214 | P52824 | -0.22741  |
| 62380 | P0C214 | Q9BWM7 | -0.99267  |
| 62381 | P0C214 | Q96QU6 | -0.38129  |
| 62382 | P0C214 | Q95460 | -0.33907  |
| 62383 | P0C214 | Q6P9B9 | -0.09912  |
| 62384 | P0C214 | Q8N6W0 | -0.32199  |
| 62385 | P0C214 | Q8TEA7 | -1.1514   |
| 62386 | P0C214 | Q75841 | -0.87447  |
| 62387 | P0C214 | Q43699 | -1.6726   |
| 62388 | P0C214 | P10911 | -0.22717  |
| 62389 | P0C214 | A7KAX9 | -0.25677  |
| 62390 | P0C214 | Q9NWH2 | -0.98681  |
| 62391 | P0C214 | Q5JRV8 | -0.98681  |
| 62392 | P0C214 | Q16539 | -0.22741  |
| 62393 | P0C214 | P01623 | -1.0022   |
| 62394 | P0C214 | Q9Y3D7 | -0.14021  |
| 62395 | P0C214 | Q6ZN84 | -0.25393  |
| 62396 | P0C214 | Q43193 | -1.4485   |

|       |        |        |           |
|-------|--------|--------|-----------|
| 62397 | P0C214 | Q96SU4 | -0.96432  |
| 62398 | P0C214 | Q9UL63 | -0.37159  |
| 62399 | P0C214 | Q9UPW5 | -0.039128 |
| 62400 | P0C214 | Q9Y6V7 | -0.79344  |
| 62401 | P0C214 | Q9NRJ4 | -0.22385  |
| 62402 | P0C214 | Q8IVU1 | -1.0923   |
| 62403 | P0C214 | Q96AY4 | -0.2274   |
| 62404 | P0C214 | Q5VTT5 | -0.37092  |
| 62405 | P0C214 | P03971 | -0.49834  |
| 62406 | P0C214 | Q15303 | -0.22741  |
| 62407 | P0C214 | Q8NG81 | -1.2952   |
| 62408 | P0C214 | O15063 | -0.082903 |
| 62409 | P0C214 | Q7RTV5 | -0.3039   |
| 62410 | P0C214 | Q16772 | -0.22354  |
| 62411 | P0C214 | Q0Z7S8 | -0.50132  |
| 62412 | P0C214 | P0DJI8 | -0.5776   |
| 62413 | P0C214 | Q99426 | -0.21839  |
| 62414 | P0C214 | Q9H3R1 | -0.7345   |
| 62415 | P0C214 | P13945 | -0.44457  |
| 62416 | P0C214 | O14817 | -1.2158   |
| 62417 | P0C214 | Q6IF00 | -1.2952   |
| 62418 | P0C214 | Q587I9 | -0.77158  |
| 62419 | P0C214 | Q8N8M0 | -0.3819   |
| 62420 | P0C214 | Q9BTY7 | -0.18353  |
| 62421 | P0C214 | Q9H3R0 | -0.18561  |
| 62422 | P0C214 | Q9BUV8 | -0.41697  |
| 62423 | P0C214 | Q5VZI3 | -0.98681  |
| 62424 | P0C214 | Q15390 | -0.2355   |
| 62425 | P0C214 | P06729 | -0.80027  |
| 62426 | P0C214 | Q9NP55 | -0.95049  |
| 62427 | P0C214 | Q6S8J7 | -0.22694  |
| 62428 | P0C214 | Q8IW41 | -0.27806  |
| 62429 | P0C214 | Q8NA69 | -0.19485  |
| 62430 | P0C214 | P15954 | -0.47996  |
| 62431 | P0C214 | Q9UMF0 | -1.2814   |
| 62432 | P0C214 | Q9BRF8 | -0.35349  |
| 62433 | P0C214 | O43520 | -0.52279  |
| 62434 | P0C214 | Q02779 | -0.72345  |
| 62435 | P0C214 | Q6ZV89 | -0.22499  |
| 62436 | P0C214 | Q969E2 | -0.85025  |
| 62437 | P0C214 | Q8N145 | -0.75292  |
| 62438 | P0C214 | P20036 | -0.77896  |
| 62439 | P0C214 | O60231 | -0.30613  |
| 62440 | P0C214 | Q9UMQ6 | -1.0024   |
| 62441 | P0C214 | O60337 | -0.86211  |
| 62442 | P0C214 | P34925 | -0.55747  |
| 62443 | P0C214 | Q96A11 | -0.6996   |
| 62444 | P0C214 | O14994 | -0.83202  |
| 62445 | P0C214 | Q9BZD7 | -1.3888   |
| 62446 | P0C214 | Q96EF0 | -0.33926  |
| 62447 | P0C214 | Q9P2W6 | -0.20758  |
| 62448 | P0C214 | Q53SF7 | -0.44956  |
| 62449 | P0C214 | P80422 | -0.91671  |
| 62450 | P0C214 | P39086 | -0.67979  |
| 62451 | P0C214 | P07384 | -0.24556  |
| 62452 | P0C214 | P14902 | -0.13407  |
| 62453 | P0C214 | Q8TD06 | -0.27979  |
| 62454 | P0C214 | P00738 | -0.71578  |
| 62455 | P0C214 | Q15116 | -0.73329  |
| 62456 | P0C214 | Q13117 | -0.76134  |
| 62457 | P0C214 | Q86XP6 | -0.91736  |
| 62458 | P0C214 | Q92738 | -1.0298   |
| 62459 | P0C214 | A4D174 | -0.75744  |
| 62460 | P0C214 | Q6PEY2 | -0.66035  |
| 62461 | P0C214 | Q13635 | -0.30338  |
| 62462 | P0C214 | Q9UIQ6 | -1.2451   |
| 62463 | P0C214 | Q96N76 | -0.39163  |
| 62464 | P0C214 | P19440 | -0.33299  |
| 62465 | P0C214 | Q86VZ1 | -1.3112   |
| 62466 | P0C214 | P24592 | -0.74399  |
| 62467 | P0C214 | Q9NUN7 | -0.35104  |
| 62468 | P0C214 | Q9NPF2 | -0.35058  |
| 62469 | P0C214 | Q6ICI0 | -0.98681  |
| 62470 | P0C214 | Q0VGL1 | -0.71104  |
| 62471 | P0C214 | P11310 | -0.30505  |
| 62472 | P0C214 | P45452 | -0.87579  |

|       |        |        |           |
|-------|--------|--------|-----------|
| 62473 | P0C214 | Q5T3U5 | -1.331    |
| 62474 | P0C214 | Q9Y2D5 | -0.38302  |
| 62475 | P0C214 | P31415 | -0.21299  |
| 62476 | P0C214 | Q9Y458 | -0.47529  |
| 62477 | P0C214 | Q00013 | -0.42461  |
| 62478 | P0C214 | Q8WYN0 | -0.52113  |
| 62479 | P0C214 | O95221 | -1.2952   |
| 62480 | P0C214 | Q3SY69 | -0.37328  |
| 62481 | P0C214 | Q99835 | -0.25833  |
| 62482 | P0C214 | Q7Z4L0 | -0.71127  |
| 62483 | P0C214 | A8MYZ5 | -0.21582  |
| 62484 | P0C214 | Q9UGI9 | -0.86606  |
| 62485 | P0C214 | Q7RTY5 | -1.4261   |
| 62486 | P0C214 | P07686 | -0.293    |
| 62487 | P0C214 | Q96PX9 | -0.76296  |
| 62488 | P0C214 | P35354 | -0.22741  |
| 62489 | P0C214 | P0C7Q3 | -0.070726 |
| 62490 | P0C214 | Q9BXC9 | -0.21608  |
| 62491 | P0C214 | Q6UXQ4 | -0.91736  |
| 62492 | P0C214 | Q6BAA4 | -0.2318   |
| 62493 | P0C214 | A6NGU5 | -0.76946  |
| 62494 | P0C214 | O95475 | -0.22771  |
| 62495 | P0C214 | P04554 | -0.86868  |
| 62496 | P0C214 | O94819 | -0.21414  |
| 62497 | P0C214 | Q7Z5J1 | -1.3244   |
| 62498 | P0C214 | Q05215 | -0.21434  |
| 62499 | P0C214 | Q6ZSK4 | -0.64455  |
| 62500 | P0C214 | Q9BT22 | -0.82502  |
| 62501 | P0C214 | Q9BT30 | -0.3248   |
| 62502 | P0C214 | Q8TEW0 | -0.2259   |
| 62503 | P0C214 | Q6NUS6 | -0.77111  |
| 62504 | P0C214 | Q9H5V7 | -0.22899  |
| 62505 | P0C214 | Q5VW36 | -0.58894  |
| 62506 | P0C214 | Q8NFZ4 | -0.70011  |
| 62507 | P0C214 | P29034 | -0.35368  |
| 62508 | P0C214 | O75628 | -1.0452   |
| 62509 | P0C214 | Q9UHY1 | -0.22741  |
| 62510 | P0C214 | O95393 | -0.22741  |
| 62511 | P0C214 | P78413 | -0.23015  |
| 62512 | P0C214 | Q9H6L5 | -0.79036  |
| 62513 | P0C214 | Q6ZXV5 | -0.98681  |
| 62514 | P0C214 | P36894 | -0.38202  |
| 62515 | P0C214 | Q96SZ6 | -0.39685  |
| 62516 | P0C214 | Q8IX06 | -0.09791  |
| 62517 | P0C214 | Q96C45 | -1.2407   |
| 62518 | P0C214 | Q9Y5E2 | -1.2131   |
| 62519 | P0C214 | O60499 | -0.46916  |
| 62520 | P0C214 | A6NER0 | -1.2827   |
| 62521 | P0C214 | O94953 | -0.13961  |
| 62522 | P0C214 | A8MTJ6 | -0.37779  |
| 62523 | P0C214 | Q9BT23 | -0.50512  |
| 62524 | P0C214 | Q95980 | -0.4483   |
| 62525 | P0C214 | P18825 | -0.39387  |
| 62526 | P0C214 | P20794 | -0.22643  |
| 62527 | P0C214 | P81605 | -1.1376   |
| 62528 | P0C214 | Q8WXB1 | -0.85348  |
| 62529 | P0C214 | Q9Y2Y6 | -0.91465  |
| 62530 | P0C214 | Q9NP78 | -0.7878   |
| 62531 | P0C214 | Q92583 | -1.1866   |
| 62532 | P0C214 | O00559 | -0.81253  |
| 62533 | P0C214 | O94759 | -1.0282   |
| 62534 | P0C214 | Q9H7X7 | -1.1039   |
| 62535 | P0C214 | Q96NH3 | -1.1484   |
| 62536 | P0C214 | O75022 | -0.66777  |
| 62537 | P0C214 | Q9NUZ1 | -0.39669  |
| 62538 | P0C214 | Q9C0J8 | -0.22729  |
| 62539 | P0C214 | Q32P28 | -0.43974  |
| 62540 | P0C214 | P25940 | -0.89791  |
| 62541 | P0C214 | Q8IXZ2 | -0.18542  |
| 62542 | P0C214 | Q6P3R8 | -1.3207   |
| 62543 | P0C214 | P50219 | -0.22742  |
| 62544 | P0C214 | Q5SZI1 | -0.98681  |
| 62545 | P0C214 | O15391 | -0.21437  |
| 62546 | P0C214 | Q8NBB2 | -0.18722  |
| 62547 | P0C214 | Q92878 | -0.211    |
| 62548 | P0C214 | Q8N9X5 | -0.98681  |

|       |        |        |           |
|-------|--------|--------|-----------|
| 62549 | P0C214 | Q8NH53 | -1.2952   |
| 62550 | P0C214 | P81133 | -0.38764  |
| 62551 | P0C214 | Q4VXF1 | -0.98681  |
| 62552 | P0C214 | Q9BQ51 | -1.2901   |
| 62553 | P0C214 | Q92954 | -0.89076  |
| 62554 | P0C214 | Q9UMY4 | -0.22428  |
| 62555 | P0C214 | Q8TAU0 | -0.22758  |
| 62556 | P0C214 | Q9UBZ4 | -0.062297 |
| 62557 | P0C214 | P03923 | -0.42829  |
| 62558 | P0C214 | Q86V86 | -0.40885  |
| 62559 | P0C214 | Q7Z7B8 | -0.88056  |
| 62560 | P0C214 | A6NLE4 | -1.0708   |
| 62561 | P0C214 | Q96C01 | -0.096513 |
| 62562 | P0C214 | Q05682 | -0.50079  |
| 62563 | P0C214 | Q9UN71 | -1.2131   |
| 62564 | P0C214 | E7EML9 | -1.4261   |
| 62565 | P0C214 | Q75WM6 | -1.1584   |
| 62566 | P0C214 | Q9NV44 | -0.11203  |
| 62567 | P0C214 | P23763 | -0.29391  |
| 62568 | P0C214 | Q8N5U1 | -0.98681  |
| 62569 | P0C214 | Q9UNW9 | -0.12397  |
| 62570 | P0C214 | Q9UN72 | -1.2636   |
| 62571 | P0C214 | A6NEC2 | -0.86208  |
| 62572 | P0C214 | Q9UN86 | -0.76108  |
| 62573 | P0C214 | Q14643 | -0.28577  |
| 62574 | P0C214 | P63244 | -0.22847  |
| 62575 | P0C214 | Q9H3Z7 | -0.32696  |
| 62576 | P0C214 | P01563 | -0.3045   |
| 62577 | P0C214 | Q8NFU1 | -0.8809   |
| 62578 | P0C214 | P01817 | -1.0022   |
| 62579 | P0C214 | Q8NB66 | -0.32303  |
| 62580 | P0C214 | P0CK96 | -0.98681  |
| 62581 | P0C214 | Q9UEU5 | -0.60816  |
| 62582 | P0C214 | P01763 | -1.0022   |
| 62583 | P0C214 | Q5SY85 | -0.067092 |
| 62584 | P0C214 | O00754 | -0.39756  |
| 62585 | P0C214 | O43246 | -0.97548  |
| 62586 | P0C214 | P55058 | -1.1869   |
| 62587 | P0C214 | Q6ZW61 | -0.07065  |
| 62588 | P0C214 | Q9NP94 | -1.1525   |
| 62589 | P0C214 | P17516 | -0.22672  |
| 62590 | P0C214 | P48745 | -1.0434   |
| 62591 | P0C214 | Q92538 | -0.2172   |
| 62592 | P0C214 | C9J3V5 | -0.23914  |
| 62593 | P0C214 | Q9NX94 | -0.98681  |
| 62594 | P0C214 | Q9UI47 | -0.22725  |
| 62595 | P0C214 | Q9P2F6 | -0.95761  |
| 62596 | P0C214 | Q9UII6 | -0.80979  |
| 62597 | P0C214 | Q9Y6V0 | -0.47137  |
| 62598 | P0C214 | Q96GD3 | -0.18961  |
| 62599 | P0C214 | Q6T310 | -0.23287  |
| 62600 | P0C214 | Q9BRP7 | -0.33381  |
| 62601 | P0C214 | Q75596 | -0.99782  |
| 62602 | P0C214 | O15357 | -0.22741  |
| 62603 | P0C214 | O95835 | -0.22732  |
| 62604 | P0C214 | P52823 | -0.58981  |
| 62605 | P0C214 | Q9NVX7 | -0.22377  |
| 62606 | P0C214 | P01712 | -1.0022   |
| 62607 | P0C214 | P56134 | -0.52983  |
| 62608 | P0C214 | Q86U17 | -0.63505  |
| 62609 | P0C214 | Q96R45 | -1.2952   |
| 62610 | P0C214 | B2RNN3 | -0.96884  |
| 62611 | P0C214 | P51878 | -0.78318  |
| 62612 | P0C214 | Q9UMN6 | -0.22625  |
| 62613 | P0C214 | P42684 | -0.43525  |
| 62614 | P0C214 | P15918 | -0.22669  |
| 62615 | P0C214 | Q02539 | -0.79938  |
| 62616 | P0C214 | Q96Q11 | -0.40385  |
| 62617 | P0C214 | Q5HYA8 | -0.28585  |
| 62618 | P0C214 | Q15149 | -0.22786  |
| 62619 | P0C214 | P55160 | -0.2951   |
| 62620 | P0C214 | Q6ZTR5 | -0.31326  |
| 62621 | P0C214 | P61601 | -0.54204  |
| 62622 | P0C214 | Q9ULS5 | -0.98681  |
| 62623 | P0C214 | Q9Y5W7 | -0.96433  |
| 62624 | P0C214 | P41594 | -0.78013  |

|       |        |        |           |
|-------|--------|--------|-----------|
| 62625 | P0C214 | Q8IYP2 | -1.4261   |
| 62626 | P0C214 | P50591 | -0.62187  |
| 62627 | P0C214 | Q5FYA8 | -0.62205  |
| 62628 | P0C214 | Q9ULW5 | -0.84887  |
| 62629 | P0C214 | O95718 | -0.22745  |
| 62630 | P0C214 | Q8IY50 | -1.0564   |
| 62631 | P0C214 | Q15035 | -0.26626  |
| 62632 | P0C214 | Q75LS8 | -0.40908  |
| 62633 | P0C214 | Q13207 | -0.40088  |
| 62634 | P0C214 | Q5VVY1 | -0.33624  |
| 62635 | P0C214 | P01781 | -1.0022   |
| 62636 | P0C214 | O00338 | -0.23042  |
| 62637 | P0C214 | P27338 | -0.4658   |
| 62638 | P0C214 | P49888 | -0.23598  |
| 62639 | P0C214 | P09758 | -0.82881  |
| 62640 | P0C214 | Q9H4G0 | -0.26033  |
| 62641 | P0C214 | Q6ZR37 | -0.76296  |
| 62642 | P0C214 | Q7Z6I6 | -0.83145  |
| 62643 | P0C214 | Q4ZIN3 | -0.78894  |
| 62644 | P0C214 | O14514 | -1.5677   |
| 62645 | P0C214 | Q9HBM0 | -0.56951  |
| 62646 | P0C214 | P36268 | -0.60888  |
| 62647 | P0C214 | Q8N7S2 | -0.4424   |
| 62648 | P0C214 | Q99952 | -0.2635   |
| 62649 | P0C214 | Q9BY64 | -0.952    |
| 62650 | P0C214 | Q9NV64 | -0.98681  |
| 62651 | P0C214 | Q8IU85 | -0.6494   |
| 62652 | P0C214 | Q16778 | -0.83614  |
| 62653 | P0C214 | Q9H2D6 | -0.24293  |
| 62654 | P0C214 | Q2VYF4 | -0.72984  |
| 62655 | P0C214 | O75711 | -0.84552  |
| 62656 | P0C214 | Q9P0T7 | -0.98727  |
| 62657 | P0C214 | Q8N9N7 | -0.25626  |
| 62658 | P0C214 | Q6IMN6 | -0.34115  |
| 62659 | P0C214 | Q9NP08 | -0.2279   |
| 62660 | P0C214 | Q96HY7 | -0.084862 |
| 62661 | P0C214 | Q96M69 | -0.91844  |
| 62662 | P0C214 | P55084 | -0.17749  |
| 62663 | P0C214 | Q8WV83 | -1.0564   |
| 62664 | P0C214 | Q96BY9 | -0.49762  |
| 62665 | P0C214 | P00367 | -0.1732   |
| 62666 | P0C214 | Q9H2D1 | -0.53036  |
| 62667 | P0C214 | Q9P2Q2 | -0.2752   |
| 62668 | P0C214 | Q7Z3Z2 | -0.48299  |
| 62669 | P0C214 | Q9NRG0 | -0.42984  |
| 62670 | P0C214 | Q96R27 | -1.2952   |
| 62671 | P0C214 | P30041 | -0.2102   |
| 62672 | P0C214 | Q76LX8 | -0.4399   |
| 62673 | P0C214 | Q9Y625 | -0.92056  |
| 62674 | P0C214 | Q9UI38 | -0.61485  |
| 62675 | P0C214 | Q86X45 | -0.3316   |
| 62676 | P0C214 | Q9ULH1 | -0.49158  |
| 62677 | P0C214 | Q8N813 | -0.27795  |
| 62678 | P0C214 | A0PJW6 | -0.75609  |
| 62679 | P0C214 | O00560 | -0.22751  |
| 62680 | P0C214 | Q86SI9 | -0.91736  |
| 62681 | P0C214 | Q4VXU2 | -0.83638  |
| 62682 | P0C214 | Q8IWK6 | -1.3735   |
| 62683 | P0C214 | Q96GD4 | -0.69123  |
| 62684 | P0C214 | Q8N7L0 | -0.16996  |
| 62685 | P0C214 | Q2TB18 | -0.30261  |
| 62686 | P0C214 | Q4VC31 | -0.15381  |
| 62687 | P0C214 | Q96NK8 | -0.22757  |
| 62688 | P0C214 | Q9NWR8 | -0.98681  |
| 62689 | P0C214 | Q9NZ56 | -0.53209  |
| 62690 | P0C214 | P07148 | -0.22029  |
| 62691 | P0C214 | P50120 | -0.18963  |
| 62692 | P0C214 | Q9UI33 | -1.1457   |
| 62693 | P0C214 | P14416 | -0.27196  |
| 62694 | P0C214 | O15211 | -0.81488  |
| 62695 | P0C214 | Q86Y82 | -0.3698   |
| 62696 | P0C214 | Q8NH76 | -1.2952   |
| 62697 | P0C214 | Q9NRW7 | -0.21581  |
| 62698 | P0C214 | Q8WV41 | -0.22741  |
| 62699 | P0C214 | Q86XI6 | -0.20086  |
| 62700 | P0C214 | Q13885 | -0.5045   |

|       |        |        |          |
|-------|--------|--------|----------|
| 62701 | P0C214 | O15091 | -0.1059  |
| 62702 | P0C214 | Q8TEQ8 | -0.81559 |
| 62703 | P0C214 | A5D8T8 | -0.90767 |
| 62704 | P0C214 | Q96JM4 | -0.22637 |
| 62705 | P0C214 | Q13564 | -0.27095 |
| 62706 | P0C214 | Q5TEJ8 | -0.66877 |
| 62707 | P0C214 | Q96P69 | -1.352   |
| 62708 | P0C214 | Q5T7P3 | -0.38015 |
| 62709 | P0C214 | Q9Y2E4 | -0.18703 |
| 62710 | P0C214 | Q96MC2 | -0.43798 |
| 62711 | P0C214 | Q8N5C7 | -0.42321 |
| 62712 | P0C214 | Q8N752 | -1.0717  |
| 62713 | P0C214 | Q9NWF4 | -1.2027  |
| 62714 | P0C214 | Q32P44 | -0.22779 |
| 62715 | P0C214 | P04626 | -0.22748 |
| 62716 | P0C214 | Q96E22 | -0.88065 |
| 62717 | P0C214 | P20645 | -1.0755  |
| 62718 | P0C214 | Q5JUK2 | -0.1979  |
| 62719 | P0C214 | P22079 | -0.91943 |
| 62720 | P0C214 | Q96SB4 | -0.25308 |
| 62721 | P0C214 | P16871 | -0.82073 |
| 62722 | P0C214 | Q14542 | -0.43615 |
| 62723 | P0C214 | Q2QD12 | -0.28737 |
| 62724 | P0C214 | P57764 | -0.41484 |
| 62725 | P0C214 | Q02108 | -0.59667 |
| 62726 | P0C214 | Q6UWB4 | -1.3887  |
| 62727 | P0C214 | Q7L0J3 | -0.64259 |
| 62728 | P0C214 | Q3C1W6 | -0.71534 |
| 62729 | P0C214 | Q9Y5G4 | -1.2424  |
| 62730 | P0C214 | A8MZ26 | -0.43585 |
| 62731 | P0C214 | P0C628 | -1.2952  |
| 62732 | P0C214 | Q7Z3B1 | -0.33231 |
| 62733 | P0C214 | Q99469 | -0.2274  |
| 62734 | P0C214 | P50053 | -0.11826 |
| 62735 | P0C214 | Q9H1D0 | -1.1774  |
| 62736 | P0C214 | Q3MIW9 | -0.98681 |
| 62737 | P0C214 | P02750 | -0.77338 |
| 62738 | P0C214 | Q9BY49 | -0.74508 |
| 62739 | P0C214 | Q9Y4F9 | -0.45175 |
| 62740 | P0C214 | Q8NH06 | -1.2952  |
| 62741 | P0C214 | Q8N7Z5 | -0.22741 |
| 62742 | P0C214 | P60827 | -0.96884 |
| 62743 | P0C214 | P01891 | -0.91186 |
| 62744 | P0C214 | Q8N687 | -0.88056 |
| 62745 | P0C214 | A6NLX4 | -0.98681 |
| 62746 | P0C214 | O75460 | -0.322   |
| 62747 | P0C214 | Q96PF2 | -0.86732 |
| 62748 | P0C214 | Q02535 | -0.22407 |
| 62749 | P0C214 | P28845 | -0.97909 |
| 62750 | P0C214 | Q9UHP7 | -1.1374  |
| 62751 | P0C214 | Q96RP9 | -0.56083 |
| 62752 | P0C214 | Q15011 | -0.46981 |
| 62753 | P0C214 | P29973 | -1.5193  |
| 62754 | P0C214 | P42336 | -0.37904 |
| 62755 | P0C214 | Q7RTY7 | -1.463   |
| 62756 | P0C214 | Q765P7 | -0.71744 |
| 62757 | P0C214 | P11362 | -0.27533 |
| 62758 | P0C214 | Q14149 | -0.19124 |
| 62759 | P0C214 | Q96KJ9 | -0.31041 |
| 62760 | P0C214 | Q96IZ2 | -1.0708  |
| 62761 | P0C214 | P35498 | -0.98578 |
| 62762 | P0C214 | P55001 | -0.84716 |
| 62763 | P0C214 | Q8WW32 | -0.50386 |
| 62764 | P0C214 | A6NNZ2 | -0.7021  |
| 62765 | P0C214 | Q9NZN1 | -0.63662 |
| 62766 | P0C214 | Q8NG94 | -1.2952  |
| 62767 | P0C214 | Q5SSJ5 | -0.71574 |
| 62768 | P0C214 | Q8TDY4 | -0.52043 |
| 62769 | P0C214 | Q13488 | -0.7838  |
| 62770 | P0C214 | P27918 | -0.91695 |
| 62771 | P0C214 | Q9HD87 | -0.98681 |
| 62772 | P0C214 | Q2NKX8 | -0.30423 |
| 62773 | P0C214 | Q9BYE4 | -0.2479  |
| 62774 | P0C214 | Q13825 | -0.13082 |
| 62775 | P0C214 | O95918 | -1.2335  |
| 62776 | P0C214 | P50052 | -0.81074 |

|       |        |        |           |
|-------|--------|--------|-----------|
| 62777 | P0C214 | Q13410 | -1.552    |
| 62778 | P0C214 | Q96AP0 | -0.17221  |
| 62779 | P0C214 | P17677 | -0.12892  |
| 62780 | P0C214 | P20849 | -0.65381  |
| 62781 | P0C214 | Q9BZJ8 | -1.1924   |
| 62782 | P0C214 | Q56A73 | -0.37965  |
| 62783 | P0C214 | P02654 | -0.61889  |
| 62784 | P0C214 | Q5HYJ3 | -0.10129  |
| 62785 | P0C214 | Q15513 | -0.42114  |
| 62786 | P0C214 | Q96RQ9 | -0.9073   |
| 62787 | P0C214 | Q9NPB3 | -0.38439  |
| 62788 | P0C214 | P17538 | -1.3633   |
| 62789 | P0C214 | P18510 | -0.3178   |
| 62790 | P0C214 | P62684 | -0.45806  |
| 62791 | P0C214 | Q86WK7 | -1.1415   |
| 62792 | P0C214 | Q8N442 | -0.48091  |
| 62793 | P0C214 | Q9GZU1 | -0.94833  |
| 62794 | P0C214 | Q5T601 | -0.85127  |
| 62795 | P0C214 | P01858 | -0.31468  |
| 62796 | P0C214 | Q96HZ4 | -0.22579  |
| 62797 | P0C214 | Q9NRY7 | -1.0496   |
| 62798 | P0C214 | Q9NPI9 | -1.2272   |
| 62799 | P0C214 | Q9NNX6 | -0.96087  |
| 62800 | P0C214 | Q96QE2 | -0.99144  |
| 62801 | P0C214 | P10721 | -0.30609  |
| 62802 | P0C214 | Q9BS86 | -0.89281  |
| 62803 | P0C214 | O43559 | -0.6678   |
| 62804 | P0C214 | Q9Y3A0 | -0.23943  |
| 62805 | P0C214 | Q9Y666 | -1.1914   |
| 62806 | P0C214 | P01762 | -1.0022   |
| 62807 | P0C214 | D6R901 | -0.68518  |
| 62808 | P0C214 | O96014 | -0.42552  |
| 62809 | P0C214 | P26715 | -1.2201   |
| 62810 | P0C214 | Q9P215 | -0.34517  |
| 62811 | P0C214 | P35236 | -0.28773  |
| 62812 | P0C214 | Q92688 | -0.15575  |
| 62813 | P0C214 | P28360 | -0.15951  |
| 62814 | P0C214 | Q86VS3 | -0.87905  |
| 62815 | P0C214 | P46092 | -1.3679   |
| 62816 | P0C214 | Q6P597 | -0.051183 |
| 62817 | P0C214 | Q8ND61 | -0.78894  |
| 62818 | P0C214 | A6NMP4 | -0.72842  |
| 62819 | P0C214 | Q13733 | -1.04     |
| 62820 | P0C214 | Q9GZU3 | -0.98681  |
| 62821 | P0C214 | Q02747 | -0.97637  |
| 62822 | P0C214 | Q3MJ13 | -0.22807  |
| 62823 | P0C214 | P07550 | -0.32262  |
| 62824 | P0C214 | Q8TD86 | -0.22332  |
| 62825 | P0C214 | P29597 | -0.71424  |
| 62826 | P0C214 | Q16774 | -0.40454  |
| 62827 | P0C214 | P23759 | -0.21948  |
| 62828 | P0C214 | P49238 | -0.69463  |
| 62829 | P0C214 | Q08116 | -0.67406  |
| 62830 | P0C214 | Q8NE86 | -0.3603   |
| 62831 | P0C214 | Q13686 | -0.22052  |
| 62832 | P0C214 | A6NJG6 | -0.2064   |
| 62833 | P0C214 | Q86VB7 | -1.0276   |
| 62834 | P0C214 | Q30KQ5 | -0.88056  |
| 62835 | P0C214 | Q15269 | -0.22457  |
| 62836 | P0C214 | A4D0S4 | -1.2333   |
| 62837 | P0C214 | Q5MJ09 | -0.14981  |
| 62838 | P0C214 | Q9Y6K0 | -0.3956   |
| 62839 | P0C214 | Q9H4F8 | -1.2792   |
| 62840 | P0C214 | P15313 | -0.3137   |
| 62841 | P0C214 | Q92766 | -0.21305  |
| 62842 | P0C214 | Q6IE37 | -0.70605  |
| 62843 | P0C214 | P22455 | -0.80054  |
| 62844 | P0C214 | Q9UQ13 | -0.27226  |
| 62845 | P0C214 | Q8WX77 | -0.87692  |
| 62846 | P0C214 | Q8NE63 | -1.1062   |
| 62847 | P0C214 | Q2MKA7 | -0.22714  |
| 62848 | P0C214 | A6NHI5 | -0.98681  |
| 62849 | P0C214 | P30536 | -0.35323  |
| 62850 | P0C214 | Q3ZCU0 | -0.20897  |
| 62851 | P0C214 | Q5JZY3 | -1.2347   |
| 62852 | P0C214 | Q9BXX5 | -0.29432  |



|       |        |        |           |
|-------|--------|--------|-----------|
| 62853 | P0C214 | Q9BV44 | -0.34444  |
| 62854 | P0C214 | O95727 | -0.98431  |
| 62855 | P0C214 | Q8NH21 | -1.2952   |
| 62856 | P0C214 | Q684P5 | -0.22251  |
| 62857 | P0C214 | Q8N165 | -1.0156   |
| 62858 | P0C214 | Q8NGN6 | -1.2952   |
| 62859 | P0C214 | P46091 | -1.4957   |
| 62860 | P0C214 | Q96PZ2 | -0.50812  |
| 62861 | P0C214 | Q3C1V9 | -0.064166 |
| 62862 | P0C214 | Q76N89 | -0.22741  |
| 62863 | P0C214 | Q16674 | -0.78562  |
| 62864 | P0C214 | Q3SY46 | -0.077263 |
| 62865 | P0C214 | Q9HBH5 | -0.61459  |
| 62866 | P0C214 | Q96S90 | -0.38318  |
| 62867 | P0C214 | P54868 | -0.22085  |
| 62868 | P0C214 | Q8NHX4 | -0.26903  |
| 62869 | P0C214 | Q9H0K1 | -0.50957  |
| 62870 | P0C214 | P0C874 | -0.98681  |
| 62871 | P0C214 | Q2M2I8 | -0.93814  |
| 62872 | P0C214 | Q9UGC6 | -0.34685  |
| 62873 | P0C214 | Q86YQ8 | -0.22974  |
| 62874 | P0C214 | Q9BQP7 | -0.15381  |
| 62875 | P0C214 | Q8IWB6 | -0.42854  |
| 62876 | P0C214 | Q9UJD0 | -0.36216  |
| 62877 | P0C214 | Q6NUS8 | -0.90861  |
| 62878 | P0C214 | Q9NUP9 | -0.14841  |
| 62879 | P0C214 | Q9BXB7 | -0.7125   |
| 62880 | P0C214 | Q6GPI1 | -1.3633   |
| 62881 | P0C214 | P01732 | -0.82929  |
| 62882 | P0C214 | P07203 | -0.25391  |
| 62883 | P0C214 | Q3SXP7 | -0.98681  |
| 62884 | P0C214 | Q6XUX3 | -0.69466  |
| 62885 | P0C214 | Q96P48 | -0.29934  |
| 62886 | P0C214 | Q6ZSR3 | -0.15381  |
| 62887 | P0C214 | A4D0T2 | -0.98681  |
| 62888 | P0C214 | Q16799 | -0.54906  |
| 62889 | P0C214 | Q9BXP2 | -1.0904   |
| 62890 | P0C214 | Q9HD64 | -0.095819 |
| 62891 | P0C214 | P35625 | -0.34775  |
| 62892 | P0C214 | Q8NGV0 | -1.2952   |
| 62893 | P0C214 | Q9BTV7 | -0.098377 |
| 62894 | P0C214 | Q9BTZ2 | -0.46608  |
| 62895 | P0C214 | Q7RTY0 | -1.1032   |
| 62896 | P0C214 | Q8TF66 | -0.98681  |
| 62897 | P0C214 | Q11206 | -0.68784  |
| 62898 | P0C214 | A6NN79 | -0.98681  |
| 62899 | P0C214 | Q5T7R7 | -0.98681  |
| 62900 | P0C214 | O14958 | -0.4515   |
| 62901 | P0C214 | P11686 | -0.33863  |
| 62902 | P0C214 | O14950 | -0.22612  |
| 62903 | P0C214 | Q5K130 | -0.47142  |
| 62904 | P0C214 | Q9UKU9 | -1.3125   |
| 62905 | P0C214 | Q9H2W1 | -0.98681  |
| 62906 | P0C214 | Q9UBR5 | -1.209    |
| 62907 | P0C214 | Q6IF63 | -1.2952   |
| 62908 | P0C214 | Q9NNZ6 | -0.80842  |
| 62909 | P0C214 | P01138 | -0.3847   |
| 62910 | P0C214 | Q8IV08 | -0.27988  |
| 62911 | P0C214 | Q8IXL9 | -0.21188  |
| 62912 | P0C214 | Q03181 | -0.34205  |
| 62913 | P0C214 | Q7Z7L9 | -0.44971  |
| 62914 | P0C214 | Q8IWA4 | -0.84256  |
| 62915 | P0C214 | Q9UBP0 | -0.22928  |
| 62916 | P0C214 | Q96K76 | -0.43488  |
| 62917 | P0C214 | O15240 | -0.56541  |
| 62918 | P0C214 | Q04721 | -0.23926  |
| 62919 | P0C214 | Q6ZMD2 | -1.1733   |
| 62920 | P0C214 | Q6ZV29 | -0.47258  |
| 62921 | P0C214 | P01708 | -1.0022   |
| 62922 | P0C214 | Q6P158 | -0.86153  |
| 62923 | P0C214 | C9JRZ8 | -0.45045  |
| 62924 | P0C214 | P13866 | -0.24414  |
| 62925 | P0C214 | P09958 | -0.45983  |
| 62926 | P0C214 | Q9Y5F9 | -1.2424   |
| 62927 | P0C214 | P04206 | -1.0022   |
| 62928 | P0C214 | Q5T9Z0 | -0.98681  |

|       |        |        |           |
|-------|--------|--------|-----------|
| 62929 | P0C214 | Q9UM22 | -0.88725  |
| 62930 | P0C214 | P47775 | -1.448    |
| 62931 | P0C214 | E7ERA6 | -1.0783   |
| 62932 | P0C214 | Q9UKJ1 | -0.92303  |
| 62933 | P0C214 | P00156 | -0.60166  |
| 62934 | P0C214 | P25089 | -1.3606   |
| 62935 | P0C214 | Q9NST1 | -0.60188  |
| 62936 | P0C214 | P30518 | -0.79422  |
| 62937 | P0C214 | Q9P2N7 | -0.18275  |
| 62938 | P0C214 | Q96PD4 | -0.52717  |
| 62939 | P0C214 | Q8N6S4 | -0.46717  |
| 62940 | P0C214 | Q9NQC1 | -0.4489   |
| 62941 | P0C214 | Q8IWZ5 | -0.71534  |
| 62942 | P0C214 | Q96BQ3 | -0.71534  |
| 62943 | P0C214 | Q5M775 | -0.22751  |
| 62944 | P0C214 | Q9HBW0 | -0.98263  |
| 62945 | P0C214 | Q8N4A0 | -0.50269  |
| 62946 | P0C214 | Q8N2E6 | -1.2083   |
| 62947 | P0C214 | Q96C03 | -0.15669  |
| 62948 | P0C214 | Q9C009 | -0.37245  |
| 62949 | P0C214 | Q96SM3 | -1.4007   |
| 62950 | P0C214 | Q969F0 | -0.91465  |
| 62951 | P0C214 | Q9NU22 | -0.36045  |
| 62952 | P0C214 | Q6PIF6 | -0.77204  |
| 62953 | P0C214 | Q15286 | -0.47243  |
| 62954 | P0C214 | Q9HDC9 | -0.84999  |
| 62955 | P0C214 | O60911 | -0.51195  |
| 62956 | P0C214 | Q86WA8 | -0.36635  |
| 62957 | P0C214 | A1A4S6 | -0.23876  |
| 62958 | P0C214 | Q309B1 | -0.22616  |
| 62959 | P0C214 | Q9Y5F0 | -1.2126   |
| 62960 | P0C214 | Q9NRM7 | -0.22741  |
| 62961 | P0C214 | P57054 | -0.81606  |
| 62962 | P0C214 | Q9BYR9 | -0.38191  |
| 62963 | P0C214 | Q96RI9 | -1.3342   |
| 62964 | P0C214 | O14654 | -0.85715  |
| 62965 | P0C214 | Q9BYD5 | -0.20592  |
| 62966 | P0C214 | Q8NGG0 | -1.2952   |
| 62967 | P0C214 | O60259 | -0.5346   |
| 62968 | P0C214 | Q8NGG6 | -1.2952   |
| 62969 | P0C214 | Q8NC67 | -0.98681  |
| 62970 | P0C214 | Q9NTN9 | -1.2154   |
| 62971 | P0C214 | P01588 | -0.22107  |
| 62972 | P0C214 | P15289 | -0.47659  |
| 62973 | P0C214 | P30531 | -0.699    |
| 62974 | P0C214 | P01760 | -1.0022   |
| 62975 | P0C214 | P22304 | -0.40709  |
| 62976 | P0C214 | Q9H254 | -0.22792  |
| 62977 | P0C214 | P11216 | -0.0728   |
| 62978 | P0C214 | Q9HCN4 | -0.97853  |
| 62979 | P0C214 | P19099 | -0.28589  |
| 62980 | P0C214 | Q4G0M1 | -0.91736  |
| 62981 | P0C214 | P49683 | -1.318    |
| 62982 | P0C214 | Q96G42 | -0.21049  |
| 62983 | P0C214 | O60762 | -0.20079  |
| 62984 | P0C214 | Q7Z3H4 | -0.2163   |
| 62985 | P0C214 | Q9BRL6 | -0.53354  |
| 62986 | P0C214 | Q9H1K4 | -0.79953  |
| 62987 | P0C214 | P56545 | -0.36336  |
| 62988 | P0C214 | Q9HCJ3 | -0.31203  |
| 62989 | P0C214 | P23435 | -0.75969  |
| 62990 | P0C214 | Q9H4S2 | -0.18777  |
| 62991 | P0C214 | A8MT33 | -0.37044  |
| 62992 | P0C214 | Q7Z7H8 | -0.42127  |
| 62993 | P0C214 | E9PQR5 | -0.040354 |
| 62994 | P0C214 | Q96M98 | -0.20773  |
| 62995 | P0C214 | A8MW92 | -0.50512  |
| 62996 | P0C214 | P43403 | -0.39831  |
| 62997 | P0C214 | Q3SYB3 | -0.41532  |
| 62998 | P0C214 | Q9BY50 | -0.74218  |
| 62999 | P0C214 | P40313 | -0.9702   |
| 63000 | P0C214 | O60809 | -0.18615  |
| 63001 | P0C214 | Q14108 | -1.3217   |
| 63002 | P0C214 | Q8NGJ2 | -1.2952   |
| 63003 | P0C214 | Q9NW97 | -0.98681  |
| 63004 | P0C214 | O95258 | -0.89738  |

|       |        |        |           |
|-------|--------|--------|-----------|
| 63005 | P0C214 | Q8IUN9 | -1.0712   |
| 63006 | P0C214 | Q9UUK9 | -0.52286  |
| 63007 | P0C214 | Q8N2B8 | -0.47212  |
| 63008 | P0C214 | Q96DU7 | -0.39434  |
| 63009 | P0C214 | Q70HW3 | -0.37534  |
| 63010 | P0C214 | Q8N0W4 | -0.43939  |
| 63011 | P0C214 | P05019 | -0.22412  |
| 63012 | P0C214 | Q5SQH8 | -0.45713  |
| 63013 | P0C214 | A6NDP7 | -0.98681  |
| 63014 | P0C214 | Q96EE4 | -0.91736  |
| 63015 | P0C214 | Q9NZ20 | -0.48074  |
| 63016 | P0C214 | Q53HI1 | -0.39434  |
| 63017 | P0C214 | Q86UB9 | -1.0335   |
| 63018 | P0C214 | Q9BVA0 | -0.22962  |
| 63019 | P0C214 | P42127 | -0.87298  |
| 63020 | P0C214 | Q8IZD0 | -0.246    |
| 63021 | P0C214 | Q7Z6M2 | -0.37066  |
| 63022 | P0C214 | Q01804 | -0.18353  |
| 63023 | P0C214 | Q96R54 | -1.2952   |
| 63024 | P0C214 | Q9HBF4 | -0.21294  |
| 63025 | P0C214 | Q96MU5 | -0.91736  |
| 63026 | P0C214 | P10316 | -0.91186  |
| 63027 | P0C214 | P20815 | -0.59138  |
| 63028 | P0C214 | Q96RC9 | -1.2952   |
| 63029 | P0C214 | Q96CX2 | -0.15611  |
| 63030 | P0C214 | O15225 | -0.18353  |
| 63031 | P0C214 | Q8NI37 | -0.19616  |
| 63032 | P0C214 | Q8IYS0 | -0.98681  |
| 63033 | P0C214 | Q99062 | -1.7275   |
| 63034 | P0C214 | P30626 | -0.29231  |
| 63035 | P0C214 | Q9NYW5 | -1.3329   |
| 63036 | P0C214 | Q6UX46 | -0.91736  |
| 63037 | P0C214 | P36544 | -0.77391  |
| 63038 | P0C214 | Q5JS37 | -0.91736  |
| 63039 | P0C214 | Q9UHI5 | -0.46114  |
| 63040 | P0C214 | Q9UJ72 | -0.14525  |
| 63041 | P0C214 | A6NJJ2 | -0.22741  |
| 63042 | P0C214 | Q8N0W7 | -0.74825  |
| 63043 | P0C214 | Q496F6 | -1.0708   |
| 63044 | P0C214 | Q8IVW1 | -0.96062  |
| 63045 | P0C214 | P01716 | -1.0022   |
| 63046 | P0C214 | O43692 | -0.72124  |
| 63047 | P0C214 | Q3B8N5 | -0.20798  |
| 63048 | P0C214 | Q6IF82 | -1.2952   |
| 63049 | P0C214 | Q99735 | -0.64079  |
| 63050 | P0C214 | Q9H0N0 | -0.42653  |
| 63051 | P0C214 | P0CG32 | -0.5018   |
| 63052 | P0C214 | A8MUX0 | -0.030516 |
| 63053 | P0C214 | Q96GA7 | -0.098252 |
| 63054 | P0C214 | Q6PEX7 | -0.98681  |
| 63055 | P0C214 | Q6ZWC4 | -0.072088 |
| 63056 | P0C214 | Q8N8U9 | -0.75744  |
| 63057 | P0C214 | Q6IFH4 | -1.2952   |
| 63058 | P0C214 | A6NKC0 | -0.4589   |
| 63059 | P0C214 | Q8N446 | -0.70722  |
| 63060 | P0C214 | Q92622 | -0.2771   |
| 63061 | P0C214 | P0CJ92 | -0.2859   |
| 63062 | P0C214 | Q8IZU8 | -0.9123   |
| 63063 | P0C214 | Q6UXK2 | -1.1038   |
| 63064 | P0C214 | Q3KR37 | -0.98681  |
| 63065 | P0C214 | P04899 | -0.32876  |
| 63066 | P0C214 | Q01629 | -0.83469  |
| 63067 | P0C214 | Q01668 | -0.6018   |
| 63068 | P0C214 | O75762 | -1.0048   |
| 63069 | P0C214 | Q8TC07 | -0.58972  |
| 63070 | P0C214 | Q09327 | -0.7182   |
| 63071 | P0C214 | Q7Z3B3 | -0.22743  |
| 63072 | P0C214 | Q92537 | -0.68883  |
| 63073 | P0C214 | O95072 | -0.29993  |
| 63074 | P0C214 | O15130 | -0.99923  |
| 63075 | P0C214 | Q13017 | -0.58889  |
| 63076 | P0C214 | Q8NGP0 | -1.2952   |
| 63077 | P0C214 | O43181 | -0.096699 |
| 63078 | P0C214 | Q8TBR7 | -1.0708   |
| 63079 | P0C214 | P0CJ86 | -0.16414  |
| 63080 | P0C214 | Q495X7 | -0.71534  |

|       |        |        |           |
|-------|--------|--------|-----------|
| 63081 | P0C214 | O95445 | -0.91501  |
| 63082 | P0C214 | Q9UIG4 | -0.64701  |
| 63083 | P0C214 | Q5T5M9 | -0.06773  |
| 63084 | P0C214 | A6NDD2 | -0.88056  |
| 63085 | P0C214 | Q5T7P8 | -0.65721  |
| 63086 | P0C214 | Q8NFW1 | -0.76757  |
| 63087 | P0C214 | Q9P275 | -0.42958  |
| 63088 | P0C214 | O14788 | -0.59139  |
| 63089 | P0C214 | P15538 | -0.27492  |
| 63090 | P0C214 | Q902F8 | -0.85122  |
| 63091 | P0C214 | A8MXE2 | -0.82935  |
| 63092 | P0C214 | O97980 | -0.50624  |
| 63093 | P0C214 | Q8NGT9 | -1.2952   |
| 63094 | P0C214 | Q92503 | -1.0001   |
| 63095 | P0C214 | Q86UF2 | -0.81992  |
| 63096 | P0C214 | Q9BXW6 | -0.22741  |
| 63097 | P0C214 | P19634 | -0.40798  |
| 63098 | P0C214 | Q12829 | -1.0449   |
| 63099 | P0C214 | P02655 | -0.55216  |
| 63100 | P0C214 | Q9NZV1 | -1.1231   |
| 63101 | P0C214 | P10163 | -0.76523  |
| 63102 | P0C214 | Q16445 | -0.87044  |
| 63103 | P0C214 | Q6NVV7 | -0.69526  |
| 63104 | P0C214 | Q6P1A2 | -0.62483  |
| 63105 | P0C214 | Q9HCM4 | -0.27519  |
| 63106 | P0C214 | Q5RL73 | -0.28388  |
| 63107 | P0C214 | Q96EY9 | -0.45753  |
| 63108 | P0C214 | Q07326 | -0.86938  |
| 63109 | P0C214 | P68400 | -0.42913  |
| 63110 | P0C214 | Q8WW27 | -0.49056  |
| 63111 | P0C214 | Q8TAB3 | -1.2424   |
| 63112 | P0C214 | Q70J99 | -0.2306   |
| 63113 | P0C214 | P40879 | -0.71239  |
| 63114 | P0C214 | P52907 | -0.35445  |
| 63115 | P0C214 | P20062 | -1.0113   |
| 63116 | P0C214 | Q8NGN0 | -1.2952   |
| 63117 | P0C214 | Q96BT1 | -0.95833  |
| 63118 | P0C214 | P59894 | -0.55123  |
| 63119 | P0C214 | Q86TA4 | -0.43241  |
| 63120 | P0C214 | Q15363 | -0.17825  |
| 63121 | P0C214 | P09067 | -0.23121  |
| 63122 | P0C214 | Q86VZ5 | -0.34255  |
| 63123 | P0C214 | Q01151 | -1.0717   |
| 63124 | P0C214 | Q8NBS3 | -0.76521  |
| 63125 | P0C214 | P26927 | -0.79627  |
| 63126 | P0C214 | P35659 | -0.30425  |
| 63127 | P0C214 | O60942 | -0.45861  |
| 63128 | P0C214 | Q96DD0 | -0.33825  |
| 63129 | P0C214 | Q6P4E1 | -0.98681  |
| 63130 | P0C214 | P36406 | -0.32346  |
| 63131 | P0C214 | O43194 | -1.5255   |
| 63132 | P0C214 | Q0ZLH3 | -0.55802  |
| 63133 | P0C214 | Q15019 | -0.22698  |
| 63134 | P0C214 | Q9H9S3 | -0.80009  |
| 63135 | P0C214 | Q13029 | -0.22728  |
| 63136 | P0C214 | Q8N5H7 | -0.66067  |
| 63137 | P0C214 | P61421 | -0.2521   |
| 63138 | P0C214 | A1KXE4 | -0.94332  |
| 63139 | P0C214 | Q9H7L2 | -0.91736  |
| 63140 | P0C214 | Q6T4P5 | -0.93907  |
| 63141 | P0C214 | Q9HB15 | -1.1424   |
| 63142 | P0C214 | Q93084 | -0.71432  |
| 63143 | P0C214 | Q14973 | -0.97069  |
| 63144 | P0C214 | P35222 | -0.22873  |
| 63145 | P0C214 | A7E2S9 | -0.22741  |
| 63146 | P0C214 | Q8WTS1 | -0.18715  |
| 63147 | P0C214 | Q99598 | -0.23467  |
| 63148 | P0C214 | P56747 | -0.86549  |
| 63149 | P0C214 | Q6AZY7 | -0.84542  |
| 63150 | P0C214 | Q8WV15 | -0.98681  |
| 63151 | P0C214 | Q6IEV9 | -1.2952   |
| 63152 | P0C214 | Q9UKF7 | -0.37913  |
| 63153 | P0C214 | Q9UQQ2 | -0.28847  |
| 63154 | P0C214 | P59861 | -0.88056  |
| 63155 | P0C214 | P05154 | -0.5146   |
| 63156 | P0C214 | Q8TD90 | -0.076407 |

|       |        |        |           |
|-------|--------|--------|-----------|
| 63157 | P0C214 | Q92599 | -0.19854  |
| 63158 | P0C214 | Q86VF7 | -0.52582  |
| 63159 | P0C214 | Q96CU9 | -0.72314  |
| 63160 | P0C214 | Q8NCA5 | -0.053266 |
| 63161 | P0C214 | Q86SQ3 | -1.3967   |
| 63162 | P0C214 | Q96FB5 | -0.89707  |
| 63163 | P0C214 | Q8NGW1 | -1.2952   |
| 63164 | P0C214 | O14603 | -0.12647  |
| 63165 | P0C214 | P35414 | -1.1381   |
| 63166 | P0C214 | Q9P0S2 | -0.50793  |
| 63167 | P0C214 | O75146 | -0.20181  |
| 63168 | P0C214 | O15033 | -0.56318  |
| 63169 | P0C214 | Q99942 | -0.26267  |
| 63170 | P0C214 | Q9UJU2 | -0.18546  |
| 63171 | P0C214 | Q9UNH6 | -0.68393  |
| 63172 | P0C214 | Q8NHC8 | -1.2952   |
| 63173 | P0C214 | Q71U36 | -0.18165  |
| 63174 | P0C214 | Q8TDS7 | -1.3693   |
| 63175 | P0C214 | O00533 | -1.4402   |
| 63176 | P0C214 | P47804 | -0.92777  |
| 63177 | P0C214 | P0CG33 | -0.2859   |
| 63178 | P0C214 | O95789 | -0.44524  |
| 63179 | P0C214 | Q9UK80 | -0.41204  |
| 63180 | P0C214 | P09466 | -1.168    |
| 63181 | P0C214 | Q68CR1 | -0.98681  |
| 63182 | P0C214 | Q96L15 | -0.83687  |
| 63183 | P0C214 | O00634 | -0.57158  |
| 63184 | P0C214 | Q75899 | -0.98979  |
| 63185 | P0C214 | P59540 | -1.4042   |
| 63186 | P0C214 | P40123 | -0.52854  |
| 63187 | P0C214 | Q96SL4 | -1.0082   |
| 63188 | P0C214 | Q86T82 | -0.32286  |
| 63189 | P0C214 | Q9Y5E7 | -1.2282   |
| 63190 | P0C214 | Q9UKQ2 | -1.7578   |
| 63191 | P0C214 | O94966 | -0.68807  |
| 63192 | P0C214 | Q9Y2P4 | -1.2517   |
| 63193 | P0C214 | O15075 | -1.1724   |
| 63194 | P0C214 | A6NHU5 | -0.045842 |
| 63195 | P0C214 | Q9UBY5 | -1.3551   |
| 63196 | P0C214 | Q5W0Z9 | -1.0453   |
| 63197 | P0C214 | P51686 | -1.3311   |
| 63198 | P0C214 | Q9BZ98 | -0.7712   |
| 63199 | P0C214 | P23510 | -0.4446   |
| 63200 | P0C214 | Q7Z2W7 | -0.96162  |
| 63201 | P0C214 | Q8N653 | -0.22717  |
| 63202 | P0C214 | Q9UHL4 | -0.98596  |
| 63203 | P0C214 | Q7Z695 | -1.1621   |
| 63204 | P0C214 | O43557 | -0.62153  |
| 63205 | P0C214 | P0CJ75 | -0.73145  |
| 63206 | P0C214 | O14975 | -0.54863  |
| 63207 | P0C214 | Q96A33 | -0.23162  |
| 63208 | P0C214 | P34947 | -0.53473  |
| 63209 | P0C214 | Q5TA82 | -0.38015  |
| 63210 | P0C214 | Q0VD67 | -1.0271   |
| 63211 | P0C214 | A6NLW8 | -0.19085  |
| 63212 | P0C214 | Q9H2Z4 | -0.42888  |
| 63213 | P0C214 | Q8N434 | -0.99951  |
| 63214 | P0C214 | Q8WV19 | -0.77158  |
| 63215 | P0C214 | Q9Y4F5 | -0.21344  |
| 63216 | P0C214 | O95302 | -0.43594  |
| 63217 | P0C214 | Q86X29 | -0.93837  |
| 63218 | P0C214 | Q6ZP65 | -0.10738  |
| 63219 | P0C214 | Q13822 | -0.86758  |
| 63220 | P0C214 | Q01955 | -0.57244  |
| 63221 | P0C214 | O75438 | -0.40654  |
| 63222 | P0C214 | Q12893 | -0.49982  |
| 63223 | P0C214 | Q8N9U0 | -0.21705  |
| 63224 | P0C214 | A8MWV9 | -0.98681  |
| 63225 | P0C214 | Q9BXB4 | -0.96432  |
| 63226 | P0C214 | P33908 | -0.63443  |
| 63227 | P0C214 | P46977 | -0.37622  |
| 63228 | P0C214 | Q96KN8 | -0.17072  |
| 63229 | P0C214 | Q15256 | -0.39358  |
| 63230 | P0C214 | A5PLL7 | -1.0037   |
| 63231 | P0C214 | Q9P2K8 | -0.95241  |
| 63232 | P0C214 | Q92615 | -0.83638  |

|       |        |        |           |
|-------|--------|--------|-----------|
| 63233 | P0C214 | Q9P1P5 | -1.3342   |
| 63234 | P0C214 | P0CG36 | -1.1133   |
| 63235 | P0C214 | Q6P5Z2 | -0.38143  |
| 63236 | P0C214 | Q6IA17 | -0.52079  |
| 63237 | P0C214 | Q8IUL8 | -0.86413  |
| 63238 | P0C214 | P20264 | -0.22741  |
| 63239 | P0C214 | Q9Y5E3 | -1.2282   |
| 63240 | P0C214 | Q86WN1 | -0.2274   |
| 63241 | P0C214 | Q96EP9 | -1.1427   |
| 63242 | P0C214 | P02461 | -0.3539   |
| 63243 | P0C214 | A6NFT4 | -0.30595  |
| 63244 | P0C214 | Q16568 | -0.31279  |
| 63245 | P0C214 | Q8IWB7 | -0.22746  |
| 63246 | P0C214 | Q9UHE5 | -1.0262   |
| 63247 | P0C214 | P40426 | -0.24407  |
| 63248 | P0C214 | F2Z333 | -0.98681  |
| 63249 | P0C214 | Q13976 | -0.31612  |
| 63250 | P0C214 | Q8IZQ8 | -0.46172  |
| 63251 | P0C214 | Q5VV63 | -1.0099   |
| 63252 | P0C214 | Q5TF21 | -0.98681  |
| 63253 | P0C214 | P20336 | -0.37512  |
| 63254 | P0C214 | Q8N3J6 | -1.2161   |
| 63255 | P0C214 | Q13459 | -0.067404 |
| 63256 | P0C214 | Q13206 | -0.73213  |
| 63257 | P0C214 | A8MVW0 | -0.98681  |
| 63258 | P0C214 | P80370 | -0.85648  |
| 63259 | P0C214 | Q9NY30 | -0.38428  |
| 63260 | P0C214 | Q96JQ5 | -0.98681  |
| 63261 | P0C214 | Q17RP2 | -0.21333  |
| 63262 | P0C214 | Q9NX01 | -0.12275  |
| 63263 | P0C214 | Q9NZV8 | -0.84441  |
| 63264 | P0C214 | Q96DY7 | -0.37909  |
| 63265 | P0C214 | A8MX34 | -0.19763  |
| 63266 | P0C214 | Q8TCN5 | -0.13368  |
| 63267 | P0C214 | Q8NGX6 | -1.2952   |
| 63268 | P0C214 | Q2M5E4 | -0.61728  |
| 63269 | P0C214 | P51888 | -0.8501   |
| 63270 | P0C214 | P30495 | -1.0367   |
| 63271 | P0C214 | Q8NFF2 | -1.1641   |
| 63272 | P0C214 | Q7Z7G2 | -0.46816  |
| 63273 | P0C214 | O94806 | -0.28828  |
| 63274 | P0C214 | O15178 | -0.34323  |
| 63275 | P0C214 | Q6UWN5 | -0.5764   |
| 63276 | P0C214 | Q14444 | -0.35978  |
| 63277 | P0C214 | P58062 | -0.23019  |
| 63278 | P0C214 | Q8NET6 | -0.48362  |
| 63279 | P0C214 | Q14330 | -1.3112   |
| 63280 | P0C214 | Q6NUI2 | -0.48267  |
| 63281 | P0C214 | P28908 | -0.78996  |
| 63282 | P0C214 | Q6NT52 | -0.89474  |
| 63283 | P0C214 | O15400 | -0.95111  |
| 63284 | P0C214 | Q75616 | -0.55566  |
| 63285 | P0C214 | Q5TA79 | -0.38015  |
| 63286 | P0C214 | P61224 | -0.22764  |
| 63287 | P0C214 | P55287 | -1.1928   |
| 63288 | P0C214 | P02812 | -0.64701  |
| 63289 | P0C214 | P45379 | -0.25902  |
| 63290 | P0C214 | P62070 | -0.64796  |
| 63291 | P0C214 | Q8NEC7 | -0.18353  |
| 63292 | P0C214 | P00325 | -0.30625  |
| 63293 | P0C214 | Q6ZUJ8 | -0.12096  |
| 63294 | P0C214 | P60891 | -0.27221  |
| 63295 | P0C214 | Q4VNC0 | -1.0065   |
| 63296 | P0C214 | Q6UW02 | -0.99601  |
| 63297 | P0C214 | Q9UBP9 | -0.58732  |
| 63298 | P0C214 | Q9UGN5 | -0.14104  |
| 63299 | P0C214 | Q9BX67 | -0.55577  |
| 63300 | P0C214 | Q99712 | -1.311    |
| 63301 | P0C214 | Q9NS40 | -1.1168   |
| 63302 | P0C214 | O60568 | -0.25194  |
| 63303 | P0C214 | Q9BV10 | -0.7589   |
| 63304 | P0C214 | O00421 | -1.4048   |
| 63305 | P0C214 | Q6UXC1 | -0.84662  |
| 63306 | P0C214 | Q02962 | -0.22731  |
| 63307 | P0C214 | Q08828 | -0.64411  |
| 63308 | P0C214 | Q93077 | -0.85588  |

|       |        |        |           |
|-------|--------|--------|-----------|
| 63309 | P0C214 | Q9H8V3 | -0.22826  |
| 63310 | P0C214 | P01033 | -0.3026   |
| 63311 | P0C214 | A6ND01 | -0.89614  |
| 63312 | P0C214 | Q9HC23 | -0.9441   |
| 63313 | P0C214 | Q6KCM7 | -0.83715  |
| 63314 | P0C214 | Q12884 | -0.61644  |
| 63315 | P0C214 | P18089 | -0.57488  |
| 63316 | P0C214 | O14773 | -0.55226  |
| 63317 | P0C214 | Q96GE6 | -0.43585  |
| 63318 | P0C214 | Q99767 | -0.22734  |
| 63319 | P0C214 | P17213 | -0.90523  |
| 63320 | P0C214 | Q8NFP0 | -0.3597   |
| 63321 | P0C214 | Q8N4M1 | -0.79755  |
| 63322 | P0C214 | Q9ULZ0 | -0.95847  |
| 63323 | P0C214 | Q12950 | -0.41532  |
| 63324 | P0C214 | Q5T9S5 | -0.086749 |
| 63325 | P0C214 | Q96LP6 | -0.40121  |
| 63326 | P0C214 | Q9C030 | -0.47551  |
| 63327 | P0C214 | Q12913 | -0.50298  |
| 63328 | P0C214 | Q9NYG8 | -1.2288   |
| 63329 | P0C214 | Q96S44 | -0.52906  |
| 63330 | P0C214 | A5YM69 | -0.35667  |
| 63331 | P0C214 | P05023 | -0.40618  |
| 63332 | P0C214 | P02585 | -0.22262  |
| 63333 | P0C214 | P48052 | -1.2079   |
| 63334 | P0C214 | Q9BVA6 | -1.0892   |
| 63335 | P0C214 | Q92777 | -0.52749  |
| 63336 | P0C214 | A6NCW0 | -0.34697  |
| 63337 | P0C214 | Q14055 | -0.85653  |
| 63338 | P0C214 | P42892 | -0.63279  |
| 63339 | P0C214 | P14778 | -0.99383  |
| 63340 | P0C214 | Q9UI40 | -1.0878   |
| 63341 | P0C214 | Q05940 | -0.60935  |
| 63342 | P0C214 | Q5RI15 | -0.77831  |
| 63343 | P0C214 | Q6ZNI0 | -0.79304  |
| 63344 | P0C214 | Q96S66 | -0.28573  |
| 63345 | P0C214 | Q9UL17 | -0.42215  |
| 63346 | P0C214 | Q99584 | -0.25562  |
| 63347 | P0C214 | P23378 | -0.38849  |
| 63348 | P0C214 | O95995 | -0.28444  |
| 63349 | P0C214 | Q92879 | -0.24445  |
| 63350 | P0C214 | Q14118 | -0.2627   |
| 63351 | P0C214 | Q8NGB2 | -1.2952   |
| 63352 | P0C214 | O43736 | -0.35508  |
| 63353 | P0C214 | P20674 | -0.098221 |
| 63354 | P0C214 | Q8NH63 | -1.2952   |
| 63355 | P0C214 | P20807 | -0.65848  |
| 63356 | P0C214 | Q8IUB5 | -0.77749  |
| 63357 | P0C214 | P13497 | -1.0606   |
| 63358 | P0C214 | Q9NQW1 | -0.22768  |
| 63359 | P0C214 | O75333 | -0.41501  |
| 63360 | P0C214 | Q8NGQ2 | -1.2952   |
| 63361 | P0C214 | O43435 | -0.47529  |
| 63362 | P0C214 | P60153 | -0.89568  |
| 63363 | P0C214 | Q693B1 | -0.14835  |
| 63364 | P0C214 | Q96RJ0 | -1.3001   |
| 63365 | P0C214 | Q6ZRR9 | -0.55123  |
| 63366 | P0C214 | Q9UIK5 | -1.3064   |
| 63367 | P0C214 | P35663 | -0.57255  |
| 63368 | P0C214 | Q4ZHG4 | -0.65231  |
| 63369 | P0C214 | O75325 | -1.2837   |
| 63370 | P0C214 | Q2M243 | -0.07534  |
| 63371 | P0C214 | Q16572 | -1.055    |
| 63372 | P0C214 | Q96A61 | -0.71534  |
| 63373 | P0C214 | Q9BVG3 | -0.71534  |
| 63374 | P0C214 | Q15617 | -1.2952   |
| 63375 | P0C214 | Q14656 | -0.7949   |
| 63376 | P0C214 | Q32MK0 | -0.71128  |
| 63377 | P0C214 | P32320 | -0.48758  |
| 63378 | P0C214 | Q9H8L6 | -0.43866  |
| 63379 | P0C214 | Q6PIZ9 | -1.0412   |
| 63380 | P0C214 | Q16821 | -0.76767  |
| 63381 | P0C214 | P01270 | -0.62409  |
| 63382 | P0C214 | Q9BY10 | -1.0749   |
| 63383 | P0C214 | Q14390 | -0.36935  |
| 63384 | P0C214 | Q9BZM1 | -0.56419  |

|       |        |        |           |
|-------|--------|--------|-----------|
| 63385 | P0C214 | O60909 | -0.46382  |
| 63386 | P0C214 | P01344 | -0.22415  |
| 63387 | P0C214 | A8MWL7 | -0.98681  |
| 63388 | P0C214 | A6NCF6 | -0.12202  |
| 63389 | P0C214 | P78562 | -1.0786   |
| 63390 | P0C214 | Q0P670 | -0.98681  |
| 63391 | P0C214 | P06280 | -0.14344  |
| 63392 | P0C214 | Q9NS91 | -0.22747  |
| 63393 | P0C214 | Q8NFU7 | -0.23573  |
| 63394 | P0C214 | Q9BQE3 | -0.44526  |
| 63395 | P0C214 | P0DI80 | -0.98681  |
| 63396 | P0C214 | Q5JV73 | -0.41401  |
| 63397 | P0C214 | Q99707 | -0.12927  |
| 63398 | P0C214 | P09471 | -0.78403  |
| 63399 | P0C214 | Q9Y4Z2 | -0.22809  |
| 63400 | P0C214 | Q13336 | -1.0999   |
| 63401 | P0C214 | P22413 | -0.30834  |
| 63402 | P0C214 | A6NDN8 | -0.16332  |
| 63403 | P0C214 | Q86TW2 | -1.2918   |
| 63404 | P0C214 | P0C7U2 | -0.41199  |
| 63405 | P0C214 | Q69YG0 | -0.98681  |
| 63406 | P0C214 | O14522 | -0.76305  |
| 63407 | P0C214 | Q9BYT9 | -1.0454   |
| 63408 | P0C214 | Q6IE36 | -0.70605  |
| 63409 | P0C214 | Q8TE59 | -1.3603   |
| 63410 | P0C214 | Q9NRX6 | -0.79982  |
| 63411 | P0C214 | Q13065 | -0.38374  |
| 63412 | P0C214 | P57082 | -0.33011  |
| 63413 | P0C214 | Q63HN1 | -0.089395 |
| 63414 | P0C214 | Q8IUC8 | -0.72252  |
| 63415 | P0C214 | Q7Z2Q7 | -0.98681  |
| 63416 | P0C214 | Q86VF2 | -0.22758  |
| 63417 | P0C214 | Q96R08 | -1.2952   |
| 63418 | P0C214 | Q9Y4U1 | -0.15836  |
| 63419 | P0C214 | Q01959 | -0.40417  |
| 63420 | P0C214 | Q6YHU6 | -0.046181 |
| 63421 | P0C214 | O76001 | -1.2952   |
| 63422 | P0C214 | Q5W188 | -0.90522  |
| 63423 | P0C214 | Q8NGK3 | -1.2952   |
| 63424 | P0C214 | Q9GZN1 | -0.23577  |
| 63425 | P0C214 | Q8N5Z0 | -0.21828  |
| 63426 | P0C214 | Q2TAC6 | -0.67393  |
| 63427 | P0C214 | Q95714 | -0.22958  |
| 63428 | P0C214 | Q8NDX1 | -0.80431  |
| 63429 | P0C214 | P29274 | -0.32741  |
| 63430 | P0C214 | P29120 | -0.36128  |
| 63431 | P0C214 | Q8TC57 | -0.80851  |
| 63432 | P0C214 | P06311 | -1.0022   |
| 63433 | P0C214 | Q8N146 | -1.2952   |
| 63434 | P0C214 | Q5GH77 | -1.0708   |
| 63435 | P0C214 | Q9P2V4 | -0.7459   |
| 63436 | P0C214 | P22310 | -0.7913   |
| 63437 | P0C214 | Q9P1Z3 | -1.3263   |
| 63438 | P0C214 | O43761 | -0.81226  |
| 63439 | P0C214 | Q6IMI4 | -0.2773   |
| 63440 | P0C214 | Q01118 | -1.1475   |
| 63441 | P0C214 | Q96KT0 | -0.23705  |
| 63442 | P0C214 | Q9BYU1 | -0.4281   |
| 63443 | P0C214 | Q8NAN2 | -0.98681  |
| 63444 | P0C214 | Q8NGC2 | -1.2952   |
| 63445 | P0C214 | P09693 | -0.89909  |
| 63446 | P0C214 | Q9Y2B1 | -1.128    |
| 63447 | P0C214 | Q9UMZ3 | -1.1482   |
| 63448 | P0C214 | P49903 | -0.95218  |
| 63449 | P0C214 | Q86VZ6 | -0.22713  |
| 63450 | P0C214 | P37108 | -0.62881  |
| 63451 | P0C214 | P30492 | -1.0367   |
| 63452 | P0C214 | P31785 | -0.86064  |
| 63453 | P0C214 | Q86YC3 | -0.98681  |
| 63454 | P0C214 | O14649 | -1.1309   |
| 63455 | P0C214 | Q92876 | -0.31678  |
| 63456 | P0C214 | Q8N2K0 | -0.87695  |
| 63457 | P0C214 | Q8NGK6 | -1.2952   |
| 63458 | P0C214 | Q53H76 | -0.87159  |
| 63459 | P0C214 | Q9HAU6 | -0.33895  |
| 63460 | P0C214 | Q96M66 | -0.82066  |



|       |        |        |           |
|-------|--------|--------|-----------|
| 63461 | P0C214 | B8ZZ34 | -0.98681  |
| 63462 | P0C214 | Q96KK5 | -0.85588  |
| 63463 | P0C214 | A6NLC5 | -0.42499  |
| 63464 | P0C214 | P13985 | -0.18353  |
| 63465 | P0C214 | P40617 | -0.2284   |
| 63466 | P0C214 | B4DS77 | -0.99712  |
| 63467 | P0C214 | Q96K19 | -1.11     |
| 63468 | P0C214 | P02747 | -0.94046  |
| 63469 | P0C214 | P01596 | -1.0022   |
| 63470 | P0C214 | Q9NYV4 | -0.19021  |
| 63471 | P0C214 | Q5JXX5 | -0.97718  |
| 63472 | P0C214 | Q6PEY0 | -1.0688   |
| 63473 | P0C214 | Q9P2B2 | -0.30965  |
| 63474 | P0C214 | Q3MII6 | -0.64909  |
| 63475 | P0C214 | Q6ZT21 | -0.89261  |
| 63476 | P0C214 | Q99536 | -0.88488  |
| 63477 | P0C214 | P01737 | -0.44807  |
| 63478 | P0C214 | Q8N1N5 | -0.67481  |
| 63479 | P0C214 | P48169 | -0.93151  |
| 63480 | P0C214 | Q9Y5S1 | -0.83223  |
| 63481 | P0C214 | P00326 | -0.30874  |
| 63482 | P0C214 | P02787 | -0.15604  |
| 63483 | P0C214 | Q9Y4R7 | -0.41097  |
| 63484 | P0C214 | Q9NZ08 | -0.52064  |
| 63485 | P0C214 | Q8IUH5 | -0.38701  |
| 63486 | P0C214 | Q2M2D7 | -0.96894  |
| 63487 | P0C214 | Q9H2F9 | -0.1564   |
| 63488 | P0C214 | P01215 | -0.056917 |
| 63489 | P0C214 | Q9GZZ8 | -0.51731  |
| 63490 | P0C214 | Q13790 | -1.1149   |
| 63491 | P0C214 | Q92832 | -0.22746  |
| 63492 | P0C214 | P07951 | -0.22279  |
| 63493 | P0C214 | Q9BXY5 | -0.43585  |
| 63494 | P0C214 | A6NDU8 | -0.31104  |
| 63495 | P0C214 | Q9H1M0 | -0.22648  |
| 63496 | P0C214 | Q96GX1 | -0.79975  |
| 63497 | P0C214 | Q9BZP6 | -0.40005  |
| 63498 | P0C214 | C9JCN9 | -0.32744  |
| 63499 | P0C214 | Q8N957 | -0.22714  |
| 63500 | P0C214 | Q1HG43 | -0.93491  |
| 63501 | P0C214 | Q96KG9 | -0.22741  |
| 63502 | P0C214 | P08476 | -0.25251  |
| 63503 | P0C214 | Q8NHJ6 | -0.59837  |
| 63504 | P0C214 | Q13115 | -0.23705  |
| 63505 | P0C214 | Q5XKR4 | -0.20158  |
| 63506 | P0C214 | O14511 | -1.3296   |
| 63507 | P0C214 | Q13291 | -0.29984  |
| 63508 | P0C214 | Q5SNT2 | -0.64035  |
| 63509 | P0C214 | O75326 | -0.25621  |
| 63510 | P0C214 | P01715 | -1.0022   |
| 63511 | P0C214 | Q8IZI9 | -0.85666  |
| 63512 | P0C214 | P63124 | -0.6957   |
| 63513 | P0C214 | P05091 | -0.3605   |
| 63514 | P0C214 | Q4VX76 | -0.74691  |
| 63515 | P0C214 | Q16643 | -0.67125  |
| 63516 | P0C214 | P35713 | -0.32396  |
| 63517 | P0C214 | Q6UWH6 | -0.88278  |
| 63518 | P0C214 | O15444 | -0.97064  |
| 63519 | P0C214 | Q86Y22 | -1.2963   |
| 63520 | P0C214 | Q969S6 | -0.98681  |
| 63521 | P0C214 | P38405 | -0.94488  |
| 63522 | P0C214 | Q7L099 | -0.77942  |
| 63523 | P0C214 | Q7Z6K4 | -0.5499   |
| 63524 | P0C214 | Q13285 | -0.23008  |
| 63525 | P0C214 | Q01523 | -0.77649  |
| 63526 | P0C214 | P04438 | -1.0022   |
| 63527 | P0C214 | Q9UEE9 | -0.59617  |
| 63528 | P0C214 | Q6UB28 | -0.48734  |
| 63529 | P0C214 | Q3SY17 | -0.80997  |
| 63530 | P0C214 | Q92522 | -0.71574  |
| 63531 | P0C214 | O75015 | -1.0152   |
| 63532 | P0C214 | P00441 | -0.21401  |
| 63533 | P0C214 | Q8TEU7 | -0.81098  |
| 63534 | P0C214 | P23458 | -0.51087  |
| 63535 | P0C214 | P20142 | -0.67068  |
| 63536 | P0C214 | Q96D42 | -0.85336  |

|       |        |        |           |
|-------|--------|--------|-----------|
| 63537 | P0C214 | Q96KQ7 | -0.22741  |
| 63538 | P0C214 | Q99969 | -0.42692  |
| 63539 | P0C214 | Q5T1J6 | -0.033839 |
| 63540 | P0C214 | Q5SY68 | -0.47015  |
| 63541 | P0C214 | Q6NUI6 | -1.0061   |
| 63542 | P0C214 | Q9NYW3 | -1.1716   |
| 63543 | P0C214 | P01597 | -1.0022   |
| 63544 | P0C214 | P60201 | -0.63759  |
| 63545 | P0C214 | Q6UWR7 | -1.2738   |
| 63546 | P0C214 | Q8IZ57 | -0.8821   |
| 63547 | P0C214 | Q5VYY1 | -0.2274   |
| 63548 | P0C214 | Q9UHI7 | -0.40564  |
| 63549 | P0C214 | Q8IZN3 | -1.0453   |
| 63550 | P0C214 | Q8NGY2 | -1.2952   |
| 63551 | P0C214 | Q8N961 | -0.35402  |
| 63552 | P0C214 | Q9BQW3 | -0.097881 |
| 63553 | P0C214 | P25090 | -1.5124   |
| 63554 | P0C214 | Q9BUR5 | -1.4559   |
| 63555 | P0C214 | Q8N8D0 | -0.98681  |
| 63556 | P0C214 | P16520 | -0.37513  |
| 63557 | P0C214 | Q9Y3A6 | -0.63801  |
| 63558 | P0C214 | P00492 | -0.21195  |
| 63559 | P0C214 | Q8IV38 | -0.68003  |
| 63560 | P0C214 | Q75973 | -0.57643  |
| 63561 | P0C214 | A6NI72 | -0.37677  |
| 63562 | P0C214 | O76050 | -0.22736  |
| 63563 | P0C214 | P30550 | -1.2582   |
| 63564 | P0C214 | Q53R41 | -0.32177  |
| 63565 | P0C214 | O15018 | -0.46579  |
| 63566 | P0C214 | A1YPR0 | -0.70722  |
| 63567 | P0C214 | Q7L576 | -0.20392  |
| 63568 | P0C214 | Q13637 | -0.73189  |
| 63569 | P0C214 | Q13685 | -0.68025  |
| 63570 | P0C214 | Q9Y4F3 | -0.78237  |
| 63571 | P0C214 | Q8N6G2 | -0.14235  |
| 63572 | P0C214 | P30411 | -0.66707  |
| 63573 | P0C214 | Q86V24 | -1.0348   |
| 63574 | P0C214 | P05109 | -0.23309  |
| 63575 | P0C214 | Q13641 | -1.0359   |
| 63576 | P0C214 | P25098 | -0.37355  |
| 63577 | P0C214 | Q2QL34 | -0.97088  |
| 63578 | P0C214 | Q5T7W0 | -0.22494  |
| 63579 | P0C214 | Q0VG99 | -0.22757  |
| 63580 | P0C214 | Q69YJ1 | -0.70551  |
| 63581 | P0C214 | Q9UGM1 | -0.96708  |
| 63582 | P0C214 | P31025 | -1.1874   |
| 63583 | P0C214 | Q9NVM1 | -0.98681  |
| 63584 | P0C214 | P35318 | -0.2508   |
| 63585 | P0C214 | Q8IZD9 | -0.21031  |
| 63586 | P0C214 | P04430 | -1.0022   |
| 63587 | P0C214 | Q96EM0 | -0.50747  |
| 63588 | P0C214 | Q6NT46 | -0.47295  |
| 63589 | P0C214 | P57078 | -0.5227   |
| 63590 | P0C214 | Q9NY59 | -0.82597  |
| 63591 | P0C214 | Q96GF1 | -0.86554  |
| 63592 | P0C214 | Q6ZUT3 | -0.61809  |
| 63593 | P0C214 | Q13643 | -0.23785  |
| 63594 | P0C214 | Q58HT5 | -0.8354   |
| 63595 | P0C214 | O75897 | -0.22835  |
| 63596 | P0C214 | O43581 | -1.0611   |
| 63597 | P0C214 | P33402 | -0.5459   |
| 63598 | P0C214 | Q9NRR2 | -1.4912   |
| 63599 | P0C214 | Q96KP4 | -0.28211  |
| 63600 | P0C214 | Q13268 | -0.21379  |
| 63601 | P0C214 | O75462 | -0.22754  |
| 63602 | P0C214 | Q9NZQ9 | -0.356    |
| 63603 | P0C214 | Q5Y7A7 | -0.71588  |
| 63604 | P0C214 | Q96PZ0 | -0.28338  |
| 63605 | P0C214 | Q9NR20 | -1.1061   |
| 63606 | P0C214 | Q9H488 | -0.19488  |
| 63607 | P0C214 | Q01459 | -0.34849  |
| 63608 | P0C214 | Q8NA29 | -1.1412   |
| 63609 | P0C214 | Q8WVN6 | -1.3932   |
| 63610 | P0C214 | P42566 | -0.22745  |
| 63611 | P0C214 | Q9BWW1 | -0.53059  |
| 63612 | P0C214 | P30520 | -0.43908  |

|       |        |        |          |
|-------|--------|--------|----------|
| 63613 | P0C214 | Q15788 | -0.27832 |
| 63614 | P0C214 | Q14213 | -0.82662 |
| 63615 | P0C214 | P56748 | -0.80928 |
| 63616 | P0C214 | O75431 | -0.16988 |
| 63617 | P0C214 | Q15842 | -0.83517 |
| 63618 | P0C214 | P38567 | -0.54401 |
| 63619 | P0C214 | Q9UL25 | -0.38863 |
| 63620 | P0C214 | Q96SZ5 | -0.30636 |
| 63621 | P0C214 | P42658 | -0.98557 |
| 63622 | P0C214 | O94876 | -0.98681 |
| 63623 | P0C214 | Q06643 | -0.79765 |
| 63624 | P0C214 | O75592 | -0.22623 |
| 63625 | P0C214 | Q7Z6L1 | -0.72672 |
| 63626 | P0C214 | Q13972 | -0.48673 |
| 63627 | P0C214 | Q6PK18 | -1.0002  |
| 63628 | P0C214 | P16949 | -0.55351 |
| 63629 | P0C214 | Q9H7C9 | -0.14705 |
| 63630 | P0C214 | O43731 | -0.66866 |
| 63631 | P0C214 | Q08722 | -0.49029 |
| 63632 | P0C214 | Q9H694 | -0.68473 |
| 63633 | P0C214 | Q8NFI4 | -0.22667 |
| 63634 | P0C214 | Q96KJ4 | -1.1636  |
| 63635 | P0C214 | Q96AX9 | -0.22735 |
| 63636 | P0C214 | Q5VT25 | -0.40268 |
| 63637 | P0C214 | Q9BX97 | -0.68587 |
| 63638 | P0C214 | Q6UWY0 | -0.62048 |
| 63639 | P0C214 | Q96J92 | -0.96117 |
| 63640 | P0C214 | Q8N729 | -0.3235  |
| 63641 | P0C214 | Q9NYR9 | -0.84929 |
| 63642 | P0C214 | P0C2W1 | -0.20657 |
| 63643 | P0C214 | Q13190 | -0.20114 |
| 63644 | P0C214 | Q9H1K0 | -0.1886  |
| 63645 | P0C214 | Q68DE3 | -0.33298 |
| 63646 | P0C214 | Q9P2H5 | -0.68518 |
| 63647 | P0C214 | P43361 | -0.18353 |
| 63648 | P0C214 | P33527 | -0.41077 |
| 63649 | P0C214 | Q9HCE9 | -1.1866  |
| 63650 | P0C214 | Q6NUT2 | -1.3081  |
| 63651 | P0C214 | Q96JA3 | -0.42319 |
| 63652 | P0C214 | Q8NHV5 | -0.46481 |
| 63653 | P0C214 | P56178 | -0.21858 |
| 63654 | P0C214 | P05060 | -0.25409 |
| 63655 | P0C214 | Q15846 | -0.80125 |
| 63656 | P0C214 | Q8IVU9 | -0.2586  |
| 63657 | P0C214 | Q86YN1 | -0.75011 |
| 63658 | P0C214 | Q3KQV9 | -0.40419 |
| 63659 | P0C214 | Q9UJ41 | -0.23152 |
| 63660 | P0C214 | Q9BZ67 | -0.41401 |
| 63661 | P0C214 | Q9P2K2 | -0.91366 |
| 63662 | P0C214 | Q5W150 | -0.66413 |
| 63663 | P0C214 | P61550 | -0.84333 |
| 63664 | P0C214 | Q6DRA6 | -0.85588 |
| 63665 | P0C214 | Q9HAK2 | -0.16534 |
| 63666 | P0C214 | Q4L235 | -0.90288 |
| 63667 | P0C214 | Q9H3S7 | -0.23186 |
| 63668 | P0C214 | Q658N2 | -0.99947 |
| 63669 | P0C214 | Q92935 | -0.94078 |
| 63670 | P0C214 | Q9H9R9 | -0.20758 |
| 63671 | P0C214 | Q6AI12 | -0.22741 |
| 63672 | P0C214 | Q92834 | -0.22441 |
| 63673 | P0C214 | A6NNA5 | -0.10607 |
| 63674 | P0C214 | Q96PX6 | -0.17918 |
| 63675 | P0C214 | Q8N144 | -0.65694 |
| 63676 | P0C214 | Q6UWQ7 | -0.91736 |
| 63677 | P0C214 | Q8N8L6 | -1.2665  |
| 63678 | P0C214 | P01824 | -1.0022  |
| 63679 | P0C214 | Q8NAG6 | -0.29363 |
| 63680 | P0C214 | P57105 | -0.71699 |
| 63681 | P0C214 | P06213 | -0.24504 |
| 63682 | P0C214 | O75937 | -0.11721 |
| 63683 | P0C214 | A6NJS3 | -0.91736 |
| 63684 | P0C214 | P48448 | -0.50777 |
| 63685 | P0C214 | Q5TCH4 | -0.67057 |
| 63686 | P0C214 | Q9Y4H2 | -0.21779 |
| 63687 | P0C214 | Q5R3K3 | -0.98681 |
| 63688 | P0C214 | Q8WVIO | -0.75609 |

|       |        |        |           |
|-------|--------|--------|-----------|
| 63689 | P0C214 | P15514 | -0.67472  |
| 63690 | P0C214 | Q8N127 | -1.2952   |
| 63691 | P0C214 | Q9NRW3 | -0.61187  |
| 63692 | P0C214 | P16219 | -0.27269  |
| 63693 | P0C214 | P43080 | -0.75508  |
| 63694 | P0C214 | Q13489 | -0.22741  |
| 63695 | P0C214 | P09488 | -0.21633  |
| 63696 | P0C214 | Q8N3R9 | -0.22422  |
| 63697 | P0C214 | Q9UKP3 | -0.68622  |
| 63698 | P0C214 | O43313 | -0.22741  |
| 63699 | P0C214 | Q9UHD0 | -0.79499  |
| 63700 | P0C214 | Q9BTN0 | -1.1528   |
| 63701 | P0C214 | P41145 | -0.89885  |
| 63702 | P0C214 | Q7Z4N2 | -1.3696   |
| 63703 | P0C214 | O14682 | -0.21026  |
| 63704 | P0C214 | Q9UPY5 | -0.8125   |
| 63705 | P0C214 | Q8TCX5 | -0.69413  |
| 63706 | P0C214 | Q9Y6G9 | -0.2206   |
| 63707 | P0C214 | Q5VXH5 | -0.18615  |
| 63708 | P0C214 | P54762 | -0.66602  |
| 63709 | P0C214 | Q7RTU9 | -0.5812   |
| 63710 | P0C214 | Q9Y6B7 | -0.098545 |
| 63711 | P0C214 | O43813 | -0.51517  |
| 63712 | P0C214 | O75439 | -0.49519  |
| 63713 | P0C214 | P42785 | -0.36438  |
| 63714 | P0C214 | Q8N328 | -0.21669  |
| 63715 | P0C214 | Q8TCV5 | -0.77749  |
| 63716 | P0C214 | Q96KR4 | -0.51552  |
| 63717 | P0C214 | O75631 | -0.8314   |
| 63718 | P0C214 | Q5QJ38 | -0.43585  |
| 63719 | P0C214 | P26951 | -0.99762  |
| 63720 | P0C214 | Q969M2 | -0.9725   |
| 63721 | P0C214 | Q9NWC5 | -0.98681  |
| 63722 | P0C214 | Q9NX74 | -0.26402  |
| 63723 | P0C214 | Q9NUC0 | -0.017206 |
| 63724 | P0C214 | O75173 | -0.81826  |
| 63725 | P0C214 | Q16820 | -1.4406   |
| 63726 | P0C214 | P21817 | -0.6845   |
| 63727 | P0C214 | O43316 | -0.22385  |
| 63728 | P0C214 | Q6DHV7 | -0.19898  |
| 63729 | P0C214 | Q96M60 | -0.27192  |
| 63730 | P0C214 | Q5VSP4 | -0.91736  |
| 63731 | P0C214 | Q8IXL6 | -1.121    |
| 63732 | P0C214 | Q8N1E2 | -0.80382  |
| 63733 | P0C214 | Q9BUB7 | -0.59795  |
| 63734 | P0C214 | Q16690 | -0.47729  |
| 63735 | P0C214 | O15529 | -1.4957   |
| 63736 | P0C214 | Q6ZNR0 | -0.69227  |
| 63737 | P0C214 | Q9Y223 | -0.49031  |
| 63738 | P0C214 | Q8TBE9 | -0.13854  |
| 63739 | P0C214 | Q969P6 | -0.41221  |
| 63740 | P0C214 | Q86UL3 | -0.46969  |
| 63741 | P0C214 | Q8NHE4 | -0.77077  |
| 63742 | P0C214 | O75955 | -0.38836  |
| 63743 | P0C214 | Q9GZP7 | -1.2435   |
| 63744 | P0C214 | Q4G0G2 | -0.334    |
| 63745 | P0C214 | O75072 | -0.38816  |
| 63746 | P0C214 | Q8IW03 | -0.22369  |
| 63747 | P0C214 | Q9NXZ2 | -0.98215  |
| 63748 | P0C214 | O75752 | -0.8473   |
| 63749 | P0C214 | Q9BZF1 | -0.96432  |
| 63750 | P0C214 | Q8IYJ1 | -0.22911  |
| 63751 | P0C214 | O94979 | -0.429    |
| 63752 | P0C214 | Q9NUL5 | -0.012873 |
| 63753 | P0C214 | A6NMS3 | -1.2952   |
| 63754 | P0C214 | Q7RTP0 | -1.074    |
| 63755 | P0C214 | Q13332 | -0.77271  |
| 63756 | P0C214 | A2VEC9 | -1.0103   |
| 63757 | P0C214 | P25686 | -0.22003  |
| 63758 | P0C214 | Q86T13 | -0.97467  |
| 63759 | P0C214 | Q92521 | -0.81606  |
| 63760 | P0C214 | Q9BQQ7 | -0.15093  |
| 63761 | P0C214 | P14679 | -0.37125  |
| 63762 | P0C214 | Q9NPR9 | -0.98681  |
| 63763 | P0C214 | Q8TDS5 | -1.2353   |
| 63764 | P0C214 | O43314 | -0.43452  |

|       |        |        |           |
|-------|--------|--------|-----------|
| 63765 | P0C214 | Q53H64 | -0.35676  |
| 63766 | P0C214 | Q99445 | -0.50193  |
| 63767 | P0C214 | Q0P641 | -0.37061  |
| 63768 | P0C214 | Q43280 | -0.30636  |
| 63769 | P0C214 | Q8WTU2 | -0.95759  |
| 63770 | P0C214 | Q8WXD9 | -0.36149  |
| 63771 | P0C214 | P07108 | -0.35533  |
| 63772 | P0C214 | B7ZBB8 | -0.24265  |
| 63773 | P0C214 | Q96LK8 | -0.67294  |
| 63774 | P0C214 | Q9NZJ7 | -0.26194  |
| 63775 | P0C214 | Q9NPD7 | -0.49108  |
| 63776 | P0C214 | Q08629 | -0.71786  |
| 63777 | P0C214 | Q9UPX0 | -1.0708   |
| 63778 | P0C214 | Q8IWF2 | -0.20933  |
| 63779 | P0C214 | P16885 | -0.22741  |
| 63780 | P0C214 | Q9H9P8 | -0.422    |
| 63781 | P0C214 | Q07617 | -0.71978  |
| 63782 | P0C214 | P19235 | -1.1202   |
| 63783 | P0C214 | Q96BD6 | -0.16174  |
| 63784 | P0C214 | P0C7U0 | -0.95344  |
| 63785 | P0C214 | Q6XXX2 | -0.21265  |
| 63786 | P0C214 | Q4ADV7 | -0.98681  |
| 63787 | P0C214 | Q8NG78 | -1.2952   |
| 63788 | P0C214 | Q5TAT6 | -1.0176   |
| 63789 | P0C214 | Q6UXX5 | -0.76087  |
| 63790 | P0C214 | O14640 | -0.096904 |
| 63791 | P0C214 | P78527 | -0.41819  |
| 63792 | P0C214 | P01034 | -0.25958  |
| 63793 | P0C214 | Q5VU65 | -0.98681  |
| 63794 | P0C214 | Q9NVH1 | -0.1398   |
| 63795 | P0C214 | Q5T686 | -0.34087  |
| 63796 | P0C214 | Q99784 | -0.22723  |
| 63797 | P0C214 | Q9BXF9 | -0.2838   |
| 63798 | P0C214 | Q9NRK6 | -0.99297  |
| 63799 | P0C214 | Q92817 | -0.21287  |
| 63800 | P0C214 | P01583 | -0.2078   |
| 63801 | P0C214 | Q9NQT8 | -0.41991  |
| 63802 | P0C214 | O15439 | -0.95624  |
| 63803 | P0C214 | O43570 | -0.96155  |
| 63804 | P0C214 | Q1A5X7 | -0.04165  |
| 63805 | P0C214 | O43866 | -0.8101   |
| 63806 | P0C214 | P02741 | -0.82231  |
| 63807 | P0C214 | P0CW27 | -0.47535  |
| 63808 | P0C214 | Q5XG92 | -0.82426  |
| 63809 | P0C214 | Q8WYK0 | -0.1547   |
| 63810 | P0C214 | P10153 | -0.85129  |
| 63811 | P0C214 | Q8ND71 | -0.17756  |
| 63812 | P0C214 | Q9GZZ0 | -0.2274   |
| 63813 | P0C214 | Q8TCT8 | -0.67588  |
| 63814 | P0C214 | Q9UKU0 | -0.68078  |
| 63815 | P0C214 | P56937 | -0.98806  |
| 63816 | P0C214 | Q8N2R0 | -0.21663  |
| 63817 | P0C214 | P38571 | -0.49642  |
| 63818 | P0C214 | O60353 | -0.51739  |
| 63819 | P0C214 | Q07890 | -0.22742  |
| 63820 | P0C214 | Q2TBE0 | -0.50812  |
| 63821 | P0C214 | P59190 | -1.0914   |
| 63822 | P0C214 | O15399 | -0.8674   |
| 63823 | P0C214 | P16452 | -0.12401  |
| 63824 | P0C214 | Q8IYL9 | -1.3445   |
| 63825 | P0C214 | Q9H1M3 | -0.88056  |
| 63826 | P0C214 | Q9BVG9 | -0.83319  |
| 63827 | P0C214 | Q9H6L2 | -0.99437  |
| 63828 | P0C214 | Q0P5N6 | -1.2665   |
| 63829 | P0C214 | O75594 | -0.72473  |
| 63830 | P0C214 | Q16478 | -0.7422   |
| 63831 | P0C214 | P55291 | -1.1305   |
| 63832 | P0C214 | Q86Y78 | -0.91736  |
| 63833 | P0C214 | Q9UQ88 | -0.30177  |
| 63834 | P0C214 | Q9GZS0 | -0.231    |
| 63835 | P0C214 | Q9HBB8 | -1.1224   |
| 63836 | P0C214 | O14668 | -1.5798   |
| 63837 | P0C214 | O95947 | -0.47529  |
| 63838 | P0C214 | Q5VX71 | -0.98681  |
| 63839 | P0C214 | P59646 | -1.1222   |
| 63840 | P0C214 | A4FU69 | -0.43585  |

|       |        |        |           |
|-------|--------|--------|-----------|
| 63841 | P0C214 | Q5JUR7 | -0.27787  |
| 63842 | P0C214 | Q5T1R4 | -0.22738  |
| 63843 | P0C214 | Q5T1V6 | -0.97389  |
| 63844 | P0C214 | Q9Y2V7 | -0.21612  |
| 63845 | P0C214 | Q8WYP3 | -0.76538  |
| 63846 | P0C214 | Q13670 | -0.39214  |
| 63847 | P0C214 | P0C7M8 | -0.97467  |
| 63848 | P0C214 | P28161 | -0.28271  |
| 63849 | P0C214 | P01266 | -0.57274  |
| 63850 | P0C214 | P51957 | -0.52479  |
| 63851 | P0C214 | Q96K80 | -0.17931  |
| 63852 | P0C214 | Q8N5I3 | -0.14454  |
| 63853 | P0C214 | Q6WQI6 | -0.2555   |
| 63854 | P0C214 | P23409 | -0.037585 |
| 63855 | P0C214 | P58397 | -1.3603   |
| 63856 | P0C214 | Q4G176 | -0.77623  |
| 63857 | P0C214 | Q14166 | -0.29695  |
| 63858 | P0C214 | Q8TC12 | -1.0229   |
| 63859 | P0C214 | P04439 | -1.0938   |
| 63860 | P0C214 | Q8IWZ4 | -0.71534  |
| 63861 | P0C214 | A8K855 | -0.43585  |
| 63862 | P0C214 | P55087 | -0.68977  |
| 63863 | P0C214 | Q8N131 | -0.97057  |
| 63864 | P0C214 | Q96QS3 | -0.15834  |
| 63865 | P0C214 | Q86SQ4 | -1.3853   |
| 63866 | P0C214 | O00329 | -0.42805  |
| 63867 | P0C214 | P21359 | -0.22616  |
| 63868 | P0C214 | Q9UDX4 | -1.3284   |
| 63869 | P0C214 | Q92502 | -0.84689  |
| 63870 | P0C214 | Q9H310 | -0.89898  |
| 63871 | P0C214 | Q2M1Z3 | -1.0935   |
| 63872 | P0C214 | P22352 | -0.6493   |
| 63873 | P0C214 | Q9BSW7 | -0.5886   |
| 63874 | P0C214 | O14798 | -0.76447  |
| 63875 | P0C214 | P48960 | -1.7579   |
| 63876 | P0C214 | O43237 | -0.20759  |
| 63877 | P0C214 | Q96A19 | -0.19247  |
| 63878 | P0C214 | Q8TAX7 | -0.34385  |
| 63879 | P0C214 | P20292 | -0.08827  |
| 63880 | P0C214 | O43653 | -0.5764   |
| 63881 | P0C214 | Q9H2A9 | -0.63283  |
| 63882 | P0C214 | Q7Z2H8 | -0.91716  |
| 63883 | P0C214 | Q86VH2 | -0.74871  |
| 63884 | P0C214 | Q8NBP7 | -0.3303   |
| 63885 | P0C214 | Q01433 | -0.15033  |
| 63886 | P0C214 | P48645 | -0.93234  |
| 63887 | P0C214 | Q8NG84 | -1.2952   |
| 63888 | P0C214 | Q8WXA3 | -0.22697  |
| 63889 | P0C214 | P17301 | -0.23831  |
| 63890 | P0C214 | P02649 | -0.26654  |
| 63891 | P0C214 | P36507 | -0.22777  |
| 63892 | P0C214 | Q969S0 | -0.72397  |
| 63893 | P0C214 | Q8N7H1 | -0.30652  |
| 63894 | P0C214 | Q96EB6 | -0.60733  |
| 63895 | P0C214 | Q9NY46 | -0.95635  |
| 63896 | P0C214 | Q9BS16 | -0.22013  |
| 63897 | P0C214 | P16410 | -0.33689  |
| 63898 | P0C214 | Q9Y271 | -1.3479   |
| 63899 | P0C214 | P47890 | -1.2952   |
| 63900 | P0C214 | Q8TBE3 | -0.98681  |
| 63901 | P0C214 | Q9Y3Q3 | -0.6324   |
| 63902 | P0C214 | Q9NRB3 | -0.4687   |
| 63903 | P0C214 | Q9BT43 | -0.30849  |
| 63904 | P0C214 | Q6IN97 | -0.22575  |
| 63905 | P0C214 | Q6P9F7 | -0.98681  |
| 63906 | P0C214 | Q9UDX5 | -0.65246  |
| 63907 | P0C214 | Q9UMX6 | -0.64618  |
| 63908 | P0C214 | P17540 | -0.67873  |
| 63909 | P0C214 | Q7Z5H3 | -0.26997  |
| 63910 | P0C214 | Q8TF30 | -0.24842  |
| 63911 | P0C214 | Q13018 | -1.2475   |
| 63912 | P0C214 | O00418 | -0.80939  |
| 63913 | P0C214 | Q92543 | -0.23419  |
| 63914 | P0C214 | Q17RB8 | -0.67205  |
| 63915 | P0C214 | Q9ULL1 | -0.79655  |
| 63916 | P0C214 | Q9BZR9 | -0.22737  |

|       |        |        |           |
|-------|--------|--------|-----------|
| 63917 | P0C214 | Q6UXK5 | -0.98681  |
| 63918 | P0C214 | O95544 | -0.50906  |
| 63919 | P0C214 | Q0D2I5 | -0.077263 |
| 63920 | P0C214 | Q8N8V2 | -0.92558  |
| 63921 | P0C214 | Q86W54 | -0.16435  |
| 63922 | P0C214 | P35408 | -0.59013  |
| 63923 | P0C214 | Q9NNZ3 | -0.49579  |
| 63924 | P0C214 | Q9Y2U2 | -1.2288   |
| 63925 | P0C214 | Q8NGP6 | -1.2952   |
| 63926 | P0C214 | Q8TEZ7 | -1.3884   |
| 63927 | P0C214 | O75964 | -0.17453  |
| 63928 | P0C214 | O15067 | -0.2439   |
| 63929 | P0C214 | Q96M32 | -0.42034  |
| 63930 | P0C214 | Q13177 | -0.228    |
| 63931 | P0C214 | P06737 | -0.10238  |
| 63932 | P0C214 | O75689 | -0.22802  |
| 63933 | P0C214 | Q9UQ90 | -0.61156  |
| 63934 | P0C214 | Q02817 | -0.3368   |
| 63935 | P0C214 | Q9NZC2 | -1.2988   |
| 63936 | P0C214 | Q5T4J0 | -0.79304  |
| 63937 | P0C214 | P42331 | -0.95761  |
| 63938 | P0C214 | O00115 | -0.6238   |
| 63939 | P0C214 | P50238 | -0.34147  |
| 63940 | P0C214 | Q6ZSJ9 | -0.98681  |
| 63941 | P0C214 | Q9HCN3 | -1.1106   |
| 63942 | P0C214 | P48060 | -1.2305   |
| 63943 | P0C214 | P20718 | -0.68726  |
| 63944 | P0C214 | Q86XE0 | -0.46674  |
| 63945 | P0C214 | Q9BWT7 | -0.20134  |
| 63946 | P0C214 | Q96EX3 | -0.2275   |
| 63947 | P0C214 | Q86UF4 | -0.59206  |
| 63948 | P0C214 | P11233 | -0.24194  |
| 63949 | P0C214 | Q8TDZ2 | -0.22743  |
| 63950 | P0C214 | O60469 | -0.94037  |
| 63951 | P0C214 | P01569 | -0.71883  |
| 63952 | P0C214 | Q9NQU5 | -0.4742   |
| 63953 | P0C214 | P11465 | -0.69158  |
| 63954 | P0C214 | Q8TAM2 | -0.22644  |
| 63955 | P0C214 | P0CG41 | -0.98681  |
| 63956 | P0C214 | O43924 | -0.028323 |
| 63957 | P0C214 | Q6P4I2 | -0.17786  |
| 63958 | P0C214 | A6NKB5 | -0.98681  |
| 63959 | P0C214 | Q8WZ74 | -0.66006  |
| 63960 | P0C214 | P55073 | -0.67359  |
| 63961 | P0C214 | A4D2G3 | -1.2952   |
| 63962 | P0C214 | Q07820 | -0.22738  |
| 63963 | P0C214 | P51589 | -0.53961  |
| 63964 | P0C214 | Q16515 | -0.81029  |
| 63965 | P0C214 | P0C7N5 | -1.2952   |
| 63966 | P0C214 | Q5VXU1 | -1.0708   |
| 63967 | P0C214 | P49685 | -1.4303   |
| 63968 | P0C214 | P05177 | -0.39134  |
| 63969 | P0C214 | P30954 | -1.3492   |
| 63970 | P0C214 | O43291 | -0.96432  |
| 63971 | P0C214 | O60427 | -0.19675  |
| 63972 | P0C214 | Q99217 | -0.76282  |
| 63973 | P0C214 | Q9HCB6 | -0.59626  |
| 63974 | P0C214 | Q9Y3I0 | -0.50442  |
| 63975 | P0C214 | O94910 | -0.89013  |
| 63976 | P0C214 | Q9HCI7 | -0.51481  |
| 63977 | P0C214 | Q8NHU6 | -0.30652  |
| 63978 | P0C214 | Q8NH05 | -1.2952   |
| 63979 | P0C214 | A6NDL7 | -0.33624  |
| 63980 | P0C214 | Q8N1N2 | -0.98681  |
| 63981 | P0C214 | Q9GZK6 | -1.2952   |
| 63982 | P0C214 | Q96H35 | -0.83638  |
| 63983 | P0C214 | Q9NR82 | -1.1639   |
| 63984 | P0C214 | Q8IUK8 | -0.98681  |
| 63985 | P0C214 | P59922 | -1.2952   |
| 63986 | P0C214 | P52179 | -0.74992  |
| 63987 | P0C214 | O75907 | -0.47604  |
| 63988 | P0C214 | Q86SE5 | -0.83638  |
| 63989 | P0C214 | Q9NUG6 | -0.18225  |
| 63990 | P0C214 | Q9Y5G5 | -1.2424   |
| 63991 | P0C214 | A2A3L6 | -0.22431  |
| 63992 | P0C214 | P15735 | -0.4054   |

|       |        |        |           |
|-------|--------|--------|-----------|
| 63993 | P0C214 | Q9ULH0 | -0.56105  |
| 63994 | P0C214 | Q9H4B7 | -0.62389  |
| 63995 | P0C214 | Q5JRA6 | -0.22069  |
| 63996 | P0C214 | Q9H6K4 | -0.3474   |
| 63997 | P0C214 | Q8IU89 | -0.27663  |
| 63998 | P0C214 | Q8TEW8 | -0.22664  |
| 63999 | P0C214 | P00167 | -0.41428  |
| 64000 | P0C214 | Q2WQJ8 | -0.98681  |
| 64001 | P0C214 | Q8N9I9 | -0.29901  |
| 64002 | P0C214 | Q16832 | -1.1052   |
| 64003 | P0C214 | Q5MNX9 | -0.22739  |
| 64004 | P0C214 | O60683 | -0.22746  |
| 64005 | P0C214 | P25774 | -1.1916   |
| 64006 | P0C214 | Q9H2C5 | -1.2952   |
| 64007 | P0C214 | O95563 | -0.80997  |
| 64008 | P0C214 | Q14353 | -0.012534 |
| 64009 | P0C214 | Q96Q80 | -0.33182  |
| 64010 | P0C214 | Q96J66 | -1.331    |
| 64011 | P0C214 | Q9NZM3 | -0.6979   |
| 64012 | P0C214 | Q86W47 | -0.75569  |
| 64013 | P0C214 | Q5T7M4 | -0.85806  |
| 64014 | P0C214 | Q7Z553 | -0.60656  |
| 64015 | P0C214 | Q8NGJ9 | -1.2952   |
| 64016 | P0C214 | Q9H0Q0 | -0.60268  |
| 64017 | P0C214 | Q9Y5S8 | -0.40993  |
| 64018 | P0C214 | Q15800 | -0.77412  |
| 64019 | P0C214 | Q9H4M7 | -0.43653  |
| 64020 | P0C214 | A8MYB1 | -0.98681  |
| 64021 | P0C214 | Q96D53 | -0.97857  |
| 64022 | P0C214 | Q8IUA0 | -0.77749  |
| 64023 | P0C214 | Q9H4A4 | -0.90135  |
| 64024 | P0C214 | Q9H0C3 | -0.73722  |
| 64025 | P0C214 | P01833 | -1.5269   |
| 64026 | P0C214 | Q7Z4M0 | -0.51384  |
| 64027 | P0C214 | A8MPY1 | -0.80529  |
| 64028 | P0C214 | Q96E52 | -0.75693  |
| 64029 | P0C214 | O00626 | -0.99149  |
| 64030 | P0C214 | P34969 | -1.3201   |
| 64031 | P0C214 | O94901 | -0.15021  |
| 64032 | P0C214 | Q96AK3 | -0.64535  |
| 64033 | P0C214 | P20851 | -0.94332  |
| 64034 | P0C214 | P23946 | -1.4765   |
| 64035 | P0C214 | Q8WXS5 | -0.93932  |
| 64036 | P0C214 | Q9Y6J3 | -0.55184  |
| 64037 | P0C214 | Q9Y4M8 | -0.85421  |
| 64038 | P0C214 | Q9NYW4 | -1.1937   |
| 64039 | P0C214 | Q86U06 | -0.52918  |
| 64040 | P0C214 | Q9BTX3 | -0.98681  |
| 64041 | P0C214 | Q12846 | -0.24054  |
| 64042 | P0C214 | P63211 | -0.72566  |
| 64043 | P0C214 | Q96S99 | -0.14827  |
| 64044 | P0C214 | P15090 | -0.19169  |
| 64045 | P0C214 | Q9UPM6 | -0.32028  |
| 64046 | P0C214 | Q6A555 | -0.4604   |
| 64047 | P0C214 | Q9UHL0 | -0.51412  |
| 64048 | P0C214 | P51817 | -0.60099  |
| 64049 | P0C214 | Q2TAC2 | -0.066326 |
| 64050 | P0C214 | C9JVI0 | -0.68518  |
| 64051 | P0C214 | Q5H9B9 | -0.17949  |
| 64052 | P0C214 | E2RYF7 | -0.91736  |
| 64053 | P0C214 | Q9UBI4 | -0.67476  |
| 64054 | P0C214 | Q2TV78 | -1.1947   |
| 64055 | P0C214 | Q9H228 | -1.259    |
| 64056 | P0C214 | Q9UG63 | -0.73947  |
| 64057 | P0C214 | A6NNY8 | -0.68518  |
| 64058 | P0C214 | P50135 | -0.22783  |
| 64059 | P0C214 | O60292 | -0.92569  |
| 64060 | P0C214 | Q8IVL8 | -1.287    |
| 64061 | P0C214 | Q86WT6 | -0.23132  |
| 64062 | P0C214 | Q13162 | -0.21322  |
| 64063 | P0C214 | P53671 | -1.0606   |
| 64064 | P0C214 | P13987 | -0.43507  |
| 64065 | P0C214 | P0CE72 | -0.47015  |
| 64066 | P0C214 | Q8N8U3 | -0.5018   |
| 64067 | P0C214 | P0CL84 | -0.065644 |
| 64068 | P0C214 | Q8N0X4 | -0.38162  |



|       |        |         |           |
|-------|--------|---------|-----------|
| 64069 | P0C214 | Q9H6T3  | -0.22705  |
| 64070 | P0C214 | P0CI26  | -0.71534  |
| 64071 | P0C214 | Q8N987  | -0.25129  |
| 64072 | P0C214 | Q8IUUF1 | -0.79608  |
| 64073 | P0C214 | P12004  | -0.19595  |
| 64074 | P0C214 | Q96A57  | -0.98681  |
| 64075 | P0C214 | Q8NF37  | -0.45839  |
| 64076 | P0C214 | Q8NC42  | -1.0581   |
| 64077 | P0C214 | P01189  | -0.50207  |
| 64078 | P0C214 | Q6P3W2  | -0.38577  |
| 64079 | P0C214 | O60513  | -0.49597  |
| 64080 | P0C214 | Q96DX4  | -1.0313   |
| 64081 | P0C214 | O95620  | -0.44612  |
| 64082 | P0C214 | Q8NGD2  | -1.2952   |
| 64083 | P0C214 | O00562  | -0.33141  |
| 64084 | P0C214 | Q9Y3Q0  | -1.2031   |
| 64085 | P0C214 | P20472  | -0.35866  |
| 64086 | P0C214 | P29466  | -0.22734  |
| 64087 | P0C214 | Q32M45  | -1.0454   |
| 64088 | P0C214 | P49842  | -0.76458  |
| 64089 | P0C214 | Q95971  | -0.67155  |
| 64090 | P0C214 | Q96LB8  | -0.89542  |
| 64091 | P0C214 | P11086  | -0.18356  |
| 64092 | P0C214 | P09848  | -0.58846  |
| 64093 | P0C214 | Q9Y6U7  | -1.0783   |
| 64094 | P0C214 | Q9BUM1  | -0.2475   |
| 64095 | P0C214 | Q86UX7  | -0.72863  |
| 64096 | P0C214 | Q9BXT2  | -1.0808   |
| 64097 | P0C214 | O94985  | -1.0251   |
| 64098 | P0C214 | Q6UW01  | -0.78007  |
| 64099 | P0C214 | Q9P267  | -0.27104  |
| 64100 | P0C214 | Q9H251  | -0.55546  |
| 64101 | P0C214 | Q92185  | -0.50146  |
| 64102 | P0C214 | Q8WWZ7  | -1.0538   |
| 64103 | P0C214 | Q9UJ37  | -0.72314  |
| 64104 | P0C214 | Q8TC44  | -0.22773  |
| 64105 | P0C214 | P05000  | -0.74273  |
| 64106 | P0C214 | A6NIJ5  | -0.4589   |
| 64107 | P0C214 | O60641  | -0.54716  |
| 64108 | P0C214 | Q06055  | -0.90915  |
| 64109 | P0C214 | P61266  | -0.90024  |
| 64110 | P0C214 | O00299  | -0.19419  |
| 64111 | P0C214 | Q9NV79  | -0.12875  |
| 64112 | P0C214 | Q13349  | -1.1108   |
| 64113 | P0C214 | Q9H426  | -0.3665   |
| 64114 | P0C214 | Q86TV6  | -0.22691  |
| 64115 | P0C214 | O43240  | -1.3209   |
| 64116 | P0C214 | Q5JPB2  | -0.70722  |
| 64117 | P0C214 | Q86WS3  | -0.91736  |
| 64118 | P0C214 | Q6ZWJ1  | -0.22741  |
| 64119 | P0C214 | C9JLJ4  | -0.68518  |
| 64120 | P0C214 | Q14931  | -1.221    |
| 64121 | P0C214 | O95470  | -0.27443  |
| 64122 | P0C214 | Q8IZ07  | -0.22741  |
| 64123 | P0C214 | Q494X1  | -0.031785 |
| 64124 | P0C214 | Q9NVP2  | -0.26604  |
| 64125 | P0C214 | Q9UHD1  | -0.16393  |
| 64126 | P0C214 | O75916  | -0.48183  |
| 64127 | P0C214 | Q7Z3Z3  | -0.57844  |
| 64128 | P0C214 | Q96P65  | -1.3342   |
| 64129 | P0C214 | Q8TDB8  | -0.97489  |
| 64130 | P0C214 | Q8NEX5  | -0.91736  |
| 64131 | P0C214 | P10635  | -0.30309  |
| 64132 | P0C214 | Q8NGT5  | -1.2952   |
| 64133 | P0C214 | O15047  | -0.22486  |
| 64134 | P0C214 | O75954  | -1.128    |
| 64135 | P0C214 | P03897  | -0.2213   |
| 64136 | P0C214 | P01622  | -1.0022   |
| 64137 | P0C214 | Q9NPH3  | -1.6418   |
| 64138 | P0C214 | Q8WUG5  | -1.1687   |
| 64139 | P0C214 | Q9HCS4  | -0.17183  |
| 64140 | P0C214 | Q9Y5U8  | -0.5302   |
| 64141 | P0C214 | Q8NGM8  | -1.2952   |
| 64142 | P0C214 | Q8NH18  | -1.2952   |
| 64143 | P0C214 | P06319  | -1.0022   |
| 64144 | P0C214 | Q2TAA2  | -0.36863  |

|       |        |         |           |
|-------|--------|---------|-----------|
| 64145 | P0C214 | Q5HY64  | -0.19934  |
| 64146 | P0C214 | Q9Y6I7  | -0.23011  |
| 64147 | P0C214 | O15393  | -1.6582   |
| 64148 | P0C214 | Q9Y5P2  | -0.76288  |
| 64149 | P0C214 | Q8IZE3  | -0.22734  |
| 64150 | P0C214 | Q13472  | -0.10288  |
| 64151 | P0C214 | Q9BR11  | -0.18814  |
| 64152 | P0C214 | Q8N567  | -0.54568  |
| 64153 | P0C214 | Q9P0S9  | -0.76162  |
| 64154 | P0C214 | Q99653  | -0.22724  |
| 64155 | P0C214 | Q9H3T3  | -1.185    |
| 64156 | P0C214 | A8MVG2  | -0.98681  |
| 64157 | P0C214 | Q9GZN6  | -1.1192   |
| 64158 | P0C214 | P0C881  | -0.13023  |
| 64159 | P0C214 | Q8IZJ0  | -0.85666  |
| 64160 | P0C214 | Q8NH09  | -1.2952   |
| 64161 | P0C214 | Q13477  | -1.209    |
| 64162 | P0C214 | Q9UN67  | -1.2126   |
| 64163 | P0C214 | Q9H3S1  | -1.0306   |
| 64164 | P0C214 | Q9BX84  | -0.95977  |
| 64165 | P0C214 | Q9NP70  | -1.0922   |
| 64166 | P0C214 | P54886  | -0.32915  |
| 64167 | P0C214 | Q6N043  | -0.22714  |
| 64168 | P0C214 | Q8NGM9  | -1.2952   |
| 64169 | P0C214 | Q494V2  | -0.53176  |
| 64170 | P0C214 | O75140  | -0.55123  |
| 64171 | P0C214 | Q9Y6Q6  | -0.28582  |
| 64172 | P0C214 | A2RUR9  | -0.099649 |
| 64173 | P0C214 | P0DJJD3 | -0.2347   |
| 64174 | P0C214 | P19113  | -0.36485  |
| 64175 | P0C214 | Q8WVB3  | -0.21616  |
| 64176 | P0C214 | Q8IU68  | -1.0037   |
| 64177 | P0C214 | P49189  | -0.38802  |
| 64178 | P0C214 | Q9Y5Y9  | -1.0043   |
| 64179 | P0C214 | Q8NI22  | -0.54085  |
| 64180 | P0C214 | A8MVU1  | -0.37677  |
| 64181 | P0C214 | Q8TEU8  | -0.69446  |
| 64182 | P0C214 | P0DM48  | -0.22697  |
| 64183 | P0C214 | Q3LXA3  | -0.72649  |
| 64184 | P0C214 | Q9BVV2  | -0.34207  |
| 64185 | P0C214 | P15153  | -0.42167  |
| 64186 | P0C214 | P30542  | -0.37769  |
| 64187 | P0C214 | Q96MX6  | -0.34917  |
| 64188 | P0C214 | O43868  | -1.131    |
| 64189 | P0C214 | Q9P2S5  | -0.22737  |
| 64190 | P0C214 | Q13813  | -0.22741  |
| 64191 | P0C214 | Q9UNH7  | -0.16042  |
| 64192 | P0C214 | Q8WXJ9  | -0.5331   |
| 64193 | P0C214 | Q6UXU1  | -0.91736  |
| 64194 | P0C214 | Q99435  | -0.47597  |
| 64195 | P0C214 | O14775  | -0.40677  |
| 64196 | P0C214 | Q15389  | -1.1462   |
| 64197 | P0C214 | Q68DU8  | -0.15611  |
| 64198 | P0C214 | Q9NQR9  | -0.29698  |
| 64199 | P0C214 | P42167  | -0.070405 |
| 64200 | P0C214 | P26842  | -0.68278  |
| 64201 | P0C214 | P35858  | -0.64945  |
| 64202 | P0C214 | Q9BUP0  | -0.22295  |
| 64203 | P0C214 | Q9HBT6  | -1.1908   |
| 64204 | P0C214 | Q5VUD6  | -1.0037   |
| 64205 | P0C214 | Q7RTY1  | -1.0965   |
| 64206 | P0C214 | Q9Y303  | -0.23503  |
| 64207 | P0C214 | Q13395  | -0.30661  |
| 64208 | P0C214 | P51671  | -0.91795  |
| 64209 | P0C214 | Q13627  | -0.33529  |
| 64210 | P0C214 | Q96G30  | -0.41036  |
| 64211 | P0C214 | Q53EL9  | -0.92513  |
| 64212 | P0C214 | O95235  | -0.32866  |
| 64213 | P0C214 | O75553  | -0.46348  |
| 64214 | P0C214 | P10319  | -1.0367   |
| 64215 | P0C214 | O60721  | -0.80502  |
| 64216 | P0C214 | Q8NOV1  | -0.10163  |
| 64217 | P0C214 | Q5FYB1  | -0.57898  |
| 64218 | P0C214 | Q9NSD5  | -1.1312   |
| 64219 | P0C214 | P40189  | -0.43002  |
| 64220 | P0C214 | Q9H3Z4  | -0.37292  |

|       |        |        |           |
|-------|--------|--------|-----------|
| 64221 | P0C214 | Q4AC94 | -0.34831  |
| 64222 | P0C214 | P80188 | -0.35216  |
| 64223 | P0C214 | P22234 | -0.087853 |
| 64224 | P0C214 | P35070 | -1.1166   |
| 64225 | P0C214 | Q13239 | -0.22741  |
| 64226 | P0C214 | P09382 | -0.49588  |
| 64227 | P0C214 | O43187 | -0.22738  |
| 64228 | P0C214 | Q9UHG0 | -0.45524  |
| 64229 | P0C214 | P02743 | -0.74138  |
| 64230 | P0C214 | Q7RTS6 | -0.98681  |
| 64231 | P0C214 | O94822 | -0.13653  |
| 64232 | P0C214 | P78314 | -0.22736  |
| 64233 | P0C214 | A2VDF0 | -0.29795  |
| 64234 | P0C214 | P0C7U9 | -0.98681  |
| 64235 | P0C214 | Q9Y5H1 | -1.2424   |
| 64236 | P0C214 | Q9H8Y5 | -0.21056  |
| 64237 | P0C214 | Q86Z23 | -0.96884  |
| 64238 | P0C214 | P52848 | -0.3694   |
| 64239 | P0C214 | Q7Z6J2 | -0.22922  |
| 64240 | P0C214 | P08217 | -1.4261   |
| 64241 | P0C214 | Q9NRE2 | -0.40904  |
| 64242 | P0C214 | Q12851 | -0.36964  |
| 64243 | P0C214 | Q6DHY5 | -1.2827   |
| 64244 | P0C214 | Q9P121 | -0.22821  |
| 64245 | P0C214 | Q8TAX9 | -0.20758  |
| 64246 | P0C214 | Q9BS91 | -0.85407  |
| 64247 | P0C214 | Q9Y2A9 | -0.58535  |
| 64248 | P0C214 | P0CJ89 | -0.16414  |
| 64249 | P0C214 | Q86SZ3 | -0.71593  |
| 64250 | P0C214 | P23771 | -0.22738  |
| 64251 | P0C214 | Q9NQE7 | -0.87695  |
| 64252 | P0C214 | Q8N104 | -0.88056  |
| 64253 | P0C214 | Q8N2C9 | -0.036748 |
| 64254 | P0C214 | Q8IW00 | -1.0708   |
| 64255 | P0C214 | P78333 | -0.95259  |
| 64256 | P0C214 | P12643 | -0.22741  |
| 64257 | P0C214 | O15062 | -0.21995  |
| 64258 | P0C214 | Q6Y2X3 | -0.32804  |
| 64259 | P0C214 | Q9P265 | -0.21654  |
| 64260 | P0C214 | Q8IZ13 | -0.18855  |
| 64261 | P0C214 | Q8NGQ6 | -1.2952   |
| 64262 | P0C214 | Q8NA56 | -0.067582 |
| 64263 | P0C214 | Q96DC8 | -0.29641  |
| 64264 | P0C214 | O43143 | -0.39715  |
| 64265 | P0C214 | Q96PT4 | -0.19191  |
| 64266 | P0C214 | P15692 | -0.30171  |
| 64267 | P0C214 | Q8NEB9 | -0.5175   |
| 64268 | P0C214 | Q17R55 | -0.98681  |
| 64269 | P0C214 | P98161 | -0.28771  |
| 64270 | P0C214 | Q9Y6A5 | -0.10906  |
| 64271 | P0C214 | Q8NB37 | -0.91736  |
| 64272 | P0C214 | O95249 | -0.48241  |
| 64273 | P0C214 | Q7RTZ1 | -1.463    |
| 64274 | P0C214 | P80075 | -1.0318   |
| 64275 | P0C214 | Q9UBR4 | -0.22884  |
| 64276 | P0C214 | P52569 | -0.8031   |
| 64277 | P0C214 | C9JH25 | -0.98681  |
| 64278 | P0C214 | Q7Z5A4 | -1.4261   |
| 64279 | P0C214 | Q8N960 | -0.18848  |
| 64280 | P0C214 | Q96L34 | -0.46486  |
| 64281 | P0C214 | P52798 | -0.52971  |
| 64282 | P0C214 | Q2M2H8 | -0.78979  |
| 64283 | P0C214 | Q96NU0 | -1.3356   |
| 64284 | P0C214 | Q8NCS7 | -0.79755  |
| 64285 | P0C214 | Q01085 | -0.27235  |
| 64286 | P0C214 | Q9UK17 | -1.142    |
| 64287 | P0C214 | Q8NC38 | -0.096308 |
| 64288 | P0C214 | P05013 | -0.57352  |
| 64289 | P0C214 | Q29960 | -1.3017   |
| 64290 | P0C214 | Q9Y466 | -0.22952  |
| 64291 | P0C214 | Q9BV38 | -0.638    |
| 64292 | P0C214 | Q15034 | -0.41099  |
| 64293 | P0C214 | P0CB46 | -0.80739  |
| 64294 | P0C214 | Q14112 | -0.71574  |
| 64295 | P0C214 | Q8N8R3 | -0.7711   |
| 64296 | P0C214 | P08922 | -1.3007   |

|       |        |        |            |
|-------|--------|--------|------------|
| 64297 | P0C214 | Q8N7F7 | -0.22388   |
| 64298 | P0C214 | Q9Y2Y1 | -0.067238  |
| 64299 | P0C214 | Q5UCC4 | -1.4034    |
| 64300 | P0C214 | P01358 | -0.26119   |
| 64301 | P0C214 | Q9Y6H8 | -1.0514    |
| 64302 | P0C214 | Q53GT1 | -0.19756   |
| 64303 | P0C214 | O15145 | -0.13138   |
| 64304 | P0C214 | P60022 | -0.88875   |
| 64305 | P0C214 | O95170 | -0.22938   |
| 64306 | P0C214 | Q99935 | -0.79476   |
| 64307 | P0C214 | P05451 | -0.68442   |
| 64308 | P0C214 | Q96RQ1 | -0.30457   |
| 64309 | P0C214 | Q8NEX6 | -0.91736   |
| 64310 | P0C214 | Q14314 | -1.087     |
| 64311 | P0C214 | Q9UL15 | -0.22763   |
| 64312 | P0C214 | P05556 | -0.24718   |
| 64313 | P0C214 | P49675 | -0.40881   |
| 64314 | P0C214 | P0CJ90 | -0.16414   |
| 64315 | P0C214 | Q9NYR8 | -1.1154    |
| 64316 | P0C214 | Q9NQS1 | -0.12672   |
| 64317 | P0C214 | Q9NQC8 | -0.31181   |
| 64318 | P0C214 | Q9H0H0 | -0.12125   |
| 64319 | P0C214 | A6NNP5 | -0.091098  |
| 64320 | P0C214 | Q8N8Q3 | -0.23733   |
| 64321 | P0C214 | P02765 | -0.66487   |
| 64322 | P0C214 | P42685 | -0.5856    |
| 64323 | P0C214 | Q9NY35 | -1.0148    |
| 64324 | P0C214 | Q2T9K0 | -0.98681   |
| 64325 | P0C214 | Q5U3C3 | -0.98681   |
| 64326 | P0C214 | Q8TBY9 | -0.43585   |
| 64327 | P0C214 | Q29983 | -0.66011   |
| 64328 | P0C214 | Q32Q52 | -0.45868   |
| 64329 | P0C214 | Q15916 | -0.20496   |
| 64330 | P0C214 | Q5T0B9 | -0.083723  |
| 64331 | P0C214 | Q7Z7N9 | -0.98681   |
| 64332 | P0C214 | P32019 | -0.34542   |
| 64333 | P0C214 | Q6N021 | -0.47222   |
| 64334 | P0C214 | Q2M3A8 | -0.41738   |
| 64335 | P0C214 | Q8TAE7 | -0.52507   |
| 64336 | P0C214 | Q16281 | -1.4736    |
| 64337 | P0C214 | P46089 | -1.432     |
| 64338 | P0C214 | Q9Y5M1 | -0.15179   |
| 64339 | P0C214 | P37088 | -0.67609   |
| 64340 | P0C214 | P08620 | -0.67766   |
| 64341 | P0C214 | Q6ZNB6 | -0.39568   |
| 64342 | P0C214 | Q9Y5F3 | -1.2424    |
| 64343 | P0C214 | Q9Y586 | -0.15289   |
| 64344 | P0C214 | O43300 | -0.8702    |
| 64345 | P0C214 | P41229 | -0.40874   |
| 64346 | P0C214 | Q3SX64 | -0.28508   |
| 64347 | P0C214 | Q5VU36 | -0.98681   |
| 64348 | P0C214 | P49281 | -0.24745   |
| 64349 | P0C214 | Q9UBN4 | -0.32078   |
| 64350 | P0C214 | Q9Y664 | -0.47145   |
| 64351 | P0C214 | Q9UBQ7 | -0.4625    |
| 64352 | P0C214 | Q8N7U6 | -0.43585   |
| 64353 | P0C214 | P16403 | -0.7011    |
| 64354 | P0C214 | Q68G74 | -0.22744   |
| 64355 | P0C214 | Q5GLZ8 | -0.55984   |
| 64356 | P0C214 | Q96MW5 | -0.21805   |
| 64357 | P0C214 | O14494 | -0.78947   |
| 64358 | P0C214 | Q7RTR8 | -1.2886    |
| 64359 | P0C214 | A6PVC2 | -0.40513   |
| 64360 | P0C214 | Q2TAY7 | -0.22795   |
| 64361 | P0C214 | Q96LZ2 | -0.0090478 |
| 64362 | P0C214 | P16422 | -0.22746   |
| 64363 | P0C214 | Q9ULG6 | -0.87513   |
| 64364 | P0C214 | P43652 | -0.92622   |
| 64365 | P0C214 | O75192 | -0.3268    |
| 64366 | P0C214 | Q9HA47 | -0.50783   |
| 64367 | P0C214 | Q96AP4 | -0.71534   |
| 64368 | P0C214 | Q9NYU1 | -0.28274   |
| 64369 | P0C214 | Q695T7 | -1.1888    |
| 64370 | P0C214 | O75382 | -0.22741   |
| 64371 | P0C214 | Q30KR1 | -0.88056   |
| 64372 | P0C214 | P10147 | -0.28903   |

|       |        |        |           |
|-------|--------|--------|-----------|
| 64373 | P0C214 | Q96DA2 | -0.96925  |
| 64374 | P0C214 | Q12946 | -0.40394  |
| 64375 | P0C214 | P51841 | -1.413    |
| 64376 | P0C214 | Q8N6C7 | -0.25832  |
| 64377 | P0C214 | Q8WWZ8 | -0.22742  |
| 64378 | P0C214 | Q9Y5I4 | -1.2636   |
| 64379 | P0C214 | P84090 | -0.20816  |
| 64380 | P0C214 | Q5TBK1 | -0.084438 |
| 64381 | P0C214 | Q9UQ26 | -0.22741  |
| 64382 | P0C214 | Q9NR34 | -0.68277  |
| 64383 | P0C214 | P07202 | -0.79192  |
| 64384 | P0C214 | Q96IS3 | -0.16292  |
| 64385 | P0C214 | Q96KR6 | -0.98681  |
| 64386 | P0C214 | Q75962 | -0.50794  |
| 64387 | P0C214 | Q9BYM8 | -0.2267   |
| 64388 | P0C214 | A2RU49 | -0.48111  |
| 64389 | P0C214 | Q8TBK6 | -0.5018   |
| 64390 | P0C214 | Q92959 | -1.2115   |
| 64391 | P0C214 | Q5VVQ6 | -0.35278  |
| 64392 | P0C214 | Q9UMD9 | -0.94508  |
| 64393 | P0C214 | Q8TAD1 | -0.39773  |
| 64394 | P0C214 | Q14CN2 | -1.5384   |
| 64395 | P0C214 | Q96PC5 | -0.91736  |
| 64396 | P0C214 | Q6PHW0 | -0.85036  |
| 64397 | P0C214 | Q9UJ55 | -0.18353  |
| 64398 | P0C214 | Q9NZA1 | -0.33214  |
| 64399 | P0C214 | Q9NYY1 | -0.83365  |
| 64400 | P0C214 | Q8IYX4 | -0.61273  |
| 64401 | P0C214 | Q5H9U9 | -0.79344  |
| 64402 | P0C214 | P18136 | -1.0022   |
| 64403 | P0C214 | Q16378 | -0.99241  |
| 64404 | P0C214 | Q96IF1 | -0.349    |
| 64405 | P0C214 | Q6PXP3 | -0.91973  |
| 64406 | P0C214 | P40126 | -0.3896   |
| 64407 | P0C214 | P18085 | -0.31842  |
| 64408 | P0C214 | P22694 | -0.22639  |
| 64409 | P0C214 | Q05209 | -0.23313  |
| 64410 | P0C214 | P31751 | -0.12508  |
| 64411 | P0C214 | P28472 | -1.0759   |
| 64412 | P0C214 | Q96SA4 | -0.98681  |
| 64413 | P0C214 | Q96PD6 | -0.70375  |
| 64414 | P0C214 | P02753 | -0.34194  |
| 64415 | P0C214 | Q43505 | -0.46567  |
| 64416 | P0C214 | Q9UPC5 | -0.88842  |
| 64417 | P0C214 | P19256 | -0.65797  |
| 64418 | P0C214 | P32754 | -0.19128  |
| 64419 | P0C214 | P00491 | -0.18609  |
| 64420 | P0C214 | Q9Y5Q0 | -0.75784  |
| 64421 | P0C214 | Q12767 | -0.98681  |
| 64422 | P0C214 | Q53EU6 | -0.59701  |
| 64423 | P0C214 | Q96FJ0 | -0.41895  |
| 64424 | P0C214 | Q9BZM2 | -0.49955  |
| 64425 | P0C214 | Q9H7X0 | -0.24671  |
| 64426 | P0C214 | Q9Y2T4 | -0.45922  |
| 64427 | P0C214 | P45985 | -0.22927  |
| 64428 | P0C214 | Q96N28 | -0.15381  |
| 64429 | P0C214 | Q6ZW34 | -0.98681  |
| 64430 | P0C214 | Q8IV01 | -0.87871  |
| 64431 | P0C214 | Q6NTE8 | -0.6201   |
| 64432 | P0C214 | P07204 | -0.46827  |
| 64433 | P0C214 | Q99558 | -0.22741  |
| 64434 | P0C214 | Q629K1 | -1.0037   |
| 64435 | P0C214 | Q9NRJ7 | -1.2126   |
| 64436 | P0C214 | Q8N1G0 | -0.17887  |
| 64437 | P0C214 | P43234 | -0.92289  |
| 64438 | P0C214 | Q6UXN9 | -0.56019  |
| 64439 | P0C214 | Q6ZRR5 | -0.98681  |
| 64440 | P0C214 | P54289 | -1.033    |
| 64441 | P0C214 | Q9UM01 | -1.1304   |
| 64442 | P0C214 | Q96IR7 | -0.51041  |
| 64443 | P0C214 | P11712 | -0.47236  |
| 64444 | P0C214 | Q8N6D2 | -0.30665  |
| 64445 | P0C214 | P43657 | -1.3112   |
| 64446 | P0C214 | Q8NGZ9 | -1.2952   |
| 64447 | P0C214 | Q8N4W6 | -0.91173  |
| 64448 | P0C214 | Q7Z713 | -0.22741  |

|       |        |        |          |
|-------|--------|--------|----------|
| 64449 | P0C214 | O75128 | -0.60307 |
| 64450 | P0C214 | Q9BTM1 | -0.85588 |
| 64451 | P0C214 | O75690 | -0.50416 |
| 64452 | P0C214 | Q15455 | -0.27293 |
| 64453 | P0C214 | P06314 | -1.0022  |
| 64454 | P0C214 | O75923 | -0.9082  |
| 64455 | P0C214 | Q9HAV0 | -0.42673 |
| 64456 | P0C214 | Q6ZQN5 | -0.41532 |
| 64457 | P0C214 | Q9BVK6 | -0.15481 |
| 64458 | P0C214 | Q96JY6 | -0.22733 |
| 64459 | P0C214 | A1L157 | -0.98681 |
| 64460 | P0C214 | O43808 | -0.33513 |
| 64461 | P0C214 | P15529 | -0.70404 |
| 64462 | P0C214 | A4D1T9 | -1.2058  |
| 64463 | P0C214 | P60602 | -0.48152 |
| 64464 | P0C214 | Q9Y4D2 | -0.71436 |
| 64465 | P0C214 | Q92784 | -0.23165 |
| 64466 | P0C214 | Q00973 | -0.63914 |
| 64467 | P0C214 | Q9NQW7 | -0.4921  |
| 64468 | P0C214 | Q9P2P1 | -0.64554 |
| 64469 | P0C214 | P61619 | -0.87592 |
| 64470 | P0C214 | Q8IWF6 | -0.23448 |
| 64471 | P0C214 | Q9NR21 | -0.40719 |
| 64472 | P0C214 | Q96L96 | -0.77139 |
| 64473 | P0C214 | Q8TD19 | -0.22741 |
| 64474 | P0C214 | P06881 | -0.23784 |
| 64475 | P0C214 | O43184 | -0.64311 |
| 64476 | P0C214 | Q8WVP7 | -0.96404 |
| 64477 | P0C214 | Q04941 | -0.63894 |
| 64478 | P0C214 | O14874 | -0.35305 |
| 64479 | P0C214 | Q9HAD4 | -0.22741 |
| 64480 | P0C214 | Q08ET2 | -1.2183  |
| 64481 | P0C214 | P50552 | -0.2139  |
| 64482 | P0C214 | Q3MUY2 | -1.034   |
| 64483 | P0C214 | P08861 | -1.4406  |
| 64484 | P0C214 | Q9UHC3 | -0.67738 |
| 64485 | P0C214 | Q9BRX9 | -0.22774 |
| 64486 | P0C214 | Q9BZD6 | -1.1363  |
| 64487 | P0C214 | O15353 | -0.362   |
| 64488 | P0C214 | Q6ZMT1 | -0.58962 |
| 64489 | P0C214 | Q6UX52 | -0.91736 |
| 64490 | P0C214 | A6NFQ7 | -0.22382 |
| 64491 | P0C214 | O15258 | -0.66417 |
| 64492 | P0C214 | P09960 | -0.33973 |
| 64493 | P0C214 | P12525 | -0.2268  |
| 64494 | P0C214 | Q92847 | -0.7086  |
| 64495 | P0C214 | Q8IUC4 | -0.4593  |
| 64496 | P0C214 | Q30201 | -0.65073 |
| 64497 | P0C214 | Q86VZ4 | -0.98681 |
| 64498 | P0C214 | P18507 | -0.54058 |
| 64499 | P0C214 | A0PJX4 | -1.1983  |
| 64500 | P0C214 | P48751 | -1.1705  |
| 64501 | P0C214 | A6NL88 | -0.98681 |
| 64502 | P0C214 | A8MYG8 | -0.22741 |
| 64503 | P0C214 | Q8N9W4 | -0.17607 |
| 64504 | P0C214 | O95104 | -0.3083  |
| 64505 | P0C214 | Q8IZP9 | -1.3645  |
| 64506 | P0C214 | P19827 | -0.78535 |
| 64507 | P0C214 | P56373 | -0.63191 |
| 64508 | P0C214 | Q96DT7 | -0.22488 |
| 64509 | P0C214 | O14793 | -0.37068 |
| 64510 | P0C214 | Q00241 | -0.80569 |
| 64511 | P0C214 | Q8WWY7 | -0.75998 |
| 64512 | P0C214 | Q8NH40 | -1.2952  |
| 64513 | P0C214 | Q8N201 | -0.47614 |
| 64514 | P0C214 | O75569 | -0.16698 |
| 64515 | P0C214 | Q9HC07 | -0.87155 |
| 64516 | P0C214 | Q5T4F4 | -0.3964  |
| 64517 | P0C214 | O43252 | -0.55028 |
| 64518 | P0C214 | Q5T124 | -0.23577 |
| 64519 | P0C214 | Q86YW5 | -0.28417 |
| 64520 | P0C214 | P58400 | -0.62455 |
| 64521 | P0C214 | Q0P6H9 | -0.98681 |
| 64522 | P0C214 | Q5S007 | -0.37568 |
| 64523 | P0C214 | A6NF89 | -1.2952  |
| 64524 | P0C214 | Q8TDM5 | -0.73819 |

|       |        |        |           |
|-------|--------|--------|-----------|
| 64525 | P0C214 | O94911 | -1.2963   |
| 64526 | P0C214 | P21926 | -0.59356  |
| 64527 | P0C214 | P42263 | -0.87424  |
| 64528 | P0C214 | P49795 | -0.22824  |
| 64529 | P0C214 | P46063 | -0.22546  |
| 64530 | P0C214 | P08758 | -0.34631  |
| 64531 | P0C214 | Q8TDW4 | -0.9586   |
| 64532 | P0C214 | P21128 | -0.73299  |
| 64533 | P0C214 | Q9HC10 | -0.57913  |
| 64534 | P0C214 | Q86XP0 | -0.22818  |
| 64535 | P0C214 | Q075Z2 | -0.92043  |
| 64536 | P0C214 | Q9TNN7 | -1.0367   |
| 64537 | P0C214 | O43427 | -0.19891  |
| 64538 | P0C214 | Q5TYW8 | -0.18615  |
| 64539 | P0C214 | Q9P1W9 | -0.75033  |
| 64540 | P0C214 | O94972 | -0.2274   |
| 64541 | P0C214 | Q99895 | -0.97208  |
| 64542 | P0C214 | Q8NFY4 | -0.79958  |
| 64543 | P0C214 | Q96RD9 | -1.0708   |
| 64544 | P0C214 | A4D1P6 | -0.22746  |
| 64545 | P0C214 | O76070 | -0.27833  |
| 64546 | P0C214 | Q8WW34 | -0.98681  |
| 64547 | P0C214 | Q7Z4J2 | -0.7176   |
| 64548 | P0C214 | P0DJ07 | -0.75609  |
| 64549 | P0C214 | B7Z6K7 | -0.3517   |
| 64550 | P0C214 | Q9H8X9 | -1.0453   |
| 64551 | P0C214 | Q9NZM6 | -1.15     |
| 64552 | P0C214 | P98198 | -0.96901  |
| 64553 | P0C214 | P15374 | -0.19343  |
| 64554 | P0C214 | Q9NY93 | -0.38216  |
| 64555 | P0C214 | Q6ZPD8 | -0.8547   |
| 64556 | P0C214 | P52701 | -0.10986  |
| 64557 | P0C214 | Q8WZA2 | -0.2274   |
| 64558 | P0C214 | Q16875 | -0.098549 |
| 64559 | P0C214 | O75388 | -1.4907   |
| 64560 | P0C214 | Q7Z4H4 | -0.82314  |
| 64561 | P0C214 | P01570 | -0.71883  |
| 64562 | P0C214 | Q8NC24 | -1.1574   |
| 64563 | P0C214 | Q9QC07 | -0.38742  |
| 64564 | P0C214 | Q06203 | -0.25298  |
| 64565 | P0C214 | Q9UMZ2 | -0.23944  |
| 64566 | P0C214 | Q5TGI0 | -0.98681  |
| 64567 | P0C214 | O75426 | -0.34682  |
| 64568 | P0C214 | Q9Y371 | -0.22739  |
| 64569 | P0C214 | Q02094 | -0.85709  |
| 64570 | P0C214 | Q7Z2T5 | -0.62793  |
| 64571 | P0C214 | Q9BXM9 | -0.18353  |
| 64572 | P0C214 | Q16659 | -0.4062   |
| 64573 | P0C214 | Q6NSI4 | -0.33     |
| 64574 | P0C214 | Q0D2K2 | -0.2051   |
| 64575 | P0C214 | Q8TD84 | -1.0149   |
| 64576 | P0C214 | Q8IYP9 | -1.0453   |
| 64577 | P0C214 | P35243 | -0.71248  |
| 64578 | P0C214 | Q96HC4 | -0.3511   |
| 64579 | P0C214 | Q8IWA0 | -0.2282   |
| 64580 | P0C214 | Q8WWQ2 | -0.76292  |
| 64581 | P0C214 | P49411 | -0.53875  |
| 64582 | P0C214 | Q96DC9 | -0.69478  |
| 64583 | P0C214 | P04234 | -0.61622  |
| 64584 | P0C214 | Q14028 | -1.2968   |
| 64585 | P0C214 | Q8IZ81 | -0.73453  |
| 64586 | P0C214 | Q6UWW0 | -0.99323  |
| 64587 | P0C214 | Q9NW68 | -0.17924  |
| 64588 | P0C214 | Q6ZMR5 | -1.7919   |
| 64589 | P0C214 | O43638 | -0.39324  |
| 64590 | P0C214 | Q92611 | -0.17409  |
| 64591 | P0C214 | Q6YP21 | -0.19589  |
| 64592 | P0C214 | Q9Y673 | -0.82322  |
| 64593 | P0C214 | O15068 | -0.35011  |
| 64594 | P0C214 | Q7L2J0 | -0.231    |
| 64595 | P0C214 | Q8TAZ6 | -0.40866  |
| 64596 | P0C214 | O75526 | -0.22727  |
| 64597 | P0C214 | P50224 | -0.23587  |
| 64598 | P0C214 | Q8IZM9 | -1.1771   |
| 64599 | P0C214 | Q9BXU3 | -0.71534  |
| 64600 | P0C214 | P50443 | -1.2343   |

|       |        |        |           |
|-------|--------|--------|-----------|
| 64601 | P0C214 | Q8NH43 | -1.2952   |
| 64602 | P0C214 | O76041 | -0.22748  |
| 64603 | P0C214 | O95786 | -0.22677  |
| 64604 | P0C214 | P05187 | -1.0991   |
| 64605 | P0C214 | Q99972 | -0.86836  |
| 64606 | P0C214 | P22607 | -0.35677  |
| 64607 | P0C214 | Q9P2K9 | -0.61479  |
| 64608 | P0C214 | Q99973 | -0.41366  |
| 64609 | P0C214 | O15554 | -0.50617  |
| 64610 | P0C214 | P78423 | -0.51211  |
| 64611 | P0C214 | Q7L775 | -0.33805  |
| 64612 | P0C214 | P09172 | -0.41923  |
| 64613 | P0C214 | Q8WTZ4 | -0.22956  |
| 64614 | P0C214 | Q9Y6A2 | -0.7739   |
| 64615 | P0C214 | Q9P2E5 | -0.43842  |
| 64616 | P0C214 | Q6IS24 | -0.78421  |
| 64617 | P0C214 | P59051 | -0.13316  |
| 64618 | P0C214 | Q96EX1 | -0.98681  |
| 64619 | P0C214 | Q8NGY7 | -1.2952   |
| 64620 | P0C214 | Q7RTY9 | -1.0193   |
| 64621 | P0C214 | Q9NY47 | -0.81465  |
| 64622 | P0C214 | Q9H267 | -0.16515  |
| 64623 | P0C214 | P01719 | -1.0022   |
| 64624 | P0C214 | Q09470 | -0.93953  |
| 64625 | P0C214 | P61803 | -0.76771  |
| 64626 | P0C214 | Q9Y6I0 | -0.6957   |
| 64627 | P0C214 | Q15517 | -0.85179  |
| 64628 | P0C214 | Q9Y4C4 | -0.23181  |
| 64629 | P0C214 | O94929 | -0.26698  |
| 64630 | P0C214 | P01780 | -1.0022   |
| 64631 | P0C214 | P18564 | -1.235    |
| 64632 | P0C214 | Q6UXV1 | -0.98681  |
| 64633 | P0C214 | Q92610 | -0.014401 |
| 64634 | P0C214 | Q6P4A7 | -1.0147   |
| 64635 | P0C214 | Q02338 | -0.22468  |
| 64636 | P0C214 | Q6PI25 | -0.43437  |
| 64637 | P0C214 | Q149M9 | -0.79608  |
| 64638 | P0C214 | Q5T753 | -0.38015  |
| 64639 | P0C214 | P09669 | -0.47996  |
| 64640 | P0C214 | P35250 | -0.19614  |
| 64641 | P0C214 | P15104 | -0.29591  |
| 64642 | P0C214 | P13598 | -1.2251   |
| 64643 | P0C214 | P12644 | -0.22741  |
| 64644 | P0C214 | P17706 | -0.24736  |
| 64645 | P0C214 | Q9UBH0 | -0.80399  |
| 64646 | P0C214 | Q96A99 | -0.96015  |
| 64647 | P0C214 | Q9H300 | -0.75608  |
| 64648 | P0C214 | Q9Y566 | -0.22743  |
| 64649 | P0C214 | Q8IXH8 | -1.2424   |
| 64650 | P0C214 | P40937 | -0.21781  |
| 64651 | P0C214 | Q9BWF3 | -0.23247  |
| 64652 | P0C214 | Q5SW96 | -0.22727  |
| 64653 | P0C214 | Q9H9V9 | -0.1953   |
| 64654 | P0C214 | Q9BYH1 | -1.0037   |
| 64655 | P0C214 | Q8TF08 | -0.69638  |
| 64656 | P0C214 | Q5T013 | -0.31169  |
| 64657 | P0C214 | Q8WUJ0 | -0.485    |
| 64658 | P0C214 | Q9Y2F5 | -0.36453  |
| 64659 | P0C214 | Q9Y4B4 | -0.46212  |
| 64660 | P0C214 | Q86X24 | -0.43877  |
| 64661 | P0C214 | Q9UHF1 | -1.109    |
| 64662 | P0C214 | Q6P6B7 | -0.22742  |
| 64663 | P0C214 | Q9HCM3 | -0.98681  |
| 64664 | P0C214 | Q4G0S4 | -0.59135  |
| 64665 | P0C214 | Q86YQ2 | -1.0961   |
| 64666 | P0C214 | Q8N4X5 | -0.26613  |
| 64667 | P0C214 | Q9P281 | -0.51359  |
| 64668 | P0C214 | P35609 | -0.74251  |
| 64669 | P0C214 | Q8NBP5 | -1.113    |
| 64670 | P0C214 | Q9BR09 | -0.17074  |
| 64671 | P0C214 | Q9C0K0 | -0.22689  |
| 64672 | P0C214 | P19961 | -0.74541  |
| 64673 | P0C214 | Q9Y6L7 | -1.54     |
| 64674 | P0C214 | P06276 | -0.57025  |
| 64675 | P0C214 | Q6UWJ1 | -1.1366   |
| 64676 | P0C214 | Q96LP4 | -0.60102  |



|       |        |        |           |
|-------|--------|--------|-----------|
| 64677 | P0C214 | Q8IZJ6 | -0.63676  |
| 64678 | P0C214 | Q86VZ2 | -0.28436  |
| 64679 | P0C214 | Q6DKI2 | -0.39457  |
| 64680 | P0C214 | Q9UBG0 | -1.0387   |
| 64681 | P0C214 | Q15061 | -0.22752  |
| 64682 | P0C214 | Q6NYC1 | -0.18213  |
| 64683 | P0C214 | Q9Y4J8 | -0.2269   |
| 64684 | P0C214 | P53367 | -0.15526  |
| 64685 | P0C214 | Q8TB36 | -0.5142   |
| 64686 | P0C214 | Q9C0C9 | -0.67194  |
| 64687 | P0C214 | Q8NGR3 | -1.2952   |
| 64688 | P0C214 | Q9BRX5 | -0.10806  |
| 64689 | P0C214 | Q8NGJ7 | -1.2952   |
| 64690 | P0C214 | P35590 | -1.0911   |
| 64691 | P0C214 | Q96PF1 | -0.43778  |
| 64692 | P0C214 | O75952 | -0.21313  |
| 64693 | P0C214 | Q9BVS4 | -1.1602   |
| 64694 | P0C214 | Q7LC44 | -0.51305  |
| 64695 | P0C214 | Q9Y2Q5 | -0.46368  |
| 64696 | P0C214 | Q0VDI3 | -0.98681  |
| 64697 | P0C214 | Q15270 | -0.22707  |
| 64698 | P0C214 | Q9BYL1 | -0.19231  |
| 64699 | P0C214 | Q9GZY4 | -0.77831  |
| 64700 | P0C214 | Q9C0E8 | -1.0447   |
| 64701 | P0C214 | Q9UHB6 | -0.52799  |
| 64702 | P0C214 | P47901 | -1.0281   |
| 64703 | P0C214 | P10966 | -0.83616  |
| 64704 | P0C214 | P61163 | -0.023078 |
| 64705 | P0C214 | Q16609 | -0.64701  |
| 64706 | P0C214 | Q8NGG1 | -1.2259   |
| 64707 | P0C214 | O14894 | -1.128    |
| 64708 | P0C214 | Q96S21 | -0.85591  |
| 64709 | P0C214 | Q9NQG1 | -0.98681  |
| 64710 | P0C214 | Q6ZUK4 | -0.98681  |
| 64711 | P0C214 | O43597 | -0.067056 |
| 64712 | P0C214 | Q96DX8 | -0.15093  |
| 64713 | P0C214 | Q96F44 | -0.22925  |
| 64714 | P0C214 | P21145 | -0.61703  |
| 64715 | P0C214 | P54277 | -0.068313 |
| 64716 | P0C214 | Q8NGI8 | -1.2952   |
| 64717 | P0C214 | Q9UIG5 | -0.47124  |
| 64718 | P0C214 | Q9NWX5 | -0.2274   |
| 64719 | P0C214 | Q9NSA1 | -0.3042   |
| 64720 | P0C214 | P48449 | -0.31012  |
| 64721 | P0C214 | Q8NGE1 | -1.2952   |
| 64722 | P0C214 | Q92997 | -0.16998  |
| 64723 | P0C214 | Q68D06 | -0.971    |
| 64724 | P0C214 | Q8NEC5 | -0.72863  |
| 64725 | P0C214 | Q9H2R5 | -1.4261   |
| 64726 | P0C214 | Q9C0C7 | -0.22745  |
| 64727 | P0C214 | A8MYJ7 | -0.13206  |
| 64728 | P0C214 | Q9NRC6 | -0.23122  |
| 64729 | P0C214 | Q9H1R3 | -0.36518  |
| 64730 | P0C214 | O94898 | -0.87046  |
| 64731 | P0C214 | P62685 | -0.45806  |
| 64732 | P0C214 | Q6ZMN8 | -0.39247  |
| 64733 | P0C214 | A6NMZ7 | -1.2262   |
| 64734 | P0C214 | Q8NB16 | -0.22741  |
| 64735 | P0C214 | Q6UY13 | -0.91736  |
| 64736 | P0C214 | Q86TY3 | -0.98681  |
| 64737 | P0C214 | Q7Z7M0 | -0.22741  |
| 64738 | P0C214 | B3KVV0 | -0.98681  |
| 64739 | P0C214 | Q9UNE2 | -0.31356  |
| 64740 | P0C214 | Q9BXA7 | -1.3135   |
| 64741 | P0C214 | Q9H898 | -0.53447  |
| 64742 | P0C214 | O00144 | -0.81022  |
| 64743 | P0C214 | P26436 | -0.63516  |
| 64744 | P0C214 | P43629 | -1.1811   |
| 64745 | P0C214 | P01774 | -1.0022   |
| 64746 | P0C214 | Q9NTU4 | -0.40411  |
| 64747 | P0C214 | P06731 | -0.6521   |
| 64748 | P0C214 | Q9BVI0 | -0.28443  |
| 64749 | P0C214 | Q8N556 | -0.47473  |
| 64750 | P0C214 | Q9Y2Y4 | -0.24205  |
| 64751 | P0C214 | P35368 | -0.79856  |
| 64752 | P0C214 | Q8NAT1 | -0.90836  |

|       |        |        |           |
|-------|--------|--------|-----------|
| 64753 | P0C214 | Q5VZ72 | -0.99724  |
| 64754 | P0C214 | Q96HJ5 | -0.2114   |
| 64755 | P0C214 | Q685J3 | -0.68302  |
| 64756 | P0C214 | Q8IUH2 | -0.79014  |
| 64757 | P0C214 | A0AVI2 | -0.98681  |
| 64758 | P0C214 | P01703 | -1.0022   |
| 64759 | P0C214 | Q9GZK3 | -1.2952   |
| 64760 | P0C214 | Q15223 | -0.47868  |
| 64761 | P0C214 | Q8NH92 | -1.2952   |
| 64762 | P0C214 | Q96LR9 | -1.7203   |
| 64763 | P0C214 | Q9P203 | -0.22323  |
| 64764 | P0C214 | Q6PIV7 | -0.80997  |
| 64765 | P0C214 | Q8WXF3 | -0.85183  |
| 64766 | P0C214 | O95025 | -1.1363   |
| 64767 | P0C214 | Q16566 | -0.31434  |
| 64768 | P0C214 | Q15218 | -1.3466   |
| 64769 | P0C214 | Q9UF72 | -0.91736  |
| 64770 | P0C214 | Q5GAN3 | -0.89568  |
| 64771 | P0C214 | P49747 | -0.58458  |
| 64772 | P0C214 | P22891 | -0.95317  |
| 64773 | P0C214 | P0CG05 | -0.99256  |
| 64774 | P0C214 | O00124 | -0.40818  |
| 64775 | P0C214 | Q9NRW4 | -0.50143  |
| 64776 | P0C214 | P09211 | -0.21543  |
| 64777 | P0C214 | Q5JT78 | -0.6518   |
| 64778 | P0C214 | P14598 | -0.24832  |
| 64779 | P0C214 | P37268 | -0.70905  |
| 64780 | P0C214 | Q9HBU6 | -0.51641  |
| 64781 | P0C214 | Q9NYL2 | -0.22741  |
| 64782 | P0C214 | Q7RTU1 | -0.34208  |
| 64783 | P0C214 | P58005 | -0.092751 |
| 64784 | P0C214 | O95944 | -1.305    |
| 64785 | P0C214 | Q6ZVE7 | -0.57006  |
| 64786 | P0C214 | Q6S5H5 | -0.22747  |
| 64787 | P0C214 | Q8NFP9 | -0.22741  |
| 64788 | P0C214 | P34130 | -0.72265  |
| 64789 | P0C214 | Q8NFX8 | -1.1636   |
| 64790 | P0C214 | Q30KQ7 | -0.88056  |
| 64791 | P0C214 | Q8NGM1 | -1.2952   |
| 64792 | P0C214 | Q9NRG7 | -0.80154  |
| 64793 | P0C214 | Q99943 | -0.52711  |
| 64794 | P0C214 | Q8IVL1 | -0.61539  |
| 64795 | P0C214 | Q9UBQ6 | -1.1573   |
| 64796 | P0C214 | Q8IZJ1 | -0.54142  |
| 64797 | P0C214 | P42285 | -0.21977  |
| 64798 | P0C214 | P33993 | -0.18302  |
| 64799 | P0C214 | P17643 | -0.38644  |
| 64800 | P0C214 | Q969Z4 | -0.87046  |
| 64801 | P0C214 | Q9H0B8 | -1.0271   |
| 64802 | P0C214 | A1L4K1 | -0.22746  |
| 64803 | P0C214 | Q8N6V9 | -0.065845 |
| 64804 | P0C214 | Q6UXT9 | -0.82426  |
| 64805 | P0C214 | P22570 | -0.079843 |
| 64806 | P0C214 | Q9UGU5 | -0.24321  |
| 64807 | P0C214 | Q6ZRF8 | -0.71534  |
| 64808 | P0C214 | Q0P140 | -0.35515  |
| 64809 | P0C214 | Q15389 | -0.49371  |
| 64810 | P0C214 | Q7Z3U7 | -0.16198  |
| 64811 | P0C214 | P03928 | -0.50375  |
| 64812 | P0C214 | O95822 | -0.23808  |
| 64813 | P0C214 | Q8WUH6 | -0.98681  |
| 64814 | P0C214 | Q5JX69 | -0.98681  |
| 64815 | P0C214 | O43915 | -0.54126  |
| 64816 | P0C214 | A6NL26 | -1.2952   |
| 64817 | P0C214 | Q86W10 | -1.0581   |
| 64818 | P0C214 | P06313 | -1.0022   |
| 64819 | P0C214 | Q5T0J3 | -0.32831  |
| 64820 | P0C214 | Q9Y2T5 | -1.4957   |
| 64821 | P0C214 | Q9NT22 | -0.82556  |
| 64822 | P0C214 | Q9BRY0 | -1.0906   |
| 64823 | P0C214 | Q5I0X7 | -0.43972  |
| 64824 | P0C214 | Q9BQT8 | -0.60901  |
| 64825 | P0C214 | Q9HC84 | -0.54762  |
| 64826 | P0C214 | P98175 | -0.49898  |
| 64827 | P0C214 | Q52LJ0 | -0.38316  |
| 64828 | P0C214 | P17483 | -0.16803  |

|       |        |        |           |
|-------|--------|--------|-----------|
| 64829 | P0C214 | Q63HM2 | -0.98681  |
| 64830 | P0C214 | P13760 | -0.46902  |
| 64831 | P0C214 | Q8N9M5 | -0.62928  |
| 64832 | P0C214 | Q3KNW1 | -0.20314  |
| 64833 | P0C214 | Q8N6L7 | -0.98681  |
| 64834 | P0C214 | Q13614 | -0.22181  |
| 64835 | P0C214 | Q96J88 | -0.54225  |
| 64836 | P0C214 | P29322 | -1.1997   |
| 64837 | P0C214 | P51178 | -0.2721   |
| 64838 | P0C214 | Q8TE56 | -1.3603   |
| 64839 | P0C214 | O60503 | -0.97986  |
| 64840 | P0C214 | P28221 | -1.3216   |
| 64841 | P0C214 | P49758 | -0.63295  |
| 64842 | P0C214 | P30480 | -1.0367   |
| 64843 | P0C214 | P78356 | -0.22149  |
| 64844 | P0C214 | P03951 | -0.73029  |
| 64845 | P0C214 | P11766 | -0.19923  |
| 64846 | P0C214 | Q9H8J5 | -0.98681  |
| 64847 | P0C214 | P17844 | -0.49841  |
| 64848 | P0C214 | Q8WZ71 | -0.98681  |
| 64849 | P0C214 | Q13445 | -0.40154  |
| 64850 | P0C214 | Q06033 | -0.7148   |
| 64851 | P0C214 | O43921 | -0.37059  |
| 64852 | P0C214 | Q8TAK6 | -0.22744  |
| 64853 | P0C214 | Q8TAQ9 | -0.9638   |
| 64854 | P0C214 | Q96PX8 | -1.0742   |
| 64855 | P0C214 | Q9NY26 | -1.0892   |
| 64856 | P0C214 | Q76B58 | -0.62618  |
| 64857 | P0C214 | Q9NVE7 | -0.72671  |
| 64858 | P0C214 | P31323 | -0.22739  |
| 64859 | P0C214 | P01711 | -1.0022   |
| 64860 | P0C214 | P58181 | -1.2952   |
| 64861 | P0C214 | Q63HN8 | -0.73607  |
| 64862 | P0C214 | Q13202 | -0.48073  |
| 64863 | P0C214 | P06899 | -0.83614  |
| 64864 | P0C214 | P53539 | -0.1551   |
| 64865 | P0C214 | Q8WVF1 | -0.64069  |
| 64866 | P0C214 | O60512 | -0.33906  |
| 64867 | P0C214 | Q13938 | -0.21536  |
| 64868 | P0C214 | P42830 | -0.91621  |
| 64869 | P0C214 | P78382 | -0.59266  |
| 64870 | P0C214 | Q569K4 | -0.39712  |
| 64871 | P0C214 | P58304 | -0.22696  |
| 64872 | P0C214 | P0DJD4 | -0.53354  |
| 64873 | P0C214 | Q9H987 | -0.29368  |
| 64874 | P0C214 | Q9HAT0 | -0.54206  |
| 64875 | P0C214 | Q9P272 | -0.39362  |
| 64876 | P0C214 | Q8IWB9 | -1.0675   |
| 64877 | P0C214 | Q96PY5 | -0.22615  |
| 64878 | P0C214 | Q9C0K1 | -1.118    |
| 64879 | P0C214 | Q9NWZ3 | -0.2273   |
| 64880 | P0C214 | Q9BSC4 | -0.21409  |
| 64881 | P0C214 | Q8NFT6 | -0.15724  |
| 64882 | P0C214 | Q86SE8 | -0.044749 |
| 64883 | P0C214 | O60779 | -0.69731  |
| 64884 | P0C214 | Q9NY97 | -0.40632  |
| 64885 | P0C214 | O00478 | -0.98681  |
| 64886 | P0C214 | Q8IYY4 | -0.59856  |
| 64887 | P0C214 | C9JJH3 | -0.68518  |
| 64888 | P0C214 | O15428 | -0.2274   |
| 64889 | P0C214 | P36382 | -1.0539   |
| 64890 | P0C214 | Q96LW4 | -0.41014  |
| 64891 | P0C214 | Q69YU5 | -0.91736  |
| 64892 | P0C214 | Q13067 | -0.60816  |
| 64893 | P0C214 | Q06828 | -0.85878  |
| 64894 | P0C214 | Q6PIW4 | -0.35185  |
| 64895 | P0C214 | Q15075 | -0.21744  |
| 64896 | P0C214 | Q99612 | -0.22484  |
| 64897 | P0C214 | P10696 | -0.7546   |
| 64898 | P0C214 | Q6P2I3 | -0.47245  |
| 64899 | P0C214 | Q9BU20 | -1.0658   |
| 64900 | P0C214 | O60240 | -0.40967  |
| 64901 | P0C214 | P56749 | -0.848    |
| 64902 | P0C214 | Q8N456 | -0.3317   |
| 64903 | P0C214 | Q9H1Q7 | -0.32696  |
| 64904 | P0C214 | Q99665 | -0.92922  |

|       |        |        |          |
|-------|--------|--------|----------|
| 64905 | P0C214 | Q96GS6 | -0.84626 |
| 64906 | P0C214 | Q96T52 | -0.52371 |
| 64907 | P0C214 | Q01851 | -0.2274  |
| 64908 | P0C214 | Q8N4H5 | -0.57743 |
| 64909 | P0C214 | Q8NGQ4 | -1.2952  |
| 64910 | P0C214 | Q7Z7G1 | -0.55818 |
| 64911 | P0C214 | Q9H867 | -0.16971 |
| 64912 | P0C214 | Q9UFP1 | -0.91736 |
| 64913 | P0C214 | Q9H871 | -0.13967 |
| 64914 | P0C214 | O75787 | -0.38812 |
| 64915 | P0C214 | Q9BZJ0 | -0.12173 |
| 64916 | P0C214 | A8MW95 | -0.20397 |
| 64917 | P0C214 | Q2M1P5 | -0.39751 |
| 64918 | P0C214 | Q96P50 | -1.215   |
| 64919 | P0C214 | P0DJ93 | -0.98681 |
| 64920 | P0C214 | P01236 | -0.83334 |
| 64921 | P0C214 | Q9UGJ0 | -0.64393 |
| 64922 | P0C214 | Q8WYL5 | -0.29812 |
| 64923 | P0C214 | C9JJ37 | -0.21869 |
| 64924 | P0C214 | Q6ZWE6 | -0.70551 |
| 64925 | P0C214 | P61225 | -0.72997 |
| 64926 | P0C214 | P59044 | -0.2491  |
| 64927 | P0C214 | P16035 | -0.87261 |
| 64928 | P0C214 | Q8N608 | -1.1561  |
| 64929 | P0C214 | Q96BZ4 | -0.70888 |
| 64930 | P0C214 | P50391 | -1.2546  |
| 64931 | P0C214 | Q15053 | -0.26414 |
| 64932 | P0C214 | Q15121 | -0.64422 |
| 64933 | P0C214 | Q86YS6 | -1.0384  |
| 64934 | P0C214 | Q58A45 | -0.20821 |
| 64935 | P0C214 | Q15582 | -1.2732  |
| 64936 | P0C214 | Q13421 | -0.49385 |
| 64937 | P0C214 | Q2WGN9 | -0.52301 |
| 64938 | P0C214 | P27361 | -0.2274  |
| 64939 | P0C214 | Q92598 | -0.29923 |
| 64940 | P0C214 | P01374 | -0.66356 |
| 64941 | P0C214 | Q8NE09 | -0.61728 |
| 64942 | P0C214 | Q9NZ94 | -0.37482 |
| 64943 | P0C214 | Q96C57 | -0.32023 |
| 64944 | P0C214 | Q6ZW05 | -0.67466 |
| 64945 | P0C214 | Q9NWW9 | -0.21401 |
| 64946 | P0C214 | Q8IZK6 | -1.1877  |
| 64947 | P0C214 | Q9NYW1 | -1.1716  |
| 64948 | P0C214 | Q8TDY3 | -0.23577 |
| 64949 | P0C214 | Q14721 | -0.37419 |
| 64950 | P0C214 | Q8N5I4 | -0.87464 |
| 64951 | P0C214 | Q8NGZ0 | -1.2952  |
| 64952 | P0C214 | Q9BVV6 | -0.21061 |
| 64953 | P0C214 | Q92536 | -1.1114  |
| 64954 | P0C214 | P35462 | -0.38217 |
| 64955 | P0C214 | P27539 | -0.67335 |
| 64956 | P0C214 | Q9UM73 | -1.4164  |
| 64957 | P0C214 | Q5T6R2 | -0.32478 |
| 64958 | P0C214 | P20701 | -0.90889 |
| 64959 | P0C214 | Q9Y572 | -0.22741 |
| 64960 | P0C214 | Q96JD6 | -0.2595  |
| 64961 | P0C214 | Q9H1N7 | -0.65223 |
| 64962 | P0C214 | Q3BBW0 | -0.20758 |
| 64963 | P0C214 | Q96KV7 | -0.22783 |
| 64964 | P0C214 | Q8N4N3 | -0.37066 |
| 64965 | P0C214 | O75795 | -0.89236 |
| 64966 | P0C214 | P49279 | -0.43295 |
| 64967 | P0C214 | Q6NSX1 | -0.99658 |
| 64968 | P0C214 | I3L1E1 | -0.37208 |
| 64969 | P0C214 | Q8IZC4 | -0.78128 |
| 64970 | P0C214 | Q70CQ3 | -0.94072 |
| 64971 | P0C214 | P14384 | -0.27511 |
| 64972 | P0C214 | Q5T0W9 | -0.13314 |
| 64973 | P0C214 | Q6PIY7 | -0.36972 |
| 64974 | P0C214 | Q7Z419 | -0.15678 |
| 64975 | P0C214 | P0CJ88 | -0.16414 |
| 64976 | P0C214 | Q9BQ39 | -0.38946 |
| 64977 | P0C214 | Q96P66 | -1.3693  |
| 64978 | P0C214 | Q16760 | -0.63255 |
| 64979 | P0C214 | Q6ZS30 | -0.22741 |
| 64980 | P0C214 | Q6UW78 | -0.91736 |

|       |        |        |           |
|-------|--------|--------|-----------|
| 64981 | P0C214 | P06331 | -1.0022   |
| 64982 | P0C214 | Q6P995 | -1.1051   |
| 64983 | P0C214 | P0C263 | -1.2407   |
| 64984 | P0C214 | P24557 | -0.72679  |
| 64985 | P0C214 | C9J2P7 | -0.68518  |
| 64986 | P0C214 | Q6R6M4 | -0.34038  |
| 64987 | P0C214 | Q8N7C0 | -1.2564   |
| 64988 | P0C214 | O14498 | -1.1054   |
| 64989 | P0C214 | A6NGJ6 | -0.71534  |
| 64990 | P0C214 | Q9UKB5 | -1.0456   |
| 64991 | P0C214 | Q58G82 | -0.21456  |
| 64992 | P0C214 | P23327 | -0.49053  |
| 64993 | P0C214 | Q9UKI3 | -0.45226  |
| 64994 | P0C214 | Q5SVJ3 | -0.11906  |
| 64995 | P0C214 | Q96C12 | -0.11778  |
| 64996 | P0C214 | Q8IZF5 | -1.3853   |
| 64997 | P0C214 | Q9UIW0 | -0.22727  |
| 64998 | P0C214 | O00327 | -0.22739  |
| 64999 | P0C214 | P48551 | -0.79992  |
| 65000 | P0C214 | Q9UPW8 | -0.2572   |
| 65001 | P0C214 | Q8NH37 | -1.2952   |
| 65002 | P0C214 | A6NK97 | -1.1214   |
| 65003 | P0C214 | Q6ZTQ4 | -1.2424   |
| 65004 | P0C214 | Q8IYS4 | -1.225    |
| 65005 | P0C214 | Q96M89 | -0.2351   |
| 65006 | P0C214 | Q6UX01 | -1.1319   |
| 65007 | P0C214 | Q8WVZ7 | -1.0519   |
| 65008 | P0C214 | Q15843 | -0.22283  |
| 65009 | P0C214 | P47989 | -0.34557  |
| 65010 | P0C214 | Q9BYT3 | -0.789    |
| 65011 | P0C214 | Q86WB7 | -0.88899  |
| 65012 | P0C214 | Q9NY91 | -1.0901   |
| 65013 | P0C214 | Q99731 | -0.45855  |
| 65014 | P0C214 | Q8IV50 | -0.38318  |
| 65015 | P0C214 | P08253 | -0.67894  |
| 65016 | P0C214 | Q9BY07 | -1.0975   |
| 65017 | P0C214 | P61599 | -0.18367  |
| 65018 | P0C214 | Q9H0Z9 | -0.23331  |
| 65019 | P0C214 | O94826 | -0.22706  |
| 65020 | P0C214 | Q9P2E2 | -0.42235  |
| 65021 | P0C214 | Q8IZF6 | -1.3853   |
| 65022 | P0C214 | Q5W0U4 | -0.23732  |
| 65023 | P0C214 | Q9H3G5 | -0.70707  |
| 65024 | P0C214 | P17658 | -0.98724  |
| 65025 | P0C214 | Q96B96 | -0.98681  |
| 65026 | P0C214 | O95157 | -0.88948  |
| 65027 | P0C214 | Q96J87 | -0.3709   |
| 65028 | P0C214 | P81408 | -0.84841  |
| 65029 | P0C214 | Q9HB90 | -0.78246  |
| 65030 | P0C214 | Q14773 | -1.5565   |
| 65031 | P0C214 | Q96KK3 | -0.55311  |
| 65032 | P0C214 | Q0IIN9 | -0.10274  |
| 65033 | P0C214 | Q70EL4 | -0.68518  |
| 65034 | P0C214 | P16070 | -0.29519  |
| 65035 | P0C214 | Q9H2G2 | -1.0504   |
| 65036 | P0C214 | Q6PF15 | -0.22199  |
| 65037 | P0C214 | Q7Z304 | -0.90851  |
| 65038 | P0C214 | Q9WJR5 | -0.33459  |
| 65039 | P0C214 | P50416 | -0.35948  |
| 65040 | P0C214 | Q9NQW5 | -0.24025  |
| 65041 | P0C214 | Q8N5W9 | -0.36474  |
| 65042 | P0C214 | P10588 | -0.24051  |
| 65043 | P0C214 | Q7Z469 | -0.80997  |
| 65044 | P0C214 | Q96L03 | -0.21919  |
| 65045 | P0C214 | Q6XE38 | -0.91736  |
| 65046 | P0C214 | Q70EK9 | -0.79619  |
| 65047 | P0C214 | Q8NH69 | -1.2952   |
| 65048 | P0C214 | Q8N4E7 | -0.061732 |
| 65049 | P0C214 | Q9BW19 | -0.37475  |
| 65050 | P0C214 | Q8WTR2 | -0.54345  |
| 65051 | P0C214 | Q15080 | -0.61553  |
| 65052 | P0C214 | Q8N6L0 | -0.97806  |
| 65053 | P0C214 | Q8IVW8 | -1.1733   |
| 65054 | P0C214 | Q12882 | -0.26338  |
| 65055 | P0C214 | Q6QEF8 | -0.43756  |
| 65056 | P0C214 | Q3SXY7 | -0.98681  |

|       |        |        |           |
|-------|--------|--------|-----------|
| 65057 | P0C214 | Q8TB45 | -0.22741  |
| 65058 | P0C214 | Q9P2G9 | -0.20643  |
| 65059 | P0C214 | A6NFC9 | -1.2952   |
| 65060 | P0C214 | A4D256 | -0.74745  |
| 65061 | P0C214 | P0C671 | -0.18188  |
| 65062 | P0C214 | Q9UBT2 | -0.209    |
| 65063 | P0C214 | Q8N130 | -0.98181  |
| 65064 | P0C214 | Q9BQS7 | -1.183    |
| 65065 | P0C214 | Q8N5P1 | -0.1667   |
| 65066 | P0C214 | Q6UWP2 | -1.3244   |
| 65067 | P0C214 | Q8NGC5 | -1.2952   |
| 65068 | P0C214 | P36776 | -0.16666  |
| 65069 | P0C214 | Q8NGH5 | -1.2952   |
| 65070 | P0C214 | Q9NR30 | -0.33389  |
| 65071 | P0C214 | P61566 | -0.85122  |
| 65072 | P0C214 | Q9UKN1 | -0.95733  |
| 65073 | P0C214 | Q6ZN66 | -0.90266  |
| 65074 | P0C214 | Q6IQ19 | -0.39699  |
| 65075 | P0C214 | Q6P3W7 | -0.22741  |
| 65076 | P0C214 | Q7Z7C7 | -0.29092  |
| 65077 | P0C214 | P02778 | -0.77816  |
| 65078 | P0C214 | Q14549 | -0.22726  |
| 65079 | P0C214 | Q30KQ8 | -0.88056  |
| 65080 | P0C214 | Q86Y30 | -0.91736  |
| 65081 | P0C214 | Q16769 | -1.197    |
| 65082 | P0C214 | Q01780 | -0.074901 |
| 65083 | P0C214 | P98173 | -0.64701  |
| 65084 | P0C214 | D6RA61 | -0.68518  |
| 65085 | P0C214 | Q9NS28 | -0.64002  |
| 65086 | P0C214 | Q92187 | -0.47859  |
| 65087 | P0C214 | Q96PQ7 | -0.21319  |
| 65088 | P0C214 | O75027 | -0.81447  |
| 65089 | P0C214 | Q8IZU3 | -0.21951  |
| 65090 | P0C214 | Q9Y274 | -0.38632  |
| 65091 | P0C214 | Q00325 | -0.90072  |
| 65092 | P0C214 | Q5TGI4 | -0.22759  |
| 65093 | P0C214 | O75031 | -0.11468  |
| 65094 | P0C214 | Q95196 | -0.61827  |
| 65095 | P0C214 | P52797 | -0.64268  |
| 65096 | P0C214 | Q5VZV4 | -0.23403  |
| 65097 | P0C214 | Q9P253 | -0.10244  |
| 65098 | P0C214 | Q17RQ9 | -0.98681  |
| 65099 | P0C214 | Q96AY3 | -0.36406  |
| 65100 | P0C214 | Q9H479 | -0.53757  |
| 65101 | P0C214 | P06732 | -0.47196  |
| 65102 | P0C214 | O43716 | -0.39606  |
| 65103 | P0C214 | Q9NX58 | -0.14519  |
| 65104 | P0C214 | P29459 | -0.15637  |
| 65105 | P0C214 | O14559 | -0.27346  |
| 65106 | P0C214 | Q9NVP4 | -0.71534  |
| 65107 | P0C214 | B2RN74 | -1.2952   |
| 65108 | P0C214 | O60462 | -0.74712  |
| 65109 | P0C214 | O43674 | -0.42419  |
| 65110 | P0C214 | Q7Z7J7 | -0.98681  |
| 65111 | P0C214 | Q96R84 | -1.2952   |
| 65112 | P0C214 | Q96MT1 | -1.0783   |
| 65113 | P0C214 | O00219 | -0.73198  |
| 65114 | P0C214 | Q8NBN3 | -0.98681  |
| 65115 | P0C214 | P0DJD7 | -1.1989   |
| 65116 | P0C214 | Q03692 | -1.0394   |
| 65117 | P0C214 | B2RXF5 | -0.21509  |
| 65118 | P0C214 | A8MT70 | -0.71534  |
| 65119 | P0C214 | P28332 | -0.21099  |
| 65120 | P0C214 | P10632 | -0.55348  |
| 65121 | P0C214 | P02776 | -0.59007  |
| 65122 | P0C214 | Q5TG30 | -0.86358  |
| 65123 | P0C214 | Q86T03 | -0.98597  |
| 65124 | P0C214 | P14616 | -1.3993   |
| 65125 | P0C214 | Q96P09 | -0.47651  |
| 65126 | P0C214 | A6NKF9 | -0.98681  |
| 65127 | P0C214 | Q5MNZ6 | -0.22664  |
| 65128 | P0C214 | Q9P0J7 | -0.7458   |
| 65129 | P0C214 | Q8N628 | -1.2952   |
| 65130 | P0C214 | Q8NEG5 | -0.30831  |
| 65131 | P0C214 | Q8IVF4 | -0.7095   |
| 65132 | P0C214 | P35613 | -0.22742  |

|       |        |         |           |
|-------|--------|---------|-----------|
| 65133 | P0C214 | Q8N967  | -0.98681  |
| 65134 | P0C214 | Q9BY84  | -0.43789  |
| 65135 | P0C214 | O75293  | -0.38037  |
| 65136 | P0C214 | Q9Y487  | -0.40749  |
| 65137 | P0C214 | P08648  | -0.35101  |
| 65138 | P0C214 | Q7Z403  | -1.0037   |
| 65139 | P0C214 | Q8WTQ1  | -0.88056  |
| 65140 | P0C214 | Q9UNN8  | -0.33069  |
| 65141 | P0C214 | Q8N7P7  | -1.1286   |
| 65142 | P0C214 | Q9BPW5  | -1.1356   |
| 65143 | P0C214 | Q6UY14  | -0.32784  |
| 65144 | P0C214 | P0C6C1  | -0.22741  |
| 65145 | P0C214 | P07305  | -0.46725  |
| 65146 | P0C214 | Q8NFP7  | -0.24807  |
| 65147 | P0C214 | Q8IW52  | -1.0742   |
| 65148 | P0C214 | Q9Y493  | -1.1761   |
| 65149 | P0C214 | Q9Y5G6  | -1.2424   |
| 65150 | P0C214 | Q9Y336  | -1.3053   |
| 65151 | P0C214 | O95785  | -0.40351  |
| 65152 | P0C214 | Q96JP5  | -0.20022  |
| 65153 | P0C214 | Q9Y2G4  | -0.2274   |
| 65154 | P0C214 | P49418  | -0.2274   |
| 65155 | P0C214 | O43676  | -0.42419  |
| 65156 | P0C214 | Q9NZ71  | -0.68953  |
| 65157 | P0C214 | O15034  | -0.50697  |
| 65158 | P0C214 | Q8N111  | -0.98681  |
| 65159 | P0C214 | Q16585  | -0.74697  |
| 65160 | P0C214 | Q9Y573  | -0.30272  |
| 65161 | P0C214 | Q5VY80  | -0.60483  |
| 65162 | P0C214 | O00311  | -0.30691  |
| 65163 | P0C214 | Q9UBM1  | -0.38815  |
| 65164 | P0C214 | O43462  | -0.86551  |
| 65165 | P0C214 | Q14526  | -0.48361  |
| 65166 | P0C214 | Q8TAD4  | -0.50741  |
| 65167 | P0C214 | Q9H7T0  | -1.1532   |
| 65168 | P0C214 | P08254  | -0.80044  |
| 65169 | P0C214 | Q96RD2  | -1.2952   |
| 65170 | P0C214 | A1L1A6  | -0.98681  |
| 65171 | P0C214 | P16499  | -0.42169  |
| 65172 | P0C214 | P51813  | -0.67166  |
| 65173 | P0C214 | Q9HBD1  | -0.44925  |
| 65174 | P0C214 | Q5FWF7  | -0.22148  |
| 65175 | P0C214 | Q8IUXX4 | -0.42487  |
| 65176 | P0C214 | Q96MD7  | -0.19841  |
| 65177 | P0C214 | P49798  | -0.28849  |
| 65178 | P0C214 | O94804  | -0.64443  |
| 65179 | P0C214 | O75074  | -0.95778  |
| 65180 | P0C214 | Q9NRP0  | -0.92102  |
| 65181 | P0C214 | Q9H6E4  | -0.91736  |
| 65182 | P0C214 | Q6UX71  | -0.52704  |
| 65183 | P0C214 | O95970  | -0.22831  |
| 65184 | P0C214 | Q8NGE2  | -1.2952   |
| 65185 | P0C214 | Q9NWB1  | -0.28058  |
| 65186 | P0C214 | Q16473  | -0.22743  |
| 65187 | P0C214 | A8MXQ7  | -0.22741  |
| 65188 | P0C214 | Q9NP59  | -0.47246  |
| 65189 | P0C214 | Q96MC6  | -1.113    |
| 65190 | P0C214 | Q15431  | -0.25375  |
| 65191 | P0C214 | Q8N136  | -0.58155  |
| 65192 | P0C214 | P84550  | -0.056118 |
| 65193 | P0C214 | Q96RF0  | -0.37625  |
| 65194 | P0C214 | Q86X19  | -0.99437  |
| 65195 | P0C214 | Q9Y2I2  | -0.29855  |
| 65196 | P0C214 | Q9H078  | -0.50281  |
| 65197 | P0C214 | Q86UD7  | -1.2827   |
| 65198 | P0C214 | Q29865  | -1.0367   |
| 65199 | P0C214 | Q6UW10  | -0.91736  |
| 65200 | P0C214 | Q15283  | -0.3839   |
| 65201 | P0C214 | A2A2V5  | -0.98681  |
| 65202 | P0C214 | Q8WTU0  | -0.54994  |
| 65203 | P0C214 | Q9Y6Q1  | -0.39339  |
| 65204 | P0C214 | Q9NW15  | -1.1314   |
| 65205 | P0C214 | Q9C0H2  | -1.1078   |
| 65206 | P0C214 | Q04656  | -0.22761  |
| 65207 | P0C214 | Q9Y520  | -0.37348  |
| 65208 | P0C214 | Q9P2D6  | -0.1018   |

|       |        |        |           |
|-------|--------|--------|-----------|
| 65209 | P0C214 | P08684 | -0.50371  |
| 65210 | P0C214 | Q6UXG8 | -0.98681  |
| 65211 | P0C214 | P01213 | -0.8979   |
| 65212 | P0C214 | Q16877 | -0.13955  |
| 65213 | P0C214 | P04085 | -0.27998  |
| 65214 | P0C214 | Q5VYM1 | -0.24647  |
| 65215 | P0C214 | Q96KG7 | -0.90937  |
| 65216 | P0C214 | Q8N271 | -1.0606   |
| 65217 | P0C214 | Q86UQ4 | -1.3439   |
| 65218 | P0C214 | Q5SRN2 | -0.98681  |
| 65219 | P0C214 | O76074 | -0.34926  |
| 65220 | P0C214 | P48230 | -0.91359  |
| 65221 | P0C214 | P48506 | -0.18345  |
| 65222 | P0C214 | P41271 | -0.66729  |
| 65223 | P0C214 | Q8NGY6 | -1.2952   |
| 65224 | P0C214 | Q6UWF7 | -0.91736  |
| 65225 | P0C214 | P28288 | -0.55234  |
| 65226 | P0C214 | Q8WVX9 | -0.93141  |
| 65227 | P0C214 | Q13946 | -0.22303  |
| 65228 | P0C214 | O15503 | -0.46175  |
| 65229 | P0C214 | Q7Z333 | -0.2356   |
| 65230 | P0C214 | P19086 | -0.8915   |
| 65231 | P0C214 | Q96K21 | -0.50512  |
| 65232 | P0C214 | Q7RTX1 | -1.3293   |
| 65233 | P0C214 | P63136 | -0.33459  |
| 65234 | P0C214 | Q9GZT6 | -0.75609  |
| 65235 | P0C214 | P02652 | -0.32505  |
| 65236 | P0C214 | P10321 | -1.0367   |
| 65237 | P0C214 | P48145 | -0.79765  |
| 65238 | P0C214 | P49447 | -0.92887  |
| 65239 | P0C214 | Q2M1V0 | -0.1907   |
| 65240 | P0C214 | Q8IV35 | -0.22759  |
| 65241 | P0C214 | P63145 | -0.45806  |
| 65242 | P0C214 | P43026 | -0.44342  |
| 65243 | P0C214 | Q5VWK0 | -0.20758  |
| 65244 | P0C214 | Q9H4Q3 | -0.22712  |
| 65245 | P0C214 | P50876 | -0.94072  |
| 65246 | P0C214 | Q6PEY1 | -0.98681  |
| 65247 | P0C214 | Q96EK2 | -0.50512  |
| 65248 | P0C214 | O60844 | -0.76737  |
| 65249 | P0C214 | P30825 | -1.2217   |
| 65250 | P0C214 | Q01813 | -0.2545   |
| 65251 | P0C214 | Q96R69 | -1.2952   |
| 65252 | P0C214 | Q7L513 | -0.83208  |
| 65253 | P0C214 | Q9NR61 | -0.96858  |
| 65254 | P0C214 | P49190 | -1.474    |
| 65255 | P0C214 | P37059 | -1.0617   |
| 65256 | P0C214 | O75110 | -0.87581  |
| 65257 | P0C214 | Q92616 | -0.22527  |
| 65258 | P0C214 | Q9C0G0 | -0.083723 |
| 65259 | P0C214 | Q8IWU6 | -0.32495  |
| 65260 | P0C214 | P09038 | -0.31443  |
| 65261 | P0C214 | O60271 | -0.1657   |
| 65262 | P0C214 | P47898 | -1.1951   |
| 65263 | P0C214 | P57103 | -0.88115  |
| 65264 | P0C214 | Q01344 | -0.54021  |
| 65265 | P0C214 | E9PGG2 | -0.22934  |
| 65266 | P0C214 | Q96AG4 | -0.97093  |
| 65267 | P0C214 | Q01740 | -0.66425  |
| 65268 | P0C214 | Q9Y6Q9 | -0.44185  |
| 65269 | P0C214 | Q9BQR3 | -1.4261   |
| 65270 | P0C214 | P78536 | -0.32247  |
| 65271 | P0C214 | P38570 | -1.1527   |
| 65272 | P0C214 | Q92765 | -0.65522  |
| 65273 | P0C214 | Q6P2C0 | -0.32822  |
| 65274 | P0C214 | A6NNM8 | -0.31355  |
| 65275 | P0C214 | Q9H628 | -1.1356   |
| 65276 | P0C214 | P56645 | -0.22677  |
| 65277 | P0C214 | Q8IUH4 | -0.9429   |
| 65278 | P0C214 | Q96B45 | -0.23604  |
| 65279 | P0C214 | Q9BXC0 | -1.322    |
| 65280 | P0C214 | Q8N4F0 | -1.0961   |
| 65281 | P0C214 | Q9UFC0 | -0.4289   |
| 65282 | P0C214 | Q9NP56 | -0.3254   |
| 65283 | P0C214 | P07949 | -0.69404  |
| 65284 | P0C214 | Q9H2Y9 | -1.1281   |



|       |        |        |            |
|-------|--------|--------|------------|
| 65285 | P0C214 | P0C2S0 | -0.96345   |
| 65286 | P0C214 | Q16181 | -0.22259   |
| 65287 | P0C214 | Q5VT52 | -0.38303   |
| 65288 | P0C214 | P12110 | -0.4853    |
| 65289 | P0C214 | Q13002 | -0.57787   |
| 65290 | P0C214 | P01610 | -1.0022    |
| 65291 | P0C214 | Q96FL9 | -0.5869    |
| 65292 | P0C214 | Q5VXU3 | -0.54036   |
| 65293 | P0C214 | P01574 | -0.40379   |
| 65294 | P0C214 | Q9BV35 | -0.83715   |
| 65295 | P0C214 | Q8IXB1 | -0.23027   |
| 65296 | P0C214 | Q7Z3B0 | -0.98681   |
| 65297 | P0C214 | Q9HC58 | -1.1269    |
| 65298 | P0C214 | Q8IXF9 | -1.0569    |
| 65299 | P0C214 | Q9NZ09 | -0.20758   |
| 65300 | P0C214 | H3BPM6 | -0.99425   |
| 65301 | P0C214 | Q76NI1 | -0.66031   |
| 65302 | P0C214 | Q4V9L6 | -0.68883   |
| 65303 | P0C214 | Q2T9J0 | -0.69044   |
| 65304 | P0C214 | Q6ZMC9 | -0.98681   |
| 65305 | P0C214 | Q96MH7 | -0.25397   |
| 65306 | P0C214 | Q9NX57 | -0.90499   |
| 65307 | P0C214 | Q567V2 | -0.75609   |
| 65308 | P0C214 | Q9H1E1 | -0.67155   |
| 65309 | P0C214 | Q96LM9 | -0.23567   |
| 65310 | P0C214 | O75185 | -0.63289   |
| 65311 | P0C214 | O75380 | -0.044964  |
| 65312 | P0C214 | Q86UP6 | -0.7053    |
| 65313 | P0C214 | Q8TB96 | -1.4408    |
| 65314 | P0C214 | Q96GQ7 | -0.49873   |
| 65315 | P0C214 | P16619 | -1.0336    |
| 65316 | P0C214 | Q9NP50 | -0.40129   |
| 65317 | P0C214 | P67812 | -0.74218   |
| 65318 | P0C214 | P49223 | -0.77749   |
| 65319 | P0C214 | Q5QGS0 | -0.31977   |
| 65320 | P0C214 | Q8IZJ3 | -0.80122   |
| 65321 | P0C214 | P15018 | -0.36377   |
| 65322 | P0C214 | Q6TDP4 | -0.5678    |
| 65323 | P0C214 | Q5T6X4 | -0.98681   |
| 65324 | P0C214 | Q8NGV7 | -1.2952    |
| 65325 | P0C214 | P17509 | -0.23363   |
| 65326 | P0C214 | O60658 | -0.22714   |
| 65327 | P0C214 | Q96M43 | -0.20758   |
| 65328 | P0C214 | P16444 | -0.45081   |
| 65329 | P0C214 | P01709 | -1.0022    |
| 65330 | P0C214 | O15254 | -0.3516    |
| 65331 | P0C214 | Q6PJI9 | -0.22739   |
| 65332 | P0C214 | Q96A22 | -0.0039072 |
| 65333 | P0C214 | Q8NHS3 | -0.5448    |
| 65334 | P0C214 | A1A519 | -0.71534   |
| 65335 | P0C214 | A6NNX1 | -0.54206   |
| 65336 | P0C214 | Q9BSE4 | -0.81658   |
| 65337 | P0C214 | Q96F25 | -0.91313   |
| 65338 | P0C214 | Q96CS7 | -0.57278   |
| 65339 | P0C214 | P27352 | -0.98147   |
| 65340 | P0C214 | B0YJ81 | -1.3806    |
| 65341 | P0C214 | Q9H765 | -0.2274    |
| 65342 | P0C214 | Q9Y6N7 | -0.61071   |
| 65343 | P0C214 | P32121 | -0.44609   |
| 65344 | P0C214 | O00429 | -0.43526   |
| 65345 | P0C214 | P57679 | -0.83075   |
| 65346 | P0C214 | A8MZ06 | -0.2859    |
| 65347 | P0C214 | Q9NYW0 | -1.1716    |
| 65348 | P0C214 | Q8NBJ9 | -1.0234    |
| 65349 | P0C214 | Q14699 | -0.58913   |
| 65350 | P0C214 | Q8NCC5 | -0.97443   |
| 65351 | P0C214 | Q8NE79 | -0.85284   |
| 65352 | P0C214 | A8MQ27 | -0.29901   |
| 65353 | P0C214 | P29965 | -0.91926   |
| 65354 | P0C214 | Q7Z309 | -0.65684   |
| 65355 | P0C214 | Q7Z3E1 | -0.43361   |
| 65356 | P0C214 | Q969V4 | -0.2838    |
| 65357 | P0C214 | Q6ZP80 | -0.98681   |
| 65358 | P0C214 | Q9NQZ7 | -0.84691   |
| 65359 | P0C214 | O75936 | -0.30465   |
| 65360 | P0C214 | P10643 | -0.88144   |

|       |        |        |           |
|-------|--------|--------|-----------|
| 65361 | P0C214 | O95208 | -0.33447  |
| 65362 | P0C214 | Q6ZVX9 | -0.98681  |
| 65363 | P0C214 | Q9Y287 | -0.12128  |
| 65364 | P0C214 | P22612 | -0.41097  |
| 65365 | P0C214 | Q9NZN3 | -0.41988  |
| 65366 | P0C214 | Q9Y4A0 | -0.2543   |
| 65367 | P0C214 | Q96MS0 | -1.0424   |
| 65368 | P0C214 | Q8NGK9 | -1.2952   |
| 65369 | P0C214 | Q96S06 | -0.70138  |
| 65370 | P0C214 | O15480 | -0.072846 |
| 65371 | P0C214 | Q9Y5E1 | -1.2126   |
| 65372 | P0C214 | P86790 | -0.64424  |
| 65373 | P0C214 | Q6ZTW0 | -0.53075  |
| 65374 | P0C214 | Q9NQ94 | -0.26173  |
| 65375 | P0C214 | A6NCS6 | -0.077922 |
| 65376 | P0C214 | Q6UXE8 | -0.68883  |
| 65377 | P0C214 | Q9NRM0 | -0.78627  |
| 65378 | P0C214 | Q6UY01 | -0.22741  |
| 65379 | P0C214 | Q9NZH6 | -0.20938  |
| 65380 | P0C214 | Q99956 | -0.58093  |
| 65381 | P0C214 | P55103 | -0.73774  |
| 65382 | P0C214 | A8MW99 | -0.59488  |
| 65383 | P0C214 | Q9H967 | -0.22705  |
| 65384 | P0C214 | Q495Y7 | -0.063885 |
| 65385 | P0C214 | P29536 | -0.20626  |
| 65386 | P0C214 | Q9BVC5 | -0.27901  |
| 65387 | P0C214 | Q96CX6 | -0.23451  |
| 65388 | P0C214 | O60895 | -0.25119  |
| 65389 | P0C214 | P42679 | -0.3575   |
| 65390 | P0C214 | Q7LDI9 | -0.45806  |
| 65391 | P0C214 | Q92854 | -0.53352  |
| 65392 | P0C214 | Q9BV23 | -0.7049   |
| 65393 | P0C214 | O43488 | -0.22187  |
| 65394 | P0C214 | Q8NG80 | -1.1265   |
| 65395 | P0C214 | O00192 | -0.22939  |
| 65396 | P0C214 | Q6ZNG9 | -0.23284  |
| 65397 | P0C214 | A6NNS2 | -1.2007   |
| 65398 | P0C214 | Q9BUD6 | -1.0644   |
| 65399 | P0C214 | Q15276 | -0.11084  |
| 65400 | P0C214 | Q5VV52 | -0.53447  |
| 65401 | P0C214 | Q9P2P6 | -0.38358  |
| 65402 | P0C214 | O15118 | -0.61292  |
| 65403 | P0C214 | Q5VYS8 | -0.43836  |
| 65404 | P0C214 | Q12809 | -0.72133  |
| 65405 | P0C214 | P17600 | -0.49991  |
| 65406 | P0C214 | Q6UXB4 | -0.36246  |
| 65407 | P0C214 | P47736 | -0.18748  |
| 65408 | P0C214 | O75159 | -0.22734  |
| 65409 | P0C214 | Q8IUE6 | -0.85588  |
| 65410 | P0C214 | Q8WWR9 | -0.13706  |
| 65411 | P0C214 | Q9NQV8 | -0.42879  |
| 65412 | P0C214 | Q8N6M8 | -0.22351  |
| 65413 | P0C214 | Q9H853 | -0.6552   |
| 65414 | P0C214 | Q8NBV4 | -0.57778  |
| 65415 | P0C214 | Q6P988 | -0.84626  |
| 65416 | P0C214 | Q12965 | -0.085306 |
| 65417 | P0C214 | P06858 | -0.37578  |
| 65418 | P0C214 | Q8N4C8 | -0.56759  |
| 65419 | P0C214 | O75718 | -0.94183  |
| 65420 | P0C214 | A6NKK0 | -1.2952   |
| 65421 | P0C214 | O76096 | -0.70856  |
| 65422 | P0C214 | Q5JU00 | -0.22706  |
| 65423 | P0C214 | Q8IVU3 | -0.2834   |
| 65424 | P0C214 | A6NMC2 | -0.18615  |
| 65425 | P0C214 | Q9UGF7 | -1.2952   |
| 65426 | P0C214 | Q9NPA2 | -1.3644   |
| 65427 | P0C214 | Q5VTT2 | -0.98681  |
| 65428 | P0C214 | Q9BRP9 | -0.38121  |
| 65429 | P0C214 | Q9HAC7 | -0.32204  |
| 65430 | P0C214 | Q9H9S5 | -1.0401   |
| 65431 | P0C214 | Q6ZMG9 | -0.23549  |
| 65432 | P0C214 | O60269 | -0.47779  |
| 65433 | P0C214 | A8MXJ8 | -0.4589   |
| 65434 | P0C214 | Q8TBB5 | -0.22386  |
| 65435 | P0C214 | P07998 | -0.21299  |
| 65436 | P0C214 | A4UGR9 | -0.37618  |

|       |        |        |           |
|-------|--------|--------|-----------|
| 65437 | P0C214 | Q5SZD1 | -0.23294  |
| 65438 | P0C214 | Q08462 | -0.7531   |
| 65439 | P0C214 | Q9Y5P1 | -1.2952   |
| 65440 | P0C214 | Q9UNK4 | -0.7773   |
| 65441 | P0C214 | Q9BVQ7 | -0.79094  |
| 65442 | P0C214 | Q8IWL2 | -1.0234   |
| 65443 | P0C214 | Q6P656 | -0.1728   |
| 65444 | P0C214 | Q5SZB4 | -0.092979 |
| 65445 | P0C214 | Q9ULV0 | -0.15135  |
| 65446 | P0C214 | Q9NPY3 | -0.46429  |
| 65447 | P0C214 | A6NDY0 | -0.63654  |
| 65448 | P0C214 | Q8NFM5 | -0.39206  |
| 65449 | P0C214 | Q96RA2 | -1.0222   |
| 65450 | P0C214 | Q14155 | -0.31678  |
| 65451 | P0C214 | Q5W186 | -0.90522  |
| 65452 | P0C214 | Q9Y5X9 | -0.72446  |
| 65453 | P0C214 | Q70CQ4 | -0.68518  |
| 65454 | P0C214 | Q96R47 | -1.2952   |
| 65455 | P0C214 | Q43561 | -0.62693  |
| 65456 | P0C214 | P52735 | -0.22741  |
| 65457 | P0C214 | Q96I23 | -0.34165  |
| 65458 | P0C214 | Q5VZP5 | -0.66239  |
| 65459 | P0C214 | P54793 | -0.62048  |
| 65460 | P0C214 | P16519 | -0.27487  |
| 65461 | P0C214 | O76000 | -1.2952   |
| 65462 | P0C214 | Q2WEN9 | -0.919    |
| 65463 | P0C214 | P09327 | -0.18191  |
| 65464 | P0C214 | Q95425 | -0.24838  |
| 65465 | P0C214 | Q15649 | -0.29101  |
| 65466 | P0C214 | O00141 | -0.46203  |
| 65467 | P0C214 | Q01628 | -0.85768  |
| 65468 | P0C214 | Q5T2N8 | -0.95254  |
| 65469 | P0C214 | Q15049 | -0.27632  |
| 65470 | P0C214 | Q96QH2 | -0.25893  |
| 65471 | P0C214 | Q9C0G6 | -0.7095   |
| 65472 | P0C214 | A6NJ16 | -0.91736  |
| 65473 | P0C214 | Q8N4L1 | -0.98681  |
| 65474 | P0C214 | O00482 | -0.23039  |
| 65475 | P0C214 | Q8TE58 | -1.3603   |
| 65476 | P0C214 | Q96MN5 | -0.21491  |
| 65477 | P0C214 | Q9BVJ7 | -0.22741  |
| 65478 | P0C214 | P48357 | -1.0552   |
| 65479 | P0C214 | Q9Y4X4 | -0.22339  |
| 65480 | P0C214 | Q9HCY8 | -0.24966  |
| 65481 | P0C214 | Q9ULX5 | -0.60339  |
| 65482 | P0C214 | Q9UKI2 | -0.57051  |
| 65483 | P0C214 | Q1L6U9 | -0.91736  |
| 65484 | P0C214 | Q96HP8 | -0.98681  |
| 65485 | P0C214 | Q9NR33 | -0.072134 |
| 65486 | P0C214 | Q8NGT7 | -1.2952   |
| 65487 | P0C214 | O95747 | -1.1912   |
| 65488 | P0C214 | P31268 | -0.4767   |
| 65489 | P0C214 | Q6ISS4 | -0.91736  |
| 65490 | P0C214 | Q8NH87 | -1.2952   |
| 65491 | P0C214 | O00339 | -0.3233   |
| 65492 | P0C214 | Q8NEQ5 | -0.98681  |
| 65493 | P0C214 | Q9UBU2 | -1.019    |
| 65494 | P0C214 | Q9UKT6 | -0.37589  |
| 65495 | P0C214 | P16284 | -0.40706  |
| 65496 | P0C214 | P51659 | -0.43146  |
| 65497 | P0C214 | Q49AH0 | -0.80596  |
| 65498 | P0C214 | Q15231 | -0.37011  |
| 65499 | P0C214 | P02745 | -0.37457  |
| 65500 | P0C214 | Q14126 | -0.92495  |
| 65501 | P0C214 | Q5T2Q4 | -0.41202  |
| 65502 | P0C214 | Q5VVB8 | -1.0772   |
| 65503 | P0C214 | O60880 | -0.22741  |
| 65504 | P0C214 | Q8NAC3 | -1.0197   |
| 65505 | P0C214 | Q9Y3M8 | -0.22994  |
| 65506 | P0C214 | A6NCI4 | -0.91736  |
| 65507 | P0C214 | Q96DZ5 | -0.71499  |
| 65508 | P0C214 | Q9Y577 | -0.2365   |
| 65509 | P0C214 | Q86YV0 | -0.54886  |
| 65510 | P0C214 | O00526 | -1.1662   |
| 65511 | P0C214 | A6NDV4 | -0.2383   |
| 65512 | P0C214 | P78508 | -0.67842  |

|       |        |        |          |
|-------|--------|--------|----------|
| 65513 | P0C214 | Q86UR5 | -0.30778 |
| 65514 | P0C214 | P12109 | -0.93498 |
| 65515 | P0C214 | Q8N6N3 | -0.20232 |
| 65516 | P0C214 | Q9NVZ3 | -0.60296 |
| 65517 | P0C214 | Q96PE1 | -1.2093  |
| 65518 | P0C214 | Q53HC9 | -0.22705 |
| 65519 | P0C214 | Q9ULI2 | -0.60466 |
| 65520 | P0C214 | Q15415 | -0.521   |
| 65521 | P0C214 | A8MUN3 | -0.91736 |
| 65522 | P0C214 | Q14184 | -0.52951 |
| 65523 | P0C214 | Q9HD67 | -0.44171 |
| 65524 | P0C214 | P40967 | -0.87148 |
| 65525 | P0C214 | P17900 | -0.45649 |
| 65526 | P0C214 | Q12864 | -1.1141  |
| 65527 | P0C214 | P52306 | -0.61671 |
| 65528 | P0C214 | P36956 | -0.22727 |
| 65529 | P0C214 | Q6IC83 | -0.7652  |
| 65530 | P0C214 | P13765 | -1.0575  |
| 65531 | P0C214 | Q8N9F7 | -0.68586 |
| 65532 | P0C214 | Q9H6Y7 | -0.23321 |
| 65533 | P0C214 | Q8NBM8 | -0.90069 |
| 65534 | P0C214 | P01743 | -1.0022  |
| 65535 | P0C214 | Q75603 | -0.2593  |
| 65536 | P0C214 | P04062 | -0.30855 |
| 65537 | P0C214 | P28300 | -0.29288 |
| 65538 | P0C214 | O95390 | -0.56311 |
| 65539 | P0C214 | Q9GZM6 | -1.2952  |
| 65540 | P0C214 | P00451 | -0.23871 |
| 65541 | P0C214 | P01241 | -0.21444 |
| 65542 | P0C214 | P20853 | -0.72807 |
| 65543 | P0C214 | Q6UWS5 | -0.38466 |
| 65544 | P0C214 | P00797 | -0.82393 |
| 65545 | P0C214 | O60383 | -0.52893 |
| 65546 | P0C214 | Q8N5T2 | -1.2827  |
| 65547 | P0C214 | Q16655 | -0.29163 |
| 65548 | P0C214 | Q8NGA8 | -1.2952  |
| 65549 | P0C214 | P47710 | -0.99181 |
| 65550 | P0C214 | Q6ZMH5 | -1.0394  |
| 65551 | P0C214 | Q8TD07 | -0.50085 |
| 65552 | P0C214 | P50897 | -0.26553 |
| 65553 | P0C214 | Q9H158 | -1.2636  |
| 65554 | P0C214 | O95147 | -0.82398 |
| 65555 | P0C214 | Q9H222 | -0.65469 |
| 65556 | P0C214 | Q9Y6Q3 | -0.23511 |
| 65557 | P0C214 | Q8NH73 | -1.2952  |
| 65558 | P0C214 | O94812 | -0.43668 |
| 65559 | P0C214 | O75676 | -0.20552 |
| 65560 | P0C214 | Q9UBT6 | -0.2022  |
| 65561 | P0C214 | Q9UK85 | -1.0232  |
| 65562 | P0C214 | A6NDE8 | -0.47295 |
| 65563 | P0C214 | Q9H9A5 | -0.29414 |
| 65564 | P0C214 | P01699 | -1.0022  |
| 65565 | P0C214 | P0C1H6 | -0.62459 |
| 65566 | P0C214 | Q9GZV8 | -0.13833 |
| 65567 | P0C214 | Q2TB10 | -0.22727 |
| 65568 | P0C214 | Q14D33 | -0.98681 |
| 65569 | P0C214 | Q9Y6C9 | -0.80997 |
| 65570 | P0C214 | Q5JUQ0 | -0.16976 |
| 65571 | P0C214 | Q9TQE0 | -0.57171 |
| 65572 | P0C214 | Q86X27 | -0.82592 |
| 65573 | P0C214 | Q8N9V6 | -0.22741 |
| 65574 | P0C214 | Q13085 | -0.2831  |
| 65575 | P0C214 | P05113 | -0.22593 |
| 65576 | P0C214 | Q9BYF1 | -0.96935 |
| 65577 | P0C214 | P54709 | -0.72922 |
| 65578 | P0C214 | A6NGK3 | -0.29561 |
| 65579 | P0C214 | P0C0P6 | -0.87541 |
| 65580 | P0C214 | Q9H1P3 | -0.83993 |
| 65581 | P0C214 | Q86TE4 | -0.91736 |
| 65582 | P0C214 | Q8NCE2 | -0.21371 |
| 65583 | P0C214 | Q14919 | -0.15937 |
| 65584 | P0C214 | Q6QN14 | -0.39034 |
| 65585 | P0C214 | Q5BKT4 | -0.837   |
| 65586 | P0C214 | O95834 | -0.54807 |
| 65587 | P0C214 | Q8N6Y2 | -0.80089 |
| 65588 | P0C214 | Q9UHF0 | -0.92873 |

|       |        |        |           |
|-------|--------|--------|-----------|
| 65589 | P0C214 | Q9UPE1 | -1.1894   |
| 65590 | P0C214 | Q9HBI1 | -0.41532  |
| 65591 | P0C214 | P51810 | -0.54209  |
| 65592 | P0C214 | Q8WWF8 | -0.26085  |
| 65593 | P0C214 | Q53FZ2 | -0.48199  |
| 65594 | P0C214 | Q9BWW9 | -1.0076   |
| 65595 | P0C214 | P25105 | -0.91193  |
| 65596 | P0C214 | A6NL99 | -1.0569   |
| 65597 | P0C214 | A4IF30 | -1.0564   |
| 65598 | P0C214 | P78539 | -0.66689  |
| 65599 | P0C214 | Q9GZX3 | -0.49221  |
| 65600 | P0C214 | Q8NH59 | -1.2952   |
| 65601 | P0C214 | Q15291 | -0.22757  |
| 65602 | P0C214 | Q12772 | -0.22729  |
| 65603 | P0C214 | Q16653 | -1.2176   |
| 65604 | P0C214 | Q9Y2L6 | -0.36551  |
| 65605 | P0C214 | Q13191 | -0.22741  |
| 65606 | P0C214 | A8MX76 | -1.0212   |
| 65607 | P0C214 | P00995 | -0.2272   |
| 65608 | P0C214 | Q96LZ7 | -0.43482  |
| 65609 | P0C214 | P29122 | -0.95865  |
| 65610 | P0C214 | P22749 | -0.82265  |
| 65611 | P0C214 | Q8TAE6 | -0.33287  |
| 65612 | P0C214 | Q9Y5G1 | -1.2424   |
| 65613 | P0C214 | Q66K37 | -0.2259   |
| 65614 | P0C214 | Q8TCT1 | -0.1708   |
| 65615 | P0C214 | P46934 | -0.22742  |
| 65616 | P0C214 | P07225 | -0.66348  |
| 65617 | P0C214 | Q6NUJ1 | -1.0393   |
| 65618 | P0C214 | Q8IYB8 | -0.22558  |
| 65619 | P0C214 | Q86WC6 | -0.22741  |
| 65620 | P0C214 | Q8NBC4 | -0.20758  |
| 65621 | P0C214 | Q5U4P2 | -0.90754  |
| 65622 | P0C214 | Q9Y6W3 | -0.69831  |
| 65623 | P0C214 | Q96R09 | -1.2952   |
| 65624 | P0C214 | Q9GZU0 | -0.47813  |
| 65625 | P0C214 | Q5BKX8 | -0.14946  |
| 65626 | P0C214 | Q7RTT9 | -1.1138   |
| 65627 | P0C214 | Q96RI0 | -1.3157   |
| 65628 | P0C214 | Q01064 | -0.22369  |
| 65629 | P0C214 | P51805 | -1.0291   |
| 65630 | P0C214 | Q2KHR3 | -1.1392   |
| 65631 | P0C214 | Q9Y6R7 | -0.22597  |
| 65632 | P0C214 | Q14469 | -0.22592  |
| 65633 | P0C214 | Q9H156 | -1.0742   |
| 65634 | P0C214 | Q8NCL8 | -0.68883  |
| 65635 | P0C214 | P35916 | -0.56235  |
| 65636 | P0C214 | Q96PT3 | -0.16581  |
| 65637 | P0C214 | Q7Z3S9 | -1.0026   |
| 65638 | P0C214 | P05496 | -0.68975  |
| 65639 | P0C214 | Q15111 | -0.57073  |
| 65640 | P0C214 | Q9NQV6 | -0.083723 |
| 65641 | P0C214 | P25106 | -1.1317   |
| 65642 | P0C214 | Q8WZ69 | -0.55137  |
| 65643 | P0C214 | A6NGU7 | -0.065231 |
| 65644 | P0C214 | Q8NHC7 | -1.2952   |
| 65645 | P0C214 | Q14607 | -0.32092  |
| 65646 | P0C214 | Q9Y2H5 | -0.52301  |
| 65647 | P0C214 | Q14642 | -0.50527  |
| 65648 | P0C214 | Q15475 | -0.22755  |
| 65649 | P0C214 | Q8N386 | -0.98681  |
| 65650 | P0C214 | P51148 | -0.84042  |
| 65651 | P0C214 | Q96FE7 | -0.90842  |
| 65652 | P0C214 | Q8NC44 | -0.91465  |
| 65653 | P0C214 | Q9Y426 | -0.32447  |
| 65654 | P0C214 | Q9UH62 | -0.86201  |
| 65655 | P0C214 | A8MRT5 | -0.98681  |
| 65656 | P0C214 | P11487 | -0.33571  |
| 65657 | P0C214 | Q95168 | -0.44582  |
| 65658 | P0C214 | Q96SF2 | -0.63891  |
| 65659 | P0C214 | Q5GH73 | -0.98681  |
| 65660 | P0C214 | Q15090 | -0.2202   |
| 65661 | P0C214 | Q8NEN9 | -0.33086  |
| 65662 | P0C214 | Q562E7 | -0.42739  |
| 65663 | P0C214 | Q00203 | -0.19145  |
| 65664 | P0C214 | Q6UWB1 | -1.025    |

|       |        |        |          |
|-------|--------|--------|----------|
| 65665 | P0C214 | C9J1S8 | -0.71534 |
| 65666 | P0C214 | Q86VU5 | -0.59877 |
| 65667 | P0C214 | P01608 | -1.0022  |
| 65668 | P0C214 | P21291 | -0.23864 |
| 65669 | P0C214 | A6NNL5 | -0.91736 |
| 65670 | P0C214 | Q9UBS0 | -0.65936 |
| 65671 | P0C214 | P00751 | -1.334   |
| 65672 | P0C214 | Q8NH16 | -1.1265  |
| 65673 | P0C214 | Q14571 | -0.54161 |
| 65674 | P0C214 | Q8TDX6 | -0.40503 |
| 65675 | P0C214 | Q9BQ08 | -0.69092 |
| 65676 | P0C214 | P32238 | -0.73398 |
| 65677 | P0C214 | Q8IYX1 | -1.2827  |
| 65678 | P0C214 | Q96RS6 | -0.1398  |
| 65679 | P0C214 | Q7Z7B0 | -0.21912 |
| 65680 | P0C214 | Q5EB52 | -0.93368 |
| 65681 | P0C214 | Q8N3I7 | -0.33792 |
| 65682 | P0C214 | Q69YQ0 | -0.22748 |
| 65683 | P0C214 | Q6P5S7 | -0.71093 |
| 65684 | P0C214 | P63129 | -0.6957  |
| 65685 | P0C214 | Q15417 | -0.51359 |
| 65686 | P0C214 | Q14993 | -1.2083  |
| 65687 | P0C214 | Q6ZRI8 | -0.86358 |
| 65688 | P0C214 | B1AL88 | -0.98681 |
| 65689 | P0C214 | P05814 | -0.93661 |
| 65690 | P0C214 | Q14681 | -0.10477 |
| 65691 | P0C214 | P30203 | -1.2432  |
| 65692 | P0C214 | P08582 | -0.64609 |
| 65693 | P0C214 | Q8WVE6 | -0.98681 |
| 65694 | P0C214 | P53384 | -0.14228 |
| 65695 | P0C214 | Q9H903 | -0.47407 |
| 65696 | P0C214 | P30498 | -1.0367  |
| 65697 | P0C214 | Q95239 | -0.32556 |
| 65698 | P0C214 | Q13075 | -0.22719 |
| 65699 | P0C214 | P56559 | -0.41719 |
| 65700 | P0C214 | P40145 | -0.84675 |
| 65701 | P0C214 | Q96PC2 | -0.47285 |
| 65702 | P0C214 | Q96C55 | -0.22001 |
| 65703 | P0C214 | O00300 | -0.83934 |
| 65704 | P0C214 | Q14236 | -0.54843 |
| 65705 | P0C214 | Q9Y5L4 | -0.26063 |
| 65706 | P0C214 | Q8TCG2 | -0.37152 |
| 65707 | P0C214 | Q96GW7 | -0.7456  |
| 65708 | P0C214 | P20338 | -0.34911 |
| 65709 | P0C214 | Q95757 | -0.22323 |
| 65710 | P0C214 | Q15375 | -0.71633 |
| 65711 | P0C214 | O60423 | -0.91666 |
| 65712 | P0C214 | O75264 | -0.98681 |
| 65713 | P0C214 | Q5J8X5 | -0.98681 |
| 65714 | P0C214 | Q9H813 | -0.98681 |
| 65715 | P0C214 | Q9NP90 | -0.42381 |
| 65716 | P0C214 | Q5T3F8 | -1.3184  |
| 65717 | P0C214 | P52945 | -0.56251 |
| 65718 | P0C214 | Q8TBP5 | -0.98681 |
| 65719 | P0C214 | P05452 | -0.87381 |
| 65720 | P0C214 | O60676 | -0.72064 |
| 65721 | P0C214 | Q9UNW1 | -0.4038  |
| 65722 | P0C214 | Q96CT2 | -0.19872 |
| 65723 | P0C214 | P0CL80 | -0.47295 |
| 65724 | P0C214 | P58499 | -0.74179 |
| 65725 | P0C214 | O60476 | -0.51016 |
| 65726 | P0C214 | Q13636 | -0.89451 |
| 65727 | P0C214 | Q6ZWH5 | -1.3369  |
| 65728 | P0C214 | Q96LZ3 | -0.43585 |
| 65729 | P0C214 | P01704 | -1.0022  |
| 65730 | P0C214 | Q8TB40 | -0.37466 |
| 65731 | P0C214 | P16144 | -0.77811 |
| 65732 | P0C214 | Q13323 | -0.47703 |
| 65733 | P0C214 | Q9UN66 | -1.2424  |
| 65734 | P0C214 | Q5U5Z8 | -0.38962 |
| 65735 | P0C214 | Q96DW6 | -0.77    |
| 65736 | P0C214 | Q969E1 | -0.89546 |
| 65737 | P0C214 | Q9NPC2 | -1.2105  |
| 65738 | P0C214 | P78357 | -0.59245 |
| 65739 | P0C214 | O96008 | -0.59726 |
| 65740 | P0C214 | Q5BLP8 | -0.91736 |

|       |        |        |            |
|-------|--------|--------|------------|
| 65741 | P0C214 | P55201 | -0.22463   |
| 65742 | P0C214 | Q00587 | -0.23108   |
| 65743 | P0C214 | Q9P2H3 | -0.46421   |
| 65744 | P0C214 | Q9NYX4 | -1.0814    |
| 65745 | P0C214 | P36897 | -0.28371   |
| 65746 | P0C214 | Q96SC8 | -0.0028232 |
| 65747 | P0C214 | Q4G0Z9 | -0.56152   |
| 65748 | P0C214 | Q9Y6C5 | -0.89188   |
| 65749 | P0C214 | Q7Z418 | -1.2164    |
| 65750 | P0C214 | P12107 | -0.80093   |
| 65751 | P0C214 | Q9H0X9 | -1.1175    |
| 65752 | P0C214 | Q5U651 | -0.24769   |
| 65753 | P0C214 | Q12929 | -0.22741   |
| 65754 | P0C214 | Q9BYW1 | -0.91973   |
| 65755 | P0C214 | Q96KT7 | -0.98681   |
| 65756 | P0C214 | A6NCK2 | -0.71534   |
| 65757 | P0C214 | Q9NX36 | -0.43259   |
| 65758 | P0C214 | Q9H2A3 | -0.22811   |
| 65759 | P0C214 | Q6P179 | -1.1564    |
| 65760 | P0C214 | P46821 | -0.2001    |
| 65761 | P0C214 | Q9HCS5 | -0.26828   |
| 65762 | P0C214 | O95992 | -0.58322   |
| 65763 | P0C214 | Q9NUB4 | -0.98681   |
| 65764 | P0C214 | P05015 | -0.70371   |
| 65765 | P0C214 | Q9HD45 | -1.0587    |
| 65766 | P0C214 | P08754 | -0.35673   |
| 65767 | P0C214 | Q9Y267 | -1.0166    |
| 65768 | P0C214 | O43895 | -0.86686   |
| 65769 | P0C214 | O94813 | -0.27545   |
| 65770 | P0C214 | Q8TDX9 | -0.78031   |
| 65771 | P0C214 | Q9P217 | -0.50512   |
| 65772 | P0C214 | P54750 | -0.22486   |
| 65773 | P0C214 | Q9NR81 | -0.35579   |
| 65774 | P0C214 | A6NE52 | -0.22746   |
| 65775 | P0C214 | Q9NYL4 | -0.87354   |
| 65776 | P0C214 | P58876 | -0.85588   |
| 65777 | P0C214 | Q15825 | -1.0452    |
| 65778 | P0C214 | Q8NG75 | -1.2952    |
| 65779 | P0C214 | O00555 | -0.3115    |
| 65780 | P0C214 | Q96QE3 | -0.63642   |
| 65781 | P0C214 | D6R9N7 | -0.68518   |
| 65782 | P0C214 | P0DH78 | -0.50512   |
| 65783 | P0C214 | Q7Z408 | -1.0708    |
| 65784 | P0C214 | Q9NRJ1 | -0.41009   |
| 65785 | P0C214 | Q9H1R2 | -0.27726   |
| 65786 | P0C214 | O00142 | -0.42402   |
| 65787 | P0C214 | Q14651 | -0.37263   |
| 65788 | P0C214 | Q07817 | -0.22729   |
| 65789 | P0C214 | O60285 | -0.42773   |
| 65790 | P0C214 | Q8IWX7 | -0.22711   |
| 65791 | P0C214 | Q5BKU6 | -0.12279   |
| 65792 | P0C214 | Q8TE77 | -0.39536   |
| 65793 | P0C214 | Q9NYW2 | -1.1716    |
| 65794 | P0C214 | P80419 | -0.91671   |
| 65795 | P0C214 | P60983 | -0.70769   |
| 65796 | P0C214 | P55773 | -1.1075    |
| 65797 | P0C214 | Q96B18 | -0.30379   |
| 65798 | P0C214 | Q9BW72 | -0.9241    |
| 65799 | P0C214 | Q02928 | -0.37328   |
| 65800 | P0C214 | O43353 | -0.22741   |
| 65801 | P0C214 | Q5SY80 | -0.98681   |
| 65802 | P0C214 | Q6UX53 | -0.39362   |
| 65803 | P0C214 | Q9Y337 | -0.83056   |
| 65804 | P0C214 | Q9BZX4 | -0.29309   |
| 65805 | P0C214 | Q8NBU5 | -0.56386   |
| 65806 | P0C214 | Q92952 | -0.93952   |
| 65807 | P0C214 | P12429 | -0.42237   |
| 65808 | P0C214 | Q99757 | -0.24745   |
| 65809 | P0C214 | P78332 | -0.83295   |
| 65810 | P0C214 | Q8N112 | -0.98681   |
| 65811 | P0C214 | P36941 | -0.28443   |
| 65812 | P0C214 | Q9H511 | -0.20176   |
| 65813 | P03383 | P20839 | -0.44777   |
| 65814 | P03383 | Q99766 | -0.45949   |
| 65815 | P03383 | Q9NQ75 | -0.58897   |
| 65816 | P03383 | Q8WV92 | -0.19787   |

|       |        |        |           |
|-------|--------|--------|-----------|
| 65817 | P03383 | P49768 | -0.22731  |
| 65818 | P03383 | Q969V3 | -0.33142  |
| 65819 | P03383 | Q495Y7 | -0.013154 |
| 65820 | P03383 | Q99593 | -0.43685  |
| 65821 | P03383 | Q8N1G4 | -0.22757  |
| 65822 | P03383 | Q9UPU3 | -0.85806  |
| 65823 | P03383 | P04118 | -0.71963  |
| 65824 | P03383 | O94779 | -0.67647  |
| 65825 | P03383 | Q86W54 | -0.17516  |
| 65826 | P03383 | Q96B70 | -0.77771  |
| 65827 | P03383 | Q6UXH1 | -0.3692   |
| 65828 | P03383 | Q9Y573 | -0.40503  |
| 65829 | P03383 | A5D8V6 | -0.12556  |
| 65830 | P03383 | Q8TDG4 | -0.49841  |
| 65831 | P03383 | Q16560 | -0.48752  |
| 65832 | P03383 | Q86X45 | -0.34295  |
| 65833 | P03383 | O75711 | -0.82891  |
| 65834 | P03383 | Q96GF1 | -0.83935  |
| 65835 | P03383 | Q5T8R8 | -0.13886  |
| 65836 | P03383 | A1L453 | -1.2917   |
| 65837 | P03383 | Q43820 | -0.70395  |
| 65838 | P03383 | O14638 | -1.0239   |
| 65839 | P03383 | Q96MH7 | -0.043937 |
| 65840 | P03383 | Q8NGC5 | -1.1027   |
| 65841 | P03383 | P10070 | -0.22727  |
| 65842 | P03383 | P59095 | -0.71621  |
| 65843 | P03383 | P53673 | -0.38195  |
| 65844 | P03383 | P29992 | -0.80937  |
| 65845 | P03383 | Q9P241 | -0.57608  |
| 65846 | P03383 | Q9UKV5 | -0.27006  |
| 65847 | P03383 | Q9UHF1 | -1.0465   |
| 65848 | P03383 | Q8N4N3 | -0.43639  |
| 65849 | P03383 | Q8NHV9 | -0.2206   |
| 65850 | P03383 | P14091 | -0.6393   |
| 65851 | P03383 | Q5HYJ1 | -0.80686  |
| 65852 | P03383 | Q5VZF2 | -0.15775  |
| 65853 | P03383 | Q6UWQ5 | -0.85255  |
| 65854 | P03383 | Q8TEC5 | -0.2274   |
| 65855 | P03383 | Q14863 | -0.2274   |
| 65856 | P03383 | Q9BUV8 | -0.16078  |
| 65857 | P03383 | O43508 | -0.7986   |
| 65858 | P03383 | P30613 | -0.3864   |
| 65859 | P03383 | Q9UHC7 | -0.22337  |
| 65860 | P03383 | Q9UQD0 | -0.83857  |
| 65861 | P03383 | Q4G0N0 | -0.55735  |
| 65862 | P03383 | Q9GZM5 | -0.72784  |
| 65863 | P03383 | Q9NS40 | -0.93206  |
| 65864 | P03383 | P24855 | -0.16909  |
| 65865 | P03383 | Q16674 | -0.82284  |
| 65866 | P03383 | Q96K80 | -0.19402  |
| 65867 | P03383 | Q9BVW6 | -0.86584  |
| 65868 | P03383 | P43235 | -0.67575  |
| 65869 | P03383 | Q9NS18 | -0.22105  |
| 65870 | P03383 | Q96MC6 | -0.87101  |
| 65871 | P03383 | P51800 | -0.91066  |
| 65872 | P03383 | P61803 | -0.73052  |
| 65873 | P03383 | Q6N022 | -0.47858  |
| 65874 | P03383 | O15085 | -0.3127   |
| 65875 | P03383 | Q2TAL5 | -0.22794  |
| 65876 | P03383 | O75072 | -0.42994  |
| 65877 | P03383 | P05413 | -0.20357  |
| 65878 | P03383 | Q75342 | -0.77669  |
| 65879 | P03383 | I1YAP6 | -0.22717  |
| 65880 | P03383 | Q9ULM2 | -0.21172  |
| 65881 | P03383 | Q92887 | -0.72431  |
| 65882 | P03383 | Q9BXJ8 | -0.52887  |
| 65883 | P03383 | P01308 | -0.22552  |
| 65884 | P03383 | Q8WWW0 | -0.22741  |
| 65885 | P03383 | P58170 | -1.1027   |
| 65886 | P03383 | Q5T754 | -0.43006  |
| 65887 | P03383 | P58546 | -0.22741  |
| 65888 | P03383 | P07332 | -0.56277  |
| 65889 | P03383 | Q6ZUT3 | -0.55304  |
| 65890 | P03383 | P20783 | -0.51804  |
| 65891 | P03383 | Q8IYJ0 | -0.86584  |
| 65892 | P03383 | A6NDX4 | -0.86584  |



|       |        |        |           |
|-------|--------|--------|-----------|
| 65893 | P03383 | Q8NH07 | -1.1027   |
| 65894 | P03383 | O60499 | -0.40254  |
| 65895 | P03383 | O95455 | -0.98617  |
| 65896 | P03383 | Q9UIR0 | -0.86584  |
| 65897 | P03383 | Q9BUQ8 | -0.37614  |
| 65898 | P03383 | Q9UJP4 | -0.20537  |
| 65899 | P03383 | Q9BYS8 | -0.53938  |
| 65900 | P03383 | Q96N03 | -0.23273  |
| 65901 | P03383 | Q6ZRP7 | -0.98967  |
| 65902 | P03383 | P10323 | -0.85199  |
| 65903 | P03383 | P61925 | -0.17378  |
| 65904 | P03383 | P01701 | -0.97479  |
| 65905 | P03383 | P59538 | -1.0953   |
| 65906 | P03383 | Q6UWW9 | -0.86584  |
| 65907 | P03383 | O14595 | -0.047767 |
| 65908 | P03383 | Q8N302 | -0.38224  |
| 65909 | P03383 | P06729 | -0.72652  |
| 65910 | P03383 | P0C7U1 | -0.13341  |
| 65911 | P03383 | Q6P7N7 | -0.86584  |
| 65912 | P03383 | O75094 | -0.66057  |
| 65913 | P03383 | O43826 | -0.31486  |
| 65914 | P03383 | Q9BXS4 | -0.69876  |
| 65915 | P03383 | Q13510 | -0.44385  |
| 65916 | P03383 | Q66K74 | -0.14971  |
| 65917 | P03383 | Q96HV5 | -0.86584  |
| 65918 | P03383 | O43823 | -0.2472   |
| 65919 | P03383 | Q86WI0 | -0.86584  |
| 65920 | P03383 | Q14618 | -0.22709  |
| 65921 | P03383 | Q13043 | -0.23099  |
| 65922 | P03383 | Q5VV42 | -0.62561  |
| 65923 | P03383 | Q6P0A1 | -0.86584  |
| 65924 | P03383 | H3BSY2 | -0.35868  |
| 65925 | P03383 | P18627 | -0.82801  |
| 65926 | P03383 | Q8N9V2 | -0.72121  |
| 65927 | P03383 | Q9Y5W5 | -1.0552   |
| 65928 | P03383 | Q9UIE0 | -0.21172  |
| 65929 | P03383 | Q8IU89 | -0.30377  |
| 65930 | P03383 | Q9BQI3 | -0.6343   |
| 65931 | P03383 | Q58WW2 | -0.2274   |
| 65932 | P03383 | Q5VWJ9 | -0.26319  |
| 65933 | P03383 | P47895 | -0.36059  |
| 65934 | P03383 | Q6ZRR7 | -0.22736  |
| 65935 | P03383 | Q92918 | -0.42716  |
| 65936 | P03383 | O15160 | -0.076981 |
| 65937 | P03383 | Q14520 | -0.5719   |
| 65938 | P03383 | Q8NHB7 | -1.1027   |
| 65939 | P03383 | Q9Y6H3 | -0.71615  |
| 65940 | P03383 | Q8IY33 | -0.38972  |
| 65941 | P03383 | P42262 | -0.80323  |
| 65942 | P03383 | P0C2Y1 | -0.29487  |
| 65943 | P03383 | Q99973 | -0.51899  |
| 65944 | P03383 | Q9UKL4 | -0.93214  |
| 65945 | P03383 | Q02383 | -0.70831  |
| 65946 | P03383 | Q4ZJI4 | -0.83752  |
| 65947 | P03383 | Q9NP79 | -0.04408  |
| 65948 | P03383 | Q2M2D7 | -0.94809  |
| 65949 | P03383 | P05543 | -0.66949  |
| 65950 | P03383 | Q96AY4 | -0.22741  |
| 65951 | P03383 | P21462 | -0.8576   |
| 65952 | P03383 | O94806 | -0.22733  |
| 65953 | P03383 | P16219 | -0.42682  |
| 65954 | P03383 | Q7Z5M8 | -0.40112  |
| 65955 | P03383 | Q86WK6 | -1.0776   |
| 65956 | P03383 | Q96IZ5 | -0.84005  |
| 65957 | P03383 | Q6AZZ1 | -0.22767  |
| 65958 | P03383 | Q9NVN3 | -0.20328  |
| 65959 | P03383 | Q8N661 | -0.58146  |
| 65960 | P03383 | Q8TCY5 | -0.62644  |
| 65961 | P03383 | Q8N9V6 | -0.22741  |
| 65962 | P03383 | Q12870 | -0.22781  |
| 65963 | P03383 | P58304 | -0.22715  |
| 65964 | P03383 | Q8WUH1 | -0.33386  |
| 65965 | P03383 | Q9Y5P1 | -1.1027   |
| 65966 | P03383 | Q8NFD2 | -0.9088   |
| 65967 | P03383 | Q9GZP1 | -0.74087  |
| 65968 | P03383 | P61952 | -0.54522  |

|       |        |        |           |
|-------|--------|--------|-----------|
| 65969 | P03383 | Q6ZUQ5 | -0.44341  |
| 65970 | P03383 | Q14515 | -1.1171   |
| 65971 | P03383 | O43426 | -0.37672  |
| 65972 | P03383 | Q9BYZ6 | -1.1939   |
| 65973 | P03383 | Q7L523 | -0.31218  |
| 65974 | P03383 | Q86UV7 | -0.73967  |
| 65975 | P03383 | Q9NRN9 | -0.37482  |
| 65976 | P03383 | Q8NAA5 | -0.1695   |
| 65977 | P03383 | Q6ZN03 | -0.11992  |
| 65978 | P03383 | P16520 | -0.48042  |
| 65979 | P03383 | P49915 | -0.46459  |
| 65980 | P03383 | Q8WZA1 | -0.6961   |
| 65981 | P03383 | P00709 | -0.89303  |
| 65982 | P03383 | Q8TAI7 | -0.98849  |
| 65983 | P03383 | Q96PY0 | -0.017691 |
| 65984 | P03383 | Q6W5P4 | -1.0063   |
| 65985 | P03383 | Q9BYV2 | -0.8443   |
| 65986 | P03383 | Q9H4G1 | -0.89477  |
| 65987 | P03383 | Q92805 | -0.27132  |
| 65988 | P03383 | P12109 | -0.8682   |
| 65989 | P03383 | Q9BRS2 | -0.95587  |
| 65990 | P03383 | Q92618 | -0.21172  |
| 65991 | P03383 | P01769 | -0.97479  |
| 65992 | P03383 | Q8N3Y7 | -1.1927   |
| 65993 | P03383 | Q99661 | -0.31402  |
| 65994 | P03383 | Q9NZH0 | -0.70701  |
| 65995 | P03383 | Q5GH76 | -0.86584  |
| 65996 | P03383 | Q13535 | -0.66259  |
| 65997 | P03383 | Q15746 | -0.44336  |
| 65998 | P03383 | Q9UNQ0 | -0.43704  |
| 65999 | P03383 | Q86SH4 | -0.87849  |
| 66000 | P03383 | O75159 | -0.22737  |
| 66001 | P03383 | Q96Q04 | -0.77148  |
| 66002 | P03383 | Q99442 | -0.7057   |
| 66003 | P03383 | Q9H221 | -0.63889  |
| 66004 | P03383 | Q6NUM9 | -0.61981  |
| 66005 | P03383 | Q9NY64 | -0.53652  |
| 66006 | P03383 | Q68CR7 | -0.86584  |
| 66007 | P03383 | Q149M9 | -0.79654  |
| 66008 | P03383 | Q9BZ19 | -0.2274   |
| 66009 | P03383 | P01040 | -0.30008  |
| 66010 | P03383 | Q5T2R2 | -0.42505  |
| 66011 | P03383 | Q9Y5F1 | -1.1553   |
| 66012 | P03383 | P30990 | -0.90712  |
| 66013 | P03383 | O60337 | -0.87564  |
| 66014 | P03383 | Q9NNX1 | -0.86951  |
| 66015 | P03383 | Q96E40 | -0.06411  |
| 66016 | P03383 | Q6GTS8 | -1.2253   |
| 66017 | P03383 | P56381 | -0.18862  |
| 66018 | P03383 | Q86WN1 | -0.22739  |
| 66019 | P03383 | Q96N64 | -0.21936  |
| 66020 | P03383 | A0AVI2 | -0.86584  |
| 66021 | P03383 | P00751 | -1.2261   |
| 66022 | P03383 | Q9NVI7 | -0.96393  |
| 66023 | P03383 | Q03014 | -0.22785  |
| 66024 | P03383 | Q659C4 | -0.4711   |
| 66025 | P03383 | Q9H0W7 | -0.39017  |
| 66026 | P03383 | Q9H497 | -0.59428  |
| 66027 | P03383 | Q4G0N4 | -0.44049  |
| 66028 | P03383 | Q96RU2 | -0.43007  |
| 66029 | P03383 | P29475 | -0.22771  |
| 66030 | P03383 | Q8NCM8 | -0.5005   |
| 66031 | P03383 | Q15418 | -0.2169   |
| 66032 | P03383 | Q8N573 | -0.12921  |
| 66033 | P03383 | Q6PI78 | -0.74159  |
| 66034 | P03383 | O43292 | -0.42419  |
| 66035 | P03383 | P59539 | -1.0953   |
| 66036 | P03383 | Q7Z4L5 | -0.47289  |
| 66037 | P03383 | Q9GZV7 | -1.0554   |
| 66038 | P03383 | Q6NUT3 | -0.85789  |
| 66039 | P03383 | Q8IWA4 | -0.87588  |
| 66040 | P03383 | P47972 | -0.73418  |
| 66041 | P03383 | Q96JP9 | -1.1383   |
| 66042 | P03383 | Q9BZM2 | -0.68346  |
| 66043 | P03383 | Q6NZY7 | -0.49789  |
| 66044 | P03383 | O43908 | -0.84705  |

|       |        |        |           |
|-------|--------|--------|-----------|
| 66045 | P03383 | O75871 | -1.0003   |
| 66046 | P03383 | Q5SZL2 | -0.13011  |
| 66047 | P03383 | Q15546 | -0.99456  |
| 66048 | P03383 | A1KZ92 | -0.83778  |
| 66049 | P03383 | P32881 | -0.7874   |
| 66050 | P03383 | Q8TF71 | -0.88723  |
| 66051 | P03383 | Q96AN5 | -0.54355  |
| 66052 | P03383 | Q8WYN0 | -0.45449  |
| 66053 | P03383 | Q9NPC1 | -1.2522   |
| 66054 | P03383 | Q8N9Q2 | -0.48379  |
| 66055 | P03383 | Q30KR1 | -0.84399  |
| 66056 | P03383 | Q6P1M0 | -0.97802  |
| 66057 | P03383 | Q96H15 | -0.86584  |
| 66058 | P03383 | Q9Y2K7 | -0.22555  |
| 66059 | P03383 | Q9H8M9 | -1.0625   |
| 66060 | P03383 | Q96B42 | -0.39523  |
| 66061 | P03383 | P51571 | -0.71996  |
| 66062 | P03383 | Q8NHC5 | -1.1027   |
| 66063 | P03383 | A6NHS7 | -0.86584  |
| 66064 | P03383 | Q5VUJ9 | -0.52751  |
| 66065 | P03383 | Q9HCE9 | -0.99834  |
| 66066 | P03383 | A5D8W1 | -0.065298 |
| 66067 | P03383 | Q04721 | -0.22742  |
| 66068 | P03383 | Q8TE67 | -0.29487  |
| 66069 | P03383 | Q6P988 | -0.8359   |
| 66070 | P03383 | Q14318 | -0.22785  |
| 66071 | P03383 | D6RJB6 | -0.69644  |
| 66072 | P03383 | P51617 | -0.22738  |
| 66073 | P03383 | O43795 | -0.48661  |
| 66074 | P03383 | P02766 | -0.19326  |
| 66075 | P03383 | Q9BW11 | -0.22408  |
| 66076 | P03383 | Q9UBT3 | -0.71748  |
| 66077 | P03383 | Q05469 | -0.2228   |
| 66078 | P03383 | Q96DA6 | -0.63212  |
| 66079 | P03383 | Q13886 | -0.22399  |
| 66080 | P03383 | O15020 | -0.27373  |
| 66081 | P03383 | Q9P2N2 | -0.66586  |
| 66082 | P03383 | O15428 | -0.2274   |
| 66083 | P03383 | Q9UM21 | -0.80889  |
| 66084 | P03383 | P07288 | -0.85051  |
| 66085 | P03383 | Q155Q3 | -0.22741  |
| 66086 | P03383 | Q6PKH6 | -1.382    |
| 66087 | P03383 | P58335 | -0.85327  |
| 66088 | P03383 | P06028 | -1.0706   |
| 66089 | P03383 | Q8WXI4 | -0.25007  |
| 66090 | P03383 | Q92854 | -0.46898  |
| 66091 | P03383 | Q8TCB7 | -0.37739  |
| 66092 | P03383 | P31391 | -1.2173   |
| 66093 | P03383 | Q96QV6 | -0.88998  |
| 66094 | P03383 | P22314 | -0.21758  |
| 66095 | P03383 | P46721 | -0.77991  |
| 66096 | P03383 | P09172 | -0.41815  |
| 66097 | P03383 | O95395 | -0.49621  |
| 66098 | P03383 | Q99062 | -1.4854   |
| 66099 | P03383 | P32302 | -1.1715   |
| 66100 | P03383 | P08048 | -0.21172  |
| 66101 | P03383 | O00270 | -1.2928   |
| 66102 | P03383 | Q9BWT6 | -0.27516  |
| 66103 | P03383 | P43119 | -0.95155  |
| 66104 | P03383 | Q6UY14 | -0.31916  |
| 66105 | P03383 | Q8NDZ6 | -0.86584  |
| 66106 | P03383 | Q9Y2G8 | -0.8703   |
| 66107 | P03383 | Q9BYW3 | -0.79616  |
| 66108 | P03383 | Q9UGF7 | -1.1027   |
| 66109 | P03383 | Q9Y5E8 | -1.1553   |
| 66110 | P03383 | Q30154 | -0.67577  |
| 66111 | P03383 | Q9Y5X2 | -0.22115  |
| 66112 | P03383 | Q6ZMC9 | -0.86584  |
| 66113 | P03383 | Q16772 | -0.27596  |
| 66114 | P03383 | Q5TF58 | -0.079857 |
| 66115 | P03383 | P52429 | -1.1046   |
| 66116 | P03383 | Q8N6R0 | -0.47305  |
| 66117 | P03383 | Q9BX51 | -0.41457  |
| 66118 | P03383 | P59826 | -0.88413  |
| 66119 | P03383 | P09543 | -0.50431  |
| 66120 | P03383 | Q96KT0 | -0.009945 |

|       |        |         |          |
|-------|--------|---------|----------|
| 66121 | P03383 | A6NI72  | -0.41347 |
| 66122 | P03383 | Q5T5A8  | -0.43006 |
| 66123 | P03383 | P60520  | -0.10341 |
| 66124 | P03383 | P26440  | -0.44788 |
| 66125 | P03383 | Q8TE49  | -0.58312 |
| 66126 | P03383 | O94923  | -0.43591 |
| 66127 | P03383 | O15239  | -0.53536 |
| 66128 | P03383 | P04628  | -0.22741 |
| 66129 | P03383 | O95718  | -0.22743 |
| 66130 | P03383 | Q96RB7  | -1.1027  |
| 66131 | P03383 | A0FGR8  | -0.93628 |
| 66132 | P03383 | Q9UBY5  | -1.1786  |
| 66133 | P03383 | Q96QI5  | -0.52862 |
| 66134 | P03383 | Q16790  | -0.47497 |
| 66135 | P03383 | O75112  | -0.29595 |
| 66136 | P03383 | Q9UI32  | -0.22738 |
| 66137 | P03383 | O94822  | -0.16696 |
| 66138 | P03383 | Q96HY7  | -0.39873 |
| 66139 | P03383 | A6NHG4  | -0.37147 |
| 66140 | P03383 | Q8NH10  | -1.1027  |
| 66141 | P03383 | Q02446  | -0.17172 |
| 66142 | P03383 | P30460  | -0.93787 |
| 66143 | P03383 | Q9UKY3  | -0.80756 |
| 66144 | P03383 | P49862  | -1.2357  |
| 66145 | P03383 | P30926  | -0.78903 |
| 66146 | P03383 | Q14005  | -0.37924 |
| 66147 | P03383 | Q9GZM6  | -1.1027  |
| 66148 | P03383 | Q9NYA1  | -0.24825 |
| 66149 | P03383 | Q6VVB1  | -0.22186 |
| 66150 | P03383 | P16519  | -0.26309 |
| 66151 | P03383 | O43181  | -0.25354 |
| 66152 | P03383 | P21781  | -0.50349 |
| 66153 | P03383 | Q9Y3I0  | -0.55766 |
| 66154 | P03383 | Q99805  | -0.87857 |
| 66155 | P03383 | Q9BQ31  | -0.52055 |
| 66156 | P03383 | P78362  | -0.36388 |
| 66157 | P03383 | Q495X7  | -0.73967 |
| 66158 | P03383 | Q99418  | -0.22741 |
| 66159 | P03383 | Q902F9  | -0.5818  |
| 66160 | P03383 | Q8N907  | -0.65515 |
| 66161 | P03383 | Q8N3Y1  | -0.22741 |
| 66162 | P03383 | Q92622  | -0.13226 |
| 66163 | P03383 | Q9BXU8  | -0.43943 |
| 66164 | P03383 | Q96P26  | -0.42345 |
| 66165 | P03383 | O95622  | -0.66326 |
| 66166 | P03383 | B7Z8K6  | -0.86584 |
| 66167 | P03383 | Q96RN1  | -0.51653 |
| 66168 | P03383 | Q8I WV1 | -0.20931 |
| 66169 | P03383 | Q5TZ20  | -1.1027  |
| 66170 | P03383 | P18084  | -0.77974 |
| 66171 | P03383 | Q03405  | -0.64197 |
| 66172 | P03383 | P47804  | -0.81101 |
| 66173 | P03383 | P50416  | -0.39032 |
| 66174 | P03383 | Q96MS3  | -0.71382 |
| 66175 | P03383 | Q8N111  | -0.86584 |
| 66176 | P03383 | Q6IF42  | -1.1027  |
| 66177 | P03383 | P07148  | -0.21962 |
| 66178 | P03383 | Q6UXP8  | -0.87849 |
| 66179 | P03383 | Q96BJ8  | -0.44669 |
| 66180 | P03383 | O60309  | -0.86584 |
| 66181 | P03383 | Q8TF61  | -0.69535 |
| 66182 | P03383 | Q86YL5  | -0.16078 |
| 66183 | P03383 | P0C854  | -0.87849 |
| 66184 | P03383 | P28039  | -0.92006 |
| 66185 | P03383 | P09529  | -0.22741 |
| 66186 | P03383 | P10109  | -0.31584 |
| 66187 | P03383 | Q8N1Q1  | -0.39077 |
| 66188 | P03383 | P24752  | -0.23526 |
| 66189 | P03383 | Q15915  | -0.32345 |
| 66190 | P03383 | Q9P0N8  | -0.99198 |
| 66191 | P03383 | Q8TC07  | -0.64497 |
| 66192 | P03383 | O95786  | -0.22702 |
| 66193 | P03383 | Q5SZQ8  | -0.3912  |
| 66194 | P03383 | Q0VAM2  | -0.79901 |
| 66195 | P03383 | A6PVS8  | -0.22663 |
| 66196 | P03383 | P54821  | -0.22478 |

|       |        |        |           |
|-------|--------|--------|-----------|
| 66197 | P03383 | P46379 | -0.22591  |
| 66198 | P03383 | P61328 | -0.3276   |
| 66199 | P03383 | Q9H061 | -0.60432  |
| 66200 | P03383 | P17677 | -0.093075 |
| 66201 | P03383 | Q96J02 | -0.22741  |
| 66202 | P03383 | Q8WZ92 | -1.1027   |
| 66203 | P03383 | Q8NI99 | -1.2031   |
| 66204 | P03383 | Q8IYE1 | -0.043174 |
| 66205 | P03383 | P29508 | -0.58014  |
| 66206 | P03383 | Q96P65 | -1.143    |
| 66207 | P03383 | Q8TAX0 | -0.20206  |
| 66208 | P03383 | P14867 | -0.78023  |
| 66209 | P03383 | Q96JA4 | -0.86584  |
| 66210 | P03383 | Q8NG66 | -0.22742  |
| 66211 | P03383 | Q13402 | -0.19686  |
| 66212 | P03383 | C9JLR9 | -0.69535  |
| 66213 | P03383 | O95971 | -0.66545  |
| 66214 | P03383 | Q96HD1 | -0.90919  |
| 66215 | P03383 | O15228 | -0.47132  |
| 66216 | P03383 | P56703 | -0.44817  |
| 66217 | P03383 | Q8NDZ4 | -0.77157  |
| 66218 | P03383 | Q8NHC7 | -1.1027   |
| 66219 | P03383 | P55808 | -0.85125  |
| 66220 | P03383 | P00966 | -0.18821  |
| 66221 | P03383 | Q6ZWJ1 | -0.22741  |
| 66222 | P03383 | Q9NVA2 | -0.22718  |
| 66223 | P03383 | Q9Y320 | -0.54396  |
| 66224 | P03383 | Q8TCT0 | -0.58477  |
| 66225 | P03383 | Q9Y216 | -0.58007  |
| 66226 | P03383 | Q9BVQ7 | -0.77802  |
| 66227 | P03383 | P55103 | -0.74186  |
| 66228 | P03383 | Q17R26 | -0.31656  |
| 66229 | P03383 | Q03989 | -0.19748  |
| 66230 | P03383 | Q9H3T2 | -0.85839  |
| 66231 | P03383 | Q8NB91 | -0.048526 |
| 66232 | P03383 | Q6PXP3 | -0.66542  |
| 66233 | P03383 | Q96FQ7 | -0.050118 |
| 66234 | P03383 | Q8NGS8 | -1.1027   |
| 66235 | P03383 | P54855 | -0.8836   |
| 66236 | P03383 | Q9UNT1 | -1.0496   |
| 66237 | P03383 | P48059 | -0.21798  |
| 66238 | P03383 | P55884 | -0.21855  |
| 66239 | P03383 | Q96A54 | -0.93314  |
| 66240 | P03383 | P04637 | -0.22238  |
| 66241 | P03383 | Q6ZMY3 | -0.39639  |
| 66242 | P03383 | P01833 | -1.3027   |
| 66243 | P03383 | P54852 | -0.89238  |
| 66244 | P03383 | Q24JQ0 | -0.86584  |
| 66245 | P03383 | A6NIU2 | -0.18904  |
| 66246 | P03383 | Q96DV4 | -0.17003  |
| 66247 | P03383 | Q99469 | -0.34077  |
| 66248 | P03383 | P13598 | -1.0872   |
| 66249 | P03383 | P47902 | -0.23918  |
| 66250 | P03383 | Q9BRK5 | -0.22481  |
| 66251 | P03383 | Q8N743 | -0.93628  |
| 66252 | P03383 | Q96A98 | -0.87465  |
| 66253 | P03383 | Q86XM0 | -0.91138  |
| 66254 | P03383 | P35663 | -0.41505  |
| 66255 | P03383 | Q5W041 | -0.22764  |
| 66256 | P03383 | P01011 | -0.29566  |
| 66257 | P03383 | Q86W42 | -0.33753  |
| 66258 | P03383 | Q9NR64 | -0.48143  |
| 66259 | P03383 | A0AVI4 | -0.52887  |
| 66260 | P03383 | P59901 | -0.31983  |
| 66261 | P03383 | Q2WEN9 | -0.90997  |
| 66262 | P03383 | P38435 | -0.79484  |
| 66263 | P03383 | Q96MT7 | -0.22741  |
| 66264 | P03383 | Q4G0F5 | -0.13648  |
| 66265 | P03383 | Q09019 | -0.22766  |
| 66266 | P03383 | Q9UKL2 | -1.2053   |
| 66267 | P03383 | Q9UEW8 | -0.5457   |
| 66268 | P03383 | Q684P5 | -0.52328  |
| 66269 | P03383 | Q13017 | -0.78259  |
| 66270 | P03383 | Q96M19 | -0.86584  |
| 66271 | P03383 | Q9BQG2 | -0.2769   |
| 66272 | P03383 | Q9C0I9 | -0.22801  |

|       |        |        |           |
|-------|--------|--------|-----------|
| 66273 | P03383 | Q9HBI5 | -0.1905   |
| 66274 | P03383 | Q9NX78 | -0.86584  |
| 66275 | P03383 | Q9P0L9 | -0.49846  |
| 66276 | P03383 | Q96L58 | -0.53457  |
| 66277 | P03383 | P42081 | -0.26675  |
| 66278 | P03383 | O43379 | -0.22789  |
| 66279 | P03383 | A8K4G0 | -0.93628  |
| 66280 | P03383 | Q9NQL9 | -0.30018  |
| 66281 | P03383 | Q93063 | -0.55665  |
| 66282 | P03383 | A2VDF0 | -0.37365  |
| 66283 | P03383 | Q9HB31 | -0.22703  |
| 66284 | P03383 | Q96M94 | -0.43639  |
| 66285 | P03383 | O15522 | -0.24974  |
| 66286 | P03383 | Q6NSW7 | -0.22762  |
| 66287 | P03383 | P25940 | -0.85299  |
| 66288 | P03383 | Q8TE58 | -1.2214   |
| 66289 | P03383 | A6NDY0 | -0.6758   |
| 66290 | P03383 | P14927 | -0.32605  |
| 66291 | P03383 | P21108 | -0.63446  |
| 66292 | P03383 | P84243 | -1.1421   |
| 66293 | P03383 | Q43149 | -0.60656  |
| 66294 | P03383 | O75845 | -0.79175  |
| 66295 | P03383 | Q94823 | -0.51989  |
| 66296 | P03383 | Q04826 | -0.88446  |
| 66297 | P03383 | P51153 | -0.57733  |
| 66298 | P03383 | P0CJ76 | -0.72903  |
| 66299 | P03383 | O75629 | -0.60915  |
| 66300 | P03383 | Q64LD2 | -0.22761  |
| 66301 | P03383 | Q86U02 | -0.86584  |
| 66302 | P03383 | Q5SQQ9 | -0.22736  |
| 66303 | P03383 | Q9P2K6 | -0.22214  |
| 66304 | P03383 | Q8NH74 | -1.1027   |
| 66305 | P03383 | Q92523 | -0.62411  |
| 66306 | P03383 | Q9NX58 | -0.060869 |
| 66307 | P03383 | O60381 | -0.19041  |
| 66308 | P03383 | A6NKD2 | -0.43319  |
| 66309 | P03383 | Q9NT68 | -0.63408  |
| 66310 | P03383 | Q9UGT4 | -0.86355  |
| 66311 | P03383 | Q68BL7 | -0.86399  |
| 66312 | P03383 | P04438 | -0.97479  |
| 66313 | P03383 | Q96A19 | -0.20868  |
| 66314 | P03383 | Q9H293 | -0.66973  |
| 66315 | P03383 | Q8NGQ5 | -1.1027   |
| 66316 | P03383 | P23786 | -0.11295  |
| 66317 | P03383 | Q6ZMN8 | -0.41982  |
| 66318 | P03383 | Q8IYY4 | -0.63028  |
| 66319 | P03383 | Q8N5M4 | -0.22618  |
| 66320 | P03383 | P20393 | -0.63884  |
| 66321 | P03383 | Q96GA7 | -0.14976  |
| 66322 | P03383 | Q8NBR9 | -0.18837  |
| 66323 | P03383 | O14657 | -0.28888  |
| 66324 | P03383 | Q16658 | -0.098738 |
| 66325 | P03383 | Q6ZNB7 | -0.93131  |
| 66326 | P03383 | Q8WV22 | -0.22326  |
| 66327 | P03383 | Q96JN8 | -0.20625  |
| 66328 | P03383 | Q05996 | -0.92554  |
| 66329 | P03383 | Q8IZ73 | -0.19121  |
| 66330 | P03383 | Q8IZ81 | -0.73913  |
| 66331 | P03383 | Q9UP65 | -0.73802  |
| 66332 | P03383 | Q7L1W4 | -0.86584  |
| 66333 | P03383 | P63302 | -0.30974  |
| 66334 | P03383 | Q9ULD2 | -0.22523  |
| 66335 | P03383 | Q8NGY5 | -1.1027   |
| 66336 | P03383 | Q6NXP6 | -0.57206  |
| 66337 | P03383 | P48448 | -0.65903  |
| 66338 | P03383 | P00505 | -0.21931  |
| 66339 | P03383 | P00750 | -0.42066  |
| 66340 | P03383 | O95833 | -0.21435  |
| 66341 | P03383 | P13637 | -0.62766  |
| 66342 | P03383 | P63119 | -0.67565  |
| 66343 | P03383 | P03989 | -0.84773  |
| 66344 | P03383 | O75603 | -0.24927  |
| 66345 | P03383 | P01567 | -0.65335  |
| 66346 | P03383 | Q8NGX0 | -1.1027   |
| 66347 | P03383 | Q8IYJ1 | -0.22854  |
| 66348 | P03383 | Q9UBS9 | -0.87537  |

|       |        |        |           |
|-------|--------|--------|-----------|
| 66349 | P03383 | Q9NYP7 | -0.15823  |
| 66350 | P03383 | P23378 | -0.62006  |
| 66351 | P03383 | P42224 | -0.22664  |
| 66352 | P03383 | P0C6P0 | -0.17514  |
| 66353 | P03383 | Q96GE4 | -0.11185  |
| 66354 | P03383 | A6NI73 | -1.182    |
| 66355 | P03383 | Q92664 | -0.025125 |
| 66356 | P03383 | Q8TAU0 | -0.22753  |
| 66357 | P03383 | Q53RD9 | -1.1707   |
| 66358 | P03383 | A8MPP1 | -0.67892  |
| 66359 | P03383 | Q9UHG0 | -0.53836  |
| 66360 | P03383 | P15918 | -0.22666  |
| 66361 | P03383 | Q8WVX3 | -0.86584  |
| 66362 | P03383 | O00421 | -1.2165   |
| 66363 | P03383 | Q9Y5X1 | -0.23366  |
| 66364 | P03383 | Q6MZN7 | -0.43787  |
| 66365 | P03383 | Q8IY22 | -0.16176  |
| 66366 | P03383 | Q96LC7 | -1.3882   |
| 66367 | P03383 | Q9Y282 | -0.72691  |
| 66368 | P03383 | Q6PJI1 | -0.44754  |
| 66369 | P03383 | Q8N6W0 | -0.43386  |
| 66370 | P03383 | Q9BQT8 | -0.59942  |
| 66371 | P03383 | Q96SQ9 | -0.77329  |
| 66372 | P03383 | O60478 | -1.0003   |
| 66373 | P03383 | Q9BSN8 | -0.31656  |
| 66374 | P03383 | Q10469 | -0.68916  |
| 66375 | P03383 | Q6ZNI0 | -0.71885  |
| 66376 | P03383 | Q9HBY8 | -0.52239  |
| 66377 | P03383 | Q8NG27 | -0.23278  |
| 66378 | P03383 | P20339 | -0.49717  |
| 66379 | P03383 | P58397 | -1.2214   |
| 66380 | P03383 | Q13461 | -0.35259  |
| 66381 | P03383 | Q9Y6A5 | -0.13276  |
| 66382 | P03383 | Q8NHS4 | -0.11483  |
| 66383 | P03383 | P29400 | -0.86409  |
| 66384 | P03383 | O00476 | -0.70253  |
| 66385 | P03383 | Q9GIY3 | -0.67577  |
| 66386 | P03383 | P0CJ75 | -0.72903  |
| 66387 | P03383 | Q9NRI6 | -0.85703  |
| 66388 | P03383 | P48426 | -0.27164  |
| 66389 | P03383 | P06753 | -0.32404  |
| 66390 | P03383 | O43374 | -0.56135  |
| 66391 | P03383 | Q15645 | -0.22829  |
| 66392 | P03383 | Q96JM3 | -0.22729  |
| 66393 | P03383 | P28289 | -0.25547  |
| 66394 | P03383 | P17752 | -0.47469  |
| 66395 | P03383 | O43561 | -0.35967  |
| 66396 | P03383 | Q9NRC1 | -0.86584  |
| 66397 | P03383 | Q5JW98 | -0.86584  |
| 66398 | P03383 | Q75106 | -0.60803  |
| 66399 | P03383 | Q9NYU2 | -0.39641  |
| 66400 | P03383 | Q16827 | -0.56214  |
| 66401 | P03383 | Q8TDI8 | -0.91739  |
| 66402 | P03383 | Q9H490 | -0.7764   |
| 66403 | P03383 | Q8N5I3 | -0.23864  |
| 66404 | P03383 | Q9NWT1 | -0.22821  |
| 66405 | P03383 | Q8N4P3 | -0.62208  |
| 66406 | P03383 | Q96GX5 | -0.22741  |
| 66407 | P03383 | Q86XE3 | -0.93591  |
| 66408 | P03383 | P48509 | -0.6056   |
| 66409 | P03383 | Q14592 | -0.21172  |
| 66410 | P03383 | P16402 | -0.77582  |
| 66411 | P03383 | Q5T4S7 | -0.42102  |
| 66412 | P03383 | Q9P266 | -0.43016  |
| 66413 | P03383 | Q6IED9 | -0.44851  |
| 66414 | P03383 | O95760 | -0.18899  |
| 66415 | P03383 | P28221 | -1.1663   |
| 66416 | P03383 | Q8TAP8 | -0.4501   |
| 66417 | P03383 | Q9H336 | -0.87849  |
| 66418 | P03383 | Q0VG99 | -0.22752  |
| 66419 | P03383 | Q6P4A8 | -0.67686  |
| 66420 | P03383 | Q12931 | -0.48372  |
| 66421 | P03383 | Q11206 | -0.65767  |
| 66422 | P03383 | Q8NFT2 | -0.96438  |
| 66423 | P03383 | Q8NE79 | -0.68791  |
| 66424 | P03383 | Q8N8Q9 | -0.96307  |

|       |        |        |           |
|-------|--------|--------|-----------|
| 66425 | P03383 | Q9UM01 | -0.94159  |
| 66426 | P03383 | Q96QV1 | -0.45594  |
| 66427 | P03383 | Q6IE36 | -0.80012  |
| 66428 | P03383 | P50461 | -0.22835  |
| 66429 | P03383 | Q86U06 | -0.60563  |
| 66430 | P03383 | Q6UW49 | -0.58617  |
| 66431 | P03383 | Q9Y5E2 | -1.1037   |
| 66432 | P03383 | O15041 | -0.75469  |
| 66433 | P03383 | Q9Y2A7 | -0.35942  |
| 66434 | P03383 | Q8NGC9 | -1.1027   |
| 66435 | P03383 | P0CJ69 | -0.72903  |
| 66436 | P03383 | Q8TAP4 | -0.25379  |
| 66437 | P03383 | O14764 | -0.93643  |
| 66438 | P03383 | Q8IVL1 | -0.66782  |
| 66439 | P03383 | Q99697 | -0.19626  |
| 66440 | P03383 | P12882 | -0.30548  |
| 66441 | P03383 | F2Z398 | -0.35202  |
| 66442 | P03383 | O15460 | -0.62495  |
| 66443 | P03383 | O75459 | -0.43344  |
| 66444 | P03383 | Q8TER5 | -0.65503  |
| 66445 | P03383 | Q86VI4 | -0.39065  |
| 66446 | P03383 | Q9Y258 | -0.92322  |
| 66447 | P03383 | Q9Y2I1 | -0.4154   |
| 66448 | P03383 | P00395 | -0.24384  |
| 66449 | P03383 | Q6ZWH5 | -1.0075   |
| 66450 | P03383 | A0PJW6 | -0.74159  |
| 66451 | P03383 | Q9NRP7 | -0.263    |
| 66452 | P03383 | P54619 | -0.4235   |
| 66453 | P03383 | Q6IEE8 | -0.83517  |
| 66454 | P03383 | Q5T764 | -0.35111  |
| 66455 | P03383 | Q9H1X1 | -0.45084  |
| 66456 | P03383 | P05546 | -0.68219  |
| 66457 | P03383 | Q9Y3N9 | -1.1027   |
| 66458 | P03383 | Q8IWZ6 | -0.16725  |
| 66459 | P03383 | Q8N7Q2 | -0.87849  |
| 66460 | P03383 | Q96GC9 | -0.45912  |
| 66461 | P03383 | Q99807 | -0.30027  |
| 66462 | P03383 | Q96R47 | -1.1027   |
| 66463 | P03383 | O15218 | -1.1621   |
| 66464 | P03383 | A6NIM6 | -0.63836  |
| 66465 | P03383 | P0CJ74 | -0.72903  |
| 66466 | P03383 | Q9UG22 | -1.1125   |
| 66467 | P03383 | P31645 | -0.33302  |
| 66468 | P03383 | P14784 | -0.98533  |
| 66469 | P03383 | Q6UWW0 | -0.86396  |
| 66470 | P03383 | P54107 | -0.8965   |
| 66471 | P03383 | Q8IVF4 | -0.69496  |
| 66472 | P03383 | Q9NY93 | -0.54608  |
| 66473 | P03383 | A7MBM2 | -0.60113  |
| 66474 | P03383 | Q7L3B6 | -0.29487  |
| 66475 | P03383 | Q3MII6 | -0.64281  |
| 66476 | P03383 | Q96MG8 | -0.25582  |
| 66477 | P03383 | Q5BKX8 | -0.1591   |
| 66478 | P03383 | O60682 | -0.22764  |
| 66479 | P03383 | Q8NGR3 | -1.1027   |
| 66480 | P03383 | Q8TCW9 | -1.143    |
| 66481 | P03383 | Q9NUB4 | -0.86584  |
| 66482 | P03383 | Q9BRR6 | -0.72796  |
| 66483 | P03383 | H3BRN8 | -0.024498 |
| 66484 | P03383 | P33121 | -0.69839  |
| 66485 | P03383 | Q8N2C3 | -0.62648  |
| 66486 | P03383 | Q07954 | -0.36242  |
| 66487 | P03383 | P54826 | -0.14937  |
| 66488 | P03383 | P26436 | -0.58892  |
| 66489 | P03383 | P10606 | -0.31104  |
| 66490 | P03383 | Q3SXZ3 | -0.21172  |
| 66491 | P03383 | Q94966 | -0.64102  |
| 66492 | P03383 | Q96F05 | -0.86584  |
| 66493 | P03383 | P20815 | -0.71887  |
| 66494 | P03383 | P56378 | -0.4302   |
| 66495 | P03383 | Q13795 | -0.58666  |
| 66496 | P03383 | Q96N28 | -0.30763  |
| 66497 | P03383 | Q9P021 | -0.27211  |
| 66498 | P03383 | P0C263 | -0.9088   |
| 66499 | P03383 | P35749 | -0.49732  |
| 66500 | P03383 | P0CG13 | -0.2473   |



|       |        |        |          |
|-------|--------|--------|----------|
| 66501 | P03383 | Q8N4W6 | -0.86545 |
| 66502 | P03383 | Q7RTY1 | -0.89073 |
| 66503 | P03383 | Q99944 | -1.1859  |
| 66504 | P03383 | Q14213 | -0.85218 |
| 66505 | P03383 | Q9BXJ0 | -0.92264 |
| 66506 | P03383 | Q8NOV5 | -0.70373 |
| 66507 | P03383 | Q9ULF5 | -0.87538 |
| 66508 | P03383 | Q2M389 | -0.40387 |
| 66509 | P03383 | P34913 | -0.46021 |
| 66510 | P03383 | Q6B0K9 | -0.42947 |
| 66511 | P03383 | Q8WWF3 | -0.86584 |
| 66512 | P03383 | Q9NZU0 | -1.0425  |
| 66513 | P03383 | Q96NR3 | -0.74565 |
| 66514 | P03383 | Q6ZMV9 | -0.26832 |
| 66515 | P03383 | Q5JS13 | -0.70463 |
| 66516 | P03383 | Q9ULV8 | -0.56954 |
| 66517 | P03383 | P12259 | -0.43428 |
| 66518 | P03383 | Q14444 | -0.49986 |
| 66519 | P03383 | Q66K37 | -0.22632 |
| 66520 | P03383 | Q8IZR5 | -0.88766 |
| 66521 | P03383 | Q0P5P2 | -0.87849 |
| 66522 | P03383 | Q8NGJ6 | -1.1027  |
| 66523 | P03383 | Q75382 | -0.22741 |
| 66524 | P03383 | Q6FIF0 | -0.4175  |
| 66525 | P03383 | A6NIJ5 | -0.48092 |
| 66526 | P03383 | O95340 | -0.71033 |
| 66527 | P03383 | Q16584 | -0.22741 |
| 66528 | P03383 | Q9UPM9 | -0.2787  |
| 66529 | P03383 | Q9P267 | -0.39531 |
| 66530 | P03383 | P34910 | -0.85214 |
| 66531 | P03383 | P14649 | -0.22644 |
| 66532 | P03383 | Q12788 | -0.23277 |
| 66533 | P03383 | Q8NGY9 | -0.91257 |
| 66534 | P03383 | Q8TC59 | -0.48051 |
| 66535 | P03383 | Q8N1D0 | -0.16078 |
| 66536 | P03383 | Q9Y484 | -0.26238 |
| 66537 | P03383 | Q0VD83 | -0.70666 |
| 66538 | P03383 | Q8NFF2 | -0.95275 |
| 66539 | P03383 | Q9Y5K8 | -0.13506 |
| 66540 | P03383 | B0FP48 | -0.86584 |
| 66541 | P03383 | P59537 | -1.067   |
| 66542 | P03383 | Q96PB8 | -0.86584 |
| 66543 | P03383 | Q7Z4J2 | -0.67287 |
| 66544 | P03383 | Q9H8W5 | -0.22741 |
| 66545 | P03383 | P62760 | -0.52751 |
| 66546 | P03383 | Q5JRX3 | -0.34859 |
| 66547 | P03383 | Q9UJA9 | -1.3738  |
| 66548 | P03383 | Q96PG2 | -0.86584 |
| 66549 | P03383 | P07498 | -0.84954 |
| 66550 | P03383 | Q43897 | -1.3579  |
| 66551 | P03383 | Q9UDX5 | -0.70233 |
| 66552 | P03383 | P49441 | -0.53245 |
| 66553 | P03383 | Q9NSA1 | -0.28981 |
| 66554 | P03383 | Q13065 | -0.43344 |
| 66555 | P03383 | Q96LD1 | -0.60374 |
| 66556 | P03383 | Q7L5Y9 | -0.18031 |
| 66557 | P03383 | Q9NWF4 | -1.0026  |
| 66558 | P03383 | Q5T700 | -0.86584 |
| 66559 | P03383 | Q8NCB2 | -0.58809 |
| 66560 | P03383 | P49736 | -0.20701 |
| 66561 | P03383 | P55290 | -0.46852 |
| 66562 | P03383 | P36969 | -0.528   |
| 66563 | P03383 | Q9NWH2 | -0.86584 |
| 66564 | P03383 | P62684 | -0.40851 |
| 66565 | P03383 | P00439 | -0.50362 |
| 66566 | P03383 | Q86UN3 | -0.59787 |
| 66567 | P03383 | A8MWK0 | -0.93241 |
| 66568 | P03383 | O95256 | -1.1326  |
| 66569 | P03383 | Q9BQF6 | -0.75272 |
| 66570 | P03383 | P46663 | -0.93514 |
| 66571 | P03383 | Q52LW3 | -0.91122 |
| 66572 | P03383 | Q8IXQ5 | -0.20947 |
| 66573 | P03383 | P14778 | -0.89146 |
| 66574 | P03383 | P63127 | -0.67565 |
| 66575 | P03383 | O60346 | -0.22771 |
| 66576 | P03383 | P02748 | -0.98868 |

|       |        |        |           |
|-------|--------|--------|-----------|
| 66577 | P03383 | Q8IYW5 | -0.22711  |
| 66578 | P03383 | Q7RTZ2 | -0.32253  |
| 66579 | P03383 | P54803 | -0.35019  |
| 66580 | P03383 | P47775 | -1.2559   |
| 66581 | P03383 | Q15438 | -0.22741  |
| 66582 | P03383 | Q8N539 | -1.0353   |
| 66583 | P03383 | Q5W5W9 | -0.72209  |
| 66584 | P03383 | Q13607 | -1.1027   |
| 66585 | P03383 | Q969S6 | -0.86584  |
| 66586 | P03383 | Q9UJ68 | -0.17863  |
| 66587 | P03383 | Q9UJD0 | -0.29942  |
| 66588 | P03383 | Q969S0 | -0.58406  |
| 66589 | P03383 | Q9NZ72 | -0.19831  |
| 66590 | P03383 | Q15825 | -0.86877  |
| 66591 | P03383 | Q6PF04 | -0.21172  |
| 66592 | P03383 | Q9NXP7 | -0.42868  |
| 66593 | P03383 | Q8NI77 | -0.63377  |
| 66594 | P03383 | B3GLJ2 | -0.87849  |
| 66595 | P03383 | Q8NGH8 | -1.1027   |
| 66596 | P03383 | Q03828 | -0.2272   |
| 66597 | P03383 | Q9NZK5 | -0.72275  |
| 66598 | P03383 | Q96PN6 | -0.58412  |
| 66599 | P03383 | Q9NYY8 | -0.3676   |
| 66600 | P03383 | Q96IK5 | -0.21585  |
| 66601 | P03383 | Q8NI35 | -0.22588  |
| 66602 | P03383 | P14207 | -0.93473  |
| 66603 | P03383 | Q9UK55 | -0.53579  |
| 66604 | P03383 | Q96KB5 | -0.22741  |
| 66605 | P03383 | Q9NRZ9 | -0.19854  |
| 66606 | P03383 | O43741 | -0.51418  |
| 66607 | P03383 | Q14320 | -0.17683  |
| 66608 | P03383 | Q93086 | -0.92348  |
| 66609 | P03383 | Q8TAM1 | -0.42335  |
| 66610 | P03383 | Q9UDT6 | -0.37062  |
| 66611 | P03383 | Q9Y4F4 | -0.17777  |
| 66612 | P03383 | B5ME19 | -0.17695  |
| 66613 | P03383 | Q8NCJ5 | -0.19747  |
| 66614 | P03383 | Q969Z3 | -0.59512  |
| 66615 | P03383 | P55291 | -1.028    |
| 66616 | P03383 | A6NKC9 | -0.22741  |
| 66617 | P03383 | Q8NGI2 | -1.1027   |
| 66618 | P03383 | Q7L8C5 | -0.92724  |
| 66619 | P03383 | P01574 | -0.44862  |
| 66620 | P03383 | O76024 | -0.53572  |
| 66621 | P03383 | P54646 | -0.2504   |
| 66622 | P03383 | P32297 | -0.63643  |
| 66623 | P03383 | Q5T3F8 | -1.1445   |
| 66624 | P03383 | Q9Y2L9 | -0.2434   |
| 66625 | P03383 | Q8NGQ1 | -1.1027   |
| 66626 | P03383 | Q3BBW0 | -0.29487  |
| 66627 | P03383 | P04049 | -0.22788  |
| 66628 | P03383 | Q6ZMJ2 | -0.98357  |
| 66629 | P03383 | Q9Y219 | -0.4804   |
| 66630 | P03383 | Q13324 | -0.738    |
| 66631 | P03383 | P30086 | -0.36498  |
| 66632 | P03383 | Q96P31 | -0.93628  |
| 66633 | P03383 | Q9Y5P6 | -0.66009  |
| 66634 | P03383 | Q15831 | -0.25684  |
| 66635 | P03383 | Q8WV60 | -0.29766  |
| 66636 | P03383 | Q9UID3 | -0.073758 |
| 66637 | P03383 | Q8IU85 | -0.55244  |
| 66638 | P03383 | Q86XK7 | -0.86584  |
| 66639 | P03383 | O15259 | -0.22741  |
| 66640 | P03383 | Q9H2P0 | -0.20424  |
| 66641 | P03383 | O75879 | -0.52182  |
| 66642 | P03383 | Q9BRQ5 | -0.31983  |
| 66643 | P03383 | P10643 | -0.8613   |
| 66644 | P03383 | Q15848 | -0.25445  |
| 66645 | P03383 | Q07011 | -0.93642  |
| 66646 | P03383 | Q9BXT8 | -0.41762  |
| 66647 | P03383 | B6SEH8 | -0.86584  |
| 66648 | P03383 | Q9Y4R7 | -0.46739  |
| 66649 | P03383 | Q8NH21 | -1.1027   |
| 66650 | P03383 | Q86W34 | -0.83564  |
| 66651 | P03383 | P55289 | -1.0566   |
| 66652 | P03383 | Q2MKA7 | -0.24882  |

|       |        |        |          |
|-------|--------|--------|----------|
| 66653 | P03383 | Q8NBJ9 | -0.87122 |
| 66654 | P03383 | Q5SYB0 | -0.36675 |
| 66655 | P03383 | P0C0L5 | -1.0528  |
| 66656 | P03383 | Q6ICH7 | -0.89197 |
| 66657 | P03383 | P26715 | -1.0842  |
| 66658 | P03383 | P08473 | -0.50824 |
| 66659 | P03383 | Q9Y5Q5 | -1.3141  |
| 66660 | P03383 | Q9BSA9 | -0.86584 |
| 66661 | P03383 | O15499 | -0.12739 |
| 66662 | P03383 | O75508 | -0.77926 |
| 66663 | P03383 | Q8TBF5 | -0.84382 |
| 66664 | P03383 | P22362 | -1.0654  |
| 66665 | P03383 | Q96EY7 | -0.25788 |
| 66666 | P03383 | O95976 | -1.0608  |
| 66667 | P03383 | P56750 | -0.5828  |
| 66668 | P03383 | P22897 | -0.98372 |
| 66669 | P03383 | O75366 | -0.37324 |
| 66670 | P03383 | Q9UKI2 | -0.58284 |
| 66671 | P03383 | Q8N4C7 | -0.62779 |
| 66672 | P03383 | O60239 | -0.18016 |
| 66673 | P03383 | Q13438 | -0.16973 |
| 66674 | P03383 | Q9NXL6 | -0.80218 |
| 66675 | P03383 | P13232 | -0.17875 |
| 66676 | P03383 | Q15035 | -0.16007 |
| 66677 | P03383 | A8MYV0 | -0.62648 |
| 66678 | P03383 | Q86TJ5 | -0.21172 |
| 66679 | P03383 | A3KMH1 | -1.0841  |
| 66680 | P03383 | Q9NWW5 | -0.40823 |
| 66681 | P03383 | Q7Z4Y8 | -0.44749 |
| 66682 | P03383 | Q9UBF8 | -0.65287 |
| 66683 | P03383 | O75899 | -0.88061 |
| 66684 | P03383 | P51164 | -0.84313 |
| 66685 | P03383 | Q9Y2K6 | -0.50938 |
| 66686 | P03383 | P52564 | -0.22868 |
| 66687 | P03383 | Q99954 | -0.87849 |
| 66688 | P03383 | P13584 | -0.70951 |
| 66689 | P03383 | Q99645 | -0.88472 |
| 66690 | P03383 | Q8NH76 | -1.1027  |
| 66691 | P03383 | Q01968 | -0.34239 |
| 66692 | P03383 | P98171 | -0.22813 |
| 66693 | P03383 | O95047 | -1.1027  |
| 66694 | P03383 | Q9UK22 | -0.36684 |
| 66695 | P03383 | O14727 | -0.22923 |
| 66696 | P03383 | Q9BT23 | -0.52332 |
| 66697 | P03383 | Q8WXJ9 | -0.62076 |
| 66698 | P03383 | O14924 | -0.46725 |
| 66699 | P03383 | Q86VH2 | -0.72602 |
| 66700 | P03383 | P25189 | -0.95101 |
| 66701 | P03383 | P22735 | -0.13883 |
| 66702 | P03383 | A6NC42 | -0.48113 |
| 66703 | P03383 | Q2UY09 | -1.0331  |
| 66704 | P03383 | Q7Z699 | -0.20715 |
| 66705 | P03383 | P02788 | -0.21306 |
| 66706 | P03383 | O00358 | -0.35259 |
| 66707 | P03383 | P19075 | -1.0498  |
| 66708 | P03383 | A5LHX3 | -0.16381 |
| 66709 | P03383 | Q3LIE5 | -0.42015 |
| 66710 | P03383 | Q8NH19 | -1.1027  |
| 66711 | P03383 | Q8NDV1 | -0.65995 |
| 66712 | P03383 | P35398 | -0.33564 |
| 66713 | P03383 | P63145 | -0.40851 |
| 66714 | P03383 | Q6UXI9 | -1.0428  |
| 66715 | P03383 | Q96DB2 | -0.20021 |
| 66716 | P03383 | Q9HAE3 | -0.52751 |
| 66717 | P03383 | P51671 | -0.90635 |
| 66718 | P03383 | Q9NVM4 | -0.19532 |
| 66719 | P03383 | Q9C0D0 | -0.32259 |
| 66720 | P03383 | Q71RH2 | -0.85795 |
| 66721 | P03383 | Q8WXA3 | -0.22712 |
| 66722 | P03383 | Q71RC2 | -0.71592 |
| 66723 | P03383 | P01777 | -0.97479 |
| 66724 | P03383 | Q9BV86 | -0.15669 |
| 66725 | P03383 | Q5VWC8 | -0.97631 |
| 66726 | P03383 | Q6Q4G3 | -1.1291  |
| 66727 | P03383 | Q9P2G1 | -0.22741 |
| 66728 | P03383 | Q9H254 | -0.22769 |

|       |        |        |            |
|-------|--------|--------|------------|
| 66729 | P03383 | P28328 | -0.30946   |
| 66730 | P03383 | Q9BRG2 | -0.82108   |
| 66731 | P03383 | A6NCS4 | -0.25393   |
| 66732 | P03383 | Q9UNX4 | -0.23092   |
| 66733 | P03383 | Q9BR01 | -0.37543   |
| 66734 | P03383 | Q9Y5Q6 | -0.67458   |
| 66735 | P03383 | C9JQI7 | -0.86584   |
| 66736 | P03383 | Q16878 | -0.35395   |
| 66737 | P03383 | Q15761 | -0.91899   |
| 66738 | P03383 | Q13224 | -0.2744    |
| 66739 | P03383 | P09104 | -0.24378   |
| 66740 | P03383 | Q9Y388 | -0.84005   |
| 66741 | P03383 | Q96QS6 | -0.9088    |
| 66742 | P03383 | Q99538 | -0.65352   |
| 66743 | P03383 | Q6UW02 | -0.95311   |
| 66744 | P03383 | Q70SY1 | -0.2251    |
| 66745 | P03383 | Q9GZP4 | -0.0073971 |
| 66746 | P03383 | Q96AE7 | -0.22362   |
| 66747 | P03383 | Q8N5S1 | -0.7196    |
| 66748 | P03383 | P08069 | -0.4271    |
| 66749 | P03383 | Q8NBN3 | -0.86584   |
| 66750 | P03383 | O00754 | -0.52766   |
| 66751 | P03383 | P04085 | -0.28329   |
| 66752 | P03383 | Q9BYG0 | -0.85902   |
| 66753 | P03383 | Q9BXP8 | -1.3494    |
| 66754 | P03383 | C9J798 | -0.91354   |
| 66755 | P03383 | Q6PL24 | -0.78733   |
| 66756 | P03383 | Q96Q40 | -0.71556   |
| 66757 | P03383 | Q6P1Q0 | -0.23376   |
| 66758 | P03383 | Q9UPX8 | -0.22741   |
| 66759 | P03383 | Q9NUV7 | -0.78401   |
| 66760 | P03383 | Q8NBP7 | -0.34116   |
| 66761 | P03383 | Q8N149 | -0.93627   |
| 66762 | P03383 | Q96MW5 | -0.21386   |
| 66763 | P03383 | Q8IUQ0 | -0.60325   |
| 66764 | P03383 | Q86YM7 | -0.40453   |
| 66765 | P03383 | O43709 | -0.35453   |
| 66766 | P03383 | Q9H237 | -0.7851    |
| 66767 | P03383 | A6NKP2 | -0.76094   |
| 66768 | P03383 | P06126 | -0.52623   |
| 66769 | P03383 | Q9BZX4 | -0.34029   |
| 66770 | P03383 | Q8IU57 | -0.40794   |
| 66771 | P03383 | Q9Y5W9 | -0.59455   |
| 66772 | P03383 | Q9UBM1 | -0.41806   |
| 66773 | P03383 | Q1KMD3 | -0.22549   |
| 66774 | P03383 | Q9C0K3 | -0.85413   |
| 66775 | P03383 | P02814 | -0.71103   |
| 66776 | P03383 | P36507 | -0.22767   |
| 66777 | P03383 | Q8TDY8 | -0.93628   |
| 66778 | P03383 | P30874 | -0.42656   |
| 66779 | P03383 | P17021 | -0.21172   |
| 66780 | P03383 | P62333 | -0.33225   |
| 66781 | P03383 | Q9BRI3 | -0.69074   |
| 66782 | P03383 | P09493 | -0.33456   |
| 66783 | P03383 | P24390 | -0.55933   |
| 66784 | P03383 | P61081 | -0.16233   |
| 66785 | P03383 | O00230 | -0.87331   |
| 66786 | P03383 | P60709 | -0.049692  |
| 66787 | P03383 | Q6URK8 | -0.87849   |
| 66788 | P03383 | P48546 | -1.1297    |
| 66789 | P03383 | Q9Y6M4 | -0.8032    |
| 66790 | P03383 | Q96S16 | -0.11941   |
| 66791 | P03383 | P0CW18 | -0.91901   |
| 66792 | P03383 | O60320 | -0.86584   |
| 66793 | P03383 | Q9UKX5 | -0.88325   |
| 66794 | P03383 | Q5VW22 | -0.98969   |
| 66795 | P03383 | C9JDV5 | -0.14783   |
| 66796 | P03383 | P20264 | -0.22741   |
| 66797 | P03383 | A4FU28 | -0.86584   |
| 66798 | P03383 | Q8NH37 | -1.1027    |
| 66799 | P03383 | Q8IYK4 | -0.43383   |
| 66800 | P03383 | Q15027 | -0.92215   |
| 66801 | P03383 | P78324 | -1.088     |
| 66802 | P03383 | Q14576 | -0.22741   |
| 66803 | P03383 | Q9H0C3 | -0.64779   |
| 66804 | P03383 | Q7Z5Q5 | -0.26572   |

|       |        |        |           |
|-------|--------|--------|-----------|
| 66805 | P03383 | Q9Y2T4 | -0.49131  |
| 66806 | P03383 | Q8N690 | -0.84399  |
| 66807 | P03383 | P35914 | -0.40189  |
| 66808 | P03383 | Q5VZ72 | -0.88564  |
| 66809 | P03383 | O43316 | -0.22528  |
| 66810 | P03383 | P02549 | -0.22741  |
| 66811 | P03383 | P48643 | -0.17571  |
| 66812 | P03383 | Q5VWQ8 | -0.27262  |
| 66813 | P03383 | Q9Y3D2 | -0.29887  |
| 66814 | P03383 | O75521 | -0.8632   |
| 66815 | P03383 | O14686 | -0.28333  |
| 66816 | P03383 | O95633 | -0.22458  |
| 66817 | P03383 | O75493 | -0.77821  |
| 66818 | P03383 | Q68CP4 | -0.66606  |
| 66819 | P03383 | P80303 | -0.19074  |
| 66820 | P03383 | P52895 | -0.37586  |
| 66821 | P03383 | O75677 | -0.52332  |
| 66822 | P03383 | P11413 | -0.25086  |
| 66823 | P03383 | E7EU14 | -0.22392  |
| 66824 | P03383 | Q6NYC1 | -0.19298  |
| 66825 | P03383 | Q9NRY4 | -0.3749   |
| 66826 | P03383 | Q13387 | -0.23824  |
| 66827 | P03383 | Q8IUN9 | -0.9384   |
| 66828 | P03383 | Q9UJQ4 | -0.1804   |
| 66829 | P03383 | Q8NHU6 | -0.22777  |
| 66830 | P03383 | Q8IZJ4 | -0.7559   |
| 66831 | P03383 | Q8NC06 | -0.61251  |
| 66832 | P03383 | P0C7I0 | -0.28783  |
| 66833 | P03383 | Q8WY07 | -0.81588  |
| 66834 | P03383 | Q9UBS0 | -0.48965  |
| 66835 | P03383 | Q9NUN5 | -0.76875  |
| 66836 | P03383 | Q00532 | -0.40126  |
| 66837 | P03383 | Q86UP6 | -0.5739   |
| 66838 | P03383 | Q8TF27 | -0.98969  |
| 66839 | P03383 | P19823 | -0.75716  |
| 66840 | P03383 | A8MS94 | -0.35868  |
| 66841 | P03383 | Q9NPB9 | -1.2317   |
| 66842 | P03383 | Q9UP79 | -1.1882   |
| 66843 | P03383 | P48775 | -0.44316  |
| 66844 | P03383 | Q96KA5 | -0.84589  |
| 66845 | P03383 | A8K0R7 | -0.73967  |
| 66846 | P03383 | Q9HBJ7 | -0.55356  |
| 66847 | P03383 | Q96MA1 | -0.060175 |
| 66848 | P03383 | Q9C0B6 | -0.63156  |
| 66849 | P03383 | P41439 | -0.83126  |
| 66850 | P03383 | Q9Y6Q3 | -0.25727  |
| 66851 | P03383 | P05154 | -0.50393  |
| 66852 | P03383 | Q14032 | -0.30649  |
| 66853 | P03383 | Q9Y2D4 | -0.2454   |
| 66854 | P03383 | Q9Y6R0 | -0.22678  |
| 66855 | P03383 | P00746 | -0.94202  |
| 66856 | P03383 | Q9Y2V7 | -0.20299  |
| 66857 | P03383 | Q14155 | -0.36924  |
| 66858 | P03383 | Q96NU0 | -1.1581   |
| 66859 | P03383 | Q96MZ4 | -0.1645   |
| 66860 | P03383 | Q13470 | -0.54773  |
| 66861 | P03383 | Q9UNW8 | -1.091    |
| 66862 | P03383 | O14529 | -0.22741  |
| 66863 | P03383 | Q9NY33 | -0.30258  |
| 66864 | P03383 | P21709 | -0.87272  |
| 66865 | P03383 | Q8NGT5 | -1.1027   |
| 66866 | P03383 | P08151 | -0.22729  |
| 66867 | P03383 | O94875 | -0.2279   |
| 66868 | P03383 | Q86XE0 | -0.38965  |
| 66869 | P03383 | Q8IZM8 | -0.2274   |
| 66870 | P03383 | Q9UJF2 | -0.58829  |
| 66871 | P03383 | Q9P055 | -0.78987  |
| 66872 | P03383 | Q6IQ26 | -0.41711  |
| 66873 | P03383 | Q9BXB7 | -0.62747  |
| 66874 | P03383 | Q8N3E9 | -0.56641  |
| 66875 | P03383 | Q96MX6 | -0.42131  |
| 66876 | P03383 | Q99489 | -0.41996  |
| 66877 | P03383 | Q9UMW8 | -0.46616  |
| 66878 | P03383 | Q92560 | -0.15501  |
| 66879 | P03383 | A6ND36 | -0.079708 |
| 66880 | P03383 | Q6AI12 | -0.22741  |

|       |        |        |             |
|-------|--------|--------|-------------|
| 66881 | P03383 | P0DH78 | -0.52332    |
| 66882 | P03383 | Q9NRT5 | -0.22916    |
| 66883 | P03383 | P17017 | -0.21172    |
| 66884 | P03383 | Q9NPA5 | -0.21172    |
| 66885 | P03383 | O95716 | -0.69561    |
| 66886 | P03383 | P41231 | -0.71405    |
| 66887 | P03383 | P49747 | -0.62813    |
| 66888 | P03383 | Q6ZQT0 | -0.07071    |
| 66889 | P03383 | Q86YG4 | -0.43358    |
| 66890 | P03383 | Q8IZ08 | -1.1721     |
| 66891 | P03383 | P52803 | -0.45673    |
| 66892 | P03383 | A6NMA1 | -0.013368   |
| 66893 | P03383 | Q99712 | -1.1314     |
| 66894 | P03383 | P37108 | -0.47365    |
| 66895 | P03383 | P21452 | -1.2322     |
| 66896 | P03383 | Q5SNT2 | -0.63516    |
| 66897 | P03383 | Q7Z2Q7 | -0.86584    |
| 66898 | P03383 | P34982 | -1.1608     |
| 66899 | P03383 | Q5VV52 | -0.61367    |
| 66900 | P03383 | A8K855 | -0.52751    |
| 66901 | P03383 | Q96T66 | -0.36495    |
| 66902 | P03383 | Q9BY07 | -0.87719    |
| 66903 | P03383 | Q9BRN9 | -0.86584    |
| 66904 | P03383 | Q5JWR5 | -0.26965    |
| 66905 | P03383 | P09683 | -0.73321    |
| 66906 | P03383 | P04001 | -1.2635     |
| 66907 | P03383 | Q495B1 | -0.576      |
| 66908 | P03383 | Q14314 | -1.0656     |
| 66909 | P03383 | Q96JP5 | -0.39322    |
| 66910 | P03383 | Q7RTY3 | -0.91901    |
| 66911 | P03383 | Q9NSC7 | -0.70111    |
| 66912 | P03383 | Q6IMN6 | -0.29244    |
| 66913 | P03383 | Q9HAU4 | -0.22741    |
| 66914 | P03383 | Q9Y2E6 | -0.38281    |
| 66915 | P03383 | P54764 | -0.44823    |
| 66916 | P03383 | P15586 | -0.21489    |
| 66917 | P03383 | P61073 | -0.3305     |
| 66918 | P03383 | Q8IXN7 | -0.76322    |
| 66919 | P03383 | Q96S44 | -0.32677    |
| 66920 | P03383 | Q8NE01 | -0.5005     |
| 66921 | P03383 | P37235 | -0.52751    |
| 66922 | P03383 | P04899 | -0.29083    |
| 66923 | P03383 | Q9UIV8 | -0.54562    |
| 66924 | P03383 | Q96K58 | -0.21172    |
| 66925 | P03383 | Q9BU23 | -0.93931    |
| 66926 | P03383 | Q7Z494 | -0.22717    |
| 66927 | P03383 | Q9HBL7 | -0.99533    |
| 66928 | P03383 | O60884 | -0.36599    |
| 66929 | P03383 | P10163 | -0.677      |
| 66930 | P03383 | Q9H0X4 | -0.86584    |
| 66931 | P03383 | Q15286 | -0.52175    |
| 66932 | P03383 | P30988 | -0.6188     |
| 66933 | P03383 | Q96KC9 | -0.33212    |
| 66934 | P03383 | P01719 | -0.97479    |
| 66935 | P03383 | Q9Y3Q0 | -1.0877     |
| 66936 | P03383 | Q8WYA1 | -0.22741    |
| 66937 | P03383 | Q14594 | -0.76462    |
| 66938 | P03383 | Q9NYY1 | -0.84631    |
| 66939 | P03383 | Q9NWS6 | -0.86584    |
| 66940 | P03383 | P68133 | -0.20392    |
| 66941 | P03383 | Q6Q0C1 | -0.7196     |
| 66942 | P03383 | Q9Y2R4 | -0.51914    |
| 66943 | P03383 | P19957 | -0.76641    |
| 66944 | P03383 | P45974 | -0.32211    |
| 66945 | P03383 | Q9Y666 | -0.99714    |
| 66946 | P03383 | Q8IX19 | -0.86584    |
| 66947 | P03383 | Q9Y2D5 | -0.4356     |
| 66948 | P03383 | P07307 | -0.45154    |
| 66949 | P03383 | Q7Z412 | -0.26098    |
| 66950 | P03383 | Q9H761 | -0.00065085 |
| 66951 | P03383 | Q6ZST2 | -0.51948    |
| 66952 | P03383 | Q9BSG5 | -0.87849    |
| 66953 | P03383 | Q6NSJ5 | -0.86584    |
| 66954 | P03383 | Q96JB3 | -0.081673   |
| 66955 | P03383 | Q9H299 | -0.13301    |
| 66956 | P03383 | Q6UXK5 | -0.86584    |

|       |        |        |            |
|-------|--------|--------|------------|
| 66957 | P03383 | Q9H9R9 | -0.29487   |
| 66958 | P03383 | P10075 | -0.47206   |
| 66959 | P03383 | Q9BPU9 | -0.053428  |
| 66960 | P03383 | Q8IZ21 | -0.60093   |
| 66961 | P03383 | P28906 | -0.48421   |
| 66962 | P03383 | Q3KNT9 | -0.86584   |
| 66963 | P03383 | P0C7U0 | -0.83288   |
| 66964 | P03383 | Q5T7B8 | -0.31403   |
| 66965 | P03383 | Q70EL3 | -0.3595    |
| 66966 | P03383 | Q6UXH8 | -1.0124    |
| 66967 | P03383 | Q68G74 | -0.22742   |
| 66968 | P03383 | Q8WYQ9 | -0.61207   |
| 66969 | P03383 | Q05707 | -1.0011    |
| 66970 | P03383 | Q3SYB3 | -0.35259   |
| 66971 | P03383 | Q4G0W2 | -1.0054    |
| 66972 | P03383 | O00327 | -0.2274    |
| 66973 | P03383 | Q01469 | -0.19433   |
| 66974 | P03383 | Q8WWF5 | -0.77298   |
| 66975 | P03383 | Q9UHA7 | -0.92615   |
| 66976 | P03383 | A6NKF9 | -0.86584   |
| 66977 | P03383 | Q8NOV4 | -0.87849   |
| 66978 | P03383 | Q86UF4 | -0.037928  |
| 66979 | P03383 | P43629 | -1.0565    |
| 66980 | P03383 | Q6PJE2 | -0.16078   |
| 66981 | P03383 | Q12955 | -0.22741   |
| 66982 | P03383 | Q16517 | -0.51742   |
| 66983 | P03383 | Q9UL36 | -0.17479   |
| 66984 | P03383 | Q9NSI8 | -0.24361   |
| 66985 | P03383 | Q95544 | -0.6655    |
| 66986 | P03383 | Q9UKT8 | -0.22997   |
| 66987 | P03383 | Q9Y283 | -0.22742   |
| 66988 | P03383 | P05976 | -0.5874    |
| 66989 | P03383 | Q8WXS5 | -0.79811   |
| 66990 | P03383 | P07451 | -0.29832   |
| 66991 | P03383 | Q9NS56 | -0.22741   |
| 66992 | P03383 | P48169 | -0.78927   |
| 66993 | P03383 | Q8WYJ6 | -0.22097   |
| 66994 | P03383 | Q12772 | -0.22735   |
| 66995 | P03383 | Q1AE95 | -0.86584   |
| 66996 | P03383 | Q96SY0 | -0.0095728 |
| 66997 | P03383 | Q15124 | -0.10689   |
| 66998 | P03383 | Q6NT55 | -0.82377   |
| 66999 | P03383 | Q75473 | -1.2187    |
| 67000 | P03383 | Q9UI15 | -0.21137   |
| 67001 | P03383 | Q9BXS9 | -0.93799   |
| 67002 | P03383 | P0CG22 | -0.92086   |
| 67003 | P03383 | Q9NPH2 | -0.61121   |
| 67004 | P03383 | Q9BRV3 | -0.48802   |
| 67005 | P03383 | Q08117 | -0.32622   |
| 67006 | P03383 | Q00300 | -0.88317   |
| 67007 | P03383 | P20142 | -0.74462   |
| 67008 | P03383 | Q14894 | -0.29327   |
| 67009 | P03383 | Q05193 | -0.36979   |
| 67010 | P03383 | Q75610 | -0.78005   |
| 67011 | P03383 | P20039 | -0.7302    |
| 67012 | P03383 | O00192 | -0.22881   |
| 67013 | P03383 | Q6NSJ2 | -0.5353    |
| 67014 | P03383 | Q6IEE7 | -0.86584   |
| 67015 | P03383 | Q9BXX5 | -0.41602   |
| 67016 | P03383 | P01583 | -0.21077   |
| 67017 | P03383 | Q92609 | -0.72282   |
| 67018 | P03383 | Q7Z5Y7 | -0.19405   |
| 67019 | P03383 | O60814 | -0.86926   |
| 67020 | P03383 | P0C6E6 | -0.20594   |
| 67021 | P03383 | Q7Z5M5 | -0.86584   |
| 67022 | P03383 | Q5SR53 | -0.21059   |
| 67023 | P03383 | Q9H5V7 | -0.22828   |
| 67024 | P03383 | Q8NGF6 | -1.1027    |
| 67025 | P03383 | Q9Y343 | -0.55524   |
| 67026 | P03383 | Q92576 | -0.22623   |
| 67027 | P03383 | Q9NRS4 | -1.1635    |
| 67028 | P03383 | Q9Y2T5 | -1.2928    |
| 67029 | P03383 | Q96A83 | -0.97928   |
| 67030 | P03383 | Q8WVJ2 | -0.58998   |
| 67031 | P03383 | P17936 | -0.22708   |
| 67032 | P03383 | Q13938 | -0.22199   |

|       |        |        |           |
|-------|--------|--------|-----------|
| 67033 | P03383 | Q8NE62 | -0.47225  |
| 67034 | P03383 | Q5JTB6 | -0.87849  |
| 67035 | P03383 | Q6GPH4 | -0.22098  |
| 67036 | P03383 | Q5TON5 | -0.22741  |
| 67037 | P03383 | P0DJI9 | -0.8156   |
| 67038 | P03383 | Q8WXH5 | -0.59538  |
| 67039 | P03383 | O75365 | -0.95843  |
| 67040 | P03383 | O14627 | -0.24387  |
| 67041 | P03383 | Q99832 | -0.39371  |
| 67042 | P03383 | Q9UHP6 | -0.21133  |
| 67043 | P03383 | Q9P2B4 | -0.22087  |
| 67044 | P03383 | Q96FC7 | -0.20924  |
| 67045 | P03383 | Q02094 | -0.74953  |
| 67046 | P03383 | P42695 | -0.16598  |
| 67047 | P03383 | O60315 | -0.21253  |
| 67048 | P03383 | Q13530 | -0.7989   |
| 67049 | P03383 | Q9BQR3 | -1.2917   |
| 67050 | P03383 | Q8WUJ0 | -0.67191  |
| 67051 | P03383 | P25874 | -0.51334  |
| 67052 | P03383 | Q6ZMJ4 | -0.72357  |
| 67053 | P03383 | Q8WWI1 | -0.2272   |
| 67054 | P03383 | O14904 | -0.7498   |
| 67055 | P03383 | P40616 | -0.74345  |
| 67056 | P03383 | Q53EP0 | -0.82382  |
| 67057 | P03383 | O14653 | -0.36476  |
| 67058 | P03383 | Q02643 | -0.34574  |
| 67059 | P03383 | C9JR72 | -0.29487  |
| 67060 | P03383 | P13760 | -0.45349  |
| 67061 | P03383 | Q969N4 | -1.143    |
| 67062 | P03383 | Q53H82 | -0.30367  |
| 67063 | P03383 | Q08462 | -0.69624  |
| 67064 | P03383 | Q8N1W1 | -0.78501  |
| 67065 | P03383 | Q8NH56 | -1.1027   |
| 67066 | P03383 | Q8N0U4 | -0.29487  |
| 67067 | P03383 | Q96JK2 | -0.30578  |
| 67068 | P03383 | Q9BQE5 | -1.0921   |
| 67069 | P03383 | P12104 | -0.4877   |
| 67070 | P03383 | P15941 | -0.35708  |
| 67071 | P03383 | P48751 | -0.94796  |
| 67072 | P03383 | Q96M95 | -0.014824 |
| 67073 | P03383 | P07098 | -0.78374  |
| 67074 | P03383 | Q96L94 | -0.55524  |
| 67075 | P03383 | Q3B8N2 | -0.44203  |
| 67076 | P03383 | Q08AM6 | -0.22733  |
| 67077 | P03383 | Q96QZ7 | -0.26967  |
| 67078 | P03383 | Q9BXC9 | -0.2334   |
| 67079 | P03383 | P54707 | -0.86687  |
| 67080 | P03383 | Q14982 | -0.84392  |
| 67081 | P03383 | Q5VU57 | -0.58722  |
| 67082 | P03383 | Q5SW96 | -0.22729  |
| 67083 | P03383 | O60858 | -0.54647  |
| 67084 | P03383 | Q8N9S9 | -0.38965  |
| 67085 | P03383 | O75038 | -0.41293  |
| 67086 | P03383 | Q6NUQ4 | -0.86584  |
| 67087 | P03383 | Q8TDU9 | -1.1437   |
| 67088 | P03383 | Q9UIW2 | -0.66628  |
| 67089 | P03383 | P51858 | -0.21881  |
| 67090 | P03383 | Q9NP58 | -0.71331  |
| 67091 | P03383 | Q8NGU9 | -1.1721   |
| 67092 | P03383 | Q5TYW8 | -0.25825  |
| 67093 | P03383 | Q5VU65 | -0.86584  |
| 67094 | P03383 | P47898 | -1.041    |
| 67095 | P03383 | O43526 | -0.81559  |
| 67096 | P03383 | Q9BWE0 | -0.65561  |
| 67097 | P03383 | Q01959 | -0.35099  |
| 67098 | P03383 | Q5EBL2 | -0.17069  |
| 67099 | P03383 | Q6ZMU1 | -0.4906   |
| 67100 | P03383 | Q7L5L3 | -0.80507  |
| 67101 | P03383 | Q7Z4H3 | -0.15558  |
| 67102 | P03383 | Q86TZ1 | -0.22739  |
| 67103 | P03383 | P58872 | -1.1526   |
| 67104 | P03383 | B7ZBB8 | -0.31134  |
| 67105 | P03383 | Q13948 | -0.67414  |
| 67106 | P03383 | Q8WX93 | -0.22766  |
| 67107 | P03383 | Q9Y2T1 | -0.69431  |
| 67108 | P03383 | Q8NHG8 | -0.60833  |



|       |        |        |           |
|-------|--------|--------|-----------|
| 67109 | P03383 | Q5H943 | -0.93628  |
| 67110 | P03383 | Q96B54 | -0.73967  |
| 67111 | P03383 | Q7Z7L7 | -0.41386  |
| 67112 | P03383 | Q16667 | -0.2185   |
| 67113 | P03383 | P09884 | -0.26698  |
| 67114 | P03383 | Q9NP95 | -0.77798  |
| 67115 | P03383 | Q16394 | -0.48324  |
| 67116 | P03383 | Q71RS6 | -0.87597  |
| 67117 | P03383 | Q95935 | -0.41019  |
| 67118 | P03383 | Q7L5Y1 | -0.27344  |
| 67119 | P03383 | Q13685 | -0.58     |
| 67120 | P03383 | Q9HBH9 | -0.60593  |
| 67121 | P03383 | P40937 | -0.18999  |
| 67122 | P03383 | Q99424 | -0.64134  |
| 67123 | P03383 | P21802 | -0.24461  |
| 67124 | P03383 | Q9H2K2 | -0.22741  |
| 67125 | P03383 | Q9H479 | -0.42808  |
| 67126 | P03383 | Q8N9W7 | -0.86584  |
| 67127 | P03383 | Q8IZN7 | -0.84399  |
| 67128 | P03383 | Q15622 | -1.1027   |
| 67129 | P03383 | Q86UB9 | -0.904    |
| 67130 | P03383 | Q8N0X7 | -0.22932  |
| 67131 | P03383 | Q96LB1 | -1.1237   |
| 67132 | P03383 | P10301 | -0.64289  |
| 67133 | P03383 | Q96C24 | -0.23115  |
| 67134 | P03383 | Q92777 | -0.63609  |
| 67135 | P03383 | Q02539 | -0.83249  |
| 67136 | P03383 | Q76NI1 | -0.57711  |
| 67137 | P03383 | Q9H425 | -0.29487  |
| 67138 | P03383 | A6NDA9 | -0.86584  |
| 67139 | P03383 | Q9BQQ7 | -0.16229  |
| 67140 | P03383 | Q7L2Z9 | -0.28467  |
| 67141 | P03383 | P01037 | -0.89477  |
| 67142 | P03383 | Q13277 | -0.28125  |
| 67143 | P03383 | Q7Z3J2 | -0.86584  |
| 67144 | P03383 | Q8N766 | -0.8462   |
| 67145 | P03383 | P63123 | -0.67565  |
| 67146 | P03383 | Q6IF99 | -1.1027   |
| 67147 | P03383 | O75880 | -0.34951  |
| 67148 | P03383 | Q9Y6J8 | -0.68964  |
| 67149 | P03383 | O75951 | -0.85255  |
| 67150 | P03383 | P30450 | -0.7844   |
| 67151 | P03383 | Q9BXL8 | -0.21602  |
| 67152 | P03383 | Q96FX8 | -0.36066  |
| 67153 | P03383 | Q5TON1 | -0.16446  |
| 67154 | P03383 | Q9H0D6 | -0.17185  |
| 67155 | P03383 | E9PIF3 | -0.063681 |
| 67156 | P03383 | Q4V321 | -0.0711   |
| 67157 | P03383 | A6NM15 | -0.79654  |
| 67158 | P03383 | P51817 | -0.39078  |
| 67159 | P03383 | P58181 | -1.1027   |
| 67160 | P03383 | Q6UX82 | -0.60538  |
| 67161 | P03383 | P31271 | -0.16809  |
| 67162 | P03383 | O75069 | -0.31983  |
| 67163 | P03383 | P60201 | -0.54903  |
| 67164 | P03383 | Q9UJ70 | -0.23765  |
| 67165 | P03383 | Q99714 | -0.21541  |
| 67166 | P03383 | Q8N434 | -0.78973  |
| 67167 | P03383 | P43628 | -0.60113  |
| 67168 | P03383 | P43155 | -0.46208  |
| 67169 | P03383 | Q92832 | -0.22744  |
| 67170 | P03383 | Q8NGQ3 | -1.1027   |
| 67171 | P03383 | Q03181 | -0.27982  |
| 67172 | P03383 | Q9UBT2 | -0.21583  |
| 67173 | P03383 | P43250 | -0.89635  |
| 67174 | P03383 | Q309B1 | -0.29487  |
| 67175 | P03383 | Q93079 | -0.88998  |
| 67176 | P03383 | A8MT19 | -0.20766  |
| 67177 | P03383 | O60281 | -0.22741  |
| 67178 | P03383 | Q53H12 | -0.70838  |
| 67179 | P03383 | Q8WU67 | -0.4518   |
| 67180 | P03383 | P48729 | -0.22741  |
| 67181 | P03383 | Q08188 | -0.52602  |
| 67182 | P03383 | Q969F0 | -0.85795  |
| 67183 | P03383 | Q400G9 | -0.83564  |
| 67184 | P03383 | Q9Y653 | -1.3579   |

|       |        |        |           |
|-------|--------|--------|-----------|
| 67185 | P03383 | Q99963 | -0.28724  |
| 67186 | P03383 | Q9NSD5 | -0.96355  |
| 67187 | P03383 | B6SEH9 | -0.86584  |
| 67188 | P03383 | P30953 | -1.1027   |
| 67189 | P03383 | P30291 | -0.22741  |
| 67190 | P03383 | Q8N6Q1 | -0.86584  |
| 67191 | P03383 | Q16378 | -1.016    |
| 67192 | P03383 | Q6ZMB0 | -0.66736  |
| 67193 | P03383 | Q53FZ2 | -0.65603  |
| 67194 | P03383 | Q5U4P2 | -0.89197  |
| 67195 | P03383 | Q9UMR7 | -1.1298   |
| 67196 | P03383 | Q9Y6S9 | -0.70315  |
| 67197 | P03383 | Q8N6Y1 | -1.1297   |
| 67198 | P03383 | Q8N6D5 | -0.2274   |
| 67199 | P03383 | Q7Z6J4 | -0.98291  |
| 67200 | P03383 | P01620 | -0.97479  |
| 67201 | P03383 | P30455 | -0.88088  |
| 67202 | P03383 | Q9UBX0 | -0.20326  |
| 67203 | P03383 | Q4VNC1 | -0.91999  |
| 67204 | P03383 | Q9UJT9 | -0.22734  |
| 67205 | P03383 | Q86TH1 | -0.57315  |
| 67206 | P03383 | A0M8Q6 | -0.95485  |
| 67207 | P03383 | Q96D15 | -0.22652  |
| 67208 | P03383 | P16188 | -0.88088  |
| 67209 | P03383 | Q674R7 | -0.79668  |
| 67210 | P03383 | Q9NQT6 | -0.46961  |
| 67211 | P03383 | O60931 | -0.89926  |
| 67212 | P03383 | Q75689 | -0.28555  |
| 67213 | P03383 | Q8N4M1 | -0.74018  |
| 67214 | P03383 | P0CB47 | -0.36664  |
| 67215 | P03383 | Q5T7R7 | -0.86584  |
| 67216 | P03383 | P28335 | -0.92343  |
| 67217 | P03383 | Q9NRJ3 | -0.94495  |
| 67218 | P03383 | Q14993 | -1.104    |
| 67219 | P03383 | P60568 | -0.43087  |
| 67220 | P03383 | Q99679 | -1.2928   |
| 67221 | P03383 | O75962 | -0.45899  |
| 67222 | P03383 | Q04771 | -0.29939  |
| 67223 | P03383 | P53384 | -0.28085  |
| 67224 | P03383 | Q8NH64 | -1.1027   |
| 67225 | P03383 | A6NCW7 | -0.26473  |
| 67226 | P03383 | P59542 | -1.0953   |
| 67227 | P03383 | Q14CB8 | -0.83952  |
| 67228 | P03383 | Q9NSI5 | -0.55386  |
| 67229 | P03383 | Q53EV4 | -0.22741  |
| 67230 | P03383 | Q9BRP7 | -0.39868  |
| 67231 | P03383 | Q9BUR5 | -1.201    |
| 67232 | P03383 | Q9NP59 | -0.38536  |
| 67233 | P03383 | P25025 | -0.99618  |
| 67234 | P03383 | Q99463 | -1.194    |
| 67235 | P03383 | Q9UHD8 | -0.22527  |
| 67236 | P03383 | P01720 | -0.97479  |
| 67237 | P03383 | Q6UXU4 | -0.86584  |
| 67238 | P03383 | P40259 | -0.61996  |
| 67239 | P03383 | Q8IZ69 | -0.71424  |
| 67240 | P03383 | Q00987 | -0.21683  |
| 67241 | P03383 | Q9UHD1 | -0.17124  |
| 67242 | P03383 | Q8NGB4 | -1.1027   |
| 67243 | P03383 | Q9Y5F0 | -1.1238   |
| 67244 | P03383 | P35504 | -0.96597  |
| 67245 | P03383 | O00560 | -0.22736  |
| 67246 | P03383 | Q9NYW2 | -0.97792  |
| 67247 | P03383 | Q9NS64 | -0.71538  |
| 67248 | P03383 | P22794 | -0.87983  |
| 67249 | P03383 | Q9NZL6 | -0.61593  |
| 67250 | P03383 | Q9HCE0 | -0.45745  |
| 67251 | P03383 | Q5SQ13 | -0.070326 |
| 67252 | P03383 | Q9UKZ9 | -0.85359  |
| 67253 | P03383 | Q9HBL0 | -0.22741  |
| 67254 | P03383 | P51665 | -0.21757  |
| 67255 | P03383 | Q9Y4F9 | -0.47954  |
| 67256 | P03383 | Q96IK0 | -0.89063  |
| 67257 | P03383 | P51690 | -0.50849  |
| 67258 | P03383 | Q86W74 | -0.86584  |
| 67259 | P03383 | Q8N8I0 | -0.2257   |
| 67260 | P03383 | Q9UBT7 | -0.38572  |

|       |        |        |           |
|-------|--------|--------|-----------|
| 67261 | P03383 | P20366 | -0.72536  |
| 67262 | P03383 | O15178 | -0.34878  |
| 67263 | P03383 | Q7L099 | -0.67326  |
| 67264 | P03383 | Q9NQ94 | -0.24681  |
| 67265 | P03383 | Q9P0K7 | -0.22747  |
| 67266 | P03383 | Q9Y5J1 | -0.22743  |
| 67267 | P03383 | Q96G91 | -1.0682   |
| 67268 | P03383 | Q13465 | -0.072463 |
| 67269 | P03383 | Q13449 | -0.2294   |
| 67270 | P03383 | Q8NI60 | -0.68954  |
| 67271 | P03383 | Q6UWX4 | -0.79456  |
| 67272 | P03383 | Q8WWH4 | -0.59065  |
| 67273 | P03383 | Q96K62 | -0.21172  |
| 67274 | P03383 | Q9Y694 | -0.94984  |
| 67275 | P03383 | Q9NVM1 | -0.86584  |
| 67276 | P03383 | Q9H461 | -0.46184  |
| 67277 | P03383 | Q86YB8 | -0.67928  |
| 67278 | P03383 | P23763 | -0.36151  |
| 67279 | P03383 | P01825 | -0.97479  |
| 67280 | P03383 | O60397 | -0.40431  |
| 67281 | P03383 | P06888 | -0.97479  |
| 67282 | P03383 | P08174 | -0.98402  |
| 67283 | P03383 | Q5XG87 | -0.15995  |
| 67284 | P03383 | P56159 | -0.50267  |
| 67285 | P03383 | Q96R67 | -1.1027   |
| 67286 | P03383 | O76027 | -0.39174  |
| 67287 | P03383 | Q8IV56 | -0.60582  |
| 67288 | P03383 | Q96RD1 | -1.1027   |
| 67289 | P03383 | Q5VZM2 | -0.48455  |
| 67290 | P03383 | Q5SY68 | -0.55769  |
| 67291 | P03383 | Q01344 | -0.50714  |
| 67292 | P03383 | Q5EB52 | -0.97809  |
| 67293 | P03383 | Q6JVE5 | -0.86389  |
| 67294 | P03383 | Q8IXL9 | -0.21762  |
| 67295 | P03383 | Q6P5S7 | -0.63518  |
| 67296 | P03383 | Q6U841 | -0.74415  |
| 67297 | P03383 | P15090 | -0.19961  |
| 67298 | P03383 | P07108 | -0.42894  |
| 67299 | P03383 | P0CJ89 | -0.1915   |
| 67300 | P03383 | P06133 | -0.87714  |
| 67301 | P03383 | Q14031 | -1.0202   |
| 67302 | P03383 | A1A4T8 | -0.2088   |
| 67303 | P03383 | Q6DKI7 | -0.86584  |
| 67304 | P03383 | P28562 | -0.24616  |
| 67305 | P03383 | Q9HCS2 | -0.61456  |
| 67306 | P03383 | Q6H3X3 | -0.44901  |
| 67307 | P03383 | Q9H972 | -0.87849  |
| 67308 | P03383 | P05109 | -0.28953  |
| 67309 | P03383 | Q6UW10 | -0.87849  |
| 67310 | P03383 | P51801 | -0.95491  |
| 67311 | P03383 | O95948 | -0.22733  |
| 67312 | P03383 | Q9H2C1 | -0.22761  |
| 67313 | P03383 | P53004 | -0.608    |
| 67314 | P03383 | Q9H3N1 | -0.85451  |
| 67315 | P03383 | Q07654 | -0.78255  |
| 67316 | P03383 | P25089 | -1.1823   |
| 67317 | P03383 | Q92629 | -0.58559  |
| 67318 | P03383 | O43488 | -0.22462  |
| 67319 | P03383 | P02750 | -0.73592  |
| 67320 | P03383 | Q86VQ3 | -0.25163  |
| 67321 | P03383 | Q86UZ6 | -0.22731  |
| 67322 | P03383 | Q7Z4H8 | -0.18182  |
| 67323 | P03383 | Q969J5 | -0.76639  |
| 67324 | P03383 | Q9NU53 | -0.86584  |
| 67325 | P03383 | O00220 | -0.22739  |
| 67326 | P03383 | Q8NFM0 | -0.7029   |
| 67327 | P03383 | Q96GQ7 | -0.64766  |
| 67328 | P03383 | Q9H6L4 | -0.22895  |
| 67329 | P03383 | Q8NFM8 | -1.0252   |
| 67330 | P03383 | Q9NQW6 | -0.21298  |
| 67331 | P03383 | Q92802 | -0.16078  |
| 67332 | P03383 | O94889 | -0.2016   |
| 67333 | P03383 | Q8TED0 | -0.22751  |
| 67334 | P03383 | P06307 | -0.67415  |
| 67335 | P03383 | Q6XYB7 | -0.23469  |
| 67336 | P03383 | Q16653 | -1.0702   |

|       |        |        |           |
|-------|--------|--------|-----------|
| 67337 | P03383 | P23434 | -0.2965   |
| 67338 | P03383 | Q6ZVL6 | -0.86584  |
| 67339 | P03383 | Q8NGI8 | -1.1027   |
| 67340 | P03383 | Q95371 | -1.0738   |
| 67341 | P03383 | P35555 | -0.69027  |
| 67342 | P03383 | P11465 | -0.60966  |
| 67343 | P03383 | Q14765 | -0.22676  |
| 67344 | P03383 | Q9Y2I9 | -1.0287   |
| 67345 | P03383 | O43866 | -0.88367  |
| 67346 | P03383 | Q06278 | -0.61834  |
| 67347 | P03383 | Q9HC07 | -0.78058  |
| 67348 | P03383 | O60902 | -0.24032  |
| 67349 | P03383 | P17693 | -0.79365  |
| 67350 | P03383 | Q9UF72 | -0.87849  |
| 67351 | P03383 | Q9NX14 | -0.55115  |
| 67352 | P03383 | Q8ND24 | -0.52332  |
| 67353 | P03383 | P48739 | -0.46139  |
| 67354 | P03383 | Q96JX3 | -0.68692  |
| 67355 | P03383 | Q9Y2R0 | -0.75099  |
| 67356 | P03383 | Q5JUR7 | -0.14187  |
| 67357 | P03383 | Q15400 | -0.85852  |
| 67358 | P03383 | P22460 | -0.54442  |
| 67359 | P03383 | Q8NFM7 | -0.64716  |
| 67360 | P03383 | Q7Z569 | -0.22741  |
| 67361 | P03383 | P02489 | -0.20127  |
| 67362 | P03383 | Q13093 | -0.82819  |
| 67363 | P03383 | Q9UG56 | -0.15597  |
| 67364 | P03383 | A6NFI3 | -0.21172  |
| 67365 | P03383 | Q9Y297 | -0.26659  |
| 67366 | P03383 | Q8N6G2 | -0.1304   |
| 67367 | P03383 | B8ZZ34 | -0.86584  |
| 67368 | P03383 | O60812 | -0.51753  |
| 67369 | P03383 | Q14756 | -1.0414   |
| 67370 | P03383 | Q9BTE0 | -0.34636  |
| 67371 | P03383 | P16189 | -0.7844   |
| 67372 | P03383 | Q5T1A1 | -0.86584  |
| 67373 | P03383 | P62834 | -0.34096  |
| 67374 | P03383 | P10644 | -0.22749  |
| 67375 | P03383 | P49765 | -0.57412  |
| 67376 | P03383 | Q9BX79 | -0.45892  |
| 67377 | P03383 | Q9H330 | -0.6579   |
| 67378 | P03383 | Q9P299 | -0.05069  |
| 67379 | P03383 | Q9GZZ9 | -0.20276  |
| 67380 | P03383 | Q9NWX6 | -0.56866  |
| 67381 | P03383 | Q9Y6X9 | -0.19413  |
| 67382 | P03383 | P61565 | -0.5818   |
| 67383 | P03383 | A9Z1Z3 | -0.86584  |
| 67384 | P03383 | A8MUH7 | -0.22991  |
| 67385 | P03383 | Q8NBQ7 | -0.44122  |
| 67386 | P03383 | P0CJ70 | -0.72903  |
| 67387 | P03383 | Q6P1A2 | -0.66781  |
| 67388 | P03383 | P07437 | -0.17603  |
| 67389 | P03383 | Q9UMX2 | -0.014802 |
| 67390 | P03383 | Q92876 | -0.27241  |
| 67391 | P03383 | Q86YR5 | -0.22416  |
| 67392 | P03383 | Q9H361 | -0.60714  |
| 67393 | P03383 | Q8IZE3 | -0.22736  |
| 67394 | P03383 | Q16134 | -0.40915  |
| 67395 | P03383 | Q9BXS0 | -1.3179   |
| 67396 | P03383 | Q15457 | -0.45576  |
| 67397 | P03383 | Q99801 | -0.23053  |
| 67398 | P03383 | Q96H55 | -0.51489  |
| 67399 | P03383 | P12318 | -0.91471  |
| 67400 | P03383 | P07237 | -0.32228  |
| 67401 | P03383 | Q5JQS5 | -1.1027   |
| 67402 | P03383 | Q75LS8 | -0.52542  |
| 67403 | P03383 | Q5T089 | -0.11126  |
| 67404 | P03383 | Q96GR2 | -0.76157  |
| 67405 | P03383 | Q99542 | -1.1794   |
| 67406 | P03383 | Q5T124 | -0.30492  |
| 67407 | P03383 | Q05BW5 | -0.11097  |
| 67408 | P03383 | Q5VYS8 | -0.45262  |
| 67409 | P03383 | Q9BXJ3 | -0.87849  |
| 67410 | P03383 | P05166 | -0.42733  |
| 67411 | P03383 | A6NJ69 | -0.87849  |
| 67412 | P03383 | Q14767 | -0.91557  |

|       |        |        |           |
|-------|--------|--------|-----------|
| 67413 | P03383 | Q0VDG4 | -0.56216  |
| 67414 | P03383 | Q15058 | -0.25642  |
| 67415 | P03383 | O75815 | -0.89817  |
| 67416 | P03383 | Q8N1A6 | -0.059679 |
| 67417 | P03383 | P00846 | -0.48707  |
| 67418 | P03383 | P31942 | -0.28598  |
| 67419 | P03383 | Q5VT52 | -0.43262  |
| 67420 | P03383 | Q4G0J3 | -0.22722  |
| 67421 | P03383 | Q12908 | -0.748    |
| 67422 | P03383 | Q7Z388 | -0.86584  |
| 67423 | P03383 | Q96IZ2 | -0.93628  |
| 67424 | P03383 | Q6PEY0 | -0.90771  |
| 67425 | P03383 | Q5SRD3 | -0.98969  |
| 67426 | P03383 | Q9BZY9 | -0.50845  |
| 67427 | P03383 | P29622 | -0.72994  |
| 67428 | P03383 | Q9NXX6 | -1.0636   |
| 67429 | P03383 | P28358 | -0.34208  |
| 67430 | P03383 | Q96ID5 | -0.87849  |
| 67431 | P03383 | Q9Y3L5 | -0.80808  |
| 67432 | P03383 | Q96MM7 | -0.59622  |
| 67433 | P03383 | B3SHH9 | -0.93628  |
| 67434 | P03383 | O60292 | -0.94742  |
| 67435 | P03383 | Q15394 | -1.0674   |
| 67436 | P03383 | Q16609 | -0.54538  |
| 67437 | P03383 | P32745 | -0.54756  |
| 67438 | P03383 | P0CJ88 | -0.1915   |
| 67439 | P03383 | P63244 | -0.22833  |
| 67440 | P03383 | Q00443 | -0.3657   |
| 67441 | P03383 | Q7Z2X4 | -0.093327 |
| 67442 | P03383 | Q3KNS1 | -0.61352  |
| 67443 | P03383 | Q16602 | -0.53774  |
| 67444 | P03383 | P49759 | -0.74493  |
| 67445 | P03383 | Q5NDL2 | -0.41678  |
| 67446 | P03383 | Q7LFX5 | -0.50289  |
| 67447 | P03383 | Q15021 | -0.87005  |
| 67448 | P03383 | Q96KR4 | -0.46755  |
| 67449 | P03383 | Q9NZN5 | -0.33885  |
| 67450 | P03383 | Q8N162 | -1.1027   |
| 67451 | P03383 | Q6UW68 | -0.86584  |
| 67452 | P03383 | Q92543 | -0.19522  |
| 67453 | P03383 | Q86VV8 | -0.59198  |
| 67454 | P03383 | Q9Y256 | -1.0653   |
| 67455 | P03383 | Q96SC8 | -0.079372 |
| 67456 | P03383 | Q9H1M4 | -0.71875  |
| 67457 | P03383 | P14902 | -0.31615  |
| 67458 | P03383 | Q9Y5R6 | -0.14915  |
| 67459 | P03383 | P55287 | -1.0801   |
| 67460 | P03383 | Q9ULI3 | -0.80126  |
| 67461 | P03383 | Q3SXY7 | -0.86584  |
| 67462 | P03383 | P12236 | -0.23778  |
| 67463 | P03383 | Q6ICIO | -0.86584  |
| 67464 | P03383 | P23468 | -0.72568  |
| 67465 | P03383 | P61129 | -0.26173  |
| 67466 | P03383 | P23276 | -0.63242  |
| 67467 | P03383 | Q14165 | -0.73881  |
| 67468 | P03383 | Q6ZRY4 | -0.81148  |
| 67469 | P03383 | Q13057 | -0.25403  |
| 67470 | P03383 | P61587 | -1.1341   |
| 67471 | P03383 | Q9UEW3 | -0.97762  |
| 67472 | P03383 | P03905 | -0.56297  |
| 67473 | P03383 | Q86SE5 | -0.84005  |
| 67474 | P03383 | Q2M3X9 | -0.21172  |
| 67475 | P03383 | C9JVI0 | -0.69644  |
| 67476 | P03383 | Q96L14 | -0.46086  |
| 67477 | P03383 | A6NCE7 | -0.45414  |
| 67478 | P03383 | O15432 | -1.0035   |
| 67479 | P03383 | Q9Y5Y9 | -0.8613   |
| 67480 | P03383 | Q96M96 | -0.89856  |
| 67481 | P03383 | Q9H0V9 | -0.54242  |
| 67482 | P03383 | P61278 | -0.76409  |
| 67483 | P03383 | Q86VQ6 | -0.58068  |
| 67484 | P03383 | O75343 | -0.77667  |
| 67485 | P03383 | O75093 | -0.63478  |
| 67486 | P03383 | Q6ZU82 | -0.43276  |
| 67487 | P03383 | O75830 | -0.68755  |
| 67488 | P03383 | P32942 | -0.71775  |

|       |        |        |           |
|-------|--------|--------|-----------|
| 67489 | P03383 | Q0D2H9 | -0.35868  |
| 67490 | P03383 | O43347 | -0.31449  |
| 67491 | P03383 | Q96PD6 | -0.72412  |
| 67492 | P03383 | Q75356 | -0.31749  |
| 67493 | P03383 | P55286 | -1.0987   |
| 67494 | P03383 | O60403 | -1.1027   |
| 67495 | P03383 | Q6B8I1 | -0.90806  |
| 67496 | P03383 | P19320 | -0.60997  |
| 67497 | P03383 | P06899 | -0.86926  |
| 67498 | P03383 | Q6DN72 | -0.86146  |
| 67499 | P03383 | Q9BQS8 | -0.317    |
| 67500 | P03383 | Q9NWX5 | -0.27737  |
| 67501 | P03383 | Q9UBX7 | -1.2103   |
| 67502 | P03383 | P23368 | -0.73447  |
| 67503 | P03383 | Q5VU13 | -0.86584  |
| 67504 | P03383 | Q96F81 | -0.71465  |
| 67505 | P03383 | Q9H3N8 | -1.1023   |
| 67506 | P03383 | Q3ZCQ3 | -0.86584  |
| 67507 | P03383 | Q8WVE0 | -0.37482  |
| 67508 | P03383 | B4DJY2 | -0.86137  |
| 67509 | P03383 | Q86UW2 | -0.7847   |
| 67510 | P03383 | P09486 | -0.28607  |
| 67511 | P03383 | Q71H61 | -0.84057  |
| 67512 | P03383 | Q5JVL4 | -0.49662  |
| 67513 | P03383 | Q9NZN1 | -0.55427  |
| 67514 | P03383 | Q8IZK6 | -0.96683  |
| 67515 | P03383 | Q53S58 | -0.86584  |
| 67516 | P03383 | Q2M243 | -0.042333 |
| 67517 | P03383 | Q587J8 | -0.33371  |
| 67518 | P03383 | P01763 | -0.97479  |
| 67519 | P03383 | P80748 | -0.97479  |
| 67520 | P03383 | P51161 | -0.22136  |
| 67521 | P03383 | P16278 | -0.15859  |
| 67522 | P03383 | Q9BWX5 | -0.22739  |
| 67523 | P03383 | Q9Y5E6 | -1.1424   |
| 67524 | P03383 | Q5KU26 | -0.63189  |
| 67525 | P03383 | Q8IWU5 | -0.51353  |
| 67526 | P03383 | Q7RTT4 | -0.16991  |
| 67527 | P03383 | P03979 | -0.54698  |
| 67528 | P03383 | Q14376 | -0.42023  |
| 67529 | P03383 | Q15642 | -0.77285  |
| 67530 | P03383 | Q9HCY8 | -0.33922  |
| 67531 | P03383 | Q9BXI6 | -0.65453  |
| 67532 | P03383 | O94956 | -0.94604  |
| 67533 | P03383 | Q9UHH9 | -0.47362  |
| 67534 | P03383 | Q8WUA4 | -0.22737  |
| 67535 | P03383 | O95867 | -0.60538  |
| 67536 | P03383 | P22894 | -1.2481   |
| 67537 | P03383 | Q6ZNJ1 | -0.43583  |
| 67538 | P03383 | Q15386 | -0.22944  |
| 67539 | P03383 | P0C7V8 | -0.22747  |
| 67540 | P03383 | P49902 | -0.11937  |
| 67541 | P03383 | Q96FE7 | -0.79698  |
| 67542 | P03383 | P01871 | -1.2614   |
| 67543 | P03383 | Q16206 | -1.0656   |
| 67544 | P03383 | Q8N4E7 | -0.2069   |
| 67545 | P03383 | Q0VAF6 | -0.44272  |
| 67546 | P03383 | Q9H347 | -0.22658  |
| 67547 | P03383 | P25024 | -1.0484   |
| 67548 | P03383 | Q9Y5I7 | -0.66877  |
| 67549 | P03383 | O60806 | -0.36071  |
| 67550 | P03383 | Q9UJJ9 | -0.78962  |
| 67551 | P03383 | P98173 | -0.54538  |
| 67552 | P03383 | Q96JQ0 | -1.1037   |
| 67553 | P03383 | Q9BZD2 | -0.83154  |
| 67554 | P03383 | Q9BXA7 | -0.9495   |
| 67555 | P03383 | Q8IZJ0 | -0.89136  |
| 67556 | P03383 | H0YL14 | -0.44158  |
| 67557 | P03383 | Q96PC3 | -0.14146  |
| 67558 | P03383 | Q12852 | -0.37438  |
| 67559 | P03383 | P57773 | -0.90771  |
| 67560 | P03383 | Q9NZN4 | -0.36883  |
| 67561 | P03383 | P20338 | -0.30874  |
| 67562 | P03383 | Q9UN67 | -1.1238   |
| 67563 | P03383 | P54317 | -0.82403  |
| 67564 | P03383 | Q13336 | -0.9149   |

|       |        |        |           |
|-------|--------|--------|-----------|
| 67565 | P03383 | Q8NAF0 | -0.21172  |
| 67566 | P03383 | Q7Z7H5 | -0.86938  |
| 67567 | P03383 | Q9BR77 | -0.3067   |
| 67568 | P03383 | Q9UK12 | -0.21172  |
| 67569 | P03383 | P30480 | -0.88446  |
| 67570 | P03383 | O95977 | -1.2248   |
| 67571 | P03383 | A0ZSE6 | -0.86584  |
| 67572 | P03383 | O75409 | -0.5307   |
| 67573 | P03383 | Q6IBS0 | -0.50394  |
| 67574 | P03383 | Q5VTY9 | -1.3144   |
| 67575 | P03383 | Q9HA64 | -0.53723  |
| 67576 | P03383 | P31947 | -0.58048  |
| 67577 | P03383 | Q16623 | -0.34457  |
| 67578 | P03383 | Q93009 | -0.32255  |
| 67579 | P03383 | Q6ZNF0 | -0.85014  |
| 67580 | P03383 | Q13585 | -1.1948   |
| 67581 | P03383 | O00526 | -0.99706  |
| 67582 | P03383 | Q9BZD3 | -0.16268  |
| 67583 | P03383 | Q5QNW6 | -0.88998  |
| 67584 | P03383 | Q96JP2 | -0.21243  |
| 67585 | P03383 | Q5VUR7 | -0.2274   |
| 67586 | P03383 | A6NFE2 | -0.86584  |
| 67587 | P03383 | P01111 | -0.6003   |
| 67588 | P03383 | O00337 | -0.87444  |
| 67589 | P03383 | P01034 | -0.29943  |
| 67590 | P03383 | Q7Z402 | -0.86584  |
| 67591 | P03383 | Q2M3M2 | -0.98191  |
| 67592 | P03383 | Q9Y6E0 | -0.23082  |
| 67593 | P03383 | Q6UXN2 | -0.87849  |
| 67594 | P03383 | Q96AH8 | -0.70724  |
| 67595 | P03383 | P11801 | -0.51644  |
| 67596 | P03383 | Q969Q5 | -0.23504  |
| 67597 | P03383 | Q94929 | -0.22845  |
| 67598 | P03383 | Q30KQ6 | -0.84399  |
| 67599 | P03383 | Q8WWB7 | -0.51637  |
| 67600 | P03383 | A8K010 | -0.36031  |
| 67601 | P03383 | Q7Z5Y6 | -0.83739  |
| 67602 | P03383 | Q86UD4 | -0.21172  |
| 67603 | P03383 | A6ND91 | -0.82356  |
| 67604 | P03383 | Q9H6P5 | -0.71187  |
| 67605 | P03383 | Q3KQV9 | -0.49134  |
| 67606 | P03383 | O96011 | -0.19126  |
| 67607 | P03383 | P0C6A0 | -0.24742  |
| 67608 | P03383 | P19237 | -0.46134  |
| 67609 | P03383 | P36871 | -0.096952 |
| 67610 | P03383 | Q86VB7 | -0.88904  |
| 67611 | P03383 | Q18PE1 | -0.64563  |
| 67612 | P03383 | Q9NXU5 | -1.2555   |
| 67613 | P03383 | Q8TDB8 | -0.62113  |
| 67614 | P03383 | Q9NQ38 | -0.50995  |
| 67615 | P03383 | Q8NDB2 | -0.43292  |
| 67616 | P03383 | Q15258 | -0.57903  |
| 67617 | P03383 | Q8NBQ5 | -1.0446   |
| 67618 | P03383 | Q9UJ90 | -0.85205  |
| 67619 | P03383 | H3BPM6 | -0.38608  |
| 67620 | P03383 | Q9NQL2 | -0.55232  |
| 67621 | P03383 | Q8IYT4 | -0.71132  |
| 67622 | P03383 | Q02779 | -0.5456   |
| 67623 | P03383 | A6NJU9 | -0.86584  |
| 67624 | P03383 | Q9BQS2 | -0.93628  |
| 67625 | P03383 | Q86TB3 | -0.55687  |
| 67626 | P03383 | Q75431 | -0.23385  |
| 67627 | P03383 | Q9Y2B4 | -0.05934  |
| 67628 | P03383 | Q9P126 | -0.53856  |
| 67629 | P03383 | Q9H741 | -0.87849  |
| 67630 | P03383 | Q09013 | -0.29451  |
| 67631 | P03383 | Q9Y5X0 | -0.33657  |
| 67632 | P03383 | P31431 | -0.62228  |
| 67633 | P03383 | O60502 | -0.17631  |
| 67634 | P03383 | Q6DJT9 | -0.19762  |
| 67635 | P03383 | Q9NZW5 | -0.22485  |
| 67636 | P03383 | Q15846 | -0.77931  |
| 67637 | P03383 | Q9Y5Y6 | -1.4561   |
| 67638 | P03383 | Q9GZY6 | -0.48947  |
| 67639 | P03383 | Q70IA8 | -0.47027  |
| 67640 | P03383 | Q13098 | -0.18077  |

|       |        |        |           |
|-------|--------|--------|-----------|
| 67641 | P03383 | Q9UF47 | -0.54897  |
| 67642 | P03383 | Q9Y6H6 | -0.89191  |
| 67643 | P03383 | P51955 | -0.22741  |
| 67644 | P03383 | P01566 | -0.7874   |
| 67645 | P03383 | Q9NRG0 | -0.45441  |
| 67646 | P03383 | Q9NVJ2 | -0.56435  |
| 67647 | P03383 | Q9UK17 | -0.96505  |
| 67648 | P03383 | Q14003 | -0.69003  |
| 67649 | P03383 | A0PJX8 | -0.86584  |
| 67650 | P03383 | P40205 | -0.60582  |
| 67651 | P03383 | P04553 | -0.79783  |
| 67652 | P03383 | Q8IWN7 | -0.19087  |
| 67653 | P03383 | Q9Y3B1 | -0.30763  |
| 67654 | P03383 | Q95837 | -0.92896  |
| 67655 | P03383 | Q6ZWJ8 | -0.87849  |
| 67656 | P03383 | Q9UL45 | -0.16659  |
| 67657 | P03383 | C9JVV0 | -0.86584  |
| 67658 | P03383 | Q92888 | -0.34989  |
| 67659 | P03383 | Q96JD6 | -0.43633  |
| 67660 | P03383 | Q8WWY7 | -0.78098  |
| 67661 | P03383 | Q8NG99 | -1.1027   |
| 67662 | P03383 | Q9NYW0 | -0.97792  |
| 67663 | P03383 | P49682 | -1.0271   |
| 67664 | P03383 | Q05923 | -0.35833  |
| 67665 | P03383 | P09651 | -0.263    |
| 67666 | P03383 | P05181 | -0.49784  |
| 67667 | P03383 | Q8IU99 | -1.013    |
| 67668 | P03383 | Q94808 | -0.19385  |
| 67669 | P03383 | P40227 | -0.49683  |
| 67670 | P03383 | O75344 | -0.54973  |
| 67671 | P03383 | Q96FI4 | -0.38685  |
| 67672 | P03383 | P17858 | -0.22031  |
| 67673 | P03383 | Q9H845 | -0.52255  |
| 67674 | P03383 | P51956 | -0.22741  |
| 67675 | P03383 | P51810 | -0.49995  |
| 67676 | P03383 | Q8IVV2 | -0.62698  |
| 67677 | P03383 | P09016 | -0.15898  |
| 67678 | P03383 | Q6AZY7 | -0.81466  |
| 67679 | P03383 | P56179 | -0.23963  |
| 67680 | P03383 | Q5VSG8 | -0.67915  |
| 67681 | P03383 | P47755 | -0.58933  |
| 67682 | P03383 | Q9UKY0 | -0.39799  |
| 67683 | P03383 | Q709C8 | -0.48011  |
| 67684 | P03383 | Q9H4I8 | -0.22249  |
| 67685 | P03383 | Q15012 | -0.81629  |
| 67686 | P03383 | Q6P656 | -0.020861 |
| 67687 | P03383 | A6NDS4 | -1.2307   |
| 67688 | P03383 | Q9UI42 | -0.98703  |
| 67689 | P03383 | Q14914 | -0.70736  |
| 67690 | P03383 | Q8TBC3 | -0.19405  |
| 67691 | P03383 | Q96KN9 | -0.90771  |
| 67692 | P03383 | Q00294 | -0.36162  |
| 67693 | P03383 | P16298 | -0.23377  |
| 67694 | P03383 | Q9UJT1 | -0.37941  |
| 67695 | P03383 | Q9NS91 | -0.22743  |
| 67696 | P03383 | Q9UM73 | -1.0822   |
| 67697 | P03383 | Q16655 | -0.37296  |
| 67698 | P03383 | Q14246 | -1.3925   |
| 67699 | P03383 | P23352 | -0.56769  |
| 67700 | P03383 | Q99633 | -0.13729  |
| 67701 | P03383 | Q6PK81 | -0.21172  |
| 67702 | P03383 | P41587 | -1.1921   |
| 67703 | P03383 | Q3SY56 | -0.22404  |
| 67704 | P03383 | Q9UH90 | -0.17746  |
| 67705 | P03383 | Q96DG6 | -0.18671  |
| 67706 | P03383 | P15976 | -0.22739  |
| 67707 | P03383 | Q6ZRF7 | -0.21172  |
| 67708 | P03383 | P29353 | -0.22741  |
| 67709 | P03383 | P62873 | -0.41417  |
| 67710 | P03383 | Q13671 | -0.38499  |
| 67711 | P03383 | P01891 | -0.7844   |
| 67712 | P03383 | Q8NGX6 | -1.1027   |
| 67713 | P03383 | Q8WXD0 | -0.99787  |
| 67714 | P03383 | Q9H2U1 | -0.22149  |
| 67715 | P03383 | Q9NQ39 | -0.22441  |
| 67716 | P03383 | O43916 | -0.54145  |



|       |        |        |            |
|-------|--------|--------|------------|
| 67717 | P03383 | O76036 | -1.0046    |
| 67718 | P03383 | Q6PRD1 | -1.2569    |
| 67719 | P03383 | Q8NC42 | -0.94237   |
| 67720 | P03383 | Q9NXL2 | -0.7066    |
| 67721 | P03383 | Q9H598 | -0.72679   |
| 67722 | P03383 | Q95365 | -0.88446   |
| 67723 | P03383 | Q6UWF9 | -0.87849   |
| 67724 | P03383 | Q8NGS0 | -1.1027    |
| 67725 | P03383 | Q8IYD8 | -0.22676   |
| 67726 | P03383 | B5MCN3 | -0.95278   |
| 67727 | P03383 | Q9NST1 | -0.65045   |
| 67728 | P03383 | P08236 | -0.52832   |
| 67729 | P03383 | P05165 | -0.64477   |
| 67730 | P03383 | Q3ZCT8 | -0.21203   |
| 67731 | P03383 | Q9NX02 | -0.22728   |
| 67732 | P03383 | Q9ULK6 | -0.92811   |
| 67733 | P03383 | Q08209 | -0.17388   |
| 67734 | P03383 | P41235 | -0.2408    |
| 67735 | P03383 | Q14753 | -0.32365   |
| 67736 | P03383 | P48065 | -0.9674    |
| 67737 | P03383 | Q13247 | -0.22706   |
| 67738 | P03383 | Q5U651 | -0.32994   |
| 67739 | P03383 | Q92545 | -0.52887   |
| 67740 | P03383 | Q14254 | -0.69991   |
| 67741 | P03383 | P00738 | -0.82064   |
| 67742 | P03383 | Q9P1P4 | -1.143     |
| 67743 | P03383 | Q5JTW2 | -0.22529   |
| 67744 | P03383 | Q9UPM8 | -0.16836   |
| 67745 | P03383 | Q7Z3H0 | -0.2274    |
| 67746 | P03383 | Q5W0N0 | -0.86584   |
| 67747 | P03383 | Q8NGC8 | -1.1027    |
| 67748 | P03383 | Q86TJ2 | -0.19594   |
| 67749 | P03383 | P07711 | -0.48627   |
| 67750 | P03383 | Q8NAA6 | -0.16294   |
| 67751 | P03383 | Q53H96 | -0.8265    |
| 67752 | P03383 | Q12891 | -0.21825   |
| 67753 | P03383 | P05111 | -0.4204    |
| 67754 | P03383 | Q14919 | -0.13711   |
| 67755 | P03383 | Q8WZA6 | -1.1027    |
| 67756 | P03383 | P25101 | -0.44549   |
| 67757 | P03383 | Q9BYT9 | -0.85455   |
| 67758 | P03383 | P0C0S8 | -0.88697   |
| 67759 | P03383 | Q9H8M2 | -0.10661   |
| 67760 | P03383 | Q9NYZ1 | -0.86584   |
| 67761 | P03383 | Q92502 | -0.98714   |
| 67762 | P03383 | P55773 | -1.0375    |
| 67763 | P03383 | Q9H2W2 | -0.22151   |
| 67764 | P03383 | Q6WRI0 | -0.97191   |
| 67765 | P03383 | Q13190 | -0.20724   |
| 67766 | P03383 | A2RU54 | -0.23043   |
| 67767 | P03383 | P52757 | -0.82882   |
| 67768 | P03383 | Q75367 | -0.42953   |
| 67769 | P03383 | Q9P0K9 | -0.52887   |
| 67770 | P03383 | Q75326 | -0.25143   |
| 67771 | P03383 | Q95278 | -0.23571   |
| 67772 | P03383 | P48431 | -0.28014   |
| 67773 | P03383 | A6NF34 | -0.8941    |
| 67774 | P03383 | Q6UXM1 | -0.86584   |
| 67775 | P03383 | Q5TA76 | -0.43006   |
| 67776 | P03383 | P22466 | -0.36273   |
| 67777 | P03383 | Q9BYP7 | -0.26665   |
| 67778 | P03383 | Q8NCM2 | -0.82925   |
| 67779 | P03383 | Q6NSJ0 | -0.65824   |
| 67780 | P03383 | Q14500 | -1.0151    |
| 67781 | P03383 | P06401 | -0.22742   |
| 67782 | P03383 | Q685J3 | -0.58126   |
| 67783 | P03383 | Q8N6M5 | -0.39579   |
| 67784 | P03383 | Q9UL59 | -0.21172   |
| 67785 | P03383 | Q8IUH4 | -0.78598   |
| 67786 | P03383 | Q9BZJ7 | -0.97774   |
| 67787 | P03383 | Q8TF30 | -0.3584    |
| 67788 | P03383 | Q9UPA5 | -0.030825  |
| 67789 | P03383 | Q9HCX3 | -0.21172   |
| 67790 | P03383 | Q2TAL6 | -0.81937   |
| 67791 | P03383 | Q8N8G6 | -0.0019623 |
| 67792 | P03383 | Q5T7M4 | -0.8736    |

|       |        |        |           |
|-------|--------|--------|-----------|
| 67793 | P03383 | P13762 | -0.67577  |
| 67794 | P03383 | P35680 | -0.22334  |
| 67795 | P03383 | Q6PJ69 | -0.73967  |
| 67796 | P03383 | Q6PCB7 | -0.56215  |
| 67797 | P03383 | Q6IMI4 | -0.34485  |
| 67798 | P03383 | A6NCL7 | -0.22742  |
| 67799 | P03383 | Q68DH5 | -0.86584  |
| 67800 | P03383 | Q5W150 | -0.23753  |
| 67801 | P03383 | Q9BPX6 | -0.51817  |
| 67802 | P03383 | P62079 | -0.86584  |
| 67803 | P03383 | O75324 | -0.72207  |
| 67804 | P03383 | Q9H0M5 | -0.21172  |
| 67805 | P03383 | O15315 | -0.16993  |
| 67806 | P03383 | Q969H4 | -0.22739  |
| 67807 | P03383 | P54819 | -0.53107  |
| 67808 | P03383 | Q9BRQ0 | -0.30335  |
| 67809 | P03383 | Q9H0B8 | -0.92736  |
| 67810 | P03383 | Q9H3S4 | -0.44193  |
| 67811 | P03383 | P01713 | -0.97479  |
| 67812 | P03383 | P0C2W1 | -0.2129   |
| 67813 | P03383 | Q5T292 | -0.86584  |
| 67814 | P03383 | Q8IUH8 | -0.93896  |
| 67815 | P03383 | Q14161 | -0.26161  |
| 67816 | P03383 | Q8IX29 | -0.21384  |
| 67817 | P03383 | P01619 | -0.95485  |
| 67818 | P03383 | O95147 | -1.0684   |
| 67819 | P03383 | Q95460 | -1.2204   |
| 67820 | P03383 | Q5VXT5 | -0.85176  |
| 67821 | P03383 | O95785 | -0.51636  |
| 67822 | P03383 | P00167 | -0.50571  |
| 67823 | P03383 | P10114 | -0.50999  |
| 67824 | P03383 | Q9H310 | -0.73641  |
| 67825 | P03383 | A1A4S6 | -0.29381  |
| 67826 | P03383 | O95922 | -0.2885   |
| 67827 | P03383 | O75923 | -0.79171  |
| 67828 | P03383 | Q68CQ4 | -0.2101   |
| 67829 | P03383 | Q9NW61 | -0.5353   |
| 67830 | P03383 | Q9NUV9 | -0.32264  |
| 67831 | P03383 | O15354 | -1.3244   |
| 67832 | P03383 | Q9H6D3 | -0.86584  |
| 67833 | P03383 | Q9NS68 | -0.74213  |
| 67834 | P03383 | Q6ZWE6 | -0.74073  |
| 67835 | P03383 | Q96IX9 | -0.19446  |
| 67836 | P03383 | P46977 | -0.39234  |
| 67837 | P03383 | Q9C0D9 | -0.77108  |
| 67838 | P03383 | Q96RT1 | -0.23418  |
| 67839 | P03383 | Q5T5B0 | -0.43006  |
| 67840 | P03383 | P01243 | -0.98388  |
| 67841 | P03383 | O43155 | -1.0425   |
| 67842 | P03383 | Q5U5Z8 | -0.56582  |
| 67843 | P03383 | Q9BWM7 | -0.83915  |
| 67844 | P03383 | Q96PE3 | -0.30575  |
| 67845 | P03383 | P42330 | -0.24463  |
| 67846 | P03383 | O95947 | -0.50489  |
| 67847 | P03383 | Q6SZW1 | -0.61334  |
| 67848 | P03383 | Q6ZW61 | -0.053863 |
| 67849 | P03383 | Q13258 | -0.67936  |
| 67850 | P03383 | Q53H76 | -0.92109  |
| 67851 | P03383 | O95670 | -0.40377  |
| 67852 | P03383 | Q7Z5A4 | -1.2917   |
| 67853 | P03383 | Q96DD0 | -0.27204  |
| 67854 | P03383 | Q9NPZ5 | -0.56395  |
| 67855 | P03383 | O43865 | -0.18319  |
| 67856 | P03383 | Q8N755 | -0.86584  |
| 67857 | P03383 | P21397 | -0.65618  |
| 67858 | P03383 | P23946 | -1.3423   |
| 67859 | P03383 | Q86WN2 | -0.85594  |
| 67860 | P03383 | Q7Z7F0 | -0.053899 |
| 67861 | P03383 | Q9H6E4 | -0.87849  |
| 67862 | P03383 | Q9HAQ2 | -0.67441  |
| 67863 | P03383 | Q9UBD6 | -0.71019  |
| 67864 | P03383 | Q9Y5K1 | -0.57911  |
| 67865 | P03383 | O43924 | -0.048865 |
| 67866 | P03383 | O95319 | -0.42595  |
| 67867 | P03383 | Q9NQX5 | -0.86584  |
| 67868 | P03383 | Q9C0B7 | -0.86584  |

|       |        |        |           |
|-------|--------|--------|-----------|
| 67869 | P03383 | Q13409 | -0.22742  |
| 67870 | P03383 | Q9Y5Z0 | -0.83995  |
| 67871 | P03383 | Q7L0X0 | -0.7671   |
| 67872 | P03383 | P01599 | -0.97479  |
| 67873 | P03383 | Q8N801 | -0.0549   |
| 67874 | P03383 | Q96EB6 | -0.56539  |
| 67875 | P03383 | P29466 | -0.22737  |
| 67876 | P03383 | Q96CN5 | -0.3067   |
| 67877 | P03383 | O14522 | -0.77805  |
| 67878 | P03383 | Q8TDQ1 | -0.93628  |
| 67879 | P03383 | Q9H8N7 | -0.1048   |
| 67880 | P03383 | Q13753 | -1.0932   |
| 67881 | P03383 | P22001 | -0.82166  |
| 67882 | P03383 | Q96SB8 | -0.21987  |
| 67883 | P03383 | Q9UBG3 | -0.36485  |
| 67884 | P03383 | Q7Z5J1 | -1.382    |
| 67885 | P03383 | P23677 | -0.79701  |
| 67886 | P03383 | Q9UEG4 | -0.21172  |
| 67887 | P03383 | Q3LFD5 | -0.69644  |
| 67888 | P03383 | Q9H2H0 | -0.17921  |
| 67889 | P03383 | Q9UKF5 | -1.0911   |
| 67890 | P03383 | Q9BZ72 | -1.3237   |
| 67891 | P03383 | Q96T49 | -0.2274   |
| 67892 | P03383 | Q92766 | -0.21688  |
| 67893 | P03383 | Q9UQ16 | -0.23158  |
| 67894 | P03383 | Q6B0I6 | -0.19512  |
| 67895 | P03383 | Q93084 | -0.74689  |
| 67896 | P03383 | Q4U2R8 | -0.37649  |
| 67897 | P03383 | Q8IY45 | -0.21159  |
| 67898 | P03383 | Q9H1K6 | -0.028441 |
| 67899 | P03383 | P16070 | -0.29051  |
| 67900 | P03383 | A8MT79 | -0.93176  |
| 67901 | P03383 | P40199 | -0.2785   |
| 67902 | P03383 | O94827 | -0.53889  |
| 67903 | P03383 | P0C623 | -1.1027   |
| 67904 | P03383 | Q5H8A3 | -0.7968   |
| 67905 | P03383 | Q9NPI7 | -0.049499 |
| 67906 | P03383 | P05060 | -0.26525  |
| 67907 | P03383 | Q9P2S5 | -0.22739  |
| 67908 | P03383 | Q8NFV4 | -0.2226   |
| 67909 | P03383 | P57087 | -0.44751  |
| 67910 | P03383 | Q96NJ3 | -0.21172  |
| 67911 | P03383 | Q9NY46 | -0.83722  |
| 67912 | P03383 | Q765P7 | -0.75806  |
| 67913 | P03383 | Q86UU1 | -0.5353   |
| 67914 | P03383 | Q9BUM1 | -0.40693  |
| 67915 | P03383 | Q9H4I9 | -0.74159  |
| 67916 | P03383 | Q9BZM4 | -0.52202  |
| 67917 | P03383 | P08913 | -0.25053  |
| 67918 | P03383 | Q96T83 | -0.34361  |
| 67919 | P03383 | Q96DR7 | -0.97333  |
| 67920 | P03383 | Q2M218 | -0.21172  |
| 67921 | P03383 | P68543 | -0.32518  |
| 67922 | P03383 | Q9H6X5 | -0.026841 |
| 67923 | P03383 | P28340 | -0.24125  |
| 67924 | P03383 | Q96NF6 | -0.86584  |
| 67925 | P03383 | Q9NR30 | -0.49836  |
| 67926 | P03383 | Q8N6I4 | -0.86584  |
| 67927 | P03383 | Q3B7J2 | -1.3339   |
| 67928 | P03383 | Q99502 | -0.032536 |
| 67929 | P03383 | P06702 | -0.22799  |
| 67930 | P03383 | Q8N1N0 | -0.90338  |
| 67931 | P03383 | P30101 | -0.24834  |
| 67932 | P03383 | Q9BQA9 | -0.31983  |
| 67933 | P03383 | Q9Y5G2 | -1.1297   |
| 67934 | P03383 | Q14943 | -1.0367   |
| 67935 | P03383 | A6NCK2 | -0.73967  |
| 67936 | P03383 | Q7Z4G4 | -0.33343  |
| 67937 | P03383 | Q8NGG5 | -1.1027   |
| 67938 | P03383 | Q7Z5A7 | -1.2172   |
| 67939 | P03383 | Q8IYB5 | -0.84966  |
| 67940 | P03383 | P49354 | -0.14144  |
| 67941 | P03383 | P0C645 | -1.1027   |
| 67942 | P03383 | Q96CM8 | -0.92107  |
| 67943 | P03383 | P11049 | -0.30173  |
| 67944 | P03383 | Q2M2I8 | -0.72873  |

|       |        |        |            |
|-------|--------|--------|------------|
| 67945 | P03383 | P68363 | -0.19884   |
| 67946 | P03383 | Q9NX07 | -0.37589   |
| 67947 | P03383 | Q9Y5Z9 | -0.42246   |
| 67948 | P03383 | Q8NEX5 | -0.87849   |
| 67949 | P03383 | Q16617 | -1.0706    |
| 67950 | P03383 | Q9NVD3 | -0.032822  |
| 67951 | P03383 | Q96LK8 | -0.16441   |
| 67952 | P03383 | P30485 | -0.88446   |
| 67953 | P03383 | P30679 | -0.83607   |
| 67954 | P03383 | Q8NH89 | -1.1027    |
| 67955 | P03383 | P21730 | -1.0704    |
| 67956 | P03383 | Q8N4L1 | -0.86584   |
| 67957 | P03383 | Q8WX94 | -0.79654   |
| 67958 | P03383 | P07585 | -0.52333   |
| 67959 | P03383 | Q9BZF3 | -0.26408   |
| 67960 | P03383 | Q6NSI1 | -0.2274    |
| 67961 | P03383 | Q9HCJ1 | -0.89807   |
| 67962 | P03383 | P19021 | -0.69632   |
| 67963 | P03383 | Q99570 | -0.29483   |
| 67964 | P03383 | O75477 | -0.39257   |
| 67965 | P03383 | Q16665 | -0.24339   |
| 67966 | P03383 | P57730 | -0.63549   |
| 67967 | P03383 | P08684 | -0.53767   |
| 67968 | P03383 | Q14966 | -0.95322   |
| 67969 | P03383 | P36269 | -0.78391   |
| 67970 | P03383 | Q96PB7 | -0.83338   |
| 67971 | P03383 | Q70EL4 | -0.69644   |
| 67972 | P03383 | Q9Y4B4 | -0.56895   |
| 67973 | P03383 | P26572 | -0.53969   |
| 67974 | P03383 | Q9NUZ1 | -0.5006    |
| 67975 | P03383 | P47736 | -0.32325   |
| 67976 | P03383 | Q5TA50 | -0.27553   |
| 67977 | P03383 | Q15320 | -0.46032   |
| 67978 | P03383 | Q8NE09 | -0.66133   |
| 67979 | P03383 | Q16695 | -0.2467    |
| 67980 | P03383 | O75015 | -0.9774    |
| 67981 | P03383 | O60259 | -0.52267   |
| 67982 | P03383 | A6NE21 | -0.48092   |
| 67983 | P03383 | Q8NGE2 | -1.1027    |
| 67984 | P03383 | Q15274 | -0.20898   |
| 67985 | P03383 | Q92611 | -0.31646   |
| 67986 | P03383 | A6NDD2 | -0.84399   |
| 67987 | P03383 | Q5SR56 | -0.87101   |
| 67988 | P03383 | P01597 | -0.97479   |
| 67989 | P03383 | P07358 | -0.91334   |
| 67990 | P03383 | Q16342 | -0.23997   |
| 67991 | P03383 | P60606 | -0.8462    |
| 67992 | P03383 | P35410 | -0.65198   |
| 67993 | P03383 | Q8NGT1 | -1.1027    |
| 67994 | P03383 | P05981 | -0.44131   |
| 67995 | P03383 | O60701 | -0.71876   |
| 67996 | P03383 | P51460 | -0.55413   |
| 67997 | P03383 | Q8NGS3 | -1.1027    |
| 67998 | P03383 | Q4L235 | -1.0247    |
| 67999 | P03383 | Q9H2S1 | -0.8545    |
| 68000 | P03383 | Q6DT37 | -0.27156   |
| 68001 | P03383 | Q96CT2 | -0.20465   |
| 68002 | P03383 | P10619 | -0.27649   |
| 68003 | P03383 | Q96LB2 | -1.1257    |
| 68004 | P03383 | Q9Y3A4 | -0.84005   |
| 68005 | P03383 | Q96FV0 | -0.22724   |
| 68006 | P03383 | P09619 | -0.32334   |
| 68007 | P03383 | Q8NHW6 | -0.93164   |
| 68008 | P03383 | Q13268 | -0.40596   |
| 68009 | P03383 | Q5JT25 | -0.92564   |
| 68010 | P03383 | Q8NA70 | -0.22751   |
| 68011 | P03383 | Q9NY57 | -0.9869    |
| 68012 | P03383 | O43248 | -0.22093   |
| 68013 | P03383 | P10635 | -0.4403    |
| 68014 | P03383 | Q5K130 | -0.0033752 |
| 68015 | P03383 | Q8WYB5 | -0.36197   |
| 68016 | P03383 | Q6P5W5 | -0.77262   |
| 68017 | P03383 | Q96DD7 | -0.86584   |
| 68018 | P03383 | P48764 | -0.54606   |
| 68019 | P03383 | Q9BW62 | -0.71132   |
| 68020 | P03383 | Q5T4T1 | -0.86584   |

|       |        |        |          |
|-------|--------|--------|----------|
| 68021 | P03383 | P26640 | -0.29415 |
| 68022 | P03383 | Q5JSH3 | -0.22743 |
| 68023 | P03383 | Q9H6B9 | -0.66345 |
| 68024 | P03383 | Q5T7P2 | -0.43006 |
| 68025 | P03383 | P01772 | -0.97479 |
| 68026 | P03383 | Q9NQT5 | -0.3476  |
| 68027 | P03383 | Q92520 | -0.76415 |
| 68028 | P03383 | P04062 | -0.4276  |
| 68029 | P03383 | P10451 | -0.72554 |
| 68030 | P03383 | Q8TEQ0 | -0.55072 |
| 68031 | P03383 | Q8N7X8 | -0.86584 |
| 68032 | P03383 | P98073 | -1.1342  |
| 68033 | P03383 | P13987 | -0.44884 |
| 68034 | P03383 | O00499 | -0.22746 |
| 68035 | P03383 | Q9H2R5 | -1.2917  |
| 68036 | P03383 | P61923 | -0.11643 |
| 68037 | P03383 | P20827 | -0.4089  |
| 68038 | P03383 | P23527 | -0.88998 |
| 68039 | P03383 | Q8N3J6 | -1.0264  |
| 68040 | P03383 | Q5VTE0 | -0.60286 |
| 68041 | P03383 | Q5VWW1 | -0.90124 |
| 68042 | P03383 | O95484 | -0.64451 |
| 68043 | P03383 | P24903 | -0.76256 |
| 68044 | P03383 | Q969L2 | -0.27874 |
| 68045 | P03383 | Q9BX73 | -0.86584 |
| 68046 | P03383 | P55283 | -1.0557  |
| 68047 | P03383 | O00144 | -0.68731 |
| 68048 | P03383 | P05106 | -0.30815 |
| 68049 | P03383 | O95562 | -0.62877 |
| 68050 | P03383 | P04629 | -0.45354 |
| 68051 | P03383 | O00451 | -0.47889 |
| 68052 | P03383 | P13473 | -0.70781 |
| 68053 | P03383 | Q9H3Y6 | -0.93793 |
| 68054 | P03383 | Q02985 | -0.91732 |
| 68055 | P03383 | Q9ULL4 | -0.61164 |
| 68056 | P03383 | P14174 | -0.27745 |
| 68057 | P03383 | A6NKC4 | -0.91471 |
| 68058 | P03383 | P10720 | -0.91859 |
| 68059 | P03383 | Q96DR8 | -0.90729 |
| 68060 | P03383 | Q86W26 | -0.79654 |
| 68061 | P03383 | Q86YS3 | -0.18702 |
| 68062 | P03383 | Q92995 | -0.23123 |
| 68063 | P03383 | Q29974 | -0.53914 |
| 68064 | P03383 | O95377 | -0.85709 |
| 68065 | P03383 | Q9UKA1 | -0.22674 |
| 68066 | P03383 | P07992 | -0.18121 |
| 68067 | P03383 | Q5T2P8 | -0.49855 |
| 68068 | P03383 | P36382 | -0.83545 |
| 68069 | P03383 | Q99880 | -0.88998 |
| 68070 | P03383 | Q53H54 | -0.33499 |
| 68071 | P03383 | P43630 | -1.0407  |
| 68072 | P03383 | Q14917 | -0.63537 |
| 68073 | P03383 | Q8TDX6 | -0.40507 |
| 68074 | P03383 | Q9Y6G9 | -0.22184 |
| 68075 | P03383 | Q13443 | -0.57415 |
| 68076 | P03383 | P01860 | -0.93808 |
| 68077 | P03383 | Q9BPX5 | -0.38856 |
| 68078 | P03383 | Q07864 | -0.3725  |
| 68079 | P03383 | Q9UI17 | -0.25335 |
| 68080 | P03383 | Q8N4C8 | -0.40218 |
| 68081 | P03383 | Q9HDC5 | -0.76247 |
| 68082 | P03383 | P60891 | -0.42371 |
| 68083 | P03383 | Q68CL5 | -0.31084 |
| 68084 | P03383 | A0PJZ0 | -0.22741 |
| 68085 | P03383 | Q86W25 | -0.79654 |
| 68086 | P03383 | O95859 | -0.99722 |
| 68087 | P03383 | P0C628 | -1.1027  |
| 68088 | P03383 | O60896 | -0.30326 |
| 68089 | P03383 | Q86YD3 | -1.2762  |
| 68090 | P03383 | Q6UWL6 | -0.90543 |
| 68091 | P03383 | P01859 | -0.93808 |
| 68092 | P03383 | Q8N945 | -0.30763 |
| 68093 | P03383 | Q8TDM0 | -0.29487 |
| 68094 | P03383 | Q6FI13 | -0.88998 |
| 68095 | P03383 | Q6P3W2 | -0.50311 |
| 68096 | P03383 | O95199 | -0.43285 |

|       |        |        |            |
|-------|--------|--------|------------|
| 68097 | P03383 | Q8WUJ3 | -0.29487   |
| 68098 | P03383 | O75648 | -0.46218   |
| 68099 | P03383 | P15391 | -1.044     |
| 68100 | P03383 | P60842 | -0.055016  |
| 68101 | P03383 | Q9NY84 | -0.39159   |
| 68102 | P03383 | Q13683 | -0.70505   |
| 68103 | P03383 | Q9NZV5 | -0.26943   |
| 68104 | P03383 | Q99624 | -0.8954    |
| 68105 | P03383 | Q8NFL0 | -0.5155    |
| 68106 | P03383 | P50990 | -0.34071   |
| 68107 | P03383 | Q8WV15 | -0.86584   |
| 68108 | P03383 | Q96M83 | -0.0016339 |
| 68109 | P03383 | Q13009 | -0.64891   |
| 68110 | P03383 | O15209 | -0.22601   |
| 68111 | P03383 | Q96RT6 | -0.67504   |
| 68112 | P03383 | Q9NUT2 | -0.60257   |
| 68113 | P03383 | O43921 | -0.38755   |
| 68114 | P03383 | A6NFA0 | -0.86584   |
| 68115 | P03383 | Q15833 | -0.21572   |
| 68116 | P03383 | Q8MH63 | -0.85749   |
| 68117 | P03383 | P32121 | -0.33183   |
| 68118 | P03383 | P21926 | -0.57575   |
| 68119 | P03383 | Q8N9B4 | -0.22741   |
| 68120 | P03383 | Q2MJR0 | -0.65616   |
| 68121 | P03383 | Q16619 | -0.53149   |
| 68122 | P03383 | Q8N6G6 | -1.0566    |
| 68123 | P03383 | O43614 | -1.1834    |
| 68124 | P03383 | Q9NWQ8 | -0.50564   |
| 68125 | P03383 | Q9BVS4 | -0.94636   |
| 68126 | P03383 | Q6NUK4 | -0.86584   |
| 68127 | P03383 | Q9H209 | -1.1027    |
| 68128 | P03383 | Q8TEX9 | -0.22563   |
| 68129 | P03383 | Q15842 | -0.75701   |
| 68130 | P03383 | Q9Y6N6 | -1.0212    |
| 68131 | P03383 | P22676 | -0.39295   |
| 68132 | P03383 | P56705 | -0.2908    |
| 68133 | P03383 | P21918 | -0.65948   |
| 68134 | P03383 | Q5JZY3 | -0.8784    |
| 68135 | P03383 | Q96J77 | -0.2077    |
| 68136 | P03383 | Q8NC69 | -0.19405   |
| 68137 | P03383 | Q86VM9 | -0.10777   |
| 68138 | P03383 | Q9HCM4 | -0.25921   |
| 68139 | P03383 | Q8NHS2 | -0.41606   |
| 68140 | P03383 | Q14627 | -1.0385    |
| 68141 | P03383 | O15440 | -0.7818    |
| 68142 | P03383 | Q6ZSM3 | -0.89347   |
| 68143 | P03383 | O14494 | -0.8024    |
| 68144 | P03383 | Q8NGH7 | -1.1027    |
| 68145 | P03383 | Q6QNK2 | -1.1905    |
| 68146 | P03383 | Q68D06 | -0.98392   |
| 68147 | P03383 | Q05086 | -0.22861   |
| 68148 | P03383 | A6NLB4 | -0.22536   |
| 68149 | P03383 | Q8NGN1 | -1.1027    |
| 68150 | P03383 | O14548 | -0.27516   |
| 68151 | P03383 | Q16288 | -0.79444   |
| 68152 | P03383 | O14957 | -0.60065   |
| 68153 | P03383 | Q8TD57 | -0.6994    |
| 68154 | P03383 | P30491 | -0.88446   |
| 68155 | P03383 | Q96C45 | -0.9088    |
| 68156 | P03383 | Q9NRJ5 | -0.2881    |
| 68157 | P03383 | A6NKL6 | -0.86584   |
| 68158 | P03383 | Q9UBC2 | -0.38787   |
| 68159 | P03383 | Q9BRL7 | -0.61576   |
| 68160 | P03383 | Q9BWV7 | -0.42167   |
| 68161 | P03383 | Q96RD6 | -0.75376   |
| 68162 | P03383 | Q8IWX8 | -0.25045   |
| 68163 | P03383 | Q9HC84 | -0.53893   |
| 68164 | P03383 | O75602 | -0.3404    |
| 68165 | P03383 | Q96SB4 | -0.22741   |
| 68166 | P03383 | O60779 | -0.59726   |
| 68167 | P03383 | Q9HDB9 | -0.40851   |
| 68168 | P03383 | Q7L576 | -0.18629   |
| 68169 | P03383 | Q92838 | -0.76261   |
| 68170 | P03383 | P13796 | -0.61103   |
| 68171 | P03383 | Q9Y2Y8 | -0.42438   |
| 68172 | P03383 | P55345 | -0.22741   |

|       |        |        |           |
|-------|--------|--------|-----------|
| 68173 | P03383 | Q3ZCU0 | -0.21591  |
| 68174 | P03383 | Q8NEW7 | -0.92901  |
| 68175 | P03383 | Q9NPQ8 | -0.5795   |
| 68176 | P03383 | Q9BXX1 | -0.21741  |
| 68177 | P03383 | Q8N474 | -0.32567  |
| 68178 | P03383 | Q8IWB9 | -0.88061  |
| 68179 | P03383 | Q71DI3 | -0.56355  |
| 68180 | P03383 | Q99986 | -0.22741  |
| 68181 | P03383 | P21281 | -0.50451  |
| 68182 | P03383 | Q92781 | -1.0127   |
| 68183 | P03383 | Q99958 | -0.25664  |
| 68184 | P03383 | P49810 | -0.22057  |
| 68185 | P03383 | Q7Z7H8 | -0.076815 |
| 68186 | P03383 | Q86Y78 | -0.87849  |
| 68187 | P03383 | Q8IUW5 | -0.80825  |
| 68188 | P03383 | Q96JF0 | -0.72399  |
| 68189 | P03383 | Q8WZA2 | -0.28523  |
| 68190 | P03383 | Q52LC2 | -0.7821   |
| 68191 | P03383 | P45983 | -0.2274   |
| 68192 | P03383 | P28332 | -0.5316   |
| 68193 | P03383 | Q8NBT0 | -0.24576  |
| 68194 | P03383 | Q96DN2 | -0.95463  |
| 68195 | P03383 | Q76KP1 | -0.69611  |
| 68196 | P03383 | P15814 | -0.94669  |
| 68197 | P03383 | Q9BTD8 | -0.44232  |
| 68198 | P03383 | Q8WUA8 | -0.87849  |
| 68199 | P03383 | Q9P0S2 | -0.43663  |
| 68200 | P03383 | Q9H2S9 | -0.27532  |
| 68201 | P03383 | A8MVW0 | -0.86584  |
| 68202 | P03383 | Q13231 | -0.77271  |
| 68203 | P03383 | Q02156 | -0.24683  |
| 68204 | P03383 | P08582 | -0.56774  |
| 68205 | P03383 | Q6UWU2 | -0.78258  |
| 68206 | P03383 | Q8IYX8 | -0.087931 |
| 68207 | P03383 | Q8TER0 | -0.89691  |
| 68208 | P03383 | Q86UD3 | -0.994    |
| 68209 | P03383 | Q6NXT1 | -0.22741  |
| 68210 | P03383 | Q95372 | -0.3318   |
| 68211 | P03383 | O15173 | -0.9819   |
| 68212 | P03383 | Q8IYS4 | -0.31925  |
| 68213 | P03383 | Q9Y6L6 | -0.8095   |
| 68214 | P03383 | Q9H3K2 | -0.04075  |
| 68215 | P03383 | Q9NZ09 | -0.29487  |
| 68216 | P03383 | P84074 | -0.60041  |
| 68217 | P03383 | Q9UJQ1 | -0.79327  |
| 68218 | P03383 | O60391 | -0.73725  |
| 68219 | P03383 | Q06889 | -0.21467  |
| 68220 | P03383 | Q9UK08 | -0.79272  |
| 68221 | P03383 | Q99595 | -0.43948  |
| 68222 | P03383 | P10646 | -0.73546  |
| 68223 | P03383 | Q8N852 | -0.86584  |
| 68224 | P03383 | P16157 | -0.22745  |
| 68225 | P03383 | P01621 | -0.97479  |
| 68226 | P03383 | Q9UL26 | -0.48528  |
| 68227 | P03383 | Q13207 | -0.41647  |
| 68228 | P03383 | P48146 | -0.67299  |
| 68229 | P03383 | Q9UKT6 | -0.47433  |
| 68230 | P03383 | P52888 | -0.58101  |
| 68231 | P03383 | Q8NFP4 | -0.62705  |
| 68232 | P03383 | Q6ZNB5 | -0.20887  |
| 68233 | P03383 | Q9NR19 | -0.36618  |
| 68234 | P03383 | Q9H853 | -0.60568  |
| 68235 | P03383 | P27216 | -0.67336  |
| 68236 | P03383 | Q8TAU3 | -0.21172  |
| 68237 | P03383 | P26992 | -0.48477  |
| 68238 | P03383 | P09681 | -0.4655   |
| 68239 | P03383 | Q8TEA7 | -0.98704  |
| 68240 | P03383 | Q8NFI3 | -0.27023  |
| 68241 | P03383 | Q9BS91 | -0.68551  |
| 68242 | P03383 | O95816 | -0.42356  |
| 68243 | P03383 | Q8NDV7 | -0.30652  |
| 68244 | P03383 | Q6NXT6 | -0.85397  |
| 68245 | P03383 | Q96C01 | -0.15369  |
| 68246 | P03383 | I3L273 | -0.019608 |
| 68247 | P03383 | Q8WWN8 | -0.86965  |
| 68248 | P03383 | Q07699 | -0.76242  |

|       |        |        |          |
|-------|--------|--------|----------|
| 68249 | P03383 | O75596 | -0.9472  |
| 68250 | P03383 | P42261 | -0.5081  |
| 68251 | P03383 | P27539 | -0.7407  |
| 68252 | P03383 | Q5VZK9 | -0.22724 |
| 68253 | P03383 | P53778 | -0.22741 |
| 68254 | P03383 | O60565 | -0.21233 |
| 68255 | P03383 | Q9UQ74 | -0.87849 |
| 68256 | P03383 | Q2VWP7 | -0.98753 |
| 68257 | P03383 | Q9UNI1 | -0.96055 |
| 68258 | P03383 | Q9H8K7 | -0.46086 |
| 68259 | P03383 | O60674 | -0.24695 |
| 68260 | P03383 | Q9BZB8 | -0.51867 |
| 68261 | P03383 | Q9BV97 | -0.31656 |
| 68262 | P03383 | Q8NGY6 | -1.1027  |
| 68263 | P03383 | Q8N967 | -0.86584 |
| 68264 | P03383 | Q9H9B4 | -0.77076 |
| 68265 | P03383 | C9JG80 | -0.16898 |
| 68266 | P03383 | Q92913 | -0.28942 |
| 68267 | P03383 | P12272 | -0.34315 |
| 68268 | P03383 | Q9UKB3 | -0.48297 |
| 68269 | P03383 | P06493 | -0.21585 |
| 68270 | P03383 | P28482 | -0.22741 |
| 68271 | P03383 | P50607 | -0.51373 |
| 68272 | P03383 | Q16595 | -0.20052 |
| 68273 | P03383 | Q5TCY1 | -0.57205 |
| 68274 | P03383 | Q7Z6M3 | -1.0197  |
| 68275 | P03383 | Q9BUL5 | -0.52332 |
| 68276 | P03383 | Q96LR1 | -0.87849 |
| 68277 | P03383 | O15503 | -0.46302 |
| 68278 | P03383 | Q96HD9 | -0.41741 |
| 68279 | P03383 | Q96I24 | -0.19475 |
| 68280 | P03383 | Q9UM44 | -0.52887 |
| 68281 | P03383 | Q9HBX9 | -1.0869  |
| 68282 | P03383 | Q7Z5L3 | -0.94408 |
| 68283 | P03383 | P52789 | -0.33193 |
| 68284 | P03383 | A3QJZ6 | -0.25825 |
| 68285 | P03383 | P57059 | -0.25702 |
| 68286 | P03383 | Q9HCK1 | -0.51948 |
| 68287 | P03383 | Q8NGL6 | -1.1027  |
| 68288 | P03383 | Q86SG4 | -0.22061 |
| 68289 | P03383 | P16150 | -0.80944 |
| 68290 | P03383 | Q9H1F0 | -0.79897 |
| 68291 | P03383 | Q9NRX5 | -0.47103 |
| 68292 | P03383 | Q13145 | -0.52991 |
| 68293 | P03383 | Q30KP8 | -0.84399 |
| 68294 | P03383 | Q05209 | -0.38755 |
| 68295 | P03383 | P31513 | -0.83702 |
| 68296 | P03383 | P24394 | -0.83761 |
| 68297 | P03383 | Q3SY17 | -0.73185 |
| 68298 | P03383 | Q13410 | -1.3283  |
| 68299 | P03383 | Q9NZC2 | -1.1177  |
| 68300 | P03383 | O60656 | -0.67826 |
| 68301 | P03383 | Q969F2 | -0.19352 |
| 68302 | P03383 | O14562 | -0.15562 |
| 68303 | P03383 | Q86SQ0 | -0.5268  |
| 68304 | P03383 | P41279 | -0.23187 |
| 68305 | P03383 | Q9H765 | -0.22741 |
| 68306 | P03383 | Q30KQ9 | -0.84399 |
| 68307 | P03383 | Q8NH01 | -1.1027  |
| 68308 | P03383 | P01375 | -0.24266 |
| 68309 | P03383 | Q99758 | -0.9965  |
| 68310 | P03383 | Q9Y2U8 | -0.34335 |
| 68311 | P03383 | Q5TC84 | -0.53928 |
| 68312 | P03383 | Q9NPD5 | -0.6841  |
| 68313 | P03383 | P13688 | -0.65165 |
| 68314 | P03383 | Q16853 | -0.96439 |
| 68315 | P03383 | Q14790 | -0.22644 |
| 68316 | P03383 | Q9NRR2 | -1.2797  |
| 68317 | P03383 | Q96Q45 | -0.84388 |
| 68318 | P03383 | O43312 | -0.31873 |
| 68319 | P03383 | P00414 | -0.53695 |
| 68320 | P03383 | Q96EQ8 | -0.72093 |
| 68321 | P03383 | Q9BQ67 | -0.2274  |
| 68322 | P03383 | Q86SM5 | -1.1721  |
| 68323 | P03383 | Q6GMV3 | -0.69639 |
| 68324 | P03383 | Q8TB36 | -0.55087 |



|       |        |        |           |
|-------|--------|--------|-----------|
| 68325 | P03383 | P61026 | -0.62127  |
| 68326 | P03383 | O95057 | -1.1897   |
| 68327 | P03383 | Q7L4E1 | -0.86584  |
| 68328 | P03383 | Q12948 | -0.26559  |
| 68329 | P03383 | Q9Y6U7 | -0.92811  |
| 68330 | P03383 | Q16762 | -0.25686  |
| 68331 | P03383 | Q14788 | -0.54969  |
| 68332 | P03383 | P11388 | -0.14874  |
| 68333 | P03383 | Q9C0I1 | -0.50994  |
| 68334 | P03383 | Q9Y581 | -0.58331  |
| 68335 | P03383 | Q8IVJ8 | -0.86584  |
| 68336 | P03383 | Q8WW43 | -0.39909  |
| 68337 | P03383 | Q5TIA1 | -0.42575  |
| 68338 | P03383 | Q8N3K9 | -0.28764  |
| 68339 | P03383 | P05090 | -0.53938  |
| 68340 | P03383 | P00747 | -0.39402  |
| 68341 | P03383 | Q9H668 | -0.039902 |
| 68342 | P03383 | Q9NU39 | -0.35259  |
| 68343 | P03383 | Q92752 | -0.4275   |
| 68344 | P03383 | O75841 | -0.68228  |
| 68345 | P03383 | P45985 | -0.22865  |
| 68346 | P03383 | Q75T13 | -0.52048  |
| 68347 | P03383 | A1A519 | -0.73967  |
| 68348 | P03383 | P82987 | -1.0838   |
| 68349 | P03383 | Q8NDB6 | -0.7792   |
| 68350 | P03383 | O75467 | -0.21172  |
| 68351 | P03383 | Q12768 | -0.3474   |
| 68352 | P03383 | Q4VC12 | -0.511    |
| 68353 | P03383 | Q9NUQ8 | -0.8667   |
| 68354 | P03383 | Q9Y2H1 | -0.27171  |
| 68355 | P03383 | A6NKT7 | -0.53439  |
| 68356 | P03383 | Q9H313 | -0.7675   |
| 68357 | P03383 | Q75071 | -0.52751  |
| 68358 | P03383 | Q8NGJ4 | -1.1027   |
| 68359 | P03383 | Q0IIM8 | -1.2794   |
| 68360 | P03383 | Q86WB7 | -0.71859  |
| 68361 | P03383 | P12821 | -0.69392  |
| 68362 | P03383 | Q8N8A6 | -0.4991   |
| 68363 | P03383 | Q96C92 | -0.29487  |
| 68364 | P03383 | Q9Y4E8 | -0.40563  |
| 68365 | P03383 | Q99259 | -0.38768  |
| 68366 | P03383 | Q6IE38 | -0.79897  |
| 68367 | P03383 | P08861 | -1.3005   |
| 68368 | P03383 | Q9UQF0 | -0.61341  |
| 68369 | P03383 | Q00453 | -0.59647  |
| 68370 | P03383 | Q9P0N9 | -0.50134  |
| 68371 | P03383 | Q8TEH3 | -0.60492  |
| 68372 | P03383 | P54851 | -0.83835  |
| 68373 | P03383 | Q96PV0 | -0.64767  |
| 68374 | P03383 | Q8NF86 | -1.3088   |
| 68375 | P03383 | P52790 | -0.32794  |
| 68376 | P03383 | Q15849 | -0.40556  |
| 68377 | P03383 | Q95838 | -1.0432   |
| 68378 | P03383 | Q8NCG5 | -0.62276  |
| 68379 | P03383 | Q9HCE5 | -0.18919  |
| 68380 | P03383 | Q9H1X3 | -0.86545  |
| 68381 | P03383 | P07988 | -0.63223  |
| 68382 | P03383 | P49593 | -0.11204  |
| 68383 | P03383 | Q9UFE4 | -0.44324  |
| 68384 | P03383 | Q8NHC4 | -1.1027   |
| 68385 | P03383 | Q9H3U7 | -1.1319   |
| 68386 | P03383 | Q9H492 | -0.14637  |
| 68387 | P03383 | P0CJ73 | -0.72903  |
| 68388 | P03383 | Q8WY91 | -0.57338  |
| 68389 | P03383 | O60503 | -0.91815  |
| 68390 | P03383 | Q5VU97 | -0.92183  |
| 68391 | P03383 | Q99541 | -0.39537  |
| 68392 | P03383 | O75954 | -1.0003   |
| 68393 | P03383 | P04040 | -0.37992  |
| 68394 | P03383 | P16471 | -0.8735   |
| 68395 | P03383 | Q9H0Q3 | -0.80195  |
| 68396 | P03383 | Q96D09 | -0.28875  |
| 68397 | P03383 | Q8NGA5 | -0.91257  |
| 68398 | P03383 | Q9NRM0 | -0.55758  |
| 68399 | P03383 | P39748 | -0.14285  |
| 68400 | P03383 | Q6GV28 | -0.87839  |

|       |        |        |           |
|-------|--------|--------|-----------|
| 68401 | P03383 | Q96A08 | -0.8091   |
| 68402 | P03383 | Q9BYJ4 | -0.50212  |
| 68403 | P03383 | Q8NH18 | -1.1027   |
| 68404 | P03383 | P49137 | -0.22913  |
| 68405 | P03383 | Q12929 | -0.22741  |
| 68406 | P03383 | Q9NWW6 | -0.80687  |
| 68407 | P03383 | Q8NAT2 | -0.62329  |
| 68408 | P03383 | Q9H9A5 | -0.17305  |
| 68409 | P03383 | P25021 | -1.2505   |
| 68410 | P03383 | Q9UKP3 | -0.73469  |
| 68411 | P03383 | F8VTS6 | -0.52332  |
| 68412 | P03383 | O60506 | -0.24662  |
| 68413 | P03383 | Q68CZ2 | -0.22741  |
| 68414 | P03383 | Q75N03 | -0.24925  |
| 68415 | P03383 | O95825 | -0.80044  |
| 68416 | P03383 | Q96NC0 | -0.61367  |
| 68417 | P03383 | Q9UBL6 | -0.48362  |
| 68418 | P03383 | P0C0E4 | -0.75906  |
| 68419 | P03383 | Q9BXJ4 | -0.38134  |
| 68420 | P03383 | P30532 | -0.89524  |
| 68421 | P03383 | Q496H8 | -0.52521  |
| 68422 | P03383 | P04431 | -0.97479  |
| 68423 | P03383 | P46940 | -0.22741  |
| 68424 | P03383 | A8MQB9 | -0.22741  |
| 68425 | P03383 | Q5T848 | -1.1721   |
| 68426 | P03383 | P08574 | -0.40776  |
| 68427 | P03383 | Q99969 | -0.39974  |
| 68428 | P03383 | Q8N465 | -0.33506  |
| 68429 | P03383 | Q8IYP2 | -1.2917   |
| 68430 | P03383 | Q3I5F7 | -0.18501  |
| 68431 | P03383 | O75600 | -0.33598  |
| 68432 | P03383 | P0C7V4 | -0.48092  |
| 68433 | P03383 | Q15533 | -0.4336   |
| 68434 | P03383 | P04439 | -0.93787  |
| 68435 | P03383 | Q8NBM4 | -0.86584  |
| 68436 | P03383 | Q5THR3 | -0.22688  |
| 68437 | P03383 | Q14549 | -0.22725  |
| 68438 | P03383 | Q8TBP5 | -0.86584  |
| 68439 | P03383 | Q4VC31 | -0.30763  |
| 68440 | P03383 | Q75031 | -0.34527  |
| 68441 | P03383 | Q9BXC0 | -1.1333   |
| 68442 | P03383 | Q9Y5P0 | -1.1027   |
| 68443 | P03383 | Q96K75 | -0.21172  |
| 68444 | P03383 | Q86Y13 | -0.23004  |
| 68445 | P03383 | Q02809 | -0.67029  |
| 68446 | P03383 | Q06520 | -0.22761  |
| 68447 | P03383 | Q01085 | -0.34681  |
| 68448 | P03383 | P0CF51 | -0.86584  |
| 68449 | P03383 | Q13351 | -0.22587  |
| 68450 | P03383 | Q43524 | -0.35259  |
| 68451 | P03383 | Q13191 | -0.22741  |
| 68452 | P03383 | Q9BYX2 | -0.67734  |
| 68453 | P03383 | E5RQL4 | -0.54583  |
| 68454 | P03383 | Q5VTT2 | -0.86584  |
| 68455 | P03383 | P18505 | -0.90218  |
| 68456 | P03383 | Q16538 | -1.1721   |
| 68457 | P03383 | P49685 | -1.2378   |
| 68458 | P03383 | Q8TBB0 | -0.61302  |
| 68459 | P03383 | O00748 | -0.34183  |
| 68460 | P03383 | Q9Y561 | -0.58262  |
| 68461 | P03383 | Q8NGA6 | -1.1027   |
| 68462 | P03383 | P13761 | -0.37101  |
| 68463 | P03383 | P30408 | -0.79046  |
| 68464 | P03383 | Q96QH8 | -0.85255  |
| 68465 | P03383 | P98194 | -0.81337  |
| 68466 | P03383 | P42126 | -0.37482  |
| 68467 | P03383 | Q9NP86 | -0.40174  |
| 68468 | P03383 | Q30KQ5 | -0.84399  |
| 68469 | P03383 | P40200 | -1.2141   |
| 68470 | P03383 | P42694 | -0.61085  |
| 68471 | P03383 | P01589 | -0.59498  |
| 68472 | P03383 | Q9BWS9 | -0.80658  |
| 68473 | P03383 | Q8IWU4 | -0.56126  |
| 68474 | P03383 | Q8N2B8 | -0.085462 |
| 68475 | P03383 | O00299 | -0.20029  |
| 68476 | P03383 | Q99828 | -0.228    |

|       |        |        |          |
|-------|--------|--------|----------|
| 68477 | P03383 | Q6UW32 | -0.34624 |
| 68478 | P03383 | Q9UHG2 | -0.74472 |
| 68479 | P03383 | Q5H913 | -1.2152  |
| 68480 | P03383 | Q6Q8B3 | -0.86584 |
| 68481 | P03383 | Q9UGC6 | -0.47095 |
| 68482 | P03383 | Q75414 | -0.55102 |
| 68483 | P03383 | P08631 | -0.24247 |
| 68484 | P03383 | P41240 | -0.22744 |
| 68485 | P03383 | Q5VWM1 | -0.25825 |
| 68486 | P03383 | A4D1N5 | -0.19242 |
| 68487 | P03383 | P63267 | -0.60293 |
| 68488 | P03383 | P01624 | -0.97479 |
| 68489 | P03383 | P61266 | -0.80703 |
| 68490 | P03383 | Q9NXE4 | -0.55889 |
| 68491 | P03383 | P85298 | -0.51291 |
| 68492 | P03383 | Q6IQ55 | -0.37131 |
| 68493 | P03383 | Q7Z5L4 | -0.65316 |
| 68494 | P03383 | Q9NQZ6 | -0.47027 |
| 68495 | P03383 | Q96KV7 | -0.22777 |
| 68496 | P03383 | P20594 | -1.0593  |
| 68497 | P03383 | Q8TEU8 | -0.71788 |
| 68498 | P03383 | Q8NGK1 | -1.1027  |
| 68499 | P03383 | Q6T4P5 | -0.94832 |
| 68500 | P03383 | Q14011 | -0.22364 |
| 68501 | P03383 | P54750 | -0.44583 |
| 68502 | P03383 | P51606 | -0.40219 |
| 68503 | P03383 | Q9NTG1 | -1.0383  |
| 68504 | P03383 | Q53FP2 | -0.55329 |
| 68505 | P03383 | Q5T1M5 | -0.66743 |
| 68506 | P03383 | Q9NVA4 | -0.86584 |
| 68507 | P03383 | P43004 | -0.54404 |
| 68508 | P03383 | Q6UVW9 | -0.3621  |
| 68509 | P03383 | Q6ZU64 | -0.71371 |
| 68510 | P03383 | Q9UK05 | -0.22741 |
| 68511 | P03383 | Q99527 | -1.0587  |
| 68512 | P03383 | Q14791 | -0.54339 |
| 68513 | P03383 | Q7RTU3 | -0.22745 |
| 68514 | P03383 | P01598 | -0.97479 |
| 68515 | P03383 | Q3BBV0 | -0.29487 |
| 68516 | P03383 | Q14654 | -0.54109 |
| 68517 | P03383 | Q8N1G0 | -0.19518 |
| 68518 | P03383 | Q6UX53 | -0.47305 |
| 68519 | P03383 | P35346 | -0.96751 |
| 68520 | P03383 | P58513 | -0.36478 |
| 68521 | P03383 | Q8WU17 | -0.53757 |
| 68522 | P03383 | Q8NGE7 | -1.1027  |
| 68523 | P03383 | P17509 | -0.21841 |
| 68524 | P03383 | Q8TD43 | -0.78277 |
| 68525 | P03383 | Q6IEU7 | -1.1027  |
| 68526 | P03383 | Q14028 | -1.0828  |
| 68527 | P03383 | Q6NX49 | -0.21172 |
| 68528 | P03383 | Q6ZV73 | -0.75138 |
| 68529 | P03383 | Q07820 | -0.22739 |
| 68530 | P03383 | Q3SXM5 | -0.88939 |
| 68531 | P03383 | P0CG30 | -0.22551 |
| 68532 | P03383 | P46736 | -0.25581 |
| 68533 | P03383 | P01127 | -0.29677 |
| 68534 | P03383 | P57054 | -0.77893 |
| 68535 | P03383 | Q30167 | -0.67577 |
| 68536 | P03383 | P04626 | -0.22741 |
| 68537 | P03383 | Q15034 | -0.42158 |
| 68538 | P03383 | P20036 | -0.73433 |
| 68539 | P03383 | Q5TA77 | -0.43006 |
| 68540 | P03383 | Q92729 | -0.73422 |
| 68541 | P03383 | Q15428 | -0.24219 |
| 68542 | P03383 | P0C7N8 | -1.1027  |
| 68543 | P03383 | Q08708 | -1.0533  |
| 68544 | P03383 | A6NC98 | -0.25005 |
| 68545 | P03383 | Q86Y39 | -0.55115 |
| 68546 | P03383 | Q7Z3T8 | -0.17723 |
| 68547 | P03383 | Q96AP4 | -0.73967 |
| 68548 | P03383 | Q15347 | -0.87027 |
| 68549 | P03383 | Q9ULI1 | -0.22741 |
| 68550 | P03383 | Q9ULG6 | -0.70961 |
| 68551 | P03383 | Q14390 | -0.41457 |
| 68552 | P03383 | P14923 | -0.55164 |

|       |        |        |           |
|-------|--------|--------|-----------|
| 68553 | P03383 | Q9HDB8 | -0.30416  |
| 68554 | P03383 | O15409 | -0.35259  |
| 68555 | P03383 | Q9NUQ9 | -0.12352  |
| 68556 | P03383 | Q9BZE0 | -0.22712  |
| 68557 | P03383 | Q96G75 | -0.039856 |
| 68558 | P03383 | Q8NGP8 | -1.1027   |
| 68559 | P03383 | P27708 | -0.4022   |
| 68560 | P03383 | Q8N350 | -0.86584  |
| 68561 | P03383 | Q9BXX2 | -0.22742  |
| 68562 | P03383 | Q8IUM7 | -0.26123  |
| 68563 | P03383 | O00391 | -1.0273   |
| 68564 | P03383 | Q13241 | -0.96614  |
| 68565 | P03383 | P0DJR0 | -0.95272  |
| 68566 | P03383 | Q2TBA0 | -0.20948  |
| 68567 | P03383 | Q13724 | -0.84278  |
| 68568 | P03383 | Q43283 | -0.33198  |
| 68569 | P03383 | Q4FZB7 | -0.21506  |
| 68570 | P03383 | P01623 | -0.97479  |
| 68571 | P03383 | P43251 | -0.62208  |
| 68572 | P03383 | Q8WXI3 | -0.62076  |
| 68573 | P03383 | Q9UL62 | -0.46731  |
| 68574 | P03383 | Q8IUK8 | -0.86584  |
| 68575 | P03383 | Q14828 | -0.50485  |
| 68576 | P03383 | A2A3L6 | -0.22531  |
| 68577 | P03383 | Q96CB5 | -0.24316  |
| 68578 | P03383 | A6NJY1 | -0.84238  |
| 68579 | P03383 | Q8IYS5 | -1.2762   |
| 68580 | P03383 | Q9UJU5 | -0.36161  |
| 68581 | P03383 | Q9NRJ4 | -0.22455  |
| 68582 | P03383 | P50897 | -0.34267  |
| 68583 | P03383 | A8MQT2 | -0.43638  |
| 68584 | P03383 | Q9NP78 | -0.66984  |
| 68585 | P03383 | P0CJ87 | -0.1915   |
| 68586 | P03383 | P50553 | -0.47725  |
| 68587 | P03383 | Q9Y672 | -0.6826   |
| 68588 | P03383 | Q6ZU69 | -0.86584  |
| 68589 | P03383 | Q9H2X0 | -0.51563  |
| 68590 | P03383 | P15622 | -0.21172  |
| 68591 | P03383 | Q14940 | -0.93992  |
| 68592 | P03383 | Q6ZQN5 | -0.37218  |
| 68593 | P03383 | Q9UGB7 | -0.38019  |
| 68594 | P03383 | P24347 | -1.3093   |
| 68595 | P03383 | Q9H207 | -1.1027   |
| 68596 | P03383 | Q9UL51 | -0.90773  |
| 68597 | P03383 | A6PVY3 | -0.090467 |
| 68598 | P03383 | O60749 | -0.22054  |
| 68599 | P03383 | P06576 | -0.21042  |
| 68600 | P03383 | P20020 | -0.68252  |
| 68601 | P03383 | Q8IZT6 | -0.2274   |
| 68602 | P03383 | P24821 | -1.0239   |
| 68603 | P03383 | Q9NQX6 | -0.21172  |
| 68604 | P03383 | O00468 | -0.451    |
| 68605 | P03383 | Q7Z2Z2 | -0.62853  |
| 68606 | P03383 | P25067 | -1.0327   |
| 68607 | P03383 | Q9H0C2 | -0.69745  |
| 68608 | P03383 | Q8N131 | -0.85525  |
| 68609 | P03383 | P09917 | -0.22679  |
| 68610 | P03383 | Q8IX04 | -0.44746  |
| 68611 | P03383 | Q8NGC1 | -1.1027   |
| 68612 | P03383 | P51828 | -0.82828  |
| 68613 | P03383 | P48740 | -0.86416  |
| 68614 | P03383 | Q92685 | -0.76941  |
| 68615 | P03383 | Q2M1Z3 | -1.17     |
| 68616 | P03383 | Q8NGA2 | -1.1027   |
| 68617 | P03383 | P01625 | -0.97479  |
| 68618 | P03383 | Q9H0R6 | -0.53322  |
| 68619 | P03383 | A1L3X4 | -0.47027  |
| 68620 | P03383 | Q8NA34 | -0.16969  |
| 68621 | P03383 | Q9UBP8 | -0.38602  |
| 68622 | P03383 | Q14733 | -0.22933  |
| 68623 | P03383 | Q9GZN4 | -1.2917   |
| 68624 | P03383 | P13378 | -0.21691  |
| 68625 | P03383 | O94953 | -0.19459  |
| 68626 | P03383 | Q9Y6M9 | -0.28702  |
| 68627 | P03383 | P16389 | -0.8014   |
| 68628 | P03383 | Q3B7T3 | -0.77465  |

|       |        |        |          |
|-------|--------|--------|----------|
| 68629 | P03383 | Q6V1X1 | -0.28246 |
| 68630 | P03383 | P04183 | -0.59373 |
| 68631 | P03383 | Q8TBE7 | -0.78058 |
| 68632 | P03383 | P32249 | -1.1048  |
| 68633 | P03383 | A5PLL7 | -0.93931 |
| 68634 | P03383 | Q10713 | -0.57622 |
| 68635 | P03383 | A6NFU8 | -0.77399 |
| 68636 | P03383 | P86790 | -0.6312  |
| 68637 | P03383 | Q9UBN1 | -1.0054  |
| 68638 | P03383 | Q9BZ71 | -0.69789 |
| 68639 | P03383 | Q9NQQ7 | -0.85789 |
| 68640 | P03383 | Q96QZ0 | -0.84725 |
| 68641 | P03383 | Q14774 | -0.22816 |
| 68642 | P03383 | Q8N7R0 | -0.22828 |
| 68643 | P03383 | Q96EH8 | -0.57509 |
| 68644 | P03383 | Q43889 | -0.39499 |
| 68645 | P03383 | P30508 | -0.93787 |
| 68646 | P03383 | Q6UX46 | -0.87849 |
| 68647 | P03383 | Q8NGU2 | -1.1027  |
| 68648 | P03383 | Q96I25 | -0.20169 |
| 68649 | P03383 | P98153 | -0.92309 |
| 68650 | P03383 | Q86Z14 | -0.73756 |
| 68651 | P03383 | Q86YC3 | -0.86584 |
| 68652 | P03383 | Q6UWP8 | -0.87849 |
| 68653 | P03383 | Q969D9 | -0.87365 |
| 68654 | P03383 | Q14117 | -0.21425 |
| 68655 | P03383 | P11511 | -0.35232 |
| 68656 | P03383 | Q9BZW4 | -0.6579  |
| 68657 | P03383 | Q4VX76 | -0.7765  |
| 68658 | P03383 | O95661 | -0.6672  |
| 68659 | P03383 | O43827 | -1.0709  |
| 68660 | P03383 | Q9H0N0 | -0.5249  |
| 68661 | P03383 | Q8NDP4 | -0.21172 |
| 68662 | P03383 | P56385 | -0.26901 |
| 68663 | P03383 | Q8NGH6 | -1.1027  |
| 68664 | P03383 | P43003 | -0.56338 |
| 68665 | P03383 | Q9BY67 | -0.4037  |
| 68666 | P03383 | Q15884 | -0.52887 |
| 68667 | P03383 | Q5JPF3 | -0.43276 |
| 68668 | P03383 | Q96JG9 | -0.22748 |
| 68669 | P03383 | P01770 | -0.97479 |
| 68670 | P03383 | Q9H112 | -0.23985 |
| 68671 | P03383 | P38484 | -0.97254 |
| 68672 | P03383 | Q969Z4 | -0.78299 |
| 68673 | P03383 | P0CG39 | -0.436   |
| 68674 | P03383 | Q7Z7G2 | -0.39612 |
| 68675 | P03383 | P01608 | -0.97479 |
| 68676 | P03383 | Q8NHY3 | -0.41932 |
| 68677 | P03383 | Q6ZSJ9 | -0.86584 |
| 68678 | P03383 | Q95007 | -1.1027  |
| 68679 | P03383 | B9EJG8 | -0.86584 |
| 68680 | P03383 | D6RF30 | -0.35868 |
| 68681 | P03383 | P34059 | -0.53103 |
| 68682 | P03383 | Q6NVY1 | -0.15158 |
| 68683 | P03383 | Q8WXR4 | -0.8093  |
| 68684 | P03383 | Q8NBE8 | -0.20345 |
| 68685 | P03383 | P57103 | -0.76906 |
| 68686 | P03383 | P09923 | -1.1216  |
| 68687 | P03383 | Q7L7L0 | -0.88998 |
| 68688 | P03383 | Q13555 | -0.71796 |
| 68689 | P03383 | Q9H0M0 | -0.22741 |
| 68690 | P03383 | Q9UPR5 | -0.81708 |
| 68691 | P03383 | O94766 | -0.56041 |
| 68692 | P03383 | P16870 | -0.74736 |
| 68693 | P03383 | Q96NK8 | -0.22751 |
| 68694 | P03383 | P24588 | -0.1033  |
| 68695 | P03383 | Q7Z2Y8 | -0.50082 |
| 68696 | P03383 | Q96NG8 | -0.21172 |
| 68697 | P03383 | Q06210 | -0.177   |
| 68698 | P03383 | Q13126 | -0.17221 |
| 68699 | P03383 | Q9UGR2 | -0.22504 |
| 68700 | P03383 | Q92968 | -0.26131 |
| 68701 | P03383 | Q9UKK9 | -0.6119  |
| 68702 | P03383 | Q7Z7M1 | -1.1905  |
| 68703 | P03383 | Q76N89 | -0.29066 |
| 68704 | P03383 | P10398 | -0.25225 |

|       |        |        |           |
|-------|--------|--------|-----------|
| 68705 | P03383 | O14795 | -0.40805  |
| 68706 | P03383 | Q9H936 | -0.33532  |
| 68707 | P03383 | P60983 | -0.74323  |
| 68708 | P03383 | Q9H8U3 | -0.63334  |
| 68709 | P03383 | P51841 | -1.1678   |
| 68710 | P03383 | P50281 | -0.36436  |
| 68711 | P03383 | Q8TBG4 | -0.41026  |
| 68712 | P03383 | P0CJ68 | -0.72903  |
| 68713 | P03383 | Q96Q77 | -0.52751  |
| 68714 | P03383 | Q9C0K1 | -0.90245  |
| 68715 | P03383 | P15289 | -0.64587  |
| 68716 | P03383 | O95677 | -0.20205  |
| 68717 | P03383 | Q9Y2J2 | -0.26946  |
| 68718 | P03383 | P03928 | -0.49695  |
| 68719 | P03383 | P29016 | -0.48659  |
| 68720 | P03383 | Q5T2L2 | -0.44296  |
| 68721 | P03383 | O14492 | -0.57799  |
| 68722 | P03383 | Q9NV35 | -0.43358  |
| 68723 | P03383 | Q96MP8 | -0.21563  |
| 68724 | P03383 | P32238 | -0.66905  |
| 68725 | P03383 | Q6IQ22 | -0.75268  |
| 68726 | P03383 | P15529 | -0.5976   |
| 68727 | P03383 | P30954 | -1.1609   |
| 68728 | P03383 | A8TX70 | -1.1454   |
| 68729 | P03383 | P23469 | -0.40014  |
| 68730 | P03383 | Q7L4P6 | -0.35868  |
| 68731 | P03383 | Q86TE4 | -0.87849  |
| 68732 | P03383 | Q92784 | -0.23036  |
| 68733 | P03383 | Q9BSH3 | -0.22463  |
| 68734 | P03383 | Q9Y6A2 | -0.81151  |
| 68735 | P03383 | Q02108 | -0.61177  |
| 68736 | P03383 | A8MX76 | -1.0319   |
| 68737 | P03383 | Q7KZI7 | -0.52113  |
| 68738 | P03383 | O94826 | -0.22726  |
| 68739 | P03383 | P0C7M7 | -0.82614  |
| 68740 | P03383 | Q6L9W6 | -0.69611  |
| 68741 | P03383 | P14550 | -0.43878  |
| 68742 | P03383 | Q9Y5H7 | -1.1553   |
| 68743 | P03383 | Q96EX1 | -0.86584  |
| 68744 | P03383 | Q9BVG8 | -0.37999  |
| 68745 | P03383 | Q14508 | -0.92274  |
| 68746 | P03383 | Q7Z5J8 | -0.86584  |
| 68747 | P03383 | Q8N3R9 | -0.22503  |
| 68748 | P03383 | Q8TDW0 | -0.93931  |
| 68749 | P03383 | Q8TEJ3 | -0.52332  |
| 68750 | P03383 | Q53FA7 | -0.71046  |
| 68751 | P03383 | Q04759 | -0.21505  |
| 68752 | P03383 | Q9BZD7 | -1.1902   |
| 68753 | P03383 | O75462 | -0.24721  |
| 68754 | P03383 | Q03426 | -0.64633  |
| 68755 | P03383 | Q68BL8 | -0.91497  |
| 68756 | P03383 | P01229 | -0.79137  |
| 68757 | P03383 | O15481 | -0.014218 |
| 68758 | P03383 | O14498 | -1.0545   |
| 68759 | P03383 | Q02978 | -0.43457  |
| 68760 | P03383 | P51684 | -1.0531   |
| 68761 | P03383 | Q6IB77 | -0.20967  |
| 68762 | P03383 | O00634 | -0.54     |
| 68763 | P03383 | Q6UB99 | -0.25591  |
| 68764 | P03383 | O60729 | -0.36058  |
| 68765 | P03383 | P04220 | -0.55431  |
| 68766 | P03383 | P13349 | -0.22741  |
| 68767 | P03383 | Q96M93 | -0.78602  |
| 68768 | P03383 | Q9BXR6 | -0.85879  |
| 68769 | P03383 | Q16799 | -0.53495  |
| 68770 | P03383 | O76083 | -0.22614  |
| 68771 | P03383 | P28799 | -0.25697  |
| 68772 | P03383 | Q14119 | -0.10299  |
| 68773 | P03383 | Q6UX73 | -0.87849  |
| 68774 | P03383 | Q06710 | -0.22713  |
| 68775 | P03383 | Q6NUJ1 | -0.97115  |
| 68776 | P03383 | P53680 | -0.15819  |
| 68777 | P03383 | Q6XPR3 | -0.95132  |
| 68778 | P03383 | Q9NZM6 | -0.95205  |
| 68779 | P03383 | O15232 | -0.54278  |
| 68780 | P03383 | Q96KN2 | -1.1503   |

|       |        |        |           |
|-------|--------|--------|-----------|
| 68781 | P03383 | O43251 | -0.27838  |
| 68782 | P03383 | A7E2F4 | -0.43638  |
| 68783 | P03383 | Q13591 | -0.85472  |
| 68784 | P03383 | A4UGR9 | -0.45146  |
| 68785 | P03383 | Q6EKJ0 | -0.15477  |
| 68786 | P03383 | Q9P225 | -0.65174  |
| 68787 | P03383 | Q9BUT1 | -0.64251  |
| 68788 | P03383 | P06850 | -0.4728   |
| 68789 | P03383 | Q9H2X9 | -0.83867  |
| 68790 | P03383 | Q7Z5P4 | -1.014    |
| 68791 | P03383 | Q9Y3M9 | -0.21172  |
| 68792 | P03383 | P13671 | -0.28263  |
| 68793 | P03383 | O94885 | -0.22699  |
| 68794 | P03383 | Q96MC5 | -0.13085  |
| 68795 | P03383 | P0C7P4 | -0.67713  |
| 68796 | P03383 | P63124 | -0.67565  |
| 68797 | P03383 | Q9BY71 | -0.31983  |
| 68798 | P03383 | Q8N4Q0 | -0.69585  |
| 68799 | P03383 | O00398 | -1.124    |
| 68800 | P03383 | Q02363 | -0.22753  |
| 68801 | P03383 | Q9P298 | -0.86584  |
| 68802 | P03383 | P15309 | -1.1298   |
| 68803 | P03383 | P18577 | -0.93117  |
| 68804 | P03383 | Q8NEK5 | -0.21172  |
| 68805 | P03383 | Q5JSS6 | -0.35097  |
| 68806 | P03383 | Q8N5C1 | -0.86584  |
| 68807 | P03383 | Q9H300 | -0.72391  |
| 68808 | P03383 | Q495D7 | -0.026915 |
| 68809 | P03383 | Q13011 | -0.16942  |
| 68810 | P03383 | Q9BRX5 | -0.25045  |
| 68811 | P03383 | Q8TC20 | -0.067364 |
| 68812 | P03383 | Q8IZP0 | -0.22834  |
| 68813 | P03383 | Q8IYX4 | -0.62496  |
| 68814 | P03383 | Q86UK5 | -0.62999  |
| 68815 | P03383 | Q9UP38 | -0.37711  |
| 68816 | P03383 | P24557 | -0.80902  |
| 68817 | P03383 | Q8N3A8 | -0.64965  |
| 68818 | P03383 | Q9BXT5 | -0.39644  |
| 68819 | P03383 | A6NE01 | -0.19693  |
| 68820 | P03383 | Q13136 | -0.22698  |
| 68821 | P03383 | A6NIR3 | -0.98969  |
| 68822 | P03383 | Q92935 | -0.88574  |
| 68823 | P03383 | Q14735 | -0.60949  |
| 68824 | P03383 | Q96EG1 | -0.56833  |
| 68825 | P03383 | P30466 | -0.88446  |
| 68826 | P03383 | Q2TAY7 | -0.22788  |
| 68827 | P03383 | A8MTL3 | -0.52332  |
| 68828 | P03383 | Q9UIG5 | -0.2682   |
| 68829 | P03383 | Q8WVD5 | -0.30297  |
| 68830 | P03383 | Q8N7E2 | -0.63687  |
| 68831 | P03383 | P98174 | -0.89491  |
| 68832 | P03383 | Q7Z6L0 | -0.92914  |
| 68833 | P03383 | Q96NR7 | -0.13105  |
| 68834 | P03383 | Q92614 | -0.089678 |
| 68835 | P03383 | Q9BZW5 | -0.6579   |
| 68836 | P03383 | Q12918 | -0.96937  |
| 68837 | P03383 | Q8N1L4 | -0.89535  |
| 68838 | P03383 | Q9Y3C1 | -0.1549   |
| 68839 | P03383 | Q9Y4G8 | -0.95646  |
| 68840 | P03383 | P55285 | -0.61003  |
| 68841 | P03383 | Q76B58 | -0.63156  |
| 68842 | P03383 | Q8WWP7 | -1.0661   |
| 68843 | P03383 | Q00887 | -0.88363  |
| 68844 | P03383 | Q8NH70 | -1.1027   |
| 68845 | P03383 | Q6UWM9 | -0.83419  |
| 68846 | P03383 | Q8WVF2 | -0.85198  |
| 68847 | P03383 | A6PVL3 | -0.75197  |
| 68848 | P03383 | O43766 | -0.60824  |
| 68849 | P03383 | Q6ZNG9 | -0.30192  |
| 68850 | P03383 | P10721 | -0.27693  |
| 68851 | P03383 | Q16816 | -0.48289  |
| 68852 | P03383 | P84550 | -0.10516  |
| 68853 | P03383 | Q8TF64 | -0.22454  |
| 68854 | P03383 | Q7RTR2 | -0.44148  |
| 68855 | P03383 | P16083 | -0.14409  |
| 68856 | P03383 | A6NFF2 | -0.27891  |

|       |        |        |          |
|-------|--------|--------|----------|
| 68857 | P03383 | P21145 | -0.55612 |
| 68858 | P03383 | O75771 | -0.21896 |
| 68859 | P03383 | Q9H257 | -0.30225 |
| 68860 | P03383 | Q8NFW5 | -0.20054 |
| 68861 | P03383 | O75127 | -0.1906  |
| 68862 | P03383 | P50053 | -0.32303 |
| 68863 | P03383 | Q9NP56 | -0.61354 |
| 68864 | P03383 | Q6PJW8 | -0.21513 |
| 68865 | P03383 | Q8NEJ0 | -0.7984  |
| 68866 | P03383 | Q9ULJ8 | -0.40229 |
| 68867 | P03383 | P78426 | -0.22844 |
| 68868 | P03383 | Q9NR00 | -0.41833 |
| 68869 | P03383 | Q86SZ3 | -0.16542 |
| 68870 | P03383 | Q8IY37 | -0.84361 |
| 68871 | P03383 | Q14123 | -0.46    |
| 68872 | P03383 | Q96JH8 | -0.89989 |
| 68873 | P03383 | Q8N8U9 | -0.76835 |
| 68874 | P03383 | Q8IW03 | -0.32802 |
| 68875 | P03383 | Q16549 | -0.97441 |
| 68876 | P03383 | P01584 | -0.24007 |
| 68877 | P03383 | P09848 | -0.63402 |
| 68878 | P03383 | Q9NPG8 | -0.89944 |
| 68879 | P03383 | Q9P0J7 | -0.78396 |
| 68880 | P03383 | Q8TAW3 | -0.21172 |
| 68881 | P03383 | Q9Y261 | -0.29235 |
| 68882 | P03383 | P00374 | -0.17578 |
| 68883 | P03383 | P48544 | -0.62998 |
| 68884 | P03383 | Q15042 | -0.41204 |
| 68885 | P03383 | Q9UKZ4 | -0.95993 |
| 68886 | P03383 | O75452 | -1.291   |
| 68887 | P03383 | P24043 | -0.77494 |
| 68888 | P03383 | Q8NCK3 | -0.21172 |
| 68889 | P03383 | Q96L91 | -0.42162 |
| 68890 | P03383 | Q9Y566 | -0.22743 |
| 68891 | P03383 | Q6GPI1 | -1.2738  |
| 68892 | P03383 | Q9Y237 | -0.15169 |
| 68893 | P03383 | Q68D51 | -0.43363 |
| 68894 | P03383 | Q96JK4 | -0.51211 |
| 68895 | P03383 | Q5H9S7 | -0.45519 |
| 68896 | P03383 | O60500 | -0.55441 |
| 68897 | P03383 | Q99877 | -0.88998 |
| 68898 | P03383 | Q6ZUX7 | -0.86584 |
| 68899 | P03383 | O43151 | -0.51648 |
| 68900 | P03383 | P78364 | -0.18806 |
| 68901 | P03383 | Q5T8D3 | -0.85332 |
| 68902 | P03383 | P00450 | -0.94654 |
| 68903 | P03383 | O75147 | -0.37132 |
| 68904 | P03383 | Q96Q07 | -0.62854 |
| 68905 | P03383 | Q29963 | -0.88446 |
| 68906 | P03383 | Q8N9B8 | -0.75221 |
| 68907 | P03383 | Q9BZE3 | -0.22711 |
| 68908 | P03383 | P30486 | -0.7844  |
| 68909 | P03383 | Q6UXY1 | -0.73461 |
| 68910 | P03383 | Q9NRD5 | -0.22722 |
| 68911 | P03383 | P02671 | -0.42702 |
| 68912 | P03383 | O15519 | -0.22205 |
| 68913 | P03383 | O60313 | -0.53745 |
| 68914 | P03383 | Q8WXD2 | -0.63437 |
| 68915 | P03383 | Q96QD5 | -0.21444 |
| 68916 | P03383 | Q13797 | -0.79129 |
| 68917 | P03383 | Q96S94 | -0.20735 |
| 68918 | P03383 | Q8NEA4 | -0.14492 |
| 68919 | P03383 | Q9NS39 | -0.1695  |
| 68920 | P03383 | P80108 | -0.4893  |
| 68921 | P03383 | O75390 | -0.17834 |
| 68922 | P03383 | Q9UIH9 | -0.2043  |
| 68923 | P03383 | Q96GE6 | -0.52751 |
| 68924 | P03383 | Q9UKJ1 | -0.72983 |
| 68925 | P03383 | Q9UKJ8 | -1.0896  |
| 68926 | P03383 | P43694 | -0.22739 |
| 68927 | P03383 | A2VDJ0 | -0.86584 |
| 68928 | P03383 | Q8IZ83 | -0.69187 |
| 68929 | P03383 | Q9Y334 | -0.54538 |
| 68930 | P03383 | Q13077 | -0.19649 |
| 68931 | P03383 | P58317 | -0.21172 |
| 68932 | P03383 | Q92989 | -0.17065 |



|       |        |        |           |
|-------|--------|--------|-----------|
| 68933 | P03383 | Q9GZP7 | -1.0439   |
| 68934 | P03383 | P11310 | -0.39643  |
| 68935 | P03383 | Q8IWZ8 | -0.1444   |
| 68936 | P03383 | Q8NCN2 | -0.22582  |
| 68937 | P03383 | O75575 | -0.6252   |
| 68938 | P03383 | Q6GMR7 | -0.79358  |
| 68939 | P03383 | Q99836 | -0.2274   |
| 68940 | P03383 | P80421 | -0.88984  |
| 68941 | P03383 | Q9NQC3 | -0.2136   |
| 68942 | P03383 | Q8NH93 | -1.1027   |
| 68943 | P03383 | Q6XYQ8 | -0.79731  |
| 68944 | P03383 | A2RRD8 | -0.21172  |
| 68945 | P03383 | Q9UQB9 | -0.40253  |
| 68946 | P03383 | Q5VSP4 | -0.87849  |
| 68947 | P03383 | Q8NDY6 | -0.22742  |
| 68948 | P03383 | A6NP81 | -0.43638  |
| 68949 | P03383 | Q8WVZ7 | -0.98817  |
| 68950 | P03383 | Q9BW30 | -0.45019  |
| 68951 | P03383 | Q8NEY1 | -0.87081  |
| 68952 | P03383 | Q9P109 | -0.49611  |
| 68953 | P03383 | A1A4F0 | -0.070986 |
| 68954 | P03383 | P28290 | -0.47148  |
| 68955 | P03383 | Q9BVM2 | -0.3529   |
| 68956 | P03383 | A7XYQ1 | -0.55032  |
| 68957 | P03383 | Q6ZMD2 | -0.92929  |
| 68958 | P03383 | Q86SI9 | -0.87849  |
| 68959 | P03383 | Q13296 | -0.1631   |
| 68960 | P03383 | P14210 | -0.30167  |
| 68961 | P03383 | Q9H1Y3 | -1.0844   |
| 68962 | P03383 | Q8NFU5 | -0.40974  |
| 68963 | P03383 | Q8IYT2 | -0.74687  |
| 68964 | P03383 | P11766 | -0.38522  |
| 68965 | P03383 | Q9NYL9 | -0.39264  |
| 68966 | P03383 | Q9Y5T4 | -0.77712  |
| 68967 | P03383 | Q96A61 | -0.73967  |
| 68968 | P03383 | Q99075 | -0.92994  |
| 68969 | P03383 | P33947 | -0.48782  |
| 68970 | P03383 | Q8TD06 | -0.2885   |
| 68971 | P03383 | P53674 | -0.59147  |
| 68972 | P03383 | Q9BY76 | -0.3965   |
| 68973 | P03383 | O15382 | -0.08324  |
| 68974 | P03383 | Q8NFA0 | -0.74569  |
| 68975 | P03383 | O00482 | -0.22934  |
| 68976 | P03383 | Q8N0S2 | -0.17099  |
| 68977 | P03383 | Q02641 | -0.58912  |
| 68978 | P03383 | Q8NHX9 | -0.49578  |
| 68979 | P03383 | Q13464 | -0.29764  |
| 68980 | P03383 | Q9UPC5 | -0.76887  |
| 68981 | P03383 | Q9HAP6 | -0.20428  |
| 68982 | P03383 | P17252 | -0.2162   |
| 68983 | P03383 | Q99928 | -0.72727  |
| 68984 | P03383 | Q9P1A2 | -0.16078  |
| 68985 | P03383 | Q8TCU6 | -0.23688  |
| 68986 | P03383 | Q9NVL8 | -0.027225 |
| 68987 | P03383 | Q9BR10 | -0.68475  |
| 68988 | P03383 | Q9H2X8 | -0.86584  |
| 68989 | P03383 | P01130 | -0.39382  |
| 68990 | P03383 | Q5SY16 | -0.47156  |
| 68991 | P03383 | Q9H227 | -0.22511  |
| 68992 | P03383 | Q86U17 | -0.70542  |
| 68993 | P03383 | P61204 | -0.53654  |
| 68994 | P03383 | Q9UBV8 | -0.22745  |
| 68995 | P03383 | Q30134 | -0.67577  |
| 68996 | P03383 | O96014 | -0.39732  |
| 68997 | P03383 | O43609 | -0.37912  |
| 68998 | P03383 | P08700 | -0.5294   |
| 68999 | P03383 | Q9NZL9 | -0.16226  |
| 69000 | P03383 | Q86T03 | -0.85964  |
| 69001 | P03383 | Q9NVK5 | -0.13136  |
| 69002 | P03383 | Q6YP21 | -0.36796  |
| 69003 | P03383 | Q96JT2 | -0.8419   |
| 69004 | P03383 | O14493 | -0.7359   |
| 69005 | P03383 | Q49MI3 | -0.35534  |
| 69006 | P03383 | Q19T08 | -1.0619   |
| 69007 | P03383 | Q4G1C9 | -0.86584  |
| 69008 | P03383 | Q6NT52 | -0.85703  |

|       |        |        |           |
|-------|--------|--------|-----------|
| 69009 | P03383 | P01893 | -1.0633   |
| 69010 | P03383 | A6NEQ0 | -0.59537  |
| 69011 | P03383 | Q6NXG1 | -0.51901  |
| 69012 | P03383 | Q8TF66 | -0.86584  |
| 69013 | P03383 | Q8IWB1 | -0.60442  |
| 69014 | P03383 | Q96H78 | -0.7196   |
| 69015 | P03383 | Q8NAB2 | -0.20635  |
| 69016 | P03383 | Q86VE9 | -0.79174  |
| 69017 | P03383 | Q9Y651 | -0.23271  |
| 69018 | P03383 | Q8WU43 | -0.10295  |
| 69019 | P03383 | P12110 | -0.50224  |
| 69020 | P03383 | Q8WW36 | -0.51948  |
| 69021 | P03383 | Q99674 | -0.9476   |
| 69022 | P03383 | Q9NZJ6 | -0.23984  |
| 69023 | P03383 | Q52LD8 | -0.60442  |
| 69024 | P03383 | Q8NA61 | -0.42034  |
| 69025 | P03383 | Q9BT76 | -0.93819  |
| 69026 | P03383 | Q15569 | -0.48623  |
| 69027 | P03383 | Q8N3G9 | -0.72271  |
| 69028 | P03383 | Q96S38 | -0.5065   |
| 69029 | P03383 | Q9NRC6 | -0.3477   |
| 69030 | P03383 | O43164 | -0.3738   |
| 69031 | P03383 | Q9UHG3 | -0.60991  |
| 69032 | P03383 | Q8TEQ8 | -0.83273  |
| 69033 | P03383 | A6NLI3 | -0.042015 |
| 69034 | P03383 | P49788 | -0.88408  |
| 69035 | P03383 | O00626 | -0.98017  |
| 69036 | P03383 | P32247 | -0.99277  |
| 69037 | P03383 | A2CJ06 | -0.6854   |
| 69038 | P03383 | Q9HC16 | -0.13993  |
| 69039 | P03383 | Q8N292 | -0.91464  |
| 69040 | P03383 | Q5T2Q4 | -0.44208  |
| 69041 | P03383 | Q03135 | -0.22663  |
| 69042 | P03383 | Q9Y5H3 | -1.1297   |
| 69043 | P03383 | Q96DA0 | -0.86789  |
| 69044 | P03383 | Q12756 | -0.39206  |
| 69045 | P03383 | Q16281 | -1.2188   |
| 69046 | P03383 | Q86XJ1 | -0.45328  |
| 69047 | P03383 | P56715 | -0.1414   |
| 69048 | P03383 | O95755 | -0.77812  |
| 69049 | P03383 | P19876 | -0.99499  |
| 69050 | P03383 | Q9NZS9 | -0.90753  |
| 69051 | P03383 | P55000 | -1.0133   |
| 69052 | P03383 | P0CJ86 | -0.1915   |
| 69053 | P03383 | Q96NZ8 | -0.76449  |
| 69054 | P03383 | P30518 | -0.74814  |
| 69055 | P03383 | P01854 | -0.47543  |
| 69056 | P03383 | Q86TI0 | -0.9907   |
| 69057 | P03383 | Q9Y623 | -0.43968  |
| 69058 | P03383 | P06310 | -0.97479  |
| 69059 | P03383 | Q6P4Q7 | -1.0981   |
| 69060 | P03383 | Q8NFW9 | -0.21822  |
| 69061 | P03383 | Q16625 | -0.22509  |
| 69062 | P03383 | Q8NGQ4 | -1.1027   |
| 69063 | P03383 | Q92828 | -0.49326  |
| 69064 | P03383 | Q8IZU2 | -0.22767  |
| 69065 | P03383 | Q9UQ03 | -0.49855  |
| 69066 | P03383 | Q96RQ1 | -0.38967  |
| 69067 | P03383 | Q5GLZ8 | -0.52661  |
| 69068 | P03383 | Q9Y2K9 | -0.50288  |
| 69069 | P03383 | Q9BW04 | -0.37984  |
| 69070 | P03383 | Q8TDF5 | -0.94969  |
| 69071 | P03383 | Q9BRA0 | -0.061576 |
| 69072 | P03383 | Q8TAL6 | -0.79238  |
| 69073 | P03383 | P01712 | -0.97479  |
| 69074 | P03383 | Q9ULZ0 | -0.44946  |
| 69075 | P03383 | Q8IXM2 | -0.23223  |
| 69076 | P03383 | P20701 | -0.80802  |
| 69077 | P03383 | P38117 | -0.19042  |
| 69078 | P03383 | Q8TCB6 | -1.1027   |
| 69079 | P03383 | O14977 | -0.35748  |
| 69080 | P03383 | Q5W0U4 | -0.23103  |
| 69081 | P03383 | P05000 | -0.78341  |
| 69082 | P03383 | O14983 | -0.4259   |
| 69083 | P03383 | Q16563 | -0.82589  |
| 69084 | P03383 | Q6A1A2 | -0.78989  |

|       |        |        |           |
|-------|--------|--------|-----------|
| 69085 | P03383 | Q8N2A8 | -0.63159  |
| 69086 | P03383 | Q9NR90 | -0.72639  |
| 69087 | P03383 | Q9UMR2 | -0.079107 |
| 69088 | P03383 | P35326 | -0.37683  |
| 69089 | P03383 | O15194 | -0.11752  |
| 69090 | P03383 | P17568 | -0.21142  |
| 69091 | P03383 | Q8WY64 | -0.22742  |
| 69092 | P03383 | O95409 | -0.3947   |
| 69093 | P03383 | P02747 | -0.91357  |
| 69094 | P03383 | Q9BR39 | -0.42885  |
| 69095 | P03383 | O75676 | -0.21283  |
| 69096 | P03383 | P52926 | -0.078438 |
| 69097 | P03383 | Q9C0A6 | -0.22541  |
| 69098 | P03383 | Q6IAA8 | -0.36791  |
| 69099 | P03383 | P07550 | -0.30626  |
| 69100 | P03383 | Q9UKS6 | -0.22741  |
| 69101 | P03383 | Q8TCP9 | -0.85296  |
| 69102 | P03383 | Q86UK0 | -1.1208   |
| 69103 | P03383 | Q03013 | -0.42626  |
| 69104 | P03383 | A8MVZ5 | -0.86584  |
| 69105 | P03383 | Q9Y2K1 | -0.21172  |
| 69106 | P03383 | Q8IZA3 | -0.60398  |
| 69107 | P03383 | Q8NGA0 | -1.1027   |
| 69108 | P03383 | Q6IFN5 | -1.1027   |
| 69109 | P03383 | O15143 | -0.35794  |
| 69110 | P03383 | Q9UIG8 | -0.94223  |
| 69111 | P03383 | O43320 | -0.86394  |
| 69112 | P03383 | Q8TB52 | -0.55362  |
| 69113 | P03383 | P02818 | -0.52423  |
| 69114 | P03383 | O60469 | -0.79057  |
| 69115 | P03383 | B7ZAQ6 | -0.70435  |
| 69116 | P03383 | O75487 | -0.91918  |
| 69117 | P03383 | Q86TD4 | -0.56322  |
| 69118 | P03383 | Q9Y547 | -0.60127  |
| 69119 | P03383 | Q96LR5 | -0.60712  |
| 69120 | P03383 | Q8TCJ2 | -0.70075  |
| 69121 | P03383 | Q9NUX5 | -0.17682  |
| 69122 | P03383 | Q6ZRK6 | -0.1319   |
| 69123 | P03383 | A6NDL7 | -0.37739  |
| 69124 | P03383 | Q9Y680 | -0.54767  |
| 69125 | P03383 | Q3KPI0 | -0.86584  |
| 69126 | P03383 | O60522 | -0.66996  |
| 69127 | P03383 | Q49AQ9 | -0.35827  |
| 69128 | P03383 | O75330 | -0.16391  |
| 69129 | P03383 | A6NM76 | -1.1027   |
| 69130 | P03383 | Q9NR31 | -0.49962  |
| 69131 | P03383 | P13716 | -0.36459  |
| 69132 | P03383 | O75325 | -1.1179   |
| 69133 | P03383 | A8MXE2 | -0.74906  |
| 69134 | P03383 | Q8NC44 | -0.85795  |
| 69135 | P03383 | O43760 | -0.81822  |
| 69136 | P03383 | Q9ULB4 | -0.93902  |
| 69137 | P03383 | O95069 | -1.0047   |
| 69138 | P03383 | A6NJZ7 | -0.22738  |
| 69139 | P03383 | O96015 | -0.36632  |
| 69140 | P03383 | Q9Y275 | -0.66945  |
| 69141 | P03383 | Q8TDS7 | -1.1721   |
| 69142 | P03383 | O14684 | -0.73807  |
| 69143 | P03383 | A6NKB5 | -0.86584  |
| 69144 | P03383 | Q99929 | -0.232    |
| 69145 | P03383 | Q96NE9 | -0.37606  |
| 69146 | P03383 | A6NDN3 | -0.35868  |
| 69147 | P03383 | Q99715 | -1.0969   |
| 69148 | P03383 | Q6PUV4 | -0.33695  |
| 69149 | P03383 | Q8NGR4 | -1.1027   |
| 69150 | P03383 | Q6ZR62 | -0.51948  |
| 69151 | P03383 | Q6ZWB6 | -0.20107  |
| 69152 | P03383 | Q96RJ6 | -0.2277   |
| 69153 | P03383 | P50570 | -0.22991  |
| 69154 | P03383 | Q6P597 | -0.10071  |
| 69155 | P03383 | Q9Y5E3 | -1.1424   |
| 69156 | P03383 | Q7Z6W1 | -0.86584  |
| 69157 | P03383 | Q9H1C4 | -0.71203  |
| 69158 | P03383 | Q8N4L4 | -0.91139  |
| 69159 | P03383 | Q96ER3 | -0.83545  |
| 69160 | P03383 | O60359 | -0.952    |

|       |        |        |           |
|-------|--------|--------|-----------|
| 69161 | P03383 | Q9Y6N5 | -0.22378  |
| 69162 | P03383 | Q8WWL2 | -0.3912   |
| 69163 | P03383 | O14613 | -0.044357 |
| 69164 | P03383 | P49703 | -0.22783  |
| 69165 | P03383 | P34932 | -0.22511  |
| 69166 | P03383 | Q9H0R8 | -0.21612  |
| 69167 | P03383 | P37059 | -1.0412   |
| 69168 | P03383 | Q9Y3D8 | -0.20184  |
| 69169 | P03383 | Q6ZUS5 | -0.29369  |
| 69170 | P03383 | Q6ZNR0 | -0.53317  |
| 69171 | P03383 | Q5H9R4 | -0.86584  |
| 69172 | P03383 | O75578 | -0.94939  |
| 69173 | P03383 | J3KSC0 | -0.31656  |
| 69174 | P03383 | Q9BZV2 | -0.65954  |
| 69175 | P03383 | Q9P2V4 | -0.6774   |
| 69176 | P03383 | Q96KN7 | -0.15788  |
| 69177 | P03383 | Q9Y4F3 | -0.72816  |
| 69178 | P03383 | Q5TC79 | -0.22711  |
| 69179 | P03383 | P29320 | -0.7632   |
| 69180 | P03383 | Q92630 | -0.48349  |
| 69181 | P03383 | Q8IX18 | -0.84361  |
| 69182 | P03383 | Q32NB8 | -0.69476  |
| 69183 | P03383 | Q8NEV4 | -0.72008  |
| 69184 | P03383 | Q8IU8  | -1.1914   |
| 69185 | P03383 | O00241 | -0.71214  |
| 69186 | P03383 | Q8N5U1 | -0.86584  |
| 69187 | P03383 | P21731 | -0.63997  |
| 69188 | P03383 | Q16322 | -0.82927  |
| 69189 | P03383 | Q92643 | -0.53392  |
| 69190 | P03383 | O14793 | -0.45304  |
| 69191 | P03383 | Q9NRQ2 | -0.47507  |
| 69192 | P03383 | Q9BY14 | -0.60604  |
| 69193 | P03383 | O43914 | -0.59683  |
| 69194 | P03383 | Q9Y238 | -0.23346  |
| 69195 | P03383 | Q8NGN3 | -1.1027   |
| 69196 | P03383 | P0C7P1 | -0.59537  |
| 69197 | P03383 | Q8IUS5 | -0.97121  |
| 69198 | P03383 | Q7L4S7 | -0.86584  |
| 69199 | P03383 | P01611 | -0.97479  |
| 69200 | P03383 | Q99966 | -0.19295  |
| 69201 | P03383 | Q9Y4X1 | -0.81906  |
| 69202 | P03383 | Q8NH67 | -1.1027   |
| 69203 | P03383 | P56559 | -0.48533  |
| 69204 | P03383 | Q9H340 | -1.1027   |
| 69205 | P03383 | P05121 | -0.15936  |
| 69206 | P03383 | P17050 | -0.32625  |
| 69207 | P03383 | Q96LM6 | -0.21602  |
| 69208 | P03383 | Q86WU2 | -0.13434  |
| 69209 | P03383 | Q6Y7W6 | -0.3127   |
| 69210 | P03383 | Q9P0J1 | -0.24633  |
| 69211 | P03383 | Q587J7 | -0.23826  |
| 69212 | P03383 | P15086 | -1.1649   |
| 69213 | P03383 | Q6WCQ1 | -0.48323  |
| 69214 | P03383 | P53597 | -0.5785   |
| 69215 | P03383 | Q6TAR4 | -0.45271  |
| 69216 | P03383 | O60667 | -0.79712  |
| 69217 | P03383 | Q9P212 | -0.29339  |
| 69218 | P03383 | P06737 | -0.38889  |
| 69219 | P03383 | Q15485 | -1.1151   |
| 69220 | P03383 | P01814 | -0.97479  |
| 69221 | P03383 | Q9P2D0 | -0.22736  |
| 69222 | P03383 | Q92563 | -0.94333  |
| 69223 | P03383 | O00442 | -0.55802  |
| 69224 | P03383 | Q96K49 | -0.86584  |
| 69225 | P03383 | O43665 | -0.35929  |
| 69226 | P03383 | Q9NU23 | -0.30763  |
| 69227 | P03383 | Q96CD2 | -0.41023  |
| 69228 | P03383 | Q6RFH5 | -0.2274   |
| 69229 | P03383 | Q9NR48 | -0.22735  |
| 69230 | P03383 | Q9GIP4 | -0.85749  |
| 69231 | P03383 | Q96SE0 | -0.58105  |
| 69232 | P03383 | P57735 | -0.43884  |
| 69233 | P03383 | A6NL05 | -0.86584  |
| 69234 | P03383 | Q9NZA1 | -0.286    |
| 69235 | P03383 | Q6UWD8 | -0.86584  |
| 69236 | P03383 | Q9H2U9 | -0.99505  |

|       |        |        |          |
|-------|--------|--------|----------|
| 69237 | P03383 | O95343 | -0.22774 |
| 69238 | P03383 | O95399 | -0.61607 |
| 69239 | P03383 | Q6PFW1 | -0.24174 |
| 69240 | P03383 | Q9BY10 | -0.83378 |
| 69241 | P03383 | O75223 | -0.28949 |
| 69242 | P03383 | P59074 | -0.27428 |
| 69243 | P03383 | A6NM62 | -0.81528 |
| 69244 | P03383 | Q14667 | -0.87849 |
| 69245 | P03383 | A4D250 | -0.11515 |
| 69246 | P03383 | A6NIK2 | -0.2317  |
| 69247 | P03383 | O75438 | -0.50126 |
| 69248 | P03383 | Q9UBP5 | -0.2269  |
| 69249 | P03383 | Q9ULT8 | -0.42287 |
| 69250 | P03383 | Q8WWV3 | -0.82157 |
| 69251 | P03383 | Q5TEU4 | -0.29222 |
| 69252 | P03383 | Q0VAK6 | -0.30255 |
| 69253 | P03383 | Q8WVN6 | -1.2422  |
| 69254 | P03383 | P51790 | -0.37472 |
| 69255 | P03383 | Q05952 | -0.95649 |
| 69256 | P03383 | Q53HC5 | -0.19617 |
| 69257 | P03383 | Q8N4C9 | -0.86584 |
| 69258 | P03383 | Q07912 | -0.35476 |
| 69259 | P03383 | Q96L42 | -0.84621 |
| 69260 | P03383 | Q9P0M6 | -0.96746 |
| 69261 | P03383 | P63316 | -0.2249  |
| 69262 | P03383 | Q9Y2K2 | -0.35421 |
| 69263 | P03383 | Q9NTJ5 | -0.61054 |
| 69264 | P03383 | P20807 | -0.74818 |
| 69265 | P03383 | P35503 | -0.83433 |
| 69266 | P03383 | Q9C037 | -0.6733  |
| 69267 | P03383 | Q9Y5Y5 | -0.43157 |
| 69268 | P03383 | O95445 | -0.8329  |
| 69269 | P03383 | Q13188 | -0.23159 |
| 69270 | P03383 | Q9H5Q3 | -0.86584 |
| 69271 | P03383 | Q9Y4K3 | -0.22724 |
| 69272 | P03383 | Q9Y5H1 | -1.1297  |
| 69273 | P03383 | P26374 | -0.74824 |
| 69274 | P03383 | O15381 | -0.38476 |
| 69275 | P03383 | Q7L945 | -0.21172 |
| 69276 | P03383 | Q15413 | -0.70177 |
| 69277 | P03383 | Q6PIF6 | -0.80413 |
| 69278 | P03383 | Q9UD57 | -0.22733 |
| 69279 | P03383 | Q16777 | -0.88998 |
| 69280 | P03383 | O75469 | -0.24406 |
| 69281 | P03383 | Q8IZ52 | -0.5004  |
| 69282 | P03383 | Q9NRM6 | -1.1427  |
| 69283 | P03383 | Q8IUH5 | -0.32247 |
| 69284 | P03383 | P27487 | -0.59903 |
| 69285 | P03383 | A6NLF2 | -0.30744 |
| 69286 | P03383 | Q8IX01 | -0.24061 |
| 69287 | P03383 | Q96D96 | -0.85839 |
| 69288 | P03383 | Q96IW2 | -0.22741 |
| 69289 | P03383 | Q96ER9 | -0.34839 |
| 69290 | P03383 | Q15434 | -0.59495 |
| 69291 | P03383 | Q96PE5 | -0.85301 |
| 69292 | P03383 | P61968 | -0.25036 |
| 69293 | P03383 | A6NNB3 | -1.0181  |
| 69294 | P03383 | Q6UX40 | -0.59708 |
| 69295 | P03383 | Q5W0B7 | -0.86584 |
| 69296 | P03383 | Q96B45 | -0.0235  |
| 69297 | P03383 | Q9UPZ6 | -1.2447  |
| 69298 | P03383 | Q8IZF2 | -1.1905  |
| 69299 | P03383 | Q6ZNA5 | -0.94512 |
| 69300 | P03383 | P43034 | -0.22915 |
| 69301 | P03383 | Q9GZM7 | -0.88726 |
| 69302 | P03383 | P56199 | -0.44772 |
| 69303 | P03383 | Q6P9H4 | -0.35708 |
| 69304 | P03383 | P78334 | -0.8097  |
| 69305 | P03383 | Q96EK7 | -0.21961 |
| 69306 | P03383 | P54219 | -0.50749 |
| 69307 | P03383 | O14668 | -1.3916  |
| 69308 | P03383 | Q6ZMM2 | -0.95528 |
| 69309 | P03383 | P42331 | -1.1111  |
| 69310 | P03383 | P23415 | -0.52108 |
| 69311 | P03383 | Q14517 | -0.23172 |
| 69312 | P03383 | Q15032 | -0.44783 |

|       |        |        |           |
|-------|--------|--------|-----------|
| 69313 | P03383 | Q7Z7G1 | -0.63478  |
| 69314 | P03383 | P59922 | -1.1027   |
| 69315 | P03383 | Q5JR12 | -0.47048  |
| 69316 | P03383 | Q8NCV1 | -0.7017   |
| 69317 | P03383 | O75751 | -0.40673  |
| 69318 | P03383 | P08253 | -0.6485   |
| 69319 | P03383 | Q9NUY8 | -0.94809  |
| 69320 | P03383 | Q9HBA0 | -0.42623  |
| 69321 | P03383 | O96033 | -0.39115  |
| 69322 | P03383 | O60513 | -0.51625  |
| 69323 | P03383 | Q6P5R6 | -0.20594  |
| 69324 | P03383 | A8MXV6 | -0.86584  |
| 69325 | P03383 | P30411 | -0.58782  |
| 69326 | P03383 | Q9BTU6 | -0.29552  |
| 69327 | P03383 | O75379 | -0.68227  |
| 69328 | P03383 | P61916 | -0.51146  |
| 69329 | P03383 | Q8TDR2 | -0.4747   |
| 69330 | P03383 | O75264 | -0.86584  |
| 69331 | P03383 | Q6ZVT0 | -0.2405   |
| 69332 | P03383 | Q14088 | -0.46426  |
| 69333 | P03383 | Q8IZS6 | -0.24736  |
| 69334 | P03383 | Q8TDW7 | -1.224    |
| 69335 | P03383 | Q00013 | -0.45857  |
| 69336 | P03383 | Q86YL7 | -0.68348  |
| 69337 | P03383 | Q3MJ16 | -0.48804  |
| 69338 | P03383 | P33241 | -0.83741  |
| 69339 | P03383 | Q96F85 | -0.26087  |
| 69340 | P03383 | Q9BX46 | -0.41372  |
| 69341 | P03383 | O75298 | -0.47593  |
| 69342 | P03383 | P17707 | -0.33935  |
| 69343 | P03383 | Q9UHL4 | -1.0023   |
| 69344 | P03383 | Q8NFZ6 | -1.1149   |
| 69345 | P03383 | P48145 | -0.70396  |
| 69346 | P03383 | Q9ULG1 | -0.19943  |
| 69347 | P03383 | P56915 | -0.18557  |
| 69348 | P03383 | Q9Y330 | -0.22232  |
| 69349 | P03383 | Q8N5D6 | -0.58721  |
| 69350 | P03383 | Q30KP9 | -0.84399  |
| 69351 | P03383 | Q96LU5 | -0.48236  |
| 69352 | P03383 | P10768 | -0.21402  |
| 69353 | P03383 | Q8N5X7 | -0.15244  |
| 69354 | P03383 | Q9UBK2 | -0.48629  |
| 69355 | P03383 | Q8N7C4 | -0.86584  |
| 69356 | P03383 | Q96PD7 | -0.34538  |
| 69357 | P03383 | P49888 | -0.22412  |
| 69358 | P03383 | Q8TBE9 | -0.26967  |
| 69359 | P03383 | A6NHL2 | -0.59955  |
| 69360 | P03383 | Q6NUT2 | -1.0373   |
| 69361 | P03383 | A4QN01 | -0.096233 |
| 69362 | P03383 | A8MY62 | -0.25529  |
| 69363 | P03383 | Q9Y3C5 | -0.22942  |
| 69364 | P03383 | P46952 | -0.33045  |
| 69365 | P03383 | Q6P9G0 | -0.47024  |
| 69366 | P03383 | Q8TBZ2 | -0.22079  |
| 69367 | P03383 | Q9Y3B3 | -0.51701  |
| 69368 | P03383 | P28566 | -1.2087   |
| 69369 | P03383 | Q8WXF7 | -0.55033  |
| 69370 | P03383 | P62502 | -0.87851  |
| 69371 | P03383 | O43247 | -0.11694  |
| 69372 | P03383 | Q5VUB5 | -0.86584  |
| 69373 | P03383 | Q5VZV1 | -0.37739  |
| 69374 | P03383 | Q86VZ2 | -0.27775  |
| 69375 | P03383 | Q86WA9 | -0.86324  |
| 69376 | P03383 | P29597 | -0.68573  |
| 69377 | P03383 | Q53GT1 | -0.23542  |
| 69378 | P03383 | Q8ND94 | -0.86584  |
| 69379 | P03383 | Q86U37 | -0.24579  |
| 69380 | P03383 | O94919 | -0.81248  |
| 69381 | P03383 | Q8N0U8 | -0.86584  |
| 69382 | P03383 | Q9P2N6 | -0.52826  |
| 69383 | P03383 | Q96RI9 | -1.143    |
| 69384 | P03383 | Q96LZ2 | -0.067275 |
| 69385 | P03383 | Q8NGZ9 | -1.1027   |
| 69386 | P03383 | P21860 | -0.49278  |
| 69387 | P03383 | Q86YD5 | -0.89915  |
| 69388 | P03383 | P40763 | -0.22693  |

|       |        |        |          |
|-------|--------|--------|----------|
| 69389 | P03383 | Q14393 | -0.2637  |
| 69390 | P03383 | Q9BXM9 | -0.16078 |
| 69391 | P03383 | Q9NSK7 | -0.66679 |
| 69392 | P03383 | Q8IYQ7 | -0.15014 |
| 69393 | P03383 | P01765 | -0.97479 |
| 69394 | P03383 | Q13595 | -0.52931 |
| 69395 | P03383 | P49019 | -1.2378  |
| 69396 | P03383 | Q99569 | -0.22905 |
| 69397 | P03383 | Q9C004 | -0.17757 |
| 69398 | P03383 | P52961 | -0.64086 |
| 69399 | P03383 | Q5T2P9 | -0.98969 |
| 69400 | P03383 | P0DJI8 | -0.59938 |
| 69401 | P03383 | Q99440 | -0.36171 |
| 69402 | P03383 | Q9ULD8 | -0.88619 |
| 69403 | P03383 | P19113 | -0.57326 |
| 69404 | P03383 | Q8NBU5 | -0.62107 |
| 69405 | P03383 | Q5R3K3 | -0.86584 |
| 69406 | P03383 | P55809 | -0.21003 |
| 69407 | P03383 | Q9Y251 | -0.27085 |
| 69408 | P03383 | P07998 | -0.24447 |
| 69409 | P03383 | Q3V5L5 | -0.72199 |
| 69410 | P03383 | P17024 | -0.21172 |
| 69411 | P03383 | P0CE71 | -0.52751 |
| 69412 | P03383 | Q86SM8 | -1.1721  |
| 69413 | P03383 | Q9BZM1 | -0.68203 |
| 69414 | P03383 | P01563 | -0.32939 |
| 69415 | P03383 | Q8NH63 | -1.1027  |
| 69416 | P03383 | Q9Y5P4 | -0.22782 |
| 69417 | P03383 | Q9BXU1 | -0.9088  |
| 69418 | P03383 | P35241 | -0.23158 |
| 69419 | P03383 | P13804 | -0.18368 |
| 69420 | P03383 | Q5VV63 | -0.88243 |
| 69421 | P03383 | Q00622 | -0.44237 |
| 69422 | P03383 | Q13751 | -0.67829 |
| 69423 | P03383 | P55040 | -0.49695 |
| 69424 | P03383 | Q96IU4 | -0.19889 |
| 69425 | P03383 | P07316 | -0.18006 |
| 69426 | P03383 | O60635 | -0.94123 |
| 69427 | P03383 | P0C7U3 | -0.89944 |
| 69428 | P03383 | P00491 | -0.39816 |
| 69429 | P03383 | Q9BXE9 | -1.1149  |
| 69430 | P03383 | Q96ND0 | -0.74159 |
| 69431 | P03383 | Q6ZN19 | -0.21172 |
| 69432 | P03383 | Q9HD45 | -0.90841 |
| 69433 | P03383 | Q9Y5Y0 | -0.42192 |
| 69434 | P03383 | P08476 | -0.22919 |
| 69435 | P03383 | A6NC78 | -0.43638 |
| 69436 | P03383 | P01775 | -0.97479 |
| 69437 | P03383 | P07204 | -0.51288 |
| 69438 | P03383 | Q4VCS5 | -0.22718 |
| 69439 | P03383 | Q9H0H9 | -0.15568 |
| 69440 | P03383 | Q96CK0 | -0.37567 |
| 69441 | P03383 | Q9H0M4 | -0.52332 |
| 69442 | P03383 | Q9BSC4 | -0.22015 |
| 69443 | P03383 | P02751 | -0.35651 |
| 69444 | P03383 | Q17R89 | -0.42685 |
| 69445 | P03383 | Q15777 | -0.35926 |
| 69446 | P03383 | Q9UMQ6 | -0.9983  |
| 69447 | P03383 | Q5T442 | -0.74224 |
| 69448 | P03383 | Q93088 | -0.18982 |
| 69449 | P03383 | Q9UMX9 | -0.9655  |
| 69450 | P03383 | Q9Y5Y2 | -0.16036 |
| 69451 | P03383 | Q9NXC5 | -0.22675 |
| 69452 | P03383 | Q5HYM0 | -0.46549 |
| 69453 | P03383 | P04196 | -0.3113  |
| 69454 | P03383 | P15735 | -0.41056 |
| 69455 | P03383 | Q8WXF0 | -0.44414 |
| 69456 | P03383 | A6NNY8 | -0.69644 |
| 69457 | P03383 | P03986 | -1.0279  |
| 69458 | P03383 | P31277 | -0.31781 |
| 69459 | P03383 | Q5BKT4 | -0.80436 |
| 69460 | P03383 | P13498 | -0.32738 |
| 69461 | P03383 | O43548 | -0.31378 |
| 69462 | P03383 | Q8TAT5 | -0.55867 |
| 69463 | P03383 | Q9Y458 | -0.50489 |
| 69464 | P03383 | P07947 | -0.58078 |

|       |        |         |           |
|-------|--------|---------|-----------|
| 69465 | P03383 | P80188  | -0.45154  |
| 69466 | P03383 | Q9H9A6  | -0.22913  |
| 69467 | P03383 | Q5W064  | -0.46243  |
| 69468 | P03383 | Q9BZQ6  | -0.46368  |
| 69469 | P03383 | Q9NY37  | -0.9365   |
| 69470 | P03383 | Q14C86  | -0.97503  |
| 69471 | P03383 | Q92743  | -0.9308   |
| 69472 | P03383 | Q969K3  | -0.44801  |
| 69473 | P03383 | Q96EG3  | -0.21172  |
| 69474 | P03383 | P05129  | -0.41387  |
| 69475 | P03383 | P17516  | -0.26769  |
| 69476 | P03383 | Q9Y2C4  | -0.21555  |
| 69477 | P03383 | Q9BS16  | -0.22274  |
| 69478 | P03383 | P14920  | -0.38633  |
| 69479 | P03383 | O95206  | -1.0198   |
| 69480 | P03383 | Q96DN0  | -0.40286  |
| 69481 | P03383 | Q9NQ76  | -0.46204  |
| 69482 | P03383 | Q5I7T1  | -0.8079   |
| 69483 | P03383 | A1L157  | -0.86584  |
| 69484 | P03383 | A6NHA9  | -1.1027   |
| 69485 | P03383 | P33778  | -0.88998  |
| 69486 | P03383 | P03891  | -0.57378  |
| 69487 | P03383 | Q14344  | -0.39623  |
| 69488 | P03383 | P61224  | -0.23972  |
| 69489 | P03383 | P0C626  | -1.1152   |
| 69490 | P03383 | Q99705  | -1.0417   |
| 69491 | P03383 | O95793  | -0.090065 |
| 69492 | P03383 | Q8NH60  | -1.1027   |
| 69493 | P03383 | P04434  | -0.97479  |
| 69494 | P03383 | A6NHG9  | -1.1027   |
| 69495 | P03383 | Q6ZUT9  | -0.84703  |
| 69496 | P03383 | P04207  | -0.97479  |
| 69497 | P03383 | Q86UT5  | -0.22736  |
| 69498 | P03383 | Q8TCD1  | -0.62512  |
| 69499 | P03383 | Q9NYS0  | -0.87099  |
| 69500 | P03383 | P79522  | -0.51948  |
| 69501 | P03383 | O00244  | -0.47867  |
| 69502 | P03383 | O43781  | -0.84315  |
| 69503 | P03383 | Q8NGN6  | -1.1027   |
| 69504 | P03383 | Q96K12  | -1.0049   |
| 69505 | P03383 | P05113  | -0.32416  |
| 69506 | P03383 | O15484  | -0.97717  |
| 69507 | P03383 | Q75626  | -0.12138  |
| 69508 | P03383 | Q8TB37  | -0.76431  |
| 69509 | P03383 | Q9U1L4  | -0.58178  |
| 69510 | P03383 | Q9UNW9  | -0.24856  |
| 69511 | P03383 | Q8TBG9  | -0.71609  |
| 69512 | P03383 | P08183  | -0.38548  |
| 69513 | P03383 | P49821  | -0.40056  |
| 69514 | P03383 | P0CF74  | -0.95485  |
| 69515 | P03383 | Q6ZSI9  | -1.0319   |
| 69516 | P03383 | P17987  | -0.03155  |
| 69517 | P03383 | Q4KMG0  | -0.32419  |
| 69518 | P03383 | Q02575  | -0.23999  |
| 69519 | P03383 | Q9Y2T6  | -1.0969   |
| 69520 | P03383 | A6NI56  | -0.085029 |
| 69521 | P03383 | Q01449  | -0.4087   |
| 69522 | P03383 | Q86VU5  | -0.5957   |
| 69523 | P03383 | P10809  | -0.17504  |
| 69524 | P03383 | P38405  | -0.92551  |
| 69525 | P03383 | O00295  | -0.84071  |
| 69526 | P03383 | Q8N6C5  | -0.52487  |
| 69527 | P03383 | Q7Z304  | -0.89984  |
| 69528 | P03383 | Q14586  | -0.40272  |
| 69529 | P03383 | Q6ZLNQ3 | -0.2282   |
| 69530 | P03383 | Q9H2M3  | -0.29012  |
| 69531 | P03383 | Q8TD30  | -0.26346  |
| 69532 | P03383 | Q8IZJ1  | -0.478    |
| 69533 | P03383 | Q15130  | -0.9662   |
| 69534 | P03383 | Q06141  | -0.87402  |
| 69535 | P03383 | Q9NXL9  | -0.66077  |
| 69536 | P03383 | Q9UJV8  | -0.33321  |
| 69537 | P03383 | Q9C0D6  | -0.49971  |
| 69538 | P03383 | Q96009  | -1.0549   |
| 69539 | P03383 | Q969N2  | -0.2209   |
| 69540 | P03383 | Q15477  | -0.50114  |



|       |        |         |           |
|-------|--------|---------|-----------|
| 69541 | P03383 | Q8N6M3  | -0.51357  |
| 69542 | P03383 | P0DJDO  | -0.53439  |
| 69543 | P03383 | Q8WXH2  | -0.73132  |
| 69544 | P03383 | Q15534  | -0.2279   |
| 69545 | P03383 | Q15270  | -0.66999  |
| 69546 | P03383 | Q99525  | -0.70171  |
| 69547 | P03383 | Q6NV75  | -1.1721   |
| 69548 | P03383 | Q5TCZ1  | -0.22741  |
| 69549 | P03383 | Q3SXZ7  | -0.45512  |
| 69550 | P03383 | Q00204  | -0.22815  |
| 69551 | P03383 | Q8NH90  | -1.1027   |
| 69552 | P03383 | A6NLU5  | -0.86584  |
| 69553 | P03383 | Q8NB37  | -0.87849  |
| 69554 | P03383 | Q9BZF1  | -0.80455  |
| 69555 | P03383 | Q8NGQ6  | -1.1027   |
| 69556 | P03383 | Q8N4N8  | -0.31135  |
| 69557 | P03383 | Q9Y5G6  | -1.1297   |
| 69558 | P03383 | P06276  | -0.66253  |
| 69559 | P03383 | Q9NUN7  | -0.4458   |
| 69560 | P03383 | P30505  | -0.88446  |
| 69561 | P03383 | Q0VAA2  | -0.22741  |
| 69562 | P03383 | Q15172  | -0.12598  |
| 69563 | P03383 | Q9H0X6  | -0.52332  |
| 69564 | P03383 | Q8NFS9  | -0.70373  |
| 69565 | P03383 | P16401  | -0.79294  |
| 69566 | P03383 | Q9NYK5  | -0.26928  |
| 69567 | P03383 | P03897  | -0.2481   |
| 69568 | P03383 | P43686  | -0.31961  |
| 69569 | P03383 | Q5VXH5  | -0.25825  |
| 69570 | P03383 | Q9NX09  | -0.35636  |
| 69571 | P03383 | Q5TAQ9  | -0.22742  |
| 69572 | P03383 | Q14183  | -0.24026  |
| 69573 | P03383 | Q9HAU8  | -0.796    |
| 69574 | P03383 | Q96RD9  | -0.93628  |
| 69575 | P03383 | Q00744  | -0.36496  |
| 69576 | P03383 | A5YM72  | -0.67465  |
| 69577 | P03383 | Q2TAC2  | -0.091539 |
| 69578 | P03383 | P54756  | -0.74844  |
| 69579 | P03383 | Q8IVJ1  | -0.96956  |
| 69580 | P03383 | Q11203  | -0.67184  |
| 69581 | P03383 | Q8WV41  | -0.22741  |
| 69582 | P03383 | Q8N413  | -0.7196   |
| 69583 | P03383 | Q13508  | -0.70149  |
| 69584 | P03383 | Q8NFAQ8 | -0.63454  |
| 69585 | P03383 | Q9HBX8  | -1.143    |
| 69586 | P03383 | P00540  | -0.8841   |
| 69587 | P03383 | P30622  | -0.22687  |
| 69588 | P03383 | Q9BSA4  | -0.45184  |
| 69589 | P03383 | P23743  | -0.88724  |
| 69590 | P03383 | Q9H0E2  | -0.22517  |
| 69591 | P03383 | Q9P2P1  | -0.50102  |
| 69592 | P03383 | Q7Z7N9  | -0.86584  |
| 69593 | P03383 | P35052  | -0.76394  |
| 69594 | P03383 | P10997  | -0.93923  |
| 69595 | P03383 | Q8N6L1  | -0.51959  |
| 69596 | P03383 | P02753  | -0.31283  |
| 69597 | P03383 | Q95259  | -0.36607  |
| 69598 | P03383 | Q6PCT2  | -0.63334  |
| 69599 | P03383 | Q96PG1  | -0.86584  |
| 69600 | P03383 | Q5XKL5  | -0.22572  |
| 69601 | P03383 | Q00587  | -0.82311  |
| 69602 | P03383 | Q7L5Y6  | -0.21602  |
| 69603 | P03383 | Q8N0Z9  | -0.86584  |
| 69604 | P03383 | P0C7X4  | -0.43943  |
| 69605 | P03383 | Q6DN03  | -0.88998  |
| 69606 | P03383 | Q9HAU6  | -0.41833  |
| 69607 | P03383 | P13995  | -0.72691  |
| 69608 | P03383 | Q11201  | -0.64168  |
| 69609 | P03383 | Q96BM0  | -0.86584  |
| 69610 | P03383 | P48594  | -0.60786  |
| 69611 | P03383 | Q9HAC8  | -0.21105  |
| 69612 | P03383 | P48645  | -0.86977  |
| 69613 | P03383 | Q16676  | -0.35259  |
| 69614 | P03383 | Q8N556  | -0.51268  |
| 69615 | P03383 | Q6S5H4  | -0.22733  |
| 69616 | P03383 | P06326  | -0.97479  |

|       |        |        |           |
|-------|--------|--------|-----------|
| 69617 | P03383 | P0C7M6 | -0.017072 |
| 69618 | P03383 | O75153 | -0.29487  |
| 69619 | P03383 | Q96PZ7 | -0.86584  |
| 69620 | P03383 | Q02127 | -0.58266  |
| 69621 | P03383 | Q5SYC1 | -0.60325  |
| 69622 | P03383 | P01603 | -0.97479  |
| 69623 | P03383 | Q9H2S6 | -0.79575  |
| 69624 | P03383 | Q96C00 | -0.22737  |
| 69625 | P03383 | Q460N3 | -0.21035  |
| 69626 | P03383 | P04433 | -0.97479  |
| 69627 | P03383 | P41440 | -0.7206   |
| 69628 | P03383 | Q53EU6 | -0.68321  |
| 69629 | P03383 | Q9Y2Y4 | -0.23469  |
| 69630 | P03383 | O60235 | -1.4823   |
| 69631 | P03383 | Q30201 | -0.50102  |
| 69632 | P03383 | Q9P218 | -0.96006  |
| 69633 | P03383 | Q7Z5A9 | -0.87563  |
| 69634 | P03383 | P56597 | -0.5046   |
| 69635 | P03383 | Q2TB10 | -0.22731  |
| 69636 | P03383 | Q9NPI5 | -0.43185  |
| 69637 | P03383 | Q5TGZ0 | -0.53764  |
| 69638 | P03383 | Q15397 | -0.093288 |
| 69639 | P03383 | Q9Y3D7 | -0.21797  |
| 69640 | P03383 | Q5GJ75 | -0.034285 |
| 69641 | P03383 | Q8WW35 | -0.2117   |
| 69642 | P03383 | D6RBM5 | -0.3595   |
| 69643 | P03383 | Q6P1N9 | -0.24578  |
| 69644 | P03383 | O60890 | -0.72222  |
| 69645 | P03383 | O43929 | -0.13997  |
| 69646 | P03383 | Q8NH80 | -1.1027   |
| 69647 | P03383 | Q16663 | -1.0483   |
| 69648 | P03383 | Q01362 | -0.83386  |
| 69649 | P03383 | Q9NZ20 | -0.59247  |
| 69650 | P03383 | Q9NQ36 | -0.95463  |
| 69651 | P03383 | Q8N9W5 | -0.23341  |
| 69652 | P03383 | Q9GZS0 | -0.28953  |
| 69653 | P03383 | Q9HBJ8 | -0.95243  |
| 69654 | P03383 | Q96IC2 | -0.83343  |
| 69655 | P03383 | P56747 | -0.65088  |
| 69656 | P03383 | Q92544 | -0.86584  |
| 69657 | P03383 | Q86WV6 | -0.074993 |
| 69658 | P03383 | Q9BWW9 | -0.85147  |
| 69659 | P03383 | P46439 | -0.42005  |
| 69660 | P03383 | Q9H4A3 | -0.35026  |
| 69661 | P03383 | P26842 | -0.62981  |
| 69662 | P03383 | Q9NV58 | -0.45957  |
| 69663 | P03383 | Q9BQP9 | -1.0096   |
| 69664 | P03383 | Q8WWA1 | -0.86584  |
| 69665 | P03383 | Q9HAY6 | -0.42629  |
| 69666 | P03383 | Q9NR96 | -0.48773  |
| 69667 | P03383 | Q8N987 | -0.14226  |
| 69668 | P03383 | Q8NGH5 | -1.1027   |
| 69669 | P03383 | Q9H6K1 | -0.16078  |
| 69670 | P03383 | P30048 | -0.21278  |
| 69671 | P03383 | Q9UMN6 | -0.22664  |
| 69672 | P03383 | Q96Q91 | -0.77181  |
| 69673 | P03383 | Q9H8M1 | -0.39016  |
| 69674 | P03383 | Q9H992 | -0.57509  |
| 69675 | P03383 | Q9HBI6 | -0.99234  |
| 69676 | P03383 | O00628 | -0.2302   |
| 69677 | P03383 | P59780 | -0.10138  |
| 69678 | P03383 | Q08828 | -0.61836  |
| 69679 | P03383 | O75908 | -0.73122  |
| 69680 | P03383 | Q6Q6R5 | -0.36685  |
| 69681 | P03383 | Q6PJF5 | -0.84439  |
| 69682 | P03383 | P35754 | -0.21778  |
| 69683 | P03383 | Q8WWX8 | -0.88705  |
| 69684 | P03383 | Q9HAW9 | -0.65585  |
| 69685 | P03383 | P12273 | -0.90509  |
| 69686 | P03383 | Q9Y265 | -0.33353  |
| 69687 | P03383 | Q9NY30 | -0.36874  |
| 69688 | P03383 | P78348 | -0.64055  |
| 69689 | P03383 | A6NEK1 | -0.576    |
| 69690 | P03383 | Q08257 | -0.67911  |
| 69691 | P03383 | Q13285 | -0.22893  |
| 69692 | P03383 | P23416 | -0.7433   |

|       |        |        |           |
|-------|--------|--------|-----------|
| 69693 | P03383 | Q9H609 | -0.21172  |
| 69694 | P03383 | O60462 | -0.46726  |
| 69695 | P03383 | Q15811 | -0.42789  |
| 69696 | P03383 | Q9HCH3 | -0.51392  |
| 69697 | P03383 | Q9UBG0 | -0.90338  |
| 69698 | P03383 | Q9NP94 | -0.95706  |
| 69699 | P03383 | Q8N6F8 | -0.086719 |
| 69700 | P03383 | Q14831 | -0.66537  |
| 69701 | P03383 | P53671 | -0.75811  |
| 69702 | P03383 | Q4G0N8 | -0.9235   |
| 69703 | P03383 | Q9UH36 | -0.45908  |
| 69704 | P03383 | Q96MU8 | -0.362    |
| 69705 | P03383 | Q70CQ3 | -0.88812  |
| 69706 | P03383 | A8MZ26 | -0.52751  |
| 69707 | P03383 | P48995 | -0.32666  |
| 69708 | P03383 | Q8NG92 | -1.1027   |
| 69709 | P03383 | Q8IW00 | -0.93628  |
| 69710 | P03383 | P17302 | -0.31547  |
| 69711 | P03383 | Q5TCM9 | -0.43006  |
| 69712 | P03383 | P07202 | -0.86729  |
| 69713 | P03383 | Q12952 | -0.3553   |
| 69714 | P03383 | Q16644 | -0.22914  |
| 69715 | P03383 | P12829 | -0.49076  |
| 69716 | P03383 | Q14678 | -1.1097   |
| 69717 | P03383 | Q9H999 | -0.64902  |
| 69718 | P03383 | Q8N109 | -0.93628  |
| 69719 | P03383 | Q6ICL3 | -0.30763  |
| 69720 | P03383 | Q8WVQ1 | -0.88804  |
| 69721 | P03383 | Q12836 | -1.0978   |
| 69722 | P03383 | Q8NCU8 | -0.86584  |
| 69723 | P03383 | P15291 | -0.40383  |
| 69724 | P03383 | Q14197 | -0.1647   |
| 69725 | P03383 | Q659A1 | -0.21602  |
| 69726 | P03383 | Q04118 | -0.79501  |
| 69727 | P03383 | Q6ZWI9 | -0.52332  |
| 69728 | P03383 | Q8WZ55 | -0.68129  |
| 69729 | P03383 | P22413 | -0.284    |
| 69730 | P03383 | P20333 | -0.64015  |
| 69731 | P03383 | Q6E213 | -0.78951  |
| 69732 | P03383 | Q9Y234 | -0.44549  |
| 69733 | P03383 | Q7L3V2 | -0.17398  |
| 69734 | P03383 | Q9BXD5 | -0.42646  |
| 69735 | P03383 | Q7Z6M2 | -0.43639  |
| 69736 | P03383 | Q8TC29 | -0.4845   |
| 69737 | P03383 | Q8NFU4 | -0.87849  |
| 69738 | P03383 | Q96KR7 | -0.33444  |
| 69739 | P03383 | P78508 | -0.58524  |
| 69740 | P03383 | Q8NCN5 | -0.068224 |
| 69741 | P03383 | O15399 | -0.71716  |
| 69742 | P03383 | Q96EM0 | -0.57737  |
| 69743 | P03383 | Q6ZMK1 | -0.21953  |
| 69744 | P03383 | Q96HN2 | -0.39609  |
| 69745 | P03383 | Q9UJU2 | -0.20577  |
| 69746 | P03383 | Q15973 | -0.21172  |
| 69747 | P03383 | P01716 | -0.97479  |
| 69748 | P03383 | O15018 | -0.59126  |
| 69749 | P03383 | Q3MIW9 | -0.86584  |
| 69750 | P03383 | Q9HC23 | -0.85007  |
| 69751 | P03383 | P01766 | -0.97479  |
| 69752 | P03383 | O75509 | -0.24838  |
| 69753 | P03383 | Q15319 | -0.22741  |
| 69754 | P03383 | Q3LI77 | -0.11137  |
| 69755 | P03383 | Q08345 | -0.70822  |
| 69756 | P03383 | Q658N2 | -0.87607  |
| 69757 | P03383 | Q86WZ6 | -0.21172  |
| 69758 | P03383 | P15374 | -0.39423  |
| 69759 | P03383 | Q99985 | -0.70302  |
| 69760 | P03383 | P78368 | -0.70897  |
| 69761 | P03383 | Q9GZX6 | -0.79589  |
| 69762 | P03383 | Q9Y467 | -0.22743  |
| 69763 | P03383 | O75311 | -0.80243  |
| 69764 | P03383 | P41225 | -0.25306  |
| 69765 | P03383 | Q96LM9 | -0.080626 |
| 69766 | P03383 | Q8IY49 | -0.72271  |
| 69767 | P03383 | Q8NGJ1 | -1.1027   |
| 69768 | P03383 | O43193 | -1.2529   |

|       |        |        |           |
|-------|--------|--------|-----------|
| 69769 | P03383 | Q96HH9 | -0.20487  |
| 69770 | P03383 | Q6IC83 | -0.18582  |
| 69771 | P03383 | Q15208 | -0.22738  |
| 69772 | P03383 | Q13825 | -0.40022  |
| 69773 | P03383 | Q8WTQ7 | -1.042    |
| 69774 | P03383 | Q8IVH2 | -0.26175  |
| 69775 | P03383 | Q8WW32 | -0.79265  |
| 69776 | P03383 | O60939 | -0.80849  |
| 69777 | P03383 | Q9NRM7 | -0.22741  |
| 69778 | P03383 | P30793 | -0.055207 |
| 69779 | P03383 | Q9BT67 | -0.39827  |
| 69780 | P03383 | P21796 | -0.3089   |
| 69781 | P03383 | Q8TAM2 | -0.22679  |
| 69782 | P03383 | Q5TA45 | -0.18886  |
| 69783 | P03383 | Q9BVA0 | -0.22932  |
| 69784 | P03383 | Q8NCL9 | -0.86584  |
| 69785 | P03383 | Q96JB1 | -0.61814  |
| 69786 | P03383 | O15466 | -0.56798  |
| 69787 | P03383 | Q8IZ20 | -0.21172  |
| 69788 | P03383 | O43555 | -1.109    |
| 69789 | P03383 | Q86VI3 | -0.59087  |
| 69790 | P03383 | Q5T6S3 | -0.21929  |
| 69791 | P03383 | Q9BT17 | -0.35073  |
| 69792 | P03383 | Q9UKN7 | -0.64341  |
| 69793 | P03383 | P80419 | -0.88984  |
| 69794 | P03383 | Q9NP73 | -0.40884  |
| 69795 | P03383 | Q13422 | -0.16053  |
| 69796 | P03383 | P11912 | -0.86054  |
| 69797 | P03383 | P10321 | -0.88446  |
| 69798 | P03383 | Q6XZB0 | -1.0637   |
| 69799 | P03383 | Q8N2U9 | -0.86584  |
| 69800 | P03383 | Q13424 | -0.2213   |
| 69801 | P03383 | Q9UJ41 | -0.2298   |
| 69802 | P03383 | Q9GZZ0 | -0.2274   |
| 69803 | P03383 | Q86VF2 | -0.2278   |
| 69804 | P03383 | Q96KR6 | -0.86584  |
| 69805 | P03383 | Q8NH50 | -1.1027   |
| 69806 | P03383 | Q86VW2 | -0.72782  |
| 69807 | P03383 | Q96LB4 | -0.51032  |
| 69808 | P03383 | Q8NEB9 | -0.38335  |
| 69809 | P03383 | O43173 | -0.57856  |
| 69810 | P03383 | Q3ZCX4 | -0.21172  |
| 69811 | P03383 | Q6ZT07 | -1.2794   |
| 69812 | P03383 | P01178 | -0.39112  |
| 69813 | P03383 | Q8NEX9 | -0.67101  |
| 69814 | P03383 | P47929 | -0.50148  |
| 69815 | P03383 | Q02535 | -0.2245   |
| 69816 | P03383 | P35270 | -0.22869  |
| 69817 | P03383 | Q9UJU6 | -0.70532  |
| 69818 | P03383 | P23435 | -0.73414  |
| 69819 | P03383 | Q9NZB2 | -0.45257  |
| 69820 | P03383 | Q96N46 | -0.4711   |
| 69821 | P03383 | P52209 | -0.26347  |
| 69822 | P03383 | Q9NYQ3 | -0.46634  |
| 69823 | P03383 | O95379 | -0.27628  |
| 69824 | P03383 | Q96FW1 | -0.097457 |
| 69825 | P03383 | Q9H329 | -0.24293  |
| 69826 | P03383 | Q8WZ26 | -0.12652  |
| 69827 | P03383 | Q9ULU8 | -0.077513 |
| 69828 | P03383 | O43143 | -0.50952  |
| 69829 | P03383 | Q9NQN1 | -1.1027   |
| 69830 | P03383 | Q9H773 | -0.51609  |
| 69831 | P03383 | Q76N32 | -0.13071  |
| 69832 | P03383 | O43708 | -0.22724  |
| 69833 | P03383 | Q96PX8 | -0.92424  |
| 69834 | P03383 | P0CAP1 | -0.34347  |
| 69835 | P03383 | Q7Z392 | -0.29699  |
| 69836 | P03383 | Q9H7C9 | -0.23711  |
| 69837 | P03383 | P58658 | -0.85471  |
| 69838 | P03383 | P30825 | -1.0155   |
| 69839 | P03383 | Q8N5Z0 | -0.23769  |
| 69840 | P03383 | A1E959 | -0.82136  |
| 69841 | P03383 | Q05682 | -0.49093  |
| 69842 | P03383 | P17097 | -0.40272  |
| 69843 | P03383 | O95475 | -0.22758  |
| 69844 | P03383 | Q9H172 | -1.0466   |

|       |        |        |           |
|-------|--------|--------|-----------|
| 69845 | P03383 | O60443 | -0.34603  |
| 69846 | P03383 | Q8N957 | -0.22725  |
| 69847 | P03383 | Q6ZST4 | -0.1641   |
| 69848 | P03383 | P13612 | -0.43945  |
| 69849 | P03383 | P40818 | -0.29438  |
| 69850 | P03383 | A6NDH6 | -1.1027   |
| 69851 | P03383 | Q9NWD8 | -0.86584  |
| 69852 | P03383 | Q14406 | -0.71371  |
| 69853 | P03383 | P01596 | -0.97479  |
| 69854 | P03383 | Q13554 | -0.57705  |
| 69855 | P03383 | Q13319 | -0.49052  |
| 69856 | P03383 | O00139 | -0.24931  |
| 69857 | P03383 | P43681 | -0.65732  |
| 69858 | P03383 | Q6UXI7 | -0.89407  |
| 69859 | P03383 | Q969W9 | -0.81502  |
| 69860 | P03383 | Q8NA23 | -0.22768  |
| 69861 | P03383 | Q9BY32 | -0.57287  |
| 69862 | P03383 | O14578 | -0.55211  |
| 69863 | P03383 | Q9P1Q5 | -1.1027   |
| 69864 | P03383 | P52198 | -0.7242   |
| 69865 | P03383 | P0C646 | -1.1027   |
| 69866 | P03383 | O00308 | -0.22741  |
| 69867 | P03383 | Q9GZX7 | -0.16446  |
| 69868 | P03383 | Q86T13 | -0.85471  |
| 69869 | P03383 | Q9H582 | -0.21172  |
| 69870 | P03383 | P56962 | -0.73572  |
| 69871 | P03383 | Q9H159 | -1.0844   |
| 69872 | P03383 | Q86X40 | -0.22837  |
| 69873 | P03383 | Q9NR20 | -0.82569  |
| 69874 | P03383 | Q9H0P0 | -0.35547  |
| 69875 | P03383 | B6A8C7 | -0.86584  |
| 69876 | P03383 | P78549 | -0.15219  |
| 69877 | P03383 | Q99728 | -0.22741  |
| 69878 | P03383 | P50458 | -0.22741  |
| 69879 | P03383 | Q9Y5B8 | -0.63939  |
| 69880 | P03383 | Q9UHQ4 | -0.6068   |
| 69881 | P03383 | O43464 | -0.22574  |
| 69882 | P03383 | Q96JB8 | -0.26891  |
| 69883 | P03383 | Q96Q27 | -0.73205  |
| 69884 | P03383 | Q9NWS9 | -0.076586 |
| 69885 | P03383 | O94880 | -0.52332  |
| 69886 | P03383 | P00533 | -0.29252  |
| 69887 | P03383 | P50336 | -0.53236  |
| 69888 | P03383 | E9PQX1 | -0.061254 |
| 69889 | P03383 | Q6UX34 | -0.86584  |
| 69890 | P03383 | Q9NR71 | -0.64763  |
| 69891 | P03383 | Q9NXC2 | -1.382    |
| 69892 | P03383 | Q14802 | -0.97937  |
| 69893 | P03383 | P35542 | -0.8156   |
| 69894 | P03383 | O00116 | -0.61136  |
| 69895 | P03383 | P08F94 | -0.22027  |
| 69896 | P03383 | P63261 | -0.14523  |
| 69897 | P03383 | Q7RTT9 | -0.89638  |
| 69898 | P03383 | P11277 | -0.22801  |
| 69899 | P03383 | Q86WC6 | -0.22741  |
| 69900 | P03383 | O15455 | -0.28986  |
| 69901 | P03383 | P24387 | -0.33853  |
| 69902 | P03383 | Q96JM2 | -0.22761  |
| 69903 | P03383 | Q6UXT8 | -0.87849  |
| 69904 | P03383 | P10826 | -0.23381  |
| 69905 | P03383 | Q86YV6 | -0.9088   |
| 69906 | P03383 | Q9H772 | -0.84337  |
| 69907 | P03383 | Q8NCG7 | -0.79772  |
| 69908 | P03383 | Q8WU76 | -0.17901  |
| 69909 | P03383 | P02768 | -0.27713  |
| 69910 | P03383 | Q63HK5 | -0.22368  |
| 69911 | P03383 | Q01064 | -0.22479  |
| 69912 | P03383 | Q8IY84 | -0.98913  |
| 69913 | P03383 | Q9NQR9 | -0.42107  |
| 69914 | P03383 | Q9UKR3 | -0.58516  |
| 69915 | P03383 | Q8N5M9 | -0.93931  |
| 69916 | P03383 | Q5M7Z0 | -0.92811  |
| 69917 | P03383 | P61011 | -0.44824  |
| 69918 | P03383 | Q14210 | -0.70833  |
| 69919 | P03383 | P68402 | -0.33112  |
| 69920 | P03383 | Q6ZMV7 | -0.17877  |

|       |        |        |           |
|-------|--------|--------|-----------|
| 69921 | P03383 | Q9BXN6 | -0.061576 |
| 69922 | P03383 | O60234 | -0.67785  |
| 69923 | P03383 | Q0VAQ4 | -0.44828  |
| 69924 | P03383 | O75191 | -0.67175  |
| 69925 | P03383 | O75144 | -0.99352  |
| 69926 | P03383 | Q9BQT9 | -0.95972  |
| 69927 | P03383 | Q6T4R5 | -0.278    |
| 69928 | P03383 | Q9NPE6 | -0.56168  |
| 69929 | P03383 | P01600 | -0.97479  |
| 69930 | P03383 | Q86YW5 | -0.20723  |
| 69931 | P03383 | Q86TV6 | -0.2271   |
| 69932 | P03383 | Q8N6S4 | -0.56568  |
| 69933 | P03383 | A2RU48 | -0.86584  |
| 69934 | P03383 | Q96L50 | -0.43639  |
| 69935 | P03383 | P51452 | -0.28651  |
| 69936 | P03383 | Q495M3 | -0.68045  |
| 69937 | P03383 | P07492 | -1.0548   |
| 69938 | P03383 | P35408 | -0.53875  |
| 69939 | P03383 | Q9H6U8 | -0.76759  |
| 69940 | P03383 | Q7Z5L2 | -0.80587  |
| 69941 | P03383 | Q16787 | -0.97831  |
| 69942 | P03383 | Q5TDP6 | -0.53197  |
| 69943 | P03383 | Q99755 | -0.20602  |
| 69944 | P03383 | P59534 | -1.0953   |
| 69945 | P03383 | Q8NEZ3 | -0.41192  |
| 69946 | P03383 | Q2TV78 | -1.1937   |
| 69947 | P03383 | Q5H8A4 | -0.90189  |
| 69948 | P03383 | Q9BZI1 | -0.22867  |
| 69949 | P03383 | A0AV96 | -0.61616  |
| 69950 | P03383 | P39877 | -0.62601  |
| 69951 | P03383 | Q96IK1 | -0.05194  |
| 69952 | P03383 | Q8TCT7 | -0.38509  |
| 69953 | P03383 | P12838 | -0.85472  |
| 69954 | P03383 | Q9ULY5 | -0.8681   |
| 69955 | P03383 | Q2MV58 | -0.70437  |
| 69956 | P03383 | Q7Z3S7 | -0.94813  |
| 69957 | P03383 | O14798 | -0.82473  |
| 69958 | P03383 | Q9Y277 | -0.9349   |
| 69959 | P03383 | O15389 | -1.0093   |
| 69960 | P03383 | P01242 | -0.83766  |
| 69961 | P03383 | P40126 | -0.60487  |
| 69962 | P03383 | P04234 | -0.55717  |
| 69963 | P03383 | P53539 | -0.085963 |
| 69964 | P03383 | Q99426 | -0.22008  |
| 69965 | P03383 | Q99988 | -0.79557  |
| 69966 | P03383 | Q96JQ2 | -0.74698  |
| 69967 | P03383 | O15540 | -0.40218  |
| 69968 | P03383 | P48067 | -0.8768   |
| 69969 | P03383 | Q96GK7 | -0.64709  |
| 69970 | P03383 | Q7L014 | -0.53174  |
| 69971 | P03383 | P47756 | -0.21963  |
| 69972 | P03383 | Q13492 | -0.21349  |
| 69973 | P03383 | Q9NYW4 | -1.0176   |
| 69974 | P03383 | Q5VZI3 | -0.86584  |
| 69975 | P03383 | O95758 | -0.57231  |
| 69976 | P03383 | Q9NXH8 | -1.163    |
| 69977 | P03383 | Q9GZW8 | -0.86584  |
| 69978 | P03383 | Q9BXJ2 | -0.72447  |
| 69979 | P03383 | Q96NI6 | -0.86584  |
| 69980 | P03383 | Q99578 | -0.89194  |
| 69981 | P03383 | Q9HCQ7 | -0.98582  |
| 69982 | P03383 | Q6ZWL3 | -1.0753   |
| 69983 | P03383 | Q5VTB9 | -0.45386  |
| 69984 | P03383 | Q8NBI5 | -0.84814  |
| 69985 | P03383 | Q5U5Q3 | -0.23772  |
| 69986 | P03383 | P08620 | -0.59152  |
| 69987 | P03383 | Q9HB63 | -0.8981   |
| 69988 | P03383 | P21815 | -0.99958  |
| 69989 | P03383 | P36954 | -0.17993  |
| 69990 | P03383 | P84095 | -0.37788  |
| 69991 | P03383 | P17026 | -0.16275  |
| 69992 | P03383 | Q6UXY8 | -0.86584  |
| 69993 | P03383 | Q9BRH9 | -0.21172  |
| 69994 | P03383 | O43157 | -0.7126   |
| 69995 | P03383 | O75915 | -0.72947  |
| 69996 | P03383 | Q6ZRF8 | -0.73967  |

|       |        |        |           |
|-------|--------|--------|-----------|
| 69997 | P03383 | P27144 | -0.5567   |
| 69998 | P03383 | Q9UJL9 | -0.17069  |
| 69999 | P03383 | Q9NVQ4 | -0.31096  |
| 70000 | P03383 | P32418 | -0.48     |
| 70001 | P03383 | Q15760 | -1.2928   |
| 70002 | P03383 | Q8ND30 | -0.67181  |
| 70003 | P03383 | Q6PJI9 | -0.2274   |
| 70004 | P03383 | Q8N8F6 | -0.93931  |
| 70005 | P03383 | Q9P246 | -0.57181  |
| 70006 | P03383 | P57052 | -0.61385  |
| 70007 | P03383 | Q86XA0 | -0.74687  |
| 70008 | P03383 | Q2V2M9 | -0.22322  |
| 70009 | P03383 | A2BFH1 | -0.24989  |
| 70010 | P03383 | Q9BSK4 | -0.30663  |
| 70011 | P03383 | O75747 | -0.62039  |
| 70012 | P03383 | Q0D2K5 | -0.2331   |
| 70013 | P03383 | Q13702 | -0.35255  |
| 70014 | P03383 | O60508 | -0.23126  |
| 70015 | P03383 | P54277 | -0.20565  |
| 70016 | P03383 | Q96E35 | -0.49852  |
| 70017 | P03383 | Q96A11 | -0.63617  |
| 70018 | P03383 | P60174 | -0.097527 |
| 70019 | P03383 | Q6UX68 | -0.86584  |
| 70020 | P03383 | P26010 | -1.0949   |
| 70021 | P03383 | Q9NPC7 | -0.17069  |
| 70022 | P03383 | Q7RTZ1 | -1.3299   |
| 70023 | P03383 | Q9BUI4 | -0.10036  |
| 70024 | P03383 | Q6UX41 | -0.31983  |
| 70025 | P03383 | O43824 | -0.95272  |
| 70026 | P03383 | Q9NY47 | -0.69805  |
| 70027 | P03383 | Q99798 | -0.15147  |
| 70028 | P03383 | O15263 | -0.93882  |
| 70029 | P03383 | Q53GD3 | -0.74018  |
| 70030 | P03383 | Q8TBC5 | -0.076586 |
| 70031 | P03383 | Q8NFI8 | -0.22742  |
| 70032 | P03383 | Q5T1S8 | -0.94863  |
| 70033 | P03383 | Q14849 | -0.78405  |
| 70034 | P03383 | Q96M32 | -0.54667  |
| 70035 | P03383 | Q8NHP7 | -0.67859  |
| 70036 | P03383 | Q63HM9 | -0.75153  |
| 70037 | P03383 | Q92696 | -0.56042  |
| 70038 | P03383 | Q9HBG6 | -0.22744  |
| 70039 | P03383 | Q9UBY8 | -0.40393  |
| 70040 | P03383 | P17023 | -0.17069  |
| 70041 | P03383 | Q8IW52 | -0.92424  |
| 70042 | P03383 | Q99706 | -0.67797  |
| 70043 | P03383 | P05455 | -0.46795  |
| 70044 | P03383 | Q7Z6I6 | -1.0002   |
| 70045 | P03383 | Q8N819 | -0.57948  |
| 70046 | P03383 | Q9H158 | -1.1553   |
| 70047 | P03383 | Q8TD91 | -0.14139  |
| 70048 | P03383 | Q3KRA9 | -0.3371   |
| 70049 | P03383 | P36980 | -0.87849  |
| 70050 | P03383 | Q8N976 | -0.22301  |
| 70051 | P03383 | P34981 | -1.1084   |
| 70052 | P03383 | Q6PKG0 | -0.4639   |
| 70053 | P03383 | P55316 | -0.35259  |
| 70054 | P03383 | Q96R48 | -1.1027   |
| 70055 | P03383 | P30872 | -1.1107   |
| 70056 | P03383 | Q8NCC5 | -0.74011  |
| 70057 | P03383 | Q96PD5 | -0.85601  |
| 70058 | P03383 | P29144 | -0.27332  |
| 70059 | P03383 | C9JQL5 | -0.86137  |
| 70060 | P03383 | P30457 | -0.7844   |
| 70061 | P03383 | P35499 | -1.0829   |
| 70062 | P03383 | Q8N127 | -1.1027   |
| 70063 | P03383 | Q9GZN0 | -1.0616   |
| 70064 | P03383 | Q12981 | -0.15059  |
| 70065 | P03383 | Q9Y267 | -0.88361  |
| 70066 | P03383 | Q8NFT8 | -0.62741  |
| 70067 | P03383 | Q9NX45 | -0.28338  |
| 70068 | P03383 | Q86WG5 | -0.22741  |
| 70069 | P03383 | O43683 | -0.22741  |
| 70070 | P03383 | Q16099 | -0.72726  |
| 70071 | P03383 | O60264 | -0.19943  |
| 70072 | P03383 | Q9Y366 | -0.36641  |

|       |        |        |           |
|-------|--------|--------|-----------|
| 70073 | P03383 | O75417 | -0.64803  |
| 70074 | P03383 | O14829 | -0.22273  |
| 70075 | P03383 | Q13434 | -0.55601  |
| 70076 | P03383 | Q3Y452 | -0.46768  |
| 70077 | P03383 | Q6GTX8 | -0.39621  |
| 70078 | P03383 | Q8IV04 | -1.2307   |
| 70079 | P03383 | P05177 | -0.46031  |
| 70080 | P03383 | Q96KN4 | -0.024544 |
| 70081 | P03383 | Q9UHC9 | -0.39553  |
| 70082 | P03383 | Q9UQC2 | -0.22739  |
| 70083 | P03383 | Q9BXB4 | -0.80455  |
| 70084 | P03383 | Q8N2H3 | -0.59308  |
| 70085 | P03383 | Q9Y264 | -0.72675  |
| 70086 | P03383 | Q14DG7 | -0.52887  |
| 70087 | P03383 | Q96NT0 | -0.53753  |
| 70088 | P03383 | Q9ULP9 | -0.54354  |
| 70089 | P03383 | Q9BST9 | -0.53254  |
| 70090 | P03383 | O94759 | -0.89164  |
| 70091 | P03383 | Q5FWF4 | -0.38405  |
| 70092 | P03383 | Q5TGI0 | -0.86584  |
| 70093 | P03383 | P48039 | -1.1042   |
| 70094 | P03383 | Q8NHV5 | -0.050615 |
| 70095 | P03383 | P23258 | -0.21274  |
| 70096 | P03383 | Q96B77 | -0.74159  |
| 70097 | P03383 | Q7Z4T8 | -0.73341  |
| 70098 | P03383 | Q9UGF6 | -1.1027   |
| 70099 | P03383 | Q8IXK0 | -0.092833 |
| 70100 | P03383 | P11836 | -0.88645  |
| 70101 | P03383 | Q12887 | -0.55296  |
| 70102 | P03383 | Q8NG97 | -1.1027   |
| 70103 | P03383 | Q6UXP9 | -0.14885  |
| 70104 | P03383 | P52306 | -0.59297  |
| 70105 | P03383 | P51587 | -0.17631  |
| 70106 | P03383 | P62191 | -0.3228   |
| 70107 | P03383 | Q15342 | -0.59562  |
| 70108 | P03383 | Q8NA19 | -0.21806  |
| 70109 | P03383 | Q7L2E3 | -0.22539  |
| 70110 | P03383 | Q9NWS0 | -0.42638  |
| 70111 | P03383 | Q96LZ3 | -0.52751  |
| 70112 | P03383 | P80098 | -0.9002   |
| 70113 | P03383 | Q6UWF7 | -0.87849  |
| 70114 | P03383 | Q5T2D2 | -0.39608  |
| 70115 | P03383 | Q8TED4 | -0.74011  |
| 70116 | P03383 | P51157 | -1.1259   |
| 70117 | P03383 | P55268 | -0.70289  |
| 70118 | P03383 | Q96J84 | -0.70202  |
| 70119 | P03383 | Q9NV96 | -0.32149  |
| 70120 | P03383 | Q8TBX8 | -0.35709  |
| 70121 | P03383 | Q99614 | -0.22526  |
| 70122 | P03383 | P12644 | -0.22741  |
| 70123 | P03383 | O60427 | -0.29778  |
| 70124 | P03383 | P41597 | -0.50353  |
| 70125 | P03383 | P11908 | -0.63076  |
| 70126 | P03383 | Q14147 | -1.0216   |
| 70127 | P03383 | P50238 | -0.38552  |
| 70128 | P03383 | Q9Y5E7 | -1.1424   |
| 70129 | P03383 | Q8WUU5 | -0.22723  |
| 70130 | P03383 | O43567 | -0.69932  |
| 70131 | P03383 | P31937 | -0.40079  |
| 70132 | P03383 | Q9NY26 | -0.93358  |
| 70133 | P03383 | Q15052 | -0.50379  |
| 70134 | P03383 | Q9Y3C6 | -0.32753  |
| 70135 | P03383 | P57679 | -0.73441  |
| 70136 | P03383 | Q9Y5F6 | -1.1297   |
| 70137 | P03383 | Q7LFL8 | -0.4371   |
| 70138 | P03383 | Q9Y576 | -0.62789  |
| 70139 | P03383 | Q8WVF5 | -0.19405  |
| 70140 | P03383 | Q5BIV9 | -0.60538  |
| 70141 | P03383 | Q9NUM3 | -0.87538  |
| 70142 | P03383 | Q9H354 | -0.86584  |
| 70143 | P03383 | Q9Y4B5 | -0.19888  |
| 70144 | P03383 | Q8N309 | -0.20148  |
| 70145 | P03383 | Q12802 | -0.22736  |
| 70146 | P03383 | Q6ZN04 | -0.22738  |
| 70147 | P03383 | Q7Z2K6 | -1.1177   |
| 70148 | P03383 | A4D0T7 | -0.86584  |



|       |        |        |           |
|-------|--------|--------|-----------|
| 70149 | P03383 | Q9Y496 | -0.30385  |
| 70150 | P03383 | Q96QE3 | -0.69823  |
| 70151 | P03383 | Q9Y5I0 | -1.1297   |
| 70152 | P03383 | Q3KP44 | -0.2274   |
| 70153 | P03383 | Q7Z4K8 | -0.73967  |
| 70154 | P03383 | Q9UHE8 | -0.98993  |
| 70155 | P03383 | Q9Y2I6 | -0.1882   |
| 70156 | P03383 | Q96JF6 | -0.21172  |
| 70157 | P03383 | Q9Y5X5 | -1.2201   |
| 70158 | P03383 | Q6ZUI0 | -0.29487  |
| 70159 | P03383 | Q8WVZ1 | -0.89944  |
| 70160 | P03383 | Q6NXN4 | -0.86584  |
| 70161 | P03383 | Q5T699 | -0.35746  |
| 70162 | P03383 | Q2PZI1 | -0.86584  |
| 70163 | P03383 | Q07973 | -0.41957  |
| 70164 | P03383 | Q6NXT2 | -0.88998  |
| 70165 | P03383 | Q9H3S1 | -0.81106  |
| 70166 | P03383 | P26012 | -1.0514   |
| 70167 | P03383 | Q8IVQ6 | -0.56747  |
| 70168 | P03383 | A5D6W6 | -0.72386  |
| 70169 | P03383 | Q9Y6C9 | -0.73185  |
| 70170 | P03383 | Q6ZRI8 | -1.052    |
| 70171 | P03383 | P0CB48 | -0.33321  |
| 70172 | P03383 | Q92686 | -0.42923  |
| 70173 | P03383 | Q96BM9 | -0.54039  |
| 70174 | P03383 | A6NH00 | -1.1027   |
| 70175 | P03383 | Q3MIR4 | -0.31698  |
| 70176 | P03383 | Q14683 | -0.86005  |
| 70177 | P03383 | Q8N6M8 | -0.22515  |
| 70178 | P03383 | Q9BY11 | -0.29065  |
| 70179 | P03383 | Q2VIQ3 | -0.32254  |
| 70180 | P03383 | P08519 | -1.0731   |
| 70181 | P03383 | Q5VTJ3 | -0.86584  |
| 70182 | P03383 | P47872 | -1.2413   |
| 70183 | P03383 | Q8IUR5 | -0.74159  |
| 70184 | P03383 | Q9BYG3 | -0.22473  |
| 70185 | P03383 | P0C1S8 | -0.3832   |
| 70186 | P03383 | Q15550 | -0.73119  |
| 70187 | P03383 | Q15768 | -0.66733  |
| 70188 | P03383 | P19801 | -0.79904  |
| 70189 | P03383 | Q9H9Y4 | -0.61034  |
| 70190 | P03383 | Q6ZQX7 | -0.065289 |
| 70191 | P03383 | Q8TDX9 | -0.66351  |
| 70192 | P03383 | Q562E7 | -0.47169  |
| 70193 | P03383 | Q8N8V4 | -0.52803  |
| 70194 | P03383 | P42167 | -0.13413  |
| 70195 | P03383 | Q08629 | -0.77556  |
| 70196 | P03383 | P0DJD8 | -1.0948   |
| 70197 | P03383 | Q86Y56 | -0.084292 |
| 70198 | P03383 | P29973 | -1.2714   |
| 70199 | P03383 | Q5VU92 | -0.22682  |
| 70200 | P03383 | P35247 | -0.45127  |
| 70201 | P03383 | Q9Y2D0 | -0.27125  |
| 70202 | P03383 | Q8N8L6 | -1.2555   |
| 70203 | P03383 | Q99581 | -0.17633  |
| 70204 | P03383 | Q49AG3 | -0.57338  |
| 70205 | P03383 | P25685 | -0.1688   |
| 70206 | P03383 | Q13255 | -0.87439  |
| 70207 | P03383 | Q4V326 | -0.0711   |
| 70208 | P03383 | P0C862 | -0.89987  |
| 70209 | P03383 | Q9H324 | -0.46153  |
| 70210 | P03383 | P55083 | -1.104    |
| 70211 | P03383 | Q16627 | -0.86088  |
| 70212 | P03383 | Q96EK2 | -0.52332  |
| 70213 | P03383 | Q6ZQY3 | -0.63334  |
| 70214 | P03383 | P80362 | -0.97479  |
| 70215 | P03383 | Q9UGI9 | -0.91944  |
| 70216 | P03383 | Q9H2S5 | -0.24278  |
| 70217 | P03383 | Q5SRR4 | -0.87849  |
| 70218 | P03383 | P28329 | -0.20198  |
| 70219 | P03383 | Q9UJW2 | -1.4201   |
| 70220 | P03383 | Q08AH3 | -0.80792  |
| 70221 | P03383 | Q8NHS0 | -0.48297  |
| 70222 | P03383 | Q9NXG0 | -0.17876  |
| 70223 | P03383 | Q9UN71 | -1.1037   |
| 70224 | P03383 | Q9Y2S0 | -0.082811 |

|       |        |        |           |
|-------|--------|--------|-----------|
| 70225 | P03383 | P55916 | -0.45963  |
| 70226 | P03383 | P51572 | -0.3041   |
| 70227 | P03383 | Q92858 | -0.22801  |
| 70228 | P03383 | Q14732 | -0.33378  |
| 70229 | P03383 | Q6P161 | -0.097496 |
| 70230 | P03383 | Q9BTT6 | -0.37554  |
| 70231 | P03383 | Q9Y263 | -0.22869  |
| 70232 | P03383 | Q8N386 | -0.86584  |
| 70233 | P03383 | P02458 | -0.57368  |
| 70234 | P03383 | Q5T481 | -0.79877  |
| 70235 | P03383 | P23083 | -0.88984  |
| 70236 | P03383 | Q96RY7 | -0.41721  |
| 70237 | P03383 | Q9H4F1 | -0.48366  |
| 70238 | P03383 | P32970 | -0.53615  |
| 70239 | P03383 | Q86XW9 | -0.31442  |
| 70240 | P03383 | P21580 | -0.19835  |
| 70241 | P03383 | P01911 | -0.67577  |
| 70242 | P03383 | Q9BUF5 | -0.63498  |
| 70243 | P03383 | Q9NV64 | -0.86584  |
| 70244 | P03383 | Q9BVH7 | -0.68746  |
| 70245 | P03383 | Q16222 | -0.055866 |
| 70246 | P03383 | Q9Y4W6 | -0.56227  |
| 70247 | P03383 | Q99829 | -0.22753  |
| 70248 | P03383 | Q8NA97 | -0.22075  |
| 70249 | P03383 | Q8WU20 | -0.21932  |
| 70250 | P03383 | Q96AZ1 | -0.89874  |
| 70251 | P03383 | Q9ULL1 | -0.78542  |
| 70252 | P03383 | P51687 | -0.30145  |
| 70253 | P03383 | A6NJS3 | -0.87849  |
| 70254 | P03383 | Q9GZV9 | -0.80492  |
| 70255 | P03383 | Q14142 | -0.43552  |
| 70256 | P03383 | P23327 | -0.55677  |
| 70257 | P03383 | Q13835 | -0.22788  |
| 70258 | P03383 | Q08AI6 | -0.96495  |
| 70259 | P03383 | Q9NS00 | -0.84027  |
| 70260 | P03383 | Q86T29 | -0.21172  |
| 70261 | P03383 | Q8N6Q8 | -0.37739  |
| 70262 | P03383 | A1Z1Q3 | -0.3955   |
| 70263 | P03383 | P30685 | -0.88446  |
| 70264 | P03383 | Q02224 | -0.2493   |
| 70265 | P03383 | P48443 | -0.2277   |
| 70266 | P03383 | Q9Y394 | -1.0135   |
| 70267 | P03383 | P10071 | -0.2273   |
| 70268 | P03383 | P08294 | -0.21946  |
| 70269 | P03383 | Q7Z4V5 | -0.25894  |
| 70270 | P03383 | Q86T82 | -0.28511  |
| 70271 | P03383 | Q4KMG9 | -0.86584  |
| 70272 | P03383 | Q96P50 | -1.1475   |
| 70273 | P03383 | Q9P2D8 | -0.86584  |
| 70274 | P03383 | Q9NPG4 | -0.98758  |
| 70275 | P03383 | Q15942 | -0.2394   |
| 70276 | P03383 | Q9UL12 | -0.22039  |
| 70277 | P03383 | Q75636 | -0.57558  |
| 70278 | P03383 | Q8N5W8 | -0.87849  |
| 70279 | P03383 | Q96AP0 | -0.09427  |
| 70280 | P03383 | Q99959 | -0.19602  |
| 70281 | P03383 | Q96C11 | -0.13989  |
| 70282 | P03383 | Q8NER1 | -0.99986  |
| 70283 | P03383 | Q8NEQ5 | -0.86584  |
| 70284 | P03383 | Q6PIL6 | -0.89315  |
| 70285 | P03383 | Q8N5V2 | -0.77791  |
| 70286 | P03383 | Q8NEM8 | -0.56582  |
| 70287 | P03383 | Q6NVV9 | -0.59433  |
| 70288 | P03383 | Q8N1Y9 | -0.86584  |
| 70289 | P03383 | Q6DCA0 | -0.019512 |
| 70290 | P03383 | Q9UHE5 | -0.84261  |
| 70291 | P03383 | Q9BTK2 | -0.009945 |
| 70292 | P03383 | O14867 | -0.22473  |
| 70293 | P03383 | A6NHQ2 | -0.10805  |
| 70294 | P03383 | O00519 | -0.72451  |
| 70295 | P03383 | O14715 | -0.1936   |
| 70296 | P03383 | Q8NGX9 | -1.1027   |
| 70297 | P03383 | Q86YW7 | -0.85703  |
| 70298 | P03383 | P16144 | -0.62167  |
| 70299 | P03383 | P10909 | -0.09149  |
| 70300 | P03383 | Q9UQ88 | -0.074607 |

|       |        |        |           |
|-------|--------|--------|-----------|
| 70301 | P03383 | Q6P2H8 | -0.86584  |
| 70302 | P03383 | P20292 | -0.16149  |
| 70303 | P03383 | Q8TDN2 | -0.84843  |
| 70304 | P03383 | Q9BXX3 | -0.22742  |
| 70305 | P03383 | P31995 | -0.30665  |
| 70306 | P03383 | Q7Z5N4 | -1.0252   |
| 70307 | P03383 | P43116 | -1.1538   |
| 70308 | P03383 | Q8NEX6 | -0.87849  |
| 70309 | P03383 | Q8TAG5 | -0.87849  |
| 70310 | P03383 | Q92886 | -0.22814  |
| 70311 | P03383 | Q96BS2 | -0.22782  |
| 70312 | P03383 | P11684 | -0.66649  |
| 70313 | P03383 | Q9BQQ3 | -0.069843 |
| 70314 | P03383 | Q96N68 | -0.86584  |
| 70315 | P03383 | P06865 | -0.45201  |
| 70316 | P03383 | P26232 | -0.19022  |
| 70317 | P03383 | P10912 | -0.27006  |
| 70318 | P03383 | Q13520 | -0.75531  |
| 70319 | P03383 | Q9H1P3 | -0.71621  |
| 70320 | P03383 | Q86YJ5 | -0.83898  |
| 70321 | P03383 | A6NFN3 | -0.87391  |
| 70322 | P03383 | Q5UCC4 | -1.1868   |
| 70323 | P03383 | P98169 | -0.030551 |
| 70324 | P03383 | Q6X784 | -0.84968  |
| 70325 | P03383 | O95969 | -0.91732  |
| 70326 | P03383 | Q96RE9 | -0.21172  |
| 70327 | P03383 | O76041 | -0.22745  |
| 70328 | P03383 | Q13103 | -0.8358   |
| 70329 | P03383 | Q05925 | -0.22725  |
| 70330 | P03383 | Q5VW00 | -0.22734  |
| 70331 | P03383 | P08263 | -0.27596  |
| 70332 | P03383 | Q9NUH8 | -0.86584  |
| 70333 | P03383 | Q8N5C7 | -0.15608  |
| 70334 | P03383 | O15169 | -0.25148  |
| 70335 | P03383 | P16615 | -0.85853  |
| 70336 | P03383 | Q9NQC1 | -0.48348  |
| 70337 | P03383 | Q99895 | -0.91901  |
| 70338 | P03383 | Q6ZMT9 | -0.576    |
| 70339 | P03383 | Q8NGJ9 | -1.1027   |
| 70340 | P03383 | Q9H707 | -0.21172  |
| 70341 | P03383 | Q8TDS5 | -1.0612   |
| 70342 | P03383 | B1AL88 | -0.86584  |
| 70343 | P03383 | O14894 | -1.0003   |
| 70344 | P03383 | Q9Y3E1 | -0.21585  |
| 70345 | P03383 | A6NMU1 | -1.1027   |
| 70346 | P03383 | Q8IZM9 | -0.96495  |
| 70347 | P03383 | O43293 | -0.32333  |
| 70348 | P03383 | Q8WW22 | -0.43933  |
| 70349 | P03383 | Q13606 | -1.1027   |
| 70350 | P03383 | Q96S79 | -1.1317   |
| 70351 | P03383 | Q7L311 | -0.86584  |
| 70352 | P03383 | I6L899 | -0.35868  |
| 70353 | P03383 | Q86TC9 | -0.22771  |
| 70354 | P03383 | Q9H6D8 | -0.92806  |
| 70355 | P03383 | P26447 | -0.23006  |
| 70356 | P03383 | Q3B7S5 | -0.86584  |
| 70357 | P03383 | Q9C0C7 | -0.22747  |
| 70358 | P03383 | P49841 | -0.22757  |
| 70359 | P03383 | Q8N6Q3 | -0.57176  |
| 70360 | P03383 | O95813 | -0.48731  |
| 70361 | P03383 | O14944 | -0.40842  |
| 70362 | P03383 | A8MZ36 | -0.20601  |
| 70363 | P03383 | Q9NS93 | -0.93628  |
| 70364 | P03383 | Q9BW72 | -0.81434  |
| 70365 | P03383 | Q53EL9 | -0.85175  |
| 70366 | P03383 | P22310 | -0.82692  |
| 70367 | P03383 | P05089 | -0.22582  |
| 70368 | P03383 | Q5TAH2 | -0.9446   |
| 70369 | P03383 | P61109 | -0.87849  |
| 70370 | P03383 | D6RBQ6 | -0.69644  |
| 70371 | P03383 | P04201 | -0.70133  |
| 70372 | P03383 | Q58FF6 | -0.58434  |
| 70373 | P03383 | Q7Z4S6 | -0.24344  |
| 70374 | P03383 | Q02388 | -0.61678  |
| 70375 | P03383 | P34096 | -0.74826  |
| 70376 | P03383 | P55072 | -0.24787  |

|       |        |        |          |
|-------|--------|--------|----------|
| 70377 | P03383 | P57075 | -0.2274  |
| 70378 | P03383 | Q96PN8 | -1.1113  |
| 70379 | P03383 | P15311 | -0.23293 |
| 70380 | P03383 | P26951 | -0.88295 |
| 70381 | P03383 | A1IGU5 | -0.57571 |
| 70382 | P03383 | A6NGC4 | -0.86584 |
| 70383 | P03383 | Q8WUD1 | -0.78574 |
| 70384 | P03383 | Q9NRP0 | -0.8104  |
| 70385 | P03383 | Q96AP7 | -0.79255 |
| 70386 | P03383 | Q9UBR5 | -1.0745  |
| 70387 | P03383 | Q8N428 | -0.59603 |
| 70388 | P03383 | O95497 | -0.66724 |
| 70389 | P03383 | Q9UL25 | -0.39859 |
| 70390 | P03383 | Q8IZ26 | -0.21172 |
| 70391 | P03383 | Q17RW2 | -0.93361 |
| 70392 | P03383 | Q8NGX1 | -1.1027  |
| 70393 | P03383 | P79483 | -0.77384 |
| 70394 | P03383 | O94868 | -0.22745 |
| 70395 | P03383 | P22748 | -0.20219 |
| 70396 | P03383 | Q9BYJ1 | -0.59511 |
| 70397 | P03383 | P42345 | -0.28051 |
| 70398 | P03383 | Q08378 | -0.1623  |
| 70399 | P03383 | A8MVS5 | -0.86584 |
| 70400 | P03383 | Q96NB2 | -0.83432 |
| 70401 | P03383 | O00305 | -0.22711 |
| 70402 | P03383 | Q9NX01 | -0.15166 |
| 70403 | P03383 | Q9BV44 | -0.39051 |
| 70404 | P03383 | Q8TCT9 | -0.55469 |
| 70405 | P03383 | Q99453 | -0.22533 |
| 70406 | P03383 | Q8N6D2 | -0.36149 |
| 70407 | P03383 | O43497 | -0.77369 |
| 70408 | P03383 | Q9UGU0 | -0.17089 |
| 70409 | P03383 | Q9BUH8 | -0.22739 |
| 70410 | P03383 | Q3MIN7 | -0.90905 |
| 70411 | P03383 | O43772 | -0.5122  |
| 70412 | P03383 | O00221 | -0.2274  |
| 70413 | P03383 | Q96NA8 | -0.81863 |
| 70414 | P03383 | Q9NPR2 | -0.92565 |
| 70415 | P03383 | Q6Pjq5 | -0.39119 |
| 70416 | P03383 | Q9NYT0 | -0.57084 |
| 70417 | P03383 | O95292 | -0.15834 |
| 70418 | P03383 | Q9H6L2 | -0.85656 |
| 70419 | P03383 | O75678 | -0.52332 |
| 70420 | P03383 | Q99795 | -1.0723  |
| 70421 | P03383 | Q504U0 | -0.01488 |
| 70422 | P03383 | Q4ADV7 | -0.86584 |
| 70423 | P03383 | Q92692 | -0.25351 |
| 70424 | P03383 | Q86WR6 | -0.10468 |
| 70425 | P03383 | O76071 | -0.2716  |
| 70426 | P03383 | Q9BX59 | -0.99793 |
| 70427 | P03383 | Q9BWQ8 | -0.55755 |
| 70428 | P03383 | P54578 | -0.3316  |
| 70429 | P03383 | Q6ZVH7 | -0.22739 |
| 70430 | P03383 | Q6GMV1 | -0.45797 |
| 70431 | P03383 | Q9UJ83 | -0.88673 |
| 70432 | P03383 | O14810 | -0.3514  |
| 70433 | P03383 | Q96JC4 | -0.21172 |
| 70434 | P03383 | Q9NYM4 | -1.1171  |
| 70435 | P03383 | Q7RTP6 | -0.61998 |
| 70436 | P03383 | Q9BR26 | -0.82691 |
| 70437 | P03383 | P20674 | -0.31245 |
| 70438 | P03383 | Q9H6A9 | -0.86584 |
| 70439 | P03383 | O00254 | -0.86864 |
| 70440 | P03383 | Q9UBM7 | -0.76502 |
| 70441 | P03383 | Q8IW70 | -0.86584 |
| 70442 | P03383 | Q6ZUK4 | -0.86584 |
| 70443 | P03383 | Q9Y289 | -0.74852 |
| 70444 | P03383 | P49913 | -0.72778 |
| 70445 | P03383 | P01601 | -0.97479 |
| 70446 | P03383 | Q8IV35 | -0.22753 |
| 70447 | P03383 | Q6IS14 | -0.17756 |
| 70448 | P03383 | Q5T5X7 | -0.14907 |
| 70449 | P03383 | Q9H4Z2 | -0.50858 |
| 70450 | P03383 | Q9Y2U9 | -0.22403 |
| 70451 | P03383 | Q9Y5G8 | -1.1297  |
| 70452 | P03383 | Q9NPF4 | -0.42145 |

|       |        |        |           |
|-------|--------|--------|-----------|
| 70453 | P03383 | Q8N4C0 | -0.063799 |
| 70454 | P03383 | Q86UP3 | -0.22594  |
| 70455 | P03383 | Q05940 | -0.53349  |
| 70456 | P03383 | Q95936 | -0.50489  |
| 70457 | P03383 | O60755 | -1.0833   |
| 70458 | P03383 | Q8TD47 | -0.16176  |
| 70459 | P03383 | O95490 | -1.0173   |
| 70460 | P03383 | O43502 | -0.20157  |
| 70461 | P03383 | Q01113 | -1.3555   |
| 70462 | P03383 | Q15303 | -0.22741  |
| 70463 | P03383 | Q9BXW4 | -0.065262 |
| 70464 | P03383 | P46059 | -0.8081   |
| 70465 | P03383 | P48444 | -0.14996  |
| 70466 | P03383 | Q96QR1 | -0.8331   |
| 70467 | P03383 | Q8N100 | -0.2284   |
| 70468 | P03383 | Q7Z4W1 | -0.6867   |
| 70469 | P03383 | Q16513 | -0.22273  |
| 70470 | P03383 | Q8WXX5 | -0.47218  |
| 70471 | P03383 | Q99612 | -0.22571  |
| 70472 | P03383 | Q13242 | -0.22688  |
| 70473 | P03383 | Q8NC38 | -0.05928  |
| 70474 | P03383 | Q86UQ4 | -1.1035   |
| 70475 | P03383 | Q7Z2W7 | -0.79809  |
| 70476 | P03383 | A6NN73 | -0.35868  |
| 70477 | P03383 | Q8N3C0 | -0.22715  |
| 70478 | P03383 | Q6UX98 | -0.89944  |
| 70479 | P03383 | Q6PF15 | -0.22303  |
| 70480 | P03383 | P50479 | -0.22741  |
| 70481 | P03383 | Q6P5X7 | -0.86584  |
| 70482 | P03383 | Q6SPF0 | -0.72903  |
| 70483 | P03383 | P01374 | -0.65846  |
| 70484 | P03383 | Q5M9N0 | -0.11957  |
| 70485 | P03383 | Q15139 | -0.22725  |
| 70486 | P03383 | Q96P56 | -0.53586  |
| 70487 | P03383 | P27824 | -0.28537  |
| 70488 | P03383 | Q969T4 | -0.35447  |
| 70489 | P03383 | Q53F39 | -0.47133  |
| 70490 | P03383 | Q969E1 | -0.858    |
| 70491 | P03383 | Q9UEU0 | -0.51168  |
| 70492 | P03383 | Q96SM3 | -1.3157   |
| 70493 | P03383 | Q08623 | -0.3412   |
| 70494 | P03383 | P0C7Q3 | -0.12536  |
| 70495 | P03383 | Q2QL34 | -0.8204   |
| 70496 | P03383 | Q8TDV0 | -1.1721   |
| 70497 | P03383 | Q6UX07 | -1.382    |
| 70498 | P03383 | Q9Y4I5 | -0.40859  |
| 70499 | P03383 | Q8N2G6 | -0.51948  |
| 70500 | P03383 | P42263 | -0.73788  |
| 70501 | P03383 | Q7L775 | -0.45036  |
| 70502 | P03383 | Q9Y4E6 | -0.22746  |
| 70503 | P03383 | Q86XP6 | -0.87849  |
| 70504 | P03383 | Q9NQF3 | -0.2211   |
| 70505 | P03383 | Q9NZP2 | -1.1027   |
| 70506 | P03383 | Q969W0 | -0.42237  |
| 70507 | P03383 | P01568 | -0.7874   |
| 70508 | P03383 | O94907 | -0.35903  |
| 70509 | P03383 | Q96KQ7 | -0.22741  |
| 70510 | P03383 | O43396 | -0.22808  |
| 70511 | P03383 | Q8N568 | -0.77578  |
| 70512 | P03383 | P23945 | -0.57006  |
| 70513 | P03383 | O75317 | -0.36838  |
| 70514 | P03383 | Q96MH6 | -0.92269  |
| 70515 | P03383 | P40225 | -0.72608  |
| 70516 | P03383 | P04436 | -0.5974   |
| 70517 | P03383 | P22455 | -0.64669  |
| 70518 | P03383 | P30447 | -0.7844   |
| 70519 | P03383 | Q96CP7 | -0.86584  |
| 70520 | P03383 | Q9ULZ3 | -0.17187  |
| 70521 | P03383 | Q13362 | -0.085496 |
| 70522 | P03383 | O00585 | -0.50463  |
| 70523 | P03383 | P0C7T2 | -1.1027   |
| 70524 | P03383 | P80511 | -0.22865  |
| 70525 | P03383 | Q96P20 | -0.22721  |
| 70526 | P03383 | P55085 | -0.33316  |
| 70527 | P03383 | O00515 | -0.822    |
| 70528 | P03383 | Q8N9N2 | -0.21926  |

|       |        |        |           |
|-------|--------|--------|-----------|
| 70529 | P03383 | Q6ZV29 | -0.63423  |
| 70530 | P03383 | Q13061 | -0.73622  |
| 70531 | P03383 | Q6AW86 | -0.21172  |
| 70532 | P03383 | Q5FYA8 | -0.71677  |
| 70533 | P03383 | Q9Y210 | -0.35801  |
| 70534 | P03383 | Q8WWX0 | -0.62076  |
| 70535 | P03383 | Q969P6 | -0.51136  |
| 70536 | P03383 | Q8NGP3 | -1.1027   |
| 70537 | P03383 | Q9NUJ7 | -0.6447   |
| 70538 | P03383 | P01876 | -0.46799  |
| 70539 | P03383 | Q9C0E4 | -0.43401  |
| 70540 | P03383 | Q5JWF8 | -0.051136 |
| 70541 | P03383 | O43572 | -0.35568  |
| 70542 | P03383 | Q9BT40 | -0.22619  |
| 70543 | P03383 | Q9BQ75 | -0.53425  |
| 70544 | P03383 | P07954 | -0.067999 |
| 70545 | P03383 | P22105 | -1.0244   |
| 70546 | P03383 | Q8N370 | -0.94648  |
| 70547 | P03383 | P05771 | -0.21955  |
| 70548 | P03383 | Q8IVG5 | -0.11653  |
| 70549 | P03383 | Q9Y5E1 | -1.1238   |
| 70550 | P03383 | O60741 | -1.0828   |
| 70551 | P03383 | Q12884 | -0.52419  |
| 70552 | P03383 | P48723 | -0.84262  |
| 70553 | P03383 | P51854 | -0.31028  |
| 70554 | P03383 | Q8IVE3 | -0.78212  |
| 70555 | P03383 | Q8N841 | -0.17067  |
| 70556 | P03383 | P0C7H9 | -0.26918  |
| 70557 | P03383 | Q9BR76 | -0.22742  |
| 70558 | P03383 | Q8WTR2 | -0.7476   |
| 70559 | P03383 | P39905 | -0.35623  |
| 70560 | P03383 | P06309 | -0.97479  |
| 70561 | P03383 | Q9UGP8 | -0.74193  |
| 70562 | P03383 | O15498 | -0.27988  |
| 70563 | P03383 | Q15047 | -0.22571  |
| 70564 | P03383 | Q5T7N8 | -0.12137  |
| 70565 | P03383 | Q13748 | -0.19812  |
| 70566 | P03383 | Q09160 | -0.88088  |
| 70567 | P03383 | P0C2L3 | -0.86584  |
| 70568 | P03383 | Q9Y6N1 | -0.69729  |
| 70569 | P03383 | P20585 | -0.052951 |
| 70570 | P03383 | Q8IYA7 | -0.24875  |
| 70571 | P03383 | Q8WTQ1 | -0.84399  |
| 70572 | P03383 | Q7RTS1 | -0.22764  |
| 70573 | P03383 | Q93100 | -0.23561  |
| 70574 | P03383 | P15559 | -0.047509 |
| 70575 | P03383 | Q13286 | -0.17861  |
| 70576 | P03383 | P46459 | -0.23288  |
| 70577 | P03383 | O95970 | -0.22798  |
| 70578 | P03383 | P41145 | -0.809    |
| 70579 | P03383 | O94972 | -0.2274   |
| 70580 | P03383 | Q9P0X4 | -0.55269  |
| 70581 | P03383 | P35442 | -0.85644  |
| 70582 | P03383 | Q9H222 | -0.55441  |
| 70583 | P03383 | Q6UX06 | -0.94283  |
| 70584 | P03383 | Q8WV28 | -0.2274   |
| 70585 | P03383 | Q9UHF0 | -0.91956  |
| 70586 | P03383 | Q5NUL3 | -1.0294   |
| 70587 | P03383 | A6NMC2 | -0.25825  |
| 70588 | P03383 | P20794 | -0.22578  |
| 70589 | P03383 | Q9NUE0 | -0.91341  |
| 70590 | P03383 | Q6PL18 | -0.23243  |
| 70591 | P03383 | Q6UXV4 | -0.72059  |
| 70592 | P03383 | P0CW22 | -0.20594  |
| 70593 | P03383 | Q9NX00 | -0.74159  |
| 70594 | P03383 | P31153 | -0.58432  |
| 70595 | P03383 | Q99550 | -0.22236  |
| 70596 | P03383 | P23560 | -0.45615  |
| 70597 | P03383 | Q9Y4X4 | -0.22445  |
| 70598 | P03383 | P52952 | -0.28653  |
| 70599 | P03383 | Q96L08 | -0.86584  |
| 70600 | P03383 | O95630 | -0.24237  |
| 70601 | P03383 | Q6TCH7 | -0.72271  |
| 70602 | P03383 | Q8WZ59 | -0.86584  |
| 70603 | P03383 | Q0P6D6 | -0.3067   |
| 70604 | P03383 | Q5VUJ6 | -0.2347   |

|       |        |        |           |
|-------|--------|--------|-----------|
| 70605 | P03383 | Q9BYZ8 | -0.86789  |
| 70606 | P03383 | Q8WVB6 | -0.61779  |
| 70607 | P03383 | Q9UQ26 | -0.22741  |
| 70608 | P03383 | Q96DR5 | -1.0096   |
| 70609 | P03383 | O43490 | -0.52312  |
| 70610 | P03383 | A8MRT5 | -0.86584  |
| 70611 | P03383 | P49961 | -1.2993   |
| 70612 | P03383 | O60840 | -0.82958  |
| 70613 | P03383 | Q9BS40 | -0.2868   |
| 70614 | P03383 | Q8WXH0 | -0.22843  |
| 70615 | P03383 | O60880 | -0.22741  |
| 70616 | P03383 | Q14353 | -0.2201   |
| 70617 | P03383 | Q9Y2G1 | -0.3867   |
| 70618 | P03383 | Q96S37 | -0.73772  |
| 70619 | P03383 | Q14739 | -0.16687  |
| 70620 | P03383 | A8MYR8 | -0.037477 |
| 70621 | P03383 | Q9Y6W5 | -0.42293  |
| 70622 | P03383 | P49448 | -0.65421  |
| 70623 | P03383 | O15240 | -0.5693   |
| 70624 | P03383 | Q07444 | -0.84923  |
| 70625 | P03383 | Q70CQ4 | -0.69644  |
| 70626 | P03383 | P68371 | -0.29618  |
| 70627 | P03383 | P01606 | -0.97479  |
| 70628 | P03383 | Q8WTR4 | -0.57232  |
| 70629 | P03383 | P35557 | -0.18442  |
| 70630 | P03383 | P61550 | -0.63565  |
| 70631 | P03383 | O43869 | -1.1027   |
| 70632 | P03383 | Q6ZT12 | -0.73228  |
| 70633 | P03383 | Q969X2 | -0.57304  |
| 70634 | P03383 | O43184 | -0.63739  |
| 70635 | P03383 | Q5T0D9 | -0.38818  |
| 70636 | P03383 | P0DJJ3 | -0.23137  |
| 70637 | P03383 | Q99965 | -1.0921   |
| 70638 | P03383 | Q8NGM8 | -1.1027   |
| 70639 | P03383 | Q96MI9 | -0.58722  |
| 70640 | P03383 | Q8IV50 | -0.43278  |
| 70641 | P03383 | Q96P47 | -1.0207   |
| 70642 | P03383 | Q147U1 | -0.21172  |
| 70643 | P03383 | Q96I85 | -0.87849  |
| 70644 | P03383 | Q9UBZ4 | -0.15234  |
| 70645 | P03383 | P34897 | -0.19454  |
| 70646 | P03383 | Q6PIV2 | -0.39119  |
| 70647 | P03383 | P19835 | -0.54142  |
| 70648 | P03383 | Q8WXX0 | -0.6994   |
| 70649 | P03383 | Q96EU7 | -0.74561  |
| 70650 | P03383 | O43586 | -0.9439   |
| 70651 | P03383 | Q9UQ90 | -0.56979  |
| 70652 | P03383 | Q9P0G3 | -1.1305   |
| 70653 | P03383 | Q6UXN7 | -0.65075  |
| 70654 | P03383 | A6NH52 | -0.86584  |
| 70655 | P03383 | P0C5Z0 | -0.85404  |
| 70656 | P03383 | P28356 | -0.22725  |
| 70657 | P03383 | P16930 | -0.45234  |
| 70658 | P03383 | A6NDI0 | -0.73967  |
| 70659 | P03383 | O95470 | -0.33234  |
| 70660 | P03383 | Q6P4F1 | -0.5003   |
| 70661 | P03383 | Q9ULR3 | -0.56275  |
| 70662 | P03383 | Q9H867 | -0.19056  |
| 70663 | P03383 | Q5TZF3 | -0.22741  |
| 70664 | P03383 | A4QPB2 | -0.41937  |
| 70665 | P03383 | Q96PU5 | -0.22741  |
| 70666 | P03383 | Q14573 | -0.22305  |
| 70667 | P03383 | Q86UL8 | -0.2264   |
| 70668 | P03383 | P20062 | -0.93821  |
| 70669 | P03383 | Q8N118 | -0.8263   |
| 70670 | P03383 | Q86UN6 | -0.34618  |
| 70671 | P03383 | Q8ND71 | -0.22925  |
| 70672 | P03383 | Q9UBP4 | -0.83187  |
| 70673 | P03383 | Q9H6R0 | -0.36505  |
| 70674 | P03383 | P29536 | -0.44328  |
| 70675 | P03383 | O76001 | -1.1027   |
| 70676 | P03383 | P15907 | -0.79665  |
| 70677 | P03383 | P35030 | -0.868    |
| 70678 | P03383 | Q7L8L6 | -0.3676   |
| 70679 | P03383 | Q96EF0 | -0.58187  |
| 70680 | P03383 | Q9H2A9 | -0.59641  |

|       |        |        |           |
|-------|--------|--------|-----------|
| 70681 | P03383 | O14827 | -0.75463  |
| 70682 | P03383 | Q9UKU9 | -1.2179   |
| 70683 | P03383 | Q8WXE0 | -0.22743  |
| 70684 | P03383 | Q9Y5P2 | -0.43931  |
| 70685 | P03383 | Q96RI8 | -1.143    |
| 70686 | P03383 | Q70Z35 | -0.72634  |
| 70687 | P03383 | P21283 | -0.20716  |
| 70688 | P03383 | P47974 | -0.19258  |
| 70689 | P03383 | Q8N9N8 | -0.21277  |
| 70690 | P03383 | Q9NX65 | -0.21172  |
| 70691 | P03383 | Q08397 | -1.059    |
| 70692 | P03383 | Q8N0Y5 | -1.1027   |
| 70693 | P03383 | Q86Y28 | -0.87849  |
| 70694 | P03383 | P29350 | -0.22741  |
| 70695 | P03383 | Q6NZ36 | -0.11045  |
| 70696 | P03383 | P50225 | -0.33247  |
| 70697 | P03383 | O95600 | -0.2167   |
| 70698 | P03383 | Q8IZD9 | -0.21029  |
| 70699 | P03383 | A8MYB1 | -0.86584  |
| 70700 | P03383 | Q96CP6 | -0.86584  |
| 70701 | P03383 | P29274 | -0.3025   |
| 70702 | P03383 | Q969M3 | -0.52664  |
| 70703 | P03383 | P16591 | -0.38919  |
| 70704 | P03383 | P01588 | -0.2481   |
| 70705 | P03383 | Q8N912 | -0.86584  |
| 70706 | P03383 | Q9ULI2 | -0.74692  |
| 70707 | P03383 | Q6UWY0 | -0.7695   |
| 70708 | P03383 | Q6ZP82 | -0.2274   |
| 70709 | P03383 | P12643 | -0.22741  |
| 70710 | P03383 | O60447 | -0.23104  |
| 70711 | P03383 | P41091 | -0.11732  |
| 70712 | P03383 | Q96JH7 | -0.49469  |
| 70713 | P03383 | Q8TEF2 | -0.86584  |
| 70714 | P03383 | O15514 | -0.196    |
| 70715 | P03383 | Q6UXC1 | -0.66148  |
| 70716 | P03383 | B2RXH2 | -0.14374  |
| 70717 | P03383 | Q9Y3B4 | -0.29713  |
| 70718 | P03383 | Q12841 | -0.98975  |
| 70719 | P03383 | P05997 | -0.8001   |
| 70720 | P03383 | Q6UY18 | -0.86584  |
| 70721 | P03383 | P54849 | -1.0046   |
| 70722 | P03383 | Q9NPJ1 | -0.19646  |
| 70723 | P03383 | Q8TDU6 | -1.1721   |
| 70724 | P03383 | Q9NPB3 | -0.50614  |
| 70725 | P03383 | Q9ULC0 | -1.2762   |
| 70726 | P03383 | Q9Y6W8 | -1.3545   |
| 70727 | P03383 | Q14626 | -1.0896   |
| 70728 | P03383 | Q14721 | -0.3333   |
| 70729 | P03383 | Q496J9 | -0.67864  |
| 70730 | P03383 | Q99447 | -0.42455  |
| 70731 | P03383 | Q86TX2 | -0.0766   |
| 70732 | P03383 | Q86V88 | -0.83848  |
| 70733 | P03383 | Q7RTS6 | -0.86584  |
| 70734 | P03383 | Q99942 | -0.38793  |
| 70735 | P03383 | Q96PH1 | -0.71636  |
| 70736 | P03383 | Q6IA17 | -0.50287  |
| 70737 | P03383 | Q9P2E5 | -0.47365  |
| 70738 | P03383 | P48304 | -0.84692  |
| 70739 | P03383 | O43364 | -0.096764 |
| 70740 | P03383 | P09086 | -0.22741  |
| 70741 | P03383 | A1KXE4 | -0.82856  |
| 70742 | P03383 | Q9P283 | -0.92565  |
| 70743 | P03383 | P06858 | -0.44113  |
| 70744 | P03383 | A8MWD9 | -0.17377  |
| 70745 | P03383 | O15060 | -0.21172  |
| 70746 | P03383 | P16118 | -0.059522 |
| 70747 | P03383 | Q12792 | -0.45268  |
| 70748 | P03383 | P14314 | -0.63088  |
| 70749 | P03383 | P09067 | -0.17599  |
| 70750 | P03383 | Q9NSE4 | -0.25311  |
| 70751 | P03383 | P56696 | -0.84475  |
| 70752 | P03383 | A6NDP7 | -0.86584  |
| 70753 | P03383 | Q9Y6N7 | -0.48444  |
| 70754 | P03383 | Q9P1C3 | -0.87849  |
| 70755 | P03383 | D6R901 | -0.69644  |
| 70756 | P03383 | O15182 | -0.22596  |



|       |        |         |           |
|-------|--------|---------|-----------|
| 70757 | P03383 | Q93098  | -0.74051  |
| 70758 | P03383 | O14626  | -1.124    |
| 70759 | P03383 | Q9H1N7  | -0.59285  |
| 70760 | P03383 | Q99729  | -0.2389   |
| 70761 | P03383 | Q9BPW5  | -1.1358   |
| 70762 | P03383 | A6NI28  | -1.1955   |
| 70763 | P03383 | Q8IUUK5 | -0.69345  |
| 70764 | P03383 | Q8NG80  | -0.91257  |
| 70765 | P03383 | Q9UBI4  | -0.51967  |
| 70766 | P03383 | Q92904  | -0.22903  |
| 70767 | P03383 | Q5H9T9  | -0.57765  |
| 70768 | P03383 | Q9ULX5  | -0.6362   |
| 70769 | P03383 | P61626  | -0.96746  |
| 70770 | P03383 | O60733  | -0.2274   |
| 70771 | P03383 | Q4G0I0  | -0.86584  |
| 70772 | P03383 | Q8IUL8  | -0.83161  |
| 70773 | P03383 | A6NC86  | -0.85844  |
| 70774 | P03383 | Q6UXQ4  | -0.87849  |
| 70775 | P03383 | Q8NGT2  | -1.1027   |
| 70776 | P03383 | Q86UX7  | -0.68674  |
| 70777 | P03383 | Q6UXH0  | -0.29044  |
| 70778 | P03383 | Q15053  | -0.060166 |
| 70779 | P03383 | Q8WYK1  | -1.1581   |
| 70780 | P03383 | Q8IYF1  | -0.23804  |
| 70781 | P03383 | Q53GS9  | -0.41227  |
| 70782 | P03383 | P0CI25  | -0.73967  |
| 70783 | P03383 | Q96IQ7  | -1.0003   |
| 70784 | P03383 | A6NM43  | -0.64477  |
| 70785 | P03383 | P40121  | -0.13811  |
| 70786 | P03383 | Q13253  | -0.30692  |
| 70787 | P03383 | Q96B97  | -0.22763  |
| 70788 | P03383 | Q6P2P2  | -0.20721  |
| 70789 | P03383 | Q16280  | -1.0951   |
| 70790 | P03383 | Q8NCC3  | -0.78735  |
| 70791 | P03383 | Q5T2N8  | -0.91185  |
| 70792 | P03383 | Q7RTS3  | -0.22831  |
| 70793 | P03383 | P30530  | -0.50685  |
| 70794 | P03383 | P22234  | -0.35418  |
| 70795 | P03383 | P11171  | -0.26455  |
| 70796 | P03383 | Q9UG01  | -0.65967  |
| 70797 | P03383 | Q14587  | -0.17069  |
| 70798 | P03383 | Q8N1W2  | -0.21172  |
| 70799 | P03383 | Q6P4F2  | -0.36217  |
| 70800 | P03383 | P0CG05  | -0.95485  |
| 70801 | P03383 | D3W0D1  | -0.49237  |
| 70802 | P03383 | Q12979  | -0.78879  |
| 70803 | P03383 | Q8IYU8  | -0.39423  |
| 70804 | P03383 | Q9BWT7  | -0.2084   |
| 70805 | P03383 | Q9UPN3  | -0.22768  |
| 70806 | P03383 | P35475  | -0.48932  |
| 70807 | P03383 | Q8N7G0  | -0.22702  |
| 70808 | P03383 | P62380  | -0.053622 |
| 70809 | P03383 | P17181  | -0.87453  |
| 70810 | P03383 | Q8IUE0  | -0.23024  |
| 70811 | P03383 | Q7RTV5  | -0.15769  |
| 70812 | P03383 | Q8IYU2  | -0.22764  |
| 70813 | P03383 | Q9Y2I8  | -0.22914  |
| 70814 | P03383 | Q8TCG2  | -0.52781  |
| 70815 | P03383 | Q9YNA8  | -0.40851  |
| 70816 | P03383 | Q8IV63  | -0.66364  |
| 70817 | P03383 | O60404  | -1.1027   |
| 70818 | P03383 | P29965  | -0.85446  |
| 70819 | P03383 | P43243  | -0.12432  |
| 70820 | P03383 | P35670  | -0.3297   |
| 70821 | P03383 | Q02221  | -0.38401  |
| 70822 | P03383 | Q86X27  | -0.84229  |
| 70823 | P03383 | P05108  | -0.2961   |
| 70824 | P03383 | Q2WGN9  | -0.5353   |
| 70825 | P03383 | Q9Y278  | -0.55636  |
| 70826 | P03383 | Q9H720  | -0.84625  |
| 70827 | P03383 | Q5GAN3  | -0.85864  |
| 70828 | P03383 | Q86U10  | -0.4301   |
| 70829 | P03383 | P81133  | -0.32345  |
| 70830 | P03383 | Q95479  | -0.69747  |
| 70831 | P03383 | Q86X24  | -0.48463  |
| 70832 | P03383 | Q8NDX2  | -0.77746  |

|       |        |        |            |
|-------|--------|--------|------------|
| 70833 | P03383 | A6NM10 | -0.83009   |
| 70834 | P03383 | Q9UBL3 | -0.22127   |
| 70835 | P03383 | Q92834 | -0.22487   |
| 70836 | P03383 | P51857 | -0.30828   |
| 70837 | P03383 | O95759 | -1.1611    |
| 70838 | P03383 | P48047 | -0.33716   |
| 70839 | P03383 | Q9BZJ0 | -0.21217   |
| 70840 | P03383 | Q96NN9 | -0.21908   |
| 70841 | P03383 | Q13007 | -0.83451   |
| 70842 | P03383 | Q8N165 | -0.75438   |
| 70843 | P03383 | Q32M45 | -0.85455   |
| 70844 | P03383 | P04035 | -0.5701    |
| 70845 | P03383 | Q8WZ75 | -0.89212   |
| 70846 | P03383 | A8MWS5 | -0.041876  |
| 70847 | P03383 | Q4LDE5 | -0.81845   |
| 70848 | P03383 | P55058 | -1.035     |
| 70849 | P03383 | Q5TGI4 | -0.22726   |
| 70850 | P03383 | Q13232 | -0.58952   |
| 70851 | P03383 | P31152 | -0.43745   |
| 70852 | P03383 | Q9Y6M0 | -0.82397   |
| 70853 | P03383 | Q5VYS4 | -0.27481   |
| 70854 | P03383 | Q9H0K6 | -0.36852   |
| 70855 | P03383 | P02812 | -0.54538   |
| 70856 | P03383 | P00734 | -0.48946   |
| 70857 | P03383 | P25942 | -0.52051   |
| 70858 | P03383 | Q96N96 | -0.22755   |
| 70859 | P03383 | P19634 | -0.3376    |
| 70860 | P03383 | Q8IWY9 | -0.86584   |
| 70861 | P03383 | Q8NGI4 | -1.1027    |
| 70862 | P03383 | Q99439 | -0.24967   |
| 70863 | P03383 | Q8IYS0 | -0.86584   |
| 70864 | P03383 | Q92542 | -0.43228   |
| 70865 | P03383 | Q5TF21 | -0.86584   |
| 70866 | P03383 | P49771 | -1.2329    |
| 70867 | P03383 | Q8NBI6 | -0.88449   |
| 70868 | P03383 | Q9NVE5 | -0.69644   |
| 70869 | P03383 | O95155 | -0.19851   |
| 70870 | P03383 | Q04756 | -1.1269    |
| 70871 | P03383 | Q9NV06 | -0.22742   |
| 70872 | P03383 | Q96BR1 | -0.75457   |
| 70873 | P03383 | Q9UI12 | -0.084199  |
| 70874 | P03383 | Q99757 | -0.28667   |
| 70875 | P03383 | Q9H4B4 | -0.22742   |
| 70876 | P03383 | Q8IVP5 | -0.27203   |
| 70877 | P03383 | P83105 | -1.1938    |
| 70878 | P03383 | Q86XH1 | -0.79654   |
| 70879 | P03383 | P02787 | -0.13203   |
| 70880 | P03383 | Q96C19 | -0.61775   |
| 70881 | P03383 | P60468 | -0.30266   |
| 70882 | P03383 | Q5F1R6 | -0.0045079 |
| 70883 | P03383 | Q3SX64 | -0.1156    |
| 70884 | P03383 | P0C7Q6 | -0.86584   |
| 70885 | P03383 | Q08493 | -0.61902   |
| 70886 | P03383 | Q8NGC3 | -1.1027    |
| 70887 | P03383 | P58400 | -0.54957   |
| 70888 | P03383 | Q9H9S3 | -0.63247   |
| 70889 | P03383 | Q9UPQ8 | -0.72625   |
| 70890 | P03383 | Q8NET6 | -0.50371   |
| 70891 | P03383 | Q07869 | -0.2386    |
| 70892 | P03383 | P43361 | -0.16078   |
| 70893 | P03383 | Q7Z3U7 | -0.17325   |
| 70894 | P03383 | Q8WWU5 | -1.0387    |
| 70895 | P03383 | Q8NGD4 | -1.1027    |
| 70896 | P03383 | Q15270 | -0.22714   |
| 70897 | P03383 | Q96HU1 | -0.23348   |
| 70898 | P03383 | O00303 | -0.19814   |
| 70899 | P03383 | Q99519 | -0.52288   |
| 70900 | P03383 | A6NMZ2 | -0.66242   |
| 70901 | P03383 | Q9ULA0 | -0.64349   |
| 70902 | P03383 | P43366 | -0.10053   |
| 70903 | P03383 | Q4LDG9 | -0.22741   |
| 70904 | P03383 | Q9POM4 | -0.85335   |
| 70905 | P03383 | P59666 | -0.8478    |
| 70906 | P03383 | P0CL85 | -0.21602   |
| 70907 | P03383 | Q6ZMI3 | -1.0172    |
| 70908 | P03383 | Q16821 | -0.70584   |

|       |        |         |           |
|-------|--------|---------|-----------|
| 70909 | P03383 | Q9H5Z1  | -0.71676  |
| 70910 | P03383 | Q07000  | -0.88446  |
| 70911 | P03383 | P26599  | -0.22574  |
| 70912 | P03383 | Q75556  | -0.2854   |
| 70913 | P03383 | P30490  | -0.88446  |
| 70914 | P03383 | Q5JUW0  | -0.31656  |
| 70915 | P03383 | Q04828  | -0.23757  |
| 70916 | P03383 | Q969F8  | -0.77659  |
| 70917 | P03383 | Q9UHW9  | -0.78625  |
| 70918 | P03383 | Q9H1R2  | -0.49175  |
| 70919 | P03383 | Q5BKY1  | -0.2279   |
| 70920 | P03383 | C9JPN9  | -0.69644  |
| 70921 | P03383 | P55010  | -0.41595  |
| 70922 | P03383 | F2Z333  | -0.86584  |
| 70923 | P03383 | Q6ZSR9  | -0.1993   |
| 70924 | P03383 | Q43687  | -0.8302   |
| 70925 | P03383 | Q6UXK2  | -0.90149  |
| 70926 | P03383 | P51679  | -1.1584   |
| 70927 | P03383 | Q13613  | -0.58448  |
| 70928 | P03383 | P06316  | -0.97479  |
| 70929 | P03383 | Q8NCH0  | -0.49357  |
| 70930 | P03383 | O95139  | -0.25432  |
| 70931 | P03383 | Q9NZH8  | -0.7626   |
| 70932 | P03383 | Q8WV44  | -0.2284   |
| 70933 | P03383 | Q99704  | -0.057289 |
| 70934 | P03383 | P23510  | -0.42245  |
| 70935 | P03383 | Q96DL1  | -0.86584  |
| 70936 | P03383 | Q9BRZ2  | -0.60231  |
| 70937 | P03383 | Q8WXQ8  | -1.1649   |
| 70938 | P03383 | Q5XG99  | -0.84623  |
| 70939 | P03383 | A6NLX4  | -0.86584  |
| 70940 | P03383 | Q63HM2  | -0.86584  |
| 70941 | P03383 | P52848  | -0.44246  |
| 70942 | P03383 | P01112  | -0.22784  |
| 70943 | P03383 | Q86VY9  | -0.86584  |
| 70944 | P03383 | I3L1E1  | -0.419    |
| 70945 | P03383 | O75943  | -0.16984  |
| 70946 | P03383 | O75752  | -0.76224  |
| 70947 | P03383 | Q8NA56  | -0.10148  |
| 70948 | P03383 | P51888  | -0.83106  |
| 70949 | P03383 | Q3KR37  | -0.86584  |
| 70950 | P03383 | A6QL63  | -0.93238  |
| 70951 | P03383 | Q8IUUY3 | -0.86584  |
| 70952 | P03383 | Q9HCZ1  | -0.21172  |
| 70953 | P03383 | Q86Y34  | -1.1905   |
| 70954 | P03383 | Q8NHM5  | -0.22673  |
| 70955 | P03383 | O14544  | -0.27575  |
| 70956 | P03383 | Q07002  | -0.67728  |
| 70957 | P03383 | O43861  | -0.77821  |
| 70958 | P03383 | P01760  | -0.97479  |
| 70959 | P03383 | Q9UJ14  | -0.69875  |
| 70960 | P03383 | Q9NW13  | -0.32302  |
| 70961 | P03383 | O43300  | -0.75156  |
| 70962 | P03383 | O15197  | -1.3407   |
| 70963 | P03383 | Q53T59  | -0.55072  |
| 70964 | P03383 | A8MZ06  | -0.35868  |
| 70965 | P03383 | Q96BY9  | -0.44597  |
| 70966 | P03383 | Q9P2B2  | -0.34931  |
| 70967 | P03383 | Q8N4V2  | -0.6818   |
| 70968 | P03383 | Q9UQQ1  | -1.2106   |
| 70969 | P03383 | Q92616  | -0.22531  |
| 70970 | P03383 | A6NCQ9  | -0.92811  |
| 70971 | P03383 | Q9H511  | -0.20344  |
| 70972 | P03383 | B2RTY4  | -0.92629  |
| 70973 | P03383 | Q8N4T0  | -1.1732   |
| 70974 | P03383 | Q9NRD8  | -0.74053  |
| 70975 | P03383 | Q9GZK7  | -1.1027   |
| 70976 | P03383 | A6NL26  | -1.1027   |
| 70977 | P03383 | P04430  | -0.97479  |
| 70978 | P03383 | Q969Q4  | -0.68576  |
| 70979 | P03383 | Q96E93  | -0.94953  |
| 70980 | P03383 | Q86U28  | -0.24489  |
| 70981 | P03383 | Q6UXX5  | -0.7817   |
| 70982 | P03383 | P29376  | -1.1486   |
| 70983 | P03383 | Q92617  | -0.52887  |
| 70984 | P03383 | Q13018  | -1.0658   |

|       |        |        |           |
|-------|--------|--------|-----------|
| 70985 | P03383 | O95081 | -0.33373  |
| 70986 | P03383 | Q6ZMB5 | -0.86584  |
| 70987 | P03383 | Q96RP7 | -0.60185  |
| 70988 | P03383 | P56704 | -0.23384  |
| 70989 | P03383 | Q8NDW4 | -0.21172  |
| 70990 | P03383 | Q8NB15 | -0.22667  |
| 70991 | P03383 | P42658 | -0.82685  |
| 70992 | P03383 | Q8NFR9 | -0.52881  |
| 70993 | P03383 | P55273 | -0.2274   |
| 70994 | P03383 | Q8N6K7 | -0.19937  |
| 70995 | P03383 | Q7Z2K8 | -0.68254  |
| 70996 | P03383 | Q76LX8 | -0.49874  |
| 70997 | P03383 | P33151 | -0.49426  |
| 70998 | P03383 | Q8NGW1 | -1.1027   |
| 70999 | P03383 | Q9BS31 | -0.21172  |
| 71000 | P03383 | Q96IV6 | -0.93388  |
| 71001 | P03383 | Q7Z3V4 | -0.45042  |
| 71002 | P03383 | A0MZ66 | -0.59586  |
| 71003 | P03383 | Q8IV31 | -0.86584  |
| 71004 | P03383 | Q8NFI5 | -1.1545   |
| 71005 | P03383 | Q99685 | -0.45382  |
| 71006 | P03383 | Q9NR23 | -0.72561  |
| 71007 | P03383 | Q9NP91 | -0.98287  |
| 71008 | P03383 | Q8NCE2 | -0.52483  |
| 71009 | P03383 | Q8NC01 | -1.1451   |
| 71010 | P03383 | Q9UKH3 | -0.5818   |
| 71011 | P03383 | P63132 | -0.43742  |
| 71012 | P03383 | Q92625 | -0.22741  |
| 71013 | P03383 | Q92954 | -0.8561   |
| 71014 | P03383 | P01702 | -0.97479  |
| 71015 | P03383 | Q2M3R5 | -0.86584  |
| 71016 | P03383 | P13667 | -0.24869  |
| 71017 | P03383 | Q5JWF2 | -0.64435  |
| 71018 | P03383 | Q9NZJ4 | -0.063411 |
| 71019 | P03383 | Q66LE6 | -0.18391  |
| 71020 | P03383 | P04632 | -0.23042  |
| 71021 | P03383 | P0CK97 | -0.86584  |
| 71022 | P03383 | Q9H1R3 | -0.25332  |
| 71023 | P03383 | Q96HS1 | -0.6601   |
| 71024 | P03383 | A6NGA9 | -0.86584  |
| 71025 | P03383 | Q9Y6C2 | -0.63459  |
| 71026 | P03383 | P55822 | -0.44035  |
| 71027 | P03383 | P52798 | -0.49924  |
| 71028 | P03383 | Q8WXS8 | -1.1636   |
| 71029 | P03383 | P05091 | -0.34965  |
| 71030 | P03383 | Q9HBR0 | -0.96495  |
| 71031 | P03383 | P30504 | -0.88446  |
| 71032 | P03383 | P05093 | -0.43888  |
| 71033 | P03383 | A6NNM3 | -0.22738  |
| 71034 | P03383 | Q6P587 | -0.27559  |
| 71035 | P03383 | O00507 | -0.55853  |
| 71036 | P03383 | P13224 | -0.59651  |
| 71037 | P03383 | Q95235 | -0.26583  |
| 71038 | P03383 | Q15431 | -0.28525  |
| 71039 | P03383 | Q96NW7 | -0.27193  |
| 71040 | P03383 | Q9NP60 | -1.0257   |
| 71041 | P03383 | Q96FK6 | -0.22741  |
| 71042 | P03383 | P62995 | -0.22335  |
| 71043 | P03383 | P13725 | -0.49487  |
| 71044 | P03383 | Q7LBE3 | -0.82496  |
| 71045 | P03383 | Q9H7B7 | -0.87849  |
| 71046 | P03383 | Q8N1H7 | -0.43266  |
| 71047 | P03383 | Q8NH16 | -0.91257  |
| 71048 | P03383 | P49619 | -0.82775  |
| 71049 | P03383 | Q86TI4 | -0.22768  |
| 71050 | P03383 | Q8NH08 | -1.1027   |
| 71051 | P03383 | Q495C1 | -0.52332  |
| 71052 | P03383 | O00750 | -0.22746  |
| 71053 | P03383 | Q9Y4X0 | -0.16078  |
| 71054 | P03383 | Q8NC96 | -0.39341  |
| 71055 | P03383 | Q68CR1 | -0.86584  |
| 71056 | P03383 | Q8N6N6 | -0.039068 |
| 71057 | P03383 | O76064 | -0.22741  |
| 71058 | P03383 | Q7Z3S9 | -0.92997  |
| 71059 | P03383 | Q8NG95 | -1.1027   |
| 71060 | P03383 | P04278 | -0.86866  |

|       |        |        |           |
|-------|--------|--------|-----------|
| 71061 | P03383 | Q14108 | -1.1458   |
| 71062 | P03383 | Q9UIF3 | -0.12173  |
| 71063 | P03383 | P02774 | -0.74009  |
| 71064 | P03383 | P08237 | -0.42703  |
| 71065 | P03383 | E2RYF7 | -0.87849  |
| 71066 | P03383 | P22557 | -0.14431  |
| 71067 | P03383 | Q5JQC9 | -0.43253  |
| 71068 | P03383 | Q99946 | -0.86137  |
| 71069 | P03383 | Q8WUT4 | -0.86584  |
| 71070 | P03383 | P45452 | -0.8538   |
| 71071 | P03383 | Q92835 | -0.22741  |
| 71072 | P03383 | Q8WTZ4 | -0.35052  |
| 71073 | P03383 | Q9NZM1 | -0.58975  |
| 71074 | P03383 | P0C7P0 | -0.48994  |
| 71075 | P03383 | Q9Y4K0 | -0.33414  |
| 71076 | P03383 | Q56UN5 | -0.9088   |
| 71077 | P03383 | P13765 | -0.94427  |
| 71078 | P03383 | P04839 | -0.60367  |
| 71079 | P03383 | A1A4Y4 | -0.813    |
| 71080 | P03383 | O95858 | -1.0003   |
| 71081 | P03383 | A6NM66 | -0.15892  |
| 71082 | P03383 | Q92551 | -0.33935  |
| 71083 | P03383 | Q86Y82 | -0.33481  |
| 71084 | P03383 | Q29960 | -1.0763   |
| 71085 | P03383 | O60609 | -0.45255  |
| 71086 | P03383 | Q14699 | -0.61793  |
| 71087 | P03383 | Q9NQ34 | -0.99509  |
| 71088 | P03383 | Q9H7M9 | -0.86584  |
| 71089 | P03383 | Q86YS6 | -0.99828  |
| 71090 | P03383 | Q9NQ40 | -1.0109   |
| 71091 | P03383 | Q9UGQ3 | -0.51436  |
| 71092 | P03383 | Q9ULZ9 | -1.3648   |
| 71093 | P03383 | Q15517 | -0.81078  |
| 71094 | P03383 | Q9H2L4 | -0.86584  |
| 71095 | P03383 | Q5T2D3 | -0.13337  |
| 71096 | P03383 | Q8WW34 | -0.86584  |
| 71097 | P03383 | O15151 | -0.2245   |
| 71098 | P03383 | Q9H1A7 | -0.25197  |
| 71099 | P03383 | Q9UNP4 | -0.64432  |
| 71100 | P03383 | Q92974 | -0.22743  |
| 71101 | P03383 | P55084 | -0.19952  |
| 71102 | P03383 | Q96FS4 | -0.2203   |
| 71103 | P03383 | Q9Y5V0 | -0.73967  |
| 71104 | P03383 | P01133 | -0.73906  |
| 71105 | P03383 | A6NFD8 | -0.22726  |
| 71106 | P03383 | O95202 | -0.28531  |
| 71107 | P03383 | Q6UWB4 | -1.1792   |
| 71108 | P03383 | P20702 | -0.48945  |
| 71109 | P03383 | Q6XQN6 | -0.063792 |
| 71110 | P03383 | Q9ULH4 | -0.75156  |
| 71111 | P03383 | P0CE72 | -0.55769  |
| 71112 | P03383 | Q96HL8 | -0.41268  |
| 71113 | P03383 | P36406 | -0.41786  |
| 71114 | P03383 | P24462 | -0.78018  |
| 71115 | P03383 | Q75N90 | -0.98791  |
| 71116 | P03383 | Q9HAT1 | -0.8057   |
| 71117 | P03383 | P22612 | -0.41405  |
| 71118 | P03383 | P18827 | -0.45362  |
| 71119 | P03383 | Q96I34 | -0.2274   |
| 71120 | P03383 | P60008 | -0.63161  |
| 71121 | P03383 | O95754 | -0.74678  |
| 71122 | P03383 | Q9BRJ9 | -0.22744  |
| 71123 | P03383 | Q13203 | -0.78961  |
| 71124 | P03383 | Q16559 | -0.22751  |
| 71125 | P03383 | Q07817 | -0.22734  |
| 71126 | P03383 | P07510 | -0.96633  |
| 71127 | P03383 | Q8TC44 | -0.22781  |
| 71128 | P03383 | Q6QHK4 | -0.23389  |
| 71129 | P03383 | P24844 | -0.41253  |
| 71130 | P03383 | Q7Z3B1 | -0.35957  |
| 71131 | P03383 | Q92508 | -0.89612  |
| 71132 | P03383 | Q6ZP29 | -0.80391  |
| 71133 | P03383 | O14949 | -0.24107  |
| 71134 | P03383 | Q8N9U0 | -0.21602  |
| 71135 | P03383 | P31483 | -0.24216  |
| 71136 | P03383 | Q9NZ56 | -0.5398   |

|       |        |        |           |
|-------|--------|--------|-----------|
| 71137 | P03383 | Q7Z7K0 | -0.33596  |
| 71138 | P03383 | Q8TDD5 | -0.82991  |
| 71139 | P03383 | Q86TW2 | -1.0981   |
| 71140 | P03383 | Q9BQB6 | -0.93052  |
| 71141 | P03383 | Q13588 | -0.22741  |
| 71142 | P03383 | P19622 | -0.22722  |
| 71143 | P03383 | Q9BUB5 | -0.22754  |
| 71144 | P03383 | Q9UKM7 | -0.83117  |
| 71145 | P03383 | Q99767 | -0.22735  |
| 71146 | P03383 | P62820 | -0.73875  |
| 71147 | P03383 | Q5TEV5 | -0.87849  |
| 71148 | P03383 | Q8IVS2 | -0.64745  |
| 71149 | P03383 | Q9BYB0 | -0.22741  |
| 71150 | P03383 | Q96DB9 | -0.97385  |
| 71151 | P03383 | Q969R2 | -0.85813  |
| 71152 | P03383 | P58512 | -0.45036  |
| 71153 | P03383 | O95396 | -0.14607  |
| 71154 | P03383 | P56645 | -0.22661  |
| 71155 | P03383 | P98161 | -0.27928  |
| 71156 | P03383 | Q9BYH1 | -0.93931  |
| 71157 | P03383 | Q9P2J2 | -0.85902  |
| 71158 | P03383 | Q05655 | -0.22267  |
| 71159 | P03383 | Q9NPH9 | -0.49787  |
| 71160 | P03383 | P33992 | -0.20401  |
| 71161 | P03383 | Q9UQG0 | -0.43742  |
| 71162 | P03383 | Q00975 | -0.69101  |
| 71163 | P03383 | O00592 | -0.87733  |
| 71164 | P03383 | Q7Z4F1 | -0.90144  |
| 71165 | P03383 | P41143 | -0.50946  |
| 71166 | P03383 | Q6UVK1 | -0.89189  |
| 71167 | P03383 | Q9NXW9 | -0.2022   |
| 71168 | P03383 | Q6NZ63 | -0.86584  |
| 71169 | P03383 | Q13070 | -0.0711   |
| 71170 | P03383 | Q9H4P4 | -0.22733  |
| 71171 | P03383 | Q9Y617 | -0.45928  |
| 71172 | P03383 | P83593 | -0.95485  |
| 71173 | P03383 | P08758 | -0.43719  |
| 71174 | P03383 | Q9Y3P9 | -0.30085  |
| 71175 | P03383 | P47989 | -0.52755  |
| 71176 | P03383 | Q16659 | -0.2274   |
| 71177 | P03383 | Q6ZN44 | -0.93114  |
| 71178 | P03383 | Q6ZUX3 | -0.1311   |
| 71179 | P03383 | P31641 | -0.93339  |
| 71180 | P03383 | Q9H269 | -0.50296  |
| 71181 | P03383 | Q14901 | -0.20115  |
| 71182 | P03383 | O15492 | -0.22799  |
| 71183 | P03383 | Q8IXS6 | -0.62171  |
| 71184 | P03383 | P12314 | -0.65895  |
| 71185 | P03383 | Q9NR33 | -0.10282  |
| 71186 | P03383 | P14652 | -0.161    |
| 71187 | P03383 | O00399 | -0.11523  |
| 71188 | P03383 | Q8ND82 | -0.2385   |
| 71189 | P03383 | Q96S06 | -0.67524  |
| 71190 | P03383 | P45378 | -0.50281  |
| 71191 | P03383 | Q96I82 | -1.0232   |
| 71192 | P03383 | Q96CN4 | -0.73825  |
| 71193 | P03383 | Q86U44 | -0.16377  |
| 71194 | P03383 | O95185 | -0.915    |
| 71195 | P03383 | P06881 | -0.23738  |
| 71196 | P03383 | O95450 | -1.116    |
| 71197 | P03383 | Q14954 | -0.96614  |
| 71198 | P03383 | P22003 | -0.51131  |
| 71199 | P03383 | Q8IUZ0 | -0.31084  |
| 71200 | P03383 | P13196 | -0.10151  |
| 71201 | P03383 | O15439 | -0.82855  |
| 71202 | P03383 | Q9NS15 | -0.81218  |
| 71203 | P03383 | P21953 | -0.09017  |
| 71204 | P03383 | P52565 | -0.072703 |
| 71205 | P03383 | P14854 | -0.24108  |
| 71206 | P03383 | Q92819 | -0.69545  |
| 71207 | P03383 | Q7RTR0 | -0.65523  |
| 71208 | P03383 | Q8N392 | -1.052    |
| 71209 | P03383 | Q8WXS4 | -0.935    |
| 71210 | P03383 | Q7Z6W7 | -0.48297  |
| 71211 | P03383 | P07306 | -0.50143  |
| 71212 | P03383 | Q99616 | -0.99985  |

|       |        |        |           |
|-------|--------|--------|-----------|
| 71213 | P03383 | O00755 | -0.41685  |
| 71214 | P03383 | Q8WZ04 | -0.47477  |
| 71215 | P03383 | Q17RP2 | -0.33043  |
| 71216 | P03383 | Q9H6R3 | -0.8584   |
| 71217 | P03383 | Q7Z2R9 | -0.87849  |
| 71218 | P03383 | A8MQB3 | -0.098227 |
| 71219 | P03383 | Q9H7B4 | -0.22708  |
| 71220 | P03383 | Q8NDA2 | -1.0058   |
| 71221 | P03383 | A6NC97 | -0.86584  |
| 71222 | P03383 | Q6BAA4 | -0.31773  |
| 71223 | P03383 | Q8WUB8 | -0.23274  |
| 71224 | P03383 | Q96L15 | -0.80255  |
| 71225 | P03383 | P08833 | -0.82908  |
| 71226 | P03383 | Q9H344 | -1.1027   |
| 71227 | P03383 | P34995 | -1.1995   |
| 71228 | P03383 | Q96NR2 | -0.14489  |
| 71229 | P03383 | A6NEJ1 | -0.063586 |
| 71230 | P03383 | Q9UKL6 | -0.48855  |
| 71231 | P03383 | Q15020 | -0.2256   |
| 71232 | P03383 | Q8WYQ4 | -0.19009  |
| 71233 | P03383 | Q9BV79 | -0.89324  |
| 71234 | P03383 | Q71RC9 | -0.86584  |
| 71235 | P03383 | Q8IY67 | -0.44232  |
| 71236 | P03383 | Q96JQ5 | -0.86584  |
| 71237 | P03383 | Q8N461 | -0.21838  |
| 71238 | P03383 | P13284 | -0.99912  |
| 71239 | P03383 | Q9BVI0 | -0.39381  |
| 71240 | P03383 | P11509 | -0.66984  |
| 71241 | P03383 | Q9NXH3 | -0.32937  |
| 71242 | P03383 | Q9BZX2 | -0.54641  |
| 71243 | P03383 | Q9Y520 | -0.41025  |
| 71244 | P03383 | Q6ZSS3 | -0.21172  |
| 71245 | P03383 | Q15217 | -0.23366  |
| 71246 | P03383 | Q8NEV9 | -0.83217  |
| 71247 | P03383 | Q9BZM6 | -0.62365  |
| 71248 | P03383 | Q86VD1 | -0.57066  |
| 71249 | P03383 | O95157 | -0.81313  |
| 71250 | P03383 | Q14507 | -0.89613  |
| 71251 | P03383 | P12532 | -0.70248  |
| 71252 | P03383 | P41222 | -0.3099   |
| 71253 | P03383 | Q16831 | -0.28101  |
| 71254 | P03383 | O14531 | -0.21421  |
| 71255 | P03383 | Q9NX36 | -0.49341  |
| 71256 | P03383 | P05937 | -0.2272   |
| 71257 | P03383 | Q96MU6 | -0.21172  |
| 71258 | P03383 | O95365 | -0.3922   |
| 71259 | P03383 | Q13085 | -0.26566  |
| 71260 | P03383 | Q2M3C6 | -0.86584  |
| 71261 | P03383 | Q5T447 | -0.22795  |
| 71262 | P03383 | Q8NHH9 | -0.46609  |
| 71263 | P03383 | Q5VTT5 | -0.43127  |
| 71264 | P03383 | Q99962 | -0.22789  |
| 71265 | P03383 | Q9Y3P4 | -0.89011  |
| 71266 | P03383 | Q9NRJ7 | -1.1238   |
| 71267 | P03383 | Q7Z602 | -1.1721   |
| 71268 | P03383 | Q02790 | -0.32536  |
| 71269 | P03383 | Q9NXI6 | -0.92811  |
| 71270 | P03383 | Q9BQY6 | -0.79897  |
| 71271 | P03383 | Q8TC36 | -0.28488  |
| 71272 | P03383 | P10276 | -0.23393  |
| 71273 | P03383 | O00330 | -0.20295  |
| 71274 | P03383 | P62805 | -0.43467  |
| 71275 | P03383 | P56706 | -0.41603  |
| 71276 | P03383 | Q92772 | -0.37317  |
| 71277 | P03383 | A2RUR9 | -0.13354  |
| 71278 | P03383 | Q6PJG9 | -0.86584  |
| 71279 | P03383 | P0CJ72 | -0.72903  |
| 71280 | P03383 | O76050 | -0.3051   |
| 71281 | P03383 | Q03169 | -0.67678  |
| 71282 | P03383 | Q8WY21 | -0.34611  |
| 71283 | P03383 | Q9UL15 | -0.31905  |
| 71284 | P03383 | P49642 | -0.26528  |
| 71285 | P03383 | Q9UPN4 | -0.23553  |
| 71286 | P03383 | Q8NES3 | -0.77713  |
| 71287 | P03383 | Q9P2X0 | -0.25535  |
| 71288 | P03383 | Q96MF2 | -0.66906  |

|       |        |        |          |
|-------|--------|--------|----------|
| 71289 | P03383 | Q8IYW2 | -0.8732  |
| 71290 | P03383 | Q9BV87 | -0.83933 |
| 71291 | P03383 | P08572 | -0.45737 |
| 71292 | P03383 | Q14643 | -0.29009 |
| 71293 | P03383 | P55082 | -0.93628 |
| 71294 | P03383 | Q68CJ6 | -0.51014 |
| 71295 | P03383 | P05423 | -0.17587 |
| 71296 | P03383 | Q53S99 | -0.50956 |
| 71297 | P03383 | Q9C0J9 | -0.22616 |
| 71298 | P03383 | P49368 | -0.19991 |
| 71299 | P03383 | Q8WTP8 | -0.24321 |
| 71300 | P03383 | Q86TG1 | -0.91447 |
| 71301 | P03383 | Q96PQ7 | -0.24751 |
| 71302 | P03383 | Q1X8D7 | -0.22698 |
| 71303 | P03383 | Q96DN5 | -0.81472 |
| 71304 | P03383 | Q9Y6Q2 | -0.29455 |
| 71305 | P03383 | Q9BXU9 | -0.70204 |
| 71306 | P03383 | Q6ZSK4 | -0.28185 |
| 71307 | P03383 | P35716 | -0.24286 |
| 71308 | P03383 | Q8WZA0 | -0.50019 |
| 71309 | P03383 | Q9UK85 | -0.98973 |
| 71310 | P03383 | Q86XI6 | -0.29771 |
| 71311 | P03383 | Q92903 | -0.71165 |
| 71312 | P03383 | Q9Y235 | -0.65067 |
| 71313 | P03383 | P61366 | -1.0261  |
| 71314 | P03383 | Q9UJN7 | -0.21172 |
| 71315 | P03383 | Q9Y3S1 | -0.87123 |
| 71316 | P03383 | Q9HCB6 | -0.61416 |
| 71317 | P03383 | Q9BZ95 | -0.31968 |
| 71318 | P03383 | Q92959 | -0.96608 |
| 71319 | P03383 | P00742 | -0.71763 |
| 71320 | P03383 | P52738 | -0.17069 |
| 71321 | P03383 | P04808 | -0.97664 |
| 71322 | P03383 | P54886 | -0.54195 |
| 71323 | P03383 | Q15269 | -0.35596 |
| 71324 | P03383 | Q71RG4 | -0.86584 |
| 71325 | P03383 | Q8TDW5 | -0.23513 |
| 71326 | P03383 | Q8IWK6 | -1.1829  |
| 71327 | P03383 | Q96BH1 | -0.27829 |
| 71328 | P03383 | Q5VYV0 | -0.42607 |
| 71329 | P03383 | P10153 | -0.81311 |
| 71330 | P03383 | Q14409 | -0.48366 |
| 71331 | P03383 | Q7Z5P9 | -0.87242 |
| 71332 | P03383 | O75445 | -0.7263  |
| 71333 | P03383 | P50148 | -0.65574 |
| 71334 | P03383 | Q8NHK3 | -0.93628 |
| 71335 | P03383 | P19235 | -0.9364  |
| 71336 | P03383 | Q9NZC9 | -0.54482 |
| 71337 | P03383 | O14662 | -0.30835 |
| 71338 | P03383 | P55196 | -0.22697 |
| 71339 | P03383 | Q5VST6 | -0.8359  |
| 71340 | P03383 | Q7Z769 | -0.86584 |
| 71341 | P03383 | O43462 | -0.77686 |
| 71342 | P03383 | Q00526 | -0.34056 |
| 71343 | P03383 | Q15404 | -0.53893 |
| 71344 | P03383 | Q86XS8 | -0.56011 |
| 71345 | P03383 | Q8N9L1 | -0.61367 |
| 71346 | P03383 | Q86UL3 | -0.54903 |
| 71347 | P03383 | Q9Y5X4 | -0.37752 |
| 71348 | P03383 | Q9Y6Y8 | -0.37968 |
| 71349 | P03383 | P06239 | -0.24615 |
| 71350 | P03383 | Q95237 | -0.64629 |
| 71351 | P03383 | A6NGJ6 | -0.73967 |
| 71352 | P03383 | P41743 | -0.22192 |
| 71353 | P03383 | Q6GMV2 | -0.2006  |
| 71354 | P03383 | Q8NCW0 | -0.82796 |
| 71355 | P03383 | Q92537 | -0.52887 |
| 71356 | P03383 | O00155 | -1.2928  |
| 71357 | P03383 | P28360 | -0.1818  |
| 71358 | P03383 | Q9BVA6 | -0.9448  |
| 71359 | P03383 | P11150 | -0.72322 |
| 71360 | P03383 | Q92506 | -0.30671 |
| 71361 | P03383 | Q96CM4 | -0.17452 |
| 71362 | P03383 | Q5IJ48 | -1.3364  |
| 71363 | P03383 | Q6UXH9 | -1.098   |
| 71364 | P03383 | Q9UBM4 | -0.91897 |



|       |        |        |          |
|-------|--------|--------|----------|
| 71365 | P03383 | P20273 | -0.70532 |
| 71366 | P03383 | Q6WN34 | -0.68441 |
| 71367 | P03383 | P13236 | -0.90999 |
| 71368 | P03383 | P26927 | -0.75967 |
| 71369 | P03383 | Q9C098 | -0.62783 |
| 71370 | P03383 | Q8NHE4 | -0.65137 |
| 71371 | P03383 | Q9UNK0 | -0.93974 |
| 71372 | P03383 | P20848 | -0.70542 |
| 71373 | P03383 | Q8NEV8 | -0.43674 |
| 71374 | P03383 | Q6PI47 | -0.19405 |
| 71375 | P03383 | Q86WS5 | -1.1792  |
| 71376 | P03383 | Q9NU02 | -0.52751 |
| 71377 | P03383 | Q96CE8 | -0.86584 |
| 71378 | P03383 | Q12851 | -0.24227 |
| 71379 | P03383 | Q8NGS6 | -1.1027  |
| 71380 | P03383 | P32314 | -0.39901 |
| 71381 | P03383 | Q8NCP5 | -0.21172 |
| 71382 | P03383 | Q5T4J0 | -0.71885 |
| 71383 | P03383 | Q9UK23 | -0.52972 |
| 71384 | P03383 | Q9BYE0 | -0.2265  |
| 71385 | P03383 | Q6IQ19 | -0.34805 |
| 71386 | P03383 | O00400 | -0.83932 |
| 71387 | P03383 | Q96J65 | -0.96498 |
| 71388 | P03383 | P49190 | -1.2827  |
| 71389 | P03383 | Q99814 | -0.23407 |
| 71390 | P03383 | Q16585 | -0.69263 |
| 71391 | P03383 | Q16850 | -0.91097 |
| 71392 | P03383 | Q9UBC7 | -0.65563 |
| 71393 | P03383 | Q9UF12 | -0.41472 |
| 71394 | P03383 | Q9BTE1 | -0.10805 |
| 71395 | P03383 | Q9NNW7 | -0.2248  |
| 71396 | P03383 | P46093 | -1.2928  |
| 71397 | P03383 | Q15583 | -0.23953 |
| 71398 | P03383 | Q92806 | -0.61863 |
| 71399 | P03383 | Q9ULC8 | -0.74135 |
| 71400 | P03383 | Q9P2E3 | -0.47027 |
| 71401 | P03383 | Q9HCM2 | -0.63462 |
| 71402 | P03383 | Q14994 | -0.22763 |
| 71403 | P03383 | P51689 | -0.52021 |
| 71404 | P03383 | P30085 | -0.32893 |
| 71405 | P03383 | P33908 | -0.70041 |
| 71406 | P03383 | Q9NYS7 | -0.62076 |
| 71407 | P03383 | Q6ZUV0 | -0.25437 |
| 71408 | P03383 | P48507 | -0.33863 |
| 71409 | P03383 | Q9P1Y6 | -0.22742 |
| 71410 | P03383 | P09228 | -0.89477 |
| 71411 | P03383 | Q9H553 | -0.19863 |
| 71412 | P03383 | Q15056 | -0.22516 |
| 71413 | P03383 | O14807 | -1.12    |
| 71414 | P03383 | Q14649 | -0.96931 |
| 71415 | P03383 | P49023 | -0.22968 |
| 71416 | P03383 | Q8NC56 | -0.44358 |
| 71417 | P03383 | Q8N3J5 | -0.28317 |
| 71418 | P03383 | O94760 | -0.26644 |
| 71419 | P03383 | O95714 | -0.22868 |
| 71420 | P03383 | Q6UXX9 | -0.77202 |
| 71421 | P03383 | Q9NPB1 | -0.56599 |
| 71422 | P03383 | O75420 | -0.43008 |
| 71423 | P03383 | Q5VT99 | -1.0257  |
| 71424 | P03383 | P20853 | -0.83318 |
| 71425 | P03383 | P53582 | -0.50852 |
| 71426 | P03383 | Q9BT73 | -0.1396  |
| 71427 | P03383 | Q14149 | -0.19211 |
| 71428 | P03383 | Q6ZW33 | -0.52839 |
| 71429 | P03383 | Q9UBV2 | -0.37397 |
| 71430 | P03383 | Q96AX2 | -0.79601 |
| 71431 | P03383 | Q8WUW1 | -0.17321 |
| 71432 | P03383 | O15403 | -0.97009 |
| 71433 | P03383 | Q86VH5 | -0.86584 |
| 71434 | P03383 | P0C874 | -0.86584 |
| 71435 | P03383 | O95196 | -0.57923 |
| 71436 | P03383 | Q5QFB9 | -0.93931 |
| 71437 | P03383 | Q8TDV2 | -1.1721  |
| 71438 | P03383 | P59045 | -0.8502  |
| 71439 | P03383 | Q9Y4D2 | -0.72194 |
| 71440 | P03383 | Q9NSD4 | -0.21172 |

|       |        |        |           |
|-------|--------|--------|-----------|
| 71441 | P03383 | Q9NYW5 | -1.1212   |
| 71442 | P03383 | Q99932 | -0.34715  |
| 71443 | P03383 | Q13237 | -0.75835  |
| 71444 | P03383 | P15088 | -0.71239  |
| 71445 | P03383 | P19022 | -0.53233  |
| 71446 | P03383 | Q969P5 | -0.081485 |
| 71447 | P03383 | Q969M7 | -0.22388  |
| 71448 | P03383 | Q9P2X7 | -0.47279  |
| 71449 | P03383 | Q5DID0 | -1.1363   |
| 71450 | P03383 | Q9H4Q3 | -0.26169  |
| 71451 | P03383 | Q9Y2P5 | -0.76711  |
| 71452 | P03383 | Q8N3Z0 | -0.97175  |
| 71453 | P03383 | Q99735 | -0.65597  |
| 71454 | P03383 | Q7Z7B7 | -0.84399  |
| 71455 | P03383 | P11487 | -0.3042   |
| 71456 | P03383 | P30481 | -0.88446  |
| 71457 | P03383 | Q6UX65 | -0.83361  |
| 71458 | P03383 | Q9NZD1 | -1.1721   |
| 71459 | P03383 | Q6P4F7 | -1.052    |
| 71460 | P03383 | P61009 | -0.69098  |
| 71461 | P03383 | A6NI15 | -0.22741  |
| 71462 | P03383 | P34931 | -0.61285  |
| 71463 | P03383 | A6NLE4 | -0.93628  |
| 71464 | P03383 | Q99835 | -0.24933  |
| 71465 | P03383 | P05162 | -0.43618  |
| 71466 | P03383 | Q13308 | -0.45118  |
| 71467 | P03383 | Q8NA82 | -0.57509  |
| 71468 | P03383 | Q8WXG9 | -0.62218  |
| 71469 | P03383 | Q8IYR0 | -0.13974  |
| 71470 | P03383 | Q96SD1 | -0.16627  |
| 71471 | P03383 | Q8NG83 | -1.1027   |
| 71472 | P03383 | Q9UPR6 | -0.69062  |
| 71473 | P03383 | Q9H228 | -1.0808   |
| 71474 | P03383 | Q9NUQ2 | -0.63146  |
| 71475 | P03383 | Q8N4V1 | -0.76738  |
| 71476 | P03383 | P19447 | -0.16167  |
| 71477 | P03383 | P51787 | -0.73798  |
| 71478 | P03383 | O60422 | -0.22626  |
| 71479 | P03383 | Q5JST6 | -0.52751  |
| 71480 | P03383 | Q4KMZ8 | -0.93628  |
| 71481 | P03383 | Q15513 | -0.46734  |
| 71482 | P03383 | Q8NMQ6 | -1.0502   |
| 71483 | P03383 | P62745 | -0.26008  |
| 71484 | P03383 | Q9Y6T7 | -0.7897   |
| 71485 | P03383 | Q9BYV9 | -0.22613  |
| 71486 | P03383 | P50583 | -0.70307  |
| 71487 | P03383 | Q6P4H8 | -0.86584  |
| 71488 | P03383 | Q9Y5G5 | -1.1297   |
| 71489 | P03383 | Q9H871 | -0.16143  |
| 71490 | P03383 | Q86UV5 | -0.33704  |
| 71491 | P03383 | O95954 | -0.26111  |
| 71492 | P03383 | Q92186 | -0.37991  |
| 71493 | P03383 | P00918 | -0.26533  |
| 71494 | P03383 | Q8NBX0 | -0.64005  |
| 71495 | P03383 | P31327 | -0.18592  |
| 71496 | P03383 | Q9UEY8 | -0.20203  |
| 71497 | P03383 | Q14240 | -0.033218 |
| 71498 | P03383 | Q12799 | -0.35738  |
| 71499 | P03383 | P43080 | -0.7866   |
| 71500 | P03383 | Q8TAB3 | -1.1297   |
| 71501 | P03383 | Q9UM19 | -0.66563  |
| 71502 | P03383 | Q9UGH3 | -0.55043  |
| 71503 | P03383 | Q5RGS3 | -0.86584  |
| 71504 | P03383 | Q6UWI2 | -0.42177  |
| 71505 | P03383 | Q9BV81 | -0.8462   |
| 71506 | P03383 | Q7RTU7 | -0.23146  |
| 71507 | P03383 | Q6F5E7 | -0.047638 |
| 71508 | P03383 | Q7Z6J8 | -0.34746  |
| 71509 | P03383 | Q2LD37 | -0.10425  |
| 71510 | P03383 | Q86YD7 | -0.48092  |
| 71511 | P03383 | O43298 | -0.21172  |
| 71512 | P03383 | Q03721 | -0.7989   |
| 71513 | P03383 | Q5T7P3 | -0.43006  |
| 71514 | P03383 | P46734 | -0.22786  |
| 71515 | P03383 | Q9C0G6 | -0.69496  |
| 71516 | P03383 | Q5VVY1 | -0.37739  |

|       |        |        |           |
|-------|--------|--------|-----------|
| 71517 | P03383 | P0C7W8 | -0.48092  |
| 71518 | P03383 | Q9NXD2 | -0.63886  |
| 71519 | P03383 | Q06430 | -0.80487  |
| 71520 | P03383 | Q8IXV7 | -0.29487  |
| 71521 | P03383 | B4DYI2 | -0.16651  |
| 71522 | P03383 | Q8NCQ7 | -0.53158  |
| 71523 | P03383 | Q99572 | -0.263    |
| 71524 | P03383 | Q9NRQ5 | -0.52887  |
| 71525 | P03383 | Q8TBP6 | -0.7196   |
| 71526 | P03383 | Q29983 | -0.6415   |
| 71527 | P03383 | Q38SD2 | -1.0667   |
| 71528 | P03383 | Q6YFQ2 | -0.2849   |
| 71529 | P03383 | O43307 | -0.6733   |
| 71530 | P03383 | Q9UPZ9 | -0.66934  |
| 71531 | P03383 | Q9NQ30 | -0.74584  |
| 71532 | P03383 | Q8IXJ6 | -0.23859  |
| 71533 | P03383 | Q6JVE6 | -0.87105  |
| 71534 | P03383 | P10916 | -0.22629  |
| 71535 | P03383 | Q9UJ04 | -0.27891  |
| 71536 | P03383 | Q92496 | -0.95108  |
| 71537 | P03383 | Q6UW78 | -0.87849  |
| 71538 | P03383 | Q8N554 | -0.21172  |
| 71539 | P03383 | Q60883 | -0.63906  |
| 71540 | P03383 | P02724 | -0.84491  |
| 71541 | P03383 | Q70IA6 | -0.17891  |
| 71542 | P03383 | Q9UDY8 | -0.22745  |
| 71543 | P03383 | Q9C056 | -0.24635  |
| 71544 | P03383 | A6NNA5 | -0.086463 |
| 71545 | P03383 | Q01668 | -0.54015  |
| 71546 | P03383 | Q8NGV6 | -1.1027   |
| 71547 | P03383 | P35625 | -0.34573  |
| 71548 | P03383 | Q5VVJ2 | -0.22737  |
| 71549 | P03383 | Q14766 | -0.43972  |
| 71550 | P03383 | Q9H579 | -0.050849 |
| 71551 | P03383 | Q8NHA6 | -1.1027   |
| 71552 | P03383 | Q8NHJ6 | -0.52198  |
| 71553 | P03383 | O43903 | -0.24431  |
| 71554 | P03383 | Q9H015 | -0.44847  |
| 71555 | P03383 | Q9HBZ2 | -0.22741  |
| 71556 | P03383 | Q95995 | -0.29655  |
| 71557 | P03383 | Q00444 | -0.22608  |
| 71558 | P03383 | P55008 | -0.2952   |
| 71559 | P03383 | P55061 | -0.6598   |
| 71560 | P03383 | Q5ZPR3 | -0.3641   |
| 71561 | P03383 | Q9BQ16 | -0.98221  |
| 71562 | P03383 | Q5T440 | -0.17922  |
| 71563 | P03383 | Q86Y30 | -0.87849  |
| 71564 | P03383 | Q99943 | -0.60924  |
| 71565 | P03383 | P55210 | -0.22486  |
| 71566 | P03383 | Q60830 | -0.46603  |
| 71567 | P03383 | Q9UIM3 | -0.36858  |
| 71568 | P03383 | P57796 | -0.78752  |
| 71569 | P03383 | A6NHY2 | -0.576    |
| 71570 | P03383 | Q99470 | -0.93064  |
| 71571 | P03383 | Q9Y5J3 | -0.22677  |
| 71572 | P03383 | Q7Z6M1 | -0.47016  |
| 71573 | P03383 | Q96L93 | -0.686    |
| 71574 | P03383 | Q5MAI5 | -0.51796  |
| 71575 | P03383 | Q96LB8 | -0.86249  |
| 71576 | P03383 | Q31612 | -0.88446  |
| 71577 | P03383 | Q8NDV2 | -1.1578   |
| 71578 | P03383 | P00326 | -0.65633  |
| 71579 | P03383 | Q9UL16 | -0.086275 |
| 71580 | P03383 | P57775 | -0.30582  |
| 71581 | P03383 | Q86YR6 | -0.60442  |
| 71582 | P03383 | Q96GQ5 | -0.86584  |
| 71583 | P03383 | Q9H8X2 | -0.61357  |
| 71584 | P03383 | Q96II8 | -0.87849  |
| 71585 | P03383 | Q86Y27 | -0.87849  |
| 71586 | P03383 | P50591 | -0.60364  |
| 71587 | P03383 | P19544 | -0.22368  |
| 71588 | P03383 | Q8NDV3 | -0.5237   |
| 71589 | P03383 | Q9H3H1 | -0.41482  |
| 71590 | P03383 | Q9H649 | -0.37739  |
| 71591 | P03383 | Q9BUJ0 | -0.66035  |
| 71592 | P03383 | Q8NFF5 | -0.60442  |

|       |        |        |          |
|-------|--------|--------|----------|
| 71593 | P03383 | Q9NP31 | -0.68214 |
| 71594 | P03383 | Q9NQZ8 | -0.17069 |
| 71595 | P03383 | Q5JSL3 | -0.55925 |
| 71596 | P03383 | Q86WK7 | -1.0067  |
| 71597 | P03383 | Q8N326 | -0.86584 |
| 71598 | P03383 | Q9NVW2 | -0.23155 |
| 71599 | P03383 | Q08499 | -0.36982 |
| 71600 | P03383 | O15172 | -0.4231  |
| 71601 | P03383 | Q9Y471 | -0.41396 |
| 71602 | P03383 | Q86XD8 | -0.52332 |
| 71603 | P03383 | Q9NUM4 | -0.59837 |
| 71604 | P03383 | Q96JA3 | -0.34607 |
| 71605 | P03383 | O75348 | -0.52253 |
| 71606 | P03383 | Q9BYC5 | -0.51316 |
| 71607 | P03383 | P07203 | -0.29955 |
| 71608 | P03383 | O15544 | -0.31115 |
| 71609 | P03383 | O43414 | -0.67649 |
| 71610 | P03383 | Q8TE57 | -1.2214  |
| 71611 | P03383 | P49335 | -0.22741 |
| 71612 | P03383 | P0C875 | -0.11052 |
| 71613 | P03383 | Q86WJ1 | -0.19762 |
| 71614 | P03383 | P27169 | -0.76214 |
| 71615 | P03383 | Q9NSB8 | -0.45287 |
| 71616 | P03383 | Q9Y5W7 | -0.74647 |
| 71617 | P03383 | Q9BUU2 | -0.37739 |
| 71618 | P03383 | Q9Y236 | -0.25505 |
| 71619 | P03383 | Q969M2 | -0.85213 |
| 71620 | P03383 | Q8N695 | -0.96937 |
| 71621 | P03383 | Q53HI1 | -0.36542 |
| 71622 | P03383 | P81408 | -0.72659 |
| 71623 | P03383 | Q460N5 | -0.22268 |
| 71624 | P03383 | Q13153 | -0.22775 |
| 71625 | P03383 | Q95967 | -0.55905 |
| 71626 | P03383 | Q9NYM9 | -0.38185 |
| 71627 | P03383 | P35523 | -0.91522 |
| 71628 | P03383 | Q1XH10 | -0.58277 |
| 71629 | P03383 | A6NFY4 | -0.86584 |
| 71630 | P03383 | Q494R4 | -0.12254 |
| 71631 | P03383 | Q8N1M1 | -0.6922  |
| 71632 | P03383 | Q969G6 | -0.40215 |
| 71633 | P03383 | A6NNE9 | -0.87916 |
| 71634 | P03383 | Q92896 | -0.71462 |
| 71635 | P03383 | P26718 | -0.54132 |
| 71636 | P03383 | Q06136 | -1.0517  |
| 71637 | P03383 | Q9H2W1 | -0.86584 |
| 71638 | P03383 | P25929 | -0.8079  |
| 71639 | P03383 | Q9UNX9 | -1.0462  |
| 71640 | P03383 | P81172 | -0.6384  |
| 71641 | P03383 | Q9C0A0 | -1.1581  |
| 71642 | P03383 | P29401 | -0.18386 |
| 71643 | P03383 | Q8NGJ5 | -1.1027  |
| 71644 | P03383 | P09430 | -0.62324 |
| 71645 | P03383 | Q6UWL2 | -0.93591 |
| 71646 | P03383 | Q969Y0 | -0.87849 |
| 71647 | P03383 | Q9HCK0 | -0.19184 |
| 71648 | P03383 | Q6P4A7 | -0.87594 |
| 71649 | P03383 | Q8IXE1 | -1.1027  |
| 71650 | P03383 | Q9P0V8 | -0.87108 |
| 71651 | P03383 | Q06203 | -0.50853 |
| 71652 | P03383 | P0C6E5 | -0.6193  |
| 71653 | P03383 | P02743 | -0.78951 |
| 71654 | P03383 | Q5RI15 | -0.75099 |
| 71655 | P03383 | Q92504 | -0.9381  |
| 71656 | P03383 | Q86SP6 | -1.0608  |
| 71657 | P03383 | Q9UN72 | -1.1553  |
| 71658 | P03383 | Q96S15 | -0.49208 |
| 71659 | P03383 | O14939 | -0.22185 |
| 71660 | P03383 | O15119 | -0.50489 |
| 71661 | P03383 | O60384 | -0.51948 |
| 71662 | P03383 | Q86X19 | -0.85656 |
| 71663 | P03383 | Q7RTU4 | -0.22751 |
| 71664 | P03383 | Q5EBL8 | -0.22698 |
| 71665 | P03383 | Q6PCB5 | -0.21602 |
| 71666 | P03383 | O75916 | -0.55941 |
| 71667 | P03383 | P23467 | -0.76612 |
| 71668 | P03383 | P43308 | -0.75989 |

|       |        |        |           |
|-------|--------|--------|-----------|
| 71669 | P03383 | B7Z1M9 | -0.059991 |
| 71670 | P03383 | Q6IFH4 | -1.1027   |
| 71671 | P03383 | O95170 | -0.22859  |
| 71672 | P03383 | Q86SQ6 | -1.0654   |
| 71673 | P03383 | Q401N2 | -0.93157  |
| 71674 | P03383 | P02144 | -0.46916  |
| 71675 | P03383 | P40879 | -0.50858  |
| 71676 | P03383 | Q99726 | -0.73247  |
| 71677 | P03383 | Q8NBI2 | -0.98818  |
| 71678 | P03383 | Q5JVF3 | -0.2989   |
| 71679 | P03383 | O43474 | -0.22491  |
| 71680 | P03383 | P09466 | -0.98476  |
| 71681 | P03383 | Q8NI17 | -0.53607  |
| 71682 | P03383 | P06681 | -1.2771   |
| 71683 | P03383 | O60760 | -0.22629  |
| 71684 | P03383 | P63125 | -0.67565  |
| 71685 | P03383 | Q9Y5F8 | -1.1297   |
| 71686 | P03383 | Q96SQ7 | -0.22763  |
| 71687 | P03383 | P03951 | -0.72056  |
| 71688 | P03383 | Q9P1W8 | -0.50935  |
| 71689 | P03383 | Q9GZN2 | -0.24329  |
| 71690 | P03383 | Q8N148 | -1.1027   |
| 71691 | P03383 | P04745 | -0.3734   |
| 71692 | P03383 | P62158 | -0.22723  |
| 71693 | P03383 | O75563 | -0.53242  |
| 71694 | P03383 | Q9H6F5 | -0.17879  |
| 71695 | P03383 | Q15165 | -0.67379  |
| 71696 | P03383 | Q13315 | -0.34533  |
| 71697 | P03383 | Q6ZN68 | -0.86584  |
| 71698 | P03383 | O94898 | -0.78299  |
| 71699 | P03383 | P08247 | -0.53188  |
| 71700 | P03383 | Q8N4F4 | -0.94043  |
| 71701 | P03383 | P0CG38 | -0.436    |
| 71702 | P03383 | P02100 | -0.33557  |
| 71703 | P03383 | Q9BZJ4 | -0.7165   |
| 71704 | P03383 | P21964 | -0.37485  |
| 71705 | P03383 | Q96AZ6 | -0.30695  |
| 71706 | P03383 | Q9Y6V7 | -0.85822  |
| 71707 | P03383 | Q8NGA1 | -1.1027   |
| 71708 | P03383 | A6NMK7 | -0.52453  |
| 71709 | P03383 | Q9Y2D2 | -0.56261  |
| 71710 | P03383 | P63129 | -0.67565  |
| 71711 | P03383 | P48307 | -0.71772  |
| 71712 | P03383 | Q8NI28 | -0.86584  |
| 71713 | P03383 | Q92521 | -0.77893  |
| 71714 | P03383 | P01036 | -0.89477  |
| 71715 | P03383 | P27105 | -0.32659  |
| 71716 | P03383 | P05186 | -0.97362  |
| 71717 | P03383 | Q7L0Q8 | -0.52491  |
| 71718 | P03383 | Q8N5B7 | -0.30336  |
| 71719 | P03383 | Q9NQS3 | -0.37951  |
| 71720 | P03383 | P03901 | -0.57217  |
| 71721 | P03383 | P02749 | -0.44028  |
| 71722 | P03383 | Q7Z4R8 | -0.84685  |
| 71723 | P03383 | O43676 | -0.51765  |
| 71724 | P03383 | Q96BM1 | -0.22741  |
| 71725 | P03383 | Q14134 | -0.41821  |
| 71726 | P03383 | Q02246 | -0.46455  |
| 71727 | P03383 | Q8NAC3 | -0.89333  |
| 71728 | P03383 | P0CAT3 | -0.090181 |
| 71729 | P03383 | O00187 | -0.91411  |
| 71730 | P03383 | Q9UJZ1 | -0.28659  |
| 71731 | P03383 | Q9BTY2 | -0.78743  |
| 71732 | P03383 | Q9H334 | -0.35259  |
| 71733 | P03383 | Q8IYK8 | -1.1897   |
| 71734 | P03383 | Q14929 | -0.17069  |
| 71735 | P03383 | A6NFC5 | -0.54726  |
| 71736 | P03383 | P09210 | -0.27596  |
| 71737 | P03383 | P31151 | -0.20825  |
| 71738 | P03383 | Q8N9I9 | -0.38281  |
| 71739 | P03383 | Q9BXT4 | -0.54369  |
| 71740 | P03383 | Q9Y5K2 | -1.2961   |
| 71741 | P03383 | O95258 | -0.81422  |
| 71742 | P03383 | Q6S5H5 | -0.22745  |
| 71743 | P03383 | O00151 | -0.22741  |
| 71744 | P03383 | P16885 | -0.22741  |

|       |        |        |           |
|-------|--------|--------|-----------|
| 71745 | P03383 | P47992 | -0.44006  |
| 71746 | P03383 | Q9NW64 | -0.51209  |
| 71747 | P03383 | Q9BV23 | -0.7932   |
| 71748 | P03383 | Q9Y587 | -0.16694  |
| 71749 | P03383 | P63135 | -0.26867  |
| 71750 | P03383 | P13797 | -0.48349  |
| 71751 | P03383 | P53701 | -0.47749  |
| 71752 | P03383 | O94812 | -0.46318  |
| 71753 | P03383 | Q96K19 | -1.0296   |
| 71754 | P03383 | O95749 | -0.1997   |
| 71755 | P03383 | Q99819 | -0.49212  |
| 71756 | P03383 | Q96FV3 | -0.8322   |
| 71757 | P03383 | O75503 | -0.34425  |
| 71758 | P03383 | Q8WUN7 | -0.21938  |
| 71759 | P03383 | Q9BYV1 | -0.25007  |
| 71760 | P03383 | Q8TD08 | -1.0765   |
| 71761 | P03383 | A6NHN0 | -0.92264  |
| 71762 | P03383 | P55789 | -0.046729 |
| 71763 | P03383 | Q8TET4 | -0.44256  |
| 71764 | P03383 | P01569 | -0.7874   |
| 71765 | P03383 | A8MWL7 | -0.86584  |
| 71766 | P03383 | O60762 | -0.2014   |
| 71767 | P03383 | Q5TIE3 | -0.87849  |
| 71768 | P03383 | Q6P2I3 | -0.64709  |
| 71769 | P03383 | Q9BWH2 | -0.30763  |
| 71770 | P03383 | P04440 | -0.693    |
| 71771 | P03383 | Q8WV35 | -0.21062  |
| 71772 | P03383 | Q5SQ64 | -0.93628  |
| 71773 | P03383 | Q5T011 | -0.2309   |
| 71774 | P03383 | Q6UXB0 | -0.87849  |
| 71775 | P03383 | Q02153 | -0.75996  |
| 71776 | P03383 | Q6UXD5 | -1.0066   |
| 71777 | P03383 | Q5JTN6 | -0.23056  |
| 71778 | P03383 | Q9Y572 | -0.22741  |
| 71779 | P03383 | P61221 | -0.48586  |
| 71780 | P03383 | Q9Y2P4 | -1.1276   |
| 71781 | P03383 | Q6IN97 | -0.22615  |
| 71782 | P03383 | P01282 | -0.71341  |
| 71783 | P03383 | P0CG40 | -0.25196  |
| 71784 | P03383 | P12755 | -0.10732  |
| 71785 | P03383 | Q96AQ2 | -0.52887  |
| 71786 | P03383 | Q9UJC3 | -0.17575  |
| 71787 | P03383 | Q15102 | -0.11808  |
| 71788 | P03383 | P18440 | -0.28923  |
| 71789 | P03383 | Q8N9C0 | -0.22759  |
| 71790 | P03383 | O00115 | -0.61199  |
| 71791 | P03383 | Q7L7V1 | -0.42269  |
| 71792 | P03383 | Q9UKQ9 | -1.2917   |
| 71793 | P03383 | Q6UXF7 | -0.86789  |
| 71794 | P03383 | P15954 | -0.56658  |
| 71795 | P03383 | P35713 | -0.2866   |
| 71796 | P03383 | Q71037 | -0.5818   |
| 71797 | P03383 | P01593 | -0.97479  |
| 71798 | P03383 | A6NCM1 | -0.79654  |
| 71799 | P03383 | Q9BXA9 | -0.20524  |
| 71800 | P03383 | Q8N1S5 | -0.87538  |
| 71801 | P03383 | Q96BW5 | -0.48656  |
| 71802 | P03383 | Q96BZ4 | -0.78649  |
| 71803 | P03383 | P19429 | -0.12006  |
| 71804 | P03383 | Q5JTD7 | -0.21864  |
| 71805 | P03383 | Q59H18 | -0.22741  |
| 71806 | P03383 | P12034 | -0.60991  |
| 71807 | P03383 | Q8IUX1 | -0.52887  |
| 71808 | P03383 | P48449 | -0.51111  |
| 71809 | P03383 | Q9UGL1 | -0.24427  |
| 71810 | P03383 | Q6ZN55 | -0.21172  |
| 71811 | P03383 | Q9HB90 | -0.7407   |
| 71812 | P03383 | A6NGB0 | -0.86584  |
| 71813 | P03383 | Q96J88 | -0.26714  |
| 71814 | P03383 | O95436 | -0.80193  |
| 71815 | P03383 | A6NGB9 | -0.51532  |
| 71816 | P03383 | A6NMD0 | -0.92914  |
| 71817 | P03383 | P42857 | -0.36478  |
| 71818 | P03383 | Q8TCZ2 | -1.0195   |
| 71819 | P03383 | P60153 | -0.85864  |
| 71820 | P03383 | Q9H1C7 | -0.86584  |

|       |        |        |           |
|-------|--------|--------|-----------|
| 71821 | P03383 | Q96FZ7 | -0.16183  |
| 71822 | P03383 | O95711 | -0.91034  |
| 71823 | P03383 | P48730 | -0.22741  |
| 71824 | P03383 | Q96RR4 | -0.90281  |
| 71825 | P03383 | Q6ZVH6 | -0.23148  |
| 71826 | P03383 | P36542 | -0.21078  |
| 71827 | P03383 | Q8N1I0 | -0.2096   |
| 71828 | P03383 | P49638 | -0.41308  |
| 71829 | P03383 | Q9UBC5 | -0.44792  |
| 71830 | P03383 | Q8N0W4 | -0.39694  |
| 71831 | P03383 | O14561 | -0.26936  |
| 71832 | P03383 | Q5VTL7 | -0.87849  |
| 71833 | P03383 | P49917 | -0.17798  |
| 71834 | P03383 | P02790 | -0.27705  |
| 71835 | P03383 | P51608 | -0.15594  |
| 71836 | P03383 | Q9NV23 | -0.55396  |
| 71837 | P03383 | A1L4Q6 | -0.20716  |
| 71838 | P03383 | Q96LW4 | -0.45345  |
| 71839 | P03383 | O43272 | -0.25248  |
| 71840 | P03383 | Q9Y6E2 | -0.5199   |
| 71841 | P03383 | Q9NVH1 | -0.35956  |
| 71842 | P03383 | P05814 | -0.84456  |
| 71843 | P03383 | O95393 | -0.25173  |
| 71844 | P03383 | P30044 | -0.34794  |
| 71845 | P03383 | P01818 | -0.97479  |
| 71846 | P03383 | Q8IY47 | -0.20702  |
| 71847 | P03383 | Q5TEZ5 | -0.16078  |
| 71848 | P03383 | Q5T1H1 | -1.0832   |
| 71849 | P03383 | Q8IYW7 | -0.26933  |
| 71850 | P03383 | Q96DR4 | -0.71621  |
| 71851 | P03383 | Q86UF1 | -0.86584  |
| 71852 | P03383 | Q96N58 | -0.21172  |
| 71853 | P03383 | A4D256 | -0.94237  |
| 71854 | P03383 | A4D2H0 | -0.068114 |
| 71855 | P03383 | Q8NCW6 | -0.56906  |
| 71856 | P03383 | O14672 | -0.26829  |
| 71857 | P03383 | A0PJZ3 | -0.79008  |
| 71858 | P03383 | O15482 | -0.6579   |
| 71859 | P03383 | P43631 | -0.96614  |
| 71860 | P03383 | Q8NEE6 | -0.22067  |
| 71861 | P03383 | P25391 | -0.71522  |
| 71862 | P03383 | Q8IZP6 | -0.51948  |
| 71863 | P03383 | Q30KQ8 | -0.84399  |
| 71864 | P03383 | O95428 | -1.0407   |
| 71865 | P03383 | Q9H4Y5 | -0.34107  |
| 71866 | P03383 | P78332 | -0.87267  |
| 71867 | P03383 | Q9BV35 | -0.78496  |
| 71868 | P03383 | Q9C0B5 | -0.95194  |
| 71869 | P03383 | Q9H5K3 | -1.1594   |
| 71870 | P03383 | O95231 | -0.2274   |
| 71871 | P03383 | P35453 | -0.22738  |
| 71872 | P03383 | P59047 | -0.22709  |
| 71873 | P03383 | Q9Y337 | -0.77582  |
| 71874 | P03383 | Q9H3S5 | -0.76317  |
| 71875 | P03383 | Q08830 | -1.04     |
| 71876 | P03383 | Q9P296 | -0.57253  |
| 71877 | P03383 | A6NGN4 | -0.25825  |
| 71878 | P03383 | P50747 | -0.40177  |
| 71879 | P03383 | O15375 | -0.9422   |
| 71880 | P03383 | Q9BX63 | -0.71702  |
| 71881 | P03383 | Q96PV4 | -0.41833  |
| 71882 | P03383 | P01700 | -0.97479  |
| 71883 | P03383 | Q9UJV9 | -0.51578  |
| 71884 | P03383 | Q6PDA7 | -0.87849  |
| 71885 | P03383 | P04217 | -0.677    |
| 71886 | P03383 | Q6P5S2 | -0.87849  |
| 71887 | P03383 | Q9HD23 | -0.79465  |
| 71888 | P03383 | Q9NYX4 | -0.94417  |
| 71889 | P03383 | Q96Q05 | -0.321    |
| 71890 | P03383 | Q5TGY3 | -0.54186  |
| 71891 | P03383 | Q7Z624 | -0.22651  |
| 71892 | P03383 | Q8IXK2 | -0.67293  |
| 71893 | P03383 | O14958 | -0.51508  |
| 71894 | P03383 | Q58HT5 | -0.82576  |
| 71895 | P03383 | Q9NZQ9 | -0.44552  |
| 71896 | P03383 | Q96EE4 | -0.87849  |

|       |        |        |           |
|-------|--------|--------|-----------|
| 71897 | P03383 | Q5H9E4 | -0.73185  |
| 71898 | P03383 | P15514 | -0.62045  |
| 71899 | P03383 | Q6NW34 | -0.86584  |
| 71900 | P03383 | Q9Y2C9 | -0.66103  |
| 71901 | P03383 | P01743 | -0.97479  |
| 71902 | P03383 | Q03001 | -0.22823  |
| 71903 | P03383 | Q6ZNW5 | -0.50214  |
| 71904 | P03383 | Q9UNN8 | -0.37118  |
| 71905 | P03383 | A6NMY6 | -0.80091  |
| 71906 | P03383 | P0CJ90 | -0.1915   |
| 71907 | P03383 | O76074 | -0.48681  |
| 71908 | P03383 | Q7Z5H3 | -0.25576  |
| 71909 | P03383 | Q92485 | -0.88373  |
| 71910 | P03383 | Q93045 | -0.21228  |
| 71911 | P03383 | Q9Y5I2 | -1.4444   |
| 71912 | P03383 | Q96KC8 | -0.2693   |
| 71913 | P03383 | Q8WWZ8 | -0.23131  |
| 71914 | P03383 | P55075 | -0.31694  |
| 71915 | P03383 | Q8IY51 | -0.33043  |
| 71916 | P03383 | Q96JP0 | -0.29946  |
| 71917 | P03383 | A0PJX4 | -1.0518   |
| 71918 | P03383 | Q8WXT5 | -0.35259  |
| 71919 | P03383 | Q9H4I3 | -0.071698 |
| 71920 | P03383 | Q99675 | -0.22693  |
| 71921 | P03383 | Q8N7B1 | -0.46399  |
| 71922 | P03383 | Q17RY0 | -0.78411  |
| 71923 | P03383 | Q66K14 | -1.4819   |
| 71924 | P03383 | P31785 | -0.76591  |
| 71925 | P03383 | Q9UMX5 | -0.84546  |
| 71926 | P03383 | Q13368 | -0.42296  |
| 71927 | P03383 | Q96SZ5 | -0.51929  |
| 71928 | P03383 | P30542 | -0.33891  |
| 71929 | P03383 | Q4G148 | -0.549    |
| 71930 | P03383 | O43314 | -0.54012  |
| 71931 | P03383 | Q6UXB1 | -0.87849  |
| 71932 | P03383 | O00506 | -0.38606  |
| 71933 | P03383 | Q96E66 | -0.29487  |
| 71934 | P03383 | Q9UBV4 | -0.73826  |
| 71935 | P03383 | Q8WYA0 | -0.54093  |
| 71936 | P03383 | P53609 | -0.49163  |
| 71937 | P03383 | Q6PIU2 | -0.91466  |
| 71938 | P03383 | O95071 | -0.22784  |
| 71939 | P03383 | Q12770 | -0.30985  |
| 71940 | P03383 | P42357 | -0.32076  |
| 71941 | P03383 | A6NJW4 | -0.86584  |
| 71942 | P03383 | Q6KF10 | -0.63113  |
| 71943 | P03383 | O43688 | -0.711    |
| 71944 | P03383 | Q30KQ7 | -0.84399  |
| 71945 | P03383 | Q7Z7J9 | -0.48521  |
| 71946 | P03383 | Q86UK7 | -0.73967  |
| 71947 | P03383 | Q9HAD4 | -0.22741  |
| 71948 | P03383 | P09110 | -0.21812  |
| 71949 | P03383 | Q9H694 | -0.65451  |
| 71950 | P03383 | Q8N205 | -0.68435  |
| 71951 | P03383 | B1ANS9 | -0.22747  |
| 71952 | P03383 | Q96SB3 | -0.22703  |
| 71953 | P03383 | Q92956 | -0.45021  |
| 71954 | P03383 | O95626 | -0.17848  |
| 71955 | P03383 | Q93052 | -0.22901  |
| 71956 | P03383 | Q8WV16 | -0.42996  |
| 71957 | P03383 | Q9C093 | -0.46334  |
| 71958 | P03383 | Q8NGP0 | -1.1027   |
| 71959 | P03383 | Q99748 | -0.54793  |
| 71960 | P03383 | Q8N7R7 | -0.44208  |
| 71961 | P03383 | Q643R3 | -0.73229  |
| 71962 | P03383 | Q9HCP6 | -0.83291  |
| 71963 | P03383 | Q8IVW4 | -0.4766   |
| 71964 | P03383 | Q96RI0 | -1.1675   |
| 71965 | P03383 | Q9BTP6 | -0.57958  |
| 71966 | P03383 | Q8N5Y8 | -0.59178  |
| 71967 | P03383 | O75192 | -0.33902  |
| 71968 | P03383 | Q9BRP9 | -0.20998  |
| 71969 | P03383 | Q8IYJ3 | -0.24047  |
| 71970 | P03383 | Q68D86 | -0.18282  |
| 71971 | P03383 | Q8WUH6 | -0.86584  |
| 71972 | P03383 | Q5TYW2 | -0.52803  |



|       |        |        |           |
|-------|--------|--------|-----------|
| 71973 | P03383 | P43652 | -0.86953  |
| 71974 | P03383 | Q6UY11 | -0.91803  |
| 71975 | P03383 | P34820 | -0.89933  |
| 71976 | P03383 | Q969E2 | -0.66475  |
| 71977 | P03383 | Q96T51 | -0.16849  |
| 71978 | P03383 | P01708 | -0.97479  |
| 71979 | P03383 | Q15649 | -0.35726  |
| 71980 | P03383 | Q6BEB4 | -0.22292  |
| 71981 | P03383 | Q6TCH4 | -0.86584  |
| 71982 | P03383 | Q96JW4 | -0.96956  |
| 71983 | P03383 | Q13523 | -0.25874  |
| 71984 | P03383 | Q9BWV2 | -1.0387   |
| 71985 | P03383 | Q2TB90 | -0.2098   |
| 71986 | P03383 | Q6NXT4 | -0.76038  |
| 71987 | P03383 | A8MXK1 | -0.86584  |
| 71988 | P03383 | Q6PDB4 | -0.39217  |
| 71989 | P03383 | Q8N0U7 | -0.52751  |
| 71990 | P03383 | O43182 | -0.6783   |
| 71991 | P03383 | Q4G0P3 | -0.14753  |
| 71992 | P03383 | Q9P1U1 | -0.84228  |
| 71993 | P03383 | Q96NS5 | -0.22743  |
| 71994 | P03383 | P52951 | -0.22711  |
| 71995 | P03383 | Q6P474 | -0.63334  |
| 71996 | P03383 | P37173 | -0.31299  |
| 71997 | P03383 | Q9Y2G4 | -0.2274   |
| 71998 | P03383 | O43660 | -0.23638  |
| 71999 | P03383 | Q13349 | -0.97633  |
| 72000 | P03383 | Q9HAS3 | -0.77052  |
| 72001 | P03383 | O00180 | -0.85968  |
| 72002 | P03383 | P35659 | -0.34279  |
| 72003 | P03383 | Q5FYB0 | -0.7695   |
| 72004 | P03383 | Q6T311 | -1.2555   |
| 72005 | P03383 | Q94915 | -0.096142 |
| 72006 | P03383 | Q9H267 | -0.18074  |
| 72007 | P03383 | Q8IZH2 | -0.1604   |
| 72008 | P03383 | Q7LDG7 | -0.70928  |
| 72009 | P03383 | Q9NY15 | -0.99644  |
| 72010 | P03383 | Q8N813 | -0.065288 |
| 72011 | P03383 | Q14116 | -0.32765  |
| 72012 | P03383 | Q13936 | -0.27544  |
| 72013 | P03383 | Q9NZS2 | -1.0036   |
| 72014 | P03383 | Q6ZVE7 | -0.47613  |
| 72015 | P03383 | Q9Y5M6 | -0.55938  |
| 72016 | P03383 | Q96LD8 | -0.77399  |
| 72017 | P03383 | Q86X67 | -0.30367  |
| 72018 | P03383 | Q8NGD5 | -1.1027   |
| 72019 | P03383 | P05107 | -0.86968  |
| 72020 | P03383 | Q86SG5 | -0.41077  |
| 72021 | P03383 | P14679 | -0.4363   |
| 72022 | P03383 | Q9BY19 | -0.86584  |
| 72023 | P03383 | O00238 | -0.55517  |
| 72024 | P03383 | P0CB38 | -0.84005  |
| 72025 | P03383 | A2VEC9 | -1.0473   |
| 72026 | P03383 | Q7Z4V0 | -0.2274   |
| 72027 | P03383 | Q6IF63 | -1.1027   |
| 72028 | P03383 | Q7Z340 | -0.21172  |
| 72029 | P03383 | P56177 | -0.22479  |
| 72030 | P03383 | P16871 | -0.71588  |
| 72031 | P03383 | Q9Y6D5 | -0.21923  |
| 72032 | P03383 | Q9NYZ4 | -0.62261  |
| 72033 | P03383 | P17035 | -0.21172  |
| 72034 | P03383 | Q96J86 | -0.6579   |
| 72035 | P03383 | O76090 | -0.7874   |
| 72036 | P03383 | Q96R09 | -1.1027   |
| 72037 | P03383 | P55081 | -0.68967  |
| 72038 | P03383 | A8MZH6 | -0.87849  |
| 72039 | P03383 | Q6UXB3 | -0.60538  |
| 72040 | P03383 | Q9UKS7 | -0.29894  |
| 72041 | P03383 | Q8IWL2 | -0.99664  |
| 72042 | P03383 | P19174 | -0.22741  |
| 72043 | P03383 | Q01101 | -0.22402  |
| 72044 | P03383 | P05496 | -0.6202   |
| 72045 | P03383 | Q6ZS11 | -0.89338  |
| 72046 | P03383 | Q6ZWK6 | -1.568    |
| 72047 | P03383 | P18089 | -0.52388  |
| 72048 | P03383 | Q9ULT6 | -0.4767   |

|       |        |        |           |
|-------|--------|--------|-----------|
| 72049 | P03383 | Q9NVE7 | -0.64902  |
| 72050 | P03383 | Q03591 | -0.92592  |
| 72051 | P03383 | Q9UKY1 | -0.2274   |
| 72052 | P03383 | Q9UKE5 | -0.23761  |
| 72053 | P03383 | Q8TE12 | -0.22997  |
| 72054 | P03383 | Q6UXB8 | -1.1688   |
| 72055 | P03383 | Q13563 | -0.27982  |
| 72056 | P03383 | P51884 | -0.61605  |
| 72057 | P03383 | Q6IQ23 | -0.22741  |
| 72058 | P03383 | Q6UXZ4 | -0.92627  |
| 72059 | P03383 | Q5JXX7 | -0.86584  |
| 72060 | P03383 | A6NFX0 | -0.86584  |
| 72061 | P03383 | Q7L1T6 | -0.5293   |
| 72062 | P03383 | Q9BXT6 | -1.1063   |
| 72063 | P03383 | Q96AM1 | -1.1721   |
| 72064 | P03383 | Q86YV0 | -0.58829  |
| 72065 | P03383 | A6NMS3 | -1.1027   |
| 72066 | P03383 | Q9UIQ6 | -1.1856   |
| 72067 | P03383 | Q9UPN6 | -0.28708  |
| 72068 | P03383 | Q16620 | -0.41457  |
| 72069 | P03383 | Q8IUQ4 | -0.2239   |
| 72070 | P03383 | Q13451 | -0.42242  |
| 72071 | P03383 | P52799 | -0.72152  |
| 72072 | P03383 | A6NNL5 | -0.87849  |
| 72073 | P03383 | Q99743 | -0.22904  |
| 72074 | P03383 | Q96RD7 | -0.75895  |
| 72075 | P03383 | Q49SQ1 | -1.1739   |
| 72076 | P03383 | Q75110 | -0.86794  |
| 72077 | P03383 | Q8TD90 | -0.12563  |
| 72078 | P03383 | Q5FYB1 | -0.76789  |
| 72079 | P03383 | Q9C010 | -0.44022  |
| 72080 | P03383 | Q8NFP9 | -0.43401  |
| 72081 | P03383 | P12268 | -0.74142  |
| 72082 | P03383 | Q06033 | -0.75716  |
| 72083 | P03383 | P59894 | -0.62648  |
| 72084 | P03383 | O60229 | -0.84873  |
| 72085 | P03383 | O60256 | -0.40051  |
| 72086 | P03383 | P17405 | -0.36314  |
| 72087 | P03383 | Q15120 | -0.22322  |
| 72088 | P03383 | Q8NCY6 | -0.21602  |
| 72089 | P03383 | Q9NZU1 | -1.0425   |
| 72090 | P03383 | Q5TGL8 | -0.55072  |
| 72091 | P03383 | Q96PC5 | -0.87849  |
| 72092 | P03383 | Q9BU40 | -0.85589  |
| 72093 | P03383 | P61619 | -0.76219  |
| 72094 | P03383 | Q8N3D4 | -0.22813  |
| 72095 | P03383 | Q96A33 | -0.25307  |
| 72096 | P03383 | Q9NPC8 | -0.23018  |
| 72097 | P03383 | Q5T601 | -0.79039  |
| 72098 | P03383 | P46531 | -0.2277   |
| 72099 | P03383 | P20151 | -1.257    |
| 72100 | P03383 | P31150 | -0.10915  |
| 72101 | P03383 | Q5VUY2 | -0.86431  |
| 72102 | P03383 | Q5T4F7 | -0.72843  |
| 72103 | P03383 | P09603 | -0.51544  |
| 72104 | P03383 | P09871 | -1.2726   |
| 72105 | P03383 | Q6DN12 | -0.87039  |
| 72106 | P03383 | Q9Y6W3 | -0.76024  |
| 72107 | P03383 | P13727 | -0.85936  |
| 72108 | P03383 | Q8NBB2 | -0.15152  |
| 72109 | P03383 | P13693 | -0.17256  |
| 72110 | P03383 | P49675 | -0.45284  |
| 72111 | P03383 | Q04741 | -0.23925  |
| 72112 | P03383 | Q658T7 | -0.097988 |
| 72113 | P03383 | Q5QP82 | -0.42996  |
| 72114 | P03383 | Q8NDX1 | -0.77606  |
| 72115 | P03383 | O43313 | -0.22741  |
| 72116 | P03383 | P51688 | -0.5547   |
| 72117 | P03383 | Q8IXZ3 | -0.28124  |
| 72118 | P03383 | P20916 | -0.85315  |
| 72119 | P03383 | Q8WU66 | -0.75739  |
| 72120 | P03383 | Q9HAU0 | -0.22741  |
| 72121 | P03383 | Q15049 | -0.20009  |
| 72122 | P03383 | P02775 | -0.60874  |
| 72123 | P03383 | Q9NV29 | -0.52887  |
| 72124 | P03383 | Q15836 | -0.22356  |

|       |        |        |           |
|-------|--------|--------|-----------|
| 72125 | P03383 | Q8TDL5 | -1.0427   |
| 72126 | P03383 | P01019 | -0.27493  |
| 72127 | P03383 | Q6ZVS7 | -0.069768 |
| 72128 | P03383 | A2VCL2 | -0.20347  |
| 72129 | P03383 | Q6B0B8 | -0.33043  |
| 72130 | P03383 | P33681 | -0.30812  |
| 72131 | P03383 | O75373 | -0.21172  |
| 72132 | P03383 | P15153 | -0.67688  |
| 72133 | P03383 | Q96NW4 | -0.23788  |
| 72134 | P03383 | Q9H4L5 | -0.53766  |
| 72135 | P03383 | Q8TBH0 | -0.22156  |
| 72136 | P03383 | Q6UWP2 | -1.382    |
| 72137 | P03383 | Q8N143 | -0.58296  |
| 72138 | P03383 | Q8NCT1 | -0.576    |
| 72139 | P03383 | Q9H6E5 | -0.22701  |
| 72140 | P03383 | Q15008 | -0.15277  |
| 72141 | P03383 | Q7Z6Z6 | -0.5536   |
| 72142 | P03383 | Q92889 | -0.13565  |
| 72143 | P03383 | Q6ZT21 | -0.81103  |
| 72144 | P03383 | Q8NH02 | -1.1027   |
| 72145 | P03383 | P11182 | -0.18651  |
| 72146 | P03383 | O00478 | -0.86584  |
| 72147 | P03383 | P0CL84 | -0.21602  |
| 72148 | P03383 | Q9BT56 | -0.48634  |
| 72149 | P03383 | Q9UII4 | -0.30394  |
| 72150 | P03383 | Q5T5U3 | -0.27262  |
| 72151 | P03383 | P27338 | -0.57344  |
| 72152 | P03383 | Q9H3U1 | -0.23338  |
| 72153 | P03383 | Q8TC17 | -0.22741  |
| 72154 | P03383 | Q9Y3B8 | -0.30297  |
| 72155 | P03383 | Q9P2H5 | -0.69644  |
| 72156 | P03383 | Q6UXS0 | -0.86789  |
| 72157 | P03383 | Q00763 | -0.32178  |
| 72158 | P03383 | P11678 | -0.68173  |
| 72159 | P03383 | Q96RJ3 | -0.72744  |
| 72160 | P03383 | Q96PP8 | -0.78189  |
| 72161 | P03383 | P30837 | -0.35321  |
| 72162 | P03383 | P61601 | -0.99984  |
| 72163 | P03383 | Q9H2Z4 | -0.36158  |
| 72164 | P03383 | Q9H2B4 | -0.81451  |
| 72165 | P03383 | Q96CX3 | -0.21172  |
| 72166 | P03383 | Q9BXJ7 | -0.90235  |
| 72167 | P03383 | Q9UBH6 | -1.0795   |
| 72168 | P03383 | Q96MM6 | -0.79654  |
| 72169 | P03383 | Q9BY21 | -1.0528   |
| 72170 | P03383 | Q86YT6 | -0.22736  |
| 72171 | P03383 | Q53HC9 | -0.22726  |
| 72172 | P03383 | Q9HB89 | -1.0282   |
| 72173 | P03383 | Q5JU85 | -0.2325   |
| 72174 | P03383 | Q8NER5 | -0.78258  |
| 72175 | P03383 | Q9P107 | -0.49335  |
| 72176 | P03383 | P25103 | -0.75379  |
| 72177 | P03383 | Q495T6 | -1.2756   |
| 72178 | P03383 | Q6FHJ7 | -0.4134   |
| 72179 | P03383 | P11216 | -0.24876  |
| 72180 | P03383 | Q8NB66 | -0.36516  |
| 72181 | P03383 | Q96PE7 | -0.16111  |
| 72182 | P03383 | P34130 | -0.73149  |
| 72183 | P03383 | Q8WXB1 | -0.74687  |
| 72184 | P03383 | Q5VWM3 | -0.25825  |
| 72185 | P03383 | P19105 | -0.45722  |
| 72186 | P03383 | Q99878 | -0.88998  |
| 72187 | P03383 | P19099 | -0.43843  |
| 72188 | P03383 | Q9NTM9 | -0.12153  |
| 72189 | P03383 | Q9NUG6 | -0.30967  |
| 72190 | P03383 | P24311 | -0.55704  |
| 72191 | P03383 | Q8N7S2 | -0.54897  |
| 72192 | P03383 | Q9UMR3 | -1.0002   |
| 72193 | P03383 | Q9Y691 | -0.92695  |
| 72194 | P03383 | Q9Y693 | -0.96404  |
| 72195 | P03383 | Q14642 | -0.53648  |
| 72196 | P03383 | F8WCM5 | -0.65351  |
| 72197 | P03383 | Q6P1Q9 | -0.37739  |
| 72198 | P03383 | Q96N19 | -0.86584  |
| 72199 | P03383 | O94905 | -0.25232  |
| 72200 | P03383 | P35219 | -0.35206  |

|       |        |        |           |
|-------|--------|--------|-----------|
| 72201 | P03383 | Q09328 | -0.64969  |
| 72202 | P03383 | Q9Y450 | -0.81319  |
| 72203 | P03383 | Q86XJ0 | -0.86584  |
| 72204 | P03383 | Q9BSJ5 | -0.86584  |
| 72205 | P03383 | P15085 | -1.1654   |
| 72206 | P03383 | Q8WV48 | -0.86584  |
| 72207 | P03383 | Q5M8T2 | -0.78743  |
| 72208 | P03383 | P01768 | -0.97479  |
| 72209 | P03383 | Q96BT7 | -0.20332  |
| 72210 | P03383 | P30459 | -0.7844   |
| 72211 | P03383 | P40933 | -0.22352  |
| 72212 | P03383 | P23229 | -0.34564  |
| 72213 | P03383 | Q9UMR5 | -0.44522  |
| 72214 | P03383 | P20138 | -1.189    |
| 72215 | P03383 | P01767 | -0.97479  |
| 72216 | P03383 | P50219 | -0.22734  |
| 72217 | P03383 | Q8IVH4 | -0.85532  |
| 72218 | P03383 | Q8N336 | -0.20326  |
| 72219 | P03383 | P17301 | -0.25378  |
| 72220 | P03383 | Q9UJ96 | -0.6626   |
| 72221 | P03383 | A8MWX3 | -0.58712  |
| 72222 | P03383 | Q8N8Z6 | -1.0252   |
| 72223 | P03383 | Q76EJ3 | -0.45815  |
| 72224 | P03383 | P55157 | -0.49757  |
| 72225 | P03383 | O14836 | -0.53129  |
| 72226 | P03383 | Q8N5G0 | -0.86584  |
| 72227 | P03383 | Q6IPX1 | -1.2307   |
| 72228 | P03383 | Q5VW38 | -0.86584  |
| 72229 | P03383 | Q96PT3 | -0.1925   |
| 72230 | P03383 | P30536 | -0.36639  |
| 72231 | P03383 | A6H8M9 | -1.1297   |
| 72232 | P03383 | Q12934 | -0.2637   |
| 72233 | P03383 | Q9H0A6 | -0.22669  |
| 72234 | P03383 | P32239 | -0.58221  |
| 72235 | P03383 | C9JUS6 | -0.87849  |
| 72236 | P03383 | Q8NBL1 | -0.352    |
| 72237 | P03383 | O14526 | -0.51365  |
| 72238 | P03383 | P59103 | -0.21023  |
| 72239 | P03383 | O00488 | -0.21566  |
| 72240 | P03383 | P18509 | -0.65735  |
| 72241 | P03383 | Q5VT79 | -0.49855  |
| 72242 | P03383 | P30464 | -0.88446  |
| 72243 | P03383 | A8MW95 | -0.29907  |
| 72244 | P03383 | Q8NGG0 | -1.1027   |
| 72245 | P03383 | P01562 | -0.77017  |
| 72246 | P03383 | P35348 | -0.57783  |
| 72247 | P03383 | Q4KMQ2 | -0.86651  |
| 72248 | P03383 | P23219 | -0.392    |
| 72249 | P03383 | P78423 | -0.50446  |
| 72250 | P03383 | Q8WWZ4 | -1.1035   |
| 72251 | P03383 | P02654 | -0.57992  |
| 72252 | P03383 | P51160 | -1.0358   |
| 72253 | P03383 | Q0GE19 | -0.96014  |
| 72254 | P03383 | Q00341 | -0.46084  |
| 72255 | P03383 | P45381 | -0.16576  |
| 72256 | P03383 | Q8IXB3 | -0.86137  |
| 72257 | P03383 | Q8NGE0 | -1.1027   |
| 72258 | P03383 | P0DJ07 | -0.74159  |
| 72259 | P03383 | Q17R31 | -0.24578  |
| 72260 | P03383 | P14735 | -0.31111  |
| 72261 | P03383 | P55259 | -0.95116  |
| 72262 | P03383 | Q16635 | -0.51764  |
| 72263 | P03383 | O14610 | -1.0896   |
| 72264 | P03383 | P07911 | -0.68724  |
| 72265 | P03383 | Q8N7X0 | -0.72995  |
| 72266 | P03383 | Q5BKU9 | -0.30763  |
| 72267 | P03383 | Q86VZ1 | -1.124    |
| 72268 | P03383 | P15812 | -0.91772  |
| 72269 | P03383 | P06313 | -0.97479  |
| 72270 | P03383 | O95222 | -1.1027   |
| 72271 | P03383 | O95166 | -0.093465 |
| 72272 | P03383 | A2RUC4 | -0.55821  |
| 72273 | P03383 | Q9H5U6 | -0.4464   |
| 72274 | P03383 | Q92839 | -0.82211  |
| 72275 | P03383 | P29279 | -0.30201  |
| 72276 | P03383 | O95214 | -0.86584  |

|       |        |        |           |
|-------|--------|--------|-----------|
| 72277 | P03383 | P57058 | -1.1099   |
| 72278 | P03383 | Q07812 | -0.22736  |
| 72279 | P03383 | Q9HCL0 | -1.1861   |
| 72280 | P03383 | P78556 | -1.0028   |
| 72281 | P03383 | A4D0S4 | -1.1527   |
| 72282 | P03383 | P07477 | -1.3159   |
| 72283 | P03383 | Q8IV61 | -0.70076  |
| 72284 | P03383 | P16284 | -0.46281  |
| 72285 | P03383 | Q8WUM9 | -1.035    |
| 72286 | P03383 | O95834 | -0.84913  |
| 72287 | P03383 | P57771 | -0.66133  |
| 72288 | P03383 | P50876 | -0.85454  |
| 72289 | P03383 | Q86X76 | -0.18609  |
| 72290 | P03383 | Q9BRC7 | -0.57501  |
| 72291 | P03383 | O76100 | -1.1027   |
| 72292 | P03383 | Q9C0H2 | -0.90773  |
| 72293 | P03383 | O14994 | -0.86567  |
| 72294 | P03383 | Q15080 | -0.45611  |
| 72295 | P03383 | Q8WVN8 | -0.5948   |
| 72296 | P03383 | Q8NGH3 | -1.1027   |
| 72297 | P03383 | Q03431 | -0.75124  |
| 72298 | P03383 | O75363 | -0.29487  |
| 72299 | P03383 | Q9P1Z0 | -0.22055  |
| 72300 | P03383 | Q7RTM1 | -1.1841   |
| 72301 | P03383 | Q9Y644 | -0.83089  |
| 72302 | P03383 | Q86WT6 | -0.24382  |
| 72303 | P03383 | Q075Z2 | -0.87851  |
| 72304 | P03383 | Q8WXX3 | -0.22739  |
| 72305 | P03383 | Q9P0N5 | -0.69542  |
| 72306 | P03383 | Q9Y3D6 | -0.24707  |
| 72307 | P03383 | P40123 | -0.59599  |
| 72308 | P03383 | P33981 | -0.65634  |
| 72309 | P03383 | P31321 | -0.33069  |
| 72310 | P03383 | Q9BTM1 | -0.88998  |
| 72311 | P03383 | B1AKI9 | -0.87849  |
| 72312 | P03383 | Q8WU10 | -0.59308  |
| 72313 | P03383 | Q9P289 | -0.23431  |
| 72314 | P03383 | P49184 | -0.45954  |
| 72315 | P03383 | P0CJ78 | -0.21172  |
| 72316 | P03383 | Q9UKA9 | -0.51473  |
| 72317 | P03383 | P78524 | -0.44839  |
| 72318 | P03383 | Q9UPX0 | -0.93628  |
| 72319 | P03383 | Q9BU79 | -0.86584  |
| 72320 | P03383 | O14617 | -0.17154  |
| 72321 | P03383 | Q9Y546 | -0.19017  |
| 72322 | P03383 | Q3ZCN5 | -0.20532  |
| 72323 | P03383 | P16435 | -0.85271  |
| 72324 | P03383 | P59541 | -1.0953   |
| 72325 | P03383 | Q9Y2A9 | -0.60804  |
| 72326 | P03383 | Q9NY65 | -0.59955  |
| 72327 | P03383 | Q5THJ4 | -0.48011  |
| 72328 | P03383 | P13639 | -0.36257  |
| 72329 | P03383 | P13805 | -0.39196  |
| 72330 | P03383 | Q8NHQ9 | -0.85822  |
| 72331 | P03383 | Q12988 | -0.21062  |
| 72332 | P03383 | Q8IYP9 | -0.89944  |
| 72333 | P03383 | Q15156 | -0.2478   |
| 72334 | P03383 | Q8N119 | -1.3145   |
| 72335 | P03383 | Q5VYJ5 | -0.86584  |
| 72336 | P03383 | O95721 | -0.21671  |
| 72337 | P03383 | Q8N7A1 | -0.29487  |
| 72338 | P03383 | Q60291 | -0.22739  |
| 72339 | P03383 | Q8IUI8 | -0.22717  |
| 72340 | P03383 | Q16825 | -0.77358  |
| 72341 | P03383 | Q12947 | -0.34874  |
| 72342 | P03383 | Q96DU3 | -0.94211  |
| 72343 | P03383 | Q6J4K2 | -0.959    |
| 72344 | P03383 | Q8TAD2 | -0.92958  |
| 72345 | P03383 | Q68DI1 | -0.21172  |
| 72346 | P03383 | Q86Y33 | -0.22741  |
| 72347 | P03383 | Q8WWH5 | -0.36285  |
| 72348 | P03383 | Q76MJ5 | -0.69048  |
| 72349 | P03383 | Q53FV1 | -0.91354  |
| 72350 | P03383 | Q9Y4D7 | -0.93007  |
| 72351 | P03383 | Q9UGJ1 | -0.041064 |
| 72352 | P03383 | Q9BWF3 | -0.23018  |

|       |        |        |          |
|-------|--------|--------|----------|
| 72353 | P03383 | B4E2M5 | -0.22741 |
| 72354 | P03383 | Q7RTX0 | -1.06    |
| 72355 | P03383 | Q9BQJ4 | -0.78442 |
| 72356 | P03383 | Q9C029 | -0.23087 |
| 72357 | P03383 | Q9UJJ7 | -0.19121 |
| 72358 | P03383 | Q9P0S9 | -0.73505 |
| 72359 | P03383 | Q8WW59 | -0.22906 |
| 72360 | P03383 | Q8NEM7 | -0.27614 |
| 72361 | P03383 | A6BM72 | -0.81305 |
| 72362 | P03383 | Q712K3 | -0.66226 |
| 72363 | P03383 | Q15345 | -0.43639 |
| 72364 | P03383 | Q96G30 | -0.49304 |
| 72365 | P03383 | Q8NDH6 | -0.42034 |
| 72366 | P03383 | Q4G0X4 | -0.19405 |
| 72367 | P03383 | A8MXB1 | -0.93176 |
| 72368 | P03383 | Q9UJL8 | -0.18522 |
| 72369 | P03383 | P03950 | -0.28273 |
| 72370 | P03383 | Q9H488 | -0.1171  |
| 72371 | P03383 | Q6S545 | -0.2274  |
| 72372 | P03383 | Q86SG7 | -0.83332 |
| 72373 | P03383 | Q13480 | -0.22729 |
| 72374 | P03383 | P81605 | -1.0403  |
| 72375 | P03383 | Q9BXF9 | -0.33477 |
| 72376 | P03383 | P09912 | -0.35243 |
| 72377 | P03383 | P54829 | -1.2145  |
| 72378 | P03383 | P12111 | -0.79666 |
| 72379 | P03383 | Q969G5 | -0.41147 |
| 72380 | P03383 | Q0P6D2 | -0.93931 |
| 72381 | P03383 | Q9Y485 | -0.22747 |
| 72382 | P03383 | Q9H4L7 | -0.20629 |
| 72383 | P03383 | Q9BXI2 | -0.58724 |
| 72384 | P03383 | Q9HBU9 | -0.6579  |
| 72385 | P03383 | P59773 | -0.86584 |
| 72386 | P03383 | O43304 | -0.95278 |
| 72387 | P03383 | P18462 | -0.7844  |
| 72388 | P03383 | Q13177 | -0.22778 |
| 72389 | P03383 | A6NEC2 | -0.81362 |
| 72390 | P03383 | Q4LDR2 | -0.8462  |
| 72391 | P03383 | Q4G0U5 | -0.51623 |
| 72392 | P03383 | A6NI47 | -0.2274  |
| 72393 | P03383 | Q92804 | -0.19088 |
| 72394 | P03383 | Q4VC39 | -0.86584 |
| 72395 | P03383 | A1L167 | -0.77713 |
| 72396 | P03383 | P48163 | -0.20906 |
| 72397 | P03383 | Q674X7 | -0.22324 |
| 72398 | P03383 | Q9NSY2 | -0.50535 |
| 72399 | P03383 | P30499 | -0.93787 |
| 72400 | P03383 | P30273 | -0.58646 |
| 72401 | P03383 | Q9HAV0 | -0.49303 |
| 72402 | P03383 | Q8IVF6 | -0.22738 |
| 72403 | P03383 | Q00722 | -0.63981 |
| 72404 | P03383 | Q16650 | -0.46645 |
| 72405 | P03383 | P62491 | -0.26265 |
| 72406 | P03383 | Q16773 | -0.2126  |
| 72407 | P03383 | Q8NBR0 | -0.78299 |
| 72408 | P03383 | P20336 | -0.33559 |
| 72409 | P03383 | Q86XU0 | -0.21172 |
| 72410 | P03383 | Q8IUG5 | -0.2515  |
| 72411 | P03383 | P18074 | -0.41431 |
| 72412 | P03383 | Q9NRR6 | -0.27011 |
| 72413 | P03383 | P32246 | -0.66144 |
| 72414 | P03383 | Q92556 | -0.18633 |
| 72415 | P03383 | Q58EX2 | -1.0252  |
| 72416 | P03383 | A8MTB9 | -0.86584 |
| 72417 | P03383 | P31415 | -0.21645 |
| 72418 | P03383 | Q969P0 | -0.31114 |
| 72419 | P03383 | P36551 | -0.17364 |
| 72420 | P03383 | Q9UJM8 | -0.66015 |
| 72421 | P03383 | Q5VT98 | -0.25825 |
| 72422 | P03383 | P59089 | -0.19014 |
| 72423 | P03383 | P55039 | -0.7779  |
| 72424 | P03383 | P15516 | -0.84518 |
| 72425 | P03383 | Q8IZY5 | -0.13172 |
| 72426 | P03383 | Q9UNA3 | -0.63344 |
| 72427 | P03383 | Q9UGI0 | -0.22029 |
| 72428 | P03383 | P52849 | -0.5651  |

|       |        |        |           |
|-------|--------|--------|-----------|
| 72429 | P03383 | Q9BSY9 | -0.55657  |
| 72430 | P03383 | Q8TBY9 | -0.52751  |
| 72431 | P03383 | P59543 | -1.0953   |
| 72432 | P03383 | P33261 | -0.63025  |
| 72433 | P03383 | P78381 | -0.39119  |
| 72434 | P03383 | Q9NZP0 | -1.1027   |
| 72435 | P03383 | Q6ZWK4 | -0.86584  |
| 72436 | P03383 | C9JI98 | -0.86584  |
| 72437 | P03383 | Q9BSN7 | -0.75016  |
| 72438 | P03383 | Q9H7F0 | -0.94875  |
| 72439 | P03383 | P78509 | -0.53773  |
| 72440 | P03383 | P60903 | -0.65557  |
| 72441 | P03383 | Q6P995 | -0.96404  |
| 72442 | P03383 | Q9NPH0 | -0.72486  |
| 72443 | P03383 | P34972 | -1.0187   |
| 72444 | P03383 | O75122 | -0.1794   |
| 72445 | P03383 | P16562 | -0.91732  |
| 72446 | P03383 | Q8N910 | -0.067677 |
| 72447 | P03383 | Q8IZY2 | -0.75787  |
| 72448 | P03383 | Q6ZVZ8 | -0.62076  |
| 72449 | P03383 | Q7L2J0 | -0.2765   |
| 72450 | P03383 | Q8IYA2 | -0.19779  |
| 72451 | P03383 | Q9UJ42 | -1.1721   |
| 72452 | P03383 | Q8NDC4 | -0.13214  |
| 72453 | P03383 | Q99640 | -0.22741  |
| 72454 | P03383 | Q8N6H7 | -0.22996  |
| 72455 | P03383 | Q9NRA0 | -0.27092  |
| 72456 | P03383 | P00451 | -0.48834  |
| 72457 | P03383 | Q9UBX8 | -0.52543  |
| 72458 | P03383 | P22059 | -0.5479   |
| 72459 | P03383 | O43240 | -1.144    |
| 72460 | P03383 | O15033 | -0.68089  |
| 72461 | P03383 | P05451 | -0.71101  |
| 72462 | P03383 | Q8IVK1 | -0.54176  |
| 72463 | P03383 | Q9HDD0 | -0.32631  |
| 72464 | P03383 | Q9H0B3 | -0.30763  |
| 72465 | P03383 | Q8N1G1 | -0.29137  |
| 72466 | P03383 | P35916 | -0.41414  |
| 72467 | P03383 | P14653 | -0.22697  |
| 72468 | P03383 | P01721 | -0.97479  |
| 72469 | P03383 | Q53F19 | -0.80587  |
| 72470 | P03383 | P27544 | -0.56521  |
| 72471 | P03383 | Q8NHS3 | -0.49807  |
| 72472 | P03383 | Q9H0A3 | -0.86584  |
| 72473 | P03383 | A6NM11 | -0.86584  |
| 72474 | P03383 | P0CJ79 | -0.21172  |
| 72475 | P03383 | P49069 | -0.39605  |
| 72476 | P03383 | Q96MA6 | -0.60276  |
| 72477 | P03383 | P00915 | -0.20242  |
| 72478 | P03383 | Q9HB20 | -0.45933  |
| 72479 | P03383 | A1L4H1 | -0.91752  |
| 72480 | P03383 | P49447 | -0.82542  |
| 72481 | P03383 | Q9Y232 | -0.22201  |
| 72482 | P03383 | Q92771 | -0.7015   |
| 72483 | P03383 | Q96NX9 | -0.31279  |
| 72484 | P03383 | P32926 | -0.92742  |
| 72485 | P03383 | Q96RK4 | -0.22691  |
| 72486 | P03383 | O75022 | -0.61082  |
| 72487 | P03383 | Q6ZN16 | -0.87868  |
| 72488 | P03383 | P68106 | -0.22959  |
| 72489 | P03383 | Q96DZ9 | -0.88766  |
| 72490 | P03383 | Q92952 | -0.80627  |
| 72491 | P03383 | O75352 | -0.79402  |
| 72492 | P03383 | Q14566 | -0.17479  |
| 72493 | P03383 | Q29865 | -0.88446  |
| 72494 | P03383 | O75828 | -0.35876  |
| 72495 | P03383 | Q8N6S5 | -0.86584  |
| 72496 | P03383 | Q9UN75 | -1.1297   |
| 72497 | P03383 | P0CH98 | -0.31372  |
| 72498 | P03383 | P09211 | -0.2217   |
| 72499 | P03383 | P50539 | -0.22063  |
| 72500 | P03383 | Q15475 | -0.22727  |
| 72501 | P03383 | Q8N2F6 | -0.81192  |
| 72502 | P03383 | Q6ZNB6 | -0.34365  |
| 72503 | P03383 | Q96BH3 | -0.87851  |
| 72504 | P03383 | Q8IUD6 | -0.22815  |

|       |        |        |           |
|-------|--------|--------|-----------|
| 72505 | P03383 | P49662 | -0.83449  |
| 72506 | P03383 | O95171 | -0.12996  |
| 72507 | P03383 | Q9BVC4 | -0.22743  |
| 72508 | P03383 | Q16760 | -0.52971  |
| 72509 | P03383 | Q8N6G5 | -0.45512  |
| 72510 | P03383 | P60022 | -0.86514  |
| 72511 | P03383 | Q05215 | -0.2182   |
| 72512 | P03383 | Q9NZG7 | -0.97066  |
| 72513 | P03383 | Q9BXX0 | -0.50485  |
| 72514 | P03383 | O60566 | -0.22741  |
| 72515 | P03383 | Q5SGD2 | -0.69722  |
| 72516 | P03383 | P02452 | -0.30048  |
| 72517 | P03383 | Q9UHA4 | -0.23368  |
| 72518 | P03383 | O43597 | -0.15373  |
| 72519 | P03383 | Q8IYD2 | -0.22576  |
| 72520 | P03383 | Q5GH70 | -0.86584  |
| 72521 | P03383 | P06727 | -0.46615  |
| 72522 | P03383 | Q96G79 | -0.62947  |
| 72523 | P03383 | Q13882 | -0.44353  |
| 72524 | P03383 | P53667 | -0.22741  |
| 72525 | P03383 | Q15256 | -0.57227  |
| 72526 | P03383 | Q9BSJ1 | -0.73967  |
| 72527 | P03383 | Q9Y4G6 | -0.2277   |
| 72528 | P03383 | Q96LD4 | -0.35518  |
| 72529 | P03383 | Q9UFV1 | -0.94809  |
| 72530 | P03383 | Q86VW1 | -0.83438  |
| 72531 | P03383 | P51843 | -0.22729  |
| 72532 | P03383 | A2RU67 | -0.86584  |
| 72533 | P03383 | Q6UW56 | -0.22588  |
| 72534 | P03383 | Q8NGS1 | -1.1027   |
| 72535 | P03383 | Q9HCD6 | -0.39767  |
| 72536 | P03383 | Q6N043 | -0.2385   |
| 72537 | P03383 | Q00574 | -1.1245   |
| 72538 | P03383 | P12429 | -0.44838  |
| 72539 | P03383 | Q9HD43 | -0.26615  |
| 72540 | P03383 | Q8NGZ5 | -1.1027   |
| 72541 | P03383 | Q6PEV8 | -0.089866 |
| 72542 | P03383 | P05019 | -0.22681  |
| 72543 | P03383 | Q4KMQ1 | -0.47105  |
| 72544 | P03383 | Q9NP77 | -0.013602 |
| 72545 | P03383 | Q6QHC5 | -0.76827  |
| 72546 | P03383 | C9JL84 | -0.87849  |
| 72547 | P03383 | Q16587 | -0.23772  |
| 72548 | P03383 | Q7Z475 | -0.85749  |
| 72549 | P03383 | Q5HYI8 | -1.0792   |
| 72550 | P03383 | A6NMB1 | -1.0093   |
| 72551 | P03383 | A6NCF6 | -0.15215  |
| 72552 | P03383 | Q8TCU4 | -0.17877  |
| 72553 | P03383 | O75594 | -0.69841  |
| 72554 | P03383 | Q6P3W7 | -0.22741  |
| 72555 | P03383 | Q15843 | -0.22489  |
| 72556 | P03383 | Q6ZMZ3 | -0.16284  |
| 72557 | P03383 | Q8NA54 | -0.35479  |
| 72558 | P03383 | Q6ZN18 | -0.36178  |
| 72559 | P03383 | Q9Y548 | -0.84601  |
| 72560 | P03383 | Q6P2D8 | -0.22741  |
| 72561 | P03383 | P02652 | -0.31299  |
| 72562 | P03383 | Q9H173 | -0.19099  |
| 72563 | P03383 | Q4G0S7 | -0.11236  |
| 72564 | P03383 | Q9NYG2 | -0.69993  |
| 72565 | P03383 | Q9HAB3 | -1.0026   |
| 72566 | P03383 | P52569 | -0.68627  |
| 72567 | P03383 | P0CG33 | -0.35868  |
| 72568 | P03383 | Q86V86 | -0.22798  |
| 72569 | P03383 | O15541 | -0.51948  |
| 72570 | P03383 | Q92820 | -0.67259  |
| 72571 | P03383 | O15554 | -0.43997  |
| 72572 | P03383 | Q9NXJ5 | -0.53879  |
| 72573 | P03383 | Q96F25 | -0.86517  |
| 72574 | P03383 | P08949 | -0.73058  |
| 72575 | P03383 | Q8WVM8 | -0.2203   |
| 72576 | P03383 | Q86XT2 | -0.11924  |
| 72577 | P03383 | P33032 | -0.8173   |
| 72578 | P03383 | P41223 | -0.098453 |
| 72579 | P03383 | Q9Y6F6 | -0.18823  |
| 72580 | P03383 | Q5T6R2 | -0.23883  |



|       |        |        |           |
|-------|--------|--------|-----------|
| 72581 | P03383 | Q96S96 | -0.53675  |
| 72582 | P03383 | P04280 | -0.677    |
| 72583 | P03383 | Q8IWT6 | -0.87926  |
| 72584 | P03383 | P63096 | -0.28165  |
| 72585 | P03383 | Q5SY80 | -0.86584  |
| 72586 | P03383 | P43403 | -0.39073  |
| 72587 | P03383 | P11274 | -0.64278  |
| 72588 | P03383 | Q9ULH0 | -0.67044  |
| 72589 | P03383 | Q95221 | -1.1027   |
| 72590 | P03383 | Q8IYL9 | -1.2109   |
| 72591 | P03383 | P61769 | -0.46461  |
| 72592 | P03383 | Q96Q15 | -0.49354  |
| 72593 | P03383 | Q16769 | -1.0922   |
| 72594 | P03383 | P59025 | -0.86391  |
| 72595 | P03383 | O75505 | -0.21857  |
| 72596 | P03383 | Q8IWL1 | -0.94367  |
| 72597 | P03383 | Q9H4W6 | -0.21792  |
| 72598 | P03383 | Q9NPC4 | -0.73712  |
| 72599 | P03383 | P16949 | -0.67463  |
| 72600 | P03383 | O43252 | -0.7451   |
| 72601 | P03383 | Q5QGZ9 | -0.92288  |
| 72602 | P03383 | Q92813 | -0.77756  |
| 72603 | P03383 | Q5VZY2 | -0.86156  |
| 72604 | P03383 | P36508 | -0.16256  |
| 72605 | P03383 | Q13106 | -0.17069  |
| 72606 | P03383 | P47887 | -1.1745   |
| 72607 | P03383 | Q6PCB0 | -0.99416  |
| 72608 | P03383 | Q76070 | -0.30353  |
| 72609 | P03383 | P42575 | -0.22519  |
| 72610 | P03383 | Q12926 | -0.27137  |
| 72611 | P03383 | P23141 | -0.4366   |
| 72612 | P03383 | Q9UPQ4 | -0.22752  |
| 72613 | P03383 | Q14249 | -0.2079   |
| 72614 | P03383 | Q9HCN4 | -0.97682  |
| 72615 | P03383 | P10915 | -1.0915   |
| 72616 | P03383 | Q6P1S2 | -0.84102  |
| 72617 | P03383 | P02786 | -0.60937  |
| 72618 | P03383 | Q96J66 | -1.095    |
| 72619 | P03383 | P67812 | -0.72157  |
| 72620 | P03383 | Q9UH64 | -0.09979  |
| 72621 | P03383 | O60245 | -1.2445   |
| 72622 | P03383 | Q9H1M0 | -0.2021   |
| 72623 | P03383 | Q8NEN9 | -0.42623  |
| 72624 | P03383 | A9YTQ3 | -0.25921  |
| 72625 | P03383 | Q8N136 | -0.58436  |
| 72626 | P03383 | Q8TBF4 | -0.39618  |
| 72627 | P03383 | Q8WV83 | -0.85789  |
| 72628 | P03383 | O00154 | -0.26204  |
| 72629 | P03383 | Q9NYD6 | -0.30061  |
| 72630 | P03383 | Q6ZV89 | -0.21519  |
| 72631 | P03383 | P24298 | -0.21152  |
| 72632 | P03383 | P43657 | -1.124    |
| 72633 | P03383 | P08195 | -0.36226  |
| 72634 | P03383 | O94769 | -0.84532  |
| 72635 | P03383 | Q6ZRS2 | -0.20421  |
| 72636 | P03383 | Q9UIW0 | -0.2273   |
| 72637 | P03383 | Q8N4E4 | -0.19333  |
| 72638 | P03383 | Q8IXX5 | -0.86584  |
| 72639 | P03383 | Q14CN2 | -1.2555   |
| 72640 | P03383 | O15243 | -0.62628  |
| 72641 | P03383 | Q9UJ37 | -0.66668  |
| 72642 | P03383 | P01609 | -0.97479  |
| 72643 | P03383 | P51813 | -0.64122  |
| 72644 | P03383 | P63136 | -0.43742  |
| 72645 | P03383 | Q5EG05 | -0.66583  |
| 72646 | P03383 | Q8N8D7 | -0.93628  |
| 72647 | P03383 | Q99935 | -0.81396  |
| 72648 | P03383 | Q5VUJ5 | -0.98969  |
| 72649 | P03383 | P18859 | -0.26808  |
| 72650 | P03383 | Q01082 | -0.22767  |
| 72651 | P03383 | O15031 | -0.89925  |
| 72652 | P03383 | Q9H596 | -0.67542  |
| 72653 | P03383 | Q496F6 | -0.93628  |
| 72654 | P03383 | P23409 | -0.030804 |
| 72655 | P03383 | P06314 | -0.97479  |
| 72656 | P03383 | Q9GZQ6 | -1.0789   |

|       |        |        |          |
|-------|--------|--------|----------|
| 72657 | P03383 | Q8N2I9 | -0.22741 |
| 72658 | P03383 | Q8N436 | -1.1851  |
| 72659 | P03383 | P57073 | -0.32446 |
| 72660 | P03383 | Q9NSV4 | -0.27764 |
| 72661 | P03383 | Q11128 | -0.58357 |
| 72662 | P03383 | P60985 | -0.9248  |
| 72663 | P03383 | P56749 | -0.64451 |
| 72664 | P03383 | Q96JY0 | -0.26365 |
| 72665 | P03383 | Q96A72 | -0.19754 |
| 72666 | P03383 | Q9ULB1 | -0.40632 |
| 72667 | P03383 | O95460 | -0.38262 |
| 72668 | P03383 | Q96FZ5 | -0.88766 |
| 72669 | P03383 | Q96RT8 | -0.16874 |
| 72670 | P03383 | Q14990 | -0.51637 |
| 72671 | P03383 | P58549 | -0.92183 |
| 72672 | P03383 | Q96SL1 | -0.92905 |
| 72673 | P03383 | Q86V21 | -0.55406 |
| 72674 | P03383 | Q5HYL7 | -0.86584 |
| 72675 | P03383 | Q2M5E4 | -0.66133 |
| 72676 | P03383 | P40313 | -0.95884 |
| 72677 | P03383 | Q9UK80 | -0.33829 |
| 72678 | P03383 | P60484 | -0.22739 |
| 72679 | P03383 | Q13162 | -0.22031 |
| 72680 | P03383 | Q9Y585 | -1.1027  |
| 72681 | P03383 | O43681 | -0.20753 |
| 72682 | P03383 | Q69YN2 | -0.36877 |
| 72683 | P03383 | O15344 | -0.47862 |
| 72684 | P03383 | Q15417 | -0.54186 |
| 72685 | P03383 | Q8NFY4 | -0.66981 |
| 72686 | P03383 | O60610 | -0.22727 |
| 72687 | P03383 | Q8NG11 | -0.86584 |
| 72688 | P03383 | O95182 | -0.23198 |
| 72689 | P03383 | P48547 | -0.84843 |
| 72690 | P03383 | Q13202 | -0.87151 |
| 72691 | P03383 | Q14542 | -0.42415 |
| 72692 | P03383 | Q8NGA4 | -1.1739  |
| 72693 | P03383 | Q14916 | -0.98308 |
| 72694 | P03383 | Q9UPU9 | -0.36161 |
| 72695 | P03383 | Q6ZTQ3 | -0.20223 |
| 72696 | P03383 | Q969K4 | -0.22728 |
| 72697 | P03383 | Q9HD87 | -0.86584 |
| 72698 | P03383 | O15353 | -0.301   |
| 72699 | P03383 | Q8IYR2 | -0.52332 |
| 72700 | P03383 | Q8IV08 | -0.44711 |
| 72701 | P03383 | Q9BYC2 | -0.39139 |
| 72702 | P03383 | Q6ISS4 | -0.87849 |
| 72703 | P03383 | Q9NZN3 | -0.35601 |
| 72704 | P03383 | Q8N8X6 | -0.35868 |
| 72705 | P03383 | P21506 | -0.21172 |
| 72706 | P03383 | Q8N4P2 | -0.51419 |
| 72707 | P03383 | Q9NYJ7 | -0.83958 |
| 72708 | P03383 | O60688 | -0.22443 |
| 72709 | P03383 | Q5VT97 | -0.85933 |
| 72710 | P03383 | Q9HC29 | -0.22732 |
| 72711 | P03383 | O15055 | -0.22628 |
| 72712 | P03383 | Q5T215 | -0.3115  |
| 72713 | P03383 | Q13219 | -1.1867  |
| 72714 | P03383 | Q9H244 | -0.78256 |
| 72715 | P03383 | O95263 | -0.22702 |
| 72716 | P03383 | Q969M1 | -0.40357 |
| 72717 | P03383 | Q7Z6J0 | -0.22733 |
| 72718 | P03383 | Q17RF5 | -0.87849 |
| 72719 | P03383 | P01733 | -0.49766 |
| 72720 | P03383 | Q6YI46 | -0.86584 |
| 72721 | P03383 | Q14195 | -0.22914 |
| 72722 | P03383 | Q9BWX1 | -0.19043 |
| 72723 | P03383 | P49257 | -0.11174 |
| 72724 | P03383 | P58418 | -0.92524 |
| 72725 | P03383 | O60353 | -0.45851 |
| 72726 | P03383 | P42765 | -0.20222 |
| 72727 | P03383 | Q9P2U8 | -0.74893 |
| 72728 | P03383 | P09131 | -0.8119  |
| 72729 | P03383 | O75881 | -0.61495 |
| 72730 | P03383 | Q5XUX1 | -0.22741 |
| 72731 | P03383 | O43353 | -0.22741 |
| 72732 | P03383 | P52945 | -0.42042 |

|       |        |        |           |
|-------|--------|--------|-----------|
| 72733 | P03383 | Q8NCQ5 | -0.45914  |
| 72734 | P03383 | P11234 | -0.27693  |
| 72735 | P03383 | Q9UNF0 | -0.2309   |
| 72736 | P03383 | Q13637 | -0.79259  |
| 72737 | P03383 | Q99592 | -0.22901  |
| 72738 | P03383 | Q6PID8 | -0.22714  |
| 72739 | P03383 | Q9H208 | -1.1027   |
| 72740 | P03383 | Q96S66 | -0.42188  |
| 72741 | P03383 | Q9Y5L4 | -0.32675  |
| 72742 | P03383 | Q9BWD1 | -0.20315  |
| 72743 | P03383 | A8MWV9 | -0.86584  |
| 72744 | P03383 | Q8TBM7 | -0.86584  |
| 72745 | P03383 | P41229 | -0.45263  |
| 72746 | P03383 | P58876 | -0.88998  |
| 72747 | P03383 | Q9BZR8 | -0.22725  |
| 72748 | P03383 | Q9UBK7 | -1.0496   |
| 72749 | P03383 | O60507 | -0.73474  |
| 72750 | P03383 | Q86XL3 | -0.22378  |
| 72751 | P03383 | A4D2P6 | -0.46488  |
| 72752 | P03383 | Q8N680 | -0.21172  |
| 72753 | P03383 | Q14004 | -0.071969 |
| 72754 | P03383 | B2RNN3 | -0.92264  |
| 72755 | P03383 | P04920 | -0.72275  |
| 72756 | P03383 | Q6VEQ5 | -0.56037  |
| 72757 | P03383 | Q99808 | -0.79107  |
| 72758 | P03383 | P0CG29 | -0.22551  |
| 72759 | P03383 | Q9UPT9 | -0.32149  |
| 72760 | P03383 | Q96LL3 | -0.86584  |
| 72761 | P03383 | Q13467 | -0.38453  |
| 72762 | P03383 | P01717 | -0.97479  |
| 72763 | P03383 | Q9UK59 | -0.21394  |
| 72764 | P03383 | Q8IYM1 | -0.22568  |
| 72765 | P03383 | Q6PKX4 | -0.52406  |
| 72766 | P03383 | Q8NA75 | -0.22736  |
| 72767 | P03383 | O60636 | -0.91681  |
| 72768 | P03383 | Q6PEY1 | -0.86584  |
| 72769 | P03383 | O60662 | -0.21585  |
| 72770 | P03383 | O75695 | -0.48433  |
| 72771 | P03383 | Q9Y2H8 | -0.21172  |
| 72772 | P03383 | Q9BX69 | -0.60545  |
| 72773 | P03383 | O95918 | -1.0524   |
| 72774 | P03383 | Q7Z3E5 | -0.2273   |
| 72775 | P03383 | P13928 | -0.4332   |
| 72776 | P03383 | Q7L7X3 | -0.51875  |
| 72777 | P03383 | Q5QJ74 | -0.30492  |
| 72778 | P03383 | Q9H2J1 | -0.21168  |
| 72779 | P03383 | Q96HU8 | -1.1897   |
| 72780 | P03383 | O75746 | -0.39293  |
| 72781 | P03383 | Q01581 | -0.20195  |
| 72782 | P03383 | Q9NXZ2 | -1.0458   |
| 72783 | P03383 | Q14206 | -0.70604  |
| 72784 | P03383 | P03915 | -0.54257  |
| 72785 | P03383 | O75293 | -0.4233   |
| 72786 | P03383 | P49674 | -0.22741  |
| 72787 | P03383 | P47888 | -1.1027   |
| 72788 | P03383 | Q8NGP2 | -1.1027   |
| 72789 | P03383 | Q8N0X2 | -0.22869  |
| 72790 | P03383 | P10319 | -0.88446  |
| 72791 | P03383 | Q99584 | -0.23886  |
| 72792 | P03383 | Q9NUA8 | -0.19255  |
| 72793 | P03383 | Q86YZ3 | -0.70565  |
| 72794 | P03383 | Q8WX39 | -0.82728  |
| 72795 | P03383 | Q9HAT0 | -0.56548  |
| 72796 | P03383 | Q14571 | -0.50878  |
| 72797 | P03383 | Q96PX9 | -0.76318  |
| 72798 | P03383 | Q96RL6 | -1.0093   |
| 72799 | P03383 | P51674 | -0.76166  |
| 72800 | P03383 | Q92519 | -0.25169  |
| 72801 | P03383 | Q96LK0 | -0.18366  |
| 72802 | P03383 | O00483 | -0.22918  |
| 72803 | P03383 | Q9BW91 | -0.4485   |
| 72804 | P03383 | Q9BT81 | -0.23066  |
| 72805 | P03383 | Q14093 | -0.55118  |
| 72806 | P03383 | Q15828 | -0.82527  |
| 72807 | P03383 | P01824 | -0.97479  |
| 72808 | P03383 | Q6ZW76 | -0.22742  |

|       |        |        |           |
|-------|--------|--------|-----------|
| 72809 | P03383 | P49802 | -0.48555  |
| 72810 | P03383 | P13929 | -0.072457 |
| 72811 | P03383 | P26639 | -0.28515  |
| 72812 | P03383 | Q8NB49 | -0.57608  |
| 72813 | P03383 | Q9NPJ3 | -0.14218  |
| 72814 | P03383 | Q16181 | -0.22453  |
| 72815 | P03383 | Q9H1J5 | -0.54105  |
| 72816 | P03383 | A6NI61 | -0.86584  |
| 72817 | P03383 | Q9NZ45 | -0.8638   |
| 72818 | P03383 | Q7L1S5 | -0.74692  |
| 72819 | P03383 | Q95897 | -0.87849  |
| 72820 | P03383 | Q96R30 | -1.1027   |
| 72821 | P03383 | Q9GZQ8 | -0.34859  |
| 72822 | P03383 | P62955 | -0.86627  |
| 72823 | P03383 | Q8TDD1 | -0.26004  |
| 72824 | P03383 | Q9NZ42 | -0.41112  |
| 72825 | P03383 | P54753 | -0.71981  |
| 72826 | P03383 | P09238 | -1.2285   |
| 72827 | P03383 | Q8IYG6 | -0.1432   |
| 72828 | P03383 | Q15904 | -0.81154  |
| 72829 | P03383 | Q3SXY8 | -0.65922  |
| 72830 | P03383 | Q9H205 | -1.1027   |
| 72831 | P03383 | Q7Z572 | -0.52751  |
| 72832 | P03383 | O00182 | -0.85043  |
| 72833 | P03383 | Q49AN0 | -0.17061  |
| 72834 | P03383 | Q9BZ97 | -0.86584  |
| 72835 | P03383 | P0DJD7 | -1.0948   |
| 72836 | P03383 | Q5T5D7 | -0.21172  |
| 72837 | P03383 | Q8TEW6 | -0.41303  |
| 72838 | P03383 | Q8TAE6 | -0.39611  |
| 72839 | P03383 | Q8WWW8 | -0.5353   |
| 72840 | P03383 | Q8NBI3 | -0.77939  |
| 72841 | P03383 | P10747 | -0.2811   |
| 72842 | P03383 | P01782 | -0.97479  |
| 72843 | P03383 | P15056 | -0.29313  |
| 72844 | P03383 | Q9NTI2 | -0.95062  |
| 72845 | P03383 | P61421 | -0.20811  |
| 72846 | P03383 | Q8N3T6 | -0.52887  |
| 72847 | P03383 | Q9P2K9 | -0.5887   |
| 72848 | P03383 | Q08AH1 | -0.8113   |
| 72849 | P03383 | Q8TC92 | -1.2683   |
| 72850 | P03383 | O14775 | -0.52122  |
| 72851 | P03383 | Q6NS38 | -0.32826  |
| 72852 | P03383 | P57088 | -0.69135  |
| 72853 | P03383 | Q8NDX5 | -0.5862   |
| 72854 | P03383 | Q86VR7 | -0.86584  |
| 72855 | P03383 | Q9BTF0 | -0.39051  |
| 72856 | P03383 | P17612 | -0.22649  |
| 72857 | P03383 | P25800 | -0.25211  |
| 72858 | P03383 | Q499Y3 | -0.12411  |
| 72859 | P03383 | Q8NBJ4 | -0.39598  |
| 72860 | P03383 | Q9UBU6 | -0.86584  |
| 72861 | P03383 | Q02747 | -0.91438  |
| 72862 | P03383 | O95255 | -1.0799   |
| 72863 | P03383 | P63131 | -0.67565  |
| 72864 | P03383 | Q8N9F8 | -0.21172  |
| 72865 | P03383 | P55774 | -0.64384  |
| 72866 | P03383 | Q14562 | -0.21189  |
| 72867 | P03383 | Q5W0Z9 | -0.89944  |
| 72868 | P03383 | Q86Y91 | -0.30627  |
| 72869 | P03383 | P24001 | -1.0381   |
| 72870 | P03383 | P38570 | -1.022    |
| 72871 | P03383 | P0CK96 | -0.86584  |
| 72872 | P03383 | Q99707 | -0.31064  |
| 72873 | P03383 | Q13201 | -0.85126  |
| 72874 | P03383 | Q9Y4C8 | -0.52711  |
| 72875 | P03383 | Q14722 | -0.84763  |
| 72876 | P03383 | Q5T1R4 | -0.22739  |
| 72877 | P03383 | O43423 | -0.13137  |
| 72878 | P03383 | Q9HCU4 | -0.93503  |
| 72879 | P03383 | Q13790 | -0.97879  |
| 72880 | P03383 | O14524 | -0.6579   |
| 72881 | P03383 | Q08426 | -0.44559  |
| 72882 | P03383 | Q86YW0 | -0.39395  |
| 72883 | P03383 | P08493 | -0.851    |
| 72884 | P03383 | P32856 | -0.26704  |

|       |        |        |           |
|-------|--------|--------|-----------|
| 72885 | P03383 | Q8TDW4 | -0.84491  |
| 72886 | P03383 | P43220 | -0.61213  |
| 72887 | P03383 | Q9NWW0 | -0.061576 |
| 72888 | P03383 | Q8IVA1 | -0.58902  |
| 72889 | P03383 | Q58FG1 | -0.58434  |
| 72890 | P03383 | A6NJ16 | -0.87849  |
| 72891 | P03383 | Q00888 | -0.86886  |
| 72892 | P03383 | Q70EL2 | -0.78366  |
| 72893 | P03383 | Q9NQ25 | -0.97735  |
| 72894 | P03383 | P35968 | -0.31545  |
| 72895 | P03383 | Q8TBK6 | -0.51948  |
| 72896 | P03383 | P01776 | -0.97479  |
| 72897 | P03383 | P63120 | -0.67565  |
| 72898 | P03383 | Q8NGI6 | -1.1027   |
| 72899 | P03383 | Q9P215 | -0.39401  |
| 72900 | P03383 | Q9UGU5 | -0.31128  |
| 72901 | P03383 | Q8WTY6 | -0.20969  |
| 72902 | P03383 | Q93008 | -0.33274  |
| 72903 | P03383 | Q9NZV6 | -0.32453  |
| 72904 | P03383 | P35998 | -0.32259  |
| 72905 | P03383 | Q9NX76 | -0.88766  |
| 72906 | P03383 | Q6UXL0 | -0.68872  |
| 72907 | P03383 | Q14717 | -0.25069  |
| 72908 | P03383 | Q9NR12 | -0.31436  |
| 72909 | P03383 | Q5I0X7 | -0.46086  |
| 72910 | P03383 | H3BS89 | -0.86584  |
| 72911 | P03383 | Q96HR9 | -0.86584  |
| 72912 | P03383 | P29322 | -0.90603  |
| 72913 | P03383 | Q9P2R3 | -0.3739   |
| 72914 | P03383 | P56192 | -0.24308  |
| 72915 | P03383 | Q9H4E5 | -0.95623  |
| 72916 | P03383 | Q0JRZ9 | -0.22531  |
| 72917 | P03383 | Q8NHC6 | -1.1027   |
| 72918 | P03383 | O15264 | -0.22741  |
| 72919 | P03383 | Q86Y25 | -0.21172  |
| 72920 | P03383 | Q7Z7G8 | -0.31296  |
| 72921 | P03383 | Q9Y466 | -0.22829  |
| 72922 | P03383 | P56937 | -1.0533   |
| 72923 | P03383 | P07099 | -0.87824  |
| 72924 | P03383 | Q7RTP0 | -0.87713  |
| 72925 | P03383 | O76080 | -0.24631  |
| 72926 | P03383 | P18031 | -0.4302   |
| 72927 | P03383 | P28067 | -0.67654  |
| 72928 | P03383 | A6NDR6 | -0.21049  |
| 72929 | P03383 | A6NMZ7 | -1.1454   |
| 72930 | P03383 | Q8N8N7 | -0.74911  |
| 72931 | P03383 | Q6DN14 | -0.87039  |
| 72932 | P03383 | Q96M43 | -0.29487  |
| 72933 | P03383 | Q9H2B2 | -0.76142  |
| 72934 | P03383 | Q75023 | -0.90121  |
| 72935 | P03383 | Q8IWF2 | -0.2145   |
| 72936 | P03383 | Q43854 | -1.2077   |
| 72937 | P03383 | Q15744 | -0.22738  |
| 72938 | P03383 | Q9NZC3 | -0.6506   |
| 72939 | P03383 | P30487 | -0.88446  |
| 72940 | P03383 | Q12996 | -0.1016   |
| 72941 | P03383 | Q9UBT6 | -0.31958  |
| 72942 | P03383 | Q9Y259 | -0.57818  |
| 72943 | P03383 | P10600 | -0.22741  |
| 72944 | P03383 | O95169 | -0.50235  |
| 72945 | P03383 | P04432 | -0.97479  |
| 72946 | P03383 | Q2TAA2 | -0.46243  |
| 72947 | P03383 | O60861 | -0.26275  |
| 72948 | P03383 | P02808 | -0.34705  |
| 72949 | P03383 | P25116 | -0.38119  |
| 72950 | P03383 | Q9NPF2 | -0.36898  |
| 72951 | P03383 | Q96QK8 | -0.86584  |
| 72952 | P03383 | Q9P0U4 | -0.2276   |
| 72953 | P03383 | Q9P0I2 | -0.51959  |
| 72954 | P03383 | Q8N4H5 | -0.51772  |
| 72955 | P03383 | P59665 | -0.92477  |
| 72956 | P03383 | Q14651 | -0.50785  |
| 72957 | P03383 | Q149N8 | -0.74954  |
| 72958 | P03383 | P18464 | -0.88446  |
| 72959 | P03383 | Q8TEB9 | -0.46151  |
| 72960 | P03383 | Q14671 | -0.14883  |

|       |        |        |           |
|-------|--------|--------|-----------|
| 72961 | P03383 | Q6UWN0 | -0.60538  |
| 72962 | P03383 | Q96JC1 | -0.2836   |
| 72963 | P03383 | P08567 | -0.22741  |
| 72964 | P03383 | Q75717 | -0.22803  |
| 72965 | P03383 | P42229 | -0.22649  |
| 72966 | P03383 | P08246 | -0.52971  |
| 72967 | P03383 | Q5JVG2 | -0.21172  |
| 72968 | P03383 | Q9H2X6 | -0.22741  |
| 72969 | P03383 | P35228 | -0.26503  |
| 72970 | P03383 | P69892 | -0.34646  |
| 72971 | P03383 | P04746 | -0.78736  |
| 72972 | P03383 | Q9BZC7 | -0.8826   |
| 72973 | P03383 | O95407 | -0.29651  |
| 72974 | P03383 | O95072 | -0.35985  |
| 72975 | P03383 | O60676 | -0.73088  |
| 72976 | P03383 | P78563 | -0.19918  |
| 72977 | P03383 | P15313 | -0.38628  |
| 72978 | P03383 | Q6ZSS7 | -0.84814  |
| 72979 | P03383 | Q9HDB5 | -0.98924  |
| 72980 | P03383 | Q16204 | -0.32147  |
| 72981 | P03383 | Q6VN20 | -0.22428  |
| 72982 | P03383 | P08912 | -0.89589  |
| 72983 | P03383 | Q9C0D3 | -0.20234  |
| 72984 | P03383 | O95727 | -0.8639   |
| 72985 | P03383 | P31275 | -0.22145  |
| 72986 | P03383 | P30939 | -1.2087   |
| 72987 | P03383 | P57723 | -0.31382  |
| 72988 | P03383 | Q58DX5 | -1.0911   |
| 72989 | P03383 | Q9H6I2 | -0.1893   |
| 72990 | P03383 | Q8N339 | -0.14411  |
| 72991 | P03383 | O95881 | -0.5611   |
| 72992 | P03383 | Q96A47 | -0.39022  |
| 72993 | P03383 | Q8NH59 | -1.1027   |
| 72994 | P03383 | P30042 | -0.30763  |
| 72995 | P03383 | Q9H6S1 | -0.22237  |
| 72996 | P03383 | Q6P9H5 | -0.95272  |
| 72997 | P03383 | P24593 | -0.36625  |
| 72998 | P03383 | Q6IPR3 | -0.33499  |
| 72999 | P03383 | Q8NGL2 | -1.1027   |
| 73000 | P03383 | P25106 | -0.9245   |
| 73001 | P03383 | Q92633 | -0.39804  |
| 73002 | P03383 | Q9ULV4 | -0.6709   |
| 73003 | P03383 | P78367 | -0.22798  |
| 73004 | P03383 | P98160 | -0.85261  |
| 73005 | P03383 | P14415 | -0.36107  |
| 73006 | P03383 | P57738 | -0.86584  |
| 73007 | P03383 | Q9Y584 | -0.5076   |
| 73008 | P03383 | Q9NRV9 | -0.80791  |
| 73009 | P03383 | P08319 | -0.37209  |
| 73010 | P03383 | P05062 | -0.21504  |
| 73011 | P03383 | Q8WWI5 | -0.62004  |
| 73012 | P03383 | Q9NVZ3 | -0.55103  |
| 73013 | P03383 | Q9GZZ7 | -0.95946  |
| 73014 | P03383 | P35414 | -1.0305   |
| 73015 | P03383 | Q15392 | -0.3982   |
| 73016 | P03383 | Q3T906 | -0.52883  |
| 73017 | P03383 | Q6UXN8 | -0.86768  |
| 73018 | P03383 | Q9H251 | -0.54352  |
| 73019 | P03383 | Q96KN3 | -0.36119  |
| 73020 | P03383 | Q6ZNL0 | -0.86263  |
| 73021 | P03383 | Q9UK97 | -0.45235  |
| 73022 | P03383 | Q8NH03 | -1.1027   |
| 73023 | P03383 | P13500 | -0.34784  |
| 73024 | P03383 | Q86VF5 | -0.73989  |
| 73025 | P03383 | Q7Z5J4 | -0.19751  |
| 73026 | P03383 | Q8N8P7 | -0.87849  |
| 73027 | P03383 | Q75900 | -1.231    |
| 73028 | P03383 | Q93096 | -0.54888  |
| 73029 | P03383 | Q99571 | -0.46374  |
| 73030 | P03383 | Q6UWM5 | -0.87849  |
| 73031 | P03383 | P30550 | -1.0815   |
| 73032 | P03383 | Q6ZNG0 | -0.21172  |
| 73033 | P03383 | Q86T20 | -0.87849  |
| 73034 | P03383 | Q9UBU7 | -0.047892 |
| 73035 | P03383 | Q8N8A2 | -0.22739  |
| 73036 | P03383 | P0C7Q5 | -0.86584  |

|       |        |        |           |
|-------|--------|--------|-----------|
| 73037 | P03383 | Q5JTH9 | -0.37664  |
| 73038 | P03383 | Q14966 | -0.1347   |
| 73039 | P03383 | Q7RTX1 | -1.1137   |
| 73040 | P03383 | Q13635 | -0.27314  |
| 73041 | P03383 | O60361 | -0.76477  |
| 73042 | P03383 | A8MUN3 | -0.87849  |
| 73043 | P03383 | P49748 | -0.35681  |
| 73044 | P03383 | Q9HAW7 | -0.70141  |
| 73045 | P03383 | A8MZ97 | -0.86584  |
| 73046 | P03383 | Q14D04 | -0.69063  |
| 73047 | P03383 | Q56A73 | -0.43051  |
| 73048 | P03383 | A6NHN6 | -0.87849  |
| 73049 | P03383 | Q9H3P7 | -0.63018  |
| 73050 | P03383 | Q9NU22 | -0.47006  |
| 73051 | P03383 | O14718 | -1.2099   |
| 73052 | P03383 | Q15878 | -0.7599   |
| 73053 | P03383 | P49959 | -0.10651  |
| 73054 | P03383 | Q6UXD7 | -0.8419   |
| 73055 | P03383 | P10147 | -0.38889  |
| 73056 | P03383 | Q9BRF8 | -0.43358  |
| 73057 | P03383 | Q86SQ3 | -1.2353   |
| 73058 | P03383 | Q8TAQ9 | -0.84643  |
| 73059 | P03383 | Q96RI1 | -0.22942  |
| 73060 | P03383 | Q92626 | -1.0634   |
| 73061 | P03383 | O95006 | -1.1027   |
| 73062 | P03383 | Q13907 | -0.30048  |
| 73063 | P03383 | O00555 | -0.36542  |
| 73064 | P03383 | Q16586 | -0.68398  |
| 73065 | P03383 | Q6ZVD8 | -0.24576  |
| 73066 | P03383 | Q7Z6L1 | -0.56722  |
| 73067 | P03383 | Q9Y2C3 | -0.75486  |
| 73068 | P03383 | P51636 | -0.22574  |
| 73069 | P03383 | Q9NPR9 | -0.86584  |
| 73070 | P03383 | P21217 | -0.68353  |
| 73071 | P03383 | P31270 | -0.22479  |
| 73072 | P03383 | Q9NVS9 | -0.34414  |
| 73073 | P03383 | P30492 | -0.88446  |
| 73074 | P03383 | Q8WXH6 | -1.058    |
| 73075 | P03383 | P38567 | -0.69732  |
| 73076 | P03383 | Q16829 | -0.30657  |
| 73077 | P03383 | O75200 | -0.87849  |
| 73078 | P03383 | O15551 | -0.78541  |
| 73079 | P03383 | Q8IWF7 | -0.44582  |
| 73080 | P03383 | P20396 | -0.43035  |
| 73081 | P03383 | P48735 | -0.14689  |
| 73082 | P03383 | P41732 | -0.85769  |
| 73083 | P03383 | Q6YHU6 | -0.048512 |
| 73084 | P03383 | Q8NHL6 | -0.33564  |
| 73085 | P03383 | Q6ZWT7 | -0.69084  |
| 73086 | P03383 | Q92619 | -1.0348   |
| 73087 | P03383 | Q9Y6X0 | -0.33321  |
| 73088 | P03383 | Q53H64 | -0.09518  |
| 73089 | P03383 | P78411 | -0.22943  |
| 73090 | P03383 | Q8N6L0 | -0.98247  |
| 73091 | P03383 | Q15075 | -0.21943  |
| 73092 | P03383 | Q9HBH0 | -0.97135  |
| 73093 | P03383 | Q8NH42 | -1.1027   |
| 73094 | P03383 | Q08050 | -0.345    |
| 73095 | P03383 | Q8NB46 | -0.22732  |
| 73096 | P03383 | Q8NBN7 | -1.0135   |
| 73097 | P03383 | O00481 | -0.35963  |
| 73098 | P03383 | P11712 | -0.5754   |
| 73099 | P03383 | Q9Y5S8 | -0.39958  |
| 73100 | P03383 | A8MWY0 | -0.86584  |
| 73101 | P03383 | Q6ZRU5 | -0.87849  |
| 73102 | P03383 | Q9P2E9 | -0.6131   |
| 73103 | P03383 | Q5VXJ0 | -0.85081  |
| 73104 | P03383 | Q96NX5 | -0.76562  |
| 73105 | P03383 | P32241 | -0.808    |
| 73106 | P03383 | Q8IUH2 | -0.9089   |
| 73107 | P03383 | Q86SG3 | -0.72639  |
| 73108 | P03383 | O60282 | -0.33188  |
| 73109 | P03383 | P01706 | -0.97479  |
| 73110 | P03383 | Q6UXA7 | -0.60046  |
| 73111 | P03383 | Q93070 | -0.57217  |
| 73112 | P03383 | Q06413 | -0.11671  |

|       |        |        |           |
|-------|--------|--------|-----------|
| 73113 | P03383 | A0PK11 | -0.86584  |
| 73114 | P03383 | Q9H857 | -0.43358  |
| 73115 | P03383 | Q9Y5K3 | -0.40002  |
| 73116 | P03383 | Q8NFT6 | -0.21979  |
| 73117 | P03383 | Q14644 | -0.62006  |
| 73118 | P03383 | Q5VWZ2 | -0.15081  |
| 73119 | P03383 | Q15116 | -0.64057  |
| 73120 | P03383 | Q01955 | -0.49839  |
| 73121 | P03383 | P29803 | -0.44461  |
| 73122 | P03383 | Q9NRF2 | -0.22741  |
| 73123 | P03383 | P39210 | -0.56147  |
| 73124 | P03383 | Q96KG9 | -0.22741  |
| 73125 | P03383 | Q01973 | -0.66755  |
| 73126 | P03383 | P35610 | -0.73154  |
| 73127 | P03383 | A6NMV5 | -0.25825  |
| 73128 | P03383 | C9JLJ4 | -0.69644  |
| 73129 | P03383 | Q16864 | -0.13376  |
| 73130 | P03383 | Q8TAZ6 | -0.51364  |
| 73131 | P03383 | Q8TBJ5 | -0.2316   |
| 73132 | P03383 | Q5VUY0 | -0.50416  |
| 73133 | P03383 | Q5GAN6 | -0.85864  |
| 73134 | P03383 | O95297 | -0.27506  |
| 73135 | P03383 | O95685 | -0.22661  |
| 73136 | P03383 | Q3B8N5 | -0.20618  |
| 73137 | P03383 | P05362 | -0.38282  |
| 73138 | P03383 | Q17RB8 | -0.64479  |
| 73139 | P03383 | Q96S82 | -0.22295  |
| 73140 | P03383 | A6NM03 | -1.1027   |
| 73141 | P03383 | Q9Y4X3 | -0.89852  |
| 73142 | P03383 | P11230 | -0.79076  |
| 73143 | P03383 | P43304 | -0.28992  |
| 73144 | P03383 | Q8TE04 | -0.45627  |
| 73145 | P03383 | Q08116 | -0.71202  |
| 73146 | P03383 | O00631 | -0.75413  |
| 73147 | P03383 | O96005 | -0.6329   |
| 73148 | P03383 | Q9Y2E5 | -0.8222   |
| 73149 | P03383 | O15245 | -0.33006  |
| 73150 | P03383 | Q8NGD2 | -1.1027   |
| 73151 | P03383 | Q01167 | -0.31617  |
| 73152 | P03383 | P78527 | -0.33459  |
| 73153 | P03383 | Q9HD90 | -0.22763  |
| 73154 | P03383 | P01773 | -0.97479  |
| 73155 | P03383 | Q9H4Z3 | -0.17207  |
| 73156 | P03383 | Q7Z5S9 | -0.86584  |
| 73157 | P03383 | A6NKF7 | -0.86584  |
| 73158 | P03383 | Q92753 | -0.80842  |
| 73159 | P03383 | Q9P1V8 | -0.21758  |
| 73160 | P03383 | P48745 | -0.97744  |
| 73161 | P03383 | P30838 | -0.36047  |
| 73162 | P03383 | Q6ZMS4 | -0.73005  |
| 73163 | P03383 | Q9C0A1 | -0.2274   |
| 73164 | P03383 | Q9ULJ1 | -0.3067   |
| 73165 | P03383 | Q9UHF5 | -0.85768  |
| 73166 | P03383 | P25311 | -0.97468  |
| 73167 | P03383 | Q9BXN2 | -0.54975  |
| 73168 | P03383 | Q99853 | -0.3422   |
| 73169 | P03383 | Q8WZ19 | -0.083775 |
| 73170 | P03383 | O15165 | -0.71859  |
| 73171 | P03383 | O95800 | -1.2928   |
| 73172 | P03383 | Q5U5R9 | -0.45042  |
| 73173 | P03383 | Q96RA2 | -0.86289  |
| 73174 | P03383 | Q5SQ80 | -0.2274   |
| 73175 | P03383 | P51784 | -0.32523  |
| 73176 | P03383 | Q9NRW3 | -0.70658  |
| 73177 | P03383 | Q30KQ4 | -0.84399  |
| 73178 | P03383 | Q2M3V2 | -0.22741  |
| 73179 | P03383 | Q9UEE9 | -0.49907  |
| 73180 | P03383 | Q86YJ7 | -0.22741  |
| 73181 | P03383 | P47900 | -0.76607  |
| 73182 | P03383 | P29122 | -0.87359  |
| 73183 | P03383 | Q8TCQ1 | -0.8601   |
| 73184 | P03383 | Q9P272 | -0.47305  |
| 73185 | P03383 | Q96AJ9 | -0.3648   |
| 73186 | P03383 | O94832 | -0.65843  |
| 73187 | P03383 | Q53HR8 | -0.40588  |
| 73188 | P03383 | Q6UWV6 | -0.75272  |



|       |        |        |           |
|-------|--------|--------|-----------|
| 73189 | P03383 | P50406 | -0.8555   |
| 73190 | P03383 | Q9UF33 | -0.797    |
| 73191 | P03383 | Q13562 | -0.22745  |
| 73192 | P03383 | Q86YH6 | -0.26104  |
| 73193 | P03383 | P18463 | -0.88446  |
| 73194 | P03383 | Q75912 | -0.22741  |
| 73195 | P03383 | Q9Y5H9 | -1.1553   |
| 73196 | P03383 | Q96BQ3 | -0.73967  |
| 73197 | P03383 | A2RUS2 | -0.42005  |
| 73198 | P03383 | Q96PU8 | -0.21098  |
| 73199 | P03383 | P48637 | -0.46644  |
| 73200 | P03383 | P51172 | -0.56725  |
| 73201 | P03383 | Q9H9S4 | -0.52163  |
| 73202 | P03383 | P08172 | -0.83205  |
| 73203 | P03383 | Q5MNZ6 | -0.26238  |
| 73204 | P03383 | Q86V35 | -0.70204  |
| 73205 | P03383 | P32004 | -0.55367  |
| 73206 | P03383 | Q8N0W3 | -0.8282   |
| 73207 | P03383 | Q9H346 | -1.1027   |
| 73208 | P03383 | Q9NT99 | -0.85058  |
| 73209 | P03383 | Q15553 | -0.37125  |
| 73210 | P03383 | Q92878 | -0.21457  |
| 73211 | P03383 | Q9UNH6 | -0.55524  |
| 73212 | P03383 | Q95477 | -0.40567  |
| 73213 | P03383 | Q6ZT98 | -0.60661  |
| 73214 | P03383 | Q86V85 | -0.86584  |
| 73215 | P03383 | P32245 | -0.56095  |
| 73216 | P03383 | Q7Z4P5 | -0.22741  |
| 73217 | P03383 | Q7Z5H5 | -0.97078  |
| 73218 | P03383 | A6NJ46 | -0.22745  |
| 73219 | P03383 | Q9NQ66 | -0.27878  |
| 73220 | P03383 | Q9H5L6 | -0.57338  |
| 73221 | P03383 | Q02045 | -0.5063   |
| 73222 | P03383 | Q9NX57 | -0.82194  |
| 73223 | P03383 | Q8TCD5 | -0.30939  |
| 73224 | P03383 | Q5VWM4 | -0.25825  |
| 73225 | P03383 | P78310 | -0.22882  |
| 73226 | P03383 | Q9H2A7 | -1.0707   |
| 73227 | P03383 | Q3C1W6 | -0.73967  |
| 73228 | P03383 | Q4AC94 | -0.39602  |
| 73229 | P03383 | P22695 | -0.093622 |
| 73230 | P03383 | P14384 | -0.35225  |
| 73231 | P03383 | P16234 | -0.24557  |
| 73232 | P03383 | Q9Y625 | -0.95452  |
| 73233 | P03383 | Q43670 | -0.20751  |
| 73234 | P03383 | Q8NGI7 | -1.1027   |
| 73235 | P03383 | Q8NGK3 | -1.1027   |
| 73236 | P03383 | B9A064 | -0.87849  |
| 73237 | P03383 | Q9Y5C1 | -0.61027  |
| 73238 | P03383 | Q06418 | -0.55014  |
| 73239 | P03383 | Q9Y3Q7 | -1.1031   |
| 73240 | P03383 | P20742 | -0.80353  |
| 73241 | P03383 | Q00423 | -0.23247  |
| 73242 | P03383 | Q15784 | -0.22755  |
| 73243 | P03383 | Q13115 | -0.32905  |
| 73244 | P03383 | Q13326 | -0.615    |
| 73245 | P03383 | P01710 | -0.97479  |
| 73246 | P03383 | Q9Y240 | -0.44948  |
| 73247 | P03383 | Q9BTC0 | -0.22732  |
| 73248 | P03383 | P20936 | -0.23838  |
| 73249 | P03383 | Q8TAK6 | -0.22742  |
| 73250 | P03383 | Q75715 | -1.0628   |
| 73251 | P03383 | Q96K37 | -0.85789  |
| 73252 | P03383 | Q94910 | -0.757    |
| 73253 | P03383 | P30711 | -0.2673   |
| 73254 | P03383 | Q56P42 | -0.091912 |
| 73255 | P03383 | Q5VW32 | -0.52476  |
| 73256 | P03383 | Q75949 | -0.86584  |
| 73257 | P03383 | Q8N183 | -0.41423  |
| 73258 | P03383 | Q5BJH2 | -0.52887  |
| 73259 | P03383 | Q9NPA0 | -0.60838  |
| 73260 | P03383 | Q13586 | -0.45985  |
| 73261 | P03383 | Q9BYN0 | -0.74654  |
| 73262 | P03383 | Q01453 | -0.44536  |
| 73263 | P03383 | P50443 | -1.0203   |
| 73264 | P03383 | Q9BSK2 | -0.73185  |

|       |        |        |           |
|-------|--------|--------|-----------|
| 73265 | P03383 | Q8WZ94 | -1.1027   |
| 73266 | P03383 | Q9H2D1 | -0.51716  |
| 73267 | P03383 | A0PJE2 | -1.0135   |
| 73268 | P03383 | Q14CX7 | -0.29487  |
| 73269 | P03383 | Q9Y600 | -0.51279  |
| 73270 | P03383 | Q95405 | -0.19221  |
| 73271 | P03383 | Q15678 | -0.72611  |
| 73272 | P03383 | Q9H1V8 | -0.74356  |
| 73273 | P03383 | O14804 | -1.2911   |
| 73274 | P03383 | Q5VXI9 | -0.85081  |
| 73275 | P03383 | Q8IUX7 | -0.52085  |
| 73276 | P03383 | O00445 | -0.60581  |
| 73277 | P03383 | P05161 | -0.4774   |
| 73278 | P03383 | Q8NH51 | -1.1027   |
| 73279 | P03383 | Q9BU19 | -0.21172  |
| 73280 | P03383 | O14908 | -0.22735  |
| 73281 | P03383 | Q53GQ0 | -0.57705  |
| 73282 | P03383 | Q15599 | -0.22937  |
| 73283 | P03383 | O60306 | -0.36148  |
| 73284 | P03383 | Q2PPJ7 | -0.42222  |
| 73285 | P03383 | P83111 | -0.2755   |
| 73286 | P03383 | Q9BT30 | -0.56922  |
| 73287 | P03383 | Q92908 | -0.22739  |
| 73288 | P03383 | Q96C12 | -0.12222  |
| 73289 | P03383 | P49773 | -0.39224  |
| 73290 | P03383 | Q7Z3B0 | -0.86584  |
| 73291 | P03383 | P48551 | -0.707    |
| 73292 | P03383 | A6NE52 | -0.22745  |
| 73293 | P03383 | F5H284 | -0.3788   |
| 73294 | P03383 | P52756 | -0.22554  |
| 73295 | P03383 | A0PK00 | -0.52887  |
| 73296 | P03383 | Q9HC10 | -0.68982  |
| 73297 | P03383 | Q9H6S3 | -0.37984  |
| 73298 | P03383 | P30968 | -1.277    |
| 73299 | P03383 | Q15858 | -0.90183  |
| 73300 | P03383 | Q8NH94 | -1.1027   |
| 73301 | P03383 | P02760 | -0.70131  |
| 73302 | P03383 | Q5RL73 | -0.42762  |
| 73303 | P03383 | Q86W50 | -0.37739  |
| 73304 | P03383 | Q53LP3 | -0.22741  |
| 73305 | P03383 | Q5VT33 | -0.05067  |
| 73306 | P03383 | P08590 | -0.43914  |
| 73307 | P03383 | Q8NHM4 | -1.294    |
| 73308 | P03383 | Q8TEW8 | -0.22688  |
| 73309 | P03383 | Q9BUY7 | -0.52751  |
| 73310 | P03383 | P19652 | -0.8489   |
| 73311 | P03383 | P04070 | -0.71304  |
| 73312 | P03383 | P22681 | -0.22741  |
| 73313 | P03383 | Q8TAA9 | -0.45343  |
| 73314 | P03383 | Q6P6B7 | -0.22741  |
| 73315 | P03383 | Q86Z02 | -0.22741  |
| 73316 | P03383 | Q9NS69 | -0.038979 |
| 73317 | P03383 | Q14623 | -0.39519  |
| 73318 | P03383 | P0C7U2 | -0.44741  |
| 73319 | P03383 | Q66K66 | -0.86584  |
| 73320 | P03383 | O15438 | -0.96695  |
| 73321 | P03383 | Q9Y3Q3 | -0.54485  |
| 73322 | P03383 | Q95452 | -0.96911  |
| 73323 | P03383 | Q86UT6 | -0.22129  |
| 73324 | P03383 | Q6Q788 | -0.39309  |
| 73325 | P03383 | Q8N5T2 | -1.2307   |
| 73326 | P03383 | A8MXU0 | -0.84399  |
| 73327 | P03383 | P0C024 | -0.42232  |
| 73328 | P03383 | P82279 | -1.0879   |
| 73329 | P03383 | Q5JSP0 | -0.81987  |
| 73330 | P03383 | Q96C23 | -0.23887  |
| 73331 | P03383 | Q99784 | -0.22733  |
| 73332 | P03383 | Q9HCE3 | -0.21172  |
| 73333 | P03383 | P09525 | -0.41259  |
| 73334 | P03383 | Q9Y5U5 | -1.2951   |
| 73335 | P03383 | Q9H1Z4 | -0.22741  |
| 73336 | P03383 | Q7Z419 | -0.25313  |
| 73337 | P03383 | Q9BR61 | -0.22741  |
| 73338 | P03383 | Q02083 | -0.151    |
| 73339 | P03383 | Q9UGV2 | -0.32071  |
| 73340 | P03383 | Q96M27 | -0.35868  |

|       |        |        |          |
|-------|--------|--------|----------|
| 73341 | P03383 | Q8WTS1 | -0.22536 |
| 73342 | P03383 | Q9UN74 | -1.1553  |
| 73343 | P03383 | Q9GZY4 | -0.75099 |
| 73344 | P03383 | Q08722 | -0.49186 |
| 73345 | P03383 | Q6UX15 | -0.87837 |
| 73346 | P03383 | Q7RTX7 | -0.8333  |
| 73347 | P03383 | A0AUZ9 | -0.36961 |
| 73348 | P03383 | Q9ULE3 | -0.42719 |
| 73349 | P03383 | Q99490 | -0.69887 |
| 73350 | P03383 | Q53R12 | -0.93628 |
| 73351 | P03383 | Q92581 | -0.8388  |
| 73352 | P03383 | P09960 | -0.28192 |
| 73353 | P03383 | Q86XP3 | -0.41491 |
| 73354 | P03383 | Q77932 | -0.84642 |
| 73355 | P03383 | P98175 | -0.55651 |
| 73356 | P03383 | Q5EBM4 | -0.21172 |
| 73357 | P03383 | Q96K76 | -0.35231 |
| 73358 | P03383 | Q15349 | -0.56462 |
| 73359 | P03383 | Q15486 | -0.32243 |
| 73360 | P03383 | Q99666 | -0.22216 |
| 73361 | P03383 | Q9NZ01 | -0.49221 |
| 73362 | P03383 | Q16795 | -0.1454  |
| 73363 | P03383 | Q8N4B1 | -0.22729 |
| 73364 | P03383 | Q5J5C9 | -0.72627 |
| 73365 | P03383 | P51148 | -0.79336 |
| 73366 | P03383 | Q6P1L6 | -0.21172 |
| 73367 | P03383 | P21854 | -0.66539 |
| 73368 | P03383 | Q6P1J6 | -0.70104 |
| 73369 | P03383 | Q5VTA0 | -0.25825 |
| 73370 | P03383 | A6NEE1 | -0.5353  |
| 73371 | P03383 | P42338 | -0.36079 |
| 73372 | P03383 | Q7Z2H8 | -0.77384 |
| 73373 | P03383 | Q75123 | -0.21172 |
| 73374 | P03383 | Q8NEM0 | -0.26075 |
| 73375 | P03383 | Q8NCR0 | -0.74906 |
| 73376 | P03383 | P81277 | -0.55238 |
| 73377 | P03383 | Q99677 | -1.3095  |
| 73378 | P03383 | Q9H799 | -0.86584 |
| 73379 | P03383 | Q9GZT9 | -0.11494 |
| 73380 | P03383 | Q8NEG5 | -0.44758 |
| 73381 | P03383 | Q9UNA0 | -0.23282 |
| 73382 | P03383 | P26038 | -0.23407 |
| 73383 | P03383 | P07333 | -0.59785 |
| 73384 | P03383 | P51511 | -0.79087 |
| 73385 | P03383 | P41182 | -0.13676 |
| 73386 | P03383 | Q15417 | -0.49888 |
| 73387 | P03383 | O60393 | -0.22518 |
| 73388 | P03383 | A8MXJ8 | -0.48092 |
| 73389 | P03383 | Q9Y6Y9 | -0.11342 |
| 73390 | P03383 | Q94985 | -0.98278 |
| 73391 | P03383 | Q8IXQ8 | -0.22678 |
| 73392 | P03383 | Q902F8 | -0.5818  |
| 73393 | P03383 | Q9NRY7 | -0.95884 |
| 73394 | P03383 | Q5VV11 | -0.16    |
| 73395 | P03383 | Q7Z429 | -0.86584 |
| 73396 | P03383 | P30484 | -0.88446 |
| 73397 | P03383 | Q16445 | -0.73183 |
| 73398 | P03383 | O00584 | -0.81245 |
| 73399 | P03383 | Q96SI1 | -0.19405 |
| 73400 | P03383 | O95843 | -0.7493  |
| 73401 | P03383 | Q96LQ0 | -0.4501  |
| 73402 | P03383 | Q2WQJ9 | -0.86584 |
| 73403 | P03383 | P15121 | -0.22543 |
| 73404 | P03383 | Q15392 | -0.21441 |
| 73405 | P03383 | P01607 | -0.97479 |
| 73406 | P03383 | O75185 | -0.59309 |
| 73407 | P03383 | Q9Y6F7 | -0.34275 |
| 73408 | P03383 | A1XBS5 | -0.15943 |
| 73409 | P03383 | Q16557 | -0.86886 |
| 73410 | P03383 | P09038 | -0.28911 |
| 73411 | P03383 | O15123 | -0.47456 |
| 73412 | P03383 | P57057 | -0.74011 |
| 73413 | P03383 | P48357 | -0.85029 |
| 73414 | P03383 | Q6UXD1 | -0.86584 |
| 73415 | P03383 | Q9P275 | -0.34958 |
| 73416 | P03383 | P23921 | -0.15962 |

|       |        |        |          |
|-------|--------|--------|----------|
| 73417 | P03383 | Q9H9J4 | -0.79091 |
| 73418 | P03383 | Q86UF2 | -0.67504 |
| 73419 | P03383 | Q9BXL6 | -0.51456 |
| 73420 | P03383 | F5H4A9 | -0.86584 |
| 73421 | P03383 | Q14494 | -0.26941 |
| 73422 | P03383 | O95876 | -0.49052 |
| 73423 | P03383 | Q15393 | -0.15154 |
| 73424 | P03383 | O95563 | -0.73185 |
| 73425 | P03383 | Q9Y6M5 | -0.72385 |
| 73426 | P03383 | Q9H6Q3 | -0.22741 |
| 73427 | P03383 | Q7Z3B3 | -0.16836 |
| 73428 | P03383 | Q16654 | -0.35202 |
| 73429 | P03383 | A6NCX1 | -0.16376 |
| 73430 | P03383 | O00408 | -0.22622 |
| 73431 | P03383 | Q9Y2W3 | -0.62407 |
| 73432 | P03383 | Q5TCX8 | -0.77867 |
| 73433 | P03383 | Q9H213 | -0.28091 |
| 73434 | P03383 | P09429 | -0.22904 |
| 73435 | P03383 | P29120 | -0.3643  |
| 73436 | P03383 | F8WBI6 | -0.35868 |
| 73437 | P03383 | Q9BZL3 | -0.86584 |
| 73438 | P03383 | O94762 | -0.22654 |
| 73439 | P03383 | Q9Y5W3 | -0.22448 |
| 73440 | P03383 | Q14728 | -0.79577 |
| 73441 | P03383 | Q9NXH9 | -0.38674 |
| 73442 | P03383 | Q96S53 | -0.56698 |
| 73443 | P03383 | P45954 | -0.48992 |
| 73444 | P03383 | Q5VU36 | -0.86584 |
| 73445 | P03383 | Q8WXI2 | -0.4485  |
| 73446 | P03383 | Q96GW7 | -0.78711 |
| 73447 | P03383 | Q9P0B6 | -0.86584 |
| 73448 | P03383 | P30479 | -0.88446 |
| 73449 | P03383 | P27037 | -0.30844 |
| 73450 | P03383 | Q9BQI0 | -0.69945 |
| 73451 | P03383 | O95461 | -0.65772 |
| 73452 | P03383 | P0C7Q2 | -0.22189 |
| 73453 | P03383 | Q7L8A9 | -0.56768 |
| 73454 | P03383 | Q8WVB3 | -0.19242 |
| 73455 | P03383 | Q7Z6K5 | -0.0254  |
| 73456 | P03383 | Q8N8E2 | -0.25496 |
| 73457 | P03383 | Q8TDT2 | -1.1721  |
| 73458 | P03383 | Q96JB6 | -0.53889 |
| 73459 | P03383 | Q96DA2 | -0.93777 |
| 73460 | P03383 | P43005 | -0.79752 |
| 73461 | P03383 | P01857 | -0.44934 |
| 73462 | P03383 | Q0VGL1 | -0.63718 |
| 73463 | P03383 | P82980 | -0.46227 |
| 73464 | P03383 | Q86Y38 | -0.9377  |
| 73465 | P03383 | Q9BXJ1 | -0.92264 |
| 73466 | P03383 | Q5VZ18 | -0.22741 |
| 73467 | P03383 | Q9Y303 | -0.2927  |
| 73468 | P03383 | A1L0T0 | -0.70183 |
| 73469 | P03383 | Q96AA8 | -0.32231 |
| 73470 | P03383 | Q9P0W0 | -0.52139 |
| 73471 | P03383 | P27701 | -0.54753 |
| 73472 | P03383 | Q9NXR5 | -0.22741 |
| 73473 | P03383 | Q8NFK5 | -1.0096  |
| 73474 | P03383 | Q99217 | -0.58228 |
| 73475 | P03383 | Q01804 | -0.16078 |
| 73476 | P03383 | Q96I51 | -0.22429 |
| 73477 | P03383 | P05538 | -0.68602 |
| 73478 | P03383 | P46095 | -1.1955  |
| 73479 | P03383 | Q05513 | -0.22545 |
| 73480 | P03383 | Q5T750 | -0.24297 |
| 73481 | P03383 | Q8NHP6 | -0.71371 |
| 73482 | P03383 | O95070 | -0.42282 |
| 73483 | P03383 | Q9H252 | -0.88642 |
| 73484 | P03383 | Q9H0I2 | -0.48317 |
| 73485 | P03383 | Q8N7C0 | -1.0257  |
| 73486 | P03383 | Q6UB35 | -0.67087 |
| 73487 | P03383 | P43115 | -1.0087  |
| 73488 | P03383 | Q5VVW2 | -0.8952  |
| 73489 | P03383 | Q15070 | -0.22565 |
| 73490 | P03383 | Q9HB15 | -0.95255 |
| 73491 | P03383 | Q6P9A3 | -0.21172 |
| 73492 | P03383 | P36915 | -0.71909 |

|       |        |        |           |
|-------|--------|--------|-----------|
| 73493 | P03383 | P61225 | -0.87011  |
| 73494 | P03383 | Q14596 | -0.2147   |
| 73495 | P03383 | Q9ULC5 | -0.70973  |
| 73496 | P03383 | Q86VK4 | -0.21172  |
| 73497 | P03383 | Q16706 | -0.5078   |
| 73498 | P03383 | Q8IX95 | -0.28887  |
| 73499 | P03383 | O76075 | -0.14033  |
| 73500 | P03383 | Q86XR5 | -0.7327   |
| 73501 | P03383 | Q9Y215 | -0.24502  |
| 73502 | P03383 | P29373 | -0.2098   |
| 73503 | P03383 | Q15771 | -0.99778  |
| 73504 | P03383 | P25686 | -0.2341   |
| 73505 | P03383 | Q86VV4 | -0.60236  |
| 73506 | P03383 | O60224 | -0.11499  |
| 73507 | P03383 | B2RC85 | -0.14886  |
| 73508 | P03383 | Q8N3P4 | -0.52332  |
| 73509 | P03383 | Q5T4D3 | -0.86584  |
| 73510 | P03383 | P30301 | -0.90729  |
| 73511 | P03383 | Q96PE6 | -0.21172  |
| 73512 | P03383 | C9JXX5 | -0.87849  |
| 73513 | P03383 | Q9NZI2 | -0.60977  |
| 73514 | P03383 | Q7L985 | -0.86584  |
| 73515 | P03383 | P63133 | -0.43742  |
| 73516 | P03383 | Q8TDN7 | -0.61474  |
| 73517 | P03383 | Q63HR2 | -0.22741  |
| 73518 | P03383 | Q14554 | -0.51956  |
| 73519 | P03383 | Q9NW82 | -0.22742  |
| 73520 | P03383 | Q76G19 | -0.29439  |
| 73521 | P03383 | Q8TBR5 | -0.075533 |
| 73522 | P03383 | Q9NR45 | -0.32995  |
| 73523 | P03383 | P19525 | -0.34494  |
| 73524 | P03383 | Q9UHP9 | -0.12272  |
| 73525 | P03383 | Q6NUK1 | -0.78496  |
| 73526 | P03383 | Q6UXT9 | -0.8145   |
| 73527 | P03383 | Q96EP0 | -0.20391  |
| 73528 | P03383 | Q6UWE0 | -0.2276   |
| 73529 | P03383 | Q9H0I9 | -0.53665  |
| 73530 | P03383 | Q8NGS9 | -1.1027   |
| 73531 | P03383 | Q86YS7 | -0.60496  |
| 73532 | P03383 | Q15247 | -0.72512  |
| 73533 | P03383 | P28300 | -0.36888  |
| 73534 | P03383 | Q2M3T9 | -0.77522  |
| 73535 | P03383 | Q9H790 | -0.27349  |
| 73536 | P03383 | Q6UWK7 | -0.87849  |
| 73537 | P03383 | P21399 | -0.1459   |
| 73538 | P03383 | Q9NRD0 | -0.23694  |
| 73539 | P03383 | Q9P2N5 | -0.25031  |
| 73540 | P03383 | Q9HC21 | -0.69008  |
| 73541 | P03383 | P21439 | -0.88612  |
| 73542 | P03383 | Q5Y7A7 | -0.67577  |
| 73543 | P03383 | Q86YJ6 | -0.61521  |
| 73544 | P03383 | Q9UHY1 | -0.22741  |
| 73545 | P03383 | Q8N3C7 | -0.22741  |
| 73546 | P03383 | Q9UBY0 | -0.98063  |
| 73547 | P03383 | Q9NYQ6 | -0.90699  |
| 73548 | P03383 | Q9Y5H6 | -1.1553   |
| 73549 | P03383 | Q9Y6H8 | -0.82695  |
| 73550 | P03383 | Q9UFH2 | -0.5687   |
| 73551 | P03383 | Q5MCW4 | -0.21172  |
| 73552 | P03383 | Q8N4P6 | -0.22723  |
| 73553 | P03383 | Q9H295 | -0.42598  |
| 73554 | P03383 | P21817 | -0.59674  |
| 73555 | P03383 | Q96K21 | -0.52332  |
| 73556 | P03383 | Q13686 | -0.4159   |
| 73557 | P03383 | Q49A26 | -0.65467  |
| 73558 | P03383 | Q68D85 | -0.72744  |
| 73559 | P03383 | Q9NTZ6 | -0.4405   |
| 73560 | P03383 | Q6UB98 | -0.22741  |
| 73561 | P03383 | Q9UJ99 | -1.1297   |
| 73562 | P03383 | A6NI03 | -0.73967  |
| 73563 | P03383 | Q02252 | -0.26894  |
| 73564 | P03383 | Q96IY4 | -0.94911  |
| 73565 | P03383 | Q5JUK3 | -1.1407   |
| 73566 | P03383 | Q8IV77 | -1.0951   |
| 73567 | P03383 | Q9Y6K8 | -0.44685  |
| 73568 | P03383 | O75116 | -0.22716  |

|       |        |        |           |
|-------|--------|--------|-----------|
| 73569 | P03383 | Q8IZ07 | -0.22741  |
| 73570 | P03383 | Q68DV7 | -0.43147  |
| 73571 | P03383 | Q15526 | -0.67379  |
| 73572 | P03383 | Q8WU68 | -0.50673  |
| 73573 | P03383 | Q5VTM2 | -1.0284   |
| 73574 | P03383 | Q8TEY7 | -0.27744  |
| 73575 | P03383 | O60704 | -0.68545  |
| 73576 | P03383 | P0DJJ0 | -0.38722  |
| 73577 | P03383 | P14618 | -0.15781  |
| 73578 | P03383 | Q6ZVW7 | -0.090145 |
| 73579 | P03383 | Q9NYG8 | -1.0473   |
| 73580 | P03383 | Q96JM4 | -0.22644  |
| 73581 | P03383 | O60333 | -0.25     |
| 73582 | P03383 | A2RRL7 | -0.86584  |
| 73583 | P03383 | Q6NXR0 | -0.87382  |
| 73584 | P03383 | Q95604 | -0.88446  |
| 73585 | P03383 | Q8IUB2 | -0.79897  |
| 73586 | P03383 | Q9Y4U1 | -0.30289  |
| 73587 | P03383 | Q95944 | -1.147    |
| 73588 | P03383 | P17813 | -0.2095   |
| 73589 | P03383 | Q00168 | -1.05     |
| 73590 | P03383 | Q9NRC9 | -0.91124  |
| 73591 | P03383 | Q86VI1 | -0.25766  |
| 73592 | P03383 | Q6IN84 | -0.20088  |
| 73593 | P03383 | P0DJD4 | -0.59537  |
| 73594 | P03383 | P0DJH9 | -0.17726  |
| 73595 | P03383 | Q8NFB2 | -0.86584  |
| 73596 | P03383 | Q60934 | -0.16049  |
| 73597 | P03383 | Q9HBV1 | -0.6579   |
| 73598 | P03383 | Q8NCL4 | -0.60578  |
| 73599 | P03383 | Q7KZN9 | -0.71965  |
| 73600 | P03383 | Q16643 | -0.67343  |
| 73601 | P03383 | Q8NH55 | -1.1027   |
| 73602 | P03383 | Q8NB90 | -0.86852  |
| 73603 | P03383 | Q00169 | -0.72935  |
| 73604 | P03383 | Q14841 | -0.651    |
| 73605 | P03383 | Q96TA2 | -1.0639   |
| 73606 | P03383 | Q9H0J9 | -0.31438  |
| 73607 | P03383 | Q8NDH2 | -0.056625 |
| 73608 | P03383 | Q9BXL7 | -0.22716  |
| 73609 | P03383 | Q14392 | -0.91266  |
| 73610 | P03383 | Q8IWD5 | -0.86584  |
| 73611 | P03383 | Q96EY8 | -0.65131  |
| 73612 | P03383 | P25774 | -1.1003   |
| 73613 | P03383 | Q6W0C5 | -0.23292  |
| 73614 | P03383 | Q13636 | -0.8886   |
| 73615 | P03383 | Q96LT4 | -0.68814  |
| 73616 | P03383 | Q96IZ6 | -0.37739  |
| 73617 | P03383 | Q13445 | -0.31467  |
| 73618 | P03383 | P43026 | -0.48423  |
| 73619 | P03383 | Q9P2X3 | -0.16233  |
| 73620 | P03383 | Q96D42 | -0.7235   |
| 73621 | P03383 | Q9HCJ6 | -0.95104  |
| 73622 | P03383 | Q96PZ0 | -0.36852  |
| 73623 | P03383 | Q96BR5 | -0.046718 |
| 73624 | P03383 | Q8NGJ8 | -1.1027   |
| 73625 | P03383 | Q8NFW1 | -0.77782  |
| 73626 | P03383 | P35222 | -0.22823  |
| 73627 | P03383 | Q9UNL2 | -0.69706  |
| 73628 | P03383 | Q7Z408 | -0.93628  |
| 73629 | P03383 | Q4VXF1 | -0.86584  |
| 73630 | P03383 | Q92698 | -0.19762  |
| 73631 | P03383 | P48058 | -0.86419  |
| 73632 | P03383 | Q60242 | -1.2048   |
| 73633 | P03383 | Q9BYD5 | -0.2882   |
| 73634 | P03383 | Q9Y2Q5 | -0.37674  |
| 73635 | P03383 | Q5SQS7 | -0.22741  |
| 73636 | P03383 | Q9BX95 | -0.70236  |
| 73637 | P03383 | Q8IZS7 | -0.92288  |
| 73638 | P03383 | Q16570 | -1.0635   |
| 73639 | P03383 | Q10981 | -0.58395  |
| 73640 | P03383 | P22309 | -0.48376  |
| 73641 | P03383 | Q8N4T4 | -0.81922  |
| 73642 | P03383 | Q6ZU45 | -0.44203  |
| 73643 | P03383 | P29374 | -0.21726  |
| 73644 | P03383 | Q8TF50 | -0.21172  |

|       |        |        |          |
|-------|--------|--------|----------|
| 73645 | P03383 | Q86UN2 | -0.59787 |
| 73646 | P03383 | P53621 | -0.23012 |
| 73647 | P03383 | Q5XX13 | -0.22762 |
| 73648 | P03383 | P41180 | -0.72562 |
| 73649 | P03383 | Q7Z6P3 | -0.99828 |
| 73650 | P03383 | Q2TAP0 | -0.38583 |
| 73651 | P03383 | Q8NH81 | -1.1027  |
| 73652 | P03383 | Q969X1 | -0.84718 |
| 73653 | P03383 | P0C6T2 | -0.86584 |
| 73654 | P03383 | Q8TDM6 | -0.52495 |
| 73655 | P03383 | Q9Y4M8 | -0.2612  |
| 73656 | P03383 | Q8WVE6 | -0.86584 |
| 73657 | P03383 | A1L4K1 | -0.22744 |
| 73658 | P03383 | A5D8T8 | -0.86789 |
| 73659 | P03383 | Q9NRH3 | -0.29433 |
| 73660 | P03383 | P87889 | -0.24566 |
| 73661 | P03383 | P51805 | -0.86178 |
| 73662 | P03383 | A8MUP2 | -0.26155 |
| 73663 | P03383 | Q8TD94 | -0.22463 |
| 73664 | P03383 | Q9NYL4 | -0.81636 |
| 73665 | P03383 | Q9BQ13 | -0.19405 |
| 73666 | P03383 | Q96MG2 | -0.60521 |
| 73667 | P03383 | Q60894 | -0.31007 |
| 73668 | P03383 | Q68DQ2 | -0.44203 |
| 73669 | P03383 | Q8TCB0 | -0.22763 |
| 73670 | P03383 | Q5VUM1 | -0.73628 |
| 73671 | P03383 | Q13621 | -0.79259 |
| 73672 | P03383 | Q2M2E5 | -0.87849 |
| 73673 | P03383 | Q95239 | -0.2624  |
| 73674 | P03383 | Q9NP08 | -0.22773 |
| 73675 | P03383 | Q12766 | -0.22734 |
| 73676 | P03383 | Q9H1P6 | -0.11967 |
| 73677 | P03383 | Q9H7F4 | -0.86584 |
| 73678 | P03383 | Q8NGJ3 | -1.1027  |
| 73679 | P03383 | Q7Z6A9 | -0.96522 |
| 73680 | P03383 | Q2KHM9 | -0.16257 |
| 73681 | P03383 | Q8TC94 | -0.30492 |
| 73682 | P03383 | Q9H7H1 | -0.35738 |
| 73683 | P03383 | P23142 | -0.94012 |
| 73684 | P03383 | Q9GZV3 | -0.89448 |
| 73685 | P03383 | Q5R372 | -0.95709 |
| 73686 | P03383 | Q8N122 | -0.24751 |
| 73687 | P03383 | Q9BZZ2 | -1.3276  |
| 73688 | P03383 | Q16854 | -0.36886 |
| 73689 | P03383 | Q0P651 | -0.87849 |
| 73690 | P03383 | Q9BVV7 | -0.32593 |
| 73691 | P03383 | P12724 | -0.69655 |
| 73692 | P03383 | P08138 | -0.30446 |
| 73693 | P03383 | Q05315 | -0.58225 |
| 73694 | P03383 | Q13477 | -1.0676  |
| 73695 | P03383 | Q969G2 | -0.22782 |
| 73696 | P03383 | Q96HJ9 | -0.30763 |
| 73697 | P03383 | Q14654 | -0.81807 |
| 73698 | P03383 | Q8NGZ6 | -1.1027  |
| 73699 | P03383 | Q5PT55 | -0.93759 |
| 73700 | P03383 | Q9UPS6 | -0.22694 |
| 73701 | P03383 | P42858 | -0.13987 |
| 73702 | P03383 | Q9P0P0 | -0.57509 |
| 73703 | P03383 | P14616 | -1.0618  |
| 73704 | P03383 | Q76094 | -0.21616 |
| 73705 | P03383 | Q8TEZ7 | -1.1105  |
| 73706 | P03383 | Q9UHI5 | -0.402   |
| 73707 | P03383 | Q9H4M9 | -0.41568 |
| 73708 | P03383 | Q5VTD9 | -0.15547 |
| 73709 | P03383 | P00403 | -0.5883  |
| 73710 | P03383 | Q13163 | -0.22914 |
| 73711 | P03383 | P01286 | -0.49363 |
| 73712 | P03383 | Q2M2E3 | -0.96938 |
| 73713 | P03383 | Q95294 | -0.54707 |
| 73714 | P03383 | Q7RTY7 | -1.3299  |
| 73715 | P03383 | Q95219 | -0.21692 |
| 73716 | P03383 | Q96PR1 | -0.65175 |
| 73717 | P03383 | Q7Z3F1 | -0.96705 |
| 73718 | P03383 | Q5T5M9 | -0.21602 |
| 73719 | P03383 | Q8NGG8 | -1.1027  |
| 73720 | P03383 | P54108 | -0.72915 |

|       |        |        |            |
|-------|--------|--------|------------|
| 73721 | P03383 | P26583 | -0.23085   |
| 73722 | P03383 | Q8NH54 | -1.1027    |
| 73723 | P03383 | Q96GD3 | -0.14016   |
| 73724 | P03383 | Q8WUU8 | -0.86584   |
| 73725 | P03383 | P19971 | -0.45338   |
| 73726 | P03383 | Q01518 | -0.32727   |
| 73727 | P03383 | P49640 | -0.22713   |
| 73728 | P03383 | O75840 | -0.22575   |
| 73729 | P03383 | Q8TC84 | -0.22743   |
| 73730 | P03383 | Q9UQM7 | -0.33248   |
| 73731 | P03383 | Q5VZ19 | -0.84005   |
| 73732 | P03383 | Q8N9V3 | -0.45235   |
| 73733 | P03383 | Q8NHU3 | -0.69343   |
| 73734 | P03383 | Q5W0Q7 | -0.47922   |
| 73735 | P03383 | P27361 | -0.2274    |
| 73736 | P03383 | A6NKK0 | -1.1027    |
| 73737 | P03383 | P53794 | -0.95622   |
| 73738 | P03383 | Q8N335 | -0.21479   |
| 73739 | P03383 | O95180 | -0.74099   |
| 73740 | P03383 | Q9UBR4 | -0.22777   |
| 73741 | P03383 | O75173 | -0.77597   |
| 73742 | P03383 | Q8IW45 | -0.39742   |
| 73743 | P03383 | O95299 | -0.19385   |
| 73744 | P03383 | Q9Y4F5 | -0.31084   |
| 73745 | P03383 | Q9HCP0 | -0.76191   |
| 73746 | P03383 | Q4V348 | -0.21172   |
| 73747 | P03383 | Q9BY64 | -0.94099   |
| 73748 | P03383 | Q8NGP6 | -1.1027    |
| 73749 | P03383 | P30626 | -0.30389   |
| 73750 | P03383 | O94991 | -0.92424   |
| 73751 | P03383 | O95932 | -0.39149   |
| 73752 | P03383 | Q8WVC6 | -0.63964   |
| 73753 | P03383 | Q8NDI1 | -0.37554   |
| 73754 | P03383 | P52797 | -0.63765   |
| 73755 | P03383 | Q9BSE4 | -0.74767   |
| 73756 | P03383 | Q68DD2 | -0.40172   |
| 73757 | P03383 | P15170 | -0.36253   |
| 73758 | P03383 | Q9C0G0 | -0.21172   |
| 73759 | P03383 | Q8WVS4 | -0.22189   |
| 73760 | P03383 | Q8NH43 | -1.1027    |
| 73761 | P03383 | A8MV23 | -0.70542   |
| 73762 | P03383 | Q6ZQW0 | -0.33596   |
| 73763 | P03383 | Q9UHD2 | -0.22741   |
| 73764 | P03383 | Q9ULC3 | -0.88519   |
| 73765 | P03383 | Q8N816 | -0.86584   |
| 73766 | P03383 | Q10472 | -0.78132   |
| 73767 | P03383 | P46060 | -0.22621   |
| 73768 | P03383 | Q9C0B1 | -0.37509   |
| 73769 | P03383 | Q9C0D5 | -0.50486   |
| 73770 | P03383 | Q494X1 | -0.0074935 |
| 73771 | P03383 | Q9NZP5 | -1.1027    |
| 73772 | P03383 | Q9NQ69 | -0.22741   |
| 73773 | P03383 | Q13639 | -0.95957   |
| 73774 | P03383 | Q14541 | -0.26341   |
| 73775 | P03383 | Q7L591 | -0.53641   |
| 73776 | P03383 | P48023 | -0.26641   |
| 73777 | P03383 | A6NK59 | -0.62076   |
| 73778 | P03383 | Q86UG4 | -0.89134   |
| 73779 | P03383 | Q6MZM0 | -1.0332    |
| 73780 | P03383 | Q13291 | -0.28552   |
| 73781 | P03383 | Q8N697 | -0.68109   |
| 73782 | P03383 | Q6P0Q8 | -0.40823   |
| 73783 | P03383 | Q8N682 | -0.92066   |
| 73784 | P03383 | Q8NGT7 | -1.1027    |
| 73785 | P03383 | Q92794 | -0.31993   |
| 73786 | P03383 | Q6IFG1 | -1.1027    |
| 73787 | P03383 | P42701 | -0.65407   |
| 73788 | P03383 | Q96M42 | -0.23863   |
| 73789 | P03383 | P14770 | -0.99257   |
| 73790 | P03383 | O43505 | -0.49372   |
| 73791 | P03383 | Q6B9Z1 | -0.87849   |
| 73792 | P03383 | P49763 | -0.77129   |
| 73793 | P03383 | Q8IZW8 | -0.2274    |
| 73794 | P03383 | Q15067 | -0.46999   |
| 73795 | P03383 | Q96EX3 | -0.29487   |
| 73796 | P03383 | Q96KM6 | -0.22684   |



|       |        |        |           |
|-------|--------|--------|-----------|
| 73797 | P03383 | P21917 | -0.45273  |
| 73798 | P03383 | Q86TL0 | -0.46416  |
| 73799 | P03383 | Q5H9K5 | -0.41835  |
| 73800 | P03383 | Q4W5G0 | -0.33043  |
| 73801 | P03383 | O15244 | -0.80045  |
| 73802 | P03383 | Q9Y6Z7 | -0.76957  |
| 73803 | P03383 | Q8N8Y5 | -0.556    |
| 73804 | P03383 | P22570 | -0.18762  |
| 73805 | P03383 | Q9BUA6 | -0.39423  |
| 73806 | P03383 | Q5TCS8 | -0.92052  |
| 73807 | P03383 | Q9H7X3 | -0.21172  |
| 73808 | P03383 | Q12965 | -0.16235  |
| 73809 | P03383 | A6NNC1 | -0.86584  |
| 73810 | P03383 | Q9BY31 | -0.21172  |
| 73811 | P03383 | Q0D2K0 | -0.91069  |
| 73812 | P03383 | Q08211 | -0.22626  |
| 73813 | P03383 | Q9UQC9 | -1.3064   |
| 73814 | P03383 | P33527 | -0.38597  |
| 73815 | P03383 | Q4VX67 | -0.86584  |
| 73816 | P03383 | Q9NR97 | -0.76504  |
| 73817 | P03383 | P10523 | -0.938    |
| 73818 | P03383 | P25090 | -1.3114   |
| 73819 | P03383 | Q43432 | -0.30264  |
| 73820 | P03383 | Q96I76 | -0.3991   |
| 73821 | P03383 | Q15390 | -0.37218  |
| 73822 | P03383 | O43812 | -0.18397  |
| 73823 | P03383 | Q92599 | -0.20578  |
| 73824 | P03383 | Q15050 | -0.40273  |
| 73825 | P03383 | Q96GX1 | -0.69815  |
| 73826 | P03383 | Q8NGB9 | -1.1027   |
| 73827 | P03383 | Q92604 | -0.52474  |
| 73828 | P03383 | P60509 | -0.93628  |
| 73829 | P03383 | P19224 | -0.82692  |
| 73830 | P03383 | Q96PS8 | -0.85361  |
| 73831 | P03383 | P01594 | -0.97479  |
| 73832 | P03383 | Q9ULI0 | -0.88399  |
| 73833 | P03383 | Q8TCA0 | -0.22752  |
| 73834 | P03383 | Q8TDU5 | -1.1149   |
| 73835 | P03383 | O60266 | -0.57112  |
| 73836 | P03383 | Q5VVX9 | -0.77713  |
| 73837 | P03383 | O00767 | -0.93657  |
| 73838 | P03383 | P51553 | -0.073359 |
| 73839 | P03383 | Q8IXF0 | -0.24243  |
| 73840 | P03383 | Q96GD4 | -0.58674  |
| 73841 | P03383 | Q9NWX2 | -0.21602  |
| 73842 | P03383 | Q71RG6 | -0.87849  |
| 73843 | P03383 | O75888 | -0.5728   |
| 73844 | P03383 | Q99523 | -0.34698  |
| 73845 | P03383 | O15528 | -0.36315  |
| 73846 | P03383 | P35913 | -0.58885  |
| 73847 | P03383 | P32248 | -0.46967  |
| 73848 | P03383 | A6NND4 | -1.1027   |
| 73849 | P03383 | Q8NA58 | -0.63418  |
| 73850 | P03383 | Q9UMZ3 | -1.1722   |
| 73851 | P03383 | Q9Y2Y6 | -0.85795  |
| 73852 | P03383 | Q15041 | -0.22425  |
| 73853 | P03383 | B7U540 | -1.0159   |
| 73854 | P03383 | Q9UN66 | -1.1297   |
| 73855 | P03383 | Q13885 | -0.5187   |
| 73856 | P03383 | Q8NGX8 | -1.1027   |
| 73857 | P03383 | P98177 | -0.33788  |
| 73858 | P03383 | Q86UA1 | -0.25339  |
| 73859 | P03383 | Q6ZQY2 | -0.22735  |
| 73860 | P03383 | Q15479 | -0.14946  |
| 73861 | P03383 | P24158 | -0.33567  |
| 73862 | P03383 | Q9HCK4 | -0.42337  |
| 73863 | P03383 | Q95236 | -0.9662   |
| 73864 | P03383 | Q9H2C8 | -1.1027   |
| 73865 | P03383 | P57768 | -0.54592  |
| 73866 | P03383 | Q8IYR6 | -1.0489   |
| 73867 | P03383 | Q96A99 | -0.91662  |
| 73868 | P03383 | Q96JL9 | -0.21172  |
| 73869 | P03383 | Q9NR11 | -0.21172  |
| 73870 | P03383 | Q6TDP4 | -0.58145  |
| 73871 | P03383 | Q03924 | -0.17069  |
| 73872 | P03383 | Q7L513 | -0.78657  |

|       |        |        |           |
|-------|--------|--------|-----------|
| 73873 | P03383 | Q9BRP0 | -0.22247  |
| 73874 | P03383 | Q8TB22 | -1.1352   |
| 73875 | P03383 | P02765 | -0.65999  |
| 73876 | P03383 | Q5T2E6 | -0.86584  |
| 73877 | P03383 | Q9P2W7 | -0.57756  |
| 73878 | P03383 | Q9BSJ8 | -0.86584  |
| 73879 | P03383 | Q13415 | -0.12734  |
| 73880 | P03383 | Q9NRA2 | -1.0021   |
| 73881 | P03383 | E5RHQ5 | -0.1848   |
| 73882 | P03383 | P0C7V7 | -1.0477   |
| 73883 | P03383 | O95907 | -0.72517  |
| 73884 | P03383 | P35236 | -0.70705  |
| 73885 | P03383 | Q8IW41 | -0.22763  |
| 73886 | P03383 | O94856 | -0.86743  |
| 73887 | P03383 | Q06730 | -0.17069  |
| 73888 | P03383 | Q9ULW2 | -0.67434  |
| 73889 | P03383 | P60981 | -0.50799  |
| 73890 | P03383 | Q5TA89 | -0.22697  |
| 73891 | P03383 | Q9UK32 | -0.6163   |
| 73892 | P03383 | Q9Y336 | -1.1589   |
| 73893 | P03383 | O95416 | -0.24952  |
| 73894 | P03383 | Q86XE5 | -0.50783  |
| 73895 | P03383 | Q14973 | -0.84219  |
| 73896 | P03383 | Q494W8 | -0.87307  |
| 73897 | P03383 | P56746 | -0.64451  |
| 73898 | P03383 | Q8NET5 | -0.97694  |
| 73899 | P03383 | O15054 | -0.50837  |
| 73900 | P03383 | Q7Z406 | -0.45579  |
| 73901 | P03383 | Q9HB40 | -0.95633  |
| 73902 | P03383 | P23443 | -0.21142  |
| 73903 | P03383 | Q9H426 | -0.30176  |
| 73904 | P03383 | Q5U3C3 | -0.86584  |
| 73905 | P03383 | Q8WW52 | -0.6579   |
| 73906 | P03383 | Q9HCQ5 | -0.66473  |
| 73907 | P03383 | Q9NP80 | -0.53829  |
| 73908 | P03383 | Q5T619 | -0.21172  |
| 73909 | P03383 | Q1EHB4 | -0.98044  |
| 73910 | P03383 | Q15555 | -0.083991 |
| 73911 | P03383 | Q9Y519 | -0.86584  |
| 73912 | P03383 | Q7Z553 | -0.62737  |
| 73913 | P03383 | Q9C0B0 | -0.51948  |
| 73914 | P03383 | O94778 | -0.87403  |
| 73915 | P03383 | Q96MS0 | -0.84088  |
| 73916 | P03383 | Q01524 | -0.85472  |
| 73917 | P03383 | B2RXF0 | -0.5197   |
| 73918 | P03383 | P06887 | -0.97479  |
| 73919 | P03383 | O95872 | -0.44783  |
| 73920 | P03383 | P12830 | -0.39165  |
| 73921 | P03383 | Q6ZMN7 | -0.55362  |
| 73922 | P03383 | P43307 | -0.61583  |
| 73923 | P03383 | P0C0L4 | -1.0528   |
| 73924 | P03383 | P61006 | -0.60635  |
| 73925 | P03383 | Q8N114 | -0.56292  |
| 73926 | P03383 | Q5VTH9 | -0.22743  |
| 73927 | P03383 | P30453 | -0.7844   |
| 73928 | P03383 | Q68CQ1 | -0.86584  |
| 73929 | P03383 | Q4ZIN3 | -0.71569  |
| 73930 | P03383 | Q96D05 | -0.86584  |
| 73931 | P03383 | Q9Y6R4 | -0.27015  |
| 73932 | P03383 | P28288 | -0.62954  |
| 73933 | P03383 | Q8N6M6 | -0.64391  |
| 73934 | P03383 | Q68EM7 | -0.39051  |
| 73935 | P03383 | Q6ZNC8 | -0.69336  |
| 73936 | P03383 | Q9BXY4 | -0.85119  |
| 73937 | P03383 | P07225 | -0.76893  |
| 73938 | P03383 | Q9Y5R8 | -0.22822  |
| 73939 | P03383 | Q8N944 | -0.70149  |
| 73940 | P03383 | Q06495 | -0.49862  |
| 73941 | P03383 | O43707 | -0.33197  |
| 73942 | P03383 | Q12805 | -0.28276  |
| 73943 | P03383 | Q6ZRR9 | -0.62648  |
| 73944 | P03383 | Q13370 | -0.36304  |
| 73945 | P03383 | Q13021 | -0.30792  |
| 73946 | P03383 | Q96R72 | -1.1027   |
| 73947 | P03383 | Q8IV13 | -0.22626  |
| 73948 | P03383 | O60542 | -0.71284  |

|       |        |        |          |
|-------|--------|--------|----------|
| 73949 | P03383 | Q0VAA5 | -0.75153 |
| 73950 | P03383 | Q9H3W5 | -0.88011 |
| 73951 | P03383 | O95925 | -0.25483 |
| 73952 | P03383 | O60882 | -0.85284 |
| 73953 | P03383 | P55318 | -0.34215 |
| 73954 | P03383 | Q58G82 | -0.20636 |
| 73955 | P03383 | Q5TF39 | -0.94058 |
| 73956 | P03383 | Q8IXA5 | -0.53248 |
| 73957 | P03383 | Q9NPA1 | -1.0014  |
| 73958 | P03383 | Q07960 | -0.41727 |
| 73959 | P03383 | Q32M92 | -0.01725 |
| 73960 | P03383 | P61764 | -0.21574 |
| 73961 | P03383 | P30456 | -0.7844  |
| 73962 | P03383 | Q7Z713 | -0.22741 |
| 73963 | P03383 | Q7RTS5 | -0.89466 |
| 73964 | P03383 | Q86T26 | -1.568   |
| 73965 | P03383 | P0C221 | -0.15255 |
| 73966 | P03383 | Q9P203 | -0.22462 |
| 73967 | P03383 | P01213 | -0.88576 |
| 73968 | P03383 | P46094 | -1.1584  |
| 73969 | P03383 | P12081 | -0.3335  |
| 73970 | P03383 | Q8NBF4 | -0.41321 |
| 73971 | P03383 | P55064 | -0.50432 |
| 73972 | P03383 | Q8WZ71 | -0.86584 |
| 73973 | P03383 | Q6ZS02 | -0.1476  |
| 73974 | P03383 | P05014 | -0.70934 |
| 73975 | P03383 | P48651 | -0.75328 |
| 73976 | P03383 | Q69YG0 | -0.86584 |
| 73977 | P03383 | Q92874 | -0.84984 |
| 73978 | P03383 | P22307 | -0.21106 |
| 73979 | P03383 | P33763 | -0.36869 |
| 73980 | P03383 | Q99879 | -0.88998 |
| 73981 | P03383 | Q6ZSZ5 | -0.61009 |
| 73982 | P03383 | Q96B86 | -0.51019 |
| 73983 | P03383 | Q9P265 | -0.33579 |
| 73984 | P03383 | P01138 | -0.41692 |
| 73985 | P03383 | Q9Y6M7 | -0.78564 |
| 73986 | P03383 | P31949 | -0.22753 |
| 73987 | P03383 | Q4AE62 | -0.45869 |
| 73988 | P03383 | O75628 | -1.0545  |
| 73989 | P03383 | A6NCF5 | -0.22358 |
| 73990 | P03383 | Q6UWT2 | -0.87849 |
| 73991 | P03383 | Q8NC54 | -0.86584 |
| 73992 | P03383 | Q12840 | -0.26351 |
| 73993 | P03383 | A8MTI9 | -1.6001  |
| 73994 | P03383 | P35125 | -0.51346 |
| 73995 | P03383 | Q05823 | -0.3571  |
| 73996 | P03383 | Q8NGF4 | -1.1027  |
| 73997 | P03383 | Q9H3Q1 | -0.47677 |
| 73998 | P03383 | Q6ZVM7 | -0.41642 |
| 73999 | P03383 | O43278 | -0.78624 |
| 74000 | P03383 | Q6QAJ8 | -0.86584 |
| 74001 | P03383 | O00206 | -0.22742 |
| 74002 | P03383 | Q8TF17 | -0.53115 |
| 74003 | P03383 | Q5T0T0 | -0.82033 |
| 74004 | P03383 | Q7LDI9 | -0.40851 |
| 74005 | P03383 | P40145 | -0.79588 |
| 74006 | P03383 | Q9WJR5 | -0.43742 |
| 74007 | P03383 | Q15019 | -0.22717 |
| 74008 | P03383 | A4D174 | -0.20225 |
| 74009 | P03383 | Q8IYV9 | -0.9284  |
| 74010 | P03383 | P00995 | -0.26055 |
| 74011 | P03383 | Q9C0J8 | -0.22737 |
| 74012 | P03383 | Q9UHJ9 | -0.39869 |
| 74013 | P03383 | O95359 | -0.22499 |
| 74014 | P03383 | P51170 | -0.60078 |
| 74015 | P03383 | Q9H3M0 | -0.84843 |
| 74016 | P03383 | P0CG01 | -0.87849 |
| 74017 | P03383 | P55089 | -0.42483 |
| 74018 | P03383 | Q8N6N2 | -0.16078 |
| 74019 | P03383 | P36776 | -0.16854 |
| 74020 | P03383 | Q9UL54 | -0.5252  |
| 74021 | P03383 | P04080 | -0.18117 |
| 74022 | P03383 | Q5UAW9 | -1.2026  |
| 74023 | P03383 | Q92817 | -0.21672 |
| 74024 | P03383 | P10314 | -0.7844  |

|       |        |        |           |
|-------|--------|--------|-----------|
| 74025 | P03383 | Q96GL9 | -0.86584  |
| 74026 | P03383 | A8MWA6 | -0.48092  |
| 74027 | P03383 | Q96BX8 | -0.69322  |
| 74028 | P03383 | P38606 | -0.61897  |
| 74029 | P03383 | E7EML9 | -1.2917   |
| 74030 | P03383 | Q6SJ93 | -0.65844  |
| 74031 | P03383 | Q9H1E5 | -0.84715  |
| 74032 | P03383 | Q1MX18 | -0.43486  |
| 74033 | P03383 | P08579 | -0.22653  |
| 74034 | P03383 | Q8TF65 | -0.29487  |
| 74035 | P03383 | P56539 | -0.22487  |
| 74036 | P03383 | Q5MY95 | -1.0955   |
| 74037 | P03383 | Q9UIF7 | -0.15391  |
| 74038 | P03383 | P61020 | -0.52749  |
| 74039 | P03383 | Q8NGL9 | -1.1027   |
| 74040 | P03383 | Q9Y4C1 | -0.24493  |
| 74041 | P03383 | Q96RU8 | -0.22829  |
| 74042 | P03383 | P78383 | -0.84053  |
| 74043 | P03383 | Q9Y586 | -0.2389   |
| 74044 | P03383 | Q969K7 | -0.52887  |
| 74045 | P03383 | A8MQ14 | -0.21172  |
| 74046 | P03383 | Q01814 | -0.34038  |
| 74047 | P03383 | Q07617 | -0.76843  |
| 74048 | P03383 | Q6ZNG2 | -0.22729  |
| 74049 | P03383 | Q3SXM0 | -0.22744  |
| 74050 | P03383 | P08118 | -0.49597  |
| 74051 | P03383 | Q9H993 | -0.098012 |
| 74052 | P03383 | Q96H86 | -0.21172  |
| 74053 | P03383 | P21695 | -0.083697 |
| 74054 | P03383 | Q6NVV3 | -0.91069  |
| 74055 | P03383 | P04054 | -0.50674  |
| 74056 | P03383 | Q14315 | -0.22811  |
| 74057 | P03383 | Q6ZXV5 | -0.86584  |
| 74058 | P03383 | Q9UGM6 | -0.20393  |
| 74059 | P03383 | Q0VD67 | -0.34726  |
| 74060 | P03383 | Q16512 | -0.22311  |
| 74061 | P03383 | P78552 | -0.48091  |
| 74062 | P03383 | A6NLP5 | -0.21705  |
| 74063 | P03383 | Q8TC26 | -0.79676  |
| 74064 | P03383 | Q96H96 | -0.64958  |
| 74065 | P03383 | P56817 | -0.81776  |
| 74066 | P03383 | Q00765 | -0.1403   |
| 74067 | P03383 | Q14126 | -0.87015  |
| 74068 | P03383 | Q96R05 | -0.46227  |
| 74069 | P03383 | Q9ULW5 | -0.72007  |
| 74070 | P03383 | P01591 | -0.88984  |
| 74071 | P03383 | Q9NP84 | -0.52929  |
| 74072 | P03383 | Q15311 | -0.41697  |
| 74073 | P03383 | Q70JA7 | -0.5004   |
| 74074 | P03383 | Q9NQ86 | -0.62301  |
| 74075 | P03383 | P20671 | -0.88998  |
| 74076 | P03383 | P46821 | -0.18335  |
| 74077 | P03383 | Q8TBZ8 | -0.21172  |
| 74078 | P03383 | P33260 | -0.7565   |
| 74079 | P03383 | A6NDJ8 | -0.92564  |
| 74080 | P03383 | Q9Y2Z9 | -0.61707  |
| 74081 | P03383 | Q9UN19 | -0.82016  |
| 74082 | P03383 | P0CG36 | -0.99941  |
| 74083 | P03383 | Q13956 | -0.52348  |
| 74084 | P03383 | P78330 | -0.46633  |
| 74085 | P03383 | Q86Y22 | -1.1319   |
| 74086 | P03383 | P07948 | -0.22979  |
| 74087 | P03383 | Q8NEW0 | -0.4551   |
| 74088 | P03383 | Q8NHP8 | -0.58777  |
| 74089 | P03383 | Q8NI32 | -0.60538  |
| 74090 | P03383 | O14843 | -1.3695   |
| 74091 | P03383 | Q86X59 | -0.15095  |
| 74092 | P03383 | O00746 | -0.54282  |
| 74093 | P03383 | Q9HCE6 | -0.57571  |
| 74094 | P03383 | Q30KQ2 | -0.84399  |
| 74095 | P03383 | Q6UX39 | -0.81814  |
| 74096 | P03383 | P10586 | -0.81492  |
| 74097 | P03383 | A6NNP5 | -0.047124 |
| 74098 | P03383 | A6NGG8 | -0.71825  |
| 74099 | P03383 | O14979 | -0.24726  |
| 74100 | P03383 | P01116 | -0.3013   |

|       |        |        |           |
|-------|--------|--------|-----------|
| 74101 | P03383 | Q8NET1 | -0.84399  |
| 74102 | P03383 | Q96M89 | -0.14089  |
| 74103 | P03383 | Q9UHW5 | -0.87111  |
| 74104 | P03383 | P13726 | -0.31336  |
| 74105 | P03383 | Q9UHJ6 | -0.54658  |
| 74106 | P03383 | P17342 | -0.79503  |
| 74107 | P03383 | P0C7P3 | -0.79654  |
| 74108 | P03383 | Q8NGR1 | -1.1027   |
| 74109 | P03383 | P13497 | -1.0314   |
| 74110 | P03383 | Q9UNE7 | -0.22549  |
| 74111 | P03383 | Q9HC56 | -1.0841   |
| 74112 | P03383 | Q9Y2T3 | -0.47097  |
| 74113 | P03383 | Q8TC99 | -0.23186  |
| 74114 | P03383 | Q96CS7 | -0.57001  |
| 74115 | P03383 | Q9H9P5 | -0.22739  |
| 74116 | P03383 | O75838 | -0.52751  |
| 74117 | P03383 | Q96L96 | -0.55578  |
| 74118 | P03383 | Q8IVU1 | -0.97042  |
| 74119 | P03383 | Q8TDC3 | -0.50926  |
| 74120 | P03383 | Q8TEB1 | -0.22785  |
| 74121 | P03383 | P48052 | -1.0972   |
| 74122 | P03383 | Q96S86 | -1.0554   |
| 74123 | P03383 | Q9UBK8 | -0.31079  |
| 74124 | P03383 | P0C264 | -0.9088   |
| 74125 | P03383 | Q6ZN92 | -0.40277  |
| 74126 | P03383 | Q86VQ1 | -0.29487  |
| 74127 | P03383 | Q96LP4 | -0.14546  |
| 74128 | P03383 | Q14896 | -0.77589  |
| 74129 | P03383 | Q99683 | -0.22739  |
| 74130 | P03383 | P55055 | -0.23489  |
| 74131 | P03383 | Q9P127 | -0.21602  |
| 74132 | P03383 | Q3LXA3 | -0.87583  |
| 74133 | P03383 | Q9H0C1 | -0.73967  |
| 74134 | P03383 | P62993 | -0.22741  |
| 74135 | P03383 | O43612 | -0.47301  |
| 74136 | P03383 | Q68CK6 | -0.69957  |
| 74137 | P03383 | Q8NG06 | -0.73967  |
| 74138 | P03383 | Q6ZTQ4 | -1.1297   |
| 74139 | P03383 | Q9NYQ8 | -0.78098  |
| 74140 | P03383 | P07359 | -0.52081  |
| 74141 | P03383 | Q14D33 | -0.86584  |
| 74142 | P03383 | P05013 | -0.64227  |
| 74143 | P03383 | P52739 | -0.42048  |
| 74144 | P03383 | Q9NQI0 | -0.47042  |
| 74145 | P03383 | Q9NQY0 | -0.35602  |
| 74146 | P03383 | Q14865 | -0.21607  |
| 74147 | P03383 | Q04743 | -0.22676  |
| 74148 | P03383 | Q9HAA7 | -0.12538  |
| 74149 | P03383 | Q92737 | -0.81234  |
| 74150 | P03383 | A1L390 | -0.76318  |
| 74151 | P03383 | Q9HBT8 | -0.21172  |
| 74152 | P03383 | Q96B02 | -0.39492  |
| 74153 | P03383 | Q14204 | -0.22532  |
| 74154 | P03383 | Q9NYI0 | -0.55826  |
| 74155 | P03383 | Q96GP6 | -0.49597  |
| 74156 | P03383 | Q6PIV7 | -0.73185  |
| 74157 | P03383 | O60412 | -1.1027   |
| 74158 | P03383 | Q02962 | -0.22735  |
| 74159 | P03383 | Q9BUP0 | -0.3325   |
| 74160 | P03383 | Q8TD17 | -0.22434  |
| 74161 | P03383 | P01602 | -0.97479  |
| 74162 | P03383 | Q96HH4 | -0.86584  |
| 74163 | P03383 | Q86WI1 | -0.83331  |
| 74164 | P03383 | P0C7T8 | -0.86584  |
| 74165 | P03383 | Q9NUD7 | -0.076011 |
| 74166 | P03383 | Q96A32 | -0.56033  |
| 74167 | P03383 | Q6UXB2 | -1.0661   |
| 74168 | P03383 | Q6UWH4 | -0.72271  |
| 74169 | P03383 | Q8WV74 | -0.30367  |
| 74170 | P03383 | Q6EBC2 | -0.87365  |
| 74171 | P03383 | Q7Z5Q1 | -0.65542  |
| 74172 | P03383 | Q9UJU3 | -0.21172  |
| 74173 | P03383 | P51793 | -0.97109  |
| 74174 | P03383 | Q9Y512 | -0.068756 |
| 74175 | P03383 | P35612 | -0.41742  |
| 74176 | P03383 | Q5T7M9 | -0.93931  |

|       |        |        |           |
|-------|--------|--------|-----------|
| 74177 | P03383 | A6NJZ3 | -1.1027   |
| 74178 | P03383 | Q8IXL6 | -0.92072  |
| 74179 | P03383 | Q9UPP2 | -0.22116  |
| 74180 | P03383 | Q9Y233 | -0.67829  |
| 74181 | P03383 | Q8NE86 | -0.33335  |
| 74182 | P03383 | Q8IXT2 | -0.10679  |
| 74183 | P03383 | P27707 | -0.43807  |
| 74184 | P03383 | P21549 | -0.20895  |
| 74185 | P03383 | Q6DHY5 | -1.2307   |
| 74186 | P03383 | Q96KT7 | -0.86584  |
| 74187 | P03383 | Q12912 | -0.9032   |
| 74188 | P03383 | P59796 | -1.045    |
| 74189 | P03383 | P54687 | -0.28677  |
| 74190 | P03383 | Q15700 | -0.18506  |
| 74191 | P03383 | Q96P48 | -0.45259  |
| 74192 | P03383 | P06241 | -0.29906  |
| 74193 | P03383 | Q9UBN7 | -0.21962  |
| 74194 | P03383 | Q9GZK6 | -1.1027   |
| 74195 | P03383 | Q9UKF2 | -1.0975   |
| 74196 | P03383 | Q9NS87 | -0.27256  |
| 74197 | P03383 | Q7M4L6 | -0.41833  |
| 74198 | P03383 | A6NCV1 | -1.1027   |
| 74199 | P03383 | A6ND01 | -0.85847  |
| 74200 | P03383 | O00159 | -0.11323  |
| 74201 | P03383 | Q7Z4M0 | -0.3778   |
| 74202 | P03383 | P15018 | -0.36767  |
| 74203 | P03383 | A6NMD2 | -0.35868  |
| 74204 | P03383 | Q5JYT7 | -0.016151 |
| 74205 | P03383 | Q9P0V9 | -0.47514  |
| 74206 | P03383 | Q9H2A2 | -0.70402  |
| 74207 | P03383 | P51124 | -1.1506   |
| 74208 | P03383 | Q4V339 | -0.79654  |
| 74209 | P03383 | P30531 | -0.60136  |
| 74210 | P03383 | Q15751 | -0.41823  |
| 74211 | P03383 | Q8WWY8 | -1.0637   |
| 74212 | P03383 | O43736 | -0.31983  |
| 74213 | P03383 | Q01995 | -0.33648  |
| 74214 | P03383 | P14061 | -0.63882  |
| 74215 | P03383 | Q9P035 | -1.0283   |
| 74216 | P03383 | P36959 | -0.53156  |
| 74217 | P03383 | Q9NZ94 | -0.34661  |
| 74218 | P03383 | P40261 | -0.21729  |
| 74219 | P03383 | O15204 | -1.0652   |
| 74220 | P03383 | P32019 | -0.43526  |
| 74221 | P03383 | Q8WXA2 | -0.87849  |
| 74222 | P03383 | Q6PIS1 | -0.81229  |
| 74223 | P03383 | Q03164 | -0.22696  |
| 74224 | P03383 | Q14416 | -1.1522   |
| 74225 | P03383 | Q16690 | -0.7944   |
| 74226 | P03383 | P04180 | -0.31468  |
| 74227 | P03383 | D6R9N7 | -0.69644  |
| 74228 | P03383 | Q96R27 | -1.1027   |
| 74229 | P03383 | P02585 | -0.54865  |
| 74230 | P03383 | P56856 | -0.64451  |
| 74231 | P03383 | Q86T90 | -0.21418  |
| 74232 | P03383 | Q6ZSU1 | -0.59109  |
| 74233 | P03383 | Q16698 | -0.21304  |
| 74234 | P03383 | Q9H3S3 | -1.2486   |
| 74235 | P03383 | P32754 | -0.44336  |
| 74236 | P03383 | Q9NYA3 | -0.35868  |
| 74237 | P03383 | Q8WUD6 | -0.58891  |
| 74238 | P03383 | P22830 | -0.10656  |
| 74239 | P03383 | Q9UKR5 | -0.70909  |
| 74240 | P03383 | P49753 | -0.3249   |
| 74241 | P03383 | Q7Z698 | -0.20729  |
| 74242 | P03383 | P00736 | -1.3118   |
| 74243 | P03383 | Q15198 | -0.64891  |
| 74244 | P03383 | Q9UDW3 | -0.17887  |
| 74245 | P03383 | Q96I99 | -0.67227  |
| 74246 | P03383 | Q6ZQQ6 | -0.18877  |
| 74247 | P03383 | Q92529 | -0.22741  |
| 74248 | P03383 | Q96D21 | -0.94485  |
| 74249 | P03383 | Q8N6K0 | -0.86584  |
| 74250 | P03383 | Q6IPT4 | -0.59653  |
| 74251 | P03383 | Q9BQP7 | -0.30763  |
| 74252 | P03383 | Q9QC07 | -0.48794  |

|       |        |         |          |
|-------|--------|---------|----------|
| 74253 | P03383 | Q96NY7  | -0.64739 |
| 74254 | P03383 | O43491  | -0.2695  |
| 74255 | P03383 | Q04912  | -0.65979 |
| 74256 | P03383 | Q9H5V8  | -1.2762  |
| 74257 | P03383 | P53816  | -0.16022 |
| 74258 | P03383 | Q9UIB8  | -1.0985  |
| 74259 | P03383 | Q9BXXN1 | -0.98121 |
| 74260 | P03383 | Q9H3E2  | -0.37527 |
| 74261 | P03383 | Q92583  | -1.1063  |
| 74262 | P03383 | O95264  | -0.99689 |
| 74263 | P03383 | Q96JN2  | -0.74159 |
| 74264 | P03383 | O60268  | -0.29487 |
| 74265 | P03383 | Q13049  | -0.2274  |
| 74266 | P03383 | Q7L5N7  | -0.68732 |
| 74267 | P03383 | C9J1S8  | -0.73967 |
| 74268 | P03383 | Q14974  | -0.22741 |
| 74269 | P03383 | Q8TBB5  | -0.22508 |
| 74270 | P03383 | Q9C0H6  | -0.20786 |
| 74271 | P03383 | Q9UP95  | -0.96471 |
| 74272 | P03383 | Q96RT7  | -0.20665 |
| 74273 | P03383 | P50454  | -0.27701 |
| 74274 | P03383 | Q86XT4  | -0.68348 |
| 74275 | P03383 | Q6ZVK1  | -0.86584 |
| 74276 | P03383 | Q9H6Y5  | -0.22692 |
| 74277 | P03383 | Q9H792  | -0.35909 |
| 74278 | P03383 | Q15614  | -1.1027  |
| 74279 | P03383 | Q8IW75  | -0.65259 |
| 74280 | P03383 | Q6ZR08  | -0.69496 |
| 74281 | P03383 | P47985  | -0.94517 |
| 74282 | P03383 | Q8IX30  | -0.22749 |
| 74283 | P03383 | Q8TAM6  | -0.50717 |
| 74284 | P03383 | P84077  | -0.22807 |
| 74285 | P03383 | P60852  | -1.155   |
| 74286 | P03383 | Q9UMZ2  | -0.25741 |
| 74287 | P03383 | Q0D2I5  | -0.11137 |
| 74288 | P03383 | Q15255  | -0.42773 |
| 74289 | P03383 | P48201  | -0.70051 |
| 74290 | P03383 | Q6ZT89  | -0.7196  |
| 74291 | P03383 | P15515  | -0.29506 |
| 74292 | P03383 | Q8N8B7  | -0.2095  |
| 74293 | P03383 | Q6UWJ8  | -0.86584 |
| 74294 | P03383 | Q9NUB1  | -0.2548  |
| 74295 | P03383 | Q9BTV7  | -0.1133  |
| 74296 | P03383 | Q01629  | -0.76864 |
| 74297 | P03383 | Q8N8S7  | -0.3081  |
| 74298 | P03383 | Q8IVF2  | -0.21602 |
| 74299 | P03383 | Q08170  | -0.22738 |
| 74300 | P03383 | Q9Y5H4  | -1.1297  |
| 74301 | P03383 | Q06945  | -0.23714 |
| 74302 | P03383 | Q96NH3  | -1.0495  |
| 74303 | P03383 | Q6J9G0  | -1.1728  |
| 74304 | P03383 | P51149  | -0.42276 |
| 74305 | P03383 | A6NM45  | -0.66509 |
| 74306 | P03383 | Q9H9P8  | -0.601   |
| 74307 | P03383 | P30461  | -0.88446 |
| 74308 | P03383 | Q01538  | -0.20848 |
| 74309 | P03383 | P15169  | -1.1688  |
| 74310 | P03383 | Q15223  | -0.39245 |
| 74311 | P03383 | Q8N264  | -0.6759  |
| 74312 | P03383 | O60928  | -0.95136 |
| 74313 | P03383 | P17025  | -0.21172 |
| 74314 | P03383 | P11309  | -0.22762 |
| 74315 | P03383 | P50226  | -0.33087 |
| 74316 | P03383 | Q15357  | -0.22741 |
| 74317 | P03383 | Q86SG2  | -0.22741 |
| 74318 | P03383 | Q96DS6  | -0.86584 |
| 74319 | P03383 | P62195  | -0.58397 |
| 74320 | P03383 | Q9HBE5  | -0.82116 |
| 74321 | P03383 | P41247  | -0.24895 |
| 74322 | P03383 | B2RD01  | -0.33321 |
| 74323 | P03383 | P22749  | -0.83697 |
| 74324 | P03383 | P17066  | -0.59192 |
| 74325 | P03383 | O75781  | -0.23554 |
| 74326 | P03383 | P10092  | -0.94563 |
| 74327 | P03383 | A6NKZ8  | -0.59955 |
| 74328 | P03383 | P56202  | -0.79571 |

|       |        |        |           |
|-------|--------|--------|-----------|
| 74329 | P03383 | Q8WYK0 | -0.23522  |
| 74330 | P03383 | Q9Y442 | -0.86584  |
| 74331 | P03383 | P78333 | -0.99364  |
| 74332 | P03383 | O43150 | -0.3896   |
| 74333 | P03383 | Q4G0T1 | -0.82841  |
| 74334 | P03383 | P40938 | -0.20532  |
| 74335 | P03383 | P35225 | -0.24559  |
| 74336 | P03383 | Q9Y597 | -0.19405  |
| 74337 | P03383 | P17900 | -0.26725  |
| 74338 | P03383 | P11117 | -0.77887  |
| 74339 | P03383 | Q8NGF0 | -1.1027   |
| 74340 | P03383 | Q5JX71 | -0.86584  |
| 74341 | P03383 | B1ANH7 | -0.23548  |
| 74342 | P03383 | Q6TFL4 | -0.4703   |
| 74343 | P03383 | Q13630 | -0.77523  |
| 74344 | P03383 | O75690 | -0.43641  |
| 74345 | P03383 | Q5QJ38 | -0.52751  |
| 74346 | P03383 | P26006 | -0.42448  |
| 74347 | P03383 | Q9BRX9 | -0.2277   |
| 74348 | P03383 | Q8NFX9 | -0.20259  |
| 74349 | P03383 | O94761 | -0.50541  |
| 74350 | P03383 | Q00537 | -0.6365   |
| 74351 | P03383 | Q8N806 | -0.46487  |
| 74352 | P03383 | O00533 | -1.1599   |
| 74353 | P03383 | A8MTJ6 | -0.37218  |
| 74354 | P03383 | Q76FK4 | -0.22772  |
| 74355 | P03383 | O75197 | -0.25247  |
| 74356 | P03383 | Q12899 | -0.56317  |
| 74357 | P03383 | Q9UH17 | -0.77806  |
| 74358 | P03383 | A8MX19 | -0.48092  |
| 74359 | P03383 | Q5JRV8 | -0.86584  |
| 74360 | P03383 | Q16880 | -0.68036  |
| 74361 | P03383 | Q2KJY2 | -0.76169  |
| 74362 | P03383 | Q9NWZ3 | -0.22734  |
| 74363 | P03383 | Q5I0G3 | -0.53444  |
| 74364 | P03383 | Q6ZV70 | -0.65844  |
| 74365 | P03383 | P51970 | -0.15863  |
| 74366 | P03383 | O76081 | -0.46363  |
| 74367 | P03383 | P12694 | -0.11324  |
| 74368 | P03383 | Q9BZ67 | -0.44826  |
| 74369 | P03383 | Q8IVF5 | -0.83722  |
| 74370 | P03383 | Q86XG9 | -0.29487  |
| 74371 | P03383 | Q9GZX9 | -0.83278  |
| 74372 | P03383 | P58743 | -0.78681  |
| 74373 | P03383 | Q8N9F0 | -0.62109  |
| 74374 | P03383 | Q8NGL7 | -1.1027   |
| 74375 | P03383 | P05534 | -0.7844   |
| 74376 | P03383 | P32456 | -0.46866  |
| 74377 | P03383 | Q07092 | -0.58746  |
| 74378 | P03383 | Q8TE23 | -1.0864   |
| 74379 | P03383 | Q9UKA4 | -0.15575  |
| 74380 | P03383 | P20929 | -0.47142  |
| 74381 | P03383 | Q13072 | -0.87849  |
| 74382 | P03383 | Q9H089 | -0.27902  |
| 74383 | P03383 | Q9Y6Q9 | -0.37945  |
| 74384 | P03383 | P37288 | -0.42717  |
| 74385 | P03383 | P06340 | -0.87018  |
| 74386 | P03383 | Q9H0R1 | -0.060558 |
| 74387 | P03383 | Q86UP8 | -0.15477  |
| 74388 | P03383 | P85037 | -0.28654  |
| 74389 | P03383 | Q2TBF2 | -0.86584  |
| 74390 | P03383 | Q6P996 | -0.63334  |
| 74391 | P03383 | O95084 | -1.0632   |
| 74392 | P03383 | Q15758 | -0.80033  |
| 74393 | P03383 | Q9NSP4 | -0.16552  |
| 74394 | P03383 | Q8TCT8 | -0.57192  |
| 74395 | P03383 | P05023 | -0.42236  |
| 74396 | P03383 | O95674 | -0.55639  |
| 74397 | P03383 | P62942 | -0.22798  |
| 74398 | P03383 | P29558 | -0.24283  |
| 74399 | P03383 | P22083 | -0.57112  |
| 74400 | P03383 | Q49A92 | -0.56548  |
| 74401 | P03383 | A6NKG6 | -0.21816  |
| 74402 | P03383 | Q6YN16 | -0.73418  |
| 74403 | P03383 | A6NC57 | -0.22741  |
| 74404 | P03383 | P46695 | -0.17819  |



|       |        |        |          |
|-------|--------|--------|----------|
| 74405 | P03383 | O00194 | -0.6836  |
| 74406 | P03383 | O94993 | -0.16792 |
| 74407 | P03383 | Q8TE99 | -0.81732 |
| 74408 | P03383 | P17481 | -0.22051 |
| 74409 | P03383 | O95249 | -0.41046 |
| 74410 | P03383 | O76062 | -0.94978 |
| 74411 | P03383 | O75051 | -0.95833 |
| 74412 | P03383 | O75061 | -0.49346 |
| 74413 | P03383 | Q9Y6X1 | -0.50292 |
| 74414 | P03383 | Q9UPM6 | -0.24495 |
| 74415 | P03383 | Q8NBF6 | -0.82196 |
| 74416 | P03383 | Q6UWM7 | -0.83419 |
| 74417 | P03383 | Q8N614 | -0.86584 |
| 74418 | P03383 | Q8WXH4 | -0.62076 |
| 74419 | P03383 | Q5TZJ5 | -0.86584 |
| 74420 | P03383 | Q9NZN9 | -0.21707 |
| 74421 | P03383 | Q504Y0 | -0.87538 |
| 74422 | P03383 | O43174 | -0.69761 |
| 74423 | P03383 | Q6UWY5 | -0.87849 |
| 74424 | P03383 | Q70CQ1 | -0.4179  |
| 74425 | P03383 | A2A2Y4 | -0.62023 |
| 74426 | P03383 | O14640 | -0.15797 |
| 74427 | P03383 | A4D2G3 | -1.1027  |
| 74428 | P03383 | O43830 | -0.17069 |
| 74429 | P03383 | Q8N0Z8 | -0.36852 |
| 74430 | P03383 | E7ETH6 | -0.17187 |
| 74431 | P03383 | Q8NC60 | -0.19977 |
| 74432 | P03383 | Q86YT5 | -0.71154 |
| 74433 | P03383 | Q6DHV7 | -0.30612 |
| 74434 | P03383 | O43896 | -0.53838 |
| 74435 | P03383 | Q68CZ1 | -0.21552 |
| 74436 | P03383 | Q8NA66 | -0.18187 |
| 74437 | P03383 | Q6UXQ6 | -0.87849 |
| 74438 | P03383 | Q9UQ72 | -0.88363 |
| 74439 | P03383 | Q7Z4S9 | -0.22732 |
| 74440 | P03383 | P21291 | -0.29787 |
| 74441 | P03383 | Q9HCG7 | -0.75521 |
| 74442 | P03383 | A6NEH6 | -0.85795 |
| 74443 | P03383 | Q9NXF8 | -0.78488 |
| 74444 | P03383 | Q7Z2G1 | -0.82471 |
| 74445 | P03383 | Q13572 | -0.89037 |
| 74446 | P03383 | Q99437 | -0.64408 |
| 74447 | P03383 | Q9Y5H5 | -1.1297  |
| 74448 | P03383 | O15042 | -0.22644 |
| 74449 | P03383 | Q96PE1 | -1.0416  |
| 74450 | P03383 | Q6L8Q7 | -0.2793  |
| 74451 | P03383 | Q96F46 | -0.55272 |
| 74452 | P03383 | Q6IAN0 | -0.95111 |
| 74453 | P03383 | P61812 | -0.22741 |
| 74454 | P03383 | P32298 | -0.75782 |
| 74455 | P03383 | Q8NGF3 | -1.1027  |
| 74456 | P03383 | P04229 | -0.54343 |
| 74457 | P03383 | P19827 | -0.83798 |
| 74458 | P03383 | Q6P5Z2 | -0.24307 |
| 74459 | P03383 | O15530 | -0.22589 |
| 74460 | P03383 | P48728 | -0.16982 |
| 74461 | P03383 | Q96FT9 | -0.22612 |
| 74462 | P03383 | Q9UM47 | -0.23068 |
| 74463 | P03383 | Q92786 | -0.21153 |
| 74464 | P03383 | Q8N2U0 | -0.86584 |
| 74465 | P03383 | Q09472 | -0.16798 |
| 74466 | P03383 | Q16552 | -0.57272 |
| 74467 | P03383 | Q7Z3Q1 | -0.84814 |
| 74468 | P03383 | Q96PP9 | -0.58408 |
| 74469 | P03383 | Q8NBP5 | -0.87101 |
| 74470 | P03383 | P30483 | -0.88446 |
| 74471 | P03383 | O14975 | -0.66179 |
| 74472 | P03383 | O00461 | -0.33407 |
| 74473 | P03383 | Q9UBS5 | -0.57472 |
| 74474 | P03383 | Q9H4G8 | -0.47027 |
| 74475 | P03383 | Q96BZ9 | -1.3001  |
| 74476 | P03383 | Q68DU8 | -0.20107 |
| 74477 | P03383 | Q99983 | -0.86646 |
| 74478 | P03383 | E5RG02 | -0.91901 |
| 74479 | P03383 | P34998 | -0.56096 |
| 74480 | P03383 | P37058 | -0.4599  |

|       |        |        |          |
|-------|--------|--------|----------|
| 74481 | P03383 | Q96AC1 | -0.216   |
| 74482 | P03383 | Q9H2Y7 | -0.38773 |
| 74483 | P03383 | Q14194 | -0.21594 |
| 74484 | P03383 | P24592 | -0.74781 |
| 74485 | P03383 | Q8TEW0 | -0.2264  |
| 74486 | P03383 | Q9Y2U5 | -0.58588 |
| 74487 | P03383 | O43323 | -0.75561 |
| 74488 | P03383 | A1A5C7 | -0.85457 |
| 74489 | P03383 | O43731 | -0.6043  |
| 74490 | P03383 | P36383 | -0.88706 |
| 74491 | P03383 | Q3MIP1 | -0.86584 |
| 74492 | P03383 | Q6P1K1 | -0.79227 |
| 74493 | P03383 | Q9P104 | -0.41303 |
| 74494 | P03383 | O95298 | -0.38662 |
| 74495 | P03383 | O95807 | -0.71866 |
| 74496 | P03383 | Q7Z398 | -0.21172 |
| 74497 | P03383 | Q13303 | -0.83199 |
| 74498 | P03383 | O60706 | -0.92907 |
| 74499 | P03383 | O95425 | -0.34537 |
| 74500 | P03383 | P03886 | -0.19473 |
| 74501 | P03383 | Q9Y5G9 | -1.1335  |
| 74502 | P03383 | O00624 | -0.98274 |
| 74503 | P03383 | Q9Y5Z4 | -0.17802 |
| 74504 | P03383 | P58166 | -0.76066 |
| 74505 | P03383 | Q13261 | -0.48878 |
| 74506 | P03383 | Q9P273 | -0.95079 |
| 74507 | P03383 | Q16555 | -0.21079 |
| 74508 | P03383 | Q7KYR7 | -0.89303 |
| 74509 | P03383 | Q9Y6F1 | -0.20621 |
| 74510 | P03383 | Q9C009 | -0.32403 |
| 74511 | P03383 | Q9BWQ6 | -0.84601 |
| 74512 | P03383 | E5RJM6 | -0.22741 |
| 74513 | P03383 | P04000 | -1.2635  |
| 74514 | P03383 | Q8TF05 | -0.17299 |
| 74515 | P03383 | P53985 | -0.5445  |
| 74516 | P03383 | O75718 | -0.89736 |
| 74517 | P03383 | Q6ZMI0 | -0.38373 |
| 74518 | P03383 | Q96DC8 | -0.54094 |
| 74519 | P03383 | P06331 | -0.97479 |
| 74520 | P03383 | Q9UQ53 | -0.55519 |
| 74521 | P03383 | P48742 | -0.22747 |
| 74522 | P03383 | Q9NZJ5 | -0.28771 |
| 74523 | P03383 | Q7Z2F6 | -0.31656 |
| 74524 | P03383 | P22303 | -0.22719 |
| 74525 | P03383 | Q96T55 | -1.0473  |
| 74526 | P03383 | Q10589 | -0.38238 |
| 74527 | P03383 | Q92914 | -0.37542 |
| 74528 | P03383 | P09669 | -0.56658 |
| 74529 | P03383 | Q9NZT2 | -0.10989 |
| 74530 | P03383 | Q8IUB3 | -0.85841 |
| 74531 | P03383 | P0C7L1 | -0.79897 |
| 74532 | P03383 | Q9NYU1 | -0.41303 |
| 74533 | P03383 | O94830 | -0.21676 |
| 74534 | P03383 | A6NEL2 | -0.22741 |
| 74535 | P03383 | Q8TAV4 | -1.0375  |
| 74536 | P03383 | Q6IQ16 | -0.22351 |
| 74537 | P03383 | P55786 | -0.30046 |
| 74538 | P03383 | Q6ZS27 | -0.21172 |
| 74539 | P03383 | Q9NRU3 | -1.0157  |
| 74540 | P03383 | P0C5W0 | -0.29487 |
| 74541 | P03383 | Q58FG0 | -0.58434 |
| 74542 | P03383 | Q6ZMH5 | -0.8306  |
| 74543 | P03383 | Q9H255 | -1.1027  |
| 74544 | P03383 | Q9Y5H8 | -1.1553  |
| 74545 | P03383 | Q8N442 | -0.66155 |
| 74546 | P03383 | P30559 | -0.78182 |
| 74547 | P03383 | Q13596 | -0.22624 |
| 74548 | P03383 | Q8TD20 | -0.50057 |
| 74549 | P03383 | P49795 | -0.26502 |
| 74550 | P03383 | Q9H7X0 | -0.25935 |
| 74551 | P03383 | Q9BT09 | -0.45909 |
| 74552 | P03383 | P10412 | -0.21697 |
| 74553 | P03383 | P11217 | -0.41156 |
| 74554 | P03383 | P02647 | -0.29094 |
| 74555 | P03383 | Q8NGI0 | -1.1027  |
| 74556 | P03383 | Q9BUZ4 | -0.22732 |

|       |        |        |          |
|-------|--------|--------|----------|
| 74557 | P03383 | Q4VNC0 | -0.91999 |
| 74558 | P03383 | Q12923 | -0.24797 |
| 74559 | P03383 | Q9NSE7 | -0.58945 |
| 74560 | P03383 | Q6W3E5 | -0.80507 |
| 74561 | P03383 | P42892 | -0.58835 |
| 74562 | P03383 | Q5D862 | -0.36485 |
| 74563 | P03383 | Q16518 | -0.59586 |
| 74564 | P03383 | Q13113 | -0.86584 |
| 74565 | P03383 | Q86VR8 | -0.91732 |
| 74566 | P03383 | Q96D53 | -0.77071 |
| 74567 | P03383 | Q9BV47 | -0.27221 |
| 74568 | P03383 | P48736 | -0.33591 |
| 74569 | P03383 | Q8TED1 | -0.99555 |
| 74570 | P03383 | P54368 | -0.26402 |
| 74571 | P03383 | Q01459 | -0.49578 |
| 74572 | P03383 | Q96P66 | -1.1721  |
| 74573 | P03383 | Q8NBM8 | -0.95283 |
| 74574 | P03383 | P55042 | -0.60517 |
| 74575 | P03383 | Q9H161 | -0.21679 |
| 74576 | P03383 | P09455 | -0.49492 |
| 74577 | P03383 | P22680 | -0.65289 |
| 74578 | P03383 | Q969J3 | -0.10308 |
| 74579 | P03383 | Q9Y4K4 | -0.34475 |
| 74580 | P03383 | Q5RGS2 | -0.86584 |
| 74581 | P03383 | Q9GZV1 | -0.7072  |
| 74582 | P03383 | P59551 | -1.0686  |
| 74583 | P03383 | A8MZ25 | -0.40462 |
| 74584 | P03383 | P39060 | -0.46674 |
| 74585 | P03383 | Q14772 | -0.82697 |
| 74586 | P03383 | Q8IVI9 | -0.22716 |
| 74587 | P03383 | Q43603 | -1.0393  |
| 74588 | P03383 | P12319 | -0.90385 |
| 74589 | P03383 | Q43895 | -0.83312 |
| 74590 | P03383 | Q9Y5J5 | -0.48642 |
| 74591 | P03383 | Q75679 | -0.52332 |
| 74592 | P03383 | Q9UJA3 | -0.33265 |
| 74593 | P03383 | Q96J87 | -0.4705  |
| 74594 | P03383 | Q86T65 | -0.46799 |
| 74595 | P03383 | Q08477 | -0.84539 |
| 74596 | P03383 | P43699 | -0.28689 |
| 74597 | P03383 | Q9Y227 | -0.52381 |
| 74598 | P03383 | B0I1T2 | -0.7233  |
| 74599 | P03383 | Q96G42 | -0.2147  |
| 74600 | P03383 | Q7LGA3 | -0.53818 |
| 74601 | P03383 | Q6T310 | -0.38454 |
| 74602 | P03383 | Q6XZF7 | -0.22741 |
| 74603 | P03383 | Q8NEA9 | -0.21848 |
| 74604 | P03383 | P05452 | -0.8601  |
| 74605 | P03383 | Q86SF2 | -0.56391 |
| 74606 | P03383 | Q9NUU7 | -0.11013 |
| 74607 | P03383 | P01033 | -0.24024 |
| 74608 | P03383 | Q96QS1 | -0.82353 |
| 74609 | P03383 | A8MUP6 | -0.86584 |
| 74610 | P03383 | Q9H1E1 | -0.67659 |
| 74611 | P03383 | Q96MX0 | -0.88766 |
| 74612 | P03383 | Q6P1R4 | -0.64448 |
| 74613 | P03383 | Q01432 | -0.2903  |
| 74614 | P03383 | Q92824 | -0.77036 |
| 74615 | P03383 | Q2QD12 | -0.4843  |
| 74616 | P03383 | O75593 | -0.30333 |
| 74617 | P03383 | Q9H903 | -0.70965 |
| 74618 | P03383 | Q0P5N6 | -1.2555  |
| 74619 | P03383 | P50895 | -1.1435  |
| 74620 | P03383 | Q96PQ0 | -0.85806 |
| 74621 | P03383 | O60911 | -0.48594 |
| 74622 | P03383 | P34969 | -1.1633  |
| 74623 | P03383 | Q9BQ50 | -0.35652 |
| 74624 | P03383 | P50151 | -0.58415 |
| 74625 | P03383 | Q8IZQ5 | -0.45307 |
| 74626 | P03383 | Q8NGX5 | -1.1027  |
| 74627 | P03383 | Q8WWF1 | -0.87849 |
| 74628 | P03383 | Q16820 | -1.2696  |
| 74629 | P03383 | Q5VY43 | -0.88921 |
| 74630 | P03383 | Q8WVT3 | -0.38521 |
| 74631 | P03383 | Q9BZP6 | -0.5399  |
| 74632 | P03383 | Q17RR3 | -0.90503 |

|       |        |        |           |
|-------|--------|--------|-----------|
| 74633 | P03383 | Q9UMY4 | -0.22243  |
| 74634 | P03383 | O43815 | -0.22757  |
| 74635 | P03383 | Q9BYJ0 | -0.87382  |
| 74636 | P03383 | Q13478 | -1.103    |
| 74637 | P03383 | Q13394 | -0.28319  |
| 74638 | P03383 | Q96JJ3 | -0.123    |
| 74639 | P03383 | Q5VYY2 | -0.85081  |
| 74640 | P03383 | P82673 | -0.10141  |
| 74641 | P03383 | Q03052 | -0.22741  |
| 74642 | P03383 | Q16572 | -0.87044  |
| 74643 | P03383 | P41181 | -0.3111   |
| 74644 | P03383 | Q8NFU3 | -0.093837 |
| 74645 | P03383 | Q9NZV1 | -0.96619  |
| 74646 | P03383 | Q9UPI3 | -0.84692  |
| 74647 | P03383 | Q5ST30 | -0.27312  |
| 74648 | P03383 | Q9NP74 | -0.57015  |
| 74649 | P03383 | Q9NQ88 | -0.79597  |
| 74650 | P03383 | Q9UKU6 | -1.1963   |
| 74651 | P03383 | Q8TC21 | -0.21172  |
| 74652 | P03383 | Q9NTJ4 | -0.51766  |
| 74653 | P03383 | Q9NVX2 | -0.22804  |
| 74654 | P03383 | Q53H47 | -0.22341  |
| 74655 | P03383 | Q6UDR6 | -0.79897  |
| 74656 | P03383 | A6NHR9 | -0.67046  |
| 74657 | P03383 | Q9HB58 | -0.19109  |
| 74658 | P03383 | O75937 | -0.24513  |
| 74659 | P03383 | Q9H0Z9 | -0.29974  |
| 74660 | P03383 | Q9H0X9 | -1.0379   |
| 74661 | P03383 | Q9UKN1 | -0.83525  |
| 74662 | P03383 | O75592 | -0.22648  |
| 74663 | P03383 | Q9NVC3 | -0.6745   |
| 74664 | P03383 | Q8NHA8 | -1.1027   |
| 74665 | P03383 | Q86X52 | -0.72755  |
| 74666 | P03383 | Q9NQA5 | -0.98469  |
| 74667 | P03383 | Q15537 | -0.98761  |
| 74668 | P03383 | Q8N144 | -0.56058  |
| 74669 | P03383 | P35212 | -0.86168  |
| 74670 | P03383 | P31997 | -0.8033   |
| 74671 | P03383 | Q9NPH5 | -0.67854  |
| 74672 | P03383 | Q9H9V4 | -0.83748  |
| 74673 | P03383 | Q5VXU9 | -0.34406  |
| 74674 | P03383 | O75995 | -0.22737  |
| 74675 | P03383 | Q14168 | -0.71044  |
| 74676 | P03383 | Q86VE3 | -0.41082  |
| 74677 | P03383 | A8MYX2 | -0.22658  |
| 74678 | P03383 | Q96MI6 | -0.28641  |
| 74679 | P03383 | Q8TCG1 | -0.23672  |
| 74680 | P03383 | Q49A17 | -0.73041  |
| 74681 | P03383 | A6NDZ8 | -0.018444 |
| 74682 | P03383 | A2A368 | -0.027543 |
| 74683 | P03383 | Q8NAG6 | -0.35498  |
| 74684 | P03383 | P30043 | -0.22087  |
| 74685 | P03383 | Q96MN2 | -0.79654  |
| 74686 | P03383 | Q8IYU4 | -0.024872 |
| 74687 | P03383 | Q8NBS9 | -0.28459  |
| 74688 | P03383 | Q6IEV9 | -1.1027   |
| 74689 | P03383 | Q12893 | -0.46912  |
| 74690 | P03383 | Q16763 | -0.31232  |
| 74691 | P03383 | Q9Y2Q3 | -0.67303  |
| 74692 | P03383 | Q8N307 | -0.74466  |
| 74693 | P03383 | O43559 | -0.67189  |
| 74694 | P03383 | P50135 | -0.15965  |
| 74695 | P03383 | P06756 | -0.31157  |
| 74696 | P03383 | Q9NPL8 | -0.74159  |
| 74697 | P03383 | Q504Q3 | -0.065644 |
| 74698 | P03383 | Q2KHN1 | -0.33859  |
| 74699 | P03383 | Q9Y2R2 | -0.22932  |
| 74700 | P03383 | Q96S42 | -0.26777  |
| 74701 | P03383 | Q9C0I4 | -0.86584  |
| 74702 | P03383 | A8MT33 | -0.42171  |
| 74703 | P03383 | Q8N8Q8 | -0.51259  |
| 74704 | P03383 | Q9ULI4 | -0.54692  |
| 74705 | P03383 | P17927 | -0.84734  |
| 74706 | P03383 | Q6P087 | -0.44749  |
| 74707 | P03383 | Q86SE8 | -0.10522  |
| 74708 | P03383 | Q9HBD1 | -0.4501   |

|       |        |        |           |
|-------|--------|--------|-----------|
| 74709 | P03383 | Q7Z4N8 | -0.60696  |
| 74710 | P03383 | Q8NFU7 | -0.34845  |
| 74711 | P03383 | Q14439 | -1.3248   |
| 74712 | P03383 | Q9Y673 | -0.78276  |
| 74713 | P03383 | P01848 | -0.91504  |
| 74714 | P03383 | Q9ULV0 | -0.19668  |
| 74715 | P03383 | P10253 | -0.39674  |
| 74716 | P03383 | Q05066 | -0.42425  |
| 74717 | P03383 | Q7Z444 | -1.1897   |
| 74718 | P03383 | P15863 | -0.22694  |
| 74719 | P03383 | Q29980 | -0.76688  |
| 74720 | P03383 | Q9BRT2 | -0.17255  |
| 74721 | P03383 | P28472 | -0.90218  |
| 74722 | P03383 | Q5EBN2 | -0.73967  |
| 74723 | P03383 | P51530 | -0.23266  |
| 74724 | P03383 | A6NF89 | -1.1027   |
| 74725 | P03383 | Q9H0H3 | -0.29487  |
| 74726 | P03383 | P80162 | -1.0728   |
| 74727 | P03383 | P26045 | -0.28792  |
| 74728 | P03383 | Q9P0U3 | -0.21961  |
| 74729 | P03383 | Q9Y6K0 | -0.50072  |
| 74730 | P03383 | Q8NGP4 | -1.1027   |
| 74731 | P03383 | Q9NQW8 | -1.2505   |
| 74732 | P03383 | Q9Y4I1 | -0.3028   |
| 74733 | P03383 | P11245 | -0.28923  |
| 74734 | P03383 | Q96KW9 | -0.87278  |
| 74735 | P03383 | P01031 | -0.73185  |
| 74736 | P03383 | Q63HQ2 | -0.82975  |
| 74737 | P03383 | Q92833 | -0.35057  |
| 74738 | P03383 | Q4KMX7 | -0.31372  |
| 74739 | P03383 | Q5T9S5 | -0.1398   |
| 74740 | P03383 | Q9BY49 | -0.9134   |
| 74741 | P03383 | Q14332 | -0.54783  |
| 74742 | P03383 | P33765 | -0.98812  |
| 74743 | P03383 | Q9NX47 | -0.36886  |
| 74744 | P03383 | Q9P2D7 | -0.53593  |
| 74745 | P03383 | P42681 | -0.43218  |
| 74746 | P03383 | Q7RTY8 | -1.2263   |
| 74747 | P03383 | Q99466 | -0.32276  |
| 74748 | P03383 | P51957 | -0.30642  |
| 74749 | P03383 | Q7Z2Y5 | -0.86132  |
| 74750 | P03383 | Q96GM1 | -0.94832  |
| 74751 | P03383 | P46063 | -0.22622  |
| 74752 | P03383 | Q01650 | -0.69306  |
| 74753 | P03383 | Q9Y575 | -0.62076  |
| 74754 | P03383 | Q01780 | -0.2156   |
| 74755 | P03383 | P19875 | -0.9946   |
| 74756 | P03383 | Q00266 | -0.60364  |
| 74757 | P03383 | P29074 | -0.31052  |
| 74758 | P03383 | Q9H6F2 | -0.61049  |
| 74759 | P03383 | Q8N1W0 | -0.86584  |
| 74760 | P03383 | Q8N8W4 | -0.5536   |
| 74761 | P03383 | P01722 | -0.97479  |
| 74762 | P03383 | Q96JG8 | -0.12145  |
| 74763 | P03383 | Q14625 | -1.0531   |
| 74764 | P03383 | Q43566 | -0.22816  |
| 74765 | P03383 | Q8NG50 | -0.15564  |
| 74766 | P03383 | Q76002 | -1.1027   |
| 74767 | P03383 | Q969T7 | -0.071525 |
| 74768 | P03383 | A2RRP1 | -0.098872 |
| 74769 | P03383 | Q8N2C7 | -0.86584  |
| 74770 | P03383 | P46019 | -0.23562  |
| 74771 | P03383 | Q13519 | -0.97317  |
| 74772 | P03383 | Q9GZT4 | -0.58083  |
| 74773 | P03383 | Q96MT0 | -0.38834  |
| 74774 | P03383 | Q96HA4 | -0.86584  |
| 74775 | P03383 | Q2M385 | -0.86584  |
| 74776 | P03383 | Q2KHR3 | -0.32488  |
| 74777 | P03383 | P18428 | -0.40083  |
| 74778 | P03383 | P17844 | -0.38943  |
| 74779 | P03383 | E2RYF6 | -0.86584  |
| 74780 | P03383 | Q5VWK0 | -0.29487  |
| 74781 | P03383 | Q92871 | -0.45311  |
| 74782 | P03383 | Q7Z7B1 | -0.80585  |
| 74783 | P03383 | Q9UHP3 | -0.28693  |
| 74784 | P03383 | Q9HCN8 | -0.476    |

|       |        |        |           |
|-------|--------|--------|-----------|
| 74785 | P03383 | P11215 | -0.30865  |
| 74786 | P03383 | Q9NV70 | -0.30139  |
| 74787 | P03383 | P00156 | -0.67633  |
| 74788 | P03383 | Q96P11 | -0.37739  |
| 74789 | P03383 | Q96MV1 | -0.52887  |
| 74790 | P03383 | Q5DT21 | -0.25373  |
| 74791 | P03383 | Q6UXV0 | -0.91447  |
| 74792 | P03383 | Q9P0K1 | -0.58459  |
| 74793 | P03383 | Q9BXW6 | -0.22741  |
| 74794 | P03383 | Q92536 | -0.92345  |
| 74795 | P03383 | Q7Z478 | -0.43232  |
| 74796 | P03383 | O95198 | -0.20482  |
| 74797 | P03383 | Q8NAT1 | -0.87088  |
| 74798 | P03383 | Q8N145 | -0.64999  |
| 74799 | P03383 | Q16647 | -0.24843  |
| 74800 | P03383 | P61160 | -0.80344  |
| 74801 | P03383 | Q6ZVX7 | -0.43664  |
| 74802 | P03383 | P58294 | -0.69342  |
| 74803 | P03383 | P61371 | -0.22828  |
| 74804 | P03383 | Q9NR63 | -0.5781   |
| 74805 | P03383 | Q9Y5U9 | -0.82946  |
| 74806 | P03383 | P05164 | -0.26933  |
| 74807 | P03383 | P41159 | -0.36486  |
| 74808 | P03383 | P23919 | -0.42111  |
| 74809 | P03383 | Q6UXR4 | -0.70542  |
| 74810 | P03383 | O43422 | -0.48534  |
| 74811 | P03383 | P0C869 | -0.54263  |
| 74812 | P03383 | P22792 | -0.82816  |
| 74813 | P03383 | Q32VQ0 | -1.1027   |
| 74814 | P03383 | A4D1Z8 | -0.44203  |
| 74815 | P03383 | A0A5B9 | -0.86584  |
| 74816 | P03383 | Q6AWC2 | -0.22741  |
| 74817 | P03383 | P41226 | -0.61122  |
| 74818 | P03383 | Q7Z3D6 | -0.084943 |
| 74819 | P03383 | Q9BXU0 | -0.42288  |
| 74820 | P03383 | A6NEW6 | -0.48092  |
| 74821 | P03383 | O95045 | -0.25075  |
| 74822 | P03383 | O43187 | -0.22739  |
| 74823 | P03383 | Q96CS4 | -0.21172  |
| 74824 | P03383 | P98155 | -0.86989  |
| 74825 | P03383 | Q9BYT8 | -0.45525  |
| 74826 | P03383 | P15538 | -0.44174  |
| 74827 | P03383 | P04003 | -0.28885  |
| 74828 | P03383 | Q8NEP7 | -0.21061  |
| 74829 | P03383 | Q14191 | -0.25025  |
| 74830 | P03383 | Q96ET8 | -0.86584  |
| 74831 | P03383 | Q9H977 | -0.22737  |
| 74832 | P03383 | Q03393 | -0.11681  |
| 74833 | P03383 | Q9Y3E0 | -0.60638  |
| 74834 | P03383 | Q9HCE7 | -0.22741  |
| 74835 | P03383 | Q86SH2 | -0.46768  |
| 74836 | P03383 | P46089 | -1.2395   |
| 74837 | P03383 | P18405 | -0.35604  |
| 74838 | P03383 | Q04917 | -0.17821  |
| 74839 | P03383 | Q8WZ84 | -1.1027   |
| 74840 | P03383 | Q9UN88 | -0.86216  |
| 74841 | P03383 | Q147U7 | -0.86584  |
| 74842 | P03383 | Q8NG98 | -1.1027   |
| 74843 | P03383 | Q9NRS6 | -0.16734  |
| 74844 | P03383 | O95336 | -0.059125 |
| 74845 | P03383 | P0C025 | -0.43358  |
| 74846 | P03383 | Q01813 | -0.5489   |
| 74847 | P03383 | Q8NB12 | -0.20742  |
| 74848 | P03383 | Q2I0M5 | -0.92069  |
| 74849 | P03383 | Q5W0B1 | -0.52332  |
| 74850 | P03383 | P17542 | -0.22752  |
| 74851 | P03383 | Q8WUP2 | -0.48926  |
| 74852 | P03383 | P43627 | -0.9357   |
| 74853 | P03383 | A8MTL9 | -0.79897  |
| 74854 | P03383 | Q96MP5 | -0.52332  |
| 74855 | P03383 | Q96KS9 | -0.17825  |
| 74856 | P03383 | P01699 | -0.97479  |
| 74857 | P03383 | P80192 | -0.35436  |
| 74858 | P03383 | Q9UPQ3 | -1.286    |
| 74859 | P03383 | O94903 | -0.32731  |
| 74860 | P03383 | Q52LJ0 | -0.43276  |

|       |        |        |           |
|-------|--------|--------|-----------|
| 74861 | P03383 | Q16774 | -0.55243  |
| 74862 | P03383 | P0C7A2 | -0.34588  |
| 74863 | P03383 | Q8N239 | -0.21318  |
| 74864 | P03383 | Q9NSK0 | -0.2671   |
| 74865 | P03383 | Q96B21 | -0.86584  |
| 74866 | P03383 | P0DKB5 | -0.86584  |
| 74867 | P03383 | P78540 | -0.21532  |
| 74868 | P03383 | Q6ZT77 | -0.21172  |
| 74869 | P03383 | Q15238 | -0.31241  |
| 74870 | P03383 | P36404 | -0.22856  |
| 74871 | P03383 | Q9Y5H0 | -1.1297   |
| 74872 | P03383 | Q99727 | -0.77076  |
| 74873 | P03383 | Q6WKZ4 | -0.28849  |
| 74874 | P03383 | Q9GZY0 | -0.35855  |
| 74875 | P03383 | Q9H7T0 | -0.92378  |
| 74876 | P03383 | Q9HD20 | -0.60765  |
| 74877 | P03383 | Q2TB18 | -0.37406  |
| 74878 | P03383 | O15393 | -1.4159   |
| 74879 | P03383 | Q6ZTW0 | -0.4516   |
| 74880 | P03383 | Q8N3H0 | -0.29487  |
| 74881 | P03383 | P78325 | -0.42164  |
| 74882 | P03383 | Q0VDE8 | -0.4677   |
| 74883 | P03383 | P13521 | -0.61018  |
| 74884 | P03383 | P60321 | -0.46121  |
| 74885 | P03383 | Q8N0Z6 | -0.20348  |
| 74886 | P03383 | Q8IV45 | -0.82169  |
| 74887 | P03383 | Q86WW8 | -0.30763  |
| 74888 | P03383 | Q9P232 | -0.68595  |
| 74889 | P03383 | Q14679 | -0.49366  |
| 74890 | P03383 | Q9UPV7 | -0.55769  |
| 74891 | P03383 | Q495A1 | -0.42549  |
| 74892 | P03383 | O15016 | -0.31686  |
| 74893 | P03383 | Q00418 | -0.73396  |
| 74894 | P03383 | O75973 | -0.53232  |
| 74895 | P03383 | Q9Y689 | -1.2555   |
| 74896 | P03383 | P57078 | -0.25848  |
| 74897 | P03383 | P35443 | -0.72683  |
| 74898 | P03383 | Q8N8Z8 | -0.21172  |
| 74899 | P03383 | P01861 | -0.93808  |
| 74900 | P03383 | Q2NKQ1 | -0.86094  |
| 74901 | P03383 | Q12951 | -0.32415  |
| 74902 | P03383 | P60508 | -0.71912  |
| 74903 | P03383 | Q9Y6P5 | -0.28128  |
| 74904 | P03383 | Q6UWW8 | -0.34921  |
| 74905 | P03383 | Q8NBZ7 | -0.95634  |
| 74906 | P03383 | Q9Y620 | -0.47915  |
| 74907 | P03383 | Q9UGF5 | -1.1027   |
| 74908 | P03383 | P02686 | -0.72187  |
| 74909 | P03383 | O43424 | -0.61467  |
| 74910 | P03383 | Q96KX0 | -0.83907  |
| 74911 | P03383 | P18054 | -0.22023  |
| 74912 | P03383 | P50395 | -0.18477  |
| 74913 | P03383 | P01737 | -0.49766  |
| 74914 | P03383 | Q9UKB1 | -0.42335  |
| 74915 | P03383 | Q8IX94 | -0.67504  |
| 74916 | P03383 | Q8NFI4 | -0.29487  |
| 74917 | P03383 | Q9BPU6 | -0.25138  |
| 74918 | P03383 | Q96G01 | -0.17612  |
| 74919 | P03383 | Q0ZLH3 | -0.60791  |
| 74920 | P03383 | Q5M775 | -0.22746  |
| 74921 | P03383 | Q9Y2C5 | -0.98274  |
| 74922 | P03383 | Q7Z5U6 | -0.2276   |
| 74923 | P03383 | Q8TD16 | -0.1672   |
| 74924 | P03383 | Q15726 | -0.26122  |
| 74925 | P03383 | P54132 | -0.22588  |
| 74926 | P03383 | Q5SRI9 | -0.61598  |
| 74927 | P03383 | A6NE82 | -0.018444 |
| 74928 | P03383 | Q9Y5R2 | -1.5364   |
| 74929 | P03383 | P54257 | -0.13458  |
| 74930 | P03383 | O75604 | -0.30381  |
| 74931 | P03383 | Q9NUD9 | -0.76317  |
| 74932 | P03383 | P30049 | -0.22198  |
| 74933 | P03383 | Q9P2D1 | -0.19668  |
| 74934 | P03383 | Q9NS86 | -0.36042  |
| 74935 | P03383 | Q5VZB9 | -0.10679  |
| 74936 | P03383 | Q14185 | -0.29985  |

|       |        |        |           |
|-------|--------|--------|-----------|
| 74937 | P03383 | Q96NJ5 | -0.19787  |
| 74938 | P03383 | Q9HOR3 | -0.86584  |
| 74939 | P03383 | Q9HC38 | -0.30763  |
| 74940 | P03383 | Q8TAV3 | -0.72441  |
| 74941 | P03383 | Q2TBC4 | -0.53928  |
| 74942 | P03383 | Q9UNG2 | -0.77298  |
| 74943 | P03383 | Q9Y272 | -0.76681  |
| 74944 | P03383 | Q00535 | -0.19581  |
| 74945 | P03383 | Q94844 | -1.1939   |
| 74946 | P03383 | P52701 | -0.12279  |
| 74947 | P03383 | P63098 | -0.28092  |
| 74948 | P03383 | Q86YT9 | -0.82104  |
| 74949 | P03383 | Q8NH48 | -1.1027   |
| 74950 | P03383 | Q8WXG6 | -0.32347  |
| 74951 | P03383 | P06315 | -0.97479  |
| 74952 | P03383 | P25098 | -0.31348  |
| 74953 | P03383 | Q9BZQ4 | -0.14635  |
| 74954 | P03383 | Q95757 | -0.27431  |
| 74955 | P03383 | Q43761 | -0.66816  |
| 74956 | P03383 | P40197 | -0.89831  |
| 74957 | P03383 | Q96LW2 | -0.9088   |
| 74958 | P03383 | Q13939 | -0.55118  |
| 74959 | P03383 | Q8IXM6 | -0.37378  |
| 74960 | P03383 | Q8WXX4 | -0.62076  |
| 74961 | P03383 | Q9GZP0 | -0.87801  |
| 74962 | P03383 | P56748 | -0.65111  |
| 74963 | P03383 | A8MPS7 | -0.29428  |
| 74964 | P03383 | Q6XD76 | -0.22753  |
| 74965 | P03383 | Q9NS84 | -0.50772  |
| 74966 | P03383 | P86434 | -0.22388  |
| 74967 | P03383 | Q99731 | -0.4623   |
| 74968 | P03383 | A6NET4 | -1.1027   |
| 74969 | P03383 | Q43291 | -0.90037  |
| 74970 | P03383 | Q9NX31 | -0.081142 |
| 74971 | P03383 | Q14469 | -0.22664  |
| 74972 | P03383 | Q495M9 | -0.22741  |
| 74973 | P03383 | P02810 | -0.34624  |
| 74974 | P03383 | A2PYH4 | -0.84361  |
| 74975 | P03383 | A6NJI9 | -0.19134  |
| 74976 | P03383 | Q96KX2 | -0.42113  |
| 74977 | P03383 | P49716 | -0.22689  |
| 74978 | P03383 | Q9P2K1 | -0.38312  |
| 74979 | P03383 | A6NIL9 | -0.86584  |
| 74980 | P03383 | Q9H2F3 | -0.78935  |
| 74981 | P03383 | Q8IWI9 | -0.37742  |
| 74982 | P03383 | Q6ZMU5 | -0.42153  |
| 74983 | P03383 | Q9H0D2 | -0.33225  |
| 74984 | P03383 | C9JJ37 | -0.22125  |
| 74985 | P03383 | O75533 | -0.22542  |
| 74986 | P03383 | Q9H3H5 | -0.72763  |
| 74987 | P03383 | Q6ZMQ8 | -0.45402  |
| 74988 | P03383 | Q9H4B7 | -0.61185  |
| 74989 | P03383 | P13591 | -1.0158   |
| 74990 | P03383 | Q5T890 | -0.43778  |
| 74991 | P03383 | P29460 | -0.26013  |
| 74992 | P03383 | P14222 | -0.54107  |
| 74993 | P03383 | A4D0T2 | -0.86584  |
| 74994 | P03383 | P07949 | -0.56747  |
| 74995 | P03383 | Q9NR82 | -0.98023  |
| 74996 | P03383 | Q86XS5 | -1.092    |
| 74997 | P03383 | Q96RP8 | -0.84843  |
| 74998 | P03383 | Q16718 | -0.22427  |
| 74999 | P03383 | Q94933 | -0.92424  |
| 75000 | P03383 | Q9UKG4 | -1.0302   |
| 75001 | P03383 | Q15057 | -0.98969  |
| 75002 | P03383 | Q2VWA4 | -0.047452 |
| 75003 | P03383 | Q9UQ49 | -0.50077  |
| 75004 | P03383 | Q9BTW9 | -0.11261  |
| 75005 | P03383 | Q6UX71 | -0.31983  |
| 75006 | P03383 | H3BQB6 | -0.62648  |
| 75007 | P03383 | A8MW99 | -0.61053  |
| 75008 | P03383 | Q75052 | -0.22372  |
| 75009 | P03383 | Q43808 | -0.26449  |
| 75010 | P03383 | P19438 | -0.32372  |
| 75011 | P03383 | P42685 | -0.4087   |
| 75012 | P03383 | P22694 | -0.22677  |



|       |        |        |           |
|-------|--------|--------|-----------|
| 75013 | P03383 | Q9ULB5 | -1.0566   |
| 75014 | P03383 | P26022 | -0.83388  |
| 75015 | P03383 | Q6ZU15 | -0.22457  |
| 75016 | P03383 | Q96L33 | -1.1764   |
| 75017 | P03383 | P55211 | -0.22583  |
| 75018 | P03383 | Q9Y5Z7 | -0.22741  |
| 75019 | P03383 | Q8N808 | -0.86584  |
| 75020 | P03383 | Q15084 | -0.26268  |
| 75021 | P03383 | O60243 | -0.63507  |
| 75022 | P03383 | P03971 | -0.5067   |
| 75023 | P03383 | Q96DT0 | -0.16028  |
| 75024 | P03383 | Q96T88 | -0.22741  |
| 75025 | P03383 | P04083 | -0.20633  |
| 75026 | P03383 | Q96H72 | -0.58115  |
| 75027 | P03383 | Q16363 | -1.0577   |
| 75028 | P03383 | Q14524 | -0.34057  |
| 75029 | P03383 | P02746 | -0.4114   |
| 75030 | P03383 | O94804 | -0.3613   |
| 75031 | P03383 | P63215 | -0.49736  |
| 75032 | P03383 | O75019 | -0.94458  |
| 75033 | P03383 | A6NN79 | -0.86584  |
| 75034 | P03383 | Q6ZTB9 | -0.73005  |
| 75035 | P03383 | Q8NFN8 | -1.143    |
| 75036 | P03383 | Q9H7Z6 | -0.2016   |
| 75037 | P03383 | Q9BS86 | -0.84968  |
| 75038 | P03383 | P14621 | -0.2316   |
| 75039 | P03383 | P11597 | -0.63281  |
| 75040 | P03383 | Q8NGS7 | -1.1027   |
| 75041 | P03383 | Q969E3 | -0.74657  |
| 75042 | P03383 | Q12974 | -0.85684  |
| 75043 | P03383 | P09017 | -0.20783  |
| 75044 | P03383 | Q9H342 | -1.1027   |
| 75045 | P03383 | P17600 | -0.60651  |
| 75046 | P03383 | Q9BQI4 | -0.87563  |
| 75047 | P03383 | P13747 | -0.9507   |
| 75048 | P03383 | Q7Z4H4 | -0.75252  |
| 75049 | P03383 | P30038 | -0.39566  |
| 75050 | P03383 | Q6IWH7 | -0.5738   |
| 75051 | P03383 | P01604 | -0.97479  |
| 75052 | P03383 | P43489 | -0.78817  |
| 75053 | P03383 | O75364 | -0.19179  |
| 75054 | P03383 | Q93033 | -0.9515   |
| 75055 | P03383 | Q5TA81 | -0.43006  |
| 75056 | P03383 | Q07283 | -0.28994  |
| 75057 | P03383 | P12277 | -0.14465  |
| 75058 | P03383 | Q3ZCQ8 | -0.07777  |
| 75059 | P03383 | Q8IVP9 | -0.21172  |
| 75060 | P03383 | Q9Y4A9 | -1.1027   |
| 75061 | P03383 | Q9NZP8 | -1.2895   |
| 75062 | P03383 | Q16828 | -0.38885  |
| 75063 | P03383 | O43930 | -0.9088   |
| 75064 | P03383 | Q86UU9 | -0.86984  |
| 75065 | P03383 | P01233 | -0.71873  |
| 75066 | P03383 | Q7Z7C7 | -0.31693  |
| 75067 | P03383 | Q7RTU9 | -0.56904  |
| 75068 | P03383 | Q9NW75 | -0.48135  |
| 75069 | P03383 | P01858 | -0.34689  |
| 75070 | P03383 | Q9UJW7 | -0.21172  |
| 75071 | P03383 | P01850 | -0.87483  |
| 75072 | P03383 | Q96P68 | -1.124    |
| 75073 | P03383 | Q8NBH2 | -0.50661  |
| 75074 | P03383 | Q8N609 | -0.75275  |
| 75075 | P03383 | Q9NQV6 | -0.21172  |
| 75076 | P03383 | Q9Y5Q0 | -0.79662  |
| 75077 | P03383 | P01350 | -0.99868  |
| 75078 | P03383 | O60218 | -0.40561  |
| 75079 | P03383 | P17081 | -0.99987  |
| 75080 | P03383 | P53708 | -0.77452  |
| 75081 | P03383 | Q9UPT6 | -0.22597  |
| 75082 | P03383 | Q9UHQ9 | -0.81002  |
| 75083 | P03383 | P20809 | -0.2963   |
| 75084 | P03383 | Q9UNF1 | -0.097692 |
| 75085 | P03383 | Q8WWQ8 | -0.69534  |
| 75086 | P03383 | Q86TN4 | -0.45819  |
| 75087 | P03383 | Q9NQS5 | -1.0965   |
| 75088 | P03383 | P11279 | -0.79385  |

|       |        |        |           |
|-------|--------|--------|-----------|
| 75089 | P03383 | P78356 | -0.43265  |
| 75090 | P03383 | Q13183 | -1.0556   |
| 75091 | P03383 | Q56NI9 | -0.35944  |
| 75092 | P03383 | Q6DN90 | -0.21616  |
| 75093 | P03383 | Q96KK5 | -0.88998  |
| 75094 | P03383 | Q6PJ21 | -0.62076  |
| 75095 | P03383 | Q69YU3 | -0.29487  |
| 75096 | P03383 | Q69YJ1 | -0.74073  |
| 75097 | P03383 | P48060 | -1.1065   |
| 75098 | P03383 | A8MXD5 | -0.5138   |
| 75099 | P03383 | Q9H1D0 | -0.98287  |
| 75100 | P03383 | Q00056 | -0.166    |
| 75101 | P03383 | Q86TL2 | -0.52887  |
| 75102 | P03383 | Q6IF82 | -1.1027   |
| 75103 | P03383 | Q8WWN9 | -0.5683   |
| 75104 | P03383 | Q9P286 | -0.514    |
| 75105 | P03383 | Q5SW24 | -0.2133   |
| 75106 | P03383 | P08034 | -0.76734  |
| 75107 | P03383 | P49407 | -0.28642  |
| 75108 | P03383 | Q6NUM6 | -1.012    |
| 75109 | P03383 | A4D1S5 | -0.99828  |
| 75110 | P03383 | P32321 | -0.4756   |
| 75111 | P03383 | Q8N6C7 | -0.017769 |
| 75112 | P03383 | P47883 | -1.1027   |
| 75113 | P03383 | Q15785 | -0.60831  |
| 75114 | P03383 | Q92934 | -0.10899  |
| 75115 | P03383 | Q8WW62 | -0.92889  |
| 75116 | P03383 | Q16696 | -0.77329  |
| 75117 | P03383 | Q9Y6M1 | -0.22611  |
| 75118 | P03383 | Q96GY0 | -0.47027  |
| 75119 | P03383 | Q8NEE8 | -0.22735  |
| 75120 | P03383 | Q5VVQ6 | -0.40093  |
| 75121 | P03383 | Q15034 | -0.52184  |
| 75122 | P03383 | Q6DWJ6 | -1.1721   |
| 75123 | P03383 | Q8TC57 | -0.66432  |
| 75124 | P03383 | Q14289 | -0.22741  |
| 75125 | P03383 | Q8WY22 | -0.75853  |
| 75126 | P03383 | Q9UJ55 | -0.16078  |
| 75127 | P03383 | Q96DU9 | -0.6758   |
| 75128 | P03383 | Q9P2G9 | -0.21072  |
| 75129 | P03383 | A6NJW9 | -0.93628  |
| 75130 | P03383 | Q6NUN0 | -0.96607  |
| 75131 | P03383 | Q94819 | -0.21661  |
| 75132 | P03383 | A6NHM9 | -0.71058  |
| 75133 | P03383 | Q969W1 | -0.93585  |
| 75134 | P03383 | Q8NGB6 | -1.1027   |
| 75135 | P03383 | Q6UXG8 | -0.86584  |
| 75136 | P03383 | Q8TAV5 | -0.87849  |
| 75137 | P03383 | O60938 | -0.72363  |
| 75138 | P03383 | Q6Y1H2 | -0.51582  |
| 75139 | P03383 | Q9UNI6 | -0.70398  |
| 75140 | P03383 | P16452 | -0.12951  |
| 75141 | P03383 | Q15488 | -0.11836  |
| 75142 | P03383 | Q8IZ41 | -0.82468  |
| 75143 | P03383 | Q95267 | -0.77765  |
| 75144 | P03383 | A4FU49 | -0.22566  |
| 75145 | P03383 | Q5TA78 | -0.43006  |
| 75146 | P03383 | Q9H0Y0 | -0.38361  |
| 75147 | P03383 | Q6UWP7 | -0.75297  |
| 75148 | P03383 | Q8IU54 | -0.71372  |
| 75149 | P03383 | Q9HAS0 | -0.28488  |
| 75150 | P03383 | Q02818 | -0.53069  |
| 75151 | P03383 | Q14926 | -0.59175  |
| 75152 | P03383 | Q9TQE0 | -0.54343  |
| 75153 | P03383 | Q9H7D7 | -0.22741  |
| 75154 | P03383 | Q9BTX3 | -0.86584  |
| 75155 | P03383 | Q86WC4 | -0.83446  |
| 75156 | P03383 | Q67FW5 | -0.45797  |
| 75157 | P03383 | Q6XPS3 | -1.0039   |
| 75158 | P03383 | P59910 | -0.29548  |
| 75159 | P03383 | Q96NU7 | -0.086866 |
| 75160 | P03383 | Q14432 | -0.61623  |
| 75161 | P03383 | Q69YZ2 | -0.86584  |
| 75162 | P03383 | Q6ZUS6 | -0.16297  |
| 75163 | P03383 | Q9NQX4 | -0.64682  |
| 75164 | P03383 | P68431 | -0.53969  |

|       |        |        |           |
|-------|--------|--------|-----------|
| 75165 | P03383 | Q494V2 | -0.015169 |
| 75166 | P03383 | Q8IX07 | -0.22736  |
| 75167 | P03383 | Q502X0 | -0.11126  |
| 75168 | P03383 | Q6XR72 | -0.94638  |
| 75169 | P03383 | Q92482 | -0.48596  |
| 75170 | P03383 | Q9Y5G3 | -1.1297   |
| 75171 | P03383 | Q5T3I0 | -0.44783  |
| 75172 | P03383 | Q2VIR3 | -0.75862  |
| 75173 | P03383 | Q3SY89 | -0.30744  |
| 75174 | P03383 | Q8N0W7 | -0.68626  |
| 75175 | P03383 | Q9NQW7 | -0.51705  |
| 75176 | P03383 | Q92963 | -0.57707  |
| 75177 | P03383 | Q6N069 | -0.22239  |
| 75178 | P03383 | Q5XLA6 | -0.63743  |
| 75179 | P03383 | Q12778 | -0.33026  |
| 75180 | P03383 | Q562R1 | -0.65868  |
| 75181 | P03383 | Q9UBQ6 | -1.0419   |
| 75182 | P03383 | P21583 | -0.44203  |
| 75183 | P03383 | Q5VT66 | -0.51768  |
| 75184 | P03383 | Q9H7L2 | -0.87849  |
| 75185 | P03383 | Q8NG35 | -0.84399  |
| 75186 | P03383 | Q8IXB1 | -0.3374   |
| 75187 | P03383 | P18564 | -0.99576  |
| 75188 | P03383 | Q66K64 | -0.43639  |
| 75189 | P03383 | P04921 | -0.5266   |
| 75190 | P03383 | P08173 | -0.89629  |
| 75191 | P03383 | O75044 | -0.22877  |
| 75192 | P03383 | Q13087 | -0.27325  |
| 75193 | P03383 | P52907 | -0.56885  |
| 75194 | P03383 | Q8IXI1 | -0.69476  |
| 75195 | P03383 | Q9NVH6 | -0.3228   |
| 75196 | P03383 | O75764 | -0.085065 |
| 75197 | P03383 | Q9ULK0 | -0.79004  |
| 75198 | P03383 | Q9UJX0 | -0.50043  |
| 75199 | P03383 | Q6PIY2 | -0.60957  |
| 75200 | P03383 | Q9HA82 | -0.30336  |
| 75201 | P03383 | Q8IUE1 | -0.23157  |
| 75202 | P03383 | Q9Y231 | -0.53429  |
| 75203 | P03383 | P10696 | -0.88396  |
| 75204 | P03383 | Q9H4M7 | -0.39675  |
| 75205 | P03383 | O60493 | -0.22347  |
| 75206 | P03383 | P47901 | -0.92023  |
| 75207 | P03383 | P0C617 | -1.1027   |
| 75208 | P03383 | O15145 | -0.15048  |
| 75209 | P03383 | Q56UQ5 | -0.1072   |
| 75210 | P03383 | Q9H6A0 | -0.43363  |
| 75211 | P03383 | Q15005 | -0.69098  |
| 75212 | P03383 | Q9BS26 | -0.35603  |
| 75213 | P03383 | Q8WTT0 | -0.82732  |
| 75214 | P03383 | O75131 | -0.22833  |
| 75215 | P03383 | O00214 | -0.3509   |
| 75216 | P03383 | Q86UW7 | -0.32491  |
| 75217 | P03383 | P00441 | -0.21994  |
| 75218 | P03383 | Q08648 | -0.78982  |
| 75219 | P03383 | Q9P2L0 | -0.27689  |
| 75220 | P03383 | P20963 | -0.18621  |
| 75221 | P03383 | Q9NRX4 | -0.21068  |
| 75222 | P03383 | O43301 | -0.79654  |
| 75223 | P03383 | Q13698 | -0.638    |
| 75224 | P03383 | Q6PIU1 | -0.8956   |
| 75225 | P03383 | A6NDE4 | -0.23131  |
| 75226 | P03383 | Q95140 | -0.70045  |
| 75227 | P03383 | P0CG37 | -0.75956  |
| 75228 | P03383 | Q14833 | -1.1996   |
| 75229 | P03383 | Q1T7F1 | -0.086045 |
| 75230 | P03383 | Q8N268 | -0.061633 |
| 75231 | P03383 | O14936 | -0.22993  |
| 75232 | P03383 | Q8NGE1 | -1.1027   |
| 75233 | P03383 | Q6XUX3 | -0.50914  |
| 75234 | P03383 | P0CV99 | -0.43319  |
| 75235 | P03383 | O15539 | -0.77549  |
| 75236 | P03383 | Q86SG6 | -0.91957  |
| 75237 | P03383 | P49746 | -0.93817  |
| 75238 | P03383 | Q5GH72 | -0.86584  |
| 75239 | P03383 | A2A3K4 | -0.93685  |
| 75240 | P03383 | Q9NYW1 | -0.97792  |

|       |        |        |            |
|-------|--------|--------|------------|
| 75241 | P03383 | Q8TAT2 | -0.82398   |
| 75242 | P03383 | O95715 | -0.90306   |
| 75243 | P03383 | P09668 | -0.26326   |
| 75244 | P03383 | Q9UBA6 | -0.18172   |
| 75245 | P03383 | Q9UDR5 | -0.59772   |
| 75246 | P03383 | A6NGE7 | -0.4219    |
| 75247 | P03383 | Q6ZVS6 | -0.87849   |
| 75248 | P03383 | O75688 | -0.14604   |
| 75249 | P03383 | Q8WUT9 | -0.7196    |
| 75250 | P03383 | Q8IWU9 | -0.47452   |
| 75251 | P03383 | P01605 | -0.97479   |
| 75252 | P03383 | A6NC62 | -0.0078497 |
| 75253 | P03383 | Q96R69 | -1.1027    |
| 75254 | P03383 | Q9HCR9 | -0.36417   |
| 75255 | P03383 | P51812 | -0.22365   |
| 75256 | P03383 | Q8TCU3 | -0.84875   |
| 75257 | P03383 | Q00LT1 | -0.85146   |
| 75258 | P03383 | P30443 | -0.91674   |
| 75259 | P03383 | Q3SXP7 | -0.86584   |
| 75260 | P03383 | Q6ZW34 | -0.86584   |
| 75261 | P03383 | Q9UHA3 | -0.1937    |
| 75262 | P03383 | Q9BX97 | -0.63355   |
| 75263 | P03383 | Q5S007 | -0.34798   |
| 75264 | P03383 | Q9H0K1 | -0.32505   |
| 75265 | P03383 | Q9NV92 | -0.091188  |
| 75266 | P03383 | Q14164 | -0.22741   |
| 75267 | P03383 | Q9UMD9 | -0.79048   |
| 75268 | P03383 | Q6UX27 | -0.86584   |
| 75269 | P03383 | Q9BSL1 | -0.31138   |
| 75270 | P03383 | P16050 | -0.21877   |
| 75271 | P03383 | Q8IZA0 | -0.31698   |
| 75272 | P03383 | P29275 | -0.734     |
| 75273 | P03383 | Q12860 | -0.51691   |
| 75274 | P03383 | P02042 | -0.34646   |
| 75275 | P03383 | Q9NZQ8 | -0.94188   |
| 75276 | P03383 | P21333 | -0.22821   |
| 75277 | P03383 | Q9NUG4 | -0.16078   |
| 75278 | P03383 | Q9H2V7 | -0.31721   |
| 75279 | P03383 | Q9ULP0 | -0.31614   |
| 75280 | P03383 | P12544 | -0.36887   |
| 75281 | P03383 | Q8TF46 | -0.14497   |
| 75282 | P03383 | P10176 | -0.56658   |
| 75283 | P03383 | Q0VDI3 | -0.86584   |
| 75284 | P03383 | Q86Y29 | -0.87849   |
| 75285 | P03383 | Q9HCS5 | -0.25461   |
| 75286 | P03383 | Q9ULQ1 | -0.49843   |
| 75287 | P03383 | Q9NZB8 | -0.65669   |
| 75288 | P03383 | O43242 | -0.11602   |
| 75289 | P03383 | Q9P2Q2 | -0.26469   |
| 75290 | P03383 | A6NGE4 | -0.22747   |
| 75291 | P03383 | Q4L180 | -0.21059   |
| 75292 | P03383 | Q8N8Q3 | -0.35809   |
| 75293 | P03383 | O15294 | -0.22657   |
| 75294 | P03383 | Q8N8N0 | -0.91878   |
| 75295 | P03383 | Q70E73 | -0.7491    |
| 75296 | P03383 | P60673 | -0.10321   |
| 75297 | P03383 | Q9BVR0 | -0.50371   |
| 75298 | P03383 | Q15427 | -0.24137   |
| 75299 | P03383 | Q9BTX7 | -0.64958   |
| 75300 | P03383 | Q8IXT5 | -0.22782   |
| 75301 | P03383 | Q86WD7 | -0.61019   |
| 75302 | P03383 | Q9NNX6 | -0.76991   |
| 75303 | P03383 | O95389 | -0.84662   |
| 75304 | P03383 | Q9Y5F7 | -1.1297    |
| 75305 | P03383 | P33764 | -0.55769   |
| 75306 | P03383 | P00740 | -1.0925    |
| 75307 | P03383 | Q9UI46 | -0.27473   |
| 75308 | P03383 | P56975 | -1.1235    |
| 75309 | P03383 | Q05397 | -0.22741   |
| 75310 | P03383 | Q9Y5I4 | -1.1553    |
| 75311 | P03383 | P01148 | -0.89266   |
| 75312 | P03383 | Q9H1Z8 | -0.80773   |
| 75313 | P03383 | P15692 | -0.27655   |
| 75314 | P03383 | Q8N104 | -0.84399   |
| 75315 | P03383 | P47874 | -0.51799   |
| 75316 | P03383 | Q6UVM3 | -1.0998    |

|       |        |        |           |
|-------|--------|--------|-----------|
| 75317 | P03383 | Q6ZTA4 | -0.58377  |
| 75318 | P03383 | O43169 | -0.72984  |
| 75319 | P03383 | Q68D91 | -0.43358  |
| 75320 | P03383 | Q8IU81 | -0.13142  |
| 75321 | P03383 | Q4UJ75 | -0.2274   |
| 75322 | P03383 | Q8TBZ3 | -0.22743  |
| 75323 | P03383 | A6NED2 | -0.37984  |
| 75324 | P03383 | Q8N4F7 | -0.92811  |
| 75325 | P03383 | Q9GZR7 | -0.49342  |
| 75326 | P03383 | Q9UQV4 | -0.89095  |
| 75327 | P03383 | Q9UDY6 | -0.42407  |
| 75328 | P03383 | Q9BZC1 | -0.32845  |
| 75329 | P03383 | Q7Z601 | -0.9653   |
| 75330 | P03383 | Q9NY97 | -0.43185  |
| 75331 | P03383 | Q15743 | -1.3209   |
| 75332 | P03383 | Q9H082 | -0.84267  |
| 75333 | P03383 | O60575 | -0.79897  |
| 75334 | P03383 | Q8NH49 | -1.1027   |
| 75335 | P03383 | Q8NGA8 | -1.1027   |
| 75336 | P03383 | Q8IYB8 | -0.22661  |
| 75337 | P03383 | Q9Y274 | -0.43942  |
| 75338 | P03383 | A0PJY2 | -0.268    |
| 75339 | P03383 | Q15672 | -0.22771  |
| 75340 | P03383 | Q6UXP3 | -0.86584  |
| 75341 | P03383 | P42680 | -0.88738  |
| 75342 | P03383 | P04424 | -0.30784  |
| 75343 | P03383 | Q5VW36 | -0.30104  |
| 75344 | P03383 | Q5SSG8 | -0.91175  |
| 75345 | P03383 | O75385 | -0.38251  |
| 75346 | P03383 | Q2TVT4 | -0.38229  |
| 75347 | P03383 | Q8TCX5 | -0.73283  |
| 75348 | P03383 | Q96DX4 | -0.96187  |
| 75349 | P03383 | Q9NPP4 | -0.22736  |
| 75350 | P03383 | Q8NGV5 | -1.1027   |
| 75351 | P03383 | Q86UY6 | -0.41082  |
| 75352 | P03383 | Q14CZ7 | -0.3676   |
| 75353 | P03383 | P27987 | -0.73346  |
| 75354 | P03383 | Q693B1 | -0.11715  |
| 75355 | P03383 | P37023 | -0.29389  |
| 75356 | P03383 | Q6ZVX9 | -0.86584  |
| 75357 | P03383 | O75083 | -0.61463  |
| 75358 | P03383 | Q86W28 | -0.65523  |
| 75359 | P03383 | P22760 | -0.87856  |
| 75360 | P03383 | Q15813 | -0.32453  |
| 75361 | P03383 | Q9Y646 | -0.85365  |
| 75362 | P03383 | Q9UHF3 | -0.85339  |
| 75363 | P03383 | A6NHT5 | -0.23708  |
| 75364 | P03383 | P51991 | -0.2363   |
| 75365 | P03383 | Q9BZA0 | -0.31536  |
| 75366 | P03383 | Q9BYX7 | -0.76823  |
| 75367 | P03383 | Q8N394 | -0.85795  |
| 75368 | P03383 | Q6P6C2 | -0.68788  |
| 75369 | P03383 | Q16515 | -0.70349  |
| 75370 | P03383 | Q9BZD6 | -0.95742  |
| 75371 | P03383 | P35626 | -0.9455   |
| 75372 | P03383 | O14792 | -0.45366  |
| 75373 | P03383 | Q9Y5S1 | -0.73256  |
| 75374 | P03383 | O43909 | -0.75543  |
| 75375 | P03383 | Q8NGE8 | -1.1027   |
| 75376 | P03383 | Q9Y5X9 | -0.75419  |
| 75377 | P03383 | Q86VZ6 | -0.22723  |
| 75378 | P03383 | Q494U1 | -0.5353   |
| 75379 | P03383 | P18507 | -0.45298  |
| 75380 | P03383 | Q9BQ08 | -0.6052   |
| 75381 | P03383 | Q96SF7 | -0.42445  |
| 75382 | P03383 | Q9HBY0 | -0.75613  |
| 75383 | P03383 | Q96LJ7 | -0.86483  |
| 75384 | P03383 | Q15078 | -0.076995 |
| 75385 | P03383 | Q6RI45 | -0.38284  |
| 75386 | P03383 | Q8N9I0 | -0.68051  |
| 75387 | P03383 | Q3KRB8 | -1.052    |
| 75388 | P03383 | Q13433 | -0.89882  |
| 75389 | P03383 | Q8ND25 | -0.23147  |
| 75390 | P03383 | Q7RTR8 | -1.0953   |
| 75391 | P03383 | O43196 | -0.63735  |
| 75392 | P03383 | P02655 | -0.52954  |

|       |        |        |           |
|-------|--------|--------|-----------|
| 75393 | P03383 | Q8IXI2 | -0.58096  |
| 75394 | P03383 | Q8TEA1 | -0.39051  |
| 75395 | P03383 | Q7RTW8 | -1.0449   |
| 75396 | P03383 | P55087 | -0.56589  |
| 75397 | P03383 | P01816 | -0.97479  |
| 75398 | P03383 | P35611 | -0.18606  |
| 75399 | P03383 | Q9BTV4 | -0.56037  |
| 75400 | P03383 | Q6NSX1 | -0.95341  |
| 75401 | P03383 | Q5T6J7 | -0.34708  |
| 75402 | P03383 | Q8TF62 | -0.94526  |
| 75403 | P03383 | Q8NDY3 | -0.40345  |
| 75404 | P03383 | Q14957 | -0.63913  |
| 75405 | P03383 | Q99811 | -0.21562  |
| 75406 | P03383 | Q9Y5Y7 | -0.74269  |
| 75407 | P03383 | Q96BR9 | -0.21994  |
| 75408 | P03383 | Q95803 | -0.76419  |
| 75409 | P03383 | Q86X10 | -0.82177  |
| 75410 | P03383 | Q14061 | -0.32388  |
| 75411 | P03383 | Q8WVI0 | -0.74159  |
| 75412 | P03383 | Q92949 | -0.33268  |
| 75413 | P03383 | Q8NGQ2 | -1.1027   |
| 75414 | P03383 | Q16739 | -0.56305  |
| 75415 | P03383 | Q13609 | -0.29746  |
| 75416 | P03383 | Q9UHN6 | -0.98753  |
| 75417 | P03383 | P52333 | -0.32301  |
| 75418 | P03383 | Q9Y3L3 | -1.0096   |
| 75419 | P03383 | Q96DX7 | -0.22855  |
| 75420 | P03383 | Q14296 | -0.22716  |
| 75421 | P03383 | Q15374 | -0.97009  |
| 75422 | P03383 | Q9BSW7 | -0.49325  |
| 75423 | P03383 | Q9NS66 | -1.1721   |
| 75424 | P03383 | B7ZAP0 | -0.12718  |
| 75425 | P03383 | Q2TAA8 | -0.52499  |
| 75426 | P03383 | Q9UBX2 | -0.1915   |
| 75427 | P03383 | A6NM28 | -0.21172  |
| 75428 | P03383 | Q95772 | -0.83273  |
| 75429 | P03383 | Q8N8D9 | -0.061698 |
| 75430 | P03383 | Q9NX62 | -0.68685  |
| 75431 | P03383 | Q13472 | -0.19784  |
| 75432 | P03383 | P19087 | -0.84799  |
| 75433 | P03383 | P19404 | -0.37766  |
| 75434 | P03383 | Q15125 | -0.77791  |
| 75435 | P03383 | Q9BY50 | -0.72157  |
| 75436 | P03383 | P0C091 | -1.4889   |
| 75437 | P03383 | Q8TE60 | -1.2214   |
| 75438 | P03383 | Q9H521 | -0.17087  |
| 75439 | P03383 | Q75795 | -0.8893   |
| 75440 | P03383 | Q8NHQ8 | -0.576    |
| 75441 | P03383 | Q16819 | -1.1823   |
| 75442 | P03383 | P01903 | -0.7302   |
| 75443 | P03383 | Q9BY15 | -1.4936   |
| 75444 | P03383 | Q92526 | -0.44512  |
| 75445 | P03383 | Q15547 | -0.73984  |
| 75446 | P03383 | Q92478 | -0.98489  |
| 75447 | P03383 | Q16270 | -0.53415  |
| 75448 | P03383 | Q9HBT6 | -1.0844   |
| 75449 | P03383 | Q9NQA3 | -0.36048  |
| 75450 | P03383 | Q9BTT0 | -0.22741  |
| 75451 | P03383 | P51654 | -0.5466   |
| 75452 | P03383 | Q9Y2I7 | -0.22611  |
| 75453 | P03383 | Q13164 | -0.22741  |
| 75454 | P03383 | Q86SJ2 | -0.33575  |
| 75455 | P03383 | Q60941 | -0.41874  |
| 75456 | P03383 | Q9H0E7 | -0.23991  |
| 75457 | P03383 | Q9BXU3 | -0.73967  |
| 75458 | P03383 | Q8TDF6 | -0.50313  |
| 75459 | P03383 | A7E2Y1 | -0.81259  |
| 75460 | P03383 | P83859 | -0.64899  |
| 75461 | P03383 | Q01740 | -0.72687  |
| 75462 | P03383 | Q9UKW4 | -0.30482  |
| 75463 | P03383 | P16152 | -0.75173  |
| 75464 | P03383 | Q94941 | -0.26443  |
| 75465 | P03383 | Q5SVS4 | -0.52568  |
| 75466 | P03383 | P02679 | -0.78607  |
| 75467 | P03383 | Q9UIG4 | -0.54538  |
| 75468 | P03383 | Q5VVB8 | -0.86584  |

|       |        |        |           |
|-------|--------|--------|-----------|
| 75469 | P03383 | Q9Y241 | -0.72689  |
| 75470 | P03383 | O75351 | -0.22864  |
| 75471 | P03383 | Q92535 | -0.83818  |
| 75472 | P03383 | O00522 | -0.22741  |
| 75473 | P03383 | P0CJ71 | -0.72903  |
| 75474 | P03383 | P08217 | -1.2917   |
| 75475 | P03383 | Q8N9M5 | -0.57862  |
| 75476 | P03383 | Q9Y4D1 | -0.41959  |
| 75477 | P03383 | P49356 | -0.045643 |
| 75478 | P03383 | O43281 | -0.51036  |
| 75479 | P03383 | P35590 | -0.78008  |
| 75480 | P03383 | P00797 | -0.80594  |
| 75481 | P03383 | Q8TD33 | -0.87849  |
| 75482 | P03383 | Q95747 | -0.90348  |
| 75483 | P03383 | D6RCP7 | -0.69644  |
| 75484 | P03383 | O60669 | -0.94189  |
| 75485 | P03383 | Q8TB68 | -0.75156  |
| 75486 | P03383 | Q8NGC6 | -1.1027   |
| 75487 | P03383 | P27449 | -0.2649   |
| 75488 | P03383 | O60721 | -0.66125  |
| 75489 | P03383 | Q5TA79 | -0.43006  |
| 75490 | P03383 | Q5SSJ5 | -0.79768  |
| 75491 | P03383 | P34947 | -0.38562  |
| 75492 | P03383 | P16581 | -0.39903  |
| 75493 | P03383 | Q8N7U6 | -0.52751  |
| 75494 | P03383 | Q9NRG1 | -0.48019  |
| 75495 | P03383 | Q9P2N4 | -1.2025   |
| 75496 | P03383 | Q96NL3 | -0.21172  |
| 75497 | P03383 | Q96T68 | -0.32933  |
| 75498 | P03383 | O43638 | -0.31899  |
| 75499 | P03383 | Q92527 | -0.22739  |
| 75500 | P03383 | Q8NAU1 | -0.9718   |
| 75501 | P03383 | Q92538 | -0.28871  |
| 75502 | P03383 | Q9HBF4 | -0.21783  |
| 75503 | P03383 | Q95857 | -1.0003   |
| 75504 | P03383 | Q99501 | -0.31975  |
| 75505 | P03383 | Q9NSD7 | -1.2438   |
| 75506 | P03383 | Q9NUR3 | -0.86584  |
| 75507 | P03383 | P01781 | -0.97479  |
| 75508 | P03383 | Q96F45 | -0.15963  |
| 75509 | P03383 | O60241 | -1.1703   |
| 75510 | P03383 | P04114 | -0.31032  |
| 75511 | P03383 | Q6ZN54 | -0.70771  |
| 75512 | P03383 | O00462 | -0.47693  |
| 75513 | P03383 | Q5R387 | -0.91899  |
| 75514 | P03383 | Q86UD5 | -0.806    |
| 75515 | P03383 | A8MVP8 | -0.070203 |
| 75516 | P03383 | Q9NYL5 | -0.65897  |
| 75517 | P03383 | Q8TB61 | -0.78581  |
| 75518 | P03383 | P01615 | -0.97479  |
| 75519 | P03383 | P15421 | -1.0706   |
| 75520 | P03383 | Q9NTN3 | -0.61119  |
| 75521 | P03383 | Q96QD8 | -0.99389  |
| 75522 | P03383 | Q9UPQ7 | -0.63753  |
| 75523 | P03383 | Q9H000 | -0.60353  |
| 75524 | P03383 | Q7Z6B7 | -0.64431  |
| 75525 | P03383 | O00339 | -0.28262  |
| 75526 | P03383 | H3BV60 | -0.86584  |
| 75527 | P03383 | Q8NEY4 | -0.46057  |
| 75528 | P03383 | Q9BZG9 | -1.1086   |
| 75529 | P03383 | Q5T742 | -0.87849  |
| 75530 | P03383 | P57105 | -0.68975  |
| 75531 | P03383 | Q8TAS1 | -0.22741  |
| 75532 | P03383 | Q8IUA0 | -0.79897  |
| 75533 | P03383 | Q15131 | -0.29383  |
| 75534 | P03383 | Q9Y2K3 | -0.62094  |
| 75535 | P03383 | Q7Z6J2 | -0.22803  |
| 75536 | P03383 | Q7Z5G4 | -0.38583  |
| 75537 | P03383 | P43490 | -0.18292  |
| 75538 | P03383 | Q9BW83 | -1.0033   |
| 75539 | P03383 | Q8NG68 | -0.6647   |
| 75540 | P03383 | Q14534 | -1.0167   |
| 75541 | P03383 | Q96LB9 | -0.86249  |
| 75542 | P03383 | Q8WVY7 | -0.097567 |
| 75543 | P03383 | P28325 | -0.35193  |
| 75544 | P03383 | P01344 | -0.22503  |

|       |        |        |           |
|-------|--------|--------|-----------|
| 75545 | P03383 | Q92765 | -0.59371  |
| 75546 | P03383 | Q96P16 | -0.4263   |
| 75547 | P03383 | Q8N6T3 | -0.27005  |
| 75548 | P03383 | Q7L0J3 | -0.49761  |
| 75549 | P03383 | Q5GAN4 | -0.85864  |
| 75550 | P03383 | Q8TDD2 | -0.21028  |
| 75551 | P03383 | Q15363 | -0.19335  |
| 75552 | P03383 | Q6Q0C0 | -0.2401   |
| 75553 | P03383 | P29972 | -0.2272   |
| 75554 | P03383 | Q4ZG55 | -0.86584  |
| 75555 | P03383 | Q96EP9 | -0.93759  |
| 75556 | P03383 | O15303 | -1.0938   |
| 75557 | P03383 | P01024 | -0.64154  |
| 75558 | P03383 | Q8NGN4 | -1.1027   |
| 75559 | P03383 | Q96L11 | -0.87849  |
| 75560 | P03383 | P41238 | -0.12162  |
| 75561 | P03383 | E9PJ23 | -0.026611 |
| 75562 | P03383 | Q8N0Y3 | -1.1027   |
| 75563 | P03383 | Q8TBF2 | -0.34049  |
| 75564 | P03383 | Q96JZ2 | -0.22741  |
| 75565 | P03383 | Q8IXF9 | -0.83009  |
| 75566 | P03383 | Q16566 | -0.32344  |
| 75567 | P03383 | A6NGN9 | -0.87849  |
| 75568 | P03383 | Q8NHP1 | -0.59308  |
| 75569 | P03383 | Q9BQ87 | -0.23246  |
| 75570 | P03383 | Q8IV16 | -0.69442  |
| 75571 | P03383 | Q70HW3 | -0.3292   |
| 75572 | P03383 | P04004 | -0.80232  |
| 75573 | P03383 | Q9NZR1 | -0.30182  |
| 75574 | P03383 | O60344 | -0.83346  |
| 75575 | P03383 | Q13454 | -0.77487  |
| 75576 | P03383 | Q9Y508 | -0.97819  |
| 75577 | P03383 | P51681 | -0.47002  |
| 75578 | P03383 | Q9H628 | -1.1358   |
| 75579 | P03383 | Q5JU69 | -0.95411  |
| 75580 | P03383 | Q75V66 | -0.91043  |
| 75581 | P03383 | P41594 | -0.68403  |
| 75582 | P03383 | Q8N4S9 | -0.83686  |
| 75583 | P03383 | Q8NGF7 | -1.1027   |
| 75584 | P03383 | P00390 | -0.22545  |
| 75585 | P03383 | O95248 | -0.96469  |
| 75586 | P03383 | Q16600 | -0.20235  |
| 75587 | P03383 | Q96S99 | -0.17193  |
| 75588 | P03383 | Q07001 | -0.86305  |
| 75589 | P03383 | Q02846 | -1.2064   |
| 75590 | P03383 | Q9NXA8 | -0.24824  |
| 75591 | P03383 | O43825 | -0.77811  |
| 75592 | P03383 | E9PQR5 | -0.030563 |
| 75593 | P03383 | P32242 | -0.3941   |
| 75594 | P03383 | Q9NYH9 | -0.28306  |
| 75595 | P03383 | Q8IV38 | -0.65419  |
| 75596 | P03383 | Q3KNW1 | -0.20785  |
| 75597 | P03383 | O00237 | -0.63305  |
| 75598 | P03383 | Q7Z7C8 | -0.33416  |
| 75599 | P03383 | Q6UXU6 | -0.86584  |
| 75600 | P03383 | Q9NSY1 | -0.57907  |
| 75601 | P03383 | P10266 | -0.32527  |
| 75602 | P03383 | P04181 | -0.21445  |
| 75603 | P03383 | P51811 | -0.32625  |
| 75604 | P03383 | A6NN92 | -0.83846  |
| 75605 | P03383 | Q8NGI1 | -1.1027   |
| 75606 | P03383 | Q76038 | -0.72437  |
| 75607 | P03383 | Q9NZQ7 | -0.60823  |
| 75608 | P03383 | Q8N3F9 | -0.86584  |
| 75609 | P03383 | Q9BS92 | -0.12134  |
| 75610 | P03383 | P0C851 | -0.86584  |
| 75611 | P03383 | Q76003 | -0.22817  |
| 75612 | P03383 | Q96PE2 | -0.66532  |
| 75613 | P03383 | Q6ZNH5 | -0.21172  |
| 75614 | P03383 | Q68G75 | -0.7792   |
| 75615 | P03383 | Q8WXA8 | -0.90812  |
| 75616 | P03383 | Q9BV90 | -0.12505  |
| 75617 | P03383 | Q969V1 | -1.1721   |
| 75618 | P03383 | P11137 | -0.11705  |
| 75619 | P03383 | Q9H3R1 | -0.76419  |
| 75620 | P03383 | Q8N2S1 | -0.42809  |



|       |        |        |            |
|-------|--------|--------|------------|
| 75621 | P03383 | Q96LA9 | -1.1721    |
| 75622 | P03383 | P15248 | -0.7515    |
| 75623 | P03383 | Q86VD9 | -0.82574   |
| 75624 | P03383 | P61566 | -0.5818    |
| 75625 | P03383 | Q96KF7 | -0.86584   |
| 75626 | P03383 | Q8WZ64 | -1.0741    |
| 75627 | P03383 | P17030 | -0.21172   |
| 75628 | P03383 | Q8N130 | -0.79953   |
| 75629 | P03383 | Q92851 | -0.22664   |
| 75630 | P03383 | P31644 | -0.76913   |
| 75631 | P03383 | Q01726 | -0.5885    |
| 75632 | P03383 | Q6UXG3 | -0.86727   |
| 75633 | P03383 | Q86XP0 | -0.39042   |
| 75634 | P03383 | O75554 | -0.16538   |
| 75635 | P03383 | A6NIV6 | -0.26087   |
| 75636 | P03383 | Q7L211 | -0.81246   |
| 75637 | P03383 | Q9ULJ7 | -0.2274    |
| 75638 | P03383 | O43557 | -0.5825    |
| 75639 | P03383 | Q96I36 | -0.73489   |
| 75640 | P03383 | Q8IVN8 | -0.91463   |
| 75641 | P03383 | O43521 | -0.23764   |
| 75642 | P03383 | Q01638 | -0.73611   |
| 75643 | P03383 | Q14568 | -0.58434   |
| 75644 | P03383 | O14645 | -0.19352   |
| 75645 | P03383 | Q8IWB7 | -0.22744   |
| 75646 | P03383 | Q9BZG1 | -0.84841   |
| 75647 | P03383 | Q9UL52 | -1.6063    |
| 75648 | P03383 | Q8WZ69 | -0.0089682 |
| 75649 | P03383 | Q9NQZ5 | -0.30763   |
| 75650 | P03383 | Q9H3S7 | -0.23003   |
| 75651 | P03383 | A8MUM7 | -0.32851   |
| 75652 | P03383 | Q15048 | -0.098222  |
| 75653 | P03383 | P0CJ92 | -0.35868   |
| 75654 | P03383 | Q9BUE6 | -0.24489   |
| 75655 | P03383 | Q9BY66 | -0.87804   |
| 75656 | P03383 | Q8IWI4 | -0.82246   |
| 75657 | P03383 | Q9BV99 | -0.22739   |
| 75658 | P03383 | Q8TF76 | -0.54095   |
| 75659 | P03383 | O76093 | -0.56516   |
| 75660 | P03383 | Q13474 | -0.50164   |
| 75661 | P03383 | P78314 | -0.22736   |
| 75662 | P03383 | Q8NGN0 | -1.1027    |
| 75663 | P03383 | Q9P0Z9 | -0.65881   |
| 75664 | P03383 | Q05329 | -0.23314   |
| 75665 | P03383 | Q8N1T3 | -0.71966   |
| 75666 | P03383 | Q9Y2S2 | -0.39179   |
| 75667 | P03383 | Q6PML9 | -0.50206   |
| 75668 | P03383 | Q13740 | -1.0558    |
| 75669 | P03383 | P52954 | -0.22992   |
| 75670 | P03383 | Q9Y5G4 | -1.1297    |
| 75671 | P03383 | Q8N142 | -0.62896   |
| 75672 | P03383 | Q9H190 | -0.25748   |
| 75673 | P03383 | P57789 | -1.1201    |
| 75674 | P03383 | Q5VWK5 | -0.52374   |
| 75675 | P03383 | A4D2B8 | -0.36757   |
| 75676 | P03383 | Q9HCN6 | -0.45178   |
| 75677 | P03383 | P26998 | -0.59147   |
| 75678 | P03383 | Q8IVV8 | -0.93628   |
| 75679 | P03383 | Q6NTE8 | -0.16078   |
| 75680 | P03383 | Q53RT3 | -0.99556   |
| 75681 | P03383 | P43365 | -0.16078   |
| 75682 | P03383 | Q14938 | -0.044518  |
| 75683 | P03383 | P50991 | -0.03201   |
| 75684 | P03383 | Q8NEA6 | -0.22727   |
| 75685 | P03383 | Q9NZJ7 | -0.27057   |
| 75686 | P03383 | Q8N8R3 | -0.69008   |
| 75687 | P03383 | P02771 | -0.63256   |
| 75688 | P03383 | P01595 | -0.97479   |
| 75689 | P03383 | P43362 | -0.16078   |
| 75690 | P03383 | Q3MUY2 | -0.95947   |
| 75691 | P03383 | P98095 | -0.97737   |
| 75692 | P03383 | Q1ZYL8 | -0.87849   |
| 75693 | P03383 | P11021 | -0.2223    |
| 75694 | P03383 | Q5T9A4 | -0.79084   |
| 75695 | P03383 | Q5VZ52 | -0.1512    |
| 75696 | P03383 | Q3YEC7 | -0.22766   |

|       |        |        |            |
|-------|--------|--------|------------|
| 75697 | P03383 | Q9BX84 | -0.64684   |
| 75698 | P03383 | Q10587 | -0.21091   |
| 75699 | P03383 | Q8TD46 | -0.63099   |
| 75700 | P03383 | Q96QF7 | -0.21602   |
| 75701 | P03383 | P07384 | -0.34273   |
| 75702 | P03383 | A6NGY5 | -1.1027    |
| 75703 | P03383 | Q9NRD9 | -0.86263   |
| 75704 | P03383 | Q9BZM5 | -0.92557   |
| 75705 | P03383 | Q9C030 | -0.50212   |
| 75706 | P03383 | Q96HP4 | -0.46168   |
| 75707 | P03383 | Q6P5Q4 | -0.53182   |
| 75708 | P03383 | Q9UDV7 | -0.16549   |
| 75709 | P03383 | Q8NE63 | -0.78975   |
| 75710 | P03383 | P12872 | -0.86165   |
| 75711 | P03383 | P0DKB6 | -0.86584   |
| 75712 | P03383 | Q13118 | -0.22486   |
| 75713 | P03383 | Q14330 | -1.124     |
| 75714 | P03383 | Q86VH4 | -0.86584   |
| 75715 | P03383 | P08235 | -0.22744   |
| 75716 | P03383 | Q96A00 | -0.32937   |
| 75717 | P03383 | Q75716 | -0.3337    |
| 75718 | P03383 | P62341 | -0.47318   |
| 75719 | P03383 | Q6MZZ7 | -1.0319    |
| 75720 | P03383 | P12931 | -0.23028   |
| 75721 | P03383 | Q5BJH7 | -0.86584   |
| 75722 | P03383 | Q9H078 | -0.52633   |
| 75723 | P03383 | P30493 | -0.88446   |
| 75724 | P03383 | Q96MF6 | -0.39016   |
| 75725 | P03383 | Q9NPG2 | -0.17062   |
| 75726 | P03383 | Q9P291 | -0.86584   |
| 75727 | P03383 | O94810 | -0.61356   |
| 75728 | P03383 | Q9UG63 | -0.71154   |
| 75729 | P03383 | P57737 | -0.49745   |
| 75730 | P03383 | Q96AX9 | -0.22737   |
| 75731 | P03383 | Q8N441 | -0.87334   |
| 75732 | P03383 | A6NM36 | -0.2279    |
| 75733 | P03383 | Q99788 | -0.82124   |
| 75734 | P03383 | Q96T54 | -1.0473    |
| 75735 | P03383 | Q5SNT6 | -0.57622   |
| 75736 | P03383 | Q6UW88 | -0.9603    |
| 75737 | P03383 | Q6ZMG9 | -0.30336   |
| 75738 | P03383 | P10827 | -0.23212   |
| 75739 | P03383 | P01730 | -0.3862    |
| 75740 | P03383 | Q92187 | -0.47772   |
| 75741 | P03383 | Q75449 | -0.22856   |
| 75742 | P03383 | Q8TB92 | -0.49374   |
| 75743 | P03383 | Q9GZZ6 | -0.81805   |
| 75744 | P03383 | Q9HBB8 | -1.0288    |
| 75745 | P03383 | Q8TE96 | -0.54812   |
| 75746 | P03383 | A6NH57 | -1.2555    |
| 75747 | P03383 | Q8TCE9 | -0.22542   |
| 75748 | P03383 | Q5W188 | -0.89477   |
| 75749 | P03383 | Q6ZRX8 | -0.19268   |
| 75750 | P03383 | Q6PK57 | -0.58559   |
| 75751 | P03383 | A6NKQ9 | -0.85703   |
| 75752 | P03383 | E9PKD4 | -0.025405  |
| 75753 | P03383 | P31930 | -0.52465   |
| 75754 | P03383 | Q5TB30 | -0.17847   |
| 75755 | P03383 | Q9BZR9 | -0.22739   |
| 75756 | P03383 | O95996 | -0.22718   |
| 75757 | P03383 | P20591 | -0.23281   |
| 75758 | P03383 | Q8TDI7 | -0.86584   |
| 75759 | P03383 | Q8N815 | -0.0058442 |
| 75760 | P03383 | Q9P2F9 | -0.21172   |
| 75761 | P03383 | Q96LB0 | -1.1721    |
| 75762 | P03383 | Q504Y3 | -0.52332   |
| 75763 | P03383 | A6NFH5 | -0.57941   |
| 75764 | P03383 | A8MVG2 | -0.86584   |
| 75765 | P03383 | Q96NZ1 | -0.43185   |
| 75766 | P03383 | O15075 | -0.92509   |
| 75767 | P03383 | Q15293 | -0.22052   |
| 75768 | P03383 | P45844 | -0.46406   |
| 75769 | P03383 | Q9HBJ0 | -0.74849   |
| 75770 | P03383 | Q96PT4 | -0.20674   |
| 75771 | P03383 | P49411 | -0.71615   |
| 75772 | P03383 | O75783 | -1.3262    |

|       |        |        |           |
|-------|--------|--------|-----------|
| 75773 | P03383 | P49641 | -0.61366  |
| 75774 | P03383 | Q8WY98 | -0.86584  |
| 75775 | P03383 | O14525 | -0.78982  |
| 75776 | P03383 | P28827 | -0.60721  |
| 75777 | P03383 | Q0VDF9 | -0.22219  |
| 75778 | P03383 | Q8WVP7 | -0.84656  |
| 75779 | P03383 | P49798 | -0.54383  |
| 75780 | P03383 | P05408 | -0.49179  |
| 75781 | P03383 | Q9UF11 | -0.83645  |
| 75782 | P03383 | Q8N139 | -1.1035   |
| 75783 | P03383 | Q96Q42 | -0.46029  |
| 75784 | P03383 | O76061 | -0.7019   |
| 75785 | P03383 | Q14582 | -0.2274   |
| 75786 | P03383 | Q15061 | -0.22753  |
| 75787 | P03383 | Q8N6R1 | -0.75275  |
| 75788 | P03383 | Q9BX10 | -0.92929  |
| 75789 | P03383 | Q96AG4 | -0.92089  |
| 75790 | P03383 | Q13361 | -0.8977   |
| 75791 | P03383 | Q99497 | -0.078529 |
| 75792 | P03383 | O76000 | -1.1027   |
| 75793 | P03383 | Q9BZP3 | -0.16078  |
| 75794 | P03383 | Q69YQ0 | -0.22744  |
| 75795 | P03383 | Q9NUJ1 | -0.52967  |
| 75796 | P03383 | Q9GZQ4 | -0.83297  |
| 75797 | P03383 | Q9NRP4 | -0.28874  |
| 75798 | P03383 | P0C7M8 | -0.85471  |
| 75799 | P03383 | Q9UK99 | -0.20999  |
| 75800 | P03383 | Q15389 | -0.47091  |
| 75801 | P03383 | Q5JPI9 | -0.37739  |
| 75802 | P03383 | P15882 | -0.81283  |
| 75803 | P03383 | Q9GZU0 | -0.48245  |
| 75804 | P03383 | Q687X5 | -1.176    |
| 75805 | P03383 | Q14CX5 | -0.86584  |
| 75806 | P03383 | Q9BYW1 | -0.66542  |
| 75807 | P03383 | Q8NGS2 | -1.1027   |
| 75808 | P03383 | Q9NRM1 | -0.98363  |
| 75809 | P03383 | Q9BXM7 | -0.49953  |
| 75810 | P03383 | Q8NHR9 | -0.30502  |
| 75811 | P03383 | O95866 | -0.87171  |
| 75812 | P03383 | Q9Y3A0 | -0.38523  |
| 75813 | P03383 | Q6ZN80 | -0.45527  |
| 75814 | P03383 | Q8IVW6 | -0.2095   |
| 75815 | P03383 | P16233 | -0.73775  |
| 75816 | P03383 | Q6UWY2 | -1.2917   |
| 75817 | P03383 | Q9Y284 | -0.86584  |
| 75818 | P03383 | Q9H0K4 | -0.66064  |
| 75819 | P03383 | P52272 | -0.21375  |
| 75820 | P03383 | Q15612 | -0.97532  |
| 75821 | P03383 | P05305 | -0.27337  |
| 75822 | P03383 | Q86WA8 | -0.33715  |
| 75823 | P03383 | P23470 | -1.223    |
| 75824 | P03383 | Q95382 | -0.9989   |
| 75825 | P03383 | Q96LA6 | -0.93628  |
| 75826 | P03383 | Q9Y276 | -0.49403  |
| 75827 | P03383 | Q96IW7 | -0.59138  |
| 75828 | P03383 | P17031 | -0.21172  |
| 75829 | P03383 | Q8WWT9 | -0.73913  |
| 75830 | P03383 | Q9Y3R0 | -0.32139  |
| 75831 | P03383 | Q13401 | -0.10096  |
| 75832 | P03383 | P42773 | -0.2274   |
| 75833 | P03383 | Q9BZ11 | -1.0975   |
| 75834 | P03383 | Q8TBY0 | -0.84005  |
| 75835 | P03383 | Q86V25 | -0.27318  |
| 75836 | P03383 | Q495N2 | -0.86584  |
| 75837 | P03383 | O95415 | -0.86584  |
| 75838 | P03383 | Q8IZF3 | -1.1905   |
| 75839 | P03383 | Q5VV43 | -0.52535  |
| 75840 | P03383 | Q9UGM3 | -0.32248  |
| 75841 | P03383 | P46108 | -0.22741  |
| 75842 | P03383 | Q96FQ6 | -0.23076  |
| 75843 | P03383 | P36896 | -0.35156  |
| 75844 | P03383 | Q9UHM6 | -1.0646   |
| 75845 | P03383 | Q9NPU4 | -0.86584  |
| 75846 | P03383 | Q15907 | -0.69073  |
| 75847 | P03383 | Q8TDE3 | -0.76271  |
| 75848 | P03383 | Q8NCW5 | -0.35914  |

|       |        |        |          |
|-------|--------|--------|----------|
| 75849 | P03383 | Q15814 | -0.30656 |
| 75850 | P03383 | Q8N543 | -0.32762 |
| 75851 | P03383 | Q6UXV1 | -0.86584 |
| 75852 | P03383 | Q9NX52 | -1.1493  |
| 75853 | P03383 | Q92915 | -0.29309 |
| 75854 | P03383 | Q6P158 | -0.90954 |
| 75855 | P03383 | P01892 | -0.54543 |
| 75856 | P03383 | A6NFZ4 | -0.87849 |
| 75857 | P03383 | Q8IZC6 | -0.91188 |
| 75858 | P03383 | Q5VV67 | -0.2245  |
| 75859 | P03383 | P18135 | -0.97479 |
| 75860 | P03383 | Q6IPR1 | -0.30763 |
| 75861 | P03383 | Q9UKI8 | -0.54447 |
| 75862 | P03383 | Q7Z4W2 | -0.85255 |
| 75863 | P03383 | Q9UBX3 | -0.23103 |
| 75864 | P03383 | Q9C0C4 | -0.64174 |
| 75865 | P03383 | P04208 | -0.97479 |
| 75866 | P03383 | Q8NGF8 | -1.1027  |
| 75867 | P03383 | A2A2Z9 | -0.22737 |
| 75868 | P03383 | O75425 | -0.73168 |
| 75869 | P03383 | Q14563 | -0.54618 |
| 75870 | P03383 | Q9H0U4 | -0.59276 |
| 75871 | P03383 | P01303 | -0.62871 |
| 75872 | P03383 | Q7Z6V5 | -0.57065 |
| 75873 | P03383 | Q96D59 | -0.92811 |
| 75874 | P03383 | Q86VR2 | -0.86584 |
| 75875 | P03383 | Q6VB84 | -0.35259 |
| 75876 | P03383 | P49767 | -0.33409 |
| 75877 | P03383 | O43525 | -0.89309 |
| 75878 | P03383 | Q86UW1 | -0.87558 |
| 75879 | P03383 | Q9BWL3 | -0.82646 |
| 75880 | P03383 | Q14242 | -0.65336 |
| 75881 | P03383 | Q8TBA6 | -0.58469 |
| 75882 | P03383 | Q9Y580 | -0.81033 |
| 75883 | P03383 | O43680 | -0.22773 |
| 75884 | P03383 | Q8NBF1 | -0.22713 |
| 75885 | P03383 | Q96T75 | -0.21703 |
| 75886 | P03383 | Q8IZ57 | -0.75625 |
| 75887 | P03383 | Q9C0H5 | -0.51041 |
| 75888 | P03383 | P07858 | -0.27513 |
| 75889 | P03383 | P61568 | -0.30416 |
| 75890 | P03383 | P16112 | -0.71541 |
| 75891 | P03383 | P40394 | -0.64144 |
| 75892 | P03383 | Q9NYK1 | -0.55011 |
| 75893 | P03383 | O75340 | -0.23004 |
| 75894 | P03383 | P20719 | -0.2186  |
| 75895 | P03383 | Q5XKR4 | -0.15834 |
| 75896 | P03383 | O95744 | -0.33287 |
| 75897 | P03383 | Q9BRB3 | -0.67759 |
| 75898 | P03383 | Q9BXS1 | -0.38718 |
| 75899 | P03383 | Q9H6H4 | -0.86584 |
| 75900 | P03383 | P07327 | -0.21512 |
| 75901 | P03383 | Q86SQ9 | -0.10222 |
| 75902 | P03383 | Q12829 | -1.058   |
| 75903 | P03383 | Q8NGV7 | -1.1027  |
| 75904 | P03383 | P58182 | -1.1027  |
| 75905 | P03383 | Q96KK4 | -1.1027  |
| 75906 | P03383 | P56134 | -0.52999 |
| 75907 | P03383 | P30533 | -0.70494 |
| 75908 | P03383 | P20155 | -0.77366 |
| 75909 | P03383 | Q969Y2 | -0.86679 |
| 75910 | P03383 | Q9NVM6 | -0.84144 |
| 75911 | P03383 | P30510 | -0.93787 |
| 75912 | P03383 | Q8NGK0 | -1.1027  |
| 75913 | P03383 | Q8WZ42 | -0.30198 |
| 75914 | P03383 | A6NE02 | -0.70406 |
| 75915 | P03383 | Q5T751 | -0.43006 |
| 75916 | P03383 | Q8N412 | -0.1486  |
| 75917 | P03383 | P07357 | -1.1824  |
| 75918 | P03383 | O43822 | -0.22728 |
| 75919 | P03383 | Q96CG8 | -0.74351 |
| 75920 | P03383 | P45880 | -0.49728 |
| 75921 | P03383 | Q9UIU6 | -0.22746 |
| 75922 | P03383 | P57082 | -0.33366 |
| 75923 | P03383 | Q9P1Z3 | -1.1441  |
| 75924 | P03383 | P01579 | -0.27454 |

|       |        |         |           |
|-------|--------|---------|-----------|
| 75925 | P03383 | Q02297  | -0.25128  |
| 75926 | P03383 | Q8IZT8  | -0.20713  |
| 75927 | P03383 | Q15818  | -0.54276  |
| 75928 | P03383 | Q86V40  | -1.086    |
| 75929 | P03383 | P16860  | -0.49898  |
| 75930 | P03383 | Q9H939  | -0.30274  |
| 75931 | P03383 | Q96M78  | -0.17419  |
| 75932 | P03383 | Q8TF42  | -0.26751  |
| 75933 | P03383 | Q6ZP65  | -0.11295  |
| 75934 | P03383 | P01709  | -0.97479  |
| 75935 | P03383 | P03372  | -0.22747  |
| 75936 | P03383 | P13631  | -0.23073  |
| 75937 | P03383 | Q96PJ5  | -0.39621  |
| 75938 | P03383 | Q9P2S6  | -0.52332  |
| 75939 | P03383 | P04275  | -0.2274   |
| 75940 | P03383 | Q5J TZ9 | -0.31319  |
| 75941 | P03383 | P11226  | -0.52562  |
| 75942 | P03383 | Q8TD26  | -0.19762  |
| 75943 | P03383 | Q96AG3  | -0.4094   |
| 75944 | P03383 | Q8NGG6  | -1.1027   |
| 75945 | P03383 | Q9P2Z0  | -0.57338  |
| 75946 | P03383 | Q8IYD9  | -0.87849  |
| 75947 | P03383 | P09769  | -0.49061  |
| 75948 | P03383 | P51677  | -1.1164   |
| 75949 | P03383 | Q9P281  | -0.54186  |
| 75950 | P03383 | O14986  | -0.22336  |
| 75951 | P03383 | P29371  | -0.85424  |
| 75952 | P03383 | P01023  | -0.25707  |
| 75953 | P03383 | A6NGU5  | -0.69875  |
| 75954 | P03383 | Q8NGK6  | -1.1027   |
| 75955 | P03383 | Q8WWQ2  | -0.83826  |
| 75956 | P03383 | Q96BD0  | -0.87829  |
| 75957 | P03383 | Q9H0R5  | -0.83224  |
| 75958 | P03383 | O60942  | -0.66801  |
| 75959 | P03383 | Q96KP6  | -0.4586   |
| 75960 | P03383 | O95260  | -0.094099 |
| 75961 | P03383 | O00501  | -0.57147  |
| 75962 | P03383 | Q8TDM5  | -0.74002  |
| 75963 | P03383 | Q96PQ1  | -1.0093   |
| 75964 | P03383 | O15431  | -1.0414   |
| 75965 | P03383 | Q69YU5  | -0.87849  |
| 75966 | P03383 | Q9HB21  | -0.22741  |
| 75967 | P03383 | O15254  | -0.62202  |
| 75968 | P03383 | E0CX11  | -0.87849  |
| 75969 | P03383 | Q8N8J7  | -0.86584  |
| 75970 | P03383 | O43166  | -0.25154  |
| 75971 | P03383 | Q8IZD2  | -0.22744  |
| 75972 | P03383 | Q8IWB4  | -0.86584  |
| 75973 | P03383 | P18545  | -0.44454  |
| 75974 | P03383 | Q9H115  | -0.22967  |
| 75975 | P03383 | Q9NQZ3  | -0.22794  |
| 75976 | P03383 | P39059  | -1.3246   |
| 75977 | P03383 | Q7Z6K3  | -0.43601  |
| 75978 | P03383 | Q8IV76  | -0.41914  |
| 75979 | P03383 | Q9UBN4  | -0.23995  |
| 75980 | P03383 | P49585  | -0.43218  |
| 75981 | P03383 | Q8NGS5  | -1.1027   |
| 75982 | P03383 | Q96A84  | -0.85842  |
| 75983 | P03383 | A0PK05  | -0.86584  |
| 75984 | P03383 | Q13705  | -0.38263  |
| 75985 | P03383 | Q6W4X9  | -0.86545  |
| 75986 | P03383 | P51693  | -0.24604  |
| 75987 | P03383 | Q5T686  | -0.329    |
| 75988 | P03383 | A6NGH8  | -0.2274   |
| 75989 | P03383 | Q9UH65  | -0.62437  |
| 75990 | P03383 | P80370  | -0.72598  |
| 75991 | P03383 | Q9NRK6  | -0.86555  |
| 75992 | P03383 | Q9NPA2  | -1.2773   |
| 75993 | P03383 | Q8NH61  | -1.1027   |
| 75994 | P03383 | Q9Y5T5  | -0.27146  |
| 75995 | P03383 | O43506  | -1.0896   |
| 75996 | P03383 | Q99967  | -0.15338  |
| 75997 | P03383 | Q8TB45  | -0.22741  |
| 75998 | P03383 | Q6PEX7  | -0.86584  |
| 75999 | P03383 | Q03395  | -1.2002   |
| 76000 | P03383 | Q629K1  | -0.93931  |

|       |        |        |           |
|-------|--------|--------|-----------|
| 76001 | P03383 | Q6UXQ8 | -0.87849  |
| 76002 | P03383 | Q9UPR0 | -0.61836  |
| 76003 | P03383 | Q86UP9 | -0.86584  |
| 76004 | P03383 | Q96RD0 | -1.1027   |
| 76005 | P03383 | Q15018 | -0.45066  |
| 76006 | P03383 | Q6URH7 | -0.15675  |
| 76007 | P03383 | Q96E17 | -0.86697  |
| 76008 | P03383 | O14817 | -1.0565   |
| 76009 | P03383 | Q8N283 | -0.22738  |
| 76010 | P03383 | Q9H4B8 | -0.70412  |
| 76011 | P03383 | P17041 | -0.21172  |
| 76012 | P03383 | P60328 | -0.069311 |
| 76013 | P03383 | Q6ZMY6 | -0.23042  |
| 76014 | P03383 | Q9NVP1 | -0.039551 |
| 76015 | P03383 | O60449 | -1.0741   |
| 76016 | P03383 | Q9Y6J3 | -0.576    |
| 76017 | P03383 | Q9H9S0 | -0.22779  |
| 76018 | P03383 | O95476 | -0.19934  |
| 76019 | P03383 | Q15782 | -0.73156  |
| 76020 | P03383 | Q13133 | -0.2314   |
| 76021 | P03383 | Q14832 | -0.96899  |
| 76022 | P03383 | P61086 | -0.43575  |
| 76023 | P03383 | Q02505 | -1.1007   |
| 76024 | P03383 | O60684 | -0.22678  |
| 76025 | P03383 | Q9H2C2 | -0.84432  |
| 76026 | P03383 | Q8NEA5 | -0.86584  |
| 76027 | P03383 | Q01151 | -0.95146  |
| 76028 | P03383 | P11488 | -0.64852  |
| 76029 | P03383 | Q86SQ4 | -1.1905   |
| 76030 | P03383 | P14373 | -0.22989  |
| 76031 | P03383 | P05112 | -0.21051  |
| 76032 | P03383 | P11055 | -0.50978  |
| 76033 | P03383 | Q9Y5Z6 | -0.79236  |
| 76034 | P03383 | Q6ZSY5 | -0.80007  |
| 76035 | P03383 | Q8WUJ1 | -0.77735  |
| 76036 | P03383 | O60331 | -0.40727  |
| 76037 | P03383 | Q4VXU2 | -0.84005  |
| 76038 | P03383 | A6NNH2 | -0.48092  |
| 76039 | P03383 | Q2WQJ8 | -0.86584  |
| 76040 | P03383 | Q96L46 | -0.53682  |
| 76041 | P03383 | P54762 | -0.50975  |
| 76042 | P03383 | Q9H3D4 | -0.22721  |
| 76043 | P03383 | O00469 | -0.70759  |
| 76044 | P03383 | P50052 | -0.71063  |
| 76045 | P03383 | P03999 | -1.227    |
| 76046 | P03383 | Q9UL17 | -0.44604  |
| 76047 | P03383 | P22607 | -0.30636  |
| 76048 | P03383 | Q96EW2 | -0.29487  |
| 76049 | P03383 | Q9NVD7 | -0.22746  |
| 76050 | P03383 | A0AV02 | -0.92964  |
| 76051 | P03383 | Q9Y2G3 | -0.63939  |
| 76052 | P03383 | Q75027 | -0.73991  |
| 76053 | P03383 | P81534 | -0.83984  |
| 76054 | P03383 | A8MXQ7 | -0.22741  |
| 76055 | P03383 | P08581 | -0.35449  |
| 76056 | P03383 | Q5THK1 | -0.027813 |
| 76057 | P03383 | Q14680 | -0.31848  |
| 76058 | P03383 | A6NHC0 | -0.81099  |
| 76059 | P03383 | Q6JVE9 | -0.88117  |
| 76060 | P03383 | Q9UNE0 | -0.59422  |
| 76061 | P03383 | Q6UE05 | -0.86584  |
| 76062 | P03383 | Q8IY18 | -0.21974  |
| 76063 | P03383 | Q96EP5 | -0.57358  |
| 76064 | P03383 | Q6ZNL6 | -0.95987  |
| 76065 | P03383 | Q9UQE7 | -0.22553  |
| 76066 | P03383 | Q96Q11 | -0.50916  |
| 76067 | P03383 | Q04609 | -0.92315  |
| 76068 | P03383 | B2RPK0 | -0.6193   |
| 76069 | P03383 | Q96PN7 | -0.25089  |
| 76070 | P03383 | Q17RS7 | -0.33995  |
| 76071 | P03383 | Q8NGG2 | -1.1027   |
| 76072 | P03383 | Q8TAX7 | -0.35169  |
| 76073 | P03383 | Q24JP5 | -0.54696  |
| 76074 | P03383 | Q8IVY1 | -0.86584  |
| 76075 | P03383 | Q02750 | -0.22752  |
| 76076 | P03383 | P15382 | -0.83212  |

|       |        |        |          |
|-------|--------|--------|----------|
| 76077 | P03383 | Q7L0L9 | -0.86584 |
| 76078 | P03383 | O15121 | -0.81046 |
| 76079 | P03383 | Q14002 | -0.92601 |
| 76080 | P03383 | O75146 | -0.2039  |
| 76081 | P03383 | Q8NGX3 | -1.1027  |
| 76082 | P03383 | Q9P2T1 | -0.53801 |
| 76083 | P03383 | Q99961 | -0.26912 |
| 76084 | P03383 | Q9BSG0 | -0.87849 |
| 76085 | P03383 | Q9UHC6 | -0.77286 |
| 76086 | P03383 | Q9NS67 | -1.1721  |
| 76087 | P03383 | P31941 | -0.39742 |
| 76088 | P03383 | Q969I6 | -0.98254 |
| 76089 | P03383 | Q86W33 | -0.95253 |
| 76090 | P03383 | Q86XR7 | -0.45458 |
| 76091 | P03383 | Q9H8Y1 | -0.52274 |
| 76092 | P03383 | Q9UBC0 | -0.22729 |
| 76093 | P03383 | Q9C019 | -0.72401 |
| 76094 | P03383 | Q8NGF9 | -1.1027  |
| 76095 | P03383 | Q8N4L2 | -0.85964 |
| 76096 | P03383 | Q8N966 | -0.89944 |
| 76097 | P03383 | Q9UBJ2 | -0.51108 |
| 76098 | P03383 | Q9ULS6 | -0.84843 |
| 76099 | P03383 | Q9H201 | -0.11666 |
| 76100 | P03383 | C4AMC7 | -0.58563 |
| 76101 | P03383 | P60660 | -0.22654 |
| 76102 | P03383 | Q9H8H2 | -0.51914 |
| 76103 | P03383 | O43435 | -0.50489 |
| 76104 | P03383 | Q8IXU6 | -0.51283 |
| 76105 | P03383 | Q92610 | -0.15816 |
| 76106 | P03383 | A5X5Y0 | -0.90812 |
| 76107 | P03383 | P48664 | -0.98196 |
| 76108 | P03383 | Q30KQ1 | -0.84399 |
| 76109 | P03383 | Q9BXU7 | -0.25798 |
| 76110 | P03383 | Q9H469 | -0.22145 |
| 76111 | P03383 | Q96RV3 | -0.86584 |
| 76112 | P03383 | Q9HCC6 | -0.22408 |
| 76113 | P03383 | Q92608 | -0.31594 |
| 76114 | P03383 | Q8IVL5 | -0.602   |
| 76115 | P03383 | Q7L5A8 | -0.76457 |
| 76116 | P03383 | Q96CU9 | -0.77327 |
| 76117 | P03383 | Q8IWW6 | -1.1111  |
| 76118 | P03383 | Q9Y4E5 | -0.2385  |
| 76119 | P03383 | Q9Y6I8 | -0.3477  |
| 76120 | P03383 | O96008 | -0.52526 |
| 76121 | P03383 | Q5J8X5 | -0.86584 |
| 76122 | P03383 | P49683 | -1.1361  |
| 76123 | P03383 | P01185 | -0.40133 |
| 76124 | P03383 | Q96IQ9 | -0.2385  |
| 76125 | P03383 | Q6UX52 | -0.87849 |
| 76126 | P03383 | Q9BV38 | -0.60582 |
| 76127 | P03383 | O14950 | -0.31531 |
| 76128 | P03383 | P54760 | -0.8461  |
| 76129 | P03383 | Q9NRY6 | -0.57963 |
| 76130 | P03383 | Q9Y5E9 | -1.1238  |
| 76131 | P03383 | Q00G26 | -0.42327 |
| 76132 | P03383 | Q6EMK4 | -1.2172  |
| 76133 | P03383 | P09758 | -0.84852 |
| 76134 | P03383 | Q8IZQ8 | -0.44277 |
| 76135 | P03383 | Q6XLA1 | -0.14575 |
| 76136 | P03383 | Q8NDX9 | -0.54538 |
| 76137 | P03383 | Q15940 | -0.73005 |
| 76138 | P03383 | Q9NQ35 | -0.55277 |
| 76139 | P03383 | Q9H1B5 | -0.66159 |
| 76140 | P03383 | Q7Z4L9 | -0.3263  |
| 76141 | P03383 | O75129 | -0.86584 |
| 76142 | P03383 | Q13304 | -1.1792  |
| 76143 | P03383 | P51797 | -0.95191 |
| 76144 | P03383 | A6NG13 | -0.72625 |
| 76145 | P03383 | Q6NX45 | -0.21172 |
| 76146 | P03383 | Q9NZH6 | -0.42774 |
| 76147 | P03383 | P55011 | -0.79456 |
| 76148 | P03383 | Q6ZS62 | -0.86584 |
| 76149 | P03383 | Q8NHV1 | -0.95272 |
| 76150 | P03383 | O00764 | -0.22555 |
| 76151 | P03383 | P08254 | -0.80235 |
| 76152 | P03383 | Q9NRZ7 | -0.74293 |

|       |        |        |           |
|-------|--------|--------|-----------|
| 76153 | P03383 | Q9BZ76 | -1.503    |
| 76154 | P03383 | O95926 | -0.18173  |
| 76155 | P03383 | Q8N9X3 | -0.22425  |
| 76156 | P03383 | Q9Y661 | -1.0012   |
| 76157 | P03383 | Q86SK9 | -0.97446  |
| 76158 | P03383 | A8K0S8 | -0.21489  |
| 76159 | P03383 | P23526 | -0.14106  |
| 76160 | P03383 | Q6UXU0 | -0.87849  |
| 76161 | P03383 | Q9H069 | -0.29487  |
| 76162 | P03383 | P51449 | -0.40052  |
| 76163 | P03383 | O60423 | -0.84807  |
| 76164 | P03383 | Q6UWV7 | -0.86584  |
| 76165 | P03383 | O43543 | -0.17787  |
| 76166 | P03383 | Q5TFE4 | -0.43358  |
| 76167 | P03383 | Q9Y4J8 | -0.22707  |
| 76168 | P03383 | A8MUU1 | -0.57941  |
| 76169 | P03383 | Q03701 | -0.22682  |
| 76170 | P03383 | Q9H114 | -0.89477  |
| 76171 | P03383 | Q5KSL6 | -0.76004  |
| 76172 | P03383 | Q8IX06 | -0.28678  |
| 76173 | P03383 | Q9H5L9 | -0.052092 |
| 76174 | P03383 | P05231 | -0.25108  |
| 76175 | P03383 | P56373 | -0.5564   |
| 76176 | P03383 | Q9H013 | -1.1299   |
| 76177 | P03383 | Q9Y242 | -0.2188   |
| 76178 | P03383 | O14763 | -0.36505  |
| 76179 | P03383 | Q8N3R3 | -0.30763  |
| 76180 | P03383 | Q9HCU0 | -0.6004   |
| 76181 | P03383 | Q96CQ1 | -0.6938   |
| 76182 | P03383 | P01774 | -0.97479  |
| 76183 | P03383 | Q9UBV7 | -0.50814  |
| 76184 | P03383 | O15079 | -0.5017   |
| 76185 | P03383 | Q9H987 | -0.39786  |
| 76186 | P03383 | Q6UXG2 | -0.7797   |
| 76187 | P03383 | Q7Z3D4 | -0.84623  |
| 76188 | P03383 | Q9C091 | -0.86584  |
| 76189 | P03383 | O15212 | -0.40269  |
| 76190 | P03383 | Q9H2X3 | -0.77447  |
| 76191 | P03383 | P52566 | -0.66284  |
| 76192 | P03383 | Q9BXB1 | -0.90494  |
| 76193 | P03383 | Q13889 | -0.20833  |
| 76194 | P03383 | P15144 | -0.82103  |
| 76195 | P03383 | P02689 | -0.4376   |
| 76196 | P03383 | P01732 | -0.71634  |
| 76197 | P03383 | P02008 | -0.41125  |
| 76198 | P03383 | Q0P670 | -0.86584  |
| 76199 | P03383 | Q9UKG9 | -0.56051  |
| 76200 | P03383 | P10589 | -0.23525  |
| 76201 | P03383 | A2RRH5 | -0.22744  |
| 76202 | P03383 | Q96E52 | -0.7389   |
| 76203 | P03383 | Q9UPS8 | -0.31528  |
| 76204 | P03383 | Q9H8P0 | -0.64618  |
| 76205 | P03383 | Q9NZ53 | -0.6084   |
| 76206 | P03383 | Q6UXS9 | -0.2534   |
| 76207 | P03383 | Q9NW08 | -0.13908  |
| 76208 | P03383 | Q8IZV2 | -0.88766  |
| 76209 | P03383 | P59768 | -0.51126  |
| 76210 | P03383 | Q9GZU1 | -0.79119  |
| 76211 | P03383 | Q6ZNE9 | -0.47027  |
| 76212 | P03383 | A4QPH2 | -0.60429  |
| 76213 | P03383 | P61158 | -0.20546  |
| 76214 | P03383 | Q8N8Y2 | -0.19897  |
| 76215 | P03383 | Q4KWH8 | -0.50182  |
| 76216 | P03383 | Q4G176 | -0.95313  |
| 76217 | P03383 | Q9UBK5 | -0.9357   |
| 76218 | P03383 | O14981 | -0.5223   |
| 76219 | P03383 | P01718 | -0.97479  |
| 76220 | P03383 | Q86TI2 | -0.54773  |
| 76221 | P03383 | Q96GR4 | -0.89944  |
| 76222 | P03383 | O43933 | -0.25272  |
| 76223 | P03383 | Q8N158 | -0.863    |
| 76224 | P03383 | Q5VZ89 | -0.7541   |
| 76225 | P03383 | Q9NR34 | -0.70695  |
| 76226 | P03383 | P29762 | -0.69567  |
| 76227 | P03383 | Q9H7X2 | -0.86584  |
| 76228 | P03383 | P35544 | -0.22626  |



|       |        |        |          |
|-------|--------|--------|----------|
| 76229 | P03383 | Q7Z5R6 | -0.58767 |
| 76230 | P03383 | P06213 | -0.24368 |
| 76231 | P03383 | Q9NT22 | -0.79774 |
| 76232 | P03383 | Q8WU08 | -0.9869  |
| 76233 | P03383 | Q9HBU1 | -0.22739 |
| 76234 | P03383 | A4D1F6 | -0.576   |
| 76235 | P03383 | Q8N1C3 | -0.75795 |
| 76236 | P03383 | Q5VZL5 | -0.67302 |
| 76237 | P03383 | P11177 | -0.25517 |
| 76238 | P03383 | Q9BZM3 | -0.28281 |
| 76239 | P03383 | Q8NFA2 | -0.38063 |
| 76240 | P03383 | O00623 | -0.45307 |
| 76241 | P03383 | Q9NS62 | -1.0638  |
| 76242 | P03383 | O14545 | -0.69469 |
| 76243 | P03383 | A6NJY4 | -0.86584 |
| 76244 | P03383 | Q9C040 | -0.22741 |
| 76245 | P03383 | Q6P3X3 | -0.22681 |
| 76246 | P03383 | G3V0H7 | -0.89134 |
| 76247 | P03383 | Q2TAC6 | -0.68836 |
| 76248 | P03383 | P31267 | -0.22505 |
| 76249 | P03383 | Q9NSU2 | -0.18501 |
| 76250 | P03383 | Q9Y5I1 | -1.1553  |
| 76251 | P03383 | Q75121 | -0.93628 |
| 76252 | P03383 | P04908 | -0.88998 |
| 76253 | P03383 | P62699 | -0.5528  |
| 76254 | P03383 | P18858 | -0.28221 |
| 76255 | P03383 | Q7LG56 | -0.10775 |
| 76256 | P03383 | Q96A05 | -0.46175 |
| 76257 | P03383 | Q92953 | -0.86026 |
| 76258 | P03383 | Q9P217 | -0.52332 |
| 76259 | P03383 | Q9H2C5 | -1.1027  |
| 76260 | P03383 | O75608 | -0.21178 |
| 76261 | P03383 | Q07108 | -0.98201 |
| 76262 | P03383 | P07305 | -0.56385 |
| 76263 | P03383 | P05549 | -0.20678 |
| 76264 | P03383 | Q6A555 | -0.44613 |
| 76265 | P03383 | Q9HC98 | -0.22843 |
| 76266 | P03383 | P49327 | -0.99998 |
| 76267 | P03383 | A6NIE9 | -1.2917  |
| 76268 | P03383 | Q15063 | -1.1707  |
| 76269 | P03383 | Q9HC36 | -0.20088 |
| 76270 | P03383 | O14921 | -0.38499 |
| 76271 | P03383 | P30495 | -0.88446 |
| 76272 | P03383 | P21589 | -0.4959  |
| 76273 | P03383 | Q9UJT0 | -0.51127 |
| 76274 | P03383 | Q5JXX5 | -0.8104  |
| 76275 | P03383 | P07360 | -0.88268 |
| 76276 | P03383 | Q96MM3 | -0.22752 |
| 76277 | P03383 | P16190 | -0.7844  |
| 76278 | P03383 | P28330 | -0.33687 |
| 76279 | P03383 | Q9Y2F9 | -0.22467 |
| 76280 | P03383 | P14780 | -0.40405 |
| 76281 | P03383 | Q8N431 | -0.8089  |
| 76282 | P03383 | Q8NG75 | -1.1027  |
| 76283 | P03383 | A6NNJ1 | -0.48092 |
| 76284 | P03383 | Q7L1I2 | -0.67387 |
| 76285 | P03383 | P19526 | -0.69708 |
| 76286 | P03383 | Q86XF0 | -0.36274 |
| 76287 | P03383 | Q9P2A4 | -0.22743 |
| 76288 | P03383 | P01241 | -0.25643 |
| 76289 | P03383 | Q9BV40 | -0.62496 |
| 76290 | P03383 | Q8NGN8 | -1.1027  |
| 76291 | P03383 | Q6ZS10 | -0.84147 |
| 76292 | P03383 | O00311 | -0.22741 |
| 76293 | P03383 | Q8NGG7 | -1.1027  |
| 76294 | P03383 | Q9BWM5 | -0.21172 |
| 76295 | P03383 | Q96NM4 | -0.2139  |
| 76296 | P03383 | Q9H6B1 | -0.50622 |
| 76297 | P03383 | P0DJ93 | -0.86584 |
| 76298 | P03383 | Q96PX6 | -0.17873 |
| 76299 | P03383 | Q6PIY7 | -0.4407  |
| 76300 | P03383 | P35558 | -0.40617 |
| 76301 | P03383 | P15173 | -0.2273  |
| 76302 | P03383 | Q5QGT7 | -0.86391 |
| 76303 | P03383 | Q9NXG2 | -0.4711  |
| 76304 | P03383 | Q14953 | -1.0618  |

|       |        |        |          |
|-------|--------|--------|----------|
| 76305 | P03383 | Q8N393 | -0.21172 |
| 76306 | P03383 | Q9BQD7 | -0.86584 |
| 76307 | P03383 | Q8IZ96 | -0.88766 |
| 76308 | P03383 | Q9NZ08 | -0.57056 |
| 76309 | P03383 | P31994 | -0.44564 |
| 76310 | P03383 | Q9NRZ5 | -0.70921 |
| 76311 | P03383 | P30040 | -0.23465 |
| 76312 | P03383 | Q6DKJ4 | -0.31655 |
| 76313 | P03383 | Q68DE3 | -0.47282 |
| 76314 | P03383 | Q6NUI6 | -0.94331 |
| 76315 | P03383 | O75128 | -0.60515 |
| 76316 | P03383 | Q9UIA0 | -0.71889 |
| 76317 | P03383 | Q9NS85 | -0.32918 |
| 76318 | P03383 | Q14964 | -0.76754 |
| 76319 | P03383 | Q9Y698 | -0.54938 |
| 76320 | P03383 | Q8N6M9 | -0.13827 |
| 76321 | P03383 | Q9UMX6 | -0.66518 |
| 76322 | P03383 | Q86W10 | -1.0415  |
| 76323 | P03383 | Q14558 | -0.39183 |
| 76324 | P03383 | Q96L12 | -0.57762 |
| 76325 | P03383 | Q5T4W7 | -0.83344 |
| 76326 | P03383 | P61019 | -0.60797 |
| 76327 | P03383 | Q9P1Z9 | -0.86584 |
| 76328 | P03383 | P57071 | -0.21172 |
| 76329 | P03383 | Q96NZ9 | -0.87849 |
| 76330 | P03383 | P16662 | -0.85724 |
| 76331 | P03383 | Q8WUF8 | -0.87563 |
| 76332 | P03383 | Q9H1U9 | -0.73185 |
| 76333 | P03383 | Q6ZMW3 | -0.31084 |
| 76334 | P03383 | Q31610 | -0.88446 |
| 76335 | P03383 | Q52M75 | -0.34903 |
| 76336 | P03383 | Q15375 | -0.5526  |
| 76337 | P03383 | Q86YQ2 | -1.0096  |
| 76338 | P03383 | O75077 | -1.1002  |
| 76339 | P03383 | F7VJQ1 | -0.4688  |
| 76340 | P03383 | Q8N807 | -0.68886 |
| 76341 | P03383 | Q9NR81 | -0.57936 |
| 76342 | P03383 | Q9Y6U3 | -0.37135 |
| 76343 | P03383 | Q8NC24 | -0.97714 |
| 76344 | P03383 | Q9Y5U8 | -0.4094  |
| 76345 | P03383 | Q96PF2 | -0.53007 |
| 76346 | P03383 | A8MTW9 | -0.87849 |
| 76347 | P03383 | Q5TFG8 | -0.47027 |
| 76348 | P03383 | P49755 | -0.1794  |
| 76349 | P03383 | Q92481 | -0.18634 |
| 76350 | P03383 | Q9NPI0 | -0.82681 |
| 76351 | P03383 | Q99680 | -1.2928  |
| 76352 | P03383 | Q16891 | -0.15853 |
| 76353 | P03383 | Q6P3S6 | -0.22698 |
| 76354 | P03383 | Q16877 | -0.45605 |
| 76355 | P03383 | Q5T9L3 | -0.34216 |
| 76356 | P03383 | P14543 | -1.0182  |
| 76357 | P03383 | P02741 | -0.78003 |
| 76358 | P03383 | P21741 | -0.78561 |
| 76359 | P03383 | Q6P093 | -1.1644  |
| 76360 | P03383 | Q8TDX7 | -0.70859 |
| 76361 | P03383 | Q96I15 | -0.5004  |
| 76362 | P03383 | Q9H1C0 | -0.80498 |
| 76363 | P03383 | Q96DT5 | -0.67619 |
| 76364 | P03383 | Q15334 | -0.54516 |
| 76365 | P03383 | Q5T5W8 | -0.86584 |
| 76366 | P03383 | P34810 | -0.87978 |
| 76367 | P03383 | Q9UQP3 | -0.81134 |
| 76368 | P03383 | Q9NWH7 | -1.1039  |
| 76369 | P03383 | Q96C10 | -0.22693 |
| 76370 | P03383 | Q13571 | -1.0489  |
| 76371 | P03383 | Q6ZMT1 | -0.6602  |
| 76372 | P03383 | Q8TBE1 | -0.80828 |
| 76373 | P03383 | Q9BYW2 | -0.22629 |
| 76374 | P03383 | Q8IYT3 | -0.20834 |
| 76375 | P03383 | Q9Y2B0 | -0.19751 |
| 76376 | P03383 | Q95822 | -0.46673 |
| 76377 | P03383 | Q13634 | -1.0987  |
| 76378 | P03383 | Q8WXX1 | -0.62076 |
| 76379 | P03383 | Q496Y0 | -0.2274  |
| 76380 | P03383 | Q8NCI6 | -0.43405 |

|       |        |        |          |
|-------|--------|--------|----------|
| 76381 | P03383 | Q6ZQN7 | -0.97339 |
| 76382 | P03383 | P20340 | -0.25123 |
| 76383 | P03383 | O75820 | -0.15809 |
| 76384 | P03383 | P27930 | -0.74629 |
| 76385 | P03383 | Q96ME7 | -0.2385  |
| 76386 | P03383 | P09693 | -0.76379 |
| 76387 | P03383 | A6NH21 | -0.86869 |
| 76388 | P03383 | P36021 | -0.87345 |
| 76389 | P03383 | O95985 | -0.7273  |
| 76390 | P03383 | Q8IVT5 | -0.26662 |
| 76391 | P03383 | Q9P253 | -0.11586 |
| 76392 | P03383 | Q5VV41 | -0.22905 |
| 76393 | P03383 | O95473 | -0.86584 |
| 76394 | P03383 | Q99218 | -1.032   |
| 76395 | P03383 | Q5YKI7 | -0.58963 |
| 76396 | P03383 | Q9HA65 | -1.2307  |
| 76397 | P03383 | Q9Y2B1 | -1.0003  |
| 76398 | P03383 | P56557 | -0.7086  |
| 76399 | P03383 | Q8N5W9 | -0.41583 |
| 76400 | P03383 | O60258 | -0.82266 |
| 76401 | P03383 | Q8WUR7 | -0.17054 |
| 76402 | P03383 | P05067 | -0.25086 |
| 76403 | P03383 | Q96HP0 | -0.31757 |
| 76404 | P03383 | Q9BSE5 | -0.23541 |
| 76405 | P03383 | P01771 | -0.97479 |
| 76406 | P03383 | Q9H9K5 | -0.66345 |
| 76407 | P03383 | Q8NCQ3 | -0.86584 |
| 76408 | P03383 | P01742 | -0.97479 |
| 76409 | P03383 | Q96R28 | -1.1027  |
| 76410 | P03383 | Q9UNK4 | -0.82712 |
| 76411 | P03383 | P20711 | -0.53656 |
| 76412 | P03383 | Q8TC27 | -0.96155 |
| 76413 | P03383 | Q9Y3Z3 | -0.14571 |
| 76414 | P03383 | Q63ZE4 | -0.78973 |
| 76415 | P03383 | Q8NGC2 | -1.1027  |
| 76416 | P03383 | Q9BYM8 | -0.22695 |
| 76417 | P03383 | Q5SXH7 | -0.5353  |
| 76418 | P03383 | O15260 | -0.24882 |
| 76419 | P03383 | A0PJW8 | -0.48243 |
| 76420 | P03383 | Q5SWH9 | -0.86584 |
| 76421 | P03383 | P60763 | -0.55464 |
| 76422 | P03383 | P82251 | -0.903   |
| 76423 | P03383 | Q96T91 | -0.85703 |
| 76424 | P03383 | Q9H2J7 | -0.93552 |
| 76425 | P03383 | Q5VZR4 | -0.81229 |
| 76426 | P03383 | Q8ND61 | -0.71569 |
| 76427 | P03383 | P78363 | -1.0187  |
| 76428 | P03383 | Q7Z570 | -0.73967 |
| 76429 | P03383 | P35354 | -0.27198 |
| 76430 | P03383 | P42898 | -0.48036 |
| 76431 | P03383 | Q8NE28 | -0.8996  |
| 76432 | P03383 | O14745 | -0.7047  |
| 76433 | P03383 | O60343 | -1.019   |
| 76434 | P03383 | Q9Y225 | -0.7734  |
| 76435 | P03383 | Q13002 | -0.51096 |
| 76436 | P03383 | Q8NEJ9 | -0.31438 |
| 76437 | P03383 | A2RU49 | -0.39957 |
| 76438 | P03383 | O43868 | -0.95219 |
| 76439 | P03383 | Q8NGM1 | -1.1027  |
| 76440 | P03383 | Q9H0H5 | -0.23491 |
| 76441 | P03383 | P00325 | -0.64316 |
| 76442 | P03383 | Q9C0C9 | -0.77713 |
| 76443 | P03383 | Q14624 | -0.65388 |
| 76444 | P03383 | O14656 | -0.10496 |
| 76445 | P03383 | Q29718 | -0.88446 |
| 76446 | P03383 | O43556 | -0.7895  |
| 76447 | P03383 | Q6P589 | -0.42318 |
| 76448 | P03383 | Q8N8V8 | -0.86584 |
| 76449 | P03383 | Q96PU9 | -0.58273 |
| 76450 | P03383 | Q9Y6C5 | -0.78142 |
| 76451 | P03383 | P17706 | -0.2407  |
| 76452 | P03383 | Q9H9Q2 | -0.16613 |
| 76453 | P03383 | Q9H9S5 | -0.96859 |
| 76454 | P03383 | Q63ZY6 | -0.37739 |
| 76455 | P03383 | P0C0S5 | -0.93307 |
| 76456 | P03383 | Q8NFW8 | -0.18553 |

|       |        |        |           |
|-------|--------|--------|-----------|
| 76457 | P03383 | Q7RTX8 | -0.076324 |
| 76458 | P03383 | Q13371 | -0.73606  |
| 76459 | P03383 | P61163 | -0.2622   |
| 76460 | P03383 | Q14584 | -0.21172  |
| 76461 | P03383 | O75897 | -0.21711  |
| 76462 | P03383 | Q7Z7G0 | -0.91265  |
| 76463 | P03383 | Q6IA69 | -0.50206  |
| 76464 | P03383 | Q9Y6B7 | -0.14383  |
| 76465 | P03383 | Q0D2J5 | -0.21172  |
| 76466 | P03383 | P31268 | -0.28664  |
| 76467 | P03383 | P05120 | -0.55291  |
| 76468 | P03383 | Q12913 | -0.48364  |
| 76469 | P03383 | Q53SF7 | -0.53859  |
| 76470 | P03383 | O43852 | -0.22667  |
| 76471 | P03383 | P18433 | -1.208    |
| 76472 | P03383 | Q9P2D6 | -0.011316 |
| 76473 | P03383 | Q9Y6Y1 | -0.2274   |
| 76474 | P03383 | P49223 | -0.79897  |
| 76475 | P03383 | Q13491 | -0.60248  |
| 76476 | P03383 | Q8N5I2 | -0.23974  |
| 76477 | P03383 | Q9BZR6 | -0.22799  |
| 76478 | P03383 | P54868 | -0.30969  |
| 76479 | P03383 | Q96SZ6 | -0.47548  |
| 76480 | P03383 | Q9UF02 | -0.74813  |
| 76481 | P03383 | O00160 | -0.50631  |
| 76482 | P03383 | Q9C0B9 | -0.47014  |
| 76483 | P03383 | O95965 | -0.98719  |
| 76484 | P03383 | Q8WUY9 | -0.99933  |
| 76485 | P03383 | Q86VL8 | -0.84766  |
| 76486 | P03383 | Q9NP62 | -0.14536  |
| 76487 | P03383 | Q92628 | -0.79654  |
| 76488 | P03383 | P57739 | -0.65088  |
| 76489 | P03383 | Q13423 | -0.68764  |
| 76490 | P03383 | P04818 | -0.042476 |
| 76491 | P03383 | Q09327 | -0.66208  |
| 76492 | P03383 | Q6ZU80 | -0.18366  |
| 76493 | P03383 | O75056 | -0.81251  |
| 76494 | P03383 | Q15036 | -0.17744  |
| 76495 | P03383 | P62807 | -0.86926  |
| 76496 | P03383 | Q8N271 | -0.88923  |
| 76497 | P03383 | Q9NXW2 | -0.86545  |
| 76498 | P03383 | Q8N6F1 | -0.36585  |
| 76499 | P03383 | Q96A29 | -0.64266  |
| 76500 | P03383 | Q5TC63 | -1.2307   |
| 76501 | P03383 | P58107 | -0.19096  |
| 76502 | P03383 | P07951 | -0.52099  |
| 76503 | P03383 | Q16539 | -0.22741  |
| 76504 | P03383 | P01705 | -0.97479  |
| 76505 | P03383 | P36537 | -0.93517  |
| 76506 | P03383 | P60880 | -0.21122  |
| 76507 | P03383 | P35250 | -0.18581  |
| 76508 | P03383 | Q8NGE3 | -1.1027   |
| 76509 | P03383 | P23471 | -1.2213   |
| 76510 | P03383 | P10072 | -0.40272  |
| 76511 | P03383 | Q7Z2W9 | -0.11411  |
| 76512 | P03383 | O75388 | -1.29     |
| 76513 | P03383 | P16035 | -0.78043  |
| 76514 | P03383 | Q99500 | -1.0768   |
| 76515 | P03383 | Q9C0D7 | -0.46549  |
| 76516 | P03383 | Q70Z44 | -0.97212  |
| 76517 | P03383 | O00487 | -0.23439  |
| 76518 | P03383 | P32455 | -0.92267  |
| 76519 | P03383 | Q06828 | -0.89386  |
| 76520 | P03383 | P68366 | -0.58088  |
| 76521 | P03383 | P09565 | -0.28698  |
| 76522 | P03383 | O76099 | -1.103    |
| 76523 | P03383 | A6NML5 | -0.86584  |
| 76524 | P03383 | O43296 | -0.21172  |
| 76525 | P03383 | Q13325 | -0.22025  |
| 76526 | P03383 | Q5VT25 | -0.22756  |
| 76527 | P03383 | Q96JA1 | -0.86584  |
| 76528 | P03383 | Q86UY8 | -0.22172  |
| 76529 | P03383 | Q8NH73 | -1.1027   |
| 76530 | P03383 | Q9Y614 | -0.29993  |
| 76531 | P03383 | Q96FB5 | -0.79048  |
| 76532 | P03383 | P61964 | -1.0007   |

|       |        |        |           |
|-------|--------|--------|-----------|
| 76533 | P03383 | Q9NWH9 | -0.22839  |
| 76534 | P03383 | Q3C1V0 | -0.86584  |
| 76535 | P03383 | P09471 | -0.76117  |
| 76536 | P03383 | P53355 | -0.32049  |
| 76537 | P03383 | O60479 | -0.21846  |
| 76538 | P03383 | Q12967 | -0.74541  |
| 76539 | P03383 | C9JCN9 | -0.33089  |
| 76540 | P03383 | Q13507 | -0.45789  |
| 76541 | P03383 | A6NDD5 | -0.77822  |
| 76542 | P03383 | P36897 | -0.25121  |
| 76543 | P03383 | Q9HAW8 | -0.8365   |
| 76544 | P03383 | O75891 | -0.41128  |
| 76545 | P03383 | Q8NFD4 | -0.037299 |
| 76546 | P03383 | Q96EV2 | -0.84005  |
| 76547 | P03383 | Q96AQ8 | -0.74159  |
| 76548 | P03383 | Q8WWV6 | -0.90561  |
| 76549 | P03383 | Q8TBQ9 | -0.72271  |
| 76550 | P03383 | Q92879 | -0.23719  |
| 76551 | P03383 | Q9BPY8 | -0.22198  |
| 76552 | P03383 | Q96P53 | -0.47027  |
| 76553 | P03383 | P56730 | -1.1083   |
| 76554 | P03383 | P57729 | -0.74354  |
| 76555 | P03383 | Q6VVX0 | -0.67636  |
| 76556 | P03383 | P20231 | -1.2917   |
| 76557 | P03383 | P49815 | -0.21013  |
| 76558 | P03383 | Q8IZU8 | -0.82458  |
| 76559 | P03383 | O75387 | -1.0082   |
| 76560 | P03383 | Q8WVI7 | -0.19392  |
| 76561 | P03383 | Q8NGG4 | -1.1027   |
| 76562 | P03383 | Q9Y6Q5 | -0.16764  |
| 76563 | P03383 | P35613 | -0.22742  |
| 76564 | P03383 | P60033 | -0.30536  |
| 76565 | P03383 | A6NC05 | -0.42433  |
| 76566 | P03383 | Q8TAX9 | -0.29487  |
| 76567 | P03383 | Q8TB73 | -0.79761  |
| 76568 | P03383 | Q5SQN1 | -0.17684  |
| 76569 | P03383 | Q9NNZ3 | -0.62188  |
| 76570 | P03383 | Q9NPC3 | -0.075827 |
| 76571 | P03383 | O60825 | -0.090418 |
| 76572 | P03383 | Q99611 | -0.75643  |
| 76573 | P03383 | Q9BTD3 | -0.52887  |
| 76574 | P03383 | Q6X4U4 | -0.85812  |
| 76575 | P03383 | Q02386 | -0.22251  |
| 76576 | P03383 | Q14669 | -0.22797  |
| 76577 | P03383 | P15848 | -0.3751   |
| 76578 | P03383 | P21266 | -0.36987  |
| 76579 | P03383 | P01258 | -0.4997   |
| 76580 | P03383 | Q94886 | -1.2031   |
| 76581 | P03383 | Q6ICL7 | -0.86584  |
| 76582 | P03383 | Q6ZS81 | -0.86584  |
| 76583 | P03383 | P13945 | -0.43194  |
| 76584 | P03383 | Q9Y5F3 | -1.1297   |
| 76585 | P03383 | Q95183 | -0.94085  |
| 76586 | P03383 | Q9BV36 | -0.36965  |
| 76587 | P03383 | B7Z6K7 | -0.39217  |
| 76588 | P03383 | P06319 | -0.97479  |
| 76589 | P03383 | Q4W5N1 | -0.24609  |
| 76590 | P03383 | Q15062 | -0.22164  |
| 76591 | P03383 | Q8WVE7 | -0.86584  |
| 76592 | P03383 | Q8TB24 | -0.36246  |
| 76593 | P03383 | Q9NVT9 | -0.33156  |
| 76594 | P03383 | Q5VYY1 | -0.2274   |
| 76595 | P03383 | P49914 | -0.51934  |
| 76596 | P03383 | Q9UJH8 | -0.95472  |
| 76597 | P03383 | P11586 | -0.43495  |
| 76598 | P03383 | Q6VB85 | -0.35259  |
| 76599 | P03383 | Q9UEF7 | -0.89796  |
| 76600 | P03383 | P01275 | -0.53199  |
| 76601 | P03383 | C9JRZ8 | -0.59308  |
| 76602 | P03383 | Q9Y239 | -0.22739  |
| 76603 | P03383 | Q02928 | -0.50415  |
| 76604 | P03383 | Q96T53 | -0.80047  |
| 76605 | P03383 | Q8IW40 | -0.2508   |
| 76606 | P03383 | Q6ZMR5 | -1.4597   |
| 76607 | P03383 | Q8N135 | -0.84597  |
| 76608 | P03383 | Q96CH1 | -1.1721   |

|       |        |        |           |
|-------|--------|--------|-----------|
| 76609 | P03383 | P08240 | -0.87338  |
| 76610 | P03383 | Q8WUK0 | -0.81114  |
| 76611 | P03383 | Q6P9F5 | -0.73967  |
| 76612 | P03383 | Q9Y6R7 | -0.22328  |
| 76613 | P03383 | Q8NFY9 | -0.21184  |
| 76614 | P03383 | Q9BVK2 | -0.76846  |
| 76615 | P03383 | Q96HZ4 | -0.22638  |
| 76616 | P03383 | Q96LA5 | -0.8409   |
| 76617 | P03383 | Q9HA92 | -0.52318  |
| 76618 | P03383 | Q9H427 | -0.95255  |
| 76619 | P03383 | Q8N8L2 | -0.21172  |
| 76620 | P03383 | P13861 | -0.22735  |
| 76621 | P03383 | Q6U736 | -1.1116   |
| 76622 | P03383 | A6NL88 | -0.86584  |
| 76623 | P03383 | Q8WVV5 | -0.80748  |
| 76624 | P03383 | Q9UL68 | -0.20848  |
| 76625 | P03383 | Q13442 | -0.56256  |
| 76626 | P03383 | Q9BZS1 | -0.29654  |
| 76627 | P03383 | Q9UEE5 | -0.62513  |
| 76628 | P03383 | Q8TC12 | -1.0839   |
| 76629 | P03383 | Q9NYV9 | -0.97792  |
| 76630 | P03383 | P34741 | -0.30605  |
| 76631 | P03383 | Q9NS61 | -0.47057  |
| 76632 | P03383 | Q9Y5H2 | -1.1297   |
| 76633 | P03383 | Q6ZTR7 | -0.056235 |
| 76634 | P03383 | P48549 | -0.59128  |
| 76635 | P03383 | P14317 | -0.22837  |
| 76636 | P03383 | P26717 | -0.59917  |
| 76637 | P03383 | Q9NYW6 | -1.0427   |
| 76638 | P03383 | Q8WTV0 | -0.39106  |
| 76639 | P03383 | A8MWS1 | -0.87849  |
| 76640 | P03383 | Q8IYB7 | -0.12811  |
| 76641 | P03383 | P43626 | -0.59537  |
| 76642 | P03383 | Q9Y2W6 | -0.22329  |
| 76643 | P03383 | Q9UBQ7 | -0.57634  |
| 76644 | P03383 | Q3KNW5 | -0.92806  |
| 76645 | P03383 | P28223 | -0.66911  |
| 76646 | P03383 | Q9H3G5 | -0.68627  |
| 76647 | P03383 | P59282 | -0.29487  |
| 76648 | P03383 | Q7Z7M8 | -0.6821   |
| 76649 | P03383 | Q9BXC1 | -1.124    |
| 76650 | P03383 | O00264 | -0.2188   |
| 76651 | P03383 | O14669 | -1.3916   |
| 76652 | P03383 | Q9Y2Z0 | -0.22692  |
| 76653 | P03383 | Q9H3Q3 | -0.69156  |
| 76654 | P03383 | Q7Z7L1 | -0.60826  |
| 76655 | P03383 | Q8N729 | -0.32093  |
| 76656 | P03383 | Q8NGD0 | -1.1027   |
| 76657 | P03383 | Q86YN6 | -0.22575  |
| 76658 | P03383 | Q9UH62 | -0.75284  |
| 76659 | P03383 | Q99518 | -0.79333  |
| 76660 | P03383 | P60329 | -0.1788   |
| 76661 | P03383 | Q6P2M8 | -0.56441  |
| 76662 | P03383 | A6NNZ2 | -0.67265  |
| 76663 | P03383 | Q5T7P8 | -0.60971  |
| 76664 | P03383 | Q8NFX3 | -0.48676  |
| 76665 | P03383 | P16109 | -0.23606  |
| 76666 | P03383 | Q9NR83 | -0.14002  |
| 76667 | P03383 | P07101 | -0.22115  |
| 76668 | P03383 | Q9P2F8 | -0.94742  |
| 76669 | P03383 | P49450 | -0.18683  |
| 76670 | P03383 | Q96001 | -0.54428  |
| 76671 | P03383 | Q6V0I7 | -0.63537  |
| 76672 | P03383 | Q9UPG8 | -0.14476  |
| 76673 | P03383 | Q07837 | -0.88333  |
| 76674 | P03383 | Q15648 | -0.14216  |
| 76675 | P03383 | Q94788 | -0.61859  |
| 76676 | P03383 | A6NIJ9 | -1.1027   |
| 76677 | P03383 | Q8NBW4 | -0.96495  |
| 76678 | P03383 | Q9NWM8 | -0.47808  |
| 76679 | P03383 | P36941 | -0.25692  |
| 76680 | P03383 | Q6UXR6 | -0.87849  |
| 76681 | P03383 | Q13651 | -0.59022  |
| 76682 | P03383 | Q9H1M3 | -0.84399  |
| 76683 | P03383 | P17538 | -1.2738   |
| 76684 | P03383 | P13798 | -0.39554  |

|       |        |        |           |
|-------|--------|--------|-----------|
| 76685 | P03383 | Q96LM5 | -0.12197  |
| 76686 | P03383 | Q6ZSG1 | -0.52332  |
| 76687 | P03383 | Q12767 | -0.86584  |
| 76688 | P03383 | Q8IY26 | -0.97121  |
| 76689 | P03383 | P04271 | -0.74286  |
| 76690 | P03383 | Q8NBJ5 | -0.43383  |
| 76691 | P03383 | Q9NRJ1 | -0.53327  |
| 76692 | P03383 | Q86V24 | -0.89134  |
| 76693 | P03383 | P20930 | -0.30554  |
| 76694 | P03383 | P42356 | -0.44128  |
| 76695 | P03383 | Q00973 | -0.59052  |
| 76696 | P03383 | P04053 | -0.075227 |
| 76697 | P03383 | A0FGR9 | -0.93628  |
| 76698 | P03383 | Q5BJD5 | -0.86584  |
| 76699 | P03383 | Q0VDD8 | -0.65655  |
| 76700 | P03383 | Q96BQ1 | -0.78571  |
| 76701 | P03383 | A6NCC3 | -0.35868  |
| 76702 | P03383 | O75882 | -1.2272   |
| 76703 | P03383 | P32320 | -0.6532   |
| 76704 | P03383 | Q8NGR8 | -1.1027   |
| 76705 | P03383 | A4D1B5 | -0.27642  |
| 76706 | P03383 | O75335 | -0.12378  |
| 76707 | P03383 | P48741 | -0.59192  |
| 76708 | P03383 | Q9NUJ3 | -0.44133  |
| 76709 | P03383 | P19086 | -0.90363  |
| 76710 | P03383 | P56180 | -1.3526   |
| 76711 | P03383 | P01225 | -0.13557  |
| 76712 | P03383 | Q4G0S4 | -0.692    |
| 76713 | P03383 | Q6ZQQ2 | -0.86584  |
| 76714 | P03383 | Q9UQ84 | -0.17052  |
| 76715 | P03383 | O15496 | -0.58087  |
| 76716 | P03383 | Q9BRR3 | -0.86584  |
| 76717 | P03383 | Q9BX74 | -1.0281   |
| 76718 | P03383 | O00548 | -0.51758  |
| 76719 | P03383 | O00459 | -0.2274   |
| 76720 | P03383 | Q6T423 | -0.8419   |
| 76721 | P03383 | Q8NDL9 | -0.39625  |
| 76722 | P03383 | Q93077 | -0.88998  |
| 76723 | P03383 | Q504Y2 | -0.69023  |
| 76724 | P03383 | Q8N1V2 | -0.22753  |
| 76725 | P03383 | Q9H3Z4 | -0.49667  |
| 76726 | P03383 | A6NMZ5 | -1.1027   |
| 76727 | P03383 | Q9UGI8 | -0.51391  |
| 76728 | P03383 | Q15738 | -0.85794  |
| 76729 | P03383 | P03956 | -1.0749   |
| 76730 | P03383 | Q9UQ07 | -0.61135  |
| 76731 | P03383 | Q02318 | -0.43403  |
| 76732 | P03383 | Q6DRA6 | -0.88998  |
| 76733 | P03383 | Q2M3G4 | -0.40841  |
| 76734 | P03383 | Q6ZMT4 | -0.23008  |
| 76735 | P03383 | Q96L73 | -0.22755  |
| 76736 | P03383 | Q8N2E2 | -0.87849  |
| 76737 | P03383 | P40426 | -0.23852  |
| 76738 | P03383 | Q96RR1 | -0.26081  |
| 76739 | P03383 | P06870 | -0.69598  |
| 76740 | P03383 | O60330 | -1.1297   |
| 76741 | P03383 | P51692 | -0.22669  |
| 76742 | P03383 | Q969V5 | -0.22739  |
| 76743 | P03383 | Q9H169 | -0.50545  |
| 76744 | P03383 | Q8N300 | -0.40816  |
| 76745 | P03383 | Q8IZI9 | -0.89136  |
| 76746 | P03383 | Q3KQZ1 | -0.73185  |
| 76747 | P03383 | Q5VXU1 | -0.93628  |
| 76748 | P03383 | Q95197 | -0.57452  |
| 76749 | P03383 | P08243 | -0.38668  |
| 76750 | P03383 | P59510 | -1.0643   |
| 76751 | P03383 | P48165 | -0.99914  |
| 76752 | P03383 | Q9C0D4 | -0.22742  |
| 76753 | P03383 | P19961 | -0.85736  |
| 76754 | P03383 | Q9NS82 | -0.9234   |
| 76755 | P03383 | Q9BYU1 | -0.36116  |
| 76756 | P03383 | Q6QEF8 | -0.48053  |
| 76757 | P03383 | P56880 | -0.64451  |
| 76758 | P03383 | Q14641 | -1.0414   |
| 76759 | P03383 | O43749 | -1.1027   |
| 76760 | P03383 | Q9H8J5 | -0.86584  |

|       |        |        |           |
|-------|--------|--------|-----------|
| 76761 | P03383 | Q8N2A0 | -0.22652  |
| 76762 | P03383 | Q8IWT3 | -0.22673  |
| 76763 | P03383 | P01613 | -0.97479  |
| 76764 | P03383 | Q9BYH8 | -0.22727  |
| 76765 | P03383 | Q9Y5L2 | -0.9558   |
| 76766 | P03383 | Q8N184 | -0.21172  |
| 76767 | P03383 | Q96KV6 | -0.86584  |
| 76768 | P03383 | P02649 | -0.26337  |
| 76769 | P03383 | Q5T5C0 | -0.3922   |
| 76770 | P03383 | Q9BZA8 | -1.1297   |
| 76771 | P03383 | Q9NQZ7 | -0.76027  |
| 76772 | P03383 | Q6P2D0 | -0.21172  |
| 76773 | P03383 | P20645 | -0.89098  |
| 76774 | P03383 | Q8IZU3 | -0.22081  |
| 76775 | P03383 | P60507 | -0.71912  |
| 76776 | P03383 | P47869 | -0.68123  |
| 76777 | P03383 | Q8IUA7 | -0.99839  |
| 76778 | P03383 | Q5T197 | -0.92811  |
| 76779 | P03383 | Q94964 | -0.89609  |
| 76780 | P03383 | Q2VYF4 | -0.73075  |
| 76781 | P03383 | Q95167 | -0.51765  |
| 76782 | P03383 | P0C7N4 | -0.86584  |
| 76783 | P03383 | Q2TBE0 | -0.65844  |
| 76784 | P03383 | Q06481 | -0.28885  |
| 76785 | P03383 | Q9Y5F9 | -1.1297   |
| 76786 | P03383 | Q96K78 | -1.1905   |
| 76787 | P03383 | Q9NS23 | -0.22741  |
| 76788 | P03383 | Q9NXN4 | -0.43605  |
| 76789 | P03383 | Q15072 | -1.149    |
| 76790 | P03383 | Q9NQV5 | -0.15732  |
| 76791 | P03383 | Q3MIT2 | -0.36852  |
| 76792 | P03383 | A8MVX0 | -0.7066   |
| 76793 | P03383 | Q00178 | -0.81508  |
| 76794 | P03383 | Q96NT5 | -0.46516  |
| 76795 | P03383 | P11926 | -0.26301  |
| 76796 | P03383 | Q9H3Y0 | -0.85841  |
| 76797 | P03383 | Q9NY56 | -0.75124  |
| 76798 | P03383 | P58550 | -0.96683  |
| 76799 | P03383 | Q13151 | -0.25725  |
| 76800 | P03383 | Q8WV19 | -0.62877  |
| 76801 | P03383 | Q86TM3 | -0.66142  |
| 76802 | P03383 | Q8N123 | -0.69535  |
| 76803 | P03383 | P27918 | -0.9223   |
| 76804 | P03383 | Q6N063 | -0.64822  |
| 76805 | P03383 | Q8IZP7 | -0.86433  |
| 76806 | P03383 | P49643 | -0.40479  |
| 76807 | P03383 | Q15111 | -0.62893  |
| 76808 | P03383 | Q96BV0 | -0.21172  |
| 76809 | P03383 | Q5JUK2 | -0.20105  |
| 76810 | P03383 | Q8NGN2 | -1.1027   |
| 76811 | P03383 | Q8N6U8 | -1.262    |
| 76812 | P03383 | P51798 | -0.94256  |
| 76813 | P03383 | Q92859 | -0.78324  |
| 76814 | P03383 | P49758 | -0.66769  |
| 76815 | P03383 | Q96N87 | -0.98057  |
| 76816 | P03383 | P04435 | -0.49766  |
| 76817 | P03383 | Q96CX6 | -0.23028  |
| 76818 | P03383 | Q92564 | -0.16078  |
| 76819 | P03383 | P53611 | -0.16969  |
| 76820 | P03383 | Q70EK9 | -0.78366  |
| 76821 | P03383 | Q6S9Z5 | -0.52332  |
| 76822 | P03383 | Q96SI9 | -0.69726  |
| 76823 | P03383 | Q5XKP0 | -0.30763  |
| 76824 | P03383 | P49326 | -0.91705  |
| 76825 | P03383 | Q9BW19 | -0.28332  |
| 76826 | P03383 | O75037 | -0.68836  |
| 76827 | P03383 | Q96FV2 | -0.56216  |
| 76828 | P03383 | P55317 | -0.35259  |
| 76829 | P03383 | Q15916 | -0.21172  |
| 76830 | P03383 | O60759 | -0.22749  |
| 76831 | P03383 | Q12982 | -0.18011  |
| 76832 | P03383 | Q6ZV80 | -0.021156 |
| 76833 | P03383 | Q15661 | -0.83061  |
| 76834 | P03383 | Q6N021 | -0.52144  |
| 76835 | P03383 | O95498 | -0.51005  |
| 76836 | P03383 | Q6ZW05 | -0.51963  |



|       |        |        |           |
|-------|--------|--------|-----------|
| 76837 | P03383 | Q16842 | -0.54535  |
| 76838 | P03383 | Q9UHK6 | -0.43603  |
| 76839 | P03383 | Q9H2K8 | -0.23025  |
| 76840 | P03383 | P58417 | -0.94064  |
| 76841 | P03383 | P03973 | -0.31177  |
| 76842 | P03383 | Q9BX93 | -0.9673   |
| 76843 | P03383 | Q8NGY2 | -1.1027   |
| 76844 | P03383 | Q9H1U4 | -0.74466  |
| 76845 | P03383 | Q8IX05 | -0.77684  |
| 76846 | P03383 | Q9UKM9 | -0.4299   |
| 76847 | P03383 | Q6P3S1 | -0.21281  |
| 76848 | P03383 | Q03167 | -0.3066   |
| 76849 | P03383 | Q9ULD6 | -0.31269  |
| 76850 | P03383 | Q9Y226 | -0.88361  |
| 76851 | P03383 | Q16661 | -0.76645  |
| 76852 | P03383 | Q9UFP1 | -0.87849  |
| 76853 | P03383 | P58753 | -0.22336  |
| 76854 | P03383 | Q15147 | -0.33185  |
| 76855 | P03383 | Q8N4A0 | -0.51238  |
| 76856 | P03383 | Q5XPI4 | -0.4367   |
| 76857 | P03383 | Q60279 | -1.006    |
| 76858 | P03383 | Q8NGU4 | -1.1027   |
| 76859 | P03383 | Q92843 | -0.22726  |
| 76860 | P03383 | Q2TVT3 | -0.38229  |
| 76861 | P03383 | Q5SV17 | -0.86584  |
| 76862 | P03383 | Q9Y6D0 | -0.58724  |
| 76863 | P03383 | Q9HCT0 | -0.63646  |
| 76864 | P03383 | Q9Y247 | -0.21602  |
| 76865 | P03383 | A6NMP4 | -0.041129 |
| 76866 | P03383 | P55017 | -0.4609   |
| 76867 | P03383 | Q4G0X9 | -0.33297  |
| 76868 | P03383 | Q8NEN0 | -0.18806  |
| 76869 | P03383 | Q9NVP4 | -0.73967  |
| 76870 | P03383 | Q8NCS7 | -0.74018  |
| 76871 | P03383 | Q8N6N7 | -0.61251  |
| 76872 | P03383 | Q8NFK1 | -0.87357  |
| 76873 | P03383 | Q86WA6 | -0.31421  |
| 76874 | P03383 | Q5VVP1 | -0.86584  |
| 76875 | P03383 | Q9UNE2 | -0.31631  |
| 76876 | P03383 | Q9BXP2 | -0.88229  |
| 76877 | P03383 | Q5TD97 | -0.22265  |
| 76878 | P03383 | Q9H1K4 | -0.71467  |
| 76879 | P03383 | P0C7T3 | -1.1027   |
| 76880 | P03383 | Q6ZSB3 | -0.14685  |
| 76881 | P03383 | Q8IY50 | -0.85789  |
| 76882 | P03383 | Q9Y255 | -0.12135  |
| 76883 | P03383 | P25054 | -0.22696  |
| 76884 | P03383 | P01761 | -0.97479  |
| 76885 | P03383 | Q13627 | -0.22741  |
| 76886 | P03383 | P49796 | -0.51898  |
| 76887 | P03383 | P31274 | -0.075379 |
| 76888 | P03383 | P0C6C1 | -0.22741  |
| 76889 | P03383 | Q9NRX1 | -0.097559 |
| 76890 | P03383 | O43805 | -0.21223  |
| 76891 | P03383 | Q3ZAQ7 | -0.84368  |
| 76892 | P03383 | Q8WXI7 | -0.85399  |
| 76893 | P03383 | Q9UII6 | -0.99108  |
| 76894 | P03383 | B7ZC32 | -0.80242  |
| 76895 | P03383 | Q9NZD2 | -0.57082  |
| 76896 | P03383 | O00203 | -0.21511  |
| 76897 | P03383 | P20849 | -0.65197  |
| 76898 | P03383 | Q95835 | -0.22736  |
| 76899 | P03383 | Q8WVF1 | -0.5939   |
| 76900 | P03383 | P02792 | -0.087263 |
| 76901 | P03383 | Q9BTV5 | -0.22748  |
| 76902 | P03383 | Q08380 | -1.1982   |
| 76903 | P03383 | Q9NZM3 | -0.74804  |
| 76904 | P03383 | P16104 | -0.33662  |
| 76905 | P03383 | Q6P499 | -0.82716  |
| 76906 | P03383 | Q6PIW4 | -0.45622  |
| 76907 | P03383 | P20718 | -0.72084  |
| 76908 | P03383 | Q8TAF8 | -0.90787  |
| 76909 | P03383 | Q7Z404 | -0.86584  |
| 76910 | P03383 | Q9UBR2 | -0.86222  |
| 76911 | P03383 | A0AVF1 | -0.51397  |
| 76912 | P03383 | P59544 | -1.0953   |

|       |        |        |            |
|-------|--------|--------|------------|
| 76913 | P03383 | Q969X0 | -0.31331   |
| 76914 | P03383 | Q7Z443 | -0.81043   |
| 76915 | P03383 | O95274 | -0.90499   |
| 76916 | P03383 | Q8NF91 | -0.22945   |
| 76917 | P03383 | Q16832 | -0.87031   |
| 76918 | P03383 | Q96I13 | -0.61717   |
| 76919 | P03383 | Q9Y4C5 | -0.58829   |
| 76920 | P03383 | Q5T2T1 | -0.22483   |
| 76921 | P03383 | Q8WVD3 | -0.74395   |
| 76922 | P03383 | Q8IY95 | -0.9104    |
| 76923 | P03383 | O60844 | -0.64978   |
| 76924 | P03383 | Q9Y4G2 | -0.39109   |
| 76925 | P03383 | Q8NGZ0 | -1.1027    |
| 76926 | P03383 | P58173 | -1.1027    |
| 76927 | P03383 | Q8NH85 | -1.1027    |
| 76928 | P03383 | Q6JBY9 | -0.48566   |
| 76929 | P03383 | Q9BY79 | -0.72123   |
| 76930 | P03383 | Q9H0V1 | -0.84601   |
| 76931 | P03383 | P35556 | -0.81933   |
| 76932 | P03383 | P10275 | -0.22743   |
| 76933 | P03383 | P0C8F1 | -0.84231   |
| 76934 | P03383 | A6NCI5 | -0.86584   |
| 76935 | P03383 | Q9H210 | -1.1027    |
| 76936 | P03383 | Q6UXV3 | -0.87849   |
| 76937 | P03383 | Q05D32 | -0.57214   |
| 76938 | P03383 | Q96MV8 | -0.81063   |
| 76939 | P03383 | Q9UKB5 | -0.88725   |
| 76940 | P03383 | Q8NGG3 | -1.1027    |
| 76941 | P03383 | Q6ZR37 | -0.76318   |
| 76942 | P03383 | O43934 | -0.52887   |
| 76943 | P03383 | Q6UY13 | -0.87849   |
| 76944 | P03383 | Q96AC6 | -0.68836   |
| 76945 | P03383 | Q4J6C6 | -0.57049   |
| 76946 | P03383 | Q9HC78 | -0.02804   |
| 76947 | P03383 | P54652 | -0.22311   |
| 76948 | P03383 | P20132 | -0.16354   |
| 76949 | P03383 | Q96HE9 | -0.0033813 |
| 76950 | P03383 | Q9P227 | -1.1258    |
| 76951 | P03383 | Q8WYR4 | -0.13369   |
| 76952 | P03383 | Q1L5Z9 | -0.64479   |
| 76953 | P03383 | P20592 | -0.45693   |
| 76954 | P03383 | Q9BVJ7 | -0.56593   |
| 76955 | P03383 | Q9UBX1 | -0.86833   |
| 76956 | P03383 | Q14449 | -0.42182   |
| 76957 | P03383 | P30039 | -0.24653   |
| 76958 | P03383 | Q8TCF1 | -0.52332   |
| 76959 | P03383 | Q9H7Y0 | -0.87849   |
| 76960 | P03383 | P01704 | -0.97479   |
| 76961 | P03383 | P08100 | -0.62668   |
| 76962 | P03383 | P51178 | -0.48541   |
| 76963 | P03383 | Q9UBE8 | -0.22741   |
| 76964 | P03383 | Q9UL01 | -0.44429   |
| 76965 | P03383 | Q02509 | -0.60048   |
| 76966 | P03383 | Q9UKF7 | -0.32622   |
| 76967 | P03383 | Q86YQ8 | -0.22896   |
| 76968 | P03383 | P78369 | -0.78522   |
| 76969 | P03383 | Q13046 | -0.88363   |
| 76970 | P03383 | A6NFR6 | -0.86584   |
| 76971 | P03383 | A8MXV4 | -0.30406   |
| 76972 | P03383 | P08185 | -0.84395   |
| 76973 | P03383 | Q8N5Z5 | -0.22267   |
| 76974 | P03383 | Q9H813 | -0.86584   |
| 76975 | P03383 | P01622 | -0.97479   |
| 76976 | P03383 | A6NJQ4 | -0.48092   |
| 76977 | P03383 | P26367 | -0.22089   |
| 76978 | P03383 | P52824 | -0.22741   |
| 76979 | P03383 | Q8NGR9 | -1.1027    |
| 76980 | P03383 | Q9NUI1 | -1.0278    |
| 76981 | P03383 | Q7Z3T1 | -1.1027    |
| 76982 | P03383 | Q8IWB6 | -0.33202   |
| 76983 | P03383 | Q6P461 | -1.0629    |
| 76984 | P03383 | Q9BZ68 | -0.44826   |
| 76985 | P03383 | Q00796 | -0.66112   |
| 76986 | P03383 | Q9P2U7 | -0.64037   |
| 76987 | P03383 | Q96F44 | -0.35539   |
| 76988 | P03383 | Q9P2C4 | -0.82152   |

|       |        |        |          |
|-------|--------|--------|----------|
| 76989 | P03383 | Q9H9P2 | -0.57281 |
| 76990 | P03383 | P55327 | -0.17105 |
| 76991 | P03383 | Q9GZM3 | -0.25197 |
| 76992 | P03383 | Q15273 | -0.13723 |
| 76993 | P03383 | P78424 | -0.2274  |
| 76994 | P03383 | Q99884 | -0.89733 |
| 76995 | P03383 | P21810 | -0.61541 |
| 76996 | P03383 | Q8NB25 | -0.16078 |
| 76997 | P03383 | P0CG23 | -0.73005 |
| 76998 | P03383 | Q92738 | -0.92707 |
| 76999 | P03383 | Q75976 | -0.78967 |
| 77000 | P03383 | Q9H0W5 | -0.55652 |
| 77001 | P03383 | P49761 | -0.55936 |
| 77002 | P03383 | Q9H5N1 | -0.49747 |
| 77003 | P03383 | Q99487 | -0.40428 |
| 77004 | P03383 | P78410 | -0.7958  |
| 77005 | P03383 | P04437 | -0.49766 |
| 77006 | P03383 | P41146 | -1.1151  |
| 77007 | P03383 | Q6PCB8 | -1.0252  |
| 77008 | P03383 | Q9HCJ2 | -0.31695 |
| 77009 | P03383 | Q2M1V0 | -0.20684 |
| 77010 | P03383 | P18206 | -0.21297 |
| 77011 | P03383 | Q96H35 | -0.84005 |
| 77012 | P03383 | Q75096 | -0.44395 |
| 77013 | P03383 | Q96DH6 | -0.6758  |
| 77014 | P03383 | Q8IY34 | -0.77737 |
| 77015 | P03383 | P06731 | -0.6716  |
| 77016 | P03383 | P51582 | -1.0044  |
| 77017 | P03383 | Q6ZS82 | -0.94295 |
| 77018 | P03383 | Q96MU5 | -0.87849 |
| 77019 | P03383 | A8MYZ5 | -0.21765 |
| 77020 | P03383 | P01780 | -0.97479 |
| 77021 | P03383 | Q07890 | -0.34984 |
| 77022 | P03383 | Q2TAA5 | -0.80366 |
| 77023 | P03383 | Q14118 | -0.27814 |
| 77024 | P03383 | P56589 | -0.20246 |
| 77025 | P03383 | P98179 | -0.46997 |
| 77026 | P03383 | Q9NRW1 | -0.63156 |
| 77027 | P03383 | P01920 | -0.65982 |
| 77028 | P03383 | A8MYU2 | -1.0606  |
| 77029 | P03383 | O60568 | -0.27398 |
| 77030 | P03383 | Q9Y493 | -1.0321  |
| 77031 | P03383 | Q2NL67 | -0.45204 |
| 77032 | P03383 | Q8NHC8 | -1.1027  |
| 77033 | P03383 | Q96FE5 | -0.71165 |
| 77034 | P03383 | Q9Y328 | -0.69357 |
| 77035 | P03383 | P0DJD1 | -0.53439 |
| 77036 | P03383 | P0C7W9 | -0.48092 |
| 77037 | P03383 | Q9UBR1 | -0.30816 |
| 77038 | P03383 | Q8NEV1 | -0.8995  |
| 77039 | P03383 | P14555 | -0.7612  |
| 77040 | P03383 | A6NFX1 | -0.85789 |
| 77041 | P03383 | Q96MW7 | -0.33043 |
| 77042 | P03383 | O15231 | -0.35525 |
| 77043 | P03383 | Q9H8S5 | -0.41982 |
| 77044 | P03383 | P07910 | -0.22745 |
| 77045 | P03383 | Q9Y5N1 | -1.2278  |
| 77046 | P03383 | Q7Z2D5 | -0.96323 |
| 77047 | P03383 | P36222 | -0.53431 |
| 77048 | P03383 | O75333 | -0.42488 |
| 77049 | P03383 | Q96J01 | -0.22719 |
| 77050 | P03383 | Q8N1P7 | -0.44203 |
| 77051 | P03383 | O43581 | -0.83254 |
| 77052 | P03383 | P53420 | -0.85842 |
| 77053 | P03383 | Q7Z3J3 | -0.53439 |
| 77054 | P03383 | A8MTQ0 | -0.2274  |
| 77055 | P03383 | Q8NHB8 | -1.1027  |
| 77056 | P03383 | Q9NX24 | -0.22386 |
| 77057 | P03383 | Q9NRW4 | -0.74671 |
| 77058 | P03383 | Q7Z4I7 | -0.37662 |
| 77059 | P03383 | Q8N752 | -0.76191 |
| 77060 | P03383 | P12271 | -0.8075  |
| 77061 | P03383 | Q96SU4 | -0.80455 |
| 77062 | P03383 | Q5T6X4 | -0.86584 |
| 77063 | P03383 | O75310 | -0.91913 |
| 77064 | P03383 | Q96JJ6 | -0.94087 |

|       |        |        |            |
|-------|--------|--------|------------|
| 77065 | P03383 | O75964 | -0.27386   |
| 77066 | P03383 | Q9HCC8 | -0.69917   |
| 77067 | P03383 | Q6ZRH7 | -1.0137    |
| 77068 | P03383 | Q9NY28 | -0.67293   |
| 77069 | P03383 | Q15762 | -0.66841   |
| 77070 | P03383 | Q9Y5Q9 | -0.22713   |
| 77071 | P03383 | O15427 | -0.67903   |
| 77072 | P03383 | Q04446 | -0.21407   |
| 77073 | P03383 | Q9BQI7 | -0.94046   |
| 77074 | P03383 | Q68CQ7 | -0.72851   |
| 77075 | P03383 | Q8N126 | -0.86358   |
| 77076 | P03383 | Q6V0L0 | -0.79339   |
| 77077 | P03383 | Q6IF00 | -1.1027    |
| 77078 | P03383 | Q8N8M0 | -0.41082   |
| 77079 | P03383 | O60603 | -0.25359   |
| 77080 | P03383 | Q5T1B0 | -0.063262  |
| 77081 | P03383 | P24468 | -0.24261   |
| 77082 | P03383 | P60323 | -0.31173   |
| 77083 | P03383 | Q9BT22 | -0.78453   |
| 77084 | P03383 | Q9NZ32 | -0.32984   |
| 77085 | P03383 | Q9NP55 | -0.85725   |
| 77086 | P03383 | Q6S8J7 | -0.22708   |
| 77087 | P03383 | Q8NA69 | -0.0040927 |
| 77088 | P03383 | Q8IUH3 | -0.58876   |
| 77089 | P03383 | Q99698 | -0.2274    |
| 77090 | P03383 | P47871 | -0.80099   |
| 77091 | P03383 | Q92667 | -0.21935   |
| 77092 | P03383 | Q7Z442 | -1.0019    |
| 77093 | P03383 | P51648 | -0.91904   |
| 77094 | P03383 | Q05BV3 | -0.31084   |
| 77095 | P03383 | A2RU14 | -0.86584   |
| 77096 | P03383 | Q96AB6 | -0.087047  |
| 77097 | P03383 | P01707 | -0.97479   |
| 77098 | P03383 | P04155 | -0.28918   |
| 77099 | P03383 | Q6UWH6 | -0.78141   |
| 77100 | P03383 | P50542 | -0.22725   |
| 77101 | P03383 | Q969R8 | -0.075773  |
| 77102 | P03383 | Q9HA38 | -0.10407   |
| 77103 | P03383 | Q9BX67 | -0.49264   |
| 77104 | P03383 | Q8NG77 | -1.1027    |
| 77105 | P03383 | O60487 | -0.45094   |
| 77106 | P03383 | O75443 | -0.98374   |
| 77107 | P03383 | Q16651 | -0.95909   |
| 77108 | P03383 | Q96HC4 | -0.28592   |
| 77109 | P03383 | Q7Z6Z7 | -0.22943   |
| 77110 | P03383 | P80422 | -0.88984   |
| 77111 | P03383 | P39086 | -0.5877    |
| 77112 | P03383 | P12074 | -0.25619   |
| 77113 | P03383 | Q14257 | -0.47839   |
| 77114 | P03383 | Q6X9E4 | -0.161     |
| 77115 | P03383 | Q8NH04 | -1.1027    |
| 77116 | P03383 | Q9NWL6 | -0.25221   |
| 77117 | P03383 | B2RXF5 | -0.21929   |
| 77118 | P03383 | Q96B18 | -0.35509   |
| 77119 | P03383 | Q6DKI2 | -0.44203   |
| 77120 | P03383 | O75506 | -0.29038   |
| 77121 | P03383 | Q14236 | -0.54588   |
| 77122 | P03383 | Q8NEB5 | -0.77446   |
| 77123 | P03383 | P31944 | -0.41232   |
| 77124 | P03383 | Q6AZW8 | -0.21172   |
| 77125 | P03383 | Q13263 | -0.2275    |
| 77126 | P03383 | P52823 | -0.60577   |
| 77127 | P03383 | P29317 | -0.48796   |
| 77128 | P03383 | Q96PH6 | -0.79879   |
| 77129 | P03383 | P58215 | -0.3348    |
| 77130 | P03383 | Q86XZ4 | -0.29487   |
| 77131 | P03383 | Q9GZN1 | -0.30492   |
| 77132 | P03383 | O95104 | -0.41191   |
| 77133 | P03383 | Q99797 | -0.53411   |
| 77134 | P03383 | Q9Y5M8 | -1.0327    |
| 77135 | P03383 | P36894 | -0.30059   |
| 77136 | P03383 | Q9H898 | -0.61367   |
| 77137 | P03383 | Q9UHF4 | -0.86584   |
| 77138 | P03383 | A6NDL8 | -1.1027    |
| 77139 | P03383 | O00124 | -0.45338   |
| 77140 | P03383 | Q7Z4L0 | -0.71261   |

|       |        |        |          |
|-------|--------|--------|----------|
| 77141 | P03383 | P39900 | -1.207   |
| 77142 | P03383 | Q05C16 | -0.22787 |
| 77143 | P03383 | P42684 | -0.42607 |
| 77144 | P03383 | Q9BQE3 | -0.46181 |
| 77145 | P03383 | P43007 | -0.46554 |
| 77146 | P03383 | P78412 | -0.22897 |
| 77147 | P03383 | P10745 | -1.0691  |
| 77148 | P03383 | Q5SRE7 | -0.65938 |
| 77149 | P03383 | Q13069 | -0.0711  |
| 77150 | P03383 | Q9UIJ5 | -0.85873 |
| 77151 | P03383 | Q9BY43 | -0.27731 |
| 77152 | P03383 | Q96DX8 | -0.16229 |
| 77153 | P03383 | Q9NY35 | -0.88055 |
| 77154 | P03383 | Q8NGT9 | -1.1027  |
| 77155 | P03383 | Q5BXX6 | -0.85789 |
| 77156 | P03383 | Q499Z3 | -0.79654 |
| 77157 | P03383 | P08686 | -0.72085 |
| 77158 | P03383 | Q7Z7D3 | -0.95902 |
| 77159 | P03383 | P52740 | -0.17069 |
| 77160 | P03383 | O75936 | -0.34325 |
| 77161 | P03383 | Q14813 | -0.16309 |
| 77162 | P03383 | Q8IZ02 | -0.22741 |
| 77163 | P03383 | Q9UKY4 | -0.8869  |
| 77164 | P03383 | Q13117 | -0.72731 |
| 77165 | P03383 | P26885 | -0.22907 |
| 77166 | P03383 | A8MT66 | -0.11076 |
| 77167 | P03383 | Q96KC2 | -1.2555  |
| 77168 | P03383 | P49221 | -0.38345 |
| 77169 | P03383 | P78413 | -0.22934 |
| 77170 | P03383 | Q8NGF1 | -1.1027  |
| 77171 | P03383 | A6PVI3 | -0.81148 |
| 77172 | P03383 | Q9NP90 | -0.35095 |
| 77173 | P03383 | Q6UXN9 | -0.4231  |
| 77174 | P03383 | Q2VPA4 | -0.77043 |
| 77175 | P03383 | Q8NGS4 | -1.1027  |
| 77176 | P03383 | Q96S21 | -0.87003 |
| 77177 | P03383 | Q07507 | -1.1206  |
| 77178 | P03383 | P30520 | -0.66577 |
| 77179 | P03383 | Q6ZRZ4 | -0.87849 |
| 77180 | P03383 | P47897 | -0.2485  |
| 77181 | P03383 | Q8N414 | -0.86584 |
| 77182 | P03383 | Q9H560 | -0.22741 |
| 77183 | P03383 | Q8N456 | -0.29487 |
| 77184 | P03383 | Q8NHY0 | -0.64315 |
| 77185 | P03383 | Q8N2Y8 | -0.22695 |
| 77186 | P03383 | Q8N635 | -0.25959 |
| 77187 | P03383 | Q9H7X7 | -1.0792  |
| 77188 | P03383 | Q9Y5Y4 | -1.1585  |
| 77189 | P03383 | A6NGW2 | -0.87849 |
| 77190 | P03383 | Q9NQ79 | -0.97418 |
| 77191 | P03383 | Q9H400 | -0.68607 |
| 77192 | P03383 | Q32P28 | -0.52665 |
| 77193 | P03383 | Q8IXZ2 | -0.20204 |
| 77194 | P03383 | Q6P3R8 | -0.9869  |
| 77195 | P03383 | Q5T0B9 | -0.21172 |
| 77196 | P03383 | Q9H756 | -0.86584 |
| 77197 | P03383 | Q13217 | -0.20333 |
| 77198 | P03383 | Q6UQ28 | -0.87068 |
| 77199 | P03383 | Q4VXA5 | -0.87142 |
| 77200 | P03383 | Q8NG57 | -0.30744 |
| 77201 | P03383 | Q8WTU2 | -0.91752 |
| 77202 | P03383 | Q9P0K8 | -0.35259 |
| 77203 | P03383 | Q8NGN5 | -1.1027  |
| 77204 | P03383 | P38398 | -0.22724 |
| 77205 | P03383 | P78382 | -0.53002 |
| 77206 | P03383 | O75369 | -0.4468  |
| 77207 | P03383 | Q5JV73 | -0.44826 |
| 77208 | P03383 | Q08334 | -0.59907 |
| 77209 | P03383 | Q9BQ49 | -0.86584 |
| 77210 | P03383 | Q86UV6 | -0.73967 |
| 77211 | P03383 | P01906 | -0.74886 |
| 77212 | P03383 | P16444 | -0.43633 |
| 77213 | P03383 | Q9HBV2 | -0.86584 |
| 77214 | P03383 | P48960 | -1.5486  |
| 77215 | P03383 | Q96QT4 | -1.0497  |
| 77216 | P03383 | Q9NTJ3 | -0.22376 |

|       |        |        |           |
|-------|--------|--------|-----------|
| 77217 | P03383 | Q7Z7B8 | -0.84399  |
| 77218 | P03383 | Q15109 | -0.72953  |
| 77219 | P03383 | P16422 | -0.2271   |
| 77220 | P03383 | Q3SY69 | -0.41488  |
| 77221 | P03383 | Q9Y345 | -0.84481  |
| 77222 | P03383 | Q5JXA9 | -0.86584  |
| 77223 | P03383 | Q75WM6 | -1.065    |
| 77224 | P03383 | Q9Y6R1 | -0.53667  |
| 77225 | P03383 | A0AVT1 | -0.2234   |
| 77226 | P03383 | Q9NYL2 | -0.22741  |
| 77227 | P03383 | P29590 | -0.22685  |
| 77228 | P03383 | Q8N2I2 | -0.21172  |
| 77229 | P03383 | Q9NR80 | -0.35552  |
| 77230 | P03383 | Q53G44 | -0.37148  |
| 77231 | P03383 | P13533 | -0.27673  |
| 77232 | P03383 | Q8NG08 | -0.70211  |
| 77233 | P03383 | Q6ZP80 | -0.86584  |
| 77234 | P03383 | Q9HA72 | -0.86584  |
| 77235 | P03383 | Q92503 | -0.80813  |
| 77236 | P03383 | P29323 | -0.62699  |
| 77237 | P03383 | Q9HB14 | -1.0473   |
| 77238 | P03383 | A5YM69 | -0.056367 |
| 77239 | P03383 | P05230 | -0.2606   |
| 77240 | P03383 | Q9NSE2 | -0.22741  |
| 77241 | P03383 | H3BUK9 | -0.22732  |
| 77242 | P03383 | Q8NBV8 | -0.74984  |
| 77243 | P03383 | A6NK58 | -0.28928  |
| 77244 | P03383 | Q86W47 | -0.62584  |
| 77245 | P03383 | Q6ZPD8 | -0.84475  |
| 77246 | P03383 | Q96AD5 | -0.67707  |
| 77247 | P03383 | Q9H2I8 | -0.22727  |
| 77248 | P03383 | Q96EK9 | -0.79654  |
| 77249 | P03383 | P12525 | -0.22687  |
| 77250 | P03383 | Q9Y2U2 | -1.0473   |
| 77251 | P03383 | P36888 | -0.40937  |
| 77252 | P03383 | Q6UXZ0 | -0.86584  |
| 77253 | P03383 | Q86VZ4 | -0.86584  |
| 77254 | P03383 | Q86YH2 | -0.2385   |
| 77255 | P03383 | Q9Y490 | -0.22906  |
| 77256 | P03383 | A6NFA1 | -0.72431  |
| 77257 | P03383 | P85299 | -0.29044  |
| 77258 | P03383 | P12645 | -0.7172   |
| 77259 | P03383 | Q8TDQ0 | -0.86584  |
| 77260 | P03383 | Q9H4Q4 | -0.26169  |
| 77261 | P03383 | Q8NGD1 | -1.1027   |
| 77262 | P03383 | Q9HC24 | -0.21884  |
| 77263 | P03383 | Q9BZ29 | -0.22636  |
| 77264 | P03383 | Q7Z333 | -0.23711  |
| 77265 | P03383 | Q9Y217 | -0.31576  |
| 77266 | P03383 | P63122 | -0.67565  |
| 77267 | P03383 | Q9H665 | -0.39621  |
| 77268 | P03383 | P47710 | -0.84627  |
| 77269 | P03383 | Q6PID6 | -0.22735  |
| 77270 | P03383 | Q32P51 | -0.25036  |
| 77271 | P03383 | Q15735 | -0.32998  |
| 77272 | P03383 | Q496M5 | -0.22741  |
| 77273 | P03383 | Q95864 | -0.7862   |
| 77274 | P03383 | Q7Z6G8 | -0.22746  |
| 77275 | P03383 | P54296 | -0.68406  |
| 77276 | P03383 | P41595 | -0.43005  |
| 77277 | P03383 | Q9P2H3 | -0.47821  |
| 77278 | P03383 | Q9ULS5 | -0.86584  |
| 77279 | P03383 | Q96N35 | -0.86584  |
| 77280 | P03383 | Q9BZG2 | -0.79461  |
| 77281 | P03383 | Q94851 | -0.65864  |
| 77282 | P03383 | Q86U38 | -0.18941  |
| 77283 | P03383 | Q96P88 | -1.1147   |
| 77284 | P03383 | Q9P2K2 | -0.88517  |
| 77285 | P03383 | Q5T7P6 | -0.86584  |
| 77286 | P03383 | P21554 | -0.62217  |
| 77287 | P03383 | Q95992 | -0.7675   |
| 77288 | P03383 | Q96J94 | -0.22658  |
| 77289 | P03383 | Q9ULM0 | -0.54034  |
| 77290 | P03383 | Q3KNS6 | -0.21172  |
| 77291 | P03383 | P10265 | -0.37415  |
| 77292 | P03383 | Q96PD4 | -0.54271  |

|       |        |        |           |
|-------|--------|--------|-----------|
| 77293 | P03383 | Q6ZS30 | -0.22741  |
| 77294 | P03383 | Q8N157 | -0.22741  |
| 77295 | P03383 | P13501 | -0.99978  |
| 77296 | P03383 | Q96GE9 | -0.86584  |
| 77297 | P03383 | Q4W5P6 | -0.87849  |
| 77298 | P03383 | Q8TBJ4 | -0.94273  |
| 77299 | P03383 | Q6ZUB0 | -0.86584  |
| 77300 | P03383 | P17735 | -0.24413  |
| 77301 | P03383 | Q8N9X5 | -0.86584  |
| 77302 | P03383 | Q9H4I0 | -0.3747   |
| 77303 | P03383 | P23458 | -0.48774  |
| 77304 | P03383 | Q8N5Y2 | -0.11743  |
| 77305 | P03383 | Q96T37 | -0.22957  |
| 77306 | P03383 | Q8N349 | -0.62965  |
| 77307 | P03383 | P0C2S0 | -0.8462   |
| 77308 | P03383 | Q99952 | -0.58395  |
| 77309 | P03383 | Q6PII5 | -0.47792  |
| 77310 | P03383 | Q8IU1F | -0.79654  |
| 77311 | P03383 | Q96LZ7 | -0.46632  |
| 77312 | P03383 | Q9Y2F5 | -0.17964  |
| 77313 | P03383 | Q16778 | -0.86926  |
| 77314 | P03383 | Q8N4Q1 | -0.12625  |
| 77315 | P03383 | P11686 | -0.11543  |
| 77316 | P03383 | P09382 | -0.57981  |
| 77317 | P03383 | P0DI80 | -0.86584  |
| 77318 | P03383 | Q13610 | -0.22742  |
| 77319 | P03383 | P78417 | -0.35416  |
| 77320 | P03383 | Q7Z7B0 | -0.22111  |
| 77321 | P03383 | P08588 | -0.64589  |
| 77322 | P03383 | O14874 | -0.21963  |
| 77323 | P03383 | Q13796 | -0.22717  |
| 77324 | P03383 | O14796 | -0.62417  |
| 77325 | P03383 | Q6PCD5 | -0.22745  |
| 77326 | P03383 | Q96M69 | -0.8114   |
| 77327 | P03383 | Q9NYC9 | -0.61423  |
| 77328 | P03383 | Q9NQ84 | -1.0997   |
| 77329 | P03383 | Q8N5H7 | -0.73447  |
| 77330 | P03383 | Q8WUA2 | -0.52636  |
| 77331 | P03383 | Q06124 | -0.22741  |
| 77332 | P03383 | Q9BY08 | -0.89626  |
| 77333 | P03383 | Q6ZP01 | -0.5908   |
| 77334 | P03383 | P98082 | -0.22649  |
| 77335 | P03383 | Q8NGR6 | -1.1027   |
| 77336 | P03383 | Q96F15 | -0.79111  |
| 77337 | P03383 | Q6UW01 | -0.78985  |
| 77338 | P03383 | O15068 | -0.54852  |
| 77339 | P03383 | Q6HA08 | -0.70098  |
| 77340 | P03383 | P01764 | -0.97479  |
| 77341 | P03383 | P13611 | -0.88679  |
| 77342 | P03383 | P17812 | -0.48527  |
| 77343 | P03383 | Q8IZP9 | -1.1711   |
| 77344 | P03383 | Q15119 | -0.12513  |
| 77345 | P03383 | Q15911 | -0.2274   |
| 77346 | P03383 | Q9H902 | -0.060914 |
| 77347 | P03383 | O15195 | -0.41477  |
| 77348 | P03383 | P25490 | -0.20956  |
| 77349 | P03383 | Q94772 | -0.45149  |
| 77350 | P03383 | Q9BXJ5 | -0.88288  |
| 77351 | P03383 | Q92826 | -0.22722  |
| 77352 | P03383 | Q8TDS4 | -0.97173  |
| 77353 | P03383 | A6NMX2 | -0.18507  |
| 77354 | P03383 | P49757 | -0.28614  |
| 77355 | P03383 | Q9NWR8 | -0.86584  |
| 77356 | P03383 | O43602 | -0.47521  |
| 77357 | P03383 | Q9NPB8 | -0.18358  |
| 77358 | P03383 | P16671 | -0.4136   |
| 77359 | P03383 | P50120 | -0.2809   |
| 77360 | P03383 | Q96SN7 | -0.31983  |
| 77361 | P03383 | Q9HA47 | -0.65832  |
| 77362 | P03383 | O15520 | -0.29955  |
| 77363 | P03383 | B2RUY7 | -0.83956  |
| 77364 | P03383 | Q7RTN6 | -0.36157  |
| 77365 | P03383 | O15552 | -1.4361   |
| 77366 | P03383 | A6NLU0 | -0.52332  |
| 77367 | P03383 | O95342 | -0.80175  |
| 77368 | P03383 | Q8IZD0 | -0.15048  |

|       |        |        |           |
|-------|--------|--------|-----------|
| 77369 | P03383 | O15091 | -0.26547  |
| 77370 | P03383 | P23515 | -0.66498  |
| 77371 | P03383 | Q6NW40 | -0.73179  |
| 77372 | P03383 | Q8WXA9 | -0.29676  |
| 77373 | P03383 | Q96A23 | -0.22704  |
| 77374 | P03383 | Q13564 | -0.30389  |
| 77375 | P03383 | P04350 | -0.25913  |
| 77376 | P03383 | A6NHI5 | -0.86584  |
| 77377 | P03383 | Q9UI40 | -0.91168  |
| 77378 | P03383 | Q14324 | -0.92689  |
| 77379 | P03383 | Q14055 | -0.84798  |
| 77380 | P03383 | P61599 | -0.25559  |
| 77381 | P03383 | Q9Y2C2 | -0.51953  |
| 77382 | P03383 | Q99999 | -0.67201  |
| 77383 | P03383 | Q9UJS0 | -0.4512   |
| 77384 | P03383 | Q99941 | -0.35793  |
| 77385 | P03383 | O94911 | -1.0782   |
| 77386 | P03383 | Q9H223 | -0.26714  |
| 77387 | P03383 | Q9UM54 | -0.051706 |
| 77388 | P03383 | Q8NEM2 | -0.41542  |
| 77389 | P03383 | P48230 | -0.80549  |
| 77390 | P03383 | Q01718 | -0.83205  |
| 77391 | P03383 | Q96E22 | -0.6866   |
| 77392 | P03383 | Q96IJ6 | -0.69053  |
| 77393 | P03383 | O95972 | -0.74206  |
| 77394 | P03383 | Q9BZV3 | -0.97822  |
| 77395 | P03383 | Q6KC79 | -0.16826  |
| 77396 | P03383 | P19784 | -0.23777  |
| 77397 | P03383 | Q92615 | -0.84005  |
| 77398 | P03383 | Q14202 | -0.48318  |
| 77399 | P03383 | Q8N5C6 | -0.51289  |
| 77400 | P03383 | Q9ULT0 | -0.3785   |
| 77401 | P03383 | Q15090 | -0.22239  |
| 77402 | P03383 | P0CG31 | -0.21172  |
| 77403 | P03383 | Q8N7U9 | -0.12504  |
| 77404 | P03383 | Q9UKG1 | -0.22469  |
| 77405 | P03383 | Q9H0Q0 | -0.66064  |
| 77406 | P03383 | Q8TB33 | -0.18897  |
| 77407 | P03383 | O75309 | -1.1297   |
| 77408 | P03383 | Q9UPW0 | -0.42664  |
| 77409 | P03383 | Q9UH73 | -0.18431  |
| 77410 | P03383 | Q8NGJ2 | -1.1027   |
| 77411 | P03383 | P52788 | -0.37911  |
| 77412 | P03383 | Q9GZK3 | -1.1027   |
| 77413 | P03383 | Q5SZI1 | -0.86584  |
| 77414 | P03383 | Q9P2W3 | -0.56828  |
| 77415 | P03383 | P18136 | -0.97479  |
| 77416 | P03383 | Q8WWA0 | -1.0232   |
| 77417 | P03383 | P60827 | -0.92264  |
| 77418 | P03383 | Q9HCX4 | -0.22647  |
| 77419 | P03383 | Q68D20 | -0.40508  |
| 77420 | P03383 | Q95750 | -0.29879  |
| 77421 | P03383 | Q9Y5R4 | -0.31829  |
| 77422 | P03383 | Q9BTZ2 | -0.67473  |
| 77423 | P03383 | Q15011 | -0.52827  |
| 77424 | P03383 | Q9Y483 | -0.26058  |
| 77425 | P03383 | Q9NQ90 | -0.53619  |
| 77426 | P03383 | P11464 | -0.88363  |
| 77427 | P03383 | P54802 | -0.3716   |
| 77428 | P03383 | P01612 | -0.97479  |
| 77429 | P03383 | Q9UHR4 | -0.22739  |
| 77430 | P03383 | Q8IWX5 | -0.7523   |
| 77431 | P03383 | Q96KJ9 | -0.46505  |
| 77432 | P03383 | Q86UP2 | -0.88407  |
| 77433 | P03383 | A6NHZ5 | -0.22605  |
| 77434 | P03383 | Q08289 | -0.41645  |
| 77435 | P03383 | P55001 | -0.81944  |
| 77436 | P03383 | Q9H6R6 | -0.96605  |
| 77437 | P03383 | O00635 | -0.79669  |
| 77438 | P03383 | Q8TF44 | -0.21144  |
| 77439 | P03383 | Q9BTN0 | -0.96434  |
| 77440 | P03383 | Q13488 | -0.68602  |
| 77441 | P03383 | Q8NBJ7 | -0.43541  |
| 77442 | P03383 | Q9NRF8 | -0.44389  |
| 77443 | P03383 | P49418 | -0.2274   |
| 77444 | P03383 | Q9Y315 | -0.38111  |



|       |        |        |          |
|-------|--------|--------|----------|
| 77445 | P03383 | Q9BPW9 | -0.83447 |
| 77446 | P03383 | P23759 | -0.22295 |
| 77447 | P03383 | Q5JTY5 | -0.79654 |
| 77448 | P03383 | Q96M15 | -0.2041  |
| 77449 | P03383 | Q9NRG7 | -0.80587 |
| 77450 | P03383 | P22301 | -0.38633 |
| 77451 | P03383 | P48066 | -0.94061 |
| 77452 | P03383 | Q86VZ5 | -0.41506 |
| 77453 | P03383 | Q02763 | -0.37467 |
| 77454 | P03383 | Q8IZF0 | -0.97189 |
| 77455 | P03383 | O95168 | -0.53425 |
| 77456 | P03383 | Q96RQ9 | -0.96165 |
| 77457 | P03383 | Q9Y286 | -1.1267  |
| 77458 | P03383 | Q7RTU0 | -0.22741 |
| 77459 | P03383 | Q9Y3T6 | -0.81148 |
| 77460 | P03383 | Q8WWZ7 | -0.86729 |
| 77461 | P03383 | P22736 | -0.22981 |
| 77462 | P03383 | P47893 | -1.1745  |
| 77463 | P03383 | Q9H3U5 | -0.8419  |
| 77464 | P03383 | P43246 | -0.18222 |
| 77465 | P03383 | Q9UNA4 | -0.12852 |
| 77466 | P03383 | O95150 | -1.2362  |
| 77467 | P03383 | Q8IYM9 | -0.22736 |
| 77468 | P03383 | Q8WXI8 | -0.82732 |
| 77469 | P03383 | A6NLI5 | -0.73967 |
| 77470 | P03383 | B1AJZ9 | -0.15469 |
| 77471 | P03383 | Q07889 | -0.36809 |
| 77472 | P03383 | P16403 | -0.78043 |
| 77473 | P03383 | P30512 | -0.7844  |
| 77474 | P03383 | P01762 | -0.97479 |
| 77475 | P03383 | Q8WWZ3 | -0.60329 |
| 77476 | P03383 | Q03692 | -1.0009  |
| 77477 | P03383 | Q8TDI0 | -0.4891  |
| 77478 | P03383 | Q8IZD6 | -0.88737 |
| 77479 | P03383 | Q9BRX8 | -0.245   |
| 77480 | P03383 | P14151 | -0.60482 |
| 77481 | P03383 | P29017 | -0.94754 |
| 77482 | P03383 | P09564 | -0.8933  |
| 77483 | P03383 | A8MPY1 | -0.65085 |
| 77484 | P03383 | Q13733 | -0.96253 |
| 77485 | P03383 | Q9BWG4 | -0.30015 |
| 77486 | P03383 | Q5MNZ9 | -0.2274  |
| 77487 | P03383 | P62068 | -0.36997 |
| 77488 | P03383 | Q96SJ8 | -0.86584 |
| 77489 | P03383 | Q9GZP9 | -0.25677 |
| 77490 | P03383 | Q3MJ13 | -0.22785 |
| 77491 | P03383 | P02745 | -0.34908 |
| 77492 | P03383 | Q8TD86 | -0.2255  |
| 77493 | P03383 | P47944 | -0.34935 |
| 77494 | P03383 | Q9NW07 | -0.20177 |
| 77495 | P03383 | Q5T4I8 | -0.1155  |
| 77496 | P03383 | Q69YW2 | -0.86584 |
| 77497 | P03383 | Q8IWW8 | -0.29101 |
| 77498 | P03383 | Q96IS3 | -0.19124 |
| 77499 | P03383 | O95994 | -0.1768  |
| 77500 | P03383 | Q9UGJ0 | -0.68003 |
| 77501 | P03383 | Q9UQ10 | -0.7261  |
| 77502 | P03383 | P28336 | -1.078   |
| 77503 | P03383 | P08571 | -0.52079 |
| 77504 | P03383 | Q86XR2 | -0.5353  |
| 77505 | P03383 | Q6SA08 | -0.53454 |
| 77506 | P03383 | P13674 | -0.53261 |
| 77507 | P03383 | P16499 | -0.66076 |
| 77508 | P03383 | Q969Q1 | -0.64292 |
| 77509 | P03383 | Q8NA29 | -0.99009 |
| 77510 | P03383 | Q9UJW8 | -0.21172 |
| 77511 | P03383 | Q17R55 | -0.86584 |
| 77512 | P03383 | Q9C026 | -0.6655  |
| 77513 | P03383 | P27815 | -0.2235  |
| 77514 | P03383 | Q96GD0 | -0.12745 |
| 77515 | P03383 | Q8N567 | -0.55657 |
| 77516 | P03383 | P59535 | -1.0953  |
| 77517 | P03383 | P20472 | -0.44974 |
| 77518 | P03383 | Q580R0 | -0.33148 |
| 77519 | P03383 | Q16740 | -0.33535 |
| 77520 | P03383 | O43570 | -0.87106 |

|       |        |        |           |
|-------|--------|--------|-----------|
| 77521 | P03383 | Q14442 | -0.05421  |
| 77522 | P03383 | Q7Z469 | -0.73185  |
| 77523 | P03383 | Q99626 | -0.22851  |
| 77524 | P03383 | O00338 | -0.31058  |
| 77525 | P03383 | O60774 | -0.98057  |
| 77526 | P03383 | Q96NG3 | -0.29487  |
| 77527 | P03383 | O00110 | -0.177    |
| 77528 | P03383 | Q9Y6I3 | -0.15875  |
| 77529 | P03383 | Q16553 | -0.67199  |
| 77530 | P03383 | Q9BQ51 | -1.0733   |
| 77531 | P03383 | Q9BV94 | -0.77028  |
| 77532 | P03383 | Q9BSK1 | -0.21172  |
| 77533 | P03383 | Q9UPW8 | -0.28089  |
| 77534 | P03383 | Q8N6V9 | -0.058342 |
| 77535 | P03383 | P43088 | -1.2734   |
| 77536 | P03383 | Q96HJ5 | -0.18122  |
| 77537 | P03383 | Q6MZM9 | -0.87849  |
| 77538 | P03383 | P46091 | -1.2928   |
| 77539 | P03383 | Q96PZ2 | -0.65844  |
| 77540 | P03383 | P30519 | -0.261    |
| 77541 | P03383 | P41586 | -0.4878   |
| 77542 | P03383 | O76082 | -0.36387  |
| 77543 | P03383 | O96024 | -0.74788  |
| 77544 | P03383 | O75460 | -0.30332  |
| 77545 | P03383 | Q9UMF0 | -1.1364   |
| 77546 | P03383 | Q9UL63 | -0.4315   |
| 77547 | P03383 | O60602 | -0.98086  |
| 77548 | P03383 | Q5TEJ8 | -0.68939  |
| 77549 | P03383 | A6NHY6 | -0.18897  |
| 77550 | P03383 | Q08357 | -0.91738  |
| 77551 | P03383 | Q8N3F8 | -0.22783  |
| 77552 | P03383 | B1AJZ1 | -0.084796 |
| 77553 | P03383 | Q15646 | -0.22187  |
| 77554 | P03383 | Q6NUS8 | -0.85345  |
| 77555 | P03383 | Q75808 | -0.692    |
| 77556 | P03383 | Q13546 | -0.22741  |
| 77557 | P03383 | Q5SRD1 | -0.20005  |
| 77558 | P03383 | P67936 | -0.57509  |
| 77559 | P03383 | Q13322 | -0.22741  |
| 77560 | P03383 | O60486 | -0.85468  |
| 77561 | P03383 | P51589 | -0.65831  |
| 77562 | P03383 | Q04941 | -0.6145   |
| 77563 | P03383 | P54315 | -1.0185   |
| 77564 | P03383 | Q9UJV3 | -0.37437  |
| 77565 | P03383 | Q8NGK2 | -1.1027   |
| 77566 | P03383 | P62253 | -0.52287  |
| 77567 | P03383 | Q13067 | -0.0711   |
| 77568 | P03383 | P08754 | -0.35859  |
| 77569 | P03383 | P08709 | -0.78048  |
| 77570 | P03383 | P05015 | -0.77017  |
| 77571 | P03383 | Q9BRK0 | -0.86584  |
| 77572 | P03383 | Q9H920 | -0.92811  |
| 77573 | P03383 | P07919 | -0.4125   |
| 77574 | P03383 | Q8IWR1 | -1.0645   |
| 77575 | P03383 | Q9UJQ7 | -0.43283  |
| 77576 | P03383 | Q8N475 | -0.95463  |
| 77577 | P03383 | P08603 | -0.89215  |
| 77578 | P03383 | P21757 | -0.51286  |
| 77579 | P03383 | Q9UIK4 | -0.65651  |
| 77580 | P03383 | Q58FF3 | -0.39456  |
| 77581 | P03383 | Q96FG2 | -0.5735   |
| 77582 | P03383 | Q14508 | -0.22741  |
| 77583 | P03383 | Q9BXA6 | -0.62031  |
| 77584 | P03383 | P0C629 | -1.1027   |
| 77585 | P03383 | Q86UE6 | -0.66459  |
| 77586 | P03383 | Q02161 | -0.93117  |
| 77587 | P03383 | Q9NVG8 | -1.2307   |
| 77588 | P03383 | Q5TAA0 | -0.059763 |
| 77589 | P03383 | P15104 | -0.60207  |
| 77590 | P03383 | P0DJD9 | -1.0948   |
| 77591 | P03383 | Q8N7Z5 | -0.22741  |
| 77592 | P03383 | P11362 | -0.25881  |
| 77593 | P03383 | Q2M2I3 | -0.059789 |
| 77594 | P03383 | Q9NQ11 | -0.99775  |
| 77595 | P03383 | Q9UPQ0 | -0.59681  |
| 77596 | P03383 | Q53R41 | -0.3676   |

|       |        |        |           |
|-------|--------|--------|-----------|
| 77597 | P03383 | B4DS77 | -0.84737  |
| 77598 | P03383 | P52735 | -0.22741  |
| 77599 | P03383 | Q9BVA1 | -0.17424  |
| 77600 | P03383 | Q95832 | -0.74106  |
| 77601 | P03383 | Q9UKU7 | -0.24249  |
| 77602 | P03383 | P27448 | -0.47461  |
| 77603 | P03383 | O43623 | -0.2129   |
| 77604 | P03383 | Q8WVV4 | -0.53859  |
| 77605 | P03383 | O75970 | -0.22702  |
| 77606 | P03383 | Q01433 | -0.22411  |
| 77607 | P03383 | P40939 | -0.14361  |
| 77608 | P03383 | Q9GZU5 | -1.0094   |
| 77609 | P03383 | Q8NC67 | -0.86584  |
| 77610 | P03383 | P13866 | -0.14999  |
| 77611 | P03383 | O43613 | -1.2197   |
| 77612 | P03383 | Q5BVD1 | -0.93931  |
| 77613 | P03383 | O95568 | -0.20721  |
| 77614 | P03383 | Q9H6X4 | -0.86584  |
| 77615 | P03383 | Q5HYK3 | -0.26046  |
| 77616 | P03383 | O95665 | -1.2105   |
| 77617 | P03383 | Q8NAA4 | -0.22794  |
| 77618 | P03383 | P20023 | -0.85876  |
| 77619 | P03383 | P60602 | -0.49598  |
| 77620 | P03383 | Q8NGL4 | -1.1027   |
| 77621 | P03383 | Q9UGM1 | -0.83415  |
| 77622 | P03383 | Q96BI3 | -0.39389  |
| 77623 | P03383 | Q3V6T2 | -0.3332   |
| 77624 | P03383 | Q8IUZ5 | -0.59157  |
| 77625 | P03383 | Q9HAR2 | -1.168    |
| 77626 | P03383 | Q9UBN6 | -0.88558  |
| 77627 | P03383 | Q9UI14 | -0.10233  |
| 77628 | P03383 | Q9GZR2 | -0.12972  |
| 77629 | P03383 | Q8N2E6 | -1.1327   |
| 77630 | P03383 | A4D2B0 | -0.43358  |
| 77631 | P03383 | Q9UPU7 | -0.81257  |
| 77632 | P03383 | P51570 | -0.44051  |
| 77633 | P03383 | Q9UFB7 | -0.21172  |
| 77634 | P03383 | Q9UK00 | -0.86584  |
| 77635 | P03383 | Q9H8H3 | -0.50513  |
| 77636 | P03383 | Q9NZC4 | -0.11506  |
| 77637 | P03383 | Q9Y3R4 | -0.23114  |
| 77638 | P03383 | P12524 | -0.2274   |
| 77639 | P03383 | Q9H195 | -0.85042  |
| 77640 | P03383 | Q01415 | -0.60978  |
| 77641 | P03383 | Q5JRM2 | -0.86584  |
| 77642 | P03383 | Q8IYS1 | -0.50416  |
| 77643 | P03383 | Q9NRE2 | -0.36611  |
| 77644 | P03383 | Q96BF6 | -0.22476  |
| 77645 | P03383 | Q86VW0 | -0.14019  |
| 77646 | P03383 | P31639 | -0.64627  |
| 77647 | P03383 | Q8NGR5 | -1.1027   |
| 77648 | P03383 | Q8NG04 | -0.80655  |
| 77649 | P03383 | P02656 | -0.56828  |
| 77650 | P03383 | P50391 | -1.1013   |
| 77651 | P03383 | P0C5K7 | -0.1572   |
| 77652 | P03383 | O15480 | -0.10349  |
| 77653 | P03383 | Q5SRN2 | -0.86584  |
| 77654 | P03383 | Q06190 | -0.045433 |
| 77655 | P03383 | Q05639 | -0.44539  |
| 77656 | P03383 | Q9NTN9 | -0.9811   |
| 77657 | P03383 | Q6UY09 | -0.86584  |
| 77658 | P03383 | P22004 | -0.5615   |
| 77659 | P03383 | Q05932 | -0.27316  |
| 77660 | P03383 | Q94916 | -0.10066  |
| 77661 | P03383 | P22304 | -0.57424  |
| 77662 | P03383 | Q3SY77 | -0.85345  |
| 77663 | P03383 | P07339 | -1.0123   |
| 77664 | P03383 | Q86WS3 | -0.87849  |
| 77665 | P03383 | P04211 | -0.97479  |
| 77666 | P03383 | Q9H2P9 | -0.38077  |
| 77667 | P03383 | O95988 | -0.22534  |
| 77668 | P03383 | Q8IYM0 | -0.3693   |
| 77669 | P03383 | O95388 | -0.88687  |
| 77670 | P03383 | P04179 | -0.19559  |
| 77671 | P03383 | Q9NUK0 | -0.27584  |
| 77672 | P03383 | P56545 | -0.30323  |

|       |        |        |           |
|-------|--------|--------|-----------|
| 77673 | P03383 | Q9HCJ3 | -0.44232  |
| 77674 | P03383 | Q8TC41 | -0.9974   |
| 77675 | P03383 | Q8N468 | -0.8419   |
| 77676 | P03383 | P33991 | -0.22102  |
| 77677 | P03383 | P43363 | -0.091989 |
| 77678 | P03383 | P49760 | -0.39308  |
| 77679 | P03383 | Q96EL3 | -0.10325  |
| 77680 | P03383 | Q9NUP9 | -0.17432  |
| 77681 | P03383 | Q9H306 | -1.2834   |
| 77682 | P03383 | Q7Z5H4 | -1.1149   |
| 77683 | P03383 | Q96C55 | -0.22007  |
| 77684 | P03383 | Q9BYV7 | -0.64041  |
| 77685 | P03383 | Q9NRF9 | -0.11332  |
| 77686 | P03383 | Q86TA4 | -0.027113 |
| 77687 | P03383 | O75204 | -0.66818  |
| 77688 | P03383 | A4D1S0 | -0.85471  |
| 77689 | P03383 | Q9HC96 | -0.72256  |
| 77690 | P03383 | O95076 | -0.2274   |
| 77691 | P03383 | O60336 | -0.42637  |
| 77692 | P03383 | Q86UW8 | -1.0554   |
| 77693 | P03383 | O43653 | -0.60538  |
| 77694 | P03383 | Q6UXB4 | -0.3256   |
| 77695 | P03383 | Q9H3R2 | -1.2123   |
| 77696 | P03383 | Q9Y4F1 | -0.58562  |
| 77697 | P03383 | Q702N8 | -0.43359  |
| 77698 | P03383 | Q9Y5K6 | -0.22745  |
| 77699 | P03383 | Q96DU7 | -0.40417  |
| 77700 | P03383 | Q8NGC7 | -1.1027   |
| 77701 | P03383 | O94854 | -0.3407   |
| 77702 | P03383 | Q96D31 | -0.52277  |
| 77703 | P03383 | Q14694 | -0.26451  |
| 77704 | P03383 | Q96AK3 | -0.7894   |
| 77705 | P03383 | Q9H165 | -0.22696  |
| 77706 | P03383 | Q1W4C9 | -0.79897  |
| 77707 | P03383 | P18075 | -0.22741  |
| 77708 | P03383 | Q92574 | -0.22718  |
| 77709 | P03383 | Q96K83 | -0.45551  |
| 77710 | P03383 | Q15262 | -0.6365   |
| 77711 | P03383 | P27658 | -1.0288   |
| 77712 | P03383 | Q8IZL9 | -0.094302 |
| 77713 | P03383 | Q9HBU6 | -0.61241  |
| 77714 | P03383 | Q9NTQ9 | -0.85917  |
| 77715 | P03383 | Q8TE59 | -1.2214   |
| 77716 | P03383 | Q96RC9 | -1.1027   |
| 77717 | P03383 | Q96CX2 | -0.20107  |
| 77718 | P03383 | P35240 | -0.23228  |
| 77719 | P03383 | Q3ZCW2 | -0.65626  |
| 77720 | P03383 | O43719 | -0.21818  |
| 77721 | P03383 | Q8TD22 | -0.83432  |
| 77722 | P03383 | Q9ULH1 | -0.49767  |
| 77723 | P03383 | Q8N3Z3 | -0.82484  |
| 77724 | P03383 | Q9P244 | -0.72432  |
| 77725 | P03383 | P42574 | -0.22624  |
| 77726 | P03383 | Q96RP9 | -0.73365  |
| 77727 | P03383 | Q9Y6Q6 | -0.25946  |
| 77728 | P03383 | Q16473 | -0.22741  |
| 77729 | P03383 | Q6PIF2 | -0.21211  |
| 77730 | P03383 | Q5T7N3 | -0.29487  |
| 77731 | P03383 | Q29836 | -0.88446  |
| 77732 | P03383 | Q04760 | -0.18407  |
| 77733 | P03383 | Q9GZN6 | -0.94455  |
| 77734 | P03383 | Q96KP4 | -0.52479  |
| 77735 | P03383 | Q9Y2E8 | -0.82538  |
| 77736 | P03383 | Q6NUS6 | -0.73035  |
| 77737 | P03383 | Q8IVW1 | -0.92764  |
| 77738 | P03383 | Q96FN5 | -0.68836  |
| 77739 | P03383 | O43692 | -0.68066  |
| 77740 | P03383 | P36957 | -0.19128  |
| 77741 | P03383 | P09601 | -0.2262   |
| 77742 | P03383 | Q9HD89 | -0.58084  |
| 77743 | P03383 | Q9Y679 | -0.60283  |
| 77744 | P03383 | Q17RQ9 | -0.86584  |
| 77745 | P03383 | P40189 | -0.40093  |
| 77746 | P03383 | O43529 | -0.68754  |
| 77747 | P03383 | Q8N998 | -0.06508  |
| 77748 | P03383 | O95868 | -0.71693  |

|       |        |        |          |
|-------|--------|--------|----------|
| 77749 | P03383 | A6NKC0 | -0.48092 |
| 77750 | P03383 | Q9BV68 | -0.23069 |
| 77751 | P03383 | Q8N446 | -0.73005 |
| 77752 | P03383 | P08962 | -0.61738 |
| 77753 | P03383 | A5PLK6 | -0.84533 |
| 77754 | P03383 | P0C7U9 | -0.86584 |
| 77755 | P03383 | P06127 | -0.54967 |
| 77756 | P03383 | Q6NXE6 | -0.21086 |
| 77757 | P03383 | A8K0Z3 | -0.18201 |
| 77758 | P03383 | Q8NG94 | -1.1027  |
| 77759 | P03383 | Q8N4Z0 | -1.0972  |
| 77760 | P03383 | Q8IZS8 | -0.93295 |
| 77761 | P03383 | Q96HH6 | -0.86584 |
| 77762 | P03383 | Q6N075 | -0.85789 |
| 77763 | P03383 | Q8WZ73 | -0.38427 |
| 77764 | P03383 | P22914 | -0.43291 |
| 77765 | P03383 | Q8N954 | -0.44783 |
| 77766 | P03383 | Q17R98 | -0.22733 |
| 77767 | P03383 | B1AK53 | -0.5657  |
| 77768 | P03383 | O15523 | -0.58467 |
| 77769 | P03383 | P98196 | -0.56576 |
| 77770 | P03383 | O00217 | -0.42421 |
| 77771 | P03383 | Q8NEG7 | -0.43363 |
| 77772 | P03383 | Q8TBR7 | -0.93628 |
| 77773 | P03383 | O60431 | -1.1027  |
| 77774 | P03383 | O15230 | -0.48738 |
| 77775 | P03383 | A8MT82 | -0.98969 |
| 77776 | P03383 | Q96MX3 | -0.21172 |
| 77777 | P03383 | P13686 | -0.50506 |
| 77778 | P03383 | Q9GZT3 | -0.22567 |
| 77779 | P03383 | Q96BI1 | -0.7285  |
| 77780 | P03383 | A5PLL1 | -0.22741 |
| 77781 | P03383 | Q8IVF7 | -0.26343 |
| 77782 | P03383 | Q9HBI0 | -0.6172  |
| 77783 | P03383 | Q9P2P5 | -0.45042 |
| 77784 | P03383 | P15498 | -0.22741 |
| 77785 | P03383 | O00444 | -0.22741 |
| 77786 | P03383 | Q8NGZ3 | -1.1027  |
| 77787 | P03383 | P06734 | -1.2057  |
| 77788 | P03383 | A8MW92 | -0.52332 |
| 77789 | P03383 | Q13873 | -0.37457 |
| 77790 | P03383 | O15213 | -0.22745 |
| 77791 | P03383 | Q8NGZ4 | -1.1027  |
| 77792 | P03383 | P35790 | -0.65323 |
| 77793 | P03383 | Q14CM0 | -0.22741 |
| 77794 | P03383 | Q15291 | -0.22753 |
| 77795 | P03383 | Q9BX66 | -0.22713 |
| 77796 | P03383 | P00558 | -0.16213 |
| 77797 | P03383 | O75396 | -0.14555 |
| 77798 | P03383 | Q43927 | -0.66687 |
| 77799 | P03383 | O95156 | -0.75225 |
| 77800 | P03383 | Q8N687 | -0.84399 |
| 77801 | P03383 | P01616 | -0.95485 |
| 77802 | P03383 | P39656 | -0.26679 |
| 77803 | P03383 | P01877 | -0.55431 |
| 77804 | P03383 | Q6UWF6 | -0.87849 |
| 77805 | P03383 | Q14761 | -0.91814 |
| 77806 | P03383 | Q07326 | -0.82485 |
| 77807 | P03383 | P68400 | -0.36178 |
| 77808 | P03383 | Q8TDB6 | -0.22741 |
| 77809 | P03383 | P59190 | -0.98206 |
| 77810 | P03383 | Q9Y6L7 | -1.361   |
| 77811 | P03383 | Q70J99 | -0.22954 |
| 77812 | P03383 | Q9BRY0 | -0.8861  |
| 77813 | P03383 | Q6ZSV7 | -0.15788 |
| 77814 | P03383 | Q9Y2G5 | -0.29815 |
| 77815 | P03383 | Q6MZQ0 | -0.30763 |
| 77816 | P03383 | Q86UP0 | -0.91871 |
| 77817 | P03383 | P21754 | -0.34259 |
| 77818 | P03383 | Q96MR6 | -0.22762 |
| 77819 | P03383 | Q66K79 | -1.134   |
| 77820 | P03383 | Q53QZ3 | -0.94961 |
| 77821 | P03383 | Q8NBS3 | -0.63218 |
| 77822 | P03383 | Q53RY4 | -0.86584 |
| 77823 | P03383 | P04798 | -0.33072 |
| 77824 | P03383 | Q9Y5L3 | -1.0128  |

|       |        |        |          |
|-------|--------|--------|----------|
| 77825 | P03383 | Q9NX94 | -0.86584 |
| 77826 | P03383 | P38936 | -0.14922 |
| 77827 | P03383 | Q8N129 | -0.94064 |
| 77828 | P03383 | Q8TEY5 | -0.227   |
| 77829 | P03383 | Q9HBW9 | -1.2062  |
| 77830 | P03383 | Q96I45 | -0.86584 |
| 77831 | P03383 | Q29940 | -0.88446 |
| 77832 | P03383 | Q9NR55 | -0.1964  |
| 77833 | P03383 | Q13029 | -0.22731 |
| 77834 | P03383 | Q8WUA7 | -1.1688  |
| 77835 | P03383 | O60341 | -0.22633 |
| 77836 | P03383 | Q86SX6 | -0.26501 |
| 77837 | P03383 | O14730 | -0.3907  |
| 77838 | P03383 | P58180 | -1.1027  |
| 77839 | P03383 | Q9NQBO | -0.2194  |
| 77840 | P03383 | Q9NQCB | -0.20377 |
| 77841 | P03383 | Q9NWM0 | -0.21945 |
| 77842 | P03383 | Q9P243 | -0.20523 |
| 77843 | P03383 | P35243 | -0.75509 |
| 77844 | P03383 | Q9NPB0 | -0.80884 |
| 77845 | P03383 | Q9Y619 | -0.58668 |
| 77846 | P03383 | Q99598 | -0.223   |
| 77847 | P03383 | Q6NTF9 | -0.89011 |
| 77848 | P03383 | Q16873 | -0.39883 |
| 77849 | P03383 | Q5VY80 | -0.64105 |
| 77850 | P03383 | Q9UJA2 | -0.57043 |
| 77851 | P03383 | P20648 | -0.96549 |
| 77852 | P03383 | Q9NYB9 | -0.37633 |
| 77853 | P03383 | P37231 | -0.24831 |
| 77854 | P03383 | Q8NFU1 | -0.66771 |
| 77855 | P03383 | Q9NVP2 | -0.27128 |
| 77856 | P03383 | Q9HBL6 | -0.86584 |
| 77857 | P03383 | Q75553 | -0.44582 |
| 77858 | P03383 | Q9NS28 | -0.67499 |
| 77859 | P03383 | Q6PHR2 | -0.35969 |
| 77860 | P03383 | Q0VF96 | -0.22616 |
| 77861 | P03383 | P23109 | -0.27597 |
| 77862 | P03383 | O43759 | -0.62798 |
| 77863 | P03383 | Q10571 | -0.16781 |
| 77864 | P03383 | Q8WUX2 | -0.16078 |
| 77865 | P03383 | Q8IVB4 | -0.87959 |
| 77866 | P03383 | P10620 | -0.22412 |
| 77867 | P03383 | P12235 | -0.23365 |
| 77868 | P03383 | Q9NV12 | -0.86584 |
| 77869 | P03383 | Q96P67 | -1.1721  |
| 77870 | P03383 | Q9BRK3 | -0.86584 |
| 77871 | P03383 | Q2IOM4 | -0.35947 |
| 77872 | P03383 | Q75955 | -0.3315  |
| 77873 | P03383 | Q9Y6N9 | -0.22248 |
| 77874 | P03383 | P0C842 | -0.65844 |
| 77875 | P03383 | Q5CZ79 | -0.2274  |
| 77876 | P03383 | Q6UY01 | -0.22741 |
| 77877 | P03383 | Q75078 | -1.0077  |
| 77878 | P03383 | P46926 | -0.1672  |
| 77879 | P03383 | Q5K4L6 | -1.1349  |
| 77880 | P03383 | P09622 | -0.2239  |
| 77881 | P03383 | Q99720 | -0.6315  |
| 77882 | P03383 | Q8NEP3 | -0.26608 |
| 77883 | P03383 | P55073 | -0.6952  |
| 77884 | P03383 | P0CJ77 | -0.72903 |
| 77885 | P03383 | Q9UN70 | -1.1037  |
| 77886 | P03383 | Q13823 | -0.40682 |
| 77887 | P03383 | Q9HAZ1 | -0.85572 |
| 77888 | P03383 | Q92570 | -0.2445  |
| 77889 | P03383 | P16455 | -0.23106 |
| 77890 | P03383 | Q11130 | -0.67425 |
| 77891 | P03383 | Q9NW15 | -0.95721 |
| 77892 | P03383 | P30488 | -0.88446 |
| 77893 | P03383 | Q8TED9 | -0.45364 |
| 77894 | P03383 | Q9BY78 | -0.74488 |
| 77895 | P03383 | Q75074 | -0.84849 |
| 77896 | P03383 | Q8NGX2 | -1.1027  |
| 77897 | P03383 | P48048 | -1.167   |
| 77898 | P03383 | Q9NV66 | -1.012   |
| 77899 | P03383 | P98066 | -0.72427 |
| 77900 | P03383 | Q8NGK4 | -1.1027  |

|       |        |        |           |
|-------|--------|--------|-----------|
| 77901 | P03383 | A6NCW0 | -0.4721   |
| 77902 | P03383 | P24071 | -1.3708   |
| 77903 | P03383 | Q5VYP0 | -0.86584  |
| 77904 | P03383 | Q9UBU3 | -0.32397  |
| 77905 | P03383 | Q9UHL0 | -0.51292  |
| 77906 | P03383 | P01614 | -0.97479  |
| 77907 | P03383 | Q9UDW1 | -0.31433  |
| 77908 | P03383 | O00429 | -0.57769  |
| 77909 | P03383 | Q14410 | -0.48366  |
| 77910 | P03383 | Q9UI08 | -0.21189  |
| 77911 | P03383 | Q96KJ4 | -1.0252   |
| 77912 | P03383 | Q9P2S2 | -0.90853  |
| 77913 | P03383 | P16473 | -0.66399  |
| 77914 | P03383 | Q13323 | -0.32363  |
| 77915 | P03383 | Q14094 | -0.48746  |
| 77916 | P03383 | Q9NTU7 | -0.77164  |
| 77917 | P03383 | Q8TCG5 | -0.75053  |
| 77918 | P03383 | Q9Y287 | -0.21046  |
| 77919 | P03383 | Q9UHP7 | -1.0456   |
| 77920 | P03383 | P02778 | -0.77272  |
| 77921 | P03383 | Q8IZP2 | -0.29487  |
| 77922 | P03383 | Q8NGY7 | -1.1027   |
| 77923 | P03383 | P31371 | -0.57287  |
| 77924 | P03383 | Q02223 | -1.0827   |
| 77925 | P03383 | Q15617 | -1.1027   |
| 77926 | P03383 | Q69384 | -0.5818   |
| 77927 | P03383 | O14647 | -0.63045  |
| 77928 | P03383 | Q86Y37 | -0.1083   |
| 77929 | P03383 | O14569 | -0.86399  |
| 77930 | P03383 | P53396 | -0.19264  |
| 77931 | P03383 | Q9UJ78 | -0.29787  |
| 77932 | P03383 | P78504 | -0.49495  |
| 77933 | P03383 | Q9P1P5 | -1.143    |
| 77934 | P03383 | A1A5B4 | -0.99834  |
| 77935 | P03383 | Q8NH83 | -1.1027   |
| 77936 | P03383 | P51513 | -0.25507  |
| 77937 | P03383 | P63121 | -0.67565  |
| 77938 | P03383 | P0C672 | -0.86584  |
| 77939 | P03383 | Q96BT1 | -0.29384  |
| 77940 | P03383 | Q99558 | -0.22741  |
| 77941 | P03383 | Q16568 | -0.31051  |
| 77942 | P03383 | O94768 | -0.76239  |
| 77943 | P03383 | P01570 | -0.7874   |
| 77944 | P03383 | Q8NCF0 | -0.86789  |
| 77945 | P03383 | A6NDK9 | -0.35868  |
| 77946 | P03383 | Q7Z3I7 | -0.21172  |
| 77947 | P03383 | Q15040 | -0.70087  |
| 77948 | P03383 | Q6UWE3 | -0.87168  |
| 77949 | P03383 | Q9BXW7 | -0.38805  |
| 77950 | P03383 | Q6DD87 | -0.21172  |
| 77951 | P03383 | Q9UHV8 | -0.43656  |
| 77952 | P03383 | Q13206 | -0.80007  |
| 77953 | P03383 | Q9NZQ0 | -0.92335  |
| 77954 | P03383 | O75339 | -0.85459  |
| 77955 | P03383 | Q9NZV8 | -0.69511  |
| 77956 | P03383 | O94782 | -0.34301  |
| 77957 | P03383 | O43677 | -0.51765  |
| 77958 | P03383 | A6NCL2 | -0.078286 |
| 77959 | P03383 | P30041 | -0.24179  |
| 77960 | P03383 | Q969S2 | -0.28227  |
| 77961 | P03383 | P04222 | -0.88446  |
| 77962 | P03383 | Q92791 | -0.22527  |
| 77963 | P03383 | Q8IWR0 | -0.50622  |
| 77964 | P03383 | P08887 | -0.31943  |
| 77965 | P03383 | Q9H5J0 | -0.22733  |
| 77966 | P03383 | Q709F0 | -0.53052  |
| 77967 | P03383 | Q9UFM2 | -0.24794  |
| 77968 | P03383 | Q6P4I2 | -0.18857  |
| 77969 | P03383 | Q9BZW8 | -0.53015  |
| 77970 | P03383 | Q6NUI2 | -0.59102  |
| 77971 | P03383 | P28908 | -0.69299  |
| 77972 | P03383 | Q14565 | -0.32062  |
| 77973 | P03383 | Q5JQD4 | -0.85703  |
| 77974 | P03383 | O75616 | -0.71414  |
| 77975 | P03383 | Q53GA4 | -0.38232  |
| 77976 | P03383 | Q6IE37 | -0.80012  |

|       |        |        |           |
|-------|--------|--------|-----------|
| 77977 | P03383 | Q9HCJ0 | -0.5482   |
| 77978 | P03383 | Q9P0M2 | -0.031499 |
| 77979 | P03383 | Q9Y2B9 | -0.54304  |
| 77980 | P03383 | Q96A70 | -0.36747  |
| 77981 | P03383 | Q9Y6N3 | -0.83948  |
| 77982 | P03383 | Q9Y376 | -0.1635   |
| 77983 | P03383 | Q5VZ03 | -0.17859  |
| 77984 | P03383 | Q9H270 | -0.22686  |
| 77985 | P03383 | Q6IQ20 | -0.59793  |
| 77986 | P03383 | P51809 | -0.21448  |
| 77987 | P03383 | Q6ZW31 | -0.85933  |
| 77988 | P03383 | Q4G0M1 | -0.87849  |
| 77989 | P03383 | P59046 | -0.22724  |
| 77990 | P03383 | P42127 | -0.83381  |
| 77991 | P03383 | Q9ULL5 | -0.54186  |
| 77992 | P03383 | Q9Y6F8 | -0.34275  |
| 77993 | P03383 | P10588 | -0.2329   |
| 77994 | P03383 | P14410 | -0.54221  |
| 77995 | P03383 | Q15696 | -0.17677  |
| 77996 | P03383 | Q8NBF2 | -0.22355  |
| 77997 | P03383 | Q9Y342 | -0.89096  |
| 77998 | P03383 | Q9NNZ6 | -0.6881   |
| 77999 | P03383 | Q9HC73 | -1.2762   |
| 78000 | P03383 | Q9H8V3 | -0.22785  |
| 78001 | P03383 | Q9BU70 | -0.29105  |
| 78002 | P03383 | Q9GZK4 | -1.1027   |
| 78003 | P03383 | Q9H7Z7 | -0.30949  |
| 78004 | P03383 | P55263 | -0.49069  |
| 78005 | P03383 | Q8N146 | -1.1027   |
| 78006 | P03383 | P00488 | -0.48591  |
| 78007 | P03383 | Q9Y2Y1 | -0.17519  |
| 78008 | P03383 | Q6KCM7 | -0.78496  |
| 78009 | P03383 | Q43448 | -0.8566   |
| 78010 | P03383 | Q96NL1 | -0.88525  |
| 78011 | P03383 | Q92620 | -0.22568  |
| 78012 | P03383 | Q9UQ52 | -0.63282  |
| 78013 | P03383 | Q9NX74 | -0.60435  |
| 78014 | P03383 | P51114 | -0.11132  |
| 78015 | P03383 | Q6BCY4 | -0.54232  |
| 78016 | P03383 | P98164 | -0.33606  |
| 78017 | P03383 | Q14714 | -0.94791  |
| 78018 | P03383 | Q8NGJ7 | -1.1027   |
| 78019 | P03383 | Q96DZ5 | -0.68515  |
| 78020 | P03383 | Q9H8L6 | -0.46489  |
| 78021 | P03383 | Q13003 | -0.79762  |
| 78022 | P03383 | Q15321 | -0.88525  |
| 78023 | P03383 | Q8NCA9 | -0.21172  |
| 78024 | P03383 | Q3MIX3 | -0.77071  |
| 78025 | P03383 | Q9H930 | -0.42119  |
| 78026 | P03383 | Q8WZ79 | -0.66966  |
| 78027 | P03383 | Q9UK28 | -0.72271  |
| 78028 | P03383 | Q7Z3Z2 | -0.52991  |
| 78029 | P03383 | P0C7M4 | -0.22332  |
| 78030 | P03383 | Q03518 | -0.34264  |
| 78031 | P03383 | Q9NPY3 | -0.43847  |
| 78032 | P03383 | Q9NP87 | -0.20293  |
| 78033 | P03383 | Q9H106 | -0.87849  |
| 78034 | P03383 | Q8IZC7 | -0.21172  |
| 78035 | P03383 | O00232 | -0.12181  |
| 78036 | P03383 | Q7Z3Z4 | -0.31462  |
| 78037 | P03383 | P49895 | -0.88716  |
| 78038 | P03383 | Q14905 | -0.50018  |
| 78039 | P03383 | Q8NGY1 | -1.1027   |
| 78040 | P03383 | Q8N112 | -0.86584  |
| 78041 | P03383 | P30154 | -0.22245  |
| 78042 | P03383 | P25100 | -1.0098   |
| 78043 | P03383 | Q8NAN2 | -0.86584  |
| 78044 | P03383 | Q5TGU0 | -0.92824  |
| 78045 | P03383 | P31629 | -0.22734  |
| 78046 | P03383 | Q9Y4Z2 | -0.22784  |
| 78047 | P03383 | A8MPX8 | -0.65844  |
| 78048 | P03383 | P09630 | -0.22691  |
| 78049 | P03383 | Q6PEW0 | -0.94312  |
| 78050 | P03383 | Q96KN8 | -0.14961  |
| 78051 | P03383 | P09488 | -0.2776   |
| 78052 | P03383 | P56470 | -0.6121   |



|       |        |        |           |
|-------|--------|--------|-----------|
| 78053 | P03383 | Q2WJ6  | -0.20422  |
| 78054 | P03383 | Q9NYN1 | -1.1358   |
| 78055 | P03383 | Q9NQW1 | -0.27748  |
| 78056 | P03383 | P54709 | -0.63134  |
| 78057 | P03383 | Q9NYF5 | -1.052    |
| 78058 | P03383 | Q6NUJ5 | -0.21806  |
| 78059 | P03383 | Q9UIK5 | -1.0737   |
| 78060 | P03383 | Q8TDY4 | -0.5443   |
| 78061 | P03383 | Q92947 | -0.42914  |
| 78062 | P03383 | Q13608 | -0.27183  |
| 78063 | P03383 | Q9H093 | -0.38119  |
| 78064 | P03383 | Q8NGE9 | -1.1027   |
| 78065 | P03383 | Q9UPY6 | -0.32766  |
| 78066 | P03383 | Q15211 | -0.80551  |
| 78067 | P03383 | Q14656 | -0.64446  |
| 78068 | P03383 | Q32MK0 | -0.61761  |
| 78069 | P03383 | Q3ZCM7 | -0.67265  |
| 78070 | P03383 | Q75541 | -0.23348  |
| 78071 | P03383 | A8MYG8 | -0.22741  |
| 78072 | P03383 | Q6PIZ9 | -0.91632  |
| 78073 | P03383 | A6NDG6 | -0.553    |
| 78074 | P03383 | Q8NHA4 | -1.1027   |
| 78075 | P03383 | P01270 | -0.60688  |
| 78076 | P03383 | Q17R60 | -1.0147   |
| 78077 | P03383 | P0CG41 | -0.86584  |
| 78078 | P03383 | Q9NZW4 | -1.0803   |
| 78079 | P03383 | Q01954 | -0.2233   |
| 78080 | P03383 | Q8ND23 | -0.29487  |
| 78081 | P03383 | Q96QS3 | -0.18551  |
| 78082 | P03383 | P80075 | -0.91615  |
| 78083 | P03383 | Q8NGY0 | -1.1027   |
| 78084 | P03383 | P78562 | -0.9726   |
| 78085 | P03383 | Q8NHW3 | -0.13159  |
| 78086 | P03383 | Q2M2H8 | -0.77962  |
| 78087 | P03383 | C9J442 | -0.87849  |
| 78088 | P03383 | P48553 | -0.16756  |
| 78089 | P03383 | Q6ZUJ8 | -0.37327  |
| 78090 | P03383 | Q86VS3 | -0.2181   |
| 78091 | P03383 | Q60496 | -0.55931  |
| 78092 | P03383 | Q9UQ13 | -0.24549  |
| 78093 | P03383 | Q8N2H9 | -0.39763  |
| 78094 | P03383 | P30414 | -0.42096  |
| 78095 | P03383 | Q8IV53 | -0.21281  |
| 78096 | P03383 | Q9H2H9 | -0.90795  |
| 78097 | P03383 | Q9NW68 | -0.1261   |
| 78098 | P03383 | Q9P2J3 | -0.20835  |
| 78099 | P03383 | Q9H611 | -0.57976  |
| 78100 | P03383 | Q9NQC7 | -0.20751  |
| 78101 | P03383 | Q14591 | -0.21172  |
| 78102 | P03383 | Q76M96 | -0.97264  |
| 78103 | P03383 | Q9UBP9 | -0.56416  |
| 78104 | P03383 | Q8N0X4 | -0.53306  |
| 78105 | P03383 | P01714 | -0.97479  |
| 78106 | P03383 | Q0P641 | -0.13485  |
| 78107 | P03383 | Q6PL45 | -0.86584  |
| 78108 | P03383 | Q92569 | -0.2274   |
| 78109 | P03383 | Q8N884 | -0.47397  |
| 78110 | P03383 | P21912 | -0.12824  |
| 78111 | P03383 | Q9H0U3 | -0.98182  |
| 78112 | P03383 | A6NGB7 | -0.86584  |
| 78113 | P03383 | Q60909 | -0.48757  |
| 78114 | P03383 | Q86UR1 | -0.22735  |
| 78115 | P03383 | Q9UBX5 | -0.47842  |
| 78116 | P03383 | Q9NPG1 | -0.47748  |
| 78117 | P03383 | Q15327 | -0.30575  |
| 78118 | P03383 | Q8WUX1 | -0.89929  |
| 78119 | P03383 | Q9C002 | -0.086275 |
| 78120 | P03383 | P05160 | -0.77576  |
| 78121 | P03383 | Q9HC47 | -0.7958   |
| 78122 | P03383 | Q7Z7J7 | -0.86584  |
| 78123 | P03383 | Q75398 | -0.21759  |
| 78124 | P03383 | P49279 | -0.38372  |
| 78125 | P03383 | Q5VV16 | -0.35259  |
| 78126 | P03383 | Q7Z353 | -0.13012  |
| 78127 | P03383 | P10082 | -0.68372  |
| 78128 | P03383 | P55344 | -0.76681  |

|       |        |        |           |
|-------|--------|--------|-----------|
| 78129 | P03383 | Q9NS98 | -1.0537   |
| 78130 | P03383 | Q7Z3G6 | -0.34271  |
| 78131 | P03383 | Q8IXY8 | -0.3788   |
| 78132 | P03383 | B5MCY1 | -0.44924  |
| 78133 | P03383 | A6NDV4 | -0.17856  |
| 78134 | P03383 | A0PJX0 | -0.52751  |
| 78135 | P03383 | Q8TAC2 | -0.7362   |
| 78136 | P03383 | Q8IVM8 | -0.8419   |
| 78137 | P03383 | Q8NES8 | -0.84399  |
| 78138 | P03383 | Q969V4 | -0.33477  |
| 78139 | P03383 | O00222 | -1.0932   |
| 78140 | P03383 | Q8NEC7 | -0.17716  |
| 78141 | P03383 | Q5T1J6 | -0.082317 |
| 78142 | P03383 | P10316 | -0.7844   |
| 78143 | P03383 | Q8WUG5 | -0.93452  |
| 78144 | P03383 | P02461 | -0.3793   |
| 78145 | P03383 | Q8NGI3 | -1.1027   |
| 78146 | P03383 | O76096 | -0.75872  |
| 78147 | P03383 | Q8NHS1 | -0.86584  |
| 78148 | P03383 | O95639 | -0.2212   |
| 78149 | P03383 | H7BZ55 | -0.11683  |
| 78150 | P03383 | Q15118 | -0.50016  |
| 78151 | P03383 | Q15013 | -0.42851  |
| 78152 | P03383 | P42830 | -0.92868  |
| 78153 | P03383 | Q5QJU3 | -0.36523  |
| 78154 | P03383 | Q969U6 | -0.22776  |
| 78155 | P03383 | Q9UPX6 | -0.86584  |
| 78156 | P03383 | B2RUZ4 | -0.86584  |
| 78157 | P03383 | P16260 | -0.53021  |
| 78158 | P03383 | P47884 | -1.1775   |
| 78159 | P03383 | Q8TE54 | -0.52442  |
| 78160 | P03383 | P47870 | -0.68727  |
| 78161 | P03383 | P01779 | -0.97479  |
| 78162 | P03383 | Q9Y2L6 | -0.39372  |
| 78163 | P03383 | P43632 | -1.0706   |
| 78164 | P03383 | Q16348 | -0.39764  |
| 78165 | P03383 | Q6NUJ2 | -0.86584  |
| 78166 | P03383 | Q86W92 | -0.70751  |
| 78167 | P03383 | Q5HYA8 | -0.31438  |
| 78168 | P03383 | Q9UHX3 | -1.2205   |
| 78169 | P03383 | O75054 | -0.86584  |
| 78170 | P03383 | Q8NEZ4 | -0.36174  |
| 78171 | P03383 | Q9H819 | -0.86545  |
| 78172 | P03383 | Q9NVR7 | -0.19183  |
| 78173 | P03383 | P00813 | -0.20376  |
| 78174 | P03383 | P49840 | -0.22755  |
| 78175 | P03383 | Q14190 | -0.24926  |
| 78176 | P03383 | P80404 | -0.3322   |
| 78177 | P03383 | Q8TCT1 | -0.49012  |
| 78178 | P03383 | P09341 | -1.0242   |
| 78179 | P03383 | Q9NPF8 | -0.70274  |
| 78180 | P03383 | O75631 | -0.77465  |
| 78181 | P03383 | Q96L34 | -0.23506  |
| 78182 | P03383 | Q9BXT2 | -0.90487  |
| 78183 | P03383 | O14960 | -0.86079  |
| 78184 | P03383 | Q9HCF6 | -0.88508  |
| 78185 | P03383 | A4D126 | -0.49075  |
| 78186 | P03383 | Q9HBW1 | -0.75156  |
| 78187 | P03383 | P01815 | -0.97479  |
| 78188 | P03383 | O43818 | -0.23001  |
| 78189 | P03383 | Q6JQN1 | -0.64889  |
| 78190 | P03383 | Q7L273 | -0.19906  |
| 78191 | P03383 | Q9H2F9 | -0.16545  |
| 78192 | P03383 | P20061 | -0.87957  |
| 78193 | P03383 | Q8TCX1 | -0.32747  |
| 78194 | P03383 | Q7Z449 | -0.96774  |
| 78195 | P03383 | Q68DA7 | -0.29999  |
| 78196 | P03383 | Q15283 | -0.48136  |
| 78197 | P03383 | Q86XQ3 | -0.85525  |
| 78198 | P03383 | P13385 | -0.22745  |
| 78199 | P03383 | Q9BSD7 | -0.8446   |
| 78200 | P03383 | O43900 | -0.23842  |
| 78201 | P03383 | Q8IWG1 | -0.14614  |
| 78202 | P03383 | Q1HG43 | -0.75204  |
| 78203 | P03383 | Q8WX77 | -0.84144  |
| 78204 | P03383 | A6NK97 | -0.88737  |

|       |        |        |           |
|-------|--------|--------|-----------|
| 78205 | P03383 | P51151 | -0.49271  |
| 78206 | P03383 | P40238 | -0.9312   |
| 78207 | P03383 | P59817 | -0.2385   |
| 78208 | P03383 | Q08881 | -0.39271  |
| 78209 | P03383 | Q9NZJ9 | -0.34953  |
| 78210 | P03383 | Q95863 | -0.22293  |
| 78211 | P03383 | Q8NHU2 | -0.039389 |
| 78212 | P03383 | Q5T4B2 | -0.61457  |
| 78213 | P03383 | Q15695 | -0.48097  |
| 78214 | P03383 | Q10588 | -0.86913  |
| 78215 | P03383 | P01137 | -0.22741  |
| 78216 | P03383 | Q8IYS2 | -0.86584  |
| 78217 | P03383 | P06280 | -0.20533  |
| 78218 | P03383 | Q96L03 | -0.23006  |
| 78219 | P03383 | Q16610 | -0.41513  |
| 78220 | P03383 | Q9H1J7 | -0.78013  |
| 78221 | P03383 | O43294 | -0.23589  |
| 78222 | P03383 | P35318 | -0.25946  |
| 78223 | P03383 | Q96T60 | -0.46669  |
| 78224 | P03383 | P49908 | -0.85441  |
| 78225 | P03383 | Q9NWW9 | -0.32473  |
| 78226 | P03383 | A7KAX9 | -0.40339  |
| 78227 | P03383 | Q8IZF4 | -1.1905   |
| 78228 | P03383 | P61165 | -0.86584  |
| 78229 | P03383 | Q9UFC0 | -0.36163  |
| 78230 | P03383 | Q53TN4 | -0.85928  |
| 78231 | P03383 | Q50LG9 | -0.86584  |
| 78232 | P03383 | P0CG06 | -0.95485  |
| 78233 | P03383 | Q08AF3 | -0.63739  |
| 78234 | P03383 | O00463 | -0.22732  |
| 78235 | P03383 | Q6ZN57 | -0.21172  |
| 78236 | P03383 | Q8NH41 | -1.1027   |
| 78237 | P03383 | Q9UNA1 | -0.39396  |
| 78238 | P03383 | P40692 | -0.052866 |
| 78239 | P03383 | P51649 | -0.37037  |
| 78240 | P03383 | Q8N9W6 | -0.32462  |
| 78241 | P03383 | P09237 | -1.0647   |
| 78242 | P03383 | Q14201 | -0.35373  |
| 78243 | P03383 | O15444 | -0.98826  |
| 78244 | P03383 | Q13316 | -0.48242  |
| 78245 | P03383 | Q9BTV6 | -0.43276  |
| 78246 | P03383 | Q8NEB7 | -0.53357  |
| 78247 | P03383 | Q5T1Q4 | -0.85789  |
| 78248 | P03383 | Q95672 | -1.2366   |
| 78249 | P03383 | Q70CQ2 | -0.3304   |
| 78250 | P03383 | Q9Y2L5 | -0.213    |
| 78251 | P03383 | Q8IZF5 | -1.1905   |
| 78252 | P03383 | Q9NVV0 | -0.8464   |
| 78253 | P03383 | Q6PEY2 | -0.62988  |
| 78254 | P03383 | Q9HAV5 | -0.55803  |
| 78255 | P03383 | Q9C000 | -0.22739  |
| 78256 | P03383 | Q8IZN3 | -0.89944  |
| 78257 | P03383 | Q9BQW3 | -0.17031  |
| 78258 | P03383 | P30498 | -0.88446  |
| 78259 | P03383 | Q8N8D0 | -0.86584  |
| 78260 | P03383 | Q96E39 | -0.50058  |
| 78261 | P03383 | Q8N7C7 | -0.92811  |
| 78262 | P03383 | Q8NGL3 | -1.1027   |
| 78263 | P03383 | Q5VZ66 | -0.32231  |
| 78264 | P03383 | P35367 | -0.68576  |
| 78265 | P03383 | Q8NGL0 | -1.1027   |
| 78266 | P03383 | Q9BPV8 | -1.034    |
| 78267 | P03383 | Q9UN86 | -0.89944  |
| 78268 | P03383 | P31273 | -0.51211  |
| 78269 | P03383 | Q5FWF7 | -0.22414  |
| 78270 | P03383 | P04279 | -0.18893  |
| 78271 | P03383 | Q9NR21 | -0.45204  |
| 78272 | P03383 | Q9NZR2 | -0.81796  |
| 78273 | P03383 | Q4JDL3 | -0.52862  |
| 78274 | P03383 | Q8NI22 | -0.57739  |
| 78275 | P03383 | Q9Y4X5 | -0.20796  |
| 78276 | P03383 | Q96RF0 | -0.27436  |
| 78277 | P03383 | P19623 | -0.35185  |
| 78278 | P03383 | P0C0P6 | -0.8335   |
| 78279 | P03383 | P43320 | -0.44858  |
| 78280 | P03383 | Q9UHY7 | -0.20387  |

|       |        |        |           |
|-------|--------|--------|-----------|
| 78281 | P03383 | Q53RE8 | -0.22741  |
| 78282 | P03383 | Q9Y463 | -0.22741  |
| 78283 | P03383 | Q5T7W0 | -0.22501  |
| 78284 | P03383 | Q96I27 | -0.21172  |
| 78285 | P03383 | Q9H3V2 | -0.86584  |
| 78286 | P03383 | Q9HDC9 | -0.72177  |
| 78287 | P03383 | A8MUK1 | -0.4721   |
| 78288 | P03383 | O94876 | -0.86584  |
| 78289 | P03383 | Q96EX2 | -0.92811  |
| 78290 | P03383 | O60307 | -0.40926  |
| 78291 | P03383 | Q9HCJ5 | -0.52332  |
| 78292 | P03383 | P09105 | -0.42947  |
| 78293 | P03383 | Q13283 | -0.23114  |
| 78294 | P03383 | Q9UL19 | -0.48875  |
| 78295 | P03383 | Q9H094 | -0.29487  |
| 78296 | P03383 | Q8N8J6 | -0.21172  |
| 78297 | P03383 | Q6QN14 | -0.33924  |
| 78298 | P03383 | Q15435 | -0.22741  |
| 78299 | P03383 | Q8N883 | -0.21172  |
| 78300 | P03383 | Q14574 | -1.0091   |
| 78301 | P03383 | Q5TEA6 | -0.86584  |
| 78302 | P03383 | P53814 | -0.43868  |
| 78303 | P03383 | Q9P0L2 | -0.77342  |
| 78304 | P03383 | O60231 | -0.45532  |
| 78305 | P03383 | Q9H568 | -0.30492  |
| 78306 | P03383 | Q49AM3 | -0.22555  |
| 78307 | P03383 | Q96R84 | -1.1027   |
| 78308 | P03383 | Q86Z23 | -0.92264  |
| 78309 | P03383 | Q5K131 | -0.29487  |
| 78310 | P03383 | Q9UHI8 | -1.1226   |
| 78311 | P03383 | Q9BXI9 | -0.97458  |
| 78312 | P03383 | Q8TD07 | -0.46331  |
| 78313 | P03383 | Q96NU1 | -0.21602  |
| 78314 | P03383 | Q8N653 | -0.22723  |
| 78315 | P03383 | Q9NR99 | -0.87849  |
| 78316 | P03383 | Q99678 | -1.2928   |
| 78317 | P03383 | Q9BYG7 | -0.18298  |
| 78318 | P03383 | Q8NBP0 | -0.22736  |
| 78319 | P03383 | Q02325 | -0.87849  |
| 78320 | P03383 | Q12946 | -0.345    |
| 78321 | P03383 | P0C6S8 | -0.86584  |
| 78322 | P03383 | Q8WV93 | -0.66622  |
| 78323 | P03383 | Q9BWV1 | -0.45653  |
| 78324 | P03383 | Q92930 | -0.6059   |
| 78325 | P03383 | P0C7X1 | -1.2307   |
| 78326 | P03383 | Q9UNH7 | -0.17858  |
| 78327 | P03383 | Q5JX69 | -0.86584  |
| 78328 | P03383 | Q68DC2 | -0.24946  |
| 78329 | P03383 | Q9H496 | -0.45036  |
| 78330 | P03383 | P36544 | -0.66943  |
| 78331 | P03383 | C9J2P7 | -0.69644  |
| 78332 | P03383 | Q95IE3 | -0.67577  |
| 78333 | P03383 | O94967 | -0.47255  |
| 78334 | P03383 | O95980 | -0.52393  |
| 78335 | P03383 | A2A3N6 | -0.32875  |
| 78336 | P03383 | O43593 | -0.089858 |
| 78337 | P03383 | Q12889 | -0.40348  |
| 78338 | P03383 | Q9H4G4 | -0.7676   |
| 78339 | P03383 | Q14114 | -0.74791  |
| 78340 | P03383 | Q8N2K0 | -0.79446  |
| 78341 | P03383 | Q96G23 | -0.1571   |
| 78342 | P03383 | Q8TE68 | -0.22741  |
| 78343 | P03383 | Q01523 | -0.77994  |
| 78344 | P03383 | Q9BWW7 | -0.2033   |
| 78345 | P03383 | Q9NRR8 | -0.45195  |
| 78346 | P03383 | P48681 | -0.15082  |
| 78347 | P03383 | Q96P09 | -0.56677  |
| 78348 | P03383 | Q96N67 | -0.60186  |
| 78349 | P03383 | Q8N0S6 | -0.33472  |
| 78350 | P03383 | P50579 | -0.51434  |
| 78351 | P03383 | Q495W5 | -0.6755   |
| 78352 | P03383 | Q9NUD5 | -0.51948  |
| 78353 | P03383 | Q96AW1 | -0.60309  |
| 78354 | P03383 | Q5TAG4 | -0.29487  |
| 78355 | P03383 | Q9BQM9 | -0.014056 |
| 78356 | P03383 | P60059 | -0.49475  |

|       |        |        |           |
|-------|--------|--------|-----------|
| 78357 | P03383 | Q96AT9 | -0.29763  |
| 78358 | P03383 | O95870 | -0.81246  |
| 78359 | P03383 | Q53GG5 | -0.45969  |
| 78360 | P03383 | Q86T24 | -0.35462  |
| 78361 | P03383 | B2RU33 | -0.2274   |
| 78362 | P03383 | Q8WZ82 | -0.26076  |
| 78363 | P03383 | Q8TF68 | -0.063299 |
| 78364 | P03383 | Q9H4A4 | -0.87281  |
| 78365 | P03383 | Q96SK2 | -0.86584  |
| 78366 | P03383 | Q86X29 | -0.82135  |
| 78367 | P03383 | Q02817 | -0.34416  |
| 78368 | P03383 | P59861 | -0.84399  |
| 78369 | P03383 | Q9UIX4 | -0.87566  |
| 78370 | P03383 | Q9P2E2 | -0.4095   |
| 78371 | P03383 | Q58EX7 | -0.78542  |
| 78372 | P03383 | Q16630 | -0.18478  |
| 78373 | P03383 | Q86UX2 | -0.7817   |
| 78374 | P03383 | Q9HAK2 | -0.21792  |
| 78375 | P03383 | Q14590 | -0.21172  |
| 78376 | P03383 | P27482 | -0.52751  |
| 78377 | P03383 | O60879 | -0.27718  |
| 78378 | P03383 | P02776 | -0.66372  |
| 78379 | P03383 | Q6UW63 | -0.40286  |
| 78380 | P03383 | Q8NDY8 | -0.86584  |
| 78381 | P03383 | Q96A25 | -0.52887  |
| 78382 | P03383 | Q6UWQ7 | -0.87849  |
| 78383 | P03383 | P09417 | -0.45213  |
| 78384 | P03383 | Q9NXR1 | -0.2271   |
| 78385 | P03383 | Q9P2J9 | -0.17743  |
| 78386 | P03383 | Q8TCW7 | -0.86584  |
| 78387 | P03383 | Q6MZW2 | -0.95463  |
| 78388 | P03383 | Q06432 | -0.93545  |
| 78389 | P03383 | Q96QU6 | -0.50184  |
| 78390 | P03383 | Q8N8F7 | -0.86584  |
| 78391 | P03383 | P28715 | -0.11988  |
| 78392 | P03383 | Q96DZ7 | -0.86584  |
| 78393 | P03383 | Q567U6 | -0.19583  |
| 78394 | P03383 | Q9UNW1 | -0.52951  |
| 78395 | P03383 | Q6NY19 | -0.22743  |
| 78396 | P03383 | Q6Y288 | -0.76602  |
| 78397 | P03383 | O60303 | -0.11699  |
| 78398 | P03383 | O43763 | -0.22799  |
| 78399 | P03383 | Q16540 | -0.41226  |
| 78400 | P03383 | Q9H5Y7 | -0.92424  |
| 78401 | P03383 | O75864 | -0.4501   |
| 78402 | P03383 | O75569 | -0.18522  |
| 78403 | P03383 | A2VCK2 | -0.62648  |
| 78404 | P03383 | Q9BWF2 | -0.22734  |
| 78405 | P03383 | Q13489 | -0.22741  |
| 78406 | P03383 | P48454 | -0.14793  |
| 78407 | P03383 | Q8IUC8 | -0.66473  |
| 78408 | P03383 | Q05901 | -0.87885  |
| 78409 | P03383 | O15335 | -0.88053  |
| 78410 | P03383 | Q5T6X5 | -1.0826   |
| 78411 | P03383 | Q7Z6E9 | -0.20539  |
| 78412 | P03383 | Q96RP3 | -0.77853  |
| 78413 | P03383 | Q9BZA7 | -1.2406   |
| 78414 | P03383 | Q7Z4N2 | -1.1464   |
| 78415 | P03383 | Q9UPY5 | -0.67986  |
| 78416 | P03383 | Q96DY7 | -0.33586  |
| 78417 | P03383 | Q8TB96 | -1.2172   |
| 78418 | P03383 | Q8N8Q1 | -0.86399  |
| 78419 | P03383 | P02462 | -0.47341  |
| 78420 | P03383 | A8MV57 | -0.21462  |
| 78421 | P03383 | Q9NWQ9 | -0.30763  |
| 78422 | P03383 | Q969H8 | -0.70049  |
| 78423 | P03383 | O75439 | -0.64926  |
| 78424 | P03383 | Q8N328 | -0.067565 |
| 78425 | P03383 | O75064 | -0.35559  |
| 78426 | P03383 | P37088 | -0.57989  |
| 78427 | P03383 | Q9UKR8 | -0.86584  |
| 78428 | P03383 | Q9Y371 | -0.22739  |
| 78429 | P03383 | O43147 | -0.94809  |
| 78430 | P03383 | Q9BYX4 | -0.22705  |
| 78431 | P03383 | P50851 | -0.5524   |
| 78432 | P03383 | Q7Z7E8 | -0.22716  |

|       |        |        |           |
|-------|--------|--------|-----------|
| 78433 | P03383 | A6NGZ7 | -0.86584  |
| 78434 | P03383 | Q8IZF7 | -1.1905   |
| 78435 | P03383 | Q14156 | -0.78629  |
| 78436 | P03383 | ALL3Z2 | -0.014147 |
| 78437 | P03383 | O94988 | -1.052    |
| 78438 | P03383 | P10966 | -0.72449  |
| 78439 | P03383 | P01889 | -0.87362  |
| 78440 | P03383 | Q9UM22 | -0.89691  |
| 78441 | P03383 | Q8N1E2 | -0.83332  |
| 78442 | P03383 | Q9BUB7 | -0.58417  |
| 78443 | P03383 | Q15077 | -1.0462   |
| 78444 | P03383 | Q9BYE2 | -1.1635   |
| 78445 | P03383 | P43353 | -0.50761  |
| 78446 | P03383 | Q8N8A4 | -0.34339  |
| 78447 | P03383 | Q8TBP0 | -1.2307   |
| 78448 | P03383 | P43354 | -0.24028  |
| 78449 | P03383 | Q9Y2H9 | -0.40235  |
| 78450 | P03383 | P50440 | -0.16359  |
| 78451 | P03383 | P01703 | -0.97479  |
| 78452 | P03383 | Q8NGB2 | -1.1027   |
| 78453 | P03383 | Q8NG85 | -0.91257  |
| 78454 | P03383 | P43166 | -0.26491  |
| 78455 | P03383 | Q9NPE2 | -0.63952  |
| 78456 | P03383 | P36268 | -0.58395  |
| 78457 | P03383 | Q9NQX3 | -0.64493  |
| 78458 | P03383 | Q9NWC5 | -0.86584  |
| 78459 | P03383 | Q14012 | -0.23325  |
| 78460 | P03383 | Q5TZK3 | -0.024121 |
| 78461 | P03383 | P60893 | -1.1721   |
| 78462 | P03383 | Q96QH2 | -0.21988  |
| 78463 | P03383 | Q86W24 | -1.0192   |
| 78464 | P03383 | O15529 | -1.2928   |
| 78465 | P03383 | Q94979 | -0.3617   |
| 78466 | P03383 | P14209 | -1.0594   |
| 78467 | P03383 | P98187 | -0.90248  |
| 78468 | P03383 | Q9H339 | -1.1027   |
| 78469 | P03383 | Q6UWT4 | -0.87849  |
| 78470 | P03383 | Q15722 | -1.3942   |
| 78471 | P03383 | Q13332 | -0.83528  |
| 78472 | P03383 | A8MZ59 | -0.22681  |
| 78473 | P03383 | Q8NH00 | -1.1027   |
| 78474 | P03383 | Q6UWI4 | -1.0518   |
| 78475 | P03383 | Q6ZSZ6 | -0.22571  |
| 78476 | P03383 | Q9Y2J0 | -0.23638  |
| 78477 | P03383 | Q99742 | -0.24928  |
| 78478 | P03383 | Q6UWU4 | -0.71372  |
| 78479 | P03383 | P0C7N1 | -1.1027   |
| 78480 | P03383 | Q8IY82 | -0.45102  |
| 78481 | P03383 | Q9UHI7 | -0.32512  |
| 78482 | P03383 | Q9UH03 | -0.22332  |
| 78483 | P03383 | P48029 | -0.62041  |
| 78484 | P03383 | P20382 | -0.7663   |
| 78485 | P03383 | Q6PK18 | -0.94629  |
| 78486 | P03383 | P29218 | -0.2025   |
| 78487 | P03383 | Q5SWL8 | -0.25825  |
| 78488 | P03383 | Q96IG2 | -0.29487  |
| 78489 | P03383 | Q8WXD9 | -0.41539  |
| 78490 | P03383 | Q9P121 | -0.22858  |
| 78491 | P03383 | P05156 | -1.2402   |
| 78492 | P03383 | Q9BQ04 | -0.43388  |
| 78493 | P03383 | A6NFQ7 | -0.22537  |
| 78494 | P03383 | Q9NPD7 | -0.52521  |
| 78495 | P03383 | O60284 | -0.050214 |
| 78496 | P03383 | A6NL99 | -0.83009  |
| 78497 | P03383 | Q9NXT0 | -0.21172  |
| 78498 | P03383 | P58005 | -0.23503  |
| 78499 | P03383 | Q96BU1 | -0.29292  |
| 78500 | P03383 | Q9Y4H2 | -0.20774  |
| 78501 | P03383 | Q8TCC7 | -0.70367  |
| 78502 | P03383 | P21941 | -0.38934  |
| 78503 | P03383 | Q9NVR0 | -0.87849  |
| 78504 | P03383 | Q9BZH6 | -0.71569  |
| 78505 | P03383 | Q96BD6 | -0.27737  |
| 78506 | P03383 | Q9NS75 | -1.025    |
| 78507 | P03383 | P0DM48 | -0.22711  |
| 78508 | P03383 | Q13643 | -0.34194  |

|       |        |        |           |
|-------|--------|--------|-----------|
| 78509 | P03383 | Q5TAT6 | -0.79965  |
| 78510 | P03383 | P01135 | -0.24817  |
| 78511 | P03383 | Q8WWG9 | -0.94617  |
| 78512 | P03383 | Q96QP1 | -0.55687  |
| 78513 | P03383 | Q9NTX5 | -0.49588  |
| 78514 | P03383 | Q5T6F0 | -0.22633  |
| 78515 | P03383 | Q008S8 | -0.7066   |
| 78516 | P03383 | Q9BYI3 | -0.46768  |
| 78517 | P03383 | P35520 | -0.22564  |
| 78518 | P03383 | Q9H2G2 | -0.83084  |
| 78519 | P03383 | Q86XT9 | -0.90998  |
| 78520 | P03383 | Q14523 | -0.52887  |
| 78521 | P03383 | Q9Y639 | -0.80318  |
| 78522 | P03383 | O60347 | -1.2307   |
| 78523 | P03383 | Q9HBW0 | -0.82599  |
| 78524 | P03383 | Q9NQT8 | -0.38055  |
| 78525 | P03383 | P35368 | -0.68541  |
| 78526 | P03383 | Q15464 | -0.67254  |
| 78527 | P03383 | Q95861 | -0.36361  |
| 78528 | P03383 | P17020 | -0.21172  |
| 78529 | P03383 | Q14CZ8 | -0.69964  |
| 78530 | P03383 | Q9H0L4 | -0.79931  |
| 78531 | P03383 | Q96A46 | -0.86516  |
| 78532 | P03383 | P25105 | -0.85855  |
| 78533 | P03383 | Q14141 | -0.22034  |
| 78534 | P03383 | Q5XG92 | -0.8145   |
| 78535 | P03383 | Q5T0U0 | -0.064298 |
| 78536 | P03383 | Q16720 | -0.95823  |
| 78537 | P03383 | Q14931 | -1.0824   |
| 78538 | P03383 | O60673 | -0.93494  |
| 78539 | P03383 | P0DKX4 | -0.19086  |
| 78540 | P03383 | P58401 | -1.0252   |
| 78541 | P03383 | Q9BQS7 | -1.0254   |
| 78542 | P03383 | Q96HF1 | -0.27719  |
| 78543 | P03383 | Q9UKU0 | -0.83912  |
| 78544 | P03383 | Q9Y2W7 | -0.25455  |
| 78545 | P03383 | Q9H3R0 | -0.20117  |
| 78546 | P03383 | P24046 | -0.76989  |
| 78547 | P03383 | Q9UI33 | -0.97613  |
| 78548 | P03383 | P37268 | -0.82745  |
| 78549 | P03383 | Q8N2R0 | -0.23983  |
| 78550 | P03383 | Q92637 | -0.98178  |
| 78551 | P03383 | Q5TDH0 | -0.55277  |
| 78552 | P03383 | Q9H7V2 | -0.76098  |
| 78553 | P03383 | P21246 | -0.7029   |
| 78554 | P03383 | Q9Y6Q1 | -0.43809  |
| 78555 | P03383 | A2RUU4 | -0.87168  |
| 78556 | P03383 | P05155 | -0.30917  |
| 78557 | P03383 | P00973 | -0.54948  |
| 78558 | P03383 | Q96G61 | -0.41353  |
| 78559 | P03383 | Q99102 | -1.2193   |
| 78560 | P03383 | P57053 | -0.86926  |
| 78561 | P03383 | Q9UKP6 | -0.84188  |
| 78562 | P03383 | P01744 | -0.97479  |
| 78563 | P03383 | Q9P219 | -0.18655  |
| 78564 | P03383 | Q8IW93 | -0.82402  |
| 78565 | P03383 | Q43280 | -0.43756  |
| 78566 | P03383 | Q9BQD1 | -0.23759  |
| 78567 | P03383 | P28845 | -1.0595   |
| 78568 | P03383 | Q96B96 | -0.86584  |
| 78569 | P03383 | P10632 | -0.68951  |
| 78570 | P03383 | P59646 | -0.91828  |
| 78571 | P03383 | A4FU69 | -0.52751  |
| 78572 | P03383 | Q5T1V6 | -1.0505   |
| 78573 | P03383 | P06703 | -0.23147  |
| 78574 | P03383 | Q9UPU5 | -0.69644  |
| 78575 | P03383 | Q8WYP3 | -0.75828  |
| 78576 | P03383 | Q13670 | -0.36757  |
| 78577 | P03383 | P52943 | -0.45853  |
| 78578 | P03383 | P55899 | -0.89895  |
| 78579 | P03383 | Q96PX1 | -0.52332  |
| 78580 | P03383 | P01266 | -0.63161  |
| 78581 | P03383 | Q9NQH7 | -0.5858   |
| 78582 | P03383 | Q15467 | -0.95053  |
| 78583 | P03383 | A6NIZ1 | -0.96444  |
| 78584 | P03383 | Q43819 | -0.33809  |

|       |        |        |           |
|-------|--------|--------|-----------|
| 78585 | P03383 | Q5T5P2 | -0.32964  |
| 78586 | P03383 | Q9NQW5 | -0.33953  |
| 78587 | P03383 | Q9NQZ2 | -0.24139  |
| 78588 | P03383 | Q8N7S6 | -0.86584  |
| 78589 | P03383 | Q14166 | -0.39004  |
| 78590 | P03383 | Q15506 | -0.42746  |
| 78591 | P03383 | A8MXZ1 | -0.48092  |
| 78592 | P03383 | P43378 | -0.24016  |
| 78593 | P03383 | Q6PP77 | -0.93628  |
| 78594 | P03383 | Q96CF2 | -0.052468 |
| 78595 | P03383 | Q7LGC8 | -0.49454  |
| 78596 | P03383 | Q9H6S0 | -0.27573  |
| 78597 | P03383 | Q8N257 | -0.88998  |
| 78598 | P03383 | Q9UBC3 | -0.2234   |
| 78599 | P03383 | O00329 | -0.33538  |
| 78600 | P03383 | P17948 | -0.3793   |
| 78601 | P03383 | Q9UDX4 | -1.0664   |
| 78602 | P03383 | P49715 | -0.21537  |
| 78603 | P03383 | Q86XX4 | -1.0388   |
| 78604 | P03383 | Q8NGY3 | -1.1027   |
| 78605 | P03383 | Q15406 | -0.2672   |
| 78606 | P03383 | Q96LT9 | -0.48752  |
| 78607 | P03383 | Q75581 | -0.23434  |
| 78608 | P03383 | Q5FWE3 | -0.86584  |
| 78609 | P03383 | P48506 | -0.33808  |
| 78610 | P03383 | Q7L622 | -0.25227  |
| 78611 | P03383 | O75179 | -0.22756  |
| 78612 | P03383 | Q4QY38 | -0.84399  |
| 78613 | P03383 | Q9Y6V0 | -0.43232  |
| 78614 | P03383 | C9JJH3 | -0.69644  |
| 78615 | P03383 | Q96DT6 | -0.68716  |
| 78616 | P03383 | O15305 | -0.4504   |
| 78617 | P03383 | Q93050 | -0.14978  |
| 78618 | P03383 | Q9H7D0 | -0.46442  |
| 78619 | P03383 | Q96MK3 | -0.87849  |
| 78620 | P03383 | Q9P0S3 | -0.91354  |
| 78621 | P03383 | Q15269 | -0.22556  |
| 78622 | P03383 | Q9HC57 | -0.59316  |
| 78623 | P03383 | P05556 | -0.23807  |
| 78624 | P03383 | P49588 | -0.25508  |
| 78625 | P03383 | Q8N4S7 | -0.86584  |
| 78626 | P03383 | Q52WX2 | -0.85083  |
| 78627 | P03383 | O60494 | -0.27819  |
| 78628 | P03383 | O95522 | -0.25825  |
| 78629 | P03383 | Q9HBE4 | -0.80476  |
| 78630 | P03383 | Q8NGE5 | -1.1027   |
| 78631 | P03383 | Q9HC97 | -1.2928   |
| 78632 | P03383 | P12004 | -0.19524  |
| 78633 | P03383 | Q6UWJ1 | -0.9169   |
| 78634 | P03383 | P54793 | -0.7695   |
| 78635 | P03383 | Q8N7H1 | -0.12916  |
| 78636 | P03383 | P08637 | -1.2376   |
| 78637 | P03383 | Q9H9Y2 | -0.014769 |
| 78638 | P03383 | P63126 | -0.40851  |
| 78639 | P03383 | Q15399 | -0.87758  |
| 78640 | P03383 | Q8N3I7 | -0.37537  |
| 78641 | P03383 | Q8TBE3 | -0.86584  |
| 78642 | P03383 | Q8NE35 | -0.75959  |
| 78643 | P03383 | Q9HBH5 | -0.89433  |
| 78644 | P03383 | Q68DY9 | -0.21172  |
| 78645 | P03383 | Q6ZRG5 | -0.22373  |
| 78646 | P03383 | Q9BT43 | -0.23704  |
| 78647 | P03383 | Q2Q1W2 | -0.69352  |
| 78648 | P03383 | Q6P9F7 | -0.86584  |
| 78649 | P03383 | Q8TDY3 | -0.30492  |
| 78650 | P03383 | Q9BQ24 | -0.41802  |
| 78651 | P03383 | Q9P2F6 | -1.1111   |
| 78652 | P03383 | Q8N427 | -0.56635  |
| 78653 | P03383 | Q96NY8 | -0.66613  |
| 78654 | P03383 | Q9Y663 | -0.52862  |
| 78655 | P03383 | P86397 | -0.68173  |
| 78656 | P03383 | Q96KE9 | -0.2473   |
| 78657 | P03383 | Q07325 | -1.0206   |
| 78658 | P03383 | Q6WQI6 | -0.29487  |
| 78659 | P03383 | P25705 | -0.10317  |
| 78660 | P03383 | Q9NXS2 | -0.92258  |



|       |        |        |           |
|-------|--------|--------|-----------|
| 78661 | P03383 | Q06643 | -0.72368  |
| 78662 | P03383 | Q8N5I4 | -1.0135   |
| 78663 | P03383 | P20933 | -0.48985  |
| 78664 | P03383 | P07093 | -0.32854  |
| 78665 | P03383 | Q8N8V2 | -0.95159  |
| 78666 | P03383 | P35858 | -0.76017  |
| 78667 | P03383 | Q7Z7L9 | -0.4097   |
| 78668 | P03383 | Q9NV79 | -0.25582  |
| 78669 | P03383 | Q9ULZ1 | -0.66717  |
| 78670 | P03383 | Q96EN8 | -0.34136  |
| 78671 | P03383 | Q6ZNC4 | -0.73967  |
| 78672 | P03383 | O15067 | -0.55509  |
| 78673 | P03383 | P57764 | -0.41312  |
| 78674 | P03383 | Q5SXM8 | -0.39487  |
| 78675 | P03383 | Q9BWV3 | -0.70886  |
| 78676 | P03383 | Q9UP52 | -0.98738  |
| 78677 | P03383 | Q5T753 | -0.43006  |
| 78678 | P03383 | Q96EK6 | -0.21373  |
| 78679 | P03383 | Q8N357 | -0.40222  |
| 78680 | P03383 | Q9UBF9 | -0.22774  |
| 78681 | P03383 | P62683 | -0.40851  |
| 78682 | P03383 | O95573 | -0.68396  |
| 78683 | P03383 | Q9Y5G0 | -1.1297   |
| 78684 | P03383 | P00492 | -0.20319  |
| 78685 | P03383 | Q13509 | -0.5632   |
| 78686 | P03383 | Q96NL6 | -0.24399  |
| 78687 | P03383 | P98170 | -0.22738  |
| 78688 | P03383 | P49916 | -0.22343  |
| 78689 | P03383 | Q9H2M9 | -0.66536  |
| 78690 | P03383 | A6ND48 | -1.1027   |
| 78691 | P03383 | P28161 | -0.38961  |
| 78692 | P03383 | P37840 | -0.21674  |
| 78693 | P03383 | Q9UPE1 | -0.83996  |
| 78694 | P03383 | Q9NX77 | -0.5818   |
| 78695 | P03383 | Q6IPM2 | -0.30763  |
| 78696 | P03383 | Q8NH72 | -1.1027   |
| 78697 | P03383 | O95466 | -0.22341  |
| 78698 | P03383 | P04233 | -0.41151  |
| 78699 | P03383 | Q658P3 | -0.52726  |
| 78700 | P03383 | P0C5Y9 | -0.85404  |
| 78701 | P03383 | Q8IV01 | -0.75287  |
| 78702 | P03383 | Q8NCN4 | -0.24629  |
| 78703 | P03383 | Q6AI14 | -0.90671  |
| 78704 | P03383 | A6NMS7 | -0.86584  |
| 78705 | P03383 | Q5SRD0 | -0.45254  |
| 78706 | P03383 | Q8TEU7 | -0.82893  |
| 78707 | P03383 | Q9H3Z7 | -0.40663  |
| 78708 | P03383 | Q9H9B1 | -0.22741  |
| 78709 | P03383 | Q13614 | -0.22322  |
| 78710 | P03383 | Q6ZMZ0 | -0.42419  |
| 78711 | P03383 | P14406 | -0.40431  |
| 78712 | P03383 | Q8N9K5 | -0.21172  |
| 78713 | P03383 | A8K7I4 | -1.1645   |
| 78714 | P03383 | Q8WZ74 | -0.65185  |
| 78715 | P03383 | Q92734 | -0.044703 |
| 78716 | P03383 | Q9NRR1 | -0.86851  |
| 78717 | P03383 | Q8IVU3 | -0.38095  |
| 78718 | P03383 | Q9NYZ2 | -0.86516  |
| 78719 | P03383 | Q9BYT1 | -0.76074  |
| 78720 | P03383 | P28068 | -0.88115  |
| 78721 | P03383 | Q96PC2 | -0.43002  |
| 78722 | P03383 | P17039 | -0.21172  |
| 78723 | P03383 | P55160 | -0.33199  |
| 78724 | P03383 | C9J202 | -0.45797  |
| 78725 | P03383 | Q8NHW4 | -1.0186   |
| 78726 | P03383 | Q8N9S7 | -0.86584  |
| 78727 | P03383 | Q06830 | -0.22107  |
| 78728 | P03383 | Q96JJ7 | -0.81698  |
| 78729 | P03383 | P59044 | -0.38241  |
| 78730 | P03383 | Q9HCI7 | -0.53142  |
| 78731 | P03383 | A6NDY2 | -0.48092  |
| 78732 | P03383 | Q9HB55 | -0.77329  |
| 78733 | P03383 | P07478 | -0.88301  |
| 78734 | P03383 | Q8NH05 | -1.1027   |
| 78735 | P03383 | Q96HP8 | -0.86584  |
| 78736 | P03383 | P04844 | -0.46972  |

|       |        |        |           |
|-------|--------|--------|-----------|
| 78737 | P03383 | P35372 | -0.4251   |
| 78738 | P03383 | A6NCD1 | -0.73967  |
| 78739 | P03383 | Q8N2M4 | -0.86584  |
| 78740 | P03383 | Q8N9H8 | -0.67859  |
| 78741 | P03383 | A8K2U0 | -0.78291  |
| 78742 | P03383 | Q9NS71 | -0.48379  |
| 78743 | P03383 | Q14697 | -0.29977  |
| 78744 | P03383 | Q08174 | -0.9346   |
| 78745 | P03383 | A7E2S9 | -0.22741  |
| 78746 | P03383 | Q92565 | -0.4947   |
| 78747 | P03383 | Q6XXX2 | -0.066299 |
| 78748 | P03383 | P78414 | -0.22986  |
| 78749 | P03383 | Q6H8Q1 | -0.22861  |
| 78750 | P03383 | Q9P2Y4 | -0.2274   |
| 78751 | P03383 | P24386 | -0.79238  |
| 78752 | P03383 | Q5JRA6 | -0.17999  |
| 78753 | P03383 | Q96CN7 | -0.54744  |
| 78754 | P03383 | Q5VUD6 | -0.93931  |
| 78755 | P03383 | Q9NQE9 | -0.070222 |
| 78756 | P03383 | Q8IZP1 | -1.2307   |
| 78757 | P03383 | Q01118 | -0.98688  |
| 78758 | P03383 | Q641Q3 | -0.87849  |
| 78759 | P03383 | A6NER0 | -1.2307   |
| 78760 | P03383 | Q32P44 | -0.31084  |
| 78761 | P03383 | Q6UWF5 | -0.86584  |
| 78762 | P03383 | Q7L3S4 | -0.21172  |
| 78763 | P03383 | Q8NF50 | -0.49603  |
| 78764 | P03383 | Q60683 | -0.22742  |
| 78765 | P03383 | P50213 | -0.076905 |
| 78766 | P03383 | Q6NXP0 | -0.52751  |
| 78767 | P03383 | O14511 | -1.1414   |
| 78768 | P03383 | P78415 | -0.23325  |
| 78769 | P03383 | P11717 | -0.29046  |
| 78770 | P03383 | Q96Q80 | -0.37415  |
| 78771 | P03383 | Q9Y574 | -0.36478  |
| 78772 | P03383 | O43657 | -0.99509  |
| 78773 | P03383 | Q9UKD2 | -0.090975 |
| 78774 | P03383 | P01817 | -0.97479  |
| 78775 | P03383 | P28676 | -0.55154  |
| 78776 | P03383 | Q96M20 | -0.22581  |
| 78777 | P03383 | Q8NCS4 | -0.86584  |
| 78778 | P03383 | Q5JUX0 | -0.43051  |
| 78779 | P03383 | Q9NZ38 | -0.009303 |
| 78780 | P03383 | Q5VST9 | -0.71861  |
| 78781 | P03383 | Q8N531 | -0.57327  |
| 78782 | P03383 | Q9NXB9 | -0.1177   |
| 78783 | P03383 | Q96RD2 | -1.1027   |
| 78784 | P03383 | Q15113 | -1.1297   |
| 78785 | P03383 | Q569K4 | -0.50622  |
| 78786 | P03383 | Q9NXJ0 | -0.86584  |
| 78787 | P03383 | O15066 | -0.34216  |
| 78788 | P03383 | Q9H239 | -1.3168   |
| 78789 | P03383 | Q8NH92 | -1.1027   |
| 78790 | P03383 | Q92731 | -0.22745  |
| 78791 | P03383 | Q8N4K4 | -0.86584  |
| 78792 | P03383 | O94901 | -0.17722  |
| 78793 | P03383 | P80365 | -0.69904  |
| 78794 | P03383 | P20851 | -0.93782  |
| 78795 | P03383 | Q9Y6F9 | -0.74     |
| 78796 | P03383 | Q96TA0 | -1.1297   |
| 78797 | P03383 | Q8IVL6 | -0.63396  |
| 78798 | P03383 | Q00370 | -0.42031  |
| 78799 | P03383 | Q96QE4 | -0.71569  |
| 78800 | P03383 | Q6P2S7 | -0.29487  |
| 78801 | P03383 | Q8IZV5 | -0.67364  |
| 78802 | P03383 | Q6UW15 | -0.88105  |
| 78803 | P03383 | Q9NQV8 | -0.36156  |
| 78804 | P03383 | P20800 | -0.55216  |
| 78805 | P03383 | Q8IYM2 | -0.436    |
| 78806 | P03383 | O75355 | -1.0482   |
| 78807 | P03383 | P50150 | -0.59994  |
| 78808 | P03383 | Q9P0T7 | -0.67885  |
| 78809 | P03383 | Q9H841 | -0.82716  |
| 78810 | P03383 | Q9H1K0 | -0.19273  |
| 78811 | P03383 | Q9Y4C0 | -1.0347   |
| 78812 | P03383 | O95050 | -0.18739  |

|       |        |        |           |
|-------|--------|--------|-----------|
| 78813 | P03383 | P31358 | -0.68461  |
| 78814 | P03383 | Q86SU0 | -0.69773  |
| 78815 | P03383 | D6RA61 | -0.69644  |
| 78816 | P03383 | P04554 | -0.79783  |
| 78817 | P03383 | Q96P15 | -0.21106  |
| 78818 | P03383 | A4D1T9 | -1.1378   |
| 78819 | P03383 | P20941 | -0.34751  |
| 78820 | P03383 | Q9H7P9 | -0.7546   |
| 78821 | P03383 | Q8IVL8 | -1.1649   |
| 78822 | P03383 | Q1A5X7 | -0.080082 |
| 78823 | P03383 | Q567V2 | -0.74159  |
| 78824 | P03383 | Q7Z5L7 | -0.78664  |
| 78825 | P03383 | P46098 | -0.87452  |
| 78826 | P03383 | Q9BZJ6 | -0.95911  |
| 78827 | P03383 | Q9Y530 | -0.39111  |
| 78828 | P03383 | Q86YV5 | -0.93793  |
| 78829 | P03383 | Q8N6L7 | -0.86584  |
| 78830 | P03383 | Q9H6T3 | -0.22725  |
| 78831 | P03383 | Q96IL0 | -0.24726  |
| 78832 | P03383 | O43246 | -0.80318  |
| 78833 | P03383 | Q16875 | -0.44358  |
| 78834 | P03383 | Q96P69 | -1.1578   |
| 78835 | P03383 | Q9HBA9 | -0.77514  |
| 78836 | P03383 | Q96CA5 | -0.22741  |
| 78837 | P03383 | O00591 | -0.72975  |
| 78838 | P03383 | Q96A57 | -0.86584  |
| 78839 | P03383 | Q9BWW8 | -0.91549  |
| 78840 | P03383 | Q9Y446 | -0.26742  |
| 78841 | P03383 | Q96IX5 | -0.73489  |
| 78842 | P03383 | Q9UGN4 | -1.0869   |
| 78843 | P03383 | A6NFC9 | -1.1027   |
| 78844 | P03383 | P45379 | -0.45593  |
| 78845 | P03383 | Q95620 | -0.64448  |
| 78846 | P03383 | Q9Y230 | -0.22729  |
| 78847 | P03383 | Q8NFX7 | -0.67409  |
| 78848 | P03383 | Q04900 | -1.0189   |
| 78849 | P03383 | Q7RTY5 | -1.2917   |
| 78850 | P03383 | Q9Y4D8 | -0.71808  |
| 78851 | P03383 | Q4ZHG4 | -0.64605  |
| 78852 | P03383 | Q9BS34 | -0.21172  |
| 78853 | P03383 | Q8IVS8 | -0.13165  |
| 78854 | P03383 | Q05586 | -0.37791  |
| 78855 | P03383 | Q96R54 | -1.1027   |
| 78856 | P03383 | P0CI26 | -0.73967  |
| 78857 | P03383 | O00142 | -0.51254  |
| 78858 | P03383 | Q6ZSC3 | -0.84005  |
| 78859 | P03383 | Q8N5K1 | -0.42091  |
| 78860 | P03383 | P48167 | -0.45462  |
| 78861 | P03383 | Q9H156 | -0.92424  |
| 78862 | P03383 | Q5H8C1 | -1.4266   |
| 78863 | P03383 | Q96LR4 | -0.87849  |
| 78864 | P03383 | Q9UN76 | -0.89018  |
| 78865 | P03383 | Q5T013 | -0.39131  |
| 78866 | P03383 | P12814 | -0.31098  |
| 78867 | P03383 | Q96HE8 | -0.86584  |
| 78868 | P03383 | Q9NQV7 | -0.21742  |
| 78869 | P03383 | Q6P575 | -0.29574  |
| 78870 | P03383 | O43451 | -0.65173  |
| 78871 | P03383 | Q14451 | -0.22741  |
| 78872 | P03383 | Q8NGJ0 | -1.1027   |
| 78873 | P03383 | Q9Y6N8 | -1.0566   |
| 78874 | P03383 | Q60641 | -0.5321   |
| 78875 | P03383 | Q7Z3H4 | -0.2157   |
| 78876 | P03383 | Q8WVH0 | -0.37356  |
| 78877 | P03383 | O00292 | -0.67835  |
| 78878 | P03383 | O95154 | -0.38624  |
| 78879 | P03383 | Q9NVF9 | -0.51206  |
| 78880 | P03383 | P61567 | -0.5818   |
| 78881 | P03383 | P53350 | -0.22741  |
| 78882 | P03383 | Q9NQU5 | -0.30765  |
| 78883 | P03383 | Q9H305 | -0.089117 |
| 78884 | P03383 | O00219 | -0.73133  |
| 78885 | P03383 | O95471 | -0.18072  |
| 78886 | P03383 | Q9BRR9 | -1.1111   |
| 78887 | P03383 | Q15615 | -1.1027   |
| 78888 | P03383 | A0A183 | -0.43006  |

|       |        |        |           |
|-------|--------|--------|-----------|
| 78889 | P03383 | P22459 | -0.58044  |
| 78890 | P03383 | Q8IWA5 | -0.80412  |
| 78891 | P03383 | Q6ZN66 | -0.92929  |
| 78892 | P03383 | Q01970 | -0.49089  |
| 78893 | P03383 | Q16048 | -0.80335  |
| 78894 | P03383 | Q12797 | -0.46497  |
| 78895 | P03383 | Q04844 | -0.96238  |
| 78896 | P03383 | P35498 | -0.85639  |
| 78897 | P03383 | Q9UKX3 | -0.62462  |
| 78898 | P03383 | Q9Y2E4 | -0.33579  |
| 78899 | P03383 | Q9NYW3 | -0.97792  |
| 78900 | P03383 | Q5JT82 | -0.22322  |
| 78901 | P03383 | Q8IYB4 | -0.34807  |
| 78902 | P03383 | Q08AF8 | -0.35868  |
| 78903 | P03383 | Q5VSY0 | -0.49482  |
| 78904 | P03383 | Q8N7C3 | -0.4696   |
| 78905 | P03383 | O95528 | -0.42064  |
| 78906 | P03383 | C9JTQ0 | -0.22741  |
| 78907 | P03383 | Q8TF45 | -0.21172  |
| 78908 | P03383 | O43306 | -0.49623  |
| 78909 | P03383 | Q9BVG9 | -0.85495  |
| 78910 | P03383 | Q9Y4A0 | -0.36497  |
| 78911 | P03383 | Q6UWN5 | -0.60538  |
| 78912 | P03383 | Q0Z7S8 | -0.42802  |
| 78913 | P03383 | Q8NEL9 | -0.34291  |
| 78914 | P03383 | Q01196 | -0.32455  |
| 78915 | P03383 | P14060 | -0.73425  |
| 78916 | P03383 | Q96M66 | -0.15898  |
| 78917 | P03383 | Q9P0L0 | -0.23594  |
| 78918 | P03383 | Q00688 | -0.36528  |
| 78919 | P03383 | O76039 | -0.29256  |
| 78920 | P03383 | O75354 | -0.95153  |
| 78921 | P03383 | P0C864 | -0.20118  |
| 78922 | P03383 | Q9BZ81 | -0.16078  |
| 78923 | P03383 | Q9H3T3 | -0.95791  |
| 78924 | P03383 | P0CG32 | -0.51948  |
| 78925 | P03383 | P0C881 | -0.14886  |
| 78926 | P03383 | Q7Z6G3 | -0.22462  |
| 78927 | P03383 | Q8N5S9 | -0.58869  |
| 78928 | P03383 | Q6UX01 | -0.98249  |
| 78929 | P03383 | P53007 | -0.27605  |
| 78930 | P03383 | Q14681 | -0.19405  |
| 78931 | P03383 | Q9H8M5 | -0.88613  |
| 78932 | P03383 | Q5SZK8 | -1.229    |
| 78933 | P03383 | Q7Z434 | -0.27696  |
| 78934 | P03383 | Q8NGM9 | -1.1027   |
| 78935 | P03383 | Q92562 | -0.18139  |
| 78936 | P03383 | P62685 | -0.40851  |
| 78937 | P03383 | Q695T7 | -0.98607  |
| 78938 | P03383 | P00748 | -0.60052  |
| 78939 | P03383 | Q9BXA5 | -1.0528   |
| 78940 | P03383 | Q7Z695 | -0.95505  |
| 78941 | P03383 | Q9UQB8 | -0.22738  |
| 78942 | P03383 | Q8N769 | -0.084972 |
| 78943 | P03383 | Q8IU68 | -0.93931  |
| 78944 | P03383 | Q8TBF8 | -0.16451  |
| 78945 | P03383 | Q6S8J3 | -0.436    |
| 78946 | P03383 | Q96PY5 | -0.27555  |
| 78947 | P03383 | Q9BWT3 | -0.44792  |
| 78948 | P03383 | P04216 | -0.25889  |
| 78949 | P03383 | Q8TBZ6 | -0.37739  |
| 78950 | P03383 | Q8NB59 | -0.77465  |
| 78951 | P03383 | Q7Z7M9 | -0.59757  |
| 78952 | P03383 | Q10471 | -0.77876  |
| 78953 | P03383 | P59533 | -1.0953   |
| 78954 | P03383 | Q86SS6 | -0.72976  |
| 78955 | P03383 | Q8N7X1 | -0.84005  |
| 78956 | P03383 | Q13813 | -0.22741  |
| 78957 | P03383 | Q6PCB6 | -0.40663  |
| 78958 | P03383 | Q16611 | -0.23651  |
| 78959 | P03383 | P30511 | -0.9507   |
| 78960 | P03383 | P41968 | -0.80036  |
| 78961 | P03383 | E9PGG2 | -0.22846  |
| 78962 | P03383 | A1YPR0 | -0.73005  |
| 78963 | P03383 | Q00889 | -0.76089  |
| 78964 | P03383 | Q8N8U2 | -0.22645  |

|       |        |        |           |
|-------|--------|--------|-----------|
| 78965 | P03383 | Q9UHC3 | -0.60411  |
| 78966 | P03383 | Q96LR9 | -1.3528   |
| 78967 | P03383 | Q8IW92 | -0.78258  |
| 78968 | P03383 | Q43237 | -0.21124  |
| 78969 | P03383 | Q9Y664 | -0.27128  |
| 78970 | P03383 | P24666 | -0.19529  |
| 78971 | P03383 | Q6NT32 | -0.74032  |
| 78972 | P03383 | Q9H6D5 | -0.86584  |
| 78973 | P03383 | Q9Y5S2 | -0.59604  |
| 78974 | P03383 | Q02413 | -0.70688  |
| 78975 | P03383 | P0C7X5 | -0.21172  |
| 78976 | P03383 | Q13395 | -0.12418  |
| 78977 | P03383 | Q6UWB1 | -0.92815  |
| 78978 | P03383 | P00367 | -0.1858   |
| 78979 | P03383 | Q9NUQ7 | -0.40752  |
| 78980 | P03383 | Q14967 | -0.85459  |
| 78981 | P03383 | Q9Y5Y3 | -1.1721   |
| 78982 | P03383 | Q9P0W8 | -0.64708  |
| 78983 | P03383 | P35462 | -0.34951  |
| 78984 | P03383 | Q5TBK1 | -0.11845  |
| 78985 | P03383 | Q96A65 | -0.17126  |
| 78986 | P03383 | P11086 | -0.24547  |
| 78987 | P03383 | Q8WXG1 | -0.14096  |
| 78988 | P03383 | Q99435 | -0.42859  |
| 78989 | P03383 | Q8N2K1 | -0.95699  |
| 78990 | P03383 | Q13239 | -0.30472  |
| 78991 | P03383 | P53634 | -0.75118  |
| 78992 | P03383 | Q96N76 | -0.33419  |
| 78993 | P03383 | P59020 | -0.19813  |
| 78994 | P03383 | O95789 | -0.46756  |
| 78995 | P03383 | Q8TDV5 | -1.2026   |
| 78996 | P03383 | Q96P44 | -0.81639  |
| 78997 | P03383 | Q8TDJ6 | -0.5207   |
| 78998 | P03383 | O15155 | -0.037468 |
| 78999 | P03383 | A6NKG5 | -0.98753  |
| 79000 | P03383 | Q96SQ5 | -0.21172  |
| 79001 | P03383 | Q6YBV0 | -0.79063  |
| 79002 | P03383 | Q14807 | -0.27994  |
| 79003 | P03383 | O95817 | -0.22739  |
| 79004 | P03383 | Q99653 | -0.2281   |
| 79005 | P03383 | Q9UGI6 | -0.8154   |
| 79006 | P03383 | Q99759 | -0.44301  |
| 79007 | P03383 | P48051 | -0.43542  |
| 79008 | P03383 | Q92847 | -0.62047  |
| 79009 | P03383 | Q8IZJ6 | -0.77467  |
| 79010 | P03383 | Q14956 | -1.0174   |
| 79011 | P03383 | Q8NGV0 | -1.1027   |
| 79012 | P03383 | P54577 | -0.29245  |
| 79013 | P03383 | Q9NQE7 | -0.78024  |
| 79014 | P03383 | Q8NGD3 | -1.1027   |
| 79015 | P03383 | A8MYZ6 | -0.33268  |
| 79016 | P03383 | Q92928 | -0.80404  |
| 79017 | P03383 | Q96RJ0 | -1.1148   |
| 79018 | P03383 | Q8NAS9 | -0.10861  |
| 79019 | P03383 | Q9BQG1 | -0.7234   |
| 79020 | P03383 | Q8NCL8 | -0.52887  |
| 79021 | P03383 | P29033 | -0.75195  |
| 79022 | P03383 | A6NKX4 | -0.88737  |
| 79023 | P03383 | Q9H3Y8 | -0.663    |
| 79024 | P03383 | P42336 | -0.31058  |
| 79025 | P03383 | Q8NBT3 | -0.86584  |
| 79026 | P03383 | Q13619 | -0.22552  |
| 79027 | P03383 | Q8IZ13 | -0.30763  |
| 79028 | P03383 | Q7LC44 | -0.44383  |
| 79029 | P03383 | Q9UBD3 | -1.0738   |
| 79030 | P03383 | Q9UHD0 | -0.87481  |
| 79031 | P03383 | O75140 | -0.62648  |
| 79032 | P03383 | Q53GL0 | -0.30561  |
| 79033 | P03383 | Q7L9B9 | -0.45271  |
| 79034 | P03383 | Q96M86 | -0.39787  |
| 79035 | P03383 | Q9GZZ8 | -0.51898  |
| 79036 | P03383 | Q03403 | -0.30886  |
| 79037 | P03383 | Q8N3Y3 | -0.71519  |
| 79038 | P03383 | P07766 | -0.62731  |
| 79039 | P03383 | Q6AHZ1 | -0.22752  |
| 79040 | P03383 | Q9NRB3 | -0.48751  |

|       |        |        |           |
|-------|--------|--------|-----------|
| 79041 | P03383 | Q99650 | -0.67337  |
| 79042 | P03383 | Q9BRT8 | -0.79654  |
| 79043 | P03383 | C9JH25 | -0.86584  |
| 79044 | P03383 | A6NFE3 | -0.64425  |
| 79045 | P03383 | Q5K651 | -0.36951  |
| 79046 | P03383 | P21728 | -0.31124  |
| 79047 | P03383 | O95361 | -0.22819  |
| 79048 | P03383 | P28907 | -0.61147  |
| 79049 | P03383 | Q9BYV6 | -0.5263   |
| 79050 | P03383 | Q9Y5U4 | -0.36143  |
| 79051 | P03383 | P24723 | -0.67271  |
| 79052 | P03383 | P01715 | -0.97479  |
| 79053 | P03383 | Q8TCT6 | -0.90742  |
| 79054 | P03383 | P15151 | -0.32538  |
| 79055 | P03383 | Q8IV48 | -0.14396  |
| 79056 | P03383 | O60293 | -0.09526  |
| 79057 | P03383 | Q96AA3 | -0.78874  |
| 79058 | P03383 | Q08ET2 | -1.0691   |
| 79059 | P03383 | Q8NCR9 | -0.86584  |
| 79060 | P03383 | P08922 | -0.94354  |
| 79061 | P03383 | Q8N7F7 | -0.29487  |
| 79062 | P03383 | O75095 | -0.23242  |
| 79063 | P03383 | P35221 | -0.18646  |
| 79064 | P03383 | P49842 | -0.63525  |
| 79065 | P03383 | Q8N511 | -0.86584  |
| 79066 | P03383 | Q32M88 | -0.46404  |
| 79067 | P03383 | Q9H422 | -0.22768  |
| 79068 | P03383 | Q9H892 | -0.2236   |
| 79069 | P03383 | Q8NA92 | -0.57338  |
| 79070 | P03383 | Q8NBK3 | -0.42764  |
| 79071 | P03383 | Q6UWV2 | -0.50251  |
| 79072 | P03383 | Q71UI9 | -0.88998  |
| 79073 | P03383 | P19883 | -0.22539  |
| 79074 | P03383 | O14773 | -0.32803  |
| 79075 | P03383 | Q9Y4P3 | -0.22747  |
| 79076 | P03383 | P03923 | -0.5784   |
| 79077 | P03383 | A1L1A6 | -0.86584  |
| 79078 | P03383 | P51911 | -0.45622  |
| 79079 | P03383 | Q9GZT6 | -0.74159  |
| 79080 | P03383 | Q9NYR8 | -1.1072   |
| 79081 | P03383 | P98088 | -0.98968  |
| 79082 | P03383 | Q9BYE3 | -0.43006  |
| 79083 | P03383 | Q6DD88 | -0.86299  |
| 79084 | P03383 | P0CV98 | -0.43319  |
| 79085 | P03383 | Q9NQG1 | -0.86584  |
| 79086 | P03383 | Q8WUY1 | -0.87849  |
| 79087 | P03383 | M0R1G4 | -0.13792  |
| 79088 | P03383 | O00571 | -0.46323  |
| 79089 | P03383 | P52732 | -0.29701  |
| 79090 | P03383 | P46020 | -0.27691  |
| 79091 | P03383 | Q8TBC4 | -0.22539  |
| 79092 | P03383 | Q8WXF3 | -0.81791  |
| 79093 | P03383 | Q12809 | -0.64378  |
| 79094 | P03383 | Q8NBD8 | -0.86584  |
| 79095 | P03383 | Q99719 | -0.22631  |
| 79096 | P03383 | P63128 | -0.55458  |
| 79097 | P03383 | Q8N688 | -0.84399  |
| 79098 | P03383 | Q32Q52 | -0.086717 |
| 79099 | P03383 | Q147X3 | -0.27263  |
| 79100 | P03383 | A8MYJ7 | -0.16444  |
| 79101 | P03383 | Q9Y6X5 | -0.97121  |
| 79102 | P03383 | Q96MZ0 | -0.22369  |
| 79103 | P03383 | Q6IEY1 | -1.1027   |
| 79104 | P03383 | P54792 | -0.6738   |
| 79105 | P03383 | Q96QG7 | -0.21285  |
| 79106 | P03383 | Q2M3A8 | -0.032505 |
| 79107 | P03383 | Q14019 | -0.173    |
| 79108 | P03383 | A6NNM8 | -0.42167  |
| 79109 | P03383 | O95847 | -0.72643  |
| 79110 | P03383 | Q719I0 | -0.40115  |
| 79111 | P03383 | Q6S5L8 | -0.51475  |
| 79112 | P03383 | A4IF30 | -0.85789  |
| 79113 | P03383 | Q7RTT3 | -0.022912 |
| 79114 | P03383 | Q9Y696 | -0.2208   |
| 79115 | P03383 | P51451 | -0.96624  |
| 79116 | P03383 | Q6UWS5 | -0.30763  |

|       |        |        |           |
|-------|--------|--------|-----------|
| 79117 | P03383 | Q14995 | -0.28629  |
| 79118 | P03383 | P36575 | -0.33517  |
| 79119 | P03383 | Q969X5 | -0.13986  |
| 79120 | P03383 | P01912 | -0.6502   |
| 79121 | P03383 | Q96PF1 | -0.47133  |
| 79122 | P03383 | Q9NUL7 | -0.21744  |
| 79123 | P03383 | A6NJT0 | -0.20319  |
| 79124 | P03383 | Q9UN73 | -1.4444   |
| 79125 | P03383 | Q96G74 | -0.59291  |
| 79126 | P03383 | A6NMT0 | -0.22766  |
| 79127 | P03383 | P01571 | -0.70934  |
| 79128 | P03383 | P22888 | -0.50157  |
| 79129 | P03383 | Q9NX38 | -0.4249   |
| 79130 | P03383 | O43295 | -1.052    |
| 79131 | P03383 | O43915 | -0.57906  |
| 79132 | P03383 | P29375 | -0.25954  |
| 79133 | P03383 | Q8NGK9 | -1.1027   |
| 79134 | P03383 | Q6UY27 | -0.91732  |
| 79135 | P03383 | P78329 | -0.23522  |
| 79136 | P03383 | P07602 | -0.78472  |
| 79137 | P03383 | Q5TGY1 | -0.86584  |
| 79138 | P03383 | Q6ZRR5 | -0.86584  |
| 79139 | P03383 | Q94955 | -0.38945  |
| 79140 | P03383 | Q7Z3Z3 | -0.51985  |
| 79141 | P03383 | Q9NQ60 | -0.74794  |
| 79142 | P03383 | Q6PI73 | -0.86584  |
| 79143 | P03383 | Q7RTV2 | -0.27596  |
| 79144 | P03383 | Q9H9E1 | -0.22741  |
| 79145 | P03383 | Q7Z410 | -1.3271   |
| 79146 | P03383 | O95841 | -1.0669   |
| 79147 | P03383 | P10636 | -0.11848  |
| 79148 | P03383 | O95096 | -0.23166  |
| 79149 | P03383 | P17787 | -0.45904  |
| 79150 | P03383 | Q8TF21 | -0.22745  |
| 79151 | P03383 | Q27J81 | -0.22521  |
| 79152 | P03383 | Q8TAG9 | -0.31021  |
| 79153 | P03383 | P78380 | -1.246    |
| 79154 | P03383 | P30462 | -0.93787  |
| 79155 | P03383 | Q9NZK7 | -0.82712  |
| 79156 | P03383 | O60312 | -0.58227  |
| 79157 | P03383 | Q8TBM8 | -0.86545  |
| 79158 | P03383 | Q9UDX3 | -1.0664   |
| 79159 | P03383 | Q9Y6B6 | -0.47731  |
| 79160 | P03383 | Q8N103 | -0.83099  |
| 79161 | P03383 | Q8NDG6 | -0.55102  |
| 79162 | P03383 | Q9Y6Z4 | -0.16078  |
| 79163 | P03383 | P59540 | -1.1788   |
| 79164 | P03383 | O60739 | -0.22228  |
| 79165 | P03383 | P19397 | -0.48462  |
| 79166 | P03383 | Q86VF7 | -0.56104  |
| 79167 | P03383 | Q07343 | -0.22336  |
| 79168 | P03383 | Q6NTF7 | -0.36752  |
| 79169 | P03383 | Q96EQ0 | -0.22694  |
| 79170 | P03383 | Q86XN8 | -0.22728  |
| 79171 | P03383 | O75829 | -1.1599   |
| 79172 | P03383 | Q5JPB2 | -0.73005  |
| 79173 | P03383 | Q8NH95 | -1.1027   |
| 79174 | P03383 | Q92636 | -0.22748  |
| 79175 | P03383 | C9J069 | -0.029615 |
| 79176 | P03383 | Q9ULL8 | -0.30924  |
| 79177 | P03383 | Q99536 | -0.93625  |
| 79178 | P03383 | Q9Y2Q0 | -0.49384  |
| 79179 | P03383 | Q8NGP9 | -1.1027   |
| 79180 | P03383 | P43121 | -0.97848  |
| 79181 | P03383 | Q9NP61 | -0.214    |
| 79182 | P03383 | Q6PH85 | -0.03901  |
| 79183 | P03383 | Q13576 | -0.94595  |
| 79184 | P03383 | P17483 | -0.16881  |
| 79185 | P03383 | Q9BVV8 | -0.70674  |
| 79186 | P03383 | P47224 | -0.47858  |
| 79187 | P03383 | Q07065 | -0.74991  |
| 79188 | P03383 | Q9H1C3 | -0.84276  |
| 79189 | P03383 | Q8TCN5 | -0.21172  |
| 79190 | P03383 | P11047 | -0.80069  |
| 79191 | P03383 | Q86Y07 | -0.28963  |
| 79192 | P03383 | P25092 | -0.77708  |

|       |        |        |          |
|-------|--------|--------|----------|
| 79193 | P03383 | P20774 | -0.33144 |
| 79194 | P03383 | P36955 | -0.78071 |
| 79195 | P03383 | A5PKW4 | -1.1205  |
| 79196 | P03383 | P19256 | -0.63093 |
| 79197 | P03383 | Q99574 | -0.67673 |
| 79198 | P03383 | O95704 | -0.30356 |
| 79199 | P03383 | P29377 | -0.47091 |
| 79200 | P03383 | Q9BQB4 | -0.33517 |
| 79201 | P03383 | P61647 | -0.59639 |
| 79202 | P03383 | Q9NSA0 | -0.68653 |
| 79203 | P03383 | Q14184 | -0.43102 |
| 79204 | P03383 | P15531 | -0.18762 |
| 79205 | P03383 | Q96FC9 | -0.80325 |
| 79206 | P03383 | O43739 | -0.5777  |
| 79207 | P03383 | Q03113 | -0.52843 |
| 79208 | P03383 | Q9NP99 | -1.2335  |
| 79209 | P03383 | Q8TE77 | -0.70597 |
| 79210 | P03383 | P26378 | -0.77115 |
| 79211 | P03383 | P83110 | -0.71944 |
| 79212 | P03383 | Q6IEZ7 | -1.1027  |
| 79213 | P03383 | P23771 | -0.22739 |
| 79214 | P03383 | P20823 | -0.21894 |
| 79215 | P03383 | Q8NAP8 | -0.2385  |
| 79216 | P03383 | Q9H672 | -0.62076 |
| 79217 | P03383 | P43234 | -0.85346 |
| 79218 | P03383 | P05141 | -0.23061 |
| 79219 | P03383 | Q5GH77 | -0.93628 |
| 79220 | P03383 | P54289 | -0.875   |
| 79221 | P03383 | Q9NYT6 | -0.21172 |
| 79222 | P03383 | Q9HD36 | -0.22464 |
| 79223 | P03383 | Q92673 | -1.0922  |
| 79224 | P03383 | P34925 | -0.40777 |
| 79225 | P03383 | Q08AE8 | -0.24745 |
| 79226 | P03383 | Q08043 | -0.32261 |
| 79227 | P03383 | P31260 | -0.22705 |
| 79228 | P03383 | Q6UWN8 | -0.79897 |
| 79229 | P03383 | Q8N4Y2 | -0.36521 |
| 79230 | P03383 | Q6PKC3 | -0.94864 |
| 79231 | P03383 | Q9Y2V3 | -0.32372 |
| 79232 | P03383 | Q9NRX6 | -0.72271 |
| 79233 | P03383 | Q13459 | -0.28404 |
| 79234 | P03383 | P54710 | -0.92344 |
| 79235 | P03383 | Q8NH69 | -1.1027  |
| 79236 | P03383 | P0C7X0 | -0.48092 |
| 79237 | P03383 | P22692 | -0.89094 |
| 79238 | P03383 | Q5T3U5 | -1.095   |
| 79239 | P03383 | Q13107 | -0.30108 |
| 79240 | P03383 | O00757 | -0.19394 |
| 79241 | P03383 | Q96JY6 | -0.22732 |
| 79242 | P03383 | Q9H477 | -0.68169 |
| 79243 | P03383 | P22492 | -1.0589  |
| 79244 | P03383 | Q9Y2P0 | -0.21172 |
| 79245 | P03383 | P19878 | -0.22738 |
| 79246 | P03383 | O42043 | -0.5818  |
| 79247 | P03383 | Q9H2E6 | -0.42794 |
| 79248 | P03383 | Q15493 | -0.23112 |
| 79249 | P03383 | Q96MD7 | -0.20644 |
| 79250 | P03383 | O60687 | -0.36909 |
| 79251 | P03383 | P63130 | -0.40851 |
| 79252 | P03383 | Q92882 | -0.70665 |
| 79253 | P03383 | P20908 | -0.78821 |
| 79254 | P03383 | Q9NSA2 | -0.8479  |
| 79255 | P03383 | Q8TCV5 | -0.79897 |
| 79256 | P03383 | Q9ULD4 | -0.25033 |
| 79257 | P03383 | P22102 | -0.50308 |
| 79258 | P03383 | Q2L4Q9 | -1.2917  |
| 79259 | P03383 | P08514 | -0.43956 |
| 79260 | P03383 | Q9UGQ2 | -0.50736 |
| 79261 | P03383 | P04066 | -0.39859 |
| 79262 | P03383 | Q6UX72 | -0.74906 |
| 79263 | P03383 | Q9H6L5 | -0.75911 |
| 79264 | P03383 | Q15620 | -1.1027  |
| 79265 | P03383 | Q9UQ05 | -0.88061 |
| 79266 | P03383 | Q9UQQ2 | -0.48535 |
| 79267 | P03383 | P50552 | -0.2139  |
| 79268 | P03383 | Q9UFD9 | -0.22738 |



|       |        |        |           |
|-------|--------|--------|-----------|
| 79269 | P03383 | P51580 | -0.15117  |
| 79270 | P03383 | P07355 | -0.23582  |
| 79271 | P03383 | Q5TBC7 | -0.10101  |
| 79272 | P03383 | Q9P2K5 | -0.28173  |
| 79273 | P03383 | P59536 | -1.0953   |
| 79274 | P03383 | A5A3E0 | -0.29454  |
| 79275 | P03383 | P23634 | -0.54011  |
| 79276 | P03383 | Q8IWZ4 | -0.73967  |
| 79277 | P03383 | O60637 | -0.86584  |
| 79278 | P03383 | O75643 | -0.22696  |
| 79279 | P03383 | O43847 | -0.2947   |
| 79280 | P03383 | Q8IUC4 | -0.55808  |
| 79281 | P03383 | Q5T8P6 | -0.29724  |
| 79282 | P03383 | P0CW20 | -0.52332  |
| 79283 | P03383 | A8MVU1 | -0.41347  |
| 79284 | P03383 | P35218 | -0.27125  |
| 79285 | P03383 | Q15391 | -1.1074   |
| 79286 | P03383 | Q8N9W4 | -0.17476  |
| 79287 | P03383 | Q96F10 | -0.27132  |
| 79288 | P03383 | Q9NRH2 | -0.81852  |
| 79289 | P03383 | Q9BUD6 | -1.0341   |
| 79290 | P03383 | Q96DT7 | -0.22547  |
| 79291 | P03383 | Q5T2S8 | -0.22799  |
| 79292 | P03383 | P62166 | -0.25147  |
| 79293 | P03383 | Q9HCC0 | -0.45841  |
| 79294 | P03383 | A6NC51 | -0.86584  |
| 79295 | P03383 | Q8IZF6 | -1.1905   |
| 79296 | P03383 | P42285 | -0.22308  |
| 79297 | P03383 | Q8NH40 | -1.1027   |
| 79298 | P03383 | P49238 | -0.59054  |
| 79299 | P03383 | Q8N201 | -0.50274  |
| 79300 | P03383 | Q8NCK7 | -0.89347  |
| 79301 | P03383 | Q8IZU9 | -0.71014  |
| 79302 | P03383 | Q5T4F4 | -0.36134  |
| 79303 | P03383 | Q9BZF2 | -0.80455  |
| 79304 | P03383 | A1L020 | -0.22737  |
| 79305 | P03383 | P46199 | -0.73674  |
| 79306 | P03383 | B5MD39 | -0.41457  |
| 79307 | P03383 | Q9Y5X3 | -0.63017  |
| 79308 | P03383 | Q6PF18 | -0.014411 |
| 79309 | P03383 | Q9NZH7 | -0.87529  |
| 79310 | P03383 | Q9BQI6 | -0.22741  |
| 79311 | P03383 | Q9P2G3 | -0.46443  |
| 79312 | P03383 | P47890 | -1.1027   |
| 79313 | P03383 | P46092 | -1.191    |
| 79314 | P03383 | Q8NGZ2 | -1.1027   |
| 79315 | P03383 | Q5J8M3 | -0.82686  |
| 79316 | P03383 | Q8IYH5 | -0.21274  |
| 79317 | P03383 | Q96MT1 | -0.92811  |
| 79318 | P03383 | P21128 | -0.77234  |
| 79319 | P03383 | Q6UX04 | -0.17751  |
| 79320 | P03383 | P50993 | -0.5137   |
| 79321 | P03383 | Q86TM6 | -0.22933  |
| 79322 | P03383 | P32927 | -0.61607  |
| 79323 | P03383 | Q9P1W9 | -0.52518  |
| 79324 | P03383 | Q9UF56 | -0.22191  |
| 79325 | P03383 | P61296 | -0.2289   |
| 79326 | P03383 | Q9H343 | -1.1027   |
| 79327 | P03383 | Q9BWP8 | -1.0121   |
| 79328 | P03383 | P01834 | -0.97479  |
| 79329 | P03383 | P23582 | -0.60606  |
| 79330 | P03383 | Q9H8X9 | -0.89944  |
| 79331 | P03383 | Q96BY6 | -0.65188  |
| 79332 | P03383 | Q13950 | -0.40196  |
| 79333 | P03383 | Q9H6K4 | -0.47816  |
| 79334 | P03383 | Q6R327 | -0.037253 |
| 79335 | P03383 | P00519 | -0.22752  |
| 79336 | P03383 | P78312 | -0.37984  |
| 79337 | P03383 | P12018 | -0.88984  |
| 79338 | P03383 | P62736 | -0.24279  |
| 79339 | P03383 | Q5T9C9 | -0.76481  |
| 79340 | P03383 | Q06732 | -0.17069  |
| 79341 | P03383 | O60763 | -0.21286  |
| 79342 | P03383 | P51686 | -1.1702   |
| 79343 | P03383 | Q68D42 | -0.86584  |
| 79344 | P03383 | Q9ULX7 | -0.85141  |

|       |        |        |          |
|-------|--------|--------|----------|
| 79345 | P03383 | A8MWE9 | -0.52751 |
| 79346 | P03383 | Q86XP1 | -0.53547 |
| 79347 | P03383 | Q9UN42 | -0.3495  |
| 79348 | P03383 | Q9Y570 | -0.37223 |
| 79349 | P03383 | Q7Z2T5 | -0.65757 |
| 79350 | P03383 | Q8NDX6 | -0.22096 |
| 79351 | P03383 | O00258 | -0.55207 |
| 79352 | P03383 | Q92522 | -0.79768 |
| 79353 | P03383 | Q8NH57 | -1.1027  |
| 79354 | P03383 | O14521 | -0.41802 |
| 79355 | P03383 | Q9BXR3 | -0.43742 |
| 79356 | P03383 | Q9H4A9 | -0.80611 |
| 79357 | P03383 | Q8NG78 | -1.1027  |
| 79358 | P03383 | A6NK02 | -0.73967 |
| 79359 | P03383 | Q2M296 | -0.79019 |
| 79360 | P03383 | A8MTJ3 | -0.71553 |
| 79361 | P03383 | Q8IWA0 | -0.22804 |
| 79362 | P03383 | Q9UJ72 | -0.33831 |
| 79363 | P03383 | Q9Y4L1 | -0.62935 |
| 79364 | P03383 | Q96DC9 | -0.65183 |
| 79365 | P03383 | P42679 | -0.39184 |
| 79366 | P03383 | Q96FN4 | -0.22767 |
| 79367 | P03383 | Q5TYW1 | -0.21172 |
| 79368 | P03383 | Q6IMI6 | -0.36808 |
| 79369 | P03383 | Q96R45 | -1.1027  |
| 79370 | P03383 | P84157 | -0.86584 |
| 79371 | P03383 | P17540 | -0.7282  |
| 79372 | P03383 | Q9BUF7 | -0.79066 |
| 79373 | P03383 | Q9UGM5 | -0.74389 |
| 79374 | P03383 | Q9NZT1 | -0.65803 |
| 79375 | P03383 | Q86UX6 | -0.9869  |
| 79376 | P03383 | P51168 | -0.49986 |
| 79377 | P03383 | Q02742 | -0.61772 |
| 79378 | P03383 | Q1HG44 | -0.75275 |
| 79379 | P03383 | P22079 | -0.97622 |
| 79380 | P03383 | Q8IV42 | -0.67026 |
| 79381 | P03383 | Q96LP6 | -0.20955 |
| 79382 | P03383 | Q75526 | -0.34907 |
| 79383 | P03383 | P31146 | -0.22743 |
| 79384 | P03383 | Q8TDZ2 | -0.22742 |
| 79385 | P03383 | P50224 | -0.29153 |
| 79386 | P03383 | Q5GH73 | -0.86584 |
| 79387 | P03383 | O00562 | -0.38123 |
| 79388 | P03383 | Q6UXU1 | -0.87849 |
| 79389 | P03383 | Q8N9N7 | -0.23901 |
| 79390 | P03383 | Q86UE8 | -0.22741 |
| 79391 | P03383 | A3KFT3 | -1.1027  |
| 79392 | P03383 | O14495 | -0.33615 |
| 79393 | P03383 | Q8WXG8 | -0.52751 |
| 79394 | P03383 | P31213 | -0.65633 |
| 79395 | P03383 | Q13131 | -0.25183 |
| 79396 | P03383 | Q58FF7 | -0.58434 |
| 79397 | P03383 | Q8IWQ3 | -0.5791  |
| 79398 | P03383 | Q9H4S2 | -0.17673 |
| 79399 | P03383 | P04090 | -0.86206 |
| 79400 | P03383 | Q8TBB6 | -0.85791 |
| 79401 | P03383 | Q75844 | -0.91531 |
| 79402 | P03383 | P02675 | -0.76602 |
| 79403 | P03383 | P10767 | -0.82939 |
| 79404 | P03383 | Q7Z401 | -0.18514 |
| 79405 | P03383 | Q5TGJ6 | -0.18409 |
| 79406 | P03383 | Q9Y2I2 | -0.24975 |
| 79407 | P03383 | P42166 | -0.19289 |
| 79408 | P03383 | Q8NGT0 | -1.1027  |
| 79409 | P03383 | P53367 | -0.17654 |
| 79410 | P03383 | P04141 | -0.16926 |
| 79411 | P03383 | Q9BPW4 | -0.90519 |
| 79412 | P03383 | Q71U36 | -0.31938 |
| 79413 | P03383 | Q6ZT52 | -0.10583 |
| 79414 | P03383 | P61570 | -0.5818  |
| 79415 | P03383 | P04843 | -0.57533 |
| 79416 | P03383 | Q9Y6I0 | -0.67565 |
| 79417 | P03383 | Q43674 | -0.51765 |
| 79418 | P03383 | Q8IUE6 | -0.88998 |
| 79419 | P03383 | Q9ULV1 | -0.48123 |
| 79420 | P03383 | O14543 | -0.24509 |

|       |        |        |           |
|-------|--------|--------|-----------|
| 79421 | P03383 | Q96AX1 | -0.1954   |
| 79422 | P03383 | Q02338 | -0.34511  |
| 79423 | P03383 | Q9NZU5 | -0.30068  |
| 79424 | P03383 | Q9UKA8 | -0.76739  |
| 79425 | P03383 | O95500 | -0.63885  |
| 79426 | P03383 | Q96QE2 | -0.74052  |
| 79427 | P03383 | Q9NPH3 | -1.4284   |
| 79428 | P03383 | Q9NY59 | -0.34465  |
| 79429 | P03383 | Q5SQI0 | -0.44947  |
| 79430 | P03383 | Q9NU63 | -0.3598   |
| 79431 | P03383 | Q8NG81 | -1.1027   |
| 79432 | P03383 | Q05D60 | -0.022123 |
| 79433 | P03383 | Q9UBH0 | -0.83449  |
| 79434 | P03383 | Q9NW81 | -0.054462 |
| 79435 | P03383 | Q6UXF1 | -0.52887  |
| 79436 | P03383 | Q76I76 | -0.84181  |
| 79437 | P03383 | Q9H7M6 | -0.52332  |
| 79438 | P03383 | P41221 | -0.22982  |
| 79439 | P03383 | Q9UKA2 | -0.22284  |
| 79440 | P03383 | P20337 | -0.7896   |
| 79441 | P03383 | Q9BYB4 | -0.22757  |
| 79442 | P03383 | P98198 | -0.88854  |
| 79443 | P03383 | Q8TF08 | -0.69769  |
| 79444 | P03383 | Q96C36 | -0.68918  |
| 79445 | P03383 | Q5FVE4 | -0.86256  |
| 79446 | P03383 | Q8WWF8 | -0.38647  |
| 79447 | P03383 | Q96A37 | -0.73967  |
| 79448 | P03383 | Q6UXE8 | -0.52887  |
| 79449 | P03383 | O43286 | -0.52848  |
| 79450 | P03383 | O60237 | -0.50215  |
| 79451 | P03383 | O60262 | -0.56853  |
| 79452 | P03383 | P40305 | -0.54638  |
| 79453 | P03383 | Q75907 | -0.51417  |
| 79454 | P03383 | Q9BXY5 | -0.52751  |
| 79455 | P03383 | Q99643 | -0.42298  |
| 79456 | P03383 | Q8N4X5 | -0.3557   |
| 79457 | P03383 | P19793 | -0.23778  |
| 79458 | P03383 | O95302 | -0.59571  |
| 79459 | P03383 | Q969G9 | -0.21647  |
| 79460 | P03383 | P32971 | -0.79033  |
| 79461 | P03383 | Q8NFJ6 | -1.1551   |
| 79462 | P03383 | Q9C0K0 | -0.22706  |
| 79463 | P03383 | Q8IWU2 | -0.59062  |
| 79464 | P03383 | Q92613 | -0.48348  |
| 79465 | P03383 | Q9Y3A6 | -0.55873  |
| 79466 | P03383 | O75380 | -0.25572  |
| 79467 | P03383 | P26439 | -0.74975  |
| 79468 | P03383 | Q9P2N7 | -0.19233  |
| 79469 | P03383 | P35568 | -0.21307  |
| 79470 | P03383 | Q92688 | -0.17854  |
| 79471 | P03383 | Q14520 | -1.3953   |
| 79472 | P03383 | P42702 | -0.87504  |
| 79473 | P03383 | A6NNT2 | -0.18319  |
| 79474 | P03383 | Q9BR09 | -0.27149  |
| 79475 | P03383 | P33993 | -0.19687  |
| 79476 | P03383 | Q6H9L7 | -0.45259  |
| 79477 | P03383 | O60512 | -0.39385  |
| 79478 | P03383 | P43146 | -0.33828  |
| 79479 | P03383 | Q8N8J0 | -0.45987  |
| 79480 | P03383 | Q9NP72 | -1.2059   |
| 79481 | P03383 | Q92997 | -0.19761  |
| 79482 | P03383 | Q75952 | -0.29309  |
| 79483 | P03383 | Q9HB29 | -1.0662   |
| 79484 | P03383 | Q9NP85 | -0.088281 |
| 79485 | P03383 | O75911 | -1.2915   |
| 79486 | P03383 | Q6E0U4 | -0.91732  |
| 79487 | P03383 | Q9H1Z9 | -0.86584  |
| 79488 | P03383 | Q6ISU1 | -0.31698  |
| 79489 | P03383 | O15146 | -0.67695  |
| 79490 | P03383 | Q9NVX7 | -0.22403  |
| 79491 | P03383 | Q9C0J1 | -0.5155   |
| 79492 | P03383 | P51575 | -0.49941  |
| 79493 | P03383 | Q9UHB6 | -0.52974  |
| 79494 | P03383 | Q9P2X8 | -0.16078  |
| 79495 | P03383 | Q5SZJ8 | -0.042401 |
| 79496 | P03383 | Q9Y426 | -0.55694  |

|       |        |        |           |
|-------|--------|--------|-----------|
| 79497 | P03383 | Q8WYL5 | -0.45604  |
| 79498 | P03383 | Q12849 | -0.52227  |
| 79499 | P03383 | Q99972 | -0.81231  |
| 79500 | P03383 | Q8N3T1 | -0.65891  |
| 79501 | P03383 | Q5JQF8 | -0.84005  |
| 79502 | P03383 | Q8NI38 | -0.23983  |
| 79503 | P03383 | P02708 | -0.69571  |
| 79504 | P03383 | Q7Z736 | -0.66252  |
| 79505 | P03383 | Q14576 | -0.9415   |
| 79506 | P03383 | Q9NY99 | -0.42777  |
| 79507 | P03383 | Q86T23 | -0.043356 |
| 79508 | P03383 | P56278 | -0.30188  |
| 79509 | P03383 | Q96QU1 | -1.2237   |
| 79510 | P03383 | Q75426 | -0.45235  |
| 79511 | P03383 | Q8N1N2 | -0.86584  |
| 79512 | P03383 | Q9H1H1 | -0.47027  |
| 79513 | P03383 | P01042 | -0.63924  |
| 79514 | P03383 | Q95819 | -0.26691  |
| 79515 | P03383 | Q9UBE0 | -0.22327  |
| 79516 | P03383 | P29034 | -0.42646  |
| 79517 | P03383 | Q43315 | -0.58528  |
| 79518 | P03383 | O14842 | -0.98803  |
| 79519 | P03383 | Q9NZR4 | -0.21951  |
| 79520 | P03383 | P00352 | -0.33826  |
| 79521 | P03383 | Q5K4E3 | -1.1298   |
| 79522 | P03383 | A4D1P6 | -0.22745  |
| 79523 | P03383 | Q9UPY3 | -0.21507  |
| 79524 | P03383 | Q08495 | -0.21946  |
| 79525 | P03383 | Q969S9 | -0.61346  |
| 79526 | P03383 | Q8N5P1 | -0.19258  |
| 79527 | P03383 | P00568 | -0.55382  |
| 79528 | P03383 | O15229 | -0.57256  |
| 79529 | P03383 | Q75319 | -0.8316   |
| 79530 | P03383 | Q8NB16 | -0.22741  |
| 79531 | P03383 | Q9H5P4 | -0.22012  |
| 79532 | P03383 | Q9HCM3 | -0.86584  |
| 79533 | P03383 | Q86TY3 | -0.86584  |
| 79534 | P03383 | Q5R3F8 | -0.83288  |
| 79535 | P03383 | B3KVV0 | -0.86584  |
| 79536 | P03383 | Q8NGC0 | -1.1027   |
| 79537 | P03383 | Q5TCH4 | -0.78764  |
| 79538 | P03383 | Q96T92 | -0.22679  |
| 79539 | P03383 | P09496 | -0.11992  |
| 79540 | P03383 | O43405 | -0.41429  |
| 79541 | P03383 | A1X283 | -0.22741  |
| 79542 | P03383 | Q8NI37 | -0.47566  |
| 79543 | P03383 | Q9H4K7 | -0.72781  |
| 79544 | P03383 | Q9Y657 | -0.28414  |
| 79545 | P03383 | Q9Y5G1 | -1.1297   |
| 79546 | P03383 | A8MQ27 | -0.38281  |
| 79547 | P03383 | P62070 | -0.74599  |
| 79548 | P03383 | Q9GZS9 | -0.49606  |
| 79549 | P03383 | Q92823 | -0.74881  |
| 79550 | P03383 | Q6ZST8 | -0.16898  |
| 79551 | P03383 | Q6VAB6 | -0.52202  |
| 79552 | P03383 | Q9UK33 | -0.21172  |
| 79553 | P03383 | Q9BSR8 | -0.77794  |
| 79554 | P03383 | Q86WK9 | -1.1105   |
| 79555 | P03383 | Q8IU80 | -0.82794  |
| 79556 | P03383 | Q5SSQ6 | -0.13981  |
| 79557 | P03383 | P25713 | -0.18518  |
| 79558 | P03383 | Q15465 | -0.22739  |
| 79559 | P03383 | Q13214 | -0.858    |
| 79560 | P03383 | Q96D71 | -0.21559  |
| 79561 | P03383 | Q7Z6J6 | -0.33424  |
| 79562 | P03383 | Q6GPH6 | -0.86584  |
| 79563 | P03383 | P48436 | -0.29395  |
| 79564 | P03383 | Q9H9L4 | -0.52826  |
| 79565 | P03383 | Q8WYK2 | -0.2256   |
| 79566 | P03383 | O00590 | -1.23     |
| 79567 | P03383 | Q8IVH8 | -0.41071  |
| 79568 | P03383 | P22891 | -1.0002   |
| 79569 | P03383 | Q15166 | -0.77095  |
| 79570 | P03383 | Q8TD55 | -0.5353   |
| 79571 | P03383 | P56178 | -0.21784  |
| 79572 | P03383 | Q9Y2H6 | -0.54247  |

|       |        |        |           |
|-------|--------|--------|-----------|
| 79573 | P03383 | Q08554 | -1.03     |
| 79574 | P03383 | Q5HY92 | -0.64607  |
| 79575 | P03383 | Q641Q2 | -0.57622  |
| 79576 | P03383 | Q9NR16 | -1.2592   |
| 79577 | P03383 | Q8WWG1 | -1.1984   |
| 79578 | P03383 | Q6ZS86 | -0.67596  |
| 79579 | P03383 | Q07075 | -0.85574  |
| 79580 | P03383 | O76054 | -0.39667  |
| 79581 | P03383 | P08648 | -0.31103  |
| 79582 | P03383 | Q8TEB7 | -0.69345  |
| 79583 | P03383 | Q6YHK3 | -0.86991  |
| 79584 | P03383 | Q9H9V9 | -0.20568  |
| 79585 | P03383 | Q8WZB0 | -0.09528  |
| 79586 | P03383 | O60547 | -0.84365  |
| 79587 | P03383 | Q5XXA6 | -0.83854  |
| 79588 | P03383 | P0CW19 | -0.37384  |
| 79589 | P03383 | O14603 | -0.089646 |
| 79590 | P03383 | P09093 | -0.95573  |
| 79591 | P03383 | Q14247 | -0.22933  |
| 79592 | P03383 | Q7Z692 | -0.86584  |
| 79593 | P03383 | P17643 | -0.45388  |
| 79594 | P03383 | Q9Y2B2 | -0.78386  |
| 79595 | P03383 | Q0WX57 | -0.32253  |
| 79596 | P03383 | P01189 | -0.53757  |
| 79597 | P03383 | A8MV81 | -0.86584  |
| 79598 | P03383 | A6PVC2 | -0.4674   |
| 79599 | P03383 | Q9BQL6 | -0.62665  |
| 79600 | P03383 | P57727 | -1.1971   |
| 79601 | P03383 | Q9BUN1 | -0.87849  |
| 79602 | P03383 | O95159 | -0.33287  |
| 79603 | P03383 | P43405 | -0.26248  |
| 79604 | P03383 | Q9BWU1 | -0.6365   |
| 79605 | P03383 | P08910 | -0.54399  |
| 79606 | P03383 | Q5T6L9 | -0.86584  |
| 79607 | P03383 | Q9Y2X7 | -0.25445  |
| 79608 | P03383 | Q9NPC2 | -1.0107   |
| 79609 | P03383 | P51878 | -0.82216  |
| 79610 | P03383 | Q8NFZ0 | -0.69527  |
| 79611 | P03383 | Q6P531 | -0.69875  |
| 79612 | P03383 | Q9Y5E5 | -0.98639  |
| 79613 | P03383 | Q9UBL9 | -0.50976  |
| 79614 | P03383 | P51795 | -0.88783  |
| 79615 | P03383 | Q9H8W4 | -0.22648  |
| 79616 | P03383 | Q06055 | -0.7545   |
| 79617 | P03383 | Q8N3J2 | -0.41945  |
| 79618 | P03383 | P36956 | -0.22733  |
| 79619 | P03383 | P0CF97 | -0.44783  |
| 79620 | P03383 | Q9HCS4 | -0.19689  |
| 79621 | P03383 | Q7RTY0 | -0.89347  |
| 79622 | P03383 | O14880 | -0.88962  |
| 79623 | P03383 | Q96J92 | -0.69186  |
| 79624 | P03383 | Q9BY84 | -0.76763  |
| 79625 | P03383 | O43813 | -0.69403  |
| 79626 | P03383 | Q96M98 | -0.33455  |
| 79627 | P03383 | Q9NVL1 | -0.082254 |
| 79628 | P03383 | Q68J44 | -0.90806  |
| 79629 | P03383 | Q96P64 | -0.98969  |
| 79630 | P03383 | O95158 | -0.63567  |
| 79631 | P03383 | O95696 | -0.37976  |
| 79632 | P03383 | Q99445 | -0.54022  |
| 79633 | P03383 | Q8TE56 | -1.2214   |
| 79634 | P03383 | Q8IVC4 | -0.21172  |
| 79635 | P03383 | Q5NE16 | -0.49945  |
| 79636 | P03383 | P08575 | -0.34928  |
| 79637 | P03383 | P0C7W6 | -0.13731  |
| 79638 | P03383 | P61966 | -0.15382  |
| 79639 | P03383 | O15164 | -0.22728  |
| 79640 | P03383 | O95025 | -0.98837  |
| 79641 | P03383 | Q14527 | -0.22325  |
| 79642 | P03383 | P30566 | -0.25451  |
| 79643 | P03383 | Q02548 | -0.22734  |
| 79644 | P03383 | Q9H0F5 | -0.52332  |
| 79645 | P03383 | A5D8V7 | -0.04903  |
| 79646 | P03383 | Q8IUB5 | -0.79897  |
| 79647 | P03383 | Q9NPI9 | -1.0462   |
| 79648 | P03383 | Q9UKQ2 | -1.4438   |

|       |        |        |          |
|-------|--------|--------|----------|
| 79649 | P03383 | P41271 | -0.64985 |
| 79650 | P03383 | Q9Y6I9 | -0.87849 |
| 79651 | P03383 | Q6DKI1 | -0.22441 |
| 79652 | P03383 | Q96CP2 | -0.16078 |
| 79653 | P03383 | P54284 | -0.5346  |
| 79654 | P03383 | P01778 | -0.97479 |
| 79655 | P03383 | P31323 | -0.22726 |
| 79656 | P03383 | P17027 | -0.21172 |
| 79657 | P03383 | P31751 | -0.15924 |
| 79658 | P03383 | Q63HN8 | -0.79202 |
| 79659 | P03383 | Q13887 | -0.22369 |
| 79660 | P03383 | A2RUH7 | -0.22905 |
| 79661 | P03383 | Q9BVG3 | -0.73967 |
| 79662 | P03383 | P26441 | -0.30507 |
| 79663 | P03383 | Q02487 | -0.93751 |
| 79664 | P03383 | Q43639 | -0.22741 |
| 79665 | P03383 | P25445 | -0.22727 |
| 79666 | P03383 | P20160 | -0.7789  |
| 79667 | P03383 | Q93038 | -1.1667  |
| 79668 | P03383 | Q9Y271 | -1.1713  |
| 79669 | P03383 | P37287 | -0.36997 |
| 79670 | P03383 | Q3SY52 | -0.21172 |
| 79671 | P03383 | Q96CW9 | -0.62956 |
| 79672 | P03383 | P0CW00 | -0.43319 |
| 79673 | P03383 | P49281 | -0.23582 |
| 79674 | P03383 | Q9BYF1 | -0.76672 |
| 79675 | P03383 | Q04671 | -0.25064 |
| 79676 | P03383 | Q13557 | -0.60555 |
| 79677 | P03383 | Q43427 | -0.2404  |
| 79678 | P03383 | P40617 | -0.23204 |
| 79679 | P03383 | O00175 | -0.79598 |
| 79680 | P03383 | Q9NYY3 | -0.30748 |
| 79681 | P03383 | Q96PM9 | -0.18352 |
| 79682 | P03383 | P10144 | -0.28895 |
| 79683 | P03383 | Q8WWZ1 | -0.83449 |
| 79684 | P03383 | Q5TC82 | -0.23109 |
| 79685 | P03383 | Q96T25 | -0.36878 |
| 79686 | P03383 | Q8N4T8 | -0.30122 |
| 79687 | P03383 | Q6UWR7 | -1.1987  |
| 79688 | P03383 | Q5RIA9 | -0.79654 |
| 79689 | P03383 | Q6NT04 | -0.33043 |
| 79690 | P03383 | Q8N960 | -0.1976  |
| 79691 | P03383 | Q2KHT4 | -0.91741 |
| 79692 | P03383 | P14598 | -0.33528 |
| 79693 | P03383 | Q9Y6A9 | -0.54988 |
| 79694 | P03383 | Q9Y624 | -0.63457 |
| 79695 | P03383 | Q15788 | -0.26349 |
| 79696 | P03383 | Q96A58 | -0.73079 |
| 79697 | P03383 | Q8N6P7 | -0.77832 |
| 79698 | P03383 | P46109 | -0.22741 |
| 79699 | P03383 | P33402 | -0.7433  |
| 79700 | P03383 | Q96RQ3 | -0.67436 |
| 79701 | P03383 | Q9BZJ8 | -0.97774 |
| 79702 | P03383 | Q6UB28 | -0.55417 |
| 79703 | P03383 | Q6JEL2 | -0.29184 |
| 79704 | P03383 | Q96PW8 | -0.22163 |
| 79705 | P03383 | P06318 | -0.97479 |
| 79706 | P03383 | Q6ZN11 | -0.21172 |
| 79707 | P03383 | Q9BU20 | -0.91903 |
| 79708 | P03383 | O60240 | -0.49032 |
| 79709 | P03383 | Q96LL9 | -0.37021 |
| 79710 | P03383 | Q75762 | -0.83942 |
| 79711 | P03383 | Q6R6M4 | -0.39606 |
| 79712 | P03383 | Q96EC8 | -0.85795 |
| 79713 | P03383 | Q99665 | -0.84521 |
| 79714 | P03383 | Q43837 | -0.17621 |
| 79715 | P03383 | Q01851 | -0.2274  |
| 79716 | P03383 | Q8TE73 | -0.51695 |
| 79717 | P03383 | Q9Y3E2 | -0.73628 |
| 79718 | P03383 | Q7Z7K2 | -0.21172 |
| 79719 | P03383 | P58062 | -0.2562  |
| 79720 | P03383 | Q8TD84 | -0.87884 |
| 79721 | P03383 | Q8TCD6 | -0.70241 |
| 79722 | P03383 | Q9P1W3 | -0.86584 |
| 79723 | P03383 | P24530 | -0.75247 |
| 79724 | P03383 | P10746 | -0.24871 |

|       |        |        |           |
|-------|--------|--------|-----------|
| 79725 | P03383 | Q9NY72 | -0.58636  |
| 79726 | P03383 | Q2M1P5 | -0.37582  |
| 79727 | P03383 | Q8NGH9 | -1.1027   |
| 79728 | P03383 | P30419 | -0.19939  |
| 79729 | P03383 | Q8NI36 | -0.22794  |
| 79730 | P03383 | Q8NHB1 | -1.1027   |
| 79731 | P03383 | O94887 | -0.45387  |
| 79732 | P03383 | Q8N1E6 | -0.2261   |
| 79733 | P03383 | P01236 | -0.78365  |
| 79734 | P03383 | Q9Y6G1 | -0.86584  |
| 79735 | P03383 | Q92730 | -0.41111  |
| 79736 | P03383 | P11233 | -0.24037  |
| 79737 | P03383 | P35609 | -0.79432  |
| 79738 | P03383 | Q9NSY0 | -0.6496   |
| 79739 | P03383 | Q96PD2 | -1.0572   |
| 79740 | P03383 | Q8N608 | -0.96259  |
| 79741 | P03383 | Q9UK53 | -0.22438  |
| 79742 | P03383 | P08311 | -1.0533   |
| 79743 | P03383 | Q6ZMP0 | -0.96701  |
| 79744 | P03383 | Q5GFL6 | -0.94502  |
| 79745 | P03383 | P69891 | -0.34646  |
| 79746 | P03383 | P63092 | -0.57541  |
| 79747 | P03383 | Q9HBK9 | -0.12121  |
| 79748 | P03383 | Q8N9I1 | -0.86584  |
| 79749 | P03383 | Q5DX21 | -1.0684   |
| 79750 | P03383 | Q8IY21 | -0.22316  |
| 79751 | P03383 | Q15195 | -0.87849  |
| 79752 | P03383 | Q8NH79 | -1.1027   |
| 79753 | P03383 | Q92598 | -0.4583   |
| 79754 | P03383 | P30989 | -1.1632   |
| 79755 | P03383 | Q9P2K8 | -0.76023  |
| 79756 | P03383 | O75787 | -0.35283  |
| 79757 | P03383 | Q8N8R5 | -0.87849  |
| 79758 | P03383 | Q8N9F7 | -0.66403  |
| 79759 | P03383 | Q13641 | -0.99363  |
| 79760 | P03383 | Q8WZ60 | -0.41653  |
| 79761 | P03383 | A6NER3 | -0.0711   |
| 79762 | P03383 | P00387 | -0.36383  |
| 79763 | P03383 | Q15669 | -0.23035  |
| 79764 | P03383 | Q13905 | -0.31487  |
| 79765 | P03383 | P23942 | -1.0376   |
| 79766 | P03383 | P18065 | -0.38907  |
| 79767 | P03383 | Q9Y5I3 | -1.4444   |
| 79768 | P03383 | Q8NGK5 | -1.1027   |
| 79769 | P03383 | P12107 | -0.77542  |
| 79770 | P03383 | O95968 | -0.91732  |
| 79771 | P03383 | Q8NGC4 | -1.1027   |
| 79772 | P03383 | Q9UKP5 | -1.2214   |
| 79773 | P03383 | Q96FT7 | -1.0532   |
| 79774 | P03383 | Q86YN1 | -0.78598  |
| 79775 | P03383 | Q7Z628 | -0.40969  |
| 79776 | P03383 | Q58FF8 | -0.58434  |
| 79777 | P03383 | A6NGZ8 | -0.93628  |
| 79778 | P03383 | Q3KQV3 | -0.21172  |
| 79779 | P03383 | Q59F38 | -0.013131 |
| 79780 | P03383 | Q9NRN5 | -1.0254   |
| 79781 | P03383 | P58511 | -0.52887  |
| 79782 | P03383 | Q5VXM1 | -0.87849  |
| 79783 | P03383 | Q8IZC4 | -0.80399  |
| 79784 | P03383 | P59827 | -0.85949  |
| 79785 | P03383 | Q9UKR0 | -1.3088   |
| 79786 | P03383 | P04206 | -0.97479  |
| 79787 | P03383 | Q8N628 | -1.1027   |
| 79788 | P03383 | Q9BQ39 | -0.56743  |
| 79789 | P03383 | Q8TDN1 | -0.84843  |
| 79790 | P03383 | Q8N2R8 | -0.20906  |
| 79791 | P03383 | Q9Y6A4 | -0.60582  |
| 79792 | P03383 | Q8TCU5 | -0.35549  |
| 79793 | P03383 | P09326 | -0.54385  |
| 79794 | P03383 | Q8WWU7 | -1.0392   |
| 79795 | P03383 | Q9Y478 | -0.21316  |
| 79796 | P03383 | Q96PL5 | -0.75967  |
| 79797 | P03383 | Q5TFQ8 | -0.86584  |
| 79798 | P03383 | Q16649 | -0.17215  |
| 79799 | P03383 | Q9BQK8 | -0.25193  |
| 79800 | P03383 | Q59EK9 | -0.52948  |

|       |        |        |           |
|-------|--------|--------|-----------|
| 79801 | P03383 | Q16849 | -0.86515  |
| 79802 | P03383 | Q9UKI3 | -0.45036  |
| 79803 | P03383 | Q15043 | -0.85654  |
| 79804 | P03383 | P08134 | -0.23306  |
| 79805 | P03383 | Q96DW6 | -0.69731  |
| 79806 | P03383 | P42696 | -0.4405   |
| 79807 | P03383 | Q9NWU1 | -0.43805  |
| 79808 | P03383 | O75914 | -0.58226  |
| 79809 | P03383 | P31939 | -0.3528   |
| 79810 | P03383 | O15516 | -0.22744  |
| 79811 | P03383 | Q8IY17 | -0.74628  |
| 79812 | P03383 | Q14512 | -0.46149  |
| 79813 | P03383 | Q96PL1 | -0.87849  |
| 79814 | P03383 | P18465 | -0.88446  |
| 79815 | P03383 | Q9HCU5 | -0.22742  |
| 79816 | P03383 | Q9BZ98 | -0.26096  |
| 79817 | P03383 | O15391 | -0.29165  |
| 79818 | P03383 | Q8NBL3 | -0.86584  |
| 79819 | P03383 | Q17RG1 | -0.19405  |
| 79820 | P03383 | Q7Z7A4 | -0.82719  |
| 79821 | P03383 | Q96BF3 | -0.93628  |
| 79822 | P03383 | Q7L0R7 | -0.52332  |
| 79823 | P03383 | A6NK44 | -0.0166   |
| 79824 | P03383 | P32322 | -0.50539  |
| 79825 | P03383 | P84351 | -0.97846  |
| 79826 | P03383 | Q9NY91 | -0.84782  |
| 79827 | P03383 | A6NDQ2 | -0.73967  |
| 79828 | P03383 | O75165 | -0.49341  |
| 79829 | P03383 | Q9HCL2 | -0.42628  |
| 79830 | P03383 | Q9Y6J0 | -0.048548 |
| 79831 | P03383 | P00739 | -1.0188   |
| 79832 | P03383 | O95741 | -0.5836   |
| 79833 | P03383 | A0PJK1 | -0.928    |
| 79834 | P03383 | Q8NE00 | -0.52887  |
| 79835 | P03383 | Q86UQ5 | -0.86584  |
| 79836 | P03383 | Q7Z5L0 | -0.85846  |
| 79837 | P03383 | P17658 | -0.84843  |
| 79838 | P03383 | Q5VTU8 | -0.38814  |
| 79839 | P03383 | Q96M02 | -0.17297  |
| 79840 | P03383 | A6NCL1 | -0.083233 |
| 79841 | P03383 | P61018 | -0.90472  |
| 79842 | P03383 | Q14773 | -1.3261   |
| 79843 | P03383 | Q96KK3 | -0.47536  |
| 79844 | P03383 | Q12794 | -0.4034   |
| 79845 | P03383 | Q8NGB8 | -1.1027   |
| 79846 | P03383 | Q9NYB5 | -0.94223  |
| 79847 | P03383 | A6NMB9 | -0.91185  |
| 79848 | P03383 | O00212 | -1.0841   |
| 79849 | P03383 | Q9H6X2 | -0.52123  |
| 79850 | P03383 | Q9NSN8 | -0.29611  |
| 79851 | P03383 | Q9C0K7 | -0.22876  |
| 79852 | P03383 | Q6ZTK2 | -0.20089  |
| 79853 | P03383 | Q765I0 | -0.85703  |
| 79854 | P03383 | Q7Z4B0 | -0.87849  |
| 79855 | P03383 | Q6XE38 | -0.87849  |
| 79856 | P03383 | Q12791 | -0.62281  |
| 79857 | P03383 | Q12866 | -0.48193  |
| 79858 | P03383 | O60678 | -0.22854  |
| 79859 | P03383 | A6NL28 | -0.39786  |
| 79860 | P03383 | Q13393 | -0.48221  |
| 79861 | P03383 | Q8NFR3 | -0.42237  |
| 79862 | P03383 | Q9Y5A9 | -0.41734  |
| 79863 | P03383 | Q9Y385 | -1.0632   |
| 79864 | P03383 | Q14BN4 | -0.87863  |
| 79865 | P03383 | Q9BZL6 | -0.26037  |
| 79866 | P03383 | Q8IYT8 | -0.5064   |
| 79867 | P03383 | Q12882 | -0.55865  |
| 79868 | P03383 | Q6P2I7 | -0.024448 |
| 79869 | P03383 | Q8NEC5 | -0.56131  |
| 79870 | P03383 | P13746 | -0.88088  |
| 79871 | P03383 | P01909 | -0.74886  |
| 79872 | P03383 | Q9H0H0 | -0.19184  |
| 79873 | P03383 | Q5T3Y7 | -0.021293 |
| 79874 | P03383 | Q96IR7 | -0.6212   |
| 79875 | P03383 | Q9UIG0 | -0.22599  |
| 79876 | P03383 | Q96PQ5 | -0.30292  |



|       |        |        |           |
|-------|--------|--------|-----------|
| 79877 | P03383 | P68032 | -0.46017  |
| 79878 | P03383 | Q9ULK5 | -0.39904  |
| 79879 | P03383 | P58499 | -0.82761  |
| 79880 | P03383 | Q8TDQ7 | -0.15039  |
| 79881 | P03383 | Q9NP70 | -0.99001  |
| 79882 | P03383 | P14138 | -0.65201  |
| 79883 | P03383 | Q8N1F8 | -0.34957  |
| 79884 | P03383 | P04209 | -0.97479  |
| 79885 | P03383 | O75084 | -0.52384  |
| 79886 | P03383 | P51159 | -0.28656  |
| 79887 | P03383 | Q8WW27 | -0.53022  |
| 79888 | P03383 | Q8N7P1 | -1.0311   |
| 79889 | P03383 | P22223 | -1.0754   |
| 79890 | P03383 | Q14050 | -0.75445  |
| 79891 | P03383 | P21453 | -0.75297  |
| 79892 | P03383 | Q8N2Q7 | -0.36918  |
| 79893 | P03383 | A8K979 | -0.71823  |
| 79894 | P03383 | Q96SL4 | -1.045    |
| 79895 | P03383 | P23975 | -0.54496  |
| 79896 | P03383 | Q6IBW4 | -0.47131  |
| 79897 | P03383 | P16442 | -0.87295  |
| 79898 | P03383 | Q0D2K2 | -0.2071   |
| 79899 | P03383 | Q9H2Q1 | -0.86584  |
| 79900 | P03383 | Q96PB1 | -0.86584  |
| 79901 | P03383 | O95398 | -0.44133  |
| 79902 | P03383 | Q00604 | -0.69474  |
| 79903 | P03383 | Q5H9U9 | -0.85822  |
| 79904 | P03383 | Q12864 | -0.92668  |
| 79905 | P03383 | Q96NR8 | -1.1968   |
| 79906 | P03383 | Q9HCN3 | -0.9358   |
| 79907 | P03383 | Q9GZU8 | -0.21602  |
| 79908 | P03383 | Q96FL8 | -0.7926   |
| 79909 | P03383 | Q8N6C8 | -1.0333   |
| 79910 | P03383 | Q8IXS8 | -0.66064  |
| 79911 | P03383 | Q9BVV2 | -0.034115 |
| 79912 | P03383 | P05187 | -1.1029   |
| 79913 | P03383 | Q02880 | -0.18381  |
| 79914 | P03383 | Q7RTY9 | -0.96482  |
| 79915 | P03383 | Q9Y3M8 | -0.31239  |
| 79916 | P03383 | Q15772 | -0.73033  |
| 79917 | P03383 | Q96AY3 | -0.54767  |
| 79918 | P03383 | Q9NYW7 | -1.0176   |
| 79919 | P03383 | Q6PEZ8 | -0.90186  |
| 79920 | P03383 | P06732 | -0.62898  |
| 79921 | P03383 | O43716 | -0.52659  |
| 79922 | P03383 | Q6P9A2 | -0.7101   |
| 79923 | P03383 | P41134 | -0.22744  |
| 79924 | P03383 | P29459 | -0.21225  |
| 79925 | P03383 | O14559 | -0.25809  |
| 79926 | P03383 | Q75712 | -0.8644   |
| 79927 | P03383 | B2RN74 | -1.1027   |
| 79928 | P03383 | P13535 | -0.41828  |
| 79929 | P03383 | Q9P2E8 | -0.79424  |
| 79930 | P03383 | Q8IWU6 | -0.44211  |
| 79931 | P03383 | Q14692 | -0.46631  |
| 79932 | P03383 | Q16589 | -0.21414  |
| 79933 | P03383 | P30046 | -0.40076  |
| 79934 | P03383 | Q04656 | -0.2276   |
| 79935 | P03383 | P49146 | -1.0658   |
| 79936 | P03383 | O95279 | -1.0332   |
| 79937 | P03383 | Q8N2G8 | -0.16093  |
| 79938 | P03383 | Q15717 | -0.42757  |
| 79939 | P03383 | Q96G04 | -0.051107 |
| 79940 | P03383 | P51814 | -0.17069  |
| 79941 | P03383 | Q9BT88 | -0.50677  |
| 79942 | P03383 | Q99467 | -0.9539   |
| 79943 | P03383 | Q5TG30 | -1.052    |
| 79944 | P03383 | Q96J42 | -0.87282  |
| 79945 | P03383 | P08842 | -0.59619  |
| 79946 | P03383 | Q9Y6X6 | -0.22055  |
| 79947 | P03383 | Q13574 | -0.22741  |
| 79948 | P03383 | Q12846 | -0.23732  |
| 79949 | P03383 | Q96G46 | -0.72927  |
| 79950 | P03383 | Q8IVL0 | -0.63712  |
| 79951 | P03383 | Q6ZW35 | -0.23868  |
| 79952 | P03383 | Q969T3 | -0.55524  |

|       |        |        |           |
|-------|--------|--------|-----------|
| 79953 | P03383 | P49286 | -1.1981   |
| 79954 | P03383 | O15144 | -0.14182  |
| 79955 | P03383 | Q16798 | -0.45407  |
| 79956 | P03383 | Q7Z403 | -0.93931  |
| 79957 | P03383 | P18085 | -0.37536  |
| 79958 | P03383 | P02730 | -0.36324  |
| 79959 | P03383 | Q92747 | -0.37192  |
| 79960 | P03383 | P31025 | -1.0175   |
| 79961 | P03383 | P08123 | -0.41388  |
| 79962 | P03383 | Q8NFP7 | -0.25513  |
| 79963 | P03383 | Q6P2N6 | -0.93628  |
| 79964 | P03383 | O95427 | -0.94539  |
| 79965 | P03383 | P47211 | -1.0773   |
| 79966 | P03383 | O43699 | -1.4036   |
| 79967 | P03383 | P52179 | -0.78803  |
| 79968 | P03383 | Q8NFZ4 | -0.61582  |
| 79969 | P03383 | Q9P2P6 | -0.46507  |
| 79970 | P03383 | Q9Y536 | -0.24989  |
| 79971 | P03383 | Q86SJ6 | -1.1632   |
| 79972 | P03383 | O14514 | -1.3031   |
| 79973 | P03383 | Q9NYV8 | -1.0176   |
| 79974 | P03383 | A6NFN9 | -0.22738  |
| 79975 | P03383 | Q15149 | -0.22764  |
| 79976 | P03383 | Q9Y3S2 | -0.22511  |
| 79977 | P03383 | P48050 | -0.47343  |
| 79978 | P03383 | Q03519 | -0.29834  |
| 79979 | P03383 | Q6ZN30 | -0.22643  |
| 79980 | P03383 | Q8NHH1 | -0.46522  |
| 79981 | P03383 | Q8TAD4 | -0.46997  |
| 79982 | P03383 | O60488 | -0.68519  |
| 79983 | P03383 | Q8TBZ5 | -0.21172  |
| 79984 | P03383 | Q92902 | -0.30303  |
| 79985 | P03383 | Q6PIY5 | -0.46202  |
| 79986 | P03383 | Q6ZUB1 | -0.86584  |
| 79987 | P03383 | Q15835 | -0.86667  |
| 79988 | P03383 | Q9NZ43 | -0.22741  |
| 79989 | P03383 | Q15126 | -0.5643   |
| 79990 | P03383 | Q96BA8 | -0.22658  |
| 79991 | P03383 | Q9Y6W6 | -0.56345  |
| 79992 | P03383 | P62330 | -0.43165  |
| 79993 | P03383 | Q9UHV5 | -0.79342  |
| 79994 | P03383 | Q5FWF5 | -0.35944  |
| 79995 | P03383 | Q8TAA1 | -0.76271  |
| 79996 | P03383 | Q9UPW5 | -0.21662  |
| 79997 | P03383 | O95013 | -1.1027   |
| 79998 | P03383 | Q9UI47 | -0.21637  |
| 79999 | P03383 | Q96HQ0 | -0.21172  |
| 80000 | P03383 | P35452 | -0.23277  |
| 80001 | P03383 | Q8N2G4 | -0.60538  |
| 80002 | P03383 | A6NLW8 | -0.20601  |
| 80003 | P03383 | Q9NWB1 | -0.25823  |
| 80004 | P03383 | Q32ZL2 | -0.97121  |
| 80005 | P03383 | Q92911 | -0.6822   |
| 80006 | P03383 | Q6Y2X3 | -0.40786  |
| 80007 | P03383 | Q8N323 | -0.87849  |
| 80008 | P03383 | P49863 | -1.2917   |
| 80009 | P03383 | Q14703 | -0.84244  |
| 80010 | P03383 | P30305 | -0.18651  |
| 80011 | P03383 | P02729 | -0.677    |
| 80012 | P03383 | Q86UD7 | -1.2307   |
| 80013 | P03383 | Q8WU79 | -0.35635  |
| 80014 | P03383 | Q9HC58 | -0.9258   |
| 80015 | P03383 | Q13496 | -0.53848  |
| 80016 | P03383 | Q8WVX9 | -0.94501  |
| 80017 | P03383 | Q8WTU0 | -0.55277  |
| 80018 | P03383 | Q8NGG1 | -1.0442   |
| 80019 | P03383 | Q9Y5G7 | -1.1297   |
| 80020 | P03383 | Q8N5G2 | -0.53823  |
| 80021 | P03383 | Q8N7I0 | -0.21911  |
| 80022 | P03383 | Q9NR61 | -0.80771  |
| 80023 | P03383 | Q93097 | -0.78619  |
| 80024 | P03383 | Q16478 | -0.6174   |
| 80025 | P03383 | Q9H374 | -0.041129 |
| 80026 | P03383 | P19440 | -0.28599  |
| 80027 | P03383 | Q9Y662 | -0.60238  |
| 80028 | P03383 | Q7Z6R9 | -0.20192  |

|       |        |         |           |
|-------|--------|---------|-----------|
| 80029 | P03383 | P18510  | -0.41425  |
| 80030 | P03383 | Q8NET8  | -0.86611  |
| 80031 | P03383 | Q96KG7  | -0.80146  |
| 80032 | P03383 | P04075  | -0.38223  |
| 80033 | P03383 | Q9NY25  | -0.7992   |
| 80034 | P03383 | O60383  | -0.61661  |
| 80035 | P03383 | Q2Y0W8  | -0.87307  |
| 80036 | P03383 | Q8IY85  | -0.22666  |
| 80037 | P03383 | Q9NQX7  | -0.31814  |
| 80038 | P03383 | A0PG75  | -0.050659 |
| 80039 | P03383 | Q9H5X1  | -0.13403  |
| 80040 | P03383 | P47712  | -0.22763  |
| 80041 | P03383 | P23280  | -0.74986  |
| 80042 | P03383 | P15428  | -0.34702  |
| 80043 | P03383 | O14607  | -0.49674  |
| 80044 | P03383 | P00749  | -0.63551  |
| 80045 | P03383 | Q13946  | -0.40949  |
| 80046 | P03383 | P0CG04  | -0.97479  |
| 80047 | P03383 | Q9UBM8  | -0.56559  |
| 80048 | P03383 | Q9BVK6  | -0.15541  |
| 80049 | P03383 | Q9Y5F2  | -1.1424   |
| 80050 | P03383 | Q9UGN5  | -0.1663   |
| 80051 | P03383 | Q9BY60  | -0.31084  |
| 80052 | P03383 | Q8WVL7  | -0.23649  |
| 80053 | P03383 | Q16527  | -0.4259   |
| 80054 | P03383 | Q2T9K0  | -0.86584  |
| 80055 | P03383 | O76076  | -0.96543  |
| 80056 | P03383 | Q96T52  | -0.54541  |
| 80057 | P03383 | Q8TD10  | -0.21602  |
| 80058 | P03383 | Q9BY12  | -0.53082  |
| 80059 | P03383 | Q8J025  | -0.9591   |
| 80060 | P03383 | Q9NXG6  | -1.0571   |
| 80061 | P03383 | Q02218  | -0.244    |
| 80062 | P03383 | Q8NGU1  | -1.1027   |
| 80063 | P03383 | Q9BYE9  | -0.58623  |
| 80064 | P03383 | P01711  | -0.97479  |
| 80065 | P03383 | Q9P2W1  | -0.16421  |
| 80066 | P03383 | Q9Y4L5  | -0.2308   |
| 80067 | P03383 | Q86YR7  | -0.78542  |
| 80068 | P03383 | P04150  | -0.22746  |
| 80069 | P03383 | O94989  | -0.48787  |
| 80070 | P03383 | Q9NXF1  | -0.44128  |
| 80071 | P03383 | P16619  | -1.0277   |
| 80072 | P03383 | P17213  | -0.87127  |
| 80073 | P03383 | Q96LU7  | -0.87849  |
| 80074 | P03383 | A2RUG3  | -0.86584  |
| 80075 | P03383 | Q6ZMW2  | -0.21172  |
| 80076 | P03383 | Q8TDG2  | -0.30492  |
| 80077 | P03383 | O43175  | -0.77654  |
| 80078 | P03383 | Q6ZVU0  | -0.13574  |
| 80079 | P03383 | Q8NH09  | -1.1027   |
| 80080 | P03383 | Q9BXR5  | -1.1278   |
| 80081 | P03383 | Q96JE9  | -0.14357  |
| 80082 | P03383 | O14863  | -0.61911  |
| 80083 | P03383 | P78536  | -0.30127  |
| 80084 | P03383 | P0CG08  | -0.67293  |
| 80085 | P03383 | Q9NRE1  | -1.1909   |
| 80086 | P03383 | Q9UBG7  | -0.15944  |
| 80087 | P03383 | Q9N2J8  | -0.71912  |
| 80088 | P03383 | O95164  | -0.78629  |
| 80089 | P03383 | Q6P2C0  | -0.4056   |
| 80090 | P03383 | Q7Z6K4  | -0.48668  |
| 80091 | P03383 | Q9BRL6  | -0.59537  |
| 80092 | P03383 | Q9C0E8  | -0.89101  |
| 80093 | P03383 | P35249  | -0.22025  |
| 80094 | P03383 | Q6GQQ9  | -0.17943  |
| 80095 | P03383 | Q96PS6  | -0.86584  |
| 80096 | P03383 | Q8TDX5  | -0.56744  |
| 80097 | P03383 | A6NJJG2 | -0.22741  |
| 80098 | P03383 | Q96RW7  | -1.0992   |
| 80099 | P03383 | P00480  | -0.15247  |
| 80100 | P03383 | Q8IUX4  | -0.54631  |
| 80101 | P03383 | P53779  | -0.2274   |
| 80102 | P03383 | Q8N594  | -0.7159   |
| 80103 | P03383 | Q8N2X6  | -0.87849  |
| 80104 | P03383 | Q9H4E7  | -0.22741  |

|       |        |        |           |
|-------|--------|--------|-----------|
| 80105 | P03383 | Q9Y3Q4 | -1.0022   |
| 80106 | P03383 | P01610 | -0.97479  |
| 80107 | P03383 | Q96FL9 | -0.56906  |
| 80108 | P03383 | Q7RTU1 | -0.38946  |
| 80109 | P03383 | Q5VXU3 | -0.56066  |
| 80110 | P03383 | P40198 | -0.86584  |
| 80111 | P03383 | P38571 | -0.52045  |
| 80112 | P03383 | Q9UIJ7 | -0.58976  |
| 80113 | P03383 | Q9NPF0 | -0.70095  |
| 80114 | P03383 | Q2NKX8 | -0.44619  |
| 80115 | P03383 | Q93099 | -0.46405  |
| 80116 | P03383 | P84996 | -0.79975  |
| 80117 | P03383 | P01298 | -0.86877  |
| 80118 | P03383 | P27352 | -0.90048  |
| 80119 | P03383 | Q8IXH8 | -1.1297   |
| 80120 | P03383 | O00341 | -0.89837  |
| 80121 | P03383 | Q9Y6J6 | -0.99588  |
| 80122 | P03383 | P63218 | -0.58415  |
| 80123 | P03383 | Q4V9L6 | -0.52887  |
| 80124 | P03383 | Q2T9J0 | -0.66481  |
| 80125 | P03383 | P56556 | -0.28478  |
| 80126 | P03383 | Q9HAT2 | -0.87201  |
| 80127 | P03383 | Q95352 | -0.20956  |
| 80128 | P03383 | Q9BYL1 | -0.14767  |
| 80129 | P03383 | Q8N7N1 | -0.10538  |
| 80130 | P03383 | P86791 | -0.6312   |
| 80131 | P03383 | O60271 | -0.27849  |
| 80132 | P03383 | Q86WT1 | -0.51419  |
| 80133 | P03383 | Q9Y397 | -0.69375  |
| 80134 | P03383 | O94900 | -0.33321  |
| 80135 | P03383 | Q8NGI9 | -1.1027   |
| 80136 | P03383 | Q13615 | -0.25951  |
| 80137 | P03383 | Q09470 | -0.80566  |
| 80138 | P03383 | Q9Y616 | -0.22739  |
| 80139 | P03383 | Q8N387 | -1.2123   |
| 80140 | P03383 | Q5QGS0 | -0.24186  |
| 80141 | P03383 | Q8IZJ3 | -0.87838  |
| 80142 | P03383 | P21359 | -0.22655  |
| 80143 | P03383 | Q4AC99 | -0.55498  |
| 80144 | P03383 | Q9NX61 | -0.78465  |
| 80145 | P03383 | Q8N7P3 | -0.64451  |
| 80146 | P03383 | P15328 | -0.9422   |
| 80147 | P03383 | Q5TBA9 | -0.47154  |
| 80148 | P03383 | Q8N9L9 | -0.42169  |
| 80149 | P03383 | P15813 | -0.58894  |
| 80150 | P03383 | O60658 | -0.22706  |
| 80151 | P03383 | Q9HBG7 | -0.87723  |
| 80152 | P03383 | Q96ES6 | -0.8419   |
| 80153 | P03383 | Q9UKJ0 | -0.46493  |
| 80154 | P03383 | P09958 | -0.42804  |
| 80155 | P03383 | Q13444 | -0.60991  |
| 80156 | P03383 | Q60I27 | -0.83965  |
| 80157 | P03383 | Q2HXU8 | -0.92288  |
| 80158 | P03383 | A6NNX1 | -0.56548  |
| 80159 | P03383 | O14830 | -0.2208   |
| 80160 | P03383 | P0C1H6 | -0.70102  |
| 80161 | P03383 | P63027 | -0.23848  |
| 80162 | P03383 | Q9NXR8 | -0.22733  |
| 80163 | P03383 | Q9NRA1 | -0.35871  |
| 80164 | P03383 | P42785 | -0.34532  |
| 80165 | P03383 | Q8N565 | -0.58433  |
| 80166 | P03383 | Q7Z5B4 | -0.7201   |
| 80167 | P03383 | P02763 | -0.39363  |
| 80168 | P03383 | Q8NB78 | -0.47201  |
| 80169 | P03383 | P46597 | -0.18645  |
| 80170 | P03383 | A8MTL0 | -0.21999  |
| 80171 | P03383 | Q3SYC2 | -0.7205   |
| 80172 | P03383 | Q9P2W9 | -0.030408 |
| 80173 | P03383 | C9JDP6 | -0.66509  |
| 80174 | P03383 | A4FU01 | -0.63886  |
| 80175 | P03383 | Q14435 | -0.29693  |
| 80176 | P03383 | P0C604 | -1.1027   |
| 80177 | P03383 | Q96SA4 | -0.86584  |
| 80178 | P03383 | P30475 | -0.93787  |
| 80179 | P03383 | Q9BYD9 | -0.07519  |
| 80180 | P03383 | Q96HE7 | -0.55677  |

|       |        |        |           |
|-------|--------|--------|-----------|
| 80181 | P03383 | P78357 | -0.53849  |
| 80182 | P03383 | Q14112 | -0.68689  |
| 80183 | P03383 | Q8N423 | -0.42559  |
| 80184 | P03383 | Q12907 | -0.54585  |
| 80185 | P03383 | O15524 | -0.2274   |
| 80186 | P03383 | Q7Z6I8 | -0.023212 |
| 80187 | P03383 | P18283 | -0.41613  |
| 80188 | P03383 | Q7Z3E1 | -0.42395  |
| 80189 | P03383 | P35575 | -0.38576  |
| 80190 | P03383 | Q03154 | -0.45214  |
| 80191 | P03383 | O75874 | -0.21609  |
| 80192 | P03383 | Q9HCI6 | -0.44783  |
| 80193 | P03383 | Q12950 | -0.35259  |
| 80194 | P03383 | P58012 | -0.35259  |
| 80195 | P03383 | Q9NZU7 | -0.22516  |
| 80196 | P03383 | O95208 | -0.36002  |
| 80197 | P03383 | Q9HC35 | -0.4228   |
| 80198 | P03383 | Q8NGR2 | -1.1027   |
| 80199 | P03383 | O00559 | -0.76002  |
| 80200 | P03383 | P61106 | -0.36632  |
| 80201 | P03383 | Q9BVM4 | -0.43559  |
| 80202 | P03383 | Q9UBI6 | -0.59575  |
| 80203 | P03383 | P33176 | -0.23626  |
| 80204 | P03383 | Q16581 | -0.92946  |
| 80205 | P03383 | O96013 | -0.56695  |
| 80206 | P03383 | Q01974 | -1.0103   |
| 80207 | P03383 | Q9HBG4 | -0.42613  |
| 80208 | P03383 | Q9Y543 | -0.22587  |
| 80209 | P03383 | Q5SWX8 | -0.99512  |
| 80210 | P03383 | Q6EIG7 | -0.78206  |
| 80211 | P03383 | O43194 | -1.3182   |
| 80212 | P03383 | A6NNS2 | -1.2508   |
| 80213 | P03383 | P10645 | -0.76023  |
| 80214 | P03383 | P55107 | -0.71263  |
| 80215 | P03383 | P28476 | -0.89566  |
| 80216 | P03383 | Q5JXM2 | -0.77979  |
| 80217 | P03383 | Q8NG76 | -1.1027   |
| 80218 | P03383 | Q15800 | -0.85225  |
| 80219 | P03383 | Q16671 | -1.086    |
| 80220 | P03383 | Q96G97 | -0.56482  |
| 80221 | P03383 | P0CG24 | -0.21172  |
| 80222 | P03383 | P30556 | -0.50239  |
| 80223 | P03383 | Q8N7X4 | -0.16078  |
| 80224 | P03383 | Q9UBP0 | -0.22881  |
| 80225 | P03383 | Q15442 | -0.11008  |
| 80226 | P03383 | O00602 | -1.1463   |
| 80227 | P03383 | Q9NXS3 | -0.19442  |
| 80228 | P03383 | Q75947 | -0.28167  |
| 80229 | P03383 | Q8TF72 | -0.42302  |
| 80230 | P03383 | P51788 | -0.75324  |
| 80231 | P03383 | Q6GYQ0 | -0.20929  |
| 80232 | P03383 | Q94813 | -0.26941  |
| 80233 | P03383 | P28331 | -0.17367  |
| 80234 | P03383 | Q16881 | -0.22337  |
| 80235 | P03383 | Q9H4G0 | -0.29797  |
| 80236 | P03383 | Q6ZSB9 | -0.21172  |
| 80237 | P03383 | Q96IF1 | -0.26401  |
| 80238 | P03383 | Q0P6H9 | -0.86584  |
| 80239 | P03383 | A6NEL3 | -0.010956 |
| 80240 | P03383 | Q86T96 | -0.67301  |
| 80241 | P03383 | Q8NFM4 | -0.48817  |
| 80242 | P03383 | Q9Y223 | -0.67944  |
| 80243 | P03383 | Q9UNU6 | -0.88299  |
| 80244 | P03383 | Q9UGP5 | -0.43299  |
| 80245 | P03383 | O43704 | -0.33969  |
| 80246 | P03383 | Q12774 | -0.77972  |
| 80247 | P03383 | P24310 | -0.70598  |
| 80248 | P03383 | Q14689 | -0.21059  |
| 80249 | P03383 | Q9NYR9 | -0.87099  |
| 80250 | P03383 | Q9NYA4 | -0.55208  |
| 80251 | P03383 | P0CW01 | -0.43319  |
| 80252 | P03383 | Q8N8Z3 | -0.21071  |
| 80253 | P03383 | P30501 | -0.93787  |
| 80254 | P03383 | O60285 | -0.26922  |
| 80255 | P03383 | Q8NBV4 | -0.74279  |
| 80256 | P03383 | Q86VD7 | -0.60007  |

|       |        |        |          |
|-------|--------|--------|----------|
| 80257 | P03383 | P48061 | -0.56345 |
| 80258 | P03383 | Q6F5E8 | -0.22358 |
| 80259 | P03383 | P41217 | -0.56136 |
| 80260 | P03383 | Q13976 | -0.34546 |
| 80261 | P03383 | Q9H2D6 | -0.23562 |
| 80262 | P03383 | Q9GZX3 | -0.51339 |
| 80263 | P03383 | Q5JU00 | -0.2272  |
| 80264 | P03383 | P40967 | -0.83376 |
| 80265 | P03383 | Q96R08 | -1.1027  |
| 80266 | P03383 | O14782 | -0.46112 |
| 80267 | P03383 | Q8N4F0 | -1.0096  |
| 80268 | P03383 | Q6EMB2 | -0.14494 |
| 80269 | P03383 | P51864 | -0.63614 |
| 80270 | P03383 | Q9BRT3 | -0.26399 |
| 80271 | P03383 | P15509 | -1.3707  |
| 80272 | P03383 | Q9HAC7 | -0.55324 |
| 80273 | P03383 | P29728 | -0.31679 |
| 80274 | P03383 | P03952 | -0.70746 |
| 80275 | P03383 | O14976 | -0.50968 |
| 80276 | P03383 | Q9TNN7 | -0.88446 |
| 80277 | P03383 | P07686 | -0.35642 |
| 80278 | P03383 | Q02086 | -0.22493 |
| 80279 | P03383 | Q587I9 | -0.62877 |
| 80280 | P03383 | Q8N0U2 | -0.86584 |
| 80281 | P03383 | P11229 | -0.70335 |
| 80282 | P03383 | Q9GZU3 | -0.86584 |
| 80283 | P03383 | A2RUT3 | -0.86584 |
| 80284 | P03383 | Q5JTV8 | -0.52106 |
| 80285 | P03383 | Q9NQG6 | -0.23148 |
| 80286 | P03383 | Q6P4E1 | -0.86584 |
| 80287 | P03383 | P0CB46 | -0.77581 |
| 80288 | P03383 | O60551 | -0.2688  |
| 80289 | P03383 | Q9Y6I7 | -0.22983 |
| 80290 | P03383 | Q8TE82 | -0.28887 |
| 80291 | P03383 | Q01628 | -0.76679 |
| 80292 | P03383 | Q06187 | -0.22741 |
| 80293 | P03383 | Q8N6Y2 | -0.81555 |
| 80294 | P03383 | P14416 | -0.2612  |
| 80295 | P03383 | O75386 | -0.19429 |
| 80296 | P03383 | Q96D03 | -0.29298 |
| 80297 | P03383 | P0CJ85 | -0.1915  |
| 80298 | P03383 | Q5W186 | -0.89477 |
| 80299 | P03383 | Q8IWZ5 | -0.73967 |
| 80300 | P03383 | Q9BXB5 | -0.80455 |
| 80301 | P03383 | P07205 | -0.5088  |
| 80302 | P03383 | Q9BZW2 | -0.90441 |
| 80303 | P03383 | Q6BDI9 | -0.5879  |
| 80304 | P03383 | Q9Y279 | -0.28982 |
| 80305 | P03383 | Q5VZP5 | -0.80303 |
| 80306 | P03383 | A6NNN8 | -0.96495 |
| 80307 | P03383 | A6NKG6 | -0.86584 |
| 80308 | P03383 | Q8N7B9 | -0.52751 |
| 80309 | P03383 | B2RXH4 | -0.22693 |
| 80310 | P03383 | Q13822 | -0.97929 |
| 80311 | P03383 | Q96A28 | -0.87108 |
| 80312 | P03383 | P17980 | -0.28702 |
| 80313 | P03383 | O00141 | -0.44678 |
| 80314 | P03383 | Q6ICB4 | -0.10822 |
| 80315 | P03383 | Q8NF37 | -0.56788 |
| 80316 | P03383 | Q8IVB5 | -0.16078 |
| 80317 | P03383 | Q8NGL1 | -1.1027  |
| 80318 | P03383 | Q8WUS8 | -1.0344  |
| 80319 | P03383 | Q8NGN7 | -1.1027  |
| 80320 | P03383 | Q96MN5 | -0.25894 |
| 80321 | P03383 | Q9BV10 | -0.73881 |
| 80322 | P03383 | Q96GS6 | -0.8359  |
| 80323 | P03383 | A6NDN8 | -0.19767 |
| 80324 | P03383 | P30084 | -0.1335  |
| 80325 | P03383 | Q15619 | -1.1027  |
| 80326 | P03383 | P69849 | -0.83538 |
| 80327 | P03383 | Q9Y243 | -0.15741 |
| 80328 | P03383 | Q1L6U9 | -0.87849 |
| 80329 | P03383 | P51993 | -0.68847 |
| 80330 | P03383 | A8MWL6 | -0.86584 |
| 80331 | P03383 | Q9UJ71 | -0.99716 |
| 80332 | P03383 | P63211 | -0.7594  |

|       |        |        |            |
|-------|--------|--------|------------|
| 80333 | P03383 | Q9Y257 | -1.0191    |
| 80334 | P03383 | Q6QHF9 | -0.43924   |
| 80335 | P03383 | Q8NH87 | -1.1027    |
| 80336 | P03383 | Q9Y4C4 | -0.22917   |
| 80337 | P03383 | P0C7N5 | -1.1027    |
| 80338 | P03383 | Q9BRQ8 | -0.54147   |
| 80339 | P03383 | Q12879 | -0.27271   |
| 80340 | P03383 | P51659 | -0.60985   |
| 80341 | P03383 | Q49AH0 | -0.80645   |
| 80342 | P03383 | P98077 | -0.30029   |
| 80343 | P03383 | P56851 | -0.76062   |
| 80344 | P03383 | Q16678 | -0.70823   |
| 80345 | P03383 | Q6UW60 | -0.99309   |
| 80346 | P03383 | P08908 | -1.0562    |
| 80347 | P03383 | Q8N961 | -0.32204   |
| 80348 | P03383 | P06312 | -0.97479   |
| 80349 | P03383 | A6NCI4 | -0.87849   |
| 80350 | P03383 | Q86YB7 | -0.66953   |
| 80351 | P03383 | P13164 | -0.41602   |
| 80352 | P03383 | Q9Y577 | -0.23112   |
| 80353 | P03383 | P49590 | -0.20822   |
| 80354 | P03383 | Q6NYC8 | -0.33887   |
| 80355 | P03383 | P09919 | -0.81957   |
| 80356 | P03383 | P47881 | -1.1027    |
| 80357 | P03383 | Q6UXZ3 | -0.39621   |
| 80358 | P03383 | Q86UR5 | -0.28877   |
| 80359 | P03383 | Q96A59 | -0.72684   |
| 80360 | P03383 | P45877 | -0.32291   |
| 80361 | P03383 | P01210 | -0.92087   |
| 80362 | P03383 | P07942 | -0.61724   |
| 80363 | P03383 | Q6ZUM4 | -0.91582   |
| 80364 | P03383 | Q4G163 | -0.28849   |
| 80365 | P03383 | P21579 | -0.29051   |
| 80366 | P03383 | O95210 | -0.51536   |
| 80367 | P03383 | Q9P0R6 | -0.29487   |
| 80368 | P03383 | P55056 | -0.89985   |
| 80369 | P03383 | Q9BR11 | -0.29787   |
| 80370 | P03383 | P08559 | -0.30077   |
| 80371 | P03383 | Q96RU3 | -0.22741   |
| 80372 | P03383 | P12955 | -0.67928   |
| 80373 | P03383 | Q9HD67 | -0.50747   |
| 80374 | P03383 | O43511 | -0.82594   |
| 80375 | P03383 | Q7RTX9 | -0.89347   |
| 80376 | P03383 | Q9NQX0 | -0.14436   |
| 80377 | P03383 | P51685 | -1.2425    |
| 80378 | P03383 | P57682 | -0.35845   |
| 80379 | P03383 | Q8IWX7 | -0.41174   |
| 80380 | P03383 | Q9H6Y7 | -0.28839   |
| 80381 | P03383 | Q6ZSA7 | -1.0257    |
| 80382 | P03383 | A6NL08 | -1.1027    |
| 80383 | P03383 | Q14847 | -0.2274    |
| 80384 | P03383 | Q95502 | -0.94954   |
| 80385 | P03383 | Q6P9G4 | -0.86584   |
| 80386 | P03383 | A8MT70 | -0.73967   |
| 80387 | P03383 | O95390 | -0.55859   |
| 80388 | P03383 | Q15155 | -0.51844   |
| 80389 | P03383 | Q9NVA1 | -0.28643   |
| 80390 | P03383 | P10415 | -0.22732   |
| 80391 | P03383 | Q92982 | -0.8727    |
| 80392 | P03383 | Q9H2Y9 | -0.89134   |
| 80393 | P03383 | Q9UNZ2 | -0.61773   |
| 80394 | P03383 | Q13418 | -0.28601   |
| 80395 | P03383 | Q9NZC7 | -0.22741   |
| 80396 | P03383 | A2A2V5 | -0.86584   |
| 80397 | P03383 | P13942 | -0.83274   |
| 80398 | P03383 | Q9BVK8 | -0.93931   |
| 80399 | P03383 | P33897 | -0.23944   |
| 80400 | P03383 | Q92736 | -0.35571   |
| 80401 | P03383 | O95998 | -0.80156   |
| 80402 | P03383 | O96028 | -0.22741   |
| 80403 | P03383 | P49189 | -0.33462   |
| 80404 | P03383 | P08218 | -1.2917    |
| 80405 | P03383 | P11498 | -0.54654   |
| 80406 | P03383 | P17655 | -0.29067   |
| 80407 | P03383 | Q5VYX0 | -0.99961   |
| 80408 | P03383 | Q8N2C9 | -0.0066395 |

|       |        |        |           |
|-------|--------|--------|-----------|
| 80409 | P03383 | Q5T9Z0 | -0.86584  |
| 80410 | P03383 | Q8NB14 | -0.69644  |
| 80411 | P03383 | Q70UQ0 | -0.37194  |
| 80412 | P03383 | Q8NGW6 | -1.1027   |
| 80413 | P03383 | P35606 | -0.23144  |
| 80414 | P03383 | Q92932 | -1.0076   |
| 80415 | P03383 | Q9UI09 | -0.16051  |
| 80416 | P03383 | P09914 | -0.20405  |
| 80417 | P03383 | Q5JPE7 | -0.41813  |
| 80418 | P03383 | Q8IVW8 | -0.92929  |
| 80419 | P03383 | Q9GZV8 | -0.22029  |
| 80420 | P03383 | Q6ZPD9 | -0.86584  |
| 80421 | P03383 | P09327 | -0.20752  |
| 80422 | P03383 | Q9NQM4 | -0.1424   |
| 80423 | P03383 | O94777 | -0.33212  |
| 80424 | P03383 | Q93091 | -0.70085  |
| 80425 | P03383 | Q96B33 | -0.64451  |
| 80426 | P03383 | Q9P2M4 | -1.145    |
| 80427 | P03383 | Q8N9I5 | -0.96508  |
| 80428 | P03383 | Q13275 | -0.84522  |
| 80429 | P03383 | Q9UI38 | -0.69536  |
| 80430 | P03383 | Q9GZM8 | -0.093066 |
| 80431 | P03383 | P63151 | -0.21049  |
| 80432 | P03383 | Q96RD3 | -1.1027   |
| 80433 | P03383 | Q9Y487 | -0.34183  |
| 80434 | P03383 | Q8TAE7 | -0.4855   |
| 80435 | P03383 | Q6PHW0 | -0.88389  |
| 80436 | P03383 | Q15056 | -0.22696  |
| 80437 | P03383 | Q9UK96 | -0.45235  |
| 80438 | P03383 | Q9H478 | -0.16078  |
| 80439 | P03383 | P41273 | -0.88525  |
| 80440 | P03383 | Q9NRM2 | -0.19624  |
| 80441 | P03383 | Q8NH06 | -1.1027   |
| 80442 | P03383 | O60548 | -0.35259  |
| 80443 | P03383 | Q9H8Y5 | -0.21443  |
| 80444 | P03383 | Q9HBI1 | -0.5829   |
| 80445 | P03383 | Q00325 | -0.81986  |
| 80446 | P03383 | O60895 | -0.19428  |
| 80447 | P03383 | Q5JS37 | -0.87849  |
| 80448 | P03383 | O43610 | -0.40512  |
| 80449 | P03383 | P16410 | -0.36523  |
| 80450 | P03383 | Q8IWT1 | -0.78472  |
| 80451 | P03383 | Q96PL2 | -0.99615  |
| 80452 | P03383 | P78539 | -0.67831  |
| 80453 | P03383 | Q96L16 | -0.099716 |
| 80454 | P03383 | P53365 | -0.22118  |
| 80455 | P03383 | O94892 | -0.21172  |
| 80456 | P03383 | Q9H0T7 | -1.1255   |
| 80457 | P03383 | P0C870 | -0.14349  |
| 80458 | P03383 | Q6NWX9 | -0.22505  |
| 80459 | P03383 | Q15382 | -1.1163   |
| 80460 | P03383 | Q8NAM6 | -0.32648  |
| 80461 | P03383 | O75674 | -0.17461  |
| 80462 | P03383 | P10911 | -0.22703  |
| 80463 | P03383 | Q15582 | -1.1855   |
| 80464 | P03383 | O15120 | -0.65929  |
| 80465 | P03383 | P28222 | -0.78168  |
| 80466 | P03383 | O95406 | -0.79326  |
| 80467 | P03383 | Q58A45 | -0.20953  |
| 80468 | P03383 | P05026 | -0.42389  |
| 80469 | P03383 | P35070 | -1.0282   |
| 80470 | P03383 | P20309 | -0.58211  |
| 80471 | P03383 | P46934 | -0.22741  |
| 80472 | P03383 | Q9Y5W8 | -0.66562  |
| 80473 | P03383 | Q8WTX9 | -0.79965  |
| 80474 | P03383 | Q5TH69 | -0.90368  |
| 80475 | P03383 | Q9N2K0 | -0.40288  |
| 80476 | P03383 | Q9P1U0 | -0.10123  |
| 80477 | P03383 | P13569 | -0.30116  |
| 80478 | P03383 | Q9H4D0 | -0.95972  |
| 80479 | P03383 | P84085 | -0.30316  |
| 80480 | P03383 | P15260 | -0.99695  |
| 80481 | P03383 | Q9UPT8 | -0.51948  |
| 80482 | P03383 | Q9BZJ3 | -1.2917   |
| 80483 | P03383 | Q9Y365 | -0.64389  |
| 80484 | P03383 | A8MQ11 | -0.33287  |



|       |        |        |            |
|-------|--------|--------|------------|
| 80485 | P03383 | O60725 | -0.52185   |
| 80486 | P03383 | O15296 | -0.5727    |
| 80487 | P03383 | Q4KMP7 | -1.1028    |
| 80488 | P03383 | A6NK06 | -0.41671   |
| 80489 | P03383 | O14682 | -0.25803   |
| 80490 | P03383 | O14815 | -0.94211   |
| 80491 | P03383 | O60906 | -0.69796   |
| 80492 | P03383 | Q13099 | -0.24776   |
| 80493 | P03383 | P49903 | -0.93349   |
| 80494 | P03383 | Q96S52 | -0.38974   |
| 80495 | P03383 | Q9NYQ7 | -0.93696   |
| 80496 | P03383 | Q9P202 | -0.22652   |
| 80497 | P03383 | O15118 | -0.56558   |
| 80498 | P03383 | Q8NDH3 | -0.71801   |
| 80499 | P03383 | P17174 | -0.20146   |
| 80500 | P03383 | P32929 | -0.21318   |
| 80501 | P03383 | Q9UKP4 | -1.1807    |
| 80502 | P03383 | Q8N8U3 | -0.51948   |
| 80503 | P03383 | Q8WUU4 | -0.22425   |
| 80504 | P03383 | Q9BXI3 | -0.39563   |
| 80505 | P03383 | Q9Y2H5 | -0.5353    |
| 80506 | P03383 | Q13421 | -0.5321    |
| 80507 | P03383 | Q5BLP8 | -0.87849   |
| 80508 | P03383 | Q9UBU2 | -0.96066   |
| 80509 | P03383 | Q12999 | -0.90987   |
| 80510 | P03383 | Q17RD7 | -0.57056   |
| 80511 | P03383 | Q8TAC1 | -0.71398   |
| 80512 | P03383 | O00409 | -0.33946   |
| 80513 | P03383 | O95631 | -0.22741   |
| 80514 | P03383 | P25325 | -0.21062   |
| 80515 | P03383 | Q96FJ0 | -0.35565   |
| 80516 | P03383 | Q8WTR8 | -0.87849   |
| 80517 | P03383 | Q9NVH0 | -0.67859   |
| 80518 | P03383 | Q96SF2 | -0.60894   |
| 80519 | P03383 | Q9HBL8 | -0.18872   |
| 80520 | P03383 | Q8IXL7 | -0.65733   |
| 80521 | P03383 | Q92623 | -0.21189   |
| 80522 | P03383 | P07996 | -0.29513   |
| 80523 | P03383 | Q6PI25 | -0.40559   |
| 80524 | P03383 | O60811 | -0.25825   |
| 80525 | P03383 | Q9HBM0 | -0.53579   |
| 80526 | P03383 | Q9Y6A1 | -0.84115   |
| 80527 | P03383 | Q86UQ0 | -0.28226   |
| 80528 | P03383 | Q9BVX2 | -0.59863   |
| 80529 | P03383 | Q86SR1 | -0.68285   |
| 80530 | P03383 | O95136 | -1.1152    |
| 80531 | P03383 | Q13972 | -0.59574   |
| 80532 | P03383 | Q9H0R4 | -0.52934   |
| 80533 | P03383 | Q8IYX1 | -1.2307    |
| 80534 | P03383 | Q96RS6 | -0.16042   |
| 80535 | P03383 | P20813 | -0.70755   |
| 80536 | P03383 | P51512 | -1.4022    |
| 80537 | P03383 | P09936 | -0.17265   |
| 80538 | P03383 | Q96GZ6 | -0.90918   |
| 80539 | P03383 | Q8TB40 | -0.46099   |
| 80540 | P03383 | Q3B7I2 | -0.12436   |
| 80541 | P03383 | Q16143 | -0.21291   |
| 80542 | P03383 | Q9H967 | -0.22717   |
| 80543 | P03383 | Q8NDW8 | -0.0023059 |
| 80544 | P03383 | Q96S90 | -0.43278   |
| 80545 | P03383 | O00253 | -0.81898   |
| 80546 | P03383 | P30203 | -1.1       |
| 80547 | P03383 | Q9BYT3 | -0.59039   |
| 80548 | P03383 | Q8NG41 | -0.32387   |
| 80549 | P03383 | P06317 | -0.95485   |
| 80550 | P03383 | A8MU46 | -0.22833   |
| 80551 | P03383 | Q9GZT5 | -0.7946    |
| 80552 | P03383 | Q8N138 | -0.40635   |
| 80553 | P03383 | P30405 | -0.21798   |
| 80554 | P03383 | P01617 | -0.97479   |
| 80555 | P03383 | Q9P0P8 | -0.30763   |
| 80556 | P03383 | O43361 | -0.21172   |
| 80557 | P03383 | Q13075 | -0.30608   |
| 80558 | P03383 | Q06416 | -0.22741   |
| 80559 | P03383 | Q9NQ03 | -0.19925   |
| 80560 | P03383 | P36405 | -0.22831   |

|       |        |        |           |
|-------|--------|--------|-----------|
| 80561 | P03383 | Q09428 | -0.553    |
| 80562 | P03383 | P42566 | -0.22741  |
| 80563 | P03383 | P06311 | -0.97479  |
| 80564 | P03383 | Q9H0J4 | -0.2058   |
| 80565 | P03383 | Q16558 | -0.96534  |
| 80566 | P03383 | B0YJ81 | -1.3021   |
| 80567 | P03383 | Q5TA82 | -0.43006  |
| 80568 | P03383 | Q9H0F7 | -0.66171  |
| 80569 | P03383 | Q15415 | -0.53838  |
| 80570 | P03383 | Q8WY36 | -0.22708  |
| 80571 | P03383 | Q9BX68 | -0.4087   |
| 80572 | P03383 | Q9NPF7 | -0.43065  |
| 80573 | P03383 | Q92484 | -0.32341  |
| 80574 | P03383 | Q75063 | -0.96513  |
| 80575 | P03383 | Q9H5I5 | -0.96063  |
| 80576 | P03383 | Q9H6B4 | -0.80349  |
| 80577 | P03383 | Q9Y5E4 | -1.1238   |
| 80578 | P03383 | Q99250 | -0.99993  |
| 80579 | P03383 | Q14952 | -1.0458   |
| 80580 | P03383 | Q6ZRI0 | -0.79086  |
| 80581 | P03383 | Q9BUK6 | -0.1309   |
| 80582 | P03383 | Q9H4L4 | -0.38771  |
| 80583 | P03383 | P55851 | -0.51747  |
| 80584 | P03383 | P01880 | -1.2614   |
| 80585 | P03383 | O60476 | -0.56671  |
| 80586 | P03383 | Q9NRW7 | -0.21971  |
| 80587 | P03383 | Q5JRS4 | -1.1027   |
| 80588 | P03383 | P53602 | -0.56773  |
| 80589 | P03383 | O14832 | -0.24523  |
| 80590 | P03383 | Q9NYV7 | -0.58596  |
| 80591 | P03383 | Q9H4F8 | -1.1398   |
| 80592 | P03383 | Q96EY9 | -0.57065  |
| 80593 | P03383 | Q15822 | -0.91138  |
| 80594 | P03383 | Q96KX1 | -0.075151 |
| 80595 | P03383 | Q6NT16 | -0.8419   |
| 80596 | P03383 | P06889 | -0.97479  |
| 80597 | P03383 | Q8WWM9 | -0.4268   |
| 80598 | P03383 | Q96S97 | -0.86584  |
| 80599 | P03383 | Q92561 | -0.14558  |
| 80600 | P03383 | Q14581 | -1.1027   |
| 80601 | P03383 | Q96CC6 | -0.57218  |
| 80602 | P03383 | P55201 | -0.28965  |
| 80603 | P03383 | Q0ZGT2 | -0.42448  |
| 80604 | P03383 | Q6WRX3 | -0.15081  |
| 80605 | P03383 | Q7Z407 | -0.93628  |
| 80606 | P03383 | P01222 | -0.64199  |
| 80607 | P03383 | Q6IC98 | -0.72588  |
| 80608 | P03383 | Q4G0Z9 | -0.57707  |
| 80609 | P03383 | Q9P003 | -0.82088  |
| 80610 | P03383 | Q7Z418 | -1.0402   |
| 80611 | P03383 | Q7Z5A8 | -0.87849  |
| 80612 | P03383 | Q2M3G0 | -1.0602   |
| 80613 | P03383 | Q5VX71 | -0.86584  |
| 80614 | P03383 | Q9UBD9 | -0.32869  |
| 80615 | P03383 | Q8TBZ0 | -0.083844 |
| 80616 | P03383 | P0CG21 | -0.22508  |
| 80617 | P03383 | Q9H2A3 | -0.22785  |
| 80618 | P03383 | Q6P179 | -1.0468   |
| 80619 | P03383 | Q3KR16 | -0.28355  |
| 80620 | P03383 | Q6XE24 | -0.72901  |
| 80621 | P03383 | Q08431 | -0.72541  |
| 80622 | P03383 | Q01484 | -0.22746  |
| 80623 | P03383 | Q92185 | -0.51011  |
| 80624 | P03383 | Q8IUR7 | -0.22748  |
| 80625 | P03383 | O95467 | -0.70669  |
| 80626 | P03383 | Q8NH53 | -1.1027   |
| 80627 | P03383 | Q9P2E7 | -1.1297   |
| 80628 | P03383 | O14609 | -0.86372  |
| 80629 | P03383 | P98172 | -0.16453  |
| 80630 | P03383 | Q96FM1 | -0.73644  |
| 80631 | P03383 | Q7Z7M0 | -0.22741  |
| 80632 | P03383 | Q96RG2 | -0.41875  |
| 80633 | P03383 | Q9BXY0 | -0.028849 |
| 80634 | P03383 | Q96QB1 | -0.27901  |
| 80635 | P03383 | Q14789 | -0.2424   |
| 80636 | P03383 | Q9H341 | -1.1027   |

|       |        |        |           |
|-------|--------|--------|-----------|
| 80637 | P03383 | Q8NG84 | -1.1027   |
| 80638 | P03383 | P63252 | -1.1993   |
| 80639 | P03383 | P31512 | -0.99237  |
| 80640 | P03383 | Q9NW97 | -0.86584  |
| 80641 | P03383 | Q13516 | -0.22747  |
| 80642 | P03383 | Q6PEW1 | -0.1108   |
| 80643 | P03383 | Q9BSE2 | -0.86584  |
| 80644 | P03383 | A8MWC7 | -0.13231  |
| 80645 | P03383 | Q4G0G5 | -0.87849  |
| 80646 | P03383 | E7ERA6 | -0.92811  |
| 80647 | P03383 | Q9NPH6 | -0.75124  |
| 80648 | P03383 | Q9Y228 | -0.31983  |
| 80649 | P03383 | Q96N66 | -0.29304  |
| 80650 | P03383 | Q9Y6I4 | -0.38786  |
| 80651 | P03383 | Q6UVY6 | -1.0483   |
| 80652 | P03383 | P34903 | -0.80184  |
| 80653 | P03383 | P17931 | -0.21055  |
| 80654 | P03383 | Q8N4G2 | -0.64105  |
| 80655 | P03383 | P22352 | -0.71364  |
| 80656 | P03383 | Q6NVU6 | -0.16482  |
| 80657 | P03383 | Q9NZI8 | -0.22647  |
| 80658 | P03383 | O00322 | -0.82073  |
| 80659 | P03383 | Q6IS24 | -0.7101   |
| 80660 | P03383 | Q0VGE8 | -0.21172  |
| 80661 | P03383 | P01160 | -0.37116  |
| 80662 | P03383 | P32119 | -0.42129  |
| 80663 | P03383 | Q6V1P9 | -1.1297   |
| 80664 | P03383 | Q9BUB4 | -0.40862  |
| 80665 | P03383 | Q96GJ1 | -0.22317  |
| 80666 | P03383 | P09544 | -0.42887  |
| 80667 | P03383 | Q8N7P7 | -0.43585  |
| 80668 | P03383 | O60519 | -0.16883  |
| 80669 | P03383 | Q9NU19 | -1.2307   |
| 80670 | P03383 | Q8N878 | -0.44826  |
| 80671 | P03383 | A1L4M7 | -0.18721  |
| 80672 | P03383 | Q9Y2H2 | -0.40159  |
| 80673 | P03383 | Q8WWF6 | -0.48297  |
| 80674 | P14079 | A8MUP2 | -0.082751 |
| 80675 | P14079 | Q8N8R5 | -0.80633  |
| 80676 | P14079 | O94885 | -0.22151  |
| 80677 | P14079 | O95857 | -0.99591  |
| 80678 | P14079 | P31415 | -0.19437  |
| 80679 | P14079 | P10082 | -0.74441  |
| 80680 | P14079 | P15086 | -1.3084   |
| 80681 | P14079 | P29466 | -0.22734  |
| 80682 | P14079 | O14798 | -0.68045  |
| 80683 | P14079 | P36404 | -0.22799  |
| 80684 | P14079 | Q8TC07 | -0.83967  |
| 80685 | P14079 | Q9NP61 | -0.11121  |
| 80686 | P14079 | P16109 | -0.29478  |
| 80687 | P14079 | P05093 | -0.53259  |
| 80688 | P14079 | Q96J42 | -0.84193  |
| 80689 | P14079 | Q9Y5R6 | -0.17052  |
| 80690 | P14079 | A2RU48 | -0.77815  |
| 80691 | P14079 | P05113 | -0.2399   |
| 80692 | P14079 | Q9C0B0 | -0.16722  |
| 80693 | P14079 | Q96DC8 | -0.22163  |
| 80694 | P14079 | Q8IYP9 | -0.94083  |
| 80695 | P14079 | Q6DWJ6 | -1.3154   |
| 80696 | P14079 | Q9P265 | -0.21115  |
| 80697 | P14079 | P01589 | -0.63364  |
| 80698 | P14079 | P61601 | -0.32953  |
| 80699 | P14079 | P01569 | -0.81438  |
| 80700 | P14079 | Q4G0T1 | -0.77114  |
| 80701 | P14079 | Q96CS7 | -0.23372  |
| 80702 | P14079 | P19440 | -0.54016  |
| 80703 | P14079 | Q9NYV9 | -1.1071   |
| 80704 | P14079 | P29992 | -0.94956  |
| 80705 | P14079 | Q9UNE7 | -0.2258   |
| 80706 | P14079 | P30041 | -0.33969  |
| 80707 | P14079 | Q14953 | -1.1804   |
| 80708 | P14079 | Q9NYW0 | -1.1071   |
| 80709 | P14079 | Q53H47 | -0.20137  |
| 80710 | P14079 | Q5JQF8 | -0.79049  |
| 80711 | P14079 | Q2M3C6 | -0.77815  |
| 80712 | P14079 | P08195 | -0.4952   |

|       |        |        |           |
|-------|--------|--------|-----------|
| 80713 | P14079 | Q0VAK6 | -0.20846  |
| 80714 | P14079 | Q6IE36 | -0.91352  |
| 80715 | P14079 | P01768 | -1        |
| 80716 | P14079 | P34741 | -0.49877  |
| 80717 | P14079 | A0AVI2 | -0.77815  |
| 80718 | P14079 | Q8IZP6 | -0.22733  |
| 80719 | P14079 | Q8TCZ2 | -1.0563   |
| 80720 | P14079 | Q8TDV2 | -1.3154   |
| 80721 | P14079 | Q9BRQ0 | -0.14581  |
| 80722 | P14079 | P20036 | -0.83991  |
| 80723 | P14079 | A2A3N6 | -0.22169  |
| 80724 | P14079 | A6NKG5 | -1.1021   |
| 80725 | P14079 | Q8NGD5 | -1.2314   |
| 80726 | P14079 | Q94907 | -0.48508  |
| 80727 | P14079 | Q6UXB4 | -0.27528  |
| 80728 | P14079 | Q86YW5 | -0.087895 |
| 80729 | P14079 | Q6IFH4 | -1.2314   |
| 80730 | P14079 | Q99808 | -0.95034  |
| 80731 | P14079 | P01766 | -1        |
| 80732 | P14079 | Q9BRQ8 | -0.36882  |
| 80733 | P14079 | Q15547 | -0.89699  |
| 80734 | P14079 | Q9H3S7 | -0.24675  |
| 80735 | P14079 | Q10981 | -0.62017  |
| 80736 | P14079 | Q8IV45 | -0.73357  |
| 80737 | P14079 | Q86VF7 | -0.272    |
| 80738 | P14079 | Q96D31 | -0.59577  |
| 80739 | P14079 | Q9Y5K1 | -0.516    |
| 80740 | P14079 | Q92813 | -1.0536   |
| 80741 | P14079 | O43497 | -1.0339   |
| 80742 | P14079 | P05546 | -0.83733  |
| 80743 | P14079 | Q8NGS9 | -1.2314   |
| 80744 | P14079 | Q16348 | -0.48387  |
| 80745 | P14079 | A2CJ06 | -0.43293  |
| 80746 | P14079 | P56880 | -0.60718  |
| 80747 | P14079 | Q9Y566 | -0.22749  |
| 80748 | P14079 | P01303 | -0.66744  |
| 80749 | P14079 | Q8NBI3 | -0.9499   |
| 80750 | P14079 | C9JRZ8 | -0.48664  |
| 80751 | P14079 | Q96RT6 | -0.82495  |
| 80752 | P14079 | Q70JA7 | -0.5712   |
| 80753 | P14079 | Q8NBJ9 | -0.85956  |
| 80754 | P14079 | Q6GMV1 | -0.31449  |
| 80755 | P14079 | P78357 | -0.57826  |
| 80756 | P14079 | O94856 | -0.95872  |
| 80757 | P14079 | Q9P0M6 | -1.0891   |
| 80758 | P14079 | A6NCL7 | -0.22746  |
| 80759 | P14079 | Q9NUQ8 | -0.92854  |
| 80760 | P14079 | P98179 | -0.50755  |
| 80761 | P14079 | O43280 | -0.44134  |
| 80762 | P14079 | P26715 | -1.2593   |
| 80763 | P14079 | P11678 | -0.66215  |
| 80764 | P14079 | Q96CN7 | -0.58475  |
| 80765 | P14079 | Q8IX95 | -0.24361  |
| 80766 | P14079 | O00217 | -0.4988   |
| 80767 | P14079 | Q14990 | -0.53669  |
| 80768 | P14079 | Q68CP4 | -0.92882  |
| 80769 | P14079 | P55103 | -0.69587  |
| 80770 | P14079 | Q99578 | -0.98016  |
| 80771 | P14079 | Q8WWV6 | -0.94582  |
| 80772 | P14079 | Q9BZM4 | -0.27113  |
| 80773 | P14079 | Q8WUM9 | -1.32     |
| 80774 | P14079 | Q9UBQ6 | -1.3078   |
| 80775 | P14079 | P21128 | -0.88784  |
| 80776 | P14079 | Q8NH94 | -1.2314   |
| 80777 | P14079 | P59537 | -1.2095   |
| 80778 | P14079 | O60547 | -0.77085  |
| 80779 | P14079 | Q9NPG8 | -0.94083  |
| 80780 | P14079 | P01703 | -1        |
| 80781 | P14079 | P35556 | -0.91058  |
| 80782 | P14079 | Q8NG83 | -1.2314   |
| 80783 | P14079 | Q8IX94 | -0.82495  |
| 80784 | P14079 | A8MWV9 | -0.77815  |
| 80785 | P14079 | Q8NG76 | -1.2314   |
| 80786 | P14079 | Q8WVS4 | -0.21693  |
| 80787 | P14079 | A4FU49 | -0.21633  |
| 80788 | P14079 | P45954 | -0.61183  |

|       |        |        |           |
|-------|--------|--------|-----------|
| 80789 | P14079 | A6NMB9 | -0.97035  |
| 80790 | P14079 | A6NIR3 | -0.96514  |
| 80791 | P14079 | O60333 | -0.24024  |
| 80792 | P14079 | Q9HDB9 | -0.066067 |
| 80793 | P14079 | Q4G148 | -0.68173  |
| 80794 | P14079 | Q6ZMJ4 | -0.67719  |
| 80795 | P14079 | Q06187 | -0.22741  |
| 80796 | P14079 | P20702 | -0.54157  |
| 80797 | P14079 | Q8WWA0 | -1.1657   |
| 80798 | P14079 | P42127 | -0.91434  |
| 80799 | P14079 | P12318 | -0.95209  |
| 80800 | P14079 | Q9UIR0 | -0.77815  |
| 80801 | P14079 | Q8N3Y7 | -1.5604   |
| 80802 | P14079 | P30542 | -0.37842  |
| 80803 | P14079 | Q8IZU2 | -0.22722  |
| 80804 | P14079 | Q6NXT6 | -0.90642  |
| 80805 | P14079 | Q9H1C0 | -1.2173   |
| 80806 | P14079 | Q8WXX4 | -0.47402  |
| 80807 | P14079 | A6NJW9 | -0.97472  |
| 80808 | P14079 | P30488 | -1        |
| 80809 | P14079 | B2RPK0 | -0.32078  |
| 80810 | P14079 | Q9NRW4 | -0.54673  |
| 80811 | P14079 | Q8NGL3 | -1.2314   |
| 80812 | P14079 | Q8TF42 | -0.22741  |
| 80813 | P14079 | Q6NXP6 | -1.0329   |
| 80814 | P14079 | O60266 | -0.73945  |
| 80815 | P14079 | Q9Y6W3 | -0.77142  |
| 80816 | P14079 | P12882 | -0.094544 |
| 80817 | P14079 | Q6ZNJ1 | -0.22741  |
| 80818 | P14079 | Q9Y4X5 | -0.18856  |
| 80819 | P14079 | Q86W28 | -0.6336   |
| 80820 | P14079 | Q8N8P7 | -0.80633  |
| 80821 | P14079 | Q8NFX7 | -0.47353  |
| 80822 | P14079 | O60906 | -0.83943  |
| 80823 | P14079 | Q17RS7 | -0.1091   |
| 80824 | P14079 | Q92563 | -0.97083  |
| 80825 | P14079 | Q6ZMU5 | -0.28688  |
| 80826 | P14079 | Q9P281 | -0.12754  |
| 80827 | P14079 | Q6IED9 | -0.42316  |
| 80828 | P14079 | Q14952 | -1.1603   |
| 80829 | P14079 | O95500 | -0.57021  |
| 80830 | P14079 | Q4VC12 | -0.20919  |
| 80831 | P14079 | P36915 | -0.68974  |
| 80832 | P14079 | Q86TG1 | -0.95173  |
| 80833 | P14079 | O95741 | -0.34366  |
| 80834 | P14079 | O43316 | -0.22288  |
| 80835 | P14079 | P59646 | -0.97984  |
| 80836 | P14079 | Q9Y463 | -0.42406  |
| 80837 | P14079 | Q8NGL6 | -1.2314   |
| 80838 | P14079 | P43627 | -0.99446  |
| 80839 | P14079 | Q8NCW5 | -0.57903  |
| 80840 | P14079 | Q9GZX6 | -0.78311  |
| 80841 | P14079 | Q8IZD0 | -0.03252  |
| 80842 | P14079 | Q9HCE6 | -0.30507  |
| 80843 | P14079 | Q9Y2U2 | -1.2622   |
| 80844 | P14079 | Q15040 | -0.68502  |
| 80845 | P14079 | P48449 | -0.48238  |
| 80846 | P14079 | Q9BUB5 | -0.52017  |
| 80847 | P14079 | P30460 | -1.0983   |
| 80848 | P14079 | Q9NP31 | -0.71214  |
| 80849 | P14079 | Q93077 | -0.92425  |
| 80850 | P14079 | Q8IUR5 | -0.62143  |
| 80851 | P14079 | Q9UL26 | -0.59347  |
| 80852 | P14079 | P50225 | -0.42264  |
| 80853 | P14079 | Q9HAU6 | -0.15268  |
| 80854 | P14079 | Q9Y2H2 | -0.16922  |
| 80855 | P14079 | Q9UKP3 | -0.46071  |
| 80856 | P14079 | P98095 | -1.0114   |
| 80857 | P14079 | Q9BZD7 | -1.4975   |
| 80858 | P14079 | Q7Z692 | -0.77815  |
| 80859 | P14079 | Q8IY82 | -0.32613  |
| 80860 | P14079 | P12724 | -0.71866  |
| 80861 | P14079 | Q6ZW33 | -0.70131  |
| 80862 | P14079 | Q6NT16 | -0.87582  |
| 80863 | P14079 | Q8N4Y2 | -0.035618 |
| 80864 | P14079 | O43921 | -0.32734  |

|       |        |        |           |
|-------|--------|--------|-----------|
| 80865 | P14079 | Q7Z6J6 | -0.50279  |
| 80866 | P14079 | Q9H611 | -0.56128  |
| 80867 | P14079 | Q96C92 | -0.13204  |
| 80868 | P14079 | Q9UN66 | -1.2343   |
| 80869 | P14079 | P38571 | -0.44029  |
| 80870 | P14079 | Q9UMF0 | -1.301    |
| 80871 | P14079 | P47893 | -1.3651   |
| 80872 | P14079 | Q04759 | -0.14685  |
| 80873 | P14079 | P15391 | -1.2307   |
| 80874 | P14079 | Q8N143 | -0.056219 |
| 80875 | P14079 | Q6UB99 | -0.22744  |
| 80876 | P14079 | Q15717 | -0.51618  |
| 80877 | P14079 | Q9UJ42 | -1.3154   |
| 80878 | P14079 | Q99075 | -1.2703   |
| 80879 | P14079 | Q5IJ48 | -1.6385   |
| 80880 | P14079 | Q2TBC4 | -0.42187  |
| 80881 | P14079 | Q9ULG6 | -0.68738  |
| 80882 | P14079 | Q96JJ6 | -1.0454   |
| 80883 | P14079 | Q2QD12 | -0.29374  |
| 80884 | P14079 | O60313 | -0.57931  |
| 80885 | P14079 | Q96SI9 | -0.73802  |
| 80886 | P14079 | Q96E22 | -1.1911   |
| 80887 | P14079 | Q8NGS5 | -1.2314   |
| 80888 | P14079 | P31930 | -0.5502   |
| 80889 | P14079 | Q6GMV3 | -0.50881  |
| 80890 | P14079 | P11168 | -0.10348  |
| 80891 | P14079 | Q9P2W7 | -0.64871  |
| 80892 | P14079 | Q15678 | -0.40046  |
| 80893 | P14079 | Q9UKR0 | -1.551    |
| 80894 | P14079 | A6NIZ1 | -1.1222   |
| 80895 | P14079 | P01562 | -0.79632  |
| 80896 | P14079 | Q14161 | -0.22741  |
| 80897 | P14079 | Q14142 | -0.35821  |
| 80898 | P14079 | O43173 | -0.55803  |
| 80899 | P14079 | Q5YKI7 | -0.69174  |
| 80900 | P14079 | Q7Z2K8 | -0.69607  |
| 80901 | P14079 | Q9UKJ1 | -0.77987  |
| 80902 | P14079 | Q8TCE9 | -0.099578 |
| 80903 | P14079 | Q5VYS8 | -0.26974  |
| 80904 | P14079 | Q12999 | -0.89571  |
| 80905 | P14079 | Q96PD4 | -0.42719  |
| 80906 | P14079 | P09104 | -0.26287  |
| 80907 | P14079 | Q6ZS11 | -0.91625  |
| 80908 | P14079 | Q9HBH5 | -0.9752   |
| 80909 | P14079 | P56180 | -1.571    |
| 80910 | P14079 | O75364 | -0.15619  |
| 80911 | P14079 | O43653 | -0.41152  |
| 80912 | P14079 | Q14562 | -0.36348  |
| 80913 | P14079 | O76100 | -1.2314   |
| 80914 | P14079 | P09848 | -0.78831  |
| 80915 | P14079 | P47755 | -0.38601  |
| 80916 | P14079 | B2RNN3 | -0.89985  |
| 80917 | P14079 | Q8IWA4 | -1.1462   |
| 80918 | P14079 | P40424 | -0.67146  |
| 80919 | P14079 | Q9NPA2 | -1.4966   |
| 80920 | P14079 | Q96M98 | -0.097713 |
| 80921 | P14079 | Q9H7X7 | -1.2251   |
| 80922 | P14079 | Q00G26 | -0.10242  |
| 80923 | P14079 | Q6ZMB0 | -0.648    |
| 80924 | P14079 | Q9UNA3 | -0.70168  |
| 80925 | P14079 | Q6RFH5 | -0.22739  |
| 80926 | P14079 | Q86W34 | -0.81211  |
| 80927 | P14079 | P01298 | -0.85694  |
| 80928 | P14079 | Q8N9X3 | -0.19387  |
| 80929 | P14079 | P14770 | -1.2283   |
| 80930 | P14079 | Q8N9V2 | -0.841    |
| 80931 | P14079 | A6NEH6 | -0.74356  |
| 80932 | P14079 | Q9ULS5 | -0.77815  |
| 80933 | P14079 | B1AKI9 | -0.80633  |
| 80934 | P14079 | A0PJZ3 | -0.85989  |
| 80935 | P14079 | P05187 | -1.1518   |
| 80936 | P14079 | Q96CP6 | -0.77815  |
| 80937 | P14079 | Q96PD2 | -1.0944   |
| 80938 | P14079 | P16403 | -0.75758  |
| 80939 | P14079 | Q16568 | -0.36866  |
| 80940 | P14079 | P58658 | -0.77403  |

|       |        |        |          |
|-------|--------|--------|----------|
| 80941 | P14079 | Q9BT67 | -0.36159 |
| 80942 | P14079 | Q8NC67 | -0.77815 |
| 80943 | P14079 | P04118 | -0.82079 |
| 80944 | P14079 | P01612 | -1       |
| 80945 | P14079 | Q9P2N7 | -0.17016 |
| 80946 | P14079 | Q9C0D3 | -0.1704  |
| 80947 | P14079 | Q9H2S6 | -0.68913 |
| 80948 | P14079 | Q86XS8 | -0.66125 |
| 80949 | P14079 | Q8NE35 | -0.73421 |
| 80950 | P14079 | Q5VVK5 | -0.51156 |
| 80951 | P14079 | Q7Z6I6 | -1.1056  |
| 80952 | P14079 | Q8WXD9 | -0.2274  |
| 80953 | P14079 | P14867 | -0.98345 |
| 80954 | P14079 | A4D1P6 | -0.22744 |
| 80955 | P14079 | Q8N7A1 | -0.22706 |
| 80956 | P14079 | Q6ZRF8 | -0.36051 |
| 80957 | P14079 | P60507 | -0.8184  |
| 80958 | P14079 | P51690 | -0.46006 |
| 80959 | P14079 | Q5VZV1 | -0.21342 |
| 80960 | P14079 | Q15165 | -0.76299 |
| 80961 | P14079 | Q68DC2 | -0.2276  |
| 80962 | P14079 | Q6AZZ1 | -0.22717 |
| 80963 | P14079 | Q9H930 | -0.22698 |
| 80964 | P14079 | Q9NNZ6 | -1.1724  |
| 80965 | P14079 | Q8NHC8 | -1.2314  |
| 80966 | P14079 | Q8NGH3 | -1.2314  |
| 80967 | P14079 | Q6ZSG1 | -0.26471 |
| 80968 | P14079 | P04430 | -1       |
| 80969 | P14079 | Q4VXU2 | -0.79049 |
| 80970 | P14079 | Q9HCC8 | -0.62003 |
| 80971 | P14079 | Q6ZUQ5 | -0.14054 |
| 80972 | P14079 | Q86WS3 | -0.80633 |
| 80973 | P14079 | Q9NS84 | -0.64164 |
| 80974 | P14079 | Q2VPA4 | -0.69852 |
| 80975 | P14079 | P49019 | -1.4456  |
| 80976 | P14079 | Q9BQD1 | -0.32707 |
| 80977 | P14079 | Q9UMZ2 | -0.16956 |
| 80978 | P14079 | O43520 | -0.74745 |
| 80979 | P14079 | Q8NGY6 | -1.2314  |
| 80980 | P14079 | P06127 | -0.59246 |
| 80981 | P14079 | Q9H7T0 | -1.1724  |
| 80982 | P14079 | P52961 | -0.66222 |
| 80983 | P14079 | Q5VTM2 | -1.0622  |
| 80984 | P14079 | Q6JVE9 | -0.83695 |
| 80985 | P14079 | Q9H4I9 | -0.62143 |
| 80986 | P14079 | O43822 | -0.2271  |
| 80987 | P14079 | Q9UKY3 | -0.77026 |
| 80988 | P14079 | P19652 | -0.87823 |
| 80989 | P14079 | P19256 | -0.73639 |
| 80990 | P14079 | Q9NZQ9 | -0.21561 |
| 80991 | P14079 | Q96LR4 | -0.80633 |
| 80992 | P14079 | Q8NE79 | -0.72096 |
| 80993 | P14079 | Q8WVZ7 | -1.2013  |
| 80994 | P14079 | P35212 | -0.99675 |
| 80995 | P14079 | P24347 | -1.6123  |
| 80996 | P14079 | Q8ND94 | -0.77815 |
| 80997 | P14079 | P62330 | -0.44045 |
| 80998 | P14079 | P0CW01 | -0.6149  |
| 80999 | P14079 | Q9Y2D0 | -0.14674 |
| 81000 | P14079 | Q96E66 | -0.22741 |
| 81001 | P14079 | Q14191 | -0.22741 |
| 81002 | P14079 | Q93079 | -0.92425 |
| 81003 | P14079 | Q8WWZ4 | -1.4244  |
| 81004 | P14079 | Q8NH70 | -1.2314  |
| 81005 | P14079 | P63316 | -0.22577 |
| 81006 | P14079 | Q6UB28 | -0.50593 |
| 81007 | P14079 | Q12899 | -0.38227 |
| 81008 | P14079 | Q9UNI6 | -0.45302 |
| 81009 | P14079 | B3KVV0 | -0.77815 |
| 81010 | P14079 | Q86U06 | -0.56146 |
| 81011 | P14079 | P04114 | -0.36479 |
| 81012 | P14079 | P34810 | -0.91154 |
| 81013 | P14079 | P04208 | -1       |
| 81014 | P14079 | Q14406 | -0.8747  |
| 81015 | P14079 | Q12965 | -0.19469 |
| 81016 | P14079 | Q8IV77 | -1.4203  |

|       |        |        |           |
|-------|--------|--------|-----------|
| 81017 | P14079 | Q5T442 | -0.79727  |
| 81018 | P14079 | O15439 | -1.3965   |
| 81019 | P14079 | P61647 | -0.58302  |
| 81020 | P14079 | O76096 | -0.80025  |
| 81021 | P14079 | Q6DKJ4 | -0.45117  |
| 81022 | P14079 | Q86UG4 | -0.98669  |
| 81023 | P14079 | P13762 | -0.72952  |
| 81024 | P14079 | Q53FV1 | -0.90098  |
| 81025 | P14079 | Q9H106 | -0.80633  |
| 81026 | P14079 | Q6ZSZ6 | -0.22447  |
| 81027 | P14079 | Q8N4A0 | -0.51731  |
| 81028 | P14079 | Q5JU85 | -0.20458  |
| 81029 | P14079 | O15090 | -0.21688  |
| 81030 | P14079 | O60462 | -0.88311  |
| 81031 | P14079 | Q6MZW2 | -0.863    |
| 81032 | P14079 | O43657 | -0.95985  |
| 81033 | P14079 | Q6UWP7 | -1.0644   |
| 81034 | P14079 | Q9UEE5 | -0.9701   |
| 81035 | P14079 | Q8N0Y5 | -1.2314   |
| 81036 | P14079 | Q6NTF7 | -0.12437  |
| 81037 | P14079 | Q9GZT4 | -0.59877  |
| 81038 | P14079 | P63128 | -0.50533  |
| 81039 | P14079 | Q53RE8 | -0.26849  |
| 81040 | P14079 | P31641 | -1.1941   |
| 81041 | P14079 | Q06481 | -0.21082  |
| 81042 | P14079 | P15374 | -0.36472  |
| 81043 | P14079 | P16435 | -0.77244  |
| 81044 | P14079 | P58294 | -0.69721  |
| 81045 | P14079 | O95573 | -0.92995  |
| 81046 | P14079 | Q14CZ8 | -0.7314   |
| 81047 | P14079 | Q99435 | -0.3122   |
| 81048 | P14079 | A6NGH8 | -0.22738  |
| 81049 | P14079 | P51512 | -1.8239   |
| 81050 | P14079 | P09417 | -0.60906  |
| 81051 | P14079 | P61009 | -0.83978  |
| 81052 | P14079 | Q9Y3Q3 | -0.46879  |
| 81053 | P14079 | Q9P241 | -0.83037  |
| 81054 | P14079 | P04150 | -0.22744  |
| 81055 | P14079 | Q9UK23 | -0.53544  |
| 81056 | P14079 | P00973 | -0.56251  |
| 81057 | P14079 | Q86UD7 | -1.4902   |
| 81058 | P14079 | Q9H400 | -0.66611  |
| 81059 | P14079 | Q14940 | -1.2206   |
| 81060 | P14079 | Q8NAA5 | -0.095118 |
| 81061 | P14079 | P49771 | -1.5923   |
| 81062 | P14079 | O14498 | -1.0375   |
| 81063 | P14079 | Q86SU0 | -0.60442  |
| 81064 | P14079 | O76090 | -0.81884  |
| 81065 | P14079 | Q9UBV7 | -0.6037   |
| 81066 | P14079 | Q6IC98 | -0.52684  |
| 81067 | P14079 | Q9HB55 | -0.97326  |
| 81068 | P14079 | Q9Y672 | -0.86243  |
| 81069 | P14079 | Q7Z403 | -0.9328   |
| 81070 | P14079 | Q9BXI2 | -0.62001  |
| 81071 | P14079 | O60487 | -0.29546  |
| 81072 | P14079 | A1L167 | -1.2144   |
| 81073 | P14079 | Q6ZRR7 | -0.2273   |
| 81074 | P14079 | O60637 | -0.77815  |
| 81075 | P14079 | Q9BV23 | -0.7439   |
| 81076 | P14079 | Q2KHN1 | -0.43974  |
| 81077 | P14079 | Q9NYW2 | -1.1071   |
| 81078 | P14079 | Q7Z5H5 | -1.0495   |
| 81079 | P14079 | P04839 | -0.74187  |
| 81080 | P14079 | Q3SXZ7 | -0.22743  |
| 81081 | P14079 | Q06830 | -0.21433  |
| 81082 | P14079 | Q99571 | -0.55209  |
| 81083 | P14079 | P05129 | -0.6128   |
| 81084 | P14079 | Q9NSD7 | -1.4594   |
| 81085 | P14079 | Q7Z5L7 | -0.8463   |
| 81086 | P14079 | P13611 | -1.1952   |
| 81087 | P14079 | Q86UR5 | -0.22743  |
| 81088 | P14079 | Q9NWL6 | -0.332    |
| 81089 | P14079 | P35243 | -0.42851  |
| 81090 | P14079 | Q9BTU6 | -0.56769  |
| 81091 | P14079 | P45880 | -0.66434  |
| 81092 | P14079 | Q99759 | -0.75627  |



|       |        |        |          |
|-------|--------|--------|----------|
| 81093 | P14079 | Q3B8N2 | -0.12799 |
| 81094 | P14079 | P68366 | -0.47762 |
| 81095 | P14079 | O60361 | -0.96553 |
| 81096 | P14079 | Q6NSJ5 | -0.77815 |
| 81097 | P14079 | P46063 | -0.22565 |
| 81098 | P14079 | P25774 | -1.3423  |
| 81099 | P14079 | P29972 | -0.22697 |
| 81100 | P14079 | Q8WU79 | -0.34928 |
| 81101 | P14079 | Q95460 | -1.5045  |
| 81102 | P14079 | Q9UF12 | -0.33456 |
| 81103 | P14079 | Q00973 | -0.73368 |
| 81104 | P14079 | A6NI61 | -0.77815 |
| 81105 | P14079 | O75348 | -0.44165 |
| 81106 | P14079 | B5MCN3 | -0.8787  |
| 81107 | P14079 | P05067 | -0.27254 |
| 81108 | P14079 | Q9Y2T5 | -1.5146  |
| 81109 | P14079 | Q08ET2 | -1.1785  |
| 81110 | P14079 | O60928 | -1.0567  |
| 81111 | P14079 | P18031 | -0.41063 |
| 81112 | P14079 | Q9BRX9 | -0.22812 |
| 81113 | P14079 | Q6ZN66 | -0.96254 |
| 81114 | P14079 | O75074 | -0.76936 |
| 81115 | P14079 | P00736 | -1.4388  |
| 81116 | P14079 | Q5JW98 | -0.77815 |
| 81117 | P14079 | Q96T55 | -1.2622  |
| 81118 | P14079 | Q8NB66 | -0.22741 |
| 81119 | P14079 | Q96T75 | -0.26849 |
| 81120 | P14079 | Q6UB35 | -0.84032 |
| 81121 | P14079 | Q14807 | -0.26345 |
| 81122 | P14079 | Q9H4B4 | -0.22742 |
| 81123 | P14079 | Q5BKX6 | -0.79981 |
| 81124 | P14079 | Q8WZ59 | -0.77815 |
| 81125 | P14079 | P51617 | -0.22734 |
| 81126 | P14079 | O14827 | -0.52679 |
| 81127 | P14079 | Q8N8I0 | -0.22332 |
| 81128 | P14079 | Q86UV6 | -0.36051 |
| 81129 | P14079 | O00322 | -0.82278 |
| 81130 | P14079 | Q9H2B2 | -0.99461 |
| 81131 | P14079 | Q5JRS4 | -1.2314  |
| 81132 | P14079 | Q9UPT8 | -0.16722 |
| 81133 | P14079 | A6NMZ5 | -1.2314  |
| 81134 | P14079 | P18464 | -1       |
| 81135 | P14079 | Q8NEV1 | -1.2818  |
| 81136 | P14079 | A8MWK0 | -1.1336  |
| 81137 | P14079 | Q9NR21 | -0.31388 |
| 81138 | P14079 | O75751 | -0.57515 |
| 81139 | P14079 | O43555 | -1.24    |
| 81140 | P14079 | O43293 | -0.41111 |
| 81141 | P14079 | Q86W26 | -0.78428 |
| 81142 | P14079 | A8MTB9 | -0.77815 |
| 81143 | P14079 | O75604 | -0.40413 |
| 81144 | P14079 | Q96BT7 | -0.17266 |
| 81145 | P14079 | P10314 | -0.92361 |
| 81146 | P14079 | Q96LA5 | -0.92569 |
| 81147 | P14079 | P11233 | -0.28146 |
| 81148 | P14079 | Q9NRM7 | -0.22742 |
| 81149 | P14079 | Q9BXB1 | -0.93919 |
| 81150 | P14079 | Q96JQ2 | -0.51884 |
| 81151 | P14079 | O60292 | -0.88669 |
| 81152 | P14079 | A4D1T9 | -1.1575  |
| 81153 | P14079 | Q96FV0 | -0.22701 |
| 81154 | P14079 | O75916 | -0.602   |
| 81155 | P14079 | Q9C0J9 | -0.22546 |
| 81156 | P14079 | Q6ZT12 | -0.97254 |
| 81157 | P14079 | Q96FL8 | -0.9429  |
| 81158 | P14079 | Q9UF47 | -0.6733  |
| 81159 | P14079 | Q8TEJ3 | -0.22714 |
| 81160 | P14079 | P49736 | -0.19247 |
| 81161 | P14079 | Q8N961 | -0.33011 |
| 81162 | P14079 | Q6ZVX9 | -0.77815 |
| 81163 | P14079 | O95985 | -0.6422  |
| 81164 | P14079 | Q6P0A1 | -0.77815 |
| 81165 | P14079 | Q969S6 | -0.77815 |
| 81166 | P14079 | O00560 | -0.2272  |
| 81167 | P14079 | P09172 | -0.52076 |
| 81168 | P14079 | O76076 | -1.1314  |

|       |        |        |           |
|-------|--------|--------|-----------|
| 81169 | P14079 | O15522 | -0.3561   |
| 81170 | P14079 | P58417 | -0.91495  |
| 81171 | P14079 | Q6UY14 | -0.38424  |
| 81172 | P14079 | Q8NGD2 | -1.2314   |
| 81173 | P14079 | Q9H3V2 | -0.77815  |
| 81174 | P14079 | O43556 | -0.69022  |
| 81175 | P14079 | Q96SQ7 | -0.22915  |
| 81176 | P14079 | Q7L0Q8 | -0.37713  |
| 81177 | P14079 | Q8WVC6 | -0.61949  |
| 81178 | P14079 | O00305 | -0.22711  |
| 81179 | P14079 | Q9Y6H6 | -1.0004   |
| 81180 | P14079 | Q9Y5P6 | -0.7887   |
| 81181 | P14079 | Q9NS98 | -1.1993   |
| 81182 | P14079 | O14627 | -0.16427  |
| 81183 | P14079 | Q5VVX9 | -1.2144   |
| 81184 | P14079 | Q9NQE7 | -0.88158  |
| 81185 | P14079 | Q8NGP0 | -1.2314   |
| 81186 | P14079 | O60427 | -0.39934  |
| 81187 | P14079 | Q9UQG0 | -0.30686  |
| 81188 | P14079 | P86397 | -0.61246  |
| 81189 | P14079 | Q9BYV2 | -0.57289  |
| 81190 | P14079 | O15123 | -0.60766  |
| 81191 | P14079 | P59773 | -0.77815  |
| 81192 | P14079 | P00709 | -0.89256  |
| 81193 | P14079 | P08069 | -0.65659  |
| 81194 | P14079 | Q9UG01 | -0.58513  |
| 81195 | P14079 | Q9ULM0 | -0.22741  |
| 81196 | P14079 | P07237 | -0.47647  |
| 81197 | P14079 | Q96NX5 | -1.1891   |
| 81198 | P14079 | Q6AI12 | -0.26849  |
| 81199 | P14079 | Q29718 | -1        |
| 81200 | P14079 | O94766 | -0.63285  |
| 81201 | P14079 | P38919 | -0.070004 |
| 81202 | P14079 | Q05086 | -0.22848  |
| 81203 | P14079 | Q8TCD6 | -0.45643  |
| 81204 | P14079 | O95832 | -0.65646  |
| 81205 | P14079 | Q15735 | -0.31403  |
| 81206 | P14079 | Q6S5L8 | -0.27677  |
| 81207 | P14079 | Q9UBK7 | -1.1703   |
| 81208 | P14079 | Q9NQX3 | -0.65228  |
| 81209 | P14079 | P16189 | -0.98914  |
| 81210 | P14079 | Q6NVY1 | -0.079283 |
| 81211 | P14079 | Q99835 | -0.34592  |
| 81212 | P14079 | P29034 | -0.23092  |
| 81213 | P14079 | Q6ZU82 | -0.11524  |
| 81214 | P14079 | Q8TER5 | -0.37693  |
| 81215 | P14079 | P11310 | -0.46463  |
| 81216 | P14079 | Q9NZR1 | -0.20607  |
| 81217 | P14079 | Q9UHP3 | -0.34461  |
| 81218 | P14079 | Q8N9N7 | -0.23389  |
| 81219 | P14079 | O60353 | -0.68175  |
| 81220 | P14079 | P17174 | -0.21935  |
| 81221 | P14079 | Q02643 | -0.36943  |
| 81222 | P14079 | Q8IU85 | -0.79655  |
| 81223 | P14079 | Q9UHF3 | -1.1095   |
| 81224 | P14079 | P08709 | -0.96498  |
| 81225 | P14079 | Q9Y662 | -0.76244  |
| 81226 | P14079 | A2RRH5 | -0.22742  |
| 81227 | P14079 | Q15118 | -1.0455   |
| 81228 | P14079 | O00757 | -0.17248  |
| 81229 | P14079 | Q7L513 | -0.78058  |
| 81230 | P14079 | Q6PCB0 | -1.0894   |
| 81231 | P14079 | Q92935 | -1.0331   |
| 81232 | P14079 | Q7Z3T1 | -1.2314   |
| 81233 | P14079 | Q6ZNA5 | -1.038    |
| 81234 | P14079 | Q6UWU4 | -0.6626   |
| 81235 | P14079 | Q5K4E3 | -1.3554   |
| 81236 | P14079 | Q7Z6M3 | -1.1326   |
| 81237 | P14079 | Q15319 | -0.22741  |
| 81238 | P14079 | Q9Y6E7 | -0.42877  |
| 81239 | P14079 | Q8TDJ6 | -0.54335  |
| 81240 | P14079 | Q86UU1 | -0.22734  |
| 81241 | P14079 | P42684 | -0.68218  |
| 81242 | P14079 | Q08043 | -0.34224  |
| 81243 | P14079 | P55291 | -1.198    |
| 81244 | P14079 | Q8WYK0 | -0.088682 |

|       |        |        |          |
|-------|--------|--------|----------|
| 81245 | P14079 | P11836 | -1.0261  |
| 81246 | P14079 | A8MTQ0 | -0.22737 |
| 81247 | P14079 | Q9NZH7 | -0.81497 |
| 81248 | P14079 | P30414 | -0.17964 |
| 81249 | P14079 | P18405 | -0.42388 |
| 81250 | P14079 | Q9BYT3 | -1.0824  |
| 81251 | P14079 | P06326 | -1       |
| 81252 | P14079 | P51572 | -0.13137 |
| 81253 | P14079 | Q8TE59 | -1.4366  |
| 81254 | P14079 | P28221 | -1.3725  |
| 81255 | P14079 | P30559 | -0.9621  |
| 81256 | P14079 | O60383 | -0.56766 |
| 81257 | P14079 | Q17R89 | -0.56964 |
| 81258 | P14079 | O60879 | -0.21958 |
| 81259 | P14079 | Q96GQ7 | -0.72224 |
| 81260 | P14079 | Q6NUJ5 | -0.20114 |
| 81261 | P14079 | Q9YNA8 | -0.1263  |
| 81262 | P14079 | P13612 | -0.50885 |
| 81263 | P14079 | O75128 | -0.53685 |
| 81264 | P14079 | Q8N461 | -0.20868 |
| 81265 | P14079 | P04179 | -0.16964 |
| 81266 | P14079 | Q7Z7L1 | -0.59673 |
| 81267 | P14079 | Q02223 | -1.4122  |
| 81268 | P14079 | P29017 | -1.0444  |
| 81269 | P14079 | Q8NGJ4 | -1.2314  |
| 81270 | P14079 | O00230 | -0.84377 |
| 81271 | P14079 | A8MV23 | -0.76468 |
| 81272 | P14079 | P52429 | -1.6568  |
| 81273 | P14079 | P30443 | -1.0728  |
| 81274 | P14079 | Q8NFA0 | -0.79744 |
| 81275 | P14079 | O43915 | -0.9086  |
| 81276 | P14079 | P41597 | -0.52765 |
| 81277 | P14079 | Q92743 | -1.061   |
| 81278 | P14079 | Q9NZB8 | -0.69521 |
| 81279 | P14079 | Q8NGZ4 | -1.2314  |
| 81280 | P14079 | P42701 | -0.71105 |
| 81281 | P14079 | A6NE01 | -0.16137 |
| 81282 | P14079 | Q9UMR7 | -1.2144  |
| 81283 | P14079 | O15533 | -0.36192 |
| 81284 | P14079 | Q9BPX6 | -0.39207 |
| 81285 | P14079 | P01135 | -0.34126 |
| 81286 | P14079 | E5RJM6 | -0.2274  |
| 81287 | P14079 | Q68D85 | -0.72224 |
| 81288 | P14079 | O00168 | -1.2897  |
| 81289 | P14079 | Q15467 | -0.94375 |
| 81290 | P14079 | P32971 | -0.81887 |
| 81291 | P14079 | P55075 | -0.58245 |
| 81292 | P14079 | Q68D06 | -0.94836 |
| 81293 | P14079 | P0CB48 | -0.21324 |
| 81294 | P14079 | Q9ULT0 | -0.22611 |
| 81295 | P14079 | B7Z8K6 | -0.77815 |
| 81296 | P14079 | Q13191 | -0.2274  |
| 81297 | P14079 | P08590 | -0.22727 |
| 81298 | P14079 | P28566 | -1.4097  |
| 81299 | P14079 | Q8NHS0 | -0.32455 |
| 81300 | P14079 | Q9BWD1 | -0.17421 |
| 81301 | P14079 | Q9NYS0 | -1.0733  |
| 81302 | P14079 | Q9Y698 | -0.67012 |
| 81303 | P14079 | O43149 | -0.23904 |
| 81304 | P14079 | Q86YT9 | -0.88583 |
| 81305 | P14079 | Q8WZ73 | -0.24978 |
| 81306 | P14079 | P49448 | -0.83404 |
| 81307 | P14079 | Q96JP0 | -0.22761 |
| 81308 | P14079 | Q8NDY8 | -0.77815 |
| 81309 | P14079 | P34096 | -0.75788 |
| 81310 | P14079 | Q8IYU2 | -0.22776 |
| 81311 | P14079 | Q86YV6 | -1.4433  |
| 81312 | P14079 | Q16663 | -1.1287  |
| 81313 | P14079 | Q01118 | -1.1188  |
| 81314 | P14079 | Q9UDR5 | -0.76054 |
| 81315 | P14079 | Q03164 | -0.22478 |
| 81316 | P14079 | O43692 | -0.93907 |
| 81317 | P14079 | Q14534 | -1.1283  |
| 81318 | P14079 | Q9NRI6 | -0.78571 |
| 81319 | P14079 | Q9Y5X4 | -0.22918 |
| 81320 | P14079 | Q9Y2C4 | -0.25523 |

|       |        |        |          |
|-------|--------|--------|----------|
| 81321 | P14079 | Q8TE12 | -0.21099 |
| 81322 | P14079 | P0DKB5 | -0.77815 |
| 81323 | P14079 | Q9Y5F6 | -1.2343  |
| 81324 | P14079 | P32241 | -0.96636 |
| 81325 | P14079 | O75022 | -0.65358 |
| 81326 | P14079 | Q9H7F4 | -0.77815 |
| 81327 | P14079 | Q30KQ4 | -0.78458 |
| 81328 | P14079 | P11712 | -0.6838  |
| 81329 | P14079 | Q9H190 | -0.22701 |
| 81330 | P14079 | Q96L96 | -0.92582 |
| 81331 | P14079 | Q8TAE7 | -0.60595 |
| 81332 | P14079 | Q96QH8 | -0.83713 |
| 81333 | P14079 | P0CG30 | -0.2224  |
| 81334 | P14079 | Q93070 | -0.54961 |
| 81335 | P14079 | P01622 | -1       |
| 81336 | P14079 | Q99418 | -0.22741 |
| 81337 | P14079 | Q96EH8 | -0.53625 |
| 81338 | P14079 | Q15831 | -0.44187 |
| 81339 | P14079 | Q6P5Z2 | -0.54968 |
| 81340 | P14079 | Q8NAT1 | -0.96169 |
| 81341 | P14079 | Q14195 | -0.20439 |
| 81342 | P14079 | Q8NEC5 | -0.87014 |
| 81343 | P14079 | Q9BZM5 | -1.0801  |
| 81344 | P14079 | O00337 | -1.0452  |
| 81345 | P14079 | Q8N8F6 | -0.9328  |
| 81346 | P14079 | P24311 | -0.55355 |
| 81347 | P14079 | Q9UI15 | -0.20823 |
| 81348 | P14079 | A6NF34 | -0.78841 |
| 81349 | P14079 | Q8NH93 | -1.2314  |
| 81350 | P14079 | Q9UIJ7 | -0.87422 |
| 81351 | P14079 | P84351 | -0.84932 |
| 81352 | P14079 | P07437 | -0.12683 |
| 81353 | P14079 | Q9BZW2 | -1.1486  |
| 81354 | P14079 | Q9NSV4 | -0.21714 |
| 81355 | P14079 | Q9Y5G5 | -1.2343  |
| 81356 | P14079 | Q8TAV4 | -1.1369  |
| 81357 | P14079 | Q9H3G5 | -0.67088 |
| 81358 | P14079 | Q9UJH8 | -1.2051  |
| 81359 | P14079 | Q9UNW8 | -1.2086  |
| 81360 | P14079 | Q9BZW8 | -0.58711 |
| 81361 | P14079 | Q9H2I8 | -0.22709 |
| 81362 | P14079 | Q8IVQ6 | -0.59078 |
| 81363 | P14079 | P30990 | -0.96431 |
| 81364 | P14079 | Q58HT5 | -1.0474  |
| 81365 | P14079 | O94823 | -0.73416 |
| 81366 | P14079 | Q9UBN6 | -0.77117 |
| 81367 | P14079 | P49137 | -0.23735 |
| 81368 | P14079 | Q16667 | -0.18648 |
| 81369 | P14079 | Q9NZA1 | -0.19672 |
| 81370 | P14079 | P02778 | -0.79858 |
| 81371 | P14079 | Q92953 | -1.1645  |
| 81372 | P14079 | Q4G1C9 | -0.77815 |
| 81373 | P14079 | Q07326 | -0.83042 |
| 81374 | P14079 | P0C7M7 | -0.99975 |
| 81375 | P14079 | P22223 | -1.1394  |
| 81376 | P14079 | Q6KF10 | -0.53092 |
| 81377 | P14079 | Q9GZK4 | -1.2314  |
| 81378 | P14079 | Q9BR39 | -0.41486 |
| 81379 | P14079 | Q9UBE8 | -0.31152 |
| 81380 | P14079 | Q9BYJ0 | -0.89183 |
| 81381 | P14079 | Q7Z5P9 | -0.85435 |
| 81382 | P14079 | P06702 | -0.22784 |
| 81383 | P14079 | Q8WVN6 | -1.5312  |
| 81384 | P14079 | P35558 | -0.59775 |
| 81385 | P14079 | P31391 | -1.4147  |
| 81386 | P14079 | Q92777 | -0.50472 |
| 81387 | P14079 | Q8N436 | -1.269   |
| 81388 | P14079 | P11234 | -0.33181 |
| 81389 | P14079 | P12643 | -0.22741 |
| 81390 | P14079 | Q9BV99 | -0.22737 |
| 81391 | P14079 | Q96IQ9 | -0.22714 |
| 81392 | P14079 | Q92581 | -1.0851  |
| 81393 | P14079 | Q8NGG3 | -1.2314  |
| 81394 | P14079 | Q9H4A4 | -0.99897 |
| 81395 | P14079 | Q15907 | -0.9405  |
| 81396 | P14079 | Q9NWH7 | -1.3879  |

|       |        |        |           |
|-------|--------|--------|-----------|
| 81397 | P14079 | Q9BX93 | -0.87876  |
| 81398 | P14079 | Q01085 | -0.2478   |
| 81399 | P14079 | O43166 | -0.25104  |
| 81400 | P14079 | Q9H6B4 | -0.71865  |
| 81401 | P14079 | Q96DU9 | -0.61155  |
| 81402 | P14079 | Q9NZG7 | -0.99065  |
| 81403 | P14079 | B1ANS9 | -0.22745  |
| 81404 | P14079 | O60825 | -0.22015  |
| 81405 | P14079 | O15540 | -0.38342  |
| 81406 | P14079 | P22794 | -0.80016  |
| 81407 | P14079 | O60312 | -0.82803  |
| 81408 | P14079 | Q01973 | -1.2882   |
| 81409 | P14079 | Q02742 | -0.65709  |
| 81410 | P14079 | Q8N109 | -0.97472  |
| 81411 | P14079 | P13761 | -0.62795  |
| 81412 | P14079 | O00338 | -0.38359  |
| 81413 | P14079 | P78504 | -0.60231  |
| 81414 | P14079 | Q9Y5W7 | -0.6126   |
| 81415 | P14079 | A8K855 | -0.22677  |
| 81416 | P14079 | Q86SG5 | -0.17841  |
| 81417 | P14079 | Q6ZSC3 | -0.79049  |
| 81418 | P14079 | P51124 | -1.2152   |
| 81419 | P14079 | P0C870 | -0.052597 |
| 81420 | P14079 | P47883 | -1.2314   |
| 81421 | P14079 | Q8TD08 | -1.5075   |
| 81422 | P14079 | Q6IF42 | -1.2314   |
| 81423 | P14079 | Q8TDM6 | -0.28313  |
| 81424 | P14079 | Q658P3 | -0.75798  |
| 81425 | P14079 | Q6UXU0 | -0.80633  |
| 81426 | P14079 | P23921 | -0.20663  |
| 81427 | P14079 | Q9UHC3 | -0.6686   |
| 81428 | P14079 | P20339 | -0.67697  |
| 81429 | P14079 | Q7RTT9 | -1.0477   |
| 81430 | P14079 | P59510 | -1.2778   |
| 81431 | P14079 | Q01780 | -0.36584  |
| 81432 | P14079 | Q9ULK0 | -0.92408  |
| 81433 | P14079 | Q13190 | -0.18559  |
| 81434 | P14079 | P32246 | -0.82374  |
| 81435 | P14079 | Q01524 | -0.87442  |
| 81436 | P14079 | P17643 | -0.44383  |
| 81437 | P14079 | Q8TBE7 | -0.62787  |
| 81438 | P14079 | P26441 | -0.34726  |
| 81439 | P14079 | Q9BVJ7 | -0.28014  |
| 81440 | P14079 | Q8WVV5 | -0.72548  |
| 81441 | P14079 | Q9NQW1 | -0.22846  |
| 81442 | P14079 | O00602 | -1.165    |
| 81443 | P14079 | Q15648 | -0.097244 |
| 81444 | P14079 | P18859 | -0.22126  |
| 81445 | P14079 | Q9ULI1 | -0.22741  |
| 81446 | P14079 | Q14623 | -0.49434  |
| 81447 | P14079 | Q5JXX7 | -0.77815  |
| 81448 | P14079 | Q9UKP6 | -0.92946  |
| 81449 | P14079 | Q9Y5H3 | -1.2343   |
| 81450 | P14079 | Q6P474 | -0.41406  |
| 81451 | P14079 | P10147 | -0.29687  |
| 81452 | P14079 | P21145 | -0.50331  |
| 81453 | P14079 | Q14376 | -0.48942  |
| 81454 | P14079 | Q9NRC1 | -0.77815  |
| 81455 | P14079 | O15479 | -0.02377  |
| 81456 | P14079 | Q08289 | -0.37939  |
| 81457 | P14079 | P00533 | -0.39831  |
| 81458 | P14079 | P56962 | -0.58025  |
| 81459 | P14079 | P02814 | -0.9996   |
| 81460 | P14079 | P06213 | -0.30267  |
| 81461 | P14079 | Q9ULI2 | -0.97591  |
| 81462 | P14079 | Q9Y543 | -0.22557  |
| 81463 | P14079 | P56696 | -1.0647   |
| 81464 | P14079 | Q4KMG0 | -0.2617   |
| 81465 | P14079 | Q96L34 | -0.50615  |
| 81466 | P14079 | Q5JUK3 | -1.5419   |
| 81467 | P14079 | P00746 | -1.21     |
| 81468 | P14079 | Q96K21 | -0.2043   |
| 81469 | P14079 | Q9NR63 | -0.76854  |
| 81470 | P14079 | O14559 | -0.40509  |
| 81471 | P14079 | A0AV02 | -1.0622   |
| 81472 | P14079 | Q86XR5 | -0.74625  |

|       |        |        |          |
|-------|--------|--------|----------|
| 81473 | P14079 | P00740 | -1.372   |
| 81474 | P14079 | P38398 | -0.22706 |
| 81475 | P14079 | Q12913 | -0.47734 |
| 81476 | P14079 | P30203 | -1.16    |
| 81477 | P14079 | P17540 | -1.1602  |
| 81478 | P14079 | P62873 | -0.24058 |
| 81479 | P14079 | Q5VXI9 | -0.9063  |
| 81480 | P14079 | Q9BY19 | -0.77815 |
| 81481 | P14079 | Q8NGC1 | -1.2314  |
| 81482 | P14079 | Q9UKG4 | -1.3404  |
| 81483 | P14079 | Q99853 | -0.68851 |
| 81484 | P14079 | Q15435 | -0.22741 |
| 81485 | P14079 | Q6IE37 | -0.91352 |
| 81486 | P14079 | Q9BXJ0 | -0.89985 |
| 81487 | P14079 | O75954 | -0.99591 |
| 81488 | P14079 | Q86VV4 | -0.22706 |
| 81489 | P14079 | Q6DN03 | -0.92425 |
| 81490 | P14079 | Q8NGJ9 | -1.2314  |
| 81491 | P14079 | Q5XX13 | -0.22812 |
| 81492 | P14079 | O75054 | -0.77815 |
| 81493 | P14079 | Q8TAI7 | -1.173   |
| 81494 | P14079 | Q7RTY7 | -1.4517  |
| 81495 | P14079 | Q9Y2Y8 | -0.23381 |
| 81496 | P14079 | P10809 | -0.12634 |
| 81497 | P14079 | Q6IQ16 | -0.22035 |
| 81498 | P14079 | Q9H845 | -0.46039 |
| 81499 | P14079 | Q96E35 | -0.2039  |
| 81500 | P14079 | Q9UK22 | -0.38821 |
| 81501 | P14079 | P0C7L1 | -0.82805 |
| 81502 | P14079 | Q16661 | -0.70815 |
| 81503 | P14079 | P13796 | -0.25951 |
| 81504 | P14079 | O94991 | -0.87401 |
| 81505 | P14079 | Q13370 | -0.30609 |
| 81506 | P14079 | Q96A46 | -0.85372 |
| 81507 | P14079 | Q5T6J7 | -0.81085 |
| 81508 | P14079 | P35790 | -0.94676 |
| 81509 | P14079 | P31327 | -0.14453 |
| 81510 | P14079 | O75907 | -0.65463 |
| 81511 | P14079 | Q96HY7 | -0.32942 |
| 81512 | P14079 | Q96P67 | -1.3154  |
| 81513 | P14079 | P48509 | -0.66125 |
| 81514 | P14079 | O43854 | -1.3412  |
| 81515 | P14079 | Q9HD89 | -0.71218 |
| 81516 | P14079 | Q8WUJ0 | -0.52597 |
| 81517 | P14079 | O76039 | -0.74436 |
| 81518 | P14079 | Q8N976 | -0.21464 |
| 81519 | P14079 | A6NLU0 | -0.22742 |
| 81520 | P14079 | Q9Y6L6 | -1.1581  |
| 81521 | P14079 | Q13637 | -0.8908  |
| 81522 | P14079 | Q8IVA1 | -0.33723 |
| 81523 | P14079 | Q8WXF0 | -0.36442 |
| 81524 | P14079 | Q9HC98 | -0.22803 |
| 81525 | P14079 | Q8IUB3 | -0.87356 |
| 81526 | P14079 | O60641 | -0.39167 |
| 81527 | P14079 | Q9Y5Y0 | -0.56591 |
| 81528 | P14079 | O75298 | -0.40274 |
| 81529 | P14079 | Q8NFD2 | -1.4433  |
| 81530 | P14079 | O95833 | -0.19398 |
| 81531 | P14079 | Q9UQ90 | -0.77931 |
| 81532 | P14079 | Q16570 | -1.1744  |
| 81533 | P14079 | Q9Y4D1 | -0.21997 |
| 81534 | P14079 | Q09019 | -0.22759 |
| 81535 | P14079 | Q9Y6Q6 | -0.22575 |
| 81536 | P14079 | P80108 | -0.49881 |
| 81537 | P14079 | Q9HBX8 | -1.2819  |
| 81538 | P14079 | Q6HA08 | -0.82111 |
| 81539 | P14079 | Q8IWB7 | -0.22746 |
| 81540 | P14079 | Q0VAA5 | -0.65834 |
| 81541 | P14079 | P10826 | -0.23173 |
| 81542 | P14079 | O60469 | -1.0823  |
| 81543 | P14079 | Q16512 | -0.2011  |
| 81544 | P14079 | Q8IYM9 | -0.22712 |
| 81545 | P14079 | Q9HCY8 | -0.21818 |
| 81546 | P14079 | P03952 | -0.91337 |
| 81547 | P14079 | Q75N90 | -1.0217  |
| 81548 | P14079 | P56937 | -1.4776  |

|       |        |        |          |
|-------|--------|--------|----------|
| 81549 | P14079 | Q99592 | -0.22377 |
| 81550 | P14079 | Q86Y29 | -0.80633 |
| 81551 | P14079 | Q9UJX0 | -0.59642 |
| 81552 | P14079 | Q96CU9 | -0.98194 |
| 81553 | P14079 | Q9NXC5 | -0.22632 |
| 81554 | P14079 | A8MW99 | -0.52028 |
| 81555 | P14079 | Q92667 | -0.20883 |
| 81556 | P14079 | O00295 | -0.68784 |
| 81557 | P14079 | Q8NH49 | -1.2314  |
| 81558 | P14079 | Q9UHD2 | -0.22741 |
| 81559 | P14079 | Q9H2U9 | -1.0552  |
| 81560 | P14079 | Q86UP0 | -1.037   |
| 81561 | P14079 | P35913 | -0.35631 |
| 81562 | P14079 | A0FGR9 | -0.97472 |
| 81563 | P14079 | Q5RGS3 | -0.77815 |
| 81564 | P14079 | Q9BVG9 | -1.078   |
| 81565 | P14079 | O95863 | -0.22087 |
| 81566 | P14079 | Q8WV4  | -0.21451 |
| 81567 | P14079 | P00734 | -0.71595 |
| 81568 | P14079 | P51649 | -0.77406 |
| 81569 | P14079 | Q8TD22 | -0.91721 |
| 81570 | P14079 | Q9UPN3 | -0.22774 |
| 81571 | P14079 | Q14766 | -0.39915 |
| 81572 | P14079 | Q8NGK6 | -1.2314  |
| 81573 | P14079 | Q8ND24 | -0.19804 |
| 81574 | P14079 | Q9Y2E5 | -0.79412 |
| 81575 | P14079 | Q86UU9 | -0.81856 |
| 81576 | P14079 | Q9H1P3 | -0.45278 |
| 81577 | P14079 | Q9NPF2 | -0.43393 |
| 81578 | P14079 | Q11203 | -0.91363 |
| 81579 | P14079 | Q6UXY1 | -0.68923 |
| 81580 | P14079 | P51686 | -1.3528  |
| 81581 | P14079 | Q04771 | -0.36661 |
| 81582 | P14079 | Q8NGX6 | -1.2314  |
| 81583 | P14079 | Q9NYF5 | -1.0254  |
| 81584 | P14079 | Q49A26 | -0.68838 |
| 81585 | P14079 | P47972 | -0.88732 |
| 81586 | P14079 | Q5QJU3 | -0.34835 |
| 81587 | P14079 | A4D2B8 | -0.38606 |
| 81588 | P14079 | B9A064 | -0.80633 |
| 81589 | P14079 | Q8NBI5 | -0.85053 |
| 81590 | P14079 | O43826 | -0.54057 |
| 81591 | P14079 | Q8IZK6 | -1.0124  |
| 81592 | P14079 | Q9UDX4 | -1.0317  |
| 81593 | P14079 | Q6UX15 | -0.79706 |
| 81594 | P14079 | Q9NX36 | -0.22291 |
| 81595 | P14079 | Q0D2K2 | -0.20332 |
| 81596 | P14079 | P59827 | -0.80872 |
| 81597 | P14079 | P20472 | -0.20446 |
| 81598 | P14079 | A6NFE3 | -0.34843 |
| 81599 | P14079 | Q9NP73 | -0.39421 |
| 81600 | P14079 | Q9GZN0 | -1.2907  |
| 81601 | P14079 | Q9HAD4 | -0.22741 |
| 81602 | P14079 | Q8NGJ7 | -1.2314  |
| 81603 | P14079 | A6NM03 | -1.2314  |
| 81604 | P14079 | O75747 | -0.95205 |
| 81605 | P14079 | P41279 | -0.58497 |
| 81606 | P14079 | Q02413 | -0.60942 |
| 81607 | P14079 | Q8WVP7 | -0.75613 |
| 81608 | P14079 | Q6NWX9 | -0.22263 |
| 81609 | P14079 | P21796 | -0.2138  |
| 81610 | P14079 | P55010 | -0.38145 |
| 81611 | P14079 | Q9NPE2 | -0.91779 |
| 81612 | P14079 | Q14439 | -1.5364  |
| 81613 | P14079 | Q9P272 | -0.29991 |
| 81614 | P14079 | Q99895 | -0.90561 |
| 81615 | P14079 | P46091 | -1.5146  |
| 81616 | P14079 | P17927 | -0.92732 |
| 81617 | P14079 | Q9GZN6 | -0.90707 |
| 81618 | P14079 | A0PJY2 | -0.02945 |
| 81619 | P14079 | Q8N9F0 | -0.63956 |
| 81620 | P14079 | Q9POM4 | -0.87253 |
| 81621 | P14079 | Q14973 | -1.1014  |
| 81622 | P14079 | Q9NX14 | -0.55346 |
| 81623 | P14079 | Q8N139 | -1.4244  |
| 81624 | P14079 | P78368 | -1.296   |

|       |        |        |           |
|-------|--------|--------|-----------|
| 81625 | P14079 | O00203 | -0.056179 |
| 81626 | P14079 | Q9Y2W7 | -0.23203  |
| 81627 | P14079 | C9JVI0 | -0.77524  |
| 81628 | P14079 | P57775 | -0.42779  |
| 81629 | P14079 | P0C0L4 | -1.1204   |
| 81630 | P14079 | Q7Z4H8 | -0.23272  |
| 81631 | P14079 | Q9BVA1 | -0.12348  |
| 81632 | P14079 | Q31612 | -1        |
| 81633 | P14079 | Q8NG85 | -1.2302   |
| 81634 | P14079 | Q04721 | -0.25008  |
| 81635 | P14079 | P31213 | -0.88817  |
| 81636 | P14079 | Q9GZP7 | -1.2834   |
| 81637 | P14079 | Q86UL3 | -0.69214  |
| 81638 | P14079 | Q7Z7J7 | -0.77815  |
| 81639 | P14079 | P21781 | -0.59344  |
| 81640 | P14079 | Q8IW92 | -0.81519  |
| 81641 | P14079 | Q8IWL2 | -1.1151   |
| 81642 | P14079 | P01606 | -1        |
| 81643 | P14079 | Q96LB8 | -0.76853  |
| 81644 | P14079 | I1YAP6 | -0.22363  |
| 81645 | P14079 | Q8IZF5 | -1.3662   |
| 81646 | P14079 | Q9NRS4 | -1.3427   |
| 81647 | P14079 | Q9UH03 | -0.21906  |
| 81648 | P14079 | P07108 | -0.20805  |
| 81649 | P14079 | Q9C0K1 | -1.0838   |
| 81650 | P14079 | Q9NYB5 | -1.1833   |
| 81651 | P14079 | P41181 | -0.27654  |
| 81652 | P14079 | Q8TC99 | -0.21618  |
| 81653 | P14079 | Q9NZL6 | -0.54946  |
| 81654 | P14079 | Q9HCQ7 | -1.0272   |
| 81655 | P14079 | Q8TC26 | -0.78796  |
| 81656 | P14079 | Q13972 | -0.48783  |
| 81657 | P14079 | Q92932 | -1.1361   |
| 81658 | P14079 | Q9HDD0 | -0.30453  |
| 81659 | P14079 | P10070 | -0.22679  |
| 81660 | P14079 | O00626 | -0.95171  |
| 81661 | P14079 | Q9NP62 | -0.26251  |
| 81662 | P14079 | Q9HBA9 | -0.75094  |
| 81663 | P14079 | O76036 | -1.1385   |
| 81664 | P14079 | Q6N063 | -0.56465  |
| 81665 | P14079 | Q86YR5 | -0.22206  |
| 81666 | P14079 | Q6ZQY3 | -0.41406  |
| 81667 | P14079 | P53365 | -0.21199  |
| 81668 | P14079 | P14735 | -0.34812  |
| 81669 | P14079 | Q9H2G2 | -1.3532   |
| 81670 | P14079 | Q9NT99 | -0.87608  |
| 81671 | P14079 | O75038 | -0.62259  |
| 81672 | P14079 | Q6ZXV5 | -0.77815  |
| 81673 | P14079 | Q2M3M2 | -1.245    |
| 81674 | P14079 | P06241 | -0.40566  |
| 81675 | P14079 | Q6GYQ0 | -0.18189  |
| 81676 | P14079 | Q8N474 | -0.79284  |
| 81677 | P14079 | Q9NTJ5 | -0.70082  |
| 81678 | P14079 | P15291 | -0.49093  |
| 81679 | P14079 | Q7Z569 | -0.40955  |
| 81680 | P14079 | P04206 | -1        |
| 81681 | P14079 | B0FP48 | -0.77815  |
| 81682 | P14079 | Q5R3F8 | -0.77344  |
| 81683 | P14079 | Q96BI1 | -0.83354  |
| 81684 | P14079 | O00155 | -1.5146   |
| 81685 | P14079 | P04920 | -0.94649  |
| 81686 | P14079 | Q6ZMJ2 | -1.1666   |
| 81687 | P14079 | Q8N9H8 | -0.56968  |
| 81688 | P14079 | Q7Z7D3 | -1.0453   |
| 81689 | P14079 | P30838 | -0.36529  |
| 81690 | P14079 | P11216 | -0.33031  |
| 81691 | P14079 | Q96PQ1 | -1.0019   |
| 81692 | P14079 | Q8WUP2 | -0.054146 |
| 81693 | P14079 | Q495X7 | -0.36051  |
| 81694 | P14079 | O00160 | -0.4226   |
| 81695 | P14079 | Q7LFX5 | -0.61086  |
| 81696 | P14079 | Q9H772 | -0.77983  |
| 81697 | P14079 | Q8NBR9 | -0.057984 |
| 81698 | P14079 | Q13698 | -0.83784  |
| 81699 | P14079 | Q8N695 | -1.1512   |
| 81700 | P14079 | Q9Y6W5 | -0.094851 |



|       |        |         |          |
|-------|--------|---------|----------|
| 81701 | P14079 | Q14714  | -1.0083  |
| 81702 | P14079 | P58753  | -0.21588 |
| 81703 | P14079 | Q9BZX2  | -0.84573 |
| 81704 | P14079 | Q13049  | -0.22738 |
| 81705 | P14079 | Q9Y2Z9  | -0.54001 |
| 81706 | P14079 | A8MYJ7  | -0.09637 |
| 81707 | P14079 | Q6S545  | -0.22739 |
| 81708 | P14079 | Q9UGI6  | -0.88489 |
| 81709 | P14079 | Q9H0M0  | -0.22741 |
| 81710 | P14079 | A6NM76  | -1.2314  |
| 81711 | P14079 | Q8TE77  | -0.40318 |
| 81712 | P14079 | Q16206  | -1.4639  |
| 81713 | P14079 | Q9Y5B8  | -0.7626  |
| 81714 | P14079 | Q8IYB8  | -0.22617 |
| 81715 | P14079 | Q8NCF0  | -0.80162 |
| 81716 | P14079 | Q8NG08  | -0.80785 |
| 81717 | P14079 | P56373  | -0.63634 |
| 81718 | P14079 | Q9Y5G6  | -1.2343  |
| 81719 | P14079 | Q86WS5  | -1.3709  |
| 81720 | P14079 | Q7RTV2  | -0.22395 |
| 81721 | P14079 | Q6UXN2  | -0.80633 |
| 81722 | P14079 | Q8IWU6  | -0.35724 |
| 81723 | P14079 | Q9BQY6  | -0.82805 |
| 81724 | P14079 | P01210  | -0.88346 |
| 81725 | P14079 | Q9Y388  | -0.79049 |
| 81726 | P14079 | Q9NY97  | -0.61675 |
| 81727 | P14079 | O95803  | -0.8025  |
| 81728 | P14079 | P47884  | -1.3694  |
| 81729 | P14079 | Q6ZSI9  | -1.0627  |
| 81730 | P14079 | Q8IXL9  | -0.2045  |
| 81731 | P14079 | O14607  | -0.44024 |
| 81732 | P14079 | O00748  | -0.22727 |
| 81733 | P14079 | Q14995  | -0.26615 |
| 81734 | P14079 | Q13508  | -0.73928 |
| 81735 | P14079 | Q99584  | -0.22848 |
| 81736 | P14079 | Q6ZU45  | -0.17952 |
| 81737 | P14079 | Q5W064  | -0.29649 |
| 81738 | P14079 | Q92504  | -1.1135  |
| 81739 | P14079 | Q9Y5I1  | -1.341   |
| 81740 | P14079 | Q6UWY2  | -1.4766  |
| 81741 | P14079 | Q0GE19  | -1.0039  |
| 81742 | P14079 | O76000  | -1.2314  |
| 81743 | P14079 | O60812  | -0.37126 |
| 81744 | P14079 | Q6UXL0  | -0.61898 |
| 81745 | P14079 | Q9UFV1  | -0.90849 |
| 81746 | P14079 | Q07864  | -0.18439 |
| 81747 | P14079 | P41440  | -0.90452 |
| 81748 | P14079 | Q02363  | -0.22818 |
| 81749 | P14079 | P25106  | -1.0864  |
| 81750 | P14079 | Q9NW75  | -0.21804 |
| 81751 | P14079 | Q9NS87  | -0.23496 |
| 81752 | P14079 | P43657  | -1.2581  |
| 81753 | P14079 | Q9UH73  | -0.0862  |
| 81754 | P14079 | Q9BYV7  | -0.52882 |
| 81755 | P14079 | Q9Y2W6  | -0.22245 |
| 81756 | P14079 | Q4G0X9  | -0.2048  |
| 81757 | P14079 | O60447  | -0.27917 |
| 81758 | P14079 | P36941  | -0.2273  |
| 81759 | P14079 | Q9NQX0  | -0.11886 |
| 81760 | P14079 | P0DJJD7 | -1.3279  |
| 81761 | P14079 | P01610  | -1       |
| 81762 | P14079 | Q9Y5Q0  | -1.1084  |
| 81763 | P14079 | Q9Y694  | -1.2472  |
| 81764 | P14079 | O75676  | -0.1435  |
| 81765 | P14079 | Q13277  | -0.45488 |
| 81766 | P14079 | P40967  | -0.89224 |
| 81767 | P14079 | Q9P0K8  | -0.99971 |
| 81768 | P14079 | Q6ZTA4  | -0.22741 |
| 81769 | P14079 | Q99878  | -0.92425 |
| 81770 | P14079 | O75995  | -0.2273  |
| 81771 | P14079 | Q8TB52  | -0.49865 |
| 81772 | P14079 | P26010  | -1.3588  |
| 81773 | P14079 | Q96R30  | -1.2314  |
| 81774 | P14079 | O75899  | -0.9433  |
| 81775 | P14079 | O15173  | -0.98519 |
| 81776 | P14079 | P49675  | -0.3356  |

|       |        |        |           |
|-------|--------|--------|-----------|
| 81777 | P14079 | Q6PRD1 | -1.3444   |
| 81778 | P14079 | Q96CN5 | -0.22675  |
| 81779 | P14079 | Q5SW96 | -0.22717  |
| 81780 | P14079 | Q9H114 | -0.94572  |
| 81781 | P14079 | Q9H343 | -1.2314   |
| 81782 | P14079 | A6NGJ6 | -0.36051  |
| 81783 | P14079 | P83105 | -1.3606   |
| 81784 | P14079 | Q9BRK5 | -0.22045  |
| 81785 | P14079 | P48051 | -0.45608  |
| 81786 | P14079 | P0CAP1 | -0.17218  |
| 81787 | P14079 | Q96T25 | -0.29326  |
| 81788 | P14079 | Q9H3N8 | -1.3333   |
| 81789 | P14079 | Q9Y619 | -0.6327   |
| 81790 | P14079 | O14594 | -0.93114  |
| 81791 | P14079 | Q86W54 | -0.093884 |
| 81792 | P14079 | Q96PN7 | -0.18589  |
| 81793 | P14079 | Q9Y2K9 | -0.37673  |
| 81794 | P14079 | Q8TCT1 | -0.34282  |
| 81795 | P14079 | Q8IV16 | -0.73992  |
| 81796 | P14079 | Q5PT55 | -0.97996  |
| 81797 | P14079 | Q9UBH0 | -0.79039  |
| 81798 | P14079 | Q9HCC0 | -0.69765  |
| 81799 | P14079 | P09543 | -0.38163  |
| 81800 | P14079 | Q9Y696 | -0.20046  |
| 81801 | P14079 | Q8IYR2 | -0.19653  |
| 81802 | P14079 | Q9BWP8 | -1.1705   |
| 81803 | P14079 | O14957 | -0.66154  |
| 81804 | P14079 | Q09470 | -1.0238   |
| 81805 | P14079 | Q2M2H8 | -0.75798  |
| 81806 | P14079 | Q05639 | -0.47886  |
| 81807 | P14079 | P07357 | -1.49     |
| 81808 | P14079 | O60359 | -1.1587   |
| 81809 | P14079 | Q9H158 | -1.341    |
| 81810 | P14079 | O14511 | -1.4642   |
| 81811 | P14079 | Q9NRA2 | -1.3182   |
| 81812 | P14079 | Q9H342 | -1.2314   |
| 81813 | P14079 | Q9NYD6 | -0.28121  |
| 81814 | P14079 | Q9NRJ1 | -0.21811  |
| 81815 | P14079 | Q8N239 | -0.20703  |
| 81816 | P14079 | Q8NBX0 | -0.75401  |
| 81817 | P14079 | Q86SE5 | -0.79049  |
| 81818 | P14079 | Q01955 | -0.56672  |
| 81819 | P14079 | Q52LC2 | -0.69545  |
| 81820 | P14079 | Q6ZNC8 | -1.0025   |
| 81821 | P14079 | P0C7V4 | -0.11885  |
| 81822 | P14079 | Q8N1W1 | -0.70705  |
| 81823 | P14079 | O00421 | -1.4137   |
| 81824 | P14079 | Q96A29 | -0.56818  |
| 81825 | P14079 | O00548 | -0.70514  |
| 81826 | P14079 | O75581 | -0.23784  |
| 81827 | P14079 | O00506 | -0.75867  |
| 81828 | P14079 | Q9NRD0 | -0.22581  |
| 81829 | P14079 | Q9UBN4 | -0.30191  |
| 81830 | P14079 | Q6NSJ0 | -0.64538  |
| 81831 | P14079 | O76074 | -0.48218  |
| 81832 | P14079 | Q9UK33 | -0.19864  |
| 81833 | P14079 | Q8N4S7 | -0.77815  |
| 81834 | P14079 | Q14565 | -0.39879  |
| 81835 | P14079 | Q9UMX6 | -0.49602  |
| 81836 | P14079 | Q86UQ4 | -1.4244   |
| 81837 | P14079 | O75426 | -0.43161  |
| 81838 | P14079 | Q30154 | -0.72952  |
| 81839 | P14079 | B2RXH2 | -0.1176   |
| 81840 | P14079 | Q7Z4V0 | -0.22738  |
| 81841 | P14079 | Q9BYJ4 | -0.29589  |
| 81842 | P14079 | P48551 | -0.9867   |
| 81843 | P14079 | P38435 | -0.91138  |
| 81844 | P14079 | P0CF51 | -0.77815  |
| 81845 | P14079 | Q9NQQ7 | -0.79981  |
| 81846 | P14079 | P06753 | -0.14288  |
| 81847 | P14079 | Q96AD5 | -0.84573  |
| 81848 | P14079 | Q96CT2 | -0.19862  |
| 81849 | P14079 | P01243 | -0.89472  |
| 81850 | P14079 | Q6ZMT1 | -0.36625  |
| 81851 | P14079 | Q9C0K7 | -0.37225  |
| 81852 | P14079 | P03956 | -1.1586   |

|       |        |        |          |
|-------|--------|--------|----------|
| 81853 | P14079 | P0DH78 | -0.2191  |
| 81854 | P14079 | Q96ER3 | -0.76494 |
| 81855 | P14079 | A6NL08 | -1.2314  |
| 81856 | P14079 | Q86SM8 | -1.3154  |
| 81857 | P14079 | P08173 | -1.094   |
| 81858 | P14079 | P50454 | -0.55804 |
| 81859 | P14079 | Q96LD8 | -0.81707 |
| 81860 | P14079 | O95714 | -0.22905 |
| 81861 | P14079 | Q7Z5H3 | -0.39145 |
| 81862 | P14079 | Q9HCX4 | -0.23306 |
| 81863 | P14079 | B2RN74 | -1.2314  |
| 81864 | P14079 | O43490 | -0.59696 |
| 81865 | P14079 | O95170 | -0.26849 |
| 81866 | P14079 | P35240 | -0.25382 |
| 81867 | P14079 | Q9BRR6 | -0.97727 |
| 81868 | P14079 | Q03692 | -1.0843  |
| 81869 | P14079 | P49190 | -1.5322  |
| 81870 | P14079 | Q53G44 | -0.11166 |
| 81871 | P14079 | P05091 | -0.73988 |
| 81872 | P14079 | Q9NUT2 | -0.8915  |
| 81873 | P14079 | Q9UPX0 | -0.97472 |
| 81874 | P14079 | Q16518 | -0.3432  |
| 81875 | P14079 | Q9NYI0 | -0.25934 |
| 81876 | P14079 | Q9BS91 | -0.59704 |
| 81877 | P14079 | P46089 | -1.458   |
| 81878 | P14079 | P09651 | -0.25726 |
| 81879 | P14079 | Q9BYZ6 | -1.2968  |
| 81880 | P14079 | Q4UJ75 | -0.22736 |
| 81881 | P14079 | Q09328 | -0.62373 |
| 81882 | P14079 | P63135 | -0.14674 |
| 81883 | P14079 | Q9NP94 | -1.2199  |
| 81884 | P14079 | P01591 | -0.81822 |
| 81885 | P14079 | P30953 | -1.2314  |
| 81886 | P14079 | Q9UNE0 | -0.71294 |
| 81887 | P14079 | Q99640 | -0.22741 |
| 81888 | P14079 | Q9BRJ9 | -0.22771 |
| 81889 | P14079 | Q567U6 | -0.13838 |
| 81890 | P14079 | P06888 | -1       |
| 81891 | P14079 | Q92747 | -0.22737 |
| 81892 | P14079 | P08582 | -0.62857 |
| 81893 | P14079 | Q9BQE3 | -0.19251 |
| 81894 | P14079 | Q1L5Z9 | -0.38744 |
| 81895 | P14079 | P46094 | -1.3317  |
| 81896 | P14079 | Q9HAS0 | -0.34345 |
| 81897 | P14079 | P52333 | -0.4616  |
| 81898 | P14079 | P51513 | -0.14288 |
| 81899 | P14079 | Q8N3Y3 | -0.69569 |
| 81900 | P14079 | Q5VZY2 | -0.85875 |
| 81901 | P14079 | Q96AZ1 | -0.92238 |
| 81902 | P14079 | Q8N2A0 | -0.22805 |
| 81903 | P14079 | P45452 | -0.948   |
| 81904 | P14079 | Q76002 | -1.2314  |
| 81905 | P14079 | Q8NGR2 | -1.2314  |
| 81906 | P14079 | Q9Y4D7 | -1.2279  |
| 81907 | P14079 | Q02928 | -0.60042 |
| 81908 | P14079 | Q9Y2Q3 | -0.63095 |
| 81909 | P14079 | P20742 | -0.90565 |
| 81910 | P14079 | Q6ZWK6 | -2.0395  |
| 81911 | P14079 | Q5SRD3 | -0.96514 |
| 81912 | P14079 | Q13976 | -0.59101 |
| 81913 | P14079 | P15428 | -0.40816 |
| 81914 | P14079 | Q8N8Q8 | -0.36145 |
| 81915 | P14079 | Q9NU39 | -0.99971 |
| 81916 | P14079 | P78381 | -0.278   |
| 81917 | P14079 | Q96AT9 | -0.20863 |
| 81918 | P14079 | Q9H2X9 | -0.96623 |
| 81919 | P14079 | P02656 | -0.62186 |
| 81920 | P14079 | Q9UHM6 | -1.1439  |
| 81921 | P14079 | A8MYG8 | -0.22741 |
| 81922 | P14079 | P11586 | -0.65344 |
| 81923 | P14079 | Q9Y5S8 | -0.45698 |
| 81924 | P14079 | Q16827 | -0.69556 |
| 81925 | P14079 | P60174 | -0.12266 |
| 81926 | P14079 | A8MWS1 | -0.80633 |
| 81927 | P14079 | Q16769 | -1.3279  |
| 81928 | P14079 | Q0Z7S8 | -0.21492 |

|       |        |        |           |
|-------|--------|--------|-----------|
| 81929 | P14079 | Q00536 | -0.42571  |
| 81930 | P14079 | Q8IUE6 | -0.92425  |
| 81931 | P14079 | P41231 | -0.81726  |
| 81932 | P14079 | P08174 | -1.0836   |
| 81933 | P14079 | Q7Z404 | -0.77815  |
| 81934 | P14079 | Q12952 | -0.831    |
| 81935 | P14079 | Q8TC59 | -0.41359  |
| 81936 | P14079 | Q9P2T1 | -0.53418  |
| 81937 | P14079 | Q6NUI2 | -0.75455  |
| 81938 | P14079 | P47887 | -1.3651   |
| 81939 | P14079 | Q9BWQ8 | -0.56022  |
| 81940 | P14079 | Q8WZA6 | -1.2314   |
| 81941 | P14079 | Q9UK97 | -0.43161  |
| 81942 | P14079 | P24723 | -1.0783   |
| 81943 | P14079 | A6NM15 | -0.78428  |
| 81944 | P14079 | P01871 | -1.5683   |
| 81945 | P14079 | A8MZH6 | -0.80633  |
| 81946 | P14079 | P78329 | -0.25877  |
| 81947 | P14079 | P51654 | -0.87369  |
| 81948 | P14079 | Q9C0A0 | -1.2378   |
| 81949 | P14079 | Q9P1U1 | -0.61387  |
| 81950 | P14079 | Q01101 | -0.2221   |
| 81951 | P14079 | A6NCF6 | -0.059236 |
| 81952 | P14079 | Q9Y276 | -0.60467  |
| 81953 | P14079 | Q16690 | -0.43043  |
| 81954 | P14079 | Q8NGZ0 | -1.2314   |
| 81955 | P14079 | Q9H2U1 | -0.21791  |
| 81956 | P14079 | Q15303 | -1.1714   |
| 81957 | P14079 | P41217 | -0.6034   |
| 81958 | P14079 | P10645 | -0.78466  |
| 81959 | P14079 | Q96CC6 | -0.5055   |
| 81960 | P14079 | P13631 | -0.22965  |
| 81961 | P14079 | Q14574 | -1.1741   |
| 81962 | P14079 | Q92915 | -0.72772  |
| 81963 | P14079 | Q8IY67 | -0.35432  |
| 81964 | P14079 | O75452 | -1.6625   |
| 81965 | P14079 | P30490 | -1        |
| 81966 | P14079 | Q96JP2 | -0.21832  |
| 81967 | P14079 | Q9Y2U5 | -0.73648  |
| 81968 | P14079 | Q8NGQ3 | -1.2314   |
| 81969 | P14079 | Q9Y274 | -0.54828  |
| 81970 | P14079 | P01609 | -1        |
| 81971 | P14079 | Q58FG0 | -0.61725  |
| 81972 | P14079 | Q9H7D0 | -0.26884  |
| 81973 | P14079 | Q14682 | -0.20993  |
| 81974 | P14079 | Q9H1N7 | -0.48327  |
| 81975 | P14079 | Q9ULL8 | -0.22551  |
| 81976 | P14079 | Q53F39 | -0.30838  |
| 81977 | P14079 | Q13724 | -0.87715  |
| 81978 | P14079 | P23083 | -0.81822  |
| 81979 | P14079 | Q96EX2 | -0.78242  |
| 81980 | P14079 | Q96R69 | -1.2314   |
| 81981 | P14079 | Q92874 | -0.77565  |
| 81982 | P14079 | Q93033 | -1.0308   |
| 81983 | P14079 | P63244 | -0.22851  |
| 81984 | P14079 | Q07001 | -1.0077   |
| 81985 | P14079 | Q8N9W4 | -0.096543 |
| 81986 | P14079 | Q9Y5E1 | -1.2218   |
| 81987 | P14079 | Q99518 | -0.98504  |
| 81988 | P14079 | A8MX19 | -0.11885  |
| 81989 | P14079 | P12838 | -0.87442  |
| 81990 | P14079 | B6SEH8 | -0.77815  |
| 81991 | P14079 | Q9HB31 | -0.4134   |
| 81992 | P14079 | Q8IUX4 | -0.33688  |
| 81993 | P14079 | Q8NHB1 | -1.2314   |
| 81994 | P14079 | Q8N752 | -1.3729   |
| 81995 | P14079 | P78415 | -0.26555  |
| 81996 | P14079 | Q13576 | -0.72063  |
| 81997 | P14079 | Q15165 | -1.0087   |
| 81998 | P14079 | O43353 | -0.22741  |
| 81999 | P14079 | O14944 | -0.60294  |
| 82000 | P14079 | O60701 | -0.96522  |
| 82001 | P14079 | Q9UDX3 | -1.0317   |
| 82002 | P14079 | Q13496 | -0.45747  |
| 82003 | P14079 | O14735 | -0.76343  |
| 82004 | P14079 | Q02535 | -0.2223   |

|       |        |        |           |
|-------|--------|--------|-----------|
| 82005 | P14079 | Q8NG04 | -0.77336  |
| 82006 | P14079 | A1L453 | -1.4766   |
| 82007 | P14079 | B1AJZ9 | -0.053415 |
| 82008 | P14079 | P54709 | -0.84278  |
| 82009 | P14079 | Q8NH79 | -1.2314   |
| 82010 | P14079 | Q86SI9 | -0.80633  |
| 82011 | P14079 | C9JL84 | -0.80633  |
| 82012 | P14079 | Q92538 | -0.20945  |
| 82013 | P14079 | Q9H6Y7 | -0.50284  |
| 82014 | P14079 | Q2NKX8 | -0.37308  |
| 82015 | P14079 | P35498 | -1.0703   |
| 82016 | P14079 | P14902 | -0.29723  |
| 82017 | P14079 | Q9NP60 | -0.99693  |
| 82018 | P14079 | O43827 | -1.1148   |
| 82019 | P14079 | Q6DHY5 | -1.4902   |
| 82020 | P14079 | O15118 | -0.65987  |
| 82021 | P14079 | Q9NQL2 | -0.4488   |
| 82022 | P14079 | Q8NAG6 | -0.22741  |
| 82023 | P14079 | Q6MZM0 | -1.2031   |
| 82024 | P14079 | P40879 | -0.711    |
| 82025 | P14079 | P60985 | -0.92807  |
| 82026 | P14079 | P60484 | -0.22738  |
| 82027 | P14079 | Q96P47 | -1.1881   |
| 82028 | P14079 | P19022 | -0.97178  |
| 82029 | P14079 | Q494W8 | -0.8556   |
| 82030 | P14079 | Q9NUL7 | -0.29003  |
| 82031 | P14079 | Q8NH51 | -1.2314   |
| 82032 | P14079 | O60939 | -0.87567  |
| 82033 | P14079 | P01859 | -0.89686  |
| 82034 | P14079 | Q8NGL9 | -1.2314   |
| 82035 | P14079 | P28336 | -1.2313   |
| 82036 | P14079 | Q9HBU6 | -1.0044   |
| 82037 | P14079 | Q16394 | -0.66463  |
| 82038 | P14079 | P63125 | -0.65475  |
| 82039 | P14079 | Q9UNK4 | -0.95095  |
| 82040 | P14079 | P59534 | -1.1233   |
| 82041 | P14079 | A6NHZ5 | -0.22448  |
| 82042 | P14079 | Q8N967 | -0.77815  |
| 82043 | P14079 | Q8WY21 | -0.20079  |
| 82044 | P14079 | Q4KMZ8 | -0.97472  |
| 82045 | P14079 | Q3KNW5 | -1.1647   |
| 82046 | P14079 | Q9UHA7 | -0.85012  |
| 82047 | P14079 | Q9NQW8 | -1.5583   |
| 82048 | P14079 | Q8WXH5 | -0.47985  |
| 82049 | P14079 | P41743 | -0.29187  |
| 82050 | P14079 | Q9NQX4 | -0.44007  |
| 82051 | P14079 | P27487 | -0.75388  |
| 82052 | P14079 | P78312 | -0.14829  |
| 82053 | P14079 | P19971 | -0.5988   |
| 82054 | P14079 | Q9Y4B5 | -0.15038  |
| 82055 | P14079 | Q96P56 | -0.83948  |
| 82056 | P14079 | P01730 | -0.35833  |
| 82057 | P14079 | Q8NER1 | -1.3321   |
| 82058 | P14079 | Q99942 | -0.56553  |
| 82059 | P14079 | Q9H172 | -1.5174   |
| 82060 | P14079 | Q9Y4G8 | -0.95996  |
| 82061 | P14079 | Q95622 | -0.83149  |
| 82062 | P14079 | Q92508 | -1.0708   |
| 82063 | P14079 | Q9Y6S9 | -1.0869   |
| 82064 | P14079 | Q9Y6H8 | -0.91205  |
| 82065 | P14079 | P35452 | -0.28775  |
| 82066 | P14079 | P49862 | -1.4459   |
| 82067 | P14079 | Q8WU68 | -0.46102  |
| 82068 | P14079 | Q13686 | -0.31063  |
| 82069 | P14079 | Q08257 | -0.57221  |
| 82070 | P14079 | Q8N2F6 | -0.79241  |
| 82071 | P14079 | Q13489 | -0.2274   |
| 82072 | P14079 | Q9Y3D8 | -0.16676  |
| 82073 | P14079 | Q8TAM6 | -0.19645  |
| 82074 | P14079 | Q04656 | -0.23624  |
| 82075 | P14079 | O43869 | -1.2314   |
| 82076 | P14079 | O75037 | -0.31142  |
| 82077 | P14079 | Q5CZ79 | -0.22736  |
| 82078 | P14079 | Q14012 | -0.61052  |
| 82079 | P14079 | Q9C0H2 | -1.0741   |
| 82080 | P14079 | Q9H2K8 | -0.48622  |

|       |        |        |          |
|-------|--------|--------|----------|
| 82081 | P14079 | O60779 | -0.71839 |
| 82082 | P14079 | Q05397 | -0.24806 |
| 82083 | P14079 | P13533 | -0.19033 |
| 82084 | P14079 | Q9BZ72 | -1.2863  |
| 82085 | P14079 | Q9NZS9 | -0.77889 |
| 82086 | P14079 | Q9BXR3 | -0.30686 |
| 82087 | P14079 | P09017 | -0.18204 |
| 82088 | P14079 | P51671 | -0.86069 |
| 82089 | P14079 | Q8NGB4 | -1.2314  |
| 82090 | P14079 | P04049 | -0.35476 |
| 82091 | P14079 | Q14654 | -0.69131 |
| 82092 | P14079 | Q53FA7 | -0.87049 |
| 82093 | P14079 | O14986 | -0.46462 |
| 82094 | P14079 | Q6NUN0 | -1.2194  |
| 82095 | P14079 | Q96NE9 | -0.2578  |
| 82096 | P14079 | O75695 | -0.66678 |
| 82097 | P14079 | Q969M2 | -0.87089 |
| 82098 | P14079 | Q9BWM7 | -0.90761 |
| 82099 | P14079 | Q9UBS5 | -0.77952 |
| 82100 | P14079 | O95279 | -1.1982  |
| 82101 | P14079 | Q5VXT5 | -0.95448 |
| 82102 | P14079 | P17735 | -0.29008 |
| 82103 | P14079 | P07093 | -0.45011 |
| 82104 | P14079 | P24557 | -1.1552  |
| 82105 | P14079 | Q8IXK2 | -0.65329 |
| 82106 | P14079 | P0C2L3 | -0.77815 |
| 82107 | P14079 | Q96S97 | -0.77815 |
| 82108 | P14079 | Q9H313 | -0.88647 |
| 82109 | P14079 | Q16739 | -0.65589 |
| 82110 | P14079 | Q6NT32 | -0.74364 |
| 82111 | P14079 | Q6IQ55 | -0.81609 |
| 82112 | P14079 | P16520 | -0.2224  |
| 82113 | P14079 | Q8NGS2 | -1.2314  |
| 82114 | P14079 | P23109 | -0.15688 |
| 82115 | P14079 | O00194 | -0.75161 |
| 82116 | P14079 | P21964 | -0.33338 |
| 82117 | P14079 | Q96R72 | -1.2314  |
| 82118 | P14079 | O15085 | -0.22741 |
| 82119 | P14079 | Q00532 | -0.96727 |
| 82120 | P14079 | P30711 | -0.2205  |
| 82121 | P14079 | O43529 | -0.76514 |
| 82122 | P14079 | P15151 | -0.31731 |
| 82123 | P14079 | P24071 | -1.7397  |
| 82124 | P14079 | Q1XH10 | -0.49885 |
| 82125 | P14079 | Q96FN5 | -0.302   |
| 82126 | P14079 | Q03518 | -0.44638 |
| 82127 | P14079 | Q9UJ83 | -0.96437 |
| 82128 | P14079 | Q5U4P2 | -1.0269  |
| 82129 | P14079 | Q6ZR37 | -0.45453 |
| 82130 | P14079 | Q96EQ0 | -0.22704 |
| 82131 | P14079 | B5MCY1 | -0.13859 |
| 82132 | P14079 | Q96MD7 | -0.15544 |
| 82133 | P14079 | Q96LR5 | -0.96373 |
| 82134 | P14079 | P51956 | -0.35619 |
| 82135 | P14079 | P27658 | -1.2043  |
| 82136 | P14079 | P30740 | -0.14682 |
| 82137 | P14079 | Q5HYJ1 | -0.93053 |
| 82138 | P14079 | Q9H853 | -0.27878 |
| 82139 | P14079 | Q86XH1 | -0.78428 |
| 82140 | P14079 | Q8IY95 | -0.89085 |
| 82141 | P14079 | Q6UXN9 | -0.51146 |
| 82142 | P14079 | P04440 | -0.75641 |
| 82143 | P14079 | Q9H2S9 | -0.84435 |
| 82144 | P14079 | Q70J99 | -0.23968 |
| 82145 | P14079 | Q9Y2H6 | -0.4266  |
| 82146 | P14079 | Q96S96 | -0.24103 |
| 82147 | P14079 | Q92959 | -1.1784  |
| 82148 | P14079 | Q9BY78 | -0.84151 |
| 82149 | P14079 | Q6WKZ4 | -0.20343 |
| 82150 | P14079 | Q96JH7 | -0.60434 |
| 82151 | P14079 | Q92886 | -0.2335  |
| 82152 | P14079 | Q96I51 | -0.22019 |
| 82153 | P14079 | Q9HD43 | -0.22744 |
| 82154 | P14079 | A6NCF5 | -0.22081 |
| 82155 | P14079 | Q9HBJ8 | -1.0115  |
| 82156 | P14079 | P59190 | -1.2314  |

|       |        |        |           |
|-------|--------|--------|-----------|
| 82157 | P14079 | Q5TDP6 | -0.25728  |
| 82158 | P14079 | Q6PIY7 | -0.54277  |
| 82159 | P14079 | Q96ND0 | -0.62143  |
| 82160 | P14079 | Q8IWL1 | -1.0861   |
| 82161 | P14079 | Q9UK00 | -0.77815  |
| 82162 | P14079 | O00744 | -0.43833  |
| 82163 | P14079 | Q8NGP8 | -1.2314   |
| 82164 | P14079 | Q96JW4 | -1.2024   |
| 82165 | P14079 | P31994 | -0.27566  |
| 82166 | P14079 | Q9NZ56 | -0.56695  |
| 82167 | P14079 | Q9P1P4 | -1.2819   |
| 82168 | P14079 | P19784 | -0.32423  |
| 82169 | P14079 | Q96QE2 | -0.94601  |
| 82170 | P14079 | Q96MK3 | -0.80633  |
| 82171 | P14079 | Q9NPF0 | -0.84093  |
| 82172 | P14079 | Q8NBW4 | -1.0142   |
| 82173 | P14079 | P48065 | -1.2198   |
| 82174 | P14079 | P16870 | -0.90054  |
| 82175 | P14079 | Q9H9V4 | -0.61144  |
| 82176 | P14079 | Q9UN71 | -1.2071   |
| 82177 | P14079 | Q9Y6Z7 | -0.75241  |
| 82178 | P14079 | O95562 | -0.41331  |
| 82179 | P14079 | Q9NXU5 | -1.3745   |
| 82180 | P14079 | Q7Z442 | -1.0402   |
| 82181 | P14079 | Q9NWM8 | -0.2328   |
| 82182 | P14079 | P58546 | -0.22742  |
| 82183 | P14079 | Q9NRU3 | -1.1532   |
| 82184 | P14079 | Q6NVV9 | -0.33595  |
| 82185 | P14079 | Q5XPI4 | -0.39241  |
| 82186 | P14079 | P08246 | -0.59144  |
| 82187 | P14079 | P51788 | -0.85707  |
| 82188 | P14079 | P36537 | -1.0155   |
| 82189 | P14079 | P01236 | -0.77016  |
| 82190 | P14079 | Q6B0I6 | -0.13762  |
| 82191 | P14079 | Q8IWG1 | -0.084207 |
| 82192 | P14079 | P01702 | -1        |
| 82193 | P14079 | Q96NZ9 | -0.80633  |
| 82194 | P14079 | Q5VUJ6 | -0.23163  |
| 82195 | P14079 | Q86SX6 | -0.20792  |
| 82196 | P14079 | P02768 | -0.34988  |
| 82197 | P14079 | Q07002 | -1.316    |
| 82198 | P14079 | Q6Q6R5 | -0.23034  |
| 82199 | P14079 | Q9UF56 | -0.21662  |
| 82200 | P14079 | Q5T0N5 | -0.22741  |
| 82201 | P14079 | Q495T6 | -1.588    |
| 82202 | P14079 | Q8N5S1 | -0.74044  |
| 82203 | P14079 | P01375 | -0.24072  |
| 82204 | P14079 | Q14055 | -1.0074   |
| 82205 | P14079 | P59826 | -0.80678  |
| 82206 | P14079 | Q9UBR4 | -0.2246   |
| 82207 | P14079 | P34995 | -1.3843   |
| 82208 | P14079 | Q9H2W2 | -0.21507  |
| 82209 | P14079 | Q7L0X0 | -0.60943  |
| 82210 | P14079 | Q9BZZ2 | -1.6686   |
| 82211 | P14079 | Q96T53 | -0.97045  |
| 82212 | P14079 | A6NHN0 | -0.89985  |
| 82213 | P14079 | Q8TD07 | -0.42968  |
| 82214 | P14079 | Q96LR1 | -0.80633  |
| 82215 | P14079 | Q2MJR0 | -0.54737  |
| 82216 | P14079 | Q92569 | -0.22737  |
| 82217 | P14079 | Q05193 | -0.27764  |
| 82218 | P14079 | Q71DI3 | -0.65928  |
| 82219 | P14079 | Q9Y4C4 | -0.22845  |
| 82220 | P14079 | Q12852 | -0.68596  |
| 82221 | P14079 | Q92574 | -0.22703  |
| 82222 | P14079 | P0CV98 | -0.6149   |
| 82223 | P14079 | Q86SG6 | -1.2343   |
| 82224 | P14079 | Q15052 | -0.35828  |
| 82225 | P14079 | P0C1S8 | -0.69477  |
| 82226 | P14079 | Q9BRL6 | -0.58152  |
| 82227 | P14079 | Q8TB22 | -1.4053   |
| 82228 | P14079 | P11487 | -0.63058  |
| 82229 | P14079 | Q8NGI8 | -1.2314   |
| 82230 | P14079 | Q92871 | -0.28614  |
| 82231 | P14079 | Q32M45 | -0.90849  |
| 82232 | P14079 | Q9NZM3 | -0.47942  |

|       |        |        |          |
|-------|--------|--------|----------|
| 82233 | P14079 | Q4V339 | -0.78428 |
| 82234 | P14079 | Q5XKR4 | -0.18596 |
| 82235 | P14079 | P98153 | -0.90178 |
| 82236 | P14079 | Q9NXG6 | -1.2048  |
| 82237 | P14079 | P01374 | -0.62391 |
| 82238 | P14079 | A8K4G0 | -0.97472 |
| 82239 | P14079 | P52799 | -0.99688 |
| 82240 | P14079 | Q9BXS0 | -1.8202  |
| 82241 | P14079 | Q6P4A7 | -0.90691 |
| 82242 | P14079 | Q7Z4L5 | -0.33779 |
| 82243 | P14079 | Q9UHQ9 | -0.91819 |
| 82244 | P14079 | Q9UQM7 | -0.66807 |
| 82245 | P14079 | Q6ZNC4 | -0.36051 |
| 82246 | P14079 | Q5W0B1 | -0.2274  |
| 82247 | P14079 | P12955 | -0.70117 |
| 82248 | P14079 | Q13873 | -0.60473 |
| 82249 | P14079 | Q96I99 | -0.97502 |
| 82250 | P14079 | Q86YQ2 | -0.97176 |
| 82251 | P14079 | Q14576 | -1.154   |
| 82252 | P14079 | Q14332 | -0.67979 |
| 82253 | P14079 | Q00499 | -0.22697 |
| 82254 | P14079 | P80404 | -0.24619 |
| 82255 | P14079 | Q9BZW5 | -0.83272 |
| 82256 | P14079 | Q8NGC2 | -1.2314  |
| 82257 | P14079 | Q9WJR5 | -0.30686 |
| 82258 | P14079 | Q9Y5G9 | -1.3321  |
| 82259 | P14079 | Q8IZU8 | -0.8053  |
| 82260 | P14079 | Q8WTQ1 | -0.78458 |
| 82261 | P14079 | Q9H2W1 | -0.77815 |
| 82262 | P14079 | Q5VW22 | -0.96514 |
| 82263 | P14079 | Q96JC1 | -0.15472 |
| 82264 | P14079 | O00219 | -0.95277 |
| 82265 | P14079 | Q8TB37 | -0.71529 |
| 82266 | P14079 | Q9Y6F8 | -0.29752 |
| 82267 | P14079 | Q6PI78 | -0.62143 |
| 82268 | P14079 | Q8N4C7 | -0.34686 |
| 82269 | P14079 | P10643 | -0.7806  |
| 82270 | P14079 | P05160 | -0.77642 |
| 82271 | P14079 | Q9Y5H6 | -1.341   |
| 82272 | P14079 | Q9NY64 | -0.89728 |
| 82273 | P14079 | Q7L4E1 | -0.77815 |
| 82274 | P14079 | O60942 | -0.56381 |
| 82275 | P14079 | P12872 | -0.87427 |
| 82276 | P14079 | Q9BPV8 | -1.2398  |
| 82277 | P14079 | Q9Y345 | -0.98764 |
| 82278 | P14079 | Q96L08 | -0.77815 |
| 82279 | P14079 | Q7RTS5 | -0.7626  |
| 82280 | P14079 | Q96FK6 | -0.2274  |
| 82281 | P14079 | P22460 | -0.68514 |
| 82282 | P14079 | Q8NGN1 | -1.2314  |
| 82283 | P14079 | P20340 | -0.36462 |
| 82284 | P14079 | P32004 | -0.79914 |
| 82285 | P14079 | Q14956 | -1.1069  |
| 82286 | P14079 | Q9NXW2 | -0.88024 |
| 82287 | P14079 | Q58EX7 | -0.51188 |
| 82288 | P14079 | Q13796 | -0.22683 |
| 82289 | P14079 | Q9Y217 | -0.18009 |
| 82290 | P14079 | P61086 | -0.81824 |
| 82291 | P14079 | P56747 | -0.55708 |
| 82292 | P14079 | A6NK59 | -0.47402 |
| 82293 | P14079 | Q9HBL6 | -0.77815 |
| 82294 | P14079 | Q13224 | -0.31401 |
| 82295 | P14079 | P61018 | -1.0141  |
| 82296 | P14079 | Q8TEW6 | -0.21578 |
| 82297 | P14079 | O43283 | -0.54216 |
| 82298 | P14079 | Q9UHV5 | -0.63529 |
| 82299 | P14079 | P30086 | -0.45141 |
| 82300 | P14079 | Q9UQB9 | -0.72179 |
| 82301 | P14079 | O95278 | -0.2341  |
| 82302 | P14079 | Q8IXE1 | -1.2314  |
| 82303 | P14079 | Q9UBY8 | -0.29812 |
| 82304 | P14079 | Q5VUJ9 | -0.226   |
| 82305 | P14079 | Q9ULH1 | -0.42499 |
| 82306 | P14079 | Q9UN88 | -1.0312  |
| 82307 | P14079 | O95935 | -0.59684 |
| 82308 | P14079 | Q8WWF6 | -0.29576 |



|       |        |        |           |
|-------|--------|--------|-----------|
| 82309 | P14079 | Q8WUD6 | -0.61575  |
| 82310 | P14079 | Q9UM44 | -0.80224  |
| 82311 | P14079 | P34982 | -1.3908   |
| 82312 | P14079 | Q9NXH9 | -0.17771  |
| 82313 | P14079 | P48165 | -1.0602   |
| 82314 | P14079 | O95427 | -1.0527   |
| 82315 | P14079 | A6NNT2 | -0.11855  |
| 82316 | P14079 | Q8NH81 | -1.2314   |
| 82317 | P14079 | Q96J88 | -0.016533 |
| 82318 | P14079 | Q14114 | -0.95094  |
| 82319 | P14079 | Q9C098 | -1.1326   |
| 82320 | P14079 | O95858 | -0.99591  |
| 82321 | P14079 | Q8NB90 | -1.2308   |
| 82322 | P14079 | O96013 | -0.98107  |
| 82323 | P14079 | Q6ZMD2 | -0.95922  |
| 82324 | P14079 | Q99958 | -0.37775  |
| 82325 | P14079 | Q5Y7A7 | -0.72952  |
| 82326 | P14079 | P04070 | -0.97483  |
| 82327 | P14079 | P18065 | -0.41034  |
| 82328 | P14079 | Q04828 | -0.22569  |
| 82329 | P14079 | Q8NH05 | -1.2314   |
| 82330 | P14079 | Q9H2A9 | -0.68656  |
| 82331 | P14079 | P55061 | -0.60166  |
| 82332 | P14079 | P80370 | -0.98674  |
| 82333 | P14079 | P49640 | -0.22683  |
| 82334 | P14079 | Q6X784 | -0.80168  |
| 82335 | P14079 | Q5T601 | -0.8365   |
| 82336 | P14079 | Q86T26 | -2.0395   |
| 82337 | P14079 | Q9Y6R4 | -0.55479  |
| 82338 | P14079 | Q5TGU0 | -0.94891  |
| 82339 | P14079 | Q9UBV4 | -1.0059   |
| 82340 | P14079 | Q9BZ19 | -0.22738  |
| 82341 | P14079 | Q6X4U4 | -1.0383   |
| 82342 | P14079 | O75746 | -0.54538  |
| 82343 | P14079 | Q15620 | -1.2314   |
| 82344 | P14079 | P30464 | -1        |
| 82345 | P14079 | Q2TB90 | -0.51915  |
| 82346 | P14079 | Q5NUL3 | -1.174    |
| 82347 | P14079 | Q9NTZ6 | -0.40019  |
| 82348 | P14079 | Q9Y258 | -0.91989  |
| 82349 | P14079 | Q7LDI9 | -0.059237 |
| 82350 | P14079 | P01019 | -0.49411  |
| 82351 | P14079 | Q9H4F1 | -0.41484  |
| 82352 | P14079 | P00367 | -0.32801  |
| 82353 | P14079 | Q96DA0 | -0.80162  |
| 82354 | P14079 | Q15195 | -0.80633  |
| 82355 | P14079 | Q15517 | -0.84224  |
| 82356 | P14079 | O75131 | -0.2328   |
| 82357 | P14079 | P11117 | -0.9258   |
| 82358 | P14079 | P09693 | -0.81867  |
| 82359 | P14079 | Q96RP7 | -0.66296  |
| 82360 | P14079 | Q9HCG7 | -0.89349  |
| 82361 | P14079 | Q9Y625 | -1.3133   |
| 82362 | P14079 | Q969I6 | -1.2622   |
| 82363 | P14079 | Q99715 | -1.3116   |
| 82364 | P14079 | Q8NGW1 | -1.2314   |
| 82365 | P14079 | Q9Y6I0 | -0.65475  |
| 82366 | P14079 | P35590 | -1.3504   |
| 82367 | P14079 | O15156 | -0.17796  |
| 82368 | P14079 | Q9UBP5 | -0.22653  |
| 82369 | P14079 | A8MX76 | -1.0627   |
| 82370 | P14079 | P19320 | -0.64862  |
| 82371 | P14079 | P21333 | -0.22831  |
| 82372 | P14079 | A0M8Q6 | -0.98486  |
| 82373 | P14079 | Q9C056 | -0.23297  |
| 82374 | P14079 | P62760 | -0.23407  |
| 82375 | P14079 | Q8IW45 | -0.71041  |
| 82376 | P14079 | Q14679 | -0.32786  |
| 82377 | P14079 | Q9BQ24 | -0.17562  |
| 82378 | P14079 | Q9Y4F4 | -0.12551  |
| 82379 | P14079 | P25090 | -1.5384   |
| 82380 | P14079 | Q5VV67 | -0.22197  |
| 82381 | P14079 | P15289 | -0.64447  |
| 82382 | P14079 | Q9NYL2 | -0.29338  |
| 82383 | P14079 | Q16819 | -1.4665   |
| 82384 | P14079 | A6ND01 | -0.78855  |

|       |        |        |          |
|-------|--------|--------|----------|
| 82385 | P14079 | Q99572 | -0.27418 |
| 82386 | P14079 | P78423 | -0.61836 |
| 82387 | P14079 | Q8WVM8 | -0.20986 |
| 82388 | P14079 | P10415 | -0.2272  |
| 82389 | P14079 | O95208 | -0.2105  |
| 82390 | P14079 | P62079 | -0.77815 |
| 82391 | P14079 | O94769 | -0.90526 |
| 82392 | P14079 | A6NG13 | -0.87896 |
| 82393 | P14079 | O43451 | -0.79819 |
| 82394 | P14079 | Q8WZ84 | -1.2314  |
| 82395 | P14079 | Q96D59 | -0.78242 |
| 82396 | P14079 | Q5SZQ8 | -0.5096  |
| 82397 | P14079 | A8MWL7 | -0.77815 |
| 82398 | P14079 | Q13554 | -0.76552 |
| 82399 | P14079 | P52735 | -0.22741 |
| 82400 | P14079 | Q9BXX1 | -0.17973 |
| 82401 | P14079 | Q96IZ2 | -0.97472 |
| 82402 | P14079 | Q8NGL4 | -1.2314  |
| 82403 | P14079 | Q9H920 | -0.78242 |
| 82404 | P14079 | Q7Z3S7 | -1.0029  |
| 82405 | P14079 | Q9P273 | -0.97667 |
| 82406 | P14079 | Q9Y3D6 | -0.18129 |
| 82407 | P14079 | A1IGU5 | -0.30507 |
| 82408 | P14079 | Q9H4E5 | -1.1188  |
| 82409 | P14079 | A6NCK2 | -0.36051 |
| 82410 | P14079 | O15432 | -1.0849  |
| 82411 | P14079 | O75027 | -1.054   |
| 82412 | P14079 | Q8NDV1 | -0.62906 |
| 82413 | P14079 | Q92583 | -1.2585  |
| 82414 | P14079 | P59796 | -1.2868  |
| 82415 | P14079 | Q9H9B1 | -0.22741 |
| 82416 | P14079 | O95749 | -0.12805 |
| 82417 | P14079 | Q4JDL3 | -0.26135 |
| 82418 | P14079 | Q9UFP1 | -0.80633 |
| 82419 | P14079 | P13861 | -0.22729 |
| 82420 | P14079 | Q9H3Q3 | -0.83907 |
| 82421 | P14079 | Q96B77 | -0.62143 |
| 82422 | P14079 | A5PLK6 | -0.76475 |
| 82423 | P14079 | P37288 | -0.48544 |
| 82424 | P14079 | A8MT79 | -0.91985 |
| 82425 | P14079 | O75095 | -0.32661 |
| 82426 | P14079 | Q5TC79 | -0.22672 |
| 82427 | P14079 | Q8N2S1 | -0.55971 |
| 82428 | P14079 | Q6L9W6 | -0.70356 |
| 82429 | P14079 | Q8N3C7 | -0.22742 |
| 82430 | P14079 | Q8TDX9 | -0.69072 |
| 82431 | P14079 | Q9H078 | -0.78643 |
| 82432 | P14079 | Q96A70 | -0.28673 |
| 82433 | P14079 | C4AMC7 | -0.31083 |
| 82434 | P14079 | Q92626 | -1.2865  |
| 82435 | P14079 | O95786 | -0.22691 |
| 82436 | P14079 | P21291 | -0.2174  |
| 82437 | P14079 | Q7Z3J3 | -0.20603 |
| 82438 | P14079 | Q9NYW6 | -1.069   |
| 82439 | P14079 | Q5T4W7 | -0.97607 |
| 82440 | P14079 | P18509 | -0.66215 |
| 82441 | P14079 | A2RU54 | -0.31888 |
| 82442 | P14079 | Q5T9A4 | -0.88231 |
| 82443 | P14079 | P01834 | -1       |
| 82444 | P14079 | Q9H3W5 | -0.94988 |
| 82445 | P14079 | Q8NI17 | -0.46967 |
| 82446 | P14079 | Q70CQ1 | -0.39467 |
| 82447 | P14079 | Q15848 | -0.26442 |
| 82448 | P14079 | P28827 | -0.60448 |
| 82449 | P14079 | Q8NH01 | -1.2314  |
| 82450 | P14079 | Q8N568 | -1.1897  |
| 82451 | P14079 | Q9BYE9 | -0.49005 |
| 82452 | P14079 | P78426 | -0.2334  |
| 82453 | P14079 | O15321 | -1.0174  |
| 82454 | P14079 | O94804 | -0.90748 |
| 82455 | P14079 | P53794 | -1.2401  |
| 82456 | P14079 | Q9BUM1 | -0.60464 |
| 82457 | P14079 | O00585 | -0.48461 |
| 82458 | P14079 | Q86XA0 | -0.77563 |
| 82459 | P14079 | Q8WUY9 | -0.9996  |
| 82460 | P14079 | P35557 | -0.15092 |

|       |        |        |           |
|-------|--------|--------|-----------|
| 82461 | P14079 | P01178 | -0.37987  |
| 82462 | P14079 | Q86SG7 | -0.81837  |
| 82463 | P14079 | Q9H210 | -1.2314   |
| 82464 | P14079 | Q9NSC7 | -0.66855  |
| 82465 | P14079 | Q8IVL0 | -0.55892  |
| 82466 | P14079 | Q5EBL8 | -0.22544  |
| 82467 | P14079 | Q9UI40 | -1.0662   |
| 82468 | P14079 | Q14165 | -0.7889   |
| 82469 | P14079 | Q9GZU5 | -1.2073   |
| 82470 | P14079 | A6NJS3 | -0.80633  |
| 82471 | P14079 | Q9UL62 | -0.65977  |
| 82472 | P14079 | P0C6C1 | -0.22741  |
| 82473 | P14079 | A8MT19 | -0.18118  |
| 82474 | P14079 | Q8IUS5 | -0.94438  |
| 82475 | P14079 | Q96NW7 | -0.229    |
| 82476 | P14079 | P20062 | -0.97155  |
| 82477 | P14079 | A2A3L6 | -0.22377  |
| 82478 | P14079 | P13995 | -0.86465  |
| 82479 | P14079 | Q9ULZ3 | -0.069189 |
| 82480 | P14079 | Q8NBP0 | -0.22727  |
| 82481 | P14079 | P32970 | -0.62043  |
| 82482 | P14079 | P0CK96 | -0.77815  |
| 82483 | P14079 | Q95071 | -0.2279   |
| 82484 | P14079 | Q56NI9 | -0.36319  |
| 82485 | P14079 | Q9NQ84 | -1.3671   |
| 82486 | P14079 | P48730 | -0.22741  |
| 82487 | P14079 | Q9UKN7 | -0.35461  |
| 82488 | P14079 | Q68CJ6 | -0.60353  |
| 82489 | P14079 | P01607 | -1        |
| 82490 | P14079 | Q8IVL1 | -0.7475   |
| 82491 | P14079 | P01716 | -1        |
| 82492 | P14079 | Q8IWZ4 | -0.36051  |
| 82493 | P14079 | Q00192 | -0.236    |
| 82494 | P14079 | Q9BVA6 | -1.2477   |
| 82495 | P14079 | P05451 | -0.67516  |
| 82496 | P14079 | Q9HCJ2 | -0.22799  |
| 82497 | P14079 | Q9H223 | -0.27622  |
| 82498 | P14079 | A5PKW4 | -1.127    |
| 82499 | P14079 | Q00116 | -0.82962  |
| 82500 | P14079 | Q8IWY4 | -0.96497  |
| 82501 | P14079 | Q9H336 | -0.80633  |
| 82502 | P14079 | Q7Z5A7 | -1.4172   |
| 82503 | P14079 | Q6UWY0 | -0.82668  |
| 82504 | P14079 | Q13322 | -0.22741  |
| 82505 | P14079 | P01185 | -0.45559  |
| 82506 | P14079 | P55085 | -0.32699  |
| 82507 | P14079 | Q95995 | -0.11669  |
| 82508 | P14079 | P23942 | -0.91301  |
| 82509 | P14079 | Q75678 | -0.22971  |
| 82510 | P14079 | Q95859 | -1.1618   |
| 82511 | P14079 | Q92913 | -0.6434   |
| 82512 | P14079 | Q86YR6 | -0.40498  |
| 82513 | P14079 | P15538 | -0.55804  |
| 82514 | P14079 | Q6ZUX3 | -0.036402 |
| 82515 | P14079 | Q9H0M4 | -0.2098   |
| 82516 | P14079 | O15344 | -0.22898  |
| 82517 | P14079 | P47929 | -0.41966  |
| 82518 | P14079 | P22570 | -0.29072  |
| 82519 | P14079 | Q5SV17 | -0.77815  |
| 82520 | P14079 | Q12923 | -0.22742  |
| 82521 | P14079 | Q9NQ86 | -0.40531  |
| 82522 | P14079 | P04628 | -0.22741  |
| 82523 | P14079 | Q9HCC6 | -0.22324  |
| 82524 | P14079 | Q6NXT4 | -0.76985  |
| 82525 | P14079 | Q8IUN9 | -0.99211  |
| 82526 | P14079 | Q8TF65 | -0.22457  |
| 82527 | P14079 | Q8NGY3 | -1.2314   |
| 82528 | P14079 | Q86TI0 | -1.2043   |
| 82529 | P14079 | P37088 | -0.55472  |
| 82530 | P14079 | P11047 | -0.98469  |
| 82531 | P14079 | Q5TEA6 | -0.77815  |
| 82532 | P14079 | P30462 | -1.0983   |
| 82533 | P14079 | P55160 | -0.27738  |
| 82534 | P14079 | P98073 | -1.3068   |
| 82535 | P14079 | Q92673 | -1.1886   |
| 82536 | P14079 | Q7L7V1 | -0.45695  |

|       |        |        |           |
|-------|--------|--------|-----------|
| 82537 | P14079 | Q7Z7M0 | -0.22741  |
| 82538 | P14079 | Q32ZL2 | -0.94438  |
| 82539 | P14079 | Q13535 | -0.82603  |
| 82540 | P14079 | Q13214 | -1.047    |
| 82541 | P14079 | Q96PJ5 | -0.29629  |
| 82542 | P14079 | O00481 | -0.23005  |
| 82543 | P14079 | Q8N3T1 | -0.6384   |
| 82544 | P14079 | Q9Y330 | -0.21013  |
| 82545 | P14079 | Q9UK96 | -0.43161  |
| 82546 | P14079 | P05771 | -0.17926  |
| 82547 | P14079 | Q9UNP9 | -0.19857  |
| 82548 | P14079 | P09067 | -0.08323  |
| 82549 | P14079 | Q16760 | -0.84523  |
| 82550 | P14079 | Q9UJ14 | -0.83048  |
| 82551 | P14079 | A0AV96 | -0.54086  |
| 82552 | P14079 | P11717 | -0.2498   |
| 82553 | P14079 | P24592 | -0.7263   |
| 82554 | P14079 | Q9NPH6 | -0.80828  |
| 82555 | P14079 | Q7KYR7 | -1.0579   |
| 82556 | P14079 | Q13445 | -0.24371  |
| 82557 | P14079 | Q95994 | -0.051791 |
| 82558 | P14079 | Q9HA72 | -0.77815  |
| 82559 | P14079 | Q9Y2T1 | -0.92097  |
| 82560 | P14079 | Q93096 | -0.47019  |
| 82561 | P14079 | P36957 | -0.14567  |
| 82562 | P14079 | Q13634 | -1.2566   |
| 82563 | P14079 | Q8WXA9 | -0.26525  |
| 82564 | P14079 | P06315 | -1        |
| 82565 | P14079 | Q96ME7 | -0.18495  |
| 82566 | P14079 | P00813 | -0.19858  |
| 82567 | P14079 | Q9Y397 | -0.641    |
| 82568 | P14079 | Q9NR82 | -1.2676   |
| 82569 | P14079 | Q5MY95 | -1.5006   |
| 82570 | P14079 | A4D1Z8 | -0.12799  |
| 82571 | P14079 | Q9BTX7 | -0.37773  |
| 82572 | P14079 | Q9H871 | -0.092537 |
| 82573 | P14079 | Q96D96 | -0.98426  |
| 82574 | P14079 | Q9NRH2 | -1.2698   |
| 82575 | P14079 | P78362 | -0.71428  |
| 82576 | P14079 | Q13402 | -0.19148  |
| 82577 | P14079 | P20815 | -0.91347  |
| 82578 | P14079 | Q8IZC4 | -0.58033  |
| 82579 | P14079 | P0CI25 | -0.36051  |
| 82580 | P14079 | Q12879 | -0.5297   |
| 82581 | P14079 | P49419 | -0.59102  |
| 82582 | P14079 | Q15391 | -1.2383   |
| 82583 | P14079 | Q96JP5 | -0.26935  |
| 82584 | P14079 | P62341 | -0.24951  |
| 82585 | P14079 | Q96LB1 | -1.2598   |
| 82586 | P14079 | Q96N96 | -0.22754  |
| 82587 | P14079 | Q8NB59 | -0.64552  |
| 82588 | P14079 | Q8TDE3 | -0.80822  |
| 82589 | P14079 | P00751 | -1.4288   |
| 82590 | P14079 | Q08431 | -0.71034  |
| 82591 | P14079 | P30501 | -1.0983   |
| 82592 | P14079 | Q8NGE3 | -1.2314   |
| 82593 | P14079 | Q12955 | -0.22743  |
| 82594 | P14079 | A6NM10 | -0.79936  |
| 82595 | P14079 | P09564 | -0.93092  |
| 82596 | P14079 | A8MYZ6 | -0.76882  |
| 82597 | P14079 | Q9H293 | -0.68346  |
| 82598 | P14079 | Q95470 | -0.36823  |
| 82599 | P14079 | Q9NS18 | -0.21129  |
| 82600 | P14079 | P28331 | -0.086754 |
| 82601 | P14079 | O00507 | -0.6769   |
| 82602 | P14079 | O60542 | -0.84819  |
| 82603 | P14079 | Q9NZM1 | -0.5695   |
| 82604 | P14079 | Q9H2S5 | -0.22721  |
| 82605 | P14079 | Q9H3S5 | -0.88201  |
| 82606 | P14079 | Q02818 | -0.20656  |
| 82607 | P14079 | P78508 | -0.74899  |
| 82608 | P14079 | P22607 | -0.38644  |
| 82609 | P14079 | Q8NGZ2 | -1.2314   |
| 82610 | P14079 | P18505 | -1.1422   |
| 82611 | P14079 | Q8NHP1 | -0.48664  |
| 82612 | P14079 | Q92696 | -0.40701  |

|       |        |        |           |
|-------|--------|--------|-----------|
| 82613 | P14079 | P22492 | -1.285    |
| 82614 | P14079 | Q02487 | -0.97738  |
| 82615 | P14079 | A3KMH1 | -1.347    |
| 82616 | P14079 | Q9NZC3 | -0.61142  |
| 82617 | P14079 | P00352 | -0.8671   |
| 82618 | P14079 | Q8TAF8 | -0.78761  |
| 82619 | P14079 | Q96L93 | -0.47625  |
| 82620 | P14079 | Q9H9S4 | -0.23096  |
| 82621 | P14079 | Q9HAQ2 | -0.34366  |
| 82622 | P14079 | Q9UQ53 | -0.54893  |
| 82623 | P14079 | Q13363 | -0.30547  |
| 82624 | P14079 | P48995 | -0.44458  |
| 82625 | P14079 | Q16671 | -1.6336   |
| 82626 | P14079 | Q7RTU7 | -0.25931  |
| 82627 | P14079 | O00299 | -0.16478  |
| 82628 | P14079 | Q9UIU6 | -0.2278   |
| 82629 | P14079 | O95150 | -1.604    |
| 82630 | P14079 | Q9HD20 | -1.0747   |
| 82631 | P14079 | O15034 | -0.33663  |
| 82632 | P14079 | O95302 | -0.39125  |
| 82633 | P14079 | Q9H9S0 | -0.22963  |
| 82634 | P14079 | Q6UXB8 | -1.4369   |
| 82635 | P14079 | P23229 | -0.34582  |
| 82636 | P14079 | P04211 | -1        |
| 82637 | P14079 | Q149N8 | -0.95419  |
| 82638 | P14079 | Q99437 | -0.68021  |
| 82639 | P14079 | Q8WW52 | -0.83272  |
| 82640 | P14079 | Q6NZ63 | -0.77815  |
| 82641 | P14079 | O95236 | -1.0112   |
| 82642 | P14079 | Q5T4D3 | -0.77815  |
| 82643 | P14079 | P09110 | -0.28501  |
| 82644 | P14079 | P35236 | -0.44741  |
| 82645 | P14079 | Q9Y5C1 | -0.64751  |
| 82646 | P14079 | Q6UVY6 | -1.2162   |
| 82647 | P14079 | Q6DHV7 | -0.2191   |
| 82648 | P14079 | Q15063 | -1.344    |
| 82649 | P14079 | P20813 | -0.86655  |
| 82650 | P14079 | Q92481 | -0.15603  |
| 82651 | P14079 | Q9P2J2 | -1.1028   |
| 82652 | P14079 | Q92551 | -0.59831  |
| 82653 | P14079 | Q14050 | -0.88758  |
| 82654 | P14079 | P09529 | -0.22741  |
| 82655 | P14079 | Q5JZY3 | -1.6825   |
| 82656 | P14079 | Q9HDC9 | -0.75541  |
| 82657 | P14079 | Q5DX21 | -1.1915   |
| 82658 | P14079 | O43291 | -1.1307   |
| 82659 | P14079 | P01892 | -0.87717  |
| 82660 | P14079 | Q8NBI2 | -1.11     |
| 82661 | P14079 | P01266 | -0.64013  |
| 82662 | P14079 | Q9NUB1 | -0.37162  |
| 82663 | P14079 | Q9HA47 | -0.92657  |
| 82664 | P14079 | Q6ZVD8 | -0.22812  |
| 82665 | P14079 | A6NJZ7 | -0.22733  |
| 82666 | P14079 | Q8NFU1 | -0.98537  |
| 82667 | P14079 | P31513 | -1.0517   |
| 82668 | P14079 | P63145 | -0.065735 |
| 82669 | P14079 | Q99819 | -0.43487  |
| 82670 | P14079 | P23786 | -0.12123  |
| 82671 | P14079 | Q8IYW5 | -0.22672  |
| 82672 | P14079 | Q96IX5 | -0.6192   |
| 82673 | P14079 | Q5JSP0 | -0.47044  |
| 82674 | P14079 | P35542 | -0.74693  |
| 82675 | P14079 | Q9H208 | -1.2314   |
| 82676 | P14079 | Q15020 | -0.21808  |
| 82677 | P14079 | Q15126 | -0.85546  |
| 82678 | P14079 | Q9NQZ7 | -0.84882  |
| 82679 | P14079 | Q8N6H7 | -0.1216   |
| 82680 | P14079 | Q9BXP8 | -1.5538   |
| 82681 | P14079 | P15531 | -0.3707   |
| 82682 | P14079 | O95630 | -0.30281  |
| 82683 | P14079 | Q53HC9 | -0.22732  |
| 82684 | P14079 | Q9NRN5 | -1.1402   |
| 82685 | P14079 | O14782 | -0.25823  |
| 82686 | P14079 | O95841 | -1.1382   |
| 82687 | P14079 | Q9UPQ8 | -0.94598  |
| 82688 | P14079 | A6NGZ8 | -0.97472  |

|       |        |        |          |
|-------|--------|--------|----------|
| 82689 | P14079 | Q8NH54 | -1.2314  |
| 82690 | P14079 | Q05707 | -1.1773  |
| 82691 | P14079 | Q8IZP2 | -0.22711 |
| 82692 | P14079 | P45844 | -0.59548 |
| 82693 | P14079 | Q6UXV4 | -0.6526  |
| 82694 | P14079 | P0CI26 | -0.36051 |
| 82695 | P14079 | Q969X2 | -0.59142 |
| 82696 | P14079 | P42685 | -0.8235  |
| 82697 | P14079 | O75110 | -1.0118  |
| 82698 | P14079 | Q9ULH0 | -0.44052 |
| 82699 | P14079 | Q6UY01 | -0.22741 |
| 82700 | P14079 | Q8NG99 | -1.2314  |
| 82701 | P14079 | Q9Y6V7 | -0.98241 |
| 82702 | P14079 | Q6UX72 | -0.71473 |
| 82703 | P14079 | O14788 | -0.66488 |
| 82704 | P14079 | Q96DR8 | -0.92368 |
| 82705 | P14079 | P52954 | -0.2419  |
| 82706 | P14079 | Q53H12 | -0.95938 |
| 82707 | P14079 | P19961 | -0.89307 |
| 82708 | P14079 | O43462 | -0.83905 |
| 82709 | P14079 | Q9NP91 | -1.2686  |
| 82710 | P14079 | Q9HCM4 | -0.37946 |
| 82711 | P14079 | Q8IWX7 | -0.35638 |
| 82712 | P14079 | P02788 | -0.18189 |
| 82713 | P14079 | Q9P0N9 | -0.65041 |
| 82714 | P14079 | Q16558 | -1.199   |
| 82715 | P14079 | O14625 | -1.06    |
| 82716 | P14079 | Q9Y5R2 | -1.9892  |
| 82717 | P14079 | Q9H6U8 | -0.88145 |
| 82718 | P14079 | Q14994 | -0.22755 |
| 82719 | P14079 | O15403 | -1.1937  |
| 82720 | P14079 | P53985 | -0.77606 |
| 82721 | P14079 | Q6U736 | -1.0923  |
| 82722 | P14079 | P12235 | -0.22961 |
| 82723 | P14079 | P50336 | -0.669   |
| 82724 | P14079 | P98155 | -0.7849  |
| 82725 | P14079 | Q8WUD1 | -0.86741 |
| 82726 | P14079 | Q09428 | -0.86538 |
| 82727 | P14079 | Q9UNU6 | -1.1669  |
| 82728 | P14079 | Q5VU97 | -0.91558 |
| 82729 | P14079 | P56748 | -0.53538 |
| 82730 | P14079 | P57768 | -0.37445 |
| 82731 | P14079 | P55196 | -0.22656 |
| 82732 | P14079 | O60494 | -0.22745 |
| 82733 | P14079 | Q9UII6 | -0.89577 |
| 82734 | P14079 | A6NHC0 | -0.78541 |
| 82735 | P14079 | A6NEQ0 | -0.58152 |
| 82736 | P14079 | Q8N6G5 | -0.51458 |
| 82737 | P14079 | A6NKP2 | -0.91402 |
| 82738 | P14079 | Q9Y6L7 | -1.6646  |
| 82739 | P14079 | A4D2P6 | -0.22724 |
| 82740 | P14079 | Q99757 | -0.32558 |
| 82741 | P14079 | Q71RH2 | -0.74356 |
| 82742 | P14079 | Q8TAA9 | -0.43651 |
| 82743 | P14079 | Q8NGF1 | -1.2314  |
| 82744 | P14079 | P00738 | -0.80223 |
| 82745 | P14079 | P22760 | -0.84382 |
| 82746 | P14079 | P17342 | -0.79097 |
| 82747 | P14079 | O75310 | -1.0044  |
| 82748 | P14079 | P14653 | -0.22313 |
| 82749 | P14079 | P01781 | -1       |
| 82750 | P14079 | Q13258 | -0.71246 |
| 82751 | P14079 | P22352 | -0.87819 |
| 82752 | P14079 | Q96EY7 | -0.11829 |
| 82753 | P14079 | Q9H596 | -0.41548 |
| 82754 | P14079 | A8MTL3 | -0.16822 |
| 82755 | P14079 | Q8N8U9 | -0.77823 |
| 82756 | P14079 | P37840 | -0.19857 |
| 82757 | P14079 | P36021 | -1.0935  |
| 82758 | P14079 | P51888 | -1.0955  |
| 82759 | P14079 | Q6UXN8 | -0.841   |
| 82760 | P14079 | P11597 | -0.7153  |
| 82761 | P14079 | Q96BH3 | -0.82261 |
| 82762 | P14079 | Q8TAB3 | -1.2343  |
| 82763 | P14079 | Q8TE58 | -1.4366  |
| 82764 | P14079 | Q16643 | -0.55183 |

|       |        |        |          |
|-------|--------|--------|----------|
| 82765 | P14079 | Q9Y5X1 | -0.22733 |
| 82766 | P14079 | Q6UXH8 | -1.1462  |
| 82767 | P14079 | Q9Y4H2 | -0.15633 |
| 82768 | P14079 | P05538 | -0.75549 |
| 82769 | P14079 | Q9BX95 | -0.7406  |
| 82770 | P14079 | Q5XLA6 | -0.50666 |
| 82771 | P14079 | Q8N907 | -0.59804 |
| 82772 | P14079 | Q9Y5Z6 | -0.75664 |
| 82773 | P14079 | O60519 | -0.10991 |
| 82774 | P14079 | Q9UKP5 | -1.4366  |
| 82775 | P14079 | P07947 | -0.90621 |
| 82776 | P14079 | P42331 | -1.0708  |
| 82777 | P14079 | Q6UXB2 | -1.2736  |
| 82778 | P14079 | Q8TDS5 | -1.1879  |
| 82779 | P14079 | P35914 | -0.43408 |
| 82780 | P14079 | P48594 | -0.64283 |
| 82781 | P14079 | Q9Y275 | -0.86243 |
| 82782 | P14079 | Q9Y5I0 | -1.2343  |
| 82783 | P14079 | P21815 | -1.0573  |
| 82784 | P14079 | Q8WW32 | -0.32721 |
| 82785 | P14079 | P17213 | -0.8883  |
| 82786 | P14079 | Q9GZV3 | -1.1898  |
| 82787 | P14079 | Q9C0J8 | -0.22696 |
| 82788 | P14079 | O14796 | -0.29853 |
| 82789 | P14079 | Q9Y2G8 | -0.93396 |
| 82790 | P14079 | P32321 | -0.30303 |
| 82791 | P14079 | O75379 | -0.41738 |
| 82792 | P14079 | P24001 | -1.0414  |
| 82793 | P14079 | Q96NL1 | -1.0174  |
| 82794 | P14079 | P63123 | -0.65475 |
| 82795 | P14079 | Q6NT55 | -0.85755 |
| 82796 | P14079 | Q9BXS9 | -1.1141  |
| 82797 | P14079 | Q86WK7 | -1.0006  |
| 82798 | P14079 | P28325 | -0.33683 |
| 82799 | P14079 | Q6UXF7 | -0.80162 |
| 82800 | P14079 | Q6UWJ8 | -0.77815 |
| 82801 | P14079 | Q9BQF6 | -0.74527 |
| 82802 | P14079 | Q9BW19 | -0.26822 |
| 82803 | P14079 | Q9UJQ1 | -0.93959 |
| 82804 | P14079 | P98172 | -0.29095 |
| 82805 | P14079 | O95388 | -1.0844  |
| 82806 | P14079 | Q9NRJ7 | -1.2218  |
| 82807 | P14079 | Q13303 | -0.94306 |
| 82808 | P14079 | P19827 | -0.85303 |
| 82809 | P14079 | Q29980 | -0.79729 |
| 82810 | P14079 | Q6QHC5 | -1.0159  |
| 82811 | P14079 | Q9UJV3 | -0.28071 |
| 82812 | P14079 | Q16842 | -0.78523 |
| 82813 | P14079 | Q9NX57 | -0.91202 |
| 82814 | P14079 | Q14773 | -1.6875  |
| 82815 | P14079 | P47898 | -1.2366  |
| 82816 | P14079 | Q96GW7 | -1.0656  |
| 82817 | P14079 | Q96PX9 | -0.45453 |
| 82818 | P14079 | Q86Y82 | -0.68089 |
| 82819 | P14079 | Q8WV22 | -0.2178  |
| 82820 | P14079 | Q9UJJ9 | -0.66796 |
| 82821 | P14079 | Q12770 | -0.22741 |
| 82822 | P14079 | Q9HAT1 | -0.69048 |
| 82823 | P14079 | Q7L1W4 | -0.77815 |
| 82824 | P14079 | Q9UBR1 | -0.16054 |
| 82825 | P14079 | Q8NDG6 | -0.78239 |
| 82826 | P14079 | P47895 | -0.88754 |
| 82827 | P14079 | Q92772 | -0.84096 |
| 82828 | P14079 | A4FU01 | -0.33262 |
| 82829 | P14079 | P01742 | -1       |
| 82830 | P14079 | P0C862 | -0.87645 |
| 82831 | P14079 | P0C7P0 | -0.12176 |
| 82832 | P14079 | P03989 | -0.96165 |
| 82833 | P14079 | Q86W10 | -1.2525  |
| 82834 | P14079 | Q9H0X6 | -0.22023 |
| 82835 | P14079 | Q5T5X7 | -0.03743 |
| 82836 | P14079 | Q6H3X3 | -0.39242 |
| 82837 | P14079 | Q9HCS5 | -0.37479 |
| 82838 | P14079 | Q96P65 | -1.2819  |
| 82839 | P14079 | Q6R6M4 | -0.47411 |
| 82840 | P14079 | Q96NR3 | -0.89095 |

|       |        |        |          |
|-------|--------|--------|----------|
| 82841 | P14079 | P52824 | -0.22741 |
| 82842 | P14079 | P59533 | -1.1233  |
| 82843 | P14079 | P51674 | -0.94323 |
| 82844 | P14079 | P56178 | -0.218   |
| 82845 | P14079 | Q6ZPD8 | -1.0734  |
| 82846 | P14079 | Q92841 | -0.87619 |
| 82847 | P14079 | Q8NH64 | -1.2314  |
| 82848 | P14079 | Q13163 | -0.36514 |
| 82849 | P14079 | Q9UPZ9 | -1.2342  |
| 82850 | P14079 | Q13630 | -0.91586 |
| 82851 | P14079 | Q8NEW7 | -0.82508 |
| 82852 | P14079 | O95758 | -0.65947 |
| 82853 | P14079 | Q99653 | -0.22736 |
| 82854 | P14079 | P57078 | -0.68864 |
| 82855 | P14079 | Q16798 | -0.61676 |
| 82856 | P14079 | Q08334 | -0.55251 |
| 82857 | P14079 | Q9Y256 | -1.2567  |
| 82858 | P14079 | Q5FWF4 | -0.24874 |
| 82859 | P14079 | P26012 | -1.3287  |
| 82860 | P14079 | Q9BX79 | -0.46616 |
| 82861 | P14079 | Q86V35 | -0.6246  |
| 82862 | P14079 | P07988 | -0.62017 |
| 82863 | P14079 | P05534 | -0.95327 |
| 82864 | P14079 | Q9UBP4 | -1.1489  |
| 82865 | P14079 | P28300 | -0.49562 |
| 82866 | P14079 | O43143 | -0.65613 |
| 82867 | P14079 | Q6UXZ0 | -0.77815 |
| 82868 | P14079 | Q86XJ1 | -0.1868  |
| 82869 | P14079 | Q99683 | -0.22726 |
| 82870 | P14079 | P07333 | -0.90848 |
| 82871 | P14079 | Q6IEZ7 | -1.2314  |
| 82872 | P14079 | Q96NH3 | -1.1901  |
| 82873 | P14079 | Q5TGL8 | -0.21505 |
| 82874 | P14079 | Q8IYD9 | -0.80633 |
| 82875 | P14079 | P14207 | -0.99528 |
| 82876 | P14079 | Q9Y548 | -0.75931 |
| 82877 | P14079 | P49221 | -0.38661 |
| 82878 | P14079 | O00592 | -1.0133  |
| 82879 | P14079 | Q9NRR1 | -0.87466 |
| 82880 | P14079 | P08620 | -0.73712 |
| 82881 | P14079 | P46940 | -0.22741 |
| 82882 | P14079 | Q9Y6R0 | -0.22585 |
| 82883 | P14079 | Q86VU5 | -0.54748 |
| 82884 | P14079 | Q8TD33 | -0.80633 |
| 82885 | P14079 | Q96SL4 | -1.2868  |
| 82886 | P14079 | Q9Y2K6 | -0.6175  |
| 82887 | P14079 | Q8N6C5 | -0.57255 |
| 82888 | P14079 | O95755 | -0.83293 |
| 82889 | P14079 | P08572 | -0.54794 |
| 82890 | P14079 | Q14168 | -0.50193 |
| 82891 | P14079 | Q8NHY0 | -0.61146 |
| 82892 | P14079 | Q9H2X0 | -0.66863 |
| 82893 | P14079 | Q86VR8 | -0.9245  |
| 82894 | P14079 | P11511 | -0.43948 |
| 82895 | P14079 | O75871 | -0.99591 |
| 82896 | P14079 | Q9UKG9 | -0.7156  |
| 82897 | P14079 | P22459 | -0.77891 |
| 82898 | P14079 | Q8N2E6 | -1.3362  |
| 82899 | P14079 | P78325 | -0.70859 |
| 82900 | P14079 | O75342 | -0.73884 |
| 82901 | P14079 | P46439 | -0.4742  |
| 82902 | P14079 | Q86SQ4 | -1.3662  |
| 82903 | P14079 | P32119 | -0.39393 |
| 82904 | P14079 | P78413 | -0.23986 |
| 82905 | P14079 | Q86T20 | -0.80633 |
| 82906 | P14079 | Q9H4M9 | -0.55314 |
| 82907 | P14079 | Q8WXA3 | -0.22656 |
| 82908 | P14079 | Q9H3Z4 | -0.52107 |
| 82909 | P14079 | P08912 | -1.0115  |
| 82910 | P14079 | O00444 | -0.22741 |
| 82911 | P14079 | Q5FYB0 | -0.82668 |
| 82912 | P14079 | A6NF89 | -1.2314  |
| 82913 | P14079 | Q5VZ18 | -0.2274  |
| 82914 | P14079 | P22897 | -1.0799  |
| 82915 | P14079 | Q8WXA2 | -0.80633 |
| 82916 | P14079 | Q8N531 | -0.6244  |



|       |        |        |           |
|-------|--------|--------|-----------|
| 82917 | P14079 | P09544 | -0.56852  |
| 82918 | P14079 | Q14767 | -0.98973  |
| 82919 | P14079 | Q9P1A2 | -0.26849  |
| 82920 | P14079 | Q9HA64 | -0.59585  |
| 82921 | P14079 | Q9NRD5 | -0.22688  |
| 82922 | P14079 | Q9NS15 | -0.75045  |
| 82923 | P14079 | P53816 | -0.088709 |
| 82924 | P14079 | Q8TC92 | -1.7649   |
| 82925 | P14079 | P46531 | -0.22869  |
| 82926 | P14079 | Q8NBP7 | -0.34826  |
| 82927 | P14079 | Q6AHZ1 | -0.22814  |
| 82928 | P14079 | P21860 | -0.75707  |
| 82929 | P14079 | Q68DV7 | -0.7156   |
| 82930 | P14079 | O43559 | -0.51533  |
| 82931 | P14079 | P15248 | -0.74442  |
| 82932 | P14079 | Q8TCW7 | -0.77815  |
| 82933 | P14079 | Q96RD3 | -1.2314   |
| 82934 | P14079 | Q15743 | -1.5273   |
| 82935 | P14079 | P54619 | -0.42508  |
| 82936 | P14079 | Q9Y689 | -1.3745   |
| 82937 | P14079 | Q9HBI5 | -0.14139  |
| 82938 | P14079 | O95835 | -0.22709  |
| 82939 | P14079 | Q3ZCQ3 | -0.77815  |
| 82940 | P14079 | Q14964 | -1.2112   |
| 82941 | P14079 | P23470 | -1.3663   |
| 82942 | P14079 | Q9NUU7 | -0.034782 |
| 82943 | P14079 | Q8NBP5 | -1.0536   |
| 82944 | P14079 | Q96BQ3 | -0.36051  |
| 82945 | P14079 | Q3KRB8 | -1.0254   |
| 82946 | P14079 | Q15569 | -0.99202  |
| 82947 | P14079 | P17252 | -0.23481  |
| 82948 | P14079 | Q8NH50 | -1.2314   |
| 82949 | P14079 | Q7Z3F1 | -0.99905  |
| 82950 | P14079 | Q6NSI1 | -0.22734  |
| 82951 | P14079 | Q02750 | -0.22808  |
| 82952 | P14079 | Q8TD55 | -0.22154  |
| 82953 | P14079 | Q86UV7 | -0.36051  |
| 82954 | P14079 | P59045 | -0.93054  |
| 82955 | P14079 | Q9UHF4 | -0.77815  |
| 82956 | P14079 | Q496Y0 | -0.22739  |
| 82957 | P14079 | Q96H96 | -0.66944  |
| 82958 | P14079 | P47901 | -1.079    |
| 82959 | P14079 | Q96PH1 | -0.83461  |
| 82960 | P14079 | Q04671 | -0.27511  |
| 82961 | P14079 | O95196 | -0.93017  |
| 82962 | P14079 | Q15619 | -1.2314   |
| 82963 | P14079 | Q9P202 | -0.22372  |
| 82964 | P14079 | Q7Z7M9 | -0.65351  |
| 82965 | P14079 | P41595 | -0.45382  |
| 82966 | P14079 | A4D2G3 | -1.2314   |
| 82967 | P14079 | O00258 | -0.47152  |
| 82968 | P14079 | P02689 | -0.22256  |
| 82969 | P14079 | Q9ULY5 | -0.8013   |
| 82970 | P14079 | Q9NS61 | -0.51651  |
| 82971 | P14079 | Q8NEA4 | -0.051922 |
| 82972 | P14079 | Q9NS68 | -0.4807   |
| 82973 | P14079 | Q8N6D2 | -0.46845  |
| 82974 | P14079 | P11912 | -0.92059  |
| 82975 | P14079 | Q8N302 | -0.56161  |
| 82976 | P14079 | Q96HR9 | -0.77815  |
| 82977 | P14079 | Q9NUZ1 | -0.79346  |
| 82978 | P14079 | P55042 | -0.66956  |
| 82979 | P14079 | Q9UHQ4 | -0.34697  |
| 82980 | P14079 | Q5KU26 | -0.51911  |
| 82981 | P14079 | Q96EE4 | -0.80633  |
| 82982 | P14079 | C9JJH3 | -0.77524  |
| 82983 | P14079 | Q6UXS0 | -0.80162  |
| 82984 | P14079 | Q9NR97 | -0.58623  |
| 82985 | P14079 | Q9BXL6 | -0.28333  |
| 82986 | P14079 | Q9HD90 | -0.22868  |
| 82987 | P14079 | A6NCE7 | -0.14642  |
| 82988 | P14079 | Q8WXX5 | -0.31475  |
| 82989 | P14079 | P10523 | -0.82729  |
| 82990 | P14079 | Q9HAE3 | -0.22833  |
| 82991 | P14079 | P35580 | -0.16496  |
| 82992 | P14079 | P59901 | -0.22743  |

|       |        |        |          |
|-------|--------|--------|----------|
| 82993 | P14079 | P40189 | -0.52706 |
| 82994 | P14079 | Q8NCM8 | -0.36249 |
| 82995 | P14079 | P48645 | -0.89548 |
| 82996 | P14079 | Q8IZ07 | -0.22741 |
| 82997 | P14079 | Q8N271 | -0.95345 |
| 82998 | P14079 | Q13520 | -0.91734 |
| 82999 | P14079 | Q6P5S2 | -0.80633 |
| 83000 | P14079 | P16402 | -0.73693 |
| 83001 | P14079 | Q13253 | -0.33854 |
| 83002 | P14079 | O75386 | -0.11324 |
| 83003 | P14079 | Q7Z4P5 | -0.22741 |
| 83004 | P14079 | Q8N118 | -0.88237 |
| 83005 | P14079 | Q6VB85 | -0.99971 |
| 83006 | P14079 | Q6B8I1 | -0.72412 |
| 83007 | P14079 | P51530 | -0.25466 |
| 83008 | P14079 | Q6UXE8 | -0.80224 |
| 83009 | P14079 | Q6UXG3 | -0.85801 |
| 83010 | P14079 | Q10472 | -0.94305 |
| 83011 | P14079 | Q96EP5 | -0.88854 |
| 83012 | P14079 | Q9H1J7 | -1.0195  |
| 83013 | P14079 | P15144 | -1.0032  |
| 83014 | P14079 | Q9UHC7 | -0.32552 |
| 83015 | P14079 | P08476 | -0.22741 |
| 83016 | P14079 | Q9HCM3 | -0.77815 |
| 83017 | P14079 | Q9UBM7 | -1.0045  |
| 83018 | P14079 | Q96SM3 | -1.5344  |
| 83019 | P14079 | Q64LD2 | -0.22743 |
| 83020 | P14079 | Q9C037 | -0.39924 |
| 83021 | P14079 | Q9BVS4 | -1.4086  |
| 83022 | P14079 | Q9H330 | -0.83272 |
| 83023 | P14079 | Q96EQ8 | -0.72388 |
| 83024 | P14079 | Q02790 | -0.36996 |
| 83025 | P14079 | Q2KHT4 | -0.9111  |
| 83026 | P14079 | O75864 | -0.2274  |
| 83027 | P14079 | P28328 | -0.22021 |
| 83028 | P14079 | Q9NWH9 | -0.22828 |
| 83029 | P14079 | P98198 | -1.2286  |
| 83030 | P14079 | H3BS89 | -0.77815 |
| 83031 | P14079 | Q9BYV6 | -0.22728 |
| 83032 | P14079 | Q9BSG0 | -0.80633 |
| 83033 | P14079 | Q9H6E5 | -0.2267  |
| 83034 | P14079 | Q9Y570 | -0.16754 |
| 83035 | P14079 | Q8WWX8 | -1.0713  |
| 83036 | P14079 | Q96L15 | -0.88792 |
| 83037 | P14079 | Q14CM0 | -0.22741 |
| 83038 | P14079 | P03891 | -0.73246 |
| 83039 | P14079 | Q9NQN1 | -1.2314  |
| 83040 | P14079 | P40939 | -0.14306 |
| 83041 | P14079 | Q9H765 | -0.2274  |
| 83042 | P14079 | Q695T7 | -1.2499  |
| 83043 | P14079 | Q13461 | -0.99971 |
| 83044 | P14079 | Q9BUL5 | -0.28137 |
| 83045 | P14079 | O43424 | -0.70407 |
| 83046 | P14079 | O60307 | -0.88957 |
| 83047 | P14079 | Q9H2F3 | -1.2514  |
| 83048 | P14079 | Q8N441 | -0.94209 |
| 83049 | P14079 | Q8N465 | -0.38072 |
| 83050 | P14079 | Q8IZP9 | -1.44    |
| 83051 | P14079 | Q96TA2 | -1.4722  |
| 83052 | P14079 | Q5VT97 | -0.67772 |
| 83053 | P14079 | O75596 | -0.91362 |
| 83054 | P14079 | P28908 | -0.63605 |
| 83055 | P14079 | O95484 | -0.60718 |
| 83056 | P14079 | O43323 | -1.058   |
| 83057 | P14079 | Q08AH1 | -1.1244  |
| 83058 | P14079 | C9JCN9 | -0.16801 |
| 83059 | P14079 | P81133 | -0.38945 |
| 83060 | P14079 | Q9NWW9 | -0.32705 |
| 83061 | P14079 | P30046 | -0.11038 |
| 83062 | P14079 | P10265 | -0.6973  |
| 83063 | P14079 | Q15049 | -0.2412  |
| 83064 | P14079 | Q9NZT1 | -0.403   |
| 83065 | P14079 | Q8N8R3 | -0.70963 |
| 83066 | P14079 | Q9H598 | -1.0547  |
| 83067 | P14079 | Q4KMQ2 | -1.0228  |
| 83068 | P14079 | Q6P4A8 | -0.82352 |

|       |        |        |           |
|-------|--------|--------|-----------|
| 83069 | P14079 | Q96RY7 | -0.016808 |
| 83070 | P14079 | Q00056 | -0.15275  |
| 83071 | P14079 | O60725 | -0.57792  |
| 83072 | P14079 | Q6ZW31 | -0.67772  |
| 83073 | P14079 | Q6ZMT4 | -0.22708  |
| 83074 | P14079 | Q6T311 | -1.3745   |
| 83075 | P14079 | Q9P2F8 | -0.88669  |
| 83076 | P14079 | P43304 | -0.28783  |
| 83077 | P14079 | A6NCV1 | -1.2314   |
| 83078 | P14079 | Q9BXC0 | -1.254    |
| 83079 | P14079 | Q0D2K5 | -0.23318  |
| 83080 | P14079 | Q8IZM8 | -0.22736  |
| 83081 | P14079 | Q04609 | -1.0894   |
| 83082 | P14079 | P00540 | -1.398    |
| 83083 | P14079 | P41587 | -1.4839   |
| 83084 | P14079 | P01242 | -0.76854  |
| 83085 | P14079 | Q969V3 | -0.27365  |
| 83086 | P14079 | Q9BYT8 | -0.44235  |
| 83087 | P14079 | A6NCI4 | -0.80633  |
| 83088 | P14079 | Q15477 | -0.53329  |
| 83089 | P14079 | Q9BY15 | -1.9254   |
| 83090 | P14079 | Q9BVQ7 | -0.82869  |
| 83091 | P14079 | Q8NGA1 | -1.2314   |
| 83092 | P14079 | Q96HU1 | -0.27442  |
| 83093 | P14079 | Q8TBE3 | -0.77815  |
| 83094 | P14079 | Q9UHL4 | -1.2311   |
| 83095 | P14079 | P12081 | -0.37952  |
| 83096 | P14079 | Q14644 | -0.31302  |
| 83097 | P14079 | Q9GZP1 | -1.1292   |
| 83098 | P14079 | Q8IZF3 | -1.3662   |
| 83099 | P14079 | O43169 | -0.68758  |
| 83100 | P14079 | Q9NXH8 | -1.4572   |
| 83101 | P14079 | Q00574 | -1.3218   |
| 83102 | P14079 | Q9P2E2 | -0.23841  |
| 83103 | P14079 | Q7Z4J2 | -0.77619  |
| 83104 | P14079 | Q5T1S8 | -1.0512   |
| 83105 | P14079 | Q9NY35 | -0.79372  |
| 83106 | P14079 | O14684 | -0.74106  |
| 83107 | P14079 | Q8IXI1 | -0.81037  |
| 83108 | P14079 | Q70CQ4 | -0.77524  |
| 83109 | P14079 | P31639 | -0.90283  |
| 83110 | P14079 | P48741 | -0.63582  |
| 83111 | P14079 | P10316 | -0.94187  |
| 83112 | P14079 | A1YPR0 | -0.35022  |
| 83113 | P14079 | P15812 | -0.90424  |
| 83114 | P14079 | O15254 | -0.77693  |
| 83115 | P14079 | Q9NXB9 | -0.23438  |
| 83116 | P14079 | Q9H159 | -1.1753   |
| 83117 | P14079 | Q9H0C1 | -0.36051  |
| 83118 | P14079 | P32745 | -0.65153  |
| 83119 | P14079 | O75388 | -1.524    |
| 83120 | P14079 | P15018 | -0.37193  |
| 83121 | P14079 | Q9NUD9 | -0.88201  |
| 83122 | P14079 | P01721 | -1        |
| 83123 | P14079 | Q9Y4D8 | -1.1217   |
| 83124 | P14079 | Q92752 | -0.5102   |
| 83125 | P14079 | Q9NQI0 | -0.89929  |
| 83126 | P14079 | Q6Q4G3 | -1.299    |
| 83127 | P14079 | P53004 | -0.69212  |
| 83128 | P14079 | P06858 | -0.57173  |
| 83129 | P14079 | Q8NGN2 | -1.2314   |
| 83130 | P14079 | Q8IYX1 | -1.4902   |
| 83131 | P14079 | Q5VW00 | -0.22727  |
| 83132 | P14079 | Q9H7V2 | -0.8392   |
| 83133 | P14079 | Q16611 | -0.22722  |
| 83134 | P14079 | Q9C0D9 | -1.0038   |
| 83135 | P14079 | Q13474 | -0.2269   |
| 83136 | P14079 | A6NL26 | -1.2314   |
| 83137 | P14079 | P21810 | -0.85701  |
| 83138 | P14079 | Q8NDV2 | -1.3119   |
| 83139 | P14079 | Q96JB8 | -0.22481  |
| 83140 | P14079 | Q5T4F4 | -0.3182   |
| 83141 | P14079 | Q9BWT3 | -0.49673  |
| 83142 | P14079 | P59543 | -1.1233   |
| 83143 | P14079 | Q96RD9 | -0.97472  |
| 83144 | P14079 | Q9UKV5 | -0.51249  |

|       |        |        |          |
|-------|--------|--------|----------|
| 83145 | P14079 | Q6ZT98 | -0.66156 |
| 83146 | P14079 | P37235 | -0.27378 |
| 83147 | P14079 | O14678 | -1.6158  |
| 83148 | P14079 | Q95800 | -1.5146  |
| 83149 | P14079 | Q9BXJ2 | -0.72291 |
| 83150 | P14079 | Q9Y6N6 | -1.055   |
| 83151 | P14079 | O15466 | -0.56699 |
| 83152 | P14079 | P20151 | -1.4383  |
| 83153 | P14079 | P01127 | -0.62768 |
| 83154 | P14079 | Q8NGT1 | -1.2314  |
| 83155 | P14079 | Q14185 | -0.34342 |
| 83156 | P14079 | Q8TED4 | -0.80261 |
| 83157 | P14079 | Q86UW2 | -0.83122 |
| 83158 | P14079 | Q8N4L2 | -0.89145 |
| 83159 | P14079 | O60687 | -0.33297 |
| 83160 | P14079 | Q5UCC4 | -1.3806  |
| 83161 | P14079 | Q9P003 | -0.74289 |
| 83162 | P14079 | Q9NXS2 | -1.0239  |
| 83163 | P14079 | Q9UM47 | -0.24296 |
| 83164 | P14079 | Q9Y3M8 | -0.23891 |
| 83165 | P14079 | Q06889 | -0.15429 |
| 83166 | P14079 | P36896 | -0.52223 |
| 83167 | P14079 | P80422 | -0.81822 |
| 83168 | P14079 | Q9NZC9 | -0.57006 |
| 83169 | P14079 | Q06828 | -1.0942  |
| 83170 | P14079 | Q9BT40 | -0.22441 |
| 83171 | P14079 | Q9NZN9 | -0.20514 |
| 83172 | P14079 | P19835 | -0.6756  |
| 83173 | P14079 | P17542 | -0.22831 |
| 83174 | P14079 | Q9UHI8 | -1.3778  |
| 83175 | P14079 | D6RBM5 | -0.26669 |
| 83176 | P14079 | O43934 | -0.80224 |
| 83177 | P14079 | Q96A23 | -0.22662 |
| 83178 | P14079 | Q8IY45 | -0.19594 |
| 83179 | P14079 | P60827 | -0.89985 |
| 83180 | P14079 | Q8N4V2 | -0.94824 |
| 83181 | P14079 | O75936 | -0.22818 |
| 83182 | P14079 | P52790 | -0.63325 |
| 83183 | P14079 | Q6UX07 | -1.7104  |
| 83184 | P14079 | Q8IZ02 | -0.26849 |
| 83185 | P14079 | Q14CB8 | -0.77494 |
| 83186 | P14079 | Q9H4I8 | -0.20826 |
| 83187 | P14079 | Q05215 | -0.17775 |
| 83188 | P14079 | Q9BXE9 | -1.2496  |
| 83189 | P14079 | P12931 | -0.24345 |
| 83190 | P14079 | Q9BS16 | -0.21505 |
| 83191 | P14079 | Q9UBP9 | -0.25509 |
| 83192 | P14079 | P16234 | -0.30165 |
| 83193 | P14079 | Q9Y6I9 | -0.80633 |
| 83194 | P14079 | Q96EK2 | -0.24215 |
| 83195 | P14079 | Q96PQ0 | -0.77143 |
| 83196 | P14079 | Q9H0K1 | -0.74637 |
| 83197 | P14079 | Q13491 | -0.88134 |
| 83198 | P14079 | O60938 | -0.97458 |
| 83199 | P14079 | P59922 | -1.2314  |
| 83200 | P14079 | A4D1S5 | -1.2215  |
| 83201 | P14079 | Q9HD23 | -0.792   |
| 83202 | P14079 | Q13046 | -0.80423 |
| 83203 | P14079 | Q8WWF8 | -0.22784 |
| 83204 | P14079 | Q9UHI5 | -0.58528 |
| 83205 | P14079 | P17301 | -0.22728 |
| 83206 | P14079 | P37059 | -1.3545  |
| 83207 | P14079 | Q14849 | -0.76966 |
| 83208 | P14079 | Q12774 | -0.72037 |
| 83209 | P14079 | Q86WT6 | -0.22962 |
| 83210 | P14079 | Q9H2J1 | -0.17426 |
| 83211 | P14079 | Q86T65 | -0.21571 |
| 83212 | P14079 | A6NMT0 | -0.2289  |
| 83213 | P14079 | Q9P2E3 | -0.22777 |
| 83214 | P14079 | O15230 | -0.57892 |
| 83215 | P14079 | Q96A84 | -0.85942 |
| 83216 | P14079 | Q9H3D4 | -0.22701 |
| 83217 | P14079 | Q9UNN8 | -0.26633 |
| 83218 | P14079 | P35916 | -0.79894 |
| 83219 | P14079 | Q96MZ0 | -0.22015 |
| 83220 | P14079 | P01719 | -1       |

|       |        |        |            |
|-------|--------|--------|------------|
| 83221 | P14079 | P49759 | -1.2888    |
| 83222 | P14079 | Q9UF11 | -0.88688   |
| 83223 | P14079 | Q5JVL4 | -0.22437   |
| 83224 | P14079 | Q9NP58 | -1.0098    |
| 83225 | P14079 | Q92485 | -0.93439   |
| 83226 | P14079 | O95467 | -0.8648    |
| 83227 | P14079 | Q9GZR7 | -0.65805   |
| 83228 | P14079 | Q96E39 | -0.41811   |
| 83229 | P14079 | Q9NX52 | -1.4266    |
| 83230 | P14079 | P10745 | -1.1562    |
| 83231 | P14079 | Q01064 | -0.22001   |
| 83232 | P14079 | Q01113 | -1.8541    |
| 83233 | P14079 | Q9NX07 | -0.28603   |
| 83234 | P14079 | Q9NVA4 | -0.77815   |
| 83235 | P14079 | Q6UVM3 | -1.5161    |
| 83236 | P14079 | Q9H792 | -0.57584   |
| 83237 | P14079 | B1AK53 | -0.22714   |
| 83238 | P14079 | O95872 | -0.2274    |
| 83239 | P14079 | Q9UBX0 | -0.17418   |
| 83240 | P14079 | Q5T3U5 | -1.5835    |
| 83241 | P14079 | Q96S16 | -0.012069  |
| 83242 | P14079 | O95711 | -0.91564   |
| 83243 | P14079 | P0CG06 | -0.98486   |
| 83244 | P14079 | Q16553 | -0.57923   |
| 83245 | P14079 | P35219 | -0.089834  |
| 83246 | P14079 | Q96KQ7 | -0.22741   |
| 83247 | P14079 | Q6NXR0 | -0.96877   |
| 83248 | P14079 | P04431 | -1         |
| 83249 | P14079 | O76082 | -0.53828   |
| 83250 | P14079 | Q92854 | -0.64224   |
| 83251 | P14079 | P20336 | -0.4504    |
| 83252 | P14079 | P02730 | -0.46797   |
| 83253 | P14079 | P33993 | -0.1727    |
| 83254 | P14079 | Q8TBJ5 | -0.0068628 |
| 83255 | P14079 | Q6ZMU1 | -0.28108   |
| 83256 | P14079 | P51589 | -0.82432   |
| 83257 | P14079 | O95626 | -0.13855   |
| 83258 | P14079 | P23141 | -0.25674   |
| 83259 | P14079 | P23515 | -0.55953   |
| 83260 | P14079 | A6NM36 | -0.22769   |
| 83261 | P14079 | P19021 | -0.81641   |
| 83262 | P14079 | Q8NG80 | -1.2302    |
| 83263 | P14079 | Q53GD3 | -0.92705   |
| 83264 | P14079 | Q8N392 | -1.0254    |
| 83265 | P14079 | A6NKK0 | -1.2314    |
| 83266 | P14079 | Q96LB2 | -1.2617    |
| 83267 | P14079 | Q8NH07 | -1.2314    |
| 83268 | P14079 | P42336 | -0.3865    |
| 83269 | P14079 | Q9ULF5 | -0.9697    |
| 83270 | P14079 | Q2WQJ6 | -0.19588   |
| 83271 | P14079 | O75185 | -0.73751   |
| 83272 | P14079 | Q8IY37 | -0.95316   |
| 83273 | P14079 | Q5K651 | -0.12675   |
| 83274 | P14079 | Q6P093 | -1.3353    |
| 83275 | P14079 | Q8WXD0 | -1.1349    |
| 83276 | P14079 | Q6UX27 | -0.77815   |
| 83277 | P14079 | Q8TAD2 | -0.86639   |
| 83278 | P14079 | P25101 | -0.49727   |
| 83279 | P14079 | Q9UHE8 | -1.1968    |
| 83280 | P14079 | O60729 | -0.22743   |
| 83281 | P14079 | P01782 | -1         |
| 83282 | P14079 | Q9P2K2 | -0.86101   |
| 83283 | P14079 | Q8NH90 | -1.2314    |
| 83284 | P14079 | P48506 | -0.50312   |
| 83285 | P14079 | Q8TEU8 | -0.71375   |
| 83286 | P14079 | O95136 | -1.2836    |
| 83287 | P14079 | Q15291 | -0.2275    |
| 83288 | P14079 | Q9GZT5 | -1.0412    |
| 83289 | P14079 | P08579 | -0.22528   |
| 83290 | P14079 | O15444 | -0.97097   |
| 83291 | P14079 | O15539 | -0.8594    |
| 83292 | P14079 | Q96JJ7 | -0.93212   |
| 83293 | P14079 | P01601 | -1         |
| 83294 | P14079 | P55083 | -1.3571    |
| 83295 | P14079 | A6NFN3 | -0.82649   |
| 83296 | P14079 | Q68CQ7 | -0.76975   |

|       |        |        |           |
|-------|--------|--------|-----------|
| 83297 | P14079 | Q16698 | -0.24219  |
| 83298 | P14079 | Q7LGA3 | -0.65988  |
| 83299 | P14079 | P01031 | -0.7286   |
| 83300 | P14079 | Q86Y38 | -1.159    |
| 83301 | P14079 | Q96CW9 | -0.84453  |
| 83302 | P14079 | Q15238 | -0.2277   |
| 83303 | P14079 | Q9BWS9 | -0.79985  |
| 83304 | P14079 | Q9Y5X9 | -0.9051   |
| 83305 | P14079 | Q8N264 | -0.66517  |
| 83306 | P14079 | Q99985 | -0.88863  |
| 83307 | P14079 | Q147X3 | -0.1619   |
| 83308 | P14079 | Q8IUQ4 | -0.21773  |
| 83309 | P14079 | Q9UDY6 | -0.34108  |
| 83310 | P14079 | Q96J66 | -1.5835   |
| 83311 | P14079 | Q13315 | -0.391    |
| 83312 | P14079 | Q8WZ64 | -0.99016  |
| 83313 | P14079 | P00414 | -0.53365  |
| 83314 | P14079 | Q05996 | -1.1202   |
| 83315 | P14079 | Q86TW2 | -1.6901   |
| 83316 | P14079 | P52943 | -0.22777  |
| 83317 | P14079 | Q9H093 | -0.7246   |
| 83318 | P14079 | Q8NGX9 | -1.2314   |
| 83319 | P14079 | Q5JTB6 | -0.80633  |
| 83320 | P14079 | Q14976 | -0.94518  |
| 83321 | P14079 | Q8NGU2 | -1.2314   |
| 83322 | P14079 | Q9NRM1 | -0.97272  |
| 83323 | P14079 | Q6QAJ8 | -0.77815  |
| 83324 | P14079 | Q96N64 | -0.20655  |
| 83325 | P14079 | Q07092 | -0.63257  |
| 83326 | P14079 | Q9NZN1 | -0.56025  |
| 83327 | P14079 | Q03591 | -0.9353   |
| 83328 | P14079 | Q8NEP7 | -0.1718   |
| 83329 | P14079 | P58182 | -1.2314   |
| 83330 | P14079 | Q9C0I4 | -0.77815  |
| 83331 | P14079 | Q4U2R8 | -0.45637  |
| 83332 | P14079 | P0C264 | -1.4433   |
| 83333 | P14079 | Q8TDY4 | -0.2564   |
| 83334 | P14079 | P55001 | -0.84617  |
| 83335 | P14079 | P08263 | -0.22318  |
| 83336 | P14079 | P29375 | -0.26997  |
| 83337 | P14079 | Q86U17 | -0.76468  |
| 83338 | P14079 | Q9P0U3 | -0.12395  |
| 83339 | P14079 | P01148 | -1.0238   |
| 83340 | P14079 | Q9BYS8 | -0.42754  |
| 83341 | P14079 | Q9P1Y6 | -0.22744  |
| 83342 | P14079 | Q8IW75 | -0.75668  |
| 83343 | P14079 | P50416 | -0.54818  |
| 83344 | P14079 | P05230 | -0.37117  |
| 83345 | P14079 | Q8TBF8 | -0.043018 |
| 83346 | P14079 | Q8NG94 | -1.2314   |
| 83347 | P14079 | P04908 | -0.92425  |
| 83348 | P14079 | Q8WTR8 | -0.80633  |
| 83349 | P14079 | Q6IF82 | -1.2314   |
| 83350 | P14079 | Q96L94 | -0.37496  |
| 83351 | P14079 | Q13610 | -0.22746  |
| 83352 | P14079 | P20155 | -0.82021  |
| 83353 | P14079 | Q8WYG9 | -0.59856  |
| 83354 | P14079 | Q96LU5 | -0.68848  |
| 83355 | P14079 | P48729 | -0.22741  |
| 83356 | P14079 | A6NMU1 | -1.2314   |
| 83357 | P14079 | P35408 | -0.50236  |
| 83358 | P14079 | P49761 | -1.1182   |
| 83359 | P14079 | Q9UQ88 | -0.47995  |
| 83360 | P14079 | Q9NPJ1 | -0.17434  |
| 83361 | P14079 | Q9BWV7 | -0.37255  |
| 83362 | P14079 | Q9H6S0 | -0.29277  |
| 83363 | P14079 | Q5VZ19 | -0.79049  |
| 83364 | P14079 | Q15645 | -0.22798  |
| 83365 | P14079 | Q8IYP2 | -1.4766   |
| 83366 | P14079 | P04432 | -1        |
| 83367 | P14079 | Q9BY21 | -1.2917   |
| 83368 | P14079 | Q9P2D7 | -0.21045  |
| 83369 | P14079 | Q9H0L4 | -0.72559  |
| 83370 | P14079 | Q8WU66 | -0.78776  |
| 83371 | P14079 | P33991 | -0.21376  |
| 83372 | P14079 | Q8WUA8 | -0.80633  |

|       |        |        |           |
|-------|--------|--------|-----------|
| 83373 | P14079 | Q8N127 | -1.2314   |
| 83374 | P14079 | O00175 | -0.75234  |
| 83375 | P14079 | Q8NFU0 | -1.0774   |
| 83376 | P14079 | Q14641 | -1.3106   |
| 83377 | P14079 | Q9BZI1 | -0.23559  |
| 83378 | P14079 | P49638 | -0.21833  |
| 83379 | P14079 | P02749 | -0.4527   |
| 83380 | P14079 | P49327 | -0.6146   |
| 83381 | P14079 | D3W0D1 | -0.4959   |
| 83382 | P14079 | O95183 | -1.1878   |
| 83383 | P14079 | Q9P2N4 | -1.53     |
| 83384 | P14079 | O00515 | -0.84377  |
| 83385 | P14079 | Q8N2A8 | -0.81831  |
| 83386 | P14079 | Q5VZK9 | -0.22699  |
| 83387 | P14079 | Q8NGJ0 | -1.2314   |
| 83388 | P14079 | P57735 | -0.69284  |
| 83389 | P14079 | Q8N687 | -0.78458  |
| 83390 | P14079 | O95389 | -0.94981  |
| 83391 | P14079 | Q96KK5 | -0.92425  |
| 83392 | P14079 | P01777 | -1        |
| 83393 | P14079 | P05015 | -0.79632  |
| 83394 | P14079 | Q8TF72 | -0.22665  |
| 83395 | P14079 | Q8NGT0 | -1.2314   |
| 83396 | P14079 | A8MZ06 | -0.16129  |
| 83397 | P14079 | P35414 | -1.2671   |
| 83398 | P14079 | P10092 | -0.89818  |
| 83399 | P14079 | P12018 | -0.81822  |
| 83400 | P14079 | P42696 | -0.40019  |
| 83401 | P14079 | P58401 | -1.0127   |
| 83402 | P14079 | P35125 | -0.73294  |
| 83403 | P14079 | P37231 | -0.24154  |
| 83404 | P14079 | Q969Q1 | -0.61724  |
| 83405 | P14079 | Q684P5 | -0.31411  |
| 83406 | P14079 | Q76MJ5 | -0.97537  |
| 83407 | P14079 | Q9ULZ1 | -0.69474  |
| 83408 | P14079 | Q8N6C8 | -1.0915   |
| 83409 | P14079 | Q8IX30 | -0.22771  |
| 83410 | P14079 | Q8NG92 | -1.2314   |
| 83411 | P14079 | P03950 | -0.34655  |
| 83412 | P14079 | O00327 | -0.22739  |
| 83413 | P14079 | O75563 | -0.26767  |
| 83414 | P14079 | Q9Y6M7 | -1.0242   |
| 83415 | P14079 | Q7L0R7 | -0.25343  |
| 83416 | P14079 | Q96P48 | -0.23886  |
| 83417 | P14079 | Q8NGX2 | -1.2314   |
| 83418 | P14079 | P42229 | -0.22552  |
| 83419 | P14079 | O43688 | -0.84192  |
| 83420 | P14079 | Q8IVS2 | -0.56958  |
| 83421 | P14079 | Q29960 | -1.3523   |
| 83422 | P14079 | Q96J77 | -0.16626  |
| 83423 | P14079 | Q5T4J0 | -0.68423  |
| 83424 | P14079 | Q8N807 | -0.78521  |
| 83425 | P14079 | Q05952 | -1.0662   |
| 83426 | P14079 | Q7Z494 | -0.22717  |
| 83427 | P14079 | P55851 | -0.49702  |
| 83428 | P14079 | P67812 | -0.86267  |
| 83429 | P14079 | P31260 | -0.22501  |
| 83430 | P14079 | Q9NP55 | -0.93362  |
| 83431 | P14079 | Q7Z3B1 | -0.25586  |
| 83432 | P14079 | A6NDY0 | -0.61155  |
| 83433 | P14079 | Q01415 | -0.88056  |
| 83434 | P14079 | Q8NEX9 | -0.79728  |
| 83435 | P14079 | Q5GH70 | -0.77815  |
| 83436 | P14079 | Q8IUH5 | -0.27918  |
| 83437 | P14079 | P00568 | -0.86351  |
| 83438 | P14079 | Q9H741 | -0.80633  |
| 83439 | P14079 | P36894 | -0.39613  |
| 83440 | P14079 | Q6P4F1 | -0.46381  |
| 83441 | P14079 | P35442 | -0.81343  |
| 83442 | P14079 | O14672 | -0.42178  |
| 83443 | P14079 | Q9UK55 | -0.60442  |
| 83444 | P14079 | Q8NGN6 | -1.2314   |
| 83445 | P14079 | Q9NY65 | -0.28045  |
| 83446 | P14079 | Q96LT4 | -0.95877  |
| 83447 | P14079 | P50395 | -0.027011 |
| 83448 | P14079 | Q13188 | -0.37722  |

|       |        |        |           |
|-------|--------|--------|-----------|
| 83449 | P14079 | O75116 | -0.25501  |
| 83450 | P14079 | P42356 | -0.74949  |
| 83451 | P14079 | P35052 | -1.0509   |
| 83452 | P14079 | P52907 | -0.24914  |
| 83453 | P14079 | Q6ZUT9 | -0.76229  |
| 83454 | P14079 | A6NKC9 | -0.22741  |
| 83455 | P14079 | P01570 | -0.81438  |
| 83456 | P14079 | P29803 | -0.3554   |
| 83457 | P14079 | Q9Y2P5 | -1.0593   |
| 83458 | P14079 | Q9UHD8 | -0.22228  |
| 83459 | P14079 | Q9UIW2 | -0.85353  |
| 83460 | P14079 | Q495M3 | -0.81395  |
| 83461 | P14079 | A6NNE9 | -1.1268   |
| 83462 | P14079 | Q9H2V7 | -0.21275  |
| 83463 | P14079 | Q8NEM8 | -0.46944  |
| 83464 | P14079 | Q13702 | -0.2268   |
| 83465 | P14079 | B3GLJ2 | -0.80633  |
| 83466 | P14079 | P57105 | -0.58977  |
| 83467 | P14079 | Q96DR4 | -0.45278  |
| 83468 | P14079 | P02792 | -0.022366 |
| 83469 | P14079 | C9JUS6 | -0.80633  |
| 83470 | P14079 | Q8TDF6 | -0.45702  |
| 83471 | P14079 | P29033 | -0.82361  |
| 83472 | P14079 | Q86UP3 | -0.2245   |
| 83473 | P14079 | Q6UXM1 | -0.77815  |
| 83474 | P14079 | Q9NYL4 | -0.8246   |
| 83475 | P14079 | Q15166 | -0.80559  |
| 83476 | P14079 | Q96QD5 | -0.33461  |
| 83477 | P14079 | Q8IXL7 | -0.48026  |
| 83478 | P14079 | P61952 | -0.38805  |
| 83479 | P14079 | Q9NR99 | -0.80633  |
| 83480 | P14079 | Q9UHC6 | -0.93277  |
| 83481 | P14079 | P24468 | -0.23799  |
| 83482 | P14079 | Q01968 | -0.34084  |
| 83483 | P14079 | Q8NGE2 | -1.2314   |
| 83484 | P14079 | Q9NZ08 | -0.67805  |
| 83485 | P14079 | Q9P244 | -0.66724  |
| 83486 | P14079 | Q9NPF7 | -0.37142  |
| 83487 | P14079 | Q9NVM6 | -0.88274  |
| 83488 | P14079 | P06309 | -1        |
| 83489 | P14079 | Q96AJ9 | -0.3605   |
| 83490 | P14079 | Q96QI5 | -0.64658  |
| 83491 | P14079 | Q9BV79 | -1.0456   |
| 83492 | P14079 | O94953 | -0.13157  |
| 83493 | P14079 | P22413 | -0.47385  |
| 83494 | P14079 | Q96BY6 | -0.47266  |
| 83495 | P14079 | P01614 | -1        |
| 83496 | P14079 | Q8IZP1 | -1.4902   |
| 83497 | P14079 | Q92859 | -0.90704  |
| 83498 | P14079 | Q9BYV1 | -0.28005  |
| 83499 | P14079 | Q9BZG9 | -1.253    |
| 83500 | P14079 | Q05901 | -1.0105   |
| 83501 | P14079 | Q9ULW5 | -1.1241   |
| 83502 | P14079 | Q96G97 | -0.75276  |
| 83503 | P14079 | O75460 | -0.49329  |
| 83504 | P14079 | P59542 | -1.1233   |
| 83505 | P14079 | O00445 | -0.90109  |
| 83506 | P14079 | A6NED2 | -0.21857  |
| 83507 | P14079 | P78536 | -0.36897  |
| 83508 | P14079 | O95013 | -1.2314   |
| 83509 | P14079 | Q8NGI0 | -1.2314   |
| 83510 | P14079 | Q96J94 | -0.22565  |
| 83511 | P14079 | P48431 | -0.30179  |
| 83512 | P14079 | P01616 | -0.98486  |
| 83513 | P14079 | Q8WTV0 | -0.7008   |
| 83514 | P14079 | Q15614 | -1.2314   |
| 83515 | P14079 | Q96PF1 | -0.36441  |
| 83516 | P14079 | Q8IYT4 | -0.58452  |
| 83517 | P14079 | Q96P31 | -0.97472  |
| 83518 | P14079 | Q8N2K0 | -0.77471  |
| 83519 | P14079 | Q9Y243 | -0.51182  |
| 83520 | P14079 | P01893 | -1.2154   |
| 83521 | P14079 | Q9Y6V0 | -0.32022  |
| 83522 | P14079 | P60201 | -0.42405  |
| 83523 | P14079 | Q9ULA0 | -0.60321  |
| 83524 | P14079 | Q6DT37 | -0.58875  |



|       |        |        |           |
|-------|--------|--------|-----------|
| 83525 | P14079 | O14668 | -1.6479   |
| 83526 | P14079 | O75019 | -1.0541   |
| 83527 | P14079 | Q6ZTW0 | -0.20111  |
| 83528 | P14079 | Q6TCH4 | -0.77815  |
| 83529 | P14079 | O76094 | -0.20688  |
| 83530 | P14079 | Q9BY49 | -1.1298   |
| 83531 | P14079 | O75509 | -0.22273  |
| 83532 | P14079 | P54107 | -0.90325  |
| 83533 | P14079 | Q96DN5 | -0.69156  |
| 83534 | P14079 | Q9BQT8 | -0.71308  |
| 83535 | P14079 | Q9BZP6 | -0.55913  |
| 83536 | P14079 | P20719 | -0.15593  |
| 83537 | P14079 | P14222 | -0.51282  |
| 83538 | P14079 | Q12805 | -0.2398   |
| 83539 | P14079 | Q5T4B2 | -0.48646  |
| 83540 | P14079 | P83859 | -0.66035  |
| 83541 | P14079 | Q86X76 | -0.11016  |
| 83542 | P14079 | O95633 | -0.2177   |
| 83543 | P14079 | Q8NGA0 | -1.2314   |
| 83544 | P14079 | O15217 | -0.22314  |
| 83545 | P14079 | P08861 | -1.4956   |
| 83546 | P14079 | A6NK97 | -1.0152   |
| 83547 | P14079 | P17931 | -0.33243  |
| 83548 | P14079 | Q53EP0 | -0.69133  |
| 83549 | P14079 | Q9UMQ6 | -1.1283   |
| 83550 | P14079 | Q9Y5F2 | -1.3144   |
| 83551 | P14079 | Q8TDW7 | -1.5033   |
| 83552 | P14079 | Q8TAA1 | -0.80822  |
| 83553 | P14079 | Q13705 | -0.57792  |
| 83554 | P14079 | Q70Z35 | -0.51567  |
| 83555 | P14079 | P29558 | -0.24826  |
| 83556 | P14079 | Q9NRY7 | -0.99075  |
| 83557 | P14079 | Q96LA6 | -0.97472  |
| 83558 | P14079 | P63120 | -0.65475  |
| 83559 | P14079 | O60262 | -0.44849  |
| 83560 | P14079 | Q03395 | -1.2094   |
| 83561 | P14079 | Q8IY47 | -0.20025  |
| 83562 | P14079 | O75339 | -0.94621  |
| 83563 | P14079 | Q5SQS7 | -0.2274   |
| 83564 | P14079 | Q13571 | -1.1458   |
| 83565 | P14079 | P21941 | -0.38689  |
| 83566 | P14079 | P0C629 | -1.2314   |
| 83567 | P14079 | Q8IYU8 | -0.19497  |
| 83568 | P14079 | Q8NGI1 | -1.2314   |
| 83569 | P14079 | Q9UNA1 | -0.26441  |
| 83570 | P14079 | Q9BXR5 | -1.1252   |
| 83571 | P14079 | Q96PD6 | -0.92065  |
| 83572 | P14079 | P16118 | -0.31917  |
| 83573 | P14079 | Q0P6D2 | -0.9328   |
| 83574 | P14079 | Q14562 | -0.095192 |
| 83575 | P14079 | Q9GZS9 | -0.64043  |
| 83576 | P14079 | P01779 | -1        |
| 83577 | P14079 | Q8NGQ2 | -1.2314   |
| 83578 | P14079 | Q8N8N7 | -0.81451  |
| 83579 | P14079 | P22003 | -0.64346  |
| 83580 | P14079 | P23467 | -0.80846  |
| 83581 | P14079 | Q07973 | -0.54575  |
| 83582 | P14079 | Q92930 | -0.94379  |
| 83583 | P14079 | Q9NRM0 | -0.76174  |
| 83584 | P14079 | Q9UQP3 | -1.1693   |
| 83585 | P14079 | P53355 | -0.45824  |
| 83586 | P14079 | P06737 | -0.63038  |
| 83587 | P14079 | Q15417 | -0.32764  |
| 83588 | P14079 | P53621 | -0.22938  |
| 83589 | P14079 | P0CE72 | -0.22233  |
| 83590 | P14079 | Q6ZS10 | -0.78136  |
| 83591 | P14079 | P27918 | -0.90521  |
| 83592 | P14079 | Q9NP95 | -0.88614  |
| 83593 | P14079 | Q99217 | -0.74947  |
| 83594 | P14079 | Q86UX2 | -0.81006  |
| 83595 | P14079 | Q9NWU1 | -0.39538  |
| 83596 | P14079 | Q8N0Z9 | -0.77815  |
| 83597 | P14079 | O00468 | -0.64622  |
| 83598 | P14079 | P36980 | -0.80633  |
| 83599 | P14079 | Q14643 | -0.33591  |
| 83600 | P14079 | P98174 | -0.75508  |

|       |        |        |           |
|-------|--------|--------|-----------|
| 83601 | P14079 | P35346 | -1.1204   |
| 83602 | P14079 | A6NJU9 | -0.77815  |
| 83603 | P14079 | Q8N145 | -0.77632  |
| 83604 | P14079 | Q14717 | -0.042432 |
| 83605 | P14079 | Q8NGP4 | -1.2314   |
| 83606 | P14079 | P08887 | -0.36593  |
| 83607 | P14079 | Q8N4T0 | -1.3863   |
| 83608 | P14079 | Q8NA66 | -0.055702 |
| 83609 | P14079 | Q15800 | -1.178    |
| 83610 | P14079 | Q9C029 | -0.22797  |
| 83611 | P14079 | Q96M20 | -0.22366  |
| 83612 | P14079 | Q9NV23 | -0.37134  |
| 83613 | P14079 | P61371 | -0.22472  |
| 83614 | P14079 | Q9P2S2 | -0.87268  |
| 83615 | P14079 | Q02318 | -0.56816  |
| 83616 | P14079 | P03979 | -0.34144  |
| 83617 | P14079 | P57053 | -0.90191  |
| 83618 | P14079 | Q99705 | -1.2123   |
| 83619 | P14079 | Q96LW2 | -1.4433   |
| 83620 | P14079 | P43080 | -0.50068  |
| 83621 | P14079 | Q8NGS6 | -1.2314   |
| 83622 | P14079 | Q8NHC6 | -1.2314   |
| 83623 | P14079 | Q07890 | -0.22742  |
| 83624 | P14079 | Q14774 | -0.2318   |
| 83625 | P14079 | O75541 | -0.22565  |
| 83626 | P14079 | Q13093 | -0.94525  |
| 83627 | P14079 | Q9Y5P0 | -1.2314   |
| 83628 | P14079 | Q96K12 | -1.5111   |
| 83629 | P14079 | Q9HAR2 | -1.3419   |
| 83630 | P14079 | Q8NGZ9 | -1.2314   |
| 83631 | P14079 | Q05C16 | -0.22769  |
| 83632 | P14079 | Q13072 | -0.80633  |
| 83633 | P14079 | P51993 | -0.69628  |
| 83634 | P14079 | Q9NU19 | -1.4902   |
| 83635 | P14079 | Q8N6Y1 | -1.2343   |
| 83636 | P14079 | Q8IUH4 | -0.8416   |
| 83637 | P14079 | Q86UA1 | -0.093499 |
| 83638 | P14079 | P30048 | -0.20052  |
| 83639 | P14079 | O43852 | -0.22686  |
| 83640 | P14079 | P0C7I0 | -0.36164  |
| 83641 | P14079 | Q8NGT9 | -1.2314   |
| 83642 | P14079 | Q8NAU1 | -1.4857   |
| 83643 | P14079 | Q9H7Z7 | -0.12634  |
| 83644 | P14079 | O60337 | -1.2333   |
| 83645 | P14079 | Q9UN72 | -1.341    |
| 83646 | P14079 | Q96H72 | -0.57775  |
| 83647 | P14079 | O60683 | -0.22738  |
| 83648 | P14079 | Q14508 | -1.1824   |
| 83649 | P14079 | Q8NA23 | -0.22761  |
| 83650 | P14079 | P16615 | -1.0368   |
| 83651 | P14079 | Q06136 | -1.5      |
| 83652 | P14079 | Q14722 | -1.0398   |
| 83653 | P14079 | Q7Z553 | -0.5205   |
| 83654 | P14079 | Q96PU5 | -0.22744  |
| 83655 | P14079 | Q9UBQ7 | -0.80927  |
| 83656 | P14079 | Q8N6S4 | -0.40998  |
| 83657 | P14079 | Q13477 | -1.257    |
| 83658 | P14079 | Q8NEB5 | -0.82245  |
| 83659 | P14079 | Q5JTD7 | -0.20355  |
| 83660 | P14079 | Q6XPS3 | -1.1646   |
| 83661 | P14079 | P0C7H9 | -0.31618  |
| 83662 | P14079 | Q9UJD0 | -0.21906  |
| 83663 | P14079 | Q9NRW7 | -0.21436  |
| 83664 | P14079 | Q01344 | -0.58149  |
| 83665 | P14079 | P18827 | -0.56825  |
| 83666 | P14079 | P06887 | -1        |
| 83667 | P14079 | Q96RI8 | -1.2819   |
| 83668 | P14079 | Q8WV16 | -0.25926  |
| 83669 | P14079 | Q9HCQ5 | -0.65284  |
| 83670 | P14079 | Q9UMX9 | -0.83848  |
| 83671 | P14079 | Q9Y442 | -0.77815  |
| 83672 | P14079 | Q9NZR2 | -0.70445  |
| 83673 | P14079 | P0DJD3 | -0.22526  |
| 83674 | P14079 | Q8NH85 | -1.2314   |
| 83675 | P14079 | Q8IVV2 | -0.344    |
| 83676 | P14079 | P0CK97 | -0.77815  |

|       |        |        |           |
|-------|--------|--------|-----------|
| 83677 | P14079 | Q8N2K1 | -1.6191   |
| 83678 | P14079 | Q9H207 | -1.2314   |
| 83679 | P14079 | P30049 | -0.23665  |
| 83680 | P14079 | Q94941 | -0.23487  |
| 83681 | P14079 | Q9UL51 | -1.3165   |
| 83682 | P14079 | Q95631 | -0.22743  |
| 83683 | P14079 | P05231 | -0.2411   |
| 83684 | P14079 | Q8NFF2 | -1.2085   |
| 83685 | P14079 | P04271 | -0.73839  |
| 83686 | P14079 | Q7Z3Q1 | -0.85053  |
| 83687 | P14079 | P18054 | -0.20148  |
| 83688 | P14079 | P18627 | -0.83193  |
| 83689 | P14079 | P0CG29 | -0.2224   |
| 83690 | P14079 | Q67FW5 | -0.31449  |
| 83691 | P14079 | Q9BRZ2 | -0.48983  |
| 83692 | P14079 | Q95620 | -0.55286  |
| 83693 | P14079 | Q9NS00 | -1.0578   |
| 83694 | P14079 | O15270 | -0.82555  |
| 83695 | P14079 | Q9BRG2 | -0.5784   |
| 83696 | P14079 | O00341 | -1.1039   |
| 83697 | P14079 | Q63ZE4 | -0.84927  |
| 83698 | P14079 | P09622 | -0.22074  |
| 83699 | P14079 | Q7Z6Z7 | -0.22985  |
| 83700 | P14079 | Q9Y576 | -0.78096  |
| 83701 | P14079 | Q15762 | -0.75398  |
| 83702 | P14079 | Q7RTZ2 | -0.32949  |
| 83703 | P14079 | Q9UKF2 | -1.2633   |
| 83704 | P14079 | Q7Z6W7 | -0.36278  |
| 83705 | P14079 | Q96A83 | -1.1718   |
| 83706 | P14079 | Q15646 | -0.21737  |
| 83707 | P14079 | O95696 | -0.21763  |
| 83708 | P14079 | O94827 | -0.25658  |
| 83709 | P14079 | Q9NXI6 | -0.78242  |
| 83710 | P14079 | Q15642 | -0.66768  |
| 83711 | P14079 | P26885 | -0.22841  |
| 83712 | P14079 | Q99501 | -0.03687  |
| 83713 | P14079 | Q99944 | -1.2679   |
| 83714 | P14079 | Q2M5E4 | -0.71709  |
| 83715 | P14079 | Q9Y3S1 | -1.4485   |
| 83716 | P14079 | P01623 | -1        |
| 83717 | P14079 | Q8NH89 | -1.2314   |
| 83718 | P14079 | P04196 | -0.35389  |
| 83719 | P14079 | Q8N4P3 | -0.39212  |
| 83720 | P14079 | Q96G91 | -1.2342   |
| 83721 | P14079 | Q14392 | -0.89954  |
| 83722 | P14079 | Q86XS5 | -1.1656   |
| 83723 | P14079 | Q6TFL4 | -0.23756  |
| 83724 | P14079 | P85298 | -0.44042  |
| 83725 | P14079 | Q8NH55 | -1.2314   |
| 83726 | P14079 | Q15211 | -0.73776  |
| 83727 | P14079 | P02765 | -0.63923  |
| 83728 | P14079 | Q6UXF1 | -0.80224  |
| 83729 | P14079 | Q8NGN8 | -1.2314   |
| 83730 | P14079 | Q6P1Q9 | -0.21342  |
| 83731 | P14079 | P31629 | -0.22859  |
| 83732 | P14079 | O95076 | -0.22739  |
| 83733 | P14079 | P40933 | -0.14814  |
| 83734 | P14079 | P10997 | -1.0632   |
| 83735 | P14079 | Q9C0C9 | -1.2144   |
| 83736 | P14079 | Q9NQ11 | -1.2356   |
| 83737 | P14079 | Q32P51 | -0.23107  |
| 83738 | P14079 | Q9BWW8 | -0.87449  |
| 83739 | P14079 | Q8NA97 | -0.039276 |
| 83740 | P14079 | Q9H2C8 | -1.2314   |
| 83741 | P14079 | Q155Q3 | -0.22741  |
| 83742 | P14079 | Q8IZ96 | -0.8507   |
| 83743 | P14079 | Q6ZT89 | -0.74044  |
| 83744 | P14079 | P11279 | -1.049    |
| 83745 | P14079 | P26951 | -0.9714   |
| 83746 | P14079 | Q99784 | -0.22726  |
| 83747 | P14079 | Q6PIU1 | -1.169    |
| 83748 | P14079 | Q69YJ1 | -0.4342   |
| 83749 | P14079 | Q9UGF7 | -1.2314   |
| 83750 | P14079 | P32927 | -0.69721  |
| 83751 | P14079 | Q86VZ5 | -0.484    |
| 83752 | P14079 | Q96JB1 | -0.35253  |

|       |        |        |           |
|-------|--------|--------|-----------|
| 83753 | P14079 | Q9UBT2 | -0.30565  |
| 83754 | P14079 | P41143 | -0.55137  |
| 83755 | P14079 | P36406 | -0.52672  |
| 83756 | P14079 | Q9P0Z9 | -0.65877  |
| 83757 | P14079 | Q95365 | -1        |
| 83758 | P14079 | Q8IZS8 | -0.99383  |
| 83759 | P14079 | P46098 | -1.0985   |
| 83760 | P14079 | Q9H6L2 | -0.89897  |
| 83761 | P14079 | Q5S007 | -0.56531  |
| 83762 | P14079 | Q14D04 | -0.48805  |
| 83763 | P14079 | P06401 | -0.22741  |
| 83764 | P14079 | Q29940 | -1        |
| 83765 | P14079 | Q96AH8 | -0.73351  |
| 83766 | P14079 | O75129 | -0.77815  |
| 83767 | P14079 | P78382 | -0.59168  |
| 83768 | P14079 | P51790 | -0.5297   |
| 83769 | P14079 | Q8NGR3 | -1.2314   |
| 83770 | P14079 | Q9Y6E0 | -0.30912  |
| 83771 | P14079 | Q96PW8 | -0.18938  |
| 83772 | P14079 | O75150 | -0.21508  |
| 83773 | P14079 | P15309 | -1.4088   |
| 83774 | P14079 | Q96P53 | -0.22741  |
| 83775 | P14079 | Q15245 | -0.48857  |
| 83776 | P14079 | Q92519 | -0.29792  |
| 83777 | P14079 | P04637 | -0.21893  |
| 83778 | P14079 | A6NJI9 | -0.13396  |
| 83779 | P14079 | O43741 | -0.25918  |
| 83780 | P14079 | Q6ZNG2 | -0.22676  |
| 83781 | P14079 | Q5JT82 | -0.20994  |
| 83782 | P14079 | P15907 | -0.99221  |
| 83783 | P14079 | P39059 | -1.8834   |
| 83784 | P14079 | Q9NX62 | -0.67709  |
| 83785 | P14079 | Q4VCS5 | -0.11206  |
| 83786 | P14079 | P04220 | -0.40849  |
| 83787 | P14079 | Q13434 | -0.51154  |
| 83788 | P14079 | Q06945 | -0.23732  |
| 83789 | P14079 | Q01581 | -0.21199  |
| 83790 | P14079 | P48061 | -0.60505  |
| 83791 | P14079 | P0C2W1 | -0.19376  |
| 83792 | P14079 | P78563 | -0.058192 |
| 83793 | P14079 | P01824 | -1        |
| 83794 | P14079 | Q969V1 | -1.3154   |
| 83795 | P14079 | Q5SSJ5 | -0.77399  |
| 83796 | P14079 | P32247 | -1.2113   |
| 83797 | P14079 | Q92576 | -0.31787  |
| 83798 | P14079 | Q8NGN4 | -1.2314   |
| 83799 | P14079 | P0DJD8 | -1.3279   |
| 83800 | P14079 | Q96QZ7 | -0.21599  |
| 83801 | P14079 | Q93063 | -0.73154  |
| 83802 | P14079 | Q8NFJ6 | -1.3067   |
| 83803 | P14079 | Q969E1 | -0.78743  |
| 83804 | P14079 | Q96T68 | -0.37138  |
| 83805 | P14079 | O75636 | -0.60079  |
| 83806 | P14079 | Q7Z5A8 | -0.80633  |
| 83807 | P14079 | P50281 | -0.44305  |
| 83808 | P14079 | Q9UMD9 | -1.1767   |
| 83809 | P14079 | Q7LBE3 | -0.98962  |
| 83810 | P14079 | Q9UPU3 | -0.77143  |
| 83811 | P14079 | Q7RTX1 | -1.2775   |
| 83812 | P14079 | Q969K7 | -0.80224  |
| 83813 | P14079 | Q6PJ69 | -0.36051  |
| 83814 | P14079 | Q9UIG8 | -1.1833   |
| 83815 | P14079 | Q9NYV8 | -1.0431   |
| 83816 | P14079 | O75635 | -0.039198 |
| 83817 | P14079 | Q9BXC1 | -1.2581   |
| 83818 | P14079 | Q969G9 | -0.19647  |
| 83819 | P14079 | Q9NVX7 | -0.22356  |
| 83820 | P14079 | Q3KQZ1 | -0.66417  |
| 83821 | P14079 | Q9UKX3 | -0.43242  |
| 83822 | P14079 | Q6UWV6 | -0.81949  |
| 83823 | P14079 | Q96KJ4 | -1.0127   |
| 83824 | P14079 | P00488 | -0.66481  |
| 83825 | P14079 | Q5JRX3 | -0.32061  |
| 83826 | P14079 | Q9H1F0 | -0.82805  |
| 83827 | P14079 | Q8NGE5 | -1.2314   |
| 83828 | P14079 | P01599 | -1        |

|       |        |        |           |
|-------|--------|--------|-----------|
| 83829 | P14079 | Q8N5G0 | -0.77815  |
| 83830 | P14079 | Q10713 | -0.63152  |
| 83831 | P14079 | Q8N5M4 | -0.22473  |
| 83832 | P14079 | Q16610 | -0.47903  |
| 83833 | P14079 | Q8NH41 | -1.2314   |
| 83834 | P14079 | A6NFZ4 | -0.80633  |
| 83835 | P14079 | Q5FWF7 | -0.22065  |
| 83836 | P14079 | P63121 | -0.65475  |
| 83837 | P14079 | Q16619 | -0.59586  |
| 83838 | P14079 | P23471 | -1.4361   |
| 83839 | P14079 | P13765 | -0.96352  |
| 83840 | P14079 | Q6PJ21 | -0.47402  |
| 83841 | P14079 | P10747 | -0.19657  |
| 83842 | P14079 | P42858 | -0.063899 |
| 83843 | P14079 | Q8N4T4 | -0.62033  |
| 83844 | P14079 | Q5TON1 | -0.092336 |
| 83845 | P14079 | Q8NGC4 | -1.2314   |
| 83846 | P14079 | P13667 | -0.35262  |
| 83847 | P14079 | Q9H4E7 | -0.2274   |
| 83848 | P14079 | P19622 | -0.22694  |
| 83849 | P14079 | P43119 | -1.151    |
| 83850 | P14079 | Q9Y483 | -0.22978  |
| 83851 | P14079 | Q75643 | -0.22668  |
| 83852 | P14079 | P58181 | -1.2314   |
| 83853 | P14079 | P06276 | -0.69854  |
| 83854 | P14079 | Q9H2P9 | -0.32654  |
| 83855 | P14079 | P20333 | -0.68222  |
| 83856 | P14079 | Q6UXC1 | -0.4911   |
| 83857 | P14079 | Q9BZA7 | -1.455    |
| 83858 | P14079 | P33241 | -0.65566  |
| 83859 | P14079 | Q7Z3H0 | -0.22739  |
| 83860 | P14079 | Q6VVB1 | -0.21145  |
| 83861 | P14079 | Q8TBA6 | -0.46024  |
| 83862 | P14079 | Q6F5E8 | -0.21958  |
| 83863 | P14079 | Q9NZ53 | -0.55299  |
| 83864 | P14079 | P50897 | -0.41978  |
| 83865 | P14079 | Q9HAS3 | -0.89883  |
| 83866 | P14079 | Q9H1R2 | -0.33607  |
| 83867 | P14079 | P20645 | -0.97084  |
| 83868 | P14079 | P28676 | -0.38833  |
| 83869 | P14079 | Q5SQ64 | -0.97472  |
| 83870 | P14079 | P29323 | -1.0225   |
| 83871 | P14079 | Q86XK7 | -0.77815  |
| 83872 | P14079 | O43252 | -1.0489   |
| 83873 | P14079 | P06317 | -0.98486  |
| 83874 | P14079 | O75106 | -0.58671  |
| 83875 | P14079 | Q5FYA8 | -0.75831  |
| 83876 | P14079 | P30939 | -1.4097   |
| 83877 | P14079 | Q9GZV7 | -1.1437   |
| 83878 | P14079 | Q16774 | -0.81143  |
| 83879 | P14079 | Q9NQ38 | -0.46746  |
| 83880 | P14079 | Q9NVP4 | -0.36051  |
| 83881 | P14079 | P29597 | -1.0938   |
| 83882 | P14079 | Q9HCK4 | -0.61051  |
| 83883 | P14079 | Q5SR56 | -1.0536   |
| 83884 | P14079 | Q8NNG4 | -1.2314   |
| 83885 | P14079 | P40938 | -0.18182  |
| 83886 | P14079 | P12109 | -0.94218  |
| 83887 | P14079 | Q6UWV7 | -0.77815  |
| 83888 | P14079 | Q9Y6W8 | -1.7337   |
| 83889 | P14079 | P46095 | -1.3741   |
| 83890 | P14079 | Q5T447 | -0.22821  |
| 83891 | P14079 | Q9NPI9 | -1.2604   |
| 83892 | P14079 | Q8N135 | -0.84387  |
| 83893 | P14079 | P01780 | -1        |
| 83894 | P14079 | Q05329 | -0.25691  |
| 83895 | P14079 | Q8NET8 | -0.99876  |
| 83896 | P14079 | O00622 | -0.44879  |
| 83897 | P14079 | Q504Y3 | -0.16822  |
| 83898 | P14079 | Q16695 | -0.18013  |
| 83899 | P14079 | O00370 | -0.14119  |
| 83900 | P14079 | Q13562 | -0.22779  |
| 83901 | P14079 | P28223 | -0.73405  |
| 83902 | P14079 | P54108 | -0.86745  |
| 83903 | P14079 | P01912 | -0.7019   |
| 83904 | P14079 | P20774 | -0.55187  |

|       |        |        |           |
|-------|--------|--------|-----------|
| 83905 | P14079 | O94808 | -0.075577 |
| 83906 | P14079 | Q9Y6G1 | -0.77815  |
| 83907 | P14079 | Q9HCU0 | -0.79073  |
| 83908 | P14079 | Q86TD4 | -0.3558   |
| 83909 | P14079 | P28358 | -0.24271  |
| 83910 | P14079 | Q16720 | -1.2665   |
| 83911 | P14079 | Q9UHD0 | -0.73075  |
| 83912 | P14079 | Q9P296 | -0.8006   |
| 83913 | P14079 | B0YJ81 | -1.5885   |
| 83914 | P14079 | P13535 | -0.17428  |
| 83915 | P14079 | Q13459 | -0.1783   |
| 83916 | P14079 | Q96Q91 | -0.99067  |
| 83917 | P14079 | Q9NR64 | -0.20121  |
| 83918 | P14079 | Q96P50 | -1.1447   |
| 83919 | P14079 | P18462 | -0.99945  |
| 83920 | P14079 | P0CB38 | -0.79049  |
| 83921 | P14079 | Q6PKX4 | -0.20015  |
| 83922 | P14079 | Q8NGP3 | -1.2314   |
| 83923 | P14079 | Q13242 | -0.22597  |
| 83924 | P14079 | Q86VB7 | -1.104    |
| 83925 | P14079 | Q15139 | -0.28784  |
| 83926 | P14079 | Q10589 | -0.42413  |
| 83927 | P14079 | P30519 | -0.34996  |
| 83928 | P14079 | P49767 | -0.54927  |
| 83929 | P14079 | Q9ULT6 | -0.83861  |
| 83930 | P14079 | Q9NNX1 | -0.7563   |
| 83931 | P14079 | Q9BQ39 | -0.75974  |
| 83932 | P14079 | P02771 | -0.61748  |
| 83933 | P14079 | Q5TAH2 | -1.1416   |
| 83934 | P14079 | Q96FQ6 | -0.22964  |
| 83935 | P14079 | A5YM72 | -0.87015  |
| 83936 | P14079 | O43304 | -0.8787   |
| 83937 | P14079 | Q96DR5 | -0.97176  |
| 83938 | P14079 | O14764 | -1.1197   |
| 83939 | P14079 | Q9Y2U9 | -0.21889  |
| 83940 | P14079 | Q13002 | -0.60033  |
| 83941 | P14079 | Q96GR4 | -0.94083  |
| 83942 | P14079 | Q9BPW4 | -1.1982   |
| 83943 | P14079 | Q8IVH8 | -0.81929  |
| 83944 | P14079 | P17612 | -0.22179  |
| 83945 | P14079 | Q8TF27 | -0.96514  |
| 83946 | P14079 | Q92786 | -0.17006  |
| 83947 | P14079 | Q9NVC3 | -0.76941  |
| 83948 | P14079 | P02750 | -1.0628   |
| 83949 | P14079 | Q75333 | -0.77559  |
| 83950 | P14079 | P22692 | -0.96607  |
| 83951 | P14079 | P61081 | -0.55543  |
| 83952 | P14079 | Q6PFW1 | -0.41265  |
| 83953 | P14079 | Q9NPH9 | -0.3665   |
| 83954 | P14079 | Q14703 | -0.95449  |
| 83955 | P14079 | O94989 | -0.50459  |
| 83956 | P14079 | Q6ZRY4 | -0.74605  |
| 83957 | P14079 | Q5QJ74 | -0.22545  |
| 83958 | P14079 | P12429 | -0.38027  |
| 83959 | P14079 | P22307 | -0.18412  |
| 83960 | P14079 | Q8NGP9 | -1.2314   |
| 83961 | P14079 | Q9UQQ2 | -0.28599  |
| 83962 | P14079 | Q53HC5 | -0.19058  |
| 83963 | P14079 | P06731 | -0.554    |
| 83964 | P14079 | P23276 | -0.81912  |
| 83965 | P14079 | Q96MV8 | -0.83545  |
| 83966 | P14079 | Q9P2M4 | -1.3575   |
| 83967 | P14079 | P02776 | -0.75766  |
| 83968 | P14079 | Q8TD19 | -0.22741  |
| 83969 | P14079 | P34932 | -0.22409  |
| 83970 | P14079 | Q969W1 | -0.95301  |
| 83971 | P14079 | O60840 | -0.92481  |
| 83972 | P14079 | P05455 | -0.40145  |
| 83973 | P14079 | Q8NBS9 | -0.49752  |
| 83974 | P14079 | P22303 | -0.22678  |
| 83975 | P14079 | Q8N7I0 | -0.20519  |
| 83976 | P14079 | Q86Z02 | -0.22741  |
| 83977 | P14079 | Q14512 | -0.58652  |
| 83978 | P14079 | Q9NQA5 | -1.2217   |
| 83979 | P14079 | Q8NGC3 | -1.2314   |
| 83980 | P14079 | Q9UBD3 | -1.0591   |

|       |        |        |          |
|-------|--------|--------|----------|
| 83981 | P14079 | P24530 | -0.8575  |
| 83982 | P14079 | O43897 | -1.6555  |
| 83983 | P14079 | Q96RQ9 | -1.0316  |
| 83984 | P14079 | Q15111 | -0.43913 |
| 83985 | P14079 | Q8N7B9 | -0.22723 |
| 83986 | P14079 | Q9UNI1 | -1.0077  |
| 83987 | P14079 | Q5GAN3 | -0.78321 |
| 83988 | P14079 | P19099 | -0.56222 |
| 83989 | P14079 | Q96MS0 | -1.1193  |
| 83990 | P14079 | A4D256 | -0.913   |
| 83991 | P14079 | Q8IVH4 | -1.0184  |
| 83992 | P14079 | Q8NCJ5 | -0.16574 |
| 83993 | P14079 | P36776 | -0.15504 |
| 83994 | P14079 | Q6ZUK4 | -0.77815 |
| 83995 | P14079 | P53708 | -0.98041 |
| 83996 | P14079 | O95081 | -0.46258 |
| 83997 | P14079 | P57087 | -0.42866 |
| 83998 | P14079 | P61769 | -0.55086 |
| 83999 | P14079 | Q6XUX3 | -1.0174  |
| 84000 | P14079 | Q8NGS7 | -1.2314  |
| 84001 | P14079 | P26583 | -0.24415 |
| 84002 | P14079 | Q9BSW7 | -0.36763 |
| 84003 | P14079 | Q8WXH4 | -0.47402 |
| 84004 | P14079 | Q6NW40 | -0.63656 |
| 84005 | P14079 | Q9HB20 | -0.3526  |
| 84006 | P14079 | Q9BZF1 | -0.53387 |
| 84007 | P14079 | Q9NUV9 | -0.31222 |
| 84008 | P14079 | Q13564 | -0.29092 |
| 84009 | P14079 | Q9Y4A9 | -1.2314  |
| 84010 | P14079 | Q8NHE4 | -0.72842 |
| 84011 | P14079 | Q9C0H5 | -0.22905 |
| 84012 | P14079 | Q96RD2 | -1.2314  |
| 84013 | P14079 | Q9NV58 | -0.39035 |
| 84014 | P14079 | P55318 | -0.73589 |
| 84015 | P14079 | Q6P3R8 | -1.4672  |
| 84016 | P14079 | Q9Y6B6 | -0.34497 |
| 84017 | P14079 | Q8IWU5 | -0.43687 |
| 84018 | P14079 | Q15399 | -1.0125  |
| 84019 | P14079 | Q63HR2 | -0.22741 |
| 84020 | P14079 | Q15043 | -1.0433  |
| 84021 | P14079 | P36507 | -0.22898 |
| 84022 | P14079 | P49815 | -0.18403 |
| 84023 | P14079 | P12644 | -0.22741 |
| 84024 | P14079 | Q13614 | -0.21152 |
| 84025 | P14079 | Q01726 | -0.71264 |
| 84026 | P14079 | Q99983 | -1.1358  |
| 84027 | P14079 | O14514 | -1.5473  |
| 84028 | P14079 | Q8NGF7 | -1.2314  |
| 84029 | P14079 | P31944 | -0.41456 |
| 84030 | P14079 | Q8TBM8 | -0.88024 |
| 84031 | P14079 | P49683 | -1.3082  |
| 84032 | P14079 | Q96PX8 | -0.87401 |
| 84033 | P14079 | P13866 | -0.37156 |
| 84034 | P14079 | P18085 | -0.37478 |
| 84035 | P14079 | Q16513 | -0.19873 |
| 84036 | P14079 | Q9Y6M9 | -0.10346 |
| 84037 | P14079 | Q9NZJ5 | -0.46549 |
| 84038 | P14079 | O43315 | -0.67234 |
| 84039 | P14079 | Q04826 | -1       |
| 84040 | P14079 | F8VTS6 | -0.22741 |
| 84041 | P14079 | Q9BXB4 | -0.53387 |
| 84042 | P14079 | Q86VW1 | -1.2544  |
| 84043 | P14079 | Q9HAW7 | -0.97591 |
| 84044 | P14079 | Q7Z7B1 | -0.95376 |
| 84045 | P14079 | Q8TAD4 | -0.42586 |
| 84046 | P14079 | Q8WXD2 | -0.79628 |
| 84047 | P14079 | Q8N6T3 | -0.10962 |
| 84048 | P14079 | O14977 | -0.1691  |
| 84049 | P14079 | Q8WUX1 | -1.1042  |
| 84050 | P14079 | P52789 | -0.68466 |
| 84051 | P14079 | O75914 | -0.90896 |
| 84052 | P14079 | Q96C45 | -1.4433  |
| 84053 | P14079 | Q8WX77 | -0.77608 |
| 84054 | P14079 | O15455 | -0.22921 |
| 84055 | P14079 | H3BUK9 | -0.22673 |
| 84056 | P14079 | Q96L12 | -0.48027 |

|       |        |        |          |
|-------|--------|--------|----------|
| 84057 | P14079 | Q8N1F8 | -0.22721 |
| 84058 | P14079 | P35318 | -0.25822 |
| 84059 | P14079 | O75355 | -1.3269  |
| 84060 | P14079 | Q8N413 | -0.74044 |
| 84061 | P14079 | Q92947 | -0.50859 |
| 84062 | P14079 | Q9UK32 | -0.95727 |
| 84063 | P14079 | P29016 | -0.79137 |
| 84064 | P14079 | A6NGE4 | -0.22737 |
| 84065 | P14079 | Q58DX5 | -1.2264  |
| 84066 | P14079 | P61328 | -0.47196 |
| 84067 | P14079 | P41180 | -0.85082 |
| 84068 | P14079 | Q96P09 | -0.2274  |
| 84069 | P14079 | Q5SQQ9 | -0.28664 |
| 84070 | P14079 | Q8TDU5 | -1.2496  |
| 84071 | P14079 | Q96LJ7 | -0.96549 |
| 84072 | P14079 | Q8IZF2 | -1.3662  |
| 84073 | P14079 | Q8NBI6 | -1.0168  |
| 84074 | P14079 | P20160 | -0.78532 |
| 84075 | P14079 | Q9NZH8 | -0.76637 |
| 84076 | P14079 | Q9BQ51 | -1.4843  |
| 84077 | P14079 | Q8NGL0 | -1.2314  |
| 84078 | P14079 | Q8TCC7 | -0.95574 |
| 84079 | P14079 | Q9ULX5 | -0.49128 |
| 84080 | P14079 | P00918 | -0.18015 |
| 84081 | P14079 | Q5JSL3 | -0.37911 |
| 84082 | P14079 | O75923 | -0.89391 |
| 84083 | P14079 | Q13586 | -0.36569 |
| 84084 | P14079 | P15104 | -0.73737 |
| 84085 | P14079 | O60412 | -1.2314  |
| 84086 | P14079 | Q12864 | -1.0643  |
| 84087 | P14079 | Q96GS6 | -0.84039 |
| 84088 | P14079 | P10912 | -0.32077 |
| 84089 | P14079 | Q5T5C0 | -0.44863 |
| 84090 | P14079 | Q68DE3 | -0.22534 |
| 84091 | P14079 | Q9UBD9 | -0.3652  |
| 84092 | P14079 | Q30KQ5 | -0.78458 |
| 84093 | P14079 | Q5VVJ2 | -0.22735 |
| 84094 | P14079 | P42338 | -0.50086 |
| 84095 | P14079 | Q8TF76 | -0.79748 |
| 84096 | P14079 | Q5KSL6 | -1.1624  |
| 84097 | P14079 | Q8NBJ5 | -0.31963 |
| 84098 | P14079 | P63096 | -0.30154 |
| 84099 | P14079 | Q99677 | -1.5484  |
| 84100 | P14079 | Q12794 | -0.49097 |
| 84101 | P14079 | P08648 | -0.29889 |
| 84102 | P14079 | Q8NDV3 | -0.47423 |
| 84103 | P14079 | Q8NDB2 | -0.11563 |
| 84104 | P14079 | P51178 | -0.34676 |
| 84105 | P14079 | Q6PIV7 | -0.66417 |
| 84106 | P14079 | Q6PIL6 | -0.99169 |
| 84107 | P14079 | Q9UPE1 | -1.5325  |
| 84108 | P14079 | P43405 | -0.33411 |
| 84109 | P14079 | P25098 | -0.47438 |
| 84110 | P14079 | Q5VVY1 | -0.21342 |
| 84111 | P14079 | Q9NZ94 | -0.32165 |
| 84112 | P14079 | Q8IZJ0 | -0.84003 |
| 84113 | P14079 | P07858 | -0.34938 |
| 84114 | P14079 | A4QPB2 | -0.22739 |
| 84115 | P14079 | P0DJD9 | -1.3279  |
| 84116 | P14079 | O75414 | -0.655   |
| 84117 | P14079 | O43306 | -0.61153 |
| 84118 | P14079 | Q8WU17 | -0.74412 |
| 84119 | P14079 | P30044 | -0.43158 |
| 84120 | P14079 | P01566 | -0.81438 |
| 84121 | P14079 | O60507 | -0.69004 |
| 84122 | P14079 | P54829 | -1.291   |
| 84123 | P14079 | Q95980 | -0.46997 |
| 84124 | P14079 | P63218 | -0.41257 |
| 84125 | P14079 | P14652 | -0.11504 |
| 84126 | P14079 | Q8N9F7 | -0.62361 |
| 84127 | P14079 | Q9UIQ6 | -1.506   |
| 84128 | P14079 | Q8N878 | -0.75763 |
| 84129 | P14079 | P26436 | -0.58535 |
| 84130 | P14079 | Q13886 | -0.20969 |
| 84131 | P14079 | Q7Z408 | -0.97472 |
| 84132 | P14079 | P30505 | -1       |



|       |        |         |           |
|-------|--------|---------|-----------|
| 84133 | P14079 | A1X283  | -0.22741  |
| 84134 | P14079 | Q16777  | -0.92425  |
| 84135 | P14079 | Q96R47  | -1.2314   |
| 84136 | P14079 | Q969X1  | -0.78773  |
| 84137 | P14079 | A6NHG9  | -1.2314   |
| 84138 | P14079 | P01605  | -1        |
| 84139 | P14079 | Q8NH37  | -1.2314   |
| 84140 | P14079 | Q9Y4C0  | -1.0878   |
| 84141 | P14079 | P02654  | -0.55593  |
| 84142 | P14079 | Q9NZI2  | -0.68306  |
| 84143 | P14079 | O75165  | -0.22291  |
| 84144 | P14079 | Q8IYR0  | -0.021192 |
| 84145 | P14079 | Q6ZN54  | -0.38596  |
| 84146 | P14079 | Q9P2B2  | -0.22741  |
| 84147 | P14079 | Q6P179  | -1.2202   |
| 84148 | P14079 | P20701  | -0.98989  |
| 84149 | P14079 | Q8NGE0  | -1.2314   |
| 84150 | P14079 | A8MWA6  | -0.11885  |
| 84151 | P14079 | P49810  | -0.21587  |
| 84152 | P14079 | Q2TBF2  | -0.77815  |
| 84153 | P14079 | Q96S15  | -0.25368  |
| 84154 | P14079 | Q96BD6  | -0.13892  |
| 84155 | P14079 | Q96AY3  | -0.36911  |
| 84156 | P14079 | Q96QE3  | -0.71251  |
| 84157 | P14079 | Q8N8V4  | -0.30915  |
| 84158 | P14079 | O95977  | -1.4388   |
| 84159 | P14079 | Q96F10  | -0.16405  |
| 84160 | P14079 | P35613  | -0.22742  |
| 84161 | P14079 | A6NHM9  | -0.65148  |
| 84162 | P14079 | Q6UXK5  | -0.77815  |
| 84163 | P14079 | Q8WZA1  | -0.67186  |
| 84164 | P14079 | Q8IZJ3  | -1.1011   |
| 84165 | P14079 | Q9H195  | -0.82666  |
| 84166 | P14079 | Q9BZD2  | -0.89858  |
| 84167 | P14079 | Q04900  | -1.4001   |
| 84168 | P14079 | Q86VD9  | -0.9463   |
| 84169 | P14079 | Q13263  | -0.22782  |
| 84170 | P14079 | A6H8M9  | -1.2343   |
| 84171 | P14079 | P58397  | -1.4366   |
| 84172 | P14079 | Q7Z4N8  | -0.53667  |
| 84173 | P14079 | P29536  | -0.18137  |
| 84174 | P14079 | P51828  | -1.0419   |
| 84175 | P14079 | O14495  | -0.39818  |
| 84176 | P14079 | Q92604  | -0.87094  |
| 84177 | P14079 | P29373  | -0.18021  |
| 84178 | P14079 | O60479  | -0.21259  |
| 84179 | P14079 | Q9H5Z1  | -1.0332   |
| 84180 | P14079 | P15421  | -1.1905   |
| 84181 | P14079 | Q96GA7  | -0.24561  |
| 84182 | P14079 | O75951  | -0.83713  |
| 84183 | P14079 | Q6UWQ5  | -0.83713  |
| 84184 | P14079 | O00526  | -1.2323   |
| 84185 | P14079 | Q5I7T1  | -0.97371  |
| 84186 | P14079 | A6NEE1  | -0.20291  |
| 84187 | P14079 | O60566  | -0.2274   |
| 84188 | P14079 | Q8NGB6  | -1.2314   |
| 84189 | P14079 | Q9P2E7  | -1.2343   |
| 84190 | P14079 | O95661  | -0.80842  |
| 84191 | P14079 | Q99972  | -0.84009  |
| 84192 | P14079 | Q6ZLNQ3 | -0.2279   |
| 84193 | P14079 | O60488  | -0.97209  |
| 84194 | P14079 | O43491  | -0.50273  |
| 84195 | P14079 | F8WCM5  | -0.68865  |
| 84196 | P14079 | P13497  | -1.3363   |
| 84197 | P14079 | Q12846  | -0.24843  |
| 84198 | P14079 | P43353  | -0.45415  |
| 84199 | P14079 | P48023  | -0.31966  |
| 84200 | P14079 | Q9BSG5  | -0.80633  |
| 84201 | P14079 | Q19T08  | -1.3865   |
| 84202 | P14079 | Q96PL5  | -0.86273  |
| 84203 | P14079 | Q8N9L9  | -0.34463  |
| 84204 | P14079 | Q16572  | -1.2337   |
| 84205 | P14079 | O00144  | -0.97687  |
| 84206 | P14079 | Q8NGX0  | -1.2314   |
| 84207 | P14079 | P01597  | -1        |
| 84208 | P14079 | P28335  | -0.97819  |

|       |        |        |            |
|-------|--------|--------|------------|
| 84209 | P14079 | Q8NFU7 | -0.24718   |
| 84210 | P14079 | O95214 | -0.77815   |
| 84211 | P14079 | Q70HW3 | -0.26199   |
| 84212 | P14079 | O15130 | -0.92686   |
| 84213 | P14079 | O94880 | -0.26083   |
| 84214 | P14079 | Q9BSA4 | -0.4993    |
| 84215 | P14079 | Q08629 | -0.94204   |
| 84216 | P14079 | O15146 | -1.1486    |
| 84217 | P14079 | O15541 | -0.22728   |
| 84218 | P14079 | Q9NXC2 | -1.7104    |
| 84219 | P14079 | Q96BS2 | -0.22737   |
| 84220 | P14079 | Q9H2M9 | -0.72684   |
| 84221 | P14079 | P01706 | -1         |
| 84222 | P14079 | Q9Y5K3 | -0.47436   |
| 84223 | P14079 | Q6JVE5 | -0.88331   |
| 84224 | P14079 | P51797 | -1.2899    |
| 84225 | P14079 | P27930 | -0.91222   |
| 84226 | P14079 | P78540 | -0.1898    |
| 84227 | P14079 | Q96BI3 | -0.28869   |
| 84228 | P14079 | Q96KV6 | -0.77815   |
| 84229 | P14079 | Q92997 | -0.19136   |
| 84230 | P14079 | Q92847 | -0.6827    |
| 84231 | P14079 | P55259 | -1.0113    |
| 84232 | P14079 | Q8TCB6 | -1.2314    |
| 84233 | P14079 | Q8NGI3 | -1.2314    |
| 84234 | P14079 | P49590 | -0.32062   |
| 84235 | P14079 | Q15270 | -0.22636   |
| 84236 | P14079 | Q7Z6J0 | -0.22732   |
| 84237 | P14079 | Q5T1V6 | -1.0938    |
| 84238 | P14079 | Q96L50 | -0.26027   |
| 84239 | P14079 | O76064 | -0.22738   |
| 84240 | P14079 | Q9H3U7 | -1.2288    |
| 84241 | P14079 | Q92963 | -0.62192   |
| 84242 | P14079 | Q08397 | -1.196     |
| 84243 | P14079 | Q9Y4I1 | -0.17347   |
| 84244 | P14079 | Q08623 | -0.49633   |
| 84245 | P14079 | Q8TBZ3 | -0.22738   |
| 84246 | P14079 | Q14651 | -0.22747   |
| 84247 | P14079 | Q7RTX0 | -1.2139    |
| 84248 | P14079 | Q2M3T9 | -0.78465   |
| 84249 | P14079 | Q68D42 | -0.77815   |
| 84250 | P14079 | P30487 | -1         |
| 84251 | P14079 | P50747 | -0.48846   |
| 84252 | P14079 | Q5JWF2 | -0.67405   |
| 84253 | P14079 | Q8WU76 | -0.12913   |
| 84254 | P14079 | Q8NFV4 | -0.20398   |
| 84255 | P14079 | Q9H4F8 | -1.3951    |
| 84256 | P14079 | Q6ZS82 | -0.80981   |
| 84257 | P14079 | P49840 | -0.25386   |
| 84258 | P14079 | Q9UHY7 | -0.14862   |
| 84259 | P14079 | Q02246 | -0.52313   |
| 84260 | P14079 | P42574 | -0.22469   |
| 84261 | P14079 | Q9BYL1 | -0.0060406 |
| 84262 | P14079 | Q8TD20 | -0.71051   |
| 84263 | P14079 | Q96KK3 | -0.62573   |
| 84264 | P14079 | Q5FYB1 | -0.79925   |
| 84265 | P14079 | Q16617 | -1.1905    |
| 84266 | P14079 | Q8N8A6 | -0.67011   |
| 84267 | P14079 | Q8IWT6 | -0.87163   |
| 84268 | P14079 | P01116 | -0.34579   |
| 84269 | P14079 | Q9BV38 | -0.47753   |
| 84270 | P14079 | Q9UQ72 | -0.80423   |
| 84271 | P14079 | Q9Y6R1 | -0.73191   |
| 84272 | P14079 | O43570 | -0.91778   |
| 84273 | P14079 | Q2M2I8 | -1.1612    |
| 84274 | P14079 | Q5T890 | -0.16862   |
| 84275 | P14079 | Q9Y277 | -1.2248    |
| 84276 | P14079 | P48739 | -0.3375    |
| 84277 | P14079 | P16066 | -1.2081    |
| 84278 | P14079 | P19957 | -0.8935    |
| 84279 | P14079 | P61278 | -0.82326   |
| 84280 | P14079 | Q15695 | -0.39679   |
| 84281 | P14079 | Q9H9A6 | -0.22851   |
| 84282 | P14079 | P54764 | -0.73951   |
| 84283 | P14079 | O95157 | -0.92406   |
| 84284 | P14079 | Q9Y485 | -0.22742   |

|       |        |        |          |
|-------|--------|--------|----------|
| 84285 | P14079 | Q8TDN2 | -1.0843  |
| 84286 | P14079 | P40198 | -0.77815 |
| 84287 | P14079 | Q9BRP0 | -0.21709 |
| 84288 | P14079 | P60568 | -0.43477 |
| 84289 | P14079 | Q9UBM4 | -0.97515 |
| 84290 | P14079 | Q8TC12 | -1.4344  |
| 84291 | P14079 | Q96FS4 | -0.20702 |
| 84292 | P14079 | Q70EL2 | -0.79741 |
| 84293 | P14079 | Q86VH5 | -0.77815 |
| 84294 | P14079 | P29376 | -1.8137  |
| 84295 | P14079 | Q15822 | -1.0411  |
| 84296 | P14079 | P80098 | -0.88326 |
| 84297 | P14079 | Q6ZNB7 | -1.1115  |
| 84298 | P14079 | P02818 | -0.45897 |
| 84299 | P14079 | O95007 | -1.2314  |
| 84300 | P14079 | P21741 | -0.90878 |
| 84301 | P14079 | P22894 | -1.4221  |
| 84302 | P14079 | O60512 | -0.41983 |
| 84303 | P14079 | Q86V24 | -0.96038 |
| 84304 | P14079 | P49768 | -0.2271  |
| 84305 | P14079 | Q13639 | -1.1032  |
| 84306 | P14079 | Q9Y5G1 | -1.2343  |
| 84307 | P14079 | P24158 | -0.37143 |
| 84308 | P14079 | P30512 | -0.93319 |
| 84309 | P14079 | Q9UBC0 | -0.22719 |
| 84310 | P14079 | P01744 | -1       |
| 84311 | P14079 | Q8IZF7 | -1.3662  |
| 84312 | P14079 | P04054 | -0.57101 |
| 84313 | P14079 | Q8WZ94 | -1.2314  |
| 84314 | P14079 | Q96NY8 | -0.69889 |
| 84315 | P14079 | P04090 | -0.78376 |
| 84316 | P14079 | Q9UHK6 | -0.43587 |
| 84317 | P14079 | P51798 | -1.4415  |
| 84318 | P14079 | Q8J025 | -1.1574  |
| 84319 | P14079 | A6NDA9 | -0.77815 |
| 84320 | P14079 | P30491 | -1       |
| 84321 | P14079 | P59536 | -1.1233  |
| 84322 | P14079 | Q9NP72 | -1.6141  |
| 84323 | P14079 | Q71RG4 | -0.77815 |
| 84324 | P14079 | Q15243 | -0.42458 |
| 84325 | P14079 | P21728 | -0.33762 |
| 84326 | P14079 | Q8WWZ8 | -0.22741 |
| 84327 | P14079 | Q0IIM8 | -1.5115  |
| 84328 | P14079 | Q9P275 | -0.5228  |
| 84329 | P14079 | Q75159 | -0.22735 |
| 84330 | P14079 | Q9H252 | -1.1453  |
| 84331 | P14079 | Q5SGD2 | -0.73834 |
| 84332 | P14079 | Q8N468 | -0.87582 |
| 84333 | P14079 | Q8N7C7 | -0.78242 |
| 84334 | P14079 | P09211 | -0.21302 |
| 84335 | P14079 | Q96PE2 | -0.35288 |
| 84336 | P14079 | A4D0S4 | -1.2746  |
| 84337 | P14079 | Q8NGX5 | -1.2314  |
| 84338 | P14079 | P80188 | -0.37171 |
| 84339 | P14079 | Q75127 | -0.16171 |
| 84340 | P14079 | P51157 | -1.3615  |
| 84341 | P14079 | Q8NGQ1 | -1.2314  |
| 84342 | P14079 | Q15661 | -0.99616 |
| 84343 | P14079 | Q8WWW8 | -0.22727 |
| 84344 | P14079 | Q07817 | -0.22726 |
| 84345 | P14079 | Q8N370 | -1.1719  |
| 84346 | P14079 | P53597 | -0.87144 |
| 84347 | P14079 | Q5TGI4 | -0.22656 |
| 84348 | P14079 | Q9HC21 | -0.70963 |
| 84349 | P14079 | Q06033 | -0.80243 |
| 84350 | P14079 | Q9HCE9 | -1.0527  |
| 84351 | P14079 | Q8N9B4 | -0.2274  |
| 84352 | P14079 | P59541 | -1.1233  |
| 84353 | P14079 | Q9NY25 | -0.75852 |
| 84354 | P14079 | P09341 | -1.0711  |
| 84355 | P14079 | Q8NG97 | -1.2314  |
| 84356 | P14079 | Q75T13 | -0.4919  |
| 84357 | P14079 | P62820 | -0.71862 |
| 84358 | P14079 | A8MWX3 | -0.25046 |
| 84359 | P14079 | Q8IZD2 | -0.22755 |
| 84360 | P14079 | P20061 | -0.88322 |

|       |        |        |           |
|-------|--------|--------|-----------|
| 84361 | P14079 | Q9BRI3 | -0.77961  |
| 84362 | P14079 | P16188 | -0.91994  |
| 84363 | P14079 | Q9Y334 | -0.88231  |
| 84364 | P14079 | Q3SXY7 | -0.77815  |
| 84365 | P14079 | A0PJZ0 | -0.2274   |
| 84366 | P14079 | A2A2Y4 | -0.48613  |
| 84367 | P14079 | Q07617 | -0.88887  |
| 84368 | P14079 | P19823 | -0.80243  |
| 84369 | P14079 | Q96T83 | -0.70687  |
| 84370 | P14079 | Q96P69 | -1.3119   |
| 84371 | P14079 | Q9H1V8 | -0.95209  |
| 84372 | P14079 | Q9BXJ5 | -1.0376   |
| 84373 | P14079 | O95352 | -0.19305  |
| 84374 | P14079 | Q8IZU9 | -0.86832  |
| 84375 | P14079 | Q9UMR5 | -0.3106   |
| 84376 | P14079 | Q9Y5W9 | -0.29746  |
| 84377 | P14079 | Q969J5 | -0.71272  |
| 84378 | P14079 | Q9Y3C6 | -0.32336  |
| 84379 | P14079 | Q9UPT9 | -0.44035  |
| 84380 | P14079 | P05019 | -0.23394  |
| 84381 | P14079 | Q8N5T2 | -1.4902   |
| 84382 | P14079 | Q6IMI6 | -0.34434  |
| 84383 | P14079 | Q9Y467 | -0.22746  |
| 84384 | P14079 | P07585 | -0.63902  |
| 84385 | P14079 | Q9Y5S2 | -0.82191  |
| 84386 | P14079 | Q9UPT6 | -0.22348  |
| 84387 | P14079 | Q9UJA2 | -0.73458  |
| 84388 | P14079 | Q6XE24 | -0.61874  |
| 84389 | P14079 | Q13790 | -1.0082   |
| 84390 | P14079 | Q16790 | -0.54358  |
| 84391 | P14079 | Q8N4S9 | -0.72648  |
| 84392 | P14079 | P08138 | -0.33697  |
| 84393 | P14079 | P01620 | -1        |
| 84394 | P14079 | Q96MV1 | -0.80224  |
| 84395 | P14079 | Q8NH76 | -1.2314   |
| 84396 | P14079 | O75325 | -1.1485   |
| 84397 | P14079 | Q8NGQ4 | -1.2314   |
| 84398 | P14079 | Q96D71 | -0.22231  |
| 84399 | P14079 | Q93084 | -0.9391   |
| 84400 | P14079 | O43312 | -0.10021  |
| 84401 | P14079 | P39877 | -0.75483  |
| 84402 | P14079 | P98173 | -0.88231  |
| 84403 | P14079 | O00418 | -1.121    |
| 84404 | P14079 | Q0VAM2 | -0.6192   |
| 84405 | P14079 | O95096 | -0.25218  |
| 84406 | P14079 | P08574 | -0.38485  |
| 84407 | P14079 | Q13454 | -0.86444  |
| 84408 | P14079 | Q6J9G0 | -1.9716   |
| 84409 | P14079 | P16284 | -0.57624  |
| 84410 | P14079 | Q14515 | -1.2169   |
| 84411 | P14079 | Q9NP56 | -0.3836   |
| 84412 | P14079 | Q8NC42 | -1.0993   |
| 84413 | P14079 | Q9UPM6 | -0.27379  |
| 84414 | P14079 | O95393 | -0.23999  |
| 84415 | P14079 | Q9BZV3 | -1.013    |
| 84416 | P14079 | P47902 | -0.16897  |
| 84417 | P14079 | Q9H0I9 | -0.37634  |
| 84418 | P14079 | Q86SQ6 | -1.1989   |
| 84419 | P14079 | Q5TEJ8 | -0.41049  |
| 84420 | P14079 | Q5JPI9 | -0.21342  |
| 84421 | P14079 | Q96JA3 | -0.2269   |
| 84422 | P14079 | P28332 | -0.7074   |
| 84423 | P14079 | P22083 | -0.60463  |
| 84424 | P14079 | O60830 | -0.33882  |
| 84425 | P14079 | O95998 | -0.80083  |
| 84426 | P14079 | Q9NRD8 | -0.90031  |
| 84427 | P14079 | P05111 | -0.52616  |
| 84428 | P14079 | Q9NYQ6 | -1.1108   |
| 84429 | P14079 | Q8NAA4 | -0.22775  |
| 84430 | P14079 | Q9Y5H2 | -1.2343   |
| 84431 | P14079 | O15232 | -0.54382  |
| 84432 | P14079 | Q12792 | -0.099387 |
| 84433 | P14079 | P02751 | -0.50686  |
| 84434 | P14079 | Q9UIK5 | -1.3933   |
| 84435 | P14079 | Q9NNZ3 | -0.62939  |
| 84436 | P14079 | Q96MA6 | -0.78758  |

|       |        |        |          |
|-------|--------|--------|----------|
| 84437 | P14079 | P05000 | -0.7166  |
| 84438 | P14079 | P01222 | -0.77765 |
| 84439 | P14079 | P12814 | -0.31968 |
| 84440 | P14079 | Q9UBN1 | -1.247   |
| 84441 | P14079 | P12034 | -0.76339 |
| 84442 | P14079 | Q9H9B4 | -0.8383  |
| 84443 | P14079 | O14795 | -0.22741 |
| 84444 | P14079 | Q9ULE3 | -0.11919 |
| 84445 | P14079 | P98161 | -0.25753 |
| 84446 | P14079 | A6QL63 | -0.90557 |
| 84447 | P14079 | Q8NFL0 | -0.60558 |
| 84448 | P14079 | Q8IUU5 | -0.85905 |
| 84449 | P14079 | P21246 | -0.77767 |
| 84450 | P14079 | Q8TCT7 | -0.44691 |
| 84451 | P14079 | Q9BYC5 | -0.45796 |
| 84452 | P14079 | Q8IZE3 | -0.2273  |
| 84453 | P14079 | Q13480 | -0.22704 |
| 84454 | P14079 | P78380 | -1.6384  |
| 84455 | P14079 | P20309 | -0.75786 |
| 84456 | P14079 | Q63HN8 | -1.107   |
| 84457 | P14079 | Q9H9P8 | -0.74057 |
| 84458 | P14079 | Q9UBY0 | -1.3082  |
| 84459 | P14079 | Q96EG1 | -0.54324 |
| 84460 | P14079 | Q01638 | -0.92638 |
| 84461 | P14079 | P07384 | -0.32136 |
| 84462 | P14079 | O75553 | -0.46574 |
| 84463 | P14079 | Q9BX84 | -1.1485  |
| 84464 | P14079 | Q43895 | -0.92656 |
| 84465 | P14079 | Q7Z6K4 | -0.36209 |
| 84466 | P14079 | Q96DH6 | -0.61155 |
| 84467 | P14079 | Q8NB16 | -0.22741 |
| 84468 | P14079 | Q9UIW0 | -0.22687 |
| 84469 | P14079 | Q8NGY0 | -1.2314  |
| 84470 | P14079 | Q5T197 | -0.78242 |
| 84471 | P14079 | Q6P9H5 | -1.0029  |
| 84472 | P14079 | P41732 | -0.68501 |
| 84473 | P14079 | O14756 | -1.0837  |
| 84474 | P14079 | Q6IF00 | -1.2314  |
| 84475 | P14079 | A2VCK2 | -0.33597 |
| 84476 | P14079 | Q9H7B4 | -0.22661 |
| 84477 | P14079 | Q8NGV0 | -1.2314  |
| 84478 | P14079 | Q96KG7 | -0.92911 |
| 84479 | P14079 | P48740 | -0.96554 |
| 84480 | P14079 | Q8NGN7 | -1.2314  |
| 84481 | P14079 | Q8TCU3 | -0.84805 |
| 84482 | P14079 | Q9Y4X1 | -0.8651  |
| 84483 | P14079 | A6NIK2 | -0.23022 |
| 84484 | P14079 | Q8N1Q1 | -0.12728 |
| 84485 | P14079 | Q9Y6N3 | -0.96495 |
| 84486 | P14079 | Q9NPH5 | -0.85393 |
| 84487 | P14079 | P18433 | -1.4782  |
| 84488 | P14079 | Q15434 | -0.58314 |
| 84489 | P14079 | Q16763 | -0.60189 |
| 84490 | P14079 | P29460 | -0.26894 |
| 84491 | P14079 | Q13588 | -0.22741 |
| 84492 | P14079 | Q8N7U6 | -0.22815 |
| 84493 | P14079 | Q8TE56 | -1.4366  |
| 84494 | P14079 | A6NI73 | -1.3486  |
| 84495 | P14079 | Q3C1W6 | -0.36051 |
| 84496 | P14079 | Q6PEW0 | -0.83609 |
| 84497 | P14079 | P33981 | -1.0868  |
| 84498 | P14079 | Q01954 | -0.21951 |
| 84499 | P14079 | P04000 | -1.4121  |
| 84500 | P14079 | Q13641 | -0.98404 |
| 84501 | P14079 | O75367 | -0.36703 |
| 84502 | P14079 | Q5VTY9 | -1.9535  |
| 84503 | P14079 | Q6ZU15 | -0.2214  |
| 84504 | P14079 | A7MBM2 | -0.73639 |
| 84505 | P14079 | Q9H9P5 | -0.22737 |
| 84506 | P14079 | Q8IY17 | -0.79395 |
| 84507 | P14079 | P84996 | -0.67782 |
| 84508 | P14079 | Q5JX69 | -0.77815 |
| 84509 | P14079 | O00330 | -0.15727 |
| 84510 | P14079 | Q8NCL4 | -0.5904  |
| 84511 | P14079 | P04632 | -0.25061 |
| 84512 | P14079 | O95450 | -1.3744  |

|       |        |        |          |
|-------|--------|--------|----------|
| 84513 | P14079 | Q8WXX1 | -0.47402 |
| 84514 | P14079 | P19235 | -1.3055  |
| 84515 | P14079 | Q96II8 | -0.80633 |
| 84516 | P14079 | O43665 | -0.50189 |
| 84517 | P14079 | Q8N7X8 | -0.77815 |
| 84518 | P14079 | Q7Z4W2 | -0.83713 |
| 84519 | P14079 | A6NNS2 | -1.5449  |
| 84520 | P14079 | Q9UJ99 | -1.2343  |
| 84521 | P14079 | Q765I0 | -0.78571 |
| 84522 | P14079 | Q3SXY8 | -0.68292 |
| 84523 | P14079 | Q9NR96 | -0.49827 |
| 84524 | P14079 | P16442 | -1.0831  |
| 84525 | P14079 | Q92503 | -0.68501 |
| 84526 | P14079 | P25092 | -1.0716  |
| 84527 | P14079 | Q86V86 | -0.52541 |
| 84528 | P14079 | Q6IAN0 | -1.6191  |
| 84529 | P14079 | Q6IQ26 | -0.22273 |
| 84530 | P14079 | P51553 | -0.34019 |
| 84531 | P14079 | O95861 | -0.34755 |
| 84532 | P14079 | P68402 | -0.41347 |
| 84533 | P14079 | P54578 | -0.4679  |
| 84534 | P14079 | Q6UXR4 | -0.76468 |
| 84535 | P14079 | O00750 | -0.3938  |
| 84536 | P14079 | P54284 | -0.39663 |
| 84537 | P14079 | Q8NDZ4 | -0.6615  |
| 84538 | P14079 | P24387 | -0.26465 |
| 84539 | P14079 | Q6IMI4 | -0.31065 |
| 84540 | P14079 | Q8NGU9 | -1.3154  |
| 84541 | P14079 | P05997 | -1.0534  |
| 84542 | P14079 | Q2M2D7 | -0.90849 |
| 84543 | P14079 | Q8N394 | -0.74356 |
| 84544 | P14079 | Q8NDX5 | -0.36395 |
| 84545 | P14079 | Q95264 | -1.3232  |
| 84546 | P14079 | P23352 | -0.88962 |
| 84547 | P14079 | O43820 | -0.75953 |
| 84548 | P14079 | O75317 | -0.54618 |
| 84549 | P14079 | P05556 | -0.2334  |
| 84550 | P14079 | Q8NGF9 | -1.2314  |
| 84551 | P14079 | Q2VIR3 | -0.74383 |
| 84552 | P14079 | Q8TDX6 | -0.47689 |
| 84553 | P14079 | P10768 | -0.1205  |
| 84554 | P14079 | P16389 | -1.0331  |
| 84555 | P14079 | Q13275 | -1.0764  |
| 84556 | P14079 | Q9BVX2 | -0.9169  |
| 84557 | P14079 | Q17RB8 | -0.38744 |
| 84558 | P14079 | P07306 | -0.46174 |
| 84559 | P14079 | Q9NPC2 | -1.3475  |
| 84560 | P14079 | P35499 | -1.2671  |
| 84561 | P14079 | Q02338 | -0.46657 |
| 84562 | P14079 | Q8NEE8 | -0.22734 |
| 84563 | P14079 | Q7Z2Q7 | -0.77815 |
| 84564 | P14079 | P30872 | -1.3723  |
| 84565 | P14079 | A6NC57 | -0.2274  |
| 84566 | P14079 | P05062 | -0.20249 |
| 84567 | P14079 | P02748 | -1.2144  |
| 84568 | P14079 | P43626 | -0.61561 |
| 84569 | P14079 | P08217 | -1.4766  |
| 84570 | P14079 | O43164 | -0.39264 |
| 84571 | P14079 | P58215 | -0.41866 |
| 84572 | P14079 | Q8NER5 | -1.1659  |
| 84573 | P14079 | Q96T66 | -0.48079 |
| 84574 | P14079 | Q9NYY1 | -0.84444 |
| 84575 | P14079 | Q9P107 | -0.42256 |
| 84576 | P14079 | Q8IUL8 | -0.86072 |
| 84577 | P14079 | Q5DT21 | -0.21751 |
| 84578 | P14079 | Q9UQ07 | -1.2082  |
| 84579 | P14079 | Q9H329 | -0.3114  |
| 84580 | P14079 | Q9BW91 | -0.21718 |
| 84581 | P14079 | Q96NG3 | -0.21471 |
| 84582 | P14079 | Q9HBW9 | -1.3439  |
| 84583 | P14079 | Q5VY80 | -0.49123 |
| 84584 | P14079 | P34947 | -0.71644 |
| 84585 | P14079 | Q9NRY6 | -0.56498 |
| 84586 | P14079 | Q8NGL7 | -1.2314  |
| 84587 | P14079 | Q6PID8 | -0.22695 |
| 84588 | P14079 | Q6UXV0 | -0.95173 |

|       |        |        |           |
|-------|--------|--------|-----------|
| 84589 | P14079 | Q8TEA7 | -1.159    |
| 84590 | P14079 | P54849 | -1.2872   |
| 84591 | P14079 | Q6NUM6 | -1.0685   |
| 84592 | P14079 | Q9BXM9 | -0.26849  |
| 84593 | P14079 | P01903 | -0.82856  |
| 84594 | P14079 | Q8N6Q1 | -0.77815  |
| 84595 | P14079 | P02743 | -0.73218  |
| 84596 | P14079 | O60271 | -0.22906  |
| 84597 | P14079 | P43251 | -0.74324  |
| 84598 | P14079 | O14543 | -0.22741  |
| 84599 | P14079 | P19634 | -0.49697  |
| 84600 | P14079 | Q9UPS6 | -0.41302  |
| 84601 | P14079 | Q15761 | -1.0276   |
| 84602 | P14079 | P27144 | -0.76982  |
| 84603 | P14079 | Q9H2H0 | -0.06461  |
| 84604 | P14079 | P12277 | -0.47828  |
| 84605 | P14079 | P47888 | -1.2314   |
| 84606 | P14079 | P26717 | -0.62338  |
| 84607 | P14079 | Q8WXX0 | -0.39615  |
| 84608 | P14079 | Q9UHL0 | -0.82887  |
| 84609 | P14079 | P51681 | -0.37347  |
| 84610 | P14079 | Q9UNX9 | -1.2604   |
| 84611 | P14079 | P51685 | -1.4772   |
| 84612 | P14079 | P30566 | -0.13072  |
| 84613 | P14079 | Q7Z7L7 | -0.38286  |
| 84614 | P14079 | O14626 | -1.2581   |
| 84615 | P14079 | P48052 | -1.2297   |
| 84616 | P14079 | P08118 | -0.76184  |
| 84617 | P14079 | Q8NGL1 | -1.2314   |
| 84618 | P14079 | Q9P2P5 | -0.72813  |
| 84619 | P14079 | Q86XP0 | -0.45722  |
| 84620 | P14079 | O95479 | -0.90087  |
| 84621 | P14079 | Q86SG3 | -1.0052   |
| 84622 | P14079 | Q04756 | -1.3392   |
| 84623 | P14079 | Q9P2J9 | -0.18159  |
| 84624 | P14079 | Q15147 | -0.22604  |
| 84625 | P14079 | Q53GG5 | -0.2274   |
| 84626 | P14079 | Q9UEW3 | -1.0271   |
| 84627 | P14079 | Q02156 | -0.29124  |
| 84628 | P14079 | Q9HB40 | -1.0823   |
| 84629 | P14079 | P78330 | -0.33006  |
| 84630 | P14079 | Q9H1Z8 | -0.90176  |
| 84631 | P14079 | Q13591 | -1.2334   |
| 84632 | P14079 | Q4VNC1 | -1.1309   |
| 84633 | P14079 | Q9NP90 | -0.55712  |
| 84634 | P14079 | Q3ZCU0 | -0.18967  |
| 84635 | P14079 | Q7L5Y1 | -0.38888  |
| 84636 | P14079 | P00439 | -0.52384  |
| 84637 | P14079 | Q96SJ8 | -0.77815  |
| 84638 | P14079 | P62068 | -0.5565   |
| 84639 | P14079 | Q7Z2Y8 | -0.46209  |
| 84640 | P14079 | Q9Y575 | -0.47402  |
| 84641 | P14079 | Q6IF99 | -1.2314   |
| 84642 | P14079 | O75628 | -1.1623   |
| 84643 | P14079 | O14904 | -1.0064   |
| 84644 | P14079 | O94782 | -0.48359  |
| 84645 | P14079 | P43088 | -1.6175   |
| 84646 | P14079 | Q8NF50 | -0.30275  |
| 84647 | P14079 | P98164 | -0.29375  |
| 84648 | P14079 | Q9Y3P9 | -0.24172  |
| 84649 | P14079 | P10721 | -0.3553   |
| 84650 | P14079 | O00241 | -0.79181  |
| 84651 | P14079 | Q9P2E9 | -0.49688  |
| 84652 | P14079 | Q86V40 | -1.4194   |
| 84653 | P14079 | Q86Y13 | -0.24681  |
| 84654 | P14079 | Q8IZ57 | -0.89114  |
| 84655 | P14079 | Q7Z478 | -0.46088  |
| 84656 | P14079 | P03951 | -0.99153  |
| 84657 | P14079 | Q9Y215 | -0.26683  |
| 84658 | P14079 | O00754 | -0.43641  |
| 84659 | P14079 | Q5T2L2 | -0.32905  |
| 84660 | P14079 | Q13232 | -0.67546  |
| 84661 | P14079 | Q9Y466 | -0.22792  |
| 84662 | P14079 | Q99798 | -0.083614 |
| 84663 | P14079 | Q96A05 | -0.31126  |
| 84664 | P14079 | Q6ZSM3 | -1.0598   |

|       |        |        |           |
|-------|--------|--------|-----------|
| 84665 | P14079 | Q99424 | -0.77845  |
| 84666 | P14079 | P09488 | -0.21821  |
| 84667 | P14079 | O14981 | -0.59532  |
| 84668 | P14079 | P46721 | -1.0848   |
| 84669 | P14079 | Q4KWH8 | -0.28956  |
| 84670 | P14079 | Q8ND82 | -0.2268   |
| 84671 | P14079 | Q9H7X0 | -0.34806  |
| 84672 | P14079 | P47869 | -0.83033  |
| 84673 | P14079 | Q8NG68 | -0.81596  |
| 84674 | P14079 | P01743 | -1        |
| 84675 | P14079 | Q07960 | -0.24655  |
| 84676 | P14079 | Q8NGC0 | -1.2314   |
| 84677 | P14079 | O95206 | -1.2014   |
| 84678 | P14079 | Q86UN2 | -0.48067  |
| 84679 | P14079 | Q71UI9 | -1        |
| 84680 | P14079 | Q9BXJ8 | -0.80224  |
| 84681 | P14079 | Q693B1 | -0.12543  |
| 84682 | P14079 | Q8TB92 | -0.24263  |
| 84683 | P14079 | Q9HB14 | -1.2622   |
| 84684 | P14079 | P60852 | -1.4568   |
| 84685 | P14079 | Q8TCP9 | -0.75027  |
| 84686 | P14079 | P51451 | -1.5641   |
| 84687 | P14079 | Q14791 | -0.54099  |
| 84688 | P14079 | P20273 | -0.79204  |
| 84689 | P14079 | O43414 | -0.53893  |
| 84690 | P14079 | Q9HCR9 | -0.2661   |
| 84691 | P14079 | Q8WWZ7 | -1.0513   |
| 84692 | P14079 | P32245 | -0.59654  |
| 84693 | P14079 | Q96N67 | -0.75254  |
| 84694 | P14079 | Q9NSI8 | -0.17218  |
| 84695 | P14079 | Q6KC79 | -0.090961 |
| 84696 | P14079 | O43660 | -0.23769  |
| 84697 | P14079 | Q9H5J0 | -0.22731  |
| 84698 | P14079 | O14817 | -1.1602   |
| 84699 | P14079 | P04438 | -1        |
| 84700 | P14079 | A7E2Y1 | -0.68372  |
| 84701 | P14079 | Q9H2A3 | -0.2311   |
| 84702 | P14079 | Q96G42 | -0.20396  |
| 84703 | P14079 | O95772 | -0.71816  |
| 84704 | P14079 | Q15229 | -0.6966   |
| 84705 | P14079 | Q9Y5P1 | -1.2314   |
| 84706 | P14079 | Q01970 | -0.24435  |
| 84707 | P14079 | Q8NH56 | -1.2314   |
| 84708 | P14079 | Q6NUK1 | -0.79732  |
| 84709 | P14079 | Q96IK0 | -0.95069  |
| 84710 | P14079 | Q08AI6 | -1.0142   |
| 84711 | P14079 | Q9UGI8 | -0.083682 |
| 84712 | P14079 | P40238 | -1.1921   |
| 84713 | P14079 | Q15113 | -1.3879   |
| 84714 | P14079 | Q00767 | -1.164    |
| 84715 | P14079 | Q8TBH0 | -0.20705  |
| 84716 | P14079 | Q75908 | -0.90599  |
| 84717 | P14079 | P01608 | -1        |
| 84718 | P14079 | O43307 | -0.41894  |
| 84719 | P14079 | P25325 | -0.17221  |
| 84720 | P14079 | Q6U841 | -0.99485  |
| 84721 | P14079 | P56597 | -0.67772  |
| 84722 | P14079 | P01772 | -1        |
| 84723 | P14079 | P48960 | -2.0593   |
| 84724 | P14079 | Q9P121 | -0.22828  |
| 84725 | P14079 | Q8N4C8 | -0.7119   |
| 84726 | P14079 | Q60882 | -1.0108   |
| 84727 | P14079 | Q96MM7 | -0.77863  |
| 84728 | P14079 | Q9HBL8 | -0.14974  |
| 84729 | P14079 | Q8NGL2 | -1.2314   |
| 84730 | P14079 | Q9UM19 | -0.34107  |
| 84731 | P14079 | P0CW00 | -0.6149   |
| 84732 | P14079 | P29965 | -1.089    |
| 84733 | P14079 | Q8TDG4 | -0.61132  |
| 84734 | P14079 | Q96HU8 | -1.4441   |
| 84735 | P14079 | Q13451 | -0.51122  |
| 84736 | P14079 | Q9UGC6 | -0.4832   |
| 84737 | P14079 | Q9ULK6 | -0.78242  |
| 84738 | P14079 | P42126 | -0.41452  |
| 84739 | P14079 | Q9ULC3 | -1.1205   |
| 84740 | P14079 | Q9HB90 | -0.66776  |



|       |        |        |           |
|-------|--------|--------|-----------|
| 84741 | P14079 | P01037 | -0.94572  |
| 84742 | P14079 | Q15546 | -1.0341   |
| 84743 | P14079 | A6NDG6 | -0.37671  |
| 84744 | P14079 | Q14CN2 | -1.638    |
| 84745 | P14079 | A0PK00 | -0.80224  |
| 84746 | P14079 | Q76KP1 | -0.70356  |
| 84747 | P14079 | Q96CX6 | -0.22922  |
| 84748 | P14079 | Q96JP9 | -1.2956   |
| 84749 | P14079 | P17066 | -0.63582  |
| 84750 | P14079 | Q8N3F9 | -0.77815  |
| 84751 | P14079 | Q9NYQ3 | -0.44172  |
| 84752 | P14079 | Q8IU80 | -0.98927  |
| 84753 | P14079 | Q92794 | -0.75796  |
| 84754 | P14079 | P49903 | -1.3277   |
| 84755 | P14079 | Q6ZS86 | -0.98845  |
| 84756 | P14079 | Q94955 | -0.57247  |
| 84757 | P14079 | Q9UPU7 | -1.0037   |
| 84758 | P14079 | O75600 | -0.22301  |
| 84759 | P14079 | Q96QU1 | -1.5445   |
| 84760 | P14079 | Q9NR34 | -0.59637  |
| 84761 | P14079 | P54819 | -0.81315  |
| 84762 | P14079 | Q5GFL6 | -0.94535  |
| 84763 | P14079 | Q6UXX5 | -0.81006  |
| 84764 | P14079 | Q643R3 | -0.94746  |
| 84765 | P14079 | Q16555 | -0.17651  |
| 84766 | P14079 | Q86YC3 | -0.77815  |
| 84767 | P14079 | Q96IW7 | -0.44519  |
| 84768 | P14079 | P01133 | -0.82626  |
| 84769 | P14079 | O15197 | -1.9327   |
| 84770 | P14079 | Q8IZY2 | -0.98176  |
| 84771 | P14079 | Q6PML9 | -0.64549  |
| 84772 | P14079 | Q8TBP0 | -1.4902   |
| 84773 | P14079 | Q16773 | -0.19864  |
| 84774 | P14079 | Q9BYW3 | -0.74495  |
| 84775 | P14079 | Q401N2 | -1.0134   |
| 84776 | P14079 | O14793 | -0.38225  |
| 84777 | P14079 | P15813 | -0.68613  |
| 84778 | P14079 | A6NGY5 | -1.2314   |
| 84779 | P14079 | Q8IWB6 | -0.4435   |
| 84780 | P14079 | Q07812 | -0.22729  |
| 84781 | P14079 | P55263 | -0.70526  |
| 84782 | P14079 | Q9Y2K7 | -0.22366  |
| 84783 | P14079 | Q9H1X3 | -0.88024  |
| 84784 | P14079 | P21359 | -0.22495  |
| 84785 | P14079 | Q6ZRI0 | -0.84775  |
| 84786 | P14079 | P51800 | -1.1127   |
| 84787 | P14079 | Q9NRR6 | -0.22399  |
| 84788 | P14079 | P47900 | -0.87226  |
| 84789 | P14079 | Q2M1P5 | -0.26828  |
| 84790 | P14079 | Q8NDF8 | -0.17016  |
| 84791 | P14079 | Q13574 | -0.22742  |
| 84792 | P14079 | Q14005 | -0.21742  |
| 84793 | P14079 | Q9UKB1 | -0.51206  |
| 84794 | P14079 | Q8NE09 | -0.71709  |
| 84795 | P14079 | Q8IX01 | -0.073622 |
| 84796 | P14079 | Q9NZH0 | -0.76044  |
| 84797 | P14079 | P14060 | -1.0319   |
| 84798 | P14079 | P50213 | -0.16197  |
| 84799 | P14079 | Q9UNW9 | -0.15558  |
| 84800 | P14079 | Q92914 | -0.6974   |
| 84801 | P14079 | P01615 | -1        |
| 84802 | P14079 | Q9NY84 | -0.52978  |
| 84803 | P14079 | Q6UX40 | -1.001    |
| 84804 | P14079 | Q9H756 | -0.77815  |
| 84805 | P14079 | P56851 | -0.86212  |
| 84806 | P14079 | Q6ZST2 | -0.16722  |
| 84807 | P14079 | O60285 | -0.58098  |
| 84808 | P14079 | O75311 | -1.006    |
| 84809 | P14079 | P09430 | -0.76502  |
| 84810 | P14079 | Q8N4E4 | -0.15595  |
| 84811 | P14079 | Q9Y2G3 | -0.80779  |
| 84812 | P14079 | Q8WXR4 | -0.97008  |
| 84813 | P14079 | O14807 | -1.5015   |
| 84814 | P14079 | Q99963 | -0.22428  |
| 84815 | P14079 | Q9P2K6 | -0.21891  |
| 84816 | P14079 | P01817 | -1        |

|       |        |        |          |
|-------|--------|--------|----------|
| 84817 | P14079 | C9JTQ0 | -0.22742 |
| 84818 | P14079 | Q8IY49 | -0.5251  |
| 84819 | P14079 | O60635 | -0.93889 |
| 84820 | P14079 | Q13671 | -0.28123 |
| 84821 | P14079 | Q99758 | -1.4137  |
| 84822 | P14079 | Q92765 | -0.79085 |
| 84823 | P14079 | Q9UGJ0 | -0.72006 |
| 84824 | P14079 | Q12889 | -0.307   |
| 84825 | P14079 | A1L4K1 | -0.22744 |
| 84826 | P14079 | Q6PK57 | -0.36821 |
| 84827 | P14079 | P15586 | -0.16881 |
| 84828 | P14079 | P08697 | -0.1049  |
| 84829 | P14079 | Q9UBV2 | -0.23135 |
| 84830 | P14079 | Q8NFW5 | -0.1912  |
| 84831 | P14079 | O43147 | -0.90849 |
| 84832 | P14079 | Q9NRM6 | -1.4954  |
| 84833 | P14079 | Q8NCB2 | -0.68666 |
| 84834 | P14079 | Q9H2H9 | -1.1283  |
| 84835 | P14079 | Q6P6B7 | -0.22744 |
| 84836 | P14079 | Q9BXT2 | -0.99551 |
| 84837 | P14079 | Q9Y5P4 | -0.2272  |
| 84838 | P14079 | P98160 | -1.0542  |
| 84839 | P14079 | P09603 | -0.60847 |
| 84840 | P14079 | Q7L211 | -0.79208 |
| 84841 | P14079 | Q13606 | -1.2314  |
| 84842 | P14079 | P04233 | -0.46564 |
| 84843 | P14079 | P23468 | -0.76223 |
| 84844 | P14079 | Q9BXN2 | -0.51728 |
| 84845 | P14079 | P52566 | -0.67421 |
| 84846 | P14079 | P18465 | -1       |
| 84847 | P14079 | O43426 | -0.41468 |
| 84848 | P14079 | Q8TDU6 | -1.3154  |
| 84849 | P14079 | P09471 | -0.77519 |
| 84850 | P14079 | Q9Y241 | -0.57353 |
| 84851 | P14079 | P12314 | -0.70202 |
| 84852 | P14079 | P52798 | -0.57165 |
| 84853 | P14079 | P49641 | -0.50923 |
| 84854 | P14079 | Q86VW2 | -0.52602 |
| 84855 | P14079 | P48169 | -0.99964 |
| 84856 | P14079 | Q8NHQ9 | -0.98241 |
| 84857 | P14079 | Q9BR61 | -0.22741 |
| 84858 | P14079 | Q9Y679 | -0.47878 |
| 84859 | P14079 | Q8N6G6 | -1.2557  |
| 84860 | P14079 | Q9UGT4 | -0.77762 |
| 84861 | P14079 | P37023 | -0.34904 |
| 84862 | P14079 | P01765 | -1       |
| 84863 | P14079 | Q12950 | -0.99971 |
| 84864 | P14079 | Q86X29 | -0.86743 |
| 84865 | P14079 | Q567V2 | -0.62143 |
| 84866 | P14079 | Q9NWW6 | -1.0342  |
| 84867 | P14079 | Q9Y2Q0 | -0.75981 |
| 84868 | P14079 | Q9Y2R4 | -0.65195 |
| 84869 | P14079 | Q8TBX8 | -0.60795 |
| 84870 | P14079 | Q5QNW6 | -0.92425 |
| 84871 | P14079 | Q8NET5 | -1.0753  |
| 84872 | P14079 | Q96AC6 | -0.302   |
| 84873 | P14079 | Q5H913 | -1.3273  |
| 84874 | P14079 | O76024 | -0.50557 |
| 84875 | P14079 | Q969G6 | -0.6536  |
| 84876 | P14079 | Q9Y2H9 | -0.73903 |
| 84877 | P14079 | A8MQB9 | -0.22741 |
| 84878 | P14079 | Q8N1C3 | -0.85494 |
| 84879 | P14079 | O95715 | -0.87556 |
| 84880 | P14079 | P21589 | -0.59127 |
| 84881 | P14079 | Q3B7J2 | -1.7561  |
| 84882 | P14079 | P0CB46 | -0.83866 |
| 84883 | P14079 | O15428 | -0.26849 |
| 84884 | P14079 | O95864 | -1.0853  |
| 84885 | P14079 | P16671 | -0.5017  |
| 84886 | P14079 | Q7Z6B7 | -0.50857 |
| 84887 | P14079 | P32881 | -0.81438 |
| 84888 | P14079 | Q9BY07 | -1.1085  |
| 84889 | P14079 | P56179 | -0.24197 |
| 84890 | P14079 | Q7Z449 | -1.3056  |
| 84891 | P14079 | P51160 | -1.0438  |
| 84892 | P14079 | Q99755 | -0.26201 |

|       |        |        |           |
|-------|--------|--------|-----------|
| 84893 | P14079 | Q9GZQ8 | -0.13907  |
| 84894 | P14079 | O00453 | -0.51075  |
| 84895 | P14079 | Q9NUV7 | -0.97451  |
| 84896 | P14079 | P19876 | -0.93572  |
| 84897 | P14079 | Q8IY33 | -0.22742  |
| 84898 | P14079 | Q969M1 | -0.54303  |
| 84899 | P14079 | Q7Z2G1 | -0.84507  |
| 84900 | P14079 | Q15415 | -0.71179  |
| 84901 | P14079 | Q03113 | -0.63173  |
| 84902 | P14079 | O15054 | -0.36343  |
| 84903 | P14079 | Q96CK0 | -0.3235   |
| 84904 | P14079 | Q9Y572 | -0.32457  |
| 84905 | P14079 | Q8N690 | -0.78458  |
| 84906 | P14079 | Q32MK0 | -0.97337  |
| 84907 | P14079 | P0C7T2 | -1.2314   |
| 84908 | P14079 | Q8NH03 | -1.2314   |
| 84909 | P14079 | C9J798 | -0.86573  |
| 84910 | P14079 | Q13061 | -0.77047  |
| 84911 | P14079 | O14894 | -0.99591  |
| 84912 | P14079 | Q9H221 | -0.87995  |
| 84913 | P14079 | Q9H6Y2 | -0.22741  |
| 84914 | P14079 | O95568 | -0.070035 |
| 84915 | P14079 | P04155 | -0.71831  |
| 84916 | P14079 | Q86YT5 | -0.90077  |
| 84917 | P14079 | Q8IWU9 | -0.52607  |
| 84918 | P14079 | Q06278 | -0.57062  |
| 84919 | P14079 | P01833 | -1.645    |
| 84920 | P14079 | Q43295 | -1.0254   |
| 84921 | P14079 | Q9UKR3 | -0.67903  |
| 84922 | P14079 | Q969Y0 | -0.80633  |
| 84923 | P14079 | Q13643 | -0.18627  |
| 84924 | P14079 | Q6ZRK6 | -0.054486 |
| 84925 | P14079 | Q9QC07 | -0.34792  |
| 84926 | P14079 | Q8NB49 | -0.83037  |
| 84927 | P14079 | P04222 | -1        |
| 84928 | P14079 | Q9BU40 | -1.0102   |
| 84929 | P14079 | P14920 | -0.5703   |
| 84930 | P14079 | Q5T2P9 | -0.96514  |
| 84931 | P14079 | Q8N957 | -0.22713  |
| 84932 | P14079 | O95084 | -1.2077   |
| 84933 | P14079 | C9JLJ4 | -0.77524  |
| 84934 | P14079 | Q8NGZ6 | -1.2314   |
| 84935 | P14079 | Q96A72 | -0.028532 |
| 84936 | P14079 | Q01449 | -0.22661  |
| 84937 | P14079 | Q8IWA5 | -1.0202   |
| 84938 | P14079 | O15335 | -0.93558  |
| 84939 | P14079 | Q8NDX1 | -0.51367  |
| 84940 | P14079 | P05106 | -0.42454  |
| 84941 | P14079 | Q96DT6 | -0.83234  |
| 84942 | P14079 | Q9NPG1 | -0.61913  |
| 84943 | P14079 | Q9P2K9 | -0.57781  |
| 84944 | P14079 | P61073 | -0.27543  |
| 84945 | P14079 | Q9NZH6 | -0.29777  |
| 84946 | P14079 | P63215 | -0.2488   |
| 84947 | P14079 | Q9P1Q5 | -1.2314   |
| 84948 | P14079 | Q5VU92 | -0.26849  |
| 84949 | P14079 | Q4KMP7 | -1.3533   |
| 84950 | P14079 | Q96NY7 | -0.7517   |
| 84951 | P14079 | P35575 | -0.55729  |
| 84952 | P14079 | Q00537 | -1.2269   |
| 84953 | P14079 | Q06495 | -0.6396   |
| 84954 | P14079 | Q6PXP3 | -0.87092  |
| 84955 | P14079 | Q2PPJ7 | -0.17568  |
| 84956 | P14079 | Q99731 | -0.41859  |
| 84957 | P14079 | Q96GF1 | -1.0171   |
| 84958 | P14079 | O14842 | -1.254    |
| 84959 | P14079 | Q9NZV1 | -1.2329   |
| 84960 | P14079 | Q9Y484 | -0.22691  |
| 84961 | P14079 | P29508 | -0.6252   |
| 84962 | P14079 | O14730 | -0.75772  |
| 84963 | P14079 | Q6ZN04 | -0.22735  |
| 84964 | P14079 | A0PJW8 | -0.16088  |
| 84965 | P14079 | Q9P035 | -1.369    |
| 84966 | P14079 | P30495 | -1        |
| 84967 | P14079 | O95528 | -0.61986  |
| 84968 | P14079 | Q01814 | -0.37017  |

|       |        |        |          |
|-------|--------|--------|----------|
| 84969 | P14079 | Q9BQI7 | -0.82478 |
| 84970 | P14079 | Q6A1A2 | -1.3361  |
| 84971 | P14079 | Q7KZN9 | -0.75299 |
| 84972 | P14079 | Q8TBB0 | -0.24007 |
| 84973 | P14079 | P48357 | -1.2089  |
| 84974 | P14079 | Q9Y6K0 | -0.62    |
| 84975 | P14079 | Q8TC41 | -1.3339  |
| 84976 | P14079 | A6NKZ8 | -0.28045 |
| 84977 | P14079 | Q9BYW2 | -0.22139 |
| 84978 | P14079 | Q68G75 | -0.61747 |
| 84979 | P14079 | Q8NGT7 | -1.2314  |
| 84980 | P14079 | Q96MR6 | -0.22749 |
| 84981 | P14079 | P0C7M8 | -0.77403 |
| 84982 | P14079 | O75121 | -0.97472 |
| 84983 | P14079 | Q15413 | -0.69634 |
| 84984 | P14079 | Q5FWF5 | -0.36319 |
| 84985 | P14079 | P17081 | -0.87823 |
| 84986 | P14079 | Q8N146 | -1.2314  |
| 84987 | P14079 | P59768 | -0.46774 |
| 84988 | P14079 | P35225 | -0.17674 |
| 84989 | P14079 | P11908 | -0.75162 |
| 84990 | P14079 | Q12756 | -0.23874 |
| 84991 | P14079 | P22102 | -0.66983 |
| 84992 | P14079 | P51911 | -0.21558 |
| 84993 | P14079 | Q96F44 | -0.4714  |
| 84994 | P14079 | P51170 | -0.69364 |
| 84995 | P14079 | Q9UHW5 | -0.83509 |
| 84996 | P14079 | Q6ZNF0 | -0.81745 |
| 84997 | P14079 | P02679 | -1.0338  |
| 84998 | P14079 | O15120 | -0.87087 |
| 84999 | P14079 | Q9Y5I7 | -0.67285 |
| 85000 | P14079 | O15320 | -0.16589 |
| 85001 | P14079 | Q99697 | -0.1649  |
| 85002 | P14079 | Q9UK80 | -0.46788 |
| 85003 | P14079 | Q6WN34 | -0.79788 |
| 85004 | P14079 | Q8NCV1 | -0.52992 |
| 85005 | P14079 | P27361 | -0.2274  |
| 85006 | P14079 | Q9ULJ8 | -0.22647 |
| 85007 | P14079 | Q9Y2C9 | -0.60529 |
| 85008 | P14079 | Q7Z572 | -0.22677 |
| 85009 | P14079 | O95918 | -1.1797  |
| 85010 | P14079 | Q9P109 | -0.50455 |
| 85011 | P14079 | P06865 | -0.44263 |
| 85012 | P14079 | P57073 | -0.36711 |
| 85013 | P14079 | O00635 | -0.56115 |
| 85014 | P14079 | O75874 | -0.34172 |
| 85015 | P14079 | Q9UQ52 | -0.56003 |
| 85016 | P14079 | P01705 | -1       |
| 85017 | P14079 | Q96R05 | -0.24967 |
| 85018 | P14079 | P13760 | -0.63001 |
| 85019 | P14079 | Q8NHH1 | -0.28112 |
| 85020 | P14079 | O00187 | -0.97159 |
| 85021 | P14079 | P14415 | -0.49033 |
| 85022 | P14079 | Q9UDT6 | -0.22674 |
| 85023 | P14079 | Q9Y6J8 | -0.47137 |
| 85024 | P14079 | Q8N6Y2 | -0.82174 |
| 85025 | P14079 | Q86YW7 | -0.78571 |
| 85026 | P14079 | P49662 | -0.72274 |
| 85027 | P14079 | P52951 | -0.22695 |
| 85028 | P14079 | O15079 | -0.47754 |
| 85029 | P14079 | Q3KP44 | -0.22736 |
| 85030 | P14079 | Q92187 | -0.52358 |
| 85031 | P14079 | O94822 | -0.11009 |
| 85032 | P14079 | Q9NZN5 | -0.22741 |
| 85033 | P14079 | Q9Y2H5 | -0.22741 |
| 85034 | P14079 | Q8IV01 | -0.78287 |
| 85035 | P14079 | Q9HC23 | -0.90036 |
| 85036 | P14079 | Q15286 | -0.69086 |
| 85037 | P14079 | Q9P2Q2 | -0.41087 |
| 85038 | P14079 | Q8N4N3 | -0.26027 |
| 85039 | P14079 | O00623 | -0.3411  |
| 85040 | P14079 | P33681 | -0.22741 |
| 85041 | P14079 | P04843 | -0.69008 |
| 85042 | P14079 | Q9P227 | -1.1003  |
| 85043 | P14079 | Q9UHN6 | -1.1021  |
| 85044 | P14079 | Q95IE3 | -0.72952 |

|       |        |        |           |
|-------|--------|--------|-----------|
| 85045 | P14079 | P01848 | -0.97696  |
| 85046 | P14079 | Q86UK0 | -1.4318   |
| 85047 | P14079 | O43603 | -1.3212   |
| 85048 | P14079 | Q6NYC1 | -0.15814  |
| 85049 | P14079 | Q13202 | -0.55878  |
| 85050 | P14079 | Q13946 | -0.21662  |
| 85051 | P14079 | Q5T7M4 | -0.8755   |
| 85052 | P14079 | Q8WVL7 | -0.22737  |
| 85053 | P14079 | P43235 | -0.7611   |
| 85054 | P14079 | P08559 | -0.31595  |
| 85055 | P14079 | P08700 | -0.57047  |
| 85056 | P14079 | Q9Y5G8 | -1.2343   |
| 85057 | P14079 | Q6UVW9 | -0.37409  |
| 85058 | P14079 | Q9TNN7 | -1        |
| 85059 | P14079 | P18135 | -1        |
| 85060 | P14079 | Q9UHW9 | -1.0305   |
| 85061 | P14079 | Q9UGM5 | -1.0546   |
| 85062 | P14079 | Q96GP6 | -0.3578   |
| 85063 | P14079 | O75051 | -1.2553   |
| 85064 | P14079 | O00204 | -0.28413  |
| 85065 | P14079 | P30411 | -0.59545  |
| 85066 | P14079 | Q6NXE6 | -0.18239  |
| 85067 | P14079 | Q01628 | -0.81472  |
| 85068 | P14079 | P0CW18 | -0.90561  |
| 85069 | P14079 | P43361 | -0.26849  |
| 85070 | P14079 | P14174 | -0.29174  |
| 85071 | P14079 | Q5VXJ0 | -0.9063   |
| 85072 | P14079 | Q8IYT8 | -1.0093   |
| 85073 | P14079 | O95807 | -0.56086  |
| 85074 | P14079 | A8MU46 | -0.22874  |
| 85075 | P14079 | O14905 | -0.64515  |
| 85076 | P14079 | Q9Y5G2 | -1.2343   |
| 85077 | P14079 | Q5VU57 | -0.47163  |
| 85078 | P14079 | Q99956 | -0.567    |
| 85079 | P14079 | Q6ZSY5 | -0.73296  |
| 85080 | P14079 | Q14318 | -0.22794  |
| 85081 | P14079 | Q96PU4 | -0.22741  |
| 85082 | P14079 | P07492 | -1.1207   |
| 85083 | P14079 | Q309B1 | -0.20471  |
| 85084 | P14079 | O75439 | -0.67982  |
| 85085 | P14079 | Q96NR8 | -1.218    |
| 85086 | P14079 | P03999 | -1.3719   |
| 85087 | P14079 | O43909 | -0.79762  |
| 85088 | P14079 | O60403 | -1.2314   |
| 85089 | P14079 | Q96EU7 | -0.63848  |
| 85090 | P14079 | Q8N387 | -1.5424   |
| 85091 | P14079 | Q8NFK5 | -1.3503   |
| 85092 | P14079 | P03915 | -0.66679  |
| 85093 | P14079 | O15294 | -0.22493  |
| 85094 | P14079 | Q9UKF5 | -1.2691   |
| 85095 | P14079 | Q8NGY9 | -1.2302   |
| 85096 | P14079 | Q8IZD6 | -1.0152   |
| 85097 | P14079 | P14543 | -1.0859   |
| 85098 | P14079 | O95428 | -1.2608   |
| 85099 | P14079 | Q8WVE0 | -0.2036   |
| 85100 | P14079 | Q96BH1 | -0.28104  |
| 85101 | P14079 | Q95965 | -1.0016   |
| 85102 | P14079 | A2RUR9 | -0.050663 |
| 85103 | P14079 | P55089 | -0.43888  |
| 85104 | P14079 | Q13516 | -0.22793  |
| 85105 | P14079 | Q8NEG5 | -0.3305   |
| 85106 | P14079 | Q00688 | -0.22744  |
| 85107 | P14079 | P50219 | -0.22716  |
| 85108 | P14079 | Q96MH6 | -0.8493   |
| 85109 | P14079 | Q13733 | -1.2887   |
| 85110 | P14079 | Q9Y561 | -0.53645  |
| 85111 | P14079 | A6NNZ2 | -0.45112  |
| 85112 | P14079 | P06881 | -0.27756  |
| 85113 | P14079 | Q9H4Y5 | -0.46497  |
| 85114 | P14079 | Q6ZVL6 | -0.77815  |
| 85115 | P14079 | Q56UN5 | -1.4433   |
| 85116 | P14079 | Q9NS91 | -0.22742  |
| 85117 | P14079 | Q6FHJ7 | -0.60407  |
| 85118 | P14079 | Q9Y6G9 | -0.21412  |
| 85119 | P14079 | Q9UL68 | -0.26226  |
| 85120 | P14079 | Q9NRC6 | -0.22979  |

|       |        |        |          |
|-------|--------|--------|----------|
| 85121 | P14079 | Q86U10 | -0.29987 |
| 85122 | P14079 | Q9NYZ4 | -0.54037 |
| 85123 | P14079 | Q6ZNE9 | -0.18875 |
| 85124 | P14079 | O43526 | -1.0998  |
| 85125 | P14079 | Q7Z6A9 | -1.1122  |
| 85126 | P14079 | P01710 | -1       |
| 85127 | P14079 | Q8N1E2 | -0.81837 |
| 85128 | P14079 | Q9UD57 | -0.2271  |
| 85129 | P14079 | P46663 | -1.0555  |
| 85130 | P14079 | Q05940 | -0.76459 |
| 85131 | P14079 | P01774 | -1       |
| 85132 | P14079 | P16050 | -0.19151 |
| 85133 | P14079 | Q12860 | -0.44212 |
| 85134 | P14079 | P32942 | -0.82466 |
| 85135 | P14079 | Q9HBT6 | -1.1753  |
| 85136 | P14079 | Q5T7N3 | -0.22739 |
| 85137 | P14079 | Q7Z4T8 | -0.69721 |
| 85138 | P14079 | Q15617 | -1.2314  |
| 85139 | P14079 | Q9Y5Y4 | -1.366   |
| 85140 | P14079 | Q8N7P1 | -0.94485 |
| 85141 | P14079 | Q86UD5 | -0.92269 |
| 85142 | P14079 | Q76FK4 | -0.22688 |
| 85143 | P14079 | Q8N100 | -0.23431 |
| 85144 | P14079 | Q96N87 | -1.2733  |
| 85145 | P14079 | P12236 | -0.23209 |
| 85146 | P14079 | Q12907 | -0.33433 |
| 85147 | P14079 | Q9NRF2 | -0.22741 |
| 85148 | P14079 | Q8IZC6 | -1.0444  |
| 85149 | P14079 | P61109 | -0.80633 |
| 85150 | P14079 | Q8IZV5 | -0.74154 |
| 85151 | P14079 | Q96M94 | -0.26027 |
| 85152 | P14079 | Q9NZP0 | -1.2314  |
| 85153 | P14079 | Q14493 | -0.73268 |
| 85154 | P14079 | Q86VQ3 | -0.39887 |
| 85155 | P14079 | Q0VAQ4 | -0.45304 |
| 85156 | P14079 | Q8N4F7 | -0.78242 |
| 85157 | P14079 | Q6Y288 | -0.92089 |
| 85158 | P14079 | Q9BWW7 | -0.17933 |
| 85159 | P14079 | P08913 | -0.29459 |
| 85160 | P14079 | O96014 | -0.44118 |
| 85161 | P14079 | P30530 | -0.8312  |
| 85162 | P14079 | Q9NPF8 | -0.59004 |
| 85163 | P14079 | O95267 | -0.75389 |
| 85164 | P14079 | Q8WWQ8 | -0.90026 |
| 85165 | P14079 | Q8WWF5 | -0.58767 |
| 85166 | P14079 | Q5VST6 | -0.84039 |
| 85167 | P14079 | Q15782 | -0.84499 |
| 85168 | P14079 | Q96T60 | -0.64435 |
| 85169 | P14079 | Q8NH42 | -1.2314  |
| 85170 | P14079 | P05181 | -0.55947 |
| 85171 | P14079 | Q86YD5 | -0.94076 |
| 85172 | P14079 | Q9H244 | -0.93055 |
| 85173 | P14079 | P55344 | -0.75234 |
| 85174 | P14079 | Q8NBM4 | -0.77815 |
| 85175 | P14079 | Q9NPA1 | -1.2594  |
| 85176 | P14079 | P61968 | -0.12381 |
| 85177 | P14079 | Q14626 | -1.2062  |
| 85178 | P14079 | Q96H15 | -0.77815 |
| 85179 | P14079 | P08514 | -0.59751 |
| 85180 | P14079 | Q9H0U3 | -1.1566  |
| 85181 | P14079 | P09871 | -1.3405  |
| 85182 | P14079 | Q99973 | -0.51009 |
| 85183 | P14079 | P13501 | -0.58608 |
| 85184 | P14079 | Q92599 | -0.17882 |
| 85185 | P14079 | O75881 | -0.69904 |
| 85186 | P14079 | O95838 | -1.1855  |
| 85187 | P14079 | Q13627 | -0.39614 |
| 85188 | P14079 | A1L0T0 | -1.0713  |
| 85189 | P14079 | Q5VTE0 | -0.57354 |
| 85190 | P14079 | Q9C0C7 | -0.22743 |
| 85191 | P14079 | Q8IXF9 | -0.79936 |
| 85192 | P14079 | Q6PCT2 | -0.20519 |
| 85193 | P14079 | Q9HBJ7 | -0.77238 |
| 85194 | P14079 | O76061 | -0.70807 |
| 85195 | P14079 | P22309 | -0.90851 |
| 85196 | P14079 | Q8NFN8 | -1.2819  |

|       |        |        |           |
|-------|--------|--------|-----------|
| 85197 | P14079 | Q709F0 | -0.53474  |
| 85198 | P14079 | Q86SE8 | -0.039232 |
| 85199 | P14079 | P51991 | -0.23542  |
| 85200 | P14079 | Q9NVP2 | -0.47811  |
| 85201 | P14079 | P27169 | -0.79383  |
| 85202 | P14079 | Q9UHF1 | -1.2646   |
| 85203 | P14079 | A6NLP5 | -0.20864  |
| 85204 | P14079 | O75140 | -0.33597  |
| 85205 | P14079 | P11274 | -0.93357  |
| 85206 | P14079 | P16104 | -0.71197  |
| 85207 | P14079 | Q8NCR9 | -0.77815  |
| 85208 | P14079 | P51793 | -1.3219   |
| 85209 | P14079 | P0C7N5 | -1.2314   |
| 85210 | P14079 | O60330 | -1.2343   |
| 85211 | P14079 | O15013 | -0.22762  |
| 85212 | P14079 | P36959 | -0.53141  |
| 85213 | P14079 | Q13231 | -0.85004  |
| 85214 | P14079 | Q9UBD6 | -0.91523  |
| 85215 | P14079 | Q5JT25 | -1.0397   |
| 85216 | P14079 | Q96A08 | -0.79774  |
| 85217 | P14079 | Q08830 | -1.1091   |
| 85218 | P14079 | Q9BPW9 | -0.91724  |
| 85219 | P14079 | Q14727 | -0.22874  |
| 85220 | P14079 | Q8N8S7 | -0.20681  |
| 85221 | P14079 | Q9BWL3 | -0.9567   |
| 85222 | P14079 | Q03167 | -0.32737  |
| 85223 | P14079 | P05023 | -0.48618  |
| 85224 | P14079 | P49895 | -1.2226   |
| 85225 | P14079 | A6NJ69 | -0.80633  |
| 85226 | P14079 | O95407 | -0.22628  |
| 85227 | P14079 | O75044 | -0.23446  |
| 85228 | P14079 | P24821 | -1.2024   |
| 85229 | P14079 | P43694 | -0.22737  |
| 85230 | P14079 | O00587 | -1.0391   |
| 85231 | P14079 | P57057 | -0.80261  |
| 85232 | P14079 | A6NGW2 | -0.80633  |
| 85233 | P14079 | Q8WTU2 | -0.87205  |
| 85234 | P14079 | B6SEH9 | -0.77815  |
| 85235 | P14079 | O75808 | -0.75866  |
| 85236 | P14079 | Q6UW88 | -1.156    |
| 85237 | P14079 | Q9BQS8 | -0.25693  |
| 85238 | P14079 | P49703 | -0.22762  |
| 85239 | P14079 | Q8N966 | -0.94083  |
| 85240 | P14079 | A1L157 | -0.77815  |
| 85241 | P14079 | Q9Y508 | -0.94616  |
| 85242 | P14079 | Q7RTR0 | -0.6336   |
| 85243 | P14079 | Q9HCF6 | -1.0354   |
| 85244 | P14079 | Q9Y2K3 | -0.39916  |
| 85245 | P14079 | Q8NG98 | -1.2314   |
| 85246 | P14079 | P58872 | -1.3264   |
| 85247 | P14079 | O00292 | -0.90062  |
| 85248 | P14079 | Q9Y5J1 | -0.22741  |
| 85249 | P14079 | Q9NR23 | -0.73489  |
| 85250 | P14079 | P09668 | -0.39635  |
| 85251 | P14079 | O60676 | -0.77059  |
| 85252 | P14079 | P51511 | -0.90022  |
| 85253 | P14079 | Q5H943 | -0.97472  |
| 85254 | P14079 | O95409 | -0.33566  |
| 85255 | P14079 | Q96DA6 | -0.52254  |
| 85256 | P14079 | A6NN79 | -0.77815  |
| 85257 | P14079 | Q6DJT9 | -0.002189 |
| 85258 | P14079 | O75838 | -0.22859  |
| 85259 | P14079 | Q9NZQ8 | -1.103    |
| 85260 | P14079 | Q9NUI1 | -1.2166   |
| 85261 | P14079 | P08631 | -0.31968  |
| 85262 | P14079 | Q15067 | -0.63629  |
| 85263 | P14079 | Q86VE3 | -0.30856  |
| 85264 | P14079 | Q2UY09 | -1.2862   |
| 85265 | P14079 | P30679 | -0.93985  |
| 85266 | P14079 | O43566 | -0.22813  |
| 85267 | P14079 | P14780 | -0.4042   |
| 85268 | P14079 | Q9NSA2 | -1.1588   |
| 85269 | P14079 | Q5SY80 | -0.77815  |
| 85270 | P14079 | Q9NU22 | -0.54     |
| 85271 | P14079 | P28330 | -0.41942  |
| 85272 | P14079 | D6RJB6 | -0.77524  |

|       |        |        |           |
|-------|--------|--------|-----------|
| 85273 | P14079 | Q6GPH6 | -0.77815  |
| 85274 | P14079 | P15814 | -0.90548  |
| 85275 | P14079 | D6RA61 | -0.77524  |
| 85276 | P14079 | Q9UQ49 | -0.54169  |
| 85277 | P14079 | Q7Z5A4 | -1.4766   |
| 85278 | P14079 | Q9BZC1 | -0.34229  |
| 85279 | P14079 | Q8NGG1 | -1.0718   |
| 85280 | P14079 | P59540 | -1.3403   |
| 85281 | P14079 | Q3ZCT8 | -0.20815  |
| 85282 | P14079 | Q13349 | -1.0975   |
| 85283 | P14079 | Q6NUT3 | -0.79981  |
| 85284 | P14079 | Q8WWT9 | -0.92339  |
| 85285 | P14079 | Q7L5A8 | -0.86282  |
| 85286 | P14079 | Q9Y2I9 | -1.1118   |
| 85287 | P14079 | P06311 | -1        |
| 85288 | P14079 | Q9HC84 | -0.53031  |
| 85289 | P14079 | Q6PJI9 | -0.26849  |
| 85290 | P14079 | Q6PL45 | -0.77815  |
| 85291 | P14079 | Q86T90 | -0.20242  |
| 85292 | P14079 | A7KAX9 | -0.30875  |
| 85293 | P14079 | Q96MU8 | -0.27233  |
| 85294 | P14079 | Q8WXH6 | -1.3858   |
| 85295 | P14079 | Q6PJF5 | -0.9453   |
| 85296 | P14079 | Q86TB3 | -0.78881  |
| 85297 | P14079 | P33260 | -0.95036  |
| 85298 | P14079 | Q3ZCW2 | -0.33045  |
| 85299 | P14079 | Q9Y6E2 | -0.49433  |
| 85300 | P14079 | Q969R2 | -0.61677  |
| 85301 | P14079 | Q6P461 | -1.2817   |
| 85302 | P14079 | O14921 | -0.34696  |
| 85303 | P14079 | Q8NGR6 | -1.2314   |
| 85304 | P14079 | Q9P0L9 | -0.5081   |
| 85305 | P14079 | Q6UWW8 | -0.22719  |
| 85306 | P14079 | Q9UQ26 | -0.22741  |
| 85307 | P14079 | P18825 | -0.52046  |
| 85308 | P14079 | P26440 | -0.47962  |
| 85309 | P14079 | Q8IZ83 | -0.82794  |
| 85310 | P14079 | Q9Y6R7 | -0.20579  |
| 85311 | P14079 | P13727 | -0.9262   |
| 85312 | P14079 | Q9H2F9 | -0.097208 |
| 85313 | P14079 | Q96SB3 | -0.22617  |
| 85314 | P14079 | Q86YT6 | -0.22721  |
| 85315 | P14079 | Q6PIF6 | -0.61688  |
| 85316 | P14079 | P58170 | -1.2314   |
| 85317 | P14079 | Q9NQ25 | -0.96755  |
| 85318 | P14079 | Q9H3Y6 | -1.4475   |
| 85319 | P14079 | P30455 | -0.91994  |
| 85320 | P14079 | Q92819 | -0.80291  |
| 85321 | P14079 | Q7Z7G1 | -0.36064  |
| 85322 | P14079 | Q9BTX3 | -0.77815  |
| 85323 | P14079 | Q96NA8 | -0.65886  |
| 85324 | P14079 | Q8ND30 | -0.42062  |
| 85325 | P14079 | Q15382 | -1.2188   |
| 85326 | P14079 | P52788 | -0.33159  |
| 85327 | P14079 | P48426 | -0.57536  |
| 85328 | P14079 | P63252 | -1.5773   |
| 85329 | P14079 | Q95819 | -0.71771  |
| 85330 | P14079 | G3V0H7 | -0.98669  |
| 85331 | P14079 | Q86SJ6 | -1.3925   |
| 85332 | P14079 | Q8IYL9 | -1.4878   |
| 85333 | P14079 | P09237 | -1.211    |
| 85334 | P14079 | Q8WUK0 | -0.72686  |
| 85335 | P14079 | Q30KQ2 | -0.78458  |
| 85336 | P14079 | P42765 | -0.17241  |
| 85337 | P14079 | Q5R387 | -0.82755  |
| 85338 | P14079 | Q9UKB3 | -0.27559  |
| 85339 | P14079 | A6NHR9 | -0.54689  |
| 85340 | P14079 | Q6ZMC9 | -0.77815  |
| 85341 | P14079 | Q8N7S2 | -0.35738  |
| 85342 | P14079 | P29762 | -0.66331  |
| 85343 | P14079 | Q14416 | -1.2924   |
| 85344 | P14079 | Q86TE4 | -0.80633  |
| 85345 | P14079 | Q9H239 | -1.4821   |
| 85346 | P14079 | Q8IVF4 | -0.41186  |
| 85347 | P14079 | A6NLI5 | -0.36051  |
| 85348 | P14079 | A8MYB1 | -0.77815  |



|       |        |         |           |
|-------|--------|---------|-----------|
| 85349 | P14079 | Q92506  | -0.40122  |
| 85350 | P14079 | Q9H228  | -1.2026   |
| 85351 | P14079 | P20382  | -0.94679  |
| 85352 | P14079 | Q13613  | -0.48698  |
| 85353 | P14079 | Q96FZ5  | -0.8507   |
| 85354 | P14079 | P13591  | -1.4828   |
| 85355 | P14079 | O00408  | -0.22387  |
| 85356 | P14079 | Q13467  | -0.71105  |
| 85357 | P14079 | P84077  | -0.2278   |
| 85358 | P14079 | Q9BXT6  | -1.4688   |
| 85359 | P14079 | A2A3K4  | -0.72983  |
| 85360 | P14079 | Q00975  | -0.99507  |
| 85361 | P14079 | Q9BSJ1  | -0.47932  |
| 85362 | P14079 | Q9ULB4  | -1.1786   |
| 85363 | P14079 | Q96L91  | -0.33932  |
| 85364 | P14079 | P0DJJD1 | -0.19739  |
| 85365 | P14079 | Q9C0G6  | -0.41186  |
| 85366 | P14079 | P67936  | -0.1556   |
| 85367 | P14079 | Q9HCN3  | -1.2381   |
| 85368 | P14079 | Q6IWH7  | -0.49924  |
| 85369 | P14079 | Q06643  | -0.89534  |
| 85370 | P14079 | Q96JH8  | -0.85157  |
| 85371 | P14079 | Q5T3F8  | -1.3355   |
| 85372 | P14079 | Q6UY11  | -0.93453  |
| 85373 | P14079 | Q9NX61  | -0.73768  |
| 85374 | P14079 | Q6UWL2  | -0.84312  |
| 85375 | P14079 | P15509  | -1.7856   |
| 85376 | P14079 | Q9NUJ1  | -0.42756  |
| 85377 | P14079 | Q9GZV1  | -0.45573  |
| 85378 | P14079 | Q16772  | -0.22223  |
| 85379 | P14079 | Q6EMK4  | -1.4172   |
| 85380 | P14079 | Q8N423  | -0.49866  |
| 85381 | P14079 | P01889  | -1.0397   |
| 85382 | P14079 | Q5VVQ6  | -0.36451  |
| 85383 | P14079 | P60153  | -0.78321  |
| 85384 | P14079 | Q5VT79  | -0.12006  |
| 85385 | P14079 | Q92482  | -0.58078  |
| 85386 | P14079 | O14830  | -0.1827   |
| 85387 | P14079 | Q9Y328  | -0.62258  |
| 85388 | P14079 | P01567  | -0.68402  |
| 85389 | P14079 | O75937  | -0.076903 |
| 85390 | P14079 | P55011  | -1.0118   |
| 85391 | P14079 | P02763  | -0.34029  |
| 85392 | P14079 | Q9NPH3  | -1.7472   |
| 85393 | P14079 | Q6UXT8  | -0.80633  |
| 85394 | P14079 | O43300  | -0.7007   |
| 85395 | P14079 | Q7Z6M1  | -0.2239   |
| 85396 | P14079 | Q8TD43  | -1.0227   |
| 85397 | P14079 | P08910  | -0.74337  |
| 85398 | P14079 | Q95944  | -1.3058   |
| 85399 | P14079 | Q6UW63  | -0.15066  |
| 85400 | P14079 | Q96GM1  | -0.92232  |
| 85401 | P14079 | A6NDN8  | -0.17079  |
| 85402 | P14079 | Q0WX57  | -0.39259  |
| 85403 | P14079 | Q13017  | -0.71473  |
| 85404 | P14079 | P11926  | -0.16371  |
| 85405 | P14079 | Q5VT99  | -1.1943   |
| 85406 | P14079 | Q15475  | -0.2286   |
| 85407 | P14079 | P25089  | -1.3751   |
| 85408 | P14079 | O94812  | -0.24342  |
| 85409 | P14079 | Q7RTR8  | -1.1233   |
| 85410 | P14079 | Q70UQ0  | -0.21714  |
| 85411 | P14079 | Q9NXG2  | -0.16685  |
| 85412 | P14079 | Q9NQZ6  | -0.14757  |
| 85413 | P14079 | P20916  | -0.97163  |
| 85414 | P14079 | P30447  | -0.98914  |
| 85415 | P14079 | Q9Y4B4  | -0.43464  |
| 85416 | P14079 | Q9BVK2  | -0.88416  |
| 85417 | P14079 | Q96CA5  | -0.22741  |
| 85418 | P14079 | Q9NRW3  | -0.31028  |
| 85419 | P14079 | Q6Q0C0  | -0.24091  |
| 85420 | P14079 | Q7Z5N4  | -1.0127   |
| 85421 | P14079 | Q86Y30  | -0.80633  |
| 85422 | P14079 | Q9Y6J6  | -1.2708   |
| 85423 | P14079 | P05154  | -0.90586  |
| 85424 | P14079 | O95672  | -1.494    |

|       |        |        |           |
|-------|--------|--------|-----------|
| 85425 | P14079 | Q13449 | -0.22907  |
| 85426 | P14079 | Q8N2I9 | -0.38205  |
| 85427 | P14079 | Q9BX46 | -0.40078  |
| 85428 | P14079 | Q86VH4 | -0.77815  |
| 85429 | P14079 | P33261 | -0.77467  |
| 85430 | P14079 | Q8NGC7 | -1.2314   |
| 85431 | P14079 | Q8NGV7 | -1.2314   |
| 85432 | P14079 | Q9UBU3 | -0.32491  |
| 85433 | P14079 | P48751 | -1.2507   |
| 85434 | P14079 | Q9P0T7 | -0.88946  |
| 85435 | P14079 | P50461 | -0.22352  |
| 85436 | P14079 | Q08345 | -1.1451   |
| 85437 | P14079 | Q6IFG1 | -1.2314   |
| 85438 | P14079 | Q9NVF9 | -0.96008  |
| 85439 | P14079 | O75354 | -1.1947   |
| 85440 | P14079 | Q9UKZ9 | -0.8249   |
| 85441 | P14079 | Q96L73 | -0.22805  |
| 85442 | P14079 | Q9UNG2 | -0.89807  |
| 85443 | P14079 | Q96IY4 | -1.1114   |
| 85444 | P14079 | Q9UHP6 | -0.26849  |
| 85445 | P14079 | P32239 | -0.62683  |
| 85446 | P14079 | P53384 | -0.23405  |
| 85447 | P14079 | Q9UEF7 | -1.1625   |
| 85448 | P14079 | P20853 | -0.93407  |
| 85449 | P14079 | P53634 | -0.73765  |
| 85450 | P14079 | Q75V66 | -1.0211   |
| 85451 | P14079 | O43174 | -0.83396  |
| 85452 | P14079 | P63130 | -0.059237 |
| 85453 | P14079 | Q9UPR5 | -1.0296   |
| 85454 | P14079 | Q8IZN3 | -0.94083  |
| 85455 | P14079 | P62834 | -0.4756   |
| 85456 | P14079 | P09681 | -0.51245  |
| 85457 | P14079 | P17509 | -0.11161  |
| 85458 | P14079 | P0CB47 | -0.22715  |
| 85459 | P14079 | Q3SYB3 | -0.99971  |
| 85460 | P14079 | P01815 | -1        |
| 85461 | P14079 | Q17RW2 | -1.0703   |
| 85462 | P14079 | P0DJD0 | -0.19733  |
| 85463 | P14079 | Q12931 | -0.61316  |
| 85464 | P14079 | O75173 | -0.99741  |
| 85465 | P14079 | Q9H0W5 | -0.39241  |
| 85466 | P14079 | Q8NB15 | -0.2256   |
| 85467 | P14079 | P36575 | -0.38937  |
| 85468 | P14079 | O75390 | -0.064485 |
| 85469 | P14079 | Q6UWL6 | -0.97025  |
| 85470 | P14079 | Q7Z443 | -0.86467  |
| 85471 | P14079 | P62685 | -0.065735 |
| 85472 | P14079 | P05166 | -0.65755  |
| 85473 | P14079 | Q8N412 | -0.01479  |
| 85474 | P14079 | A6NJG2 | -0.2274   |
| 85475 | P14079 | Q9H2D1 | -0.54396  |
| 85476 | P14079 | P78410 | -0.84446  |
| 85477 | P14079 | O75891 | -0.80921  |
| 85478 | P14079 | A8MT82 | -0.96514  |
| 85479 | P14079 | O76038 | -0.85965  |
| 85480 | P14079 | Q9Y297 | -0.28069  |
| 85481 | P14079 | Q9BZM3 | -0.39611  |
| 85482 | P14079 | P49821 | -0.40259  |
| 85483 | P14079 | P30485 | -1        |
| 85484 | P14079 | Q8NGY2 | -1.2314   |
| 85485 | P14079 | Q15835 | -1.163    |
| 85486 | P14079 | P47712 | -0.25234  |
| 85487 | P14079 | Q9NR20 | -1.2822   |
| 85488 | P14079 | P15169 | -1.3566   |
| 85489 | P14079 | Q16445 | -0.92809  |
| 85490 | P14079 | Q6XYQ8 | -1.0778   |
| 85491 | P14079 | P22310 | -1.0507   |
| 85492 | P14079 | P47871 | -0.92708  |
| 85493 | P14079 | Q03431 | -0.84981  |
| 85494 | P14079 | Q8NGR8 | -1.2314   |
| 85495 | P14079 | P00326 | -0.7878   |
| 85496 | P14079 | P42857 | -0.089076 |
| 85497 | P14079 | Q6P2M8 | -1.0008   |
| 85498 | P14079 | Q69YU3 | -0.22581  |
| 85499 | P14079 | Q7L622 | -0.43181  |
| 85500 | P14079 | Q1X8D7 | -0.22664  |

|       |        |        |          |
|-------|--------|--------|----------|
| 85501 | P14079 | P43116 | -1.3411  |
| 85502 | P14079 | Q00872 | -0.54423 |
| 85503 | P14079 | Q96IW2 | -0.22739 |
| 85504 | P14079 | P24752 | -0.30347 |
| 85505 | P14079 | Q8IWI9 | -0.47086 |
| 85506 | P14079 | Q96BX8 | -0.34663 |
| 85507 | P14079 | Q96P66 | -1.3154  |
| 85508 | P14079 | Q8N3J6 | -1.2159  |
| 85509 | P14079 | Q96RU3 | -0.22741 |
| 85510 | P14079 | Q6P158 | -0.92947 |
| 85511 | P14079 | Q969S0 | -0.51755 |
| 85512 | P14079 | P01621 | -1       |
| 85513 | P14079 | P18136 | -1       |
| 85514 | P14079 | Q9Y581 | -0.77516 |
| 85515 | P14079 | Q9ULT8 | -0.5118  |
| 85516 | P14079 | A6NH21 | -0.83499 |
| 85517 | P14079 | P01850 | -0.87298 |
| 85518 | P14079 | O60343 | -1.1681  |
| 85519 | P14079 | Q6P1R4 | -0.55286 |
| 85520 | P14079 | Q6ZMN7 | -0.49865 |
| 85521 | P14079 | Q92753 | -0.55136 |
| 85522 | P14079 | Q9UKR8 | -0.77815 |
| 85523 | P14079 | Q14815 | -1.0948  |
| 85524 | P14079 | Q86YQ8 | -0.23691 |
| 85525 | P14079 | O75610 | -0.83053 |
| 85526 | P14079 | Q6W4X9 | -0.87284 |
| 85527 | P14079 | P52757 | -0.69109 |
| 85528 | P14079 | Q14507 | -0.90309 |
| 85529 | P14079 | O75679 | -0.22865 |
| 85530 | P14079 | P06028 | -1.1905  |
| 85531 | P14079 | Q8IXB1 | -0.39814 |
| 85532 | P14079 | Q9NS62 | -1.2135  |
| 85533 | P14079 | Q16654 | -0.86935 |
| 85534 | P14079 | Q96PQ7 | -0.21047 |
| 85535 | P14079 | Q8NGZ5 | -1.2314  |
| 85536 | P14079 | Q5JU00 | -0.22697 |
| 85537 | P14079 | Q6ZV73 | -0.40604 |
| 85538 | P14079 | Q9NYL5 | -0.82252 |
| 85539 | P14079 | B2RXH4 | -0.22693 |
| 85540 | P14079 | P58499 | -0.72095 |
| 85541 | P14079 | Q6ZWL3 | -1.2532  |
| 85542 | P14079 | Q9UJ37 | -0.64471 |
| 85543 | P14079 | A8MW92 | -0.16822 |
| 85544 | P14079 | Q8WWV3 | -0.89486 |
| 85545 | P14079 | Q7Z7E8 | -0.5903  |
| 85546 | P14079 | Q9NYW4 | -1.0432  |
| 85547 | P14079 | P20794 | -0.22558 |
| 85548 | P14079 | Q2TB10 | -0.22738 |
| 85549 | P14079 | Q9Y219 | -0.67263 |
| 85550 | P14079 | P78310 | -0.23199 |
| 85551 | P14079 | Q7KZI7 | -1.0821  |
| 85552 | P14079 | Q8NFZ4 | -0.64576 |
| 85553 | P14079 | Q96PU8 | -0.20016 |
| 85554 | P14079 | Q9BZ95 | -0.42796 |
| 85555 | P14079 | Q5HYI8 | -1.2251  |
| 85556 | P14079 | Q9HAZ1 | -1.3937  |
| 85557 | P14079 | P82251 | -1.2115  |
| 85558 | P14079 | Q7Z5J4 | -0.12347 |
| 85559 | P14079 | Q8NGO6 | -0.36051 |
| 85560 | P14079 | Q8N608 | -0.96374 |
| 85561 | P14079 | Q13555 | -1.1493  |
| 85562 | P14079 | Q6ZVH7 | -0.22731 |
| 85563 | P14079 | Q8N428 | -0.59781 |
| 85564 | P14079 | Q96SB4 | -0.34316 |
| 85565 | P14079 | Q9H346 | -1.2314  |
| 85566 | P14079 | P13716 | -0.13883 |
| 85567 | P14079 | Q9BWF3 | -0.2306  |
| 85568 | P14079 | P25189 | -1.0104  |
| 85569 | P14079 | P32926 | -0.82729 |
| 85570 | P14079 | P09960 | -0.2442  |
| 85571 | P14079 | P61619 | -0.75412 |
| 85572 | P14079 | Q9H0X9 | -1.0267  |
| 85573 | P14079 | P01709 | -1       |
| 85574 | P14079 | O43704 | -0.43544 |
| 85575 | P14079 | Q6P7N7 | -0.77815 |
| 85576 | P14079 | Q9H0E7 | -0.25634 |

|       |        |        |          |
|-------|--------|--------|----------|
| 85577 | P14079 | Q9BQG2 | -0.22744 |
| 85578 | P14079 | Q9Y282 | -0.5508  |
| 85579 | P14079 | Q5T2Q4 | -0.09708 |
| 85580 | P14079 | P30874 | -0.45475 |
| 85581 | P14079 | Q496J9 | -0.97661 |
| 85582 | P14079 | Q68BL8 | -0.8614  |
| 85583 | P14079 | Q15027 | -0.94096 |
| 85584 | P14079 | P47804 | -0.76881 |
| 85585 | P14079 | P57052 | -0.73421 |
| 85586 | P14079 | Q8NCG5 | -0.73698 |
| 85587 | P14079 | A6NIE9 | -1.4766  |
| 85588 | P14079 | P30989 | -1.2787  |
| 85589 | P14079 | Q16473 | -0.26849 |
| 85590 | P14079 | Q15768 | -0.81168 |
| 85591 | P14079 | P84550 | -0.13116 |
| 85592 | P14079 | Q93086 | -1.0895  |
| 85593 | P14079 | Q8TF44 | -0.17714 |
| 85594 | P14079 | P01275 | -0.65527 |
| 85595 | P14079 | Q8N4Q0 | -1.0574  |
| 85596 | P14079 | Q9BXX0 | -0.68159 |
| 85597 | P14079 | P01042 | -0.84508 |
| 85598 | P14079 | O00254 | -1.1902  |
| 85599 | P14079 | Q9NNX6 | -0.92925 |
| 85600 | P14079 | O14610 | -1.143   |
| 85601 | P14079 | P08185 | -0.93559 |
| 85602 | P14079 | Q8NI37 | -0.21992 |
| 85603 | P14079 | Q06520 | -0.24609 |
| 85604 | P14079 | Q8NAB2 | -0.19352 |
| 85605 | P14079 | Q8N6R0 | -0.29991 |
| 85606 | P14079 | Q9Y5Z0 | -0.90507 |
| 85607 | P14079 | Q9UQF0 | -0.76818 |
| 85608 | P14079 | Q8TDV0 | -1.3154  |
| 85609 | P14079 | Q8NC44 | -0.74356 |
| 85610 | P14079 | O15381 | -0.43953 |
| 85611 | P14079 | Q9BXR6 | -0.78886 |
| 85612 | P14079 | P52272 | -0.15244 |
| 85613 | P14079 | O96024 | -0.71481 |
| 85614 | P14079 | Q86V21 | -0.55815 |
| 85615 | P14079 | Q8WXI3 | -0.47402 |
| 85616 | P14079 | P43365 | -0.26849 |
| 85617 | P14079 | P49802 | -0.546   |
| 85618 | P14079 | Q9Y5J5 | -0.15304 |
| 85619 | P14079 | O95258 | -0.81957 |
| 85620 | P14079 | P08575 | -0.35476 |
| 85621 | P14079 | Q99805 | -0.8313  |
| 85622 | P14079 | O14966 | -1.1755  |
| 85623 | P14079 | Q8IWR0 | -0.21997 |
| 85624 | P14079 | O60658 | -0.22592 |
| 85625 | P14079 | Q96IG2 | -0.22563 |
| 85626 | P14079 | P42830 | -0.95011 |
| 85627 | P14079 | Q8TB61 | -0.75313 |
| 85628 | P14079 | P09326 | -0.60345 |
| 85629 | P14079 | Q14031 | -1.1722  |
| 85630 | P14079 | Q75WM6 | -1.2891  |
| 85631 | P14079 | O14792 | -0.61364 |
| 85632 | P14079 | Q9BYE0 | -0.22572 |
| 85633 | P14079 | P57058 | -1.776   |
| 85634 | P14079 | Q96SF7 | -0.63139 |
| 85635 | P14079 | Q16676 | -0.99971 |
| 85636 | P14079 | Q9BUT1 | -0.73013 |
| 85637 | P14079 | P43250 | -1.4865  |
| 85638 | P14079 | Q14289 | -0.23537 |
| 85639 | P14079 | O15021 | -1.372   |
| 85640 | P14079 | Q5SYB0 | -0.22739 |
| 85641 | P14079 | O95319 | -0.4477  |
| 85642 | P14079 | Q86YN6 | -0.22444 |
| 85643 | P14079 | Q99611 | -1.0995  |
| 85644 | P14079 | Q6DKI7 | -0.77815 |
| 85645 | P14079 | P33764 | -0.22115 |
| 85646 | P14079 | O95970 | -0.23029 |
| 85647 | P14079 | Q6IFN5 | -1.2314  |
| 85648 | P14079 | Q9H6H4 | -0.77815 |
| 85649 | P14079 | Q09160 | -0.9799  |
| 85650 | P14079 | Q96EM0 | -0.28192 |
| 85651 | P14079 | Q8N8N0 | -1.1717  |
| 85652 | P14079 | Q9HC58 | -1.185   |

|       |        |        |           |
|-------|--------|--------|-----------|
| 85653 | P14079 | Q7RTU5 | -0.23278  |
| 85654 | P14079 | Q9UFD9 | -0.22733  |
| 85655 | P14079 | P16422 | -0.22568  |
| 85656 | P14079 | P29122 | -1.0701   |
| 85657 | P14079 | P47989 | -0.64603  |
| 85658 | P14079 | Q86XR7 | -0.20041  |
| 85659 | P14079 | O43423 | -0.014277 |
| 85660 | P14079 | P10266 | -0.36404  |
| 85661 | P14079 | Q96G46 | -0.58334  |
| 85662 | P14079 | Q99712 | -1.4127   |
| 85663 | P14079 | Q86XP6 | -0.80633  |
| 85664 | P14079 | Q8NGS4 | -1.2314   |
| 85665 | P14079 | P51693 | -0.16076  |
| 85666 | P14079 | Q8NCW6 | -0.57862  |
| 85667 | P14079 | Q16820 | -1.6372   |
| 85668 | P14079 | Q96PY6 | -0.22741  |
| 85669 | P14079 | P08253 | -0.77753  |
| 85670 | P14079 | P0C5Z0 | -0.93244  |
| 85671 | P14079 | Q8TEH3 | -0.63584  |
| 85672 | P14079 | Q8N1N0 | -0.8703   |
| 85673 | P14079 | Q03135 | -0.22506  |
| 85674 | P14079 | P22455 | -1.0696   |
| 85675 | P14079 | Q6ZMY6 | -0.23562  |
| 85676 | P14079 | Q92730 | -0.34861  |
| 85677 | P14079 | Q9Y4C1 | -0.30198  |
| 85678 | P14079 | Q9BZM2 | -0.87318  |
| 85679 | P14079 | Q96EK9 | -0.78428  |
| 85680 | P14079 | O60890 | -0.6322   |
| 85681 | P14079 | Q6TDP4 | -0.55652  |
| 85682 | P14079 | Q96RD0 | -1.2314   |
| 85683 | P14079 | Q71U36 | -0.1734   |
| 85684 | P14079 | P41222 | -0.30838  |
| 85685 | P14079 | Q99707 | -0.24565  |
| 85686 | P14079 | Q17R55 | -0.77815  |
| 85687 | P14079 | Q8NDI1 | -0.22802  |
| 85688 | P14079 | Q8N3K9 | -0.22758  |
| 85689 | P14079 | Q9NZW4 | -1.2698   |
| 85690 | P14079 | Q8WY64 | -0.22745  |
| 85691 | P14079 | Q86YS7 | -0.41923  |
| 85692 | P14079 | P03372 | -0.22745  |
| 85693 | P14079 | P49841 | -0.22833  |
| 85694 | P14079 | Q96PZ7 | -0.77815  |
| 85695 | P14079 | Q5T2N8 | -0.97035  |
| 85696 | P14079 | P26439 | -1.0568   |
| 85697 | P14079 | Q9NVE5 | -0.77524  |
| 85698 | P14079 | Q9UJ71 | -1.1154   |
| 85699 | P14079 | Q9NQV5 | -0.02627  |
| 85700 | P14079 | P58180 | -1.2314   |
| 85701 | P14079 | Q9HB15 | -1.0585   |
| 85702 | P14079 | P31267 | -0.20261  |
| 85703 | P14079 | Q99593 | -0.81015  |
| 85704 | P14079 | Q8NGF8 | -1.2314   |
| 85705 | P14079 | P58062 | -0.22038  |
| 85706 | P14079 | P60903 | -0.40033  |
| 85707 | P14079 | Q02086 | -0.21612  |
| 85708 | P14079 | Q15884 | -0.80224  |
| 85709 | P14079 | Q14694 | -0.30656  |
| 85710 | P14079 | Q8NI77 | -0.42877  |
| 85711 | P14079 | Q6UWP2 | -1.7104   |
| 85712 | P14079 | O00142 | -0.84341  |
| 85713 | P14079 | Q9NTU7 | -0.73304  |
| 85714 | P14079 | Q9P0G3 | -1.3318   |
| 85715 | P14079 | P49795 | -0.27908  |
| 85716 | P14079 | Q96GX5 | -0.2274   |
| 85717 | P14079 | O96028 | -0.22737  |
| 85718 | P14079 | O95248 | -0.91146  |
| 85719 | P14079 | P46597 | -0.12852  |
| 85720 | P14079 | Q96DN2 | -0.863    |
| 85721 | P14079 | Q96IZ6 | -0.21342  |
| 85722 | P14079 | Q9HAT0 | -0.28079  |
| 85723 | P14079 | Q13635 | -0.27669  |
| 85724 | P14079 | Q8N2C3 | -0.33597  |
| 85725 | P14079 | Q8TEY7 | -0.34907  |
| 85726 | P14079 | P15056 | -0.48267  |
| 85727 | P14079 | Q9UNK0 | -0.91655  |
| 85728 | P14079 | Q13748 | -0.172    |

|       |        |        |          |
|-------|--------|--------|----------|
| 85729 | P14079 | Q9UHG2 | -0.80455 |
| 85730 | P14079 | Q9NR30 | -0.65078 |
| 85731 | P14079 | Q8N2M4 | -0.77815 |
| 85732 | P14079 | Q13029 | -0.22735 |
| 85733 | P14079 | Q11128 | -0.61926 |
| 85734 | P14079 | Q9UBT7 | -0.18303 |
| 85735 | P14079 | Q8WVE7 | -0.77815 |
| 85736 | P14079 | Q86WK6 | -1.4746  |
| 85737 | P14079 | Q96R48 | -1.2314  |
| 85738 | P14079 | O14967 | -0.8315  |
| 85739 | P14079 | Q9Y3N9 | -1.2314  |
| 85740 | P14079 | Q9ULQ1 | -0.57472 |
| 85741 | P14079 | O60231 | -0.59561 |
| 85742 | P14079 | Q86UV5 | -0.49136 |
| 85743 | P14079 | P18075 | -0.22741 |
| 85744 | P14079 | Q6ZMP0 | -1.1523  |
| 85745 | P14079 | Q9BUP0 | -0.22547 |
| 85746 | P14079 | O00624 | -1.177   |
| 85747 | P14079 | P41159 | -0.38483 |
| 85748 | P14079 | Q8NGE1 | -1.2314  |
| 85749 | P14079 | P11049 | -0.10183 |
| 85750 | P14079 | Q8TE99 | -0.82182 |
| 85751 | P14079 | Q5JQS5 | -1.2314  |
| 85752 | P14079 | Q05655 | -0.19838 |
| 85753 | P14079 | Q5T1A1 | -0.77815 |
| 85754 | P14079 | P11055 | -0.26946 |
| 85755 | P14079 | Q3MJ13 | -0.22801 |
| 85756 | P14079 | Q9NSE7 | -0.59593 |
| 85757 | P14079 | Q96F81 | -0.82551 |
| 85758 | P14079 | Q9Y620 | -0.36341 |
| 85759 | P14079 | P22362 | -0.95509 |
| 85760 | P14079 | P05014 | -0.70359 |
| 85761 | P14079 | P17655 | -0.27943 |
| 85762 | P14079 | P08637 | -1.5694  |
| 85763 | P14079 | Q9Y661 | -1.2392  |
| 85764 | P14079 | O95466 | -0.21835 |
| 85765 | P14079 | Q6H9L7 | -0.38728 |
| 85766 | P14079 | Q6P995 | -0.76459 |
| 85767 | P14079 | P06239 | -0.33529 |
| 85768 | P14079 | D6R9N7 | -0.77524 |
| 85769 | P14079 | P56470 | -0.3968  |
| 85770 | P14079 | Q8N119 | -1.4134  |
| 85771 | P14079 | Q8TEC5 | -0.2274  |
| 85772 | P14079 | Q5MNZ6 | -0.22604 |
| 85773 | P14079 | Q9BY66 | -0.97242 |
| 85774 | P14079 | Q14C86 | -0.95999 |
| 85775 | P14079 | Q86YJ7 | -0.22741 |
| 85776 | P14079 | Q92928 | -0.95037 |
| 85777 | P14079 | Q9BX74 | -0.98877 |
| 85778 | P14079 | P61366 | -1.2584  |
| 85779 | P14079 | O15438 | -1.5214  |
| 85780 | P14079 | Q01851 | -0.2274  |
| 85781 | P14079 | Q9BY12 | -0.12265 |
| 85782 | P14079 | P41247 | -0.43939 |
| 85783 | P14079 | Q96RD1 | -1.2314  |
| 85784 | P14079 | Q6IEY1 | -1.2314  |
| 85785 | P14079 | Q9BYB4 | -0.22782 |
| 85786 | P14079 | Q00888 | -0.80086 |
| 85787 | P14079 | O14492 | -0.44647 |
| 85788 | P14079 | P31323 | -0.22706 |
| 85789 | P14079 | P13521 | -0.61718 |
| 85790 | P14079 | O43525 | -1.1874  |
| 85791 | P14079 | Q7Z406 | -0.42647 |
| 85792 | P14079 | P14061 | -0.75278 |
| 85793 | P14079 | P21917 | -0.51726 |
| 85794 | P14079 | Q16854 | -0.65476 |
| 85795 | P14079 | Q15818 | -0.41342 |
| 85796 | P14079 | Q9BRT8 | -0.78428 |
| 85797 | P14079 | Q96AQ8 | -0.62143 |
| 85798 | P14079 | O43916 | -0.67949 |
| 85799 | P14079 | Q9H4G1 | -0.94572 |
| 85800 | P14079 | Q96QD8 | -1.276   |
| 85801 | P14079 | O95897 | -0.80633 |
| 85802 | P14079 | P05112 | -0.1482  |
| 85803 | P14079 | Q5W188 | -0.94572 |
| 85804 | P14079 | P07355 | -0.21105 |

|       |        |        |           |
|-------|--------|--------|-----------|
| 85805 | P14079 | Q3SY69 | -0.79105  |
| 85806 | P14079 | Q6GTS8 | -1.3467   |
| 85807 | P14079 | Q9NS66 | -1.3154   |
| 85808 | P14079 | O60478 | -0.99591  |
| 85809 | P14079 | O95259 | -0.50701  |
| 85810 | P14079 | Q9Y5H4 | -1.2343   |
| 85811 | P14079 | O95452 | -0.91314  |
| 85812 | P14079 | Q15825 | -0.99028  |
| 85813 | P14079 | Q9BY76 | -0.63916  |
| 85814 | P14079 | Q9UHY1 | -0.2274   |
| 85815 | P14079 | Q9Y4W6 | -0.73742  |
| 85816 | P14079 | Q2T9J0 | -0.66781  |
| 85817 | P14079 | Q969E3 | -0.8262   |
| 85818 | P14079 | Q86VZ1 | -1.2581   |
| 85819 | P14079 | O14556 | -0.14778  |
| 85820 | P14079 | P25021 | -1.4742   |
| 85821 | P14079 | Q96HF1 | -0.31004  |
| 85822 | P14079 | Q8N122 | -0.22739  |
| 85823 | P14079 | O60806 | -0.54382  |
| 85824 | P14079 | P80192 | -0.62556  |
| 85825 | P14079 | O75897 | -0.34125  |
| 85826 | P14079 | P43005 | -0.9707   |
| 85827 | P14079 | Q16623 | -0.49847  |
| 85828 | P14079 | Q86X52 | -0.95409  |
| 85829 | P14079 | A8TX70 | -1.271    |
| 85830 | P14079 | Q8WXX3 | -0.22731  |
| 85831 | P14079 | P01571 | -0.70359  |
| 85832 | P14079 | Q6UX98 | -0.94083  |
| 85833 | P14079 | Q5T700 | -0.77815  |
| 85834 | P14079 | Q9Y585 | -1.2314   |
| 85835 | P14079 | Q9Y5X0 | -0.14717  |
| 85836 | P14079 | Q15262 | -0.71251  |
| 85837 | P14079 | Q95239 | -0.25296  |
| 85838 | P14079 | P49763 | -1.0687   |
| 85839 | P14079 | Q562E7 | -0.22741  |
| 85840 | P14079 | Q13507 | -0.69165  |
| 85841 | P14079 | P01023 | -0.30708  |
| 85842 | P14079 | P07101 | -0.23043  |
| 85843 | P14079 | Q02509 | -0.89796  |
| 85844 | P14079 | Q9NXR8 | -0.2273   |
| 85845 | P14079 | Q16881 | -0.21853  |
| 85846 | P14079 | Q7Z3E5 | -0.22731  |
| 85847 | P14079 | O14958 | -0.3197   |
| 85848 | P14079 | Q8IUC8 | -0.65284  |
| 85849 | P14079 | Q7RTR2 | -0.47215  |
| 85850 | P14079 | Q13418 | -0.35332  |
| 85851 | P14079 | P29973 | -1.6033   |
| 85852 | P14079 | O75356 | -0.20698  |
| 85853 | P14079 | P02790 | -0.21682  |
| 85854 | P14079 | Q6NUS8 | -0.90579  |
| 85855 | P14079 | Q6P531 | -0.83048  |
| 85856 | P14079 | Q9H2A2 | -0.95306  |
| 85857 | P14079 | Q8NGG8 | -1.2314   |
| 85858 | P14079 | Q5ZPR3 | -0.2863   |
| 85859 | P14079 | O95460 | -0.22855  |
| 85860 | P14079 | Q16552 | -0.43448  |
| 85861 | P14079 | Q8NGK3 | -1.2314   |
| 85862 | P14079 | A8MXQ7 | -0.22742  |
| 85863 | P14079 | Q6A555 | -0.51911  |
| 85864 | P14079 | Q5VWZ2 | -0.1198   |
| 85865 | P14079 | Q8NI28 | -0.77815  |
| 85866 | P14079 | P51677 | -1.2118   |
| 85867 | P14079 | Q8TDM0 | -0.079022 |
| 85868 | P14079 | Q13085 | -0.4538   |
| 85869 | P14079 | Q9BQE5 | -1.313    |
| 85870 | P14079 | P60981 | -0.15132  |
| 85871 | P14079 | Q8WTS1 | -0.24772  |
| 85872 | P14079 | Q13319 | -0.35761  |
| 85873 | P14079 | Q9UJU6 | -0.47012  |
| 85874 | P14079 | Q6X9E4 | -0.10663  |
| 85875 | P14079 | Q96KN9 | -0.9224   |
| 85876 | P14079 | Q9BTT6 | -0.2372   |
| 85877 | P14079 | Q8NC01 | -1.1955   |
| 85878 | P14079 | Q9H903 | -0.8594   |
| 85879 | P14079 | P01619 | -0.98486  |
| 85880 | P14079 | P57739 | -0.55708  |

|       |        |        |           |
|-------|--------|--------|-----------|
| 85881 | P14079 | Q6UXA7 | -0.94853  |
| 85882 | P14079 | Q4L235 | -1.1925   |
| 85883 | P14079 | Q29836 | -1        |
| 85884 | P14079 | Q92526 | -0.51497  |
| 85885 | P14079 | O00206 | -0.22745  |
| 85886 | P14079 | Q96C19 | -0.32638  |
| 85887 | P14079 | Q9H227 | -0.2197   |
| 85888 | P14079 | Q9H5U6 | -0.24799  |
| 85889 | P14079 | O00584 | -0.92936  |
| 85890 | P14079 | Q96CQ1 | -0.69511  |
| 85891 | P14079 | Q6XZB0 | -1.3567   |
| 85892 | P14079 | Q9ULI0 | -0.93112  |
| 85893 | P14079 | Q7Z3S9 | -1.0587   |
| 85894 | P14079 | Q6UX73 | -0.80633  |
| 85895 | P14079 | P07451 | -0.097964 |
| 85896 | P14079 | Q9H069 | -0.22737  |
| 85897 | P14079 | P01625 | -1        |
| 85898 | P14079 | P46821 | -0.071372 |
| 85899 | P14079 | P49798 | -0.45238  |
| 85900 | P14079 | Q8IZ08 | -1.3154   |
| 85901 | P14079 | P38484 | -1.1144   |
| 85902 | P14079 | Q5TZF3 | -0.26849  |
| 85903 | P14079 | P42694 | -0.56875  |
| 85904 | P14079 | Q6Q788 | -0.41303  |
| 85905 | P14079 | Q8IWZ5 | -0.36051  |
| 85906 | P14079 | O43613 | -1.4056   |
| 85907 | P14079 | O95471 | -0.032136 |
| 85908 | P14079 | Q9P2C4 | -0.72881  |
| 85909 | P14079 | P43308 | -0.73045  |
| 85910 | P14079 | Q13304 | -1.3744   |
| 85911 | P14079 | P48507 | -0.26263  |
| 85912 | P14079 | Q6UXY8 | -0.77815  |
| 85913 | P14079 | Q8IVM8 | -0.87582  |
| 85914 | P14079 | Q14993 | -1.4401   |
| 85915 | P14079 | Q6ZRH7 | -1.2992   |
| 85916 | P14079 | P01880 | -1.5683   |
| 85917 | P14079 | Q8N3E9 | -0.48691  |
| 85918 | P14079 | P46092 | -1.3806   |
| 85919 | P14079 | Q8TCU5 | -0.43192  |
| 85920 | P14079 | P20849 | -0.72993  |
| 85921 | P14079 | P50993 | -0.64158  |
| 85922 | P14079 | Q96AG4 | -0.82635  |
| 85923 | P14079 | Q6ZP01 | -0.53268  |
| 85924 | P14079 | Q96EX3 | -0.22773  |
| 85925 | P14079 | P10915 | -1.1811   |
| 85926 | P14079 | P35070 | -1.3746   |
| 85927 | P14079 | O00451 | -0.29985  |
| 85928 | P14079 | Q9NV35 | -0.18916  |
| 85929 | P14079 | Q5T2D2 | -0.31287  |
| 85930 | P14079 | P05362 | -0.36049  |
| 85931 | P14079 | Q9Y6K8 | -0.60576  |
| 85932 | P14079 | Q6ZMI3 | -1.4117   |
| 85933 | P14079 | Q7L7X3 | -0.68552  |
| 85934 | P14079 | Q96PV0 | -0.53635  |
| 85935 | P14079 | A6NGN9 | -0.80633  |
| 85936 | P14079 | Q6JQN1 | -0.67434  |
| 85937 | P14079 | Q9BYX2 | -0.77283  |
| 85938 | P14079 | Q14957 | -0.7852   |
| 85939 | P14079 | Q99941 | -0.22231  |
| 85940 | P14079 | P10071 | -0.22695  |
| 85941 | P14079 | Q96MI6 | -0.1657   |
| 85942 | P14079 | Q8NGN5 | -1.2314   |
| 85943 | P14079 | P63092 | -0.6954   |
| 85944 | P14079 | P04062 | -0.45583  |
| 85945 | P14079 | Q5T7P6 | -0.77815  |
| 85946 | P14079 | Q7Z7M1 | -1.3662   |
| 85947 | P14079 | Q9BXJ7 | -1.2361   |
| 85948 | P14079 | Q96PG1 | -0.77815  |
| 85949 | P14079 | P31997 | -0.76084  |
| 85950 | P14079 | P00750 | -0.52661  |
| 85951 | P14079 | P01760 | -1        |
| 85952 | P14079 | Q8NBF6 | -0.7681   |
| 85953 | P14079 | Q5SZK8 | -1.463    |
| 85954 | P14079 | P48201 | -0.67085  |
| 85955 | P14079 | Q5TF21 | -0.77815  |
| 85956 | P14079 | Q92956 | -0.37787  |



|       |        |        |           |
|-------|--------|--------|-----------|
| 85957 | P14079 | Q06124 | -0.22742  |
| 85958 | P14079 | Q8NDX2 | -0.94267  |
| 85959 | P14079 | Q9Y2S2 | -0.50276  |
| 85960 | P14079 | Q68DA7 | -0.21651  |
| 85961 | P14079 | P51689 | -0.44589  |
| 85962 | P14079 | Q86SP6 | -1.1818   |
| 85963 | P14079 | Q9ULL4 | -0.76613  |
| 85964 | P14079 | Q08AH3 | -0.98194  |
| 85965 | P14079 | P37287 | -0.37779  |
| 85966 | P14079 | P55786 | -0.28852  |
| 85967 | P14079 | Q99643 | -0.56672  |
| 85968 | P14079 | P51679 | -1.3423   |
| 85969 | P14079 | Q5JS13 | -0.71751  |
| 85970 | P14079 | Q8IVW4 | -1.1015   |
| 85971 | P14079 | Q9BZJ7 | -1.3166   |
| 85972 | P14079 | Q9UDY8 | -0.22744  |
| 85973 | P14079 | O14669 | -1.6479   |
| 85974 | P14079 | Q9H4G0 | -0.35349  |
| 85975 | P14079 | Q9UNQ0 | -0.75773  |
| 85976 | P14079 | Q6NUT2 | -1.355    |
| 85977 | P14079 | Q5H9U9 | -0.98241  |
| 85978 | P14079 | Q8N819 | -0.36257  |
| 85979 | P14079 | P07998 | -0.21554  |
| 85980 | P14079 | Q9Y5F7 | -1.2343   |
| 85981 | P14079 | Q2VIQ3 | -0.30139  |
| 85982 | P14079 | Q96P68 | -1.2581   |
| 85983 | P14079 | O95343 | -0.22952  |
| 85984 | P14079 | Q9Y663 | -0.64658  |
| 85985 | P14079 | Q9UN19 | -0.57875  |
| 85986 | P14079 | Q7Z769 | -0.77815  |
| 85987 | P14079 | P13746 | -0.91994  |
| 85988 | P14079 | Q92904 | -0.32273  |
| 85989 | P14079 | P32418 | -0.52331  |
| 85990 | P14079 | Q9Y6X6 | -0.2227   |
| 85991 | P14079 | Q9H2X6 | -0.22741  |
| 85992 | P14079 | Q6UXH9 | -1.0132   |
| 85993 | P14079 | A1KZ92 | -1.089    |
| 85994 | P14079 | P33032 | -0.96289  |
| 85995 | P14079 | Q8IVV8 | -0.97472  |
| 85996 | P14079 | Q8NGA8 | -1.2314   |
| 85997 | P14079 | Q96J87 | -0.42056  |
| 85998 | P14079 | Q5TBA9 | -0.31195  |
| 85999 | P14079 | P52888 | -0.60275  |
| 86000 | P14079 | P13797 | -0.2275   |
| 86001 | P14079 | Q76099 | -1.3111   |
| 86002 | P14079 | Q9HCU4 | -1.2569   |
| 86003 | P14079 | O75602 | -0.22744  |
| 86004 | P14079 | P0C672 | -0.77815  |
| 86005 | P14079 | Q8NBM8 | -1.0721   |
| 86006 | P14079 | P20783 | -0.66112  |
| 86007 | P14079 | Q96BA8 | -0.22884  |
| 86008 | P14079 | P78324 | -1.248    |
| 86009 | P14079 | Q99727 | -0.82443  |
| 86010 | P14079 | Q8WVZ1 | -0.94083  |
| 86011 | P14079 | P98170 | -0.22736  |
| 86012 | P14079 | Q96NB2 | -0.91721  |
| 86013 | P14079 | P51684 | -1.2116   |
| 86014 | P14079 | Q9UKT6 | -0.47607  |
| 86015 | P14079 | Q8TAV5 | -0.80633  |
| 86016 | P14079 | P33765 | -1.1541   |
| 86017 | P14079 | Q86XE0 | -0.092085 |
| 86018 | P14079 | Q9H254 | -0.22773  |
| 86019 | P14079 | Q6ZMZ0 | -0.48232  |
| 86020 | P14079 | Q9H169 | -0.33929  |
| 86021 | P14079 | Q8NGN3 | -1.2314   |
| 86022 | P14079 | Q9H479 | -0.57362  |
| 86023 | P14079 | Q8IVF2 | -0.20437  |
| 86024 | P14079 | P06734 | -1.4809   |
| 86025 | P14079 | Q8NEZ3 | -0.22629  |
| 86026 | P14079 | P01033 | -0.28573  |
| 86027 | P14079 | P61224 | -0.27818  |
| 86028 | P14079 | Q9P1Z3 | -1.5688   |
| 86029 | P14079 | Q8NHG8 | -0.49562  |
| 86030 | P14079 | P28482 | -0.22741  |
| 86031 | P14079 | P22888 | -0.5887   |
| 86032 | P14079 | Q9UJ90 | -0.80096  |

|       |        |        |          |
|-------|--------|--------|----------|
| 86033 | P14079 | Q96AX9 | -0.22719 |
| 86034 | P14079 | P53582 | -0.45822 |
| 86035 | P14079 | Q9H6R0 | -0.35639 |
| 86036 | P14079 | Q9UKL4 | -0.96372 |
| 86037 | P14079 | O75264 | -0.77815 |
| 86038 | P14079 | Q96HE7 | -0.57651 |
| 86039 | P14079 | P09958 | -0.47215 |
| 86040 | P14079 | O60721 | -0.76827 |
| 86041 | P14079 | Q15622 | -1.2314  |
| 86042 | P14079 | P09758 | -0.89293 |
| 86043 | P14079 | Q7Z410 | -1.6686  |
| 86044 | P14079 | Q8TCQ1 | -1.234   |
| 86045 | P14079 | P58400 | -0.60602 |
| 86046 | P14079 | P57727 | -1.4308  |
| 86047 | P14079 | Q6ZWJ8 | -0.80633 |
| 86048 | P14079 | Q92784 | -0.24265 |
| 86049 | P14079 | Q9H0X4 | -0.77815 |
| 86050 | P14079 | A6NKT7 | -0.19972 |
| 86051 | P14079 | P40227 | -0.38614 |
| 86052 | P14079 | Q8IYA2 | -0.16936 |
| 86053 | P14079 | Q8NGI4 | -1.2314  |
| 86054 | P14079 | Q12778 | -0.78895 |
| 86055 | P14079 | Q15828 | -0.95808 |
| 86056 | P14079 | Q9BS86 | -0.80168 |
| 86057 | P14079 | O43251 | -0.27619 |
| 86058 | P14079 | Q8WTT0 | -0.72055 |
| 86059 | P14079 | Q9UBC2 | -0.22741 |
| 86060 | P14079 | Q96GD4 | -0.85671 |
| 86061 | P14079 | P51153 | -0.65264 |
| 86062 | P14079 | Q9NY47 | -0.87247 |
| 86063 | P14079 | Q96N66 | -0.50354 |
| 86064 | P14079 | P01011 | -0.16337 |
| 86065 | P14079 | Q5TCX8 | -1.303   |
| 86066 | P14079 | P01594 | -1       |
| 86067 | P14079 | Q8N103 | -0.57209 |
| 86068 | P14079 | Q9UHF5 | -0.8357  |
| 86069 | P14079 | Q9H8L6 | -0.53668 |
| 86070 | P14079 | Q92186 | -0.44559 |
| 86071 | P14079 | Q9NR48 | -0.22709 |
| 86072 | P14079 | Q7Z6P3 | -1.2215  |
| 86073 | P14079 | Q9NVE7 | -0.90069 |
| 86074 | P14079 | Q99879 | -0.92425 |
| 86075 | P14079 | Q6ZS81 | -0.77815 |
| 86076 | P14079 | P11309 | -0.65657 |
| 86077 | P14079 | Q5SY16 | -0.75458 |
| 86078 | P14079 | Q16821 | -0.66019 |
| 86079 | P14079 | Q07912 | -0.72433 |
| 86080 | P14079 | Q969Z4 | -0.76997 |
| 86081 | P14079 | Q9BVI0 | -0.22672 |
| 86082 | P14079 | Q99801 | -0.24558 |
| 86083 | P14079 | Q5T9L3 | -0.44101 |
| 86084 | P14079 | Q5TEZ5 | -0.26849 |
| 86085 | P14079 | Q9C0B6 | -0.57377 |
| 86086 | P14079 | P40617 | -0.28779 |
| 86087 | P14079 | Q8N149 | -0.91125 |
| 86088 | P14079 | Q13177 | -0.23647 |
| 86089 | P14079 | P04003 | -0.22659 |
| 86090 | P14079 | Q05586 | -0.44288 |
| 86091 | P14079 | Q9NRE1 | -1.3995  |
| 86092 | P14079 | Q5SVS4 | -0.68669 |
| 86093 | P14079 | Q8NGZ3 | -1.2314  |
| 86094 | P14079 | Q3KPI0 | -0.77815 |
| 86095 | P14079 | Q8N2Y8 | -0.22619 |
| 86096 | P14079 | Q9GZX9 | -1.0052  |
| 86097 | P14079 | P21731 | -0.68679 |
| 86098 | P14079 | P58418 | -0.9012  |
| 86099 | P14079 | P61764 | -0.20329 |
| 86100 | P14079 | P21453 | -0.81688 |
| 86101 | P14079 | Q8WWI1 | -0.22711 |
| 86102 | P14079 | P0C842 | -0.34347 |
| 86103 | P14079 | Q8N7X4 | -0.26849 |
| 86104 | P14079 | P12104 | -0.44966 |
| 86105 | P14079 | P0C628 | -1.2314  |
| 86106 | P14079 | Q15223 | -0.49846 |
| 86107 | P14079 | P61011 | -0.42886 |
| 86108 | P14079 | P15514 | -0.61417 |

|       |        |        |           |
|-------|--------|--------|-----------|
| 86109 | P14079 | Q05D32 | -0.33225  |
| 86110 | P14079 | P56177 | -0.22674  |
| 86111 | P14079 | P09923 | -1.205    |
| 86112 | P14079 | Q43927 | -0.69424  |
| 86113 | P14079 | Q9Y226 | -0.98162  |
| 86114 | P14079 | Q9NTI2 | -1.1524   |
| 86115 | P14079 | P29120 | -0.44675  |
| 86116 | P14079 | Q15109 | -1.0344   |
| 86117 | P14079 | Q7L576 | -0.072146 |
| 86118 | P14079 | Q96AP7 | -0.80494  |
| 86119 | P14079 | O00238 | -0.87779  |
| 86120 | P14079 | P50876 | -0.94544  |
| 86121 | P14079 | Q9BV94 | -0.84596  |
| 86122 | P14079 | Q13131 | -0.33386  |
| 86123 | P14079 | P48549 | -0.69381  |
| 86124 | P14079 | Q9GZY0 | -0.35209  |
| 86125 | P14079 | Q13336 | -1.1174   |
| 86126 | P14079 | Q9H6B9 | -1.022    |
| 86127 | P14079 | Q86YS6 | -1.2215   |
| 86128 | P14079 | P18206 | -0.1778   |
| 86129 | P14079 | P06126 | -0.50023  |
| 86130 | P14079 | A6NFX1 | -0.79981  |
| 86131 | P14079 | Q8WU08 | -1.4672   |
| 86132 | P14079 | P43489 | -0.84601  |
| 86133 | P14079 | Q6UQ28 | -0.8156   |
| 86134 | P14079 | Q6UWB4 | -1.3709   |
| 86135 | P14079 | Q9GZX3 | -0.66706  |
| 86136 | P14079 | Q75319 | -0.70737  |
| 86137 | P14079 | Q5VVW2 | -0.81798  |
| 86138 | P14079 | P50607 | -0.3374   |
| 86139 | P14079 | Q7Z7A4 | -0.76086  |
| 86140 | P14079 | O60909 | -0.53324  |
| 86141 | P14079 | P26006 | -0.46247  |
| 86142 | P14079 | Q96QS3 | -0.14537  |
| 86143 | P14079 | P17706 | -0.30884  |
| 86144 | P14079 | Q7Z6L0 | -0.98103  |
| 86145 | P14079 | P08571 | -0.44782  |
| 86146 | P14079 | Q9NRM2 | -0.12467  |
| 86147 | P14079 | Q9Y490 | -0.22898  |
| 86148 | P14079 | P30954 | -1.3581   |
| 86149 | P14079 | Q99928 | -0.8492   |
| 86150 | P14079 | Q96RL6 | -1.0019   |
| 86151 | P14079 | Q6RI45 | -0.22797  |
| 86152 | P14079 | O95255 | -1.4379   |
| 86153 | P14079 | Q9UK85 | -1.0594   |
| 86154 | P14079 | O60902 | -0.25083  |
| 86155 | P14079 | Q9NRA1 | -0.44172  |
| 86156 | P14079 | Q75083 | -0.31346  |
| 86157 | P14079 | P22732 | -0.44654  |
| 86158 | P14079 | Q16880 | -0.74218  |
| 86159 | P14079 | O95185 | -1.1415   |
| 86160 | P14079 | A6NM43 | -0.62789  |
| 86161 | P14079 | Q9Y5I4 | -1.341    |
| 86162 | P14079 | Q96Q04 | -1.6986   |
| 86163 | P14079 | P63098 | -0.22762  |
| 86164 | P14079 | Q6ZTQ4 | -1.2343   |
| 86165 | P14079 | Q9Y680 | -0.36911  |
| 86166 | P14079 | Q9UPC5 | -0.77497  |
| 86167 | P14079 | Q9UHR4 | -0.22737  |
| 86168 | P14079 | Q9NZU1 | -1.2776   |
| 86169 | P14079 | Q8TBB5 | -0.22158  |
| 86170 | P14079 | P60509 | -0.97472  |
| 86171 | P14079 | Q13285 | -0.22843  |
| 86172 | P14079 | Q15915 | -0.37047  |
| 86173 | P14079 | P01568 | -0.81438  |
| 86174 | P14079 | O95199 | -0.22723  |
| 86175 | P14079 | Q8NGJ6 | -1.2314   |
| 86176 | P14079 | Q03519 | -0.37054  |
| 86177 | P14079 | Q16706 | -0.40145  |
| 86178 | P14079 | P49746 | -0.93709  |
| 86179 | P14079 | P62745 | -0.32555  |
| 86180 | P14079 | Q13291 | -0.12454  |
| 86181 | P14079 | P05161 | -0.31026  |
| 86182 | P14079 | Q09013 | -0.57467  |
| 86183 | P14079 | P62491 | -0.42906  |
| 86184 | P14079 | P85299 | -0.054711 |

|       |        |        |          |
|-------|--------|--------|----------|
| 86185 | P14079 | Q8NE63 | -1.3253  |
| 86186 | P14079 | A6NEC2 | -0.79016 |
| 86187 | P14079 | A8MPX8 | -0.34347 |
| 86188 | P14079 | Q8TED9 | -0.14388 |
| 86189 | P14079 | Q99742 | -0.24662 |
| 86190 | P14079 | Q13206 | -0.89549 |
| 86191 | P14079 | Q9H8X2 | -0.80212 |
| 86192 | P14079 | Q9H2J7 | -1.1949  |
| 86193 | P14079 | Q96FL9 | -0.57862 |
| 86194 | P14079 | Q6NUM9 | -0.58987 |
| 86195 | P14079 | P28356 | -0.22609 |
| 86196 | P14079 | P46934 | -0.22742 |
| 86197 | P14079 | Q969T4 | -0.70683 |
| 86198 | P14079 | P80421 | -0.81822 |
| 86199 | P14079 | Q92833 | -0.22167 |
| 86200 | P14079 | Q99218 | -1.2029  |
| 86201 | P14079 | P43146 | -0.309   |
| 86202 | P14079 | Q587J7 | -0.38684 |
| 86203 | P14079 | Q9BR10 | -0.99344 |
| 86204 | P14079 | Q96HN2 | -0.1813  |
| 86205 | P14079 | Q9P2N2 | -0.61744 |
| 86206 | P14079 | Q7Z444 | -1.4441  |
| 86207 | P14079 | A6NNL5 | -0.80633 |
| 86208 | P14079 | Q6ZN44 | -1.0946  |
| 86209 | P14079 | P29371 | -0.95166 |
| 86210 | P14079 | Q96PP8 | -0.91785 |
| 86211 | P14079 | Q8TEB7 | -0.89826 |
| 86212 | P14079 | P08686 | -0.86269 |
| 86213 | P14079 | P57773 | -0.97546 |
| 86214 | P14079 | Q9Y2P4 | -1.5298  |
| 86215 | P14079 | Q08828 | -0.74352 |
| 86216 | P14079 | P33151 | -0.99492 |
| 86217 | P14079 | P59551 | -1.0957  |
| 86218 | P14079 | P20848 | -0.76468 |
| 86219 | P14079 | Q86SQ3 | -1.4035  |
| 86220 | P14079 | P56539 | -0.22119 |
| 86221 | P14079 | O14525 | -0.85628 |
| 86222 | P14079 | O43861 | -0.88904 |
| 86223 | P14079 | Q16659 | -0.50193 |
| 86224 | P14079 | O60422 | -0.22532 |
| 86225 | P14079 | P0C617 | -1.2314  |
| 86226 | P14079 | Q16563 | -1.0506  |
| 86227 | P14079 | P07948 | -0.24113 |
| 86228 | P14079 | P0CG32 | -0.16722 |
| 86229 | P14079 | O43521 | -0.10659 |
| 86230 | P14079 | Q9BZG2 | -0.77505 |
| 86231 | P14079 | A8K7I4 | -1.5762  |
| 86232 | P14079 | Q76I76 | -0.49168 |
| 86233 | P14079 | Q8NGK2 | -1.2314  |
| 86234 | P14079 | Q94832 | -0.55451 |
| 86235 | P14079 | Q8WUU4 | -0.22089 |
| 86236 | P14079 | Q9H461 | -0.55389 |
| 86237 | P14079 | Q8TDS7 | -1.3154  |
| 86238 | P14079 | Q8IZS7 | -0.96439 |
| 86239 | P14079 | Q9H000 | -0.79734 |
| 86240 | P14079 | Q9P0X4 | -0.75803 |
| 86241 | P14079 | A1L1A6 | -0.77815 |
| 86242 | P14079 | Q07837 | -1.2017  |
| 86243 | P14079 | Q9BZJ3 | -1.4766  |
| 86244 | P14079 | Q96EC8 | -0.74356 |
| 86245 | P14079 | Q96JT2 | -0.87582 |
| 86246 | P14079 | Q9Y3E2 | -0.64392 |
| 86247 | P14079 | Q7Z402 | -0.77815 |
| 86248 | P14079 | Q8NG35 | -0.78458 |
| 86249 | P14079 | Q96RI9 | -1.2819  |
| 86250 | P14079 | Q9BYE2 | -1.3427  |
| 86251 | P14079 | Q8WV35 | -0.19532 |
| 86252 | P14079 | Q9BXB5 | -0.53387 |
| 86253 | P14079 | Q7Z2Z2 | -0.58429 |
| 86254 | P14079 | Q8N4F4 | -1.0444  |
| 86255 | P14079 | Q9HCT0 | -0.71214 |
| 86256 | P14079 | A6NK02 | -0.36051 |
| 86257 | P14079 | Q9BUQ8 | -0.77056 |
| 86258 | P14079 | A2VEC9 | -1.1808  |
| 86259 | P14079 | Q96K78 | -1.3662  |
| 86260 | P14079 | Q6ZWT7 | -1.0065  |

|       |        |        |           |
|-------|--------|--------|-----------|
| 86261 | P14079 | P15153 | -0.75498  |
| 86262 | P14079 | Q14721 | -0.50905  |
| 86263 | P14079 | O95847 | -0.67537  |
| 86264 | P14079 | Q16795 | -0.12005  |
| 86265 | P14079 | P55157 | -0.44902  |
| 86266 | P14079 | P14679 | -0.4221   |
| 86267 | P14079 | Q5TC63 | -1.4902   |
| 86268 | P14079 | O95988 | -0.10432  |
| 86269 | P14079 | Q6ZW05 | -0.78462  |
| 86270 | P14079 | O43707 | -0.35353  |
| 86271 | P14079 | Q96EW2 | -0.14438  |
| 86272 | P14079 | Q9H339 | -1.2314   |
| 86273 | P14079 | O00634 | -0.81224  |
| 86274 | P14079 | Q86YJ6 | -0.90181  |
| 86275 | P14079 | Q9Y342 | -0.93826  |
| 86276 | P14079 | Q8N806 | -0.82998  |
| 86277 | P14079 | Q9NZQ7 | -0.71934  |
| 86278 | P14079 | Q9BW83 | -1.1431   |
| 86279 | P14079 | Q96QS1 | -0.90945  |
| 86280 | P14079 | Q8N1L4 | -1.0066   |
| 86281 | P14079 | Q8N0S2 | -0.099991 |
| 86282 | P14079 | Q13563 | -0.29634  |
| 86283 | P14079 | Q15375 | -1.171    |
| 86284 | P14079 | B6A8C7 | -0.77815  |
| 86285 | P14079 | O75689 | -0.26468  |
| 86286 | P14079 | Q3V6T2 | -0.20755  |
| 86287 | P14079 | P17900 | -0.13505  |
| 86288 | P14079 | D6RBQ6 | -0.77524  |
| 86289 | P14079 | Q8NGY5 | -1.2314   |
| 86290 | P14079 | Q8N7Z5 | -0.22741  |
| 86291 | P14079 | Q5VZ89 | -0.67102  |
| 86292 | P14079 | Q5BVD1 | -0.9328   |
| 86293 | P14079 | Q8IXL6 | -1.1233   |
| 86294 | P14079 | Q9BYC2 | -0.24489  |
| 86295 | P14079 | A4QPH2 | -0.72052  |
| 86296 | P14079 | P11509 | -0.82842  |
| 86297 | P14079 | Q8WWI5 | -0.81531  |
| 86298 | P14079 | P22792 | -0.76776  |
| 86299 | P14079 | Q6E213 | -0.99773  |
| 86300 | P14079 | Q9BRC7 | -0.40212  |
| 86301 | P14079 | P08754 | -0.34611  |
| 86302 | P14079 | Q96K37 | -0.79981  |
| 86303 | P14079 | P04075 | -0.51292  |
| 86304 | P14079 | Q96QV1 | -0.47262  |
| 86305 | P14079 | Q14728 | -0.7477   |
| 86306 | P14079 | Q86YN1 | -0.85681  |
| 86307 | P14079 | Q6VAB6 | -0.57346  |
| 86308 | P14079 | Q96LT9 | -0.44295  |
| 86309 | P14079 | Q8TCX5 | -0.41467  |
| 86310 | P14079 | P00749 | -0.79713  |
| 86311 | P14079 | Q6AI14 | -1.1907   |
| 86312 | P14079 | Q7Z6L1 | -0.6157   |
| 86313 | P14079 | Q969Q4 | -0.71832  |
| 86314 | P14079 | Q8NH69 | -1.2314   |
| 86315 | P14079 | P08319 | -0.36269  |
| 86316 | P14079 | P30461 | -1        |
| 86317 | P14079 | P02649 | -0.26807  |
| 86318 | P14079 | Q5VU13 | -0.77815  |
| 86319 | P14079 | P63133 | -0.30686  |
| 86320 | P14079 | Q8WUJ1 | -0.73912  |
| 86321 | P14079 | Q96JQ0 | -1.2071   |
| 86322 | P14079 | Q75578 | -1.0305   |
| 86323 | P14079 | Q8IYB4 | -0.22599  |
| 86324 | P14079 | Q8NCK7 | -1.0598   |
| 86325 | P14079 | Q8N5Y8 | -0.62485  |
| 86326 | P14079 | Q9NRW1 | -0.70023  |
| 86327 | P14079 | P53420 | -1.0398   |
| 86328 | P14079 | P23946 | -1.4922   |
| 86329 | P14079 | P18510 | -0.34751  |
| 86330 | P14079 | Q14520 | -1.6651   |
| 86331 | P14079 | Q92522 | -0.77399  |
| 86332 | P14079 | Q9BY84 | -0.59     |
| 86333 | P14079 | O60496 | -0.38006  |
| 86334 | P14079 | O00764 | -0.4325   |
| 86335 | P14079 | P30484 | -1        |
| 86336 | P14079 | Q96R28 | -1.2314   |

|       |        |        |          |
|-------|--------|--------|----------|
| 86337 | P14079 | Q5BJH7 | -0.77815 |
| 86338 | P14079 | Q9Y2G4 | -0.22737 |
| 86339 | P14079 | Q96TA0 | -1.2343  |
| 86340 | P14079 | P35221 | -0.11272 |
| 86341 | P14079 | Q5MNZ9 | -0.22738 |
| 86342 | P14079 | Q9BXU7 | -0.28303 |
| 86343 | P14079 | Q14254 | -0.66894 |
| 86344 | P14079 | Q9P1W9 | -0.73039 |
| 86345 | P14079 | P00739 | -0.94638 |
| 86346 | P14079 | P53814 | -0.22793 |
| 86347 | P14079 | Q8N158 | -1.1302  |
| 86348 | P14079 | Q9UI33 | -1.1446  |
| 86349 | P14079 | P28340 | -0.21754 |
| 86350 | P14079 | Q95968 | -0.9245  |
| 86351 | P14079 | Q9BYF1 | -0.98629 |
| 86352 | P14079 | Q5TFQ8 | -0.77815 |
| 86353 | P14079 | Q9P0S3 | -0.90098 |
| 86354 | P14079 | Q9NP70 | -1.0922  |
| 86355 | P14079 | Q6PF15 | -0.21993 |
| 86356 | P14079 | P32754 | -0.38292 |
| 86357 | P14079 | Q99469 | -0.22737 |
| 86358 | P14079 | Q9P2P6 | -0.26457 |
| 86359 | P14079 | P31937 | -0.637   |
| 86360 | P14079 | P20827 | -0.45342 |
| 86361 | P14079 | P15260 | -1.1756  |
| 86362 | P14079 | P31645 | -0.35023 |
| 86363 | P14079 | P01189 | -0.63118 |
| 86364 | P14079 | Q86W24 | -1.3538  |
| 86365 | P14079 | Q9Y5Q6 | -0.8593  |
| 86366 | P14079 | O14578 | -0.94605 |
| 86367 | P14079 | Q9H0R4 | -0.27114 |
| 86368 | P14079 | Q13683 | -0.74805 |
| 86369 | P14079 | P12110 | -0.59444 |
| 86370 | P14079 | Q02548 | -0.22727 |
| 86371 | P14079 | Q95256 | -1.1092  |
| 86372 | P14079 | Q92826 | -0.22632 |
| 86373 | P14079 | O60522 | -0.56178 |
| 86374 | P14079 | Q9NXX6 | -1.2767  |
| 86375 | P14079 | Q96MF2 | -0.40993 |
| 86376 | P14079 | Q9P246 | -0.57991 |
| 86377 | P14079 | Q92609 | -0.92791 |
| 86378 | P14079 | Q96JG9 | -0.22758 |
| 86379 | P14079 | P33778 | -0.92425 |
| 86380 | P14079 | Q8NH59 | -1.2314  |
| 86381 | P14079 | Q9BUU2 | -0.21342 |
| 86382 | P14079 | Q86WB7 | -1.0087  |
| 86383 | P14079 | Q9Y2E4 | -0.1588  |
| 86384 | P14079 | Q9HAW8 | -0.9998  |
| 86385 | P14079 | P04433 | -1       |
| 86386 | P14079 | P04216 | -0.18084 |
| 86387 | P14079 | O43374 | -0.22781 |
| 86388 | P14079 | Q8NGK4 | -1.2314  |
| 86389 | P14079 | Q9NRJ5 | -0.29585 |
| 86390 | P14079 | Q9H497 | -0.57089 |
| 86391 | P14079 | P07510 | -1.1669  |
| 86392 | P14079 | Q6DKI2 | -0.12799 |
| 86393 | P14079 | Q6IEV9 | -1.2314  |
| 86394 | P14079 | P40926 | -0.18086 |
| 86395 | P14079 | Q969K4 | -0.22716 |
| 86396 | P14079 | P49441 | -0.37544 |
| 86397 | P14079 | Q5K4L6 | -1.4451  |
| 86398 | P14079 | Q86WA9 | -0.95258 |
| 86399 | P14079 | Q8IZF0 | -1.1098  |
| 86400 | P14079 | Q70SY1 | -0.18144 |
| 86401 | P14079 | Q6UWV2 | -0.37735 |
| 86402 | P14079 | Q01167 | -0.77505 |
| 86403 | P14079 | Q8N5I4 | -1.1307  |
| 86404 | P14079 | Q9Y6N5 | -0.21523 |
| 86405 | P14079 | Q15496 | -0.70406 |
| 86406 | P14079 | P25874 | -0.57621 |
| 86407 | P14079 | Q16850 | -1.1847  |
| 86408 | P14079 | Q96S38 | -0.92991 |
| 86409 | P14079 | Q9BZ81 | -0.26849 |
| 86410 | P14079 | O43825 | -0.74321 |
| 86411 | P14079 | Q15392 | -0.41888 |
| 86412 | P14079 | Q8WTR2 | -0.55047 |

|       |        |        |           |
|-------|--------|--------|-----------|
| 86413 | P14079 | P04004 | -0.89367  |
| 86414 | P14079 | Q15771 | -1.2523   |
| 86415 | P14079 | P01598 | -1        |
| 86416 | P14079 | Q9Y228 | -0.099859 |
| 86417 | P14079 | Q9Y4F3 | -0.90521  |
| 86418 | P14079 | Q96F15 | -0.99206  |
| 86419 | P14079 | Q9H5V8 | -1.5917   |
| 86420 | P14079 | Q8IWK6 | -1.3796   |
| 86421 | P14079 | Q06055 | -0.76294  |
| 86422 | P14079 | Q6UXU4 | -0.77815  |
| 86423 | P14079 | Q08170 | -0.22318  |
| 86424 | P14079 | P34925 | -0.84698  |
| 86425 | P14079 | Q8WXS4 | -1.0145   |
| 86426 | P14079 | Q8WZ75 | -1.0432   |
| 86427 | P14079 | O60336 | -0.22775  |
| 86428 | P14079 | Q8N653 | -0.22713  |
| 86429 | P14079 | Q6UXP3 | -0.77815  |
| 86430 | P14079 | Q5VUY0 | -0.25216  |
| 86431 | P14079 | Q8IYM1 | -0.22385  |
| 86432 | P14079 | Q9P2K8 | -1.1333   |
| 86433 | P14079 | O60880 | -0.22741  |
| 86434 | P14079 | Q96BF3 | -0.97472  |
| 86435 | P14079 | Q15669 | -0.21863  |
| 86436 | P14079 | P78562 | -1.2215   |
| 86437 | P14079 | P26572 | -0.50991  |
| 86438 | P14079 | Q4LDE5 | -0.64606  |
| 86439 | P14079 | Q8NH16 | -1.2302   |
| 86440 | P14079 | Q6UWJ1 | -1.0708   |
| 86441 | P14079 | Q96GE6 | -0.22679  |
| 86442 | P14079 | Q9UIK4 | -1.0342   |
| 86443 | P14079 | P48058 | -1.145    |
| 86444 | P14079 | Q5QGT7 | -0.90447  |
| 86445 | P14079 | Q9BXU9 | -0.6246   |
| 86446 | P14079 | P08172 | -1.0207   |
| 86447 | P14079 | Q96PN8 | -1.817    |
| 86448 | P14079 | Q6SPF0 | -0.64465  |
| 86449 | P14079 | Q8NH83 | -1.2314   |
| 86450 | P14079 | Q99943 | -0.75555  |
| 86451 | P14079 | P30457 | -0.99945  |
| 86452 | P14079 | P04435 | -0.27282  |
| 86453 | P14079 | O75912 | -0.36942  |
| 86454 | P14079 | P10176 | -0.57679  |
| 86455 | P14079 | O95406 | -0.68292  |
| 86456 | P14079 | Q8TD90 | -0.010861 |
| 86457 | P14079 | Q3ZCN5 | -0.14965  |
| 86458 | P14079 | Q96RP8 | -1.0843   |
| 86459 | P14079 | Q96PE1 | -1.223    |
| 86460 | P14079 | Q12829 | -1.3858   |
| 86461 | P14079 | A8MWY0 | -0.77815  |
| 86462 | P14079 | Q9P2E5 | -0.5501   |
| 86463 | P14079 | Q9C030 | -0.29589  |
| 86464 | P14079 | Q8NG66 | -0.56356  |
| 86465 | P14079 | C9JR72 | -0.2064   |
| 86466 | P14079 | Q9P232 | -0.57912  |
| 86467 | P14079 | Q9NSA1 | -0.64217  |
| 86468 | P14079 | Q5EG05 | -0.44379  |
| 86469 | P14079 | P30520 | -0.91428  |
| 86470 | P14079 | Q86VH2 | -0.37099  |
| 86471 | P14079 | Q5VYX0 | -1.1266   |
| 86472 | P14079 | P54886 | -0.89503  |
| 86473 | P14079 | A6NDI0 | -0.36051  |
| 86474 | P14079 | Q8NHB8 | -1.2314   |
| 86475 | P14079 | Q6UWI4 | -1.2312   |
| 86476 | P14079 | P51692 | -0.22592  |
| 86477 | P14079 | P54753 | -1.2035   |
| 86478 | P14079 | Q7RTY8 | -1.5081   |
| 86479 | P14079 | O75343 | -0.8552   |
| 86480 | P14079 | P42330 | -0.2228   |
| 86481 | P14079 | O43680 | -0.22995  |
| 86482 | P14079 | Q8IVW6 | -0.18447  |
| 86483 | P14079 | P43632 | -1.1905   |
| 86484 | P14079 | Q86UW7 | -0.19241  |
| 86485 | P14079 | Q99999 | -0.86741  |
| 86486 | P14079 | Q6SJ93 | -0.34347  |
| 86487 | P14079 | P14555 | -0.9372   |
| 86488 | P14079 | O15460 | -0.60685  |

|       |        |        |           |
|-------|--------|--------|-----------|
| 86489 | P14079 | Q9BSD7 | -1.1126   |
| 86490 | P14079 | A6NMB1 | -1.0019   |
| 86491 | P14079 | P57682 | -0.23163  |
| 86492 | P14079 | Q96A25 | -0.80224  |
| 86493 | P14079 | Q9NY56 | -0.80828  |
| 86494 | P14079 | P10632 | -0.84341  |
| 86495 | P14079 | P32456 | -0.39593  |
| 86496 | P14079 | Q8NEY1 | -0.91088  |
| 86497 | P14079 | Q9HB29 | -1.0685   |
| 86498 | P14079 | P12259 | -0.63981  |
| 86499 | P14079 | O60344 | -1.0433   |
| 86500 | P14079 | P34130 | -0.78712  |
| 86501 | P14079 | P49146 | -1.2062   |
| 86502 | P14079 | O95759 | -1.418    |
| 86503 | P14079 | P21580 | -0.15833  |
| 86504 | P14079 | Q9BSK2 | -0.66417  |
| 86505 | P14079 | Q8WXH2 | -0.90889  |
| 86506 | P14079 | P51659 | -0.83347  |
| 86507 | P14079 | Q9Y3Q0 | -1.2319   |
| 86508 | P14079 | Q9BUA6 | -0.22695  |
| 86509 | P14079 | A1A4Y4 | -0.99989  |
| 86510 | P14079 | Q96PM5 | -0.22606  |
| 86511 | P14079 | O00308 | -0.22741  |
| 86512 | P14079 | P58549 | -0.96318  |
| 86513 | P14079 | Q9HBA0 | -0.42946  |
| 86514 | P14079 | Q7Z5P4 | -1.6635   |
| 86515 | P14079 | Q6YI46 | -0.77815  |
| 86516 | P14079 | O94844 | -1.2968   |
| 86517 | P14079 | Q86TI2 | -0.42379  |
| 86518 | P14079 | Q9HBE4 | -0.78311  |
| 86519 | P14079 | Q6ZMN8 | -0.10173  |
| 86520 | P14079 | Q13217 | -0.11982  |
| 86521 | P14079 | Q8NH60 | -1.2314   |
| 86522 | P14079 | O75973 | -0.73502  |
| 86523 | P14079 | A7E2F4 | -0.080911 |
| 86524 | P14079 | Q96KB5 | -0.71027  |
| 86525 | P14079 | Q9UQ05 | -1.176    |
| 86526 | P14079 | Q6ZQN7 | -1.4823   |
| 86527 | P14079 | Q9NPB9 | -1.4493   |
| 86528 | P14079 | P01130 | -0.38939  |
| 86529 | P14079 | Q13795 | -0.54991  |
| 86530 | P14079 | Q96PL1 | -0.80633  |
| 86531 | P14079 | Q14116 | -0.29414  |
| 86532 | P14079 | Q8NGV6 | -1.2314   |
| 86533 | P14079 | Q9H1D0 | -1.2319   |
| 86534 | P14079 | P49748 | -0.42054  |
| 86535 | P14079 | Q9H3S1 | -1.1066   |
| 86536 | P14079 | Q86VR7 | -0.77815  |
| 86537 | P14079 | Q9NPB1 | -0.68536  |
| 86538 | P14079 | Q96BD0 | -1.0978   |
| 86539 | P14079 | P08183 | -0.65062  |
| 86540 | P14079 | Q3KQV9 | -0.31242  |
| 86541 | P14079 | A6PVS8 | -0.22457  |
| 86542 | P14079 | Q8NG84 | -1.2314   |
| 86543 | P14079 | P00325 | -0.77057  |
| 86544 | P14079 | P35504 | -1.0761   |
| 86545 | P14079 | Q6UY27 | -0.9245   |
| 86546 | P14079 | Q6P9H4 | -0.22731  |
| 86547 | P14079 | P56706 | -0.49272  |
| 86548 | P14079 | P49619 | -1.2253   |
| 86549 | P14079 | Q9NUE0 | -0.94244  |
| 86550 | P14079 | Q9P291 | -0.77815  |
| 86551 | P14079 | O15072 | -1.3643   |
| 86552 | P14079 | Q99570 | -0.65441  |
| 86553 | P14079 | P61626 | -1.0044   |
| 86554 | P14079 | O75844 | -1.0411   |
| 86555 | P14079 | Q9BQS2 | -0.97472  |
| 86556 | P14079 | O75508 | -0.83688  |
| 86557 | P14079 | Q9ULX7 | -0.94129  |
| 86558 | P14079 | P28907 | -0.6698   |
| 86559 | P14079 | P22891 | -1.1208   |
| 86560 | P14079 | O14979 | -0.23767  |
| 86561 | P14079 | A0A5B9 | -0.77815  |
| 86562 | P14079 | Q9HBY0 | -0.86616  |
| 86563 | P14079 | Q8NGJ5 | -1.2314   |
| 86564 | P14079 | Q96GD3 | -0.14853  |



|       |        |        |           |
|-------|--------|--------|-----------|
| 86565 | P14079 | O75815 | -0.66893  |
| 86566 | P14079 | Q8TBG9 | -0.93899  |
| 86567 | P14079 | Q658N2 | -0.83282  |
| 86568 | P14079 | P07478 | -1.001    |
| 86569 | P14079 | Q9NPG4 | -1.068    |
| 86570 | P14079 | P39905 | -0.39914  |
| 86571 | P14079 | P01713 | -1        |
| 86572 | P14079 | Q8WUT9 | -0.74044  |
| 86573 | P14079 | Q0VAA2 | -0.22741  |
| 86574 | P14079 | Q9UMR2 | -0.040851 |
| 86575 | P14079 | Q495A1 | -0.39032  |
| 86576 | P14079 | P48304 | -0.8173   |
| 86577 | P14079 | Q8NGK0 | -1.2314   |
| 86578 | P14079 | Q5VTH9 | -0.22753  |
| 86579 | P14079 | Q6MZZ7 | -1.0627   |
| 86580 | P14079 | Q14123 | -0.22002  |
| 86581 | P14079 | Q8TCA0 | -0.22748  |
| 86582 | P14079 | P0C024 | -0.5501   |
| 86583 | P14079 | O00391 | -1.3404   |
| 86584 | P14079 | Q5VTB9 | -0.55135  |
| 86585 | P14079 | Q9UKA9 | -0.50041  |
| 86586 | P14079 | A6NHY2 | -0.28212  |
| 86587 | P14079 | P58166 | -0.71755  |
| 86588 | P14079 | P01258 | -0.5402   |
| 86589 | P14079 | P10153 | -0.8628   |
| 86590 | P14079 | O95399 | -0.56412  |
| 86591 | P14079 | P56557 | -0.95997  |
| 86592 | P14079 | P35555 | -0.79626  |
| 86593 | P14079 | Q86VF5 | -0.94266  |
| 86594 | P14079 | P29218 | -0.13106  |
| 86595 | P14079 | Q9Y271 | -1.3586   |
| 86596 | P14079 | P0C6A0 | -0.23002  |
| 86597 | P14079 | Q13247 | -0.22148  |
| 86598 | P14079 | Q9NRZ7 | -1.0148   |
| 86599 | P14079 | O43448 | -0.97721  |
| 86600 | P14079 | Q8N3H0 | -0.16951  |
| 86601 | P14079 | Q8NH08 | -1.2314   |
| 86602 | P14079 | Q9BSJ5 | -0.77815  |
| 86603 | P14079 | P13686 | -0.48815  |
| 86604 | P14079 | O15492 | -0.22697  |
| 86605 | P14079 | P51149 | -0.49989  |
| 86606 | P14079 | Q9H205 | -1.2314   |
| 86607 | P14079 | Q02809 | -0.73848  |
| 86608 | P14079 | Q7RTS3 | -0.23499  |
| 86609 | P14079 | Q96J65 | -1.3419   |
| 86610 | P14079 | Q96DN0 | -0.097643 |
| 86611 | P14079 | Q9UMZ3 | -1.2543   |
| 86612 | P14079 | P98088 | -1.0696   |
| 86613 | P14079 | P54793 | -0.82668  |
| 86614 | P14079 | Q9ULB1 | -0.40555  |
| 86615 | P14079 | P19525 | -0.5148   |
| 86616 | P14079 | Q8N2U9 | -0.77815  |
| 86617 | P14079 | P61599 | -0.1433   |
| 86618 | P14079 | O15520 | -0.65658  |
| 86619 | P14079 | O15209 | -0.22376  |
| 86620 | P14079 | Q6AWC2 | -0.2274   |
| 86621 | P14079 | P78509 | -0.65133  |
| 86622 | P14079 | Q86TV6 | -0.22696  |
| 86623 | P14079 | Q8NFB0 | -0.6321   |
| 86624 | P14079 | Q9HCH3 | -0.33168  |
| 86625 | P14079 | Q9HBX9 | -1.2467   |
| 86626 | P14079 | Q6IBS0 | -0.25346  |
| 86627 | P14079 | P07332 | -0.87561  |
| 86628 | P14079 | O00270 | -1.5146   |
| 86629 | P14079 | P30481 | -1        |
| 86630 | P14079 | O95249 | -0.15367  |
| 86631 | P14079 | Q8NHP6 | -0.56962  |
| 86632 | P14079 | P56730 | -1.3907   |
| 86633 | P14079 | Q9H0T7 | -1.3556   |
| 86634 | P14079 | Q8WUR7 | -0.076507 |
| 86635 | P14079 | Q9UBN7 | -0.18538  |
| 86636 | P14079 | Q8N4F0 | -0.97176  |
| 86637 | P14079 | Q8TF61 | -0.31747  |
| 86638 | P14079 | Q8NHJ6 | -0.47782  |
| 86639 | P14079 | Q8IVF7 | -0.20919  |
| 86640 | P14079 | P08134 | -0.22027  |

|       |        |        |          |
|-------|--------|--------|----------|
| 86641 | P14079 | Q8NEP3 | -0.22739 |
| 86642 | P14079 | Q6PIW4 | -0.51886 |
| 86643 | P14079 | Q9NQL9 | -0.23786 |
| 86644 | P14079 | Q8NGH9 | -1.2314  |
| 86645 | P14079 | O94819 | -0.21221 |
| 86646 | P14079 | Q8IUX7 | -0.5967  |
| 86647 | P14079 | O43255 | -0.22277 |
| 86648 | P14079 | Q9H3R2 | -1.5318  |
| 86649 | P14079 | Q9NZP2 | -1.2314  |
| 86650 | P14079 | Q9P2R3 | -0.2274  |
| 86651 | P14079 | O15550 | -0.76184 |
| 86652 | P14079 | Q9BYB0 | -0.22741 |
| 86653 | P14079 | P21754 | -0.37377 |
| 86654 | P14079 | Q969V5 | -0.22737 |
| 86655 | P14079 | P17752 | -0.50062 |
| 86656 | P14079 | Q9UNA0 | -0.35884 |
| 86657 | P14079 | O60706 | -1.3462  |
| 86658 | P14079 | Q96RU8 | -0.23186 |
| 86659 | P14079 | Q9BQI4 | -0.78099 |
| 86660 | P14079 | Q9NSD5 | -1.1891  |
| 86661 | P14079 | Q99665 | -0.89897 |
| 86662 | P14079 | Q14003 | -0.87163 |
| 86663 | P14079 | P35228 | -0.18517 |
| 86664 | P14079 | Q8N2R8 | -0.17898 |
| 86665 | P14079 | P42658 | -0.80611 |
| 86666 | P14079 | Q4ZHG4 | -0.65053 |
| 86667 | P14079 | Q9H0R5 | -0.86687 |
| 86668 | P14079 | Q9Y6M5 | -0.85866 |
| 86669 | P14079 | Q68CR1 | -0.77815 |
| 86670 | P14079 | P23945 | -0.6593  |
| 86671 | P14079 | Q3C1V0 | -0.77815 |
| 86672 | P14079 | O00141 | -0.6935  |
| 86673 | P14079 | O60674 | -0.28345 |
| 86674 | P14079 | Q8IV08 | -0.49134 |
| 86675 | P14079 | Q5M775 | -0.22746 |
| 86676 | P14079 | Q9NZM6 | -1.1091  |
| 86677 | P14079 | Q9GZP0 | -1.0013  |
| 86678 | P14079 | P01350 | -0.94427 |
| 86679 | P14079 | P78417 | -0.46642 |
| 86680 | P14079 | Q8NGB9 | -1.2314  |
| 86681 | P14079 | O14763 | -0.22246 |
| 86682 | P14079 | P31151 | -0.13396 |
| 86683 | P14079 | P36888 | -0.6335  |
| 86684 | P14079 | P01763 | -1       |
| 86685 | P14079 | Q63HM9 | -0.65834 |
| 86686 | P14079 | Q9H4Q4 | -0.22178 |
| 86687 | P14079 | P01708 | -1       |
| 86688 | P14079 | P13569 | -0.40778 |
| 86689 | P14079 | Q76B58 | -0.57377 |
| 86690 | P14079 | Q9P2H3 | -0.22741 |
| 86691 | P14079 | Q9H1E1 | -0.67368 |
| 86692 | P14079 | Q15843 | -0.22244 |
| 86693 | P14079 | Q8N7E2 | -0.41679 |
| 86694 | P14079 | P08254 | -0.81924 |
| 86695 | P14079 | Q9Y6F7 | -0.29752 |
| 86696 | P14079 | Q8IWW8 | -0.30772 |
| 86697 | P14079 | P59095 | -0.45278 |
| 86698 | P14079 | P05976 | -0.33108 |
| 86699 | P14079 | Q08380 | -1.3991  |
| 86700 | P14079 | P54317 | -0.96524 |
| 86701 | P14079 | Q9H6Y5 | -0.2241  |
| 86702 | P14079 | P27105 | -0.13783 |
| 86703 | P14079 | Q8N7F7 | -0.22409 |
| 86704 | P14079 | P01344 | -0.33551 |
| 86705 | P14079 | P05026 | -0.56637 |
| 86706 | P14079 | B3SHH9 | -0.97472 |
| 86707 | P14079 | A6NEL2 | -0.22741 |
| 86708 | P14079 | Q8TBY0 | -0.79049 |
| 86709 | P14079 | Q7RTW8 | -1.1487  |
| 86710 | P14079 | Q5T1H1 | -0.92373 |
| 86711 | P14079 | Q12934 | -0.359   |
| 86712 | P14079 | P15918 | -0.22663 |
| 86713 | P14079 | O15247 | -0.73112 |
| 86714 | P14079 | P01593 | -1       |
| 86715 | P14079 | P19526 | -0.79171 |
| 86716 | P14079 | Q9NQ69 | -0.2274  |

|       |        |        |          |
|-------|--------|--------|----------|
| 86717 | P14079 | Q9Y261 | -0.68142 |
| 86718 | P14079 | O14931 | -1.1956  |
| 86719 | P14079 | P54855 | -0.96615 |
| 86720 | P14079 | Q99453 | -0.22201 |
| 86721 | P14079 | Q495N2 | -0.77815 |
| 86722 | P14079 | P30101 | -0.37248 |
| 86723 | P14079 | Q8N130 | -1.0533  |
| 86724 | P14079 | Q9BQI3 | -1.0202  |
| 86725 | P14079 | P37173 | -0.41461 |
| 86726 | P14079 | Q86UE6 | -0.90927 |
| 86727 | P14079 | Q9Y6T7 | -1.1868  |
| 86728 | P14079 | Q96BM1 | -0.22741 |
| 86729 | P14079 | P54710 | -1.2006  |
| 86730 | P14079 | Q075Z2 | -0.82261 |
| 86731 | P14079 | Q9BV35 | -0.79732 |
| 86732 | P14079 | Q9BQ16 | -1.0785  |
| 86733 | P14079 | P19438 | -0.24726 |
| 86734 | P14079 | P43115 | -1.0653  |
| 86735 | P14079 | Q9Y6U7 | -0.78242 |
| 86736 | P14079 | Q9Y251 | -0.31554 |
| 86737 | P14079 | P26927 | -1.0455  |
| 86738 | P14079 | O95072 | -0.28256 |
| 86739 | P14079 | Q96F25 | -0.87237 |
| 86740 | P14079 | Q5HYA8 | -0.20514 |
| 86741 | P14079 | Q9BV36 | -0.11789 |
| 86742 | P14079 | Q8TB40 | -0.29778 |
| 86743 | P14079 | Q9Y2W3 | -0.67908 |
| 86744 | P14079 | Q9UIV8 | -0.59345 |
| 86745 | P14079 | P16619 | -0.95439 |
| 86746 | P14079 | Q02505 | -1.3619  |
| 86747 | P14079 | Q92484 | -0.42007 |
| 86748 | P14079 | P15328 | -1.0149  |
| 86749 | P14079 | Q7Z4S9 | -0.22711 |
| 86750 | P14079 | Q86VZ4 | -0.77815 |
| 86751 | P14079 | P22004 | -0.63125 |
| 86752 | P14079 | P02462 | -0.57418 |
| 86753 | P14079 | Q8NH48 | -1.2314  |
| 86754 | P14079 | O15018 | -0.50434 |
| 86755 | P14079 | P23759 | -0.21801 |
| 86756 | P14079 | Q53EV4 | -0.26849 |
| 86757 | P14079 | Q8N5U1 | -0.77815 |
| 86758 | P14079 | Q8NGH8 | -1.2314  |
| 86759 | P14079 | Q9Y6M4 | -1.4466  |
| 86760 | P14079 | Q9UHX3 | -1.4461  |
| 86761 | P14079 | Q9Y574 | -0.37923 |
| 86762 | P14079 | Q9H3U1 | -0.24355 |
| 86763 | P14079 | Q969P0 | -0.29346 |
| 86764 | P14079 | P43628 | -0.62699 |
| 86765 | P14079 | Q9NZN4 | -0.50054 |
| 86766 | P14079 | P28799 | -0.11646 |
| 86767 | P14079 | Q9HC56 | -1.1338  |
| 86768 | P14079 | Q5SZI1 | -0.77815 |
| 86769 | P14079 | Q8NCU8 | -0.77815 |
| 86770 | P14079 | Q96HD1 | -0.81986 |
| 86771 | P14079 | Q6P4Q7 | -1.163   |
| 86772 | P14079 | Q92851 | -0.22588 |
| 86773 | P14079 | P49279 | -0.4228  |
| 86774 | P14079 | Q9NSE2 | -0.23076 |
| 86775 | P14079 | Q9UKU6 | -1.4676  |
| 86776 | P14079 | Q9BST9 | -0.49793 |
| 86777 | P14079 | P51570 | -0.7202  |
| 86778 | P14079 | Q93009 | -0.44347 |
| 86779 | P14079 | P06307 | -0.76715 |
| 86780 | P14079 | P07098 | -0.947   |
| 86781 | P14079 | P41229 | -0.59515 |
| 86782 | P14079 | Q9H7Z6 | -0.1972  |
| 86783 | P14079 | P16219 | -0.5254  |
| 86784 | P14079 | Q8N6M8 | -0.22389 |
| 86785 | P14079 | A4IF30 | -0.79981 |
| 86786 | P14079 | Q8IYJ1 | -0.23437 |
| 86787 | P14079 | Q9HC96 | -0.7597  |
| 86788 | P14079 | O75387 | -1.2806  |
| 86789 | P14079 | Q8NHC5 | -1.2314  |
| 86790 | P14079 | P02747 | -0.87245 |
| 86791 | P14079 | Q96T91 | -0.78571 |
| 86792 | P14079 | Q9HCJ6 | -1.0353  |

|       |        |        |           |
|-------|--------|--------|-----------|
| 86793 | P14079 | O43781 | -1.3052   |
| 86794 | P14079 | P49682 | -1.1755   |
| 86795 | P14079 | Q8WWG9 | -1.0587   |
| 86796 | P14079 | Q96SU4 | -0.53387  |
| 86797 | P14079 | Q12947 | -0.97595  |
| 86798 | P14079 | P20929 | -0.2247   |
| 86799 | P14079 | Q9Y231 | -0.58144  |
| 86800 | P14079 | O94898 | -0.76997  |
| 86801 | P14079 | Q9Y6A9 | -0.7696   |
| 86802 | P14079 | Q96MX0 | -0.8507   |
| 86803 | P14079 | P35372 | -0.4209   |
| 86804 | P14079 | P60033 | -0.29122  |
| 86805 | P14079 | Q86XQ3 | -1.2156   |
| 86806 | P14079 | P08842 | -0.62538  |
| 86807 | P14079 | Q6NTF9 | -0.79884  |
| 86808 | P14079 | Q8N3D4 | -0.26849  |
| 86809 | P14079 | P48146 | -0.69329  |
| 86810 | P14079 | Q9Y235 | -0.45306  |
| 86811 | P14079 | P43681 | -0.8985   |
| 86812 | P14079 | Q99929 | -0.26356  |
| 86813 | P14079 | A8MQ27 | -0.32568  |
| 86814 | P14079 | A5X5Y0 | -1.1191   |
| 86815 | P14079 | Q8NEJ0 | -0.53366  |
| 86816 | P14079 | O60404 | -1.2314   |
| 86817 | P14079 | Q9Y691 | -1.1748   |
| 86818 | P14079 | Q8NI22 | -0.38913  |
| 86819 | P14079 | P48067 | -1.0841   |
| 86820 | P14079 | Q96A32 | -0.26903  |
| 86821 | P14079 | P13671 | -0.22741  |
| 86822 | P14079 | Q8IZL9 | -0.48425  |
| 86823 | P14079 | P48307 | -0.91288  |
| 86824 | P14079 | A8MRT5 | -0.77815  |
| 86825 | P14079 | Q9BXU8 | -0.34293  |
| 86826 | P14079 | Q7RTY5 | -1.4766   |
| 86827 | P14079 | Q8NGH7 | -1.2314   |
| 86828 | P14079 | P0C7X4 | -0.34293  |
| 86829 | P14079 | Q504Y2 | -1.1061   |
| 86830 | P14079 | A6NI47 | -0.22734  |
| 86831 | P14079 | O15269 | -0.46065  |
| 86832 | P14079 | P04626 | -0.25448  |
| 86833 | P14079 | Q52LW3 | -0.85096  |
| 86834 | P14079 | Q8TE60 | -1.4366   |
| 86835 | P14079 | P54756 | -1.2939   |
| 86836 | P14079 | Q96RC9 | -1.2314   |
| 86837 | P14079 | Q9UL63 | -0.21514  |
| 86838 | P14079 | P02775 | -0.74111  |
| 86839 | P14079 | Q96BR1 | -1.1845   |
| 86840 | P14079 | Q7Z5H4 | -1.2496   |
| 86841 | P14079 | P56703 | -0.60537  |
| 86842 | P14079 | Q9P2G3 | -0.28383  |
| 86843 | P14079 | Q96RP3 | -0.86159  |
| 86844 | P14079 | P25940 | -1.0157   |
| 86845 | P14079 | Q96R08 | -1.2314   |
| 86846 | P14079 | P09429 | -0.23209  |
| 86847 | P14079 | Q7Z4H4 | -0.81111  |
| 86848 | P14079 | Q92766 | -0.20629  |
| 86849 | P14079 | Q6UWR7 | -1.5274   |
| 86850 | P14079 | Q9NTN9 | -1.2767   |
| 86851 | P14079 | Q9UQ13 | -0.23868  |
| 86852 | P14079 | P62683 | -0.065735 |
| 86853 | P14079 | Q96RB7 | -1.2314   |
| 86854 | P14079 | P01617 | -1        |
| 86855 | P14079 | Q13444 | -0.74201  |
| 86856 | P14079 | P98187 | -1.1947   |
| 86857 | P14079 | Q8TDW4 | -0.75108  |
| 86858 | P14079 | Q96Q77 | -0.22751  |
| 86859 | P14079 | Q6FI13 | -0.93071  |
| 86860 | P14079 | Q99720 | -0.69639  |
| 86861 | P14079 | Q9Y6C9 | -0.66417  |
| 86862 | P14079 | P78411 | -0.24043  |
| 86863 | P14079 | Q14449 | -0.22741  |
| 86864 | P14079 | Q5XXA6 | -1.1079   |
| 86865 | P14079 | Q14642 | -0.38389  |
| 86866 | P14079 | Q6UWW0 | -0.88339  |
| 86867 | P14079 | Q96HC4 | -0.12885  |
| 86868 | P14079 | Q5H8C1 | -1.7991   |

|       |        |        |           |
|-------|--------|--------|-----------|
| 86869 | P14079 | Q9UH62 | -0.56705  |
| 86870 | P14079 | P53609 | -0.37565  |
| 86871 | P14079 | P49758 | -0.74964  |
| 86872 | P14079 | Q8IUW5 | -0.82875  |
| 86873 | P14079 | Q3B8N5 | -0.17151  |
| 86874 | P14079 | P0DKX4 | -0.093403 |
| 86875 | P14079 | Q01650 | -1.0173   |
| 86876 | P14079 | Q96LA9 | -1.3154   |
| 86877 | P14079 | Q9NX47 | -0.58079  |
| 86878 | P14079 | P78367 | -0.23077  |
| 86879 | P14079 | Q6P4F7 | -1.0254   |
| 86880 | P14079 | Q15406 | -0.25614  |
| 86881 | P14079 | P17600 | -0.42831  |
| 86882 | P14079 | P30456 | -0.99945  |
| 86883 | P14079 | Q8NGD4 | -1.2314   |
| 86884 | P14079 | O43847 | -0.25225  |
| 86885 | P14079 | Q8NFZ3 | -0.45495  |
| 86886 | P14079 | Q9BUF7 | -0.77484  |
| 86887 | P14079 | Q8TDD5 | -0.93931  |
| 86888 | P14079 | Q16816 | -0.9725   |
| 86889 | P14079 | P49863 | -1.4766   |
| 86890 | P14079 | Q5GAN4 | -0.78321  |
| 86891 | P14079 | Q2TAC6 | -0.302    |
| 86892 | P14079 | Q16527 | -0.46272  |
| 86893 | P14079 | Q96DD0 | -0.25642  |
| 86894 | P14079 | A6NLB4 | -0.22056  |
| 86895 | P14079 | O14843 | -1.6243   |
| 86896 | P14079 | Q5JUK2 | -0.23939  |
| 86897 | P14079 | Q9H3T2 | -1.1681   |
| 86898 | P14079 | Q8NBL3 | -0.77815  |
| 86899 | P14079 | O75344 | -0.46869  |
| 86900 | P14079 | Q68CR7 | -0.77815  |
| 86901 | P14079 | Q9NRK6 | -1.3088   |
| 86902 | P14079 | Q6PKH6 | -1.7104   |
| 86903 | P14079 | Q16647 | -0.35738  |
| 86904 | P14079 | Q9NQH7 | -0.58412  |
| 86905 | P14079 | Q9NW82 | -0.22742  |
| 86906 | P14079 | Q3KNW1 | -0.1909   |
| 86907 | P14079 | Q86TI4 | -0.2277   |
| 86908 | P14079 | P46379 | -0.22445  |
| 86909 | P14079 | Q16559 | -0.22811  |
| 86910 | P14079 | P01563 | -0.34272  |
| 86911 | P14079 | Q8N335 | -0.38607  |
| 86912 | P14079 | A6NJW4 | -0.77815  |
| 86913 | P14079 | P80075 | -0.97125  |
| 86914 | P14079 | Q8IUB5 | -0.82805  |
| 86915 | P14079 | Q9NZ71 | -0.64273  |
| 86916 | P14079 | Q2TAA2 | -0.29649  |
| 86917 | P14079 | Q8N9I5 | -1.1504   |
| 86918 | P14079 | P20020 | -0.93385  |
| 86919 | P14079 | Q9GZK6 | -1.2314   |
| 86920 | P14079 | O75147 | -0.22957  |
| 86921 | P14079 | A6NKQ9 | -0.78571  |
| 86922 | P14079 | D6R901 | -0.77524  |
| 86923 | P14079 | Q6P5Q4 | -0.21091  |
| 86924 | P14079 | P00519 | -0.22807  |
| 86925 | P14079 | Q16665 | -0.24142  |
| 86926 | P14079 | Q9Y286 | -1.195    |
| 86927 | P14079 | P84074 | -0.26964  |
| 86928 | P14079 | P30518 | -0.86984  |
| 86929 | P14079 | A8MUK1 | -0.45107  |
| 86930 | P14079 | Q8TDW0 | -0.9328   |
| 86931 | P14079 | O60931 | -1.1087   |
| 86932 | P14079 | P07766 | -0.6567   |
| 86933 | P14079 | Q8WXF7 | -0.6771   |
| 86934 | P14079 | A6NIV6 | -0.24806  |
| 86935 | P14079 | A0PJE2 | -1.1307   |
| 86936 | P14079 | O14640 | -0.18072  |
| 86937 | P14079 | Q15485 | -1.2167   |
| 86938 | P14079 | Q9Y5K2 | -1.4141   |
| 86939 | P14079 | P20592 | -0.42175  |
| 86940 | P14079 | Q12791 | -0.82409  |
| 86941 | P14079 | P12319 | -1.0815   |
| 86942 | P14079 | Q86VZ2 | -0.2516   |
| 86943 | P14079 | A6NCD1 | -0.36051  |
| 86944 | P14079 | Q6UVK1 | -1.3465   |

|       |        |        |          |
|-------|--------|--------|----------|
| 86945 | P14079 | P43652 | -0.89868 |
| 86946 | P14079 | Q03721 | -1.0332  |
| 86947 | P14079 | P40205 | -0.47753 |
| 86948 | P14079 | B2RU33 | -0.22737 |
| 86949 | P14079 | Q96I15 | -0.34043 |
| 86950 | P14079 | Q8N3J5 | -0.10533 |
| 86951 | P14079 | Q8IY34 | -0.89106 |
| 86952 | P14079 | Q96C36 | -0.80353 |
| 86953 | P14079 | Q9C0E4 | -0.22034 |
| 86954 | P14079 | Q9H2E5 | -1.2314  |
| 86955 | P14079 | Q4VX67 | -0.77815 |
| 86956 | P14079 | P18440 | -0.28339 |
| 86957 | P14079 | Q07075 | -1.1456  |
| 86958 | P14079 | Q9H977 | -0.22735 |
| 86959 | P14079 | Q7Z5R6 | -0.28767 |
| 86960 | P14079 | Q07444 | -0.77673 |
| 86961 | P14079 | Q99679 | -1.5146  |
| 86962 | P14079 | Q9UP52 | -1.2136  |
| 86963 | P14079 | Q969K3 | -0.51621 |
| 86964 | P14079 | Q9NYN1 | -1.3081  |
| 86965 | P14079 | Q9NP86 | -0.22572 |
| 86966 | P14079 | P53539 | -0.06472 |
| 86967 | P14079 | P06319 | -1       |
| 86968 | P14079 | O75061 | -0.28064 |
| 86969 | P14079 | Q15785 | -0.53953 |
| 86970 | P14079 | Q9UN67 | -1.2218  |
| 86971 | P14079 | Q9BUD6 | -1.1232  |
| 86972 | P14079 | Q9Y2J0 | -0.27599 |
| 86973 | P14079 | Q9BZR9 | -0.22736 |
| 86974 | P14079 | Q17RR3 | -0.97705 |
| 86975 | P14079 | Q8NES8 | -0.78458 |
| 86976 | P14079 | Q8NEE6 | -0.21398 |
| 86977 | P14079 | Q8NH04 | -1.2314  |
| 86978 | P14079 | Q9GZM7 | -0.9757  |
| 86979 | P14079 | Q8NFT8 | -0.70466 |
| 86980 | P14079 | P05121 | -0.19721 |
| 86981 | P14079 | Q6PCD5 | -0.2276  |
| 86982 | P14079 | Q969Z3 | -0.63393 |
| 86983 | P14079 | P59025 | -0.90447 |
| 86984 | P14079 | Q8IVH2 | -0.51655 |
| 86985 | P14079 | Q01362 | -0.94745 |
| 86986 | P14079 | Q96AK3 | -0.51369 |
| 86987 | P14079 | Q9UEW8 | -0.82071 |
| 86988 | P14079 | Q99961 | -0.22634 |
| 86989 | P14079 | Q8NFP4 | -0.87804 |
| 86990 | P14079 | Q9NYV4 | -0.40096 |
| 86991 | P14079 | P80162 | -1.1138  |
| 86992 | P14079 | O60229 | -1.0511  |
| 86993 | P14079 | Q8NH53 | -1.2314  |
| 86994 | P14079 | Q8NGA6 | -1.2314  |
| 86995 | P14079 | Q9UKQ9 | -1.4766  |
| 86996 | P14079 | Q68G74 | -0.22736 |
| 86997 | P14079 | Q7Z3V4 | -0.72813 |
| 86998 | P14079 | Q13464 | -0.34393 |
| 86999 | P14079 | Q8NBH2 | -0.37796 |
| 87000 | P14079 | P04207 | -1       |
| 87001 | P14079 | Q00755 | -0.45933 |
| 87002 | P14079 | Q4G0J3 | -0.21707 |
| 87003 | P14079 | P0C7T3 | -1.2314  |
| 87004 | P14079 | Q5VU65 | -0.77815 |
| 87005 | P14079 | P23378 | -0.61748 |
| 87006 | P14079 | P28562 | -0.25257 |
| 87007 | P14079 | Q96RD7 | -0.94009 |
| 87008 | P14079 | Q8IYA7 | -0.35036 |
| 87009 | P14079 | Q9C019 | -0.35664 |
| 87010 | P14079 | Q2VWP7 | -1.1021  |
| 87011 | P14079 | Q14094 | -0.27804 |
| 87012 | P14079 | Q5R372 | -1.1952  |
| 87013 | P14079 | Q86SK9 | -1.1687  |
| 87014 | P14079 | P0CG22 | -1.0605  |
| 87015 | P14079 | Q9UIJ5 | -0.89761 |
| 87016 | P14079 | P84085 | -0.2888  |
| 87017 | P14079 | O43818 | -0.23238 |
| 87018 | P14079 | P17516 | -0.27144 |
| 87019 | P14079 | Q9NWZ3 | -0.22724 |
| 87020 | P14079 | Q8WU67 | -0.75978 |

|       |        |         |            |
|-------|--------|---------|------------|
| 87021 | P14079 | Q96KE9  | -0.22297   |
| 87022 | P14079 | Q5J TZ9 | -0.39084   |
| 87023 | P14079 | Q96A11  | -0.6642    |
| 87024 | P14079 | Q13368  | -0.22526   |
| 87025 | P14079 | O43511  | -0.99221   |
| 87026 | P14079 | P01229  | -0.92143   |
| 87027 | P14079 | Q3KR37  | -0.77815   |
| 87028 | P14079 | P56202  | -0.82871   |
| 87029 | P14079 | Q8WZ42  | -0.45203   |
| 87030 | P14079 | O60393  | -0.22438   |
| 87031 | P14079 | Q01813  | -1.0074    |
| 87032 | P14079 | Q9NZJ6  | -0.083546  |
| 87033 | P14079 | Q9UPZ6  | -1.6335    |
| 87034 | P14079 | Q9H0Q0  | -0.32122   |
| 87035 | P14079 | P49418  | -0.22732   |
| 87036 | P14079 | P03905  | -0.69794   |
| 87037 | P14079 | Q02539  | -0.88202   |
| 87038 | P14079 | A4D1F6  | -0.28212   |
| 87039 | P14079 | Q9Y2R2  | -0.23843   |
| 87040 | P14079 | Q53H54  | -0.15479   |
| 87041 | P14079 | O75197  | -0.24222   |
| 87042 | P14079 | P36544  | -0.76163   |
| 87043 | P14079 | Q05925  | -0.22701   |
| 87044 | P14079 | P43234  | -0.93907   |
| 87045 | P14079 | Q9NUN7  | -0.44992   |
| 87046 | P14079 | P55073  | -1.0109    |
| 87047 | P14079 | Q15198  | -0.82383   |
| 87048 | P14079 | Q8IYX4  | -0.71676   |
| 87049 | P14079 | Q08493  | -0.45952   |
| 87050 | P14079 | Q5U5R9  | -0.72813   |
| 87051 | P14079 | Q8NHX9  | -0.55809   |
| 87052 | P14079 | O15554  | -0.47386   |
| 87053 | P14079 | Q6V1P9  | -1.2343    |
| 87054 | P14079 | Q92878  | -0.19908   |
| 87055 | P14079 | Q8N9V3  | -0.43161   |
| 87056 | P14079 | Q3SY77  | -0.90579   |
| 87057 | P14079 | P01712  | -1         |
| 87058 | P14079 | Q13133  | -0.23011   |
| 87059 | P14079 | Q8IVE3  | -0.49835   |
| 87060 | P14079 | Q6ZMR5  | -2.043     |
| 87061 | P14079 | P52306  | -0.82209   |
| 87062 | P14079 | Q99558  | -0.22741   |
| 87063 | P14079 | Q9UKX5  | -0.97189   |
| 87064 | P14079 | O94910  | -0.87842   |
| 87065 | P14079 | P68371  | -0.111     |
| 87066 | P14079 | Q99685  | -0.58932   |
| 87067 | P14079 | P07202  | -1.1656    |
| 87068 | P14079 | O75947  | -0.21911   |
| 87069 | P14079 | A6NCS4  | -0.38048   |
| 87070 | P14079 | P20936  | -0.22741   |
| 87071 | P14079 | Q8N5H7  | -0.49942   |
| 87072 | P14079 | Q15811  | -0.33301   |
| 87073 | P14079 | P04229  | -0.62241   |
| 87074 | P14079 | Q9UPQ0  | -0.22719   |
| 87075 | P14079 | Q5TEU4  | -0.24638   |
| 87076 | P14079 | P21554  | -0.73512   |
| 87077 | P14079 | Q9NRJ4  | -0.21999   |
| 87078 | P14079 | Q8TD91  | -0.0066921 |
| 87079 | P14079 | Q6T310  | -0.43958   |
| 87080 | P14079 | Q00722  | -0.53423   |
| 87081 | P14079 | P04746  | -0.89743   |
| 87082 | P14079 | Q5TA89  | -0.22701   |
| 87083 | P14079 | Q8IVL5  | -0.52233   |
| 87084 | P14079 | Q92478  | -0.98486   |
| 87085 | P14079 | Q5VVB8  | -0.77815   |
| 87086 | P14079 | Q9P225  | -0.3752    |
| 87087 | P14079 | Q3MIN7  | -0.70597   |
| 87088 | P14079 | Q96K19  | -1.1091    |
| 87089 | P14079 | P41240  | -0.22758   |
| 87090 | P14079 | O60279  | -1.0023    |
| 87091 | P14079 | P14410  | -0.64052   |
| 87092 | P14079 | P47985  | -1.0034    |
| 87093 | P14079 | P51857  | -0.32188   |
| 87094 | P14079 | P85037  | -0.59222   |
| 87095 | P14079 | Q9Y5E2  | -1.2071    |
| 87096 | P14079 | Q9UM73  | -1.7296    |

|       |        |        |           |
|-------|--------|--------|-----------|
| 87097 | P14079 | Q9NXR5 | -0.22742  |
| 87098 | P14079 | P60323 | -0.2562   |
| 87099 | P14079 | P34972 | -1.2604   |
| 87100 | P14079 | Q6UWN5 | -0.41152  |
| 87101 | P14079 | O95154 | -0.2915   |
| 87102 | P14079 | Q2HXU8 | -0.96439  |
| 87103 | P14079 | P31275 | -0.15404  |
| 87104 | P14079 | A6NGZ7 | -0.77815  |
| 87105 | P14079 | O43933 | -0.24367  |
| 87106 | P14079 | O95747 | -1.4427   |
| 87107 | P14079 | Q8NHA6 | -1.2314   |
| 87108 | P14079 | Q8WXG6 | -0.20759  |
| 87109 | P14079 | Q4LDG9 | -0.2274   |
| 87110 | P14079 | Q15386 | -0.22988  |
| 87111 | P14079 | Q9NZI8 | -0.22637  |
| 87112 | P14079 | Q8NFY9 | -0.20548  |
| 87113 | P14079 | Q96EP9 | -0.97996  |
| 87114 | P14079 | O15427 | -0.96768  |
| 87115 | P14079 | P63132 | -0.30686  |
| 87116 | P14079 | Q3MJ16 | -0.52698  |
| 87117 | P14079 | O95104 | -0.37968  |
| 87118 | P14079 | Q8NI36 | -0.22721  |
| 87119 | P14079 | Q0JRZ9 | -0.22236  |
| 87120 | P14079 | Q99674 | -0.98743  |
| 87121 | P14079 | O15482 | -0.83272  |
| 87122 | P14079 | Q86WN2 | -0.81576  |
| 87123 | P14079 | Q9BT17 | -0.3304   |
| 87124 | P14079 | Q6UXH1 | -0.22741  |
| 87125 | P14079 | P54851 | -0.78996  |
| 87126 | P14079 | P51843 | -0.22712  |
| 87127 | P14079 | Q9UKP4 | -1.3932   |
| 87128 | P14079 | Q6QNK2 | -1.3662   |
| 87129 | P14079 | Q7Z602 | -1.3154   |
| 87130 | P14079 | P42892 | -0.6867   |
| 87131 | P14079 | P42785 | -0.39609  |
| 87132 | P14079 | Q8NHA4 | -1.2314   |
| 87133 | P14079 | Q9H469 | -0.21602  |
| 87134 | P14079 | Q5J5C9 | -0.80789  |
| 87135 | P14079 | Q86YD3 | -1.5917   |
| 87136 | P14079 | Q9UBI4 | -0.78464  |
| 87137 | P14079 | P02812 | -0.88231  |
| 87138 | P14079 | P30480 | -1        |
| 87139 | P14079 | Q96NZ1 | -1.0047   |
| 87140 | P14079 | P40616 | -0.72877  |
| 87141 | P14079 | O60476 | -0.47159  |
| 87142 | P14079 | P34981 | -1.2909   |
| 87143 | P14079 | O75094 | -0.85731  |
| 87144 | P14079 | Q96J84 | -0.69858  |
| 87145 | P14079 | Q9Y5L2 | -1.1912   |
| 87146 | P14079 | Q16832 | -1.3426   |
| 87147 | P14079 | P02760 | -0.70896  |
| 87148 | P14079 | Q5JPB2 | -0.35022  |
| 87149 | P14079 | Q14919 | -0.013716 |
| 87150 | P14079 | P41594 | -0.77651  |
| 87151 | P14079 | Q9BZJ6 | -1.3165   |
| 87152 | P14079 | O00476 | -0.91031  |
| 87153 | P14079 | Q13885 | -0.31309  |
| 87154 | P14079 | Q9UBI6 | -0.45343  |
| 87155 | P14079 | Q8N565 | -0.40793  |
| 87156 | P14079 | Q7L014 | -0.81799  |
| 87157 | P14079 | P16471 | -1.0774   |
| 87158 | P14079 | Q8WTR4 | -0.74148  |
| 87159 | P14079 | Q8NCN4 | -0.17774  |
| 87160 | P14079 | Q9NRZ9 | -0.039177 |
| 87161 | P14079 | P62684 | -0.065735 |
| 87162 | P14079 | P30504 | -1        |
| 87163 | P14079 | Q9UHV8 | -0.28666  |
| 87164 | P14079 | P17813 | -0.18471  |
| 87165 | P14079 | Q68DD2 | -0.44177  |
| 87166 | P14079 | Q6IPM2 | -0.17015  |
| 87167 | P14079 | P48167 | -0.72202  |
| 87168 | P14079 | Q96PX6 | -0.12818  |
| 87169 | P14079 | P13284 | -1.1597   |
| 87170 | P14079 | P06576 | -0.31459  |
| 87171 | P14079 | Q6UWE3 | -0.86147  |
| 87172 | P14079 | Q15208 | -0.61831  |



|       |        |        |           |
|-------|--------|--------|-----------|
| 87173 | P14079 | Q8N0V4 | -0.80633  |
| 87174 | P14079 | O94778 | -1.088    |
| 87175 | P14079 | Q9UII4 | -0.332    |
| 87176 | P14079 | O43175 | -1.0895   |
| 87177 | P14079 | Q99832 | -0.31003  |
| 87178 | P14079 | Q6ZST4 | -0.034237 |
| 87179 | P14079 | Q8NH74 | -1.2314   |
| 87180 | P14079 | Q8TAG5 | -0.80633  |
| 87181 | P14079 | O75369 | -0.37439  |
| 87182 | P14079 | P17858 | -0.66592  |
| 87183 | P14079 | O75438 | -0.50373  |
| 87184 | P14079 | P07686 | -0.34088  |
| 87185 | P14079 | Q9UKA1 | -0.2256   |
| 87186 | P14079 | Q6DN14 | -0.72584  |
| 87187 | P14079 | P98082 | -0.22392  |
| 87188 | P14079 | Q9BZQ6 | -0.35248  |
| 87189 | P14079 | P13747 | -1.1613   |
| 87190 | P14079 | Q9UKE5 | -0.36437  |
| 87191 | P14079 | Q8NGG6 | -1.2314   |
| 87192 | P14079 | Q9UPN4 | -0.12073  |
| 87193 | P14079 | Q8TB73 | -0.8205   |
| 87194 | P14079 | Q8TE57 | -1.4366   |
| 87195 | P14079 | Q14184 | -0.46145  |
| 87196 | P14079 | Q96KN2 | -1.3038   |
| 87197 | P14079 | P01138 | -0.41565  |
| 87198 | P14079 | Q01433 | -0.20008  |
| 87199 | P14079 | Q147U7 | -0.77815  |
| 87200 | P14079 | Q15746 | -0.59137  |
| 87201 | P14079 | Q9BTY2 | -0.82138  |
| 87202 | P14079 | Q9H5Y7 | -0.87401  |
| 87203 | P14079 | Q96F46 | -0.58149  |
| 87204 | P14079 | Q8NGF6 | -1.2314   |
| 87205 | P14079 | P00387 | -0.45389  |
| 87206 | P14079 | P05549 | -0.18508  |
| 87207 | P14079 | P33121 | -0.94669  |
| 87208 | P14079 | P51812 | -0.20686  |
| 87209 | P14079 | Q8NGD0 | -1.2314   |
| 87210 | P14079 | P43220 | -0.70497  |
| 87211 | P14079 | Q02108 | -0.6507   |
| 87212 | P14079 | Q08881 | -0.64349  |
| 87213 | P14079 | Q9Y365 | -0.43527  |
| 87214 | P14079 | Q16363 | -1.2096   |
| 87215 | P14079 | Q01995 | -0.19461  |
| 87216 | P14079 | P04040 | -0.43612  |
| 87217 | P14079 | Q16853 | -1.1254   |
| 87218 | P14079 | Q96AG3 | -0.67426  |
| 87219 | P14079 | Q9Y6C2 | -0.72064  |
| 87220 | P14079 | Q9Y5H5 | -1.2343   |
| 87221 | P14079 | Q9H1U4 | -0.88232  |
| 87222 | P14079 | P98077 | -0.22741  |
| 87223 | P14079 | A0PJK1 | -1.0727   |
| 87224 | P14079 | Q00478 | -0.77815  |
| 87225 | P14079 | P01920 | -0.7263   |
| 87226 | P14079 | Q5T848 | -1.3154   |
| 87227 | P14079 | Q6ZS02 | -0.09414  |
| 87228 | P14079 | P80362 | -1        |
| 87229 | P14079 | Q8NEN9 | -0.22741  |
| 87230 | P14079 | P84095 | -0.37721  |
| 87231 | P14079 | P32320 | -0.68455  |
| 87232 | P14079 | Q6WCQ1 | -0.22238  |
| 87233 | P14079 | Q58FG1 | -0.61725  |
| 87234 | P14079 | Q6UXX2 | -1.1319   |
| 87235 | P14079 | Q5M7Z0 | -0.78242  |
| 87236 | P14079 | Q15080 | -0.46909  |
| 87237 | P14079 | Q7Z5J1 | -1.7104   |
| 87238 | P14079 | A4FU28 | -0.77815  |
| 87239 | P14079 | Q9UIL4 | -0.26233  |
| 87240 | P14079 | O00300 | -0.86564  |
| 87241 | P14079 | P55287 | -1.2488   |
| 87242 | P14079 | P0DJI9 | -0.74693  |
| 87243 | P14079 | Q04844 | -1.1774   |
| 87244 | P14079 | Q9BTV6 | -0.22753  |
| 87245 | P14079 | Q3MIP1 | -0.77815  |
| 87246 | P14079 | P78539 | -0.44686  |
| 87247 | P14079 | P52849 | -0.69195  |
| 87248 | P14079 | Q6UXX9 | -0.817    |

|       |        |        |           |
|-------|--------|--------|-----------|
| 87249 | P14079 | Q96PB8 | -0.77815  |
| 87250 | P14079 | Q8TDI0 | -0.44833  |
| 87251 | P14079 | O75064 | -0.043495 |
| 87252 | P14079 | A6NJT0 | -0.22263  |
| 87253 | P14079 | P17483 | -0.13834  |
| 87254 | P14079 | A6NDD5 | -0.64485  |
| 87255 | P14079 | Q86WI1 | -0.75239  |
| 87256 | P14079 | Q12849 | -0.41814  |
| 87257 | P14079 | P30988 | -0.68541  |
| 87258 | P14079 | Q9BZV2 | -0.80117  |
| 87259 | P14079 | Q9H324 | -0.91888  |
| 87260 | P14079 | P07359 | -0.64934  |
| 87261 | P14079 | Q5VV43 | -0.64913  |
| 87262 | P14079 | Q6UWU2 | -0.81519  |
| 87263 | P14079 | Q99259 | -0.23477  |
| 87264 | P14079 | Q96KX0 | -0.7713   |
| 87265 | P14079 | Q9NXA8 | -0.33127  |
| 87266 | P14079 | P0C7P1 | -0.58152  |
| 87267 | P14079 | Q9NYR9 | -1.0733   |
| 87268 | P14079 | Q96BZ9 | -1.646    |
| 87269 | P14079 | C9JJ37 | -0.2163   |
| 87270 | P14079 | Q9Y2L6 | -0.32257  |
| 87271 | P14079 | Q8IV13 | -0.22352  |
| 87272 | P14079 | Q6UXD5 | -1.116    |
| 87273 | P14079 | Q9Y4E6 | -0.22724  |
| 87274 | P14079 | P78332 | -0.67068  |
| 87275 | P14079 | Q9NR80 | -0.22747  |
| 87276 | P14079 | P14618 | -0.10053  |
| 87277 | P14079 | Q8TBJ4 | -0.87327  |
| 87278 | P14079 | O95461 | -0.64295  |
| 87279 | P14079 | Q96S44 | -0.75447  |
| 87280 | P14079 | P49916 | -0.21795  |
| 87281 | P14079 | Q9NQG6 | -0.029493 |
| 87282 | P14079 | Q96D42 | -0.46283  |
| 87283 | P14079 | Q60I27 | -0.95559  |
| 87284 | P14079 | Q11206 | -0.89068  |
| 87285 | P14079 | Q8NGJ2 | -1.2314   |
| 87286 | P14079 | A2RUC4 | -0.4822   |
| 87287 | P14079 | P34903 | -1.0046   |
| 87288 | P14079 | P17481 | -0.18329  |
| 87289 | P14079 | A8MPP1 | -0.59338  |
| 87290 | P14079 | Q16557 | -0.80086  |
| 87291 | P14079 | O95006 | -1.2314   |
| 87292 | P14079 | O00746 | -0.8053   |
| 87293 | P14079 | Q96SL1 | -0.95251  |
| 87294 | P14079 | Q9UIG0 | -0.22104  |
| 87295 | P14079 | Q6QEF8 | -0.22741  |
| 87296 | P14079 | A8MXB1 | -0.91985  |
| 87297 | P14079 | Q9ULV1 | -0.84842  |
| 87298 | P14079 | Q8NH10 | -1.2314   |
| 87299 | P14079 | Q6BAA4 | -0.22874  |
| 87300 | P14079 | Q60883 | -0.77072  |
| 87301 | P14079 | Q5VXM1 | -0.80633  |
| 87302 | P14079 | Q9Y278 | -0.68653  |
| 87303 | P14079 | Q8WWY8 | -1.3567   |
| 87304 | P14079 | Q86XN8 | -0.22713  |
| 87305 | P14079 | Q96BQ1 | -0.66951  |
| 87306 | P14079 | Q13936 | -0.39298  |
| 87307 | P14079 | Q7RTY9 | -1.0415   |
| 87308 | P14079 | Q86V88 | -0.63051  |
| 87309 | P14079 | P23142 | -0.93804  |
| 87310 | P14079 | Q5VZM2 | -0.32361  |
| 87311 | P14079 | Q9BXA7 | -1.6655   |
| 87312 | P14079 | Q4KMG9 | -0.77815  |
| 87313 | P14079 | Q8TER0 | -0.80317  |
| 87314 | P14079 | Q8IY84 | -1.4846   |
| 87315 | P14079 | A5D8T8 | -0.80162  |
| 87316 | P14079 | O15047 | -0.44627  |
| 87317 | P14079 | Q6UX06 | -0.9778   |
| 87318 | P14079 | Q9BXT4 | -0.34547  |
| 87319 | P14079 | Q92570 | -0.23786  |
| 87320 | P14079 | Q86UF1 | -0.77815  |
| 87321 | P14079 | Q8NB46 | -0.22682  |
| 87322 | P14079 | Q10588 | -1.1027   |
| 87323 | P14079 | Q0ZGT2 | -0.22741  |
| 87324 | P14079 | P98196 | -0.73031  |

|       |        |        |           |
|-------|--------|--------|-----------|
| 87325 | P14079 | Q5W041 | -0.2289   |
| 87326 | P14079 | Q9H1R3 | -0.48513  |
| 87327 | P14079 | Q8WYL5 | -0.38657  |
| 87328 | P14079 | Q4AC99 | -0.27049  |
| 87329 | P14079 | Q9UQ16 | -0.26647  |
| 87330 | P14079 | Q9UHH9 | -0.56976  |
| 87331 | P14079 | Q92820 | -0.63199  |
| 87332 | P14079 | Q9H4I0 | -0.16064  |
| 87333 | P14079 | O43772 | -0.51603  |
| 87334 | P14079 | Q8NGG7 | -1.2314   |
| 87335 | P14079 | Q8TDV5 | -1.3834   |
| 87336 | P14079 | P61019 | -0.86794  |
| 87337 | P14079 | P24666 | -0.077926 |
| 87338 | P14079 | Q9BZB8 | -0.43196  |
| 87339 | P14079 | O96009 | -1.2882   |
| 87340 | P14079 | Q9NRV9 | -0.7479   |
| 87341 | P14079 | P0C7V8 | -0.22741  |
| 87342 | P14079 | Q7Z429 | -0.77815  |
| 87343 | P14079 | Q9Y259 | -0.93511  |
| 87344 | P14079 | Q9BYJ1 | -0.49356  |
| 87345 | P14079 | Q8NGF3 | -1.2314   |
| 87346 | P14079 | Q8NGC5 | -1.2314   |
| 87347 | P14079 | Q8TF66 | -0.77815  |
| 87348 | P14079 | Q9UBG3 | -0.23652  |
| 87349 | P14079 | Q8WW62 | -0.94416  |
| 87350 | P14079 | Q03001 | -0.22847  |
| 87351 | P14079 | Q16560 | -0.44295  |
| 87352 | P14079 | Q5GLZ8 | -0.90905  |
| 87353 | P14079 | P0C0E4 | -1.041    |
| 87354 | P14079 | O15050 | -0.22288  |
| 87355 | P14079 | Q8WXF3 | -0.72377  |
| 87356 | P14079 | Q9HCN8 | -0.17671  |
| 87357 | P14079 | Q6ISS4 | -0.80633  |
| 87358 | P14079 | A8MV57 | -0.022044 |
| 87359 | P14079 | P11766 | -0.41439  |
| 87360 | P14079 | Q96CM8 | -1.0887   |
| 87361 | P14079 | Q5JXX5 | -0.95819  |
| 87362 | P14079 | Q96AE7 | -0.22025  |
| 87363 | P14079 | Q96IR7 | -0.51016  |
| 87364 | P14079 | P56746 | -0.60718  |
| 87365 | P14079 | P15498 | -0.22741  |
| 87366 | P14079 | P20393 | -0.43252  |
| 87367 | P14079 | P55056 | -0.88214  |
| 87368 | P14079 | Q13433 | -1.1047   |
| 87369 | P14079 | Q5VYV0 | -0.99971  |
| 87370 | P14079 | Q9P0J1 | -0.18756  |
| 87371 | P14079 | Q9NWX5 | -0.22737  |
| 87372 | P14079 | P27824 | -0.25269  |
| 87373 | P14079 | P26232 | -0.13094  |
| 87374 | P14079 | P51151 | -0.52371  |
| 87375 | P14079 | O43464 | -0.22525  |
| 87376 | P14079 | Q13423 | -1.0084   |
| 87377 | P14079 | P13798 | -0.20853  |
| 87378 | P14079 | Q96LB0 | -1.3154   |
| 87379 | P14079 | O00409 | -0.76882  |
| 87380 | P14079 | Q6UY18 | -0.77815  |
| 87381 | P14079 | Q2WEN9 | -0.79717  |
| 87382 | P14079 | Q8NE28 | -1.0959   |
| 87383 | P14079 | O75677 | -0.22829  |
| 87384 | P14079 | P39086 | -0.75887  |
| 87385 | P14079 | Q9Y5H8 | -1.341    |
| 87386 | P14079 | O15394 | -1.1916   |
| 87387 | P14079 | Q9P2F6 | -1.0708   |
| 87388 | P14079 | P78348 | -0.77356  |
| 87389 | P14079 | Q9NQ8  | -0.23946  |
| 87390 | P14079 | Q76LX8 | -0.66673  |
| 87391 | P14079 | Q9UNH6 | -0.37496  |
| 87392 | P14079 | O14494 | -1.0286   |
| 87393 | P14079 | Q8NGX1 | -1.2314   |
| 87394 | P14079 | O95140 | -0.87444  |
| 87395 | P14079 | Q8NGC6 | -1.2314   |
| 87396 | P14079 | Q12882 | -0.65071  |
| 87397 | P14079 | Q8IW00 | -0.97472  |
| 87398 | P14079 | Q9BSE5 | -0.16037  |
| 87399 | P14079 | Q9H2R5 | -1.4766   |
| 87400 | P14079 | P51460 | -0.64378  |

|       |        |        |           |
|-------|--------|--------|-----------|
| 87401 | P14079 | Q8IV76 | -0.23159  |
| 87402 | P14079 | Q9HAY6 | -0.39968  |
| 87403 | P14079 | Q6UWN8 | -0.82805  |
| 87404 | P14079 | Q8NFS9 | -0.67018  |
| 87405 | P14079 | P05496 | -0.6999   |
| 87406 | P14079 | A8MUP6 | -0.77815  |
| 87407 | P14079 | P48047 | -0.39216  |
| 87408 | P14079 | Q6ZWI9 | -0.22745  |
| 87409 | P14079 | Q02575 | -0.22311  |
| 87410 | P14079 | O95813 | -0.51833  |
| 87411 | P14079 | O15537 | -0.99393  |
| 87412 | P14079 | Q9HCD6 | -0.2274   |
| 87413 | P14079 | P21802 | -0.26363  |
| 87414 | P14079 | O15524 | -0.22739  |
| 87415 | P14079 | A8MVU1 | -0.22739  |
| 87416 | P14079 | P01911 | -0.72952  |
| 87417 | P14079 | Q8N0W4 | -0.36395  |
| 87418 | P14079 | P78363 | -1.4185   |
| 87419 | P14079 | P02585 | -0.22608  |
| 87420 | P14079 | Q9UQV4 | -0.92214  |
| 87421 | P14079 | P04554 | -0.86644  |
| 87422 | P14079 | Q9BZJ8 | -1.3166   |
| 87423 | P14079 | Q14563 | -0.74124  |
| 87424 | P14079 | Q13219 | -1.3876   |
| 87425 | P14079 | Q8NGS3 | -1.2314   |
| 87426 | P14079 | Q96MT1 | -0.78242  |
| 87427 | P14079 | Q75N03 | -0.27674  |
| 87428 | P14079 | Q9Y223 | -0.90083  |
| 87429 | P14079 | O75888 | -0.54085  |
| 87430 | P14079 | P07358 | -0.93448  |
| 87431 | P14079 | P31321 | -0.34021  |
| 87432 | P14079 | O60762 | -0.092217 |
| 87433 | P14079 | O60755 | -1.1959   |
| 87434 | P14079 | Q6IPT4 | -0.49129  |
| 87435 | P14079 | Q8IZR5 | -0.8507   |
| 87436 | P14079 | P08123 | -0.53391  |
| 87437 | P14079 | Q8N4X5 | -0.12577  |
| 87438 | P14079 | Q96LC7 | -1.761    |
| 87439 | P14079 | O60431 | -1.2314   |
| 87440 | P14079 | Q9H819 | -0.88024  |
| 87441 | P14079 | Q8NGA2 | -1.2314   |
| 87442 | P14079 | O43281 | -0.33698  |
| 87443 | P14079 | Q99959 | -0.14413  |
| 87444 | P14079 | Q8IYS0 | -0.77815  |
| 87445 | P14079 | O75962 | -0.75529  |
| 87446 | P14079 | Q86W92 | -0.54413  |
| 87447 | P14079 | Q9BX10 | -0.96254  |
| 87448 | P14079 | Q12918 | -1.0561   |
| 87449 | P14079 | P06331 | -1        |
| 87450 | P14079 | Q9Y5F9 | -1.2343   |
| 87451 | P14079 | O14863 | -0.6547   |
| 87452 | P14079 | Q9UQD0 | -1.18     |
| 87453 | P14079 | Q96A58 | -0.74059  |
| 87454 | P14079 | Q8N6N2 | -0.26849  |
| 87455 | P14079 | Q9H161 | -0.20539  |
| 87456 | P14079 | O94900 | -0.21759  |
| 87457 | P14079 | Q6Q0C1 | -0.74044  |
| 87458 | P14079 | Q96MM3 | -0.2274   |
| 87459 | P14079 | Q96QT4 | -1.5805   |
| 87460 | P14079 | Q5VWW1 | -0.87899  |
| 87461 | P14079 | Q8IWX5 | -0.85946  |
| 87462 | P14079 | Q9BWV3 | -0.4292   |
| 87463 | P14079 | Q9H0H3 | -0.20409  |
| 87464 | P14079 | P21452 | -1.4497   |
| 87465 | P14079 | P05543 | -0.65582  |
| 87466 | P14079 | P01024 | -0.70933  |
| 87467 | P14079 | Q5THJ4 | -0.20682  |
| 87468 | P14079 | Q99946 | -0.79151  |
| 87469 | P14079 | Q9BUR5 | -1.4544   |
| 87470 | P14079 | P14550 | -0.4042   |
| 87471 | P14079 | Q8NH67 | -1.2314   |
| 87472 | P14079 | Q9Y4K4 | -0.83432  |
| 87473 | P14079 | P14784 | -1.1444   |
| 87474 | P14079 | Q9H9P2 | -0.47861  |
| 87475 | P14079 | Q7RTM1 | -1.4432   |
| 87476 | P14079 | Q9HBI0 | -0.17462  |

|       |        |        |           |
|-------|--------|--------|-----------|
| 87477 | P14079 | A6NHT5 | -0.34392  |
| 87478 | P14079 | Q9H3M0 | -1.0843   |
| 87479 | P14079 | Q9Y2A7 | -0.30676  |
| 87480 | P14079 | P18428 | -0.36773  |
| 87481 | P14079 | P04180 | -0.45522  |
| 87482 | P14079 | Q8TAC1 | -0.57577  |
| 87483 | P14079 | Q9Y6H3 | -0.72915  |
| 87484 | P14079 | O14520 | -0.68847  |
| 87485 | P14079 | P30038 | -0.48474  |
| 87486 | P14079 | P27037 | -0.50498  |
| 87487 | P14079 | Q92839 | -1.1601   |
| 87488 | P14079 | P31995 | -0.22741  |
| 87489 | P14079 | P58173 | -1.2314   |
| 87490 | P14079 | P25713 | -0.15904  |
| 87491 | P14079 | Q9Y6X5 | -0.94438  |
| 87492 | P14079 | P83110 | -0.81502  |
| 87493 | P14079 | Q92918 | -0.86133  |
| 87494 | P14079 | O60565 | -0.18918  |
| 87495 | P14079 | Q6JEL2 | -0.21121  |
| 87496 | P14079 | O14581 | -1.2314   |
| 87497 | P14079 | Q9NRP7 | -0.76839  |
| 87498 | P14079 | Q9NQS3 | -0.38236  |
| 87499 | P14079 | P98177 | -0.82888  |
| 87500 | P14079 | Q8N9I1 | -0.77815  |
| 87501 | P14079 | Q15256 | -0.53654  |
| 87502 | P14079 | Q9Y4L1 | -0.53934  |
| 87503 | P14079 | Q4L180 | -0.19345  |
| 87504 | P14079 | O00180 | -1.0273   |
| 87505 | P14079 | Q9Y2E6 | -0.32568  |
| 87506 | P14079 | P06493 | -0.17923  |
| 87507 | P14079 | Q49A17 | -0.68595  |
| 87508 | P14079 | Q00889 | -0.82682  |
| 87509 | P14079 | Q9NR90 | -1.0052   |
| 87510 | P14079 | Q96ID5 | -0.80633  |
| 87511 | P14079 | Q9HA65 | -1.4902   |
| 87512 | P14079 | O75629 | -1.0068   |
| 87513 | P14079 | P49888 | -0.27827  |
| 87514 | P14079 | Q14680 | -0.70749  |
| 87515 | P14079 | Q8N427 | -0.69826  |
| 87516 | P14079 | P0C7N1 | -1.2314   |
| 87517 | P14079 | P08311 | -1.2578   |
| 87518 | P14079 | Q6UDR6 | -0.82805  |
| 87519 | P14079 | Q6P4H8 | -0.77815  |
| 87520 | P14079 | Q9H6A0 | -0.11626  |
| 87521 | P14079 | Q38SD2 | -1.6053   |
| 87522 | P14079 | Q96P63 | -0.078661 |
| 87523 | P14079 | Q6T4P5 | -0.92232  |
| 87524 | P14079 | Q9BTM1 | -0.92425  |
| 87525 | P14079 | Q8IV38 | -0.33756  |
| 87526 | P14079 | Q01432 | -0.18245  |
| 87527 | P14079 | Q02218 | -0.2898   |
| 87528 | P14079 | Q9Y230 | -0.22808  |
| 87529 | P14079 | P55285 | -0.97619  |
| 87530 | P14079 | Q8NGR4 | -1.2314   |
| 87531 | P14079 | P20023 | -0.91938  |
| 87532 | P14079 | P23677 | -1.0147   |
| 87533 | P14079 | Q9Y577 | -0.31343  |
| 87534 | P14079 | Q8TF17 | -0.34637  |
| 87535 | P14079 | Q9NVH0 | -0.56968  |
| 87536 | P14079 | Q08477 | -1.0992   |
| 87537 | P14079 | Q9NPQ8 | -0.60529  |
| 87538 | P14079 | Q9BZ11 | -1.2633   |
| 87539 | P14079 | Q04912 | -1.1728   |
| 87540 | P14079 | Q96NZ8 | -0.792    |
| 87541 | P14079 | Q96P44 | -0.91149  |
| 87542 | P14079 | Q9Y6N8 | -1.2011   |
| 87543 | P14079 | Q8WZ92 | -1.2314   |
| 87544 | P14079 | Q9UK53 | -0.2188   |
| 87545 | P14079 | P09884 | -0.23404  |
| 87546 | P14079 | Q9BXN1 | -0.97217  |
| 87547 | P14079 | O15374 | -1.1937   |
| 87548 | P14079 | P01588 | -0.20581  |
| 87549 | P14079 | Q8N434 | -0.84927  |
| 87550 | P14079 | Q5T7M9 | -0.9328   |
| 87551 | P14079 | O76054 | -0.20119  |
| 87552 | P14079 | P40394 | -0.78635  |

|       |        |         |          |
|-------|--------|---------|----------|
| 87553 | P14079 | Q58A45  | -0.19666 |
| 87554 | P14079 | Q96S53  | -1.097   |
| 87555 | P14079 | Q99719  | -0.22506 |
| 87556 | P14079 | Q8TC29  | -0.17805 |
| 87557 | P14079 | A6NIL9  | -0.77815 |
| 87558 | P14079 | Q9NQ30  | -0.72953 |
| 87559 | P14079 | Q9NQF3  | -0.28444 |
| 87560 | P14079 | Q92544  | -0.77815 |
| 87561 | P14079 | Q9UMR3  | -0.60057 |
| 87562 | P14079 | A8MXK1  | -0.77815 |
| 87563 | P14079 | Q16602  | -0.58784 |
| 87564 | P14079 | Q5UAW9  | -1.386   |
| 87565 | P14079 | Q9C0K0  | -0.22695 |
| 87566 | P14079 | Q07507  | -1.2494  |
| 87567 | P14079 | Q96H78  | -0.74044 |
| 87568 | P14079 | Q9NUQ2  | -0.85245 |
| 87569 | P14079 | Q9NYG8  | -1.2622  |
| 87570 | P14079 | Q3KNS1  | -0.77415 |
| 87571 | P14079 | Q96PG2  | -0.77815 |
| 87572 | P14079 | O15529  | -1.5146  |
| 87573 | P14079 | Q8IUUK8 | -0.77815 |
| 87574 | P14079 | Q8IWB9  | -0.9519  |
| 87575 | P14079 | Q9GZU1  | -0.99833 |
| 87576 | P14079 | Q96LR9  | -1.8416  |
| 87577 | P14079 | Q13905  | -0.22718 |
| 87578 | P14079 | Q5EBN2  | -0.36051 |
| 87579 | P14079 | P05108  | -0.31017 |
| 87580 | P14079 | Q95475  | -0.22859 |
| 87581 | P14079 | Q00013  | -0.22499 |
| 87582 | P14079 | P63027  | -0.32027 |
| 87583 | P14079 | Q9ULI3  | -1.0143  |
| 87584 | P14079 | A3KFT3  | -1.2314  |
| 87585 | P14079 | Q5VZP5  | -0.50745 |
| 87586 | P14079 | Q6IMN6  | -0.33121 |
| 87587 | P14079 | Q712K3  | -1.0854  |
| 87588 | P14079 | C9J202  | -0.31449 |
| 87589 | P14079 | Q9NP99  | -1.5898  |
| 87590 | P14079 | Q9NYL9  | -0.20334 |
| 87591 | P14079 | Q9NR45  | -0.16669 |
| 87592 | P14079 | O15212  | -0.17287 |
| 87593 | P14079 | Q9BZC7  | -1.1619  |
| 87594 | P14079 | Q9NXZ2  | -1.1985  |
| 87595 | P14079 | Q01523  | -0.86811 |
| 87596 | P14079 | O60941  | -0.22451 |
| 87597 | P14079 | Q9NYB9  | -0.22762 |
| 87598 | P14079 | Q4VXF1  | -0.77815 |
| 87599 | P14079 | Q9NQC1  | -0.23586 |
| 87600 | P14079 | P48048  | -1.5811  |
| 87601 | P14079 | Q7L8A9  | -0.60803 |
| 87602 | P14079 | Q5T7P8  | -0.79899 |
| 87603 | P14079 | Q8N257  | -0.92425 |
| 87604 | P14079 | A6NKB5  | -0.77815 |
| 87605 | P14079 | Q8NES3  | -1.1241  |
| 87606 | P14079 | Q8WW36  | -0.16722 |
| 87607 | P14079 | P01711  | -1       |
| 87608 | P14079 | O00339  | -0.52439 |
| 87609 | P14079 | Q8N6R1  | -0.68207 |
| 87610 | P14079 | Q6IQ20  | -0.44399 |
| 87611 | P14079 | Q08174  | -1.0766  |
| 87612 | P14079 | Q9H8M5  | -1.0079  |
| 87613 | P14079 | P12272  | -0.33175 |
| 87614 | P14079 | Q10471  | -0.97367 |
| 87615 | P14079 | A6NCW0  | -0.45107 |
| 87616 | P14079 | Q9NYM4  | -1.2524  |
| 87617 | P14079 | Q6DN72  | -0.81993 |
| 87618 | P14079 | Q14344  | -0.4967  |
| 87619 | P14079 | P80365  | -0.69332 |
| 87620 | P14079 | Q9GZQ4  | -0.97851 |
| 87621 | P14079 | Q43347  | -0.33651 |
| 87622 | P14079 | Q8IV35  | -0.22739 |
| 87623 | P14079 | Q4AE62  | -0.30601 |
| 87624 | P14079 | Q14246  | -1.6782  |
| 87625 | P14079 | O00763  | -0.4463  |
| 87626 | P14079 | Q9BZJ0  | -0.26403 |
| 87627 | P14079 | Q02962  | -0.2273  |
| 87628 | P14079 | Q99735  | -0.83861 |

|       |        |        |           |
|-------|--------|--------|-----------|
| 87629 | P14079 | Q9Y3L5 | -0.88152  |
| 87630 | P14079 | Q9P1V8 | -0.19952  |
| 87631 | P14079 | Q5TCY1 | -1.008    |
| 87632 | P14079 | Q00590 | -1.5547   |
| 87633 | P14079 | Q9NYW3 | -1.1071   |
| 87634 | P14079 | A6NJY1 | -0.87962  |
| 87635 | P14079 | P16233 | -0.86674  |
| 87636 | P14079 | Q86WA6 | -0.17147  |
| 87637 | P14079 | P62195 | -0.48599  |
| 87638 | P14079 | A6NN92 | -0.97546  |
| 87639 | P14079 | P51159 | -0.28743  |
| 87640 | P14079 | Q9H892 | -0.22424  |
| 87641 | P14079 | P42680 | -1.2325   |
| 87642 | P14079 | Q00526 | -0.74612  |
| 87643 | P14079 | Q9H6S3 | -0.22741  |
| 87644 | P14079 | Q6YN16 | -1.1156   |
| 87645 | P14079 | P35612 | -0.11599  |
| 87646 | P14079 | Q5I0G3 | -0.76212  |
| 87647 | P14079 | P38567 | -0.68599  |
| 87648 | P14079 | P02708 | -0.82229  |
| 87649 | P14079 | P14317 | -0.22747  |
| 87650 | P14079 | P40261 | -0.1066   |
| 87651 | P14079 | Q96RA2 | -0.91978  |
| 87652 | P14079 | Q9UKT8 | -0.23247  |
| 87653 | P14079 | Q8WVD3 | -0.74425  |
| 87654 | P14079 | P20366 | -0.78099  |
| 87655 | P14079 | Q76M96 | -1.0734   |
| 87656 | P14079 | P01286 | -0.50384  |
| 87657 | P14079 | Q6P3W7 | -0.22741  |
| 87658 | P14079 | P12830 | -0.93989  |
| 87659 | P14079 | P52926 | -0.069958 |
| 87660 | P14079 | O95274 | -0.94143  |
| 87661 | P14079 | Q17RY0 | -0.75311  |
| 87662 | P14079 | Q9UBM1 | -0.44766  |
| 87663 | P14079 | P31371 | -0.7618   |
| 87664 | P14079 | Q9Y4Z2 | -0.23099  |
| 87665 | P14079 | Q9UM22 | -0.80317  |
| 87666 | P14079 | Q96P20 | -0.22696  |
| 87667 | P14079 | Q8N7C0 | -1.1943   |
| 87668 | P14079 | Q6QHK4 | -0.2753   |
| 87669 | P14079 | P35609 | -0.72375  |
| 87670 | P14079 | Q8ND23 | -0.2265   |
| 87671 | P14079 | P01861 | -0.89686  |
| 87672 | P14079 | Q9NW13 | -0.31969  |
| 87673 | P14079 | Q8TBC4 | -0.26443  |
| 87674 | P14079 | Q9NPE6 | -0.29075  |
| 87675 | P14079 | Q9ULC5 | -0.98571  |
| 87676 | P14079 | Q9UGQ3 | -0.71982  |
| 87677 | P14079 | A8MTJ3 | -0.72065  |
| 87678 | P14079 | P01701 | -1        |
| 87679 | P14079 | P01009 | -0.17468  |
| 87680 | P14079 | Q9UQQ1 | -1.4546   |
| 87681 | P14079 | Q8TCX1 | -0.029416 |
| 87682 | P14079 | P61106 | -0.4786   |
| 87683 | P14079 | P31644 | -0.97509  |
| 87684 | P14079 | Q6PID6 | -0.22729  |
| 87685 | P14079 | Q43610 | -0.40005  |
| 87686 | P14079 | Q8NEB9 | -0.54711  |
| 87687 | P14079 | Q9UI42 | -1.209    |
| 87688 | P14079 | O95395 | -0.50556  |
| 87689 | P14079 | Q08050 | -0.95292  |
| 87690 | P14079 | Q14786 | -0.018038 |
| 87691 | P14079 | Q9P298 | -0.77815  |
| 87692 | P14079 | Q9UBX3 | -0.22848  |
| 87693 | P14079 | P07550 | -0.59238  |
| 87694 | P14079 | Q5U651 | -0.14193  |
| 87695 | P14079 | P56705 | -0.32989  |
| 87696 | P14079 | Q86Y33 | -0.2274   |
| 87697 | P14079 | Q92185 | -0.53827  |
| 87698 | P14079 | Q0VDD8 | -0.27947  |
| 87699 | P14079 | O15020 | -0.22779  |
| 87700 | P14079 | O94887 | -0.22761  |
| 87701 | P14079 | Q9NTQ9 | -0.88575  |
| 87702 | P14079 | Q8TE49 | -0.4498   |
| 87703 | P14079 | P12271 | -0.57365  |
| 87704 | P14079 | Q9NX74 | -0.49241  |

|       |        |        |          |
|-------|--------|--------|----------|
| 87705 | P14079 | Q8N743 | -0.97472 |
| 87706 | P14079 | P0DM48 | -0.22641 |
| 87707 | P14079 | Q7Z3Z4 | -0.2398  |
| 87708 | P14079 | Q96RG2 | -0.76534 |
| 87709 | P14079 | Q92598 | -0.58794 |
| 87710 | P14079 | Q9UHI7 | -0.5327  |
| 87711 | P14079 | Q9BSL1 | -0.22191 |
| 87712 | P14079 | P40197 | -1.1005  |
| 87713 | P14079 | P19086 | -0.97376 |
| 87714 | P14079 | Q96NK8 | -0.22811 |
| 87715 | P14079 | P0C7X1 | -1.4902  |
| 87716 | P14079 | Q9H2C5 | -1.2314  |
| 87717 | P14079 | Q9NZV8 | -0.99149 |
| 87718 | P14079 | P01818 | -1       |
| 87719 | P14079 | Q2TVT4 | -0.62942 |
| 87720 | P14079 | Q9BX67 | -0.70547 |
| 87721 | P14079 | P32238 | -0.74602 |
| 87722 | P14079 | Q8N475 | -0.863   |
| 87723 | P14079 | P02741 | -0.72581 |
| 87724 | P14079 | Q14257 | -0.16346 |
| 87725 | P14079 | P0C6E5 | -0.41691 |
| 87726 | P14079 | Q8N5G2 | -0.74759 |
| 87727 | P14079 | Q94889 | -0.18675 |
| 87728 | P14079 | Q95155 | -0.15157 |
| 87729 | P14079 | Q8NHS2 | -0.29986 |
| 87730 | P14079 | Q9H0D2 | -0.22246 |
| 87731 | P14079 | P07307 | -0.35545 |
| 87732 | P14079 | Q9HBH9 | -0.9065  |
| 87733 | P14079 | P55317 | -0.99971 |
| 87734 | P14079 | A6NI03 | -0.36051 |
| 87735 | P14079 | Q5TGJ6 | -0.11721 |
| 87736 | P14079 | Q5JU69 | -1.1518  |
| 87737 | P14079 | Q8N8V2 | -1.0163  |
| 87738 | P14079 | P43121 | -1.1455  |
| 87739 | P14079 | Q96HL8 | -0.22738 |
| 87740 | P14079 | P01270 | -0.60922 |
| 87741 | P14079 | A8MTL9 | -0.82805 |
| 87742 | P14079 | Q8NI99 | -1.5153  |
| 87743 | P14079 | Q9ULC8 | -0.85132 |
| 87744 | P14079 | Q92620 | -0.22457 |
| 87745 | P14079 | Q9H0F5 | -0.28835 |
| 87746 | P14079 | Q8TDS4 | -1.0221  |
| 87747 | P14079 | Q6UX53 | -0.29991 |
| 87748 | P14079 | Q5TC82 | -0.2274  |
| 87749 | P14079 | P39060 | -0.45698 |
| 87750 | P14079 | P56704 | -0.27165 |
| 87751 | P14079 | Q8N6U8 | -1.5746  |
| 87752 | P14079 | P54760 | -1.5444  |
| 87753 | P14079 | Q9NX45 | -0.25946 |
| 87754 | P14079 | Q14554 | -0.56272 |
| 87755 | P14079 | P59539 | -1.1233  |
| 87756 | P14079 | Q95297 | -0.15376 |
| 87757 | P14079 | Q8N5V2 | -0.83992 |
| 87758 | P14079 | P54646 | -0.33237 |
| 87759 | P14079 | Q13087 | -0.53392 |
| 87760 | P14079 | Q95197 | -0.29086 |
| 87761 | P14079 | Q58FF6 | -0.61725 |
| 87762 | P14079 | Q9H694 | -0.58811 |
| 87763 | P14079 | Q8TCT8 | -0.74798 |
| 87764 | P14079 | Q8WTX9 | -0.96144 |
| 87765 | P14079 | P52803 | -0.55381 |
| 87766 | P14079 | Q96BR9 | -0.21404 |
| 87767 | P14079 | Q9H2B4 | -1.0022  |
| 87768 | P14079 | P01213 | -0.86484 |
| 87769 | P14079 | Q9C009 | -0.69294 |
| 87770 | P14079 | Q01629 | -0.78588 |
| 87771 | P14079 | Q86UK7 | -0.36051 |
| 87772 | P14079 | Q9NR31 | -0.33502 |
| 87773 | P14079 | P30479 | -1       |
| 87774 | P14079 | O43548 | -0.29978 |
| 87775 | P14079 | P10275 | -0.22742 |
| 87776 | P14079 | Q8NGJ3 | -1.2314  |
| 87777 | P14079 | P00491 | -0.25138 |
| 87778 | P14079 | P30626 | -0.2314  |
| 87779 | P14079 | Q9HAV5 | -0.69082 |
| 87780 | P14079 | P0C869 | -0.58687 |



|       |        |        |          |
|-------|--------|--------|----------|
| 87781 | P14079 | O95069 | -1.2175  |
| 87782 | P14079 | O15121 | -1.1448  |
| 87783 | P14079 | Q9H6D8 | -0.93653 |
| 87784 | P14079 | Q96JB6 | -0.62984 |
| 87785 | P14079 | O75845 | -1.0287  |
| 87786 | P14079 | Q9UPW8 | -0.22741 |
| 87787 | P14079 | Q9ULI4 | -0.29467 |
| 87788 | P14079 | Q86YM7 | -0.2705  |
| 87789 | P14079 | P19075 | -1.0649  |
| 87790 | P14079 | P59046 | -0.22708 |
| 87791 | P14079 | Q9Y651 | -0.2316  |
| 87792 | P14079 | A6NHS7 | -0.77815 |
| 87793 | P14079 | P16144 | -0.8021  |
| 87794 | P14079 | P11230 | -0.95702 |
| 87795 | P14079 | Q9NTX7 | -0.22726 |
| 87796 | P14079 | Q96PD7 | -0.49768 |
| 87797 | P14079 | Q71RS6 | -1.1006  |
| 87798 | P14079 | P00390 | -0.31632 |
| 87799 | P14079 | Q5TGI0 | -0.77815 |
| 87800 | P14079 | Q9NT68 | -0.57832 |
| 87801 | P14079 | Q6IPX1 | -1.4902  |
| 87802 | P14079 | Q86VD7 | -0.61547 |
| 87803 | P14079 | P12107 | -0.79044 |
| 87804 | P14079 | Q16877 | -0.86691 |
| 87805 | P14079 | Q9Y4K3 | -0.22724 |
| 87806 | P14079 | Q13797 | -0.86796 |
| 87807 | P14079 | O00154 | -0.13773 |
| 87808 | P14079 | Q9P126 | -0.62111 |
| 87809 | P14079 | P51164 | -1.0191  |
| 87810 | P14079 | P00748 | -0.75972 |
| 87811 | P14079 | Q7M4L6 | -0.22739 |
| 87812 | P14079 | A8MVZ5 | -0.77815 |
| 87813 | P14079 | Q7L1I2 | -0.96923 |
| 87814 | P14079 | P17844 | -0.80673 |
| 87815 | P14079 | P00797 | -0.91023 |
| 87816 | P14079 | Q6P2D8 | -0.22741 |
| 87817 | P14079 | Q6UW68 | -0.77815 |
| 87818 | P14079 | Q9Y666 | -1.2843  |
| 87819 | P14079 | P59544 | -1.1233  |
| 87820 | P14079 | P05186 | -1.0438  |
| 87821 | P14079 | Q9HC10 | -0.849   |
| 87822 | P14079 | Q5T2S8 | -0.23099 |
| 87823 | P14079 | Q9C0I9 | -0.22775 |
| 87824 | P14079 | O00459 | -0.22738 |
| 87825 | P14079 | Q9Y227 | -0.43753 |
| 87826 | P14079 | Q96L33 | -1.2256  |
| 87827 | P14079 | Q6NT52 | -0.78571 |
| 87828 | P14079 | Q07954 | -0.43654 |
| 87829 | P14079 | P0C645 | -1.2314  |
| 87830 | P14079 | O43719 | -0.21036 |
| 87831 | P14079 | Q8IVU1 | -0.95918 |
| 87832 | P14079 | P32248 | -0.48617 |
| 87833 | P14079 | P55087 | -0.69755 |
| 87834 | P14079 | Q7Z7M8 | -0.66242 |
| 87835 | P14079 | P06681 | -1.4809  |
| 87836 | P14079 | Q9UKU9 | -1.4592  |
| 87837 | P14079 | Q13332 | -0.89693 |
| 87838 | P14079 | Q96IZ5 | -0.79049 |
| 87839 | P14079 | Q9GZM6 | -1.2314  |
| 87840 | P14079 | Q13268 | -0.40996 |
| 87841 | P14079 | P30450 | -0.99945 |
| 87842 | P14079 | O60341 | -0.22386 |
| 87843 | P14079 | Q9UPN6 | -0.32497 |
| 87844 | P14079 | P11801 | -0.87553 |
| 87845 | P14079 | Q8NH61 | -1.2314  |
| 87846 | P14079 | Q16635 | -0.57958 |
| 87847 | P14079 | Q6P4I2 | -0.15937 |
| 87848 | P14079 | Q06430 | -0.93145 |
| 87849 | P14079 | Q9BZ76 | -1.9339  |
| 87850 | P14079 | O43246 | -0.81608 |
| 87851 | P14079 | Q9UL25 | -0.45047 |
| 87852 | P14079 | O95750 | -0.76651 |
| 87853 | P14079 | Q92824 | -1.0043  |
| 87854 | P14079 | Q7Z2H8 | -0.95241 |
| 87855 | P14079 | Q86YZ3 | -0.63606 |
| 87856 | P14079 | Q8IUZ5 | -0.45681 |

|       |        |        |           |
|-------|--------|--------|-----------|
| 87857 | P14079 | P26045 | -0.22836  |
| 87858 | P14079 | Q6P3S6 | -0.22631  |
| 87859 | P14079 | P55058 | -1.0507   |
| 87860 | P14079 | Q9UKZ4 | -1.2795   |
| 87861 | P14079 | Q9HBV1 | -0.83272  |
| 87862 | P14079 | Q99666 | -0.2137   |
| 87863 | P14079 | Q969T3 | -0.37496  |
| 87864 | P14079 | Q99969 | -0.33096  |
| 87865 | P14079 | Q8NH21 | -1.2314   |
| 87866 | P14079 | Q8NHU3 | -0.96779  |
| 87867 | P14079 | P63211 | -0.66964  |
| 87868 | P14079 | Q96H55 | -0.23887  |
| 87869 | P14079 | Q86YV5 | -1.4475   |
| 87870 | P14079 | Q8NHA8 | -1.2314   |
| 87871 | P14079 | Q5T9C9 | -1.0893   |
| 87872 | P14079 | Q8NB14 | -0.77524  |
| 87873 | P14079 | O77932 | -0.76023  |
| 87874 | P14079 | P35858 | -0.83051  |
| 87875 | P14079 | Q9UBS9 | -0.96148  |
| 87876 | P14079 | Q8NCW0 | -0.84632  |
| 87877 | P14079 | Q9BQS7 | -1.3319   |
| 87878 | P14079 | P07602 | -0.99748  |
| 87879 | P14079 | P04085 | -0.40495  |
| 87880 | P14079 | Q8N148 | -1.2314   |
| 87881 | P14079 | P36897 | -0.26109  |
| 87882 | P14079 | O75096 | -0.72365  |
| 87883 | P14079 | Q9H165 | -0.22679  |
| 87884 | P14079 | P42262 | -1.0662   |
| 87885 | P14079 | Q15760 | -1.5146   |
| 87886 | P14079 | Q9ULV4 | -0.34863  |
| 87887 | P14079 | P43166 | -0.154    |
| 87888 | P14079 | A6NE02 | -0.66861  |
| 87889 | P14079 | Q6UWY5 | -0.80633  |
| 87890 | P14079 | Q8N283 | -0.22725  |
| 87891 | P14079 | Q5H9E4 | -0.66417  |
| 87892 | P14079 | Q13207 | -0.70558  |
| 87893 | P14079 | Q9H0J4 | -0.18842  |
| 87894 | P14079 | Q96DX4 | -0.81992  |
| 87895 | P14079 | O75487 | -1.3233   |
| 87896 | P14079 | Q1W4C9 | -0.82805  |
| 87897 | P14079 | P21817 | -0.71468  |
| 87898 | P14079 | Q7Z3D4 | -0.76126  |
| 87899 | P14079 | Q8N4T8 | -0.38766  |
| 87900 | P14079 | Q5U5Z8 | -0.46944  |
| 87901 | P14079 | Q86VQ6 | -0.7873   |
| 87902 | P14079 | P35503 | -0.9998   |
| 87903 | P14079 | O43506 | -1.2656   |
| 87904 | P14079 | Q9Y232 | -0.21737  |
| 87905 | P14079 | P40426 | -0.29205  |
| 87906 | P14079 | P29377 | -0.2277   |
| 87907 | P14079 | P55268 | -0.74375  |
| 87908 | P14079 | P05162 | -0.15003  |
| 87909 | P14079 | Q96FE7 | -0.71882  |
| 87910 | P14079 | Q9BZR6 | -0.23131  |
| 87911 | P14079 | Q8NGT2 | -1.2314   |
| 87912 | P14079 | P28067 | -0.60685  |
| 87913 | P14079 | Q15016 | -0.2272   |
| 87914 | P14079 | Q14638 | -1.1665   |
| 87915 | P14079 | Q7Z6V5 | -0.29842  |
| 87916 | P14079 | Q8TEB9 | -0.57264  |
| 87917 | P14079 | Q8IZ52 | -0.5712   |
| 87918 | P14079 | Q96CE8 | -0.77815  |
| 87919 | P14079 | Q7LGC8 | -0.61781  |
| 87920 | P14079 | Q9NY46 | -0.91597  |
| 87921 | P14079 | P35443 | -0.89047  |
| 87922 | P14079 | P19883 | -0.22197  |
| 87923 | P14079 | Q9C004 | -0.079468 |
| 87924 | P14079 | Q9HBB8 | -1.0937   |
| 87925 | P14079 | Q68CK6 | -1.0975   |
| 87926 | P14079 | Q7Z3D6 | -0.12745  |
| 87927 | P14079 | Q9BVH7 | -0.65632  |
| 87928 | P14079 | P01733 | -0.27282  |
| 87929 | P14079 | Q8WU10 | -0.48664  |
| 87930 | P14079 | Q96QU6 | -0.24264  |
| 87931 | P14079 | Q9UF33 | -1.6003   |
| 87932 | P14079 | Q9UMW8 | -0.52697  |

|       |        |        |           |
|-------|--------|--------|-----------|
| 87933 | P14079 | Q96S86 | -1.1437   |
| 87934 | P14079 | Q9UGH3 | -0.81149  |
| 87935 | P14079 | A6NDJ8 | -1.0397   |
| 87936 | P14079 | Q6N022 | -0.35494  |
| 87937 | P14079 | Q9Y5G0 | -1.2343   |
| 87938 | P14079 | Q9HC73 | -1.5917   |
| 87939 | P14079 | P43155 | -0.62214  |
| 87940 | P14079 | Q9BXJ3 | -0.80633  |
| 87941 | P14079 | O14874 | -0.63291  |
| 87942 | P14079 | Q16674 | -0.89273  |
| 87943 | P14079 | Q8N2E2 | -0.80633  |
| 87944 | P14079 | P26374 | -0.64289  |
| 87945 | P14079 | Q8IW93 | -0.63877  |
| 87946 | P14079 | P36383 | -1.0448   |
| 87947 | P14079 | Q96S37 | -0.81873  |
| 87948 | P14079 | Q9C091 | -0.77815  |
| 87949 | P14079 | Q96L58 | -0.60291  |
| 87950 | P14079 | P68431 | -0.62524  |
| 87951 | P14079 | Q8NFQ6 | -0.99085  |
| 87952 | P14079 | Q9NS85 | -0.36634  |
| 87953 | P14079 | Q9NRD9 | -1.0881   |
| 87954 | P14079 | P25105 | -0.933    |
| 87955 | P14079 | P43026 | -0.41435  |
| 87956 | P14079 | Q86UW8 | -1.1437   |
| 87957 | P14079 | O00462 | -0.40991  |
| 87958 | P14079 | P01584 | -0.21444  |
| 87959 | P14079 | Q86Y07 | -0.61845  |
| 87960 | P14079 | Q75603 | -0.1521   |
| 87961 | P14079 | P36969 | -0.6758   |
| 87962 | P14079 | Q6P9A2 | -0.67963  |
| 87963 | P14079 | Q9Y5E4 | -1.2218   |
| 87964 | P14079 | Q9Y616 | -0.37476  |
| 87965 | P14079 | Q92806 | -0.71219  |
| 87966 | P14079 | P24298 | -0.20015  |
| 87967 | P14079 | Q4W5N1 | -0.35682  |
| 87968 | P14079 | P07996 | -0.3069   |
| 87969 | P14079 | O75795 | -0.92625  |
| 87970 | P14079 | Q12967 | -0.49161  |
| 87971 | P14079 | Q1L6U9 | -0.80633  |
| 87972 | P14079 | P49447 | -0.73677  |
| 87973 | P14079 | O60259 | -0.62164  |
| 87974 | P14079 | Q5VTJ3 | -0.77815  |
| 87975 | P14079 | Q9ULD8 | -1.1739   |
| 87976 | P14079 | Q8IVW8 | -0.95922  |
| 87977 | P14079 | Q6J4K2 | -1.1786   |
| 87978 | P14079 | Q02045 | -0.22692  |
| 87979 | P14079 | Q2TB18 | -0.066645 |
| 87980 | P14079 | Q6VVX0 | -0.82853  |
| 87981 | P14079 | P0C6P0 | -0.074208 |
| 87982 | P14079 | Q14649 | -1.2187   |
| 87983 | P14079 | P16070 | -0.4387   |
| 87984 | P14079 | Q9Y337 | -0.96567  |
| 87985 | P14079 | Q9GZQ6 | -1.3135   |
| 87986 | P14079 | A6ND91 | -0.93782  |
| 87987 | P14079 | Q9BU79 | -0.77815  |
| 87988 | P14079 | Q9ULV8 | -0.44921  |
| 87989 | P14079 | Q13393 | -0.45848  |
| 87990 | P14079 | Q8NG77 | -1.2314   |
| 87991 | P14079 | P48050 | -0.66509  |
| 87992 | P14079 | P28845 | -1.4693   |
| 87993 | P14079 | A6NCQ9 | -0.78242  |
| 87994 | P14079 | Q5VW38 | -0.77815  |
| 87995 | P14079 | O95825 | -0.81425  |
| 87996 | P14079 | Q53TN4 | -1.0824   |
| 87997 | P14079 | Q9HBE5 | -0.79975  |
| 87998 | P14079 | Q96DC9 | -0.81627  |
| 87999 | P14079 | Q9BY64 | -1.0288   |
| 88000 | P14079 | Q12891 | -0.1801   |
| 88001 | P14079 | Q9UBC7 | -0.82727  |
| 88002 | P14079 | P61296 | -0.23915  |
| 88003 | P14079 | Q5VUJ5 | -0.96514  |
| 88004 | P14079 | Q76G19 | -0.22675  |
| 88005 | P14079 | Q9BWW9 | -0.9471   |
| 88006 | P14079 | Q9H8X9 | -0.94083  |
| 88007 | P14079 | Q8TCT9 | -0.73382  |
| 88008 | P14079 | Q92876 | -0.3378   |

|       |        |        |          |
|-------|--------|--------|----------|
| 88009 | P14079 | Q15034 | -0.79256 |
| 88010 | P14079 | O43572 | -0.22    |
| 88011 | P14079 | Q9HBG7 | -0.98228 |
| 88012 | P14079 | Q9BUY7 | -0.22424 |
| 88013 | P14079 | P55082 | -0.97472 |
| 88014 | P14079 | Q05823 | -0.52147 |
| 88015 | P14079 | Q8WXI2 | -0.22741 |
| 88016 | P14079 | Q13153 | -0.22932 |
| 88017 | P14079 | P54652 | -0.22104 |
| 88018 | P14079 | O75309 | -1.2343  |
| 88019 | P14079 | P78356 | -0.70633 |
| 88020 | P14079 | B4E2M5 | -0.22742 |
| 88021 | P14079 | Q9UP38 | -0.54958 |
| 88022 | P14079 | Q86W25 | -0.78428 |
| 88023 | P14079 | Q99650 | -0.70836 |
| 88024 | P14079 | A6NH57 | -1.3745  |
| 88025 | P14079 | P09683 | -0.77515 |
| 88026 | P14079 | P48039 | -1.3116  |
| 88027 | P14079 | P22680 | -0.79254 |
| 88028 | P14079 | O60741 | -1.4812  |
| 88029 | P14079 | Q14155 | -0.22742 |
| 88030 | P14079 | P53396 | -0.31953 |
| 88031 | P14079 | Q13387 | -0.15266 |
| 88032 | P14079 | P15848 | -0.37916 |
| 88033 | P14079 | A8MZ36 | -0.16795 |
| 88034 | P14079 | Q30KP8 | -0.78458 |
| 88035 | P14079 | Q8WVN8 | -1.017   |
| 88036 | P14079 | Q14831 | -0.69529 |
| 88037 | P14079 | Q9Y4F1 | -0.22745 |
| 88038 | P14079 | Q5U5Q3 | -0.22736 |
| 88039 | P14079 | O15552 | -1.7517  |
| 88040 | P14079 | P61225 | -0.95875 |
| 88041 | P14079 | Q7Z695 | -1.4869  |
| 88042 | P14079 | Q12951 | -0.69743 |
| 88043 | P14079 | P23771 | -0.22736 |
| 88044 | P14079 | O15516 | -0.22743 |
| 88045 | P14079 | Q6UXS9 | -0.22245 |
| 88046 | P14079 | Q8IUC4 | -0.25612 |
| 88047 | P14079 | Q8NGM9 | -1.2314  |
| 88048 | P14079 | Q9BY50 | -0.86267 |
| 88049 | P14079 | O94813 | -0.31064 |
| 88050 | P14079 | Q6P996 | -0.41406 |
| 88051 | P14079 | Q9H3U5 | -0.87582 |
| 88052 | P14079 | P01876 | -0.23117 |
| 88053 | P14079 | Q9BZJ4 | -0.65093 |
| 88054 | P14079 | Q86UP2 | -0.99748 |
| 88055 | P14079 | Q15751 | -0.44034 |
| 88056 | P14079 | P58550 | -1.0124  |
| 88057 | P14079 | Q2M3G0 | -1.508   |
| 88058 | P14079 | Q95365 | -0.17553 |
| 88059 | P14079 | P0C091 | -1.7441  |
| 88060 | P14079 | Q9Y5U5 | -1.611   |
| 88061 | P14079 | P24593 | -0.36078 |
| 88062 | P14079 | O95147 | -0.85106 |
| 88063 | P14079 | Q02978 | -0.60192 |
| 88064 | P14079 | Q8N456 | -0.25361 |
| 88065 | P14079 | Q8NA29 | -1.1228  |
| 88066 | P14079 | Q96RD6 | -0.96157 |
| 88067 | P14079 | P30685 | -1       |
| 88068 | P14079 | P62070 | -0.80972 |
| 88069 | P14079 | Q9C0B7 | -0.77815 |
| 88070 | P14079 | P13224 | -0.75107 |
| 88071 | P14079 | Q9H427 | -1.0585  |
| 88072 | P14079 | Q9Y6A2 | -1.0814  |
| 88073 | P14079 | Q86YV0 | -0.22712 |
| 88074 | P14079 | O43749 | -1.2314  |
| 88075 | P14079 | Q05315 | -0.59662 |
| 88076 | P14079 | Q15131 | -0.70588 |
| 88077 | P14079 | P29274 | -0.33188 |
| 88078 | P14079 | O14960 | -0.88246 |
| 88079 | P14079 | P32302 | -1.3829  |
| 88080 | P14079 | Q6UWE0 | -0.24961 |
| 88081 | P14079 | Q9NPU4 | -0.77815 |
| 88082 | P14079 | P09238 | -1.4092  |
| 88083 | P14079 | P28472 | -1.1422  |
| 88084 | P14079 | Q9BY71 | -0.22864 |

|       |        |        |          |
|-------|--------|--------|----------|
| 88085 | P14079 | B7ZC32 | -0.67224 |
| 88086 | P14079 | Q86W47 | -0.78612 |
| 88087 | P14079 | P58876 | -0.92425 |
| 88088 | P14079 | P11488 | -0.67968 |
| 88089 | P14079 | Q9NP08 | -0.22931 |
| 88090 | P14079 | Q8NHV1 | -1.0029  |
| 88091 | P14079 | Q6P3X3 | -0.26849 |
| 88092 | P14079 | Q92995 | -0.23687 |
| 88093 | P14079 | Q9H4Q3 | -0.22695 |
| 88094 | P14079 | Q6ZN16 | -1.2486  |
| 88095 | P14079 | Q0P5N6 | -1.3745  |
| 88096 | P14079 | Q5T4F7 | -0.9432  |
| 88097 | P14079 | Q9NVV0 | -0.95375 |
| 88098 | P14079 | Q5TYW2 | -0.30915 |
| 88099 | P14079 | Q99250 | -1.0585  |
| 88100 | P14079 | Q9Y2L9 | -0.23753 |
| 88101 | P14079 | Q9UPY3 | -0.20438 |
| 88102 | P14079 | Q6IQ22 | -0.79677 |
| 88103 | P14079 | P30532 | -1.104   |
| 88104 | P14079 | Q96PN6 | -0.67783 |
| 88105 | P14079 | P25103 | -0.71569 |
| 88106 | P14079 | P61221 | -0.39604 |
| 88107 | P14079 | P54289 | -0.93746 |
| 88108 | P14079 | P00451 | -0.80102 |
| 88109 | P14079 | Q9Y5E6 | -1.3144  |
| 88110 | P14079 | Q99988 | -0.81768 |
| 88111 | P14079 | Q49SQ1 | -1.3324  |
| 88112 | P14079 | Q8IZ81 | -0.57873 |
| 88113 | P14079 | Q9UN74 | -1.341   |
| 88114 | P14079 | P01906 | -0.85773 |
| 88115 | P14079 | P63124 | -0.65475 |
| 88116 | P14079 | Q9UBX8 | -0.60046 |
| 88117 | P14079 | Q9HCS2 | -0.78981 |
| 88118 | P14079 | Q9HBY8 | -1.0381  |
| 88119 | P14079 | Q96DR7 | -0.7658  |
| 88120 | P14079 | Q92887 | -1.1401  |
| 88121 | P14079 | Q07869 | -0.23497 |
| 88122 | P14079 | P10600 | -0.22741 |
| 88123 | P14079 | O15354 | -1.594   |
| 88124 | P14079 | Q9Y4P3 | -0.26849 |
| 88125 | P14079 | A1Z1Q3 | -0.36288 |
| 88126 | P14079 | Q92608 | -0.22278 |
| 88127 | P14079 | Q6ZW76 | -0.22746 |
| 88128 | P14079 | Q9UHC9 | -0.54548 |
| 88129 | P14079 | Q93008 | -0.47567 |
| 88130 | P14079 | P34820 | -1.0925  |
| 88131 | P14079 | Q99965 | -1.2293  |
| 88132 | P14079 | Q8N6D5 | -0.22739 |
| 88133 | P14079 | Q8NEV4 | -0.81398 |
| 88134 | P14079 | Q9Y446 | -0.22965 |
| 88135 | P14079 | P01008 | -0.39236 |
| 88136 | P14079 | A6NI28 | -1.198   |
| 88137 | P14079 | O15409 | -0.99971 |
| 88138 | P14079 | O76070 | -0.17426 |
| 88139 | P14079 | P47775 | -1.4626  |
| 88140 | P14079 | Q05469 | -0.21099 |
| 88141 | P14079 | A6NNM8 | -0.37255 |
| 88142 | P14079 | Q6JVE6 | -0.82575 |
| 88143 | P14079 | P19105 | -0.22611 |
| 88144 | P14079 | Q5I0X7 | -0.2274  |
| 88145 | P14079 | Q8NCC5 | -0.80261 |
| 88146 | P14079 | Q9NS82 | -1.2445  |
| 88147 | P14079 | Q92781 | -1.0743  |
| 88148 | P14079 | Q13651 | -0.56951 |
| 88149 | P14079 | P10644 | -0.22759 |
| 88150 | P14079 | Q8N144 | -0.97546 |
| 88151 | P14079 | Q0P651 | -0.80633 |
| 88152 | P14079 | P57729 | -1.0241  |
| 88153 | P14079 | Q96R67 | -1.2314  |
| 88154 | P14079 | Q6ICH7 | -1.0269  |
| 88155 | P14079 | Q8WXS5 | -0.94274 |
| 88156 | P14079 | Q6ZN92 | -0.16946 |
| 88157 | P14079 | Q9UIM3 | -0.22503 |
| 88158 | P14079 | Q9Y2C3 | -0.69292 |
| 88159 | P14079 | Q92738 | -1.5094  |
| 88160 | P14079 | Q5VV63 | -0.80287 |

|       |        |        |           |
|-------|--------|--------|-----------|
| 88161 | P14079 | Q99729 | -0.22967  |
| 88162 | P14079 | Q9UGU5 | -0.27351  |
| 88163 | P14079 | Q05513 | -0.21464  |
| 88164 | P14079 | Q95158 | -0.81975  |
| 88165 | P14079 | Q9Y336 | -1.2672   |
| 88166 | P14079 | Q9H4B8 | -0.71627  |
| 88167 | P14079 | Q8TAM1 | -0.31664  |
| 88168 | P14079 | P26022 | -0.76093  |
| 88169 | P14079 | A6NFE2 | -0.77815  |
| 88170 | P14079 | P05165 | -0.88673  |
| 88171 | P14079 | Q96S82 | -0.21895  |
| 88172 | P14079 | P45974 | -0.33698  |
| 88173 | P14079 | P0CE71 | -0.22273  |
| 88174 | P14079 | Q6UXN7 | -0.54334  |
| 88175 | P14079 | P10145 | -0.47461  |
| 88176 | P14079 | Q14393 | -0.3158   |
| 88177 | P14079 | Q07065 | -0.65803  |
| 88178 | P14079 | Q96RK4 | -0.22593  |
| 88179 | P14079 | Q8NCR0 | -0.71473  |
| 88180 | P14079 | A8MXD5 | -0.50495  |
| 88181 | P14079 | Q43286 | -0.60568  |
| 88182 | P14079 | Q96G74 | -0.51388  |
| 88183 | P14079 | P17948 | -0.65477  |
| 88184 | P14079 | Q9Y289 | -1.05     |
| 88185 | P14079 | Q9ULJ7 | -0.22738  |
| 88186 | P14079 | Q2TVT3 | -0.53086  |
| 88187 | P14079 | P53350 | -0.22741  |
| 88188 | P14079 | Q6PEZ8 | -0.93036  |
| 88189 | P14079 | Q5T7W0 | -0.21926  |
| 88190 | P14079 | Q9BY10 | -1.022    |
| 88191 | P14079 | Q96JF0 | -0.9012   |
| 88192 | P14079 | Q8IYS5 | -1.5917   |
| 88193 | P14079 | P13725 | -0.52305  |
| 88194 | P14079 | Q2L4Q9 | -1.4766   |
| 88195 | P14079 | Q8IY21 | -0.22055  |
| 88196 | P14079 | P52569 | -0.86812  |
| 88197 | P14079 | Q9Y5Y9 | -1.0384   |
| 88198 | P14079 | A4D0T7 | -0.77815  |
| 88199 | P14079 | Q9NQR9 | -0.63865  |
| 88200 | P14079 | Q9BQB6 | -1.1093   |
| 88201 | P14079 | Q02153 | -0.78437  |
| 88202 | P14079 | P47992 | -0.42787  |
| 88203 | P14079 | Q16099 | -0.86512  |
| 88204 | P14079 | Q8NCS7 | -0.92705  |
| 88205 | P14079 | P28068 | -0.91623  |
| 88206 | P14079 | O76080 | -0.25547  |
| 88207 | P14079 | Q9P0S2 | -0.65931  |
| 88208 | P14079 | Q5T5U3 | -0.24359  |
| 88209 | P14079 | Q9H0Q3 | -1.1975   |
| 88210 | P14079 | Q9H3S3 | -1.6033   |
| 88211 | P14079 | P48651 | -0.99412  |
| 88212 | P14079 | P48066 | -1.192    |
| 88213 | P14079 | Q92496 | -0.86555  |
| 88214 | P14079 | P27701 | -0.53679  |
| 88215 | P14079 | Q7L0J3 | -0.70093  |
| 88216 | P14079 | O94886 | -1.4609   |
| 88217 | P14079 | Q32P28 | -0.78685  |
| 88218 | P14079 | Q96SB8 | -0.21499  |
| 88219 | P14079 | P48745 | -1.0216   |
| 88220 | P14079 | Q9Y487 | -0.33693  |
| 88221 | P14079 | P51841 | -1.5642   |
| 88222 | P14079 | Q86Z23 | -0.89985  |
| 88223 | P14079 | Q9UNP4 | -0.69888  |
| 88224 | P14079 | Q8N6M6 | -0.60411  |
| 88225 | P14079 | P42345 | -0.32678  |
| 88226 | P14079 | P55774 | -0.61419  |
| 88227 | P14079 | Q5T4S7 | -0.26343  |
| 88228 | P14079 | Q99527 | -1.2033   |
| 88229 | P14079 | O60423 | -1.0684   |
| 88230 | P14079 | P51795 | -1.2281   |
| 88231 | P14079 | P12273 | -0.84733  |
| 88232 | P14079 | P51168 | -0.53641  |
| 88233 | P14079 | O14531 | -0.18397  |
| 88234 | P14079 | Q96PC2 | -0.65365  |
| 88235 | P14079 | Q93088 | -0.056922 |
| 88236 | P14079 | Q9BXA9 | -0.17005  |

|       |        |        |           |
|-------|--------|--------|-----------|
| 88237 | P14079 | Q9NVI7 | -1.2056   |
| 88238 | P14079 | P54219 | -0.59116  |
| 88239 | P14079 | Q6ZMV7 | -0.11163  |
| 88240 | P14079 | P08F94 | -0.20122  |
| 88241 | P14079 | Q8WY07 | -1.0225   |
| 88242 | P14079 | A8MYZ5 | -0.20363  |
| 88243 | P14079 | Q9HAV0 | -0.34392  |
| 88244 | P14079 | Q9UJF2 | -0.22633  |
| 88245 | P14079 | Q6P2N6 | -0.97472  |
| 88246 | P14079 | Q14296 | -0.50151  |
| 88247 | P14079 | Q6PEY2 | -0.3416   |
| 88248 | P14079 | Q96I82 | -1.2628   |
| 88249 | P14079 | Q9Y5H7 | -1.341    |
| 88250 | P14079 | Q93038 | -1.3308   |
| 88251 | P14079 | Q9NR19 | -0.49666  |
| 88252 | P14079 | Q8N431 | -0.5837   |
| 88253 | P14079 | Q9H553 | -0.22636  |
| 88254 | P14079 | P05120 | -0.73443  |
| 88255 | P14079 | P02458 | -0.65069  |
| 88256 | P14079 | P32019 | -0.45022  |
| 88257 | P14079 | Q9NRZ5 | -0.9413   |
| 88258 | P14079 | Q9N2K0 | -0.79614  |
| 88259 | P14079 | Q03426 | -0.94057  |
| 88260 | P14079 | P28329 | -0.15362  |
| 88261 | P14079 | Q53RD9 | -1.266    |
| 88262 | P14079 | Q9ULC0 | -1.5917   |
| 88263 | P14079 | Q96DW6 | -0.62484  |
| 88264 | P14079 | Q8N5B7 | -0.33361  |
| 88265 | P14079 | Q9BWV2 | -1.3332   |
| 88266 | P14079 | Q9UKL2 | -1.4035   |
| 88267 | P14079 | P55899 | -0.95927  |
| 88268 | P14079 | Q5SYC1 | -0.42631  |
| 88269 | P14079 | Q8TEW8 | -0.22544  |
| 88270 | P14079 | Q9UM21 | -0.97612  |
| 88271 | P14079 | Q14624 | -0.75715  |
| 88272 | P14079 | P33897 | -0.48857  |
| 88273 | P14079 | Q9H7P9 | -0.42488  |
| 88274 | P14079 | Q8TC27 | -0.9255   |
| 88275 | P14079 | Q1KMD3 | -0.22355  |
| 88276 | P14079 | Q6IE38 | -0.82805  |
| 88277 | P14079 | P23415 | -0.71533  |
| 88278 | P14079 | Q9UL19 | -0.33143  |
| 88279 | P14079 | Q13115 | -0.24016  |
| 88280 | P14079 | Q9NY26 | -1.2001   |
| 88281 | P14079 | Q8NGQ6 | -1.2314   |
| 88282 | P14079 | P27449 | -0.12188  |
| 88283 | P14079 | P50591 | -0.66247  |
| 88284 | P14079 | Q8TAX0 | -0.17886  |
| 88285 | P14079 | Q9NYP7 | -0.22431  |
| 88286 | P14079 | Q15116 | -0.72434  |
| 88287 | P14079 | Q8WVN9 | -0.43854  |
| 88288 | P14079 | Q03014 | -0.22995  |
| 88289 | P14079 | Q969Y2 | -0.844    |
| 88290 | P14079 | Q5BKX8 | -0.067787 |
| 88291 | P14079 | Q2Y0W8 | -1.1266   |
| 88292 | P14079 | Q13283 | -0.24386  |
| 88293 | P14079 | Q75594 | -0.59598  |
| 88294 | P14079 | P11177 | -0.33326  |
| 88295 | P14079 | Q8NGH6 | -1.2314   |
| 88296 | P14079 | Q9P286 | -0.87442  |
| 88297 | P14079 | P07099 | -0.86346  |
| 88298 | P14079 | Q99447 | -0.55603  |
| 88299 | P14079 | P51114 | -0.065312 |
| 88300 | P14079 | Q43474 | -0.21466  |
| 88301 | P14079 | Q8IWQ3 | -0.9273   |
| 88302 | P14079 | Q9C0D5 | -0.3797   |
| 88303 | P14079 | P20039 | -0.82856  |
| 88304 | P14079 | P10586 | -1.0038   |
| 88305 | P14079 | Q9UN76 | -1.1546   |
| 88306 | P14079 | P01603 | -1        |
| 88307 | P14079 | Q5VSP4 | -0.80633  |
| 88308 | P14079 | Q8WUA7 | -1.4295   |
| 88309 | P14079 | Q8N2H3 | -0.48664  |
| 88310 | P14079 | Q9NYZ2 | -0.85372  |
| 88311 | P14079 | Q60291 | -0.22738  |
| 88312 | P14079 | Q15464 | -0.67553  |

|       |        |        |          |
|-------|--------|--------|----------|
| 88313 | P14079 | P32322 | -0.75978 |
| 88314 | P14079 | Q86XM0 | -1.2296  |
| 88315 | P14079 | O43240 | -1.3884  |
| 88316 | P14079 | Q13670 | -0.38606 |
| 88317 | P14079 | Q86U02 | -0.77815 |
| 88318 | P14079 | O43866 | -0.83691 |
| 88319 | P14079 | P59666 | -0.86127 |
| 88320 | P14079 | Q9UHP7 | -1.1784  |
| 88321 | P14079 | P54750 | -0.22207 |
| 88322 | P14079 | P18577 | -0.92724 |
| 88323 | P14079 | P14210 | -0.44487 |
| 88324 | P14079 | P21918 | -0.75738 |
| 88325 | P14079 | Q9Y3Q4 | -1.3787  |
| 88326 | P14079 | Q8WXI8 | -0.72055 |
| 88327 | P14079 | Q08116 | -0.72425 |
| 88328 | P14079 | P51810 | -0.43566 |
| 88329 | P14079 | Q03828 | -0.22698 |
| 88330 | P14079 | Q8NH00 | -1.2314  |
| 88331 | P14079 | P14416 | -0.27343 |
| 88332 | P14079 | P20264 | -0.22741 |
| 88333 | P14079 | Q6ZWH5 | -1.508   |
| 88334 | P14079 | A6NEK1 | -0.28212 |
| 88335 | P14079 | P27448 | -1.0034  |
| 88336 | P14079 | Q9HCM2 | -0.86488 |
| 88337 | P14079 | P30291 | -0.22741 |
| 88338 | P14079 | Q9NZQ0 | -1.1201  |
| 88339 | P14079 | P23435 | -0.68229 |
| 88340 | P14079 | Q2I0M4 | -0.2323  |
| 88341 | P14079 | O15178 | -0.44233 |
| 88342 | P14079 | Q9UBL6 | -0.27285 |
| 88343 | P14079 | P49223 | -0.82805 |
| 88344 | P14079 | Q8WZ04 | -0.45364 |
| 88345 | P14079 | Q13636 | -1.0737  |
| 88346 | P14079 | P22301 | -0.33088 |
| 88347 | P14079 | Q07820 | -0.22736 |
| 88348 | P14079 | Q02880 | -0.14362 |
| 88349 | P14079 | O60636 | -0.92659 |
| 88350 | P14079 | P61812 | -0.22741 |
| 88351 | P14079 | P25054 | -0.22654 |
| 88352 | P14079 | Q3ZCM7 | -0.45112 |
| 88353 | P14079 | P0C6S8 | -0.77815 |
| 88354 | P14079 | P62955 | -0.95357 |
| 88355 | P14079 | Q15431 | -0.1567  |
| 88356 | P14079 | O60568 | -0.26433 |
| 88357 | P14079 | Q9H1B5 | -0.75652 |
| 88358 | P14079 | Q9NWQ8 | -0.39797 |
| 88359 | P14079 | Q9Y496 | -0.28684 |
| 88360 | P14079 | Q5SQ80 | -0.22738 |
| 88361 | P14079 | Q92737 | -1.0124  |
| 88362 | P14079 | Q94966 | -0.80748 |
| 88363 | P14079 | Q16566 | -0.41444 |
| 88364 | P14079 | Q7Z333 | -0.26912 |
| 88365 | P14079 | Q9H340 | -1.2314  |
| 88366 | P14079 | P0C7V7 | -1.2355  |
| 88367 | P14079 | Q9HC57 | -0.67946 |
| 88368 | P14079 | Q9UP95 | -1.2664  |
| 88369 | P14079 | Q75077 | -1.4677  |
| 88370 | P14079 | Q8IWU2 | -1.1203  |
| 88371 | P14079 | Q8WWU5 | -1.3332  |
| 88372 | P14079 | Q96QZ0 | -0.99729 |
| 88373 | P14079 | A6NFM0 | -0.77815 |
| 88374 | P14079 | P0C7N8 | -1.2314  |
| 88375 | P14079 | Q9UGF6 | -1.2314  |
| 88376 | P14079 | O60894 | -0.32368 |
| 88377 | P14079 | Q07325 | -1.0372  |
| 88378 | P14079 | P35716 | -0.24678 |
| 88379 | P14079 | Q4G176 | -1.1188  |
| 88380 | P14079 | P68106 | -0.22962 |
| 88381 | P14079 | Q9BQ75 | -0.30137 |
| 88382 | P14079 | P35453 | -0.22717 |
| 88383 | P14079 | Q6PK18 | -1.0489  |
| 88384 | P14079 | P16519 | -0.28709 |
| 88385 | P14079 | Q8WXT5 | -0.99971 |
| 88386 | P14079 | Q641Q3 | -0.80633 |
| 88387 | P14079 | P01857 | -0.3152  |
| 88388 | P14079 | Q9H4P4 | -0.22734 |



|       |        |        |           |
|-------|--------|--------|-----------|
| 88389 | P14079 | P16562 | -0.9245   |
| 88390 | P14079 | P15085 | -1.3519   |
| 88391 | P14079 | P61916 | -0.4348   |
| 88392 | P14079 | Q5H8A4 | -1.0027   |
| 88393 | P14079 | Q8NHP7 | -0.56968  |
| 88394 | P14079 | P41221 | -0.23188  |
| 88395 | P14079 | P25686 | -0.34826  |
| 88396 | P14079 | Q8NGU4 | -1.2314   |
| 88397 | P14079 | A6NER0 | -1.4902   |
| 88398 | P14079 | P52732 | -0.27825  |
| 88399 | P14079 | Q6UXG2 | -0.86133  |
| 88400 | P14079 | Q8NBE8 | -0.19337  |
| 88401 | P14079 | P04234 | -0.46883  |
| 88402 | P14079 | Q9H1Y3 | -1.1274   |
| 88403 | P14079 | P32121 | -0.38423  |
| 88404 | P14079 | Q9BYN0 | -0.79864  |
| 88405 | P14079 | Q8NGS8 | -1.2314   |
| 88406 | P14079 | P56856 | -0.60718  |
| 88407 | P14079 | O95436 | -0.97924  |
| 88408 | P14079 | Q9NUH8 | -0.77815  |
| 88409 | P14079 | Q9NPZ5 | -0.6397   |
| 88410 | P14079 | P54821 | -0.22105  |
| 88411 | P14079 | A8MPY1 | -0.8712   |
| 88412 | P14079 | P01732 | -0.9316   |
| 88413 | P14079 | Q9BR26 | -0.84256  |
| 88414 | P14079 | Q9H0J9 | -0.19851  |
| 88415 | P14079 | P63126 | -0.065735 |
| 88416 | P14079 | A8MVG2 | -0.77815  |
| 88417 | P14079 | Q8IWF2 | -0.18953  |
| 88418 | P14079 | Q8NH09 | -1.2314   |
| 88419 | P14079 | P35368 | -0.91716  |
| 88420 | P14079 | Q96S79 | -1.3707   |
| 88421 | P14079 | P31152 | -0.86943  |
| 88422 | P14079 | Q58FF7 | -0.61725  |
| 88423 | P14079 | Q86XE3 | -0.84312  |
| 88424 | P14079 | P18858 | -0.2017   |
| 88425 | P14079 | Q8NGN0 | -1.2314   |
| 88426 | P14079 | B2RUY7 | -0.84347  |
| 88427 | P14079 | P33402 | -0.80753  |
| 88428 | P14079 | Q96AX2 | -1.0156   |
| 88429 | P14079 | Q86WA8 | -0.47229  |
| 88430 | P14079 | Q01453 | -0.36188  |
| 88431 | P14079 | Q99986 | -0.22741  |
| 88432 | P14079 | Q9UKL6 | -0.21512  |
| 88433 | P14079 | Q9BXB7 | -0.63732  |
| 88434 | P14079 | Q86YH2 | -0.22824  |
| 88435 | P14079 | P35247 | -0.51054  |
| 88436 | P14079 | A6NJ16 | -0.80633  |
| 88437 | P14079 | O75711 | -0.85688  |
| 88438 | P14079 | Q6PCB7 | -0.80915  |
| 88439 | P14079 | Q9NWC5 | -0.77815  |
| 88440 | P14079 | P01737 | -0.27282  |
| 88441 | P14079 | P57059 | -0.5772   |
| 88442 | P14079 | Q13308 | -0.59148  |
| 88443 | P14079 | Q6UXG8 | -0.77815  |
| 88444 | P14079 | Q9NSY2 | -0.30295  |
| 88445 | P14079 | Q06203 | -0.45574  |
| 88446 | P14079 | Q8N5S9 | -0.98858  |
| 88447 | P14079 | Q5JTN6 | -0.22843  |
| 88448 | P14079 | Q9H1Z9 | -0.77815  |
| 88449 | P14079 | Q9NZK5 | -0.82457  |
| 88450 | P14079 | P20648 | -1.257    |
| 88451 | P14079 | Q9H9V9 | -0.18508  |
| 88452 | P14079 | Q14330 | -1.2581   |
| 88453 | P14079 | P81605 | -1.2261   |
| 88454 | P14079 | Q9UNF0 | -0.2271   |
| 88455 | P14079 | Q9NZS2 | -1.0506   |
| 88456 | P14079 | Q8NGS0 | -1.2314   |
| 88457 | P14079 | Q8N1M1 | -1.0419   |
| 88458 | P14079 | P35713 | -0.31001  |
| 88459 | P14079 | P41235 | -0.23615  |
| 88460 | P14079 | Q9UBK8 | -0.20158  |
| 88461 | P14079 | A6NE52 | -0.22743  |
| 88462 | P14079 | Q14183 | -0.30136  |
| 88463 | P14079 | O60241 | -1.3284   |
| 88464 | P14079 | P15692 | -0.56971  |

|       |        |        |           |
|-------|--------|--------|-----------|
| 88465 | P14079 | P49238 | -0.62325  |
| 88466 | P14079 | P25116 | -0.42911  |
| 88467 | P14079 | P29317 | -0.71498  |
| 88468 | P14079 | Q8N4P6 | -0.22705  |
| 88469 | P14079 | Q9H1J5 | -0.69747  |
| 88470 | P14079 | A6NC97 | -0.77815  |
| 88471 | P14079 | P09919 | -0.97174  |
| 88472 | P14079 | Q8NC24 | -1.0575   |
| 88473 | P14079 | A6NIJ9 | -1.2314   |
| 88474 | P14079 | Q8NBZ7 | -1.0621   |
| 88475 | P14079 | Q9UQB8 | -0.22734  |
| 88476 | P14079 | Q86XP1 | -0.8498   |
| 88477 | P14079 | Q53GQ0 | -0.81948  |
| 88478 | P14079 | Q14126 | -0.99297  |
| 88479 | P14079 | P43378 | -0.23809  |
| 88480 | P14079 | P00167 | -0.53684  |
| 88481 | P14079 | Q8TDI7 | -0.77815  |
| 88482 | P14079 | Q96HH9 | -0.095256 |
| 88483 | P14079 | P30273 | -0.7107   |
| 88484 | P14079 | Q13621 | -1.0196   |
| 88485 | P14079 | Q5W0Z9 | -0.94083  |
| 88486 | P14079 | Q15465 | -0.22737  |
| 88487 | P14079 | Q00533 | -1.7476   |
| 88488 | P14079 | Q8NHP8 | -0.48039  |
| 88489 | P14079 | P04001 | -1.4121   |
| 88490 | P14079 | Q6DRA6 | -0.92425  |
| 88491 | P14079 | Q8WVF2 | -0.95167  |
| 88492 | P14079 | P21926 | -0.75829  |
| 88493 | P14079 | P22694 | -0.22352  |
| 88494 | P14079 | Q9UNT1 | -1.1703   |
| 88495 | P14079 | Q96RF0 | -0.2274   |
| 88496 | P14079 | Q96MX6 | -0.22724  |
| 88497 | P14079 | Q9BXA6 | -1.2617   |
| 88498 | P14079 | Q9P1P5 | -1.2819   |
| 88499 | P14079 | Q58FF8 | -0.61725  |
| 88500 | P14079 | Q92952 | -0.88492  |
| 88501 | P14079 | Q00796 | -0.77762  |
| 88502 | P14079 | Q75398 | -0.20513  |
| 88503 | P14079 | Q9ULS6 | -1.0843   |
| 88504 | P14079 | P45379 | -0.16237  |
| 88505 | P14079 | Q8WW59 | -0.22897  |
| 88506 | P14079 | O15143 | -0.22739  |
| 88507 | P14079 | Q76EJ3 | -0.58368  |
| 88508 | P14079 | Q969Q5 | -0.26885  |
| 88509 | P14079 | Q8TCT0 | -1.0256   |
| 88510 | P14079 | P09601 | -0.24913  |
| 88511 | P14079 | O95502 | -1.0529   |
| 88512 | P14079 | Q6UWM5 | -0.80633  |
| 88513 | P14079 | O14732 | -0.20335  |
| 88514 | P14079 | Q9UHG0 | -0.29001  |
| 88515 | P14079 | Q9GZZ7 | -1.0198   |
| 88516 | P14079 | P01624 | -1        |
| 88517 | P14079 | Q9Y6W6 | -0.36225  |
| 88518 | P14079 | Q9Y5H0 | -1.2343   |
| 88519 | P14079 | P56749 | -0.60718  |
| 88520 | P14079 | P24386 | -0.74988  |
| 88521 | P14079 | Q96LD4 | -0.22724  |
| 88522 | P14079 | Q9UK08 | -0.83203  |
| 88523 | P14079 | P30043 | -0.42893  |
| 88524 | P14079 | P30493 | -1        |
| 88525 | P14079 | Q92736 | -0.39987  |
| 88526 | P14079 | Q8NFI4 | -0.2271   |
| 88527 | P14079 | Q8N3C0 | -0.22707  |
| 88528 | P14079 | Q76062 | -1.1751   |
| 88529 | P14079 | Q9UJV9 | -0.9203   |
| 88530 | P14079 | Q8TD84 | -1.0872   |
| 88531 | P14079 | Q95498 | -0.40666  |
| 88532 | P14079 | Q8IZF4 | -1.3662   |
| 88533 | P14079 | Q8IVJ1 | -1.2024   |
| 88534 | P14079 | A6NFN9 | -0.22735  |
| 88535 | P14079 | O43623 | -0.20115  |
| 88536 | P14079 | Q7Z418 | -1.2746   |
| 88537 | P14079 | Q86TM3 | -0.81414  |
| 88538 | P14079 | O60513 | -0.58897  |
| 88539 | P14079 | P08519 | -1.3181   |
| 88540 | P14079 | P49286 | -1.425    |

|       |        |        |            |
|-------|--------|--------|------------|
| 88541 | P14079 | Q5VX71 | -0.77815   |
| 88542 | P14079 | Q8NGT5 | -1.2314    |
| 88543 | P14079 | P0CG01 | -0.80633   |
| 88544 | P14079 | P41439 | -0.75767   |
| 88545 | P14079 | Q8TBY9 | -0.2274    |
| 88546 | P14079 | O60503 | -1.1661    |
| 88547 | P14079 | Q92858 | -0.23246   |
| 88548 | P14079 | P18463 | -1         |
| 88549 | P14079 | Q8TEQ8 | -1.0222    |
| 88550 | P14079 | P21217 | -0.6899    |
| 88551 | P14079 | Q96NX9 | -0.35872   |
| 88552 | P14079 | A6NDL7 | -0.21342   |
| 88553 | P14079 | Q13470 | -1.0224    |
| 88554 | P14079 | Q9NXL2 | -0.43809   |
| 88555 | P14079 | P28039 | -0.9464    |
| 88556 | P14079 | P50150 | -0.46489   |
| 88557 | P14079 | O60235 | -2.0058    |
| 88558 | P14079 | A6NHG4 | -0.15652   |
| 88559 | P14079 | Q9H8H3 | -0.30279   |
| 88560 | P14079 | Q9HCP0 | -1.3729    |
| 88561 | P14079 | O43193 | -1.4952    |
| 88562 | P14079 | A2A2Z9 | -0.22716   |
| 88563 | P14079 | Q8IV63 | -0.80081   |
| 88564 | P14079 | Q66K79 | -1.4301    |
| 88565 | P14079 | Q13607 | -1.2314    |
| 88566 | P14079 | Q6EIG7 | -0.6692    |
| 88567 | P14079 | Q08708 | -1.1705    |
| 88568 | P14079 | P07205 | -0.74661   |
| 88569 | P14079 | Q7L099 | -0.75021   |
| 88570 | P14079 | A4D0T2 | -0.77815   |
| 88571 | P14079 | Q9BYW1 | -0.87092   |
| 88572 | P14079 | O95390 | -0.64485   |
| 88573 | P14079 | Q86T13 | -0.77403   |
| 88574 | P14079 | Q9BRN9 | -0.77815   |
| 88575 | P14079 | Q8N414 | -0.77815   |
| 88576 | P14079 | Q8NGB2 | -1.2314    |
| 88577 | P14079 | D6RCP7 | -0.77524   |
| 88578 | P14079 | Q9BS26 | -0.28786   |
| 88579 | P14079 | Q7Z4I7 | -0.042437  |
| 88580 | P14079 | P26842 | -0.67009   |
| 88581 | P14079 | P00995 | -0.24599   |
| 88582 | P14079 | Q9UIB8 | -1.3374    |
| 88583 | P14079 | Q96N46 | -0.22263   |
| 88584 | P14079 | Q8NB37 | -0.80633   |
| 88585 | P14079 | Q8IX18 | -0.95316   |
| 88586 | P14079 | Q70E73 | -0.50888   |
| 88587 | P14079 | Q9Y5H9 | -1.341     |
| 88588 | P14079 | Q92908 | -0.22736   |
| 88589 | P14079 | P07360 | -0.86118   |
| 88590 | P14079 | P47881 | -1.2314    |
| 88591 | P14079 | O15213 | -0.26849   |
| 88592 | P14079 | Q9BY79 | -0.7866    |
| 88593 | P14079 | P01160 | -0.32009   |
| 88594 | P14079 | Q6PI25 | -0.42625   |
| 88595 | P14079 | P43007 | -0.53117   |
| 88596 | P14079 | Q9UBC5 | -0.24631   |
| 88597 | P14079 | Q9Y394 | -1.1307    |
| 88598 | P14079 | Q16515 | -0.82808   |
| 88599 | P14079 | Q5BJH2 | -0.80224   |
| 88600 | P14079 | Q9H6R3 | -0.96992   |
| 88601 | P14079 | C9J1S8 | -0.36051   |
| 88602 | P14079 | P01704 | -1         |
| 88603 | P14079 | Q9H0B8 | -0.91271   |
| 88604 | P14079 | Q6Y2X3 | -0.34073   |
| 88605 | P14079 | P06889 | -1         |
| 88606 | P14079 | P40313 | -1.0452    |
| 88607 | P14079 | Q8NHC7 | -1.2314    |
| 88608 | P14079 | P61020 | -0.59186   |
| 88609 | P14079 | Q8ND25 | -0.25068   |
| 88610 | P14079 | P29279 | -0.37405   |
| 88611 | P14079 | Q8N5K1 | -0.28035   |
| 88612 | P14079 | Q8NDA2 | -1.0065    |
| 88613 | P14079 | H7BZ55 | -0.0097993 |
| 88614 | P14079 | A8MUU1 | -0.35425   |
| 88615 | P14079 | Q9H628 | -1.3081    |
| 88616 | P14079 | Q6E0U4 | -0.9245    |

|       |        |        |           |
|-------|--------|--------|-----------|
| 88617 | P14079 | Q13239 | -0.22741  |
| 88618 | P14079 | Q49AM3 | -0.2257   |
| 88619 | P14079 | Q9NPC8 | -0.24559  |
| 88620 | P14079 | Q9Y216 | -0.41001  |
| 88621 | P14079 | P25445 | -0.22705  |
| 88622 | P14079 | Q8IWU4 | -0.70734  |
| 88623 | P14079 | A6NI15 | -0.22746  |
| 88624 | P14079 | Q06141 | -1.0391   |
| 88625 | P14079 | Q95342 | -1.195    |
| 88626 | P14079 | Q5VT66 | -0.4488   |
| 88627 | P14079 | Q5JS37 | -0.80633  |
| 88628 | P14079 | P35968 | -0.49478  |
| 88629 | P14079 | Q7Z6K3 | -0.30215  |
| 88630 | P14079 | Q8NAP8 | -0.2213   |
| 88631 | P14079 | Q9H6I2 | -0.16515  |
| 88632 | P14079 | A8K979 | -0.54524  |
| 88633 | P14079 | P05109 | -0.2286   |
| 88634 | P14079 | P29320 | -1.2359   |
| 88635 | P14079 | P00558 | -0.57909  |
| 88636 | P14079 | P17302 | -0.3696   |
| 88637 | P14079 | Q9Y2I2 | -0.25386  |
| 88638 | P14079 | Q6PCB8 | -1.0127   |
| 88639 | P14079 | Q15019 | -0.22695  |
| 88640 | P14079 | Q99788 | -0.92266  |
| 88641 | P14079 | O15244 | -1.1261   |
| 88642 | P14079 | Q7L591 | -0.33097  |
| 88643 | P14079 | O60500 | -0.63991  |
| 88644 | P14079 | Q15077 | -1.2232   |
| 88645 | P14079 | Q99463 | -1.2994   |
| 88646 | P14079 | P12694 | -0.057111 |
| 88647 | P14079 | Q58FF3 | -0.20035  |
| 88648 | P14079 | P08240 | -1.0593   |
| 88649 | P14079 | Q96T88 | -0.22744  |
| 88650 | P14079 | Q9NQ34 | -0.95985  |
| 88651 | P14079 | P49914 | -0.59881  |
| 88652 | P14079 | Q9P0J7 | -0.56497  |
| 88653 | P14079 | Q8NCC3 | -0.98946  |
| 88654 | P14079 | O75554 | -0.10777  |
| 88655 | P14079 | O60656 | -0.9759   |
| 88656 | P14079 | Q9H7M9 | -0.77815  |
| 88657 | P14079 | Q9Y2X7 | -0.22741  |
| 88658 | P14079 | Q9NW15 | -1.0803   |
| 88659 | P14079 | O75071 | -0.21358  |
| 88660 | P14079 | Q2TAL6 | -1.051    |
| 88661 | P14079 | O43868 | -1.149    |
| 88662 | P14079 | Q9H8H2 | -0.65195  |
| 88663 | P14079 | Q8TCG2 | -0.81437  |
| 88664 | P14079 | Q99706 | -0.73489  |
| 88665 | P14079 | Q14517 | -0.24334  |
| 88666 | P14079 | A6NJZ3 | -1.2314   |
| 88667 | P14079 | P00492 | -0.28952  |
| 88668 | P14079 | P25024 | -1.1957   |
| 88669 | P14079 | P10619 | -0.25957  |
| 88670 | P14079 | Q8NGJ8 | -1.2314   |
| 88671 | P14079 | Q9H112 | -0.23169  |
| 88672 | P14079 | P03986 | -1.0329   |
| 88673 | P14079 | Q8N8L6 | -1.3745   |
| 88674 | P14079 | Q9UNL2 | -0.69134  |
| 88675 | P14079 | P60321 | -0.4215   |
| 88676 | P14079 | Q99626 | -0.20107  |
| 88677 | P14079 | P01764 | -1        |
| 88678 | P14079 | Q8MH63 | -0.80868  |
| 88679 | P14079 | P61587 | -1.2227   |
| 88680 | P14079 | Q8IZJ6 | -0.7217   |
| 88681 | P14079 | P25067 | -1.2025   |
| 88682 | P14079 | A0AVI4 | -0.80224  |
| 88683 | P14079 | P07711 | -0.64575  |
| 88684 | P14079 | O95754 | -1.0712   |
| 88685 | P14079 | Q96B21 | -0.77815  |
| 88686 | P14079 | O76081 | -0.47579  |
| 88687 | P14079 | Q6ZWE6 | -0.4342   |
| 88688 | P14079 | O95047 | -1.2314   |
| 88689 | P14079 | Q6UWF7 | -0.80633  |
| 88690 | P14079 | Q8TDB6 | -0.22741  |
| 88691 | P14079 | P31277 | -0.38177  |
| 88692 | P14079 | Q8NEC7 | -0.26849  |

|       |        |         |           |
|-------|--------|---------|-----------|
| 88693 | P14079 | Q6UWX4  | -0.79419  |
| 88694 | P14079 | Q92823  | -0.99696  |
| 88695 | P14079 | Q6ZNW5  | -0.68353  |
| 88696 | P14079 | Q00253  | -0.84467  |
| 88697 | P14079 | P16444  | -0.49702  |
| 88698 | P14079 | Q9UJQ7  | -0.11531  |
| 88699 | P14079 | Q8NF86  | -1.551    |
| 88700 | P14079 | Q68EM7  | -0.71003  |
| 88701 | P14079 | P0CG36  | -1.1048   |
| 88702 | P14079 | Q8N543  | -0.24075  |
| 88703 | P14079 | P60880  | -0.18311  |
| 88704 | P14079 | Q7RTY0  | -1.0598   |
| 88705 | P14079 | Q8TAK6  | -0.22757  |
| 88706 | P14079 | P15088  | -0.7617   |
| 88707 | P14079 | P63136  | -0.30686  |
| 88708 | P14079 | Q9Y2H1  | -0.45962  |
| 88709 | P14079 | Q86X19  | -0.89897  |
| 88710 | P14079 | Q30134  | -0.72952  |
| 88711 | P14079 | Q6S8J7  | -0.22572  |
| 88712 | P14079 | P16860  | -0.4338   |
| 88713 | P14079 | P0C646  | -1.2314   |
| 88714 | P14079 | Q13825  | -0.28493  |
| 88715 | P14079 | P0C263  | -1.4433   |
| 88716 | P14079 | O94851  | -0.29687  |
| 88717 | P14079 | Q8N556  | -0.22235  |
| 88718 | P14079 | Q9Y2B9  | -0.257    |
| 88719 | P14079 | P32856  | -0.33346  |
| 88720 | P14079 | Q9UG63  | -0.80289  |
| 88721 | P14079 | Q8N165  | -1.2569   |
| 88722 | P14079 | O43435  | -0.99949  |
| 88723 | P14079 | P00966  | -0.1936   |
| 88724 | P14079 | Q9NRA0  | -0.61395  |
| 88725 | P14079 | P54792  | -0.8391   |
| 88726 | P14079 | O60858  | -0.73835  |
| 88727 | P14079 | Q6ZSU1  | -0.48143  |
| 88728 | P14079 | Q8TCG1  | -0.077225 |
| 88729 | P14079 | Q16653  | -1.2042   |
| 88730 | P14079 | Q496M5  | -0.22741  |
| 88731 | P14079 | P22612  | -0.8753   |
| 88732 | P14079 | P07288  | -0.94096  |
| 88733 | P14079 | Q9P104  | -0.15168  |
| 88734 | P14079 | Q9H4M7  | -0.30456  |
| 88735 | P14079 | Q15389  | -0.59603  |
| 88736 | P14079 | Q14190  | -0.24658  |
| 88737 | P14079 | Q95837  | -1.0677   |
| 88738 | P14079 | Q9ULB5  | -1.2011   |
| 88739 | P14079 | Q86SM5  | -1.3154   |
| 88740 | P14079 | P01720  | -1        |
| 88741 | P14079 | P51608  | -0.087255 |
| 88742 | P14079 | Q9NVR0  | -0.80633  |
| 88743 | P14079 | Q96NU0  | -1.2378   |
| 88744 | P14079 | Q96D53  | -1.0854   |
| 88745 | P14079 | P52739  | -0.49352  |
| 88746 | P14079 | A0AVT1  | -0.26929  |
| 88747 | P14079 | Q96M32  | -0.69038  |
| 88748 | P14079 | Q96PS8  | -1.0507   |
| 88749 | P14079 | A6NNM3  | -0.22733  |
| 88750 | P14079 | Q92643  | -0.69961  |
| 88751 | P14079 | P01602  | -1        |
| 88752 | P14079 | Q2WVGJ9 | -0.77815  |
| 88753 | P14079 | Q99467  | -0.95169  |
| 88754 | P14079 | P21397  | -0.84265  |
| 88755 | P14079 | O95704  | -0.22611  |
| 88756 | P14079 | Q9H3P7  | -0.52813  |
| 88757 | P14079 | Q9HB89  | -1.1796   |
| 88758 | P14079 | Q02846  | -1.6652   |
| 88759 | P14079 | P43034  | -0.2302   |
| 88760 | P14079 | Q86XT4  | -0.41702  |
| 88761 | P14079 | Q15842  | -0.88696  |
| 88762 | P14079 | O75840  | -0.21889  |
| 88763 | P14079 | O60669  | -1.1707   |
| 88764 | P14079 | P43004  | -0.66778  |
| 88765 | P14079 | P35354  | -0.26435  |
| 88766 | P14079 | P54577  | -0.34849  |
| 88767 | P14079 | P16885  | -0.22741  |
| 88768 | P14079 | P27987  | -0.90473  |

|       |        |        |          |
|-------|--------|--------|----------|
| 88769 | P14079 | P56545 | -0.32469 |
| 88770 | P14079 | Q8NHK3 | -0.97472 |
| 88771 | P14079 | P42681 | -0.68976 |
| 88772 | P14079 | P33908 | -0.56348 |
| 88773 | P14079 | Q9NTG1 | -1.1971  |
| 88774 | P14079 | Q3LFD5 | -0.77524 |
| 88775 | P14079 | Q9NZJ7 | -0.21537 |
| 88776 | P14079 | Q9H2E6 | -0.58055 |
| 88777 | P14079 | P0C0L5 | -1.1204  |
| 88778 | P14079 | Q92828 | -0.22742 |
| 88779 | P14079 | P23763 | -0.36965 |
| 88780 | P14079 | O60331 | -0.61301 |
| 88781 | P14079 | Q9UBR5 | -1.2915  |
| 88782 | P14079 | Q9Y4D2 | -0.85557 |
| 88783 | P14079 | Q70CQ2 | -0.47088 |
| 88784 | P14079 | Q9H4L5 | -0.41792 |
| 88785 | P14079 | Q8WV93 | -0.64478 |
| 88786 | P14079 | P13942 | -0.89766 |
| 88787 | P14079 | P50224 | -0.32014 |
| 88788 | P14079 | Q02127 | -0.72845 |
| 88789 | P14079 | P0C7U0 | -0.77344 |
| 88790 | P14079 | P07203 | -0.3621  |
| 88791 | P14079 | P16949 | -0.45385 |
| 88792 | P14079 | Q16825 | -0.44658 |
| 88793 | P14079 | A4D126 | -0.35098 |
| 88794 | P14079 | Q4G0S4 | -0.7115  |
| 88795 | P14079 | Q9H257 | -0.14707 |
| 88796 | P14079 | Q8N3Z0 | -0.87568 |
| 88797 | P14079 | Q9HBH0 | -0.94955 |
| 88798 | P14079 | P25025 | -1.1038  |
| 88799 | P14079 | O00214 | -0.11231 |
| 88800 | P14079 | P13688 | -0.98293 |
| 88801 | P14079 | Q8NEN0 | -0.12534 |
| 88802 | P14079 | Q13401 | -0.13703 |
| 88803 | P14079 | P32242 | -0.41781 |
| 88804 | P14079 | P30550 | -1.2678  |
| 88805 | P14079 | Q99714 | -0.19998 |
| 88806 | P14079 | Q95716 | -0.84497 |
| 88807 | P14079 | P08567 | -0.22741 |
| 88808 | P14079 | O60218 | -0.55483 |
| 88809 | P14079 | Q9NQU5 | -0.6532  |
| 88810 | P14079 | Q9H251 | -0.77306 |
| 88811 | P14079 | Q96DU3 | -0.98281 |
| 88812 | P14079 | O60391 | -0.92884 |
| 88813 | P14079 | P08236 | -0.47756 |
| 88814 | P14079 | P09769 | -0.66889 |
| 88815 | P14079 | P10767 | -1.1145  |
| 88816 | P14079 | Q96A28 | -0.78716 |
| 88817 | P14079 | Q01196 | -0.32522 |
| 88818 | P14079 | Q32VQ0 | -1.2314  |
| 88819 | P14079 | P10451 | -0.77662 |
| 88820 | P14079 | Q14527 | -0.20348 |
| 88821 | P14079 | Q96S42 | -0.26205 |
| 88822 | P14079 | A6NMD0 | -0.98103 |
| 88823 | P14079 | Q96R84 | -1.2314  |
| 88824 | P14079 | Q9Y257 | -1.2478  |
| 88825 | P14079 | P61160 | -0.58529 |
| 88826 | P14079 | Q8N5C1 | -0.77815 |
| 88827 | P14079 | Q5W0U4 | -0.227   |
| 88828 | P14079 | Q8NGM1 | -1.2314  |
| 88829 | P14079 | Q8IUB2 | -0.82805 |
| 88830 | P14079 | Q16538 | -1.3154  |
| 88831 | P14079 | Q9Y3Q7 | -1.4438  |
| 88832 | P14079 | Q8TE73 | -0.39898 |
| 88833 | P14079 | Q9H1C4 | -0.69945 |
| 88834 | P14079 | Q9UBU2 | -1.2472  |
| 88835 | P14079 | Q9UJU2 | -0.19947 |
| 88836 | P14079 | Q9Y4C5 | -0.82632 |
| 88837 | P14079 | Q13011 | -0.05587 |
| 88838 | P14079 | P78527 | -0.42765 |
| 88839 | P14079 | P46093 | -1.5146  |
| 88840 | P14079 | O95263 | -0.2259  |
| 88841 | P14079 | Q96EF0 | -0.32799 |
| 88842 | P14079 | Q02985 | -0.9245  |
| 88843 | P14079 | Q13753 | -1.4322  |
| 88844 | P14079 | Q9Y385 | -1.7321  |

|       |        |        |           |
|-------|--------|--------|-----------|
| 88845 | P14079 | Q86TM6 | -0.23695  |
| 88846 | P14079 | Q9P2U8 | -1.0526   |
| 88847 | P14079 | Q12870 | -0.23077  |
| 88848 | P14079 | P40259 | -0.66118  |
| 88849 | P14079 | Q6ZRP7 | -1.3851   |
| 88850 | P14079 | Q08357 | -1.0652   |
| 88851 | P14079 | Q8IXZ2 | -0.14714  |
| 88852 | P14079 | P47710 | -0.82237  |
| 88853 | P14079 | Q8N5M9 | -0.9328   |
| 88854 | P14079 | P01891 | -0.98914  |
| 88855 | P14079 | O75955 | -0.24499  |
| 88856 | P14079 | Q8N0W3 | -1.1644   |
| 88857 | P14079 | P49326 | -1.126    |
| 88858 | P14079 | Q9UBE0 | -0.21989  |
| 88859 | P14079 | Q99748 | -0.609    |
| 88860 | P14079 | Q96KK4 | -1.2314   |
| 88861 | P14079 | Q8NFA2 | -0.22733  |
| 88862 | P14079 | O75023 | -0.87758  |
| 88863 | P14079 | Q06210 | -0.044424 |
| 88864 | P14079 | Q14914 | -0.78026  |
| 88865 | P14079 | Q9H310 | -0.97817  |
| 88866 | P14079 | Q9BY11 | -0.22738  |
| 88867 | P14079 | Q8WX94 | -0.78428  |
| 88868 | P14079 | Q9P1W3 | -0.77815  |
| 88869 | P14079 | Q9NYX4 | -1.1847   |
| 88870 | P14079 | Q6ZQW0 | -0.30425  |
| 88871 | P14079 | Q9Y2I8 | -0.23023  |
| 88872 | P14079 | P20338 | -0.69434  |
| 88873 | P14079 | E5RHQ5 | -0.13465  |
| 88874 | P14079 | Q2M3V2 | -0.22742  |
| 88875 | P14079 | Q8TDQ0 | -0.77815  |
| 88876 | P14079 | O95674 | -0.72153  |
| 88877 | P14079 | Q92565 | -0.28572  |
| 88878 | P14079 | Q13241 | -1.0939   |
| 88879 | P14079 | Q07283 | -0.23753  |
| 88880 | P14079 | Q86SQ0 | -0.29156  |
| 88881 | P14079 | Q16609 | -0.88231  |
| 88882 | P14079 | P50052 | -0.84441  |
| 88883 | P14079 | A6NIM6 | -0.54187  |
| 88884 | P14079 | Q9NYQ8 | -0.82862  |
| 88885 | P14079 | Q13608 | -0.31565  |
| 88886 | P14079 | P10253 | -0.42075  |
| 88887 | P14079 | O60667 | -0.70924  |
| 88888 | P14079 | O60309 | -0.77815  |
| 88889 | P14079 | O75882 | -1.6066   |
| 88890 | P14079 | Q9Y624 | -0.50666  |
| 88891 | P14079 | P52797 | -0.57766  |
| 88892 | P14079 | P20941 | -0.080343 |
| 88893 | P14079 | Q9NR71 | -0.74722  |
| 88894 | P14079 | Q6ZNI0 | -0.68423  |
| 88895 | P14079 | Q96NS5 | -0.22752  |
| 88896 | P14079 | P21266 | -0.2574   |
| 88897 | P14079 | P62253 | -0.90355  |
| 88898 | P14079 | Q8N6N7 | -0.37587  |
| 88899 | P14079 | Q86Y34 | -1.3662   |
| 88900 | P14079 | O75144 | -1.1718   |
| 88901 | P14079 | Q8NCT1 | -0.28212  |
| 88902 | P14079 | Q6ZU64 | -0.56962  |
| 88903 | P14079 | Q5T8D3 | -1.1448   |
| 88904 | P14079 | Q9Y2T4 | -0.20321  |
| 88905 | P14079 | Q6UX41 | -0.22803  |
| 88906 | P14079 | Q6IF63 | -1.2314   |
| 88907 | P14079 | Q8IXA5 | -0.63314  |
| 88908 | P14079 | Q8NGI2 | -1.2314   |
| 88909 | P14079 | Q9H347 | -0.2256   |
| 88910 | P14079 | Q8IYV9 | -0.92719  |
| 88911 | P14079 | P11217 | -0.57059  |
| 88912 | P14079 | Q17R98 | -0.22717  |
| 88913 | P14079 | Q00266 | -0.78827  |
| 88914 | P14079 | Q9NY15 | -1.0584   |
| 88915 | P14079 | Q7L5L3 | -0.80562  |
| 88916 | P14079 | O95222 | -1.2314   |
| 88917 | P14079 | Q9Y2A9 | -0.74754  |
| 88918 | P14079 | P48029 | -1.0694   |
| 88919 | P14079 | P40199 | -0.22753  |
| 88920 | P14079 | P78383 | -0.891    |

|       |        |        |          |
|-------|--------|--------|----------|
| 88921 | P14079 | Q9NQ88 | -0.55809 |
| 88922 | P14079 | Q9NP80 | -0.64176 |
| 88923 | P14079 | P05089 | -0.18754 |
| 88924 | P14079 | P10301 | -0.79116 |
| 88925 | P14079 | P08833 | -0.78452 |
| 88926 | P14079 | Q7L7L0 | -0.92425 |
| 88927 | P14079 | Q9UKJ0 | -0.34385 |
| 88928 | P14079 | A7E2S9 | -0.2274  |
| 88929 | P14079 | Q0VF96 | -0.22551 |
| 88930 | P14079 | Q14982 | -0.79039 |
| 88931 | P14079 | Q9H1K4 | -0.74581 |
| 88932 | P14079 | Q7Z6G8 | -0.22764 |
| 88933 | P14079 | Q8WUS8 | -1.3929  |
| 88934 | P14079 | P19878 | -0.22246 |
| 88935 | P14079 | Q9NRB3 | -0.58982 |
| 88936 | P14079 | Q8IUH8 | -1.1571  |
| 88937 | P14079 | P01775 | -1       |
| 88938 | P14079 | Q08499 | -0.2179  |
| 88939 | P14079 | Q96T54 | -1.2622  |
| 88940 | P14079 | Q99538 | -0.81537 |
| 88941 | P14079 | P21730 | -1.2504  |
| 88942 | P14079 | P28161 | -0.22775 |
| 88943 | P14079 | Q8TCG5 | -0.98122 |
| 88944 | P14079 | Q6ZT07 | -1.5115  |
| 88945 | P14079 | Q01740 | -0.91683 |
| 88946 | P14079 | Q6UXI9 | -1.3151  |
| 88947 | P14079 | Q8NH43 | -1.2314  |
| 88948 | P14079 | P54687 | -0.218   |
| 88949 | P14079 | P05156 | -1.4696  |
| 88950 | P14079 | P37268 | -1.0817  |
| 88951 | P14079 | P57730 | -0.50781 |
| 88952 | P14079 | Q8WWY7 | -0.80861 |
| 88953 | P14079 | Q8NCH0 | -0.5967  |
| 88954 | P14079 | Q8WVF1 | -0.43647 |
| 88955 | P14079 | Q8TD30 | -0.26954 |
| 88956 | P14079 | Q4G0N8 | -1.3812  |
| 88957 | P14079 | P34998 | -0.64948 |
| 88958 | P14079 | Q95925 | -0.21951 |
| 88959 | P14079 | Q53EL9 | -0.95657 |
| 88960 | P14079 | Q9NRH3 | -0.20188 |
| 88961 | P14079 | Q8N129 | -0.91495 |
| 88962 | P14079 | A0PJX0 | -0.22755 |
| 88963 | P14079 | Q9Y5S1 | -0.93357 |
| 88964 | P14079 | Q8N4L4 | -1.1677  |
| 88965 | P14079 | P00450 | -1.1798  |
| 88966 | P14079 | P51784 | -0.43956 |
| 88967 | P14079 | Q9NS75 | -1.2385  |
| 88968 | P14079 | Q94933 | -0.87401 |
| 88969 | P14079 | Q8TBR7 | -0.97472 |
| 88970 | P14079 | P04798 | -0.3606  |
| 88971 | P14079 | Q14162 | -0.941   |
| 88972 | P14079 | Q8NBV8 | -1.0709  |
| 88973 | P14079 | P01241 | -0.23934 |
| 88974 | P14079 | Q6PHR2 | -0.81005 |
| 88975 | P14079 | Q86XD8 | -0.22043 |
| 88976 | P14079 | Q5VT25 | -0.47317 |
| 88977 | P14079 | Q8NGR5 | -1.2314  |
| 88978 | P14079 | Q17R60 | -1.0038  |
| 88979 | P14079 | P59910 | -0.35539 |
| 88980 | P14079 | Q8TDX7 | -0.85037 |
| 88981 | P14079 | P17693 | -0.98295 |
| 88982 | P14079 | Q9NX24 | -0.22212 |
| 88983 | P14079 | Q9BYT1 | -0.81669 |
| 88984 | P14079 | Q765P7 | -0.43792 |
| 88985 | P14079 | Q9BVG3 | -0.36051 |
| 88986 | P14079 | Q9UPR0 | -0.42249 |
| 88987 | P14079 | O43824 | -1.0029  |
| 88988 | P14079 | Q96PH6 | -0.80752 |
| 88989 | P14079 | Q9NPB3 | -0.27173 |
| 88990 | P14079 | Q9H3Y0 | -0.87356 |
| 88991 | P14079 | P47872 | -1.507   |
| 88992 | P14079 | Q9BQR3 | -1.4766  |
| 88993 | P14079 | Q9Y4L5 | -0.25028 |
| 88994 | P14079 | Q9H426 | -0.28296 |
| 88995 | P14079 | Q8IYK4 | -0.31963 |
| 88996 | P14079 | Q96L42 | -1.153   |



|       |        |        |           |
|-------|--------|--------|-----------|
| 88997 | P14079 | O75976 | -0.85488  |
| 88998 | P14079 | P83593 | -0.98486  |
| 88999 | P14079 | O75718 | -1.055    |
| 89000 | P14079 | P20671 | -0.94462  |
| 89001 | P14079 | Q9NZ01 | -0.74534  |
| 89002 | P14079 | Q6YHK3 | -1.0852   |
| 89003 | P14079 | Q96JA1 | -0.77815  |
| 89004 | P14079 | O15399 | -0.83953  |
| 89005 | P14079 | Q96JA4 | -0.77815  |
| 89006 | P14079 | P79483 | -0.88866  |
| 89007 | P14079 | Q8TDN7 | -0.7906   |
| 89008 | P14079 | Q9Y5T5 | -0.39141  |
| 89009 | P14079 | Q96SQ9 | -0.97326  |
| 89010 | P14079 | Q9NST1 | -0.92461  |
| 89011 | P14079 | P87889 | -0.1403   |
| 89012 | P14079 | Q8NEA9 | -0.21181  |
| 89013 | P14079 | Q9UMX5 | -0.85388  |
| 89014 | P14079 | P35568 | -0.18583  |
| 89015 | P14079 | P43699 | -0.57001  |
| 89016 | P14079 | O60449 | -1.1086   |
| 89017 | P14079 | Q9BXJ1 | -0.89985  |
| 89018 | P14079 | P42081 | -0.2252   |
| 89019 | P14079 | P54315 | -1.0242   |
| 89020 | P14079 | Q9UKA8 | -0.77217  |
| 89021 | P14079 | P09210 | -0.22447  |
| 89022 | P14079 | P08473 | -0.66826  |
| 89023 | P14079 | Q14573 | -0.21329  |
| 89024 | P14079 | Q86YB8 | -0.71047  |
| 89025 | P14079 | O95907 | -1.0375   |
| 89026 | P14079 | Q8N4N8 | -0.29263  |
| 89027 | P14079 | P22304 | -0.54644  |
| 89028 | P14079 | Q8WVQ1 | -0.87479  |
| 89029 | P14079 | Q9NRJ3 | -0.88098  |
| 89030 | P14079 | Q2M296 | -0.78401  |
| 89031 | P14079 | Q8NAC3 | -0.92944  |
| 89032 | P14079 | Q9H1M3 | -0.78458  |
| 89033 | P14079 | P31146 | -0.22741  |
| 89034 | P14079 | Q9Y4K0 | -0.47129  |
| 89035 | P14079 | P14314 | -0.40324  |
| 89036 | P14079 | O75900 | -1.4683   |
| 89037 | P14079 | Q6IEU7 | -1.2314   |
| 89038 | P14079 | Q9BZS1 | -0.65391  |
| 89039 | P14079 | Q9HCN4 | -1.0388   |
| 89040 | P14079 | P46059 | -1.0315   |
| 89041 | P14079 | Q8N323 | -0.80633  |
| 89042 | P14079 | P42261 | -0.65153  |
| 89043 | P14079 | Q9H3Z7 | -0.16635  |
| 89044 | P14079 | Q8NBS3 | -0.71241  |
| 89045 | P14079 | Q9NU53 | -0.77815  |
| 89046 | P14079 | Q7Z6J2 | -0.22759  |
| 89047 | P14079 | P20142 | -1.0194   |
| 89048 | P14079 | P30085 | -0.52549  |
| 89049 | P14079 | Q8NH57 | -1.2314   |
| 89050 | P14079 | Q9H2Y9 | -0.98669  |
| 89051 | P14079 | Q02224 | -0.24335  |
| 89052 | P14079 | Q8WUY1 | -0.80633  |
| 89053 | P14079 | Q9Y6Y8 | -0.11825  |
| 89054 | P14079 | P31153 | -0.694    |
| 89055 | P14079 | O00591 | -0.8455   |
| 89056 | P14079 | P57082 | -0.43954  |
| 89057 | P14079 | Q9Y546 | -0.12532  |
| 89058 | P14079 | Q9H936 | -0.29085  |
| 89059 | P14079 | P30825 | -1.3142   |
| 89060 | P14079 | Q15393 | -0.098252 |
| 89061 | P14079 | P60508 | -0.8184   |
| 89062 | P14079 | Q9BZ29 | -0.22474  |
| 89063 | P14079 | O14544 | -0.22717  |
| 89064 | P14079 | Q9Y5F3 | -1.2343   |
| 89065 | P14079 | Q8NHV9 | -0.21372  |
| 89066 | P14079 | Q7L8C5 | -0.85111  |
| 89067 | P14079 | Q9NYK1 | -0.53959  |
| 89068 | P14079 | P30613 | -0.56698  |
| 89069 | P14079 | P15529 | -0.62385  |
| 89070 | P14079 | Q01974 | -1.4711   |
| 89071 | P14079 | Q9BRY0 | -1.0804   |
| 89072 | P14079 | Q9UQ10 | -0.93949  |

|       |        |        |          |
|-------|--------|--------|----------|
| 89073 | P14079 | Q8IUG5 | -0.17176 |
| 89074 | P14079 | Q9HCB6 | -0.70056 |
| 89075 | P14079 | Q9BT88 | -0.66011 |
| 89076 | P14079 | P13598 | -1.2546  |
| 89077 | P14079 | P01769 | -1       |
| 89078 | P14079 | P10646 | -0.96956 |
| 89079 | P14079 | Q9Y5F0 | -1.2218  |
| 89080 | P14079 | P25391 | -0.86784 |
| 89081 | P14079 | Q8NGG5 | -1.2314  |
| 89082 | P14079 | O15393 | -1.8721  |
| 89083 | P14079 | P05177 | -0.52936 |
| 89084 | P14079 | O14939 | -0.21178 |
| 89085 | P14079 | P55290 | -0.87216 |
| 89086 | P14079 | P05107 | -1.0743  |
| 89087 | P14079 | Q96A54 | -1.0587  |
| 89088 | P14079 | Q8TDD1 | -0.44188 |
| 89089 | P14079 | Q9BTZ2 | -0.82029 |
| 89090 | P14079 | Q6P5X7 | -0.77815 |
| 89091 | P14079 | Q1MX18 | -0.39519 |
| 89092 | P14079 | Q9BZM1 | -0.8177  |
| 89093 | P14079 | Q9UKY4 | -0.99121 |
| 89094 | P14079 | P01699 | -1       |
| 89095 | P14079 | P46019 | -0.1905  |
| 89096 | P14079 | Q8WZA2 | -0.33222 |
| 89097 | P14079 | Q5TIE3 | -0.80633 |
| 89098 | P14079 | Q96GZ6 | -0.96263 |
| 89099 | P14079 | A6NFC9 | -1.2314  |
| 89100 | P14079 | Q14522 | -0.86664 |
| 89101 | P14079 | Q15784 | -0.34273 |
| 89102 | P14079 | Q6UX52 | -0.80633 |
| 89103 | P14079 | O95455 | -0.93292 |
| 89104 | P14079 | Q96A99 | -0.81387 |
| 89105 | P14079 | Q6ZNR0 | -0.8118  |
| 89106 | P14079 | O15530 | -0.21868 |
| 89107 | P14079 | Q8NH73 | -1.2314  |
| 89108 | P14079 | Q86SF2 | -0.58014 |
| 89109 | P14079 | P0CG21 | -0.22122 |
| 89110 | P14079 | O95677 | -0.12858 |
| 89111 | P14079 | Q8NGA4 | -1.3324  |
| 89112 | P14079 | P07204 | -0.60543 |
| 89113 | P14079 | Q9UIA0 | -0.47225 |
| 89114 | P14079 | P62502 | -0.82261 |
| 89115 | P14079 | Q12836 | -1.4039  |
| 89116 | P14079 | Q9Y3B4 | -0.22245 |
| 89117 | P14079 | Q6TCH7 | -0.5251  |
| 89118 | P14079 | P01854 | -0.26135 |
| 89119 | P14079 | Q7RTY3 | -0.90561 |
| 89120 | P14079 | P49961 | -1.8184  |
| 89121 | P14079 | Q4G0W2 | -0.82815 |
| 89122 | P14079 | P21283 | -0.15137 |
| 89123 | P14079 | Q9H1U9 | -0.66417 |
| 89124 | P14079 | Q9NWQ9 | -0.1339  |
| 89125 | P14079 | Q9UGP8 | -0.75175 |
| 89126 | P14079 | Q96RJ0 | -1.2495  |
| 89127 | P14079 | Q96E52 | -0.93065 |
| 89128 | P14079 | Q06710 | -0.22678 |
| 89129 | P14079 | Q8IVW1 | -0.92563 |
| 89130 | P14079 | Q6NUJ1 | -0.96939 |
| 89131 | P14079 | P78552 | -0.49019 |
| 89132 | P14079 | P51805 | -1.1111  |
| 89133 | P14079 | P52198 | -0.88399 |
| 89134 | P14079 | C9J2P7 | -0.77524 |
| 89135 | P14079 | Q6ZR62 | -0.16722 |
| 89136 | P14079 | Q9Y267 | -0.98162 |
| 89137 | P14079 | Q92617 | -0.80224 |
| 89138 | P14079 | Q9UBK2 | -0.81607 |
| 89139 | P14079 | P07327 | -0.20404 |
| 89140 | P14079 | Q6PI73 | -0.77815 |
| 89141 | P14079 | Q6ZVS6 | -0.80633 |
| 89142 | P14079 | Q9UQ74 | -0.80633 |
| 89143 | P14079 | Q12841 | -0.99629 |
| 89144 | P14079 | Q9H0U4 | -0.67916 |
| 89145 | P14079 | Q9Y493 | -1.1376  |
| 89146 | P14079 | Q8IUFL | -0.78428 |
| 89147 | P14079 | A1L390 | -0.45453 |
| 89148 | P14079 | Q86SJ2 | -0.24224 |

|       |        |        |          |
|-------|--------|--------|----------|
| 89149 | P14079 | P35749 | -0.36066 |
| 89150 | P14079 | P35544 | -0.26849 |
| 89151 | P14079 | P43630 | -1.1719  |
| 89152 | P14079 | Q12908 | -0.94376 |
| 89153 | P14079 | A6NFA1 | -0.98394 |
| 89154 | P14079 | Q15649 | -0.11791 |
| 89155 | P14079 | Q6FIF0 | -0.49975 |
| 89156 | P14079 | Q13261 | -0.65041 |
| 89157 | P14079 | Q9HCL0 | -1.3727  |
| 89158 | P14079 | A6PVI3 | -0.74605 |
| 89159 | P14079 | Q75LS8 | -0.2272  |
| 89160 | P14079 | A6NMZ7 | -1.271   |
| 89161 | P14079 | Q86UR1 | -0.22715 |
| 89162 | P14079 | O60320 | -0.77815 |
| 89163 | P14079 | Q9H5Q3 | -0.77815 |
| 89164 | P14079 | P43354 | -0.23586 |
| 89165 | P14079 | P43403 | -0.62859 |
| 89166 | P14079 | P41146 | -1.2792  |
| 89167 | P14079 | O00220 | -0.22734 |
| 89168 | P14079 | Q8TAV3 | -0.93554 |
| 89169 | P14079 | P48637 | -0.64033 |
| 89170 | P14079 | P32455 | -1.0658  |
| 89171 | P14079 | Q8N8V8 | -0.77815 |
| 89172 | P14079 | P55072 | -0.24025 |
| 89173 | P14079 | Q14141 | -0.21185 |
| 89174 | P14079 | Q8TD94 | -0.21207 |
| 89175 | P14079 | Q13043 | -0.356   |
| 89176 | P14079 | P48060 | -1.4784  |
| 89177 | P14079 | Q16539 | -0.22741 |
| 89178 | P14079 | Q9P2H5 | -0.77524 |
| 89179 | P14079 | Q9NV66 | -1.0685  |
| 89180 | P14079 | Q9BSJ8 | -0.77815 |
| 89181 | P14079 | Q5TGY1 | -0.77815 |
| 89182 | P14079 | P04437 | -0.27282 |
| 89183 | P14079 | Q75783 | -1.5925  |
| 89184 | P14079 | O14975 | -0.99205 |
| 89185 | P14079 | Q15120 | -0.37667 |
| 89186 | P14079 | Q9HDC5 | -0.97667 |
| 89187 | P14079 | P11464 | -0.80423 |
| 89188 | P14079 | Q6UXZ3 | -0.29629 |
| 89189 | P14079 | Q86SR1 | -0.65676 |
| 89190 | P14079 | O43524 | -0.99971 |
| 89191 | P14079 | Q969G2 | -0.22423 |
| 89192 | P14079 | Q9BXP2 | -1.0366  |
| 89193 | P14079 | Q8WYN0 | -0.47602 |
| 89194 | P14079 | Q8WXI7 | -1.13    |
| 89195 | P14079 | Q8WXA8 | -1.1191  |
| 89196 | P14079 | O43602 | -0.37797 |
| 89197 | P14079 | Q9Y5W5 | -1.2699  |
| 89198 | P14079 | Q9H7L2 | -0.80633 |
| 89199 | P14079 | P22105 | -1.1869  |
| 89200 | P14079 | P25942 | -0.55175 |
| 89201 | P14079 | P26367 | -0.21395 |
| 89202 | P14079 | Q8N1S5 | -0.9697  |
| 89203 | P14079 | Q8TC36 | -0.34345 |
| 89204 | P14079 | Q99680 | -1.5146  |
| 89205 | P14079 | Q7RTZ1 | -1.4517  |
| 89206 | P14079 | Q5VWC8 | -1.0586  |
| 89207 | P14079 | P01771 | -1       |
| 89208 | P14079 | P57737 | -0.39253 |
| 89209 | P14079 | Q7Z5A9 | -0.78099 |
| 89210 | P14079 | Q8IW52 | -0.87401 |
| 89211 | P14079 | P01773 | -1       |
| 89212 | P14079 | P38405 | -0.99162 |
| 89213 | P14079 | Q8IYR6 | -1.2805  |
| 89214 | P14079 | A6NET4 | -1.2314  |
| 89215 | P14079 | Q7Z407 | -0.97472 |
| 89216 | P14079 | Q9UJU5 | -0.73383 |
| 89217 | P14079 | Q9UPS8 | -0.22732 |
| 89218 | P14079 | O95992 | -0.9451  |
| 89219 | P14079 | P30492 | -1       |
| 89220 | P14079 | P18564 | -1.1351  |
| 89221 | P14079 | P48436 | -0.32246 |
| 89222 | P14079 | P63127 | -0.65475 |
| 89223 | P14079 | Q86YR7 | -0.51188 |
| 89224 | P14079 | Q8IU57 | -0.25824 |

|       |        |        |           |
|-------|--------|--------|-----------|
| 89225 | P14079 | Q14802 | -1.169    |
| 89226 | P14079 | Q8NEY4 | -0.3022   |
| 89227 | P14079 | Q01151 | -1.084    |
| 89228 | P14079 | P06316 | -1        |
| 89229 | P14079 | O95376 | -0.21475  |
| 89230 | P14079 | P16591 | -0.45583  |
| 89231 | P14079 | P29400 | -1.0805   |
| 89232 | P14079 | Q30201 | -0.81677  |
| 89233 | P14079 | Q9H0D6 | -0.12926  |
| 89234 | P14079 | P41225 | -0.26111  |
| 89235 | P14079 | O43301 | -0.78428  |
| 89236 | P14079 | Q13950 | -0.57443  |
| 89237 | P14079 | O14718 | -1.2603   |
| 89238 | P14079 | Q05923 | -0.23702  |
| 89239 | P14079 | Q9UPU5 | -0.77524  |
| 89240 | P14079 | A6NI72 | -0.2274   |
| 89241 | P14079 | P60893 | -1.3154   |
| 89242 | P14079 | P26718 | -0.65407  |
| 89243 | P14079 | Q9BWU1 | -1.2269   |
| 89244 | P14079 | P56199 | -0.52566  |
| 89245 | P14079 | P02786 | -0.75919  |
| 89246 | P14079 | Q31610 | -1        |
| 89247 | P14079 | P08603 | -0.87884  |
| 89248 | P14079 | O14880 | -1.1693   |
| 89249 | P14079 | Q8IU89 | -0.35543  |
| 89250 | P14079 | Q96P64 | -0.96514  |
| 89251 | P14079 | P32249 | -1.296    |
| 89252 | P14079 | P27539 | -0.72297  |
| 89253 | P14079 | Q6DD88 | -1.1194   |
| 89254 | P14079 | Q9NPC1 | -1.4774   |
| 89255 | P14079 | Q6QHF9 | -0.55759  |
| 89256 | P14079 | P35410 | -0.6773   |
| 89257 | P14079 | Q2MKA7 | -0.31125  |
| 89258 | P14079 | P16401 | -0.7527   |
| 89259 | P14079 | Q15758 | -0.98085  |
| 89260 | P14079 | Q99489 | -0.53063  |
| 89261 | P14079 | H3BV60 | -0.77815  |
| 89262 | P14079 | Q5JR12 | -0.22348  |
| 89263 | P14079 | P33176 | -0.23311  |
| 89264 | P14079 | Q99726 | -0.98472  |
| 89265 | P14079 | P52823 | -0.63773  |
| 89266 | P14079 | Q9Y5G3 | -1.2343   |
| 89267 | P14079 | Q30167 | -0.72952  |
| 89268 | P14079 | Q8IZJ4 | -0.68983  |
| 89269 | P14079 | P48736 | -0.43229  |
| 89270 | P14079 | O75385 | -0.68868  |
| 89271 | P14079 | P22466 | -0.33483  |
| 89272 | P14079 | Q9UGF5 | -1.2314   |
| 89273 | P14079 | P54296 | -0.4414   |
| 89274 | P14079 | Q13018 | -1.3358   |
| 89275 | P14079 | Q9P212 | -0.23076  |
| 89276 | P14079 | P30533 | -0.8442   |
| 89277 | P14079 | O95377 | -0.90485  |
| 89278 | P14079 | Q6UX34 | -0.77815  |
| 89279 | P14079 | Q9NYW7 | -1.0432   |
| 89280 | P14079 | O95843 | -0.39788  |
| 89281 | P14079 | Q7Z6J4 | -0.83741  |
| 89282 | P14079 | A6NKD2 | -0.6149   |
| 89283 | P14079 | Q9N2J8 | -0.8184   |
| 89284 | P14079 | O75829 | -1.5597   |
| 89285 | P14079 | Q04741 | -0.22562  |
| 89286 | P14079 | P51648 | -1.0935   |
| 89287 | P14079 | Q70EK9 | -0.79741  |
| 89288 | P14079 | Q9UGI0 | -0.21128  |
| 89289 | P14079 | Q5T9S5 | -0.063716 |
| 89290 | P14079 | O15218 | -1.3268   |
| 89291 | P14079 | Q92954 | -0.80891  |
| 89292 | P14079 | Q6PJE2 | -0.26849  |
| 89293 | P14079 | Q4FZB7 | -0.23121  |
| 89294 | P14079 | Q9GZT3 | -0.21237  |
| 89295 | P14079 | Q6ZWB6 | -0.13435  |
| 89296 | P14079 | Q9Y3B3 | -0.42076  |
| 89297 | P14079 | Q02161 | -0.92724  |
| 89298 | P14079 | Q13546 | -0.22741  |
| 89299 | P14079 | Q8NGR1 | -1.2314   |
| 89300 | P14079 | P18507 | -0.82649  |

|       |        |         |          |
|-------|--------|---------|----------|
| 89301 | P14079 | Q9NYT0  | -0.33393 |
| 89302 | P14079 | O94956  | -1.2088  |
| 89303 | P14079 | P23280  | -0.7605  |
| 89304 | P14079 | Q5T6X5  | -1.2118  |
| 89305 | P14079 | Q96R09  | -1.2314  |
| 89306 | P14079 | Q03169  | -0.71978 |
| 89307 | P14079 | Q00887  | -0.80423 |
| 89308 | P14079 | Q13421  | -0.5777  |
| 89309 | P14079 | O75445  | -0.80255 |
| 89310 | P14079 | Q9Y5E3  | -1.3144  |
| 89311 | P14079 | O60499  | -0.15251 |
| 89312 | P14079 | Q9BX68  | -0.17073 |
| 89313 | P14079 | Q6NY19  | -0.22752 |
| 89314 | P14079 | Q9P1Z0  | -0.21284 |
| 89315 | P14079 | Q9Y242  | -0.21064 |
| 89316 | P14079 | Q8TF64  | -0.22159 |
| 89317 | P14079 | Q9NVH1  | -0.16937 |
| 89318 | P14079 | P35520  | -0.22229 |
| 89319 | P14079 | O94988  | -1.0254  |
| 89320 | P14079 | Q8IVN8  | -0.83808 |
| 89321 | P14079 | Q9C026  | -0.80349 |
| 89322 | P14079 | P51813  | -0.9769  |
| 89323 | P14079 | Q6IN97  | -0.22314 |
| 89324 | P14079 | Q92527  | -0.22731 |
| 89325 | P14079 | P0DJJD4 | -0.58152 |
| 89326 | P14079 | Q92637  | -1.1213  |
| 89327 | P14079 | P13378  | -0.15144 |
| 89328 | P14079 | Q16281  | -1.5924  |
| 89329 | P14079 | O75473  | -1.4141  |
| 89330 | P14079 | Q7RTP6  | -0.27269 |
| 89331 | P14079 | P06133  | -0.95714 |
| 89332 | P14079 | Q6SZW1  | -0.2822  |
| 89333 | P14079 | Q8NG11  | -0.77815 |
| 89334 | P14079 | Q8TDY8  | -0.97472 |
| 89335 | P14079 | P30511  | -1.1613  |
| 89336 | P14079 | Q8N386  | -0.77815 |
| 89337 | P14079 | P30536  | -0.30383 |
| 89338 | P14079 | Q13324  | -0.79959 |
| 89339 | P14079 | Q9BZD6  | -1.3024  |
| 89340 | P14079 | Q6UWM7  | -0.86949 |
| 89341 | P14079 | P41586  | -0.5878  |
| 89342 | P14079 | P48544  | -0.75354 |
| 89343 | P14079 | P05981  | -0.82171 |
| 89344 | P14079 | Q13151  | -0.23223 |
| 89345 | P14079 | P48764  | -0.70753 |
| 89346 | P14079 | P34969  | -1.3678  |
| 89347 | P14079 | Q8NGH5  | -1.2314  |
| 89348 | P14079 | Q5VTT5  | -0.22773 |
| 89349 | P14079 | Q9NXL9  | -0.62857 |
| 89350 | P14079 | Q15357  | -0.22741 |
| 89351 | P14079 | P50120  | -0.17926 |
| 89352 | P14079 | Q9NYA1  | -0.50596 |
| 89353 | P14079 | Q8TAU0  | -0.22803 |
| 89354 | P14079 | Q13595  | -0.58738 |
| 89355 | P14079 | Q9Y4C8  | -0.62753 |
| 89356 | P14079 | Q8NGF4  | -1.2314  |
| 89357 | P14079 | Q95969  | -0.9245  |
| 89358 | P14079 | Q86YB7  | -0.43618 |
| 89359 | P14079 | Q96R27  | -1.2314  |
| 89360 | P14079 | Q58WW2  | -0.22733 |
| 89361 | P14079 | P23560  | -0.47699 |
| 89362 | P14079 | Q685J3  | -0.70474 |
| 89363 | P14079 | Q9Y2C5  | -1.177   |
| 89364 | P14079 | Q95971  | -0.62461 |
| 89365 | P14079 | O75462  | -0.27049 |
| 89366 | P14079 | Q9UBX5  | -0.49665 |
| 89367 | P14079 | P28906  | -0.59827 |
| 89368 | P14079 | Q9UHG3  | -0.62177 |
| 89369 | P14079 | P51801  | -1.254   |
| 89370 | P14079 | P29590  | -0.22614 |
| 89371 | P14079 | Q9NW61  | -0.20291 |
| 89372 | P14079 | P40225  | -0.93967 |
| 89373 | P14079 | Q5T0T0  | -1.1644  |
| 89374 | P14079 | Q96KV7  | -0.22801 |
| 89375 | P14079 | Q8NCI6  | -0.27282 |
| 89376 | P14079 | P48723  | -0.75636 |

|       |        |        |          |
|-------|--------|--------|----------|
| 89377 | P14079 | P20839 | -0.47218 |
| 89378 | P14079 | O94967 | -0.22703 |
| 89379 | P14079 | Q96PP9 | -0.58833 |
| 89380 | P14079 | Q53LP3 | -0.22742 |
| 89381 | P14079 | Q00604 | -0.69974 |
| 89382 | P14079 | Q9C0A1 | -0.2274  |
| 89383 | P14079 | Q6UXT9 | -0.81748 |
| 89384 | P14079 | P10319 | -1       |
| 89385 | P14079 | Q2QL34 | -0.99462 |
| 89386 | P14079 | O15498 | -0.17552 |
| 89387 | P14079 | A2RUH7 | -0.26849 |
| 89388 | P14079 | P04921 | -0.5089  |
| 89389 | P14079 | Q9H8P0 | -0.83905 |
| 89390 | P14079 | Q86VI3 | -0.53935 |
| 89391 | P14079 | O94826 | -0.2273  |
| 89392 | P14079 | Q9UJM8 | -0.82062 |
| 89393 | P14079 | Q8TBE1 | -0.79273 |
| 89394 | P14079 | Q9BUJ0 | -0.58849 |
| 89395 | P14079 | Q03013 | -0.4821  |
| 89396 | P14079 | A6NC86 | -0.78848 |
| 89397 | P14079 | Q99519 | -0.55862 |
| 89398 | P14079 | Q8NH18 | -1.2314  |
| 89399 | P14079 | Q59H18 | -0.51215 |
| 89400 | P14079 | Q6KCM7 | -0.79732 |
| 89401 | P14079 | Q7LC44 | -0.35816 |
| 89402 | P14079 | Q5TCS8 | -0.96497 |
| 89403 | P14079 | P23527 | -0.92425 |
| 89404 | P14079 | O43320 | -0.93644 |
| 89405 | P14079 | O14926 | -0.20082 |
| 89406 | P14079 | Q13572 | -1.125   |
| 89407 | P14079 | P01770 | -1       |
| 89408 | P14079 | P46459 | -0.22983 |
| 89409 | P14079 | Q14894 | -0.36598 |
| 89410 | P14079 | P16473 | -0.80117 |
| 89411 | P14079 | Q9H2C1 | -0.22552 |
| 89412 | P14079 | Q9H987 | -0.2264  |
| 89413 | P14079 | P01596 | -1       |
| 89414 | P14079 | Q9NR81 | -0.29444 |
| 89415 | P14079 | Q9UBL9 | -0.59875 |
| 89416 | P14079 | P19397 | -0.44255 |
| 89417 | P14079 | P55773 | -1.0563  |
| 89418 | P14079 | Q8NGR9 | -1.2314  |
| 89419 | P14079 | P57103 | -0.96206 |
| 89420 | P14079 | Q9C040 | -0.2274  |
| 89421 | P14079 | O94762 | -0.2263  |
| 89422 | P14079 | Q7Z2D5 | -1.0638  |
| 89423 | P14079 | Q8IWT1 | -0.89605 |
| 89424 | P14079 | P36268 | -0.96708 |
| 89425 | P14079 | E5RG02 | -0.90561 |
| 89426 | P14079 | Q92949 | -0.73602 |
| 89427 | P14079 | Q2Q1W2 | -0.4951  |
| 89428 | P14079 | Q9Y458 | -0.99949 |
| 89429 | P14079 | Q8IX29 | -0.19672 |
| 89430 | P14079 | Q15615 | -1.2314  |
| 89431 | P14079 | Q9Y6F9 | -0.92275 |
| 89432 | P14079 | P59817 | -0.22769 |
| 89433 | P14079 | Q6SA08 | -1.1241  |
| 89434 | P14079 | Q5VXU1 | -0.97472 |
| 89435 | P14079 | Q8TCU6 | -0.22764 |
| 89436 | P14079 | Q9UL54 | -0.82225 |
| 89437 | P14079 | Q12926 | -0.28561 |
| 89438 | P14079 | Q8N2G6 | -0.16722 |
| 89439 | P14079 | O60240 | -0.38761 |
| 89440 | P14079 | P18074 | -0.21527 |
| 89441 | P14079 | A6NGU5 | -0.83048 |
| 89442 | P14079 | Q08188 | -0.57505 |
| 89443 | P14079 | Q6P3W2 | -0.28941 |
| 89444 | P14079 | O43638 | -0.82888 |
| 89445 | P14079 | Q6ZNL6 | -0.80205 |
| 89446 | P14079 | Q7Z4W1 | -0.87149 |
| 89447 | P14079 | Q9C0C4 | -0.9055  |
| 89448 | P14079 | Q8NCL8 | -0.80224 |
| 89449 | P14079 | O94985 | -1.151   |
| 89450 | P14079 | Q6ZMM2 | -0.98536 |
| 89451 | P14079 | Q13361 | -0.95216 |
| 89452 | P14079 | Q8WUU8 | -0.77815 |

|       |        |         |          |
|-------|--------|---------|----------|
| 89453 | P14079 | P06732  | -0.99881 |
| 89454 | P14079 | P00441  | -0.20698 |
| 89455 | P14079 | Q4ZJI4  | -0.9055  |
| 89456 | P14079 | O75093  | -0.81617 |
| 89457 | P14079 | O14983  | -0.52212 |
| 89458 | P14079 | O75771  | -0.20184 |
| 89459 | P14079 | O43405  | -0.33314 |
| 89460 | P14079 | P20851  | -0.99506 |
| 89461 | P14079 | P63131  | -0.65475 |
| 89462 | P14079 | P06729  | -0.97747 |
| 89463 | P14079 | Q496F6  | -0.97472 |
| 89464 | P14079 | Q9P0K9  | -0.80224 |
| 89465 | P14079 | Q8NGJ1  | -1.2314  |
| 89466 | P14079 | Q9Y5E9  | -1.2218  |
| 89467 | P14079 | Q9P2P1  | -0.73943 |
| 89468 | P14079 | P10966  | -0.91036 |
| 89469 | P14079 | Q96FT7  | -1.162   |
| 89470 | P14079 | Q99624  | -1.1538  |
| 89471 | P14079 | P06870  | -0.64569 |
| 89472 | P14079 | Q96ET8  | -0.77815 |
| 89473 | P14079 | Q16280  | -1.4203  |
| 89474 | P14079 | Q9P2V4  | -0.92528 |
| 89475 | P14079 | Q8NA75  | -0.22676 |
| 89476 | P14079 | Q6WRI0  | -1.0911  |
| 89477 | P14079 | Q68D86  | -0.12906 |
| 89478 | P14079 | P0DJR0  | -1.0029  |
| 89479 | P14079 | Q9Y5H1  | -1.2343  |
| 89480 | P14079 | Q8IWR1  | -0.91258 |
| 89481 | P14079 | Q92771  | -0.64544 |
| 89482 | P14079 | O00555  | -0.37243 |
| 89483 | P14079 | Q96EY8  | -0.78625 |
| 89484 | P14079 | Q13685  | -0.68668 |
| 89485 | P14079 | Q15523  | -0.94282 |
| 89486 | P14079 | Q96A47  | -0.27864 |
| 89487 | P14079 | Q9NXS3  | -0.17501 |
| 89488 | P14079 | Q8IUUY3 | -0.77815 |
| 89489 | P14079 | Q9Y673  | -0.89822 |
| 89490 | P14079 | Q9Y6N1  | -0.67976 |
| 89491 | P14079 | O60237  | -0.29022 |
| 89492 | P14079 | A6NMS7  | -0.77815 |
| 89493 | P14079 | P0C7U2  | -0.27297 |
| 89494 | P14079 | Q2TAA5  | -0.91751 |
| 89495 | P14079 | Q7Z4F1  | -0.86133 |
| 89496 | P14079 | Q9P1W8  | -0.56992 |
| 89497 | P14079 | Q14917  | -0.61062 |
| 89498 | P14079 | Q96JQ5  | -0.77815 |
| 89499 | P14079 | Q02094  | -0.98309 |
| 89500 | P14079 | Q8NGI6  | -1.2314  |
| 89501 | P14079 | P39900  | -1.3454  |
| 89502 | P14079 | Q96SF2  | -0.61925 |
| 89503 | P14079 | Q9H5K3  | -1.5918  |
| 89504 | P14079 | Q5JV73  | -0.22666 |
| 89505 | P14079 | Q9ULK5  | -0.42952 |
| 89506 | P14079 | Q58EX2  | -1.0127  |
| 89507 | P14079 | Q3SYC2  | -0.93806 |
| 89508 | P14079 | Q12766  | -0.22727 |
| 89509 | P14079 | Q29963  | -1       |
| 89510 | P14079 | Q03403  | -0.29093 |
| 89511 | P14079 | P82987  | -1.2134  |
| 89512 | P14079 | A6NDH6  | -1.2314  |
| 89513 | P14079 | Q7Z3H4  | -0.19879 |
| 89514 | P14079 | Q9Y3R0  | -0.22192 |
| 89515 | P14079 | P01909  | -0.85773 |
| 89516 | P14079 | Q14733  | -0.2384  |
| 89517 | P14079 | Q8NGD3  | -1.2314  |
| 89518 | P14079 | Q9UJA3  | -0.18134 |
| 89519 | P14079 | Q8N2X6  | -0.80633 |
| 89520 | P14079 | Q13422  | -0.27773 |
| 89521 | P14079 | Q9H3S4  | -0.7129  |
| 89522 | P14079 | Q15440  | -1.2751  |
| 89523 | P14079 | Q9NT22  | -0.81478 |
| 89524 | P14079 | P09936  | -0.17958 |
| 89525 | P14079 | P01111  | -0.70192 |
| 89526 | P14079 | Q9NZP8  | -1.5015  |
| 89527 | P14079 | Q14863  | -0.22739 |
| 89528 | P14079 | Q8TDT2  | -1.3154  |

|       |        |        |          |
|-------|--------|--------|----------|
| 89529 | P14079 | P47211 | -1.2357  |
| 89530 | P14079 | O60603 | -0.22792 |
| 89531 | P14079 | Q9H3H5 | -0.83034 |
| 89532 | P14079 | Q8NGK9 | -1.2314  |
| 89533 | P14079 | Q8IXQ5 | -0.20046 |
| 89534 | P14079 | P62807 | -0.90191 |
| 89535 | P14079 | O43760 | -1.0057  |
| 89536 | P14079 | P46736 | -0.4526  |
| 89537 | P14079 | O14753 | -0.20918 |
| 89538 | P14079 | Q9UIX4 | -1.0754  |
| 89539 | P14079 | Q96PE5 | -0.8251  |
| 89540 | P14079 | Q86X27 | -0.73132 |
| 89541 | P14079 | Q9BZF3 | -0.23157 |
| 89542 | P14079 | Q8N5D6 | -0.57892 |
| 89543 | P14079 | Q96JY6 | -0.22722 |
| 89544 | P14079 | Q9UGM1 | -0.94546 |
| 89545 | P14079 | Q9Y5L3 | -1.3303  |
| 89546 | P14079 | Q6UW15 | -0.79997 |
| 89547 | P14079 | Q96BM9 | -0.60147 |
| 89548 | P14079 | Q53EU6 | -0.88341 |
| 89549 | P14079 | Q9Y3I0 | -0.61995 |
| 89550 | P14079 | Q13585 | -1.4534  |
| 89551 | P14079 | Q9NSI5 | -0.37538 |
| 89552 | P14079 | P35222 | -0.23186 |
| 89553 | P14079 | Q99675 | -0.22611 |
| 89554 | P14079 | Q7Z4K8 | -0.36051 |
| 89555 | P14079 | O75715 | -1.332   |
| 89556 | P14079 | Q9BQG1 | -0.87619 |
| 89557 | P14079 | Q9HB63 | -1.073   |
| 89558 | P14079 | Q9H6X2 | -0.53595 |
| 89559 | P14079 | Q92619 | -0.99707 |
| 89560 | P14079 | O75084 | -0.62836 |
| 89561 | P14079 | Q8WWN8 | -0.64693 |
| 89562 | P14079 | P19801 | -0.88037 |
| 89563 | P14079 | Q96MC6 | -1.0536  |
| 89564 | P14079 | Q8NFB2 | -0.77815 |
| 89565 | P14079 | Q9BSK4 | -0.26449 |
| 89566 | P14079 | P48664 | -1.238   |
| 89567 | P14079 | P25311 | -0.99384 |
| 89568 | P14079 | Q86Y78 | -0.80633 |
| 89569 | P14079 | Q8TEZ7 | -1.4227  |
| 89570 | P14079 | Q9NPI5 | -0.56019 |
| 89571 | P14079 | P14151 | -0.76245 |
| 89572 | P14079 | P37108 | -0.25851 |
| 89573 | P14079 | Q13075 | -0.28693 |
| 89574 | P14079 | Q8NH92 | -1.2314  |
| 89575 | P14079 | Q5QP82 | -0.25926 |
| 89576 | P14079 | A8MTL0 | -0.21479 |
| 89577 | P14079 | Q9Y5Q5 | -1.7203  |
| 89578 | P14079 | Q5VUY2 | -0.82579 |
| 89579 | P14079 | Q08AF3 | -0.67147 |
| 89580 | P14079 | Q92625 | -0.22741 |
| 89581 | P14079 | Q9GZK7 | -1.2314  |
| 89582 | P14079 | Q9P218 | -1.0483  |
| 89583 | P14079 | O14772 | -1.0549  |
| 89584 | P14079 | Q7Z2W7 | -0.93526 |
| 89585 | P14079 | O75575 | -0.57553 |
| 89586 | P14079 | A1L4H1 | -0.87205 |
| 89587 | P14079 | Q9UBF8 | -1.0105  |
| 89588 | P14079 | O60733 | -0.22738 |
| 89589 | P14079 | Q9BZF2 | -0.53387 |
| 89590 | P14079 | Q86VF2 | -0.2276  |
| 89591 | P14079 | Q13237 | -1.3249  |
| 89592 | P14079 | P22676 | -0.22587 |
| 89593 | P14079 | P16581 | -0.41478 |
| 89594 | P14079 | Q5VZ03 | -0.12479 |
| 89595 | P14079 | P20591 | -0.25712 |
| 89596 | P14079 | P17181 | -1.0079  |
| 89597 | P14079 | O43896 | -0.26125 |
| 89598 | P14079 | P0DKB6 | -0.77815 |
| 89599 | P14079 | Q53H76 | -0.99296 |
| 89600 | P14079 | Q86Y27 | -0.80633 |
| 89601 | P14079 | Q8NHC4 | -1.2314  |
| 89602 | P14079 | O75191 | -0.9858  |
| 89603 | P14079 | Q8IUX8 | -1.6197  |
| 89604 | P14079 | A2RUS2 | -0.22706 |



|       |        |        |           |
|-------|--------|--------|-----------|
| 89605 | P14079 | Q9HD45 | -0.82661  |
| 89606 | P14079 | Q96M69 | -1.0879   |
| 89607 | P14079 | Q6P5S7 | -0.73981  |
| 89608 | P14079 | Q9UK05 | -0.22741  |
| 89609 | P14079 | P55107 | -0.70541  |
| 89610 | P14079 | P35367 | -0.74393  |
| 89611 | P14079 | Q96PD5 | -0.78165  |
| 89612 | P14079 | Q9UN73 | -1.8675   |
| 89613 | P14079 | O15169 | -0.25002  |
| 89614 | P14079 | Q14206 | -0.77399  |
| 89615 | P14079 | Q8TCV5 | -0.82805  |
| 89616 | P14079 | P22314 | -0.4108   |
| 89617 | P14079 | Q8WXS8 | -1.3652   |
| 89618 | P14079 | P50406 | -0.96549  |
| 89619 | P14079 | Q8NDX9 | -0.88231  |
| 89620 | P14079 | Q9H237 | -1.041    |
| 89621 | P14079 | O76093 | -0.72441  |
| 89622 | P14079 | O75417 | -0.56434  |
| 89623 | P14079 | Q9H832 | -0.59575  |
| 89624 | P14079 | Q16828 | -0.30076  |
| 89625 | P14079 | P19404 | -0.43603  |
| 89626 | P14079 | P04275 | -0.22736  |
| 89627 | P14079 | A6NIU2 | -0.1918   |
| 89628 | P14079 | Q8N142 | -0.8349   |
| 89629 | P14079 | P14778 | -1.1122   |
| 89630 | P14079 | Q9BQI0 | -0.28882  |
| 89631 | P14079 | Q9NWH2 | -0.77815  |
| 89632 | P14079 | Q460N5 | -0.21985  |
| 89633 | P14079 | Q9Y279 | -0.22743  |
| 89634 | P14079 | Q8IVL8 | -1.3084   |
| 89635 | P14079 | Q86WK9 | -1.4227   |
| 89636 | P14079 | P55283 | -1.2913   |
| 89637 | P14079 | P23634 | -0.71836  |
| 89638 | P14079 | Q99500 | -1.2725   |
| 89639 | P14079 | Q8TF21 | -0.22764  |
| 89640 | P14079 | Q8TE96 | -0.58447  |
| 89641 | P14079 | Q13488 | -0.83641  |
| 89642 | P14079 | Q99967 | -0.10107  |
| 89643 | P14079 | Q18PE1 | -0.48021  |
| 89644 | P14079 | Q9H156 | -0.87401  |
| 89645 | P14079 | P22681 | -0.22741  |
| 89646 | P14079 | Q15084 | -0.45427  |
| 89647 | P14079 | Q8WUG5 | -1.2051   |
| 89648 | P14079 | P30466 | -1        |
| 89649 | P14079 | Q14568 | -0.61725  |
| 89650 | P14079 | Q8NGY1 | -1.2314   |
| 89651 | P14079 | Q8NGE8 | -1.2314   |
| 89652 | P14079 | A6NC98 | -0.11409  |
| 89653 | P14079 | Q96RI0 | -1.5696   |
| 89654 | P14079 | P04201 | -0.85188  |
| 89655 | P14079 | Q8NGM8 | -1.2314   |
| 89656 | P14079 | C9JPN9 | -0.77524  |
| 89657 | P14079 | Q9BXI9 | -1.0804   |
| 89658 | P14079 | O94972 | -0.2274   |
| 89659 | P14079 | Q9Y547 | -0.34251  |
| 89660 | P14079 | Q6UY13 | -0.80633  |
| 89661 | P14079 | Q9UJW2 | -1.798    |
| 89662 | P14079 | A6NNY8 | -0.77524  |
| 89663 | P14079 | Q5QGZ9 | -0.96439  |
| 89664 | P14079 | Q14896 | -0.54083  |
| 89665 | P14079 | O60243 | -0.86194  |
| 89666 | P14079 | A6NMS3 | -1.2314   |
| 89667 | P14079 | P01718 | -1        |
| 89668 | P14079 | Q9UKM7 | -0.88812  |
| 89669 | P14079 | O60774 | -1.1007   |
| 89670 | P14079 | O75015 | -1.0373   |
| 89671 | P14079 | P07911 | -0.7391   |
| 89672 | P14079 | Q8NB78 | -0.48334  |
| 89673 | P14079 | Q9HC97 | -1.5146   |
| 89674 | P14079 | P0C7A2 | -0.012568 |
| 89675 | P14079 | O43150 | -0.31241  |
| 89676 | P14079 | Q8NFP9 | -0.22741  |
| 89677 | P14079 | O15068 | -0.2687   |
| 89678 | P14079 | A6BM72 | -0.84394  |
| 89679 | P14079 | Q9UPW0 | -0.99971  |
| 89680 | P14079 | Q9BTF0 | -0.22882  |

|       |        |        |          |
|-------|--------|--------|----------|
| 89681 | P14079 | Q99935 | -0.84626 |
| 89682 | P14079 | Q9NRG1 | -0.40714 |
| 89683 | P14079 | P16190 | -0.98914 |
| 89684 | P14079 | Q99645 | -0.90264 |
| 89685 | P14079 | O15342 | -0.67713 |
| 89686 | P14079 | Q9HCN6 | -0.54791 |
| 89687 | P14079 | Q9Y5T4 | -0.71316 |
| 89688 | P14079 | Q96PL2 | -1.1512  |
| 89689 | P14079 | P48546 | -1.3187  |
| 89690 | P14079 | Q9H341 | -1.2314  |
| 89691 | P14079 | Q6P5W5 | -0.91373 |
| 89692 | P14079 | Q9Y2V3 | -0.34357 |
| 89693 | P14079 | P29074 | -0.22817 |
| 89694 | P14079 | Q9Y2F9 | -0.2244  |
| 89695 | P14079 | Q9BYZ8 | -0.80162 |
| 89696 | P14079 | Q8NGW6 | -1.2314  |
| 89697 | P14079 | Q9NPY3 | -0.30608 |
| 89698 | P14079 | P50443 | -1.2857  |
| 89699 | P14079 | Q9C0J1 | -0.60558 |
| 89700 | P14079 | Q9NYW1 | -1.1071  |
| 89701 | P14079 | Q14112 | -0.71206 |
| 89702 | P14079 | O43508 | -1.1176  |
| 89703 | P14079 | Q9BTN0 | -1.0656  |
| 89704 | P14079 | Q6PJG9 | -0.77815 |
| 89705 | P14079 | Q86X40 | -0.22777 |
| 89706 | P14079 | Q13823 | -0.51028 |
| 89707 | P14079 | Q13325 | -0.29258 |
| 89708 | P14079 | Q7Z628 | -0.22997 |
| 89709 | P14079 | O94761 | -0.62823 |
| 89710 | P14079 | A6NHL2 | -0.28045 |
| 89711 | P14079 | Q9H222 | -0.84792 |
| 89712 | P14079 | E7EML9 | -1.4766  |
| 89713 | P14079 | Q8N2R0 | -0.1835  |
| 89714 | P14079 | Q8IVB4 | -1.053   |
| 89715 | P14079 | P10114 | -0.49345 |
| 89716 | P14079 | Q8NG81 | -1.2314  |
| 89717 | P14079 | P19113 | -0.60506 |
| 89718 | P14079 | O95972 | -0.71911 |
| 89719 | P14079 | P16035 | -0.71096 |
| 89720 | P14079 | A6NMY6 | -0.77628 |
| 89721 | P14079 | Q8WWX0 | -0.47402 |
| 89722 | P14079 | Q9NUD5 | -0.16722 |
| 89723 | P14079 | Q9H0F7 | -0.64301 |
| 89724 | P14079 | Q14541 | -0.22877 |
| 89725 | P14079 | Q96QB1 | -0.49097 |
| 89726 | P14079 | P25100 | -1.3618  |
| 89727 | P14079 | Q92535 | -0.9605  |
| 89728 | P14079 | P22748 | -0.15243 |
| 89729 | P14079 | Q00341 | -0.3435  |
| 89730 | P14079 | Q15457 | -0.39766 |
| 89731 | P14079 | Q8IZ69 | -0.64826 |
| 89732 | P14079 | Q5VYY2 | -0.9063  |
| 89733 | P14079 | Q9NYG2 | -0.63227 |
| 89734 | P14079 | Q6XPR3 | -0.95759 |
| 89735 | P14079 | Q9Y5F1 | -1.341   |
| 89736 | P14079 | Q15672 | -0.22979 |
| 89737 | P14079 | Q96H35 | -0.79049 |
| 89738 | P14079 | Q96E17 | -1.1461  |
| 89739 | P14079 | Q08462 | -0.84541 |
| 89740 | P14079 | Q8NFK1 | -0.93038 |
| 89741 | P14079 | P01762 | -1       |
| 89742 | P14079 | P51817 | -0.82214 |
| 89743 | P14079 | P42702 | -1.1704  |
| 89744 | P14079 | Q9H4A3 | -0.74892 |
| 89745 | P14079 | P60008 | -0.85204 |
| 89746 | P14079 | P51161 | -0.21426 |
| 89747 | P14079 | Q8N884 | -0.15003 |
| 89748 | P14079 | Q92521 | -0.8988  |
| 89749 | P14079 | Q86YL7 | -0.89239 |
| 89750 | P14079 | Q92692 | -0.22746 |
| 89751 | P14079 | Q12884 | -0.62756 |
| 89752 | P14079 | Q8TBE9 | -0.19954 |
| 89753 | P14079 | O94806 | -0.52082 |
| 89754 | P14079 | Q5VWJ9 | -0.21513 |
| 89755 | P14079 | Q6ZV89 | -0.19199 |
| 89756 | P14079 | Q8N4V1 | -0.69516 |

|       |        |        |           |
|-------|--------|--------|-----------|
| 89757 | P14079 | P16260 | -0.64465  |
| 89758 | P14079 | Q16549 | -1.0873   |
| 89759 | P14079 | P34059 | -0.52101  |
| 89760 | P14079 | Q96PX1 | -0.22737  |
| 89761 | P14079 | Q008S8 | -0.43809  |
| 89762 | P14079 | P01814 | -1        |
| 89763 | P14079 | O15296 | -0.46309  |
| 89764 | P14079 | Q5VTL7 | -0.80633  |
| 89765 | P14079 | P19087 | -0.85052  |
| 89766 | P14079 | A8MYU2 | -1.4317   |
| 89767 | P14079 | Q8WVD5 | -0.22878  |
| 89768 | P14079 | Q96Q27 | -0.60753  |
| 89769 | P14079 | Q6UXD7 | -0.87582  |
| 89770 | P14079 | Q9BXJ4 | -0.55015  |
| 89771 | P14079 | P16499 | -0.48424  |
| 89772 | P14079 | Q9H2Y7 | -0.23179  |
| 89773 | P14079 | Q16778 | -0.90191  |
| 89774 | P14079 | P55064 | -0.58882  |
| 89775 | P14079 | Q96DT5 | -0.39879  |
| 89776 | P14079 | Q9NY28 | -0.65329  |
| 89777 | P14079 | P50851 | -0.85625  |
| 89778 | P14079 | Q9HBI1 | -0.22736  |
| 89779 | P14079 | P55145 | -0.6653   |
| 89780 | P14079 | Q9UF02 | -0.85365  |
| 89781 | P14079 | Q9UH17 | -0.50877  |
| 89782 | P14079 | O75326 | -0.27355  |
| 89783 | P14079 | Q6PIS1 | -0.87103  |
| 89784 | P14079 | Q86UX7 | -0.46964  |
| 89785 | P14079 | Q15303 | -0.24484  |
| 89786 | P14079 | Q9NY37 | -1.0683   |
| 89787 | P14079 | Q8N9B8 | -0.54517  |
| 89788 | P14079 | A6NKX4 | -1.0152   |
| 89789 | P14079 | Q5T8P6 | -0.18192  |
| 89790 | P14079 | Q53R12 | -0.97472  |
| 89791 | P14079 | P09493 | -0.21241  |
| 89792 | P14079 | O75841 | -0.4963   |
| 89793 | P14079 | P11169 | -0.38908  |
| 89794 | P14079 | Q9Y6N7 | -0.70947  |
| 89795 | P14079 | P0C7U3 | -0.94083  |
| 89796 | P14079 | Q9NSB8 | -0.28094  |
| 89797 | P14079 | P82980 | -0.24967  |
| 89798 | P14079 | O95398 | -0.62515  |
| 89799 | P14079 | P32314 | -0.90438  |
| 89800 | P14079 | P02753 | -0.31147  |
| 89801 | P14079 | Q8NFQ5 | -0.97176  |
| 89802 | P14079 | O94759 | -1.1684   |
| 89803 | P14079 | P61266 | -0.71758  |
| 89804 | P14079 | Q5T6R2 | -0.070256 |
| 89805 | P14079 | Q8TE82 | -0.24361  |
| 89806 | P14079 | P01877 | -0.25987  |
| 89807 | P14079 | Q9Y639 | -0.88184  |
| 89808 | P14079 | Q14657 | -0.27625  |
| 89809 | P14079 | O95221 | -1.2314   |
| 89810 | P14079 | A6NCW7 | -0.32525  |
| 89811 | P14079 | P15382 | -1.0177   |
| 89812 | P14079 | Q9UKU0 | -1.2356   |
| 89813 | P14079 | Q6PEY0 | -0.9224   |
| 89814 | P14079 | P16152 | -0.83496  |
| 89815 | P14079 | Q8N0V5 | -0.67018  |
| 89816 | P14079 | Q9Y5E5 | -1.1065   |
| 89817 | P14079 | Q14451 | -0.22741  |
| 89818 | P14079 | P10321 | -1        |
| 89819 | P14079 | Q99574 | -0.73286  |
| 89820 | P14079 | Q96IX9 | -0.1432   |
| 89821 | P14079 | Q9UGB7 | -0.29084  |
| 89822 | P14079 | Q5SY68 | -0.22115  |
| 89823 | P14079 | P08684 | -0.6998   |
| 89824 | P14079 | P54132 | -0.22588  |
| 89825 | P14079 | Q92685 | -0.88584  |
| 89826 | P14079 | Q13519 | -0.91892  |
| 89827 | P14079 | Q8IXI2 | -0.75369  |
| 89828 | P14079 | Q9H0H5 | -0.26834  |
| 89829 | P14079 | P30486 | -0.9799   |
| 89830 | P14079 | Q4V9L6 | -0.80224  |
| 89831 | P14079 | Q13523 | -0.86762  |
| 89832 | P14079 | Q8WTQ7 | -1.5249   |

|       |        |        |           |
|-------|--------|--------|-----------|
| 89833 | P14079 | Q9NUM3 | -0.9697   |
| 89834 | P14079 | Q9Y2I1 | -0.22741  |
| 89835 | P14079 | Q9HD67 | -0.46035  |
| 89836 | P14079 | Q9H992 | -0.53625  |
| 89837 | P14079 | Q6BCY4 | -0.47668  |
| 89838 | P14079 | P0C851 | -0.77815  |
| 89839 | P14079 | Q13615 | -0.12134  |
| 89840 | P14079 | O43670 | -0.18485  |
| 89841 | P14079 | Q9Y5W8 | -0.53292  |
| 89842 | P14079 | P06318 | -1        |
| 89843 | P14079 | P06727 | -0.52858  |
| 89844 | P14079 | O43396 | -0.23205  |
| 89845 | P14079 | Q8N8J0 | -0.17292  |
| 89846 | P14079 | Q6P9G0 | -0.16639  |
| 89847 | P14079 | P21709 | -1.3486   |
| 89848 | P14079 | Q8NEX5 | -0.80633  |
| 89849 | P14079 | P59538 | -1.1233   |
| 89850 | P14079 | Q99952 | -0.41092  |
| 89851 | P14079 | Q9H672 | -0.47402  |
| 89852 | P14079 | P35249 | -0.20953  |
| 89853 | P14079 | Q95057 | -1.4441   |
| 89854 | P14079 | Q96RN1 | -0.77417  |
| 89855 | P14079 | P58743 | -0.88164  |
| 89856 | P14079 | Q8IVF5 | -0.91629  |
| 89857 | P14079 | Q96I13 | -0.38177  |
| 89858 | P14079 | Q7L1T6 | -0.45722  |
| 89859 | P14079 | Q96QK8 | -0.77815  |
| 89860 | P14079 | Q75052 | -0.22004  |
| 89861 | P14079 | Q8TBP6 | -0.74044  |
| 89862 | P14079 | Q8N4E7 | -0.12558  |
| 89863 | P14079 | Q8N539 | -1.0763   |
| 89864 | P14079 | P14091 | -0.67101  |
| 89865 | P14079 | Q96PF2 | -1.0041   |
| 89866 | P14079 | P53611 | -0.062005 |
| 89867 | P14079 | Q86VL8 | -1.0127   |
| 89868 | P14079 | Q13183 | -1.3757   |
| 89869 | P14079 | Q02817 | -0.26839  |
| 89870 | P14079 | Q8N349 | -0.74807  |
| 89871 | P14079 | Q9UN75 | -1.2343   |
| 89872 | P14079 | Q9HBI6 | -1.2968   |
| 89873 | P14079 | Q15125 | -0.92993  |
| 89874 | P14079 | Q6NUK4 | -0.77815  |
| 89875 | P14079 | Q8NH40 | -1.2314   |
| 89876 | P14079 | P30510 | -1.0983   |
| 89877 | P14079 | Q8N6W0 | -0.37634  |
| 89878 | P14079 | P31025 | -1.0768   |
| 89879 | P14079 | Q7L311 | -0.77815  |
| 89880 | P14079 | Q5TG30 | -1.0254   |
| 89881 | P14079 | Q9H4A9 | -0.8969   |
| 89882 | P14079 | Q14627 | -1.1497   |
| 89883 | P14079 | Q9HBD1 | -0.2448   |
| 89884 | P14079 | Q9GIP4 | -0.80868  |
| 89885 | P14079 | Q8N3P4 | -0.21007  |
| 89886 | P14079 | Q15612 | -1.0572   |
| 89887 | P14079 | P24903 | -0.98206  |
| 89888 | P14079 | P0C5Y9 | -0.93244  |
| 89889 | P14079 | Q5VV16 | -0.99971  |
| 89890 | P14079 | Q75712 | -0.88862  |
| 89891 | P14079 | P29622 | -0.85675  |
| 89892 | P14079 | Q8IUH3 | -0.77151  |
| 89893 | P14079 | Q8N6K7 | -0.15394  |
| 89894 | P14079 | P51449 | -0.312    |
| 89895 | P14079 | P21281 | -0.56565  |
| 89896 | P14079 | P01040 | -0.12023  |
| 89897 | P14079 | Q9Y4E8 | -0.43606  |
| 89898 | P14079 | P01112 | -0.22962  |
| 89899 | P14079 | A6NDQ2 | -0.36051  |
| 89900 | P14079 | Q9NZP5 | -1.2314   |
| 89901 | P14079 | Q96RI1 | -0.22876  |
| 89902 | P14079 | Q8IYK8 | -1.4441   |
| 89903 | P14079 | P21108 | -0.91883  |
| 89904 | P14079 | Q8TED1 | -1.2444   |
| 89905 | P14079 | Q16581 | -1.0199   |
| 89906 | P14079 | Q14314 | -1.1369   |
| 89907 | P14079 | O75365 | -0.90507  |
| 89908 | P14079 | Q16696 | -0.97326  |

|       |        |        |           |
|-------|--------|--------|-----------|
| 89909 | P14079 | Q9BRK3 | -0.77815  |
| 89910 | P14079 | Q8TBM7 | -0.77815  |
| 89911 | P14079 | Q86T96 | -0.87505  |
| 89912 | P14079 | P56975 | -1.4894   |
| 89913 | P14079 | Q96MT7 | -0.22737  |
| 89914 | P14079 | Q2TV78 | -1.2804   |
| 89915 | P14079 | Q93097 | -1.0618   |
| 89916 | P14079 | O76083 | -0.22447  |
| 89917 | P14079 | Q93098 | -0.99557  |
| 89918 | P14079 | Q96KS9 | -0.099074 |
| 89919 | P14079 | Q8IX04 | -0.6775   |
| 89920 | P14079 | Q7Z419 | -0.34192  |
| 89921 | P14079 | Q6PDA7 | -0.80633  |
| 89922 | P14079 | Q9P2W1 | -0.108    |
| 89923 | P14079 | Q6UXH0 | -0.14864  |
| 89924 | P14079 | Q9GZK3 | -1.2314   |
| 89925 | P14079 | Q9NY99 | -0.22129  |
| 89926 | P14079 | A6NNN8 | -1.0142   |
| 89927 | P14079 | Q92974 | -0.22743  |
| 89928 | P14079 | Q15506 | -0.27092  |
| 89929 | P14079 | Q92523 | -0.86616  |
| 89930 | P14079 | Q7Z5M8 | -0.18034  |
| 89931 | P14079 | Q8NGY7 | -1.2314   |
| 89932 | P14079 | P19875 | -0.93558  |
| 89933 | P14079 | P55008 | -0.22724  |
| 89934 | P14079 | Q9HCS4 | -0.17987  |
| 89935 | P14079 | A8MZ26 | -0.22519  |
| 89936 | P14079 | P05090 | -0.58345  |
| 89937 | P14079 | Q6UWM9 | -0.88493  |
| 89938 | P14079 | Q9HCJ1 | -1.0384   |
| 89939 | P14079 | Q8NHS4 | -0.064056 |
| 89940 | P14079 | Q9Y4X3 | -0.89946  |
| 89941 | P14079 | Q9UKI8 | -1.0846   |
| 89942 | P14079 | Q7Z3Z3 | -0.51923  |
| 89943 | P14079 | O43683 | -0.22741  |
| 89944 | P14079 | P04434 | -1        |
| 89945 | P14079 | Q9NYC9 | -0.40566  |
| 89946 | P14079 | Q5SXH7 | -0.20291  |
| 89947 | P14079 | Q96MM6 | -0.78428  |
| 89948 | P14079 | Q7Z7H5 | -0.84244  |
| 89949 | P14079 | Q9UJA9 | -1.7076   |
| 89950 | P14079 | Q9NX02 | -0.22715  |
| 89951 | P14079 | Q9Y225 | -0.52588  |
| 89952 | P14079 | Q8NBB2 | -0.052205 |
| 89953 | P14079 | Q7L1S5 | -1.0628   |
| 89954 | P14079 | Q9Y600 | -0.42876  |
| 89955 | P14079 | Q92879 | -0.23847  |
| 89956 | P14079 | P56817 | -0.99775  |
| 89957 | P14079 | P04808 | -0.92443  |
| 89958 | P14079 | P49281 | -0.25215  |
| 89959 | P14079 | Q8N136 | -0.30437  |
| 89960 | P14079 | Q9H0N0 | -0.27899  |
| 89961 | P14079 | P20337 | -1.0064   |
| 89962 | P14079 | O15551 | -0.76393  |
| 89963 | P14079 | Q01668 | -0.73429  |
| 89964 | P14079 | P36382 | -1.0142   |
| 89965 | P14079 | Q8NGQ5 | -1.2314   |
| 89966 | P14079 | P58335 | -1.0437   |
| 89967 | P14079 | P23416 | -0.93088  |
| 89968 | P14079 | Q14324 | -0.53907  |
| 89969 | P14079 | Q96RQ3 | -0.91467  |
| 89970 | P14079 | Q16270 | -0.51189  |
| 89971 | P14079 | O14545 | -0.33298  |
| 89972 | P14079 | Q9UKQ2 | -1.9543   |
| 89973 | P14079 | P55201 | -0.21955  |
| 89974 | P14079 | A6NMZ2 | -0.37105  |
| 89975 | P14079 | P01600 | -1        |
| 89976 | P14079 | P23443 | -0.12947  |
| 89977 | P14079 | P52848 | -0.45699  |
| 89978 | P14079 | A2PYH4 | -0.95316  |
| 89979 | P14079 | Q96E93 | -1.0083   |
| 89980 | P14079 | P35270 | -0.33377  |
| 89981 | P14079 | P36222 | -0.59481  |
| 89982 | P14079 | O00294 | -0.25836  |
| 89983 | P14079 | Q9BQL6 | -0.33046  |
| 89984 | P14079 | P61026 | -0.65142  |

|       |        |        |            |
|-------|--------|--------|------------|
| 89985 | P14079 | Q8NI60 | -1.0628    |
| 89986 | P14079 | Q8N8Q1 | -0.76962   |
| 89987 | P14079 | P27708 | -0.56195   |
| 89988 | P14079 | Q5GAN6 | -0.78321   |
| 89989 | P14079 | Q96PY5 | -0.22651   |
| 89990 | P14079 | P12532 | -1.1367    |
| 89991 | P14079 | O00562 | -0.22468   |
| 89992 | P14079 | P62158 | -0.22719   |
| 89993 | P14079 | Q9Y653 | -1.7441    |
| 89994 | P14079 | Q9P289 | -0.44842   |
| 89995 | P14079 | Q6V1X1 | -0.19276   |
| 89996 | P14079 | P23975 | -0.64443   |
| 89997 | P14079 | Q86UF2 | -0.82495   |
| 89998 | P14079 | Q5VZR4 | -0.87103   |
| 89999 | P14079 | P41968 | -0.94723   |
| 90000 | P14079 | A2RUU4 | -0.86147   |
| 90001 | P14079 | P34910 | -0.80291   |
| 90002 | P14079 | O95967 | -0.54407   |
| 90003 | P14079 | Q07000 | -1         |
| 90004 | P14079 | O95210 | -0.42616   |
| 90005 | P14079 | Q12979 | -0.74018   |
| 90006 | P14079 | Q7RTX7 | -1.2108    |
| 90007 | P14079 | Q16651 | -1.2704    |
| 90008 | P14079 | Q5SSQ6 | -0.0048046 |
| 90009 | P14079 | O75449 | -0.22805   |
| 90010 | P14079 | Q96M96 | -0.59596   |
| 90011 | P14079 | Q9Y623 | -0.29912   |
| 90012 | P14079 | Q4G0M1 | -0.80633   |
| 90013 | P14079 | Q12974 | -0.77962   |
| 90014 | P14079 | P0C626 | -1.2503    |
| 90015 | P14079 | P15311 | -0.25735   |
| 90016 | P14079 | Q7Z736 | -0.22293   |
| 90017 | P14079 | P08243 | -0.43897   |
| 90018 | P14079 | Q9NVA2 | -0.22706   |
| 90019 | P14079 | Q53GS9 | -0.23758   |
| 90020 | P14079 | P06756 | -0.35474   |
| 90021 | P14079 | O43194 | -1.4799    |
| 90022 | P14079 | Q6XE38 | -0.80633   |
| 90023 | P14079 | Q9BX97 | -0.64025   |
| 90024 | P14079 | Q6ZN80 | -0.29501   |
| 90025 | P14079 | Q9BXY5 | -0.22543   |
| 90026 | P14079 | P50053 | -0.60561   |
| 90027 | P14079 | P11465 | -0.7894    |
| 90028 | P14079 | Q8ND71 | -0.19744   |
| 90029 | P14079 | Q8NBU5 | -0.7899    |
| 90030 | P14079 | Q9UFH2 | -0.23186   |
| 90031 | P14079 | P04629 | -0.73724   |
| 90032 | P14079 | O43557 | -0.67829   |
| 90033 | P14079 | O95294 | -0.22742   |
| 90034 | P14079 | P28222 | -0.86397   |
| 90035 | P14079 | O15264 | -0.37315   |
| 90036 | P14079 | P35610 | -0.90702   |
| 90037 | P14079 | Q9Y3A6 | -0.3877    |
| 90038 | P14079 | Q8NFY4 | -0.8786    |
| 90039 | P14079 | Q02641 | -0.60576   |
| 90040 | P14079 | Q9Y5G7 | -1.2343    |
| 90041 | P14079 | Q8N5C6 | -0.21169   |
| 90042 | P14079 | Q9UI38 | -0.66701   |
| 90043 | P14079 | Q8TB36 | -0.46154   |
| 90044 | P14079 | O15033 | -0.80725   |
| 90045 | P14079 | P37058 | -0.50039   |
| 90046 | P14079 | Q9NS40 | -1.235     |
| 90047 | P14079 | P49757 | -0.29651   |
| 90048 | P14079 | Q9UNE2 | -0.20219   |
| 90049 | P14079 | O60602 | -0.92628   |
| 90050 | P14079 | Q96RW7 | -1.0205    |
| 90051 | P14079 | Q9H898 | -0.13812   |
| 90052 | P14079 | Q7RTY1 | -1.0715    |
| 90053 | P14079 | O60662 | -0.21015   |
| 90054 | P14079 | Q8WWH4 | -0.57678   |
| 90055 | P14079 | Q15777 | -0.14608   |
| 90056 | P14079 | Q5NE16 | -0.24673   |
| 90057 | P14079 | Q96RJ3 | -0.66988   |
| 90058 | P14079 | Q9Y644 | -1.2812    |
| 90059 | P14079 | Q8NBF2 | -0.21044   |
| 90060 | P14079 | Q6ZUB1 | -0.77815   |

|       |        |        |           |
|-------|--------|--------|-----------|
| 90061 | P14079 | Q6UXI7 | -0.93075  |
| 90062 | P14079 | E7EU14 | -0.24359  |
| 90063 | P14079 | Q8N7X1 | -0.79049  |
| 90064 | P14079 | P53367 | -0.1036   |
| 90065 | P14079 | Q96QV6 | -0.92425  |
| 90066 | P14079 | Q8N5Z0 | -0.24845  |
| 90067 | P14079 | Q01959 | -0.40496  |
| 90068 | P14079 | Q8IWT3 | -0.22628  |
| 90069 | P14079 | Q6GPI1 | -1.5382   |
| 90070 | P14079 | Q9NR16 | -1.5574   |
| 90071 | P14079 | Q15738 | -1.1782   |
| 90072 | P14079 | Q9NRE2 | -0.22801  |
| 90073 | P14079 | Q9TQE0 | -0.62795  |
| 90074 | P14079 | Q6UXZ4 | -1.0313   |
| 90075 | P14079 | Q13126 | -0.081132 |
| 90076 | P14079 | P30508 | -1.0983   |
| 90077 | P14079 | P13236 | -0.94618  |
| 90078 | P14079 | P01816 | -1        |
| 90079 | P14079 | Q95870 | -0.79208  |
| 90080 | P14079 | Q9BQT9 | -0.97367  |
| 90081 | P14079 | Q687X5 | -1.5111   |
| 90082 | P14079 | P60891 | -0.69394  |
| 90083 | P14079 | Q2TAL5 | -0.228    |
| 90084 | P14079 | P0CG04 | -1        |
| 90085 | P14079 | P63122 | -0.65475  |
| 90086 | P14079 | A2RU14 | -0.77815  |
| 90087 | P14079 | Q9P0L2 | -1.1536   |
| 90088 | P14079 | Q96IK5 | -0.20589  |
| 90089 | P14079 | P11215 | -0.32598  |
| 90090 | P14079 | P48547 | -1.0843   |
| 90091 | P14079 | P14209 | -1.1909   |
| 90092 | P14079 | O75716 | -0.64776  |
| 90093 | P14079 | Q11201 | -0.93439  |
| 90094 | P14079 | P01579 | -0.22509  |
| 90095 | P14079 | Q5QJ38 | -0.1887   |
| 90096 | P14079 | P30498 | -1        |
| 90097 | P14079 | P32298 | -1.1939   |
| 90098 | P14079 | Q9NXD2 | -0.33262  |
| 90099 | P14079 | Q8N816 | -0.77815  |
| 90100 | P14079 | Q99523 | -0.40014  |
| 90101 | P14079 | Q6P1A2 | -0.94738  |
| 90102 | P14079 | P02671 | -0.62702  |
| 90103 | P14079 | Q6XR72 | -1.1718   |
| 90104 | P14079 | Q8IWX8 | -0.091567 |
| 90105 | P14079 | P01825 | -1        |
| 90106 | P14079 | P19793 | -0.23416  |
| 90107 | P14079 | P78334 | -0.95655  |
| 90108 | P14079 | Q6S5H5 | -0.22764  |
| 90109 | P14079 | Q5TF39 | -1.1811   |
| 90110 | P14079 | Q9HAU8 | -0.77372  |
| 90111 | P14079 | P02461 | -0.47188  |
| 90112 | P14079 | Q43908 | -0.76023  |
| 90113 | P14079 | P58012 | -0.99971  |
| 90114 | P14079 | Q8WUA2 | -0.46336  |
| 90115 | P14079 | Q9BXU1 | -1.4433   |
| 90116 | P14079 | Q92520 | -1.0147   |
| 90117 | P14079 | P49685 | -1.4456   |
| 90118 | P14079 | Q9BY67 | -0.60042  |
| 90119 | P14079 | Q96LZ3 | -0.22772  |
| 90120 | P14079 | Q8WZ60 | -0.20394  |
| 90121 | P14079 | P33763 | -0.22719  |
| 90122 | P14079 | Q86XP3 | -0.84365  |
| 90123 | P14079 | Q9NQS5 | -1.3514   |
| 90124 | P14079 | Q94876 | -0.77815  |
| 90125 | P14079 | A6NM11 | -0.77815  |
| 90126 | P14079 | Q13410 | -1.5939   |
| 90127 | P14079 | Q9H6D5 | -0.77815  |
| 90128 | P14079 | Q9GZW8 | -0.77815  |
| 90129 | P14079 | Q9UBJ2 | -0.76364  |
| 90130 | P14079 | P43631 | -1.0321   |
| 90131 | P14079 | A8MXJ8 | -0.11885  |
| 90132 | P14079 | Q14002 | -0.96352  |
| 90133 | P14079 | P62995 | -0.20605  |
| 90134 | P14079 | Q99536 | -1.1962   |
| 90135 | P14079 | Q95976 | -1.1086   |
| 90136 | P14079 | P22749 | -0.84053  |

|       |        |        |          |
|-------|--------|--------|----------|
| 90137 | P14079 | P49407 | -0.30758 |
| 90138 | P14079 | P08922 | -1.6418  |
| 90139 | P14079 | O15204 | -1.284   |
| 90140 | P14079 | P35348 | -0.63562 |
| 90141 | P14079 | Q9BPY8 | -0.21709 |
| 90142 | P14079 | P55316 | -0.99971 |
| 90143 | P14079 | P41226 | -0.7873  |
| 90144 | P14079 | Q96C24 | -0.25098 |
| 90145 | P14079 | Q9UBP0 | -0.22823 |
| 90146 | P14079 | Q9H2X3 | -0.93673 |
| 90147 | P14079 | Q9NYQ7 | -1.1808  |
| 90148 | P14079 | Q14147 | -1.0641  |
| 90149 | P14079 | Q6ZNL0 | -0.77573 |
| 90150 | P14079 | Q8N446 | -0.35022 |
| 90151 | P14079 | P38606 | -0.7547  |
| 90152 | P14079 | Q6ZSZ5 | -0.3188  |
| 90153 | P14079 | Q5SRN2 | -0.77815 |
| 90154 | P14079 | P15121 | -0.22339 |
| 90155 | P14079 | Q6ZWK4 | -0.77815 |
| 90156 | P14079 | Q7LDG7 | -0.68863 |
| 90157 | P14079 | Q96D21 | -1.1303  |
| 90158 | P14079 | Q9BZM6 | -0.48697 |
| 90159 | P14079 | A8MTJ6 | -0.93101 |
| 90160 | P14079 | Q9HAC8 | -0.19241 |
| 90161 | P14079 | Q8IVF6 | -0.22724 |
| 90162 | P14079 | Q9H334 | -0.99971 |
| 90163 | P14079 | P0CG41 | -0.77815 |
| 90164 | P14079 | Q58G82 | -0.16236 |
| 90165 | P14079 | P05141 | -0.22665 |
| 90166 | P14079 | Q13007 | -0.71204 |
| 90167 | P14079 | P05164 | -0.21878 |
| 90168 | P14079 | Q8N4Z0 | -1.2793  |
| 90169 | P14079 | P56159 | -0.44274 |
| 90170 | P14079 | Q8N6P7 | -0.82547 |
| 90171 | P14079 | Q8N6L0 | -0.81244 |
| 90172 | P14079 | Q14943 | -1.152   |
| 90173 | P14079 | Q14032 | -0.39686 |
| 90174 | P14079 | Q9NQB0 | -0.21312 |
| 90175 | P14079 | O75056 | -0.99979 |
| 90176 | P14079 | Q9Y6I7 | -0.22865 |
| 90177 | P14079 | Q92968 | -0.22738 |
| 90178 | P14079 | P80748 | -1       |
| 90179 | P14079 | Q8WYQ4 | -0.14881 |
| 90180 | P14079 | O43237 | -0.17322 |
| 90181 | P14079 | Q9Y450 | -0.80488 |
| 90182 | P14079 | Q6NUS6 | -0.50607 |
| 90183 | P14079 | P17538 | -1.5382  |
| 90184 | P14079 | Q9H1M0 | -0.14034 |
| 90185 | P14079 | P54852 | -0.79673 |
| 90186 | P14079 | Q9UKN1 | -0.98987 |
| 90187 | P14079 | Q6VB84 | -0.99971 |
| 90188 | P14079 | Q9H209 | -1.2314  |
| 90189 | P14079 | P47870 | -0.8455  |
| 90190 | P14079 | O00398 | -1.2581  |
| 90191 | P14079 | P01036 | -0.94572 |
| 90192 | P14079 | P07148 | -0.20849 |
| 90193 | P14079 | Q53H96 | -0.97176 |
| 90194 | P14079 | Q8TEU7 | -0.78649 |
| 90195 | P14079 | Q9H867 | -0.35308 |
| 90196 | P14079 | Q9UH65 | -0.44235 |
| 90197 | P14079 | Q13103 | -0.73996 |
| 90198 | P14079 | Q96NI6 | -0.77815 |
| 90199 | P14079 | P13987 | -0.50082 |
| 90200 | P14079 | Q9HBG6 | -0.22739 |
| 90201 | P14079 | O94875 | -0.22679 |
| 90202 | P14079 | Q8NGI9 | -1.2314  |
| 90203 | P14079 | Q99884 | -1.1107  |
| 90204 | P14079 | P25929 | -0.97631 |
| 90205 | P14079 | Q96IJ6 | -0.78271 |
| 90206 | P14079 | O95168 | -0.57668 |
| 90207 | P14079 | P12111 | -1.0588  |
| 90208 | P14079 | A6NMK7 | -0.20631 |
| 90209 | P14079 | P24844 | -0.22602 |
| 90210 | P14079 | P17658 | -1.0843  |
| 90211 | P14079 | O75828 | -0.40523 |
| 90212 | P14079 | P56915 | -0.13906 |



|       |        |        |           |
|-------|--------|--------|-----------|
| 90213 | P14079 | P04436 | -0.42984  |
| 90214 | P14079 | Q8NH95 | -1.2314   |
| 90215 | P14079 | O43739 | -0.30803  |
| 90216 | P14079 | Q7Z5J8 | -0.77815  |
| 90217 | P14079 | O95025 | -1.2091   |
| 90218 | P14079 | A1A5C7 | -1.0039   |
| 90219 | P14079 | P08908 | -1.3064   |
| 90220 | P14079 | Q9Y5Y7 | -1.0183   |
| 90221 | P14079 | Q8TCB7 | -0.21342  |
| 90222 | P14079 | Q8NBQ5 | -1.2838   |
| 90223 | P14079 | Q14156 | -0.57947  |
| 90224 | P14079 | Q9UKU7 | -0.24594  |
| 90225 | P14079 | Q8NG95 | -1.2314   |
| 90226 | P14079 | P53007 | -0.42446  |
| 90227 | P14079 | Q13003 | -0.97529  |
| 90228 | P14079 | A6NDE4 | -0.22533  |
| 90229 | P14079 | Q15311 | -0.38591  |
| 90230 | P14079 | Q5W0N0 | -0.77815  |
| 90231 | P14079 | Q9Y233 | -0.64914  |
| 90232 | P14079 | Q96JD6 | -0.32592  |
| 90233 | P14079 | O43272 | -0.29603  |
| 90234 | P14079 | P30531 | -0.70207  |
| 90235 | P14079 | Q8TAQ9 | -0.76148  |
| 90236 | P14079 | Q14432 | -0.59369  |
| 90237 | P14079 | P0CV99 | -0.6149   |
| 90238 | P14079 | Q8N9I9 | -0.32568  |
| 90239 | P14079 | Q9Y6Q9 | -0.33854  |
| 90240 | P14079 | Q6P1M0 | -1.3391   |
| 90241 | P14079 | Q9BPU6 | -0.20215  |
| 90242 | P14079 | P51787 | -1.0008   |
| 90243 | P14079 | Q8N8Z6 | -1.0127   |
| 90244 | P14079 | A0PJX4 | -1.2312   |
| 90245 | P14079 | P24043 | -0.87489  |
| 90246 | P14079 | O00159 | -0.16629  |
| 90247 | P14079 | Q86UN3 | -0.48067  |
| 90248 | P14079 | Q9H2A7 | -1.3314   |
| 90249 | P14079 | P30556 | -0.54266  |
| 90250 | P14079 | Q96MS3 | -0.77183  |
| 90251 | P14079 | Q3T906 | -0.62285  |
| 90252 | P14079 | P12829 | -0.27895  |
| 90253 | P14079 | O60609 | -0.3565   |
| 90254 | P14079 | Q14697 | -0.16722  |
| 90255 | P14079 | Q8IZT8 | -0.12545  |
| 90256 | P14079 | Q96QE4 | -0.58343  |
| 90257 | P14079 | Q9Y2K2 | -0.80674  |
| 90258 | P14079 | Q9UBS0 | -0.70061  |
| 90259 | P14079 | P30837 | -0.95306  |
| 90260 | P14079 | P02647 | -0.35492  |
| 90261 | P14079 | Q8TB96 | -1.4172   |
| 90262 | P14079 | Q15582 | -1.388    |
| 90263 | P14079 | Q9P0W0 | -0.44527  |
| 90264 | P14079 | A6NDL8 | -1.2314   |
| 90265 | P14079 | Q8TF62 | -1.17     |
| 90266 | P14079 | Q13740 | -1.2657   |
| 90267 | P14079 | P0DJJ0 | -0.192    |
| 90268 | P14079 | P13385 | -0.22765  |
| 90269 | P14079 | Q6ZV29 | -0.51569  |
| 90270 | P14079 | Q9HBU1 | -0.22739  |
| 90271 | P14079 | Q2WGN9 | -0.22726  |
| 90272 | P14079 | O43155 | -1.2776   |
| 90273 | P14079 | Q5TCH4 | -0.81938  |
| 90274 | P14079 | Q96LB9 | -0.76853  |
| 90275 | P14079 | Q9BUF5 | -0.4429   |
| 90276 | P14079 | A8MT33 | -0.22371  |
| 90277 | P14079 | Q96AM1 | -1.3154   |
| 90278 | P14079 | Q9UQ03 | -0.22742  |
| 90279 | P14079 | Q99811 | -0.19831  |
| 90280 | P14079 | P09016 | -0.12342  |
| 90281 | P14079 | P06313 | -1        |
| 90282 | P14079 | Q8IXZ3 | -0.098051 |
| 90283 | P14079 | Q5SWX8 | -1.0699   |
| 90284 | P14079 | Q8IYT2 | -0.77563  |
| 90285 | P14079 | Q8NGI7 | -1.2314   |
| 90286 | P14079 | A8K2U0 | -0.89298  |
| 90287 | P14079 | O15119 | -0.99949  |
| 90288 | P14079 | Q969F8 | -0.73808  |

|       |        |        |            |
|-------|--------|--------|------------|
| 90289 | P14079 | Q9NTN3 | -0.809     |
| 90290 | P14079 | Q8N3G9 | -0.5251    |
| 90291 | P14079 | Q14117 | -0.18545   |
| 90292 | P14079 | Q9H6L4 | -0.23627   |
| 90293 | P14079 | Q9H1P6 | -0.0085582 |
| 90294 | P14079 | Q13203 | -0.57419   |
| 90295 | P14079 | Q9P0K1 | -0.72411   |
| 90296 | P14079 | Q96S21 | -1.2182    |
| 90297 | P14079 | Q8NH02 | -1.2314    |
| 90298 | P14079 | O60234 | -0.37274   |
| 90299 | P14079 | O75631 | -0.74409   |
| 90300 | P14079 | Q96B02 | -0.61327   |
| 90301 | P14079 | P09630 | -0.22292   |
| 90302 | P14079 | Q09472 | -0.048104  |
| 90303 | P14079 | Q76NI1 | -0.81798   |
| 90304 | P14079 | Q9H015 | -0.66434   |
| 90305 | P14079 | P01714 | -1         |
| 90306 | P14079 | Q8IXQ8 | -0.2248    |
| 90307 | P14079 | Q8IY26 | -0.94438   |
| 90308 | P14079 | Q96J01 | -0.22573   |
| 90309 | P14079 | Q92536 | -1.2752    |
| 90310 | P14079 | Q9C0A6 | -0.21613   |
| 90311 | P14079 | Q9BRR9 | -1.0708    |
| 90312 | P14079 | Q96AP4 | -0.36051   |
| 90313 | P14079 | P02746 | -0.39337   |
| 90314 | P14079 | Q6UW56 | -0.22374   |
| 90315 | P14079 | Q6UX39 | -0.9937    |
| 90316 | P14079 | P23219 | -0.4093    |
| 90317 | P14079 | P98066 | -0.54807   |
| 90318 | P14079 | P61964 | -0.57935   |
| 90319 | P14079 | O15353 | -0.82317   |
| 90320 | P14079 | Q86YJ5 | -0.97866   |
| 90321 | P14079 | Q9BYP7 | -0.59614   |
| 90322 | P14079 | P49760 | -0.83172   |
| 90323 | P14079 | Q7Z304 | -0.93407   |
| 90324 | P14079 | O43248 | -0.18793   |
| 90325 | P14079 | Q9UMN6 | -0.22589   |
| 90326 | P14079 | O15431 | -1.3135    |
| 90327 | P14079 | P78369 | -0.75501   |
| 90328 | P14079 | Q06418 | -0.94458   |
| 90329 | P14079 | P0C623 | -1.2314    |
| 90330 | P14079 | P04181 | -0.17047   |
| 90331 | P14079 | P98175 | -0.57513   |
| 90332 | P14079 | Q5M8T2 | -0.73619   |
| 90333 | P14079 | Q9BRK0 | -0.77815   |
| 90334 | P14079 | Q9NQ79 | -0.98053   |
| 90335 | P14079 | Q7Z469 | -0.66417   |
| 90336 | P14079 | P51452 | -0.32549   |
| 90337 | P14079 | Q9NXF8 | -0.7889    |
| 90338 | P14079 | Q8IZF6 | -1.3662    |
| 90339 | P14079 | Q9BXA5 | -1.2917    |
| 90340 | P14079 | O43488 | -0.22192   |
| 90341 | P14079 | Q9ULH4 | -0.7007    |
| 90342 | P14079 | Q29983 | -0.63047   |
| 90343 | P14079 | P23582 | -0.56407   |
| 90344 | P14079 | Q96A19 | -0.20071   |
| 90345 | P14079 | O15240 | -0.82505   |
| 90346 | P14079 | Q96NN9 | -0.21559   |
| 90347 | P14079 | Q8TAS1 | -0.57389   |
| 90348 | P14079 | Q9HCJ3 | -0.35432   |
| 90349 | P14079 | Q14028 | -1.2666    |
| 90350 | P14079 | O75762 | -0.94867   |
| 90351 | P14079 | P16662 | -0.92872   |
| 90352 | P14079 | Q96R45 | -1.2314    |
| 90353 | P14079 | O14775 | -0.31881   |
| 90354 | P14079 | Q9NQC3 | -0.1861    |
| 90355 | P14079 | P51884 | -0.72361   |
| 90356 | P14079 | Q86T82 | -0.36689   |
| 90357 | P14079 | Q3YEC7 | -0.2286    |
| 90358 | P14079 | P16410 | -0.28823   |
| 90359 | P14079 | O14686 | -0.54917   |
| 90360 | P14079 | P13637 | -0.74306   |
| 90361 | P14079 | Q9H4D0 | -0.97367   |
| 90362 | P14079 | Q92502 | -0.87975   |
| 90363 | P14079 | Q9UGN4 | -1.195     |
| 90364 | P14079 | P52952 | -0.56814   |

|       |        |        |           |
|-------|--------|--------|-----------|
| 90365 | P14079 | O75526 | -0.23862  |
| 90366 | P14079 | O95936 | -0.99949  |
| 90367 | P14079 | Q70EL4 | -0.77524  |
| 90368 | P14079 | Q96M86 | -0.14721  |
| 90369 | P14079 | P59665 | -0.9431   |
| 90370 | P14079 | Q96CH1 | -1.3154   |
| 90371 | P14079 | Q05066 | -0.51182  |
| 90372 | P14079 | A9Z1Z3 | -0.77815  |
| 90373 | P14079 | P29275 | -0.84907  |
| 90374 | P14079 | Q9H4B7 | -0.40549  |
| 90375 | P14079 | Q9GIY3 | -0.72952  |
| 90376 | P14079 | Q7Z4N2 | -1.406    |
| 90377 | P14079 | P01700 | -1        |
| 90378 | P14079 | Q5TH69 | -0.81506  |
| 90379 | P14079 | Q9UHB6 | -0.22209  |
| 90380 | P14079 | O43930 | -1.4433   |
| 90381 | P14079 | C9JQL5 | -0.79151  |
| 90382 | P14079 | Q15904 | -0.98308  |
| 90383 | P14079 | Q9BQP9 | -0.97176  |
| 90384 | P14079 | P50579 | -0.46629  |
| 90385 | P14079 | Q9H560 | -0.22739  |
| 90386 | P14079 | Q8WYK1 | -1.2378   |
| 90387 | P14079 | A6NHA9 | -1.2314   |
| 90388 | P14079 | Q16322 | -1.0579   |
| 90389 | P14079 | P51957 | -0.7301   |
| 90390 | P14079 | O76050 | -0.31219  |
| 90391 | P14079 | Q7L985 | -0.77815  |
| 90392 | P14079 | Q86XX4 | -1.0627   |
| 90393 | P14079 | P05452 | -0.86743  |
| 90394 | P14079 | Q8N7C3 | -0.46249  |
| 90395 | P14079 | Q9UEU0 | -0.36757  |
| 90396 | P14079 | P47736 | -0.16388  |
| 90397 | P14079 | O43182 | -0.65104  |
| 90398 | P14079 | Q8TEY5 | -0.2298   |
| 90399 | P14079 | Q7Z7G0 | -0.95984  |
| 90400 | P14079 | O15228 | -0.52941  |
| 90401 | P14079 | P49913 | -0.61985  |
| 90402 | P14079 | Q92561 | -0.042413 |
| 90403 | P14079 | Q8NBN7 | -1.1307   |
| 90404 | P14079 | P51636 | -0.22338  |
| 90405 | P14079 | Q8NGF0 | -1.2314   |
| 90406 | P14079 | Q92613 | -0.24252  |
| 90407 | P14079 | O95340 | -1.0249   |
| 90408 | P14079 | Q9H361 | -0.57888  |
| 90409 | P14079 | E7ERA6 | -0.78242  |
| 90410 | P14079 | Q15404 | -0.27529  |
| 90411 | P14079 | P00846 | -0.55149  |
| 90412 | P14079 | Q8N9L1 | -0.22578  |
| 90413 | P14079 | Q9NTJ3 | -0.21839  |
| 90414 | P14079 | Q96P15 | -0.039198 |
| 90415 | P14079 | Q8N1T3 | -0.56256  |
| 90416 | P14079 | Q9UJT0 | -0.1696   |
| 90417 | P14079 | P30499 | -1.0983   |
| 90418 | P14079 | O75911 | -1.6179   |
| 90419 | P14079 | Q6PL24 | -0.6886   |
| 90420 | P14079 | Q9H270 | -0.22639  |
| 90421 | P14079 | O94760 | -0.11673  |
| 90422 | P14079 | Q50LG9 | -0.77815  |
| 90423 | P14079 | Q9P2W3 | -0.44973  |
| 90424 | P14079 | Q8N697 | -0.76178  |
| 90425 | P14079 | Q8N131 | -0.80457  |
| 90426 | P14079 | Q6ZS30 | -0.22741  |
| 90427 | P14079 | O75592 | -0.22513  |
| 90428 | P14079 | O60575 | -0.82805  |
| 90429 | P14079 | Q9BVG8 | -0.24554  |
| 90430 | P14079 | P29322 | -1.5397   |
| 90431 | P14079 | Q00325 | -0.85059  |
| 90432 | P14079 | P63129 | -0.65475  |
| 90433 | P14079 | P55000 | -1.0175   |
| 90434 | P14079 | P05013 | -0.71877  |
| 90435 | P14079 | Q6UWF6 | -0.80633  |
| 90436 | P14079 | Q14524 | -0.36311  |
| 90437 | P14079 | P51858 | -0.20518  |
| 90438 | P14079 | Q8N350 | -0.77815  |
| 90439 | P14079 | Q9BU20 | -0.91924  |
| 90440 | P14079 | Q9Y2C2 | -0.63392  |

|       |        |        |           |
|-------|--------|--------|-----------|
| 90441 | P14079 | Q6UW10 | -0.80633  |
| 90442 | P14079 | Q9P2J3 | -0.20151  |
| 90443 | P14079 | Q6GQQ9 | -0.078986 |
| 90444 | P14079 | Q8NGC8 | -1.2314   |
| 90445 | P14079 | P51687 | -0.36326  |
| 90446 | P14079 | Q11130 | -0.68178  |
| 90447 | P14079 | Q96JK2 | -0.22741  |
| 90448 | P14079 | Q9NX76 | -0.8507   |
| 90449 | P14079 | Q96T52 | -0.68639  |
| 90450 | P14079 | Q8IYB5 | -0.85762  |
| 90451 | P14079 | Q8NGP2 | -1.2314   |
| 90452 | P14079 | Q969F2 | -0.11796  |
| 90453 | P14079 | Q14213 | -0.96608  |
| 90454 | P14079 | Q96GR2 | -0.89961  |
| 90455 | P14079 | A6NHI5 | -0.77815  |
| 90456 | P14079 | A6NNB3 | -1.2578   |
| 90457 | P14079 | Q504Y0 | -0.9697   |
| 90458 | P14079 | Q6Q8B3 | -0.77815  |
| 90459 | P14079 | Q9NRR2 | -1.5321   |
| 90460 | P14079 | Q6GTX8 | -0.29629  |
| 90461 | P14079 | Q12948 | -0.46295  |
| 90462 | P14079 | Q2MV58 | -0.69591  |
| 90463 | P14079 | Q53RT3 | -1.213    |
| 90464 | P14079 | Q92835 | -0.22741  |
| 90465 | P14079 | Q2NKQ1 | -0.77594  |
| 90466 | P14079 | Q969D9 | -0.8267   |
| 90467 | P14079 | Q68BL7 | -0.82125  |
| 90468 | P14079 | Q6W5P4 | -1.0963   |
| 90469 | P14079 | P00505 | -0.31876  |
| 90470 | P14079 | O43763 | -0.23802  |
| 90471 | P14079 | O14936 | -0.24191  |
| 90472 | P14079 | Q96MN2 | -0.78428  |
| 90473 | P14079 | Q13286 | -0.11765  |
| 90474 | P14079 | Q9NZR4 | -0.21085  |
| 90475 | P14079 | Q16134 | -0.49979  |
| 90476 | P14079 | Q7L523 | -0.22727  |
| 90477 | P14079 | Q9BRV3 | -0.45329  |
| 90478 | P14079 | Q8NHM4 | -1.4097   |
| 90479 | P14079 | O60760 | -0.22511  |
| 90480 | P14079 | Q6UW01 | -0.75073  |
| 90481 | P14079 | Q6V0L0 | -1.0919   |
| 90482 | P14079 | Q8N2Q7 | -0.3517   |
| 90483 | P14079 | Q8NH72 | -1.2314   |
| 90484 | P14079 | P04035 | -0.74762  |
| 90485 | P14079 | Q99678 | -1.5146   |
| 90486 | P14079 | Q00169 | -0.51709  |
| 90487 | P14079 | Q96FE5 | -0.73657  |
| 90488 | P14079 | Q13478 | -1.1524   |
| 90489 | P14079 | P20800 | -0.57488  |
| 90490 | P14079 | O75380 | -0.15428  |
| 90491 | P14079 | Q8IUQ0 | -0.42631  |
| 90492 | P14079 | Q96KC2 | -1.3745   |
| 90493 | P14079 | Q8TCJ2 | -0.85863  |
| 90494 | P14079 | Q8N628 | -1.2314   |
| 90495 | P14079 | Q9NQZ3 | -0.31184  |
| 90496 | P14079 | Q1ZYL8 | -0.80633  |
| 90497 | P14079 | P10720 | -0.82846  |
| 90498 | P14079 | Q8IUA0 | -0.82805  |
| 90499 | P14079 | Q6N043 | -0.22684  |
| 90500 | P14079 | Q9BT76 | -1.0129   |
| 90501 | P14079 | P13945 | -0.55767  |
| 90502 | P14079 | O95665 | -1.4524   |
| 90503 | P14079 | O00628 | -0.2274   |
| 90504 | P14079 | Q9H5V7 | -0.22841  |
| 90505 | P14079 | Q86UD3 | -1.2685   |
| 90506 | P14079 | O14950 | -0.2263   |
| 90507 | P14079 | Q9BTD8 | -0.35432  |
| 90508 | P14079 | Q9Y5X3 | -0.63625  |
| 90509 | P14079 | Q9P2S6 | -0.2274   |
| 90510 | P14079 | O15391 | -0.20763  |
| 90511 | P14079 | Q9NY72 | -0.70161  |
| 90512 | P14079 | P22001 | -1.0569   |
| 90513 | P14079 | P57796 | -0.64558  |
| 90514 | P14079 | P05305 | -0.26573  |
| 90515 | P14079 | Q13162 | -0.28448  |
| 90516 | P14079 | Q5MAI5 | -1.114    |

|       |        |        |           |
|-------|--------|--------|-----------|
| 90517 | P14079 | Q8NET6 | -0.61198  |
| 90518 | P14079 | A8MVX0 | -0.43809  |
| 90519 | P14079 | Q8N4M1 | -0.92705  |
| 90520 | P14079 | Q14656 | -0.81217  |
| 90521 | P14079 | Q6V0I7 | -0.61062  |
| 90522 | P14079 | Q86Z14 | -0.80729  |
| 90523 | P14079 | P11413 | -0.34185  |
| 90524 | P14079 | Q495B1 | -0.28212  |
| 90525 | P14079 | Q5W5W9 | -0.57152  |
| 90526 | P14079 | Q9HBG4 | -0.4304   |
| 90527 | P14079 | Q9Y6M0 | -0.84838  |
| 90528 | P14079 | Q9BWV1 | -0.57636  |
| 90529 | P14079 | Q5DID0 | -1.4432   |
| 90530 | P14079 | Q13948 | -0.50691  |
| 90531 | P14079 | Q5RIA9 | -0.78428  |
| 90532 | P14079 | Q8NHY3 | -0.099287 |
| 90533 | P14079 | P01583 | -0.18706  |
| 90534 | P14079 | Q7Z7B0 | -0.21284  |
| 90535 | P14079 | Q96NW4 | -0.22929  |
| 90536 | P14079 | P01722 | -1        |
| 90537 | P14079 | Q15772 | -1.225    |
| 90538 | P14079 | Q9H422 | -0.48777  |
| 90539 | P14079 | Q00535 | -0.212    |
| 90540 | P14079 | P0C8F1 | -0.94938  |
| 90541 | P14079 | P55084 | -0.16669  |
| 90542 | P14079 | Q92731 | -0.22743  |
| 90543 | P14079 | O43914 | -0.68568  |
| 90544 | P14079 | P23469 | -0.33943  |
| 90545 | P14079 | Q9UG22 | -1.3764   |
| 90546 | P14079 | P35462 | -0.33862  |
| 90547 | P14079 | Q96FV3 | -1.0256   |
| 90548 | P14079 | Q8TDM5 | -0.73085  |
| 90549 | P14079 | P46734 | -0.23001  |
| 90550 | P14079 | B7U540 | -1.2214   |
| 90551 | P14079 | Q7RTX9 | -1.0598   |
| 90552 | P14079 | Q8WZ19 | -0.083828 |
| 90553 | P14079 | Q9Y252 | -0.28803  |
| 90554 | P14079 | Q09327 | -0.63483  |
| 90555 | P14079 | Q9UHE5 | -1.043    |
| 90556 | P14079 | Q8IUA7 | -1.2946   |
| 90557 | P14079 | P35626 | -1.4025   |
| 90558 | P14079 | Q8WVX9 | -1.4131   |
| 90559 | P14079 | Q5VWQ8 | -0.22498  |
| 90560 | P14079 | Q9BRS2 | -1.3797   |
| 90561 | P14079 | Q6PIU2 | -0.87011  |
| 90562 | P14079 | Q8TDN1 | -1.0843   |
| 90563 | P14079 | Q6UY09 | -0.77815  |
| 90564 | P14079 | Q96EN8 | -0.37216  |
| 90565 | P14079 | P01613 | -1        |
| 90566 | P14079 | Q9P0V9 | -0.39101  |
| 90567 | P14079 | Q8TCT6 | -1.1265   |
| 90568 | P14079 | P07942 | -0.73958  |
| 90569 | P14079 | P07949 | -0.8022   |
| 90570 | P14079 | O00311 | -0.22741  |
| 90571 | P14079 | O95237 | -0.73515  |
| 90572 | P14079 | Q8TE68 | -0.22741  |
| 90573 | P14079 | P0C604 | -1.2314   |
| 90574 | P14079 | P20231 | -1.4766   |
| 90575 | P14079 | Q13938 | -0.22445  |
| 90576 | P14079 | O14994 | -1.0907   |
| 90577 | P14079 | Q9H7F0 | -1.1701   |
| 90578 | P14079 | A6NGE7 | -0.45152  |
| 90579 | P14079 | Q9BW62 | -0.58452  |
| 90580 | P14079 | Q6UW60 | -1.1834   |
| 90581 | P14079 | Q8WX39 | -0.80414  |
| 90582 | P14079 | P84243 | -1.3346   |
| 90583 | P14079 | Q96FN4 | -0.22926  |
| 90584 | P14079 | P13726 | -0.36236  |
| 90585 | P14079 | Q5VYY1 | -0.22738  |
| 90586 | P14079 | Q5HY92 | -0.66198  |
| 90587 | P14079 | P80419 | -0.81822  |
| 90588 | P14079 | P19367 | -0.15921  |
| 90589 | P14079 | Q9H9J4 | -1.03     |
| 90590 | P14079 | Q8WXG8 | -0.23025  |
| 90591 | P14079 | P52895 | -0.35677  |
| 90592 | P14079 | O15056 | -0.22603  |

|       |        |        |          |
|-------|--------|--------|----------|
| 90593 | P14079 | Q8NGE9 | -1.2314  |
| 90594 | P14079 | P27338 | -0.73291 |
| 90595 | P14079 | O60844 | -0.72504 |
| 90596 | P14079 | Q95757 | -0.28668 |
| 90597 | P14079 | Q9H3R0 | -0.1456  |
| 90598 | P14079 | P02652 | -0.30961 |
| 90599 | P14079 | Q9NWM0 | -0.20378 |
| 90600 | P14079 | P51878 | -0.73129 |
| 90601 | P14079 | Q8NGG2 | -1.2314  |
| 90602 | P14079 | Q86WN1 | -0.2274  |
| 90603 | P14079 | A6NM62 | -0.72303 |
| 90604 | P14079 | P48163 | -0.40339 |
| 90605 | P14079 | P01034 | -0.34025 |
| 90606 | P14079 | Q9BV10 | -0.85361 |
| 90607 | P14079 | Q96IV6 | -1.0672  |
| 90608 | P14079 | P31512 | -1.1574  |
| 90609 | P14079 | Q9NPD5 | -0.99233 |
| 90610 | P14079 | O15417 | -0.12754 |
| 90611 | P14079 | Q12851 | -0.4729  |
| 90612 | P14079 | P62699 | -0.34131 |
| 90613 | P14079 | P43003 | -0.69014 |
| 90614 | P14079 | Q9Y646 | -0.96695 |
| 90615 | P14079 | Q8NH06 | -1.2314  |
| 90616 | P14079 | Q5XG92 | -0.81748 |
| 90617 | P14079 | Q9UGL1 | -0.25058 |
| 90618 | P14079 | P35218 | -0.08807 |
| 90619 | P14079 | Q96AY4 | -0.2274  |
| 90620 | P14079 | Q8N9V6 | -0.2274  |
| 90621 | P14079 | Q92903 | -0.93171 |
| 90622 | P14079 | P23510 | -0.42918 |
| 90623 | P14079 | Q86W74 | -0.77815 |
| 90624 | P14079 | P13674 | -0.431   |
| 90625 | P14079 | A2VDJ0 | -0.77815 |
| 90626 | P14079 | P55017 | -0.57729 |
| 90627 | P14079 | Q8IU99 | -1.2564  |
| 90628 | P14079 | P51148 | -1.0536  |
| 90629 | P14079 | Q9NUY8 | -0.90849 |
| 90630 | P14079 | P60763 | -0.74736 |
| 90631 | P14079 | Q9Y584 | -0.37948 |
| 90632 | P14079 | Q86Y22 | -1.5685  |
| 90633 | P14079 | P30483 | -1       |
| 90634 | P14079 | Q96J92 | -1.1287  |
| 90635 | P14079 | P08294 | -0.2103  |
| 90636 | P14079 | P21757 | -0.5778  |
| 90637 | P14079 | P00742 | -0.89148 |
| 90638 | P14079 | Q86UX6 | -1.4672  |
| 90639 | P14079 | P50583 | -0.7353  |
| 90640 | P14079 | Q8N8Y5 | -0.4293  |
| 90641 | P14079 | Q9UPQ3 | -1.5655  |
| 90642 | P14079 | P04745 | -0.36354 |
| 90643 | P14079 | Q9H013 | -1.2828  |
| 90644 | P14079 | Q9H306 | -1.4436  |
| 90645 | P14079 | Q9NPC4 | -0.80847 |
| 90646 | P14079 | Q9BV40 | -0.65561 |
| 90647 | P14079 | Q9NWT1 | -0.2281  |
| 90648 | P14079 | Q7Z5U6 | -0.2275  |
| 90649 | P14079 | Q86TH1 | -0.63472 |
| 90650 | P14079 | Q9BY08 | -0.89014 |
| 90651 | P14079 | Q9Y5M8 | -1.2566  |
| 90652 | P14079 | Q9H0Z9 | -0.32048 |
| 90653 | P14079 | P12544 | -0.33784 |
| 90654 | P14079 | P62805 | -0.48288 |
| 90655 | P14079 | Q9NQW7 | -0.52007 |
| 90656 | P14079 | Q08426 | -0.67687 |
| 90657 | P14079 | Q8WWG1 | -1.5258  |
| 90658 | P14079 | Q70EL3 | -0.40998 |
| 90659 | P14079 | Q8N7X0 | -0.56382 |
| 90660 | P14079 | Q14500 | -1.2509  |
| 90661 | P14079 | Q04941 | -0.70198 |
| 90662 | P14079 | Q8TF71 | -1.1101  |
| 90663 | P14079 | P04899 | -0.31408 |
| 90664 | P14079 | Q9GZZ0 | -0.22733 |
| 90665 | P14079 | P09619 | -0.45631 |
| 90666 | P14079 | Q5VYJ5 | -0.77815 |
| 90667 | P14079 | Q9P2U7 | -0.90126 |
| 90668 | P14079 | Q8N9X5 | -0.77815 |

|       |        |        |            |
|-------|--------|--------|------------|
| 90669 | P14079 | P23368 | -0.8865    |
| 90670 | P14079 | P48735 | -0.18029   |
| 90671 | P14079 | Q5SR53 | -0.17752   |
| 90672 | P14079 | P20718 | -0.61005   |
| 90673 | P14079 | Q9GZZ9 | -0.17608   |
| 90674 | P14079 | Q9HBW1 | -0.7007    |
| 90675 | P14079 | Q9NP59 | -0.5167    |
| 90676 | P14079 | Q8IZM9 | -1.0142    |
| 90677 | P14079 | Q92838 | -1.0506    |
| 90678 | P14079 | Q08648 | -0.96632   |
| 90679 | P14079 | Q07699 | -0.92141   |
| 90680 | P14079 | P40818 | -0.3726    |
| 90681 | P14079 | P11150 | -0.83788   |
| 90682 | P14079 | P59044 | -0.36359   |
| 90683 | P14079 | Q9NPR2 | -1.115     |
| 90684 | P14079 | Q9BYH1 | -0.9328    |
| 90685 | P14079 | Q7Z475 | -0.80868   |
| 90686 | P14079 | Q9HCL2 | -0.51394   |
| 90687 | P14079 | Q8IXH8 | -1.2343    |
| 90688 | P14079 | P33527 | -0.57897   |
| 90689 | P14079 | Q12797 | -0.60177   |
| 90690 | P14079 | P51575 | -0.53883   |
| 90691 | P14079 | Q96Q07 | -0.36083   |
| 90692 | P14079 | P55809 | -0.18874   |
| 90693 | P14079 | P15170 | -0.23488   |
| 90694 | P14079 | Q9BRF8 | -0.18916   |
| 90695 | P14079 | P08100 | -0.61122   |
| 90696 | P14079 | P78556 | -1.0089    |
| 90697 | P14079 | O00212 | -1.183     |
| 90698 | P14079 | P20138 | -1.4465    |
| 90699 | P14079 | O60861 | -0.32954   |
| 90700 | P14079 | Q92888 | -0.28807   |
| 90701 | P14079 | P04209 | -1         |
| 90702 | P14079 | P57771 | -0.71709   |
| 90703 | P14079 | Q9BZL6 | -0.38201   |
| 90704 | P14079 | O95445 | -0.86605   |
| 90705 | P14079 | Q969U6 | -0.22765   |
| 90706 | P14079 | Q13117 | -1.0088    |
| 90707 | P14079 | Q9BQ04 | -0.39203   |
| 90708 | P14079 | Q9H0C2 | -0.74605   |
| 90709 | P14079 | Q96QS6 | -1.4433    |
| 90710 | P14079 | P02745 | -0.29708   |
| 90711 | P14079 | P09455 | -0.33107   |
| 90712 | P14079 | P10276 | -0.23181   |
| 90713 | P14079 | P20823 | -0.21084   |
| 90714 | P14079 | Q3LXA3 | -0.9951    |
| 90715 | P14079 | P05155 | -0.88496   |
| 90716 | P14079 | Q4VNC0 | -1.1309    |
| 90717 | P14079 | P10696 | -0.79121   |
| 90718 | P14079 | P23743 | -1.2177    |
| 90719 | P14079 | P54707 | -1.1198    |
| 90720 | P14079 | A0FGR8 | -0.97472   |
| 90721 | P14079 | P08581 | -0.51741   |
| 90722 | P14079 | Q15057 | -0.96514   |
| 90723 | P14079 | P11086 | -0.17082   |
| 90724 | P14079 | O95932 | -0.26019   |
| 90725 | P14079 | P04439 | -1.0983    |
| 90726 | P14079 | A6NL99 | -0.79936   |
| 90727 | P14079 | Q8TDU9 | -1.2826    |
| 90728 | P14079 | Q8NGV5 | -1.2314    |
| 90729 | P14079 | Q8N309 | -0.12483   |
| 90730 | P14079 | Q9UM01 | -1.2874    |
| 90731 | P14079 | O96008 | -0.51385   |
| 90732 | P14079 | Q9NZU0 | -1.2776    |
| 90733 | P14079 | P24046 | -0.99914   |
| 90734 | P14079 | Q9NYW5 | -1.2729    |
| 90735 | P14079 | Q8TDR2 | -0.98674   |
| 90736 | P14079 | Q9P0P0 | -0.53625   |
| 90737 | P14079 | Q6ZP29 | -0.83665   |
| 90738 | P14079 | Q8NGS1 | -1.2314    |
| 90739 | P14079 | P0C7W6 | -0.0025943 |
| 90740 | P14079 | P40126 | -0.61354   |
| 90741 | P14079 | Q96HP4 | -0.34151   |
| 90742 | P14079 | Q7Z4R8 | -0.69255   |
| 90743 | P14079 | Q92882 | -0.43481   |
| 90744 | P14079 | Q13443 | -0.90871   |

|       |        |         |           |
|-------|--------|---------|-----------|
| 90745 | P14079 | Q9UGM3  | -0.26462  |
| 90746 | P14079 | O94921  | -0.092799 |
| 90747 | P14079 | Q8IZJ1  | -0.52396  |
| 90748 | P14079 | P62942  | -0.22749  |
| 90749 | P14079 | Q9NQ36  | -0.863    |
| 90750 | P14079 | O94768  | -1.1881   |
| 90751 | P14079 | Q10469  | -0.72171  |
| 90752 | P14079 | Q6DN12  | -0.72584  |
| 90753 | P14079 | Q8I WV2 | -1.1329   |
| 90754 | P14079 | O95477  | -0.50457  |
| 90755 | P14079 | Q02297  | -0.29811  |
| 90756 | P14079 | P29475  | -0.22713  |
| 90757 | P14079 | Q8TD46  | -0.6579   |
| 90758 | P14079 | P18089  | -0.6645   |
| 90759 | P14079 | P15882  | -0.7693   |
| 90760 | P14079 | Q8TBG4  | -0.40599  |
| 90761 | P14079 | Q9C0B5  | -1.0875   |
| 90762 | P14079 | Q8IX06  | -0.12839  |
| 90763 | P14079 | Q8NFM4  | -0.60527  |
| 90764 | P14079 | Q9H2S1  | -0.97385  |
| 90765 | P14079 | Q7Z5L3  | -0.97155  |
| 90766 | P14079 | P00747  | -0.57701  |
| 90767 | P14079 | Q9NR61  | -0.97229  |
| 90768 | P14079 | P11226  | -0.5962   |
| 90769 | P14079 | Q13107  | -0.38714  |
| 90770 | P14079 | P82279  | -1.3757   |
| 90771 | P14079 | P01233  | -0.74782  |
| 90772 | P14079 | Q14654  | -0.67787  |
| 90773 | P14079 | Q8NHS3  | -0.44343  |
| 90774 | P14079 | P01715  | -1        |
| 90775 | P14079 | P52945  | -0.63984  |
| 90776 | P14079 | Q8NHL6  | -0.31622  |
| 90777 | P14079 | Q13939  | -0.42609  |
| 90778 | P14079 | Q7Z3E1  | -0.30905  |
| 90779 | P14079 | Q8NCM2  | -1.0669   |
| 90780 | P14079 | P04278  | -0.84503  |
| 90781 | P14079 | O43157  | -1.029    |
| 90782 | P14079 | Q7Z6W1  | -0.77815  |
| 90783 | P14079 | P54762  | -0.86068  |
| 90784 | P14079 | P02655  | -0.5952   |
| 90785 | P14079 | Q9BVR0  | -0.47702  |
| 90786 | P14079 | Q8NGX3  | -1.2314   |
| 90787 | P14079 | O15484  | -1.0274   |
| 90788 | P14079 | O14804  | -1.4961   |
| 90789 | P14079 | Q9UJS0  | -0.65305  |
| 90790 | P14079 | Q86UP6  | -0.64148  |
| 90791 | P14079 | Q9NXN4  | -0.17565  |
| 90792 | P14079 | Q96BZ4  | -0.90419  |
| 90793 | P14079 | Q9NU02  | -0.22744  |
| 90794 | P14079 | P56559  | -0.58542  |
| 90795 | P14079 | O95881  | -0.51322  |
| 90796 | P14079 | Q53T59  | -0.21505  |
| 90797 | P14079 | Q14833  | -1.4629   |
| 90798 | P14079 | Q8IZP7  | -0.98155  |
| 90799 | P14079 | O75830  | -0.7562   |
| 90800 | P14079 | E2RYF7  | -0.80633  |
| 90801 | P14079 | Q16627  | -0.79601  |
| 90802 | P14079 | O60704  | -0.61929  |
| 90803 | P14079 | Q8NGK1  | -1.2314   |
| 90804 | P14079 | Q63HQ2  | -0.85673  |
| 90805 | P14079 | P08962  | -0.6968   |
| 90806 | P14079 | Q14088  | -0.5444   |
| 90807 | P14079 | Q8N FZ8 | -1.0127   |
| 90808 | P14079 | Q8NFW1  | -0.87321  |
| 90809 | P14079 | Q8TC17  | -0.22741  |
| 90810 | P14079 | Q3MIX3  | -1.0854   |
| 90811 | P14079 | Q02779  | -0.74523  |
| 90812 | P14079 | O95371  | -1.1948   |
| 90813 | P14079 | O15075  | -1.3963   |
| 90814 | P14079 | Q02325  | -0.80633  |
| 90815 | P14079 | Q8TDL5  | -1.0807   |
| 90816 | P14079 | Q8TBB6  | -0.90186  |
| 90817 | P14079 | Q9H8J5  | -0.77815  |
| 90818 | P14079 | P35670  | -0.37189  |
| 90819 | P14079 | Q6W3E5  | -0.80562  |
| 90820 | P14079 | Q9NZK7  | -0.95095  |



|       |        |        |           |
|-------|--------|--------|-----------|
| 90821 | P14079 | Q5JTY5 | -0.78428  |
| 90822 | P14079 | P31273 | -0.31933  |
| 90823 | P14079 | P0CF74 | -0.98486  |
| 90824 | P14079 | Q5FVE4 | -1.2477   |
| 90825 | P14079 | Q6YP21 | -0.36887  |
| 90826 | P14079 | Q9HCK0 | -0.13969  |
| 90827 | P14079 | Q16650 | -0.84555  |
| 90828 | P14079 | Q14542 | -0.48872  |
| 90829 | P14079 | A8MUH7 | -0.22765  |
| 90830 | P14079 | Q53QZ3 | -0.92443  |
| 90831 | P14079 | Q9NY91 | -1.0012   |
| 90832 | P14079 | Q6P9F7 | -0.77815  |
| 90833 | P14079 | Q9H6T3 | -0.22729  |
| 90834 | P14079 | P13500 | -0.3304   |
| 90835 | P14079 | Q92989 | -0.23867  |
| 90836 | P14079 | P51172 | -0.60075  |
| 90837 | P14079 | Q9NPH0 | -0.75181  |
| 90838 | P14079 | Q6ZMH5 | -1.0226   |
| 90839 | P14079 | Q96A37 | -0.36051  |
| 90840 | P14079 | Q8NF37 | -0.64067  |
| 90841 | P14079 | Q9NYS7 | -0.47402  |
| 90842 | P14079 | Q03181 | -0.23369  |
| 90843 | P14079 | Q96L03 | -0.21497  |
| 90844 | P14079 | P51688 | -0.52787  |
| 90845 | P14079 | Q8WUT4 | -0.77815  |
| 90846 | P14079 | P11684 | -0.57405  |
| 90847 | P14079 | Q9P2E8 | -1.0071   |
| 90848 | P14079 | P02766 | -0.13366  |
| 90849 | P14079 | P48448 | -0.60623  |
| 90850 | P14079 | Q9UBY5 | -1.3298   |
| 90851 | P14079 | Q86UE8 | -0.22741  |
| 90852 | P14079 | Q8NI38 | -0.22738  |
| 90853 | P14079 | Q5VUR7 | -0.22736  |
| 90854 | P14079 | Q6IC10 | -0.77815  |
| 90855 | P14079 | P02724 | -0.87777  |
| 90856 | P14079 | P01137 | -0.22741  |
| 90857 | P14079 | P09228 | -0.94572  |
| 90858 | P14079 | Q95382 | -1.4015   |
| 90859 | P14079 | P14384 | -0.38728  |
| 90860 | P14079 | Q9H2Q1 | -0.77815  |
| 90861 | P14079 | Q14571 | -0.66505  |
| 90862 | P14079 | P15172 | -0.22692  |
| 90863 | P14079 | Q96P88 | -1.2493   |
| 90864 | P14079 | Q8TBZ2 | -0.12359  |
| 90865 | P14079 | Q9BZ67 | -0.073893 |
| 90866 | P14079 | Q7Z2R9 | -0.80633  |
| 90867 | P14079 | A6NKC4 | -0.95209  |
| 90868 | P14079 | Q14526 | -0.34343  |
| 90869 | P14079 | Q9UKW4 | -0.24363  |
| 90870 | P14079 | P06850 | -0.46057  |
| 90871 | P14079 | Q16595 | -0.1582   |
| 90872 | P14079 | P01707 | -1        |
| 90873 | P14079 | Q60911 | -0.59008  |
| 90874 | P14079 | Q6ZMT9 | -0.28212  |
| 90875 | P14079 | Q95372 | -0.15282  |
| 90876 | P14079 | P61129 | -0.33641  |
| 90877 | P14079 | P08247 | -0.62101  |
| 90878 | P14079 | Q6NUI6 | -0.97448  |
| 90879 | P14079 | P01282 | -0.64423  |
| 90880 | P14079 | Q9UJ96 | -0.94369  |
| 90881 | P14079 | P02787 | -0.17525  |
| 90882 | P14079 | Q8IXU6 | -0.80846  |
| 90883 | P14079 | Q99470 | -0.96911  |
| 90884 | P14079 | Q14669 | -0.22806  |
| 90885 | P14079 | Q16181 | -0.22091  |
| 90886 | P14079 | P14598 | -0.2274   |
| 90887 | P14079 | P49674 | -0.22741  |
| 90888 | P14079 | Q8N9C0 | -0.22751  |
| 90889 | P14079 | Q9NQ75 | -0.21139  |
| 90890 | P14079 | Q9Y5I2 | -1.8675   |
| 90891 | P14079 | Q96Q42 | -0.44925  |
| 90892 | P14079 | P06314 | -1        |
| 90893 | P14079 | Q9HCP6 | -0.82147  |
| 90894 | P14079 | P06312 | -1        |
| 90895 | P14079 | Q14832 | -1.0774   |
| 90896 | P14079 | Q15722 | -1.7758   |

|       |        |        |           |
|-------|--------|--------|-----------|
| 90897 | P14079 | P31268 | -0.21245  |
| 90898 | P14079 | Q9Y6C5 | -0.78449  |
| 90899 | P14079 | Q2TBA0 | -0.20145  |
| 90900 | P14079 | O43278 | -0.83077  |
| 90901 | P14079 | Q68CQ1 | -0.77815  |
| 90902 | P14079 | Q8NCL9 | -0.77815  |
| 90903 | P14079 | P01776 | -1        |
| 90904 | P14079 | P15313 | -0.3616   |
| 90905 | P14079 | P32297 | -0.82179  |
| 90906 | P14079 | Q92802 | -0.26849  |
| 90907 | P14079 | Q8TBF4 | -0.2114   |
| 90908 | P14079 | Q15418 | -0.16304  |
| 90909 | P14079 | Q9ULD4 | -0.24198  |
| 90910 | P14079 | P15863 | -0.22643  |
| 90911 | P14079 | Q8NEW0 | -0.42152  |
| 90912 | P14079 | P22059 | -0.22748  |
| 90913 | P14079 | Q96R54 | -1.2314   |
| 90914 | P14079 | Q8NFZ6 | -1.2496   |
| 90915 | P14079 | P49643 | -0.11473  |
| 90916 | P14079 | O43614 | -1.3551   |
| 90917 | P14079 | P13584 | -0.88168  |
| 90918 | P14079 | O43808 | -0.24937  |
| 90919 | P14079 | P47890 | -1.2314   |
| 90920 | P14079 | Q8IYD2 | -0.2246   |
| 90921 | P14079 | O00222 | -1.2849   |
| 90922 | P14079 | P49908 | -0.9548   |
| 90923 | P14079 | Q6ZQQ6 | -0.15558  |
| 90924 | P14079 | P01761 | -1        |
| 90925 | P14079 | P39210 | -0.62206  |
| 90926 | P14079 | P17936 | -0.22629  |
| 90927 | P14079 | Q96JK4 | -0.84471  |
| 90928 | P14079 | Q8IVU3 | -0.60051  |
| 90929 | P14079 | Q6ZUS6 | -0.082461 |
| 90930 | P14079 | P01308 | -0.22306  |
| 90931 | P14079 | Q9HC35 | -0.51146  |
| 90932 | P14079 | Q9Y320 | -0.85839  |
| 90933 | P14079 | P06310 | -1        |
| 90934 | P14079 | Q02747 | -0.8743   |
| 90935 | P14079 | Q8WXB1 | -0.77563  |
| 90936 | P14079 | Q8NGC9 | -1.2314   |
| 90937 | P14079 | P27482 | -0.22704  |
| 90938 | P14079 | Q9UQC9 | -1.7095   |
| 90939 | P14079 | Q9H9S3 | -0.80463  |
| 90940 | P14079 | P42285 | -0.24223  |
| 90941 | P14079 | Q6IA17 | -0.31298  |
| 90942 | P14079 | P06899 | -0.90191  |
| 90943 | P14079 | Q8NGE7 | -1.2314   |
| 90944 | P14079 | Q15334 | -0.3271   |
| 90945 | P14079 | Q8N594 | -0.69954  |
| 90946 | P14079 | Q99728 | -0.22742  |
| 90947 | P14079 | Q96HZ4 | -0.22601  |
| 90948 | P14079 | Q92633 | -0.38321  |
| 90949 | P14079 | P34913 | -0.38583  |
| 90950 | P14079 | P55211 | -0.22433  |
| 90951 | P14079 | Q9Y210 | -0.52523  |
| 90952 | P14079 | Q6T423 | -0.87582  |
| 90953 | P14079 | P28476 | -1.0867   |
| 90954 | P14079 | Q9UBT3 | -1.148    |
| 90955 | P14079 | P07477 | -1.5126   |
| 90956 | P14079 | Q7Z6M2 | -0.26027  |
| 90957 | P14079 | Q7Z5Y6 | -1.0098   |
| 90958 | P14079 | P57789 | -1.3658   |
| 90959 | P14079 | P08949 | -0.71223  |
| 90960 | P14079 | Q8N0Y3 | -1.2314   |
| 90961 | P14079 | Q14494 | -0.22674  |
| 90962 | P14079 | O95231 | -0.22739  |
| 90963 | P14079 | Q9H4S2 | -0.15885  |
| 90964 | P14079 | Q96HP0 | -0.1389   |
| 90965 | P14079 | B2RTY4 | -1.0227   |
| 90966 | P14079 | Q86WD7 | -0.65932  |
| 90967 | P14079 | B0I1T2 | -0.60628  |
| 90968 | P14079 | Q9UKM9 | -0.55466  |
| 90969 | P14079 | Q9NZC2 | -1.4433   |
| 90970 | P14079 | Q6ZVZ8 | -0.47402  |
| 90971 | P14079 | P21439 | -1.3459   |
| 90972 | P14079 | P30453 | -0.98914  |

|       |        |        |          |
|-------|--------|--------|----------|
| 90973 | P14079 | Q9C0I1 | -0.1988  |
| 90974 | P14079 | P41145 | -0.89176 |
| 90975 | P14079 | Q9H7B7 | -0.80633 |
| 90976 | P14079 | Q7L5N7 | -0.84268 |
| 90977 | P14079 | Q02252 | -0.519   |
| 90978 | P14079 | Q16875 | -0.8403  |
| 90979 | P14079 | Q8N4G2 | -0.79686 |
| 90980 | P14079 | P34931 | -0.63769 |
| 90981 | P14079 | P49747 | -0.67712 |
| 90982 | P14079 | P43629 | -1.192   |
| 90983 | P14079 | Q9H344 | -1.2314  |
| 90984 | P14079 | Q5T481 | -0.75088 |
| 90985 | P14079 | Q6ZR08 | -0.41186 |
| 90986 | P14079 | P17787 | -0.87781 |
| 90987 | P14079 | P26992 | -0.45453 |
| 90988 | P14079 | Q8TE23 | -1.2452  |
| 90989 | P14079 | Q8IUR7 | -0.22802 |
| 90990 | P14079 | Q96NJ5 | -0.18884 |
| 90991 | P14079 | P53671 | -1.2376  |
| 90992 | P14079 | Q9P2G9 | -0.19987 |
| 90993 | P14079 | Q8N954 | -0.12325 |
| 90994 | P14079 | O15062 | -0.2178  |
| 90995 | P14079 | Q9HCE7 | -0.22741 |
| 90996 | P14079 | Q9Y5Y3 | -1.3154  |
| 90997 | P14079 | O75493 | -0.7108  |
| 90998 | P14079 | P43246 | -0.11369 |
| 90999 | P14079 | Q9NVJ2 | -0.56491 |
| 91000 | P14079 | Q9H3R1 | -0.8025  |
| 91001 | P14079 | O14647 | -0.58811 |
| 91002 | P14079 | Q9UBH6 | -1.1938  |
| 91003 | P14079 | Q8WWU7 | -1.0416  |
| 91004 | P14079 | P48742 | -0.22683 |
| 91005 | P14079 | Q8NA82 | -0.53625 |
| 91006 | P14079 | Q9Y343 | -0.37496 |
| 91007 | P14079 | Q9NYY3 | -0.33924 |
| 91008 | P14079 | Q9P283 | -1.115   |
| 91009 | P14079 | Q96DL1 | -0.77815 |
| 91010 | P14079 | Q9BZA8 | -1.2343  |
| 91011 | P14079 | P48145 | -0.7192  |
| 91012 | P14079 | Q6P2P2 | -0.14663 |
| 91013 | P14079 | Q9NP78 | -0.97177 |
| 91014 | P14079 | Q99954 | -0.80633 |
| 91015 | P14079 | O14745 | -0.48342 |
| 91016 | P14079 | Q02763 | -0.53436 |
| 91017 | P14079 | A8MWL6 | -0.77815 |
| 91018 | P14079 | Q7Z601 | -0.98897 |
| 91019 | P14079 | Q13099 | -0.22713 |
| 91020 | P14079 | P01611 | -1       |
| 91021 | P14079 | Q9Y5G4 | -1.2343  |
| 91022 | P14079 | Q15813 | -0.22741 |
| 91023 | P14079 | Q5T2R2 | -0.33278 |
| 91024 | P14079 | Q96L46 | -0.30291 |
| 91025 | P14079 | Q5BKT4 | -0.92831 |
| 91026 | P14079 | P15090 | -0.16489 |
| 91027 | P14079 | O60896 | -0.25416 |
| 91028 | P14079 | Q16620 | -0.61025 |
| 91029 | P14079 | P50458 | -0.2274  |
| 91030 | P14079 | Q99877 | -0.92425 |
| 91031 | P14079 | Q96A98 | -0.80122 |
| 91032 | P14079 | Q8N4W6 | -0.88024 |
| 91033 | P14079 | P50151 | -0.41257 |
| 91034 | P14079 | Q8NCE2 | -0.3632  |
| 91035 | P14079 | Q9NRY4 | -0.32892 |
| 91036 | P14079 | Q66K14 | -1.9657  |
| 91037 | P14079 | Q8WUJ3 | -0.20483 |
| 91038 | P14079 | Q07011 | -0.8912  |
| 91039 | P14079 | P30459 | -0.93319 |
| 91040 | P14079 | A6NCM1 | -0.78428 |
| 91041 | P14079 | Q8IZV2 | -0.8507  |
| 91042 | P14079 | P01717 | -1       |
| 91043 | P14079 | Q7RTU1 | -0.32508 |
| 91044 | P14079 | O75078 | -1.1179  |
| 91045 | P14079 | Q8NGB8 | -1.2314  |
| 91046 | P14079 | O43314 | -0.72093 |
| 91047 | P14079 | P50148 | -0.94873 |
| 91048 | P14079 | Q8NG78 | -1.2314  |

|       |        |         |          |
|-------|--------|---------|----------|
| 91049 | P14079 | Q14BN4  | -0.79258 |
| 91050 | P14079 | P50391  | -1.3141  |
| 91051 | P14079 | O43837  | -0.2995  |
| 91052 | P14079 | Q76N89  | -0.58024 |
| 91053 | P14079 | Q9C0D6  | -0.21299 |
| 91054 | P14079 | O43567  | -0.86082 |
| 91055 | P14079 | Q8NAT2  | -0.68862 |
| 91056 | P14079 | Q96Q40  | -1.2598  |
| 91057 | P14079 | Q6PJQ5  | -0.97768 |
| 91058 | P14079 | P10398  | -0.71037 |
| 91059 | P14079 | P36269  | -0.99767 |
| 91060 | P14079 | A6NH00  | -1.2314  |
| 91061 | P14079 | P11021  | -0.21967 |
| 91062 | P14079 | Q8TET4  | -0.29274 |
| 91063 | P14079 | Q9Y264  | -0.82362 |
| 91064 | P14079 | P27707  | -0.66295 |
| 91065 | P14079 | P01778  | -1       |
| 91066 | P14079 | A6NND4  | -1.2314  |
| 91067 | P14079 | P13473  | -0.8412  |
| 91068 | P14079 | Q8WYP3  | -0.94614 |
| 91069 | P14079 | Q9H8W5  | -0.22741 |
| 91070 | P14079 | O43609  | -0.21943 |
| 91071 | P14079 | Q9P0L0  | -0.23512 |
| 91072 | P14079 | Q9Y272  | -0.95186 |
| 91073 | P14079 | Q9H967  | -0.22702 |
| 91074 | P14079 | Q8NH80  | -1.2314  |
| 91075 | P14079 | Q9H9S5  | -1.247   |
| 91076 | P14079 | Q8NC06  | -0.37587 |
| 91077 | P14079 | Q8TDB8  | -0.99916 |
| 91078 | P14079 | Q8IV04  | -1.4902  |
| 91079 | P14079 | P38570  | -1.1431  |
| 91080 | P14079 | Q53GT1  | -0.20051 |
| 91081 | P14079 | Q94779  | -0.47488 |
| 91082 | P14079 | P11245  | -0.28339 |
| 91083 | P14079 | O76071  | -0.22756 |
| 91084 | P14079 | O60673  | -0.95691 |
| 91085 | P14079 | Q9ULL1  | -0.51188 |
| 91086 | P14079 | Q9ULZ9  | -1.6305  |
| 91087 | P14079 | Q9NRC9  | -0.79842 |
| 91088 | P14079 | P55916  | -0.52438 |
| 91089 | P14079 | O00443  | -0.59731 |
| 91090 | P14079 | Q8NH63  | -1.2314  |
| 91091 | P14079 | Q9Y2T6  | -1.2829  |
| 91092 | P14079 | Q99880  | -0.92425 |
| 91093 | P14079 | P04183  | -0.80813 |
| 91094 | P14079 | A8MWE9  | -0.1887  |
| 91095 | P14079 | Q8NG75  | -1.2314  |
| 91096 | P14079 | Q06432  | -1.0489  |
| 91097 | P14079 | A6NLU5  | -0.77815 |
| 91098 | P14079 | Q6P9F5  | -0.36051 |
| 91099 | P14079 | Q9H173  | -0.14095 |
| 91100 | P14079 | Q16799  | -0.47024 |
| 91101 | P14079 | Q8N162  | -1.2314  |
| 91102 | P14079 | Q15858  | -1.0094  |
| 91103 | P14079 | O15528  | -0.41863 |
| 91104 | P14079 | Q01459  | -0.36739 |
| 91105 | P14079 | Q96A61  | -0.36051 |
| 91106 | P14079 | Q5W186  | -0.94572 |
| 91107 | P14079 | P59535  | -1.1233  |
| 91108 | P14079 | Q66K37  | -0.22484 |
| 91109 | P14079 | Q9HAW9  | -0.93032 |
| 91110 | P14079 | Q8NLFU5 | -0.62267 |
| 91111 | P14079 | O00329  | -0.43839 |
| 91112 | P14079 | Q9UBR2  | -0.95464 |
| 91113 | P14079 | Q9H1E5  | -0.82882 |
| 91114 | P14079 | Q96PB7  | -0.79777 |
| 91115 | P14079 | Q05209  | -0.2593  |
| 91116 | P14079 | Q16478  | -0.73405 |
| 91117 | P14079 | Q16288  | -1.2555  |
| 91118 | P14079 | Q99616  | -0.99139 |
| 91119 | P14079 | O75752  | -0.7289  |
| 91120 | P14079 | Q9UGQ2  | -0.76219 |
| 91121 | P14079 | Q13255  | -0.99047 |
| 91122 | P14079 | Q3KR16  | -0.2279  |
| 91123 | P14079 | Q5JQD4  | -0.78571 |
| 91124 | P14079 | Q96MN5  | -0.19661 |

|       |        |        |          |
|-------|--------|--------|----------|
| 91125 | P14079 | Q96RR4 | -1.1826  |
| 91126 | P14079 | Q9C0E8 | -1.0322  |
| 91127 | P14079 | P35523 | -1.1165  |
| 91128 | P14079 | P50226 | -0.4279  |
| 91129 | P14079 | Q6ZQY2 | -0.22727 |
| 91130 | P14079 | Q9NTX5 | -0.16839 |
| 91131 | P14079 | P30968 | -1.6034  |
| 91132 | P14079 | Q29974 | -0.67629 |
| 91133 | P14079 | Q6P1J6 | -0.90944 |
| 91134 | P14079 | P04217 | -0.89896 |
| 91135 | P14079 | Q96KC8 | -0.32369 |
| 91136 | P14079 | Q07889 | -0.22739 |
| 91137 | P14079 | Q15119 | -0.50269 |
| 91138 | P14079 | Q2M2E3 | -1.246   |
| 91139 | P14079 | P01860 | -0.89686 |
| 91140 | P14079 | P02452 | -0.30753 |
| 91141 | P14079 | Q9Y580 | -0.74944 |
| 91142 | P14079 | Q9P0V8 | -0.78716 |
| 91143 | P14079 | P19174 | -0.22741 |
| 91144 | P14079 | A8MTI9 | -1.968   |
| 91145 | P14079 | P09486 | -0.30921 |
| 91146 | P14079 | Q9Y6A1 | -1.0983  |
| 91147 | P14079 | Q8TDQ1 | -0.97472 |
| 91148 | P14079 | Q6P0Q8 | -0.69855 |
| 91149 | P14079 | Q96IQ7 | -0.99591 |
| 91150 | P14079 | Q5TZ20 | -1.2314  |
| 91151 | P14079 | Q96HS1 | -0.62393 |
| 91152 | P14079 | Q9H4L4 | -0.35306 |
| 91153 | P14079 | Q13530 | -0.709   |
| 91154 | P14079 | Q8N9W6 | -0.48157 |
| 91155 | P14079 | Q6NXT2 | -0.92425 |
| 91156 | P14079 | Q9HBW0 | -0.95366 |
| 91157 | P14079 | Q9Y2U8 | -0.18066 |
| 91158 | P14079 | Q9BT23 | -0.22527 |
| 91159 | P14079 | Q99795 | -1.1921  |
| 91160 | P14079 | Q8IV61 | -0.66913 |
| 91161 | P14079 | Q6NUQ4 | -0.77815 |
| 91162 | P14079 | Q9BXC9 | -0.11571 |
| 91163 | P14079 | P16150 | -1.0158  |
| 91164 | P14079 | Q5H8A3 | -0.70554 |
| 91165 | P14079 | Q17RD7 | -0.31401 |
| 91166 | P14079 | P09382 | -0.52415 |
| 91167 | P14079 | Q49AH0 | -0.76558 |
| 91168 | P14079 | P03971 | -0.55541 |
| 91169 | P14079 | P16871 | -0.93621 |
| 91170 | P14079 | Q14469 | -0.22626 |
| 91171 | P14079 | Q9Y5E7 | -1.3144  |
| 91172 | P14079 | Q8TD57 | -0.39615 |
| 91173 | P14079 | Q5EB52 | -1.036   |
| 91174 | P14079 | Q94810 | -0.61405 |
| 91175 | P14079 | P21583 | -0.4977  |
| 91176 | P14079 | Q60242 | -1.3681  |
| 91177 | P14079 | P78333 | -1.3582  |
| 91178 | P14079 | Q13009 | -0.42435 |
| 91179 | P14079 | Q15375 | -0.96865 |
| 91180 | P14079 | O15041 | -1.0057  |
| 91181 | P14079 | Q9NS28 | -0.71584 |
| 91182 | P14079 | Q96QP1 | -0.78881 |
| 91183 | P14079 | P60983 | -0.50791 |
| 91184 | P14079 | Q9UPI3 | -0.99953 |
| 91185 | P14079 | Q2KJY2 | -0.57708 |
| 91186 | P14079 | Q75443 | -1.0854  |
| 91187 | P14079 | P50895 | -1.3648  |
| 91188 | P14079 | Q9NVG8 | -1.4902  |
| 91189 | P14079 | Q86YW0 | -0.41341 |
| 91190 | P14079 | Q15269 | -0.2145  |
| 91191 | P14079 | P46952 | -0.35052 |
| 91192 | P14079 | P11182 | -0.19559 |
| 91193 | P14079 | Q8NH19 | -1.2314  |
| 91194 | P14079 | Q9H2C2 | -0.81512 |
| 91195 | P14079 | Q6NXG1 | -0.59285 |
| 91196 | P14079 | Q9P0B6 | -0.77815 |
| 91197 | P14079 | Q7Z2K6 | -1.3516  |
| 91198 | P14079 | P41273 | -1.0113  |
| 91199 | P14079 | Q8NGD1 | -1.2314  |
| 91200 | P14079 | Q14435 | -0.23524 |

|       |        |        |          |
|-------|--------|--------|----------|
| 91201 | P14079 | Q9BQ31 | -0.67454 |
| 91202 | P14079 | Q92630 | -0.76786 |
| 91203 | P14079 | Q96K76 | -0.51003 |
| 91204 | P14079 | Q9BQB4 | -0.40444 |
| 91205 | P14079 | Q8IVT5 | -0.27612 |
| 91206 | P14079 | Q969N4 | -1.2819  |
| 91207 | P14079 | Q8NHW4 | -0.95747 |
| 91208 | P14079 | Q9Y5F8 | -1.2343  |
| 91209 | P14079 | Q99797 | -0.57032 |
| 91210 | P14079 | O43766 | -0.49136 |
| 91211 | P14079 | O15031 | -1.274   |
| 91212 | P14079 | P55289 | -1.2011  |
| 91213 | P14079 | P51864 | -0.51211 |
| 91214 | P14079 | P31942 | -0.37657 |
| 91215 | P14079 | P30475 | -1.0983  |
| 91216 | P14079 | Q8NGA5 | -1.2302  |
| 91217 | P14079 | Q495C1 | -0.16822 |
| 91218 | P14079 | P51582 | -1.1685  |
| 91219 | P14079 | Q9H6A9 | -0.77815 |
| 91220 | P14079 | Q9UK17 | -1.2886  |
| 91221 | P14079 | A6ND48 | -1.2314  |
| 91222 | P14079 | Q8IXV7 | -0.21419 |
| 91223 | P14079 | P50238 | -0.22779 |
| 91224 | P14079 | P36952 | -0.12358 |
| 91225 | P14079 | Q6ZUM4 | -0.80443 |
| 91226 | P14079 | P21579 | -0.39997 |
| 91227 | P14079 | P49585 | -0.43916 |
| 91228 | P14079 | Q9BZY9 | -0.42865 |
| 91229 | P14079 | Q7Z5Q1 | -0.59067 |
| 91230 | P14079 | Q86TZ1 | -0.22736 |
| 91231 | P14079 | Q6QN14 | -0.43956 |
| 91232 | P14079 | O00358 | -0.99971 |
| 91233 | P14079 | Q9Y5N1 | -1.4671  |
| 91234 | P14079 | Q02388 | -0.8348  |
| 91235 | P14079 | Q9Y4E5 | -0.22405 |
| 91236 | P14079 | Q9UBG0 | -0.8703  |
| 91237 | P14079 | O60814 | -0.90191 |
| 91238 | P14079 | Q9BUB4 | -0.26704 |
| 91239 | P14079 | Q9H5I5 | -1.0235  |
| 91240 | P14079 | P01604 | -1       |
| 91241 | P14079 | Q149M9 | -0.78428 |
| 91242 | P14079 | Q9C0D4 | -0.22744 |
| 91243 | P14079 | Q9H1C3 | -0.91706 |
| 91244 | P14079 | Q14954 | -1.0321  |
| 91245 | P14079 | Q96SE0 | -0.79952 |
| 91246 | P14079 | Q15005 | -0.83978 |
| 91247 | P14079 | Q8NHB7 | -1.2314  |
| 91248 | P14079 | Q9BXX2 | -0.26849 |
| 91249 | P14079 | Q9NVW2 | -0.25567 |
| 91250 | P14079 | Q5T1M5 | -0.54333 |
| 91251 | P14079 | P51809 | -0.19918 |
| 91252 | P14079 | Q6PHW0 | -1.2039  |
| 91253 | P14079 | Q9NYM9 | -0.19111 |
| 91254 | P14079 | Q92611 | -0.24911 |
| 91255 | P14079 | Q9BX59 | -1.0351  |
| 91256 | P14079 | P35625 | -0.20962 |
| 91257 | P14079 | Q9Y2D2 | -0.5001  |
| 91258 | P14079 | Q99062 | -1.9616  |
| 91259 | P14079 | P09038 | -0.6974  |
| 91260 | P14079 | P49335 | -0.22741 |
| 91261 | P14079 | Q9NYA4 | -0.33116 |
| 91262 | P14079 | Q9P0N8 | -1.4117  |
| 91263 | P14079 | Q8NFT2 | -1.2239  |
| 91264 | P14079 | Q15836 | -0.21716 |
| 91265 | P14079 | Q6YBV0 | -0.7668  |
| 91266 | P14079 | O60486 | -1.0947  |
| 91267 | P14079 | P0C7P4 | -0.53723 |
| 91268 | P14079 | Q9ULR3 | -0.31581 |
| 91269 | P14079 | Q9H6R6 | -1.0628  |
| 91270 | P14079 | Q01484 | -0.22774 |
| 91271 | P14079 | Q5TAT6 | -1.2153  |
| 91272 | P14079 | Q9UJT1 | -0.29789 |
| 91273 | P14079 | P30301 | -1.0266  |
| 91274 | P14079 | P12268 | -0.93326 |
| 91275 | P14079 | P09131 | -0.81706 |
| 91276 | P14079 | Q8TDF5 | -1.1061  |

|       |        |        |           |
|-------|--------|--------|-----------|
| 91277 | P14079 | Q14916 | -1.2601   |
| 91278 | P14079 | Q8IW41 | -0.49251  |
| 91279 | P14079 | P61204 | -0.54708  |
| 91280 | P14079 | P19544 | -0.2069   |
| 91281 | P14079 | P45378 | -0.14037  |
| 91282 | P14079 | O00469 | -0.74714  |
| 91283 | P14079 | Q9C0K3 | -0.57688  |
| 91284 | P14079 | Q8TDW5 | -0.26938  |
| 91285 | P14079 | P11362 | -0.33027  |
| 91286 | P14079 | O75063 | -1.3662   |
| 91287 | P14079 | Q8IX05 | -0.74766  |
| 91288 | P14079 | Q6S5H4 | -0.22682  |
| 91289 | P14079 | Q3SY17 | -0.66417  |
| 91290 | P14079 | Q5VST9 | -0.96652  |
| 91291 | P14079 | A1KXE4 | -0.9156   |
| 91292 | P14079 | Q9HCU5 | -0.22737  |
| 91293 | P14079 | P08218 | -1.4766   |
| 91294 | P14079 | P41271 | -0.61747  |
| 91295 | P14079 | O43581 | -1.0743   |
| 91296 | P14079 | Q8TE54 | -0.61374  |
| 91297 | P14079 | Q5VY43 | -0.92017  |
| 91298 | P14079 | Q0VG99 | -0.22828  |
| 91299 | P14079 | Q9HBJ0 | -1.1062   |
| 91300 | P14079 | Q9NQW5 | -0.32735  |
| 91301 | P14079 | P12821 | -0.83057  |
| 91302 | P14079 | Q674R7 | -0.85741  |
| 91303 | P14079 | O14924 | -0.48889  |
| 91304 | P14079 | P15735 | -0.91241  |
| 91305 | P14079 | Q92537 | -0.80224  |
| 91306 | P14079 | Q9H4G4 | -0.62376  |
| 91307 | P14079 | P29353 | -0.22741  |
| 91308 | P14079 | O95497 | -0.72138  |
| 91309 | P14079 | Q9NSY1 | -1.06     |
| 91310 | P14079 | Q9NZD1 | -1.3154   |
| 91311 | P14079 | Q3SXM0 | -0.22743  |
| 91312 | P14079 | Q9UP79 | -1.3892   |
| 91313 | P14079 | P30926 | -0.94721  |
| 91314 | P14079 | Q9BZ71 | -0.60389  |
| 91315 | P14079 | Q8NGX8 | -1.2314   |
| 91316 | P14079 | Q8N0U8 | -0.77815  |
| 91317 | P14079 | Q96JM4 | -0.2244   |
| 91318 | P14079 | Q8TC57 | -0.82709  |
| 91319 | P14079 | Q9BZH6 | -0.58343  |
| 91320 | P14079 | Q96PR1 | -0.90933  |
| 91321 | P14079 | Q8TCW9 | -1.2819   |
| 91322 | P14079 | Q9BX63 | -0.24238  |
| 91323 | P14079 | Q9UHJ6 | -0.81364  |
| 91324 | P14079 | P54868 | -0.29576  |
| 91325 | P14079 | Q8NHH9 | -0.60761  |
| 91326 | P14079 | Q6ZMG9 | -0.33361  |
| 91327 | P14079 | P14138 | -0.77815  |
| 91328 | P14079 | O95219 | -0.18883  |
| 91329 | P14079 | Q8WWQ2 | -1.1582   |
| 91330 | P14079 | Q13509 | -0.39457  |
| 91331 | P14079 | P14616 | -1.7074   |
| 91332 | P14079 | Q9NSY0 | -0.7907   |
| 91333 | P14079 | P63119 | -0.65475  |
| 91334 | P14079 | P31270 | -0.068511 |
| 91335 | P14079 | Q8WXQ8 | -1.3084   |
| 91336 | P14079 | O95396 | -0.091276 |
| 91337 | P14079 | O43184 | -0.90887  |
| 91338 | P14079 | Q8NGP6 | -1.2314   |
| 91339 | P14079 | O00182 | -0.78977  |
| 91340 | P14079 | A8MXZ1 | -0.11885  |
| 91341 | P14079 | A6NFH5 | -0.35425  |
| 91342 | P14079 | Q92623 | -0.18667  |
| 91343 | P14079 | P02774 | -0.71848  |
| 91344 | P14079 | Q9Y5X5 | -1.4077   |
| 91345 | P14079 | Q6P1K1 | -0.7548   |
| 91346 | P14079 | P01767 | -1        |
| 91347 | P14079 | P0C0P6 | -0.76796  |
| 91348 | P14079 | P78314 | -0.22727  |
| 91349 | P14079 | Q03405 | -0.91025  |
| 91350 | P14079 | Q495W5 | -0.64419  |
| 91351 | P14079 | Q9Y2I7 | -0.27118  |
| 91352 | P14079 | P04350 | -0.14172  |

|       |        |        |           |
|-------|--------|--------|-----------|
| 91353 | P14079 | Q8WWZ1 | -0.79039  |
| 91354 | P14079 | O76001 | -1.2314   |
| 91355 | P14079 | A8MXV6 | -0.77815  |
| 91356 | P14079 | O60548 | -0.99971  |
| 91357 | P14079 | P01574 | -0.40376  |
| 91358 | P14079 | Q9Y6I4 | -0.38154  |
| 91359 | P14079 | Q8NGU1 | -1.2314   |
| 91360 | P14079 | Q92805 | -0.19789  |
| 91361 | P14079 | P08493 | -1.0012   |
| 91362 | P14079 | O43795 | -0.31435  |
| 91363 | P14079 | Q15846 | -0.6741   |
| 91364 | Q2Q067 | Q9GZL8 | -0.24416  |
| 91365 | Q2Q067 | Q8NCL4 | -0.73549  |
| 91366 | Q2Q067 | Q9Y5H0 | -1.3679   |
| 91367 | Q2Q067 | Q8NGF3 | -1.4096   |
| 91368 | Q2Q067 | Q6IEY1 | -1.4096   |
| 91369 | Q2Q067 | P04209 | -1.1115   |
| 91370 | Q2Q067 | O14874 | -0.47916  |
| 91371 | Q2Q067 | Q14728 | -0.97601  |
| 91372 | Q2Q067 | Q8NHP6 | -0.89369  |
| 91373 | Q2Q067 | Q9H972 | -0.98666  |
| 91374 | Q2Q067 | Q15147 | -0.22698  |
| 91375 | Q2Q067 | Q96EG3 | -0.085533 |
| 91376 | Q2Q067 | P18577 | -1.1043   |
| 91377 | Q2Q067 | P61567 | -0.86704  |
| 91378 | Q2Q067 | Q9UKJ1 | -1.0945   |
| 91379 | Q2Q067 | P01714 | -1.1115   |
| 91380 | Q2Q067 | Q6DHY5 | -1.4231   |
| 91381 | Q2Q067 | Q8IWG1 | -0.16881  |
| 91382 | Q2Q067 | A8MXV4 | -0.37494  |
| 91383 | Q2Q067 | O95294 | -0.55774  |
| 91384 | Q2Q067 | Q8N5G0 | -1.0345   |
| 91385 | Q2Q067 | O96008 | -0.62117  |
| 91386 | Q2Q067 | Q8N9V3 | -0.43384  |
| 91387 | Q2Q067 | Q9UK85 | -1.1681   |
| 91388 | Q2Q067 | O95196 | -0.77998  |
| 91389 | Q2Q067 | Q5TGY1 | -1.0345   |
| 91390 | Q2Q067 | Q14957 | -0.78128  |
| 91391 | Q2Q067 | Q9BS26 | -0.30016  |
| 91392 | Q2Q067 | P59095 | -0.80691  |
| 91393 | Q2Q067 | Q14721 | -0.38225  |
| 91394 | Q2Q067 | Q15080 | -0.42878  |
| 91395 | Q2Q067 | P29992 | -1.021    |
| 91396 | Q2Q067 | Q9Y2H1 | -0.50685  |
| 91397 | Q2Q067 | P98198 | -1.2036   |
| 91398 | Q2Q067 | Q9BV10 | -0.91035  |
| 91399 | Q2Q067 | A6ND01 | -0.96331  |
| 91400 | Q2Q067 | Q8TBB5 | -0.22544  |
| 91401 | Q2Q067 | Q8N8V8 | -1.0345   |
| 91402 | Q2Q067 | O95231 | -0.2274   |
| 91403 | Q2Q067 | Q8NER1 | -1.3181   |
| 91404 | Q2Q067 | Q567U6 | -0.20726  |
| 91405 | Q2Q067 | P09564 | -1.0971   |
| 91406 | Q2Q067 | P41235 | -0.2456   |
| 91407 | Q2Q067 | Q96LB0 | -1.4967   |
| 91408 | Q2Q067 | Q96PY0 | -0.068206 |
| 91409 | Q2Q067 | P41595 | -0.5148   |
| 91410 | Q2Q067 | A8MXB1 | -1.1024   |
| 91411 | Q2Q067 | Q5JRV8 | -1.0345   |
| 91412 | Q2Q067 | Q96M20 | -0.22617  |
| 91413 | Q2Q067 | O43699 | -1.8637   |
| 91414 | Q2Q067 | Q15661 | -1.0114   |
| 91415 | Q2Q067 | Q0VAM2 | -0.8302   |
| 91416 | Q2Q067 | O60911 | -0.54996  |
| 91417 | Q2Q067 | P51512 | -1.8328   |
| 91418 | Q2Q067 | Q5I7T1 | -1.0431   |
| 91419 | Q2Q067 | O75363 | -0.20901  |
| 91420 | Q2Q067 | P54296 | -0.63479  |
| 91421 | Q2Q067 | Q6PKG0 | -0.42871  |
| 91422 | Q2Q067 | Q9P2Q2 | -0.25377  |
| 91423 | Q2Q067 | Q96NY8 | -0.9432   |
| 91424 | Q2Q067 | P02750 | -0.99681  |
| 91425 | Q2Q067 | Q16181 | -0.22527  |
| 91426 | Q2Q067 | Q9BYJ0 | -0.998    |
| 91427 | Q2Q067 | Q6UX68 | -1.0345   |
| 91428 | Q2Q067 | Q902F8 | -0.86704  |



|       |        |        |            |
|-------|--------|--------|------------|
| 91429 | Q2Q067 | Q96BW5 | -0.45059   |
| 91430 | Q2Q067 | Q9BZ72 | -1.6125    |
| 91431 | Q2Q067 | P28907 | -0.7507    |
| 91432 | Q2Q067 | Q96KJ4 | -1.227     |
| 91433 | Q2Q067 | Q8IVE0 | -0.058734  |
| 91434 | Q2Q067 | Q99795 | -1.3215    |
| 91435 | Q2Q067 | O60449 | -1.2943    |
| 91436 | Q2Q067 | Q9BZG9 | -1.3995    |
| 91437 | Q2Q067 | Q8N7A1 | -0.2273    |
| 91438 | Q2Q067 | Q9NVA2 | -0.22729   |
| 91439 | Q2Q067 | Q9Y6X6 | -0.22298   |
| 91440 | Q2Q067 | Q8N9U9 | -0.0020918 |
| 91441 | Q2Q067 | Q04446 | -0.095305  |
| 91442 | Q2Q067 | P26998 | -0.53868   |
| 91443 | Q2Q067 | Q7Z418 | -1.2801    |
| 91444 | Q2Q067 | Q15063 | -1.3484    |
| 91445 | Q2Q067 | Q08477 | -1.0055    |
| 91446 | Q2Q067 | Q53S33 | -0.77379   |
| 91447 | Q2Q067 | Q562E7 | -0.433     |
| 91448 | Q2Q067 | Q92858 | -0.22818   |
| 91449 | Q2Q067 | P10323 | -0.98783   |
| 91450 | Q2Q067 | Q969I3 | -0.28787   |
| 91451 | Q2Q067 | Q86XT2 | -0.046146  |
| 91452 | Q2Q067 | P31629 | -0.22752   |
| 91453 | Q2Q067 | Q5T7M9 | -1.1118    |
| 91454 | Q2Q067 | P49641 | -0.67202   |
| 91455 | Q2Q067 | Q86SG4 | -0.19667   |
| 91456 | Q2Q067 | P47895 | -0.32186   |
| 91457 | Q2Q067 | Q7L1I2 | -0.90575   |
| 91458 | Q2Q067 | P04554 | -0.82343   |
| 91459 | Q2Q067 | P24752 | -0.19785   |
| 91460 | Q2Q067 | Q38SD2 | -1.4929    |
| 91461 | Q2Q067 | Q8N135 | -0.9475    |
| 91462 | Q2Q067 | Q96LK8 | -0.094271  |
| 91463 | Q2Q067 | Q96QU1 | -1.539     |
| 91464 | Q2Q067 | Q9Y2P4 | -1.4696    |
| 91465 | Q2Q067 | A5A3E0 | -0.24696   |
| 91466 | Q2Q067 | P08514 | -0.51957   |
| 91467 | Q2Q067 | O75602 | -0.31088   |
| 91468 | Q2Q067 | Q93091 | -0.79628   |
| 91469 | Q2Q067 | Q6UXB1 | -0.98666   |
| 91470 | Q2Q067 | Q9H336 | -0.98666   |
| 91471 | Q2Q067 | Q969T3 | -0.67605   |
| 91472 | Q2Q067 | P0CG41 | -1.0345    |
| 91473 | Q2Q067 | Q9BY21 | -1.3897    |
| 91474 | Q2Q067 | Q9Y257 | -1.2542    |
| 91475 | Q2Q067 | P56381 | -0.15965   |
| 91476 | Q2Q067 | Q06945 | -0.23341   |
| 91477 | Q2Q067 | P30613 | -0.39644   |
| 91478 | Q2Q067 | Q16570 | -1.3421    |
| 91479 | Q2Q067 | Q6S9Z5 | -0.48451   |
| 91480 | Q2Q067 | Q6KF10 | -0.65602   |
| 91481 | Q2Q067 | Q8NGR1 | -1.4096    |
| 91482 | Q2Q067 | O43825 | -0.97656   |
| 91483 | Q2Q067 | O14526 | -0.55577   |
| 91484 | Q2Q067 | A1L020 | -0.22738   |
| 91485 | Q2Q067 | Q9P0K1 | -0.69349   |
| 91486 | Q2Q067 | Q9GZV1 | -0.62101   |
| 91487 | Q2Q067 | Q9BX40 | -0.49014   |
| 91488 | Q2Q067 | Q9NP84 | -0.69732   |
| 91489 | Q2Q067 | Q7LGA3 | -0.66256   |
| 91490 | Q2Q067 | Q8NES8 | -0.94775   |
| 91491 | Q2Q067 | P21462 | -1.104     |
| 91492 | Q2Q067 | H3BS89 | -1.0345    |
| 91493 | Q2Q067 | Q9NX07 | -0.35827   |
| 91494 | Q2Q067 | P98169 | -0.07465   |
| 91495 | Q2Q067 | Q7Z5M8 | -0.35973   |
| 91496 | Q2Q067 | Q7Z3B0 | -1.0345    |
| 91497 | Q2Q067 | Q9BXP8 | -1.7028    |
| 91498 | Q2Q067 | Q9HC38 | -0.21265   |
| 91499 | Q2Q067 | Q9P107 | -0.49508   |
| 91500 | Q2Q067 | Q9H4G4 | -0.89454   |
| 91501 | Q2Q067 | P28472 | -1.1254    |
| 91502 | Q2Q067 | P98174 | -0.95727   |
| 91503 | Q2Q067 | Q9Y6G1 | -1.0345    |
| 91504 | Q2Q067 | Q7Z5A7 | -1.5853    |

|       |        |        |          |
|-------|--------|--------|----------|
| 91505 | Q2Q067 | Q9Y6C5 | -0.94004 |
| 91506 | Q2Q067 | Q9BRF8 | -0.40827 |
| 91507 | Q2Q067 | P10966 | -0.94669 |
| 91508 | Q2Q067 | Q9H9A5 | -0.13651 |
| 91509 | Q2Q067 | Q14164 | -0.22741 |
| 91510 | Q2Q067 | Q8IYD2 | -0.22631 |
| 91511 | Q2Q067 | Q8IUB5 | -0.90081 |
| 91512 | Q2Q067 | P30566 | -0.11104 |
| 91513 | Q2Q067 | Q14320 | -0.12359 |
| 91514 | Q2Q067 | Q9NYA3 | -0.28132 |
| 91515 | Q2Q067 | P56746 | -0.85277 |
| 91516 | Q2Q067 | Q8NBR0 | -0.95288 |
| 91517 | Q2Q067 | Q08174 | -1.1724  |
| 91518 | Q2Q067 | Q6IEE7 | -1.0345  |
| 91519 | Q2Q067 | Q71DI3 | -0.55883 |
| 91520 | Q2Q067 | P21283 | -0.21411 |
| 91521 | Q2Q067 | Q92817 | -0.21862 |
| 91522 | Q2Q067 | P00709 | -1.028   |
| 91523 | Q2Q067 | Q9Y388 | -0.96284 |
| 91524 | Q2Q067 | Q6AHZ1 | -0.22782 |
| 91525 | Q2Q067 | Q96LQ0 | -0.41456 |
| 91526 | Q2Q067 | P14174 | -0.32    |
| 91527 | Q2Q067 | Q15467 | -1.0895  |
| 91528 | Q2Q067 | Q9UQD0 | -1.0575  |
| 91529 | Q2Q067 | Q9BRS2 | -1.2704  |
| 91530 | Q2Q067 | Q8N7P7 | -0.37088 |
| 91531 | Q2Q067 | Q6ZQQ6 | -0.19694 |
| 91532 | Q2Q067 | Q58WW2 | -0.2274  |
| 91533 | Q2Q067 | Q8NGJ4 | -1.4096  |
| 91534 | Q2Q067 | Q96QV6 | -0.82527 |
| 91535 | Q2Q067 | O76100 | -1.4096  |
| 91536 | Q2Q067 | O00481 | -0.41055 |
| 91537 | Q2Q067 | Q15342 | -0.73196 |
| 91538 | Q2Q067 | Q4ZJI4 | -1.0424  |
| 91539 | Q2Q067 | Q93038 | -1.4307  |
| 91540 | Q2Q067 | Q8NGI4 | -1.4096  |
| 91541 | Q2Q067 | B5ME19 | -0.0791  |
| 91542 | Q2Q067 | Q8NH73 | -1.4096  |
| 91543 | Q2Q067 | P60602 | -0.58416 |
| 91544 | Q2Q067 | P04278 | -0.98725 |
| 91545 | Q2Q067 | Q9Y6N3 | -0.96431 |
| 91546 | Q2Q067 | Q96LZ3 | -0.45603 |
| 91547 | Q2Q067 | Q14924 | -0.47701 |
| 91548 | Q2Q067 | A6NH57 | -1.4417  |
| 91549 | Q2Q067 | O60502 | -0.13046 |
| 91550 | Q2Q067 | P10696 | -0.94561 |
| 91551 | Q2Q067 | Q6UXF1 | -0.77947 |
| 91552 | Q2Q067 | Q75056 | -1.005   |
| 91553 | Q2Q067 | Q3ZCT8 | -0.21584 |
| 91554 | Q2Q067 | Q9H6D8 | -1.1229  |
| 91555 | Q2Q067 | P61550 | -0.86758 |
| 91556 | Q2Q067 | Q96JJ6 | -1.1507  |
| 91557 | Q2Q067 | P0C672 | -1.0345  |
| 91558 | Q2Q067 | P24903 | -0.83907 |
| 91559 | Q2Q067 | Q96LA5 | -1.0816  |
| 91560 | Q2Q067 | Q92784 | -0.23003 |
| 91561 | Q2Q067 | Q43670 | -0.21033 |
| 91562 | Q2Q067 | Q08881 | -0.58099 |
| 91563 | Q2Q067 | P58400 | -0.66897 |
| 91564 | Q2Q067 | Q9HAD4 | -0.22741 |
| 91565 | Q2Q067 | Q9BYE9 | -0.67757 |
| 91566 | Q2Q067 | Q9Y2Y1 | -0.11475 |
| 91567 | Q2Q067 | Q43292 | -0.45459 |
| 91568 | Q2Q067 | Q5K651 | -0.25609 |
| 91569 | Q2Q067 | Q9NX57 | -0.98481 |
| 91570 | Q2Q067 | Q97980 | -0.06517 |
| 91571 | Q2Q067 | Q9UBL6 | -0.49956 |
| 91572 | Q2Q067 | Q8IZ52 | -0.61626 |
| 91573 | Q2Q067 | Q8NGG5 | -1.4096  |
| 91574 | Q2Q067 | Q8TAX0 | -0.20714 |
| 91575 | Q2Q067 | P03886 | -0.17084 |
| 91576 | Q2Q067 | P35498 | -1.0328  |
| 91577 | Q2Q067 | Q86VF7 | -0.52293 |
| 91578 | Q2Q067 | Q9Y5E6 | -1.3638  |
| 91579 | Q2Q067 | Q43929 | -0.15256 |
| 91580 | Q2Q067 | P15144 | -1.071   |

|       |        |        |           |
|-------|--------|--------|-----------|
| 91581 | Q2Q067 | Q8WXQ8 | -1.3781   |
| 91582 | Q2Q067 | P28845 | -1.306    |
| 91583 | Q2Q067 | Q96H15 | -1.0345   |
| 91584 | Q2Q067 | Q9Y2K7 | -0.22573  |
| 91585 | Q2Q067 | Q9H8M9 | -1.2955   |
| 91586 | Q2Q067 | Q9HC57 | -0.6912   |
| 91587 | Q2Q067 | Q8NAA5 | -0.18333  |
| 91588 | Q2Q067 | Q8TCU4 | -0.11744  |
| 91589 | Q2Q067 | Q5BLP8 | -0.98666  |
| 91590 | Q2Q067 | Q96P09 | -0.52384  |
| 91591 | Q2Q067 | Q96J77 | -0.2119   |
| 91592 | Q2Q067 | Q9NS40 | -1.1886   |
| 91593 | Q2Q067 | Q6NXP0 | -0.45603  |
| 91594 | Q2Q067 | P20062 | -1.096    |
| 91595 | Q2Q067 | Q16517 | -0.55831  |
| 91596 | Q2Q067 | P48730 | -0.22741  |
| 91597 | Q2Q067 | P56202 | -0.87119  |
| 91598 | Q2Q067 | Q9H1K6 | -0.074535 |
| 91599 | Q2Q067 | Q0VAF6 | -0.48196  |
| 91600 | Q2Q067 | Q3LFD5 | -0.76972  |
| 91601 | Q2Q067 | A2A3L6 | -0.22563  |
| 91602 | Q2Q067 | Q9NW68 | -0.14167  |
| 91603 | Q2Q067 | Q96NX9 | -0.29161  |
| 91604 | Q2Q067 | P10301 | -0.8367   |
| 91605 | Q2Q067 | Q9UEE5 | -0.88117  |
| 91606 | Q2Q067 | P10997 | -1.1405   |
| 91607 | Q2Q067 | P08473 | -0.66457  |
| 91608 | Q2Q067 | Q7L5Y6 | -0.12884  |
| 91609 | Q2Q067 | P50440 | -0.12359  |
| 91610 | Q2Q067 | Q96CU9 | -0.94127  |
| 91611 | Q2Q067 | Q7Z7J7 | -1.0345   |
| 91612 | Q2Q067 | O43731 | -0.68107  |
| 91613 | Q2Q067 | Q8TCB7 | -0.38719  |
| 91614 | Q2Q067 | Q99999 | -0.83565  |
| 91615 | Q2Q067 | Q9H9A6 | -0.22867  |
| 91616 | Q2Q067 | Q9UNX9 | -1.2889   |
| 91617 | Q2Q067 | Q9NWX5 | -0.2274   |
| 91618 | Q2Q067 | Q96LZ7 | -0.45978  |
| 91619 | Q2Q067 | P22314 | -0.23831  |
| 91620 | Q2Q067 | O60237 | -0.51255  |
| 91621 | Q2Q067 | H3BV60 | -1.0345   |
| 91622 | Q2Q067 | Q9Y5W5 | -1.2586   |
| 91623 | Q2Q067 | P20674 | -0.27775  |
| 91624 | Q2Q067 | O15121 | -0.94231  |
| 91625 | Q2Q067 | P08048 | -0.085533 |
| 91626 | Q2Q067 | Q99584 | -0.24056  |
| 91627 | Q2Q067 | Q9Y6N5 | -0.21333  |
| 91628 | Q2Q067 | P54793 | -0.83456  |
| 91629 | Q2Q067 | Q6ZRI0 | -0.89466  |
| 91630 | Q2Q067 | P43307 | -0.7048   |
| 91631 | Q2Q067 | Q8NDZ6 | -1.0345   |
| 91632 | Q2Q067 | P09488 | -0.2226   |
| 91633 | Q2Q067 | Q9BZE0 | -0.22722  |
| 91634 | Q2Q067 | Q01995 | -0.20669  |
| 91635 | Q2Q067 | Q9BYW3 | -0.90029  |
| 91636 | Q2Q067 | Q8WUU4 | -0.2249   |
| 91637 | Q2Q067 | Q9Y4H2 | -0.21193  |
| 91638 | Q2Q067 | Q6B9Z1 | -0.98666  |
| 91639 | Q2Q067 | Q5T4T1 | -1.0345   |
| 91640 | Q2Q067 | Q9UJP4 | -0.211    |
| 91641 | Q2Q067 | P09912 | -0.39293  |
| 91642 | Q2Q067 | P57764 | -0.35849  |
| 91643 | Q2Q067 | Q8IXI2 | -0.69168  |
| 91644 | Q2Q067 | Q8N8F7 | -1.0345   |
| 91645 | Q2Q067 | Q9BX51 | -0.36767  |
| 91646 | Q2Q067 | O95704 | -0.2281   |
| 91647 | Q2Q067 | P13497 | -1.2149   |
| 91648 | Q2Q067 | P24310 | -0.81433  |
| 91649 | Q2Q067 | Q658T7 | -0.045012 |
| 91650 | Q2Q067 | O60662 | -0.21889  |
| 91651 | Q2Q067 | Q9BU70 | -0.25031  |
| 91652 | Q2Q067 | Q9NPH6 | -0.92382  |
| 91653 | Q2Q067 | Q96DZ5 | -0.79048  |
| 91654 | Q2Q067 | P60983 | -0.77215  |
| 91655 | Q2Q067 | Q8TCW9 | -1.4577   |
| 91656 | Q2Q067 | A6NHG4 | -0.29742  |

|       |        |        |          |
|-------|--------|--------|----------|
| 91657 | Q2Q067 | P78417 | -0.25639 |
| 91658 | Q2Q067 | Q6JVE6 | -1.011   |
| 91659 | Q2Q067 | Q6P461 | -1.1979  |
| 91660 | Q2Q067 | O60312 | -0.79938 |
| 91661 | Q2Q067 | P30460 | -1.2066  |
| 91662 | Q2Q067 | Q8WXX5 | -0.45109 |
| 91663 | Q2Q067 | Q96BA8 | -0.22209 |
| 91664 | Q2Q067 | Q9NQZ6 | -0.43755 |
| 91665 | Q2Q067 | P43361 | -0.24416 |
| 91666 | Q2Q067 | Q14005 | -0.39179 |
| 91667 | Q2Q067 | Q96BZ9 | -1.8132  |
| 91668 | Q2Q067 | Q8TC59 | -0.55076 |
| 91669 | Q2Q067 | Q5TYW2 | -0.51982 |
| 91670 | Q2Q067 | Q5VVJ2 | -0.22738 |
| 91671 | Q2Q067 | Q6SJ93 | -0.5697  |
| 91672 | Q2Q067 | Q5VSY0 | -0.46675 |
| 91673 | Q2Q067 | Q8N966 | -1.13    |
| 91674 | Q2Q067 | Q12912 | -1.0433  |
| 91675 | Q2Q067 | Q8TC41 | -1.267   |
| 91676 | Q2Q067 | Q9NRK6 | -1.1687  |
| 91677 | Q2Q067 | P78362 | -0.56141 |
| 91678 | Q2Q067 | Q99878 | -0.82527 |
| 91679 | Q2Q067 | P46597 | -0.19439 |
| 91680 | Q2Q067 | Q15198 | -0.82206 |
| 91681 | Q2Q067 | Q9UHP6 | -0.24416 |
| 91682 | Q2Q067 | P01111 | -0.72783 |
| 91683 | Q2Q067 | Q5XG87 | -0.17379 |
| 91684 | Q2Q067 | O60476 | -0.61095 |
| 91685 | Q2Q067 | Q96BD0 | -1.1388  |
| 91686 | Q2Q067 | Q709F0 | -0.48801 |
| 91687 | Q2Q067 | Q8IZC4 | -0.87536 |
| 91688 | Q2Q067 | Q96RN1 | -0.74694 |
| 91689 | Q2Q067 | P84077 | -0.22853 |
| 91690 | Q2Q067 | P46721 | -1.017   |
| 91691 | Q2Q067 | Q86SJ2 | -0.33027 |
| 91692 | Q2Q067 | P55087 | -0.72089 |
| 91693 | Q2Q067 | P18084 | -0.99703 |
| 91694 | Q2Q067 | Q8TBY9 | -0.45603 |
| 91695 | Q2Q067 | Q9NS15 | -0.88371 |
| 91696 | Q2Q067 | P02144 | -0.49521 |
| 91697 | Q2Q067 | Q68CR1 | -1.0345  |
| 91698 | Q2Q067 | Q8TF61 | -0.66124 |
| 91699 | Q2Q067 | P32456 | -0.37716 |
| 91700 | Q2Q067 | A1L0T0 | -0.99719 |
| 91701 | Q2Q067 | Q14842 | -1.2802  |
| 91702 | Q2Q067 | Q9NQG6 | -0.21666 |
| 91703 | Q2Q067 | Q00722 | -0.61082 |
| 91704 | Q2Q067 | P68402 | -0.26772 |
| 91705 | Q2Q067 | Q9BQI6 | -0.22741 |
| 91706 | Q2Q067 | Q8NH48 | -1.4096  |
| 91707 | Q2Q067 | P83110 | -0.86918 |
| 91708 | Q2Q067 | Q96R45 | -1.4096  |
| 91709 | Q2Q067 | P19105 | -0.36777 |
| 91710 | Q2Q067 | P01909 | -0.8793  |
| 91711 | Q2Q067 | Q9Y219 | -0.63486 |
| 91712 | Q2Q067 | Q9UKG9 | -0.62733 |
| 91713 | Q2Q067 | Q702N8 | -0.34141 |
| 91714 | Q2Q067 | O60704 | -0.80548 |
| 91715 | Q2Q067 | Q8N8E2 | -0.11556 |
| 91716 | Q2Q067 | Q92485 | -0.97698 |
| 91717 | Q2Q067 | O14640 | -0.16221 |
| 91718 | Q2Q067 | P00326 | -0.62398 |
| 91719 | Q2Q067 | Q8TB36 | -0.60095 |
| 91720 | Q2Q067 | Q4ZIN3 | -0.82814 |
| 91721 | Q2Q067 | Q969H4 | -0.2274  |
| 91722 | Q2Q067 | Q9HBU9 | -0.88683 |
| 91723 | Q2Q067 | Q14002 | -1.148   |
| 91724 | Q2Q067 | O95222 | -1.4096  |
| 91725 | Q2Q067 | P01623 | -1.1115  |
| 91726 | Q2Q067 | Q9H1Z9 | -1.0345  |
| 91727 | Q2Q067 | Q96E22 | -1.008   |
| 91728 | Q2Q067 | O00222 | -1.3793  |
| 91729 | Q2Q067 | Q9HCS5 | -0.24996 |
| 91730 | Q2Q067 | Q15615 | -1.4096  |
| 91731 | Q2Q067 | P14867 | -0.95142 |
| 91732 | Q2Q067 | Q9UM00 | -0.90701 |

|       |        |        |            |
|-------|--------|--------|------------|
| 91733 | Q2Q067 | Q9NYQ8 | -0.84454   |
| 91734 | Q2Q067 | Q8NCN2 | -0.22686   |
| 91735 | Q2Q067 | Q8WXT5 | -0.33602   |
| 91736 | Q2Q067 | Q9UGI8 | -0.41525   |
| 91737 | Q2Q067 | Q8NE62 | -0.45302   |
| 91738 | Q2Q067 | P55259 | -1.166     |
| 91739 | Q2Q067 | P04234 | -0.63162   |
| 91740 | Q2Q067 | Q92563 | -1.0672    |
| 91741 | Q2Q067 | P98073 | -1.4329    |
| 91742 | Q2Q067 | A8MWL7 | -1.0345    |
| 91743 | Q2Q067 | P23109 | -0.17264   |
| 91744 | Q2Q067 | O43822 | -0.22731   |
| 91745 | Q2Q067 | A6NER0 | -1.4231    |
| 91746 | Q2Q067 | Q9Y210 | -0.44435   |
| 91747 | Q2Q067 | P21333 | -0.22826   |
| 91748 | Q2Q067 | Q9UIY3 | -0.071884  |
| 91749 | Q2Q067 | P30556 | -0.60121   |
| 91750 | Q2Q067 | Q8WTQ4 | -0.0015091 |
| 91751 | Q2Q067 | Q13595 | -0.56396   |
| 91752 | Q2Q067 | Q969Q4 | -0.80683   |
| 91753 | Q2Q067 | Q8N9L7 | -0.014206  |
| 91754 | Q2Q067 | Q13946 | -0.28829   |
| 91755 | Q2Q067 | Q99932 | -0.45645   |
| 91756 | Q2Q067 | Q9BQI5 | -0.10042   |
| 91757 | Q2Q067 | Q96GQ7 | -0.65853   |
| 91758 | Q2Q067 | Q494V2 | -0.19262   |
| 91759 | Q2Q067 | P54753 | -1.0526    |
| 91760 | Q2Q067 | Q14541 | -0.28333   |
| 91761 | Q2Q067 | Q8N2F6 | -0.92746   |
| 91762 | Q2Q067 | A6NMC2 | -0.19475   |
| 91763 | Q2Q067 | Q3ZCW2 | -0.63282   |
| 91764 | Q2Q067 | Q6ZMY3 | -0.34538   |
| 91765 | Q2Q067 | P29536 | -0.24891   |
| 91766 | Q2Q067 | Q53FZ2 | -0.79202   |
| 91767 | Q2Q067 | Q9NNX1 | -0.98622   |
| 91768 | Q2Q067 | Q9BQ04 | -0.46736   |
| 91769 | Q2Q067 | Q04118 | -0.94439   |
| 91770 | Q2Q067 | P20336 | -0.42691   |
| 91771 | Q2Q067 | Q92520 | -0.93432   |
| 91772 | Q2Q067 | O43903 | -0.20126   |
| 91773 | Q2Q067 | P52569 | -0.83815   |
| 91774 | Q2Q067 | Q04759 | -0.21717   |
| 91775 | Q2Q067 | P11245 | -0.21337   |
| 91776 | Q2Q067 | Q9NPF4 | -0.38125   |
| 91777 | Q2Q067 | Q05952 | -1.0264    |
| 91778 | Q2Q067 | Q9BXJ2 | -0.78756   |
| 91779 | Q2Q067 | Q9Y573 | -0.28426   |
| 91780 | Q2Q067 | P67936 | -0.40025   |
| 91781 | Q2Q067 | O00750 | -0.24683   |
| 91782 | Q2Q067 | P48201 | -0.86346   |
| 91783 | Q2Q067 | Q9NWU2 | -0.12902   |
| 91784 | Q2Q067 | Q95841 | -1.2462    |
| 91785 | Q2Q067 | Q8IYQ7 | -0.2445    |
| 91786 | Q2Q067 | Q8NGI9 | -1.4096    |
| 91787 | Q2Q067 | Q02880 | -0.19494   |
| 91788 | Q2Q067 | Q9NX74 | -0.53186   |
| 91789 | Q2Q067 | Q9HC35 | -0.3893    |
| 91790 | Q2Q067 | P19878 | -0.22751   |
| 91791 | Q2Q067 | P52306 | -0.74696   |
| 91792 | Q2Q067 | Q9GZQ8 | -0.32762   |
| 91793 | Q2Q067 | Q8IV48 | -0.07508   |
| 91794 | Q2Q067 | Q96C45 | -1.3228    |
| 91795 | Q2Q067 | Q8NGL4 | -1.4096    |
| 91796 | Q2Q067 | Q6FIF0 | -0.38591   |
| 91797 | Q2Q067 | P31947 | -0.70448   |
| 91798 | Q2Q067 | Q8N8Q1 | -1.0481    |
| 91799 | Q2Q067 | O14976 | -0.85574   |
| 91800 | Q2Q067 | Q9UQ74 | -0.98666   |
| 91801 | Q2Q067 | Q8WXG8 | -0.45603   |
| 91802 | Q2Q067 | Q9C0I1 | -0.40349   |
| 91803 | Q2Q067 | Q9BXM9 | -0.24416   |
| 91804 | Q2Q067 | P33765 | -1.2433    |
| 91805 | Q2Q067 | Q7RTT4 | -0.16361   |
| 91806 | Q2Q067 | Q7Z7J9 | -0.56031   |
| 91807 | Q2Q067 | Q13115 | -0.23208   |
| 91808 | Q2Q067 | Q9H3S1 | -1.1009    |

|       |        |        |           |
|-------|--------|--------|-----------|
| 91809 | Q2Q067 | F7VJQ1 | -0.42579  |
| 91810 | Q2Q067 | Q3KQV9 | -0.47143  |
| 91811 | Q2Q067 | Q5F1R6 | -0.034988 |
| 91812 | Q2Q067 | P23229 | -0.37589  |
| 91813 | Q2Q067 | P58550 | -1.1958   |
| 91814 | Q2Q067 | Q9NSD5 | -1.193    |
| 91815 | Q2Q067 | Q8WUD6 | -0.69868  |
| 91816 | Q2Q067 | Q9Y6Y9 | -0.08703  |
| 91817 | Q2Q067 | Q96NC0 | -0.50923  |
| 91818 | Q2Q067 | Q8IWK6 | -1.4997   |
| 91819 | Q2Q067 | P15248 | -0.83112  |
| 91820 | Q2Q067 | Q9UII6 | -0.91922  |
| 91821 | Q2Q067 | A8MT79 | -1.1024   |
| 91822 | Q2Q067 | P51153 | -0.73133  |
| 91823 | Q2Q067 | Q06418 | -0.79949  |
| 91824 | Q2Q067 | O75459 | -0.38152  |
| 91825 | Q2Q067 | O95292 | -0.16669  |
| 91826 | Q2Q067 | Q9H089 | -0.18411  |
| 91827 | Q2Q067 | A6NI56 | -0.099664 |
| 91828 | Q2Q067 | Q92523 | -0.795    |
| 91829 | Q2Q067 | O43749 | -1.4096   |
| 91830 | Q2Q067 | Q49A17 | -0.9122   |
| 91831 | Q2Q067 | A8K979 | -0.7497   |
| 91832 | Q2Q067 | O95498 | -0.54921  |
| 91833 | Q2Q067 | Q6UWW9 | -1.0345   |
| 91834 | Q2Q067 | Q7RTR8 | -1.3729   |
| 91835 | Q2Q067 | B4DYI2 | -0.24088  |
| 91836 | Q2Q067 | Q8NGZ0 | -1.4096   |
| 91837 | Q2Q067 | Q9H7F4 | -1.0345   |
| 91838 | Q2Q067 | P16152 | -0.78932  |
| 91839 | Q2Q067 | P21579 | -0.35229  |
| 91840 | Q2Q067 | Q14916 | -1.2288   |
| 91841 | Q2Q067 | P62745 | -0.2779   |
| 91842 | Q2Q067 | Q99470 | -1.1242   |
| 91843 | Q2Q067 | P13535 | -0.21158  |
| 91844 | Q2Q067 | O15050 | -0.38851  |
| 91845 | Q2Q067 | Q5TEV5 | -0.98666  |
| 91846 | Q2Q067 | Q14019 | -0.17308  |
| 91847 | Q2Q067 | Q9WJR5 | -0.36034  |
| 91848 | Q2Q067 | Q92896 | -0.84134  |
| 91849 | Q2Q067 | O75339 | -0.9736   |
| 91850 | Q2Q067 | Q05996 | -1.1909   |
| 91851 | Q2Q067 | Q9NS61 | -0.53799  |
| 91852 | Q2Q067 | Q6YHU6 | -0.058388 |
| 91853 | Q2Q067 | Q9UP65 | -0.78963  |
| 91854 | Q2Q067 | Q8NGQ4 | -1.4096   |
| 91855 | Q2Q067 | Q9H0M0 | -0.22741  |
| 91856 | Q2Q067 | Q14183 | -0.23786  |
| 91857 | Q2Q067 | Q8N9S9 | -0.39054  |
| 91858 | Q2Q067 | Q13332 | -0.88173  |
| 91859 | Q2Q067 | Q9BZS1 | -0.28739  |
| 91860 | Q2Q067 | P25391 | -0.83784  |
| 91861 | Q2Q067 | P02753 | -0.36653  |
| 91862 | Q2Q067 | P63119 | -0.74403  |
| 91863 | Q2Q067 | Q9UMN6 | -0.22683  |
| 91864 | Q2Q067 | Q8WUY1 | -0.98666  |
| 91865 | Q2Q067 | Q5T2L2 | -0.38128  |
| 91866 | Q2Q067 | Q03164 | -0.22709  |
| 91867 | Q2Q067 | Q8NHH9 | -0.59628  |
| 91868 | Q2Q067 | A1L4M7 | -0.063982 |
| 91869 | Q2Q067 | A1E959 | -0.92553  |
| 91870 | Q2Q067 | P17302 | -0.34151  |
| 91871 | Q2Q067 | O95006 | -1.4096   |
| 91872 | Q2Q067 | Q96DZ9 | -1.0608   |
| 91873 | Q2Q067 | A6NMB9 | -1.0603   |
| 91874 | Q2Q067 | Q6PEY0 | -1.1243   |
| 91875 | Q2Q067 | A8MPP1 | -0.58623  |
| 91876 | Q2Q067 | Q5JX71 | -1.0345   |
| 91877 | Q2Q067 | Q8N5W9 | -0.36976  |
| 91878 | Q2Q067 | O95665 | -1.5353   |
| 91879 | Q2Q067 | P06734 | -1.5786   |
| 91880 | Q2Q067 | Q8IWA4 | -1.1214   |
| 91881 | Q2Q067 | Q9H343 | -1.4096   |
| 91882 | Q2Q067 | Q8NGX9 | -1.4096   |
| 91883 | Q2Q067 | O75679 | -0.48451  |
| 91884 | Q2Q067 | Q9BZJ7 | -1.3467   |

|       |        |        |          |
|-------|--------|--------|----------|
| 91885 | Q2Q067 | P23786 | -0.1351  |
| 91886 | Q2Q067 | P08567 | -0.22741 |
| 91887 | Q2Q067 | Q8IXF0 | -0.30386 |
| 91888 | Q2Q067 | Q08397 | -1.2186  |
| 91889 | Q2Q067 | Q9NZU0 | -1.3047  |
| 91890 | Q2Q067 | Q96C36 | -0.74658 |
| 91891 | Q2Q067 | O75690 | -0.53608 |
| 91892 | Q2Q067 | Q24JP5 | -0.75797 |
| 91893 | Q2Q067 | Q9UBX0 | -0.20066 |
| 91894 | Q2Q067 | Q9P2S6 | -0.48451 |
| 91895 | Q2Q067 | Q9Y275 | -0.91225 |
| 91896 | Q2Q067 | Q96MZ4 | -0.10159 |
| 91897 | Q2Q067 | Q5TCZ1 | -0.22741 |
| 91898 | Q2Q067 | Q96EB6 | -0.68016 |
| 91899 | Q2Q067 | Q02779 | -0.75208 |
| 91900 | Q2Q067 | O75293 | -0.38546 |
| 91901 | Q2Q067 | Q6AI12 | -0.24416 |
| 91902 | Q2Q067 | Q15319 | -0.22741 |
| 91903 | Q2Q067 | Q9Y536 | -0.16764 |
| 91904 | Q2Q067 | P49190 | -1.6173  |
| 91905 | Q2Q067 | Q8IZA3 | -0.48774 |
| 91906 | Q2Q067 | Q9UJH8 | -1.1552  |
| 91907 | Q2Q067 | Q8NCC5 | -0.95901 |
| 91908 | Q2Q067 | P60468 | -0.37225 |
| 91909 | Q2Q067 | Q9Y2I2 | -0.33557 |
| 91910 | Q2Q067 | Q8WV35 | -0.21467 |
| 91911 | Q2Q067 | A6NF36 | -0.25993 |
| 91912 | Q2Q067 | Q92765 | -0.70988 |
| 91913 | Q2Q067 | O15524 | -0.2274  |
| 91914 | Q2Q067 | Q9UPT9 | -0.30646 |
| 91915 | Q2Q067 | Q5JTD7 | -0.22117 |
| 91916 | Q2Q067 | P0DJ93 | -1.0345  |
| 91917 | Q2Q067 | Q96PE7 | -0.15236 |
| 91918 | Q2Q067 | Q8WYK1 | -1.4429  |
| 91919 | Q2Q067 | Q8NBN7 | -1.0935  |
| 91920 | Q2Q067 | P29375 | -0.25757 |
| 91921 | Q2Q067 | Q5T7R7 | -1.0345  |
| 91922 | Q2Q067 | P35125 | -0.67198 |
| 91923 | Q2Q067 | Q9P266 | -0.37702 |
| 91924 | Q2Q067 | Q6GPI1 | -1.5058  |
| 91925 | Q2Q067 | P23280 | -0.83773 |
| 91926 | Q2Q067 | Q15672 | -0.22777 |
| 91927 | Q2Q067 | Q6UWD8 | -1.0345  |
| 91928 | Q2Q067 | Q16816 | -0.68445 |
| 91929 | Q2Q067 | Q8IZP1 | -1.4231  |
| 91930 | Q2Q067 | Q9GZT6 | -0.84904 |
| 91931 | Q2Q067 | P56645 | -0.22857 |
| 91932 | Q2Q067 | Q15915 | -0.36168 |
| 91933 | Q2Q067 | Q9BY67 | -0.54284 |
| 91934 | Q2Q067 | P07996 | -0.31039 |
| 91935 | Q2Q067 | Q6ZVH6 | -0.30015 |
| 91936 | Q2Q067 | Q6H9L7 | -0.42866 |
| 91937 | Q2Q067 | Q8IXS6 | -0.67176 |
| 91938 | Q2Q067 | P18825 | -0.46065 |
| 91939 | Q2Q067 | P07307 | -0.54121 |
| 91940 | Q2Q067 | Q9Y6E2 | -0.56846 |
| 91941 | Q2Q067 | Q9H992 | -0.58666 |
| 91942 | Q2Q067 | Q8N5G2 | -0.69647 |
| 91943 | Q2Q067 | Q6DKI2 | -0.39245 |
| 91944 | Q2Q067 | Q9UL15 | -0.26951 |
| 91945 | Q2Q067 | P86397 | -0.62714 |
| 91946 | Q2Q067 | Q5JU69 | -1.1185  |
| 91947 | Q2Q067 | Q0P6D2 | -1.1118  |
| 91948 | Q2Q067 | Q9H069 | -0.22739 |
| 91949 | Q2Q067 | Q9Y520 | -0.35017 |
| 91950 | Q2Q067 | Q008S8 | -0.70301 |
| 91951 | Q2Q067 | Q15042 | -0.40554 |
| 91952 | Q2Q067 | Q9NTJ4 | -0.4592  |
| 91953 | Q2Q067 | P36382 | -1.0836  |
| 91954 | Q2Q067 | P40879 | -0.66999 |
| 91955 | Q2Q067 | Q9Y2I1 | -0.35568 |
| 91956 | Q2Q067 | A6H8M9 | -1.3679  |
| 91957 | Q2Q067 | Q6IFH4 | -1.4096  |
| 91958 | Q2Q067 | P52895 | -0.35383 |
| 91959 | Q2Q067 | Q7L513 | -0.89618 |
| 91960 | Q2Q067 | Q9P2K8 | -1.0469  |

|       |        |        |           |
|-------|--------|--------|-----------|
| 91961 | Q2Q067 | Q96PD7 | -0.36834  |
| 91962 | Q2Q067 | P50461 | -0.22794  |
| 91963 | Q2Q067 | P81408 | -0.89173  |
| 91964 | Q2Q067 | O95838 | -1.3167   |
| 91965 | Q2Q067 | P10826 | -0.25025  |
| 91966 | Q2Q067 | Q6ZXV5 | -1.0345   |
| 91967 | Q2Q067 | O95989 | -0.20982  |
| 91968 | Q2Q067 | O95156 | -0.89455  |
| 91969 | Q2Q067 | Q9H0B8 | -1.0692   |
| 91970 | Q2Q067 | A4D1Z8 | -0.39245  |
| 91971 | Q2Q067 | Q66K79 | -1.3567   |
| 91972 | Q2Q067 | Q16678 | -0.76827  |
| 91973 | Q2Q067 | Q7KYR7 | -1.1158   |
| 91974 | Q2Q067 | Q9H6A0 | -0.382    |
| 91975 | Q2Q067 | Q9UN72 | -1.4044   |
| 91976 | Q2Q067 | Q96JW4 | -1.2422   |
| 91977 | Q2Q067 | Q15283 | -0.44528  |
| 91978 | Q2Q067 | O00294 | -0.44214  |
| 91979 | Q2Q067 | P01116 | -0.35323  |
| 91980 | Q2Q067 | P07306 | -0.57374  |
| 91981 | Q2Q067 | Q9UBK7 | -1.2226   |
| 91982 | Q2Q067 | O75936 | -0.21368  |
| 91983 | Q2Q067 | Q8NDY8 | -1.0345   |
| 91984 | Q2Q067 | Q9H201 | -0.00285  |
| 91985 | Q2Q067 | Q6IED9 | -0.44707  |
| 91986 | Q2Q067 | P00748 | -0.72303  |
| 91987 | Q2Q067 | Q13191 | -0.22741  |
| 91988 | Q2Q067 | Q14827 | -0.73268  |
| 91989 | Q2Q067 | Q5JZY3 | -1.4379   |
| 91990 | Q2Q067 | P10606 | -0.27834  |
| 91991 | Q2Q067 | Q9H4P4 | -0.22736  |
| 91992 | Q2Q067 | P04040 | -0.36316  |
| 91993 | Q2Q067 | Q9GZM3 | -0.056663 |
| 91994 | Q2Q067 | P0CJ71 | -0.80201  |
| 91995 | Q2Q067 | O43739 | -0.62095  |
| 91996 | Q2Q067 | P04150 | -0.22756  |
| 91997 | Q2Q067 | Q86XA0 | -0.94793  |
| 91998 | Q2Q067 | Q7L099 | -0.7881   |
| 91999 | Q2Q067 | Q6UE05 | -1.0345   |
| 92000 | Q2Q067 | O15075 | -1.2455   |
| 92001 | Q2Q067 | O15296 | -0.56684  |
| 92002 | Q2Q067 | Q6ZMK1 | -0.12096  |
| 92003 | Q2Q067 | Q8IV42 | -0.87356  |
| 92004 | Q2Q067 | Q9NRJ1 | -0.47796  |
| 92005 | Q2Q067 | Q96QD5 | -0.2038   |
| 92006 | Q2Q067 | Q9NUG6 | -0.23841  |
| 92007 | Q2Q067 | P11230 | -0.97917  |
| 92008 | Q2Q067 | Q6V0L0 | -0.97631  |
| 92009 | Q2Q067 | Q6JQN1 | -0.66114  |
| 92010 | Q2Q067 | Q9Y4L1 | -0.67849  |
| 92011 | Q2Q067 | Q96NR3 | -0.97013  |
| 92012 | Q2Q067 | P05089 | -0.20348  |
| 92013 | Q2Q067 | Q96EC8 | -0.99456  |
| 92014 | Q2Q067 | Q6P2M8 | -0.85204  |
| 92015 | Q2Q067 | Q7Z7G1 | -0.60404  |
| 92016 | Q2Q067 | Q96PY5 | -0.22704  |
| 92017 | Q2Q067 | P12259 | -0.51634  |
| 92018 | Q2Q067 | Q14914 | -0.75388  |
| 92019 | Q2Q067 | Q9HBU6 | -0.76108  |
| 92020 | Q2Q067 | Q96RD6 | -0.95233  |
| 92021 | Q2Q067 | P07204 | -0.59657  |
| 92022 | Q2Q067 | P13760 | -0.51949  |
| 92023 | Q2Q067 | P30301 | -1.1414   |
| 92024 | Q2Q067 | Q96HE8 | -1.0345   |
| 92025 | Q2Q067 | Q8WYL5 | -0.35428  |
| 92026 | Q2Q067 | P02679 | -0.93321  |
| 92027 | Q2Q067 | Q86Z02 | -0.22741  |
| 92028 | Q2Q067 | Q08117 | -0.31691  |
| 92029 | Q2Q067 | Q9P246 | -0.67635  |
| 92030 | Q2Q067 | O75947 | -0.26719  |
| 92031 | Q2Q067 | Q9H3S7 | -0.22958  |
| 92032 | Q2Q067 | Q8TB52 | -0.55187  |
| 92033 | Q2Q067 | P98095 | -1.0932   |
| 92034 | Q2Q067 | Q04828 | -0.22666  |
| 92035 | Q2Q067 | P55822 | -0.29578  |
| 92036 | Q2Q067 | Q9Y330 | -0.23777  |



|       |        |        |            |
|-------|--------|--------|------------|
| 92037 | Q2Q067 | Q9UGN4 | -1.3445    |
| 92038 | Q2Q067 | Q02218 | -0.1891    |
| 92039 | Q2Q067 | O00591 | -0.91405   |
| 92040 | Q2Q067 | Q4G0U5 | -0.52364   |
| 92041 | Q2Q067 | Q9Y5X0 | -0.36409   |
| 92042 | Q2Q067 | Q6UVY6 | -1.2474    |
| 92043 | Q2Q067 | O14763 | -0.43065   |
| 92044 | Q2Q067 | Q6P5S2 | -0.98666   |
| 92045 | Q2Q067 | Q9H1M0 | -0.17447   |
| 92046 | Q2Q067 | P49221 | -0.44243   |
| 92047 | Q2Q067 | P15509 | -1.7855    |
| 92048 | Q2Q067 | Q8NEM2 | -0.36034   |
| 92049 | Q2Q067 | Q8NH18 | -1.4096    |
| 92050 | Q2Q067 | Q5GJ75 | -0.066842  |
| 92051 | Q2Q067 | Q7Z388 | -1.0345    |
| 92052 | Q2Q067 | Q86SG2 | -0.22741   |
| 92053 | Q2Q067 | O15321 | -1.1215    |
| 92054 | Q2Q067 | Q9H2X9 | -1.0321    |
| 92055 | Q2Q067 | Q9NQA3 | -0.43918   |
| 92056 | Q2Q067 | Q9Y5R2 | -2.0059    |
| 92057 | Q2Q067 | Q8TCG2 | -0.66755   |
| 92058 | Q2Q067 | Q96BT7 | -0.20385   |
| 92059 | Q2Q067 | Q96KP4 | -0.47895   |
| 92060 | Q2Q067 | O00519 | -0.88029   |
| 92061 | Q2Q067 | Q8IZF2 | -1.5126    |
| 92062 | Q2Q067 | O43294 | -0.22005   |
| 92063 | Q2Q067 | Q9NZN9 | -0.21881   |
| 92064 | Q2Q067 | Q8N4U5 | -0.0026148 |
| 92065 | Q2Q067 | Q71RS6 | -1.1145    |
| 92066 | Q2Q067 | P10124 | -0.12095   |
| 92067 | Q2Q067 | Q4VXU2 | -0.96284   |
| 92068 | Q2Q067 | Q9C019 | -0.71637   |
| 92069 | Q2Q067 | Q8NGX1 | -1.4096    |
| 92070 | Q2Q067 | O00308 | -0.22741   |
| 92071 | Q2Q067 | P13985 | -0.24416   |
| 92072 | Q2Q067 | Q5T2N8 | -1.0603    |
| 92073 | Q2Q067 | Q9NZR2 | -0.959     |
| 92074 | Q2Q067 | Q8IZQ5 | -0.40645   |
| 92075 | Q2Q067 | Q8TDN1 | -1.0103    |
| 92076 | Q2Q067 | P20963 | -0.18541   |
| 92077 | Q2Q067 | Q96HL8 | -0.35909   |
| 92078 | Q2Q067 | Q96MF2 | -0.69205   |
| 92079 | Q2Q067 | O60346 | -0.22766   |
| 92080 | Q2Q067 | P58401 | -1.227     |
| 92081 | Q2Q067 | P63211 | -0.86561   |
| 92082 | Q2Q067 | Q99466 | -0.37338   |
| 92083 | Q2Q067 | Q8N3D4 | -0.24416   |
| 92084 | Q2Q067 | Q9H9P5 | -0.2274    |
| 92085 | Q2Q067 | Q76I76 | -0.68112   |
| 92086 | Q2Q067 | Q2TAC2 | -0.10552   |
| 92087 | Q2Q067 | Q86YS6 | -1.2693    |
| 92088 | Q2Q067 | O15055 | -0.23001   |
| 92089 | Q2Q067 | P02786 | -0.80216   |
| 92090 | Q2Q067 | Q96JD6 | -0.37655   |
| 92091 | Q2Q067 | P60903 | -0.65344   |
| 92092 | Q2Q067 | Q15119 | -0.1363    |
| 92093 | Q2Q067 | Q9C030 | -0.51633   |
| 92094 | Q2Q067 | Q3T906 | -0.62476   |
| 92095 | Q2Q067 | Q99538 | -0.73734   |
| 92096 | Q2Q067 | P59544 | -1.3729    |
| 92097 | Q2Q067 | P10645 | -0.9162    |
| 92098 | Q2Q067 | P22310 | -0.96179   |
| 92099 | Q2Q067 | P51797 | -1.2867    |
| 92100 | Q2Q067 | Q8IWI9 | -0.32209   |
| 92101 | Q2Q067 | Q9P2D1 | -0.19854   |
| 92102 | Q2Q067 | Q9NQU5 | -0.56174   |
| 92103 | Q2Q067 | Q96IX9 | -0.19024   |
| 92104 | Q2Q067 | Q9Y3Z3 | -0.15818   |
| 92105 | Q2Q067 | Q8NGT0 | -1.4096    |
| 92106 | Q2Q067 | Q8NDV3 | -0.49189   |
| 92107 | Q2Q067 | A6NIJ5 | -0.43957   |
| 92108 | Q2Q067 | Q6UWF3 | -0.34501   |
| 92109 | Q2Q067 | Q9UHG0 | -0.51549   |
| 92110 | Q2Q067 | Q9UM01 | -1.2046    |
| 92111 | Q2Q067 | Q8NFQ6 | -1.232     |
| 92112 | Q2Q067 | Q03426 | -0.7499    |

|       |        |        |           |
|-------|--------|--------|-----------|
| 92113 | Q2Q067 | Q30KR1 | -0.94775  |
| 92114 | Q2Q067 | Q8N1N2 | -1.0345   |
| 92115 | Q2Q067 | Q8WWV3 | -0.86354  |
| 92116 | Q2Q067 | Q9UHX3 | -1.5438   |
| 92117 | Q2Q067 | Q8NDX2 | -0.93607  |
| 92118 | Q2Q067 | Q8WV41 | -0.22741  |
| 92119 | Q2Q067 | Q93086 | -1.1674   |
| 92120 | Q2Q067 | Q8TAM1 | -0.51224  |
| 92121 | Q2Q067 | Q9Y4F4 | -0.19123  |
| 92122 | Q2Q067 | A1L4K1 | -0.22743  |
| 92123 | Q2Q067 | Q3MIT2 | -0.32489  |
| 92124 | Q2Q067 | Q2TBA0 | -0.21436  |
| 92125 | Q2Q067 | O95833 | -0.21652  |
| 92126 | Q2Q067 | Q96JY6 | -0.22737  |
| 92127 | Q2Q067 | Q8NGI2 | -1.4096   |
| 92128 | Q2Q067 | Q9H7P9 | -0.68874  |
| 92129 | Q2Q067 | Q9Y2V7 | -0.16658  |
| 92130 | Q2Q067 | P28335 | -1.1367   |
| 92131 | Q2Q067 | Q96HP4 | -0.39165  |
| 92132 | Q2Q067 | P84351 | -1.091    |
| 92133 | Q2Q067 | Q9HAW9 | -0.75135  |
| 92134 | Q2Q067 | Q15139 | -0.27823  |
| 92135 | Q2Q067 | Q8TEF2 | -1.0345   |
| 92136 | Q2Q067 | P15311 | -0.23199  |
| 92137 | Q2Q067 | Q8IWB4 | -1.0345   |
| 92138 | Q2Q067 | Q6ZVM7 | -0.40404  |
| 92139 | Q2Q067 | Q9BPW4 | -1.2044   |
| 92140 | Q2Q067 | Q9H5Y7 | -1.1214   |
| 92141 | Q2Q067 | Q9P0G3 | -1.3271   |
| 92142 | Q2Q067 | Q96DY2 | -0.011737 |
| 92143 | Q2Q067 | Q8IWE4 | -0.12164  |
| 92144 | Q2Q067 | Q9NZ09 | -0.20901  |
| 92145 | Q2Q067 | Q17RS7 | -0.17319  |
| 92146 | Q2Q067 | Q5VZ89 | -0.80655  |
| 92147 | Q2Q067 | P55145 | -0.39469  |
| 92148 | Q2Q067 | Q9BRQ5 | -0.35359  |
| 92149 | Q2Q067 | Q9NR99 | -0.98666  |
| 92150 | Q2Q067 | Q9BY66 | -1.0115   |
| 92151 | Q2Q067 | P04049 | -0.31632  |
| 92152 | Q2Q067 | P25105 | -1.0023   |
| 92153 | Q2Q067 | P48167 | -0.53643  |
| 92154 | Q2Q067 | P21731 | -0.78894  |
| 92155 | Q2Q067 | Q8IZS8 | -1.1451   |
| 92156 | Q2Q067 | Q8NGI6 | -1.4096   |
| 92157 | Q2Q067 | A8K7I4 | -1.5358   |
| 92158 | Q2Q067 | Q5T5W8 | -1.0345   |
| 92159 | Q2Q067 | Q9BZJ4 | -0.84815  |
| 92160 | Q2Q067 | Q9UFM2 | -0.23028  |
| 92161 | Q2Q067 | Q5VU36 | -1.0345   |
| 92162 | Q2Q067 | P03897 | -0.23171  |
| 92163 | Q2Q067 | Q6IE36 | -0.90419  |
| 92164 | Q2Q067 | P16109 | -0.22741  |
| 92165 | Q2Q067 | Q12802 | -0.2274   |
| 92166 | Q2Q067 | Q9Y2E5 | -0.88077  |
| 92167 | Q2Q067 | P30530 | -0.72958  |
| 92168 | Q2Q067 | Q86VI1 | -0.28256  |
| 92169 | Q2Q067 | Q13017 | -0.84752  |
| 92170 | Q2Q067 | O94941 | -0.21526  |
| 92171 | Q2Q067 | Q96PU8 | -0.21177  |
| 92172 | Q2Q067 | Q16558 | -1.205    |
| 92173 | Q2Q067 | Q96PQ0 | -1.0243   |
| 92174 | Q2Q067 | Q6PHW0 | -1.0976   |
| 92175 | Q2Q067 | Q96LB8 | -1.0023   |
| 92176 | Q2Q067 | P08575 | -0.36609  |
| 92177 | Q2Q067 | Q16572 | -1.1211   |
| 92178 | Q2Q067 | Q6ZN54 | -0.70005  |
| 92179 | Q2Q067 | Q5TEA6 | -1.0345   |
| 92180 | Q2Q067 | Q9H609 | -0.11891  |
| 92181 | Q2Q067 | Q30KP9 | -0.94775  |
| 92182 | Q2Q067 | P78333 | -1.2192   |
| 92183 | Q2Q067 | P41222 | -0.30289  |
| 92184 | Q2Q067 | Q9ULP9 | -0.67144  |
| 92185 | Q2Q067 | Q9NYL5 | -0.71619  |
| 92186 | Q2Q067 | Q5HYK3 | -0.23184  |
| 92187 | Q2Q067 | Q86XK7 | -1.0345   |
| 92188 | Q2Q067 | Q9P1Y6 | -0.22742  |

|       |        |        |           |
|-------|--------|--------|-----------|
| 92189 | Q2Q067 | P07357 | -1.548    |
| 92190 | Q2Q067 | Q6ZNE9 | -0.43755  |
| 92191 | Q2Q067 | Q5VU13 | -1.0345   |
| 92192 | Q2Q067 | Q15540 | -0.43275  |
| 92193 | Q2Q067 | Q96MT1 | -1.1176   |
| 92194 | Q2Q067 | P01298 | -0.98931  |
| 92195 | Q2Q067 | O75420 | -0.37803  |
| 92196 | Q2Q067 | O95047 | -1.4096   |
| 92197 | Q2Q067 | P23416 | -0.91855  |
| 92198 | Q2Q067 | Q9H902 | -0.053689 |
| 92199 | Q2Q067 | Q9P212 | -0.28124  |
| 92200 | Q2Q067 | Q8NF50 | -0.37816  |
| 92201 | Q2Q067 | Q9ULC3 | -1.1705   |
| 92202 | Q2Q067 | A8MVG2 | -1.0345   |
| 92203 | Q2Q067 | Q13098 | -0.18894  |
| 92204 | Q2Q067 | Q9Y450 | -0.93749  |
| 92205 | Q2Q067 | Q9Y5H6 | -1.4044   |
| 92206 | Q2Q067 | Q30KQ2 | -0.94775  |
| 92207 | Q2Q067 | Q3KR37 | -1.0345   |
| 92208 | Q2Q067 | P27037 | -0.47074  |
| 92209 | Q2Q067 | Q902F9 | -0.86704  |
| 92210 | Q2Q067 | O95170 | -0.24416  |
| 92211 | Q2Q067 | P21359 | -0.22666  |
| 92212 | Q2Q067 | P47804 | -0.98313  |
| 92213 | Q2Q067 | P34810 | -1.1047   |
| 92214 | Q2Q067 | Q15506 | -0.47179  |
| 92215 | Q2Q067 | Q9NS75 | -1.3364   |
| 92216 | Q2Q067 | P53396 | -0.14008  |
| 92217 | Q2Q067 | P48507 | -0.25688  |
| 92218 | Q2Q067 | Q8ND61 | -0.82814  |
| 92219 | Q2Q067 | Q9HAE3 | -0.45603  |
| 92220 | Q2Q067 | P83105 | -1.3992   |
| 92221 | Q2Q067 | Q6UXD5 | -1.2353   |
| 92222 | Q2Q067 | A0PJX4 | -1.3026   |
| 92223 | Q2Q067 | Q9Y2I9 | -1.2195   |
| 92224 | Q2Q067 | Q86W50 | -0.38719  |
| 92225 | Q2Q067 | A6NN73 | -0.28132  |
| 92226 | Q2Q067 | P48546 | -1.4352   |
| 92227 | Q2Q067 | Q8N148 | -1.4096   |
| 92228 | Q2Q067 | Q9P2G1 | -0.22741  |
| 92229 | Q2Q067 | Q12788 | -0.22968  |
| 92230 | Q2Q067 | O75712 | -1.0324   |
| 92231 | Q2Q067 | Q6V1P9 | -1.3679   |
| 92232 | Q2Q067 | Q15831 | -0.35104  |
| 92233 | Q2Q067 | P51513 | -0.12672  |
| 92234 | Q2Q067 | O75311 | -0.97871  |
| 92235 | Q2Q067 | P47874 | -0.47986  |
| 92236 | Q2Q067 | Q8NFX0 | -1.0057   |
| 92237 | Q2Q067 | Q96AA8 | -0.2659   |
| 92238 | Q2Q067 | Q9BRK5 | -0.22545  |
| 92239 | Q2Q067 | Q13574 | -0.22741  |
| 92240 | Q2Q067 | A8MPS7 | -0.23289  |
| 92241 | Q2Q067 | Q9Y2D5 | -0.3888   |
| 92242 | Q2Q067 | P28906 | -0.58427  |
| 92243 | Q2Q067 | Q5JX69 | -1.0345   |
| 92244 | Q2Q067 | A2RUC4 | -0.54447  |
| 92245 | Q2Q067 | Q43677 | -0.56537  |
| 92246 | Q2Q067 | Q96CW9 | -0.83093  |
| 92247 | Q2Q067 | Q1L5Z9 | -0.65682  |
| 92248 | Q2Q067 | Q15464 | -0.82297  |
| 92249 | Q2Q067 | Q9NRE2 | -0.3074   |
| 92250 | Q2Q067 | Q8NGJ7 | -1.4096   |
| 92251 | Q2Q067 | P01733 | -0.47581  |
| 92252 | Q2Q067 | Q8IYU8 | -0.28191  |
| 92253 | Q2Q067 | Q9BVS4 | -1.2912   |
| 92254 | Q2Q067 | Q9UPU5 | -0.76972  |
| 92255 | Q2Q067 | Q9NPE6 | -0.71472  |
| 92256 | Q2Q067 | Q15027 | -1.1118   |
| 92257 | Q2Q067 | Q3LXA3 | -0.97187  |
| 92258 | Q2Q067 | Q96EY7 | -0.18605  |
| 92259 | Q2Q067 | P17927 | -1.0384   |
| 92260 | Q2Q067 | Q2KHM9 | -0.033712 |
| 92261 | Q2Q067 | Q8NFC6 | -0.44839  |
| 92262 | Q2Q067 | P01765 | -1.1115   |
| 92263 | Q2Q067 | O75912 | -0.22741  |
| 92264 | Q2Q067 | P09529 | -0.22741  |

|       |        |        |           |
|-------|--------|--------|-----------|
| 92265 | Q2Q067 | P80365 | -0.69972  |
| 92266 | Q2Q067 | Q9BQD7 | -1.0345   |
| 92267 | Q2Q067 | Q8N2B8 | -0.076768 |
| 92268 | Q2Q067 | Q9BXC0 | -1.4438   |
| 92269 | Q2Q067 | P0C862 | -1.0215   |
| 92270 | Q2Q067 | O14682 | -0.21644  |
| 92271 | Q2Q067 | Q9BYV1 | -0.20578  |
| 92272 | Q2Q067 | Q9H300 | -0.8497   |
| 92273 | Q2Q067 | Q969F2 | -0.19224  |
| 92274 | Q2Q067 | Q6T4R5 | -0.16518  |
| 92275 | Q2Q067 | O14730 | -0.66676  |
| 92276 | Q2Q067 | Q6UXB8 | -1.5271   |
| 92277 | Q2Q067 | P0CW18 | -1.0134   |
| 92278 | Q2Q067 | Q7Z444 | -1.5078   |
| 92279 | Q2Q067 | Q9BRI3 | -0.85281  |
| 92280 | Q2Q067 | O14513 | -0.32909  |
| 92281 | Q2Q067 | P32246 | -0.82989  |
| 92282 | Q2Q067 | Q9NY93 | -0.58694  |
| 92283 | Q2Q067 | A6NKW6 | -1.0345   |
| 92284 | Q2Q067 | Q96DB9 | -1.1523   |
| 92285 | Q2Q067 | Q96CT2 | -0.21139  |
| 92286 | Q2Q067 | Q96J94 | -0.22671  |
| 92287 | Q2Q067 | Q9H426 | -0.28403  |
| 92288 | Q2Q067 | Q9H857 | -0.40827  |
| 92289 | Q2Q067 | P35325 | -0.25317  |
| 92290 | Q2Q067 | Q9Y485 | -0.22742  |
| 92291 | Q2Q067 | O15194 | -0.095793 |
| 92292 | Q2Q067 | Q9H195 | -1.0247   |
| 92293 | Q2Q067 | Q96QV1 | -0.54657  |
| 92294 | Q2Q067 | O60814 | -0.80644  |
| 92295 | Q2Q067 | Q8NFX7 | -0.73239  |
| 92296 | Q2Q067 | P01612 | -1.1115   |
| 92297 | Q2Q067 | Q8IYK4 | -0.42175  |
| 92298 | Q2Q067 | Q9UL01 | -0.47081  |
| 92299 | Q2Q067 | Q8N8Q3 | -0.29155  |
| 92300 | Q2Q067 | O14548 | -0.21895  |
| 92301 | Q2Q067 | A1KZ92 | -0.95481  |
| 92302 | Q2Q067 | P59797 | -0.40645  |
| 92303 | Q2Q067 | P35914 | -0.38676  |
| 92304 | Q2Q067 | Q8WUY8 | -0.35602  |
| 92305 | Q2Q067 | Q8NH83 | -1.4096   |
| 92306 | Q2Q067 | P02549 | -0.22741  |
| 92307 | Q2Q067 | P41273 | -1.1577   |
| 92308 | Q2Q067 | Q96AX2 | -0.97611  |
| 92309 | Q2Q067 | P21127 | -0.16463  |
| 92310 | Q2Q067 | Q8IY37 | -0.94996  |
| 92311 | Q2Q067 | Q93098 | -0.88518  |
| 92312 | Q2Q067 | Q99836 | -0.2274   |
| 92313 | Q2Q067 | Q9H093 | -0.71935  |
| 92314 | Q2Q067 | Q2VIR3 | -0.85978  |
| 92315 | Q2Q067 | Q53FE4 | -0.072135 |
| 92316 | Q2Q067 | Q8NGT5 | -1.4096   |
| 92317 | Q2Q067 | Q07869 | -0.27113  |
| 92318 | Q2Q067 | Q96EQ0 | -0.22712  |
| 92319 | Q2Q067 | Q9BTT0 | -0.22741  |
| 92320 | Q2Q067 | P11413 | -0.15466  |
| 92321 | Q2Q067 | Q9H313 | -0.92521  |
| 92322 | Q2Q067 | P48740 | -1.0186   |
| 92323 | Q2Q067 | Q5SV17 | -1.0345   |
| 92324 | Q2Q067 | P16104 | -0.31222  |
| 92325 | Q2Q067 | Q9UJW8 | -0.085533 |
| 92326 | Q2Q067 | Q7Z5P9 | -0.98622  |
| 92327 | Q2Q067 | Q15771 | -1.2751   |
| 92328 | Q2Q067 | Q15019 | -0.22728  |
| 92329 | Q2Q067 | Q3LI77 | -0.10908  |
| 92330 | Q2Q067 | Q96KX0 | -0.94068  |
| 92331 | Q2Q067 | Q8NCW6 | -0.69795  |
| 92332 | Q2Q067 | Q9BV38 | -0.62283  |
| 92333 | Q2Q067 | Q8WUG5 | -1.1985   |
| 92334 | Q2Q067 | Q96A05 | -0.38096  |
| 92335 | Q2Q067 | Q8N126 | -1.0678   |
| 92336 | Q2Q067 | P63098 | -0.22764  |
| 92337 | Q2Q067 | P24043 | -0.92315  |
| 92338 | Q2Q067 | Q9H156 | -1.1214   |
| 92339 | Q2Q067 | Q96S16 | -0.13579  |
| 92340 | Q2Q067 | Q9NSY1 | -0.86587  |

|       |        |        |           |
|-------|--------|--------|-----------|
| 92341 | Q2Q067 | Q8NBI3 | -0.92089  |
| 92342 | Q2Q067 | Q96S21 | -1.1237   |
| 92343 | Q2Q067 | O14880 | -1.1118   |
| 92344 | Q2Q067 | Q96E52 | -0.91738  |
| 92345 | Q2Q067 | Q01538 | -0.18027  |
| 92346 | Q2Q067 | Q9C0B6 | -0.70554  |
| 92347 | Q2Q067 | Q96P50 | -1.3713   |
| 92348 | Q2Q067 | Q9H0W7 | -0.32396  |
| 92349 | Q2Q067 | O15270 | -0.75222  |
| 92350 | Q2Q067 | Q9Y2D4 | -0.24627  |
| 92351 | Q2Q067 | Q96DU9 | -0.76347  |
| 92352 | Q2Q067 | Q8IW52 | -1.1214   |
| 92353 | Q2Q067 | P24311 | -0.61522  |
| 92354 | Q2Q067 | P13533 | -0.19     |
| 92355 | Q2Q067 | Q9NZP2 | -1.4096   |
| 92356 | Q2Q067 | Q9C0C4 | -0.86545  |
| 92357 | Q2Q067 | Q3V5L5 | -0.90099  |
| 92358 | Q2Q067 | Q8NG11 | -1.0345   |
| 92359 | Q2Q067 | Q69YN2 | -0.41192  |
| 92360 | Q2Q067 | P37287 | -0.43953  |
| 92361 | Q2Q067 | Q6UXP3 | -1.0345   |
| 92362 | Q2Q067 | Q8IZM8 | -0.2274   |
| 92363 | Q2Q067 | Q16654 | -0.53247  |
| 92364 | Q2Q067 | Q24JQ0 | -1.0345   |
| 92365 | Q2Q067 | A6NLU5 | -1.0345   |
| 92366 | Q2Q067 | O95918 | -1.3425   |
| 92367 | Q2Q067 | Q8WUA2 | -0.53751  |
| 92368 | Q2Q067 | Q8NGI0 | -1.4096   |
| 92369 | Q2Q067 | P51809 | -0.21926  |
| 92370 | Q2Q067 | Q9GZR7 | -0.55681  |
| 92371 | Q2Q067 | Q9UNI1 | -1.1259   |
| 92372 | Q2Q067 | Q2M3C6 | -1.0345   |
| 92373 | Q2Q067 | P09486 | -0.28704  |
| 92374 | Q2Q067 | Q5T6R2 | -0.22997  |
| 92375 | Q2Q067 | Q9H2B4 | -1.0365   |
| 92376 | Q2Q067 | Q96I51 | -0.22546  |
| 92377 | Q2Q067 | P63122 | -0.74403  |
| 92378 | Q2Q067 | P23526 | -0.16179  |
| 92379 | Q2Q067 | Q9P0T7 | -0.95837  |
| 92380 | Q2Q067 | Q9NPA5 | -0.085533 |
| 92381 | Q2Q067 | Q8TBP5 | -1.0345   |
| 92382 | Q2Q067 | Q5GAN6 | -0.97935  |
| 92383 | Q2Q067 | A6NJ16 | -0.98666  |
| 92384 | Q2Q067 | Q05823 | -0.41458  |
| 92385 | Q2Q067 | P29508 | -0.63126  |
| 92386 | Q2Q067 | Q10588 | -1.0916   |
| 92387 | Q2Q067 | Q9NXX6 | -1.3916   |
| 92388 | Q2Q067 | Q96JC1 | -0.29473  |
| 92389 | Q2Q067 | P22309 | -0.53355  |
| 92390 | Q2Q067 | Q96KN9 | -1.1243   |
| 92391 | Q2Q067 | O95166 | -0.12167  |
| 92392 | Q2Q067 | P31152 | -0.72979  |
| 92393 | Q2Q067 | Q86UQ0 | -0.15316  |
| 92394 | Q2Q067 | P09543 | -0.47127  |
| 92395 | Q2Q067 | Q9BTD3 | -0.77947  |
| 92396 | Q2Q067 | Q6P1A2 | -0.81404  |
| 92397 | Q2Q067 | Q3KP44 | -0.2274   |
| 92398 | Q2Q067 | Q86YD3 | -1.6971   |
| 92399 | Q2Q067 | P30462 | -1.2066   |
| 92400 | Q2Q067 | Q3SXZ7 | -0.45229  |
| 92401 | Q2Q067 | Q9BXB5 | -0.9261   |
| 92402 | Q2Q067 | P28827 | -0.65306  |
| 92403 | Q2Q067 | Q5JWR5 | -0.24487  |
| 92404 | Q2Q067 | O60762 | -0.20891  |
| 92405 | Q2Q067 | O43555 | -1.3161   |
| 92406 | Q2Q067 | B6SEH8 | -1.0345   |
| 92407 | Q2Q067 | Q5PT55 | -1.1513   |
| 92408 | Q2Q067 | Q6ZU45 | -0.39245  |
| 92409 | Q2Q067 | Q31612 | -1.1453   |
| 92410 | Q2Q067 | Q9UIV8 | -0.58736  |
| 92411 | Q2Q067 | Q9NZZ2 | -0.042213 |
| 92412 | Q2Q067 | Q7Z6W1 | -1.0345   |
| 92413 | Q2Q067 | Q99445 | -0.56295  |
| 92414 | Q2Q067 | A1A5B4 | -1.2393   |
| 92415 | Q2Q067 | Q9HCL0 | -1.4592   |
| 92416 | Q2Q067 | Q9BTF0 | -0.41073  |

|       |        |        |           |
|-------|--------|--------|-----------|
| 92417 | Q2Q067 | P53355 | -0.57162  |
| 92418 | Q2Q067 | Q8N4K4 | -1.0345   |
| 92419 | Q2Q067 | O00461 | -0.30319  |
| 92420 | Q2Q067 | Q9BWU1 | -1.0912   |
| 92421 | Q2Q067 | P01774 | -1.1115   |
| 92422 | Q2Q067 | P78415 | -0.23221  |
| 92423 | Q2Q067 | Q92908 | -0.22739  |
| 92424 | Q2Q067 | Q9HBL7 | -1.2038   |
| 92425 | Q2Q067 | Q53GL0 | -0.23159  |
| 92426 | Q2Q067 | P13598 | -1.3308   |
| 92427 | Q2Q067 | P01816 | -1.1115   |
| 92428 | Q2Q067 | Q9BZJ8 | -1.3467   |
| 92429 | Q2Q067 | Q14494 | -0.22595  |
| 92430 | Q2Q067 | Q9NFB9 | -1.5436   |
| 92431 | Q2Q067 | P51991 | -0.23812  |
| 92432 | Q2Q067 | Q16635 | -0.58193  |
| 92433 | Q2Q067 | Q9BQK8 | -0.16578  |
| 92434 | Q2Q067 | P0C2L3 | -1.0345   |
| 92435 | Q2Q067 | Q86XR5 | -0.89194  |
| 92436 | Q2Q067 | Q7RTM1 | -1.5466   |
| 92437 | Q2Q067 | P68133 | -0.15414  |
| 92438 | Q2Q067 | Q6Q0C1 | -0.85935  |
| 92439 | Q2Q067 | Q9UBS0 | -0.70877  |
| 92440 | Q2Q067 | Q92551 | -0.44507  |
| 92441 | Q2Q067 | Q6GQQ9 | -0.18049  |
| 92442 | Q2Q067 | Q96FC7 | -0.21824  |
| 92443 | Q2Q067 | C9JRZ8 | -0.56541  |
| 92444 | Q2Q067 | Q9P2P5 | -0.41408  |
| 92445 | Q2Q067 | P49279 | -0.43265  |
| 92446 | Q2Q067 | Q16774 | -0.653    |
| 92447 | Q2Q067 | P00846 | -0.56744  |
| 92448 | Q2Q067 | Q9Y6M7 | -1.0272   |
| 92449 | Q2Q067 | Q7Z5U6 | -0.2275   |
| 92450 | Q2Q067 | Q6NXE6 | -0.21745  |
| 92451 | Q2Q067 | A8MXZ1 | -0.43957  |
| 92452 | Q2Q067 | O96001 | -0.62145  |
| 92453 | Q2Q067 | O95544 | -0.77623  |
| 92454 | Q2Q067 | O60813 | -0.19475  |
| 92455 | Q2Q067 | P46663 | -1.1577   |
| 92456 | Q2Q067 | Q15843 | -0.22551  |
| 92457 | Q2Q067 | Q86VD1 | -0.6274   |
| 92458 | Q2Q067 | O95340 | -0.78686  |
| 92459 | Q2Q067 | Q8TBQ9 | -0.82825  |
| 92460 | Q2Q067 | Q5JUK3 | -1.5081   |
| 92461 | Q2Q067 | P16118 | -0.054553 |
| 92462 | Q2Q067 | P01160 | -0.36495  |
| 92463 | Q2Q067 | P08572 | -0.57096  |
| 92464 | Q2Q067 | Q8TDQ0 | -1.0345   |
| 92465 | Q2Q067 | O95490 | -1.2724   |
| 92466 | Q2Q067 | Q96MS3 | -0.82794  |
| 92467 | Q2Q067 | Q96A70 | -0.25123  |
| 92468 | Q2Q067 | Q9H579 | -0.10793  |
| 92469 | Q2Q067 | Q3C1W6 | -0.73178  |
| 92470 | Q2Q067 | Q4G0W2 | -0.88327  |
| 92471 | Q2Q067 | P23946 | -1.5694   |
| 92472 | Q2Q067 | Q14831 | -0.77176  |
| 92473 | Q2Q067 | Q96RR1 | -0.21792  |
| 92474 | Q2Q067 | Q8NFQ8 | -0.63736  |
| 92475 | Q2Q067 | Q9ULI3 | -1.056    |
| 92476 | Q2Q067 | Q8NH50 | -1.4096   |
| 92477 | Q2Q067 | Q8N5S1 | -0.85935  |
| 92478 | Q2Q067 | Q8N6G2 | -0.15218  |
| 92479 | Q2Q067 | P45877 | -0.28412  |
| 92480 | Q2Q067 | P16298 | -0.18268  |
| 92481 | Q2Q067 | Q96NU1 | -0.054655 |
| 92482 | Q2Q067 | O95210 | -0.58595  |
| 92483 | Q2Q067 | Q9P0B6 | -1.0345   |
| 92484 | Q2Q067 | P09105 | -0.42327  |
| 92485 | Q2Q067 | Q9H7H1 | -0.17203  |
| 92486 | Q2Q067 | Q9Y6W6 | -0.3095   |
| 92487 | Q2Q067 | Q8IV76 | -0.32693  |
| 92488 | Q2Q067 | O60547 | -0.88329  |
| 92489 | Q2Q067 | P83859 | -0.75882  |
| 92490 | Q2Q067 | P01766 | -1.1115   |
| 92491 | Q2Q067 | P59551 | -1.3377   |
| 92492 | Q2Q067 | Q8WTT0 | -0.98129  |

|       |        |        |           |
|-------|--------|--------|-----------|
| 92493 | Q2Q067 | O14977 | -0.20484  |
| 92494 | Q2Q067 | O95365 | -0.37991  |
| 92495 | Q2Q067 | P48745 | -1.1142   |
| 92496 | Q2Q067 | A6NJU9 | -1.0345   |
| 92497 | Q2Q067 | P52790 | -0.36207  |
| 92498 | Q2Q067 | Q9UIA0 | -0.77908  |
| 92499 | Q2Q067 | A8MS94 | -0.28132  |
| 92500 | Q2Q067 | Q9P2R3 | -0.30541  |
| 92501 | Q2Q067 | Q15036 | -0.18196  |
| 92502 | Q2Q067 | Q8NG97 | -1.4096   |
| 92503 | Q2Q067 | Q9NYV4 | -0.23117  |
| 92504 | Q2Q067 | Q14289 | -0.24577  |
| 92505 | Q2Q067 | Q6MZM0 | -1.2978   |
| 92506 | Q2Q067 | A6NHG9 | -1.4096   |
| 92507 | Q2Q067 | Q8TDG4 | -0.49737  |
| 92508 | Q2Q067 | B1AKI9 | -0.98666  |
| 92509 | Q2Q067 | P0C1H6 | -0.6176   |
| 92510 | Q2Q067 | P17540 | -0.9716   |
| 92511 | Q2Q067 | P39060 | -0.55363  |
| 92512 | Q2Q067 | Q6ZPB5 | -0.23864  |
| 92513 | Q2Q067 | C9JXH3 | -0.76972  |
| 92514 | Q2Q067 | Q96N35 | -1.0345   |
| 92515 | Q2Q067 | Q75509 | -0.31704  |
| 92516 | Q2Q067 | Q13621 | -1.0108   |
| 92517 | Q2Q067 | Q9BYV2 | -0.87111  |
| 92518 | Q2Q067 | Q96GK7 | -0.58869  |
| 92519 | Q2Q067 | Q9UP95 | -1.2288   |
| 92520 | Q2Q067 | Q5SR53 | -0.21283  |
| 92521 | Q2Q067 | P51172 | -0.7092   |
| 92522 | Q2Q067 | P42229 | -0.22662  |
| 92523 | Q2Q067 | Q8N4B1 | -0.22734  |
| 92524 | Q2Q067 | Q9NRS4 | -1.472    |
| 92525 | Q2Q067 | Q96IZ5 | -0.96284  |
| 92526 | Q2Q067 | Q58FG0 | -0.66086  |
| 92527 | Q2Q067 | Q17R31 | -0.13409  |
| 92528 | Q2Q067 | Q6IWH7 | -0.55133  |
| 92529 | Q2Q067 | O15551 | -1.0051   |
| 92530 | Q2Q067 | P06756 | -0.37913  |
| 92531 | Q2Q067 | P20338 | -0.30981  |
| 92532 | Q2Q067 | Q3KNS1 | -0.82427  |
| 92533 | Q2Q067 | Q99832 | -0.31121  |
| 92534 | Q2Q067 | Q92583 | -1.3067   |
| 92535 | Q2Q067 | P80098 | -1.035    |
| 92536 | Q2Q067 | Q96HU1 | -0.27853  |
| 92537 | Q2Q067 | Q9UMX6 | -0.72647  |
| 92538 | Q2Q067 | A8MZ26 | -0.45603  |
| 92539 | Q2Q067 | Q92673 | -1.3603   |
| 92540 | Q2Q067 | Q86V40 | -1.3837   |
| 92541 | Q2Q067 | P30041 | -0.21872  |
| 92542 | Q2Q067 | Q8N1T3 | -0.74612  |
| 92543 | Q2Q067 | P25874 | -0.62366  |
| 92544 | Q2Q067 | Q14847 | -0.22741  |
| 92545 | Q2Q067 | Q5TC84 | -0.5462   |
| 92546 | Q2Q067 | Q8IY34 | -1.016    |
| 92547 | Q2Q067 | Q5SQ13 | -0.086824 |
| 92548 | Q2Q067 | O14904 | -0.89627  |
| 92549 | Q2Q067 | A6NM15 | -0.91075  |
| 92550 | Q2Q067 | P20645 | -1.1012   |
| 92551 | Q2Q067 | Q8N614 | -1.0345   |
| 92552 | Q2Q067 | Q6P1Q0 | -0.21895  |
| 92553 | Q2Q067 | Q9NRM0 | -0.79718  |
| 92554 | Q2Q067 | Q8IY17 | -0.85648  |
| 92555 | Q2Q067 | Q9NY72 | -0.69461  |
| 92556 | Q2Q067 | P18054 | -0.21867  |
| 92557 | Q2Q067 | Q9P2J3 | -0.21291  |
| 92558 | Q2Q067 | Q13554 | -0.74777  |
| 92559 | Q2Q067 | Q5SQH8 | -0.14329  |
| 92560 | Q2Q067 | P51692 | -0.2268   |
| 92561 | Q2Q067 | Q14807 | -0.26584  |
| 92562 | Q2Q067 | P0CAT3 | -0.11511  |
| 92563 | Q2Q067 | Q8NH56 | -1.4096   |
| 92564 | Q2Q067 | Q495M3 | -0.84661  |
| 92565 | Q2Q067 | P55851 | -0.58612  |
| 92566 | Q2Q067 | P59666 | -0.95242  |
| 92567 | Q2Q067 | Q9NYL2 | -0.25901  |
| 92568 | Q2Q067 | P54886 | -0.65791  |

|       |        |        |           |
|-------|--------|--------|-----------|
| 92569 | Q2Q067 | Q9UI46 | -0.22749  |
| 92570 | Q2Q067 | P12104 | -0.5519   |
| 92571 | Q2Q067 | Q6TDP4 | -0.65412  |
| 92572 | Q2Q067 | Q96M95 | -0.051997 |
| 92573 | Q2Q067 | O60486 | -1.1378   |
| 92574 | Q2Q067 | Q6UWF5 | -1.0345   |
| 92575 | Q2Q067 | Q8N5Z5 | -0.17958  |
| 92576 | Q2Q067 | P61421 | -0.21141  |
| 92577 | Q2Q067 | Q9UQB8 | -0.22739  |
| 92578 | Q2Q067 | P01584 | -0.2359   |
| 92579 | Q2Q067 | Q96JM4 | -0.22657  |
| 92580 | Q2Q067 | P78413 | -0.22921  |
| 92581 | Q2Q067 | Q8NCH0 | -0.59993  |
| 92582 | Q2Q067 | Q9BVI0 | -0.22739  |
| 92583 | Q2Q067 | Q99819 | -0.43024  |
| 92584 | Q2Q067 | Q9H2G2 | -1.21     |
| 92585 | Q2Q067 | Q5SY68 | -0.50694  |
| 92586 | Q2Q067 | Q6NUQ4 | -1.0345   |
| 92587 | Q2Q067 | Q8N6L7 | -1.0345   |
| 92588 | Q2Q067 | C9JLJ4 | -0.76972  |
| 92589 | Q2Q067 | Q9NVM6 | -0.96096  |
| 92590 | Q2Q067 | Q641Q2 | -0.6371   |
| 92591 | Q2Q067 | P63128 | -0.6331   |
| 92592 | Q2Q067 | Q96Q40 | -1.1911   |
| 92593 | Q2Q067 | P69849 | -0.99678  |
| 92594 | Q2Q067 | P01833 | -1.7088   |
| 92595 | Q2Q067 | Q9NQ03 | -0.20516  |
| 92596 | Q2Q067 | P49746 | -1.0191   |
| 92597 | Q2Q067 | P43686 | -0.29476  |
| 92598 | Q2Q067 | O43526 | -1.0075   |
| 92599 | Q2Q067 | Q13905 | -0.23972  |
| 92600 | Q2Q067 | Q96S06 | -0.76154  |
| 92601 | Q2Q067 | Q99558 | -0.22741  |
| 92602 | Q2Q067 | Q96I13 | -0.53802  |
| 92603 | Q2Q067 | Q9ULD8 | -1.1194   |
| 92604 | Q2Q067 | Q9BZA8 | -1.3679   |
| 92605 | Q2Q067 | Q9Y228 | -0.35359  |
| 92606 | Q2Q067 | P51587 | -0.17037  |
| 92607 | Q2Q067 | P31997 | -0.87945  |
| 92608 | Q2Q067 | Q9C0A0 | -1.4429   |
| 92609 | Q2Q067 | O15417 | -0.44839  |
| 92610 | Q2Q067 | Q9NUB1 | -0.24823  |
| 92611 | Q2Q067 | Q6ZNB7 | -1.0975   |
| 92612 | Q2Q067 | P06127 | -0.66684  |
| 92613 | Q2Q067 | P30483 | -1.1453   |
| 92614 | Q2Q067 | P43681 | -0.80497  |
| 92615 | Q2Q067 | Q8IYP9 | -1.13     |
| 92616 | Q2Q067 | Q8NFR9 | -0.70631  |
| 92617 | Q2Q067 | P13746 | -1.0994   |
| 92618 | Q2Q067 | Q75335 | -0.14034  |
| 92619 | Q2Q067 | Q7Z7M9 | -0.76556  |
| 92620 | Q2Q067 | Q14093 | -0.62243  |
| 92621 | Q2Q067 | P35520 | -0.2257   |
| 92622 | Q2Q067 | O95164 | -0.87127  |
| 92623 | Q2Q067 | Q8NEY3 | -0.19666  |
| 92624 | Q2Q067 | Q96BR9 | -0.22255  |
| 92625 | Q2Q067 | Q8TC44 | -0.22751  |
| 92626 | Q2Q067 | Q9NZ45 | -0.97687  |
| 92627 | Q2Q067 | P78363 | -1.3636   |
| 92628 | Q2Q067 | Q49MI3 | -0.32204  |
| 92629 | Q2Q067 | Q8NH43 | -1.4096   |
| 92630 | Q2Q067 | Q9UGL1 | -0.24533  |
| 92631 | Q2Q067 | Q96MM3 | -0.228    |
| 92632 | Q2Q067 | Q6IPM2 | -0.21265  |
| 92633 | Q2Q067 | Q8NHL6 | -0.35602  |
| 92634 | Q2Q067 | Q5T7N8 | -0.19339  |
| 92635 | Q2Q067 | P43652 | -1.0114   |
| 92636 | Q2Q067 | P20273 | -0.85304  |
| 92637 | Q2Q067 | P56975 | -1.4589   |
| 92638 | Q2Q067 | Q15166 | -0.87514  |
| 92639 | Q2Q067 | Q13277 | -0.25444  |
| 92640 | Q2Q067 | Q9NP55 | -1.0417   |
| 92641 | Q2Q067 | Q6IF99 | -1.4096   |
| 92642 | Q2Q067 | P01614 | -1.1115   |
| 92643 | Q2Q067 | Q9UBV7 | -0.62687  |
| 92644 | Q2Q067 | Q9Y6J8 | -0.62943  |



|       |        |        |          |
|-------|--------|--------|----------|
| 92645 | Q2Q067 | Q15058 | -0.24735 |
| 92646 | Q2Q067 | O95976 | -1.256   |
| 92647 | Q2Q067 | P24530 | -0.93132 |
| 92648 | Q2Q067 | Q9BQ75 | -0.53238 |
| 92649 | Q2Q067 | Q96FX8 | -0.27722 |
| 92650 | Q2Q067 | P59045 | -0.97031 |
| 92651 | Q2Q067 | Q9BTP6 | -0.51084 |
| 92652 | Q2Q067 | Q6IQ23 | -0.22741 |
| 92653 | Q2Q067 | P31995 | -0.33819 |
| 92654 | Q2Q067 | Q9BUY7 | -0.45603 |
| 92655 | Q2Q067 | P63267 | -0.56115 |
| 92656 | Q2Q067 | P11086 | -0.16416 |
| 92657 | Q2Q067 | Q5VWQ8 | -0.25243 |
| 92658 | Q2Q067 | Q9Y493 | -1.278   |
| 92659 | Q2Q067 | Q8TCU5 | -0.4617  |
| 92660 | Q2Q067 | Q8NGC3 | -1.4096  |
| 92661 | Q2Q067 | P52756 | -0.22527 |
| 92662 | Q2Q067 | Q9NS39 | -0.17813 |
| 92663 | Q2Q067 | Q9ULI0 | -1.0263  |
| 92664 | Q2Q067 | P01877 | -0.55357 |
| 92665 | Q2Q067 | P12074 | -0.1902  |
| 92666 | Q2Q067 | Q8NGQ2 | -1.4096  |
| 92667 | Q2Q067 | Q99807 | -0.21538 |
| 92668 | Q2Q067 | P34913 | -0.38009 |
| 92669 | Q2Q067 | Q9Y3B4 | -0.28973 |
| 92670 | Q2Q067 | Q16625 | -0.226   |
| 92671 | Q2Q067 | P56706 | -0.47245 |
| 92672 | Q2Q067 | Q5XLA6 | -0.65847 |
| 92673 | Q2Q067 | P15502 | -0.24341 |
| 92674 | Q2Q067 | Q96KT7 | -1.0345  |
| 92675 | Q2Q067 | Q9NYV7 | -0.70602 |
| 92676 | Q2Q067 | Q13237 | -1.0893  |
| 92677 | Q2Q067 | Q92819 | -0.84576 |
| 92678 | Q2Q067 | Q9NZH6 | -0.2861  |
| 92679 | Q2Q067 | O75023 | -1.0791  |
| 92680 | Q2Q067 | P61073 | -0.39055 |
| 92681 | Q2Q067 | Q8NEE8 | -0.22737 |
| 92682 | Q2Q067 | Q6UXZ3 | -0.48734 |
| 92683 | Q2Q067 | P51688 | -0.54359 |
| 92684 | Q2Q067 | P04280 | -0.86843 |
| 92685 | Q2Q067 | Q8WXF0 | -0.47683 |
| 92686 | Q2Q067 | Q9NQZ5 | -0.21265 |
| 92687 | Q2Q067 | P51617 | -0.22738 |
| 92688 | Q2Q067 | B6SEH9 | -1.0345  |
| 92689 | Q2Q067 | A2RUU4 | -0.98967 |
| 92690 | Q2Q067 | Q9UBI6 | -0.63925 |
| 92691 | Q2Q067 | Q9Y5C1 | -0.68454 |
| 92692 | Q2Q067 | Q6ZMB0 | -0.82058 |
| 92693 | Q2Q067 | Q16473 | -0.24416 |
| 92694 | Q2Q067 | O60427 | -0.27767 |
| 92695 | Q2Q067 | Q13303 | -0.93876 |
| 92696 | Q2Q067 | Q4G0S7 | -0.11595 |
| 92697 | Q2Q067 | Q8N6Y1 | -1.3679  |
| 92698 | Q2Q067 | P07550 | -0.33413 |
| 92699 | Q2Q067 | Q9H936 | -0.3033  |
| 92700 | Q2Q067 | O15244 | -1.0127  |
| 92701 | Q2Q067 | Q8IZD0 | -0.18878 |
| 92702 | Q2Q067 | Q8IZF3 | -1.5126  |
| 92703 | Q2Q067 | Q8TEC5 | -0.2274  |
| 92704 | Q2Q067 | Q9NYX4 | -1.1879  |
| 92705 | Q2Q067 | Q6ISS4 | -0.98666 |
| 92706 | Q2Q067 | Q8TE57 | -1.4569  |
| 92707 | Q2Q067 | Q15389 | -0.54922 |
| 92708 | Q2Q067 | A8MTL3 | -0.48451 |
| 92709 | Q2Q067 | Q6UWJ8 | -1.0345  |
| 92710 | Q2Q067 | O95382 | -1.4193  |
| 92711 | Q2Q067 | Q8IYX8 | -0.10656 |
| 92712 | Q2Q067 | Q92833 | -0.3054  |
| 92713 | Q2Q067 | P31273 | -0.21042 |
| 92714 | Q2Q067 | Q6P1M0 | -1.2492  |
| 92715 | Q2Q067 | Q8TE68 | -0.22741 |
| 92716 | Q2Q067 | Q96NZ1 | -0.44783 |
| 92717 | Q2Q067 | Q9ULG6 | -0.90054 |
| 92718 | Q2Q067 | P01033 | -0.27919 |
| 92719 | Q2Q067 | Q86UK5 | -0.73017 |
| 92720 | Q2Q067 | A8MWD9 | -0.18174 |

|       |        |        |           |
|-------|--------|--------|-----------|
| 92721 | Q2Q067 | Q9GZT4 | -0.61605  |
| 92722 | Q2Q067 | Q9H7T0 | -1.2181   |
| 92723 | Q2Q067 | Q96JP9 | -1.3651   |
| 92724 | Q2Q067 | Q2M2D7 | -1.0238   |
| 92725 | Q2Q067 | Q04771 | -0.39131  |
| 92726 | Q2Q067 | Q9BWT3 | -0.54762  |
| 92727 | Q2Q067 | Q9H2M3 | -0.28231  |
| 92728 | Q2Q067 | Q9H173 | -0.19656  |
| 92729 | Q2Q067 | P51693 | -0.29783  |
| 92730 | Q2Q067 | Q92982 | -1.0425   |
| 92731 | Q2Q067 | Q8NGG1 | -1.3053   |
| 92732 | Q2Q067 | Q9H6R0 | -0.34588  |
| 92733 | Q2Q067 | Q8NAG6 | -0.28235  |
| 92734 | Q2Q067 | O60235 | -1.9775   |
| 92735 | Q2Q067 | P51690 | -0.46805  |
| 92736 | Q2Q067 | P14210 | -0.36128  |
| 92737 | Q2Q067 | Q9H772 | -0.9397   |
| 92738 | Q2Q067 | P31944 | -0.39307  |
| 92739 | Q2Q067 | Q9Y586 | -0.16321  |
| 92740 | Q2Q067 | O15013 | -0.29293  |
| 92741 | Q2Q067 | Q8IZ69 | -0.81373  |
| 92742 | Q2Q067 | Q9HBH9 | -0.87152  |
| 92743 | Q2Q067 | P19526 | -0.85088  |
| 92744 | Q2Q067 | Q14011 | -0.21562  |
| 92745 | Q2Q067 | Q17RP2 | -0.16018  |
| 92746 | Q2Q067 | Q6ZV80 | -0.021675 |
| 92747 | Q2Q067 | P26951 | -1.0866   |
| 92748 | Q2Q067 | Q8IZ07 | -0.22741  |
| 92749 | Q2Q067 | Q5VVQ6 | -0.43445  |
| 92750 | Q2Q067 | P18464 | -1.1453   |
| 92751 | Q2Q067 | Q92503 | -0.98886  |
| 92752 | Q2Q067 | Q14679 | -0.51377  |
| 92753 | Q2Q067 | P35858 | -0.80755  |
| 92754 | Q2Q067 | Q96GE9 | -1.0345   |
| 92755 | Q2Q067 | O95167 | -0.56537  |
| 92756 | Q2Q067 | Q8N9F7 | -0.79504  |
| 92757 | Q2Q067 | Q8TE99 | -0.92834  |
| 92758 | Q2Q067 | O76061 | -0.80874  |
| 92759 | Q2Q067 | Q52WX2 | -1.2491   |
| 92760 | Q2Q067 | Q9H0R6 | -0.59546  |
| 92761 | Q2Q067 | Q8NGE9 | -1.4096   |
| 92762 | Q2Q067 | P48739 | -0.4742   |
| 92763 | Q2Q067 | O00744 | -0.40792  |
| 92764 | Q2Q067 | P38606 | -0.64387  |
| 92765 | Q2Q067 | Q9BYC2 | -0.34339  |
| 92766 | Q2Q067 | Q9UBT7 | -0.31345  |
| 92767 | Q2Q067 | Q8IVW6 | -0.21151  |
| 92768 | Q2Q067 | P84157 | -1.0345   |
| 92769 | Q2Q067 | Q96T49 | -0.2274   |
| 92770 | Q2Q067 | B9A014 | -0.014931 |
| 92771 | Q2Q067 | P31146 | -0.22741  |
| 92772 | Q2Q067 | O43603 | -1.3362   |
| 92773 | Q2Q067 | Q5TA77 | -0.37794  |
| 92774 | Q2Q067 | P05556 | -0.25013  |
| 92775 | Q2Q067 | Q6ZNC8 | -0.86832  |
| 92776 | Q2Q067 | O94985 | -1.1805   |
| 92777 | Q2Q067 | P48547 | -1.0103   |
| 92778 | Q2Q067 | Q9H461 | -0.5826   |
| 92779 | Q2Q067 | Q9NVL1 | -0.22988  |
| 92780 | Q2Q067 | P48775 | -0.36045  |
| 92781 | Q2Q067 | Q9NXJ5 | -0.46473  |
| 92782 | Q2Q067 | Q5RGS2 | -1.0345   |
| 92783 | Q2Q067 | A5PLK6 | -1.0088   |
| 92784 | Q2Q067 | Q6UX73 | -0.98666  |
| 92785 | Q2Q067 | P54855 | -1.0359   |
| 92786 | Q2Q067 | Q6P4A8 | -0.68927  |
| 92787 | Q2Q067 | Q06190 | -0.09641  |
| 92788 | Q2Q067 | P15289 | -0.65575  |
| 92789 | Q2Q067 | Q9H6H4 | -1.0345   |
| 92790 | Q2Q067 | Q9NY57 | -1.4247   |
| 92791 | Q2Q067 | Q6NVV9 | -0.58211  |
| 92792 | Q2Q067 | Q7L211 | -0.97833  |
| 92793 | Q2Q067 | Q92997 | -0.19761  |
| 92794 | Q2Q067 | Q5T6L9 | -1.0345   |
| 92795 | Q2Q067 | P55287 | -1.3128   |
| 92796 | Q2Q067 | Q8WWX8 | -1.1517   |

|       |        |        |           |
|-------|--------|--------|-----------|
| 92797 | Q2Q067 | Q96GF1 | -1.0225   |
| 92798 | Q2Q067 | P61764 | -0.21966  |
| 92799 | Q2Q067 | Q4QY38 | -0.94775  |
| 92800 | Q2Q067 | Q8NBR9 | -0.18001  |
| 92801 | Q2Q067 | Q9BRV3 | -0.54282  |
| 92802 | Q2Q067 | Q9Y251 | -0.26591  |
| 92803 | Q2Q067 | P35670 | -0.37087  |
| 92804 | Q2Q067 | Q9BQQ7 | -0.1403   |
| 92805 | Q2Q067 | Q8NHV1 | -1.0835   |
| 92806 | Q2Q067 | Q8NEV4 | -0.91496  |
| 92807 | Q2Q067 | Q5QNW6 | -0.82527  |
| 92808 | Q2Q067 | P0C7M7 | -0.90533  |
| 92809 | Q2Q067 | A1A4T8 | -0.1515   |
| 92810 | Q2Q067 | A4QN01 | -0.16442  |
| 92811 | Q2Q067 | P54756 | -1.1167   |
| 92812 | Q2Q067 | P28562 | -0.23406  |
| 92813 | Q2Q067 | Q9Y2Q5 | -0.46146  |
| 92814 | Q2Q067 | O14793 | -0.48139  |
| 92815 | Q2Q067 | Q8N2G8 | -0.17281  |
| 92816 | Q2Q067 | P31785 | -0.98802  |
| 92817 | Q2Q067 | Q504Y2 | -1.0083   |
| 92818 | Q2Q067 | Q19T08 | -1.4076   |
| 92819 | Q2Q067 | P53004 | -0.5613   |
| 92820 | Q2Q067 | Q6ZW05 | -0.76252  |
| 92821 | Q2Q067 | Q96MP5 | -0.48451  |
| 92822 | Q2Q067 | Q96FM1 | -0.82956  |
| 92823 | Q2Q067 | Q9Y3M8 | -0.25777  |
| 92824 | Q2Q067 | O14545 | -0.68159  |
| 92825 | Q2Q067 | Q9NQV6 | -0.15582  |
| 92826 | Q2Q067 | Q8NHB8 | -1.4096   |
| 92827 | Q2Q067 | P60893 | -1.4967   |
| 92828 | Q2Q067 | P0C7X4 | -0.36032  |
| 92829 | Q2Q067 | Q96L73 | -0.22751  |
| 92830 | Q2Q067 | Q9BX84 | -1.0487   |
| 92831 | Q2Q067 | Q7RTV5 | -0.20112  |
| 92832 | Q2Q067 | Q99935 | -0.91914  |
| 92833 | Q2Q067 | Q0WX57 | -0.29263  |
| 92834 | Q2Q067 | Q86VE3 | -0.42319  |
| 92835 | Q2Q067 | Q6ZU82 | -0.38123  |
| 92836 | Q2Q067 | Q9Y3Q7 | -1.4693   |
| 92837 | Q2Q067 | Q86VV4 | -0.5643   |
| 92838 | Q2Q067 | Q9NSK7 | -0.74406  |
| 92839 | Q2Q067 | O95263 | -0.22697  |
| 92840 | Q2Q067 | A0AUZ9 | -0.26012  |
| 92841 | Q2Q067 | O00322 | -0.96454  |
| 92842 | Q2Q067 | Q9HAU8 | -0.87727  |
| 92843 | Q2Q067 | Q0VGL1 | -0.68996  |
| 92844 | Q2Q067 | P05129 | -0.54833  |
| 92845 | Q2Q067 | A8MXU0 | -0.94775  |
| 92846 | Q2Q067 | Q96M27 | -0.28132  |
| 92847 | Q2Q067 | Q86YS7 | -0.58827  |
| 92848 | Q2Q067 | Q6WN34 | -0.77613  |
| 92849 | Q2Q067 | O15399 | -0.893    |
| 92850 | Q2Q067 | Q16134 | -0.38986  |
| 92851 | Q2Q067 | Q16832 | -1.2307   |
| 92852 | Q2Q067 | P00738 | -0.85295  |
| 92853 | Q2Q067 | O14625 | -1.2285   |
| 92854 | Q2Q067 | P35555 | -0.80498  |
| 92855 | Q2Q067 | Q96R67 | -1.4096   |
| 92856 | Q2Q067 | P22694 | -0.22688  |
| 92857 | Q2Q067 | Q6ZMR3 | -0.2605   |
| 92858 | Q2Q067 | Q9BR26 | -1.0157   |
| 92859 | Q2Q067 | Q2M3A8 | -0.10168  |
| 92860 | Q2Q067 | Q9Y6Z2 | -0.24416  |
| 92861 | Q2Q067 | Q9HDB5 | -1.1939   |
| 92862 | Q2Q067 | Q7Z569 | -0.25942  |
| 92863 | Q2Q067 | Q13683 | -0.82549  |
| 92864 | Q2Q067 | Q8IXB1 | -0.3686   |
| 92865 | Q2Q067 | Q8IY26 | -1.1058   |
| 92866 | Q2Q067 | Q9HCE5 | -0.090091 |
| 92867 | Q2Q067 | Q9BU23 | -1.1118   |
| 92868 | Q2Q067 | O75191 | -0.88681  |
| 92869 | Q2Q067 | Q08AE8 | -0.12664  |
| 92870 | Q2Q067 | Q9NQZ7 | -0.9363   |
| 92871 | Q2Q067 | Q5TGI0 | -1.0345   |
| 92872 | Q2Q067 | Q9Y230 | -0.2273   |

|       |        |        |          |
|-------|--------|--------|----------|
| 92873 | Q2Q067 | Q9NZI8 | -0.22612 |
| 92874 | Q2Q067 | Q7Z2Z2 | -0.69618 |
| 92875 | Q2Q067 | Q9UHV5 | -0.88973 |
| 92876 | Q2Q067 | Q8TE96 | -0.55742 |
| 92877 | Q2Q067 | P01616 | -1.101   |
| 92878 | Q2Q067 | O75970 | -0.22699 |
| 92879 | Q2Q067 | Q8WUX1 | -1.1155  |
| 92880 | Q2Q067 | Q9UHW9 | -1.0419  |
| 92881 | Q2Q067 | Q96NS5 | -0.22742 |
| 92882 | Q2Q067 | O43915 | -0.73336 |
| 92883 | Q2Q067 | Q6ZMJ4 | -0.80281 |
| 92884 | Q2Q067 | Q9H665 | -0.48734 |
| 92885 | Q2Q067 | A8MV23 | -0.78629 |
| 92886 | Q2Q067 | Q7Z4V5 | -0.1855  |
| 92887 | Q2Q067 | Q8WV15 | -1.0345  |
| 92888 | Q2Q067 | O60760 | -0.22639 |
| 92889 | Q2Q067 | P27448 | -0.9033  |
| 92890 | Q2Q067 | P08620 | -0.71921 |
| 92891 | Q2Q067 | P08574 | -0.42693 |
| 92892 | Q2Q067 | O60610 | -0.22729 |
| 92893 | Q2Q067 | Q92914 | -0.3995  |
| 92894 | Q2Q067 | Q8TBJ5 | -0.20908 |
| 92895 | Q2Q067 | P08069 | -0.59247 |
| 92896 | Q2Q067 | Q6PXP3 | -0.93903 |
| 92897 | Q2Q067 | P07237 | -0.39437 |
| 92898 | Q2Q067 | Q9P2U7 | -0.79844 |
| 92899 | Q2Q067 | P33032 | -1.0336  |
| 92900 | Q2Q067 | Q9BSA4 | -0.59097 |
| 92901 | Q2Q067 | A6NJW9 | -1.1634  |
| 92902 | Q2Q067 | Q6FI13 | -0.82527 |
| 92903 | Q2Q067 | Q9NPC2 | -1.2609  |
| 92904 | Q2Q067 | P00374 | -0.10405 |
| 92905 | Q2Q067 | Q9BQ08 | -0.8022  |
| 92906 | Q2Q067 | Q9NQ38 | -0.47745 |
| 92907 | Q2Q067 | Q8NF86 | -1.5429  |
| 92908 | Q2Q067 | Q9P109 | -0.60003 |
| 92909 | Q2Q067 | Q9UMF0 | -1.393   |
| 92910 | Q2Q067 | P86791 | -0.69118 |
| 92911 | Q2Q067 | P30954 | -1.4695  |
| 92912 | Q2Q067 | Q8WVS4 | -0.22273 |
| 92913 | Q2Q067 | P63252 | -1.5279  |
| 92914 | Q2Q067 | P47972 | -0.92032 |
| 92915 | Q2Q067 | P22004 | -0.61775 |
| 92916 | Q2Q067 | Q96M98 | -0.27321 |
| 92917 | Q2Q067 | Q4FZB7 | -0.21572 |
| 92918 | Q2Q067 | P35030 | -1.0353  |
| 92919 | Q2Q067 | Q8N119 | -1.4994  |
| 92920 | Q2Q067 | P0C7W8 | -0.43957 |
| 92921 | Q2Q067 | Q99592 | -0.23535 |
| 92922 | Q2Q067 | P19652 | -0.98724 |
| 92923 | Q2Q067 | Q15517 | -0.90742 |
| 92924 | Q2Q067 | Q8TB92 | -0.36218 |
| 92925 | Q2Q067 | O00748 | -0.28192 |
| 92926 | Q2Q067 | Q7Z6P3 | -1.2693  |
| 92927 | Q2Q067 | Q9BZY9 | -0.4815  |
| 92928 | Q2Q067 | P0C5Z0 | -0.81722 |
| 92929 | Q2Q067 | Q9UM21 | -1.0826  |
| 92930 | Q2Q067 | P98175 | -0.6501  |
| 92931 | Q2Q067 | Q9HC98 | -0.33706 |
| 92932 | Q2Q067 | Q7L775 | -0.37256 |
| 92933 | Q2Q067 | Q8TD46 | -0.93034 |
| 92934 | Q2Q067 | Q15394 | -1.3329  |
| 92935 | Q2Q067 | Q86UZ6 | -0.22828 |
| 92936 | Q2Q067 | A8MT33 | -0.36741 |
| 92937 | Q2Q067 | A8MT82 | -1.1564  |
| 92938 | Q2Q067 | A6NI61 | -1.0345  |
| 92939 | Q2Q067 | Q9BX63 | -0.29856 |
| 92940 | Q2Q067 | Q9NUY8 | -1.0238  |
| 92941 | Q2Q067 | P24071 | -1.7806  |
| 92942 | Q2Q067 | P08240 | -1.1388  |
| 92943 | Q2Q067 | P24387 | -0.3323  |
| 92944 | Q2Q067 | A6NKF7 | -1.0345  |
| 92945 | Q2Q067 | O95407 | -0.3346  |
| 92946 | Q2Q067 | Q9H2W1 | -1.0345  |
| 92947 | Q2Q067 | Q8NHJ6 | -0.67154 |
| 92948 | Q2Q067 | Q8NGN4 | -1.4096  |

|       |        |        |           |
|-------|--------|--------|-----------|
| 92949 | Q2Q067 | Q9UKP6 | -1.0473   |
| 92950 | Q2Q067 | O15021 | -1.2968   |
| 92951 | Q2Q067 | Q580R0 | -0.25339  |
| 92952 | Q2Q067 | Q6VAB6 | -0.72268  |
| 92953 | Q2Q067 | Q12849 | -0.55715  |
| 92954 | Q2Q067 | Q9NZN5 | -0.31847  |
| 92955 | Q2Q067 | Q8NH59 | -1.4096   |
| 92956 | Q2Q067 | P02766 | -0.23918  |
| 92957 | Q2Q067 | Q92629 | -0.67798  |
| 92958 | Q2Q067 | A7KAX9 | -0.41946  |
| 92959 | Q2Q067 | Q5VV16 | -0.33602  |
| 92960 | Q2Q067 | P49913 | -0.72296  |
| 92961 | Q2Q067 | P54762 | -0.74717  |
| 92962 | Q2Q067 | Q9UL52 | -2.1401   |
| 92963 | Q2Q067 | Q13508 | -0.81189  |
| 92964 | Q2Q067 | Q96MS0 | -1.087    |
| 92965 | Q2Q067 | E9PQR5 | -0.065082 |
| 92966 | Q2Q067 | Q9NYP8 | -0.24416  |
| 92967 | Q2Q067 | P23276 | -0.86593  |
| 92968 | Q2Q067 | Q14973 | -1.0638   |
| 92969 | Q2Q067 | P21108 | -0.86177  |
| 92970 | Q2Q067 | P23468 | -0.7617   |
| 92971 | Q2Q067 | Q9Y5X9 | -0.86249  |
| 92972 | Q2Q067 | Q0GE19 | -1.1806   |
| 92973 | Q2Q067 | Q13434 | -0.58312  |
| 92974 | Q2Q067 | O15432 | -1.2266   |
| 92975 | Q2Q067 | Q3SY17 | -0.86765  |
| 92976 | Q2Q067 | Q14469 | -0.2265   |
| 92977 | Q2Q067 | Q5TFQ8 | -1.0345   |
| 92978 | Q2Q067 | Q5VZ72 | -1.0788   |
| 92979 | Q2Q067 | Q6ZUV0 | -0.18029  |
| 92980 | Q2Q067 | P32248 | -0.54287  |
| 92981 | Q2Q067 | Q0D2H9 | -0.28132  |
| 92982 | Q2Q067 | Q9NPE2 | -0.77445  |
| 92983 | Q2Q067 | P07099 | -0.98477  |
| 92984 | Q2Q067 | A8MZ06 | -0.28132  |
| 92985 | Q2Q067 | Q9Y225 | -0.89412  |
| 92986 | Q2Q067 | Q8NHP8 | -0.61382  |
| 92987 | Q2Q067 | Q99767 | -0.22723  |
| 92988 | Q2Q067 | Q9NY46 | -0.96174  |
| 92989 | Q2Q067 | Q15700 | -0.21172  |
| 92990 | Q2Q067 | P0CG36 | -1.1655   |
| 92991 | Q2Q067 | Q3ZCM7 | -0.75936  |
| 92992 | Q2Q067 | P23443 | -0.21415  |
| 92993 | Q2Q067 | Q9H3N8 | -1.4553   |
| 92994 | Q2Q067 | Q8IU54 | -0.78629  |
| 92995 | Q2Q067 | Q8WVE0 | -0.40146  |
| 92996 | Q2Q067 | Q3B7I2 | -0.15265  |
| 92997 | Q2Q067 | Q8N268 | -0.11088  |
| 92998 | Q2Q067 | Q71H61 | -1.0356   |
| 92999 | Q2Q067 | Q6NVU6 | -0.24314  |
| 93000 | Q2Q067 | Q9NRM1 | -1.137    |
| 93001 | Q2Q067 | Q8TBZ3 | -0.22742  |
| 93002 | Q2Q067 | P17181 | -1.0591   |
| 93003 | Q2Q067 | Q9BXI2 | -0.69359  |
| 93004 | Q2Q067 | P30049 | -0.22171  |
| 93005 | Q2Q067 | Q96RP3 | -0.90413  |
| 93006 | Q2Q067 | P59542 | -1.3729   |
| 93007 | Q2Q067 | Q9UK28 | -0.82825  |
| 93008 | Q2Q067 | O14581 | -1.4096   |
| 93009 | Q2Q067 | Q9P2G9 | -0.21523  |
| 93010 | Q2Q067 | Q8N806 | -0.58215  |
| 93011 | Q2Q067 | Q8N7X0 | -0.74972  |
| 93012 | Q2Q067 | Q9Y5E2 | -1.3351   |
| 93013 | Q2Q067 | Q5VV41 | -0.22873  |
| 93014 | Q2Q067 | P55291 | -1.252    |
| 93015 | Q2Q067 | O75553 | -0.48089  |
| 93016 | Q2Q067 | Q9UHH9 | -0.53773  |
| 93017 | Q2Q067 | Q8N4E7 | -0.077234 |
| 93018 | Q2Q067 | Q5VWZ2 | -0.16552  |
| 93019 | Q2Q067 | O14617 | -0.18596  |
| 93020 | Q2Q067 | Q9Y2G4 | -0.2274   |
| 93021 | Q2Q067 | P49902 | -0.093077 |
| 93022 | Q2Q067 | P19021 | -0.85917  |
| 93023 | Q2Q067 | Q8IWF7 | -0.40349  |
| 93024 | Q2Q067 | Q8NC42 | -1.1727   |

|       |        |        |           |
|-------|--------|--------|-----------|
| 93025 | Q2Q067 | Q86UN2 | -0.65911  |
| 93026 | Q2Q067 | P0C7W9 | -0.43957  |
| 93027 | Q2Q067 | Q13202 | -0.57459  |
| 93028 | Q2Q067 | P01570 | -0.86951  |
| 93029 | Q2Q067 | Q12870 | -0.22792  |
| 93030 | Q2Q067 | Q8WTV0 | -0.46702  |
| 93031 | Q2Q067 | Q13459 | -0.26502  |
| 93032 | Q2Q067 | Q9Y5I7 | -0.89565  |
| 93033 | Q2Q067 | Q02297 | -0.27844  |
| 93034 | Q2Q067 | Q30KQ5 | -0.94775  |
| 93035 | Q2Q067 | P26374 | -0.78773  |
| 93036 | Q2Q067 | O15444 | -1.101    |
| 93037 | Q2Q067 | O95479 | -0.70526  |
| 93038 | Q2Q067 | P23945 | -0.7507   |
| 93039 | Q2Q067 | P08311 | -1.248    |
| 93040 | Q2Q067 | Q9NX94 | -1.0345   |
| 93041 | Q2Q067 | Q9NRG0 | -0.37157  |
| 93042 | Q2Q067 | Q9Y4K0 | -0.38201  |
| 93043 | Q2Q067 | Q99519 | -0.56683  |
| 93044 | Q2Q067 | Q9NZJ5 | -0.41761  |
| 93045 | Q2Q067 | Q9P2N4 | -1.4538   |
| 93046 | Q2Q067 | P80162 | -1.2657   |
| 93047 | Q2Q067 | P0CG38 | -0.4135   |
| 93048 | Q2Q067 | P56556 | -0.23196  |
| 93049 | Q2Q067 | Q7Z429 | -1.0345   |
| 93050 | Q2Q067 | Q2TBE0 | -0.5697   |
| 93051 | Q2Q067 | Q9BR77 | -0.21094  |
| 93052 | Q2Q067 | Q5I0X7 | -0.43841  |
| 93053 | Q2Q067 | Q6PH81 | -0.028595 |
| 93054 | Q2Q067 | P59910 | -0.38367  |
| 93055 | Q2Q067 | P23434 | -0.21939  |
| 93056 | Q2Q067 | Q9NPH9 | -0.46251  |
| 93057 | Q2Q067 | P56750 | -0.7577   |
| 93058 | Q2Q067 | Q6UWN5 | -0.65821  |
| 93059 | Q2Q067 | Q6X4U4 | -0.98439  |
| 93060 | Q2Q067 | P35626 | -1.3417   |
| 93061 | Q2Q067 | Q15149 | -0.22766  |
| 93062 | Q2Q067 | Q9H6K4 | -0.39421  |
| 93063 | Q2Q067 | Q96BI3 | -0.41459  |
| 93064 | Q2Q067 | Q9UEW3 | -1.1605   |
| 93065 | Q2Q067 | P19237 | -0.25302  |
| 93066 | Q2Q067 | Q6N022 | -0.47415  |
| 93067 | Q2Q067 | Q8NDX6 | -0.23275  |
| 93068 | Q2Q067 | Q6UXN7 | -0.73411  |
| 93069 | Q2Q067 | A7XYQ1 | -0.50277  |
| 93070 | Q2Q067 | O95057 | -1.5078   |
| 93071 | Q2Q067 | Q6ZNB5 | -0.053162 |
| 93072 | Q2Q067 | Q8TET4 | -0.36772  |
| 93073 | Q2Q067 | Q9H342 | -1.4096   |
| 93074 | Q2Q067 | Q9UIB8 | -1.3476   |
| 93075 | Q2Q067 | A6NKZ8 | -0.65192  |
| 93076 | Q2Q067 | P61163 | -0.11674  |
| 93077 | Q2Q067 | Q96G01 | -0.19553  |
| 93078 | Q2Q067 | Q6UW78 | -0.98666  |
| 93079 | Q2Q067 | Q9NZJ6 | -0.18351  |
| 93080 | Q2Q067 | Q7Z2H8 | -0.97274  |
| 93081 | Q2Q067 | Q9Y6Q3 | -0.22281  |
| 93082 | Q2Q067 | P01233 | -0.85756  |
| 93083 | Q2Q067 | Q9BT09 | -0.40014  |
| 93084 | Q2Q067 | Q8IVF6 | -0.22739  |
| 93085 | Q2Q067 | Q14444 | -0.42345  |
| 93086 | Q2Q067 | Q9NP94 | -1.2008   |
| 93087 | Q2Q067 | Q495T6 | -1.6848   |
| 93088 | Q2Q067 | Q7Z5Y6 | -0.97332  |
| 93089 | Q2Q067 | Q6P5S7 | -0.79095  |
| 93090 | Q2Q067 | Q9NP08 | -0.22767  |
| 93091 | Q2Q067 | P08247 | -0.66528  |
| 93092 | Q2Q067 | Q96MD7 | -0.20893  |
| 93093 | Q2Q067 | Q96NL6 | -0.16617  |
| 93094 | Q2Q067 | P25189 | -1.186    |
| 93095 | Q2Q067 | Q96SY0 | -0.050525 |
| 93096 | Q2Q067 | Q14032 | -0.27309  |
| 93097 | Q2Q067 | Q9NSE2 | -0.22741  |
| 93098 | Q2Q067 | Q6UXU0 | -0.98666  |
| 93099 | Q2Q067 | Q9UKW4 | -0.29923  |
| 93100 | Q2Q067 | Q8N9F0 | -0.70212  |

|       |        |        |           |
|-------|--------|--------|-----------|
| 93101 | Q2Q067 | Q9NXT0 | -0.085533 |
| 93102 | Q2Q067 | O60443 | -0.22772  |
| 93103 | Q2Q067 | Q8NBQ5 | -1.1889   |
| 93104 | Q2Q067 | Q9BWS9 | -0.89576  |
| 93105 | Q2Q067 | Q13018 | -1.3795   |
| 93106 | Q2Q067 | Q8WW43 | -0.47419  |
| 93107 | Q2Q067 | Q0VAK6 | -0.22109  |
| 93108 | Q2Q067 | C9J442 | -0.98666  |
| 93109 | Q2Q067 | Q0VD83 | -0.84267  |
| 93110 | Q2Q067 | Q75NE6 | -1.0345   |
| 93111 | Q2Q067 | O75417 | -0.66978  |
| 93112 | Q2Q067 | Q9NX76 | -1.0608   |
| 93113 | Q2Q067 | Q6Y2X3 | -0.43038  |
| 93114 | Q2Q067 | Q9NYA4 | -0.38101  |
| 93115 | Q2Q067 | Q9HBW9 | -1.496    |
| 93116 | Q2Q067 | Q9BZV2 | -0.86219  |
| 93117 | Q2Q067 | Q96LP6 | -0.0766   |
| 93118 | Q2Q067 | Q9HB21 | -0.22741  |
| 93119 | Q2Q067 | Q9BY64 | -1.1064   |
| 93120 | Q2Q067 | P13945 | -0.49057  |
| 93121 | Q2Q067 | P07911 | -0.83166  |
| 93122 | Q2Q067 | O95299 | -0.11746  |
| 93123 | Q2Q067 | Q9NZ01 | -0.53912  |
| 93124 | Q2Q067 | Q13145 | -0.60866  |
| 93125 | Q2Q067 | P86434 | -0.14493  |
| 93126 | Q2Q067 | Q9PON9 | -0.58018  |
| 93127 | Q2Q067 | Q6UXV3 | -0.98666  |
| 93128 | Q2Q067 | P0C881 | -0.16798  |
| 93129 | Q2Q067 | Q68DE3 | -0.30622  |
| 93130 | Q2Q067 | Q8N350 | -1.0345   |
| 93131 | Q2Q067 | P30520 | -0.73205  |
| 93132 | Q2Q067 | O14791 | -0.6805   |
| 93133 | Q2Q067 | Q9BXU1 | -1.3228   |
| 93134 | Q2Q067 | P27708 | -0.43651  |
| 93135 | Q2Q067 | Q96AZ6 | -0.26785  |
| 93136 | Q2Q067 | Q02763 | -0.51555  |
| 93137 | Q2Q067 | Q8IVU3 | -0.25149  |
| 93138 | Q2Q067 | P51582 | -1.2911   |
| 93139 | Q2Q067 | O14957 | -0.67999  |
| 93140 | Q2Q067 | P33241 | -0.92755  |
| 93141 | Q2Q067 | Q6UY09 | -1.0345   |
| 93142 | Q2Q067 | P01574 | -0.46231  |
| 93143 | Q2Q067 | Q92888 | -0.36853  |
| 93144 | Q2Q067 | Q14055 | -0.97636  |
| 93145 | Q2Q067 | Q9Y287 | -0.21567  |
| 93146 | Q2Q067 | Q96DD0 | -0.25999  |
| 93147 | Q2Q067 | Q8NBC4 | -0.20901  |
| 93148 | Q2Q067 | P09651 | -0.26537  |
| 93149 | Q2Q067 | Q8IY22 | -0.14159  |
| 93150 | Q2Q067 | Q94808 | -0.1606   |
| 93151 | Q2Q067 | Q86U10 | -0.41643  |
| 93152 | Q2Q067 | Q9Y256 | -1.2979   |
| 93153 | Q2Q067 | O75344 | -0.62131  |
| 93154 | Q2Q067 | P0C626 | -1.4202   |
| 93155 | Q2Q067 | O60636 | -1.1208   |
| 93156 | Q2Q067 | Q9NYW6 | -1.3035   |
| 93157 | Q2Q067 | Q8TDX6 | -0.50139  |
| 93158 | Q2Q067 | O43426 | -0.37882  |
| 93159 | Q2Q067 | Q92537 | -0.77947  |
| 93160 | Q2Q067 | Q96A46 | -1.0334   |
| 93161 | Q2Q067 | Q9P0U3 | -0.17435  |
| 93162 | Q2Q067 | P63145 | -0.47805  |
| 93163 | Q2Q067 | O60243 | -0.78873  |
| 93164 | Q2Q067 | Q9BZA7 | -1.5027   |
| 93165 | Q2Q067 | Q5VU97 | -1.1323   |
| 93166 | Q2Q067 | Q6DHV7 | -0.21342  |
| 93167 | Q2Q067 | P50148 | -0.84564  |
| 93168 | Q2Q067 | A4D161 | -0.15937  |
| 93169 | Q2Q067 | Q6DN12 | -0.99575  |
| 93170 | Q2Q067 | P0C6S8 | -1.0345   |
| 93171 | Q2Q067 | Q14571 | -0.62642  |
| 93172 | Q2Q067 | O95630 | -0.23765  |
| 93173 | Q2Q067 | P47881 | -1.4096   |
| 93174 | Q2Q067 | P19086 | -1.1259   |
| 93175 | Q2Q067 | Q6PJF5 | -1.1147   |
| 93176 | Q2Q067 | Q13596 | -0.22661  |

|       |        |        |            |
|-------|--------|--------|------------|
| 93177 | Q2Q067 | P02810 | -0.40114   |
| 93178 | Q2Q067 | P30679 | -0.99684   |
| 93179 | Q2Q067 | Q9H112 | -0.23777   |
| 93180 | Q2Q067 | Q8NH04 | -1.4096    |
| 93181 | Q2Q067 | Q14246 | -1.7213    |
| 93182 | Q2Q067 | P56937 | -1.3146    |
| 93183 | Q2Q067 | Q9NVH1 | -0.29776   |
| 93184 | Q2Q067 | Q9P2W3 | -0.63848   |
| 93185 | Q2Q067 | Q5JT25 | -1.0904    |
| 93186 | Q2Q067 | O15123 | -0.58808   |
| 93187 | Q2Q067 | O60902 | -0.17382   |
| 93188 | Q2Q067 | P0C221 | -0.20805   |
| 93189 | Q2Q067 | Q6P2I7 | -0.11861   |
| 93190 | Q2Q067 | P63261 | -0.10741   |
| 93191 | Q2Q067 | P04207 | -1.1115    |
| 93192 | Q2Q067 | Q8WXI2 | -0.47907   |
| 93193 | Q2Q067 | Q9Y5Q6 | -0.85883   |
| 93194 | Q2Q067 | Q9NWH2 | -1.0345    |
| 93195 | Q2Q067 | P33764 | -0.50694   |
| 93196 | Q2Q067 | H3BSY2 | -0.28132   |
| 93197 | Q2Q067 | E9PB15 | -0.0040899 |
| 93198 | Q2Q067 | Q8NGC2 | -1.4096    |
| 93199 | Q2Q067 | Q96PX8 | -1.1214    |
| 93200 | Q2Q067 | Q9H6L2 | -1.0862    |
| 93201 | Q2Q067 | Q15940 | -0.74229   |
| 93202 | Q2Q067 | Q7Z698 | -0.21017   |
| 93203 | Q2Q067 | P09455 | -0.54258   |
| 93204 | Q2Q067 | Q8IVW4 | -0.90164   |
| 93205 | Q2Q067 | Q9HC56 | -1.3081    |
| 93206 | Q2Q067 | Q16281 | -1.6111    |
| 93207 | Q2Q067 | Q8WWN9 | -0.63569   |
| 93208 | Q2Q067 | Q86UQ5 | -1.0345    |
| 93209 | Q2Q067 | P53420 | -1.0068    |
| 93210 | Q2Q067 | Q95365 | -1.1453    |
| 93211 | Q2Q067 | Q8TE54 | -0.66411   |
| 93212 | Q2Q067 | Q9Y216 | -0.35895   |
| 93213 | Q2Q067 | Q8N3C7 | -0.22741   |
| 93214 | Q2Q067 | Q14562 | -0.2144    |
| 93215 | Q2Q067 | Q7Z572 | -0.45603   |
| 93216 | Q2Q067 | Q7Z6A9 | -1.1866    |
| 93217 | Q2Q067 | Q1HG44 | -0.92178   |
| 93218 | Q2Q067 | P49748 | -0.33393   |
| 93219 | Q2Q067 | P33681 | -0.40599   |
| 93220 | Q2Q067 | Q9NX02 | -0.22732   |
| 93221 | Q2Q067 | Q8TD08 | -1.4448    |
| 93222 | Q2Q067 | P57103 | -0.95823   |
| 93223 | Q2Q067 | O43315 | -0.7003    |
| 93224 | Q2Q067 | P29377 | -0.41688   |
| 93225 | Q2Q067 | Q9H6L5 | -0.85872   |
| 93226 | Q2Q067 | P48065 | -1.1906    |
| 93227 | Q2Q067 | P0CG37 | -1.0598    |
| 93228 | Q2Q067 | Q59EK9 | -0.50714   |
| 93229 | Q2Q067 | Q9Y698 | -0.65988   |
| 93230 | Q2Q067 | Q9Y3C6 | -0.31294   |
| 93231 | Q2Q067 | Q9NR16 | -1.6623    |
| 93232 | Q2Q067 | Q8NFW8 | -0.091378  |
| 93233 | Q2Q067 | P06703 | -0.23142   |
| 93234 | Q2Q067 | P60763 | -0.68072   |
| 93235 | Q2Q067 | O75840 | -0.22625   |
| 93236 | Q2Q067 | Q6NXP6 | -0.76681   |
| 93237 | Q2Q067 | O60931 | -1.18      |
| 93238 | Q2Q067 | Q53H96 | -0.93328   |
| 93239 | Q2Q067 | Q9NVE5 | -0.76972   |
| 93240 | Q2Q067 | Q8WZA6 | -1.4096    |
| 93241 | Q2Q067 | Q6ZMI3 | -1.3661    |
| 93242 | Q2Q067 | Q6PEW1 | -0.056856  |
| 93243 | Q2Q067 | Q8TDC3 | -0.78584   |
| 93244 | Q2Q067 | Q9C0G0 | -0.085533  |
| 93245 | Q2Q067 | O95343 | -0.22772   |
| 93246 | Q2Q067 | P29122 | -1.0884    |
| 93247 | Q2Q067 | O75914 | -0.87778   |
| 93248 | Q2Q067 | P52888 | -0.63588   |
| 93249 | Q2Q067 | Q629K1 | -1.1118    |
| 93250 | Q2Q067 | Q8N5S9 | -0.76527   |
| 93251 | Q2Q067 | Q6ZMN7 | -0.55187   |
| 93252 | Q2Q067 | Q9H2W2 | -0.21925   |



|       |        |        |           |
|-------|--------|--------|-----------|
| 93253 | Q2Q067 | P27918 | -1.0326   |
| 93254 | Q2Q067 | Q9UKF7 | -0.38165  |
| 93255 | Q2Q067 | Q8TDS4 | -1.2201   |
| 93256 | Q2Q067 | Q12791 | -0.79109  |
| 93257 | Q2Q067 | Q8IVQ6 | -0.68018  |
| 93258 | Q2Q067 | Q96CQ1 | -0.82477  |
| 93259 | Q2Q067 | Q96MX3 | -0.085533 |
| 93260 | Q2Q067 | Q49AG3 | -0.52609  |
| 93261 | Q2Q067 | Q9UBR2 | -0.96005  |
| 93262 | Q2Q067 | Q8IX01 | -0.16977  |
| 93263 | Q2Q067 | Q96S86 | -1.1911   |
| 93264 | Q2Q067 | Q9Y234 | -0.40887  |
| 93265 | Q2Q067 | O95249 | -0.42923  |
| 93266 | Q2Q067 | Q6UWS5 | -0.21265  |
| 93267 | Q2Q067 | Q8N4S7 | -1.0345   |
| 93268 | Q2Q067 | Q5QGZ9 | -1.146    |
| 93269 | Q2Q067 | Q9UK33 | -0.21518  |
| 93270 | Q2Q067 | P14735 | -0.33183  |
| 93271 | Q2Q067 | Q9Y5S8 | -0.48605  |
| 93272 | Q2Q067 | Q96MA6 | -0.68703  |
| 93273 | Q2Q067 | P38571 | -0.55811  |
| 93274 | Q2Q067 | P06401 | -0.22742  |
| 93275 | Q2Q067 | P13385 | -0.22744  |
| 93276 | Q2Q067 | Q9UGF5 | -1.4096   |
| 93277 | Q2Q067 | Q17RY6 | -0.44234  |
| 93278 | Q2Q067 | P34947 | -0.67534  |
| 93279 | Q2Q067 | Q7L7X3 | -0.69016  |
| 93280 | Q2Q067 | Q9H5Y0 | -0.28132  |
| 93281 | Q2Q067 | Q9UQ13 | -0.23982  |
| 93282 | Q2Q067 | P13762 | -0.79235  |
| 93283 | Q2Q067 | O15393 | -1.8676   |
| 93284 | Q2Q067 | Q6PJ69 | -0.73178  |
| 93285 | Q2Q067 | Q6NT16 | -1.049    |
| 93286 | Q2Q067 | P58170 | -1.4096   |
| 93287 | Q2Q067 | O75844 | -1.1397   |
| 93288 | Q2Q067 | P16444 | -0.52802  |
| 93289 | Q2Q067 | Q99624 | -1.1176   |
| 93290 | Q2Q067 | P00973 | -0.53654  |
| 93291 | Q2Q067 | P55268 | -0.81532  |
| 93292 | Q2Q067 | Q9NZJ7 | -0.25835  |
| 93293 | Q2Q067 | Q96QS3 | -0.16081  |
| 93294 | Q2Q067 | Q07343 | -0.22357  |
| 93295 | Q2Q067 | Q7Z3J3 | -0.48206  |
| 93296 | Q2Q067 | P48449 | -0.49684  |
| 93297 | Q2Q067 | P0DJD9 | -1.2971   |
| 93298 | Q2Q067 | Q05513 | -0.24404  |
| 93299 | Q2Q067 | Q7Z5A8 | -0.98666  |
| 93300 | Q2Q067 | Q9HBD1 | -0.47839  |
| 93301 | Q2Q067 | Q8NBB2 | -0.17704  |
| 93302 | Q2Q067 | Q30154 | -0.79235  |
| 93303 | Q2Q067 | P01713 | -1.1115   |
| 93304 | Q2Q067 | Q6UW32 | -0.40114  |
| 93305 | Q2Q067 | Q9Y6E0 | -0.37815  |
| 93306 | Q2Q067 | Q96M66 | -0.25369  |
| 93307 | Q2Q067 | Q9UBN4 | -0.30537  |
| 93308 | Q2Q067 | P48307 | -0.81818  |
| 93309 | Q2Q067 | Q9UKR5 | -0.92207  |
| 93310 | Q2Q067 | Q9Y5S2 | -0.9262   |
| 93311 | Q2Q067 | Q3SXM0 | -0.22742  |
| 93312 | Q2Q067 | Q96K12 | -1.2787   |
| 93313 | Q2Q067 | O94919 | -0.94168  |
| 93314 | Q2Q067 | Q8IXU6 | -0.79724  |
| 93315 | Q2Q067 | Q8N9V2 | -0.79686  |
| 93316 | Q2Q067 | O60344 | -1.091    |
| 93317 | Q2Q067 | O15240 | -0.69537  |
| 93318 | Q2Q067 | Q96RI1 | -0.23424  |
| 93319 | Q2Q067 | P54219 | -0.61739  |
| 93320 | Q2Q067 | Q8IYB5 | -1.0295   |
| 93321 | Q2Q067 | P04229 | -0.62454  |
| 93322 | Q2Q067 | A6NI15 | -0.22742  |
| 93323 | Q2Q067 | P85037 | -0.26994  |
| 93324 | Q2Q067 | Q99706 | -0.84593  |
| 93325 | Q2Q067 | Q8N3R3 | -0.21265  |
| 93326 | Q2Q067 | Q5TD97 | -0.22127  |
| 93327 | Q2Q067 | Q8N819 | -0.52629  |
| 93328 | Q2Q067 | Q8IUX4 | -0.50862  |

|       |        |        |           |
|-------|--------|--------|-----------|
| 93329 | Q2Q067 | Q86VW1 | -1.1477   |
| 93330 | Q2Q067 | Q96J66 | -1.5095   |
| 93331 | Q2Q067 | Q8TDS5 | -1.3478   |
| 93332 | Q2Q067 | Q92535 | -1.006    |
| 93333 | Q2Q067 | O75695 | -0.69506  |
| 93334 | Q2Q067 | Q92886 | -0.2284   |
| 93335 | Q2Q067 | Q6SZW1 | -0.59689  |
| 93336 | Q2Q067 | Q969U6 | -0.22758  |
| 93337 | Q2Q067 | Q96DR8 | -1.0929   |
| 93338 | Q2Q067 | P35544 | -0.24416  |
| 93339 | Q2Q067 | Q9NYY3 | -0.49851  |
| 93340 | Q2Q067 | O60602 | -1.217    |
| 93341 | Q2Q067 | P33991 | -0.22232  |
| 93342 | Q2Q067 | P50458 | -0.22741  |
| 93343 | Q2Q067 | D6R901 | -0.76972  |
| 93344 | Q2Q067 | P51511 | -0.96177  |
| 93345 | Q2Q067 | Q9NPZ5 | -0.70846  |
| 93346 | Q2Q067 | P32297 | -0.80758  |
| 93347 | Q2Q067 | Q9H1N7 | -0.67866  |
| 93348 | Q2Q067 | Q5T4F7 | -0.87254  |
| 93349 | Q2Q067 | Q96EK2 | -0.48451  |
| 93350 | Q2Q067 | P48664 | -1.2154   |
| 93351 | Q2Q067 | Q8IZ41 | -0.93917  |
| 93352 | Q2Q067 | Q9UHY7 | -0.20509  |
| 93353 | Q2Q067 | P15090 | -0.20472  |
| 93354 | Q2Q067 | P35410 | -0.75257  |
| 93355 | Q2Q067 | Q9UNL2 | -0.82118  |
| 93356 | Q2Q067 | Q6P4A7 | -1.0264   |
| 93357 | Q2Q067 | Q96SN7 | -0.35359  |
| 93358 | Q2Q067 | Q06495 | -0.62731  |
| 93359 | Q2Q067 | Q92859 | -0.95662  |
| 93360 | Q2Q067 | O14522 | -0.88218  |
| 93361 | Q2Q067 | Q13685 | -0.73912  |
| 93362 | Q2Q067 | O60721 | -0.81929  |
| 93363 | Q2Q067 | P17017 | -0.085533 |
| 93364 | Q2Q067 | A6NKL6 | -1.0345   |
| 93365 | Q2Q067 | P52951 | -0.22466  |
| 93366 | Q2Q067 | Q9Y5R4 | -0.27615  |
| 93367 | Q2Q067 | P51452 | -0.25072  |
| 93368 | Q2Q067 | A6NIE9 | -1.5202   |
| 93369 | Q2Q067 | O75426 | -0.43384  |
| 93370 | Q2Q067 | P48742 | -0.22743  |
| 93371 | Q2Q067 | Q02224 | -0.23842  |
| 93372 | Q2Q067 | Q6PIU2 | -1.0211   |
| 93373 | Q2Q067 | Q8TCB0 | -0.12521  |
| 93374 | Q2Q067 | P04062 | -0.44264  |
| 93375 | Q2Q067 | O75129 | -1.0345   |
| 93376 | Q2Q067 | Q9BSK0 | -0.45017  |
| 93377 | Q2Q067 | Q8TDQ1 | -1.1634   |
| 93378 | Q2Q067 | P0CI26 | -0.73178  |
| 93379 | Q2Q067 | O43614 | -1.4652   |
| 93380 | Q2Q067 | A6NFU8 | -0.85877  |
| 93381 | Q2Q067 | Q9HCE3 | -0.14213  |
| 93382 | Q2Q067 | P15529 | -0.78684  |
| 93383 | Q2Q067 | O43889 | -0.3333   |
| 93384 | Q2Q067 | Q13368 | -0.36663  |
| 93385 | Q2Q067 | P01241 | -0.30021  |
| 93386 | Q2Q067 | Q9Y5H8 | -1.4044   |
| 93387 | Q2Q067 | P01270 | -0.67511  |
| 93388 | Q2Q067 | Q99525 | -0.62453  |
| 93389 | Q2Q067 | Q8NGD3 | -1.4096   |
| 93390 | Q2Q067 | Q9UQ16 | -0.23195  |
| 93391 | Q2Q067 | A6NJW4 | -1.0345   |
| 93392 | Q2Q067 | Q16760 | -0.76713  |
| 93393 | Q2Q067 | Q969S0 | -0.70802  |
| 93394 | Q2Q067 | O75366 | -0.31935  |
| 93395 | Q2Q067 | Q14088 | -0.63711  |
| 93396 | Q2Q067 | P00492 | -0.20787  |
| 93397 | Q2Q067 | Q9H340 | -1.4096   |
| 93398 | Q2Q067 | Q6ZP29 | -1.0137   |
| 93399 | Q2Q067 | Q5SRD0 | -0.4134   |
| 93400 | Q2Q067 | P32119 | -0.39396  |
| 93401 | Q2Q067 | Q96LM5 | -0.1428   |
| 93402 | Q2Q067 | Q8WU08 | -1.4247   |
| 93403 | Q2Q067 | Q96SB4 | -0.32742  |
| 93404 | Q2Q067 | P78329 | -0.22812  |

|       |        |        |           |
|-------|--------|--------|-----------|
| 93405 | Q2Q067 | Q96DR5 | -1.1714   |
| 93406 | Q2Q067 | Q8NGG4 | -1.4096   |
| 93407 | Q2Q067 | Q96ER9 | -0.27244  |
| 93408 | Q2Q067 | Q8IYT2 | -0.94793  |
| 93409 | Q2Q067 | Q8NFV4 | -0.22178  |
| 93410 | Q2Q067 | P61568 | -0.2833   |
| 93411 | Q2Q067 | Q8TAL6 | -0.84542  |
| 93412 | Q2Q067 | Q6ZN19 | -0.085533 |
| 93413 | Q2Q067 | Q8NA82 | -0.58666  |
| 93414 | Q2Q067 | Q9Y639 | -0.98275  |
| 93415 | Q2Q067 | O75569 | -0.18824  |
| 93416 | Q2Q067 | Q96E40 | -0.043855 |
| 93417 | Q2Q067 | Q9NP99 | -1.6156   |
| 93418 | Q2Q067 | Q9P283 | -1.204    |
| 93419 | Q2Q067 | Q9Y5E5 | -1.1567   |
| 93420 | Q2Q067 | Q6ZNI0 | -0.88339  |
| 93421 | Q2Q067 | Q5JV73 | -0.3932   |
| 93422 | Q2Q067 | Q8IZU9 | -0.97068  |
| 93423 | Q2Q067 | P25025 | -1.241    |
| 93424 | Q2Q067 | Q6ICI0 | -1.0345   |
| 93425 | Q2Q067 | Q96M42 | -0.25453  |
| 93426 | Q2Q067 | Q5VY43 | -1.1009   |
| 93427 | Q2Q067 | Q8WUF8 | -0.95448  |
| 93428 | Q2Q067 | P07451 | -0.18846  |
| 93429 | Q2Q067 | Q6UWV6 | -0.86213  |
| 93430 | Q2Q067 | P04350 | -0.2679   |
| 93431 | Q2Q067 | Q9BXP2 | -1.1367   |
| 93432 | Q2Q067 | A8K554 | -0.028364 |
| 93433 | Q2Q067 | Q13489 | -0.22741  |
| 93434 | Q2Q067 | O43869 | -1.4096   |
| 93435 | Q2Q067 | O14657 | -0.2638   |
| 93436 | Q2Q067 | Q8NAB2 | -0.2118   |
| 93437 | Q2Q067 | Q6P4F2 | -0.28806  |
| 93438 | Q2Q067 | O95970 | -0.22798  |
| 93439 | Q2Q067 | Q92911 | -0.83054  |
| 93440 | Q2Q067 | P57737 | -0.46267  |
| 93441 | Q2Q067 | P63129 | -0.74403  |
| 93442 | Q2Q067 | P54826 | -0.16273  |
| 93443 | Q2Q067 | Q8NDW8 | -0.052774 |
| 93444 | Q2Q067 | P42696 | -0.44426  |
| 93445 | Q2Q067 | O15480 | -0.11041  |
| 93446 | Q2Q067 | Q6ZMZ0 | -0.52335  |
| 93447 | Q2Q067 | Q00604 | -0.78801  |
| 93448 | Q2Q067 | Q6ZVD8 | -0.2283   |
| 93449 | Q2Q067 | P08908 | -1.3488   |
| 93450 | Q2Q067 | P68363 | -0.20752  |
| 93451 | Q2Q067 | P20815 | -0.78702  |
| 93452 | Q2Q067 | Q9Y561 | -0.70648  |
| 93453 | Q2Q067 | Q6UW56 | -0.22652  |
| 93454 | Q2Q067 | Q12899 | -0.59831  |
| 93455 | Q2Q067 | Q9P2M4 | -1.3279   |
| 93456 | Q2Q067 | A6NNE9 | -1.1133   |
| 93457 | Q2Q067 | Q969R8 | -0.11046  |
| 93458 | Q2Q067 | O94812 | -0.41321  |
| 93459 | Q2Q067 | Q8WUR7 | -0.16817  |
| 93460 | Q2Q067 | A6NLU0 | -0.48451  |
| 93461 | Q2Q067 | Q9NXF1 | -0.39983  |
| 93462 | Q2Q067 | Q8WX94 | -0.91075  |
| 93463 | Q2Q067 | Q8TAA9 | -0.57212  |
| 93464 | Q2Q067 | P15173 | -0.22732  |
| 93465 | Q2Q067 | P32926 | -0.99573  |
| 93466 | Q2Q067 | Q13049 | -0.2274   |
| 93467 | Q2Q067 | Q9BYC5 | -0.61658  |
| 93468 | Q2Q067 | Q7RTY5 | -1.5202   |
| 93469 | Q2Q067 | Q96P20 | -0.22726  |
| 93470 | Q2Q067 | Q53F19 | -0.89117  |
| 93471 | Q2Q067 | Q8N8Z6 | -1.227    |
| 93472 | Q2Q067 | Q9H361 | -0.67719  |
| 93473 | Q2Q067 | P98082 | -0.22679  |
| 93474 | Q2Q067 | P14543 | -1.1318   |
| 93475 | Q2Q067 | Q12955 | -0.22741  |
| 93476 | Q2Q067 | P00156 | -0.78518  |
| 93477 | Q2Q067 | O60941 | -0.32941  |
| 93478 | Q2Q067 | P46952 | -0.2452   |
| 93479 | Q2Q067 | P31327 | -0.19068  |
| 93480 | Q2Q067 | O43320 | -0.99386  |

|       |        |        |           |
|-------|--------|--------|-----------|
| 93481 | Q2Q067 | P54922 | -0.33701  |
| 93482 | Q2Q067 | Q14CM0 | -0.22741  |
| 93483 | Q2Q067 | Q4KMG0 | -0.35086  |
| 93484 | Q2Q067 | P41440 | -0.91893  |
| 93485 | Q2Q067 | Q96LW4 | -0.41142  |
| 93486 | Q2Q067 | Q8IWZ6 | -0.18971  |
| 93487 | Q2Q067 | O95573 | -0.80454  |
| 93488 | Q2Q067 | Q8N436 | -1.3462   |
| 93489 | Q2Q067 | Q96LL3 | -1.0345   |
| 93490 | Q2Q067 | Q2LD37 | -0.055166 |
| 93491 | Q2Q067 | P21802 | -0.26189  |
| 93492 | Q2Q067 | Q9GZU1 | -0.97849  |
| 93493 | Q2Q067 | O15056 | -0.22704  |
| 93494 | Q2Q067 | Q8N9C0 | -0.22745  |
| 93495 | Q2Q067 | O94804 | -0.75737  |
| 93496 | Q2Q067 | P50238 | -0.37289  |
| 93497 | Q2Q067 | Q8TDD1 | -0.28217  |
| 93498 | Q2Q067 | Q02386 | -0.20906  |
| 93499 | Q2Q067 | Q8N8Q9 | -1.2271   |
| 93500 | Q2Q067 | Q96P65 | -1.4577   |
| 93501 | Q2Q067 | O15357 | -0.22741  |
| 93502 | Q2Q067 | Q8NA58 | -0.67254  |
| 93503 | Q2Q067 | Q8NFP9 | -0.36059  |
| 93504 | Q2Q067 | Q765I0 | -0.96181  |
| 93505 | Q2Q067 | Q9H967 | -0.22728  |
| 93506 | Q2Q067 | Q969M2 | -1.0245   |
| 93507 | Q2Q067 | Q9Y3A4 | -0.96284  |
| 93508 | Q2Q067 | Q9BQ50 | -0.23362  |
| 93509 | Q2Q067 | Q4V339 | -0.91075  |
| 93510 | Q2Q067 | Q6ZWJ8 | -0.98666  |
| 93511 | Q2Q067 | A1Z1Q3 | -0.42564  |
| 93512 | Q2Q067 | Q709C8 | -0.44605  |
| 93513 | Q2Q067 | B0I1T2 | -0.82429  |
| 93514 | Q2Q067 | Q5JXX7 | -1.0345   |
| 93515 | Q2Q067 | Q8IWT1 | -0.92756  |
| 93516 | Q2Q067 | Q16853 | -1.1735   |
| 93517 | Q2Q067 | P55290 | -0.58558  |
| 93518 | Q2Q067 | A6NC98 | -0.19792  |
| 93519 | Q2Q067 | Q6P5W5 | -0.97368  |
| 93520 | Q2Q067 | Q96DD7 | -1.0345   |
| 93521 | Q2Q067 | Q13557 | -0.78771  |
| 93522 | Q2Q067 | Q9NQT6 | -0.38574  |
| 93523 | Q2Q067 | P26439 | -0.85264  |
| 93524 | Q2Q067 | Q9UK32 | -0.8178   |
| 93525 | Q2Q067 | Q86UE6 | -0.8917   |
| 93526 | Q2Q067 | Q8NA70 | -0.14882  |
| 93527 | Q2Q067 | Q8WV07 | -0.24416  |
| 93528 | Q2Q067 | Q13609 | -0.13113  |
| 93529 | Q2Q067 | O43414 | -0.71451  |
| 93530 | Q2Q067 | Q9H2K8 | -0.44016  |
| 93531 | Q2Q067 | Q13563 | -0.2982   |
| 93532 | Q2Q067 | Q9NZW5 | -0.22612  |
| 93533 | Q2Q067 | P10451 | -0.82302  |
| 93534 | Q2Q067 | Q8TEQ0 | -0.52507  |
| 93535 | Q2Q067 | Q9UFP1 | -0.98666  |
| 93536 | Q2Q067 | Q9UBS9 | -1.067    |
| 93537 | Q2Q067 | Q92876 | -0.26684  |
| 93538 | Q2Q067 | P55160 | -0.32712  |
| 93539 | Q2Q067 | A6NK06 | -0.36377  |
| 93540 | Q2Q067 | Q5THK1 | -0.045029 |
| 93541 | Q2Q067 | O14562 | -0.17566  |
| 93542 | Q2Q067 | Q93099 | -0.37703  |
| 93543 | Q2Q067 | O00220 | -0.2274   |
| 93544 | Q2Q067 | Q9BXL6 | -0.50164  |
| 93545 | Q2Q067 | O15409 | -0.33602  |
| 93546 | Q2Q067 | Q96KC9 | -0.27506  |
| 93547 | Q2Q067 | P29317 | -0.67435  |
| 93548 | Q2Q067 | Q587I9 | -0.73764  |
| 93549 | Q2Q067 | Q9Y4A0 | -0.20439  |
| 93550 | Q2Q067 | Q9HCS2 | -0.7114   |
| 93551 | Q2Q067 | Q9H8U3 | -0.56368  |
| 93552 | Q2Q067 | Q5FWE3 | -1.0345   |
| 93553 | Q2Q067 | P19429 | -0.11401  |
| 93554 | Q2Q067 | P05186 | -1.1358   |
| 93555 | Q2Q067 | Q8TDQ7 | -0.16004  |
| 93556 | Q2Q067 | O95445 | -0.96652  |

|       |        |         |           |
|-------|--------|---------|-----------|
| 93557 | Q2Q067 | P48448  | -0.6377   |
| 93558 | Q2Q067 | Q9P215  | -0.30633  |
| 93559 | Q2Q067 | Q8NHG7  | -0.41212  |
| 93560 | Q2Q067 | Q6ZLNJ1 | -0.35842  |
| 93561 | Q2Q067 | A4D2B8  | -0.43693  |
| 93562 | Q2Q067 | Q9NYW2  | -1.2647   |
| 93563 | Q2Q067 | A8MRT5  | -1.0345   |
| 93564 | Q2Q067 | O00506  | -0.71465  |
| 93565 | Q2Q067 | Q9H6B9  | -0.84654  |
| 93566 | Q2Q067 | Q9UG22  | -1.4445   |
| 93567 | Q2Q067 | P69891  | -0.23916  |
| 93568 | Q2Q067 | Q29974  | -0.61932  |
| 93569 | Q2Q067 | A4D0T2  | -1.0345   |
| 93570 | Q2Q067 | Q7L1S5  | -0.99193  |
| 93571 | Q2Q067 | O43379  | -0.22763  |
| 93572 | Q2Q067 | Q9Y6C2  | -0.75998  |
| 93573 | Q2Q067 | Q04900  | -1.3674   |
| 93574 | Q2Q067 | Q13724  | -0.95508  |
| 93575 | Q2Q067 | Q99798  | -0.16295  |
| 93576 | Q2Q067 | O43815  | -0.22752  |
| 93577 | Q2Q067 | Q9Y3L5  | -0.91555  |
| 93578 | Q2Q067 | Q8NH94  | -1.4096   |
| 93579 | Q2Q067 | Q13443  | -0.74243  |
| 93580 | Q2Q067 | Q9HBH0  | -1.0871   |
| 93581 | Q2Q067 | Q9HAA7  | -0.094358 |
| 93582 | Q2Q067 | Q8TC27  | -1.1703   |
| 93583 | Q2Q067 | Q9BX67  | -0.65629  |
| 93584 | Q2Q067 | Q969P0  | -0.41807  |
| 93585 | Q2Q067 | Q14671  | -0.16694  |
| 93586 | Q2Q067 | Q02413  | -0.76046  |
| 93587 | Q2Q067 | Q9H761  | -0.026321 |
| 93588 | Q2Q067 | Q9NZC2  | -1.49     |
| 93589 | Q2Q067 | P0C263  | -1.3228   |
| 93590 | Q2Q067 | Q9BS34  | -0.085533 |
| 93591 | Q2Q067 | Q9H6X4  | -1.0345   |
| 93592 | Q2Q067 | Q8WXX1  | -0.61006  |
| 93593 | Q2Q067 | P01605  | -1.1115   |
| 93594 | Q2Q067 | Q9UQE7  | -0.22621  |
| 93595 | Q2Q067 | Q6ZQN7  | -1.3809   |
| 93596 | Q2Q067 | Q8IZY5  | -0.18201  |
| 93597 | Q2Q067 | Q8NG92  | -1.4096   |
| 93598 | Q2Q067 | Q8N118  | -0.88962  |
| 93599 | Q2Q067 | Q14623  | -0.46613  |
| 93600 | Q2Q067 | Q8NGC9  | -1.4096   |
| 93601 | Q2Q067 | P57105  | -0.78611  |
| 93602 | Q2Q067 | O75648  | -0.55205  |
| 93603 | Q2Q067 | P18510  | -0.41322  |
| 93604 | Q2Q067 | O60688  | -0.07418  |
| 93605 | Q2Q067 | P47985  | -1.0988   |
| 93606 | Q2Q067 | O95150  | -1.615    |
| 93607 | Q2Q067 | A6NM36  | -0.22779  |
| 93608 | Q2Q067 | Q8N883  | -0.085533 |
| 93609 | Q2Q067 | Q9Y5Z9  | -0.40193  |
| 93610 | Q2Q067 | Q9H324  | -0.72671  |
| 93611 | Q2Q067 | Q9UPM6  | -0.22741  |
| 93612 | Q2Q067 | O15209  | -0.22648  |
| 93613 | Q2Q067 | A8K0Z3  | -0.19487  |
| 93614 | Q2Q067 | P00736  | -1.5019   |
| 93615 | Q2Q067 | Q96DX4  | -1.083    |
| 93616 | Q2Q067 | Q9Y584  | -0.59399  |
| 93617 | Q2Q067 | O60313  | -0.67854  |
| 93618 | Q2Q067 | Q9Y2G5  | -0.26712  |
| 93619 | Q2Q067 | Q96PE1  | -1.3217   |
| 93620 | Q2Q067 | Q8WXH6  | -1.3356   |
| 93621 | Q2Q067 | P47887  | -1.4862   |
| 93622 | Q2Q067 | Q86TH1  | -0.67739  |
| 93623 | Q2Q067 | Q9P0M6  | -0.94752  |
| 93624 | Q2Q067 | O00453  | -0.67875  |
| 93625 | Q2Q067 | O75874  | -0.13943  |
| 93626 | Q2Q067 | P09565  | -0.32596  |
| 93627 | Q2Q067 | Q16342  | -0.18032  |
| 93628 | Q2Q067 | Q9H9S4  | -0.39393  |
| 93629 | Q2Q067 | P47898  | -1.3111   |
| 93630 | Q2Q067 | Q9UBI4  | -0.76259  |
| 93631 | Q2Q067 | Q7Z3V4  | -0.41408  |
| 93632 | Q2Q067 | A2RU48  | -1.0345   |

|       |        |        |           |
|-------|--------|--------|-----------|
| 93633 | Q2Q067 | Q8NFU4 | -0.98666  |
| 93634 | Q2Q067 | P28290 | -0.38929  |
| 93635 | Q2Q067 | Q6UWK7 | -0.98666  |
| 93636 | Q2Q067 | Q9Y2I7 | -0.22621  |
| 93637 | Q2Q067 | O94907 | -0.41981  |
| 93638 | Q2Q067 | Q6P5R6 | -0.075864 |
| 93639 | Q2Q067 | P60608 | -0.2833   |
| 93640 | Q2Q067 | Q5T4D3 | -1.0345   |
| 93641 | Q2Q067 | Q6ZSM3 | -1.1513   |
| 93642 | Q2Q067 | Q14699 | -0.67345  |
| 93643 | Q2Q067 | Q8NH64 | -1.4096   |
| 93644 | Q2Q067 | Q9UBV2 | -0.39171  |
| 93645 | Q2Q067 | Q8N4A0 | -0.62195  |
| 93646 | Q2Q067 | P0C6E5 | -0.45296  |
| 93647 | Q2Q067 | Q9BPW9 | -0.91458  |
| 93648 | Q2Q067 | Q8NEC5 | -0.77475  |
| 93649 | Q2Q067 | Q5T447 | -0.22787  |
| 93650 | Q2Q067 | Q9NPJ1 | -0.19614  |
| 93651 | Q2Q067 | Q5VXU9 | -0.38592  |
| 93652 | Q2Q067 | Q13627 | -0.35132  |
| 93653 | Q2Q067 | Q14184 | -0.54187  |
| 93654 | Q2Q067 | Q5T3I0 | -0.41613  |
| 93655 | Q2Q067 | Q75319 | -0.6567   |
| 93656 | Q2Q067 | Q9BYW2 | -0.22649  |
| 93657 | Q2Q067 | Q86XS5 | -1.277    |
| 93658 | Q2Q067 | Q86V24 | -1.1068   |
| 93659 | Q2Q067 | Q5JU67 | -0.07604  |
| 93660 | Q2Q067 | A6NL05 | -1.0345   |
| 93661 | Q2Q067 | P09110 | -0.20568  |
| 93662 | Q2Q067 | P67812 | -0.89161  |
| 93663 | Q2Q067 | Q9NU23 | -0.21265  |
| 93664 | Q2Q067 | Q6ZSS7 | -1.0195   |
| 93665 | Q2Q067 | Q96LM6 | -0.054655 |
| 93666 | Q2Q067 | Q8N9S7 | -1.0345   |
| 93667 | Q2Q067 | Q9NS00 | -1.1315   |
| 93668 | Q2Q067 | Q96CD2 | -0.26773  |
| 93669 | Q2Q067 | Q8WUJ0 | -0.58577  |
| 93670 | Q2Q067 | P09237 | -1.232    |
| 93671 | Q2Q067 | Q99595 | -0.49963  |
| 93672 | Q2Q067 | Q9BQ39 | -0.61698  |
| 93673 | Q2Q067 | P20337 | -0.96099  |
| 93674 | Q2Q067 | Q9C0J8 | -0.22735  |
| 93675 | Q2Q067 | Q8N565 | -0.6371   |
| 93676 | Q2Q067 | P21281 | -0.53735  |
| 93677 | Q2Q067 | Q7Z407 | -1.1634   |
| 93678 | Q2Q067 | Q13449 | -0.22798  |
| 93679 | Q2Q067 | Q7Z3Z4 | -0.31313  |
| 93680 | Q2Q067 | Q9H2F9 | -0.18541  |
| 93681 | Q2Q067 | Q6R6M4 | -0.4237   |
| 93682 | Q2Q067 | Q95843 | -0.71617  |
| 93683 | Q2Q067 | Q86YW5 | -0.21935  |
| 93684 | Q2Q067 | Q15165 | -0.8156   |
| 93685 | Q2Q067 | Q6ZN03 | -0.13843  |
| 93686 | Q2Q067 | Q8WZ04 | -0.58187  |
| 93687 | Q2Q067 | P45983 | -0.22741  |
| 93688 | Q2Q067 | P0C7P1 | -0.64476  |
| 93689 | Q2Q067 | Q684P5 | -0.41417  |
| 93690 | Q2Q067 | O43293 | -0.44499  |
| 93691 | Q2Q067 | Q96L03 | -0.22329  |
| 93692 | Q2Q067 | P54792 | -0.79041  |
| 93693 | Q2Q067 | P21781 | -0.57433  |
| 93694 | Q2Q067 | Q16773 | -0.21421  |
| 93695 | Q2Q067 | P15814 | -1.123    |
| 93696 | Q2Q067 | Q8WUA8 | -0.98666  |
| 93697 | Q2Q067 | O94806 | -0.41949  |
| 93698 | Q2Q067 | Q9H2S9 | -0.27011  |
| 93699 | Q2Q067 | O75897 | -0.22751  |
| 93700 | Q2Q067 | Q7Z5M5 | -1.0345   |
| 93701 | Q2Q067 | Q14926 | -0.56462  |
| 93702 | Q2Q067 | Q9Y600 | -0.48258  |
| 93703 | Q2Q067 | O14610 | -1.3291   |
| 93704 | Q2Q067 | Q499Z3 | -0.91075  |
| 93705 | Q2Q067 | Q5T754 | -0.37794  |
| 93706 | Q2Q067 | Q29865 | -1.1453   |
| 93707 | Q2Q067 | Q8N729 | -0.35437  |
| 93708 | Q2Q067 | Q3MIN7 | -0.96854  |

|       |        |        |           |
|-------|--------|--------|-----------|
| 93709 | Q2Q067 | Q8TEA7 | -1.1901   |
| 93710 | Q2Q067 | Q8TDL5 | -1.2143   |
| 93711 | Q2Q067 | Q9H8P0 | -0.74803  |
| 93712 | Q2Q067 | Q9H9P2 | -0.64252  |
| 93713 | Q2Q067 | O60779 | -0.77066  |
| 93714 | Q2Q067 | P62873 | -0.42685  |
| 93715 | Q2Q067 | Q9BRB3 | -0.85701  |
| 93716 | Q2Q067 | P03891 | -0.63325  |
| 93717 | Q2Q067 | Q9UPV7 | -0.50694  |
| 93718 | Q2Q067 | Q14568 | -0.66086  |
| 93719 | Q2Q067 | Q5H8C1 | -1.7876   |
| 93720 | Q2Q067 | Q9Y6N1 | -0.8041   |
| 93721 | Q2Q067 | P35613 | -0.22741  |
| 93722 | Q2Q067 | O15305 | -0.31041  |
| 93723 | Q2Q067 | Q8TF17 | -0.52848  |
| 93724 | Q2Q067 | P35716 | -0.23844  |
| 93725 | Q2Q067 | Q8NGS7 | -1.4096   |
| 93726 | Q2Q067 | Q8NEJ9 | -0.23328  |
| 93727 | Q2Q067 | Q6P1R4 | -0.60681  |
| 93728 | Q2Q067 | P78504 | -0.61168  |
| 93729 | Q2Q067 | Q5JUK2 | -0.20493  |
| 93730 | Q2Q067 | P26992 | -0.57074  |
| 93731 | Q2Q067 | Q5JSL3 | -0.4805   |
| 93732 | Q2Q067 | Q8IVH2 | -0.23648  |
| 93733 | Q2Q067 | Q96LA6 | -1.1634   |
| 93734 | Q2Q067 | O43759 | -0.75223  |
| 93735 | Q2Q067 | P58876 | -0.82527  |
| 93736 | Q2Q067 | Q6UXG2 | -0.98135  |
| 93737 | Q2Q067 | Q96EX2 | -1.1176   |
| 93738 | Q2Q067 | P84996 | -0.93875  |
| 93739 | Q2Q067 | P0C7P3 | -0.91075  |
| 93740 | Q2Q067 | Q13326 | -0.71762  |
| 93741 | Q2Q067 | Q5T4J0 | -0.88339  |
| 93742 | Q2Q067 | Q13067 | -0.18742  |
| 93743 | Q2Q067 | Q96JQ0 | -1.3351   |
| 93744 | Q2Q067 | Q7RTS5 | -1.0551   |
| 93745 | Q2Q067 | Q96S66 | -0.31624  |
| 93746 | Q2Q067 | Q8TAD2 | -1.0441   |
| 93747 | Q2Q067 | Q6UXD1 | -1.0345   |
| 93748 | Q2Q067 | Q7L0Q8 | -0.57771  |
| 93749 | Q2Q067 | Q4G0T1 | -0.97734  |
| 93750 | Q2Q067 | Q14249 | -0.12756  |
| 93751 | Q2Q067 | Q01726 | -0.72972  |
| 93752 | Q2Q067 | P0CE71 | -0.45603  |
| 93753 | Q2Q067 | Q6UX01 | -1.2337   |
| 93754 | Q2Q067 | Q15973 | -0.085533 |
| 93755 | Q2Q067 | Q7Z5J1 | -1.5999   |
| 93756 | Q2Q067 | Q14542 | -0.47464  |
| 93757 | Q2Q067 | Q9NWD8 | -1.0345   |
| 93758 | Q2Q067 | Q96LX7 | -0.01615  |
| 93759 | Q2Q067 | Q9UKZ4 | -1.2092   |
| 93760 | Q2Q067 | Q14153 | -0.24416  |
| 93761 | Q2Q067 | Q8IZM9 | -1.1869   |
| 93762 | Q2Q067 | Q6ZSK4 | -0.27903  |
| 93763 | Q2Q067 | Q9H9B4 | -0.90884  |
| 93764 | Q2Q067 | Q02246 | -0.54103  |
| 93765 | Q2Q067 | Q15397 | -0.10385  |
| 93766 | Q2Q067 | P24001 | -1.1434   |
| 93767 | Q2Q067 | Q8NGZ6 | -1.4096   |
| 93768 | Q2Q067 | P84243 | -1.2288   |
| 93769 | Q2Q067 | O95393 | -0.27221  |
| 93770 | Q2Q067 | P28482 | -0.22741  |
| 93771 | Q2Q067 | Q8N145 | -0.79316  |
| 93772 | Q2Q067 | Q9Y2F9 | -0.22578  |
| 93773 | Q2Q067 | O60293 | -0.042609 |
| 93774 | Q2Q067 | Q8WYQ4 | -0.19308  |
| 93775 | Q2Q067 | Q6UWL6 | -1.1322   |
| 93776 | Q2Q067 | P08493 | -0.96081  |
| 93777 | Q2Q067 | Q8IUA7 | -1.332    |
| 93778 | Q2Q067 | Q9UMX5 | -0.9666   |
| 93779 | Q2Q067 | Q8NBD8 | -1.0345   |
| 93780 | Q2Q067 | Q6IQ22 | -0.95921  |
| 93781 | Q2Q067 | Q9NQX0 | -0.1649   |
| 93782 | Q2Q067 | Q9BZJ6 | -1.327    |
| 93783 | Q2Q067 | Q9H8M5 | -1.1457   |
| 93784 | Q2Q067 | Q9UBT2 | -0.218    |

|       |        |        |            |
|-------|--------|--------|------------|
| 93785 | Q2Q067 | P01721 | -1.1115    |
| 93786 | Q2Q067 | P40617 | -0.27081   |
| 93787 | Q2Q067 | Q8NGL6 | -1.4096    |
| 93788 | Q2Q067 | Q9Y620 | -0.39834   |
| 93789 | Q2Q067 | Q7Z5S9 | -1.0345    |
| 93790 | Q2Q067 | Q8IVL0 | -0.68396   |
| 93791 | Q2Q067 | Q7L0X0 | -0.90071   |
| 93792 | Q2Q067 | Q5SR56 | -1.1451    |
| 93793 | Q2Q067 | A6NHZ5 | -0.22626   |
| 93794 | Q2Q067 | Q07108 | -1.1629    |
| 93795 | Q2Q067 | P04220 | -0.55357   |
| 93796 | Q2Q067 | Q9Y3D8 | -0.20148   |
| 93797 | Q2Q067 | O76050 | -0.32516   |
| 93798 | Q2Q067 | Q99884 | -1.1296    |
| 93799 | Q2Q067 | O15151 | -0.22514   |
| 93800 | Q2Q067 | Q86SQ0 | -0.57284   |
| 93801 | Q2Q067 | Q96RF0 | -0.40096   |
| 93802 | Q2Q067 | Q8N628 | -1.4096    |
| 93803 | Q2Q067 | Q2NL67 | -0.4609    |
| 93804 | Q2Q067 | Q30KQ9 | -0.94775   |
| 93805 | Q2Q067 | Q9Y2Z4 | -0.20039   |
| 93806 | Q2Q067 | Q4W5N1 | -0.24343   |
| 93807 | Q2Q067 | P12318 | -1.1348    |
| 93808 | Q2Q067 | Q8NFN8 | -1.4576    |
| 93809 | Q2Q067 | Q8NG83 | -1.4096    |
| 93810 | Q2Q067 | Q96KV6 | -1.0345    |
| 93811 | Q2Q067 | P62068 | -0.347     |
| 93812 | Q2Q067 | P50053 | -0.37819   |
| 93813 | Q2Q067 | Q9UJQ4 | -0.18725   |
| 93814 | Q2Q067 | P17980 | -0.27403   |
| 93815 | Q2Q067 | Q7Z3D6 | -0.10886   |
| 93816 | Q2Q067 | Q14410 | -0.67829   |
| 93817 | Q2Q067 | P56539 | -0.22534   |
| 93818 | Q2Q067 | Q96SI1 | -0.19088   |
| 93819 | Q2Q067 | Q8NHA6 | -1.4096    |
| 93820 | Q2Q067 | Q7L4E1 | -1.0345    |
| 93821 | Q2Q067 | Q7Z6J4 | -1.1036    |
| 93822 | Q2Q067 | O15120 | -0.78513   |
| 93823 | Q2Q067 | P98177 | -0.32944   |
| 93824 | Q2Q067 | Q96PB7 | -0.93392   |
| 93825 | Q2Q067 | P24844 | -0.24442   |
| 93826 | Q2Q067 | Q6UXN8 | -1.0503    |
| 93827 | Q2Q067 | Q8WWW8 | -0.51797   |
| 93828 | Q2Q067 | Q9Y581 | -0.76713   |
| 93829 | Q2Q067 | Q96AX9 | -0.22738   |
| 93830 | Q2Q067 | Q9BY89 | -0.0078291 |
| 93831 | Q2Q067 | Q9ULH1 | -0.65904   |
| 93832 | Q2Q067 | Q9HBJ8 | -1.1815    |
| 93833 | Q2Q067 | Q9ULT8 | -0.38945   |
| 93834 | Q2Q067 | A6NC97 | -1.0345    |
| 93835 | Q2Q067 | Q9UI08 | -0.21667   |
| 93836 | Q2Q067 | P58513 | -0.32012   |
| 93837 | Q2Q067 | Q9P0V9 | -0.56562   |
| 93838 | Q2Q067 | Q8IXL7 | -0.60213   |
| 93839 | Q2Q067 | Q92752 | -0.46109   |
| 93840 | Q2Q067 | P52429 | -1.5807    |
| 93841 | Q2Q067 | Q6PID6 | -0.22736   |
| 93842 | Q2Q067 | O76002 | -1.4096    |
| 93843 | Q2Q067 | P29322 | -1.3338    |
| 93844 | Q2Q067 | P24855 | -0.10259   |
| 93845 | Q2Q067 | Q96Q91 | -1.0157    |
| 93846 | Q2Q067 | Q99766 | -0.46909   |
| 93847 | Q2Q067 | Q96SB8 | -0.22323   |
| 93848 | Q2Q067 | Q9H1X3 | -1.0544    |
| 93849 | Q2Q067 | Q14714 | -1.1354    |
| 93850 | Q2Q067 | P49841 | -0.22756   |
| 93851 | Q2Q067 | P0C5W0 | -0.20901   |
| 93852 | Q2Q067 | Q6AZY7 | -0.94276   |
| 93853 | Q2Q067 | Q5T1V6 | -1.2085    |
| 93854 | Q2Q067 | P28039 | -1.0143    |
| 93855 | Q2Q067 | O15079 | -0.58966   |
| 93856 | Q2Q067 | A8MUH7 | -0.2288    |
| 93857 | Q2Q067 | Q9UHJ9 | -0.33717   |
| 93858 | Q2Q067 | Q9BV97 | -0.27686   |
| 93859 | Q2Q067 | Q96RD2 | -1.4096    |
| 93860 | Q2Q067 | Q9H521 | -0.18766   |



|       |        |        |            |
|-------|--------|--------|------------|
| 93861 | Q2Q067 | O75907 | -0.61218   |
| 93862 | Q2Q067 | Q9NYR9 | -1.1263    |
| 93863 | Q2Q067 | Q6UW10 | -0.98666   |
| 93864 | Q2Q067 | Q9UBF9 | -0.22748   |
| 93865 | Q2Q067 | Q9H5N1 | -0.57865   |
| 93866 | Q2Q067 | Q5CZ79 | -0.2274    |
| 93867 | Q2Q067 | Q8WZ42 | -0.36513   |
| 93868 | Q2Q067 | P14314 | -0.59127   |
| 93869 | Q2Q067 | Q86YW0 | -0.34568   |
| 93870 | Q2Q067 | Q9H1Q7 | -0.36393   |
| 93871 | Q2Q067 | Q9NUU6 | -0.0021168 |
| 93872 | Q2Q067 | Q96PV0 | -0.7136    |
| 93873 | Q2Q067 | P49903 | -1.1721    |
| 93874 | Q2Q067 | Q9H0R5 | -0.99877   |
| 93875 | Q2Q067 | P01185 | -0.44016   |
| 93876 | Q2Q067 | P25024 | -1.3314    |
| 93877 | Q2Q067 | Q8NGL7 | -1.4096    |
| 93878 | Q2Q067 | Q8NGT9 | -1.4096    |
| 93879 | Q2Q067 | P21728 | -0.34002   |
| 93880 | Q2Q067 | Q6UXL0 | -0.81219   |
| 93881 | Q2Q067 | Q9BWM7 | -1.012     |
| 93882 | Q2Q067 | Q8TBF5 | -0.997     |
| 93883 | Q2Q067 | Q96B42 | -0.30158   |
| 93884 | Q2Q067 | Q8N0Z9 | -1.0345    |
| 93885 | Q2Q067 | Q9Y458 | -0.36741   |
| 93886 | Q2Q067 | Q96NB2 | -1.0006    |
| 93887 | Q2Q067 | Q02535 | -0.2252    |
| 93888 | Q2Q067 | Q674R7 | -0.97763   |
| 93889 | Q2Q067 | Q9NTX5 | -0.28343   |
| 93890 | Q2Q067 | P52798 | -0.65276   |
| 93891 | Q2Q067 | Q92692 | -0.30874   |
| 93892 | Q2Q067 | P35663 | -0.50701   |
| 93893 | Q2Q067 | Q5TA45 | -0.19304   |
| 93894 | Q2Q067 | Q4G0N4 | -0.46572   |
| 93895 | Q2Q067 | Q8IVL6 | -0.62648   |
| 93896 | Q2Q067 | O76093 | -0.6941    |
| 93897 | Q2Q067 | Q9Y276 | -0.65089   |
| 93898 | Q2Q067 | Q8N7Z5 | -0.22741   |
| 93899 | Q2Q067 | P49137 | -0.22875   |
| 93900 | Q2Q067 | Q13424 | -0.22237   |
| 93901 | Q2Q067 | Q9NWW6 | -1.0455    |
| 93902 | Q2Q067 | Q5T890 | -0.30994   |
| 93903 | Q2Q067 | Q01740 | -0.84825   |
| 93904 | Q2Q067 | P11049 | -0.33096   |
| 93905 | Q2Q067 | Q3ZCQ8 | -0.054601  |
| 93906 | Q2Q067 | Q8IVI9 | -0.22727   |
| 93907 | Q2Q067 | Q6P9H4 | -0.31771   |
| 93908 | Q2Q067 | O75973 | -0.68929   |
| 93909 | Q2Q067 | Q01780 | -0.21529   |
| 93910 | Q2Q067 | Q9UJ70 | -0.40061   |
| 93911 | Q2Q067 | P0C7T3 | -1.4096    |
| 93912 | Q2Q067 | Q5T7P8 | -0.72775   |
| 93913 | Q2Q067 | A6NKX4 | -1.1225    |
| 93914 | Q2Q067 | Q8TF72 | -0.3404    |
| 93915 | Q2Q067 | P07339 | -1.2005    |
| 93916 | Q2Q067 | Q99829 | -0.22752   |
| 93917 | Q2Q067 | Q43147 | -1.0238    |
| 93918 | Q2Q067 | Q9UL17 | -0.31899   |
| 93919 | Q2Q067 | Q6U841 | -0.97196   |
| 93920 | Q2Q067 | Q96CG8 | -0.87002   |
| 93921 | Q2Q067 | P20036 | -0.8608    |
| 93922 | Q2Q067 | Q10713 | -0.58934   |
| 93923 | Q2Q067 | Q9Y2H2 | -0.36028   |
| 93924 | Q2Q067 | Q6MZN7 | -0.38857   |
| 93925 | Q2Q067 | A0AVI4 | -0.77947   |
| 93926 | Q2Q067 | Q96DC8 | -0.41709   |
| 93927 | Q2Q067 | Q8NH80 | -1.4096    |
| 93928 | Q2Q067 | P0C7T8 | -1.0345    |
| 93929 | Q2Q067 | Q9UPU3 | -1.0243    |
| 93930 | Q2Q067 | Q96JB6 | -0.66065   |
| 93931 | Q2Q067 | Q9NV96 | -0.32824   |
| 93932 | Q2Q067 | Q6P3W2 | -0.49927   |
| 93933 | Q2Q067 | Q9UDT6 | -0.22723   |
| 93934 | Q2Q067 | A6NMY6 | -0.86769   |
| 93935 | Q2Q067 | Q86W33 | -1.1532    |
| 93936 | Q2Q067 | Q96GS6 | -0.95044   |

|       |        |        |           |
|-------|--------|--------|-----------|
| 93937 | Q2Q067 | O75628 | -1.3138   |
| 93938 | Q2Q067 | Q96DA2 | -1.1543   |
| 93939 | Q2Q067 | Q4VC31 | -0.21265  |
| 93940 | Q2Q067 | Q8NEG5 | -0.42704  |
| 93941 | Q2Q067 | Q9NUH8 | -1.0345   |
| 93942 | Q2Q067 | Q16619 | -0.648    |
| 93943 | Q2Q067 | Q6IQ26 | -0.3601   |
| 93944 | Q2Q067 | O15354 | -1.6599   |
| 93945 | Q2Q067 | P03952 | -0.86233  |
| 93946 | Q2Q067 | O15165 | -1.004    |
| 93947 | Q2Q067 | Q9H0F5 | -0.48451  |
| 93948 | Q2Q067 | O95136 | -1.4457   |
| 93949 | Q2Q067 | Q8NDV2 | -1.4779   |
| 93950 | Q2Q067 | Q9NXW2 | -1.0544   |
| 93951 | Q2Q067 | Q9UH03 | -0.22381  |
| 93952 | Q2Q067 | Q5VX71 | -1.0345   |
| 93953 | Q2Q067 | Q9NX47 | -0.41486  |
| 93954 | Q2Q067 | Q96N66 | -0.36984  |
| 93955 | Q2Q067 | Q5T2Q4 | -0.4023   |
| 93956 | Q2Q067 | P18505 | -1.1254   |
| 93957 | Q2Q067 | Q8N8R5 | -0.98666  |
| 93958 | Q2Q067 | Q6UWE3 | -0.98967  |
| 93959 | Q2Q067 | Q8NG77 | -1.4096   |
| 93960 | Q2Q067 | D3W0D1 | -0.57462  |
| 93961 | Q2Q067 | Q0VD67 | -0.39904  |
| 93962 | Q2Q067 | P56373 | -0.66163  |
| 93963 | Q2Q067 | Q99707 | -0.27452  |
| 93964 | Q2Q067 | Q15243 | -0.71164  |
| 93965 | Q2Q067 | Q7Z6K4 | -0.5093   |
| 93966 | Q2Q067 | Q8NHU6 | -0.21552  |
| 93967 | Q2Q067 | Q5T8P6 | -0.37308  |
| 93968 | Q2Q067 | Q9NUT2 | -0.77566  |
| 93969 | Q2Q067 | Q6GMR7 | -0.95425  |
| 93970 | Q2Q067 | P50406 | -1.0611   |
| 93971 | Q2Q067 | Q92609 | -0.85881  |
| 93972 | Q2Q067 | Q9H0V9 | -0.61276  |
| 93973 | Q2Q067 | Q9NPU4 | -1.0345   |
| 93974 | Q2Q067 | P0C7U3 | -1.13     |
| 93975 | Q2Q067 | P49674 | -0.22741  |
| 93976 | Q2Q067 | O95071 | -0.22775  |
| 93977 | Q2Q067 | O00327 | -0.2274   |
| 93978 | Q2Q067 | Q9NVN3 | -0.07115  |
| 93979 | Q2Q067 | Q15228 | -0.48892  |
| 93980 | Q2Q067 | P30475 | -1.2066   |
| 93981 | Q2Q067 | Q9H7L2 | -0.98666  |
| 93982 | Q2Q067 | P50583 | -0.76038  |
| 93983 | Q2Q067 | Q5SRD1 | -0.34942  |
| 93984 | Q2Q067 | Q9H694 | -0.69675  |
| 93985 | Q2Q067 | P08183 | -0.57241  |
| 93986 | Q2Q067 | Q969V1 | -1.4967   |
| 93987 | Q2Q067 | Q8WZ92 | -1.4096   |
| 93988 | Q2Q067 | P49682 | -1.2658   |
| 93989 | Q2Q067 | Q5VV52 | -0.50923  |
| 93990 | Q2Q067 | Q05469 | -0.22323  |
| 93991 | Q2Q067 | O43680 | -0.2278   |
| 93992 | Q2Q067 | P98164 | -0.3858   |
| 93993 | Q2Q067 | Q9NZP0 | -1.4096   |
| 93994 | Q2Q067 | A2RU14 | -1.0345   |
| 93995 | Q2Q067 | B9A064 | -0.98666  |
| 93996 | Q2Q067 | Q9Y4C1 | -0.24073  |
| 93997 | Q2Q067 | Q9UKF5 | -1.3734   |
| 93998 | Q2Q067 | Q9H1E5 | -1.0091   |
| 93999 | Q2Q067 | Q86XH1 | -0.91075  |
| 94000 | Q2Q067 | Q14683 | -1.0238   |
| 94001 | Q2Q067 | P58658 | -1.0212   |
| 94002 | Q2Q067 | P41223 | -0.031996 |
| 94003 | Q2Q067 | P61916 | -0.56953  |
| 94004 | Q2Q067 | O95139 | -0.21037  |
| 94005 | Q2Q067 | Q01638 | -0.94982  |
| 94006 | Q2Q067 | Q6T311 | -1.4417   |
| 94007 | Q2Q067 | Q8TBZ6 | -0.38719  |
| 94008 | Q2Q067 | Q08499 | -0.27953  |
| 94009 | Q2Q067 | P20930 | -0.3268   |
| 94010 | Q2Q067 | Q5JSS6 | -0.29697  |
| 94011 | Q2Q067 | Q86W47 | -0.76251  |
| 94012 | Q2Q067 | P35442 | -0.98727  |

|       |        |        |           |
|-------|--------|--------|-----------|
| 94013 | Q2Q067 | Q86W24 | -1.2801   |
| 94014 | Q2Q067 | Q8N9L9 | -0.42596  |
| 94015 | Q2Q067 | Q8NGZ4 | -1.4096   |
| 94016 | Q2Q067 | Q6ZST2 | -0.50058  |
| 94017 | Q2Q067 | Q8IVV2 | -0.60341  |
| 94018 | Q2Q067 | Q9Y6W3 | -0.77556  |
| 94019 | Q2Q067 | A0PG75 | -0.062433 |
| 94020 | Q2Q067 | Q96AG4 | -1.0514   |
| 94021 | Q2Q067 | Q8WVV5 | -0.96072  |
| 94022 | Q2Q067 | P28676 | -0.54326  |
| 94023 | Q2Q067 | Q8NGX0 | -1.4096   |
| 94024 | Q2Q067 | P62683 | -0.47805  |
| 94025 | Q2Q067 | Q70SY1 | -0.18969  |
| 94026 | Q2Q067 | P13500 | -0.3722   |
| 94027 | Q2Q067 | Q9UBI9 | -0.48212  |
| 94028 | Q2Q067 | Q8NH03 | -1.4096   |
| 94029 | Q2Q067 | Q6UWB4 | -1.5018   |
| 94030 | Q2Q067 | P07108 | -0.40502  |
| 94031 | Q2Q067 | Q8NBZ9 | -0.016819 |
| 94032 | Q2Q067 | Q8NDV1 | -0.80471  |
| 94033 | Q2Q067 | Q86Y39 | -0.60556  |
| 94034 | Q2Q067 | Q8ND94 | -1.0345   |
| 94035 | Q2Q067 | Q8N9N7 | -0.23587  |
| 94036 | Q2Q067 | Q69YZ2 | -1.0345   |
| 94037 | Q2Q067 | Q14254 | -0.80141  |
| 94038 | Q2Q067 | Q7RTX1 | -1.4259   |
| 94039 | Q2Q067 | Q9Y376 | -0.18347  |
| 94040 | Q2Q067 | Q8IZU3 | -0.22198  |
| 94041 | Q2Q067 | Q8IWU6 | -0.41815  |
| 94042 | Q2Q067 | Q96PL1 | -0.98666  |
| 94043 | Q2Q067 | Q9BZL3 | -1.0345   |
| 94044 | Q2Q067 | Q9NS28 | -0.74996  |
| 94045 | Q2Q067 | Q9Y4E5 | -0.22685  |
| 94046 | Q2Q067 | Q9Y3L3 | -1.1476   |
| 94047 | Q2Q067 | P0CW22 | -0.19081  |
| 94048 | Q2Q067 | Q6ICH7 | -1.0738   |
| 94049 | Q2Q067 | P52799 | -1.0351   |
| 94050 | Q2Q067 | P49908 | -0.98013  |
| 94051 | Q2Q067 | Q96G91 | -1.3228   |
| 94052 | Q2Q067 | Q01101 | -0.22601  |
| 94053 | Q2Q067 | Q6UXQ6 | -0.98666  |
| 94054 | Q2Q067 | Q7L5L3 | -0.98896  |
| 94055 | Q2Q067 | Q9UKL6 | -0.43353  |
| 94056 | Q2Q067 | Q6P6C2 | -0.70823  |
| 94057 | Q2Q067 | Q14576 | -1.1585   |
| 94058 | Q2Q067 | Q4L235 | -1.1367   |
| 94059 | Q2Q067 | Q8N6P7 | -0.97931  |
| 94060 | Q2Q067 | Q495W5 | -0.82542  |
| 94061 | Q2Q067 | Q6ZN55 | -0.085533 |
| 94062 | Q2Q067 | Q8IYS5 | -1.6971   |
| 94063 | Q2Q067 | Q8TCD5 | -0.16862  |
| 94064 | Q2Q067 | Q9H1J7 | -0.93166  |
| 94065 | Q2Q067 | P07947 | -0.78843  |
| 94066 | Q2Q067 | P21266 | -0.33272  |
| 94067 | Q2Q067 | Q8N158 | -1.0491   |
| 94068 | Q2Q067 | Q8TDU9 | -1.4586   |
| 94069 | Q2Q067 | Q9Y4I5 | -0.42646  |
| 94070 | Q2Q067 | Q9UHV8 | -0.41939  |
| 94071 | Q2Q067 | Q9BUD6 | -1.1996   |
| 94072 | Q2Q067 | Q6ZSA7 | -1.3079   |
| 94073 | Q2Q067 | Q969D9 | -0.97648  |
| 94074 | Q2Q067 | P48736 | -0.36132  |
| 94075 | Q2Q067 | Q9H2X0 | -0.61588  |
| 94076 | Q2Q067 | Q86YQ2 | -1.1714   |
| 94077 | Q2Q067 | Q96FG2 | -0.57423  |
| 94078 | Q2Q067 | P01782 | -1.1115   |
| 94079 | Q2Q067 | P01222 | -0.77098  |
| 94080 | Q2Q067 | O14718 | -1.48     |
| 94081 | Q2Q067 | Q6PJE2 | -0.24416  |
| 94082 | Q2Q067 | Q8NFX8 | -1.227    |
| 94083 | Q2Q067 | P06576 | -0.24668  |
| 94084 | Q2Q067 | Q95980 | -0.57303  |
| 94085 | Q2Q067 | Q5SZQ8 | -0.44795  |
| 94086 | Q2Q067 | Q8NH21 | -1.4096   |
| 94087 | Q2Q067 | Q9H993 | -0.029676 |
| 94088 | Q2Q067 | P51553 | -0.11111  |

|       |        |        |           |
|-------|--------|--------|-----------|
| 94089 | Q2Q067 | Q9NSA0 | -0.8847   |
| 94090 | Q2Q067 | Q7Z7G2 | -0.42622  |
| 94091 | Q2Q067 | Q8NHW4 | -1.1342   |
| 94092 | Q2Q067 | Q9H0C2 | -0.87762  |
| 94093 | Q2Q067 | P26717 | -0.71447  |
| 94094 | Q2Q067 | A2BFH1 | -0.16764  |
| 94095 | Q2Q067 | Q86SF2 | -0.69105  |
| 94096 | Q2Q067 | Q9NUQ7 | -0.33664  |
| 94097 | Q2Q067 | A6NKC0 | -0.43957  |
| 94098 | Q2Q067 | Q15582 | -1.3929   |
| 94099 | Q2Q067 | Q8NC67 | -1.0345   |
| 94100 | Q2Q067 | Q9HAT1 | -0.95512  |
| 94101 | Q2Q067 | A1L3X4 | -0.43755  |
| 94102 | Q2Q067 | Q6UWB1 | -1.095    |
| 94103 | Q2Q067 | Q92851 | -0.22677  |
| 94104 | Q2Q067 | Q07889 | -0.31339  |
| 94105 | Q2Q067 | Q9C0A1 | -0.2274   |
| 94106 | Q2Q067 | Q9BV35 | -0.91242  |
| 94107 | Q2Q067 | P30501 | -1.2066   |
| 94108 | Q2Q067 | Q5T1S8 | -1.1606   |
| 94109 | Q2Q067 | Q15349 | -0.72481  |
| 94110 | Q2Q067 | Q96RP9 | -0.79676  |
| 94111 | Q2Q067 | Q9H0I9 | -0.49572  |
| 94112 | Q2Q067 | A6NMV5 | -0.19475  |
| 94113 | Q2Q067 | O94991 | -1.1214   |
| 94114 | Q2Q067 | Q9NYZ1 | -1.0345   |
| 94115 | Q2Q067 | P22003 | -0.58784  |
| 94116 | Q2Q067 | P09327 | -0.17692  |
| 94117 | Q2Q067 | Q13201 | -0.94933  |
| 94118 | Q2Q067 | Q16581 | -1.1441   |
| 94119 | Q2Q067 | Q8TD26 | -0.19943  |
| 94120 | Q2Q067 | Q9UI14 | -0.14024  |
| 94121 | Q2Q067 | Q13907 | -0.21142  |
| 94122 | Q2Q067 | Q9NSB8 | -0.45717  |
| 94123 | Q2Q067 | Q86VQ3 | -0.24231  |
| 94124 | Q2Q067 | P20592 | -0.36409  |
| 94125 | Q2Q067 | O60701 | -0.66996  |
| 94126 | Q2Q067 | O60884 | -0.3924   |
| 94127 | Q2Q067 | Q15057 | -1.1564   |
| 94128 | Q2Q067 | P61129 | -0.38013  |
| 94129 | Q2Q067 | P11678 | -0.70365  |
| 94130 | Q2Q067 | P78330 | -0.29088  |
| 94131 | Q2Q067 | Q5T0U0 | -0.098681 |
| 94132 | Q2Q067 | Q9Y587 | -0.15923  |
| 94133 | Q2Q067 | P02765 | -0.72523  |
| 94134 | Q2Q067 | A6NJK2 | -0.22741  |
| 94135 | Q2Q067 | Q9UJZ1 | -0.21157  |
| 94136 | Q2Q067 | Q86VZ4 | -1.0345   |
| 94137 | Q2Q067 | Q07075 | -1.1349   |
| 94138 | Q2Q067 | Q05639 | -0.45862  |
| 94139 | Q2Q067 | Q8NGR5 | -1.4096   |
| 94140 | Q2Q067 | Q95436 | -0.98258  |
| 94141 | Q2Q067 | P32239 | -0.67745  |
| 94142 | Q2Q067 | Q9BR10 | -0.98864  |
| 94143 | Q2Q067 | Q8NGH6 | -1.4096   |
| 94144 | Q2Q067 | Q8IZS6 | -0.13422  |
| 94145 | Q2Q067 | P48751 | -1.2133   |
| 94146 | Q2Q067 | Q6ZS02 | -0.17248  |
| 94147 | Q2Q067 | Q6ZUJ8 | -0.27358  |
| 94148 | Q2Q067 | Q6MZM9 | -0.98666  |
| 94149 | Q2Q067 | Q9NQI0 | -0.52281  |
| 94150 | Q2Q067 | P54803 | -0.28638  |
| 94151 | Q2Q067 | Q9P1W3 | -1.0345   |
| 94152 | Q2Q067 | Q13733 | -1.2271   |
| 94153 | Q2Q067 | Q6FHJ7 | -0.44565  |
| 94154 | Q2Q067 | Q9H222 | -0.76947  |
| 94155 | Q2Q067 | Q6ZUM4 | -1.0832   |
| 94156 | Q2Q067 | Q92882 | -0.72506  |
| 94157 | Q2Q067 | Q99963 | -0.34799  |
| 94158 | Q2Q067 | Q9NQB0 | -0.21926  |
| 94159 | Q2Q067 | O60496 | -0.50237  |
| 94160 | Q2Q067 | Q9UM73 | -1.5968   |
| 94161 | Q2Q067 | Q4LDG9 | -0.22741  |
| 94162 | Q2Q067 | Q86SQ9 | -0.077558 |
| 94163 | Q2Q067 | O43865 | -0.19153  |
| 94164 | Q2Q067 | Q8WVJ2 | -0.53082  |

|       |        |        |           |
|-------|--------|--------|-----------|
| 94165 | Q2Q067 | P16190 | -0.99938  |
| 94166 | Q2Q067 | Q8NB37 | -0.98666  |
| 94167 | Q2Q067 | Q99956 | -0.5125   |
| 94168 | Q2Q067 | Q7Z4H8 | -0.19748  |
| 94169 | Q2Q067 | Q96S79 | -1.4305   |
| 94170 | Q2Q067 | O60353 | -0.56402  |
| 94171 | Q2Q067 | P59826 | -1.0158   |
| 94172 | Q2Q067 | O14681 | -0.35765  |
| 94173 | Q2Q067 | A6NND4 | -1.4096   |
| 94174 | Q2Q067 | Q96J84 | -0.88358  |
| 94175 | Q2Q067 | O15400 | -1        |
| 94176 | Q2Q067 | Q9HD20 | -0.95822  |
| 94177 | Q2Q067 | Q8IW41 | -0.36323  |
| 94178 | Q2Q067 | Q15111 | -0.63632  |
| 94179 | Q2Q067 | P08581 | -0.45941  |
| 94180 | Q2Q067 | Q9H560 | -0.22741  |
| 94181 | Q2Q067 | P0C7N8 | -1.4096   |
| 94182 | Q2Q067 | Q96HE9 | -0.03144  |
| 94183 | Q2Q067 | O95342 | -1.0773   |
| 94184 | Q2Q067 | Q15363 | -0.20271  |
| 94185 | Q2Q067 | A6NGB0 | -1.0345   |
| 94186 | Q2Q067 | P51810 | -0.59994  |
| 94187 | Q2Q067 | Q86UX2 | -0.88039  |
| 94188 | Q2Q067 | P35222 | -0.22818  |
| 94189 | Q2Q067 | P04054 | -0.56704  |
| 94190 | Q2Q067 | C9JUS6 | -0.98666  |
| 94191 | Q2Q067 | O15016 | -0.2273   |
| 94192 | Q2Q067 | Q96T91 | -0.96181  |
| 94193 | Q2Q067 | Q96GC9 | -0.53585  |
| 94194 | Q2Q067 | Q9BRL6 | -0.64476  |
| 94195 | Q2Q067 | Q13796 | -0.22728  |
| 94196 | Q2Q067 | P78509 | -0.63003  |
| 94197 | Q2Q067 | Q8NGF1 | -1.4096   |
| 94198 | Q2Q067 | P29016 | -0.75182  |
| 94199 | Q2Q067 | Q09428 | -0.73314  |
| 94200 | Q2Q067 | Q86SQ6 | -1.3422   |
| 94201 | Q2Q067 | Q9NVP2 | -0.28888  |
| 94202 | Q2Q067 | Q8NA97 | -0.19974  |
| 94203 | Q2Q067 | Q92630 | -0.6695   |
| 94204 | Q2Q067 | Q9GZU0 | -0.54438  |
| 94205 | Q2Q067 | Q8IWY9 | -1.0345   |
| 94206 | Q2Q067 | Q5MNZ9 | -0.2274   |
| 94207 | Q2Q067 | C9JXX5 | -0.98666  |
| 94208 | Q2Q067 | Q15782 | -0.80897  |
| 94209 | Q2Q067 | Q8ND25 | -0.23079  |
| 94210 | Q2Q067 | Q5JT78 | -0.095193 |
| 94211 | Q2Q067 | A6NE52 | -0.22743  |
| 94212 | Q2Q067 | A6NGN4 | -0.19475  |
| 94213 | Q2Q067 | Q8NBJ4 | -0.41811  |
| 94214 | Q2Q067 | A8MWY0 | -1.0345   |
| 94215 | Q2Q067 | Q96T68 | -0.31953  |
| 94216 | Q2Q067 | E5RG02 | -1.0134   |
| 94217 | Q2Q067 | O75762 | -1.0157   |
| 94218 | Q2Q067 | P36952 | -0.13507  |
| 94219 | Q2Q067 | Q8IUX8 | -1.5264   |
| 94220 | Q2Q067 | Q9Y215 | -0.2432   |
| 94221 | Q2Q067 | Q14543 | -0.22741  |
| 94222 | Q2Q067 | P01594 | -1.1115   |
| 94223 | Q2Q067 | Q96BQ1 | -0.86631  |
| 94224 | Q2Q067 | Q5M9N0 | -0.16087  |
| 94225 | Q2Q067 | Q3ZCN5 | -0.20749  |
| 94226 | Q2Q067 | Q5TCX8 | -1.1417   |
| 94227 | Q2Q067 | Q9NVZ3 | -0.66219  |
| 94228 | Q2Q067 | Q8N9U0 | -0.18188  |
| 94229 | Q2Q067 | Q8TDW0 | -1.1118   |
| 94230 | Q2Q067 | O60522 | -0.74967  |
| 94231 | Q2Q067 | P55008 | -0.24702  |
| 94232 | Q2Q067 | Q68CR7 | -1.0345   |
| 94233 | Q2Q067 | Q6P5Z2 | -0.47911  |
| 94234 | Q2Q067 | Q96NL1 | -1.1215   |
| 94235 | Q2Q067 | Q9HCX4 | -0.22661  |
| 94236 | Q2Q067 | Q96IZ2 | -1.1634   |
| 94237 | Q2Q067 | Q3BBW0 | -0.20901  |
| 94238 | Q2Q067 | P08582 | -0.68824  |
| 94239 | Q2Q067 | P63130 | -0.47805  |
| 94240 | Q2Q067 | Q96GY0 | -0.43755  |

|       |        |        |           |
|-------|--------|--------|-----------|
| 94241 | Q2Q067 | Q5SYB0 | -0.23303  |
| 94242 | Q2Q067 | Q96C92 | -0.20901  |
| 94243 | Q2Q067 | P14416 | -0.27565  |
| 94244 | Q2Q067 | P51684 | -1.303    |
| 94245 | Q2Q067 | B6A8C7 | -1.0345   |
| 94246 | Q2Q067 | Q86Y28 | -0.98666  |
| 94247 | Q2Q067 | Q658P3 | -0.72556  |
| 94248 | Q2Q067 | P12277 | -0.20466  |
| 94249 | Q2Q067 | O43676 | -0.56537  |
| 94250 | Q2Q067 | Q8N4E4 | -0.20004  |
| 94251 | Q2Q067 | P48169 | -0.96135  |
| 94252 | Q2Q067 | A0AV96 | -0.63823  |
| 94253 | Q2Q067 | Q96TA2 | -1.4497   |
| 94254 | Q2Q067 | Q5J5C9 | -0.86483  |
| 94255 | Q2Q067 | Q9H4A3 | -0.62048  |
| 94256 | Q2Q067 | Q15124 | -0.089805 |
| 94257 | Q2Q067 | Q9HCI6 | -0.41613  |
| 94258 | Q2Q067 | Q6P0Q8 | -0.77679  |
| 94259 | Q2Q067 | Q6ZSJ9 | -1.0345   |
| 94260 | Q2Q067 | P0C2Y1 | -0.20901  |
| 94261 | Q2Q067 | P61328 | -0.30061  |
| 94262 | Q2Q067 | Q6ZRH7 | -1.348    |
| 94263 | Q2Q067 | Q5VTE0 | -0.66858  |
| 94264 | Q2Q067 | Q96KR6 | -1.0345   |
| 94265 | Q2Q067 | Q99572 | -0.27808  |
| 94266 | Q2Q067 | Q8N556 | -0.43513  |
| 94267 | Q2Q067 | Q6PH85 | -0.068842 |
| 94268 | Q2Q067 | Q71RG6 | -0.98666  |
| 94269 | Q2Q067 | P05113 | -0.34511  |
| 94270 | Q2Q067 | O75364 | -0.16548  |
| 94271 | Q2Q067 | A8MTQ0 | -0.22739  |
| 94272 | Q2Q067 | Q9UJU2 | -0.21046  |
| 94273 | Q2Q067 | Q14672 | -0.25916  |
| 94274 | Q2Q067 | Q8NGE2 | -1.4096   |
| 94275 | Q2Q067 | P35556 | -0.92984  |
| 94276 | Q2Q067 | Q8N1H7 | -0.54134  |
| 94277 | Q2Q067 | Q12841 | -1.1056   |
| 94278 | Q2Q067 | Q6P7N7 | -1.0345   |
| 94279 | Q2Q067 | Q8NGN6 | -1.4096   |
| 94280 | Q2Q067 | P00491 | -0.31924  |
| 94281 | Q2Q067 | Q9H841 | -0.98558  |
| 94282 | Q2Q067 | P20936 | -0.22741  |
| 94283 | Q2Q067 | Q5JWF2 | -0.74118  |
| 94284 | Q2Q067 | Q06710 | -0.22711  |
| 94285 | Q2Q067 | Q9UPT8 | -0.50058  |
| 94286 | Q2Q067 | Q9NYW5 | -1.4624   |
| 94287 | Q2Q067 | A6NKT7 | -0.48206  |
| 94288 | Q2Q067 | Q8N4C8 | -0.63411  |
| 94289 | Q2Q067 | Q9H4Z3 | -0.18586  |
| 94290 | Q2Q067 | Q8WZ79 | -0.75742  |
| 94291 | Q2Q067 | Q6ZS30 | -0.22741  |
| 94292 | Q2Q067 | Q8N7E2 | -0.63223  |
| 94293 | Q2Q067 | P42263 | -0.90102  |
| 94294 | Q2Q067 | Q8WZA2 | -0.33227  |
| 94295 | Q2Q067 | P14780 | -0.43873  |
| 94296 | Q2Q067 | Q9BXA9 | -0.20306  |
| 94297 | Q2Q067 | P48357 | -1.1628   |
| 94298 | Q2Q067 | Q9H2P9 | -0.41015  |
| 94299 | Q2Q067 | Q15614 | -1.4096   |
| 94300 | Q2Q067 | Q2NKX8 | -0.41736  |
| 94301 | Q2Q067 | O15530 | -0.22607  |
| 94302 | Q2Q067 | Q9BZR9 | -0.22739  |
| 94303 | Q2Q067 | Q8NGR8 | -1.4096   |
| 94304 | Q2Q067 | A6BM72 | -1.0227   |
| 94305 | Q2Q067 | P49914 | -0.51025  |
| 94306 | Q2Q067 | Q8NDX1 | -0.87273  |
| 94307 | Q2Q067 | O95528 | -0.62588  |
| 94308 | Q2Q067 | Q96D42 | -0.90631  |
| 94309 | Q2Q067 | Q7Z6L0 | -1.1566   |
| 94310 | Q2Q067 | Q8IX18 | -0.94996  |
| 94311 | Q2Q067 | Q0P5P2 | -0.98666  |
| 94312 | Q2Q067 | O60883 | -0.87653  |
| 94313 | Q2Q067 | Q12809 | -0.7909   |
| 94314 | Q2Q067 | Q9UFV3 | -0.016975 |
| 94315 | Q2Q067 | Q9Y3C1 | -0.16331  |
| 94316 | Q2Q067 | P40197 | -1.0713   |

|       |        |         |           |
|-------|--------|---------|-----------|
| 94317 | Q2Q067 | Q9BYE0  | -0.22654  |
| 94318 | Q2Q067 | P61619  | -0.94859  |
| 94319 | Q2Q067 | Q8NH76  | -1.4096   |
| 94320 | Q2Q067 | Q92615  | -0.96284  |
| 94321 | Q2Q067 | O75473  | -1.5371   |
| 94322 | Q2Q067 | Q9BWF3  | -0.2296   |
| 94323 | Q2Q067 | P15374  | -0.3328   |
| 94324 | Q2Q067 | P53634  | -0.82946  |
| 94325 | Q2Q067 | Q9NP86  | -0.28516  |
| 94326 | Q2Q067 | Q9UKK9  | -0.6181   |
| 94327 | Q2Q067 | Q9P2X0  | -0.26727  |
| 94328 | Q2Q067 | Q8TF64  | -0.22548  |
| 94329 | Q2Q067 | Q8WXA8  | -1.1556   |
| 94330 | Q2Q067 | Q9BPW5  | -1.4198   |
| 94331 | Q2Q067 | Q9ULC0  | -1.6971   |
| 94332 | Q2Q067 | O95475  | -0.22758  |
| 94333 | Q2Q067 | P13671  | -0.28477  |
| 94334 | Q2Q067 | Q8NHG8  | -0.69743  |
| 94335 | Q2Q067 | Q96EE4  | -0.98666  |
| 94336 | Q2Q067 | Q16696  | -0.84452  |
| 94337 | Q2Q067 | P33947  | -0.52126  |
| 94338 | Q2Q067 | O15438  | -1.3242   |
| 94339 | Q2Q067 | Q9UPR6  | -0.67781  |
| 94340 | Q2Q067 | Q96PP4  | -0.018722 |
| 94341 | Q2Q067 | Q7M4L6  | -0.35564  |
| 94342 | Q2Q067 | Q9ULJ8  | -0.37155  |
| 94343 | Q2Q067 | Q96NZ8  | -0.86019  |
| 94344 | Q2Q067 | Q9H8J5  | -1.0345   |
| 94345 | Q2Q067 | Q8TDX7  | -0.9759   |
| 94346 | Q2Q067 | Q5TIE3  | -0.98666  |
| 94347 | Q2Q067 | Q9UJ78  | -0.15756  |
| 94348 | Q2Q067 | Q96R30  | -1.4096   |
| 94349 | Q2Q067 | P13797  | -0.34151  |
| 94350 | Q2Q067 | Q8NEB9  | -0.34743  |
| 94351 | Q2Q067 | Q6HA08  | -0.83938  |
| 94352 | Q2Q067 | Q8WTR4  | -0.73769  |
| 94353 | Q2Q067 | Q9BYG3  | -0.2229   |
| 94354 | Q2Q067 | P0C7M6  | -0.079663 |
| 94355 | Q2Q067 | Q16539  | -0.22741  |
| 94356 | Q2Q067 | P48544  | -0.75928  |
| 94357 | Q2Q067 | A6NNM8  | -0.42102  |
| 94358 | Q2Q067 | Q7Z4R8  | -0.94158  |
| 94359 | Q2Q067 | P28358  | -0.21675  |
| 94360 | Q2Q067 | O15229  | -0.55787  |
| 94361 | Q2Q067 | Q8NHA8  | -1.4096   |
| 94362 | Q2Q067 | P0CL84  | -0.054655 |
| 94363 | Q2Q067 | P51685  | -1.5558   |
| 94364 | Q2Q067 | Q9UNZ2  | -0.54844  |
| 94365 | Q2Q067 | P17812  | -0.49662  |
| 94366 | Q2Q067 | Q8IUUY3 | -1.0345   |
| 94367 | Q2Q067 | O95473  | -1.0345   |
| 94368 | Q2Q067 | P00325  | -0.61179  |
| 94369 | Q2Q067 | Q6GTX8  | -0.48734  |
| 94370 | Q2Q067 | Q06730  | -0.067277 |
| 94371 | Q2Q067 | P41240  | -0.22743  |
| 94372 | Q2Q067 | Q9NY65  | -0.65192  |
| 94373 | Q2Q067 | Q9Y6B7  | -0.16921  |
| 94374 | Q2Q067 | Q13950  | -0.36954  |
| 94375 | Q2Q067 | P07101  | -0.22258  |
| 94376 | Q2Q067 | Q9UL54  | -0.79098  |
| 94377 | Q2Q067 | Q8N9B8  | -0.77711  |
| 94378 | Q2Q067 | Q9ULZ0  | -0.39967  |
| 94379 | Q2Q067 | P10721  | -0.33581  |
| 94380 | Q2Q067 | P30510  | -1.2066   |
| 94381 | Q2Q067 | Q07011  | -1.0989   |
| 94382 | Q2Q067 | Q8N8P7  | -0.98666  |
| 94383 | Q2Q067 | O95406  | -0.91595  |
| 94384 | Q2Q067 | Q1KMD3  | -0.22559  |
| 94385 | Q2Q067 | Q643R3  | -0.85682  |
| 94386 | Q2Q067 | Q9NXL9  | -0.60881  |
| 94387 | Q2Q067 | Q14112  | -0.76156  |
| 94388 | Q2Q067 | Q9NSA1  | -0.37384  |
| 94389 | Q2Q067 | Q9HB15  | -1.1607   |
| 94390 | Q2Q067 | O43847  | -0.25218  |
| 94391 | Q2Q067 | P35221  | -0.19262  |
| 94392 | Q2Q067 | P10619  | -0.20167  |

|       |        |        |           |
|-------|--------|--------|-----------|
| 94393 | Q2Q067 | O60880 | -0.22741  |
| 94394 | Q2Q067 | Q13231 | -0.83758  |
| 94395 | Q2Q067 | Q5TA76 | -0.37794  |
| 94396 | Q2Q067 | Q96SJ8 | -1.0345   |
| 94397 | Q2Q067 | P42285 | -0.22387  |
| 94398 | Q2Q067 | P33993 | -0.20493  |
| 94399 | Q2Q067 | P0C7Q3 | -0.14149  |
| 94400 | Q2Q067 | Q14CZ7 | -0.35547  |
| 94401 | Q2Q067 | Q16204 | -0.30645  |
| 94402 | Q2Q067 | Q9H4G1 | -1.024    |
| 94403 | Q2Q067 | Q9Y334 | -0.77379  |
| 94404 | Q2Q067 | Q86V21 | -0.52353  |
| 94405 | Q2Q067 | Q9BUU2 | -0.38719  |
| 94406 | Q2Q067 | Q99985 | -0.88896  |
| 94407 | Q2Q067 | O15085 | -0.28943  |
| 94408 | Q2Q067 | Q9Y6T7 | -1.0285   |
| 94409 | Q2Q067 | Q6TCH7 | -0.82825  |
| 94410 | Q2Q067 | Q9BX46 | -0.41656  |
| 94411 | Q2Q067 | Q8IX29 | -0.21738  |
| 94412 | Q2Q067 | O15522 | -0.24593  |
| 94413 | Q2Q067 | P48729 | -0.22741  |
| 94414 | Q2Q067 | Q9NVH6 | -0.26909  |
| 94415 | Q2Q067 | Q8TCT8 | -0.74568  |
| 94416 | Q2Q067 | O14653 | -0.40955  |
| 94417 | Q2Q067 | O43548 | -0.31776  |
| 94418 | Q2Q067 | Q9H1X1 | -0.45945  |
| 94419 | Q2Q067 | Q96J42 | -1.0438   |
| 94420 | Q2Q067 | Q9UQB9 | -0.62508  |
| 94421 | Q2Q067 | Q96N28 | -0.21265  |
| 94422 | Q2Q067 | Q8NG08 | -0.76556  |
| 94423 | Q2Q067 | Q9H082 | -1.0614   |
| 94424 | Q2Q067 | A6NP81 | -0.40653  |
| 94425 | Q2Q067 | Q7Z7M1 | -1.5126   |
| 94426 | Q2Q067 | Q8N392 | -1.0924   |
| 94427 | Q2Q067 | P0CG06 | -1.101    |
| 94428 | Q2Q067 | O14950 | -0.2269   |
| 94429 | Q2Q067 | O15062 | -0.22444  |
| 94430 | Q2Q067 | Q7Z404 | -1.0345   |
| 94431 | Q2Q067 | P20774 | -0.40221  |
| 94432 | Q2Q067 | Q9UKU9 | -1.459    |
| 94433 | Q2Q067 | P43234 | -0.97521  |
| 94434 | Q2Q067 | Q13203 | -0.74653  |
| 94435 | Q2Q067 | Q8NBT3 | -1.0345   |
| 94436 | Q2Q067 | Q8N9R6 | -0.055595 |
| 94437 | Q2Q067 | Q5T2S8 | -0.22796  |
| 94438 | Q2Q067 | Q6VB85 | -0.33602  |
| 94439 | Q2Q067 | Q5FYB0 | -0.83456  |
| 94440 | Q2Q067 | P12532 | -0.94818  |
| 94441 | Q2Q067 | M0R1G4 | -0.12735  |
| 94442 | Q2Q067 | Q7RTU7 | -0.232    |
| 94443 | Q2Q067 | Q8NGJ3 | -1.4096   |
| 94444 | Q2Q067 | Q9NP73 | -0.41591  |
| 94445 | Q2Q067 | Q9UPN4 | -0.19554  |
| 94446 | Q2Q067 | P59074 | -0.21619  |
| 94447 | Q2Q067 | P98187 | -1.0803   |
| 94448 | Q2Q067 | P30990 | -1.0617   |
| 94449 | Q2Q067 | A6NLX4 | -1.0345   |
| 94450 | Q2Q067 | Q02641 | -0.65626  |
| 94451 | Q2Q067 | O95180 | -0.90535  |
| 94452 | Q2Q067 | Q9HBY8 | -0.80167  |
| 94453 | Q2Q067 | Q01362 | -1.0339   |
| 94454 | Q2Q067 | Q6ZWI9 | -0.48451  |
| 94455 | Q2Q067 | P47736 | -0.26895  |
| 94456 | Q2Q067 | Q9NQ30 | -0.83702  |
| 94457 | Q2Q067 | Q96DT5 | -0.75347  |
| 94458 | Q2Q067 | F8WBI6 | -0.28132  |
| 94459 | Q2Q067 | Q2TVT3 | -0.31999  |
| 94460 | Q2Q067 | P01130 | -0.48704  |
| 94461 | Q2Q067 | Q8NG85 | -1.2565   |
| 94462 | Q2Q067 | Q9H227 | -0.22469  |
| 94463 | Q2Q067 | Q8NBX0 | -0.67964  |
| 94464 | Q2Q067 | P62253 | -0.61039  |
| 94465 | Q2Q067 | A8MZH6 | -0.98666  |
| 94466 | Q2Q067 | P62760 | -0.45603  |
| 94467 | Q2Q067 | O94956 | -1.2275   |
| 94468 | Q2Q067 | P36896 | -0.53854  |



|       |        |        |           |
|-------|--------|--------|-----------|
| 94469 | Q2Q067 | Q16877 | -0.50265  |
| 94470 | Q2Q067 | Q7Z6I6 | -1.0586   |
| 94471 | Q2Q067 | Q2MJR0 | -0.73252  |
| 94472 | Q2Q067 | Q9BZF1 | -0.9261   |
| 94473 | Q2Q067 | Q9NZP8 | -1.5174   |
| 94474 | Q2Q067 | A6NGY5 | -1.4096   |
| 94475 | Q2Q067 | Q8NGC8 | -1.4096   |
| 94476 | Q2Q067 | A5YM72 | -0.83846  |
| 94477 | Q2Q067 | Q4G1C9 | -1.0345   |
| 94478 | Q2Q067 | P10912 | -0.29502  |
| 94479 | Q2Q067 | Q96F15 | -1.0074   |
| 94480 | Q2Q067 | Q9C0B0 | -0.50058  |
| 94481 | Q2Q067 | P26441 | -0.26201  |
| 94482 | Q2Q067 | Q9U1L4 | -0.60234  |
| 94483 | Q2Q067 | Q02083 | -0.17325  |
| 94484 | Q2Q067 | Q53HI1 | -0.35872  |
| 94485 | Q2Q067 | Q14833 | -1.4997   |
| 94486 | Q2Q067 | Q16674 | -0.95143  |
| 94487 | Q2Q067 | Q9Y426 | -0.42766  |
| 94488 | Q2Q067 | A8MQ11 | -0.29776  |
| 94489 | Q2Q067 | Q9H2J7 | -1.1654   |
| 94490 | Q2Q067 | P0DJR0 | -1.0835   |
| 94491 | Q2Q067 | Q96CN5 | -0.22721  |
| 94492 | Q2Q067 | Q9NVX2 | -0.22776  |
| 94493 | Q2Q067 | Q8NFL0 | -0.80147  |
| 94494 | Q2Q067 | Q9UGQ3 | -0.78289  |
| 94495 | Q2Q067 | Q14940 | -1.196    |
| 94496 | Q2Q067 | Q9H269 | -0.56579  |
| 94497 | Q2Q067 | Q9Y6B6 | -0.46766  |
| 94498 | Q2Q067 | Q13410 | -1.7076   |
| 94499 | Q2Q067 | Q8IU5  | -0.9667   |
| 94500 | Q2Q067 | P56705 | -0.31296  |
| 94501 | Q2Q067 | Q9NW13 | -0.33032  |
| 94502 | Q2Q067 | Q9H3K2 | -0.07742  |
| 94503 | Q2Q067 | Q5T753 | -0.37794  |
| 94504 | Q2Q067 | Q8NAT1 | -1.0294   |
| 94505 | Q2Q067 | Q8N0V4 | -0.98666  |
| 94506 | Q2Q067 | P02729 | -0.86843  |
| 94507 | Q2Q067 | Q9NQ79 | -1.0767   |
| 94508 | Q2Q067 | Q03591 | -1.0479   |
| 94509 | Q2Q067 | Q14782 | -0.36193  |
| 94510 | Q2Q067 | Q9BWJ2 | -0.021975 |
| 94511 | Q2Q067 | Q9H4A9 | -0.9831   |
| 94512 | Q2Q067 | Q86V85 | -1.0345   |
| 94513 | Q2Q067 | Q2QL34 | -1.0569   |
| 94514 | Q2Q067 | P56715 | -0.16459  |
| 94515 | Q2Q067 | Q95755 | -0.97933  |
| 94516 | Q2Q067 | A6NGB7 | -1.0345   |
| 94517 | Q2Q067 | Q9ULL8 | -0.24837  |
| 94518 | Q2Q067 | P01854 | -0.41987  |
| 94519 | Q2Q067 | P04808 | -1.1311   |
| 94520 | Q2Q067 | Q96LD1 | -0.69905  |
| 94521 | Q2Q067 | P15918 | -0.22689  |
| 94522 | Q2Q067 | P40238 | -1.1529   |
| 94523 | Q2Q067 | Q8TDI8 | -1.0603   |
| 94524 | Q2Q067 | P00519 | -0.22752  |
| 94525 | Q2Q067 | Q9HCS4 | -0.19672  |
| 94526 | Q2Q067 | Q5SW96 | -0.22732  |
| 94527 | Q2Q067 | A6NED2 | -0.33831  |
| 94528 | Q2Q067 | Q9Y5P0 | -1.4096   |
| 94529 | Q2Q067 | Q6PIY5 | -0.38445  |
| 94530 | Q2Q067 | P03986 | -1.2067   |
| 94531 | Q2Q067 | Q6ZSV7 | -0.086597 |
| 94532 | Q2Q067 | P43362 | -0.24416  |
| 94533 | Q2Q067 | O43246 | -0.99098  |
| 94534 | Q2Q067 | Q63ZE4 | -1.0022   |
| 94535 | Q2Q067 | Q6ZN57 | -0.085533 |
| 94536 | Q2Q067 | P05937 | -0.22728  |
| 94537 | Q2Q067 | Q9BQE9 | -0.38281  |
| 94538 | Q2Q067 | Q9H330 | -0.88683  |
| 94539 | Q2Q067 | A6NDN8 | -0.20285  |
| 94540 | Q2Q067 | Q7Z5H4 | -1.4199   |
| 94541 | Q2Q067 | P0CG32 | -0.50058  |
| 94542 | Q2Q067 | P41238 | -0.11931  |
| 94543 | Q2Q067 | Q32M45 | -1.0594   |
| 94544 | Q2Q067 | Q8N2A8 | -0.73284  |

|       |        |        |           |
|-------|--------|--------|-----------|
| 94545 | Q2Q067 | P16112 | -0.87164  |
| 94546 | Q2Q067 | Q9NVX7 | -0.22515  |
| 94547 | Q2Q067 | P01588 | -0.26081  |
| 94548 | Q2Q067 | Q96EG1 | -0.54967  |
| 94549 | Q2Q067 | P0DKB6 | -1.0345   |
| 94550 | Q2Q067 | Q15520 | -0.30198  |
| 94551 | Q2Q067 | Q9NZD1 | -1.4967   |
| 94552 | Q2Q067 | Q58FF7 | -0.66086  |
| 94553 | Q2Q067 | Q14761 | -1.1406   |
| 94554 | Q2Q067 | Q92633 | -0.45753  |
| 94555 | Q2Q067 | Q12950 | -0.33602  |
| 94556 | Q2Q067 | Q496M5 | -0.22741  |
| 94557 | Q2Q067 | P30453 | -0.99938  |
| 94558 | Q2Q067 | P52926 | -0.07825  |
| 94559 | Q2Q067 | Q8TE73 | -0.63531  |
| 94560 | Q2Q067 | Q8NHX9 | -0.62313  |
| 94561 | Q2Q067 | Q8TE56 | -1.4569   |
| 94562 | Q2Q067 | Q86Y07 | -0.58491  |
| 94563 | Q2Q067 | Q9NQH7 | -0.62766  |
| 94564 | Q2Q067 | Q5SNT2 | -0.65964  |
| 94565 | Q2Q067 | Q8NI22 | -0.60555  |
| 94566 | Q2Q067 | P60985 | -1.0669   |
| 94567 | Q2Q067 | Q6IFN5 | -1.4096   |
| 94568 | Q2Q067 | Q15761 | -1.1126   |
| 94569 | Q2Q067 | Q8IVL5 | -0.59527  |
| 94570 | Q2Q067 | P00390 | -0.22563  |
| 94571 | Q2Q067 | P02818 | -0.57811  |
| 94572 | Q2Q067 | Q16718 | -0.15366  |
| 94573 | Q2Q067 | Q9H115 | -0.18051  |
| 94574 | Q2Q067 | O15439 | -1.1801   |
| 94575 | Q2Q067 | P43626 | -0.71274  |
| 94576 | Q2Q067 | P10321 | -1.1453   |
| 94577 | Q2Q067 | Q3SXP7 | -1.0345   |
| 94578 | Q2Q067 | Q14681 | -0.12599  |
| 94579 | Q2Q067 | Q9Y4M8 | -0.29137  |
| 94580 | Q2Q067 | Q14004 | -0.23107  |
| 94581 | Q2Q067 | Q15435 | -0.22741  |
| 94582 | Q2Q067 | Q9P2F9 | -0.085533 |
| 94583 | Q2Q067 | Q9Y6Q6 | -0.31213  |
| 94584 | Q2Q067 | Q92887 | -1.0219   |
| 94585 | Q2Q067 | Q6ZQT0 | -0.053214 |
| 94586 | Q2Q067 | Q9NY26 | -1.1815   |
| 94587 | Q2Q067 | Q9ULU8 | -0.10842  |
| 94588 | Q2Q067 | P0CG23 | -0.74229  |
| 94589 | Q2Q067 | Q2V2M9 | -0.22411  |
| 94590 | Q2Q067 | P58180 | -1.4096   |
| 94591 | Q2Q067 | Q9H4B4 | -0.22742  |
| 94592 | Q2Q067 | Q8WZ84 | -1.4096   |
| 94593 | Q2Q067 | Q9P2S2 | -1.072    |
| 94594 | Q2Q067 | P01593 | -1.1115   |
| 94595 | Q2Q067 | O95256 | -1.3844   |
| 94596 | Q2Q067 | Q96I34 | -0.2274   |
| 94597 | Q2Q067 | Q8N3R9 | -0.22608  |
| 94598 | Q2Q067 | Q9Y6I4 | -0.37894  |
| 94599 | Q2Q067 | P31358 | -0.73612  |
| 94600 | Q2Q067 | Q6ZWB6 | -0.19517  |
| 94601 | Q2Q067 | Q07627 | -0.54605  |
| 94602 | Q2Q067 | P29965 | -1.0718   |
| 94603 | Q2Q067 | Q8NGD4 | -1.4096   |
| 94604 | Q2Q067 | Q6AWC2 | -0.22741  |
| 94605 | Q2Q067 | Q8WWM9 | -0.45563  |
| 94606 | Q2Q067 | Q5VZ18 | -0.22741  |
| 94607 | Q2Q067 | O76080 | -0.29522  |
| 94608 | Q2Q067 | P04844 | -0.50886  |
| 94609 | Q2Q067 | A8K0R7 | -0.73178  |
| 94610 | Q2Q067 | Q8TF44 | -0.21293  |
| 94611 | Q2Q067 | Q8IZP2 | -0.22718  |
| 94612 | Q2Q067 | Q8TB68 | -0.91133  |
| 94613 | Q2Q067 | Q9HBW0 | -1.0734   |
| 94614 | Q2Q067 | Q14563 | -0.77584  |
| 94615 | Q2Q067 | P51114 | -0.13337  |
| 94616 | Q2Q067 | P61204 | -0.60862  |
| 94617 | Q2Q067 | Q14416 | -1.4257   |
| 94618 | Q2Q067 | Q8TAP8 | -0.41456  |
| 94619 | Q2Q067 | P00403 | -0.6779   |
| 94620 | Q2Q067 | O00330 | -0.19845  |

|       |        |        |           |
|-------|--------|--------|-----------|
| 94621 | Q2Q067 | Q8WYA0 | -0.61461  |
| 94622 | Q2Q067 | Q9NTU7 | -0.85913  |
| 94623 | Q2Q067 | P43631 | -1.1794   |
| 94624 | Q2Q067 | Q9Y6N8 | -1.2844   |
| 94625 | Q2Q067 | A6NDA9 | -1.0345   |
| 94626 | Q2Q067 | Q9Y343 | -0.67605  |
| 94627 | Q2Q067 | Q04721 | -0.26138  |
| 94628 | Q2Q067 | Q8NGR9 | -1.4096   |
| 94629 | Q2Q067 | Q8IVF4 | -0.77552  |
| 94630 | Q2Q067 | P29320 | -1.1188   |
| 94631 | Q2Q067 | Q16363 | -1.223    |
| 94632 | Q2Q067 | Q4W4Y0 | -0.010541 |
| 94633 | Q2Q067 | Q86X29 | -1.0175   |
| 94634 | Q2Q067 | Q5TCM9 | -0.37794  |
| 94635 | Q2Q067 | Q99731 | -0.49496  |
| 94636 | Q2Q067 | Q9P2U8 | -0.95514  |
| 94637 | Q2Q067 | Q9Y233 | -0.64786  |
| 94638 | Q2Q067 | A1L167 | -0.92845  |
| 94639 | Q2Q067 | P49411 | -0.77419  |
| 94640 | Q2Q067 | Q7Z2Q7 | -1.0345   |
| 94641 | Q2Q067 | Q96PS6 | -1.0345   |
| 94642 | Q2Q067 | P04908 | -0.82527  |
| 94643 | Q2Q067 | P38398 | -0.22727  |
| 94644 | Q2Q067 | Q9H8M2 | -0.050913 |
| 94645 | Q2Q067 | Q16720 | -1.2428   |
| 94646 | Q2Q067 | Q9H2X8 | -1.0345   |
| 94647 | Q2Q067 | O76000 | -1.4096   |
| 94648 | Q2Q067 | Q7RTW8 | -1.2559   |
| 94649 | Q2Q067 | P09382 | -0.60725  |
| 94650 | Q2Q067 | P09960 | -0.2645   |
| 94651 | Q2Q067 | Q9H000 | -0.74251  |
| 94652 | Q2Q067 | P17813 | -0.21598  |
| 94653 | Q2Q067 | Q9H1Z8 | -0.92911  |
| 94654 | Q2Q067 | P01604 | -1.1115   |
| 94655 | Q2Q067 | Q02383 | -0.83968  |
| 94656 | Q2Q067 | Q8N4P3 | -0.56716  |
| 94657 | Q2Q067 | P31644 | -0.95289  |
| 94658 | Q2Q067 | P02654 | -0.65234  |
| 94659 | Q2Q067 | P31415 | -0.21819  |
| 94660 | Q2Q067 | Q86SG5 | -0.33117  |
| 94661 | Q2Q067 | Q9H305 | -0.09702  |
| 94662 | Q2Q067 | O94886 | -1.5806   |
| 94663 | Q2Q067 | Q8NGS2 | -1.4096   |
| 94664 | Q2Q067 | O76071 | -0.23464  |
| 94665 | Q2Q067 | Q8IUX1 | -0.77947  |
| 94666 | Q2Q067 | O95371 | -1.3728   |
| 94667 | Q2Q067 | Q12891 | -0.22289  |
| 94668 | Q2Q067 | P61296 | -0.22921  |
| 94669 | Q2Q067 | Q9H165 | -0.2271   |
| 94670 | Q2Q067 | Q96NY7 | -0.78014  |
| 94671 | Q2Q067 | P21917 | -0.55094  |
| 94672 | Q2Q067 | P22083 | -0.70868  |
| 94673 | Q2Q067 | Q99961 | -0.30494  |
| 94674 | Q2Q067 | Q96M43 | -0.20901  |
| 94675 | Q2Q067 | P41586 | -0.62604  |
| 94676 | Q2Q067 | Q96SE0 | -0.79582  |
| 94677 | Q2Q067 | Q96RW7 | -1.2184   |
| 94678 | Q2Q067 | P20783 | -0.62542  |
| 94679 | Q2Q067 | Q13002 | -0.59809  |
| 94680 | Q2Q067 | Q9Y2K1 | -0.15502  |
| 94681 | Q2Q067 | Q9BRX9 | -0.22757  |
| 94682 | Q2Q067 | P02774 | -0.73057  |
| 94683 | Q2Q067 | Q8IU89 | -0.25804  |
| 94684 | Q2Q067 | Q8N387 | -1.6088   |
| 94685 | Q2Q067 | Q96A65 | -0.19167  |
| 94686 | Q2Q067 | Q92878 | -0.2181   |
| 94687 | Q2Q067 | A5D6W6 | -0.88983  |
| 94688 | Q2Q067 | Q9Y2L5 | -0.10635  |
| 94689 | Q2Q067 | Q7Z7L1 | -0.62868  |
| 94690 | Q2Q067 | Q92904 | -0.27096  |
| 94691 | Q2Q067 | Q14667 | -0.98666  |
| 94692 | Q2Q067 | P01042 | -0.72982  |
| 94693 | Q2Q067 | Q96EL3 | -0.18351  |
| 94694 | Q2Q067 | P30988 | -0.77415  |
| 94695 | Q2Q067 | Q8TCT1 | -0.35212  |
| 94696 | Q2Q067 | Q86X27 | -0.97462  |

|       |        |        |           |
|-------|--------|--------|-----------|
| 94697 | Q2Q067 | Q09470 | -0.9572   |
| 94698 | Q2Q067 | Q9Y2Y8 | -0.3787   |
| 94699 | Q2Q067 | O43313 | -0.22741  |
| 94700 | Q2Q067 | Q8NFD4 | -0.031529 |
| 94701 | Q2Q067 | A6NGA9 | -1.0345   |
| 94702 | Q2Q067 | P45954 | -0.47     |
| 94703 | Q2Q067 | O00124 | -0.40776  |
| 94704 | Q2Q067 | O15428 | -0.24416  |
| 94705 | Q2Q067 | Q14654 | -0.62187  |
| 94706 | Q2Q067 | Q9H295 | -0.50004  |
| 94707 | Q2Q067 | P0CAP1 | -0.35617  |
| 94708 | Q2Q067 | P41217 | -0.7064   |
| 94709 | Q2Q067 | O75841 | -0.84315  |
| 94710 | Q2Q067 | Q9UHP3 | -0.27167  |
| 94711 | Q2Q067 | Q8WW22 | -0.48124  |
| 94712 | Q2Q067 | Q15311 | -0.41929  |
| 94713 | Q2Q067 | P01718 | -1.1115   |
| 94714 | Q2Q067 | P0C7X1 | -1.4231   |
| 94715 | Q2Q067 | Q5TYW1 | -0.085533 |
| 94716 | Q2Q067 | Q9Y5Y5 | -0.49402  |
| 94717 | Q2Q067 | Q8TDN2 | -1.0103   |
| 94718 | Q2Q067 | P00352 | -0.31893  |
| 94719 | Q2Q067 | Q8WUJ3 | -0.22047  |
| 94720 | Q2Q067 | Q9Y4K3 | -0.2273   |
| 94721 | Q2Q067 | P14138 | -0.77191  |
| 94722 | Q2Q067 | P35241 | -0.23066  |
| 94723 | Q2Q067 | Q92574 | -0.22726  |
| 94724 | Q2Q067 | Q9ULW2 | -0.86657  |
| 94725 | Q2Q067 | O00767 | -1.1099   |
| 94726 | Q2Q067 | A4D256 | -0.89343  |
| 94727 | Q2Q067 | Q96AB6 | -0.099726 |
| 94728 | Q2Q067 | Q8NGM1 | -1.4096   |
| 94729 | Q2Q067 | Q86UG4 | -1.163    |
| 94730 | Q2Q067 | Q6P158 | -1.0197   |
| 94731 | Q2Q067 | Q96FV2 | -0.56029  |
| 94732 | Q2Q067 | Q96IW7 | -0.68398  |
| 94733 | Q2Q067 | Q14390 | -0.36767  |
| 94734 | Q2Q067 | O60840 | -0.99182  |
| 94735 | Q2Q067 | Q9NQA5 | -1.2282   |
| 94736 | Q2Q067 | Q8N2K0 | -0.95523  |
| 94737 | Q2Q067 | Q9UPX6 | -1.0345   |
| 94738 | Q2Q067 | P30414 | -0.4093   |
| 94739 | Q2Q067 | P20366 | -0.8509   |
| 94740 | Q2Q067 | P46531 | -0.22971  |
| 94741 | Q2Q067 | Q9BW83 | -1.1609   |
| 94742 | Q2Q067 | O75096 | -0.58299  |
| 94743 | Q2Q067 | Q8IZP6 | -0.50058  |
| 94744 | Q2Q067 | Q6PL18 | -0.23125  |
| 94745 | Q2Q067 | Q96DS6 | -1.0345   |
| 94746 | Q2Q067 | Q9UBQ7 | -0.59791  |
| 94747 | Q2Q067 | P49640 | -0.22265  |
| 94748 | Q2Q067 | P11233 | -0.38128  |
| 94749 | Q2Q067 | Q9H2D1 | -0.61568  |
| 94750 | Q2Q067 | Q96R27 | -1.4096   |
| 94751 | Q2Q067 | Q9H223 | -0.2897   |
| 94752 | Q2Q067 | Q12860 | -0.55506  |
| 94753 | Q2Q067 | P17152 | -0.23914  |
| 94754 | Q2Q067 | Q86U44 | -0.18496  |
| 94755 | Q2Q067 | O43927 | -0.765    |
| 94756 | Q2Q067 | Q7RTX9 | -1.1513   |
| 94757 | Q2Q067 | Q9Y5G8 | -1.3679   |
| 94758 | Q2Q067 | O00305 | -0.22725  |
| 94759 | Q2Q067 | O60830 | -0.53984  |
| 94760 | Q2Q067 | Q12846 | -0.2327   |
| 94761 | Q2Q067 | P06737 | -0.37154  |
| 94762 | Q2Q067 | Q8TAV3 | -0.80074  |
| 94763 | Q2Q067 | Q9NS68 | -0.83199  |
| 94764 | Q2Q067 | Q13371 | -0.73967  |
| 94765 | Q2Q067 | Q6ZS82 | -1.115    |
| 94766 | Q2Q067 | Q9BY14 | -0.65938  |
| 94767 | Q2Q067 | Q86WV6 | -0.087916 |
| 94768 | Q2Q067 | O14979 | -0.2488   |
| 94769 | Q2Q067 | P04222 | -1.1453   |
| 94770 | Q2Q067 | Q8TF05 | -0.18976  |
| 94771 | Q2Q067 | Q04609 | -1.0772   |
| 94772 | Q2Q067 | Q9BYZ8 | -0.97472  |

|       |        |        |           |
|-------|--------|--------|-----------|
| 94773 | Q2Q067 | Q9HC23 | -1.0166   |
| 94774 | Q2Q067 | Q96J01 | -0.22723  |
| 94775 | Q2Q067 | O00459 | -0.2274   |
| 94776 | Q2Q067 | Q5T848 | -1.4967   |
| 94777 | Q2Q067 | P0DM48 | -0.22718  |
| 94778 | Q2Q067 | Q8NG94 | -1.4096   |
| 94779 | Q2Q067 | P20132 | -0.15992  |
| 94780 | Q2Q067 | P31942 | -0.29251  |
| 94781 | Q2Q067 | Q8TDW7 | -1.5337   |
| 94782 | Q2Q067 | Q9H6F2 | -0.66887  |
| 94783 | Q2Q067 | Q9BY43 | -0.21562  |
| 94784 | Q2Q067 | Q9BSA9 | -1.0345   |
| 94785 | Q2Q067 | O14523 | -0.77947  |
| 94786 | Q2Q067 | Q8IWF9 | -0.09553  |
| 94787 | Q2Q067 | Q06732 | -0.067277 |
| 94788 | Q2Q067 | P05023 | -0.51244  |
| 94789 | Q2Q067 | Q9BXR3 | -0.36034  |
| 94790 | Q2Q067 | O75298 | -0.56152  |
| 94791 | Q2Q067 | Q96MF6 | -0.33494  |
| 94792 | Q2Q067 | Q01650 | -0.84677  |
| 94793 | Q2Q067 | P01601 | -1.1115   |
| 94794 | Q2Q067 | Q8IX19 | -1.0345   |
| 94795 | Q2Q067 | Q96QH2 | -0.22574  |
| 94796 | Q2Q067 | Q02221 | -0.33814  |
| 94797 | Q2Q067 | P57738 | -1.0345   |
| 94798 | Q2Q067 | Q8NF37 | -0.62754  |
| 94799 | Q2Q067 | Q9H2V7 | -0.38285  |
| 94800 | Q2Q067 | Q8WU79 | -0.34212  |
| 94801 | Q2Q067 | Q9NZN1 | -0.71877  |
| 94802 | Q2Q067 | Q6GV28 | -1.0582   |
| 94803 | Q2Q067 | P02768 | -0.31003  |
| 94804 | Q2Q067 | Q6NUI2 | -0.68864  |
| 94805 | Q2Q067 | Q9H6R6 | -1.1974   |
| 94806 | Q2Q067 | Q96RI0 | -1.5373   |
| 94807 | Q2Q067 | Q8NI32 | -0.65821  |
| 94808 | Q2Q067 | Q8N6Q3 | -0.62164  |
| 94809 | Q2Q067 | Q9NXN4 | -0.38591  |
| 94810 | Q2Q067 | Q9C0I9 | -0.22787  |
| 94811 | Q2Q067 | Q9NW75 | -0.46392  |
| 94812 | Q2Q067 | O95466 | -0.22417  |
| 94813 | Q2Q067 | O15547 | -0.922    |
| 94814 | Q2Q067 | Q9Y315 | -0.33728  |
| 94815 | Q2Q067 | P0CJ68 | -0.80201  |
| 94816 | Q2Q067 | O75575 | -0.67841  |
| 94817 | Q2Q067 | P57735 | -0.64806  |
| 94818 | Q2Q067 | Q6UB28 | -0.58368  |
| 94819 | Q2Q067 | P21815 | -1.1284   |
| 94820 | Q2Q067 | P55001 | -0.92776  |
| 94821 | Q2Q067 | Q53F39 | -0.52184  |
| 94822 | Q2Q067 | Q9GZZ8 | -0.58621  |
| 94823 | Q2Q067 | O15389 | -1.2081   |
| 94824 | Q2Q067 | A6NCF6 | -0.1649   |
| 94825 | Q2Q067 | Q9Y2G8 | -1.0604   |
| 94826 | Q2Q067 | Q6NW40 | -0.84204  |
| 94827 | Q2Q067 | Q8NFM7 | -0.2733   |
| 94828 | Q2Q067 | Q86YT9 | -0.99676  |
| 94829 | Q2Q067 | Q9NYY1 | -0.96196  |
| 94830 | Q2Q067 | Q92913 | -0.28029  |
| 94831 | Q2Q067 | Q9HCM2 | -0.87563  |
| 94832 | Q2Q067 | Q9NVH0 | -0.69115  |
| 94833 | Q2Q067 | Q9NZ94 | -0.37994  |
| 94834 | Q2Q067 | O00624 | -1.1959   |
| 94835 | Q2Q067 | O43405 | -0.44152  |
| 94836 | Q2Q067 | Q69YW0 | -0.059378 |
| 94837 | Q2Q067 | Q8WXI4 | -0.18737  |
| 94838 | Q2Q067 | P10153 | -0.94238  |
| 94839 | Q2Q067 | Q9UHD1 | -0.17627  |
| 94840 | Q2Q067 | Q8N6T3 | -0.17179  |
| 94841 | Q2Q067 | Q6NSJ2 | -0.51797  |
| 94842 | Q2Q067 | Q9H4I3 | -0.093298 |
| 94843 | Q2Q067 | Q6J4K2 | -1.2256   |
| 94844 | Q2Q067 | O60234 | -0.65245  |
| 94845 | Q2Q067 | Q8NHA4 | -1.4096   |
| 94846 | Q2Q067 | P54707 | -1.1119   |
| 94847 | Q2Q067 | Q9P2K9 | -0.6962   |
| 94848 | Q2Q067 | Q15291 | -0.22748  |

|       |        |        |          |
|-------|--------|--------|----------|
| 94849 | Q2Q067 | Q8N302 | -0.49914 |
| 94850 | Q2Q067 | O75051 | -1.2565  |
| 94851 | Q2Q067 | Q5T2P9 | -1.1564  |
| 94852 | Q2Q067 | O76027 | -0.22608 |
| 94853 | Q2Q067 | Q149N8 | -0.76397 |
| 94854 | Q2Q067 | O14775 | -0.48815 |
| 94855 | Q2Q067 | Q13882 | -0.74895 |
| 94856 | Q2Q067 | Q9UNA1 | -0.43537 |
| 94857 | Q2Q067 | Q16610 | -0.51356 |
| 94858 | Q2Q067 | Q6ZWL3 | -1.2978  |
| 94859 | Q2Q067 | O75077 | -1.4527  |
| 94860 | Q2Q067 | Q86T03 | -1.0672  |
| 94861 | Q2Q067 | Q63HR2 | -0.22741 |
| 94862 | Q2Q067 | Q8TC94 | -0.21707 |
| 94863 | Q2Q067 | A4D2P6 | -0.43144 |
| 94864 | Q2Q067 | Q9Y3P9 | -0.23202 |
| 94865 | Q2Q067 | Q99487 | -0.38057 |
| 94866 | Q2Q067 | P43246 | -0.18673 |
| 94867 | Q2Q067 | O00238 | -0.83934 |
| 94868 | Q2Q067 | P51571 | -0.80965 |
| 94869 | Q2Q067 | P35228 | -0.25296 |
| 94870 | Q2Q067 | P01625 | -1.1115  |
| 94871 | Q2Q067 | Q6P9F5 | -0.73178 |
| 94872 | Q2Q067 | Q8IWR1 | -1.2896  |
| 94873 | Q2Q067 | Q04844 | -1.1899  |
| 94874 | Q2Q067 | Q9NYS0 | -1.1263  |
| 94875 | Q2Q067 | Q9NZK7 | -0.94288 |
| 94876 | Q2Q067 | Q30167 | -0.79235 |
| 94877 | Q2Q067 | Q5SQS7 | -0.22741 |
| 94878 | Q2Q067 | Q9BQA9 | -0.35359 |
| 94879 | Q2Q067 | Q6ZP65 | -0.15583 |
| 94880 | Q2Q067 | Q9BXE9 | -1.4199  |
| 94881 | Q2Q067 | Q9P2E7 | -1.3679  |
| 94882 | Q2Q067 | P43629 | -1.2886  |
| 94883 | Q2Q067 | Q9BUE6 | -0.1902  |
| 94884 | Q2Q067 | Q7RTX0 | -1.3532  |
| 94885 | Q2Q067 | P49757 | -0.2825  |
| 94886 | Q2Q067 | Q5T8D3 | -1.1693  |
| 94887 | Q2Q067 | P01716 | -1.1115  |
| 94888 | Q2Q067 | Q9H3M9 | -0.26676 |
| 94889 | Q2Q067 | P11279 | -1.0381  |
| 94890 | Q2Q067 | Q07507 | -1.2709  |
| 94891 | Q2Q067 | Q08830 | -1.2137  |
| 94892 | Q2Q067 | Q9H0H9 | -0.10904 |
| 94893 | Q2Q067 | Q8IWW6 | -1.1792  |
| 94894 | Q2Q067 | Q5TAH2 | -1.172   |
| 94895 | Q2Q067 | Q969F0 | -0.99456 |
| 94896 | Q2Q067 | Q5JUW0 | -0.27686 |
| 94897 | Q2Q067 | Q86SI9 | -0.98666 |
| 94898 | Q2Q067 | P18859 | -0.26564 |
| 94899 | Q2Q067 | Q9Y241 | -0.84325 |
| 94900 | Q2Q067 | Q13530 | -0.96154 |
| 94901 | Q2Q067 | Q5VU57 | -0.51488 |
| 94902 | Q2Q067 | Q9H598 | -0.9301  |
| 94903 | Q2Q067 | Q8N0V5 | -0.86321 |
| 94904 | Q2Q067 | Q9H228 | -1.3736  |
| 94905 | Q2Q067 | Q43353 | -0.22741 |
| 94906 | Q2Q067 | Q7Z5A4 | -1.5202  |
| 94907 | Q2Q067 | Q96DU7 | -0.51375 |
| 94908 | Q2Q067 | Q9NRV9 | -0.91151 |
| 94909 | Q2Q067 | A6NIU2 | -0.19456 |
| 94910 | Q2Q067 | Q6ZTQ3 | -0.20298 |
| 94911 | Q2Q067 | O95409 | -0.42597 |
| 94912 | Q2Q067 | Q5HYA8 | -0.35701 |
| 94913 | Q2Q067 | Q6PF15 | -0.22446 |
| 94914 | Q2Q067 | P20020 | -0.88516 |
| 94915 | Q2Q067 | Q9BTY7 | -0.24416 |
| 94916 | Q2Q067 | Q13608 | -0.26765 |
| 94917 | Q2Q067 | Q8NGK2 | -1.4096  |
| 94918 | Q2Q067 | Q9UG01 | -0.72356 |
| 94919 | Q2Q067 | P58397 | -1.4569  |
| 94920 | Q2Q067 | Q7Z4H4 | -0.86544 |
| 94921 | Q2Q067 | P22303 | -0.22724 |
| 94922 | Q2Q067 | Q9Y679 | -0.5765  |
| 94923 | Q2Q067 | Q16651 | -1.3091  |
| 94924 | Q2Q067 | Q5S007 | -0.4715  |

|       |        |        |           |
|-------|--------|--------|-----------|
| 94925 | Q2Q067 | Q96FJ0 | -0.33375  |
| 94926 | Q2Q067 | Q3KNW5 | -1.1759   |
| 94927 | Q2Q067 | P08833 | -0.94756  |
| 94928 | Q2Q067 | Q96AY4 | -0.22741  |
| 94929 | Q2Q067 | P30740 | -0.17434  |
| 94930 | Q2Q067 | Q9BXU3 | -0.73178  |
| 94931 | Q2Q067 | C9J2P7 | -0.76972  |
| 94932 | Q2Q067 | Q96LW2 | -1.3228   |
| 94933 | Q2Q067 | Q59H18 | -0.41763  |
| 94934 | Q2Q067 | O94892 | -0.085533 |
| 94935 | Q2Q067 | A8MXV6 | -1.0345   |
| 94936 | Q2Q067 | Q9H061 | -0.73055  |
| 94937 | Q2Q067 | Q86UP9 | -1.0345   |
| 94938 | Q2Q067 | P58549 | -1.1369   |
| 94939 | Q2Q067 | P05362 | -0.42291  |
| 94940 | Q2Q067 | Q8N1C3 | -0.92853  |
| 94941 | Q2Q067 | P59539 | -1.3729   |
| 94942 | Q2Q067 | Q8TCD1 | -0.63565  |
| 94943 | Q2Q067 | O15488 | -0.077555 |
| 94944 | Q2Q067 | P79522 | -0.50058  |
| 94945 | Q2Q067 | O95177 | -0.24416  |
| 94946 | Q2Q067 | Q8IUF1 | -0.91075  |
| 94947 | Q2Q067 | Q15622 | -1.4096   |
| 94948 | Q2Q067 | P04440 | -0.81493  |
| 94949 | Q2Q067 | Q8WUK0 | -0.74543  |
| 94950 | Q2Q067 | P04208 | -1.1115   |
| 94951 | Q2Q067 | Q9Y508 | -1.1276   |
| 94952 | Q2Q067 | Q13336 | -1.1542   |
| 94953 | Q2Q067 | P14923 | -0.66409  |
| 94954 | Q2Q067 | Q8IVL8 | -1.3781   |
| 94955 | Q2Q067 | Q14994 | -0.22817  |
| 94956 | Q2Q067 | Q8TDM0 | -0.20901  |
| 94957 | Q2Q067 | Q8N4L2 | -1.0672   |
| 94958 | Q2Q067 | O15374 | -1.2284   |
| 94959 | Q2Q067 | Q8WWP7 | -1.3412   |
| 94960 | Q2Q067 | O14544 | -0.22731  |
| 94961 | Q2Q067 | Q99523 | -0.38526  |
| 94962 | Q2Q067 | Q3KNW1 | -0.21165  |
| 94963 | Q2Q067 | P78325 | -0.50094  |
| 94964 | Q2Q067 | Q53G44 | -0.28719  |
| 94965 | Q2Q067 | Q6ZVS6 | -0.98666  |
| 94966 | Q2Q067 | Q9Y691 | -1.1382   |
| 94967 | Q2Q067 | P46019 | -0.23452  |
| 94968 | Q2Q067 | Q6DKI1 | -0.11694  |
| 94969 | Q2Q067 | Q8N6C5 | -0.74432  |
| 94970 | Q2Q067 | O15492 | -0.22785  |
| 94971 | Q2Q067 | Q9GIP4 | -1.0256   |
| 94972 | Q2Q067 | Q9HD45 | -1.0992   |
| 94973 | Q2Q067 | Q8N0U7 | -0.45603  |
| 94974 | Q2Q067 | Q8TD30 | -0.21198  |
| 94975 | Q2Q067 | Q6IF82 | -1.4096   |
| 94976 | Q2Q067 | Q7L4S7 | -1.0345   |
| 94977 | Q2Q067 | P28068 | -1.0698   |
| 94978 | Q2Q067 | Q6DKJ4 | -0.17899  |
| 94979 | Q2Q067 | Q16617 | -1.3184   |
| 94980 | Q2Q067 | P01742 | -1.1115   |
| 94981 | Q2Q067 | P45844 | -0.56646  |
| 94982 | Q2Q067 | Q7RTZ1 | -1.5804   |
| 94983 | Q2Q067 | Q96PE3 | -0.19387  |
| 94984 | Q2Q067 | Q9UPQ8 | -0.94644  |
| 94985 | Q2Q067 | O75452 | -1.5795   |
| 94986 | Q2Q067 | Q5H9U9 | -0.98139  |
| 94987 | Q2Q067 | P05106 | -0.39285  |
| 94988 | Q2Q067 | Q15084 | -0.26228  |
| 94989 | Q2Q067 | Q01814 | -0.38331  |
| 94990 | Q2Q067 | Q9BRK0 | -1.0345   |
| 94991 | Q2Q067 | Q6ZMC9 | -1.0345   |
| 94992 | Q2Q067 | O75165 | -0.46295  |
| 94993 | Q2Q067 | Q9Y5I1 | -1.4044   |
| 94994 | Q2Q067 | Q5EG05 | -0.66937  |
| 94995 | Q2Q067 | A6NCW7 | -0.26527  |
| 94996 | Q2Q067 | Q8NFP0 | -0.4038   |
| 94997 | Q2Q067 | Q8TD19 | -0.22741  |
| 94998 | Q2Q067 | Q6UXG3 | -1.0866   |
| 94999 | Q2Q067 | Q8IX94 | -0.90414  |
| 95000 | Q2Q067 | P07942 | -0.7437   |

|       |        |        |          |
|-------|--------|--------|----------|
| 95001 | Q2Q067 | P17600 | -0.54174 |
| 95002 | Q2Q067 | Q9Y4F9 | -0.49991 |
| 95003 | Q2Q067 | Q9H8G2 | -0.35564 |
| 95004 | Q2Q067 | P04201 | -0.89921 |
| 95005 | Q2Q067 | A1L453 | -1.5202  |
| 95006 | Q2Q067 | Q9Y661 | -1.3238  |
| 95007 | Q2Q067 | Q9UPY6 | -0.20692 |
| 95008 | Q2Q067 | Q96GD3 | -0.12723 |
| 95009 | Q2Q067 | Q5QGS0 | -0.13406 |
| 95010 | Q2Q067 | P12931 | -0.22979 |
| 95011 | Q2Q067 | Q8N413 | -0.85935 |
| 95012 | Q2Q067 | Q9H7F0 | -1.2567  |
| 95013 | Q2Q067 | Q9Y6F1 | -0.21208 |
| 95014 | Q2Q067 | P01700 | -1.1115  |
| 95015 | Q2Q067 | Q8TEH3 | -0.72872 |
| 95016 | Q2Q067 | Q9UKP5 | -1.4569  |
| 95017 | Q2Q067 | Q9BRQ0 | -0.23441 |
| 95018 | Q2Q067 | O43900 | -0.2326  |
| 95019 | Q2Q067 | Q9UBD9 | -0.3677  |
| 95020 | Q2Q067 | Q8NAP8 | -0.22537 |
| 95021 | Q2Q067 | Q7Z7L7 | -0.39365 |
| 95022 | Q2Q067 | Q15835 | -1.2149  |
| 95023 | Q2Q067 | P18074 | -0.24707 |
| 95024 | Q2Q067 | Q8N945 | -0.21265 |
| 95025 | Q2Q067 | Q9HCR9 | -0.27666 |
| 95026 | Q2Q067 | Q5XKL5 | -0.22629 |
| 95027 | Q2Q067 | Q5TZJ5 | -1.0345  |
| 95028 | Q2Q067 | Q8WWV6 | -1.1125  |
| 95029 | Q2Q067 | P23471 | -1.3809  |
| 95030 | Q2Q067 | P42830 | -1.084   |
| 95031 | Q2Q067 | Q6AZZ1 | -0.22742 |
| 95032 | Q2Q067 | O14810 | -0.28123 |
| 95033 | Q2Q067 | Q8N6L0 | -1.0552  |
| 95034 | Q2Q067 | Q8N6F1 | -0.41342 |
| 95035 | Q2Q067 | Q9NQW5 | -0.31097 |
| 95036 | Q2Q067 | Q8N3T1 | -0.80599 |
| 95037 | Q2Q067 | Q02161 | -1.1043  |
| 95038 | Q2Q067 | Q93045 | -0.19783 |
| 95039 | Q2Q067 | P48594 | -0.65195 |
| 95040 | Q2Q067 | Q96P88 | -1.4196  |
| 95041 | Q2Q067 | Q86SX6 | -0.21856 |
| 95042 | Q2Q067 | P30455 | -1.0994  |
| 95043 | Q2Q067 | P47712 | -0.22761 |
| 95044 | Q2Q067 | Q8IZR5 | -1.0608  |
| 95045 | Q2Q067 | Q95857 | -1.1904  |
| 95046 | Q2Q067 | Q92874 | -0.88967 |
| 95047 | Q2Q067 | Q6NUM9 | -0.62975 |
| 95048 | Q2Q067 | Q86WB7 | -1.004   |
| 95049 | Q2Q067 | Q96L93 | -0.82094 |
| 95050 | Q2Q067 | P31371 | -0.68997 |
| 95051 | Q2Q067 | P0DJD0 | -0.48206 |
| 95052 | Q2Q067 | Q96QI5 | -0.64917 |
| 95053 | Q2Q067 | Q6NSJ5 | -1.0345  |
| 95054 | Q2Q067 | O60266 | -0.69011 |
| 95055 | Q2Q067 | O94966 | -0.81327 |
| 95056 | Q2Q067 | Q8N8W4 | -0.51309 |
| 95057 | Q2Q067 | Q9UK80 | -0.32044 |
| 95058 | Q2Q067 | Q17R89 | -0.39066 |
| 95059 | Q2Q067 | Q8IWZ4 | -0.73178 |
| 95060 | Q2Q067 | Q7RTP6 | -0.55778 |
| 95061 | Q2Q067 | Q9NV06 | -0.22742 |
| 95062 | Q2Q067 | A8MVX0 | -0.70301 |
| 95063 | Q2Q067 | Q9NYN1 | -1.4198  |
| 95064 | Q2Q067 | P17858 | -0.28765 |
| 95065 | Q2Q067 | P01848 | -1.1103  |
| 95066 | Q2Q067 | P40313 | -1.0707  |
| 95067 | Q2Q067 | P01762 | -1.1115  |
| 95068 | Q2Q067 | Q9NUN7 | -0.48561 |
| 95069 | Q2Q067 | Q96PC5 | -0.98666 |
| 95070 | Q2Q067 | Q96QG7 | -0.22016 |
| 95071 | Q2Q067 | A6NNX1 | -0.56189 |
| 95072 | Q2Q067 | P01562 | -0.84976 |
| 95073 | Q2Q067 | P32455 | -1.0564  |
| 95074 | Q2Q067 | Q9NRD5 | -0.22728 |
| 95075 | Q2Q067 | Q96HR9 | -1.0345  |
| 95076 | Q2Q067 | Q8IVS8 | -0.10627 |



|       |        |        |           |
|-------|--------|--------|-----------|
| 95077 | Q2Q067 | P10319 | -1.1453   |
| 95078 | Q2Q067 | Q8NA29 | -1.2495   |
| 95079 | Q2Q067 | P09038 | -0.29101  |
| 95080 | Q2Q067 | Q9BVV8 | -0.81878  |
| 95081 | Q2Q067 | P42336 | -0.29153  |
| 95082 | Q2Q067 | Q8TCV5 | -0.90081  |
| 95083 | Q2Q067 | Q15762 | -0.83317  |
| 95084 | Q2Q067 | Q9BY84 | -0.5256   |
| 95085 | Q2Q067 | Q2VWP7 | -1.2391   |
| 95086 | Q2Q067 | Q9H553 | -0.20989  |
| 95087 | Q2Q067 | P54368 | -0.11639  |
| 95088 | Q2Q067 | Q14849 | -0.99895  |
| 95089 | Q2Q067 | Q8NAF0 | -0.19903  |
| 95090 | Q2Q067 | Q9UJV8 | -0.1381   |
| 95091 | Q2Q067 | Q9NV58 | -0.48267  |
| 95092 | Q2Q067 | Q6ZUB0 | -1.0345   |
| 95093 | Q2Q067 | O94876 | -1.0345   |
| 95094 | Q2Q067 | Q8N4F4 | -1.171    |
| 95095 | Q2Q067 | Q99801 | -0.23001  |
| 95096 | Q2Q067 | Q9NWT1 | -0.22787  |
| 95097 | Q2Q067 | P49747 | -0.70616  |
| 95098 | Q2Q067 | Q13835 | -0.22785  |
| 95099 | Q2Q067 | Q8IUE6 | -0.82527  |
| 95100 | Q2Q067 | Q16831 | -0.16503  |
| 95101 | Q2Q067 | Q969Q5 | -0.2331   |
| 95102 | Q2Q067 | Q86WA6 | -0.24439  |
| 95103 | Q2Q067 | Q8N144 | -0.68462  |
| 95104 | Q2Q067 | Q9BXJ8 | -0.77947  |
| 95105 | Q2Q067 | Q13153 | -0.22769  |
| 95106 | Q2Q067 | Q969M3 | -0.60106  |
| 95107 | Q2Q067 | Q9Y5G4 | -1.3679   |
| 95108 | Q2Q067 | P49961 | -1.7073   |
| 95109 | Q2Q067 | Q96I15 | -0.34931  |
| 95110 | Q2Q067 | Q8N130 | -1.0178   |
| 95111 | Q2Q067 | Q9UPS8 | -0.2341   |
| 95112 | Q2Q067 | Q96L46 | -0.53278  |
| 95113 | Q2Q067 | P12273 | -1.0137   |
| 95114 | Q2Q067 | P07225 | -0.86631  |
| 95115 | Q2Q067 | P06702 | -0.2279   |
| 95116 | Q2Q067 | P78348 | -0.79554  |
| 95117 | Q2Q067 | Q14587 | -0.067277 |
| 95118 | Q2Q067 | Q9Y2R0 | -0.86095  |
| 95119 | Q2Q067 | Q13069 | -0.18742  |
| 95120 | Q2Q067 | P51811 | -0.41645  |
| 95121 | Q2Q067 | A8MX19 | -0.43957  |
| 95122 | Q2Q067 | P12314 | -0.83147  |
| 95123 | Q2Q067 | O75487 | -1.1576   |
| 95124 | Q2Q067 | O60271 | -0.20664  |
| 95125 | Q2Q067 | Q29836 | -1.1453   |
| 95126 | Q2Q067 | Q16557 | -0.9841   |
| 95127 | Q2Q067 | Q02045 | -0.41459  |
| 95128 | Q2Q067 | Q15344 | -0.40647  |
| 95129 | Q2Q067 | O60858 | -0.69365  |
| 95130 | Q2Q067 | Q96JA1 | -1.0345   |
| 95131 | Q2Q067 | P31277 | -0.26149  |
| 95132 | Q2Q067 | Q96MU8 | -0.42047  |
| 95133 | Q2Q067 | Q3C1V0 | -1.0345   |
| 95134 | Q2Q067 | Q15126 | -0.66046  |
| 95135 | Q2Q067 | O60739 | -0.19035  |
| 95136 | Q2Q067 | Q4G0S4 | -0.75716  |
| 95137 | Q2Q067 | O43143 | -0.54596  |
| 95138 | Q2Q067 | Q6UXA7 | -0.81501  |
| 95139 | Q2Q067 | P36222 | -0.56121  |
| 95140 | Q2Q067 | Q8NCK7 | -1.1513   |
| 95141 | Q2Q067 | Q9BY60 | -0.1753   |
| 95142 | Q2Q067 | Q8IZY2 | -1.0147   |
| 95143 | Q2Q067 | Q96GX1 | -0.82845  |
| 95144 | Q2Q067 | Q96KV7 | -0.22759  |
| 95145 | Q2Q067 | O95785 | -0.41024  |
| 95146 | Q2Q067 | Q92974 | -0.22743  |
| 95147 | Q2Q067 | Q52LC2 | -0.9277   |
| 95148 | Q2Q067 | O00241 | -0.9071   |
| 95149 | Q2Q067 | Q96SM3 | -1.5439   |
| 95150 | Q2Q067 | Q06413 | -0.14642  |
| 95151 | Q2Q067 | Q9H3R2 | -1.6054   |
| 95152 | Q2Q067 | Q14330 | -1.4336   |

|       |        |        |            |
|-------|--------|--------|------------|
| 95153 | Q2Q067 | P12643 | -0.22741   |
| 95154 | Q2Q067 | Q96L11 | -0.98666   |
| 95155 | Q2Q067 | Q96FW1 | -0.05638   |
| 95156 | Q2Q067 | A6NMX2 | -0.09932   |
| 95157 | Q2Q067 | O75326 | -0.30778   |
| 95158 | Q2Q067 | Q86VS3 | -0.31922   |
| 95159 | Q2Q067 | P58512 | -0.37256   |
| 95160 | Q2Q067 | Q96LL9 | -0.34065   |
| 95161 | Q2Q067 | Q7Z6J2 | -0.22778   |
| 95162 | Q2Q067 | Q68CJ6 | -0.53409   |
| 95163 | Q2Q067 | A4D2B0 | -0.40827   |
| 95164 | Q2Q067 | P11047 | -0.94019   |
| 95165 | Q2Q067 | Q6UW02 | -1.1665    |
| 95166 | Q2Q067 | O00178 | -0.83867   |
| 95167 | Q2Q067 | O43506 | -1.3963    |
| 95168 | Q2Q067 | Q5SZB4 | -0.0044854 |
| 95169 | Q2Q067 | P19827 | -0.91631   |
| 95170 | Q2Q067 | P51151 | -0.66617   |
| 95171 | Q2Q067 | Q9ULH0 | -0.65928   |
| 95172 | Q2Q067 | Q5VT98 | -0.19475   |
| 95173 | Q2Q067 | Q16777 | -0.82527   |
| 95174 | Q2Q067 | P00966 | -0.1683    |
| 95175 | Q2Q067 | Q9ULR3 | -0.47365   |
| 95176 | Q2Q067 | P24394 | -1.088     |
| 95177 | Q2Q067 | Q9Y6K8 | -0.50526   |
| 95178 | Q2Q067 | Q5TAT6 | -1.1326    |
| 95179 | Q2Q067 | Q5SQ80 | -0.2274    |
| 95180 | Q2Q067 | Q86WZ6 | -0.085533  |
| 95181 | Q2Q067 | Q13480 | -0.22732   |
| 95182 | Q2Q067 | P01375 | -0.24807   |
| 95183 | Q2Q067 | Q8IV45 | -0.99454   |
| 95184 | Q2Q067 | A6NMD0 | -1.1566    |
| 95185 | Q2Q067 | P41225 | -0.24543   |
| 95186 | Q2Q067 | Q8IWU5 | -0.4806    |
| 95187 | Q2Q067 | Q68CQ4 | -0.10494   |
| 95188 | Q2Q067 | Q9C091 | -1.0345    |
| 95189 | Q2Q067 | Q99954 | -0.98666   |
| 95190 | Q2Q067 | Q9NPA2 | -1.579     |
| 95191 | Q2Q067 | Q4G0X4 | -0.18017   |
| 95192 | Q2Q067 | B2RN74 | -1.4096    |
| 95193 | Q2Q067 | P30518 | -0.89619   |
| 95194 | Q2Q067 | A8MQB9 | -0.22741   |
| 95195 | Q2Q067 | Q969F8 | -0.97676   |
| 95196 | Q2Q067 | Q8IXB3 | -1.0325    |
| 95197 | Q2Q067 | Q96SZ5 | -0.4844    |
| 95198 | Q2Q067 | Q7L8C5 | -1.0565    |
| 95199 | Q2Q067 | O43464 | -0.22612   |
| 95200 | Q2Q067 | P11464 | -1.0002    |
| 95201 | Q2Q067 | Q12879 | -0.29298   |
| 95202 | Q2Q067 | Q8NHS2 | -0.375     |
| 95203 | Q2Q067 | A6NET4 | -1.4096    |
| 95204 | Q2Q067 | Q8WTY6 | -0.16693   |
| 95205 | Q2Q067 | Q8ND23 | -0.22708   |
| 95206 | Q2Q067 | P40199 | -0.33015   |
| 95207 | Q2Q067 | Q8IZ20 | -0.21449   |
| 95208 | Q2Q067 | P42262 | -0.99988   |
| 95209 | Q2Q067 | Q96IQ7 | -1.1904    |
| 95210 | Q2Q067 | Q96PB8 | -1.0345    |
| 95211 | Q2Q067 | Q8ND82 | -0.22731   |
| 95212 | Q2Q067 | Q8NHY3 | -0.3562    |
| 95213 | Q2Q067 | Q14435 | -0.26722   |
| 95214 | Q2Q067 | Q9BT17 | -0.31472   |
| 95215 | Q2Q067 | Q96LR1 | -0.98666   |
| 95216 | Q2Q067 | Q6UWH6 | -0.90678   |
| 95217 | Q2Q067 | Q6DKI7 | -1.0345    |
| 95218 | Q2Q067 | P01215 | -0.14177   |
| 95219 | Q2Q067 | Q6QHC5 | -0.91002   |
| 95220 | Q2Q067 | Q9P272 | -0.46621   |
| 95221 | Q2Q067 | Q96M86 | -0.32737   |
| 95222 | Q2Q067 | Q5JT18 | -0.40612   |
| 95223 | Q2Q067 | P32245 | -0.69623   |
| 95224 | Q2Q067 | P07437 | -0.18929   |
| 95225 | Q2Q067 | Q8N442 | -0.77802   |
| 95226 | Q2Q067 | Q9Y446 | -0.22785   |
| 95227 | Q2Q067 | Q6ZPD9 | -1.0345    |
| 95228 | Q2Q067 | Q6ZN30 | -0.22663   |

|       |        |        |           |
|-------|--------|--------|-----------|
| 95229 | Q2Q067 | Q9UL68 | -0.18027  |
| 95230 | Q2Q067 | P34932 | -0.22586  |
| 95231 | Q2Q067 | A4D250 | -0.15622  |
| 95232 | Q2Q067 | Q9BZX2 | -0.64756  |
| 95233 | Q2Q067 | Q9HB29 | -1.2857   |
| 95234 | Q2Q067 | Q29983 | -0.7867   |
| 95235 | Q2Q067 | Q9NR90 | -0.87644  |
| 95236 | Q2Q067 | Q96FS4 | -0.22151  |
| 95237 | Q2Q067 | Q5VZF2 | -0.071355 |
| 95238 | Q2Q067 | Q8IWZ5 | -0.73178  |
| 95239 | Q2Q067 | Q76EJ3 | -0.64672  |
| 95240 | Q2Q067 | Q9HD87 | -1.0345   |
| 95241 | Q2Q067 | Q5TC82 | -0.22741  |
| 95242 | Q2Q067 | P51451 | -1.4031   |
| 95243 | Q2Q067 | Q96J92 | -1.011    |
| 95244 | Q2Q067 | Q5T7N3 | -0.22741  |
| 95245 | Q2Q067 | Q96QZ0 | -1.1015   |
| 95246 | Q2Q067 | Q7Z3U7 | -0.18366  |
| 95247 | Q2Q067 | Q96P47 | -1.2987   |
| 95248 | Q2Q067 | P0C7Q6 | -1.0345   |
| 95249 | Q2Q067 | Q7Z3T8 | -0.18317  |
| 95250 | Q2Q067 | P57679 | -0.90155  |
| 95251 | Q2Q067 | Q9Y5G9 | -1.4197   |
| 95252 | Q2Q067 | Q6UW68 | -1.0345   |
| 95253 | Q2Q067 | P01704 | -1.1115   |
| 95254 | Q2Q067 | P43363 | -0.098575 |
| 95255 | Q2Q067 | Q86UF4 | -0.15712  |
| 95256 | Q2Q067 | Q9HB63 | -1.0542   |
| 95257 | Q2Q067 | Q96HH9 | -0.21586  |
| 95258 | Q2Q067 | O60656 | -0.7818   |
| 95259 | Q2Q067 | Q8N5C1 | -1.0345   |
| 95260 | Q2Q067 | O75192 | -0.39396  |
| 95261 | Q2Q067 | Q8N2U9 | -1.0345   |
| 95262 | Q2Q067 | Q8NDB6 | -0.91342  |
| 95263 | Q2Q067 | A6NJY4 | -1.0345   |
| 95264 | Q2Q067 | O94844 | -1.2755   |
| 95265 | Q2Q067 | P62070 | -0.93502  |
| 95266 | Q2Q067 | Q8TAD4 | -0.47393  |
| 95267 | Q2Q067 | Q96MK3 | -0.98666  |
| 95268 | Q2Q067 | P51787 | -0.89738  |
| 95269 | Q2Q067 | Q6QEF8 | -0.45358  |
| 95270 | Q2Q067 | Q9UBG0 | -1.0959   |
| 95271 | Q2Q067 | Q9H871 | -0.17877  |
| 95272 | Q2Q067 | Q5VVK0 | -0.20901  |
| 95273 | Q2Q067 | Q9UPN6 | -0.30664  |
| 95274 | Q2Q067 | Q5T1A1 | -1.0345   |
| 95275 | Q2Q067 | Q8N335 | -0.1199   |
| 95276 | Q2Q067 | P59540 | -1.542    |
| 95277 | Q2Q067 | Q9UIG8 | -1.2283   |
| 95278 | Q2Q067 | Q7Z7B7 | -0.94775  |
| 95279 | Q2Q067 | Q9C0C9 | -0.92845  |
| 95280 | Q2Q067 | P57739 | -0.86036  |
| 95281 | Q2Q067 | Q99541 | -0.38569  |
| 95282 | Q2Q067 | Q8IZN3 | -1.13     |
| 95283 | Q2Q067 | Q9Y2W7 | -0.23269  |
| 95284 | Q2Q067 | O14578 | -0.89552  |
| 95285 | Q2Q067 | Q8IXQ9 | -0.18205  |
| 95286 | Q2Q067 | A6NEK1 | -0.57228  |
| 95287 | Q2Q067 | Q96IK5 | -0.21728  |
| 95288 | Q2Q067 | P21291 | -0.22943  |
| 95289 | Q2Q067 | O14863 | -0.73699  |
| 95290 | Q2Q067 | Q99683 | -0.3174   |
| 95291 | Q2Q067 | P0C0L5 | -1.2191   |
| 95292 | Q2Q067 | P53816 | -0.16495  |
| 95293 | Q2Q067 | Q8IYB8 | -0.22681  |
| 95294 | Q2Q067 | Q9Y6J6 | -1.2556   |
| 95295 | Q2Q067 | Q01113 | -1.8065   |
| 95296 | Q2Q067 | Q6UX52 | -0.98666  |
| 95297 | Q2Q067 | O60306 | -0.33852  |
| 95298 | Q2Q067 | Q9BRG2 | -0.82203  |
| 95299 | Q2Q067 | Q9BSF4 | -0.042083 |
| 95300 | Q2Q067 | Q5U649 | -0.024674 |
| 95301 | Q2Q067 | Q6AI14 | -1.1704   |
| 95302 | Q2Q067 | O15254 | -0.64123  |
| 95303 | Q2Q067 | Q15035 | -0.19602  |
| 95304 | Q2Q067 | Q7Z602 | -1.4967   |

|       |        |        |           |
|-------|--------|--------|-----------|
| 95305 | Q2Q067 | Q6IEE8 | -1.0254   |
| 95306 | Q2Q067 | O94768 | -1.1148   |
| 95307 | Q2Q067 | P82980 | -0.49702  |
| 95308 | Q2Q067 | A0FGR8 | -1.1634   |
| 95309 | Q2Q067 | Q6F5E8 | -0.22418  |
| 95310 | Q2Q067 | Q7Z4S9 | -0.22732  |
| 95311 | Q2Q067 | Q7Z2Y8 | -0.3753   |
| 95312 | Q2Q067 | Q9HAV5 | -0.7123   |
| 95313 | Q2Q067 | O76003 | -0.228    |
| 95314 | Q2Q067 | Q6ZSC3 | -0.96284  |
| 95315 | Q2Q067 | Q9HBW1 | -0.91133  |
| 95316 | Q2Q067 | Q6S5H4 | -0.22732  |
| 95317 | Q2Q067 | O14807 | -1.4401   |
| 95318 | Q2Q067 | Q4KWH8 | -0.43688  |
| 95319 | Q2Q067 | P14384 | -0.37931  |
| 95320 | Q2Q067 | Q1T7F1 | -0.19996  |
| 95321 | Q2Q067 | Q9BY07 | -1.1235   |
| 95322 | Q2Q067 | Q9BUK6 | -0.066137 |
| 95323 | Q2Q067 | Q6UXT8 | -0.98666  |
| 95324 | Q2Q067 | Q12931 | -0.57381  |
| 95325 | Q2Q067 | Q9BZW4 | -0.88683  |
| 95326 | Q2Q067 | Q13011 | -0.13568  |
| 95327 | Q2Q067 | Q8N9L1 | -0.50923  |
| 95328 | Q2Q067 | Q9GZY4 | -0.86095  |
| 95329 | Q2Q067 | Q3SX64 | -0.15568  |
| 95330 | Q2Q067 | P60329 | -0.20974  |
| 95331 | Q2Q067 | Q9H114 | -1.024    |
| 95332 | Q2Q067 | Q5T5U3 | -0.31986  |
| 95333 | Q2Q067 | Q92667 | -0.20783  |
| 95334 | Q2Q067 | Q9UKR3 | -0.70747  |
| 95335 | Q2Q067 | Q96RI9 | -1.4576   |
| 95336 | Q2Q067 | Q9Y487 | -0.40137  |
| 95337 | Q2Q067 | Q5M7Z0 | -1.1176   |
| 95338 | Q2Q067 | Q14210 | -0.78417  |
| 95339 | Q2Q067 | Q6ZMV7 | -0.19505  |
| 95340 | Q2Q067 | Q96NE9 | -0.3593   |
| 95341 | Q2Q067 | Q13361 | -1.0261   |
| 95342 | Q2Q067 | Q9NUN5 | -1.0359   |
| 95343 | Q2Q067 | Q5VZ03 | -0.18858  |
| 95344 | Q2Q067 | Q9H9S3 | -0.87915  |
| 95345 | Q2Q067 | Q9Y484 | -0.22725  |
| 95346 | Q2Q067 | Q9H0V1 | -1.0094   |
| 95347 | Q2Q067 | Q9UJ14 | -0.87471  |
| 95348 | Q2Q067 | Q5T1B0 | -0.085774 |
| 95349 | Q2Q067 | P01600 | -1.1115   |
| 95350 | Q2Q067 | Q96QZ7 | -0.37519  |
| 95351 | Q2Q067 | Q9H400 | -0.85931  |
| 95352 | Q2Q067 | Q6TFL4 | -0.46133  |
| 95353 | Q2Q067 | P50454 | -0.26408  |
| 95354 | Q2Q067 | Q8N427 | -0.67079  |
| 95355 | Q2Q067 | P17405 | -0.35362  |
| 95356 | Q2Q067 | Q16602 | -0.66911  |
| 95357 | Q2Q067 | Q8NBQ7 | -0.47413  |
| 95358 | Q2Q067 | Q15399 | -1.0787   |
| 95359 | Q2Q067 | O94779 | -0.68618  |
| 95360 | Q2Q067 | Q02388 | -0.73503  |
| 95361 | Q2Q067 | Q99755 | -0.21329  |
| 95362 | Q2Q067 | P49763 | -1.0276   |
| 95363 | Q2Q067 | Q9BR39 | -0.50483  |
| 95364 | Q2Q067 | Q9NR21 | -0.4609   |
| 95365 | Q2Q067 | Q9NQV7 | -0.19315  |
| 95366 | Q2Q067 | Q7Z410 | -1.7038   |
| 95367 | Q2Q067 | Q86UP3 | -0.22622  |
| 95368 | Q2Q067 | Q7Z442 | -1.2097   |
| 95369 | Q2Q067 | Q8IYJ0 | -1.0345   |
| 95370 | Q2Q067 | Q5TAA0 | -0.070454 |
| 95371 | Q2Q067 | Q9NUJ1 | -0.45623  |
| 95372 | Q2Q067 | Q14451 | -0.22741  |
| 95373 | Q2Q067 | P01701 | -1.1115   |
| 95374 | Q2Q067 | O43909 | -0.93027  |
| 95375 | Q2Q067 | Q14236 | -0.59531  |
| 95376 | Q2Q067 | P35916 | -0.65714  |
| 95377 | Q2Q067 | Q6S8J3 | -0.4135   |
| 95378 | Q2Q067 | Q01415 | -0.78097  |
| 95379 | Q2Q067 | Q9BVK8 | -1.1118   |
| 95380 | Q2Q067 | Q8TAC2 | -0.81378  |

|       |        |        |           |
|-------|--------|--------|-----------|
| 95381 | Q2Q067 | Q96JP5 | -0.31075  |
| 95382 | Q2Q067 | Q99988 | -0.93527  |
| 95383 | Q2Q067 | Q11203 | -0.88543  |
| 95384 | Q2Q067 | Q96PN7 | -0.22267  |
| 95385 | Q2Q067 | Q6UX82 | -0.65821  |
| 95386 | Q2Q067 | Q3V6T2 | -0.25986  |
| 95387 | Q2Q067 | Q96J86 | -0.88683  |
| 95388 | Q2Q067 | P35609 | -0.86884  |
| 95389 | Q2Q067 | P20702 | -0.58307  |
| 95390 | Q2Q067 | Q02809 | -0.72989  |
| 95391 | Q2Q067 | Q9H898 | -0.50923  |
| 95392 | Q2Q067 | A6NDS4 | -1.4231   |
| 95393 | Q2Q067 | Q9P2Y4 | -0.22741  |
| 95394 | Q2Q067 | Q13402 | -0.1867   |
| 95395 | Q2Q067 | Q8TCT0 | -0.83479  |
| 95396 | Q2Q067 | Q8NBL1 | -0.32164  |
| 95397 | Q2Q067 | Q96A25 | -0.77947  |
| 95398 | Q2Q067 | B0YJ81 | -1.5792   |
| 95399 | Q2Q067 | Q13126 | -0.17136  |
| 95400 | Q2Q067 | P17026 | -0.071856 |
| 95401 | Q2Q067 | Q9NX52 | -1.5255   |
| 95402 | Q2Q067 | Q6UXQ4 | -0.98666  |
| 95403 | Q2Q067 | O43157 | -0.97562  |
| 95404 | Q2Q067 | A6NCK2 | -0.73178  |
| 95405 | Q2Q067 | Q8N4G2 | -0.77099  |
| 95406 | Q2Q067 | Q15768 | -0.93529  |
| 95407 | Q2Q067 | Q8NH08 | -1.4096   |
| 95408 | Q2Q067 | Q9NQY0 | -0.31564  |
| 95409 | Q2Q067 | P10071 | -0.22733  |
| 95410 | Q2Q067 | Q53H54 | -0.33689  |
| 95411 | Q2Q067 | O15130 | -1.072    |
| 95412 | Q2Q067 | Q5VXH5 | -0.19475  |
| 95413 | Q2Q067 | Q9H6D5 | -1.0345   |
| 95414 | Q2Q067 | Q9Y5T5 | -0.26759  |
| 95415 | Q2Q067 | Q9Y5K3 | -0.40483  |
| 95416 | Q2Q067 | Q70IA8 | -0.43755  |
| 95417 | Q2Q067 | Q96M34 | -0.032876 |
| 95418 | Q2Q067 | Q9NUD5 | -0.50058  |
| 95419 | Q2Q067 | Q99712 | -1.384    |
| 95420 | Q2Q067 | Q96Q04 | -1.3874   |
| 95421 | Q2Q067 | P11684 | -0.75582  |
| 95422 | Q2Q067 | Q53H82 | -0.2353   |
| 95423 | Q2Q067 | O75367 | -0.3809   |
| 95424 | Q2Q067 | P0C2W1 | -0.21704  |
| 95425 | Q2Q067 | Q9UNK4 | -0.94288  |
| 95426 | Q2Q067 | P01850 | -1.0636   |
| 95427 | Q2Q067 | P62191 | -0.30163  |
| 95428 | Q2Q067 | P55000 | -1.1254   |
| 95429 | Q2Q067 | P33176 | -0.23349  |
| 95430 | Q2Q067 | P06331 | -1.1115   |
| 95431 | Q2Q067 | P01135 | -0.3255   |
| 95432 | Q2Q067 | Q9H892 | -0.2251   |
| 95433 | Q2Q067 | Q9UFV1 | -1.0238   |
| 95434 | Q2Q067 | Q8NGG0 | -1.4096   |
| 95435 | Q2Q067 | Q8N292 | -1.1348   |
| 95436 | Q2Q067 | Q6UX41 | -0.35359  |
| 95437 | Q2Q067 | O43824 | -1.0835   |
| 95438 | Q2Q067 | P09493 | -0.22523  |
| 95439 | Q2Q067 | Q9P0L2 | -1.1668   |
| 95440 | Q2Q067 | Q86YM7 | -0.39309  |
| 95441 | Q2Q067 | Q96AG3 | -0.62542  |
| 95442 | Q2Q067 | Q86SZ3 | -0.26258  |
| 95443 | Q2Q067 | A8MY62 | -0.28979  |
| 95444 | Q2Q067 | Q5SQQ9 | -0.22703  |
| 95445 | Q2Q067 | Q8N112 | -1.0345   |
| 95446 | Q2Q067 | Q4G176 | -1.0498   |
| 95447 | Q2Q067 | A8MUK1 | -0.44208  |
| 95448 | Q2Q067 | P36959 | -0.42076  |
| 95449 | Q2Q067 | Q96F10 | -0.25523  |
| 95450 | Q2Q067 | P42566 | -0.2274   |
| 95451 | Q2Q067 | Q9C0B9 | -0.44593  |
| 95452 | Q2Q067 | P22492 | -1.1352   |
| 95453 | Q2Q067 | Q6WQI6 | -0.20901  |
| 95454 | Q2Q067 | Q6ZT98 | -0.72137  |
| 95455 | Q2Q067 | Q9NY84 | -0.50297  |
| 95456 | Q2Q067 | Q9NQT8 | -0.44959  |

|       |        |        |           |
|-------|--------|--------|-----------|
| 95457 | Q2Q067 | Q9HBG6 | -0.22742  |
| 95458 | Q2Q067 | Q9Y6C9 | -0.86765  |
| 95459 | Q2Q067 | Q9NXI6 | -1.1176   |
| 95460 | Q2Q067 | O75923 | -0.98155  |
| 95461 | Q2Q067 | Q9Y3E0 | -0.69104  |
| 95462 | Q2Q067 | Q9P2B2 | -0.35975  |
| 95463 | Q2Q067 | O95969 | -1.0374   |
| 95464 | Q2Q067 | Q7L5N7 | -0.78616  |
| 95465 | Q2Q067 | P49418 | -0.22741  |
| 95466 | Q2Q067 | Q75N90 | -1.0992   |
| 95467 | Q2Q067 | Q3KRA9 | -0.23868  |
| 95468 | Q2Q067 | Q86T96 | -0.75054  |
| 95469 | Q2Q067 | Q9UJ37 | -0.81633  |
| 95470 | Q2Q067 | Q6ICL7 | -1.0345   |
| 95471 | Q2Q067 | Q6P9G0 | -0.44013  |
| 95472 | Q2Q067 | Q99581 | -0.1262   |
| 95473 | Q2Q067 | A6NL88 | -1.0345   |
| 95474 | Q2Q067 | O15381 | -0.38912  |
| 95475 | Q2Q067 | O96009 | -1.2583   |
| 95476 | Q2Q067 | Q6GYQ0 | -0.21211  |
| 95477 | Q2Q067 | Q14651 | -0.39207  |
| 95478 | Q2Q067 | P05093 | -0.48487  |
| 95479 | Q2Q067 | Q12981 | -0.16142  |
| 95480 | Q2Q067 | P03372 | -0.22762  |
| 95481 | Q2Q067 | P21854 | -0.81492  |
| 95482 | Q2Q067 | P05111 | -0.51863  |
| 95483 | Q2Q067 | Q86WG5 | -0.2274   |
| 95484 | Q2Q067 | Q15726 | -0.28293  |
| 95485 | Q2Q067 | Q9HBA0 | -0.49875  |
| 95486 | Q2Q067 | P29279 | -0.30757  |
| 95487 | Q2Q067 | P21549 | -0.21002  |
| 95488 | Q2Q067 | Q9BZ68 | -0.3932   |
| 95489 | Q2Q067 | P11234 | -0.42071  |
| 95490 | Q2Q067 | P78368 | -0.98211  |
| 95491 | Q2Q067 | P49765 | -0.7252   |
| 95492 | Q2Q067 | Q8IV04 | -1.4231   |
| 95493 | Q2Q067 | Q70UQ0 | -0.39667  |
| 95494 | Q2Q067 | P24298 | -0.21358  |
| 95495 | Q2Q067 | P78357 | -0.66428  |
| 95496 | Q2Q067 | P08118 | -0.59321  |
| 95497 | Q2Q067 | Q9Y5M8 | -1.314    |
| 95498 | Q2Q067 | Q9Y264 | -0.86302  |
| 95499 | Q2Q067 | Q9NZP5 | -1.4096   |
| 95500 | Q2Q067 | A7E2S9 | -0.22741  |
| 95501 | Q2Q067 | Q13972 | -0.60758  |
| 95502 | Q2Q067 | P0C617 | -1.4096   |
| 95503 | Q2Q067 | P61601 | -0.66824  |
| 95504 | Q2Q067 | P01720 | -1.1115   |
| 95505 | Q2Q067 | P13631 | -0.23926  |
| 95506 | Q2Q067 | B2RUY7 | -0.933    |
| 95507 | Q2Q067 | Q9NR20 | -1.2074   |
| 95508 | Q2Q067 | Q8WUA7 | -1.3346   |
| 95509 | Q2Q067 | Q96KC8 | -0.24999  |
| 95510 | Q2Q067 | E9PKD4 | -0.073316 |
| 95511 | Q2Q067 | A6NCL2 | -0.2074   |
| 95512 | Q2Q067 | P56704 | -0.25228  |
| 95513 | Q2Q067 | P01815 | -1.1115   |
| 95514 | Q2Q067 | P55283 | -1.277    |
| 95515 | Q2Q067 | O75716 | -0.62362  |
| 95516 | Q2Q067 | O43521 | -0.21465  |
| 95517 | Q2Q067 | A6NDP7 | -1.0345   |
| 95518 | Q2Q067 | Q16394 | -0.58053  |
| 95519 | Q2Q067 | Q7L2E3 | -0.2259   |
| 95520 | Q2Q067 | Q8NC96 | -0.47563  |
| 95521 | Q2Q067 | Q9NWZ3 | -0.22735  |
| 95522 | Q2Q067 | Q86VR8 | -1.0374   |
| 95523 | Q2Q067 | O75128 | -0.68258  |
| 95524 | Q2Q067 | Q9H1P3 | -0.80691  |
| 95525 | Q2Q067 | Q86UV7 | -0.73178  |
| 95526 | Q2Q067 | Q2TAC6 | -0.71913  |
| 95527 | Q2Q067 | Q9HCH3 | -0.5142   |
| 95528 | Q2Q067 | Q6ZRU5 | -0.98666  |
| 95529 | Q2Q067 | A6NCS4 | -0.24941  |
| 95530 | Q2Q067 | Q9UH62 | -0.87637  |
| 95531 | Q2Q067 | O95834 | -0.55878  |
| 95532 | Q2Q067 | Q8IUZ0 | -0.2274   |

|       |        |        |            |
|-------|--------|--------|------------|
| 95533 | Q2Q067 | P04000 | -1.5773    |
| 95534 | Q2Q067 | Q9UH64 | -0.18529   |
| 95535 | Q2Q067 | O95450 | -1.3577    |
| 95536 | Q2Q067 | P41597 | -0.59268   |
| 95537 | Q2Q067 | P34981 | -1.3858    |
| 95538 | Q2Q067 | O94903 | -0.28001   |
| 95539 | Q2Q067 | Q05D32 | -0.49368   |
| 95540 | Q2Q067 | P59533 | -1.3729    |
| 95541 | Q2Q067 | P0C264 | -1.3228    |
| 95542 | Q2Q067 | Q8NHM4 | -1.5362    |
| 95543 | Q2Q067 | Q5SYC1 | -0.71071   |
| 95544 | Q2Q067 | Q06250 | -0.24416   |
| 95545 | Q2Q067 | Q53FV1 | -1.0791    |
| 95546 | Q2Q067 | A8MX76 | -1.124     |
| 95547 | Q2Q067 | Q8IVU9 | -0.058703  |
| 95548 | Q2Q067 | Q8N5D6 | -0.73141   |
| 95549 | Q2Q067 | Q8N8Q8 | -0.56945   |
| 95550 | Q2Q067 | Q9Y5P4 | -0.22763   |
| 95551 | Q2Q067 | P30203 | -1.3106    |
| 95552 | Q2Q067 | Q9Y576 | -0.70852   |
| 95553 | Q2Q067 | P78527 | -0.30937   |
| 95554 | Q2Q067 | Q3MIR4 | -0.34971   |
| 95555 | Q2Q067 | Q8TB73 | -0.92434   |
| 95556 | Q2Q067 | P38435 | -0.94436   |
| 95557 | Q2Q067 | O00443 | -0.48121   |
| 95558 | Q2Q067 | Q96K58 | -0.085533  |
| 95559 | Q2Q067 | Q9NQF3 | -0.22215   |
| 95560 | Q2Q067 | Q68DH5 | -1.0345    |
| 95561 | Q2Q067 | Q9HBG7 | -1.0933    |
| 95562 | Q2Q067 | P01857 | -0.53542   |
| 95563 | Q2Q067 | Q6UVW9 | -0.42289   |
| 95564 | Q2Q067 | Q8NGS5 | -1.4096    |
| 95565 | Q2Q067 | Q9BVM4 | -0.43937   |
| 95566 | Q2Q067 | Q68DC2 | -0.22743   |
| 95567 | Q2Q067 | O75563 | -0.46138   |
| 95568 | Q2Q067 | Q16658 | -0.1244    |
| 95569 | Q2Q067 | Q9H7Y2 | -0.0079254 |
| 95570 | Q2Q067 | Q8IYW5 | -0.22715   |
| 95571 | Q2Q067 | Q01064 | -0.22488   |
| 95572 | Q2Q067 | Q9HCD6 | -0.33444   |
| 95573 | Q2Q067 | Q9H425 | -0.20901   |
| 95574 | Q2Q067 | P63131 | -0.74403   |
| 95575 | Q2Q067 | Q8NEE6 | -0.22254   |
| 95576 | Q2Q067 | Q6UXG8 | -1.0345    |
| 95577 | Q2Q067 | Q14324 | -0.72079   |
| 95578 | Q2Q067 | D6RCP7 | -0.76972   |
| 95579 | Q2Q067 | Q6NXN4 | -1.0345    |
| 95580 | Q2Q067 | Q969Z3 | -0.59128   |
| 95581 | Q2Q067 | Q70CQ4 | -0.76972   |
| 95582 | Q2Q067 | Q9H3M0 | -1.0103    |
| 95583 | Q2Q067 | Q99250 | -1.122     |
| 95584 | Q2Q067 | Q5TCY1 | -0.86629   |
| 95585 | Q2Q067 | Q8NFA2 | -0.45848   |
| 95586 | Q2Q067 | Q8N339 | -0.14418   |
| 95587 | Q2Q067 | Q8TBE7 | -0.90887   |
| 95588 | Q2Q067 | Q9H7V2 | -0.93306   |
| 95589 | Q2Q067 | Q43491 | -0.26698   |
| 95590 | Q2Q067 | Q8NGK5 | -1.4096    |
| 95591 | Q2Q067 | Q15195 | -0.98666   |
| 95592 | Q2Q067 | Q8IYP2 | -1.5202    |
| 95593 | Q2Q067 | Q8N6Q1 | -1.0345    |
| 95594 | Q2Q067 | Q75037 | -0.71913   |
| 95595 | Q2Q067 | Q6ZUX3 | -0.15501   |
| 95596 | Q2Q067 | P07766 | -0.751     |
| 95597 | Q2Q067 | Q96RS6 | -0.17164   |
| 95598 | Q2Q067 | Q96N96 | -0.2275    |
| 95599 | Q2Q067 | Q01085 | -0.37114   |
| 95600 | Q2Q067 | Q9Y3N9 | -1.4096    |
| 95601 | Q2Q067 | Q8WWZ8 | -0.22741   |
| 95602 | Q2Q067 | Q8WWY8 | -1.3083    |
| 95603 | Q2Q067 | P08519 | -1.2905    |
| 95604 | Q2Q067 | Q9BZH6 | -0.82814   |
| 95605 | Q2Q067 | Q496F6 | -1.1634    |
| 95606 | Q2Q067 | O00151 | -0.22741   |
| 95607 | Q2Q067 | Q8IWA6 | -0.0039445 |
| 95608 | Q2Q067 | O95260 | -0.29897   |

|       |        |        |           |
|-------|--------|--------|-----------|
| 95609 | Q2Q067 | Q8IUR5 | -0.84904  |
| 95610 | Q2Q067 | Q9UI09 | -0.082451 |
| 95611 | Q2Q067 | O75829 | -1.5415   |
| 95612 | Q2Q067 | P05181 | -0.50622  |
| 95613 | Q2Q067 | Q01523 | -0.89259  |
| 95614 | Q2Q067 | Q15546 | -1.2155   |
| 95615 | Q2Q067 | P43166 | -0.20169  |
| 95616 | Q2Q067 | P55081 | -0.88713  |
| 95617 | Q2Q067 | Q8TAK6 | -0.22743  |
| 95618 | Q2Q067 | P01730 | -0.46004  |
| 95619 | Q2Q067 | P30046 | -0.33777  |
| 95620 | Q2Q067 | Q5SRN2 | -1.0345   |
| 95621 | Q2Q067 | Q6NZ63 | -1.0345   |
| 95622 | Q2Q067 | P35247 | -0.53065  |
| 95623 | Q2Q067 | Q8N3P4 | -0.48451  |
| 95624 | Q2Q067 | P47883 | -1.4096   |
| 95625 | Q2Q067 | Q6UXU1 | -0.98666  |
| 95626 | Q2Q067 | P27824 | -0.30344  |
| 95627 | Q2Q067 | Q6UXP8 | -0.98666  |
| 95628 | Q2Q067 | Q03431 | -0.89964  |
| 95629 | Q2Q067 | Q8NEA6 | -0.2273   |
| 95630 | Q2Q067 | Q6IA17 | -0.58531  |
| 95631 | Q2Q067 | Q4G0Z9 | -0.52769  |
| 95632 | Q2Q067 | Q9NPR2 | -1.204    |
| 95633 | Q2Q067 | P0C854 | -0.98666  |
| 95634 | Q2Q067 | Q6UX65 | -0.95876  |
| 95635 | Q2Q067 | Q9BRC7 | -0.56849  |
| 95636 | Q2Q067 | Q9BWV2 | -1.3836   |
| 95637 | Q2Q067 | Q9UF11 | -1.028    |
| 95638 | Q2Q067 | P11150 | -0.80845  |
| 95639 | Q2Q067 | Q9H079 | -0.18308  |
| 95640 | Q2Q067 | Q13232 | -0.74897  |
| 95641 | Q2Q067 | Q86YG4 | -0.40827  |
| 95642 | Q2Q067 | Q5H9E4 | -0.86765  |
| 95643 | Q2Q067 | O76096 | -0.84162  |
| 95644 | Q2Q067 | P50539 | -0.22194  |
| 95645 | Q2Q067 | O95390 | -0.64658  |
| 95646 | Q2Q067 | P55916 | -0.5319   |
| 95647 | Q2Q067 | Q32M88 | -0.37763  |
| 95648 | Q2Q067 | O75159 | -0.22738  |
| 95649 | Q2Q067 | O14732 | -0.30811  |
| 95650 | Q2Q067 | Q96S96 | -0.52602  |
| 95651 | Q2Q067 | Q9Y663 | -0.64917  |
| 95652 | Q2Q067 | Q13316 | -0.43493  |
| 95653 | Q2Q067 | Q9GZT5 | -0.9348   |
| 95654 | Q2Q067 | P08631 | -0.32563  |
| 95655 | Q2Q067 | O14983 | -0.49406  |
| 95656 | Q2Q067 | O00300 | -0.99884  |
| 95657 | Q2Q067 | Q96FN5 | -0.71913  |
| 95658 | Q2Q067 | Q31610 | -1.1453   |
| 95659 | Q2Q067 | P0CW01 | -0.44292  |
| 95660 | Q2Q067 | Q8NH55 | -1.4096   |
| 95661 | Q2Q067 | P01911 | -0.79235  |
| 95662 | Q2Q067 | Q6ZR37 | -0.78041  |
| 95663 | Q2Q067 | Q8NGJ6 | -1.4096   |
| 95664 | Q2Q067 | Q68CQ7 | -0.8885   |
| 95665 | Q2Q067 | Q5VU65 | -1.0345   |
| 95666 | Q2Q067 | Q32MK0 | -0.83657  |
| 95667 | Q2Q067 | Q6UXY8 | -1.0345   |
| 95668 | Q2Q067 | Q6NXR0 | -1.036    |
| 95669 | Q2Q067 | Q5VXT5 | -1.1098   |
| 95670 | Q2Q067 | A1L4Q6 | -0.32186  |
| 95671 | Q2Q067 | Q8NH63 | -1.4096   |
| 95672 | Q2Q067 | P0CJ92 | -0.28132  |
| 95673 | Q2Q067 | P02585 | -0.313    |
| 95674 | Q2Q067 | P51970 | -0.16703  |
| 95675 | Q2Q067 | Q8TAX9 | -0.20901  |
| 95676 | Q2Q067 | A6NMS7 | -1.0345   |
| 95677 | Q2Q067 | Q92791 | -0.073255 |
| 95678 | Q2Q067 | Q9H1Y3 | -1.3198   |
| 95679 | Q2Q067 | Q6PI78 | -0.84904  |
| 95680 | Q2Q067 | P61587 | -1.3497   |
| 95681 | Q2Q067 | Q96JF6 | -0.085533 |
| 95682 | Q2Q067 | Q9UBV4 | -0.86883  |
| 95683 | Q2Q067 | Q9Y277 | -1.201    |
| 95684 | Q2Q067 | A8MXT2 | -0.032291 |



|       |        |        |            |
|-------|--------|--------|------------|
| 95685 | Q2Q067 | Q86XG9 | -0.20901   |
| 95686 | Q2Q067 | P03901 | -0.63242   |
| 95687 | Q2Q067 | Q9NPG4 | -1.1884    |
| 95688 | Q2Q067 | Q6UW60 | -1.2907    |
| 95689 | Q2Q067 | Q6UWQ5 | -0.93539   |
| 95690 | Q2Q067 | Q6W0C5 | -0.14552   |
| 95691 | Q2Q067 | P0CJ73 | -0.80201   |
| 95692 | Q2Q067 | Q8N5W8 | -0.98666   |
| 95693 | Q2Q067 | Q9P1U0 | -0.07043   |
| 95694 | Q2Q067 | Q9H9K5 | -0.88843   |
| 95695 | Q2Q067 | O43237 | -0.21136   |
| 95696 | Q2Q067 | P20933 | -0.46559   |
| 95697 | Q2Q067 | O43474 | -0.22568   |
| 95698 | Q2Q067 | Q96GA7 | -0.19949   |
| 95699 | Q2Q067 | Q8NH51 | -1.4096    |
| 95700 | Q2Q067 | Q9UKP4 | -1.4145    |
| 95701 | Q2Q067 | Q8N912 | -1.0345    |
| 95702 | Q2Q067 | Q6ZMD2 | -1.1882    |
| 95703 | Q2Q067 | P51790 | -0.48254   |
| 95704 | Q2Q067 | Q9P2W6 | -0.20901   |
| 95705 | Q2Q067 | O43184 | -0.84253   |
| 95706 | Q2Q067 | P0CB38 | -0.96284   |
| 95707 | Q2Q067 | P16403 | -0.69207   |
| 95708 | Q2Q067 | Q6UY11 | -1.0679    |
| 95709 | Q2Q067 | P23921 | -0.069237  |
| 95710 | Q2Q067 | P51636 | -0.22606   |
| 95711 | Q2Q067 | Q53GD3 | -0.92541   |
| 95712 | Q2Q067 | Q96NA8 | -0.92967   |
| 95713 | Q2Q067 | E5RHQ5 | -0.19297   |
| 95714 | Q2Q067 | Q8NGE8 | -1.4096    |
| 95715 | Q2Q067 | Q8N441 | -1.0824    |
| 95716 | Q2Q067 | P16401 | -0.70729   |
| 95717 | Q2Q067 | Q96CX6 | -0.22994   |
| 95718 | Q2Q067 | Q8IZF4 | -1.5126    |
| 95719 | Q2Q067 | P20309 | -0.74852   |
| 95720 | Q2Q067 | Q8N8D9 | -0.083214  |
| 95721 | Q2Q067 | Q99759 | -0.68536   |
| 95722 | Q2Q067 | Q68CK6 | -0.81335   |
| 95723 | Q2Q067 | Q9UFC0 | -0.33868   |
| 95724 | Q2Q067 | O15255 | -0.55984   |
| 95725 | Q2Q067 | A8MWP4 | -0.030698  |
| 95726 | Q2Q067 | Q8N841 | -0.18532   |
| 95727 | Q2Q067 | O95361 | -0.22545   |
| 95728 | Q2Q067 | Q96RA2 | -1.1109    |
| 95729 | Q2Q067 | Q0P670 | -1.0345    |
| 95730 | Q2Q067 | Q9NV44 | -0.0087628 |
| 95731 | Q2Q067 | P19099 | -0.45578   |
| 95732 | Q2Q067 | P55317 | -0.33602   |
| 95733 | Q2Q067 | O15260 | -0.22238   |
| 95734 | Q2Q067 | Q6X784 | -0.95735   |
| 95735 | Q2Q067 | Q9Y6H8 | -1.0737    |
| 95736 | Q2Q067 | Q9NPG2 | -0.093003  |
| 95737 | Q2Q067 | Q7Z5L2 | -0.89117   |
| 95738 | Q2Q067 | P0C0S5 | -0.8886    |
| 95739 | Q2Q067 | P16520 | -0.45786   |
| 95740 | Q2Q067 | Q96DU3 | -1.1712    |
| 95741 | Q2Q067 | Q8WVI7 | -0.18815   |
| 95742 | Q2Q067 | O15204 | -1.2929    |
| 95743 | Q2Q067 | Q8NGE5 | -1.4096    |
| 95744 | Q2Q067 | P43304 | -0.22716   |
| 95745 | Q2Q067 | O75891 | -0.31038   |
| 95746 | Q2Q067 | Q8IVF2 | -0.21753   |
| 95747 | Q2Q067 | P55157 | -0.54941   |
| 95748 | Q2Q067 | Q9NP95 | -0.9408    |
| 95749 | Q2Q067 | Q15223 | -0.53365   |
| 95750 | Q2Q067 | Q9BZM2 | -0.73788   |
| 95751 | Q2Q067 | O75477 | -0.41769   |
| 95752 | Q2Q067 | P55103 | -0.82517   |
| 95753 | Q2Q067 | Q6P9A2 | -0.87193   |
| 95754 | Q2Q067 | O14727 | -0.22821   |
| 95755 | Q2Q067 | P28329 | -0.20427   |
| 95756 | Q2Q067 | A6NJS3 | -0.98666   |
| 95757 | Q2Q067 | Q53EU6 | -0.81157   |
| 95758 | Q2Q067 | Q9HCP6 | -0.97396   |
| 95759 | Q2Q067 | B2RPK0 | -0.45296   |
| 95760 | Q2Q067 | P26572 | -0.66486   |

|       |        |        |           |
|-------|--------|--------|-----------|
| 95761 | Q2Q067 | Q01629 | -0.91616  |
| 95762 | Q2Q067 | Q9H4M7 | -0.51463  |
| 95763 | Q2Q067 | Q9NXJ0 | -1.0345   |
| 95764 | Q2Q067 | P59922 | -1.4096   |
| 95765 | Q2Q067 | P51884 | -0.66819  |
| 95766 | Q2Q067 | P68543 | -0.13458  |
| 95767 | Q2Q067 | P10600 | -0.22741  |
| 95768 | Q2Q067 | P32242 | -0.24281  |
| 95769 | Q2Q067 | Q6P988 | -0.95044  |
| 95770 | Q2Q067 | P17301 | -0.30041  |
| 95771 | Q2Q067 | Q9UBT6 | -0.18973  |
| 95772 | Q2Q067 | P0CI25 | -0.73178  |
| 95773 | Q2Q067 | P46439 | -0.40501  |
| 95774 | Q2Q067 | Q5T3F8 | -1.4752   |
| 95775 | Q2Q067 | Q8NGQ6 | -1.4096   |
| 95776 | Q2Q067 | Q9BYE3 | -0.37794  |
| 95777 | Q2Q067 | Q6IB77 | -0.17643  |
| 95778 | Q2Q067 | Q6NSJ0 | -0.71836  |
| 95779 | Q2Q067 | P08637 | -1.6207   |
| 95780 | Q2Q067 | Q2NKQ1 | -0.91132  |
| 95781 | Q2Q067 | Q8NGE7 | -1.4096   |
| 95782 | Q2Q067 | Q14061 | -0.29455  |
| 95783 | Q2Q067 | P16452 | -0.15234  |
| 95784 | Q2Q067 | Q8WWB3 | -0.053957 |
| 95785 | Q2Q067 | Q8NDB2 | -0.38141  |
| 95786 | Q2Q067 | Q9P289 | -0.46952  |
| 95787 | Q2Q067 | Q86VQ6 | -0.57618  |
| 95788 | Q2Q067 | Q6NVV7 | -0.11555  |
| 95789 | Q2Q067 | Q04741 | -0.22708  |
| 95790 | Q2Q067 | P0C0P6 | -0.93491  |
| 95791 | Q2Q067 | Q96N19 | -1.0345   |
| 95792 | Q2Q067 | Q9H354 | -1.0345   |
| 95793 | Q2Q067 | Q75795 | -1.0343   |
| 95794 | Q2Q067 | Q5VYX0 | -1.1227   |
| 95795 | Q2Q067 | P15735 | -0.61088  |
| 95796 | Q2Q067 | Q8IYR2 | -0.48451  |
| 95797 | Q2Q067 | Q9BYZ6 | -1.2755   |
| 95798 | Q2Q067 | Q01851 | -0.22741  |
| 95799 | Q2Q067 | A6NFH5 | -0.63791  |
| 95800 | Q2Q067 | Q7Z7M0 | -0.22741  |
| 95801 | Q2Q067 | Q9UF33 | -1.3224   |
| 95802 | Q2Q067 | Q9BZ97 | -1.0345   |
| 95803 | Q2Q067 | Q9UNK0 | -1.1193   |
| 95804 | Q2Q067 | P02675 | -0.90787  |
| 95805 | Q2Q067 | Q9BQL6 | -0.62386  |
| 95806 | Q2Q067 | O43164 | -0.38349  |
| 95807 | Q2Q067 | P00167 | -0.56615  |
| 95808 | Q2Q067 | Q8N9Q2 | -0.48783  |
| 95809 | Q2Q067 | Q6UWM9 | -1.0097   |
| 95810 | Q2Q067 | Q9NVF9 | -0.69167  |
| 95811 | Q2Q067 | Q5BKY1 | -0.22777  |
| 95812 | Q2Q067 | P10070 | -0.2273   |
| 95813 | Q2Q067 | Q86Y56 | -0.12062  |
| 95814 | Q2Q067 | Q9BYJ1 | -0.58874  |
| 95815 | Q2Q067 | P80188 | -0.42486  |
| 95816 | Q2Q067 | Q9HCK0 | -0.20837  |
| 95817 | Q2Q067 | P43353 | -0.45843  |
| 95818 | Q2Q067 | Q8NHK3 | -1.1634   |
| 95819 | Q2Q067 | Q9HBB8 | -1.2337   |
| 95820 | Q2Q067 | O95425 | -0.27115  |
| 95821 | Q2Q067 | P0CV98 | -0.44292  |
| 95822 | Q2Q067 | Q9NPH2 | -0.66329  |
| 95823 | Q2Q067 | Q8NES3 | -1.0869   |
| 95824 | Q2Q067 | P04085 | -0.31687  |
| 95825 | Q2Q067 | P06729 | -0.92579  |
| 95826 | Q2Q067 | Q9H158 | -1.4044   |
| 95827 | Q2Q067 | Q92560 | -0.15554  |
| 95828 | Q2Q067 | O14498 | -1.1764   |
| 95829 | Q2Q067 | Q92824 | -1.0225   |
| 95830 | Q2Q067 | P25940 | -0.98835  |
| 95831 | Q2Q067 | Q02505 | -1.4342   |
| 95832 | Q2Q067 | Q86WR6 | -0.10916  |
| 95833 | Q2Q067 | Q9Y2A9 | -0.74475  |
| 95834 | Q2Q067 | P13686 | -0.49453  |
| 95835 | Q2Q067 | Q9Y694 | -1.2125   |
| 95836 | Q2Q067 | O60447 | -0.23045  |

|       |        |        |            |
|-------|--------|--------|------------|
| 95837 | Q2Q067 | Q8WV22 | -0.2239    |
| 95838 | Q2Q067 | Q4G0P3 | -0.16131   |
| 95839 | Q2Q067 | Q6IAN0 | -1.3386    |
| 95840 | Q2Q067 | Q9GZX3 | -0.63329   |
| 95841 | Q2Q067 | P55285 | -0.64102   |
| 95842 | Q2Q067 | Q6P9F7 | -1.0345    |
| 95843 | Q2Q067 | Q86XR2 | -0.51797   |
| 95844 | Q2Q067 | Q8NA69 | -0.021117  |
| 95845 | Q2Q067 | Q06430 | -1.0292    |
| 95846 | Q2Q067 | Q8IXX5 | -1.0345    |
| 95847 | Q2Q067 | Q9NP58 | -0.92455   |
| 95848 | Q2Q067 | Q9H208 | -1.4096    |
| 95849 | Q2Q067 | P18405 | -0.38749   |
| 95850 | Q2Q067 | Q9Y2W3 | -0.82426   |
| 95851 | Q2Q067 | O75112 | -0.26632   |
| 95852 | Q2Q067 | Q8N2R0 | -0.20952   |
| 95853 | Q2Q067 | Q96H72 | -0.66922   |
| 95854 | Q2Q067 | Q9NYQ6 | -1.1033    |
| 95855 | Q2Q067 | P13236 | -1.0326    |
| 95856 | Q2Q067 | Q5VUD6 | -1.1118    |
| 95857 | Q2Q067 | P16519 | -0.34152   |
| 95858 | Q2Q067 | P52907 | -0.48576   |
| 95859 | Q2Q067 | O95633 | -0.22504   |
| 95860 | Q2Q067 | Q9NP31 | -0.80308   |
| 95861 | Q2Q067 | Q9Y2U9 | -0.22446   |
| 95862 | Q2Q067 | Q8WYJ6 | -0.22271   |
| 95863 | Q2Q067 | Q9Y3D7 | -0.18052   |
| 95864 | Q2Q067 | Q99616 | -1.158     |
| 95865 | Q2Q067 | Q5T5M9 | -0.12669   |
| 95866 | Q2Q067 | Q3MJ40 | -0.0049947 |
| 95867 | Q2Q067 | Q9UBN6 | -1.0695    |
| 95868 | Q2Q067 | Q9BVW6 | -1.0345    |
| 95869 | Q2Q067 | O43808 | -0.25417   |
| 95870 | Q2Q067 | Q9NX00 | -0.84904   |
| 95871 | Q2Q067 | Q13510 | -0.42449   |
| 95872 | Q2Q067 | P36269 | -1.0131    |
| 95873 | Q2Q067 | Q9NWB1 | -0.25568   |
| 95874 | Q2Q067 | Q8NH92 | -1.4096    |
| 95875 | Q2Q067 | Q9NZG7 | -1.1536    |
| 95876 | Q2Q067 | Q9Y5G5 | -1.3679    |
| 95877 | Q2Q067 | Q9NVG8 | -1.4231    |
| 95878 | Q2Q067 | O95235 | -0.25552   |
| 95879 | Q2Q067 | Q13107 | -0.29324   |
| 95880 | Q2Q067 | Q9P0L9 | -0.57082   |
| 95881 | Q2Q067 | Q96BH1 | -0.21361   |
| 95882 | Q2Q067 | Q13242 | -0.22647   |
| 95883 | Q2Q067 | Q9H2M9 | -0.74499   |
| 95884 | Q2Q067 | Q9NZ20 | -0.69906   |
| 95885 | Q2Q067 | Q68DD2 | -0.38516   |
| 95886 | Q2Q067 | Q86XN8 | -0.22732   |
| 95887 | Q2Q067 | Q6ZMM2 | -1.081     |
| 95888 | Q2Q067 | Q6UWL2 | -1.0902    |
| 95889 | Q2Q067 | Q2M3T9 | -0.87261   |
| 95890 | Q2Q067 | Q8N4L1 | -1.0345    |
| 95891 | Q2Q067 | O15066 | -0.31136   |
| 95892 | Q2Q067 | Q969E2 | -0.82676   |
| 95893 | Q2Q067 | Q6PID8 | -0.22722   |
| 95894 | Q2Q067 | Q9NRH2 | -1.1691    |
| 95895 | Q2Q067 | C9JJ37 | -0.22279   |
| 95896 | Q2Q067 | Q6SPF0 | -0.80201   |
| 95897 | Q2Q067 | Q9NYF5 | -1.0924    |
| 95898 | Q2Q067 | Q969N4 | -1.4576    |
| 95899 | Q2Q067 | Q7LFL8 | -0.31532   |
| 95900 | Q2Q067 | Q92805 | -0.21917   |
| 95901 | Q2Q067 | Q1X8D7 | -0.22709   |
| 95902 | Q2Q067 | Q9BY71 | -0.35359   |
| 95903 | Q2Q067 | A6NHN0 | -1.0482    |
| 95904 | Q2Q067 | Q71RC9 | -1.0345    |
| 95905 | Q2Q067 | Q969T4 | -0.36769   |
| 95906 | Q2Q067 | P15151 | -0.38835   |
| 95907 | Q2Q067 | Q96Q15 | -0.58681   |
| 95908 | Q2Q067 | Q8IZQ8 | -0.5476    |
| 95909 | Q2Q067 | Q9NSA2 | -1.0908    |
| 95910 | Q2Q067 | Q9NXC5 | -0.22694   |
| 95911 | Q2Q067 | P16150 | -1.0011    |
| 95912 | Q2Q067 | P25116 | -0.4563    |

|       |        |        |           |
|-------|--------|--------|-----------|
| 95913 | Q2Q067 | Q9Y5F3 | -1.3679   |
| 95914 | Q2Q067 | Q9Y2T3 | -0.37204  |
| 95915 | Q2Q067 | Q9H867 | -0.25917  |
| 95916 | Q2Q067 | O60381 | -0.19631  |
| 95917 | Q2Q067 | Q13607 | -1.4096   |
| 95918 | Q2Q067 | Q16527 | -0.44435  |
| 95919 | Q2Q067 | Q99729 | -0.2388   |
| 95920 | Q2Q067 | P27338 | -0.64902  |
| 95921 | Q2Q067 | O43435 | -0.36741  |
| 95922 | Q2Q067 | P0CE72 | -0.50694  |
| 95923 | Q2Q067 | Q9H6B4 | -0.9856   |
| 95924 | Q2Q067 | Q9Y577 | -0.22935  |
| 95925 | Q2Q067 | Q8NGS6 | -1.4096   |
| 95926 | Q2Q067 | Q8NCQ7 | -0.47072  |
| 95927 | Q2Q067 | Q9P2F5 | -0.26673  |
| 95928 | Q2Q067 | O75317 | -0.3456   |
| 95929 | Q2Q067 | O15264 | -0.22741  |
| 95930 | Q2Q067 | P61626 | -1.047    |
| 95931 | Q2Q067 | P30447 | -0.99938  |
| 95932 | Q2Q067 | Q9ULZ3 | -0.17258  |
| 95933 | Q2Q067 | Q9NVR7 | -0.1191   |
| 95934 | Q2Q067 | P59534 | -1.3729   |
| 95935 | Q2Q067 | P19438 | -0.37441  |
| 95936 | Q2Q067 | Q6KC79 | -0.17539  |
| 95937 | Q2Q067 | Q9NP90 | -0.57097  |
| 95938 | Q2Q067 | Q96KQ7 | -0.22741  |
| 95939 | Q2Q067 | Q92614 | -0.13275  |
| 95940 | Q2Q067 | Q6ZRF7 | -0.085533 |
| 95941 | Q2Q067 | P59894 | -0.59947  |
| 95942 | Q2Q067 | P06888 | -1.1115   |
| 95943 | Q2Q067 | Q6P093 | -1.3951   |
| 95944 | Q2Q067 | Q5T2R2 | -0.42813  |
| 95945 | Q2Q067 | Q17RQ9 | -1.0345   |
| 95946 | Q2Q067 | Q9UBM1 | -0.48663  |
| 95947 | Q2Q067 | P26378 | -0.90414  |
| 95948 | Q2Q067 | O75951 | -0.93539  |
| 95949 | Q2Q067 | Q5JWF8 | -0.089991 |
| 95950 | Q2Q067 | Q6ZTA4 | -0.54342  |
| 95951 | Q2Q067 | A0MZ66 | -0.58902  |
| 95952 | Q2Q067 | O15440 | -1.0562   |
| 95953 | Q2Q067 | Q15746 | -0.62214  |
| 95954 | Q2Q067 | P31275 | -0.19852  |
| 95955 | Q2Q067 | Q96T53 | -0.98364  |
| 95956 | Q2Q067 | Q8N370 | -1.2108   |
| 95957 | Q2Q067 | Q96LD8 | -0.85877  |
| 95958 | Q2Q067 | Q6MZQ0 | -0.21265  |
| 95959 | Q2Q067 | O43150 | -0.51725  |
| 95960 | Q2Q067 | A8MWL6 | -1.0345   |
| 95961 | Q2Q067 | P15538 | -0.45122  |
| 95962 | Q2Q067 | Q9NPB8 | -0.077462 |
| 95963 | Q2Q067 | Q9H2C1 | -0.22749  |
| 95964 | Q2Q067 | P11217 | -0.36297  |
| 95965 | Q2Q067 | O75385 | -0.5537   |
| 95966 | Q2Q067 | Q71RG4 | -1.0345   |
| 95967 | Q2Q067 | P39905 | -0.40855  |
| 95968 | Q2Q067 | Q96QD8 | -1.2374   |
| 95969 | Q2Q067 | Q15523 | -0.55723  |
| 95970 | Q2Q067 | Q13136 | -0.22721  |
| 95971 | Q2Q067 | O15516 | -0.22759  |
| 95972 | Q2Q067 | Q09160 | -1.0994   |
| 95973 | Q2Q067 | A6NHL2 | -0.65192  |
| 95974 | Q2Q067 | P01817 | -1.1115   |
| 95975 | Q2Q067 | Q7Z6W7 | -0.4622   |
| 95976 | Q2Q067 | Q9Y5E4 | -1.3348   |
| 95977 | Q2Q067 | P05546 | -0.77144  |
| 95978 | Q2Q067 | Q6ZU80 | -0.18631  |
| 95979 | Q2Q067 | Q96PN8 | -1.6446   |
| 95980 | Q2Q067 | P30968 | -1.6434   |
| 95981 | Q2Q067 | O94889 | -0.20909  |
| 95982 | Q2Q067 | Q8N661 | -0.66401  |
| 95983 | Q2Q067 | Q9BUF7 | -0.98952  |
| 95984 | Q2Q067 | Q9BQT8 | -0.71696  |
| 95985 | Q2Q067 | Q9UBG7 | -0.16471  |
| 95986 | Q2Q067 | Q9Y5G1 | -1.3679   |
| 95987 | Q2Q067 | O43772 | -0.59265  |
| 95988 | Q2Q067 | Q99983 | -0.99387  |

|       |        |        |           |
|-------|--------|--------|-----------|
| 95989 | Q2Q067 | O43766 | -0.58966  |
| 95990 | Q2Q067 | Q9Y2A7 | -0.4213   |
| 95991 | Q2Q067 | Q8N6R1 | -0.92178  |
| 95992 | Q2Q067 | P07288 | -1.0381   |
| 95993 | Q2Q067 | Q15751 | -0.35595  |
| 95994 | Q2Q067 | Q49AM3 | -0.2262   |
| 95995 | Q2Q067 | O95070 | -0.37918  |
| 95996 | Q2Q067 | Q6ZRR9 | -0.59947  |
| 95997 | Q2Q067 | P28300 | -0.39587  |
| 95998 | Q2Q067 | P17787 | -0.52026  |
| 95999 | Q2Q067 | Q5VW22 | -1.1564   |
| 96000 | Q2Q067 | A6NE01 | -0.2003   |
| 96001 | Q2Q067 | Q6UXK5 | -1.0345   |
| 96002 | Q2Q067 | Q03013 | -0.41074  |
| 96003 | Q2Q067 | Q8WWU7 | -1.2102   |
| 96004 | Q2Q067 | Q96L08 | -1.0345   |
| 96005 | Q2Q067 | Q5H9K5 | -0.29189  |
| 96006 | Q2Q067 | P0CW19 | -0.30511  |
| 96007 | Q2Q067 | Q8IY47 | -0.21285  |
| 96008 | Q2Q067 | Q5SWA1 | -0.32317  |
| 96009 | Q2Q067 | Q96BX8 | -0.69044  |
| 96010 | Q2Q067 | Q15113 | -1.356    |
| 96011 | Q2Q067 | Q86UW7 | -0.41043  |
| 96012 | Q2Q067 | Q9NYW0 | -1.2647   |
| 96013 | Q2Q067 | Q9Y3B1 | -0.21265  |
| 96014 | Q2Q067 | Q9H9J4 | -0.94675  |
| 96015 | Q2Q067 | O95467 | -0.86589  |
| 96016 | Q2Q067 | P17035 | -0.085533 |
| 96017 | Q2Q067 | P61020 | -0.70544  |
| 96018 | Q2Q067 | P60022 | -0.95513  |
| 96019 | Q2Q067 | Q8IZE3 | -0.22737  |
| 96020 | Q2Q067 | P55286 | -1.3366   |
| 96021 | Q2Q067 | Q32VQ0 | -1.4096   |
| 96022 | Q2Q067 | Q9Y6W5 | -0.42911  |
| 96023 | Q2Q067 | Q9HBM0 | -0.59548  |
| 96024 | Q2Q067 | O95822 | -0.38805  |
| 96025 | Q2Q067 | Q6P2I3 | -0.58869  |
| 96026 | Q2Q067 | Q99943 | -0.69555  |
| 96027 | Q2Q067 | Q14108 | -1.4088   |
| 96028 | Q2Q067 | Q9C0E8 | -1.1135   |
| 96029 | Q2Q067 | Q9UP52 | -1.2249   |
| 96030 | Q2Q067 | Q6ZT12 | -0.89899  |
| 96031 | Q2Q067 | Q8TAF8 | -1.0515   |
| 96032 | Q2Q067 | Q8NHC8 | -1.4096   |
| 96033 | Q2Q067 | Q30134 | -0.79235  |
| 96034 | Q2Q067 | Q17RY0 | -0.89435  |
| 96035 | Q2Q067 | Q969E1 | -0.96269  |
| 96036 | Q2Q067 | Q99965 | -1.324    |
| 96037 | Q2Q067 | Q13324 | -0.90516  |
| 96038 | Q2Q067 | Q8WWB7 | -0.47389  |
| 96039 | Q2Q067 | O43895 | -1.0171   |
| 96040 | Q2Q067 | P28566 | -1.4995   |
| 96041 | Q2Q067 | O75083 | -0.48637  |
| 96042 | Q2Q067 | O75962 | -0.67902  |
| 96043 | Q2Q067 | Q4AE62 | -0.46038  |
| 96044 | Q2Q067 | Q7Z392 | -0.20453  |
| 96045 | Q2Q067 | A6NMU1 | -1.4096   |
| 96046 | Q2Q067 | Q9UBJ2 | -0.58599  |
| 96047 | Q2Q067 | Q3YBM2 | -0.53632  |
| 96048 | Q2Q067 | A6NH52 | -1.0345   |
| 96049 | Q2Q067 | Q8NCM8 | -0.53318  |
| 96050 | Q2Q067 | Q86UR5 | -0.30235  |
| 96051 | Q2Q067 | O95185 | -1.1891   |
| 96052 | Q2Q067 | Q5MY95 | -1.4805   |
| 96053 | Q2Q067 | Q8WYQ9 | -0.61542  |
| 96054 | Q2Q067 | Q17R55 | -1.0345   |
| 96055 | Q2Q067 | Q9H9S5 | -1.2717   |
| 96056 | Q2Q067 | Q7Z7H3 | -0.028999 |
| 96057 | Q2Q067 | Q9HCJ1 | -1.1187   |
| 96058 | Q2Q067 | P78382 | -0.633    |
| 96059 | Q2Q067 | P57053 | -0.80644  |
| 96060 | Q2Q067 | P14207 | -1.1474   |
| 96061 | Q2Q067 | P52739 | -0.40655  |
| 96062 | Q2Q067 | Q8IVJ8 | -1.0345   |
| 96063 | Q2Q067 | P62820 | -0.83485  |
| 96064 | Q2Q067 | P01589 | -0.70127  |

|       |        |        |           |
|-------|--------|--------|-----------|
| 96065 | Q2Q067 | P51993 | -0.846    |
| 96066 | Q2Q067 | Q86UN6 | -0.32493  |
| 96067 | Q2Q067 | Q9UKT8 | -0.22932  |
| 96068 | Q2Q067 | Q9NS18 | -0.22107  |
| 96069 | Q2Q067 | Q8NBJ5 | -0.42175  |
| 96070 | Q2Q067 | Q9BTX3 | -1.0345   |
| 96071 | Q2Q067 | Q5NUL3 | -1.3238   |
| 96072 | Q2Q067 | Q9P232 | -0.76465  |
| 96073 | Q2Q067 | P02790 | -0.3543   |
| 96074 | Q2Q067 | P08246 | -0.63875  |
| 96075 | Q2Q067 | Q15717 | -0.3949   |
| 96076 | Q2Q067 | P13674 | -0.47143  |
| 96077 | Q2Q067 | Q86Y37 | -0.072218 |
| 96078 | Q2Q067 | P50990 | -0.22756  |
| 96079 | Q2Q067 | P23560 | -0.50682  |
| 96080 | Q2Q067 | P19793 | -0.24016  |
| 96081 | Q2Q067 | Q9HDB9 | -0.47805  |
| 96082 | Q2Q067 | Q6P9G4 | -1.0345   |
| 96083 | Q2Q067 | P34925 | -0.65937  |
| 96084 | Q2Q067 | P42765 | -0.20546  |
| 96085 | Q2Q067 | Q9BVV7 | -0.47097  |
| 96086 | Q2Q067 | Q96DA6 | -0.74181  |
| 96087 | Q2Q067 | A8K2U0 | -0.88386  |
| 96088 | Q2Q067 | Q8NE09 | -0.73848  |
| 96089 | Q2Q067 | Q8NBU5 | -0.76273  |
| 96090 | Q2Q067 | O75387 | -1.2705   |
| 96091 | Q2Q067 | Q96RJ3 | -0.85415  |
| 96092 | Q2Q067 | Q8NGP8 | -1.4096   |
| 96093 | Q2Q067 | Q9UJJ7 | -0.27576  |
| 96094 | Q2Q067 | P12018 | -0.98652  |
| 96095 | Q2Q067 | P05451 | -0.79217  |
| 96096 | Q2Q067 | P01743 | -1.1115   |
| 96097 | Q2Q067 | Q9NQX7 | -0.41135  |
| 96098 | Q2Q067 | Q99643 | -0.46647  |
| 96099 | Q2Q067 | Q9H596 | -0.42043  |
| 96100 | Q2Q067 | Q8N3G9 | -0.82825  |
| 96101 | Q2Q067 | Q9NRJ4 | -0.22466  |
| 96102 | Q2Q067 | P13284 | -1.1162   |
| 96103 | Q2Q067 | Q6ZRZ4 | -0.98666  |
| 96104 | Q2Q067 | Q8NG04 | -1.0003   |
| 96105 | Q2Q067 | Q96JG6 | -0.016735 |
| 96106 | Q2Q067 | O00212 | -1.227    |
| 96107 | Q2Q067 | Q9BT30 | -0.56586  |
| 96108 | Q2Q067 | Q9UJD0 | -0.28224  |
| 96109 | Q2Q067 | Q969V3 | -0.30944  |
| 96110 | Q2Q067 | P33778 | -0.82527  |
| 96111 | Q2Q067 | Q8TD84 | -1.0911   |
| 96112 | Q2Q067 | Q0VAA5 | -0.80026  |
| 96113 | Q2Q067 | Q8NHW6 | -1.0091   |
| 96114 | Q2Q067 | Q9UGI6 | -0.99069  |
| 96115 | Q2Q067 | Q15208 | -0.41005  |
| 96116 | Q2Q067 | P54760 | -1.3103   |
| 96117 | Q2Q067 | P49915 | -0.46317  |
| 96118 | Q2Q067 | Q70CQ3 | -1.1164   |
| 96119 | Q2Q067 | Q96GD4 | -0.8227   |
| 96120 | Q2Q067 | Q05932 | -0.21415  |
| 96121 | Q2Q067 | Q6PJQ5 | -0.38017  |
| 96122 | Q2Q067 | Q9NZQ7 | -0.79956  |
| 96123 | Q2Q067 | P63215 | -0.51516  |
| 96124 | Q2Q067 | Q6NXT2 | -0.82527  |
| 96125 | Q2Q067 | A8MVU1 | -0.35982  |
| 96126 | Q2Q067 | A6NH00 | -1.4096   |
| 96127 | Q2Q067 | Q96MW5 | -0.21497  |
| 96128 | Q2Q067 | Q96S15 | -0.46418  |
| 96129 | Q2Q067 | P51397 | -0.22253  |
| 96130 | Q2Q067 | P13611 | -1.0347   |
| 96131 | Q2Q067 | Q96RB7 | -1.4096   |
| 96132 | Q2Q067 | Q9P2E3 | -0.43755  |
| 96133 | Q2Q067 | Q9P202 | -0.22617  |
| 96134 | Q2Q067 | A8MQ27 | -0.34642  |
| 96135 | Q2Q067 | Q99719 | -0.22662  |
| 96136 | Q2Q067 | Q92685 | -0.94812  |
| 96137 | Q2Q067 | P54315 | -1.1196   |
| 96138 | Q2Q067 | Q7Z6V5 | -0.52007  |
| 96139 | Q2Q067 | Q8IYX4 | -0.69711  |
| 96140 | Q2Q067 | Q9UGT4 | -1.0118   |

|       |        |        |            |
|-------|--------|--------|------------|
| 96141 | Q2Q067 | P01566 | -0.86951   |
| 96142 | Q2Q067 | Q9P1C3 | -0.98666   |
| 96143 | Q2Q067 | Q96AJ9 | -0.43103   |
| 96144 | Q2Q067 | Q9BR09 | -0.21485   |
| 96145 | Q2Q067 | P54710 | -1.1854    |
| 96146 | Q2Q067 | Q8TCA0 | -0.22749   |
| 96147 | Q2Q067 | Q99435 | -0.49429   |
| 96148 | Q2Q067 | Q92786 | -0.21102   |
| 96149 | Q2Q067 | Q86SM8 | -1.4967    |
| 96150 | Q2Q067 | P0C874 | -1.0345    |
| 96151 | Q2Q067 | A6NI28 | -1.3875    |
| 96152 | Q2Q067 | O76074 | -0.4869    |
| 96153 | Q2Q067 | Q9NYP7 | -0.17457   |
| 96154 | Q2Q067 | Q8N136 | -0.60457   |
| 96155 | Q2Q067 | Q8N0S2 | -0.18244   |
| 96156 | Q2Q067 | Q9NST1 | -0.79408   |
| 96157 | Q2Q067 | Q9NZ32 | -0.24756   |
| 96158 | Q2Q067 | Q6P0A1 | -1.0345    |
| 96159 | Q2Q067 | Q4ZG55 | -1.0345    |
| 96160 | Q2Q067 | P48163 | -0.13356   |
| 96161 | Q2Q067 | Q96HN2 | -0.35597   |
| 96162 | Q2Q067 | Q96KK4 | -1.4096    |
| 96163 | Q2Q067 | Q9H8Y5 | -0.21832   |
| 96164 | Q2Q067 | Q02539 | -0.80278   |
| 96165 | Q2Q067 | P01781 | -1.1115    |
| 96166 | Q2Q067 | Q9NR80 | -0.3378    |
| 96167 | Q2Q067 | O75916 | -0.60606   |
| 96168 | Q2Q067 | Q99626 | -0.20284   |
| 96169 | Q2Q067 | Q7Z2W9 | -0.049247  |
| 96170 | Q2Q067 | Q9H7X7 | -1.2498    |
| 96171 | Q2Q067 | Q8NAT2 | -0.71834   |
| 96172 | Q2Q067 | Q6ZVN7 | -0.056199  |
| 96173 | Q2Q067 | Q9BXN2 | -0.65851   |
| 96174 | Q2Q067 | A6NM43 | -0.73128   |
| 96175 | Q2Q067 | Q8TBC3 | -0.19739   |
| 96176 | Q2Q067 | O60637 | -1.0345    |
| 96177 | Q2Q067 | Q9NX45 | -0.2344    |
| 96178 | Q2Q067 | Q96D59 | -1.1176    |
| 96179 | Q2Q067 | Q9UFE4 | -0.45156   |
| 96180 | Q2Q067 | P20701 | -1.0048    |
| 96181 | Q2Q067 | Q96FE7 | -0.94782   |
| 96182 | Q2Q067 | Q6BEB4 | -0.22389   |
| 96183 | Q2Q067 | Q13492 | -0.21725   |
| 96184 | Q2Q067 | A6NHC0 | -0.84786   |
| 96185 | Q2Q067 | Q14603 | -0.064045  |
| 96186 | Q2Q067 | P01876 | -0.41415   |
| 96187 | Q2Q067 | Q16206 | -1.2763    |
| 96188 | Q2Q067 | A6NM66 | -0.21032   |
| 96189 | Q2Q067 | P78423 | -0.63055   |
| 96190 | Q2Q067 | O76083 | -0.2264    |
| 96191 | Q2Q067 | Q8TDU6 | -1.4967    |
| 96192 | Q2Q067 | Q9H4F1 | -0.5234    |
| 96193 | Q2Q067 | P31513 | -0.97997   |
| 96194 | Q2Q067 | O43281 | -0.47457   |
| 96195 | Q2Q067 | P11597 | -0.75137   |
| 96196 | Q2Q067 | Q99447 | -0.45788   |
| 96197 | Q2Q067 | Q12979 | -0.8329    |
| 96198 | Q2Q067 | Q9NUJ3 | -0.34281   |
| 96199 | Q2Q067 | P30533 | -0.84429   |
| 96200 | Q2Q067 | P02775 | -0.68565   |
| 96201 | Q2Q067 | Q13133 | -0.24205   |
| 96202 | Q2Q067 | P32019 | -0.50561   |
| 96203 | Q2Q067 | Q5VXU1 | -1.1634    |
| 96204 | Q2Q067 | Q9Y6M9 | -0.19928   |
| 96205 | Q2Q067 | Q9NU63 | -0.31935   |
| 96206 | Q2Q067 | Q9Y2I8 | -0.22823   |
| 96207 | Q2Q067 | Q8IV63 | -0.79432   |
| 96208 | Q2Q067 | C9JQL5 | -1.0325    |
| 96209 | Q2Q067 | Q9H8W4 | -0.22654   |
| 96210 | Q2Q067 | O60609 | -0.49672   |
| 96211 | Q2Q067 | Q9UP79 | -1.4193    |
| 96212 | Q2Q067 | Q9BTK2 | -0.0023341 |
| 96213 | Q2Q067 | P16473 | -0.87074   |
| 96214 | Q2Q067 | Q9GZT3 | -0.22591   |
| 96215 | Q2Q067 | Q8NG78 | -1.4096    |
| 96216 | Q2Q067 | P10915 | -1.2387    |

|       |        |        |           |
|-------|--------|--------|-----------|
| 96217 | Q2Q067 | Q9NSE4 | -0.24051  |
| 96218 | Q2Q067 | Q9NVQ4 | -0.34687  |
| 96219 | Q2Q067 | Q9BSE2 | -1.0345   |
| 96220 | Q2Q067 | P46094 | -1.4546   |
| 96221 | Q2Q067 | P09210 | -0.22634  |
| 96222 | Q2Q067 | P01912 | -0.75992  |
| 96223 | Q2Q067 | Q16820 | -1.6462   |
| 96224 | Q2Q067 | O00631 | -0.88838  |
| 96225 | Q2Q067 | O95182 | -0.16268  |
| 96226 | Q2Q067 | O75838 | -0.45603  |
| 96227 | Q2Q067 | Q6ZUK4 | -1.0345   |
| 96228 | Q2Q067 | Q86YN1 | -0.91191  |
| 96229 | Q2Q067 | P68366 | -0.61626  |
| 96230 | Q2Q067 | O95388 | -1.0427   |
| 96231 | Q2Q067 | Q8WWN8 | -1.0036   |
| 96232 | Q2Q067 | Q8NCU8 | -1.0345   |
| 96233 | Q2Q067 | P04035 | -0.64636  |
| 96234 | Q2Q067 | P37268 | -0.96078  |
| 96235 | Q2Q067 | Q8IVU1 | -1.1519   |
| 96236 | Q2Q067 | O60882 | -0.99422  |
| 96237 | Q2Q067 | Q8WWF3 | -1.0345   |
| 96238 | Q2Q067 | Q8N1F8 | -0.2942   |
| 96239 | Q2Q067 | Q9H9B1 | -0.22741  |
| 96240 | Q2Q067 | O75711 | -0.95299  |
| 96241 | Q2Q067 | P01761 | -1.1115   |
| 96242 | Q2Q067 | O14944 | -0.54323  |
| 96243 | Q2Q067 | Q86VY9 | -1.0345   |
| 96244 | Q2Q067 | A2A2Z9 | -0.22737  |
| 96245 | Q2Q067 | Q16566 | -0.41008  |
| 96246 | Q2Q067 | P35575 | -0.43705  |
| 96247 | Q2Q067 | A8MTW9 | -0.98666  |
| 96248 | Q2Q067 | Q6S5L8 | -0.53916  |
| 96249 | Q2Q067 | Q08648 | -0.987    |
| 96250 | Q2Q067 | P19022 | -0.62475  |
| 96251 | Q2Q067 | P28476 | -1.1003   |
| 96252 | Q2Q067 | Q9BT76 | -1.1696   |
| 96253 | Q2Q067 | Q02446 | -0.17172  |
| 96254 | Q2Q067 | Q9Y6D5 | -0.22067  |
| 96255 | Q2Q067 | Q8NBF2 | -0.22379  |
| 96256 | Q2Q067 | P02776 | -0.7358   |
| 96257 | Q2Q067 | P02808 | -0.40081  |
| 96258 | Q2Q067 | Q96BR1 | -1.0413   |
| 96259 | Q2Q067 | Q96QE3 | -0.72825  |
| 96260 | Q2Q067 | Q96T54 | -1.2903   |
| 96261 | Q2Q067 | O43169 | -0.85664  |
| 96262 | Q2Q067 | P43251 | -0.70989  |
| 96263 | Q2Q067 | P01568 | -0.86951  |
| 96264 | Q2Q067 | Q9ULK6 | -1.1176   |
| 96265 | Q2Q067 | P51911 | -0.35603  |
| 96266 | Q2Q067 | Q9BRR6 | -0.94103  |
| 96267 | Q2Q067 | O00628 | -0.22738  |
| 96268 | Q2Q067 | Q9H4L4 | -0.35638  |
| 96269 | Q2Q067 | Q9BTE6 | -0.44508  |
| 96270 | Q2Q067 | Q15669 | -0.22697  |
| 96271 | Q2Q067 | Q7Z5H5 | -1.2234   |
| 96272 | Q2Q067 | Q2QD12 | -0.41459  |
| 96273 | Q2Q067 | P30825 | -1.2796   |
| 96274 | Q2Q067 | P28325 | -0.41781  |
| 96275 | Q2Q067 | P42261 | -0.63603  |
| 96276 | Q2Q067 | Q99679 | -1.6361   |
| 96277 | Q2Q067 | Q4V348 | -0.085533 |
| 96278 | Q2Q067 | Q8WWG1 | -1.5893   |
| 96279 | Q2Q067 | Q14028 | -1.3836   |
| 96280 | Q2Q067 | Q92620 | -0.22603  |
| 96281 | Q2Q067 | Q5JPI3 | -0.35564  |
| 96282 | Q2Q067 | Q6ZN16 | -1.2636   |
| 96283 | Q2Q067 | Q9UBS5 | -0.73126  |
| 96284 | Q2Q067 | Q9BY31 | -0.085533 |
| 96285 | Q2Q067 | P01906 | -0.8793   |
| 96286 | Q2Q067 | Q14644 | -0.71176  |
| 96287 | Q2Q067 | A6NNP5 | -0.076808 |
| 96288 | Q2Q067 | Q9H5Z1 | -0.84139  |
| 96289 | Q2Q067 | O60895 | -0.23689  |
| 96290 | Q2Q067 | Q8NCW0 | -0.99436  |
| 96291 | Q2Q067 | P30490 | -1.1453   |
| 96292 | Q2Q067 | Q96R48 | -1.4096   |



|       |        |        |           |
|-------|--------|--------|-----------|
| 96293 | Q2Q067 | Q00G26 | -0.36991  |
| 96294 | Q2Q067 | Q96BI1 | -0.92315  |
| 96295 | Q2Q067 | Q03113 | -0.6881   |
| 96296 | Q2Q067 | Q2M3M2 | -1.272    |
| 96297 | Q2Q067 | O95727 | -1.0768   |
| 96298 | Q2Q067 | P21439 | -1.1894   |
| 96299 | Q2Q067 | O43687 | -0.93987  |
| 96300 | Q2Q067 | Q92903 | -0.92191  |
| 96301 | Q2Q067 | P20039 | -0.85514  |
| 96302 | Q2Q067 | Q8NGD1 | -1.4096   |
| 96303 | Q2Q067 | P68032 | -0.41476  |
| 96304 | Q2Q067 | P17706 | -0.23914  |
| 96305 | Q2Q067 | Q86YV5 | -1.3039   |
| 96306 | Q2Q067 | Q14896 | -0.65839  |
| 96307 | Q2Q067 | Q6P5Q4 | -0.43823  |
| 96308 | Q2Q067 | A8MYX2 | -0.31663  |
| 96309 | Q2Q067 | P21754 | -0.39612  |
| 96310 | Q2Q067 | O60393 | -0.21956  |
| 96311 | Q2Q067 | P56749 | -0.85277  |
| 96312 | Q2Q067 | Q5T197 | -1.1176   |
| 96313 | Q2Q067 | O94880 | -0.48451  |
| 96314 | Q2Q067 | Q9UJU3 | -0.085533 |
| 96315 | Q2Q067 | Q9NNX6 | -1.1171   |
| 96316 | Q2Q067 | P33981 | -0.98125  |
| 96317 | Q2Q067 | Q96L14 | -0.43841  |
| 96318 | Q2Q067 | Q9UJ83 | -1.0118   |
| 96319 | Q2Q067 | Q96PW8 | -0.21966  |
| 96320 | Q2Q067 | Q9C0A6 | -0.22543  |
| 96321 | Q2Q067 | Q9H2F3 | -1.0101   |
| 96322 | Q2Q067 | Q9UBR4 | -0.22757  |
| 96323 | Q2Q067 | P40225 | -0.86314  |
| 96324 | Q2Q067 | Q96S90 | -0.38126  |
| 96325 | Q2Q067 | Q5VY80 | -0.69135  |
| 96326 | Q2Q067 | Q8N8R3 | -0.82143  |
| 96327 | Q2Q067 | P78380 | -1.6091   |
| 96328 | Q2Q067 | Q96R08 | -1.4096   |
| 96329 | Q2Q067 | P14902 | -0.26176  |
| 96330 | Q2Q067 | Q9C0K1 | -1.152    |
| 96331 | Q2Q067 | Q8N813 | -0.07958  |
| 96332 | Q2Q067 | Q8IX21 | -0.032092 |
| 96333 | Q2Q067 | P14151 | -0.73261  |
| 96334 | Q2Q067 | P17066 | -0.66337  |
| 96335 | Q2Q067 | Q9UIR0 | -1.0345   |
| 96336 | Q2Q067 | Q9Y548 | -1.0094   |
| 96337 | Q2Q067 | P06126 | -0.61249  |
| 96338 | Q2Q067 | Q96D71 | -0.22012  |
| 96339 | Q2Q067 | Q9H251 | -0.60644  |
| 96340 | Q2Q067 | D6RBM5 | -0.29674  |
| 96341 | Q2Q067 | Q30KP8 | -0.94775  |
| 96342 | Q2Q067 | Q99828 | -0.22735  |
| 96343 | Q2Q067 | O60706 | -1.2504   |
| 96344 | Q2Q067 | A6NCQ9 | -1.1176   |
| 96345 | Q2Q067 | Q05925 | -0.22302  |
| 96346 | Q2Q067 | Q9NQC7 | -0.21289  |
| 96347 | Q2Q067 | Q5M8T2 | -0.99061  |
| 96348 | Q2Q067 | Q14264 | -0.13268  |
| 96349 | Q2Q067 | Q9GZK7 | -1.4096   |
| 96350 | Q2Q067 | O95622 | -0.85096  |
| 96351 | Q2Q067 | P01824 | -1.1115   |
| 96352 | Q2Q067 | O75952 | -0.26399  |
| 96353 | Q2Q067 | Q96PF2 | -0.94092  |
| 96354 | Q2Q067 | Q9P121 | -0.22845  |
| 96355 | Q2Q067 | Q8NHQ8 | -0.57228  |
| 96356 | Q2Q067 | P42898 | -0.34873  |
| 96357 | Q2Q067 | Q8NH16 | -1.2565   |
| 96358 | Q2Q067 | P29376 | -1.6913   |
| 96359 | Q2Q067 | Q86XT4 | -0.64987  |
| 96360 | Q2Q067 | P15328 | -1.1207   |
| 96361 | Q2Q067 | Q6P1S2 | -1.0091   |
| 96362 | Q2Q067 | Q8TE04 | -0.5359   |
| 96363 | Q2Q067 | Q99463 | -1.4762   |
| 96364 | Q2Q067 | P06315 | -1.1115   |
| 96365 | Q2Q067 | O95158 | -0.81406  |
| 96366 | Q2Q067 | Q8N1G0 | -0.20278  |
| 96367 | Q2Q067 | Q502X0 | -0.13634  |
| 96368 | Q2Q067 | Q02742 | -0.75325  |

|       |        |        |           |
|-------|--------|--------|-----------|
| 96369 | Q2Q067 | Q8NC24 | -1.2309   |
| 96370 | Q2Q067 | P31641 | -1.1716   |
| 96371 | Q2Q067 | Q15238 | -0.36319  |
| 96372 | Q2Q067 | P17707 | -0.21566  |
| 96373 | Q2Q067 | Q9NYA1 | -0.24475  |
| 96374 | Q2Q067 | Q7Z478 | -0.44319  |
| 96375 | Q2Q067 | A0A183 | -0.37794  |
| 96376 | Q2Q067 | P49773 | -0.26118  |
| 96377 | Q2Q067 | A6NDG6 | -0.46465  |
| 96378 | Q2Q067 | O75908 | -0.89879  |
| 96379 | Q2Q067 | Q6ZW34 | -1.0345   |
| 96380 | Q2Q067 | Q96EP9 | -1.1513   |
| 96381 | Q2Q067 | Q8TC17 | -0.22741  |
| 96382 | Q2Q067 | Q15493 | -0.11419  |
| 96383 | Q2Q067 | Q9NQW7 | -0.54397  |
| 96384 | Q2Q067 | Q4KMX7 | -0.25279  |
| 96385 | Q2Q067 | Q8NBH2 | -0.5238   |
| 96386 | Q2Q067 | Q16825 | -0.6304   |
| 96387 | Q2Q067 | Q14558 | -0.33686  |
| 96388 | Q2Q067 | O95239 | -0.25301  |
| 96389 | Q2Q067 | Q5VZY2 | -1.006    |
| 96390 | Q2Q067 | A6NCX1 | -0.12087  |
| 96391 | Q2Q067 | Q9UMQ6 | -1.1084   |
| 96392 | Q2Q067 | P09630 | -0.22618  |
| 96393 | Q2Q067 | Q6P2P2 | -0.2101   |
| 96394 | Q2Q067 | Q9Y5I3 | -1.8625   |
| 96395 | Q2Q067 | Q96T51 | -0.1755   |
| 96396 | Q2Q067 | Q9ULX7 | -1.0731   |
| 96397 | Q2Q067 | Q9NT22 | -0.89937  |
| 96398 | Q2Q067 | Q92804 | -0.19777  |
| 96399 | Q2Q067 | Q8WXS8 | -1.387    |
| 96400 | Q2Q067 | Q86Y30 | -0.98666  |
| 96401 | Q2Q067 | Q13253 | -0.32582  |
| 96402 | Q2Q067 | Q9H8L6 | -0.55594  |
| 96403 | Q2Q067 | B7Z1M9 | -0.097216 |
| 96404 | Q2Q067 | Q5T0B9 | -0.096903 |
| 96405 | Q2Q067 | Q8NFJ6 | -1.4813   |
| 96406 | Q2Q067 | P08887 | -0.38271  |
| 96407 | Q2Q067 | Q53T59 | -0.52507  |
| 96408 | Q2Q067 | P31321 | -0.31437  |
| 96409 | Q2Q067 | Q6UWM5 | -0.98666  |
| 96410 | Q2Q067 | Q13591 | -1.177    |
| 96411 | Q2Q067 | Q9C040 | -0.22741  |
| 96412 | Q2Q067 | O00548 | -0.67583  |
| 96413 | Q2Q067 | Q96BM9 | -0.68979  |
| 96414 | Q2Q067 | O76094 | -0.21662  |
| 96415 | Q2Q067 | Q9H7B7 | -0.98666  |
| 96416 | Q2Q067 | Q496Y0 | -0.2274   |
| 96417 | Q2Q067 | P11926 | -0.1746   |
| 96418 | Q2Q067 | Q86TI4 | -0.22759  |
| 96419 | Q2Q067 | Q9NV79 | -0.17204  |
| 96420 | Q2Q067 | Q15434 | -0.62494  |
| 96421 | Q2Q067 | Q15485 | -1.2845   |
| 96422 | Q2Q067 | Q9BVG4 | -0.24416  |
| 96423 | Q2Q067 | Q7Z624 | -0.20488  |
| 96424 | Q2Q067 | O43155 | -1.3047   |
| 96425 | Q2Q067 | Q6ZNB6 | -0.34599  |
| 96426 | Q2Q067 | Q96AH8 | -0.84968  |
| 96427 | Q2Q067 | Q9HDC5 | -0.94892  |
| 96428 | Q2Q067 | Q8IVG5 | -0.11459  |
| 96429 | Q2Q067 | Q96MT0 | -0.34728  |
| 96430 | Q2Q067 | P06317 | -1.101    |
| 96431 | Q2Q067 | Q969W1 | -1.1486   |
| 96432 | Q2Q067 | Q9BYE4 | -0.25317  |
| 96433 | Q2Q067 | P08237 | -0.54912  |
| 96434 | Q2Q067 | P09683 | -0.86911  |
| 96435 | Q2Q067 | P0C864 | -0.2245   |
| 96436 | Q2Q067 | Q9H1K4 | -0.85328  |
| 96437 | Q2Q067 | Q96MN2 | -0.91075  |
| 96438 | Q2Q067 | Q6IC83 | -0.26171  |
| 96439 | Q2Q067 | Q2VWA4 | -0.087048 |
| 96440 | Q2Q067 | Q13422 | -0.1755   |
| 96441 | Q2Q067 | Q5Y7A7 | -0.79235  |
| 96442 | Q2Q067 | Q9BY49 | -0.99312  |
| 96443 | Q2Q067 | O60658 | -0.22704  |
| 96444 | Q2Q067 | Q9UPY3 | -0.21698  |

|       |        |        |           |
|-------|--------|--------|-----------|
| 96445 | Q2Q067 | P49761 | -0.83202  |
| 96446 | Q2Q067 | P11168 | -0.081444 |
| 96447 | Q2Q067 | Q9Y4D1 | -0.34542  |
| 96448 | Q2Q067 | Q96R28 | -1.4096   |
| 96449 | Q2Q067 | P0DJH9 | -0.11024  |
| 96450 | Q2Q067 | Q96C19 | -0.60787  |
| 96451 | Q2Q067 | Q13085 | -0.25691  |
| 96452 | Q2Q067 | Q08AF8 | -0.28132  |
| 96453 | Q2Q067 | Q5TYX0 | -0.19475  |
| 96454 | Q2Q067 | Q9NQZ3 | -0.22781  |
| 96455 | Q2Q067 | Q9UKX3 | -0.59485  |
| 96456 | Q2Q067 | Q2M296 | -0.92931  |
| 96457 | Q2Q067 | P14222 | -0.67678  |
| 96458 | Q2Q067 | Q9BXU8 | -0.36032  |
| 96459 | Q2Q067 | Q9NRH3 | -0.21748  |
| 96460 | Q2Q067 | Q7Z3S7 | -1.1647   |
| 96461 | Q2Q067 | O43423 | -0.14937  |
| 96462 | Q2Q067 | Q9Y2Q3 | -0.68447  |
| 96463 | Q2Q067 | Q8NEY4 | -0.37457  |
| 96464 | Q2Q067 | Q2M2E5 | -0.98666  |
| 96465 | Q2Q067 | Q14733 | -0.2289   |
| 96466 | Q2Q067 | P06899 | -0.80644  |
| 96467 | Q2Q067 | Q96IC2 | -0.97142  |
| 96468 | Q2Q067 | Q92736 | -0.41341  |
| 96469 | Q2Q067 | Q96T83 | -0.38103  |
| 96470 | Q2Q067 | Q9NR31 | -0.51653  |
| 96471 | Q2Q067 | Q9HBL8 | -0.11146  |
| 96472 | Q2Q067 | Q5VTU8 | -0.38303  |
| 96473 | Q2Q067 | Q86UT5 | -0.22726  |
| 96474 | Q2Q067 | Q6ZRR7 | -0.22737  |
| 96475 | Q2Q067 | Q14574 | -1.2917   |
| 96476 | Q2Q067 | Q8NGR6 | -1.4096   |
| 96477 | Q2Q067 | P55056 | -1.0628   |
| 96478 | Q2Q067 | P22891 | -1.1122   |
| 96479 | Q2Q067 | A6NG13 | -0.92004  |
| 96480 | Q2Q067 | O94777 | -0.35987  |
| 96481 | Q2Q067 | A8MYV0 | -0.59947  |
| 96482 | Q2Q067 | Q8TF66 | -1.0345   |
| 96483 | Q2Q067 | Q6P2D8 | -0.22741  |
| 96484 | Q2Q067 | Q3SY05 | -0.042418 |
| 96485 | Q2Q067 | Q8NC56 | -0.40894  |
| 96486 | Q2Q067 | Q9NQ36 | -1.0413   |
| 96487 | Q2Q067 | Q96PD6 | -0.87081  |
| 96488 | Q2Q067 | Q02643 | -0.40899  |
| 96489 | Q2Q067 | O95718 | -0.22745  |
| 96490 | Q2Q067 | Q96A99 | -1.0477   |
| 96491 | Q2Q067 | Q96NJ5 | -0.20576  |
| 96492 | Q2Q067 | Q9NX24 | -0.22483  |
| 96493 | Q2Q067 | Q8WVF5 | -0.15939  |
| 96494 | Q2Q067 | O00444 | -0.22741  |
| 96495 | Q2Q067 | O14990 | -0.3768   |
| 96496 | Q2Q067 | Q15455 | -0.28147  |
| 96497 | Q2Q067 | Q99720 | -0.75915  |
| 96498 | Q2Q067 | Q9Y5X4 | -0.40265  |
| 96499 | Q2Q067 | Q8IXS8 | -0.63454  |
| 96500 | Q2Q067 | D6RBQ6 | -0.76972  |
| 96501 | Q2Q067 | Q8IW92 | -0.83124  |
| 96502 | Q2Q067 | O75390 | -0.17522  |
| 96503 | Q2Q067 | P0C5Y9 | -0.81722  |
| 96504 | Q2Q067 | Q8N7U9 | -0.10741  |
| 96505 | Q2Q067 | Q15269 | -0.22561  |
| 96506 | Q2Q067 | P20333 | -0.84209  |
| 96507 | Q2Q067 | Q8WVT3 | -0.3221   |
| 96508 | Q2Q067 | A4FU01 | -0.5636   |
| 96509 | Q2Q067 | O15060 | -0.085533 |
| 96510 | Q2Q067 | A6NMZ5 | -1.4096   |
| 96511 | Q2Q067 | Q9ULZ9 | -1.666    |
| 96512 | Q2Q067 | P04629 | -0.65415  |
| 96513 | Q2Q067 | Q96EM0 | -0.523    |
| 96514 | Q2Q067 | Q9H0N0 | -0.52987  |
| 96515 | Q2Q067 | Q7Z2F6 | -0.27686  |
| 96516 | Q2Q067 | Q9NRF2 | -0.22741  |
| 96517 | Q2Q067 | Q9P275 | -0.33024  |
| 96518 | Q2Q067 | O95994 | -0.1797   |
| 96519 | Q2Q067 | Q9Y2H9 | -0.7922   |
| 96520 | Q2Q067 | Q02094 | -0.94308  |

|       |        |        |           |
|-------|--------|--------|-----------|
| 96521 | Q2Q067 | Q9UKM7 | -0.95305  |
| 96522 | Q2Q067 | Q96A83 | -1.1541   |
| 96523 | Q2Q067 | Q5SNT6 | -0.6371   |
| 96524 | Q2Q067 | Q9Y6I0 | -0.74403  |
| 96525 | Q2Q067 | Q9BTZ2 | -0.6758   |
| 96526 | Q2Q067 | Q9BY50 | -0.89161  |
| 96527 | Q2Q067 | Q6ZMI0 | -0.31925  |
| 96528 | Q2Q067 | P07360 | -1.0047   |
| 96529 | Q2Q067 | O15047 | -0.2686   |
| 96530 | Q2Q067 | Q16513 | -0.22328  |
| 96531 | Q2Q067 | Q96RG2 | -0.68768  |
| 96532 | Q2Q067 | P63132 | -0.36034  |
| 96533 | Q2Q067 | Q5T292 | -1.0345   |
| 96534 | Q2Q067 | Q8IZC6 | -1.0559   |
| 96535 | Q2Q067 | Q05655 | -0.22323  |
| 96536 | Q2Q067 | Q8TBF8 | -0.18305  |
| 96537 | Q2Q067 | Q08AM6 | -0.15904  |
| 96538 | Q2Q067 | Q9BXM8 | -0.24416  |
| 96539 | Q2Q067 | Q13177 | -0.27378  |
| 96540 | Q2Q067 | Q9NQV5 | -0.16282  |
| 96541 | Q2Q067 | A6NHY2 | -0.57228  |
| 96542 | Q2Q067 | Q8N8J0 | -0.41985  |
| 96543 | Q2Q067 | Q95568 | -0.18205  |
| 96544 | Q2Q067 | P24462 | -0.85691  |
| 96545 | Q2Q067 | P08123 | -0.50035  |
| 96546 | Q2Q067 | P0C7Q2 | -0.26488  |
| 96547 | Q2Q067 | P30043 | -0.10794  |
| 96548 | Q2Q067 | Q5XKR4 | -0.1132   |
| 96549 | Q2Q067 | P0C6E6 | -0.075864 |
| 96550 | Q2Q067 | O95677 | -0.11519  |
| 96551 | Q2Q067 | Q92625 | -0.22741  |
| 96552 | Q2Q067 | O95866 | -1.056    |
| 96553 | Q2Q067 | Q5R372 | -1.045    |
| 96554 | Q2Q067 | Q9Y2B2 | -0.92922  |
| 96555 | Q2Q067 | Q8NGI8 | -1.4096   |
| 96556 | Q2Q067 | P18283 | -0.38622  |
| 96557 | Q2Q067 | Q5TA79 | -0.37794  |
| 96558 | Q2Q067 | Q6ZTB9 | -0.74229  |
| 96559 | Q2Q067 | Q8WUH1 | -0.32494  |
| 96560 | Q2Q067 | Q9HAU0 | -0.22741  |
| 96561 | Q2Q067 | Q6XPR3 | -1.0508   |
| 96562 | Q2Q067 | Q00526 | -0.69415  |
| 96563 | Q2Q067 | Q02108 | -0.65474  |
| 96564 | Q2Q067 | Q92954 | -0.96597  |
| 96565 | Q2Q067 | Q9GZP1 | -1.0494   |
| 96566 | Q2Q067 | Q16795 | -0.16729  |
| 96567 | Q2Q067 | Q96I82 | -1.224    |
| 96568 | Q2Q067 | P35212 | -1.1048   |
| 96569 | Q2Q067 | Q53SF7 | -0.44287  |
| 96570 | Q2Q067 | Q96S82 | -0.2238   |
| 96571 | Q2Q067 | Q9P1Z9 | -1.0345   |
| 96572 | Q2Q067 | A6PVS8 | -0.22666  |
| 96573 | Q2Q067 | P0C7X0 | -0.43957  |
| 96574 | Q2Q067 | Q8TD90 | -0.13392  |
| 96575 | Q2Q067 | Q5VWW1 | -1.0229   |
| 96576 | Q2Q067 | Q9C0K0 | -0.22717  |
| 96577 | Q2Q067 | P52565 | -0.081839 |
| 96578 | Q2Q067 | Q92989 | -0.21413  |
| 96579 | Q2Q067 | P61647 | -0.72248  |
| 96580 | Q2Q067 | P12236 | -0.27726  |
| 96581 | Q2Q067 | O95847 | -0.86369  |
| 96582 | Q2Q067 | Q8WXS4 | -1.1328   |
| 96583 | Q2Q067 | Q8N7P1 | -1.1697   |
| 96584 | Q2Q067 | Q8WVE6 | -1.0345   |
| 96585 | Q2Q067 | Q8NGU2 | -1.4096   |
| 96586 | Q2Q067 | Q14118 | -0.27831  |
| 96587 | Q2Q067 | Q6EIG7 | -0.9242   |
| 96588 | Q2Q067 | A6NN92 | -1.0354   |
| 96589 | Q2Q067 | P32314 | -0.35721  |
| 96590 | Q2Q067 | Q7Z2R9 | -0.98666  |
| 96591 | Q2Q067 | Q92832 | -0.22745  |
| 96592 | Q2Q067 | Q7Z7E8 | -0.3149   |
| 96593 | Q2Q067 | P05165 | -0.69951  |
| 96594 | Q2Q067 | P21246 | -0.80124  |
| 96595 | Q2Q067 | Q7L0J3 | -0.6611   |
| 96596 | Q2Q067 | Q8IWL2 | -1.1684   |

|       |        |        |          |
|-------|--------|--------|----------|
| 96597 | Q2Q067 | A5X5Y0 | -1.1556  |
| 96598 | Q2Q067 | Q5VSP4 | -0.98666 |
| 96599 | Q2Q067 | P35557 | -0.19168 |
| 96600 | Q2Q067 | Q9UNP4 | -0.77779 |
| 96601 | Q2Q067 | Q6IA69 | -0.506   |
| 96602 | Q2Q067 | P78324 | -1.357   |
| 96603 | Q2Q067 | Q92576 | -0.2536  |
| 96604 | Q2Q067 | Q96CN7 | -0.57043 |
| 96605 | Q2Q067 | Q9BV79 | -0.9671  |
| 96606 | Q2Q067 | O75052 | -0.22425 |
| 96607 | Q2Q067 | Q9H9R9 | -0.20901 |
| 96608 | Q2Q067 | Q8WXX0 | -0.78111 |
| 96609 | Q2Q067 | P22059 | -0.63548 |
| 96610 | Q2Q067 | P78411 | -0.22909 |
| 96611 | Q2Q067 | Q75V66 | -1.1148  |
| 96612 | Q2Q067 | P57082 | -0.27326 |
| 96613 | Q2Q067 | Q9H765 | -0.22741 |
| 96614 | Q2Q067 | Q6IBS0 | -0.48894 |
| 96615 | Q2Q067 | P12694 | -0.12887 |
| 96616 | Q2Q067 | Q8NGQ1 | -1.4096  |
| 96617 | Q2Q067 | Q15077 | -1.3392  |
| 96618 | Q2Q067 | P06313 | -1.1115  |
| 96619 | Q2Q067 | Q8NI28 | -1.0345  |
| 96620 | Q2Q067 | Q5VTT5 | -0.3703  |
| 96621 | Q2Q067 | Q58EX2 | -1.227   |
| 96622 | Q2Q067 | P12644 | -0.22741 |
| 96623 | Q2Q067 | Q9ULD4 | -0.22373 |
| 96624 | Q2Q067 | Q7Z5R6 | -0.60558 |
| 96625 | Q2Q067 | Q8N954 | -0.41613 |
| 96626 | Q2Q067 | Q8N6Q8 | -0.38719 |
| 96627 | Q2Q067 | Q8NBW4 | -1.1869  |
| 96628 | Q2Q067 | Q9UHD8 | -0.22562 |
| 96629 | Q2Q067 | Q14534 | -1.167   |
| 96630 | Q2Q067 | Q96M78 | -0.15733 |
| 96631 | Q2Q067 | P36542 | -0.17996 |
| 96632 | Q2Q067 | Q96Q07 | -0.5919  |
| 96633 | Q2Q067 | Q6QHK4 | -0.23475 |
| 96634 | Q2Q067 | O15552 | -1.8735  |
| 96635 | Q2Q067 | Q96PH6 | -0.92087 |
| 96636 | Q2Q067 | Q8N0X4 | -0.47352 |
| 96637 | Q2Q067 | Q9UIW2 | -0.8572  |
| 96638 | Q2Q067 | Q8NFW5 | -0.19182 |
| 96639 | Q2Q067 | A6NMZ2 | -0.66328 |
| 96640 | Q2Q067 | Q9UMR2 | -0.1056  |
| 96641 | Q2Q067 | Q5VT66 | -0.45004 |
| 96642 | Q2Q067 | Q5JXX5 | -1.0026  |
| 96643 | Q2Q067 | O60259 | -0.63184 |
| 96644 | Q2Q067 | Q8NFX0 | -0.64205 |
| 96645 | Q2Q067 | O60503 | -1.1731  |
| 96646 | Q2Q067 | P61109 | -0.98666 |
| 96647 | Q2Q067 | O75915 | -0.82987 |
| 96648 | Q2Q067 | Q5T5P2 | -0.34899 |
| 96649 | Q2Q067 | Q8NGY2 | -1.4096  |
| 96650 | Q2Q067 | Q86SJ6 | -1.4859  |
| 96651 | Q2Q067 | Q96N46 | -0.43468 |
| 96652 | Q2Q067 | Q6XXX2 | -0.08461 |
| 96653 | Q2Q067 | O15457 | -0.45869 |
| 96654 | Q2Q067 | Q9UGP5 | -0.30228 |
| 96655 | Q2Q067 | P39877 | -0.71802 |
| 96656 | Q2Q067 | Q8NCN4 | -0.20394 |
| 96657 | Q2Q067 | P80421 | -0.98652 |
| 96658 | Q2Q067 | Q5T751 | -0.37794 |
| 96659 | Q2Q067 | O75356 | -0.28897 |
| 96660 | Q2Q067 | O60749 | -0.22208 |
| 96661 | Q2Q067 | Q6SA08 | -0.96618 |
| 96662 | Q2Q067 | Q6N021 | -0.57437 |
| 96663 | Q2Q067 | Q6NSX1 | -1.1022  |
| 96664 | Q2Q067 | Q9GZP9 | -0.25761 |
| 96665 | Q2Q067 | Q8NE63 | -1.1884  |
| 96666 | Q2Q067 | Q8N4Z0 | -1.348   |
| 96667 | Q2Q067 | Q8NHS0 | -0.4622  |
| 96668 | Q2Q067 | O95749 | -0.17052 |
| 96669 | Q2Q067 | A6NI03 | -0.73178 |
| 96670 | Q2Q067 | P23141 | -0.36746 |
| 96671 | Q2Q067 | O94813 | -0.30024 |
| 96672 | Q2Q067 | O14492 | -0.57234 |

|       |        |        |           |
|-------|--------|--------|-----------|
| 96673 | Q2Q067 | Q96DN5 | -0.84906  |
| 96674 | Q2Q067 | O43613 | -1.511    |
| 96675 | Q2Q067 | Q9BXU9 | -0.80816  |
| 96676 | Q2Q067 | P29762 | -0.82072  |
| 96677 | Q2Q067 | Q86T13 | -1.0212   |
| 96678 | Q2Q067 | Q14609 | -1.0351   |
| 96679 | Q2Q067 | Q9BT88 | -0.64639  |
| 96680 | Q2Q067 | Q8N2U0 | -1.0345   |
| 96681 | Q2Q067 | Q9NRY7 | -1.1588   |
| 96682 | Q2Q067 | Q5VVY1 | -0.38719  |
| 96683 | Q2Q067 | Q12805 | -0.29656  |
| 96684 | Q2Q067 | Q86T90 | -0.21643  |
| 96685 | Q2Q067 | Q08380 | -1.4645   |
| 96686 | Q2Q067 | P27707 | -0.46159  |
| 96687 | Q2Q067 | O15466 | -0.69425  |
| 96688 | Q2Q067 | Q8WXX3 | -0.2274   |
| 96689 | Q2Q067 | Q9NP91 | -1.2344   |
| 96690 | Q2Q067 | Q8WZ26 | -0.15593  |
| 96691 | Q2Q067 | Q9Y239 | -0.2274   |
| 96692 | Q2Q067 | Q03154 | -0.33443  |
| 96693 | Q2Q067 | Q14494 | -0.96599  |
| 96694 | Q2Q067 | Q13241 | -1.1939   |
| 96695 | Q2Q067 | Q6PJG9 | -1.0345   |
| 96696 | Q2Q067 | O60488 | -0.81275  |
| 96697 | Q2Q067 | Q9UM22 | -0.96065  |
| 96698 | Q2Q067 | Q96M93 | -0.87867  |
| 96699 | Q2Q067 | Q7RTS6 | -1.0345   |
| 96700 | Q2Q067 | Q9ULV8 | -0.52894  |
| 96701 | Q2Q067 | P35250 | -0.18815  |
| 96702 | Q2Q067 | Q92544 | -1.0345   |
| 96703 | Q2Q067 | Q9H4G0 | -0.24672  |
| 96704 | Q2Q067 | P13637 | -0.74297  |
| 96705 | Q2Q067 | Q5FWF4 | -0.29666  |
| 96706 | Q2Q067 | P55196 | -0.2271   |
| 96707 | Q2Q067 | Q8NEX6 | -0.98666  |
| 96708 | Q2Q067 | Q68BL8 | -1.0387   |
| 96709 | Q2Q067 | P57054 | -0.95841  |
| 96710 | Q2Q067 | A1L157 | -1.0345   |
| 96711 | Q2Q067 | Q6ZVT0 | -0.20803  |
| 96712 | Q2Q067 | Q567V2 | -0.84904  |
| 96713 | Q2Q067 | P23327 | -0.50675  |
| 96714 | Q2Q067 | P20591 | -0.2322   |
| 96715 | Q2Q067 | P46059 | -1.04     |
| 96716 | Q2Q067 | Q6ZN11 | -0.085533 |
| 96717 | Q2Q067 | Q96RC9 | -1.4096   |
| 96718 | Q2Q067 | O60669 | -1.19     |
| 96719 | Q2Q067 | P42892 | -0.73928  |
| 96720 | Q2Q067 | Q9BY10 | -1.1016   |
| 96721 | Q2Q067 | Q9Y342 | -1.0967   |
| 96722 | Q2Q067 | Q9H374 | -0.20629  |
| 96723 | Q2Q067 | Q7L4P6 | -0.28132  |
| 96724 | Q2Q067 | Q9BRP9 | -0.10746  |
| 96725 | Q2Q067 | Q9H790 | -0.3385   |
| 96726 | Q2Q067 | Q9Y4R7 | -0.46845  |
| 96727 | Q2Q067 | Q8N300 | -0.3577   |
| 96728 | Q2Q067 | A6NC51 | -1.0345   |
| 96729 | Q2Q067 | Q92506 | -0.29961  |
| 96730 | Q2Q067 | Q16740 | -0.45182  |
| 96731 | Q2Q067 | Q8WUZ0 | -0.35564  |
| 96732 | Q2Q067 | A1L390 | -0.78041  |
| 96733 | Q2Q067 | Q9P2K6 | -0.22357  |
| 96734 | Q2Q067 | Q9UBM4 | -1.0514   |
| 96735 | Q2Q067 | Q9H0C3 | -0.84155  |
| 96736 | Q2Q067 | P43628 | -0.72077  |
| 96737 | Q2Q067 | Q765P7 | -0.75125  |
| 96738 | Q2Q067 | Q96NZ9 | -0.98666  |
| 96739 | Q2Q067 | Q9H0W5 | -0.56101  |
| 96740 | Q2Q067 | Q8N8A6 | -0.52376  |
| 96741 | Q2Q067 | Q12794 | -0.41305  |
| 96742 | Q2Q067 | P02686 | -0.8175   |
| 96743 | Q2Q067 | O60258 | -1.0204   |
| 96744 | Q2Q067 | Q9UMX9 | -1.1443   |
| 96745 | Q2Q067 | Q9UBK2 | -0.6164   |
| 96746 | Q2Q067 | O43566 | -0.22796  |
| 96747 | Q2Q067 | P37088 | -0.66867  |
| 96748 | Q2Q067 | Q9UKY3 | -0.90333  |

|       |        |        |           |
|-------|--------|--------|-----------|
| 96749 | Q2Q067 | Q07912 | -0.59809  |
| 96750 | Q2Q067 | Q9UEF7 | -1.1172   |
| 96751 | Q2Q067 | Q8TCF1 | -0.48451  |
| 96752 | Q2Q067 | Q9BR01 | -0.36218  |
| 96753 | Q2Q067 | P53609 | -0.48514  |
| 96754 | Q2Q067 | Q5TZ20 | -1.4096   |
| 96755 | Q2Q067 | Q9UK23 | -0.61405  |
| 96756 | Q2Q067 | Q9Y4U1 | -0.21365  |
| 96757 | Q2Q067 | Q6PL45 | -1.0345   |
| 96758 | Q2Q067 | O15146 | -1.0122   |
| 96759 | Q2Q067 | Q9Y5X1 | -0.31382  |
| 96760 | Q2Q067 | P11226 | -0.62086  |
| 96761 | Q2Q067 | A6NI73 | -1.5328   |
| 96762 | Q2Q067 | P0C6A0 | -0.2274   |
| 96763 | Q2Q067 | Q8N100 | -0.22868  |
| 96764 | Q2Q067 | Q9NR96 | -0.58869  |
| 96765 | Q2Q067 | Q9BTE1 | -0.094137 |
| 96766 | Q2Q067 | P21757 | -0.54672  |
| 96767 | Q2Q067 | Q8WWQ2 | -1.0467   |
| 96768 | Q2Q067 | P30953 | -1.4096   |
| 96769 | Q2Q067 | Q9ULC8 | -0.92262  |
| 96770 | Q2Q067 | Q92604 | -0.68656  |
| 96771 | Q2Q067 | Q5JXM2 | -0.93456  |
| 96772 | Q2Q067 | Q9BQI0 | -0.71966  |
| 96773 | Q2Q067 | Q96N76 | -0.19817  |
| 96774 | Q2Q067 | P31213 | -0.7823   |
| 96775 | Q2Q067 | Q9H9Y4 | -0.84803  |
| 96776 | Q2Q067 | P01034 | -0.33537  |
| 96777 | Q2Q067 | P54868 | -0.29271  |
| 96778 | Q2Q067 | Q99941 | -0.30197  |
| 96779 | Q2Q067 | Q9ULT6 | -0.60286  |
| 96780 | Q2Q067 | P0CG13 | -0.11893  |
| 96781 | Q2Q067 | Q5T7B8 | -0.28694  |
| 96782 | Q2Q067 | Q9ULL1 | -0.81263  |
| 96783 | Q2Q067 | Q96R69 | -1.4096   |
| 96784 | Q2Q067 | A6NNL5 | -0.98666  |
| 96785 | Q2Q067 | P50553 | -0.57493  |
| 96786 | Q2Q067 | Q9Y6I9 | -0.98666  |
| 96787 | Q2Q067 | Q8N1M1 | -0.98255  |
| 96788 | Q2Q067 | P49023 | -0.21658  |
| 96789 | Q2Q067 | Q9HC96 | -0.70807  |
| 96790 | Q2Q067 | Q8N682 | -1.1329   |
| 96791 | Q2Q067 | O43196 | -0.67398  |
| 96792 | Q2Q067 | Q9P2E8 | -0.9778   |
| 96793 | Q2Q067 | Q9NQL2 | -0.63083  |
| 96794 | Q2Q067 | Q14863 | -0.2274   |
| 96795 | Q2Q067 | P98088 | -1.1188   |
| 96796 | Q2Q067 | Q5T6F0 | -0.22657  |
| 96797 | Q2Q067 | O75071 | -0.45603  |
| 96798 | Q2Q067 | Q9NYZ2 | -1.0334   |
| 96799 | Q2Q067 | Q96Q80 | -0.40497  |
| 96800 | Q2Q067 | Q03828 | -0.22403  |
| 96801 | Q2Q067 | Q6ZW33 | -0.65122  |
| 96802 | Q2Q067 | P0C869 | -0.55027  |
| 96803 | Q2Q067 | Q16644 | -0.22876  |
| 96804 | Q2Q067 | Q7Z5P4 | -1.3263   |
| 96805 | Q2Q067 | Q6BDI9 | -0.61186  |
| 96806 | Q2Q067 | Q8NGN3 | -1.4096   |
| 96807 | Q2Q067 | Q76G19 | -0.22723  |
| 96808 | Q2Q067 | P0CG22 | -1.019    |
| 96809 | Q2Q067 | P11177 | -0.15505  |
| 96810 | Q2Q067 | Q5QFB9 | -1.1118   |
| 96811 | Q2Q067 | A6NHA9 | -1.4096   |
| 96812 | Q2Q067 | Q14147 | -1.1453   |
| 96813 | Q2Q067 | Q86TE4 | -0.98666  |
| 96814 | Q2Q067 | Q5T7P3 | -0.37794  |
| 96815 | Q2Q067 | Q8NG41 | -0.35838  |
| 96816 | Q2Q067 | Q9H3Z7 | -0.36393  |
| 96817 | Q2Q067 | P37108 | -0.43856  |
| 96818 | Q2Q067 | Q9P2X7 | -0.42142  |
| 96819 | Q2Q067 | Q9H0A3 | -1.0345   |
| 96820 | Q2Q067 | Q5T1R4 | -0.22746  |
| 96821 | Q2Q067 | Q9Y2P5 | -0.93386  |
| 96822 | Q2Q067 | Q9BZJ3 | -1.5202   |
| 96823 | Q2Q067 | Q02509 | -0.79307  |
| 96824 | Q2Q067 | Q02487 | -1.1159   |

|       |        |        |             |
|-------|--------|--------|-------------|
| 96825 | Q2Q067 | Q8N715 | -0.051027   |
| 96826 | Q2Q067 | Q75T13 | -0.59253    |
| 96827 | Q2Q067 | Q6EMB2 | -0.1422     |
| 96828 | Q2Q067 | Q8IYS1 | -0.44284    |
| 96829 | Q2Q067 | Q9C0K7 | -0.22846    |
| 96830 | Q2Q067 | Q8N434 | -1.0022     |
| 96831 | Q2Q067 | O96014 | -0.43689    |
| 96832 | Q2Q067 | Q99944 | -1.4074     |
| 96833 | Q2Q067 | P43243 | -0.13479    |
| 96834 | Q2Q067 | Q9NWH7 | -1.3599     |
| 96835 | Q2Q067 | Q8N1Y9 | -1.0345     |
| 96836 | Q2Q067 | P28289 | -0.22208    |
| 96837 | Q2Q067 | Q6UX98 | -1.13       |
| 96838 | Q2Q067 | Q9Y2L9 | -0.23773    |
| 96839 | Q2Q067 | A8MUU1 | -0.63791    |
| 96840 | Q2Q067 | Q9BTT6 | -0.33241    |
| 96841 | Q2Q067 | Q8NA61 | -0.36472    |
| 96842 | Q2Q067 | Q12893 | -0.48912    |
| 96843 | Q2Q067 | Q96M19 | -1.0345     |
| 96844 | Q2Q067 | Q92834 | -0.22587    |
| 96845 | Q2Q067 | P05981 | -0.55088    |
| 96846 | Q2Q067 | Q9ULD9 | -0.73178    |
| 96847 | Q2Q067 | Q9H2C8 | -1.4096     |
| 96848 | Q2Q067 | P59103 | -0.11295    |
| 96849 | Q2Q067 | P12724 | -0.79011    |
| 96850 | Q2Q067 | Q9Y4P3 | -0.24416    |
| 96851 | Q2Q067 | Q8ND24 | -0.48451    |
| 96852 | Q2Q067 | Q95264 | -1.2593     |
| 96853 | Q2Q067 | P50993 | -0.63609    |
| 96854 | Q2Q067 | Q8NFI5 | -1.4304     |
| 96855 | Q2Q067 | Q9BY19 | -1.0345     |
| 96856 | Q2Q067 | Q5JST6 | -0.45603    |
| 96857 | Q2Q067 | Q11201 | -0.86332    |
| 96858 | Q2Q067 | P06732 | -0.74999    |
| 96859 | Q2Q067 | Q13507 | -0.56662    |
| 96860 | Q2Q067 | O43781 | -1.1859     |
| 96861 | Q2Q067 | Q7Z7A4 | -0.99944    |
| 96862 | Q2Q067 | O60500 | -0.67755    |
| 96863 | Q2Q067 | Q8WXE0 | -0.22743    |
| 96864 | Q2Q067 | Q9Y231 | -0.66837    |
| 96865 | Q2Q067 | P63302 | -0.23412    |
| 96866 | Q2Q067 | Q3MII6 | -0.79103    |
| 96867 | Q2Q067 | Q8TDW5 | -0.23322    |
| 96868 | Q2Q067 | P26367 | -0.21923    |
| 96869 | Q2Q067 | Q8N801 | -0.089545   |
| 96870 | Q2Q067 | O95954 | -0.11264    |
| 96871 | Q2Q067 | P43657 | -1.4336     |
| 96872 | Q2Q067 | P16949 | -0.63099    |
| 96873 | Q2Q067 | Q9H3Y8 | -0.71754    |
| 96874 | Q2Q067 | P51159 | -0.34312    |
| 96875 | Q2Q067 | Q12799 | -0.17203    |
| 96876 | Q2Q067 | Q96NR7 | -0.14052    |
| 96877 | Q2Q067 | O14756 | -1.1372     |
| 96878 | Q2Q067 | Q02817 | -0.39497    |
| 96879 | Q2Q067 | Q8N8Y5 | -0.61132    |
| 96880 | Q2Q067 | Q7Z6K5 | -0.00030642 |
| 96881 | Q2Q067 | Q6UXE8 | -0.77947    |
| 96882 | Q2Q067 | O15482 | -0.88683    |
| 96883 | Q2Q067 | P61106 | -0.40284    |
| 96884 | Q2Q067 | A6NIZ1 | -1.1183     |
| 96885 | Q2Q067 | P01024 | -0.75104    |
| 96886 | Q2Q067 | P04155 | -0.28976    |
| 96887 | Q2Q067 | Q3SXY8 | -0.76394    |
| 96888 | Q2Q067 | P78508 | -0.73788    |
| 96889 | Q2Q067 | Q9UEU0 | -0.59932    |
| 96890 | Q2Q067 | O00339 | -0.41633    |
| 96891 | Q2Q067 | Q4V328 | -0.31231    |
| 96892 | Q2Q067 | O95502 | -1.197      |
| 96893 | Q2Q067 | Q4KMQ1 | -0.47393    |
| 96894 | Q2Q067 | O00462 | -0.43834    |
| 96895 | Q2Q067 | P51798 | -1.332      |
| 96896 | Q2Q067 | Q9BZX4 | -0.33595    |
| 96897 | Q2Q067 | Q16763 | -0.39325    |
| 96898 | Q2Q067 | O15460 | -0.62653    |
| 96899 | Q2Q067 | A9Z1Z3 | -1.0345     |
| 96900 | Q2Q067 | Q9UN76 | -1.1316     |



|       |        |        |            |
|-------|--------|--------|------------|
| 96901 | Q2Q067 | Q8TBP6 | -0.85935   |
| 96902 | Q2Q067 | Q9BSC4 | -0.22208   |
| 96903 | Q2Q067 | A2RUR9 | -0.16413   |
| 96904 | Q2Q067 | Q8N122 | -0.23003   |
| 96905 | Q2Q067 | Q08828 | -0.76302   |
| 96906 | Q2Q067 | Q9UPZ9 | -1.0009    |
| 96907 | Q2Q067 | Q9NS98 | -1.309     |
| 96908 | Q2Q067 | P51686 | -1.4606    |
| 96909 | Q2Q067 | Q96E66 | -0.22741   |
| 96910 | Q2Q067 | O75333 | -0.32708   |
| 96911 | Q2Q067 | Q96N87 | -1.2543    |
| 96912 | Q2Q067 | A8MWX3 | -0.58496   |
| 96913 | Q2Q067 | Q9HCN8 | -0.43928   |
| 96914 | Q2Q067 | Q9Y6F7 | -0.22558   |
| 96915 | Q2Q067 | Q8N816 | -1.0345    |
| 96916 | Q2Q067 | Q16288 | -1.1642    |
| 96917 | Q2Q067 | P58511 | -0.77947   |
| 96918 | Q2Q067 | Q9H8X3 | -0.036624  |
| 96919 | Q2Q067 | Q96HY7 | -0.30314   |
| 96920 | Q2Q067 | O75976 | -0.94249   |
| 96921 | Q2Q067 | P46092 | -1.4985    |
| 96922 | Q2Q067 | Q7Z5A9 | -0.95448   |
| 96923 | Q2Q067 | Q8N257 | -0.82527   |
| 96924 | Q2Q067 | Q6EEV6 | -0.0097199 |
| 96925 | Q2Q067 | Q7RTY1 | -1.1464    |
| 96926 | Q2Q067 | Q9H7B4 | -0.22713   |
| 96927 | Q2Q067 | P48058 | -1.1006    |
| 96928 | Q2Q067 | P22413 | -0.31612   |
| 96929 | Q2Q067 | P11215 | -0.3218    |
| 96930 | Q2Q067 | Q8N1E2 | -0.91361   |
| 96931 | Q2Q067 | Q5JUR7 | -0.15803   |
| 96932 | Q2Q067 | Q13438 | -0.17311   |
| 96933 | Q2Q067 | Q92526 | -0.5579    |
| 96934 | Q2Q067 | P01709 | -1.1115    |
| 96935 | Q2Q067 | Q96JA4 | -1.0345    |
| 96936 | Q2Q067 | Q05707 | -1.157     |
| 96937 | Q2Q067 | Q92995 | -0.23044   |
| 96938 | Q2Q067 | Q9UKU7 | -0.24353   |
| 96939 | Q2Q067 | P49842 | -0.86559   |
| 96940 | Q2Q067 | Q14185 | -0.31975   |
| 96941 | Q2Q067 | Q9BXA5 | -1.3897    |
| 96942 | Q2Q067 | Q96LT4 | -0.88779   |
| 96943 | Q2Q067 | Q9NZS2 | -1.1955    |
| 96944 | Q2Q067 | P46199 | -0.80569   |
| 96945 | Q2Q067 | Q86WN2 | -0.95457   |
| 96946 | Q2Q067 | Q9NZL6 | -0.5929    |
| 96947 | Q2Q067 | Q4G0G5 | -0.98666   |
| 96948 | Q2Q067 | Q8NGS8 | -1.4096    |
| 96949 | Q2Q067 | Q96GQ5 | -1.0345    |
| 96950 | Q2Q067 | Q8N7S6 | -1.0345    |
| 96951 | Q2Q067 | O14792 | -0.51745   |
| 96952 | Q2Q067 | Q8WZ71 | -1.0345    |
| 96953 | Q2Q067 | Q9Y2Z9 | -0.58479   |
| 96954 | Q2Q067 | Q5NE16 | -0.46968   |
| 96955 | Q2Q067 | Q8N103 | -0.77337   |
| 96956 | Q2Q067 | Q9UBM7 | -0.92332   |
| 96957 | Q2Q067 | P22894 | -1.4458    |
| 96958 | Q2Q067 | Q9Y2Y6 | -0.99456   |
| 96959 | Q2Q067 | Q9H773 | -0.49246   |
| 96960 | Q2Q067 | P30495 | -1.1453    |
| 96961 | Q2Q067 | P10415 | -0.22732   |
| 96962 | Q2Q067 | Q9UN86 | -0.97094   |
| 96963 | Q2Q067 | Q9Y574 | -0.34278   |
| 96964 | Q2Q067 | Q7Z3Z3 | -0.60814   |
| 96965 | Q2Q067 | Q96CP7 | -1.0345    |
| 96966 | Q2Q067 | Q8N1N0 | -1.0959    |
| 96967 | Q2Q067 | Q2TAA2 | -0.43391   |
| 96968 | Q2Q067 | Q99574 | -0.75155   |
| 96969 | Q2Q067 | Q15847 | -0.24416   |
| 96970 | Q2Q067 | Q5FVE4 | -1.0704    |
| 96971 | Q2Q067 | Q8IU57 | -0.45427   |
| 96972 | Q2Q067 | P0C604 | -1.4096    |
| 96973 | Q2Q067 | P51814 | -0.067277  |
| 96974 | Q2Q067 | Q7Z4P5 | -0.22741   |
| 96975 | Q2Q067 | Q8NGM8 | -1.4096    |
| 96976 | Q2Q067 | P61278 | -0.87304   |

|       |        |        |           |
|-------|--------|--------|-----------|
| 96977 | Q2Q067 | Q7RTY9 | -1.156    |
| 96978 | Q2Q067 | P05060 | -0.29857  |
| 96979 | Q2Q067 | P14091 | -0.6738   |
| 96980 | Q2Q067 | O14939 | -0.22243  |
| 96981 | Q2Q067 | O14594 | -0.84598  |
| 96982 | Q2Q067 | P51648 | -1.0631   |
| 96983 | Q2Q067 | Q8WYB5 | -0.33894  |
| 96984 | Q2Q067 | Q14697 | -0.20006  |
| 96985 | Q2Q067 | Q96B86 | -0.52535  |
| 96986 | Q2Q067 | Q9Y519 | -1.0345   |
| 96987 | Q2Q067 | Q86SG6 | -1.3436   |
| 96988 | Q2Q067 | Q15612 | -1.2349   |
| 96989 | Q2Q067 | A5D8T8 | -0.97472  |
| 96990 | Q2Q067 | O94953 | -0.17225  |
| 96991 | Q2Q067 | Q9UBM8 | -0.70356  |
| 96992 | Q2Q067 | P13798 | -0.39389  |
| 96993 | Q2Q067 | P85299 | -0.28292  |
| 96994 | Q2Q067 | O43908 | -1.0102   |
| 96995 | Q2Q067 | P15586 | -0.22218  |
| 96996 | Q2Q067 | P22692 | -1.0455   |
| 96997 | Q2Q067 | P98066 | -0.77857  |
| 96998 | Q2Q067 | Q9NZQ8 | -1.1596   |
| 96999 | Q2Q067 | P17213 | -1.0287   |
| 97000 | Q2Q067 | A6NFY4 | -1.0345   |
| 97001 | Q2Q067 | P22732 | -0.38631  |
| 97002 | Q2Q067 | Q96NT0 | -0.5272   |
| 97003 | Q2Q067 | P06889 | -1.1115   |
| 97004 | Q2Q067 | Q6IN97 | -0.22602  |
| 97005 | Q2Q067 | P61165 | -1.0345   |
| 97006 | Q2Q067 | Q08043 | -0.32261  |
| 97007 | Q2Q067 | Q5VTT2 | -1.0345   |
| 97008 | Q2Q067 | O95867 | -0.65821  |
| 97009 | Q2Q067 | Q6P4H8 | -1.0345   |
| 97010 | Q2Q067 | P15391 | -1.2859   |
| 97011 | Q2Q067 | Q7Z2W7 | -0.96981  |
| 97012 | Q2Q067 | P61565 | -0.86704  |
| 97013 | Q2Q067 | O00160 | -0.54101  |
| 97014 | Q2Q067 | Q96Q27 | -0.76346  |
| 97015 | Q2Q067 | P51687 | -0.21048  |
| 97016 | Q2Q067 | P81172 | -0.67747  |
| 97017 | Q2Q067 | Q8TBE1 | -0.976    |
| 97018 | Q2Q067 | O94929 | -0.22245  |
| 97019 | Q2Q067 | Q8NGJ5 | -1.4096   |
| 97020 | Q2Q067 | Q9Y644 | -1.214    |
| 97021 | Q2Q067 | Q9BZG2 | -0.9554   |
| 97022 | Q2Q067 | Q9UL26 | -0.67448  |
| 97023 | Q2Q067 | P45381 | -0.077058 |
| 97024 | Q2Q067 | Q495N2 | -1.0345   |
| 97025 | Q2Q067 | P35236 | -0.45695  |
| 97026 | Q2Q067 | Q6ZVH7 | -0.22739  |
| 97027 | Q2Q067 | Q86X67 | -0.2353   |
| 97028 | Q2Q067 | P01610 | -1.1115   |
| 97029 | Q2Q067 | Q7Z5J4 | -0.18981  |
| 97030 | Q2Q067 | P41159 | -0.39533  |
| 97031 | Q2Q067 | Q7L622 | -0.21253  |
| 97032 | Q2Q067 | Q96HU8 | -1.5078   |
| 97033 | Q2Q067 | P0CB48 | -0.2162   |
| 97034 | Q2Q067 | Q96K80 | -0.19934  |
| 97035 | Q2Q067 | Q9HCQ5 | -0.81418  |
| 97036 | Q2Q067 | P13804 | -0.10171  |
| 97037 | Q2Q067 | P32942 | -0.88492  |
| 97038 | Q2Q067 | Q03403 | -0.3525   |
| 97039 | Q2Q067 | P31645 | -0.34253  |
| 97040 | Q2Q067 | Q9Y2U2 | -1.2903   |
| 97041 | Q2Q067 | P29622 | -0.81862  |
| 97042 | Q2Q067 | Q9UIG0 | -0.22487  |
| 97043 | Q2Q067 | Q96SK2 | -1.0345   |
| 97044 | Q2Q067 | P08476 | -0.25605  |
| 97045 | Q2Q067 | Q86TW2 | -1.5113   |
| 97046 | Q2Q067 | Q8NGP3 | -1.4096   |
| 97047 | Q2Q067 | Q8NB78 | -0.45424  |
| 97048 | Q2Q067 | P05166 | -0.47677  |
| 97049 | Q2Q067 | Q49A92 | -0.56189  |
| 97050 | Q2Q067 | Q12797 | -0.56439  |
| 97051 | Q2Q067 | P20264 | -0.22741  |
| 97052 | Q2Q067 | Q9Y4X3 | -1.0274   |

|       |        |        |           |
|-------|--------|--------|-----------|
| 97053 | Q2Q067 | G3V0H7 | -1.163    |
| 97054 | Q2Q067 | Q96LP4 | -0.18668  |
| 97055 | Q2Q067 | P24592 | -0.84343  |
| 97056 | Q2Q067 | P01711 | -1.1115   |
| 97057 | Q2Q067 | O75752 | -0.95489  |
| 97058 | Q2Q067 | Q92484 | -0.39669  |
| 97059 | Q2Q067 | Q03518 | -0.42549  |
| 97060 | Q2Q067 | Q7L5Y9 | -0.099423 |
| 97061 | Q2Q067 | Q92608 | -0.25764  |
| 97062 | Q2Q067 | P55061 | -0.65585  |
| 97063 | Q2Q067 | O94911 | -1.4785   |
| 97064 | Q2Q067 | Q9HCP0 | -1.1546   |
| 97065 | Q2Q067 | Q8NGR4 | -1.4096   |
| 97066 | Q2Q067 | Q9UJ42 | -1.4967   |
| 97067 | Q2Q067 | Q92186 | -0.46413  |
| 97068 | Q2Q067 | Q5SY80 | -1.0345   |
| 97069 | Q2Q067 | Q13615 | -0.19706  |
| 97070 | Q2Q067 | P33992 | -0.21123  |
| 97071 | Q2Q067 | Q9UQ26 | -0.22741  |
| 97072 | Q2Q067 | Q6DWJ6 | -1.4967   |
| 97073 | Q2Q067 | Q9NRJ5 | -0.34362  |
| 97074 | Q2Q067 | P27449 | -0.30515  |
| 97075 | Q2Q067 | O95470 | -0.37335  |
| 97076 | Q2Q067 | O75845 | -0.92817  |
| 97077 | Q2Q067 | Q9Y5Y7 | -0.93699  |
| 97078 | Q2Q067 | Q30KQ7 | -0.94775  |
| 97079 | Q2Q067 | Q86XF0 | -0.32121  |
| 97080 | Q2Q067 | O75541 | -0.27773  |
| 97081 | Q2Q067 | Q96FN4 | -0.22766  |
| 97082 | Q2Q067 | Q4ZHG4 | -0.74717  |
| 97083 | Q2Q067 | Q9UHP7 | -1.2669   |
| 97084 | Q2Q067 | Q96GR2 | -0.79237  |
| 97085 | Q2Q067 | Q16378 | -1.1198   |
| 97086 | Q2Q067 | Q6W4X9 | -0.9826   |
| 97087 | Q2Q067 | P36508 | -0.064679 |
| 97088 | Q2Q067 | Q86X52 | -0.96924  |
| 97089 | Q2Q067 | Q5TGL8 | -0.52507  |
| 97090 | Q2Q067 | Q7Z7H5 | -1.0985   |
| 97091 | Q2Q067 | Q6ZW76 | -0.22742  |
| 97092 | Q2Q067 | P25106 | -1.2561   |
| 97093 | Q2Q067 | P19623 | -0.2168   |
| 97094 | Q2Q067 | Q8NG81 | -1.4096   |
| 97095 | Q2Q067 | Q9UBC7 | -0.82517  |
| 97096 | Q2Q067 | Q8WXH0 | -0.2285   |
| 97097 | Q2Q067 | Q8N3K9 | -0.24504  |
| 97098 | Q2Q067 | Q9BXS9 | -1.1671   |
| 97099 | Q2Q067 | P48048 | -1.5254   |
| 97100 | Q2Q067 | Q8NGA8 | -1.4096   |
| 97101 | Q2Q067 | Q96GW9 | -0.21214  |
| 97102 | Q2Q067 | Q8NGW1 | -1.4096   |
| 97103 | Q2Q067 | Q7Z2Y5 | -1.2527   |
| 97104 | Q2Q067 | Q6UXZ0 | -1.0345   |
| 97105 | Q2Q067 | Q9BTV4 | -0.52558  |
| 97106 | Q2Q067 | Q04756 | -1.3173   |
| 97107 | Q2Q067 | Q8IXT5 | -0.27718  |
| 97108 | Q2Q067 | P42330 | -0.22543  |
| 97109 | Q2Q067 | P30044 | -0.30486  |
| 97110 | Q2Q067 | Q5T7M4 | -0.98561  |
| 97111 | Q2Q067 | Q6IEU7 | -1.4096   |
| 97112 | Q2Q067 | O75398 | -0.21874  |
| 97113 | Q2Q067 | P06239 | -0.24295  |
| 97114 | Q2Q067 | Q92542 | -0.49     |
| 97115 | Q2Q067 | P22362 | -1.1922   |
| 97116 | Q2Q067 | P31151 | -0.21155  |
| 97117 | Q2Q067 | Q92777 | -0.59543  |
| 97118 | Q2Q067 | Q9H8K7 | -0.43841  |
| 97119 | Q2Q067 | O43505 | -0.60421  |
| 97120 | Q2Q067 | Q99614 | -0.22602  |
| 97121 | Q2Q067 | P15169 | -1.3833   |
| 97122 | Q2Q067 | Q9UNW1 | -0.46951  |
| 97123 | Q2Q067 | P47944 | -0.34008  |
| 97124 | Q2Q067 | Q9H478 | -0.24416  |
| 97125 | Q2Q067 | Q9H310 | -0.95174  |
| 97126 | Q2Q067 | A6NNJ1 | -0.43957  |
| 97127 | Q2Q067 | A4D0T7 | -1.0345   |
| 97128 | Q2Q067 | Q01453 | -0.5322   |

|       |        |        |           |
|-------|--------|--------|-----------|
| 97129 | Q2Q067 | P63135 | -0.20886  |
| 97130 | Q2Q067 | Q9UIQ6 | -1.5225   |
| 97131 | Q2Q067 | Q9GZK6 | -1.4096   |
| 97132 | Q2Q067 | P09871 | -1.4774   |
| 97133 | Q2Q067 | Q8N976 | -0.2228   |
| 97134 | Q2Q067 | Q92729 | -0.81831  |
| 97135 | Q2Q067 | P49798 | -0.47439  |
| 97136 | Q2Q067 | Q86Z14 | -0.88101  |
| 97137 | Q2Q067 | Q969Q1 | -0.60277  |
| 97138 | Q2Q067 | Q8NGV5 | -1.4096   |
| 97139 | Q2Q067 | Q6ZQN5 | -0.34661  |
| 97140 | Q2Q067 | Q4UJ75 | -0.2274   |
| 97141 | Q2Q067 | Q96S37 | -0.89899  |
| 97142 | Q2Q067 | Q9P0K7 | -0.22745  |
| 97143 | Q2Q067 | P53597 | -0.61615  |
| 97144 | Q2Q067 | Q7Z4J2 | -0.84696  |
| 97145 | Q2Q067 | Q9BWW7 | -0.20901  |
| 97146 | Q2Q067 | A6NM03 | -1.4096   |
| 97147 | Q2Q067 | Q8N1S5 | -1.0849   |
| 97148 | Q2Q067 | Q9UN75 | -1.3679   |
| 97149 | Q2Q067 | Q9BZF2 | -0.9261   |
| 97150 | Q2Q067 | Q8IZJ3 | -1.0824   |
| 97151 | Q2Q067 | Q99536 | -1.1422   |
| 97152 | Q2Q067 | Q4LDE5 | -0.91924  |
| 97153 | Q2Q067 | Q02153 | -0.82476  |
| 97154 | Q2Q067 | Q9BT67 | -0.48259  |
| 97155 | Q2Q067 | Q5JTN6 | -0.22883  |
| 97156 | Q2Q067 | P16885 | -0.22741  |
| 97157 | Q2Q067 | O00187 | -1.0904   |
| 97158 | Q2Q067 | Q8IZF7 | -1.5126   |
| 97159 | Q2Q067 | P31025 | -1.2155   |
| 97160 | Q2Q067 | P08253 | -0.8121   |
| 97161 | Q2Q067 | Q96B18 | -0.31106  |
| 97162 | Q2Q067 | Q8NGX2 | -1.4096   |
| 97163 | Q2Q067 | Q96AQ2 | -0.77947  |
| 97164 | Q2Q067 | Q9BQ24 | -0.40129  |
| 97165 | Q2Q067 | Q2M3D2 | -0.24416  |
| 97166 | Q2Q067 | P18440 | -0.21593  |
| 97167 | Q2Q067 | P98161 | -0.3005   |
| 97168 | Q2Q067 | Q6NTF9 | -1.0807   |
| 97169 | Q2Q067 | Q9NRD9 | -1.0393   |
| 97170 | Q2Q067 | Q7L7V1 | -0.37868  |
| 97171 | Q2Q067 | Q8TF76 | -0.74336  |
| 97172 | Q2Q067 | Q29980 | -0.97138  |
| 97173 | Q2Q067 | Q00872 | -0.75377  |
| 97174 | Q2Q067 | Q7RTY8 | -1.591    |
| 97175 | Q2Q067 | Q58G82 | -0.20867  |
| 97176 | Q2Q067 | Q14656 | -0.86627  |
| 97177 | Q2Q067 | Q16540 | -0.38045  |
| 97178 | Q2Q067 | P04066 | -0.33027  |
| 97179 | Q2Q067 | Q86VH4 | -1.0345   |
| 97180 | Q2Q067 | Q14406 | -0.92397  |
| 97181 | Q2Q067 | P04430 | -1.1115   |
| 97182 | Q2Q067 | Q92813 | -0.95831  |
| 97183 | Q2Q067 | Q8IZV5 | -0.73141  |
| 97184 | Q2Q067 | Q7Z3G6 | -0.30084  |
| 97185 | Q2Q067 | P13942 | -0.92575  |
| 97186 | Q2Q067 | Q9H4I8 | -0.22236  |
| 97187 | Q2Q067 | P41439 | -0.98993  |
| 97188 | Q2Q067 | P36575 | -0.3387   |
| 97189 | Q2Q067 | Q17R26 | -0.27686  |
| 97190 | Q2Q067 | Q14191 | -0.22693  |
| 97191 | Q2Q067 | Q8WW34 | -1.0345   |
| 97192 | Q2Q067 | Q52M75 | -0.4772   |
| 97193 | Q2Q067 | Q6UWR7 | -1.5209   |
| 97194 | Q2Q067 | Q95819 | -0.57276  |
| 97195 | Q2Q067 | Q9Y5F6 | -1.3679   |
| 97196 | Q2Q067 | Q7RTS3 | -0.2285   |
| 97197 | Q2Q067 | Q96Q42 | -0.4963   |
| 97198 | Q2Q067 | Q96FZ7 | -0.095633 |
| 97199 | Q2Q067 | Q5T2T1 | -0.2261   |
| 97200 | Q2Q067 | Q9H3D4 | -0.22727  |
| 97201 | Q2Q067 | A4D1F6 | -0.57228  |
| 97202 | Q2Q067 | Q13362 | -0.095764 |
| 97203 | Q2Q067 | Q8N9W5 | -0.13771  |
| 97204 | Q2Q067 | Q14527 | -0.2235   |

|       |        |        |          |
|-------|--------|--------|----------|
| 97205 | Q2Q067 | O43278 | -0.94276 |
| 97206 | Q2Q067 | P02652 | -0.35901 |
| 97207 | Q2Q067 | Q9UBC5 | -0.43    |
| 97208 | Q2Q067 | Q96JN2 | -0.84904 |
| 97209 | Q2Q067 | Q5VTL7 | -0.98666 |
| 97210 | Q2Q067 | Q8NGC5 | -1.4096  |
| 97211 | Q2Q067 | O15498 | -0.20623 |
| 97212 | Q2Q067 | Q8N283 | -0.22739 |
| 97213 | Q2Q067 | Q9H0X6 | -0.48451 |
| 97214 | Q2Q067 | P56557 | -0.95872 |
| 97215 | Q2Q067 | O95925 | -0.29208 |
| 97216 | Q2Q067 | Q86UW8 | -1.1911  |
| 97217 | Q2Q067 | P15170 | -0.40979 |
| 97218 | Q2Q067 | Q9UDW1 | -0.26644 |
| 97219 | Q2Q067 | Q96P16 | -0.37636 |
| 97220 | Q2Q067 | Q9Y5F8 | -1.3679  |
| 97221 | Q2Q067 | Q8NEB7 | -0.77385 |
| 97222 | Q2Q067 | Q9UJV3 | -0.3865  |
| 97223 | Q2Q067 | O43316 | -0.22498 |
| 97224 | Q2Q067 | Q96HP8 | -1.0345  |
| 97225 | Q2Q067 | Q8TDM5 | -0.83914 |
| 97226 | Q2Q067 | Q06033 | -0.85004 |
| 97227 | Q2Q067 | Q9HDD0 | -0.32173 |
| 97228 | Q2Q067 | P30491 | -1.1453  |
| 97229 | Q2Q067 | Q9Y6Q2 | -0.20801 |
| 97230 | Q2Q067 | Q2KJY2 | -0.84266 |
| 97231 | Q2Q067 | P50579 | -0.5489  |
| 97232 | Q2Q067 | Q9BXJ5 | -1.0246  |
| 97233 | Q2Q067 | O95428 | -1.2096  |
| 97234 | Q2Q067 | Q96G79 | -0.76055 |
| 97235 | Q2Q067 | Q92637 | -1.2203  |
| 97236 | Q2Q067 | Q9BY08 | -1.0583  |
| 97237 | Q2Q067 | Q14257 | -0.37693 |
| 97238 | Q2Q067 | Q9BRJ9 | -0.22746 |
| 97239 | Q2Q067 | P09238 | -1.4119  |
| 97240 | Q2Q067 | P05452 | -0.95283 |
| 97241 | Q2Q067 | Q86XT9 | -1.1166  |
| 97242 | Q2Q067 | O43826 | -0.43366 |
| 97243 | Q2Q067 | P05091 | -0.30043 |
| 97244 | Q2Q067 | P43146 | -0.35227 |
| 97245 | Q2Q067 | P06133 | -1.0277  |
| 97246 | Q2Q067 | Q86XJ1 | -0.40813 |
| 97247 | Q2Q067 | O60568 | -0.26901 |
| 97248 | Q2Q067 | Q6NVY1 | -0.15888 |
| 97249 | Q2Q067 | O15503 | -0.52425 |
| 97250 | Q2Q067 | Q9HAP6 | -0.19994 |
| 97251 | Q2Q067 | Q5BIV9 | -0.65821 |
| 97252 | Q2Q067 | Q9H270 | -0.227   |
| 97253 | Q2Q067 | P26232 | -0.19702 |
| 97254 | Q2Q067 | Q9Y5R8 | -0.10591 |
| 97255 | Q2Q067 | Q14641 | -1.3055  |
| 97256 | Q2Q067 | Q8NC69 | -0.15456 |
| 97257 | Q2Q067 | P00451 | -0.57585 |
| 97258 | Q2Q067 | Q8IUM7 | -0.43521 |
| 97259 | Q2Q067 | P51674 | -0.99655 |
| 97260 | Q2Q067 | Q9UQ03 | -0.4475  |
| 97261 | Q2Q067 | P34903 | -0.97803 |
| 97262 | Q2Q067 | P61086 | -0.50734 |
| 97263 | Q2Q067 | P01569 | -0.86951 |
| 97264 | Q2Q067 | Q9Y646 | -0.98006 |
| 97265 | Q2Q067 | Q9NR45 | -0.18556 |
| 97266 | Q2Q067 | Q9H2S5 | -0.27012 |
| 97267 | Q2Q067 | Q92545 | -0.77947 |
| 97268 | Q2Q067 | Q6PIU1 | -1.0619  |
| 97269 | Q2Q067 | P35611 | -0.19505 |
| 97270 | Q2Q067 | Q8IUK8 | -1.0345  |
| 97271 | Q2Q067 | P42338 | -0.33007 |
| 97272 | Q2Q067 | Q9UGH3 | -0.71602 |
| 97273 | Q2Q067 | Q86UN3 | -0.65911 |
| 97274 | Q2Q067 | Q13795 | -0.72601 |
| 97275 | Q2Q067 | Q6ZUX7 | -1.0345  |
| 97276 | Q2Q067 | A6NNM3 | -0.2274  |
| 97277 | Q2Q067 | Q9Y5G0 | -1.3679  |
| 97278 | Q2Q067 | Q9NXG2 | -0.43468 |
| 97279 | Q2Q067 | Q07092 | -0.69303 |
| 97280 | Q2Q067 | A6NFT4 | -0.13361 |

|       |        |        |            |
|-------|--------|--------|------------|
| 97281 | Q2Q067 | O60309 | -1.0345    |
| 97282 | Q2Q067 | O43709 | -0.32979   |
| 97283 | Q2Q067 | O43741 | -0.54279   |
| 97284 | Q2Q067 | P49189 | -0.31592   |
| 97285 | Q2Q067 | P30508 | -1.2066    |
| 97286 | Q2Q067 | Q9ULY5 | -1.0289    |
| 97287 | Q2Q067 | Q53H64 | -0.01546   |
| 97288 | Q2Q067 | P28223 | -0.80338   |
| 97289 | Q2Q067 | Q495A1 | -0.54141   |
| 97290 | Q2Q067 | Q6PJW8 | -0.24054   |
| 97291 | Q2Q067 | Q9NR97 | -0.88581   |
| 97292 | Q2Q067 | P0CK96 | -1.0345    |
| 97293 | Q2Q067 | P00450 | -1.0813    |
| 97294 | Q2Q067 | Q6PEY2 | -0.6929    |
| 97295 | Q2Q067 | P17481 | -0.21667   |
| 97296 | Q2Q067 | P53582 | -0.54128   |
| 97297 | Q2Q067 | Q96LB9 | -1.0023    |
| 97298 | Q2Q067 | Q9H6X2 | -0.67483   |
| 97299 | Q2Q067 | Q9UF56 | -0.22315   |
| 97300 | Q2Q067 | Q9NYD6 | -0.21978   |
| 97301 | Q2Q067 | Q9BQQ3 | -0.11447   |
| 97302 | Q2Q067 | P04279 | -0.25813   |
| 97303 | Q2Q067 | Q9NWM8 | -0.4346    |
| 97304 | Q2Q067 | Q8WVC6 | -0.70689   |
| 97305 | Q2Q067 | O95562 | -0.73764   |
| 97306 | Q2Q067 | Q8NGS4 | -1.4096    |
| 97307 | Q2Q067 | P02746 | -0.46493   |
| 97308 | Q2Q067 | P42357 | -0.16727   |
| 97309 | Q2Q067 | Q9HAS3 | -0.98154   |
| 97310 | Q2Q067 | P33151 | -0.59265   |
| 97311 | Q2Q067 | Q8N5T2 | -1.4231    |
| 97312 | Q2Q067 | Q9BQW3 | -0.048817  |
| 97313 | Q2Q067 | O43688 | -0.84701   |
| 97314 | Q2Q067 | Q659C4 | -0.43468   |
| 97315 | Q2Q067 | Q9HCF6 | -1.0902    |
| 97316 | Q2Q067 | Q15619 | -1.4096    |
| 97317 | Q2Q067 | Q9UPM8 | -0.18731   |
| 97318 | Q2Q067 | Q9P2D8 | -1.0345    |
| 97319 | Q2Q067 | Q8TAA1 | -0.87122   |
| 97320 | Q2Q067 | O60423 | -1.1228    |
| 97321 | Q2Q067 | Q8N5I4 | -1.0935    |
| 97322 | Q2Q067 | P04839 | -0.7234    |
| 97323 | Q2Q067 | O95626 | -0.19301   |
| 97324 | Q2Q067 | Q96BT1 | -0.3035    |
| 97325 | Q2Q067 | P25445 | -0.22732   |
| 97326 | Q2Q067 | O00206 | -0.22742   |
| 97327 | Q2Q067 | P0C7I0 | -0.27824   |
| 97328 | Q2Q067 | P52824 | -0.22741   |
| 97329 | Q2Q067 | Q96PD2 | -1.2705    |
| 97330 | Q2Q067 | A6NJ69 | -0.98666   |
| 97331 | Q2Q067 | Q9BZM6 | -0.65168   |
| 97332 | Q2Q067 | Q96KM6 | -0.22741   |
| 97333 | Q2Q067 | P19801 | -0.88824   |
| 97334 | Q2Q067 | H3BRN8 | -0.0067995 |
| 97335 | Q2Q067 | Q8IYJ3 | -0.23787   |
| 97336 | Q2Q067 | P17509 | -0.18877   |
| 97337 | Q2Q067 | Q6PEY1 | -1.0345    |
| 97338 | Q2Q067 | Q68CQ1 | -1.0345    |
| 97339 | Q2Q067 | Q8NH06 | -1.4096    |
| 97340 | Q2Q067 | Q9Y4P9 | -0.21443   |
| 97341 | Q2Q067 | Q9NR30 | -0.52061   |
| 97342 | Q2Q067 | Q96H35 | -0.96284   |
| 97343 | Q2Q067 | Q6ZN80 | -0.37564   |
| 97344 | Q2Q067 | A2A2V5 | -1.0345    |
| 97345 | Q2Q067 | Q13523 | -0.51252   |
| 97346 | Q2Q067 | Q2TB90 | -0.27928   |
| 97347 | Q2Q067 | Q86YT6 | -0.22738   |
| 97348 | Q2Q067 | P61925 | -0.14824   |
| 97349 | Q2Q067 | Q9UF02 | -0.91332   |
| 97350 | Q2Q067 | Q9P2W7 | -0.72938   |
| 97351 | Q2Q067 | Q9P1U1 | -0.93009   |
| 97352 | Q2Q067 | Q8NB46 | -0.22733   |
| 97353 | Q2Q067 | Q9Y274 | -0.53066   |
| 97354 | Q2Q067 | P10176 | -0.63006   |
| 97355 | Q2Q067 | Q6P474 | -0.59474   |
| 97356 | Q2Q067 | P12109 | -0.99623   |

|       |        |        |           |
|-------|--------|--------|-----------|
| 97357 | Q2Q067 | P37173 | -0.41897  |
| 97358 | Q2Q067 | A6NFC5 | -0.63644  |
| 97359 | Q2Q067 | Q13283 | -0.23036  |
| 97360 | Q2Q067 | P23582 | -0.65795  |
| 97361 | Q2Q067 | Q9NQM4 | -0.10298  |
| 97362 | Q2Q067 | O43174 | -0.74868  |
| 97363 | Q2Q067 | Q6ISU1 | -0.34971  |
| 97364 | Q2Q067 | Q58EX7 | -0.81263  |
| 97365 | Q2Q067 | Q15043 | -1.0548   |
| 97366 | Q2Q067 | Q96JP2 | -0.21645  |
| 97367 | Q2Q067 | Q7Z403 | -1.1118   |
| 97368 | Q2Q067 | Q8NE86 | -0.36224  |
| 97369 | Q2Q067 | Q86WC6 | -0.22741  |
| 97370 | Q2Q067 | Q9NPH3 | -1.8418   |
| 97371 | Q2Q067 | P29459 | -0.20847  |
| 97372 | Q2Q067 | Q12840 | -0.25553  |
| 97373 | Q2Q067 | Q6ZNC4 | -0.73178  |
| 97374 | Q2Q067 | Q8NE28 | -1.1402   |
| 97375 | Q2Q067 | O00400 | -0.99605  |
| 97376 | Q2Q067 | P62341 | -0.43673  |
| 97377 | Q2Q067 | Q4KMZ8 | -1.1634   |
| 97378 | Q2Q067 | Q7Z4M0 | -0.30884  |
| 97379 | Q2Q067 | Q9H339 | -1.4096   |
| 97380 | Q2Q067 | P17174 | -0.20476  |
| 97381 | Q2Q067 | O95715 | -1.0396   |
| 97382 | Q2Q067 | Q9H4E5 | -1.1051   |
| 97383 | Q2Q067 | Q14156 | -0.87127  |
| 97384 | Q2Q067 | Q16655 | -0.37148  |
| 97385 | Q2Q067 | Q8NCT1 | -0.57228  |
| 97386 | Q2Q067 | Q9NP59 | -0.48497  |
| 97387 | Q2Q067 | Q9UJ71 | -1.2573   |
| 97388 | Q2Q067 | P58294 | -0.78312  |
| 97389 | Q2Q067 | Q9NVV5 | -0.35359  |
| 97390 | Q2Q067 | P15907 | -1.0395   |
| 97391 | Q2Q067 | Q01518 | -0.30246  |
| 97392 | Q2Q067 | Q8NBI2 | -1.2317   |
| 97393 | Q2Q067 | Q5SRI9 | -0.70918  |
| 97394 | Q2Q067 | P57058 | -1.5903   |
| 97395 | Q2Q067 | Q8NFI9 | -0.20259  |
| 97396 | Q2Q067 | Q5VV43 | -0.70567  |
| 97397 | Q2Q067 | Q9Y653 | -1.7503   |
| 97398 | Q2Q067 | Q96JH8 | -0.97665  |
| 97399 | Q2Q067 | P83111 | -0.19952  |
| 97400 | Q2Q067 | P08172 | -1.0552   |
| 97401 | Q2Q067 | P61964 | -0.80916  |
| 97402 | Q2Q067 | Q8N309 | -0.20057  |
| 97403 | Q2Q067 | Q9UBY5 | -1.4652   |
| 97404 | Q2Q067 | Q9Y4F1 | -0.57474  |
| 97405 | Q2Q067 | Q9NZK5 | -0.76311  |
| 97406 | Q2Q067 | Q53H12 | -0.9102   |
| 97407 | Q2Q067 | P08588 | -0.76804  |
| 97408 | Q2Q067 | O43719 | -0.21857  |
| 97409 | Q2Q067 | Q9NPI9 | -1.2889   |
| 97410 | Q2Q067 | Q9H8W2 | -0.060384 |
| 97411 | Q2Q067 | Q8IVV8 | -1.1634   |
| 97412 | Q2Q067 | Q6UWF6 | -0.98666  |
| 97413 | Q2Q067 | P36537 | -1.0973   |
| 97414 | Q2Q067 | Q9H1A7 | -0.056663 |
| 97415 | Q2Q067 | A6NGB9 | -0.54375  |
| 97416 | Q2Q067 | Q15486 | -0.28232  |
| 97417 | Q2Q067 | Q7L1T6 | -0.51576  |
| 97418 | Q2Q067 | Q9UJ90 | -1.0189   |
| 97419 | Q2Q067 | Q8NG06 | -0.73178  |
| 97420 | Q2Q067 | P49327 | -0.63049  |
| 97421 | Q2Q067 | Q6ZRK6 | -0.1459   |
| 97422 | Q2Q067 | Q96PX9 | -0.78041  |
| 97423 | Q2Q067 | Q9ULV0 | -0.21196  |
| 97424 | Q2Q067 | Q5H9T9 | -0.56545  |
| 97425 | Q2Q067 | Q8NHB7 | -1.4096   |
| 97426 | Q2Q067 | P49736 | -0.21088  |
| 97427 | Q2Q067 | Q14126 | -1.0486   |
| 97428 | Q2Q067 | Q9BUJ0 | -0.76683  |
| 97429 | Q2Q067 | P29558 | -0.23889  |
| 97430 | Q2Q067 | P22830 | -0.043402 |
| 97431 | Q2Q067 | B9EJG8 | -1.0345   |
| 97432 | Q2Q067 | Q8NGF9 | -1.4096   |

|       |        |        |           |
|-------|--------|--------|-----------|
| 97433 | Q2Q067 | P39086 | -0.71436  |
| 97434 | Q2Q067 | Q86TL2 | -0.77947  |
| 97435 | Q2Q067 | Q13068 | -0.068567 |
| 97436 | Q2Q067 | Q16518 | -0.60297  |
| 97437 | Q2Q067 | P21453 | -0.91986  |
| 97438 | Q2Q067 | O60229 | -1.0956   |
| 97439 | Q2Q067 | Q9BTN0 | -1.221    |
| 97440 | Q2Q067 | A1L3Z2 | -0.050572 |
| 97441 | Q2Q067 | Q9BXU7 | -0.25323  |
| 97442 | Q2Q067 | Q5T0N1 | -0.15602  |
| 97443 | Q2Q067 | O15294 | -0.22667  |
| 97444 | Q2Q067 | Q9NZU1 | -1.3047   |
| 97445 | Q2Q067 | Q8TD47 | -0.11985  |
| 97446 | Q2Q067 | Q9ULP0 | -0.17339  |
| 97447 | Q2Q067 | Q9Y3Q0 | -1.3534   |
| 97448 | Q2Q067 | P00747 | -0.4562   |
| 97449 | Q2Q067 | Q99748 | -0.65232  |
| 97450 | Q2Q067 | Q9UBX8 | -0.66022  |
| 97451 | Q2Q067 | O75888 | -0.60655  |
| 97452 | Q2Q067 | O43511 | -1.0187   |
| 97453 | Q2Q067 | P32004 | -0.71547  |
| 97454 | Q2Q067 | Q9BSE4 | -0.92364  |
| 97455 | Q2Q067 | P17931 | -0.24024  |
| 97456 | Q2Q067 | Q9BZP6 | -0.56325  |
| 97457 | Q2Q067 | Q9Y345 | -1.054    |
| 97458 | Q2Q067 | Q8NCS7 | -0.92541  |
| 97459 | Q2Q067 | Q9UIK5 | -1.4569   |
| 97460 | Q2Q067 | Q8NGL2 | -1.4096   |
| 97461 | Q2Q067 | P27144 | -0.68416  |
| 97462 | Q2Q067 | P13727 | -0.98942  |
| 97463 | Q2Q067 | Q9UHP9 | -0.11733  |
| 97464 | Q2Q067 | P12645 | -0.84383  |
| 97465 | Q2Q067 | Q5SXH7 | -0.51797  |
| 97466 | Q2Q067 | Q8N4N3 | -0.40021  |
| 97467 | Q2Q067 | P61366 | -1.2224   |
| 97468 | Q2Q067 | Q9P2G3 | -0.35818  |
| 97469 | Q2Q067 | Q9Y2K3 | -0.58698  |
| 97470 | Q2Q067 | Q13813 | -0.22741  |
| 97471 | Q2Q067 | Q7Z7K2 | -0.085533 |
| 97472 | Q2Q067 | Q8N1A6 | -0.080066 |
| 97473 | Q2Q067 | Q8WWF5 | -0.90812  |
| 97474 | Q2Q067 | A6NEA5 | -0.039439 |
| 97475 | Q2Q067 | P50443 | -1.2878   |
| 97476 | Q2Q067 | Q9Y5E1 | -1.3348   |
| 97477 | Q2Q067 | Q8N7C7 | -1.1176   |
| 97478 | Q2Q067 | O60292 | -1.0359   |
| 97479 | Q2Q067 | Q9UEE9 | -0.64073  |
| 97480 | Q2Q067 | A2VCL2 | -0.19878  |
| 97481 | Q2Q067 | Q13395 | -0.16263  |
| 97482 | Q2Q067 | Q8TER5 | -0.65495  |
| 97483 | Q2Q067 | P02671 | -0.53077  |
| 97484 | Q2Q067 | Q86YB7 | -0.5835   |
| 97485 | Q2Q067 | Q9HCC8 | -0.86482  |
| 97486 | Q2Q067 | Q0VAQ4 | -0.4851   |
| 97487 | Q2Q067 | O14994 | -1.0327   |
| 97488 | Q2Q067 | Q9Y4G8 | -1.0859   |
| 97489 | Q2Q067 | Q86SH2 | -0.45335  |
| 97490 | Q2Q067 | O76082 | -0.50434  |
| 97491 | Q2Q067 | Q9NQL9 | -0.24768  |
| 97492 | Q2Q067 | P26045 | -0.22752  |
| 97493 | Q2Q067 | A2A2Y4 | -0.69095  |
| 97494 | Q2Q067 | Q5J8X5 | -1.0345   |
| 97495 | Q2Q067 | Q9UJC3 | -0.19441  |
| 97496 | Q2Q067 | Q96R47 | -1.4096   |
| 97497 | Q2Q067 | Q63ZY6 | -0.38719  |
| 97498 | Q2Q067 | O75264 | -1.0345   |
| 97499 | Q2Q067 | P57088 | -0.86268  |
| 97500 | Q2Q067 | Q6X9E4 | -0.17804  |
| 97501 | Q2Q067 | P55039 | -0.87339  |
| 97502 | Q2Q067 | P48029 | -0.87415  |
| 97503 | Q2Q067 | Q9NXG6 | -1.2617   |
| 97504 | Q2Q067 | Q5VV42 | -0.8735   |
| 97505 | Q2Q067 | Q53GS9 | -0.33313  |
| 97506 | Q2Q067 | Q9Y5W9 | -0.70496  |
| 97507 | Q2Q067 | Q969G6 | -0.47849  |
| 97508 | Q2Q067 | P29475 | -0.22759  |



|       |        |        |          |
|-------|--------|--------|----------|
| 97509 | Q2Q067 | Q9H329 | -0.24027 |
| 97510 | Q2Q067 | Q9NYY8 | -0.35547 |
| 97511 | Q2Q067 | P17538 | -1.5058  |
| 97512 | Q2Q067 | A6NCD1 | -0.73178 |
| 97513 | Q2Q067 | Q9H4B8 | -0.83314 |
| 97514 | Q2Q067 | Q96D53 | -1.0988  |
| 97515 | Q2Q067 | Q5K130 | -0.13451 |
| 97516 | Q2Q067 | Q8NER5 | -1.1792  |
| 97517 | Q2Q067 | Q9C004 | -0.18113 |
| 97518 | Q2Q067 | Q9H3N1 | -1.0397  |
| 97519 | Q2Q067 | P55072 | -0.24144 |
| 97520 | Q2Q067 | Q9NXU5 | -1.4417  |
| 97521 | Q2Q067 | P52179 | -0.79029 |
| 97522 | Q2Q067 | Q8NGV0 | -1.4096  |
| 97523 | Q2Q067 | Q2M1Z3 | -1.2797  |
| 97524 | Q2Q067 | Q9BZW8 | -0.67994 |
| 97525 | Q2Q067 | Q96B70 | -0.76667 |
| 97526 | Q2Q067 | Q2WGN9 | -0.51797 |
| 97527 | Q2Q067 | Q13263 | -0.22749 |
| 97528 | Q2Q067 | Q9UQ10 | -0.81059 |
| 97529 | Q2Q067 | O60241 | -1.491   |
| 97530 | Q2Q067 | Q7LFX5 | -0.61293 |
| 97531 | Q2Q067 | Q5U5Q3 | -0.22739 |
| 97532 | Q2Q067 | P04271 | -0.90356 |
| 97533 | Q2Q067 | Q99973 | -0.51036 |
| 97534 | Q2Q067 | P0C6P0 | -0.17729 |
| 97535 | Q2Q067 | Q7Z7N9 | -1.0345  |
| 97536 | Q2Q067 | Q96L91 | -0.37986 |
| 97537 | Q2Q067 | Q6UX53 | -0.46621 |
| 97538 | Q2Q067 | A8MV57 | -0.25527 |
| 97539 | Q2Q067 | Q9Y3D2 | -0.25654 |
| 97540 | Q2Q067 | Q86XJ0 | -1.0345  |
| 97541 | Q2Q067 | Q13753 | -1.2845  |
| 97542 | Q2Q067 | P50591 | -0.77678 |
| 97543 | Q2Q067 | Q8WV16 | -0.3949  |
| 97544 | Q2Q067 | O95415 | -1.0345  |
| 97545 | Q2Q067 | P40123 | -0.63065 |
| 97546 | Q2Q067 | Q9NS64 | -0.83762 |
| 97547 | Q2Q067 | P0C7V9 | -0.38719 |
| 97548 | Q2Q067 | Q76KP1 | -0.84861 |
| 97549 | Q2Q067 | P05161 | -0.47787 |
| 97550 | Q2Q067 | Q13454 | -0.91001 |
| 97551 | Q2Q067 | Q8IYL2 | -0.24528 |
| 97552 | Q2Q067 | Q13099 | -0.23371 |
| 97553 | Q2Q067 | Q92838 | -1.0258  |
| 97554 | Q2Q067 | Q7Z408 | -1.1634  |
| 97555 | Q2Q067 | Q6PJI9 | -0.24416 |
| 97556 | Q2Q067 | Q9NQ39 | -0.16579 |
| 97557 | Q2Q067 | P16662 | -1.0014  |
| 97558 | Q2Q067 | Q9BSW7 | -0.58224 |
| 97559 | Q2Q067 | Q9BXD5 | -0.31399 |
| 97560 | Q2Q067 | P16860 | -0.50645 |
| 97561 | Q2Q067 | P0CG01 | -0.98666 |
| 97562 | Q2Q067 | Q86Y29 | -0.98666 |
| 97563 | Q2Q067 | Q9BZV3 | -1.1884  |
| 97564 | Q2Q067 | Q9BQB4 | -0.37463 |
| 97565 | Q2Q067 | Q17RD7 | -0.54803 |
| 97566 | Q2Q067 | Q96GZ6 | -1.1273  |
| 97567 | Q2Q067 | Q9H3Z4 | -0.54377 |
| 97568 | Q2Q067 | P07311 | -0.30307 |
| 97569 | Q2Q067 | Q6NWX9 | -0.22549 |
| 97570 | Q2Q067 | Q9BW04 | -0.33831 |
| 97571 | Q2Q067 | P59535 | -1.3729  |
| 97572 | Q2Q067 | O94832 | -0.69101 |
| 97573 | Q2Q067 | P48060 | -1.4801  |
| 97574 | Q2Q067 | Q86W28 | -0.74063 |
| 97575 | Q2Q067 | Q5TIA1 | -0.38365 |
| 97576 | Q2Q067 | P14618 | -0.17426 |
| 97577 | Q2Q067 | P16219 | -0.39816 |
| 97578 | Q2Q067 | P0CG04 | -1.1115  |
| 97579 | Q2Q067 | Q9Y6Q1 | -0.40421 |
| 97580 | Q2Q067 | Q5T9C9 | -1.0679  |
| 97581 | Q2Q067 | P51606 | -0.3478  |
| 97582 | Q2Q067 | O60499 | -0.41679 |
| 97583 | Q2Q067 | P09417 | -0.38144 |
| 97584 | Q2Q067 | O60811 | -0.19475 |

|       |        |        |            |
|-------|--------|--------|------------|
| 97585 | Q2Q067 | Q9P2K1 | -0.36372   |
| 97586 | Q2Q067 | P59827 | -0.98529   |
| 97587 | Q2Q067 | Q9H6S3 | -0.33831   |
| 97588 | Q2Q067 | A8MWC7 | -0.12304   |
| 97589 | Q2Q067 | Q8NBI5 | -1.0195    |
| 97590 | Q2Q067 | A6NLB4 | -0.22571   |
| 97591 | Q2Q067 | Q14943 | -1.2628    |
| 97592 | Q2Q067 | Q5VZ19 | -0.96284   |
| 97593 | Q2Q067 | O75581 | -0.23841   |
| 97594 | Q2Q067 | Q6B0I6 | -0.19253   |
| 97595 | Q2Q067 | Q86TA4 | -0.075372  |
| 97596 | Q2Q067 | Q9BXJ4 | -0.49154   |
| 97597 | Q2Q067 | A6NGN9 | -0.98666   |
| 97598 | Q2Q067 | O75131 | -0.22825   |
| 97599 | Q2Q067 | Q5BKU9 | -0.21265   |
| 97600 | Q2Q067 | O95025 | -1.27      |
| 97601 | Q2Q067 | Q12913 | -0.5387    |
| 97602 | Q2Q067 | O43704 | -0.27877   |
| 97603 | Q2Q067 | Q8N485 | -0.0051606 |
| 97604 | Q2Q067 | Q00765 | -0.23991   |
| 97605 | Q2Q067 | A6NNA5 | -0.053944  |
| 97606 | Q2Q067 | P29597 | -0.89725   |
| 97607 | Q2Q067 | Q7Z5G4 | -0.33784   |
| 97608 | Q2Q067 | Q8NI17 | -0.63186   |
| 97609 | Q2Q067 | P78556 | -1.1674    |
| 97610 | Q2Q067 | Q9UN67 | -1.3348    |
| 97611 | Q2Q067 | Q96SZ6 | -0.50461   |
| 97612 | Q2Q067 | Q92823 | -0.92894   |
| 97613 | Q2Q067 | Q8WUM9 | -1.3127    |
| 97614 | Q2Q067 | O96002 | -0.24416   |
| 97615 | Q2Q067 | Q96PC2 | -0.5621    |
| 97616 | Q2Q067 | Q8TED4 | -0.95901   |
| 97617 | Q2Q067 | Q96DR7 | -1.0701    |
| 97618 | Q2Q067 | Q9HCE9 | -1.2393    |
| 97619 | Q2Q067 | O75355 | -1.3876    |
| 97620 | Q2Q067 | P51878 | -0.89898   |
| 97621 | Q2Q067 | Q8NH19 | -1.4096    |
| 97622 | Q2Q067 | P0C870 | -0.15711   |
| 97623 | Q2Q067 | A6NC05 | -0.36972   |
| 97624 | Q2Q067 | Q9H4F8 | -1.3551    |
| 97625 | Q2Q067 | Q7L1W4 | -1.0345    |
| 97626 | Q2Q067 | P19087 | -0.99006   |
| 97627 | Q2Q067 | Q86U37 | -0.2518    |
| 97628 | Q2Q067 | Q8IZV2 | -1.0608    |
| 97629 | Q2Q067 | P51956 | -0.26295   |
| 97630 | Q2Q067 | Q9UGU5 | -0.23569   |
| 97631 | Q2Q067 | P00751 | -1.4519    |
| 97632 | Q2Q067 | Q8IWW8 | -0.22327   |
| 97633 | Q2Q067 | Q99967 | -0.16771   |
| 97634 | Q2Q067 | Q9PON5 | -0.83714   |
| 97635 | Q2Q067 | Q96FK6 | -0.22741   |
| 97636 | Q2Q067 | Q6UWU2 | -0.83124   |
| 97637 | Q2Q067 | Q9UIF3 | -0.13707   |
| 97638 | Q2Q067 | Q9NY25 | -1.0509    |
| 97639 | Q2Q067 | A6NML5 | -1.0345    |
| 97640 | Q2Q067 | Q96RD1 | -1.4096    |
| 97641 | Q2Q067 | Q92915 | -0.29511   |
| 97642 | Q2Q067 | Q8NB25 | -0.24416   |
| 97643 | Q2Q067 | O75365 | -0.96973   |
| 97644 | Q2Q067 | O14524 | -0.88683   |
| 97645 | Q2Q067 | Q8WU20 | -0.19843   |
| 97646 | Q2Q067 | Q13555 | -0.9833    |
| 97647 | Q2Q067 | Q9BXN1 | -1.1006    |
| 97648 | Q2Q067 | Q9H2R5 | -1.5202    |
| 97649 | Q2Q067 | A6NL99 | -1.0472    |
| 97650 | Q2Q067 | Q9UJM8 | -0.68959   |
| 97651 | Q2Q067 | Q13075 | -0.40262   |
| 97652 | Q2Q067 | P05162 | -0.38826   |
| 97653 | Q2Q067 | Q68J44 | -0.75558   |
| 97654 | Q2Q067 | Q6IE37 | -0.90419   |
| 97655 | Q2Q067 | O00270 | -1.6361    |
| 97656 | Q2Q067 | Q02127 | -0.61912   |
| 97657 | Q2Q067 | Q9NQC3 | -0.2415    |
| 97658 | Q2Q067 | P32856 | -0.30531   |
| 97659 | Q2Q067 | Q14586 | -0.35555   |
| 97660 | Q2Q067 | Q6UWT4 | -0.98666   |

|       |        |        |           |
|-------|--------|--------|-----------|
| 97661 | Q2Q067 | Q6ZSB3 | -0.082451 |
| 97662 | Q2Q067 | P01242 | -0.93922  |
| 97663 | Q2Q067 | Q8IVT5 | -0.40393  |
| 97664 | Q2Q067 | Q12947 | -0.33268  |
| 97665 | Q2Q067 | P27987 | -0.94147  |
| 97666 | Q2Q067 | Q02318 | -0.44633  |
| 97667 | Q2Q067 | Q8N465 | -0.26506  |
| 97668 | Q2Q067 | P34096 | -0.8544   |
| 97669 | Q2Q067 | P11717 | -0.3235   |
| 97670 | Q2Q067 | Q9H1E1 | -0.76202  |
| 97671 | Q2Q067 | P26012 | -1.3302   |
| 97672 | Q2Q067 | Q8TDB4 | -0.1404   |
| 97673 | Q2Q067 | Q9NNZ3 | -0.70796  |
| 97674 | Q2Q067 | P35372 | -0.48443  |
| 97675 | Q2Q067 | Q5BKU6 | -0.066997 |
| 97676 | Q2Q067 | Q8N5I3 | -0.16118  |
| 97677 | Q2Q067 | A6ND36 | -0.14603  |
| 97678 | Q2Q067 | Q9NYC9 | -0.70689  |
| 97679 | Q2Q067 | O75409 | -0.49915  |
| 97680 | Q2Q067 | Q6VVX0 | -0.73883  |
| 97681 | Q2Q067 | Q6W5P4 | -1.27     |
| 97682 | Q2Q067 | Q9C029 | -0.22911  |
| 97683 | Q2Q067 | Q9NZR1 | -0.22443  |
| 97684 | Q2Q067 | Q9UI17 | -0.18065  |
| 97685 | Q2Q067 | Q8TD91 | -0.14422  |
| 97686 | Q2Q067 | Q15345 | -0.40021  |
| 97687 | Q2Q067 | Q8WU68 | -0.54849  |
| 97688 | Q2Q067 | Q9HCJ6 | -1.0359   |
| 97689 | Q2Q067 | Q9BWF2 | -0.22735  |
| 97690 | Q2Q067 | O95750 | -0.30036  |
| 97691 | Q2Q067 | Q5K131 | -0.20901  |
| 97692 | Q2Q067 | Q9UK55 | -0.58051  |
| 97693 | Q2Q067 | Q9UJU6 | -0.74561  |
| 97694 | Q2Q067 | Q5EBL8 | -0.22699  |
| 97695 | Q2Q067 | Q9NR34 | -0.78195  |
| 97696 | Q2Q067 | Q86WT6 | -0.22846  |
| 97697 | Q2Q067 | Q8TBZ2 | -0.22948  |
| 97698 | Q2Q067 | Q9BZM1 | -0.76782  |
| 97699 | Q2Q067 | Q96SF7 | -0.30653  |
| 97700 | Q2Q067 | P12081 | -0.28698  |
| 97701 | Q2Q067 | P01707 | -1.1115   |
| 97702 | Q2Q067 | P01778 | -1.1115   |
| 97703 | Q2Q067 | Q14692 | -0.4936   |
| 97704 | Q2Q067 | Q10981 | -0.71825  |
| 97705 | Q2Q067 | Q9NS85 | -0.3938   |
| 97706 | Q2Q067 | Q9Y320 | -0.7937   |
| 97707 | Q2Q067 | F2Z398 | -0.32914  |
| 97708 | Q2Q067 | O00585 | -0.55733  |
| 97709 | Q2Q067 | Q9BTX1 | -0.18302  |
| 97710 | Q2Q067 | Q96D09 | -0.2071   |
| 97711 | Q2Q067 | O00141 | -0.61533  |
| 97712 | Q2Q067 | Q7L8L6 | -0.35547  |
| 97713 | Q2Q067 | Q8IZJ0 | -0.99416  |
| 97714 | Q2Q067 | Q96KN3 | -0.33876  |
| 97715 | Q2Q067 | A6NIM6 | -0.81022  |
| 97716 | Q2Q067 | A6NMB1 | -1.2081   |
| 97717 | Q2Q067 | Q9H6R7 | -0.012073 |
| 97718 | Q2Q067 | Q9BPX6 | -0.56864  |
| 97719 | Q2Q067 | P54646 | -0.32688  |
| 97720 | Q2Q067 | Q8TBH0 | -0.22304  |
| 97721 | Q2Q067 | Q496H8 | -0.57999  |
| 97722 | Q2Q067 | Q9H568 | -0.21707  |
| 97723 | Q2Q067 | Q8NG98 | -1.4096   |
| 97724 | Q2Q067 | P48050 | -0.6043   |
| 97725 | Q2Q067 | Q8IXZ3 | -0.2099   |
| 97726 | Q2Q067 | Q16665 | -0.30879  |
| 97727 | Q2Q067 | Q8NHC6 | -1.4096   |
| 97728 | Q2Q067 | Q9NV64 | -1.0345   |
| 97729 | Q2Q067 | P01893 | -1.3012   |
| 97730 | Q2Q067 | P54852 | -1.0766   |
| 97731 | Q2Q067 | Q96LB2 | -1.4342   |
| 97732 | Q2Q067 | Q9NS66 | -1.4967   |
| 97733 | Q2Q067 | Q96I36 | -0.84145  |
| 97734 | Q2Q067 | Q06520 | -0.22829  |
| 97735 | Q2Q067 | Q14680 | -0.66055  |
| 97736 | Q2Q067 | Q08116 | -0.80259  |

|       |        |        |           |
|-------|--------|--------|-----------|
| 97737 | Q2Q067 | O00399 | -0.12212  |
| 97738 | Q2Q067 | Q13093 | -0.95717  |
| 97739 | Q2Q067 | Q9UHF3 | -1.1192   |
| 97740 | Q2Q067 | Q92826 | -0.2271   |
| 97741 | Q2Q067 | O43272 | -0.21223  |
| 97742 | Q2Q067 | P35523 | -1.115    |
| 97743 | Q2Q067 | Q9BRN9 | -1.0345   |
| 97744 | Q2Q067 | Q92581 | -1.0494   |
| 97745 | Q2Q067 | A1A519 | -0.73178  |
| 97746 | Q2Q067 | O95500 | -0.81973  |
| 97747 | Q2Q067 | O95868 | -0.82655  |
| 97748 | Q2Q067 | Q9NRN9 | -0.40146  |
| 97749 | Q2Q067 | O94933 | -1.1214   |
| 97750 | Q2Q067 | Q5RL73 | -0.40724  |
| 97751 | Q2Q067 | O94910 | -0.97984  |
| 97752 | Q2Q067 | P18462 | -0.98258  |
| 97753 | Q2Q067 | P40227 | -0.4249   |
| 97754 | Q2Q067 | Q52LG2 | -0.027519 |
| 97755 | Q2Q067 | Q9NRW4 | -0.5737   |
| 97756 | Q2Q067 | Q15858 | -1.065    |
| 97757 | Q2Q067 | C9JI98 | -1.0345   |
| 97758 | Q2Q067 | Q8TDT2 | -1.4967   |
| 97759 | Q2Q067 | Q96EP5 | -0.70706  |
| 97760 | Q2Q067 | Q6N075 | -1.062    |
| 97761 | Q2Q067 | P17568 | -0.14002  |
| 97762 | Q2Q067 | P34972 | -1.3164   |
| 97763 | Q2Q067 | Q8IZ13 | -0.21265  |
| 97764 | Q2Q067 | P30484 | -1.1453   |
| 97765 | Q2Q067 | Q9H3G5 | -0.74529  |
| 97766 | Q2Q067 | Q9UL25 | -0.53393  |
| 97767 | Q2Q067 | Q96A72 | -0.14281  |
| 97768 | Q2Q067 | Q8IWR0 | -0.42257  |
| 97769 | Q2Q067 | Q8IVY1 | -1.0345   |
| 97770 | Q2Q067 | Q6PK18 | -1.1578   |
| 97771 | Q2Q067 | Q5VUM1 | -0.79903  |
| 97772 | Q2Q067 | P23142 | -1.1347   |
| 97773 | Q2Q067 | Q8N6D5 | -0.2274   |
| 97774 | Q2Q067 | Q69YW2 | -1.0345   |
| 97775 | Q2Q067 | Q9UKA1 | -0.2269   |
| 97776 | Q2Q067 | Q5T481 | -0.88202  |
| 97777 | Q2Q067 | P48431 | -0.27252  |
| 97778 | Q2Q067 | Q5VWV2 | -0.96975  |
| 97779 | Q2Q067 | P30457 | -0.98258  |
| 97780 | Q2Q067 | Q86YH2 | -0.24422  |
| 97781 | Q2Q067 | Q5HY64 | -0.067839 |
| 97782 | Q2Q067 | Q96NW7 | -0.23892  |
| 97783 | Q2Q067 | P11836 | -1.0726   |
| 97784 | Q2Q067 | Q8NHC7 | -1.4096   |
| 97785 | Q2Q067 | Q9NQ35 | -0.54571  |
| 97786 | Q2Q067 | Q5VZK9 | -0.22726  |
| 97787 | Q2Q067 | O60613 | -0.31477  |
| 97788 | Q2Q067 | Q05BV3 | -0.22757  |
| 97789 | Q2Q067 | P29973 | -1.6215   |
| 97790 | Q2Q067 | Q9UBU3 | -0.34344  |
| 97791 | Q2Q067 | Q86TN4 | -0.50172  |
| 97792 | Q2Q067 | P15941 | -0.41078  |
| 97793 | Q2Q067 | P05109 | -0.27337  |
| 97794 | Q2Q067 | Q9NTU4 | -0.41909  |
| 97795 | Q2Q067 | Q8IZ81 | -0.80265  |
| 97796 | Q2Q067 | Q13474 | -0.48093  |
| 97797 | Q2Q067 | Q6QN14 | -0.3095   |
| 97798 | Q2Q067 | P01622 | -1.1115   |
| 97799 | Q2Q067 | Q13007 | -0.92291  |
| 97800 | Q2Q067 | A3KFT3 | -1.4096   |
| 97801 | Q2Q067 | Q8TD17 | -0.091718 |
| 97802 | Q2Q067 | O76081 | -0.48297  |
| 97803 | Q2Q067 | Q96PX6 | -0.19341  |
| 97804 | Q2Q067 | Q96L16 | -0.11167  |
| 97805 | Q2Q067 | Q5T2P8 | -0.42848  |
| 97806 | Q2Q067 | O00230 | -0.95572  |
| 97807 | Q2Q067 | P68106 | -0.22952  |
| 97808 | Q2Q067 | Q5JSH3 | -0.22742  |
| 97809 | Q2Q067 | Q9UNW9 | -0.10728  |
| 97810 | Q2Q067 | C9J3V5 | -0.25176  |
| 97811 | Q2Q067 | Q86T20 | -0.98666  |
| 97812 | Q2Q067 | Q14566 | -0.18259  |

|       |        |        |           |
|-------|--------|--------|-----------|
| 97813 | Q2Q067 | Q8NH90 | -1.4096   |
| 97814 | Q2Q067 | P36915 | -0.76615  |
| 97815 | Q2Q067 | Q8TDR2 | -0.76409  |
| 97816 | Q2Q067 | O00194 | -0.82913  |
| 97817 | Q2Q067 | Q9P2N6 | -0.30384  |
| 97818 | Q2Q067 | Q5VZL5 | -0.6528   |
| 97819 | Q2Q067 | Q5VYS4 | -0.18649  |
| 97820 | Q2Q067 | O14607 | -0.42801  |
| 97821 | Q2Q067 | Q9H6U8 | -0.94689  |
| 97822 | Q2Q067 | Q13825 | -0.30988  |
| 97823 | Q2Q067 | P37059 | -1.2946   |
| 97824 | Q2Q067 | Q9H5L6 | -0.52609  |
| 97825 | Q2Q067 | Q86Y82 | -0.30606  |
| 97826 | Q2Q067 | O60812 | -0.51446  |
| 97827 | Q2Q067 | P35240 | -0.23145  |
| 97828 | Q2Q067 | Q5H9L4 | -0.078541 |
| 97829 | Q2Q067 | Q5GH77 | -1.1634   |
| 97830 | Q2Q067 | P49662 | -0.91141  |
| 97831 | Q2Q067 | P06850 | -0.53918  |
| 97832 | Q2Q067 | P11277 | -0.22782  |
| 97833 | Q2Q067 | Q6PP77 | -1.1634   |
| 97834 | Q2Q067 | Q8N6G5 | -0.55154  |
| 97835 | Q2Q067 | O43247 | -0.44075  |
| 97836 | Q2Q067 | Q6ZV29 | -0.61084  |
| 97837 | Q2Q067 | Q16864 | -0.04952  |
| 97838 | Q2Q067 | Q96DH6 | -0.76347  |
| 97839 | Q2Q067 | Q8IYT3 | -0.11913  |
| 97840 | Q2Q067 | Q96MF0 | -0.010311 |
| 97841 | Q2Q067 | Q8N3F9 | -1.0345   |
| 97842 | Q2Q067 | Q5TZF3 | -0.24416  |
| 97843 | Q2Q067 | Q14C87 | -0.28275  |
| 97844 | Q2Q067 | P06727 | -0.53167  |
| 97845 | Q2Q067 | P50219 | -0.22666  |
| 97846 | Q2Q067 | Q86Z23 | -1.0482   |
| 97847 | Q2Q067 | P53667 | -0.2547   |
| 97848 | Q2Q067 | O60242 | -1.5349   |
| 97849 | Q2Q067 | Q9H3V2 | -1.0345   |
| 97850 | Q2Q067 | Q96AP4 | -0.73178  |
| 97851 | Q2Q067 | Q96LD4 | -0.22732  |
| 97852 | Q2Q067 | A6NGZ7 | -1.0345   |
| 97853 | Q2Q067 | P51843 | -0.2273   |
| 97854 | Q2Q067 | Q8IZP9 | -1.5016   |
| 97855 | Q2Q067 | Q86UY8 | -0.060291 |
| 97856 | Q2Q067 | Q6ZT52 | -0.13215  |
| 97857 | Q2Q067 | P15515 | -0.33736  |
| 97858 | Q2Q067 | Q9UNI6 | -0.48069  |
| 97859 | Q2Q067 | O95832 | -1.0014   |
| 97860 | Q2Q067 | Q9HD43 | -0.22741  |
| 97861 | Q2Q067 | O94819 | -0.21977  |
| 97862 | Q2Q067 | Q9BYF1 | -1.1196   |
| 97863 | Q2Q067 | Q7Z692 | -1.0345   |
| 97864 | Q2Q067 | P32321 | -0.33012  |
| 97865 | Q2Q067 | Q14565 | -0.37361  |
| 97866 | Q2Q067 | Q8IY84 | -1.4291   |
| 97867 | Q2Q067 | Q5HY92 | -0.68318  |
| 97868 | Q2Q067 | P39210 | -0.67418  |
| 97869 | Q2Q067 | Q14531 | -0.21413  |
| 97870 | Q2Q067 | P10644 | -0.22749  |
| 97871 | Q2Q067 | A6NLP5 | -0.21877  |
| 97872 | Q2Q067 | Q8WW36 | -0.50058  |
| 97873 | Q2Q067 | Q9NZM6 | -1.1995   |
| 97874 | Q2Q067 | Q5J8M3 | -0.97393  |
| 97875 | Q2Q067 | Q96K76 | -0.3323   |
| 97876 | Q2Q067 | P18465 | -1.1453   |
| 97877 | Q2Q067 | Q96HH4 | -1.0345   |
| 97878 | Q2Q067 | Q6ZN18 | -0.33881  |
| 97879 | Q2Q067 | Q96A58 | -0.78038  |
| 97880 | Q2Q067 | Q9NZ43 | -0.24006  |
| 97881 | Q2Q067 | Q8NFU5 | -0.51908  |
| 97882 | Q2Q067 | Q9C0K3 | -0.91678  |
| 97883 | Q2Q067 | P48047 | -0.37042  |
| 97884 | Q2Q067 | P51795 | -1.1773   |
| 97885 | Q2Q067 | P52943 | -0.42694  |
| 97886 | Q2Q067 | Q8IYX1 | -1.4231   |
| 97887 | Q2Q067 | Q9C026 | -0.75994  |
| 97888 | Q2Q067 | Q9HCC0 | -0.51302  |

|       |        |        |          |
|-------|--------|--------|----------|
| 97889 | Q2Q067 | O00487 | -0.23189 |
| 97890 | Q2Q067 | P08686 | -0.80306 |
| 97891 | Q2Q067 | Q9ULV4 | -0.64957 |
| 97892 | Q2Q067 | Q86VE9 | -0.91403 |
| 97893 | Q2Q067 | P30939 | -1.4995  |
| 97894 | Q2Q067 | Q8IZA0 | -0.34971 |
| 97895 | Q2Q067 | Q8NFU1 | -0.95447 |
| 97896 | Q2Q067 | Q8IUX7 | -0.53318 |
| 97897 | Q2Q067 | A1L4H1 | -1.0915  |
| 97898 | Q2Q067 | P49917 | -0.1787  |
| 97899 | Q2Q067 | Q15393 | -0.17506 |
| 97900 | Q2Q067 | Q8NGP0 | -1.4096  |
| 97901 | Q2Q067 | Q5T764 | -0.32854 |
| 97902 | Q2Q067 | Q02548 | -0.22734 |
| 97903 | Q2Q067 | Q8N7B1 | -0.33326 |
| 97904 | Q2Q067 | Q8N884 | -0.42587 |
| 97905 | Q2Q067 | Q5ZPR3 | -0.43024 |
| 97906 | Q2Q067 | P00367 | -0.19789 |
| 97907 | Q2Q067 | O43286 | -0.66421 |
| 97908 | Q2Q067 | Q6ZMY6 | -0.22918 |
| 97909 | Q2Q067 | Q9ULM0 | -0.51995 |
| 97910 | Q2Q067 | P48728 | -0.10376 |
| 97911 | Q2Q067 | Q16873 | -0.39541 |
| 97912 | Q2Q067 | A6NDV4 | -0.17514 |
| 97913 | Q2Q067 | A4D126 | -0.47327 |
| 97914 | Q2Q067 | Q6ZMU1 | -0.45792 |
| 97915 | Q2Q067 | Q6ZMP0 | -1.1343  |
| 97916 | Q2Q067 | P13796 | -0.5784  |
| 97917 | Q2Q067 | A4UGR9 | -0.34398 |
| 97918 | Q2Q067 | P41181 | -0.3416  |
| 97919 | Q2Q067 | Q02747 | -1.0535  |
| 97920 | Q2Q067 | Q8IY67 | -0.42972 |
| 97921 | Q2Q067 | Q6P1J6 | -0.86905 |
| 97922 | Q2Q067 | P01011 | -0.2365  |
| 97923 | Q2Q067 | Q16698 | -0.21493 |
| 97924 | Q2Q067 | Q9NXL2 | -0.70301 |
| 97925 | Q2Q067 | Q9Y2T5 | -1.6361  |
| 97926 | Q2Q067 | Q15012 | -0.99901 |
| 97927 | Q2Q067 | Q5GAN3 | -0.97935 |
| 97928 | Q2Q067 | Q6N043 | -0.2274  |
| 97929 | Q2Q067 | Q12926 | -0.263   |
| 97930 | Q2Q067 | P01763 | -1.1115  |
| 97931 | Q2Q067 | O60928 | -1.1593  |
| 97932 | Q2Q067 | P18433 | -1.399   |
| 97933 | Q2Q067 | O60384 | -0.50058 |
| 97934 | Q2Q067 | O43861 | -0.95986 |
| 97935 | Q2Q067 | P09211 | -0.22174 |
| 97936 | Q2Q067 | Q9BXX0 | -0.63288 |
| 97937 | Q2Q067 | O00488 | -0.21654 |
| 97938 | Q2Q067 | Q5U3C3 | -1.0345  |
| 97939 | Q2Q067 | Q9H078 | -0.68911 |
| 97940 | Q2Q067 | B2RC85 | -0.16798 |
| 97941 | Q2Q067 | P17050 | -0.24788 |
| 97942 | Q2Q067 | P22680 | -0.70803 |
| 97943 | Q2Q067 | Q8WXJ9 | -0.61006 |
| 97944 | Q2Q067 | Q03692 | -1.1664  |
| 97945 | Q2Q067 | P46926 | -0.11136 |
| 97946 | Q2Q067 | F8VTS6 | -0.48451 |
| 97947 | Q2Q067 | Q5QGT7 | -1.0784  |
| 97948 | Q2Q067 | A8MPY1 | -0.8355  |
| 97949 | Q2Q067 | P23763 | -0.34154 |
| 97950 | Q2Q067 | P30874 | -0.53886 |
| 97951 | Q2Q067 | P30485 | -1.1453  |
| 97952 | Q2Q067 | Q13255 | -1.0555  |
| 97953 | Q2Q067 | Q15526 | -0.7642  |
| 97954 | Q2Q067 | Q92743 | -1.0115  |
| 97955 | Q2Q067 | Q8NGH8 | -1.4096  |
| 97956 | Q2Q067 | Q6UXR6 | -0.98666 |
| 97957 | Q2Q067 | P15954 | -0.63006 |
| 97958 | Q2Q067 | O43323 | -0.98746 |
| 97959 | Q2Q067 | Q9Y2W6 | -0.21333 |
| 97960 | Q2Q067 | Q9H2A9 | -0.73206 |
| 97961 | Q2Q067 | A8MT66 | -0.12925 |
| 97962 | Q2Q067 | P01609 | -1.1115  |
| 97963 | Q2Q067 | P43026 | -0.53277 |
| 97964 | Q2Q067 | A0ZSE6 | -1.0345  |

|       |        |        |           |
|-------|--------|--------|-----------|
| 97965 | Q2Q067 | P40938 | -0.20714  |
| 97966 | Q2Q067 | Q8N8D7 | -1.1634   |
| 97967 | Q2Q067 | Q8NFY9 | -0.21607  |
| 97968 | Q2Q067 | Q92963 | -0.76274  |
| 97969 | Q2Q067 | P28332 | -0.52413  |
| 97970 | Q2Q067 | Q8TD06 | -0.32821  |
| 97971 | Q2Q067 | Q9UJJ9 | -0.86963  |
| 97972 | Q2Q067 | Q5SWH9 | -1.0345   |
| 97973 | Q2Q067 | Q6IEZ7 | -1.4096   |
| 97974 | Q2Q067 | Q9NRR6 | -0.25167  |
| 97975 | Q2Q067 | P0CJ74 | -0.80201  |
| 97976 | Q2Q067 | Q6UXX5 | -0.88039  |
| 97977 | Q2Q067 | P01579 | -0.27015  |
| 97978 | Q2Q067 | P06312 | -1.1115   |
| 97979 | Q2Q067 | Q7Z494 | -0.22736  |
| 97980 | Q2Q067 | Q13635 | -0.30251  |
| 97981 | Q2Q067 | Q16739 | -0.68929  |
| 97982 | Q2Q067 | Q8WVZ7 | -1.2138   |
| 97983 | Q2Q067 | Q9Y619 | -0.69501  |
| 97984 | Q2Q067 | Q12952 | -0.36182  |
| 97985 | Q2Q067 | Q9H1V8 | -0.9332   |
| 97986 | Q2Q067 | Q8NGK9 | -1.4096   |
| 97987 | Q2Q067 | Q9Y6F6 | -0.18488  |
| 97988 | Q2Q067 | Q9H5X1 | -0.20992  |
| 97989 | Q2Q067 | O14520 | -0.74601  |
| 97990 | Q2Q067 | Q9UN74 | -1.4044   |
| 97991 | Q2Q067 | Q5VZR4 | -1.0322   |
| 97992 | Q2Q067 | Q8N6M9 | -0.0481   |
| 97993 | Q2Q067 | Q8NB66 | -0.37337  |
| 97994 | Q2Q067 | Q8NGY0 | -1.4096   |
| 97995 | Q2Q067 | Q8NCF0 | -0.97472  |
| 97996 | Q2Q067 | O60741 | -1.3744   |
| 97997 | Q2Q067 | Q9P1A2 | -0.24416  |
| 97998 | Q2Q067 | P12814 | -0.30884  |
| 97999 | Q2Q067 | O43681 | -0.2092   |
| 98000 | Q2Q067 | Q9Y3Q3 | -0.65306  |
| 98001 | Q2Q067 | Q9P2K5 | -0.2026   |
| 98002 | Q2Q067 | P22105 | -1.1851   |
| 98003 | Q2Q067 | Q8NEV1 | -1.2588   |
| 98004 | Q2Q067 | Q14195 | -0.21283  |
| 98005 | Q2Q067 | P10265 | -0.54772  |
| 98006 | Q2Q067 | Q92802 | -0.24416  |
| 98007 | Q2Q067 | Q9H6S1 | -0.13879  |
| 98008 | Q2Q067 | P22676 | -0.29599  |
| 98009 | Q2Q067 | P05455 | -0.47787  |
| 98010 | Q2Q067 | Q02750 | -0.22751  |
| 98011 | Q2Q067 | P37231 | -0.30415  |
| 98012 | Q2Q067 | O43525 | -1.0983   |
| 98013 | Q2Q067 | Q6ZSI9 | -1.124    |
| 98014 | Q2Q067 | Q6P5X7 | -1.0345   |
| 98015 | Q2Q067 | Q8NE01 | -0.65189  |
| 98016 | Q2Q067 | Q9Y272 | -0.92151  |
| 98017 | Q2Q067 | Q9GZP0 | -1.0887   |
| 98018 | Q2Q067 | Q5VU92 | -0.24416  |
| 98019 | Q2Q067 | Q86VI3 | -0.66137  |
| 98020 | Q2Q067 | O00421 | -1.5352   |
| 98021 | Q2Q067 | Q7RTY0 | -1.1513   |
| 98022 | Q2Q067 | Q6XUX3 | -0.78523  |
| 98023 | Q2Q067 | Q9Y6I8 | -0.45614  |
| 98024 | Q2Q067 | Q14376 | -0.33245  |
| 98025 | Q2Q067 | A6NMD2 | -0.28132  |
| 98026 | Q2Q067 | Q95711 | -1.0637   |
| 98027 | Q2Q067 | Q969W9 | -0.98946  |
| 98028 | Q2Q067 | Q8IXL9 | -0.21958  |
| 98029 | Q2Q067 | Q5TEA3 | -0.020422 |
| 98030 | Q2Q067 | P57057 | -0.95901  |
| 98031 | Q2Q067 | Q9NR83 | -0.1529   |
| 98032 | Q2Q067 | C9JG80 | -0.17648  |
| 98033 | Q2Q067 | Q0VGE8 | -0.085533 |
| 98034 | Q2Q067 | P00480 | -0.11791  |
| 98035 | Q2Q067 | Q7L273 | -0.20763  |
| 98036 | Q2Q067 | Q8N9I0 | -0.86037  |
| 98037 | Q2Q067 | Q9NP62 | -0.14831  |
| 98038 | Q2Q067 | Q9NWL6 | -0.30946  |
| 98039 | Q2Q067 | Q8IZD9 | -0.21566  |
| 98040 | Q2Q067 | Q92806 | -0.75414  |

|       |        |        |           |
|-------|--------|--------|-----------|
| 98041 | Q2Q067 | Q8NB7  | -0.38266  |
| 98042 | Q2Q067 | Q96I99 | -0.72131  |
| 98043 | Q2Q067 | A8MPX8 | -0.5697   |
| 98044 | Q2Q067 | Q9H1R3 | -0.39625  |
| 98045 | Q2Q067 | Q6UWX4 | -0.86402  |
| 98046 | Q2Q067 | Q96RP7 | -0.75357  |
| 98047 | Q2Q067 | Q5VYV0 | -0.42771  |
| 98048 | Q2Q067 | P48741 | -0.66337  |
| 98049 | Q2Q067 | P49368 | -0.20966  |
| 98050 | Q2Q067 | P11498 | -0.60198  |
| 98051 | Q2Q067 | P13667 | -0.24386  |
| 98052 | Q2Q067 | Q6ZNL6 | -1.137    |
| 98053 | Q2Q067 | Q6ZUB1 | -1.0345   |
| 98054 | Q2Q067 | Q96PP9 | -0.59733  |
| 98055 | Q2Q067 | Q9Y226 | -1.0688   |
| 98056 | Q2Q067 | P04211 | -1.1115   |
| 98057 | Q2Q067 | Q8TBM7 | -1.0345   |
| 98058 | Q2Q067 | Q9BQI3 | -0.89239  |
| 98059 | Q2Q067 | A1A4F0 | -0.10518  |
| 98060 | Q2Q067 | Q8TBG4 | -0.41162  |
| 98061 | Q2Q067 | Q7L3T8 | -0.21221  |
| 98062 | Q2Q067 | Q8WWZ3 | -0.66568  |
| 98063 | Q2Q067 | Q9H257 | -0.24805  |
| 98064 | Q2Q067 | Q99571 | -0.54895  |
| 98065 | Q2Q067 | P49863 | -1.5202   |
| 98066 | Q2Q067 | P60568 | -0.46083  |
| 98067 | Q2Q067 | P23527 | -0.82527  |
| 98068 | Q2Q067 | Q8NE00 | -0.77947  |
| 98069 | Q2Q067 | Q30KQ4 | -0.94775  |
| 98070 | Q2Q067 | P0C7H9 | -0.26036  |
| 98071 | Q2Q067 | P51148 | -1.0397   |
| 98072 | Q2Q067 | Q0P641 | -0.15142  |
| 98073 | Q2Q067 | O60431 | -1.4096   |
| 98074 | Q2Q067 | O14843 | -1.763    |
| 98075 | Q2Q067 | A0PJK1 | -1.1667   |
| 98076 | Q2Q067 | O95968 | -1.0374   |
| 98077 | Q2Q067 | Q9H9V9 | -0.20823  |
| 98078 | Q2Q067 | P56180 | -1.5302   |
| 98079 | Q2Q067 | P40189 | -0.50071  |
| 98080 | Q2Q067 | O43520 | -0.69718  |
| 98081 | Q2Q067 | O60894 | -0.40155  |
| 98082 | Q2Q067 | O43149 | -0.55071  |
| 98083 | Q2Q067 | P55318 | -0.38869  |
| 98084 | Q2Q067 | P01344 | -0.23238  |
| 98085 | Q2Q067 | Q14952 | -1.2857   |
| 98086 | Q2Q067 | Q969H8 | -0.76533  |
| 98087 | Q2Q067 | Q5TEU4 | -0.30613  |
| 98088 | Q2Q067 | O75414 | -0.6981   |
| 98089 | Q2Q067 | P48023 | -0.32429  |
| 98090 | Q2Q067 | A6NEQ0 | -0.64476  |
| 98091 | Q2Q067 | Q9Y5Z4 | -0.19831  |
| 98092 | Q2Q067 | Q6Q0C0 | -0.23568  |
| 98093 | Q2Q067 | Q9BX69 | -0.56848  |
| 98094 | Q2Q067 | Q6UXB4 | -0.36144  |
| 98095 | Q2Q067 | Q6ZSZ6 | -0.22625  |
| 98096 | Q2Q067 | Q3KNS6 | -0.085533 |
| 98097 | Q2Q067 | P80748 | -1.1115   |
| 98098 | Q2Q067 | P01350 | -1.1453   |
| 98099 | Q2Q067 | Q9BZ95 | -0.33702  |
| 98100 | Q2Q067 | Q01581 | -0.20436  |
| 98101 | Q2Q067 | Q9H7M9 | -1.0345   |
| 98102 | Q2Q067 | P11908 | -0.7836   |
| 98103 | Q2Q067 | P03915 | -0.59494  |
| 98104 | Q2Q067 | A8MT19 | -0.21267  |
| 98105 | Q2Q067 | P06753 | -0.21527  |
| 98106 | Q2Q067 | Q9BSN8 | -0.27686  |
| 98107 | Q2Q067 | Q9H2Q1 | -1.0345   |
| 98108 | Q2Q067 | Q5RIA9 | -0.91075  |
| 98109 | Q2Q067 | P49223 | -0.90081  |
| 98110 | Q2Q067 | P21695 | -0.051582 |
| 98111 | Q2Q067 | Q08ET2 | -1.3218   |
| 98112 | Q2Q067 | Q8IYM0 | -0.29213  |
| 98113 | Q2Q067 | Q15034 | -0.40133  |
| 98114 | Q2Q067 | P23368 | -0.72327  |
| 98115 | Q2Q067 | H3BQB6 | -0.59947  |
| 98116 | Q2Q067 | A8MQT2 | -0.40653  |



|       |        |         |           |
|-------|--------|---------|-----------|
| 98117 | Q2Q067 | P82987  | -1.2449   |
| 98118 | Q2Q067 | Q3SYC2  | -0.86859  |
| 98119 | Q2Q067 | P36941  | -0.31386  |
| 98120 | Q2Q067 | O95389  | -1.0069   |
| 98121 | Q2Q067 | Q14C86  | -1.078    |
| 98122 | Q2Q067 | Q6P575  | -0.23494  |
| 98123 | Q2Q067 | Q9UKL4  | -1.1401   |
| 98124 | Q2Q067 | Q8IWT0  | -0.033717 |
| 98125 | Q2Q067 | P49802  | -0.48123  |
| 98126 | Q2Q067 | Q8NCY6  | -0.054655 |
| 98127 | Q2Q067 | O75830  | -0.765    |
| 98128 | Q2Q067 | Q96B02  | -0.38122  |
| 98129 | Q2Q067 | Q9C0H2  | -1.1613   |
| 98130 | Q2Q067 | P13498  | -0.36415  |
| 98131 | Q2Q067 | P62736  | -0.10809  |
| 98132 | Q2Q067 | Q9Y5H9  | -1.4044   |
| 98133 | Q2Q067 | Q8IUH3  | -0.6846   |
| 98134 | Q2Q067 | Q8IUH5  | -0.38955  |
| 98135 | Q2Q067 | Q9BQE5  | -1.3404   |
| 98136 | Q2Q067 | Q14766  | -0.49695  |
| 98137 | Q2Q067 | Q6NUS6  | -0.83999  |
| 98138 | Q2Q067 | Q9HAT2  | -1.0122   |
| 98139 | Q2Q067 | P19957  | -0.8699   |
| 98140 | Q2Q067 | Q6P2C0  | -0.34843  |
| 98141 | Q2Q067 | Q96KK5  | -0.82527  |
| 98142 | Q2Q067 | Q9P2V4  | -0.88709  |
| 98143 | Q2Q067 | Q9BQJ4  | -0.983    |
| 98144 | Q2Q067 | Q99440  | -0.31778  |
| 98145 | Q2Q067 | Q9H756  | -1.0345   |
| 98146 | Q2Q067 | Q14141  | -0.2225   |
| 98147 | Q2Q067 | Q9Y6M5  | -0.89692  |
| 98148 | Q2Q067 | P07359  | -0.61586  |
| 98149 | Q2Q067 | Q9HAR2  | -1.4828   |
| 98150 | Q2Q067 | Q8TBR7  | -1.1634   |
| 98151 | Q2Q067 | Q9BRK3  | -1.0345   |
| 98152 | Q2Q067 | Q99593  | -0.33307  |
| 98153 | Q2Q067 | Q9C0B5  | -1.23     |
| 98154 | Q2Q067 | Q8WTS1  | -0.20331  |
| 98155 | Q2Q067 | Q8NA66  | -0.1756   |
| 98156 | Q2Q067 | Q5U4P2  | -1.0738   |
| 98157 | Q2Q067 | Q8N3T6  | -0.77947  |
| 98158 | Q2Q067 | Q08AH1  | -0.91728  |
| 98159 | Q2Q067 | Q16891  | -0.16602  |
| 98160 | Q2Q067 | Q99437  | -0.78229  |
| 98161 | Q2Q067 | Q3B8N5  | -0.20561  |
| 98162 | Q2Q067 | Q8NDX5  | -0.51311  |
| 98163 | Q2Q067 | Q5SSG8  | -1.1371   |
| 98164 | Q2Q067 | Q92959  | -1.26     |
| 98165 | Q2Q067 | P35968  | -0.44524  |
| 98166 | Q2Q067 | Q3SYB3  | -0.33602  |
| 98167 | Q2Q067 | Q96K37  | -1.062    |
| 98168 | Q2Q067 | Q5W5W9  | -0.76489  |
| 98169 | Q2Q067 | Q5J TZ9 | -0.37052  |
| 98170 | Q2Q067 | Q6PJ21  | -0.61006  |
| 98171 | Q2Q067 | Q8IWQ3  | -0.88727  |
| 98172 | Q2Q067 | O60285  | -0.49347  |
| 98173 | Q2Q067 | Q9GZS9  | -0.6087   |
| 98174 | Q2Q067 | P19235  | -1.2809   |
| 98175 | Q2Q067 | P43354  | -0.24839  |
| 98176 | Q2Q067 | Q9UNN8  | -0.37351  |
| 98177 | Q2Q067 | Q8IWF2  | -0.2168   |
| 98178 | Q2Q067 | Q9UI33  | -1.1803   |
| 98179 | Q2Q067 | P28799  | -0.24353  |
| 98180 | Q2Q067 | Q8NGZ3  | -1.4096   |
| 98181 | Q2Q067 | Q68DQ2  | -0.39245  |
| 98182 | Q2Q067 | Q8TE58  | -1.4569   |
| 98183 | Q2Q067 | Q86UP6  | -0.73023  |
| 98184 | Q2Q067 | Q99640  | -0.22741  |
| 98185 | Q2Q067 | Q9UBP5  | -0.22693  |
| 98186 | Q2Q067 | P22792  | -0.9295   |
| 98187 | Q2Q067 | Q86YN6  | -0.22593  |
| 98188 | Q2Q067 | O42043  | -0.86704  |
| 98189 | Q2Q067 | Q08426  | -0.36801  |
| 98190 | Q2Q067 | Q8TCU6  | -0.22757  |
| 98191 | Q2Q067 | Q9UIG4  | -0.77379  |
| 98192 | Q2Q067 | P20941  | -0.179    |

|       |        |        |           |
|-------|--------|--------|-----------|
| 98193 | Q2Q067 | P05019 | -0.23177  |
| 98194 | Q2Q067 | Q86WA8 | -0.41459  |
| 98195 | Q2Q067 | Q8IV38 | -0.68378  |
| 98196 | Q2Q067 | Q9H0U3 | -1.2184   |
| 98197 | Q2Q067 | P51955 | -0.22741  |
| 98198 | Q2Q067 | Q8N6M6 | -0.69248  |
| 98199 | Q2Q067 | Q9UPR5 | -1.0222   |
| 98200 | Q2Q067 | Q01432 | -0.18874  |
| 98201 | Q2Q067 | Q13822 | -1.0466   |
| 98202 | Q2Q067 | O60487 | -0.55846  |
| 98203 | Q2Q067 | Q969L2 | -0.32851  |
| 98204 | Q2Q067 | Q3KQZ1 | -0.86765  |
| 98205 | Q2Q067 | Q5SY16 | -0.61382  |
| 98206 | Q2Q067 | Q9NY56 | -0.92382  |
| 98207 | Q2Q067 | Q96M02 | -0.054782 |
| 98208 | Q2Q067 | Q9Y5W8 | -0.81656  |
| 98209 | Q2Q067 | A0PK11 | -1.0345   |
| 98210 | Q2Q067 | P25713 | -0.17796  |
| 98211 | Q2Q067 | Q93088 | -0.17643  |
| 98212 | Q2Q067 | Q8WWZ1 | -0.93109  |
| 98213 | Q2Q067 | P02749 | -0.5278   |
| 98214 | Q2Q067 | Q9NVP1 | -0.064767 |
| 98215 | Q2Q067 | B2RNN3 | -1.0482   |
| 98216 | Q2Q067 | A6NJ78 | -0.38719  |
| 98217 | Q2Q067 | Q86UF1 | -1.0345   |
| 98218 | Q2Q067 | O00522 | -0.22741  |
| 98219 | Q2Q067 | P06858 | -0.53437  |
| 98220 | Q2Q067 | Q8N402 | -0.010639 |
| 98221 | Q2Q067 | O43432 | -0.20439  |
| 98222 | Q2Q067 | Q6UX06 | -1.0318   |
| 98223 | Q2Q067 | Q96EV2 | -0.96284  |
| 98224 | Q2Q067 | O95786 | -0.22714  |
| 98225 | Q2Q067 | P0CI00 | -0.37381  |
| 98226 | Q2Q067 | Q53EL9 | -1.0568   |
| 98227 | Q2Q067 | Q16445 | -0.9113   |
| 98228 | Q2Q067 | P18031 | -0.34483  |
| 98229 | Q2Q067 | P28067 | -0.80189  |
| 98230 | Q2Q067 | O75173 | -0.94748  |
| 98231 | Q2Q067 | P11586 | -0.37959  |
| 98232 | Q2Q067 | Q99677 | -1.6838   |
| 98233 | Q2Q067 | Q8NDC4 | -0.15129  |
| 98234 | Q2Q067 | O00451 | -0.52265  |
| 98235 | Q2Q067 | Q96D05 | -1.0345   |
| 98236 | Q2Q067 | Q15438 | -0.22741  |
| 98237 | Q2Q067 | P87889 | -0.39083  |
| 98238 | Q2Q067 | P30487 | -1.1453   |
| 98239 | Q2Q067 | Q8IX05 | -0.94713  |
| 98240 | Q2Q067 | Q8NGN1 | -1.4096   |
| 98241 | Q2Q067 | Q9UPM9 | -0.22672  |
| 98242 | Q2Q067 | Q7Z4F1 | -1.1146   |
| 98243 | Q2Q067 | Q6PIL6 | -1.0378   |
| 98244 | Q2Q067 | Q96NG3 | -0.22292  |
| 98245 | Q2Q067 | Q9Y385 | -1.4036   |
| 98246 | Q2Q067 | Q8NDV7 | -0.22495  |
| 98247 | Q2Q067 | Q4VX67 | -1.0345   |
| 98248 | Q2Q067 | Q6RI45 | -0.31016  |
| 98249 | Q2Q067 | P20472 | -0.3916   |
| 98250 | Q2Q067 | Q9P0I2 | -0.76248  |
| 98251 | Q2Q067 | P59665 | -1.0353   |
| 98252 | Q2Q067 | A8MYR8 | -0.088166 |
| 98253 | Q2Q067 | P59541 | -1.3729   |
| 98254 | Q2Q067 | Q96HC4 | -0.25159  |
| 98255 | Q2Q067 | O15020 | -0.22776  |
| 98256 | Q2Q067 | P0C7U2 | -0.4228   |
| 98257 | Q2Q067 | P12034 | -0.74699  |
| 98258 | Q2Q067 | P07305 | -0.45288  |
| 98259 | Q2Q067 | Q8N2I9 | -0.22741  |
| 98260 | Q2Q067 | Q6NZY7 | -0.4942   |
| 98261 | Q2Q067 | Q96DT7 | -0.22643  |
| 98262 | Q2Q067 | Q53HR8 | -0.33974  |
| 98263 | Q2Q067 | Q15788 | -0.41086  |
| 98264 | Q2Q067 | O60729 | -0.22741  |
| 98265 | Q2Q067 | Q8IX04 | -0.4523   |
| 98266 | Q2Q067 | P69892 | -0.23916  |
| 98267 | Q2Q067 | Q8IY49 | -0.82825  |
| 98268 | Q2Q067 | Q9BZC7 | -1.1981   |

|       |        |        |           |
|-------|--------|--------|-----------|
| 98269 | Q2Q067 | Q14142 | -0.49332  |
| 98270 | Q2Q067 | Q9P1W8 | -0.63787  |
| 98271 | Q2Q067 | Q13938 | -0.22347  |
| 98272 | Q2Q067 | P84550 | -0.10964  |
| 98273 | Q2Q067 | Q8IYU4 | -0.065284 |
| 98274 | Q2Q067 | Q8N3A8 | -0.68028  |
| 98275 | Q2Q067 | P43115 | -1.2628   |
| 98276 | Q2Q067 | P20800 | -0.60699  |
| 98277 | Q2Q067 | Q32M92 | -0.046492 |
| 98278 | Q2Q067 | Q86XR7 | -0.45025  |
| 98279 | Q2Q067 | Q9H4B7 | -0.69081  |
| 98280 | Q2Q067 | O43462 | -0.97227  |
| 98281 | Q2Q067 | Q9NYG8 | -1.2903   |
| 98282 | Q2Q067 | P05014 | -0.77343  |
| 98283 | Q2Q067 | O95171 | -0.14602  |
| 98284 | Q2Q067 | P01178 | -0.42346  |
| 98285 | Q2Q067 | Q6GMV2 | -0.31321  |
| 98286 | Q2Q067 | B1AK53 | -0.53104  |
| 98287 | Q2Q067 | P31937 | -0.40268  |
| 98288 | Q2Q067 | Q7KZI7 | -0.86507  |
| 98289 | Q2Q067 | Q86TD4 | -0.56824  |
| 98290 | Q2Q067 | P49753 | -0.28006  |
| 98291 | Q2Q067 | O43427 | -0.10287  |
| 98292 | Q2Q067 | P24593 | -0.4101   |
| 98293 | Q2Q067 | O15481 | -0.044225 |
| 98294 | Q2Q067 | Q9HBT6 | -1.3119   |
| 98295 | Q2Q067 | Q969N2 | -0.20519  |
| 98296 | Q2Q067 | Q96RQ3 | -0.73417  |
| 98297 | Q2Q067 | P0DJD1 | -0.48206  |
| 98298 | Q2Q067 | Q96JE9 | -0.078751 |
| 98299 | Q2Q067 | Q9P0K9 | -0.77947  |
| 98300 | Q2Q067 | P0CJ78 | -0.085533 |
| 98301 | Q2Q067 | Q86XE5 | -0.40007  |
| 98302 | Q2Q067 | Q5DID0 | -1.4724   |
| 98303 | Q2Q067 | Q9BZ81 | -0.24416  |
| 98304 | Q2Q067 | Q6IBW4 | -0.33448  |
| 98305 | Q2Q067 | Q8N7R7 | -0.4023   |
| 98306 | Q2Q067 | Q969E3 | -0.85271  |
| 98307 | Q2Q067 | Q8NCN5 | -0.068007 |
| 98308 | Q2Q067 | Q96G42 | -0.2178   |
| 98309 | Q2Q067 | Q9H0R8 | -0.22055  |
| 98310 | Q2Q067 | A6NDK9 | -0.28132  |
| 98311 | Q2Q067 | A6NDX4 | -1.0345   |
| 98312 | Q2Q067 | Q6ZMG9 | -0.24263  |
| 98313 | Q2Q067 | Q13520 | -0.95186  |
| 98314 | Q2Q067 | P26885 | -0.22906  |
| 98315 | Q2Q067 | Q9Y336 | -1.3915   |
| 98316 | Q2Q067 | Q9UHM6 | -1.337    |
| 98317 | Q2Q067 | P38570 | -1.2535   |
| 98318 | Q2Q067 | P25100 | -1.3409   |
| 98319 | Q2Q067 | Q68D42 | -1.0345   |
| 98320 | Q2Q067 | Q7Z3Q1 | -1.0195   |
| 98321 | Q2Q067 | Q9HCJ5 | -0.48451  |
| 98322 | Q2Q067 | Q6B8I1 | -0.75558  |
| 98323 | Q2Q067 | Q9NPF7 | -0.44754  |
| 98324 | Q2Q067 | Q9UBH0 | -0.93109  |
| 98325 | Q2Q067 | P14598 | -0.33119  |
| 98326 | Q2Q067 | Q15465 | -0.2274   |
| 98327 | Q2Q067 | Q5VT79 | -0.42848  |
| 98328 | Q2Q067 | Q86UB9 | -1.0957   |
| 98329 | Q2Q067 | P22301 | -0.40639  |
| 98330 | Q2Q067 | Q8IUC4 | -0.53541  |
| 98331 | Q2Q067 | Q9H237 | -0.97072  |
| 98332 | Q2Q067 | O75689 | -0.34405  |
| 98333 | Q2Q067 | P41145 | -0.99014  |
| 98334 | Q2Q067 | Q9ULB4 | -1.1818   |
| 98335 | Q2Q067 | O76054 | -0.42272  |
| 98336 | Q2Q067 | Q99489 | -0.47719  |
| 98337 | Q2Q067 | P0C7Q5 | -1.0345   |
| 98338 | Q2Q067 | Q9P0N8 | -1.2722   |
| 98339 | Q2Q067 | Q13315 | -0.4387   |
| 98340 | Q2Q067 | Q5T601 | -0.93408  |
| 98341 | Q2Q067 | Q96AD5 | -0.7411   |
| 98342 | Q2Q067 | Q2VIQ3 | -0.29279  |
| 98343 | Q2Q067 | O60361 | -0.99005  |
| 98344 | Q2Q067 | Q9Y2U5 | -0.78009  |

|       |        |        |           |
|-------|--------|--------|-----------|
| 98345 | Q2Q067 | P01210 | -1.0571   |
| 98346 | Q2Q067 | Q16515 | -0.84149  |
| 98347 | Q2Q067 | P17844 | -0.3612   |
| 98348 | Q2Q067 | P57768 | -0.66835  |
| 98349 | Q2Q067 | Q9NSN8 | -0.22591  |
| 98350 | Q2Q067 | Q9BTC0 | -0.22725  |
| 98351 | Q2Q067 | A6NHN6 | -0.98666  |
| 98352 | Q2Q067 | P42685 | -0.6668   |
| 98353 | Q2Q067 | Q8TEA1 | -0.41073  |
| 98354 | Q2Q067 | Q14D04 | -0.78341  |
| 98355 | Q2Q067 | Q52LJ0 | -0.38123  |
| 98356 | Q2Q067 | P01619 | -1.101    |
| 98357 | Q2Q067 | Q6P587 | -0.077087 |
| 98358 | Q2Q067 | Q9UK17 | -1.2123   |
| 98359 | Q2Q067 | Q15404 | -0.43378  |
| 98360 | Q2Q067 | Q9BS40 | -0.22421  |
| 98361 | Q2Q067 | Q9Y2U8 | -0.33901  |
| 98362 | Q2Q067 | O43280 | -0.42384  |
| 98363 | Q2Q067 | Q96P67 | -1.4967   |
| 98364 | Q2Q067 | P11229 | -0.89196  |
| 98365 | Q2Q067 | Q95807 | -0.80303  |
| 98366 | Q2Q067 | Q92626 | -1.2122   |
| 98367 | Q2Q067 | A8MUM7 | -0.31035  |
| 98368 | Q2Q067 | P01606 | -1.1115   |
| 98369 | Q2Q067 | Q6UWF7 | -0.98666  |
| 98370 | Q2Q067 | Q8NGE0 | -1.4096   |
| 98371 | Q2Q067 | P59046 | -0.22728  |
| 98372 | Q2Q067 | Q16850 | -1.0926   |
| 98373 | Q2Q067 | Q68BL7 | -0.96288  |
| 98374 | Q2Q067 | Q9Y2C3 | -0.9159   |
| 98375 | Q2Q067 | O43795 | -0.50829  |
| 98376 | Q2Q067 | P01137 | -0.22741  |
| 98377 | Q2Q067 | Q96C10 | -0.22707  |
| 98378 | Q2Q067 | Q969X5 | -0.065855 |
| 98379 | Q2Q067 | Q5JS37 | -0.98666  |
| 98380 | Q2Q067 | O75022 | -0.74063  |
| 98381 | Q2Q067 | Q8N6D2 | -0.40847  |
| 98382 | Q2Q067 | Q9Y5F2 | -1.3638   |
| 98383 | Q2Q067 | Q8WXF3 | -0.91253  |
| 98384 | Q2Q067 | P43088 | -1.6671   |
| 98385 | Q2Q067 | P62995 | -0.2191   |
| 98386 | Q2Q067 | Q32NB8 | -0.73052  |
| 98387 | Q2Q067 | Q86VZ6 | -0.22725  |
| 98388 | Q2Q067 | P60880 | -0.21483  |
| 98389 | Q2Q067 | Q9BQT9 | -1.1141   |
| 98390 | Q2Q067 | Q969S6 | -1.0345   |
| 98391 | Q2Q067 | Q96BF3 | -1.1634   |
| 98392 | Q2Q067 | Q8N4T8 | -0.2816   |
| 98393 | Q2Q067 | Q9UHF1 | -1.2216   |
| 98394 | Q2Q067 | P01780 | -1.1115   |
| 98395 | Q2Q067 | Q96KN8 | -0.17129  |
| 98396 | Q2Q067 | P32238 | -0.80957  |
| 98397 | Q2Q067 | Q8IYB4 | -0.27135  |
| 98398 | Q2Q067 | P27544 | -0.64462  |
| 98399 | Q2Q067 | A6NF89 | -1.4096   |
| 98400 | Q2Q067 | Q8NCQ5 | -0.41615  |
| 98401 | Q2Q067 | Q5BKT4 | -0.9946   |
| 98402 | Q2Q067 | O43763 | -0.22789  |
| 98403 | Q2Q067 | Q9Y5G7 | -1.3679   |
| 98404 | Q2Q067 | P01303 | -0.70477  |
| 98405 | Q2Q067 | Q92930 | -0.82556  |
| 98406 | Q2Q067 | Q9C0D9 | -0.99529  |
| 98407 | Q2Q067 | Q8N349 | -0.85832  |
| 98408 | Q2Q067 | Q5VYS8 | -0.47809  |
| 98409 | Q2Q067 | Q4VXF1 | -1.0345   |
| 98410 | Q2Q067 | Q16798 | -0.46926  |
| 98411 | Q2Q067 | Q9GZM7 | -1.0108   |
| 98412 | Q2Q067 | Q9Y4E8 | -0.36257  |
| 98413 | Q2Q067 | Q5T1M5 | -0.70667  |
| 98414 | Q2Q067 | Q9P2L0 | -0.22741  |
| 98415 | Q2Q067 | Q96A37 | -0.73178  |
| 98416 | Q2Q067 | P45378 | -0.33889  |
| 98417 | Q2Q067 | P10636 | -0.1263   |
| 98418 | Q2Q067 | Q8IWT3 | -0.22691  |
| 98419 | Q2Q067 | Q92618 | -0.085533 |
| 98420 | Q2Q067 | Q9BYV7 | -0.63787  |

|       |        |        |           |
|-------|--------|--------|-----------|
| 98421 | Q2Q067 | Q9Y547 | -0.58277  |
| 98422 | Q2Q067 | Q9C0J1 | -0.63844  |
| 98423 | Q2Q067 | Q9UPS6 | -0.24812  |
| 98424 | Q2Q067 | P05997 | -0.97283  |
| 98425 | Q2Q067 | P61266 | -0.92686  |
| 98426 | Q2Q067 | P78356 | -0.5034   |
| 98427 | Q2Q067 | Q8NGA1 | -1.4096   |
| 98428 | Q2Q067 | Q96B54 | -0.73178  |
| 98429 | Q2Q067 | Q96MM7 | -0.75217  |
| 98430 | Q2Q067 | O14795 | -0.43448  |
| 98431 | Q2Q067 | Q9HC58 | -1.1727   |
| 98432 | Q2Q067 | Q6PEW0 | -0.98968  |
| 98433 | Q2Q067 | Q8IYD9 | -0.98666  |
| 98434 | Q2Q067 | Q8NGA6 | -1.4096   |
| 98435 | Q2Q067 | Q9P2A4 | -0.22742  |
| 98436 | Q2Q067 | Q9Y5K6 | -0.2275   |
| 98437 | Q2Q067 | Q8IW45 | -0.57234  |
| 98438 | Q2Q067 | Q8IUN9 | -1.1706   |
| 98439 | Q2Q067 | Q5VUY0 | -0.44284  |
| 98440 | Q2Q067 | Q9BR11 | -0.15756  |
| 98441 | Q2Q067 | P78524 | -0.4039   |
| 98442 | Q2Q067 | Q15907 | -0.94985  |
| 98443 | Q2Q067 | A1X283 | -0.22741  |
| 98444 | Q2Q067 | P43632 | -1.3184   |
| 98445 | Q2Q067 | Q9NRD0 | -0.22692  |
| 98446 | Q2Q067 | Q8TDZ2 | -0.22742  |
| 98447 | Q2Q067 | P46095 | -1.5052   |
| 98448 | Q2Q067 | Q96FC9 | -0.29566  |
| 98449 | Q2Q067 | Q8NI77 | -0.70629  |
| 98450 | Q2Q067 | Q9P2P1 | -0.74192  |
| 98451 | Q2Q067 | P01776 | -1.1115   |
| 98452 | Q2Q067 | Q9ULS6 | -1.0103   |
| 98453 | Q2Q067 | Q15231 | -0.28126  |
| 98454 | Q2Q067 | Q6ZNA5 | -1.1498   |
| 98455 | Q2Q067 | Q6U736 | -1.3662   |
| 98456 | Q2Q067 | Q8WXB1 | -0.94793  |
| 98457 | Q2Q067 | Q9NUQ2 | -0.74826  |
| 98458 | Q2Q067 | Q5VV17 | -0.020133 |
| 98459 | Q2Q067 | Q9P0P8 | -0.21265  |
| 98460 | Q2Q067 | P68371 | -0.22765  |
| 98461 | Q2Q067 | Q86VB7 | -1.18     |
| 98462 | Q2Q067 | Q9NYQ7 | -1.1999   |
| 98463 | Q2Q067 | P02745 | -0.43898  |
| 98464 | Q2Q067 | Q01524 | -0.96337  |
| 98465 | Q2Q067 | P01773 | -1.1115   |
| 98466 | Q2Q067 | P20742 | -0.91412  |
| 98467 | Q2Q067 | Q13823 | -0.44302  |
| 98468 | Q2Q067 | Q9Y5A9 | -0.36156  |
| 98469 | Q2Q067 | Q8N6G6 | -1.2247   |
| 98470 | Q2Q067 | Q75954 | -1.1904   |
| 98471 | Q2Q067 | Q13936 | -0.31821  |
| 98472 | Q2Q067 | P0CG05 | -1.101    |
| 98473 | Q2Q067 | Q8WWH4 | -0.68236  |
| 98474 | Q2Q067 | Q9NP56 | -0.50192  |
| 98475 | Q2Q067 | Q8NEL9 | -0.30481  |
| 98476 | Q2Q067 | Q8NHC4 | -1.4096   |
| 98477 | Q2Q067 | Q75074 | -1.0094   |
| 98478 | Q2Q067 | Q13401 | -0.14242  |
| 98479 | Q2Q067 | Q96MV8 | -1.01     |
| 98480 | Q2Q067 | Q96P64 | -1.1564   |
| 98481 | Q2Q067 | Q9ULW5 | -1.0408   |
| 98482 | Q2Q067 | Q5VT97 | -0.83748  |
| 98483 | Q2Q067 | P51784 | -0.30949  |
| 98484 | Q2Q067 | Q13586 | -0.49915  |
| 98485 | Q2Q067 | O00142 | -0.63858  |
| 98486 | Q2Q067 | Q9NR12 | -0.2766   |
| 98487 | Q2Q067 | Q5VYY1 | -0.2274   |
| 98488 | Q2Q067 | Q5K4L6 | -1.3857   |
| 98489 | Q2Q067 | Q43813 | -0.61341  |
| 98490 | Q2Q067 | P35326 | -0.33388  |
| 98491 | Q2Q067 | Q53HC5 | -0.2052   |
| 98492 | Q2Q067 | P09601 | -0.17978  |
| 98493 | Q2Q067 | P29803 | -0.32069  |
| 98494 | Q2Q067 | Q9UIJ7 | -0.74136  |
| 98495 | Q2Q067 | P01891 | -0.99938  |
| 98496 | Q2Q067 | Q9UBU6 | -1.0345   |

|       |        |        |          |
|-------|--------|--------|----------|
| 98497 | Q2Q067 | Q8NGJ0 | -1.4096  |
| 98498 | Q2Q067 | Q8NHE4 | -0.7942  |
| 98499 | Q2Q067 | Q86YH6 | -0.21902 |
| 98500 | Q2Q067 | Q95789 | -0.38251 |
| 98501 | Q2Q067 | Q9N2K0 | -0.73255 |
| 98502 | Q2Q067 | Q9UHL4 | -1.1353  |
| 98503 | Q2Q067 | Q8NHP7 | -0.69115 |
| 98504 | Q2Q067 | A6NMZ7 | -1.3099  |
| 98505 | Q2Q067 | P29373 | -0.21262 |
| 98506 | Q2Q067 | Q9H2S6 | -0.94987 |
| 98507 | Q2Q067 | O00295 | -0.89778 |
| 98508 | Q2Q067 | Q13070 | -0.18742 |
| 98509 | Q2Q067 | P0DJD7 | -1.2971  |
| 98510 | Q2Q067 | P31391 | -1.5315  |
| 98511 | Q2Q067 | Q86V35 | -0.80816 |
| 98512 | Q2Q067 | Q8NHS1 | -1.0345  |
| 98513 | Q2Q067 | Q9HAC8 | -0.21392 |
| 98514 | Q2Q067 | P04439 | -1.2066  |
| 98515 | Q2Q067 | Q9NQ94 | -0.24431 |
| 98516 | Q2Q067 | Q9NYM4 | -1.4224  |
| 98517 | Q2Q067 | Q9HBA9 | -0.796   |
| 98518 | Q2Q067 | Q96I45 | -1.0345  |
| 98519 | Q2Q067 | Q07837 | -1.0883  |
| 98520 | Q2Q067 | Q96PG2 | -1.0345  |
| 98521 | Q2Q067 | O60512 | -0.48092 |
| 98522 | Q2Q067 | Q9UHC3 | -0.70237 |
| 98523 | Q2Q067 | Q8IXA5 | -0.71324 |
| 98524 | Q2Q067 | Q1ZYL8 | -0.98666 |
| 98525 | Q2Q067 | Q9P2N7 | -0.19972 |
| 98526 | Q2Q067 | Q9UQP3 | -1.065   |
| 98527 | Q2Q067 | Q9UIM3 | -0.28601 |
| 98528 | Q2Q067 | Q13606 | -1.4096  |
| 98529 | Q2Q067 | Q95944 | -1.4336  |
| 98530 | Q2Q067 | Q9C0D5 | -0.57377 |
| 98531 | Q2Q067 | Q6UXU6 | -1.0345  |
| 98532 | Q2Q067 | P35318 | -0.29527 |
| 98533 | Q2Q067 | P78334 | -1.0018  |
| 98534 | Q2Q067 | A6NLE4 | -1.1634  |
| 98535 | Q2Q067 | Q8NGJ8 | -1.4096  |
| 98536 | Q2Q067 | Q96T60 | -0.48216 |
| 98537 | Q2Q067 | Q8NGI7 | -1.4096  |
| 98538 | Q2Q067 | Q969Y2 | -0.95947 |
| 98539 | Q2Q067 | Q9HDC9 | -0.90441 |
| 98540 | Q2Q067 | Q9BSE5 | -0.20379 |
| 98541 | Q2Q067 | Q6PIF6 | -0.92116 |
| 98542 | Q2Q067 | P01258 | -0.53952 |
| 98543 | Q2Q067 | Q9NQ34 | -1.2344  |
| 98544 | Q2Q067 | P48165 | -1.2316  |
| 98545 | Q2Q067 | Q8TD86 | -0.226   |
| 98546 | Q2Q067 | Q13637 | -0.91441 |
| 98547 | Q2Q067 | Q9UBY8 | -0.4319  |
| 98548 | Q2Q067 | Q8IZ08 | -1.4967  |
| 98549 | Q2Q067 | Q92730 | -0.44337 |
| 98550 | Q2Q067 | Q86VZ1 | -1.4336  |
| 98551 | Q2Q067 | P35443 | -0.82386 |
| 98552 | Q2Q067 | Q9UK59 | -0.11518 |
| 98553 | Q2Q067 | Q9Y5X3 | -0.82305 |
| 98554 | Q2Q067 | F2Z333 | -1.0345  |
| 98555 | Q2Q067 | Q8NA54 | -0.29085 |
| 98556 | Q2Q067 | Q9NRG7 | -0.89117 |
| 98557 | Q2Q067 | Q9BTU6 | -0.38601 |
| 98558 | Q2Q067 | P43235 | -0.75699 |
| 98559 | Q2Q067 | Q9Y5T4 | -0.90869 |
| 98560 | Q2Q067 | Q2M389 | -0.34932 |
| 98561 | Q2Q067 | Q8WVV4 | -0.44287 |
| 98562 | Q2Q067 | Q6PFW1 | -0.23861 |
| 98563 | Q2Q067 | P30443 | -1.1773  |
| 98564 | Q2Q067 | Q9NZ72 | -0.20323 |
| 98565 | Q2Q067 | Q99715 | -1.2552  |
| 98566 | Q2Q067 | Q9UHC9 | -0.49995 |
| 98567 | Q2Q067 | Q9GZN8 | -0.24416 |
| 98568 | Q2Q067 | P49862 | -1.4579  |
| 98569 | Q2Q067 | O43252 | -0.8251  |
| 98570 | Q2Q067 | Q6IMI4 | -0.3314  |
| 98571 | Q2Q067 | Q16584 | -0.22741 |
| 98572 | Q2Q067 | Q99426 | -0.22203 |

|       |        |        |            |
|-------|--------|--------|------------|
| 98573 | Q2Q067 | Q969M1 | -0.54844   |
| 98574 | Q2Q067 | Q86WT1 | -0.51507   |
| 98575 | Q2Q067 | Q8IWB9 | -1.1532    |
| 98576 | Q2Q067 | O00445 | -0.81818   |
| 98577 | Q2Q067 | Q96F44 | -0.27415   |
| 98578 | Q2Q067 | P17948 | -0.56019   |
| 98579 | Q2Q067 | P22748 | -0.20595   |
| 98580 | Q2Q067 | O75144 | -1.2506    |
| 98581 | Q2Q067 | Q8TBP0 | -1.4231    |
| 98582 | Q2Q067 | O75629 | -0.75427   |
| 98583 | Q2Q067 | Q8N183 | -0.38223   |
| 98584 | Q2Q067 | Q8NFF2 | -1.2099    |
| 98585 | Q2Q067 | P78426 | -0.22827   |
| 98586 | Q2Q067 | Q14031 | -1.2283    |
| 98587 | Q2Q067 | Q9NRZ7 | -0.91017   |
| 98588 | Q2Q067 | Q9H3S3 | -1.6357    |
| 98589 | Q2Q067 | P0CH98 | -0.25279   |
| 98590 | Q2Q067 | A4D1E9 | -0.57591   |
| 98591 | Q2Q067 | Q9NRX4 | -0.031668  |
| 98592 | Q2Q067 | O60359 | -1.163     |
| 98593 | Q2Q067 | Q15155 | -0.75671   |
| 98594 | Q2Q067 | P49638 | -0.34075   |
| 98595 | Q2Q067 | Q6UXY1 | -0.89801   |
| 98596 | Q2Q067 | Q969S9 | -0.6725    |
| 98597 | Q2Q067 | P23510 | -0.47842   |
| 98598 | Q2Q067 | P36268 | -0.80216   |
| 98599 | Q2Q067 | P50391 | -1.3804    |
| 98600 | Q2Q067 | Q15772 | -1.0399    |
| 98601 | Q2Q067 | Q9P0S2 | -0.62811   |
| 98602 | Q2Q067 | Q9UI15 | -0.21604   |
| 98603 | Q2Q067 | Q96A00 | -0.26162   |
| 98604 | Q2Q067 | P08758 | -0.40629   |
| 98605 | Q2Q067 | Q6UX15 | -1.0759    |
| 98606 | Q2Q067 | O75064 | -0.28049   |
| 98607 | Q2Q067 | Q9BVA6 | -1.2856    |
| 98608 | Q2Q067 | Q53LP3 | -0.22741   |
| 98609 | Q2Q067 | Q9UJQ7 | -0.38131   |
| 98610 | Q2Q067 | Q15270 | -0.22718   |
| 98611 | Q2Q067 | Q7LDG7 | -0.77348   |
| 98612 | Q2Q067 | Q6NY19 | -0.22742   |
| 98613 | Q2Q067 | Q96M96 | -0.93185   |
| 98614 | Q2Q067 | Q7RTU1 | -0.32303   |
| 98615 | Q2Q067 | Q7Z5N4 | -1.227     |
| 98616 | Q2Q067 | Q8NFT2 | -1.1736    |
| 98617 | Q2Q067 | P58215 | -0.30981   |
| 98618 | Q2Q067 | Q8IYG6 | -0.14889   |
| 98619 | Q2Q067 | Q9H477 | -0.90103   |
| 98620 | Q2Q067 | Q9H1D0 | -1.2275    |
| 98621 | Q2Q067 | Q9Y3E2 | -0.79903   |
| 98622 | Q2Q067 | P10747 | -0.23298   |
| 98623 | Q2Q067 | P20594 | -1.4194    |
| 98624 | Q2Q067 | Q86UT6 | -0.22209   |
| 98625 | Q2Q067 | Q5H9S7 | -0.45055   |
| 98626 | Q2Q067 | Q92781 | -1.1237    |
| 98627 | Q2Q067 | P82279 | -1.4376    |
| 98628 | Q2Q067 | Q7LC44 | -0.52996   |
| 98629 | Q2Q067 | Q7L591 | -0.58863   |
| 98630 | Q2Q067 | Q8IZU2 | -0.22756   |
| 98631 | Q2Q067 | Q5JQC9 | -0.45258   |
| 98632 | Q2Q067 | Q8NGF8 | -1.4096    |
| 98633 | Q2Q067 | Q96EQ8 | -0.75619   |
| 98634 | Q2Q067 | Q8NG76 | -1.4096    |
| 98635 | Q2Q067 | O75352 | -0.94591   |
| 98636 | Q2Q067 | P30512 | -0.98258   |
| 98637 | Q2Q067 | P01861 | -1.113     |
| 98638 | Q2Q067 | Q99942 | -0.4358    |
| 98639 | Q2Q067 | P42680 | -1.2303    |
| 98640 | Q2Q067 | Q494W8 | -1.072     |
| 98641 | Q2Q067 | Q7RTS1 | -0.22768   |
| 98642 | Q2Q067 | P35790 | -0.80204   |
| 98643 | Q2Q067 | Q8IY21 | -0.22403   |
| 98644 | Q2Q067 | Q96JG9 | -0.22751   |
| 98645 | Q2Q067 | Q9C0H5 | -0.35085   |
| 98646 | Q2Q067 | Q9NSC7 | -0.86401   |
| 98647 | Q2Q067 | P35612 | -0.42757   |
| 98648 | Q2Q067 | Q49AJ0 | -0.0012767 |

|       |        |        |          |
|-------|--------|--------|----------|
| 98649 | Q2Q067 | Q15005 | -0.84105 |
| 98650 | Q2Q067 | Q86XI6 | -0.2369  |
| 98651 | Q2Q067 | A6NEW6 | -0.43957 |
| 98652 | Q2Q067 | Q8N3J2 | -0.43628 |
| 98653 | Q2Q067 | Q86V88 | -0.76524 |
| 98654 | Q2Q067 | Q86W74 | -1.0345  |
| 98655 | Q2Q067 | P35568 | -0.21637 |
| 98656 | Q2Q067 | P48995 | -0.39341 |
| 98657 | Q2Q067 | P0CK97 | -1.0345  |
| 98658 | Q2Q067 | Q2TB18 | -0.28744 |
| 98659 | Q2Q067 | Q8N7X4 | -0.24416 |
| 98660 | Q2Q067 | Q8TEW6 | -0.39958 |
| 98661 | Q2Q067 | P42679 | -0.5696  |
| 98662 | Q2Q067 | P60323 | -0.30808 |
| 98663 | Q2Q067 | A6NEE1 | -0.51797 |
| 98664 | Q2Q067 | Q18PE1 | -0.76303 |
| 98665 | Q2Q067 | P17735 | -0.21719 |
| 98666 | Q2Q067 | P30542 | -0.39665 |
| 98667 | Q2Q067 | Q0ZLH3 | -0.57819 |
| 98668 | Q2Q067 | Q7Z406 | -0.47271 |
| 98669 | Q2Q067 | Q95274 | -1.1204  |
| 98670 | Q2Q067 | P30411 | -0.7021  |
| 98671 | Q2Q067 | Q9Y6A9 | -0.69359 |
| 98672 | Q2Q067 | Q8NEV8 | -0.398   |
| 98673 | Q2Q067 | O14717 | -0.15829 |
| 98674 | Q2Q067 | P51164 | -1.0574  |
| 98675 | Q2Q067 | Q9UNA0 | -0.26058 |
| 98676 | Q2Q067 | Q2M3R5 | -1.0345  |
| 98677 | Q2Q067 | O43638 | -0.30205 |
| 98678 | Q2Q067 | Q9UNH6 | -0.67605 |
| 98679 | Q2Q067 | O75449 | -0.23658 |
| 98680 | Q2Q067 | Q86U06 | -0.64574 |
| 98681 | Q2Q067 | Q6ZT21 | -0.99205 |
| 98682 | Q2Q067 | Q01970 | -0.40298 |
| 98683 | Q2Q067 | P21709 | -1.2354  |
| 98684 | Q2Q067 | Q9GZZ9 | -0.20715 |
| 98685 | Q2Q067 | Q15417 | -0.52001 |
| 98686 | Q2Q067 | P27482 | -0.45603 |
| 98687 | Q2Q067 | Q68D85 | -0.96425 |
| 98688 | Q2Q067 | Q15442 | -0.19978 |
| 98689 | Q2Q067 | Q2TAA8 | -0.59916 |
| 98690 | Q2Q067 | Q9UK08 | -0.96904 |
| 98691 | Q2Q067 | Q9Y696 | -0.21985 |
| 98692 | Q2Q067 | Q96RP8 | -1.0103  |
| 98693 | Q2Q067 | Q9HAV0 | -0.50559 |
| 98694 | Q2Q067 | P29400 | -1.0185  |
| 98695 | Q2Q067 | P54284 | -0.46677 |
| 98696 | Q2Q067 | Q8N2H9 | -0.26355 |
| 98697 | Q2Q067 | Q86W10 | -1.2438  |
| 98698 | Q2Q067 | Q9BX97 | -0.76149 |
| 98699 | Q2Q067 | Q7RTX8 | -0.10329 |
| 98700 | Q2Q067 | Q5JPI9 | -0.38719 |
| 98701 | Q2Q067 | Q96HH6 | -1.0345  |
| 98702 | Q2Q067 | Q6UWW8 | -0.28544 |
| 98703 | Q2Q067 | Q13219 | -1.5143  |
| 98704 | Q2Q067 | Q9Y4K4 | -0.67512 |
| 98705 | Q2Q067 | Q9NP74 | -0.6164  |
| 98706 | Q2Q067 | A4D1B5 | -0.19836 |
| 98707 | Q2Q067 | Q8WZ75 | -1.0721  |
| 98708 | Q2Q067 | Q8NA34 | -0.17489 |
| 98709 | Q2Q067 | Q8N695 | -1.2386  |
| 98710 | Q2Q067 | Q9BRY0 | -1.1292  |
| 98711 | Q2Q067 | Q6UXH8 | -1.1647  |
| 98712 | Q2Q067 | P53680 | -0.17751 |
| 98713 | Q2Q067 | Q8WU10 | -0.56541 |
| 98714 | Q2Q067 | O14514 | -1.6554  |
| 98715 | Q2Q067 | Q7L311 | -1.0345  |
| 98716 | Q2Q067 | Q86UK7 | -0.73178 |
| 98717 | Q2Q067 | Q16875 | -0.47179 |
| 98718 | Q2Q067 | Q99946 | -1.0325  |
| 98719 | Q2Q067 | P16671 | -0.48102 |
| 98720 | Q2Q067 | P48443 | -0.22779 |
| 98721 | Q2Q067 | Q8IZT8 | -0.21978 |
| 98722 | Q2Q067 | Q53R41 | -0.35547 |
| 98723 | Q2Q067 | Q6PEZ8 | -1.0259  |
| 98724 | Q2Q067 | Q8NEB5 | -0.91212 |



|       |        |         |           |
|-------|--------|---------|-----------|
| 98725 | Q2Q067 | Q8WV60  | -0.25278  |
| 98726 | Q2Q067 | Q9NZL9  | -0.16929  |
| 98727 | Q2Q067 | Q969Z0  | -0.27202  |
| 98728 | Q2Q067 | Q95876  | -0.55487  |
| 98729 | Q2Q067 | Q9NXD2  | -0.5636   |
| 98730 | Q2Q067 | Q3SYA9  | -0.24416  |
| 98731 | Q2Q067 | Q6ZVZ8  | -0.61006  |
| 98732 | Q2Q067 | A8MQB3  | -0.044253 |
| 98733 | Q2Q067 | Q6JBY9  | -0.45459  |
| 98734 | Q2Q067 | Q86VF5  | -0.89123  |
| 98735 | Q2Q067 | Q53GG5  | -0.42906  |
| 98736 | Q2Q067 | O43182  | -0.69986  |
| 98737 | Q2Q067 | P48551  | -0.96465  |
| 98738 | Q2Q067 | Q96HF1  | -0.29599  |
| 98739 | Q2Q067 | O00408  | -0.22639  |
| 98740 | Q2Q067 | O60478  | -1.1904   |
| 98741 | Q2Q067 | O14715  | -0.14096  |
| 98742 | Q2Q067 | Q5SZK8  | -1.5788   |
| 98743 | Q2Q067 | Q58A44  | -0.20901  |
| 98744 | Q2Q067 | Q96QU6  | -0.41542  |
| 98745 | Q2Q067 | P40205  | -0.62283  |
| 98746 | Q2Q067 | P09429  | -0.22817  |
| 98747 | Q2Q067 | O60939  | -0.93379  |
| 98748 | Q2Q067 | Q6IS24  | -0.87193  |
| 98749 | Q2Q067 | Q14114  | -0.99081  |
| 98750 | Q2Q067 | Q6NUM6  | -1.0672   |
| 98751 | Q2Q067 | Q6ZS86  | -0.89409  |
| 98752 | Q2Q067 | O75343  | -0.87863  |
| 98753 | Q2Q067 | Q9NQ88  | -0.74446  |
| 98754 | Q2Q067 | P07333  | -0.82871  |
| 98755 | Q2Q067 | Q9NYW3  | -1.2647   |
| 98756 | Q2Q067 | Q6ZQQ2  | -1.0345   |
| 98757 | Q2Q067 | Q9NPG8  | -1.13     |
| 98758 | Q2Q067 | Q8N6N2  | -0.24416  |
| 98759 | Q2Q067 | Q6ZTR7  | -0.069998 |
| 98760 | Q2Q067 | P10632  | -0.74594  |
| 98761 | Q2Q067 | Q96KX2  | -0.35529  |
| 98762 | Q2Q067 | P14555  | -0.90799  |
| 98763 | Q2Q067 | Q3YEC7  | -0.22761  |
| 98764 | Q2Q067 | Q9BRP0  | -0.23128  |
| 98765 | Q2Q067 | Q2T9F4  | -0.036312 |
| 98766 | Q2Q067 | A8MUN3  | -0.98666  |
| 98767 | Q2Q067 | Q5VV11  | -0.27267  |
| 98768 | Q2Q067 | O95221  | -1.4096   |
| 98769 | Q2Q067 | P13584  | -0.77606  |
| 98770 | Q2Q067 | Q05901  | -1.0952   |
| 98771 | Q2Q067 | P42681  | -0.64895  |
| 98772 | Q2Q067 | Q8I WV2 | -1.135    |
| 98773 | Q2Q067 | P43004  | -0.66511  |
| 98774 | Q2Q067 | O60565  | -0.21898  |
| 98775 | Q2Q067 | A8TX70  | -1.3099   |
| 98776 | Q2Q067 | Q6ZSY5  | -0.95363  |
| 98777 | Q2Q067 | Q9BSR8  | -0.87735  |
| 98778 | Q2Q067 | O95870  | -0.97833  |
| 98779 | Q2Q067 | Q7RTY3  | -1.0134   |
| 98780 | Q2Q067 | P18507  | -0.53951  |
| 98781 | Q2Q067 | Q86W34  | -0.92273  |
| 98782 | Q2Q067 | Q9H6L4  | -0.22895  |
| 98783 | Q2Q067 | Q15620  | -1.4096   |
| 98784 | Q2Q067 | Q12836  | -1.429    |
| 98785 | Q2Q067 | Q9NXR5  | -0.22741  |
| 98786 | Q2Q067 | Q8NGP2  | -1.4096   |
| 98787 | Q2Q067 | Q5XPI4  | -0.42101  |
| 98788 | Q2Q067 | Q9UMD9  | -1.079    |
| 98789 | Q2Q067 | P51817  | -0.63006  |
| 98790 | Q2Q067 | Q8N271  | -1.1545   |
| 98791 | Q2Q067 | Q496J9  | -0.91343  |
| 98792 | Q2Q067 | Q96NR8  | -1.2875   |
| 98793 | Q2Q067 | Q9Y616  | -0.33371  |
| 98794 | Q2Q067 | Q3KNT9  | -1.0345   |
| 98795 | Q2Q067 | Q02325  | -0.98666  |
| 98796 | Q2Q067 | Q9H252  | -1.121    |
| 98797 | Q2Q067 | Q6XYQ8  | -1.0676   |
| 98798 | Q2Q067 | Q8NGZ5  | -1.4096   |
| 98799 | Q2Q067 | Q8IYL9  | -1.5388   |
| 98800 | Q2Q067 | Q9GZU3  | -1.0345   |

|       |        |        |           |
|-------|--------|--------|-----------|
| 98801 | Q2Q067 | Q8TCJ2 | -0.84942  |
| 98802 | Q2Q067 | O00469 | -0.7785   |
| 98803 | Q2Q067 | O95104 | -0.42675  |
| 98804 | Q2Q067 | Q7Z713 | -0.22741  |
| 98805 | Q2Q067 | O00482 | -0.23464  |
| 98806 | Q2Q067 | Q9H6A9 | -1.0345   |
| 98807 | Q2Q067 | Q6YBV0 | -0.97256  |
| 98808 | Q2Q067 | Q01813 | -0.6263   |
| 98809 | Q2Q067 | Q9BWX1 | -0.19634  |
| 98810 | Q2Q067 | Q9BVK6 | -0.17644  |
| 98811 | Q2Q067 | B7Z6K7 | -0.37381  |
| 98812 | Q2Q067 | Q8NFD2 | -1.3228   |
| 98813 | Q2Q067 | Q5HYM0 | -0.44678  |
| 98814 | Q2Q067 | P48643 | -0.063275 |
| 98815 | Q2Q067 | P36776 | -0.16186  |
| 98816 | Q2Q067 | Q9NNZ6 | -0.83698  |
| 98817 | Q2Q067 | Q8IUW5 | -0.99288  |
| 98818 | Q2Q067 | Q9H341 | -1.4096   |
| 98819 | Q2Q067 | Q8NGG6 | -1.4096   |
| 98820 | Q2Q067 | O14745 | -0.79872  |
| 98821 | Q2Q067 | P29017 | -1.1659   |
| 98822 | Q2Q067 | Q9NZI2 | -0.72374  |
| 98823 | Q2Q067 | Q7L985 | -1.0345   |
| 98824 | Q2Q067 | Q6UB99 | -0.22741  |
| 98825 | Q2Q067 | A6NIJ9 | -1.4096   |
| 98826 | Q2Q067 | P01722 | -1.1115   |
| 98827 | Q2Q067 | Q5VTB9 | -0.45518  |
| 98828 | Q2Q067 | Q96PZ0 | -0.32489  |
| 98829 | Q2Q067 | Q5TFG8 | -0.43755  |
| 98830 | Q2Q067 | Q9UBY0 | -1.2576   |
| 98831 | Q2Q067 | P48764 | -0.69584  |
| 98832 | Q2Q067 | Q8NGP4 | -1.4096   |
| 98833 | Q2Q067 | Q96Q77 | -0.45603  |
| 98834 | Q2Q067 | Q5T4W7 | -0.97518  |
| 98835 | Q2Q067 | Q9BQ31 | -0.57268  |
| 98836 | Q2Q067 | Q8WWT9 | -0.93516  |
| 98837 | Q2Q067 | Q14432 | -0.66769  |
| 98838 | Q2Q067 | Q9H920 | -1.1176   |
| 98839 | Q2Q067 | P30405 | -0.145    |
| 98840 | Q2Q067 | Q9P035 | -1.3226   |
| 98841 | Q2Q067 | O15533 | -0.48752  |
| 98842 | Q2Q067 | Q96MH7 | -0.1185   |
| 98843 | Q2Q067 | O15247 | -0.83351  |
| 98844 | Q2Q067 | Q9Y6Z7 | -0.86226  |
| 98845 | Q2Q067 | Q86UL3 | -0.63843  |
| 98846 | Q2Q067 | Q9UHF4 | -1.0345   |
| 98847 | Q2Q067 | Q96RD9 | -1.1634   |
| 98848 | Q2Q067 | Q9UKN1 | -1.0379   |
| 98849 | Q2Q067 | Q8WV83 | -1.062    |
| 98850 | Q2Q067 | Q9HC21 | -0.82143  |
| 98851 | Q2Q067 | Q9Y6X5 | -1.1058   |
| 98852 | Q2Q067 | P59020 | -0.24416  |
| 98853 | Q2Q067 | Q8IZJ1 | -0.64274  |
| 98854 | Q2Q067 | A2PYH4 | -0.94996  |
| 98855 | Q2Q067 | Q15067 | -0.50973  |
| 98856 | Q2Q067 | O00626 | -1.1357   |
| 98857 | Q2Q067 | P14770 | -1.2043   |
| 98858 | Q2Q067 | Q01167 | -0.29976  |
| 98859 | Q2Q067 | Q9H4M9 | -0.50734  |
| 98860 | Q2Q067 | Q9BZM4 | -0.58517  |
| 98861 | Q2Q067 | Q96HS1 | -0.75575  |
| 98862 | Q2Q067 | B3GLJ2 | -0.98666  |
| 98863 | Q2Q067 | Q8N4P6 | -0.22724  |
| 98864 | Q2Q067 | P09936 | -0.17036  |
| 98865 | Q2Q067 | Q9H611 | -0.56352  |
| 98866 | Q2Q067 | Q08554 | -1.2366   |
| 98867 | Q2Q067 | P35499 | -1.2684   |
| 98868 | Q2Q067 | P30042 | -0.21265  |
| 98869 | Q2Q067 | Q8TB24 | -0.48474  |
| 98870 | Q2Q067 | Q76B58 | -0.70554  |
| 98871 | Q2Q067 | Q9NVR0 | -0.98666  |
| 98872 | Q2Q067 | Q86U90 | -0.34093  |
| 98873 | Q2Q067 | Q9BY15 | -1.9526   |
| 98874 | Q2Q067 | Q02252 | -0.2616   |
| 98875 | Q2Q067 | Q5H8A4 | -1.0558   |
| 98876 | Q2Q067 | Q8N129 | -1.073    |

|       |        |        |            |
|-------|--------|--------|------------|
| 98877 | Q2Q067 | O00168 | -1.3216    |
| 98878 | Q2Q067 | O75116 | -0.31993   |
| 98879 | Q2Q067 | Q9NRT5 | -0.25999   |
| 98880 | Q2Q067 | Q9NTN3 | -0.75899   |
| 98881 | Q2Q067 | P04424 | -0.14799   |
| 98882 | Q2Q067 | Q9P0V8 | -1.0427    |
| 98883 | Q2Q067 | Q13705 | -0.55764   |
| 98884 | Q2Q067 | Q9NYU1 | -0.40894   |
| 98885 | Q2Q067 | P36957 | -0.1895    |
| 98886 | Q2Q067 | Q92496 | -1.095     |
| 98887 | Q2Q067 | P0DJJ0 | -0.34548   |
| 98888 | Q2Q067 | Q15052 | -0.47766   |
| 98889 | Q2Q067 | O95255 | -1.4612    |
| 98890 | Q2Q067 | Q8TCU3 | -1.0496    |
| 98891 | Q2Q067 | Q8IWU9 | -0.41146   |
| 98892 | Q2Q067 | Q9Y4X0 | -0.24416   |
| 98893 | Q2Q067 | P0C091 | -1.8515    |
| 98894 | Q2Q067 | Q9NP78 | -0.90236   |
| 98895 | Q2Q067 | Q6NUJ1 | -1.1214    |
| 98896 | Q2Q067 | Q1MX18 | -0.46166   |
| 98897 | Q2Q067 | O94762 | -0.22658   |
| 98898 | Q2Q067 | Q8N104 | -0.94775   |
| 98899 | Q2Q067 | O43508 | -1.1008    |
| 98900 | Q2Q067 | Q9Y4D8 | -0.83548   |
| 98901 | Q2Q067 | Q93079 | -0.82527   |
| 98902 | Q2Q067 | Q9H0S4 | -0.018561  |
| 98903 | Q2Q067 | Q8N0U2 | -1.0345    |
| 98904 | Q2Q067 | Q8TAC1 | -0.70465   |
| 98905 | Q2Q067 | P61225 | -1.0009    |
| 98906 | Q2Q067 | Q9HBT8 | -0.085533  |
| 98907 | Q2Q067 | Q9UGF7 | -1.4096    |
| 98908 | Q2Q067 | Q92847 | -0.7648    |
| 98909 | Q2Q067 | O60825 | -0.1202    |
| 98910 | Q2Q067 | Q9NUE0 | -1.1576    |
| 98911 | Q2Q067 | Q8NH41 | -1.4096    |
| 98912 | Q2Q067 | Q53FA7 | -0.78985   |
| 98913 | Q2Q067 | Q9NQ40 | -1.2386    |
| 98914 | Q2Q067 | P32970 | -0.70599   |
| 98915 | Q2Q067 | Q9BXX1 | -0.21802   |
| 98916 | Q2Q067 | O14841 | -0.62931   |
| 98917 | Q2Q067 | Q9BQS2 | -1.1634    |
| 98918 | Q2Q067 | A6ND91 | -0.90835   |
| 98919 | Q2Q067 | Q9H0J9 | -0.25505   |
| 98920 | Q2Q067 | Q9BXL7 | -0.22729   |
| 98921 | Q2Q067 | Q14627 | -1.2903    |
| 98922 | Q2Q067 | Q7Z6M3 | -1.2525    |
| 98923 | Q2Q067 | A4D1S5 | -1.2693    |
| 98924 | Q2Q067 | O75955 | -0.40818   |
| 98925 | Q2Q067 | Q6PKC3 | -1.1249    |
| 98926 | Q2Q067 | Q9NYW1 | -1.2647    |
| 98927 | Q2Q067 | Q05329 | -0.23105   |
| 98928 | Q2Q067 | A8MWE9 | -0.45603   |
| 98929 | Q2Q067 | P19971 | -0.44006   |
| 98930 | Q2Q067 | Q9UNW8 | -1.3885    |
| 98931 | Q2Q067 | Q9HC73 | -1.6971    |
| 98932 | Q2Q067 | P23515 | -0.74258   |
| 98933 | Q2Q067 | Q04941 | -0.74125   |
| 98934 | Q2Q067 | Q04826 | -1.1453    |
| 98935 | Q2Q067 | P49590 | -0.2122    |
| 98936 | Q2Q067 | Q9GZN1 | -0.21707   |
| 98937 | Q2Q067 | Q53HC9 | -0.22728   |
| 98938 | Q2Q067 | O75469 | -0.28594   |
| 98939 | Q2Q067 | Q6ZQW0 | -0.22164   |
| 98940 | Q2Q067 | B0FP48 | -1.0345    |
| 98941 | Q2Q067 | P02741 | -0.94921   |
| 98942 | Q2Q067 | A2RRH5 | -0.22742   |
| 98943 | Q2Q067 | P49588 | -0.25124   |
| 98944 | Q2Q067 | P21583 | -0.58674   |
| 98945 | Q2Q067 | Q8NBF6 | -0.99356   |
| 98946 | Q2Q067 | Q5JXC2 | -0.0052874 |
| 98947 | Q2Q067 | P12268 | -0.7061    |
| 98948 | Q2Q067 | Q9Y6F9 | -0.88726   |
| 98949 | Q2Q067 | Q16854 | -0.42761   |
| 98950 | Q2Q067 | P0CB47 | -0.22728   |
| 98951 | Q2Q067 | P53621 | -0.22873   |
| 98952 | Q2Q067 | Q9BZD6 | -1.3074    |

|       |        |        |           |
|-------|--------|--------|-----------|
| 98953 | Q2Q067 | Q9BQ49 | -1.0345   |
| 98954 | Q2Q067 | Q8WXX7 | -0.24416  |
| 98955 | Q2Q067 | Q6PII5 | -0.44835  |
| 98956 | Q2Q067 | A6NCC3 | -0.28132  |
| 98957 | Q2Q067 | Q9NV66 | -1.0672   |
| 98958 | Q2Q067 | Q9BW62 | -0.77636  |
| 98959 | Q2Q067 | P55084 | -0.20298  |
| 98960 | Q2Q067 | Q9NPG1 | -0.60521  |
| 98961 | Q2Q067 | P08138 | -0.34564  |
| 98962 | Q2Q067 | Q8NB49 | -0.80036  |
| 98963 | Q2Q067 | P48645 | -1.0023   |
| 98964 | Q2Q067 | Q86YC3 | -1.0345   |
| 98965 | Q2Q067 | A6NGE4 | -0.22743  |
| 98966 | Q2Q067 | Q96MG2 | -0.61419  |
| 98967 | Q2Q067 | Q99218 | -1.2195   |
| 98968 | Q2Q067 | Q8IZJ6 | -0.80437  |
| 98969 | Q2Q067 | P09131 | -0.99322  |
| 98970 | Q2Q067 | E9PIF3 | -0.096389 |
| 98971 | Q2Q067 | Q9Y5N1 | -1.5503   |
| 98972 | Q2Q067 | P22570 | -0.16814  |
| 98973 | Q2Q067 | Q15070 | -0.18631  |
| 98974 | Q2Q067 | Q5VSG8 | -0.78402  |
| 98975 | Q2Q067 | P09104 | -0.16963  |
| 98976 | Q2Q067 | O95685 | -0.15707  |
| 98977 | Q2Q067 | Q8NB15 | -0.22679  |
| 98978 | Q2Q067 | Q96A47 | -0.3343   |
| 98979 | Q2Q067 | C9JQI7 | -1.0345   |
| 98980 | Q2Q067 | Q9BTV6 | -0.38123  |
| 98981 | Q2Q067 | Q5TA78 | -0.37794  |
| 98982 | Q2Q067 | P62805 | -0.41126  |
| 98983 | Q2Q067 | O75526 | -0.32884  |
| 98984 | Q2Q067 | O43854 | -1.3626   |
| 98985 | Q2Q067 | Q16769 | -1.3155   |
| 98986 | Q2Q067 | P17900 | -0.2038   |
| 98987 | Q2Q067 | P48960 | -2.0141   |
| 98988 | Q2Q067 | P49069 | -0.44798  |
| 98989 | Q2Q067 | Q93077 | -0.82527  |
| 98990 | Q2Q067 | P56192 | -0.18214  |
| 98991 | Q2Q067 | Q96JA3 | -0.40163  |
| 98992 | Q2Q067 | Q969G2 | -0.22759  |
| 98993 | Q2Q067 | Q05315 | -0.62035  |
| 98994 | Q2Q067 | A6NKK0 | -1.4096   |
| 98995 | Q2Q067 | P28331 | -0.18915  |
| 98996 | Q2Q067 | Q92519 | -0.2633   |
| 98997 | Q2Q067 | O00144 | -0.87293  |
| 98998 | Q2Q067 | Q9Y4D2 | -0.90714  |
| 98999 | Q2Q067 | Q16559 | -0.22752  |
| 99000 | Q2Q067 | Q15031 | -0.19386  |
| 99001 | Q2Q067 | P48549 | -0.71382  |
| 99002 | Q2Q067 | Q9NWW9 | -0.31959  |
| 99003 | Q2Q067 | Q8WVH0 | -0.33703  |
| 99004 | Q2Q067 | P08709 | -0.90028  |
| 99005 | Q2Q067 | Q96PE2 | -0.57171  |
| 99006 | Q2Q067 | Q9NPF0 | -0.87848  |
| 99007 | Q2Q067 | P13995 | -0.74521  |
| 99008 | Q2Q067 | Q15109 | -0.96774  |
| 99009 | Q2Q067 | P0CAP2 | -0.12823  |
| 99010 | Q2Q067 | Q16661 | -0.85673  |
| 99011 | Q2Q067 | Q86U02 | -1.0345   |
| 99012 | Q2Q067 | Q08AF3 | -0.68456  |
| 99013 | Q2Q067 | Q9Y258 | -1.0796   |
| 99014 | Q2Q067 | P14415 | -0.45077  |
| 99015 | Q2Q067 | Q2M2E3 | -1.2882   |
| 99016 | Q2Q067 | P22460 | -0.64805  |
| 99017 | Q2Q067 | P04001 | -1.5773   |
| 99018 | Q2Q067 | A6NDL7 | -0.38719  |
| 99019 | Q2Q067 | Q96PR1 | -0.78032  |
| 99020 | Q2Q067 | A8MYJ7 | -0.17439  |
| 99021 | Q2Q067 | A6NFO0 | -1.0345   |
| 99022 | Q2Q067 | P51671 | -1.0205   |
| 99023 | Q2Q067 | Q96L33 | -1.3733   |
| 99024 | Q2Q067 | Q8N7P3 | -0.85277  |
| 99025 | Q2Q067 | Q9H1M3 | -0.94775  |
| 99026 | Q2Q067 | P63218 | -0.63112  |
| 99027 | Q2Q067 | Q7Z2D5 | -1.1344   |
| 99028 | Q2Q067 | Q13610 | -0.22742  |

|       |        |        |          |
|-------|--------|--------|----------|
| 99029 | Q2Q067 | P49146 | -1.3269  |
| 99030 | Q2Q067 | Q9NVS9 | -0.22647 |
| 99031 | Q2Q067 | Q8WUU8 | -1.0345  |
| 99032 | Q2Q067 | Q9Y673 | -0.96737 |
| 99033 | Q2Q067 | Q8N0Y5 | -1.4096  |
| 99034 | Q2Q067 | A8MXE2 | -0.92843 |
| 99035 | Q2Q067 | Q8IZJ4 | -0.79637 |
| 99036 | Q2Q067 | Q9GZY6 | -0.586   |
| 99037 | Q2Q067 | Q8IUI8 | -0.22605 |
| 99038 | Q2Q067 | Q8NFM4 | -0.6387  |
| 99039 | Q2Q067 | O75676 | -0.21532 |
| 99040 | Q2Q067 | Q7Z4W2 | -0.93539 |
| 99041 | Q2Q067 | Q9NUX5 | -0.15519 |
| 99042 | Q2Q067 | P37288 | -0.50662 |
| 99043 | Q2Q067 | O00398 | -1.4336  |
| 99044 | Q2Q067 | Q6UY01 | -0.22741 |
| 99045 | Q2Q067 | Q8TEB7 | -0.81915 |
| 99046 | Q2Q067 | Q0D2K2 | -0.2146  |
| 99047 | Q2Q067 | Q9P2K2 | -0.99335 |
| 99048 | Q2Q067 | Q9GZV7 | -1.1911  |
| 99049 | Q2Q067 | O43306 | -0.65163 |
| 99050 | Q2Q067 | P48061 | -0.62303 |
| 99051 | Q2Q067 | Q9UM44 | -0.77947 |
| 99052 | Q2Q067 | P09525 | -0.34149 |
| 99053 | Q2Q067 | P0CW20 | -0.48451 |
| 99054 | Q2Q067 | Q5T750 | -0.28272 |
| 99055 | Q2Q067 | P51570 | -0.52727 |
| 99056 | Q2Q067 | Q16821 | -0.83917 |
| 99057 | Q2Q067 | Q8NC01 | -1.372   |
| 99058 | Q2Q067 | P23771 | -0.22739 |
| 99059 | Q2Q067 | Q6PCB0 | -1.1707  |
| 99060 | Q2Q067 | Q9UBX5 | -0.50966 |
| 99061 | Q2Q067 | Q8N149 | -1.1566  |
| 99062 | Q2Q067 | Q9NUM4 | -0.87896 |
| 99063 | Q2Q067 | P52732 | -0.26707 |
| 99064 | Q2Q067 | Q2TAY7 | -0.22763 |
| 99065 | Q2Q067 | Q14694 | -0.25676 |
| 99066 | Q2Q067 | P13725 | -0.55178 |
| 99067 | Q2Q067 | Q9H346 | -1.4096  |
| 99068 | Q2Q067 | Q8N2K1 | -1.2592  |
| 99069 | Q2Q067 | P31483 | -0.24101 |
| 99070 | Q2Q067 | Q15828 | -0.97161 |
| 99071 | Q2Q067 | Q13275 | -1.0647  |
| 99072 | Q2Q067 | Q15555 | -0.13384 |
| 99073 | Q2Q067 | Q8NH69 | -1.4096  |
| 99074 | Q2Q067 | P46098 | -1.0683  |
| 99075 | Q2Q067 | Q5QP82 | -0.3949  |
| 99076 | Q2Q067 | O60667 | -0.94701 |
| 99077 | Q2Q067 | Q07444 | -1.0053  |
| 99078 | Q2Q067 | Q14995 | -0.33856 |
| 99079 | Q2Q067 | P20827 | -0.52307 |
| 99080 | Q2Q067 | Q15172 | -0.40099 |
| 99081 | Q2Q067 | P15153 | -0.71756 |
| 99082 | Q2Q067 | Q569K4 | -0.42257 |
| 99083 | Q2Q067 | P0CF74 | -1.101   |
| 99084 | Q2Q067 | Q9BUN8 | -0.12469 |
| 99085 | Q2Q067 | P0C628 | -1.4096  |
| 99086 | Q2Q067 | Q6Y288 | -0.95446 |
| 99087 | Q2Q067 | Q8N3I7 | -0.40519 |
| 99088 | Q2Q067 | Q7Z7K0 | -0.25984 |
| 99089 | Q2Q067 | Q9BVA0 | -0.22839 |
| 99090 | Q2Q067 | Q8TC29 | -0.48619 |
| 99091 | Q2Q067 | Q8N4N8 | -0.2851  |
| 99092 | Q2Q067 | Q13885 | -0.57463 |
| 99093 | Q2Q067 | Q9H427 | -1.1607  |
| 99094 | Q2Q067 | P26927 | -0.95443 |
| 99095 | Q2Q067 | Q86W67 | -0.01834 |
| 99096 | Q2Q067 | P58182 | -1.4096  |
| 99097 | Q2Q067 | Q9NQC8 | -0.10517 |
| 99098 | Q2Q067 | O15034 | -0.5571  |
| 99099 | Q2Q067 | Q92527 | -0.22739 |
| 99100 | Q2Q067 | Q86TL0 | -0.53694 |
| 99101 | Q2Q067 | Q8TAB3 | -1.3679  |
| 99102 | Q2Q067 | Q8TEU8 | -0.80046 |
| 99103 | Q2Q067 | Q96ID5 | -0.98666 |
| 99104 | Q2Q067 | Q96K78 | -1.5126  |

|       |        |        |            |
|-------|--------|--------|------------|
| 99105 | Q2Q067 | P09848 | -0.74763   |
| 99106 | Q2Q067 | P60508 | -1.0096    |
| 99107 | Q2Q067 | Q8N852 | -1.0345    |
| 99108 | Q2Q067 | Q02978 | -0.49704   |
| 99109 | Q2Q067 | O15335 | -1.0034    |
| 99110 | Q2Q067 | P61570 | -0.86704   |
| 99111 | Q2Q067 | Q9H207 | -1.4096    |
| 99112 | Q2Q067 | Q05D60 | -0.051394  |
| 99113 | Q2Q067 | Q96R09 | -1.4096    |
| 99114 | Q2Q067 | P04920 | -0.95462   |
| 99115 | Q2Q067 | Q9Y6L6 | -1.0564    |
| 99116 | Q2Q067 | P54107 | -1.0127    |
| 99117 | Q2Q067 | Q587J8 | -0.29049   |
| 99118 | Q2Q067 | O14817 | -1.3016    |
| 99119 | Q2Q067 | Q9BVG9 | -1.0588    |
| 99120 | Q2Q067 | E2RYF6 | -1.0345    |
| 99121 | Q2Q067 | Q96CB5 | -0.19878   |
| 99122 | Q2Q067 | Q9BUT1 | -0.64438   |
| 99123 | Q2Q067 | O60307 | -0.77425   |
| 99124 | Q2Q067 | Q96LA9 | -1.4967    |
| 99125 | Q2Q067 | Q6NSI4 | -0.024898  |
| 99126 | Q2Q067 | P03979 | -0.53321   |
| 99127 | Q2Q067 | P09923 | -1.3375    |
| 99128 | Q2Q067 | Q8IZ02 | -0.24416   |
| 99129 | Q2Q067 | P10266 | -0.30998   |
| 99130 | Q2Q067 | P32418 | -0.55054   |
| 99131 | Q2Q067 | Q9UDX3 | -1.2928    |
| 99132 | Q2Q067 | Q96R72 | -1.4096    |
| 99133 | Q2Q067 | Q96MI6 | -0.16328   |
| 99134 | Q2Q067 | Q9ULB1 | -0.47877   |
| 99135 | Q2Q067 | P24468 | -0.2512    |
| 99136 | Q2Q067 | P09619 | -0.41534   |
| 99137 | Q2Q067 | Q13046 | -1.0002    |
| 99138 | Q2Q067 | Q7Z3H0 | -0.22741   |
| 99139 | Q2Q067 | Q9HBV1 | -0.88683   |
| 99140 | Q2Q067 | Q9BS86 | -0.95735   |
| 99141 | Q2Q067 | Q92871 | -0.32902   |
| 99142 | Q2Q067 | Q5VVX9 | -0.92845   |
| 99143 | Q2Q067 | Q8IYS2 | -1.0345    |
| 99144 | Q2Q067 | O43683 | -0.22741   |
| 99145 | Q2Q067 | Q96G04 | -0.063394  |
| 99146 | Q2Q067 | Q504U0 | -0.11064   |
| 99147 | Q2Q067 | Q9Y4D7 | -1.2393    |
| 99148 | Q2Q067 | Q9HBL6 | -1.0345    |
| 99149 | Q2Q067 | Q6IQ55 | -0.70838   |
| 99150 | Q2Q067 | Q9Y2G3 | -0.81641   |
| 99151 | Q2Q067 | Q8WXS5 | -0.96112   |
| 99152 | Q2Q067 | P35913 | -0.53658   |
| 99153 | Q2Q067 | Q6ZQY3 | -0.59474   |
| 99154 | Q2Q067 | Q9H943 | -0.11132   |
| 99155 | Q2Q067 | Q5R387 | -1.023     |
| 99156 | Q2Q067 | Q9Y6V0 | -0.45502   |
| 99157 | Q2Q067 | Q02363 | -0.22751   |
| 99158 | Q2Q067 | P30291 | -0.22741   |
| 99159 | Q2Q067 | Q8N2R8 | -0.21548   |
| 99160 | Q2Q067 | P43490 | -0.13715   |
| 99161 | Q2Q067 | Q9P0L0 | -0.33503   |
| 99162 | Q2Q067 | A3QJZ6 | -0.19475   |
| 99163 | Q2Q067 | Q6UXB3 | -0.65821   |
| 99164 | Q2Q067 | Q3SY69 | -0.30773   |
| 99165 | Q2Q067 | Q86UA1 | -0.16439   |
| 99166 | Q2Q067 | Q96LB4 | -0.45496   |
| 99167 | Q2Q067 | P59538 | -1.3729    |
| 99168 | Q2Q067 | P50225 | -0.27507   |
| 99169 | Q2Q067 | P40616 | -0.8933    |
| 99170 | Q2Q067 | Q2M243 | -0.079964  |
| 99171 | Q2Q067 | Q8ND99 | -0.11612   |
| 99172 | Q2Q067 | Q5T9Z0 | -1.0345    |
| 99173 | Q2Q067 | Q86YS3 | -0.19755   |
| 99174 | Q2Q067 | O43653 | -0.65821   |
| 99175 | Q2Q067 | Q6ZN44 | -1.2143    |
| 99176 | Q2Q067 | Q8N4L8 | -0.0068675 |
| 99177 | Q2Q067 | O15143 | -0.24778   |
| 99178 | Q2Q067 | Q6IFG1 | -1.4096    |
| 99179 | Q2Q067 | Q06210 | -0.1467    |
| 99180 | Q2Q067 | P08236 | -0.48091   |

|       |        |         |            |
|-------|--------|---------|------------|
| 99181 | Q2Q067 | Q8IWIY4 | -0.98212   |
| 99182 | Q2Q067 | Q5W0Q7  | -0.49414   |
| 99183 | Q2Q067 | Q08431  | -0.90995   |
| 99184 | Q2Q067 | Q13261  | -0.60895   |
| 99185 | Q2Q067 | Q9BVJ7  | -0.22741   |
| 99186 | Q2Q067 | A0PJW6  | -0.84904   |
| 99187 | Q2Q067 | A2CJ06  | -0.76021   |
| 99188 | Q2Q067 | Q8N2C7  | -1.0345    |
| 99189 | Q2Q067 | P22888  | -0.58636   |
| 99190 | Q2Q067 | A0AVT1  | -0.22425   |
| 99191 | Q2Q067 | P02760  | -0.83343   |
| 99192 | Q2Q067 | Q9UBN1  | -1.2185    |
| 99193 | Q2Q067 | O14626  | -1.4336    |
| 99194 | Q2Q067 | O00237  | -0.78625   |
| 99195 | Q2Q067 | Q9BZD7  | -1.5696    |
| 99196 | Q2Q067 | P60981  | -0.42964   |
| 99197 | Q2Q067 | Q8TAU0  | -0.2275    |
| 99198 | Q2Q067 | P22102  | -0.52608   |
| 99199 | Q2Q067 | O43175  | -0.78784   |
| 99200 | Q2Q067 | A1A4S6  | -0.27248   |
| 99201 | Q2Q067 | P30532  | -1.1439    |
| 99202 | Q2Q067 | Q07325  | -1.1781    |
| 99203 | Q2Q067 | Q8NGN5  | -1.4096    |
| 99204 | Q2Q067 | Q9HB40  | -1.0321    |
| 99205 | Q2Q067 | O94854  | -0.28436   |
| 99206 | Q2Q067 | Q9BVH7  | -0.84561   |
| 99207 | Q2Q067 | Q96GX5  | -0.22741   |
| 99208 | Q2Q067 | Q9NP80  | -0.60736   |
| 99209 | Q2Q067 | Q96LB1  | -1.4318    |
| 99210 | Q2Q067 | O75330  | -0.12487   |
| 99211 | Q2Q067 | P01775  | -1.1115    |
| 99212 | Q2Q067 | Q9Y6N6  | -1.241     |
| 99213 | Q2Q067 | P54709  | -0.79784   |
| 99214 | Q2Q067 | Q5EBM4  | -0.085533  |
| 99215 | Q2Q067 | P21452  | -1.553     |
| 99216 | Q2Q067 | Q13748  | -0.20702   |
| 99217 | Q2Q067 | B2RXF0  | -0.59209   |
| 99218 | Q2Q067 | A6NFZ4  | -0.98666   |
| 99219 | Q2Q067 | P55201  | -0.22419   |
| 99220 | Q2Q067 | O95872  | -0.41613   |
| 99221 | Q2Q067 | Q9HAU6  | -0.35564   |
| 99222 | Q2Q067 | Q9HCQ7  | -1.1968    |
| 99223 | Q2Q067 | Q13087  | -0.26512   |
| 99224 | Q2Q067 | Q86WK6  | -1.4519    |
| 99225 | Q2Q067 | O95372  | -0.2764    |
| 99226 | Q2Q067 | Q8NHV9  | -0.2129    |
| 99227 | Q2Q067 | Q8NI38  | -0.2274    |
| 99228 | Q2Q067 | P13693  | -0.18217   |
| 99229 | Q2Q067 | Q13491  | -0.86692   |
| 99230 | Q2Q067 | Q96M83  | -0.0078652 |
| 99231 | Q2Q067 | Q96JB3  | -0.050368  |
| 99232 | Q2Q067 | O00746  | -0.69602   |
| 99233 | Q2Q067 | Q8NFZ4  | -0.72806   |
| 99234 | Q2Q067 | Q00887  | -1.0002    |
| 99235 | Q2Q067 | Q8NE79  | -0.85623   |
| 99236 | Q2Q067 | Q8NHU3  | -0.91222   |
| 99237 | Q2Q067 | Q9NY59  | -0.43507   |
| 99238 | Q2Q067 | Q8N3Y7  | -1.4792    |
| 99239 | Q2Q067 | P56559  | -0.62704   |
| 99240 | Q2Q067 | Q8NGG8  | -1.4096    |
| 99241 | Q2Q067 | A6NEL3  | -0.055931  |
| 99242 | Q2Q067 | P43220  | -0.73476   |
| 99243 | Q2Q067 | P49768  | -0.22693   |
| 99244 | Q2Q067 | Q8N690  | -0.94775   |
| 99245 | Q2Q067 | O43193  | -1.5874    |
| 99246 | Q2Q067 | Q13686  | -0.33927   |
| 99247 | Q2Q067 | Q5EBL2  | -0.067277  |
| 99248 | Q2Q067 | Q6Q6R5  | -0.29943   |
| 99249 | Q2Q067 | P56851  | -0.90906   |
| 99250 | Q2Q067 | A8MZ25  | -0.39293   |
| 99251 | Q2Q067 | P29590  | -0.22695   |
| 99252 | Q2Q067 | Q9BXB1  | -1.1278    |
| 99253 | Q2Q067 | Q99500  | -1.3925    |
| 99254 | Q2Q067 | P50607  | -0.41395   |
| 99255 | Q2Q067 | Q9NRC1  | -1.0345    |
| 99256 | Q2Q067 | Q8WTR2  | -0.60951   |

|       |        |        |           |
|-------|--------|--------|-----------|
| 99257 | Q2Q067 | Q96GM1 | -1.0788   |
| 99258 | Q2Q067 | Q92952 | -0.97904  |
| 99259 | Q2Q067 | Q8NGN8 | -1.4096   |
| 99260 | Q2Q067 | P20155 | -0.86951  |
| 99261 | Q2Q067 | Q9C0H6 | -0.21169  |
| 99262 | Q2Q067 | Q8TF21 | -0.22744  |
| 99263 | Q2Q067 | Q8N8U9 | -0.86516  |
| 99264 | Q2Q067 | P36544 | -0.81021  |
| 99265 | Q2Q067 | P17097 | -0.35555  |
| 99266 | Q2Q067 | O43760 | -1.0359   |
| 99267 | Q2Q067 | Q01469 | -0.20444  |
| 99268 | Q2Q067 | Q15678 | -0.58721  |
| 99269 | Q2Q067 | O95427 | -1.1092   |
| 99270 | Q2Q067 | Q6UWI4 | -1.3026   |
| 99271 | Q2Q067 | Q9BSL1 | -0.26347  |
| 99272 | Q2Q067 | O60513 | -0.6469   |
| 99273 | Q2Q067 | Q9H845 | -0.43659  |
| 99274 | Q2Q067 | P09622 | -0.22414  |
| 99275 | Q2Q067 | Q9NXB9 | -0.13994  |
| 99276 | Q2Q067 | Q92968 | -0.32017  |
| 99277 | Q2Q067 | Q9NUK0 | -0.19525  |
| 99278 | Q2Q067 | P48067 | -1.1019   |
| 99279 | Q2Q067 | Q6ZS17 | -0.20901  |
| 99280 | Q2Q067 | Q13291 | -0.35616  |
| 99281 | Q2Q067 | Q8N4T4 | -0.8754   |
| 99282 | Q2Q067 | O75911 | -1.5967   |
| 99283 | Q2Q067 | O14965 | -0.22768  |
| 99284 | Q2Q067 | O75715 | -1.2159   |
| 99285 | Q2Q067 | P08648 | -0.40326  |
| 99286 | Q2Q067 | A6NCF5 | -0.22502  |
| 99287 | Q2Q067 | P50876 | -1.0418   |
| 99288 | Q2Q067 | Q8NC54 | -1.0345   |
| 99289 | Q2Q067 | Q14894 | -0.2155   |
| 99290 | Q2Q067 | Q5JTH9 | -0.32312  |
| 99291 | Q2Q067 | Q9NUJ7 | -0.63419  |
| 99292 | Q2Q067 | A1A4Y4 | -1        |
| 99293 | Q2Q067 | Q6XE38 | -0.98666  |
| 99294 | Q2Q067 | Q99612 | -0.22612  |
| 99295 | Q2Q067 | Q07817 | -0.22735  |
| 99296 | Q2Q067 | Q8NCR9 | -1.0345   |
| 99297 | Q2Q067 | Q9NX36 | -0.46295  |
| 99298 | Q2Q067 | P0C7P0 | -0.3897   |
| 99299 | Q2Q067 | O15427 | -0.84492  |
| 99300 | Q2Q067 | Q86VR2 | -1.0345   |
| 99301 | Q2Q067 | Q9ULX5 | -0.69694  |
| 99302 | Q2Q067 | P32971 | -0.97568  |
| 99303 | Q2Q067 | O15382 | -0.043116 |
| 99304 | Q2Q067 | Q5T0T0 | -1.0572   |
| 99305 | Q2Q067 | P04746 | -0.84068  |
| 99306 | Q2Q067 | Q8N4F7 | -1.1176   |
| 99307 | Q2Q067 | Q99698 | -0.2274   |
| 99308 | Q2Q067 | Q96JT2 | -1.049    |
| 99309 | Q2Q067 | P40305 | -0.63233  |
| 99310 | Q2Q067 | P49788 | -1.0535   |
| 99311 | Q2Q067 | P01768 | -1.1115   |
| 99312 | Q2Q067 | P56134 | -0.62403  |
| 99313 | Q2Q067 | P0DJD3 | -0.22951  |
| 99314 | Q2Q067 | Q92622 | -0.043194 |
| 99315 | Q2Q067 | Q1A5X7 | -0.11855  |
| 99316 | Q2Q067 | Q8NGK4 | -1.4096   |
| 99317 | Q2Q067 | Q15061 | -0.22746  |
| 99318 | Q2Q067 | Q5JXA9 | -1.0345   |
| 99319 | Q2Q067 | P01717 | -1.1115   |
| 99320 | Q2Q067 | Q5HYL7 | -1.0345   |
| 99321 | Q2Q067 | Q9BZG1 | -1.032    |
| 99322 | Q2Q067 | P00746 | -1.0949   |
| 99323 | Q2Q067 | Q96RK4 | -0.22689  |
| 99324 | Q2Q067 | Q9BYT3 | -0.87471  |
| 99325 | Q2Q067 | P10314 | -0.98258  |
| 99326 | Q2Q067 | Q9Y4F5 | -0.21582  |
| 99327 | Q2Q067 | Q96F05 | -1.0345   |
| 99328 | Q2Q067 | Q9HCU5 | -0.22741  |
| 99329 | Q2Q067 | Q5T9S5 | -0.17028  |
| 99330 | Q2Q067 | P54851 | -1.0295   |
| 99331 | Q2Q067 | Q8WVM8 | -0.22107  |
| 99332 | Q2Q067 | P00395 | -0.23612  |



|       |        |        |           |
|-------|--------|--------|-----------|
| 99333 | Q2Q067 | Q8IYW7 | -0.16273  |
| 99334 | Q2Q067 | Q9NRP4 | -0.19734  |
| 99335 | Q2Q067 | C9JDV5 | -0.11478  |
| 99336 | Q2Q067 | O00635 | -0.88069  |
| 99337 | Q2Q067 | P01737 | -0.47581  |
| 99338 | Q2Q067 | Q8N2H3 | -0.56541  |
| 99339 | Q2Q067 | Q86SG7 | -0.91361  |
| 99340 | Q2Q067 | Q8NGL9 | -1.4096   |
| 99341 | Q2Q067 | Q9Y5W7 | -0.9375   |
| 99342 | Q2Q067 | P09919 | -0.93175  |
| 99343 | Q2Q067 | Q9NZA1 | -0.28887  |
| 99344 | Q2Q067 | P0C7U1 | -0.13928  |
| 99345 | Q2Q067 | P60059 | -0.63725  |
| 99346 | Q2Q067 | P80075 | -1.1207   |
| 99347 | Q2Q067 | Q12829 | -1.3356   |
| 99348 | Q2Q067 | Q96HJ5 | -0.17163  |
| 99349 | Q2Q067 | P10768 | -0.20931  |
| 99350 | Q2Q067 | Q8N9M5 | -0.72777  |
| 99351 | Q2Q067 | Q9UJA9 | -1.7525   |
| 99352 | Q2Q067 | Q6ZMT4 | -0.22864  |
| 99353 | Q2Q067 | Q9BYL1 | -0.16666  |
| 99354 | Q2Q067 | P02461 | -0.44027  |
| 99355 | Q2Q067 | Q9NQG1 | -1.0345   |
| 99356 | Q2Q067 | Q8IUH8 | -1.1501   |
| 99357 | Q2Q067 | O95837 | -1.1162   |
| 99358 | Q2Q067 | P59817 | -0.2273   |
| 99359 | Q2Q067 | Q8WVN8 | -0.70679  |
| 99360 | Q2Q067 | Q96MX6 | -0.36854  |
| 99361 | Q2Q067 | Q8NBN3 | -1.0345   |
| 99362 | Q2Q067 | Q9UKI8 | -0.84765  |
| 99363 | Q2Q067 | Q08623 | -0.42446  |
| 99364 | Q2Q067 | Q9H7X0 | -0.30427  |
| 99365 | Q2Q067 | Q6E0U4 | -1.0374   |
| 99366 | Q2Q067 | Q9H6E5 | -0.22711  |
| 99367 | Q2Q067 | Q9UN42 | -0.33578  |
| 99368 | Q2Q067 | Q8IYR6 | -1.355    |
| 99369 | Q2Q067 | P78410 | -1.0032   |
| 99370 | Q2Q067 | Q8NGN0 | -1.4096   |
| 99371 | Q2Q067 | Q70CQ1 | -0.3801   |
| 99372 | Q2Q067 | Q8IUQ0 | -0.71071  |
| 99373 | Q2Q067 | Q9BW91 | -0.39835  |
| 99374 | Q2Q067 | Q96M89 | -0.15752  |
| 99375 | Q2Q067 | O60403 | -1.4096   |
| 99376 | Q2Q067 | Q7Z7D3 | -1.2057   |
| 99377 | Q2Q067 | Q86TB3 | -0.80277  |
| 99378 | Q2Q067 | Q4G0I0 | -1.0345   |
| 99379 | Q2Q067 | B3SHH9 | -1.1634   |
| 99380 | Q2Q067 | Q9Y3A6 | -0.6488   |
| 99381 | Q2Q067 | P29371 | -1.0175   |
| 99382 | Q2Q067 | P31270 | -0.19851  |
| 99383 | Q2Q067 | Q1W4C9 | -0.90081  |
| 99384 | Q2Q067 | P0DKV0 | -0.081461 |
| 99385 | Q2Q067 | Q9UN19 | -0.79353  |
| 99386 | Q2Q067 | P43378 | -0.22868  |
| 99387 | Q2Q067 | O43623 | -0.21609  |
| 99388 | Q2Q067 | Q149M9 | -0.91075  |
| 99389 | Q2Q067 | P07948 | -0.23604  |
| 99390 | Q2Q067 | O95858 | -1.1904   |
| 99391 | Q2Q067 | P21860 | -0.69509  |
| 99392 | Q2Q067 | Q6ZRF8 | -0.73178  |
| 99393 | Q2Q067 | P22735 | -0.15757  |
| 99394 | Q2Q067 | Q86X59 | -0.19405  |
| 99395 | Q2Q067 | P08559 | -0.20127  |
| 99396 | Q2Q067 | P36969 | -0.52725  |
| 99397 | Q2Q067 | Q6UX39 | -0.98394  |
| 99398 | Q2Q067 | Q96FZ5 | -1.0608   |
| 99399 | Q2Q067 | Q9NZT1 | -0.6448   |
| 99400 | Q2Q067 | Q9NVL8 | -0.21985  |
| 99401 | Q2Q067 | Q9UBK8 | -0.29123  |
| 99402 | Q2Q067 | P33897 | -0.27928  |
| 99403 | Q2Q067 | P17342 | -0.90983  |
| 99404 | Q2Q067 | P26583 | -0.22965  |
| 99405 | Q2Q067 | Q8TAP4 | -0.24244  |
| 99406 | Q2Q067 | P58107 | -0.19683  |
| 99407 | Q2Q067 | Q5UCC4 | -1.5435   |
| 99408 | Q2Q067 | Q9N2J8 | -1.0096   |

|       |        |        |           |
|-------|--------|--------|-----------|
| 99409 | Q2Q067 | Q8N357 | -0.34435  |
| 99410 | Q2Q067 | Q9UL51 | -1.1718   |
| 99411 | Q2Q067 | O15263 | -1.0407   |
| 99412 | Q2Q067 | Q9BYX2 | -0.711    |
| 99413 | Q2Q067 | P53350 | -0.22741  |
| 99414 | Q2Q067 | P04180 | -0.37799  |
| 99415 | Q2Q067 | Q6JVE9 | -1.0247   |
| 99416 | Q2Q067 | Q15375 | -0.8392   |
| 99417 | Q2Q067 | Q8IWU2 | -0.96862  |
| 99418 | Q2Q067 | Q9BV99 | -0.22739  |
| 99419 | Q2Q067 | P42574 | -0.2264   |
| 99420 | Q2Q067 | O60383 | -0.67056  |
| 99421 | Q2Q067 | Q9BXJ1 | -1.0482   |
| 99422 | Q2Q067 | Q9BYP7 | -0.50171  |
| 99423 | Q2Q067 | Q9NSU2 | -0.051589 |
| 99424 | Q2Q067 | Q8NEW0 | -0.52089  |
| 99425 | Q2Q067 | P05976 | -0.40628  |
| 99426 | Q2Q067 | Q9Y3S1 | -1.3136   |
| 99427 | Q2Q067 | Q7Z4B0 | -0.98666  |
| 99428 | Q2Q067 | Q9P1Q5 | -1.4096   |
| 99429 | Q2Q067 | Q8WTQ7 | -1.5029   |
| 99430 | Q2Q067 | O15273 | -0.15507  |
| 99431 | Q2Q067 | P06887 | -1.1115   |
| 99432 | Q2Q067 | P56278 | -0.23768  |
| 99433 | Q2Q067 | P30493 | -1.1453   |
| 99434 | Q2Q067 | Q9H0H3 | -0.21477  |
| 99435 | Q2Q067 | P15085 | -1.3795   |
| 99436 | Q2Q067 | Q9UKF2 | -1.4051   |
| 99437 | Q2Q067 | Q99645 | -1.0123   |
| 99438 | Q2Q067 | P41091 | -0.054004 |
| 99439 | Q2Q067 | Q147X3 | -0.25603  |
| 99440 | Q2Q067 | Q8WWX0 | -0.61006  |
| 99441 | Q2Q067 | Q02575 | -0.2257   |
| 99442 | Q2Q067 | Q96EU7 | -0.87923  |
| 99443 | Q2Q067 | Q86YJ7 | -0.22741  |
| 99444 | Q2Q067 | Q6YFQ2 | -0.19603  |
| 99445 | Q2Q067 | Q9Y259 | -0.71356  |
| 99446 | Q2Q067 | Q9BXB7 | -0.71157  |
| 99447 | Q2Q067 | Q9UP38 | -0.45678  |
| 99448 | Q2Q067 | P10398 | -0.48942  |
| 99449 | Q2Q067 | P12955 | -0.75634  |
| 99450 | Q2Q067 | O60412 | -1.4096   |
| 99451 | Q2Q067 | Q8TC36 | -0.3731   |
| 99452 | Q2Q067 | Q9Y6M0 | -0.97125  |
| 99453 | Q2Q067 | Q8TAS1 | -0.4556   |
| 99454 | Q2Q067 | Q9UBH6 | -1.3157   |
| 99455 | Q2Q067 | Q9P241 | -0.80036  |
| 99456 | Q2Q067 | D6R9N7 | -0.76972  |
| 99457 | Q2Q067 | Q5T700 | -1.0345   |
| 99458 | Q2Q067 | P49335 | -0.22741  |
| 99459 | Q2Q067 | Q96M60 | -0.016974 |
| 99460 | Q2Q067 | Q9H015 | -0.58552  |
| 99461 | Q2Q067 | O43374 | -0.55202  |
| 99462 | Q2Q067 | Q9UKH3 | -0.86704  |
| 99463 | Q2Q067 | Q8N808 | -1.0345   |
| 99464 | Q2Q067 | P04275 | -0.2274   |
| 99465 | Q2Q067 | Q96EX1 | -1.0345   |
| 99466 | Q2Q067 | Q7KZN9 | -0.80806  |
| 99467 | Q2Q067 | P98173 | -0.77379  |
| 99468 | Q2Q067 | A6NJZ3 | -1.4096   |
| 99469 | Q2Q067 | P11182 | -0.14712  |
| 99470 | Q2Q067 | Q66K37 | -0.22665  |
| 99471 | Q2Q067 | O94967 | -0.40591  |
| 99472 | Q2Q067 | P15086 | -1.3781   |
| 99473 | Q2Q067 | Q9UKS7 | -0.28842  |
| 99474 | Q2Q067 | Q00537 | -1.0912   |
| 99475 | Q2Q067 | Q08722 | -0.57612  |
| 99476 | Q2Q067 | Q96KR4 | -0.5457   |
| 99477 | Q2Q067 | P40198 | -1.0345   |
| 99478 | Q2Q067 | Q4G0X9 | -0.35842  |
| 99479 | Q2Q067 | Q9BZ67 | -0.3932   |
| 99480 | Q2Q067 | P06493 | -0.21896  |
| 99481 | Q2Q067 | Q687X5 | -1.547    |
| 99482 | Q2Q067 | Q6ZRY4 | -0.91559  |
| 99483 | Q2Q067 | P01703 | -1.1115   |
| 99484 | Q2Q067 | Q9Y442 | -1.0345   |

|       |        |        |            |
|-------|--------|--------|------------|
| 99485 | Q2Q067 | Q13103 | -0.91758   |
| 99486 | Q2Q067 | Q9UBN7 | -0.22134   |
| 99487 | Q2Q067 | Q8N2A0 | -0.22588   |
| 99488 | Q2Q067 | Q8NGF6 | -1.4096    |
| 99489 | Q2Q067 | P62685 | -0.47805   |
| 99490 | Q2Q067 | Q8TCP9 | -1.0323    |
| 99491 | Q2Q067 | Q99895 | -1.0134    |
| 99492 | Q2Q067 | Q9NYJ7 | -1.0493    |
| 99493 | Q2Q067 | P51168 | -0.60399   |
| 99494 | Q2Q067 | Q8NEX5 | -0.98666   |
| 99495 | Q2Q067 | P62699 | -0.52103   |
| 99496 | Q2Q067 | Q7Z7F1 | -0.0087717 |
| 99497 | Q2Q067 | P01615 | -1.1115    |
| 99498 | Q2Q067 | Q86YD7 | -0.43957   |
| 99499 | Q2Q067 | A6NMP4 | -0.20629   |
| 99500 | Q2Q067 | Q14953 | -1.295     |
| 99501 | Q2Q067 | Q9UMR3 | -0.69349   |
| 99502 | Q2Q067 | P98153 | -1.0975    |
| 99503 | Q2Q067 | Q9UI47 | -0.2199    |
| 99504 | Q2Q067 | Q8IYA7 | -0.24497   |
| 99505 | Q2Q067 | P40967 | -1.0687    |
| 99506 | Q2Q067 | P14061 | -0.54156   |
| 99507 | Q2Q067 | Q8N4L4 | -1.2098    |
| 99508 | Q2Q067 | Q4V326 | -0.18742   |
| 99509 | Q2Q067 | P08243 | -0.36279   |
| 99510 | Q2Q067 | Q13009 | -0.64183   |
| 99511 | Q2Q067 | Q9H1P6 | -0.16462   |
| 99512 | Q2Q067 | Q6PDB4 | -0.37381   |
| 99513 | Q2Q067 | Q8WXA2 | -0.98666   |
| 99514 | Q2Q067 | P58743 | -0.96046   |
| 99515 | Q2Q067 | P16871 | -0.93382   |
| 99516 | Q2Q067 | P32320 | -0.65655   |
| 99517 | Q2Q067 | Q8WY91 | -0.52609   |
| 99518 | Q2Q067 | P14406 | -0.36866   |
| 99519 | Q2Q067 | Q9BUL5 | -0.48451   |
| 99520 | Q2Q067 | Q5TAG4 | -0.20901   |
| 99521 | Q2Q067 | Q8TB61 | -0.97793   |
| 99522 | Q2Q067 | Q6ZSU1 | -0.58871   |
| 99523 | Q2Q067 | Q9GZS0 | -0.22741   |
| 99524 | Q2Q067 | Q0VAA2 | -0.22741   |
| 99525 | Q2Q067 | P63133 | -0.36034   |
| 99526 | Q2Q067 | Q13190 | -0.21431   |
| 99527 | Q2Q067 | Q6ZVX7 | -0.38874   |
| 99528 | Q2Q067 | O75608 | -0.18979   |
| 99529 | Q2Q067 | Q9H2U1 | -0.22277   |
| 99530 | Q2Q067 | Q9H8X2 | -0.74861   |
| 99531 | Q2Q067 | Q96FQ7 | -0.10332   |
| 99532 | Q2Q067 | P36404 | -0.22929   |
| 99533 | Q2Q067 | Q9HD23 | -0.94542   |
| 99534 | Q2Q067 | Q9Y6G9 | -0.22342   |
| 99535 | Q2Q067 | P52797 | -0.72336   |
| 99536 | Q2Q067 | O76036 | -1.2665    |
| 99537 | Q2Q067 | Q504Y0 | -1.0849    |
| 99538 | Q2Q067 | Q8N111 | -1.0345    |
| 99539 | Q2Q067 | Q9BVM2 | -0.29708   |
| 99540 | Q2Q067 | Q9Y263 | -0.22816   |
| 99541 | Q2Q067 | Q9UBC0 | -0.22731   |
| 99542 | Q2Q067 | Q8N6K0 | -1.0345    |
| 99543 | Q2Q067 | Q13323 | -0.3666    |
| 99544 | Q2Q067 | Q5T2D2 | -0.49717   |
| 99545 | Q2Q067 | Q5RI15 | -0.86095   |
| 99546 | Q2Q067 | Q92619 | -1.0965    |
| 99547 | Q2Q067 | Q50LG9 | -1.0345    |
| 99548 | Q2Q067 | O95377 | -1.0629    |
| 99549 | Q2Q067 | Q6ZRV2 | -0.39837   |
| 99550 | Q2Q067 | Q9H0D6 | -0.18034   |
| 99551 | Q2Q067 | Q96B77 | -0.84904   |
| 99552 | Q2Q067 | Q9H205 | -1.4096    |
| 99553 | Q2Q067 | P29033 | -0.94229   |
| 99554 | Q2Q067 | Q1AE95 | -1.0345    |
| 99555 | Q2Q067 | Q495C1 | -0.48451   |
| 99556 | Q2Q067 | Q96BM0 | -1.0345    |
| 99557 | Q2Q067 | O15375 | -1.1904    |
| 99558 | Q2Q067 | Q6NYC8 | -0.20113   |
| 99559 | Q2Q067 | Q9H903 | -0.76294   |
| 99560 | Q2Q067 | P16422 | -0.22882   |

|       |        |        |           |
|-------|--------|--------|-----------|
| 99561 | Q2Q067 | Q9UPQ9 | -0.25252  |
| 99562 | Q2Q067 | Q5GH76 | -1.0345   |
| 99563 | Q2Q067 | Q96M15 | -0.20091  |
| 99564 | Q2Q067 | Q16878 | -0.27909  |
| 99565 | Q2Q067 | Q6NXG1 | -0.59441  |
| 99566 | Q2Q067 | P17027 | -0.085533 |
| 99567 | Q2Q067 | Q8NBM8 | -1.0684   |
| 99568 | Q2Q067 | Q99697 | -0.17302  |
| 99569 | Q2Q067 | Q9H6Y5 | -0.22675  |
| 99570 | Q2Q067 | Q9UI42 | -1.2016   |
| 99571 | Q2Q067 | Q9H792 | -0.6161   |
| 99572 | Q2Q067 | P0C875 | -0.1395   |
| 99573 | Q2Q067 | P32927 | -0.76226  |
| 99574 | Q2Q067 | O75592 | -0.22679  |
| 99575 | Q2Q067 | Q15784 | -0.22759  |
| 99576 | Q2Q067 | Q8WVP7 | -1.0098   |
| 99577 | Q2Q067 | Q96CC6 | -0.73364  |
| 99578 | Q2Q067 | O95096 | -0.23094  |
| 99579 | Q2Q067 | O95455 | -1.0754   |
| 99580 | Q2Q067 | Q8NH54 | -1.4096   |
| 99581 | Q2Q067 | P63096 | -0.26966  |
| 99582 | Q2Q067 | A2RTX5 | -0.33238  |
| 99583 | Q2Q067 | P49767 | -0.43885  |
| 99584 | Q2Q067 | Q9P260 | -0.076941 |
| 99585 | Q2Q067 | P21941 | -0.46094  |
| 99586 | Q2Q067 | Q9NRM6 | -1.4827   |
| 99587 | Q2Q067 | Q9GZP7 | -1.3764   |
| 99588 | Q2Q067 | P30498 | -1.1453   |
| 99589 | Q2Q067 | Q9H3R1 | -0.88137  |
| 99590 | Q2Q067 | Q5GH73 | -1.0345   |
| 99591 | Q2Q067 | P51160 | -1.2169   |
| 99592 | Q2Q067 | Q9H813 | -1.0345   |
| 99593 | Q2Q067 | P16234 | -0.29896  |
| 99594 | Q2Q067 | Q9Y371 | -0.2274   |
| 99595 | Q2Q067 | Q9Y5P6 | -0.76157  |
| 99596 | Q2Q067 | Q8TDI0 | -0.46393  |
| 99597 | Q2Q067 | Q9Y5H4 | -1.3679   |
| 99598 | Q2Q067 | Q15904 | -1.0719   |
| 99599 | Q2Q067 | Q9H6X5 | -0.090453 |
| 99600 | Q2Q067 | Q96DY7 | -0.33397  |
| 99601 | Q2Q067 | O75369 | -0.46843  |
| 99602 | Q2Q067 | Q9HDB8 | -0.2833   |
| 99603 | Q2Q067 | Q8IYV9 | -1.0874   |
| 99604 | Q2Q067 | P51149 | -0.53192  |
| 99605 | Q2Q067 | Q8TDV2 | -1.4967   |
| 99606 | Q2Q067 | P53674 | -0.53868  |
| 99607 | Q2Q067 | Q9BZP3 | -0.24416  |
| 99608 | Q2Q067 | P12872 | -1.0132   |
| 99609 | Q2Q067 | Q96NU0 | -1.4429   |
| 99610 | Q2Q067 | Q969T7 | -0.14128  |
| 99611 | Q2Q067 | Q9HC29 | -0.22734  |
| 99612 | Q2Q067 | Q8IZS7 | -1.146    |
| 99613 | Q2Q067 | Q8N680 | -0.11398  |
| 99614 | Q2Q067 | Q8N428 | -0.73275  |
| 99615 | Q2Q067 | P78563 | -0.15474  |
| 99616 | Q2Q067 | Q4G148 | -0.68421  |
| 99617 | Q2Q067 | Q99611 | -0.99109  |
| 99618 | Q2Q067 | Q9BPX5 | -0.26531  |
| 99619 | Q2Q067 | Q5VUJ5 | -1.1564   |
| 99620 | Q2Q067 | Q8IWN7 | -0.21377  |
| 99621 | Q2Q067 | P41247 | -0.32375  |
| 99622 | Q2Q067 | O95935 | -0.31648  |
| 99623 | Q2Q067 | Q8TDE3 | -0.87122  |
| 99624 | Q2Q067 | P01719 | -1.1115   |
| 99625 | Q2Q067 | P09769 | -0.62661  |
| 99626 | Q2Q067 | Q5U651 | -0.29724  |
| 99627 | Q2Q067 | Q6UWP2 | -1.5999   |
| 99628 | Q2Q067 | O95319 | -0.44327  |
| 99629 | Q2Q067 | Q9NY64 | -0.78043  |
| 99630 | Q2Q067 | P21810 | -0.74391  |
| 99631 | Q2Q067 | Q5BJD5 | -1.0345   |
| 99632 | Q2Q067 | Q9H6S0 | -0.31632  |
| 99633 | Q2Q067 | P23743 | -1.0633   |
| 99634 | Q2Q067 | Q4G0N0 | -0.63383  |
| 99635 | Q2Q067 | Q9Y282 | -0.81496  |
| 99636 | Q2Q067 | O60256 | -0.3413   |

|       |        |        |            |
|-------|--------|--------|------------|
| 99637 | Q2Q067 | O14638 | -1.2529    |
| 99638 | Q2Q067 | P29275 | -0.88775   |
| 99639 | Q2Q067 | O75443 | -1.1682    |
| 99640 | Q2Q067 | P41221 | -0.23155   |
| 99641 | Q2Q067 | O14917 | -0.75051   |
| 99642 | Q2Q067 | Q8IV53 | -0.11375   |
| 99643 | Q2Q067 | Q8N127 | -1.4096    |
| 99644 | Q2Q067 | Q8IWT6 | -1.0815    |
| 99645 | Q2Q067 | Q9H3U5 | -1.049     |
| 99646 | Q2Q067 | P45974 | -0.37144   |
| 99647 | Q2Q067 | Q6PIS1 | -1.0322    |
| 99648 | Q2Q067 | Q4JDL3 | -0.25535   |
| 99649 | Q2Q067 | Q9NWS0 | -0.37641   |
| 99650 | Q2Q067 | Q8N143 | -0.4773    |
| 99651 | Q2Q067 | P53814 | -0.31651   |
| 99652 | Q2Q067 | Q14050 | -0.87106   |
| 99653 | Q2Q067 | Q9Y585 | -1.4096    |
| 99654 | Q2Q067 | Q8IYJ1 | -0.22843   |
| 99655 | Q2Q067 | Q16653 | -1.3223    |
| 99656 | Q2Q067 | Q6GTS8 | -1.4314    |
| 99657 | Q2Q067 | Q92771 | -0.6533    |
| 99658 | Q2Q067 | P18428 | -0.47252   |
| 99659 | Q2Q067 | Q14CN2 | -1.6805    |
| 99660 | Q2Q067 | P30622 | -0.22711   |
| 99661 | Q2Q067 | P03905 | -0.62784   |
| 99662 | Q2Q067 | Q8TF50 | -0.085533  |
| 99663 | Q2Q067 | P16435 | -0.9867    |
| 99664 | Q2Q067 | Q9NQT5 | -0.31138   |
| 99665 | Q2Q067 | A8MTB9 | -1.0345    |
| 99666 | Q2Q067 | Q8N323 | -0.98666   |
| 99667 | Q2Q067 | Q00013 | -0.50674   |
| 99668 | Q2Q067 | Q6T4P5 | -1.0788    |
| 99669 | Q2Q067 | Q8NFZ6 | -1.4199    |
| 99670 | Q2Q067 | O60343 | -1.1266    |
| 99671 | Q2Q067 | Q9UJ72 | -0.20857   |
| 99672 | Q2Q067 | Q9P281 | -0.44839   |
| 99673 | Q2Q067 | Q6P050 | -0.40021   |
| 99674 | Q2Q067 | Q8NEQ5 | -1.0345    |
| 99675 | Q2Q067 | Q7Z419 | -0.28075   |
| 99676 | Q2Q067 | Q9UGI0 | -0.22166   |
| 99677 | Q2Q067 | P02763 | -0.48366   |
| 99678 | Q2Q067 | P16050 | -0.21323   |
| 99679 | Q2Q067 | Q7Z3H4 | -0.21693   |
| 99680 | Q2Q067 | Q8IY45 | -0.2158    |
| 99681 | Q2Q067 | Q8WXH4 | -0.61006   |
| 99682 | Q2Q067 | Q8TE23 | -1.389     |
| 99683 | Q2Q067 | P02008 | -0.40398   |
| 99684 | Q2Q067 | Q9UKA4 | -0.088072  |
| 99685 | Q2Q067 | P20929 | -0.27062   |
| 99686 | Q2Q067 | Q6ZTY8 | -0.0045317 |
| 99687 | Q2Q067 | Q9BSN7 | -0.9106    |
| 99688 | Q2Q067 | P16619 | -1.1397    |
| 99689 | Q2Q067 | Q05397 | -0.23872   |
| 99690 | Q2Q067 | P51589 | -0.71567   |
| 99691 | Q2Q067 | Q96EH8 | -0.58666   |
| 99692 | Q2Q067 | Q8N2M4 | -1.0345    |
| 99693 | Q2Q067 | P30989 | -1.4074    |
| 99694 | Q2Q067 | Q9UPQ7 | -0.68603   |
| 99695 | Q2Q067 | O60674 | -0.26572   |
| 99696 | Q2Q067 | Q03405 | -0.84045   |
| 99697 | Q2Q067 | P55075 | -0.34039   |
| 99698 | Q2Q067 | Q9NR33 | -0.11337   |
| 99699 | Q2Q067 | Q6P597 | -0.080978  |
| 99700 | Q2Q067 | Q8TD33 | -0.98666   |
| 99701 | Q2Q067 | P02458 | -0.62919   |
| 99702 | Q2Q067 | Q96GR4 | -1.13      |
| 99703 | Q2Q067 | P40259 | -0.66946   |
| 99704 | Q2Q067 | Q5TC63 | -1.4231    |
| 99705 | Q2Q067 | Q6P995 | -1.1018    |
| 99706 | Q2Q067 | O43151 | -0.49873   |
| 99707 | Q2Q067 | Q15053 | -0.091792  |
| 99708 | Q2Q067 | B1AJZ9 | -0.16433   |
| 99709 | Q2Q067 | Q16880 | -0.81113   |
| 99710 | Q2Q067 | P26436 | -0.63121   |
| 99711 | Q2Q067 | Q14696 | -0.31808   |
| 99712 | Q2Q067 | Q17RB8 | -0.65682   |

|       |        |        |          |
|-------|--------|--------|----------|
| 99713 | Q2Q067 | P05771 | -0.22089 |
| 99714 | Q2Q067 | P0C7T2 | -1.4096  |
| 99715 | Q2Q067 | P68431 | -0.53412 |
| 99716 | Q2Q067 | O75061 | -0.32093 |
| 99717 | Q2Q067 | Q96P26 | -0.3754  |
| 99718 | Q2Q067 | Q9UMR5 | -0.44047 |
| 99719 | Q2Q067 | Q8WZ64 | -1.188   |
| 99720 | Q2Q067 | Q8NH81 | -1.4096  |
| 99721 | Q2Q067 | Q96E93 | -1.1809  |
| 99722 | Q2Q067 | Q14116 | -0.32348 |
| 99723 | Q2Q067 | P05090 | -0.652   |
| 99724 | Q2Q067 | Q9NPC8 | -0.23014 |
| 99725 | Q2Q067 | Q99653 | -0.2274  |
| 99726 | Q2Q067 | Q00341 | -0.47414 |
| 99727 | Q2Q067 | P29353 | -0.22741 |
| 99728 | Q2Q067 | P04090 | -0.97496 |
| 99729 | Q2Q067 | Q4VNC0 | -1.216   |
| 99730 | Q2Q067 | Q5TGJ6 | -0.18716 |
| 99731 | Q2Q067 | P01624 | -1.1115  |
| 99732 | Q2Q067 | P48723 | -0.89974 |
| 99733 | Q2Q067 | Q8N6S5 | -1.0345  |
| 99734 | Q2Q067 | Q9Y4B4 | -0.52732 |
| 99735 | Q2Q067 | Q8IUH4 | -0.98435 |
| 99736 | Q2Q067 | Q9H1B5 | -0.82884 |
| 99737 | Q2Q067 | Q14773 | -1.7407  |
| 99738 | Q2Q067 | Q86Y38 | -1.2093  |
| 99739 | Q2Q067 | Q9BZQ6 | -0.43416 |
| 99740 | Q2Q067 | Q9NPQ8 | -0.67802 |
| 99741 | Q2Q067 | Q9HCG7 | -0.88397 |
| 99742 | Q2Q067 | Q9H0I2 | -0.44668 |
| 99743 | Q2Q067 | P48146 | -0.86633 |
| 99744 | Q2Q067 | C9J798 | -1.0432  |
| 99745 | Q2Q067 | P62942 | -0.22802 |
| 99746 | Q2Q067 | Q13572 | -1.0413  |
| 99747 | Q2Q067 | Q9UNF0 | -0.22743 |
| 99748 | Q2Q067 | Q96G97 | -0.72549 |
| 99749 | Q2Q067 | Q8IW93 | -0.88212 |
| 99750 | Q2Q067 | Q6ZWK6 | -2.0647  |
| 99751 | Q2Q067 | P21145 | -0.65114 |
| 99752 | Q2Q067 | Q6P531 | -0.87471 |
| 99753 | Q2Q067 | B2RUZ4 | -1.0345  |
| 99754 | Q2Q067 | Q92538 | -0.22183 |
| 99755 | Q2Q067 | Q9GZM6 | -1.4096  |
| 99756 | Q2Q067 | Q8NFY4 | -0.88265 |
| 99757 | Q2Q067 | P0C0L4 | -1.2191  |
| 99758 | Q2Q067 | Q86YV6 | -1.3228  |
| 99759 | Q2Q067 | P58012 | -0.33602 |
| 99760 | Q2Q067 | Q5SRD3 | -1.1564  |
| 99761 | Q2Q067 | Q92902 | -0.24724 |
| 99762 | Q2Q067 | Q9H0C1 | -0.73178 |
| 99763 | Q2Q067 | Q9GZX9 | -0.98642 |
| 99764 | Q2Q067 | Q95972 | -0.82048 |
| 99765 | Q2Q067 | Q9UGN5 | -0.18427 |
| 99766 | Q2Q067 | Q8N2S1 | -0.51361 |
| 99767 | Q2Q067 | Q14796 | -0.60841 |
| 99768 | Q2Q067 | P51161 | -0.22339 |
| 99769 | Q2Q067 | Q9UG63 | -0.85107 |
| 99770 | Q2Q067 | P00439 | -0.41426 |
| 99771 | Q2Q067 | Q9H2H9 | -1.1314  |
| 99772 | Q2Q067 | Q96NH3 | -1.213   |
| 99773 | Q2Q067 | Q5T442 | -0.93711 |
| 99774 | Q2Q067 | Q2UY09 | -1.1918  |
| 99775 | Q2Q067 | Q14626 | -1.3274  |
| 99776 | Q2Q067 | A1KXE4 | -1.053   |
| 99777 | Q2Q067 | Q9NU19 | -1.4231  |
| 99778 | Q2Q067 | Q9Y623 | -0.33762 |
| 99779 | Q2Q067 | Q8IUS5 | -1.1058  |
| 99780 | Q2Q067 | Q494U1 | -0.51797 |
| 99781 | Q2Q067 | Q8N7U6 | -0.45603 |
| 99782 | Q2Q067 | Q96S52 | -0.432   |
| 99783 | Q2Q067 | P55210 | -0.22492 |
| 99784 | Q2Q067 | Q8WX77 | -0.94123 |
| 99785 | Q2Q067 | Q14332 | -0.67583 |
| 99786 | Q2Q067 | Q9NX09 | -0.32158 |
| 99787 | Q2Q067 | P07327 | -0.21584 |
| 99788 | Q2Q067 | Q9NZQ9 | -0.32976 |

|       |        |        |            |
|-------|--------|--------|------------|
| 99789 | Q2Q067 | Q86XQ3 | -1.12      |
| 99790 | Q2Q067 | Q29940 | -1.1453    |
| 99791 | Q2Q067 | P50895 | -1.4135    |
| 99792 | Q2Q067 | Q9BZJ0 | -0.15905   |
| 99793 | Q2Q067 | Q96PL2 | -1.2356    |
| 99794 | Q2Q067 | Q9HB89 | -1.2834    |
| 99795 | Q2Q067 | Q9UJ55 | -0.24416   |
| 99796 | Q2Q067 | P13761 | -0.40895   |
| 99797 | Q2Q067 | P18136 | -1.1115    |
| 99798 | Q2Q067 | P56696 | -1.007     |
| 99799 | Q2Q067 | P0C7M3 | -0.06517   |
| 99800 | Q2Q067 | Q9Y5G3 | -1.3679    |
| 99801 | Q2Q067 | P43489 | -0.95059   |
| 99802 | Q2Q067 | A6NNS2 | -1.4442    |
| 99803 | Q2Q067 | A4IF30 | -1.062     |
| 99804 | Q2Q067 | Q93096 | -0.496     |
| 99805 | Q2Q067 | Q9NV92 | -0.011102  |
| 99806 | Q2Q067 | P01859 | -1.113     |
| 99807 | Q2Q067 | Q14318 | -0.22784   |
| 99808 | Q2Q067 | Q68D86 | -0.1972    |
| 99809 | Q2Q067 | Q12889 | -0.37292   |
| 99810 | Q2Q067 | Q9UQ53 | -0.68891   |
| 99811 | Q2Q067 | P12235 | -0.23145   |
| 99812 | Q2Q067 | P19875 | -1.1067    |
| 99813 | Q2Q067 | Q13546 | -0.22741   |
| 99814 | Q2Q067 | Q8IV01 | -0.90761   |
| 99815 | Q2Q067 | Q8NAA6 | -0.090405  |
| 99816 | Q2Q067 | Q96P63 | -0.14005   |
| 99817 | Q2Q067 | Q9NVA4 | -1.0345    |
| 99818 | Q2Q067 | P15260 | -1.247     |
| 99819 | Q2Q067 | Q9NR19 | -0.22811   |
| 99820 | Q2Q067 | Q96P44 | -0.93452   |
| 99821 | Q2Q067 | P52945 | -0.38688   |
| 99822 | Q2Q067 | O60269 | -0.070481  |
| 99823 | Q2Q067 | A6NEL2 | -0.22741   |
| 99824 | Q2Q067 | Q8TAV4 | -1.3189    |
| 99825 | Q2Q067 | Q27J81 | -0.22581   |
| 99826 | Q2Q067 | A6PVL3 | -0.86662   |
| 99827 | Q2Q067 | A6NE02 | -0.79127   |
| 99828 | Q2Q067 | Q8N6C7 | -0.12223   |
| 99829 | Q2Q067 | I6L899 | -0.28132   |
| 99830 | Q2Q067 | P53384 | -0.25287   |
| 99831 | Q2Q067 | Q6DJT9 | -0.13315   |
| 99832 | Q2Q067 | Q8TE77 | -0.46096   |
| 99833 | Q2Q067 | O95157 | -0.97681   |
| 99834 | Q2Q067 | O95881 | -0.51131   |
| 99835 | Q2Q067 | Q8NB90 | -1.089     |
| 99836 | Q2Q067 | P08571 | -0.59406   |
| 99837 | Q2Q067 | Q8N635 | -0.17423   |
| 99838 | Q2Q067 | Q96PL5 | -0.94977   |
| 99839 | Q2Q067 | Q7L2Z9 | -0.095171  |
| 99840 | Q2Q067 | Q9Y5Y0 | -0.54892   |
| 99841 | Q2Q067 | C9JPN9 | -0.76972   |
| 99842 | Q2Q067 | Q8TAX7 | -0.40578   |
| 99843 | Q2Q067 | Q9P227 | -1.2902    |
| 99844 | Q2Q067 | Q9ULF5 | -1.0849    |
| 99845 | Q2Q067 | Q6ZVE7 | -0.51643   |
| 99846 | Q2Q067 | Q8N8N0 | -1.1627    |
| 99847 | Q2Q067 | O94988 | -1.0924    |
| 99848 | Q2Q067 | Q9BSG0 | -0.98666   |
| 99849 | Q2Q067 | Q8TDJ6 | -0.58568   |
| 99850 | Q2Q067 | Q9P298 | -1.0345    |
| 99851 | Q2Q067 | O14613 | -0.0097514 |
| 99852 | Q2Q067 | Q9UJT1 | -0.42547   |
| 99853 | Q2Q067 | O75506 | -0.15576   |
| 99854 | Q2Q067 | Q96JF0 | -0.90114   |
| 99855 | Q2Q067 | Q8IW00 | -1.1634    |
| 99856 | Q2Q067 | Q7RTX7 | -1.1062    |
| 99857 | Q2Q067 | Q14003 | -0.80784   |
| 99858 | Q2Q067 | Q8NET8 | -1.0654    |
| 99859 | Q2Q067 | O95395 | -0.60008   |
| 99860 | Q2Q067 | P13569 | -0.37977   |
| 99861 | Q2Q067 | Q5HYJ1 | -0.95425   |
| 99862 | Q2Q067 | P53602 | -0.5586    |
| 99863 | Q2Q067 | Q9H939 | -0.22344   |
| 99864 | Q2Q067 | Q75WM6 | -1.202     |

|       |        |        |           |
|-------|--------|--------|-----------|
| 99865 | Q2Q067 | P20711 | -0.60934  |
| 99866 | Q2Q067 | Q8N456 | -0.25813  |
| 99867 | Q2Q067 | Q96SI9 | -0.7308   |
| 99868 | Q2Q067 | Q96A33 | -0.31602  |
| 99869 | Q2Q067 | O75093 | -0.74717  |
| 99870 | Q2Q067 | O14836 | -0.61356  |
| 99871 | Q2Q067 | P13861 | -0.22737  |
| 99872 | Q2Q067 | Q9BX68 | -0.31919  |
| 99873 | Q2Q067 | P12319 | -1.1355   |
| 99874 | Q2Q067 | Q8TDY3 | -0.21707  |
| 99875 | Q2Q067 | Q29718 | -1.1453   |
| 99876 | Q2Q067 | Q9HCE6 | -0.54479  |
| 99877 | Q2Q067 | Q13423 | -0.83521  |
| 99878 | Q2Q067 | Q9P1W9 | -0.82056  |
| 99879 | Q2Q067 | E7ERA6 | -1.1176   |
| 99880 | Q2Q067 | Q8NHR9 | -0.16898  |
| 99881 | Q2Q067 | Q3I5F7 | -0.1769   |
| 99882 | Q2Q067 | A0PJZ3 | -0.9897   |
| 99883 | Q2Q067 | O95861 | -0.28327  |
| 99884 | Q2Q067 | Q13948 | -0.79969  |
| 99885 | Q2Q067 | Q05682 | -0.39261  |
| 99886 | Q2Q067 | Q9BWP8 | -1.1889   |
| 99887 | Q2Q067 | Q0VDG4 | -0.56029  |
| 99888 | Q2Q067 | Q9BZR6 | -0.22798  |
| 99889 | Q2Q067 | P62834 | -0.39201  |
| 99890 | Q2Q067 | Q96QS1 | -1.0693   |
| 99891 | Q2Q067 | A8MUP6 | -1.0345   |
| 99892 | Q2Q067 | Q96S97 | -1.0345   |
| 99893 | Q2Q067 | P56385 | -0.25272  |
| 99894 | Q2Q067 | P18463 | -1.1453   |
| 99895 | Q2Q067 | O00476 | -0.84282  |
| 99896 | Q2Q067 | Q96KN2 | -1.3455   |
| 99897 | Q2Q067 | P23469 | -0.30625  |
| 99898 | Q2Q067 | Q5JVF3 | -0.2698   |
| 99899 | Q2Q067 | Q86UK0 | -1.5208   |
| 99900 | Q2Q067 | O75095 | -0.33828  |
| 99901 | Q2Q067 | Q15846 | -0.86292  |
| 99902 | Q2Q067 | Q7L0R7 | -0.48451  |
| 99903 | Q2Q067 | Q9NPJ3 | -0.056398 |
| 99904 | Q2Q067 | Q9NXL6 | -0.95241  |
| 99905 | Q2Q067 | Q9UHW5 | -0.97389  |
| 99906 | Q2Q067 | P50151 | -0.63112  |
| 99907 | Q2Q067 | Q9Y6J3 | -0.57228  |
| 99908 | Q2Q067 | Q9HB20 | -0.58759  |
| 99909 | Q2Q067 | O43181 | -0.214    |
| 99910 | Q2Q067 | Q8N5U1 | -1.0345   |
| 99911 | Q2Q067 | O43166 | -0.34856  |
| 99912 | Q2Q067 | Q9H190 | -0.22731  |
| 99913 | Q2Q067 | Q9H3U7 | -1.3159   |
| 99914 | Q2Q067 | Q17RR3 | -1.0034   |
| 99915 | Q2Q067 | Q70Z35 | -0.75082  |
| 99916 | Q2Q067 | Q9HBI0 | -0.58584  |
| 99917 | Q2Q067 | Q15049 | -0.2745   |
| 99918 | Q2Q067 | Q9P218 | -1.1053   |
| 99919 | Q2Q067 | Q96B21 | -1.0345   |
| 99920 | Q2Q067 | O14832 | -0.21352  |
| 99921 | Q2Q067 | Q8N7N1 | -0.1242   |
| 99922 | Q2Q067 | P61566 | -0.86704  |
| 99923 | Q2Q067 | P60008 | -0.7093   |
| 99924 | Q2Q067 | Q9Y6S9 | -1.046    |
| 99925 | Q2Q067 | O15118 | -0.70894  |
| 99926 | Q2Q067 | P34982 | -1.4701   |
| 99927 | Q2Q067 | Q7Z7H8 | -0.14866  |
| 99928 | Q2Q067 | Q9NUA8 | -0.11842  |
| 99929 | Q2Q067 | P62333 | -0.29934  |
| 99930 | Q2Q067 | Q07864 | -0.29717  |
| 99931 | Q2Q067 | P50281 | -0.44009  |
| 99932 | Q2Q067 | P53778 | -0.22741  |
| 99933 | Q2Q067 | Q93097 | -0.93612  |
| 99934 | Q2Q067 | Q96H55 | -0.52075  |
| 99935 | Q2Q067 | Q6UDR6 | -0.90081  |
| 99936 | Q2Q067 | Q13268 | -0.32361  |
| 99937 | Q2Q067 | Q12908 | -0.87186  |
| 99938 | Q2Q067 | Q8NH93 | -1.4096   |
| 99939 | Q2Q067 | P32298 | -1.0327   |
| 99940 | Q2Q067 | Q502W6 | -0.081674 |



|        |        |        |           |
|--------|--------|--------|-----------|
| 99941  | Q2Q067 | Q8NG75 | -1.4096   |
| 99942  | Q2Q067 | Q4G0M1 | -0.98666  |
| 99943  | Q2Q067 | P22695 | -0.096313 |
| 99944  | Q2Q067 | Q9NPB0 | -0.98761  |
| 99945  | Q2Q067 | P08034 | -0.97725  |
| 99946  | Q2Q067 | P41271 | -0.72543  |
| 99947  | Q2Q067 | P19224 | -0.96179  |
| 99948  | Q2Q067 | Q9NUU7 | -0.1026   |
| 99949  | Q2Q067 | Q6ZVX9 | -1.0345   |
| 99950  | Q2Q067 | Q9NYB9 | -0.30009  |
| 99951  | Q2Q067 | O60336 | -0.37274  |
| 99952  | Q2Q067 | P60153 | -0.97935  |
| 99953  | Q2Q067 | Q5T3Y7 | -0.023294 |
| 99954  | Q2Q067 | O95405 | -0.19638  |
| 99955  | Q2Q067 | Q9NPH5 | -0.81498  |
| 99956  | Q2Q067 | A8MXQ7 | -0.22741  |
| 99957  | Q2Q067 | O94885 | -0.22738  |
| 99958  | Q2Q067 | Q07960 | -0.37696  |
| 99959  | Q2Q067 | O15269 | -0.40061  |
| 99960  | Q2Q067 | Q68D91 | -0.40827  |
| 99961  | Q2Q067 | Q8N4P2 | -0.51507  |
| 99962  | Q2Q067 | Q8NCE2 | -0.33529  |
| 99963  | Q2Q067 | P10745 | -1.2534   |
| 99964  | Q2Q067 | Q9NZC4 | -0.13704  |
| 99965  | Q2Q067 | Q8TER0 | -0.96065  |
| 99966  | Q2Q067 | Q9Y664 | -0.11525  |
| 99967  | Q2Q067 | Q5VW38 | -1.0345   |
| 99968  | Q2Q067 | Q9UKI2 | -0.61812  |
| 99969  | Q2Q067 | Q8IXL6 | -1.2067   |
| 99970  | Q2Q067 | Q6IPR3 | -0.33689  |
| 99971  | Q2Q067 | Q8N4H0 | -0.17078  |
| 99972  | Q2Q067 | Q7Z6L1 | -0.76763  |
| 99973  | Q2Q067 | P26038 | -0.23293  |
| 99974  | Q2Q067 | Q15334 | -0.68724  |
| 99975  | Q2Q067 | Q8N573 | -0.12132  |
| 99976  | Q2Q067 | Q95604 | -1.1453   |
| 99977  | Q2Q067 | Q8WVX9 | -1.2132   |
| 99978  | Q2Q067 | Q08493 | -0.58388  |
| 99979  | Q2Q067 | P33908 | -0.75334  |
| 99980  | Q2Q067 | Q16772 | -0.2256   |
| 99981  | Q2Q067 | Q96E35 | -0.47006  |
| 99982  | Q2Q067 | Q8WXI7 | -1.1451   |
| 99983  | Q2Q067 | Q6UWE0 | -0.22755  |
| 99984  | Q2Q067 | A0PJX8 | -1.0345   |
| 99985  | Q2Q067 | Q99674 | -1.0788   |
| 99986  | Q2Q067 | Q9BRX8 | -0.13821  |
| 99987  | Q2Q067 | Q9QC07 | -0.42735  |
| 99988  | Q2Q067 | Q14439 | -1.6497   |
| 99989  | Q2Q067 | Q495Y7 | -0.0538   |
| 99990  | Q2Q067 | O60890 | -0.76236  |
| 99991  | Q2Q067 | Q6P6B7 | -0.22741  |
| 99992  | Q2Q067 | P15692 | -0.27093  |
| 99993  | Q2Q067 | Q14094 | -0.49553  |
| 99994  | Q2Q067 | P58753 | -0.22315  |
| 99995  | Q2Q067 | Q15822 | -1.1387   |
| 99996  | Q2Q067 | Q9P2H5 | -0.76972  |
| 99997  | Q2Q067 | P51677 | -1.4745   |
| 99998  | Q2Q067 | Q92617 | -0.77947  |
| 99999  | Q2Q067 | P02462 | -0.58948  |
| 100000 | Q2Q067 | Q96N68 | -1.0345   |
| 100001 | Q2Q067 | Q13467 | -0.46229  |
| 100002 | Q2Q067 | Q9BXR6 | -0.96369  |
| 100003 | Q2Q067 | O95965 | -1.0953   |
| 100004 | Q2Q067 | P13232 | -0.17447  |
| 100005 | Q2Q067 | Q9Y6K0 | -0.56424  |
| 100006 | Q2Q067 | Q9Y2C9 | -0.7715   |
| 100007 | Q2Q067 | P16233 | -0.8291   |
| 100008 | Q2Q067 | Q8IXN7 | -0.87973  |
| 100009 | Q2Q067 | Q86UQ4 | -1.4923   |
| 100010 | Q2Q067 | Q9NS87 | -0.23368  |
| 100011 | Q2Q067 | Q13630 | -0.80262  |
| 100012 | Q2Q067 | O76070 | -0.26997  |
| 100013 | Q2Q067 | P55899 | -1.1062   |
| 100014 | Q2Q067 | Q96E17 | -1.0593   |
| 100015 | Q2Q067 | P28288 | -0.73995  |
| 100016 | Q2Q067 | P13747 | -1.1678   |

|        |        |         |            |
|--------|--------|---------|------------|
| 100017 | Q2Q067 | P06028  | -1.3184    |
| 100018 | Q2Q067 | E9PQX1  | -0.22593   |
| 100019 | Q2Q067 | Q8N2G6  | -0.50058   |
| 100020 | Q2Q067 | P07492  | -1.2302    |
| 100021 | Q2Q067 | Q9H5I5  | -1.1877    |
| 100022 | Q2Q067 | Q96EY8  | -0.77078   |
| 100023 | Q2Q067 | P01563  | -0.38005   |
| 100024 | Q2Q067 | Q5TBK1  | -0.13226   |
| 100025 | Q2Q067 | P55011  | -1.0082    |
| 100026 | Q2Q067 | Q6UX72  | -0.92843   |
| 100027 | Q2Q067 | Q12866  | -0.78919   |
| 100028 | Q2Q067 | Q96KS9  | -0.17635   |
| 100029 | Q2Q067 | Q6L9W6  | -0.84861   |
| 100030 | Q2Q067 | Q9NZB8  | -0.57809   |
| 100031 | Q2Q067 | Q96KW9  | -0.98193   |
| 100032 | Q2Q067 | Q9BYI3  | -0.61903   |
| 100033 | Q2Q067 | P56589  | -0.12804   |
| 100034 | Q2Q067 | P24347  | -1.5594    |
| 100035 | Q2Q067 | Q4U2R8  | -0.47475   |
| 100036 | Q2Q067 | Q9NXC2  | -1.5999    |
| 100037 | Q2Q067 | Q75610  | -0.89949   |
| 100038 | Q2Q067 | P01591  | -0.98652   |
| 100039 | Q2Q067 | P04438  | -1.1115    |
| 100040 | Q2Q067 | P46821  | -0.19287   |
| 100041 | Q2Q067 | Q9UEW8  | -0.80929   |
| 100042 | Q2Q067 | P08294  | -0.21921   |
| 100043 | Q2Q067 | P02647  | -0.32884   |
| 100044 | Q2Q067 | Q5VWM1  | -0.19475   |
| 100045 | Q2Q067 | Q8WZ59  | -1.0345    |
| 100046 | Q2Q067 | Q5FWF5  | -0.34831   |
| 100047 | Q2Q067 | P48436  | -0.28505   |
| 100048 | Q2Q067 | Q5VST9  | -0.95043   |
| 100049 | Q2Q067 | C9JQTQ0 | -0.22741   |
| 100050 | Q2Q067 | Q8NEP3  | -0.2274    |
| 100051 | Q2Q067 | Q8IYA2  | -0.20548   |
| 100052 | Q2Q067 | Q92623  | -0.21411   |
| 100053 | Q2Q067 | Q92688  | -0.19206   |
| 100054 | Q2Q067 | Q15415  | -0.66876   |
| 100055 | Q2Q067 | Q9NW07  | -0.089514  |
| 100056 | Q2Q067 | Q9Y6R1  | -0.69963   |
| 100057 | Q2Q067 | Q13639  | -1.1926    |
| 100058 | Q2Q067 | A8MWA6  | -0.43957   |
| 100059 | Q2Q067 | Q8NGN2  | -1.4096    |
| 100060 | Q2Q067 | Q7Z412  | -0.32069   |
| 100061 | Q2Q067 | Q8IWL1  | -1.0879    |
| 100062 | Q2Q067 | Q75200  | -0.98666   |
| 100063 | Q2Q067 | Q15513  | -0.42238   |
| 100064 | Q2Q067 | Q6PI47  | -0.066659  |
| 100065 | Q2Q067 | Q86UD7  | -1.4231    |
| 100066 | Q2Q067 | P0C623  | -1.4096    |
| 100067 | Q2Q067 | Q96MK2  | -0.0084888 |
| 100068 | Q2Q067 | Q8TC57  | -0.82924   |
| 100069 | Q2Q067 | Q15825  | -1.0814    |
| 100070 | Q2Q067 | P50747  | -0.34475   |
| 100071 | Q2Q067 | Q9P0J1  | -0.13252   |
| 100072 | Q2Q067 | Q99418  | -0.22741   |
| 100073 | Q2Q067 | Q6UXV0  | -1.1346    |
| 100074 | Q2Q067 | Q86WS3  | -0.98666   |
| 100075 | Q2Q067 | Q401N2  | -1.1619    |
| 100076 | Q2Q067 | P48506  | -0.34589   |
| 100077 | Q2Q067 | Q9BSG5  | -0.98666   |
| 100078 | Q2Q067 | Q8WVZ1  | -1.13      |
| 100079 | Q2Q067 | Q7Z4I7  | -0.22489   |
| 100080 | Q2Q067 | Q9NTQ9  | -1.0604    |
| 100081 | Q2Q067 | Q9BZ29  | -0.22666   |
| 100082 | Q2Q067 | P01858  | -0.33807   |
| 100083 | Q2Q067 | Q96J88  | -0.28226   |
| 100084 | Q2Q067 | Q70E73  | -0.88764   |
| 100085 | Q2Q067 | Q9Y2E6  | -0.34642   |
| 100086 | Q2Q067 | Q9Y5U9  | -0.9577    |
| 100087 | Q2Q067 | Q9Y3P4  | -1.0807    |
| 100088 | Q2Q067 | P01702  | -1.1115    |
| 100089 | Q2Q067 | O43422  | -0.38655   |
| 100090 | Q2Q067 | P58418  | -1.1065    |
| 100091 | Q2Q067 | P62807  | -0.80644   |
| 100092 | Q2Q067 | Q96M94  | -0.40021   |

|        |        |        |           |
|--------|--------|--------|-----------|
| 100093 | Q2Q067 | Q5VX52 | -0.027347 |
| 100094 | Q2Q067 | Q8IV56 | -0.62283  |
| 100095 | Q2Q067 | P43116 | -1.4478   |
| 100096 | Q2Q067 | P04217 | -0.86843  |
| 100097 | Q2Q067 | O60245 | -1.5006   |
| 100098 | Q2Q067 | Q86WA9 | -1.079    |
| 100099 | Q2Q067 | Q9BXU0 | -0.369    |
| 100100 | Q2Q067 | Q99969 | -0.46943  |
| 100101 | Q2Q067 | P48304 | -0.97805  |
| 100102 | Q2Q067 | Q9H1C3 | -1.0612   |
| 100103 | Q2Q067 | A1L162 | -0.036155 |
| 100104 | Q2Q067 | Q9BYT8 | -0.4669   |
| 100105 | Q2Q067 | Q8NI60 | -0.96116  |
| 100106 | Q2Q067 | Q6ZRG5 | -0.20199  |
| 100107 | Q2Q067 | Q9H799 | -1.0345   |
| 100108 | Q2Q067 | O94900 | -0.22092  |
| 100109 | Q2Q067 | P0DJD8 | -1.2971   |
| 100110 | Q2Q067 | Q9H7X2 | -1.0345   |
| 100111 | Q2Q067 | O15230 | -0.57978  |
| 100112 | Q2Q067 | P22223 | -1.2879   |
| 100113 | Q2Q067 | Q96MC6 | -1.1451   |
| 100114 | Q2Q067 | Q0D2K0 | -1.1241   |
| 100115 | Q2Q067 | Q4KMP7 | -1.2686   |
| 100116 | Q2Q067 | P04216 | -0.23025  |
| 100117 | Q2Q067 | Q8N8B7 | -0.083985 |
| 100118 | Q2Q067 | O15539 | -0.94976  |
| 100119 | Q2Q067 | P59796 | -1.1923   |
| 100120 | Q2Q067 | Q9H344 | -1.4096   |
| 100121 | Q2Q067 | Q96FT9 | -0.12371  |
| 100122 | Q2Q067 | Q15800 | -1.029    |
| 100123 | Q2Q067 | Q15048 | -0.11133  |
| 100124 | Q2Q067 | Q13003 | -0.97692  |
| 100125 | Q2Q067 | Q3Y452 | -0.45335  |
| 100126 | Q2Q067 | O95461 | -0.8029   |
| 100127 | Q2Q067 | P0C025 | -0.40827  |
| 100128 | Q2Q067 | P57682 | -0.3313   |
| 100129 | Q2Q067 | Q7Z5Q5 | -0.098978 |
| 100130 | Q2Q067 | P00734 | -0.57857  |
| 100131 | Q2Q067 | O60507 | -0.89834  |
| 100132 | Q2Q067 | O43529 | -0.83475  |
| 100133 | Q2Q067 | Q6UY14 | -0.40785  |
| 100134 | Q2Q067 | Q9BXB4 | -0.9261   |
| 100135 | Q2Q067 | Q96BH3 | -0.98907  |
| 100136 | Q2Q067 | Q96A98 | -0.98125  |
| 100137 | Q2Q067 | A6NCE7 | -0.42396  |
| 100138 | Q2Q067 | A6NCM1 | -0.91075  |
| 100139 | Q2Q067 | Q8IVW8 | -1.1882   |
| 100140 | Q2Q067 | Q8N239 | -0.21804  |
| 100141 | Q2Q067 | A6NMT0 | -0.22762  |
| 100142 | Q2Q067 | O95477 | -0.48897  |
| 100143 | Q2Q067 | P01358 | -0.30628  |
| 100144 | Q2Q067 | P21964 | -0.36655  |
| 100145 | Q2Q067 | Q9Y3T6 | -0.91559  |
| 100146 | Q2Q067 | Q7Z3S9 | -1.0549   |
| 100147 | Q2Q067 | P78540 | -0.21552  |
| 100148 | Q2Q067 | Q32P28 | -0.61629  |
| 100149 | Q2Q067 | Q9BTD8 | -0.42972  |
| 100150 | Q2Q067 | P55089 | -0.51303  |
| 100151 | Q2Q067 | P01374 | -0.77687  |
| 100152 | Q2Q067 | P13726 | -0.40709  |
| 100153 | Q2Q067 | Q86XE3 | -1.0902   |
| 100154 | Q2Q067 | O43581 | -1.105    |
| 100155 | Q2Q067 | P01712 | -1.1115   |
| 100156 | Q2Q067 | P50897 | -0.35333  |
| 100157 | Q2Q067 | Q9Y4E6 | -0.22743  |
| 100158 | Q2Q067 | P54829 | -1.323    |
| 100159 | Q2Q067 | I3L1E1 | -0.37058  |
| 100160 | Q2Q067 | P13521 | -0.68428  |
| 100161 | Q2Q067 | P50336 | -0.58384  |
| 100162 | Q2Q067 | P34741 | -0.38956  |
| 100163 | Q2Q067 | Q13465 | -0.071059 |
| 100164 | Q2Q067 | Q8NCS4 | -1.0345   |
| 100165 | Q2Q067 | P04075 | -0.31703  |
| 100166 | Q2Q067 | Q9NZV5 | -0.41954  |
| 100167 | Q2Q067 | Q17RF5 | -0.98666  |
| 100168 | Q2Q067 | Q8NBP0 | -0.22735  |

|        |        |        |           |
|--------|--------|--------|-----------|
| 100169 | Q2Q067 | Q5VVB8 | -1.0345   |
| 100170 | Q2Q067 | P08218 | -1.5202   |
| 100171 | Q2Q067 | Q96HA4 | -1.0345   |
| 100172 | Q2Q067 | Q9Y6R0 | -0.22692  |
| 100173 | Q2Q067 | Q99879 | -0.82527  |
| 100174 | Q2Q067 | Q5JPF3 | -0.38123  |
| 100175 | Q2Q067 | Q5M775 | -0.22744  |
| 100176 | Q2Q067 | Q8NGA5 | -1.2565   |
| 100177 | Q2Q067 | Q9H2I8 | -0.2273   |
| 100178 | Q2Q067 | Q86W54 | -0.17224  |
| 100179 | Q2Q067 | Q8WUA4 | -0.22739  |
| 100180 | Q2Q067 | O95696 | -0.25739  |
| 100181 | Q2Q067 | Q86WU2 | -0.14895  |
| 100182 | Q2Q067 | Q96B45 | -0.027031 |
| 100183 | Q2Q067 | P04628 | -0.22741  |
| 100184 | Q2Q067 | P27105 | -0.25138  |
| 100185 | Q2Q067 | I3L273 | -0.26466  |
| 100186 | Q2Q067 | O75808 | -0.8081   |
| 100187 | Q2Q067 | Q5R3K3 | -1.0345   |
| 100188 | Q2Q067 | Q5T0W9 | -0.012763 |
| 100189 | Q2Q067 | Q6NT55 | -0.8821   |
| 100190 | Q2Q067 | O14764 | -1.1643   |
| 100191 | Q2Q067 | Q96HV5 | -1.0345   |
| 100192 | Q2Q067 | Q12778 | -0.31681  |
| 100193 | Q2Q067 | Q9BQI7 | -1.1372   |
| 100194 | Q2Q067 | Q8NBP5 | -1.1451   |
| 100195 | Q2Q067 | Q9H0Z9 | -0.29037  |
| 100196 | Q2Q067 | Q9NVV0 | -1.017    |
| 100197 | Q2Q067 | Q8IYB7 | -0.14758  |
| 100198 | Q2Q067 | Q9H2A7 | -1.3811   |
| 100199 | Q2Q067 | P61812 | -0.22741  |
| 100200 | Q2Q067 | Q9Y490 | -0.22765  |
| 100201 | Q2Q067 | O75146 | -0.21418  |
| 100202 | Q2Q067 | O75604 | -0.29581  |
| 100203 | Q2Q067 | P13765 | -1.1385   |
| 100204 | Q2Q067 | Q8IVA1 | -0.5951   |
| 100205 | Q2Q067 | Q9NQS5 | -1.4504   |
| 100206 | Q2Q067 | A6NKC9 | -0.22741  |
| 100207 | Q2Q067 | Q96RU8 | -0.22828  |
| 100208 | Q2Q067 | Q9Y2D2 | -0.6791   |
| 100209 | Q2Q067 | Q9H0R3 | -1.0345   |
| 100210 | Q2Q067 | Q5HYI8 | -1.2498   |
| 100211 | Q2Q067 | Q9BZL6 | -0.39619  |
| 100212 | Q2Q067 | Q9UHR4 | -0.2274   |
| 100213 | Q2Q067 | Q8NGE1 | -1.4096   |
| 100214 | Q2Q067 | Q6UW63 | -0.31962  |
| 100215 | Q2Q067 | P49441 | -0.55515  |
| 100216 | Q2Q067 | P54687 | -0.17547  |
| 100217 | Q2Q067 | O14830 | -0.22239  |
| 100218 | Q2Q067 | P46109 | -0.22741  |
| 100219 | Q2Q067 | Q8WVE7 | -1.0345   |
| 100220 | Q2Q067 | Q9NP70 | -1.148    |
| 100221 | Q2Q067 | P03971 | -0.58448  |
| 100222 | Q2Q067 | Q8WUD1 | -0.95353  |
| 100223 | Q2Q067 | Q86T23 | -0.065811 |
| 100224 | Q2Q067 | Q07000 | -1.1453   |
| 100225 | Q2Q067 | Q9H3E2 | -0.39488  |
| 100226 | Q2Q067 | Q5JRX3 | -0.25865  |
| 100227 | Q2Q067 | Q9NSY0 | -0.81603  |
| 100228 | Q2Q067 | Q8IXM6 | -0.43392  |
| 100229 | Q2Q067 | Q15431 | -0.20643  |
| 100230 | Q2Q067 | Q9BS92 | -0.11974  |
| 100231 | Q2Q067 | A8MW95 | -0.22873  |
| 100232 | Q2Q067 | O00258 | -0.54503  |
| 100233 | Q2Q067 | Q9HB14 | -1.2903   |
| 100234 | Q2Q067 | O75348 | -0.46605  |
| 100235 | Q2Q067 | Q01954 | -0.22424  |
| 100236 | Q2Q067 | Q9NRD8 | -0.87647  |
| 100237 | Q2Q067 | Q13057 | -0.30929  |
| 100238 | Q2Q067 | Q6UY18 | -1.0345   |
| 100239 | Q2Q067 | Q5XG99 | -1.0097   |
| 100240 | Q2Q067 | Q2PZI1 | -1.0345   |
| 100241 | Q2Q067 | Q07699 | -0.90445  |
| 100242 | Q2Q067 | Q8N6W0 | -0.44048  |
| 100243 | Q2Q067 | P59773 | -1.0345   |
| 100244 | Q2Q067 | Q14123 | -0.32799  |

|        |        |        |           |
|--------|--------|--------|-----------|
| 100245 | Q2Q067 | Q9NW64 | -0.63963  |
| 100246 | Q2Q067 | P47888 | -1.4096   |
| 100247 | Q2Q067 | A6NJI9 | -0.19868  |
| 100248 | Q2Q067 | Q9HBJ7 | -0.6503   |
| 100249 | Q2Q067 | Q3MUJ2 | -1.1743   |
| 100250 | Q2Q067 | Q8N6Y2 | -0.91619  |
| 100251 | Q2Q067 | Q9H1K0 | -0.18819  |
| 100252 | Q2Q067 | Q6P087 | -0.4138   |
| 100253 | Q2Q067 | Q96E39 | -0.52465  |
| 100254 | Q2Q067 | Q70JA7 | -0.61626  |
| 100255 | Q2Q067 | Q8N8Z3 | -0.090179 |
| 100256 | Q2Q067 | Q14BN4 | -1.0457   |
| 100257 | Q2Q067 | P15088 | -0.79783  |
| 100258 | Q2Q067 | Q86W92 | -0.7143   |
| 100259 | Q2Q067 | Q9BWW9 | -1.0751   |
| 100260 | Q2Q067 | O00764 | -0.24711  |
| 100261 | Q2Q067 | Q12772 | -0.22734  |
| 100262 | Q2Q067 | O14960 | -0.95414  |
| 100263 | Q2Q067 | O15225 | -0.24416  |
| 100264 | Q2Q067 | P20160 | -0.85082  |
| 100265 | Q2Q067 | Q5KSL6 | -1.078    |
| 100266 | Q2Q067 | Q9Y6N7 | -0.64332  |
| 100267 | Q2Q067 | Q86W42 | -0.32147  |
| 100268 | Q2Q067 | O00254 | -1.1638   |
| 100269 | Q2Q067 | Q9UQ49 | -0.49943  |
| 100270 | Q2Q067 | Q9Y5I0 | -1.3679   |
| 100271 | Q2Q067 | Q8IYU2 | -0.2276   |
| 100272 | Q2Q067 | Q8TAM6 | -0.47061  |
| 100273 | Q2Q067 | Q13886 | -0.2243   |
| 100274 | Q2Q067 | Q9ULC5 | -0.83719  |
| 100275 | Q2Q067 | Q8WXX4 | -0.61006  |
| 100276 | Q2Q067 | P63092 | -0.72022  |
| 100277 | Q2Q067 | P11686 | -0.17395  |
| 100278 | Q2Q067 | Q9NP50 | -0.39592  |
| 100279 | Q2Q067 | Q8NGE3 | -1.4096   |
| 100280 | Q2Q067 | Q9NX14 | -0.60556  |
| 100281 | Q2Q067 | Q9C0C7 | -0.22743  |
| 100282 | Q2Q067 | Q8N5C7 | -0.17617  |
| 100283 | Q2Q067 | A4D174 | -0.29113  |
| 100284 | Q2Q067 | A6NN79 | -1.0345   |
| 100285 | Q2Q067 | Q13702 | -0.31372  |
| 100286 | Q2Q067 | Q6TCH4 | -1.0345   |
| 100287 | Q2Q067 | Q15916 | -0.21934  |
| 100288 | Q2Q067 | P20848 | -0.78629  |
| 100289 | Q2Q067 | O76041 | -0.22744  |
| 100290 | Q2Q067 | Q96A84 | -0.94532  |
| 100291 | Q2Q067 | Q9BU19 | -0.17059  |
| 100292 | Q2Q067 | Q6ZWK4 | -1.0345   |
| 100293 | Q2Q067 | Q8N6F8 | -0.098924 |
| 100294 | Q2Q067 | Q01484 | -0.22745  |
| 100295 | Q2Q067 | P47890 | -1.4096   |
| 100296 | Q2Q067 | Q5W0B1 | -0.48451  |
| 100297 | Q2Q067 | Q8IVB4 | -1.0869   |
| 100298 | Q2Q067 | A6NM76 | -1.4096   |
| 100299 | Q2Q067 | Q9UPE1 | -1.2714   |
| 100300 | Q2Q067 | Q6ZVW7 | -0.041744 |
| 100301 | Q2Q067 | Q00325 | -0.96977  |
| 100302 | Q2Q067 | Q9H2H0 | -0.16972  |
| 100303 | Q2Q067 | Q14789 | -0.23885  |
| 100304 | Q2Q067 | Q8TD10 | -0.17451  |
| 100305 | Q2Q067 | A6NMA1 | -0.12206  |
| 100306 | Q2Q067 | P42857 | -0.28889  |
| 100307 | Q2Q067 | Q8NA96 | -0.06517  |
| 100308 | Q2Q067 | Q96S38 | -0.9196   |
| 100309 | Q2Q067 | P54802 | -0.36139  |
| 100310 | Q2Q067 | Q9BS91 | -0.84817  |
| 100311 | Q2Q067 | Q8TD07 | -0.55631  |
| 100312 | Q2Q067 | Q13258 | -0.872    |
| 100313 | Q2Q067 | Q07002 | -1.1608   |
| 100314 | Q2Q067 | Q3MJ16 | -0.46037  |
| 100315 | Q2Q067 | Q9C0H9 | -0.071378 |
| 100316 | Q2Q067 | Q9P2X3 | -0.2366   |
| 100317 | Q2Q067 | Q86VH5 | -1.0345   |
| 100318 | Q2Q067 | O75110 | -1.0845   |
| 100319 | Q2Q067 | Q8N1Q1 | -0.24937  |
| 100320 | Q2Q067 | Q69384 | -0.86704  |

|        |        |        |           |
|--------|--------|--------|-----------|
| 100321 | Q2Q067 | Q6ZN66 | -1.0643   |
| 100322 | Q2Q067 | Q9H209 | -1.4096   |
| 100323 | Q2Q067 | P22103 | -0.26     |
| 100324 | Q2Q067 | P20382 | -0.88208  |
| 100325 | Q2Q067 | Q8WW59 | -0.22874  |
| 100326 | Q2Q067 | Q8N0Z8 | -0.32489  |
| 100327 | Q2Q067 | Q9UHE5 | -1.0958   |
| 100328 | Q2Q067 | Q6UWN8 | -0.90081  |
| 100329 | Q2Q067 | Q9UQQ1 | -1.5268   |
| 100330 | Q2Q067 | P45379 | -0.32752  |
| 100331 | Q2Q067 | P18075 | -0.22741  |
| 100332 | Q2Q067 | Q96JX3 | -0.76787  |
| 100333 | Q2Q067 | P30040 | -0.14339  |
| 100334 | Q2Q067 | P49810 | -0.22169  |
| 100335 | Q2Q067 | P31153 | -0.64772  |
| 100336 | Q2Q067 | P61769 | -0.50449  |
| 100337 | Q2Q067 | Q9ULE3 | -0.37893  |
| 100338 | Q2Q067 | Q5VXH4 | -0.19475  |
| 100339 | Q2Q067 | Q99650 | -0.8207   |
| 100340 | Q2Q067 | Q8N6V9 | -0.055311 |
| 100341 | Q2Q067 | A0AVI2 | -1.0345   |
| 100342 | Q2Q067 | Q8NE35 | -0.86536  |
| 100343 | Q2Q067 | Q4G0N8 | -1.2683   |
| 100344 | Q2Q067 | P14679 | -0.48446  |
| 100345 | Q2Q067 | O43543 | -0.18578  |
| 100346 | Q2Q067 | O95155 | -0.2044   |
| 100347 | Q2Q067 | O94875 | -0.22815  |
| 100348 | Q2Q067 | O95199 | -0.38133  |
| 100349 | Q2Q067 | Q9Y580 | -0.92668  |
| 100350 | Q2Q067 | Q9Y4J8 | -0.22715  |
| 100351 | Q2Q067 | O15259 | -0.22741  |
| 100352 | Q2Q067 | P98196 | -0.77852  |
| 100353 | Q2Q067 | Q9NX65 | -0.085533 |
| 100354 | Q2Q067 | P49821 | -0.3651   |
| 100355 | Q2Q067 | Q6V0I7 | -0.75051  |
| 100356 | Q2Q067 | Q9Y5U5 | -1.6969   |
| 100357 | Q2Q067 | Q30201 | -0.79348  |
| 100358 | Q2Q067 | Q8IY50 | -1.062    |
| 100359 | Q2Q067 | A8MXD5 | -0.55792  |
| 100360 | Q2Q067 | O75771 | -0.21928  |
| 100361 | Q2Q067 | Q6UWT2 | -0.98666  |
| 100362 | Q2Q067 | A6NE21 | -0.43957  |
| 100363 | Q2Q067 | Q6UXT9 | -0.9251   |
| 100364 | Q2Q067 | Q8N446 | -0.74229  |
| 100365 | Q2Q067 | P25067 | -1.2065   |
| 100366 | Q2Q067 | P19113 | -0.53061  |
| 100367 | Q2Q067 | Q8NGU4 | -1.4096   |
| 100368 | Q2Q067 | Q8TD57 | -0.78111  |
| 100369 | Q2Q067 | Q96PZ7 | -1.0345   |
| 100370 | Q2Q067 | P09884 | -0.24949  |
| 100371 | Q2Q067 | D6RJB6 | -0.76972  |
| 100372 | Q2Q067 | P32241 | -0.92307  |
| 100373 | Q2Q067 | Q96H96 | -0.77289  |
| 100374 | Q2Q067 | Q8IZN7 | -0.94775  |
| 100375 | Q2Q067 | Q309B1 | -0.22197  |
| 100376 | Q2Q067 | O15217 | -0.22559  |
| 100377 | Q2Q067 | Q5T0D9 | -0.40804  |
| 100378 | Q2Q067 | Q9NYW7 | -1.2705   |
| 100379 | Q2Q067 | Q16659 | -0.42743  |
| 100380 | Q2Q067 | Q96JK2 | -0.23095  |
| 100381 | Q2Q067 | Q9NS67 | -1.4967   |
| 100382 | Q2Q067 | Q8N6K7 | -0.20677  |
| 100383 | Q2Q067 | Q9Y5X5 | -1.5397   |
| 100384 | Q2Q067 | Q9UGV2 | -0.37219  |
| 100385 | Q2Q067 | Q0P5N6 | -1.4417   |
| 100386 | Q2Q067 | Q8WXR4 | -1.0826   |
| 100387 | Q2Q067 | Q5VTH9 | -0.22742  |
| 100388 | Q2Q067 | Q9BV36 | -0.30786  |
| 100389 | Q2Q067 | O43451 | -0.75366  |
| 100390 | Q2Q067 | P50135 | -0.18145  |
| 100391 | Q2Q067 | Q96S44 | -0.62384  |
| 100392 | Q2Q067 | Q15032 | -0.41613  |
| 100393 | Q2Q067 | O60938 | -0.85844  |
| 100394 | Q2Q067 | Q8N6M8 | -0.22546  |
| 100395 | Q2Q067 | O75325 | -1.3777   |
| 100396 | Q2Q067 | Q6ZMH5 | -1.0772   |

|        |        |        |          |
|--------|--------|--------|----------|
| 100397 | Q2Q067 | O94923 | -0.48151 |
| 100398 | Q2Q067 | O95202 | -0.24614 |
| 100399 | Q2Q067 | O60268 | -0.20901 |
| 100400 | Q2Q067 | Q86VZ5 | -0.4916  |
| 100401 | Q2Q067 | Q7Z3E5 | -0.22733 |
| 100402 | Q2Q067 | P34969 | -1.4427  |
| 100403 | Q2Q067 | P27487 | -0.78236 |
| 100404 | Q2Q067 | Q5QJ74 | -0.22674 |
| 100405 | Q2Q067 | Q8N8A8 | -0.00212 |
| 100406 | Q2Q067 | Q9HAS0 | -0.3731  |
| 100407 | Q2Q067 | Q5TA89 | -0.22702 |
| 100408 | Q2Q067 | Q6ZMB5 | -1.0345  |
| 100409 | Q2Q067 | P01903 | -0.85514 |
| 100410 | Q2Q067 | P15309 | -1.468   |
| 100411 | Q2Q067 | Q8WXH5 | -0.5882  |
| 100412 | Q2Q067 | P11766 | -0.34574 |
| 100413 | Q2Q067 | Q5T2E6 | -1.0345  |
| 100414 | Q2Q067 | P30505 | -1.1453  |
| 100415 | Q2Q067 | P05408 | -0.58501 |
| 100416 | Q2Q067 | Q6UWY2 | -1.5202  |
| 100417 | Q2Q067 | P30531 | -0.70747 |
| 100418 | Q2Q067 | A6NFE3 | -0.62209 |
| 100419 | Q2Q067 | A2VCK2 | -0.59947 |
| 100420 | Q2Q067 | P33121 | -0.83009 |
| 100421 | Q2Q067 | Q5NDL2 | -0.3971  |
| 100422 | Q2Q067 | Q6DRA6 | -0.82527 |
| 100423 | Q2Q067 | Q9NP60 | -1.2478  |
| 100424 | Q2Q067 | P0C7V7 | -1.3491  |
| 100425 | Q2Q067 | P33261 | -0.68208 |
| 100426 | Q2Q067 | Q86XP3 | -0.38235 |
| 100427 | Q2Q067 | Q02790 | -0.30865 |
| 100428 | Q2Q067 | P35052 | -0.92693 |
| 100429 | Q2Q067 | Q6E213 | -0.96086 |
| 100430 | Q2Q067 | P0CF51 | -1.0345  |
| 100431 | Q2Q067 | Q6XZF7 | -0.22741 |
| 100432 | Q2Q067 | Q9UHC6 | -0.99699 |
| 100433 | Q2Q067 | Q9ULH4 | -0.91133 |
| 100434 | Q2Q067 | Q9UPN3 | -0.2277  |
| 100435 | Q2Q067 | Q8N688 | -0.94775 |
| 100436 | Q2Q067 | O75751 | -0.51396 |
| 100437 | Q2Q067 | Q9BX95 | -0.79069 |
| 100438 | Q2Q067 | Q92543 | -0.2043  |
| 100439 | Q2Q067 | Q9H2A2 | -0.67235 |
| 100440 | Q2Q067 | Q6PKX4 | -0.50696 |
| 100441 | Q2Q067 | Q9NR00 | -0.35564 |
| 100442 | Q2Q067 | Q9H7J1 | -0.19546 |
| 100443 | Q2Q067 | P17081 | -0.98927 |
| 100444 | Q2Q067 | Q9HCM3 | -1.0345  |
| 100445 | Q2Q067 | Q8TBF4 | -0.41055 |
| 100446 | Q2Q067 | P14060 | -0.8342  |
| 100447 | Q2Q067 | Q8TEZ7 | -1.4833  |
| 100448 | Q2Q067 | Q9NP61 | -0.13599 |
| 100449 | Q2Q067 | Q8NGP9 | -1.4096  |
| 100450 | Q2Q067 | P41226 | -0.59287 |
| 100451 | Q2Q067 | A6NJY1 | -1.0134  |
| 100452 | Q2Q067 | Q9UBQ6 | -1.3754  |
| 100453 | Q2Q067 | Q99424 | -0.68083 |
| 100454 | Q2Q067 | Q16620 | -0.52896 |
| 100455 | Q2Q067 | Q9NRM2 | -0.1775  |
| 100456 | Q2Q067 | Q8TCD6 | -0.63974 |
| 100457 | Q2Q067 | Q6ZUI0 | -0.20901 |
| 100458 | Q2Q067 | Q99928 | -0.88961 |
| 100459 | Q2Q067 | Q9UJH6 | -0.7261  |
| 100460 | Q2Q067 | P09669 | -0.63006 |
| 100461 | Q2Q067 | P00742 | -0.85632 |
| 100462 | Q2Q067 | Q01118 | -1.1608  |
| 100463 | Q2Q067 | Q9BXR5 | -1.3955  |
| 100464 | Q2Q067 | P08861 | -1.5302  |
| 100465 | Q2Q067 | Q99490 | -0.86914 |
| 100466 | Q2Q067 | Q8NC06 | -0.63086 |
| 100467 | Q2Q067 | Q9UHK6 | -0.3701  |
| 100468 | Q2Q067 | Q9HBV2 | -1.0345  |
| 100469 | Q2Q067 | Q9Y6X1 | -0.57986 |
| 100470 | Q2Q067 | Q96DA0 | -0.97472 |
| 100471 | Q2Q067 | O43301 | -0.91075 |
| 100472 | Q2Q067 | O94964 | -1.0125  |

|        |        |        |           |
|--------|--------|--------|-----------|
| 100473 | Q2Q067 | P63120 | -0.74403  |
| 100474 | Q2Q067 | O95140 | -0.81025  |
| 100475 | Q2Q067 | Q14643 | -0.33396  |
| 100476 | Q2Q067 | Q9H4G8 | -0.43755  |
| 100477 | Q2Q067 | B7Z8K6 | -1.0345   |
| 100478 | Q2Q067 | P01892 | -0.88778  |
| 100479 | Q2Q067 | Q8N8L2 | -0.085533 |
| 100480 | Q2Q067 | P31150 | -0.12505  |
| 100481 | Q2Q067 | P32247 | -1.2791   |
| 100482 | Q2Q067 | Q10469 | -0.85697  |
| 100483 | Q2Q067 | P02649 | -0.27792  |
| 100484 | Q2Q067 | O94766 | -0.69967  |
| 100485 | Q2Q067 | Q7RTN6 | -0.38773  |
| 100486 | Q2Q067 | Q17RW2 | -1.0822   |
| 100487 | Q2Q067 | Q9HCY8 | -0.27652  |
| 100488 | Q2Q067 | Q5GH72 | -1.0345   |
| 100489 | Q2Q067 | Q14802 | -1.2115   |
| 100490 | Q2Q067 | Q8IZU8 | -0.98762  |
| 100491 | Q2Q067 | Q8TAT2 | -0.95127  |
| 100492 | Q2Q067 | P42081 | -0.30203  |
| 100493 | Q2Q067 | Q9UDR5 | -0.54882  |
| 100494 | Q2Q067 | Q6YHK3 | -1.0689   |
| 100495 | Q2Q067 | Q9H2Z4 | -0.33866  |
| 100496 | Q2Q067 | Q16322 | -0.98614  |
| 100497 | Q2Q067 | B4DJY2 | -1.0325   |
| 100498 | Q2Q067 | C9JVI0 | -0.76972  |
| 100499 | Q2Q067 | Q9H221 | -0.82752  |
| 100500 | Q2Q067 | P51812 | -0.2244   |
| 100501 | Q2Q067 | P04004 | -0.90038  |
| 100502 | Q2Q067 | Q8IYW4 | -0.031003 |
| 100503 | Q2Q067 | Q8IUQ4 | -0.22494  |
| 100504 | Q2Q067 | Q10471 | -1.016    |
| 100505 | Q2Q067 | Q00688 | -0.29207  |
| 100506 | Q2Q067 | Q9ULV1 | -0.5857   |
| 100507 | Q2Q067 | Q5FWF7 | -0.22484  |
| 100508 | Q2Q067 | P56730 | -1.3895   |
| 100509 | Q2Q067 | Q8TCE9 | -0.16847  |
| 100510 | Q2Q067 | P01834 | -1.1115   |
| 100511 | Q2Q067 | Q9GZV9 | -0.93292  |
| 100512 | Q2Q067 | Q9UQG0 | -0.36034  |
| 100513 | Q2Q067 | Q8N653 | -0.22729  |
| 100514 | Q2Q067 | Q8NGX6 | -1.4096   |
| 100515 | Q2Q067 | O75881 | -0.66325  |
| 100516 | Q2Q067 | A6NKP2 | -0.82798  |
| 100517 | Q2Q067 | O43933 | -0.24274  |
| 100518 | Q2Q067 | Q8WV19 | -0.73764  |
| 100519 | Q2Q067 | Q9NUG4 | -0.24416  |
| 100520 | Q2Q067 | Q9UJS0 | -0.50608  |
| 100521 | Q2Q067 | Q9UGF6 | -1.4096   |
| 100522 | Q2Q067 | Q8IY51 | -0.16018  |
| 100523 | Q2Q067 | P12544 | -0.37336  |
| 100524 | Q2Q067 | Q9UFH2 | -0.61661  |
| 100525 | Q2Q067 | Q96DW6 | -0.82281  |
| 100526 | Q2Q067 | P16070 | -0.32438  |
| 100527 | Q2Q067 | P00568 | -0.6533   |
| 100528 | Q2Q067 | Q8NFR3 | -0.47552  |
| 100529 | Q2Q067 | P61026 | -0.75177  |
| 100530 | Q2Q067 | Q8TDY8 | -1.1634   |
| 100531 | Q2Q067 | P15056 | -0.41678  |
| 100532 | Q2Q067 | P23458 | -0.6757   |
| 100533 | Q2Q067 | Q9NRX1 | -0.10773  |
| 100534 | Q2Q067 | Q96R54 | -1.4096   |
| 100535 | Q2Q067 | Q9BWV7 | -0.42102  |
| 100536 | Q2Q067 | A8MZ97 | -1.0345   |
| 100537 | Q2Q067 | P20916 | -1.0386   |
| 100538 | Q2Q067 | P10109 | -0.26785  |
| 100539 | Q2Q067 | P35348 | -0.68252  |
| 100540 | Q2Q067 | O14649 | -1.1707   |
| 100541 | Q2Q067 | Q03169 | -0.75006  |
| 100542 | Q2Q067 | Q9NW82 | -0.22741  |
| 100543 | Q2Q067 | Q9UIG5 | -0.164    |
| 100544 | Q2Q067 | Q96C55 | -0.23772  |
| 100545 | Q2Q067 | Q8N6C8 | -1.2156   |
| 100546 | Q2Q067 | A0FGR9 | -1.1634   |
| 100547 | Q2Q067 | P00740 | -1.2747   |
| 100548 | Q2Q067 | Q9Y478 | -0.186    |



|        |        |        |          |
|--------|--------|--------|----------|
| 100549 | Q2Q067 | Q9Y5L5 | -0.69286 |
| 100550 | Q2Q067 | Q16676 | -0.33602 |
| 100551 | Q2Q067 | P04436 | -0.58826 |
| 100552 | Q2Q067 | Q9UNG2 | -0.99886 |
| 100553 | Q2Q067 | Q96JJ7 | -0.97579 |
| 100554 | Q2Q067 | Q9UGC6 | -0.49084 |
| 100555 | Q2Q067 | Q9NU22 | -0.49443 |
| 100556 | Q2Q067 | Q9P2E9 | -0.74772 |
| 100557 | Q2Q067 | Q71RC2 | -0.80897 |
| 100558 | Q2Q067 | Q08289 | -0.41654 |
| 100559 | Q2Q067 | Q5BJH7 | -1.0345  |
| 100560 | Q2Q067 | Q9BXM7 | -0.75296 |
| 100561 | Q2Q067 | Q6DN90 | -0.21883 |
| 100562 | Q2Q067 | Q75380 | -0.19906 |
| 100563 | Q2Q067 | Q5FYA8 | -0.81882 |
| 100564 | Q2Q067 | Q8N8V4 | -0.51982 |
| 100565 | Q2Q067 | Q96KG7 | -1.0053  |
| 100566 | Q2Q067 | Q9UQV4 | -1.1271  |
| 100567 | Q2Q067 | Q9UDY6 | -0.47843 |
| 100568 | Q2Q067 | P57087 | -0.53513 |
| 100569 | Q2Q067 | Q14D33 | -1.0345  |
| 100570 | Q2Q067 | Q96PY6 | -0.22741 |
| 100571 | Q2Q067 | Q15743 | -1.675   |
| 100572 | Q2Q067 | Q14561 | -0.18894 |
| 100573 | Q2Q067 | Q9Y5H1 | -1.3679  |
| 100574 | Q2Q067 | Q8WZ94 | -1.4096  |
| 100575 | Q2Q067 | Q8IUB3 | -0.97312 |
| 100576 | Q2Q067 | Q9BYJ4 | -0.51633 |
| 100577 | Q2Q067 | Q5TA82 | -0.37794 |
| 100578 | Q2Q067 | Q96G61 | -0.39129 |
| 100579 | Q2Q067 | O75072 | -0.43247 |
| 100580 | Q2Q067 | P30838 | -0.25281 |
| 100581 | Q2Q067 | Q7LGC8 | -0.60335 |
| 100582 | Q2Q067 | Q8IW75 | -0.72415 |
| 100583 | Q2Q067 | Q9UQM7 | -0.49719 |
| 100584 | Q2Q067 | P52952 | -0.27644 |
| 100585 | Q2Q067 | Q9UM54 | -0.07614 |
| 100586 | Q2Q067 | O00429 | -0.64963 |
| 100587 | Q2Q067 | Q6UXK2 | -1.1886  |
| 100588 | Q2Q067 | Q5T089 | -0.13634 |
| 100589 | Q2Q067 | Q5SW24 | -0.11689 |
| 100590 | Q2Q067 | P60852 | -1.5267  |
| 100591 | Q2Q067 | Q5W064 | -0.43391 |
| 100592 | Q2Q067 | Q8TBE9 | -0.24229 |
| 100593 | Q2Q067 | P53701 | -0.46135 |
| 100594 | Q2Q067 | P05538 | -0.80647 |
| 100595 | Q2Q067 | Q9HAT0 | -0.56189 |
| 100596 | Q2Q067 | Q9BX10 | -1.0643  |
| 100597 | Q2Q067 | O00409 | -0.31352 |
| 100598 | Q2Q067 | Q96T66 | -0.35271 |
| 100599 | Q2Q067 | A6NHT5 | -0.22858 |
| 100600 | Q2Q067 | P01148 | -1.0798  |
| 100601 | Q2Q067 | Q9H649 | -0.38719 |
| 100602 | Q2Q067 | Q05193 | -0.42684 |
| 100603 | Q2Q067 | O95072 | -0.31129 |
| 100604 | Q2Q067 | P34130 | -0.82969 |
| 100605 | Q2Q067 | P25686 | -0.22876 |
| 100606 | Q2Q067 | Q7Z5L3 | -1.0984  |
| 100607 | Q2Q067 | O94898 | -0.95288 |
| 100608 | Q2Q067 | Q49AQ9 | -0.33378 |
| 100609 | Q2Q067 | Q9BU79 | -1.0345  |
| 100610 | Q2Q067 | Q9P291 | -1.0345  |
| 100611 | Q2Q067 | P15018 | -0.38921 |
| 100612 | Q2Q067 | P04181 | -0.16091 |
| 100613 | Q2Q067 | Q8NBS9 | -0.26998 |
| 100614 | Q2Q067 | Q6Y1H2 | -0.59689 |
| 100615 | Q2Q067 | O95863 | -0.22416 |
| 100616 | Q2Q067 | Q96C03 | -0.20216 |
| 100617 | Q2Q067 | Q8TE49 | -0.53174 |
| 100618 | Q2Q067 | Q9UHY1 | -0.22741 |
| 100619 | Q2Q067 | P30499 | -1.2066  |
| 100620 | Q2Q067 | P49447 | -0.99842 |
| 100621 | Q2Q067 | Q9HBI6 | -1.1977  |
| 100622 | Q2Q067 | Q9UKV5 | -0.30546 |
| 100623 | Q2Q067 | Q9GZZ7 | -1.1782  |
| 100624 | Q2Q067 | A8K855 | -0.45603 |

|        |        |        |           |
|--------|--------|--------|-----------|
| 100625 | Q2Q067 | Q9HBR0 | -1.1869   |
| 100626 | Q2Q067 | Q6YN16 | -0.86085  |
| 100627 | Q2Q067 | A6NC78 | -0.40653  |
| 100628 | Q2Q067 | Q96QK8 | -1.0345   |
| 100629 | Q2Q067 | Q6WRI0 | -1.1495   |
| 100630 | Q2Q067 | Q5T1J6 | -0.089245 |
| 100631 | Q2Q067 | Q969I6 | -1.2482   |
| 100632 | Q2Q067 | P16157 | -0.22744  |
| 100633 | Q2Q067 | Q9UKJ8 | -1.3963   |
| 100634 | Q2Q067 | Q9H6D3 | -1.0345   |
| 100635 | Q2Q067 | Q00169 | -0.78148  |
| 100636 | Q2Q067 | Q15646 | -0.22224  |
| 100637 | Q2Q067 | Q58FG1 | -0.66086  |
| 100638 | Q2Q067 | Q8NEM8 | -0.50501  |
| 100639 | Q2Q067 | O96024 | -0.93117  |
| 100640 | Q2Q067 | Q8IV61 | -0.74239  |
| 100641 | Q2Q067 | O76087 | -0.24416  |
| 100642 | Q2Q067 | Q07820 | -0.22739  |
| 100643 | Q2Q067 | Q8NDA2 | -1.1227   |
| 100644 | Q2Q067 | O14966 | -1.2439   |
| 100645 | Q2Q067 | Q00266 | -0.67489  |
| 100646 | Q2Q067 | Q2L4Q9 | -1.5202   |
| 100647 | Q2Q067 | P62993 | -0.22741  |
| 100648 | Q2Q067 | Q5SSQ6 | -0.14846  |
| 100649 | Q2Q067 | P04434 | -1.1115   |
| 100650 | Q2Q067 | P42127 | -0.98586  |
| 100651 | Q2Q067 | Q5JW98 | -1.0345   |
| 100652 | Q2Q067 | Q8N766 | -1.0097   |
| 100653 | Q2Q067 | P52333 | -0.41556  |
| 100654 | Q2Q067 | Q00532 | -0.77372  |
| 100655 | Q2Q067 | Q8NCG5 | -0.77476  |
| 100656 | Q2Q067 | O14908 | -0.22738  |
| 100657 | Q2Q067 | Q9HA82 | -0.24263  |
| 100658 | Q2Q067 | Q16609 | -0.77379  |
| 100659 | Q2Q067 | Q15760 | -1.6361   |
| 100660 | Q2Q067 | Q8NH95 | -1.4096   |
| 100661 | Q2Q067 | P0C7W6 | -0.15831  |
| 100662 | Q2Q067 | Q5TCS8 | -1.0499   |
| 100663 | Q2Q067 | Q86X10 | -0.86026  |
| 100664 | Q2Q067 | O95772 | -0.99011  |
| 100665 | Q2Q067 | Q96L58 | -0.65924  |
| 100666 | Q2Q067 | Q9GZM5 | -0.89367  |
| 100667 | Q2Q067 | O14735 | -0.75001  |
| 100668 | Q2Q067 | Q8TDD5 | -1.0397   |
| 100669 | Q2Q067 | Q9UBE0 | -0.22401  |
| 100670 | Q2Q067 | O75063 | -1.3736   |
| 100671 | Q2Q067 | Q9NVI7 | -1.2559   |
| 100672 | Q2Q067 | P00387 | -0.34527  |
| 100673 | Q2Q067 | Q8TAE7 | -0.53941  |
| 100674 | Q2Q067 | A8MWS1 | -0.98666  |
| 100675 | Q2Q067 | Q9BT22 | -0.96936  |
| 100676 | Q2Q067 | Q9UJA2 | -0.6866   |
| 100677 | Q2Q067 | Q8NH01 | -1.4096   |
| 100678 | Q2Q067 | Q8NCM2 | -1.0413   |
| 100679 | Q2Q067 | A2RU67 | -1.0345   |
| 100680 | Q2Q067 | Q9Y666 | -1.2532   |
| 100681 | Q2Q067 | Q6P2N6 | -1.1634   |
| 100682 | Q2Q067 | Q9UGM3 | -0.43319  |
| 100683 | Q2Q067 | P43403 | -0.52958  |
| 100684 | Q2Q067 | Q92932 | -1.0926   |
| 100685 | Q2Q067 | Q9H819 | -1.0544   |
| 100686 | Q2Q067 | Q9BZF3 | -0.32336  |
| 100687 | Q2Q067 | Q9H1U9 | -0.86765  |
| 100688 | Q2Q067 | P31751 | -0.17089  |
| 100689 | Q2Q067 | Q9BQS7 | -1.3081   |
| 100690 | Q2Q067 | P0C629 | -1.4096   |
| 100691 | Q2Q067 | Q13164 | -0.22741  |
| 100692 | Q2Q067 | O43312 | -0.31426  |
| 100693 | Q2Q067 | Q9H8M1 | -0.33494  |
| 100694 | Q2Q067 | Q8IXF9 | -1.0472   |
| 100695 | Q2Q067 | Q96P53 | -0.43755  |
| 100696 | Q2Q067 | Q9Y289 | -0.95705  |
| 100697 | Q2Q067 | Q96AC6 | -0.71913  |
| 100698 | Q2Q067 | P10145 | -0.59524  |
| 100699 | Q2Q067 | Q5SVS4 | -0.70917  |
| 100700 | Q2Q067 | C9J202 | -0.46685  |

|        |        |        |           |
|--------|--------|--------|-----------|
| 100701 | Q2Q067 | P10620 | -0.18022  |
| 100702 | Q2Q067 | Q5DT21 | -0.29088  |
| 100703 | Q2Q067 | P43365 | -0.24416  |
| 100704 | Q2Q067 | Q9Y2I6 | -0.18228  |
| 100705 | Q2Q067 | Q96JY0 | -0.21031  |
| 100706 | Q2Q067 | Q01968 | -0.36129  |
| 100707 | Q2Q067 | Q86X45 | -0.37014  |
| 100708 | Q2Q067 | P13805 | -0.21722  |
| 100709 | Q2Q067 | Q6PIV7 | -0.86765  |
| 100710 | Q2Q067 | Q86YR6 | -0.65765  |
| 100711 | Q2Q067 | P35453 | -0.22735  |
| 100712 | Q2Q067 | Q6UWY0 | -0.83456  |
| 100713 | Q2Q067 | Q8IVL1 | -0.69911  |
| 100714 | Q2Q067 | P28360 | -0.18977  |
| 100715 | Q2Q067 | Q9BX73 | -1.0345   |
| 100716 | Q2Q067 | Q8WV93 | -0.73781  |
| 100717 | Q2Q067 | Q9P055 | -0.91163  |
| 100718 | Q2Q067 | Q92772 | -0.70866  |
| 100719 | Q2Q067 | P24723 | -0.92711  |
| 100720 | Q2Q067 | Q9UHQ4 | -0.67648  |
| 100721 | Q2Q067 | Q43572 | -0.25706  |
| 100722 | Q2Q067 | Q96A23 | -0.22714  |
| 100723 | Q2Q067 | Q8NE31 | -0.031872 |
| 100724 | Q2Q067 | Q6XPS3 | -1.0636   |
| 100725 | Q2Q067 | Q6NX49 | -0.085533 |
| 100726 | Q2Q067 | O75147 | -0.32264  |
| 100727 | Q2Q067 | Q9BUZ4 | -0.22736  |
| 100728 | Q2Q067 | Q5VST6 | -0.95044  |
| 100729 | Q2Q067 | Q9HA64 | -0.67195  |
| 100730 | Q2Q067 | P55273 | -0.2274   |
| 100731 | Q2Q067 | P04196 | -0.34578  |
| 100732 | Q2Q067 | Q8N5I2 | -0.23898  |
| 100733 | Q2Q067 | P03956 | -1.3042   |
| 100734 | Q2Q067 | P07332 | -0.78054  |
| 100735 | Q2Q067 | P86790 | -0.69118  |
| 100736 | Q2Q067 | O94972 | -0.22741  |
| 100737 | Q2Q067 | Q8NA56 | -0.065054 |
| 100738 | Q2Q067 | Q96K21 | -0.48451  |
| 100739 | Q2Q067 | Q9BYG8 | -0.044815 |
| 100740 | Q2Q067 | P0CG39 | -0.4135   |
| 100741 | Q2Q067 | P16188 | -1.0994   |
| 100742 | Q2Q067 | P04114 | -0.34905  |
| 100743 | Q2Q067 | P10588 | -0.23623  |
| 100744 | Q2Q067 | Q12934 | -0.39268  |
| 100745 | Q2Q067 | Q9UHG3 | -0.6458   |
| 100746 | Q2Q067 | P04206 | -1.1115   |
| 100747 | Q2Q067 | Q7L9B9 | -0.31399  |
| 100748 | Q2Q067 | Q16799 | -0.64268  |
| 100749 | Q2Q067 | O75460 | -0.52053  |
| 100750 | Q2Q067 | Q13043 | -0.30256  |
| 100751 | Q2Q067 | Q8NFZ3 | -0.57373  |
| 100752 | Q2Q067 | Q9NPA0 | -0.7451   |
| 100753 | Q2Q067 | Q6PHR2 | -0.6748   |
| 100754 | Q2Q067 | Q9GZN6 | -1.1659   |
| 100755 | Q2Q067 | Q9NW15 | -1.2095   |
| 100756 | Q2Q067 | Q9H1M4 | -0.84743  |
| 100757 | Q2Q067 | Q14201 | -0.28847  |
| 100758 | Q2Q067 | Q8N7S2 | -0.57939  |
| 100759 | Q2Q067 | O75223 | -0.17874  |
| 100760 | Q2Q067 | Q96JH7 | -0.50946  |
| 100761 | Q2Q067 | Q15131 | -0.63625  |
| 100762 | Q2Q067 | Q99217 | -0.72388  |
| 100763 | Q2Q067 | P47869 | -0.83943  |
| 100764 | Q2Q067 | P50416 | -0.47091  |
| 100765 | Q2Q067 | Q400G9 | -0.92273  |
| 100766 | Q2Q067 | Q9NXH8 | -1.5411   |
| 100767 | Q2Q067 | O60519 | -0.15919  |
| 100768 | Q2Q067 | P51575 | -0.5801   |
| 100769 | Q2Q067 | Q15041 | -0.98881  |
| 100770 | Q2Q067 | Q8NH67 | -1.4096   |
| 100771 | Q2Q067 | Q8N7C3 | -0.46244  |
| 100772 | Q2Q067 | Q16552 | -0.61661  |
| 100773 | Q2Q067 | P0C7U9 | -1.0345   |
| 100774 | Q2Q067 | Q9Y5Y2 | -0.16862  |
| 100775 | Q2Q067 | O75445 | -0.93356  |
| 100776 | Q2Q067 | P18206 | -0.21167  |

|        |        |        |            |
|--------|--------|--------|------------|
| 100777 | Q2Q067 | A6NM10 | -1.0472    |
| 100778 | Q2Q067 | Q96BZ4 | -0.89867   |
| 100779 | Q2Q067 | Q96RT6 | -0.90414   |
| 100780 | Q2Q067 | Q9Y2F5 | -0.11321   |
| 100781 | Q2Q067 | Q12766 | -0.22736   |
| 100782 | Q2Q067 | Q6H3X3 | -0.5386    |
| 100783 | Q2Q067 | P15498 | -0.22741   |
| 100784 | Q2Q067 | P0C645 | -1.4096    |
| 100785 | Q2Q067 | P30488 | -1.1453    |
| 100786 | Q2Q067 | Q6NUN0 | -1.0842    |
| 100787 | Q2Q067 | O15514 | -0.16412   |
| 100788 | Q2Q067 | Q9Y2B0 | -0.19785   |
| 100789 | Q2Q067 | P0CL85 | -0.054655  |
| 100790 | Q2Q067 | P55010 | -0.37578   |
| 100791 | Q2Q067 | Q0P6H9 | -1.0345    |
| 100792 | Q2Q067 | Q9ULB5 | -1.2844    |
| 100793 | Q2Q067 | O00192 | -0.2289    |
| 100794 | Q2Q067 | P02778 | -0.88502   |
| 100795 | Q2Q067 | Q9H2D6 | -0.21943   |
| 100796 | Q2Q067 | Q693B1 | -0.13755   |
| 100797 | Q2Q067 | Q9BQS8 | -0.4049    |
| 100798 | Q2Q067 | P00488 | -0.57523   |
| 100799 | Q2Q067 | P05164 | -0.22493   |
| 100800 | Q2Q067 | P09758 | -0.96518   |
| 100801 | Q2Q067 | O15144 | -0.16559   |
| 100802 | Q2Q067 | P58062 | -0.29478   |
| 100803 | Q2Q067 | O75354 | -1.2376    |
| 100804 | Q2Q067 | P46734 | -0.22776   |
| 100805 | Q2Q067 | O95248 | -0.97488   |
| 100806 | Q2Q067 | Q12974 | -0.83191   |
| 100807 | Q2Q067 | Q495B1 | -0.57228   |
| 100808 | Q2Q067 | Q6ZWT7 | -0.86551   |
| 100809 | Q2Q067 | Q68CL5 | -0.1753    |
| 100810 | Q2Q067 | Q86X40 | -0.22806   |
| 100811 | Q2Q067 | Q8WVB3 | -0.21359   |
| 100812 | Q2Q067 | Q99735 | -0.79609   |
| 100813 | Q2Q067 | Q9Y4B5 | -0.20044   |
| 100814 | Q2Q067 | Q5TYW8 | -0.19475   |
| 100815 | Q2Q067 | O75438 | -0.5457    |
| 100816 | Q2Q067 | A9YTO3 | -0.3997    |
| 100817 | Q2Q067 | Q9H628 | -1.4198    |
| 100818 | Q2Q067 | Q5H9B9 | -0.0075954 |
| 100819 | Q2Q067 | Q8IZ83 | -0.65271   |
| 100820 | Q2Q067 | Q9BZ76 | -2.0113    |
| 100821 | Q2Q067 | Q8TC99 | -0.23386   |
| 100822 | Q2Q067 | Q99726 | -0.91588   |
| 100823 | Q2Q067 | P08319 | -0.30654   |
| 100824 | Q2Q067 | P20138 | -1.5171    |
| 100825 | Q2Q067 | Q5H8A3 | -0.88706   |
| 100826 | Q2Q067 | Q9NSV4 | -0.22313   |
| 100827 | Q2Q067 | Q13939 | -0.62243   |
| 100828 | Q2Q067 | Q6UWY5 | -0.98666   |
| 100829 | Q2Q067 | O94905 | -0.25174   |
| 100830 | Q2Q067 | P55884 | -0.22081   |
| 100831 | Q2Q067 | Q8NBM4 | -1.0345    |
| 100832 | Q2Q067 | Q01959 | -0.41414   |
| 100833 | Q2Q067 | Q86UV6 | -0.73178   |
| 100834 | Q2Q067 | Q5VT52 | -0.38109   |
| 100835 | Q2Q067 | Q9P267 | -0.19402   |
| 100836 | Q2Q067 | P0C851 | -1.0345    |
| 100837 | Q2Q067 | P51572 | -0.2585    |
| 100838 | Q2Q067 | Q7Z6M2 | -0.40021   |
| 100839 | Q2Q067 | Q9Y2X7 | -0.28825   |
| 100840 | Q2Q067 | Q16762 | -0.25161   |
| 100841 | Q2Q067 | Q9UQ07 | -1.0754    |
| 100842 | Q2Q067 | Q7Z449 | -1.1657    |
| 100843 | Q2Q067 | Q03519 | -0.39664   |
| 100844 | Q2Q067 | P11137 | -0.13154   |
| 100845 | Q2Q067 | Q6ZWH5 | -1.4412    |
| 100846 | Q2Q067 | Q8NH61 | -1.4096    |
| 100847 | Q2Q067 | Q8TC20 | -0.089153  |
| 100848 | Q2Q067 | Q99598 | -0.17381   |
| 100849 | Q2Q067 | Q9UKU6 | -1.571     |
| 100850 | Q2Q067 | Q86UU9 | -0.98487   |
| 100851 | Q2Q067 | P26715 | -1.3324    |
| 100852 | Q2Q067 | Q96GL9 | -1.0345    |

|        |        |        |          |
|--------|--------|--------|----------|
| 100853 | Q2Q067 | P60321 | -0.51917 |
| 100854 | Q2Q067 | Q8N0W3 | -1.0788  |
| 100855 | Q2Q067 | P01286 | -0.56666 |
| 100856 | Q2Q067 | Q96G27 | -0.23565 |
| 100857 | Q2Q067 | O00468 | -0.54528 |
| 100858 | Q2Q067 | P15813 | -0.73258 |
| 100859 | Q2Q067 | O75554 | -0.17452 |
| 100860 | Q2Q067 | A6NIV6 | -0.25336 |
| 100861 | Q2Q067 | P07951 | -0.29302 |
| 100862 | Q2Q067 | Q92747 | -0.25526 |
| 100863 | Q2Q067 | Q52LD8 | -0.65765 |
| 100864 | Q2Q067 | Q12918 | -1.2008  |
| 100865 | Q2Q067 | Q9UJ68 | -0.03672 |
| 100866 | Q2Q067 | P51681 | -0.57225 |
| 100867 | Q2Q067 | Q9BW19 | -0.26832 |
| 100868 | Q2Q067 | Q13797 | -0.96231 |
| 100869 | Q2Q067 | O75379 | -0.76298 |
| 100870 | Q2Q067 | Q6UWW0 | -1.0219  |
| 100871 | Q2Q067 | Q8NGK0 | -1.4096  |
| 100872 | Q2Q067 | O15031 | -1.2154  |
| 100873 | Q2Q067 | P35475 | -0.47643 |
| 100874 | Q2Q067 | Q8NFT8 | -0.7498  |
| 100875 | Q2Q067 | Q96C24 | -0.23064 |
| 100876 | Q2Q067 | Q9NU39 | -0.33602 |
| 100877 | Q2Q067 | Q6ZMJ2 | -1.2276  |
| 100878 | Q2Q067 | Q8NGB6 | -1.4096  |
| 100879 | Q2Q067 | P30479 | -1.1453  |
| 100880 | Q2Q067 | P51793 | -1.3128  |
| 100881 | Q2Q067 | P98160 | -1.0554  |
| 100882 | Q2Q067 | Q8N8S7 | -0.22361 |
| 100883 | Q2Q067 | Q96IK0 | -1.1495  |
| 100884 | Q2Q067 | Q99666 | -0.22391 |
| 100885 | Q2Q067 | Q9BY12 | -0.40465 |
| 100886 | Q2Q067 | P09341 | -1.1853  |
| 100887 | Q2Q067 | Q16667 | -0.21423 |
| 100888 | Q2Q067 | Q8TDF6 | -0.56395 |
| 100889 | Q2Q067 | P04798 | -0.33526 |
| 100890 | Q2Q067 | Q8NGT7 | -1.4096  |
| 100891 | Q2Q067 | Q96CN4 | -0.87857 |
| 100892 | Q2Q067 | Q30KQ1 | -0.94775 |
| 100893 | Q2Q067 | Q96MU5 | -0.98666 |
| 100894 | Q2Q067 | Q86W25 | -0.91075 |
| 100895 | Q2Q067 | Q9Y2R4 | -0.53895 |
| 100896 | Q2Q067 | O15391 | -0.22489 |
| 100897 | Q2Q067 | Q8NGS1 | -1.4096  |
| 100898 | Q2Q067 | O00110 | -0.18702 |
| 100899 | Q2Q067 | Q8N7C4 | -1.0345  |
| 100900 | Q2Q067 | Q8NHS4 | -0.14915 |
| 100901 | Q2Q067 | P55073 | -0.88624 |
| 100902 | Q2Q067 | P57789 | -1.4056  |
| 100903 | Q2Q067 | Q9Y575 | -0.61006 |
| 100904 | Q2Q067 | Q96JB1 | -0.68701 |
| 100905 | Q2Q067 | P61599 | -0.19963 |
| 100906 | Q2Q067 | Q9UQQ2 | -0.4017  |
| 100907 | Q2Q067 | Q9BWQ8 | -0.68965 |
| 100908 | Q2Q067 | E0CX11 | -0.98666 |
| 100909 | Q2Q067 | Q8TDX9 | -0.82969 |
| 100910 | Q2Q067 | Q6PF18 | -0.05097 |
| 100911 | Q2Q067 | Q8IVM8 | -1.049   |
| 100912 | Q2Q067 | P40818 | -0.28726 |
| 100913 | Q2Q067 | Q8TE59 | -1.4569  |
| 100914 | Q2Q067 | Q9Y2T1 | -0.82413 |
| 100915 | Q2Q067 | P63125 | -0.74403 |
| 100916 | Q2Q067 | Q6IAA8 | -0.42292 |
| 100917 | Q2Q067 | O95988 | -0.22315 |
| 100918 | Q2Q067 | Q16280 | -1.4362  |
| 100919 | Q2Q067 | P08842 | -0.67418 |
| 100920 | Q2Q067 | Q8IXS2 | -0.0121  |
| 100921 | Q2Q067 | A6NGJ6 | -0.73178 |
| 100922 | Q2Q067 | Q99797 | -0.5664  |
| 100923 | Q2Q067 | Q86X76 | -0.18957 |
| 100924 | Q2Q067 | P0CG40 | -0.21041 |
| 100925 | Q2Q067 | P11021 | -0.22391 |
| 100926 | Q2Q067 | P20151 | -1.4803  |
| 100927 | Q2Q067 | Q96FE5 | -0.88681 |
| 100928 | Q2Q067 | Q96RT1 | -0.23261 |

|        |        |        |            |
|--------|--------|--------|------------|
| 100929 | Q2Q067 | Q9UNQ0 | -0.62553   |
| 100930 | Q2Q067 | A8MYZ6 | -0.30831   |
| 100931 | Q2Q067 | P62684 | -0.47805   |
| 100932 | Q2Q067 | P35218 | -0.18854   |
| 100933 | Q2Q067 | Q8TEY7 | -0.26706   |
| 100934 | Q2Q067 | Q9UNH7 | -0.18844   |
| 100935 | Q2Q067 | Q9NZQ0 | -1.0611    |
| 100936 | Q2Q067 | Q9H9V4 | -0.9564    |
| 100937 | Q2Q067 | P07202 | -1.0495    |
| 100938 | Q2Q067 | P51654 | -0.6993    |
| 100939 | Q2Q067 | Q9C0D3 | -0.21036   |
| 100940 | Q2Q067 | P19320 | -0.76957   |
| 100941 | Q2Q067 | Q0D2K5 | -0.23041   |
| 100942 | Q2Q067 | Q05215 | -0.21927   |
| 100943 | Q2Q067 | Q9UIJ5 | -1.0753    |
| 100944 | Q2Q067 | Q6UXV4 | -0.77606   |
| 100945 | Q2Q067 | O95631 | -0.22741   |
| 100946 | Q2Q067 | P25054 | -0.22705   |
| 100947 | Q2Q067 | O75044 | -0.22863   |
| 100948 | Q2Q067 | O75718 | -1.0687    |
| 100949 | Q2Q067 | Q9Y265 | -0.31456   |
| 100950 | Q2Q067 | Q9NWH9 | -0.22827   |
| 100951 | Q2Q067 | P49286 | -1.5096    |
| 100952 | Q2Q067 | Q5U5R9 | -0.41408   |
| 100953 | Q2Q067 | Q2M3G0 | -1.4228    |
| 100954 | Q2Q067 | Q7Z469 | -0.86765   |
| 100955 | Q2Q067 | Q6ZV89 | -0.22057   |
| 100956 | Q2Q067 | Q8NCC3 | -0.94165   |
| 100957 | Q2Q067 | P35346 | -1.2151    |
| 100958 | Q2Q067 | P53673 | -0.40889   |
| 100959 | Q2Q067 | P01225 | -0.19755   |
| 100960 | Q2Q067 | Q9NP81 | -0.24508   |
| 100961 | Q2Q067 | P49407 | -0.28577   |
| 100962 | Q2Q067 | P02689 | -0.46713   |
| 100963 | Q2Q067 | O75879 | -0.5818    |
| 100964 | Q2Q067 | Q8NCB2 | -0.78506   |
| 100965 | Q2Q067 | Q14990 | -0.64487   |
| 100966 | Q2Q067 | Q9BWH2 | -0.21265   |
| 100967 | Q2Q067 | Q04656 | -0.22745   |
| 100968 | Q2Q067 | A6NNH2 | -0.43957   |
| 100969 | Q2Q067 | P30492 | -1.1453    |
| 100970 | Q2Q067 | Q9H2Y9 | -1.163     |
| 100971 | Q2Q067 | Q92854 | -0.5948    |
| 100972 | Q2Q067 | Q8NGZ9 | -1.4096    |
| 100973 | Q2Q067 | Q8N8N7 | -0.79742   |
| 100974 | Q2Q067 | Q12946 | -0.32944   |
| 100975 | Q2Q067 | P08913 | -0.27732   |
| 100976 | Q2Q067 | Q8WXH2 | -0.93308   |
| 100977 | Q2Q067 | Q9NX77 | -0.86704   |
| 100978 | Q2Q067 | Q9P296 | -0.83068   |
| 100979 | Q2Q067 | P25090 | -1.6654    |
| 100980 | Q2Q067 | P31930 | -0.53414   |
| 100981 | Q2Q067 | Q9NRR1 | -0.99817   |
| 100982 | Q2Q067 | Q13505 | -0.64419   |
| 100983 | Q2Q067 | Q96P15 | -0.12664   |
| 100984 | Q2Q067 | A6NFN3 | -0.9733    |
| 100985 | Q2Q067 | Q03135 | -0.22672   |
| 100986 | Q2Q067 | Q9H496 | -0.37256   |
| 100987 | Q2Q067 | Q8TDU5 | -1.4199    |
| 100988 | Q2Q067 | Q504Y3 | -0.48451   |
| 100989 | Q2Q067 | O00244 | -0.4061    |
| 100990 | Q2Q067 | P42694 | -0.62958   |
| 100991 | Q2Q067 | A6NK44 | -0.075564  |
| 100992 | Q2Q067 | Q9UPZ6 | -1.6912    |
| 100993 | Q2Q067 | Q9UKM9 | -0.46143   |
| 100994 | Q2Q067 | A6NFK2 | -0.0061184 |
| 100995 | Q2Q067 | Q8NDG6 | -0.63428   |
| 100996 | Q2Q067 | Q7Z6Z6 | -0.51309   |
| 100997 | Q2Q067 | B4DS77 | -1.0633    |
| 100998 | Q2Q067 | P18545 | -0.33195   |
| 100999 | Q2Q067 | Q6ZVS7 | -0.17926   |
| 101000 | Q2Q067 | P20648 | -1.2362    |
| 101001 | Q2Q067 | P13473 | -0.87801   |
| 101002 | Q2Q067 | Q5VUB5 | -1.0345    |
| 101003 | Q2Q067 | P30626 | -0.34789   |
| 101004 | Q2Q067 | Q9BZ23 | -0.45773   |

|        |        |        |           |
|--------|--------|--------|-----------|
| 101005 | Q2Q067 | Q9UHD2 | -0.22741  |
| 101006 | Q2Q067 | Q8TEW0 | -0.2262   |
| 101007 | Q2Q067 | O43837 | -0.11315  |
| 101008 | Q2Q067 | Q9NY35 | -1.054    |
| 101009 | Q2Q067 | O15090 | -0.22337  |
| 101010 | Q2Q067 | P0DKX4 | -0.20851  |
| 101011 | Q2Q067 | Q7Z5L4 | -0.78608  |
| 101012 | Q2Q067 | Q9H5V7 | -0.22858  |
| 101013 | Q2Q067 | Q17RG1 | -0.16072  |
| 101014 | Q2Q067 | P37840 | -0.21561  |
| 101015 | Q2Q067 | O60397 | -0.36866  |
| 101016 | Q2Q067 | P06681 | -1.5011   |
| 101017 | Q2Q067 | Q8N7C0 | -1.3079   |
| 101018 | Q2Q067 | Q8N878 | -0.3932   |
| 101019 | Q2Q067 | Q8N752 | -1.1546   |
| 101020 | Q2Q067 | Q8WY64 | -0.2361   |
| 101021 | Q2Q067 | Q8N414 | -1.0345   |
| 101022 | Q2Q067 | Q86UR1 | -0.22738  |
| 101023 | Q2Q067 | P48735 | -0.15567  |
| 101024 | Q2Q067 | Q9UPX0 | -1.1634   |
| 101025 | Q2Q067 | Q96AX1 | -0.20516  |
| 101026 | Q2Q067 | Q6PIV2 | -0.38017  |
| 101027 | Q2Q067 | P07686 | -0.34384  |
| 101028 | Q2Q067 | Q8TCG5 | -0.92613  |
| 101029 | Q2Q067 | P15882 | -0.86244  |
| 101030 | Q2Q067 | O75467 | -0.085533 |
| 101031 | Q2Q067 | O60603 | -0.24874  |
| 101032 | Q2Q067 | Q95169 | -0.52629  |
| 101033 | Q2Q067 | Q6N069 | -0.22329  |
| 101034 | Q2Q067 | Q9ULQ1 | -0.62717  |
| 101035 | Q2Q067 | P29034 | -0.39687  |
| 101036 | Q2Q067 | Q8WWA0 | -1.2747   |
| 101037 | Q2Q067 | Q8IVH4 | -0.97363  |
| 101038 | Q2Q067 | P12111 | -0.9146   |
| 101039 | Q2Q067 | Q5VW00 | -0.22736  |
| 101040 | Q2Q067 | P51124 | -1.34     |
| 101041 | Q2Q067 | Q8WTQ1 | -0.94775  |
| 101042 | Q2Q067 | P13224 | -0.70658  |
| 101043 | Q2Q067 | Q99501 | -0.25156  |
| 101044 | Q2Q067 | Q8WW27 | -0.52174  |
| 101045 | Q2Q067 | Q9Y284 | -1.0345   |
| 101046 | Q2Q067 | A6NMS3 | -1.4096   |
| 101047 | Q2Q067 | Q9UBU2 | -1.1326   |
| 101048 | Q2Q067 | P14621 | -0.14211  |
| 101049 | Q2Q067 | Q8NB59 | -0.90721  |
| 101050 | Q2Q067 | Q8NEN9 | -0.40674  |
| 101051 | Q2Q067 | Q7Z769 | -1.0345   |
| 101052 | Q2Q067 | Q86UY6 | -0.42319  |
| 101053 | Q2Q067 | Q5XKP0 | -0.21265  |
| 101054 | Q2Q067 | P33402 | -0.75525  |
| 101055 | Q2Q067 | P30456 | -0.98258  |
| 101056 | Q2Q067 | Q86UE8 | -0.22741  |
| 101057 | Q2Q067 | Q9H1U4 | -0.95771  |
| 101058 | Q2Q067 | P43007 | -0.56414  |
| 101059 | Q2Q067 | Q96PQ7 | -0.21785  |
| 101060 | Q2Q067 | Q6ZT89 | -0.85935  |
| 101061 | Q2Q067 | Q6P4Q7 | -1.3833   |
| 101062 | Q2Q067 | Q2M3G4 | -0.26909  |
| 101063 | Q2Q067 | P59089 | -0.18142  |
| 101064 | Q2Q067 | Q8NBF1 | -0.2272   |
| 101065 | Q2Q067 | Q9BXJ0 | -1.0482   |
| 101066 | Q2Q067 | Q8NEJ0 | -0.52602  |
| 101067 | Q2Q067 | Q96IX5 | -0.84145  |
| 101068 | Q2Q067 | Q9UIK4 | -0.9641   |
| 101069 | Q2Q067 | Q6UX04 | -0.047454 |
| 101070 | Q2Q067 | Q8NGC1 | -1.4096   |
| 101071 | Q2Q067 | Q15814 | -0.21284  |
| 101072 | Q2Q067 | A8MU46 | -0.22846  |
| 101073 | Q2Q067 | P31639 | -0.87173  |
| 101074 | Q2Q067 | A6NGE7 | -0.4871   |
| 101075 | Q2Q067 | Q13061 | -0.90309  |
| 101076 | Q2Q067 | Q06278 | -0.59961  |
| 101077 | Q2Q067 | Q9NRQ5 | -0.77947  |
| 101078 | Q2Q067 | Q8WVD5 | -0.22761  |
| 101079 | Q2Q067 | Q16553 | -0.73143  |
| 101080 | Q2Q067 | Q9UBL9 | -0.61535  |

|        |        |        |           |
|--------|--------|--------|-----------|
| 101081 | Q2Q067 | Q9Y614 | -0.21848  |
| 101082 | Q2Q067 | Q6DN03 | -0.82527  |
| 101083 | Q2Q067 | Q96F46 | -0.67192  |
| 101084 | Q2Q067 | Q95147 | -0.92115  |
| 101085 | Q2Q067 | A6NL28 | -0.27069  |
| 101086 | Q2Q067 | P23677 | -1.0374   |
| 101087 | Q2Q067 | P78312 | -0.33831  |
| 101088 | Q2Q067 | O75643 | -0.22703  |
| 101089 | Q2Q067 | P41279 | -0.51619  |
| 101090 | Q2Q067 | Q8NGY9 | -1.2565   |
| 101091 | Q2Q067 | P30480 | -1.1453   |
| 101092 | Q2Q067 | O00526 | -1.2469   |
| 101093 | Q2Q067 | Q9NTG1 | -1.2922   |
| 101094 | Q2Q067 | Q8TDB8 | -0.9684   |
| 101095 | Q2Q067 | Q99685 | -0.49147  |
| 101096 | Q2Q067 | Q96IZ6 | -0.38719  |
| 101097 | Q2Q067 | Q9BWL3 | -0.97153  |
| 101098 | Q2Q067 | Q6UB35 | -0.71657  |
| 101099 | Q2Q067 | P47224 | -0.51057  |
| 101100 | Q2Q067 | P07585 | -0.5989   |
| 101101 | Q2Q067 | O60635 | -1.1658   |
| 101102 | Q2Q067 | Q96EL1 | -0.39013  |
| 101103 | Q2Q067 | O60673 | -0.95117  |
| 101104 | Q2Q067 | Q5VT25 | -0.47398  |
| 101105 | Q2Q067 | Q8NFA0 | -0.84271  |
| 101106 | Q2Q067 | P35713 | -0.27446  |
| 101107 | Q2Q067 | O15553 | -0.22834  |
| 101108 | Q2Q067 | P78383 | -1.0104   |
| 101109 | Q2Q067 | P43699 | -0.27673  |
| 101110 | Q2Q067 | O95460 | -0.40503  |
| 101111 | Q2Q067 | Q96BM1 | -0.22741  |
| 101112 | Q2Q067 | P59044 | -0.40825  |
| 101113 | Q2Q067 | O14668 | -1.7558   |
| 101114 | Q2Q067 | Q6PIY2 | -0.4509   |
| 101115 | Q2Q067 | Q16560 | -0.51726  |
| 101116 | Q2Q067 | Q5VZI3 | -1.0345   |
| 101117 | Q2Q067 | P0C6T2 | -1.0345   |
| 101118 | Q2Q067 | Q9NYG2 | -0.84677  |
| 101119 | Q2Q067 | Q6IMN6 | -0.28147  |
| 101120 | Q2Q067 | Q9HB55 | -0.84452  |
| 101121 | Q2Q067 | Q9P0P0 | -0.58666  |
| 101122 | Q2Q067 | A6NIK2 | -0.23119  |
| 101123 | Q2Q067 | P01710 | -1.1115   |
| 101124 | Q2Q067 | Q8NI99 | -1.4721   |
| 101125 | Q2Q067 | Q9P1Z0 | -0.22473  |
| 101126 | Q2Q067 | O75094 | -0.75939  |
| 101127 | Q2Q067 | Q9NRC6 | -0.22895  |
| 101128 | Q2Q067 | Q8ND30 | -0.66308  |
| 101129 | Q2Q067 | Q9BVX2 | -0.84207  |
| 101130 | Q2Q067 | Q4ADV7 | -1.0345   |
| 101131 | Q2Q067 | Q99784 | -0.22735  |
| 101132 | Q2Q067 | C9J069 | -0.034163 |
| 101133 | Q2Q067 | Q8IYR0 | -0.13662  |
| 101134 | Q2Q067 | P04080 | -0.18532  |
| 101135 | Q2Q067 | P56915 | -0.17633  |
| 101136 | Q2Q067 | O15156 | -0.22122  |
| 101137 | Q2Q067 | Q5JT82 | -0.22452  |
| 101138 | Q2Q067 | P38405 | -1.0858   |
| 101139 | Q2Q067 | P09466 | -1.1784   |
| 101140 | Q2Q067 | Q8NGY5 | -1.4096   |
| 101141 | Q2Q067 | Q16555 | -0.21247  |
| 101142 | Q2Q067 | Q16586 | -0.80165  |
| 101143 | Q2Q067 | O00418 | -0.95982  |
| 101144 | Q2Q067 | Q9UBV8 | -0.22744  |
| 101145 | Q2Q067 | Q6PCD5 | -0.22743  |
| 101146 | Q2Q067 | P18085 | -0.46566  |
| 101147 | Q2Q067 | Q5VVM6 | -0.032779 |
| 101148 | Q2Q067 | P56748 | -0.83313  |
| 101149 | Q2Q067 | Q9Y466 | -0.22877  |
| 101150 | Q2Q067 | Q7L7L0 | -0.82527  |
| 101151 | Q2Q067 | Q9Y5F1 | -1.4044   |
| 101152 | Q2Q067 | Q2TAA5 | -0.98445  |
| 101153 | Q2Q067 | O14986 | -0.31356  |
| 101154 | Q2Q067 | Q9H5Q3 | -1.0345   |
| 101155 | Q2Q067 | P30273 | -0.69714  |
| 101156 | Q2Q067 | Q9Y261 | -0.30442  |



|        |        |         |            |
|--------|--------|---------|------------|
| 101157 | Q2Q067 | Q9UL12  | -0.12112   |
| 101158 | Q2Q067 | Q29963  | -1.1453    |
| 101159 | Q2Q067 | Q7Z5B4  | -0.80925   |
| 101160 | Q2Q067 | O75386  | -0.20146   |
| 101161 | Q2Q067 | Q96KP6  | -0.41852   |
| 101162 | Q2Q067 | P46020  | -0.17232   |
| 101163 | Q2Q067 | Q6IPX1  | -1.4231    |
| 101164 | Q2Q067 | Q8NFI4  | -0.22721   |
| 101165 | Q2Q067 | Q8IUUA0 | -0.90081   |
| 101166 | Q2Q067 | O75995  | -0.22739   |
| 101167 | Q2Q067 | Q8IX06  | -0.17957   |
| 101168 | Q2Q067 | Q4LDR2  | -1.0097    |
| 101169 | Q2Q067 | Q92737  | -0.99079   |
| 101170 | Q2Q067 | Q14767  | -1.0412    |
| 101171 | Q2Q067 | P35590  | -1.2267    |
| 101172 | Q2Q067 | Q9HA47  | -0.74967   |
| 101173 | Q2Q067 | Q8N8J7  | -1.0345    |
| 101174 | Q2Q067 | Q6VEQ5  | -0.58024   |
| 101175 | Q2Q067 | P26640  | -0.22044   |
| 101176 | Q2Q067 | P51854  | -0.18804   |
| 101177 | Q2Q067 | O43557  | -0.77375   |
| 101178 | Q2Q067 | Q8NGG3  | -1.4096    |
| 101179 | Q2Q067 | P0DJI8  | -0.65466   |
| 101180 | Q2Q067 | O60733  | -0.2274    |
| 101181 | Q2Q067 | Q7Z6K3  | -0.44064   |
| 101182 | Q2Q067 | P0C7P4  | -0.68981   |
| 101183 | Q2Q067 | Q96LJ7  | -0.87602   |
| 101184 | Q2Q067 | Q9UL19  | -0.47404   |
| 101185 | Q2Q067 | Q9NZR4  | -0.21802   |
| 101186 | Q2Q067 | Q5D862  | -0.32201   |
| 101187 | Q2Q067 | P11487  | -0.37997   |
| 101188 | Q2Q067 | Q8N6I4  | -1.0345    |
| 101189 | Q2Q067 | P49759  | -1.0566    |
| 101190 | Q2Q067 | P04431  | -1.1115    |
| 101191 | Q2Q067 | Q5VWM3  | -0.19475   |
| 101192 | Q2Q067 | Q9P265  | -0.22121   |
| 101193 | Q2Q067 | Q01628  | -0.93343   |
| 101194 | Q2Q067 | Q9HCU4  | -1.2107    |
| 101195 | Q2Q067 | Q9Y2V3  | -0.2495    |
| 101196 | Q2Q067 | Q6IPT4  | -0.57259   |
| 101197 | Q2Q067 | Q8TCT6  | -1.1097    |
| 101198 | Q2Q067 | Q13224  | -0.29579   |
| 101199 | Q2Q067 | O76090  | -0.90844   |
| 101200 | Q2Q067 | Q8N5V2  | -0.89905   |
| 101201 | Q2Q067 | A4QPB2  | -0.37261   |
| 101202 | Q2Q067 | Q9HCK4  | -0.57107   |
| 101203 | Q2Q067 | A2RRL7  | -1.0345    |
| 101204 | Q2Q067 | Q0VF96  | -0.22668   |
| 101205 | Q2Q067 | Q9HCE7  | -0.22741   |
| 101206 | Q2Q067 | Q96T25  | -0.38004   |
| 101207 | Q2Q067 | P35610  | -0.89931   |
| 101208 | Q2Q067 | P35504  | -1.1371    |
| 101209 | Q2Q067 | Q6EMK4  | -1.5853    |
| 101210 | Q2Q067 | Q9UPR0  | -0.62166   |
| 101211 | Q2Q067 | Q8IYM1  | -0.22604   |
| 101212 | Q2Q067 | O43187  | -0.22739   |
| 101213 | Q2Q067 | Q6URH7  | -0.15856   |
| 101214 | Q2Q067 | Q6ZNF0  | -0.98036   |
| 101215 | Q2Q067 | O43586  | -0.92003   |
| 101216 | Q2Q067 | Q9H1R2  | -0.36382   |
| 101217 | Q2Q067 | O15347  | -0.82663   |
| 101218 | Q2Q067 | Q04912  | -1.021     |
| 101219 | Q2Q067 | Q9BRL7  | -0.6964    |
| 101220 | Q2Q067 | Q86VH2  | -0.79901   |
| 101221 | Q2Q067 | Q8NA92  | -0.52609   |
| 101222 | Q2Q067 | Q6ZMR5  | -1.9982    |
| 101223 | Q2Q067 | Q5TEZ5  | -0.24416   |
| 101224 | Q2Q067 | Q99727  | -0.90951   |
| 101225 | Q2Q067 | Q13976  | -0.48916   |
| 101226 | Q2Q067 | Q96LV5  | -0.070395  |
| 101227 | Q2Q067 | Q86UX7  | -0.7149    |
| 101228 | Q2Q067 | Q68D20  | -0.37536   |
| 101229 | Q2Q067 | Q9BXT2  | -1.0948    |
| 101230 | Q2Q067 | Q9H2C2  | -1.0153    |
| 101231 | Q2Q067 | A8K4G0  | -1.1634    |
| 101232 | Q2Q067 | Q5VVP2  | -0.0011527 |

|        |        |        |           |
|--------|--------|--------|-----------|
| 101233 | Q2Q067 | Q8WU66 | -0.87055  |
| 101234 | Q2Q067 | P05112 | -0.20045  |
| 101235 | Q2Q067 | Q9HC84 | -0.61417  |
| 101236 | Q2Q067 | P16066 | -1.2376   |
| 101237 | Q2Q067 | Q8TDV0 | -1.4967   |
| 101238 | Q2Q067 | A6NJT0 | -0.16469  |
| 101239 | Q2Q067 | P47902 | -0.21173  |
| 101240 | Q2Q067 | Q9H4E7 | -0.22741  |
| 101241 | Q2Q067 | P22914 | -0.40022  |
| 101242 | Q2Q067 | P0CG21 | -0.22575  |
| 101243 | Q2Q067 | Q5VXI9 | -0.96522  |
| 101244 | Q2Q067 | A2RUG3 | -1.0345   |
| 101245 | Q2Q067 | P01706 | -1.1115   |
| 101246 | Q2Q067 | O43868 | -1.1883   |
| 101247 | Q2Q067 | Q8NCG7 | -1.0143   |
| 101248 | Q2Q067 | Q9H2X3 | -1.1194   |
| 101249 | Q2Q067 | P01770 | -1.1115   |
| 101250 | Q2Q067 | Q8NGF0 | -1.4096   |
| 101251 | Q2Q067 | Q86UD5 | -0.97058  |
| 101252 | Q2Q067 | Q9P2E5 | -0.56912  |
| 101253 | Q2Q067 | Q8N1L4 | -1.0767   |
| 101254 | Q2Q067 | O95800 | -1.6361   |
| 101255 | Q2Q067 | Q99880 | -0.82527  |
| 101256 | Q2Q067 | Q9NY97 | -0.57059  |
| 101257 | Q2Q067 | Q9NVE7 | -0.85954  |
| 101258 | Q2Q067 | Q8WU76 | -0.18313  |
| 101259 | Q2Q067 | P0C7N5 | -1.4096   |
| 101260 | Q2Q067 | Q96T92 | -0.22707  |
| 101261 | Q2Q067 | Q9P0S9 | -0.84166  |
| 101262 | Q2Q067 | O94856 | -1.0611   |
| 101263 | Q2Q067 | Q8N0U8 | -1.0345   |
| 101264 | Q2Q067 | Q5H9R4 | -1.0345   |
| 101265 | Q2Q067 | P23219 | -0.37877  |
| 101266 | Q2Q067 | P47755 | -0.54543  |
| 101267 | Q2Q067 | Q16563 | -1.044    |
| 101268 | Q2Q067 | Q9UQC9 | -1.7154   |
| 101269 | Q2Q067 | Q8NGG2 | -1.4096   |
| 101270 | Q2Q067 | P14209 | -1.2806   |
| 101271 | Q2Q067 | P78552 | -0.5912   |
| 101272 | Q2Q067 | Q96IJ6 | -0.72587  |
| 101273 | Q2Q067 | Q8WTX9 | -1.0598   |
| 101274 | Q2Q067 | Q9Y4W6 | -0.74076  |
| 101275 | Q2Q067 | Q9P021 | -0.24003  |
| 101276 | Q2Q067 | Q2M2H8 | -0.89945  |
| 101277 | Q2Q067 | Q9P217 | -0.48451  |
| 101278 | Q2Q067 | P21730 | -1.333    |
| 101279 | Q2Q067 | P56178 | -0.22119  |
| 101280 | Q2Q067 | O15315 | -0.17833  |
| 101281 | Q2Q067 | Q8N131 | -1.0212   |
| 101282 | Q2Q067 | Q93033 | -1.1869   |
| 101283 | Q2Q067 | Q8TBJ4 | -1.0768   |
| 101284 | Q2Q067 | Q6A555 | -0.49108  |
| 101285 | Q2Q067 | Q0D2I5 | -0.11491  |
| 101286 | Q2Q067 | Q9UJU5 | -0.3445   |
| 101287 | Q2Q067 | Q15911 | -0.2274   |
| 101288 | Q2Q067 | Q495X7 | -0.73178  |
| 101289 | Q2Q067 | Q96G75 | -0.072561 |
| 101290 | Q2Q067 | Q9NXZ2 | -1.198    |
| 101291 | Q2Q067 | Q9NY47 | -0.883    |
| 101292 | Q2Q067 | P17020 | -0.085533 |
| 101293 | Q2Q067 | Q96T75 | -0.24416  |
| 101294 | Q2Q067 | Q5VYP0 | -1.0345   |
| 101295 | Q2Q067 | Q8NCA9 | -0.085533 |
| 101296 | Q2Q067 | Q9NS62 | -1.373    |
| 101297 | Q2Q067 | O75593 | -0.29328  |
| 101298 | Q2Q067 | Q15475 | -0.22737  |
| 101299 | Q2Q067 | Q16478 | -0.76343  |
| 101300 | Q2Q067 | Q16099 | -0.8457   |
| 101301 | Q2Q067 | Q9P2F8 | -1.0359   |
| 101302 | Q2Q067 | Q9Y5H5 | -1.3679   |
| 101303 | Q2Q067 | Q5TC79 | -0.22771  |
| 101304 | Q2Q067 | C4AMC7 | -0.62081  |
| 101305 | Q2Q067 | Q76NI1 | -0.75336  |
| 101306 | Q2Q067 | Q13956 | -0.50288  |
| 101307 | Q2Q067 | Q9GZM8 | -0.13785  |
| 101308 | Q2Q067 | P04637 | -0.22395  |

|        |        |        |            |
|--------|--------|--------|------------|
| 101309 | Q2Q067 | Q96BJ8 | -0.41062   |
| 101310 | Q2Q067 | Q9Y5U8 | -0.62542   |
| 101311 | Q2Q067 | Q6ZWJ1 | -0.22741   |
| 101312 | Q2Q067 | Q9NSK0 | -0.19398   |
| 101313 | Q2Q067 | Q8IZC7 | -0.085533  |
| 101314 | Q2Q067 | Q9NW61 | -0.51797   |
| 101315 | Q2Q067 | Q58FF8 | -0.66086   |
| 101316 | Q2Q067 | Q96RV3 | -1.0345    |
| 101317 | Q2Q067 | Q9UKB1 | -0.38954   |
| 101318 | Q2Q067 | O15550 | -0.70577   |
| 101319 | Q2Q067 | Q8TB37 | -0.82653   |
| 101320 | Q2Q067 | Q6UXB2 | -1.2764    |
| 101321 | Q2Q067 | Q9Y512 | -0.0082728 |
| 101322 | Q2Q067 | Q3SXM5 | -0.92961   |
| 101323 | Q2Q067 | A6NGZ8 | -1.1634    |
| 101324 | Q2Q067 | O75342 | -0.76347   |
| 101325 | Q2Q067 | Q5VZ52 | -0.16471   |
| 101326 | Q2Q067 | Q9BSD7 | -1.039     |
| 101327 | Q2Q067 | P01825 | -1.1115    |
| 101328 | Q2Q067 | P57073 | -0.307     |
| 101329 | Q2Q067 | Q96N64 | -0.22013   |
| 101330 | Q2Q067 | Q9UK05 | -0.22741   |
| 101331 | Q2Q067 | Q15382 | -1.3512    |
| 101332 | Q2Q067 | Q8N475 | -1.0413    |
| 101333 | Q2Q067 | A6NIR3 | -1.1564    |
| 101334 | Q2Q067 | P01599 | -1.1115    |
| 101335 | Q2Q067 | Q14247 | -0.22917   |
| 101336 | Q2Q067 | Q6NUK1 | -0.91242   |
| 101337 | Q2Q067 | Q86UW2 | -1.0022    |
| 101338 | Q2Q067 | O00507 | -0.64076   |
| 101339 | Q2Q067 | Q9NRY6 | -0.70646   |
| 101340 | Q2Q067 | Q8WTR8 | -0.98666   |
| 101341 | Q2Q067 | P07919 | -0.38872   |
| 101342 | Q2Q067 | Q9NY33 | -0.28768   |
| 101343 | Q2Q067 | Q92521 | -0.95841   |
| 101344 | Q2Q067 | Q9BQ16 | -1.116     |
| 101345 | Q2Q067 | O95379 | -0.1982    |
| 101346 | Q2Q067 | P11465 | -0.79881   |
| 101347 | Q2Q067 | Q9Y5I4 | -1.4044    |
| 101348 | Q2Q067 | Q8N3J6 | -1.3008    |
| 101349 | Q2Q067 | P12271 | -0.91357   |
| 101350 | Q2Q067 | Q9NWF4 | -1.2643    |
| 101351 | Q2Q067 | Q9BUB5 | -0.29546   |
| 101352 | Q2Q067 | O00584 | -0.91678   |
| 101353 | Q2Q067 | P53779 | -0.22741   |
| 101354 | Q2Q067 | P22352 | -0.7836    |
| 101355 | Q2Q067 | Q9HCN3 | -1.21      |
| 101356 | Q2Q067 | P82251 | -1.1328    |
| 101357 | Q2Q067 | Q9UQF0 | -0.91052   |
| 101358 | Q2Q067 | P05230 | -0.25754   |
| 101359 | Q2Q067 | P52954 | -0.22949   |
| 101360 | Q2Q067 | P84074 | -0.48712   |
| 101361 | Q2Q067 | Q8N3Z0 | -1.0177    |
| 101362 | Q2Q067 | Q9NPY3 | -0.53534   |
| 101363 | Q2Q067 | Q5GLZ8 | -0.48698   |
| 101364 | Q2Q067 | Q16881 | -0.2237    |
| 101365 | Q2Q067 | Q9NQQ7 | -1.062     |
| 101366 | Q2Q067 | P01705 | -1.1115    |
| 101367 | Q2Q067 | Q7RTY7 | -1.5804    |
| 101368 | Q2Q067 | Q5FYB1 | -0.81266   |
| 101369 | Q2Q067 | Q9Y2S2 | -0.28111   |
| 101370 | Q2Q067 | P51449 | -0.52972   |
| 101371 | Q2Q067 | Q8NHP1 | -0.56541   |
| 101372 | Q2Q067 | P24386 | -0.85649   |
| 101373 | Q2Q067 | P52757 | -0.88486   |
| 101374 | Q2Q067 | Q8TE67 | -0.22741   |
| 101375 | Q2Q067 | Q86VQ1 | -0.20901   |
| 101376 | Q2Q067 | Q6ZS62 | -1.0345    |
| 101377 | Q2Q067 | Q9BXT4 | -0.61037   |
| 101378 | Q2Q067 | O00499 | -0.22747   |
| 101379 | Q2Q067 | P0C8F1 | -0.98233   |
| 101380 | Q2Q067 | Q6NUT2 | -1.3834    |
| 101381 | Q2Q067 | P03973 | -0.36033   |
| 101382 | Q2Q067 | Q8N0W4 | -0.44672   |
| 101383 | Q2Q067 | Q12770 | -0.32286   |
| 101384 | Q2Q067 | P62079 | -1.0345    |

|        |        |        |           |
|--------|--------|--------|-----------|
| 101385 | Q2Q067 | Q9HCU0 | -0.77132  |
| 101386 | Q2Q067 | P25089 | -1.5077   |
| 101387 | Q2Q067 | Q15735 | -0.27528  |
| 101388 | Q2Q067 | A8MW99 | -0.61702  |
| 101389 | Q2Q067 | Q7Z3D4 | -1.0097   |
| 101390 | Q2Q067 | Q70EL3 | -0.29807  |
| 101391 | Q2Q067 | Q13641 | -1.1325   |
| 101392 | Q2Q067 | Q9NZV6 | -0.25249  |
| 101393 | Q2Q067 | Q6UXH9 | -1.1821   |
| 101394 | Q2Q067 | Q9UJ41 | -0.22929  |
| 101395 | Q2Q067 | Q12923 | -0.22741  |
| 101396 | Q2Q067 | Q63HQ2 | -0.94904  |
| 101397 | Q2Q067 | O43665 | -0.36543  |
| 101398 | Q2Q067 | Q92613 | -0.30964  |
| 101399 | Q2Q067 | Q5D0E6 | -0.58654  |
| 101400 | Q2Q067 | A6NFE2 | -1.0345   |
| 101401 | Q2Q067 | Q99757 | -0.24183  |
| 101402 | Q2Q067 | Q9HBH5 | -0.91266  |
| 101403 | Q2Q067 | O00757 | -0.035264 |
| 101404 | Q2Q067 | Q8N6R0 | -0.46621  |
| 101405 | Q2Q067 | P61221 | -0.55016  |
| 101406 | Q2Q067 | Q8WU43 | -0.065333 |
| 101407 | Q2Q067 | P24557 | -0.9853   |
| 101408 | Q2Q067 | Q8N4C0 | -0.10724  |
| 101409 | Q2Q067 | Q6P589 | -0.36492  |
| 101410 | Q2Q067 | Q8TBF2 | -0.18191  |
| 101411 | Q2Q067 | Q9H6K1 | -0.24416  |
| 101412 | Q2Q067 | Q14162 | -1.1211   |
| 101413 | Q2Q067 | Q8N8Y2 | -0.18439  |
| 101414 | Q2Q067 | P00414 | -0.59157  |
| 101415 | Q2Q067 | Q9Y6H3 | -0.80013  |
| 101416 | Q2Q067 | P10809 | -0.18572  |
| 101417 | Q2Q067 | Q06187 | -0.22741  |
| 101418 | Q2Q067 | O14981 | -0.50957  |
| 101419 | Q2Q067 | O15211 | -0.90065  |
| 101420 | Q2Q067 | P00915 | -0.18497  |
| 101421 | Q2Q067 | Q8TED1 | -1.219    |
| 101422 | Q2Q067 | P16499 | -0.6421   |
| 101423 | Q2Q067 | P16083 | -0.024964 |
| 101424 | Q2Q067 | O75964 | -0.25797  |
| 101425 | Q2Q067 | Q9UHI7 | -0.43725  |
| 101426 | Q2Q067 | O14828 | -0.59922  |
| 101427 | Q2Q067 | Q8N743 | -1.1634   |
| 101428 | Q2Q067 | Q9Y283 | -0.22742  |
| 101429 | Q2Q067 | Q6ZS81 | -1.0345   |
| 101430 | Q2Q067 | O75596 | -1.0613   |
| 101431 | Q2Q067 | A6NL26 | -1.4096   |
| 101432 | Q2Q067 | Q6UQ28 | -1.0392   |
| 101433 | Q2Q067 | Q9Y2R2 | -0.2289   |
| 101434 | Q2Q067 | Q8N6N7 | -0.63086  |
| 101435 | Q2Q067 | Q06136 | -1.302    |
| 101436 | Q2Q067 | P11216 | -0.18313  |
| 101437 | Q2Q067 | Q9H3Y6 | -1.3039   |
| 101438 | Q2Q067 | O96015 | -0.27819  |
| 101439 | Q2Q067 | O00515 | -0.99175  |
| 101440 | Q2Q067 | P0C0S8 | -0.83327  |
| 101441 | Q2Q067 | Q16663 | -1.2394   |
| 101442 | Q2Q067 | Q9H4A4 | -1.0153   |
| 101443 | Q2Q067 | Q6P3X3 | -0.24416  |
| 101444 | Q2Q067 | Q96PD4 | -0.5682   |
| 101445 | Q2Q067 | P51864 | -0.72119  |
| 101446 | Q2Q067 | P31267 | -0.22111  |
| 101447 | Q2Q067 | P10075 | -0.46727  |
| 101448 | Q2Q067 | Q5VW32 | -0.52586  |
| 101449 | Q2Q067 | Q5SRR4 | -0.98666  |
| 101450 | Q2Q067 | Q8NGL1 | -1.4096   |
| 101451 | Q2Q067 | P16471 | -1.1378   |
| 101452 | Q2Q067 | Q96L50 | -0.40021  |
| 101453 | Q2Q067 | P13928 | -0.35999  |
| 101454 | Q2Q067 | Q86XX4 | -1.3246   |
| 101455 | Q2Q067 | P49448 | -0.70614  |
| 101456 | Q2Q067 | Q95460 | -1.5735   |
| 101457 | Q2Q067 | Q14117 | -0.21532  |
| 101458 | Q2Q067 | Q8N4Y2 | -0.26566  |
| 101459 | Q2Q067 | Q96GW7 | -0.95295  |
| 101460 | Q2Q067 | P07205 | -0.59069  |

|        |        |        |           |
|--------|--------|--------|-----------|
| 101461 | Q2Q067 | O76024 | -0.59514  |
| 101462 | Q2Q067 | Q8NBP7 | -0.38191  |
| 101463 | Q2Q067 | Q8WUP2 | -0.34909  |
| 101464 | Q2Q067 | Q96CX2 | -0.13546  |
| 101465 | Q2Q067 | Q9P244 | -0.88136  |
| 101466 | Q2Q067 | Q8N5Y8 | -0.64307  |
| 101467 | Q2Q067 | Q93050 | -0.17187  |
| 101468 | Q2Q067 | Q2Y0W8 | -1.1259   |
| 101469 | Q2Q067 | O15534 | -0.23225  |
| 101470 | Q2Q067 | Q9HC36 | -0.1693   |
| 101471 | Q2Q067 | Q9Y5J1 | -0.22741  |
| 101472 | Q2Q067 | Q5TGU0 | -1.1379   |
| 101473 | Q2Q067 | P21589 | -0.59456  |
| 101474 | Q2Q067 | Q9BY32 | -0.63426  |
| 101475 | Q2Q067 | Q14449 | -0.34665  |
| 101476 | Q2Q067 | O76038 | -0.89408  |
| 101477 | Q2Q067 | Q13614 | -0.22202  |
| 101478 | Q2Q067 | Q6ZSZ5 | -0.54509  |
| 101479 | Q2Q067 | Q96FL8 | -1.0179   |
| 101480 | Q2Q067 | Q8NGX8 | -1.4096   |
| 101481 | Q2Q067 | O75123 | -0.085533 |
| 101482 | Q2Q067 | P14550 | -0.33052  |
| 101483 | Q2Q067 | Q9NQ86 | -0.64343  |
| 101484 | Q2Q067 | P04141 | -0.15537  |
| 101485 | Q2Q067 | O95897 | -0.98666  |
| 101486 | Q2Q067 | P13378 | -0.20116  |
| 101487 | Q2Q067 | Q9H4Q4 | -0.23688  |
| 101488 | Q2Q067 | Q6ICL3 | -0.21265  |
| 101489 | Q2Q067 | Q15848 | -0.25923  |
| 101490 | Q2Q067 | Q9BS16 | -0.22275  |
| 101491 | Q2Q067 | Q6UXR4 | -0.78629  |
| 101492 | Q2Q067 | Q8NGG7 | -1.4096   |
| 101493 | Q2Q067 | Q8TAV5 | -0.98666  |
| 101494 | Q2Q067 | Q86Y78 | -0.98666  |
| 101495 | Q2Q067 | Q9Y5J9 | -0.29178  |
| 101496 | Q2Q067 | Q9HBF4 | -0.21844  |
| 101497 | Q2Q067 | A6NCL7 | -0.22742  |
| 101498 | Q2Q067 | Q5TA81 | -0.37794  |
| 101499 | Q2Q067 | B2RXH4 | -0.22716  |
| 101500 | Q2Q067 | P08134 | -0.22689  |
| 101501 | Q2Q067 | Q8TD20 | -0.71533  |
| 101502 | Q2Q067 | O75631 | -0.90362  |
| 101503 | Q2Q067 | B1AL88 | -1.0345   |
| 101504 | Q2Q067 | Q8IZ96 | -1.0608   |
| 101505 | Q2Q067 | Q8NA23 | -0.2275   |
| 101506 | Q2Q067 | I1YAP6 | -0.22667  |
| 101507 | Q2Q067 | Q9Y271 | -1.4748   |
| 101508 | Q2Q067 | P26842 | -0.79065  |
| 101509 | Q2Q067 | P23470 | -1.3742   |
| 101510 | Q2Q067 | Q5VZ66 | -0.2659   |
| 101511 | Q2Q067 | Q4VX76 | -0.84192  |
| 101512 | Q2Q067 | O43916 | -0.66996  |
| 101513 | Q2Q067 | Q5TGI4 | -0.22729  |
| 101514 | Q2Q067 | P10082 | -0.80999  |
| 101515 | Q2Q067 | P53708 | -0.9869   |
| 101516 | Q2Q067 | Q14964 | -1.1196   |
| 101517 | Q2Q067 | E5RJM6 | -0.22741  |
| 101518 | Q2Q067 | P80511 | -0.2286   |
| 101519 | Q2Q067 | P24390 | -0.62863  |
| 101520 | Q2Q067 | Q8TF30 | -0.27779  |
| 101521 | Q2Q067 | Q8NFK1 | -1.0247   |
| 101522 | Q2Q067 | Q9UID3 | -0.096878 |
| 101523 | Q2Q067 | Q15303 | -0.24195  |
| 101524 | Q2Q067 | Q8N9W7 | -1.0345   |
| 101525 | Q2Q067 | Q7Z4W1 | -0.7783   |
| 101526 | Q2Q067 | Q96P56 | -0.74282  |
| 101527 | Q2Q067 | P42858 | -0.16072  |
| 101528 | Q2Q067 | Q3KRB8 | -1.0924   |
| 101529 | Q2Q067 | Q6NUT3 | -1.062    |
| 101530 | Q2Q067 | P60484 | -0.2274   |
| 101531 | Q2Q067 | P47211 | -1.37     |
| 101532 | Q2Q067 | P57078 | -0.62743  |
| 101533 | Q2Q067 | Q9C0I4 | -1.0345   |
| 101534 | Q2Q067 | Q16587 | -0.19093  |
| 101535 | Q2Q067 | Q9HA92 | -0.42093  |
| 101536 | Q2Q067 | Q8NCR0 | -0.92843  |

|        |        |        |           |
|--------|--------|--------|-----------|
| 101537 | Q2Q067 | Q9C037 | -0.68692  |
| 101538 | Q2Q067 | Q8N807 | -0.76943  |
| 101539 | Q2Q067 | Q9BTE0 | -0.33486  |
| 101540 | Q2Q067 | Q43921 | -0.44135  |
| 101541 | Q2Q067 | Q5T699 | -0.34653  |
| 101542 | Q2Q067 | Q96T55 | -1.2903   |
| 101543 | Q2Q067 | Q8WZ69 | -0.16029  |
| 101544 | Q2Q067 | Q8WWZ4 | -1.4923   |
| 101545 | Q2Q067 | Q9NTJ5 | -0.68959  |
| 101546 | Q2Q067 | Q92481 | -0.19346  |
| 101547 | Q2Q067 | Q9Y5M1 | -0.21943  |
| 101548 | Q2Q067 | Q15813 | -0.24789  |
| 101549 | Q2Q067 | Q86U28 | -0.1902   |
| 101550 | Q2Q067 | Q75783 | -1.6986   |
| 101551 | Q2Q067 | P41594 | -0.84769  |
| 101552 | Q2Q067 | Q9BYX7 | -0.83802  |
| 101553 | Q2Q067 | Q8N4M1 | -0.92541  |
| 101554 | Q2Q067 | P98194 | -1.0091   |
| 101555 | Q2Q067 | Q96RD7 | -0.92061  |
| 101556 | Q2Q067 | Q43300 | -0.91133  |
| 101557 | Q2Q067 | Q6ZMV9 | -0.25734  |
| 101558 | Q2Q067 | Q9BQF6 | -0.76059  |
| 101559 | Q2Q067 | P54257 | -0.15388  |
| 101560 | Q2Q067 | Q9NT68 | -0.72974  |
| 101561 | Q2Q067 | Q9H1C0 | -1.1692   |
| 101562 | Q2Q067 | Q9UF12 | -0.35059  |
| 101563 | Q2Q067 | Q969J3 | -0.15064  |
| 101564 | Q2Q067 | Q8N159 | -0.11404  |
| 101565 | Q2Q067 | Q96ET8 | -1.0345   |
| 101566 | Q2Q067 | Q9NV35 | -0.40827  |
| 101567 | Q2Q067 | Q9UJX0 | -0.57359  |
| 101568 | Q2Q067 | Q9NX38 | -0.37497  |
| 101569 | Q2Q067 | Q8NGS3 | -1.4096   |
| 101570 | Q2Q067 | Q8ND71 | -0.19841  |
| 101571 | Q2Q067 | Q8IYT8 | -0.87376  |
| 101572 | Q2Q067 | Q15169 | -0.24616  |
| 101573 | Q2Q067 | Q96LR5 | -0.71291  |
| 101574 | Q2Q067 | Q13634 | -1.3366   |
| 101575 | Q2Q067 | P01617 | -1.1115   |
| 101576 | Q2Q067 | Q93063 | -0.68481  |
| 101577 | Q2Q067 | Q9Y2C4 | -0.26336  |
| 101578 | Q2Q067 | Q9NRB3 | -0.59125  |
| 101579 | Q2Q067 | P0C7V4 | -0.43957  |
| 101580 | Q2Q067 | P43034 | -0.2286   |
| 101581 | Q2Q067 | P19075 | -1.3317   |
| 101582 | Q2Q067 | P0C6C1 | -0.22741  |
| 101583 | Q2Q067 | P10635 | -0.44555  |
| 101584 | Q2Q067 | Q14206 | -0.82228  |
| 101585 | Q2Q067 | Q16827 | -0.62103  |
| 101586 | Q2Q067 | Q9UGM5 | -0.95136  |
| 101587 | Q2Q067 | Q96ME7 | -0.20895  |
| 101588 | Q2Q067 | P29074 | -0.2275   |
| 101589 | Q2Q067 | P36021 | -1.1172   |
| 101590 | Q2Q067 | Q95985 | -0.70627  |
| 101591 | Q2Q067 | Q13585 | -1.5514   |
| 101592 | Q2Q067 | Q96C01 | -0.082205 |
| 101593 | Q2Q067 | P60201 | -0.63383  |
| 101594 | Q2Q067 | Q10589 | -0.47019  |
| 101595 | Q2Q067 | Q6P4I2 | -0.19851  |
| 101596 | Q2Q067 | P46379 | -0.22611  |
| 101597 | Q2Q067 | Q96HP0 | -0.16927  |
| 101598 | Q2Q067 | P55344 | -0.96025  |
| 101599 | Q2Q067 | Q5YKI7 | -0.73222  |
| 101600 | Q2Q067 | Q96AK3 | -0.74038  |
| 101601 | Q2Q067 | Q9BVV2 | -0.082396 |
| 101602 | Q2Q067 | Q9BXA6 | -1.0863   |
| 101603 | Q2Q067 | Q16048 | -0.9237   |
| 101604 | Q2Q067 | Q9NQ69 | -0.22741  |
| 101605 | Q2Q067 | Q92731 | -0.22753  |
| 101606 | Q2Q067 | Q9UBC2 | -0.30491  |
| 101607 | Q2Q067 | A4QPH2 | -0.75491  |
| 101608 | Q2Q067 | Q5JRA6 | -0.18467  |
| 101609 | Q2Q067 | Q96PD5 | -1.0162   |
| 101610 | Q2Q067 | Q95471 | -0.27021  |
| 101611 | Q2Q067 | Q2KHN1 | -0.31864  |
| 101612 | Q2Q067 | Q96KX1 | -0.21716  |

|        |        |        |            |
|--------|--------|--------|------------|
| 101613 | Q2Q067 | Q8NG95 | -1.4096    |
| 101614 | Q2Q067 | O95936 | -0.36741   |
| 101615 | Q2Q067 | A6NDU8 | -0.0099976 |
| 101616 | Q2Q067 | Q6IEV9 | -1.4096    |
| 101617 | Q2Q067 | A6NER3 | -0.18742   |
| 101618 | Q2Q067 | P22612 | -0.59524   |
| 101619 | Q2Q067 | Q13065 | -0.38152   |
| 101620 | Q2Q067 | Q9Y6R7 | -0.22347   |
| 101621 | Q2Q067 | Q9Y6A1 | -1.0995    |
| 101622 | Q2Q067 | Q6IQ16 | -0.22434   |
| 101623 | Q2Q067 | Q9BYE2 | -1.472     |
| 101624 | Q2Q067 | Q14344 | -0.518     |
| 101625 | Q2Q067 | P36383 | -1.1133    |
| 101626 | Q2Q067 | Q02928 | -0.52835   |
| 101627 | Q2Q067 | P34910 | -0.98764   |
| 101628 | Q2Q067 | Q96CM8 | -0.99546   |
| 101629 | Q2Q067 | P52803 | -0.58001   |
| 101630 | Q2Q067 | Q9H0P7 | -0.15976   |
| 101631 | Q2Q067 | P13716 | -0.19277   |
| 101632 | Q2Q067 | P19784 | -0.23714   |
| 101633 | Q2Q067 | P43003 | -0.69111   |
| 101634 | Q2Q067 | Q9NX31 | -0.10343   |
| 101635 | Q2Q067 | Q92934 | -0.091164  |
| 101636 | Q2Q067 | Q7Z570 | -0.73178   |
| 101637 | Q2Q067 | B7ZC32 | -0.96098   |
| 101638 | Q2Q067 | O60347 | -1.4231    |
| 101639 | Q2Q067 | Q9NRY4 | -0.31509   |
| 101640 | Q2Q067 | Q6UXC1 | -0.82008   |
| 101641 | Q2Q067 | A0PJZ0 | -0.22741   |
| 101642 | Q2Q067 | Q9BW30 | -0.28905   |
| 101643 | Q2Q067 | P01595 | -1.1115    |
| 101644 | Q2Q067 | P49760 | -0.64177   |
| 101645 | Q2Q067 | Q95825 | -0.76292   |
| 101646 | Q2Q067 | Q05940 | -0.66611   |
| 101647 | Q2Q067 | Q9H0H5 | -0.23368   |
| 101648 | Q2Q067 | P02787 | -0.12594   |
| 101649 | Q2Q067 | Q6Q4G3 | -1.4476    |
| 101650 | Q2Q067 | P09228 | -1.024     |
| 101651 | Q2Q067 | Q5IJ48 | -1.7389    |
| 101652 | Q2Q067 | P04435 | -0.47581   |
| 101653 | Q2Q067 | Q7L0L9 | -1.0345    |
| 101654 | Q2Q067 | Q9NRW3 | -0.71588   |
| 101655 | Q2Q067 | A8MVZ5 | -1.0345    |
| 101656 | Q2Q067 | Q9H9Q2 | -0.1735    |
| 101657 | Q2Q067 | Q96CP6 | -1.0345    |
| 101658 | Q2Q067 | P20809 | -0.31747   |
| 101659 | Q2Q067 | Q6ZQX7 | -0.092868  |
| 101660 | Q2Q067 | Q95998 | -0.90015   |
| 101661 | Q2Q067 | Q02156 | -0.30279   |
| 101662 | Q2Q067 | Q9Y2K6 | -0.59018   |
| 101663 | Q2Q067 | Q8N8L6 | -1.4417    |
| 101664 | Q2Q067 | A6NFI3 | -0.085533  |
| 101665 | Q2Q067 | P05120 | -0.6259    |
| 101666 | Q2Q067 | Q6ZMT9 | -0.57228   |
| 101667 | Q2Q067 | Q9Y546 | -0.18596   |
| 101668 | Q2Q067 | Q8IW03 | -0.24933   |
| 101669 | Q2Q067 | O60469 | -1.0671    |
| 101670 | Q2Q067 | Q8IY33 | -0.33932   |
| 101671 | Q2Q067 | Q9H306 | -1.472     |
| 101672 | Q2Q067 | P01715 | -1.1115    |
| 101673 | Q2Q067 | Q96NI6 | -1.0345    |
| 101674 | Q2Q067 | Q15645 | -0.22798   |
| 101675 | Q2Q067 | Q13308 | -0.60334   |
| 101676 | Q2Q067 | O00337 | -1.0844    |
| 101677 | Q2Q067 | C9JL8  | -0.73178   |
| 101678 | Q2Q067 | Q9Y680 | -0.52559   |
| 101679 | Q2Q067 | Q96NX5 | -1.0955    |
| 101680 | Q2Q067 | P18827 | -0.56366   |
| 101681 | Q2Q067 | Q96P48 | -0.48376   |
| 101682 | Q2Q067 | A2RRP1 | -0.019442  |
| 101683 | Q2Q067 | O00501 | -0.77643   |
| 101684 | Q2Q067 | Q9NQC1 | -0.30964   |
| 101685 | Q2Q067 | Q96PF1 | -0.49451   |
| 101686 | Q2Q067 | Q9UBP4 | -1.0017    |
| 101687 | Q2Q067 | Q9NR82 | -1.2111    |
| 101688 | Q2Q067 | O14753 | -0.29188   |

|        |        |        |           |
|--------|--------|--------|-----------|
| 101689 | Q2Q067 | Q01668 | -0.64861  |
| 101690 | Q2Q067 | Q5W0N0 | -1.0345   |
| 101691 | Q2Q067 | A6NFN9 | -0.22739  |
| 101692 | Q2Q067 | Q6UY27 | -1.0374   |
| 101693 | Q2Q067 | P10147 | -0.31577  |
| 101694 | Q2Q067 | Q9UPQ3 | -1.6179   |
| 101695 | Q2Q067 | P32121 | -0.33525  |
| 101696 | Q2Q067 | Q9NRC9 | -0.98648  |
| 101697 | Q2Q067 | Q9NPD5 | -0.88721  |
| 101698 | Q2Q067 | Q9Y4X1 | -0.99821  |
| 101699 | Q2Q067 | A6NGH8 | -0.2274   |
| 101700 | Q2Q067 | Q8TEU7 | -0.96423  |
| 101701 | Q2Q067 | Q96PQ5 | -0.25171  |
| 101702 | Q2Q067 | P47989 | -0.51807  |
| 101703 | Q2Q067 | Q14832 | -1.2015   |
| 101704 | Q2Q067 | Q8TB40 | -0.43838  |
| 101705 | Q2Q067 | P10072 | -0.35555  |
| 101706 | Q2Q067 | Q99929 | -0.23331  |
| 101707 | Q2Q067 | A6QL63 | -1.1275   |
| 101708 | Q2Q067 | Q9NQV8 | -0.33864  |
| 101709 | Q2Q067 | Q7Z6I8 | -0.041796 |
| 101710 | Q2Q067 | Q4VC39 | -1.0345   |
| 101711 | Q2Q067 | Q9C0D7 | -0.44678  |
| 101712 | Q2Q067 | P30048 | -0.21446  |
| 101713 | Q2Q067 | Q8IVF7 | -0.22074  |
| 101714 | Q2Q067 | Q8TB96 | -1.5853   |
| 101715 | Q2Q067 | Q5W0Z9 | -1.13     |
| 101716 | Q2Q067 | Q00203 | -0.1894   |
| 101717 | Q2Q067 | Q9H0K4 | -0.63454  |
| 101718 | Q2Q067 | Q7L3V2 | -0.17247  |
| 101719 | Q2Q067 | Q8N4C7 | -0.60352  |
| 101720 | Q2Q067 | Q9H3H5 | -0.87133  |
| 101721 | Q2Q067 | P56177 | -0.22568  |
| 101722 | Q2Q067 | P42356 | -0.5822   |
| 101723 | Q2Q067 | Q96PP8 | -0.96018  |
| 101724 | Q2Q067 | Q9Y2Q0 | -0.69083  |
| 101725 | Q2Q067 | Q13021 | -0.35659  |
| 101726 | Q2Q067 | A6NHI5 | -1.0345   |
| 101727 | Q2Q067 | Q8WZ60 | -0.36309  |
| 101728 | Q2Q067 | P02814 | -0.90912  |
| 101729 | Q2Q067 | Q4G0J3 | -0.21888  |
| 101730 | Q2Q067 | P0C7A2 | -0.35634  |
| 101731 | Q2Q067 | Q95168 | -0.59252  |
| 101732 | Q2Q067 | P32754 | -0.3366   |
| 101733 | Q2Q067 | Q96CP2 | -0.24416  |
| 101734 | Q2Q067 | Q15849 | -0.53178  |
| 101735 | Q2Q067 | Q9H3Q1 | -0.47541  |
| 101736 | Q2Q067 | Q95398 | -0.58601  |
| 101737 | Q2Q067 | Q96LM9 | -0.15831  |
| 101738 | Q2Q067 | P27352 | -1.0351   |
| 101739 | Q2Q067 | Q9HAW8 | -0.96709  |
| 101740 | Q2Q067 | P59780 | -0.057159 |
| 101741 | Q2Q067 | P22079 | -1.1712   |
| 101742 | Q2Q067 | Q8NGH9 | -1.4096   |
| 101743 | Q2Q067 | P49675 | -0.49249  |
| 101744 | Q2Q067 | P01583 | -0.21374  |
| 101745 | Q2Q067 | Q8N2H4 | -0.62531  |
| 101746 | Q2Q067 | Q15695 | -0.52441  |
| 101747 | Q2Q067 | Q09019 | -0.24676  |
| 101748 | Q2Q067 | Q95007 | -1.4096   |
| 101749 | Q2Q067 | Q9Y4G6 | -0.22765  |
| 101750 | Q2Q067 | Q9BXT5 | -0.38533  |
| 101751 | Q2Q067 | Q9NRW7 | -0.22163  |
| 101752 | Q2Q067 | Q9HA72 | -1.0345   |
| 101753 | Q2Q067 | Q16270 | -0.60753  |
| 101754 | Q2Q067 | Q9NS84 | -0.62211  |
| 101755 | Q2Q067 | Q5TF39 | -1.2133   |
| 101756 | Q2Q067 | Q14392 | -1.0731   |
| 101757 | Q2Q067 | Q49A26 | -0.61319  |
| 101758 | Q2Q067 | Q14591 | -0.085533 |
| 101759 | Q2Q067 | P98155 | -1.0345   |
| 101760 | Q2Q067 | Q95859 | -1.2376   |
| 101761 | Q2Q067 | Q99714 | -0.21719  |
| 101762 | Q2Q067 | Q99958 | -0.25286  |
| 101763 | Q2Q067 | Q2T9K0 | -1.0345   |
| 101764 | Q2Q067 | Q8NCI6 | -0.35474  |



|        |        |        |            |
|--------|--------|--------|------------|
| 101765 | Q2Q067 | Q96RQ1 | -0.30591   |
| 101766 | Q2Q067 | Q7Z5L7 | -0.88057   |
| 101767 | Q2Q067 | A4D0S4 | -1.3147    |
| 101768 | Q2Q067 | P07988 | -0.71016   |
| 101769 | Q2Q067 | Q9UMZ3 | -1.2978    |
| 101770 | Q2Q067 | Q9BUQ8 | -0.35017   |
| 101771 | Q2Q067 | Q9NPC3 | -0.12058   |
| 101772 | Q2Q067 | Q6DD87 | -0.085533  |
| 101773 | Q2Q067 | Q9Y6U3 | -0.27098   |
| 101774 | Q2Q067 | Q15262 | -0.74921   |
| 101775 | Q2Q067 | Q9NZD2 | -0.66723   |
| 101776 | Q2Q067 | Q96A54 | -1.1925    |
| 101777 | Q2Q067 | Q92947 | -0.39647   |
| 101778 | Q2Q067 | Q9H293 | -0.81244   |
| 101779 | Q2Q067 | P15848 | -0.35038   |
| 101780 | Q2Q067 | Q8NGY1 | -1.4096    |
| 101781 | Q2Q067 | P0CW00 | -0.44292   |
| 101782 | Q2Q067 | O15245 | -0.42835   |
| 101783 | Q2Q067 | Q6UXI7 | -1.0242    |
| 101784 | Q2Q067 | P30486 | -0.98258   |
| 101785 | Q2Q067 | P30085 | -0.32964   |
| 101786 | Q2Q067 | P11309 | -0.5076    |
| 101787 | Q2Q067 | Q0Z7S8 | -0.45398   |
| 101788 | Q2Q067 | A6NJQ4 | -0.43957   |
| 101789 | Q2Q067 | Q9HD90 | -0.22766   |
| 101790 | Q2Q067 | Q8IZP7 | -1.0924    |
| 101791 | Q2Q067 | Q96DZ7 | -1.0345    |
| 101792 | Q2Q067 | Q96G30 | -0.46903   |
| 101793 | Q2Q067 | Q8WVIO | -0.84904   |
| 101794 | Q2Q067 | Q08334 | -0.75912   |
| 101795 | Q2Q067 | Q8N114 | -0.55345   |
| 101796 | Q2Q067 | Q9Y2K9 | -0.62737   |
| 101797 | Q2Q067 | Q6ZMQ8 | -0.85641   |
| 101798 | Q2Q067 | Q9NQS3 | -0.44844   |
| 101799 | Q2Q067 | O15320 | -0.42103   |
| 101800 | Q2Q067 | Q8IXR9 | -0.0056241 |
| 101801 | Q2Q067 | Q0VDE8 | -0.44252   |
| 101802 | Q2Q067 | P36405 | -0.22911   |
| 101803 | Q2Q067 | P98170 | -0.22739   |
| 101804 | Q2Q067 | Q8WXG9 | -0.74016   |
| 101805 | Q2Q067 | Q96PB1 | -1.0345    |
| 101806 | Q2Q067 | Q9HA65 | -1.4231    |
| 101807 | Q2Q067 | Q8NH60 | -1.4096    |
| 101808 | Q2Q067 | Q8IU80 | -1.0853    |
| 101809 | Q2Q067 | Q9NQ76 | -0.54261   |
| 101810 | Q2Q067 | P01008 | -0.24773   |
| 101811 | Q2Q067 | Q9UJV9 | -0.55723   |
| 101812 | Q2Q067 | P52823 | -0.68457   |
| 101813 | Q2Q067 | A6NLI5 | -0.73178   |
| 101814 | Q2Q067 | P09681 | -0.53194   |
| 101815 | Q2Q067 | Q15125 | -0.90518   |
| 101816 | Q2Q067 | Q6ZVU0 | -0.15259   |
| 101817 | Q2Q067 | Q6NSI1 | -0.2274    |
| 101818 | Q2Q067 | O00754 | -0.50876   |
| 101819 | Q2Q067 | Q9H0X9 | -1.2446    |
| 101820 | Q2Q067 | Q8IWX8 | -0.20294   |
| 101821 | Q2Q067 | Q6UXQ8 | -0.98666   |
| 101822 | Q2Q067 | Q7Z333 | -0.23219   |
| 101823 | Q2Q067 | Q9H2X6 | -0.22741   |
| 101824 | Q2Q067 | Q9GZY0 | -0.36436   |
| 101825 | Q2Q067 | P0C866 | -0.027529  |
| 101826 | Q2Q067 | Q6UXS9 | -0.22525   |
| 101827 | Q2Q067 | Q96PN6 | -0.70804   |
| 101828 | Q2Q067 | Q9NYV9 | -1.2647    |
| 101829 | Q2Q067 | Q16348 | -0.51073   |
| 101830 | Q2Q067 | Q8NGH3 | -1.4096    |
| 101831 | Q2Q067 | Q9BRP7 | -0.39275   |
| 101832 | Q2Q067 | P35368 | -0.86036   |
| 101833 | Q2Q067 | P14317 | -0.22829   |
| 101834 | Q2Q067 | A5PLL1 | -0.22741   |
| 101835 | Q2Q067 | Q9UI40 | -1.1266    |
| 101836 | Q2Q067 | Q9BRR9 | -1.1792    |
| 101837 | Q2Q067 | Q8WXD0 | -1.2589    |
| 101838 | Q2Q067 | P39059 | -1.7459    |
| 101839 | Q2Q067 | Q6PKH6 | -1.5999    |
| 101840 | Q2Q067 | Q9BX93 | -1.0766    |

|        |        |        |           |
|--------|--------|--------|-----------|
| 101841 | Q2Q067 | A7MBM2 | -0.80701  |
| 101842 | Q2Q067 | Q9Y2H0 | -0.12823  |
| 101843 | Q2Q067 | Q9HCX3 | -0.085533 |
| 101844 | Q2Q067 | Q9Y4C5 | -0.75793  |
| 101845 | Q2Q067 | Q14956 | -1.2164   |
| 101846 | Q2Q067 | Q43897 | -1.6209   |
| 101847 | Q2Q067 | P23083 | -0.98652  |
| 101848 | Q2Q067 | Q8N1W0 | -1.0345   |
| 101849 | Q2Q067 | O15195 | -0.30685  |
| 101850 | Q2Q067 | Q96F81 | -0.88909  |
| 101851 | Q2Q067 | A4D263 | -0.24416  |
| 101852 | Q2Q067 | Q7Z2T5 | -0.65737  |
| 101853 | Q2Q067 | Q8NGB4 | -1.4096   |
| 101854 | Q2Q067 | Q9ULK5 | -0.4723   |
| 101855 | Q2Q067 | Q92565 | -0.43258  |
| 101856 | Q2Q067 | Q6ZU64 | -0.89369  |
| 101857 | Q2Q067 | P59537 | -1.3875   |
| 101858 | Q2Q067 | Q9NRM7 | -0.22741  |
| 101859 | Q2Q067 | Q7Z2K8 | -0.83427  |
| 101860 | Q2Q067 | Q8NBJ9 | -1.0725   |
| 101861 | Q2Q067 | A6NDI0 | -0.73178  |
| 101862 | Q2Q067 | Q5VWM4 | -0.19475  |
| 101863 | Q2Q067 | Q6UWN0 | -0.65821  |
| 101864 | Q2Q067 | P78310 | -0.26654  |
| 101865 | Q2Q067 | Q8N2C3 | -0.59947  |
| 101866 | Q2Q067 | Q15648 | -0.15521  |
| 101867 | Q2Q067 | P24666 | -0.17851  |
| 101868 | Q2Q067 | P50542 | -0.22727  |
| 101869 | Q2Q067 | Q6IQ19 | -0.37621  |
| 101870 | Q2Q067 | Q96S99 | -0.1754   |
| 101871 | Q2Q067 | Q4AC94 | -0.36202  |
| 101872 | Q2Q067 | Q8WWU5 | -1.3836   |
| 101873 | Q2Q067 | Q13131 | -0.30929  |
| 101874 | Q2Q067 | Q6ZV70 | -0.5697   |
| 101875 | Q2Q067 | Q6B0K9 | -0.42327  |
| 101876 | Q2Q067 | P14616 | -1.5498   |
| 101877 | Q2Q067 | Q9NQ11 | -1.3388   |
| 101878 | Q2Q067 | P22897 | -1.2019   |
| 101879 | Q2Q067 | Q15527 | -0.24416  |
| 101880 | Q2Q067 | P01607 | -1.1115   |
| 101881 | Q2Q067 | Q9HCC6 | -0.22373  |
| 101882 | Q2Q067 | Q9H741 | -0.98666  |
| 101883 | Q2Q067 | Q9Y6R4 | -0.52755  |
| 101884 | Q2Q067 | Q66K14 | -1.9108   |
| 101885 | Q2Q067 | Q86V25 | -0.19834  |
| 101886 | Q2Q067 | P45985 | -0.2285   |
| 101887 | Q2Q067 | Q9BRZ2 | -0.60423  |
| 101888 | Q2Q067 | Q9UPQ4 | -0.2273   |
| 101889 | Q2Q067 | Q9BQP9 | -1.1714   |
| 101890 | Q2Q067 | Q9NVM1 | -1.0345   |
| 101891 | Q2Q067 | A4FU28 | -1.0345   |
| 101892 | Q2Q067 | A4D1S0 | -1.0212   |
| 101893 | Q2Q067 | P04553 | -0.82343  |
| 101894 | Q2Q067 | Q8IV16 | -0.88451  |
| 101895 | Q2Q067 | P02708 | -0.86446  |
| 101896 | Q2Q067 | Q8NHU2 | -0.065031 |
| 101897 | Q2Q067 | Q7Z7C7 | -0.29862  |
| 101898 | Q2Q067 | P30039 | -0.29577  |
| 101899 | Q2Q067 | P02100 | -0.23015  |
| 101900 | Q2Q067 | P35542 | -0.91277  |
| 101901 | Q2Q067 | Q13066 | -0.24416  |
| 101902 | Q2Q067 | Q9NU53 | -1.0345   |
| 101903 | Q2Q067 | Q16627 | -0.95067  |
| 101904 | Q2Q067 | Q86YR5 | -0.22515  |
| 101905 | Q2Q067 | Q9UKS6 | -0.22741  |
| 101906 | Q2Q067 | P00750 | -0.499    |
| 101907 | Q2Q067 | Q69YG0 | -1.0345   |
| 101908 | Q2Q067 | Q8N307 | -0.92619  |
| 101909 | Q2Q067 | Q6XE24 | -0.78558  |
| 101910 | Q2Q067 | Q9BYT9 | -1.0594   |
| 101911 | Q2Q067 | Q96T59 | -0.06517  |
| 101912 | Q2Q067 | O75493 | -0.88755  |
| 101913 | Q2Q067 | Q9Y662 | -0.72773  |
| 101914 | Q2Q067 | A2VDF0 | -0.32541  |
| 101915 | Q2Q067 | A6NDD5 | -0.90997  |
| 101916 | Q2Q067 | Q8N0X7 | -0.13709  |

|        |        |        |           |
|--------|--------|--------|-----------|
| 101917 | Q2Q067 | Q96PG1 | -1.0345   |
| 101918 | Q2Q067 | Q92953 | -1.05     |
| 101919 | Q2Q067 | P00441 | -0.21962  |
| 101920 | Q2Q067 | Q96Q11 | -0.58582  |
| 101921 | Q2Q067 | O15239 | -0.58776  |
| 101922 | Q2Q067 | P02728 | -0.24416  |
| 101923 | Q2Q067 | Q9H7Y0 | -0.98666  |
| 101924 | Q2Q067 | Q9NYI0 | -0.58329  |
| 101925 | Q2Q067 | Q9UPW5 | -0.061466 |
| 101926 | Q2Q067 | Q587J7 | -0.35147  |
| 101927 | Q2Q067 | Q03014 | -0.22777  |
| 101928 | Q2Q067 | Q14DG7 | -0.77947  |
| 101929 | Q2Q067 | Q2I0M4 | -0.4496   |
| 101930 | Q2Q067 | Q8N2E2 | -0.98666  |
| 101931 | Q2Q067 | Q92616 | -0.22561  |
| 101932 | Q2Q067 | Q12774 | -0.84721  |
| 101933 | Q2Q067 | Q5T4I8 | -0.14491  |
| 101934 | Q2Q067 | Q86XS8 | -0.61128  |
| 101935 | Q2Q067 | Q0P651 | -0.98666  |
| 101936 | Q2Q067 | Q969V5 | -0.2274   |
| 101937 | Q2Q067 | Q9H169 | -0.51536  |
| 101938 | Q2Q067 | Q9Y3I0 | -0.64109  |
| 101939 | Q2Q067 | P09430 | -0.65351  |
| 101940 | Q2Q067 | O95197 | -0.65587  |
| 101941 | Q2Q067 | P18065 | -0.45626  |
| 101942 | Q2Q067 | Q8N539 | -1.3182   |
| 101943 | Q2Q067 | P01871 | -1.6599   |
| 101944 | Q2Q067 | Q9NYM9 | -0.38179  |
| 101945 | Q2Q067 | Q9NS82 | -1.1652   |
| 101946 | Q2Q067 | A6NKC4 | -1.1348   |
| 101947 | Q2Q067 | Q9ULE0 | -0.045788 |
| 101948 | Q2Q067 | P34995 | -1.5092   |
| 101949 | Q2Q067 | Q96PH1 | -0.83557  |
| 101950 | Q2Q067 | A8MUP2 | -0.23203  |
| 101951 | Q2Q067 | Q6ZP01 | -0.64352  |
| 101952 | Q2Q067 | Q6ZUT3 | -0.67953  |
| 101953 | Q2Q067 | A6NKQ9 | -0.96181  |
| 101954 | Q2Q067 | P01613 | -1.1115   |
| 101955 | Q2Q067 | Q7Z3Z2 | -0.46099  |
| 101956 | Q2Q067 | Q9HBI5 | -0.20827  |
| 101957 | Q2Q067 | Q9P2P6 | -0.4197   |
| 101958 | Q2Q067 | Q13387 | -0.21817  |
| 101959 | Q2Q067 | Q6UXN2 | -0.98666  |
| 101960 | Q2Q067 | Q8IZF6 | -1.5126   |
| 101961 | Q2Q067 | Q03395 | -1.4082   |
| 101962 | Q2Q067 | Q1HG43 | -0.96697  |
| 101963 | Q2Q067 | Q969G5 | -0.35797  |
| 101964 | Q2Q067 | O95352 | -0.21105  |
| 101965 | Q2Q067 | Q11130 | -0.82693  |
| 101966 | Q2Q067 | Q6IN84 | -0.1693   |
| 101967 | Q2Q067 | Q8WYN0 | -0.52443  |
| 101968 | Q2Q067 | Q5T4B2 | -0.58982  |
| 101969 | Q2Q067 | Q86SP6 | -1.3465   |
| 101970 | Q2Q067 | P04233 | -0.47981  |
| 101971 | Q2Q067 | Q06481 | -0.28437  |
| 101972 | Q2Q067 | Q8NCJ5 | -0.19822  |
| 101973 | Q2Q067 | C9JR72 | -0.21733  |
| 101974 | Q2Q067 | Q9Y5K8 | -0.04222  |
| 101975 | Q2Q067 | Q8IW40 | -0.19836  |
| 101976 | Q2Q067 | Q1EHB4 | -1.2661   |
| 101977 | Q2Q067 | P51828 | -1.0644   |
| 101978 | Q2Q067 | Q06141 | -1.0364   |
| 101979 | Q2Q067 | Q96MV1 | -0.77947  |
| 101980 | Q2Q067 | P19447 | -0.17328  |
| 101981 | Q2Q067 | Q9NYV8 | -1.2704   |
| 101982 | Q2Q067 | Q9ULI1 | -0.22741  |
| 101983 | Q2Q067 | A6NFC9 | -1.4096   |
| 101984 | Q2Q067 | P17039 | -0.085533 |
| 101985 | Q2Q067 | P22455 | -0.92892  |
| 101986 | Q2Q067 | Q6WCQ1 | -0.39071  |
| 101987 | Q2Q067 | O14669 | -1.7558   |
| 101988 | Q2Q067 | B1ATL7 | -0.025551 |
| 101989 | Q2Q067 | P49643 | -0.3552   |
| 101990 | Q2Q067 | Q9H8H2 | -0.53895  |
| 101991 | Q2Q067 | P12882 | -0.1936   |
| 101992 | Q2Q067 | Q4VC12 | -0.47233  |

|        |        |        |           |
|--------|--------|--------|-----------|
| 101993 | Q2Q067 | Q8NGH7 | -1.4096   |
| 101994 | Q2Q067 | P62166 | -0.23186  |
| 101995 | Q2Q067 | Q8IV13 | -0.2264   |
| 101996 | Q2Q067 | Q95214 | -1.0345   |
| 101997 | Q2Q067 | Q9BV81 | -1.0097   |
| 101998 | Q2Q067 | Q14155 | -0.38087  |
| 101999 | Q2Q067 | Q96IM9 | -0.029196 |
| 102000 | Q2Q067 | Q96I76 | -0.41656  |
| 102001 | Q2Q067 | Q9NR81 | -0.49207  |
| 102002 | Q2Q067 | Q8IYM2 | -0.4135   |
| 102003 | Q2Q067 | Q96GE6 | -0.45603  |
| 102004 | Q2Q067 | Q8TC92 | -1.6228   |
| 102005 | Q2Q067 | P49326 | -1.1083   |
| 102006 | Q2Q067 | Q9GZQ6 | -1.4203   |
| 102007 | Q2Q067 | P06326 | -1.1115   |
| 102008 | Q2Q067 | P10586 | -0.94416  |
| 102009 | Q2Q067 | Q5JRS4 | -1.4096   |
| 102010 | Q2Q067 | Q8NH89 | -1.4096   |
| 102011 | Q2Q067 | O60331 | -0.4973   |
| 102012 | Q2Q067 | O94760 | -0.1831   |
| 102013 | Q2Q067 | Q5I0G3 | -0.53398  |
| 102014 | Q2Q067 | Q16842 | -0.71264  |
| 102015 | Q2Q067 | Q7Z7F0 | -0.072238 |
| 102016 | Q2Q067 | O14521 | -0.45602  |
| 102017 | Q2Q067 | Q96IR7 | -0.62755  |
| 102018 | Q2Q067 | P52566 | -0.65716  |
| 102019 | Q2Q067 | Q6P9H5 | -1.0835   |
| 102020 | Q2Q067 | Q86UV5 | -0.32528  |
| 102021 | Q2Q067 | Q56UN5 | -1.3228   |
| 102022 | Q2Q067 | Q9BXS0 | -1.7521   |
| 102023 | Q2Q067 | P27701 | -0.66429  |
| 102024 | Q2Q067 | Q9UET6 | -0.36733  |
| 102025 | Q2Q067 | Q13442 | -0.58688  |
| 102026 | Q2Q067 | P04745 | -0.39674  |
| 102027 | Q2Q067 | A6NEN9 | -0.087294 |
| 102028 | Q2Q067 | O00217 | -0.40527  |
| 102029 | Q2Q067 | Q9UKG4 | -1.3107   |
| 102030 | Q2Q067 | Q96M32 | -0.61439  |
| 102031 | Q2Q067 | Q6UX40 | -0.88997  |
| 102032 | Q2Q067 | P61371 | -0.22786  |
| 102033 | Q2Q067 | O60279 | -1.2043   |
| 102034 | Q2Q067 | Q8NGF7 | -1.4096   |
| 102035 | Q2Q067 | Q0JRZ9 | -0.22586  |
| 102036 | Q2Q067 | Q9BW72 | -0.9693   |
| 102037 | Q2Q067 | P61968 | -0.23964  |
| 102038 | Q2Q067 | Q15884 | -0.77947  |
| 102039 | Q2Q067 | Q8NGK6 | -1.4096   |
| 102040 | Q2Q067 | Q9NRW1 | -0.77714  |
| 102041 | Q2Q067 | Q9NXE4 | -0.64504  |
| 102042 | Q2Q067 | Q8NGI1 | -1.4096   |
| 102043 | Q2Q067 | Q9BXJ7 | -1.1731   |
| 102044 | Q2Q067 | Q6UVK1 | -1.2236   |
| 102045 | Q2Q067 | Q77932 | -0.95443  |
| 102046 | Q2Q067 | Q9NT99 | -1.0581   |
| 102047 | Q2Q067 | Q5MNZ6 | -0.22694  |
| 102048 | Q2Q067 | Q9HCN4 | -1.0809   |
| 102049 | Q2Q067 | P18135 | -1.1115   |
| 102050 | Q2Q067 | Q92599 | -0.21197  |
| 102051 | Q2Q067 | P35462 | -0.39546  |
| 102052 | Q2Q067 | Q8N146 | -1.4096   |
| 102053 | Q2Q067 | Q17R60 | -1.131    |
| 102054 | Q2Q067 | P05015 | -0.84976  |
| 102055 | Q2Q067 | P07355 | -0.25151  |
| 102056 | Q2Q067 | Q7L523 | -0.34868  |
| 102057 | Q2Q067 | Q96LK0 | -0.065949 |
| 102058 | Q2Q067 | Q9NQX3 | -0.78254  |
| 102059 | Q2Q067 | P03928 | -0.57896  |
| 102060 | Q2Q067 | O60925 | -0.021037 |
| 102061 | Q2Q067 | Q8IUZ5 | -0.53764  |
| 102062 | Q2Q067 | Q5BXX6 | -1.062    |
| 102063 | Q2Q067 | P78332 | -0.89148  |
| 102064 | Q2Q067 | Q96AT9 | -0.13872  |
| 102065 | Q2Q067 | P49796 | -0.448    |
| 102066 | Q2Q067 | Q14919 | -0.15922  |
| 102067 | Q2Q067 | O75197 | -0.28415  |
| 102068 | Q2Q067 | Q2HXU8 | -1.146    |

|        |        |        |           |
|--------|--------|--------|-----------|
| 102069 | Q2Q067 | Q3ZAQ7 | -1.0323   |
| 102070 | Q2Q067 | Q8N386 | -1.0345   |
| 102071 | Q2Q067 | Q9UBG3 | -0.2929   |
| 102072 | Q2Q067 | P07203 | -0.27659  |
| 102073 | Q2Q067 | Q6UXN9 | -0.38954  |
| 102074 | Q2Q067 | Q15145 | -0.16388  |
| 102075 | Q2Q067 | Q9Y5E3 | -1.3638   |
| 102076 | Q2Q067 | Q9UBZ4 | -0.12059  |
| 102077 | Q2Q067 | Q9BT56 | -0.45943  |
| 102078 | Q2Q067 | P0C0E4 | -0.95517  |
| 102079 | Q2Q067 | Q6ZTK2 | -0.1534   |
| 102080 | Q2Q067 | B5MD39 | -0.36767  |
| 102081 | Q2Q067 | Q9H0M4 | -0.48451  |
| 102082 | Q2Q067 | P52198 | -0.95655  |
| 102083 | Q2Q067 | Q96A19 | -0.21332  |
| 102084 | Q2Q067 | P46063 | -0.22629  |
| 102085 | Q2Q067 | Q96EN8 | -0.25683  |
| 102086 | Q2Q067 | Q6S545 | -0.22741  |
| 102087 | Q2Q067 | Q9UJA3 | -0.28947  |
| 102088 | Q2Q067 | Q75015 | -1.1875   |
| 102089 | Q2Q067 | Q96J87 | -0.49082  |
| 102090 | Q2Q067 | Q8IVJ1 | -1.2422   |
| 102091 | Q2Q067 | Q6UWP8 | -0.98666  |
| 102092 | Q2Q067 | Q7L576 | -0.19091  |
| 102093 | Q2Q067 | Q99808 | -0.98799  |
| 102094 | Q2Q067 | P43627 | -1.1621   |
| 102095 | Q2Q067 | Q5T011 | -0.33151  |
| 102096 | Q2Q067 | Q92187 | -0.58641  |
| 102097 | Q2Q067 | P63136 | -0.36034  |
| 102098 | Q2Q067 | Q8NFP4 | -0.82348  |
| 102099 | Q2Q067 | Q14905 | -0.58069  |
| 102100 | Q2Q067 | P56199 | -0.52446  |
| 102101 | Q2Q067 | Q9Y4G2 | -0.36307  |
| 102102 | Q2Q067 | Q8N162 | -1.4096   |
| 102103 | Q2Q067 | P30550 | -1.3717   |
| 102104 | Q2Q067 | Q14190 | -0.34582  |
| 102105 | Q2Q067 | P57071 | -0.085533 |
| 102106 | Q2Q067 | Q9NW08 | -0.042665 |
| 102107 | Q2Q067 | Q9BY79 | -0.91453  |
| 102108 | Q2Q067 | Q9BX59 | -1.188    |
| 102109 | Q2Q067 | Q9UBD3 | -1.2111   |
| 102110 | Q2Q067 | Q9HA38 | -0.098244 |
| 102111 | Q2Q067 | P10275 | -0.22744  |
| 102112 | Q2Q067 | Q14515 | -1.2717   |
| 102113 | Q2Q067 | Q96HD9 | -0.45634  |
| 102114 | Q2Q067 | Q06828 | -1.0339   |
| 102115 | Q2Q067 | A6NDE4 | -0.22944  |
| 102116 | Q2Q067 | Q7Z309 | -0.1375   |
| 102117 | Q2Q067 | P17612 | -0.22665  |
| 102118 | Q2Q067 | P62330 | -0.54194  |
| 102119 | Q2Q067 | Q14511 | -1.5336   |
| 102120 | Q2Q067 | P48637 | -0.49026  |
| 102121 | Q2Q067 | P06881 | -0.28783  |
| 102122 | Q2Q067 | Q8NET5 | -1.2277   |
| 102123 | Q2Q067 | Q8IVE3 | -0.92785  |
| 102124 | Q2Q067 | Q9ULT0 | -0.3072   |
| 102125 | Q2Q067 | P52209 | -0.16999  |
| 102126 | Q2Q067 | Q8N7Q2 | -0.98666  |
| 102127 | Q2Q067 | Q9BZA0 | -0.29146  |
| 102128 | Q2Q067 | Q8IUG5 | -0.16435  |
| 102129 | Q2Q067 | Q9NS71 | -0.62883  |
| 102130 | Q2Q067 | Q9UHD0 | -0.97372  |
| 102131 | Q2Q067 | Q8IWF6 | -0.23807  |
| 102132 | Q2Q067 | Q9UBX1 | -0.99215  |
| 102133 | Q2Q067 | Q95971 | -0.77619  |
| 102134 | Q2Q067 | Q6ZNO3 | -0.22803  |
| 102135 | Q2Q067 | Q8N1W2 | -0.085533 |
| 102136 | Q2Q067 | Q9BT40 | -0.22635  |
| 102137 | Q2Q067 | Q92610 | -0.11975  |
| 102138 | Q2Q067 | P10316 | -0.98258  |
| 102139 | Q2Q067 | Q13163 | -0.32483  |
| 102140 | Q2Q067 | Q68D51 | -0.382    |
| 102141 | Q2Q067 | P37023 | -0.38915  |
| 102142 | Q2Q067 | Q9NY37 | -1.1605   |
| 102143 | Q2Q067 | P19404 | -0.36778  |
| 102144 | Q2Q067 | Q9UBR1 | -0.16384  |

|        |        |        |           |
|--------|--------|--------|-----------|
| 102145 | Q2Q067 | Q8N531 | -0.5976   |
| 102146 | Q2Q067 | Q8WU17 | -0.65331  |
| 102147 | Q2Q067 | P08185 | -0.99827  |
| 102148 | Q2Q067 | Q94989 | -0.5714   |
| 102149 | Q2Q067 | Q86WD7 | -0.709    |
| 102150 | Q2Q067 | Q15078 | -0.13051  |
| 102151 | Q2Q067 | Q8N9H8 | -0.69115  |
| 102152 | Q2Q067 | Q08462 | -0.88118  |
| 102153 | Q2Q067 | Q75828 | -0.22702  |
| 102154 | Q2Q067 | Q16787 | -1.1762   |
| 102155 | Q2Q067 | P24588 | -0.10221  |
| 102156 | Q2Q067 | P41231 | -0.8994   |
| 102157 | Q2Q067 | P43630 | -1.2792   |
| 102158 | Q2Q067 | Q8WZ19 | -0.09494  |
| 102159 | Q2Q067 | Q8IVN8 | -1.0131   |
| 102160 | Q2Q067 | Q60391 | -0.92494  |
| 102161 | Q2Q067 | Q4J6C6 | -0.52178  |
| 102162 | Q2Q067 | Q9Y5G6 | -1.3679   |
| 102163 | Q2Q067 | Q86YR7 | -0.81263  |
| 102164 | Q2Q067 | Q6ZQY2 | -0.22736  |
| 102165 | Q2Q067 | Q9UPU9 | -0.34397  |
| 102166 | Q2Q067 | Q8N2Y8 | -0.22709  |
| 102167 | Q2Q067 | Q6JVE5 | -1.0218   |
| 102168 | Q2Q067 | Q8N594 | -0.77872  |
| 102169 | Q2Q067 | Q5RGS3 | -1.0345   |
| 102170 | Q2Q067 | Q969Y0 | -0.98666  |
| 102171 | Q2Q067 | Q9Y5H3 | -1.3679   |
| 102172 | Q2Q067 | Q9NRJ3 | -1.0442   |
| 102173 | Q2Q067 | Q8WW62 | -1.1346   |
| 102174 | Q2Q067 | Q9NRZ5 | -0.86411  |
| 102175 | Q2Q067 | Q3SY56 | -0.22472  |
| 102176 | Q2Q067 | Q86UP0 | -1.1264   |
| 102177 | Q2Q067 | Q9Y3B3 | -0.61416  |
| 102178 | Q2Q067 | Q8TBC4 | -0.22584  |
| 102179 | Q2Q067 | Q96SQ9 | -0.84452  |
| 102180 | Q2Q067 | P04437 | -0.47581  |
| 102181 | Q2Q067 | Q9NWM0 | -0.22008  |
| 102182 | Q2Q067 | Q9Y217 | -0.22086  |
| 102183 | Q2Q067 | P0CF75 | -0.030413 |
| 102184 | Q2Q067 | Q0ZGT2 | -0.32198  |
| 102185 | Q2Q067 | Q9NUD9 | -0.93617  |
| 102186 | Q2Q067 | Q96H78 | -0.85935  |
| 102187 | Q2Q067 | Q04671 | -0.32211  |
| 102188 | Q2Q067 | Q9UHA4 | -0.25333  |
| 102189 | Q2Q067 | Q9HBU1 | -0.22735  |
| 102190 | Q2Q067 | Q695T7 | -1.2394   |
| 102191 | Q2Q067 | Q2Q1W2 | -0.72316  |
| 102192 | Q2Q067 | Q14647 | -0.61435  |
| 102193 | Q2Q067 | Q95747 | -1.3229   |
| 102194 | Q2Q067 | B7ZBB8 | -0.24981  |
| 102195 | Q2Q067 | Q6NT04 | -0.16018  |
| 102196 | Q2Q067 | Q8TD22 | -1.0006   |
| 102197 | Q2Q067 | P98179 | -0.51581  |
| 102198 | Q2Q067 | Q96I85 | -0.98666  |
| 102199 | Q2Q067 | Q2KHT4 | -1.0846   |
| 102200 | Q2Q067 | Q9BUA6 | -0.28191  |
| 102201 | Q2Q067 | Q15218 | -1.4763   |
| 102202 | Q2Q067 | P05013 | -0.73385  |
| 102203 | Q2Q067 | Q6UXD7 | -1.049    |
| 102204 | Q2Q067 | Q9HBY0 | -0.89305  |
| 102205 | Q2Q067 | B2RXH2 | -0.14226  |
| 102206 | Q2Q067 | Q9Y2E4 | -0.20421  |
| 102207 | Q2Q067 | Q7L2J0 | -0.26058  |
| 102208 | Q2Q067 | Q9Y463 | -0.32633  |
| 102209 | Q2Q067 | P56880 | -0.85277  |
| 102210 | Q2Q067 | Q9NX78 | -1.0345   |
| 102211 | Q2Q067 | Q9Y2H6 | -0.53481  |
| 102212 | Q2Q067 | Q9NSY2 | -0.46603  |
| 102213 | Q2Q067 | Q86SQ3 | -1.5419   |
| 102214 | Q2Q067 | Q14165 | -0.87374  |
| 102215 | Q2Q067 | P0C7N4 | -1.0345   |
| 102216 | Q2Q067 | Q8TC12 | -1.331    |
| 102217 | Q2Q067 | Q9UPW0 | -0.42529  |
| 102218 | Q2Q067 | Q01459 | -0.45385  |
| 102219 | Q2Q067 | Q8TEJ3 | -0.48451  |
| 102220 | Q2Q067 | Q9NYK1 | -0.65272  |

|        |        |        |           |
|--------|--------|--------|-----------|
| 102221 | Q2Q067 | Q70EK9 | -0.86859  |
| 102222 | Q2Q067 | Q96L96 | -0.78182  |
| 102223 | Q2Q067 | B2RD01 | -0.1381   |
| 102224 | Q2Q067 | Q15836 | -0.22463  |
| 102225 | Q2Q067 | P58335 | -1.1584   |
| 102226 | Q2Q067 | Q9BT04 | -0.18713  |
| 102227 | Q2Q067 | P63316 | -0.22548  |
| 102228 | Q2Q067 | Q86TI0 | -1.0824   |
| 102229 | Q2Q067 | Q8NGC7 | -1.4096   |
| 102230 | Q2Q067 | Q9NUV9 | -0.21623  |
| 102231 | Q2Q067 | P51788 | -0.92079  |
| 102232 | Q2Q067 | Q68G74 | -0.22741  |
| 102233 | Q2Q067 | P01620 | -1.1115   |
| 102234 | Q2Q067 | P60328 | -0.27386  |
| 102235 | Q2Q067 | Q01151 | -1.177    |
| 102236 | Q2Q067 | A6NF34 | -1.09     |
| 102237 | Q2Q067 | Q9H0E7 | -0.23728  |
| 102238 | Q2Q067 | Q9UGP8 | -0.92278  |
| 102239 | Q2Q067 | Q8NBE8 | -0.21069  |
| 102240 | Q2Q067 | Q155Q3 | -0.22741  |
| 102241 | Q2Q067 | P05154 | -0.61736  |
| 102242 | Q2Q067 | Q96SU4 | -0.9261   |
| 102243 | Q2Q067 | Q9UHL0 | -0.60927  |
| 102244 | Q2Q067 | Q15738 | -1.0347   |
| 102245 | Q2Q067 | Q9BYU1 | -0.33818  |
| 102246 | Q2Q067 | Q5MJ08 | -0.063237 |
| 102247 | Q2Q067 | O95744 | -0.29776  |
| 102248 | Q2Q067 | P51857 | -0.22642  |
| 102249 | Q2Q067 | Q8N4W6 | -1.0544   |
| 102250 | Q2Q067 | Q15286 | -0.67811  |
| 102251 | Q2Q067 | P52564 | -0.22834  |
| 102252 | Q2Q067 | Q9Y6M4 | -1.204    |
| 102253 | Q2Q067 | Q5MAI5 | -0.96062  |
| 102254 | Q2Q067 | O75626 | -0.15274  |
| 102255 | Q2Q067 | Q8N5C6 | -0.46343  |
| 102256 | Q2Q067 | Q9BUV8 | -0.24416  |
| 102257 | Q2Q067 | Q8TDI7 | -1.0345   |
| 102258 | Q2Q067 | Q16695 | -0.20905  |
| 102259 | Q2Q067 | Q68EM7 | -0.39401  |
| 102260 | Q2Q067 | P10523 | -1.0272   |
| 102261 | Q2Q067 | Q6IF00 | -1.4096   |
| 102262 | Q2Q067 | O15258 | -0.69851  |
| 102263 | Q2Q067 | Q8N8M0 | -0.42319  |
| 102264 | Q2Q067 | O95672 | -1.5748   |
| 102265 | Q2Q067 | Q15008 | -0.16266  |
| 102266 | Q2Q067 | Q9BZ11 | -1.4051   |
| 102267 | Q2Q067 | Q5TGZ0 | -0.69747  |
| 102268 | Q2Q067 | Q9NPH0 | -0.80377  |
| 102269 | Q2Q067 | Q6S8J7 | -0.22713  |
| 102270 | Q2Q067 | Q8WWI5 | -0.77845  |
| 102271 | Q2Q067 | Q8NGM9 | -1.4096   |
| 102272 | Q2Q067 | Q99469 | -0.22741  |
| 102273 | Q2Q067 | P20292 | -0.09511  |
| 102274 | Q2Q067 | Q9C0J9 | -0.22628  |
| 102275 | Q2Q067 | Q3LIE5 | -0.39621  |
| 102276 | Q2Q067 | Q86YV0 | -0.59115  |
| 102277 | Q2Q067 | P47893 | -1.4862   |
| 102278 | Q2Q067 | P09326 | -0.6606   |
| 102279 | Q2Q067 | P05156 | -1.5363   |
| 102280 | Q2Q067 | A6NKB5 | -1.0345   |
| 102281 | Q2Q067 | Q5VWK5 | -0.61241  |
| 102282 | Q2Q067 | P26022 | -0.93753  |
| 102283 | Q2Q067 | P06318 | -1.1115   |
| 102284 | Q2Q067 | Q8N109 | -1.1634   |
| 102285 | Q2Q067 | Q96A11 | -0.76719  |
| 102286 | Q2Q067 | Q9UPC5 | -0.91283  |
| 102287 | Q2Q067 | O43852 | -0.22686  |
| 102288 | Q2Q067 | Q3ZCQ3 | -1.0345   |
| 102289 | Q2Q067 | Q8WXG6 | -0.38442  |
| 102290 | Q2Q067 | Q5TZK3 | -0.01299  |
| 102291 | Q2Q067 | Q8TDF5 | -1.2459   |
| 102292 | Q2Q067 | Q96SL1 | -1.1853   |
| 102293 | Q2Q067 | P80422 | -0.98652  |
| 102294 | Q2Q067 | O60404 | -1.4096   |
| 102295 | Q2Q067 | Q01974 | -1.4274   |
| 102296 | Q2Q067 | Q8WXA3 | -0.22724  |

|        |        |        |           |
|--------|--------|--------|-----------|
| 102297 | Q2Q067 | Q9NYK5 | -0.3276   |
| 102298 | Q2Q067 | P39900 | -1.3811   |
| 102299 | Q2Q067 | O95497 | -0.81165  |
| 102300 | Q2Q067 | Q9H347 | -0.2267   |
| 102301 | Q2Q067 | P06311 | -1.1115   |
| 102302 | Q2Q067 | Q9TQE0 | -0.62454  |
| 102303 | Q2Q067 | A6NFA0 | -1.0345   |
| 102304 | Q2Q067 | P52701 | -0.13326  |
| 102305 | Q2Q067 | Q8TE82 | -0.32909  |
| 102306 | Q2Q067 | O14569 | -1.0481   |
| 102307 | Q2Q067 | Q9H9L4 | -0.30384  |
| 102308 | Q2Q067 | Q71RH2 | -0.99456  |
| 102309 | Q2Q067 | A6NC86 | -0.96328  |
| 102310 | Q2Q067 | Q5VYJ5 | -1.0345   |
| 102311 | Q2Q067 | Q9BYH1 | -1.1118   |
| 102312 | Q2Q067 | Q9UGQ2 | -0.73309  |
| 102313 | Q2Q067 | Q96IQ9 | -0.22736  |
| 102314 | Q2Q067 | P48039 | -1.4047   |
| 102315 | Q2Q067 | Q9GZU5 | -1.221    |
| 102316 | Q2Q067 | Q9UEY8 | -0.17993  |
| 102317 | Q2Q067 | Q9BYG0 | -1.0882   |
| 102318 | Q2Q067 | Q2M385 | -1.0345   |
| 102319 | Q2Q067 | Q00973 | -0.7783   |
| 102320 | Q2Q067 | Q8N1G1 | -0.20226  |
| 102321 | Q2Q067 | O14894 | -1.1904   |
| 102322 | Q2Q067 | Q8NGA2 | -1.4096   |
| 102323 | Q2Q067 | Q7Z4L0 | -0.80824  |
| 102324 | Q2Q067 | Q6UWV2 | -0.58098  |
| 102325 | Q2Q067 | P54819 | -0.66284  |
| 102326 | Q2Q067 | Q9Y279 | -0.31179  |
| 102327 | Q2Q067 | P06276 | -0.74593  |
| 102328 | Q2Q067 | Q99570 | -0.49838  |
| 102329 | Q2Q067 | O60341 | -0.22649  |
| 102330 | Q2Q067 | Q96AA3 | -1.0123   |
| 102331 | Q2Q067 | O95259 | -0.41361  |
| 102332 | Q2Q067 | Q8N9N8 | -0.072295 |
| 102333 | Q2Q067 | Q6NYC1 | -0.20056  |
| 102334 | Q2Q067 | Q8WUT9 | -0.85935  |
| 102335 | Q2Q067 | O00587 | -1.0725   |
| 102336 | Q2Q067 | Q8WVX3 | -1.0345   |
| 102337 | Q2Q067 | Q9NQS1 | -0.11163  |
| 102338 | Q2Q067 | Q14CX7 | -0.20901  |
| 102339 | Q2Q067 | Q9Y572 | -0.25681  |
| 102340 | Q2Q067 | P23759 | -0.2222   |
| 102341 | Q2Q067 | Q8NGY6 | -1.4096   |
| 102342 | Q2Q067 | P61009 | -0.84105  |
| 102343 | Q2Q067 | Q96FI4 | -0.20158  |
| 102344 | Q2Q067 | P01571 | -0.77343  |
| 102345 | Q2Q067 | Q15777 | -0.34249  |
| 102346 | Q2Q067 | Q16643 | -0.70379  |
| 102347 | Q2Q067 | Q9NWC5 | -1.0345   |
| 102348 | Q2Q067 | Q9Y617 | -0.34587  |
| 102349 | Q2Q067 | Q2MV58 | -0.80822  |
| 102350 | Q2Q067 | P55786 | -0.27212  |
| 102351 | Q2Q067 | Q9P0W0 | -0.56566  |
| 102352 | Q2Q067 | Q9P2T1 | -0.42324  |
| 102353 | Q2Q067 | P35503 | -0.96578  |
| 102354 | Q2Q067 | Q9UBP8 | -0.3682   |
| 102355 | Q2Q067 | P43250 | -1.3562   |
| 102356 | Q2Q067 | Q7Z4N8 | -0.59337  |
| 102357 | Q2Q067 | Q12756 | -0.32819  |
| 102358 | Q2Q067 | A2RU54 | -0.22991  |
| 102359 | Q2Q067 | A5YM69 | -0.044497 |
| 102360 | Q2Q067 | Q8NB14 | -0.76972  |
| 102361 | Q2Q067 | A1L1A6 | -1.0345   |
| 102362 | Q2Q067 | Q8TAQ9 | -1.0099   |
| 102363 | Q2Q067 | P20839 | -0.31566  |
| 102364 | Q2Q067 | P08962 | -0.7374   |
| 102365 | Q2Q067 | Q14242 | -0.79893  |
| 102366 | Q2Q067 | P07478 | -1.0563   |
| 102367 | Q2Q067 | P47897 | -0.19237  |
| 102368 | Q2Q067 | Q9NZW4 | -1.2399   |
| 102369 | Q2Q067 | Q5DX21 | -1.3212   |
| 102370 | Q2Q067 | Q66K66 | -1.0345   |
| 102371 | Q2Q067 | O94826 | -0.22731  |
| 102372 | Q2Q067 | Q9BZL1 | -0.14672  |



|        |        |        |           |
|--------|--------|--------|-----------|
| 102373 | Q2Q067 | Q9BT73 | -0.18798  |
| 102374 | Q2Q067 | O95947 | -0.36741  |
| 102375 | Q2Q067 | Q7L3B6 | -0.20901  |
| 102376 | Q2Q067 | Q7Z695 | -1.4048   |
| 102377 | Q2Q067 | P59861 | -0.94775  |
| 102378 | Q2Q067 | Q8IXZ2 | -0.20509  |
| 102379 | Q2Q067 | Q6P3R8 | -1.4247   |
| 102380 | Q2Q067 | P58499 | -0.91711  |
| 102381 | Q2Q067 | P16260 | -0.64234  |
| 102382 | Q2Q067 | Q8WWG9 | -1.1529   |
| 102383 | Q2Q067 | Q9NQ75 | -0.61195  |
| 102384 | Q2Q067 | Q9UIU6 | -0.22745  |
| 102385 | Q2Q067 | Q8N0Y3 | -1.4096   |
| 102386 | Q2Q067 | Q68CZ1 | -0.21816  |
| 102387 | Q2Q067 | P49683 | -1.4295   |
| 102388 | Q2Q067 | Q9BRX5 | -0.10046  |
| 102389 | Q2Q067 | O95267 | -0.83199  |
| 102390 | Q2Q067 | Q8NG48 | -0.042761 |
| 102391 | Q2Q067 | P06280 | -0.19057  |
| 102392 | Q2Q067 | Q6ZST4 | -0.17889  |
| 102393 | Q2Q067 | Q13535 | -0.89917  |
| 102394 | Q2Q067 | Q8IVB5 | -0.24416  |
| 102395 | Q2Q067 | Q15033 | -0.74841  |
| 102396 | Q2Q067 | B8ZZ34 | -1.0345   |
| 102397 | Q2Q067 | Q7Z7B8 | -0.94775  |
| 102398 | Q2Q067 | Q86TI2 | -0.5165   |
| 102399 | Q2Q067 | Q9Y597 | -0.19558  |
| 102400 | Q2Q067 | O60896 | -0.40615  |
| 102401 | Q2Q067 | Q8WVB6 | -0.68279  |
| 102402 | Q2Q067 | Q8WUH6 | -1.0345   |
| 102403 | Q2Q067 | P08949 | -0.86155  |
| 102404 | Q2Q067 | Q8IVP5 | -0.27594  |
| 102405 | Q2Q067 | P19525 | -0.54358  |
| 102406 | Q2Q067 | Q8N9X3 | -0.22389  |
| 102407 | Q2Q067 | Q99467 | -1.1838   |
| 102408 | Q2Q067 | P14778 | -1.1502   |
| 102409 | Q2Q067 | P54108 | -0.87136  |
| 102410 | Q2Q067 | P01744 | -1.1115   |
| 102411 | Q2Q067 | Q9BYT1 | -0.99147  |
| 102412 | Q2Q067 | Q96N67 | -0.73088  |
| 102413 | Q2Q067 | Q13285 | -0.23202  |
| 102414 | Q2Q067 | Q86UD3 | -1.2913   |
| 102415 | Q2Q067 | Q9HC97 | -1.6361   |
| 102416 | Q2Q067 | P0CV99 | -0.44292  |
| 102417 | Q2Q067 | P35070 | -1.3633   |
| 102418 | Q2Q067 | Q13117 | -0.8773   |
| 102419 | Q2Q067 | Q92628 | -0.91075  |
| 102420 | Q2Q067 | Q8N165 | -1.0844   |
| 102421 | Q2Q067 | Q96L94 | -0.67605  |
| 102422 | Q2Q067 | Q15406 | -0.39276  |
| 102423 | Q2Q067 | A6NFX1 | -1.062    |
| 102424 | Q2Q067 | Q14573 | -0.22287  |
| 102425 | Q2Q067 | Q9Y6H6 | -1.0852   |
| 102426 | Q2Q067 | A6NM62 | -0.97031  |
| 102427 | Q2Q067 | Q96L34 | -0.47048  |
| 102428 | Q2Q067 | A6NK58 | -0.23535  |
| 102429 | Q2Q067 | Q86Y22 | -1.5162   |
| 102430 | Q2Q067 | P05543 | -0.73647  |
| 102431 | Q2Q067 | Q9HAB3 | -1.2643   |
| 102432 | Q2Q067 | Q8NCL8 | -0.77947  |
| 102433 | Q2Q067 | Q9UFD9 | -0.2274   |
| 102434 | Q2Q067 | Q86UD4 | -0.085533 |
| 102435 | Q2Q067 | Q8N4V2 | -0.89825  |
| 102436 | Q2Q067 | O75556 | -0.32319  |
| 102437 | Q2Q067 | Q13183 | -1.345    |
| 102438 | Q2Q067 | Q8NH53 | -1.4096   |
| 102439 | Q2Q067 | P05549 | -0.21004  |
| 102440 | Q2Q067 | O94952 | -0.37468  |
| 102441 | Q2Q067 | Q8NH85 | -1.4096   |
| 102442 | Q2Q067 | P63121 | -0.74403  |
| 102443 | Q2Q067 | Q147U7 | -1.0345   |
| 102444 | Q2Q067 | P04843 | -0.69683  |
| 102445 | Q2Q067 | Q9Y5Q5 | -1.7354   |
| 102446 | Q2Q067 | A0PJX0 | -0.45603  |
| 102447 | Q2Q067 | Q5VYY2 | -0.96522  |
| 102448 | Q2Q067 | P23919 | -0.55478  |

|        |        |        |           |
|--------|--------|--------|-----------|
| 102449 | Q2Q067 | Q96R84 | -1.4096   |
| 102450 | Q2Q067 | Q9HCE0 | -0.41421  |
| 102451 | Q2Q067 | Q76N32 | -0.06624  |
| 102452 | Q2Q067 | P34897 | -0.17286  |
| 102453 | Q2Q067 | P55042 | -0.79881  |
| 102454 | Q2Q067 | Q8IV77 | -1.4362   |
| 102455 | Q2Q067 | Q9Y5E8 | -1.4044   |
| 102456 | Q2Q067 | A6PVY3 | -0.04597  |
| 102457 | Q2Q067 | Q8TAZ6 | -0.51183  |
| 102458 | Q2Q067 | Q9BUR5 | -1.6115   |
| 102459 | Q2Q067 | O15232 | -0.60258  |
| 102460 | Q2Q067 | P13987 | -0.5841   |
| 102461 | Q2Q067 | Q8NFT6 | -0.12492  |
| 102462 | Q2Q067 | Q9P2S5 | -0.22739  |
| 102463 | Q2Q067 | Q9BXI3 | -0.35452  |
| 102464 | Q2Q067 | Q9ULS5 | -1.0345   |
| 102465 | Q2Q067 | Q96PQ1 | -1.2081   |
| 102466 | Q2Q067 | P0DJ07 | -0.84904  |
| 102467 | Q2Q067 | Q9BVC5 | -0.31314  |
| 102468 | Q2Q067 | P25098 | -0.4509   |
| 102469 | Q2Q067 | P20231 | -1.5202   |
| 102470 | Q2Q067 | Q86YQ8 | -0.2288   |
| 102471 | Q2Q067 | A0PJW8 | -0.459    |
| 102472 | Q2Q067 | P20585 | -0.049604 |
| 102473 | Q2Q067 | O00175 | -0.91352  |
| 102474 | Q2Q067 | Q9BQG1 | -0.94778  |
| 102475 | Q2Q067 | Q8N609 | -0.92178  |
| 102476 | Q2Q067 | P01112 | -0.22779  |
| 102477 | Q2Q067 | Q96DN0 | -0.31962  |
| 102478 | Q2Q067 | Q9H3P7 | -0.73193  |
| 102479 | Q2Q067 | Q8TBX8 | -0.50833  |
| 102480 | Q2Q067 | P05177 | -0.48909  |
| 102481 | Q2Q067 | Q8NGC4 | -1.4096   |
| 102482 | Q2Q067 | P09668 | -0.24597  |
| 102483 | Q2Q067 | P07998 | -0.29149  |
| 102484 | Q2Q067 | P06319 | -1.1115   |
| 102485 | Q2Q067 | P20807 | -0.80061  |
| 102486 | Q2Q067 | P81534 | -0.94155  |
| 102487 | Q2Q067 | P61158 | -0.1951   |
| 102488 | Q2Q067 | Q99952 | -0.34901  |
| 102489 | Q2Q067 | O14921 | -0.25975  |
| 102490 | Q2Q067 | P30464 | -1.1453   |
| 102491 | Q2Q067 | O95741 | -0.53692  |
| 102492 | Q2Q067 | Q16778 | -0.80644  |
| 102493 | Q2Q067 | Q92839 | -1.0402   |
| 102494 | Q2Q067 | Q8NDZ4 | -0.85707  |
| 102495 | Q2Q067 | Q53H47 | -0.22431  |
| 102496 | Q2Q067 | Q01718 | -1.0554   |
| 102497 | Q2Q067 | P36894 | -0.40947  |
| 102498 | Q2Q067 | Q9ULL5 | -0.44839  |
| 102499 | Q2Q067 | Q8IXE1 | -1.4096   |
| 102500 | Q2Q067 | P30685 | -1.1453   |
| 102501 | Q2Q067 | Q9HCN6 | -0.52634  |
| 102502 | Q2Q067 | O95219 | -0.22082  |
| 102503 | Q2Q067 | Q96M69 | -1.059    |
| 102504 | Q2Q067 | P53539 | -0.085297 |
| 102505 | Q2Q067 | Q13472 | -0.13273  |
| 102506 | Q2Q067 | Q5T013 | -0.33573  |
| 102507 | Q2Q067 | P29466 | -0.22737  |
| 102508 | Q2Q067 | A1XBS5 | -0.14376  |
| 102509 | Q2Q067 | P45880 | -0.63779  |
| 102510 | Q2Q067 | Q8N9W6 | -0.46971  |
| 102511 | Q2Q067 | O43934 | -0.77947  |
| 102512 | Q2Q067 | Q5JS13 | -0.85431  |
| 102513 | Q2Q067 | P30872 | -1.4261   |
| 102514 | Q2Q067 | P04921 | -0.6351   |
| 102515 | Q2Q067 | Q4V321 | -0.18742  |
| 102516 | Q2Q067 | Q9NPA1 | -1.2348   |
| 102517 | Q2Q067 | Q14982 | -0.92726  |
| 102518 | Q2Q067 | O00264 | -0.15921  |
| 102519 | Q2Q067 | Q9Y5P2 | -0.38057  |
| 102520 | Q2Q067 | P49771 | -1.657    |
| 102521 | Q2Q067 | Q8TF45 | -0.085533 |
| 102522 | Q2Q067 | Q8IWA5 | -1.0555   |
| 102523 | Q2Q067 | A6NHM9 | -0.70326  |
| 102524 | Q2Q067 | A8MWK0 | -1.1207   |

|        |        |        |           |
|--------|--------|--------|-----------|
| 102525 | Q2Q067 | Q15418 | -0.2187   |
| 102526 | Q2Q067 | Q8WVL7 | -0.2274   |
| 102527 | Q2Q067 | Q6ZST8 | -0.18785  |
| 102528 | Q2Q067 | Q96IW2 | -0.22741  |
| 102529 | Q2Q067 | Q5JQD4 | -0.96181  |
| 102530 | Q2Q067 | Q9NWR8 | -1.0345   |
| 102531 | Q2Q067 | Q14931 | -1.3259   |
| 102532 | Q2Q067 | Q7Z7G8 | -0.30536  |
| 102533 | Q2Q067 | P52789 | -0.37257  |
| 102534 | Q2Q067 | P50120 | -0.20947  |
| 102535 | Q2Q067 | A0AV02 | -1.1559   |
| 102536 | Q2Q067 | Q5MCW4 | -0.085533 |
| 102537 | Q2Q067 | O75880 | -0.29177  |
| 102538 | Q2Q067 | P16035 | -0.89558  |
| 102539 | Q2Q067 | Q14161 | -0.31094  |
| 102540 | Q2Q067 | Q15842 | -0.91802  |
| 102541 | Q2Q067 | Q96JB8 | -0.22612  |
| 102542 | Q2Q067 | Q9Y3R4 | -0.052516 |
| 102543 | Q2Q067 | O15091 | -0.16536  |
| 102544 | Q2Q067 | Q7Z628 | -0.27752  |
| 102545 | Q2Q067 | P07384 | -0.38453  |
| 102546 | Q2Q067 | P48051 | -0.51574  |
| 102547 | Q2Q067 | D6RF30 | -0.28132  |
| 102548 | Q2Q067 | O94759 | -1.0953   |
| 102549 | Q2Q067 | Q9NRF8 | -0.41284  |
| 102550 | Q2Q067 | Q96RM1 | -0.25317  |
| 102551 | Q2Q067 | Q13564 | -0.40863  |
| 102552 | Q2Q067 | D6RA61 | -0.76972  |
| 102553 | Q2Q067 | Q8TBK6 | -0.50058  |
| 102554 | Q2Q067 | Q9Y4C4 | -0.22886  |
| 102555 | Q2Q067 | P13501 | -0.74336  |
| 102556 | Q2Q067 | Q9ULJ7 | -0.2274   |
| 102557 | Q2Q067 | O76062 | -1.1014   |
| 102558 | Q2Q067 | Q13519 | -1.0899   |
| 102559 | Q2Q067 | A4D2H0 | -0.11935  |
| 102560 | Q2Q067 | Q6NUJ2 | -1.0345   |
| 102561 | Q2Q067 | Q5T7P2 | -0.37794  |
| 102562 | Q2Q067 | Q9C0D4 | -0.22743  |
| 102563 | Q2Q067 | P81605 | -1.2304   |
| 102564 | Q2Q067 | Q92956 | -0.56325  |
| 102565 | Q2Q067 | Q5ZEY9 | -0.47344  |
| 102566 | Q2Q067 | Q96DX8 | -0.1403   |
| 102567 | Q2Q067 | A0M8Q6 | -1.101    |
| 102568 | Q2Q067 | Q96EY9 | -0.52007  |
| 102569 | Q2Q067 | Q99704 | -0.077757 |
| 102570 | Q2Q067 | Q9Y657 | -0.23673  |
| 102571 | Q2Q067 | Q8N4B5 | -0.37256  |
| 102572 | Q2Q067 | Q99075 | -1.2299   |
| 102573 | Q2Q067 | A4D1N5 | -0.16793  |
| 102574 | Q2Q067 | O60942 | -0.64179  |
| 102575 | Q2Q067 | Q6UW15 | -0.99185  |
| 102576 | Q2Q067 | P01598 | -1.1115   |
| 102577 | Q2Q067 | Q6ZMN8 | -0.38028  |
| 102578 | Q2Q067 | P58546 | -0.22741  |
| 102579 | Q2Q067 | Q8NAM6 | -0.23206  |
| 102580 | Q2Q067 | Q15116 | -0.84708  |
| 102581 | Q2Q067 | Q8NFW1 | -0.88525  |
| 102582 | Q2Q067 | O94810 | -0.66966  |
| 102583 | Q2Q067 | Q9H2B2 | -0.98245  |
| 102584 | Q2Q067 | P03951 | -0.94563  |
| 102585 | Q2Q067 | Q9BV44 | -0.41073  |
| 102586 | Q2Q067 | Q9BXC1 | -1.4336   |
| 102587 | Q2Q067 | Q01973 | -1.1125   |
| 102588 | Q2Q067 | Q8N412 | -0.16672  |
| 102589 | Q2Q067 | P60827 | -1.0482   |
| 102590 | Q2Q067 | P09544 | -0.50394  |
| 102591 | Q2Q067 | P54317 | -0.91272  |
| 102592 | Q2Q067 | O43307 | -0.58381  |
| 102593 | Q2Q067 | Q5BJH2 | -0.77947  |
| 102594 | Q2Q067 | Q96RL6 | -1.2081   |
| 102595 | Q2Q067 | O15119 | -0.36741  |
| 102596 | Q2Q067 | A6NMK7 | -0.51647  |
| 102597 | Q2Q067 | O15544 | -0.18671  |
| 102598 | Q2Q067 | Q15011 | -0.6126   |
| 102599 | Q2Q067 | Q99453 | -0.22316  |
| 102600 | Q2Q067 | Q96P11 | -0.38719  |

|        |        |        |          |
|--------|--------|--------|----------|
| 102601 | Q2Q067 | Q9UPU7 | -0.97938 |
| 102602 | Q2Q067 | Q9Y5K1 | -0.52415 |
| 102603 | Q2Q067 | P06340 | -1.077   |
| 102604 | Q2Q067 | Q9Y5B8 | -0.81878 |
| 102605 | Q2Q067 | Q96KJ9 | -0.44247 |
| 102606 | Q2Q067 | Q13636 | -1.1292  |
| 102607 | Q2Q067 | P25942 | -0.62185 |
| 102608 | Q2Q067 | Q6EBC2 | -0.97648 |
| 102609 | Q2Q067 | P20671 | -0.82527 |
| 102610 | Q2Q067 | Q3MIW9 | -1.0345  |
| 102611 | Q2Q067 | P00558 | -0.19109 |
| 102612 | Q2Q067 | Q5ST30 | -0.28955 |
| 102613 | Q2Q067 | Q6PI73 | -1.0345  |
| 102614 | Q2Q067 | Q13488 | -0.83439 |
| 102615 | Q2Q067 | Q9P2C4 | -0.9776  |
| 102616 | Q2Q067 | P46060 | -0.22649 |
| 102617 | Q2Q067 | Q9NZB2 | -0.46792 |
| 102618 | Q2Q067 | Q9NQW8 | -1.6317  |
| 102619 | Q2Q067 | Q9H3U1 | -0.22719 |
| 102620 | Q2Q067 | Q92643 | -0.67244 |
| 102621 | Q2Q067 | Q6UW01 | -0.8802  |
| 102622 | Q2Q067 | Q99678 | -1.6361  |
| 102623 | Q2Q067 | Q75LS8 | -0.45962 |
| 102624 | Q2Q067 | Q9H422 | -0.43725 |
| 102625 | Q2Q067 | P30926 | -0.9664  |
| 102626 | Q2Q067 | Q5T2D3 | -0.16746 |
| 102627 | Q2Q067 | Q5T742 | -0.98666 |
| 102628 | Q2Q067 | Q5TBA9 | -0.53788 |
| 102629 | Q2Q067 | Q9Y5H2 | -1.3679  |
| 102630 | Q2Q067 | Q96RQ9 | -1.0582  |
| 102631 | Q2Q067 | Q13351 | -0.22633 |
| 102632 | Q2Q067 | P51157 | -1.4215  |
| 102633 | Q2Q067 | P54132 | -0.22607 |
| 102634 | Q2Q067 | Q13325 | -0.3054  |
| 102635 | Q2Q067 | Q96IV6 | -1.111   |
| 102636 | Q2Q067 | P05108 | -0.30171 |
| 102637 | Q2Q067 | Q56UQ5 | -0.13877 |
| 102638 | Q2Q067 | Q6UX46 | -0.98666 |
| 102639 | Q2Q067 | P31271 | -0.15996 |
| 102640 | Q2Q067 | Q8N0W7 | -0.80791 |
| 102641 | Q2Q067 | Q58DX5 | -1.3794  |
| 102642 | Q2Q067 | Q8TD55 | -0.51797 |
| 102643 | Q2Q067 | Q86WI1 | -0.87161 |
| 102644 | Q2Q067 | Q86W26 | -0.91075 |
| 102645 | Q2Q067 | P02730 | -0.4282  |
| 102646 | Q2Q067 | Q9NY30 | -0.3607  |
| 102647 | Q2Q067 | Q8IX30 | -0.22759 |
| 102648 | Q2Q067 | A6NNZ2 | -0.75936 |
| 102649 | Q2Q067 | Q9UKN7 | -0.65292 |
| 102650 | Q2Q067 | Q53H76 | -1.0212  |
| 102651 | Q2Q067 | O94822 | -0.1753  |
| 102652 | Q2Q067 | P12830 | -0.47655 |
| 102653 | Q2Q067 | Q7Z736 | -0.68704 |
| 102654 | Q2Q067 | Q969K7 | -0.77947 |
| 102655 | Q2Q067 | P41732 | -1.0719  |
| 102656 | Q2Q067 | O00623 | -0.53712 |
| 102657 | Q2Q067 | Q5W0B7 | -1.0345  |
| 102658 | Q2Q067 | Q9H2L4 | -1.0345  |
| 102659 | Q2Q067 | Q8NAA4 | -0.22763 |
| 102660 | Q2Q067 | Q9NPF2 | -0.42148 |
| 102661 | Q2Q067 | Q9BXA7 | -1.4379  |
| 102662 | Q2Q067 | Q8WWZ7 | -1.1557  |
| 102663 | Q2Q067 | O43291 | -1.1534  |
| 102664 | Q2Q067 | Q3MJ13 | -0.22771 |
| 102665 | Q2Q067 | P19622 | -0.22459 |
| 102666 | Q2Q067 | Q9UPW8 | -0.29299 |
| 102667 | Q2Q067 | Q92696 | -0.56488 |
| 102668 | Q2Q067 | P48553 | -0.10309 |
| 102669 | Q2Q067 | Q6UXX9 | -0.89712 |
| 102670 | Q2Q067 | Q96LR4 | -0.98666 |
| 102671 | Q2Q067 | P59282 | -0.20901 |
| 102672 | Q2Q067 | P16562 | -1.0374  |
| 102673 | Q2Q067 | Q9C098 | -0.94275 |
| 102674 | Q2Q067 | Q9ULK0 | -1.0002  |
| 102675 | Q2Q067 | Q9Y6A4 | -0.62283 |
| 102676 | Q2Q067 | Q8TCQ1 | -1.1143  |

|        |        |        |           |
|--------|--------|--------|-----------|
| 102677 | Q2Q067 | P53007 | -0.28625  |
| 102678 | Q2Q067 | P01213 | -0.98493  |
| 102679 | Q2Q067 | Q86SG3 | -0.87644  |
| 102680 | Q2Q067 | Q69YQ0 | -0.22746  |
| 102681 | Q2Q067 | O75636 | -0.69912  |
| 102682 | Q2Q067 | Q5BKX8 | -0.16323  |
| 102683 | Q2Q067 | Q86VV8 | -0.60834  |
| 102684 | Q2Q067 | Q9BQ13 | -0.17553  |
| 102685 | Q2Q067 | Q96GD0 | -0.12376  |
| 102686 | Q2Q067 | Q5VTY9 | -1.7752   |
| 102687 | Q2Q067 | Q96G46 | -0.72552  |
| 102688 | Q2Q067 | P22794 | -1.0432   |
| 102689 | Q2Q067 | Q6NTF7 | -0.24125  |
| 102690 | Q2Q067 | P21926 | -0.69523  |
| 102691 | Q2Q067 | O60755 | -1.3505   |
| 102692 | Q2Q067 | Q8N5Z0 | -0.22146  |
| 102693 | Q2Q067 | A6NLI3 | -0.14349  |
| 102694 | Q2Q067 | Q8TDG2 | -0.21707  |
| 102695 | Q2Q067 | P28221 | -1.4455   |
| 102696 | Q2Q067 | Q8IYE1 | -0.086379 |
| 102697 | Q2Q067 | Q8N960 | -0.20751  |
| 102698 | Q2Q067 | Q9BQD1 | -0.30016  |
| 102699 | Q2Q067 | O60493 | -0.22432  |
| 102700 | Q2Q067 | Q8TDN7 | -0.7427   |
| 102701 | Q2Q067 | Q8N8F6 | -1.1118   |
| 102702 | Q2Q067 | Q6PK57 | -0.59142  |
| 102703 | Q2Q067 | P01031 | -0.82117  |
| 102704 | Q2Q067 | Q13421 | -0.66137  |
| 102705 | Q2Q067 | Q9NXF8 | -0.96686  |
| 102706 | Q2Q067 | P46091 | -1.6361   |
| 102707 | Q2Q067 | Q96PZ2 | -0.5697   |
| 102708 | Q2Q067 | P00540 | -1.2842   |
| 102709 | Q2Q067 | Q96MR6 | -0.22753  |
| 102710 | Q2Q067 | Q13671 | -0.50467  |
| 102711 | Q2Q067 | Q9Y6I7 | -0.22831  |
| 102712 | Q2Q067 | Q9H3H1 | -0.55035  |
| 102713 | Q2Q067 | P57775 | -0.3221   |
| 102714 | Q2Q067 | P0CJ75 | -0.80201  |
| 102715 | Q2Q067 | Q8NH49 | -1.4096   |
| 102716 | Q2Q067 | Q2TV78 | -1.3298   |
| 102717 | Q2Q067 | Q6P499 | -0.98558  |
| 102718 | Q2Q067 | Q96DL1 | -1.0345   |
| 102719 | Q2Q067 | Q6NUS8 | -1.0345   |
| 102720 | Q2Q067 | P30837 | -0.33136  |
| 102721 | Q2Q067 | Q5JTY5 | -0.91075  |
| 102722 | Q2Q067 | P16581 | -0.46133  |
| 102723 | Q2Q067 | P30461 | -1.1453   |
| 102724 | Q2Q067 | Q56NI9 | -0.34831  |
| 102725 | Q2Q067 | P41146 | -1.3999   |
| 102726 | Q2Q067 | Q6ZSR3 | -0.21265  |
| 102727 | Q2Q067 | Q2I0M5 | -1.0718   |
| 102728 | Q2Q067 | P20393 | -0.73759  |
| 102729 | Q2Q067 | Q5VUR7 | -0.2274   |
| 102730 | Q2Q067 | Q6UXI9 | -1.2708   |
| 102731 | Q2Q067 | Q09327 | -0.81054  |
| 102732 | Q2Q067 | Q2PPJ7 | -0.2348   |
| 102733 | Q2Q067 | Q30KQ6 | -0.94775  |
| 102734 | Q2Q067 | P04003 | -0.34335  |
| 102735 | Q2Q067 | P35580 | -0.14175  |
| 102736 | Q2Q067 | P51841 | -1.5365   |
| 102737 | Q2Q067 | Q9BRT3 | -0.11477  |
| 102738 | Q2Q067 | Q9UBD6 | -0.90795  |
| 102739 | Q2Q067 | P35249 | -0.21918  |
| 102740 | Q2Q067 | Q9GZK4 | -1.4096   |
| 102741 | Q2Q067 | Q96P69 | -1.4779   |
| 102742 | Q2Q067 | P34059 | -0.52059  |
| 102743 | Q2Q067 | Q9P1P4 | -1.4576   |
| 102744 | Q2Q067 | Q96MT7 | -0.2274   |
| 102745 | Q2Q067 | Q6UXH0 | -0.33141  |
| 102746 | Q2Q067 | O43283 | -0.625    |
| 102747 | Q2Q067 | Q6UWM7 | -0.95565  |
| 102748 | Q2Q067 | A6NCW0 | -0.44208  |
| 102749 | Q2Q067 | Q5R3F8 | -1.0021   |
| 102750 | Q2Q067 | Q6DT37 | -0.56271  |
| 102751 | Q2Q067 | P50851 | -0.80688  |
| 102752 | Q2Q067 | Q8N3E9 | -0.63338  |

|        |        |        |           |
|--------|--------|--------|-----------|
| 102753 | Q2Q067 | Q13444 | -0.79056  |
| 102754 | Q2Q067 | Q9H7Z6 | -0.17781  |
| 102755 | Q2Q067 | Q08708 | -1.2863   |
| 102756 | Q2Q067 | Q8NGH5 | -1.4096   |
| 102757 | Q2Q067 | Q7Z7L9 | -0.44631  |
| 102758 | Q2Q067 | P78369 | -1.0201   |
| 102759 | Q2Q067 | P13612 | -0.54335  |
| 102760 | Q2Q067 | J3KSC0 | -0.45168  |
| 102761 | Q2Q067 | Q69YJ1 | -0.769    |
| 102762 | Q2Q067 | Q96RD3 | -1.4096   |
| 102763 | Q2Q067 | Q96AW1 | -0.76165  |
| 102764 | Q2Q067 | Q9NVJ2 | -0.7461   |
| 102765 | Q2Q067 | B7U540 | -1.2745   |
| 102766 | Q2Q067 | Q9NFB3 | -0.50982  |
| 102767 | Q2Q067 | P13866 | -0.27298  |
| 102768 | Q2Q067 | Q96MG8 | -0.17204  |
| 102769 | Q2Q067 | P14649 | -0.22667  |
| 102770 | Q2Q067 | P34931 | -0.68736  |
| 102771 | Q2Q067 | Q9UGB7 | -0.32749  |
| 102772 | Q2Q067 | Q86WS5 | -1.5018   |
| 102773 | Q2Q067 | Q8N423 | -0.52604  |
| 102774 | Q2Q067 | Q9NPC7 | -0.067277 |
| 102775 | Q2Q067 | P31512 | -1.1701   |
| 102776 | Q2Q067 | A6NDY0 | -0.76347  |
| 102777 | Q2Q067 | Q8NHC5 | -1.4096   |
| 102778 | Q2Q067 | Q9P0J7 | -0.80644  |
| 102779 | Q2Q067 | P55289 | -1.2844   |
| 102780 | Q2Q067 | P54277 | -0.049745 |
| 102781 | Q2Q067 | O96033 | -0.32983  |
| 102782 | Q2Q067 | O43609 | -0.3322   |
| 102783 | Q2Q067 | Q92820 | -0.65322  |
| 102784 | Q2Q067 | Q15722 | -1.8049   |
| 102785 | Q2Q067 | Q2KHR3 | -0.34526  |
| 102786 | Q2Q067 | Q8N2E6 | -1.3767   |
| 102787 | Q2Q067 | Q9HCT0 | -0.73032  |
| 102788 | Q2Q067 | Q16650 | -0.35255  |
| 102789 | Q2Q067 | Q9ULD6 | -0.29647  |
| 102790 | Q2Q067 | Q76LX8 | -0.57789  |
| 102791 | Q2Q067 | Q96NT5 | -0.61266  |
| 102792 | Q2Q067 | Q8WZB0 | -0.16256  |
| 102793 | Q2Q067 | P48066 | -1.1847   |
| 102794 | Q2Q067 | Q6XZB0 | -1.3083   |
| 102795 | Q2Q067 | Q12951 | -0.29976  |
| 102796 | Q2Q067 | Q8TF62 | -1.2607   |
| 102797 | Q2Q067 | Q6ZTQ4 | -1.3679   |
| 102798 | Q2Q067 | A8MTI9 | -1.9013   |
| 102799 | Q2Q067 | Q5SZD4 | -0.28978  |
| 102800 | Q2Q067 | Q86XP6 | -0.98666  |
| 102801 | Q2Q067 | Q6UWJ1 | -1.1462   |
| 102802 | Q2Q067 | O43497 | -0.94877  |
| 102803 | Q2Q067 | Q96F45 | -0.17283  |
| 102804 | Q2Q067 | Q8NEV9 | -0.93701  |
| 102805 | Q2Q067 | Q9NZ71 | -0.77663  |
| 102806 | Q2Q067 | O60282 | -0.30385  |
| 102807 | Q2Q067 | Q9Y2C2 | -0.63638  |
| 102808 | Q2Q067 | Q9H0L4 | -0.86575  |
| 102809 | Q2Q067 | Q9Y5L2 | -1.2498   |
| 102810 | Q2Q067 | Q8NGB9 | -1.4096   |
| 102811 | Q2Q067 | Q9Y286 | -1.3457   |
| 102812 | Q2Q067 | A6NI72 | -0.35982  |
| 102813 | Q2Q067 | Q9NTN9 | -1.3092   |
| 102814 | Q2Q067 | Q93084 | -0.89302  |
| 102815 | Q2Q067 | P05231 | -0.2517   |
| 102816 | Q2Q067 | Q12852 | -0.59367  |
| 102817 | Q2Q067 | Q8TDW4 | -1.0043   |
| 102818 | Q2Q067 | P22304 | -0.56762  |
| 102819 | Q2Q067 | O75019 | -1.1693   |
| 102820 | Q2Q067 | O15403 | -1.2284   |
| 102821 | Q2Q067 | P08754 | -0.45096  |
| 102822 | Q2Q067 | Q16611 | -0.2273   |
| 102823 | Q2Q067 | P80404 | -0.28085  |
| 102824 | Q2Q067 | O60909 | -0.60608  |
| 102825 | Q2Q067 | Q8N5K1 | -0.40568  |
| 102826 | Q2Q067 | Q6RFH5 | -0.2274   |
| 102827 | Q2Q067 | Q8WY22 | -0.87584  |
| 102828 | Q2Q067 | Q14596 | -0.21599  |

|        |        |        |           |
|--------|--------|--------|-----------|
| 102829 | Q2Q067 | Q86SM5 | -1.4967   |
| 102830 | Q2Q067 | Q9UBR5 | -1.4009   |
| 102831 | Q2Q067 | P56545 | -0.2859   |
| 102832 | Q2Q067 | Q9HCJ3 | -0.42972  |
| 102833 | Q2Q067 | O43914 | -0.75599  |
| 102834 | Q2Q067 | Q5T3U5 | -1.5095   |
| 102835 | Q2Q067 | P43366 | -0.10706  |
| 102836 | Q2Q067 | Q3B7S5 | -1.0345   |
| 102837 | Q2Q067 | Q9UMY4 | -0.22304  |
| 102838 | Q2Q067 | Q9NZ42 | -0.43561  |
| 102839 | Q2Q067 | P48509 | -0.64445  |
| 102840 | Q2Q067 | Q86SU0 | -0.71802  |
| 102841 | Q2Q067 | O00219 | -0.92285  |
| 102842 | Q2Q067 | Q9BXS4 | -0.79772  |
| 102843 | Q2Q067 | Q8TBB0 | -0.58247  |
| 102844 | Q2Q067 | Q9C0B7 | -1.0345   |
| 102845 | Q2Q067 | Q58A45 | -0.21584  |
| 102846 | Q2Q067 | Q86SH4 | -0.98666  |
| 102847 | Q2Q067 | Q9H9P8 | -0.6273   |
| 102848 | Q2Q067 | Q8IV31 | -1.0345   |
| 102849 | Q2Q067 | B2RTY4 | -1.1338   |
| 102850 | Q2Q067 | Q8NHV5 | -0.19441  |
| 102851 | Q2Q067 | Q8NGJ9 | -1.4096   |
| 102852 | Q2Q067 | P36955 | -0.92532  |
| 102853 | Q2Q067 | Q8NH70 | -1.4096   |
| 102854 | Q2Q067 | Q9UKQ2 | -1.9966   |
| 102855 | Q2Q067 | Q9Y5V0 | -0.73178  |
| 102856 | Q2Q067 | P16442 | -1.1738   |
| 102857 | Q2Q067 | P29972 | -0.22724  |
| 102858 | Q2Q067 | Q9H7Z3 | -0.24416  |
| 102859 | Q2Q067 | Q5JVG2 | -0.085533 |
| 102860 | Q2Q067 | Q16538 | -1.4967   |
| 102861 | Q2Q067 | Q92918 | -0.73529  |
| 102862 | Q2Q067 | Q13162 | -0.22108  |
| 102863 | Q2Q067 | Q14495 | -0.37628  |
| 102864 | Q2Q067 | P07858 | -0.27702  |
| 102865 | Q2Q067 | Q8NGS0 | -1.4096   |
| 102866 | Q2Q067 | Q5JPB2 | -0.74229  |
| 102867 | Q2Q067 | Q14642 | -0.57321  |
| 102868 | Q2Q067 | Q15197 | -1.8778   |
| 102869 | Q2Q067 | Q5SWX8 | -1.1818   |
| 102870 | Q2Q067 | C9JLR9 | -0.66124  |
| 102871 | Q2Q067 | Q9UK22 | -0.27863  |
| 102872 | Q2Q067 | P09693 | -0.93516  |
| 102873 | Q2Q067 | P13591 | -1.3832   |
| 102874 | Q2Q067 | E7EML9 | -1.5202   |
| 102875 | Q2Q067 | P51801 | -1.1982   |
| 102876 | Q2Q067 | Q5GFL6 | -1.097    |
| 102877 | Q2Q067 | A6NKG5 | -1.2391   |
| 102878 | Q2Q067 | Q8NDI1 | -0.33241  |
| 102879 | Q2Q067 | P54577 | -0.23966  |
| 102880 | Q2Q067 | Q95297 | -0.36954  |
| 102881 | Q2Q067 | Q8NBF4 | -0.38043  |
| 102882 | Q2Q067 | O60831 | -0.69388  |
| 102883 | Q2Q067 | P48426 | -0.34906  |
| 102884 | Q2Q067 | Q8N5M4 | -0.22636  |
| 102885 | Q2Q067 | Q92698 | -0.20112  |
| 102886 | Q2Q067 | Q95816 | -0.37739  |
| 102887 | Q2Q067 | P10163 | -0.86843  |
| 102888 | Q2Q067 | Q95926 | -0.15853  |
| 102889 | Q2Q067 | Q53GT1 | -0.20901  |
| 102890 | Q2Q067 | Q6ZMT1 | -0.65664  |
| 102891 | Q2Q067 | Q02985 | -1.0374   |
| 102892 | Q2Q067 | A4FU49 | -0.226    |
| 102893 | Q2Q067 | Q8IVW1 | -1.0592   |
| 102894 | Q2Q067 | O43692 | -0.87164  |
| 102895 | Q2Q067 | Q9NPC1 | -1.582    |
| 102896 | Q2Q067 | Q5QJ38 | -0.45603  |
| 102897 | Q2Q067 | Q6UX27 | -1.0345   |
| 102898 | Q2Q067 | Q5VTJ3 | -1.0345   |
| 102899 | Q2Q067 | P0CJ70 | -0.80201  |
| 102900 | Q2Q067 | Q6PEX7 | -1.0345   |
| 102901 | Q2Q067 | P40937 | -0.19159  |
| 102902 | Q2Q067 | Q8NGU9 | -1.4967   |
| 102903 | Q2Q067 | Q8IVS2 | -0.60409  |
| 102904 | Q2Q067 | A6NHR9 | -0.67691  |

|        |        |        |           |
|--------|--------|--------|-----------|
| 102905 | Q2Q067 | Q9H1J5 | -0.62154  |
| 102906 | Q2Q067 | Q9BQR3 | -1.5202   |
| 102907 | Q2Q067 | P10144 | -0.27325  |
| 102908 | Q2Q067 | Q6W3E5 | -0.98896  |
| 102909 | Q2Q067 | Q3SY89 | -0.17761  |
| 102910 | Q2Q067 | P49619 | -1.1415   |
| 102911 | Q2Q067 | P41743 | -0.27521  |
| 102912 | Q2Q067 | P01764 | -1.1115   |
| 102913 | Q2Q067 | Q9BU40 | -1.033    |
| 102914 | Q2Q067 | P51888 | -0.97548  |
| 102915 | Q2Q067 | Q8NEP7 | -0.21297  |
| 102916 | Q2Q067 | Q9H244 | -0.96648  |
| 102917 | Q2Q067 | Q93100 | -0.11299  |
| 102918 | Q2Q067 | O75594 | -0.75221  |
| 102919 | Q2Q067 | Q5TH69 | -1.0508   |
| 102920 | Q2Q067 | Q5T440 | -0.11449  |
| 102921 | Q2Q067 | Q96SA4 | -1.0345   |
| 102922 | Q2Q067 | P22532 | -0.25317  |
| 102923 | Q2Q067 | Q15818 | -0.55546  |
| 102924 | Q2Q067 | Q8N1D0 | -0.24416  |
| 102925 | Q2Q067 | Q5THJ4 | -0.44605  |
| 102926 | Q2Q067 | Q86U38 | -0.28281  |
| 102927 | Q2Q067 | P50052 | -0.90159  |
| 102928 | Q2Q067 | O75324 | -0.83156  |
| 102929 | Q2Q067 | Q8WW52 | -0.88683  |
| 102930 | Q2Q067 | Q9Y238 | -0.19268  |
| 102931 | Q2Q067 | E9PJ23 | -0.045175 |
| 102932 | Q2Q067 | P57773 | -1.1243   |
| 102933 | Q2Q067 | P50226 | -0.26821  |
| 102934 | Q2Q067 | Q5T215 | -0.19815  |
| 102935 | Q2Q067 | Q8WXD2 | -0.7668   |
| 102936 | Q2Q067 | Q8WXA9 | -0.24708  |
| 102937 | Q2Q067 | Q01804 | -0.24416  |
| 102938 | Q2Q067 | Q9UGJ0 | -0.73256  |
| 102939 | Q2Q067 | O43240 | -1.4009   |
| 102940 | Q2Q067 | Q9UJF2 | -0.59115  |
| 102941 | Q2Q067 | Q5VZM2 | -0.55368  |
| 102942 | Q2Q067 | Q8NH72 | -1.4096   |
| 102943 | Q2Q067 | P84085 | -0.3768   |
| 102944 | Q2Q067 | A6NDY2 | -0.43957  |
| 102945 | Q2Q067 | Q6QNK2 | -1.5126   |
| 102946 | Q2Q067 | Q9P2N5 | -0.24162  |
| 102947 | Q2Q067 | P17677 | -0.13956  |
| 102948 | Q2Q067 | P01023 | -0.26207  |
| 102949 | Q2Q067 | Q9ULI2 | -0.85985  |
| 102950 | Q2Q067 | Q8NEA9 | -0.21992  |
| 102951 | Q2Q067 | Q8NBL3 | -1.0345   |
| 102952 | Q2Q067 | Q9Y4A9 | -1.4096   |
| 102953 | Q2Q067 | P01036 | -1.024    |
| 102954 | Q2Q067 | Q07326 | -0.97332  |
| 102955 | Q2Q067 | P68400 | -0.59339  |
| 102956 | Q2Q067 | P35749 | -0.39978  |
| 102957 | Q2Q067 | Q9GZK3 | -1.4096   |
| 102958 | Q2Q067 | Q6IC98 | -0.8175   |
| 102959 | Q2Q067 | Q70J99 | -0.2291   |
| 102960 | Q2Q067 | P25311 | -1.1369   |
| 102961 | Q2Q067 | P04432 | -1.1115   |
| 102962 | Q2Q067 | Q92738 | -1.2123   |
| 102963 | Q2Q067 | Q76N89 | -0.23595  |
| 102964 | Q2Q067 | Q9NX62 | -0.82251  |
| 102965 | Q2Q067 | Q9Y303 | -0.26041  |
| 102966 | Q2Q067 | Q8IWU4 | -0.68014  |
| 102967 | Q2Q067 | Q8NBS3 | -0.78065  |
| 102968 | Q2Q067 | Q96BR5 | -0.097155 |
| 102969 | Q2Q067 | P06316 | -1.1115   |
| 102970 | Q2Q067 | Q8IXI1 | -0.79972  |
| 102971 | Q2Q067 | Q2TBF2 | -1.0345   |
| 102972 | Q2Q067 | P21554 | -0.76262  |
| 102973 | Q2Q067 | Q6UW88 | -1.2281   |
| 102974 | Q2Q067 | A2RU49 | -0.50611  |
| 102975 | Q2Q067 | P43405 | -0.32144  |
| 102976 | Q2Q067 | Q9H8S5 | -0.38028  |
| 102977 | Q2Q067 | Q86X19 | -1.0862   |
| 102978 | Q2Q067 | Q13029 | -0.22768  |
| 102979 | Q2Q067 | Q9BVG3 | -0.73178  |
| 102980 | Q2Q067 | Q9H4D0 | -1.1141   |



|        |        |        |           |
|--------|--------|--------|-----------|
| 102981 | Q2Q067 | O15541 | -0.50058  |
| 102982 | Q2Q067 | P25705 | -0.12368  |
| 102983 | Q2Q067 | Q00888 | -0.9841   |
| 102984 | Q2Q067 | Q9BWG4 | -0.097681 |
| 102985 | Q2Q067 | P14854 | -0.15122  |
| 102986 | Q2Q067 | P32249 | -1.3793   |
| 102987 | Q2Q067 | P62491 | -0.25474  |
| 102988 | Q2Q067 | P53367 | -0.17685  |
| 102989 | Q2Q067 | Q99705 | -1.3      |
| 102990 | Q2Q067 | P29274 | -0.34544  |
| 102991 | Q2Q067 | P20908 | -0.92315  |
| 102992 | Q2Q067 | O76076 | -1.1524   |
| 102993 | Q2Q067 | Q9H4Y5 | -0.25205  |
| 102994 | Q2Q067 | Q9Y243 | -0.44217  |
| 102995 | Q2Q067 | Q68DV7 | -0.49257  |
| 102996 | Q2Q067 | Q2VYF4 | -0.83024  |
| 102997 | Q2Q067 | A6NDN3 | -0.28132  |
| 102998 | Q2Q067 | P60507 | -1.0096   |
| 102999 | Q2Q067 | Q9P0K8 | -0.33602  |
| 103000 | Q2Q067 | Q5W041 | -0.22765  |
| 103001 | Q2Q067 | Q15075 | -0.21971  |
| 103002 | Q2Q067 | P07098 | -0.9554   |
| 103003 | Q2Q067 | Q6P1N9 | -0.13409  |
| 103004 | Q2Q067 | Q3KPI0 | -1.0345   |
| 103005 | Q2Q067 | O60262 | -0.61392  |
| 103006 | Q2Q067 | Q9Y236 | -0.29781  |
| 103007 | Q2Q067 | Q9NV29 | -0.77947  |
| 103008 | Q2Q067 | Q8NEM0 | -0.21436  |
| 103009 | Q2Q067 | Q92686 | -0.42087  |
| 103010 | Q2Q067 | Q9H5J0 | -0.2274   |
| 103011 | Q2Q067 | Q5W188 | -1.024    |
| 103012 | Q2Q067 | Q13322 | -0.22741  |
| 103013 | Q2Q067 | Q92536 | -1.1851   |
| 103014 | Q2Q067 | Q9H0E2 | -0.2261   |
| 103015 | Q2Q067 | P07358 | -1.0856   |
| 103016 | Q2Q067 | O43567 | -0.80267  |
| 103017 | Q2Q067 | Q8WVF1 | -0.68059  |
| 103018 | Q2Q067 | O94921 | -0.19679  |
| 103019 | Q2Q067 | P19174 | -0.22741  |
| 103020 | Q2Q067 | Q969P6 | -0.51328  |
| 103021 | Q2Q067 | P07510 | -1.1951   |
| 103022 | Q2Q067 | Q00796 | -0.76847  |
| 103023 | Q2Q067 | Q08170 | -0.22607  |
| 103024 | Q2Q067 | O75949 | -1.0345   |
| 103025 | Q2Q067 | Q8TF42 | -0.22741  |
| 103026 | Q2Q067 | P36551 | -0.096639 |
| 103027 | Q2Q067 | Q6P4E1 | -1.0345   |
| 103028 | Q2Q067 | Q14149 | -0.20052  |
| 103029 | Q2Q067 | O75899 | -1.0623   |
| 103030 | Q2Q067 | Q8IWB6 | -0.44544  |
| 103031 | Q2Q067 | P40261 | -0.20108  |
| 103032 | Q2Q067 | Q9Y5J5 | -0.52919  |
| 103033 | Q2Q067 | Q9BV40 | -0.70368  |
| 103034 | Q2Q067 | Q9UPI3 | -1.0875   |
| 103035 | Q2Q067 | Q8N8X6 | -0.28132  |
| 103036 | Q2Q067 | Q96MM6 | -0.91075  |
| 103037 | Q2Q067 | Q15040 | -0.76176  |
| 103038 | Q2Q067 | Q9NTZ6 | -0.44426  |
| 103039 | Q2Q067 | Q5XX13 | -0.22758  |
| 103040 | Q2Q067 | Q9H853 | -0.65091  |
| 103041 | Q2Q067 | P13164 | -0.48226  |
| 103042 | Q2Q067 | P15382 | -1.0158   |
| 103043 | Q2Q067 | Q9Y6L7 | -1.6326   |
| 103044 | Q2Q067 | Q14393 | -0.29204  |
| 103045 | Q2Q067 | Q6UW49 | -0.63145  |
| 103046 | Q2Q067 | P14784 | -1.2943   |
| 103047 | Q2Q067 | Q86V86 | -0.46956  |
| 103048 | Q2Q067 | Q9Y6A2 | -0.97196  |
| 103049 | Q2Q067 | Q969K3 | -0.42968  |
| 103050 | Q2Q067 | Q9BRR3 | -1.0345   |
| 103051 | Q2Q067 | O95206 | -1.2543   |
| 103052 | Q2Q067 | Q96EP0 | -0.20705  |
| 103053 | Q2Q067 | Q9BXX2 | -0.24416  |
| 103054 | Q2Q067 | O60479 | -0.22137  |
| 103055 | Q2Q067 | Q49SQ1 | -1.4986   |
| 103056 | Q2Q067 | Q6UX71 | -0.35359  |

|        |        |        |           |
|--------|--------|--------|-----------|
| 103057 | Q2Q067 | O43561 | -0.4316   |
| 103058 | Q2Q067 | Q3ZCU0 | -0.21336  |
| 103059 | Q2Q067 | Q5VUJ9 | -0.45603  |
| 103060 | Q2Q067 | Q96F25 | -1.0241   |
| 103061 | Q2Q067 | Q6P2S7 | -0.20901  |
| 103062 | Q2Q067 | Q9BV68 | -0.22977  |
| 103063 | Q2Q067 | Q8IU99 | -1.2877   |
| 103064 | Q2Q067 | Q99877 | -0.82527  |
| 103065 | Q2Q067 | Q96Q05 | -0.23355  |
| 103066 | Q2Q067 | P22607 | -0.38128  |
| 103067 | Q2Q067 | O43761 | -0.85262  |
| 103068 | Q2Q067 | P01889 | -1.1252   |
| 103069 | Q2Q067 | Q8N8J6 | -0.085533 |
| 103070 | Q2Q067 | Q6IQ20 | -0.64634  |
| 103071 | Q2Q067 | Q8NEL0 | -0.039279 |
| 103072 | Q2Q067 | Q9Y337 | -0.94716  |
| 103073 | Q2Q067 | P15516 | -0.96658  |
| 103074 | Q2Q067 | Q9Y5K2 | -1.5389   |
| 103075 | Q2Q067 | Q9P1P5 | -1.4576   |
| 103076 | Q2Q067 | Q9UBX7 | -1.4104   |
| 103077 | Q2Q067 | Q96AE7 | -0.2242   |
| 103078 | Q2Q067 | Q8N9I5 | -1.1667   |
| 103079 | Q2Q067 | Q9BXT8 | -0.42442  |
| 103080 | Q2Q067 | P20718 | -0.76784  |
| 103081 | Q2Q067 | P17693 | -0.9623   |
| 103082 | Q2Q067 | P01603 | -1.1115   |
| 103083 | Q2Q067 | Q53TN4 | -1.0615   |
| 103084 | Q2Q067 | Q7Z7M8 | -0.84072  |
| 103085 | Q2Q067 | Q96H86 | -0.085533 |
| 103086 | Q2Q067 | Q7Z5H3 | -0.25104  |
| 103087 | Q2Q067 | Q16568 | -0.39152  |
| 103088 | Q2Q067 | Q9UBK5 | -1.1621   |
| 103089 | Q2Q067 | O43930 | -1.3228   |
| 103090 | Q2Q067 | Q96LU7 | -0.98666  |
| 103091 | Q2Q067 | Q9Y6I3 | -0.075667 |
| 103092 | Q2Q067 | Q8NH10 | -1.4096   |
| 103093 | Q2Q067 | P57052 | -0.72163  |
| 103094 | Q2Q067 | Q9Y6X0 | -0.1381   |
| 103095 | Q2Q067 | Q13464 | -0.41245  |
| 103096 | Q2Q067 | Q8N957 | -0.22727  |
| 103097 | Q2Q067 | Q7Z4L9 | -0.22631  |
| 103098 | Q2Q067 | Q6PCT2 | -0.56368  |
| 103099 | Q2Q067 | A8MV81 | -1.0345   |
| 103100 | Q2Q067 | Q13206 | -0.90703  |
| 103101 | Q2Q067 | O60231 | -0.47418  |
| 103102 | Q2Q067 | O43827 | -1.2513   |
| 103103 | Q2Q067 | P59901 | -0.35359  |
| 103104 | Q2Q067 | Q9Y5F0 | -1.3348   |
| 103105 | Q2Q067 | Q9NZV8 | -0.88506  |
| 103106 | Q2Q067 | Q6GPH6 | -1.0345   |
| 103107 | Q2Q067 | Q86TZ1 | -0.22739  |
| 103108 | Q2Q067 | Q14788 | -0.66266  |
| 103109 | Q2Q067 | Q8NGV7 | -1.4096   |
| 103110 | Q2Q067 | Q96RR4 | -1.2064   |
| 103111 | Q2Q067 | Q9H013 | -1.4747   |
| 103112 | Q2Q067 | P12821 | -0.89119  |
| 103113 | Q2Q067 | B2RU33 | -0.2274   |
| 103114 | Q2Q067 | P38484 | -1.1616   |
| 103115 | Q2Q067 | Q12967 | -0.68141  |
| 103116 | Q2Q067 | Q2M2I8 | -1.0736   |
| 103117 | Q2Q067 | P48230 | -0.9485   |
| 103118 | Q2Q067 | Q96EX3 | -0.22746  |
| 103119 | Q2Q067 | Q14202 | -0.3777   |
| 103120 | Q2Q067 | P43694 | -0.22739  |
| 103121 | Q2Q067 | P28908 | -0.82489  |
| 103122 | Q2Q067 | Q99259 | -0.34288  |
| 103123 | Q2Q067 | Q14966 | -0.094357 |
| 103124 | Q2Q067 | O75616 | -0.812    |
| 103125 | Q2Q067 | Q9UKA9 | -0.55659  |
| 103126 | Q2Q067 | Q13515 | -0.27879  |
| 103127 | Q2Q067 | Q5SGD2 | -0.79022  |
| 103128 | Q2Q067 | Q9HCJ0 | -0.50897  |
| 103129 | Q2Q067 | P27169 | -0.85479  |
| 103130 | Q2Q067 | Q8NG68 | -0.76739  |
| 103131 | Q2Q067 | A8MTL0 | -0.22168  |
| 103132 | Q2Q067 | P0DJI9 | -0.91277  |

|        |        |        |            |
|--------|--------|--------|------------|
| 103133 | Q2Q067 | P19961 | -0.93732   |
| 103134 | Q2Q067 | Q96EK6 | -0.12445   |
| 103135 | Q2Q067 | P30459 | -0.98258   |
| 103136 | Q2Q067 | Q86YT5 | -0.91682   |
| 103137 | Q2Q067 | B1ANS9 | -0.22744   |
| 103138 | Q2Q067 | Q9H2E6 | -0.57145   |
| 103139 | Q2Q067 | O15178 | -0.28965   |
| 103140 | Q2Q067 | Q9NUL7 | -0.17619   |
| 103141 | Q2Q067 | A5PKW4 | -1.4205    |
| 103142 | Q2Q067 | A6NNT2 | -0.18234   |
| 103143 | Q2Q067 | P55773 | -1.2054    |
| 103144 | Q2Q067 | P43121 | -1.2286    |
| 103145 | Q2Q067 | P01814 | -1.1115    |
| 103146 | Q2Q067 | Q8N0X2 | -0.2278    |
| 103147 | Q2Q067 | Q8NG80 | -1.2565    |
| 103148 | Q2Q067 | B7ZAP0 | -0.13125   |
| 103149 | Q2Q067 | Q8N687 | -0.94775   |
| 103150 | Q2Q067 | O75508 | -1.0489    |
| 103151 | Q2Q067 | Q96DT6 | -0.76778   |
| 103152 | Q2Q067 | Q9H8V3 | -0.22768   |
| 103153 | Q2Q067 | P23942 | -1.1986    |
| 103154 | Q2Q067 | Q13445 | -0.448     |
| 103155 | Q2Q067 | Q99788 | -1.0173    |
| 103156 | Q2Q067 | Q6PIW4 | -0.50054   |
| 103157 | Q2Q067 | Q86VD9 | -1.0173    |
| 103158 | Q2Q067 | Q6KCM7 | -0.91242   |
| 103159 | Q2Q067 | P51608 | -0.16408   |
| 103160 | Q2Q067 | Q658N2 | -1.0545    |
| 103161 | Q2Q067 | Q8NFM7 | -0.75362   |
| 103162 | Q2Q067 | P27539 | -0.8199    |
| 103163 | Q2Q067 | Q6ZNR0 | -0.78298   |
| 103164 | Q2Q067 | Q6ZUT9 | -1.0105    |
| 103165 | Q2Q067 | Q07954 | -0.41877   |
| 103166 | Q2Q067 | Q5SQ64 | -1.1634    |
| 103167 | Q2Q067 | Q8IY95 | -1.123     |
| 103168 | Q2Q067 | Q6PCB6 | -0.36393   |
| 103169 | Q2Q067 | P17252 | -0.22676   |
| 103170 | Q2Q067 | Q6UX07 | -1.5999    |
| 103171 | Q2Q067 | Q9BX74 | -1.2229    |
| 103172 | Q2Q067 | O95759 | -1.3856    |
| 103173 | Q2Q067 | P15428 | -0.22003   |
| 103174 | Q2Q067 | P48052 | -1.2963    |
| 103175 | Q2Q067 | Q9P273 | -1.1496    |
| 103176 | Q2Q067 | Q9BV87 | -1.009     |
| 103177 | Q2Q067 | O43674 | -0.56537   |
| 103178 | Q2Q067 | Q86TV6 | -0.22722   |
| 103179 | Q2Q067 | P62502 | -0.98907   |
| 103180 | Q2Q067 | Q9HBF5 | -0.36827   |
| 103181 | Q2Q067 | Q5T6V5 | -0.24416   |
| 103182 | Q2Q067 | Q13698 | -0.76653   |
| 103183 | Q2Q067 | Q53S58 | -1.0345    |
| 103184 | Q2Q067 | Q9Y366 | -0.3162    |
| 103185 | Q2Q067 | Q9NWU1 | -0.35395   |
| 103186 | Q2Q067 | Q9Y5M6 | -0.49414   |
| 103187 | Q2Q067 | Q2WQJ9 | -1.0345    |
| 103188 | Q2Q067 | Q6UWI2 | -0.36841   |
| 103189 | Q2Q067 | Q9Y496 | -0.28333   |
| 103190 | Q2Q067 | P51178 | -0.43095   |
| 103191 | Q2Q067 | Q9C0G6 | -0.77552   |
| 103192 | Q2Q067 | Q8WW32 | -0.45296   |
| 103193 | Q2Q067 | P08700 | -0.61653   |
| 103194 | Q2Q067 | Q9UN70 | -1.3351    |
| 103195 | Q2Q067 | Q8NDH2 | -0.043716  |
| 103196 | Q2Q067 | O95714 | -0.2284    |
| 103197 | Q2Q067 | Q9H0T7 | -1.4453    |
| 103198 | Q2Q067 | Q9NRG1 | -0.43822   |
| 103199 | Q2Q067 | Q96KT0 | -0.0023341 |
| 103200 | Q2Q067 | Q9NQW1 | -0.24047   |
| 103201 | Q2Q067 | A6NM11 | -1.0345    |
| 103202 | Q2Q067 | Q8NGQ3 | -1.4096    |
| 103203 | Q2Q067 | P11844 | -0.44899   |
| 103204 | Q2Q067 | Q5TON5 | -0.22741   |
| 103205 | Q2Q067 | O95258 | -0.96668   |
| 103206 | Q2Q067 | Q68DA7 | -0.22337   |
| 103207 | Q2Q067 | Q92835 | -0.22741   |
| 103208 | Q2Q067 | Q96LZ2 | -0.074164  |

|        |        |        |           |
|--------|--------|--------|-----------|
| 103209 | Q2Q067 | O43736 | -0.35359  |
| 103210 | Q2Q067 | P14927 | -0.2771   |
| 103211 | Q2Q067 | Q05C16 | -0.22775  |
| 103212 | Q2Q067 | Q9NS69 | -0.077928 |
| 103213 | Q2Q067 | Q9Y6D0 | -0.55042  |
| 103214 | Q2Q067 | Q92561 | -0.19636  |
| 103215 | Q2Q067 | O94778 | -1.1159   |
| 103216 | Q2Q067 | Q03721 | -0.95221  |
| 103217 | Q2Q067 | B1AJZ1 | -0.12815  |
| 103218 | Q2Q067 | Q58FF6 | -0.66086  |
| 103219 | Q2Q067 | Q86X24 | -0.45499  |
| 103220 | Q2Q067 | Q5VV67 | -0.2243   |
| 103221 | Q2Q067 | Q9P0M4 | -0.9932   |
| 103222 | Q2Q067 | Q6PIZ9 | -1.1343   |
| 103223 | Q2Q067 | P05305 | -0.28366  |
| 103224 | Q2Q067 | O00571 | -0.51368  |
| 103225 | Q2Q067 | P56597 | -0.63578  |
| 103226 | Q2Q067 | Q8WZ74 | -0.70566  |
| 103227 | Q2Q067 | P23634 | -0.67511  |
| 103228 | Q2Q067 | Q8NGV6 | -1.4096   |
| 103229 | Q2Q067 | Q9BV23 | -0.86713  |
| 103230 | Q2Q067 | Q9H5U6 | -0.48384  |
| 103231 | Q2Q067 | P41180 | -0.93325  |
| 103232 | Q2Q067 | Q8IXQ8 | -0.22687  |
| 103233 | Q2Q067 | P78562 | -1.2361   |
| 103234 | Q2Q067 | Q86YJ5 | -1.0517   |
| 103235 | Q2Q067 | Q9NRA1 | -0.38812  |
| 103236 | Q2Q067 | Q6ZMW3 | -0.22749  |
| 103237 | Q2Q067 | O43597 | -0.09485  |
| 103238 | Q2Q067 | Q9H213 | -0.18841  |
| 103239 | Q2Q067 | Q96A08 | -0.75998  |
| 103240 | Q2Q067 | P51813 | -0.88282  |
| 103241 | Q2Q067 | Q8NAC3 | -1.1067   |
| 103242 | Q2Q067 | P0C7V8 | -0.22743  |
| 103243 | Q2Q067 | Q9NZJ9 | -0.32309  |
| 103244 | Q2Q067 | P18858 | -0.23932  |
| 103245 | Q2Q067 | O43556 | -0.89774  |
| 103246 | Q2Q067 | Q8NGJ2 | -1.4096   |
| 103247 | Q2Q067 | P01243 | -1.1528   |
| 103248 | Q2Q067 | Q8TF27 | -1.1564   |
| 103249 | Q2Q067 | P29323 | -0.89962  |
| 103250 | Q2Q067 | Q9NPC4 | -0.92143  |
| 103251 | Q2Q067 | Q7Z6M1 | -0.43646  |
| 103252 | Q2Q067 | O15353 | -0.3153   |
| 103253 | Q2Q067 | Q01344 | -0.66076  |
| 103254 | Q2Q067 | H7BZ55 | -0.15783  |
| 103255 | Q2Q067 | O75425 | -0.93827  |
| 103256 | Q2Q067 | P05155 | -0.30033  |
| 103257 | Q2Q067 | Q8N6S4 | -0.58265  |
| 103258 | Q2Q067 | Q86VF2 | -0.2275   |
| 103259 | Q2Q067 | P52848 | -0.48925  |
| 103260 | Q2Q067 | Q15072 | -1.379    |
| 103261 | Q2Q067 | P08195 | -0.44434  |
| 103262 | Q2Q067 | Q96RI8 | -1.4576   |
| 103263 | Q2Q067 | P27361 | -0.2274   |
| 103264 | Q2Q067 | Q14624 | -0.74235  |
| 103265 | Q2Q067 | Q9BZM3 | -0.23606  |
| 103266 | Q2Q067 | P35558 | -0.41252  |
| 103267 | Q2Q067 | Q02846 | -1.6279   |
| 103268 | Q2Q067 | Q6NXT4 | -0.91498  |
| 103269 | Q2Q067 | P08100 | -0.77363  |
| 103270 | Q2Q067 | Q9GZN4 | -1.5202   |
| 103271 | Q2Q067 | P59025 | -1.0784   |
| 103272 | Q2Q067 | Q8IXY8 | -0.32591  |
| 103273 | Q2Q067 | Q07654 | -0.945    |
| 103274 | Q2Q067 | A8MYU2 | -1.362    |
| 103275 | Q2Q067 | Q9UKY0 | -0.37327  |
| 103276 | Q2Q067 | Q641Q3 | -0.98666  |
| 103277 | Q2Q067 | Q9H8N7 | -0.12047  |
| 103278 | Q2Q067 | Q9NZS9 | -1.097    |
| 103279 | Q2Q067 | Q9H7Z7 | -0.18549  |
| 103280 | Q2Q067 | O43602 | -0.43256  |
| 103281 | Q2Q067 | P17542 | -0.22755  |
| 103282 | Q2Q067 | P26718 | -0.6559   |
| 103283 | Q2Q067 | Q8WWH5 | -0.32914  |
| 103284 | Q2Q067 | O60906 | -0.87573  |

|        |        |        |           |
|--------|--------|--------|-----------|
| 103285 | Q2Q067 | Q6P1K1 | -0.99221  |
| 103286 | Q2Q067 | P52788 | -0.26862  |
| 103287 | Q2Q067 | O00533 | -1.6264   |
| 103288 | Q2Q067 | P20396 | -0.46797  |
| 103289 | Q2Q067 | Q03001 | -0.22801  |
| 103290 | Q2Q067 | A6NGW2 | -0.98666  |
| 103291 | Q2Q067 | Q9Y2E8 | -1.0015   |
| 103292 | Q2Q067 | Q5TF58 | -0.16027  |
| 103293 | Q2Q067 | P16870 | -0.88181  |
| 103294 | Q2Q067 | Q9BQE3 | -0.49248  |
| 103295 | Q2Q067 | Q9NTI2 | -1.2604   |
| 103296 | Q2Q067 | B4E2M5 | -0.22741  |
| 103297 | Q2Q067 | P11801 | -0.82429  |
| 103298 | Q2Q067 | P05067 | -0.26037  |
| 103299 | Q2Q067 | Q53S99 | -0.54556  |
| 103300 | Q2Q067 | Q8IZ73 | -0.27576  |
| 103301 | Q2Q067 | Q6UXB0 | -0.98666  |
| 103302 | Q2Q067 | Q8NGK3 | -1.4096   |
| 103303 | Q2Q067 | Q9H1H1 | -0.43755  |
| 103304 | Q2Q067 | Q8TDY4 | -0.55886  |
| 103305 | Q2Q067 | Q9P2Z0 | -0.52609  |
| 103306 | Q2Q067 | Q02962 | -0.22734  |
| 103307 | Q2Q067 | Q96KC2 | -1.4417   |
| 103308 | Q2Q067 | Q13496 | -0.49708  |
| 103309 | Q2Q067 | Q9H8Y1 | -0.43489  |
| 103310 | Q2Q067 | Q6PL24 | -0.90354  |
| 103311 | Q2Q067 | Q13790 | -1.1662   |
| 103312 | Q2Q067 | Q8NDX9 | -0.77379  |
| 103313 | Q2Q067 | Q53EP0 | -0.94957  |
| 103314 | Q2Q067 | Q8N4T0 | -1.396    |
| 103315 | Q2Q067 | Q9BYG7 | -0.19709  |
| 103316 | Q2Q067 | A4D1P6 | -0.22743  |
| 103317 | Q2Q067 | Q96RD0 | -1.4096   |
| 103318 | Q2Q067 | Q9H7M6 | -0.48451  |
| 103319 | Q2Q067 | Q9H479 | -0.5794   |
| 103320 | Q2Q067 | Q96KF7 | -1.0345   |
| 103321 | Q2Q067 | P01779 | -1.1115   |
| 103322 | Q2Q067 | Q13740 | -1.3562   |
| 103323 | Q2Q067 | O43173 | -0.69823  |
| 103324 | Q2Q067 | P30101 | -0.24457  |
| 103325 | Q2Q067 | Q9HBE5 | -0.97438  |
| 103326 | Q2Q067 | P55064 | -0.63123  |
| 103327 | Q2Q067 | Q16790 | -0.53942  |
| 103328 | Q2Q067 | Q9NX01 | -0.16472  |
| 103329 | Q2Q067 | Q12767 | -1.0345   |
| 103330 | Q2Q067 | Q9NWX6 | -0.72531  |
| 103331 | Q2Q067 | Q96P66 | -1.4967   |
| 103332 | Q2Q067 | Q6DN14 | -0.99575  |
| 103333 | Q2Q067 | P48651 | -0.936    |
| 103334 | Q2Q067 | P16278 | -0.18523  |
| 103335 | Q2Q067 | P21918 | -0.79001  |
| 103336 | Q2Q067 | Q13166 | -0.24416  |
| 103337 | Q2Q067 | P78536 | -0.33092  |
| 103338 | Q2Q067 | Q6ZUS5 | -0.25687  |
| 103339 | Q2Q067 | A6NKF9 | -1.0345   |
| 103340 | Q2Q067 | Q96R05 | -0.49702  |
| 103341 | Q2Q067 | Q8TAE6 | -0.37111  |
| 103342 | Q2Q067 | P80370 | -0.939    |
| 103343 | Q2Q067 | Q6NV75 | -1.4967   |
| 103344 | Q2Q067 | Q8N5S3 | -0.19035  |
| 103345 | Q2Q067 | Q58FF3 | -0.37561  |
| 103346 | Q2Q067 | Q5T686 | -0.33127  |
| 103347 | Q2Q067 | P30519 | -0.21637  |
| 103348 | Q2Q067 | Q14500 | -1.243    |
| 103349 | Q2Q067 | Q96CS7 | -0.60828  |
| 103350 | Q2Q067 | Q9NUD7 | -0.025017 |
| 103351 | Q2Q067 | Q9Y4F3 | -0.89945  |
| 103352 | Q2Q067 | Q16849 | -0.93115  |
| 103353 | Q2Q067 | Q9NR11 | -0.085533 |
| 103354 | Q2Q067 | Q5JSP0 | -0.81736  |
| 103355 | Q2Q067 | Q9UKA8 | -0.88222  |
| 103356 | Q2Q067 | Q9UBE8 | -0.22741  |
| 103357 | Q2Q067 | Q9H5L9 | -0.047471 |
| 103358 | Q2Q067 | P30536 | -0.38477  |
| 103359 | Q2Q067 | Q70HW3 | -0.28434  |
| 103360 | Q2Q067 | P49755 | -0.19048  |

|        |        |         |           |
|--------|--------|---------|-----------|
| 103361 | Q2Q067 | O95013  | -1.4096   |
| 103362 | Q2Q067 | Q8NEA5  | -1.0345   |
| 103363 | Q2Q067 | Q6UXH1  | -0.35601  |
| 103364 | Q2Q067 | Q6ZRR5  | -1.0345   |
| 103365 | Q2Q067 | Q9NQ84  | -1.3865   |
| 103366 | Q2Q067 | Q8N8U3  | -0.50058  |
| 103367 | Q2Q067 | Q9Y5Y9  | -1.0387   |
| 103368 | Q2Q067 | Q9UJ99  | -1.3679   |
| 103369 | Q2Q067 | P30408  | -1.0377   |
| 103370 | Q2Q067 | P30038  | -0.35879  |
| 103371 | Q2Q067 | Q6L8Q7  | -0.195    |
| 103372 | Q2Q067 | P40692  | -0.038463 |
| 103373 | Q2Q067 | Q86VR7  | -1.0345   |
| 103374 | Q2Q067 | Q2WGG6  | -0.21097  |
| 103375 | Q2Q067 | Q8NFFQ5 | -1.1714   |
| 103376 | Q2Q067 | Q969Z4  | -0.95288  |
| 103377 | Q2Q067 | A8MZ36  | -0.20911  |
| 103378 | Q2Q067 | Q8N2X6  | -0.98666  |
| 103379 | Q2Q067 | O75038  | -0.59461  |
| 103380 | Q2Q067 | Q6NUI6  | -1.0793   |
| 103381 | Q2Q067 | Q9H3R0  | -0.20274  |
| 103382 | Q2Q067 | P98171  | -0.2281   |
| 103383 | Q2Q067 | Q5JUX0  | -0.37866  |
| 103384 | Q2Q067 | Q9BX79  | -0.55118  |
| 103385 | Q2Q067 | Q8N4Q0  | -0.82939  |
| 103386 | Q2Q067 | P47992  | -0.47839  |
| 103387 | Q2Q067 | P29401  | -0.072489 |
| 103388 | Q2Q067 | P0CJ69  | -0.80201  |
| 103389 | Q2Q067 | P16389  | -0.95401  |
| 103390 | Q2Q067 | Q96NR2  | -0.13109  |
| 103391 | Q2Q067 | Q96QE2  | -1.0163   |
| 103392 | Q2Q067 | P13688  | -0.94334  |
| 103393 | Q2Q067 | Q9NS86  | -0.20737  |
| 103394 | Q2Q067 | Q99102  | -1.6193   |
| 103395 | Q2Q067 | Q8TCW7  | -1.0345   |
| 103396 | Q2Q067 | Q8N8D0  | -1.0345   |
| 103397 | Q2Q067 | Q5T6X4  | -1.0345   |
| 103398 | Q2Q067 | Q14993  | -1.3105   |
| 103399 | Q2Q067 | Q96EW2  | -0.20901  |
| 103400 | Q2Q067 | Q9BSK4  | -0.25817  |
| 103401 | Q2Q067 | Q9P104  | -0.39958  |
| 103402 | Q2Q067 | Q13188  | -0.34192  |
| 103403 | Q2Q067 | Q9BWV3  | -0.64557  |
| 103404 | Q2Q067 | P61224  | -0.2949   |
| 103405 | Q2Q067 | Q8NBV8  | -1.0231   |
| 103406 | Q2Q067 | Q9HCB6  | -0.71326  |
| 103407 | Q2Q067 | Q5VVP1  | -1.0345   |
| 103408 | Q2Q067 | Q8N910  | -0.063348 |
| 103409 | Q2Q067 | Q76M96  | -1.1379   |
| 103410 | Q2Q067 | Q8N967  | -1.0345   |
| 103411 | Q2Q067 | O43298  | -0.20395  |
| 103412 | Q2Q067 | Q92794  | -0.30408  |
| 103413 | Q2Q067 | O75578  | -1.1482   |
| 103414 | Q2Q067 | Q6ZV73  | -0.79481  |
| 103415 | Q2Q067 | Q86YZ3  | -0.73137  |
| 103416 | Q2Q067 | Q9BSJ5  | -1.0345   |
| 103417 | Q2Q067 | Q6ZN04  | -0.22739  |
| 103418 | Q2Q067 | Q5T7W0  | -0.23184  |
| 103419 | Q2Q067 | P24821  | -1.2037   |
| 103420 | Q2Q067 | Q05209  | -0.23122  |
| 103421 | Q2Q067 | O95992  | -0.83891  |
| 103422 | Q2Q067 | P01282  | -0.7912   |
| 103423 | Q2Q067 | Q8NHH1  | -0.48158  |
| 103424 | Q2Q067 | Q9Y2K2  | -0.72763  |
| 103425 | Q2Q067 | Q5W150  | -0.32136  |
| 103426 | Q2Q067 | Q5T6X5  | -1.3848   |
| 103427 | Q2Q067 | Q6IMI6  | -0.36698  |
| 103428 | Q2Q067 | P01138  | -0.45594  |
| 103429 | Q2Q067 | Q8NA75  | -0.22734  |
| 103430 | Q2Q067 | Q9P2J9  | -0.17633  |
| 103431 | Q2Q067 | O60551  | -0.11961  |
| 103432 | Q2Q067 | P01189  | -0.6273   |
| 103433 | Q2Q067 | E2RYF7  | -0.98666  |
| 103434 | Q2Q067 | Q96C12  | -0.14425  |
| 103435 | Q2Q067 | Q9UDX5  | -0.78597  |
| 103436 | Q2Q067 | Q96KN4  | -0.060241 |

|        |        |        |          |
|--------|--------|--------|----------|
| 103437 | Q2Q067 | Q58HT5 | -1.0082  |
| 103438 | Q2Q067 | P55808 | -1.1541  |
| 103439 | Q2Q067 | Q92879 | -0.2354  |
| 103440 | Q2Q067 | P59536 | -1.3729  |
| 103441 | Q2Q067 | Q6ZR08 | -0.77552 |
| 103442 | Q2Q067 | Q86UP2 | -1.0766  |
| 103443 | Q2Q067 | Q9GZQ4 | -1.0635  |
| 103444 | Q2Q067 | P43155 | -0.53045 |
| 103445 | Q2Q067 | P51805 | -1.1524  |
| 103446 | Q2Q067 | P46695 | -0.19711 |
| 103447 | Q2Q067 | Q9UJT0 | -0.54479 |
| 103448 | Q2Q067 | O43488 | -0.22511 |
| 103449 | Q2Q067 | Q9UKB5 | -1.0937  |
| 103450 | Q2Q067 | Q9Y365 | -0.77641 |
| 103451 | Q2Q067 | Q8IU85 | -0.72852 |
| 103452 | Q2Q067 | Q06432 | -1.1315  |
| 103453 | Q2Q067 | Q5JU85 | -0.2219  |
| 103454 | Q2Q067 | Q9BWV1 | -0.59944 |
| 103455 | Q2Q067 | O60548 | -0.33602 |
| 103456 | Q2Q067 | A8MTJ6 | -0.34661 |
| 103457 | Q2Q067 | Q6PIY7 | -0.51741 |
| 103458 | Q2Q067 | Q9Y6V7 | -0.98139 |
| 103459 | Q2Q067 | Q6PEV8 | -0.11523 |
| 103460 | Q2Q067 | Q8N755 | -1.0345  |
| 103461 | Q2Q067 | B1ANH7 | -0.17938 |
| 103462 | Q2Q067 | O43819 | -0.27923 |
| 103463 | Q2Q067 | Q12929 | -0.22741 |
| 103464 | Q2Q067 | Q8IYY4 | -0.60189 |
| 103465 | Q2Q067 | Q9HBX9 | -1.4155  |
| 103466 | Q2Q067 | Q9H672 | -0.61006 |
| 103467 | Q2Q067 | Q8WWA1 | -1.0345  |
| 103468 | Q2Q067 | O00115 | -0.62091 |
| 103469 | Q2Q067 | O00341 | -1.1452  |
| 103470 | Q2Q067 | Q99805 | -1.0584  |
| 103471 | Q2Q067 | P58166 | -0.84741 |
| 103472 | Q2Q067 | Q7Z7B0 | -0.22297 |
| 103473 | Q2Q067 | Q8WTZ4 | -0.25091 |
| 103474 | Q2Q067 | Q8IVK1 | -0.53726 |
| 103475 | Q2Q067 | P00918 | -0.20055 |
| 103476 | Q2Q067 | Q6TAR4 | -0.31399 |
| 103477 | Q2Q067 | Q5TDH0 | -0.54571 |
| 103478 | Q2Q067 | P15104 | -0.59086 |
| 103479 | Q2Q067 | Q6NUJ5 | -0.2189  |
| 103480 | Q2Q067 | P40933 | -0.21968 |
| 103481 | Q2Q067 | Q8NGT2 | -1.4096  |
| 103482 | Q2Q067 | Q9UHE8 | -1.2432  |
| 103483 | Q2Q067 | O75747 | -0.82503 |
| 103484 | Q2Q067 | Q9Y5E9 | -1.3348  |
| 103485 | Q2Q067 | O60774 | -1.1473  |
| 103486 | Q2Q067 | Q8NEY1 | -0.9992  |
| 103487 | Q2Q067 | P53611 | -0.16724 |
| 103488 | Q2Q067 | Q8N0S6 | -0.12446 |
| 103489 | Q2Q067 | O95907 | -0.91007 |
| 103490 | Q2Q067 | Q9UKE5 | -0.23535 |
| 103491 | Q2Q067 | A6NL08 | -1.4096  |
| 103492 | Q2Q067 | Q8IVF5 | -0.91961 |
| 103493 | Q2Q067 | Q8WVQ1 | -1.0624  |
| 103494 | Q2Q067 | P14920 | -0.38141 |
| 103495 | Q2Q067 | Q6DN72 | -1.0301  |
| 103496 | Q2Q067 | P49795 | -0.3183  |
| 103497 | Q2Q067 | O43194 | -1.6856  |
| 103498 | Q2Q067 | P54652 | -0.22446 |
| 103499 | Q2Q067 | Q9UH65 | -0.63172 |
| 103500 | Q2Q067 | P14410 | -0.60431 |
| 103501 | Q2Q067 | Q9P2W1 | -0.18247 |
| 103502 | Q2Q067 | Q9NYU2 | -0.394   |
| 103503 | Q2Q067 | P37058 | -0.46554 |
| 103504 | Q2Q067 | P01767 | -1.1115  |
| 103505 | Q2Q067 | Q9HCJ2 | -0.34971 |
| 103506 | Q2Q067 | Q9NZH7 | -0.96479 |
| 103507 | Q2Q067 | O94788 | -0.66375 |
| 103508 | Q2Q067 | Q96A32 | -0.4739  |
| 103509 | Q2Q067 | A4D2G3 | -1.4096  |
| 103510 | Q2Q067 | Q6ZMS4 | -0.74229 |
| 103511 | Q2Q067 | Q969M7 | -0.29018 |
| 103512 | Q2Q067 | Q96F85 | -0.21039 |

|        |        |        |           |
|--------|--------|--------|-----------|
| 103513 | Q2Q067 | P43320 | -0.44527  |
| 103514 | Q2Q067 | O95278 | -0.22913  |
| 103515 | Q2Q067 | Q9UMW8 | -0.35901  |
| 103516 | Q2Q067 | Q9HCM4 | -0.25216  |
| 103517 | Q2Q067 | Q9HAK2 | -0.11224  |
| 103518 | Q2Q067 | P49019 | -1.565    |
| 103519 | Q2Q067 | Q6NUK4 | -1.0345   |
| 103520 | Q2Q067 | O14772 | -0.98215  |
| 103521 | Q2Q067 | Q8WWI1 | -0.22727  |
| 103522 | Q2Q067 | Q6XLA1 | -0.18638  |
| 103523 | Q2Q067 | Q15274 | -0.085722 |
| 103524 | Q2Q067 | P05496 | -0.76221  |
| 103525 | Q2Q067 | Q6UWQ7 | -0.98666  |
| 103526 | Q2Q067 | Q8NH74 | -1.4096   |
| 103527 | Q2Q067 | Q9UN73 | -1.8625   |
| 103528 | Q2Q067 | P0C2S0 | -1.0097   |
| 103529 | Q2Q067 | A6NFA1 | -0.93284  |
| 103530 | Q2Q067 | P56470 | -0.49543  |
| 103531 | Q2Q067 | O43424 | -0.74546  |
| 103532 | Q2Q067 | Q70Z44 | -1.2431   |
| 103533 | Q2Q067 | Q86T26 | -2.0647   |
| 103534 | Q2Q067 | Q96L42 | -1.069    |
| 103535 | Q2Q067 | O43448 | -0.96851  |
| 103536 | Q2Q067 | Q9BVR0 | -0.50749  |
| 103537 | Q2Q067 | P45452 | -0.96901  |
| 103538 | Q2Q067 | Q16706 | -0.54411  |
| 103539 | Q2Q067 | P43080 | -0.83613  |
| 103540 | Q2Q067 | Q8NEN0 | -0.19365  |
| 103541 | Q2Q067 | O43570 | -1.0821   |
| 103542 | Q2Q067 | Q06124 | -0.22741  |
| 103543 | Q2Q067 | Q8NET1 | -0.94775  |
| 103544 | Q2Q067 | O95084 | -1.1929   |
| 103545 | Q2Q067 | Q53FP2 | -0.82566  |
| 103546 | Q2Q067 | Q9H492 | -0.16029  |
| 103547 | Q2Q067 | Q02223 | -1.4438   |
| 103548 | Q2Q067 | Q9BPV8 | -1.3389   |
| 103549 | Q2Q067 | Q59F38 | -0.049966 |
| 103550 | Q2Q067 | Q8TCX5 | -0.74028  |
| 103551 | Q2Q067 | Q9UKZ9 | -0.9742   |
| 103552 | Q2Q067 | Q08AI6 | -1.1869   |
| 103553 | Q2Q067 | P0CG08 | -0.79053  |
| 103554 | Q2Q067 | Q5SSJ5 | -0.70642  |
| 103555 | Q2Q067 | Q5TGP6 | -0.26375  |
| 103556 | Q2Q067 | Q7Z4N2 | -1.4303   |
| 103557 | Q2Q067 | P48145 | -0.87816  |
| 103558 | Q2Q067 | Q9UPY5 | -0.88489  |
| 103559 | Q2Q067 | Q9P203 | -0.22546  |
| 103560 | Q2Q067 | P23975 | -0.66783  |
| 103561 | Q2Q067 | Q9NUM3 | -1.0849   |
| 103562 | Q2Q067 | Q6ZUQ5 | -0.47166  |
| 103563 | Q2Q067 | Q86SS6 | -1.0004   |
| 103564 | Q2Q067 | Q9UF72 | -0.98666  |
| 103565 | Q2Q067 | Q9Y6F8 | -0.22575  |
| 103566 | Q2Q067 | Q63HM2 | -1.0345   |
| 103567 | Q2Q067 | O75439 | -0.65974  |
| 103568 | Q2Q067 | Q9H1C4 | -0.84576  |
| 103569 | Q2Q067 | Q8N328 | -0.069918 |
| 103570 | Q2Q067 | Q8TCY5 | -0.72954  |
| 103571 | Q2Q067 | Q96QP1 | -0.80277  |
| 103572 | Q2Q067 | O95237 | -0.77232  |
| 103573 | Q2Q067 | Q8TCX1 | -0.22689  |
| 103574 | Q2Q067 | Q6ZVL6 | -1.0345   |
| 103575 | Q2Q067 | Q86VU5 | -0.72128  |
| 103576 | Q2Q067 | Q8N4S9 | -0.99157  |
| 103577 | Q2Q067 | Q8N8A4 | -0.38988  |
| 103578 | Q2Q067 | Q8NGY7 | -1.4096   |
| 103579 | Q2Q067 | Q14774 | -0.22804  |
| 103580 | Q2Q067 | Q9H3S4 | -0.52863  |
| 103581 | Q2Q067 | Q8NEG7 | -0.382    |
| 103582 | Q2Q067 | Q9UL62 | -0.59325  |
| 103583 | Q2Q067 | Q5VTA0 | -0.19475  |
| 103584 | Q2Q067 | Q6UWH4 | -0.82825  |
| 103585 | Q2Q067 | Q69YU5 | -0.98666  |
| 103586 | Q2Q067 | Q8NGC6 | -1.4096   |
| 103587 | Q2Q067 | Q96K83 | -0.45536  |
| 103588 | Q2Q067 | Q9BSK1 | -0.085533 |



|        |        |        |           |
|--------|--------|--------|-----------|
| 103589 | Q2Q067 | Q9BUB7 | -0.69807  |
| 103590 | Q2Q067 | Q8IV50 | -0.38126  |
| 103591 | Q2Q067 | P04632 | -0.22997  |
| 103592 | Q2Q067 | O75431 | -0.20803  |
| 103593 | Q2Q067 | Q15118 | -0.68612  |
| 103594 | Q2Q067 | P0C5K7 | -0.11504  |
| 103595 | Q2Q067 | Q6PRD1 | -1.585    |
| 103596 | Q2Q067 | Q8N6U8 | -1.6533   |
| 103597 | Q2Q067 | O43347 | -0.29953  |
| 103598 | Q2Q067 | Q7RTR0 | -0.74063  |
| 103599 | Q2Q067 | Q8J025 | -1.1814   |
| 103600 | Q2Q067 | Q8IYK8 | -1.5078   |
| 103601 | Q2Q067 | Q99972 | -0.99449  |
| 103602 | Q2Q067 | Q9H511 | -0.21046  |
| 103603 | Q2Q067 | Q8NAU1 | -1.3695   |
| 103604 | Q2Q067 | Q6ZVN6 | -0.010153 |
| 103605 | Q2Q067 | Q9Y3Q4 | -1.2495   |
| 103606 | Q2Q067 | P31941 | -0.28189  |
| 103607 | Q2Q067 | Q9Y6Z4 | -0.24416  |
| 103608 | Q2Q067 | Q9NQ66 | -0.23488  |
| 103609 | Q2Q067 | Q9Y2B1 | -1.1904   |
| 103610 | Q2Q067 | O94979 | -0.33874  |
| 103611 | Q2Q067 | Q9NSI8 | -0.2186   |
| 103612 | Q2Q067 | P0DJD4 | -0.64476  |
| 103613 | Q2Q067 | Q15942 | -0.22573  |
| 103614 | Q2Q067 | Q5SRE7 | -0.66631  |
| 103615 | Q2Q067 | A8MYG8 | -0.22741  |
| 103616 | Q2Q067 | Q8N474 | -0.30887  |
| 103617 | Q2Q067 | P49685 | -1.565    |
| 103618 | Q2Q067 | Q9BTY2 | -0.83642  |
| 103619 | Q2Q067 | Q9BZW5 | -0.88683  |
| 103620 | Q2Q067 | Q6GMV3 | -0.62171  |
| 103621 | Q2Q067 | Q9UPT6 | -0.2264   |
| 103622 | Q2Q067 | Q9GZZ0 | -0.22739  |
| 103623 | Q2Q067 | P30086 | -0.41967  |
| 103624 | Q2Q067 | Q5U5Z8 | -0.50501  |
| 103625 | Q2Q067 | P30711 | -0.22428  |
| 103626 | Q2Q067 | Q6QAJ8 | -1.0345   |
| 103627 | Q2Q067 | P01818 | -1.1115   |
| 103628 | Q2Q067 | P84095 | -0.3973   |
| 103629 | Q2Q067 | P49642 | -0.24621  |
| 103630 | Q2Q067 | Q9UN66 | -1.3679   |
| 103631 | Q2Q067 | Q8WTU2 | -1.0915   |
| 103632 | Q2Q067 | Q5SWL8 | -0.19475  |
| 103633 | Q2Q067 | Q8WXD9 | -0.38586  |
| 103634 | Q2Q067 | Q8NAJ2 | -0.027319 |
| 103635 | Q2Q067 | Q9NS93 | -1.1634   |
| 103636 | Q2Q067 | Q9UNE0 | -0.79202  |
| 103637 | Q2Q067 | Q9NPD7 | -0.57999  |
| 103638 | Q2Q067 | O00555 | -0.26184  |
| 103639 | Q2Q067 | P01596 | -1.1115   |
| 103640 | Q2Q067 | P56378 | -0.61578  |
| 103641 | Q2Q067 | P48681 | -0.19194  |
| 103642 | Q2Q067 | Q8NGY3 | -1.4096   |
| 103643 | Q2Q067 | Q96P31 | -1.1634   |
| 103644 | Q2Q067 | Q9BZW2 | -1.1639   |
| 103645 | Q2Q067 | Q86WK9 | -1.4833   |
| 103646 | Q2Q067 | P42331 | -1.1792   |
| 103647 | Q2Q067 | Q96BD6 | -0.21115  |
| 103648 | Q2Q067 | P62952 | -0.22034  |
| 103649 | Q2Q067 | P28222 | -0.94048  |
| 103650 | Q2Q067 | Q9Y5F9 | -1.3679   |
| 103651 | Q2Q067 | O95399 | -0.66201  |
| 103652 | Q2Q067 | P98077 | -0.22741  |
| 103653 | Q2Q067 | O14525 | -0.98781  |
| 103654 | Q2Q067 | Q9NRP7 | -0.52029  |
| 103655 | Q2Q067 | P78364 | -0.077674 |
| 103656 | Q2Q067 | P23352 | -0.73709  |
| 103657 | Q2Q067 | F8WCM5 | -0.73372  |
| 103658 | Q2Q067 | P35225 | -0.2723   |
| 103659 | Q2Q067 | P54849 | -1.335    |
| 103660 | Q2Q067 | O14627 | -0.19908  |
| 103661 | Q2Q067 | P12107 | -0.84347  |
| 103662 | Q2Q067 | O95864 | -0.91515  |
| 103663 | Q2Q067 | Q7RTP0 | -1.1059   |
| 103664 | Q2Q067 | Q9NUR3 | -1.0345   |

|        |        |        |           |
|--------|--------|--------|-----------|
| 103665 | Q2Q067 | Q2M5E4 | -0.73848  |
| 103666 | Q2Q067 | Q8TBB6 | -1.0669   |
| 103667 | Q2Q067 | O95754 | -1.0011   |
| 103668 | Q2Q067 | Q8WU67 | -0.68602  |
| 103669 | Q2Q067 | Q53GQ0 | -0.69601  |
| 103670 | Q2Q067 | Q96JPO | -0.23253  |
| 103671 | Q2Q067 | P15514 | -0.77391  |
| 103672 | Q2Q067 | Q8WZA0 | -0.46991  |
| 103673 | Q2Q067 | A3KMH1 | -1.3094   |
| 103674 | Q2Q067 | Q86SE5 | -0.96284  |
| 103675 | Q2Q067 | Q5XG92 | -0.9251   |
| 103676 | Q2Q067 | Q7Z7B1 | -0.99127  |
| 103677 | Q2Q067 | Q6IF42 | -1.4096   |
| 103678 | Q2Q067 | Q9H6I2 | -0.18964  |
| 103679 | Q2Q067 | Q9HBE4 | -0.90475  |
| 103680 | Q2Q067 | Q8N3Y1 | -0.22741  |
| 103681 | Q2Q067 | Q9UKU0 | -1.0078   |
| 103682 | Q2Q067 | P11511 | -0.35986  |
| 103683 | Q2Q067 | P01597 | -1.1115   |
| 103684 | Q2Q067 | Q15018 | -0.409    |
| 103685 | Q2Q067 | O00442 | -0.57893  |
| 103686 | Q2Q067 | P19823 | -0.85004  |
| 103687 | Q2Q067 | P47929 | -0.4767   |
| 103688 | Q2Q067 | Q6MZW2 | -1.0413   |
| 103689 | Q2Q067 | A6NFF2 | -0.14475  |
| 103690 | Q2Q067 | A6NCV1 | -1.4096   |
| 103691 | Q2Q067 | Q9BPY8 | -0.21923  |
| 103692 | Q2Q067 | P0C842 | -0.5697   |
| 103693 | Q2Q067 | Q6UX34 | -1.0345   |
| 103694 | Q2Q067 | Q9UHF0 | -1.0584   |
| 103695 | Q2Q067 | Q7Z553 | -0.6952   |
| 103696 | Q2Q067 | Q8WXG1 | -0.047159 |
| 103697 | Q2Q067 | A6NC42 | -0.47808  |
| 103698 | Q2Q067 | Q96BY6 | -0.68091  |
| 103699 | Q2Q067 | P08684 | -0.61965  |
| 103700 | Q2Q067 | Q86UU1 | -0.51797  |
| 103701 | Q2Q067 | Q96A29 | -0.7906   |
| 103702 | Q2Q067 | O43295 | -1.0924   |
| 103703 | Q2Q067 | Q6YI46 | -1.0345   |
| 103704 | Q2Q067 | Q8TBM8 | -1.0544   |
| 103705 | Q2Q067 | Q9Y247 | -0.061907 |
| 103706 | Q2Q067 | P56703 | -0.5161   |
| 103707 | Q2Q067 | Q5EB52 | -1.1139   |
| 103708 | Q2Q067 | Q13113 | -1.0345   |
| 103709 | Q2Q067 | P59646 | -1.1323   |
| 103710 | Q2Q067 | A4FU69 | -0.45603  |
| 103711 | Q2Q067 | Q8TCN5 | -0.17007  |
| 103712 | Q2Q067 | Q9NYL9 | -0.26938  |
| 103713 | Q2Q067 | Q9H5V8 | -1.6971   |
| 103714 | Q2Q067 | Q8WYP3 | -0.91029  |
| 103715 | Q2Q067 | Q13670 | -0.43693  |
| 103716 | Q2Q067 | Q13247 | -0.22517  |
| 103717 | Q2Q067 | Q68G75 | -0.91342  |
| 103718 | Q2Q067 | P28161 | -0.34633  |
| 103719 | Q2Q067 | P01266 | -0.67854  |
| 103720 | Q2Q067 | Q8NH02 | -1.4096   |
| 103721 | Q2Q067 | A2RUT3 | -1.0345   |
| 103722 | Q2Q067 | Q7Z6B7 | -0.61723  |
| 103723 | Q2Q067 | P38567 | -0.72611  |
| 103724 | Q2Q067 | Q9UQ52 | -0.67738  |
| 103725 | Q2Q067 | Q0P6D6 | -0.21094  |
| 103726 | Q2Q067 | P46736 | -0.24645  |
| 103727 | Q2Q067 | Q14166 | -0.33648  |
| 103728 | Q2Q067 | Q96C11 | -0.26251  |
| 103729 | Q2Q067 | O15213 | -0.24416  |
| 103730 | Q2Q067 | P04433 | -1.1115   |
| 103731 | Q2Q067 | Q96D96 | -1.0491   |
| 103732 | Q2Q067 | Q9NVT9 | -0.25755  |
| 103733 | Q2Q067 | Q8NGK1 | -1.4096   |
| 103734 | Q2Q067 | A6NDL8 | -1.4096   |
| 103735 | Q2Q067 | Q96A28 | -1.0427   |
| 103736 | Q2Q067 | Q8WY21 | -0.3859   |
| 103737 | Q2Q067 | O00329 | -0.38348  |
| 103738 | Q2Q067 | Q9BVA1 | -0.18802  |
| 103739 | Q2Q067 | P32745 | -0.72357  |
| 103740 | Q2Q067 | Q9UDX4 | -1.2928   |

|        |        |        |           |
|--------|--------|--------|-----------|
| 103741 | Q2Q067 | P40939 | -0.1532   |
| 103742 | Q2Q067 | Q15649 | -0.32896  |
| 103743 | Q2Q067 | Q9BWT6 | -0.14617  |
| 103744 | Q2Q067 | Q9BQI4 | -0.95448  |
| 103745 | Q2Q067 | A8MXJ8 | -0.43957  |
| 103746 | Q2Q067 | P07602 | -0.95417  |
| 103747 | Q2Q067 | Q969X2 | -0.70909  |
| 103748 | Q2Q067 | O95813 | -0.55248  |
| 103749 | Q2Q067 | O60676 | -0.83079  |
| 103750 | Q2Q067 | Q08188 | -0.57796  |
| 103751 | Q2Q067 | Q9BRQ8 | -0.44833  |
| 103752 | Q2Q067 | O95484 | -0.85277  |
| 103753 | Q2Q067 | Q53RT3 | -1.2649   |
| 103754 | Q2Q067 | P08254 | -0.86902  |
| 103755 | Q2Q067 | P46093 | -1.6361   |
| 103756 | Q2Q067 | Q13571 | -1.3214   |
| 103757 | Q2Q067 | Q96SQ7 | -0.22766  |
| 103758 | Q2Q067 | P01567 | -0.73689  |
| 103759 | Q2Q067 | Q8N907 | -0.72545  |
| 103760 | Q2Q067 | O14804 | -1.6059   |
| 103761 | Q2Q067 | Q9NW81 | -0.066333 |
| 103762 | Q2Q067 | Q15811 | -0.43345  |
| 103763 | Q2Q067 | Q9H0K1 | -0.60294  |
| 103764 | Q2Q067 | Q8N7H1 | -0.12431  |
| 103765 | Q2Q067 | Q8NC60 | -0.21315  |
| 103766 | Q2Q067 | P07093 | -0.36672  |
| 103767 | Q2Q067 | Q9NRI6 | -0.96181  |
| 103768 | Q2Q067 | Q96NN9 | -0.2206   |
| 103769 | Q2Q067 | O75871 | -1.1904   |
| 103770 | Q2Q067 | O00311 | -0.32833  |
| 103771 | Q2Q067 | P47872 | -1.5667   |
| 103772 | Q2Q067 | Q8TDX5 | -0.43329  |
| 103773 | Q2Q067 | Q96CE8 | -1.0345   |
| 103774 | Q2Q067 | Q8TBE3 | -1.0345   |
| 103775 | Q2Q067 | P02751 | -0.41197  |
| 103776 | Q2Q067 | O75084 | -0.64188  |
| 103777 | Q2Q067 | Q9Y6A5 | -0.12774  |
| 103778 | Q2Q067 | Q9BT43 | -0.16867  |
| 103779 | Q2Q067 | Q8N0U4 | -0.20901  |
| 103780 | Q2Q067 | Q9Y5Y3 | -1.4967   |
| 103781 | Q2Q067 | Q6ZNG9 | -0.25824  |
| 103782 | Q2Q067 | Q14722 | -0.96415  |
| 103783 | Q2Q067 | Q9BXJ3 | -0.98666  |
| 103784 | Q2Q067 | Q6ZSG1 | -0.48451  |
| 103785 | Q2Q067 | P40145 | -1.0201   |
| 103786 | Q2Q067 | P34998 | -0.69349  |
| 103787 | Q2Q067 | Q3B8N2 | -0.39245  |
| 103788 | Q2Q067 | P42785 | -0.42747  |
| 103789 | Q2Q067 | Q9HC24 | -0.20313  |
| 103790 | Q2Q067 | Q16647 | -0.23792  |
| 103791 | Q2Q067 | H3BPM6 | -0.30411  |
| 103792 | Q2Q067 | Q4KMG9 | -1.0345   |
| 103793 | Q2Q067 | A6NK02 | -0.73178  |
| 103794 | Q2Q067 | Q9Y328 | -0.81926  |
| 103795 | Q2Q067 | Q8N8V2 | -1.1558   |
| 103796 | Q2Q067 | P35408 | -0.63882  |
| 103797 | Q2Q067 | P33527 | -0.49254  |
| 103798 | Q2Q067 | P59510 | -1.2675   |
| 103799 | Q2Q067 | P52746 | -0.032739 |
| 103800 | Q2Q067 | O75635 | -0.12664  |
| 103801 | Q2Q067 | O15067 | -0.53653  |
| 103802 | Q2Q067 | Q86VW2 | -0.70712  |
| 103803 | Q2Q067 | P01037 | -1.024    |
| 103804 | Q2Q067 | Q9Y5L4 | -0.29178  |
| 103805 | Q2Q067 | Q7Z6J8 | -0.30969  |
| 103806 | Q2Q067 | Q5EBM0 | -0.44827  |
| 103807 | Q2Q067 | P80362 | -1.1115   |
| 103808 | Q2Q067 | Q6UWV7 | -1.0345   |
| 103809 | Q2Q067 | Q9BQ51 | -1.4629   |
| 103810 | Q2Q067 | P60509 | -1.1634   |
| 103811 | Q2Q067 | Q5SXM8 | -0.31398  |
| 103812 | Q2Q067 | Q2TBC4 | -0.44149  |
| 103813 | Q2Q067 | O75388 | -1.6325   |
| 103814 | Q2Q067 | O60861 | -0.3024   |
| 103815 | Q2Q067 | Q8NG27 | -0.23133  |
| 103816 | Q2Q067 | O75078 | -1.2686   |

|        |        |         |           |
|--------|--------|---------|-----------|
| 103817 | Q2Q067 | Q1XH10  | -0.56192  |
| 103818 | Q2Q067 | Q8NGZ2  | -1.4096   |
| 103819 | Q2Q067 | Q86XE0  | -0.39054  |
| 103820 | Q2Q067 | Q9UNT1  | -1.2226   |
| 103821 | Q2Q067 | Q9BZB8  | -0.65311  |
| 103822 | Q2Q067 | Q9NY28  | -0.82477  |
| 103823 | Q2Q067 | P22749  | -0.9425   |
| 103824 | Q2Q067 | Q12884  | -0.68865  |
| 103825 | Q2Q067 | Q30KQ8  | -0.94775  |
| 103826 | Q2Q067 | O75031  | -0.22126  |
| 103827 | Q2Q067 | P35452  | -0.19834  |
| 103828 | Q2Q067 | Q49AN0  | -0.18877  |
| 103829 | Q2Q067 | Q96KB5  | -0.56632  |
| 103830 | Q2Q067 | O95760  | -0.1785   |
| 103831 | Q2Q067 | Q9UIX4  | -1.0183   |
| 103832 | Q2Q067 | Q5VW36  | -0.32459  |
| 103833 | Q2Q067 | Q6ZN68  | -1.0345   |
| 103834 | Q2Q067 | Q8TAM2  | -0.22702  |
| 103835 | Q2Q067 | Q9Y2C5  | -1.1959   |
| 103836 | Q2Q067 | Q5JRM2  | -1.0345   |
| 103837 | Q2Q067 | Q9NYT0  | -0.65248  |
| 103838 | Q2Q067 | A6NI47  | -0.2274   |
| 103839 | Q2Q067 | Q9UKJ0  | -0.52521  |
| 103840 | Q2Q067 | Q8WTP8  | -0.14877  |
| 103841 | Q2Q067 | Q96AZ1  | -1.1333   |
| 103842 | Q2Q067 | P54764  | -0.64989  |
| 103843 | Q2Q067 | P47901  | -1.1321   |
| 103844 | Q2Q067 | A6NEH6  | -0.99456  |
| 103845 | Q2Q067 | Q8N1P7  | -0.39245  |
| 103846 | Q2Q067 | Q9UKT6  | -0.46576  |
| 103847 | Q2Q067 | Q16690  | -0.52949  |
| 103848 | Q2Q067 | Q969X0  | -0.17467  |
| 103849 | Q2Q067 | Q6IE38  | -0.90081  |
| 103850 | Q2Q067 | Q9NXP7  | -0.39249  |
| 103851 | Q2Q067 | Q7L3S4  | -0.085533 |
| 103852 | Q2Q067 | O14798  | -0.92068  |
| 103853 | Q2Q067 | P63244  | -0.22787  |
| 103854 | Q2Q067 | Q7Z443  | -0.99796  |
| 103855 | Q2Q067 | Q6UXM1  | -1.0345   |
| 103856 | Q2Q067 | Q8NBT0  | -0.22782  |
| 103857 | Q2Q067 | P79483  | -0.92485  |
| 103858 | Q2Q067 | Q9HCI7  | -0.47738  |
| 103859 | Q2Q067 | Q9NXS2  | -1.177    |
| 103860 | Q2Q067 | Q9BT23  | -0.48451  |
| 103861 | Q2Q067 | Q8NH05  | -1.4096   |
| 103862 | Q2Q067 | P01229  | -0.95829  |
| 103863 | Q2Q067 | Q969V4  | -0.26409  |
| 103864 | Q2Q067 | P42701  | -0.78851  |
| 103865 | Q2Q067 | Q5JTTJ3 | -0.086893 |
| 103866 | Q2Q067 | O75462  | -0.2961   |
| 103867 | Q2Q067 | O15484  | -1.1088   |
| 103868 | Q2Q067 | Q9NRN5  | -1.1974   |
| 103869 | Q2Q067 | P49888  | -0.22744  |
| 103870 | Q2Q067 | Q9Y5L3  | -1.3382   |
| 103871 | Q2Q067 | Q13751  | -0.85903  |
| 103872 | Q2Q067 | P0C024  | -0.51687  |
| 103873 | Q2Q067 | Q9NUB4  | -1.0345   |
| 103874 | Q2Q067 | A1IGU5  | -0.54479  |
| 103875 | Q2Q067 | Q6WKZ4  | -0.2678   |
| 103876 | Q2Q067 | Q9BWE0  | -0.57404  |
| 103877 | Q2Q067 | Q494R4  | -0.14125  |
| 103878 | Q2Q067 | P00995  | -0.29624  |
| 103879 | Q2Q067 | Q60I27  | -0.94865  |
| 103880 | Q2Q067 | P08912  | -1.1235   |
| 103881 | Q2Q067 | Q12887  | -0.65533  |
| 103882 | Q2Q067 | Q8NGD5  | -1.4096   |
| 103883 | Q2Q067 | Q00889  | -0.91281  |
| 103884 | Q2Q067 | P55040  | -0.63084  |
| 103885 | Q2Q067 | Q075Z2  | -0.98907  |
| 103886 | Q2Q067 | Q6ZN92  | -0.36112  |
| 103887 | Q2Q067 | Q86YB8  | -0.72037  |
| 103888 | Q2Q067 | A1A5C7  | -1.1011   |
| 103889 | Q2Q067 | P55263  | -0.54702  |
| 103890 | Q2Q067 | O94769  | -0.96799  |
| 103891 | Q2Q067 | O60683  | -0.22742  |
| 103892 | Q2Q067 | Q8NGB2  | -1.4096   |

|        |        |        |          |
|--------|--------|--------|----------|
| 103893 | Q2Q067 | Q9H3Y0 | -0.97312 |
| 103894 | Q2Q067 | Q9BZ19 | -0.2274  |
| 103895 | Q2Q067 | O60844 | -0.78378 |
| 103896 | Q2Q067 | P35354 | -0.26    |
| 103897 | Q2Q067 | Q9H2U9 | -1.2457  |
| 103898 | Q2Q067 | Q9UGM6 | -0.20548 |
| 103899 | Q2Q067 | Q8N567 | -0.55342 |
| 103900 | Q2Q067 | P52849 | -0.63978 |
| 103901 | Q2Q067 | Q8IUL8 | -0.943   |
| 103902 | Q2Q067 | P36897 | -0.29388 |
| 103903 | Q2Q067 | Q9UHA7 | -1.0266  |
| 103904 | Q2Q067 | Q9BUB4 | -0.40716 |
| 103905 | Q2Q067 | Q6ZMZ3 | -0.17207 |
| 103906 | Q2Q067 | Q8NEZ3 | -0.39597 |
| 103907 | Q2Q067 | O00602 | -1.3301  |
| 103908 | Q2Q067 | Q9GZW8 | -1.0345  |
| 103909 | Q2Q067 | P26599 | -0.22589 |
| 103910 | Q2Q067 | Q96TA0 | -1.3679  |
| 103911 | Q2Q067 | Q9H0D2 | -0.34125 |
| 103912 | Q2Q067 | P16930 | -0.31078 |
| 103913 | Q2Q067 | Q8N5M9 | -1.1118  |
| 103914 | Q2Q067 | O94901 | -0.19606 |
| 103915 | Q2Q067 | P63027 | -0.22825 |
| 103916 | Q2Q067 | P62195 | -0.69176 |
| 103917 | Q2Q067 | P20851 | -1.0848  |
| 103918 | Q2Q067 | Q2TB10 | -0.22736 |
| 103919 | Q2Q067 | P60606 | -1.0097  |
| 103920 | Q2Q067 | P32302 | -1.4753  |
| 103921 | Q2Q067 | Q5TF21 | -1.0345  |
| 103922 | Q2Q067 | Q9P0S3 | -1.0791  |
| 103923 | Q2Q067 | A0PJE2 | -1.0935  |
| 103924 | Q2Q067 | O95302 | -0.58353 |
| 103925 | Q2Q067 | Q9Y566 | -0.22742 |
| 103926 | Q2Q067 | Q8WWL2 | -0.29633 |
| 103927 | Q2Q067 | Q8N139 | -1.4923  |
| 103928 | Q2Q067 | O75600 | -0.19913 |
| 103929 | Q2Q067 | Q9BUF5 | -0.71714 |
| 103930 | Q2Q067 | A6NDQ2 | -0.73178 |
| 103931 | Q2Q067 | A4D1T9 | -1.2915  |
| 103932 | Q2Q067 | P01699 | -1.1115  |
| 103933 | Q2Q067 | A2VDJ0 | -1.0345  |
| 103934 | Q2Q067 | Q9Y2J0 | -0.23471 |
| 103935 | Q2Q067 | P18627 | -0.98512 |
| 103936 | Q2Q067 | P51800 | -1.1113  |
| 103937 | Q2Q067 | Q6F5E7 | -0.13952 |
| 103938 | Q2Q067 | P50213 | -0.1141  |
| 103939 | Q2Q067 | Q8NCW5 | -0.48672 |
| 103940 | Q2Q067 | Q14703 | -1.0467  |
| 103941 | Q2Q067 | Q7Z3J2 | -1.0345  |
| 103942 | Q2Q067 | Q9H3W5 | -1.0868  |
| 103943 | Q2Q067 | Q8NCV1 | -0.72121 |
| 103944 | Q2Q067 | P27930 | -1.0084  |
| 103945 | Q2Q067 | P0DKB5 | -1.0345  |
| 103946 | Q2Q067 | Q9BUN1 | -0.98666 |
| 103947 | Q2Q067 | O15554 | -0.52102 |
| 103948 | Q2Q067 | Q7Z6G8 | -0.22744 |
| 103949 | Q2Q067 | Q685J3 | -0.76407 |
| 103950 | Q2Q067 | Q06889 | -0.21685 |
| 103951 | Q2Q067 | Q9H6T3 | -0.22731 |
| 103952 | Q2Q067 | Q64LD2 | -0.22749 |
| 103953 | Q2Q067 | Q9P253 | -0.14732 |
| 103954 | Q2Q067 | Q9H1C7 | -1.0345  |
| 103955 | Q2Q067 | Q8NGW6 | -1.4096  |
| 103956 | Q2Q067 | Q9YNA8 | -0.47805 |
| 103957 | Q2Q067 | Q96CA5 | -0.22741 |
| 103958 | Q2Q067 | Q96A57 | -1.0345  |
| 103959 | Q2Q067 | P23378 | -0.57846 |
| 103960 | Q2Q067 | Q13873 | -0.56952 |
| 103961 | Q2Q067 | A6NCI5 | -1.0345  |
| 103962 | Q2Q067 | O15431 | -1.3152  |
| 103963 | Q2Q067 | Q9NS91 | -0.22742 |
| 103964 | Q2Q067 | P61019 | -0.73331 |
| 103965 | Q2Q067 | O95620 | -0.60681 |
| 103966 | Q2Q067 | Q9BZD2 | -1.0568  |
| 103967 | Q2Q067 | Q8N264 | -0.78951 |
| 103968 | Q2Q067 | A8MYZ5 | -0.22049 |

|        |        |        |           |
|--------|--------|--------|-----------|
| 103969 | Q2Q067 | Q86XP1 | -0.74402  |
| 103970 | Q2Q067 | O43707 | -0.33197  |
| 103971 | Q2Q067 | P58417 | -1.073    |
| 103972 | Q2Q067 | P19835 | -0.52991  |
| 103973 | Q2Q067 | Q92522 | -0.70642  |
| 103974 | Q2Q067 | O60566 | -0.22741  |
| 103975 | Q2Q067 | P0CG33 | -0.28132  |
| 103976 | Q2Q067 | Q712K3 | -0.78692  |
| 103977 | Q2Q067 | P20853 | -0.90668  |
| 103978 | Q2Q067 | Q32P51 | -0.25186  |
| 103979 | Q2Q067 | P10276 | -0.25033  |
| 103980 | Q2Q067 | O00182 | -0.96891  |
| 103981 | Q2Q067 | O14815 | -1.0708   |
| 103982 | Q2Q067 | P01860 | -1.113    |
| 103983 | Q2Q067 | Q9H7D0 | -0.43444  |
| 103984 | Q2Q067 | P28336 | -1.3482   |
| 103985 | Q2Q067 | Q15569 | -0.80302  |
| 103986 | Q2Q067 | P11509 | -0.72677  |
| 103987 | Q2Q067 | O94887 | -0.34122  |
| 103988 | Q2Q067 | O60641 | -0.60181  |
| 103989 | Q2Q067 | Q14645 | -0.090662 |
| 103990 | Q2Q067 | P51858 | -0.21903  |
| 103991 | Q2Q067 | O43610 | -0.47134  |
| 103992 | Q2Q067 | P56962 | -0.82936  |
| 103993 | Q2Q067 | Q9GZNO | -1.4026   |
| 103994 | Q2Q067 | Q9NSE7 | -0.67807  |
| 103995 | Q2Q067 | Q8NBZ7 | -1.1558   |
| 103996 | Q2Q067 | Q8NI37 | -0.3705   |
| 103997 | Q2Q067 | Q8IXV7 | -0.22198  |
| 103998 | Q2Q067 | Q8NGN7 | -1.4096   |
| 103999 | Q2Q067 | Q9H999 | -0.85954  |
| 104000 | Q2Q067 | Q9NYZ4 | -0.74961  |
| 104001 | Q2Q067 | Q14296 | -0.4699   |
| 104002 | Q2Q067 | P56179 | -0.22482  |
| 104003 | Q2Q067 | Q8N697 | -0.86647  |
| 104004 | Q2Q067 | Q8NEZ4 | -0.33878  |
| 104005 | Q2Q067 | Q96C23 | -0.13614  |
| 104006 | Q2Q067 | A7E2F4 | -0.40653  |
| 104007 | Q2Q067 | Q8TB22 | -1.3542   |
| 104008 | Q2Q067 | Q3KR16 | -0.33347  |
| 104009 | Q2Q067 | Q9UK00 | -1.0345   |
| 104010 | Q2Q067 | O00338 | -0.2298   |
| 104011 | Q2Q067 | Q6MZZ7 | -1.124    |
| 104012 | Q2Q067 | Q96IY4 | -1.1119   |
| 104013 | Q2Q067 | O00221 | -0.2274   |
| 104014 | Q2Q067 | Q9Y625 | -1.1784   |
| 104015 | Q2Q067 | Q5SZI1 | -1.0345   |
| 104016 | Q2Q067 | P0C671 | -0.054424 |
| 104017 | Q2Q067 | P35270 | -0.22616  |
| 104018 | Q2Q067 | Q8IUC8 | -0.81418  |
| 104019 | Q2Q067 | Q92828 | -0.43462  |
| 104020 | Q2Q067 | P00739 | -1.0792   |
| 104021 | Q2Q067 | Q05923 | -0.22995  |
| 104022 | Q2Q067 | Q6YP21 | -0.32322  |
| 104023 | Q2Q067 | Q9UNU6 | -1.0557   |
| 104024 | Q2Q067 | P10412 | -0.067784 |
| 104025 | Q2Q067 | Q9NYS7 | -0.61006  |
| 104026 | Q2Q067 | Q14353 | -0.15918  |
| 104027 | Q2Q067 | Q96L15 | -0.94417  |
| 104028 | Q2Q067 | Q7Z304 | -1.0656   |
| 104029 | Q2Q067 | Q15785 | -0.68114  |
| 104030 | Q2Q067 | Q9P225 | -0.72503  |
| 104031 | Q2Q067 | Q6ZWE6 | -0.769    |
| 104032 | Q2Q067 | Q8IZF0 | -1.1625   |
| 104033 | Q2Q067 | Q6UWU4 | -0.85905  |
| 104034 | Q2Q067 | Q9H3T3 | -1.276    |
| 104035 | Q2Q067 | P15421 | -1.3184   |
| 104036 | Q2Q067 | Q8N511 | -1.0345   |
| 104037 | Q2Q067 | Q9H3S5 | -0.93617  |
| 104038 | Q2Q067 | Q6ZTW0 | -0.48981  |
| 104039 | Q2Q067 | Q9NR23 | -0.80575  |
| 104040 | Q2Q067 | Q8TBR5 | -0.06462  |
| 104041 | Q2Q067 | Q6ZR62 | -0.50058  |
| 104042 | Q2Q067 | P20339 | -0.68666  |
| 104043 | Q2Q067 | Q96EF0 | -0.38881  |
| 104044 | Q2Q067 | Q96EK9 | -0.91075  |

|        |        |        |           |
|--------|--------|--------|-----------|
| 104045 | Q2Q067 | P07148 | -0.22099  |
| 104046 | Q2Q067 | P04899 | -0.27681  |
| 104047 | Q2Q067 | P29350 | -0.22741  |
| 104048 | Q2Q067 | O75787 | -0.39409  |
| 104049 | Q2Q067 | Q8IUR7 | -0.22751  |
| 104050 | Q2Q067 | P80108 | -0.51262  |
| 104051 | Q2Q067 | Q5TDP6 | -0.4694   |
| 104052 | Q2Q067 | Q9P0R6 | -0.20901  |
| 104053 | Q2Q067 | Q8IU68 | -1.1118   |
| 104054 | Q2Q067 | P0C7M8 | -1.0212   |
| 104055 | Q2Q067 | Q9UH36 | -0.41609  |
| 104056 | Q2Q067 | Q86SQ4 | -1.5126   |
| 104057 | Q2Q067 | Q14168 | -0.7823   |
| 104058 | Q2Q067 | Q5BVD1 | -1.1118   |
| 104059 | Q2Q067 | Q6Q788 | -0.48321  |
| 104060 | Q2Q067 | P16591 | -0.46771  |
| 104061 | Q2Q067 | Q9P0W8 | -0.65993  |
| 104062 | Q2Q067 | P56817 | -1.0006   |
| 104063 | Q2Q067 | Q16613 | -0.08276  |
| 104064 | Q2Q067 | Q9UKR0 | -1.5429   |
| 104065 | Q2Q067 | Q6ZRI8 | -1.0924   |
| 104066 | Q2Q067 | O00560 | -0.22736  |
| 104067 | Q2Q067 | Q9H9S0 | -0.22772  |
| 104068 | Q2Q067 | Q6ZW61 | -0.088664 |
| 104069 | Q2Q067 | Q9Y5Y4 | -1.4487   |
| 104070 | Q2Q067 | Q9NVC3 | -0.83125  |
| 104071 | Q2Q067 | Q8N944 | -0.81943  |
| 104072 | Q2Q067 | P55058 | -1.255    |
| 104073 | Q2Q067 | Q8WUT4 | -1.0345   |
| 104074 | Q2Q067 | Q9H161 | -0.21402  |
| 104075 | Q2Q067 | P11169 | -0.30741  |
| 104076 | Q2Q067 | P02788 | -0.20965  |
| 104077 | Q2Q067 | Q9H6Q3 | -0.22741  |
| 104078 | Q2Q067 | Q8N3J5 | -0.14918  |
| 104079 | Q2Q067 | A2A3K4 | -0.80438  |
| 104080 | Q2Q067 | Q56A73 | -0.37866  |
| 104081 | Q2Q067 | Q8N6H7 | -0.25059  |
| 104082 | Q2Q067 | Q9H582 | -0.20546  |
| 104083 | Q2Q067 | Q9NZN3 | -0.3352   |
| 104084 | Q2Q067 | O60333 | -0.24294  |
| 104085 | Q2Q067 | Q12792 | -0.40777  |
| 104086 | Q2Q067 | P43308 | -0.89992  |
| 104087 | Q2Q067 | Q6T310 | -0.46681  |
| 104088 | Q2Q067 | Q9BUP0 | -0.23917  |
| 104089 | Q2Q067 | Q8NBK3 | -0.38022  |
| 104090 | Q2Q067 | Q8TED9 | -0.44451  |
| 104091 | Q2Q067 | Q92564 | -0.24416  |
| 104092 | Q2Q067 | O75185 | -0.7634   |
| 104093 | Q2Q067 | Q99542 | -1.3942   |
| 104094 | Q2Q067 | P25325 | -0.21409  |
| 104095 | Q2Q067 | Q969X1 | -1.033    |
| 104096 | Q2Q067 | Q9UBA6 | -0.21049  |
| 104097 | Q2Q067 | O00358 | -0.33602  |
| 104098 | Q2Q067 | Q8N9B4 | -0.22741  |
| 104099 | Q2Q067 | Q13239 | -0.22741  |
| 104100 | Q2Q067 | Q96LC7 | -1.8251   |
| 104101 | Q2Q067 | P21817 | -0.70196  |
| 104102 | Q2Q067 | Q99986 | -0.22741  |
| 104103 | Q2Q067 | Q99675 | -0.22706  |
| 104104 | Q2Q067 | Q8N1F1 | -0.21265  |
| 104105 | Q2Q067 | A6NK97 | -1.1225   |
| 104106 | Q2Q067 | Q6ZS10 | -1.0376   |
| 104107 | Q2Q067 | Q8N7B9 | -0.45603  |
| 104108 | Q2Q067 | Q9NRR2 | -1.6147   |
| 104109 | Q2Q067 | A0PJY2 | -0.2345   |
| 104110 | Q2Q067 | Q96BP3 | -0.055785 |
| 104111 | Q2Q067 | Q9H334 | -0.33602  |
| 104112 | Q2Q067 | P02655 | -0.61128  |
| 104113 | Q2Q067 | Q9NPR9 | -1.0345   |
| 104114 | Q2Q067 | Q9UKR8 | -1.0345   |
| 104115 | Q2Q067 | Q9UNA3 | -0.79268  |
| 104116 | Q2Q067 | Q92570 | -0.24843  |
| 104117 | Q2Q067 | O14773 | -0.33022  |
| 104118 | Q2Q067 | Q969R2 | -1.0525   |
| 104119 | Q2Q067 | O43657 | -1.2344   |
| 104120 | Q2Q067 | A8MPV3 | -0.021296 |

|        |        |        |           |
|--------|--------|--------|-----------|
| 104121 | Q2Q067 | Q9NWZ5 | -0.037233 |
| 104122 | Q2Q067 | Q15642 | -0.88954  |
| 104123 | Q2Q067 | Q66K64 | -0.40021  |
| 104124 | Q2Q067 | Q9BS31 | -0.085533 |
| 104125 | Q2Q067 | Q9NQE7 | -0.90601  |
| 104126 | Q2Q067 | Q08357 | -1.2157   |
| 104127 | Q2Q067 | Q08629 | -0.8724   |
| 104128 | Q2Q067 | O96013 | -0.94309  |
| 104129 | Q2Q067 | O43314 | -0.62698  |
| 104130 | Q2Q067 | Q9BXY5 | -0.45603  |
| 104131 | Q2Q067 | Q8N9I1 | -1.0345   |
| 104132 | Q2Q067 | Q9H987 | -0.27069  |
| 104133 | Q2Q067 | Q9Y6Y8 | -0.3238   |
| 104134 | Q2Q067 | Q96LU5 | -0.63409  |
| 104135 | Q2Q067 | P05107 | -1.1062   |
| 104136 | Q2Q067 | Q5VUJ6 | -0.23345  |
| 104137 | Q2Q067 | Q9C009 | -0.30152  |
| 104138 | Q2Q067 | P23435 | -0.84302  |
| 104139 | Q2Q067 | Q14197 | -0.07892  |
| 104140 | Q2Q067 | P15291 | -0.48728  |
| 104141 | Q2Q067 | Q9NRA0 | -0.28566  |
| 104142 | Q2Q067 | Q86XP0 | -0.34339  |
| 104143 | Q2Q067 | Q8NAS9 | -0.11839  |
| 104144 | Q2Q067 | P06310 | -1.1115   |
| 104145 | Q2Q067 | A0PK05 | -1.0345   |
| 104146 | Q2Q067 | Q96Q06 | -0.44053  |
| 104147 | Q2Q067 | P15313 | -0.37021  |
| 104148 | Q2Q067 | P05000 | -0.86599  |
| 104149 | Q2Q067 | O00559 | -0.90242  |
| 104150 | Q2Q067 | Q13207 | -0.33213  |
| 104151 | Q2Q067 | O76001 | -1.4096   |
| 104152 | Q2Q067 | Q8NH07 | -1.4096   |
| 104153 | Q2Q067 | Q8WY07 | -1.0306   |
| 104154 | Q2Q067 | C9JH25 | -1.0345   |
| 104155 | Q2Q067 | A0A5B9 | -1.0345   |
| 104156 | Q2Q067 | Q7Z601 | -1.2117   |
| 104157 | Q2Q067 | B5MCN3 | -1.1211   |
| 104158 | Q2Q067 | Q8NGI3 | -1.4096   |
| 104159 | Q2Q067 | O60281 | -0.22741  |
| 104160 | Q2Q067 | Q8WV28 | -0.2274   |
| 104161 | Q2Q067 | O15173 | -1.2389   |
| 104162 | Q2Q067 | P26440 | -0.40631  |
| 104163 | Q2Q067 | P34820 | -1.0399   |
| 104164 | Q2Q067 | Q8N3Y3 | -0.87577  |
| 104165 | Q2Q067 | Q7Z4K8 | -0.73178  |
| 104166 | Q2Q067 | Q499Y3 | -0.12822  |
| 104167 | Q2Q067 | Q32P44 | -0.2276   |
| 104168 | Q2Q067 | Q8IXM2 | -0.036558 |
| 104169 | Q2Q067 | P08922 | -1.4697   |
| 104170 | Q2Q067 | Q8N7F7 | -0.22606  |
| 104171 | Q2Q067 | Q2MKA7 | -0.26444  |
| 104172 | Q2Q067 | Q9NQX5 | -1.0345   |
| 104173 | Q2Q067 | Q8NFB2 | -1.0345   |
| 104174 | Q2Q067 | Q99835 | -0.24926  |
| 104175 | Q2Q067 | P20849 | -0.75234  |
| 104176 | Q2Q067 | P04626 | -0.24605  |
| 104177 | Q2Q067 | Q13651 | -0.76357  |
| 104178 | Q2Q067 | P22234 | -0.32748  |
| 104179 | Q2Q067 | Q7Z4G4 | -0.35189  |
| 104180 | Q2Q067 | Q9Y227 | -0.56468  |
| 104181 | Q2Q067 | Q8N394 | -0.99456  |
| 104182 | Q2Q067 | Q96NW4 | -0.28045  |
| 104183 | Q2Q067 | O95758 | -0.66126  |
| 104184 | Q2Q067 | P01275 | -0.62927  |
| 104185 | Q2Q067 | P08F94 | -0.22476  |
| 104186 | Q2Q067 | Q76MJ5 | -1.051    |
| 104187 | Q2Q067 | Q9BQB6 | -1.1079   |
| 104188 | Q2Q067 | Q9NRE1 | -1.4192   |
| 104189 | Q2Q067 | Q96AQ8 | -0.84904  |
| 104190 | Q2Q067 | Q9NYR8 | -1.331    |
| 104191 | Q2Q067 | Q9BVQ7 | -0.89961  |
| 104192 | Q2Q067 | Q00975 | -0.91398  |
| 104193 | Q2Q067 | P11362 | -0.30235  |
| 104194 | Q2Q067 | Q15878 | -0.94186  |
| 104195 | Q2Q067 | Q7Z4Y8 | -0.44806  |
| 104196 | Q2Q067 | Q8WZ55 | -0.81886  |



|        |        |        |           |
|--------|--------|--------|-----------|
| 104197 | Q2Q067 | Q8N543 | -0.22946  |
| 104198 | Q2Q067 | O15054 | -0.44978  |
| 104199 | Q2Q067 | A2VEC9 | -1.1831   |
| 104200 | Q2Q067 | Q86XM0 | -1.2473   |
| 104201 | Q2Q067 | O14684 | -0.89106  |
| 104202 | Q2Q067 | Q9NTJ3 | -0.22505  |
| 104203 | Q2Q067 | P51689 | -0.49967  |
| 104204 | Q2Q067 | Q8N2Q7 | -0.40347  |
| 104205 | Q2Q067 | Q6QHF9 | -0.45031  |
| 104206 | Q2Q067 | Q6URK8 | -0.98666  |
| 104207 | Q2Q067 | Q32Q52 | -0.13794  |
| 104208 | Q2Q067 | Q14508 | -1.1064   |
| 104209 | Q2Q067 | P01880 | -1.6599   |
| 104210 | Q2Q067 | O15537 | -1.1259   |
| 104211 | Q2Q067 | Q13516 | -0.22749  |
| 104212 | Q2Q067 | Q5VWJ9 | -0.23468  |
| 104213 | Q2Q067 | Q99758 | -1.3749   |
| 104214 | Q2Q067 | Q9C010 | -0.39821  |
| 104215 | Q2Q067 | Q96JM2 | -0.2277   |
| 104216 | Q2Q067 | Q8NC44 | -0.99456  |
| 104217 | Q2Q067 | Q15413 | -0.79286  |
| 104218 | Q2Q067 | Q8NGU1 | -1.4096   |
| 104219 | Q2Q067 | P49585 | -0.38967  |
| 104220 | Q2Q067 | Q9NPI0 | -1.0207   |
| 104221 | Q2Q067 | P60033 | -0.42872  |
| 104222 | Q2Q067 | P60709 | -0.046322 |
| 104223 | Q2Q067 | P00505 | -0.22602  |
| 104224 | Q2Q067 | Q99527 | -1.3114   |
| 104225 | Q2Q067 | Q15041 | -0.13329  |
| 104226 | Q2Q067 | Q9C0D6 | -0.40601  |
| 104227 | Q2Q067 | P19440 | -0.4145   |
| 104228 | Q2Q067 | Q5T1Q4 | -1.062    |
| 104229 | Q2Q067 | Q96HZ4 | -0.22628  |
| 104230 | Q2Q067 | Q5T5B0 | -0.37794  |
| 104231 | Q2Q067 | P06870 | -0.69246  |
| 104232 | Q2Q067 | O00478 | -1.0345   |
| 104233 | Q2Q067 | Q9Y5G2 | -1.3679   |
| 104234 | Q2Q067 | O75815 | -0.95624  |
| 104235 | Q2Q067 | Q9Y3A0 | -0.33172  |
| 104236 | Q2Q067 | Q8NGA0 | -1.4096   |
| 104237 | Q2Q067 | Q96MH6 | -1.0705   |
| 104238 | Q2Q067 | P42684 | -0.58345  |
| 104239 | Q2Q067 | P23467 | -0.79202  |
| 104240 | Q2Q067 | Q96FB5 | -0.93922  |
| 104241 | Q2Q067 | O14949 | -0.17944  |
| 104242 | Q2Q067 | Q8NCL9 | -1.0345   |
| 104243 | Q2Q067 | Q9H0J4 | -0.21125  |
| 104244 | Q2Q067 | Q06643 | -0.95501  |
| 104245 | Q2Q067 | Q9UM19 | -0.6192   |
| 104246 | Q2Q067 | O76099 | -1.4479   |
| 104247 | Q2Q067 | Q53R12 | -1.1634   |
| 104248 | Q2Q067 | P55083 | -1.332    |
| 104249 | Q2Q067 | Q9ULA0 | -0.69202  |
| 104250 | Q2Q067 | Q96A61 | -0.73178  |
| 104251 | Q2Q067 | O00253 | -0.92319  |
| 104252 | Q2Q067 | Q86SK9 | -1.1749   |
| 104253 | Q2Q067 | Q8TCT7 | -0.46406  |
| 104254 | Q2Q067 | Q8NGB8 | -1.4096   |
| 104255 | Q2Q067 | P06314 | -1.1115   |
| 104256 | Q2Q067 | O94772 | -0.4899   |
| 104257 | Q2Q067 | O95069 | -1.2332   |
| 104258 | Q2Q067 | P35243 | -0.74184  |
| 104259 | Q2Q067 | Q9NRU3 | -1.2972   |
| 104260 | Q2Q067 | Q08AH3 | -0.88746  |
| 104261 | Q2Q067 | Q14520 | -1.6288   |
| 104262 | Q2Q067 | P84090 | -0.19154  |
| 104263 | Q2Q067 | Q9Y397 | -0.81717  |
| 104264 | Q2Q067 | Q8N205 | -0.67622  |
| 104265 | Q2Q067 | Q6UY13 | -0.98666  |
| 104266 | Q2Q067 | Q6EKJ0 | -0.07818  |
| 104267 | Q2Q067 | Q8TCT9 | -0.69772  |
| 104268 | Q2Q067 | P23415 | -0.59333  |
| 104269 | Q2Q067 | Q8WUD4 | -0.010095 |
| 104270 | Q2Q067 | Q9GZP4 | -0.058325 |
| 104271 | Q2Q067 | Q6NXT6 | -1.0556   |
| 104272 | Q2Q067 | Q6ZUS6 | -0.18361  |

|        |        |        |           |
|--------|--------|--------|-----------|
| 104273 | Q2Q067 | Q8NGT1 | -1.4096   |
| 104274 | Q2Q067 | Q99661 | -0.29078  |
| 104275 | Q2Q067 | P49758 | -0.78228  |
| 104276 | Q2Q067 | Q9BWD1 | -0.20625  |
| 104277 | Q2Q067 | P54750 | -0.31874  |
| 104278 | Q2Q067 | Q9UBP9 | -0.60464  |
| 104279 | Q2Q067 | P00813 | -0.19412  |
| 104280 | Q2Q067 | Q96K19 | -1.2518   |
| 104281 | Q2Q067 | Q2VPA4 | -0.90866  |
| 104282 | Q2Q067 | Q14517 | -0.23435  |
| 104283 | Q2Q067 | Q9BWQ6 | -1.0094   |
| 104284 | Q2Q067 | P78314 | -0.22738  |
| 104285 | Q2Q067 | Q70EL4 | -0.76972  |
| 104286 | Q2Q067 | O15042 | -0.22547  |
| 104287 | Q2Q067 | O15479 | -0.15323  |
| 104288 | Q2Q067 | Q8IWX5 | -0.86195  |
| 104289 | Q2Q067 | P0CJ76 | -0.80201  |
| 104290 | Q2Q067 | Q6UXU4 | -1.0345   |
| 104291 | Q2Q067 | Q8IYS4 | -0.4628   |
| 104292 | Q2Q067 | Q5JYT7 | -0.091244 |
| 104293 | Q2Q067 | P81133 | -0.30629  |
| 104294 | Q2Q067 | Q9Y2G1 | -0.37363  |
| 104295 | Q2Q067 | P59543 | -1.3729   |
| 104296 | Q2Q067 | P25800 | -0.24148  |
| 104297 | Q2Q067 | Q9H0P0 | -0.32095  |
| 104298 | Q2Q067 | Q8N9V6 | -0.22741  |
| 104299 | Q2Q067 | P41143 | -0.62156  |
| 104300 | Q2Q067 | Q9UM47 | -0.2298   |
| 104301 | Q2Q067 | Q3SY77 | -1.0345   |
| 104302 | Q2Q067 | Q53RY4 | -1.0345   |
| 104303 | Q2Q067 | P19256 | -0.76029  |
| 104304 | Q2Q067 | Q13072 | -0.98666  |
| 104305 | Q2Q067 | Q8IZK6 | -1.1958   |
| 104306 | Q2Q067 | P55082 | -1.1634   |
| 104307 | Q2Q067 | Q8NFX3 | -0.067685 |
| 104308 | Q2Q067 | Q6P3W7 | -0.22741  |
| 104309 | Q2Q067 | Q9Y2B9 | -0.54527  |
| 104310 | Q2Q067 | Q9H8W5 | -0.22741  |
| 104311 | Q2Q067 | Q07001 | -1.0733   |
| 104312 | Q2Q067 | Q13393 | -0.49817  |
| 104313 | Q2Q067 | O43490 | -0.65635  |
| 104314 | Q2Q067 | O15528 | -0.36885  |
| 104315 | Q2Q067 | A8MYB1 | -1.0345   |
| 104316 | Q2Q067 | Q6NT52 | -0.96181  |
| 104317 | Q2Q067 | Q5QJU3 | -0.39571  |
| 104318 | Q2Q067 | Q9Y2D0 | -0.20566  |
| 104319 | Q2Q067 | P39656 | -0.27712  |
| 104320 | Q2Q067 | Q96PJ5 | -0.48734  |
| 104321 | Q2Q067 | Q8N468 | -1.049    |
| 104322 | Q2Q067 | Q6A1A2 | -1.251    |
| 104323 | Q2Q067 | P49815 | -0.21272  |
| 104324 | Q2Q067 | P0CJ77 | -0.80201  |
| 104325 | Q2Q067 | Q7Z5J8 | -1.0345   |
| 104326 | Q2Q067 | Q8IYS0 | -1.0345   |
| 104327 | Q2Q067 | Q9BSJ1 | -0.73178  |
| 104328 | Q2Q067 | P08173 | -1.149    |
| 104329 | Q2Q067 | P54289 | -1.0635   |
| 104330 | Q2Q067 | O75310 | -1.0795   |
| 104331 | Q2Q067 | Q96NK8 | -0.22754  |
| 104332 | Q2Q067 | P33260 | -0.82553  |
| 104333 | Q2Q067 | Q86TG1 | -1.1346   |
| 104334 | Q2Q067 | Q7Z402 | -1.0345   |
| 104335 | Q2Q067 | O75127 | -0.19852  |
| 104336 | Q2Q067 | Q96GJ1 | -0.18821  |
| 104337 | Q2Q067 | Q96HJ9 | -0.21265  |
| 104338 | Q2Q067 | Q9HCL2 | -0.4686   |
| 104339 | Q2Q067 | P46977 | -0.47995  |
| 104340 | Q2Q067 | A6NEC2 | -0.89744  |
| 104341 | Q2Q067 | Q8IW70 | -1.0345   |
| 104342 | Q2Q067 | Q9HD89 | -0.63149  |
| 104343 | Q2Q067 | Q01433 | -0.17987  |
| 104344 | Q2Q067 | Q8TF71 | -1.1553   |
| 104345 | Q2Q067 | Q8NGJ1 | -1.4096   |
| 104346 | Q2Q067 | O15068 | -0.50585  |
| 104347 | Q2Q067 | Q12768 | -0.27618  |
| 104348 | Q2Q067 | Q8N7X8 | -1.0345   |

|        |        |        |            |
|--------|--------|--------|------------|
| 104349 | Q2Q067 | Q8IUH2 | -0.9792    |
| 104350 | Q2Q067 | Q9H497 | -0.64255   |
| 104351 | Q2Q067 | A6NC57 | -0.22741   |
| 104352 | Q2Q067 | Q9H6B1 | -0.42257   |
| 104353 | Q2Q067 | Q9Y5I2 | -1.8625    |
| 104354 | Q2Q067 | O75069 | -0.35359   |
| 104355 | Q2Q067 | Q7L5Y1 | -0.30591   |
| 104356 | Q2Q067 | P11274 | -0.82929   |
| 104357 | Q2Q067 | P47756 | -0.13693   |
| 104358 | Q2Q067 | Q9Y5Z0 | -1.0209    |
| 104359 | Q2Q067 | Q04760 | -0.14666   |
| 104360 | Q2Q067 | Q9UN88 | -1.0791    |
| 104361 | Q2Q067 | Q9NV12 | -1.0345    |
| 104362 | Q2Q067 | Q15390 | -0.3257    |
| 104363 | Q2Q067 | Q8N3Z3 | -0.91874   |
| 104364 | Q2Q067 | Q7L5A8 | -0.88001   |
| 104365 | Q2Q067 | Q5JTB6 | -0.98666   |
| 104366 | Q2Q067 | O95154 | -0.23017   |
| 104367 | Q2Q067 | O95967 | -0.66291   |
| 104368 | Q2Q067 | Q9HCK1 | -0.50058   |
| 104369 | Q2Q067 | P20023 | -1.0266    |
| 104370 | Q2Q067 | P50552 | -0.21742   |
| 104371 | Q2Q067 | H3BUK9 | -0.22731   |
| 104372 | Q2Q067 | Q8N1V8 | -0.0065151 |
| 104373 | Q2Q067 | Q8NH00 | -1.4096    |
| 104374 | Q2Q067 | Q2TAL6 | -0.97843   |
| 104375 | Q2Q067 | Q9ULI4 | -0.48831   |
| 104376 | Q2Q067 | Q8WWF8 | -0.28452   |
| 104377 | Q2Q067 | Q86WK7 | -1.204     |
| 104378 | Q2Q067 | Q9Y235 | -0.64544   |
| 104379 | Q2Q067 | Q9BSY9 | -0.58146   |
| 104380 | Q2Q067 | P05121 | -0.16194   |
| 104381 | Q2Q067 | Q13370 | -0.36141   |
| 104382 | Q2Q067 | Q08257 | -0.58188   |
| 104383 | Q2Q067 | Q6ZU15 | -0.22559   |
| 104384 | Q2Q067 | P29218 | -0.20367   |
| 104385 | Q2Q067 | Q67FW5 | -0.46685   |
| 104386 | Q2Q067 | Q9NX61 | -0.94037   |
| 104387 | Q2Q067 | Q7RTT9 | -1.153     |
| 104388 | Q2Q067 | Q9Y4I1 | -0.28616   |
| 104389 | Q2Q067 | Q92478 | -1.1722    |
| 104390 | Q2Q067 | Q8N9W4 | -0.18908   |
| 104391 | Q2Q067 | Q8TD94 | -0.22488   |
| 104392 | Q2Q067 | Q9NY99 | -0.37277   |
| 104393 | Q2Q067 | Q86T24 | -0.33469   |
| 104394 | Q2Q067 | Q96DX7 | -0.22877   |
| 104395 | Q2Q067 | Q10571 | -0.25022   |
| 104396 | Q2Q067 | O00755 | -0.45384   |
| 104397 | Q2Q067 | Q3MIP1 | -1.0345    |
| 104398 | Q2Q067 | P01608 | -1.1115    |
| 104399 | Q2Q067 | Q8NGR2 | -1.4096    |
| 104400 | Q2Q067 | O95670 | -0.3024    |
| 104401 | Q2Q067 | Q8NH40 | -1.4096    |
| 104402 | Q2Q067 | O60725 | -0.63236   |
| 104403 | Q2Q067 | Q8N201 | -0.50742   |
| 104404 | Q2Q067 | P01732 | -0.92739   |
| 104405 | Q2Q067 | Q6PJI1 | -0.42087   |
| 104406 | Q2Q067 | Q5JTZ5 | -0.074881  |
| 104407 | Q2Q067 | Q5T4F4 | -0.48347   |
| 104408 | Q2Q067 | Q08495 | -0.22526   |
| 104409 | Q2Q067 | Q9Y232 | -0.2222    |
| 104410 | Q2Q067 | Q9NXS3 | -0.20132   |
| 104411 | Q2Q067 | Q86U17 | -0.78629   |
| 104412 | Q2Q067 | Q13349 | -1.181     |
| 104413 | Q2Q067 | Q6S5H5 | -0.22744   |
| 104414 | Q2Q067 | P09958 | -0.51427   |
| 104415 | Q2Q067 | P35998 | -0.29698   |
| 104416 | Q2Q067 | P00749 | -0.77419   |
| 104417 | Q2Q067 | O95674 | -0.67732   |
| 104418 | Q2Q067 | P61160 | -0.88429   |
| 104419 | Q2Q067 | A6NIL9 | -1.0345    |
| 104420 | Q2Q067 | P22001 | -0.97726   |
| 104421 | Q2Q067 | P21128 | -0.90155   |
| 104422 | Q2Q067 | Q8N6M5 | -0.35567   |
| 104423 | Q2Q067 | Q14954 | -1.1794    |
| 104424 | Q2Q067 | Q96JQ5 | -1.0345    |

|        |        |        |           |
|--------|--------|--------|-----------|
| 104425 | Q2Q067 | A2A3N6 | -0.26341  |
| 104426 | Q2Q067 | Q96HD1 | -1.0526   |
| 104427 | Q2Q067 | P57771 | -0.73848  |
| 104428 | Q2Q067 | Q8IVH8 | -0.71094  |
| 104429 | Q2Q067 | Q9NR64 | -0.43458  |
| 104430 | Q2Q067 | Q96ES6 | -1.049    |
| 104431 | Q2Q067 | Q9H8X9 | -1.13     |
| 104432 | Q2Q067 | Q9BZI1 | -0.22846  |
| 104433 | Q2Q067 | Q14CZ8 | -0.90696  |
| 104434 | Q2Q067 | Q68DU8 | -0.13723  |
| 104435 | Q2Q067 | Q96MU6 | -0.085533 |
| 104436 | Q2Q067 | O00299 | -0.20725  |
| 104437 | Q2Q067 | Q9Y3P8 | -0.36511  |
| 104438 | Q2Q067 | Q9H0U4 | -0.72925  |
| 104439 | Q2Q067 | Q9H0Y0 | -0.39017  |
| 104440 | Q2Q067 | P58181 | -1.4096   |
| 104441 | Q2Q067 | Q6BAA4 | -0.22823  |
| 104442 | Q2Q067 | Q00535 | -0.21233  |
| 104443 | Q2Q067 | Q9UKX5 | -1.0588   |
| 104444 | Q2Q067 | P49895 | -1.0853   |
| 104445 | Q2Q067 | Q14958 | -0.47947  |
| 104446 | Q2Q067 | Q96ER3 | -0.93599  |
| 104447 | Q2Q067 | P36888 | -0.57123  |
| 104448 | Q2Q067 | Q75N03 | -0.24467  |
| 104449 | Q2Q067 | Q96FT7 | -1.2636   |
| 104450 | Q2Q067 | Q6P1Q9 | -0.38719  |
| 104451 | Q2Q067 | O71037 | -0.86704  |
| 104452 | Q2Q067 | Q9Y5S1 | -0.90555  |
| 104453 | Q2Q067 | O75521 | -0.85075  |
| 104454 | Q2Q067 | Q9Y5X2 | -0.22336  |
| 104455 | Q2Q067 | Q96QT4 | -1.5303   |
| 104456 | Q2Q067 | Q9HBJ0 | -0.97992  |
| 104457 | Q2Q067 | Q6ZNL0 | -1.0303   |
| 104458 | Q2Q067 | Q562R1 | -0.73754  |
| 104459 | Q2Q067 | Q9BYB0 | -0.22741  |
| 104460 | Q2Q067 | Q8NCP5 | -0.21464  |
| 104461 | Q2Q067 | Q8NG35 | -0.94775  |
| 104462 | Q2Q067 | P02724 | -1.0978   |
| 104463 | Q2Q067 | Q6V1X1 | -0.23601  |
| 104464 | Q2Q067 | Q8IWA0 | -0.22767  |
| 104465 | Q2Q067 | O75054 | -1.0345   |
| 104466 | Q2Q067 | Q969G9 | -0.21676  |
| 104467 | Q2Q067 | Q96DC9 | -0.76789  |
| 104468 | Q2Q067 | Q8TCG1 | -0.27095  |
| 104469 | Q2Q067 | Q9HC47 | -1.0032   |
| 104470 | Q2Q067 | O75204 | -0.85679  |
| 104471 | Q2Q067 | Q8N961 | -0.36882  |
| 104472 | Q2Q067 | Q5T5A8 | -0.37794  |
| 104473 | Q2Q067 | P29120 | -0.40846  |
| 104474 | Q2Q067 | Q8N9X5 | -1.0345   |
| 104475 | Q2Q067 | Q9UBP0 | -0.22831  |
| 104476 | Q2Q067 | A8K010 | -0.29401  |
| 104477 | Q2Q067 | Q8NCE8 | -0.28132  |
| 104478 | Q2Q067 | A6NGU5 | -0.87471  |
| 104479 | Q2Q067 | P00797 | -0.97269  |
| 104480 | Q2Q067 | P06309 | -1.1115   |
| 104481 | Q2Q067 | Q9Y4H4 | -0.25491  |
| 104482 | Q2Q067 | Q8NGX3 | -1.4096   |
| 104483 | Q2Q067 | Q9Y483 | -0.22788  |
| 104484 | Q2Q067 | P50224 | -0.23295  |
| 104485 | Q2Q067 | P09172 | -0.49034  |
| 104486 | Q2Q067 | Q9Y4C8 | -0.55458  |
| 104487 | Q2Q067 | Q8N4H5 | -0.61495  |
| 104488 | Q2Q067 | P21217 | -0.84282  |
| 104489 | Q2Q067 | Q9NPP4 | -0.22737  |
| 104490 | Q2Q067 | Q9Y570 | -0.33953  |
| 104491 | Q2Q067 | Q9Y278 | -0.6926   |
| 104492 | Q2Q067 | Q9BYD5 | -0.20698  |
| 104493 | Q2Q067 | A6NJZ7 | -0.2274   |
| 104494 | Q2Q067 | Q9NRX5 | -0.565    |
| 104495 | Q2Q067 | O95045 | -0.13693  |
| 104496 | Q2Q067 | P07316 | -0.11934  |
| 104497 | Q2Q067 | Q9UPQ0 | -0.51887  |
| 104498 | Q2Q067 | Q9NV23 | -0.50511  |
| 104499 | Q2Q067 | Q7Z5Y7 | -0.064418 |
| 104500 | Q2Q067 | P01769 | -1.1115   |

|        |        |        |            |
|--------|--------|--------|------------|
| 104501 | Q2Q067 | Q15477 | -0.45863   |
| 104502 | Q2Q067 | Q9P2J2 | -1.1497    |
| 104503 | Q2Q067 | Q01449 | -0.33412   |
| 104504 | Q2Q067 | Q8NGA4 | -1.4986    |
| 104505 | Q2Q067 | Q7Z6J6 | -0.48732   |
| 104506 | Q2Q067 | P62955 | -1.0451    |
| 104507 | Q2Q067 | Q9NWS6 | -1.0345    |
| 104508 | Q2Q067 | Q96ME1 | -0.0072636 |
| 104509 | Q2Q067 | Q9Y394 | -1.0935    |
| 104510 | Q2Q067 | O00154 | -0.14001   |
| 104511 | Q2Q067 | Q96QB1 | -0.26782   |
| 104512 | Q2Q067 | Q8IZD6 | -1.1225    |
| 104513 | Q2Q067 | Q02338 | -0.2958    |
| 104514 | Q2Q067 | Q16822 | -0.010521  |
| 104515 | Q2Q067 | Q5H943 | -1.1634    |
| 104516 | Q2Q067 | Q8IU82 | -0.90081   |
| 104517 | Q2Q067 | Q8NGD0 | -1.4096    |
| 104518 | Q2Q067 | P51649 | -0.30539   |
| 104519 | Q2Q067 | O14493 | -0.9392    |
| 104520 | Q2Q067 | Q14512 | -0.66774   |
| 104521 | Q2Q067 | Q86TM6 | -0.2289    |
| 104522 | Q2Q067 | B7ZAQ6 | -0.8551    |
| 104523 | Q2Q067 | Q9BXW7 | -0.28959   |
| 104524 | Q2Q067 | Q9NUQ8 | -1.0008    |
| 104525 | Q2Q067 | Q2TVT4 | -0.31999   |
| 104526 | Q2Q067 | Q9UHN6 | -1.2391    |
| 104527 | Q2Q067 | P36507 | -0.2276    |
| 104528 | Q2Q067 | Q9Y530 | -0.35233   |
| 104529 | Q2Q067 | Q8TE12 | -0.22864   |
| 104530 | Q2Q067 | Q8NET6 | -0.61401   |
| 104531 | Q2Q067 | O43866 | -1.0437    |
| 104532 | Q2Q067 | Q8TF08 | -0.79037   |
| 104533 | Q2Q067 | Q9UNF1 | -0.11911   |
| 104534 | Q2Q067 | Q8TEY5 | -0.22407   |
| 104535 | Q2Q067 | Q09472 | -0.051814  |
| 104536 | Q2Q067 | Q8NHX4 | -0.34405   |
| 104537 | Q2Q067 | Q0IIM8 | -1.4477    |
| 104538 | Q2Q067 | Q9BQY6 | -0.90081   |
| 104539 | Q2Q067 | Q8TC07 | -0.77491   |
| 104540 | Q2Q067 | Q96I25 | -0.20806   |
| 104541 | Q2Q067 | Q02086 | -0.22588   |
| 104542 | Q2Q067 | P10253 | -0.39719   |
| 104543 | Q2Q067 | Q8TAI7 | -1.2458    |
| 104544 | Q2Q067 | P19544 | -0.22382   |
| 104545 | Q2Q067 | Q96IG2 | -0.2268    |
| 104546 | Q2Q067 | Q96J65 | -1.2902    |
| 104547 | Q2Q067 | Q5T8R8 | -0.26475   |
| 104548 | Q2Q067 | P59768 | -0.56666   |
| 104549 | Q2Q067 | Q8N4X5 | -0.29817   |
| 104550 | Q2Q067 | Q9NYW4 | -1.2705    |
| 104551 | Q2Q067 | A5D8V7 | -0.097881  |
| 104552 | Q2Q067 | A6NDJ8 | -1.0904    |
| 104553 | Q2Q067 | Q9NZC3 | -0.77758   |
| 104554 | Q2Q067 | O00116 | -0.64897   |
| 104555 | Q2Q067 | Q96S42 | -0.27794   |
| 104556 | Q2Q067 | Q9UL63 | -0.39507   |
| 104557 | Q2Q067 | Q9Y5Q9 | -0.22712   |
| 104558 | Q2Q067 | P04183 | -0.68206   |
| 104559 | Q2Q067 | P61952 | -0.60859   |
| 104560 | Q2Q067 | Q96B33 | -0.85277   |
| 104561 | Q2Q067 | Q86Y33 | -0.22741   |
| 104562 | Q2Q067 | Q5JPH6 | -0.23344   |
| 104563 | Q2Q067 | Q9BWT7 | -0.21507   |
| 104564 | Q2Q067 | Q9NPL8 | -0.84904   |
| 104565 | Q2Q067 | P51460 | -0.66457   |
| 104566 | Q2Q067 | Q8NGR3 | -1.4096    |
| 104567 | Q2Q067 | P03950 | -0.31329   |
| 104568 | Q2Q067 | Q8WWM7 | -0.42439   |
| 104569 | Q2Q067 | Q7Z2G1 | -0.80254   |
| 104570 | Q2Q067 | P18564 | -1.339     |
| 104571 | Q2Q067 | Q8TEB9 | -0.60015   |
| 104572 | Q2Q067 | Q9H4K7 | -0.81591   |
| 104573 | Q2Q067 | Q86T65 | -0.3723    |
| 104574 | Q2Q067 | P11712 | -0.61739   |
| 104575 | Q2Q067 | Q9GZX6 | -0.92332   |
| 104576 | Q2Q067 | Q5T6J7 | -0.58762   |

|        |        |        |            |
|--------|--------|--------|------------|
| 104577 | Q2Q067 | Q9NYB5 | -1.2283    |
| 104578 | Q2Q067 | Q16595 | -0.19725   |
| 104579 | Q2Q067 | A6NH21 | -1.0454    |
| 104580 | Q2Q067 | Q9NQZ2 | -0.22353   |
| 104581 | Q2Q067 | Q7Z7G0 | -1.054     |
| 104582 | Q2Q067 | P61803 | -0.90253   |
| 104583 | Q2Q067 | Q5VUY2 | -1.0084    |
| 104584 | Q2Q067 | Q9UHB6 | -0.50285   |
| 104585 | Q2Q067 | Q9BYN0 | -0.71091   |
| 104586 | Q2Q067 | Q9Y624 | -0.81773   |
| 104587 | Q2Q067 | O43818 | -0.22887   |
| 104588 | Q2Q067 | O75882 | -1.5997    |
| 104589 | Q2Q067 | Q9NPB1 | -0.58223   |
| 104590 | Q2Q067 | Q9UKP3 | -0.74503   |
| 104591 | Q2Q067 | Q6ZSR9 | -0.29649   |
| 104592 | Q2Q067 | P17516 | -0.22701   |
| 104593 | Q2Q067 | Q9UJ96 | -0.79496   |
| 104594 | Q2Q067 | A6NK59 | -0.61006   |
| 104595 | Q2Q067 | P24158 | -0.30491   |
| 104596 | Q2Q067 | Q5JTV8 | -0.51428   |
| 104597 | Q2Q067 | Q5UAW9 | -1.5302    |
| 104598 | Q2Q067 | Q6T423 | -1.049     |
| 104599 | Q2Q067 | Q92508 | -1.1158    |
| 104600 | Q2Q067 | Q9UHG2 | -0.84375   |
| 104601 | Q2Q067 | Q9P2F6 | -1.1792    |
| 104602 | Q2Q067 | Q8NEA4 | -0.16061   |
| 104603 | Q2Q067 | Q8TDS7 | -1.4967    |
| 104604 | Q2Q067 | Q8WX39 | -0.97506   |
| 104605 | Q2Q067 | Q9HAY2 | -0.0075932 |
| 104606 | Q2Q067 | Q6N063 | -0.65798   |
| 104607 | Q2Q067 | Q86VD7 | -0.70579   |
| 104608 | Q2Q067 | O75864 | -0.41456   |
| 104609 | Q2Q067 | Q9C0E4 | -0.29202   |
| 104610 | Q2Q067 | Q9NRJ7 | -1.3348    |
| 104611 | Q2Q067 | Q9NZV1 | -1.2829    |
| 104612 | Q2Q067 | Q3B7J2 | -1.593     |
| 104613 | Q2Q067 | P22459 | -0.66721   |
| 104614 | Q2Q067 | P55316 | -0.33602   |
| 104615 | Q2Q067 | Q5T124 | -0.21707   |
| 104616 | Q2Q067 | Q9P2D0 | -0.22738   |
| 104617 | Q2Q067 | Q9BST9 | -0.66973   |
| 104618 | Q2Q067 | Q8NB16 | -0.22741   |
| 104619 | Q2Q067 | P47870 | -0.7463    |
| 104620 | Q2Q067 | Q9NQ25 | -1.1687    |
| 104621 | Q2Q067 | Q5XXA6 | -1.0959    |
| 104622 | Q2Q067 | Q9BXX5 | -0.35365   |
| 104623 | Q2Q067 | B3KVV0 | -1.0345    |
| 104624 | Q2Q067 | P02743 | -0.89648   |
| 104625 | Q2Q067 | Q6P3S6 | -0.22703   |
| 104626 | Q2Q067 | Q92185 | -0.62122   |
| 104627 | Q2Q067 | O60320 | -1.0345    |
| 104628 | Q2Q067 | O60687 | -0.42332   |
| 104629 | Q2Q067 | P35414 | -1.2575    |
| 104630 | Q2Q067 | P46940 | -0.22741   |
| 104631 | Q2Q067 | Q96ND0 | -0.84904   |
| 104632 | Q2Q067 | Q53EV4 | -0.24416   |
| 104633 | Q2Q067 | Q9BY78 | -0.99849   |
| 104634 | Q2Q067 | P0CB46 | -0.8637    |
| 104635 | Q2Q067 | Q5SQI0 | -0.45439   |
| 104636 | Q2Q067 | Q9H239 | -1.5113    |
| 104637 | Q2Q067 | Q9NUV7 | -0.90989   |
| 104638 | Q2Q067 | Q95995 | -0.26941   |
| 104639 | Q2Q067 | Q9H0B3 | -0.21265   |
| 104640 | Q2Q067 | O15496 | -0.65461   |
| 104641 | Q2Q067 | Q9Y2Y4 | -0.24519   |
| 104642 | Q2Q067 | O75677 | -0.48451   |
| 104643 | Q2Q067 | Q5JPE7 | -0.46468   |
| 104644 | Q2Q067 | P06731 | -0.74353   |
| 104645 | Q2Q067 | Q9H3T2 | -1.154     |
| 104646 | Q2Q067 | Q9NZ53 | -0.69705   |
| 104647 | Q2Q067 | Q7Z475 | -1.0256    |
| 104648 | Q2Q067 | Q9HBK9 | -0.14194   |
| 104649 | Q2Q067 | Q86UU5 | -0.44923   |
| 104650 | Q2Q067 | Q9H930 | -0.25631   |
| 104651 | Q2Q067 | Q8WY98 | -1.0345    |
| 104652 | Q2Q067 | O14633 | -0.278     |

|        |        |        |            |
|--------|--------|--------|------------|
| 104653 | Q2Q067 | P08590 | -0.29492   |
| 104654 | Q2Q067 | P59190 | -1.2811    |
| 104655 | Q2Q067 | Q9H832 | -0.27073   |
| 104656 | Q2Q067 | Q6ICG6 | -0.050811  |
| 104657 | Q2Q067 | A6NM45 | -0.85798   |
| 104658 | Q2Q067 | Q8TAT5 | -0.43266   |
| 104659 | Q2Q067 | Q9Y3M9 | -0.085533  |
| 104660 | Q2Q067 | A6NNB3 | -1.3152    |
| 104661 | Q2Q067 | Q5GAN4 | -0.97935   |
| 104662 | Q2Q067 | P56159 | -0.57517   |
| 104663 | Q2Q067 | Q9UHQ9 | -0.94171   |
| 104664 | Q2Q067 | Q99680 | -1.6361    |
| 104665 | Q2Q067 | Q14554 | -0.49233   |
| 104666 | Q2Q067 | A8MWS5 | -0.088675  |
| 104667 | Q2Q067 | Q6PDA7 | -0.98666   |
| 104668 | Q2Q067 | P18509 | -0.7662    |
| 104669 | Q2Q067 | P63127 | -0.74403   |
| 104670 | Q2Q067 | Q6NTE8 | -0.24416   |
| 104671 | Q2Q067 | Q9UK53 | -0.22353   |
| 104672 | Q2Q067 | Q6NW34 | -1.0345    |
| 104673 | Q2Q067 | Q7RTR2 | -0.53541   |
| 104674 | Q2Q067 | Q12864 | -1.1766    |
| 104675 | Q2Q067 | P35659 | -0.26427   |
| 104676 | Q2Q067 | Q5VZV1 | -0.38719   |
| 104677 | Q2Q067 | Q5XUX0 | -0.32416   |
| 104678 | Q2Q067 | P49703 | -0.2567    |
| 104679 | Q2Q067 | Q9BR61 | -0.22741   |
| 104680 | Q2Q067 | P25101 | -0.52742   |
| 104681 | Q2Q067 | O60462 | -0.83433   |
| 104682 | Q2Q067 | A6NLC5 | -0.0058394 |
| 104683 | Q2Q067 | Q8NFF5 | -0.60148   |
| 104684 | Q2Q067 | O95661 | -0.88439   |
| 104685 | Q2Q067 | P17643 | -0.49095   |
| 104686 | Q2Q067 | Q99442 | -0.86424   |
| 104687 | Q2Q067 | Q5VTM2 | -1.2207    |
| 104688 | Q2Q067 | Q4VXA5 | -1.0514    |
| 104689 | Q2Q067 | Q8WZ73 | -0.37673   |
| 104690 | Q2Q067 | Q7L8A9 | -0.66131   |
| 104691 | Q2Q067 | Q9HC10 | -0.75983   |
| 104692 | Q2Q067 | Q8NGS9 | -1.4096    |
| 104693 | Q2Q067 | Q8N326 | -1.0345    |
| 104694 | Q2Q067 | Q96QH8 | -0.93539   |
| 104695 | Q2Q067 | Q53RE8 | -0.24416   |
| 104696 | Q2Q067 | Q0P140 | -0.0098849 |
| 104697 | Q2Q067 | Q9BTV7 | -0.067403  |
| 104698 | Q2Q067 | Q8TAG9 | -0.3459    |
| 104699 | Q2Q067 | O14967 | -0.98444   |
| 104700 | Q2Q067 | Q8NHS3 | -0.52466   |
| 104701 | Q2Q067 | P19397 | -0.63671   |
| 104702 | Q2Q067 | Q6P3S1 | -0.1296    |
| 104703 | Q2Q067 | P20794 | -0.22689   |
| 104704 | Q2Q067 | Q14409 | -0.67829   |
| 104705 | Q2Q067 | P13639 | -0.29995   |
| 104706 | Q2Q067 | P53365 | -0.2222    |
| 104707 | Q2Q067 | Q96Q45 | -1.0428    |
| 104708 | Q2Q067 | Q5T1H1 | -1.1705    |
| 104709 | Q2Q067 | Q8NHB1 | -1.4096    |
| 104710 | Q2Q067 | P31939 | -0.20719   |
| 104711 | Q2Q067 | P11055 | -0.36208   |
| 104712 | Q2Q067 | Q9P2X8 | -0.24416   |
| 104713 | Q2Q067 | Q96MX0 | -1.0608    |
| 104714 | Q2Q067 | Q9BZ98 | -0.29684   |
| 104715 | Q2Q067 | O95803 | -0.88137   |
| 104716 | Q2Q067 | Q9Y2T6 | -1.3781    |
| 104717 | Q2Q067 | Q8N8I0 | -0.22616   |
| 104718 | Q2Q067 | O60678 | -0.15544   |
| 104719 | Q2Q067 | Q8N3H0 | -0.21532   |
| 104720 | Q2Q067 | Q5JVL4 | -0.46278   |
| 104721 | Q2Q067 | P01602 | -1.1115    |
| 104722 | Q2Q067 | O94955 | -0.51259   |
| 104723 | Q2Q067 | P49238 | -0.75944   |
| 104724 | Q2Q067 | Q8N157 | -0.22741   |
| 104725 | Q2Q067 | Q8N5B7 | -0.24263   |
| 104726 | Q2Q067 | Q16585 | -0.80372   |
| 104727 | Q2Q067 | Q8TDM6 | -0.56371   |
| 104728 | Q2Q067 | Q7Z434 | -0.30269   |

|        |        |        |           |
|--------|--------|--------|-----------|
| 104729 | Q2Q067 | P07992 | -0.18015  |
| 104730 | Q2Q067 | Q14CB8 | -0.78779  |
| 104731 | Q2Q067 | Q6IPR1 | -0.21265  |
| 104732 | Q2Q067 | P36954 | -0.19237  |
| 104733 | Q2Q067 | Q96PV4 | -0.35564  |
| 104734 | Q2Q067 | P31323 | -0.22731  |
| 104735 | Q2Q067 | P80419 | -0.98652  |
| 104736 | Q2Q067 | Q63HN8 | -0.92391  |
| 104737 | Q2Q067 | P29144 | -0.14534  |
| 104738 | Q2Q067 | Q96SL4 | -1.1923   |
| 104739 | Q2Q067 | Q6BCY4 | -0.53742  |
| 104740 | Q2Q067 | O94823 | -0.72007  |
| 104741 | Q2Q067 | O95396 | -0.15276  |
| 104742 | Q2Q067 | Q96MP8 | -0.21935  |
| 104743 | Q2Q067 | Q4W5P6 | -0.98666  |
| 104744 | Q2Q067 | Q96KG9 | -0.22741  |
| 104745 | Q2Q067 | Q8N4F0 | -1.1714   |
| 104746 | Q2Q067 | O75309 | -1.3679   |
| 104747 | Q2Q067 | Q53QZ3 | -1.0482   |
| 104748 | Q2Q067 | Q96KR7 | -0.15731  |
| 104749 | Q2Q067 | P21741 | -0.95803  |
| 104750 | Q2Q067 | P22760 | -0.96531  |
| 104751 | Q2Q067 | P01920 | -0.77318  |
| 104752 | Q2Q067 | P01308 | -0.2258   |
| 104753 | Q2Q067 | Q9H8H3 | -0.51633  |
| 104754 | Q2Q067 | O43896 | -0.50925  |
| 104755 | Q2Q067 | O95183 | -1.1681   |
| 104756 | Q2Q067 | O00292 | -0.78588  |
| 104757 | Q2Q067 | P27216 | -0.72742  |
| 104758 | Q2Q067 | Q03181 | -0.32331  |
| 104759 | Q2Q067 | Q8N815 | -0.061906 |
| 104760 | Q2Q067 | Q14314 | -1.2449   |
| 104761 | Q2Q067 | A8MXK1 | -1.0345   |
| 104762 | Q2Q067 | Q9UJW2 | -1.6891   |
| 104763 | Q2Q067 | Q00LT1 | -0.98174  |
| 104764 | Q2Q067 | Q6UWP7 | -0.93065  |
| 104765 | Q2Q067 | A8MVW0 | -1.0345   |
| 104766 | Q2Q067 | O96011 | -0.14234  |
| 104767 | Q2Q067 | Q96PU9 | -0.66672  |
| 104768 | Q2Q067 | Q99439 | -0.22049  |
| 104769 | Q2Q067 | Q6PUV4 | -0.31814  |
| 104770 | Q2Q067 | A6NHS7 | -1.0345   |
| 104771 | Q2Q067 | P35625 | -0.37423  |
| 104772 | Q2Q067 | Q6PI25 | -0.50241  |
| 104773 | Q2Q067 | Q8IV08 | -0.46737  |
| 104774 | Q2Q067 | Q9NWQ8 | -0.61919  |
| 104775 | Q2Q067 | O94827 | -0.46398  |
| 104776 | Q2Q067 | Q9BU20 | -1.1347   |
| 104777 | Q2Q067 | O60240 | -0.50203  |
| 104778 | Q2Q067 | Q6ZMU5 | -0.46874  |
| 104779 | Q2Q067 | Q9UI38 | -0.70143  |
| 104780 | Q2Q067 | Q9NZU5 | -0.27078  |
| 104781 | Q2Q067 | P07711 | -0.56833  |
| 104782 | Q2Q067 | Q99665 | -0.99969  |
| 104783 | Q2Q067 | Q9ULJ1 | -0.21094  |
| 104784 | Q2Q067 | Q9UHI5 | -0.4998   |
| 104785 | Q2Q067 | Q93070 | -0.66947  |
| 104786 | Q2Q067 | Q9Y223 | -0.75383  |
| 104787 | Q2Q067 | Q96AN5 | -0.71318  |
| 104788 | Q2Q067 | O00763 | -0.28344  |
| 104789 | Q2Q067 | P04083 | -0.23018  |
| 104790 | Q2Q067 | O75746 | -0.42437  |
| 104791 | Q2Q067 | Q6UXF7 | -0.97472  |
| 104792 | Q2Q067 | Q6NVV3 | -1.1241   |
| 104793 | Q2Q067 | O75503 | -0.34393  |
| 104794 | Q2Q067 | Q2M1P5 | -0.47427  |
| 104795 | Q2Q067 | P40126 | -0.60661  |
| 104796 | Q2Q067 | Q6ZRX8 | -0.18296  |
| 104797 | Q2Q067 | Q6JEL2 | -0.22628  |
| 104798 | Q2Q067 | Q86SR1 | -0.84989  |
| 104799 | Q2Q067 | O00155 | -1.6361   |
| 104800 | Q2Q067 | P01236 | -0.9065   |
| 104801 | Q2Q067 | P50150 | -0.64839  |
| 104802 | Q2Q067 | Q86UF2 | -0.90414  |
| 104803 | Q2Q067 | Q9H6E4 | -0.98666  |
| 104804 | Q2Q067 | O76039 | -0.55107  |



|        |        |        |            |
|--------|--------|--------|------------|
| 104805 | Q2Q067 | P53794 | -1.2125    |
| 104806 | Q2Q067 | P0C1S8 | -0.58081   |
| 104807 | Q2Q067 | A6NDH6 | -1.4096    |
| 104808 | Q2Q067 | Q8N608 | -1.2021    |
| 104809 | Q2Q067 | Q9H094 | -0.20901   |
| 104810 | Q2Q067 | Q4L180 | -0.217     |
| 104811 | Q2Q067 | Q8IYT4 | -0.77636   |
| 104812 | Q2Q067 | Q96BY9 | -0.52307   |
| 104813 | Q2Q067 | Q7Z5Q1 | -0.73827   |
| 104814 | Q2Q067 | Q03167 | -0.34802   |
| 104815 | Q2Q067 | Q0VDD8 | -0.71873   |
| 104816 | Q2Q067 | P63123 | -0.74403   |
| 104817 | Q2Q067 | Q13643 | -0.22691   |
| 104818 | Q2Q067 | Q9HBX8 | -1.4577    |
| 104819 | Q2Q067 | Q6UXS0 | -0.97472   |
| 104820 | Q2Q067 | Q8NH57 | -1.4096    |
| 104821 | Q2Q067 | Q92598 | -0.4856    |
| 104822 | Q2Q067 | P05534 | -0.98258   |
| 104823 | Q2Q067 | Q7Z422 | -0.097856  |
| 104824 | Q2Q067 | Q96KN7 | -0.12614   |
| 104825 | Q2Q067 | Q92504 | -1.174     |
| 104826 | Q2Q067 | Q96SB3 | -0.22718   |
| 104827 | Q2Q067 | Q95236 | -1.2155    |
| 104828 | Q2Q067 | Q9UJQ1 | -1.0201    |
| 104829 | Q2Q067 | P46089 | -1.5656    |
| 104830 | Q2Q067 | Q86XD8 | -0.48451   |
| 104831 | Q2Q067 | Q92482 | -0.64771   |
| 104832 | Q2Q067 | Q5VZ46 | -0.0088717 |
| 104833 | Q2Q067 | Q9HAQ2 | -0.70795   |
| 104834 | Q2Q067 | P15863 | -0.22696   |
| 104835 | Q2Q067 | Q9P2H3 | -0.47447   |
| 104836 | Q2Q067 | P15531 | -0.22833   |
| 104837 | Q2Q067 | P42658 | -1.0194    |
| 104838 | Q2Q067 | Q96JK4 | -0.72031   |
| 104839 | Q2Q067 | Q96BU1 | -0.15682   |
| 104840 | Q2Q067 | Q9H106 | -0.98666   |
| 104841 | Q2Q067 | Q70EL2 | -0.86859   |
| 104842 | Q2Q067 | P29728 | -0.23128   |
| 104843 | Q2Q067 | Q9BY76 | -0.51332   |
| 104844 | Q2Q067 | Q96N20 | -0.079284  |
| 104845 | Q2Q067 | Q6UXV1 | -1.0345    |
| 104846 | Q2Q067 | Q99811 | -0.21089   |
| 104847 | Q2Q067 | Q8NH09 | -1.4096    |
| 104848 | Q2Q067 | Q9Y6W8 | -1.7544    |
| 104849 | Q2Q067 | Q8NAN2 | -1.0345    |
| 104850 | Q2Q067 | Q8IZL9 | -0.33003   |
| 104851 | Q2Q067 | P55789 | -0.10535   |
| 104852 | Q2Q067 | Q9Y689 | -1.4417    |
| 104853 | Q2Q067 | P0C646 | -1.4096    |
| 104854 | Q2Q067 | Q8N123 | -0.66124   |
| 104855 | Q2Q067 | Q9NYH9 | -0.16721   |
| 104856 | Q2Q067 | Q86Y27 | -0.98666   |
| 104857 | Q2Q067 | Q96NF6 | -1.0345    |
| 104858 | Q2Q067 | Q8NEW7 | -1.0807    |
| 104859 | Q2Q067 | Q5JQS5 | -1.4096    |
| 104860 | Q2Q067 | Q8NG66 | -0.38858   |
| 104861 | Q2Q067 | Q96MC5 | -0.14634   |
| 104862 | Q2Q067 | A8MVS5 | -1.0345    |
| 104863 | Q2Q067 | P35398 | -0.39543   |
| 104864 | Q2Q067 | Q8WWQ8 | -0.82722   |
| 104865 | Q2Q067 | Q9C093 | -0.42142   |
| 104866 | Q2Q067 | Q9UKI3 | -0.37256   |
| 104867 | Q2Q067 | P18089 | -0.66433   |
| 104868 | Q2Q067 | Q8IZ57 | -0.96231   |
| 104869 | Q2Q067 | Q13470 | -0.92979   |
| 104870 | Q2Q067 | Q9P2D7 | -0.5779    |
| 104871 | Q2Q067 | Q9BZM5 | -1.1276    |
| 104872 | Q2Q067 | Q6ZRP7 | -1.2316    |
| 104873 | Q2Q067 | Q96MI9 | -0.51488   |
| 104874 | Q2Q067 | Q86SE8 | -0.13188   |
| 104875 | Q2Q067 | P10911 | -0.22717   |
| 104876 | Q2Q067 | P19634 | -0.36034   |
| 104877 | Q2Q067 | Q13394 | -0.2201    |
| 104878 | Q2Q067 | Q9HB31 | -0.22672   |
| 104879 | Q2Q067 | Q13477 | -1.3375    |
| 104880 | Q2Q067 | Q86UW1 | -1.0912    |

|        |        |        |            |
|--------|--------|--------|------------|
| 104881 | Q2Q067 | Q5T5C0 | -0.51404   |
| 104882 | Q2Q067 | O75140 | -0.59947   |
| 104883 | Q2Q067 | Q7Z3F1 | -1.1663    |
| 104884 | Q2Q067 | P17752 | -0.38966   |
| 104885 | Q2Q067 | P48454 | -0.15595   |
| 104886 | Q2Q067 | Q86YJ6 | -0.78494   |
| 104887 | Q2Q067 | P50395 | -0.17899   |
| 104888 | Q2Q067 | Q9NY91 | -1.0809    |
| 104889 | Q2Q067 | Q9BUM1 | -0.45298   |
| 104890 | Q2Q067 | P32322 | -0.54936   |
| 104891 | Q2Q067 | P57796 | -0.75069   |
| 104892 | Q2Q067 | Q9H4R4 | -0.0043796 |
| 104893 | Q2Q067 | A5D8W1 | -0.12242   |
| 104894 | Q2Q067 | Q6UVM3 | -1.4767    |
| 104895 | Q2Q067 | Q12948 | -0.26494   |
| 104896 | Q2Q067 | P07949 | -0.78854   |
| 104897 | Q2Q067 | Q9NW97 | -1.0345    |
| 104898 | Q2Q067 | Q4VNC1 | -1.216     |
| 104899 | Q2Q067 | Q9NZ08 | -0.6851    |
| 104900 | Q2Q067 | Q13461 | -0.33602   |
| 104901 | Q2Q067 | Q9BXI6 | -0.823     |
| 104902 | Q2Q067 | P17658 | -1.0103    |
| 104903 | Q2Q067 | P20813 | -0.76608   |
| 104904 | Q2Q067 | Q12851 | -0.46603   |
| 104905 | Q2Q067 | Q01955 | -0.5975    |
| 104906 | Q2Q067 | Q7RTZ2 | -0.27849   |
| 104907 | Q2Q067 | Q5T9L3 | -0.42736   |
| 104908 | Q2Q067 | Q96AP7 | -0.95703   |
| 104909 | Q2Q067 | P16144 | -0.8064    |
| 104910 | Q2Q067 | Q9UMR7 | -1.343     |
| 104911 | Q2Q067 | Q96KK3 | -0.54729   |
| 104912 | Q2Q067 | Q96BJ3 | -0.4579    |
| 104913 | Q2Q067 | Q9HC07 | -0.90887   |
| 104914 | Q2Q067 | Q9UGM1 | -0.9927    |
| 104915 | Q2Q067 | Q0VDI3 | -1.0345    |
| 104916 | Q2Q067 | Q9BXF9 | -0.26409   |
| 104917 | Q2Q067 | Q8WUS8 | -1.309     |
| 104918 | Q2Q067 | H0YL14 | -0.47914   |
| 104919 | Q2Q067 | P30450 | -0.98258   |
| 104920 | Q2Q067 | Q96FV0 | -0.22727   |
| 104921 | Q2Q067 | P08174 | -1.1886    |
| 104922 | Q2Q067 | Q96K49 | -1.0345    |
| 104923 | Q2Q067 | O00159 | -0.14387   |
| 104924 | Q2Q067 | Q5VT99 | -1.3079    |
| 104925 | Q2Q067 | O75937 | -0.19862   |
| 104926 | Q2Q067 | Q8N4V1 | -0.91481   |
| 104927 | Q2Q067 | Q8TD43 | -1.0132    |
| 104928 | Q2Q067 | A2RUH7 | -0.24416   |
| 104929 | Q2Q067 | Q9NR71 | -0.79454   |
| 104930 | Q2Q067 | Q8TCC7 | -0.93101   |
| 104931 | Q2Q067 | Q53RD9 | -1.3116    |
| 104932 | Q2Q067 | Q12882 | -0.50998   |
| 104933 | Q2Q067 | Q6ZP80 | -1.0345    |
| 104934 | Q2Q067 | Q9BSK2 | -0.86765   |
| 104935 | Q2Q067 | Q3SXY7 | -1.0345    |
| 104936 | Q2Q067 | Q8IWX7 | -0.3197    |
| 104937 | Q2Q067 | C9JL84 | -0.98666   |
| 104938 | Q2Q067 | P20061 | -1.0099    |
| 104939 | Q2Q067 | Q5W0U4 | -0.22987   |
| 104940 | Q2Q067 | Q96PX1 | -0.48451   |
| 104941 | Q2Q067 | P17936 | -0.22729   |
| 104942 | Q2Q067 | Q9NXG0 | -0.06903   |
| 104943 | Q2Q067 | P08263 | -0.22592   |
| 104944 | Q2Q067 | P55085 | -0.36771   |
| 104945 | Q2Q067 | Q9UQC2 | -0.22739   |
| 104946 | Q2Q067 | P56856 | -0.85277   |
| 104947 | Q2Q067 | Q9H255 | -1.4096    |
| 104948 | Q2Q067 | Q8NCQ3 | -1.0345    |
| 104949 | Q2Q067 | P42345 | -0.27549   |
| 104950 | Q2Q067 | Q8WUY9 | -1.0346    |
| 104951 | Q2Q067 | P12272 | -0.34044   |
| 104952 | Q2Q067 | Q8IZI9 | -0.99416   |
| 104953 | Q2Q067 | Q13509 | -0.63034   |
| 104954 | Q2Q067 | Q9Y4X4 | -0.22522   |
| 104955 | Q2Q067 | Q05586 | -0.43852   |
| 104956 | Q2Q067 | O75900 | -1.5678    |

|        |        |        |          |
|--------|--------|--------|----------|
| 104957 | Q2Q067 | Q5VXJ0 | -0.96522 |
| 104958 | Q2Q067 | A6NNN8 | -1.1869  |
| 104959 | Q2Q067 | P51530 | -0.22921 |
| 104960 | Q2Q067 | P03923 | -0.63636 |
| 104961 | Q2Q067 | Q15392 | -0.35369 |
| 104962 | Q2Q067 | Q92949 | -0.30831 |
| 104963 | Q2Q067 | Q9GZV3 | -1.1424  |
| 104964 | Q2Q067 | P33763 | -0.23773 |
| 104965 | Q2Q067 | Q99578 | -1.0482  |
| 104966 | Q2Q067 | Q9BRT8 | -0.91075 |
| 104967 | Q2Q067 | P25929 | -0.95545 |
| 104968 | Q2Q067 | P10646 | -0.84742 |
| 104969 | Q2Q067 | P16402 | -0.69291 |
| 104970 | Q2Q067 | Q6XR72 | -1.2106  |
| 104971 | Q2Q067 | Q96BS2 | -0.22745 |
| 104972 | Q2Q067 | Q07617 | -0.87335 |
| 104973 | Q2Q067 | O94782 | -0.32428 |
| 104974 | Q2Q067 | Q70CQ2 | -0.31401 |
| 104975 | Q2Q067 | Q5U4N7 | -0.21265 |
| 104976 | Q2Q067 | Q96AY3 | -0.52559 |
| 104977 | Q2Q067 | Q9BVG8 | -0.35126 |
| 104978 | Q2Q067 | Q86TY3 | -1.0345  |
| 104979 | Q2Q067 | O43716 | -0.58783 |
| 104980 | Q2Q067 | P98172 | -0.19369 |
| 104981 | Q2Q067 | Q6DD88 | -1.0899  |
| 104982 | Q2Q067 | Q8N6L1 | -0.76248 |
| 104983 | Q2Q067 | O14559 | -0.26853 |
| 104984 | Q2Q067 | P19883 | -0.22575 |
| 104985 | Q2Q067 | P80303 | -0.18477 |
| 104986 | Q2Q067 | P06213 | -0.27166 |
| 104987 | Q2Q067 | Q9H3Q3 | -0.89115 |
| 104988 | Q2Q067 | Q96PS8 | -1.1187  |
| 104989 | Q2Q067 | Q8NH79 | -1.4096  |
| 104990 | Q2Q067 | P03989 | -1.0946  |
| 104991 | Q2Q067 | P01760 | -1.1115  |
| 104992 | Q2Q067 | Q86VI4 | -0.48898 |
| 104993 | Q2Q067 | Q7LDI9 | -0.47805 |
| 104994 | Q2Q067 | Q9NP85 | -0.10311 |
| 104995 | Q2Q067 | Q8IUG1 | -0.53608 |
| 104996 | Q2Q067 | Q9Y2L6 | -0.33549 |
| 104997 | Q2Q067 | P83593 | -1.101   |
| 104998 | Q2Q067 | Q9BXW6 | -0.22741 |
| 104999 | Q2Q067 | E5RQL4 | -0.53226 |
| 105000 | Q2Q067 | Q9BV94 | -0.86803 |
| 105001 | Q2Q067 | Q9Y5P1 | -1.4096  |
| 105002 | Q2Q067 | Q8NDH3 | -0.78221 |
| 105003 | Q2Q067 | Q5TG30 | -1.0924  |
| 105004 | Q2Q067 | P54619 | -0.45332 |
| 105005 | Q2Q067 | P04070 | -0.85056 |
| 105006 | Q2Q067 | P40394 | -0.68344 |
| 105007 | Q2Q067 | C9JCN9 | -0.32381 |
| 105008 | Q2Q067 | P08217 | -1.5202  |
| 105009 | Q2Q067 | O95279 | -1.2492  |
| 105010 | Q2Q067 | Q9H2J1 | -0.21271 |
| 105011 | Q2Q067 | O95050 | -0.1377  |
| 105012 | Q2Q067 | Q8IV35 | -0.22749 |
| 105013 | Q2Q067 | P01772 | -1.1115  |
| 105014 | Q2Q067 | Q9BSJ8 | -1.0345  |
| 105015 | Q2Q067 | Q9Y471 | -0.40359 |
| 105016 | Q2Q067 | P26006 | -0.51208 |
| 105017 | Q2Q067 | O95716 | -0.90446 |
| 105018 | Q2Q067 | Q52LW3 | -0.95765 |
| 105019 | Q2Q067 | Q86Y91 | -0.28161 |
| 105020 | Q2Q067 | P24046 | -0.9322  |
| 105021 | Q2Q067 | Q5TEJ8 | -0.66806 |
| 105022 | Q2Q067 | Q8TF65 | -0.22636 |
| 105023 | Q2Q067 | Q9UK96 | -0.43384 |
| 105024 | Q2Q067 | Q9NSD7 | -1.5681  |
| 105025 | Q2Q067 | Q8NFP7 | -0.20988 |
| 105026 | Q2Q067 | Q2M2I3 | -0.17888 |
| 105027 | Q2Q067 | O00590 | -1.5712  |
| 105028 | Q2Q067 | Q9BZD3 | -0.24349 |
| 105029 | Q2Q067 | Q92935 | -1.0929  |
| 105030 | Q2Q067 | O15212 | -0.3656  |
| 105031 | Q2Q067 | P16410 | -0.37026 |
| 105032 | Q2Q067 | P25021 | -1.5688  |

|        |        |        |           |
|--------|--------|--------|-----------|
| 105033 | Q2Q067 | Q07973 | -0.40608  |
| 105034 | Q2Q067 | Q9NRX6 | -0.82825  |
| 105035 | Q2Q067 | Q9NZM1 | -0.65245  |
| 105036 | Q2Q067 | Q96A59 | -0.85126  |
| 105037 | Q2Q067 | O14654 | -0.96647  |
| 105038 | Q2Q067 | Q7RTU9 | -0.56969  |
| 105039 | Q2Q067 | P27658 | -1.1921   |
| 105040 | Q2Q067 | P63126 | -0.47805  |
| 105041 | Q2Q067 | Q9UQ05 | -1.1113   |
| 105042 | Q2Q067 | A6ND48 | -1.4096   |
| 105043 | Q2Q067 | Q96RU3 | -0.22741  |
| 105044 | Q2Q067 | Q86YD5 | -1.108    |
| 105045 | Q2Q067 | Q9P2E2 | -0.4092   |
| 105046 | Q2Q067 | P12829 | -0.33917  |
| 105047 | Q2Q067 | Q9P2N2 | -0.59619  |
| 105048 | Q2Q067 | P20340 | -0.24717  |
| 105049 | Q2Q067 | O00592 | -1.0888   |
| 105050 | Q2Q067 | Q96T52 | -0.64834  |
| 105051 | Q2Q067 | Q86TM3 | -0.69188  |
| 105052 | Q2Q067 | Q53GA4 | -0.35548  |
| 105053 | Q2Q067 | Q9H4I9 | -0.84904  |
| 105054 | Q2Q067 | P0CZ25 | -0.15368  |
| 105055 | Q2Q067 | A6NKD2 | -0.44292  |
| 105056 | Q2Q067 | Q8IZ21 | -0.62898  |
| 105057 | Q2Q067 | O43396 | -0.2278   |
| 105058 | Q2Q067 | Q6UWF9 | -0.98666  |
| 105059 | Q2Q067 | P0C7L1 | -0.90081  |
| 105060 | Q2Q067 | P12110 | -0.62324  |
| 105061 | Q2Q067 | Q9BTM1 | -0.82527  |
| 105062 | Q2Q067 | Q4VCS5 | -0.18994  |
| 105063 | Q2Q067 | Q14524 | -0.37052  |
| 105064 | Q2Q067 | Q06055 | -0.93896  |
| 105065 | Q2Q067 | Q9UHC7 | -0.24592  |
| 105066 | Q2Q067 | Q9UKQ9 | -1.5202   |
| 105067 | Q2Q067 | Q9BYB4 | -0.22752  |
| 105068 | Q2Q067 | Q719I0 | -0.35237  |
| 105069 | Q2Q067 | Q7Z4V0 | -0.22741  |
| 105070 | Q2Q067 | Q8WXI3 | -0.61006  |
| 105071 | Q2Q067 | Q9HAW7 | -0.80632  |
| 105072 | Q2Q067 | P30511 | -1.1678   |
| 105073 | Q2Q067 | O75153 | -0.20901  |
| 105074 | Q2Q067 | O75106 | -0.66239  |
| 105075 | Q2Q067 | P51957 | -0.60259  |
| 105076 | Q2Q067 | Q8NEX9 | -0.69703  |
| 105077 | Q2Q067 | P55809 | -0.18239  |
| 105078 | Q2Q067 | Q9BVK2 | -0.9471   |
| 105079 | Q2Q067 | Q9H2Y7 | -0.22989  |
| 105080 | Q2Q067 | Q8WTU0 | -0.54571  |
| 105081 | Q2Q067 | Q9H720 | -1.0097   |
| 105082 | Q2Q067 | Q8NGD2 | -1.4096   |
| 105083 | Q2Q067 | P36980 | -0.98666  |
| 105084 | Q2Q067 | A6NGG8 | -0.7418   |
| 105085 | Q2Q067 | P78381 | -0.40101  |
| 105086 | Q2Q067 | A5PLL7 | -1.1118   |
| 105087 | Q2Q067 | Q9P2D6 | -0.033427 |
| 105088 | Q2Q067 | Q96KA5 | -0.99762  |
| 105089 | Q2Q067 | Q3MIX3 | -1.0988   |
| 105090 | Q2Q067 | Q8TEQ8 | -1.0088   |
| 105091 | Q2Q067 | Q15256 | -0.5239   |
| 105092 | Q2Q067 | P00533 | -0.35957  |
| 105093 | Q2Q067 | Q96BQ3 | -0.73178  |
| 105094 | Q2Q067 | Q7Z2K6 | -1.4259   |
| 105095 | Q2Q067 | Q07812 | -0.22737  |
| 105096 | Q2Q067 | Q5T5X7 | -0.15242  |
| 105097 | Q2Q067 | Q8NGP6 | -1.4096   |
| 105098 | Q2Q067 | P10720 | -1.0274   |
| 105099 | Q2Q067 | Q07283 | -0.26029  |
| 105100 | Q2Q067 | Q8N461 | -0.22031  |
| 105101 | Q2Q067 | Q5VV63 | -1.0548   |
| 105102 | Q2Q067 | P61006 | -0.83481  |
| 105103 | Q2Q067 | Q969J5 | -0.75714  |
| 105104 | Q2Q067 | P55107 | -0.78087  |
| 105105 | Q2Q067 | O15018 | -0.55734  |
| 105106 | Q2Q067 | P52740 | -0.067277 |
| 105107 | Q2Q067 | Q8NEC7 | -0.24416  |
| 105108 | Q2Q067 | O95563 | -0.86765  |

|        |        |        |            |
|--------|--------|--------|------------|
| 105109 | Q2Q067 | Q13319 | -0.53928   |
| 105110 | Q2Q067 | Q13304 | -1.4869    |
| 105111 | Q2Q067 | Q9NRQ2 | -0.55944   |
| 105112 | Q2Q067 | Q9H254 | -0.22771   |
| 105113 | Q2Q067 | Q9UMZ2 | -0.21941   |
| 105114 | Q2Q067 | P21796 | -0.35573   |
| 105115 | Q2Q067 | Q9BXC9 | -0.24432   |
| 105116 | Q2Q067 | P49281 | -0.2408    |
| 105117 | Q2Q067 | P01708 | -1.1115    |
| 105118 | Q2Q067 | Q9UD57 | -0.22732   |
| 105119 | Q2Q067 | Q8NH37 | -1.4096    |
| 105120 | Q2Q067 | Q71U36 | -0.26073   |
| 105121 | Q2Q067 | Q96DT0 | -0.16603   |
| 105122 | Q2Q067 | Q9UKB3 | -0.4622    |
| 105123 | Q2Q067 | Q11206 | -0.86455   |
| 105124 | Q2Q067 | Q99633 | -0.14717   |
| 105125 | Q2Q067 | Q96I27 | -0.085533  |
| 105126 | Q2Q067 | Q8N142 | -0.67165   |
| 105127 | Q2Q067 | Q9Y5Y6 | -1.9525    |
| 105128 | Q2Q067 | Q8IX95 | -0.32909   |
| 105129 | Q2Q067 | Q43559 | -0.76723   |
| 105130 | Q2Q067 | Q96PE5 | -1.0391    |
| 105131 | Q2Q067 | Q5KU26 | -0.70528   |
| 105132 | Q2Q067 | A8MWV9 | -1.0345    |
| 105133 | Q2Q067 | Q92928 | -1.0303    |
| 105134 | Q2Q067 | Q86T29 | -0.085533  |
| 105135 | Q2Q067 | Q14213 | -1.028     |
| 105136 | Q2Q067 | Q00391 | -1.3013    |
| 105137 | Q2Q067 | Q14678 | -1.504     |
| 105138 | Q2Q067 | Q16671 | -1.6248    |
| 105139 | Q2Q067 | Q9UKY4 | -1.117     |
| 105140 | Q2Q067 | Q7Z4T8 | -0.90289   |
| 105141 | Q2Q067 | Q9UIW0 | -0.22726   |
| 105142 | Q2Q067 | P42126 | -0.29964   |
| 105143 | Q2Q067 | Q5VXD3 | -0.0061078 |
| 105144 | Q2Q067 | Q9H490 | -0.94168   |
| 105145 | Q2Q067 | Q86WI0 | -1.0345    |
| 105146 | Q2Q067 | P10114 | -0.58499   |
| 105147 | Q2Q067 | Q9NV70 | -0.33638   |
| 105148 | Q2Q067 | Q5GH70 | -1.0345    |
| 105149 | Q2Q067 | Q9TNN7 | -1.1453    |
| 105150 | Q2Q067 | Q96G74 | -0.54955   |
| 105151 | Q2Q067 | Q6ZW35 | -0.1255    |
| 105152 | Q2Q067 | Q9NZN4 | -0.45436   |
| 105153 | Q2Q067 | Q5T9A4 | -0.94933   |
| 105154 | Q2Q067 | Q8N6N6 | -0.086484  |
| 105155 | Q2Q067 | Q99853 | -0.32794   |
| 105156 | Q2Q067 | Q60264 | -0.20112   |
| 105157 | Q2Q067 | Q8WZA1 | -0.85345   |
| 105158 | Q2Q067 | Q9Y467 | -0.22747   |
| 105159 | Q2Q067 | Q9NR61 | -1.0248    |
| 105160 | Q2Q067 | Q8TBA6 | -0.65584   |
| 105161 | Q2Q067 | Q13433 | -1.1045    |
| 105162 | Q2Q067 | P12429 | -0.49232   |
| 105163 | Q2Q067 | Q8TBG9 | -0.94419   |
| 105164 | Q2Q067 | Q13286 | -0.193     |
| 105165 | Q2Q067 | Q96FL9 | -0.69795   |
| 105166 | Q2Q067 | Q96P68 | -1.4336    |
| 105167 | Q2Q067 | Q9UHF5 | -0.98303   |
| 105168 | Q2Q067 | Q5VXU3 | -0.62874   |
| 105169 | Q2Q067 | P01019 | -0.25806   |
| 105170 | Q2Q067 | Q60879 | -0.22465   |
| 105171 | Q2Q067 | P32881 | -0.86951   |
| 105172 | Q2Q067 | Q96JQ2 | -0.83794   |
| 105173 | Q2Q067 | Q9H469 | -0.22245   |
| 105174 | Q2Q067 | P09471 | -0.8947    |
| 105175 | Q2Q067 | Q14975 | -0.80646   |
| 105176 | Q2Q067 | Q969W0 | -0.47552   |
| 105177 | Q2Q067 | Q96KE9 | -0.22509   |
| 105178 | Q2Q067 | Q4V9L6 | -0.77947   |
| 105179 | Q2Q067 | Q2T9J0 | -0.71313   |
| 105180 | Q2Q067 | Q9H0Q0 | -0.63454   |
| 105181 | Q2Q067 | Q96JG8 | -0.13031   |
| 105182 | Q2Q067 | Q5VWC8 | -1.1711    |
| 105183 | Q2Q067 | P05187 | -1.293     |
| 105184 | Q2Q067 | A6NFR6 | -1.0345    |

|        |        |        |           |
|--------|--------|--------|-----------|
| 105185 | Q2Q067 | Q8WUX2 | -0.24416  |
| 105186 | Q2Q067 | Q8WV74 | -0.2353   |
| 105187 | Q2Q067 | Q96L12 | -0.59501  |
| 105188 | Q2Q067 | Q9Y6U7 | -1.1176   |
| 105189 | Q2Q067 | Q6PCB8 | -1.227    |
| 105190 | Q2Q067 | P06307 | -0.78132  |
| 105191 | Q2Q067 | Q86WC4 | -0.90793  |
| 105192 | Q2Q067 | Q7LBE3 | -1.0202   |
| 105193 | Q2Q067 | P28340 | -0.23945  |
| 105194 | Q2Q067 | Q15617 | -1.4096   |
| 105195 | Q2Q067 | Q96LR9 | -1.888    |
| 105196 | Q2Q067 | P60891 | -0.51446  |
| 105197 | Q2Q067 | Q8N5X7 | -0.092021 |
| 105198 | Q2Q067 | Q7Z4S6 | -0.23776  |
| 105199 | Q2Q067 | O00574 | -1.4241   |
| 105200 | Q2Q067 | Q6AW86 | -0.085533 |
| 105201 | Q2Q067 | P36406 | -0.56613  |
| 105202 | Q2Q067 | P80192 | -0.58235  |
| 105203 | Q2Q067 | Q96HM7 | -0.36393  |
| 105204 | Q2Q067 | Q08345 | -1.0401   |
| 105205 | Q2Q067 | Q07065 | -0.88577  |
| 105206 | Q2Q067 | Q9NR63 | -0.64983  |
| 105207 | Q2Q067 | Q92611 | -0.30263  |
| 105208 | Q2Q067 | P0DH78 | -0.48451  |
| 105209 | Q2Q067 | Q9BXS1 | -0.30833  |
| 105210 | Q2Q067 | Q9NP72 | -1.5827   |
| 105211 | Q2Q067 | Q9GZZ6 | -1.0217   |
| 105212 | Q2Q067 | Q9Y3B8 | -0.21579  |
| 105213 | Q2Q067 | Q9H1F0 | -0.90081  |
| 105214 | Q2Q067 | P11310 | -0.40543  |
| 105215 | Q2Q067 | Q9NQ90 | -0.62006  |
| 105216 | Q2Q067 | Q9C0B1 | -0.30278  |
| 105217 | Q2Q067 | Q9H172 | -1.421    |
| 105218 | Q2Q067 | Q9NQ60 | -0.94319  |
| 105219 | Q2Q067 | Q8NH42 | -1.4096   |
| 105220 | Q2Q067 | Q9HBG4 | -0.49499  |
| 105221 | Q2Q067 | P16615 | -1.0254   |
| 105222 | Q2Q067 | Q10472 | -1.0172   |
| 105223 | Q2Q067 | P35219 | -0.28603  |
| 105224 | Q2Q067 | P10092 | -1.0857   |
| 105225 | Q2Q067 | P43119 | -1.1378   |
| 105226 | Q2Q067 | Q9Y2T4 | -0.46873  |
| 105227 | Q2Q067 | P51170 | -0.72252  |
| 105228 | Q2Q067 | Q9NUI1 | -1.1365   |
| 105229 | Q2Q067 | Q75678 | -0.48451  |
| 105230 | Q2Q067 | Q96CH1 | -1.4967   |
| 105231 | Q2Q067 | Q9Y5H7 | -1.4044   |
| 105232 | Q2Q067 | Q8NI36 | -0.2276   |
| 105233 | Q2Q067 | O14936 | -0.22937  |
| 105234 | Q2Q067 | O00214 | -0.28579  |
| 105235 | Q2Q067 | P20142 | -0.83683  |
| 105236 | Q2Q067 | Q9H488 | -0.15018  |
| 105237 | Q2Q067 | Q92569 | -0.2274   |
| 105238 | Q2Q067 | Q8TE60 | -1.4569   |
| 105239 | Q2Q067 | Q15391 | -1.3992   |
| 105240 | Q2Q067 | P31431 | -0.84987  |
| 105241 | Q2Q067 | Q8N9I9 | -0.34642  |
| 105242 | Q2Q067 | Q69YU3 | -0.22686  |
| 105243 | Q2Q067 | P15812 | -1.0911   |
| 105244 | Q2Q067 | Q8WV48 | -1.0345   |
| 105245 | Q2Q067 | Q07890 | -0.23183  |
| 105246 | Q2Q067 | Q8N1W1 | -0.94781  |
| 105247 | Q2Q067 | Q7Z3E1 | -0.45645  |
| 105248 | Q2Q067 | P63124 | -0.74403  |
| 105249 | Q2Q067 | Q7Z5L0 | -0.9633   |
| 105250 | Q2Q067 | Q16512 | -0.22385  |
| 105251 | Q2Q067 | Q9UH17 | -0.73775  |
| 105252 | Q2Q067 | Q09328 | -0.79385  |
| 105253 | Q2Q067 | P0CJ72 | -0.80201  |
| 105254 | Q2Q067 | Q5TA50 | -0.19457  |
| 105255 | Q2Q067 | O95208 | -0.34473  |
| 105256 | Q2Q067 | A0PK00 | -0.77947  |
| 105257 | Q2Q067 | Q8WWY7 | -0.87956  |
| 105258 | Q2Q067 | Q3B7T3 | -0.90721  |
| 105259 | Q2Q067 | F5H284 | -0.32591  |
| 105260 | Q2Q067 | Q86UX6 | -1.4247   |

|        |        |        |           |
|--------|--------|--------|-----------|
| 105261 | Q2Q067 | P47710 | -0.99876  |
| 105262 | Q2Q067 | Q2TAL5 | -0.22777  |
| 105263 | Q2Q067 | O95977 | -1.5561   |
| 105264 | Q2Q067 | Q9BXI9 | -1.1405   |
| 105265 | Q2Q067 | Q9Y5Q0 | -0.97246  |
| 105266 | Q2Q067 | Q969K4 | -0.22733  |
| 105267 | Q2Q067 | Q7Z3B1 | -0.41069  |
| 105268 | Q2Q067 | Q5VXM1 | -0.98666  |
| 105269 | Q2Q067 | P10909 | -0.11642  |
| 105270 | Q2Q067 | Q9NY15 | -1.2055   |
| 105271 | Q2Q067 | P0C7U0 | -1.0021   |
| 105272 | Q2Q067 | P11488 | -0.80598  |
| 105273 | Q2Q067 | Q9Y5W3 | -0.22511  |
| 105274 | Q2Q067 | Q9BQM9 | -0.1275   |
| 105275 | Q2Q067 | Q8IWB1 | -0.65765  |
| 105276 | Q2Q067 | Q5TCH4 | -0.84243  |
| 105277 | Q2Q067 | P49916 | -0.22398  |
| 105278 | Q2Q067 | Q8TEW8 | -0.2268   |
| 105279 | Q2Q067 | Q6P4F1 | -0.60964  |
| 105280 | Q2Q067 | Q6IF63 | -1.4096   |
| 105281 | Q2Q067 | Q96AC1 | -0.21724  |
| 105282 | Q2Q067 | O94915 | -0.11229  |
| 105283 | Q2Q067 | Q8TAG5 | -0.98666  |
| 105284 | Q2Q067 | Q8NG84 | -1.4096   |
| 105285 | Q2Q067 | P51679 | -1.4409   |
| 105286 | Q2Q067 | A6NDD2 | -0.94775  |
| 105287 | Q2Q067 | Q9NZC9 | -0.55138  |
| 105288 | Q2Q067 | Q95IE3 | -0.79235  |
| 105289 | Q2Q067 | Q9NXA8 | -0.24383  |
| 105290 | Q2Q067 | Q15120 | -0.22394  |
| 105291 | Q2Q067 | O75121 | -1.1634   |
| 105292 | Q2Q067 | Q8NDH6 | -0.3736   |
| 105293 | Q2Q067 | Q9H210 | -1.4096   |
| 105294 | Q2Q067 | Q99959 | -0.19751  |
| 105295 | Q2Q067 | P01771 | -1.1115   |
| 105296 | Q2Q067 | P57059 | -0.45528  |
| 105297 | Q2Q067 | P16189 | -0.99938  |
| 105298 | Q2Q067 | P02656 | -0.6622   |
| 105299 | Q2Q067 | P41587 | -1.5351   |
| 105300 | Q2Q067 | Q86YW7 | -0.96181  |
| 105301 | Q2Q067 | Q9NVD3 | -0.043901 |
| 105302 | Q2Q067 | Q8WZ82 | -0.18599  |
| 105303 | Q2Q067 | Q6ZS11 | -1.0128   |
| 105304 | Q2Q067 | P28328 | -0.34589  |
| 105305 | Q2Q067 | Q9Y5U4 | -0.38144  |
| 105306 | Q2Q067 | Q8WXF7 | -0.71947  |
| 105307 | Q2Q067 | Q8NBV4 | -0.72637  |
| 105308 | Q2Q067 | Q8NGX5 | -1.4096   |
| 105309 | Q2Q067 | Q9NZ56 | -0.59022  |
| 105310 | Q2Q067 | Q6ZW31 | -0.83748  |
| 105311 | Q2Q067 | Q9H0K6 | -0.32489  |
| 105312 | Q2Q067 | Q5JU00 | -0.22723  |
| 105313 | Q2Q067 | Q5SZJ8 | -0.086232 |
| 105314 | Q2Q067 | P48059 | -0.21691  |
| 105315 | Q2Q067 | Q8NGC0 | -1.4096   |
| 105316 | Q2Q067 | Q9Y4C0 | -1.228    |
| 105317 | Q2Q067 | Q8IXH8 | -1.3679   |
| 105318 | Q2Q067 | P57730 | -0.68583  |
| 105319 | Q2Q067 | Q9HAC7 | -0.4842   |
| 105320 | Q2Q067 | P0CF97 | -0.41613  |
| 105321 | Q2Q067 | P30481 | -1.1453   |
| 105322 | Q2Q067 | Q94830 | -0.13949  |
| 105323 | Q2Q067 | O95452 | -1.1329   |
| 105324 | Q2Q067 | Q96D31 | -0.62932  |
| 105325 | Q2Q067 | P47775 | -1.5865   |
| 105326 | Q2Q067 | Q13214 | -1.0849   |
| 105327 | Q2Q067 | Q5EBN2 | -0.73178  |
| 105328 | Q2Q067 | P06241 | -0.3859   |
| 105329 | Q2Q067 | Q9GIY3 | -0.79235  |
| 105330 | Q2Q067 | Q9NUQ9 | -0.13249  |
| 105331 | Q2Q067 | O60542 | -0.83177  |
| 105332 | Q2Q067 | Q13217 | -0.19778  |
| 105333 | Q2Q067 | O43820 | -0.76419  |
| 105334 | Q2Q067 | Q8TCB6 | -1.4096   |
| 105335 | Q2Q067 | P06865 | -0.45177  |
| 105336 | Q2Q067 | Q9Y3R0 | -0.23312  |

|        |        |        |           |
|--------|--------|--------|-----------|
| 105337 | Q2Q067 | Q6PCB5 | -0.054655 |
| 105338 | Q2Q067 | Q6PML9 | -0.63669  |
| 105339 | Q2Q067 | Q9P003 | -0.94893  |
| 105340 | Q2Q067 | P01777 | -1.1115   |
| 105341 | Q2Q067 | Q5W186 | -1.024    |
| 105342 | Q2Q067 | Q4AC99 | -0.48663  |
| 105343 | Q2Q067 | P08910 | -0.75125  |
| 105344 | Q2Q067 | Q9H4I0 | -0.25491  |
| 105345 | Q2Q067 | Q96HE7 | -0.55706  |
| 105346 | Q2Q067 | P52735 | -0.22741  |
| 105347 | Q2Q067 | Q15020 | -0.22072  |
| 105348 | Q2Q067 | Q9UGI9 | -1.0139   |
| 105349 | Q2Q067 | Q5VZP5 | -0.69931  |
| 105350 | Q2Q067 | Q8IXK2 | -0.82477  |
| 105351 | Q2Q067 | P47884 | -1.4902   |
| 105352 | Q2Q067 | Q9BZ71 | -0.88462  |
| 105353 | Q2Q067 | Q9UQ88 | -0.35402  |
| 105354 | Q2Q067 | A6NGC4 | -1.0345   |
| 105355 | Q2Q067 | Q13451 | -0.38912  |
| 105356 | Q2Q067 | Q9NQX4 | -0.65992  |
| 105357 | Q2Q067 | Q8WWF1 | -0.98666  |
| 105358 | Q2Q067 | P02812 | -0.77379  |
| 105359 | Q2Q067 | Q8NFS9 | -0.86321  |
| 105360 | Q2Q067 | Q8NGL0 | -1.4096   |
| 105361 | Q2Q067 | P11912 | -1.047    |
| 105362 | Q2Q067 | P31994 | -0.59326  |
| 105363 | Q2Q067 | Q96MN5 | -0.21638  |
| 105364 | Q2Q067 | Q5T4S7 | -0.45581  |
| 105365 | Q2Q067 | P49184 | -0.36901  |
| 105366 | Q2Q067 | P37235 | -0.45603  |
| 105367 | Q2Q067 | Q96RU2 | -0.39631  |
| 105368 | Q2Q067 | O60494 | -0.25236  |
| 105369 | Q2Q067 | P02771 | -0.73456  |
| 105370 | Q2Q067 | P26639 | -0.22525  |
| 105371 | Q2Q067 | Q1L6U9 | -0.98666  |
| 105372 | Q2Q067 | Q8NGQ5 | -1.4096   |
| 105373 | Q2Q067 | Q9UJ04 | -0.14475  |
| 105374 | Q2Q067 | P05814 | -0.95576  |
| 105375 | Q2Q067 | Q8WVF2 | -0.97447  |
| 105376 | Q2Q067 | A6NNY8 | -0.76972  |
| 105377 | Q2Q067 | O00370 | -0.37295  |
| 105378 | Q2Q067 | Q8NH87 | -1.4096   |
| 105379 | Q2Q067 | Q8N7I0 | -0.21987  |
| 105380 | Q2Q067 | O75179 | -0.22754  |
| 105381 | Q2Q067 | Q9UI12 | -0.053808 |
| 105382 | Q2Q067 | P47871 | -1.0093   |
| 105383 | Q2Q067 | P28330 | -0.30057  |
| 105384 | Q2Q067 | P16284 | -0.56865  |
| 105385 | Q2Q067 | P51659 | -0.63863  |
| 105386 | Q2Q067 | Q49AH0 | -0.90018  |
| 105387 | Q2Q067 | Q9NVP4 | -0.73178  |
| 105388 | Q2Q067 | Q6P2H8 | -1.0345   |
| 105389 | Q2Q067 | Q9BYM8 | -0.22709  |
| 105390 | Q2Q067 | Q9NXH3 | -0.26162  |
| 105391 | Q2Q067 | P41229 | -0.55673  |
| 105392 | Q2Q067 | Q9H159 | -1.3119   |
| 105393 | Q2Q067 | Q9BYW1 | -0.93903  |
| 105394 | Q2Q067 | A6NCI4 | -0.98666  |
| 105395 | Q2Q067 | P07498 | -0.95176  |
| 105396 | Q2Q067 | Q9C056 | -0.22753  |
| 105397 | Q2Q067 | P05160 | -0.867    |
| 105398 | Q2Q067 | Q9P1V8 | -0.22009  |
| 105399 | Q2Q067 | Q6PRD7 | -0.20901  |
| 105400 | Q2Q067 | Q9BYS8 | -0.44176  |
| 105401 | Q2Q067 | Q6ZSB9 | -0.085533 |
| 105402 | Q2Q067 | Q8WUJ1 | -0.8879   |
| 105403 | Q2Q067 | Q9H2C5 | -1.4096   |
| 105404 | Q2Q067 | P04179 | -0.19856  |
| 105405 | Q2Q067 | Q16828 | -0.27     |
| 105406 | Q2Q067 | Q8NBI6 | -1.0949   |
| 105407 | Q2Q067 | Q71UI9 | -0.82527  |
| 105408 | Q2Q067 | Q06203 | -0.43117  |
| 105409 | Q2Q067 | O95835 | -0.22737  |
| 105410 | Q2Q067 | Q8MH63 | -1.0256   |
| 105411 | Q2Q067 | Q96II8 | -0.98666  |
| 105412 | Q2Q067 | P55211 | -0.22595  |



|        |        |        |           |
|--------|--------|--------|-----------|
| 105413 | Q2Q067 | Q5H913 | -1.3915   |
| 105414 | Q2Q067 | Q9HD67 | -0.58353  |
| 105415 | Q2Q067 | Q9H0H0 | -0.10248  |
| 105416 | Q2Q067 | Q63HM9 | -0.80026  |
| 105417 | Q2Q067 | O94761 | -0.48179  |
| 105418 | Q2Q067 | Q8TC26 | -0.95489  |
| 105419 | Q2Q067 | P02042 | -0.23916  |
| 105420 | Q2Q067 | Q9UKL2 | -1.5188   |
| 105421 | Q2Q067 | Q9Y5R6 | -0.09994  |
| 105422 | Q2Q067 | O95298 | -0.38551  |
| 105423 | Q2Q067 | Q9H6P5 | -0.75955  |
| 105424 | Q2Q067 | Q9H6Y7 | -0.34923  |
| 105425 | Q2Q067 | Q96RJ0 | -1.4198   |
| 105426 | Q2Q067 | Q6ZT07 | -1.4477   |
| 105427 | Q2Q067 | O60337 | -1.078    |
| 105428 | Q2Q067 | Q8IYM9 | -0.22734  |
| 105429 | Q2Q067 | E7EU14 | -0.22353  |
| 105430 | Q2Q067 | Q2M3V2 | -0.22741  |
| 105431 | Q2Q067 | Q9H6R3 | -0.91508  |
| 105432 | Q2Q067 | P0CW27 | -0.098707 |
| 105433 | Q2Q067 | Q9NRP0 | -0.96468  |
| 105434 | Q2Q067 | Q99062 | -1.9406   |
| 105435 | Q2Q067 | Q2WGJ8 | -1.0345   |
| 105436 | Q2Q067 | Q96S53 | -0.89962  |
| 105437 | Q2Q067 | Q9NSI5 | -0.64146  |
| 105438 | Q2Q067 | Q9NRZ9 | -0.20193  |
| 105439 | Q2Q067 | O60575 | -0.90081  |
| 105440 | Q2Q067 | P56747 | -0.86036  |
| 105441 | Q2Q067 | Q9NWW5 | -0.42027  |
| 105442 | Q2Q067 | Q9P0Z9 | -0.6762   |
| 105443 | Q2Q067 | O95522 | -0.19475  |
| 105444 | Q2Q067 | Q00536 | -0.15023  |
| 105445 | Q2Q067 | P29460 | -0.27378  |
| 105446 | Q2Q067 | Q8N138 | -0.44839  |
| 105447 | Q2Q067 | P57729 | -1.0241   |
| 105448 | Q2Q067 | P40200 | -1.4804   |
| 105449 | Q2Q067 | P01040 | -0.2355   |
| 105450 | Q2Q067 | O15303 | -1.3265   |
| 105451 | Q2Q067 | Q8TCZ2 | -1.251    |
| 105452 | Q2Q067 | Q8WWF6 | -0.4622   |
| 105453 | Q2Q067 | Q8N6M3 | -0.58925  |
| 105454 | Q2Q067 | Q9P0X4 | -0.63824  |
| 105455 | Q2Q067 | O00562 | -0.41206  |
| 105456 | Q2Q067 | Q9H0R4 | -0.48648  |
| 105457 | Q2Q067 | O15327 | -0.19387  |
| 105458 | Q2Q067 | Q8NDY3 | -0.37827  |
| 105459 | Q2Q067 | Q9GZV8 | -0.12322  |
| 105460 | Q2Q067 | Q13151 | -0.26299  |
| 105461 | Q2Q067 | Q9NPI5 | -0.62327  |
| 105462 | Q2Q067 | Q9BZC1 | -0.35878  |
| 105463 | Q2Q067 | Q96QE4 | -0.82814  |
| 105464 | Q2Q067 | Q16623 | -0.44653  |
| 105465 | Q2Q067 | Q9NXH9 | -0.41967  |
| 105466 | Q2Q067 | O95932 | -0.39453  |
| 105467 | Q2Q067 | P0DI80 | -1.0345   |
| 105468 | Q2Q067 | P25092 | -1.0818   |
| 105469 | Q2Q067 | Q99742 | -0.33866  |
| 105470 | Q2Q067 | Q9Y6X9 | -0.20435  |
| 105471 | Q2Q067 | Q9P286 | -0.79141  |
| 105472 | Q2Q067 | Q13478 | -1.3681   |
| 105473 | Q2Q067 | P42702 | -1.1361   |
| 105474 | Q2Q067 | Q13588 | -0.22741  |
| 105475 | Q2Q067 | Q8WYK0 | -0.17386  |
| 105476 | Q2Q067 | Q9P126 | -0.61752  |
| 105477 | Q2Q067 | P10643 | -0.95532  |
| 105478 | Q2Q067 | A6NNC1 | -1.0345   |
| 105479 | Q2Q067 | P62158 | -0.22727  |
| 105480 | Q2Q067 | O43304 | -1.1211   |
| 105481 | Q2Q067 | O95600 | -0.21909  |
| 105482 | Q2Q067 | Q2WEN9 | -0.98507  |
| 105483 | Q2Q067 | Q9HBI1 | -0.49456  |
| 105484 | Q2Q067 | Q5TGY3 | -0.44839  |
| 105485 | Q2Q067 | Q17R98 | -0.22747  |
| 105486 | Q2Q067 | Q9NYL4 | -0.9837   |
| 105487 | Q2Q067 | Q32ZL2 | -1.1058   |
| 105488 | Q2Q067 | P09093 | -1.0644   |

|        |        |        |           |
|--------|--------|--------|-----------|
| 105489 | Q2Q067 | Q9NYQ3 | -0.39513  |
| 105490 | Q2Q067 | P26010 | -1.4044   |
| 105491 | Q2Q067 | P49840 | -0.22755  |
| 105492 | Q2Q067 | P02452 | -0.32028  |
| 105493 | Q2Q067 | P78539 | -0.71323  |
| 105494 | Q2Q067 | Q9BZZ2 | -1.737    |
| 105495 | Q2Q067 | Q8WVD3 | -0.79637  |
| 105496 | Q2Q067 | P81277 | -0.5935   |
| 105497 | Q2Q067 | Q9BQG2 | -0.22741  |
| 105498 | Q2Q067 | Q86YL7 | -0.89129  |
| 105499 | Q2Q067 | Q6ZPD8 | -1.0329   |
| 105500 | Q2Q067 | Q86VL8 | -1.0949   |
| 105501 | Q2Q067 | Q96B96 | -1.0345   |
| 105502 | Q2Q067 | O00180 | -1.0388   |
| 105503 | Q2Q067 | P58872 | -1.4687   |
| 105504 | Q2Q067 | Q6Y7W6 | -0.26574  |
| 105505 | Q2Q067 | Q8WVN6 | -1.632    |
| 105506 | Q2Q067 | O95081 | -0.46979  |
| 105507 | Q2Q067 | Q29960 | -1.4674   |
| 105508 | Q2Q067 | Q9NRS6 | -0.1905   |
| 105509 | Q2Q067 | Q12907 | -0.6418   |
| 105510 | Q2Q067 | Q86VZ2 | -0.2454   |
| 105511 | Q2Q067 | Q9NZH0 | -0.81229  |
| 105512 | Q2Q067 | Q86VK4 | -0.21039  |
| 105513 | Q2Q067 | P46934 | -0.22741  |
| 105514 | Q2Q067 | P53671 | -1.1187   |
| 105515 | Q2Q067 | P30466 | -1.1453   |
| 105516 | Q2Q067 | O75781 | -0.25413  |
| 105517 | Q2Q067 | Q9Y267 | -1.0688   |
| 105518 | Q2Q067 | Q92502 | -1.0188   |
| 105519 | Q2Q067 | Q9UQ90 | -0.79086  |
| 105520 | Q2Q067 | Q8NHY0 | -0.78507  |
| 105521 | Q2Q067 | Q9BYV6 | -0.44079  |
| 105522 | Q2Q067 | Q12999 | -1.0758   |
| 105523 | Q2Q067 | Q6Q8B3 | -1.0345   |
| 105524 | Q2Q067 | O00622 | -0.48384  |
| 105525 | Q2Q067 | Q9NRA2 | -1.2829   |
| 105526 | Q2Q067 | Q6P4F7 | -1.0924   |
| 105527 | Q2Q067 | Q9UF47 | -0.57939  |
| 105528 | Q2Q067 | Q96D03 | -0.2098   |
| 105529 | Q2Q067 | P30559 | -0.96297  |
| 105530 | Q2Q067 | O00634 | -0.70489  |
| 105531 | Q2Q067 | O60218 | -0.50508  |
| 105532 | Q2Q067 | Q9UBF8 | -0.81877  |
| 105533 | Q2Q067 | Q16819 | -1.5046   |
| 105534 | Q2Q067 | P54578 | -0.31482  |
| 105535 | Q2Q067 | Q13418 | -0.37086  |
| 105536 | Q2Q067 | Q9UPP2 | -0.22201  |
| 105537 | Q2Q067 | P04118 | -0.81996  |
| 105538 | Q2Q067 | A6PVC2 | -0.46454  |
| 105539 | Q2Q067 | Q6NT32 | -0.8374   |
| 105540 | Q2Q067 | Q96RE9 | -0.085533 |
| 105541 | Q2Q067 | P09603 | -0.64212  |
| 105542 | Q2Q067 | A8MT70 | -0.73178  |
| 105543 | Q2Q067 | P22307 | -0.21241  |
| 105544 | Q2Q067 | O75603 | -0.19013  |
| 105545 | Q2Q067 | Q9Y2H5 | -0.51797  |
| 105546 | Q2Q067 | Q96MZ0 | -0.22362  |
| 105547 | Q2Q067 | Q7L014 | -0.59657  |
| 105548 | Q2Q067 | P21580 | -0.18008  |
| 105549 | Q2Q067 | Q9H5K3 | -1.6349   |
| 105550 | Q2Q067 | P49257 | -0.086571 |
| 105551 | Q2Q067 | O14901 | -0.20696  |
| 105552 | Q2Q067 | Q9H4L5 | -0.44044  |
| 105553 | Q2Q067 | Q9H9E1 | -0.22741  |
| 105554 | Q2Q067 | Q9UH73 | -0.12539  |
| 105555 | Q2Q067 | Q6ZU69 | -1.0345   |
| 105556 | Q2Q067 | Q9H4Q3 | -0.22731  |
| 105557 | Q2Q067 | Q96GP6 | -0.5583   |
| 105558 | Q2Q067 | Q8WXI8 | -0.98129  |
| 105559 | Q2Q067 | Q96SF2 | -0.71726  |
| 105560 | Q2Q067 | Q8TDV5 | -1.5618   |
| 105561 | Q2Q067 | Q68D06 | -1.1155   |
| 105562 | Q2Q067 | P05141 | -0.22926  |
| 105563 | Q2Q067 | Q9NRR8 | -0.45557  |
| 105564 | Q2Q067 | Q7RTV2 | -0.22615  |

|        |        |         |           |
|--------|--------|---------|-----------|
| 105565 | Q2Q067 | Q6ZVK1  | -1.0345   |
| 105566 | Q2Q067 | P17655  | -0.29446  |
| 105567 | Q2Q067 | Q9UBT3  | -0.94734  |
| 105568 | Q2Q067 | Q6P996  | -0.59474  |
| 105569 | Q2Q067 | Q9Y240  | -0.45702  |
| 105570 | Q2Q067 | Q8NDL9  | -0.24608  |
| 105571 | Q2Q067 | Q9H0A0  | -0.30448  |
| 105572 | Q2Q067 | Q09013  | -0.44755  |
| 105573 | Q2Q067 | A8MTL9  | -0.90081  |
| 105574 | Q2Q067 | Q8IWD5  | -1.0345   |
| 105575 | Q2Q067 | Q9HAZ1  | -1.1835   |
| 105576 | Q2Q067 | Q9H7C9  | -0.14727  |
| 105577 | Q2Q067 | Q7Z3T1  | -1.4096   |
| 105578 | Q2Q067 | O43612  | -0.50715  |
| 105579 | Q2Q067 | P0C7N1  | -1.4096   |
| 105580 | Q2Q067 | Q8NHQ9  | -0.98139  |
| 105581 | Q2Q067 | Q13613  | -0.4455   |
| 105582 | Q2Q067 | O00483  | -0.16142  |
| 105583 | Q2Q067 | Q8NG99  | -1.4096   |
| 105584 | Q2Q067 | Q96FV3  | -1.0158   |
| 105585 | Q2Q067 | Q13576  | -0.9873   |
| 105586 | Q2Q067 | Q16549  | -1.2494   |
| 105587 | Q2Q067 | O94851  | -0.57646  |
| 105588 | Q2Q067 | Q9Y693  | -1.1018   |
| 105589 | Q2Q067 | Q15758  | -0.98422  |
| 105590 | Q2Q067 | Q96HA9  | -0.38403  |
| 105591 | Q2Q067 | Q6J9G0  | -1.7877   |
| 105592 | Q2Q067 | Q8N5H7  | -0.76524  |
| 105593 | Q2Q067 | P10916  | -0.22656  |
| 105594 | Q2Q067 | Q6UXZ4  | -1.1938   |
| 105595 | Q2Q067 | Q9UK97  | -0.43384  |
| 105596 | Q2Q067 | Q4KMQ2  | -1.1047   |
| 105597 | Q2Q067 | Q8TB45  | -0.22741  |
| 105598 | Q2Q067 | P57727  | -1.4887   |
| 105599 | Q2Q067 | O95757  | -0.23098  |
| 105600 | Q2Q067 | Q9BY11  | -0.29817  |
| 105601 | Q2Q067 | Q14507  | -1.0125   |
| 105602 | Q2Q067 | Q9Y5F7  | -1.3679   |
| 105603 | Q2Q067 | Q96RY7  | -0.41655  |
| 105604 | Q2Q067 | Q8I WV1 | -0.1757   |
| 105605 | Q2Q067 | Q92766  | -0.21917  |
| 105606 | Q2Q067 | Q6GMV1  | -0.46685  |
| 105607 | Q2Q067 | Q8N4Q1  | -0.063667 |
| 105608 | Q2Q067 | O60330  | -1.3679   |
| 105609 | Q2Q067 | Q9Y672  | -0.87341  |
| 105610 | Q2Q067 | Q9NUZ1  | -0.61297  |
| 105611 | Q2Q067 | Q5JR12  | -0.36867  |
| 105612 | Q2Q067 | Q9NZM3  | -0.74277  |
| 105613 | Q2Q067 | P03999  | -1.5305   |
| 105614 | Q2Q067 | P11117  | -0.9738   |
| 105615 | Q2Q067 | Q6PCB7  | -0.68031  |
| 105616 | Q2Q067 | Q14CX5  | -1.0345   |
| 105617 | Q2Q067 | Q9BWW8  | -1.1019   |
| 105618 | Q2Q067 | Q9H0X4  | -1.0345   |
| 105619 | Q2Q067 | Q5K4E3  | -1.3271   |
| 105620 | Q2Q067 | Q13296  | -0.24391  |
| 105621 | Q2Q067 | Q96DN2  | -1.0413   |
| 105622 | Q2Q067 | P12838  | -0.96337  |
| 105623 | Q2Q067 | P78367  | -0.22788  |
| 105624 | Q2Q067 | Q9BXY4  | -0.99325  |
| 105625 | Q2Q067 | P25774  | -1.3487   |
| 105626 | Q2Q067 | P35367  | -0.78061  |
| 105627 | Q2Q067 | Q12965  | -0.18269  |
| 105628 | Q2Q067 | Q9BXT6  | -1.3567   |
| 105629 | Q2Q067 | Q6ZNW5  | -0.594    |
| 105630 | Q2Q067 | Q5JQF8  | -0.96284  |
| 105631 | Q2Q067 | Q9UHI8  | -1.3552   |
| 105632 | Q2Q067 | Q5T7P6  | -1.0345   |
| 105633 | Q2Q067 | P61018  | -1.1137   |
| 105634 | Q2Q067 | P41968  | -1.0091   |
| 105635 | Q2Q067 | Q8IY82  | -0.50566  |
| 105636 | Q2Q067 | Q8IZF5  | -1.5126   |
| 105637 | Q2Q067 | Q9BTX7  | -0.67997  |
| 105638 | Q2Q067 | Q8TBY0  | -0.96284  |
| 105639 | Q2Q067 | P01621  | -1.1115   |
| 105640 | Q2Q067 | F5H4A9  | -1.0345   |

|        |        |        |           |
|--------|--------|--------|-----------|
| 105641 | Q2Q067 | A7E2Y1 | -0.892    |
| 105642 | Q2Q067 | Q2TAP0 | -0.33784  |
| 105643 | Q2Q067 | Q5TFE4 | -0.40827  |
| 105644 | Q2Q067 | P01611 | -1.1115   |
| 105645 | Q2Q067 | Q9ULZ1 | -0.75621  |
| 105646 | Q2Q067 | Q9NZH8 | -0.88372  |
| 105647 | Q2Q067 | Q8N7X1 | -0.96284  |
| 105648 | Q2Q067 | Q9NVA1 | -0.21529  |
| 105649 | Q2Q067 | P61081 | -0.21277  |
| 105650 | Q2Q067 | A0AVF1 | -0.51949  |
| 105651 | Q2Q067 | Q8N568 | -1.1512   |
| 105652 | Q2Q067 | O96005 | -0.80634  |
| 105653 | Q2Q067 | Q9Y3D6 | -0.23454  |
| 105654 | Q2Q067 | Q6WRX3 | -0.17173  |
| 105655 | Q2Q067 | Q8IWB7 | -0.22744  |
| 105656 | Q2Q067 | Q9H2S1 | -1.0373   |
| 105657 | Q2Q067 | P53985 | -0.67148  |
| 105658 | Q2Q067 | P61011 | -0.45824  |
| 105659 | Q2Q067 | C9JVW0 | -1.0345   |
| 105660 | Q2Q067 | Q8NGF4 | -1.4096   |
| 105661 | Q2Q067 | Q9H2A3 | -0.22801  |
| 105662 | Q2Q067 | Q6P179 | -1.3121   |
| 105663 | Q2Q067 | Q8NGL3 | -1.4096   |
| 105664 | Q2Q067 | Q9UNE2 | -0.317    |
| 105665 | Q2Q067 | P05026 | -0.55956  |
| 105666 | Q2Q067 | P43005 | -0.94525  |
| 105667 | Q2Q067 | Q11128 | -0.71775  |
| 105668 | Q2Q067 | Q75027 | -0.96625  |
| 105669 | Q2Q067 | P52961 | -0.74115  |
| 105670 | Q2Q067 | Q8N2G4 | -0.65821  |
| 105671 | Q2Q067 | Q3BBV0 | -0.20901  |
| 105672 | Q2Q067 | P55017 | -0.51147  |
| 105673 | Q2Q067 | P02748 | -1.2582   |
| 105674 | Q2Q067 | Q96D21 | -1.1828   |
| 105675 | Q2Q067 | Q99518 | -0.9241   |
| 105676 | Q2Q067 | A2A368 | -0.054539 |
| 105677 | Q2Q067 | P01127 | -0.27817  |
| 105678 | Q2Q067 | A8MW92 | -0.48451  |
| 105679 | Q2Q067 | Q96QR1 | -0.92434  |
| 105680 | Q2Q067 | P58173 | -1.4096   |
| 105681 | Q2Q067 | Q96MC2 | -0.1065   |
| 105682 | Q2Q067 | Q9NQN1 | -1.4096   |
| 105683 | Q2Q067 | A2RUS2 | -0.36766  |
| 105684 | Q2Q067 | Q8N431 | -0.82882  |
| 105685 | Q2Q067 | Q02818 | -0.45558  |
| 105686 | Q2Q067 | Q9Y5E7 | -1.3638   |
| 105687 | Q2Q067 | Q8N4C9 | -1.0345   |
| 105688 | Q2Q067 | P21397 | -0.7492   |
| 105689 | Q2Q067 | O95076 | -0.22739  |
| 105690 | Q2Q067 | Q86WW8 | -0.21265  |
| 105691 | Q2Q067 | C9JDP6 | -0.85798  |
| 105692 | Q2Q067 | Q15529 | -1.6361   |
| 105693 | Q2Q067 | Q4G163 | -0.18286  |
| 105694 | Q2Q067 | Q9BPU6 | -0.21956  |
| 105695 | Q2Q067 | Q96LT9 | -0.51726  |
| 105696 | Q2Q067 | Q9H0Q3 | -1.1364   |
| 105697 | Q2Q067 | Q9BZQ4 | -0.135    |
| 105698 | Q2Q067 | A8MTJ3 | -0.84077  |
| 105699 | Q2Q067 | Q9P1Z3 | -1.4489   |
| 105700 | Q2Q067 | P55774 | -0.77597  |
| 105701 | Q2Q067 | Q9H6Q4 | -0.20099  |
| 105702 | Q2Q067 | Q9H0F7 | -0.84528  |
| 105703 | Q2Q067 | P50479 | -0.22741  |
| 105704 | Q2Q067 | Q96QS6 | -1.3228   |
| 105705 | Q2Q067 | B5MCY1 | -0.4123   |
| 105706 | Q2Q067 | Q9H4W6 | -0.098658 |
| 105707 | Q2Q067 | O95922 | -0.22447  |
| 105708 | Q2Q067 | P22466 | -0.40981  |
| 105709 | Q2Q067 | Q6ZNG2 | -0.22731  |
| 105710 | Q2Q067 | A1YPR0 | -0.74229  |
| 105711 | Q2Q067 | Q68CP4 | -0.86376  |
| 105712 | Q2Q067 | Q9NQ9  | -0.49659  |
| 105713 | Q2Q067 | Q86YL5 | -0.24416  |
| 105714 | Q2Q067 | P85298 | -0.49923  |
| 105715 | Q2Q067 | P07477 | -1.5692   |
| 105716 | Q2Q067 | P46459 | -0.23074  |

|        |        |        |           |
|--------|--------|--------|-----------|
| 105717 | Q2Q067 | Q86Y34 | -1.5126   |
| 105718 | Q2Q067 | A6PVI3 | -0.91559  |
| 105719 | Q2Q067 | P10767 | -1.0505   |
| 105720 | Q85601 | P08218 | -1.3764   |
| 105721 | Q85601 | Q495M3 | -0.67341  |
| 105722 | Q85601 | P62699 | -0.49663  |
| 105723 | Q85601 | O00308 | -0.22742  |
| 105724 | Q85601 | Q96PE5 | -0.89654  |
| 105725 | Q85601 | Q9Y2K5 | -0.063332 |
| 105726 | Q85601 | O14958 | -0.48944  |
| 105727 | Q85601 | Q92564 | -0.18472  |
| 105728 | Q85601 | Q9NP62 | -0.15331  |
| 105729 | Q85601 | Q3LI63 | -0.2031   |
| 105730 | Q85601 | Q9Y644 | -1.0356   |
| 105731 | Q85601 | Q13889 | -0.61248  |
| 105732 | Q85601 | Q8N1G4 | -0.22768  |
| 105733 | Q85601 | Q9UN74 | -1.2846   |
| 105734 | Q85601 | P04118 | -0.78233  |
| 105735 | Q85601 | Q9NZN1 | -0.67548  |
| 105736 | Q85601 | Q8N3J3 | -0.43565  |
| 105737 | Q85601 | P67936 | -0.28574  |
| 105738 | Q85601 | P22792 | -0.85497  |
| 105739 | Q85601 | P04201 | -0.82798  |
| 105740 | Q85601 | Q13613 | -0.32353  |
| 105741 | Q85601 | Q9NUZ1 | -0.66942  |
| 105742 | Q85601 | Q3B7S5 | -0.92686  |
| 105743 | Q85601 | Q8NGZ5 | -1.2621   |
| 105744 | Q85601 | Q96GX8 | -0.092462 |
| 105745 | Q85601 | P57087 | -0.47421  |
| 105746 | Q85601 | P78423 | -0.58342  |
| 105747 | Q85601 | Q6GV28 | -0.95064  |
| 105748 | Q85601 | P0C7V0 | -0.2031   |
| 105749 | Q85601 | Q6PCB5 | -0.6658   |
| 105750 | Q85601 | Q9NUN7 | -0.40282  |
| 105751 | Q85601 | Q5TFE4 | -0.26641  |
| 105752 | Q85601 | Q9ULV0 | -0.17981  |
| 105753 | Q85601 | Q9H4L4 | -0.25178  |
| 105754 | Q85601 | Q7Z4K8 | -0.589    |
| 105755 | Q85601 | Q92833 | -0.26833  |
| 105756 | Q85601 | Q9UQC9 | -1.4803   |
| 105757 | Q85601 | O00155 | -1.4753   |
| 105758 | Q85601 | Q9NRR1 | -0.91605  |
| 105759 | Q85601 | P59095 | -0.63909  |
| 105760 | Q85601 | P53673 | -0.35063  |
| 105761 | Q85601 | Q9UMN6 | -0.22614  |
| 105762 | Q85601 | Q6AI39 | -0.041273 |
| 105763 | Q85601 | P29992 | -0.87697  |
| 105764 | Q85601 | P06889 | -1.046    |
| 105765 | Q85601 | Q16877 | -0.45514  |
| 105766 | Q85601 | Q13232 | -0.63863  |
| 105767 | Q85601 | A6NKC4 | -1.0139   |
| 105768 | Q85601 | Q9UHF1 | -1.1317   |
| 105769 | Q85601 | Q6ZUT1 | -0.2031   |
| 105770 | Q85601 | P0C874 | -0.92686  |
| 105771 | Q85601 | P14091 | -0.57628  |
| 105772 | Q85601 | Q15612 | -1.0567   |
| 105773 | Q85601 | A6NFU0 | -0.92686  |
| 105774 | Q85601 | Q86UF4 | -0.86007  |
| 105775 | Q85601 | Q52LW3 | -0.87398  |
| 105776 | Q85601 | Q7RTS1 | -0.2278   |
| 105777 | Q85601 | Q9NSU2 | -0.32249  |
| 105778 | Q85601 | Q43508 | -1.0337   |
| 105779 | Q85601 | Q8N8K9 | -0.28324  |
| 105780 | Q85601 | Q8NGE2 | -1.2621   |
| 105781 | Q85601 | A6NI15 | -0.22742  |
| 105782 | Q85601 | P21549 | -0.20942  |
| 105783 | Q85601 | Q15904 | -0.89387  |
| 105784 | Q85601 | Q70CQ4 | -0.66238  |
| 105785 | Q85601 | Q15477 | -0.29865  |
| 105786 | Q85601 | Q13115 | -0.23645  |
| 105787 | Q85601 | P32121 | -0.47653  |
| 105788 | Q85601 | P02462 | -0.54899  |
| 105789 | Q85601 | Q86UY6 | -0.35034  |
| 105790 | Q85601 | Q68BL7 | -0.90914  |
| 105791 | Q85601 | Q9NQ60 | -0.80452  |
| 105792 | Q85601 | P07288 | -0.91924  |

|        |        |        |           |
|--------|--------|--------|-----------|
| 105793 | Q85601 | P50406 | -0.9474   |
| 105794 | Q85601 | A6NGZ8 | -1.0386   |
| 105795 | Q85601 | Q8WXH4 | -0.58286  |
| 105796 | Q85601 | P24387 | -0.52443  |
| 105797 | Q85601 | Q2TAL5 | -0.22868  |
| 105798 | Q85601 | Q8TBM8 | -1.0002   |
| 105799 | Q85601 | Q9P2E5 | -0.46444  |
| 105800 | Q85601 | Q9Y6R9 | -0.13417  |
| 105801 | Q85601 | Q9P2E2 | -0.25553  |
| 105802 | Q85601 | O60676 | -0.70802  |
| 105803 | Q85601 | Q96FZ5 | -0.95476  |
| 105804 | Q85601 | Q96GE9 | -0.92686  |
| 105805 | Q85601 | P04818 | -0.14872  |
| 105806 | Q85601 | Q86XA0 | -0.82309  |
| 105807 | Q85601 | O75179 | -0.22765  |
| 105808 | Q85601 | P28330 | -0.3366   |
| 105809 | Q85601 | Q9NWZ3 | -0.22733  |
| 105810 | Q85601 | Q6UX65 | -0.80316  |
| 105811 | Q85601 | P34903 | -0.84241  |
| 105812 | Q85601 | P08574 | -0.30895  |
| 105813 | Q85601 | Q9BYT3 | -0.71012  |
| 105814 | Q85601 | Q02809 | -0.72306  |
| 105815 | Q85601 | Q16570 | -1.2182   |
| 105816 | Q85601 | Q96K83 | -0.31137  |
| 105817 | Q85601 | Q9UPU3 | -0.92143  |
| 105818 | Q85601 | P07919 | -0.63256  |
| 105819 | Q85601 | Q9Y2B2 | -0.84056  |
| 105820 | Q85601 | Q99797 | -0.42844  |
| 105821 | Q85601 | P39210 | -0.60986  |
| 105822 | Q85601 | O95455 | -1.007    |
| 105823 | Q85601 | Q86X10 | -0.82891  |
| 105824 | Q85601 | Q92854 | -0.55416  |
| 105825 | Q85601 | Q8NGC8 | -1.2621   |
| 105826 | Q85601 | Q9BYS8 | -0.74179  |
| 105827 | Q85601 | P31995 | -0.24011  |
| 105828 | Q85601 | P55064 | -0.52217  |
| 105829 | Q85601 | P10323 | -0.87433  |
| 105830 | Q85601 | P01701 | -1.046    |
| 105831 | Q85601 | Q641Q2 | -0.47698  |
| 105832 | Q85601 | Q5SRR4 | -0.9043   |
| 105833 | Q85601 | Q8IZF0 | -0.99216  |
| 105834 | Q85601 | Q9H9Y4 | -0.77201  |
| 105835 | Q85601 | P55786 | -0.34893  |
| 105836 | Q85601 | P01703 | -1.046    |
| 105837 | Q85601 | Q96PE1 | -1.2039   |
| 105838 | Q85601 | Q8WU66 | -0.79186  |
| 105839 | Q85601 | Q70EL4 | -0.66238  |
| 105840 | Q85601 | A8MU46 | -0.22978  |
| 105841 | Q85601 | Q9Y2Z4 | -0.17803  |
| 105842 | Q85601 | Q68DC2 | -0.22746  |
| 105843 | Q85601 | O95822 | -0.39361  |
| 105844 | Q85601 | Q3LI77 | -0.22404  |
| 105845 | Q85601 | Q9NS93 | -1.0386   |
| 105846 | Q85601 | P57054 | -0.87496  |
| 105847 | Q85601 | P00374 | -0.16145  |
| 105848 | Q85601 | Q96MH6 | -0.97206  |
| 105849 | Q85601 | Q8NGL7 | -1.2621   |
| 105850 | Q85601 | Q6PIV7 | -0.69716  |
| 105851 | Q85601 | Q9NS67 | -1.3443   |
| 105852 | Q85601 | O43567 | -0.58745  |
| 105853 | Q85601 | O60760 | -0.22645  |
| 105854 | Q85601 | P02729 | -0.7935   |
| 105855 | Q85601 | Q8WTQ7 | -1.357    |
| 105856 | Q85601 | P32019 | -0.37964  |
| 105857 | Q85601 | Q9Y5U2 | -0.096614 |
| 105858 | Q85601 | P40200 | -1.358    |
| 105859 | Q85601 | O14520 | -0.60305  |
| 105860 | Q85601 | Q8NHB7 | -1.2621   |
| 105861 | Q85601 | Q05BU3 | -0.2031   |
| 105862 | Q85601 | P30048 | -0.21288  |
| 105863 | Q85601 | Q14789 | -0.14947  |
| 105864 | Q85601 | Q8IVV2 | -0.53032  |
| 105865 | Q85601 | Q8IY33 | -0.22744  |
| 105866 | Q85601 | Q9H672 | -0.58286  |
| 105867 | Q85601 | Q4AC99 | -0.41799  |
| 105868 | Q85601 | Q8NGW6 | -1.2621   |

|        |        |        |           |
|--------|--------|--------|-----------|
| 105869 | Q85601 | P59533 | -1.2301   |
| 105870 | Q85601 | P00973 | -0.39184  |
| 105871 | Q85601 | P07766 | -0.70435  |
| 105872 | Q85601 | P20794 | -0.22637  |
| 105873 | Q85601 | Q9H3S5 | -0.85407  |
| 105874 | Q85601 | Q14573 | -0.22667  |
| 105875 | Q85601 | P21462 | -0.98185  |
| 105876 | Q85601 | Q96S16 | -0.092241 |
| 105877 | Q85601 | Q9NVL8 | -0.98353  |
| 105878 | Q85601 | Q7Z5M8 | -0.27951  |
| 105879 | Q85601 | P07478 | -0.94375  |
| 105880 | Q85601 | O94777 | -0.33193  |
| 105881 | Q85601 | Q9H0W5 | -0.47705  |
| 105882 | Q85601 | Q9NR81 | -0.45402  |
| 105883 | Q85601 | O75131 | -0.22895  |
| 105884 | Q85601 | Q05925 | -0.22734  |
| 105885 | Q85601 | Q6UXH1 | -0.29724  |
| 105886 | Q85601 | Q8IWZ4 | -0.589    |
| 105887 | Q85601 | Q13007 | -0.85345  |
| 105888 | Q85601 | P59541 | -1.2301   |
| 105889 | Q85601 | Q96005 | -0.73673  |
| 105890 | Q85601 | P80421 | -0.92206  |
| 105891 | Q85601 | Q9GZP1 | -0.94173  |
| 105892 | Q85601 | A6NNW6 | -0.13227  |
| 105893 | Q85601 | Q9NP90 | -0.42958  |
| 105894 | Q85601 | P05162 | -0.32846  |
| 105895 | Q85601 | P25100 | -1.2244   |
| 105896 | Q85601 | P29218 | -0.24947  |
| 105897 | Q85601 | Q8NHS1 | -0.92686  |
| 105898 | Q85601 | P16499 | -0.4837   |
| 105899 | Q85601 | P0DJ93 | -0.92686  |
| 105900 | Q85601 | Q5VSD8 | -0.37351  |
| 105901 | Q85601 | Q9NXG2 | -0.38907  |
| 105902 | Q85601 | O75563 | -0.34957  |
| 105903 | Q85601 | Q02383 | -0.77291  |
| 105904 | Q85601 | Q70CQ3 | -0.98387  |
| 105905 | Q85601 | Q96CX6 | -0.23214  |
| 105906 | Q85601 | Q0D2K5 | -0.23377  |
| 105907 | Q85601 | P55316 | -0.43379  |
| 105908 | Q85601 | P41440 | -0.76549  |
| 105909 | Q85601 | P00709 | -0.95892  |
| 105910 | Q85601 | Q9NZ72 | -0.114    |
| 105911 | Q85601 | Q5T2N8 | -0.9668   |
| 105912 | Q85601 | Q9UDX3 | -1.128    |
| 105913 | Q85601 | Q96MF4 | -0.43048  |
| 105914 | Q85601 | Q96MM6 | -0.81985  |
| 105915 | Q85601 | O00587 | -0.88819  |
| 105916 | Q85601 | Q9Y366 | -0.27254  |
| 105917 | Q85601 | Q9BRS2 | -1.1587   |
| 105918 | Q85601 | P60891 | -0.45889  |
| 105919 | Q85601 | Q9H0C1 | -0.589    |
| 105920 | Q85601 | Q8IXB1 | -0.37884  |
| 105921 | Q85601 | Q8NDD1 | -0.067507 |
| 105922 | Q85601 | Q8N7X0 | -0.71975  |
| 105923 | Q85601 | Q9NZH0 | -0.61028  |
| 105924 | Q85601 | Q5GH76 | -0.92686  |
| 105925 | Q85601 | P15515 | -0.30491  |
| 105926 | Q85601 | Q9Y3X0 | -0.11254  |
| 105927 | Q85601 | Q96BM9 | -0.53751  |
| 105928 | Q85601 | O60344 | -0.90047  |
| 105929 | Q85601 | A2RUB1 | -0.092462 |
| 105930 | Q85601 | A8MV81 | -0.92686  |
| 105931 | Q85601 | P24310 | -0.72835  |
| 105932 | Q85601 | Q99442 | -0.71323  |
| 105933 | Q85601 | Q9NX62 | -0.673    |
| 105934 | Q85601 | Q9H5I5 | -0.99407  |
| 105935 | Q85601 | Q69YL0 | -0.2031   |
| 105936 | Q85601 | Q8N159 | -0.080367 |
| 105937 | Q85601 | B2RTY4 | -1.0059   |
| 105938 | Q85601 | Q149M9 | -0.81985  |
| 105939 | Q85601 | A4D1P6 | -0.22746  |
| 105940 | Q85601 | Q9Y5G9 | -1.2966   |
| 105941 | Q85601 | O94810 | -0.53807  |
| 105942 | Q85601 | Q6PCT2 | -0.39002  |
| 105943 | Q85601 | P15692 | -0.30428  |
| 105944 | Q85601 | O95180 | -0.7792   |

|        |        |        |          |
|--------|--------|--------|----------|
| 105945 | Q85601 | A8MUH7 | -0.2316  |
| 105946 | Q85601 | O43749 | -1.2621  |
| 105947 | Q85601 | P98161 | -0.28991 |
| 105948 | Q85601 | Q9H3S4 | -0.44557 |
| 105949 | Q85601 | P56381 | -0.36135 |
| 105950 | Q85601 | Q86WN1 | -0.22739 |
| 105951 | Q85601 | P00751 | -1.3192  |
| 105952 | Q85601 | O95631 | -0.22741 |
| 105953 | Q85601 | A8MT33 | -0.30595 |
| 105954 | Q85601 | Q969T7 | -0.22862 |
| 105955 | Q85601 | Q4G0N4 | -0.40782 |
| 105956 | Q85601 | P51864 | -0.61813 |
| 105957 | Q85601 | P30542 | -0.38645 |
| 105958 | Q85601 | Q6UWB1 | -1.0087  |
| 105959 | Q85601 | Q9NVQ4 | -0.90638 |
| 105960 | Q85601 | Q86WC6 | -0.22741 |
| 105961 | Q85601 | O43292 | -1.1489  |
| 105962 | Q85601 | P15311 | -0.23599 |
| 105963 | Q85601 | O60256 | -0.29131 |
| 105964 | Q85601 | P79483 | -0.81574 |
| 105965 | Q85601 | Q6NUT3 | -0.86355 |
| 105966 | Q85601 | Q6UX82 | -0.58208 |
| 105967 | Q85601 | P0C1S8 | -0.41935 |
| 105968 | Q85601 | Q92777 | -0.5324  |
| 105969 | Q85601 | Q04828 | -0.22688 |
| 105970 | Q85601 | Q14847 | -0.22741 |
| 105971 | Q85601 | P55107 | -0.72136 |
| 105972 | Q85601 | Q9Y2G8 | -1.0044  |
| 105973 | Q85601 | Q96IZ2 | -1.0386  |
| 105974 | Q85601 | A1KZ92 | -0.85045 |
| 105975 | Q85601 | Q86XR2 | -0.44245 |
| 105976 | Q85601 | Q9NQV8 | -0.44859 |
| 105977 | Q85601 | Q9P1Q5 | -1.2621  |
| 105978 | Q85601 | Q96F85 | -0.41739 |
| 105979 | Q85601 | P09172 | -0.47202 |
| 105980 | Q85601 | O15119 | -0.50118 |
| 105981 | Q85601 | P30533 | -0.76162 |
| 105982 | Q85601 | Q96H15 | -0.92686 |
| 105983 | Q85601 | Q9Y2K7 | -0.22495 |
| 105984 | Q85601 | Q9H8M9 | -1.161   |
| 105985 | Q85601 | Q495N2 | -0.92686 |
| 105986 | Q85601 | Q8TAG5 | -0.9043  |
| 105987 | Q85601 | Q8NHC5 | -1.2621  |
| 105988 | Q85601 | Q8IV32 | -0.1805  |
| 105989 | Q85601 | Q96PY5 | -0.22624 |
| 105990 | Q85601 | O95665 | -1.3897  |
| 105991 | Q85601 | Q5JXX7 | -0.92686 |
| 105992 | Q85601 | Q9HCE9 | -1.0877  |
| 105993 | Q85601 | Q13536 | -0.2031  |
| 105994 | Q85601 | P02649 | -0.26386 |
| 105995 | Q85601 | Q9UPE1 | -1.1502  |
| 105996 | Q85601 | O75417 | -0.53554 |
| 105997 | Q85601 | Q9UBR2 | -0.84894 |
| 105998 | Q85601 | D6RJB6 | -0.66238 |
| 105999 | Q85601 | Q9H2J1 | -0.22152 |
| 106000 | Q85601 | O95870 | -0.85273 |
| 106001 | Q85601 | Q7Z5N4 | -1.11    |
| 106002 | Q85601 | Q9H1C3 | -0.93858 |
| 106003 | Q85601 | Q8N0U2 | -0.92686 |
| 106004 | Q85601 | Q9UBT2 | -0.21134 |
| 106005 | Q85601 | P62685 | -0.28681 |
| 106006 | Q85601 | Q14142 | -0.32532 |
| 106007 | Q85601 | P60059 | -0.58102 |
| 106008 | Q85601 | P0C853 | -0.2031  |
| 106009 | Q85601 | Q99959 | -0.18905 |
| 106010 | Q85601 | Q96DU3 | -1.0482  |
| 106011 | Q85601 | Q9Y4W6 | -0.62303 |
| 106012 | Q85601 | Q8NGR2 | -1.2621  |
| 106013 | Q85601 | Q5T5P2 | -0.24419 |
| 106014 | Q85601 | Q8N442 | -0.68131 |
| 106015 | Q85601 | Q96QE4 | -0.67921 |
| 106016 | Q85601 | P11511 | -0.3515  |
| 106017 | Q85601 | Q8TCB7 | -0.30175 |
| 106018 | Q85601 | P52952 | -0.32495 |
| 106019 | Q85601 | Q96QV6 | -0.7417  |
| 106020 | Q85601 | P22314 | -0.21346 |



|        |        |        |           |
|--------|--------|--------|-----------|
| 106021 | Q85601 | Q9NP59 | -0.38098  |
| 106022 | Q85601 | Q9Y694 | -1.0303   |
| 106023 | Q85601 | Q07627 | -0.50533  |
| 106024 | Q85601 | Q9BSR8 | -0.74274  |
| 106025 | Q85601 | Q96A25 | -0.67993  |
| 106026 | Q85601 | Q8N8N0 | -0.95663  |
| 106027 | Q85601 | Q8IYD2 | -0.22529  |
| 106028 | Q85601 | I6L899 | -0.26553  |
| 106029 | Q85601 | Q9Y487 | -0.30707  |
| 106030 | Q85601 | P51809 | -0.2139   |
| 106031 | Q85601 | Q96KK4 | -1.2621   |
| 106032 | Q85601 | Q8NDZ6 | -0.92686  |
| 106033 | Q85601 | Q96PY0 | -0.76951  |
| 106034 | Q85601 | P22680 | -0.66458  |
| 106035 | Q85601 | Q5GFL6 | -1.0248   |
| 106036 | Q85601 | Q9BYW3 | -0.81755  |
| 106037 | Q85601 | Q14508 | -1.0224   |
| 106038 | Q85601 | Q8TEA7 | -1.1082   |
| 106039 | Q85601 | Q8NG76 | -1.2621   |
| 106040 | Q85601 | O00592 | -0.99317  |
| 106041 | Q85601 | Q49MI3 | -0.4817   |
| 106042 | Q85601 | Q8IZ02 | -0.22741  |
| 106043 | Q85601 | Q9BYR9 | -0.53399  |
| 106044 | Q85601 | Q13316 | -0.32098  |
| 106045 | Q85601 | Q8N6R0 | -0.38771  |
| 106046 | Q85601 | Q9BX51 | -0.31113  |
| 106047 | Q85601 | P09543 | -0.39339  |
| 106048 | Q85601 | P49675 | -0.40465  |
| 106049 | Q85601 | Q92186 | -0.38253  |
| 106050 | Q85601 | O75355 | -1.2345   |
| 106051 | Q85601 | Q6IEU7 | -1.2621   |
| 106052 | Q85601 | Q6ZVM7 | -0.3095   |
| 106053 | Q85601 | Q7Z5H4 | -1.2768   |
| 106054 | Q85601 | Q8NCS7 | -0.83997  |
| 106055 | Q85601 | P0CW20 | -0.29575  |
| 106056 | Q85601 | O75352 | -0.79228  |
| 106057 | Q85601 | Q9HCC8 | -0.64739  |
| 106058 | Q85601 | P22004 | -0.58595  |
| 106059 | Q85601 | P42345 | -0.32184  |
| 106060 | Q85601 | P0DJJ8 | -1.1749   |
| 106061 | Q85601 | A6NHG4 | -0.20806  |
| 106062 | Q85601 | A6NCL7 | -0.22742  |
| 106063 | Q85601 | Q8TE12 | -0.2319   |
| 106064 | Q85601 | P34810 | -0.96323  |
| 106065 | Q85601 | P30460 | -1.1574   |
| 106066 | Q85601 | Q07325 | -1.1017   |
| 106067 | Q85601 | Q8NF50 | -0.32829  |
| 106068 | Q85601 | P30926 | -0.8392   |
| 106069 | Q85601 | Q14005 | -0.33294  |
| 106070 | Q85601 | Q9ULY5 | -0.9445   |
| 106071 | Q85601 | P0C5Y4 | -0.27098  |
| 106072 | Q85601 | Q9Y6H6 | -0.92405  |
| 106073 | Q85601 | Q8IZA3 | -0.37781  |
| 106074 | Q85601 | P51452 | -0.28085  |
| 106075 | Q85601 | P34998 | -0.65796  |
| 106076 | Q85601 | Q6PKH6 | -1.5893   |
| 106077 | Q85601 | Q02952 | -0.26191  |
| 106078 | Q85601 | Q8IX29 | -0.20994  |
| 106079 | Q85601 | Q96L03 | -0.22028  |
| 106080 | Q85601 | P49916 | -0.22137  |
| 106081 | Q85601 | Q14050 | -0.80995  |
| 106082 | Q85601 | P20020 | -0.70341  |
| 106083 | Q85601 | Q96C12 | -0.14664  |
| 106084 | Q85601 | P78362 | -0.49656  |
| 106085 | Q85601 | Q9NRJ5 | -0.19706  |
| 106086 | Q85601 | B4DJY2 | -0.92669  |
| 106087 | Q85601 | Q9HBG4 | -0.41935  |
| 106088 | Q85601 | Q8TCT8 | -0.65423  |
| 106089 | Q85601 | Q92622 | -0.32699  |
| 106090 | Q85601 | Q9HA90 | -0.092462 |
| 106091 | Q85601 | Q96P26 | -0.3062   |
| 106092 | Q85601 | Q96EB6 | -0.64218  |
| 106093 | Q85601 | B7Z8K6 | -0.92686  |
| 106094 | Q85601 | Q96RN1 | -0.59938  |
| 106095 | Q85601 | Q04743 | -0.2264   |
| 106096 | Q85601 | Q8NGE0 | -1.2621   |

|        |        |        |           |
|--------|--------|--------|-----------|
| 106097 | Q85601 | Q7Z4V0 | -0.2274   |
| 106098 | Q85601 | P10316 | -0.93461  |
| 106099 | Q85601 | P18084 | -0.96686  |
| 106100 | Q85601 | Q96S86 | -1.1027   |
| 106101 | Q85601 | Q8IWZ5 | -0.589    |
| 106102 | Q85601 | Q96MC6 | -0.94066  |
| 106103 | Q85601 | A6NL99 | -0.85197  |
| 106104 | Q85601 | P48029 | -0.7445   |
| 106105 | Q85601 | Q96S15 | -0.40558  |
| 106106 | Q85601 | Q9Y2A0 | -0.19746  |
| 106107 | Q85601 | Q8NAB5 | -0.2031   |
| 106108 | Q85601 | Q86YL5 | -0.18472  |
| 106109 | Q85601 | P05408 | -0.52522  |
| 106110 | Q85601 | Q9HAP6 | -0.19028  |
| 106111 | Q85601 | Q6U841 | -0.82712  |
| 106112 | Q85601 | Q8N6N6 | -0.34306  |
| 106113 | Q85601 | Q71RC9 | -0.92686  |
| 106114 | Q85601 | Q96QT4 | -1.3035   |
| 106115 | Q85601 | Q9NXS3 | -0.18595  |
| 106116 | Q85601 | Q6PEV8 | -0.23604  |
| 106117 | Q85601 | Q15457 | -0.41454  |
| 106118 | Q85601 | Q16853 | -1.1063   |
| 106119 | Q85601 | Q9NXL9 | -0.43824  |
| 106120 | Q85601 | Q96IG2 | -0.22615  |
| 106121 | Q85601 | Q5T4T1 | -0.92686  |
| 106122 | Q85601 | Q13637 | -0.82683  |
| 106123 | Q85601 | Q8WWU5 | -1.2433   |
| 106124 | Q85601 | P54821 | -0.22212  |
| 106125 | Q85601 | P0C5Y9 | -0.75938  |
| 106126 | Q85601 | A8K979 | -0.61517  |
| 106127 | Q85601 | Q08188 | -0.44239  |
| 106128 | Q85601 | Q8NFK1 | -0.95692  |
| 106129 | Q85601 | Q8IVK1 | -0.45541  |
| 106130 | Q85601 | P14867 | -0.82183  |
| 106131 | Q85601 | Q7Z2K8 | -0.74011  |
| 106132 | Q85601 | P28476 | -0.94187  |
| 106133 | Q85601 | A6NEK1 | -0.49132  |
| 106134 | Q85601 | Q9HBU6 | -0.67255  |
| 106135 | Q85601 | P12235 | -0.23943  |
| 106136 | Q85601 | Q96LD1 | -0.54911  |
| 106137 | Q85601 | Q15056 | -0.22713  |
| 106138 | Q85601 | Q6IQ26 | -0.26137  |
| 106139 | Q85601 | P51172 | -0.57087  |
| 106140 | Q85601 | Q9HC35 | -0.59222  |
| 106141 | Q85601 | Q95988 | -0.33389  |
| 106142 | Q85601 | P12643 | -0.22741  |
| 106143 | Q85601 | Q14CB8 | -0.74396  |
| 106144 | Q85601 | Q8NGY9 | -1.1204   |
| 106145 | Q85601 | Q9Y320 | -0.6939   |
| 106146 | Q85601 | Q9GZX9 | -0.92075  |
| 106147 | Q85601 | Q9Y216 | -0.26508  |
| 106148 | Q85601 | Q13103 | -0.84351  |
| 106149 | Q85601 | E5RG02 | -0.88468  |
| 106150 | Q85601 | Q4VC05 | -0.17055  |
| 106151 | Q85601 | P38405 | -0.96764  |
| 106152 | Q85601 | P11836 | -0.95698  |
| 106153 | Q85601 | Q8NB91 | -0.58404  |
| 106154 | Q85601 | Q96A22 | -0.32331  |
| 106155 | Q85601 | Q96FQ7 | -0.52163  |
| 106156 | Q85601 | Q13087 | -0.3033   |
| 106157 | Q85601 | Q17R60 | -1.0308   |
| 106158 | Q85601 | H3BU77 | -0.039332 |
| 106159 | Q85601 | Q2TVT3 | -0.30184  |
| 106160 | Q85601 | Q96HF1 | -0.28177  |
| 106161 | Q85601 | Q8WU79 | -0.1298   |
| 106162 | Q85601 | Q9BY15 | -1.806    |
| 106163 | Q85601 | P0CG21 | -0.22638  |
| 106164 | Q85601 | Q5JXA9 | -0.92686  |
| 106165 | Q85601 | Q7Z5L2 | -0.82516  |
| 106166 | Q85601 | Q6ZWK6 | -1.8812   |
| 106167 | Q85601 | P04637 | -0.22033  |
| 106168 | Q85601 | Q6ZMY3 | -0.2512   |
| 106169 | Q85601 | Q75324 | -0.73795  |
| 106170 | Q85601 | Q9BV29 | -0.40562  |
| 106171 | Q85601 | Q8N3Z3 | -0.84242  |
| 106172 | Q85601 | Q14654 | -0.84077  |

|        |        |        |           |
|--------|--------|--------|-----------|
| 106173 | Q85601 | Q5VTJ3 | -0.92686  |
| 106174 | Q85601 | Q8IZD6 | -0.9396   |
| 106175 | Q85601 | P0C7P3 | -0.81985  |
| 106176 | Q85601 | P62942 | -0.22862  |
| 106177 | Q85601 | Q9BXB4 | -0.74313  |
| 106178 | Q85601 | P33176 | -0.24294  |
| 106179 | Q85601 | O14836 | -0.91232  |
| 106180 | Q85601 | Q8IXH8 | -1.246    |
| 106181 | Q85601 | P35663 | -0.37901  |
| 106182 | Q85601 | Q8NBN7 | -1.1015   |
| 106183 | Q85601 | Q7Z7J9 | -0.53745  |
| 106184 | Q85601 | Q8IVU9 | -0.40114  |
| 106185 | Q85601 | Q8NH50 | -1.2621   |
| 106186 | Q85601 | Q4KMG0 | -0.31605  |
| 106187 | Q85601 | Q86WA6 | -0.19794  |
| 106188 | Q85601 | Q9UKS7 | -0.36997  |
| 106189 | Q85601 | Q16647 | -0.2276   |
| 106190 | Q85601 | Q96LW4 | -0.35235  |
| 106191 | Q85601 | P46093 | -1.4753   |
| 106192 | Q85601 | Q8WU58 | -0.35323  |
| 106193 | Q85601 | P19087 | -0.87156  |
| 106194 | Q85601 | P28329 | -0.21836  |
| 106195 | Q85601 | Q7L8L6 | -0.2899   |
| 106196 | Q85601 | Q9UL62 | -0.49637  |
| 106197 | Q85601 | Q12860 | -0.49281  |
| 106198 | Q85601 | Q6ZRR5 | -0.92686  |
| 106199 | Q85601 | Q8IV50 | -0.31917  |
| 106200 | Q85601 | Q96H72 | -0.54931  |
| 106201 | Q85601 | O15488 | -0.075171 |
| 106202 | Q85601 | Q5M8T2 | -0.80224  |
| 106203 | Q85601 | Q03403 | -0.3251   |
| 106204 | Q85601 | O15484 | -1.0297   |
| 106205 | Q85601 | P80108 | -0.47756  |
| 106206 | Q85601 | Q13046 | -0.91419  |
| 106207 | Q85601 | Q4G0N0 | -0.52326  |
| 106208 | Q85601 | Q02108 | -0.59016  |
| 106209 | Q85601 | P33908 | -0.65272  |
| 106210 | Q85601 | Q8N4N8 | -0.35741  |
| 106211 | Q85601 | O75578 | -1.0408   |
| 106212 | Q85601 | Q9P2F6 | -1.1208   |
| 106213 | Q85601 | Q9Y639 | -0.89026  |
| 106214 | Q85601 | Q6ZR54 | -0.2031   |
| 106215 | Q85601 | P11234 | -0.31054  |
| 106216 | Q85601 | Q9NUB1 | -0.30796  |
| 106217 | Q85601 | Q8NE28 | -1.033    |
| 106218 | Q85601 | P63211 | -0.75699  |
| 106219 | Q85601 | Q9UQP3 | -1.0157   |
| 106220 | Q85601 | Q9H5Y0 | -0.1796   |
| 106221 | Q85601 | O76002 | -1.2621   |
| 106222 | Q85601 | P21730 | -1.2206   |
| 106223 | Q85601 | Q8N146 | -1.2621   |
| 106224 | Q85601 | O75845 | -0.92451  |
| 106225 | Q85601 | Q8IYB0 | -0.2031   |
| 106226 | Q85601 | P51153 | -0.51556  |
| 106227 | Q85601 | Q99581 | -0.085628 |
| 106228 | Q85601 | P08567 | -0.22741  |
| 106229 | Q85601 | Q9NYW3 | -1.1294   |
| 106230 | Q85601 | Q5JX69 | -1.1089   |
| 106231 | Q85601 | Q8N4A0 | -0.51495  |
| 106232 | Q85601 | Q8NH74 | -1.2621   |
| 106233 | Q85601 | Q92523 | -0.67053  |
| 106234 | Q85601 | Q8IYU4 | -0.055112 |
| 106235 | Q85601 | Q5T754 | -0.31607  |
| 106236 | Q85601 | Q8TDE3 | -0.79088  |
| 106237 | Q85601 | P11509 | -0.67385  |
| 106238 | Q85601 | Q2HXU8 | -1.0252   |
| 106239 | Q85601 | Q9Y3C8 | -0.6001   |
| 106240 | Q85601 | Q9P2P1 | -0.64916  |
| 106241 | Q85601 | O75354 | -1.0972   |
| 106242 | Q85601 | Q03692 | -1.0418   |
| 106243 | Q85601 | P46089 | -1.413    |
| 106244 | Q85601 | Q9Y3Q3 | -0.47288  |
| 106245 | Q85601 | Q07011 | -0.99686  |
| 106246 | Q85601 | O94827 | -0.41166  |
| 106247 | Q85601 | P56179 | -0.22353  |
| 106248 | Q85601 | Q8IZ81 | -0.68269  |

|        |        |        |           |
|--------|--------|--------|-----------|
| 106249 | Q85601 | Q9UK97 | -0.36484  |
| 106250 | Q85601 | Q8IYA7 | -0.26071  |
| 106251 | Q85601 | P17707 | -0.2011   |
| 106252 | Q85601 | Q8NF86 | -1.4031   |
| 106253 | Q85601 | Q9NS75 | -1.2101   |
| 106254 | Q85601 | P19438 | -0.353    |
| 106255 | Q85601 | Q14191 | -0.22706  |
| 106256 | Q85601 | Q05996 | -1.0753   |
| 106257 | Q85601 | Q5VST6 | -0.85016  |
| 106258 | Q85601 | P07711 | -0.49065  |
| 106259 | Q85601 | Q9UP65 | -0.731    |
| 106260 | Q85601 | Q15393 | -0.14405  |
| 106261 | Q85601 | A0MZ66 | -0.54207  |
| 106262 | Q85601 | Q8NGY5 | -1.2621   |
| 106263 | Q85601 | P30498 | -1.1017   |
| 106264 | Q85601 | P00505 | -0.20689  |
| 106265 | Q85601 | Q9BZM1 | -0.66859  |
| 106266 | Q85601 | B0I1T2 | -0.69193  |
| 106267 | Q85601 | P63119 | -0.64385  |
| 106268 | Q85601 | Q96M96 | -0.87482  |
| 106269 | Q85601 | Q95497 | -0.73078  |
| 106270 | Q85601 | P0DJDO | -0.46976  |
| 106271 | Q85601 | P01033 | -0.3666   |
| 106272 | Q85601 | O43347 | -0.38098  |
| 106273 | Q85601 | Q15283 | -0.32889  |
| 106274 | Q85601 | Q7L211 | -0.85273  |
| 106275 | Q85601 | Q8NH95 | -1.2621   |
| 106276 | Q85601 | Q13445 | -0.30762  |
| 106277 | Q85601 | O75715 | -1.2005   |
| 106278 | Q85601 | Q13702 | -0.22701  |
| 106279 | Q85601 | Q8NH94 | -1.2621   |
| 106280 | Q85601 | A8MPP1 | -0.43509  |
| 106281 | Q85601 | P04626 | -0.23193  |
| 106282 | Q85601 | Q5T0U0 | -0.01583  |
| 106283 | Q85601 | P15918 | -0.22663  |
| 106284 | Q85601 | Q92911 | -0.70162  |
| 106285 | Q85601 | P31512 | -1.1307   |
| 106286 | Q85601 | O00421 | -1.3941   |
| 106287 | Q85601 | P36222 | -0.51052  |
| 106288 | Q85601 | Q96AC1 | -0.22748  |
| 106289 | Q85601 | Q86VD9 | -0.9163   |
| 106290 | Q85601 | Q99828 | -0.22724  |
| 106291 | Q85601 | Q8TDV2 | -1.3443   |
| 106292 | Q85601 | Q8N5H3 | -0.092462 |
| 106293 | Q85601 | Q9Y5Q0 | -0.96825  |
| 106294 | Q85601 | Q693B1 | -0.10932  |
| 106295 | Q85601 | Q8NH92 | -1.2621   |
| 106296 | Q85601 | Q9NQR7 | -0.2031   |
| 106297 | Q85601 | P35228 | -0.31056  |
| 106298 | Q85601 | Q8TAI1 | -0.25231  |
| 106299 | Q85601 | P20339 | -0.57708  |
| 106300 | Q85601 | A8MYB1 | -0.92686  |
| 106301 | Q85601 | Q00341 | -0.31208  |
| 106302 | Q85601 | P09105 | -0.27381  |
| 106303 | Q85601 | Q9GIY3 | -0.68895  |
| 106304 | Q85601 | P16190 | -0.93461  |
| 106305 | Q85601 | Q9Y276 | -0.58218  |
| 106306 | Q85601 | Q96M60 | -0.64992  |
| 106307 | Q85601 | P49736 | -0.20081  |
| 106308 | Q85601 | P03928 | -0.4901   |
| 106309 | Q85601 | Q15118 | -0.63543  |
| 106310 | Q85601 | A1L162 | -0.65802  |
| 106311 | Q85601 | O00254 | -1.0651   |
| 106312 | Q85601 | Q6ZUC2 | -0.45453  |
| 106313 | Q85601 | Q68DL7 | -0.2031   |
| 106314 | Q85601 | Q15391 | -1.273    |
| 106315 | Q85601 | P61570 | -0.7596   |
| 106316 | Q85601 | Q5JW98 | -0.92686  |
| 106317 | Q85601 | O43930 | -1.2086   |
| 106318 | Q85601 | Q9NR96 | -0.54499  |
| 106319 | Q85601 | P14735 | -0.2565   |
| 106320 | Q85601 | O95965 | -1.0352   |
| 106321 | Q85601 | O60829 | -0.18472  |
| 106322 | Q85601 | Q96LV5 | -0.098964 |
| 106323 | Q85601 | Q92537 | -0.67993  |
| 106324 | Q85601 | Q9NNX1 | -0.86448  |

|        |        |        |           |
|--------|--------|--------|-----------|
| 106325 | Q85601 | Q8N4P3 | -0.43731  |
| 106326 | Q85601 | A0PJW6 | -0.75013  |
| 106327 | Q85601 | A1A519 | -0.589    |
| 106328 | Q85601 | Q8N2K0 | -0.83349  |
| 106329 | Q85601 | P06870 | -0.56735  |
| 106330 | Q85601 | Q8TBJ4 | -0.98099  |
| 106331 | Q85601 | Q9GZU8 | -0.20153  |
| 106332 | Q85601 | Q6P4I2 | -0.18207  |
| 106333 | Q85601 | Q9P266 | -0.32517  |
| 106334 | Q85601 | P11362 | -0.28768  |
| 106335 | Q85601 | P01569 | -0.80645  |
| 106336 | Q85601 | Q9HAT2 | -0.90717  |
| 106337 | Q85601 | O95672 | -1.4162   |
| 106338 | Q85601 | Q5SYC1 | -0.54908  |
| 106339 | Q85601 | P19971 | -0.60256  |
| 106340 | Q85601 | Q96SZ5 | -0.48138  |
| 106341 | Q85601 | Q8IUB9 | -0.2031   |
| 106342 | Q85601 | O95007 | -1.2621   |
| 106343 | Q85601 | Q96N53 | -0.2031   |
| 106344 | Q85601 | P25116 | -0.42752  |
| 106345 | Q85601 | Q8TCF1 | -0.29575  |
| 106346 | Q85601 | Q502W6 | -0.49275  |
| 106347 | Q85601 | Q01780 | -0.20234  |
| 106348 | Q85601 | P00491 | -0.29586  |
| 106349 | Q85601 | Q02246 | -0.51502  |
| 106350 | Q85601 | P55287 | -1.2033   |
| 106351 | Q85601 | P06734 | -1.4213   |
| 106352 | Q85601 | P0CL84 | -0.009788 |
| 106353 | Q85601 | Q5VW32 | -0.4438   |
| 106354 | Q85601 | A4D126 | -0.39502  |
| 106355 | Q85601 | Q4G0P3 | -0.44104  |
| 106356 | Q85601 | Q9NX36 | -0.41148  |
| 106357 | Q85601 | Q8NGX8 | -1.2621   |
| 106358 | Q85601 | Q86WB7 | -0.8895   |
| 106359 | Q85601 | Q8WXX3 | -0.22738  |
| 106360 | Q85601 | Q6XPS3 | -0.93841  |
| 106361 | Q85601 | Q8NFZ8 | -1.11     |
| 106362 | Q85601 | D6RCP7 | -0.66238  |
| 106363 | Q85601 | Q3MJ40 | -0.44415  |
| 106364 | Q85601 | Q9Y5H1 | -1.246    |
| 106365 | Q85601 | A0PJZ3 | -0.87785  |
| 106366 | Q85601 | Q6MZZ7 | -1.0551   |
| 106367 | Q85601 | Q8TER5 | -0.58075  |
| 106368 | Q85601 | Q8N377 | -0.2031   |
| 106369 | Q85601 | Q92613 | -0.23206  |
| 106370 | Q85601 | P13378 | -0.21111  |
| 106371 | Q85601 | Q9Y2I1 | -0.29334  |
| 106372 | Q85601 | P04920 | -0.80467  |
| 106373 | Q85601 | A5A3E0 | -0.12909  |
| 106374 | Q85601 | P78426 | -0.22912  |
| 106375 | Q85601 | Q15493 | -0.31199  |
| 106376 | Q85601 | Q9Y5Y7 | -0.79268  |
| 106377 | Q85601 | Q8N6D5 | -0.2274   |
| 106378 | Q85601 | Q9NRC6 | -0.23245  |
| 106379 | Q85601 | Q9Y5X1 | -0.22797  |
| 106380 | Q85601 | Q9Y3N9 | -1.2621   |
| 106381 | Q85601 | Q969E3 | -0.80061  |
| 106382 | Q85601 | Q6ZV60 | -0.2031   |
| 106383 | Q85601 | P58513 | -1.1163   |
| 106384 | Q85601 | P23468 | -0.68239  |
| 106385 | Q85601 | Q9P1Z0 | -0.21712  |
| 106386 | Q85601 | Q9BXX2 | -0.22742  |
| 106387 | Q85601 | A6NHQ4 | -0.24081  |
| 106388 | Q85601 | O60880 | -0.22741  |
| 106389 | Q85601 | Q6ZR03 | -0.24678  |
| 106390 | Q85601 | Q9UIL4 | -0.4258   |
| 106391 | Q85601 | P61225 | -0.90797  |
| 106392 | Q85601 | O75438 | -0.50581  |
| 106393 | Q85601 | Q9NZR4 | -0.20979  |
| 106394 | Q85601 | P48645 | -0.93739  |
| 106395 | Q85601 | P05231 | -0.25192  |
| 106396 | Q85601 | P43004 | -0.58758  |
| 106397 | Q85601 | Q2TBE0 | -0.50749  |
| 106398 | Q85601 | Q9Y278 | -0.57486  |
| 106399 | Q85601 | Q8NEQ5 | -0.92686  |
| 106400 | Q85601 | P47224 | -0.27323  |

|        |        |        |           |
|--------|--------|--------|-----------|
| 106401 | Q85601 | P31751 | -0.11502  |
| 106402 | Q85601 | Q8N7C0 | -1.0889   |
| 106403 | Q85601 | O43294 | -0.24229  |
| 106404 | Q85601 | P14207 | -1.0416   |
| 106405 | Q85601 | P10606 | -0.61397  |
| 106406 | Q85601 | Q5S007 | -0.43918  |
| 106407 | Q85601 | O94966 | -0.66001  |
| 106408 | Q85601 | P56378 | -0.52835  |
| 106409 | Q85601 | Q8N131 | -0.92036  |
| 106410 | Q85601 | Q9H6S3 | -0.22741  |
| 106411 | Q85601 | P49895 | -1.059    |
| 106412 | Q85601 | Q9Y5R2 | -1.7855   |
| 106413 | Q85601 | P30536 | -0.37476  |
| 106414 | Q85601 | Q9H1M0 | -0.11991  |
| 106415 | Q85601 | P43626 | -0.64106  |
| 106416 | Q85601 | Q6L8G8 | -0.2031   |
| 106417 | Q85601 | Q9Y259 | -0.63296  |
| 106418 | Q85601 | A6NDE8 | -0.68194  |
| 106419 | Q85601 | Q8IWU6 | -0.34464  |
| 106420 | Q85601 | P20155 | -0.7976   |
| 106421 | Q85601 | Q96DT6 | -0.571    |
| 106422 | Q85601 | Q13283 | -0.23408  |
| 106423 | Q85601 | Q15527 | -0.63624  |
| 106424 | Q85601 | P20062 | -0.892    |
| 106425 | Q85601 | A5PLN7 | -0.092462 |
| 106426 | Q85601 | Q6EKJ0 | -0.098724 |
| 106427 | Q85601 | Q96NR3 | -0.86673  |
| 106428 | Q85601 | Q08AH3 | -0.78891  |
| 106429 | Q85601 | Q9ULV8 | -0.37542  |
| 106430 | Q85601 | Q6GTX8 | -0.40654  |
| 106431 | Q85601 | P12259 | -0.43743  |
| 106432 | Q85601 | Q9Y6N1 | -0.72071  |
| 106433 | Q85601 | Q66K37 | -0.22639  |
| 106434 | Q85601 | P16150 | -0.93187  |
| 106435 | Q85601 | Q9NP31 | -0.67523  |
| 106436 | Q85601 | Q5BKX5 | -0.092462 |
| 106437 | Q85601 | Q99572 | -0.26661  |
| 106438 | Q85601 | A6NKP2 | -0.83662  |
| 106439 | Q85601 | Q5QNW6 | -0.7417   |
| 106440 | Q85601 | Q8IX04 | -0.45292  |
| 106441 | Q85601 | P06239 | -0.25832  |
| 106442 | Q85601 | P61129 | -0.21268  |
| 106443 | Q85601 | P27216 | -0.62992  |
| 106444 | Q85601 | Q3LI60 | -0.2031   |
| 106445 | Q85601 | Q5VYS8 | -0.309    |
| 106446 | Q85601 | Q9UPM9 | -0.10398  |
| 106447 | Q85601 | P53582 | -0.37172  |
| 106448 | Q85601 | Q13449 | -0.22851  |
| 106449 | Q85601 | P29972 | -0.22712  |
| 106450 | Q85601 | Q96SY0 | -0.072669 |
| 106451 | Q85601 | Q9Y2B0 | -0.76896  |
| 106452 | Q85601 | Q9BTA0 | -0.092462 |
| 106453 | Q85601 | Q5T2P8 | -0.32272  |
| 106454 | Q85601 | A6NH21 | -0.94828  |
| 106455 | Q85601 | O75553 | -0.43925  |
| 106456 | Q85601 | Q8NCJ5 | -0.19381  |
| 106457 | Q85601 | Q86UZ6 | -0.22782  |
| 106458 | Q85601 | Q8N2G6 | -0.32209  |
| 106459 | Q85601 | P55318 | -0.35656  |
| 106460 | Q85601 | B0FP48 | -0.92686  |
| 106461 | Q85601 | P59537 | -1.247    |
| 106462 | Q85601 | Q16878 | -0.338    |
| 106463 | Q85601 | O15130 | -1.0091   |
| 106464 | Q85601 | Q52LC2 | -0.83251  |
| 106465 | Q85601 | Q6ZS52 | -0.2031   |
| 106466 | Q85601 | P01589 | -0.65749  |
| 106467 | Q85601 | P56748 | -0.75774  |
| 106468 | Q85601 | Q9GIP4 | -0.92452  |
| 106469 | Q85601 | Q86WK9 | -1.3324   |
| 106470 | Q85601 | Q8NGZ2 | -1.2621   |
| 106471 | Q85601 | P20393 | -0.74821  |
| 106472 | Q85601 | P35372 | -0.41045  |
| 106473 | Q85601 | E2RYF6 | -0.92686  |
| 106474 | Q85601 | P59536 | -1.2301   |
| 106475 | Q85601 | Q13113 | -0.92686  |
| 106476 | Q85601 | Q8IV45 | -0.83204  |

|        |        |        |          |
|--------|--------|--------|----------|
| 106477 | Q85601 | Q8TF65 | -0.22588 |
| 106478 | Q85601 | Q8TDV5 | -1.4108  |
| 106479 | Q85601 | P01607 | -1.046   |
| 106480 | Q85601 | Q9H9A5 | -0.47222 |
| 106481 | Q85601 | P62684 | -0.28681 |
| 106482 | Q85601 | P50053 | -0.3069  |
| 106483 | Q85601 | Q8N441 | -0.98222 |
| 106484 | Q85601 | P00439 | -0.42446 |
| 106485 | Q85601 | P22749 | -0.87182 |
| 106486 | Q85601 | Q9NUQ7 | -0.6156  |
| 106487 | Q85601 | P13987 | -0.51004 |
| 106488 | Q85601 | Q8N8E1 | -0.39625 |
| 106489 | Q85601 | O95256 | -1.3262  |
| 106490 | Q85601 | Q969S6 | -0.92686 |
| 106491 | Q85601 | F8WBI6 | -0.1796  |
| 106492 | Q85601 | Q8IXS8 | -0.61352 |
| 106493 | Q85601 | P14778 | -1.0911  |
| 106494 | Q85601 | O60636 | -1.01    |
| 106495 | Q85601 | Q8N3H0 | -0.226   |
| 106496 | Q85601 | P63127 | -0.64385 |
| 106497 | Q85601 | P0CAT3 | -0.24892 |
| 106498 | Q85601 | O43927 | -0.72482 |
| 106499 | Q85601 | A4D1T9 | -1.1839  |
| 106500 | Q85601 | Q7RTZ2 | -0.30795 |
| 106501 | Q85601 | P56385 | -0.19661 |
| 106502 | Q85601 | Q9ULI0 | -0.93617 |
| 106503 | Q85601 | A6NC86 | -0.88345 |
| 106504 | Q85601 | Q5JPE7 | -1.3423  |
| 106505 | Q85601 | O15063 | -0.48137 |
| 106506 | Q85601 | P20719 | -0.22791 |
| 106507 | Q85601 | O75575 | -0.58426 |
| 106508 | Q85601 | Q68DH5 | -0.92686 |
| 106509 | Q85601 | A2RU48 | -0.92686 |
| 106510 | Q85601 | A0AVI4 | -0.67993 |
| 106511 | Q85601 | Q9NQS1 | -0.52408 |
| 106512 | Q85601 | Q969S0 | -0.53981 |
| 106513 | Q85601 | Q14576 | -1.055   |
| 106514 | Q85601 | P0DH78 | -0.29575 |
| 106515 | Q85601 | Q15438 | -0.22741 |
| 106516 | Q85601 | O15391 | -0.21441 |
| 106517 | Q85601 | Q9NXP7 | -0.33939 |
| 106518 | Q85601 | P01344 | -0.22531 |
| 106519 | Q85601 | P28332 | -0.42884 |
| 106520 | Q85601 | Q9NQX4 | -0.55921 |
| 106521 | Q85601 | Q6P5S7 | -0.78929 |
| 106522 | Q85601 | B3GLJ2 | -1.037   |
| 106523 | Q85601 | Q9Y3D8 | -0.19854 |
| 106524 | Q85601 | Q03828 | -0.22719 |
| 106525 | Q85601 | Q9UJ42 | -1.3443  |
| 106526 | Q85601 | Q9BQI6 | -0.22741 |
| 106527 | Q85601 | Q96PN6 | -0.60591 |
| 106528 | Q85601 | Q9H496 | -0.31531 |
| 106529 | Q85601 | Q96IK5 | -0.21345 |
| 106530 | Q85601 | Q96T59 | -0.79503 |
| 106531 | Q85601 | Q8NGB9 | -1.2621  |
| 106532 | Q85601 | P35249 | -0.22593 |
| 106533 | Q85601 | Q8TDI0 | -0.22298 |
| 106534 | Q85601 | Q6ZVT6 | -0.46073 |
| 106535 | Q85601 | Q9P2M4 | -1.2587  |
| 106536 | Q85601 | Q86Y78 | -0.9043  |
| 106537 | Q85601 | Q8IZ83 | -0.66404 |
| 106538 | Q85601 | Q93086 | -0.98036 |
| 106539 | Q85601 | Q8TAM1 | -0.44068 |
| 106540 | Q85601 | H0UI37 | -0.29359 |
| 106541 | Q85601 | Q9Y4F4 | -0.16636 |
| 106542 | Q85601 | Q8WZ73 | -0.22739 |
| 106543 | Q85601 | Q8N6V4 | -0.4446  |
| 106544 | Q85601 | Q7Z2Y5 | -1.1458  |
| 106545 | Q85601 | P61278 | -0.84422 |
| 106546 | Q85601 | Q5BIV9 | -0.5608  |
| 106547 | Q85601 | A6NKC9 | -0.22741 |
| 106548 | Q85601 | P31641 | -0.99712 |
| 106549 | Q85601 | Q8NGI2 | -1.2621  |
| 106550 | Q85601 | Q8NDB6 | -1.0177  |
| 106551 | Q85601 | P01574 | -0.4281  |
| 106552 | Q85601 | Q96NW7 | -0.2322  |

|        |        |        |           |
|--------|--------|--------|-----------|
| 106553 | Q85601 | Q99435 | -0.46097  |
| 106554 | Q85601 | Q96EY8 | -0.67746  |
| 106555 | Q85601 | Q14344 | -0.44236  |
| 106556 | Q85601 | Q8NH16 | -1.1204   |
| 106557 | Q85601 | Q13588 | -0.22741  |
| 106558 | Q85601 | Q9H6A0 | -0.31993  |
| 106559 | Q85601 | O00626 | -1.063    |
| 106560 | Q85601 | Q9BUU2 | -0.30175  |
| 106561 | Q85601 | P43080 | -0.72774  |
| 106562 | Q85601 | Q9BW04 | -0.57801  |
| 106563 | Q85601 | P0CW21 | -0.2031   |
| 106564 | Q85601 | Q9UBP5 | -0.22672  |
| 106565 | Q85601 | Q8TC71 | -0.54767  |
| 106566 | Q85601 | O14548 | -0.83361  |
| 106567 | Q85601 | P17509 | -0.21509  |
| 106568 | Q85601 | Q8IU85 | -0.64147  |
| 106569 | Q85601 | P30511 | -1.1113   |
| 106570 | Q85601 | C9J6K1 | -0.17976  |
| 106571 | Q85601 | Q05952 | -1.1044   |
| 106572 | Q85601 | Q9Y4A9 | -1.2621   |
| 106573 | Q85601 | Q8N9W6 | -0.39581  |
| 106574 | Q85601 | P43681 | -0.71516  |
| 106575 | Q85601 | Q9BRQ5 | -0.3746   |
| 106576 | Q85601 | P09871 | -1.3284   |
| 106577 | Q85601 | P55291 | -1.1468   |
| 106578 | Q85601 | Q9UK05 | -0.22741  |
| 106579 | Q85601 | Q6NW29 | -0.11827  |
| 106580 | Q85601 | Q15848 | -0.26257  |
| 106581 | Q85601 | P61769 | -0.50555  |
| 106582 | Q85601 | Q6ZMT4 | -0.22973  |
| 106583 | Q85601 | Q9Y4R7 | -0.31283  |
| 106584 | Q85601 | Q8NH02 | -1.2621   |
| 106585 | Q85601 | P51580 | -0.090153 |
| 106586 | Q85601 | Q96PD4 | -0.5386   |
| 106587 | Q85601 | P05109 | -0.2359   |
| 106588 | Q85601 | Q01344 | -0.5882   |
| 106589 | Q85601 | Q7Z4H9 | -0.098892 |
| 106590 | Q85601 | Q9P2E8 | -0.73915  |
| 106591 | Q85601 | P57729 | -0.83088  |
| 106592 | Q85601 | Q8WUT4 | -0.92686  |
| 106593 | Q85601 | P51606 | -0.39049  |
| 106594 | Q85601 | Q8NGT9 | -1.2621   |
| 106595 | Q85601 | O75508 | -0.96109  |
| 106596 | Q85601 | Q13948 | -0.60072  |
| 106597 | Q85601 | Q8WV74 | -0.14599  |
| 106598 | Q85601 | Q96EY7 | -0.19487  |
| 106599 | Q85601 | Q5VWK5 | -0.56898  |
| 106600 | Q85601 | Q92570 | -0.25347  |
| 106601 | Q85601 | P22897 | -1.0739   |
| 106602 | Q85601 | A6NJV1 | -0.078476 |
| 106603 | Q85601 | Q8NGG1 | -1.1712   |
| 106604 | Q85601 | P52789 | -0.33301  |
| 106605 | Q85601 | Q5JUK9 | -0.23158  |
| 106606 | Q85601 | Q9NXL6 | -0.85495  |
| 106607 | Q85601 | Q30201 | -0.7351   |
| 106608 | Q85601 | Q5FYB1 | -0.72385  |
| 106609 | Q85601 | A3KMH1 | -1.2245   |
| 106610 | Q85601 | Q8N5T2 | -1.3431   |
| 106611 | Q85601 | Q14703 | -0.92219  |
| 106612 | Q85601 | O75899 | -0.92311  |
| 106613 | Q85601 | Q96JE9 | -0.39206  |
| 106614 | Q85601 | P40939 | -0.13801  |
| 106615 | Q85601 | Q9Y463 | -0.22741  |
| 106616 | Q85601 | Q9Y3M8 | -0.23039  |
| 106617 | Q85601 | Q8TDT2 | -1.3443   |
| 106618 | Q85601 | Q99645 | -0.93013  |
| 106619 | Q85601 | P52564 | -0.22949  |
| 106620 | Q85601 | O95047 | -1.2621   |
| 106621 | Q85601 | Q8NI17 | -0.5595   |
| 106622 | Q85601 | Q7Z5L7 | -0.77219  |
| 106623 | Q85601 | D6RA61 | -0.66238  |
| 106624 | Q85601 | P23415 | -0.53197  |
| 106625 | Q85601 | Q8NBF6 | -0.89231  |
| 106626 | Q85601 | Q99944 | -1.3164   |
| 106627 | Q85601 | Q9BZJ7 | -1.196    |
| 106628 | Q85601 | P22676 | -0.22595  |



|        |        |        |           |
|--------|--------|--------|-----------|
| 106629 | Q85601 | O14523 | -0.67993  |
| 106630 | Q85601 | O60678 | -0.045505 |
| 106631 | Q85601 | P63145 | -0.28681  |
| 106632 | Q85601 | Q9UBN6 | -0.96653  |
| 106633 | Q85601 | Q16825 | -0.46445  |
| 106634 | Q85601 | Q9HAE3 | -0.39878  |
| 106635 | Q85601 | Q8WTR8 | -0.9043   |
| 106636 | Q85601 | Q9H867 | -0.17886  |
| 106637 | Q85601 | Q03518 | -0.40166  |
| 106638 | Q85601 | Q6UW88 | -1.1303   |
| 106639 | Q85601 | P01777 | -1.046    |
| 106640 | Q85601 | Q9Y5H6 | -1.2846   |
| 106641 | Q85601 | Q7Z4H4 | -0.79367  |
| 106642 | Q85601 | Q9NP99 | -1.5312   |
| 106643 | Q85601 | Q0GE19 | -0.98691  |
| 106644 | Q85601 | Q96A19 | -0.19829  |
| 106645 | Q85601 | Q8N7B9 | -0.39878  |
| 106646 | Q85601 | Q8NG66 | -0.25399  |
| 106647 | Q85601 | Q92851 | -0.22644  |
| 106648 | Q85601 | Q8N6L0 | -0.89755  |
| 106649 | Q85601 | Q8N4U5 | -0.2226   |
| 106650 | Q85601 | Q86XD5 | -0.25431  |
| 106651 | Q85601 | Q6NUS6 | -0.75397  |
| 106652 | Q85601 | Q9H665 | -0.40654  |
| 106653 | Q85601 | Q6T4R5 | -0.15076  |
| 106654 | Q85601 | A6NDE4 | -0.23725  |
| 106655 | Q85601 | Q04671 | -0.23303  |
| 106656 | Q85601 | Q86UD5 | -0.81953  |
| 106657 | Q85601 | P19525 | -0.53175  |
| 106658 | Q85601 | P49767 | -0.4049   |
| 106659 | Q85601 | P58658 | -0.917    |
| 106660 | Q85601 | Q3T906 | -0.41563  |
| 106661 | Q85601 | B7ZC32 | -0.82262  |
| 106662 | Q85601 | Q9H9P5 | -0.22737  |
| 106663 | Q85601 | P01774 | -1.046    |
| 106664 | Q85601 | Q99424 | -0.74854  |
| 106665 | Q85601 | Q8NHW4 | -1.0634   |
| 106666 | Q85601 | Q86U02 | -0.92686  |
| 106667 | Q85601 | O95150 | -1.5148   |
| 106668 | Q85601 | P34931 | -0.61206  |
| 106669 | Q85601 | Q96FG2 | -0.46868  |
| 106670 | Q85601 | E9PGG2 | -0.22939  |
| 106671 | Q85601 | Q9BXP8 | -1.491    |
| 106672 | Q85601 | O15520 | -0.33915  |
| 106673 | Q85601 | P32418 | -0.48581  |
| 106674 | Q85601 | Q9H2E6 | -0.50156  |
| 106675 | Q85601 | Q99536 | -1.0236   |
| 106676 | Q85601 | Q14973 | -0.9024   |
| 106677 | Q85601 | O60725 | -0.55954  |
| 106678 | Q85601 | P22309 | -0.50943  |
| 106679 | Q85601 | Q6ZTY8 | -0.18466  |
| 106680 | Q85601 | P80162 | -1.1859   |
| 106681 | Q85601 | Q9H6R6 | -0.97944  |
| 106682 | Q85601 | P00918 | -0.23171  |
| 106683 | Q85601 | P04632 | -0.23267  |
| 106684 | Q85601 | P57105 | -0.69766  |
| 106685 | Q85601 | Q6IMI4 | -0.26262  |
| 106686 | Q85601 | A8MYV0 | -0.5766   |
| 106687 | Q85601 | Q9NPH9 | -0.42275  |
| 106688 | Q85601 | Q9Y6X0 | -0.091237 |
| 106689 | Q85601 | Q5T442 | -0.85251  |
| 106690 | Q85601 | F5H4A9 | -0.92686  |
| 106691 | Q85601 | Q9UBM1 | -0.45733  |
| 106692 | Q85601 | O00182 | -0.84101  |
| 106693 | Q85601 | O75348 | -0.39687  |
| 106694 | Q85601 | Q12955 | -0.22741  |
| 106695 | Q85601 | Q6P2I3 | -0.45044  |
| 106696 | Q85601 | Q9NRH2 | -1.0081   |
| 106697 | Q85601 | Q8TCP9 | -0.93182  |
| 106698 | Q85601 | Q9BWG6 | -0.07029  |
| 106699 | Q85601 | Q9BRI3 | -0.70262  |
| 106700 | Q85601 | P33947 | -0.35094  |
| 106701 | Q85601 | P98174 | -0.82783  |
| 106702 | Q85601 | Q6DKI1 | -0.065175 |
| 106703 | Q85601 | Q01650 | -0.68927  |
| 106704 | Q85601 | Q6U736 | -1.2178   |

|        |        |        |           |
|--------|--------|--------|-----------|
| 106705 | Q85601 | Q9UGQ3 | -0.62621  |
| 106706 | Q85601 | Q01167 | -0.37376  |
| 106707 | Q85601 | Q8NI37 | -0.24842  |
| 106708 | Q85601 | Q5TGP6 | -1.1711   |
| 106709 | Q85601 | Q9NQH7 | -0.49267  |
| 106710 | Q85601 | Q9BXA7 | -1.2446   |
| 106711 | Q85601 | O00244 | -0.28146  |
| 106712 | Q85601 | Q9H3S1 | -0.99634  |
| 106713 | Q85601 | P15309 | -1.3833   |
| 106714 | Q85601 | Q14116 | -0.31242  |
| 106715 | Q85601 | Q8IV35 | -0.22757  |
| 106716 | Q85601 | Q8IYK4 | -0.35467  |
| 106717 | Q85601 | O94823 | -0.59086  |
| 106718 | Q85601 | Q7RTX0 | -1.2204   |
| 106719 | Q85601 | P78324 | -1.2364   |
| 106720 | Q85601 | Q86UR1 | -0.22736  |
| 106721 | Q85601 | Q13643 | -0.22907  |
| 106722 | Q85601 | Q9Y2T4 | -0.3974   |
| 106723 | Q85601 | Q8N690 | -1.0467   |
| 106724 | Q85601 | Q99967 | -0.14187  |
| 106725 | Q85601 | P35914 | -0.36339  |
| 106726 | Q85601 | Q8NGL4 | -1.2621   |
| 106727 | Q85601 | P02549 | -0.22741  |
| 106728 | Q85601 | Q9HC29 | -0.22724  |
| 106729 | Q85601 | P0C5K7 | -0.47449  |
| 106730 | Q85601 | O95267 | -0.70243  |
| 106731 | Q85601 | Q92482 | -0.50755  |
| 106732 | Q85601 | Q9H3H1 | -0.36982  |
| 106733 | Q85601 | Q2QD12 | -0.31396  |
| 106734 | Q85601 | Q8NAT2 | -0.59207  |
| 106735 | Q85601 | P30291 | -0.22741  |
| 106736 | Q85601 | Q32M92 | -0.012826 |
| 106737 | Q85601 | Q8N4T8 | -0.33693  |
| 106738 | Q85601 | O60282 | -0.37941  |
| 106739 | Q85601 | P35368 | -0.78052  |
| 106740 | Q85601 | P11413 | -0.15773  |
| 106741 | Q85601 | Q6ZSJ9 | -0.92686  |
| 106742 | Q85601 | Q12904 | -0.23159  |
| 106743 | Q85601 | O95477 | -0.43244  |
| 106744 | Q85601 | Q6BAA4 | -0.23318  |
| 106745 | Q85601 | Q13627 | -0.31279  |
| 106746 | Q85601 | Q9UIR0 | -0.92686  |
| 106747 | Q85601 | Q9UJQ4 | -0.16946  |
| 106748 | Q85601 | Q9BXU3 | -0.589    |
| 106749 | Q85601 | Q6NUK4 | -0.92686  |
| 106750 | Q85601 | P13686 | -0.4441   |
| 106751 | Q85601 | Q8WU68 | -0.45843  |
| 106752 | Q85601 | Q9UBS0 | -0.63205  |
| 106753 | Q85601 | Q9NWU2 | -0.080131 |
| 106754 | Q85601 | O75955 | -0.34337  |
| 106755 | Q85601 | Q8NGZ3 | -1.2621   |
| 106756 | Q85601 | Q9NZT2 | -0.14787  |
| 106757 | Q85601 | Q9NX07 | -0.29927  |
| 106758 | Q85601 | Q9Y3P8 | -0.22635  |
| 106759 | Q85601 | Q9BXT4 | -0.41157  |
| 106760 | Q85601 | Q9NPB9 | -1.4085   |
| 106761 | Q85601 | P07910 | -0.22859  |
| 106762 | Q85601 | Q9Y662 | -0.61684  |
| 106763 | Q85601 | Q9Y5G8 | -1.246    |
| 106764 | Q85601 | Q96MM3 | -0.22763  |
| 106765 | Q85601 | Q96KA5 | -0.89925  |
| 106766 | Q85601 | Q9UKP3 | -0.58165  |
| 106767 | Q85601 | Q8N9K3 | -0.092462 |
| 106768 | Q85601 | Q9Y5G7 | -1.246    |
| 106769 | Q85601 | Q9C0B6 | -0.59592  |
| 106770 | Q85601 | Q9ULF5 | -0.91096  |
| 106771 | Q85601 | Q9Y2D4 | -0.1405   |
| 106772 | Q85601 | P42765 | -0.20135  |
| 106773 | Q85601 | C9JRZ8 | -0.57159  |
| 106774 | Q85601 | O95302 | -0.52922  |
| 106775 | Q85601 | P52824 | -0.22741  |
| 106776 | Q85601 | O00358 | -0.43379  |
| 106777 | Q85601 | Q14155 | -0.40116  |
| 106778 | Q85601 | Q8N0Y3 | -1.2621   |
| 106779 | Q85601 | P12931 | -0.23215  |
| 106780 | Q85601 | O15145 | -0.22104  |

|        |        |        |          |
|--------|--------|--------|----------|
| 106781 | Q85601 | A1A4F0 | -0.36006 |
| 106782 | Q85601 | Q8NGT5 | -1.2621  |
| 106783 | Q85601 | Q6UXH9 | -1.0962  |
| 106784 | Q85601 | Q86XE0 | -0.2858  |
| 106785 | Q85601 | Q8IZM8 | -0.22739 |
| 106786 | Q85601 | Q5T7M4 | -0.91047 |
| 106787 | Q85601 | O95365 | -0.25194 |
| 106788 | Q85601 | Q8N8A8 | -0.78059 |
| 106789 | Q85601 | Q8NI22 | -0.42901 |
| 106790 | Q85601 | Q8N3E9 | -0.47627 |
| 106791 | Q85601 | Q13202 | -0.42281 |
| 106792 | Q85601 | Q9NUY8 | -0.9791  |
| 106793 | Q85601 | Q15695 | -0.3685  |
| 106794 | Q85601 | Q99489 | -0.51662 |
| 106795 | Q85601 | P17931 | -0.30768 |
| 106796 | Q85601 | Q6ICH7 | -1.0516  |
| 106797 | Q85601 | Q9H228 | -1.2354  |
| 106798 | Q85601 | Q9UN67 | -1.2231  |
| 106799 | Q85601 | Q14451 | -0.22741 |
| 106800 | Q85601 | Q8NGF1 | -1.2621  |
| 106801 | Q85601 | Q9Y388 | -0.896   |
| 106802 | Q85601 | P0C7P2 | -0.35723 |
| 106803 | Q85601 | Q2VIQ3 | -0.37474 |
| 106804 | Q85601 | Q86YB7 | -0.54718 |
| 106805 | Q85601 | O95716 | -0.73817 |
| 106806 | Q85601 | P49281 | -0.22459 |
| 106807 | Q85601 | Q8NFO8 | -0.54272 |
| 106808 | Q85601 | O60656 | -0.72517 |
| 106809 | Q85601 | Q14114 | -0.92812 |
| 106810 | Q85601 | Q9NVP4 | -0.589   |
| 106811 | Q85601 | Q96LP6 | -0.69473 |
| 106812 | Q85601 | A6NMA1 | -0.72246 |
| 106813 | Q85601 | Q96AJ9 | -0.26853 |
| 106814 | Q85601 | Q5BJH2 | -0.67993 |
| 106815 | Q85601 | Q8N5W9 | -0.57991 |
| 106816 | Q85601 | P51817 | -0.53383 |
| 106817 | Q85601 | Q8NCW0 | -0.87046 |
| 106818 | Q85601 | Q96GE6 | -0.39878 |
| 106819 | Q85601 | Q9UL12 | -0.13421 |
| 106820 | Q85601 | P34982 | -1.3266  |
| 106821 | Q85601 | Q9HDB8 | -0.22105 |
| 106822 | Q85601 | Q9HBY8 | -0.67724 |
| 106823 | Q85601 | O43889 | -0.44668 |
| 106824 | Q85601 | P32971 | -0.90977 |
| 106825 | Q85601 | Q5JT78 | -0.92867 |
| 106826 | Q85601 | Q9BRN9 | -0.92686 |
| 106827 | Q85601 | Q5JWR5 | -0.12348 |
| 106828 | Q85601 | P35626 | -1.2262  |
| 106829 | Q85601 | P04001 | -1.4102  |
| 106830 | Q85601 | Q9H993 | -0.18477 |
| 106831 | Q85601 | P13716 | -0.29941 |
| 106832 | Q85601 | Q13641 | -0.97568 |
| 106833 | Q85601 | Q7RTY3 | -0.88468 |
| 106834 | Q85601 | Q6ZQT7 | -0.2031  |
| 106835 | Q85601 | Q30KQ4 | -0.86864 |
| 106836 | Q85601 | Q8WXT5 | -0.43379 |
| 106837 | Q85601 | Q9Y657 | -0.16297 |
| 106838 | Q85601 | B1AK53 | -0.45477 |
| 106839 | Q85601 | Q6ZPA2 | -0.2031  |
| 106840 | Q85601 | Q96S44 | -0.5338  |
| 106841 | Q85601 | Q9NQI0 | -0.55779 |
| 106842 | Q85601 | Q8J025 | -1.0455  |
| 106843 | Q85601 | Q8IWW8 | -0.24314 |
| 106844 | Q85601 | Q02083 | -0.47218 |
| 106845 | Q85601 | Q6UW01 | -0.81684 |
| 106846 | Q85601 | P04899 | -0.33871 |
| 106847 | Q85601 | Q5SQI0 | -0.37756 |
| 106848 | Q85601 | Q9NQF3 | -0.22556 |
| 106849 | Q85601 | Q5JQD4 | -0.88182 |
| 106850 | Q85601 | Q96HS1 | -0.64675 |
| 106851 | Q85601 | Q86SP6 | -1.2121  |
| 106852 | Q85601 | Q9HBL7 | -1.0828  |
| 106853 | Q85601 | P05014 | -0.71791 |
| 106854 | Q85601 | Q9BTD8 | -0.35426 |
| 106855 | Q85601 | Q6YHK3 | -0.97497 |
| 106856 | Q85601 | Q15286 | -0.52351 |

|        |        |        |          |
|--------|--------|--------|----------|
| 106857 | Q85601 | Q8N1W1 | -0.77076 |
| 106858 | Q85601 | P09960 | -0.37735 |
| 106859 | Q85601 | Q96KC9 | -0.1887  |
| 106860 | Q85601 | P32245 | -0.62371 |
| 106861 | Q85601 | Q9P0J7 | -0.65742 |
| 106862 | Q85601 | Q5VZR4 | -0.84819 |
| 106863 | Q85601 | Q9UNF0 | -0.22747 |
| 106864 | Q85601 | Q15517 | -0.86013 |
| 106865 | Q85601 | Q6Q0C1 | -0.69944 |
| 106866 | Q85601 | Q96QZ0 | -0.92859 |
| 106867 | Q85601 | P19957 | -0.80194 |
| 106868 | Q85601 | Q92617 | -0.67993 |
| 106869 | Q85601 | P45974 | -0.24572 |
| 106870 | Q85601 | Q9Y666 | -1.0601  |
| 106871 | Q85601 | Q5SRD1 | -0.21765 |
| 106872 | Q85601 | P08648 | -0.38791 |
| 106873 | Q85601 | Q9BTV4 | -0.39589 |
| 106874 | Q85601 | Q9UJS0 | -0.42585 |
| 106875 | Q85601 | Q4LDG9 | -0.22741 |
| 106876 | Q85601 | Q9BSG5 | -0.9043  |
| 106877 | Q85601 | P07202 | -0.97773 |
| 106878 | Q85601 | P55087 | -0.56734 |
| 106879 | Q85601 | P35218 | -0.20182 |
| 106880 | Q85601 | Q16819 | -1.2722  |
| 106881 | Q85601 | Q86SM8 | -1.3443  |
| 106882 | Q85601 | Q6NT52 | -0.88182 |
| 106883 | Q85601 | Q8WWZ1 | -0.85772 |
| 106884 | Q85601 | A6NKK0 | -1.2621  |
| 106885 | Q85601 | O75912 | -0.22741 |
| 106886 | Q85601 | Q7L5A3 | -0.15486 |
| 106887 | Q85601 | Q5T7B8 | -0.36156 |
| 106888 | Q85601 | Q00535 | -0.21157 |
| 106889 | Q85601 | P51617 | -0.22737 |
| 106890 | Q85601 | Q68G74 | -0.22743 |
| 106891 | Q85601 | Q9Y3E0 | -0.48835 |
| 106892 | Q85601 | Q6ZNA5 | -1.0606  |
| 106893 | Q85601 | Q16777 | -0.7417  |
| 106894 | Q85601 | Q3SYB3 | -0.43379 |
| 106895 | Q85601 | Q4G0W2 | -0.76809 |
| 106896 | Q85601 | Q6F5E7 | -0.78623 |
| 106897 | Q85601 | A8MQB9 | -0.22741 |
| 106898 | Q85601 | Q6ZT21 | -0.98768 |
| 106899 | Q85601 | Q15061 | -0.22751 |
| 106900 | Q85601 | P0C879 | -0.2031  |
| 106901 | Q85601 | Q8N743 | -1.0386  |
| 106902 | Q85601 | Q9NTJ3 | -0.22179 |
| 106903 | Q85601 | Q00587 | -0.37325 |
| 106904 | Q85601 | A6NHA9 | -1.2621  |
| 106905 | Q85601 | Q92828 | -0.40665 |
| 106906 | Q85601 | Q43155 | -1.1795  |
| 106907 | Q85601 | Q96PN7 | -0.18519 |
| 106908 | Q85601 | Q5VT33 | -0.68603 |
| 106909 | Q85601 | Q9NY28 | -0.7006  |
| 106910 | Q85601 | O95994 | -0.24473 |
| 106911 | Q85601 | A1L157 | -0.92686 |
| 106912 | Q85601 | Q86UV7 | -0.589   |
| 106913 | Q85601 | P05976 | -0.35994 |
| 106914 | Q85601 | O75127 | -0.19055 |
| 106915 | Q85601 | Q6UXA7 | -0.85562 |
| 106916 | Q85601 | Q5M775 | -0.22754 |
| 106917 | Q85601 | Q96JQ5 | -0.92686 |
| 106918 | Q85601 | Q75197 | -0.25235 |
| 106919 | Q85601 | Q6ZMT9 | -0.49132 |
| 106920 | Q85601 | Q9H114 | -0.94321 |
| 106921 | Q85601 | Q5JTH9 | -0.2139  |
| 106922 | Q85601 | Q8TDD5 | -0.81186 |
| 106923 | Q85601 | Q3B7T3 | -0.79216 |
| 106924 | Q85601 | Q9NQZ3 | -0.23013 |
| 106925 | Q85601 | Q9BXS9 | -1.0654  |
| 106926 | Q85601 | P23515 | -0.66553 |
| 106927 | Q85601 | Q96FC7 | -0.23109 |
| 106928 | Q85601 | Q15062 | -0.2197  |
| 106929 | Q85601 | Q9H8H2 | -0.40752 |
| 106930 | Q85601 | Q05C16 | -0.22818 |
| 106931 | Q85601 | P01189 | -0.57673 |
| 106932 | Q85601 | P40225 | -0.81841 |

|        |        |        |           |
|--------|--------|--------|-----------|
| 106933 | Q85601 | P20039 | -0.75133  |
| 106934 | Q85601 | O00192 | -0.22972  |
| 106935 | Q85601 | Q9BY32 | -0.47942  |
| 106936 | Q85601 | Q96RD2 | -1.2621   |
| 106937 | Q85601 | O00522 | -0.22741  |
| 106938 | Q85601 | Q5TCZ1 | -0.22741  |
| 106939 | Q85601 | Q6UXU1 | -0.9043   |
| 106940 | Q85601 | Q9BZM3 | -0.2171   |
| 106941 | Q85601 | Q5SR53 | -0.20882  |
| 106942 | Q85601 | P28838 | -0.049532 |
| 106943 | Q85601 | Q9H841 | -0.88448  |
| 106944 | Q85601 | Q9Y343 | -0.52704  |
| 106945 | Q85601 | Q92576 | -0.22192  |
| 106946 | Q85601 | Q9NRS4 | -1.3105   |
| 106947 | Q85601 | Q9C098 | -0.79307  |
| 106948 | Q85601 | Q9Y2T5 | -1.4753   |
| 106949 | Q85601 | Q92878 | -0.21055  |
| 106950 | Q85601 | Q9H2X9 | -0.92446  |
| 106951 | Q85601 | Q13938 | -0.21933  |
| 106952 | Q85601 | Q8N535 | -0.010085 |
| 106953 | Q85601 | P10911 | -0.22745  |
| 106954 | Q85601 | Q9HCM2 | -0.83303  |
| 106955 | Q85601 | Q32M84 | -0.015063 |
| 106956 | Q85601 | Q8N6G6 | -1.0604   |
| 106957 | Q85601 | Q9Y672 | -0.78896  |
| 106958 | Q85601 | Q64LD2 | -0.22765  |
| 106959 | Q85601 | P48449 | -0.4539   |
| 106960 | Q85601 | Q29940 | -1.1017   |
| 106961 | Q85601 | Q99832 | -0.24034  |
| 106962 | Q85601 | Q13188 | -0.27398  |
| 106963 | Q85601 | Q8TD33 | -0.9043   |
| 106964 | Q85601 | Q8TDC3 | -0.61569  |
| 106965 | Q85601 | Q86V40 | -1.198    |
| 106966 | Q85601 | Q9H9V9 | -0.19694  |
| 106967 | Q85601 | Q13530 | -0.81164  |
| 106968 | Q85601 | A6NC78 | -0.29141  |
| 106969 | Q85601 | Q5JSP0 | -0.71389  |
| 106970 | Q85601 | P0CJ68 | -0.67838  |
| 106971 | Q85601 | P25874 | -0.52234  |
| 106972 | Q85601 | P02679 | -0.8827   |
| 106973 | Q85601 | Q9Y4E5 | -0.22479  |
| 106974 | Q85601 | Q6UWB4 | -1.3361   |
| 106975 | Q85601 | O14904 | -0.85162  |
| 106976 | Q85601 | Q96S52 | -0.73689  |
| 106977 | Q85601 | Q8NGP9 | -1.2621   |
| 106978 | Q85601 | P49238 | -0.6889   |
| 106979 | Q85601 | P31146 | -0.22741  |
| 106980 | Q85601 | Q6PKG0 | -0.38444  |
| 106981 | Q85601 | Q53SZ7 | -0.092462 |
| 106982 | Q85601 | Q9BZ71 | -0.73351  |
| 106983 | Q85601 | Q08462 | -0.81066  |
| 106984 | Q85601 | Q95292 | -0.14342  |
| 106985 | Q85601 | Q9NZM3 | -0.68575  |
| 106986 | Q85601 | P86481 | -0.2031   |
| 106987 | Q85601 | Q8IUZ0 | -0.2274   |
| 106988 | Q85601 | Q8NH56 | -1.2621   |
| 106989 | Q85601 | Q8IZJ1 | -0.5729   |
| 106990 | Q85601 | P13693 | -0.15899  |
| 106991 | Q85601 | Q8N326 | -0.92686  |
| 106992 | Q85601 | Q9BQE5 | -1.1377   |
| 106993 | Q85601 | P12104 | -0.40588  |
| 106994 | Q85601 | P35221 | -0.21275  |
| 106995 | Q85601 | Q99748 | -0.6191   |
| 106996 | Q85601 | Q6A555 | -0.34789  |
| 106997 | Q85601 | Q8NBH2 | -0.50459  |
| 106998 | Q85601 | P09228 | -0.94321  |
| 106999 | Q85601 | Q92915 | -0.32915  |
| 107000 | Q85601 | Q9H4D0 | -0.98758  |
| 107001 | Q85601 | Q86VQ3 | -0.22804  |
| 107002 | Q85601 | P54760 | -1.1884   |
| 107003 | Q85601 | O60858 | -0.55022  |
| 107004 | Q85601 | Q6ZW34 | -0.92686  |
| 107005 | Q85601 | P60508 | -0.89021  |
| 107006 | Q85601 | P30508 | -1.1574   |
| 107007 | Q85601 | Q6NUQ4 | -0.92686  |
| 107008 | Q85601 | Q96K31 | -0.1756   |

|        |        |        |           |
|--------|--------|--------|-----------|
| 107009 | Q85601 | O43251 | -0.35798  |
| 107010 | Q85601 | Q8WU67 | -0.57082  |
| 107011 | Q85601 | Q96NB2 | -0.84774  |
| 107012 | Q85601 | Q9UFE4 | -0.30903  |
| 107013 | Q85601 | Q4V339 | -0.81985  |
| 107014 | Q85601 | P18206 | -0.22279  |
| 107015 | Q85601 | Q7L7L0 | -0.7417   |
| 107016 | Q85601 | O43526 | -0.87406  |
| 107017 | Q85601 | P63122 | -0.64385  |
| 107018 | Q85601 | Q3SXM0 | -0.22744  |
| 107019 | Q85601 | A5PLN9 | -0.10985  |
| 107020 | Q85601 | P63130 | -0.28681  |
| 107021 | Q85601 | Q13126 | -0.30762  |
| 107022 | Q85601 | Q16549 | -1.0725   |
| 107023 | Q85601 | A6NEQ0 | -0.64145  |
| 107024 | Q85601 | Q99807 | -0.1973   |
| 107025 | Q85601 | Q9BPY3 | -0.39396  |
| 107026 | Q85601 | Q6IA17 | -0.56934  |
| 107027 | Q85601 | Q9H5N1 | -0.3819   |
| 107028 | Q85601 | P04432 | -1.046    |
| 107029 | Q85601 | Q5VST9 | -0.85614  |
| 107030 | Q85601 | Q8IV31 | -0.92686  |
| 107031 | Q85601 | Q9H1H1 | -0.31263  |
| 107032 | Q85601 | Q16394 | -0.52676  |
| 107033 | Q85601 | Q71RS6 | -0.943    |
| 107034 | Q85601 | Q9BVR0 | -0.37835  |
| 107035 | Q85601 | Q8IWF6 | -0.14024  |
| 107036 | Q85601 | P0C7P1 | -0.64145  |
| 107037 | Q85601 | O00214 | -0.21857  |
| 107038 | Q85601 | Q7Z769 | -0.92686  |
| 107039 | Q85601 | Q9NU23 | -0.48365  |
| 107040 | Q85601 | Q86XT9 | -1.0005   |
| 107041 | Q85601 | Q9NZM6 | -1.0068   |
| 107042 | Q85601 | Q9H479 | -0.50276  |
| 107043 | Q85601 | F2Z398 | -0.43988  |
| 107044 | Q85601 | Q8IZN7 | -0.86864  |
| 107045 | Q85601 | P57796 | -0.6517   |
| 107046 | Q85601 | Q86UB9 | -0.99418  |
| 107047 | Q85601 | P04054 | -0.52555  |
| 107048 | Q85601 | Q8N9L9 | -0.38348  |
| 107049 | Q85601 | Q05586 | -0.40053  |
| 107050 | Q85601 | Q02539 | -0.71698  |
| 107051 | Q85601 | Q5T8R8 | -0.85884  |
| 107052 | Q85601 | Q9H1Q7 | -0.28116  |
| 107053 | Q85601 | P41221 | -0.23028  |
| 107054 | Q85601 | A8MZH6 | -0.9043   |
| 107055 | Q85601 | Q8NGN0 | -1.2621   |
| 107056 | Q85601 | Q13277 | -0.30593  |
| 107057 | Q85601 | Q15825 | -0.92236  |
| 107058 | Q85601 | Q8N766 | -0.90534  |
| 107059 | Q85601 | O95169 | -0.47157  |
| 107060 | Q85601 | Q6IF99 | -1.2621   |
| 107061 | Q85601 | Q96NJ5 | -0.19335  |
| 107062 | Q85601 | Q9Y6J8 | -0.58128  |
| 107063 | Q85601 | Q6UWH6 | -0.81958  |
| 107064 | Q85601 | Q99932 | -0.37169  |
| 107065 | Q85601 | Q6P4F7 | -1.0442   |
| 107066 | Q85601 | Q96FX8 | -0.11549  |
| 107067 | Q85601 | Q96G97 | -0.64202  |
| 107068 | Q85601 | Q15726 | -0.65846  |
| 107069 | Q85601 | Q16134 | -0.37367  |
| 107070 | Q85601 | Q14791 | -1.0729   |
| 107071 | Q85601 | Q6PID6 | -0.22732  |
| 107072 | Q85601 | Q95396 | -0.14527  |
| 107073 | Q85601 | P61619 | -0.83451  |
| 107074 | Q85601 | Q9UJ70 | -0.55874  |
| 107075 | Q85601 | Q99714 | -0.20861  |
| 107076 | Q85601 | P04808 | -1.0326   |
| 107077 | Q85601 | Q7Z3J2 | -1.0822   |
| 107078 | Q85601 | P43628 | -0.64867  |
| 107079 | Q85601 | Q8N6D2 | -0.2067   |
| 107080 | Q85601 | Q9HCJ5 | -0.54584  |
| 107081 | Q85601 | Q6PJ21 | -0.58286  |
| 107082 | Q85601 | Q8NAA4 | -0.22789  |
| 107083 | Q85601 | A6NH11 | -0.092604 |
| 107084 | Q85601 | Q8WV28 | -0.2274   |

|        |        |        |          |
|--------|--------|--------|----------|
| 107085 | Q85601 | P16389 | -0.80743 |
| 107086 | Q85601 | O00330 | -0.20433 |
| 107087 | Q85601 | Q9Y5L5 | -0.62388 |
| 107088 | Q85601 | P24666 | -0.17916 |
| 107089 | Q85601 | A8MT19 | -0.21295 |
| 107090 | Q85601 | P07311 | -0.22852 |
| 107091 | Q85601 | Q8NDX1 | -0.80613 |
| 107092 | Q85601 | Q9H2M9 | -1.1496  |
| 107093 | Q85601 | O75781 | -0.19746 |
| 107094 | Q85601 | P48729 | -0.22741 |
| 107095 | Q85601 | P21217 | -0.71353 |
| 107096 | Q85601 | Q14863 | -0.22739 |
| 107097 | Q85601 | Q9UGM3 | -0.37954 |
| 107098 | Q85601 | P15498 | -0.22741 |
| 107099 | Q85601 | Q6ZW35 | -0.7298  |
| 107100 | Q85601 | B6SEH9 | -0.92686 |
| 107101 | Q85601 | Q01813 | -0.51388 |
| 107102 | Q85601 | Q8NI99 | -1.3651  |
| 107103 | Q85601 | A8MTB9 | -0.92686 |
| 107104 | Q85601 | Q6ZMB0 | -0.69662 |
| 107105 | Q85601 | Q14798 | -0.81329 |
| 107106 | Q85601 | Q9HB90 | -0.809   |
| 107107 | Q85601 | Q9Y261 | -0.36489 |
| 107108 | Q85601 | Q8N6Y1 | -1.246   |
| 107109 | Q85601 | Q9UHP9 | -0.59962 |
| 107110 | Q85601 | Q9UBR4 | -0.22805 |
| 107111 | Q85601 | Q9H295 | -0.51023 |
| 107112 | Q85601 | Q9UM22 | -0.89861 |
| 107113 | Q85601 | P01620 | -1.046   |
| 107114 | Q85601 | Q9NS64 | -0.69542 |
| 107115 | Q85601 | Q8NGA5 | -1.1204  |
| 107116 | Q85601 | O00219 | -0.81161 |
| 107117 | Q85601 | Q96EP0 | -0.18804 |
| 107118 | Q85601 | P78334 | -0.84871 |
| 107119 | Q85601 | P30480 | -1.1017  |
| 107120 | Q85601 | Q1RN00 | -0.2031  |
| 107121 | Q85601 | O60809 | -0.157   |
| 107122 | Q85601 | A2RUC4 | -0.55127 |
| 107123 | Q85601 | Q14055 | -0.90743 |
| 107124 | Q85601 | P0CJ73 | -0.67838 |
| 107125 | Q85601 | Q96MV8 | -0.80772 |
| 107126 | Q85601 | P12109 | -0.92963 |
| 107127 | Q85601 | Q96ND0 | -0.75013 |
| 107128 | Q85601 | Q6ZRU5 | -0.9043  |
| 107129 | Q85601 | Q5VZ72 | -0.98367 |
| 107130 | Q85601 | P22310 | -0.88592 |
| 107131 | Q85601 | Q8N1P7 | -0.3304  |
| 107132 | Q85601 | Q04771 | -0.35985 |
| 107133 | Q85601 | Q86YG4 | -0.26641 |
| 107134 | Q85601 | P61006 | -0.66312 |
| 107135 | Q85601 | O75445 | -0.81478 |
| 107136 | Q85601 | Q8TAQ9 | -0.90562 |
| 107137 | Q85601 | Q9NYW0 | -1.1294  |
| 107138 | Q85601 | Q685J3 | -0.68256 |
| 107139 | Q85601 | Q9NUU6 | -0.74725 |
| 107140 | Q85601 | P36897 | -0.28344 |
| 107141 | Q85601 | Q8N0W5 | -0.41972 |
| 107142 | Q85601 | O43184 | -0.63723 |
| 107143 | Q85601 | A6NHR8 | -0.2031  |
| 107144 | Q85601 | Q96GE4 | -0.2311  |
| 107145 | Q85601 | P42330 | -0.22547 |
| 107146 | Q85601 | P07225 | -0.8283  |
| 107147 | Q85601 | Q8TDI7 | -0.92686 |
| 107148 | Q85601 | Q9BZK8 | -0.2031  |
| 107149 | Q85601 | Q14190 | -0.2613  |
| 107150 | Q85601 | Q8IZ69 | -0.76027 |
| 107151 | Q85601 | Q96SA4 | -0.92686 |
| 107152 | Q85601 | Q6DHV5 | -0.18771 |
| 107153 | Q85601 | Q9NQ03 | -0.18716 |
| 107154 | Q85601 | Q8WUY9 | -0.98633 |
| 107155 | Q85601 | P35504 | -1.0162  |
| 107156 | Q85601 | Q96LA5 | -0.9698  |
| 107157 | Q85601 | Q02575 | -0.22669 |
| 107158 | Q85601 | O60307 | -0.6959  |
| 107159 | Q85601 | P63129 | -0.64385 |
| 107160 | Q85601 | P22794 | -0.93995 |

|        |        |        |           |
|--------|--------|--------|-----------|
| 107161 | Q85601 | O60306 | -0.44824  |
| 107162 | Q85601 | P30039 | -0.23416  |
| 107163 | Q85601 | Q67FW5 | -0.38524  |
| 107164 | Q85601 | Q9Y6N5 | -0.42682  |
| 107165 | Q85601 | Q9UKM9 | -0.49777  |
| 107166 | Q85601 | Q9BV90 | -0.089672 |
| 107167 | Q85601 | O94772 | -0.47345  |
| 107168 | Q85601 | P02753 | -0.31225  |
| 107169 | Q85601 | O75695 | -0.5238   |
| 107170 | Q85601 | Q86W74 | -0.92686  |
| 107171 | Q85601 | Q969Y2 | -0.919    |
| 107172 | Q85601 | Q03405 | -0.78284  |
| 107173 | Q85601 | Q9UBT7 | -0.28334  |
| 107174 | Q85601 | Q9UMW8 | -0.47518  |
| 107175 | Q85601 | Q9P244 | -0.79955  |
| 107176 | Q85601 | O60343 | -1.0139   |
| 107177 | Q85601 | B9A014 | -0.42861  |
| 107178 | Q85601 | P52198 | -0.896    |
| 107179 | Q85601 | Q96GZ6 | -1.0102   |
| 107180 | Q85601 | P06028 | -1.184    |
| 107181 | Q85601 | Q9P0S2 | -0.5379   |
| 107182 | Q85601 | Q5TGZ0 | -0.61202  |
| 107183 | Q85601 | Q8N6W0 | -0.38904  |
| 107184 | Q85601 | Q8NFT2 | -1.0823   |
| 107185 | Q85601 | Q86W10 | -0.92686  |
| 107186 | Q85601 | Q9Y263 | -0.22882  |
| 107187 | Q85601 | Q6UWX4 | -0.78694  |
| 107188 | Q85601 | Q6ZSY5 | -0.85815  |
| 107189 | Q85601 | Q9NVM1 | -0.92686  |
| 107190 | Q85601 | Q9H461 | -0.45242  |
| 107191 | Q85601 | Q8IU53 | -0.095801 |
| 107192 | Q85601 | Q96C24 | -0.23375  |
| 107193 | Q85601 | P40259 | -0.48982  |
| 107194 | Q85601 | O60397 | -0.62434  |
| 107195 | Q85601 | O94760 | -0.053159 |
| 107196 | Q85601 | O96033 | -0.27716  |
| 107197 | Q85601 | Q9BVK6 | -0.16622  |
| 107198 | Q85601 | Q969V4 | -0.13626  |
| 107199 | Q85601 | P01761 | -1.046    |
| 107200 | Q85601 | Q86UP0 | -1.0318   |
| 107201 | Q85601 | O60701 | -0.69583  |
| 107202 | Q85601 | P27169 | -0.7792   |
| 107203 | Q85601 | Q96B77 | -0.77221  |
| 107204 | Q85601 | Q96EG1 | -0.46836  |
| 107205 | Q85601 | Q9HBH0 | -0.97236  |
| 107206 | Q85601 | O43736 | -0.29083  |
| 107207 | Q85601 | P0CAP1 | -0.22742  |
| 107208 | Q85601 | Q96RP9 | -0.7684   |
| 107209 | Q85601 | Q8IX19 | -0.92686  |
| 107210 | Q85601 | Q9UHH6 | -0.61681  |
| 107211 | Q85601 | P01588 | -0.33468  |
| 107212 | Q85601 | Q5VT97 | -0.81021  |
| 107213 | Q85601 | Q14031 | -1.1399   |
| 107214 | Q85601 | A1A4T8 | -0.53515  |
| 107215 | Q85601 | Q6UX72 | -0.77052  |
| 107216 | Q85601 | P28562 | -0.24097  |
| 107217 | Q85601 | Q9NUQ8 | -0.92256  |
| 107218 | Q85601 | A6NLU0 | -0.29575  |
| 107219 | Q85601 | O43300 | -0.816    |
| 107220 | Q85601 | Q6H3X3 | -0.4767   |
| 107221 | Q85601 | Q9H972 | -0.9043   |
| 107222 | Q85601 | Q9UQ26 | -0.22741  |
| 107223 | Q85601 | P12429 | -0.43645  |
| 107224 | Q85601 | Q9H2C1 | -0.22777  |
| 107225 | Q85601 | P53004 | -0.46405  |
| 107226 | Q85601 | Q96KC8 | -0.35675  |
| 107227 | Q85601 | O95294 | -0.44329  |
| 107228 | Q85601 | Q8TD84 | -1.0247   |
| 107229 | Q85601 | P29279 | -0.28835  |
| 107230 | Q85601 | Q01113 | -1.6718   |
| 107231 | Q85601 | O95069 | -1.0561   |
| 107232 | Q85601 | P35030 | -0.91509  |
| 107233 | Q85601 | Q8WUD1 | -0.74914  |
| 107234 | Q85601 | P48230 | -0.84802  |
| 107235 | Q85601 | Q96DA0 | -0.89494  |
| 107236 | Q85601 | P11226 | -0.62609  |



|        |        |        |           |
|--------|--------|--------|-----------|
| 107237 | Q85601 | Q8N6Y2 | -0.84956  |
| 107238 | Q85601 | Q8NFU0 | -0.83103  |
| 107239 | Q85601 | Q6UXQ8 | -0.9043   |
| 107240 | Q85601 | P27352 | -0.87735  |
| 107241 | Q85601 | Q8IXS0 | -0.092462 |
| 107242 | Q85601 | O00459 | -0.2274   |
| 107243 | Q85601 | C9J442 | -0.9043   |
| 107244 | Q85601 | Q9Y4X3 | -0.96067  |
| 107245 | Q85601 | O94889 | -0.19406  |
| 107246 | Q85601 | Q8TAS1 | -0.37591  |
| 107247 | Q85601 | P06307 | -0.77106  |
| 107248 | Q85601 | Q9H2M3 | -0.18373  |
| 107249 | Q85601 | O00501 | -0.70197  |
| 107250 | Q85601 | P32247 | -1.1683   |
| 107251 | Q85601 | O60312 | -0.67429  |
| 107252 | Q85601 | Q14623 | -0.444    |
| 107253 | Q85601 | P11465 | -0.72714  |
| 107254 | Q85601 | P51178 | -0.30917  |
| 107255 | Q85601 | Q8N4V1 | -0.71926  |
| 107256 | Q85601 | P49640 | -0.22712  |
| 107257 | Q85601 | Q01628 | -0.84653  |
| 107258 | Q85601 | Q8N468 | -0.86184  |
| 107259 | Q85601 | O60902 | -0.17466  |
| 107260 | Q85601 | P17693 | -0.93718  |
| 107261 | Q85601 | O60449 | -1.2087   |
| 107262 | Q85601 | Q9H6S0 | -0.2274   |
| 107263 | Q85601 | Q9HAU6 | -0.29993  |
| 107264 | Q85601 | O76039 | -0.43443  |
| 107265 | Q85601 | Q9P0P0 | -0.39358  |
| 107266 | Q85601 | P48426 | -0.24196  |
| 107267 | Q85601 | Q9UHF4 | -0.92686  |
| 107268 | Q85601 | O95199 | -0.31926  |
| 107269 | Q85601 | Q15012 | -0.77101  |
| 107270 | Q85601 | Q13368 | -0.26129  |
| 107271 | Q85601 | P12074 | -0.14796  |
| 107272 | Q85601 | P22460 | -0.56597  |
| 107273 | Q85601 | O95754 | -0.90864  |
| 107274 | Q85601 | Q7Z569 | -0.22741  |
| 107275 | Q85601 | A2A3L6 | -0.22408  |
| 107276 | Q85601 | O94929 | -0.22923  |
| 107277 | Q85601 | O75783 | -1.5299   |
| 107278 | Q85601 | Q9UN70 | -1.2169   |
| 107279 | Q85601 | P49757 | -0.22705  |
| 107280 | Q85601 | Q8NCR9 | -0.92686  |
| 107281 | Q85601 | Q6X9E4 | -0.12829  |
| 107282 | Q85601 | Q99593 | -0.43406  |
| 107283 | Q85601 | Q9P2J2 | -1.0545   |
| 107284 | Q85601 | Q5SY80 | -0.92686  |
| 107285 | Q85601 | Q8NEM7 | -1.0307   |
| 107286 | Q85601 | Q15125 | -0.84605  |
| 107287 | Q85601 | P55789 | -0.37991  |
| 107288 | Q85601 | Q9BX79 | -0.47711  |
| 107289 | Q85601 | Q96JK2 | -0.22741  |
| 107290 | Q85601 | Q68D10 | -0.18472  |
| 107291 | Q85601 | Q9HAW9 | -0.69786  |
| 107292 | Q85601 | Q96GX1 | -0.68319  |
| 107293 | Q85601 | P05113 | -0.31369  |
| 107294 | Q85601 | O75787 | -0.33753  |
| 107295 | Q85601 | P21579 | -0.26932  |
| 107296 | Q85601 | Q16513 | -0.21919  |
| 107297 | Q85601 | P16234 | -0.28148  |
| 107298 | Q85601 | Q96PH1 | -0.82885  |
| 107299 | Q85601 | Q9NSI8 | -0.24825  |
| 107300 | Q85601 | O95167 | -0.5043   |
| 107301 | Q85601 | P55040 | -0.53776  |
| 107302 | Q85601 | P61224 | -0.26735  |
| 107303 | Q85601 | Q9H361 | -0.59974  |
| 107304 | Q85601 | Q6UVY6 | -1.1625   |
| 107305 | Q85601 | Q8N3T1 | -0.68584  |
| 107306 | Q85601 | Q5SSQ6 | -0.13187  |
| 107307 | Q85601 | Q9BXS0 | -1.6227   |
| 107308 | Q85601 | P25092 | -1.0184   |
| 107309 | Q85601 | P27658 | -1.1119   |
| 107310 | Q85601 | O95568 | -0.088929 |
| 107311 | Q85601 | F8VTS6 | -0.29575  |
| 107312 | Q85601 | P07237 | -0.36978  |

|        |        |        |          |
|--------|--------|--------|----------|
| 107313 | Q85601 | Q6J4K2 | -1.0276  |
| 107314 | Q85601 | Q14558 | -0.28969 |
| 107315 | Q85601 | Q9Y2F5 | -0.90326 |
| 107316 | Q85601 | P33981 | -0.89486 |
| 107317 | Q85601 | Q8N0U4 | -0.10154 |
| 107318 | Q85601 | Q8IVG5 | -0.34872 |
| 107319 | Q85601 | Q96MD7 | -0.19999 |
| 107320 | Q85601 | O14944 | -0.50331 |
| 107321 | Q85601 | Q9UMQ6 | -1.0312  |
| 107322 | Q85601 | A6NC62 | -0.21779 |
| 107323 | Q85601 | A8MTL0 | -0.21448 |
| 107324 | Q85601 | Q8N8N7 | -0.71122 |
| 107325 | Q85601 | Q53HR8 | -0.27774 |
| 107326 | Q85601 | Q6UXV4 | -0.78984 |
| 107327 | Q85601 | P09017 | -0.20435 |
| 107328 | Q85601 | O75815 | -0.92975 |
| 107329 | Q85601 | Q5JQF8 | -0.896   |
| 107330 | Q85601 | Q9BYT9 | -0.88392 |
| 107331 | Q85601 | Q96GK7 | -0.45044 |
| 107332 | Q85601 | Q6ZN16 | -1.114   |
| 107333 | Q85601 | Q96Q45 | -0.93927 |
| 107334 | Q85601 | Q16821 | -0.74128 |
| 107335 | Q85601 | Q8NGN7 | -1.2621  |
| 107336 | Q85601 | Q4G0J3 | -0.22154 |
| 107337 | Q85601 | Q9BX93 | -0.95069 |
| 107338 | Q85601 | Q99633 | -0.25431 |
| 107339 | Q85601 | Q9HBK9 | -0.23634 |
| 107340 | Q85601 | Q9P0X4 | -0.54167 |
| 107341 | Q85601 | Q5T0W9 | -0.2488  |
| 107342 | Q85601 | Q5SRD3 | -0.88202 |
| 107343 | Q85601 | Q9BZY9 | -0.30329 |
| 107344 | Q85601 | Q92772 | -0.5513  |
| 107345 | Q85601 | P06309 | -1.046   |
| 107346 | Q85601 | P28358 | -0.42015 |
| 107347 | Q85601 | Q96ID5 | -0.9043  |
| 107348 | Q85601 | Q969P0 | -0.37308 |
| 107349 | Q85601 | B3SHH9 | -1.0386  |
| 107350 | Q85601 | O60292 | -0.98478 |
| 107351 | Q85601 | O15394 | -1.2056  |
| 107352 | Q85601 | Q7Z3Z3 | -0.49176 |
| 107353 | Q85601 | O43866 | -0.96197 |
| 107354 | Q85601 | Q86WR0 | -0.45507 |
| 107355 | Q85601 | Q9H8S5 | -0.3257  |
| 107356 | Q85601 | Q9NQZ5 | -0.15485 |
| 107357 | Q85601 | Q16602 | -0.58387 |
| 107358 | Q85601 | P48051 | -0.38261 |
| 107359 | Q85601 | Q8TAE6 | -0.33266 |
| 107360 | Q85601 | P01708 | -1.046   |
| 107361 | Q85601 | Q8NEE0 | -0.2031  |
| 107362 | Q85601 | Q15021 | -1.1005  |
| 107363 | Q85601 | Q9ULC5 | -0.7975  |
| 107364 | Q85601 | P62070 | -0.88679 |
| 107365 | Q85601 | Q13950 | -0.59586 |
| 107366 | Q85601 | Q9NZN5 | -0.28129 |
| 107367 | Q85601 | Q9Y258 | -1.0122  |
| 107368 | Q85601 | P45985 | -0.22957 |
| 107369 | Q85601 | Q6UY18 | -0.92686 |
| 107370 | Q85601 | Q9BXY5 | -0.39878 |
| 107371 | Q85601 | Q86VZ6 | -0.22712 |
| 107372 | Q85601 | Q8TF44 | -0.21864 |
| 107373 | Q85601 | Q9HAV0 | -0.43531 |
| 107374 | Q85601 | Q6UXP9 | -0.63143 |
| 107375 | Q85601 | Q16774 | -0.60085 |
| 107376 | Q85601 | O94953 | -0.13735 |
| 107377 | Q85601 | Q04759 | -0.20433 |
| 107378 | Q85601 | Q3SXY7 | -0.92686 |
| 107379 | Q85601 | P04424 | -0.19173 |
| 107380 | Q85601 | Q4KMQ2 | -0.92239 |
| 107381 | Q85601 | Q9BQG1 | -0.74085 |
| 107382 | Q85601 | O95992 | -0.80859 |
| 107383 | Q85601 | P23276 | -0.6995  |
| 107384 | Q85601 | O14764 | -0.99284 |
| 107385 | Q85601 | O14562 | -0.16686 |
| 107386 | Q85601 | O75841 | -0.75348 |
| 107387 | Q85601 | P03905 | -0.62525 |
| 107388 | Q85601 | Q2M3G4 | -0.13566 |

|        |        |        |            |
|--------|--------|--------|------------|
| 107389 | Q85601 | Q8N412 | -0.20102   |
| 107390 | Q85601 | Q96L14 | -0.38669   |
| 107391 | Q85601 | Q86WA8 | -0.34077   |
| 107392 | Q85601 | Q15432 | -1.0281    |
| 107393 | Q85601 | Q709C8 | -0.38031   |
| 107394 | Q85601 | Q9H0V9 | -0.46806   |
| 107395 | Q85601 | P42262 | -0.91536   |
| 107396 | Q85601 | Q8NFI4 | -0.22688   |
| 107397 | Q85601 | P45379 | -0.30763   |
| 107398 | Q85601 | Q0P6D2 | -1.0116    |
| 107399 | Q85601 | Q0D2H9 | -0.1796    |
| 107400 | Q85601 | Q8N7Y1 | -0.2031    |
| 107401 | Q85601 | Q8TBE9 | -0.17925   |
| 107402 | Q85601 | Q96PD6 | -0.79502   |
| 107403 | Q85601 | Q9HCN8 | -0.36922   |
| 107404 | Q85601 | Q6ZUL3 | -0.2031    |
| 107405 | Q85601 | O60403 | -1.2621    |
| 107406 | Q85601 | P19320 | -0.72215   |
| 107407 | Q85601 | Q6NVY1 | -0.16003   |
| 107408 | Q85601 | P0C629 | -1.2621    |
| 107409 | Q85601 | Q8WWU7 | -1.1284    |
| 107410 | Q85601 | Q86UV5 | -0.4411    |
| 107411 | Q85601 | Q12778 | -0.39698   |
| 107412 | Q85601 | Q5U4N7 | -0.2031    |
| 107413 | Q85601 | Q52M75 | -1.472     |
| 107414 | Q85601 | Q9H3N8 | -1.3112    |
| 107415 | Q85601 | Q8WVE0 | -0.32443   |
| 107416 | Q85601 | Q8N1D0 | -0.18472   |
| 107417 | Q85601 | Q9BQ04 | -0.36349   |
| 107418 | Q85601 | O15522 | -0.26425   |
| 107419 | Q85601 | Q9UBU6 | -0.92686   |
| 107420 | Q85601 | P12724 | -0.71825   |
| 107421 | Q85601 | Q71H61 | -0.9269    |
| 107422 | Q85601 | Q86VG3 | -0.0099115 |
| 107423 | Q85601 | Q53S58 | -0.92686   |
| 107424 | Q85601 | Q8TED4 | -0.78488   |
| 107425 | Q85601 | Q2M243 | -0.17346   |
| 107426 | Q85601 | Q8NFZ4 | -0.66793   |
| 107427 | Q85601 | Q6ZNF0 | -0.82731   |
| 107428 | Q85601 | P48728 | -0.070863  |
| 107429 | Q85601 | Q68D20 | -0.29763   |
| 107430 | Q85601 | P51164 | -0.89545   |
| 107431 | Q85601 | Q5ZPR3 | -0.41373   |
| 107432 | Q85601 | Q8NGZ4 | -1.2621    |
| 107433 | Q85601 | Q8TB92 | -0.24968   |
| 107434 | Q85601 | Q5W0U4 | -0.23884   |
| 107435 | Q85601 | P31153 | -0.56711   |
| 107436 | Q85601 | Q9Y5I1 | -1.2846    |
| 107437 | Q85601 | Q5VWJ9 | -0.22586   |
| 107438 | Q85601 | P01700 | -1.046     |
| 107439 | Q85601 | Q7L8W6 | -0.087811  |
| 107440 | Q85601 | Q9NXJ0 | -0.92686   |
| 107441 | Q85601 | Q902F9 | -0.7596    |
| 107442 | Q85601 | Q9UHQ4 | -0.51231   |
| 107443 | Q85601 | Q9UHH9 | -0.45895   |
| 107444 | Q85601 | Q96KR6 | -0.92686   |
| 107445 | Q85601 | Q95528 | -0.4582    |
| 107446 | Q85601 | Q9UQ74 | -0.9043    |
| 107447 | Q85601 | P49902 | -0.5621    |
| 107448 | Q85601 | Q9H334 | -0.43379   |
| 107449 | Q85601 | Q12756 | -0.25642   |
| 107450 | Q85601 | A0PJE2 | -1.1015    |
| 107451 | Q85601 | Q9P2F8 | -0.98478   |
| 107452 | Q85601 | Q14517 | -0.23546   |
| 107453 | Q85601 | Q3V6T2 | -0.19726   |
| 107454 | Q85601 | Q6ZRH9 | -0.2031    |
| 107455 | Q85601 | P80748 | -1.046     |
| 107456 | Q85601 | Q96PH6 | -0.86206   |
| 107457 | Q85601 | Q6ZUM4 | -0.98256   |
| 107458 | Q85601 | Q9Y5I7 | -0.75633   |
| 107459 | Q85601 | Q8N302 | -0.42591   |
| 107460 | Q85601 | Q9UJJ9 | -0.75161   |
| 107461 | Q85601 | Q6IBS0 | -0.43975   |
| 107462 | Q85601 | P56747 | -0.77926   |
| 107463 | Q85601 | Q71RC2 | -0.75765   |
| 107464 | Q85601 | Q8WWF6 | -0.44461   |

|        |        |        |          |
|--------|--------|--------|----------|
| 107465 | Q85601 | Q96JQ0 | -1.2169  |
| 107466 | Q85601 | Q9P0Z9 | -0.69021 |
| 107467 | Q85601 | Q13304 | -1.3423  |
| 107468 | Q85601 | P30531 | -0.59428 |
| 107469 | Q85601 | Q8IYA2 | -0.18271 |
| 107470 | Q85601 | Q9GZK6 | -1.2621  |
| 107471 | Q85601 | Q8N4F0 | -1.0768  |
| 107472 | Q85601 | Q969D9 | -0.89837 |
| 107473 | Q85601 | P0C7U0 | -0.90143 |
| 107474 | Q85601 | P43631 | -1.0755  |
| 107475 | Q85601 | Q6DHY5 | -1.3431  |
| 107476 | Q85601 | Q9BWT6 | -0.1295  |
| 107477 | Q85601 | Q9BZV2 | -0.70754 |
| 107478 | Q85601 | Q5RIA9 | -0.81985 |
| 107479 | Q85601 | Q92630 | -0.52866 |
| 107480 | Q85601 | Q96SB4 | -0.26261 |
| 107481 | Q85601 | Q9NYW7 | -1.1404  |
| 107482 | Q85601 | Q4G0S7 | -0.20336 |
| 107483 | Q85601 | Q9UGI6 | -0.78215 |
| 107484 | Q85601 | A2RU14 | -0.92686 |
| 107485 | Q85601 | Q9Y6K0 | -0.46205 |
| 107486 | Q85601 | Q96PX9 | -0.74567 |
| 107487 | Q85601 | Q96GJ1 | -0.11511 |
| 107488 | Q85601 | E7EU14 | -0.22192 |
| 107489 | Q85601 | Q9BU19 | -0.10786 |
| 107490 | Q85601 | Q9H2X8 | -0.92686 |
| 107491 | Q85601 | P63316 | -0.22382 |
| 107492 | Q85601 | Q6NXT4 | -0.72806 |
| 107493 | Q85601 | Q8N7I0 | -0.22092 |
| 107494 | Q85601 | Q9Y5G6 | -1.246   |
| 107495 | Q85601 | Q9ULT0 | -0.25663 |
| 107496 | Q85601 | Q5VUR7 | -0.2274  |
| 107497 | Q85601 | P01111 | -0.64793 |
| 107498 | Q85601 | O00337 | -0.91199 |
| 107499 | Q85601 | Q96PQ1 | -1.0948  |
| 107500 | Q85601 | O43707 | -0.49441 |
| 107501 | Q85601 | Q9NP94 | -0.99864 |
| 107502 | Q85601 | Q3SX64 | -0.30012 |
| 107503 | Q85601 | Q07108 | -1.0555  |
| 107504 | Q85601 | Q96SI9 | -0.64835 |
| 107505 | Q85601 | P49788 | -0.9481  |
| 107506 | Q85601 | Q9P0N9 | -0.53214 |
| 107507 | Q85601 | Q13207 | -0.41919 |
| 107508 | Q85601 | Q6KC79 | -0.181   |
| 107509 | Q85601 | Q07960 | -0.33935 |
| 107510 | Q85601 | A6NDV4 | -0.29224 |
| 107511 | Q85601 | Q7Z5Y6 | -0.89311 |
| 107512 | Q85601 | A6ND91 | -0.91177 |
| 107513 | Q85601 | A4D2B8 | -0.37861 |
| 107514 | Q85601 | Q75477 | -0.3683  |
| 107515 | Q85601 | Q9P021 | -0.19199 |
| 107516 | Q85601 | Q5EG05 | -0.65599 |
| 107517 | Q85601 | Q7Z7A4 | -0.85733 |
| 107518 | Q85601 | Q9NSE7 | -0.49491 |
| 107519 | Q85601 | Q18PE1 | -0.6864  |
| 107520 | Q85601 | Q96B45 | -0.31881 |
| 107521 | Q85601 | B1AMM8 | -0.19605 |
| 107522 | Q85601 | Q86W42 | -0.23428 |
| 107523 | Q85601 | Q587I9 | -0.55279 |
| 107524 | Q85601 | Q86YV5 | -1.1899  |
| 107525 | Q85601 | Q8NBQ5 | -1.1535  |
| 107526 | Q85601 | P29475 | -0.22806 |
| 107527 | Q85601 | Q9UGP8 | -0.79248 |
| 107528 | Q85601 | Q8IYT4 | -0.57155 |
| 107529 | Q85601 | Q9H4B0 | -0.11099 |
| 107530 | Q85601 | A3KFT3 | -1.2621  |
| 107531 | Q85601 | Q9BQS2 | -1.0386  |
| 107532 | Q85601 | Q86TB3 | -0.6975  |
| 107533 | Q85601 | Q15428 | -0.2274  |
| 107534 | Q85601 | Q9BZB8 | -0.60859 |
| 107535 | Q85601 | A1L0T0 | -0.8458  |
| 107536 | Q85601 | P21815 | -1.0992  |
| 107537 | Q85601 | Q9BZS1 | -0.34139 |
| 107538 | Q85601 | Q9H4B4 | -0.22742 |
| 107539 | Q85601 | Q6ZVS7 | -0.78967 |
| 107540 | Q85601 | Q86WT1 | -0.44012 |

|        |        |        |           |
|--------|--------|--------|-----------|
| 107541 | Q85601 | O95918 | -1.2028   |
| 107542 | Q85601 | Q96NS5 | -0.22743  |
| 107543 | Q85601 | Q6DKI2 | -0.3304   |
| 107544 | Q85601 | P08514 | -0.48082  |
| 107545 | Q85601 | P41223 | -0.030242 |
| 107546 | Q85601 | Q9BWF3 | -0.23372  |
| 107547 | Q85601 | O60894 | -0.29968  |
| 107548 | Q85601 | O14842 | -1.1684   |
| 107549 | Q85601 | Q70IA8 | -0.31263  |
| 107550 | Q85601 | P98171 | -0.2286   |
| 107551 | Q85601 | Q96P56 | -0.62074  |
| 107552 | Q85601 | Q8TC29 | -0.41644  |
| 107553 | Q85601 | P01566 | -0.80645  |
| 107554 | Q85601 | Q9ULX5 | -0.43182  |
| 107555 | Q85601 | Q15223 | -0.5239   |
| 107556 | Q85601 | Q8IVF4 | -0.57589  |
| 107557 | Q85601 | Q8N9V7 | -0.14456  |
| 107558 | Q85601 | Q96LM6 | -0.39017  |
| 107559 | Q85601 | Q14003 | -0.67093  |
| 107560 | Q85601 | A0PJX8 | -0.92686  |
| 107561 | Q85601 | P04553 | -0.73378  |
| 107562 | Q85601 | Q8NGY3 | -1.2621   |
| 107563 | Q85601 | Q9Y232 | -0.21971  |
| 107564 | Q85601 | Q15427 | -0.25698  |
| 107565 | Q85601 | Q6N075 | -0.86355  |
| 107566 | Q85601 | C9JVV0 | -0.92686  |
| 107567 | Q85601 | Q92888 | -0.31005  |
| 107568 | Q85601 | P20853 | -0.83028  |
| 107569 | Q85601 | P51681 | -0.50451  |
| 107570 | Q85601 | P09651 | -0.29769  |
| 107571 | Q85601 | Q8TF17 | -0.45039  |
| 107572 | Q85601 | O94808 | -0.18448  |
| 107573 | Q85601 | Q15113 | -1.2561   |
| 107574 | Q85601 | Q96RJ0 | -1.2767   |
| 107575 | Q85601 | O75344 | -0.55562  |
| 107576 | Q85601 | Q86WT6 | -0.23161  |
| 107577 | Q85601 | Q9Y4E1 | -0.068455 |
| 107578 | Q85601 | Q9BS26 | -0.26376  |
| 107579 | Q85601 | P01243 | -1.0053   |
| 107580 | Q85601 | A8MU93 | -0.092462 |
| 107581 | Q85601 | P28472 | -0.96709  |
| 107582 | Q85601 | Q6AZY7 | -0.82272  |
| 107583 | Q85601 | A6NNH2 | -0.54018  |
| 107584 | Q85601 | Q5VSG8 | -0.62963  |
| 107585 | Q85601 | Q9Y4A0 | -0.17376  |
| 107586 | Q85601 | Q15847 | -0.2031   |
| 107587 | Q85601 | Q9HC24 | -0.15708  |
| 107588 | Q85601 | O14521 | -0.37197  |
| 107589 | Q85601 | Q6ZV77 | -0.2031   |
| 107590 | Q85601 | P43353 | -0.44016  |
| 107591 | Q85601 | Q9H1Y3 | -1.1841   |
| 107592 | Q85601 | Q8N292 | -1.0138   |
| 107593 | Q85601 | O94804 | -0.67079  |
| 107594 | Q85601 | Q06203 | -0.36865  |
| 107595 | Q85601 | Q14914 | -0.67714  |
| 107596 | Q85601 | O75923 | -0.87225  |
| 107597 | Q85601 | P47872 | -1.4189   |
| 107598 | Q85601 | O43674 | -0.5043   |
| 107599 | Q85601 | Q96DY2 | -0.17801  |
| 107600 | Q85601 | Q96EL3 | -0.40147  |
| 107601 | Q85601 | P28328 | -0.24799  |
| 107602 | Q85601 | Q9UJT1 | -0.22202  |
| 107603 | Q85601 | Q05193 | -0.29099  |
| 107604 | Q85601 | Q16281 | -1.3777   |
| 107605 | Q85601 | P13861 | -0.22745  |
| 107606 | Q85601 | A1L4H1 | -0.99449  |
| 107607 | Q85601 | Q14246 | -1.5747   |
| 107608 | Q85601 | P51571 | -0.77174  |
| 107609 | Q85601 | Q04721 | -0.2278   |
| 107610 | Q85601 | P13765 | -1.0545   |
| 107611 | Q85601 | P49863 | -1.3764   |
| 107612 | Q85601 | P21291 | -0.23316  |
| 107613 | Q85601 | A7E2S9 | -0.22741  |
| 107614 | Q85601 | Q9NXZ2 | -1.0852   |
| 107615 | Q85601 | Q53RT3 | -1.1254   |
| 107616 | Q85601 | Q9GZU3 | -0.92686  |

|        |        |        |           |
|--------|--------|--------|-----------|
| 107617 | Q85601 | Q9H5Y7 | -1.0205   |
| 107618 | Q85601 | Q6UXV3 | -0.9043   |
| 107619 | Q85601 | P61952 | -0.52039  |
| 107620 | Q85601 | P07988 | -0.64062  |
| 107621 | Q85601 | P33121 | -0.78468  |
| 107622 | Q85601 | Q9P0P8 | -0.55562  |
| 107623 | Q85601 | O60906 | -0.74648  |
| 107624 | Q85601 | Q6PEW0 | -0.86543  |
| 107625 | Q85601 | O60258 | -0.94312  |
| 107626 | Q85601 | O15480 | -0.084375 |
| 107627 | Q85601 | A6NMS7 | -0.92686  |
| 107628 | Q85601 | Q8NH37 | -1.2621   |
| 107629 | Q85601 | O43916 | -0.56956  |
| 107630 | Q85601 | Q2TB10 | -0.22728  |
| 107631 | Q85601 | Q96RB7 | -1.2621   |
| 107632 | Q85601 | Q9BWJ2 | -0.37393  |
| 107633 | Q85601 | Q8N6Q3 | -0.53441  |
| 107634 | Q85601 | Q6UWU4 | -0.71009  |
| 107635 | Q85601 | Q95365 | -1.1017   |
| 107636 | Q85601 | Q9NTQ9 | -0.9746   |
| 107637 | Q85601 | Q8NGS0 | -1.2621   |
| 107638 | Q85601 | P56159 | -0.51834  |
| 107639 | Q85601 | Q8IY84 | -1.2652   |
| 107640 | Q85601 | Q96PC5 | -0.9043   |
| 107641 | Q85601 | Q9NST1 | -0.72033  |
| 107642 | Q85601 | P34913 | -0.30539  |
| 107643 | Q85601 | Q3ZCT8 | -0.20977  |
| 107644 | Q85601 | Q9NX02 | -0.2272   |
| 107645 | Q85601 | Q16671 | -1.4619   |
| 107646 | Q85601 | P16298 | -0.14422  |
| 107647 | Q85601 | Q9BXT6 | -1.2112   |
| 107648 | Q85601 | P48065 | -1.0195   |
| 107649 | Q85601 | Q8N5G2 | -0.59786  |
| 107650 | Q85601 | Q96M20 | -0.22706  |
| 107651 | Q85601 | Q92545 | -0.67993  |
| 107652 | Q85601 | Q86SG5 | -0.27929  |
| 107653 | Q85601 | Q01973 | -0.96355  |
| 107654 | Q85601 | Q02779 | -0.67874  |
| 107655 | Q85601 | P59103 | -0.495    |
| 107656 | Q85601 | P24347 | -1.3626   |
| 107657 | Q85601 | O75192 | -0.37428  |
| 107658 | Q85601 | Q9H497 | -0.52654  |
| 107659 | Q85601 | Q5W0N0 | -1.2023   |
| 107660 | Q85601 | Q8NFM7 | -0.56365  |
| 107661 | Q85601 | Q8N8B7 | -0.043909 |
| 107662 | Q85601 | O95800 | -1.4753   |
| 107663 | Q85601 | Q8NAA6 | -0.419    |
| 107664 | Q85601 | Q53H96 | -0.94127  |
| 107665 | Q85601 | Q96S07 | -0.2031   |
| 107666 | Q85601 | Q05707 | -1.0791   |
| 107667 | Q85601 | Q96PJ5 | -0.40654  |
| 107668 | Q85601 | Q8WZA6 | -1.2621   |
| 107669 | Q85601 | Q8N9U0 | -0.23689  |
| 107670 | Q85601 | P0C0S8 | -0.74924  |
| 107671 | Q85601 | Q9H9B1 | -0.22741  |
| 107672 | Q85601 | Q8N1T3 | -0.64204  |
| 107673 | Q85601 | P59922 | -1.2621   |
| 107674 | Q85601 | Q8NAP8 | -0.22309  |
| 107675 | Q85601 | Q9UIJ7 | -0.68235  |
| 107676 | Q85601 | P51530 | -0.2319   |
| 107677 | Q85601 | P05107 | -1.0363   |
| 107678 | Q85601 | P55773 | -1.1305   |
| 107679 | Q85601 | Q9P225 | -0.53715  |
| 107680 | Q85601 | Q9H490 | -0.86718  |
| 107681 | Q85601 | Q9H2W2 | -0.21448  |
| 107682 | Q85601 | Q6PCB6 | -0.28116  |
| 107683 | Q85601 | Q8WV16 | -0.32981  |
| 107684 | Q85601 | Q3V5L5 | -0.70736  |
| 107685 | Q85601 | P84550 | -0.053154 |
| 107686 | Q85601 | P09668 | -0.26867  |
| 107687 | Q85601 | Q6ZMV9 | -0.29485  |
| 107688 | Q85601 | Q8N9V2 | -0.58952  |
| 107689 | Q85601 | Q6NZY7 | -0.37325  |
| 107690 | Q85601 | O43175 | -0.81453  |
| 107691 | Q85601 | P0C671 | -0.37178  |
| 107692 | Q85601 | P20333 | -0.76742  |

|        |        |        |           |
|--------|--------|--------|-----------|
| 107693 | Q85601 | Q96RI9 | -1.31     |
| 107694 | Q85601 | Q86YB8 | -0.74936  |
| 107695 | Q85601 | Q9NRZ9 | -0.17981  |
| 107696 | Q85601 | Q9P2G9 | -0.20637  |
| 107697 | Q85601 | Q9BSD7 | -0.917    |
| 107698 | Q85601 | Q8IWF7 | -0.33692  |
| 107699 | Q85601 | Q6NSJ0 | -0.62041  |
| 107700 | Q85601 | Q5JS13 | -0.74493  |
| 107701 | Q85601 | P06401 | -0.22743  |
| 107702 | Q85601 | O95926 | -0.327    |
| 107703 | Q85601 | Q9BYG8 | -0.44198  |
| 107704 | Q85601 | Q96LU5 | -0.52384  |
| 107705 | Q85601 | Q9Y5Z6 | -0.83375  |
| 107706 | Q85601 | Q86YJ5 | -0.81296  |
| 107707 | Q85601 | A6NEH6 | -0.89384  |
| 107708 | Q85601 | Q9UBV7 | -0.49203  |
| 107709 | Q85601 | Q9NZU0 | -1.1795   |
| 107710 | Q85601 | P13762 | -0.68895  |
| 107711 | Q85601 | Q3SYF9 | -0.2031   |
| 107712 | Q85601 | Q9H560 | -0.2274   |
| 107713 | Q85601 | Q6PJ69 | -0.589    |
| 107714 | Q85601 | P32119 | -0.37258  |
| 107715 | Q85601 | Q7Z624 | -0.32294  |
| 107716 | Q85601 | Q15415 | -0.65083  |
| 107717 | Q85601 | P02652 | -0.34823  |
| 107718 | Q85601 | Q86SY8 | -0.2031   |
| 107719 | Q85601 | P16885 | -0.22741  |
| 107720 | Q85601 | Q96RI0 | -1.4134   |
| 107721 | Q85601 | Q9N2J8 | -0.89021  |
| 107722 | Q85601 | O15399 | -0.77234  |
| 107723 | Q85601 | Q9Y2B4 | -0.55868  |
| 107724 | Q85601 | Q8N8D9 | -0.65138  |
| 107725 | Q85601 | Q9HDB5 | -1.0807   |
| 107726 | Q85601 | A4D1Z8 | -0.33055  |
| 107727 | Q85601 | Q9BRQ0 | -0.18193  |
| 107728 | Q85601 | Q6UXB3 | -0.8927   |
| 107729 | Q85601 | P01713 | -1.046    |
| 107730 | Q85601 | Q96NN9 | -0.21431  |
| 107731 | Q85601 | P38484 | -1.0448   |
| 107732 | Q85601 | Q9HDD0 | -0.22471  |
| 107733 | Q85601 | Q8WV41 | -0.22741  |
| 107734 | Q85601 | Q9UMY4 | -0.22574  |
| 107735 | Q85601 | A8MTQ0 | -0.22739  |
| 107736 | Q85601 | Q8N8Y5 | -0.45684  |
| 107737 | Q85601 | Q95460 | -1.4835   |
| 107738 | Q85601 | Q5VXT5 | -0.91593  |
| 107739 | Q85601 | Q96D96 | -0.89049  |
| 107740 | Q85601 | P30837 | -0.43707  |
| 107741 | Q85601 | Q96S97 | -0.92686  |
| 107742 | Q85601 | Q9BXL6 | -0.43794  |
| 107743 | Q85601 | Q9Y5G5 | -1.246    |
| 107744 | Q85601 | A6NJ64 | -0.11464  |
| 107745 | Q85601 | Q8IVW8 | -0.98487  |
| 107746 | Q85601 | Q6ZWC4 | -0.36432  |
| 107747 | Q85601 | Q2VIR3 | -0.78594  |
| 107748 | Q85601 | P05160 | -0.79588  |
| 107749 | Q85601 | A8MYP8 | -0.33783  |
| 107750 | Q85601 | Q9NW61 | -0.44245  |
| 107751 | Q85601 | Q8WVI7 | -0.042058 |
| 107752 | Q85601 | Q5SWW7 | -0.2031   |
| 107753 | Q85601 | Q8WVZ1 | -0.89983  |
| 107754 | Q85601 | Q96KT0 | -0.74261  |
| 107755 | Q85601 | O15374 | -1.0232   |
| 107756 | Q85601 | Q8IW41 | -0.26879  |
| 107757 | Q85601 | Q9H977 | -0.22736  |
| 107758 | Q85601 | Q7LGC8 | -0.50611  |
| 107759 | Q85601 | P52961 | -1.0063   |
| 107760 | Q85601 | Q53EL9 | -0.9572   |
| 107761 | Q85601 | Q9Y5Y3 | -1.3443   |
| 107762 | Q85601 | Q15617 | -1.2621   |
| 107763 | Q85601 | Q6PXP3 | -0.76447  |
| 107764 | Q85601 | Q6SZW1 | -0.53087  |
| 107765 | Q85601 | P46721 | -0.86215  |
| 107766 | Q85601 | Q13275 | -0.982    |
| 107767 | Q85601 | P43116 | -1.3097   |
| 107768 | Q85601 | Q86XM0 | -1.1329   |

|        |        |        |            |
|--------|--------|--------|------------|
| 107769 | Q85601 | Q96I25 | -0.19564   |
| 107770 | Q85601 | Q15619 | -1.2621    |
| 107771 | Q85601 | O95670 | -0.3324    |
| 107772 | Q85601 | Q8IVE3 | -0.74397   |
| 107773 | Q85601 | P02689 | -0.30649   |
| 107774 | Q85601 | A8MZ06 | -0.19533   |
| 107775 | Q85601 | Q9NPZ5 | -0.5431    |
| 107776 | Q85601 | P33897 | -0.24754   |
| 107777 | Q85601 | P19622 | -0.22725   |
| 107778 | Q85601 | Q6MZN7 | -0.32474   |
| 107779 | Q85601 | Q96C11 | -0.19493   |
| 107780 | Q85601 | A6NJW4 | -0.92686   |
| 107781 | Q85601 | A8MYA2 | -0.0071062 |
| 107782 | Q85601 | Q96CN7 | -0.51402   |
| 107783 | Q85601 | Q99622 | -0.058696  |
| 107784 | Q85601 | Q13370 | -0.27273   |
| 107785 | Q85601 | Q13393 | -0.43594   |
| 107786 | Q85601 | Q765P7 | -0.67907   |
| 107787 | Q85601 | P09669 | -0.56392   |
| 107788 | Q85601 | P05019 | -0.22725   |
| 107789 | Q85601 | P11310 | -0.44761   |
| 107790 | Q85601 | Q8TE04 | -0.45283   |
| 107791 | Q85601 | Q9NZR1 | -0.21167   |
| 107792 | Q85601 | P14770 | -1.0894    |
| 107793 | Q85601 | Q9H4L5 | -0.7452    |
| 107794 | Q85601 | Q8NEL0 | -0.10137   |
| 107795 | Q85601 | P01599 | -1.046     |
| 107796 | Q85601 | A0FGR8 | -1.0386    |
| 107797 | Q85601 | Q7Z6A9 | -1.0734    |
| 107798 | Q85601 | Q12891 | -0.25816   |
| 107799 | Q85601 | Q5FWF4 | -0.1854    |
| 107800 | Q85601 | Q9C093 | -0.35904   |
| 107801 | Q85601 | Q92839 | -0.93539   |
| 107802 | Q85601 | Q9UH62 | -0.76414   |
| 107803 | Q85601 | Q9H5V9 | -0.13618   |
| 107804 | Q85601 | Q5VUY2 | -0.89266   |
| 107805 | Q85601 | Q5TZ20 | -1.2621    |
| 107806 | Q85601 | Q8TDQ1 | -1.0386    |
| 107807 | Q85601 | P78410 | -0.89199   |
| 107808 | Q85601 | Q76I76 | -0.53918   |
| 107809 | Q85601 | P41968 | -0.90304   |
| 107810 | Q85601 | Q16557 | -0.89909   |
| 107811 | Q85601 | Q9UBG3 | -0.28315   |
| 107812 | Q85601 | Q6P2H8 | -0.92686   |
| 107813 | Q85601 | E5RHO5 | -0.21277   |
| 107814 | Q85601 | O15075 | -1.1888    |
| 107815 | Q85601 | Q9UKF5 | -1.1973    |
| 107816 | Q85601 | Q53FE4 | -0.41149   |
| 107817 | Q85601 | Q9BZ72 | -1.3538    |
| 107818 | Q85601 | Q6UXC1 | -0.62037   |
| 107819 | Q85601 | Q13516 | -0.22751   |
| 107820 | Q85601 | Q9UQ16 | -0.23535   |
| 107821 | Q85601 | Q7L1S5 | -0.8818    |
| 107822 | Q85601 | P42701 | -0.71975   |
| 107823 | Q85601 | Q4U2R8 | -0.43163   |
| 107824 | Q85601 | P08174 | -1.0912    |
| 107825 | Q85601 | A8K010 | -0.27602   |
| 107826 | Q85601 | Q9H1K6 | -0.066929  |
| 107827 | Q85601 | Q8IXN7 | -0.69766   |
| 107828 | Q85601 | A8MT79 | -1.0237    |
| 107829 | Q85601 | Q9H3U1 | -0.22684   |
| 107830 | Q85601 | Q8N7C3 | -0.39187   |
| 107831 | Q85601 | Q9BWQ6 | -0.90533   |
| 107832 | Q85601 | Q8N128 | -0.2031    |
| 107833 | Q85601 | Q8WZ69 | -0.88768   |
| 107834 | Q85601 | P0C623 | -1.2621    |
| 107835 | Q85601 | Q9P241 | -0.67364   |
| 107836 | Q85601 | A8MXZ1 | -0.32255   |
| 107837 | Q85601 | Q6UWJ8 | -0.99043   |
| 107838 | Q85601 | Q8NFV4 | -0.2321    |
| 107839 | Q85601 | Q9UK96 | -0.36484   |
| 107840 | Q85601 | Q8N4S0 | -0.092462  |
| 107841 | Q85601 | P52848 | -0.42419   |
| 107842 | Q85601 | Q8N3F0 | -0.22182   |
| 107843 | Q85601 | Q5TG53 | -0.2031    |
| 107844 | Q85601 | P11487 | -0.34636   |



|        |        |        |           |
|--------|--------|--------|-----------|
| 107845 | Q85601 | P01732 | -0.87522  |
| 107846 | Q85601 | Q8N9C0 | -0.2275   |
| 107847 | Q85601 | Q5VV41 | -0.23017  |
| 107848 | Q85601 | Q96T83 | -0.38284  |
| 107849 | Q85601 | Q6PIY2 | -0.41177  |
| 107850 | Q85601 | Q9BYV2 | -0.60797  |
| 107851 | Q85601 | P80419 | -0.92206  |
| 107852 | Q85601 | Q13546 | -0.22741  |
| 107853 | Q85601 | Q6V702 | -0.089177 |
| 107854 | Q85601 | Q9H6X5 | -0.21322  |
| 107855 | Q85601 | Q7L7X3 | -0.57782  |
| 107856 | Q85601 | P42680 | -1.0315   |
| 107857 | Q85601 | Q96NF6 | -0.92686  |
| 107858 | Q85601 | Q6ZV80 | -0.88226  |
| 107859 | Q85601 | Q14849 | -0.80399  |
| 107860 | Q85601 | Q9Y6J3 | -0.49132  |
| 107861 | Q85601 | P06702 | -0.229    |
| 107862 | Q85601 | O00453 | -0.93107  |
| 107863 | Q85601 | P30101 | -0.26247  |
| 107864 | Q85601 | Q0D2K2 | -0.20358  |
| 107865 | Q85601 | P33151 | -0.55476  |
| 107866 | Q85601 | Q8NGR9 | -1.2621   |
| 107867 | Q85601 | Q9UF47 | -0.54747  |
| 107868 | Q85601 | O14633 | -0.22686  |
| 107869 | Q85601 | O75829 | -1.399    |
| 107870 | Q85601 | Q6BEB4 | -0.22087  |
| 107871 | Q85601 | P56704 | -0.24552  |
| 107872 | Q85601 | O76000 | -1.2621   |
| 107873 | Q85601 | Q8IYB5 | -0.72758  |
| 107874 | Q85601 | Q8WZA9 | -0.092462 |
| 107875 | Q85601 | P28845 | -1.2949   |
| 107876 | Q85601 | P01859 | -1.0489   |
| 107877 | Q85601 | Q6ZVD7 | -0.80139  |
| 107878 | Q85601 | Q6DKJ4 | -0.18432  |
| 107879 | Q85601 | P68363 | -0.19372  |
| 107880 | Q85601 | Q9H857 | -0.26641  |
| 107881 | Q85601 | Q9NTJ4 | -0.30052  |
| 107882 | Q85601 | Q9BWW9 | -0.86403  |
| 107883 | Q85601 | Q9BQI3 | -0.80352  |
| 107884 | Q85601 | Q9BYE3 | -0.31607  |
| 107885 | Q85601 | Q6P1J6 | -0.78265  |
| 107886 | Q85601 | Q92974 | -0.22746  |
| 107887 | Q85601 | Q8IWB1 | -0.55752  |
| 107888 | Q85601 | Q9BYI3 | -0.45834  |
| 107889 | Q85601 | P30679 | -0.88611  |
| 107890 | Q85601 | Q03431 | -0.8175   |
| 107891 | Q85601 | Q5TON5 | -0.22741  |
| 107892 | Q85601 | Q8WX94 | -0.81985  |
| 107893 | Q85601 | Q07343 | -0.22466  |
| 107894 | Q85601 | Q6NSI4 | -0.51097  |
| 107895 | Q85601 | O14921 | -0.22817  |
| 107896 | Q85601 | Q9BYC5 | -0.53409  |
| 107897 | Q85601 | Q8NEJ0 | -0.37652  |
| 107898 | Q85601 | P32004 | -0.63196  |
| 107899 | Q85601 | Q8IVN8 | -0.94833  |
| 107900 | Q85601 | O00623 | -0.39413  |
| 107901 | Q85601 | Q9Y6Q1 | -0.29625  |
| 107902 | Q85601 | P08684 | -0.5662   |
| 107903 | Q85601 | O14966 | -1.0189   |
| 107904 | Q85601 | O00481 | -0.35463  |
| 107905 | Q85601 | P48067 | -0.92556  |
| 107906 | Q85601 | Q969E2 | -0.64065  |
| 107907 | Q85601 | Q9HCY8 | -0.25594  |
| 107908 | Q85601 | Q92886 | -0.22868  |
| 107909 | Q85601 | P54922 | -0.26178  |
| 107910 | Q85601 | P57078 | -0.50743  |
| 107911 | Q85601 | Q8TAB3 | -1.246    |
| 107912 | Q85601 | Q86UU1 | -0.44245  |
| 107913 | Q85601 | Q6MZW2 | -0.96646  |
| 107914 | Q85601 | A6NCX1 | -0.28465  |
| 107915 | Q85601 | A8MQB3 | -0.60531  |
| 107916 | Q85601 | Q96IT6 | -0.2031   |
| 107917 | Q85601 | Q9C0K7 | -0.22951  |
| 107918 | Q85601 | P51788 | -0.79678  |
| 107919 | Q85601 | Q9Y337 | -0.85172  |
| 107920 | Q85601 | P05026 | -0.47612  |

|        |        |        |           |
|--------|--------|--------|-----------|
| 107921 | Q85601 | P51160 | -1.0494   |
| 107922 | Q85601 | Q9BYF1 | -0.98003  |
| 107923 | Q85601 | O43525 | -0.94938  |
| 107924 | Q85601 | P49768 | -0.22366  |
| 107925 | Q85601 | A2RU49 | -0.3873   |
| 107926 | Q85601 | C9JR72 | -0.20909  |
| 107927 | Q85601 | Q8NH85 | -1.2621   |
| 107928 | Q85601 | Q9BZG1 | -0.81692  |
| 107929 | Q85601 | P29017 | -1.0473   |
| 107930 | Q85601 | Q86YR6 | -0.55752  |
| 107931 | Q85601 | Q9BUE6 | -0.16398  |
| 107932 | Q85601 | Q58DX5 | -1.246    |
| 107933 | Q85601 | Q5I7T1 | -0.98062  |
| 107934 | Q85601 | Q6P2P2 | -0.18963  |
| 107935 | Q85601 | Q16665 | -0.2538   |
| 107936 | Q85601 | Q13555 | -0.90761  |
| 107937 | Q85601 | Q9Y3A4 | -0.896    |
| 107938 | Q85601 | A6NCM1 | -0.81985  |
| 107939 | Q85601 | Q01740 | -0.83143  |
| 107940 | Q85601 | P60903 | -0.60047  |
| 107941 | Q85601 | Q96A32 | -0.42025  |
| 107942 | Q85601 | Q6ZRI8 | -1.0442   |
| 107943 | Q85601 | Q6WQI6 | -0.696    |
| 107944 | Q85601 | Q7Z6B7 | -0.60376  |
| 107945 | Q85601 | Q9Y5Y0 | -0.43588  |
| 107946 | Q85601 | Q9BYZ8 | -0.89494  |
| 107947 | Q85601 | Q9UNE2 | -0.21315  |
| 107948 | Q85601 | Q92623 | -0.2152   |
| 107949 | Q85601 | Q6V0L0 | -0.94127  |
| 107950 | Q85601 | Q6P5W5 | -0.79672  |
| 107951 | Q85601 | Q96DD7 | -0.92686  |
| 107952 | Q85601 | Q6ZW76 | -0.22742  |
| 107953 | Q85601 | P30038 | -0.39407  |
| 107954 | Q85601 | O75636 | -0.6679   |
| 107955 | Q85601 | Q8WUQ7 | -0.21519  |
| 107956 | Q85601 | A8K0R7 | -0.589    |
| 107957 | Q85601 | Q96M34 | -0.33358  |
| 107958 | Q85601 | Q8TAL6 | -0.73461  |
| 107959 | Q85601 | Q13069 | -0.67238  |
| 107960 | Q85601 | Q8N967 | -0.92686  |
| 107961 | Q85601 | Q13586 | -0.3621   |
| 107962 | Q85601 | Q8TAX0 | -0.1906   |
| 107963 | Q85601 | Q8TEU8 | -0.73566  |
| 107964 | Q85601 | P10451 | -0.74779  |
| 107965 | Q85601 | Q8TEQ0 | -0.48411  |
| 107966 | Q85601 | Q9H2S6 | -0.81885  |
| 107967 | Q85601 | P60893 | -1.3443   |
| 107968 | Q85601 | O00499 | -0.22758  |
| 107969 | Q85601 | Q9H7Z3 | -0.18472  |
| 107970 | Q85601 | Q9P2K1 | -0.2456   |
| 107971 | Q85601 | A6NDL8 | -1.2621   |
| 107972 | Q85601 | Q96P50 | -1.1078   |
| 107973 | Q85601 | Q7Z2H8 | -0.83032  |
| 107974 | Q85601 | Q969L2 | -0.21985  |
| 107975 | Q85601 | Q2M1Z3 | -1.2436   |
| 107976 | Q85601 | P25025 | -1.1547   |
| 107977 | Q85601 | A6NDX4 | -0.92686  |
| 107978 | Q85601 | P05106 | -0.38875  |
| 107979 | Q85601 | Q86XR7 | -0.35429  |
| 107980 | Q85601 | O75094 | -0.70528  |
| 107981 | Q85601 | Q8NA66 | -0.27027  |
| 107982 | Q85601 | O00451 | -0.5375   |
| 107983 | Q85601 | O95382 | -1.2689   |
| 107984 | Q85601 | Q9NUN5 | -0.85999  |
| 107985 | Q85601 | Q99788 | -0.92286  |
| 107986 | Q85601 | P10720 | -0.95762  |
| 107987 | Q85601 | P16401 | -0.62572  |
| 107988 | Q85601 | Q9UI08 | -0.22688  |
| 107989 | Q85601 | Q9UHM6 | -1.1992   |
| 107990 | Q85601 | Q29974 | -0.55261  |
| 107991 | Q85601 | Q8TB37 | -0.69084  |
| 107992 | Q85601 | Q6XXX2 | -0.27335  |
| 107993 | Q85601 | Q9ULI4 | -0.36152  |
| 107994 | Q85601 | Q1KMD3 | -0.22506  |
| 107995 | Q85601 | Q96NU1 | -0.019162 |
| 107996 | Q85601 | Q6WRX3 | -0.25224  |

|        |        |        |           |
|--------|--------|--------|-----------|
| 107997 | Q85601 | Q9NQ90 | -0.45682  |
| 107998 | Q85601 | Q9HDC5 | -0.86913  |
| 107999 | Q85601 | Q8TCY9 | -0.33066  |
| 108000 | Q85601 | A6NNN8 | -0.9929   |
| 108001 | Q85601 | Q13443 | -0.63531  |
| 108002 | Q85601 | P78415 | -0.2365   |
| 108003 | Q85601 | Q6ZTK2 | -0.62114  |
| 108004 | Q85601 | Q8N8Z3 | -0.85983  |
| 108005 | Q85601 | Q6ZVD8 | -0.2293   |
| 108006 | Q85601 | Q6ZSZ6 | -0.22481  |
| 108007 | Q85601 | Q07864 | -0.26386  |
| 108008 | Q85601 | O95785 | -0.27324  |
| 108009 | Q85601 | Q9HD45 | -1.0011   |
| 108010 | Q85601 | P10070 | -0.22717  |
| 108011 | Q85601 | P49418 | -0.22741  |
| 108012 | Q85601 | P67812 | -0.82239  |
| 108013 | Q85601 | A6NHN0 | -0.96335  |
| 108014 | Q85601 | P01213 | -0.88713  |
| 108015 | Q85601 | Q8NCI6 | -0.28515  |
| 108016 | Q85601 | O95936 | -0.50118  |
| 108017 | Q85601 | Q6ZSA8 | -0.2031   |
| 108018 | Q85601 | Q9H8W5 | -0.22742  |
| 108019 | Q85601 | Q14134 | -0.58711  |
| 108020 | Q85601 | Q86V21 | -0.48308  |
| 108021 | Q85601 | Q8TDW5 | -0.24021  |
| 108022 | Q85601 | A5D8V7 | -0.038886 |
| 108023 | Q85601 | O75891 | -0.39582  |
| 108024 | Q85601 | A6NGQ2 | -0.061197 |
| 108025 | Q85601 | Q8N945 | -0.15485  |
| 108026 | Q85601 | Q7Z5G4 | -0.22315  |
| 108027 | Q85601 | Q9NS40 | -1.0261   |
| 108028 | Q85601 | Q6UWU2 | -0.74675  |
| 108029 | Q85601 | Q9H7T0 | -1.0914   |
| 108030 | Q85601 | Q8WWI1 | -0.22708  |
| 108031 | Q85601 | Q9BRB3 | -0.77348  |
| 108032 | Q85601 | P14780 | -0.39775  |
| 108033 | Q85601 | Q99798 | -0.12748  |
| 108034 | Q85601 | Q9Y228 | -0.29083  |
| 108035 | Q85601 | O75648 | -0.44223  |
| 108036 | Q85601 | Q92956 | -0.51664  |
| 108037 | Q85601 | P49019 | -1.4115   |
| 108038 | Q85601 | A6NDI0 | -0.589    |
| 108039 | Q85601 | P25103 | -0.86037  |
| 108040 | Q85601 | Q495W5 | -0.68845  |
| 108041 | Q85601 | Q8NGC4 | -1.2621   |
| 108042 | Q85601 | Q96RJ3 | -1.0037   |
| 108043 | Q85601 | C9J2P7 | -0.66238  |
| 108044 | Q85601 | Q86UT5 | -0.22739  |
| 108045 | Q85601 | P59051 | -0.43167  |
| 108046 | Q85601 | Q8NGC2 | -1.2621   |
| 108047 | Q85601 | O15209 | -0.22518  |
| 108048 | Q85601 | P0CG08 | -0.59595  |
| 108049 | Q85601 | Q8N8Q1 | -0.88661  |
| 108050 | Q85601 | Q7L4S7 | -0.92686  |
| 108051 | Q85601 | Q96DS6 | -0.92686  |
| 108052 | Q85601 | P78412 | -0.22984  |
| 108053 | Q85601 | P84095 | -0.39284  |
| 108054 | Q85601 | Q8TAL5 | -0.51642  |
| 108055 | Q85601 | Q8N9B4 | -0.22741  |
| 108056 | Q85601 | Q2MJR0 | -0.6356   |
| 108057 | Q85601 | Q49A92 | -0.48341  |
| 108058 | Q85601 | P36575 | -0.48448  |
| 108059 | Q85601 | Q9NNX6 | -0.99339  |
| 108060 | Q85601 | Q9Y5R8 | -0.28306  |
| 108061 | Q85601 | Q9H209 | -1.2621   |
| 108062 | Q85601 | Q5HYA8 | -0.27175  |
| 108063 | Q85601 | P01160 | -0.31223  |
| 108064 | Q85601 | O14727 | -0.22896  |
| 108065 | Q85601 | Q9C0H9 | -0.32631  |
| 108066 | Q85601 | A6NIJ5 | -0.32255  |
| 108067 | Q85601 | Q8NC69 | -0.11628  |
| 108068 | Q85601 | Q9H2W1 | -0.92686  |
| 108069 | Q85601 | Q8NCG7 | -0.8524   |
| 108070 | Q85601 | P04179 | -0.18354  |
| 108071 | Q85601 | Q5JQC4 | -0.2031   |
| 108072 | Q85601 | Q96E66 | -0.22741  |

|        |        |        |          |
|--------|--------|--------|----------|
| 108073 | Q85601 | P08575 | -0.3459  |
| 108074 | Q85601 | Q6IPT4 | -0.57924 |
| 108075 | Q85601 | O43166 | -0.29138 |
| 108076 | Q85601 | Q6ZSM3 | -0.9485  |
| 108077 | Q85601 | Q01638 | -0.91119 |
| 108078 | Q85601 | O00628 | -0.22734 |
| 108079 | Q85601 | Q9C026 | -0.62171 |
| 108080 | Q85601 | Q562E7 | -0.36748 |
| 108081 | Q85601 | Q9BRL6 | -0.64145 |
| 108082 | Q85601 | Q15475 | -0.22752 |
| 108083 | Q85601 | Q9NPF7 | -0.42924 |
| 108084 | Q85601 | Q9BS91 | -0.68527 |
| 108085 | Q85601 | Q16288 | -1.0497  |
| 108086 | Q85601 | Q8TD57 | -0.57173 |
| 108087 | Q85601 | A6NJ08 | -0.06433 |
| 108088 | Q85601 | Q5NUL3 | -1.1944  |
| 108089 | Q85601 | Q69384 | -0.7596  |
| 108090 | Q85601 | Q9NRP7 | -0.36792 |
| 108091 | Q85601 | Q00604 | -0.71149 |
| 108092 | Q85601 | P47884 | -1.3404  |
| 108093 | Q85601 | Q96CQ1 | -0.67164 |
| 108094 | Q85601 | Q6EBC2 | -0.89837 |
| 108095 | Q85601 | Q8IWX8 | -0.17363 |
| 108096 | Q85601 | A6NN79 | -0.92686 |
| 108097 | Q85601 | Q8NC56 | -0.32055 |
| 108098 | Q85601 | P20036 | -0.75692 |
| 108099 | Q85601 | Q9HDB9 | -0.28681 |
| 108100 | Q85601 | P30459 | -0.93461 |
| 108101 | Q85601 | Q9H8Y1 | -0.38784 |
| 108102 | Q85601 | Q155Q3 | -0.22741 |
| 108103 | Q85601 | Q96CE8 | -0.92686 |
| 108104 | Q85601 | Q7Z553 | -0.59989 |
| 108105 | Q85601 | P35318 | -0.32234 |
| 108106 | Q85601 | O00238 | -0.77063 |
| 108107 | Q85601 | Q9H2A2 | -0.67843 |
| 108108 | Q85601 | Q8N474 | -0.38941 |
| 108109 | Q85601 | Q8N5H7 | -0.68068 |
| 108110 | Q85601 | Q71DI3 | -0.5153  |
| 108111 | Q85601 | Q8NH72 | -1.2621  |
| 108112 | Q85601 | P21281 | -0.38741 |
| 108113 | Q85601 | O95164 | -0.81166 |
| 108114 | Q85601 | O75365 | -0.82939 |
| 108115 | Q85601 | Q99958 | -0.28202 |
| 108116 | Q85601 | P48058 | -0.9971  |
| 108117 | Q85601 | Q69YG0 | -0.92686 |
| 108118 | Q85601 | Q8N616 | -0.2031  |
| 108119 | Q85601 | P46098 | -0.92317 |
| 108120 | Q85601 | P0C263 | -1.2086  |
| 108121 | Q85601 | P45983 | -0.22741 |
| 108122 | Q85601 | Q50LG9 | -0.92686 |
| 108123 | Q85601 | Q02318 | -0.41776 |
| 108124 | Q85601 | P05452 | -0.86107 |
| 108125 | Q85601 | P15814 | -1.0409  |
| 108126 | Q85601 | Q7Z7M8 | -0.71356 |
| 108127 | Q85601 | Q8WUA8 | -0.9043  |
| 108128 | Q85601 | Q9UP79 | -1.224   |
| 108129 | Q85601 | Q9H2S9 | -0.32588 |
| 108130 | Q85601 | P49279 | -0.39996 |
| 108131 | Q85601 | Q02156 | -0.24869 |
| 108132 | Q85601 | Q969M3 | -0.42846 |
| 108133 | Q85601 | P29597 | -0.73968 |
| 108134 | Q85601 | Q95567 | -0.2031  |
| 108135 | Q85601 | Q86VW2 | -0.61838 |
| 108136 | Q85601 | P49069 | -0.38037 |
| 108137 | Q85601 | Q8IZE3 | -0.22734 |
| 108138 | Q85601 | A6NJ69 | -0.9043  |
| 108139 | Q85601 | O60911 | -0.47056 |
| 108140 | Q85601 | Q8TCU5 | -0.418   |
| 108141 | Q85601 | Q96RU8 | -0.22888 |
| 108142 | Q85601 | Q9NPR9 | -0.92686 |
| 108143 | Q85601 | Q49A88 | -0.13417 |
| 108144 | Q85601 | Q496H8 | -0.49263 |
| 108145 | Q85601 | Q8N5V2 | -0.82449 |
| 108146 | Q85601 | Q8IW45 | -0.53204 |
| 108147 | Q85601 | Q86YD7 | -0.32255 |
| 108148 | Q85601 | Q7Z7H3 | -0.50989 |

|        |        |        |          |
|--------|--------|--------|----------|
| 108149 | Q85601 | Q8N852 | -0.92686 |
| 108150 | Q85601 | Q8NG94 | -1.2621  |
| 108151 | Q85601 | Q86SE5 | -0.896   |
| 108152 | Q85601 | O60262 | -0.54409 |
| 108153 | Q85601 | Q9Y2U8 | -0.28835 |
| 108154 | Q85601 | Q7RTZ1 | -1.3852  |
| 108155 | Q85601 | P48146 | -0.75902 |
| 108156 | Q85601 | Q9UKT6 | -0.39658 |
| 108157 | Q85601 | Q8NFP4 | -0.72317 |
| 108158 | Q85601 | O14810 | -0.33795 |
| 108159 | Q85601 | Q9NR19 | -0.24623 |
| 108160 | Q85601 | Q08AF3 | -0.57921 |
| 108161 | Q85601 | O43464 | -0.22497 |
| 108162 | Q85601 | Q8N687 | -0.86864 |
| 108163 | Q85601 | P26992 | -0.5135  |
| 108164 | Q85601 | Q2UY09 | -1.1095  |
| 108165 | Q85601 | Q9P2V4 | -0.80019 |
| 108166 | Q85601 | Q9P2S2 | -0.94142 |
| 108167 | Q85601 | Q9NQG1 | -0.92686 |
| 108168 | Q85601 | Q53GG5 | -0.23279 |
| 108169 | Q85601 | O00294 | -0.35654 |
| 108170 | Q85601 | Q96C01 | -0.42884 |
| 108171 | Q85601 | O75144 | -1.145   |
| 108172 | Q85601 | Q9NVH1 | -0.28779 |
| 108173 | Q85601 | I3L273 | -1.207   |
| 108174 | Q85601 | Q8WWN8 | -0.83046 |
| 108175 | Q85601 | P01763 | -1.046   |
| 108176 | Q85601 | O75596 | -0.97629 |
| 108177 | Q85601 | P42261 | -0.57198 |
| 108178 | Q85601 | P18089 | -0.60157 |
| 108179 | Q85601 | O15146 | -0.91815 |
| 108180 | Q85601 | P08253 | -0.67954 |
| 108181 | Q85601 | P16104 | -0.42369 |
| 108182 | Q85601 | O75489 | -0.23561 |
| 108183 | Q85601 | Q13336 | -0.96235 |
| 108184 | Q85601 | Q8TDJ6 | -0.51474 |
| 108185 | Q85601 | Q9Y2E5 | -0.71565 |
| 108186 | Q85601 | P54646 | -0.28099 |
| 108187 | Q85601 | O60674 | -0.25493 |
| 108188 | Q85601 | Q96G46 | -0.63884 |
| 108189 | Q85601 | Q9NVT9 | -0.54703 |
| 108190 | Q85601 | Q9H0H0 | -0.27219 |
| 108191 | Q85601 | Q5JSL3 | -0.42255 |
| 108192 | Q85601 | Q9Y4F3 | -0.83098 |
| 108193 | Q85601 | Q9H9B4 | -0.77432 |
| 108194 | Q85601 | P01909 | -0.77219 |
| 108195 | Q85601 | A6PVI3 | -0.85824 |
| 108196 | Q85601 | Q86WI1 | -0.80534 |
| 108197 | Q85601 | O95843 | -0.6258  |
| 108198 | Q85601 | O15121 | -0.93758 |
| 108199 | Q85601 | A8MZ36 | -0.20477 |
| 108200 | Q85601 | P28482 | -0.22741 |
| 108201 | Q85601 | Q8N6M8 | -0.22382 |
| 108202 | Q85601 | P24530 | -0.84768 |
| 108203 | Q85601 | O75063 | -1.2088  |
| 108204 | Q85601 | Q5TA79 | -0.31607 |
| 108205 | Q85601 | A0PJX0 | -0.39878 |
| 108206 | Q85601 | Q9P0V9 | -0.38863 |
| 108207 | Q85601 | P16615 | -0.87375 |
| 108208 | Q85601 | P16035 | -0.80227 |
| 108209 | Q85601 | A5PLL7 | -1.0116  |
| 108210 | Q85601 | P09210 | -0.22673 |
| 108211 | Q85601 | Q96HD9 | -0.30579 |
| 108212 | Q85601 | Q8IYP2 | -1.3764  |
| 108213 | Q85601 | O00115 | -0.58136 |
| 108214 | Q85601 | Q9UM44 | -0.67993 |
| 108215 | Q85601 | Q9H4E7 | -0.22741 |
| 108216 | Q85601 | P07148 | -0.22369 |
| 108217 | Q85601 | P38398 | -0.22713 |
| 108218 | Q85601 | P57059 | -0.34771 |
| 108219 | Q85601 | O95696 | -0.22361 |
| 108220 | Q85601 | Q8NGL6 | -1.2621  |
| 108221 | Q85601 | Q96GF1 | -0.81376 |
| 108222 | Q85601 | O43147 | -0.9791  |
| 108223 | Q85601 | Q9NRX5 | -0.50876 |
| 108224 | Q85601 | Q30KP8 | -0.86864 |

|        |        |        |           |
|--------|--------|--------|-----------|
| 108225 | Q85601 | P20848 | -0.72076  |
| 108226 | Q85601 | Q8N5C7 | -0.69187  |
| 108227 | Q85601 | Q58FF6 | -0.56805  |
| 108228 | Q85601 | A6NCV1 | -1.2621   |
| 108229 | Q85601 | Q7Z4J2 | -0.73636  |
| 108230 | Q85601 | P16591 | -0.4322   |
| 108231 | Q85601 | O76074 | -0.41558  |
| 108232 | Q85601 | Q86SQ0 | -0.42581  |
| 108233 | Q85601 | Q0ZGT2 | -0.23962  |
| 108234 | Q85601 | Q6EMB2 | -0.20062  |
| 108235 | Q85601 | Q9H765 | -0.2274   |
| 108236 | Q85601 | Q30KQ9 | -0.86864  |
| 108237 | Q85601 | P01375 | -0.24737  |
| 108238 | Q85601 | O95749 | -0.1473   |
| 108239 | Q85601 | Q8N614 | -0.92686  |
| 108240 | Q85601 | Q9NZG7 | -1.0488   |
| 108241 | Q85601 | Q9NPD5 | -0.71243  |
| 108242 | Q85601 | P13688 | -0.86201  |
| 108243 | Q85601 | P05015 | -0.78863  |
| 108244 | Q85601 | Q9NRR2 | -1.443    |
| 108245 | Q85601 | Q13519 | -1.0051   |
| 108246 | Q85601 | Q8TDY8 | -1.0386   |
| 108247 | Q85601 | O43312 | -0.28598  |
| 108248 | Q85601 | P00414 | -0.53039  |
| 108249 | Q85601 | Q8N7E2 | -0.4456   |
| 108250 | Q85601 | Q9HCU5 | -0.22741  |
| 108251 | Q85601 | Q6UXZ4 | -1.0743   |
| 108252 | Q85601 | P61026 | -0.59781  |
| 108253 | Q85601 | O75995 | -0.22737  |
| 108254 | Q85601 | Q7L4E1 | -0.92686  |
| 108255 | Q85601 | O75631 | -0.82819  |
| 108256 | Q85601 | Q969H9 | -0.2031   |
| 108257 | Q85601 | Q9UK22 | -0.19278  |
| 108258 | Q85601 | O14594 | -0.80119  |
| 108259 | Q85601 | Q2WGN9 | -0.44245  |
| 108260 | Q85601 | O43699 | -1.724    |
| 108261 | Q85601 | Q9Y581 | -0.70159  |
| 108262 | Q85601 | Q8TDX5 | -0.36964  |
| 108263 | Q85601 | Q96I34 | -0.22739  |
| 108264 | Q85601 | A6NCS4 | -0.27119  |
| 108265 | Q85601 | Q9H9S5 | -1.1331   |
| 108266 | Q85601 | Q9BZD3 | -0.27046  |
| 108267 | Q85601 | Q8NFD2 | -1.2086   |
| 108268 | Q85601 | Q9UBK8 | -0.4043   |
| 108269 | Q85601 | Q8TAD7 | -0.092462 |
| 108270 | Q85601 | P59817 | -0.22715  |
| 108271 | Q85601 | Q92752 | -0.39705  |
| 108272 | Q85601 | P55211 | -0.22543  |
| 108273 | Q85601 | Q15843 | -0.22296  |
| 108274 | Q85601 | Q2PZI1 | -0.92686  |
| 108275 | Q85601 | Q04844 | -1.0296   |
| 108276 | Q85601 | Q5VZ52 | -0.14636  |
| 108277 | Q85601 | Q9UBG0 | -1.0004   |
| 108278 | Q85601 | Q9NU39 | -0.43379  |
| 108279 | Q85601 | Q8NFM4 | -0.9043   |
| 108280 | Q85601 | Q3SY77 | -0.92767  |
| 108281 | Q85601 | Q969N4 | -1.31     |
| 108282 | Q85601 | A6NKT7 | -0.46976  |
| 108283 | Q85601 | O75071 | -0.39878  |
| 108284 | Q85601 | Q9BXJ4 | -0.47495  |
| 108285 | Q85601 | O95685 | -0.11258  |
| 108286 | Q85601 | P32942 | -0.80806  |
| 108287 | Q85601 | O15165 | -0.8895   |
| 108288 | Q85601 | P59535 | -1.2301   |
| 108289 | Q85601 | Q96E40 | -0.26256  |
| 108290 | Q85601 | Q9BQL6 | -0.49681  |
| 108291 | Q85601 | Q9BW62 | -0.57155  |
| 108292 | Q85601 | Q6UXB0 | -0.9043   |
| 108293 | Q85601 | P01779 | -1.046    |
| 108294 | Q85601 | A6NEN9 | -0.21595  |
| 108295 | Q85601 | O60840 | -0.84425  |
| 108296 | Q85601 | Q8IVL0 | -0.59996  |
| 108297 | Q85601 | Q8IVU3 | -0.2889   |
| 108298 | Q85601 | O14514 | -1.5112   |
| 108299 | Q85601 | Q8NDX2 | -0.79141  |
| 108300 | Q85601 | Q6VEQ5 | -0.44711  |

|        |        |        |           |
|--------|--------|--------|-----------|
| 108301 | Q85601 | Q96PV0 | -0.65832  |
| 108302 | Q85601 | Q8N7U9 | -0.49933  |
| 108303 | Q85601 | P10319 | -1.1017   |
| 108304 | Q85601 | Q13683 | -0.70109  |
| 108305 | Q85601 | Q9H4K7 | -0.7378   |
| 108306 | Q85601 | Q8NHY3 | -0.21575  |
| 108307 | Q85601 | Q8IXL7 | -0.50537  |
| 108308 | Q85601 | Q5SY13 | -0.2031   |
| 108309 | Q85601 | Q969P6 | -0.44677  |
| 108310 | Q85601 | P11912 | -0.95125  |
| 108311 | Q85601 | Q9ULL5 | -0.39822  |
| 108312 | Q85601 | Q7LGA3 | -0.54394  |
| 108313 | Q85601 | Q9BUN8 | -0.10854  |
| 108314 | Q85601 | P09488 | -0.22375  |
| 108315 | Q85601 | Q9BXA9 | -0.19189  |
| 108316 | Q85601 | Q9H061 | -0.64551  |
| 108317 | Q85601 | O43313 | -0.22741  |
| 108318 | Q85601 | Q96JD6 | -0.34182  |
| 108319 | Q85601 | Q99541 | -0.30107  |
| 108320 | Q85601 | P04040 | -0.35578  |
| 108321 | Q85601 | Q92838 | -0.95888  |
| 108322 | Q85601 | Q9H1R2 | -0.28454  |
| 108323 | Q85601 | Q8N6V9 | -0.071919 |
| 108324 | Q85601 | Q99835 | -0.25931  |
| 108325 | Q85601 | Q9NRM0 | -0.64286  |
| 108326 | Q85601 | O00468 | -0.50951  |
| 108327 | Q85601 | A0PK05 | -0.92686  |
| 108328 | Q85601 | P21964 | -0.27361  |
| 108329 | Q85601 | P98153 | -0.98472  |
| 108330 | Q85601 | Q92841 | -0.59032  |
| 108331 | Q85601 | O43677 | -0.5043   |
| 108332 | Q85601 | Q8NBX0 | -0.67382  |
| 108333 | Q85601 | Q8IXR9 | -0.22542  |
| 108334 | Q85601 | P49137 | -0.23044  |
| 108335 | Q85601 | Q9NWW6 | -0.91033  |
| 108336 | Q85601 | O95467 | -0.78666  |
| 108337 | Q85601 | Q96LR9 | -1.7416   |
| 108338 | Q85601 | P59510 | -1.0906   |
| 108339 | Q85601 | Q9ULL8 | -0.22669  |
| 108340 | Q85601 | Q5T2T1 | -0.2245   |
| 108341 | Q85601 | Q9BSK4 | -0.22749  |
| 108342 | Q85601 | Q96AC6 | -0.52038  |
| 108343 | Q85601 | E9PJ23 | -0.22178  |
| 108344 | Q85601 | Q96AY4 | -0.2274   |
| 108345 | Q85601 | Q8N104 | -0.86864  |
| 108346 | Q85601 | Q8N4S7 | -0.92686  |
| 108347 | Q85601 | Q96LT4 | -0.81009  |
| 108348 | Q85601 | Q8N2M4 | -0.92686  |
| 108349 | Q85601 | Q96NC0 | -0.39438  |
| 108350 | Q85601 | Q9BVC6 | -0.080871 |
| 108351 | Q85601 | Q9UBL6 | -0.3807   |
| 108352 | Q85601 | P0C0E4 | -0.84588  |
| 108353 | Q85601 | Q92685 | -0.8633   |
| 108354 | Q85601 | P07357 | -1.457    |
| 108355 | Q85601 | Q9UGI8 | -0.69976  |
| 108356 | Q85601 | Q8N3P4 | -0.29575  |
| 108357 | Q85601 | Q6ZSV7 | -0.82349  |
| 108358 | Q85601 | Q9Y6M9 | -0.15511  |
| 108359 | Q85601 | P47736 | -0.23138  |
| 108360 | Q85601 | P55774 | -0.74207  |
| 108361 | Q85601 | Q96A58 | -0.64365  |
| 108362 | Q85601 | Q9Y243 | -0.26395  |
| 108363 | Q85601 | Q96LM5 | -0.17166  |
| 108364 | Q85601 | A8MWC7 | -0.53262  |
| 108365 | Q85601 | Q8NGU1 | -1.2621   |
| 108366 | Q85601 | Q96SL1 | -0.97357  |
| 108367 | Q85601 | Q7Z5B4 | -0.70842  |
| 108368 | Q85601 | O75600 | -0.14015  |
| 108369 | Q85601 | Q13191 | -0.22741  |
| 108370 | Q85601 | Q99679 | -1.4753   |
| 108371 | Q85601 | Q9BXS4 | -0.66438  |
| 108372 | Q85601 | Q9NQX0 | -0.10303  |
| 108373 | Q85601 | Q8TBP5 | -0.92686  |
| 108374 | Q85601 | Q9UI25 | -0.2031   |
| 108375 | Q85601 | P52566 | -0.53742  |
| 108376 | Q85601 | O60359 | -0.99872  |

|        |        |        |          |
|--------|--------|--------|----------|
| 108377 | Q85601 | P58012 | -0.43379 |
| 108378 | Q85601 | Q401N2 | -0.9237  |
| 108379 | Q85601 | Q8IU54 | -0.74136 |
| 108380 | Q85601 | Q53RD9 | -1.2271  |
| 108381 | Q85601 | Q06520 | -0.23432 |
| 108382 | Q85601 | P56180 | -1.3878  |
| 108383 | Q85601 | Q08117 | -0.42301 |
| 108384 | Q85601 | Q9NZV6 | -0.12116 |
| 108385 | Q85601 | Q8NDV1 | -0.6722  |
| 108386 | Q85601 | Q9HBX8 | -1.31    |
| 108387 | Q85601 | Q96Q40 | -1.0292  |
| 108388 | Q85601 | Q5BJE1 | -0.22872 |
| 108389 | Q85601 | Q8NH69 | -1.2621  |
| 108390 | Q85601 | A8MT70 | -0.589   |
| 108391 | Q85601 | Q9C0D6 | -0.3513  |
| 108392 | Q85601 | P22760 | -0.85352 |
| 108393 | Q85601 | P18505 | -0.96709 |
| 108394 | Q85601 | Q9P2H0 | -0.90591 |
| 108395 | Q85601 | P40197 | -0.9749  |
| 108396 | Q85601 | Q8N531 | -0.51375 |
| 108397 | Q85601 | Q6UWP8 | -0.9043  |
| 108398 | Q85601 | Q86XF0 | -0.33019 |
| 108399 | Q85601 | P20774 | -0.37942 |
| 108400 | Q85601 | P23378 | -0.57786 |
| 108401 | Q85601 | O75251 | -0.21435 |
| 108402 | Q85601 | Q15334 | -0.7247  |
| 108403 | Q85601 | P12034 | -0.7029  |
| 108404 | Q85601 | P13761 | -0.46231 |
| 108405 | Q85601 | Q4G0S4 | -0.6962  |
| 108406 | Q85601 | P20142 | -0.71503 |
| 108407 | Q85601 | O15552 | -1.7039  |
| 108408 | Q85601 | P42126 | -0.30209 |
| 108409 | Q85601 | Q9UJW2 | -1.6037  |
| 108410 | Q85601 | Q9Y4E8 | -0.4068  |
| 108411 | Q85601 | O94988 | -1.1728  |
| 108412 | Q85601 | Q30KQ5 | -1.1815  |
| 108413 | Q85601 | P54756 | -1.0575  |
| 108414 | Q85601 | P42694 | -0.3856  |
| 108415 | Q85601 | P60568 | -0.44221 |
| 108416 | Q85601 | Q9HAD4 | -0.22741 |
| 108417 | Q85601 | Q96HM7 | -0.28116 |
| 108418 | Q85601 | Q9Y2P4 | -1.2822  |
| 108419 | Q85601 | P30457 | -0.93461 |
| 108420 | Q85601 | A6NDD2 | -0.86864 |
| 108421 | Q85601 | Q8N4K4 | -0.92686 |
| 108422 | Q85601 | Q6E213 | -0.87783 |
| 108423 | Q85601 | Q8WU08 | -1.2583  |
| 108424 | Q85601 | Q5T9C9 | -0.92328 |
| 108425 | Q85601 | Q8TD08 | -1.3661  |
| 108426 | Q85601 | Q8WVB3 | -0.26408 |
| 108427 | Q85601 | P08631 | -0.26675 |
| 108428 | Q85601 | Q6P9H4 | -0.22736 |
| 108429 | Q85601 | Q8TAF5 | -0.2031  |
| 108430 | Q85601 | Q7M4L6 | -0.29993 |
| 108431 | Q85601 | Q16512 | -0.21987 |
| 108432 | Q85601 | Q9NTU4 | -0.29788 |
| 108433 | Q85601 | Q16832 | -1.1321  |
| 108434 | Q85601 | P30501 | -1.1574  |
| 108435 | Q85601 | A6NKZ8 | -0.48383 |
| 108436 | Q85601 | Q8TDN2 | -0.84367 |
| 108437 | Q85601 | Q765I0 | -0.88182 |
| 108438 | Q85601 | P85298 | -0.48972 |
| 108439 | Q85601 | A4D2P6 | -0.37024 |
| 108440 | Q85601 | Q9UKL2 | -1.3675  |
| 108441 | Q85601 | P50440 | -0.12632 |
| 108442 | Q85601 | Q8NCN5 | -0.1904  |
| 108443 | Q85601 | Q96R48 | -1.2621  |
| 108444 | Q85601 | O14793 | -0.42269 |
| 108445 | Q85601 | Q09019 | -0.22769 |
| 108446 | Q85601 | Q6UXU4 | -0.92686 |
| 108447 | Q85601 | A6NHY2 | -0.49132 |
| 108448 | Q85601 | Q9NRE1 | -1.2068  |
| 108449 | Q85601 | Q53FP2 | -0.71006 |
| 108450 | Q85601 | Q9Y2Q3 | -0.64609 |
| 108451 | Q85601 | P07498 | -0.87285 |
| 108452 | Q85601 | Q53GS9 | -0.25625 |



|        |        |        |           |
|--------|--------|--------|-----------|
| 108453 | Q85601 | P02656 | -0.60502  |
| 108454 | Q85601 | Q8N2R8 | -0.22456  |
| 108455 | Q85601 | Q9UNI6 | -0.3013   |
| 108456 | Q85601 | Q6ZUT4 | -0.024737 |
| 108457 | Q85601 | Q9NZ32 | -0.11291  |
| 108458 | Q85601 | Q9BVG3 | -0.589    |
| 108459 | Q85601 | Q8N3A8 | -0.64138  |
| 108460 | Q85601 | Q9UKB1 | -0.59282  |
| 108461 | Q85601 | O43908 | -0.90609  |
| 108462 | Q85601 | P09622 | -0.22279  |
| 108463 | Q85601 | Q13464 | -0.3443   |
| 108464 | Q85601 | P42685 | -0.56593  |
| 108465 | Q85601 | Q9UNQ0 | -0.55707  |
| 108466 | Q85601 | P55289 | -1.1748   |
| 108467 | Q85601 | P15248 | -0.78389  |
| 108468 | Q85601 | O94768 | -1.0046   |
| 108469 | Q85601 | Q8NH04 | -1.2621   |
| 108470 | Q85601 | Q7Z7L7 | -0.33326  |
| 108471 | Q85601 | Q66K64 | -0.47601  |
| 108472 | Q85601 | Q9UIV8 | -0.48057  |
| 108473 | Q85601 | Q6XUX3 | -0.63972  |
| 108474 | Q85601 | Q9Y5F2 | -1.2542   |
| 108475 | Q85601 | Q9H1E1 | -0.70047  |
| 108476 | Q85601 | Q9HC38 | -0.15485  |
| 108477 | Q85601 | Q8NE79 | -0.76922  |
| 108478 | Q85601 | Q76N89 | -0.22741  |
| 108479 | Q85601 | Q15582 | -1.2876   |
| 108480 | Q85601 | P23786 | -0.16122  |
| 108481 | Q85601 | Q8N283 | -0.22736  |
| 108482 | Q85601 | Q15428 | -0.17092  |
| 108483 | Q85601 | O15544 | -0.89438  |
| 108484 | Q85601 | P10523 | -0.90356  |
| 108485 | Q85601 | Q86Y39 | -0.54052  |
| 108486 | Q85601 | P22103 | -0.20819  |
| 108487 | Q85601 | Q15347 | -0.72662  |
| 108488 | Q85601 | Q9P2W3 | -0.55696  |
| 108489 | Q85601 | Q8TCA0 | -0.2276   |
| 108490 | Q85601 | P12644 | -0.22741  |
| 108491 | Q85601 | Q9ULV1 | -0.49821  |
| 108492 | Q85601 | Q92959 | -1.0534   |
| 108493 | Q85601 | Q8NEB5 | -0.73836  |
| 108494 | Q85601 | Q9BZE0 | -0.227    |
| 108495 | Q85601 | Q7L775 | -0.34874  |
| 108496 | Q85601 | Q96BQ1 | -0.80752  |
| 108497 | Q85601 | M0R1G4 | -0.32426  |
| 108498 | Q85601 | Q7Z4M0 | -0.83138  |
| 108499 | Q85601 | P11047 | -0.88781  |
| 108500 | Q85601 | Q7Z4I7 | -0.21814  |
| 108501 | Q85601 | Q8N461 | -0.21474  |
| 108502 | Q85601 | P07098 | -0.86411  |
| 108503 | Q85601 | Q6UWW8 | -0.2274   |
| 108504 | Q85601 | Q12907 | -0.41961  |
| 108505 | Q85601 | Q14469 | -0.2257   |
| 108506 | Q85601 | B7ZAP0 | -0.2733   |
| 108507 | Q85601 | Q4FZB7 | -0.21477  |
| 108508 | Q85601 | P00167 | -0.42656  |
| 108509 | Q85601 | P43251 | -0.63306  |
| 108510 | Q85601 | A8TX70 | -1.2159   |
| 108511 | Q85601 | Q14831 | -0.71372  |
| 108512 | Q85601 | Q8N9P0 | -0.66944  |
| 108513 | Q85601 | Q9NS66 | -1.3443   |
| 108514 | Q85601 | Q16517 | -0.38993  |
| 108515 | Q85601 | Q9BVH7 | -0.70631  |
| 108516 | Q85601 | Q1RMZ1 | -0.053895 |
| 108517 | Q85601 | Q969G5 | -0.29718  |
| 108518 | Q85601 | A8MXZ3 | -0.2031   |
| 108519 | Q85601 | Q68D06 | -1.0676   |
| 108520 | Q85601 | Q8IYS5 | -1.5584   |
| 108521 | Q85601 | Q9UJU5 | -0.46295  |
| 108522 | Q85601 | Q9NRJ4 | -0.22324  |
| 108523 | Q85601 | P50542 | -0.22716  |
| 108524 | Q85601 | A2RUU4 | -0.92242  |
| 108525 | Q85601 | Q7Z7F0 | -0.078562 |
| 108526 | Q85601 | B7Z1M9 | -0.097679 |
| 108527 | Q85601 | Q9Y3S1 | -1.1586   |
| 108528 | Q85601 | O14901 | -0.18411  |

|        |        |        |           |
|--------|--------|--------|-----------|
| 108529 | Q85601 | Q8WZ84 | -1.2621   |
| 108530 | Q85601 | Q96KP4 | -0.35805  |
| 108531 | Q85601 | A8MRT5 | -0.92686  |
| 108532 | Q85601 | Q9H2X0 | -0.5924   |
| 108533 | Q85601 | Q9BYC2 | -0.28737  |
| 108534 | Q85601 | Q14165 | -0.81472  |
| 108535 | Q85601 | Q86XZ4 | -0.10147  |
| 108536 | Q85601 | Q96QI5 | -0.5342   |
| 108537 | Q85601 | Q9H9S4 | -0.34293  |
| 108538 | Q85601 | Q8TE96 | -0.42394  |
| 108539 | Q85601 | Q96M98 | -0.20966  |
| 108540 | Q85601 | Q8N865 | -0.062056 |
| 108541 | Q85601 | P06576 | -0.21305  |
| 108542 | Q85601 | Q92729 | -0.7239   |
| 108543 | Q85601 | O43819 | -0.43531  |
| 108544 | Q85601 | O75907 | -0.56202  |
| 108545 | Q85601 | Q6P1R4 | -0.62288  |
| 108546 | Q85601 | O43826 | -0.34545  |
| 108547 | Q85601 | Q8NH49 | -1.2621   |
| 108548 | Q85601 | Q9UPW0 | -0.43379  |
| 108549 | Q85601 | Q8IX05 | -0.82412  |
| 108550 | Q85601 | O15143 | -0.2274   |
| 108551 | Q85601 | Q9H0C2 | -0.7181   |
| 108552 | Q85601 | Q96NT0 | -0.70772  |
| 108553 | Q85601 | Q14694 | -0.29924  |
| 108554 | Q85601 | P41594 | -0.75036  |
| 108555 | Q85601 | Q92781 | -1.0881   |
| 108556 | Q85601 | P48740 | -0.93105  |
| 108557 | Q85601 | Q96PD2 | -1.1451   |
| 108558 | Q85601 | Q05D60 | -0.05463  |
| 108559 | Q85601 | Q9H0R6 | -0.52879  |
| 108560 | Q85601 | A1L3X4 | -0.31263  |
| 108561 | Q85601 | Q68J44 | -0.6051   |
| 108562 | Q85601 | Q9NXH3 | -0.33266  |
| 108563 | Q85601 | Q9BRP0 | -0.22169  |
| 108564 | Q85601 | P35716 | -0.25227  |
| 108565 | Q85601 | Q504Y0 | -0.91096  |
| 108566 | Q85601 | Q5W0A0 | -0.17906  |
| 108567 | Q85601 | Q9GZL8 | -0.18472  |
| 108568 | Q85601 | P01817 | -1.046    |
| 108569 | Q85601 | Q9NYK1 | -0.59219  |
| 108570 | Q85601 | P51690 | -0.35895  |
| 108571 | Q85601 | Q96HC4 | -0.29779  |
| 108572 | Q85601 | P04183 | -0.5264   |
| 108573 | Q85601 | Q9BXM9 | -0.18472  |
| 108574 | Q85601 | Q9Y520 | -0.28953  |
| 108575 | Q85601 | Q8ND94 | -0.92686  |
| 108576 | Q85601 | Q9GZT6 | -0.75013  |
| 108577 | Q85601 | Q7L311 | -0.92686  |
| 108578 | Q85601 | P23368 | -0.67709  |
| 108579 | Q85601 | A4D1B5 | -0.16322  |
| 108580 | Q85601 | Q8N695 | -1.0496   |
| 108581 | Q85601 | Q9P212 | -0.23622  |
| 108582 | Q85601 | Q8NGI3 | -1.2621   |
| 108583 | Q85601 | Q13621 | -0.86312  |
| 108584 | Q85601 | Q6PL18 | -0.24031  |
| 108585 | Q85601 | P53708 | -0.91437  |
| 108586 | Q85601 | Q5VT52 | -0.31899  |
| 108587 | Q85601 | Q9UL54 | -0.66096  |
| 108588 | Q85601 | P57723 | -0.13847  |
| 108589 | Q85601 | O00478 | -0.92686  |
| 108590 | Q85601 | Q9H3V2 | -0.92686  |
| 108591 | Q85601 | Q8TEC5 | -0.2274   |
| 108592 | Q85601 | O60494 | -0.22742  |
| 108593 | Q85601 | O60242 | -1.3782   |
| 108594 | Q85601 | Q9H8Y5 | -0.21164  |
| 108595 | Q85601 | Q8IXI2 | -0.65425  |
| 108596 | Q85601 | A2VEC9 | -1.0984   |
| 108597 | Q85601 | Q6ZMT1 | -0.57591  |
| 108598 | Q85601 | Q14117 | -0.22586  |
| 108599 | Q85601 | P35575 | -0.38754  |
| 108600 | Q85601 | Q9BZW4 | -0.78714  |
| 108601 | Q85601 | Q9UFH2 | -0.42647  |
| 108602 | Q85601 | Q9H0N0 | -0.41032  |
| 108603 | Q85601 | Q8TCG1 | -0.14996  |
| 108604 | Q85601 | Q9Y5P1 | -1.2621   |

|        |        |        |           |
|--------|--------|--------|-----------|
| 108605 | Q85601 | Q8NGH6 | -1.2621   |
| 108606 | Q85601 | P43243 | -0.13021  |
| 108607 | Q85601 | Q8NDV7 | -0.21859  |
| 108608 | Q85601 | Q15884 | -0.67993  |
| 108609 | Q85601 | Q92819 | -0.76136  |
| 108610 | Q85601 | Q8NG81 | -1.2621   |
| 108611 | Q85601 | Q6AWC8 | -0.15835  |
| 108612 | Q85601 | Q9NWW5 | -0.55741  |
| 108613 | Q85601 | Q16873 | -0.35103  |
| 108614 | Q85601 | Q2NL68 | -0.092462 |
| 108615 | Q85601 | P01770 | -1.046    |
| 108616 | Q85601 | P0C1H6 | -0.526    |
| 108617 | Q85601 | Q96JQ2 | -0.70972  |
| 108618 | Q85601 | Q7L099 | -0.70681  |
| 108619 | Q85601 | Q96MC5 | -0.33378  |
| 108620 | Q85601 | P0CG39 | -0.32575  |
| 108621 | Q85601 | Q16625 | -0.22324  |
| 108622 | Q85601 | Q86TW2 | -1.3958   |
| 108623 | Q85601 | Q702N8 | -0.60152  |
| 108624 | Q85601 | Q9NP95 | -0.85823  |
| 108625 | Q85601 | A5D8T8 | -0.89494  |
| 108626 | Q85601 | O76036 | -1.1425   |
| 108627 | Q85601 | Q92611 | -0.29657  |
| 108628 | Q85601 | P19793 | -0.24424  |
| 108629 | Q85601 | Q9BY10 | -0.90015  |
| 108630 | Q85601 | Q6UWJ1 | -0.96899  |
| 108631 | Q85601 | P06312 | -1.046    |
| 108632 | Q85601 | P35790 | -0.73394  |
| 108633 | Q85601 | Q9BZQ4 | -0.024009 |
| 108634 | Q85601 | P04629 | -0.59483  |
| 108635 | Q85601 | Q8NGK5 | -1.2621   |
| 108636 | Q85601 | P0C7W6 | -0.18589  |
| 108637 | Q85601 | Q5H943 | -1.0386   |
| 108638 | Q85601 | Q9UPR5 | -0.87493  |
| 108639 | Q85601 | Q96HP8 | -0.92686  |
| 108640 | Q85601 | P08123 | -0.47802  |
| 108641 | Q85601 | P43155 | -0.4621   |
| 108642 | Q85601 | P05937 | -0.2274   |
| 108643 | Q85601 | Q17RD7 | -0.50122  |
| 108644 | Q85601 | Q5VZ03 | -0.19932  |
| 108645 | Q85601 | P47901 | -1.032    |
| 108646 | Q85601 | Q9C0C7 | -0.22745  |
| 108647 | Q85601 | Q9HCB6 | -0.66399  |
| 108648 | Q85601 | Q9Y490 | -0.22785  |
| 108649 | Q85601 | Q9P2G3 | -0.27994  |
| 108650 | Q85601 | Q658P3 | -0.61893  |
| 108651 | Q85601 | P01562 | -0.78863  |
| 108652 | Q85601 | Q9H992 | -0.39358  |
| 108653 | Q85601 | Q86T20 | -1.0168   |
| 108654 | Q85601 | Q9H8U3 | -0.39002  |
| 108655 | Q85601 | Q6Q795 | -0.2031   |
| 108656 | Q85601 | P04921 | -0.54714  |
| 108657 | Q85601 | Q8NGQ3 | -1.2621   |
| 108658 | Q85601 | P98164 | -0.32233  |
| 108659 | Q85601 | O94875 | -0.22936  |
| 108660 | Q85601 | P29016 | -0.68156  |
| 108661 | Q85601 | Q9BQ08 | -0.74445  |
| 108662 | Q85601 | Q9H190 | -0.22732  |
| 108663 | Q85601 | P29558 | -0.2582   |
| 108664 | Q85601 | Q9NV35 | -0.26641  |
| 108665 | Q85601 | Q13474 | -0.22949  |
| 108666 | Q85601 | Q14956 | -1.103    |
| 108667 | Q85601 | Q9UHL0 | -0.36283  |
| 108668 | Q85601 | P84157 | -0.92686  |
| 108669 | Q85601 | Q15019 | -0.22704  |
| 108670 | Q85601 | Q8NFL0 | -0.53746  |
| 108671 | Q85601 | P35326 | -0.24545  |
| 108672 | Q85601 | Q99784 | -0.22725  |
| 108673 | Q85601 | Q9HD89 | -0.55916  |
| 108674 | Q85601 | Q7Z304 | -0.98203  |
| 108675 | Q85601 | P11717 | -0.22948  |
| 108676 | Q85601 | A6NFK2 | -0.27095  |
| 108677 | Q85601 | Q9NYA4 | -0.24371  |
| 108678 | Q85601 | Q8NET8 | -0.90554  |
| 108679 | Q85601 | A8MX76 | -1.0551   |
| 108680 | Q85601 | P0C7M7 | -0.80477  |

|        |        |        |           |
|--------|--------|--------|-----------|
| 108681 | Q85601 | P47972 | -0.80195  |
| 108682 | Q85601 | Q9Y5H7 | -1.2846   |
| 108683 | Q85601 | P98077 | -0.22741  |
| 108684 | Q85601 | Q9NVX7 | -0.22338  |
| 108685 | Q85601 | O75223 | -0.35791  |
| 108686 | Q85601 | Q9BVG8 | -0.27096  |
| 108687 | Q85601 | Q9HCM4 | -0.27679  |
| 108688 | Q85601 | Q15916 | -0.20871  |
| 108689 | Q85601 | Q9NRC9 | -0.90316  |
| 108690 | Q85601 | Q8TDW0 | -1.0116   |
| 108691 | Q85601 | Q9NY46 | -0.78025  |
| 108692 | Q85601 | P55317 | -0.43379  |
| 108693 | Q85601 | Q86XR5 | -0.8016   |
| 108694 | Q85601 | O43653 | -0.5608   |
| 108695 | Q85601 | Q9UKJ1 | -1.0061   |
| 108696 | Q85601 | Q96G42 | -0.21059  |
| 108697 | Q85601 | Q9BYT5 | -0.71136  |
| 108698 | Q85601 | O94822 | -0.15046  |
| 108699 | Q85601 | Q8TEB9 | -0.52978  |
| 108700 | Q85601 | P25391 | -0.79302  |
| 108701 | Q85601 | P32856 | -0.27142  |
| 108702 | Q85601 | Q96M85 | -0.2031   |
| 108703 | Q85601 | Q96FN4 | -0.22785  |
| 108704 | Q85601 | C9JUS6 | -1.289    |
| 108705 | Q85601 | P51684 | -1.1978   |
| 108706 | Q85601 | Q96IV6 | -1.0853   |
| 108707 | Q85601 | O00634 | -0.63153  |
| 108708 | Q85601 | Q8TCU3 | -0.86522  |
| 108709 | Q85601 | Q9UHG0 | -0.50015  |
| 108710 | Q85601 | Q96M93 | -0.80724  |
| 108711 | Q85601 | P29622 | -0.75562  |
| 108712 | Q85601 | O76083 | -0.22598  |
| 108713 | Q85601 | Q8N414 | -0.92686  |
| 108714 | Q85601 | Q9NS87 | -0.24446  |
| 108715 | Q85601 | P31321 | -0.28671  |
| 108716 | Q85601 | Q5THK1 | -0.65233  |
| 108717 | Q85601 | Q9NPL8 | -0.75013  |
| 108718 | Q85601 | P09884 | -0.30894  |
| 108719 | Q85601 | P35225 | -0.35334  |
| 108720 | Q85601 | Q49AR2 | -0.51585  |
| 108721 | Q85601 | Q07092 | -0.64008  |
| 108722 | Q85601 | P63123 | -0.64385  |
| 108723 | Q85601 | Q8WVP7 | -0.90552  |
| 108724 | Q85601 | P09958 | -0.44763  |
| 108725 | Q85601 | Q76NI1 | -0.75825  |
| 108726 | Q85601 | P0C5K6 | -0.2031   |
| 108727 | Q85601 | Q9Y226 | -0.97222  |
| 108728 | Q85601 | Q9BZM6 | -0.58534  |
| 108729 | Q85601 | Q96FE7 | -0.85234  |
| 108730 | Q85601 | Q8NGP2 | -1.2621   |
| 108731 | Q85601 | P01850 | -0.96804  |
| 108732 | Q85601 | Q9Y619 | -0.57376  |
| 108733 | Q85601 | Q8IWN6 | -0.33349  |
| 108734 | Q85601 | P22301 | -0.40563  |
| 108735 | Q85601 | Q9NYI0 | -0.54763  |
| 108736 | Q85601 | P01818 | -1.046    |
| 108737 | Q85601 | Q8IUB5 | -0.82753  |
| 108738 | Q85601 | O60337 | -0.89063  |
| 108739 | Q85601 | O60320 | -0.92686  |
| 108740 | Q85601 | Q9Y5X0 | -0.23044  |
| 108741 | Q85601 | Q96A00 | -0.33266  |
| 108742 | Q85601 | Q8N9I9 | -0.22746  |
| 108743 | Q85601 | A8MT66 | -0.25324  |
| 108744 | Q85601 | Q8NDB2 | -0.31933  |
| 108745 | Q85601 | P42263 | -0.81542  |
| 108746 | Q85601 | Q9BZ11 | -1.1563   |
| 108747 | Q85601 | O95235 | -0.28691  |
| 108748 | Q85601 | P18859 | -0.20815  |
| 108749 | Q85601 | Q6ZQT0 | -0.090859 |
| 108750 | Q85601 | Q495D7 | -0.1784   |
| 108751 | Q85601 | Q9UGN4 | -1.2114   |
| 108752 | Q85601 | Q9BRX5 | -0.18066  |
| 108753 | Q85601 | O60500 | -0.60905  |
| 108754 | Q85601 | Q6ZS49 | -0.2031   |
| 108755 | Q85601 | P26599 | -0.22603  |
| 108756 | Q85601 | P43490 | -0.080076 |

|        |        |        |           |
|--------|--------|--------|-----------|
| 108757 | Q85601 | Q8WUY8 | -0.246    |
| 108758 | Q85601 | Q8TDM6 | -0.48579  |
| 108759 | Q85601 | Q9NQZ6 | -0.31263  |
| 108760 | Q85601 | Q95407 | -0.3094   |
| 108761 | Q85601 | Q96HV5 | -0.92686  |
| 108762 | Q85601 | Q8NH07 | -1.2621   |
| 108763 | Q85601 | Q5JUK2 | -0.19715  |
| 108764 | Q85601 | O75106 | -0.55446  |
| 108765 | Q85601 | Q9BYE0 | -0.22628  |
| 108766 | Q85601 | Q4ZJI4 | -0.86408  |
| 108767 | Q85601 | P59910 | -0.37713  |
| 108768 | Q85601 | Q8N5S1 | -0.69944  |
| 108769 | Q85601 | Q92484 | -0.34733  |
| 108770 | Q85601 | Q9H756 | -0.92686  |
| 108771 | Q85601 | Q7Z6L0 | -1.0343   |
| 108772 | Q85601 | Q9Y587 | -0.08668  |
| 108773 | Q85601 | Q8N3F9 | -1.4038   |
| 108774 | Q85601 | Q70SY1 | -0.18727  |
| 108775 | Q85601 | Q06278 | -0.54255  |
| 108776 | Q85601 | Q9Y3C1 | -0.20669  |
| 108777 | Q85601 | Q43610 | -0.34678  |
| 108778 | Q85601 | Q14254 | -0.69305  |
| 108779 | Q85601 | Q00221 | -0.2274   |
| 108780 | Q85601 | Q8IUN9 | -1.0714   |
| 108781 | Q85601 | Q9NRI7 | -0.2031   |
| 108782 | Q85601 | Q8N8Q8 | -0.48167  |
| 108783 | Q85601 | O00559 | -0.77069  |
| 108784 | Q85601 | P63132 | -0.23073  |
| 108785 | Q85601 | Q86U37 | -0.91462  |
| 108786 | Q85601 | Q86UU9 | -0.9217   |
| 108787 | Q85601 | Q8IXZ3 | -0.19033  |
| 108788 | Q85601 | Q96SB3 | -0.22693  |
| 108789 | Q85601 | Q8TF64 | -0.22559  |
| 108790 | Q85601 | Q9NXU5 | -1.3986   |
| 108791 | Q85601 | Q9H0T7 | -1.2501   |
| 108792 | Q85601 | A6NG13 | -0.81723  |
| 108793 | Q85601 | Q03181 | -0.27163  |
| 108794 | Q85601 | Q9P2G4 | -0.092462 |
| 108795 | Q85601 | O75096 | -0.53319  |
| 108796 | Q85601 | Q6IC83 | -0.97943  |
| 108797 | Q85601 | Q9UL51 | -1.0609   |
| 108798 | Q85601 | Q701N2 | -0.2031   |
| 108799 | Q85601 | Q75L30 | -0.2031   |
| 108800 | Q85601 | P0CG42 | -0.2031   |
| 108801 | Q85601 | Q9ULJ8 | -0.25121  |
| 108802 | Q85601 | Q53RE8 | -0.22741  |
| 108803 | Q85601 | Q969Y0 | -1.0219   |
| 108804 | Q85601 | Q7Z3E5 | -0.22726  |
| 108805 | Q85601 | Q8NDY3 | -0.30108  |
| 108806 | Q85601 | Q8IYP9 | -0.89983  |
| 108807 | Q85601 | O00220 | -0.22739  |
| 108808 | Q85601 | Q96JH8 | -0.87096  |
| 108809 | Q85601 | Q6N043 | -0.22721  |
| 108810 | Q85601 | Q9NVN3 | -0.16445  |
| 108811 | Q85601 | Q9BZG9 | -1.3042   |
| 108812 | Q85601 | A6NH00 | -1.2621   |
| 108813 | Q85601 | Q56VL3 | -0.15351  |
| 108814 | Q85601 | Q6UWT2 | -0.9043   |
| 108815 | Q85601 | P34059 | -0.41803  |
| 108816 | Q85601 | Q8IZV5 | -0.66846  |
| 108817 | Q85601 | P48544 | -0.63727  |
| 108818 | Q85601 | P30491 | -1.1017   |
| 108819 | Q85601 | Q9UKZ4 | -1.0924   |
| 108820 | Q85601 | O00212 | -1.1678   |
| 108821 | Q85601 | P24043 | -0.87444  |
| 108822 | Q85601 | P23327 | -0.45722  |
| 108823 | Q85601 | Q8N699 | -0.13828  |
| 108824 | Q85601 | Q5R3F8 | -0.90143  |
| 108825 | Q85601 | Q8NGI4 | -1.2621   |
| 108826 | Q85601 | Q6DN90 | -0.21785  |
| 108827 | Q85601 | P78314 | -0.22737  |
| 108828 | Q85601 | Q9C0J1 | -0.5343   |
| 108829 | Q85601 | O14609 | -0.92926  |
| 108830 | Q85601 | Q5R387 | -0.90492  |
| 108831 | Q85601 | P35240 | -0.23498  |
| 108832 | Q85601 | P21854 | -0.74294  |

|        |        |         |           |
|--------|--------|---------|-----------|
| 108833 | Q85601 | P57058  | -1.454    |
| 108834 | Q85601 | P00450  | -0.96292  |
| 108835 | Q85601 | Q96Q07  | -0.51779  |
| 108836 | Q85601 | A6NMK7  | -0.35537  |
| 108837 | Q85601 | Q8N9B8  | -0.75656  |
| 108838 | Q85601 | P20264  | -0.22741  |
| 108839 | Q85601 | Q02505  | -1.3414   |
| 108840 | Q85601 | Q6UW68  | -0.92686  |
| 108841 | Q85601 | Q7RTM1  | -1.4517   |
| 108842 | Q85601 | Q3MJ16  | -0.3462   |
| 108843 | Q85601 | Q9BZM4  | -0.53495  |
| 108844 | Q85601 | Q8N568  | -0.983    |
| 108845 | Q85601 | O60313  | -0.62094  |
| 108846 | Q85601 | P12814  | -0.43535  |
| 108847 | Q85601 | Q8NBJ9  | -1.0144   |
| 108848 | Q85601 | Q96PS8  | -0.92428  |
| 108849 | Q85601 | P32970  | -0.66017  |
| 108850 | Q85601 | P54315  | -1.0135   |
| 108851 | Q85601 | Q9NP91  | -1.0552   |
| 108852 | Q85601 | A2RUR9  | -0.096258 |
| 108853 | Q85601 | Q9N2K0  | -0.62554  |
| 108854 | Q85601 | Q92667  | -0.21595  |
| 108855 | Q85601 | Q9NS15  | -0.82384  |
| 108856 | Q85601 | Q9UKJ8  | -1.1535   |
| 108857 | Q85601 | Q7Z5Q5  | -0.42602  |
| 108858 | Q85601 | P43694  | -0.22738  |
| 108859 | Q85601 | Q9Y334  | -0.69894  |
| 108860 | Q85601 | Q92989  | -0.2103   |
| 108861 | Q85601 | Q9BVM4  | -0.36637  |
| 108862 | Q85601 | C9JL84  | -1.1355   |
| 108863 | Q85601 | Q5W188  | -0.94321  |
| 108864 | Q85601 | Q9Y6Y8  | -0.18911  |
| 108865 | Q85601 | Q9UHU1  | -0.2031   |
| 108866 | Q85601 | P43363  | -0.07672  |
| 108867 | Q85601 | Q6GMR7  | -0.83253  |
| 108868 | Q85601 | Q9P2E9  | -0.58738  |
| 108869 | Q85601 | P52907  | -0.42177  |
| 108870 | Q85601 | Q9NQCC3 | -0.2164   |
| 108871 | Q85601 | Q8NH93  | -1.2621   |
| 108872 | Q85601 | Q9NRA0  | -0.37157  |
| 108873 | Q85601 | Q52LG2  | -0.42946  |
| 108874 | Q85601 | Q9UQB9  | -0.45523  |
| 108875 | Q85601 | Q5VSP4  | -0.9043   |
| 108876 | Q85601 | A6NP81  | -0.29141  |
| 108877 | Q85601 | P57738  | -0.92686  |
| 108878 | Q85601 | Q9Y5Z9  | -0.27384  |
| 108879 | Q85601 | Q96JA1  | -0.92686  |
| 108880 | Q85601 | Q6P587  | -0.30389  |
| 108881 | Q85601 | Q6UW02  | -1.0837   |
| 108882 | Q85601 | P28290  | -0.27304  |
| 108883 | Q85601 | Q9BVM2  | -0.31718  |
| 108884 | Q85601 | A7XYQ1  | -0.39695  |
| 108885 | Q85601 | Q13296  | -0.61642  |
| 108886 | Q85601 | Q9NY59  | -0.99439  |
| 108887 | Q85601 | O15213  | -0.22746  |
| 108888 | Q85601 | Q9P2D8  | -0.92686  |
| 108889 | Q85601 | Q9NYL9  | -0.21931  |
| 108890 | Q85601 | Q8IZA0  | -0.33885  |
| 108891 | Q85601 | Q96A61  | -0.589    |
| 108892 | Q85601 | Q8N8U9  | -0.80167  |
| 108893 | Q85601 | Q4G0X4  | -0.16907  |
| 108894 | Q85601 | Q6ZV73  | -0.66151  |
| 108895 | Q85601 | Q86XN7  | -0.092462 |
| 108896 | Q85601 | Q02535  | -0.2239   |
| 108897 | Q85601 | B1ATL7  | -0.41628  |
| 108898 | Q85601 | Q8NFA0  | -0.70106  |
| 108899 | Q85601 | Q8NI60  | -0.85358  |
| 108900 | Q85601 | Q8NHX9  | -0.5325   |
| 108901 | Q85601 | P21452  | -1.4064   |
| 108902 | Q85601 | Q02641  | -0.54615  |
| 108903 | Q85601 | Q12912  | -0.90199  |
| 108904 | Q85601 | Q5VV63  | -0.94917  |
| 108905 | Q85601 | Q5VZ18  | -0.22741  |
| 108906 | Q85601 | Q9NZK5  | -0.61607  |
| 108907 | Q85601 | P17252  | -0.21778  |
| 108908 | Q85601 | Q6NUN7  | -0.2031   |

|        |        |         |           |
|--------|--------|---------|-----------|
| 108909 | Q85601 | Q86XT2  | -0.16865  |
| 108910 | Q85601 | Q8IUIG1 | -0.49663  |
| 108911 | Q85601 | Q6ZVN6  | -0.4846   |
| 108912 | Q85601 | Q14796  | -0.58289  |
| 108913 | Q85601 | P01130  | -0.41654  |
| 108914 | Q85601 | P31644  | -0.83996  |
| 108915 | Q85601 | P61550  | -0.7608   |
| 108916 | Q85601 | Q9H227  | -0.22591  |
| 108917 | Q85601 | Q86VQ6  | -0.51157  |
| 108918 | Q85601 | Q99661  | -0.36155  |
| 108919 | Q85601 | Q86VY9  | -0.92686  |
| 108920 | Q85601 | Q9P2Z0  | -0.42502  |
| 108921 | Q85601 | O60721  | -0.66727  |
| 108922 | Q85601 | Q7Z429  | -0.92686  |
| 108923 | Q85601 | P20674  | -0.2519   |
| 108924 | Q85601 | Q8N5K1  | -0.32016  |
| 108925 | Q85601 | Q6UX98  | -0.89983  |
| 108926 | Q85601 | Q9H5X1  | -0.14916  |
| 108927 | Q85601 | Q9NZ01  | -0.53563  |
| 108928 | Q85601 | P21397  | -0.74748  |
| 108929 | Q85601 | Q66K66  | -0.92686  |
| 108930 | Q85601 | Q96NL1  | -1.0009   |
| 108931 | Q85601 | Q19T08  | -1.2585   |
| 108932 | Q85601 | Q4G1C9  | -0.92686  |
| 108933 | Q85601 | Q5T5C0  | -0.35028  |
| 108934 | Q85601 | P17540  | -0.88804  |
| 108935 | Q85601 | Q53EU6  | -0.75224  |
| 108936 | Q85601 | Q9Y274  | -0.43465  |
| 108937 | Q85601 | Q8WXS5  | -0.84002  |
| 108938 | Q85601 | P02750  | -0.91024  |
| 108939 | Q85601 | Q99829  | -0.22763  |
| 108940 | Q85601 | P37108  | -0.80221  |
| 108941 | Q85601 | P06316  | -1.046    |
| 108942 | Q85601 | Q9HD20  | -0.79778  |
| 108943 | Q85601 | P62745  | -0.22778  |
| 108944 | Q85601 | Q8TDX7  | -0.74264  |
| 108945 | Q85601 | Q8WW36  | -0.32209  |
| 108946 | Q85601 | Q96GW7  | -0.91261  |
| 108947 | Q85601 | P22732  | -0.28552  |
| 108948 | Q85601 | Q1ZYL8  | -0.9043   |
| 108949 | Q85601 | H7BZ55  | -0.079582 |
| 108950 | Q85601 | O60268  | -0.22767  |
| 108951 | Q85601 | Q9UPP5  | -0.078476 |
| 108952 | Q85601 | Q8NBE8  | -0.19678  |
| 108953 | Q85601 | Q9C030  | -0.35381  |
| 108954 | Q85601 | Q9H330  | -0.83634  |
| 108955 | Q85601 | Q3MIV0  | -0.2031   |
| 108956 | Q85601 | O60928  | -0.9826   |
| 108957 | Q85601 | O00144  | -0.75461  |
| 108958 | Q85601 | Q01668  | -0.57535  |
| 108959 | Q85601 | Q16617  | -1.184    |
| 108960 | Q85601 | Q8NGY1  | -1.2621   |
| 108961 | Q85601 | A8MWK0  | -1.0663   |
| 108962 | Q85601 | A4QPB2  | -0.31243  |
| 108963 | Q85601 | Q9H6K4  | -0.30094  |
| 108964 | Q85601 | P56715  | -0.1879   |
| 108965 | Q85601 | Q95755  | -0.76367  |
| 108966 | Q85601 | Q9NRM1  | -1.0563   |
| 108967 | Q85601 | Q8WUS8  | -1.2768   |
| 108968 | Q85601 | Q16342  | -0.19078  |
| 108969 | Q85601 | Q9BSJ5  | -0.92686  |
| 108970 | Q85601 | P01854  | -0.37338  |
| 108971 | Q85601 | P0C7I0  | -0.33073  |
| 108972 | Q85601 | P06310  | -1.046    |
| 108973 | Q85601 | Q9BRQ8  | -0.43773  |
| 108974 | Q85601 | Q96QD5  | -0.1662   |
| 108975 | Q85601 | Q8N594  | -0.66703  |
| 108976 | Q85601 | Q9UKF2  | -1.1563   |
| 108977 | Q85601 | Q8NC38  | -0.35498  |
| 108978 | Q85601 | Q53FA7  | -0.76413  |
| 108979 | Q85601 | Q8NHS4  | -0.03757  |
| 108980 | Q85601 | P0C2W1  | -0.21333  |
| 108981 | Q85601 | P0CAP2  | -0.26439  |
| 108982 | Q85601 | Q8NAV2  | -0.60035  |
| 108983 | Q85601 | Q8TDF5  | -1.1677   |
| 108984 | Q85601 | Q8NBM8  | -1.0561   |

|        |        |        |           |
|--------|--------|--------|-----------|
| 108985 | Q85601 | O60814 | -0.72536  |
| 108986 | Q85601 | Q8N8R3 | -0.67119  |
| 108987 | Q85601 | Q9UJ55 | -0.18472  |
| 108988 | Q85601 | Q96M78 | -0.39922  |
| 108989 | Q85601 | Q7L0X0 | -0.82517  |
| 108990 | Q85601 | P53384 | -0.20411  |
| 108991 | Q85601 | Q494U1 | -0.44245  |
| 108992 | Q85601 | O00311 | -0.22741  |
| 108993 | Q85601 | Q6A1A2 | -1.0893   |
| 108994 | Q85601 | Q8N2A8 | -0.67707  |
| 108995 | Q85601 | Q9NR90 | -0.73413  |
| 108996 | Q85601 | Q09327 | -0.68655  |
| 108997 | Q85601 | Q76B58 | -0.59592  |
| 108998 | Q85601 | P17568 | -0.1031   |
| 108999 | Q85601 | C9JQT0 | -0.22741  |
| 109000 | Q85601 | P01614 | -1.046    |
| 109001 | Q85601 | Q9Y2S6 | -0.2031   |
| 109002 | Q85601 | Q6UX73 | -0.9043   |
| 109003 | Q85601 | Q6ICL7 | -0.92686  |
| 109004 | Q85601 | O75204 | -0.71208  |
| 109005 | Q85601 | Q9UBI4 | -0.66611  |
| 109006 | Q85601 | Q6ZQP7 | -0.2031   |
| 109007 | Q85601 | P52803 | -0.52072  |
| 109008 | Q85601 | P52926 | -0.038046 |
| 109009 | Q85601 | Q9H3S3 | -1.4786   |
| 109010 | Q85601 | Q6IAA8 | -0.31863  |
| 109011 | Q85601 | Q9BQ31 | -0.41511  |
| 109012 | Q85601 | Q13214 | -0.99974  |
| 109013 | Q85601 | O95450 | -1.1732   |
| 109014 | Q85601 | Q86UK0 | -1.2989   |
| 109015 | Q85601 | P49917 | -0.16819  |
| 109016 | Q85601 | P15144 | -0.86331  |
| 109017 | Q85601 | Q8NGA0 | -1.2621   |
| 109018 | Q85601 | Q6IFN5 | -1.2621   |
| 109019 | Q85601 | Q9Y6R1 | -0.58187  |
| 109020 | Q85601 | Q9H6K1 | -0.18472  |
| 109021 | Q85601 | Q8IZF4 | -1.3639   |
| 109022 | Q85601 | A6NM10 | -0.85197  |
| 109023 | Q85601 | P02818 | -0.51032  |
| 109024 | Q85601 | B7ZAQ6 | -0.67563  |
| 109025 | Q85601 | Q9BY78 | -0.77468  |
| 109026 | Q85601 | O60431 | -1.2621   |
| 109027 | Q85601 | Q8NFK6 | -1.3313   |
| 109028 | Q85601 | Q9Y547 | -0.5028   |
| 109029 | Q85601 | P36888 | -0.53613  |
| 109030 | Q85601 | Q7KZN9 | -0.77377  |
| 109031 | Q85601 | Q5M9N0 | -0.17506  |
| 109032 | Q85601 | Q92932 | -0.93093  |
| 109033 | Q85601 | Q8WU39 | -0.10068  |
| 109034 | Q85601 | Q14500 | -1.0662   |
| 109035 | Q85601 | P10586 | -0.86869  |
| 109036 | Q85601 | P01892 | -0.78212  |
| 109037 | Q85601 | Q49AQ9 | -0.26158  |
| 109038 | Q85601 | Q6P9G4 | -0.92686  |
| 109039 | Q85601 | Q6UXP8 | -0.9043   |
| 109040 | Q85601 | Q9NTG1 | -1.0938   |
| 109041 | Q85601 | Q15321 | -1.0009   |
| 109042 | Q85601 | P13584 | -0.7204   |
| 109043 | Q85601 | E5RJ46 | -0.2031   |
| 109044 | Q85601 | Q07001 | -0.92477  |
| 109045 | Q85601 | Q9Y673 | -0.88109  |
| 109046 | Q85601 | Q9BZ81 | -0.18472  |
| 109047 | Q85601 | A6NJZ7 | -0.2274   |
| 109048 | Q85601 | Q9Y219 | -0.57519  |
| 109049 | Q85601 | Q02223 | -1.3137   |
| 109050 | Q85601 | Q6PH85 | -0.086274 |
| 109051 | Q85601 | Q9NYV4 | -0.18923  |
| 109052 | Q85601 | P11908 | -0.6966   |
| 109053 | Q85601 | P14555 | -0.82546  |
| 109054 | Q85601 | A6NFN3 | -1.0174   |
| 109055 | Q85601 | Q96IX9 | -0.16952  |
| 109056 | Q85601 | Q8N119 | -1.2953   |
| 109057 | Q85601 | P09486 | -0.27536  |
| 109058 | Q85601 | Q9HBY0 | -0.83702  |
| 109059 | Q85601 | Q86UK5 | -0.5496   |
| 109060 | Q85601 | Q15722 | -1.6794   |



|        |        |        |           |
|--------|--------|--------|-----------|
| 109061 | Q85601 | Q8WU49 | -0.2031   |
| 109062 | Q85601 | O75364 | -0.15641  |
| 109063 | Q85601 | Q92520 | -0.77667  |
| 109064 | Q85601 | Q6NTF7 | -0.06202  |
| 109065 | Q85601 | Q96ER3 | -0.86719  |
| 109066 | Q85601 | P51884 | -0.61986  |
| 109067 | Q85601 | P49703 | -0.22808  |
| 109068 | Q85601 | Q2T9L4 | -0.22445  |
| 109069 | Q85601 | P52179 | -0.71416  |
| 109070 | Q85601 | Q16206 | -1.2467   |
| 109071 | Q85601 | Q9BXX0 | -0.57881  |
| 109072 | Q85601 | Q9UBV8 | -0.22749  |
| 109073 | Q85601 | Q92731 | -0.22747  |
| 109074 | Q85601 | Q5H9R4 | -0.92686  |
| 109075 | Q85601 | P10646 | -0.77684  |
| 109076 | Q85601 | Q16667 | -0.22294  |
| 109077 | Q85601 | Q9GZY0 | -0.22998  |
| 109078 | Q85601 | A6NKG5 | -1.1159   |
| 109079 | Q85601 | Q641Q3 | -0.9043   |
| 109080 | Q85601 | Q9Y4K0 | -0.49845  |
| 109081 | Q85601 | P29320 | -1.0402   |
| 109082 | Q85601 | Q86VR2 | -0.92686  |
| 109083 | Q85601 | A6NKB5 | -0.92686  |
| 109084 | Q85601 | Q6P9G0 | -0.31579  |
| 109085 | Q85601 | A6NGG8 | -0.63041  |
| 109086 | Q85601 | Q99758 | -1.1848   |
| 109087 | Q85601 | Q8NGP6 | -1.2621   |
| 109088 | Q85601 | Q8WVN8 | -0.57511  |
| 109089 | Q85601 | Q9UHF0 | -0.99239  |
| 109090 | Q85601 | Q6UWN0 | -0.5608   |
| 109091 | Q85601 | Q8NFX7 | -0.58374  |
| 109092 | Q85601 | Q15404 | -0.38033  |
| 109093 | Q85601 | Q9NSB8 | -0.43494  |
| 109094 | Q85601 | O75711 | -1.1433   |
| 109095 | Q85601 | Q494W8 | -0.89013  |
| 109096 | Q85601 | Q5VYS4 | -0.22553  |
| 109097 | Q85601 | Q9Y614 | -0.1219   |
| 109098 | Q85601 | Q9HAV5 | -0.62866  |
| 109099 | Q85601 | O43451 | -0.6694   |
| 109100 | Q85601 | Q9NQX3 | -0.64754  |
| 109101 | Q85601 | Q6XZF7 | -0.22742  |
| 109102 | Q85601 | Q96CM8 | -0.92886  |
| 109103 | Q85601 | Q8NH67 | -1.2621   |
| 109104 | Q85601 | Q9H340 | -1.2621   |
| 109105 | Q85601 | Q99853 | -0.42888  |
| 109106 | Q85601 | Q14896 | -0.58126  |
| 109107 | Q85601 | Q9Y2C2 | -0.52494  |
| 109108 | Q85601 | Q8NGC6 | -1.2621   |
| 109109 | Q85601 | Q9P0J1 | -0.037304 |
| 109110 | Q85601 | Q95409 | -0.28032  |
| 109111 | Q85601 | Q9Y5M1 | -0.28405  |
| 109112 | Q85601 | Q6WCQ1 | -0.25591  |
| 109113 | Q85601 | Q9NP58 | -0.78005  |
| 109114 | Q85601 | P04211 | -1.046    |
| 109115 | Q85601 | Q8NGX0 | -1.2621   |
| 109116 | Q85601 | P62820 | -0.64037  |
| 109117 | Q85601 | P40305 | -0.54782  |
| 109118 | Q85601 | Q6ZMZ0 | -0.33922  |
| 109119 | Q85601 | Q13131 | -0.27986  |
| 109120 | Q85601 | Q86W25 | -0.81985  |
| 109121 | Q85601 | Q9H8W3 | -0.18324  |
| 109122 | Q85601 | Q9Y6N6 | -1.1255   |
| 109123 | Q85601 | Q6UXK5 | -0.92686  |
| 109124 | Q85601 | Q9H1M4 | -0.78041  |
| 109125 | Q85601 | Q8WVM8 | -0.21493  |
| 109126 | Q85601 | Q9Y5Y9 | -0.89533  |
| 109127 | Q85601 | Q96SE0 | -0.68059  |
| 109128 | Q85601 | Q8WW27 | -0.342    |
| 109129 | Q85601 | P09016 | -0.12508  |
| 109130 | Q85601 | A3QJZ6 | -0.157    |
| 109131 | Q85601 | P32881 | -0.80645  |
| 109132 | Q85601 | P56696 | -0.84305  |
| 109133 | Q85601 | Q8N6M6 | -0.45016  |
| 109134 | Q85601 | Q86YR5 | -0.22167  |
| 109135 | Q85601 | O15444 | -1.0319   |
| 109136 | Q85601 | Q6ZS82 | -0.98358  |

|        |        |        |          |
|--------|--------|--------|----------|
| 109137 | Q85601 | O95399 | -0.64432 |
| 109138 | Q85601 | Q6GYQ0 | -0.21425 |
| 109139 | Q85601 | O60729 | -0.22742 |
| 109140 | Q85601 | Q12852 | -0.51296 |
| 109141 | Q85601 | P59074 | -0.14236 |
| 109142 | Q85601 | Q674R7 | -0.86836 |
| 109143 | Q85601 | Q8TCG5 | -0.84758 |
| 109144 | Q85601 | Q96BR9 | -0.217   |
| 109145 | Q85601 | A6NM62 | -0.86713 |
| 109146 | Q85601 | Q14667 | -0.9043  |
| 109147 | Q85601 | Q9NSC7 | -0.7204  |
| 109148 | Q85601 | P18283 | -0.45679 |
| 109149 | Q85601 | Q8NGA4 | -1.3483  |
| 109150 | Q85601 | P19237 | -0.22343 |
| 109151 | Q85601 | P05181 | -0.47641 |
| 109152 | Q85601 | Q14D04 | -0.67235 |
| 109153 | Q85601 | Q0VAK6 | -0.22208 |
| 109154 | Q85601 | Q8WVN6 | -1.4811  |
| 109155 | Q85601 | Q8WW52 | -0.78714 |
| 109156 | Q85601 | A6NGU7 | -0.47239 |
| 109157 | Q85601 | Q8NFM4 | -0.57296 |
| 109158 | Q85601 | Q9Y5P6 | -0.69917 |
| 109159 | Q85601 | Q96MC2 | -0.70162 |
| 109160 | Q85601 | P51170 | -0.6076  |
| 109161 | Q85601 | Q6PIY5 | -1.3663  |
| 109162 | Q85601 | Q9Y4H2 | -0.23114 |
| 109163 | Q85601 | P81133 | -0.26226 |
| 109164 | Q85601 | Q9Y2K2 | -0.56797 |
| 109165 | Q85601 | Q9NTJ5 | -0.57865 |
| 109166 | Q85601 | O43680 | -0.22794 |
| 109167 | Q85601 | P07332 | -0.67785 |
| 109168 | Q85601 | Q5SQH8 | -0.86251 |
| 109169 | Q85601 | P35503 | -0.88457 |
| 109170 | Q85601 | Q9UK59 | -0.41082 |
| 109171 | Q85601 | P35236 | -0.33672 |
| 109172 | Q85601 | Q9P2H3 | -0.32741 |
| 109173 | Q85601 | Q9Y5Y5 | -0.6427  |
| 109174 | Q85601 | Q96T75 | -0.21828 |
| 109175 | Q85601 | Q9Y2H0 | -0.12219 |
| 109176 | Q85601 | Q8WTT0 | -0.89014 |
| 109177 | Q85601 | Q9Y4K3 | -0.22723 |
| 109178 | Q85601 | P41217 | -0.62786 |
| 109179 | Q85601 | P40938 | -0.1983  |
| 109180 | Q85601 | Q6UWN5 | -0.88661 |
| 109181 | Q85601 | Q15381 | -0.28315 |
| 109182 | Q85601 | Q9HC58 | -0.99838 |
| 109183 | Q85601 | Q96HZ4 | -0.22543 |
| 109184 | Q85601 | Q96D09 | -0.12272 |
| 109185 | Q85601 | O95154 | -0.22484 |
| 109186 | Q85601 | Q96GD4 | -0.66735 |
| 109187 | Q85601 | Q9NX38 | -0.31478 |
| 109188 | Q85601 | Q99538 | -0.65453 |
| 109189 | Q85601 | Q8IYU8 | -0.23084 |
| 109190 | Q85601 | Q96CP7 | -0.92686 |
| 109191 | Q85601 | Q8IXB3 | -0.92669 |
| 109192 | Q85601 | Q96TA0 | -1.246   |
| 109193 | Q85601 | Q96JG8 | -0.12018 |
| 109194 | Q85601 | Q06250 | -0.2031  |
| 109195 | Q85601 | P53420 | -0.93825 |
| 109196 | Q85601 | Q9Y2H1 | -0.32012 |
| 109197 | Q85601 | P49327 | -0.54831 |
| 109198 | Q85601 | Q9NRG1 | -0.35526 |
| 109199 | Q85601 | B4E2M5 | -0.22741 |
| 109200 | Q85601 | P54577 | -0.18902 |
| 109201 | Q85601 | P0C7M3 | -0.79503 |
| 109202 | Q85601 | Q6UWF3 | -0.29218 |
| 109203 | Q85601 | Q00LT1 | -0.80378 |
| 109204 | Q85601 | Q9NWX4 | -0.18472 |
| 109205 | Q85601 | Q9H9R9 | -0.10147 |
| 109206 | Q85601 | Q9GZS0 | -0.22741 |
| 109207 | Q85601 | Q6UB28 | -0.44797 |
| 109208 | Q85601 | Q9NRP4 | -0.14402 |
| 109209 | Q85601 | Q9NPH6 | -0.75732 |
| 109210 | Q85601 | Q32M88 | -0.49142 |
| 109211 | Q85601 | P37231 | -0.25891 |
| 109212 | Q85601 | Q6ZV89 | -0.23175 |

|        |        |        |           |
|--------|--------|--------|-----------|
| 109213 | Q85601 | Q4LDE5 | -0.78362  |
| 109214 | Q85601 | P63136 | -0.23073  |
| 109215 | Q85601 | P58180 | -1.2621   |
| 109216 | Q85601 | Q14997 | -0.054179 |
| 109217 | Q85601 | Q05209 | -0.23369  |
| 109218 | Q85601 | Q5HYI8 | -1.1647   |
| 109219 | Q85601 | O95072 | -0.25896  |
| 109220 | Q85601 | P49447 | -0.84667  |
| 109221 | Q85601 | Q9NUV9 | -0.20942  |
| 109222 | Q85601 | O95841 | -1.1659   |
| 109223 | Q85601 | Q6ZMM2 | -0.94772  |
| 109224 | Q85601 | Q5T0J7 | -0.46148  |
| 109225 | Q85601 | Q9H0K6 | -0.29345  |
| 109226 | Q85601 | Q9UG63 | -0.70544  |
| 109227 | Q85601 | Q3LI67 | -0.2031   |
| 109228 | Q85601 | Q1A5X7 | -0.064364 |
| 109229 | Q85601 | P05111 | -0.501    |
| 109230 | Q85601 | P10398 | -0.38872  |
| 109231 | Q85601 | P37288 | -0.45589  |
| 109232 | Q85601 | Q9C0C4 | -0.77859  |
| 109233 | Q85601 | P61081 | -0.15561  |
| 109234 | Q85601 | A8MXV6 | -0.92686  |
| 109235 | Q85601 | P04090 | -0.89146  |
| 109236 | Q85601 | Q7Z442 | -1.0262   |
| 109237 | Q85601 | A6NMN3 | -0.37255  |
| 109238 | Q85601 | Q9H8W4 | -0.22556  |
| 109239 | Q85601 | Q8TDW7 | -1.3989   |
| 109240 | Q85601 | P35348 | -0.62492  |
| 109241 | Q85601 | Q9H093 | -0.61366  |
| 109242 | Q85601 | Q3KQV9 | -0.40089  |
| 109243 | Q85601 | Q9BX46 | -0.33853  |
| 109244 | Q85601 | O75298 | -0.47701  |
| 109245 | Q85601 | Q7Z7M9 | -0.64505  |
| 109246 | Q85601 | P13928 | -0.2658   |
| 109247 | Q85601 | Q5RGS3 | -0.92686  |
| 109248 | Q85601 | O43914 | -0.71642  |
| 109249 | Q85601 | Q9BQD7 | -0.92686  |
| 109250 | Q85601 | P08118 | -0.52412  |
| 109251 | Q85601 | Q9NQA5 | -1.0433   |
| 109252 | Q85601 | Q12792 | -0.34893  |
| 109253 | Q85601 | Q9Y6C2 | -0.71803  |
| 109254 | Q85601 | Q9H1F0 | -0.82753  |
| 109255 | Q85601 | Q8N5D6 | -0.55269  |
| 109256 | Q85601 | Q9WJR5 | -0.23073  |
| 109257 | Q85601 | Q96RP3 | -0.86116  |
| 109258 | Q85601 | Q5ST30 | -0.21117  |
| 109259 | Q85601 | Q15751 | -0.23914  |
| 109260 | Q85601 | P01912 | -0.66288  |
| 109261 | Q85601 | P01031 | -0.78393  |
| 109262 | Q85601 | Q6ZUS5 | -0.64306  |
| 109263 | Q85601 | Q8NG41 | -0.4355   |
| 109264 | Q85601 | Q5SW96 | -0.22731  |
| 109265 | Q85601 | P24821 | -1.1443   |
| 109266 | Q85601 | P46663 | -1.0533   |
| 109267 | Q85601 | P00746 | -1.011    |
| 109268 | Q85601 | P0CB48 | -0.20242  |
| 109269 | Q85601 | Q13651 | -0.66087  |
| 109270 | Q85601 | Q5HYJ1 | -0.90087  |
| 109271 | Q85601 | P01571 | -0.71791  |
| 109272 | Q85601 | P56817 | -0.84203  |
| 109273 | Q85601 | P11215 | -0.26437  |
| 109274 | Q85601 | Q6PEX7 | -0.92686  |
| 109275 | Q85601 | Q9BTD1 | -0.039012 |
| 109276 | Q85601 | O60741 | -1.2239   |
| 109277 | Q85601 | O15068 | -0.44971  |
| 109278 | Q85601 | Q8NCL8 | -0.67993  |
| 109279 | Q85601 | Q10981 | -0.71706  |
| 109280 | Q85601 | Q6UWY2 | -1.3764   |
| 109281 | Q85601 | P04438 | -1.046    |
| 109282 | Q85601 | Q9BQ49 | -0.92686  |
| 109283 | Q85601 | Q5VUB5 | -0.92686  |
| 109284 | Q85601 | Q96EX2 | -0.89088  |
| 109285 | Q85601 | Q9Y5F1 | -1.2846   |
| 109286 | Q85601 | Q86WA9 | -0.87305  |
| 109287 | Q85601 | Q8IV61 | -0.65884  |
| 109288 | Q85601 | Q6ZU64 | -0.79723  |

|        |        |        |            |
|--------|--------|--------|------------|
| 109289 | Q85601 | P14923 | -0.61773   |
| 109290 | Q85601 | Q96F46 | -0.58583   |
| 109291 | Q85601 | Q8N0U8 | -0.92686   |
| 109292 | Q85601 | Q9NR61 | -0.94197   |
| 109293 | Q85601 | Q96LZ2 | -0.0082224 |
| 109294 | Q85601 | Q8IYM1 | -0.22469   |
| 109295 | Q85601 | P21860 | -0.65507   |
| 109296 | Q85601 | Q9Y2W7 | -0.2386    |
| 109297 | Q85601 | P13612 | -0.47815   |
| 109298 | Q85601 | Q9UJT0 | -0.39567   |
| 109299 | Q85601 | Q8IU8  | -1.4017    |
| 109300 | Q85601 | Q9H477 | -0.81126   |
| 109301 | Q85601 | Q96RL6 | -1.0948    |
| 109302 | Q85601 | O60341 | -0.22621   |
| 109303 | Q85601 | Q8TCT7 | -0.3658    |
| 109304 | Q85601 | Q96N68 | -0.92686   |
| 109305 | Q85601 | Q13595 | -0.57751   |
| 109306 | Q85601 | Q96NZ9 | -0.9043    |
| 109307 | Q85601 | Q2YD98 | -0.24101   |
| 109308 | Q85601 | Q5T2P9 | -0.88202   |
| 109309 | Q85601 | Q8NHM4 | -1.3473    |
| 109310 | Q85601 | Q14627 | -1.1617    |
| 109311 | Q85601 | Q15273 | -0.43964   |
| 109312 | Q85601 | Q94778 | -0.93032   |
| 109313 | Q85601 | Q9BVV2 | -0.48742   |
| 109314 | Q85601 | Q5R3K3 | -0.92686   |
| 109315 | Q85601 | A8MTZ7 | -0.19528   |
| 109316 | Q85601 | Q6ZR37 | -0.74567   |
| 109317 | Q85601 | Q9NWH9 | -0.22958   |
| 109318 | Q85601 | Q9BUM1 | -0.38961   |
| 109319 | Q85601 | P56556 | -0.19066   |
| 109320 | Q85601 | Q5Y7A7 | -0.68895   |
| 109321 | Q85601 | Q9NS18 | -0.22265   |
| 109322 | Q85601 | O00341 | -0.96318   |
| 109323 | Q85601 | Q8NH63 | -1.2621    |
| 109324 | Q85601 | Q7L2K0 | -0.22517   |
| 109325 | Q85601 | Q96NU0 | -1.3257    |
| 109326 | Q85601 | O75947 | -0.27857   |
| 109327 | Q85601 | Q86UQ4 | -1.2667    |
| 109328 | Q85601 | Q9C0B1 | -0.24286   |
| 109329 | Q85601 | P31944 | -0.25746   |
| 109330 | Q85601 | Q8N9K7 | -0.2031    |
| 109331 | Q85601 | Q6ZNC8 | -0.79786   |
| 109332 | Q85601 | Q9Y483 | -0.22844   |
| 109333 | Q85601 | O60635 | -1.0485    |
| 109334 | Q85601 | P59036 | -0.2031    |
| 109335 | Q85601 | Q96A70 | -0.23189   |
| 109336 | Q85601 | Q9Y617 | -0.31271   |
| 109337 | Q85601 | Q9BXE9 | -1.2768    |
| 109338 | Q85601 | Q3LI70 | -0.2031    |
| 109339 | Q85601 | O43306 | -0.58948   |
| 109340 | Q85601 | Q9UJ83 | -1.0087    |
| 109341 | Q85601 | Q9UG01 | -0.64306   |
| 109342 | Q85601 | Q3LI59 | -0.2031    |
| 109343 | Q85601 | Q8WUD4 | -0.45431   |
| 109344 | Q85601 | P07204 | -0.54034   |
| 109345 | Q85601 | Q4VCS5 | -0.1628    |
| 109346 | Q85601 | O14610 | -1.2002    |
| 109347 | Q85601 | Q9H0H9 | -0.2854    |
| 109348 | Q85601 | O94819 | -0.21431   |
| 109349 | Q85601 | P60329 | -0.31217   |
| 109350 | Q85601 | Q6ZVH7 | -0.22738   |
| 109351 | Q85601 | Q9Y4P3 | -0.22746   |
| 109352 | Q85601 | Q96P47 | -1.0659    |
| 109353 | Q85601 | O95967 | -0.613     |
| 109354 | Q85601 | Q9NXC5 | -0.2262    |
| 109355 | Q85601 | Q9Y5E2 | -1.2169    |
| 109356 | Q85601 | Q14353 | -0.1412    |
| 109357 | Q85601 | Q96EH8 | -0.39358   |
| 109358 | Q85601 | P0C864 | -0.52002   |
| 109359 | Q85601 | Q9HC73 | -1.5584    |
| 109360 | Q85601 | Q9H3W5 | -0.95667   |
| 109361 | Q85601 | Q4J6C6 | -0.38548   |
| 109362 | Q85601 | P13498 | -0.38568   |
| 109363 | Q85601 | O43548 | -0.22511   |
| 109364 | Q85601 | Q8N0U7 | -0.39878   |

|        |        |        |           |
|--------|--------|--------|-----------|
| 109365 | Q85601 | P57768 | -0.51105  |
| 109366 | Q85601 | P04066 | -0.45989  |
| 109367 | Q85601 | Q8N109 | -1.0386   |
| 109368 | Q85601 | B1ANH7 | -0.9494   |
| 109369 | Q85601 | Q9Y6V0 | -0.31428  |
| 109370 | Q85601 | Q8NDZ9 | -0.2031   |
| 109371 | Q85601 | O43240 | -1.245    |
| 109372 | Q85601 | Q96SK2 | -0.92686  |
| 109373 | Q85601 | Q9HCK0 | -0.18557  |
| 109374 | Q85601 | Q14C86 | -1.0122   |
| 109375 | Q85601 | P47989 | -0.50217  |
| 109376 | Q85601 | O60496 | -0.44899  |
| 109377 | Q85601 | Q969K3 | -0.24682  |
| 109378 | Q85601 | P58418 | -0.98834  |
| 109379 | Q85601 | Q99715 | -1.1727   |
| 109380 | Q85601 | P04844 | -0.47309  |
| 109381 | Q85601 | Q9NZP8 | -1.3972   |
| 109382 | Q85601 | Q96GR2 | -0.67574  |
| 109383 | Q85601 | Q96FT7 | -1.0697   |
| 109384 | Q85601 | Q15642 | -0.76573  |
| 109385 | Q85601 | Q9Y2M2 | -0.07606  |
| 109386 | Q85601 | P05230 | -0.27882  |
| 109387 | Q85601 | A0AV02 | -0.97405  |
| 109388 | Q85601 | Q92599 | -0.19884  |
| 109389 | Q85601 | Q7Z2V1 | -0.2031   |
| 109390 | Q85601 | Q53R41 | -0.2899   |
| 109391 | Q85601 | Q5T481 | -0.84269  |
| 109392 | Q85601 | Q9UGU5 | -0.24478  |
| 109393 | Q85601 | Q99705 | -1.1796   |
| 109394 | Q85601 | Q96EQ8 | -0.62621  |
| 109395 | Q85601 | Q13956 | -0.40878  |
| 109396 | Q85601 | Q96IR7 | -0.59227  |
| 109397 | Q85601 | Q9BXJ8 | -0.67993  |
| 109398 | Q85601 | P47775 | -1.4315   |
| 109399 | Q85601 | A2VCK2 | -0.5766   |
| 109400 | Q85601 | Q6ZMJ2 | -1.0452   |
| 109401 | Q85601 | Q8TCD1 | -0.5525   |
| 109402 | Q85601 | Q8NH83 | -1.2621   |
| 109403 | Q85601 | Q71RH2 | -0.89384  |
| 109404 | Q85601 | O95177 | -0.18472  |
| 109405 | Q85601 | O75165 | -0.41148  |
| 109406 | Q85601 | O75044 | -0.22966  |
| 109407 | Q85601 | P01621 | -1.046    |
| 109408 | Q85601 | Q8TDU9 | -1.3108   |
| 109409 | Q85601 | P23416 | -0.78914  |
| 109410 | Q85601 | Q8IYR0 | -0.097619 |
| 109411 | Q85601 | A5D8W1 | -0.41732  |
| 109412 | Q85601 | Q9UNW9 | -0.13922  |
| 109413 | Q85601 | Q8TBG9 | -0.77783  |
| 109414 | Q85601 | A8MUN3 | -0.9043   |
| 109415 | Q85601 | P49821 | -0.35916  |
| 109416 | Q85601 | Q86T96 | -0.56174  |
| 109417 | Q85601 | Q9HB14 | -1.0978   |
| 109418 | Q85601 | O14756 | -1.124    |
| 109419 | Q85601 | Q4QY38 | -0.86864  |
| 109420 | Q85601 | A6NI56 | -0.22492  |
| 109421 | Q85601 | Q969M2 | -0.94705  |
| 109422 | Q85601 | Q8IZF6 | -1.3639   |
| 109423 | Q85601 | P30968 | -1.4904   |
| 109424 | Q85601 | Q14696 | -0.25853  |
| 109425 | Q85601 | Q9Y227 | -0.39504  |
| 109426 | Q85601 | Q8N6C5 | -0.68127  |
| 109427 | Q85601 | Q9NZQ0 | -1.0264   |
| 109428 | Q85601 | O43424 | -0.63     |
| 109429 | Q85601 | P69849 | -0.89575  |
| 109430 | Q85601 | O95372 | -0.28158  |
| 109431 | Q85601 | Q8TD30 | -0.21043  |
| 109432 | Q85601 | Q8N122 | -0.22741  |
| 109433 | Q85601 | P51828 | -0.98698  |
| 109434 | Q85601 | Q6UY27 | -0.95724  |
| 109435 | Q85601 | O15231 | -0.17516  |
| 109436 | Q85601 | P41229 | -0.54534  |
| 109437 | Q85601 | P41273 | -1.0856   |
| 109438 | Q85601 | Q9NSE4 | -0.16536  |
| 109439 | Q85601 | Q13615 | -0.16649  |
| 109440 | Q85601 | Q8N4M1 | -0.83997  |

|        |        |        |           |
|--------|--------|--------|-----------|
| 109441 | Q85601 | B2RXH2 | -0.12043  |
| 109442 | Q85601 | Q9BZD2 | -0.86767  |
| 109443 | Q85601 | P11230 | -0.84945  |
| 109444 | Q85601 | Q96JG6 | -0.015132 |
| 109445 | Q85601 | P0CE67 | -0.2031   |
| 109446 | Q85601 | P30874 | -0.44684  |
| 109447 | Q85601 | Q8N392 | -1.0442   |
| 109448 | Q85601 | P57775 | -0.26553  |
| 109449 | Q85601 | Q9UQ13 | -0.25723  |
| 109450 | Q85601 | O43261 | -0.64501  |
| 109451 | Q85601 | Q8N7X4 | -0.18472  |
| 109452 | Q85601 | Q9BXT8 | -0.31783  |
| 109453 | Q85601 | Q9BTY2 | -0.75349  |
| 109454 | Q85601 | Q9ULT8 | -0.59257  |
| 109455 | Q85601 | Q6N021 | -0.53666  |
| 109456 | Q85601 | Q8WUX1 | -1.026    |
| 109457 | Q85601 | Q2QL34 | -0.98128  |
| 109458 | Q85601 | P30505 | -1.1017   |
| 109459 | Q85601 | Q9H0C3 | -0.74877  |
| 109460 | Q85601 | Q9NV96 | -0.27463  |
| 109461 | Q85601 | O75339 | -0.90389  |
| 109462 | Q85601 | P26718 | -0.59725  |
| 109463 | Q85601 | Q92791 | -0.15493  |
| 109464 | Q85601 | P39656 | -0.25693  |
| 109465 | Q85601 | P31785 | -0.91118  |
| 109466 | Q85601 | Q8WVJ2 | -0.40746  |
| 109467 | Q85601 | O43414 | -0.63487  |
| 109468 | Q85601 | Q9NX09 | -0.29766  |
| 109469 | Q85601 | Q13591 | -1.0677   |
| 109470 | Q85601 | Q3SYA9 | -0.18472  |
| 109471 | Q85601 | Q9BT40 | -0.22577  |
| 109472 | Q85601 | Q16659 | -0.31091  |
| 109473 | Q85601 | O00744 | -0.38724  |
| 109474 | Q85601 | A5YM72 | -0.71135  |
| 109475 | Q85601 | Q53HI1 | -0.1912   |
| 109476 | Q85601 | Q9H936 | -0.23394  |
| 109477 | Q85601 | Q8IVJ1 | -1.042    |
| 109478 | Q85601 | Q12797 | -0.55649  |
| 109479 | Q85601 | Q9H4G1 | -0.94321  |
| 109480 | Q85601 | Q8N413 | -0.69944  |
| 109481 | Q85601 | Q8NGL0 | -1.2621   |
| 109482 | Q85601 | P0C7N8 | -1.2621   |
| 109483 | Q85601 | Q11206 | -0.7726   |
| 109484 | Q85601 | Q9UN72 | -1.2846   |
| 109485 | Q85601 | P40205 | -0.54101  |
| 109486 | Q85601 | Q14894 | -0.22293  |
| 109487 | Q85601 | Q16611 | -0.22724  |
| 109488 | Q85601 | Q99500 | -1.2658   |
| 109489 | Q85601 | P46019 | -0.54052  |
| 109490 | Q85601 | Q9NZL6 | -0.58984  |
| 109491 | Q85601 | O14494 | -0.8726   |
| 109492 | Q85601 | P19835 | -0.46966  |
| 109493 | Q85601 | Q9UNH6 | -0.52704  |
| 109494 | Q85601 | P49795 | -0.22839  |
| 109495 | Q85601 | Q8N6L1 | -0.66601  |
| 109496 | Q85601 | Q76EJ3 | -0.46872  |
| 109497 | Q85601 | O95259 | -0.33954  |
| 109498 | Q85601 | Q2M2H8 | -0.7992   |
| 109499 | Q85601 | Q96PG1 | -0.92686  |
| 109500 | Q85601 | Q5XKL5 | -0.22534  |
| 109501 | Q85601 | Q6PHW0 | -1.0659   |
| 109502 | Q85601 | Q96EP5 | -0.60152  |
| 109503 | Q85601 | P08700 | -0.58464  |
| 109504 | Q85601 | Q6S9Z5 | -0.29575  |
| 109505 | Q85601 | Q08554 | -1.133    |
| 109506 | Q85601 | Q8NG99 | -1.2621   |
| 109507 | Q85601 | Q4V321 | -0.67238  |
| 109508 | Q85601 | O95237 | -0.66958  |
| 109509 | Q85601 | Q11201 | -0.76913  |
| 109510 | Q85601 | Q96BM0 | -0.92686  |
| 109511 | Q85601 | P48594 | -0.56623  |
| 109512 | Q85601 | Q495B1 | -0.49132  |
| 109513 | Q85601 | Q6ZWH5 | -1.2768   |
| 109514 | Q85601 | P35212 | -0.9406   |
| 109515 | Q85601 | P06313 | -1.046    |
| 109516 | Q85601 | Q96KN3 | -0.4493   |

|        |        |        |           |
|--------|--------|--------|-----------|
| 109517 | Q85601 | Q9UGI0 | -0.21598  |
| 109518 | Q85601 | Q9NX47 | -0.29103  |
| 109519 | Q85601 | Q86X19 | -0.97505  |
| 109520 | Q85601 | Q6ZMC9 | -0.92686  |
| 109521 | Q85601 | Q5IJ48 | -1.6081   |
| 109522 | Q85601 | O75503 | -0.60817  |
| 109523 | Q85601 | Q6IQ55 | -0.6245   |
| 109524 | Q85601 | P54296 | -0.56127  |
| 109525 | Q85601 | O95299 | -0.087957 |
| 109526 | Q85601 | Q8IY95 | -0.99866  |
| 109527 | Q85601 | Q15149 | -0.22805  |
| 109528 | Q85601 | A6NCD4 | -0.13713  |
| 109529 | Q85601 | Q8IXE1 | -1.2621   |
| 109530 | Q85601 | P84074 | -0.43838  |
| 109531 | Q85601 | P0C2S0 | -0.90534  |
| 109532 | Q85601 | Q04118 | -0.86054  |
| 109533 | Q85601 | P04745 | -0.29939  |
| 109534 | Q85601 | Q8NHC8 | -1.2621   |
| 109535 | Q85601 | Q8TB96 | -1.4625   |
| 109536 | Q85601 | P10912 | -0.27963  |
| 109537 | Q85601 | Q96BZ8 | -0.18472  |
| 109538 | Q85601 | Q7Z5A9 | -0.87832  |
| 109539 | Q85601 | P56597 | -0.54425  |
| 109540 | Q85601 | Q86XJ1 | -0.34507  |
| 109541 | Q85601 | Q8NHA8 | -1.2621   |
| 109542 | Q85601 | Q711Q0 | -0.2031   |
| 109543 | Q85601 | Q96KT6 | -0.2031   |
| 109544 | Q85601 | Q7Z4N8 | -0.58183  |
| 109545 | Q85601 | A6NL26 | -1.2621   |
| 109546 | Q85601 | Q6UXH8 | -1.0829   |
| 109547 | Q85601 | Q5GJ75 | -0.2139   |
| 109548 | Q85601 | Q9Y6Z2 | -0.2031   |
| 109549 | Q85601 | Q9NWS6 | -0.92686  |
| 109550 | Q85601 | P51151 | -0.49227  |
| 109551 | Q85601 | O43929 | -0.11926  |
| 109552 | Q85601 | P14616 | -1.4252   |
| 109553 | Q85601 | P01781 | -1.046    |
| 109554 | Q85601 | Q96L33 | -1.2447   |
| 109555 | Q85601 | Q8N565 | -0.54904  |
| 109556 | Q85601 | Q96BW5 | -0.2572   |
| 109557 | Q85601 | Q96D53 | -0.9875   |
| 109558 | Q85601 | Q86W26 | -0.81985  |
| 109559 | Q85601 | P59020 | -0.79167  |
| 109560 | Q85601 | Q15738 | -1.0063   |
| 109561 | Q85601 | P35346 | -1.0602   |
| 109562 | Q85601 | Q9P126 | -0.54111  |
| 109563 | Q85601 | Q9ULG3 | -0.2031   |
| 109564 | Q85601 | P31415 | -0.23125  |
| 109565 | Q85601 | Q9NV58 | -0.22296  |
| 109566 | Q85601 | Q8N2C3 | -0.5766   |
| 109567 | Q85601 | Q96MZ0 | -0.22321  |
| 109568 | Q85601 | Q9HAY6 | -0.31222  |
| 109569 | Q85601 | P33527 | -0.36293  |
| 109570 | Q85601 | Q8N987 | -0.3385   |
| 109571 | Q85601 | Q6NZ63 | -0.92686  |
| 109572 | Q85601 | P86791 | -0.59751  |
| 109573 | Q85601 | Q9H239 | -1.3124   |
| 109574 | Q85601 | Q9BZX2 | -0.60097  |
| 109575 | Q85601 | I3L1E1 | -0.31092  |
| 109576 | Q85601 | Q9H2P9 | -0.33512  |
| 109577 | Q85601 | Q9H553 | -0.23951  |
| 109578 | Q85601 | O75908 | -0.83218  |
| 109579 | Q85601 | Q6PHR2 | -0.5751   |
| 109580 | Q85601 | Q6FI13 | -0.7417   |
| 109581 | Q85601 | Q9NSG2 | -0.07513  |
| 109582 | Q85601 | O15169 | -0.27239  |
| 109583 | Q85601 | Q96B21 | -0.92686  |
| 109584 | Q85601 | Q9NTI7 | -0.10516  |
| 109585 | Q85601 | A6NJT0 | -0.18202  |
| 109586 | Q85601 | P12273 | -0.93511  |
| 109587 | Q85601 | Q6ZS92 | -0.21062  |
| 109588 | Q85601 | P78348 | -0.68283  |
| 109589 | Q85601 | P51513 | -0.1401   |
| 109590 | Q85601 | Q9NQS5 | -1.2979   |
| 109591 | Q85601 | P35052 | -0.86297  |
| 109592 | Q85601 | P25054 | -0.22674  |

|        |        |        |           |
|--------|--------|--------|-----------|
| 109593 | Q85601 | Q68EN5 | -0.48158  |
| 109594 | Q85601 | Q8WWZ4 | -1.2667   |
| 109595 | Q85601 | Q9Y6C5 | -0.85043  |
| 109596 | Q85601 | P30530 | -0.68114  |
| 109597 | Q85601 | Q99704 | -0.18653  |
| 109598 | Q85601 | Q9BWT3 | -0.40139  |
| 109599 | Q85601 | Q8N6F8 | -0.087072 |
| 109600 | Q85601 | Q7Z7J7 | -0.92686  |
| 109601 | Q85601 | Q9NZI8 | -0.22606  |
| 109602 | Q85601 | Q9NPI9 | -1.0964   |
| 109603 | Q85601 | Q9BQ61 | -0.092462 |
| 109604 | Q85601 | Q96MU8 | -0.35387  |
| 109605 | Q85601 | Q16762 | -0.2291   |
| 109606 | Q85601 | P56749 | -0.7761   |
| 109607 | Q85601 | A6NME0 | -0.082734 |
| 109608 | Q85601 | A7KAX9 | -0.38007  |
| 109609 | Q85601 | Q96RQ1 | -0.10415  |
| 109610 | Q85601 | Q6V0I7 | -0.66929  |
| 109611 | Q85601 | O43761 | -0.76545  |
| 109612 | Q85601 | Q9UDT6 | -0.22693  |
| 109613 | Q85601 | Q96DN2 | -0.96646  |
| 109614 | Q85601 | P12829 | -0.30655  |
| 109615 | Q85601 | Q6PP77 | -1.0386   |
| 109616 | Q85601 | O43278 | -0.86376  |
| 109617 | Q85601 | Q8TET4 | -0.3019   |
| 109618 | Q85601 | Q7Z4G4 | -0.27874  |
| 109619 | Q85601 | Q9BX95 | -0.71495  |
| 109620 | Q85601 | Q14011 | -0.22357  |
| 109621 | Q85601 | O95859 | -1.1147   |
| 109622 | Q85601 | Q6ZXV5 | -0.92686  |
| 109623 | Q85601 | P36957 | -0.19901  |
| 109624 | Q85601 | P17050 | -0.20234  |
| 109625 | Q85601 | O95393 | -0.22741  |
| 109626 | Q85601 | Q14197 | -0.02734  |
| 109627 | Q85601 | O15467 | -1.0374   |
| 109628 | Q85601 | Q9UM73 | -1.4756   |
| 109629 | Q85601 | P25800 | -0.27076  |
| 109630 | Q85601 | Q6ZWI9 | -0.29575  |
| 109631 | Q85601 | Q6IPM2 | -0.1598   |
| 109632 | Q85601 | Q9BRJ6 | -0.15538  |
| 109633 | Q85601 | Q8NCP5 | -0.19567  |
| 109634 | Q85601 | Q06889 | -0.2064   |
| 109635 | Q85601 | P25705 | -0.10985  |
| 109636 | Q85601 | O00624 | -1.0145   |
| 109637 | Q85601 | Q8NBT3 | -0.92686  |
| 109638 | Q85601 | Q7L3V2 | -0.2621   |
| 109639 | Q85601 | Q7Z6M2 | -0.33306  |
| 109640 | Q85601 | Q6PII3 | -0.19309  |
| 109641 | Q85601 | Q9UHI5 | -0.39624  |
| 109642 | Q85601 | Q7Z6M1 | -0.26471  |
| 109643 | Q85601 | Q8N9L1 | -0.39438  |
| 109644 | Q85601 | P09417 | -0.40832  |
| 109645 | Q85601 | P78508 | -0.6521   |
| 109646 | Q85601 | O75690 | -0.49663  |
| 109647 | Q85601 | Q8NGK1 | -1.2621   |
| 109648 | Q85601 | Q13217 | -0.22479  |
| 109649 | Q85601 | Q4VX67 | -1.2416   |
| 109650 | Q85601 | Q9UP38 | -0.402    |
| 109651 | Q85601 | A6NK97 | -0.9396   |
| 109652 | Q85601 | Q86VI4 | -0.84637  |
| 109653 | Q85601 | Q8NBS9 | -0.3029   |
| 109654 | Q85601 | P53778 | -0.22741  |
| 109655 | Q85601 | P41271 | -0.67454  |
| 109656 | Q85601 | Q9H0J4 | -0.19525  |
| 109657 | Q85601 | Q9NY93 | -0.46656  |
| 109658 | Q85601 | O75509 | -0.22661  |
| 109659 | Q85601 | Q86TH1 | -0.57484  |
| 109660 | Q85601 | Q08345 | -0.96664  |
| 109661 | Q85601 | Q92913 | -0.32965  |
| 109662 | Q85601 | Q99985 | -0.8348   |
| 109663 | Q85601 | A1L188 | -0.15485  |
| 109664 | Q85601 | Q9UBX7 | -1.2386   |
| 109665 | Q85601 | Q96GL9 | -0.92686  |
| 109666 | Q85601 | P41225 | -0.27065  |
| 109667 | Q85601 | P47881 | -1.2621   |
| 109668 | Q85601 | O43307 | -0.55119  |



|        |        |        |           |
|--------|--------|--------|-----------|
| 109669 | Q85601 | P24390 | -0.47945  |
| 109670 | Q85601 | Q9UHA4 | -0.1778   |
| 109671 | Q85601 | Q9Y2K9 | -0.4072   |
| 109672 | Q85601 | P01772 | -1.046    |
| 109673 | Q85601 | Q8WZA2 | -0.32312  |
| 109674 | Q85601 | Q9NRM7 | -0.22741  |
| 109675 | Q85601 | A1E959 | -0.85336  |
| 109676 | Q85601 | A6NDS4 | -1.3431   |
| 109677 | Q85601 | Q99880 | -0.7417   |
| 109678 | Q85601 | P21796 | -0.29955  |
| 109679 | Q85601 | Q8NGD0 | -1.2621   |
| 109680 | Q85601 | Q6ZS94 | -0.2031   |
| 109681 | Q85601 | Q504Y2 | -0.80008  |
| 109682 | Q85601 | Q8NCL9 | -0.9493   |
| 109683 | Q85601 | Q9NZN3 | -0.44489  |
| 109684 | Q85601 | A6NGW2 | -1.1922   |
| 109685 | Q85601 | Q8IZ20 | -0.19444  |
| 109686 | Q85601 | P01258 | -0.52503  |
| 109687 | Q85601 | Q8NAM6 | -0.13695  |
| 109688 | Q85601 | O94967 | -0.2275   |
| 109689 | Q85601 | Q9BWT7 | -0.20027  |
| 109690 | Q85601 | Q9UP95 | -1.0396   |
| 109691 | Q85601 | O43555 | -1.2055   |
| 109692 | Q85601 | P43308 | -0.8767   |
| 109693 | Q85601 | P14543 | -1.0668   |
| 109694 | Q85601 | Q9BT17 | -0.23312  |
| 109695 | Q85601 | Q7RTN6 | -0.44863  |
| 109696 | Q85601 | Q14833 | -1.3949   |
| 109697 | Q85601 | Q8NEJ9 | -0.1558   |
| 109698 | Q85601 | A0A5B9 | -0.92686  |
| 109699 | Q85601 | Q9Y5K3 | -0.33067  |
| 109700 | Q85601 | Q02509 | -0.72988  |
| 109701 | Q85601 | Q5JT18 | -0.22251  |
| 109702 | Q85601 | Q9UJ99 | -1.246    |
| 109703 | Q85601 | Q14641 | -1.2291   |
| 109704 | Q85601 | Q8WWF3 | -0.92686  |
| 109705 | Q85601 | Q9BT76 | -1.0464   |
| 109706 | Q85601 | B8ZZ34 | -0.92686  |
| 109707 | Q85601 | Q6UXM1 | -0.92686  |
| 109708 | Q85601 | O43173 | -0.59861  |
| 109709 | Q85601 | P06493 | -0.21258  |
| 109710 | Q85601 | P01178 | -0.39335  |
| 109711 | Q85601 | O95264 | -1.0984   |
| 109712 | Q85601 | P47929 | -0.37843  |
| 109713 | Q85601 | Q8N4N3 | -0.33306  |
| 109714 | Q85601 | Q7Z3F1 | -1.1074   |
| 109715 | Q85601 | Q59GN2 | -0.073938 |
| 109716 | Q85601 | Q86VR7 | -0.92686  |
| 109717 | Q85601 | P01604 | -1.046    |
| 109718 | Q85601 | Q9NQB0 | -0.20661  |
| 109719 | Q85601 | Q9P1V8 | -0.23209  |
| 109720 | Q85601 | O95379 | -0.16535  |
| 109721 | Q85601 | Q8WZ26 | -0.90338  |
| 109722 | Q85601 | Q9BVS4 | -1.1788   |
| 109723 | Q85601 | Q8N4F7 | -0.89088  |
| 109724 | Q85601 | Q8N8G6 | -0.29567  |
| 109725 | Q85601 | Q8NI36 | -0.22785  |
| 109726 | Q85601 | Q3KQZ1 | -0.69716  |
| 109727 | Q85601 | P42684 | -0.49613  |
| 109728 | Q85601 | Q9C0G6 | -0.57589  |
| 109729 | Q85601 | Q96P31 | -1.0386   |
| 109730 | Q85601 | Q92692 | -0.29134  |
| 109731 | Q85601 | Q76KP1 | -0.71269  |
| 109732 | Q85601 | P0C7X4 | -0.35246  |
| 109733 | Q85601 | P59045 | -0.91983  |
| 109734 | Q85601 | Q9H3K2 | -0.042487 |
| 109735 | Q85601 | P27361 | -0.2274   |
| 109736 | Q85601 | Q8NGH8 | -1.2621   |
| 109737 | Q85601 | P60323 | -0.12231  |
| 109738 | Q85601 | O60830 | -0.41244  |
| 109739 | Q85601 | Q99735 | -0.68496  |
| 109740 | Q85601 | Q9ULH0 | -0.58834  |
| 109741 | Q85601 | P0DJI9 | -0.8459   |
| 109742 | Q85601 | Q9H172 | -1.2319   |
| 109743 | Q85601 | Q3KP44 | -0.22739  |
| 109744 | Q85601 | P08240 | -1.0185   |

|        |        |        |           |
|--------|--------|--------|-----------|
| 109745 | Q85601 | O75264 | -0.92686  |
| 109746 | Q85601 | H3BMG3 | -0.26824  |
| 109747 | Q85601 | Q156A1 | -0.2031   |
| 109748 | Q85601 | P26715 | -1.2033   |
| 109749 | Q85601 | Q9NQ40 | -1.0221   |
| 109750 | Q85601 | Q9HBE4 | -0.8567   |
| 109751 | Q85601 | Q8N148 | -1.2621   |
| 109752 | Q85601 | P09327 | -0.17625  |
| 109753 | Q85601 | Q8WVX9 | -1.2031   |
| 109754 | Q85601 | A4QPH2 | -0.67094  |
| 109755 | Q85601 | Q8NGI8 | -1.2621   |
| 109756 | Q85601 | P03950 | -0.29773  |
| 109757 | Q85601 | Q9UHA7 | -0.96806  |
| 109758 | Q85601 | Q969W9 | -0.8859   |
| 109759 | Q85601 | H3BQW9 | -0.096111 |
| 109760 | Q85601 | Q8NGB6 | -1.2621   |
| 109761 | Q85601 | Q14410 | -0.55548  |
| 109762 | Q85601 | O14578 | -0.75018  |
| 109763 | Q85601 | Q9UFP1 | -0.9043   |
| 109764 | Q85601 | P30519 | -0.21148  |
| 109765 | Q85601 | P23942 | -1.0613   |
| 109766 | Q85601 | Q9Y5P2 | -0.89661  |
| 109767 | Q85601 | P0C646 | -1.2621   |
| 109768 | Q85601 | Q9NVJ2 | -0.59234  |
| 109769 | Q85601 | O60939 | -0.80822  |
| 109770 | Q85601 | Q6UXB8 | -1.4108   |
| 109771 | Q85601 | Q9H6V9 | -0.21292  |
| 109772 | Q85601 | Q8IYS4 | -1.5087   |
| 109773 | Q85601 | Q9BY12 | -0.27297  |
| 109774 | Q85601 | P55017 | -0.42181  |
| 109775 | Q85601 | Q5TEA6 | -0.92686  |
| 109776 | Q85601 | Q6NSJ2 | -0.44245  |
| 109777 | Q85601 | P00395 | -0.23091  |
| 109778 | Q85601 | A6NDG6 | -0.38612  |
| 109779 | Q85601 | Q9BTX7 | -0.58358  |
| 109780 | Q85601 | Q8NGD4 | -1.2621   |
| 109781 | Q85601 | Q9Y5B8 | -0.68572  |
| 109782 | Q85601 | Q9NRY7 | -1.0484   |
| 109783 | Q85601 | A4D161 | -0.82928  |
| 109784 | Q85601 | Q15811 | -0.43698  |
| 109785 | Q85601 | P16619 | -1.071    |
| 109786 | Q85601 | Q14392 | -0.9707   |
| 109787 | Q85601 | P58004 | -0.20985  |
| 109788 | Q85601 | Q8WTR2 | -0.5061   |
| 109789 | Q85601 | P49810 | -0.21878  |
| 109790 | Q85601 | A0AVF1 | -0.44892  |
| 109791 | Q85601 | Q8N8S7 | -0.23195  |
| 109792 | Q85601 | Q9BV10 | -0.84127  |
| 109793 | Q85601 | Q9H7M9 | -0.92686  |
| 109794 | Q85601 | P11277 | -0.22895  |
| 109795 | Q85601 | P05534 | -0.93461  |
| 109796 | Q85601 | Q5VTQ0 | -0.13499  |
| 109797 | Q85601 | Q8NFT8 | -0.72989  |
| 109798 | Q85601 | Q6UXT8 | -0.9043   |
| 109799 | Q85601 | Q86YV6 | -1.2086   |
| 109800 | Q85601 | Q86VH5 | -0.92686  |
| 109801 | Q85601 | O95361 | -0.2358   |
| 109802 | Q85601 | Q13410 | -1.5779   |
| 109803 | Q85601 | P19440 | -0.51401  |
| 109804 | Q85601 | O95881 | -0.51858  |
| 109805 | Q85601 | O95971 | -0.70664  |
| 109806 | Q85601 | Q6ZRP7 | -1.1674   |
| 109807 | Q85601 | Q6UWM5 | -0.9043   |
| 109808 | Q85601 | Q9UKR3 | -0.5848   |
| 109809 | Q85601 | P53779 | -0.2274   |
| 109810 | Q85601 | Q99879 | -0.7417   |
| 109811 | Q85601 | Q5M7Z0 | -0.89088  |
| 109812 | Q85601 | A4UGR9 | -0.29877  |
| 109813 | Q85601 | Q14210 | -0.98631  |
| 109814 | Q85601 | Q9UHD2 | -0.22741  |
| 109815 | Q85601 | Q6ZMV7 | -0.18142  |
| 109816 | Q85601 | P62079 | -0.92686  |
| 109817 | Q85601 | Q9BXN6 | -0.72674  |
| 109818 | Q85601 | P0CG22 | -1.0215   |
| 109819 | Q85601 | Q8NGS6 | -1.2621   |
| 109820 | Q85601 | Q32P44 | -0.22783  |

|        |        |         |           |
|--------|--------|---------|-----------|
| 109821 | Q85601 | O00203  | -0.13778  |
| 109822 | Q85601 | Q9Y5F9  | -1.246    |
| 109823 | Q85601 | Q9NY99  | -0.22516  |
| 109824 | Q85601 | Q9NQY0  | -0.52037  |
| 109825 | Q85601 | P36507  | -0.22783  |
| 109826 | Q85601 | P01600  | -1.046    |
| 109827 | Q85601 | Q14624  | -0.63725  |
| 109828 | Q85601 | Q86TV6  | -0.22687  |
| 109829 | Q85601 | Q6ZWT7  | -0.79512  |
| 109830 | Q85601 | Q7Z2W7  | -0.84117  |
| 109831 | Q85601 | P37235  | -0.39878  |
| 109832 | Q85601 | P19099  | -0.43711  |
| 109833 | Q85601 | P35408  | -0.57979  |
| 109834 | Q85601 | Q6ZTN6  | -0.14609  |
| 109835 | Q85601 | Q5TC04  | -0.51161  |
| 109836 | Q85601 | Q5TDP6  | -0.40594  |
| 109837 | Q85601 | Q99755  | -0.20977  |
| 109838 | Q85601 | Q15418  | -0.20897  |
| 109839 | Q85601 | Q8IUUK5 | -0.92886  |
| 109840 | Q85601 | Q8NHV9  | -0.21464  |
| 109841 | Q85601 | Q11128  | -0.59264  |
| 109842 | Q85601 | Q8NGF6  | -1.2621   |
| 109843 | Q85601 | Q9HAQ2  | -0.51746  |
| 109844 | Q85601 | Q8N365  | -0.092462 |
| 109845 | Q85601 | P61073  | -0.34188  |
| 109846 | Q85601 | Q86YZ3  | -0.66558  |
| 109847 | Q85601 | Q4G176  | -1.0135   |
| 109848 | Q85601 | P12838  | -0.90163  |
| 109849 | Q85601 | Q86W24  | -1.155    |
| 109850 | Q85601 | Q2MV58  | -0.70413  |
| 109851 | Q85601 | Q9UK08  | -0.88177  |
| 109852 | Q85601 | Q8IW03  | -0.11871  |
| 109853 | Q85601 | Q53GA4  | -0.23161  |
| 109854 | Q85601 | P48047  | -0.29625  |
| 109855 | Q85601 | Q15155  | -0.66337  |
| 109856 | Q85601 | Q8WYK0  | -0.17314  |
| 109857 | Q85601 | P51685  | -1.425    |
| 109858 | Q85601 | O15212  | -0.35192  |
| 109859 | Q85601 | Q99988  | -0.85833  |
| 109860 | Q85601 | Q8NBI2  | -1.1234   |
| 109861 | Q85601 | P48050  | -0.5048   |
| 109862 | Q85601 | P0C7A2  | -0.84014  |
| 109863 | Q85601 | Q8N4H5  | -0.47427  |
| 109864 | Q85601 | Q08881  | -0.46736  |
| 109865 | Q85601 | P47756  | -0.17801  |
| 109866 | Q85601 | Q9Y2G3  | -0.71005  |
| 109867 | Q85601 | P01616  | -1.0219   |
| 109868 | Q85601 | Q9H939  | -0.22181  |
| 109869 | Q85601 | Q3ZCQ3  | -0.92686  |
| 109870 | Q85601 | Q9BXJ2  | -0.69278  |
| 109871 | Q85601 | P01597  | -1.046    |
| 109872 | Q85601 | Q0P670  | -0.92686  |
| 109873 | Q85601 | P48163  | -0.20286  |
| 109874 | Q85601 | Q16552  | -0.57118  |
| 109875 | Q85601 | A6NHI5  | -0.92686  |
| 109876 | Q85601 | Q8NGH3  | -1.2621   |
| 109877 | Q85601 | Q96AK3  | -0.54031  |
| 109878 | Q85601 | P08620  | -0.65727  |
| 109879 | Q85601 | Q8TDL5  | -1.1222   |
| 109880 | Q85601 | Q8NC60  | -0.17589  |
| 109881 | Q85601 | Q8NG98  | -1.2621   |
| 109882 | Q85601 | Q99811  | -0.20351  |
| 109883 | Q85601 | P48061  | -0.594    |
| 109884 | Q85601 | O43157  | -0.92507  |
| 109885 | Q85601 | Q8WVH0  | -0.24911  |
| 109886 | Q85601 | P0C645  | -1.2621   |
| 109887 | Q85601 | Q9UFC0  | -0.4487   |
| 109888 | Q85601 | Q96I13  | -0.45713  |
| 109889 | Q85601 | Q9BR39  | -0.45348  |
| 109890 | Q85601 | O76093  | -0.63225  |
| 109891 | Q85601 | Q7Z5A8  | -0.9043   |
| 109892 | Q85601 | Q9NQV5  | -0.16602  |
| 109893 | Q85601 | Q15760  | -1.4753   |
| 109894 | Q85601 | Q9NQT5  | -0.50932  |
| 109895 | Q85601 | P09923  | -1.1561   |
| 109896 | Q85601 | Q9P246  | -0.56369  |

|        |        |        |           |
|--------|--------|--------|-----------|
| 109897 | Q85601 | Q8TAB5 | -0.092462 |
| 109898 | Q85601 | P57052 | -0.69249  |
| 109899 | Q85601 | O75146 | -0.19841  |
| 109900 | Q85601 | A6NI72 | -0.28104  |
| 109901 | Q85601 | Q9BY19 | -0.92686  |
| 109902 | Q85601 | Q14994 | -0.22773  |
| 109903 | Q85601 | P06311 | -1.046    |
| 109904 | Q85601 | O15228 | -0.47259  |
| 109905 | Q85601 | Q96A11 | -0.657    |
| 109906 | Q85601 | P56705 | -0.29508  |
| 109907 | Q85601 | P26010 | -1.2568   |
| 109908 | Q85601 | Q9HB20 | -0.45449  |
| 109909 | Q85601 | P13598 | -1.2109   |
| 109910 | Q85601 | Q7L0Q8 | -0.51423  |
| 109911 | Q85601 | P17813 | -0.21789  |
| 109912 | Q85601 | Q6UX41 | -0.29083  |
| 109913 | Q85601 | O43824 | -1.0027   |
| 109914 | Q85601 | Q9NY47 | -0.73278  |
| 109915 | Q85601 | O95405 | -0.162    |
| 109916 | Q85601 | Q99884 | -0.94757  |
| 109917 | Q85601 | Q8N7X1 | -0.896    |
| 109918 | Q85601 | Q13224 | -0.27951  |
| 109919 | Q85601 | Q96DZ7 | -0.92686  |
| 109920 | Q85601 | P13798 | -0.25293  |
| 109921 | Q85601 | P01816 | -1.046    |
| 109922 | Q85601 | Q9NZK7 | -0.85144  |
| 109923 | Q85601 | Q96MW5 | -0.21994  |
| 109924 | Q85601 | Q5TZK3 | -0.24616  |
| 109925 | Q85601 | Q9UPW5 | -0.23379  |
| 109926 | Q85601 | Q96PP9 | -0.46842  |
| 109927 | Q85601 | O43283 | -0.51934  |
| 109928 | Q85601 | Q99956 | -0.57361  |
| 109929 | Q85601 | Q92696 | -0.38493  |
| 109930 | Q85601 | Q9HBG6 | -0.22743  |
| 109931 | Q85601 | Q9UGF7 | -1.2621   |
| 109932 | Q85601 | Q9Y2U5 | -0.62583  |
| 109933 | Q85601 | O15320 | -0.36978  |
| 109934 | Q85601 | O60688 | -0.24979  |
| 109935 | Q85601 | P51991 | -0.24741  |
| 109936 | Q85601 | Q9NYP3 | -0.098541 |
| 109937 | Q85601 | Q8N819 | -0.4027   |
| 109938 | Q85601 | Q9NZM1 | -0.5261   |
| 109939 | Q85601 | Q0Z7S8 | -0.28843  |
| 109940 | Q85601 | Q3KRA9 | -0.41173  |
| 109941 | Q85601 | P60484 | -0.22739  |
| 109942 | Q85601 | P23443 | -0.19935  |
| 109943 | Q85601 | P22570 | -0.21306  |
| 109944 | Q85601 | Q9Y4I1 | -0.23568  |
| 109945 | Q85601 | Q8NGC5 | -1.2621   |
| 109946 | Q85601 | P29144 | -0.14298  |
| 109947 | Q85601 | Q9UJ37 | -0.69213  |
| 109948 | Q85601 | Q9BXJ1 | -0.96335  |
| 109949 | Q85601 | P35499 | -1.0938   |
| 109950 | Q85601 | Q6QEF8 | -0.416    |
| 109951 | Q85601 | Q9GZN0 | -1.2523   |
| 109952 | Q85601 | Q8NG06 | -0.589    |
| 109953 | Q85601 | Q9UMD9 | -1.006    |
| 109954 | Q85601 | Q15622 | -1.2621   |
| 109955 | Q85601 | Q86WG5 | -0.22742  |
| 109956 | Q85601 | Q95IE3 | -0.68895  |
| 109957 | Q85601 | Q96GP6 | -0.48837  |
| 109958 | Q85601 | P30475 | -1.1574   |
| 109959 | Q85601 | Q8NHU0 | -0.17382  |
| 109960 | Q85601 | O00488 | -0.21577  |
| 109961 | Q85601 | P08473 | -0.5236   |
| 109962 | Q85601 | Q8NB59 | -0.79216  |
| 109963 | Q85601 | Q9BZG2 | -0.83369  |
| 109964 | Q85601 | P04206 | -1.046    |
| 109965 | Q85601 | Q8IV04 | -1.3431   |
| 109966 | Q85601 | Q92813 | -0.93143  |
| 109967 | Q85601 | Q6ZUT3 | -0.61387  |
| 109968 | Q85601 | P29965 | -1.009    |
| 109969 | Q85601 | Q96PD5 | -0.88886  |
| 109970 | Q85601 | B2RPK0 | -0.38297  |
| 109971 | Q85601 | Q96E17 | -0.87675  |
| 109972 | Q85601 | P46695 | -0.39514  |

|        |        |        |           |
|--------|--------|--------|-----------|
| 109973 | Q85601 | Q9Y264 | -0.808    |
| 109974 | Q85601 | P00734 | -0.54607  |
| 109975 | Q85601 | Q9ULP9 | -0.5977   |
| 109976 | Q85601 | Q38SD2 | -1.3305   |
| 109977 | Q85601 | Q8TD91 | -0.1234   |
| 109978 | Q85601 | P18054 | -0.2343   |
| 109979 | Q85601 | Q9UPX0 | -1.0386   |
| 109980 | Q85601 | Q9UGF6 | -1.2621   |
| 109981 | Q85601 | Q9NPJ3 | -0.12892  |
| 109982 | Q85601 | Q8N5M4 | -0.22595  |
| 109983 | Q85601 | Q8TE49 | -0.28938  |
| 109984 | Q85601 | Q8N4Y2 | -0.23818  |
| 109985 | Q85601 | Q9UPQ8 | -0.93248  |
| 109986 | Q85601 | Q8NG97 | -1.2621   |
| 109987 | Q85601 | Q86SS6 | -0.81511  |
| 109988 | Q85601 | O14735 | -0.65788  |
| 109989 | Q85601 | Q8IXM7 | -0.36802  |
| 109990 | Q85601 | P62191 | -0.44784  |
| 109991 | Q85601 | O15342 | -0.61845  |
| 109992 | Q85601 | P14679 | -0.44922  |
| 109993 | Q85601 | Q96LZ3 | -0.39878  |
| 109994 | Q85601 | Q8WV93 | -0.65342  |
| 109995 | Q85601 | O75874 | -0.12951  |
| 109996 | Q85601 | P55808 | -1.0305   |
| 109997 | Q85601 | O14638 | -1.1323   |
| 109998 | Q85601 | Q9BZ01 | -0.017314 |
| 109999 | Q85601 | Q9BQG2 | -0.22741  |
| 110000 | Q85601 | P06729 | -0.87225  |
| 110001 | Q85601 | Q5VU57 | -0.31254  |
| 110002 | Q85601 | Q99595 | -0.3726   |
| 110003 | Q85601 | Q8N1M1 | -0.81563  |
| 110004 | Q85601 | Q5VX71 | -0.92686  |
| 110005 | Q85601 | Q15672 | -0.22791  |
| 110006 | Q85601 | Q96FV3 | -0.90773  |
| 110007 | Q85601 | Q9UKG9 | -0.53616  |
| 110008 | Q85601 | Q8WZA1 | -0.71152  |
| 110009 | Q85601 | O43909 | -0.80231  |
| 110010 | Q85601 | P41597 | -0.56513  |
| 110011 | Q85601 | Q9UHC9 | -0.44975  |
| 110012 | Q85601 | Q68DV7 | -0.32034  |
| 110013 | Q85601 | Q9P016 | -0.26826  |
| 110014 | Q85601 | Q12802 | -0.22739  |
| 110015 | Q85601 | Q8NG75 | -1.2621   |
| 110016 | Q85601 | Q13362 | -0.10332  |
| 110017 | Q85601 | P0C8F1 | -1.1272   |
| 110018 | Q85601 | O15263 | -0.98056  |
| 110019 | Q85601 | I1YAP6 | -0.22766  |
| 110020 | Q85601 | Q9NY26 | -1.0244   |
| 110021 | Q85601 | Q15052 | -0.44709  |
| 110022 | Q85601 | Q9H339 | -1.2621   |
| 110023 | Q85601 | Q86SR1 | -0.68652  |
| 110024 | Q85601 | A6NFC9 | -1.2621   |
| 110025 | Q85601 | Q7LFL8 | -0.10631  |
| 110026 | Q85601 | Q9Y576 | -0.67696  |
| 110027 | Q85601 | Q8ND61 | -0.67921  |
| 110028 | Q85601 | Q86WU2 | -0.1467   |
| 110029 | Q85601 | Q9NUM3 | -0.91096  |
| 110030 | Q85601 | Q9NZV5 | -0.37729  |
| 110031 | Q85601 | Q8IV13 | -0.22522  |
| 110032 | Q85601 | P15391 | -1.1612   |
| 110033 | Q85601 | P0C7V4 | -0.32255  |
| 110034 | Q85601 | Q96MF6 | -0.26707  |
| 110035 | Q85601 | Q9Y2K6 | -0.41361  |
| 110036 | Q85601 | P04085 | -0.31071  |
| 110037 | Q85601 | Q5TEJ8 | -0.59646  |
| 110038 | Q85601 | Q8IYJ0 | -0.92686  |
| 110039 | Q85601 | Q7Z3S7 | -0.94511  |
| 110040 | Q85601 | Q9P0G3 | -1.2092   |
| 110041 | Q85601 | Q9BXJ3 | -0.9043   |
| 110042 | Q85601 | P20592 | -0.24903  |
| 110043 | Q85601 | Q99584 | -0.26846  |
| 110044 | Q85601 | Q1XH10 | -0.49845  |
| 110045 | Q85601 | P30559 | -0.89969  |
| 110046 | Q85601 | P80404 | -0.26905  |
| 110047 | Q85601 | P56880 | -0.7761   |
| 110048 | Q85601 | Q496F6 | -1.0386   |

|        |        |        |          |
|--------|--------|--------|----------|
| 110049 | Q85601 | P08172 | -0.99284 |
| 110050 | Q85601 | P07949 | -0.71785 |
| 110051 | Q85601 | Q6ZUI0 | -0.33621 |
| 110052 | Q85601 | Q9NRP0 | -0.86678 |
| 110053 | Q85601 | P53396 | -0.14076 |
| 110054 | Q85601 | Q6NXN4 | -0.92686 |
| 110055 | Q85601 | Q96JA3 | -0.22662 |
| 110056 | Q85601 | O75027 | -0.78868 |
| 110057 | Q85601 | P08842 | -0.57272 |
| 110058 | Q85601 | Q6NXT2 | -0.7417  |
| 110059 | Q85601 | Q6IQ20 | -0.45811 |
| 110060 | Q85601 | P26012 | -1.2276  |
| 110061 | Q85601 | P42081 | -0.25291 |
| 110062 | Q85601 | Q14162 | -1.0274  |
| 110063 | Q85601 | Q9UKY0 | -0.27011 |
| 110064 | Q85601 | Q99519 | -0.46623 |
| 110065 | Q85601 | P48546 | -1.2984  |
| 110066 | Q85601 | P0DJ07 | -0.75013 |
| 110067 | Q85601 | Q96JP5 | -0.15661 |
| 110068 | Q85601 | Q9UKR8 | -0.92686 |
| 110069 | Q85601 | Q3MIR4 | -0.28888 |
| 110070 | Q85601 | O43448 | -0.77676 |
| 110071 | Q85601 | Q86UP3 | -0.22534 |
| 110072 | Q85601 | P08519 | -1.1047  |
| 110073 | Q85601 | P50416 | -0.40458 |
| 110074 | Q85601 | Q9NYU1 | -0.3676  |
| 110075 | Q85601 | Q8N5Y8 | -0.54116 |
| 110076 | Q85601 | Q8NG92 | -1.2621  |
| 110077 | Q85601 | O14828 | -0.44527 |
| 110078 | Q85601 | Q8IUR5 | -0.75013 |
| 110079 | Q85601 | Q9Y6G1 | -0.92686 |
| 110080 | Q85601 | P09936 | -0.16324 |
| 110081 | Q85601 | A6NMY6 | -0.80598 |
| 110082 | Q85601 | Q8NEA5 | -0.92686 |
| 110083 | Q85601 | Q9NYQ8 | -0.7474  |
| 110084 | Q85601 | O75462 | -0.23093 |
| 110085 | Q85601 | O95473 | -0.92686 |
| 110086 | Q85601 | P01906 | -0.77219 |
| 110087 | Q85601 | P18465 | -1.1017  |
| 110088 | Q85601 | Q96KN4 | -0.15029 |
| 110089 | Q85601 | P42167 | -0.12583 |
| 110090 | Q85601 | P54317 | -0.82161 |
| 110091 | Q85601 | Q8N907 | -0.66956 |
| 110092 | Q85601 | Q8TD94 | -0.22283 |
| 110093 | Q85601 | Q6DN12 | -0.9059  |
| 110094 | Q85601 | Q9Y2H2 | -0.28009 |
| 110095 | Q85601 | P35247 | -0.50042 |
| 110096 | Q85601 | Q8IV01 | -0.8131  |
| 110097 | Q85601 | Q9NR20 | -0.9921  |
| 110098 | Q85601 | Q5VY43 | -0.98398 |
| 110099 | Q85601 | P03886 | -0.77311 |
| 110100 | Q85601 | Q9NPC1 | -1.4285  |
| 110101 | Q85601 | Q6ZS62 | -0.92686 |
| 110102 | Q85601 | Q9NX94 | -0.92686 |
| 110103 | Q85601 | Q8N8U3 | -0.32209 |
| 110104 | Q85601 | Q9UHZ2 | -0.2031  |
| 110105 | Q85601 | P55083 | -1.2527  |
| 110106 | Q85601 | P02778 | -0.83398 |
| 110107 | Q85601 | Q5T3Y7 | -0.14553 |
| 110108 | Q85601 | O00241 | -0.79449 |
| 110109 | Q85601 | Q8IWA4 | -0.95617 |
| 110110 | Q85601 | Q96PV4 | -0.29993 |
| 110111 | Q85601 | Q8WY21 | -0.32512 |
| 110112 | Q85601 | P47883 | -1.2621  |
| 110113 | Q85601 | Q8NC24 | -1.1107  |
| 110114 | Q85601 | Q14832 | -1.0999  |
| 110115 | Q85601 | O14772 | -0.84911 |
| 110116 | Q85601 | P14410 | -0.52512 |
| 110117 | Q85601 | Q8NHS0 | -0.44461 |
| 110118 | Q85601 | O00533 | -1.5165  |
| 110119 | Q85601 | Q8N1Y9 | -0.92686 |
| 110120 | Q85601 | O60499 | -0.23607 |
| 110121 | Q85601 | P60153 | -0.90766 |
| 110122 | Q85601 | P55916 | -0.46493 |
| 110123 | Q85601 | Q96SM3 | -1.3256  |
| 110124 | Q85601 | Q9H6L2 | -0.97505 |

|        |        |        |           |
|--------|--------|--------|-----------|
| 110125 | Q85601 | O14732 | -0.23738  |
| 110126 | Q85601 | O95057 | -1.3701   |
| 110127 | Q85601 | Q92609 | -0.81577  |
| 110128 | Q85601 | P53602 | -0.5591   |
| 110129 | Q85601 | Q9H293 | -0.73417  |
| 110130 | Q85601 | O60245 | -1.3703   |
| 110131 | Q85601 | P02458 | -0.58839  |
| 110132 | Q85601 | Q8NCQ3 | -0.92686  |
| 110133 | Q85601 | Q15111 | -0.5273   |
| 110134 | Q85601 | P02743 | -0.82389  |
| 110135 | Q85601 | Q9H2A9 | -0.61716  |
| 110136 | Q85601 | P21580 | -0.1944   |
| 110137 | Q85601 | P01911 | -0.68895  |
| 110138 | Q85601 | Q86V42 | -0.07694  |
| 110139 | Q85601 | Q96N96 | -0.22765  |
| 110140 | Q85601 | O75367 | -0.60054  |
| 110141 | Q85601 | Q9NRN5 | -1.0985   |
| 110142 | Q85601 | Q96GR4 | -0.89983  |
| 110143 | Q85601 | Q8WU20 | -0.14012  |
| 110144 | Q85601 | Q96AZ1 | -1.0466   |
| 110145 | Q85601 | Q02880 | -0.15737  |
| 110146 | Q85601 | P51687 | -0.21262  |
| 110147 | Q85601 | A6NJS3 | -0.9043   |
| 110148 | Q85601 | C9JPN9 | -0.66238  |
| 110149 | Q85601 | P0C843 | -0.15236  |
| 110150 | Q85601 | Q96Q04 | -1.2524   |
| 110151 | Q85601 | Q86XT4 | -0.44097  |
| 110152 | Q85601 | Q8WTX7 | -0.076784 |
| 110153 | Q85601 | P30685 | -1.1017   |
| 110154 | Q85601 | Q01101 | -0.22284  |
| 110155 | Q85601 | Q9Y394 | -1.1015   |
| 110156 | Q85601 | Q9Y6W6 | -0.29837  |
| 110157 | Q85601 | Q5JWF2 | -0.67371  |
| 110158 | Q85601 | Q86YQ2 | -1.0768   |
| 110159 | Q85601 | P25686 | -0.26844  |
| 110160 | Q85601 | Q86SH4 | -0.9043   |
| 110161 | Q85601 | Q9NPG4 | -1.0906   |
| 110162 | Q85601 | Q9Y5W5 | -1.135    |
| 110163 | Q85601 | Q8NHC7 | -1.2621   |
| 110164 | Q85601 | P60896 | -0.2031   |
| 110165 | Q85601 | Q8N5W8 | -0.9043   |
| 110166 | Q85601 | P27487 | -0.72426  |
| 110167 | Q85601 | Q8TC12 | -1.3415   |
| 110168 | Q85601 | Q8NER1 | -1.1323   |
| 110169 | Q85601 | Q6UWV7 | -0.92686  |
| 110170 | Q85601 | P31358 | -0.63744  |
| 110171 | Q85601 | O60512 | -0.32948  |
| 110172 | Q85601 | Q9NZS9 | -0.90986  |
| 110173 | Q85601 | Q9P0T7 | -1.2134   |
| 110174 | Q85601 | Q5JXM2 | -0.83307  |
| 110175 | Q85601 | Q5XX13 | -0.22775  |
| 110176 | Q85601 | Q9BSG0 | -0.9043   |
| 110177 | Q85601 | P30518 | -0.79488  |
| 110178 | Q85601 | P27482 | -0.39878  |
| 110179 | Q85601 | Q3LI64 | -0.2031   |
| 110180 | Q85601 | Q9NQ94 | -0.2681   |
| 110181 | Q85601 | Q9UQ88 | -0.23129  |
| 110182 | Q85601 | P02745 | -0.41805  |
| 110183 | Q85601 | P20292 | -0.10723  |
| 110184 | Q85601 | P07585 | -0.56287  |
| 110185 | Q85601 | Q9Y5W7 | -0.771    |
| 110186 | Q85601 | P07360 | -0.95997  |
| 110187 | Q85601 | Q8N8Q9 | -1.01     |
| 110188 | Q85601 | O75342 | -0.7416   |
| 110189 | Q85601 | Q9NS00 | -0.97494  |
| 110190 | Q85601 | Q8NGC9 | -1.2621   |
| 110191 | Q85601 | P23219 | -0.33228  |
| 110192 | Q85601 | Q6UWI2 | -0.16169  |
| 110193 | Q85601 | O95715 | -0.93265  |
| 110194 | Q85601 | O43895 | -0.83784  |
| 110195 | Q85601 | Q6PRD1 | -1.4084   |
| 110196 | Q85601 | Q9H343 | -1.2621   |
| 110197 | Q85601 | Q5T9A4 | -0.85263  |
| 110198 | Q85601 | Q96J94 | -0.22633  |
| 110199 | Q85601 | Q9Y239 | -0.22739  |
| 110200 | Q85601 | Q30KP9 | -0.86864  |

|        |        |        |           |
|--------|--------|--------|-----------|
| 110201 | Q85601 | Q8N271 | -1.0367   |
| 110202 | Q85601 | O43822 | -0.22723  |
| 110203 | Q85601 | Q8TCT0 | -0.69865  |
| 110204 | Q85601 | P25311 | -1.0611   |
| 110205 | Q85601 | H3BSY2 | -0.1796   |
| 110206 | Q85601 | Q8WU17 | -0.50897  |
| 110207 | Q85601 | Q96DT5 | -0.55926  |
| 110208 | Q85601 | Q6X784 | -0.87948  |
| 110209 | Q85601 | P01880 | -1.5415   |
| 110210 | Q85601 | P09758 | -0.86811  |
| 110211 | Q85601 | Q86T24 | -0.43784  |
| 110212 | Q85601 | O76041 | -0.22749  |
| 110213 | Q85601 | Q5QJ74 | -0.2265   |
| 110214 | Q85601 | P22492 | -1.0657   |
| 110215 | Q85601 | Q9HCN6 | -0.46065  |
| 110216 | Q85601 | Q7Z2K6 | -1.2389   |
| 110217 | Q85601 | Q7Z5A4 | -1.3764   |
| 110218 | Q85601 | Q09328 | -0.67357  |
| 110219 | Q85601 | Q0VAM2 | -0.7933   |
| 110220 | Q85601 | Q13072 | -0.9043   |
| 110221 | Q85601 | Q86UF1 | -0.92686  |
| 110222 | Q85601 | Q99805 | -0.83983  |
| 110223 | Q85601 | P98095 | -1.0214   |
| 110224 | Q85601 | Q9BYZ6 | -1.2405   |
| 110225 | Q85601 | O75054 | -0.92686  |
| 110226 | Q85601 | Q8IVM8 | -0.86184  |
| 110227 | Q85601 | Q9P104 | -0.34176  |
| 110228 | Q85601 | P83593 | -1.0219   |
| 110229 | Q85601 | Q99469 | -0.2274   |
| 110230 | Q85601 | Q99574 | -0.69997  |
| 110231 | Q85601 | Q96M83 | -0.26572  |
| 110232 | Q85601 | A0AVI2 | -0.92686  |
| 110233 | Q85601 | Q03014 | -0.22814  |
| 110234 | Q85601 | Q6UWE3 | -0.92242  |
| 110235 | Q85601 | Q9P215 | -0.32094  |
| 110236 | Q85601 | P14222 | -0.552    |
| 110237 | Q85601 | P56199 | -0.48382  |
| 110238 | Q85601 | Q9BYW2 | -0.22545  |
| 110239 | Q85601 | Q9H6D8 | -1.0058   |
| 110240 | Q85601 | C9JDV5 | -0.35731  |
| 110241 | Q85601 | P03973 | -0.37844  |
| 110242 | Q85601 | Q5SZQ8 | -0.44638  |
| 110243 | Q85601 | O95813 | -0.54052  |
| 110244 | Q85601 | Q14643 | -0.30269  |
| 110245 | Q85601 | Q5SWH9 | -0.92686  |
| 110246 | Q85601 | Q9NQG6 | -0.18706  |
| 110247 | Q85601 | Q9BW72 | -0.86682  |
| 110248 | Q85601 | Q9BZF2 | -0.74313  |
| 110249 | Q85601 | Q6PF15 | -0.22218  |
| 110250 | Q85601 | Q96R08 | -1.2621   |
| 110251 | Q85601 | Q9NWL6 | -0.26023  |
| 110252 | Q85601 | D6RBQ6 | -0.66238  |
| 110253 | Q85601 | Q9GZV1 | -0.53658  |
| 110254 | Q85601 | Q7Z5R6 | -0.48135  |
| 110255 | Q85601 | Q9BRX8 | -0.27422  |
| 110256 | Q85601 | Q15057 | -0.88202  |
| 110257 | Q85601 | Q9NUE0 | -0.92985  |
| 110258 | Q85601 | Q6NUT2 | -1.2473   |
| 110259 | Q85601 | Q9Y2X7 | -0.22741  |
| 110260 | Q85601 | Q92826 | -0.22713  |
| 110261 | Q85601 | Q86XG9 | -0.10147  |
| 110262 | Q85601 | Q02388 | -0.68667  |
| 110263 | Q85601 | Q9BYE4 | -0.2031   |
| 110264 | Q85601 | Q9NYU2 | -0.36693  |
| 110265 | Q85601 | P01282 | -0.72667  |
| 110266 | Q85601 | Q96BI3 | -0.4548   |
| 110267 | Q85601 | Q92628 | -0.81985  |
| 110268 | Q85601 | P06340 | -0.95279  |
| 110269 | Q85601 | Q01118 | -0.99834  |
| 110270 | Q85601 | A2RUQ5 | -0.050558 |
| 110271 | Q85601 | Q9BSK0 | -0.24867  |
| 110272 | Q85601 | A6NGC4 | -0.92686  |
| 110273 | Q85601 | Q16559 | -0.22759  |
| 110274 | Q85601 | Q96AP7 | -0.8683   |
| 110275 | Q85601 | Q9UPY3 | -0.21097  |
| 110276 | Q85601 | P0C7T4 | -0.2031   |



|        |        |        |           |
|--------|--------|--------|-----------|
| 110277 | Q85601 | P63133 | -0.23073  |
| 110278 | Q85601 | Q7LFX5 | -0.50814  |
| 110279 | Q85601 | Q15116 | -0.74494  |
| 110280 | Q85601 | O95470 | -0.35897  |
| 110281 | Q85601 | O95750 | -0.33798  |
| 110282 | Q85601 | O94910 | -0.88305  |
| 110283 | Q85601 | O14807 | -1.3155   |
| 110284 | Q85601 | Q9UI42 | -0.99981  |
| 110285 | Q85601 | Q9BYJ1 | -0.56226  |
| 110286 | Q85601 | P23467 | -0.68836  |
| 110287 | Q85601 | Q14002 | -1.0268   |
| 110288 | Q85601 | Q14993 | -1.2073   |
| 110289 | Q85601 | Q86XP0 | -0.23827  |
| 110290 | Q85601 | Q8IXT5 | -0.28849  |
| 110291 | Q85601 | Q96G27 | -0.49878  |
| 110292 | Q85601 | O95025 | -1.1547   |
| 110293 | Q85601 | Q8TCT9 | -0.62142  |
| 110294 | Q85601 | O43570 | -0.88966  |
| 110295 | Q85601 | Q96PZ0 | -0.35324  |
| 110296 | Q85601 | Q13823 | -0.34896  |
| 110297 | Q85601 | P09919 | -0.8642   |
| 110298 | Q85601 | P30085 | -0.25822  |
| 110299 | Q85601 | A6NGR9 | -0.51328  |
| 110300 | Q85601 | P03986 | -1.1076   |
| 110301 | Q85601 | Q9Y6V7 | -0.84068  |
| 110302 | Q85601 | P00325 | -0.51394  |
| 110303 | Q85601 | Q9NZS2 | -1.0822   |
| 110304 | Q85601 | Q99712 | -1.1842   |
| 110305 | Q85601 | Q13303 | -0.75373  |
| 110306 | Q85601 | Q9H8J5 | -0.92686  |
| 110307 | Q85601 | Q00G26 | -0.30566  |
| 110308 | Q85601 | Q86WR6 | -0.16148  |
| 110309 | Q85601 | P50225 | -0.23955  |
| 110310 | Q85601 | Q9ULV4 | -0.60448  |
| 110311 | Q85601 | P48167 | -0.46545  |
| 110312 | Q85601 | Q5JSS6 | -0.33577  |
| 110313 | Q85601 | P35398 | -0.40141  |
| 110314 | Q85601 | Q14236 | -0.73729  |
| 110315 | Q85601 | Q13454 | -0.77439  |
| 110316 | Q85601 | Q8IWA6 | -0.3555   |
| 110317 | Q85601 | P23677 | -0.93477  |
| 110318 | Q85601 | P61158 | -0.16386  |
| 110319 | Q85601 | Q9BR26 | -0.91203  |
| 110320 | Q85601 | Q8NFA2 | -0.4216   |
| 110321 | Q85601 | Q9H3T2 | -1.0347   |
| 110322 | Q85601 | Q8IVF5 | -0.8713   |
| 110323 | Q85601 | Q96FV0 | -0.22719  |
| 110324 | Q85601 | Q6ZTQ3 | -0.27006  |
| 110325 | Q85601 | Q6ZUK4 | -0.92686  |
| 110326 | Q85601 | Q8NGG6 | -1.2621   |
| 110327 | Q85601 | Q8TBH0 | -0.23258  |
| 110328 | Q85601 | Q9H347 | -0.22587  |
| 110329 | Q85601 | O15482 | -0.78714  |
| 110330 | Q85601 | O94759 | -0.92717  |
| 110331 | Q85601 | P86397 | -0.65811  |
| 110332 | Q85601 | P84085 | -0.23843  |
| 110333 | Q85601 | Q8NA58 | -0.57254  |
| 110334 | Q85601 | O75037 | -0.52038  |
| 110335 | Q85601 | Q9Y2U9 | -0.22314  |
| 110336 | Q85601 | O75185 | -0.59161  |
| 110337 | Q85601 | P0CG01 | -0.9043   |
| 110338 | Q85601 | Q9NRR8 | -0.29839  |
| 110339 | Q85601 | P35410 | -0.56239  |
| 110340 | Q85601 | Q14123 | -0.2321   |
| 110341 | Q85601 | Q9BY66 | -1.0283   |
| 110342 | Q85601 | Q6PFW1 | -0.13274  |
| 110343 | Q85601 | Q9H0H3 | -0.20548  |
| 110344 | Q85601 | O95490 | -1.1207   |
| 110345 | Q85601 | Q9BS40 | -1.023    |
| 110346 | Q85601 | Q6IFH4 | -1.2621   |
| 110347 | Q85601 | Q9Y2Q0 | -0.57368  |
| 110348 | Q85601 | Q9H426 | -0.2406   |
| 110349 | Q85601 | Q8N6R1 | -0.7359   |
| 110350 | Q85601 | Q5XKR4 | -0.088945 |
| 110351 | Q85601 | Q9H0X9 | -1.0546   |
| 110352 | Q85601 | P83111 | -0.50838  |

|        |        |        |           |
|--------|--------|--------|-----------|
| 110353 | Q85601 | P09619 | -0.38184  |
| 110354 | Q85601 | O43151 | -0.42126  |
| 110355 | Q85601 | P42785 | -0.40895  |
| 110356 | Q85601 | Q9Y2R0 | -0.76329  |
| 110357 | Q85601 | Q13242 | -0.22687  |
| 110358 | Q85601 | Q0D2K0 | -0.93421  |
| 110359 | Q85601 | Q9NYM9 | -0.19867  |
| 110360 | Q85601 | Q8NB14 | -0.66238  |
| 110361 | Q85601 | Q8NCB2 | -0.65178  |
| 110362 | Q85601 | Q8WZ92 | -1.2621   |
| 110363 | Q85601 | O75888 | -0.59316  |
| 110364 | Q85601 | P04233 | -0.45492  |
| 110365 | Q85601 | Q96MP5 | -0.29575  |
| 110366 | Q85601 | Q96QA5 | -0.075887 |
| 110367 | Q85601 | Q9H6L4 | -0.22995  |
| 110368 | Q85601 | Q6SPF0 | -0.67838  |
| 110369 | Q85601 | P17936 | -0.22805  |
| 110370 | Q85601 | P61803 | -0.84151  |
| 110371 | Q85601 | A6NL08 | -1.2621   |
| 110372 | Q85601 | P00739 | -1.004    |
| 110373 | Q85601 | Q8IXI1 | -0.75487  |
| 110374 | Q85601 | O00187 | -0.97927  |
| 110375 | Q85601 | Q8NHH1 | -0.33869  |
| 110376 | Q85601 | Q969E1 | -0.88279  |
| 110377 | Q85601 | Q9UEU0 | -0.41686  |
| 110378 | Q85601 | Q3LHN2 | -0.2031   |
| 110379 | Q85601 | Q08623 | -0.28952  |
| 110380 | Q85601 | P0C7Q3 | -0.080419 |
| 110381 | Q85601 | Q68DU8 | -0.10531  |
| 110382 | Q85601 | Q6ZUA9 | -0.14972  |
| 110383 | Q85601 | Q8N9F7 | -0.60365  |
| 110384 | Q85601 | O96014 | -0.40888  |
| 110385 | Q85601 | Q9UF83 | -0.019294 |
| 110386 | Q85601 | Q5BJH7 | -0.92686  |
| 110387 | Q85601 | Q9H0U4 | -0.49704  |
| 110388 | Q85601 | Q6Y288 | -0.84666  |
| 110389 | Q85601 | Q9C0D4 | -0.22745  |
| 110390 | Q85601 | Q9NPU4 | -0.92686  |
| 110391 | Q85601 | Q9BWE0 | -0.46329  |
| 110392 | Q85601 | P15090 | -0.20681  |
| 110393 | Q85601 | Q9P2H5 | -0.66238  |
| 110394 | Q85601 | Q9NQX7 | -0.29906  |
| 110395 | Q85601 | P54803 | -0.47109  |
| 110396 | Q85601 | Q8WXG6 | -0.29514  |
| 110397 | Q85601 | P20396 | -0.39004  |
| 110398 | Q85601 | Q8NBN3 | -0.92686  |
| 110399 | Q85601 | P23945 | -0.65944  |
| 110400 | Q85601 | O75317 | -0.4855   |
| 110401 | Q85601 | P52849 | -0.53321  |
| 110402 | Q85601 | P50607 | -0.27806  |
| 110403 | Q85601 | P30447 | -0.93461  |
| 110404 | Q85601 | A6NMD0 | -1.0343   |
| 110405 | Q85601 | Q9ULZ3 | -0.16872  |
| 110406 | Q85601 | P51801 | -1.0204   |
| 110407 | Q85601 | Q9NQT6 | -0.29149  |
| 110408 | Q85601 | O95158 | -0.848    |
| 110409 | Q85601 | A8MWP6 | -0.2031   |
| 110410 | Q85601 | Q969Z4 | -0.78755  |
| 110411 | Q85601 | O43597 | -0.095209 |
| 110412 | Q85601 | Q9GZY6 | -0.9517   |
| 110413 | Q85601 | P42681 | -0.53192  |
| 110414 | Q85601 | Q6ZV29 | -0.49671  |
| 110415 | Q85601 | O95498 | -0.45323  |
| 110416 | Q85601 | Q9UPC5 | -0.75579  |
| 110417 | Q85601 | O94779 | -0.53957  |
| 110418 | Q85601 | Q9Y330 | -0.22401  |
| 110419 | Q85601 | Q9UH73 | -0.13656  |
| 110420 | Q85601 | Q9BZM5 | -1.0404   |
| 110421 | Q85601 | Q9NUJ7 | -0.61797  |
| 110422 | Q85601 | Q8IUX4 | -0.33913  |
| 110423 | Q85601 | A8MYJ7 | -0.17663  |
| 110424 | Q85601 | P01625 | -1.046    |
| 110425 | Q85601 | Q8N6C8 | -1.1068   |
| 110426 | Q85601 | Q05682 | -0.72957  |
| 110427 | Q85601 | Q8N370 | -1.0167   |
| 110428 | Q85601 | Q9UD57 | -0.2273   |

|        |        |        |          |
|--------|--------|--------|----------|
| 110429 | Q85601 | Q9NW15 | -1.041   |
| 110430 | Q85601 | Q6PH81 | -0.74554 |
| 110431 | Q85601 | Q5VXU1 | -1.0386  |
| 110432 | Q85601 | Q9BUN1 | -0.9043  |
| 110433 | Q85601 | A6NF36 | -0.20819 |
| 110434 | Q85601 | Q15070 | -0.19808 |
| 110435 | Q85601 | Q8N841 | -0.19443 |
| 110436 | Q85601 | P04217 | -0.7935  |
| 110437 | Q85601 | Q9BZD7 | -1.4522  |
| 110438 | Q85601 | Q5JTZ5 | -0.69614 |
| 110439 | Q85601 | Q8IZM0 | -0.32662 |
| 110440 | Q85601 | P39905 | -0.39874 |
| 110441 | Q85601 | O15498 | -0.19088 |
| 110442 | Q85601 | Q9BRT8 | -0.81985 |
| 110443 | Q85601 | P26572 | -0.51634 |
| 110444 | Q85601 | Q13748 | -0.19295 |
| 110445 | Q85601 | Q09160 | -1.0428  |
| 110446 | Q85601 | P43003 | -0.62004 |
| 110447 | Q85601 | Q9H892 | -0.22073 |
| 110448 | Q85601 | Q6PEY1 | -0.92686 |
| 110449 | Q85601 | P20908 | -0.86901 |
| 110450 | Q85601 | Q6ZNG2 | -0.22722 |
| 110451 | Q85601 | Q8WTQ1 | -1.1133  |
| 110452 | Q85601 | Q5T751 | -0.31607 |
| 110453 | Q85601 | Q9UHR4 | -0.22739 |
| 110454 | Q85601 | Q13286 | -0.18942 |
| 110455 | Q85601 | Q9H511 | -0.2012  |
| 110456 | Q85601 | P60763 | -0.64682 |
| 110457 | Q85601 | Q5VV43 | -0.60782 |
| 110458 | Q85601 | P28799 | -0.34216 |
| 110459 | Q85601 | Q9HCE6 | -0.48079 |
| 110460 | Q85601 | Q9UBC2 | -0.22793 |
| 110461 | Q85601 | Q8N6N2 | -0.18472 |
| 110462 | Q85601 | P00519 | -0.22761 |
| 110463 | Q85601 | Q9UJ72 | -0.1654  |
| 110464 | Q85601 | Q9NUX5 | -0.25705 |
| 110465 | Q85601 | Q8N9R0 | -0.2031  |
| 110466 | Q85601 | Q16099 | -0.73243 |
| 110467 | Q85601 | A4QN01 | -0.65038 |
| 110468 | Q85601 | Q9BYH1 | -1.0116  |
| 110469 | Q85601 | Q9ULD4 | -0.2236  |
| 110470 | Q85601 | Q8NGF4 | -1.2621  |
| 110471 | Q85601 | Q96NU7 | -0.22034 |
| 110472 | Q85601 | Q5T0J3 | -0.49869 |
| 110473 | Q85601 | Q9BUH6 | -0.07648 |
| 110474 | Q85601 | Q9BV19 | -0.26749 |
| 110475 | Q85601 | P23759 | -0.21746 |
| 110476 | Q85601 | P22059 | -0.40538 |
| 110477 | Q85601 | Q9Y585 | -1.2621  |
| 110478 | Q85601 | Q8NGP3 | -1.2621  |
| 110479 | Q85601 | P61204 | -0.46886 |
| 110480 | Q85601 | Q0ZLH3 | -0.52643 |
| 110481 | Q85601 | Q9NS85 | -0.33212 |
| 110482 | Q85601 | Q496A3 | -0.27498 |
| 110483 | Q85601 | P08034 | -0.87182 |
| 110484 | Q85601 | Q8NEM8 | -0.28712 |
| 110485 | Q85601 | Q96L08 | -0.92686 |
| 110486 | Q85601 | Q8NGN6 | -1.2621  |
| 110487 | Q85601 | P50458 | -0.22741 |
| 110488 | Q85601 | Q9Y275 | -0.8667  |
| 110489 | Q85601 | Q8WZ59 | -1.1162  |
| 110490 | Q85601 | Q9BUB4 | -0.30274 |
| 110491 | Q85601 | Q96DX4 | -0.87986 |
| 110492 | Q85601 | Q9H1X1 | -0.31245 |
| 110493 | Q85601 | Q99518 | -0.90272 |
| 110494 | Q85601 | P78411 | -0.23059 |
| 110495 | Q85601 | Q96DR5 | -1.0768  |
| 110496 | Q85601 | Q02978 | -0.39183 |
| 110497 | Q85601 | Q13522 | -0.21928 |
| 110498 | Q85601 | Q86Y29 | -1.233   |
| 110499 | Q85601 | Q6UXF7 | -0.89494 |
| 110500 | Q85601 | O75915 | -0.70381 |
| 110501 | Q85601 | Q5TAH2 | -1.0001  |
| 110502 | Q85601 | Q9Y267 | -0.97222 |
| 110503 | Q85601 | A6NM11 | -0.92686 |
| 110504 | Q85601 | P21810 | -0.69027 |

|        |        |         |           |
|--------|--------|---------|-----------|
| 110505 | Q85601 | Q9Y6W5  | -0.43947  |
| 110506 | Q85601 | P49448  | -0.66957  |
| 110507 | Q85601 | O14647  | -0.50898  |
| 110508 | Q85601 | P01606  | -1.046    |
| 110509 | Q85601 | Q6BCY4  | -0.53953  |
| 110510 | Q85601 | B2RNN3  | -0.96335  |
| 110511 | Q85601 | Q9NVZ3  | -0.53606  |
| 110512 | Q85601 | P03923  | -0.64886  |
| 110513 | Q85601 | Q6ZT12  | -0.71645  |
| 110514 | Q85601 | P49682  | -1.1188   |
| 110515 | Q85601 | P0DJJD3 | -0.23746  |
| 110516 | Q85601 | Q99965  | -1.1687   |
| 110517 | Q85601 | Q14168  | -0.67474  |
| 110518 | Q85601 | P02748  | -1.1484   |
| 110519 | Q85601 | P47887  | -1.3389   |
| 110520 | Q85601 | Q9Y485  | -0.22743  |
| 110521 | Q85601 | O94911  | -1.2617   |
| 110522 | Q85601 | P18627  | -0.89101  |
| 110523 | Q85601 | A2CJ06  | -0.53897  |
| 110524 | Q85601 | Q96LB8  | -0.9277   |
| 110525 | Q85601 | Q8IUH3  | -0.56946  |
| 110526 | Q85601 | P56539  | -0.22504  |
| 110527 | Q85601 | P50148  | -0.7259   |
| 110528 | Q85601 | A0PG75  | -0.064043 |
| 110529 | Q85601 | P51397  | -0.19103  |
| 110530 | Q85601 | A6NH52  | -0.92686  |
| 110531 | Q85601 | Q9UQF0  | -0.80165  |
| 110532 | Q85601 | P16930  | -0.27666  |
| 110533 | Q85601 | Q7Z2W9  | -0.037314 |
| 110534 | Q85601 | Q99706  | -0.74566  |
| 110535 | Q85601 | Q99470  | -1.0283   |
| 110536 | Q85601 | Q6P4F1  | -0.5186   |
| 110537 | Q85601 | Q9H0K4  | -0.61352  |
| 110538 | Q85601 | Q5T6X4  | -0.92686  |
| 110539 | Q85601 | Q8N4Q1  | -0.077183 |
| 110540 | Q85601 | P36896  | -0.47981  |
| 110541 | Q85601 | A6NC98  | -0.20149  |
| 110542 | Q85601 | Q9UJM8  | -0.7131   |
| 110543 | Q85601 | Q92771  | -0.49252  |
| 110544 | Q85601 | Q9Y235  | -0.47989  |
| 110545 | Q85601 | Q8TAG9  | -0.22003  |
| 110546 | Q85601 | Q8IY34  | -0.8337   |
| 110547 | Q85601 | Q86UN6  | -0.21745  |
| 110548 | Q85601 | Q16674  | -0.88695  |
| 110549 | Q85601 | Q9NZJ7  | -0.25171  |
| 110550 | Q85601 | P78381  | -0.30342  |
| 110551 | Q85601 | P29353  | -0.22741  |
| 110552 | Q85601 | A6NNP5  | -0.10792  |
| 110553 | Q85601 | Q14507  | -0.93484  |
| 110554 | Q85601 | Q8NGG0  | -1.2621   |
| 110555 | Q85601 | O75879  | -0.51731  |
| 110556 | Q85601 | P56559  | -0.48828  |
| 110557 | Q85601 | Q5JUK3  | -1.3035   |
| 110558 | Q85601 | Q9UKU9  | -1.3614   |
| 110559 | Q85601 | Q8N573  | -0.27706  |
| 110560 | Q85601 | P03891  | -0.63408  |
| 110561 | Q85601 | O60779  | -0.63835  |
| 110562 | Q85601 | Q2TBC4  | -0.74159  |
| 110563 | Q85601 | Q6UXQ4  | -0.9043   |
| 110564 | Q85601 | O43435  | -0.50118  |
| 110565 | Q85601 | Q08397  | -1.1537   |
| 110566 | Q85601 | Q6P6C2  | -0.68247  |
| 110567 | Q85601 | P04004  | -0.85894  |
| 110568 | Q85601 | P29350  | -0.22742  |
| 110569 | Q85601 | P42658  | -0.90502  |
| 110570 | Q85601 | Q1HG44  | -0.7359   |
| 110571 | Q85601 | P09455  | -0.39546  |
| 110572 | Q85601 | Q6UXY1  | -0.79839  |
| 110573 | Q85601 | P52945  | -0.58942  |
| 110574 | Q85601 | A0FGR9  | -1.0386   |
| 110575 | Q85601 | Q8IZY5  | -0.72254  |
| 110576 | Q85601 | Q9BVV8  | -0.67388  |
| 110577 | Q85601 | Q9NR82  | -1.047    |
| 110578 | Q85601 | Q15911  | -0.22739  |
| 110579 | Q85601 | P78414  | -0.23126  |
| 110580 | Q85601 | Q8N567  | -0.42211  |

|        |        |        |           |
|--------|--------|--------|-----------|
| 110581 | Q85601 | P61011 | -0.50283  |
| 110582 | Q85601 | Q08499 | -0.22637  |
| 110583 | Q85601 | Q9Y6J6 | -1.0773   |
| 110584 | Q85601 | A2RUT3 | -0.92686  |
| 110585 | Q85601 | Q9UI09 | -0.012704 |
| 110586 | Q85601 | P20936 | -0.22741  |
| 110587 | Q85601 | Q9UI15 | -0.20307  |
| 110588 | Q85601 | P34096 | -0.77371  |
| 110589 | Q85601 | P43246 | -0.19819  |
| 110590 | Q85601 | Q9NYP7 | -0.15575  |
| 110591 | Q85601 | Q99808 | -0.8292   |
| 110592 | Q85601 | P86496 | -0.2031   |
| 110593 | Q85601 | Q68DQ2 | -0.3304   |
| 110594 | Q85601 | P54849 | -1.2073   |
| 110595 | Q85601 | Q86X29 | -0.91456  |
| 110596 | Q85601 | Q58A44 | -0.2031   |
| 110597 | Q85601 | Q68G75 | -0.80712  |
| 110598 | Q85601 | Q9HD64 | -0.32625  |
| 110599 | Q85601 | Q9BWH2 | -0.18859  |
| 110600 | Q85601 | Q9NQ84 | -1.2355   |
| 110601 | Q85601 | Q7RTS6 | -0.92686  |
| 110602 | Q85601 | Q6QHK4 | -0.23745  |
| 110603 | Q85601 | Q13255 | -0.96843  |
| 110604 | Q85601 | O15344 | -0.23122  |
| 110605 | Q85601 | Q9NYV7 | -0.82631  |
| 110606 | Q85601 | Q15077 | -1.2097   |
| 110607 | Q85601 | O76027 | -0.2086   |
| 110608 | Q85601 | Q6ZU80 | -0.16158  |
| 110609 | Q85601 | Q9P283 | -1.0813   |
| 110610 | Q85601 | Q9NQZ2 | -0.13336  |
| 110611 | Q85601 | Q96GS6 | -0.85016  |
| 110612 | Q85601 | Q6ZRP0 | -0.092462 |
| 110613 | Q85601 | Q9ULG6 | -0.77756  |
| 110614 | Q85601 | Q9H9J4 | -0.82552  |
| 110615 | Q85601 | Q86VW1 | -0.96653  |
| 110616 | Q85601 | O15466 | -0.56392  |
| 110617 | Q85601 | Q9Y2Y6 | -0.89384  |
| 110618 | Q85601 | Q8NGF7 | -1.2621   |
| 110619 | Q85601 | O95183 | -0.99851  |
| 110620 | Q85601 | Q9Y6N7 | -0.58581  |
| 110621 | Q85601 | Q9P1C3 | -0.9043   |
| 110622 | Q85601 | Q9Y3L5 | -0.78932  |
| 110623 | Q85601 | Q9NPB8 | -0.039987 |
| 110624 | Q85601 | C9JDP6 | -0.7627   |
| 110625 | Q85601 | Q9H8K7 | -0.38669  |
| 110626 | Q85601 | O15066 | -0.40513  |
| 110627 | Q85601 | P45452 | -0.86228  |
| 110628 | Q85601 | Q86YL7 | -0.83726  |
| 110629 | Q85601 | A6NI28 | -1.3038   |
| 110630 | Q85601 | Q8IVH4 | -0.88217  |
| 110631 | Q85601 | Q02413 | -0.71111  |
| 110632 | Q85601 | Q9BXU7 | -0.2827   |
| 110633 | Q85601 | Q2TB18 | -0.20062  |
| 110634 | Q85601 | Q96MS0 | -1.0048   |
| 110635 | Q85601 | Q92904 | -0.23259  |
| 110636 | Q85601 | Q5H9T9 | -0.50034  |
| 110637 | Q85601 | Q68EM7 | -0.36506  |
| 110638 | Q85601 | P29375 | -0.30919  |
| 110639 | Q85601 | Q7Z402 | -0.92686  |
| 110640 | Q85601 | Q9BXM8 | -0.2031   |
| 110641 | Q85601 | O75110 | -0.91587  |
| 110642 | Q85601 | Q9NPF2 | -0.36092  |
| 110643 | Q85601 | Q86VB7 | -1.0931   |
| 110644 | Q85601 | Q9BRG2 | -0.79151  |
| 110645 | Q85601 | Q86UX7 | -0.65009  |
| 110646 | Q85601 | Q9H237 | -0.85627  |
| 110647 | Q85601 | Q9BRK3 | -0.92686  |
| 110648 | Q85601 | Q15053 | -0.61753  |
| 110649 | Q85601 | Q96Q91 | -0.85479  |
| 110650 | Q85601 | P37059 | -1.271    |
| 110651 | Q85601 | A6NL88 | -0.92686  |
| 110652 | Q85601 | P0CI25 | -0.589    |
| 110653 | Q85601 | A1YPR0 | -0.60958  |
| 110654 | Q85601 | Q96EN8 | -0.22317  |
| 110655 | Q85601 | E9PQR5 | -0.12731  |
| 110656 | Q85601 | A6NM43 | -0.61614  |

|        |        |        |           |
|--------|--------|--------|-----------|
| 110657 | Q85601 | P25090 | -1.5151   |
| 110658 | Q85601 | Q9H3H3 | -0.15653  |
| 110659 | Q85601 | Q8WWL2 | -0.12414  |
| 110660 | Q85601 | P05543 | -0.70568  |
| 110661 | Q85601 | Q9Y5Z4 | -0.55554  |
| 110662 | Q85601 | Q1T7F1 | -0.99867  |
| 110663 | Q85601 | A6NCW0 | -0.34651  |
| 110664 | Q85601 | P32248 | -0.52131  |
| 110665 | Q85601 | Q9P1W3 | -0.92686  |
| 110666 | Q85601 | Q9UNA1 | -0.38202  |
| 110667 | Q85601 | Q99865 | -0.095296 |
| 110668 | Q85601 | Q9NRW7 | -0.21745  |
| 110669 | Q85601 | Q15375 | -0.79479  |
| 110670 | Q85601 | Q8IY21 | -0.22048  |
| 110671 | Q85601 | Q9H213 | -0.15264  |
| 110672 | Q85601 | Q8N9I5 | -1.1479   |
| 110673 | Q85601 | Q15084 | -0.28974  |
| 110674 | Q85601 | Q7Z736 | -0.56835  |
| 110675 | Q85601 | Q8IWL1 | -1.0112   |
| 110676 | Q85601 | Q96NL8 | -0.10147  |
| 110677 | Q85601 | Q12979 | -0.79945  |
| 110678 | Q85601 | P28289 | -0.22075  |
| 110679 | Q85601 | Q14644 | -0.57319  |
| 110680 | Q85601 | P30626 | -0.27971  |
| 110681 | Q85601 | Q9P291 | -0.92686  |
| 110682 | Q85601 | Q86XE3 | -0.98975  |
| 110683 | Q85601 | Q9P2U7 | -0.69663  |
| 110684 | Q85601 | Q96A59 | -0.764    |
| 110685 | Q85601 | O75333 | -0.42211  |
| 110686 | Q85601 | Q969W0 | -0.43109  |
| 110687 | Q85601 | Q8IYU2 | -0.22787  |
| 110688 | Q85601 | Q9Y2I8 | -0.22915  |
| 110689 | Q85601 | Q14522 | -0.77554  |
| 110690 | Q85601 | Q96QB1 | -0.31248  |
| 110691 | Q85601 | Q8IV63 | -0.69577  |
| 110692 | Q85601 | O60404 | -1.2621   |
| 110693 | Q85601 | P34981 | -1.2595   |
| 110694 | Q85601 | P19875 | -1.038    |
| 110695 | Q85601 | Q96LR4 | -0.9043   |
| 110696 | Q85601 | Q6ZVX9 | -0.92686  |
| 110697 | Q85601 | O43529 | -0.7037   |
| 110698 | Q85601 | P42336 | -0.37011  |
| 110699 | Q85601 | A1KXE4 | -0.90199  |
| 110700 | Q85601 | P00742 | -0.78321  |
| 110701 | Q85601 | Q8NEZ3 | -0.27051  |
| 110702 | Q85601 | Q9BXI2 | -0.57024  |
| 110703 | Q85601 | Q9HBJ8 | -1.0649   |
| 110704 | Q85601 | P10767 | -0.97173  |
| 110705 | Q85601 | Q86X24 | -0.37938  |
| 110706 | Q85601 | Q9UBU3 | -0.35842  |
| 110707 | Q85601 | Q8IZY2 | -0.81799  |
| 110708 | Q85601 | A2RU67 | -0.92686  |
| 110709 | Q85601 | P55884 | -0.21704  |
| 110710 | Q85601 | O95759 | -1.3038   |
| 110711 | Q85601 | Q9BTY7 | -0.23595  |
| 110712 | Q85601 | Q6UXX9 | -0.80147  |
| 110713 | Q85601 | Q86VD7 | -0.58498  |
| 110714 | Q85601 | A0PJY2 | -0.13936  |
| 110715 | Q85601 | P53794 | -1.0308   |
| 110716 | Q85601 | Q32M45 | -0.88392  |
| 110717 | Q85601 | P04035 | -0.65342  |
| 110718 | Q85601 | Q14832 | -0.27589  |
| 110719 | Q85601 | Q14563 | -0.73587  |
| 110720 | Q85601 | Q9H4B8 | -0.68312  |
| 110721 | Q85601 | P55058 | -1.068    |
| 110722 | Q85601 | P01814 | -1.046    |
| 110723 | Q85601 | Q96IW2 | -0.2274   |
| 110724 | Q85601 | Q5TA76 | -0.31607  |
| 110725 | Q85601 | Q8N813 | -0.48197  |
| 110726 | Q85601 | Q9Y693 | -1.0035   |
| 110727 | Q85601 | Q2TBA0 | -0.20513  |
| 110728 | Q85601 | Q9NXJ5 | -0.33614  |
| 110729 | Q85601 | Q9UBK2 | -0.59606  |
| 110730 | Q85601 | Q9UH65 | -0.49603  |
| 110731 | Q85601 | Q13459 | -0.22006  |
| 110732 | Q85601 | P30485 | -1.1017   |

|        |        |        |           |
|--------|--------|--------|-----------|
| 110733 | Q85601 | Q9NWZ5 | -0.11524  |
| 110734 | Q85601 | Q6ZPD9 | -0.92686  |
| 110735 | Q85601 | Q14916 | -1.0472   |
| 110736 | Q85601 | Q9Y5S2 | -0.77126  |
| 110737 | Q85601 | P08217 | -1.3764   |
| 110738 | Q85601 | Q68D85 | -0.85363  |
| 110739 | Q85601 | P14902 | -0.2488   |
| 110740 | Q85601 | Q99439 | -0.21925  |
| 110741 | Q85601 | Q95471 | -0.24166  |
| 110742 | Q85601 | P01148 | -0.99848  |
| 110743 | Q85601 | Q8WWM1 | -0.074145 |
| 110744 | Q85601 | P49771 | -1.5367   |
| 110745 | Q85601 | Q9H579 | -0.1615   |
| 110746 | Q85601 | Q86VE9 | -0.80738  |
| 110747 | Q85601 | Q96BR1 | -0.95279  |
| 110748 | Q85601 | Q6ZV56 | -0.2031   |
| 110749 | Q85601 | Q8IVP5 | -0.85076  |
| 110750 | Q85601 | Q9H4Q3 | -0.22711  |
| 110751 | Q85601 | Q5EBN2 | -0.589    |
| 110752 | Q85601 | Q9Y5C1 | -0.65435  |
| 110753 | Q85601 | O60462 | -0.7399   |
| 110754 | Q85601 | P0DJH9 | -0.64542  |
| 110755 | Q85601 | Q7Z6J6 | -0.32811  |
| 110756 | Q85601 | Q86UE6 | -0.80527  |
| 110757 | Q85601 | Q15256 | -0.37651  |
| 110758 | Q85601 | Q9NXA8 | -0.26923  |
| 110759 | Q85601 | P54826 | -0.14386  |
| 110760 | Q85601 | Q16651 | -1.1933   |
| 110761 | Q85601 | P38117 | -0.021314 |
| 110762 | Q85601 | Q96LB9 | -0.9277   |
| 110763 | Q85601 | Q6UXN9 | -0.5928   |
| 110764 | Q85601 | O60331 | -0.44213  |
| 110765 | Q85601 | Q8WUE5 | -0.052267 |
| 110766 | Q85601 | Q07869 | -0.24427  |
| 110767 | Q85601 | Q94769 | -0.90759  |
| 110768 | Q85601 | Q2KHT3 | -0.09681  |
| 110769 | Q85601 | Q7Z3U7 | -0.14764  |
| 110770 | Q85601 | O43247 | -0.30357  |
| 110771 | Q85601 | Q9BZP3 | -0.44836  |
| 110772 | Q85601 | P49763 | -0.97744  |
| 110773 | Q85601 | P00533 | -0.33959  |
| 110774 | Q85601 | Q14953 | -1.1813   |
| 110775 | Q85601 | Q5JPB2 | -0.60958  |
| 110776 | Q85601 | P32238 | -0.73121  |
| 110777 | Q85601 | P43366 | -0.10899  |
| 110778 | Q85601 | Q6UX06 | -0.94947  |
| 110779 | Q85601 | Q9P0M4 | -0.92427  |
| 110780 | Q85601 | Q5FVE4 | -0.94123  |
| 110781 | Q85601 | P01776 | -1.046    |
| 110782 | Q85601 | Q96EM0 | -0.47337  |
| 110783 | Q85601 | Q9Y6A2 | -0.9131   |
| 110784 | Q85601 | Q9H5Z1 | -0.78888  |
| 110785 | Q85601 | Q8NG84 | -1.2621   |
| 110786 | Q85601 | P35556 | -0.87024  |
| 110787 | Q85601 | P30490 | -1.1017   |
| 110788 | Q85601 | Q9H1P6 | -0.17858  |
| 110789 | Q85601 | Q96F81 | -0.80665  |
| 110790 | Q85601 | Q13609 | -0.10921  |
| 110791 | Q85601 | Q02363 | -0.22759  |
| 110792 | Q85601 | Q7Z6M3 | -1.1263   |
| 110793 | Q85601 | Q9Y6I9 | -0.9043   |
| 110794 | Q85601 | P15428 | -0.21736  |
| 110795 | Q85601 | F2Z333 | -0.92686  |
| 110796 | Q85601 | Q6P4F2 | -0.2113   |
| 110797 | Q85601 | O43687 | -0.88276  |
| 110798 | Q85601 | O75771 | -0.21574  |
| 110799 | Q85601 | Q6UXX2 | -1.0598   |
| 110800 | Q85601 | P32456 | -0.24453  |
| 110801 | Q85601 | A6NLE4 | -1.0386   |
| 110802 | Q85601 | P51878 | -0.85134  |
| 110803 | Q85601 | P26374 | -0.67315  |
| 110804 | Q85601 | Q9NZH8 | -0.81736  |
| 110805 | Q85601 | P59538 | -1.2301   |
| 110806 | Q85601 | Q96B33 | -0.7761   |
| 110807 | Q85601 | P01579 | -0.26778  |
| 110808 | Q85601 | Q8N139 | -1.2667   |

|        |        |        |           |
|--------|--------|--------|-----------|
| 110809 | Q85601 | Q8IW50 | -0.092462 |
| 110810 | Q85601 | Q05823 | -0.29701  |
| 110811 | Q85601 | Q96KN9 | -1.0301   |
| 110812 | Q85601 | Q63HM2 | -0.92686  |
| 110813 | Q85601 | Q0P6H9 | -0.92686  |
| 110814 | Q85601 | P86434 | -0.93417  |
| 110815 | Q85601 | Q5BKY6 | -0.2031   |
| 110816 | Q85601 | Q7Z601 | -1.0377   |
| 110817 | Q85601 | Q8IWW6 | -1.1208   |
| 110818 | Q85601 | Q32MH5 | -0.19449  |
| 110819 | Q85601 | P01275 | -0.57914  |
| 110820 | Q85601 | O95837 | -0.98918  |
| 110821 | Q85601 | Q8N628 | -1.2621   |
| 110822 | Q85601 | Q96D21 | -1.0785   |
| 110823 | Q85601 | Q9NUG6 | -0.21288  |
| 110824 | Q85601 | Q9ULI2 | -0.68338  |
| 110825 | Q85601 | P86480 | -0.2031   |
| 110826 | Q85601 | Q8NAT1 | -0.93106  |
| 110827 | Q85601 | P01760 | -1.046    |
| 110828 | Q85601 | Q147X3 | -0.14635  |
| 110829 | Q85601 | Q8TDQ7 | -0.26076  |
| 110830 | Q85601 | Q9HDC9 | -0.79449  |
| 110831 | Q85601 | Q9NU22 | -0.4317   |
| 110832 | Q85601 | P15374 | -0.24683  |
| 110833 | Q85601 | Q15040 | -0.6535   |
| 110834 | Q85601 | O75200 | -0.9043   |
| 110835 | Q85601 | Q86YS6 | -1.1435   |
| 110836 | Q85601 | B1AH88 | -0.2031   |
| 110837 | Q85601 | Q13043 | -0.25316  |
| 110838 | Q85601 | P33402 | -0.66673  |
| 110839 | Q85601 | A6NCQ9 | -0.89088  |
| 110840 | Q85601 | A6NFC5 | -0.51436  |
| 110841 | Q85601 | P48169 | -0.83623  |
| 110842 | Q85601 | Q99720 | -0.62266  |
| 110843 | Q85601 | Q16799 | -0.56729  |
| 110844 | Q85601 | Q9GZK7 | -1.2621   |
| 110845 | Q85601 | Q9NRI6 | -0.88182  |
| 110846 | Q85601 | Q969Q4 | -0.80251  |
| 110847 | Q85601 | Q9NQ79 | -1.0028   |
| 110848 | Q85601 | P41732 | -0.97878  |
| 110849 | Q85601 | Q5T8I3 | -0.60557  |
| 110850 | Q85601 | P15907 | -0.92577  |
| 110851 | Q85601 | P29376 | -1.5565   |
| 110852 | Q85601 | O15523 | -0.57929  |
| 110853 | Q85601 | Q7Z475 | -0.92452  |
| 110854 | Q85601 | Q96MG8 | -0.079757 |
| 110855 | Q85601 | P55056 | -1.1326   |
| 110856 | Q85601 | Q9H195 | -0.93784  |
| 110857 | Q85601 | P51168 | -0.50416  |
| 110858 | Q85601 | Q8NEA4 | -0.14978  |
| 110859 | Q85601 | Q6SA08 | -0.83036  |
| 110860 | Q85601 | Q7L5Y6 | -0.29514  |
| 110861 | Q85601 | Q8NFI4 | -0.7028   |
| 110862 | Q85601 | Q6ZMU1 | -0.39536  |
| 110863 | Q85601 | Q96JX3 | -0.68649  |
| 110864 | Q85601 | O95935 | -0.43641  |
| 110865 | Q85601 | Q8NGW1 | -1.2621   |
| 110866 | Q85601 | O75970 | -0.22684  |
| 110867 | Q85601 | P22735 | -0.1959   |
| 110868 | Q85601 | O15172 | -0.3494   |
| 110869 | Q85601 | Q7Z3V4 | -0.33113  |
| 110870 | Q85601 | P16402 | -0.61395  |
| 110871 | Q85601 | P10163 | -0.7935   |
| 110872 | Q85601 | Q6ZNL0 | -0.9254   |
| 110873 | Q85601 | Q6W4X9 | -0.91969  |
| 110874 | Q85601 | Q8IVA1 | -0.51629  |
| 110875 | Q85601 | Q9NR23 | -0.74673  |
| 110876 | Q85601 | P45954 | -0.54956  |
| 110877 | Q85601 | Q3ZCV2 | -0.092462 |
| 110878 | Q85601 | H3BPM6 | -1.1287   |
| 110879 | Q85601 | P49458 | -0.26928  |
| 110880 | Q85601 | Q5VZT2 | -0.2428   |
| 110881 | Q85601 | Q8NGB2 | -1.2621   |
| 110882 | Q85601 | Q99941 | -0.28951  |
| 110883 | Q85601 | O43837 | -0.10628  |
| 110884 | Q85601 | Q9P2F5 | -0.21645  |



|        |        |        |           |
|--------|--------|--------|-----------|
| 110885 | Q85601 | P43007 | -0.49872  |
| 110886 | Q85601 | P21695 | -0.11736  |
| 110887 | Q85601 | Q9HBR0 | -0.9929   |
| 110888 | Q85601 | Q05901 | -0.93494  |
| 110889 | Q85601 | P0CK97 | -0.92686  |
| 110890 | Q85601 | Q14603 | -0.45713  |
| 110891 | Q85601 | Q86YJ7 | -0.22741  |
| 110892 | Q85601 | Q9UNP4 | -0.64991  |
| 110893 | Q85601 | Q06418 | -0.72748  |
| 110894 | Q85601 | A6NGA9 | -0.92686  |
| 110895 | Q85601 | Q92876 | -0.31812  |
| 110896 | Q85601 | Q5T3F8 | -1.3649   |
| 110897 | Q85601 | Q9HCN2 | -0.2031   |
| 110898 | Q85601 | Q8WXS8 | -1.185    |
| 110899 | Q85601 | Q6P093 | -1.2828   |
| 110900 | Q85601 | Q9BZF1 | -0.74313  |
| 110901 | Q85601 | P53365 | -0.2208   |
| 110902 | Q85601 | P05093 | -0.47745  |
| 110903 | Q85601 | P14415 | -0.32297  |
| 110904 | Q85601 | O75871 | -1.0729   |
| 110905 | Q85601 | Q6UVM3 | -1.2578   |
| 110906 | Q85601 | Q6ZWJ8 | -0.9043   |
| 110907 | Q85601 | P51157 | -1.2886   |
| 110908 | Q85601 | Q9Y519 | -0.92686  |
| 110909 | Q85601 | Q5U5R9 | -0.33113  |
| 110910 | Q85601 | Q96FK6 | -0.2274   |
| 110911 | Q85601 | Q3KNT9 | -0.92686  |
| 110912 | Q85601 | Q02094 | -0.79228  |
| 110913 | Q85601 | Q13387 | -0.19824  |
| 110914 | Q85601 | P30041 | -0.21698  |
| 110915 | Q85601 | Q9H7B7 | -0.9043   |
| 110916 | Q85601 | P10696 | -0.78375  |
| 110917 | Q85601 | Q8NBJ5 | -0.35467  |
| 110918 | Q85601 | Q9ULL4 | -0.78853  |
| 110919 | Q85601 | Q9NYQ7 | -1.0878   |
| 110920 | Q85601 | Q86TI4 | -0.22783  |
| 110921 | Q85601 | Q7L2J0 | -0.18811  |
| 110922 | Q85601 | O00750 | -0.22751  |
| 110923 | Q85601 | P14151 | -0.66195  |
| 110924 | Q85601 | Q8NC96 | -0.32674  |
| 110925 | Q85601 | Q03395 | -1.2691   |
| 110926 | Q85601 | Q86YM7 | -0.32751  |
| 110927 | Q85601 | A8MYU2 | -1.1945   |
| 110928 | Q85601 | P24394 | -1.0131   |
| 110929 | Q85601 | P22748 | -0.22308  |
| 110930 | Q85601 | O00339 | -0.39571  |
| 110931 | Q85601 | Q9H019 | -0.059259 |
| 110932 | Q85601 | Q07954 | -0.35838  |
| 110933 | Q85601 | Q569K4 | -0.29369  |
| 110934 | Q85601 | P08908 | -1.2389   |
| 110935 | Q85601 | Q15800 | -1.0191   |
| 110936 | Q85601 | P08237 | -0.51504  |
| 110937 | Q85601 | Q8N609 | -0.7359   |
| 110938 | Q85601 | P22557 | -0.19934  |
| 110939 | Q85601 | Q5JQC9 | -0.38285  |
| 110940 | Q85601 | Q6PK18 | -1.1028   |
| 110941 | Q85601 | Q01433 | -0.1901   |
| 110942 | Q85601 | P01717 | -1.046    |
| 110943 | Q85601 | Q8WVF2 | -0.91097  |
| 110944 | Q85601 | Q92835 | -0.22741  |
| 110945 | Q85601 | Q14393 | -0.28248  |
| 110946 | Q85601 | Q8N1X5 | -0.2031   |
| 110947 | Q85601 | P0C7P0 | -0.24837  |
| 110948 | Q85601 | A8MTL9 | -0.82753  |
| 110949 | Q85601 | Q6UXN7 | -0.63686  |
| 110950 | Q85601 | P0CB43 | -0.23595  |
| 110951 | Q85601 | P42338 | -0.4556   |
| 110952 | Q85601 | Q6P3S1 | -0.21115  |
| 110953 | Q85601 | O76094 | -0.21617  |
| 110954 | Q85601 | Q15645 | -0.22957  |
| 110955 | Q85601 | Q6P1Q0 | -0.16183  |
| 110956 | Q85601 | Q92551 | -0.31505  |
| 110957 | Q85601 | O60673 | -0.77849  |
| 110958 | Q85601 | Q9UHG3 | -0.63279  |
| 110959 | Q85601 | Q9UJ68 | -0.15365  |
| 110960 | Q85601 | Q5JV73 | -0.29924  |

|        |        |        |           |
|--------|--------|--------|-----------|
| 110961 | Q85601 | Q9Y2A7 | -0.39536  |
| 110962 | Q85601 | P51553 | -0.060877 |
| 110963 | Q85601 | Q6ZNB5 | -0.11485  |
| 110964 | Q85601 | Q15375 | -0.99625  |
| 110965 | Q85601 | Q86YT6 | -0.22734  |
| 110966 | Q85601 | P15954 | -0.79105  |
| 110967 | Q85601 | Q8WTP8 | -0.10352  |
| 110968 | Q85601 | Q0VDD8 | -0.49365  |
| 110969 | Q85601 | Q9H2L4 | -0.92686  |
| 110970 | Q85601 | Q5T2D3 | -0.39373  |
| 110971 | Q85601 | Q8WW34 | -0.92686  |
| 110972 | Q85601 | Q5T848 | -1.3443   |
| 110973 | Q85601 | P68431 | -0.49351  |
| 110974 | Q85601 | P01711 | -1.046    |
| 110975 | Q85601 | P21583 | -0.50666  |
| 110976 | Q85601 | Q8N8V8 | -0.92686  |
| 110977 | Q85601 | Q9Y5V0 | -0.589    |
| 110978 | Q85601 | Q5VUJ5 | -0.88202  |
| 110979 | Q85601 | Q8TD55 | -0.44245  |
| 110980 | Q85601 | Q9NRE2 | -0.2131   |
| 110981 | Q85601 | A6NMU1 | -1.2621   |
| 110982 | Q85601 | Q8TD90 | -0.10285  |
| 110983 | Q85601 | Q7Z5V6 | -0.35655  |
| 110984 | Q85601 | P0C7T8 | -0.92686  |
| 110985 | Q85601 | P16562 | -0.95724  |
| 110986 | Q85601 | Q8NGG8 | -1.2621   |
| 110987 | Q85601 | Q9ULH4 | -0.816    |
| 110988 | Q85601 | Q9BQQ7 | -0.085601 |
| 110989 | Q85601 | Q96T91 | -1.0199   |
| 110990 | Q85601 | Q9HAW7 | -0.74278  |
| 110991 | Q85601 | Q9HAT1 | -0.854    |
| 110992 | Q85601 | Q6UXI9 | -1.1854   |
| 110993 | Q85601 | Q8NF67 | -0.036274 |
| 110994 | Q85601 | Q8IWB4 | -0.92686  |
| 110995 | Q85601 | P0CK96 | -0.92686  |
| 110996 | Q85601 | Q9NQ76 | -0.49979  |
| 110997 | Q85601 | P01705 | -1.046    |
| 110998 | Q85601 | Q96JY0 | -0.11371  |
| 110999 | Q85601 | Q96S37 | -0.74013  |
| 111000 | Q85601 | Q13203 | -0.66545  |
| 111001 | Q85601 | P18463 | -1.1017   |
| 111002 | Q85601 | P08590 | -0.24807  |
| 111003 | Q85601 | Q8NG78 | -1.2621   |
| 111004 | Q85601 | P01229 | -0.91152  |
| 111005 | Q85601 | Q8N8J0 | -0.35686  |
| 111006 | Q85601 | P78563 | -0.14329  |
| 111007 | Q85601 | Q6ZP29 | -0.84267  |
| 111008 | Q85601 | Q8N4E4 | -0.18946  |
| 111009 | Q85601 | Q9NTI2 | -1.0899   |
| 111010 | Q85601 | P31483 | -0.2614   |
| 111011 | Q85601 | Q96A98 | -0.901    |
| 111012 | Q85601 | P18462 | -0.93461  |
| 111013 | Q85601 | P57088 | -0.76949  |
| 111014 | Q85601 | Q9BQR3 | -1.3764   |
| 111015 | Q85601 | P30450 | -0.93461  |
| 111016 | Q85601 | P07550 | -0.33198  |
| 111017 | Q85601 | Q6ZUG5 | -0.20842  |
| 111018 | Q85601 | Q9UKM7 | -0.88884  |
| 111019 | Q85601 | O00253 | -0.8389   |
| 111020 | Q85601 | O95747 | -1.1339   |
| 111021 | Q85601 | Q8IVS2 | -0.55626  |
| 111022 | Q85601 | Q96LQ0 | -0.35334  |
| 111023 | Q85601 | O00754 | -0.39206  |
| 111024 | Q85601 | P58512 | -0.31364  |
| 111025 | Q85601 | O15540 | -0.30819  |
| 111026 | Q85601 | Q9HCN3 | -1.0929   |
| 111027 | Q85601 | Q99963 | -0.25911  |
| 111028 | Q85601 | Q13797 | -0.87159  |
| 111029 | Q85601 | Q96I45 | -0.92686  |
| 111030 | Q85601 | Q8IWR0 | -0.29369  |
| 111031 | Q85601 | Q5T1H1 | -1.0623   |
| 111032 | Q85601 | Q05655 | -0.21856  |
| 111033 | Q85601 | P52943 | -0.26883  |
| 111034 | Q85601 | Q9UQG0 | -0.23073  |
| 111035 | Q85601 | Q96IZ6 | -0.30175  |
| 111036 | Q85601 | Q8WUZ0 | -0.29993  |

|        |        |        |           |
|--------|--------|--------|-----------|
| 111037 | Q85601 | Q9NS71 | -0.57203  |
| 111038 | Q85601 | P51665 | -0.21728  |
| 111039 | Q85601 | P35443 | -0.76034  |
| 111040 | Q85601 | Q95389 | -0.9284   |
| 111041 | Q85601 | A8MYR8 | -0.052095 |
| 111042 | Q85601 | Q96Q77 | -0.39878  |
| 111043 | Q85601 | Q99614 | -0.22408  |
| 111044 | Q85601 | Q86WC4 | -0.81577  |
| 111045 | Q85601 | Q9Y3P9 | -0.2302   |
| 111046 | Q85601 | P50213 | -0.064163 |
| 111047 | Q85601 | O96002 | -0.2031   |
| 111048 | Q85601 | Q969Q0 | -0.16012  |
| 111049 | Q85601 | Q6PCB8 | -1.11     |
| 111050 | Q85601 | Q5PT55 | -0.96354  |
| 111051 | Q85601 | Q8NEV1 | -1.1569   |
| 111052 | Q85601 | O14672 | -0.29603  |
| 111053 | Q85601 | Q8NB37 | -0.9043   |
| 111054 | Q85601 | Q9Y2K1 | -0.10212  |
| 111055 | Q85601 | P04628 | -0.22741  |
| 111056 | Q85601 | P12314 | -0.8023   |
| 111057 | Q85601 | Q92934 | -0.11245  |
| 111058 | Q85601 | Q9HBI6 | -1.118    |
| 111059 | Q85601 | Q9H161 | -0.20388  |
| 111060 | Q85601 | Q8N1F8 | -0.22733  |
| 111061 | Q85601 | Q8ND82 | -0.22711  |
| 111062 | Q85601 | Q96S06 | -0.66098  |
| 111063 | Q85601 | Q96I82 | -1.1253   |
| 111064 | Q85601 | Q5SR56 | -0.94066  |
| 111065 | Q85601 | Q6PL24 | -0.73027  |
| 111066 | Q85601 | P06881 | -0.28262  |
| 111067 | Q85601 | Q9BU79 | -0.92686  |
| 111068 | Q85601 | O43427 | -0.44402  |
| 111069 | Q85601 | Q8NHP6 | -0.79723  |
| 111070 | Q85601 | P48745 | -1.0511   |
| 111071 | Q85601 | Q6UWE0 | -0.22773  |
| 111072 | Q85601 | Q8N1S5 | -0.91096  |
| 111073 | Q85601 | P41439 | -0.90223  |
| 111074 | Q85601 | O14795 | -0.27457  |
| 111075 | Q85601 | Q6ZSJ8 | -0.092462 |
| 111076 | Q85601 | P14854 | -0.39796  |
| 111077 | Q85601 | Q96R28 | -1.2621   |
| 111078 | Q85601 | P20815 | -0.72994  |
| 111079 | Q85601 | Q8WXS4 | -0.9595   |
| 111080 | Q85601 | Q96A83 | -1.0588   |
| 111081 | Q85601 | P30455 | -1.0428   |
| 111082 | Q85601 | Q8NGK4 | -1.2621   |
| 111083 | Q85601 | Q9UBX5 | -0.45722  |
| 111084 | Q85601 | Q6UE05 | -0.92686  |
| 111085 | Q85601 | Q9Y5F7 | -1.246    |
| 111086 | Q85601 | Q7Z2R9 | -0.9043   |
| 111087 | Q85601 | Q8NH03 | -1.2621   |
| 111088 | Q85601 | A6NCK2 | -0.589    |
| 111089 | Q85601 | O95907 | -0.77173  |
| 111090 | Q85601 | Q9BRF8 | -0.26641  |
| 111091 | Q85601 | O75388 | -1.4741   |
| 111092 | Q85601 | Q96L15 | -0.98321  |
| 111093 | Q85601 | O75425 | -0.83337  |
| 111094 | Q85601 | Q9H344 | -1.2621   |
| 111095 | Q85601 | Q8N7Q2 | -0.9043   |
| 111096 | Q85601 | Q8NHC6 | -1.2621   |
| 111097 | Q85601 | P63125 | -0.64385  |
| 111098 | Q85601 | Q9NPC2 | -1.1007   |
| 111099 | Q85601 | Q9UKL6 | -0.2869   |
| 111100 | Q85601 | Q15269 | -0.22425  |
| 111101 | Q85601 | Q9BRL7 | -0.53295  |
| 111102 | Q85601 | Q9BV79 | -0.95025  |
| 111103 | Q85601 | A6NJY1 | -0.92186  |
| 111104 | Q85601 | Q8IY67 | -0.35426  |
| 111105 | Q85601 | Q96R30 | -1.2621   |
| 111106 | Q85601 | Q9BYP8 | -0.2031   |
| 111107 | Q85601 | A2RU30 | -0.089768 |
| 111108 | Q85601 | Q9BVI0 | -0.22751  |
| 111109 | Q85601 | P32302 | -1.3329   |
| 111110 | Q85601 | Q8WX39 | -0.80939  |
| 111111 | Q85601 | Q9GZN4 | -1.3764   |
| 111112 | Q85601 | B2RU33 | -0.2274   |

|        |        |        |          |
|--------|--------|--------|----------|
| 111113 | Q85601 | Q709F0 | -0.53887 |
| 111114 | Q85601 | P84243 | -1.1382  |
| 111115 | Q85601 | P08493 | -0.91429 |
| 111116 | Q85601 | A1XBS5 | -0.25519 |
| 111117 | Q85601 | Q6UXX5 | -0.80939 |
| 111118 | Q85601 | Q16773 | -0.21213 |
| 111119 | Q85601 | O95786 | -0.22683 |
| 111120 | Q85601 | Q7Z5Q1 | -0.6481  |
| 111121 | Q85601 | Q9GZX3 | -0.52667 |
| 111122 | Q85601 | Q96KF7 | -0.92686 |
| 111123 | Q85601 | Q7Z3G6 | -0.4175  |
| 111124 | Q85601 | Q9HCJ6 | -0.97993 |
| 111125 | Q85601 | Q8NGF9 | -1.2621  |
| 111126 | Q85601 | Q8WUX2 | -0.18472 |
| 111127 | Q85601 | P57727 | -1.3589  |
| 111128 | Q85601 | Q6S5H4 | -0.22724 |
| 111129 | Q85601 | Q9HC23 | -0.95008 |
| 111130 | Q85601 | Q9BQI7 | -1.1052  |
| 111131 | Q85601 | Q13442 | -0.51696 |
| 111132 | Q85601 | Q68CL5 | -0.19693 |
| 111133 | Q85601 | Q9GZV3 | -1.0025  |
| 111134 | Q85601 | Q5T447 | -0.22837 |
| 111135 | Q85601 | Q5NE16 | -0.40218 |
| 111136 | Q85601 | P62834 | -0.35408 |
| 111137 | Q85601 | Q9NZY2 | -0.2031  |
| 111138 | Q85601 | Q0VDD5 | -0.2031  |
| 111139 | Q85601 | O95297 | -0.31468 |
| 111140 | Q85601 | Q15262 | -0.69854 |
| 111141 | Q85601 | Q495C1 | -0.29575 |
| 111142 | Q85601 | Q96I36 | -0.74681 |
| 111143 | Q85601 | O60637 | -0.92686 |
| 111144 | Q85601 | Q9Y586 | -0.2288  |
| 111145 | Q85601 | Q94850 | -0.52159 |
| 111146 | Q85601 | P46734 | -0.2282  |
| 111147 | Q85601 | Q9UFV1 | -0.9791  |
| 111148 | Q85601 | B9EJG8 | -0.92686 |
| 111149 | Q85601 | Q7L1W4 | -0.92686 |
| 111150 | Q85601 | Q86SJ6 | -1.3863  |
| 111151 | Q85601 | Q70YC5 | -0.39259 |
| 111152 | Q85601 | Q5T5X7 | -0.12039 |
| 111153 | Q85601 | Q6UW78 | -0.9043  |
| 111154 | Q85601 | Q9H1K4 | -0.69754 |
| 111155 | Q85601 | Q93096 | -0.31335 |
| 111156 | Q85601 | Q8NFI5 | -1.2259  |
| 111157 | Q85601 | O75077 | -1.3043  |
| 111158 | Q85601 | Q7Z7B7 | -0.86864 |
| 111159 | Q85601 | P04839 | -0.72005 |
| 111160 | Q85601 | Q96MF2 | -0.62434 |
| 111161 | Q85601 | Q8IWW2 | -1.0574  |
| 111162 | Q85601 | Q9BV87 | -0.90982 |
| 111163 | Q85601 | Q0VAF6 | -0.39975 |
| 111164 | Q85601 | Q75712 | -0.94865 |
| 111165 | Q85601 | P55082 | -1.0386  |
| 111166 | Q85601 | Q68CJ6 | -0.41817 |
| 111167 | Q85601 | Q9NV44 | -0.35861 |
| 111168 | Q85601 | Q16698 | -0.20781 |
| 111169 | Q85601 | Q96DN5 | -0.79274 |
| 111170 | Q85601 | Q9BXU9 | -0.63889 |
| 111171 | Q85601 | P17483 | -0.1398  |
| 111172 | Q85601 | Q9H7Y2 | -0.61789 |
| 111173 | Q85601 | Q8NGH7 | -1.2621  |
| 111174 | Q85601 | Q8NHG8 | -0.49564 |
| 111175 | Q85601 | O15258 | -0.5801  |
| 111176 | Q85601 | Q9UJX0 | -0.48662 |
| 111177 | Q85601 | A8MWE9 | -0.39878 |
| 111178 | Q85601 | Q2TAA2 | -0.36101 |
| 111179 | Q85601 | Q9C0A0 | -1.3257  |
| 111180 | Q85601 | Q8NHJ6 | -0.58106 |
| 111181 | Q85601 | Q5VZ46 | -0.50997 |
| 111182 | Q85601 | Q86V85 | -0.92686 |
| 111183 | Q85601 | B2RUZ4 | -0.92686 |
| 111184 | Q85601 | A1L167 | -0.82656 |
| 111185 | Q85601 | Q96HH9 | -0.29619 |
| 111186 | Q85601 | P54886 | -0.61276 |
| 111187 | Q85601 | Q5TYM5 | -0.30414 |
| 111188 | Q85601 | Q4G0G5 | -0.9043  |

|        |        |        |           |
|--------|--------|--------|-----------|
| 111189 | Q85601 | P01782 | -1.046    |
| 111190 | Q85601 | P62491 | -0.28517  |
| 111191 | Q85601 | Q5T1M5 | -0.56218  |
| 111192 | Q85601 | P35555 | -0.75424  |
| 111193 | Q85601 | Q16718 | -0.11467  |
| 111194 | Q85601 | P10153 | -0.85576  |
| 111195 | Q85601 | Q14409 | -0.55548  |
| 111196 | Q85601 | Q15063 | -1.2553   |
| 111197 | Q85601 | Q15119 | -0.21749  |
| 111198 | Q85601 | Q8N0V4 | -0.9043   |
| 111199 | Q85601 | Q8NA70 | -0.69424  |
| 111200 | Q85601 | O14669 | -1.6318   |
| 111201 | Q85601 | P55196 | -0.22665  |
| 111202 | Q85601 | Q8WUJ3 | -0.22069  |
| 111203 | Q85601 | Q9NP72 | -1.373    |
| 111204 | Q85601 | A4FU49 | -0.22479  |
| 111205 | Q85601 | Q8NHV1 | -1.0027   |
| 111206 | Q85601 | P39877 | -0.62335  |
| 111207 | Q85601 | Q16831 | -0.19802  |
| 111208 | Q85601 | Q96LB1 | -1.2882   |
| 111209 | Q85601 | A8MU10 | -0.2031   |
| 111210 | Q85601 | Q76G19 | -0.22707  |
| 111211 | Q85601 | Q6ZQY7 | -0.012472 |
| 111212 | Q85601 | Q7L5L3 | -0.83172  |
| 111213 | Q85601 | Q9P273 | -1.0625   |
| 111214 | Q85601 | Q9BQD1 | -0.78768  |
| 111215 | Q85601 | Q9H2X6 | -0.22741  |
| 111216 | Q85601 | Q6RI45 | -0.25115  |
| 111217 | Q85601 | P41743 | -0.21715  |
| 111218 | Q85601 | P27037 | -0.40531  |
| 111219 | Q85601 | P45880 | -0.54715  |
| 111220 | Q85601 | P01036 | -0.94321  |
| 111221 | Q85601 | Q9BQP9 | -1.0768   |
| 111222 | Q85601 | Q9UK00 | -0.92686  |
| 111223 | Q85601 | P59052 | -0.099814 |
| 111224 | Q85601 | Q96JJ7 | -0.88429  |
| 111225 | Q85601 | P11150 | -0.75995  |
| 111226 | Q85601 | Q92506 | -0.33647  |
| 111227 | Q85601 | Q8NGU4 | -1.2621   |
| 111228 | Q85601 | Q9UBM4 | -0.96965  |
| 111229 | Q85601 | Q6WN34 | -0.65436  |
| 111230 | Q85601 | P52739 | -0.599    |
| 111231 | Q85601 | Q9UHT9 | -0.2031   |
| 111232 | Q85601 | Q8WWH5 | -0.30017  |
| 111233 | Q85601 | Q96E39 | -0.53592  |
| 111234 | Q85601 | P09529 | -0.22741  |
| 111235 | Q85601 | Q14320 | -0.23084  |
| 111236 | Q85601 | Q9UKP6 | -0.96006  |
| 111237 | Q85601 | O75208 | -0.15711  |
| 111238 | Q85601 | Q9H069 | -0.22739  |
| 111239 | Q85601 | O95340 | -0.73168  |
| 111240 | Q85601 | Q9NU02 | -0.39878  |
| 111241 | Q85601 | Q9Y3Z3 | -0.23075  |
| 111242 | Q85601 | Q32NC0 | -0.1067   |
| 111243 | Q85601 | Q99466 | -0.31073  |
| 111244 | Q85601 | P42857 | -0.41585  |
| 111245 | Q85601 | P07437 | -0.16416  |
| 111246 | Q85601 | P43489 | -0.8817   |
| 111247 | Q85601 | Q9UK23 | -0.48334  |
| 111248 | Q85601 | Q16760 | -0.56309  |
| 111249 | Q85601 | Q5TCM9 | -0.31607  |
| 111250 | Q85601 | P16442 | -0.99324  |
| 111251 | Q85601 | P49190 | -1.4616   |
| 111252 | Q85601 | A6NFB4 | -0.9043   |
| 111253 | Q85601 | Q9GZK4 | -1.2621   |
| 111254 | Q85601 | A6NLI3 | -0.39564  |
| 111255 | Q85601 | P19174 | -0.22741  |
| 111256 | Q85601 | Q9ULZ1 | -0.72408  |
| 111257 | Q85601 | Q9NSA1 | -0.33558  |
| 111258 | Q85601 | Q9NRM6 | -1.3071   |
| 111259 | Q85601 | Q01459 | -0.38582  |
| 111260 | Q85601 | Q8IX95 | -0.25822  |
| 111261 | Q85601 | Q9ULC8 | -0.70977  |
| 111262 | Q85601 | E5RQL4 | -0.46288  |
| 111263 | Q85601 | Q99819 | -0.33566  |
| 111264 | Q85601 | P51689 | -0.41202  |

|        |        |        |           |
|--------|--------|--------|-----------|
| 111265 | Q85601 | Q96N35 | -0.92686  |
| 111266 | Q85601 | O43847 | -0.21645  |
| 111267 | Q85601 | P54277 | -0.091427 |
| 111268 | Q85601 | Q8N456 | -0.29675  |
| 111269 | Q85601 | Q9P1Y6 | -0.22743  |
| 111270 | Q85601 | Q9UG22 | -1.2821   |
| 111271 | Q85601 | Q6P996 | -0.52928  |
| 111272 | Q85601 | Q8TAC1 | -0.6475   |
| 111273 | Q85601 | Q6ZU82 | -0.55079  |
| 111274 | Q85601 | P49023 | -0.23139  |
| 111275 | Q85601 | Q86X60 | -0.25093  |
| 111276 | Q85601 | O94880 | -0.29575  |
| 111277 | Q85601 | Q9P2N2 | -0.54413  |
| 111278 | Q85601 | Q8TER0 | -0.89861  |
| 111279 | Q85601 | Q01415 | -0.669    |
| 111280 | Q85601 | Q9GZY4 | -0.76329  |
| 111281 | Q85601 | Q86SX6 | -0.21757  |
| 111282 | Q85601 | Q6ZNE9 | -0.31263  |
| 111283 | Q85601 | Q5VT99 | -1.0889   |
| 111284 | Q85601 | Q008S8 | -0.67753  |
| 111285 | Q85601 | Q9BT73 | -0.35315  |
| 111286 | Q85601 | Q6ZW33 | -0.5108   |
| 111287 | Q85601 | Q86VV8 | -0.85903  |
| 111288 | Q85601 | Q8NFK5 | -1.0768   |
| 111289 | Q85601 | Q14802 | -1.0309   |
| 111290 | Q85601 | A6NDU8 | -0.64292  |
| 111291 | Q85601 | Q9H6F2 | -0.53323  |
| 111292 | Q85601 | Q02962 | -0.22729  |
| 111293 | Q85601 | Q5QFB9 | -1.0116   |
| 111294 | Q85601 | Q93091 | -0.72302  |
| 111295 | Q85601 | Q96SN7 | -0.29083  |
| 111296 | Q85601 | P20648 | -1.0428   |
| 111297 | Q85601 | Q86XQ3 | -0.96016  |
| 111298 | Q85601 | Q9NYW5 | -1.3129   |
| 111299 | Q85601 | P14060 | -0.82928  |
| 111300 | Q85601 | Q8TDQ0 | -0.92686  |
| 111301 | Q85601 | P54257 | -0.14088  |
| 111302 | Q85601 | Q6ZUF6 | -0.3515   |
| 111303 | Q85601 | Q86YN1 | -0.82412  |
| 111304 | Q85601 | Q9P2X7 | -0.3588   |
| 111305 | Q85601 | Q5DID0 | -1.314    |
| 111306 | Q85601 | O15335 | -0.92663  |
| 111307 | Q85601 | E0CX11 | -0.9043   |
| 111308 | Q85601 | Q9Y2P5 | -0.87763  |
| 111309 | Q85601 | P46092 | -1.353    |
| 111310 | Q85601 | Q8N3Z0 | -0.9386   |
| 111311 | Q85601 | Q92536 | -1.0156   |
| 111312 | Q85601 | Q05329 | -0.24155  |
| 111313 | Q85601 | Q86VV4 | -0.5458   |
| 111314 | Q85601 | Q99731 | -0.48502  |
| 111315 | Q85601 | Q96DR7 | -1.0416   |
| 111316 | Q85601 | Q8IUB3 | -0.89433  |
| 111317 | Q85601 | P30481 | -1.1017   |
| 111318 | Q85601 | Q96PZ7 | -0.92686  |
| 111319 | Q85601 | O95206 | -1.1836   |
| 111320 | Q85601 | Q96MN2 | -0.81985  |
| 111321 | Q85601 | P04554 | -0.81762  |
| 111322 | Q85601 | Q569H4 | -0.092462 |
| 111323 | Q85601 | P22303 | -0.22743  |
| 111324 | Q85601 | Q49A26 | -0.63021  |
| 111325 | Q85601 | P41240 | -0.22745  |
| 111326 | Q85601 | Q6ZUJ8 | -0.16732  |
| 111327 | Q85601 | Q96G79 | -0.56514  |
| 111328 | Q85601 | Q9NP86 | -0.22476  |
| 111329 | Q85601 | Q13308 | -0.52046  |
| 111330 | Q85601 | Q58WW2 | -0.22739  |
| 111331 | Q85601 | Q13099 | -0.22722  |
| 111332 | Q85601 | P85299 | -0.20073  |
| 111333 | Q85601 | Q8NG83 | -1.2621   |
| 111334 | Q85601 | Q6Q6R5 | -0.23802  |
| 111335 | Q85601 | Q9UHT4 | -0.2031   |
| 111336 | Q85601 | Q29836 | -1.1017   |
| 111337 | Q85601 | P52954 | -0.23155  |
| 111338 | Q85601 | Q8NH60 | -1.2621   |
| 111339 | Q85601 | O75356 | -0.44087  |
| 111340 | Q85601 | Q5JST6 | -0.39878  |

|        |        |        |          |
|--------|--------|--------|----------|
| 111341 | Q85601 | Q6UWR7 | -1.3972  |
| 111342 | Q85601 | Q4KMZ8 | -1.0386  |
| 111343 | Q85601 | Q8NFO6 | -1.1313  |
| 111344 | Q85601 | P78329 | -0.22903 |
| 111345 | Q85601 | P45381 | -0.3099  |
| 111346 | Q85601 | P59551 | -1.1993  |
| 111347 | Q85601 | Q9Y2R2 | -0.23037 |
| 111348 | Q85601 | P10826 | -0.23709 |
| 111349 | Q85601 | Q6R6M4 | -0.33834 |
| 111350 | Q85601 | Q9NPB0 | -0.87482 |
| 111351 | Q85601 | E9PQX1 | -0.84864 |
| 111352 | Q85601 | O95954 | -0.32666 |
| 111353 | Q85601 | Q9P217 | -0.46939 |
| 111354 | Q85601 | Q5TFQ8 | -0.92686 |
| 111355 | Q85601 | O15533 | -0.49925 |
| 111356 | Q85601 | Q8IZR5 | -0.95476 |
| 111357 | Q85601 | Q12799 | -0.13043 |
| 111358 | Q85601 | P01135 | -0.2885  |
| 111359 | Q85601 | Q86YC3 | -0.92686 |
| 111360 | Q85601 | P49189 | -0.40674 |
| 111361 | Q85601 | P11678 | -0.64857 |
| 111362 | Q85601 | Q6NVV3 | -0.93421 |
| 111363 | Q85601 | Q9UM19 | -0.61824 |
| 111364 | Q85601 | P62502 | -0.9077  |
| 111365 | Q85601 | Q9UGH3 | -0.59362 |
| 111366 | Q85601 | P41222 | -0.23556 |
| 111367 | Q85601 | P35270 | -0.22718 |
| 111368 | Q85601 | Q5TYW8 | -0.157   |
| 111369 | Q85601 | Q15546 | -1.0896  |
| 111370 | Q85601 | Q9UEU5 | -0.67238 |
| 111371 | Q85601 | Q8N6G2 | -0.21395 |
| 111372 | Q85601 | Q03721 | -0.79965 |
| 111373 | Q85601 | Q16363 | -1.1538  |
| 111374 | Q85601 | Q4V328 | -0.23763 |
| 111375 | Q85601 | O43181 | -0.18227 |
| 111376 | Q85601 | Q8NAN2 | -0.92686 |
| 111377 | Q85601 | P0C7W8 | -0.32255 |
| 111378 | Q85601 | Q8IXV7 | -0.21773 |
| 111379 | Q85601 | P0C264 | -1.2086  |
| 111380 | Q85601 | Q9NP70 | -1.0774  |
| 111381 | Q85601 | O00217 | -0.58579 |
| 111382 | Q85601 | Q8TBP6 | -0.69944 |
| 111383 | Q85601 | Q8N8A6 | -0.40405 |
| 111384 | Q85601 | P28566 | -1.3608  |
| 111385 | Q85601 | Q6ZTW0 | -0.3223  |
| 111386 | Q85601 | Q9UPZ9 | -0.79904 |
| 111387 | Q85601 | Q96C36 | -0.71005 |
| 111388 | Q85601 | Q9UQB8 | -0.2274  |
| 111389 | Q85601 | Q6UXT9 | -0.82699 |
| 111390 | Q85601 | Q8WWZ7 | -0.95462 |
| 111391 | Q85601 | D6R901 | -0.66238 |
| 111392 | Q85601 | Q96LR1 | -0.9043  |
| 111393 | Q85601 | Q15464 | -0.67189 |
| 111394 | Q85601 | Q9BQ75 | -0.45057 |
| 111395 | Q85601 | Q8N5M9 | -1.0116  |
| 111396 | Q85601 | Q9C056 | -0.22766 |
| 111397 | Q85601 | Q8TCV5 | -0.82753 |
| 111398 | Q85601 | Q12951 | -0.35656 |
| 111399 | Q85601 | A0AUK8 | -0.18188 |
| 111400 | Q85601 | P35625 | -0.30059 |
| 111401 | Q85601 | A6NGS2 | -0.29419 |
| 111402 | Q85601 | Q9UPP2 | -0.22253 |
| 111403 | Q85601 | Q9P289 | -0.34368 |
| 111404 | Q85601 | Q9UEE5 | -0.79801 |
| 111405 | Q85601 | Q8NHA6 | -1.2621  |
| 111406 | Q85601 | Q86Y91 | -0.35742 |
| 111407 | Q85601 | Q9HAR2 | -1.3389  |
| 111408 | Q85601 | P78357 | -0.61578 |
| 111409 | Q85601 | Q08648 | -0.91318 |
| 111410 | Q85601 | Q30167 | -0.68895 |
| 111411 | Q85601 | P35542 | -0.8459  |
| 111412 | Q85601 | Q14515 | -1.1844  |
| 111413 | Q85601 | O00400 | -0.82233 |
| 111414 | Q85601 | P55008 | -0.22962 |
| 111415 | Q85601 | Q3LFD5 | -0.66238 |
| 111416 | Q85601 | Q7Z4W1 | -0.77587 |

|        |        |        |           |
|--------|--------|--------|-----------|
| 111417 | Q85601 | Q8NEG0 | -0.23984  |
| 111418 | Q85601 | Q9H6X4 | -0.92686  |
| 111419 | Q85601 | Q8NGL3 | -1.2621   |
| 111420 | Q85601 | Q9UPN4 | -0.041517 |
| 111421 | Q85601 | Q99943 | -0.6518   |
| 111422 | Q85601 | P56746 | -0.7761   |
| 111423 | Q85601 | Q6ZS02 | -0.12779  |
| 111424 | Q85601 | Q9UJ71 | -1.1847   |
| 111425 | Q85601 | P21108 | -0.75552  |
| 111426 | Q85601 | Q96HA4 | -0.92686  |
| 111427 | Q85601 | O60243 | -0.70595  |
| 111428 | Q85601 | Q2M3M2 | -1.0676   |
| 111429 | Q85601 | Q8NGZ6 | -1.2621   |
| 111430 | Q85601 | A1L390 | -0.74567  |
| 111431 | Q85601 | P20930 | -0.28312  |
| 111432 | Q85601 | Q8N8X6 | -0.1796   |
| 111433 | Q85601 | Q495A1 | -0.47259  |
| 111434 | Q85601 | Q15506 | -0.36143  |
| 111435 | Q85601 | P48741 | -0.58965  |
| 111436 | Q85601 | Q6PDA7 | -0.9043   |
| 111437 | Q85601 | Q8N205 | -0.58647  |
| 111438 | Q85601 | P43307 | -0.69427  |
| 111439 | Q85601 | Q96AH8 | -0.67181  |
| 111440 | Q85601 | Q96GQ5 | -0.92686  |
| 111441 | Q85601 | Q9H8X2 | -0.65614  |
| 111442 | Q85601 | A8MVW0 | -0.92686  |
| 111443 | Q85601 | Q8IVV8 | -1.0386   |
| 111444 | Q85601 | Q2VWP7 | -1.1159   |
| 111445 | Q85601 | Q7Z7L1 | -0.53656  |
| 111446 | Q85601 | O15232 | -0.56256  |
| 111447 | Q85601 | Q8NDV3 | -0.37672  |
| 111448 | Q85601 | Q6ZU15 | -0.22383  |
| 111449 | Q85601 | Q96S90 | -0.38094  |
| 111450 | Q85601 | Q8N556 | -0.32207  |
| 111451 | Q85601 | P12821 | -0.77274  |
| 111452 | Q85601 | Q8WXB1 | -0.82309  |
| 111453 | Q85601 | Q7Z392 | -0.11181  |
| 111454 | Q85601 | Q9ULE3 | -0.32964  |
| 111455 | Q85601 | Q96EF0 | -0.28415  |
| 111456 | Q85601 | O75311 | -0.84305  |
| 111457 | Q85601 | Q15842 | -0.77296  |
| 111458 | Q85601 | Q96DZ1 | -0.30553  |
| 111459 | Q85601 | Q30KQ2 | -1.3426   |
| 111460 | Q85601 | P52429 | -1.4365   |
| 111461 | Q85601 | O00237 | -0.62252  |
| 111462 | Q85601 | Q99983 | -0.92904  |
| 111463 | Q85601 | O00418 | -0.85248  |
| 111464 | Q85601 | Q05923 | -0.23227  |
| 111465 | Q85601 | Q9NUM4 | -0.76396  |
| 111466 | Q85601 | Q01449 | -0.27906  |
| 111467 | Q85601 | Q6UB35 | -0.6914   |
| 111468 | Q85601 | Q6NSJ5 | -0.92686  |
| 111469 | Q85601 | Q8IXL9 | -0.21476  |
| 111470 | Q85601 | Q2M389 | -0.27661  |
| 111471 | Q85601 | Q01484 | -0.22749  |
| 111472 | Q85601 | P51841 | -1.4151   |
| 111473 | Q85601 | Q9H606 | -0.20128  |
| 111474 | Q85601 | P30613 | -0.35792  |
| 111475 | Q85601 | P20839 | -0.34243  |
| 111476 | Q85601 | B5MCN3 | -0.9773   |
| 111477 | Q85601 | Q5H8A3 | -0.81566  |
| 111478 | Q85601 | C9J302 | -0.39008  |
| 111479 | Q85601 | Q66K80 | -0.2031   |
| 111480 | Q85601 | P50897 | -0.36426  |
| 111481 | Q85601 | P81408 | -0.79875  |
| 111482 | Q85601 | P28336 | -1.168    |
| 111483 | Q85601 | Q13153 | -0.22796  |
| 111484 | Q85601 | Q9H9V4 | -0.70843  |
| 111485 | Q85601 | P50336 | -0.61651  |
| 111486 | Q85601 | Q7L3T8 | -0.13901  |
| 111487 | Q85601 | A6NFY4 | -0.92686  |
| 111488 | Q85601 | O75128 | -0.66781  |
| 111489 | Q85601 | O75379 | -0.61038  |
| 111490 | Q85601 | P01714 | -1.046    |
| 111491 | Q85601 | Q12766 | -0.22736  |
| 111492 | Q85601 | Q14574 | -1.1654   |



|        |        |        |            |
|--------|--------|--------|------------|
| 111493 | Q85601 | Q96T53 | -0.88563   |
| 111494 | Q85601 | P04207 | -1.046     |
| 111495 | Q85601 | Q8TAM6 | -0.39717   |
| 111496 | Q85601 | Q8N8P6 | -0.22553   |
| 111497 | Q85601 | Q96PX8 | -1.0205    |
| 111498 | Q85601 | Q01718 | -0.94076   |
| 111499 | Q85601 | Q2VPA4 | -0.7691    |
| 111500 | Q85601 | Q9Y5E1 | -1.2231    |
| 111501 | Q85601 | O96009 | -1.1452    |
| 111502 | Q85601 | P00492 | -0.29419   |
| 111503 | Q85601 | Q9UNX9 | -1.0964    |
| 111504 | Q85601 | P81172 | -0.59686   |
| 111505 | Q85601 | Q8IVM7 | -0.2031    |
| 111506 | Q85601 | Q96NT3 | -0.0068965 |
| 111507 | Q85601 | Q8NGJ5 | -1.2621    |
| 111508 | Q85601 | P24001 | -1.0718    |
| 111509 | Q85601 | Q9NS28 | -0.60687   |
| 111510 | Q85601 | A8MWD9 | -0.1691    |
| 111511 | Q85601 | Q15165 | -0.66002   |
| 111512 | Q85601 | Q8TD43 | -0.83338   |
| 111513 | Q85601 | Q5T4H9 | -0.2031    |
| 111514 | Q85601 | Q59EK9 | -0.44593   |
| 111515 | Q85601 | Q8NH10 | -1.2621    |
| 111516 | Q85601 | P0C6E5 | -0.38297   |
| 111517 | Q85601 | Q13470 | -0.78812   |
| 111518 | Q85601 | Q8IV38 | -0.48575   |
| 111519 | Q85601 | Q2NKX9 | -0.092462  |
| 111520 | Q85601 | Q6EMK4 | -1.4625    |
| 111521 | Q85601 | P16519 | -0.27019   |
| 111522 | Q85601 | Q9NXW2 | -1.0002    |
| 111523 | Q85601 | Q9NY57 | -1.2583    |
| 111524 | Q85601 | P06731 | -0.64222   |
| 111525 | Q85601 | P04434 | -1.046     |
| 111526 | Q85601 | O75390 | -0.19438   |
| 111527 | Q85601 | O60669 | -0.9959    |
| 111528 | Q85601 | Q5VYX0 | -1.1096    |
| 111529 | Q85601 | Q969X1 | -0.89981   |
| 111530 | Q85601 | P15104 | -0.56754   |
| 111531 | Q85601 | O00763 | -0.29345   |
| 111532 | Q85601 | Q86XE5 | -0.37695   |
| 111533 | Q85601 | Q9NWU1 | -0.28645   |
| 111534 | Q85601 | P09565 | -0.28289   |
| 111535 | Q85601 | Q96C03 | -0.30784   |
| 111536 | Q85601 | O14668 | -1.6318    |
| 111537 | Q85601 | Q5HYN5 | -0.18672   |
| 111538 | Q85601 | P08910 | -0.7199    |
| 111539 | Q85601 | P35611 | -0.19202   |
| 111540 | Q85601 | Q9BYX7 | -0.71497   |
| 111541 | Q85601 | P24386 | -0.73842   |
| 111542 | Q85601 | Q8WWB3 | -0.059383  |
| 111543 | Q85601 | Q9NYS0 | -0.97434   |
| 111544 | Q85601 | Q96CK0 | -0.46561   |
| 111545 | Q85601 | P22607 | -0.36472   |
| 111546 | Q85601 | Q8NBJ7 | -0.28865   |
| 111547 | Q85601 | A6NN92 | -0.95024   |
| 111548 | Q85601 | O43795 | -0.37937   |
| 111549 | Q85601 | Q8N6U8 | -1.4893    |
| 111550 | Q85601 | A1L168 | -0.092462  |
| 111551 | Q85601 | P29275 | -0.81031   |
| 111552 | Q85601 | Q8N812 | -0.17402   |
| 111553 | Q85601 | Q13258 | -0.7777    |
| 111554 | Q85601 | P23560 | -0.49082   |
| 111555 | Q85601 | O43150 | -0.23159   |
| 111556 | Q85601 | Q2KHR3 | -1.2861    |
| 111557 | Q85601 | P49798 | -0.35461   |
| 111558 | Q85601 | P13284 | -1.1331    |
| 111559 | Q85601 | Q07283 | -0.3412    |
| 111560 | Q85601 | Q8IYY4 | -0.47176   |
| 111561 | Q85601 | Q0VFX4 | -0.081874  |
| 111562 | Q85601 | Q8N4F4 | -0.97974   |
| 111563 | Q85601 | P40238 | -1.0481    |
| 111564 | Q85601 | O60347 | -1.3431    |
| 111565 | Q85601 | Q86UD1 | -0.076803  |
| 111566 | Q85601 | P27701 | -0.57249   |
| 111567 | Q85601 | Q96AZ6 | -0.23351   |
| 111568 | Q85601 | Q93063 | -0.60911   |

|        |        |        |          |
|--------|--------|--------|----------|
| 111569 | Q85601 | O75038 | -0.4296  |
| 111570 | Q85601 | P54750 | -0.22758 |
| 111571 | Q85601 | P48307 | -0.75725 |
| 111572 | Q85601 | Q8NI28 | -0.966   |
| 111573 | Q85601 | P57739 | -0.77926 |
| 111574 | Q85601 | Q9P2S6 | -0.29575 |
| 111575 | Q85601 | O60235 | -1.7915  |
| 111576 | Q85601 | Q9H0M4 | -0.29575 |
| 111577 | Q85601 | Q15771 | -1.1417  |
| 111578 | Q85601 | Q9NQS3 | -0.41012 |
| 111579 | Q85601 | P23458 | -0.55252 |
| 111580 | Q85601 | A6PVS8 | -0.22714 |
| 111581 | Q85601 | Q9GZM6 | -1.2621  |
| 111582 | Q85601 | P02749 | -0.48442 |
| 111583 | Q85601 | Q7Z4R8 | -0.86777 |
| 111584 | Q85601 | Q8TCH9 | -0.59115 |
| 111585 | Q85601 | O43676 | -0.5043  |
| 111586 | Q85601 | Q9Y484 | -0.22706 |
| 111587 | Q85601 | Q8IWX7 | -0.22026 |
| 111588 | Q85601 | Q12934 | -0.62671 |
| 111589 | Q85601 | P57057 | -0.78488 |
| 111590 | Q85601 | Q96H55 | -0.35116 |
| 111591 | Q85601 | Q9UJZ1 | -0.14507 |
| 111592 | Q85601 | Q8NGS4 | -1.2621  |
| 111593 | Q85601 | Q8NHB1 | -1.2621  |
| 111594 | Q85601 | Q86Y07 | -0.47673 |
| 111595 | Q85601 | O15218 | -1.3388  |
| 111596 | Q85601 | Q9BZA0 | -0.90698 |
| 111597 | Q85601 | Q9BRR3 | -0.92686 |
| 111598 | Q85601 | O60271 | -0.16698 |
| 111599 | Q85601 | P31151 | -0.2627  |
| 111600 | Q85601 | Q9C0I4 | -0.92686 |
| 111601 | Q85601 | P21453 | -0.83028 |
| 111602 | Q85601 | Q8IZF7 | -1.3639  |
| 111603 | Q85601 | P30273 | -0.64588 |
| 111604 | Q85601 | Q8NGN8 | -1.2621  |
| 111605 | Q85601 | Q7Z3E2 | -0.15084 |
| 111606 | Q85601 | O14957 | -0.61353 |
| 111607 | Q85601 | Q9HBX9 | -1.2395  |
| 111608 | Q85601 | Q13351 | -0.22502 |
| 111609 | Q85601 | Q96JF0 | -0.76353 |
| 111610 | Q85601 | Q5T1J6 | -0.5268  |
| 111611 | Q85601 | P63135 | -0.10253 |
| 111612 | Q85601 | F8WCM5 | -0.66448 |
| 111613 | Q85601 | P01570 | -0.80645 |
| 111614 | Q85601 | Q9NV23 | -0.44714 |
| 111615 | Q85601 | Q96CH1 | -1.3443  |
| 111616 | Q85601 | P15509 | -1.6409  |
| 111617 | Q85601 | Q9Y4C5 | -0.6499  |
| 111618 | Q85601 | Q9P0B6 | -0.92686 |
| 111619 | Q85601 | Q8NGT2 | -1.2621  |
| 111620 | Q85601 | Q9HBL6 | -0.92686 |
| 111621 | Q85601 | P56202 | -0.77341 |
| 111622 | Q85601 | A0PK00 | -0.67993 |
| 111623 | Q85601 | Q9UBM7 | -0.89917 |
| 111624 | Q85601 | O00270 | -1.4753  |
| 111625 | Q85601 | Q8TBA6 | -0.57079 |
| 111626 | Q85601 | Q8TEW0 | -0.2257  |
| 111627 | Q85601 | P41180 | -0.83038 |
| 111628 | Q85601 | Q8NAG6 | -0.22741 |
| 111629 | Q85601 | A2RRP1 | -0.52188 |
| 111630 | Q85601 | Q5SQ64 | -1.0386  |
| 111631 | Q85601 | Q9BXS1 | -0.23897 |
| 111632 | Q85601 | Q9BY21 | -1.2441  |
| 111633 | Q85601 | Q8NG95 | -1.2621  |
| 111634 | Q85601 | P58743 | -0.86936 |
| 111635 | Q85601 | Q02153 | -0.69714 |
| 111636 | Q85601 | Q96NI6 | -0.92686 |
| 111637 | Q85601 | Q5JTN6 | -0.2305  |
| 111638 | Q85601 | Q8IWN7 | -0.30299 |
| 111639 | Q85601 | Q53H47 | -0.22082 |
| 111640 | Q85601 | Q16539 | -0.22741 |
| 111641 | Q85601 | P06326 | -1.046   |
| 111642 | Q85601 | Q9H967 | -0.22703 |
| 111643 | Q85601 | B5MCY1 | -0.35751 |
| 111644 | Q85601 | Q96AQ2 | -0.67993 |

|        |        |        |           |
|--------|--------|--------|-----------|
| 111645 | Q85601 | Q10713 | -0.47269  |
| 111646 | Q85601 | P18440 | -0.4938   |
| 111647 | Q85601 | Q6ZUB1 | -0.99437  |
| 111648 | Q85601 | P62873 | -0.40428  |
| 111649 | Q85601 | Q7L7V1 | -0.25145  |
| 111650 | Q85601 | Q9UKQ9 | -1.3764   |
| 111651 | Q85601 | A6NMD2 | -0.1796   |
| 111652 | Q85601 | A8MWY0 | -0.92686  |
| 111653 | Q85601 | Q6P4A7 | -0.84636  |
| 111654 | Q85601 | P35713 | -0.33345  |
| 111655 | Q85601 | O71037 | -0.7596   |
| 111656 | Q85601 | Q495Y7 | -0.18515  |
| 111657 | Q85601 | Q8N661 | -0.52044  |
| 111658 | Q85601 | Q9Y664 | -0.83936  |
| 111659 | Q85601 | Q8NB90 | -0.93407  |
| 111660 | Q85601 | Q96PB8 | -0.92686  |
| 111661 | Q85601 | Q6UXF1 | -0.67993  |
| 111662 | Q85601 | Q8NEP3 | -0.2274   |
| 111663 | Q85601 | P10909 | -0.17845  |
| 111664 | Q85601 | Q92544 | -0.92686  |
| 111665 | Q85601 | Q8N386 | -0.92686  |
| 111666 | Q85601 | Q07065 | -0.7252   |
| 111667 | Q85601 | Q8IUE6 | -0.7417   |
| 111668 | Q85601 | O43896 | -0.30383  |
| 111669 | Q85601 | O95436 | -0.84609  |
| 111670 | Q85601 | P30495 | -1.1017   |
| 111671 | Q85601 | Q9Y4F5 | -0.20948  |
| 111672 | Q85601 | P58550 | -0.99727  |
| 111673 | Q85601 | Q9H1C7 | -0.92686  |
| 111674 | Q85601 | Q9UBM8 | -0.54407  |
| 111675 | Q85601 | Q9BVK8 | -1.0116   |
| 111676 | Q85601 | Q8N5N4 | -0.076588 |
| 111677 | Q85601 | Q9NYF3 | -0.35719  |
| 111678 | Q85601 | Q6ZVH6 | -0.99506  |
| 111679 | Q85601 | Q8TC57 | -0.75867  |
| 111680 | Q85601 | Q9Y6L6 | -0.89867  |
| 111681 | Q85601 | P48735 | -0.12987  |
| 111682 | Q85601 | Q9NVR7 | -0.083693 |
| 111683 | Q85601 | Q9UBC5 | -0.33313  |
| 111684 | Q85601 | Q01955 | -0.56308  |
| 111685 | Q85601 | O14561 | -0.1829   |
| 111686 | Q85601 | Q5VTL7 | -0.9043   |
| 111687 | Q85601 | Q9H819 | -1.0002   |
| 111688 | Q85601 | Q17RS7 | -0.14194  |
| 111689 | Q85601 | Q8ND99 | -0.80343  |
| 111690 | Q85601 | O43182 | -0.66161  |
| 111691 | Q85601 | P41143 | -0.5358   |
| 111692 | Q85601 | P07510 | -1.0311   |
| 111693 | Q85601 | Q13508 | -0.7015   |
| 111694 | Q85601 | Q8NAA5 | -0.17595  |
| 111695 | Q85601 | Q6UXD1 | -0.92686  |
| 111696 | Q85601 | Q8NGQ6 | -1.2621   |
| 111697 | Q85601 | A1L1A6 | -0.92686  |
| 111698 | Q85601 | Q96L91 | -0.26141  |
| 111699 | Q85601 | Q86W67 | -0.041216 |
| 111700 | Q85601 | Q8IY47 | -0.20232  |
| 111701 | Q85601 | O43731 | -0.53478  |
| 111702 | Q85601 | P05177 | -0.45843  |
| 111703 | Q85601 | Q5BJF2 | -0.41331  |
| 111704 | Q85601 | Q01362 | -0.95182  |
| 111705 | Q85601 | O75556 | -1.363    |
| 111706 | Q85601 | Q7Z6K4 | -0.44118  |
| 111707 | Q85601 | P36542 | -0.13693  |
| 111708 | Q85601 | P43146 | -0.33949  |
| 111709 | Q85601 | Q07973 | -0.38865  |
| 111710 | Q85601 | A6NFE2 | -0.92686  |
| 111711 | Q85601 | Q8NDX6 | -0.22746  |
| 111712 | Q85601 | O95428 | -1.079    |
| 111713 | Q85601 | Q5JRC9 | -0.11375  |
| 111714 | Q85601 | Q52WX2 | -1.1045   |
| 111715 | Q85601 | Q9BXU8 | -0.35246  |
| 111716 | Q85601 | Q9NYQ3 | -0.39698  |
| 111717 | Q85601 | Q08380 | -1.3534   |
| 111718 | Q85601 | P09326 | -0.59248  |
| 111719 | Q85601 | Q92616 | -0.2259   |
| 111720 | Q85601 | O43614 | -1.3312   |

|        |        |        |           |
|--------|--------|--------|-----------|
| 111721 | Q85601 | Q5FYA8 | -0.70671  |
| 111722 | Q85601 | Q13465 | -0.060514 |
| 111723 | Q85601 | Q6ZW13 | -0.2031   |
| 111724 | Q85601 | Q6B0I6 | -0.19188  |
| 111725 | Q85601 | Q9HA64 | -0.58825  |
| 111726 | Q85601 | Q8IZU2 | -0.22769  |
| 111727 | Q85601 | P13473 | -0.76807  |
| 111728 | Q85601 | Q6UXL0 | -0.73394  |
| 111729 | Q85601 | Q9HBG7 | -0.99302  |
| 111730 | Q85601 | Q9NRQ2 | -0.48788  |
| 111731 | Q85601 | Q9NVE7 | -0.72766  |
| 111732 | Q85601 | O15529 | -1.4753   |
| 111733 | Q85601 | Q7L8J4 | -0.10567  |
| 111734 | Q85601 | D6RF30 | -0.1796   |
| 111735 | Q85601 | Q2VPJ9 | -0.092462 |
| 111736 | Q85601 | Q6ZRC1 | -0.2031   |
| 111737 | Q85601 | Q9BTM1 | -0.7417   |
| 111738 | Q85601 | Q8NH55 | -1.2621   |
| 111739 | Q85601 | A5PL33 | -0.18472  |
| 111740 | Q85601 | P37840 | -0.22934  |
| 111741 | Q85601 | Q14318 | -0.22821  |
| 111742 | Q85601 | Q58HT5 | -0.91978  |
| 111743 | Q85601 | Q9HC84 | -0.57822  |
| 111744 | Q85601 | Q49AG3 | -0.42502  |
| 111745 | Q85601 | Q5H9E4 | -0.69716  |
| 111746 | Q85601 | Q9NVI7 | -1.1427   |
| 111747 | Q85601 | Q9H7L2 | -0.9043   |
| 111748 | Q85601 | Q6ZNW5 | -0.46971  |
| 111749 | Q85601 | Q8NGX3 | -1.2621   |
| 111750 | Q85601 | P01286 | -0.52734  |
| 111751 | Q85601 | P55103 | -0.75458  |
| 111752 | Q85601 | C9JJH3 | -0.66238  |
| 111753 | Q85601 | Q7Z408 | -1.0386   |
| 111754 | Q85601 | Q96RY7 | -0.28276  |
| 111755 | Q85601 | P49915 | -0.39552  |
| 111756 | Q85601 | Q68DA7 | -0.2208   |
| 111757 | Q85601 | O95202 | -0.20205  |
| 111758 | Q85601 | O43187 | -0.22739  |
| 111759 | Q85601 | A6NNL5 | -1.2026   |
| 111760 | Q85601 | Q96LK8 | -0.78515  |
| 111761 | Q85601 | Q658N2 | -0.94744  |
| 111762 | Q85601 | P0C7M8 | -0.917    |
| 111763 | Q85601 | Q29963 | -1.1017   |
| 111764 | Q85601 | Q13795 | -0.65599  |
| 111765 | Q85601 | Q6P3W2 | -0.42533  |
| 111766 | Q85601 | Q9HCJ1 | -0.93479  |
| 111767 | Q85601 | Q86UP2 | -0.9799   |
| 111768 | Q85601 | Q5QGT7 | -0.95544  |
| 111769 | Q85601 | Q9Y233 | -0.52364  |
| 111770 | Q85601 | Q6UWY5 | -0.9043   |
| 111771 | Q85601 | Q17RY0 | -0.83511  |
| 111772 | Q85601 | P51677 | -1.3556   |
| 111773 | Q85601 | Q9NYZ4 | -0.66466  |
| 111774 | Q85601 | Q9NRD9 | -0.99784  |
| 111775 | Q85601 | A0AVT1 | -0.2217   |
| 111776 | Q85601 | P18825 | -0.40429  |
| 111777 | Q85601 | Q32VQ0 | -1.2621   |
| 111778 | Q85601 | Q5JRM2 | -0.92686  |
| 111779 | Q85601 | Q9ULZ9 | -1.4658   |
| 111780 | Q85601 | B3EWF7 | -0.2031   |
| 111781 | Q85601 | Q9NP81 | -0.17207  |
| 111782 | Q85601 | Q9UBD3 | -1.1233   |
| 111783 | Q85601 | Q9UBV4 | -0.79423  |
| 111784 | Q85601 | Q8WYA0 | -0.50186  |
| 111785 | Q85601 | Q8N130 | -0.86127  |
| 111786 | Q85601 | Q13061 | -0.7855   |
| 111787 | Q85601 | Q12770 | -0.27977  |
| 111788 | Q85601 | P42357 | -0.40361  |
| 111789 | Q85601 | Q9Y5H9 | -1.2846   |
| 111790 | Q85601 | B2RD01 | -0.091237 |
| 111791 | Q85601 | Q96A46 | -0.86004  |
| 111792 | Q85601 | O43688 | -0.74402  |
| 111793 | Q85601 | P32745 | -0.62651  |
| 111794 | Q85601 | Q6NV75 | -1.3443   |
| 111795 | Q85601 | O15020 | -0.22821  |
| 111796 | Q85601 | Q9H582 | -0.191    |

|        |        |        |           |
|--------|--------|--------|-----------|
| 111797 | Q85601 | Q9HC96 | -0.65344  |
| 111798 | Q85601 | Q86Z14 | -0.78019  |
| 111799 | Q85601 | P35354 | -0.25675  |
| 111800 | Q85601 | A8MXK1 | -0.92686  |
| 111801 | Q85601 | O00443 | -0.39579  |
| 111802 | Q85601 | O95626 | -0.16615  |
| 111803 | Q85601 | P30953 | -1.2621   |
| 111804 | Q85601 | P35590 | -1.1069   |
| 111805 | Q85601 | Q9BX59 | -1.0578   |
| 111806 | Q85601 | Q8IUA0 | -0.82753  |
| 111807 | Q85601 | Q12908 | -0.72231  |
| 111808 | Q85601 | Q1AE95 | -0.92686  |
| 111809 | Q85601 | Q6IE36 | -0.83462  |
| 111810 | Q85601 | Q9UPM6 | -0.22743  |
| 111811 | Q85601 | A6NC97 | -0.92686  |
| 111812 | Q85601 | Q9P003 | -0.84902  |
| 111813 | Q85601 | O60610 | -0.22719  |
| 111814 | Q85601 | A6NE02 | -0.66331  |
| 111815 | Q85601 | Q96JA4 | -0.92686  |
| 111816 | Q85601 | Q7Z7H5 | -0.89356  |
| 111817 | Q85601 | Q8IYJ3 | -0.24907  |
| 111818 | Q85601 | Q8IUZ5 | -0.47103  |
| 111819 | Q85601 | Q6T310 | -0.34107  |
| 111820 | Q85601 | Q96CU9 | -0.9073   |
| 111821 | Q85601 | A6NEQ2 | -0.2031   |
| 111822 | Q85601 | Q6UY11 | -0.99901  |
| 111823 | Q85601 | Q6PIF6 | -0.7629   |
| 111824 | Q85601 | A8MZ25 | -1.28     |
| 111825 | Q85601 | Q68CR1 | -0.92686  |
| 111826 | Q85601 | P22352 | -0.7718   |
| 111827 | Q85601 | P14784 | -1.1843   |
| 111828 | Q85601 | Q13523 | -0.47062  |
| 111829 | Q85601 | Q99727 | -0.82423  |
| 111830 | Q85601 | Q2TB90 | -0.19966  |
| 111831 | Q85601 | Q9BTT6 | -0.25424  |
| 111832 | Q85601 | P05156 | -1.4072   |
| 111833 | Q85601 | Q29865 | -1.1017   |
| 111834 | Q85601 | Q8TE82 | -0.25822  |
| 111835 | Q85601 | Q9P1U1 | -0.78104  |
| 111836 | Q85601 | Q9P0L9 | -0.46896  |
| 111837 | Q85601 | Q09MP3 | -0.2103   |
| 111838 | Q85601 | P52951 | -0.22699  |
| 111839 | Q85601 | Q6P474 | -0.52928  |
| 111840 | Q85601 | Q9NXC2 | -1.5893   |
| 111841 | Q85601 | P37173 | -0.39146  |
| 111842 | Q85601 | P0CE71 | -0.39878  |
| 111843 | Q85601 | Q96HE9 | -0.31826  |
| 111844 | Q85601 | Q8WVV9 | -0.041797 |
| 111845 | Q85601 | Q9UHL4 | -1.0028   |
| 111846 | Q85601 | O00180 | -0.84693  |
| 111847 | Q85601 | Q9UHG2 | -0.76067  |
| 111848 | Q85601 | Q15569 | -0.69564  |
| 111849 | Q85601 | Q8NGX6 | -1.2621   |
| 111850 | Q85601 | A6NHG9 | -1.2621   |
| 111851 | Q85601 | Q9C0D5 | -0.5506   |
| 111852 | Q85601 | P30989 | -1.2446   |
| 111853 | Q85601 | Q9BZ29 | -0.22652  |
| 111854 | Q85601 | O94782 | -0.43928  |
| 111855 | Q85601 | P49366 | -0.58976  |
| 111856 | Q85601 | Q92743 | -0.88395  |
| 111857 | Q85601 | Q13936 | -0.28351  |
| 111858 | Q85601 | Q5VU92 | -0.22655  |
| 111859 | Q85601 | Q8IX18 | -0.82114  |
| 111860 | Q85601 | P78417 | -0.24873  |
| 111861 | Q85601 | Q8NGD5 | -1.2621   |
| 111862 | Q85601 | P50583 | -0.68023  |
| 111863 | Q85601 | P52823 | -0.60611  |
| 111864 | Q85601 | Q96PX6 | -0.18061  |
| 111865 | Q85601 | P16144 | -0.75289  |
| 111866 | Q85601 | Q8NGS1 | -1.2621   |
| 111867 | Q85601 | Q9NZP2 | -1.2621   |
| 111868 | Q85601 | O43603 | -1.2261   |
| 111869 | Q85601 | Q8NG77 | -1.2621   |
| 111870 | Q85601 | A1IGU5 | -0.48079  |
| 111871 | Q85601 | O43174 | -0.71736  |
| 111872 | Q85601 | P14416 | -0.27189  |

|        |        |        |           |
|--------|--------|--------|-----------|
| 111873 | Q85601 | P56177 | -0.22501  |
| 111874 | Q85601 | Q99578 | -0.92614  |
| 111875 | Q85601 | Q9Y6D5 | -0.21896  |
| 111876 | Q85601 | Q7RTY8 | -1.4124   |
| 111877 | Q85601 | O14640 | -0.093502 |
| 111878 | Q85601 | Q9Y2C9 | -0.74307  |
| 111879 | Q85601 | O60861 | -0.27215  |
| 111880 | Q85601 | Q9C0A6 | -0.22413  |
| 111881 | Q85601 | P62807 | -0.72536  |
| 111882 | Q85601 | Q15836 | -0.22371  |
| 111883 | Q85601 | Q9NQ75 | -0.47411  |
| 111884 | Q85601 | P16520 | -0.39138  |
| 111885 | Q85601 | Q8IWL2 | -1.0844   |
| 111886 | Q85601 | O94812 | -0.35173  |
| 111887 | Q85601 | Q9NZQ9 | -0.22023  |
| 111888 | Q85601 | P05496 | -0.64085  |
| 111889 | Q85601 | Q06136 | -1.292    |
| 111890 | Q85601 | Q9UNK4 | -0.85144  |
| 111891 | Q85601 | Q75T13 | -0.47756  |
| 111892 | Q85601 | P0C854 | -0.9043   |
| 111893 | Q85601 | Q8WVD5 | -0.22783  |
| 111894 | Q85601 | P04083 | -0.21355  |
| 111895 | Q85601 | Q8TD22 | -0.84774  |
| 111896 | Q85601 | Q08828 | -0.68367  |
| 111897 | Q85601 | Q9BX97 | -0.88546  |
| 111898 | Q85601 | Q15615 | -1.2621   |
| 111899 | Q85601 | Q9H223 | -0.23648  |
| 111900 | Q85601 | P34897 | -0.13054  |
| 111901 | Q85601 | Q5I0G3 | -0.54978  |
| 111902 | Q85601 | P61916 | -0.57169  |
| 111903 | Q85601 | Q9BUJ0 | -0.60146  |
| 111904 | Q85601 | O00519 | -0.73997  |
| 111905 | Q85601 | Q9Y496 | -0.35342  |
| 111906 | Q85601 | Q96R47 | -1.2621   |
| 111907 | Q85601 | Q7L1T6 | -0.48411  |
| 111908 | Q85601 | Q9H2B4 | -0.87027  |
| 111909 | Q85601 | P60880 | -0.20417  |
| 111910 | Q85601 | Q9P281 | -0.39822  |
| 111911 | Q85601 | P00738 | -0.79202  |
| 111912 | Q85601 | D3W0D1 | -0.51674  |
| 111913 | Q85601 | A6NKW6 | -0.92686  |
| 111914 | Q85601 | P01567 | -0.68676  |
| 111915 | Q85601 | Q8IUQ4 | -0.22321  |
| 111916 | Q85601 | Q13451 | -0.59179  |
| 111917 | Q85601 | O60477 | -0.74598  |
| 111918 | Q85601 | P54707 | -0.92112  |
| 111919 | Q85601 | Q8N428 | -0.59413  |
| 111920 | Q85601 | Q8NGJ9 | -1.2621   |
| 111921 | Q85601 | Q86VH4 | -0.92686  |
| 111922 | Q85601 | Q9UI47 | -0.24583  |
| 111923 | Q85601 | Q9C010 | -0.33791  |
| 111924 | Q85601 | A8MTA8 | -0.079226 |
| 111925 | Q85601 | Q5VT40 | -0.38807  |
| 111926 | Q85601 | O15353 | -0.35656  |
| 111927 | Q85601 | P01563 | -0.39598  |
| 111928 | Q85601 | O60229 | -1.0072   |
| 111929 | Q85601 | A6NFR6 | -1.236    |
| 111930 | Q85601 | O00206 | -0.22742  |
| 111931 | Q85601 | Q8ND71 | -0.18673  |
| 111932 | Q85601 | Q7L014 | -0.63182  |
| 111933 | Q85601 | O43741 | -0.78378  |
| 111934 | Q85601 | P35968 | -0.40878  |
| 111935 | Q85601 | P98088 | -1.0505   |
| 111936 | Q85601 | Q9NZU1 | -1.1795   |
| 111937 | Q85601 | A6NEQ9 | -0.2031   |
| 111938 | Q85601 | Q6ZTQ4 | -1.246    |
| 111939 | Q85601 | O95622 | -0.77234  |
| 111940 | Q85601 | Q5H8A4 | -0.9734   |
| 111941 | Q85601 | Q7Z5P9 | -0.92195  |
| 111942 | Q85601 | Q9BR10 | -0.87832  |
| 111943 | Q85601 | Q6ISS4 | -0.9043   |
| 111944 | Q85601 | Q8TDM5 | -0.72654  |
| 111945 | Q85601 | Q9NXS2 | -0.92597  |
| 111946 | Q85601 | Q9BUZ4 | -0.2273   |
| 111947 | Q85601 | P36955 | -0.86551  |
| 111948 | Q85601 | Q86X67 | -0.1022   |

|        |        |        |           |
|--------|--------|--------|-----------|
| 111949 | Q85601 | Q93038 | -1.3259   |
| 111950 | Q85601 | Q8NFJ9 | -0.17508  |
| 111951 | Q85601 | P43630 | -1.1519   |
| 111952 | Q85601 | Q96A29 | -0.59804  |
| 111953 | Q85601 | Q04741 | -0.22679  |
| 111954 | Q85601 | Q9GZV9 | -0.8605   |
| 111955 | Q85601 | Q6PCB7 | -0.59817  |
| 111956 | Q85601 | Q9H6B9 | -0.75444  |
| 111957 | Q85601 | Q96C10 | -0.22678  |
| 111958 | Q85601 | Q7Z2D5 | -1.0207   |
| 111959 | Q85601 | Q8N9S7 | -0.92686  |
| 111960 | Q85601 | C9J798 | -0.87396  |
| 111961 | Q85601 | P0C6E6 | -0.073938 |
| 111962 | Q85601 | Q8NCC3 | -0.85351  |
| 111963 | Q85601 | Q9NV29 | -0.67993  |
| 111964 | Q85601 | Q8NFU3 | -0.14634  |
| 111965 | Q85601 | Q01995 | -0.18842  |
| 111966 | Q85601 | P01019 | -0.28982  |
| 111967 | Q85601 | A2VCL2 | -0.43687  |
| 111968 | Q85601 | Q9NYW4 | -1.1404   |
| 111969 | Q85601 | Q6DN72 | -0.92728  |
| 111970 | Q85601 | P33681 | -0.38572  |
| 111971 | Q85601 | P29317 | -0.6301   |
| 111972 | Q85601 | Q8WWX8 | -0.97127  |
| 111973 | Q85601 | O75838 | -0.39878  |
| 111974 | Q85601 | Q96KQ7 | -0.22741  |
| 111975 | Q85601 | Q8N143 | -0.36078  |
| 111976 | Q85601 | O43852 | -0.22634  |
| 111977 | Q85601 | Q5VZI3 | -0.92686  |
| 111978 | Q85601 | Q7Z6Z6 | -0.44664  |
| 111979 | Q85601 | Q8WXI3 | -0.58286  |
| 111980 | Q85601 | Q9Y6R0 | -0.22694  |
| 111981 | Q85601 | Q13563 | -0.2851   |
| 111982 | Q85601 | P10092 | -0.9938   |
| 111983 | Q85601 | P27708 | -0.37917  |
| 111984 | Q85601 | P19623 | -0.20448  |
| 111985 | Q85601 | Q9BT56 | -0.34036  |
| 111986 | Q85601 | Q92858 | -0.22847  |
| 111987 | Q85601 | Q5T5A4 | -0.29267  |
| 111988 | Q85601 | P04431 | -1.046    |
| 111989 | Q85601 | Q6PJI9 | -0.2274   |
| 111990 | Q85601 | P0CG06 | -1.0219   |
| 111991 | Q85601 | P11926 | -0.17452  |
| 111992 | Q85601 | Q8NGH9 | -1.2621   |
| 111993 | Q85601 | Q96LB0 | -1.3443   |
| 111994 | Q85601 | Q5VWM3 | -0.157    |
| 111995 | Q85601 | Q5JYT7 | -0.18962  |
| 111996 | Q85601 | Q9Y653 | -1.596    |
| 111997 | Q85601 | Q86UL3 | -0.60039  |
| 111998 | Q85601 | Q9H7V2 | -0.87689  |
| 111999 | Q85601 | Q8NCC5 | -0.78488  |
| 112000 | Q85601 | Q9NR00 | -0.29993  |
| 112001 | Q85601 | Q4ZG55 | -0.92686  |
| 112002 | Q85601 | Q9UBP8 | -0.40158  |
| 112003 | Q85601 | Q8TAK6 | -0.22744  |
| 112004 | Q85601 | Q8NAC3 | -1.1708   |
| 112005 | Q85601 | Q9Y5E7 | -1.2542   |
| 112006 | Q85601 | Q8N9I0 | -0.68911  |
| 112007 | Q85601 | Q96S96 | -0.44943  |
| 112008 | Q85601 | Q4JDL3 | -0.23599  |
| 112009 | Q85601 | Q96MT0 | -1.2818   |
| 112010 | Q85601 | P42566 | -0.22747  |
| 112011 | Q85601 | Q8NER5 | -1.0655   |
| 112012 | Q85601 | Q6IA69 | -0.4617   |
| 112013 | Q85601 | Q9UBS9 | -0.96937  |
| 112014 | Q85601 | Q9HCP6 | -0.9533   |
| 112015 | Q85601 | Q96PE7 | -0.29493  |
| 112016 | Q85601 | Q14183 | -0.2486   |
| 112017 | Q85601 | Q9NQ36 | -0.96646  |
| 112018 | Q85601 | Q5SWX8 | -1.0871   |
| 112019 | Q85601 | O15033 | -0.64002  |
| 112020 | Q85601 | Q9NW81 | -0.017481 |
| 112021 | Q85601 | Q9NTM9 | -0.37441  |
| 112022 | Q85601 | Q9HB55 | -0.78004  |
| 112023 | Q85601 | Q16787 | -1.1097   |
| 112024 | Q85601 | Q96RD1 | -1.2621   |

|        |        |        |          |
|--------|--------|--------|----------|
| 112025 | Q85601 | Q96MK3 | -0.9043  |
| 112026 | Q85601 | Q96R54 | -1.2621  |
| 112027 | Q85601 | A6NND4 | -1.2621  |
| 112028 | Q85601 | Q8NCU4 | -0.20646 |
| 112029 | Q85601 | P48039 | -1.2697  |
| 112030 | Q85601 | P35219 | -0.21957 |
| 112031 | Q85601 | O75460 | -0.4273  |
| 112032 | Q85601 | Q86XJ0 | -0.92686 |
| 112033 | Q85601 | P53007 | -0.26738 |
| 112034 | Q85601 | Q8N2Q7 | -0.38382 |
| 112035 | Q85601 | Q6P575 | -0.34936 |
| 112036 | Q85601 | P40261 | -0.259   |
| 112037 | Q85601 | O14792 | -0.38232 |
| 112038 | Q85601 | Q8NGG5 | -1.2621  |
| 112039 | Q85601 | Q86T90 | -0.21005 |
| 112040 | Q85601 | Q8TAV5 | -0.9043  |
| 112041 | Q85601 | Q15390 | -0.43039 |
| 112042 | Q85601 | Q8IY22 | -0.17215 |
| 112043 | Q85601 | Q96P65 | -1.31    |
| 112044 | Q85601 | Q9NPF8 | -0.672   |
| 112045 | Q85601 | Q9H255 | -1.2621  |
| 112046 | Q85601 | Q92604 | -0.58945 |
| 112047 | Q85601 | Q9UJ96 | -0.67565 |
| 112048 | Q85601 | P05108 | -0.29997 |
| 112049 | Q85601 | Q8N8Z6 | -1.11    |
| 112050 | Q85601 | Q99624 | -0.95733 |
| 112051 | Q85601 | Q86X76 | -0.20445 |
| 112052 | Q85601 | Q86YW0 | -0.24709 |
| 112053 | Q85601 | Q9UDX5 | -0.70439 |
| 112054 | Q85601 | Q9Y3I0 | -0.49377 |
| 112055 | Q85601 | O15440 | -0.91208 |
| 112056 | Q85601 | Q8N2U9 | -0.92686 |
| 112057 | Q85601 | P0C7H9 | -0.30363 |
| 112058 | Q85601 | Q7L591 | -0.45087 |
| 112059 | Q85601 | Q9H3R1 | -0.7392  |
| 112060 | Q85601 | Q8NCE2 | -0.26617 |
| 112061 | Q85601 | Q96AP0 | -0.3187  |
| 112062 | Q85601 | Q8TBK6 | -0.32209 |
| 112063 | Q85601 | P42285 | -0.22071 |
| 112064 | Q85601 | Q96JK4 | -0.63866 |
| 112065 | Q85601 | Q9Y2B9 | -0.46812 |
| 112066 | Q85601 | P47211 | -1.2393  |
| 112067 | Q85601 | P18509 | -0.72258 |
| 112068 | Q85601 | Q8NET1 | -0.86864 |
| 112069 | Q85601 | P30464 | -1.1017  |
| 112070 | Q85601 | P31371 | -0.62711 |
| 112071 | Q85601 | O95298 | -0.29324 |
| 112072 | Q85601 | Q16653 | -1.204   |
| 112073 | Q85601 | Q8TC99 | -0.26611 |
| 112074 | Q85601 | P02654 | -0.57314 |
| 112075 | Q85601 | A8MWX3 | -0.43441 |
| 112076 | Q85601 | Q8ND30 | -0.67423 |
| 112077 | Q85601 | Q63HQ2 | -0.88531 |
| 112078 | Q85601 | Q587J7 | -0.27078 |
| 112079 | Q85601 | Q9P2E3 | -0.31263 |
| 112080 | Q85601 | Q6ZN03 | -0.88918 |
| 112081 | Q85601 | P11801 | -0.6202  |
| 112082 | Q85601 | P48201 | -0.7172  |
| 112083 | Q85601 | Q9NS61 | -0.45154 |
| 112084 | Q85601 | Q8N966 | -0.89983 |
| 112085 | Q85601 | Q6NUJ1 | -1.038   |
| 112086 | Q85601 | Q15296 | -0.55828 |
| 112087 | Q85601 | P20231 | -1.3764  |
| 112088 | Q85601 | P01860 | -1.0489  |
| 112089 | Q85601 | Q9TQE0 | -0.556   |
| 112090 | Q85601 | Q5VW22 | -0.88202 |
| 112091 | Q85601 | O00487 | -0.24068 |
| 112092 | Q85601 | Q5BKU9 | -0.24566 |
| 112093 | Q85601 | Q9HCN4 | -0.93379 |
| 112094 | Q85601 | Q8N9W5 | -0.57348 |
| 112095 | Q85601 | A6NHU5 | -0.51639 |
| 112096 | Q85601 | Q4G0G2 | -0.36446 |
| 112097 | Q85601 | Q96L94 | -0.52704 |
| 112098 | Q85601 | Q9H488 | -0.30338 |
| 112099 | Q85601 | O00574 | -1.2872  |
| 112100 | Q85601 | A8MS94 | -0.47583 |



|        |        |        |           |
|--------|--------|--------|-----------|
| 112101 | Q85601 | P10147 | -0.31031  |
| 112102 | Q85601 | Q9HCL0 | -1.332    |
| 112103 | Q85601 | P78556 | -1.0931   |
| 112104 | Q85601 | Q13614 | -0.22573  |
| 112105 | Q85601 | P16284 | -0.5112   |
| 112106 | Q85601 | Q8WUM9 | -1.1202   |
| 112107 | Q85601 | Q5TA82 | -0.31607  |
| 112108 | Q85601 | Q9Y5X2 | -0.22667  |
| 112109 | Q85601 | P10082 | -0.76042  |
| 112110 | Q85601 | Q96T55 | -1.0978   |
| 112111 | Q85601 | O76100 | -1.2621   |
| 112112 | Q85601 | Q15782 | -0.7273   |
| 112113 | Q85601 | Q16663 | -1.1683   |
| 112114 | Q85601 | Q15080 | -0.74169  |
| 112115 | Q85601 | P30711 | -0.22461  |
| 112116 | Q85601 | P01891 | -0.93461  |
| 112117 | Q85601 | P54819 | -0.60589  |
| 112118 | Q85601 | P01603 | -1.046    |
| 112119 | Q85601 | Q96Q15 | -0.70026  |
| 112120 | Q85601 | Q9UBP9 | -0.4232   |
| 112121 | Q85601 | Q8N6S5 | -0.92686  |
| 112122 | Q85601 | A4D0V7 | -0.31364  |
| 112123 | Q85601 | Q9NPA2 | -1.3758   |
| 112124 | Q85601 | Q9P0N5 | -0.68671  |
| 112125 | Q85601 | Q9Y3D6 | -0.45468  |
| 112126 | Q85601 | Q13009 | -0.61838  |
| 112127 | Q85601 | Q6PJF5 | -0.9051   |
| 112128 | Q85601 | Q6UY09 | -0.92686  |
| 112129 | Q85601 | Q8WV48 | -0.92686  |
| 112130 | Q85601 | Q93097 | -0.86342  |
| 112131 | Q85601 | P02812 | -0.7023   |
| 112132 | Q85601 | O14617 | -0.14032  |
| 112133 | Q85601 | Q9Y546 | -0.19262  |
| 112134 | Q85601 | A5D6W6 | -0.81145  |
| 112135 | Q85601 | P16435 | -1.0247   |
| 112136 | Q85601 | Q2T9F4 | -0.048902 |
| 112137 | Q85601 | Q9Y2I7 | -0.22502  |
| 112138 | Q85601 | Q5THJ4 | -0.38031  |
| 112139 | Q85601 | Q9H4Y5 | -0.24353  |
| 112140 | Q85601 | P13805 | -0.32557  |
| 112141 | Q85601 | Q8NHQ9 | -0.84068  |
| 112142 | Q85601 | O60285 | -0.33628  |
| 112143 | Q85601 | Q9NY72 | -0.60912  |
| 112144 | Q85601 | Q5JPI3 | -0.29993  |
| 112145 | Q85601 | P13671 | -0.29686  |
| 112146 | Q85601 | Q6NYC8 | -0.25585  |
| 112147 | Q85601 | P58499 | -0.84885  |
| 112148 | Q85601 | Q8IUI8 | -0.23116  |
| 112149 | Q85601 | Q8IYK8 | -1.3701   |
| 112150 | Q85601 | Q12947 | -0.42744  |
| 112151 | Q85601 | Q9Y575 | -0.58286  |
| 112152 | Q85601 | P16949 | -0.51968  |
| 112153 | Q85601 | H3BQB6 | -0.5766   |
| 112154 | Q85601 | P22362 | -1.0944   |
| 112155 | Q85601 | Q6NYC1 | -0.18893  |
| 112156 | Q85601 | Q8TDG4 | -0.35546  |
| 112157 | Q85601 | Q76MJ5 | -0.91534  |
| 112158 | Q85601 | Q6UX68 | -0.92686  |
| 112159 | Q85601 | Q9H0F7 | -0.71609  |
| 112160 | Q85601 | Q13322 | -0.22741  |
| 112161 | Q85601 | Q5T0B9 | -0.041296 |
| 112162 | Q85601 | P42858 | -0.13398  |
| 112163 | Q85601 | Q8TDU6 | -1.3443   |
| 112164 | Q85601 | P19224 | -0.88592  |
| 112165 | Q85601 | Q9C029 | -0.23488  |
| 112166 | Q85601 | P04440 | -0.70825  |
| 112167 | Q85601 | O14960 | -0.83124  |
| 112168 | Q85601 | Q9NNZ6 | -0.82375  |
| 112169 | Q85601 | Q92786 | -0.22774  |
| 112170 | Q85601 | Q9BV36 | -0.19545  |
| 112171 | Q85601 | B1AJZ9 | -0.13016  |
| 112172 | Q85601 | P11766 | -0.27741  |
| 112173 | Q85601 | Q96HH4 | -0.92686  |
| 112174 | Q85601 | Q15345 | -0.5527   |
| 112175 | Q85601 | Q9BRK5 | -0.22617  |
| 112176 | Q85601 | Q8NDH6 | -0.31405  |

|        |        |        |           |
|--------|--------|--------|-----------|
| 112177 | Q85601 | P32246 | -0.76671  |
| 112178 | Q85601 | Q6ZU45 | -0.3304   |
| 112179 | Q85601 | Q5SRN2 | -0.92686  |
| 112180 | Q85601 | Q9NSI5 | -0.52346  |
| 112181 | Q85601 | A6NNM8 | -0.33211  |
| 112182 | Q85601 | Q86SG7 | -0.83163  |
| 112183 | Q85601 | P19021 | -0.83167  |
| 112184 | Q85601 | Q9H6R0 | -0.23061  |
| 112185 | Q85601 | Q15777 | -0.2934   |
| 112186 | Q85601 | Q8NGV6 | -1.2621   |
| 112187 | Q85601 | Q8NBP5 | -0.94066  |
| 112188 | Q85601 | A8K7I4 | -1.3217   |
| 112189 | Q85601 | Q5TON1 | -0.10624  |
| 112190 | Q85601 | P08311 | -1.1456   |
| 112191 | Q85601 | Q96GA7 | -0.15163  |
| 112192 | Q85601 | Q9UEW3 | -1.061    |
| 112193 | Q85601 | Q6UXR8 | -0.2031   |
| 112194 | Q85601 | Q6ZMN7 | -0.36309  |
| 112195 | Q85601 | Q9GZN1 | -0.080154 |
| 112196 | Q85601 | P14209 | -1.1012   |
| 112197 | Q85601 | Q05940 | -0.59079  |
| 112198 | Q85601 | Q16445 | -0.80502  |
| 112199 | Q85601 | P51811 | -0.30225  |
| 112200 | Q85601 | Q4LDR2 | -0.90534  |
| 112201 | Q85601 | Q9NQV6 | -0.079016 |
| 112202 | Q85601 | A6NI47 | -0.22739  |
| 112203 | Q85601 | Q0VD67 | -1.2947   |
| 112204 | Q85601 | P0C870 | -0.13801  |
| 112205 | Q85601 | Q15413 | -0.6793   |
| 112206 | Q85601 | O14626 | -1.2881   |
| 112207 | Q85601 | P14314 | -0.611    |
| 112208 | Q85601 | Q96F44 | -0.22954  |
| 112209 | Q85601 | P51460 | -0.63679  |
| 112210 | Q85601 | Q99973 | -0.40272  |
| 112211 | Q85601 | P60201 | -0.57543  |
| 112212 | Q85601 | Q8N4S9 | -0.88567  |
| 112213 | Q85601 | Q3C1V0 | -0.92686  |
| 112214 | Q85601 | P26583 | -0.23254  |
| 112215 | Q85601 | P09564 | -1.0007   |
| 112216 | Q85601 | Q12788 | -0.23229  |
| 112217 | Q85601 | Q14699 | -0.57485  |
| 112218 | Q85601 | P12532 | -0.86282  |
| 112219 | Q85601 | Q03591 | -0.96663  |
| 112220 | Q85601 | Q14919 | -0.12886  |
| 112221 | Q85601 | Q3ZCN5 | -0.23245  |
| 112222 | Q85601 | Q6PI78 | -0.75013  |
| 112223 | Q85601 | P63128 | -0.4499   |
| 112224 | Q85601 | Q8NHG7 | -0.29381  |
| 112225 | Q85601 | Q14957 | -0.66318  |
| 112226 | Q85601 | P54219 | -0.47498  |
| 112227 | Q85601 | Q16626 | -0.4562   |
| 112228 | Q85601 | P23434 | -0.16839  |
| 112229 | Q85601 | O43237 | -0.20944  |
| 112230 | Q85601 | P29401 | -0.2244   |
| 112231 | Q85601 | Q5VW38 | -0.92686  |
| 112232 | Q85601 | Q8TB61 | -0.77197  |
| 112233 | Q85601 | Q8WXF0 | -0.50999  |
| 112234 | Q85601 | Q2I0M4 | -0.27316  |
| 112235 | Q85601 | Q9UNA3 | -0.65457  |
| 112236 | Q85601 | P29033 | -0.80427  |
| 112237 | Q85601 | Q5HYM0 | -0.27087  |
| 112238 | Q85601 | Q9Y6W8 | -1.631    |
| 112239 | Q85601 | Q75NE6 | -0.92686  |
| 112240 | Q85601 | Q9NRX6 | -0.69     |
| 112241 | Q85601 | P42574 | -0.22649  |
| 112242 | Q85601 | P22694 | -0.22629  |
| 112243 | Q85601 | Q8WY64 | -0.22742  |
| 112244 | Q85601 | O76080 | -0.2831   |
| 112245 | Q85601 | P00748 | -0.66634  |
| 112246 | Q85601 | Q8N4Q0 | -0.78632  |
| 112247 | Q85601 | C9JI98 | -0.92686  |
| 112248 | Q85601 | Q8IYW2 | -0.2031   |
| 112249 | Q85601 | Q3ZCQ2 | -0.2031   |
| 112250 | Q85601 | Q8N1N0 | -1.0004   |
| 112251 | Q85601 | O76061 | -0.7492   |
| 112252 | Q85601 | O14545 | -0.54845  |

|        |        |        |          |
|--------|--------|--------|----------|
| 112253 | Q85601 | Q9NPH0 | -0.72095 |
| 112254 | Q85601 | P34972 | -1.2432  |
| 112255 | Q85601 | O75022 | -0.64946 |
| 112256 | Q85601 | A8MVG2 | -0.92686 |
| 112257 | Q85601 | Q9BUP0 | -0.22441 |
| 112258 | Q85601 | O94898 | -0.78755 |
| 112259 | Q85601 | P30466 | -1.1017  |
| 112260 | Q85601 | Q8NBV8 | -0.80525 |
| 112261 | Q85601 | Q8IWB9 | -1.0374  |
| 112262 | Q85601 | Q6UWD8 | -0.92686 |
| 112263 | Q85601 | P53367 | -0.16701 |
| 112264 | Q85601 | Q8NA56 | -0.12873 |
| 112265 | Q85601 | Q9UIF3 | -0.1503  |
| 112266 | Q85601 | O75449 | -0.23024 |
| 112267 | Q85601 | P62805 | -0.37008 |
| 112268 | Q85601 | Q6PJE2 | -0.18472 |
| 112269 | Q85601 | P04209 | -1.046   |
| 112270 | Q85601 | Q60I27 | -0.85429 |
| 112271 | Q85601 | Q9BR01 | -0.45207 |
| 112272 | Q85601 | Q6ZN92 | -0.28102 |
| 112273 | Q85601 | Q29960 | -1.414   |
| 112274 | Q85601 | P29973 | -1.3914  |
| 112275 | Q85601 | Q16658 | -0.21491 |
| 112276 | Q85601 | Q6IQ19 | -0.23393 |
| 112277 | Q85601 | O43543 | -0.16176 |
| 112278 | Q85601 | P01721 | -1.046   |
| 112279 | Q85601 | Q86YR7 | -0.77588 |
| 112280 | Q85601 | P31327 | -0.21651 |
| 112281 | Q85601 | Q12965 | -0.12014 |
| 112282 | Q85601 | Q8TCX5 | -0.7076  |
| 112283 | Q85601 | Q5TF39 | -1.0219  |
| 112284 | Q85601 | Q8N9M5 | -1.0685  |
| 112285 | Q85601 | Q8WWQ2 | -0.99245 |
| 112286 | Q85601 | Q8IW52 | -1.0205  |
| 112287 | Q85601 | P16109 | -0.22741 |
| 112288 | Q85601 | Q96EC8 | -0.89384 |
| 112289 | Q85601 | Q5TA50 | -0.30556 |
| 112290 | Q85601 | Q8WWG9 | -0.98219 |
| 112291 | Q85601 | Q8NGN4 | -1.2621  |
| 112292 | Q85601 | P58400 | -0.61093 |
| 112293 | Q85601 | Q8IX06 | -0.11845 |
| 112294 | Q85601 | Q5GH70 | -0.92686 |
| 112295 | Q85601 | C9JFL3 | -0.2031  |
| 112296 | Q85601 | P27824 | -0.26984 |
| 112297 | Q85601 | Q9Y5J1 | -0.22741 |
| 112298 | Q85601 | P01768 | -1.046   |
| 112299 | Q85601 | Q08116 | -0.66692 |
| 112300 | Q85601 | Q9Y5G1 | -1.246   |
| 112301 | Q85601 | P68106 | -0.23114 |
| 112302 | Q85601 | Q96DZ9 | -0.95476 |
| 112303 | Q85601 | Q92619 | -0.99983 |
| 112304 | Q85601 | Q14950 | -0.22638 |
| 112305 | Q85601 | Q9UMF0 | -1.2621  |
| 112306 | Q85601 | P23469 | -0.23186 |
| 112307 | Q85601 | Q99523 | -0.27665 |
| 112308 | Q85601 | Q5VYP0 | -0.92686 |
| 112309 | Q85601 | O43272 | -0.54179 |
| 112310 | Q85601 | Q8NDZ4 | -1.3921  |
| 112311 | Q85601 | O43861 | -0.80881 |
| 112312 | Q85601 | Q8N655 | -0.2031  |
| 112313 | Q85601 | P51451 | -1.2717  |
| 112314 | Q85601 | Q9UJH8 | -1.0608  |
| 112315 | Q85601 | Q7RTS3 | -0.229   |
| 112316 | Q85601 | Q03013 | -0.32028 |
| 112317 | Q85601 | P07858 | -0.27059 |
| 112318 | Q85601 | Q9BUA6 | -0.23084 |
| 112319 | Q85601 | Q96BH3 | -0.9077  |
| 112320 | Q85601 | Q6UX52 | -0.9043  |
| 112321 | Q85601 | P49662 | -0.86244 |
| 112322 | Q85601 | Q9NV39 | -0.12739 |
| 112323 | Q85601 | Q13885 | -0.42986 |
| 112324 | Q85601 | Q8N6G5 | -0.43199 |
| 112325 | Q85601 | Q2NKQ1 | -0.8331  |
| 112326 | Q85601 | Q05215 | -0.21314 |
| 112327 | Q85601 | Q6P444 | -0.15096 |
| 112328 | Q85601 | O60566 | -0.2274  |

|        |        |        |           |
|--------|--------|--------|-----------|
| 112329 | Q85601 | Q7Z3T8 | -0.13291  |
| 112330 | Q85601 | Q9BU70 | -0.46096  |
| 112331 | Q85601 | Q86TN4 | -0.42381  |
| 112332 | Q85601 | P07951 | -0.20737  |
| 112333 | Q85601 | O95873 | -0.092462 |
| 112334 | Q85601 | P06727 | -0.48389  |
| 112335 | Q85601 | Q13882 | -0.63705  |
| 112336 | Q85601 | P53667 | -0.22741  |
| 112337 | Q85601 | Q86SG4 | -0.88179  |
| 112338 | Q85601 | Q86SG3 | -0.73413  |
| 112339 | Q85601 | Q96JH7 | -0.34485  |
| 112340 | Q85601 | E9PJI5 | -0.15235  |
| 112341 | Q85601 | Q9Y4G6 | -0.22783  |
| 112342 | Q85601 | Q96LD4 | -0.22726  |
| 112343 | Q85601 | Q93079 | -0.7417   |
| 112344 | Q85601 | P51843 | -0.22729  |
| 112345 | Q85601 | Q92527 | -0.22738  |
| 112346 | Q85601 | Q8NAF0 | -0.17356  |
| 112347 | Q85601 | P53985 | -0.56048  |
| 112348 | Q85601 | O15537 | -1.0172   |
| 112349 | Q85601 | A8MUM7 | -0.29801  |
| 112350 | Q85601 | Q9HD43 | -0.22742  |
| 112351 | Q85601 | Q5BKY9 | -0.092462 |
| 112352 | Q85601 | Q14213 | -0.93458  |
| 112353 | Q85601 | Q8NHV5 | -0.65998  |
| 112354 | Q85601 | P20810 | -0.40931  |
| 112355 | Q85601 | Q6ZVZ8 | -0.58286  |
| 112356 | Q85601 | A4D2G3 | -1.2621   |
| 112357 | Q85601 | Q96I23 | -0.59227  |
| 112358 | Q85601 | Q3SXR2 | -0.41964  |
| 112359 | Q85601 | P23470 | -1.2416   |
| 112360 | Q85601 | Q9H427 | -0.98396  |
| 112361 | Q85601 | Q96AD5 | -0.67037  |
| 112362 | Q85601 | A6NCF6 | -0.13449  |
| 112363 | Q85601 | Q8TCU4 | -0.13878  |
| 112364 | Q85601 | P35520 | -0.22721  |
| 112365 | Q85601 | Q9NX76 | -0.95476  |
| 112366 | Q85601 | Q15646 | -0.21779  |
| 112367 | Q85601 | A6NFN9 | -0.22736  |
| 112368 | Q85601 | P57678 | -1.0528   |
| 112369 | Q85601 | Q6ZN18 | -0.44895  |
| 112370 | Q85601 | Q13480 | -0.22735  |
| 112371 | Q85601 | P13725 | -0.52201  |
| 112372 | Q85601 | P47870 | -0.64656  |
| 112373 | Q85601 | Q5JSQ8 | -0.11172  |
| 112374 | Q85601 | Q6ICG7 | -0.2031   |
| 112375 | Q85601 | P49815 | -0.21569  |
| 112376 | Q85601 | P50895 | -1.2824   |
| 112377 | Q85601 | O95972 | -0.75471  |
| 112378 | Q85601 | Q8TCX1 | -0.14833  |
| 112379 | Q85601 | Q96CP2 | -0.24528  |
| 112380 | Q85601 | Q08043 | -0.47051  |
| 112381 | Q85601 | Q4VC39 | -0.92686  |
| 112382 | Q85601 | O94886 | -1.4606   |
| 112383 | Q85601 | Q8N165 | -0.96839  |
| 112384 | Q85601 | O15013 | -0.27619  |
| 112385 | Q85601 | Q92930 | -0.68332  |
| 112386 | Q85601 | P08949 | -0.82075  |
| 112387 | Q85601 | Q14108 | -1.285    |
| 112388 | Q85601 | Q5TBA9 | -0.43251  |
| 112389 | Q85601 | P51686 | -1.3328   |
| 112390 | Q85601 | Q96PS6 | -0.92686  |
| 112391 | Q85601 | Q9H0V1 | -0.90533  |
| 112392 | Q85601 | P0CG38 | -0.32575  |
| 112393 | Q85601 | Q96D59 | -0.89088  |
| 112394 | Q85601 | Q03135 | -0.22698  |
| 112395 | Q85601 | Q01974 | -1.3084   |
| 112396 | Q85601 | P41595 | -0.46809  |
| 112397 | Q85601 | Q6ZR85 | -0.2031   |
| 112398 | Q85601 | P63096 | -0.32261  |
| 112399 | Q85601 | Q96DR8 | -1.0134   |
| 112400 | Q85601 | Q8NEV8 | -0.32057  |
| 112401 | Q85601 | P29536 | -0.21476  |
| 112402 | Q85601 | P55286 | -1.2212   |
| 112403 | Q85601 | Q9UL19 | -0.40508  |
| 112404 | Q85601 | Q6P1M0 | -1.1053   |

|        |        |        |           |
|--------|--------|--------|-----------|
| 112405 | Q85601 | O95221 | -1.2621   |
| 112406 | Q85601 | P61165 | -0.92686  |
| 112407 | Q85601 | P06318 | -1.046    |
| 112408 | Q85601 | P59025 | -0.95544  |
| 112409 | Q85601 | Q86UN3 | -0.56714  |
| 112410 | Q85601 | Q9H244 | -0.86783  |
| 112411 | Q85601 | P43220 | -0.67224  |
| 112412 | Q85601 | Q9H4W6 | -0.097457 |
| 112413 | Q85601 | P20827 | -0.48667  |
| 112414 | Q85601 | O43252 | -0.76489  |
| 112415 | Q85601 | Q96F05 | -0.92686  |
| 112416 | Q85601 | Q96MX6 | -0.31507  |
| 112417 | Q85601 | P16278 | -0.3393   |
| 112418 | Q85601 | P49888 | -0.2662   |
| 112419 | Q85601 | Q9UHP3 | -0.33531  |
| 112420 | Q85601 | Q9UKY4 | -0.96168  |
| 112421 | Q85601 | Q96NA8 | -0.82092  |
| 112422 | Q85601 | Q9Y580 | -0.86324  |
| 112423 | Q85601 | Q56UQ5 | -0.084593 |
| 112424 | Q85601 | P40937 | -0.18412  |
| 112425 | Q85601 | Q12926 | -0.31241  |
| 112426 | Q85601 | Q502W7 | -0.49581  |
| 112427 | Q85601 | O43143 | -0.45791  |
| 112428 | Q85601 | Q14692 | -0.38539  |
| 112429 | Q85601 | Q9H1U9 | -0.69716  |
| 112430 | Q85601 | P24298 | -0.2093   |
| 112431 | Q85601 | P0C7V9 | -0.30175  |
| 112432 | Q85601 | Q92817 | -0.21477  |
| 112433 | Q85601 | P51957 | -0.40054  |
| 112434 | Q85601 | Q8WZ04 | -0.44689  |
| 112435 | Q85601 | O95139 | -0.68215  |
| 112436 | Q85601 | P58401 | -1.11     |
| 112437 | Q85601 | Q7Z4S9 | -0.22737  |
| 112438 | Q85601 | Q9P0K8 | -0.43379  |
| 112439 | Q85601 | Q9Y4E6 | -0.22746  |
| 112440 | Q85601 | Q8WV83 | -0.86355  |
| 112441 | Q85601 | Q9UKW4 | -0.24785  |
| 112442 | Q85601 | Q8N8I6 | -0.2031   |
| 112443 | Q85601 | Q9Y2E6 | -0.2159   |
| 112444 | Q85601 | Q8WXX5 | -0.43428  |
| 112445 | Q85601 | Q8IZJ0 | -0.91335  |
| 112446 | Q85601 | Q01959 | -0.35592  |
| 112447 | Q85601 | A2VDJ0 | -0.92686  |
| 112448 | Q85601 | Q96FN5 | -0.52038  |
| 112449 | Q85601 | Q9UBD6 | -0.75803  |
| 112450 | Q85601 | Q9HA92 | -0.33314  |
| 112451 | Q85601 | Q01968 | -0.33432  |
| 112452 | Q85601 | O15243 | -0.58613  |
| 112453 | Q85601 | Q8N944 | -0.69192  |
| 112454 | Q85601 | P01609 | -1.046    |
| 112455 | Q85601 | Q9Y6S9 | -0.94315  |
| 112456 | Q85601 | Q8N8D7 | -1.0386   |
| 112457 | Q85601 | Q14CN2 | -1.4294   |
| 112458 | Q85601 | Q6ZMW3 | -0.22759  |
| 112459 | Q85601 | Q8N5I9 | -0.092462 |
| 112460 | Q85601 | P07108 | -0.26968  |
| 112461 | Q85601 | O43491 | -0.29714  |
| 112462 | Q85601 | Q9UBA6 | -0.3461   |
| 112463 | Q85601 | Q13434 | -0.40065  |
| 112464 | Q85601 | Q96AB6 | -0.20605  |
| 112465 | Q85601 | Q8N2I9 | -0.22742  |
| 112466 | Q85601 | P30411 | -0.64052  |
| 112467 | Q85601 | P11498 | -0.5294   |
| 112468 | Q85601 | Q969X5 | -0.063064 |
| 112469 | Q85601 | Q9NX04 | -0.055529 |
| 112470 | Q85601 | Q8WZ42 | -0.32757  |
| 112471 | Q85601 | Q96J86 | -0.78714  |
| 112472 | Q85601 | P29322 | -1.2294   |
| 112473 | Q85601 | O60542 | -0.79923  |
| 112474 | Q85601 | Q9NSV4 | -0.22009  |
| 112475 | Q85601 | Q8WXJ9 | -0.58286  |
| 112476 | Q85601 | P60985 | -1.309    |
| 112477 | Q85601 | P56915 | -0.13965  |
| 112478 | Q85601 | Q14147 | -0.98325  |
| 112479 | Q85601 | P04439 | -1.1574   |
| 112480 | Q85601 | Q68CQ7 | -0.77427  |

|        |        |        |           |
|--------|--------|--------|-----------|
| 112481 | Q85601 | A6PVC2 | -0.29892  |
| 112482 | Q85601 | Q86UG4 | -0.9468   |
| 112483 | Q85601 | O95460 | -0.37475  |
| 112484 | Q85601 | Q8WUY1 | -0.98425  |
| 112485 | Q85601 | P20783 | -0.57503  |
| 112486 | Q85601 | Q8N9X5 | -0.92686  |
| 112487 | Q85601 | Q14990 | -0.56025  |
| 112488 | Q85601 | Q8NDY8 | -0.92686  |
| 112489 | Q85601 | Q6DJT9 | -0.095043 |
| 112490 | Q85601 | O75936 | -0.52566  |
| 112491 | Q85601 | P0DJI8 | -0.60991  |
| 112492 | Q85601 | Q5VTE6 | -0.015557 |
| 112493 | Q85601 | Q9NPA0 | -0.61265  |
| 112494 | Q85601 | P40313 | -0.94716  |
| 112495 | Q85601 | Q9UK80 | -0.43023  |
| 112496 | Q85601 | Q8NFU1 | -0.78669  |
| 112497 | Q85601 | Q6UWW9 | -0.92686  |
| 112498 | Q85601 | P14598 | -0.36555  |
| 112499 | Q85601 | P02751 | -0.40267  |
| 112500 | Q85601 | Q8NEB9 | -0.49419  |
| 112501 | Q85601 | A6NJ78 | -0.30175  |
| 112502 | Q85601 | P09466 | -0.98407  |
| 112503 | Q85601 | Q8IZP9 | -1.3191   |
| 112504 | Q85601 | P48547 | -0.84367  |
| 112505 | Q85601 | Q9UIG8 | -1.027    |
| 112506 | Q85601 | P48506 | -0.31144  |
| 112507 | Q85601 | Q9Y2V7 | -0.10002  |
| 112508 | Q85601 | P01719 | -1.046    |
| 112509 | Q85601 | Q9BXU2 | -0.12951  |
| 112510 | Q85601 | Q6IE37 | -0.83462  |
| 112511 | Q85601 | Q96BT1 | -1.2425   |
| 112512 | Q85601 | O43474 | -0.22354  |
| 112513 | Q85601 | P60606 | -0.90534  |
| 112514 | Q85601 | Q075Z2 | -0.9077   |
| 112515 | Q85601 | Q6PIW4 | -0.33098  |
| 112516 | Q85601 | Q8TBY9 | -0.39878  |
| 112517 | Q85601 | Q9H920 | -0.89088  |
| 112518 | Q85601 | Q9NRY4 | -0.28625  |
| 112519 | Q85601 | Q8NAJ2 | -0.057001 |
| 112520 | Q85601 | P36269 | -0.89083  |
| 112521 | Q85601 | Q8N4P2 | -0.44012  |
| 112522 | Q85601 | Q9NV12 | -0.92686  |
| 112523 | Q85601 | Q8WYQ9 | -0.46557  |
| 112524 | Q85601 | P49590 | -0.15987  |
| 112525 | Q85601 | P16444 | -0.47393  |
| 112526 | Q85601 | P40126 | -0.54783  |
| 112527 | Q85601 | P32249 | -1.2601   |
| 112528 | Q85601 | Q9NPI7 | -0.48151  |
| 112529 | Q85601 | Q96M43 | -0.1723   |
| 112530 | Q85601 | O95263 | -0.22749  |
| 112531 | Q85601 | Q8N142 | -0.56845  |
| 112532 | Q85601 | Q8N1Q1 | -0.22218  |
| 112533 | Q85601 | Q6IF82 | -1.2621   |
| 112534 | Q85601 | P25067 | -1.1225   |
| 112535 | Q85601 | Q9GZU0 | -0.52772  |
| 112536 | Q85601 | Q5JVL4 | -0.42289  |
| 112537 | Q85601 | Q07890 | -0.27053  |
| 112538 | Q85601 | Q86SH2 | -0.61903  |
| 112539 | Q85601 | O75469 | -0.25263  |
| 112540 | Q85601 | Q4W4Y0 | -0.78686  |
| 112541 | Q85601 | O76071 | -0.22774  |
| 112542 | Q85601 | P49840 | -0.22769  |
| 112543 | Q85601 | Q8N9U9 | -0.4524   |
| 112544 | Q85601 | Q92737 | -0.84772  |
| 112545 | Q85601 | Q8NCQ5 | -0.35197  |
| 112546 | Q85601 | Q5BVD1 | -1.0116   |
| 112547 | Q85601 | O60469 | -0.9885   |
| 112548 | Q85601 | Q9NVH2 | -0.33349  |
| 112549 | Q85601 | Q56UN5 | -1.2086   |
| 112550 | Q85601 | Q96S66 | -0.37637  |
| 112551 | Q85601 | A6NDB9 | -0.38734  |
| 112552 | Q85601 | Q8N4W6 | -1.0002   |
| 112553 | Q85601 | Q8TBM7 | -0.92686  |
| 112554 | Q85601 | Q5T2Q4 | -0.344    |
| 112555 | Q85601 | Q15878 | -0.81936  |
| 112556 | Q85601 | Q6P1A2 | -0.75152  |

|        |        |        |           |
|--------|--------|--------|-----------|
| 112557 | Q85601 | Q8IWD4 | -0.092462 |
| 112558 | Q85601 | Q96KE9 | -0.22259  |
| 112559 | Q85601 | Q9BXW6 | -0.22741  |
| 112560 | Q85601 | Q96BS2 | -0.22753  |
| 112561 | Q85601 | Q9H0R4 | -0.35343  |
| 112562 | Q85601 | Q12974 | -0.65935  |
| 112563 | Q85601 | C9JLJ4 | -0.66238  |
| 112564 | Q85601 | Q6ZST2 | -0.32209  |
| 112565 | Q85601 | P58872 | -1.3166   |
| 112566 | Q85601 | P41226 | -0.53372  |
| 112567 | Q85601 | Q96BI1 | -0.77367  |
| 112568 | Q85601 | P01185 | -0.42882  |
| 112569 | Q85601 | P16152 | -0.76264  |
| 112570 | Q85601 | Q9H649 | -0.30175  |
| 112571 | Q85601 | Q3B7J2 | -1.5705   |
| 112572 | Q85601 | Q7L4P6 | -0.2023   |
| 112573 | Q85601 | P51679 | -1.3221   |
| 112574 | Q85601 | Q13467 | -0.37874  |
| 112575 | Q85601 | P55084 | -0.19827  |
| 112576 | Q85601 | Q8N145 | -0.72557  |
| 112577 | Q85601 | Q969G6 | -0.35689  |
| 112578 | Q85601 | P09630 | -0.22667  |
| 112579 | Q85601 | P43361 | -0.18472  |
| 112580 | Q85601 | Q5VVP1 | -0.92686  |
| 112581 | Q85601 | Q8N4T0 | -1.1802   |
| 112582 | Q85601 | Q96AT9 | -0.20234  |
| 112583 | Q85601 | Q9ULK6 | -0.89088  |
| 112584 | Q85601 | Q5T764 | -0.44032  |
| 112585 | Q85601 | O15427 | -0.72035  |
| 112586 | Q85601 | Q8N9L7 | -0.26129  |
| 112587 | Q85601 | P78325 | -0.4146   |
| 112588 | Q85601 | Q9BX69 | -0.56729  |
| 112589 | Q85601 | P31270 | -0.22705  |
| 112590 | Q85601 | Q4ADV7 | -0.92686  |
| 112591 | Q85601 | O75747 | -0.73531  |
| 112592 | Q85601 | Q9H0I2 | -0.59048  |
| 112593 | Q85601 | Q96MT7 | -0.22739  |
| 112594 | Q85601 | Q8NEG5 | -0.2798   |
| 112595 | Q85601 | Q15406 | -0.29078  |
| 112596 | Q85601 | Q92521 | -0.87496  |
| 112597 | Q85601 | O75698 | -0.2031   |
| 112598 | Q85601 | Q9Y5I3 | -1.7314   |
| 112599 | Q85601 | Q01581 | -0.20563  |
| 112600 | Q85601 | A6NMC2 | -0.157    |
| 112601 | Q85601 | Q9H2D1 | -0.50234  |
| 112602 | Q85601 | P03915 | -0.5954   |
| 112603 | Q85601 | O75293 | -0.30928  |
| 112604 | Q85601 | A6NN06 | -0.2031   |
| 112605 | Q85601 | Q8IY50 | -0.86355  |
| 112606 | Q85601 | P46059 | -0.8633   |
| 112607 | Q85601 | Q8N0X2 | -0.22839  |
| 112608 | Q85601 | Q15109 | -0.90774  |
| 112609 | Q85601 | Q5TZF3 | -0.22741  |
| 112610 | Q85601 | Q9Y5Y4 | -1.3247   |
| 112611 | Q85601 | Q96DX7 | -0.2372   |
| 112612 | Q85601 | Q96RI1 | -0.23046  |
| 112613 | Q85601 | Q99447 | -0.40614  |
| 112614 | Q85601 | Q9BY76 | -0.47041  |
| 112615 | Q85601 | Q9UHK6 | -0.5043   |
| 112616 | Q85601 | Q9H3S7 | -0.232    |
| 112617 | Q85601 | O00483 | -0.14048  |
| 112618 | Q85601 | Q9H425 | -0.21596  |
| 112619 | Q85601 | P35858 | -0.70468  |
| 112620 | Q85601 | Q6P158 | -0.78298  |
| 112621 | Q85601 | P30838 | -0.27909  |
| 112622 | Q85601 | Q15828 | -0.8971   |
| 112623 | Q85601 | Q8WU10 | -0.57159  |
| 112624 | Q85601 | Q6UXU0 | -0.9043   |
| 112625 | Q85601 | Q6TDP4 | -0.63067  |
| 112626 | Q85601 | P56589 | -0.22235  |
| 112627 | Q85601 | P68371 | -0.15706  |
| 112628 | Q85601 | P49802 | -0.3438   |
| 112629 | Q85601 | Q96BX8 | -0.60978  |
| 112630 | Q85601 | Q14681 | -0.096043 |
| 112631 | Q85601 | Q9NPB1 | -0.49702  |
| 112632 | Q85601 | P01233 | -0.80643  |

|        |        |        |           |
|--------|--------|--------|-----------|
| 112633 | Q85601 | O95070 | -0.22009  |
| 112634 | Q85601 | Q96RM1 | -0.2031   |
| 112635 | Q85601 | Q9H1J5 | -0.57998  |
| 112636 | Q85601 | A6NI61 | -0.92686  |
| 112637 | Q85601 | Q9NZ45 | -0.80801  |
| 112638 | Q85601 | P00995 | -0.26351  |
| 112639 | Q85601 | O95897 | -0.9043   |
| 112640 | Q85601 | Q9BWV2 | -1.2433   |
| 112641 | Q85601 | Q96B49 | -0.11939  |
| 112642 | Q85601 | P62955 | -0.89141  |
| 112643 | Q85601 | O15118 | -0.65516  |
| 112644 | Q85601 | P17787 | -0.47059  |
| 112645 | Q85601 | Q8NI38 | -0.2274   |
| 112646 | Q85601 | P09238 | -1.2392   |
| 112647 | Q85601 | Q8IYG6 | -0.11379  |
| 112648 | Q85601 | P35612 | -0.3135   |
| 112649 | Q85601 | Q9NWF4 | -1.042    |
| 112650 | Q85601 | Q9ULH1 | -0.40873  |
| 112651 | Q85601 | Q8WW18 | -0.092462 |
| 112652 | Q85601 | Q9NZV1 | -1.1829   |
| 112653 | Q85601 | Q9H336 | -0.9043   |
| 112654 | Q85601 | Q9UNT1 | -1.1265   |
| 112655 | Q85601 | Q14697 | -0.20589  |
| 112656 | Q85601 | Q53GT1 | -0.19655  |
| 112657 | Q85601 | Q8TEW6 | -0.34176  |
| 112658 | Q85601 | Q30KQ6 | -0.86864  |
| 112659 | Q85601 | Q8WWW8 | -0.44245  |
| 112660 | Q85601 | Q15492 | -0.22955  |
| 112661 | Q85601 | P01619 | -1.0219   |
| 112662 | Q85601 | P15056 | -0.32918  |
| 112663 | Q85601 | Q6UW49 | -0.54292  |
| 112664 | Q85601 | Q8N3T6 | -0.67993  |
| 112665 | Q85601 | Q9P2K9 | -0.61984  |
| 112666 | Q85601 | Q08AH1 | -0.84195  |
| 112667 | Q85601 | A8MWA6 | -0.32255  |
| 112668 | Q85601 | Q6ZRX8 | -0.41551  |
| 112669 | Q85601 | Q8NDX5 | -0.35245  |
| 112670 | Q85601 | P0C7U3 | -0.89983  |
| 112671 | Q85601 | Q9BST9 | -0.65313  |
| 112672 | Q85601 | P17612 | -0.2258   |
| 112673 | Q85601 | Q6ZTA4 | -0.33818  |
| 112674 | Q85601 | Q8NBJ4 | -0.30961  |
| 112675 | Q85601 | Q9P0V8 | -0.93654  |
| 112676 | Q85601 | Q7Z6W7 | -0.44461  |
| 112677 | Q85601 | A6NGY5 | -1.2621   |
| 112678 | Q85601 | Q8IXX5 | -0.92686  |
| 112679 | Q85601 | A0PJK1 | -0.98144  |
| 112680 | Q85601 | Q32ZL2 | -0.98181  |
| 112681 | Q85601 | Q13070 | -0.67238  |
| 112682 | Q85601 | A6NM03 | -1.2621   |
| 112683 | Q85601 | Q49A17 | -0.7187   |
| 112684 | Q85601 | Q14562 | -0.20103  |
| 112685 | Q85601 | Q5W0Z9 | -0.89983  |
| 112686 | Q85601 | P24855 | -0.52782  |
| 112687 | Q85601 | Q01726 | -0.6285   |
| 112688 | Q85601 | P00387 | -0.33044  |
| 112689 | Q85601 | Q9UBH6 | -1.1895   |
| 112690 | Q85601 | Q8N3G9 | -0.69     |
| 112691 | Q85601 | Q9H4I8 | -0.22702  |
| 112692 | Q85601 | Q12996 | -0.072688 |
| 112693 | Q85601 | P15586 | -0.24489  |
| 112694 | Q85601 | P0DKV0 | -0.4224   |
| 112695 | Q85601 | Q7Z5L3 | -1.0324   |
| 112696 | Q85601 | Q96IQ9 | -0.22732  |
| 112697 | Q85601 | Q9Y572 | -0.22741  |
| 112698 | Q85601 | O14524 | -0.78714  |
| 112699 | Q85601 | Q08426 | -0.35032  |
| 112700 | Q85601 | O95279 | -1.0649   |
| 112701 | Q85601 | Q9H0I9 | -0.3263   |
| 112702 | Q85601 | Q71RG6 | -0.9043   |
| 112703 | Q85601 | Q8TDW4 | -0.9006   |
| 112704 | Q85601 | Q9Y236 | -0.85253  |
| 112705 | Q85601 | Q86XX4 | -1.157    |
| 112706 | Q85601 | H3BR10 | -0.2031   |
| 112707 | Q85601 | Q9UL52 | -1.9449   |
| 112708 | Q85601 | Q5FWE3 | -0.92686  |



|        |        |        |           |
|--------|--------|--------|-----------|
| 112709 | Q85601 | Q9NQ25 | -1.0605   |
| 112710 | Q85601 | P0C617 | -1.2621   |
| 112711 | Q85601 | Q92794 | -0.38037  |
| 112712 | Q85601 | Q9BUY7 | -0.39878  |
| 112713 | Q85601 | Q8NGI6 | -1.2621   |
| 112714 | Q85601 | Q92903 | -0.84402  |
| 112715 | Q85601 | P07316 | -0.10457  |
| 112716 | Q85601 | Q9Y4B4 | -0.42904  |
| 112717 | Q85601 | P30566 | -0.089217 |
| 112718 | Q85601 | Q8WTY6 | -0.78272  |
| 112719 | Q85601 | Q8IZS5 | -0.42243  |
| 112720 | Q85601 | P41231 | -0.80839  |
| 112721 | Q85601 | Q96N64 | -0.21709  |
| 112722 | Q85601 | Q5VWQ8 | -0.22994  |
| 112723 | Q85601 | A8MZG2 | -0.092462 |
| 112724 | Q85601 | Q12849 | -0.50736  |
| 112725 | Q85601 | Q9NW64 | -0.51514  |
| 112726 | Q85601 | Q9NWD8 | -0.92686  |
| 112727 | Q85601 | A6NNT2 | -0.16461  |
| 112728 | Q85601 | O14717 | -0.14758  |
| 112729 | Q85601 | Q9NR12 | -0.38002  |
| 112730 | Q85601 | Q15620 | -1.2621   |
| 112731 | Q85601 | Q6UXD5 | -1.1196   |
| 112732 | Q85601 | Q96K76 | -0.45531  |
| 112733 | Q85601 | Q9P0N8 | -1.0572   |
| 112734 | Q85601 | P56192 | -0.14884  |
| 112735 | Q85601 | A6NLC5 | -0.72766  |
| 112736 | Q85601 | Q7Z698 | -0.20723  |
| 112737 | Q85601 | O75956 | -0.11587  |
| 112738 | Q85601 | Q9H0Q3 | -0.93866  |
| 112739 | Q85601 | Q6PIU1 | -0.89501  |
| 112740 | Q85601 | Q6ZV70 | -0.50749  |
| 112741 | Q85601 | P48060 | -1.3684   |
| 112742 | Q85601 | O95352 | -0.20083  |
| 112743 | Q85601 | Q8WXD2 | -0.67263  |
| 112744 | Q85601 | Q569G3 | -0.092462 |
| 112745 | Q85601 | Q8WV35 | -0.20205  |
| 112746 | Q85601 | Q5VV67 | -0.22697  |
| 112747 | Q85601 | P18031 | -0.27284  |
| 112748 | Q85601 | P28067 | -0.73858  |
| 112749 | Q85601 | Q9BXW3 | -0.2031   |
| 112750 | Q85601 | P0CG05 | -1.0219   |
| 112751 | Q85601 | A8MQT2 | -0.29141  |
| 112752 | Q85601 | P15260 | -1.1206   |
| 112753 | Q85601 | A6NMZ7 | -1.2159   |
| 112754 | Q85601 | Q8WXH5 | -0.5626   |
| 112755 | Q85601 | Q96FW1 | -0.50659  |
| 112756 | Q85601 | Q8IUX7 | -0.40816  |
| 112757 | Q85601 | B4DS77 | -0.96488  |
| 112758 | Q85601 | Q8IWF2 | -0.22931  |
| 112759 | Q85601 | O43854 | -1.2712   |
| 112760 | Q85601 | Q8N434 | -0.82336  |
| 112761 | Q85601 | P48736 | -0.41309  |
| 112762 | Q85601 | Q9NZC3 | -0.59207  |
| 112763 | Q85601 | P30487 | -1.1017   |
| 112764 | Q85601 | Q92485 | -0.89471  |
| 112765 | Q85601 | P10600 | -0.22741  |
| 112766 | Q85601 | P59826 | -0.90615  |
| 112767 | Q85601 | P08183 | -0.4724   |
| 112768 | Q85601 | Q9H0D6 | -0.15164  |
| 112769 | Q85601 | Q02747 | -0.97687  |
| 112770 | Q85601 | Q9UI14 | -0.12286  |
| 112771 | Q85601 | Q9P0I2 | -0.66601  |
| 112772 | Q85601 | Q6UW60 | -1.1519   |
| 112773 | Q85601 | P59665 | -0.97892  |
| 112774 | Q85601 | Q9UPS8 | -0.22738  |
| 112775 | Q85601 | P0C7Q2 | -0.95723  |
| 112776 | Q85601 | Q86TM6 | -0.23021  |
| 112777 | Q85601 | Q9P2X0 | -0.81353  |
| 112778 | Q85601 | Q8NGE1 | -1.2621   |
| 112779 | Q85601 | Q969Q1 | -0.39004  |
| 112780 | Q85601 | Q8NHR9 | -0.071636 |
| 112781 | Q85601 | P59539 | -1.2301   |
| 112782 | Q85601 | Q96QS3 | -0.14135  |
| 112783 | Q85601 | Q9H0D2 | -0.22395  |
| 112784 | Q85601 | Q6ZMJ4 | -0.74823  |

|        |        |        |          |
|--------|--------|--------|----------|
| 112785 | Q85601 | P42229 | -0.22642 |
| 112786 | Q85601 | Q8N129 | -1.0044  |
| 112787 | Q85601 | Q96EE4 | -0.9043  |
| 112788 | Q85601 | Q6ZQY2 | -0.22731 |
| 112789 | Q85601 | Q6ZVW7 | -0.23377 |
| 112790 | Q85601 | Q68DD2 | -0.3016  |
| 112791 | Q85601 | Q8TBC3 | -0.199   |
| 112792 | Q85601 | Q9BZC7 | -1.0225  |
| 112793 | Q85601 | Q969R2 | -0.84879 |
| 112794 | Q85601 | Q17RP2 | -0.12008 |
| 112795 | Q85601 | P20336 | -0.3696  |
| 112796 | Q85601 | P15313 | -0.29471 |
| 112797 | Q85601 | Q9UKY3 | -0.83121 |
| 112798 | Q85601 | Q9Y5X4 | -0.24659 |
| 112799 | Q85601 | Q5H9J9 | -0.55774 |
| 112800 | Q85601 | Q8N3Y7 | -1.4461  |
| 112801 | Q85601 | A6NHL2 | -0.48383 |
| 112802 | Q85601 | Q9H165 | -0.22675 |
| 112803 | Q85601 | Q95727 | -0.98822 |
| 112804 | Q85601 | Q6UX07 | -1.5893  |
| 112805 | Q85601 | Q96NK8 | -0.22759 |
| 112806 | Q85601 | P09211 | -0.22445 |
| 112807 | Q85601 | A2RRL7 | -0.92686 |
| 112808 | Q85601 | Q9H6I2 | -0.14745 |
| 112809 | Q85601 | Q9NZ08 | -0.55783 |
| 112810 | Q85601 | O43759 | -0.69203 |
| 112811 | Q85601 | P40879 | -0.58689 |
| 112812 | Q85601 | Q86YW7 | -0.88182 |
| 112813 | Q85601 | Q9UHP6 | -0.20046 |
| 112814 | Q85601 | P24593 | -0.40413 |
| 112815 | Q85601 | O15156 | -0.20976 |
| 112816 | Q85601 | P25106 | -1.1043  |
| 112817 | Q85601 | Q8N136 | -0.52255 |
| 112818 | Q85601 | Q86Y33 | -0.22741 |
| 112819 | Q85601 | Q5XPI4 | -0.22741 |
| 112820 | Q85601 | Q9Y508 | -0.95073 |
| 112821 | Q85601 | Q02750 | -0.2276  |
| 112822 | Q85601 | Q9Y336 | -1.2648  |
| 112823 | Q85601 | O15409 | -0.43379 |
| 112824 | Q85601 | Q99719 | -0.22575 |
| 112825 | Q85601 | Q9Y584 | -0.46087 |
| 112826 | Q85601 | Q6ZN44 | -1.106   |
| 112827 | Q85601 | Q6ZSK4 | -0.97582 |
| 112828 | Q85601 | Q5JXC2 | -0.60532 |
| 112829 | Q85601 | Q9C0D9 | -0.87203 |
| 112830 | Q85601 | Q6ZTY9 | -0.38863 |
| 112831 | Q85601 | Q6UWK7 | -0.9043  |
| 112832 | Q85601 | Q6FHJ7 | -0.37347 |
| 112833 | Q85601 | Q6UX15 | -0.98706 |
| 112834 | Q85601 | Q9BZF3 | -0.25808 |
| 112835 | Q85601 | Q6ZUX3 | -0.0906  |
| 112836 | Q85601 | Q15392 | -0.32508 |
| 112837 | Q85601 | Q96I51 | -0.2237  |
| 112838 | Q85601 | Q9Y426 | -0.6461  |
| 112839 | Q85601 | Q92935 | -0.98434 |
| 112840 | Q85601 | Q8NEY4 | -0.32449 |
| 112841 | Q85601 | Q6ZPD8 | -0.94175 |
| 112842 | Q85601 | Q9NRD8 | -0.84478 |
| 112843 | Q85601 | Q9UF02 | -0.78994 |
| 112844 | Q85601 | Q9BY67 | -0.51127 |
| 112845 | Q85601 | Q9NWM3 | -0.17017 |
| 112846 | Q85601 | O76038 | -0.76066 |
| 112847 | Q85601 | Q86VF5 | -0.81304 |
| 112848 | Q85601 | O75569 | -0.16312 |
| 112849 | Q85601 | O75900 | -1.3819  |
| 112850 | Q85601 | P0DM63 | -0.15235 |
| 112851 | Q85601 | Q9Y4J8 | -0.22685 |
| 112852 | Q85601 | Q6NUK1 | -0.75691 |
| 112853 | Q85601 | A8K0Z3 | -0.23638 |
| 112854 | Q85601 | P0C7Q5 | -0.92686 |
| 112855 | Q85601 | P56706 | -0.46088 |
| 112856 | Q85601 | P04075 | -0.31867 |
| 112857 | Q85601 | P24468 | -0.25349 |
| 112858 | Q85601 | O60361 | -0.85847 |
| 112859 | Q85601 | Q9Y5E3 | -1.2542  |
| 112860 | Q85601 | Q8NGP4 | -1.2621  |

|        |        |        |          |
|--------|--------|--------|----------|
| 112861 | Q85601 | Q92538 | -0.21993 |
| 112862 | Q85601 | P09683 | -0.79151 |
| 112863 | Q85601 | Q56A73 | -0.31655 |
| 112864 | Q85601 | A6NHN6 | -0.9043  |
| 112865 | Q85601 | F8W1W9 | -0.12031 |
| 112866 | Q85601 | P33260 | -0.76303 |
| 112867 | Q85601 | E2RYF7 | -0.9043  |
| 112868 | Q85601 | Q9BUA3 | -0.31844 |
| 112869 | Q85601 | Q6ICG6 | -0.59745 |
| 112870 | Q85601 | O60890 | -0.76214 |
| 112871 | Q85601 | Q96L12 | -0.51014 |
| 112872 | Q85601 | Q8N5G0 | -0.92686 |
| 112873 | Q85601 | O14653 | -0.2534  |
| 112874 | Q85601 | O95479 | -0.6989  |
| 112875 | Q85601 | P48775 | -0.36474 |
| 112876 | Q85601 | A4D0Y5 | -0.2031  |
| 112877 | Q85601 | A6NER0 | -1.3431  |
| 112878 | Q85601 | Q9NP60 | -1.1925  |
| 112879 | Q85601 | Q92626 | -1.1617  |
| 112880 | Q85601 | Q8N7B7 | -0.1583  |
| 112881 | Q85601 | B1ANY3 | -0.50784 |
| 112882 | Q85601 | Q96K19 | -1.0337  |
| 112883 | Q85601 | Q9P2A4 | -0.22745 |
| 112884 | Q85601 | Q7Z469 | -0.69716 |
| 112885 | Q85601 | Q7Z6L1 | -0.67386 |
| 112886 | Q85601 | Q9Y2C3 | -0.76291 |
| 112887 | Q85601 | Q8TAA9 | -0.49174 |
| 112888 | Q85601 | Q8TF66 | -0.92686 |
| 112889 | Q85601 | Q13166 | -0.2031  |
| 112890 | Q85601 | Q6IMI6 | -0.25354 |
| 112891 | Q85601 | Q9UIW2 | -0.74814 |
| 112892 | Q85601 | Q9BY64 | -0.98927 |
| 112893 | Q85601 | Q9NW82 | -0.22741 |
| 112894 | Q85601 | Q6PUV4 | -0.24589 |
| 112895 | Q85601 | O15551 | -0.92475 |
| 112896 | Q85601 | Q5W150 | -0.75661 |
| 112897 | Q85601 | Q5T750 | -0.23054 |
| 112898 | Q85601 | Q96T25 | -0.31904 |
| 112899 | Q85601 | P10253 | -0.35012 |
| 112900 | Q85601 | Q5VUJ6 | -0.23871 |
| 112901 | Q85601 | P0DM48 | -0.22695 |
| 112902 | Q85601 | O60931 | -0.98553 |
| 112903 | Q85601 | Q9HCM3 | -0.92686 |
| 112904 | Q85601 | Q8NHL6 | -0.32394 |
| 112905 | Q85601 | P52788 | -0.23479 |
| 112906 | Q85601 | Q53T59 | -0.48411 |
| 112907 | Q85601 | O94919 | -0.80675 |
| 112908 | Q85601 | O60502 | -0.37053 |
| 112909 | Q85601 | P06133 | -0.9211  |
| 112910 | Q85601 | Q5H9K5 | -0.16845 |
| 112911 | Q85601 | O95633 | -0.22887 |
| 112912 | Q85601 | Q14554 | -0.51109 |
| 112913 | Q85601 | Q6P461 | -1.0722  |
| 112914 | Q85601 | Q8TCE9 | -0.17749 |
| 112915 | Q85601 | Q7Z2Y8 | -0.27768 |
| 112916 | Q85601 | Q5T4I8 | -0.14041 |
| 112917 | Q85601 | Q9GZP7 | -1.2331  |
| 112918 | Q85601 | P13667 | -0.26258 |
| 112919 | Q85601 | Q9Y5S8 | -0.44418 |
| 112920 | Q85601 | Q04756 | -1.151   |
| 112921 | Q85601 | P01584 | -0.23644 |
| 112922 | Q85601 | P31391 | -1.3871  |
| 112923 | Q85601 | Q9NYQ6 | -1.0442  |
| 112924 | Q85601 | Q96HB5 | -0.15536 |
| 112925 | Q85601 | Q9NQ34 | -1.111   |
| 112926 | Q85601 | P32241 | -0.77551 |
| 112927 | Q85601 | P20340 | -0.26667 |
| 112928 | Q85601 | Q99075 | -1.1322  |
| 112929 | Q85601 | P01706 | -1.046   |
| 112930 | Q85601 | Q93070 | -0.9768  |
| 112931 | Q85601 | A6NGG3 | -0.2031  |
| 112932 | Q85601 | A0PK11 | -0.92686 |
| 112933 | Q85601 | H3BS89 | -0.92686 |
| 112934 | Q85601 | Q9UHD8 | -0.22459 |
| 112935 | Q85601 | O60602 | -1.1498  |
| 112936 | Q85601 | O15239 | -0.52666 |

|        |        |        |           |
|--------|--------|--------|-----------|
| 112937 | Q85601 | Q5SZB4 | -0.58854  |
| 112938 | Q85601 | P00813 | -0.24017  |
| 112939 | Q85601 | Q8WXX1 | -0.58286  |
| 112940 | Q85601 | Q9NYW2 | -1.1294   |
| 112941 | Q85601 | P50461 | -0.22887  |
| 112942 | Q85601 | Q5VT66 | -0.4532   |
| 112943 | Q85601 | Q86UY5 | -0.11378  |
| 112944 | Q85601 | Q9HC07 | -0.76636  |
| 112945 | Q85601 | Q9NYY1 | -0.90216  |
| 112946 | Q85601 | Q2KHN1 | -0.22742  |
| 112947 | Q85601 | P0C2Y1 | -0.10147  |
| 112948 | Q85601 | Q9UM21 | -0.91962  |
| 112949 | Q85601 | O15197 | -1.741    |
| 112950 | Q85601 | Q5VUY0 | -0.36803  |
| 112951 | Q85601 | P01920 | -0.67569  |
| 112952 | Q85601 | Q02325 | -0.9043   |
| 112953 | Q85601 | P01702 | -1.046    |
| 112954 | Q85601 | P82987 | -1.0964   |
| 112955 | Q85601 | Q8N3D4 | -0.22904  |
| 112956 | Q85601 | Q8NGD3 | -1.2621   |
| 112957 | Q85601 | Q9BQ51 | -1.3633   |
| 112958 | Q85601 | Q8N7U6 | -0.39878  |
| 112959 | Q85601 | Q12887 | -0.5834   |
| 112960 | Q85601 | P00326 | -0.52302  |
| 112961 | Q85601 | P86479 | -0.2031   |
| 112962 | Q85601 | Q9NYA3 | -0.1796   |
| 112963 | Q85601 | P19883 | -0.22729  |
| 112964 | Q85601 | Q14531 | -0.22273  |
| 112965 | Q85601 | Q9HCH3 | -0.4665   |
| 112966 | Q85601 | Q9H3Q3 | -0.74797  |
| 112967 | Q85601 | Q8N103 | -0.75554  |
| 112968 | Q85601 | Q8TBB0 | -0.48219  |
| 112969 | Q85601 | Q9NVF9 | -0.63199  |
| 112970 | Q85601 | Q9NX31 | -0.33041  |
| 112971 | Q85601 | Q9Y2D5 | -0.32484  |
| 112972 | Q85601 | Q9HD90 | -0.22785  |
| 112973 | Q85601 | P01773 | -1.046    |
| 112974 | Q85601 | P58505 | -0.020158 |
| 112975 | Q85601 | A6NKF7 | -0.92686  |
| 112976 | Q85601 | Q6UXR4 | -0.72076  |
| 112977 | Q85601 | Q8WXX0 | -0.57173  |
| 112978 | Q85601 | Q9Y5Q6 | -0.7744   |
| 112979 | Q85601 | Q6ZMS4 | -0.60958  |
| 112980 | Q85601 | Q9UGM6 | -0.13549  |
| 112981 | Q85601 | Q8N8A4 | -0.57832  |
| 112982 | Q85601 | Q9UHF5 | -0.93055  |
| 112983 | Q85601 | O43709 | -0.44261  |
| 112984 | Q85601 | P82980 | -0.33299  |
| 112985 | Q85601 | Q6RVD6 | -0.2031   |
| 112986 | Q85601 | O75629 | -0.75223  |
| 112987 | Q85601 | Q5T6J7 | -0.47298  |
| 112988 | Q85601 | Q6MZM0 | -1.1108   |
| 112989 | Q85601 | Q8NGU2 | -1.2621   |
| 112990 | Q85601 | P47944 | -0.16577  |
| 112991 | Q85601 | A8MVM7 | -0.2031   |
| 112992 | Q85601 | Q9BVX2 | -0.75008  |
| 112993 | Q85601 | Q86T03 | -0.92725  |
| 112994 | Q85601 | P62158 | -0.22715  |
| 112995 | Q85601 | P51784 | -0.40633  |
| 112996 | Q85601 | Q9UMR3 | -0.59919  |
| 112997 | Q85601 | Q8N1D5 | -0.31524  |
| 112998 | Q85601 | P28300 | -0.51122  |
| 112999 | Q85601 | P98082 | -0.22826  |
| 113000 | Q85601 | Q5VZ89 | -0.71353  |
| 113001 | Q85601 | P47900 | -0.89298  |
| 113002 | Q85601 | Q8IYS0 | -0.92686  |
| 113003 | Q85601 | Q8TCQ1 | -0.91357  |
| 113004 | Q85601 | Q8TCD6 | -0.50344  |
| 113005 | Q85601 | Q9H2S5 | -0.22755  |
| 113006 | Q85601 | Q86VH2 | -0.609    |
| 113007 | Q85601 | Q494V2 | -0.70935  |
| 113008 | Q85601 | O14493 | -0.86019  |
| 113009 | Q85601 | Q08722 | -0.51834  |
| 113010 | Q85601 | Q86YH6 | -0.12458  |
| 113011 | Q85601 | P00558 | -0.1966   |
| 113012 | Q85601 | Q02161 | -0.9973   |

|        |        |        |           |
|--------|--------|--------|-----------|
| 113013 | Q85601 | A2RUS2 | -0.30808  |
| 113014 | Q85601 | Q96PU8 | -0.20548  |
| 113015 | Q85601 | P51800 | -0.94927  |
| 113016 | Q85601 | Q8NBK3 | -0.62367  |
| 113017 | Q85601 | Q9NR45 | -0.15151  |
| 113018 | Q85601 | O43298 | -0.18129  |
| 113019 | Q85601 | Q2TVT4 | -0.32602  |
| 113020 | Q85601 | Q86V35 | -0.63889  |
| 113021 | Q85601 | Q53RY4 | -0.92686  |
| 113022 | Q85601 | Q5T9S5 | -0.044699 |
| 113023 | Q85601 | Q8NGF8 | -1.2621   |
| 113024 | Q85601 | Q86Y28 | -0.9043   |
| 113025 | Q85601 | Q7KZI7 | -0.70255  |
| 113026 | Q85601 | Q86UQ8 | -0.52628  |
| 113027 | Q85601 | Q09470 | -0.80668  |
| 113028 | Q85601 | Q9NVR0 | -0.9043   |
| 113029 | Q85601 | Q13231 | -0.77343  |
| 113030 | Q85601 | P22914 | -0.35395  |
| 113031 | Q85601 | Q96MK2 | -0.40037  |
| 113032 | Q85601 | P61566 | -0.7596   |
| 113033 | Q85601 | Q9GZK3 | -1.2621   |
| 113034 | Q85601 | Q5SNT2 | -0.55808  |
| 113035 | Q85601 | A8MYX2 | -1.1551   |
| 113036 | Q85601 | Q5JPF3 | -0.31914  |
| 113037 | Q85601 | Q8TCD5 | -0.07561  |
| 113038 | Q85601 | Q5VWM4 | -0.157    |
| 113039 | Q85601 | A8MPY1 | -0.71193  |
| 113040 | Q85601 | Q8N960 | -0.17903  |
| 113041 | Q85601 | Q3C1W6 | -0.589    |
| 113042 | Q85601 | Q92952 | -0.77621  |
| 113043 | Q85601 | P14384 | -0.22415  |
| 113044 | Q85601 | Q8TC92 | -1.578    |
| 113045 | Q85601 | Q9Y625 | -1.0929   |
| 113046 | Q85601 | O43670 | -0.20233  |
| 113047 | Q85601 | Q8NGI7 | -1.2621   |
| 113048 | Q85601 | Q96QZ7 | -0.27889  |
| 113049 | Q85601 | P51636 | -0.22589  |
| 113050 | Q85601 | P57764 | -0.52579  |
| 113051 | Q85601 | Q5JXX5 | -0.84946  |
| 113052 | Q85601 | Q9NW13 | -0.30475  |
| 113053 | Q85601 | Q15784 | -0.22768  |
| 113054 | Q85601 | Q9BS86 | -0.87948  |
| 113055 | Q85601 | Q9Y240 | -0.34007  |
| 113056 | Q85601 | Q13607 | -1.2621   |
| 113057 | Q85601 | Q6ZRI6 | -0.099387 |
| 113058 | Q85601 | P20309 | -0.70565  |
| 113059 | Q85601 | Q8WVE6 | -0.92686  |
| 113060 | Q85601 | Q8WXX4 | -0.58286  |
| 113061 | Q85601 | O75949 | -0.92686  |
| 113062 | Q85601 | Q9H1Z8 | -0.84941  |
| 113063 | Q85601 | A6NLX4 | -0.92686  |
| 113064 | Q85601 | P26717 | -0.63089  |
| 113065 | Q85601 | O14830 | -0.21678  |
| 113066 | Q85601 | Q92820 | -0.60883  |
| 113067 | Q85601 | P04271 | -0.9942   |
| 113068 | Q85601 | Q92859 | -0.87368  |
| 113069 | Q85601 | Q92805 | -0.20474  |
| 113070 | Q85601 | Q5MJ09 | -0.40972  |
| 113071 | Q85601 | P50443 | -1.0866   |
| 113072 | Q85601 | Q8N127 | -1.2621   |
| 113073 | Q85601 | Q9UKJ0 | -0.45376  |
| 113074 | Q85601 | Q9Y4C1 | -0.13229  |
| 113075 | Q85601 | Q9H0A3 | -0.92686  |
| 113076 | Q85601 | A6NDN3 | -0.19474  |
| 113077 | Q85601 | Q9Y4M8 | -1.1404   |
| 113078 | Q85601 | O14924 | -0.34777  |
| 113079 | Q85601 | Q9Y600 | -0.44483  |
| 113080 | Q85601 | P11712 | -0.57574  |
| 113081 | Q85601 | Q9BYE9 | -0.61046  |
| 113082 | Q85601 | Q6RUI8 | -0.13543  |
| 113083 | Q85601 | P06317 | -1.0219   |
| 113084 | Q85601 | O00445 | -0.67892  |
| 113085 | Q85601 | Q96DP5 | -0.13312  |
| 113086 | Q85601 | P29728 | -0.10396  |
| 113087 | Q85601 | Q15032 | -0.36086  |
| 113088 | Q85601 | Q96F63 | -0.092462 |

|        |        |        |           |
|--------|--------|--------|-----------|
| 113089 | Q85601 | Q99878 | -0.7417   |
| 113090 | Q85601 | Q06828 | -1.0069   |
| 113091 | Q85601 | P02741 | -1.0215   |
| 113092 | Q85601 | Q8NFU7 | -0.21306  |
| 113093 | Q85601 | Q5T292 | -0.92686  |
| 113094 | Q85601 | Q14649 | -1.0338   |
| 113095 | Q85601 | Q2PPJ7 | -0.19838  |
| 113096 | Q85601 | Q9NT99 | -0.97023  |
| 113097 | Q85601 | P41587 | -1.3918   |
| 113098 | Q85601 | A6NDA9 | -0.92686  |
| 113099 | Q85601 | P10915 | -1.1489   |
| 113100 | Q85601 | Q9BT23 | -0.29575  |
| 113101 | Q85601 | Q8WZA8 | -0.2031   |
| 113102 | Q85601 | P51956 | -0.22741  |
| 113103 | Q85601 | A6NE52 | -0.22745  |
| 113104 | Q85601 | P35568 | -0.22432  |
| 113105 | Q85601 | Q96JB1 | -0.50627  |
| 113106 | Q85601 | Q9NX78 | -0.92686  |
| 113107 | Q85601 | K7EJ46 | -0.2031   |
| 113108 | Q85601 | P52756 | -0.22529  |
| 113109 | Q85601 | Q02221 | -0.36569  |
| 113110 | Q85601 | A1A4Y4 | -0.85324  |
| 113111 | Q85601 | Q7RTR2 | -0.42948  |
| 113112 | Q85601 | Q14565 | -0.3173   |
| 113113 | Q85601 | Q5T319 | -0.2031   |
| 113114 | Q85601 | Q12841 | -1.034    |
| 113115 | Q85601 | Q99680 | -1.4753   |
| 113116 | Q85601 | Q9NY33 | -0.079559 |
| 113117 | Q85601 | Q99677 | -1.5239   |
| 113118 | Q85601 | O60831 | -0.50309  |
| 113119 | Q85601 | Q53LP3 | -0.22741  |
| 113120 | Q85601 | P21554 | -0.7122   |
| 113121 | Q85601 | P20023 | -0.97104  |
| 113122 | Q85601 | Q6P7N7 | -0.92686  |
| 113123 | Q85601 | P59534 | -1.2301   |
| 113124 | Q85601 | Q9H2A7 | -1.2852   |
| 113125 | Q85601 | Q86SU0 | -0.57439  |
| 113126 | Q85601 | Q5JT25 | -0.99624  |
| 113127 | Q85601 | P04070 | -0.7819   |
| 113128 | Q85601 | Q9NRA1 | -0.32379  |
| 113129 | Q85601 | Q8NGT1 | -1.2621   |
| 113130 | Q85601 | O43315 | -0.60451  |
| 113131 | Q85601 | Q86Z02 | -0.22741  |
| 113132 | Q85601 | Q9NS69 | -0.29644  |
| 113133 | Q85601 | Q15553 | -0.23012  |
| 113134 | Q85601 | Q96N46 | -0.38907  |
| 113135 | Q85601 | Q5JTB6 | -0.9043   |
| 113136 | Q85601 | Q14718 | -1.325    |
| 113137 | Q85601 | P07998 | -0.26255  |
| 113138 | Q85601 | Q86UT6 | -0.21851  |
| 113139 | Q85601 | Q8WZA0 | -0.41606  |
| 113140 | Q85601 | Q5T3U5 | -1.2842   |
| 113141 | Q85601 | Q9HBH9 | -0.69605  |
| 113142 | Q85601 | P82279 | -1.3371   |
| 113143 | Q85601 | Q3Y452 | -0.32959  |
| 113144 | Q85601 | Q15020 | -0.22663  |
| 113145 | Q85601 | Q8N162 | -1.2621   |
| 113146 | Q85601 | Q9HCE3 | -0.11856  |
| 113147 | Q85601 | Q8NEY1 | -0.82796  |
| 113148 | Q85601 | Q9BR61 | -0.22741  |
| 113149 | Q85601 | P17706 | -0.248    |
| 113150 | Q85601 | C9J069 | -0.18928  |
| 113151 | Q85601 | Q96M27 | -0.20207  |
| 113152 | Q85601 | Q6QN14 | -0.40639  |
| 113153 | Q85601 | O76050 | -0.22735  |
| 113154 | Q85601 | Q9P0M6 | -0.85428  |
| 113155 | Q85601 | Q15813 | -0.22741  |
| 113156 | Q85601 | Q9BXC1 | -1.2881   |
| 113157 | Q85601 | P56178 | -0.21771  |
| 113158 | Q85601 | P37088 | -0.56431  |
| 113159 | Q85601 | A6NL28 | -0.17669  |
| 113160 | Q85601 | P50226 | -0.21672  |
| 113161 | Q85601 | P49758 | -0.63936  |
| 113162 | Q85601 | P54132 | -0.22513  |
| 113163 | Q85601 | Q9NP56 | -0.38454  |
| 113164 | Q85601 | P59540 | -1.3829   |

|        |        |        |           |
|--------|--------|--------|-----------|
| 113165 | Q85601 | Q86XP3 | -0.5663   |
| 113166 | Q85601 | Q9BYB0 | -0.22741  |
| 113167 | Q85601 | Q14332 | -0.58009  |
| 113168 | Q85601 | P98175 | -0.56059  |
| 113169 | Q85601 | Q96DL1 | -0.92686  |
| 113170 | Q85601 | Q8N635 | -0.077736 |
| 113171 | Q85601 | Q7Z5H5 | -1.0644   |
| 113172 | Q85601 | Q15349 | -0.65884  |
| 113173 | Q85601 | Q8N912 | -0.92686  |
| 113174 | Q85601 | Q9NZL9 | -0.24412  |
| 113175 | Q85601 | P37023 | -0.35857  |
| 113176 | Q85601 | A6ND36 | -0.32158  |
| 113177 | Q85601 | Q16795 | -0.22654  |
| 113178 | Q85601 | Q8N4B1 | -0.22729  |
| 113179 | Q85601 | Q9UIM3 | -0.22526  |
| 113180 | Q85601 | Q9Y238 | -0.49624  |
| 113181 | Q85601 | Q7Z444 | -1.3701   |
| 113182 | Q85601 | Q9NRF8 | -0.3736   |
| 113183 | Q85601 | P02747 | -0.97418  |
| 113184 | Q85601 | Q6DHV7 | -0.23214  |
| 113185 | Q85601 | A6NEE1 | -0.44245  |
| 113186 | Q85601 | Q8WWA0 | -1.1746   |
| 113187 | Q85601 | Q8IYM2 | -0.32575  |
| 113188 | Q85601 | P14406 | -0.53147  |
| 113189 | Q85601 | Q8TDR2 | -0.6088   |
| 113190 | Q85601 | Q5T7N3 | -0.2274   |
| 113191 | Q85601 | P0CL85 | -0.009788 |
| 113192 | Q85601 | P01824 | -1.046    |
| 113193 | Q85601 | Q9UNA0 | -0.23759  |
| 113194 | Q85601 | P26038 | -0.23776  |
| 113195 | Q85601 | Q1A5X6 | -0.092462 |
| 113196 | Q85601 | Q9Y566 | -0.22743  |
| 113197 | Q85601 | Q8N323 | -0.9043   |
| 113198 | Q85601 | P58876 | -0.7417   |
| 113199 | Q85601 | Q9Y2L9 | -0.25378  |
| 113200 | Q85601 | Q15417 | -0.51015  |
| 113201 | Q85601 | Q96B54 | -0.589    |
| 113202 | Q85601 | Q9BY50 | -0.82239  |
| 113203 | Q85601 | O95427 | -1.0215   |
| 113204 | Q85601 | Q9Y257 | -1.0717   |
| 113205 | Q85601 | A6NEC2 | -0.67987  |
| 113206 | Q85601 | Q902F8 | -0.7596   |
| 113207 | Q85601 | Q6ZNJ1 | -0.3019   |
| 113208 | Q85601 | P49221 | -0.31971  |
| 113209 | Q85601 | Q96KR4 | -0.3786   |
| 113210 | Q85601 | A6NK44 | -0.23282  |
| 113211 | Q85601 | P26006 | -0.45398  |
| 113212 | Q85601 | Q6UWI4 | -1.1875   |
| 113213 | Q85601 | Q5JT82 | -0.22131  |
| 113214 | Q85601 | Q8IYB1 | -0.024762 |
| 113215 | Q85601 | P35243 | -0.64393  |
| 113216 | Q85601 | P15018 | -0.35725  |
| 113217 | Q85601 | Q9UGL9 | -0.2031   |
| 113218 | Q85601 | Q16864 | -0.067813 |
| 113219 | Q85601 | Q8IUX1 | -0.70529  |
| 113220 | Q85601 | Q9BYJ0 | -0.92173  |
| 113221 | Q85601 | Q43462 | -0.92805  |
| 113222 | Q85601 | Q9NSD5 | -1.0061   |
| 113223 | Q85601 | Q9BR09 | -0.1184   |
| 113224 | Q85601 | O15524 | -0.22739  |
| 113225 | Q85601 | Q9HC47 | -0.89199  |
| 113226 | Q85601 | A6NM66 | -1.1661   |
| 113227 | Q85601 | Q149N8 | -0.47806  |
| 113228 | Q85601 | Q86VF7 | -0.36492  |
| 113229 | Q85601 | Q96C19 | -0.53372  |
| 113230 | Q85601 | Q8NDC4 | -0.11011  |
| 113231 | Q85601 | Q13724 | -0.88317  |
| 113232 | Q85601 | Q9NR33 | -0.06334  |
| 113233 | Q85601 | Q86UF2 | -0.79275  |
| 113234 | Q85601 | O14827 | -0.66859  |
| 113235 | Q85601 | Q9UKQ2 | -1.7306   |
| 113236 | Q85601 | Q8IYM0 | -0.64136  |
| 113237 | Q85601 | Q8N3J2 | -0.35781  |
| 113238 | Q85601 | O95876 | -0.41281  |
| 113239 | Q85601 | Q9P0W0 | -0.52454  |
| 113240 | Q85601 | Q96G74 | -0.4811   |

|        |        |        |           |
|--------|--------|--------|-----------|
| 113241 | Q85601 | Q9Y5S1 | -0.77815  |
| 113242 | Q85601 | Q86YT9 | -0.90771  |
| 113243 | Q85601 | O75493 | -0.81244  |
| 113244 | Q85601 | O94941 | -0.20367  |
| 113245 | Q85601 | Q9UH03 | -0.22018  |
| 113246 | Q85601 | Q9BSE2 | -0.92686  |
| 113247 | Q85601 | Q9P2Q2 | -0.27682  |
| 113248 | Q85601 | Q9Y3D2 | -0.21063  |
| 113249 | Q85601 | O00408 | -0.22714  |
| 113250 | Q85601 | P0C841 | -0.2031   |
| 113251 | Q85601 | Q15208 | -0.23808  |
| 113252 | Q85601 | Q5TCX8 | -1.0636   |
| 113253 | Q85601 | P0DI80 | -0.92686  |
| 113254 | Q85601 | Q5TH74 | -0.045263 |
| 113255 | Q85601 | P09429 | -0.22936  |
| 113256 | Q85601 | P29120 | -0.3901   |
| 113257 | Q85601 | Q9NYV8 | -1.1404   |
| 113258 | Q85601 | O94762 | -0.22611  |
| 113259 | Q85601 | Q9H6R3 | -0.83102  |
| 113260 | Q85601 | Q9Y5W3 | -0.22287  |
| 113261 | Q85601 | Q14728 | -0.80966  |
| 113262 | Q85601 | Q5XG85 | -0.2031   |
| 113263 | Q85601 | Q96S53 | -0.71764  |
| 113264 | Q85601 | O95424 | -0.44495  |
| 113265 | Q85601 | Q6UB99 | -0.22742  |
| 113266 | Q85601 | Q8WXI2 | -0.37615  |
| 113267 | Q85601 | Q86TL2 | -0.67993  |
| 113268 | Q85601 | Q16563 | -0.86909  |
| 113269 | Q85601 | A0PJX4 | -1.1875   |
| 113270 | Q85601 | O14683 | -0.92056  |
| 113271 | Q85601 | P34947 | -0.55789  |
| 113272 | Q85601 | Q96L93 | -0.63738  |
| 113273 | Q85601 | Q9GZU1 | -0.77875  |
| 113274 | Q85601 | P01903 | -0.75133  |
| 113275 | Q85601 | O95835 | -0.22731  |
| 113276 | Q85601 | Q7Z6K5 | -0.47642  |
| 113277 | Q85601 | A6NGB0 | -0.92686  |
| 113278 | Q85601 | P28068 | -0.95957  |
| 113279 | Q85601 | Q9BZ97 | -0.92686  |
| 113280 | Q85601 | Q96JB6 | -0.6236   |
| 113281 | Q85601 | A6NM76 | -1.2621   |
| 113282 | Q85601 | Q9BPX7 | -0.37159  |
| 113283 | Q85601 | Q9H2Z4 | -0.44868  |
| 113284 | Q85601 | Q8NI77 | -0.74175  |
| 113285 | Q85601 | Q8IZJ4 | -0.73795  |
| 113286 | Q85601 | P03897 | -0.43659  |
| 113287 | Q85601 | O95096 | -0.23446  |
| 113288 | Q85601 | Q9Y303 | -0.28242  |
| 113289 | Q85601 | O60488 | -0.75007  |
| 113290 | Q85601 | Q96HU1 | -0.22763  |
| 113291 | Q85601 | Q9HCE0 | -0.34923  |
| 113292 | Q85601 | Q9H156 | -1.0205   |
| 113293 | Q85601 | A8MZF0 | -0.092462 |
| 113294 | Q85601 | P41145 | -0.8993   |
| 113295 | Q85601 | Q96GC9 | -0.47221  |
| 113296 | Q85601 | Q9NXR5 | -0.22741  |
| 113297 | Q85601 | Q9BX63 | -0.41228  |
| 113298 | Q85601 | A6NMB1 | -1.0948   |
| 113299 | Q85601 | Q02790 | -0.41046  |
| 113300 | Q85601 | O94832 | -0.61078  |
| 113301 | Q85601 | P43115 | -1.0924   |
| 113302 | Q85601 | Q7Z443 | -0.83864  |
| 113303 | Q85601 | Q8NBP7 | -0.34173  |
| 113304 | Q85601 | Q8TE54 | -0.51427  |
| 113305 | Q85601 | Q9Y3P4 | -0.96818  |
| 113306 | Q85601 | Q9H252 | -0.96449  |
| 113307 | Q85601 | Q9BY08 | -0.9642   |
| 113308 | Q85601 | Q9BTE6 | -0.30332  |
| 113309 | Q85601 | O14682 | -0.20957  |
| 113310 | Q85601 | Q9UI54 | -0.2031   |
| 113311 | Q85601 | P32321 | -0.2065   |
| 113312 | Q85601 | Q07837 | -0.93185  |
| 113313 | Q85601 | Q9NZ09 | -0.10147  |
| 113314 | Q85601 | Q96CD2 | -0.24313  |
| 113315 | Q85601 | P15538 | -0.4398   |
| 113316 | Q85601 | Q8TCT1 | -0.27272  |



|        |        |        |            |
|--------|--------|--------|------------|
| 113317 | Q85601 | Q16706 | -0.41572   |
| 113318 | Q85601 | Q4VXF1 | -0.92686   |
| 113319 | Q85601 | Q9NZB2 | -0.34619   |
| 113320 | Q85601 | Q8WWN9 | -0.49653   |
| 113321 | Q85601 | Q5VYV0 | -0.43379   |
| 113322 | Q85601 | Q8IUH4 | -0.69332   |
| 113323 | Q85601 | Q9Y215 | -0.26185   |
| 113324 | Q85601 | P78382 | -0.47904   |
| 113325 | Q85601 | P0CJ72 | -0.67838   |
| 113326 | Q85601 | Q7RTT4 | -0.18324   |
| 113327 | Q85601 | Q15363 | -0.19582   |
| 113328 | Q85601 | O00515 | -0.92892   |
| 113329 | Q85601 | Q9NVV5 | -0.45156   |
| 113330 | Q85601 | Q8N4C8 | -0.55867   |
| 113331 | Q85601 | Q6EIG7 | -0.84497   |
| 113332 | Q85601 | O95760 | -0.50937   |
| 113333 | Q85601 | Q5T4D3 | -0.92686   |
| 113334 | Q85601 | Q9UEY8 | -0.16143   |
| 113335 | Q85601 | P01611 | -1.046     |
| 113336 | Q85601 | Q9NZI2 | -0.64174   |
| 113337 | Q85601 | Q7L985 | -0.92686   |
| 113338 | Q85601 | Q5T1Q4 | -0.86355   |
| 113339 | Q85601 | P63098 | -0.22775   |
| 113340 | Q85601 | P08173 | -1.0737    |
| 113341 | Q85601 | Q5T0D9 | -0.36104   |
| 113342 | Q85601 | Q8NGI0 | -1.2621    |
| 113343 | Q85601 | Q8NC67 | -0.92686   |
| 113344 | Q85601 | Q96BH1 | -0.20442   |
| 113345 | Q85601 | Q86UP9 | -0.92686   |
| 113346 | Q85601 | A4D997 | -0.15646   |
| 113347 | Q85601 | P27105 | -0.18051   |
| 113348 | Q85601 | P62952 | -0.53507   |
| 113349 | Q85601 | Q5JU67 | -0.0057217 |
| 113350 | Q85601 | Q5GAN4 | -0.90766   |
| 113351 | Q85601 | Q5W064 | -0.50102   |
| 113352 | Q85601 | Q9Y6R4 | -0.40536   |
| 113353 | Q85601 | Q4L235 | -1.0718    |
| 113354 | Q85601 | O00370 | -0.33479   |
| 113355 | Q85601 | Q2KJY2 | -0.65288   |
| 113356 | Q85601 | P12694 | -0.10456   |
| 113357 | Q85601 | Q15270 | -0.22703   |
| 113358 | Q85601 | Q86YS7 | -0.51627   |
| 113359 | Q85601 | Q53HC9 | -0.22716   |
| 113360 | Q85601 | O15247 | -0.67656   |
| 113361 | Q85601 | Q9P1A2 | -0.18472   |
| 113362 | Q85601 | P01623 | -1.046     |
| 113363 | Q85601 | Q76LX8 | -0.48219   |
| 113364 | Q85601 | Q8WY22 | -0.77725   |
| 113365 | Q85601 | Q9NRD0 | -0.22645   |
| 113366 | Q85601 | Q9HC21 | -0.67119   |
| 113367 | Q85601 | P31513 | -0.95662   |
| 113368 | Q85601 | Q8NH76 | -1.2621    |
| 113369 | Q85601 | Q8NGX9 | -1.2621    |
| 113370 | Q85601 | Q06190 | -0.24126   |
| 113371 | Q85601 | Q9Y570 | -0.27221   |
| 113372 | Q85601 | Q5GAN3 | -0.90766   |
| 113373 | Q85601 | P60321 | -0.32427   |
| 113374 | Q85601 | Q7L273 | -0.21497   |
| 113375 | Q85601 | Q9BXR6 | -0.88395   |
| 113376 | Q85601 | Q8IZU9 | -0.88703   |
| 113377 | Q85601 | O00602 | -1.2319    |
| 113378 | Q85601 | Q8N4P6 | -0.22716   |
| 113379 | Q85601 | Q9Y574 | -0.28532   |
| 113380 | Q85601 | P21709 | -1.139     |
| 113381 | Q85601 | O00124 | -0.34409   |
| 113382 | Q85601 | Q96K21 | -0.29575   |
| 113383 | Q85601 | Q9UBQ6 | -1.232     |
| 113384 | Q85601 | Q6PIU2 | -0.89961   |
| 113385 | Q85601 | Q9UBE0 | -0.2218    |
| 113386 | Q85601 | Q9NTZ6 | -0.39291   |
| 113387 | Q85601 | Q92522 | -0.62412   |
| 113388 | Q85601 | Q13571 | -1.0948    |
| 113389 | Q85601 | Q02252 | -0.29893   |
| 113390 | Q85601 | Q92185 | -0.51211   |
| 113391 | Q85601 | Q8IV77 | -1.2393    |
| 113392 | Q85601 | Q9Y6K8 | -0.41756   |

|        |        |        |          |
|--------|--------|--------|----------|
| 113393 | Q85601 | O75116 | -0.22698 |
| 113394 | Q85601 | Q13635 | -0.26856 |
| 113395 | Q85601 | Q92738 | -1.1398  |
| 113396 | Q85601 | P58549 | -0.95095 |
| 113397 | Q85601 | P52569 | -0.69265 |
| 113398 | Q85601 | Q14CM0 | -0.22741 |
| 113399 | Q85601 | Q9NVL1 | -0.53606 |
| 113400 | Q85601 | O14983 | -0.4291  |
| 113401 | Q85601 | Q96PE2 | -0.57314 |
| 113402 | Q85601 | P62068 | -0.48812 |
| 113403 | Q85601 | P0DJJ0 | -0.32097 |
| 113404 | Q85601 | Q5VUJ9 | -0.39878 |
| 113405 | Q85601 | Q6NUN0 | -0.96788 |
| 113406 | Q85601 | Q9Y5F3 | -1.246   |
| 113407 | Q85601 | Q9UJ14 | -0.75895 |
| 113408 | Q85601 | P17213 | -0.91796 |
| 113409 | Q85601 | Q9GZN6 | -1.0145  |
| 113410 | Q85601 | Q86UW2 | -0.83043 |
| 113411 | Q85601 | Q9H2R5 | -1.3764  |
| 113412 | Q85601 | Q96EU7 | -0.79731 |
| 113413 | Q85601 | Q8N3K9 | -0.22789 |
| 113414 | Q85601 | Q6NXR0 | -0.89969 |
| 113415 | Q85601 | Q8IUB2 | -0.82753 |
| 113416 | Q85601 | P25021 | -1.4316  |
| 113417 | Q85601 | O95944 | -1.2927  |
| 113418 | Q85601 | O00168 | -1.1157  |
| 113419 | Q85601 | P51511 | -0.79834 |
| 113420 | Q85601 | Q92502 | -0.98058 |
| 113421 | Q85601 | Q4KMQ1 | -0.41666 |
| 113422 | Q85601 | Q8N5C1 | -0.92686 |
| 113423 | Q85601 | Q13163 | -0.2585  |
| 113424 | Q85601 | F2Z3M2 | -0.2031  |
| 113425 | Q85601 | Q9UMR5 | -0.35415 |
| 113426 | Q85601 | Q9HBV1 | -0.78714 |
| 113427 | Q85601 | P20366 | -0.79993 |
| 113428 | Q85601 | Q8IWU9 | -0.40597 |
| 113429 | Q85601 | Q9P109 | -0.50496 |
| 113430 | Q85601 | Q9NRG0 | -0.36843 |
| 113431 | Q85601 | Q9C0A1 | -0.2274  |
| 113432 | Q85601 | Q5SZI1 | -0.92686 |
| 113433 | Q85601 | Q8NG35 | -0.86864 |
| 113434 | Q85601 | O14841 | -0.55942 |
| 113435 | Q85601 | Q96TA2 | -1.2852  |
| 113436 | Q85601 | Q9H0J9 | -0.19951 |
| 113437 | Q85601 | Q8NDH2 | -0.37117 |
| 113438 | Q85601 | Q9BXL7 | -0.22701 |
| 113439 | Q85601 | Q9NZQ8 | -0.98199 |
| 113440 | Q85601 | Q14571 | -0.54453 |
| 113441 | Q85601 | Q96FM1 | -0.7148  |
| 113442 | Q85601 | Q6ZQN7 | -1.1526  |
| 113443 | Q85601 | P49588 | -0.21159 |
| 113444 | Q85601 | Q9UK85 | -1.0713  |
| 113445 | Q85601 | Q9NYZ1 | -0.92686 |
| 113446 | Q85601 | Q96P69 | -1.329   |
| 113447 | Q85601 | P26440 | -0.48083 |
| 113448 | Q85601 | P20849 | -0.66235 |
| 113449 | Q85601 | Q8IWB6 | -0.29722 |
| 113450 | Q85601 | Q6PJG9 | -0.92686 |
| 113451 | Q85601 | Q8NGJ8 | -1.2621  |
| 113452 | Q85601 | Q9Y6U3 | -0.21783 |
| 113453 | Q85601 | Q30KQ1 | -0.86864 |
| 113454 | Q85601 | Q08708 | -1.1584  |
| 113455 | Q85601 | Q13630 | -0.77134 |
| 113456 | Q85601 | Q9UKX5 | -0.95829 |
| 113457 | Q85601 | P02808 | -0.36697 |
| 113458 | Q85601 | Q9H845 | -0.74457 |
| 113459 | Q85601 | Q9Y620 | -0.24226 |
| 113460 | Q85601 | Q8NEL9 | -0.13689 |
| 113461 | Q85601 | Q99453 | -0.22372 |
| 113462 | Q85601 | O60883 | -0.76104 |
| 113463 | Q85601 | Q7RTR0 | -0.60825 |
| 113464 | Q85601 | P49747 | -0.66803 |
| 113465 | Q85601 | P29803 | -0.32483 |
| 113466 | Q85601 | Q92643 | -0.60505 |
| 113467 | Q85601 | Q8N6G1 | -0.2031  |
| 113468 | Q85601 | Q9UFD9 | -0.2274  |

|        |        |        |           |
|--------|--------|--------|-----------|
| 113469 | Q85601 | P53621 | -0.23023  |
| 113470 | Q85601 | Q01151 | -1.064    |
| 113471 | Q85601 | Q0VF96 | -0.22538  |
| 113472 | Q85601 | Q7Z6P3 | -1.1435   |
| 113473 | Q85601 | Q5JTY5 | -0.81985  |
| 113474 | Q85601 | Q3YEC7 | -0.2278   |
| 113475 | Q85601 | Q9ULI1 | -0.22741  |
| 113476 | Q85601 | Q8NH41 | -1.2621   |
| 113477 | Q85601 | Q58FG0 | -0.56805  |
| 113478 | Q85601 | Q8NEP7 | -0.22137  |
| 113479 | Q85601 | Q6J9G0 | -1.6299   |
| 113480 | Q85601 | Q9NRH3 | -0.20784  |
| 113481 | Q85601 | P87889 | -0.20244  |
| 113482 | Q85601 | Q5SQ80 | -0.2274   |
| 113483 | Q85601 | Q8WVB6 | -0.77198  |
| 113484 | Q85601 | Q96F25 | -0.9458   |
| 113485 | Q85601 | Q969Q5 | -0.23927  |
| 113486 | Q85601 | Q00888 | -0.89909  |
| 113487 | Q85601 | Q5TF58 | -0.082457 |
| 113488 | Q85601 | Q86SG6 | -1.1266   |
| 113489 | Q85601 | Q9ULT6 | -0.42666  |
| 113490 | Q85601 | Q96MG2 | -0.54199  |
| 113491 | Q85601 | P30825 | -1.0876   |
| 113492 | Q85601 | Q5VU97 | -0.93945  |
| 113493 | Q85601 | Q96QD8 | -1.0601   |
| 113494 | Q85601 | P29460 | -0.26286  |
| 113495 | Q85601 | P02774 | -0.63514  |
| 113496 | Q85601 | Q86X45 | -0.26808  |
| 113497 | Q85601 | O43683 | -0.22741  |
| 113498 | Q85601 | Q5T7P2 | -0.31607  |
| 113499 | Q85601 | Q8WWZ3 | -0.53007  |
| 113500 | Q85601 | Q9NP08 | -0.22795  |
| 113501 | Q85601 | Q8NFB2 | -0.92686  |
| 113502 | Q85601 | P20594 | -1.3319   |
| 113503 | Q85601 | P23919 | -0.50336  |
| 113504 | Q85601 | Q96FS4 | -0.22423  |
| 113505 | Q85601 | Q86UQ5 | -0.92686  |
| 113506 | Q85601 | Q5SQS8 | -0.11781  |
| 113507 | Q85601 | Q9ULP0 | -0.071039 |
| 113508 | Q85601 | Q2KHM9 | -0.39568  |
| 113509 | Q85601 | O75363 | -0.42396  |
| 113510 | Q85601 | Q9H7H1 | -0.35982  |
| 113511 | Q85601 | P23142 | -1.0816   |
| 113512 | Q85601 | Q8NGC3 | -1.2621   |
| 113513 | Q85601 | Q9Y217 | -0.24663  |
| 113514 | Q85601 | Q9UBJ2 | -0.50071  |
| 113515 | Q85601 | Q86W33 | -1.0514   |
| 113516 | Q85601 | Q5TGJ6 | -0.17884  |
| 113517 | Q85601 | Q5SYB0 | -0.2274   |
| 113518 | Q85601 | Q9BVV7 | -0.51274  |
| 113519 | Q85601 | Q14766 | -0.46631  |
| 113520 | Q85601 | P08138 | -0.29222  |
| 113521 | Q85601 | Q05315 | -0.53803  |
| 113522 | Q85601 | Q02224 | -0.26582  |
| 113523 | Q85601 | Q96FJ8 | -0.2031   |
| 113524 | Q85601 | Q13477 | -1.2292   |
| 113525 | Q85601 | P35414 | -1.1012   |
| 113526 | Q85601 | Q8WY98 | -0.92686  |
| 113527 | Q85601 | P01833 | -1.5667   |
| 113528 | Q85601 | Q92824 | -0.93424  |
| 113529 | Q85601 | Q5JPI9 | -0.30175  |
| 113530 | Q85601 | Q14442 | -0.56442  |
| 113531 | Q85601 | P54108 | -0.81572  |
| 113532 | Q85601 | Q9H772 | -0.86476  |
| 113533 | Q85601 | Q9BW83 | -1.0826   |
| 113534 | Q85601 | Q6UXV1 | -0.92686  |
| 113535 | Q85601 | P55263 | -0.46216  |
| 113536 | Q85601 | Q9H6U8 | -0.86343  |
| 113537 | Q85601 | Q96RR4 | -1.1059   |
| 113538 | Q85601 | Q8TEZ7 | -1.3324   |
| 113539 | Q85601 | Q16676 | -0.43379  |
| 113540 | Q85601 | Q8WXF7 | -0.60601  |
| 113541 | Q85601 | Q9BV40 | -0.62587  |
| 113542 | Q85601 | Q9BYU5 | -0.27846  |
| 113543 | Q85601 | Q6ZMN8 | -0.3257   |
| 113544 | Q85601 | Q8N3J6 | -1.1924   |

|        |        |        |           |
|--------|--------|--------|-----------|
| 113545 | Q85601 | Q2M2E3 | -1.158    |
| 113546 | Q85601 | Q9UIG0 | -0.22496  |
| 113547 | Q85601 | Q7RTY7 | -1.3852   |
| 113548 | Q85601 | Q52LD8 | -0.6874   |
| 113549 | Q85601 | Q96PR1 | -0.65914  |
| 113550 | Q85601 | Q7L5Y1 | -0.30884  |
| 113551 | Q85601 | A8MPX8 | -0.50749  |
| 113552 | Q85601 | Q9Y5E9 | -1.2231   |
| 113553 | Q85601 | Q8NFF5 | -0.54797  |
| 113554 | Q85601 | Q99795 | -1.1892   |
| 113555 | Q85601 | Q15669 | -0.22642  |
| 113556 | Q85601 | Q8N2Y8 | -0.22697  |
| 113557 | Q85601 | P22692 | -0.98118  |
| 113558 | Q85601 | Q16643 | -0.6726   |
| 113559 | Q85601 | Q8WUU8 | -1.2172   |
| 113560 | Q85601 | Q86U44 | -0.25402  |
| 113561 | Q85601 | Q8NB25 | -0.18472  |
| 113562 | Q85601 | P33778 | -0.7417   |
| 113563 | Q85601 | A4QMS7 | -0.15068  |
| 113564 | Q85601 | O75840 | -0.225    |
| 113565 | Q85601 | Q9BZJ0 | -0.18751  |
| 113566 | Q85601 | P04155 | -0.4187   |
| 113567 | Q85601 | Q9UQM7 | -0.45539  |
| 113568 | Q85601 | Q16270 | -0.56667  |
| 113569 | Q85601 | P35367 | -0.64211  |
| 113570 | Q85601 | P55327 | -0.33345  |
| 113571 | Q85601 | Q8WWB7 | -0.40111  |
| 113572 | Q85601 | P61587 | -1.2462   |
| 113573 | Q85601 | P59044 | -0.26116  |
| 113574 | Q85601 | Q9BZC1 | -0.34138  |
| 113575 | Q85601 | Q4G0X9 | -0.36486  |
| 113576 | Q85601 | O15240 | -0.66769  |
| 113577 | Q85601 | Q8N158 | -0.97589  |
| 113578 | Q85601 | Q8N7C4 | -0.92686  |
| 113579 | Q85601 | Q9ULB5 | -1.1748   |
| 113580 | Q85601 | P22001 | -0.81987  |
| 113581 | Q85601 | P24071 | -1.6539   |
| 113582 | Q85601 | Q96NS8 | -0.39212  |
| 113583 | Q85601 | Q8N7L0 | -0.25731  |
| 113584 | Q85601 | Q9H257 | -0.25631  |
| 113585 | Q85601 | P01593 | -1.046    |
| 113586 | Q85601 | O95757 | -0.22395  |
| 113587 | Q85601 | Q9UF11 | -0.89072  |
| 113588 | Q85601 | Q8WVC6 | -0.62761  |
| 113589 | Q85601 | Q8NDI1 | -0.22881  |
| 113590 | Q85601 | P02728 | -0.2031   |
| 113591 | Q85601 | Q15746 | -0.515    |
| 113592 | Q85601 | P61221 | -0.47521  |
| 113593 | Q85601 | Q9BQB6 | -1.0862   |
| 113594 | Q85601 | Q96MU5 | -0.9043   |
| 113595 | Q85601 | Q8WVS4 | -0.21788  |
| 113596 | Q85601 | Q8NH43 | -1.2621   |
| 113597 | Q85601 | A8MV23 | -0.72076  |
| 113598 | Q85601 | Q9Y385 | -1.2779   |
| 113599 | Q85601 | Q5VXU9 | -1.2065   |
| 113600 | Q85601 | Q9BUT1 | -0.62624  |
| 113601 | Q85601 | Q3SY56 | -0.22218  |
| 113602 | Q85601 | Q8N9H6 | -0.24903  |
| 113603 | Q85601 | Q9BSL1 | -0.22314  |
| 113604 | Q85601 | Q8NHA4 | -1.2621   |
| 113605 | Q85601 | Q15526 | -0.71654  |
| 113606 | Q85601 | Q6UWP7 | -0.8606   |
| 113607 | Q85601 | Q494X1 | -0.12317  |
| 113608 | Q85601 | A8MYZ5 | -0.21837  |
| 113609 | Q85601 | Q9Y3A6 | -0.4768   |
| 113610 | Q85601 | Q96J66 | -1.2842   |
| 113611 | Q85601 | Q8NEX9 | -0.65569  |
| 113612 | Q85601 | P78368 | -0.86766  |
| 113613 | Q85601 | P0C5W0 | -0.10147  |
| 113614 | Q85601 | P04275 | -0.22741  |
| 113615 | Q85601 | Q9Y6B6 | -0.34994  |
| 113616 | Q85601 | Q8TD35 | -0.092462 |
| 113617 | Q85601 | Q96CW9 | -0.73647  |
| 113618 | Q85601 | Q9C0K1 | -0.96582  |
| 113619 | Q85601 | Q8N976 | -0.22418  |
| 113620 | Q85601 | Q8IZP7 | -0.97216  |

|        |        |        |           |
|--------|--------|--------|-----------|
| 113621 | Q85601 | Q86Y30 | -1.0256   |
| 113622 | Q85601 | Q9H0P7 | -0.67168  |
| 113623 | Q85601 | P52701 | -0.13748  |
| 113624 | Q85601 | Q96P44 | -0.81875  |
| 113625 | Q85601 | Q6IEE8 | -1.1371   |
| 113626 | Q85601 | P29374 | -0.21521  |
| 113627 | Q85601 | P26436 | -0.53854  |
| 113628 | Q85601 | Q6UW10 | -0.9043   |
| 113629 | Q85601 | Q8NH00 | -1.2621   |
| 113630 | Q85601 | Q8NFR7 | -0.037087 |
| 113631 | Q85601 | Q96M42 | -1.0878   |
| 113632 | Q85601 | Q8N688 | -0.86864  |
| 113633 | Q85601 | O43613 | -1.372    |
| 113634 | Q85601 | P0C626 | -1.2771   |
| 113635 | Q85601 | Q13177 | -0.23273  |
| 113636 | Q85601 | P03989 | -1.0526   |
| 113637 | Q85601 | Q8WVZ7 | -1.0048   |
| 113638 | Q85601 | Q6P1Q9 | -0.30175  |
| 113639 | Q85601 | Q14195 | -0.22574  |
| 113640 | Q85601 | O95544 | -0.68248  |
| 113641 | Q85601 | Q86TL0 | -0.33314  |
| 113642 | Q85601 | O00116 | -0.64416  |
| 113643 | Q85601 | Q5U649 | -0.51345  |
| 113644 | Q85601 | Q9H611 | -0.46004  |
| 113645 | Q85601 | P28907 | -0.67276  |
| 113646 | Q85601 | Q9Y6Y9 | -0.51028  |
| 113647 | Q85601 | Q6UXS9 | -0.22503  |
| 113648 | Q85601 | A8MUX0 | -0.3092   |
| 113649 | Q85601 | Q6PEY0 | -1.0301   |
| 113650 | Q85601 | O60479 | -0.21753  |
| 113651 | Q85601 | Q9C0B0 | -0.32209  |
| 113652 | Q85601 | Q8NHX4 | -0.2952   |
| 113653 | Q85601 | A6NCS6 | -0.35225  |
| 113654 | Q85601 | Q9NWX6 | -0.5717   |
| 113655 | Q85601 | Q8N5Z5 | -0.16085  |
| 113656 | Q85601 | Q8NH73 | -1.2621   |
| 113657 | Q85601 | O76062 | -1.0607   |
| 113658 | Q85601 | Q9NQW8 | -1.3974   |
| 113659 | Q85601 | Q9UN66 | -1.246    |
| 113660 | Q85601 | Q99653 | -0.22737  |
| 113661 | Q85601 | O14817 | -1.1729   |
| 113662 | Q85601 | P29373 | -0.21869  |
| 113663 | Q85601 | P63120 | -0.64385  |
| 113664 | Q85601 | Q8NCQ7 | -0.41501  |
| 113665 | Q85601 | Q5U3C3 | -0.92686  |
| 113666 | Q85601 | Q9NZH7 | -0.90378  |
| 113667 | Q85601 | P13747 | -1.1113   |
| 113668 | Q85601 | Q8NCW5 | -0.43552  |
| 113669 | Q85601 | Q9BXM7 | -0.6424   |
| 113670 | Q85601 | Q68D42 | -0.92686  |
| 113671 | Q85601 | P54792 | -0.67632  |
| 113672 | Q85601 | O75830 | -0.70157  |
| 113673 | Q85601 | Q96N66 | -0.33035  |
| 113674 | Q85601 | Q99954 | -0.9043   |
| 113675 | Q85601 | Q96M15 | -0.79606  |
| 113676 | Q85601 | P01594 | -1.046    |
| 113677 | Q85601 | Q96N76 | -0.54066  |
| 113678 | Q85601 | Q9UJD0 | -0.22561  |
| 113679 | Q85601 | P59089 | -0.64753  |
| 113680 | Q85601 | O14905 | -0.55457  |
| 113681 | Q85601 | Q5VVX9 | -0.82656  |
| 113682 | Q85601 | Q7Z602 | -1.3443   |
| 113683 | Q85601 | O15047 | -0.22461  |
| 113684 | Q85601 | Q9UMR7 | -1.2309   |
| 113685 | Q85601 | Q9UPZ6 | -1.5459   |
| 113686 | Q85601 | Q8TAX7 | -0.38064  |
| 113687 | Q85601 | Q8NEM0 | -0.21062  |
| 113688 | Q85601 | P57682 | -0.22587  |
| 113689 | Q85601 | Q15008 | -0.13769  |
| 113690 | Q85601 | Q9Y2V3 | -0.19772  |
| 113691 | Q85601 | P35913 | -0.39849  |
| 113692 | Q85601 | Q16518 | -0.39177  |
| 113693 | Q85601 | P01778 | -1.046    |
| 113694 | Q85601 | Q9H943 | -0.37195  |
| 113695 | Q85601 | C9JQI7 | -0.92686  |
| 113696 | Q85601 | O75452 | -1.5282   |

|        |        |        |           |
|--------|--------|--------|-----------|
| 113697 | Q85601 | Q9HC10 | -0.69615  |
| 113698 | Q85601 | Q8NGK0 | -1.2621   |
| 113699 | Q85601 | P07327 | -0.22337  |
| 113700 | Q85601 | O60667 | -0.84787  |
| 113701 | Q85601 | A6NIN4 | -0.2031   |
| 113702 | Q85601 | Q9Y3Q4 | -1.1072   |
| 113703 | Q85601 | Q6NXG1 | -0.57795  |
| 113704 | Q85601 | P04843 | -0.66197  |
| 113705 | Q85601 | Q86UA1 | -0.17149  |
| 113706 | Q85601 | P31939 | -0.18512  |
| 113707 | Q85601 | P51858 | -0.21279  |
| 113708 | Q85601 | P08236 | -0.46684  |
| 113709 | Q85601 | P61019 | -0.58187  |
| 113710 | Q85601 | Q13066 | -0.68194  |
| 113711 | Q85601 | Q9HCK4 | -0.52603  |
| 113712 | Q85601 | Q86YD5 | -0.99172  |
| 113713 | Q85601 | Q9H251 | -0.54676  |
| 113714 | Q85601 | Q6UWP2 | -1.5893   |
| 113715 | Q85601 | Q12791 | -0.69659  |
| 113716 | Q85601 | Q96C92 | -0.14461  |
| 113717 | Q85601 | Q96A72 | -0.11464  |
| 113718 | Q85601 | P17844 | -0.51858  |
| 113719 | Q85601 | Q8N808 | -0.92686  |
| 113720 | Q85601 | Q2MKA7 | -0.23026  |
| 113721 | Q85601 | Q8IUH2 | -0.93735  |
| 113722 | Q85601 | Q8N4C0 | -0.70748  |
| 113723 | Q85601 | Q96MI9 | -0.31254  |
| 113724 | Q85601 | Q8NCT1 | -0.49132  |
| 113725 | Q85601 | Q99759 | -0.59165  |
| 113726 | Q85601 | Q9BSJ8 | -0.92686  |
| 113727 | Q85601 | Q9BVG9 | -1.0142   |
| 113728 | Q85601 | P16870 | -0.68532  |
| 113729 | Q85601 | Q8NGS8 | -1.2621   |
| 113730 | Q85601 | Q6UXZ0 | -0.92686  |
| 113731 | Q85601 | Q9H1K0 | -0.12279  |
| 113732 | Q85601 | Q6DN14 | -0.9059   |
| 113733 | Q85601 | Q9NY97 | -0.47435  |
| 113734 | Q85601 | Q96AG4 | -0.93626  |
| 113735 | Q85601 | Q9Y5K2 | -1.3497   |
| 113736 | Q85601 | P18507 | -0.4596   |
| 113737 | Q85601 | Q8IV76 | -0.24135  |
| 113738 | Q85601 | P60981 | -0.39466  |
| 113739 | Q85601 | Q9Y6M7 | -0.88371  |
| 113740 | Q85601 | Q9UK32 | -0.68804  |
| 113741 | Q85601 | Q96G30 | -0.53634  |
| 113742 | Q85601 | O15054 | -0.42045  |
| 113743 | Q85601 | Q9HB40 | -0.93524  |
| 113744 | Q85601 | Q8NHS9 | -0.31136  |
| 113745 | Q85601 | Q53EV4 | -0.22741  |
| 113746 | Q85601 | Q9H306 | -1.2792   |
| 113747 | Q85601 | Q8WTS1 | -0.20487  |
| 113748 | Q85601 | Q6ZTR5 | -0.49467  |
| 113749 | Q85601 | Q9NP80 | -0.53342  |
| 113750 | Q85601 | Q96I15 | -0.26159  |
| 113751 | Q85601 | P50281 | -0.36337  |
| 113752 | Q85601 | Q8N9N8 | -0.051509 |
| 113753 | Q85601 | Q13478 | -1.3005   |
| 113754 | Q85601 | P83859 | -0.69435  |
| 113755 | Q85601 | Q9P260 | -0.79746  |
| 113756 | Q85601 | Q9HCX4 | -0.22637  |
| 113757 | Q85601 | Q01524 | -0.90163  |
| 113758 | Q85601 | B2RXF0 | -0.92461  |
| 113759 | Q85601 | Q6ZSN7 | -0.22511  |
| 113760 | Q85601 | P06887 | -1.046    |
| 113761 | Q85601 | O95872 | -0.36086  |
| 113762 | Q85601 | Q92765 | -0.62524  |
| 113763 | Q85601 | P06753 | -0.27499  |
| 113764 | Q85601 | P0CL82 | -0.68194  |
| 113765 | Q85601 | Q9NUL7 | -0.14395  |
| 113766 | Q85601 | Q16515 | -0.71184  |
| 113767 | Q85601 | Q14534 | -1.139    |
| 113768 | Q85601 | Q8IVW4 | -0.76045  |
| 113769 | Q85601 | Q9BPW5 | -1.2967   |
| 113770 | Q85601 | Q8IYB8 | -0.22579  |
| 113771 | Q85601 | Q7Z3T1 | -1.2621   |
| 113772 | Q85601 | Q68CQ1 | -0.92686  |

|        |        |         |          |
|--------|--------|---------|----------|
| 113773 | Q85601 | P0C867  | -0.2383  |
| 113774 | Q85601 | Q4ZIN3  | -0.86229 |
| 113775 | Q85601 | Q96D05  | -0.92686 |
| 113776 | Q85601 | Q9NSY1  | -0.75112 |
| 113777 | Q85601 | O75594  | -0.67605 |
| 113778 | Q85601 | Q9NS82  | -1.0162  |
| 113779 | Q85601 | Q8IYB4  | -0.22803 |
| 113780 | Q85601 | Q8TDV0  | -1.3443  |
| 113781 | Q85601 | O60303  | -0.44188 |
| 113782 | Q85601 | O15294  | -0.22602 |
| 113783 | Q85601 | Q92519  | -0.22871 |
| 113784 | Q85601 | Q6UXR6  | -0.9043  |
| 113785 | Q85601 | Q7Z692  | -0.92686 |
| 113786 | Q85601 | Q8NH18  | -1.2621  |
| 113787 | Q85601 | P0CW71  | -0.2031  |
| 113788 | Q85601 | Q8TCG2  | -0.56121 |
| 113789 | Q85601 | P35462  | -0.37027 |
| 113790 | Q85601 | Q13021  | -0.26736 |
| 113791 | Q85601 | Q5TAP6  | -0.194   |
| 113792 | Q85601 | Q9ULK0  | -0.8482  |
| 113793 | Q85601 | Q16623  | -0.40024 |
| 113794 | Q85601 | Q0VAA5  | -0.74419 |
| 113795 | Q85601 | Q5T8P6  | -0.28474 |
| 113796 | Q85601 | Q8N4L8  | -0.36489 |
| 113797 | Q85601 | Q9H7F0  | -1.088   |
| 113798 | Q85601 | O60882  | -0.84509 |
| 113799 | Q85601 | Q58G82  | -0.22295 |
| 113800 | Q85601 | Q96T54  | -1.0978  |
| 113801 | Q85601 | Q8NEX5  | -0.9043  |
| 113802 | Q85601 | P01112  | -0.22808 |
| 113803 | Q85601 | Q6Y1H2  | -0.79782 |
| 113804 | Q85601 | Q9NPA1  | -1.0544  |
| 113805 | Q85601 | Q14118  | -0.25193 |
| 113806 | Q85601 | Q15614  | -1.2621  |
| 113807 | Q85601 | Q8N3I7  | -0.30772 |
| 113808 | Q85601 | Q8NGJ6  | -1.2621  |
| 113809 | Q85601 | Q32NB8  | -0.68513 |
| 113810 | Q85601 | Q96NY7  | -0.63171 |
| 113811 | Q85601 | P30049  | -0.23244 |
| 113812 | Q85601 | Q9H5K3  | -1.4901  |
| 113813 | Q85601 | Q9NPQ8  | -0.55571 |
| 113814 | Q85601 | O15244  | -0.87184 |
| 113815 | Q85601 | Q8IWIY9 | -0.92686 |
| 113816 | Q85601 | P46094  | -1.3208  |
| 113817 | Q85601 | Q3KNW1  | -0.20481 |
| 113818 | Q85601 | Q5T5U3  | -0.23165 |
| 113819 | Q85601 | P61647  | -0.61909 |
| 113820 | Q85601 | Q13825  | -0.30632 |
| 113821 | Q85601 | Q9NP85  | -0.18163 |
| 113822 | Q85601 | Q92882  | -0.64842 |
| 113823 | Q85601 | Q9BY84  | -0.37271 |
| 113824 | Q85601 | Q2M296  | -0.84077 |
| 113825 | Q85601 | Q96MZ4  | -0.32257 |
| 113826 | Q85601 | Q9NRN9  | -0.32443 |
| 113827 | Q85601 | O14607  | -0.38781 |
| 113828 | Q85601 | P46531  | -0.22788 |
| 113829 | Q85601 | P01730  | -0.42657 |
| 113830 | Q85601 | P59768  | -0.51016 |
| 113831 | Q85601 | Q8NBR0  | -0.78755 |
| 113832 | Q85601 | P06126  | -0.52389 |
| 113833 | Q85601 | P51575  | -0.47764 |
| 113834 | Q85601 | P30504  | -1.1017  |
| 113835 | Q85601 | Q8TEU7  | -0.87289 |
| 113836 | Q85601 | Q8NEW7  | -0.98689 |
| 113837 | Q85601 | Q9H106  | -0.9043  |
| 113838 | Q85601 | P11684  | -0.65225 |
| 113839 | Q85601 | P26441  | -0.23578 |
| 113840 | Q85601 | O75628  | -1.1946  |
| 113841 | Q85601 | A6NCF5  | -0.22313 |
| 113842 | Q85601 | P26885  | -0.23055 |
| 113843 | Q85601 | Q8NC54  | -0.92686 |
| 113844 | Q85601 | Q13608  | -0.28812 |
| 113845 | Q85601 | Q309B1  | -0.22866 |
| 113846 | Q85601 | Q9GZW8  | -0.92686 |
| 113847 | Q85601 | P35125  | -0.57296 |
| 113848 | Q85601 | Q15465  | -0.2274  |

|        |        |        |           |
|--------|--------|--------|-----------|
| 113849 | Q85601 | A6NC05 | -0.62295  |
| 113850 | Q85601 | Q96IQ7 | -1.0729   |
| 113851 | Q85601 | Q9H3Q1 | -0.37325  |
| 113852 | Q85601 | Q8N1L1 | -0.2031   |
| 113853 | Q85601 | O43827 | -1.1673   |
| 113854 | Q85601 | Q9UI40 | -0.97287  |
| 113855 | Q85601 | Q8N126 | -0.98956  |
| 113856 | Q85601 | P08F94 | -0.2432   |
| 113857 | Q85601 | Q6S545 | -0.2274   |
| 113858 | Q85601 | Q5T0T0 | -0.86268  |
| 113859 | Q85601 | Q96LT6 | -0.14888  |
| 113860 | Q85601 | P08637 | -1.5076   |
| 113861 | Q85601 | O95178 | -0.12005  |
| 113862 | Q85601 | P15531 | -0.17452  |
| 113863 | Q85601 | Q49AS3 | -0.5481   |
| 113864 | Q85601 | Q9C0J8 | -0.22729  |
| 113865 | Q85601 | Q8NHC4 | -1.2621   |
| 113866 | Q85601 | Q8NGX5 | -1.2621   |
| 113867 | Q85601 | A8MUK1 | -0.36987  |
| 113868 | Q85601 | Q8TBB6 | -0.88296  |
| 113869 | Q85601 | P40394 | -0.64721  |
| 113870 | Q85601 | Q8TCU6 | -0.22783  |
| 113871 | Q85601 | Q3LHN1 | -0.2031   |
| 113872 | Q85601 | Q5T6L9 | -0.92686  |
| 113873 | Q85601 | P12872 | -0.95198  |
| 113874 | Q85601 | P41238 | -0.16408  |
| 113875 | Q85601 | Q9BX67 | -0.63337  |
| 113876 | Q85601 | Q9UHP7 | -1.1374   |
| 113877 | Q85601 | Q6P2S7 | -0.12851  |
| 113878 | Q85601 | P54829 | -1.1887   |
| 113879 | Q85601 | Q7RTP6 | -0.42398  |
| 113880 | Q85601 | P10314 | -0.93461  |
| 113881 | Q85601 | Q5R3I4 | -0.41717  |
| 113882 | Q85601 | P29466 | -0.22734  |
| 113883 | Q85601 | Q5T871 | -0.2031   |
| 113884 | Q85601 | Q9NUD7 | -0.46555  |
| 113885 | Q85601 | Q8WTR4 | -0.63354  |
| 113886 | Q85601 | Q1MX18 | -0.34225  |
| 113887 | Q85601 | Q4W5P6 | -0.9043   |
| 113888 | Q85601 | Q6UY14 | -0.38223  |
| 113889 | Q85601 | Q9HB31 | -0.22668  |
| 113890 | Q85601 | Q6ZRT6 | -0.092462 |
| 113891 | Q85601 | Q99678 | -1.4753   |
| 113892 | Q85601 | Q8N4G2 | -0.73545  |
| 113893 | Q85601 | Q8NGL9 | -1.2621   |
| 113894 | Q85601 | P21728 | -0.32898  |
| 113895 | Q85601 | Q9H5V7 | -0.22976  |
| 113896 | Q85601 | Q16555 | -0.22453  |
| 113897 | Q85601 | Q96KC2 | -1.3986   |
| 113898 | Q85601 | Q01453 | -0.45987  |
| 113899 | Q85601 | Q92187 | -0.48437  |
| 113900 | Q85601 | Q95847 | -0.6965   |
| 113901 | Q85601 | P52797 | -0.6338   |
| 113902 | Q85601 | Q9NXG6 | -1.2137   |
| 113903 | Q85601 | P47755 | -0.48929  |
| 113904 | Q85601 | Q9H987 | -0.22714  |
| 113905 | Q85601 | Q8IW40 | -0.16356  |
| 113906 | Q85601 | Q6PJI1 | -0.32882  |
| 113907 | Q85601 | P43632 | -1.184    |
| 113908 | Q85601 | Q5QP74 | -0.2031   |
| 113909 | Q85601 | Q9HBV2 | -0.92686  |
| 113910 | Q85601 | Q8N135 | -0.87684  |
| 113911 | Q85601 | Q9UHI7 | -0.35796  |
| 113912 | Q85601 | Q8TBQ9 | -0.69     |
| 113913 | Q85601 | P14210 | -0.33592  |
| 113914 | Q85601 | Q6ZQN5 | -0.43379  |
| 113915 | Q85601 | P18074 | -0.28966  |
| 113916 | Q85601 | P78552 | -0.5033   |
| 113917 | Q85601 | Q8NE09 | -0.58993  |
| 113918 | Q85601 | Q9HAB3 | -1.042    |
| 113919 | Q85601 | P17900 | -0.51629  |
| 113920 | Q85601 | Q643R3 | -0.80154  |
| 113921 | Q85601 | Q58EX2 | -1.11     |
| 113922 | Q85601 | P48551 | -0.9048   |
| 113923 | Q85601 | Q9UBT3 | -0.84997  |
| 113924 | Q85601 | Q9NPI5 | -0.55568  |



|        |        |        |           |
|--------|--------|--------|-----------|
| 113925 | Q85601 | Q5SQ13 | -0.37312  |
| 113926 | Q85601 | Q6NTF9 | -0.96818  |
| 113927 | Q85601 | Q15311 | -0.37375  |
| 113928 | Q85601 | P51512 | -1.6346   |
| 113929 | Q85601 | P49901 | -0.2031   |
| 113930 | Q85601 | Q70JA7 | -0.47214  |
| 113931 | Q85601 | Q00975 | -0.78098  |
| 113932 | Q85601 | P20671 | -0.7417   |
| 113933 | Q85601 | Q8N9P6 | -0.2031   |
| 113934 | Q85601 | Q6H9L7 | -0.34212  |
| 113935 | Q85601 | P31431 | -0.7772   |
| 113936 | Q85601 | Q6F5E8 | -0.22213  |
| 113937 | Q85601 | Q9UN19 | -0.63385  |
| 113938 | Q85601 | Q8N801 | -0.24766  |
| 113939 | Q85601 | Q86Y22 | -1.4154   |
| 113940 | Q85601 | P07948 | -0.23155  |
| 113941 | Q85601 | P05981 | -0.59272  |
| 113942 | Q85601 | Q8NHP8 | -0.52817  |
| 113943 | Q85601 | Q96J84 | -0.79063  |
| 113944 | Q85601 | P04350 | -0.19255  |
| 113945 | Q85601 | Q86X59 | -0.50614  |
| 113946 | Q85601 | Q13939 | -0.48008  |
| 113947 | Q85601 | O60733 | -0.2274   |
| 113948 | Q85601 | Q9NRJ1 | -0.49436  |
| 113949 | Q85601 | Q6UX39 | -1.0261   |
| 113950 | Q85601 | A6NL05 | -0.92686  |
| 113951 | Q85601 | O75762 | -0.87852  |
| 113952 | Q85601 | Q96LP2 | -0.044298 |
| 113953 | Q85601 | Q13162 | -0.21958  |
| 113954 | Q85601 | Q9NRJ7 | -1.2231   |
| 113955 | Q85601 | Q9P227 | -1.2059   |
| 113956 | Q85601 | P29274 | -0.3428   |
| 113957 | Q85601 | Q8NEN0 | -0.20591  |
| 113958 | Q85601 | Q96PN8 | -1.463    |
| 113959 | Q85601 | Q8TB22 | -1.2391   |
| 113960 | Q85601 | P17342 | -0.84144  |
| 113961 | Q85601 | Q9H9S3 | -0.75562  |
| 113962 | Q85601 | Q8NGR1 | -1.2621   |
| 113963 | Q85601 | A8MXV4 | -0.25562  |
| 113964 | Q85601 | P13727 | -0.91815  |
| 113965 | Q85601 | P01612 | -1.046    |
| 113966 | Q85601 | P31942 | -0.31737  |
| 113967 | Q85601 | P32754 | -0.31127  |
| 113968 | Q85601 | Q9ULB1 | -0.4031   |
| 113969 | Q85601 | Q3ZCW2 | -0.61248  |
| 113970 | Q85601 | Q96L96 | -0.65808  |
| 113971 | Q85601 | O43586 | -0.86712  |
| 113972 | Q85601 | Q8TAM2 | -0.22642  |
| 113973 | Q85601 | P62341 | -0.37272  |
| 113974 | Q85601 | A8MX19 | -0.32255  |
| 113975 | Q85601 | Q9Y446 | -0.22814  |
| 113976 | Q85601 | P28356 | -0.22716  |
| 113977 | Q85601 | A2RU37 | -0.30819  |
| 113978 | Q85601 | P84077 | -0.22859  |
| 113979 | Q85601 | P01871 | -1.5415   |
| 113980 | Q85601 | Q86XP6 | -0.9043   |
| 113981 | Q85601 | Q96LP4 | -1.0581   |
| 113982 | Q85601 | A8MV72 | -0.37421  |
| 113983 | Q85601 | Q9H8W2 | -0.57562  |
| 113984 | Q85601 | Q9P127 | -0.36788  |
| 113985 | Q85601 | Q8N7X8 | -1.5375   |
| 113986 | Q85601 | A6NJU9 | -0.92686  |
| 113987 | Q85601 | O43612 | -0.44649  |
| 113988 | Q85601 | Q96HD1 | -0.95681  |
| 113989 | Q85601 | A6NGH8 | -0.2274   |
| 113990 | Q85601 | Q9BQM9 | -0.91833  |
| 113991 | Q85601 | P0C604 | -1.2621   |
| 113992 | Q85601 | P07359 | -0.5471   |
| 113993 | Q85601 | Q96NZ1 | -0.38736  |
| 113994 | Q85601 | P05013 | -0.67663  |
| 113995 | Q85601 | Q9Y450 | -0.85484  |
| 113996 | Q85601 | Q8N2U0 | -0.92686  |
| 113997 | Q85601 | Q11203 | -0.7905   |
| 113998 | Q85601 | Q8TDF6 | -0.45638  |
| 113999 | Q85601 | Q8NB15 | -0.22651  |
| 114000 | Q85601 | P52895 | -0.33607  |

|        |        |        |           |
|--------|--------|--------|-----------|
| 114001 | Q85601 | Q6JEL2 | -0.21303  |
| 114002 | Q85601 | Q6GMV3 | -0.5305   |
| 114003 | Q85601 | O15547 | -0.76336  |
| 114004 | Q85601 | P56730 | -1.269    |
| 114005 | Q85601 | O43903 | -0.20397  |
| 114006 | Q85601 | Q9H0F5 | -0.29575  |
| 114007 | Q85601 | Q14654 | -0.55017  |
| 114008 | Q85601 | O60412 | -1.2621   |
| 114009 | Q85601 | P00390 | -0.22504  |
| 114010 | Q85601 | Q14C87 | -0.22405  |
| 114011 | Q85601 | Q13740 | -1.2754   |
| 114012 | Q85601 | Q9NW68 | -0.26784  |
| 114013 | Q85601 | O95076 | -0.2274   |
| 114014 | Q85601 | Q86UX6 | -1.2583   |
| 114015 | Q85601 | Q9BRK0 | -0.92686  |
| 114016 | Q85601 | H0Y354 | -0.09606  |
| 114017 | Q85601 | Q9BYE2 | -1.3105   |
| 114018 | Q85601 | Q6UWW0 | -0.86178  |
| 114019 | Q85601 | Q06413 | -0.07739  |
| 114020 | Q85601 | Q96QP1 | -0.6975   |
| 114021 | Q85601 | P05166 | -0.4266   |
| 114022 | Q85601 | Q8N2C9 | -0.38475  |
| 114023 | Q85601 | A6NJZ3 | -1.2621   |
| 114024 | Q85601 | Q9Y4D2 | -0.74212  |
| 114025 | Q85601 | Q8IXS2 | -0.072825 |
| 114026 | Q85601 | Q8NGA1 | -1.2621   |
| 114027 | Q85601 | Q9NPI0 | -0.91722  |
| 114028 | Q85601 | Q6NWX9 | -0.2241   |
| 114029 | Q85601 | O75147 | -0.27957  |
| 114030 | Q85601 | Q96KT7 | -0.92686  |
| 114031 | Q85601 | O43869 | -1.2621   |
| 114032 | Q85601 | Q99062 | -1.7867   |
| 114033 | Q85601 | Q9NRT5 | -0.3775   |
| 114034 | Q85601 | Q9BX68 | -0.25655  |
| 114035 | Q85601 | P80362 | -1.046    |
| 114036 | Q85601 | Q8TE68 | -0.22741  |
| 114037 | Q85601 | Q96M32 | -0.51267  |
| 114038 | Q85601 | Q9UBN7 | -0.21456  |
| 114039 | Q85601 | A6NN90 | -0.14505  |
| 114040 | Q85601 | Q6ZS72 | -0.31063  |
| 114041 | Q85601 | P18577 | -0.9973   |
| 114042 | Q85601 | O75074 | -0.91447  |
| 114043 | Q85601 | O60427 | -0.28606  |
| 114044 | Q85601 | A2A3N6 | -0.22422  |
| 114045 | Q85601 | O00506 | -0.54092  |
| 114046 | Q85601 | P10588 | -0.23624  |
| 114047 | Q85601 | Q9UGQ2 | -0.6465   |
| 114048 | Q85601 | Q9NZP5 | -1.2621   |
| 114049 | Q85601 | O75459 | -0.52654  |
| 114050 | Q85601 | Q8IVB5 | -0.83324  |
| 114051 | Q85601 | O95182 | -0.45697  |
| 114052 | Q85601 | P51570 | -0.4411   |
| 114053 | Q85601 | Q9Y289 | -0.81879  |
| 114054 | Q85601 | Q9Y6A1 | -0.95134  |
| 114055 | Q85601 | A8MV57 | -0.5349   |
| 114056 | Q85601 | Q16822 | -0.1537   |
| 114057 | Q85601 | Q63HM9 | -0.74419  |
| 114058 | Q85601 | Q07699 | -0.80611  |
| 114059 | Q85601 | P14061 | -0.54911  |
| 114060 | Q85601 | Q16740 | -0.35722  |
| 114061 | Q85601 | Q9BUW7 | -0.18472  |
| 114062 | Q85601 | Q6B0K9 | -0.27381  |
| 114063 | Q85601 | P49903 | -1.0612   |
| 114064 | Q85601 | Q8WXD0 | -1.1389   |
| 114065 | Q85601 | Q8N511 | -0.92686  |
| 114066 | Q85601 | Q8WXA2 | -1.1664   |
| 114067 | Q85601 | Q5H9U9 | -0.84068  |
| 114068 | Q85601 | Q14416 | -1.3303   |
| 114069 | Q85601 | Q5TEU4 | -0.23929  |
| 114070 | Q85601 | Q9H9P8 | -0.64508  |
| 114071 | Q85601 | Q9UL16 | -0.37971  |
| 114072 | Q85601 | Q03113 | -0.59681  |
| 114073 | Q85601 | A5PKW4 | -1.3354   |
| 114074 | Q85601 | Q8TBE1 | -0.9214   |
| 114075 | Q85601 | Q6ZSU1 | -0.51515  |
| 114076 | Q85601 | P20273 | -0.75773  |

|        |        |        |           |
|--------|--------|--------|-----------|
| 114077 | Q85601 | P15085 | -1.1703   |
| 114078 | Q85601 | B2RXH4 | -0.22689  |
| 114079 | Q85601 | Q9UNK0 | -0.92377  |
| 114080 | Q85601 | Q6P1S2 | -0.91046  |
| 114081 | Q85601 | Q9UKR5 | -0.84564  |
| 114082 | Q85601 | Q9P2W6 | -0.2031   |
| 114083 | Q85601 | Q7Z7E8 | -0.25073  |
| 114084 | Q85601 | Q9UIX4 | -0.83547  |
| 114085 | Q85601 | P23975 | -0.54389  |
| 114086 | Q85601 | Q9H3Z4 | -0.51028  |
| 114087 | Q85601 | Q9BXI9 | -1.0764   |
| 114088 | Q85601 | Q9Y6F9 | -0.82888  |
| 114089 | Q85601 | A2VDF0 | -0.32646  |
| 114090 | Q85601 | Q9NP84 | -0.61474  |
| 114091 | Q85601 | Q9Y2A9 | -0.63504  |
| 114092 | Q85601 | Q6ZQQ6 | -0.17986  |
| 114093 | Q85601 | Q9Y4K4 | -0.57079  |
| 114094 | Q85601 | Q8N6K0 | -0.92686  |
| 114095 | Q85601 | Q9H6B4 | -0.88     |
| 114096 | Q85601 | O60231 | -0.382    |
| 114097 | Q85601 | Q58EX7 | -0.77588  |
| 114098 | Q85601 | P13224 | -0.62497  |
| 114099 | Q85601 | Q7L5A8 | -0.81707  |
| 114100 | Q85601 | P61812 | -0.22741  |
| 114101 | Q85601 | A6NEL3 | -0.20159  |
| 114102 | Q85601 | Q9BXN1 | -1.0296   |
| 114103 | Q85601 | P00352 | -0.41275  |
| 114104 | Q85601 | Q5MY95 | -1.3274   |
| 114105 | Q85601 | P0DJD1 | -0.46976  |
| 114106 | Q85601 | Q96PL2 | -1.125    |
| 114107 | Q85601 | Q96JN2 | -0.75013  |
| 114108 | Q85601 | Q8IXP5 | -0.092462 |
| 114109 | Q85601 | Q14939 | -0.22323  |
| 114110 | Q85601 | Q7L5N7 | -0.70995  |
| 114111 | Q85601 | C9J1S8 | -0.589    |
| 114112 | Q85601 | P06314 | -1.046    |
| 114113 | Q85601 | Q9UBI6 | -0.56925  |
| 114114 | Q85601 | Q8N1C3 | -0.78845  |
| 114115 | Q85601 | Q8TBB5 | -0.22428  |
| 114116 | Q85601 | A8MTW9 | -0.9043   |
| 114117 | Q85601 | Q5K130 | -0.78483  |
| 114118 | Q85601 | Q6QAJ8 | -0.92686  |
| 114119 | Q85601 | Q75610 | -0.81574  |
| 114120 | Q85601 | P53355 | -0.49106  |
| 114121 | Q85601 | Q14715 | -0.067059 |
| 114122 | Q85601 | P40227 | -0.33787  |
| 114123 | Q85601 | Q86VU5 | -0.60824  |
| 114124 | Q85601 | Q9H6Y5 | -0.22627  |
| 114125 | Q85601 | O95210 | -0.51704  |
| 114126 | Q85601 | Q9H792 | -0.51533  |
| 114127 | Q85601 | Q6PL45 | -0.92686  |
| 114128 | Q85601 | Q9UQ52 | -0.60674  |
| 114129 | Q85601 | Q15940 | -0.60958  |
| 114130 | Q85601 | Q9H4I3 | -0.43187  |
| 114131 | Q85601 | P55072 | -0.27465  |
| 114132 | Q85601 | Q8IX30 | -0.22753  |
| 114133 | Q85601 | Q9BWV3 | -0.4473   |
| 114134 | Q85601 | P60852 | -1.371    |
| 114135 | Q85601 | Q9H9P2 | -0.52424  |
| 114136 | Q85601 | Q9UMZ2 | -0.25214  |
| 114137 | Q85601 | P13501 | -0.6826   |
| 114138 | Q85601 | Q5JX71 | -0.92686  |
| 114139 | Q85601 | Q8NGJ0 | -1.2621   |
| 114140 | Q85601 | P61601 | -0.6507   |
| 114141 | Q85601 | O60234 | -0.64469  |
| 114142 | Q85601 | Q92496 | -1.0037   |
| 114143 | Q85601 | Q01629 | -0.83792  |
| 114144 | Q85601 | Q9NTX5 | -0.20792  |
| 114145 | Q85601 | P32239 | -0.58562  |
| 114146 | Q85601 | Q6ZRG5 | -0.49935  |
| 114147 | Q85601 | Q9Y5H4 | -1.246    |
| 114148 | Q85601 | A0AUZ9 | -0.21854  |
| 114149 | Q85601 | Q06945 | -0.24012  |
| 114150 | Q85601 | Q12948 | -0.29873  |
| 114151 | Q85601 | Q7Z4W3 | -0.2031   |
| 114152 | Q85601 | Q9UKH3 | -0.7596   |

|        |        |        |           |
|--------|--------|--------|-----------|
| 114153 | Q85601 | O95968 | -0.95724  |
| 114154 | Q85601 | P51149 | -0.38914  |
| 114155 | Q85601 | P0CJ69 | -0.67838  |
| 114156 | Q85601 | Q6NUJ2 | -0.92686  |
| 114157 | Q85601 | P63267 | -0.43102  |
| 114158 | Q85601 | Q8NGD2 | -1.2621   |
| 114159 | Q85601 | Q9H4Q4 | -0.22912  |
| 114160 | Q85601 | Q8NG68 | -0.68467  |
| 114161 | Q85601 | A8MX34 | -0.46329  |
| 114162 | Q85601 | Q8TAP4 | -0.2737   |
| 114163 | Q85601 | P24311 | -0.55007  |
| 114164 | Q85601 | Q9C0C9 | -0.82656  |
| 114165 | Q85601 | Q9NWQ9 | -0.36798  |
| 114166 | Q85601 | P55000 | -1.0411   |
| 114167 | Q85601 | J3KSC0 | -1.416    |
| 114168 | Q85601 | Q5U5Q3 | -0.22738  |
| 114169 | Q85601 | Q96BU1 | -0.57497  |
| 114170 | Q85601 | P41247 | -0.26222  |
| 114171 | Q85601 | Q13424 | -0.21725  |
| 114172 | Q85601 | Q8TCY5 | -0.80473  |
| 114173 | Q85601 | P55085 | -0.34408  |
| 114174 | Q85601 | Q5T5W8 | -0.92686  |
| 114175 | Q85601 | Q02045 | -0.34876  |
| 114176 | Q85601 | Q99928 | -0.77446  |
| 114177 | Q85601 | P05155 | -0.36589  |
| 114178 | Q85601 | Q8NI32 | -0.5608   |
| 114179 | Q85601 | O75095 | -0.29993  |
| 114180 | Q85601 | Q7Z3J3 | -0.46976  |
| 114181 | Q85601 | Q9Y442 | -0.92686  |
| 114182 | Q85601 | A6NM45 | -0.7627   |
| 114183 | Q85601 | Q8NH59 | -1.2621   |
| 114184 | Q85601 | Q9BYL1 | -0.22381  |
| 114185 | Q85601 | Q12864 | -0.9871   |
| 114186 | Q85601 | Q2M5E4 | -0.58993  |
| 114187 | Q85601 | Q9P2B7 | -0.092462 |
| 114188 | Q85601 | Q7Z3S9 | -0.92774  |
| 114189 | Q85601 | Q9Y597 | -0.19603  |
| 114190 | Q85601 | Q6ZST4 | -0.23644  |
| 114191 | Q85601 | P28340 | -0.26869  |
| 114192 | Q85601 | Q14206 | -0.76662  |
| 114193 | Q85601 | A1A4G5 | -0.2031   |
| 114194 | Q85601 | Q8TAZ6 | -0.40089  |
| 114195 | Q85601 | Q96KN8 | -0.23312  |
| 114196 | Q85601 | A6NER3 | -0.67238  |
| 114197 | Q85601 | Q6P3W7 | -0.22741  |
| 114198 | Q85601 | P28331 | -0.23587  |
| 114199 | Q85601 | Q9Y3Q7 | -1.2749   |
| 114200 | Q85601 | K9M1U5 | -0.2031   |
| 114201 | Q85601 | Q9BRQ4 | -0.29201  |
| 114202 | Q85601 | Q99895 | -0.88468  |
| 114203 | Q85601 | Q9UGT4 | -0.92602  |
| 114204 | Q85601 | Q7Z4L5 | -0.46216  |
| 114205 | Q85601 | Q6NXP6 | -0.76846  |
| 114206 | Q85601 | Q92608 | -0.22519  |
| 114207 | Q85601 | Q86VL8 | -0.90484  |
| 114208 | Q85601 | O15431 | -1.1084   |
| 114209 | Q85601 | P58170 | -1.2621   |
| 114210 | Q85601 | P0C866 | -0.32924  |
| 114211 | Q85601 | A8MTJ6 | -0.28919  |
| 114212 | Q85601 | Q9H2I8 | -0.22722  |
| 114213 | Q85601 | Q53GQ0 | -0.71255  |
| 114214 | Q85601 | Q12899 | -0.43418  |
| 114215 | Q85601 | Q9UH17 | -0.53843  |
| 114216 | Q85601 | Q9NRW3 | -0.51833  |
| 114217 | Q85601 | P10265 | -0.45084  |
| 114218 | Q85601 | Q96LL3 | -0.92686  |
| 114219 | Q85601 | A1Z1Q3 | -0.33991  |
| 114220 | Q85601 | Q15049 | -0.21069  |
| 114221 | Q85601 | B9A064 | -0.9043   |
| 114222 | Q85601 | Q7Z2G1 | -0.70359  |
| 114223 | Q85601 | Q5JU85 | -0.22075  |
| 114224 | Q85601 | Q8NBP0 | -0.22732  |
| 114225 | Q85601 | Q9UP52 | -1.0629   |
| 114226 | Q85601 | Q96P09 | -0.35441  |
| 114227 | Q85601 | P59827 | -0.85105  |
| 114228 | Q85601 | Q9H0Y0 | -0.27557  |

|        |        |        |           |
|--------|--------|--------|-----------|
| 114229 | Q85601 | Q9H2K0 | -0.056376 |
| 114230 | Q85601 | Q8NCR0 | -0.77052  |
| 114231 | Q85601 | Q02742 | -0.6479   |
| 114232 | Q85601 | Q86WS3 | -0.9043   |
| 114233 | Q85601 | C9J3V5 | -0.14254  |
| 114234 | Q85601 | P01596 | -1.046    |
| 114235 | Q85601 | Q8N6M5 | -0.37929  |
| 114236 | Q85601 | Q96EL1 | -0.32788  |
| 114237 | Q85601 | Q8TE23 | -1.2519   |
| 114238 | Q85601 | O14976 | -0.71834  |
| 114239 | Q85601 | Q9UKA4 | -0.11006  |
| 114240 | Q85601 | P20929 | -0.22642  |
| 114241 | Q85601 | O76070 | -0.21404  |
| 114242 | Q85601 | Q96CS7 | -0.50182  |
| 114243 | Q85601 | Q6UX40 | -0.78644  |
| 114244 | Q85601 | P68032 | -0.37136  |
| 114245 | Q85601 | Q96EW2 | -0.1888   |
| 114246 | Q85601 | A6NDD5 | -0.77042  |
| 114247 | Q85601 | P48730 | -0.22741  |
| 114248 | Q85601 | Q5VU65 | -0.92686  |
| 114249 | Q85601 | Q2TBF2 | -0.92686  |
| 114250 | Q85601 | P63302 | -0.39549  |
| 114251 | Q85601 | Q9Y6G9 | -0.22067  |
| 114252 | Q85601 | O75326 | -0.2691   |
| 114253 | Q85601 | Q8TBF8 | -0.27037  |
| 114254 | Q85601 | P78363 | -1.1475   |
| 114255 | Q85601 | Q6ZQW0 | -0.21764  |
| 114256 | Q85601 | A8MTJ3 | -0.71666  |
| 114257 | Q85601 | P05023 | -0.4091   |
| 114258 | Q85601 | Q68CR7 | -0.92686  |
| 114259 | Q85601 | Q9BV35 | -0.75691  |
| 114260 | Q85601 | P61421 | -0.18152  |
| 114261 | Q85601 | P49913 | -0.78193  |
| 114262 | Q85601 | P30550 | -1.2557   |
| 114263 | Q85601 | P35544 | -0.22535  |
| 114264 | Q85601 | A6NC57 | -0.2274   |
| 114265 | Q85601 | Q7Z5J8 | -0.92686  |
| 114266 | Q85601 | P22105 | -1.1629   |
| 114267 | Q85601 | Q92766 | -0.21428  |
| 114268 | Q85601 | Q8WVL7 | -0.22739  |
| 114269 | Q85601 | Q8IUS5 | -0.98181  |
| 114270 | Q85601 | O14513 | -0.25822  |
| 114271 | Q85601 | O75061 | -0.27822  |
| 114272 | Q85601 | Q9Y6X1 | -0.54602  |
| 114273 | Q85601 | Q9ULS6 | -0.84367  |
| 114274 | Q85601 | Q9P1G2 | -0.16728  |
| 114275 | Q85601 | P08754 | -0.32563  |
| 114276 | Q85601 | Q7RTY9 | -1.0067   |
| 114277 | Q85601 | Q9NZN9 | -0.21518  |
| 114278 | Q85601 | Q96M89 | -0.35897  |
| 114279 | Q85601 | Q9BSA4 | -0.46579  |
| 114280 | Q85601 | P02008 | -0.2589   |
| 114281 | Q85601 | O75159 | -0.22733  |
| 114282 | Q85601 | P26439 | -0.84766  |
| 114283 | Q85601 | Q9Y6T7 | -0.85538  |
| 114284 | Q85601 | Q13461 | -0.43379  |
| 114285 | Q85601 | Q9BYN0 | -0.68044  |
| 114286 | Q85601 | A6NFT4 | -0.74113  |
| 114287 | Q85601 | P48739 | -0.36157  |
| 114288 | Q85601 | Q8N7X2 | -0.2031   |
| 114289 | Q85601 | P15516 | -0.84253  |
| 114290 | Q85601 | P49746 | -0.96449  |
| 114291 | Q85601 | Q9C0B5 | -0.99292  |
| 114292 | Q85601 | Q6UXQ6 | -0.9043   |
| 114293 | Q85601 | Q9UQ72 | -0.91419  |
| 114294 | Q85601 | O75916 | -0.45158  |
| 114295 | Q85601 | Q9BXU1 | -1.2086   |
| 114296 | Q85601 | Q9HCG7 | -0.8019   |
| 114297 | Q85601 | Q9NXF8 | -0.72806  |
| 114298 | Q85601 | Q70EL3 | -0.37137  |
| 114299 | Q85601 | Q5SSG8 | -1.0347   |
| 114300 | Q85601 | Q13698 | -0.64701  |
| 114301 | Q85601 | Q9Y223 | -0.62634  |
| 114302 | Q85601 | P00441 | -0.225    |
| 114303 | Q85601 | P18433 | -1.2535   |
| 114304 | Q85601 | P51692 | -0.22672  |

|        |        |        |           |
|--------|--------|--------|-----------|
| 114305 | Q85601 | P55081 | -0.81539  |
| 114306 | Q85601 | P32298 | -0.95558  |
| 114307 | Q85601 | Q9H6K5 | -0.092462 |
| 114308 | Q85601 | Q9BV81 | -0.90534  |
| 114309 | Q85601 | P04229 | -0.556    |
| 114310 | Q85601 | Q17RN3 | -0.27025  |
| 114311 | Q85601 | Q96SJ8 | -0.92686  |
| 114312 | Q85601 | Q5T601 | -0.79497  |
| 114313 | Q85601 | Q8WXE0 | -0.22745  |
| 114314 | Q85601 | Q96JP0 | -0.22746  |
| 114315 | Q85601 | P49748 | -0.39133  |
| 114316 | Q85601 | Q9UM47 | -0.23279  |
| 114317 | Q85601 | Q8N118 | -0.81196  |
| 114318 | Q85601 | Q09472 | -0.1384   |
| 114319 | Q85601 | P18827 | -0.50641  |
| 114320 | Q85601 | Q96T49 | -0.2274   |
| 114321 | Q85601 | Q6ZTI0 | -0.2031   |
| 114322 | Q85601 | P26842 | -0.72818  |
| 114323 | Q85601 | Q8IZP1 | -1.3431   |
| 114324 | Q85601 | P18545 | -0.2597   |
| 114325 | Q85601 | P04280 | -0.7935   |
| 114326 | Q85601 | Q9BXI3 | -0.29533  |
| 114327 | Q85601 | Q9H4G8 | -0.31263  |
| 114328 | Q85601 | Q9NUJ1 | -0.37188  |
| 114329 | Q85601 | Q9BPW8 | -0.15497  |
| 114330 | Q85601 | O95466 | -0.22182  |
| 114331 | Q85601 | Q8TF30 | -0.12949  |
| 114332 | Q85601 | Q93100 | -0.10874  |
| 114333 | Q85601 | P37058 | -0.47297  |
| 114334 | Q85601 | Q9UNE0 | -0.69957  |
| 114335 | Q85601 | A2A2V5 | -0.92686  |
| 114336 | Q85601 | Q6ZSB3 | -0.57298  |
| 114337 | Q85601 | Q86W50 | -0.30175  |
| 114338 | Q85601 | Q9HBW0 | -0.95287  |
| 114339 | Q85601 | Q7Z4V5 | -0.15613  |
| 114340 | Q85601 | Q2WJ8  | -0.92686  |
| 114341 | Q85601 | Q7L523 | -0.22761  |
| 114342 | Q85601 | Q53H54 | -0.25566  |
| 114343 | Q85601 | P01040 | -0.2433   |
| 114344 | Q85601 | Q96T68 | -0.22026  |
| 114345 | Q85601 | Q3MIP1 | -0.92686  |
| 114346 | Q85601 | Q8MH63 | -0.92452  |
| 114347 | Q85601 | Q15303 | -0.22741  |
| 114348 | Q85601 | Q6UWN8 | -0.82753  |
| 114349 | Q85601 | Q8N1H7 | -0.46974  |
| 114350 | Q85601 | Q6PI25 | -0.48603  |
| 114351 | Q85601 | Q6GTS8 | -1.2571   |
| 114352 | Q85601 | P04278 | -0.9303   |
| 114353 | Q85601 | Q9BUV8 | -0.53187  |
| 114354 | Q85601 | P58166 | -0.77443  |
| 114355 | Q85601 | Q9NZC4 | -0.028221 |
| 114356 | Q85601 | Q9BTK2 | -0.74261  |
| 114357 | Q85601 | Q3SY46 | -0.15418  |
| 114358 | Q85601 | P08581 | -0.44078  |
| 114359 | Q85601 | P02452 | -0.29075  |
| 114360 | Q85601 | Q8N6C7 | -0.35204  |
| 114361 | Q85601 | Q6ZW61 | -0.28284  |
| 114362 | Q85601 | Q2M329 | -0.076207 |
| 114363 | Q85601 | Q96HA9 | -0.3386   |
| 114364 | Q85601 | Q12929 | -0.22741  |
| 114365 | Q85601 | Q6ZMI0 | -0.26089  |
| 114366 | Q85601 | Q9Y255 | -0.23855  |
| 114367 | Q85601 | P06331 | -1.046    |
| 114368 | Q85601 | Q9UQ53 | -0.53433  |
| 114369 | Q85601 | P25445 | -0.22733  |
| 114370 | Q85601 | Q8IVY1 | -0.92686  |
| 114371 | Q85601 | Q9NPF4 | -0.26546  |
| 114372 | Q85601 | Q92914 | -0.33937  |
| 114373 | Q85601 | Q8N961 | -0.31544  |
| 114374 | Q85601 | Q5TH69 | -0.98493  |
| 114375 | Q85601 | P01857 | -0.5117   |
| 114376 | Q85601 | P13164 | -0.42764  |
| 114377 | Q85601 | Q5TGL8 | -0.48411  |
| 114378 | Q85601 | P0CG32 | -0.32209  |
| 114379 | Q85601 | Q9Y6A5 | -0.091931 |
| 114380 | Q85601 | A6NEL2 | -0.22741  |

|        |        |        |           |
|--------|--------|--------|-----------|
| 114381 | Q85601 | Q8TAV4 | -1.1825   |
| 114382 | Q85601 | Q06643 | -0.89759  |
| 114383 | Q85601 | Q5BLP8 | -0.9043   |
| 114384 | Q85601 | P0CG20 | -0.080583 |
| 114385 | Q85601 | Q9Y279 | -0.26697  |
| 114386 | Q85601 | Q9UBR5 | -1.303    |
| 114387 | Q85601 | O60844 | -0.59946  |
| 114388 | Q85601 | Q6P0A1 | -1.0904   |
| 114389 | Q85601 | P23634 | -0.50569  |
| 114390 | Q85601 | Q9NR30 | -0.40754  |
| 114391 | Q85601 | Q9Y4X1 | -0.89092  |
| 114392 | Q85601 | P21266 | -0.27021  |
| 114393 | Q85601 | Q6JQN1 | -0.69983  |
| 114394 | Q85601 | Q6ZRN7 | -0.2031   |
| 114395 | Q85601 | P48509 | -0.5687   |
| 114396 | Q85601 | P08833 | -0.87805  |
| 114397 | Q85601 | Q9NRA2 | -1.0737   |
| 114398 | Q85601 | Q8IWZ6 | -0.22074  |
| 114399 | Q85601 | O75121 | -1.0386   |
| 114400 | Q85601 | Q9Y6I7 | -0.22954  |
| 114401 | Q85601 | Q7Z3Z2 | -0.35678  |
| 114402 | Q85601 | Q8N6Q1 | -0.92686  |
| 114403 | Q85601 | O94915 | -0.16884  |
| 114404 | Q85601 | Q5VT79 | -0.32272  |
| 114405 | Q85601 | Q13349 | -1.0931   |
| 114406 | Q85601 | Q3KR37 | -0.92686  |
| 114407 | Q85601 | P49368 | -0.18795  |
| 114408 | Q85601 | Q7Z5L0 | -0.88347  |
| 114409 | Q85601 | Q02548 | -0.2273   |
| 114410 | Q85601 | Q14112 | -0.72198  |
| 114411 | Q85601 | Q9Y3B1 | -0.15537  |
| 114412 | Q85601 | P0C7T7 | -0.2031   |
| 114413 | Q85601 | Q08AI8 | -0.092462 |
| 114414 | Q85601 | O14511 | -1.4193   |
| 114415 | Q85601 | P21817 | -0.60532  |
| 114416 | Q85601 | Q53F39 | -0.33089  |
| 114417 | Q85601 | Q9NZC9 | -0.44603  |
| 114418 | Q85601 | Q9Y256 | -1.1636   |
| 114419 | Q85601 | P55042 | -0.70362  |
| 114420 | Q85601 | Q8IVQ6 | -0.49537  |
| 114421 | Q85601 | Q9BRC7 | -0.43684  |
| 114422 | Q85601 | P55075 | -0.32916  |
| 114423 | Q85601 | Q86Y38 | -1.0846   |
| 114424 | Q85601 | Q30KQ8 | -0.86864  |
| 114425 | Q85601 | P0C875 | -0.78591  |
| 114426 | Q85601 | Q0JRZ9 | -0.22577  |
| 114427 | Q85601 | Q9UBC7 | -0.74352  |
| 114428 | Q85601 | Q5RGS2 | -0.92686  |
| 114429 | Q85601 | Q9UJ94 | -0.2031   |
| 114430 | Q85601 | Q8IWT3 | -0.2263   |
| 114431 | Q85601 | P18858 | -0.15383  |
| 114432 | Q85601 | Q8WWZ8 | -0.22741  |
| 114433 | Q85601 | Q5DJT8 | -0.17382  |
| 114434 | Q85601 | P25024 | -1.2072   |
| 114435 | Q85601 | P12319 | -1.0404   |
| 114436 | Q85601 | Q96C45 | -1.2086   |
| 114437 | Q85601 | P39059 | -1.6253   |
| 114438 | Q85601 | Q9Y6U7 | -0.89088  |
| 114439 | Q85601 | Q86T65 | -0.31934  |
| 114440 | Q85601 | Q96P68 | -1.2881   |
| 114441 | Q85601 | Q8WWF1 | -0.9043   |
| 114442 | Q85601 | Q15434 | -0.57937  |
| 114443 | Q85601 | Q9H0R5 | -0.85223  |
| 114444 | Q85601 | P30408 | -0.9286   |
| 114445 | Q85601 | Q96RD9 | -1.0386   |
| 114446 | Q85601 | P05091 | -0.37678  |
| 114447 | Q85601 | Q9NX58 | -0.28867  |
| 114448 | Q85601 | Q5JQS5 | -1.2621   |
| 114449 | Q85601 | Q9UK17 | -1.0322   |
| 114450 | Q85601 | Q96QS1 | -1.0215   |
| 114451 | Q85601 | A8MUP6 | -0.92686  |
| 114452 | Q85601 | Q16558 | -1.0247   |
| 114453 | Q85601 | Q96MX0 | -0.95476  |
| 114454 | Q85601 | Q9BT88 | -0.49547  |
| 114455 | Q85601 | P45378 | -0.31701  |
| 114456 | Q85601 | P29122 | -0.99649  |

|        |        |        |            |
|--------|--------|--------|------------|
| 114457 | Q85601 | Q9NVA4 | -0.92686   |
| 114458 | Q85601 | Q9H903 | -0.7403    |
| 114459 | Q85601 | Q8NDY4 | -0.2031    |
| 114460 | Q85601 | Q9NYS7 | -0.58286   |
| 114461 | Q85601 | Q6ZUQ5 | -1.142     |
| 114462 | Q85601 | P34969 | -1.3098    |
| 114463 | Q85601 | Q16540 | -0.3964    |
| 114464 | Q85601 | P0C880 | -0.2031    |
| 114465 | Q85601 | P50151 | -0.54654   |
| 114466 | Q85601 | Q8IZQ5 | -0.42716   |
| 114467 | Q85601 | Q8N7S6 | -0.92686   |
| 114468 | Q85601 | Q6UQ28 | -0.93364   |
| 114469 | Q85601 | Q9H3G5 | -0.64036   |
| 114470 | Q85601 | Q96G61 | -0.36762   |
| 114471 | Q85601 | Q8TCW7 | -0.92686   |
| 114472 | Q85601 | P08582 | -0.54749   |
| 114473 | Q85601 | Q9BV23 | -0.76528   |
| 114474 | Q85601 | Q17RR3 | -0.91268   |
| 114475 | Q85601 | Q13509 | -0.52563   |
| 114476 | Q85601 | Q5VZY2 | -0.88288   |
| 114477 | Q85601 | Q5VVJ2 | -0.22736   |
| 114478 | Q85601 | Q8IYK2 | -0.17514   |
| 114479 | Q85601 | Q96P11 | -0.30175   |
| 114480 | Q85601 | Q8N0Z9 | -0.92686   |
| 114481 | Q85601 | Q4KMG9 | -0.92686   |
| 114482 | Q85601 | Q14296 | -0.66287   |
| 114483 | Q85601 | Q8NGK6 | -1.2621    |
| 114484 | Q85601 | P22894 | -1.2712    |
| 114485 | Q85601 | Q16572 | -0.95082   |
| 114486 | Q85601 | Q17RH7 | -0.2031    |
| 114487 | Q85601 | Q9ULB4 | -1.0826    |
| 114488 | Q85601 | Q92574 | -0.22715   |
| 114489 | Q85601 | Q96LS8 | -0.3636    |
| 114490 | Q85601 | Q8N387 | -1.4937    |
| 114491 | Q85601 | Q6ZRH3 | -0.0066268 |
| 114492 | Q85601 | Q9NQ88 | -0.70467   |
| 114493 | Q85601 | Q9UKU6 | -1.3232    |
| 114494 | Q85601 | Q92542 | -0.42435   |
| 114495 | Q85601 | Q9Y265 | -0.41424   |
| 114496 | Q85601 | P0CG40 | -0.19141   |
| 114497 | Q85601 | A6NIR3 | -0.88202   |
| 114498 | Q85601 | O00154 | -0.25011   |
| 114499 | Q85601 | Q6UDR6 | -0.82753   |
| 114500 | Q85601 | Q02218 | -0.2061    |
| 114501 | Q85601 | A6NHR9 | -0.58113   |
| 114502 | Q85601 | O75937 | -0.23748   |
| 114503 | Q85601 | P23109 | -0.15653   |
| 114504 | Q85601 | Q86W10 | -1.1477    |
| 114505 | Q85601 | P10809 | -0.16776   |
| 114506 | Q85601 | Q6IPX1 | -1.3431    |
| 114507 | Q85601 | I3L3R5 | -0.2031    |
| 114508 | Q85601 | Q8WYQ3 | -0.10107   |
| 114509 | Q85601 | P51970 | -0.36131   |
| 114510 | Q85601 | Q86X52 | -0.82532   |
| 114511 | Q85601 | Q9BZQ6 | -0.41091   |
| 114512 | Q85601 | Q7Z7N9 | -0.92686   |
| 114513 | Q85601 | A8MTB1 | -0.2031    |
| 114514 | Q85601 | Q15661 | -0.91288   |
| 114515 | Q85601 | Q8TB45 | -0.22741   |
| 114516 | Q85601 | Q9NPH5 | -0.79742   |
| 114517 | Q85601 | Q96JJ6 | -1.0451    |
| 114518 | Q85601 | Q9NUL5 | -0.28507   |
| 114519 | Q85601 | A6NMX2 | -0.054163  |
| 114520 | Q85601 | O00755 | -0.43318   |
| 114521 | Q85601 | Q86VE3 | -0.35034   |
| 114522 | Q85601 | A6NJJ6 | -0.092462  |
| 114523 | Q85601 | O60522 | -0.75422   |
| 114524 | Q85601 | Q96MI6 | -0.074711  |
| 114525 | Q85601 | Q6IF42 | -1.2621    |
| 114526 | Q85601 | Q9BYG0 | -0.9937    |
| 114527 | Q85601 | O60391 | -0.81602   |
| 114528 | Q85601 | Q13585 | -1.4007    |
| 114529 | Q85601 | O60942 | -0.58298   |
| 114530 | Q85601 | P30043 | -0.32221   |
| 114531 | Q85601 | Q7RTT9 | -0.95232   |
| 114532 | Q85601 | P63027 | -0.21794   |



|        |        |        |           |
|--------|--------|--------|-----------|
| 114533 | Q85601 | Q8N300 | -0.34216  |
| 114534 | Q85601 | Q969T3 | -0.52704  |
| 114535 | Q85601 | Q15818 | -0.50992  |
| 114536 | Q85601 | Q8N307 | -0.8354   |
| 114537 | Q85601 | Q5T197 | -0.89088  |
| 114538 | Q85601 | P50135 | -0.31043  |
| 114539 | Q85601 | P06858 | -0.50791  |
| 114540 | Q85601 | Q96GM1 | -0.9586   |
| 114541 | Q85601 | O75385 | -0.51324  |
| 114542 | Q85601 | Q9NY15 | -1.1098   |
| 114543 | Q85601 | P07306 | -0.49161  |
| 114544 | Q85601 | P08247 | -0.58805  |
| 114545 | Q85601 | Q7L3B6 | -0.10147  |
| 114546 | Q85601 | P14920 | -0.44919  |
| 114547 | Q85601 | P12268 | -0.65761  |
| 114548 | Q85601 | Q6P087 | -0.37282  |
| 114549 | Q85601 | Q9HBD1 | -0.27286  |
| 114550 | Q85601 | Q9BXJ7 | -1.0701   |
| 114551 | Q85601 | P36894 | -0.39284  |
| 114552 | Q85601 | Q6T311 | -1.3986   |
| 114553 | Q85601 | Q14439 | -1.4937   |
| 114554 | Q85601 | P09430 | -0.58863  |
| 114555 | Q85601 | Q8WV4  | -0.38596  |
| 114556 | Q85601 | Q9UJU2 | -0.18133  |
| 114557 | Q85601 | Q6P9F5 | -0.589    |
| 114558 | Q85601 | O00764 | -0.25299  |
| 114559 | Q85601 | P20061 | -0.85426  |
| 114560 | Q85601 | P07205 | -0.48414  |
| 114561 | Q85601 | P27539 | -0.75316  |
| 114562 | Q85601 | Q29980 | -0.9026   |
| 114563 | Q85601 | Q9BSY9 | -0.43157  |
| 114564 | Q85601 | Q9UMX6 | -0.63023  |
| 114565 | Q85601 | A6NJG2 | -0.2274   |
| 114566 | Q85601 | P26045 | -0.22763  |
| 114567 | Q85601 | Q15822 | -0.96884  |
| 114568 | Q85601 | Q69YU3 | -0.22697  |
| 114569 | Q85601 | Q8N423 | -0.46114  |
| 114570 | Q85601 | Q6Q8B3 | -0.92686  |
| 114571 | Q85601 | Q9BWN1 | -0.092462 |
| 114572 | Q85601 | Q96B70 | -0.63694  |
| 114573 | Q85601 | A8K855 | -0.39878  |
| 114574 | Q85601 | P29377 | -0.36501  |
| 114575 | Q85601 | O60269 | -0.83226  |
| 114576 | Q85601 | Q9ULJ7 | -0.2274   |
| 114577 | Q85601 | P19961 | -0.80417  |
| 114578 | Q85601 | Q8WWP7 | -1.211    |
| 114579 | Q85601 | Q9NQM4 | -0.47065  |
| 114580 | Q85601 | Q9Y467 | -0.22747  |
| 114581 | Q85601 | P04196 | -0.29014  |
| 114582 | Q85601 | P01034 | -0.32544  |
| 114583 | Q85601 | P42127 | -0.93882  |
| 114584 | Q85601 | P46977 | -0.4279   |
| 114585 | Q85601 | Q969F0 | -0.89384  |
| 114586 | Q85601 | Q5T035 | -0.25689  |
| 114587 | Q85601 | Q92947 | -0.46453  |
| 114588 | Q85601 | O15417 | -0.39822  |
| 114589 | Q85601 | B3EWG5 | -0.092462 |
| 114590 | Q85601 | O00591 | -0.76871  |
| 114591 | Q85601 | P13760 | -0.46249  |
| 114592 | Q85601 | Q9ULZ0 | -1.1993   |
| 114593 | Q85601 | O15041 | -0.90473  |
| 114594 | Q85601 | Q95932 | -0.2621   |
| 114595 | Q85601 | P86478 | -0.2031   |
| 114596 | Q85601 | Q8N443 | -0.23476  |
| 114597 | Q85601 | Q9UGB7 | -0.27206  |
| 114598 | Q85601 | Q01814 | -0.32893  |
| 114599 | Q85601 | P21918 | -0.73067  |
| 114600 | Q85601 | Q8N1W0 | -0.92686  |
| 114601 | Q85601 | P02724 | -1.0326   |
| 114602 | Q85601 | P51888 | -0.91158  |
| 114603 | Q85601 | Q6ZU35 | -0.092462 |
| 114604 | Q85601 | Q8TBF4 | -0.33802  |
| 114605 | Q85601 | O14894 | -1.3117   |
| 114606 | Q85601 | P48431 | -0.32291  |
| 114607 | Q85601 | Q8TF42 | -0.22741  |
| 114608 | Q85601 | O60519 | -0.15269  |

|        |        |        |           |
|--------|--------|--------|-----------|
| 114609 | Q85601 | Q5U5Z8 | -0.28712  |
| 114610 | Q85601 | P36404 | -0.22945  |
| 114611 | Q85601 | Q96H96 | -0.68244  |
| 114612 | Q85601 | Q9Y5G0 | -1.246    |
| 114613 | Q85601 | Q9H6A9 | -0.92686  |
| 114614 | Q85601 | Q8WYN0 | -0.31668  |
| 114615 | Q85601 | Q9P2K6 | -0.22023  |
| 114616 | Q85601 | Q8N7A1 | -0.22724  |
| 114617 | Q85601 | P01037 | -0.94321  |
| 114618 | Q85601 | O14733 | -0.23056  |
| 114619 | Q85601 | Q5T6V5 | -0.55622  |
| 114620 | Q85601 | Q9UII6 | -0.80642  |
| 114621 | Q85601 | Q9NWX4 | -0.016738 |
| 114622 | Q85601 | Q8IVL1 | -0.5898   |
| 114623 | Q85601 | Q9NV70 | -0.20351  |
| 114624 | Q85601 | Q96SL4 | -1.1716   |
| 114625 | Q85601 | O14525 | -0.887    |
| 114626 | Q85601 | Q96MV1 | -0.67993  |
| 114627 | Q85601 | Q9NZH6 | -0.22625  |
| 114628 | Q85601 | P41235 | -0.24906  |
| 114629 | Q85601 | Q13268 | -0.30567  |
| 114630 | Q85601 | Q6UXV0 | -1.0136   |
| 114631 | Q85601 | Q66K14 | -1.801    |
| 114632 | Q85601 | Q9UDW1 | -0.37864  |
| 114633 | Q85601 | Q7Z6I6 | -0.984    |
| 114634 | Q85601 | Q7Z478 | -0.30772  |
| 114635 | Q85601 | Q9NVA1 | -0.43207  |
| 114636 | Q85601 | Q9Y397 | -0.54601  |
| 114637 | Q85601 | Q01085 | -0.32389  |
| 114638 | Q85601 | P40617 | -0.22815  |
| 114639 | Q85601 | P08243 | -0.36169  |
| 114640 | Q85601 | Q13402 | -0.12974  |
| 114641 | Q85601 | Q96GY3 | -0.6747   |
| 114642 | Q85601 | Q9NR63 | -0.60785  |
| 114643 | Q85601 | Q9Y5U9 | -0.83924  |
| 114644 | Q85601 | Q96FL8 | -0.84475  |
| 114645 | Q85601 | Q9Y234 | -0.34279  |
| 114646 | Q85601 | Q9Y365 | -0.5692   |
| 114647 | Q85601 | Q8N144 | -0.61766  |
| 114648 | Q85601 | O43422 | -0.30062  |
| 114649 | Q85601 | Q92629 | -0.54516  |
| 114650 | Q85601 | Q6IQ22 | -0.75409  |
| 114651 | Q85601 | Q9HAU8 | -0.66638  |
| 114652 | Q85601 | Q9H4I9 | -0.75013  |
| 114653 | Q85601 | Q9NXH8 | -1.4099   |
| 114654 | Q85601 | Q3ZCU0 | -0.22081  |
| 114655 | Q85601 | P35325 | -0.2031   |
| 114656 | Q85601 | Q7Z3D6 | -0.10532  |
| 114657 | Q85601 | Q9BXU0 | -0.30451  |
| 114658 | Q85601 | Q9Y548 | -0.90533  |
| 114659 | Q85601 | Q5BKU6 | -0.2987   |
| 114660 | Q85601 | O15217 | -0.22599  |
| 114661 | Q85601 | Q8N2H9 | -0.21046  |
| 114662 | Q85601 | Q9BYT8 | -0.28607  |
| 114663 | Q85601 | P01815 | -1.046    |
| 114664 | Q85601 | P01624 | -1.046    |
| 114665 | Q85601 | Q9BQ24 | -0.26544  |
| 114666 | Q85601 | Q5TDH0 | -0.46957  |
| 114667 | Q85601 | Q03393 | -0.2211   |
| 114668 | Q85601 | Q9H0Q0 | -0.61352  |
| 114669 | Q85601 | Q9Y6I8 | -0.39224  |
| 114670 | Q85601 | P34820 | -0.95594  |
| 114671 | Q85601 | Q96DU9 | -0.67006  |
| 114672 | Q85601 | Q9UJV9 | -0.56883  |
| 114673 | Q85601 | Q96LJ7 | -0.89463  |
| 114674 | Q85601 | P18405 | -0.38177  |
| 114675 | Q85601 | Q9BXL5 | -0.43027  |
| 114676 | Q85601 | P10415 | -0.22729  |
| 114677 | Q85601 | Q9UN88 | -0.91878  |
| 114678 | Q85601 | P05165 | -0.60886  |
| 114679 | Q85601 | Q9BZ76 | -1.8802   |
| 114680 | Q85601 | Q6UWL2 | -0.98975  |
| 114681 | Q85601 | Q15274 | -0.16616  |
| 114682 | Q85601 | P0C025 | -0.26641  |
| 114683 | Q85601 | Q9HD87 | -0.92686  |
| 114684 | Q85601 | Q5DX21 | -1.1915   |

|        |        |         |           |
|--------|--------|---------|-----------|
| 114685 | Q85601 | Q969Z3  | -0.58278  |
| 114686 | Q85601 | P59901  | -0.29083  |
| 114687 | Q85601 | O96001  | -0.55399  |
| 114688 | Q85601 | P43320  | -0.40867  |
| 114689 | Q85601 | P07476  | -0.063429 |
| 114690 | Q85601 | Q9UL45  | -0.24448  |
| 114691 | Q85601 | P80192  | -0.5239   |
| 114692 | Q85601 | Q9NTN3  | -0.64597  |
| 114693 | Q85601 | Q52LJ0  | -0.76175  |
| 114694 | Q85601 | Q58FG1  | -0.56805  |
| 114695 | Q85601 | P46459  | -0.23971  |
| 114696 | Q85601 | Q5T6F0  | -0.22577  |
| 114697 | Q85601 | Q8N239  | -0.20824  |
| 114698 | Q85601 | P78509  | -0.57962  |
| 114699 | Q85601 | P50747  | -0.30175  |
| 114700 | Q85601 | P0DKB5  | -0.92686  |
| 114701 | Q85601 | P78540  | -0.22359  |
| 114702 | Q85601 | Q99558  | -0.22741  |
| 114703 | Q85601 | Q8NGY7  | -1.2621   |
| 114704 | Q85601 | Q8IUH5  | -0.2274   |
| 114705 | Q85601 | Q2WGGJ9 | -0.92686  |
| 114706 | Q85601 | Q14721  | -0.30793  |
| 114707 | Q85601 | Q8NBW4  | -0.9929   |
| 114708 | Q85601 | P12018  | -0.92206  |
| 114709 | Q85601 | Q9NZW4  | -1.1577   |
| 114710 | Q85601 | A6NKKX1 | -0.2031   |
| 114711 | Q85601 | A0M8Q6  | -1.0219   |
| 114712 | Q85601 | Q0VDE8  | -0.30887  |
| 114713 | Q85601 | P13521  | -0.67627  |
| 114714 | Q85601 | O75387  | -1.0749   |
| 114715 | Q85601 | Q86U90  | -0.26955  |
| 114716 | Q85601 | Q8IV20  | -0.37767  |
| 114717 | Q85601 | Q9P2T1  | -0.40732  |
| 114718 | Q85601 | A8MWP4  | -0.59451  |
| 114719 | Q85601 | Q93099  | -0.37879  |
| 114720 | Q85601 | O43524  | -0.43379  |
| 114721 | Q85601 | Q6ZUU3  | -0.2031   |
| 114722 | Q85601 | Q9UPV7  | -0.39113  |
| 114723 | Q85601 | Q5TA81  | -0.31607  |
| 114724 | Q85601 | Q9P2N7  | -0.18449  |
| 114725 | Q85601 | B6A8C7  | -0.92686  |
| 114726 | Q85601 | Q96G75  | -0.049139 |
| 114727 | Q85601 | P22223  | -1.1614   |
| 114728 | Q85601 | Q5VTT2  | -0.92686  |
| 114729 | Q85601 | Q15327  | -0.41148  |
| 114730 | Q85601 | Q86VK4  | -0.19642  |
| 114731 | Q85601 | Q8N0Y5  | -1.2621   |
| 114732 | Q85601 | Q14390  | -0.37895  |
| 114733 | Q85601 | Q6T423  | -0.86184  |
| 114734 | Q85601 | A8MZ26  | -0.39878  |
| 114735 | Q85601 | O43423  | -0.11692  |
| 114736 | Q85601 | Q8IWG1  | -0.089905 |
| 114737 | Q85601 | Q9H313  | -0.77771  |
| 114738 | Q85601 | Q9UHX3  | -1.4202   |
| 114739 | Q85601 | Q6ZMU5  | -0.27498  |
| 114740 | Q85601 | Q6NT04  | -0.12008  |
| 114741 | Q85601 | Q96PX1  | -0.29575  |
| 114742 | Q85601 | Q9Y6W3  | -0.70468  |
| 114743 | Q85601 | B1ANS9  | -0.22747  |
| 114744 | Q85601 | Q96KX0  | -0.86331  |
| 114745 | Q85601 | Q8IWX5  | -0.77499  |
| 114746 | Q85601 | P50395  | -0.25504  |
| 114747 | Q85601 | P01737  | -0.42093  |
| 114748 | Q85601 | Q9UQ03  | -0.3409   |
| 114749 | Q85601 | Q6P4H8  | -0.92686  |
| 114750 | Q85601 | Q01064  | -0.22602  |
| 114751 | Q85601 | Q6ZU69  | -0.92686  |
| 114752 | Q85601 | Q5VVC0  | -0.025453 |
| 114753 | Q85601 | Q8NH01  | -1.2621   |
| 114754 | Q85601 | P31275  | -0.21975  |
| 114755 | Q85601 | Q9Y5T4  | -0.82411  |
| 114756 | Q85601 | Q86YD3  | -1.5584   |
| 114757 | Q85601 | Q7LDI9  | -0.28681  |
| 114758 | Q85601 | Q96NG3  | -0.21946  |
| 114759 | Q85601 | Q6ZQX7  | -0.29329  |
| 114760 | Q85601 | Q4G0M1  | -0.9043   |

|        |        |         |           |
|--------|--------|---------|-----------|
| 114761 | Q85601 | P21283  | -0.24198  |
| 114762 | Q85601 | O75604  | -0.36672  |
| 114763 | Q85601 | Q9NQQ7  | -0.86355  |
| 114764 | Q85601 | Q5VTT5  | -0.33413  |
| 114765 | Q85601 | Q9NS86  | -0.29573  |
| 114766 | Q85601 | Q15031  | -0.12371  |
| 114767 | Q85601 | Q9H0R3  | -0.92686  |
| 114768 | Q85601 | Q9NRZ5  | -0.79734  |
| 114769 | Q85601 | P06315  | -1.046    |
| 114770 | Q85601 | P21333  | -0.22932  |
| 114771 | Q85601 | Q5RL73  | -0.38309  |
| 114772 | Q85601 | Q16850  | -1.0241   |
| 114773 | Q85601 | Q8NH06  | -1.2621   |
| 114774 | Q85601 | Q8IZ07  | -0.22741  |
| 114775 | Q85601 | A6NDQ2  | -0.589    |
| 114776 | Q85601 | P35670  | -0.26836  |
| 114777 | Q85601 | Q8NFY9  | -0.2083   |
| 114778 | Q85601 | Q86SZ3  | -1.0439   |
| 114779 | Q85601 | O00142  | -0.58641  |
| 114780 | Q85601 | Q8IZS7  | -1.0252   |
| 114781 | Q85601 | Q9NZ20  | -0.55883  |
| 114782 | Q85601 | P43627  | -1.0399   |
| 114783 | Q85601 | Q9BVK2  | -0.8622   |
| 114784 | Q85601 | Q6ZLNQ3 | -0.22872  |
| 114785 | Q85601 | Q8NFS9  | -0.71737  |
| 114786 | Q85601 | Q8IXM6  | -0.33857  |
| 114787 | Q85601 | Q96PI1  | -0.12289  |
| 114788 | Q85601 | Q9NUD9  | -0.94107  |
| 114789 | Q85601 | Q02127  | -0.62019  |
| 114790 | Q85601 | Q5SY16  | -0.51525  |
| 114791 | Q85601 | Q7L9B9  | -0.23364  |
| 114792 | Q85601 | P13385  | -0.22748  |
| 114793 | Q85601 | A8MVP8  | -0.346    |
| 114794 | Q85601 | Q9BPU6  | -0.22131  |
| 114795 | Q85601 | Q99707  | -0.18364  |
| 114796 | Q85601 | P23141  | -0.31371  |
| 114797 | Q85601 | Q9H7B4  | -0.2269   |
| 114798 | Q85601 | Q658T7  | -0.10066  |
| 114799 | Q85601 | Q9UNL2  | -0.80166  |
| 114800 | Q85601 | Q9Y286  | -1.2255   |
| 114801 | Q85601 | Q69YJ1  | -0.67807  |
| 114802 | Q85601 | A6NJI9  | -0.19221  |
| 114803 | Q85601 | Q8NE31  | -0.056174 |
| 114804 | Q85601 | Q16854  | -0.36287  |
| 114805 | Q85601 | P48048  | -1.3068   |
| 114806 | Q85601 | Q9H6D5  | -0.92686  |
| 114807 | Q85601 | P10997  | -1.0941   |
| 114808 | Q85601 | Q8IWI9  | -0.43298  |
| 114809 | Q85601 | A6NDP7  | -0.92686  |
| 114810 | Q85601 | Q8WUT9  | -0.69944  |
| 114811 | Q85601 | Q7RTV5  | -0.42592  |
| 114812 | Q85601 | Q75533  | -0.2251   |
| 114813 | Q85601 | Q96B86  | -0.44725  |
| 114814 | Q85601 | Q6ZMQ8  | -0.73948  |
| 114815 | Q85601 | Q9H999  | -0.72766  |
| 114816 | Q85601 | Q9BRX9  | -0.22774  |
| 114817 | Q85601 | Q9BV38  | -0.54101  |
| 114818 | Q85601 | Q9H478  | -0.20807  |
| 114819 | Q85601 | P13591  | -1.2924   |
| 114820 | Q85601 | Q8N2G4  | -0.5608   |
| 114821 | Q85601 | P47710  | -0.82783  |
| 114822 | Q85601 | Q2LD37  | -0.56344  |
| 114823 | Q85601 | Q9UF56  | -0.2183   |
| 114824 | Q85601 | Q8NH48  | -1.2621   |
| 114825 | Q85601 | Q86XS5  | -1.1941   |
| 114826 | Q85601 | Q9Y4D1  | -0.23997  |
| 114827 | Q85601 | Q12767  | -0.92686  |
| 114828 | Q85601 | Q94933  | -1.0205   |
| 114829 | Q85601 | Q9UKG4  | -1.1107   |
| 114830 | Q85601 | Q9NQL9  | -0.1539   |
| 114831 | Q85601 | Q96AW1  | -0.62345  |
| 114832 | Q85601 | Q9UQ49  | -0.42854  |
| 114833 | Q85601 | Q8N427  | -0.53619  |
| 114834 | Q85601 | Q6UX71  | -0.74117  |
| 114835 | Q85601 | Q8NGJ3  | -1.2621   |
| 114836 | Q85601 | A8MW99  | -0.53649  |

|        |        |        |           |
|--------|--------|--------|-----------|
| 114837 | Q85601 | O43808 | -0.29491  |
| 114838 | Q85601 | P31273 | -0.70396  |
| 114839 | Q85601 | Q969K7 | -0.8419   |
| 114840 | Q85601 | Q16584 | -0.22741  |
| 114841 | Q85601 | Q6ZNB7 | -1.0761   |
| 114842 | Q85601 | P43354 | -0.24799  |
| 114843 | Q85601 | P35609 | -0.96336  |
| 114844 | Q85601 | Q9BTX1 | -0.12679  |
| 114845 | Q85601 | Q08357 | -1.0434   |
| 114846 | Q85601 | Q9Y210 | -0.37379  |
| 114847 | Q85601 | Q5VXI9 | -0.87626  |
| 114848 | Q85601 | Q8WW32 | -0.46344  |
| 114849 | Q85601 | O95863 | -0.22163  |
| 114850 | Q85601 | P48664 | -1.04     |
| 114851 | Q85601 | A4D1N5 | -0.32655  |
| 114852 | Q85601 | Q12870 | -0.22811  |
| 114853 | Q85601 | O00526 | -1.1262   |
| 114854 | Q85601 | Q14524 | -0.33415  |
| 114855 | Q85601 | P02746 | -0.4595   |
| 114856 | Q85601 | Q9NQ32 | -0.37155  |
| 114857 | Q85601 | Q9P2N6 | -0.25822  |
| 114858 | Q85601 | P49908 | -0.90961  |
| 114859 | Q85601 | Q4V326 | -0.67238  |
| 114860 | Q85601 | O95600 | -0.20976  |
| 114861 | Q85601 | Q3MUY2 | -1.0657   |
| 114862 | Q85601 | Q6ZSN1 | -0.21767  |
| 114863 | Q85601 | Q86VI3 | -0.60886  |
| 114864 | Q85601 | Q8TDN7 | -0.67793  |
| 114865 | Q85601 | P41181 | -0.26688  |
| 114866 | Q85601 | Q8NGS7 | -1.2621   |
| 114867 | Q85601 | Q6ZQQ2 | -0.92686  |
| 114868 | Q85601 | Q8WY07 | -0.87728  |
| 114869 | Q85601 | Q8IZ41 | -0.82641  |
| 114870 | Q85601 | P17600 | -0.46526  |
| 114871 | Q85601 | Q16654 | -0.47624  |
| 114872 | Q85601 | P20807 | -0.7463   |
| 114873 | Q85601 | Q7L592 | -0.090399 |
| 114874 | Q85601 | Q6AWC2 | -0.2274   |
| 114875 | Q85601 | O75015 | -1.0943   |
| 114876 | Q85601 | Q6PIY7 | -0.36091  |
| 114877 | Q85601 | Q6IWH7 | -0.42137  |
| 114878 | Q85601 | Q99571 | -0.48961  |
| 114879 | Q85601 | Q9Y6X6 | -0.21537  |
| 114880 | Q85601 | Q15126 | -0.58897  |
| 114881 | Q85601 | Q9H422 | -0.30585  |
| 114882 | Q85601 | Q9H3R2 | -1.4917   |
| 114883 | Q85601 | P46199 | -0.77609  |
| 114884 | Q85601 | Q495X7 | -0.589    |
| 114885 | Q85601 | P12277 | -0.35853  |
| 114886 | Q85601 | Q5SGD2 | -0.66668  |
| 114887 | Q85601 | Q96JP9 | -1.2472   |
| 114888 | Q85601 | Q9H1N7 | -0.49692  |
| 114889 | Q85601 | Q8N9M1 | -0.0957   |
| 114890 | Q85601 | P15421 | -1.184    |
| 114891 | Q85601 | Q7Z7C7 | -0.24238  |
| 114892 | Q85601 | O00555 | -0.31978  |
| 114893 | Q85601 | Q9H790 | -0.27871  |
| 114894 | Q85601 | Q567U6 | -0.22684  |
| 114895 | Q85601 | Q8N4L4 | -1.0322   |
| 114896 | Q85601 | A6NNE9 | -0.88685  |
| 114897 | Q85601 | P04208 | -1.046    |
| 114898 | Q85601 | Q13018 | -1.2787   |
| 114899 | Q85601 | Q96NR8 | -1.2946   |
| 114900 | Q85601 | P55039 | -0.74521  |
| 114901 | Q85601 | P10301 | -0.75547  |
| 114902 | Q85601 | Q9H3N1 | -0.94834  |
| 114903 | Q85601 | P58335 | -1.0249   |
| 114904 | Q85601 | P58294 | -0.71673  |
| 114905 | Q85601 | Q5SNT6 | -0.47698  |
| 114906 | Q85601 | P61018 | -0.94205  |
| 114907 | Q85601 | Q9UBY8 | -0.39334  |
| 114908 | Q85601 | P20809 | -0.28474  |
| 114909 | Q85601 | Q5T013 | -0.55287  |
| 114910 | Q85601 | Q8WWQ8 | -0.73647  |
| 114911 | Q85601 | Q9BXB1 | -1.0142   |
| 114912 | Q85601 | Q5TCS8 | -0.9581   |

|        |        |        |          |
|--------|--------|--------|----------|
| 114913 | Q85601 | P05060 | -0.26318 |
| 114914 | Q85601 | Q3LI54 | -0.2031  |
| 114915 | Q85601 | Q2M2D7 | -0.9791  |
| 114916 | Q85601 | P33241 | -0.83102 |
| 114917 | Q85601 | Q56NI9 | -0.22043 |
| 114918 | Q85601 | Q9Y478 | -0.46439 |
| 114919 | Q85601 | Q96BT7 | -0.19551 |
| 114920 | Q85601 | P24462 | -0.79252 |
| 114921 | Q85601 | Q86XI6 | -0.17955 |
| 114922 | Q85601 | Q12836 | -1.3512  |
| 114923 | Q85601 | A8MXD5 | -0.50105 |
| 114924 | Q85601 | Q5TC82 | -0.2274  |
| 114925 | Q85601 | Q9UL63 | -0.27225 |
| 114926 | Q85601 | Q6ZTC4 | -0.2031  |
| 114927 | Q85601 | A6NCI5 | -0.92686 |
| 114928 | Q85601 | O60241 | -1.3393  |
| 114929 | Q85601 | P39900 | -1.2009  |
| 114930 | Q85601 | P0CF75 | -0.37742 |
| 114931 | Q85601 | P51693 | -0.2302  |
| 114932 | Q85601 | Q16650 | -0.47176 |
| 114933 | Q85601 | Q14815 | -1.0015  |
| 114934 | Q85601 | Q6NUM6 | -1.0138  |
| 114935 | Q85601 | Q15139 | -0.22743 |
| 114936 | Q85601 | Q9UGI9 | -0.9571  |
| 114937 | Q85601 | Q9H4Z3 | -0.13961 |
| 114938 | Q85601 | Q86UW8 | -1.1027  |
| 114939 | Q85601 | Q8WW62 | -0.94245 |
| 114940 | Q85601 | Q01518 | -0.36185 |
| 114941 | Q85601 | Q16696 | -0.78004 |
| 114942 | Q85601 | Q96GY0 | -0.31263 |
| 114943 | Q85601 | O95319 | -0.39655 |
| 114944 | Q85601 | Q16378 | -1.0205  |
| 114945 | Q85601 | P07099 | -0.86785 |
| 114946 | Q85601 | Q96RD6 | -0.78512 |
| 114947 | Q85601 | Q5VXJ0 | -0.87626 |
| 114948 | Q85601 | Q6B9Z1 | -0.9043  |
| 114949 | Q85601 | P07384 | -0.29428 |
| 114950 | Q85601 | P57771 | -0.58993 |
| 114951 | Q85601 | Q7L1I2 | -0.75903 |
| 114952 | Q85601 | Q86SQ3 | -1.4007  |
| 114953 | Q85601 | P12236 | -0.24549 |
| 114954 | Q85601 | O95741 | -0.50976 |
| 114955 | Q85601 | Q9UIU6 | -0.2275  |
| 114956 | Q85601 | O75752 | -0.79619 |
| 114957 | Q85601 | Q9H159 | -1.1961  |
| 114958 | Q85601 | Q9Y5P0 | -1.2621  |
| 114959 | Q85601 | P80370 | -0.86069 |
| 114960 | Q85601 | Q96BY6 | -0.59933 |
| 114961 | Q85601 | Q8IX21 | -0.57004 |
| 114962 | Q85601 | Q6UXG8 | -0.92686 |
| 114963 | Q85601 | Q8WVF1 | -0.51518 |
| 114964 | Q85601 | O60938 | -0.78674 |
| 114965 | Q85601 | P22455 | -0.8259  |
| 114966 | Q85601 | P0DMC3 | -0.2031  |
| 114967 | Q85601 | Q8IWF9 | -1.0087  |
| 114968 | Q85601 | P20711 | -0.56984 |
| 114969 | Q85601 | Q96AE7 | -0.2218  |
| 114970 | Q85601 | Q9HAS3 | -0.81404 |
| 114971 | Q85601 | Q96CG8 | -0.77271 |
| 114972 | Q85601 | Q5TA78 | -0.31607 |
| 114973 | Q85601 | Q9BXA6 | -0.94108 |
| 114974 | Q85601 | Q9BUD6 | -1.0945  |
| 114975 | Q85601 | Q9HAS0 | -0.31631 |
| 114976 | Q85601 | Q9H761 | -0.45836 |
| 114977 | Q85601 | O95255 | -1.2463  |
| 114978 | Q85601 | O14926 | -0.46016 |
| 114979 | Q85601 | P60008 | -0.60828 |
| 114980 | Q85601 | Q9NZT1 | -0.5721  |
| 114981 | Q85601 | Q8IXS6 | -0.57134 |
| 114982 | Q85601 | P09110 | -0.20195 |
| 114983 | Q85601 | Q96D42 | -0.82408 |
| 114984 | Q85601 | Q69YZ2 | -0.92686 |
| 114985 | Q85601 | Q8IVL5 | -0.55517 |
| 114986 | Q85601 | Q7L2Z9 | -0.29926 |
| 114987 | Q85601 | Q9BYM8 | -0.22667 |
| 114988 | Q85601 | Q6NVV9 | -0.44727 |

|        |        |        |           |
|--------|--------|--------|-----------|
| 114989 | Q85601 | Q9HB15 | -0.98396  |
| 114990 | Q85601 | Q9BY60 | -0.099779 |
| 114991 | Q85601 | Q8N9S9 | -0.2858   |
| 114992 | Q85601 | Q9Y5G3 | -1.246    |
| 114993 | Q85601 | Q9NXI6 | -0.89088  |
| 114994 | Q85601 | Q9GZQ4 | -0.97597  |
| 114995 | Q85601 | Q3SY89 | -0.10077  |
| 114996 | Q85601 | Q8N0W7 | -0.71464  |
| 114997 | Q85601 | Q9BYU1 | -0.44782  |
| 114998 | Q85601 | P07333 | -0.77482  |
| 114999 | Q85601 | O14730 | -0.58966  |
| 115000 | Q85601 | Q9H2X3 | -0.99371  |
| 115001 | Q85601 | Q9H000 | -0.61068  |
| 115002 | Q85601 | O43921 | -0.38345  |
| 115003 | Q85601 | Q5XLA6 | -0.5968   |
| 115004 | Q85601 | Q9BY65 | -0.23778  |
| 115005 | Q85601 | Q9NYG8 | -1.0978   |
| 115006 | Q85601 | Q562R1 | -0.57676  |
| 115007 | Q85601 | Q6ZMI3 | -1.2309   |
| 115008 | Q85601 | A6NMZ2 | -0.58832  |
| 115009 | Q85601 | Q12918 | -1.0774   |
| 115010 | Q85601 | P51857 | -0.22684  |
| 115011 | Q85601 | P49862 | -1.322    |
| 115012 | Q85601 | P08887 | -0.36899  |
| 115013 | Q85601 | P49914 | -0.61778  |
| 115014 | Q85601 | P16871 | -0.86635  |
| 115015 | Q85601 | P04049 | -0.27495  |
| 115016 | Q85601 | Q9UKL4 | -1.0464   |
| 115017 | Q85601 | A6NES4 | -0.19729  |
| 115018 | Q85601 | Q1W4C9 | -0.82753  |
| 115019 | Q85601 | Q9NYY3 | -0.45247  |
| 115020 | Q85601 | Q8NHY0 | -0.65562  |
| 115021 | Q85601 | Q9BYB4 | -0.22764  |
| 115022 | Q85601 | P47869 | -0.72602  |
| 115023 | Q85601 | Q16798 | -0.45268  |
| 115024 | Q85601 | Q86TG1 | -1.0136   |
| 115025 | Q85601 | Q05513 | -0.22375  |
| 115026 | Q85601 | P25101 | -0.4901   |
| 115027 | Q85601 | A6NIK2 | -0.23494  |
| 115028 | Q85601 | O15270 | -0.69535  |
| 115029 | Q85601 | Q9Y5Q9 | -0.22691  |
| 115030 | Q85601 | Q12931 | -0.5252   |
| 115031 | Q85601 | Q96NX5 | -0.92775  |
| 115032 | Q85601 | Q9NX61 | -0.84536  |
| 115033 | Q85601 | Q96R45 | -1.2621   |
| 115034 | Q85601 | P19823 | -0.78037  |
| 115035 | Q85601 | O15530 | -0.22475  |
| 115036 | Q85601 | Q4G148 | -0.60062  |
| 115037 | Q85601 | Q96C57 | -0.63426  |
| 115038 | Q85601 | Q8IVF7 | -0.21551  |
| 115039 | Q85601 | Q13822 | -0.91341  |
| 115040 | Q85601 | P27544 | -0.54971  |
| 115041 | Q85601 | A2A3K4 | -0.69616  |
| 115042 | Q85601 | Q9P2L0 | -0.22741  |
| 115043 | Q85601 | P20963 | -0.30817  |
| 115044 | Q85601 | O43301 | -0.81985  |
| 115045 | Q85601 | O75951 | -0.85081  |
| 115046 | Q85601 | O95140 | -0.73379  |
| 115047 | Q85601 | Q6XCG6 | -0.2031   |
| 115048 | Q85601 | P36980 | -0.9043   |
| 115049 | Q85601 | O43781 | -1.0298   |
| 115050 | Q85601 | Q969G2 | -0.22814  |
| 115051 | Q85601 | P48436 | -0.34944  |
| 115052 | Q85601 | Q70EL2 | -0.65617  |
| 115053 | Q85601 | A8MXB1 | -1.0237   |
| 115054 | Q85601 | Q96S79 | -1.3013   |
| 115055 | Q85601 | Q5GH72 | -0.92686  |
| 115056 | Q85601 | Q03001 | -0.22951  |
| 115057 | Q85601 | P05362 | -0.41741  |
| 115058 | Q85601 | Q8TAT2 | -0.87803  |
| 115059 | Q85601 | Q6ZT52 | -0.14302  |
| 115060 | Q85601 | Q712K3 | -0.69723  |
| 115061 | Q85601 | Q9UDR5 | -0.52677  |
| 115062 | Q85601 | O43561 | -0.90375  |
| 115063 | Q85601 | P35610 | -0.83262  |
| 115064 | Q85601 | A4FU28 | -0.92686  |

|        |        |        |            |
|--------|--------|--------|------------|
| 115065 | Q85601 | Q8NEG7 | -0.31993   |
| 115066 | Q85601 | Q96GW9 | -0.13895   |
| 115067 | Q85601 | P18136 | -1.046     |
| 115068 | Q85601 | P11309 | -0.33883   |
| 115069 | Q85601 | Q66K79 | -1.1324    |
| 115070 | Q85601 | Q9HCR9 | -0.22656   |
| 115071 | Q85601 | P51812 | -0.22082   |
| 115072 | Q85601 | Q9UGV2 | -0.26282   |
| 115073 | Q85601 | P30443 | -1.1297    |
| 115074 | Q85601 | Q3SXP7 | -0.92686   |
| 115075 | Q85601 | Q6WRI0 | -1.0465    |
| 115076 | Q85601 | Q5T7R7 | -0.92686   |
| 115077 | Q85601 | P0C091 | -1.6955    |
| 115078 | Q85601 | P53814 | -0.22845   |
| 115079 | Q85601 | A6NJW9 | -1.0386    |
| 115080 | Q85601 | Q96QU1 | -1.4318    |
| 115081 | Q85601 | Q8N1N5 | -0.96439   |
| 115082 | Q85601 | P10644 | -0.22762   |
| 115083 | Q85601 | Q6UX27 | -0.92686   |
| 115084 | Q85601 | P0C7U9 | -0.92686   |
| 115085 | Q85601 | P31997 | -0.79145   |
| 115086 | Q85601 | P16050 | -0.22138   |
| 115087 | Q85601 | Q9NWQ8 | -0.57169   |
| 115088 | Q85601 | O15245 | -0.36728   |
| 115089 | Q85601 | Q9UHW9 | -0.87829   |
| 115090 | Q85601 | A0ZSE6 | -0.92686   |
| 115091 | Q85601 | Q9NUG4 | -0.18472   |
| 115092 | Q85601 | Q9H2V7 | -0.28017   |
| 115093 | Q85601 | Q96BD0 | -0.95544   |
| 115094 | Q85601 | P12544 | -0.40197   |
| 115095 | Q85601 | Q6NXR4 | -0.32451   |
| 115096 | Q85601 | P10176 | -0.56392   |
| 115097 | Q85601 | P11245 | -0.53518   |
| 115098 | Q85601 | Q53QW1 | -0.092462  |
| 115099 | Q85601 | Q9ULQ1 | -0.5189    |
| 115100 | Q85601 | Q6P5X7 | -0.97278   |
| 115101 | Q85601 | O43242 | -0.12691   |
| 115102 | Q85601 | P36268 | -0.69213   |
| 115103 | Q85601 | Q17RW2 | -1.0018    |
| 115104 | Q85601 | P50391 | -1.2486    |
| 115105 | Q85601 | O75409 | -0.43391   |
| 115106 | Q85601 | O94813 | -0.28827   |
| 115107 | Q85601 | Q13572 | -0.93732   |
| 115108 | Q85601 | P47888 | -1.2621    |
| 115109 | Q85601 | Q8NH57 | -1.2621    |
| 115110 | Q85601 | Q5VV11 | -1.179     |
| 115111 | Q85601 | Q8TAU0 | -0.22758   |
| 115112 | Q85601 | Q99946 | -0.92669   |
| 115113 | Q85601 | Q9UFV3 | -0.0092162 |
| 115114 | Q85601 | Q7RTX9 | -0.9485    |
| 115115 | Q85601 | P47895 | -0.41844   |
| 115116 | Q85601 | P00740 | -1.1735    |
| 115117 | Q85601 | Q9UI46 | -0.22756   |
| 115118 | Q85601 | Q96CN4 | -0.83414   |
| 115119 | Q85601 | O14492 | -0.44324   |
| 115120 | Q85601 | O15229 | -0.58074   |
| 115121 | Q85601 | Q5JQS6 | -0.02069   |
| 115122 | Q85601 | Q99683 | -0.27638   |
| 115123 | Q85601 | A6NF89 | -1.2621    |
| 115124 | Q85601 | Q53S33 | -0.69894   |
| 115125 | Q85601 | Q92887 | -0.8666    |
| 115126 | Q85601 | Q8TEY5 | -0.22701   |
| 115127 | Q85601 | O60493 | -0.22365   |
| 115128 | Q85601 | Q15075 | -0.21762   |
| 115129 | Q85601 | Q8TBZ3 | -0.22742   |
| 115130 | Q85601 | P04062 | -0.39828   |
| 115131 | Q85601 | Q96PF1 | -0.36704   |
| 115132 | Q85601 | Q9GZR7 | -0.4149    |
| 115133 | Q85601 | Q9UQV4 | -1.025     |
| 115134 | Q85601 | Q9UDY6 | -0.31561   |
| 115135 | Q85601 | P0CB47 | -0.2271    |
| 115136 | Q85601 | Q8NE01 | -0.50662   |
| 115137 | Q85601 | Q15743 | -1.5182    |
| 115138 | Q85601 | Q9H082 | -0.85413   |
| 115139 | Q85601 | Q99742 | -0.2635    |
| 115140 | Q85601 | K7EIZ4 | -0.2031    |



|        |        |        |           |
|--------|--------|--------|-----------|
| 115141 | Q85601 | Q8NBA8 | -0.29173  |
| 115142 | Q85601 | Q96BZ9 | -1.7169   |
| 115143 | Q85601 | Q9NXE4 | -0.51507  |
| 115144 | Q85601 | Q86U17 | -0.72076  |
| 115145 | Q85601 | P27338 | -0.66956  |
| 115146 | Q85601 | Q6UXP3 | -0.92686  |
| 115147 | Q85601 | Q9UNZ5 | -0.092462 |
| 115148 | Q85601 | Q4VX76 | -0.78622  |
| 115149 | Q85601 | Q9BQA9 | -0.59301  |
| 115150 | Q85601 | Q9HAB8 | -0.11695  |
| 115151 | Q85601 | Q9Y5H2 | -1.246    |
| 115152 | Q85601 | Q9BPX5 | -0.17838  |
| 115153 | Q85601 | Q9NPP4 | -0.22732  |
| 115154 | Q85601 | Q9P1P4 | -1.31     |
| 115155 | Q85601 | Q92954 | -0.91323  |
| 115156 | Q85601 | P59542 | -1.2301   |
| 115157 | Q85601 | Q14CZ7 | -0.2899   |
| 115158 | Q85601 | Q96KS9 | -0.18868  |
| 115159 | Q85601 | Q9BT30 | -0.50064  |
| 115160 | Q85601 | Q8NBL1 | -0.31292  |
| 115161 | Q85601 | Q96HG1 | -0.2031   |
| 115162 | Q85601 | P53674 | -0.46791  |
| 115163 | Q85601 | P01298 | -0.92822  |
| 115164 | Q85601 | P09693 | -0.84599  |
| 115165 | Q85601 | Q9Y646 | -0.8096   |
| 115166 | Q85601 | A6NHT5 | -0.22973  |
| 115167 | Q85601 | Q96PG2 | -0.92686  |
| 115168 | Q85601 | P54868 | -0.28578  |
| 115169 | Q85601 | Q15435 | -0.22741  |
| 115170 | Q85601 | Q9Y5F0 | -1.2231   |
| 115171 | Q85601 | Q8ND25 | -0.23412  |
| 115172 | Q85601 | A8K4G0 | -1.0386   |
| 115173 | Q85601 | P13232 | -0.5388   |
| 115174 | Q85601 | P61599 | -0.21054  |
| 115175 | Q85601 | P31268 | -0.3358   |
| 115176 | Q85601 | Q96A08 | -0.69268  |
| 115177 | Q85601 | P0C7W0 | -0.092462 |
| 115178 | Q85601 | Q14DG7 | -0.67993  |
| 115179 | Q85601 | Q6P6B7 | -0.22742  |
| 115180 | Q85601 | Q9BVA6 | -1.1543   |
| 115181 | Q85601 | Q8WV19 | -0.55279  |
| 115182 | Q85601 | Q14679 | -0.35923  |
| 115183 | Q85601 | P46439 | -0.31734  |
| 115184 | Q85601 | Q96HY7 | -0.33346  |
| 115185 | Q85601 | Q8NGZ0 | -1.2621   |
| 115186 | Q85601 | Q5NDL2 | -0.74839  |
| 115187 | Q85601 | Q14767 | -0.97747  |
| 115188 | Q85601 | O43609 | -0.24367  |
| 115189 | Q85601 | Q7Z7G2 | -0.32219  |
| 115190 | Q85601 | Q6P5Z2 | -0.38183  |
| 115191 | Q85601 | Q96JT2 | -0.86184  |
| 115192 | Q85601 | Q53H76 | -0.93138  |
| 115193 | Q85601 | Q7Z4F1 | -1.0237   |
| 115194 | Q85601 | Q14774 | -0.22866  |
| 115195 | Q85601 | P06850 | -0.51988  |
| 115196 | Q85601 | Q8N2X6 | -0.9043   |
| 115197 | Q85601 | Q8NBU5 | -0.69022  |
| 115198 | Q85601 | P29371 | -0.90225  |
| 115199 | Q85601 | Q7RTW8 | -1.1439   |
| 115200 | Q85601 | P17542 | -0.22761  |
| 115201 | Q85601 | A6NK02 | -0.589    |
| 115202 | Q85601 | Q92543 | -0.26085  |
| 115203 | Q85601 | Q9Y5R6 | -0.035957 |
| 115204 | Q85601 | P35659 | -0.22915  |
| 115205 | Q85601 | Q8N715 | -0.82672  |
| 115206 | Q85601 | Q9Y2Q5 | -0.3711   |
| 115207 | Q85601 | Q6UY01 | -0.22741  |
| 115208 | Q85601 | Q9Y2F9 | -0.22407  |
| 115209 | Q85601 | P54764 | -0.60036  |
| 115210 | Q85601 | Q7Z4P5 | -0.22741  |
| 115211 | Q85601 | A8MQ27 | -0.22732  |
| 115212 | Q85601 | Q68BL8 | -0.9569   |
| 115213 | Q85601 | O95803 | -0.7392   |
| 115214 | Q85601 | O15442 | -0.20921  |
| 115215 | Q85601 | Q9Y5U5 | -1.5643   |
| 115216 | Q85601 | Q16739 | -0.58944  |

|        |        |        |           |
|--------|--------|--------|-----------|
| 115217 | Q85601 | Q9UHW5 | -0.90311  |
| 115218 | Q85601 | Q9UHN6 | -1.1159   |
| 115219 | Q85601 | P52333 | -0.36353  |
| 115220 | Q85601 | P25774 | -1.2489   |
| 115221 | Q85601 | Q92997 | -0.15133  |
| 115222 | Q85601 | P35557 | -0.17591  |
| 115223 | Q85601 | Q9H210 | -1.2621   |
| 115224 | Q85601 | Q9GZT3 | -0.22619  |
| 115225 | Q85601 | Q6ZUX7 | -0.92686  |
| 115226 | Q85601 | P98198 | -1.0513   |
| 115227 | Q85601 | Q2TAA8 | -0.47092  |
| 115228 | Q85601 | Q99463 | -1.3352   |
| 115229 | Q85601 | Q92753 | -0.76835  |
| 115230 | Q85601 | O60393 | -0.22344  |
| 115231 | Q85601 | O95772 | -0.87387  |
| 115232 | Q85601 | Q6ZRR9 | -0.5766   |
| 115233 | Q85601 | Q13472 | -0.029517 |
| 115234 | Q85601 | Q9NPR2 | -1.0813   |
| 115235 | Q85601 | O60548 | -0.43379  |
| 115236 | Q85601 | Q8TE58 | -1.2377   |
| 115237 | Q85601 | Q92928 | -0.79797  |
| 115238 | Q85601 | A6NEA5 | -0.6514   |
| 115239 | Q85601 | Q8NGS9 | -1.2621   |
| 115240 | Q85601 | P31025 | -1.0126   |
| 115241 | Q85601 | Q6L8H2 | -0.2031   |
| 115242 | Q85601 | Q10571 | -0.35427  |
| 115243 | Q85601 | Q8WUH1 | -0.35959  |
| 115244 | Q85601 | P0C0P6 | -0.94704  |
| 115245 | Q85601 | P21917 | -0.51337  |
| 115246 | Q85601 | Q92526 | -0.47232  |
| 115247 | Q85601 | Q9GZU5 | -1.1542   |
| 115248 | Q85601 | Q6PI47 | -0.038048 |
| 115249 | Q85601 | P14138 | -0.72632  |
| 115250 | Q85601 | Q0VZF6 | -0.092462 |
| 115251 | Q85601 | Q9NYF5 | -1.0442   |
| 115252 | Q85601 | Q8IZK6 | -0.99727  |
| 115253 | Q85601 | Q9HBT6 | -1.1961   |
| 115254 | Q85601 | O15050 | -0.282    |
| 115255 | Q85601 | Q8IZV2 | -0.95476  |
| 115256 | Q85601 | Q9BYV6 | -0.23736  |
| 115257 | Q85601 | Q86TI2 | -0.37258  |
| 115258 | Q85601 | Q13164 | -0.22741  |
| 115259 | Q85601 | Q86SJ2 | -0.25085  |
| 115260 | Q85601 | Q9Y3D7 | -0.084421 |
| 115261 | Q85601 | O43766 | -0.47222  |
| 115262 | Q85601 | Q5T089 | -0.078406 |
| 115263 | Q85601 | C9JJ37 | -0.21921  |
| 115264 | Q85601 | A7E2Y1 | -0.76819  |
| 115265 | Q85601 | O15438 | -1.1416   |
| 115266 | Q85601 | P51861 | -0.068522 |
| 115267 | Q85601 | P20702 | -0.50892  |
| 115268 | Q85601 | Q5SVS4 | -0.56349  |
| 115269 | Q85601 | Q86SF2 | -0.57623  |
| 115270 | Q85601 | Q9Y4D7 | -1.1638   |
| 115271 | Q85601 | Q9BZL3 | -0.92686  |
| 115272 | Q85601 | Q6UWQ5 | -0.85081  |
| 115273 | Q85601 | Q9UBR1 | -0.15344  |
| 115274 | Q85601 | Q9H346 | -1.2621   |
| 115275 | Q85601 | Q9H147 | -0.10908  |
| 115276 | Q85601 | Q9UI72 | -0.2031   |
| 115277 | Q85601 | P0CJ71 | -0.67838  |
| 115278 | Q85601 | Q16348 | -0.40641  |
| 115279 | Q85601 | Q6L8G9 | -0.2031   |
| 115280 | Q85601 | P28676 | -0.4449   |
| 115281 | Q85601 | Q9UKX3 | -0.46771  |
| 115282 | Q85601 | Q9BPW9 | -0.89201  |
| 115283 | Q85601 | Q6V1X1 | -0.22247  |
| 115284 | Q85601 | Q8N0V5 | -0.71737  |
| 115285 | Q85601 | A6NML5 | -0.92686  |
| 115286 | Q85601 | Q7Z7B0 | -0.2162   |
| 115287 | Q85601 | Q9Y5W9 | -0.55849  |
| 115288 | Q85601 | Q9NWQ4 | -0.16655  |
| 115289 | Q85601 | O00622 | -0.46147  |
| 115290 | Q85601 | Q5SSJ5 | -0.62412  |
| 115291 | Q85601 | O00305 | -0.22709  |
| 115292 | Q85601 | Q8WZ60 | -0.30384  |

|        |        |        |          |
|--------|--------|--------|----------|
| 115293 | Q85601 | Q9NUC0 | -0.41531 |
| 115294 | Q85601 | Q9H5Q3 | -0.92686 |
| 115295 | Q85601 | Q9UL15 | -0.24297 |
| 115296 | Q85601 | Q9Y421 | -0.3711  |
| 115297 | Q85601 | O43638 | -0.40954 |
| 115298 | Q85601 | Q9H5U6 | -0.29382 |
| 115299 | Q85601 | P38570 | -1.1323  |
| 115300 | Q85601 | Q8N998 | -0.48863 |
| 115301 | Q85601 | Q9NPB3 | -0.34847 |
| 115302 | Q85601 | Q96KN2 | -1.1884  |
| 115303 | Q85601 | Q9NUR3 | -0.92686 |
| 115304 | Q85601 | Q0IIM8 | -1.3741  |
| 115305 | Q85601 | P81277 | -0.5275  |
| 115306 | Q85601 | Q8IWR1 | -1.1116  |
| 115307 | Q85601 | P04114 | -0.31954 |
| 115308 | Q85601 | Q8TE99 | -0.83117 |
| 115309 | Q85601 | Q96C23 | -0.51022 |
| 115310 | Q85601 | P20701 | -0.9235  |
| 115311 | Q85601 | Q13574 | -0.22741 |
| 115312 | Q85601 | Q5H9S7 | -0.33854 |
| 115313 | Q85601 | Q96N11 | -0.50923 |
| 115314 | Q85601 | Q9NRJ3 | -0.97254 |
| 115315 | Q85601 | Q8NGQ1 | -1.2621  |
| 115316 | Q85601 | Q9UPQ7 | -0.50066 |
| 115317 | Q85601 | Q96EK9 | -0.81985 |
| 115318 | Q85601 | Q9H1V8 | -0.78667 |
| 115319 | Q85601 | Q6ZWK4 | -0.92686 |
| 115320 | Q85601 | Q94985 | -1.0645  |
| 115321 | Q85601 | Q8NFZ6 | -1.2768  |
| 115322 | Q85601 | A8MY62 | -0.80998 |
| 115323 | Q85601 | Q9BQE9 | -0.31899 |
| 115324 | Q85601 | Q15131 | -0.57391 |
| 115325 | Q85601 | P63244 | -0.22832 |
| 115326 | Q85601 | P23435 | -0.80028 |
| 115327 | Q85601 | Q9UJU6 | -0.8873  |
| 115328 | Q85601 | P51654 | -0.65033 |
| 115329 | Q85601 | Q9H0W7 | -0.21361 |
| 115330 | Q85601 | Q7Z333 | -0.23688 |
| 115331 | Q85601 | A8MTI9 | -1.7838  |
| 115332 | Q85601 | Q6GMV1 | -0.38524 |
| 115333 | Q85601 | P28325 | -0.37833 |
| 115334 | Q85601 | P54652 | -0.22108 |
| 115335 | Q85601 | Q9NYC9 | -0.52983 |
| 115336 | Q85601 | Q96P16 | -0.31618 |
| 115337 | Q85601 | Q6ZS10 | -0.87895 |
| 115338 | Q85601 | B7U540 | -1.075   |
| 115339 | Q85601 | Q9NYD6 | -0.35075 |
| 115340 | Q85601 | Q16644 | -0.23045 |
| 115341 | Q85601 | Q9Y5X5 | -1.405   |
| 115342 | Q85601 | Q92583 | -1.2393  |
| 115343 | Q85601 | O15400 | -0.8777  |
| 115344 | Q85601 | Q53GL0 | -0.32145 |
| 115345 | Q85601 | P98177 | -0.42129 |
| 115346 | Q85601 | Q8IZD0 | -0.28921 |
| 115347 | Q85601 | Q8N9Q2 | -0.3642  |
| 115348 | Q85601 | Q9BS16 | -0.22215 |
| 115349 | Q85601 | Q95925 | -0.26106 |
| 115350 | Q85601 | Q5T5N4 | -0.15444 |
| 115351 | Q85601 | Q9Y5P4 | -0.2282  |
| 115352 | Q85601 | Q8TBF2 | -0.18964 |
| 115353 | Q85601 | Q9BXV9 | -0.2031  |
| 115354 | Q85601 | Q3MIN7 | -0.93153 |
| 115355 | Q85601 | Q8IV16 | -0.82432 |
| 115356 | Q85601 | Q9UN75 | -1.246   |
| 115357 | Q85601 | Q9Y3B4 | -0.34441 |
| 115358 | Q85601 | Q96CB5 | -0.5827  |
| 115359 | Q85601 | P0C2L3 | -0.92686 |
| 115360 | Q85601 | Q3SY69 | -0.39064 |
| 115361 | Q85601 | Q75V66 | -0.94513 |
| 115362 | Q85601 | P56937 | -1.2919  |
| 115363 | Q85601 | Q9NWC5 | -0.92686 |
| 115364 | Q85601 | Q8N2H3 | -0.57159 |
| 115365 | Q85601 | Q9H8V8 | -0.2031  |
| 115366 | Q85601 | Q16820 | -1.395   |
| 115367 | Q85601 | O95248 | -0.86302 |
| 115368 | Q85601 | P42830 | -1.0072  |

|        |        |        |            |
|--------|--------|--------|------------|
| 115369 | Q85601 | Q8IVW6 | -0.20838   |
| 115370 | Q85601 | Q9UKI2 | -0.47528   |
| 115371 | Q85601 | Q5QJ38 | -0.39878   |
| 115372 | Q85601 | P04435 | -0.42093   |
| 115373 | Q85601 | Q9P232 | -0.66888   |
| 115374 | Q85601 | Q15079 | -0.51579   |
| 115375 | Q85601 | Q9NR71 | -0.70489   |
| 115376 | Q85601 | Q6ZSZ5 | -0.49528   |
| 115377 | Q85601 | Q9Y4F1 | -0.47332   |
| 115378 | Q85601 | Q6P9H5 | -1.0027    |
| 115379 | Q85601 | Q96JB8 | -0.22454   |
| 115380 | Q85601 | Q8NGY6 | -1.2621    |
| 115381 | Q85601 | Q8IU99 | -1.1075    |
| 115382 | Q85601 | Q6UXU6 | -0.92686   |
| 115383 | Q85601 | Q14449 | -0.22741   |
| 115384 | Q85601 | Q75LS8 | -0.41744   |
| 115385 | Q85601 | P58215 | -0.56034   |
| 115386 | Q85601 | Q96C55 | -0.22438   |
| 115387 | Q85601 | Q86WN2 | -0.87714   |
| 115388 | Q85601 | Q13017 | -0.76044   |
| 115389 | Q85601 | Q15195 | -0.9043    |
| 115390 | Q85601 | Q5T9C2 | -0.092462  |
| 115391 | Q85601 | P0C851 | -0.92686   |
| 115392 | Q85601 | Q96J87 | -0.4527    |
| 115393 | Q85601 | Q9Y328 | -0.68533   |
| 115394 | Q85601 | Q92874 | -0.82617   |
| 115395 | Q85601 | Q8WXA8 | -0.97347   |
| 115396 | Q85601 | Q9P298 | -0.92686   |
| 115397 | Q85601 | Q969V1 | -1.3443    |
| 115398 | Q85601 | P11137 | -0.15846   |
| 115399 | Q85601 | Q5VV42 | -0.72056   |
| 115400 | Q85601 | Q53F19 | -0.82516   |
| 115401 | Q85601 | Q99525 | -0.54639   |
| 115402 | Q85601 | Q3KPI0 | -0.92686   |
| 115403 | Q85601 | Q5KU26 | -0.60006   |
| 115404 | Q85601 | Q7RTU7 | -0.2341    |
| 115405 | Q85601 | Q92736 | -0.37492   |
| 115406 | Q85601 | Q5HYL7 | -0.92686   |
| 115407 | Q85601 | Q16630 | -0.1817    |
| 115408 | Q85601 | Q86T13 | -0.917     |
| 115409 | Q85601 | Q08AI6 | -0.9929    |
| 115410 | Q85601 | Q58FF7 | -0.56805   |
| 115411 | Q85601 | Q7Z4L9 | -0.22708   |
| 115412 | Q85601 | Q16553 | -0.64165   |
| 115413 | Q85601 | Q96DC8 | -0.36121   |
| 115414 | Q85601 | O75554 | -0.155     |
| 115415 | Q85601 | A6NIV6 | -0.28262   |
| 115416 | Q85601 | P78332 | -0.826     |
| 115417 | Q85601 | Q8N431 | -0.8072    |
| 115418 | Q85601 | Q07820 | -0.22739   |
| 115419 | Q85601 | Q5T124 | -0.080154  |
| 115420 | Q85601 | Q43521 | -0.31979   |
| 115421 | Q85601 | Q8N4H0 | -0.86328   |
| 115422 | Q85601 | Q86V59 | -0.0031831 |
| 115423 | Q85601 | Q9GZZ8 | -0.53892   |
| 115424 | Q85601 | P0C5Z0 | -0.75938   |
| 115425 | Q85601 | A6NCE7 | -0.23559   |
| 115426 | Q85601 | Q01804 | -0.18472   |
| 115427 | Q85601 | P54107 | -0.93499   |
| 115428 | Q85601 | Q5GLZ8 | -0.59251   |
| 115429 | Q85601 | Q15198 | -0.74291   |
| 115430 | Q85601 | Q8NCU8 | -0.92686   |
| 115431 | Q85601 | Q6IAN0 | -1.3039    |
| 115432 | Q85601 | Q9UQ90 | -0.63065   |
| 115433 | Q85601 | O95833 | -0.21725   |
| 115434 | Q85601 | Q9UKF7 | -0.42271   |
| 115435 | Q85601 | Q5T5M9 | -0.087451  |
| 115436 | Q85601 | Q5TFG8 | -0.31263   |
| 115437 | Q85601 | Q86X53 | -0.56056   |
| 115438 | Q85601 | P31947 | -0.62508   |
| 115439 | Q85601 | Q9P1Z9 | -0.92686   |
| 115440 | Q85601 | Q16655 | -0.28999   |
| 115441 | Q85601 | O95573 | -0.74516   |
| 115442 | Q85601 | P61567 | -0.7596    |
| 115443 | Q85601 | Q9H329 | -0.2531    |
| 115444 | Q85601 | Q9NUJ3 | -0.4571    |

|        |        |        |           |
|--------|--------|--------|-----------|
| 115445 | Q85601 | Q9UBD9 | -0.44962  |
| 115446 | Q85601 | Q8N9Z2 | -0.1805   |
| 115447 | Q85601 | P19022 | -0.58837  |
| 115448 | Q85601 | P32322 | -0.58163  |
| 115449 | Q85601 | P78369 | -0.93131  |
| 115450 | Q85601 | Q9UN73 | -1.7314   |
| 115451 | Q85601 | P57789 | -1.1972   |
| 115452 | Q85601 | A6NKX4 | -0.9396   |
| 115453 | Q85601 | P07911 | -0.74189  |
| 115454 | Q85601 | Q6ZVE7 | -0.32079  |
| 115455 | Q85601 | Q6ZMZ3 | -0.13647  |
| 115456 | Q85601 | P59666 | -0.89019  |
| 115457 | Q85601 | Q96RA2 | -0.98898  |
| 115458 | Q85601 | Q15513 | -0.3595   |
| 115459 | Q85601 | O15455 | -0.26851  |
| 115460 | Q85601 | P31152 | -0.61459  |
| 115461 | Q85601 | Q6ZR08 | -0.57589  |
| 115462 | Q85601 | P09603 | -0.61756  |
| 115463 | Q85601 | Q68CK6 | -0.73049  |
| 115464 | Q85601 | Q96JG9 | -0.22756  |
| 115465 | Q85601 | Q86W47 | -0.89887  |
| 115466 | Q85601 | P0C7V8 | -0.22745  |
| 115467 | Q85601 | P43362 | -0.18472  |
| 115468 | Q85601 | P48960 | -1.8864   |
| 115469 | Q85601 | Q96PQ7 | -0.21203  |
| 115470 | Q85601 | Q9UIA0 | -0.71402  |
| 115471 | Q85601 | Q6DT37 | -0.41439  |
| 115472 | Q85601 | P11021 | -0.21991  |
| 115473 | Q85601 | Q9P0K9 | -1.1402   |
| 115474 | Q85601 | P61020 | -0.59312  |
| 115475 | Q85601 | Q8NEW0 | -0.34777  |
| 115476 | Q85601 | Q06033 | -0.78037  |
| 115477 | Q85601 | Q9UN42 | -0.19839  |
| 115478 | Q85601 | Q9BX84 | -0.87266  |
| 115479 | Q85601 | A1A4S6 | -0.24155  |
| 115480 | Q85601 | Q8TD46 | -0.85884  |
| 115481 | Q85601 | Q96QF7 | -0.11589  |
| 115482 | Q85601 | Q9UGB4 | -0.2031   |
| 115483 | Q85601 | Q9Y3E2 | -0.72344  |
| 115484 | Q85601 | Q08830 | -1.1359   |
| 115485 | Q85601 | P23083 | -0.92206  |
| 115486 | Q85601 | P0CG36 | -1.0697   |
| 115487 | Q85601 | A6NK59 | -0.58286  |
| 115488 | Q85601 | A4D1S5 | -1.1435   |
| 115489 | Q85601 | O95156 | -0.82599  |
| 115490 | Q85601 | Q96IX5 | -0.74681  |
| 115491 | Q85601 | Q8N485 | -0.13324  |
| 115492 | Q85601 | Q8NE63 | -1.0402   |
| 115493 | Q85601 | P08588 | -0.6885   |
| 115494 | Q85601 | Q9Y5Q5 | -1.5736   |
| 115495 | Q85601 | P0DKB6 | -0.92686  |
| 115496 | Q85601 | Q96B18 | -0.24541  |
| 115497 | Q85601 | Q14330 | -1.2881   |
| 115498 | Q85601 | P11169 | -0.21767  |
| 115499 | Q85601 | B0YJ81 | -1.4694   |
| 115500 | Q85601 | O14979 | -0.26562  |
| 115501 | Q85601 | Q9P0W8 | -0.86971  |
| 115502 | Q85601 | O60568 | -0.41887  |
| 115503 | Q85601 | A7E2F4 | -0.29141  |
| 115504 | Q85601 | O95718 | -0.22744  |
| 115505 | Q85601 | Q8TB05 | -0.092462 |
| 115506 | Q85601 | Q8NEP4 | -0.092462 |
| 115507 | Q85601 | O95006 | -1.2621   |
| 115508 | Q85601 | Q494R0 | -0.2031   |
| 115509 | Q85601 | Q6UWF7 | -0.9043   |
| 115510 | Q85601 | Q9HCU4 | -1.0657   |
| 115511 | Q85601 | Q6UXB4 | -0.30072  |
| 115512 | Q85601 | Q9BQ16 | -1.0422   |
| 115513 | Q85601 | Q8N7Z5 | -0.22741  |
| 115514 | Q85601 | P22307 | -0.21786  |
| 115515 | Q85601 | P57737 | -0.32067  |
| 115516 | Q85601 | P09067 | -0.15585  |
| 115517 | Q85601 | Q9NZN4 | -0.33999  |
| 115518 | Q85601 | Q16181 | -0.22376  |
| 115519 | Q85601 | Q7Z3B0 | -0.92686  |
| 115520 | Q85601 | A6ND01 | -0.88349  |

|        |        |        |           |
|--------|--------|--------|-----------|
| 115521 | Q85601 | Q96HE8 | -0.92686  |
| 115522 | Q85601 | Q9P265 | -0.22914  |
| 115523 | Q85601 | Q6UWF6 | -1.0641   |
| 115524 | Q85601 | Q9P055 | -0.82701  |
| 115525 | Q85601 | Q9GZX6 | -0.87002  |
| 115526 | Q85601 | Q6ZMG9 | -0.24446  |
| 115527 | Q85601 | Q96M66 | -1.0013   |
| 115528 | Q85601 | Q9BUR5 | -1.3811   |
| 115529 | Q85601 | O76001 | -1.2621   |
| 115530 | Q85601 | E9PIF3 | -0.28227  |
| 115531 | Q85601 | Q8N884 | -0.35816  |
| 115532 | Q85601 | Q14184 | -0.39544  |
| 115533 | Q85601 | Q9NWS0 | -0.31623  |
| 115534 | Q85601 | Q9Y6F7 | -0.22437  |
| 115535 | Q85601 | P26678 | -0.091981 |
| 115536 | Q85601 | Q8N157 | -0.22741  |
| 115537 | Q85601 | P03979 | -0.47044  |
| 115538 | Q85601 | Q9Y230 | -0.2274   |
| 115539 | Q85601 | P31937 | -0.43634  |
| 115540 | Q85601 | Q15700 | -0.19812  |
| 115541 | Q85601 | Q9P2N4 | -1.2575   |
| 115542 | Q85601 | P0CG13 | -0.36157  |
| 115543 | Q85601 | P31930 | -0.46464  |
| 115544 | Q85601 | Q96EK5 | -0.62332  |
| 115545 | Q85601 | Q96R05 | -0.33299  |
| 115546 | Q85601 | Q13671 | -0.34785  |
| 115547 | Q85601 | Q6ISU1 | -0.28888  |
| 115548 | Q85601 | Q9BV99 | -0.22738  |
| 115549 | Q85601 | Q9Y5P3 | -0.68496  |
| 115550 | Q85601 | A6NET4 | -1.2621   |
| 115551 | Q85601 | Q504Y3 | -0.29575  |
| 115552 | Q85601 | A6NFH5 | -0.49134  |
| 115553 | Q85601 | P53634 | -0.72261  |
| 115554 | Q85601 | P43629 | -1.1772   |
| 115555 | Q85601 | O94991 | -1.0205   |
| 115556 | Q85601 | Q9HBJ0 | -0.89754  |
| 115557 | Q85601 | Q96PT4 | -0.18396  |
| 115558 | Q85601 | P0C7U2 | -0.64179  |
| 115559 | Q85601 | P43166 | -0.21954  |
| 115560 | Q85601 | P23510 | -0.45717  |
| 115561 | Q85601 | O43915 | -0.69934  |
| 115562 | Q85601 | P28827 | -0.56195  |
| 115563 | Q85601 | Q9UKR0 | -1.4031   |
| 115564 | Q85601 | Q5W5X9 | -0.11582  |
| 115565 | Q85601 | Q9NPE6 | -0.54362  |
| 115566 | Q85601 | Q9BZ23 | -0.36075  |
| 115567 | Q85601 | Q9UBN1 | -1.0497   |
| 115568 | Q85601 | Q8N9W7 | -0.92686  |
| 115569 | Q85601 | Q96Q42 | -0.49868  |
| 115570 | Q85601 | Q2M2I3 | -0.58114  |
| 115571 | Q85601 | P51674 | -0.92456  |
| 115572 | Q85601 | Q5T2E6 | -0.92686  |
| 115573 | Q85601 | Q13291 | -0.30018  |
| 115574 | Q85601 | O14975 | -0.7784   |
| 115575 | Q85601 | Q9Y4H4 | -0.18287  |
| 115576 | Q85601 | Q9UEF7 | -1.0225   |
| 115577 | Q85601 | Q8NET5 | -1.1364   |
| 115578 | Q85601 | Q53S99 | -0.50741  |
| 115579 | Q85601 | Q9BTU6 | -0.49675  |
| 115580 | Q85601 | O75880 | -0.1955   |
| 115581 | Q85601 | Q8TE73 | -0.45081  |
| 115582 | Q85601 | P09769 | -0.55926  |
| 115583 | Q85601 | Q7Z3B1 | -0.38196  |
| 115584 | Q85601 | P0CG37 | -0.96055  |
| 115585 | Q85601 | O75581 | -0.23664  |
| 115586 | Q85601 | Q99490 | -0.58673  |
| 115587 | Q85601 | P13942 | -0.86238  |
| 115588 | Q85601 | P17152 | -0.39141  |
| 115589 | Q85601 | Q9BZW5 | -0.78714  |
| 115590 | Q85601 | P15882 | -0.79057  |
| 115591 | Q85601 | Q6ZUJ4 | -0.50587  |
| 115592 | Q85601 | Q86YQ8 | -0.22997  |
| 115593 | Q85601 | P04798 | -0.32145  |
| 115594 | Q85601 | Q69YW0 | -0.66591  |
| 115595 | Q85601 | P03999 | -1.3713   |
| 115596 | Q85601 | Q14CX5 | -0.92686  |

|        |        |        |           |
|--------|--------|--------|-----------|
| 115597 | Q85601 | Q13201 | -0.88244  |
| 115598 | Q85601 | Q5DT21 | -0.26005  |
| 115599 | Q85601 | Q9Y2C5 | -1.0145   |
| 115600 | Q85601 | P49223 | -0.82753  |
| 115601 | Q85601 | Q5BKT4 | -0.90432  |
| 115602 | Q85601 | Q9HCP0 | -0.99477  |
| 115603 | Q85601 | Q9Y3A0 | -0.30301  |
| 115604 | Q85601 | Q92535 | -1.2522   |
| 115605 | Q85601 | Q2M3C6 | -0.92686  |
| 115606 | Q85601 | P18065 | -0.42893  |
| 115607 | Q85601 | P20645 | -0.90859  |
| 115608 | Q85601 | Q9Y284 | -0.92686  |
| 115609 | Q85601 | Q8WW43 | -0.41709  |
| 115610 | Q85601 | Q9BV94 | -0.83047  |
| 115611 | Q85601 | Q9GZT4 | -0.54542  |
| 115612 | Q85601 | Q15031 | -1.1296   |
| 115613 | Q85601 | Q92908 | -0.22738  |
| 115614 | Q85601 | O60266 | -0.57796  |
| 115615 | Q85601 | O00429 | -0.55728  |
| 115616 | Q85601 | P28222 | -0.84149  |
| 115617 | Q85601 | Q96GI7 | -0.092462 |
| 115618 | Q85601 | Q8N682 | -1.0248   |
| 115619 | Q85601 | Q13401 | -0.12882  |
| 115620 | Q85601 | Q5QGZ9 | -1.0252   |
| 115621 | Q85601 | Q86V25 | -0.55724  |
| 115622 | Q85601 | Q9H7D0 | -0.31915  |
| 115623 | Q85601 | Q04941 | -0.66693  |
| 115624 | Q85601 | Q5VVQ6 | -0.32438  |
| 115625 | Q85601 | O75072 | -0.68438  |
| 115626 | Q85601 | Q8IWQ3 | -0.75814  |
| 115627 | Q85601 | P56856 | -0.7761   |
| 115628 | Q85601 | P55283 | -1.1727   |
| 115629 | Q85601 | P0C221 | -0.55661  |
| 115630 | Q85601 | Q6UWV2 | -0.50984  |
| 115631 | Q85601 | P19526 | -0.71596  |
| 115632 | Q85601 | Q14201 | -0.18835  |
| 115633 | Q85601 | Q96GD3 | -0.21145  |
| 115634 | Q85601 | Q6P4A8 | -0.64003  |
| 115635 | Q85601 | Q6P3S6 | -0.22686  |
| 115636 | Q85601 | Q15814 | -0.086358 |
| 115637 | Q85601 | P01764 | -1.046    |
| 115638 | Q85601 | Q7LBE3 | -0.9357   |
| 115639 | Q85601 | Q9NX52 | -1.3521   |
| 115640 | Q85601 | Q9NT68 | -0.65796  |
| 115641 | Q85601 | Q9Y251 | -0.33304  |
| 115642 | Q85601 | Q9Y5F8 | -1.246    |
| 115643 | Q85601 | Q9ULM0 | -0.41564  |
| 115644 | Q85601 | P18135 | -1.046    |
| 115645 | Q85601 | Q9UKZ9 | -0.89794  |
| 115646 | Q85601 | Q9NV64 | -0.92686  |
| 115647 | Q85601 | Q7Z4W2 | -0.85081  |
| 115648 | Q85601 | Q14249 | -0.2086   |
| 115649 | Q85601 | Q15514 | -0.11261  |
| 115650 | Q85601 | A6NEY8 | -0.22872  |
| 115651 | Q85601 | H3BN30 | -0.2031   |
| 115652 | Q85601 | P08571 | -0.55046  |
| 115653 | Q85601 | Q9P2X3 | -0.18267  |
| 115654 | Q85601 | Q8N697 | -0.71084  |
| 115655 | Q85601 | Q96RK4 | -0.22657  |
| 115656 | Q85601 | P40199 | -0.25717  |
| 115657 | Q85601 | P00403 | -0.59858  |
| 115658 | Q85601 | Q9Y4C4 | -0.23032  |
| 115659 | Q85601 | P51911 | -0.27888  |
| 115660 | Q85601 | Q9UIK4 | -0.86635  |
| 115661 | Q85601 | Q9BWL3 | -0.94299  |
| 115662 | Q85601 | Q9C0K3 | -0.80932  |
| 115663 | Q85601 | Q14242 | -0.7301   |
| 115664 | Q85601 | O00571 | -0.57629  |
| 115665 | Q85601 | Q96MW1 | -0.092462 |
| 115666 | Q85601 | Q9UKI8 | -0.69897  |
| 115667 | Q85601 | P05186 | -0.99914  |
| 115668 | Q85601 | Q969H4 | -0.22739  |
| 115669 | Q85601 | Q8IZ57 | -0.87519  |
| 115670 | Q85601 | Q96R72 | -1.2621   |
| 115671 | Q85601 | Q9C0H5 | -0.32233  |
| 115672 | Q85601 | P11182 | -0.17121  |

|        |        |        |           |
|--------|--------|--------|-----------|
| 115673 | Q85601 | Q0VF49 | -0.2031   |
| 115674 | Q85601 | P16112 | -0.78345  |
| 115675 | Q85601 | A6NLI5 | -0.589    |
| 115676 | Q85601 | Q5VVY1 | -0.30175  |
| 115677 | Q85601 | O95744 | -0.24894  |
| 115678 | Q85601 | P09525 | -0.24495  |
| 115679 | Q85601 | P01709 | -1.046    |
| 115680 | Q85601 | Q8NF37 | -0.5594   |
| 115681 | Q85601 | Q9H6H4 | -0.92686  |
| 115682 | Q85601 | P15328 | -1.0084   |
| 115683 | Q85601 | Q8NC44 | -0.89384  |
| 115684 | Q85601 | Q8TCN5 | -0.13647  |
| 115685 | Q85601 | Q8NHB8 | -1.2621   |
| 115686 | Q85601 | P58182 | -1.2621   |
| 115687 | Q85601 | Q14032 | -0.41723  |
| 115688 | Q85601 | O15528 | -0.33289  |
| 115689 | Q85601 | Q9BQI0 | -0.62153  |
| 115690 | Q85601 | P23771 | -0.22738  |
| 115691 | Q85601 | Q9GZP8 | -0.2031   |
| 115692 | Q85601 | P09237 | -1.0854   |
| 115693 | Q85601 | Q6UWF5 | -0.92686  |
| 115694 | Q85601 | Q9HC97 | -1.4753   |
| 115695 | Q85601 | Q9BQE3 | -0.35794  |
| 115696 | Q85601 | Q6S5H5 | -0.22747  |
| 115697 | Q85601 | Q8IY37 | -0.82114  |
| 115698 | Q85601 | P53701 | -0.38206  |
| 115699 | Q85601 | Q6ZNG9 | -0.27993  |
| 115700 | Q85601 | A6NCN8 | -0.092462 |
| 115701 | Q85601 | P43686 | -0.42787  |
| 115702 | Q85601 | Q6PCB0 | -1.0978   |
| 115703 | Q85601 | P01767 | -1.046    |
| 115704 | Q85601 | P0C7Q6 | -0.92686  |
| 115705 | Q85601 | Q5T7M9 | -1.0116   |
| 115706 | Q85601 | P48304 | -0.90945  |
| 115707 | Q85601 | P21145 | -0.58225  |
| 115708 | Q85601 | P01716 | -1.046    |
| 115709 | Q85601 | Q8N100 | -0.22927  |
| 115710 | Q85601 | Q16769 | -1.1081   |
| 115711 | Q85601 | P30493 | -1.1017   |
| 115712 | Q85601 | Q9P286 | -0.66539  |
| 115713 | Q85601 | Q6NTE8 | -0.70573  |
| 115714 | Q85601 | Q8NDZ2 | -0.32664  |
| 115715 | Q85601 | Q9NRQ5 | -0.67993  |
| 115716 | Q85601 | Q9HC56 | -1.2046   |
| 115717 | Q85601 | P98196 | -0.63531  |
| 115718 | Q85601 | Q92879 | -0.2475   |
| 115719 | Q85601 | Q9H3Y8 | -0.61993  |
| 115720 | Q85601 | Q08E93 | -0.2031   |
| 115721 | Q85601 | A8MXU0 | -0.86864  |
| 115722 | Q85601 | Q9H4G4 | -0.76519  |
| 115723 | Q85601 | O14526 | -0.47597  |
| 115724 | Q85601 | O14949 | -0.34461  |
| 115725 | Q85601 | Q9NZ71 | -0.53028  |
| 115726 | Q85601 | O14986 | -0.27335  |
| 115727 | Q85601 | A6NGU5 | -0.75895  |
| 115728 | Q85601 | Q5JTD7 | -0.22398  |
| 115729 | Q85601 | Q75506 | -0.27108  |
| 115730 | Q85601 | Q9Y5R4 | -0.22378  |
| 115731 | Q85601 | Q96H78 | -0.69944  |
| 115732 | Q85601 | Q5W041 | -0.22786  |
| 115733 | Q85601 | Q96KP6 | -0.37049  |
| 115734 | Q85601 | O60739 | -0.14258  |
| 115735 | Q85601 | Q9UHE8 | -1.132    |
| 115736 | Q85601 | P09038 | -0.32299  |
| 115737 | Q85601 | Q99626 | -0.23074  |
| 115738 | Q85601 | Q69YU5 | -0.9043   |
| 115739 | Q85601 | Q9UEE9 | -0.55907  |
| 115740 | Q85601 | P54284 | -0.39109  |
| 115741 | Q85601 | Q8N8J7 | -0.92686  |
| 115742 | Q85601 | Q5BKY1 | -0.22823  |
| 115743 | Q85601 | Q8TDI8 | -0.94901  |
| 115744 | Q85601 | P17858 | -0.22478  |
| 115745 | Q85601 | P40818 | -0.34998  |
| 115746 | Q85601 | Q9H115 | -0.16989  |
| 115747 | Q85601 | Q6PKC3 | -1.0238   |
| 115748 | Q85601 | Q7Z6K3 | -0.36846  |



|        |        |        |           |
|--------|--------|--------|-----------|
| 115749 | Q85601 | P01771 | -1.046    |
| 115750 | Q85601 | Q9ULW2 | -0.72928  |
| 115751 | Q85601 | Q2TV78 | -1.2133   |
| 115752 | Q85601 | Q5VV52 | -0.39438  |
| 115753 | Q85601 | Q99592 | -0.2276   |
| 115754 | Q85601 | Q8NEV4 | -0.76663  |
| 115755 | Q85601 | Q6NW40 | -0.74923  |
| 115756 | Q85601 | Q8IZL9 | -0.18912  |
| 115757 | Q85601 | P35250 | -0.17162  |
| 115758 | Q85601 | Q08477 | -0.93671  |
| 115759 | Q85601 | P01568 | -0.80645  |
| 115760 | Q85601 | Q96DN0 | -0.26582  |
| 115761 | Q85601 | Q8N0W4 | -0.4295   |
| 115762 | Q85601 | O14684 | -0.78337  |
| 115763 | Q85601 | Q8N806 | -0.40004  |
| 115764 | Q85601 | Q8N5B7 | -0.24446  |
| 115765 | Q85601 | Q7Z4H8 | -0.20863  |
| 115766 | Q85601 | O76090 | -0.74266  |
| 115767 | Q85601 | P01715 | -1.046    |
| 115768 | Q85601 | Q12794 | -0.36496  |
| 115769 | Q85601 | Q8WVK2 | -0.034312 |
| 115770 | Q85601 | Q629K1 | -1.0116   |
| 115771 | Q85601 | P41146 | -1.2643   |
| 115772 | Q85601 | Q9UPR0 | -0.51158  |
| 115773 | Q85601 | Q8N9E0 | -0.092462 |
| 115774 | Q85601 | O43623 | -0.20938  |
| 115775 | Q85601 | P30484 | -1.1017   |
| 115776 | Q85601 | Q6URH7 | -0.57387  |
| 115777 | Q85601 | Q92747 | -0.22738  |
| 115778 | Q85601 | Q8N9T2 | -0.2031   |
| 115779 | Q85601 | P48681 | -0.19472  |
| 115780 | Q85601 | A8MXQ7 | -0.22741  |
| 115781 | Q85601 | Q8IWD5 | -0.92686  |
| 115782 | Q85601 | P60328 | -1.0167   |
| 115783 | Q85601 | O95807 | -0.66121  |
| 115784 | Q85601 | Q86W28 | -0.60825  |
| 115785 | Q85601 | O43293 | -0.32698  |
| 115786 | Q85601 | Q8N4B5 | -0.31364  |
| 115787 | Q85601 | Q5T5A8 | -0.31607  |
| 115788 | Q85601 | Q9NTU7 | -0.7977   |
| 115789 | Q85601 | Q9GZQ8 | -0.24896  |
| 115790 | Q85601 | Q86Y56 | -0.029118 |
| 115791 | Q85601 | Q6ZR62 | -0.32209  |
| 115792 | Q85601 | Q6ZP01 | -0.58057  |
| 115793 | Q85601 | O43281 | -0.3674   |
| 115794 | Q85601 | Q8IZF2 | -1.3639   |
| 115795 | Q85601 | Q9H2C2 | -0.92554  |
| 115796 | Q85601 | Q6IFG1 | -1.2621   |
| 115797 | Q85601 | Q86SQ4 | -1.3639   |
| 115798 | Q85601 | Q5VWP2 | -0.45621  |
| 115799 | Q85601 | P08758 | -0.35211  |
| 115800 | Q85601 | Q9NQX5 | -0.92686  |
| 115801 | Q85601 | Q13444 | -0.64688  |
| 115802 | Q85601 | Q8N0V1 | -0.19808  |
| 115803 | Q85601 | P05112 | -0.24692  |
| 115804 | Q85601 | P48443 | -0.2278   |
| 115805 | Q85601 | Q9Y4F9 | -0.35551  |
| 115806 | Q85601 | Q9GZZ9 | -0.20042  |
| 115807 | Q85601 | Q9Y5H5 | -1.246    |
| 115808 | Q85601 | O43772 | -0.43097  |
| 115809 | Q85601 | P55160 | -0.30502  |
| 115810 | Q85601 | Q5T5B0 | -0.31607  |
| 115811 | Q85601 | O75716 | -0.51956  |
| 115812 | Q85601 | O95522 | -0.157    |
| 115813 | Q85601 | O14863 | -0.6007   |
| 115814 | Q85601 | O95445 | -0.83299  |
| 115815 | Q85601 | Q16635 | -0.56064  |
| 115816 | Q85601 | Q9UL17 | -0.44273  |
| 115817 | Q85601 | Q8NGI9 | -1.2621   |
| 115818 | Q85601 | P13611 | -0.97625  |
| 115819 | Q85601 | P22528 | -0.093817 |
| 115820 | Q85601 | Q9BZH6 | -0.67921  |
| 115821 | Q85601 | Q6ZP98 | -0.3508   |
| 115822 | Q85601 | Q6P988 | -0.85016  |
| 115823 | Q85601 | Q9BXQ6 | -0.2031   |
| 115824 | Q85601 | Q6ZQY3 | -0.52928  |

|        |        |         |           |
|--------|--------|---------|-----------|
| 115825 | Q85601 | Q13520  | -0.79342  |
| 115826 | Q85601 | Q9UI56  | -0.2031   |
| 115827 | Q85601 | P00540  | -1.1732   |
| 115828 | Q85601 | Q8NHS2  | -0.25955  |
| 115829 | Q85601 | B2RC85  | -0.12765  |
| 115830 | Q85601 | Q8N9V6  | -0.22741  |
| 115831 | Q85601 | Q6ZNL6  | -0.97774  |
| 115832 | Q85601 | Q9UQE7  | -0.22444  |
| 115833 | Q85601 | Q8NHU3  | -0.80323  |
| 115834 | Q85601 | Q00537  | -0.97825  |
| 115835 | Q85601 | O95147  | -0.80291  |
| 115836 | Q85601 | P24903  | -0.77803  |
| 115837 | Q85601 | P63126  | -0.28681  |
| 115838 | Q85601 | P20382  | -0.81053  |
| 115839 | Q85601 | Q8NGG2  | -1.2621   |
| 115840 | Q85601 | Q0P6D6  | -0.41467  |
| 115841 | Q85601 | Q24JP5  | -0.63956  |
| 115842 | Q85601 | Q96L34  | -0.39831  |
| 115843 | Q85601 | Q8IV42  | -0.78779  |
| 115844 | Q85601 | Q8TED9  | -0.34079  |
| 115845 | Q85601 | P85037  | -0.3249   |
| 115846 | Q85601 | Q92565  | -0.4232   |
| 115847 | Q85601 | P51688  | -0.43712  |
| 115848 | Q85601 | Q63HNN1 | -0.4938   |
| 115849 | Q85601 | P15291  | -0.44323  |
| 115850 | Q85601 | Q6L8H1  | -0.2031   |
| 115851 | Q85601 | Q9H2D6  | -0.24316  |
| 115852 | Q85601 | Q14324  | -0.66344  |
| 115853 | Q85601 | Q99961  | -0.22977  |
| 115854 | Q85601 | Q9UBF8  | -0.69242  |
| 115855 | Q85601 | Q13315  | -0.44845  |
| 115856 | Q85601 | P14550  | -0.3501   |
| 115857 | Q85601 | P10124  | -0.10953  |
| 115858 | Q85601 | O14775  | -0.38056  |
| 115859 | Q85601 | Q8TC26  | -0.80221  |
| 115860 | Q85601 | P11177  | -0.16084  |
| 115861 | Q85601 | P52798  | -0.58518  |
| 115862 | Q85601 | Q9C019  | -0.57799  |
| 115863 | Q85601 | P0C7L1  | -0.82753  |
| 115864 | Q85601 | Q8N4L2  | -0.92725  |
| 115865 | Q85601 | Q9Y4X4  | -0.2231   |
| 115866 | Q85601 | Q8WVI0  | -0.75013  |
| 115867 | Q85601 | Q9H4G0  | -0.26599  |
| 115868 | Q85601 | Q9Y2G1  | -0.28061  |
| 115869 | Q85601 | C4AMC7  | -0.49851  |
| 115870 | Q85601 | Q99643  | -0.42237  |
| 115871 | Q85601 | Q4VNC0  | -1.0517   |
| 115872 | Q85601 | Q8IXU6  | -0.62504  |
| 115873 | Q85601 | Q9H173  | -0.1727   |
| 115874 | Q85601 | Q9UMX5  | -0.84074  |
| 115875 | Q85601 | Q4KMZ1  | -0.14841  |
| 115876 | Q85601 | Q8WWV3  | -0.81537  |
| 115877 | Q85601 | P49619  | -0.95509  |
| 115878 | Q85601 | Q96RV3  | -0.92686  |
| 115879 | Q85601 | Q5TGY3  | -0.55868  |
| 115880 | Q85601 | Q8NBM4  | -0.92686  |
| 115881 | Q85601 | P57082  | -0.34126  |
| 115882 | Q85601 | Q0P5N6  | -1.3986   |
| 115883 | Q85601 | Q9NYJ7  | -0.9617   |
| 115884 | Q85601 | Q96MS3  | -0.69357  |
| 115885 | Q85601 | Q86VQ1  | -0.10147  |
| 115886 | Q85601 | Q96N19  | -0.92686  |
| 115887 | Q85601 | P22083  | -0.57877  |
| 115888 | Q85601 | P0CB46  | -0.75163  |
| 115889 | Q85601 | Q8TD06  | -0.29176  |
| 115890 | Q85601 | Q8NGA8  | -1.2621   |
| 115891 | Q85601 | P05305  | -0.27634  |
| 115892 | Q85601 | P02655  | -0.59053  |
| 115893 | Q85601 | Q8NA96  | -0.79503  |
| 115894 | Q85601 | Q8IYI0  | -0.028256 |
| 115895 | Q85601 | Q00796  | -0.68739  |
| 115896 | Q85601 | P42356  | -0.53426  |
| 115897 | Q85601 | Q9UF33  | -1.1938   |
| 115898 | Q85601 | Q70UQ0  | -0.34563  |
| 115899 | Q85601 | Q9NRY6  | -0.64672  |
| 115900 | Q85601 | Q9NRM2  | -0.15826  |

|        |        |        |           |
|--------|--------|--------|-----------|
| 115901 | Q85601 | Q8WYQ4 | -0.15872  |
| 115902 | Q85601 | Q9NWM0 | -0.22294  |
| 115903 | Q85601 | O60896 | -0.2913   |
| 115904 | Q85601 | Q8IZQ8 | -0.50125  |
| 115905 | Q85601 | Q6UXN8 | -0.95124  |
| 115906 | Q85601 | Q8NDX9 | -0.81082  |
| 115907 | Q85601 | Q9H1B5 | -0.69929  |
| 115908 | Q85601 | Q1X8D7 | -0.22676  |
| 115909 | Q85601 | Q8N257 | -0.7417   |
| 115910 | Q85601 | Q9BSE4 | -0.82601  |
| 115911 | Q85601 | Q96I76 | -0.35467  |
| 115912 | Q85601 | Q9BRV3 | -0.35691  |
| 115913 | Q85601 | P18085 | -0.3168   |
| 115914 | Q85601 | Q9QC07 | -0.29459  |
| 115915 | Q85601 | P22830 | -0.030291 |
| 115916 | Q85601 | Q5SXH7 | -0.44245  |
| 115917 | Q85601 | Q9P0S3 | -0.98231  |
| 115918 | Q85601 | Q96F10 | -0.2253   |
| 115919 | Q85601 | P23743 | -0.93064  |
| 115920 | Q85601 | P08254 | -0.75872  |
| 115921 | Q85601 | P07992 | -0.1751   |
| 115922 | Q85601 | P49753 | -0.22883  |
| 115923 | Q85601 | Q9Y2D0 | -0.24042  |
| 115924 | Q85601 | Q8TDN1 | -0.84367  |
| 115925 | Q85601 | O95081 | -0.25009  |
| 115926 | Q85601 | O95866 | -0.90863  |
| 115927 | Q85601 | Q86SK9 | -1.1203   |
| 115928 | Q85601 | Q8WWY8 | -1.1893   |
| 115929 | Q85601 | O60259 | -0.52667  |
| 115930 | Q85601 | Q9UBQ7 | -0.61816  |
| 115931 | Q85601 | P51449 | -0.36768  |
| 115932 | Q85601 | A8MUI8 | -0.16984  |
| 115933 | Q85601 | Q8WUD6 | -0.55422  |
| 115934 | Q85601 | O15018 | -0.44615  |
| 115935 | Q85601 | Q6ZUB0 | -0.92686  |
| 115936 | Q85601 | Q13324 | -0.77493  |
| 115937 | Q85601 | Q8IYT2 | -0.82309  |
| 115938 | Q85601 | P50219 | -0.22733  |
| 115939 | Q85601 | Q5KSL6 | -0.88933  |
| 115940 | Q85601 | O43704 | -0.25674  |
| 115941 | Q85601 | Q9NRJ2 | -0.2031   |
| 115942 | Q85601 | Q969J3 | -0.29409  |
| 115943 | Q85601 | B2CW77 | -0.2031   |
| 115944 | Q85601 | P08861 | -1.3878   |
| 115945 | Q85601 | O14763 | -0.37344  |
| 115946 | Q85601 | P13497 | -1.0669   |
| 115947 | Q85601 | Q9HCU0 | -0.6493   |
| 115948 | Q85601 | P05089 | -0.20873  |
| 115949 | Q85601 | Q14512 | -0.74589  |
| 115950 | Q85601 | Q7Z7G0 | -0.98026  |
| 115951 | Q85601 | Q9P2W1 | -0.12853  |
| 115952 | Q85601 | Q5JQF7 | -0.2031   |
| 115953 | Q85601 | Q7Z3D4 | -0.90538  |
| 115954 | Q85601 | Q9HCC0 | -0.46792  |
| 115955 | Q85601 | Q6ZN68 | -0.92686  |
| 115956 | Q85601 | Q96RP7 | -0.64398  |
| 115957 | Q85601 | Q9Y6R7 | -0.23408  |
| 115958 | Q85601 | P36959 | -0.40515  |
| 115959 | Q85601 | P49407 | -0.3831   |
| 115960 | Q85601 | Q86TI0 | -1.0113   |
| 115961 | Q85601 | Q9BXJ0 | -0.96335  |
| 115962 | Q85601 | Q8N4T4 | -0.82333  |
| 115963 | Q85601 | Q9HD23 | -0.78107  |
| 115964 | Q85601 | Q8N8P7 | -0.9043   |
| 115965 | Q85601 | O94830 | -0.12092  |
| 115966 | Q85601 | Q9UIY3 | -0.52245  |
| 115967 | Q85601 | P09012 | -0.22465  |
| 115968 | Q85601 | Q96PP4 | -0.73373  |
| 115969 | Q85601 | Q96PE3 | -0.31298  |
| 115970 | Q85601 | P10412 | -0.027627 |
| 115971 | Q85601 | O95475 | -0.22772  |
| 115972 | Q85601 | P01358 | -0.25237  |
| 115973 | Q85601 | Q9H8P0 | -0.71953  |
| 115974 | Q85601 | P78524 | -0.34172  |
| 115975 | Q85601 | P11686 | -0.43122  |
| 115976 | Q85601 | Q96K78 | -1.3639   |

|        |        |         |           |
|--------|--------|---------|-----------|
| 115977 | Q85601 | Q8IXK2  | -0.7006   |
| 115978 | Q85601 | O60811  | -0.157    |
| 115979 | Q85601 | Q8NGN2  | -1.2621   |
| 115980 | Q85601 | P80365  | -0.67541  |
| 115981 | Q85601 | Q8N8Y2  | -0.13647  |
| 115982 | Q85601 | Q4KWH8  | -0.28236  |
| 115983 | Q85601 | Q70Z44  | -1.047    |
| 115984 | Q85601 | Q9NQZ7  | -0.8072   |
| 115985 | Q85601 | O14981  | -0.42501  |
| 115986 | Q85601 | P01718  | -1.046    |
| 115987 | Q85601 | Q5U4P2  | -1.0516   |
| 115988 | Q85601 | O43934  | -0.67993  |
| 115989 | Q85601 | Q2WVGJ6 | -0.19626  |
| 115990 | Q85601 | Q9NR34  | -0.67617  |
| 115991 | Q85601 | O95980  | -0.4967   |
| 115992 | Q85601 | P17655  | -0.25161  |
| 115993 | Q85601 | Q8TE67  | -0.22741  |
| 115994 | Q85601 | Q9NZP0  | -1.2621   |
| 115995 | Q85601 | P78330  | -0.21726  |
| 115996 | Q85601 | O75593  | -0.36066  |
| 115997 | Q85601 | P06213  | -0.25552  |
| 115998 | Q85601 | Q8WV15  | -0.92686  |
| 115999 | Q85601 | A6NNS2  | -1.4345   |
| 116000 | Q85601 | P13500  | -0.36049  |
| 116001 | Q85601 | P09382  | -0.58695  |
| 116002 | Q85601 | Q15056  | -0.22616  |
| 116003 | Q85601 | O95084  | -1.0535   |
| 116004 | Q85601 | P98073  | -1.2766   |
| 116005 | Q85601 | Q9H094  | -0.14904  |
| 116006 | Q85601 | O15178  | -0.34796  |
| 116007 | Q85601 | P24752  | -0.1996   |
| 116008 | Q85601 | Q86VS3  | -1.2143   |
| 116009 | Q85601 | Q9NS62  | -1.2109   |
| 116010 | Q85601 | O95867  | -0.5608   |
| 116011 | Q85601 | Q96P64  | -0.88202  |
| 116012 | Q85601 | Q6P3X3  | -0.22642  |
| 116013 | Q85601 | Q9BWQ8  | -0.62743  |
| 116014 | Q85601 | P31267  | -0.22404  |
| 116015 | Q85601 | Q99729  | -0.25258  |
| 116016 | Q85601 | P30044  | -0.29182  |
| 116017 | Q85601 | Q9H6S1  | -0.057584 |
| 116018 | Q85601 | Q8N6K7  | -0.22434  |
| 116019 | Q85601 | Q9UN71  | -1.2169   |
| 116020 | Q85601 | A6NDN8  | -0.17274  |
| 116021 | Q85601 | Q9BWW7  | -0.19583  |
| 116022 | Q85601 | O43504  | -0.46152  |
| 116023 | Q85601 | Q92953  | -0.90076  |
| 116024 | Q85601 | Q494R4  | -0.14757  |
| 116025 | Q85601 | Q9H2C5  | -1.2621   |
| 116026 | Q85601 | Q92802  | -0.18472  |
| 116027 | Q85601 | Q8NFP9  | -0.24662  |
| 116028 | Q85601 | Q5K651  | -0.17861  |
| 116029 | Q85601 | Q9C0B9  | -0.2603   |
| 116030 | Q85601 | Q8WY50  | -0.2031   |
| 116031 | Q85601 | O95900  | -0.30017  |
| 116032 | Q85601 | Q9HC98  | -0.2291   |
| 116033 | Q85601 | Q2TAA5  | -0.89712  |
| 116034 | Q85601 | Q96AP4  | -0.589    |
| 116035 | Q85601 | Q00266  | -0.57809  |
| 116036 | Q85601 | Q96NW4  | -0.22741  |
| 116037 | Q85601 | Q9HC36  | -0.22552  |
| 116038 | Q85601 | Q9BT22  | -0.88318  |
| 116039 | Q85601 | P21589  | -0.47701  |
| 116040 | Q85601 | P0C7U1  | -0.23399  |
| 116041 | Q85601 | Q9Y5N1  | -1.4022   |
| 116042 | Q85601 | O15389  | -1.0948   |
| 116043 | Q85601 | Q9Y6C9  | -0.69716  |
| 116044 | Q85601 | Q9H0K1  | -0.42363  |
| 116045 | Q85601 | Q9BWW8  | -0.87645  |
| 116046 | Q85601 | O14990  | -0.3126   |
| 116047 | Q85601 | Q8N2B8  | -0.8361   |
| 116048 | Q85601 | P21439  | -1.0282   |
| 116049 | Q85601 | Q8N1A6  | -0.15717  |
| 116050 | Q85601 | Q6DD88  | -0.97295  |
| 116051 | Q85601 | O95864  | -0.91126  |
| 116052 | Q85601 | P01241  | -0.24997  |

|        |        |        |            |
|--------|--------|--------|------------|
| 116053 | Q85601 | Q9BRJ9 | -0.22747   |
| 116054 | Q85601 | Q8NGB4 | -1.2621    |
| 116055 | Q85601 | A6NCJ1 | -0.52584   |
| 116056 | Q85601 | Q8NGG7 | -1.2621    |
| 116057 | Q85601 | Q9P2J9 | -0.097571  |
| 116058 | Q85601 | P10620 | -0.18276   |
| 116059 | Q85601 | Q99611 | -0.88954   |
| 116060 | Q85601 | P0C862 | -0.93911   |
| 116061 | Q85601 | P32927 | -0.67497   |
| 116062 | Q85601 | P02671 | -0.50813   |
| 116063 | Q85601 | O94905 | -0.14477   |
| 116064 | Q85601 | Q31612 | -1.1017    |
| 116065 | Q85601 | P0DJD9 | -1.1749    |
| 116066 | Q85601 | Q6ZVK1 | -0.92686   |
| 116067 | Q85601 | Q5U651 | -0.18771   |
| 116068 | Q85601 | P0CG33 | -0.1796    |
| 116069 | Q85601 | Q5BXX6 | -0.86355   |
| 116070 | Q85601 | Q8IZ96 | -0.95476   |
| 116071 | Q85601 | Q15048 | -0.11628   |
| 116072 | Q85601 | Q8IWZ8 | -0.13923   |
| 116073 | Q85601 | P53597 | -0.54598   |
| 116074 | Q85601 | Q86T26 | -1.8812    |
| 116075 | Q85601 | P0C7N4 | -0.92686   |
| 116076 | Q85601 | P11274 | -0.79217   |
| 116077 | Q85601 | Q8NHW6 | -0.92288   |
| 116078 | Q85601 | Q6NUI6 | -0.99634   |
| 116079 | Q85601 | P55157 | -0.45597   |
| 116080 | Q85601 | Q5TEV5 | -0.9043    |
| 116081 | Q85601 | Q14964 | -0.90665   |
| 116082 | Q85601 | Q9NRU3 | -1.074     |
| 116083 | Q85601 | Q96PS1 | -0.038772  |
| 116084 | Q85601 | Q8NFW5 | -0.17303   |
| 116085 | Q85601 | O43820 | -0.69895   |
| 116086 | Q85601 | Q8NEN9 | -0.35978   |
| 116087 | Q85601 | Q8NGH5 | -1.2621    |
| 116088 | Q85601 | Q15027 | -0.82012   |
| 116089 | Q85601 | Q9Y6M4 | -1.0398    |
| 116090 | Q85601 | O43304 | -0.9773    |
| 116091 | Q85601 | Q96RU3 | -0.22741   |
| 116092 | Q85601 | A6NNB3 | -1.1826    |
| 116093 | Q85601 | P16662 | -0.90415   |
| 116094 | Q85601 | Q8WUF8 | -0.87832   |
| 116095 | Q85601 | Q9ULA0 | -0.44972   |
| 116096 | Q85601 | Q9H6P5 | -0.6402    |
| 116097 | Q85601 | Q5TGU0 | -0.95568   |
| 116098 | Q85601 | O75718 | -0.9883    |
| 116099 | Q85601 | Q9P2B2 | -0.27158   |
| 116100 | Q85601 | P54793 | -0.74145   |
| 116101 | Q85601 | P12107 | -0.79336   |
| 116102 | Q85601 | Q8N807 | -0.67472   |
| 116103 | Q85601 | P10747 | -0.27867   |
| 116104 | Q85601 | P57679 | -0.75245   |
| 116105 | Q85601 | Q06141 | -0.93934   |
| 116106 | Q85601 | P50591 | -0.72085   |
| 116107 | Q85601 | Q96G04 | -0.0099546 |
| 116108 | Q85601 | A6NLU5 | -0.92686   |
| 116109 | Q85601 | Q15431 | -0.14372   |
| 116110 | Q85601 | Q9NYH9 | -0.14382   |
| 116111 | Q85601 | P49755 | -0.17716   |
| 116112 | Q85601 | Q92481 | -0.17679   |
| 116113 | Q85601 | Q9Y287 | -0.18171   |
| 116114 | Q85601 | Q8TE59 | -1.2377    |
| 116115 | Q85601 | Q7RTS5 | -1.0428    |
| 116116 | Q85601 | P01615 | -1.046     |
| 116117 | Q85601 | Q9Y6E0 | -0.26148   |
| 116118 | Q85601 | P35453 | -0.22737   |
| 116119 | Q85601 | Q6ZUV0 | -0.36533   |
| 116120 | Q85601 | Q2TAC2 | -0.090486  |
| 116121 | Q85601 | Q6ZVN7 | -0.73358   |
| 116122 | Q85601 | O76087 | -0.68194   |
| 116123 | Q85601 | P43304 | -0.23505   |
| 116124 | Q85601 | Q9H1C0 | -1.037     |
| 116125 | Q85601 | Q96CC6 | -0.56626   |
| 116126 | Q85601 | Q8IW75 | -0.66344   |
| 116127 | Q85601 | Q9UJC3 | -0.15863   |
| 116128 | Q85601 | O15269 | -0.36282   |

|        |        |        |           |
|--------|--------|--------|-----------|
| 116129 | Q85601 | Q9NWH7 | -1.241    |
| 116130 | Q85601 | Q9NVM6 | -0.92548  |
| 116131 | Q85601 | Q496J9 | -0.76385  |
| 116132 | Q85601 | P0CG23 | -0.60958  |
| 116133 | Q85601 | Q96PL5 | -0.77737  |
| 116134 | Q85601 | Q9BQY6 | -0.82753  |
| 116135 | Q85601 | Q99674 | -0.98591  |
| 116136 | Q85601 | P24046 | -0.8211   |
| 116137 | Q85601 | O43374 | -0.42642  |
| 116138 | Q85601 | Q86XP1 | -0.55253  |
| 116139 | Q85601 | Q13634 | -1.2212   |
| 116140 | Q85601 | Q8N3U1 | -0.2031   |
| 116141 | Q85601 | Q03154 | -0.40729  |
| 116142 | Q85601 | Q8NB66 | -0.22741  |
| 116143 | Q85601 | Q8NGR4 | -1.2621   |
| 116144 | Q85601 | P01876 | -0.36909  |
| 116145 | Q85601 | Q6XE24 | -0.66524  |
| 116146 | Q85601 | Q9P0U3 | -0.14582  |
| 116147 | Q85601 | P27930 | -0.93456  |
| 116148 | Q85601 | Q96ME7 | -0.19494  |
| 116149 | Q85601 | Q3SXZ7 | -0.26242  |
| 116150 | Q85601 | P36021 | -0.93414  |
| 116151 | Q85601 | Q95985 | -0.62212  |
| 116152 | Q85601 | P55344 | -0.8765   |
| 116153 | Q85601 | Q8IVT5 | -0.29097  |
| 116154 | Q85601 | Q6ZRS4 | -0.053147 |
| 116155 | Q85601 | P17174 | -0.19266  |
| 116156 | Q85601 | Q8NGS2 | -1.2621   |
| 116157 | Q85601 | Q07817 | -0.22731  |
| 116158 | Q85601 | Q86U38 | -0.24699  |
| 116159 | Q85601 | Q5YKI7 | -0.54075  |
| 116160 | Q85601 | Q9H6E5 | -0.22702  |
| 116161 | Q85601 | P33765 | -1.1349   |
| 116162 | Q85601 | Q7LDG7 | -0.68677  |
| 116163 | Q85601 | P52272 | -0.20482  |
| 116164 | Q85601 | P46821 | -0.23405  |
| 116165 | Q85601 | Q9P2W7 | -0.56313  |
| 116166 | Q85601 | Q7Z7B1 | -0.90581  |
| 116167 | Q85601 | Q8WXG1 | -0.073775 |
| 116168 | Q85601 | Q8WUR7 | -0.24668  |
| 116169 | Q85601 | Q96EY9 | -0.31969  |
| 116170 | Q85601 | Q9BVC5 | -0.25649  |
| 116171 | Q85601 | Q7Z6J8 | -0.25853  |
| 116172 | Q85601 | Q9H9K5 | -0.78509  |
| 116173 | Q85601 | Q5T7P3 | -0.31607  |
| 116174 | Q85601 | P10643 | -0.90929  |
| 116175 | Q85601 | Q9H270 | -0.22656  |
| 116176 | Q85601 | Q3YBM2 | -0.42203  |
| 116177 | Q85601 | P04234 | -0.5192   |
| 116178 | Q85601 | Q8N138 | -0.53681  |
| 116179 | Q85601 | Q8TC27 | -0.99804  |
| 116180 | Q85601 | Q8NGK2 | -1.2621   |
| 116181 | Q85601 | O60218 | -0.51296  |
| 116182 | Q85601 | Q14126 | -0.9744   |
| 116183 | Q85601 | Q6NT16 | -0.86184  |
| 116184 | Q85601 | Q9UF12 | -0.36438  |
| 116185 | Q85601 | Q6ZTR7 | -0.10437  |
| 116186 | Q85601 | Q92784 | -0.23244  |
| 116187 | Q85601 | P82251 | -0.97445  |
| 116188 | Q85601 | Q13323 | -0.84947  |
| 116189 | Q85601 | Q9H741 | -0.9043   |
| 116190 | Q85601 | Q8NGQ2 | -1.2621   |
| 116191 | Q85601 | Q9H2J7 | -0.99518  |
| 116192 | Q85601 | Q6VB84 | -0.43379  |
| 116193 | Q85601 | D6R9N7 | -0.66238  |
| 116194 | Q85601 | P61009 | -0.77813  |
| 116195 | Q85601 | P05814 | -0.80832  |
| 116196 | Q85601 | Q7Z570 | -0.589    |
| 116197 | Q85601 | Q8NA47 | -0.092462 |
| 116198 | Q85601 | O15123 | -0.52033  |
| 116199 | Q85601 | Q6UWT4 | -0.9043   |
| 116200 | Q85601 | Q8NG80 | -1.1204   |
| 116201 | Q85601 | Q9Y225 | -0.64409  |
| 116202 | Q85601 | Q9BZJ6 | -1.1866   |
| 116203 | Q85601 | P01742 | -1.046    |
| 116204 | Q85601 | Q969W1 | -0.943    |

|        |        |        |           |
|--------|--------|--------|-----------|
| 116205 | Q85601 | Q9Y4U1 | -0.42334  |
| 116206 | Q85601 | O43194 | -1.4755   |
| 116207 | Q85601 | P02810 | -0.36479  |
| 116208 | Q85601 | Q9H0H5 | -0.23902  |
| 116209 | Q85601 | P09093 | -0.93808  |
| 116210 | Q85601 | P08913 | -0.25992  |
| 116211 | Q85601 | Q5K131 | -0.30378  |
| 116212 | Q85601 | Q30KR1 | -0.86864  |
| 116213 | Q85601 | P51810 | -0.48567  |
| 116214 | Q85601 | O15354 | -1.5103   |
| 116215 | Q85601 | P33032 | -0.9201   |
| 116216 | Q85601 | Q9NUQ2 | -0.68879  |
| 116217 | Q85601 | Q9NVH6 | -0.27361  |
| 116218 | Q85601 | P0C0S5 | -0.80267  |
| 116219 | Q85601 | P01222 | -0.72775  |
| 116220 | Q85601 | Q5VTU8 | -0.27122  |
| 116221 | Q85601 | Q13422 | -0.13881  |
| 116222 | Q85601 | Q6L8G5 | -0.2031   |
| 116223 | Q85601 | Q8NHS3 | -0.32962  |
| 116224 | Q85601 | Q8N1N2 | -0.92686  |
| 116225 | Q85601 | Q12913 | -0.48264  |
| 116226 | Q85601 | P01308 | -0.22633  |
| 116227 | Q85601 | Q08431 | -0.85838  |
| 116228 | Q85601 | A6NMV5 | -0.157    |
| 116229 | Q85601 | Q9P2D6 | -0.30567  |
| 116230 | Q85601 | Q86XN8 | -0.22721  |
| 116231 | Q85601 | Q6TCH4 | -0.92686  |
| 116232 | Q85601 | Q9H3R0 | -0.18422  |
| 116233 | Q85601 | Q6ZT07 | -1.3741   |
| 116234 | Q85601 | Q13491 | -0.69629  |
| 116235 | Q85601 | Q8N5I2 | -0.26243  |
| 116236 | Q85601 | Q9BZR6 | -0.22848  |
| 116237 | Q85601 | Q9NUI1 | -1.1516   |
| 116238 | Q85601 | P20742 | -0.84163  |
| 116239 | Q85601 | Q8NH90 | -1.2621   |
| 116240 | Q85601 | Q5SXM8 | -0.13496  |
| 116241 | Q85601 | Q8IZ21 | -0.5881   |
| 116242 | Q85601 | Q8IY82 | -0.38042  |
| 116243 | Q85601 | O43497 | -0.82823  |
| 116244 | Q85601 | Q01523 | -0.82641  |
| 116245 | Q85601 | Q5JTV8 | -0.42039  |
| 116246 | Q85601 | P59894 | -0.5766   |
| 116247 | Q85601 | Q5TGY1 | -0.92686  |
| 116248 | Q85601 | O15120 | -0.72798  |
| 116249 | Q85601 | Q13423 | -0.83125  |
| 116250 | Q85601 | Q9BTK6 | -0.67237  |
| 116251 | Q85601 | P28039 | -0.93251  |
| 116252 | Q85601 | Q96RG2 | -0.5584   |
| 116253 | Q85601 | Q9P275 | -0.44949  |
| 116254 | Q85601 | A1L453 | -1.3764   |
| 116255 | Q85601 | Q8WU76 | -0.16868  |
| 116256 | Q85601 | Q96KB5 | -0.47332  |
| 116257 | Q85601 | Q8IYA8 | -0.092462 |
| 116258 | Q85601 | Q96DD0 | -0.30103  |
| 116259 | Q85601 | Q8N3R3 | -0.15485  |
| 116260 | Q85601 | O75689 | -0.2279   |
| 116261 | Q85601 | P58107 | -0.19172  |
| 116262 | Q85601 | Q3KP22 | -0.3389   |
| 116263 | Q85601 | Q92637 | -1.1626   |
| 116264 | Q85601 | Q9UKP4 | -1.1948   |
| 116265 | Q85601 | P51124 | -1.2261   |
| 116266 | Q85601 | Q9BUQ8 | -0.49625  |
| 116267 | Q85601 | P07477 | -1.3918   |
| 116268 | Q85601 | P24844 | -0.22611  |
| 116269 | Q85601 | O95050 | -0.22946  |
| 116270 | Q85601 | Q9UEW8 | -0.6735   |
| 116271 | Q85601 | Q8NGB8 | -1.2621   |
| 116272 | Q85601 | A6NLX3 | -0.098571 |
| 116273 | Q85601 | O94844 | -1.2405   |
| 116274 | Q85601 | Q14161 | -0.22741  |
| 116275 | Q85601 | P50238 | -0.23038  |
| 116276 | Q85601 | Q9Y561 | -0.63073  |
| 116277 | Q85601 | O95857 | -1.0729   |
| 116278 | Q85601 | P49674 | -0.22741  |
| 116279 | Q85601 | P32455 | -0.89887  |
| 116280 | Q85601 | P60602 | -0.5168   |

|        |        |        |           |
|--------|--------|--------|-----------|
| 116281 | Q85601 | Q9NQL2 | -0.76543  |
| 116282 | Q85601 | Q8TEQ8 | -0.92976  |
| 116283 | Q85601 | O76099 | -1.3008   |
| 116284 | Q85601 | P16671 | -0.44324  |
| 116285 | Q85601 | Q8TE57 | -1.2377   |
| 116286 | Q85601 | Q13325 | -0.27466  |
| 116287 | Q85601 | B3EWG6 | -0.092462 |
| 116288 | Q85601 | H3BRN8 | -0.16512  |
| 116289 | Q85601 | P61964 | -0.8069   |
| 116290 | Q85601 | Q9Y312 | -0.09721  |
| 116291 | Q85601 | Q96PB7 | -0.81745  |
| 116292 | Q85601 | P09471 | -0.84266  |
| 116293 | Q85601 | A1L4M7 | -0.66835  |
| 116294 | Q85601 | O95834 | -0.46303  |
| 116295 | Q85601 | Q9UNF1 | -0.074821 |
| 116296 | Q85601 | Q8NH80 | -1.2621   |
| 116297 | Q85601 | Q13507 | -0.48187  |
| 116298 | Q85601 | Q9BSI4 | -0.21513  |
| 116299 | Q85601 | Q0VAQ4 | -0.36383  |
| 116300 | Q85601 | Q8NES3 | -0.93349  |
| 116301 | Q85601 | Q9UJA2 | -0.61967  |
| 116302 | Q85601 | Q7L0R7 | -0.29575  |
| 116303 | Q85601 | P11233 | -0.28668  |
| 116304 | Q85601 | Q9HAW8 | -0.88455  |
| 116305 | Q85601 | Q9BSN7 | -0.81615  |
| 116306 | Q85601 | P12272 | -0.28468  |
| 116307 | Q85601 | Q8NFD4 | -0.61377  |
| 116308 | Q85601 | P05187 | -1.1043   |
| 116309 | Q85601 | Q7RTP0 | -0.89165  |
| 116310 | Q85601 | O94856 | -1.0042   |
| 116311 | Q85601 | Q9P2K2 | -0.90988  |
| 116312 | Q85601 | Q9HC57 | -0.6583   |
| 116313 | Q85601 | Q9Y6H3 | -0.65302  |
| 116314 | Q85601 | Q8NHE4 | -0.66894  |
| 116315 | Q85601 | P36551 | -0.12185  |
| 116316 | Q85601 | Q96P53 | -0.31263  |
| 116317 | Q85601 | P49759 | -0.94258  |
| 116318 | Q85601 | Q63ZE4 | -0.82336  |
| 116319 | Q85601 | Q6VVX0 | -0.68449  |
| 116320 | Q85601 | P01374 | -0.7621   |
| 116321 | Q85601 | Q6ZT83 | -0.28076  |
| 116322 | Q85601 | Q99757 | -0.25015  |
| 116323 | Q85601 | P35523 | -0.95749  |
| 116324 | Q85601 | Q8TD19 | -0.22741  |
| 116325 | Q85601 | Q96EX3 | -0.22751  |
| 116326 | Q85601 | P19876 | -1.0384   |
| 116327 | Q85601 | P35613 | -0.22742  |
| 116328 | Q85601 | P60033 | -0.39274  |
| 116329 | Q85601 | Q9HAZ1 | -1.0815   |
| 116330 | Q85601 | Q3LI62 | -0.2031   |
| 116331 | Q85601 | A6NM36 | -0.22818  |
| 116332 | Q85601 | Q6P1K1 | -0.78978  |
| 116333 | Q85601 | Q9BYJ4 | -0.35381  |
| 116334 | Q85601 | Q9NNZ3 | -0.67045  |
| 116335 | Q85601 | O75795 | -0.92345  |
| 116336 | Q85601 | A6NGB7 | -0.92686  |
| 116337 | Q85601 | Q00013 | -0.48194  |
| 116338 | Q85601 | P47893 | -1.3389   |
| 116339 | Q85601 | A6NDH6 | -1.2621   |
| 116340 | Q85601 | Q8NGF3 | -1.2621   |
| 116341 | Q85601 | P15848 | -0.28327  |
| 116342 | Q85601 | Q9HCQ5 | -0.6934   |
| 116343 | Q85601 | P17066 | -0.58965  |
| 116344 | Q85601 | O60565 | -0.23772  |
| 116345 | Q85601 | P19544 | -0.22125  |
| 116346 | Q85601 | Q9NY65 | -0.48383  |
| 116347 | Q85601 | Q5JVF3 | -0.20792  |
| 116348 | Q85601 | Q8NB46 | -0.22723  |
| 116349 | Q85601 | Q96KH6 | -0.054837 |
| 116350 | Q85601 | Q8TCT6 | -1.0162   |
| 116351 | Q85601 | B7Z6K7 | -0.27679  |
| 116352 | Q85601 | P06319 | -1.046    |
| 116353 | Q85601 | Q4W5N1 | -0.26609  |
| 116354 | Q85601 | Q9H8H3 | -0.42696  |
| 116355 | Q85601 | Q9NYP8 | -0.47887  |
| 116356 | Q85601 | Q8TB24 | -0.4992   |



|        |        |        |           |
|--------|--------|--------|-----------|
| 116357 | Q85601 | Q96HU8 | -1.3701   |
| 116358 | Q85601 | Q9GZN8 | -0.4936   |
| 116359 | Q85601 | P16083 | -0.11879  |
| 116360 | Q85601 | Q8NGJ7 | -1.2621   |
| 116361 | Q85601 | P01042 | -0.66916  |
| 116362 | Q85601 | P11586 | -0.34839  |
| 116363 | Q85601 | Q6VB85 | -0.43379  |
| 116364 | Q85601 | Q2M3R5 | -0.92686  |
| 116365 | Q85601 | Q86WW8 | -0.15485  |
| 116366 | Q85601 | Q9BXT2 | -0.93101  |
| 116367 | Q85601 | Q6YP21 | -0.30038  |
| 116368 | Q85601 | Q02928 | -0.47466  |
| 116369 | Q85601 | A6NJY4 | -0.92686  |
| 116370 | Q85601 | P56962 | -0.65245  |
| 116371 | Q85601 | Q9H7J1 | -0.14676  |
| 116372 | Q85601 | Q9NXE8 | -0.11593  |
| 116373 | Q85601 | Q8IZF3 | -1.3639   |
| 116374 | Q85601 | Q8NE35 | -0.80782  |
| 116375 | Q85601 | O00748 | -0.2274   |
| 116376 | Q85601 | Q9UBN4 | -0.22893  |
| 116377 | Q85601 | Q08493 | -0.46522  |
| 116378 | Q85601 | D6RBM5 | -0.25776  |
| 116379 | Q85601 | Q3SXY8 | -0.76152  |
| 116380 | Q85601 | Q96KX2 | -0.25965  |
| 116381 | Q85601 | Q8IUF1 | -0.81985  |
| 116382 | Q85601 | Q86WK6 | -1.3342   |
| 116383 | Q85601 | P16233 | -0.73694  |
| 116384 | Q85601 | Q9UBK5 | -1.0399   |
| 116385 | Q85601 | Q9UL68 | -0.1163   |
| 116386 | Q85601 | P51589 | -0.66555  |
| 116387 | Q85601 | Q8NGN3 | -1.2621   |
| 116388 | Q85601 | Q6UW56 | -0.22738  |
| 116389 | Q85601 | P02585 | -0.28676  |
| 116390 | Q85601 | P26022 | -0.87971  |
| 116391 | Q85601 | O00222 | -1.253    |
| 116392 | Q85601 | Q9NYV9 | -1.1294   |
| 116393 | Q85601 | Q8WX77 | -0.86367  |
| 116394 | Q85601 | Q8NEX6 | -0.9043   |
| 116395 | Q85601 | Q5JUX0 | -0.31655  |
| 116396 | Q85601 | Q4VX62 | -0.25003  |
| 116397 | Q85601 | Q14541 | -0.23076  |
| 116398 | Q85601 | Q2M2W7 | -0.092462 |
| 116399 | Q85601 | Q9Y4L1 | -0.62223  |
| 116400 | Q85601 | Q16828 | -0.30091  |
| 116401 | Q85601 | Q9UJF2 | -0.51772  |
| 116402 | Q85601 | Q9Y6Q6 | -0.25127  |
| 116403 | Q85601 | O43314 | -0.52815  |
| 116404 | Q85601 | P04746 | -0.74394  |
| 116405 | Q85601 | Q9H853 | -0.48582  |
| 116406 | Q85601 | Q9Y2W6 | -0.22082  |
| 116407 | Q85601 | Q8NAE3 | -0.056713 |
| 116408 | Q85601 | Q13636 | -1.0062   |
| 116409 | Q85601 | Q8TC36 | -0.31631  |
| 116410 | Q85601 | Q02643 | -0.36152  |
| 116411 | Q85601 | Q9UBV2 | -0.34746  |
| 116412 | Q85601 | P22234 | -0.3264   |
| 116413 | Q85601 | Q7Z7K0 | -0.31278  |
| 116414 | Q85601 | Q9NYZ2 | -0.86004  |
| 116415 | Q85601 | Q8TAA1 | -0.79088  |
| 116416 | Q85601 | Q8NDA2 | -1.0349   |
| 116417 | Q85601 | Q538Z0 | -0.2031   |
| 116418 | Q85601 | Q9UN86 | -0.80476  |
| 116419 | Q85601 | Q9H2S1 | -0.88993  |
| 116420 | Q85601 | Q9HBX3 | -0.2031   |
| 116421 | Q85601 | A6NGB9 | -0.40283  |
| 116422 | Q85601 | A4D263 | -0.41923  |
| 116423 | Q85601 | Q6P2M8 | -0.71062  |
| 116424 | Q85601 | P08246 | -0.57028  |
| 116425 | Q85601 | P30488 | -1.1017   |
| 116426 | Q85601 | Q2M3G0 | -1.2194   |
| 116427 | Q85601 | P55073 | -0.838    |
| 116428 | Q85601 | Q12774 | -0.74889  |
| 116429 | Q85601 | P07101 | -0.2287   |
| 116430 | Q85601 | Q96AT1 | -0.092462 |
| 116431 | Q85601 | Q13554 | -0.66496  |
| 116432 | Q85601 | Q6P3X8 | -0.094818 |

|        |        |        |           |
|--------|--------|--------|-----------|
| 116433 | Q85601 | Q92569 | -0.2274   |
| 116434 | Q85601 | Q9H6D3 | -0.92686  |
| 116435 | Q85601 | Q8IUL8 | -0.87133  |
| 116436 | Q85601 | Q9BZ67 | -0.29924  |
| 116437 | Q85601 | Q15648 | -0.15731  |
| 116438 | Q85601 | P11279 | -0.95162  |
| 116439 | Q85601 | A6NIJ9 | -1.2621   |
| 116440 | Q85601 | P10276 | -0.23729  |
| 116441 | Q85601 | P54709 | -0.64616  |
| 116442 | Q85601 | Q93084 | -0.709    |
| 116443 | Q85601 | Q14094 | -0.42677  |
| 116444 | Q85601 | Q96S19 | -0.18964  |
| 116445 | Q85601 | P36941 | -0.29301  |
| 116446 | Q85601 | P60022 | -0.90036  |
| 116447 | Q85601 | O15016 | -0.22732  |
| 116448 | Q85601 | Q7Z572 | -0.39878  |
| 116449 | Q85601 | A6NFQ2 | -0.25651  |
| 116450 | Q85601 | Q6ZSG1 | -0.29575  |
| 116451 | Q85601 | Q5SYE7 | -0.018113 |
| 116452 | Q85601 | O43897 | -1.3984   |
| 116453 | Q85601 | Q8IY26 | -0.98181  |
| 116454 | Q85601 | Q5VXH5 | -0.157    |
| 116455 | Q85601 | Q9NWH2 | -0.92686  |
| 116456 | Q85601 | Q8IZM9 | -0.9929   |
| 116457 | Q85601 | Q00325 | -0.79738  |
| 116458 | Q85601 | O75325 | -1.2487   |
| 116459 | Q85601 | Q17R98 | -0.22735  |
| 116460 | Q85601 | Q9BRR9 | -1.1208   |
| 116461 | Q85601 | Q00973 | -0.84431  |
| 116462 | Q85601 | Q8N9H9 | -0.2031   |
| 116463 | Q85601 | Q13421 | -0.55401  |
| 116464 | Q85601 | Q8IZ52 | -0.47214  |
| 116465 | Q85601 | O75882 | -1.4427   |
| 116466 | Q85601 | P32320 | -0.56977  |
| 116467 | Q85601 | Q8NGR8 | -1.2621   |
| 116468 | Q85601 | O75335 | -0.19204  |
| 116469 | Q85601 | Q9Y5I2 | -1.7314   |
| 116470 | Q85601 | P78356 | -0.39991  |
| 116471 | Q85601 | P19086 | -0.98628  |
| 116472 | Q85601 | P01858 | -0.27652  |
| 116473 | Q85601 | Q9NRX4 | -0.29578  |
| 116474 | Q85601 | Q70HW3 | -0.3263   |
| 116475 | Q85601 | Q5VUD6 | -1.0116   |
| 116476 | Q85601 | P81605 | -1.1138   |
| 116477 | Q85601 | Q6ZRV3 | -0.2031   |
| 116478 | Q85601 | Q9BX74 | -1.1125   |
| 116479 | Q85601 | Q96T52 | -0.52209  |
| 116480 | Q85601 | Q6UXG2 | -0.89305  |
| 116481 | Q85601 | P28221 | -1.3147   |
| 116482 | Q85601 | Q8WZ71 | -0.92686  |
| 116483 | Q85601 | Q92832 | -0.22746  |
| 116484 | Q85601 | Q8NDL9 | -0.18286  |
| 116485 | Q85601 | Q93077 | -0.7417   |
| 116486 | Q85601 | Q8NEE6 | -0.21867  |
| 116487 | Q85601 | Q9BXY4 | -0.90114  |
| 116488 | Q85601 | P05000 | -0.79676  |
| 116489 | Q85601 | P11217 | -0.31744  |
| 116490 | Q85601 | A6NMZ5 | -1.2621   |
| 116491 | Q85601 | P0CF51 | -0.92686  |
| 116492 | Q85601 | Q9NP74 | -0.51534  |
| 116493 | Q85601 | Q9UQ07 | -0.92119  |
| 116494 | Q85601 | P80188 | -0.39033  |
| 116495 | Q85601 | P02647 | -0.31133  |
| 116496 | Q85601 | Q8N149 | -1.0412   |
| 116497 | Q85601 | Q6DRA6 | -0.7417   |
| 116498 | Q85601 | Q2I0M5 | -0.95811  |
| 116499 | Q85601 | Q96LA6 | -1.0386   |
| 116500 | Q85601 | Q9Y3R0 | -0.22534  |
| 116501 | Q85601 | Q8N2E2 | -0.9043   |
| 116502 | Q85601 | Q96IW7 | -0.52334  |
| 116503 | Q85601 | P16188 | -1.0428   |
| 116504 | Q85601 | Q29983 | -0.6754   |
| 116505 | Q85601 | Q58A45 | -0.20286  |
| 116506 | Q85601 | Q9UPR6 | -0.60528  |
| 116507 | Q85601 | Q8N8W4 | -0.44664  |
| 116508 | Q85601 | Q7RTY1 | -0.94841  |

|        |        |        |          |
|--------|--------|--------|----------|
| 116509 | Q85601 | O14498 | -1.0846  |
| 116510 | Q85601 | Q969V5 | -0.22738 |
| 116511 | Q85601 | Q9H169 | -0.41442 |
| 116512 | Q85601 | Q8NBT0 | -0.22823 |
| 116513 | Q85601 | Q8IZI9 | -0.91335 |
| 116514 | Q85601 | Q5GAN6 | -0.90766 |
| 116515 | Q85601 | Q86SQ6 | -1.1564  |
| 116516 | Q85601 | O95197 | -0.50962 |
| 116517 | Q85601 | Q96K12 | -1.27    |
| 116518 | Q85601 | P54578 | -0.418   |
| 116519 | Q85601 | Q6ZST8 | -0.79218 |
| 116520 | Q85601 | P48165 | -1.0362  |
| 116521 | Q85601 | Q96PG8 | -0.2031  |
| 116522 | Q85601 | P04180 | -0.35995 |
| 116523 | Q85601 | P00915 | -0.22753 |
| 116524 | Q85601 | Q8NEC7 | -0.2273  |
| 116525 | Q85601 | Q9H7Z7 | -0.25237 |
| 116526 | Q85601 | P20132 | -0.18664 |
| 116527 | Q85601 | P30462 | -1.1574  |
| 116528 | Q85601 | P01889 | -1.0888  |
| 116529 | Q85601 | A6NEH8 | -0.14927 |
| 116530 | Q85601 | P01613 | -1.046   |
| 116531 | Q85601 | P49842 | -0.76265 |
| 116532 | Q85601 | A6NCD1 | -0.589   |
| 116533 | Q85601 | Q08ET2 | -1.193   |
| 116534 | Q85601 | P02768 | -0.24231 |
| 116535 | Q85601 | Q96KV6 | -0.92686 |
| 116536 | Q85601 | Q9Y2Z9 | -0.57831 |
| 116537 | Q85601 | Q9H521 | -0.33665 |
| 116538 | Q85601 | Q9BZA8 | -1.246   |
| 116539 | Q85601 | Q6ZMY6 | -0.23085 |
| 116540 | Q85601 | Q13418 | -0.3456  |
| 116541 | Q85601 | P60507 | -0.89021 |
| 116542 | Q85601 | Q8IUA7 | -1.1242  |
| 116543 | Q85601 | Q92990 | -0.22524 |
| 116544 | Q85601 | P59861 | -0.86864 |
| 116545 | Q85601 | Q5T9Z0 | -0.92686 |
| 116546 | Q85601 | Q6ZRI0 | -0.81796 |
| 116547 | Q85601 | Q06481 | -0.26687 |
| 116548 | Q85601 | Q9NZJ9 | -0.23772 |
| 116549 | Q85601 | Q6DCA0 | -0.50949 |
| 116550 | Q85601 | P0C024 | -0.42206 |
| 116551 | Q85601 | Q96B96 | -0.92686 |
| 116552 | Q85601 | Q8TAD1 | -0.68375 |
| 116553 | Q85601 | A8MVX0 | -0.67753 |
| 116554 | Q85601 | O00178 | -0.74169 |
| 116555 | Q85601 | O75083 | -0.39209 |
| 116556 | Q85601 | Q9H3Y0 | -0.89433 |
| 116557 | Q85601 | Q99616 | -1.0935  |
| 116558 | Q85601 | Q8IZJ6 | -0.7413  |
| 116559 | Q85601 | Q93098 | -0.83362 |
| 116560 | Q85601 | P48742 | -0.22752 |
| 116561 | Q85601 | P46095 | -1.3577  |
| 116562 | Q85601 | Q8IXA5 | -0.64967 |
| 116563 | Q85601 | Q86TM3 | -0.57856 |
| 116564 | Q85601 | Q9H694 | -0.61516 |
| 116565 | Q85601 | Q5QP82 | -0.32981 |
| 116566 | Q85601 | Q96A05 | -0.33087 |
| 116567 | Q85601 | Q96NT5 | -0.4736  |
| 116568 | Q85601 | P49643 | -0.29615 |
| 116569 | Q85601 | Q86YT5 | -0.77977 |
| 116570 | Q85601 | Q43760 | -0.90691 |
| 116571 | Q85601 | Q3BBW0 | -0.10147 |
| 116572 | Q85601 | Q9Y689 | -1.3986  |
| 116573 | Q85601 | Q6TCH7 | -0.69    |
| 116574 | Q85601 | P60468 | -0.44038 |
| 116575 | Q85601 | Q9H2H9 | -0.96967 |
| 116576 | Q85601 | O43488 | -0.22544 |
| 116577 | Q85601 | Q5T4J0 | -0.73292 |
| 116578 | Q85601 | Q6NT55 | -0.8037  |
| 116579 | Q85601 | A6NGY3 | -0.53742 |
| 116580 | Q85601 | P53611 | -0.16591 |
| 116581 | Q85601 | P13569 | -0.30825 |
| 116582 | Q85601 | Q70EK9 | -0.65617 |
| 116583 | Q85601 | O43396 | -0.22851 |
| 116584 | Q85601 | Q9NQN1 | -1.2621  |

|        |        |        |          |
|--------|--------|--------|----------|
| 116585 | Q85601 | Q96L50 | -0.33306 |
| 116586 | Q85601 | Q6ZUT9 | -0.90619 |
| 116587 | Q85601 | Q92871 | -0.24924 |
| 116588 | Q85601 | P49326 | -1.0672  |
| 116589 | Q85601 | P23763 | -0.28849 |
| 116590 | Q85601 | Q13068 | -0.44954 |
| 116591 | Q85601 | O75602 | -0.22742 |
| 116592 | Q85601 | Q9NSK0 | -0.14116 |
| 116593 | Q85601 | P61160 | -0.75755 |
| 116594 | Q85601 | Q8WUG5 | -1.0177  |
| 116595 | Q85601 | Q9NNW7 | -0.22393 |
| 116596 | Q85601 | Q8TC17 | -0.22741 |
| 116597 | Q85601 | Q15835 | -1.1142  |
| 116598 | Q85601 | Q16842 | -0.59993 |
| 116599 | Q85601 | P48539 | -0.49573 |
| 116600 | Q85601 | P51813 | -0.75274 |
| 116601 | Q85601 | Q53GD3 | -0.83997 |
| 116602 | Q85601 | Q9NYR9 | -0.97434 |
| 116603 | Q85601 | Q9BY49 | -1.0006  |
| 116604 | Q85601 | P0C869 | -0.4793  |
| 116605 | Q85601 | A6NGZ7 | -0.92686 |
| 116606 | Q85601 | Q9H1U4 | -0.85352 |
| 116607 | Q85601 | Q6YI46 | -0.92686 |
| 116608 | Q85601 | Q7Z5A7 | -1.4625  |
| 116609 | Q85601 | O15403 | -1.0232  |
| 116610 | Q85601 | Q96RI8 | -1.31    |
| 116611 | Q85601 | Q9ULD6 | -0.22732 |
| 116612 | Q85601 | Q6ZMK1 | -0.10177 |
| 116613 | Q85601 | Q9Y5L4 | -0.10583 |
| 116614 | Q85601 | Q15147 | -0.22689 |
| 116615 | Q85601 | O15503 | -0.50617 |
| 116616 | Q85601 | Q96EF9 | -0.25752 |
| 116617 | Q85601 | P05164 | -0.22799 |
| 116618 | Q85601 | O60279 | -1.0904  |
| 116619 | Q85601 | Q9H6F5 | -0.91588 |
| 116620 | Q85601 | O95219 | -0.23312 |
| 116621 | Q85601 | Q9HBA9 | -0.6049  |
| 116622 | Q85601 | P25089 | -1.3584  |
| 116623 | Q85601 | Q9Y6D0 | -0.49024 |
| 116624 | Q85601 | Q8N6M3 | -0.53033 |
| 116625 | Q85601 | Q9HCT0 | -0.60143 |
| 116626 | Q85601 | Q9Y2W3 | -0.66785 |
| 116627 | Q85601 | Q8NGS3 | -1.2621  |
| 116628 | Q85601 | Q8NDV2 | -1.329   |
| 116629 | Q85601 | Q9Y696 | -0.2294  |
| 116630 | Q85601 | Q8NBZ9 | -0.30941 |
| 116631 | Q85601 | Q6DN03 | -0.7417  |
| 116632 | Q85601 | Q96BN6 | -0.21337 |
| 116633 | Q85601 | Q9H4A9 | -0.81414 |
| 116634 | Q85601 | Q6B8I1 | -0.6051  |
| 116635 | Q85601 | Q96RF0 | -0.28427 |
| 116636 | Q85601 | Q9UI66 | -0.2031  |
| 116637 | Q85601 | Q4UJ75 | -0.2274  |
| 116638 | Q85601 | P54687 | -0.13406 |
| 116639 | Q85601 | Q96LJ8 | -0.09342 |
| 116640 | Q85601 | Q9BU40 | -0.94347 |
| 116641 | Q85601 | Q9BXP2 | -0.93469 |
| 116642 | Q85601 | O14908 | -0.22736 |
| 116643 | Q85601 | Q96QE3 | -0.60744 |
| 116644 | Q85601 | P0C7T3 | -1.2621  |
| 116645 | Q85601 | Q717R9 | -0.32204 |
| 116646 | Q85601 | Q9GZM7 | -0.90847 |
| 116647 | Q85601 | Q8N539 | -1.1636  |
| 116648 | Q85601 | O60925 | -0.26364 |
| 116649 | Q85601 | P48145 | -0.77761 |
| 116650 | Q85601 | P0C6P0 | -0.19712 |
| 116651 | Q85601 | P49796 | -0.3039  |
| 116652 | Q85601 | Q9Y5Z0 | -0.8573  |
| 116653 | Q85601 | P26378 | -0.86864 |
| 116654 | Q85601 | Q9H0L4 | -0.86601 |
| 116655 | Q85601 | Q2WEN9 | -0.90148 |
| 116656 | Q85601 | Q9H158 | -1.2846  |
| 116657 | Q85601 | Q3ZAQ7 | -0.92703 |
| 116658 | Q85601 | Q8WXI7 | -1.8172  |
| 116659 | Q85601 | Q16875 | -0.41635 |
| 116660 | Q85601 | O00585 | -0.53867 |

|        |        |        |           |
|--------|--------|--------|-----------|
| 116661 | Q85601 | P37268 | -0.93644  |
| 116662 | Q85601 | Q7Z407 | -1.0386   |
| 116663 | Q85601 | Q5JS37 | -0.9043   |
| 116664 | Q85601 | Q96GU1 | -0.051822 |
| 116665 | Q85601 | A6NGJ6 | -0.589    |
| 116666 | Q85601 | P47890 | -1.2621   |
| 116667 | Q85601 | Q6ZWB6 | -0.2036   |
| 116668 | Q85601 | O75366 | -0.23652  |
| 116669 | Q85601 | P21359 | -0.22675  |
| 116670 | Q85601 | P21246 | -0.74831  |
| 116671 | Q85601 | Q10588 | -0.97511  |
| 116672 | Q85601 | P30486 | -0.93461  |
| 116673 | Q85601 | Q8NBC4 | -0.2031   |
| 116674 | Q85601 | Q15042 | -0.39169  |
| 116675 | Q85601 | P28223 | -0.72838  |
| 116676 | Q85601 | Q8NGC0 | -1.2621   |
| 116677 | Q85601 | P59544 | -1.2301   |
| 116678 | Q85601 | Q8TBC4 | -0.22458  |
| 116679 | Q85601 | Q9Y6N3 | -0.90787  |
| 116680 | Q85601 | Q8NGQ5 | -1.2621   |
| 116681 | Q85601 | Q6UW63 | -0.26582  |
| 116682 | Q85601 | Q6ZRR7 | -0.22733  |
| 116683 | Q85601 | P13995 | -0.73634  |
| 116684 | Q85601 | Q99650 | -0.74231  |
| 116685 | Q85601 | Q5SZD1 | -0.63831  |
| 116686 | Q85601 | P82673 | -0.11721  |
| 116687 | Q85601 | Q8WVD3 | -0.6405   |
| 116688 | Q85601 | P46063 | -0.22563  |
| 116689 | Q85601 | Q5T011 | -0.77122  |
| 116690 | Q85601 | Q9Y4G2 | -0.27308  |
| 116691 | Q85601 | Q4KMP7 | -1.1523   |
| 116692 | Q85601 | Q9NWT1 | -0.22848  |
| 116693 | Q85601 | Q92896 | -0.73404  |
| 116694 | Q85601 | Q14995 | -0.32113  |
| 116695 | Q85601 | P98155 | -0.93317  |
| 116696 | Q85601 | Q6JBY9 | -0.40805  |
| 116697 | Q85601 | Q9BY79 | -0.82172  |
| 116698 | Q85601 | P24158 | -0.4005   |
| 116699 | Q85601 | Q9P0U1 | -0.10858  |
| 116700 | Q85601 | Q3SY05 | -0.21202  |
| 116701 | Q85601 | P06681 | -1.382    |
| 116702 | Q85601 | P10275 | -0.22744  |
| 116703 | Q85601 | P16189 | -0.93461  |
| 116704 | Q85601 | P13639 | -0.26134  |
| 116705 | Q85601 | Q6NUM9 | -0.7357   |
| 116706 | Q85601 | Q9C0E4 | -0.22509  |
| 116707 | Q85601 | O60603 | -0.24216  |
| 116708 | Q85601 | P02787 | -0.20523  |
| 116709 | Q85601 | Q8NGG3 | -1.2621   |
| 116710 | Q85601 | Q30KQ7 | -0.86864  |
| 116711 | Q85601 | Q86TZ1 | -0.22738  |
| 116712 | Q85601 | Q9UPS6 | -0.22663  |
| 116713 | Q85601 | Q9NPF0 | -0.785    |
| 116714 | Q85601 | Q969X2 | -0.55171  |
| 116715 | Q85601 | Q8WWI5 | -0.6421   |
| 116716 | Q85601 | O95674 | -0.61074  |
| 116717 | Q85601 | P16219 | -0.47109  |
| 116718 | Q85601 | Q9H254 | -0.22814  |
| 116719 | Q85601 | O43520 | -0.60059  |
| 116720 | Q85601 | Q5T4F7 | -0.75633  |
| 116721 | Q85601 | O14773 | -0.7038   |
| 116722 | Q85601 | Q9UBX1 | -0.86101  |
| 116723 | Q85601 | Q9NZJ5 | -0.37712  |
| 116724 | Q85601 | Q6S8J3 | -0.32575  |
| 116725 | Q85601 | O95819 | -0.47499  |
| 116726 | Q85601 | Q9H7Y0 | -0.9043   |
| 116727 | Q85601 | Q53H12 | -0.82865  |
| 116728 | Q85601 | P12318 | -1.0139   |
| 116729 | Q85601 | A6NCW7 | -0.30949  |
| 116730 | Q85601 | Q5H8C1 | -1.6425   |
| 116731 | Q85601 | Q8IWK6 | -1.3545   |
| 116732 | Q85601 | Q6ZWL3 | -1.1973   |
| 116733 | Q85601 | P00846 | -0.47836  |
| 116734 | Q85601 | Q96EK2 | -0.29575  |
| 116735 | Q85601 | Q9UHF3 | -1.0009   |
| 116736 | Q85601 | A6PVY3 | -0.58793  |

|        |        |        |          |
|--------|--------|--------|----------|
| 116737 | Q85601 | P08185 | -0.84335 |
| 116738 | Q85601 | A6NGE7 | -0.76307 |
| 116739 | Q85601 | Q9H813 | -0.92686 |
| 116740 | Q85601 | Q8IXR5 | -0.24111 |
| 116741 | Q85601 | P57076 | -0.2482  |
| 116742 | Q85601 | Q9Y2B1 | -1.0729  |
| 116743 | Q85601 | A6NJQ4 | -0.32255 |
| 116744 | Q85601 | P52790 | -0.31885 |
| 116745 | Q85601 | P01712 | -1.046   |
| 116746 | Q85601 | Q6E0U4 | -0.95724 |
| 116747 | Q85601 | Q08495 | -0.21545 |
| 116748 | Q85601 | Q5TIA1 | -0.71148 |
| 116749 | Q85601 | Q5I0X7 | -0.38669 |
| 116750 | Q85601 | P47804 | -0.86129 |
| 116751 | Q85601 | Q9H207 | -1.2621  |
| 116752 | Q85601 | P0CF97 | -0.36086 |
| 116753 | Q85601 | Q27J81 | -0.22498 |
| 116754 | Q85601 | Q96L42 | -0.92673 |
| 116755 | Q85601 | Q8N999 | -0.54419 |
| 116756 | Q85601 | Q0VD83 | -0.68581 |
| 116757 | Q85601 | Q5T890 | -0.20193 |
| 116758 | Q85601 | Q8NGP8 | -1.2621  |
| 116759 | Q85601 | Q75343 | -0.73492 |
| 116760 | Q85601 | Q75976 | -0.72385 |
| 116761 | Q85601 | Q5T036 | -0.53235 |
| 116762 | Q85601 | P49761 | -0.70698 |
| 116763 | Q85601 | A8MZ59 | -0.22649 |
| 116764 | Q85601 | P04437 | -0.48816 |
| 116765 | Q85601 | Q8IWT6 | -0.96408 |
| 116766 | Q85601 | Q9HBB8 | -1.1194  |
| 116767 | Q85601 | P06865 | -0.40334 |
| 116768 | Q85601 | P43121 | -1.1105  |
| 116769 | Q85601 | Q8N9X3 | -0.26718 |
| 116770 | Q85601 | Q99801 | -0.23259 |
| 116771 | Q85601 | Q96DH6 | -0.67006 |
| 116772 | Q85601 | Q3SXM5 | -0.9443  |
| 116773 | Q85601 | P01765 | -1.046   |
| 116774 | Q85601 | Q8NCA5 | -0.2908  |
| 116775 | Q85601 | P51582 | -1.1501  |
| 116776 | Q85601 | Q75676 | -0.20337 |
| 116777 | Q85601 | P01780 | -1.046   |
| 116778 | Q85601 | Q7Z309 | -1.0017  |
| 116779 | Q85601 | A6NNY8 | -0.66238 |
| 116780 | Q85601 | Q8NCL4 | -0.62585 |
| 116781 | Q85601 | Q8N6S4 | -0.53633 |
| 116782 | Q85601 | Q12829 | -1.2476  |
| 116783 | Q85601 | P98179 | -0.47013 |
| 116784 | Q85601 | O60478 | -1.0729  |
| 116785 | Q85601 | O43149 | -0.37338 |
| 116786 | Q85601 | Q9Y5W8 | -0.64674 |
| 116787 | Q85601 | P00747 | -0.47109 |
| 116788 | Q85601 | Q2NL67 | -0.38174 |
| 116789 | Q85601 | Q95274 | -1.003   |
| 116790 | Q85601 | Q75N03 | -0.19531 |
| 116791 | Q85601 | Q8WTX9 | -0.85245 |
| 116792 | Q85601 | Q8TAV3 | -0.75489 |
| 116793 | Q85601 | Q96T66 | -0.30588 |
| 116794 | Q85601 | P58511 | -0.67993 |
| 116795 | Q85601 | Q9BXA5 | -1.2441  |
| 116796 | Q85601 | Q9Y241 | -0.75307 |
| 116797 | Q85601 | Q719I0 | -0.29642 |
| 116798 | Q85601 | P98173 | -0.69894 |
| 116799 | Q85601 | P34925 | -0.55426 |
| 116800 | Q85601 | Q95758 | -0.63907 |
| 116801 | Q85601 | Q9BSJ1 | -0.589   |
| 116802 | Q85601 | Q86VZ2 | -0.27069 |
| 116803 | Q85601 | Q8N7R7 | -0.344   |
| 116804 | Q85601 | Q95236 | -0.98802 |
| 116805 | Q85601 | Q07000 | -1.1017  |
| 116806 | Q85601 | Q96J01 | -0.22709 |
| 116807 | Q85601 | P0C0L4 | -1.1384  |
| 116808 | Q85601 | Q9GZZ0 | -0.22739 |
| 116809 | Q85601 | Q8NFZ0 | -0.51425 |
| 116810 | Q85601 | Q8NG48 | -0.11197 |
| 116811 | Q85601 | O60774 | -1.1098  |
| 116812 | Q85601 | Q96L58 | -0.55273 |

|        |        |        |          |
|--------|--------|--------|----------|
| 116813 | Q85601 | Q8NGP0 | -1.2621  |
| 116814 | Q85601 | Q9UHC7 | -0.22037 |
| 116815 | Q85601 | Q9NX24 | -0.22279 |
| 116816 | Q85601 | O15225 | -0.2031  |
| 116817 | Q85601 | Q96FF7 | -0.2031  |
| 116818 | Q85601 | Q5T752 | -0.2031  |
| 116819 | Q85601 | P57073 | -0.40677 |
| 116820 | Q85601 | Q8IYT3 | -0.79256 |
| 116821 | Q85601 | Q96SU4 | -0.74313 |
| 116822 | Q85601 | Q9NQ69 | -0.2274  |
| 116823 | Q85601 | Q9H4B7 | -0.56658 |
| 116824 | Q85601 | O00338 | -0.24274 |
| 116825 | Q85601 | O75310 | -0.96594 |
| 116826 | Q85601 | Q9BZZ2 | -1.6269  |
| 116827 | Q85601 | O75964 | -0.19982 |
| 116828 | Q85601 | P0C7W9 | -0.32255 |
| 116829 | Q85601 | P53350 | -0.22742 |
| 116830 | Q85601 | Q8N5I3 | -0.15377 |
| 116831 | Q85601 | Q13751 | -0.79311 |
| 116832 | Q85601 | Q9BYG3 | -0.22521 |
| 116833 | Q85601 | Q10472 | -0.91247 |
| 116834 | Q85601 | Q8NGR5 | -1.2621  |
| 116835 | Q85601 | Q5FYB0 | -0.74145 |
| 116836 | Q85601 | A2A2Z9 | -0.22734 |
| 116837 | Q85601 | Q9P2S5 | -0.22737 |
| 116838 | Q85601 | Q9Y6M5 | -0.76563 |
| 116839 | Q85601 | Q53H64 | -0.72159 |
| 116840 | Q85601 | P48637 | -0.43836 |
| 116841 | Q85601 | Q6IF00 | -1.2621  |
| 116842 | Q85601 | O95484 | -0.7761  |
| 116843 | Q85601 | Q8N8M0 | -0.44308 |
| 116844 | Q85601 | Q9NY37 | -0.97439 |
| 116845 | Q85601 | Q9H300 | -0.71652 |
| 116846 | Q85601 | P56134 | -0.52472 |
| 116847 | Q85601 | Q6UWM9 | -0.90613 |
| 116848 | Q85601 | Q00887 | -0.91419 |
| 116849 | Q85601 | Q9NP55 | -0.9716  |
| 116850 | Q85601 | Q6S8J7 | -0.22689 |
| 116851 | Q85601 | Q8NA69 | -0.69238 |
| 116852 | Q85601 | Q96AX1 | -0.19702 |
| 116853 | Q85601 | P47871 | -0.91504 |
| 116854 | Q85601 | Q99445 | -0.48958 |
| 116855 | Q85601 | Q92902 | -0.86623 |
| 116856 | Q85601 | Q9Y5U4 | -0.34664 |
| 116857 | Q85601 | Q504U0 | -0.81216 |
| 116858 | Q85601 | P63092 | -0.61391 |
| 116859 | Q85601 | Q9NYT0 | -0.48661 |
| 116860 | Q85601 | Q9Y5E6 | -1.2542  |
| 116861 | Q85601 | O95825 | -0.73348 |
| 116862 | Q85601 | Q15678 | -0.43282 |
| 116863 | Q85601 | Q96E93 | -1.0781  |
| 116864 | Q85601 | Q969R8 | -0.13775 |
| 116865 | Q85601 | P02765 | -0.68485 |
| 116866 | Q85601 | O60941 | -0.22542 |
| 116867 | Q85601 | Q9UKN1 | -0.95456 |
| 116868 | Q85601 | Q8WW59 | -0.23249 |
| 116869 | Q85601 | Q14954 | -1.0755  |
| 116870 | Q85601 | P10071 | -0.22722 |
| 116871 | Q85601 | P80422 | -0.92206 |
| 116872 | Q85601 | P39086 | -0.65988 |
| 116873 | Q85601 | Q9NPH2 | -0.57558 |
| 116874 | Q85601 | Q96SQ7 | -0.22777 |
| 116875 | Q85601 | Q8TDU5 | -1.2768  |
| 116876 | Q85601 | Q8TE77 | -0.32667 |
| 116877 | Q85601 | P51648 | -1.0282  |
| 116878 | Q85601 | Q8TB33 | -0.87069 |
| 116879 | Q85601 | Q92567 | -0.57641 |
| 116880 | Q85601 | Q8NHH9 | -0.51051 |
| 116881 | Q85601 | Q07654 | -0.87692 |
| 116882 | Q85601 | P01605 | -1.046   |
| 116883 | Q85601 | Q9NVV0 | -0.86573 |
| 116884 | Q85601 | P15151 | -0.28426 |
| 116885 | Q85601 | Q5W0B7 | -0.92686 |
| 116886 | Q85601 | O00560 | -0.22741 |
| 116887 | Q85601 | Q9Y3B3 | -0.44046 |
| 116888 | Q85601 | P13797 | -0.25118 |

|        |        |        |          |
|--------|--------|--------|----------|
| 116889 | Q85601 | Q15717 | -0.60818 |
| 116890 | Q85601 | Q70E73 | -0.72977 |
| 116891 | Q85601 | Q8IU89 | -0.25834 |
| 116892 | Q85601 | Q13049 | -0.2274  |
| 116893 | Q85601 | Q6ZT98 | -0.59212 |
| 116894 | Q85601 | Q969K4 | -0.22725 |
| 116895 | Q85601 | P59091 | -0.37377 |
| 116896 | Q85601 | P03901 | -0.62422 |
| 116897 | Q85601 | Q5TGI0 | -0.92686 |
| 116898 | Q85601 | O75864 | -0.35334 |
| 116899 | Q85601 | P50993 | -0.5167  |
| 116900 | Q85601 | Q96BZ4 | -0.81809 |
| 116901 | Q85601 | P78310 | -0.246   |
| 116902 | Q85601 | A8MUL3 | -0.2031  |
| 116903 | Q85601 | Q16880 | -0.74456 |
| 116904 | Q85601 | Q2VYF4 | -0.7376  |
| 116905 | Q85601 | Q9H898 | -0.39438 |
| 116906 | Q85601 | Q9Y5I0 | -1.246   |
| 116907 | Q85601 | A6NNM3 | -0.2274  |
| 116908 | Q85601 | Q7Z4L0 | -0.81674 |
| 116909 | Q85601 | Q86YV0 | -0.51772 |
| 116910 | Q85601 | Q6ZP80 | -0.92686 |
| 116911 | Q85601 | Q5HYK3 | -0.15483 |
| 116912 | Q85601 | P0CJ74 | -0.67838 |
| 116913 | Q85601 | P49642 | -0.18379 |
| 116914 | Q85601 | Q9BQB4 | -0.30346 |
| 116915 | Q85601 | Q8NA34 | -0.39195 |
| 116916 | Q85601 | Q8IYJ1 | -0.22928 |
| 116917 | Q85601 | Q9UIJ5 | -0.85909 |
| 116918 | Q85601 | P86790 | -0.59751 |
| 116919 | Q85601 | Q96DX8 | -0.30891 |
| 116920 | Q85601 | Q13261 | -0.54175 |
| 116921 | Q85601 | Q95976 | -1.1516  |
| 116922 | Q85601 | Q9UGM1 | -0.86717 |
| 116923 | Q85601 | Q8IZS8 | -0.93174 |
| 116924 | Q85601 | Q5T2R2 | -0.31674 |
| 116925 | Q85601 | Q8N769 | -0.4596  |
| 116926 | Q85601 | Q96QH2 | -0.2722  |
| 116927 | Q85601 | Q96IC2 | -0.91568 |
| 116928 | Q85601 | Q9HBE5 | -0.87417 |
| 116929 | Q85601 | Q7Z7D3 | -1.0983  |
| 116930 | Q85601 | Q6PML9 | -0.49152 |
| 116931 | Q85601 | Q7RTY5 | -1.3764  |
| 116932 | Q85601 | Q9Y2C4 | -0.15034 |
| 116933 | Q85601 | O75019 | -1.0501  |
| 116934 | Q85601 | Q5VU13 | -0.92686 |
| 116935 | Q85601 | H0YL14 | -0.38376 |
| 116936 | Q85601 | Q9H3Z7 | -0.28116 |
| 116937 | Q85601 | O94900 | -0.21409 |
| 116938 | Q85601 | Q13253 | -0.31789 |
| 116939 | Q85601 | Q7LC44 | -0.47458 |
| 116940 | Q85601 | P78413 | -0.23024 |
| 116941 | Q85601 | O95461 | -0.6726  |
| 116942 | Q85601 | Q6PEY2 | -0.52843 |
| 116943 | Q85601 | Q8NH61 | -1.2621  |
| 116944 | Q85601 | Q7L0J3 | -0.52208 |
| 116945 | Q85601 | P32926 | -0.92417 |
| 116946 | Q85601 | P06888 | -1.046   |
| 116947 | Q85601 | Q9BY14 | -0.58765 |
| 116948 | Q85601 | P00966 | -0.23731 |
| 116949 | Q85601 | O75973 | -0.5818  |
| 116950 | Q85601 | Q07507 | -1.1863  |
| 116951 | Q85601 | P30520 | -0.61665 |
| 116952 | Q85601 | Q9H354 | -0.92686 |
| 116953 | Q85601 | P36544 | -0.72102 |
| 116954 | Q85601 | Q9H324 | -0.56477 |
| 116955 | Q85601 | Q9Y5E5 | -1.0208  |
| 116956 | Q85601 | P05549 | -0.20255 |
| 116957 | Q85601 | P0DL12 | -0.21712 |
| 116958 | Q85601 | A6NKQ9 | -0.88182 |
| 116959 | Q85601 | O15496 | -0.59375 |
| 116960 | Q85601 | Q15078 | -0.21335 |
| 116961 | Q85601 | Q9UK33 | -0.19879 |
| 116962 | Q85601 | Q63HR2 | -0.22741 |
| 116963 | Q85601 | Q9NRB3 | -0.49274 |
| 116964 | Q85601 | P22888 | -0.5397  |



|        |        |        |           |
|--------|--------|--------|-----------|
| 116965 | Q85601 | Q9H7X7 | -1.1647   |
| 116966 | Q85601 | Q69YW2 | -0.92686  |
| 116967 | Q85601 | P56703 | -0.48409  |
| 116968 | Q85601 | Q8NCV1 | -0.70117  |
| 116969 | Q85601 | Q9H400 | -0.78802  |
| 116970 | Q85601 | Q32P28 | -0.57345  |
| 116971 | Q85601 | Q8IXZ2 | -0.18712  |
| 116972 | Q85601 | Q6P3R8 | -1.2583   |
| 116973 | Q85601 | P35498 | -0.91243  |
| 116974 | Q85601 | Q8N2F6 | -0.83739  |
| 116975 | Q85601 | Q8N6L7 | -0.92686  |
| 116976 | Q85601 | P47898 | -1.1805   |
| 116977 | Q85601 | Q9Y5F6 | -1.246    |
| 116978 | Q85601 | P50553 | -0.56246  |
| 116979 | Q85601 | Q8WTU2 | -0.99449  |
| 116980 | Q85601 | Q8NGN5 | -1.2621   |
| 116981 | Q85601 | P30532 | -1.0124   |
| 116982 | Q85601 | Q6P1X6 | -0.15485  |
| 116983 | Q85601 | Q9UBF9 | -0.22754  |
| 116984 | Q85601 | Q9H5J0 | -0.22734  |
| 116985 | Q85601 | Q6UXS0 | -0.89494  |
| 116986 | Q85601 | Q9Y6M0 | -0.78493  |
| 116987 | Q85601 | Q9HCD6 | -0.27624  |
| 116988 | Q85601 | Q5TA89 | -0.22653  |
| 116989 | Q85601 | A8MVS5 | -0.92686  |
| 116990 | Q85601 | P16860 | -0.46362  |
| 116991 | Q85601 | P08476 | -0.25192  |
| 116992 | Q85601 | Q7Z7B8 | -0.86864  |
| 116993 | Q85601 | Q8NBQ7 | -0.33585  |
| 116994 | Q85601 | P16422 | -0.22835  |
| 116995 | Q85601 | P98172 | -0.25228  |
| 116996 | Q85601 | O14967 | -0.93034  |
| 116997 | Q85601 | Q75WM6 | -1.0808   |
| 116998 | Q85601 | Q15166 | -0.76886  |
| 116999 | Q85601 | O60353 | -0.47421  |
| 117000 | Q85601 | P29590 | -0.22658  |
| 117001 | Q85601 | P22003 | -0.53927  |
| 117002 | Q85601 | Q6NT46 | -0.68194  |
| 117003 | Q85601 | Q9NR80 | -0.30144  |
| 117004 | Q85601 | Q53G44 | -0.20021  |
| 117005 | Q85601 | O95170 | -0.22941  |
| 117006 | Q85601 | Q8NG08 | -0.64769  |
| 117007 | Q85601 | Q0P651 | -0.9043   |
| 117008 | Q85601 | O43581 | -0.90034  |
| 117009 | Q85601 | P42892 | -0.65785  |
| 117010 | Q85601 | Q9HA72 | -0.92686  |
| 117011 | Q85601 | Q9NZD1 | -1.3443   |
| 117012 | Q85601 | Q6PK57 | -0.50307  |
| 117013 | Q85601 | Q5T7N7 | -0.2031   |
| 117014 | Q85601 | Q5T4W7 | -0.91644  |
| 117015 | Q85601 | Q5JRS4 | -1.2621   |
| 117016 | Q85601 | O00230 | -0.88737  |
| 117017 | Q85601 | Q9NSE2 | -0.22741  |
| 117018 | Q85601 | H3BUK9 | -0.22722  |
| 117019 | Q85601 | A6NK58 | -0.12691  |
| 117020 | Q85601 | P03372 | -0.2275   |
| 117021 | Q85601 | Q9Y5G4 | -1.246    |
| 117022 | Q85601 | Q92504 | -0.99681  |
| 117023 | Q85601 | Q8WUB2 | -0.28469  |
| 117024 | Q85601 | A8MVJ9 | -0.013395 |
| 117025 | Q85601 | A6NLB4 | -0.22829  |
| 117026 | Q85601 | Q5SVJ3 | -0.39603  |
| 117027 | Q85601 | Q9H305 | -0.092958 |
| 117028 | Q85601 | P63124 | -0.64385  |
| 117029 | Q85601 | Q92918 | -0.67598  |
| 117030 | Q85601 | P49683 | -1.2939   |
| 117031 | Q85601 | Q86YH2 | -0.23695  |
| 117032 | Q85601 | A6NFA1 | -0.7723   |
| 117033 | Q85601 | Q8NGG4 | -1.2621   |
| 117034 | Q85601 | P0CJ92 | -0.1796   |
| 117035 | Q85601 | P32242 | -0.69872  |
| 117036 | Q85601 | P15559 | -0.33443  |
| 117037 | Q85601 | P01116 | -0.31938  |
| 117038 | Q85601 | Q8IW92 | -0.74675  |
| 117039 | Q85601 | Q8IYV9 | -1.0049   |
| 117040 | Q85601 | Q7L0X2 | -0.50856  |

|        |        |        |           |
|--------|--------|--------|-----------|
| 117041 | Q85601 | Q9NRK6 | -1.0105   |
| 117042 | Q85601 | P51797 | -1.0763   |
| 117043 | Q85601 | Q12946 | -0.42129  |
| 117044 | Q85601 | P0C842 | -0.50749  |
| 117045 | Q85601 | A8MVU1 | -0.28104  |
| 117046 | Q85601 | Q8NGK9 | -1.2621   |
| 117047 | Q85601 | Q32P51 | -0.27452  |
| 117048 | Q85601 | Q8N8L6 | -1.3986   |
| 117049 | Q85601 | Q9NXX6 | -1.254    |
| 117050 | Q85601 | Q96AA3 | -0.84518  |
| 117051 | Q85601 | Q9NU53 | -0.92686  |
| 117052 | Q85601 | P05546 | -0.71021  |
| 117053 | Q85601 | Q9ULS5 | -0.92686  |
| 117054 | Q85601 | Q9BZM2 | -0.65534  |
| 117055 | Q85601 | Q9UI33 | -1.0232   |
| 117056 | Q85601 | Q9NR64 | -0.36277  |
| 117057 | Q85601 | Q9Y5H0 | -1.246    |
| 117058 | Q85601 | Q8TB40 | -0.3645   |
| 117059 | Q85601 | P30479 | -1.1017   |
| 117060 | Q85601 | Q8TC07 | -0.7052   |
| 117061 | Q85601 | P06899 | -0.72536  |
| 117062 | Q85601 | A1L4K1 | -0.22747  |
| 117063 | Q85601 | Q9Y5Y6 | -1.778    |
| 117064 | Q85601 | Q8IWU2 | -0.87017  |
| 117065 | Q85601 | Q96DM3 | -0.10368  |
| 117066 | Q85601 | P31645 | -0.30996  |
| 117067 | Q85601 | Q8TAP8 | -0.35334  |
| 117068 | Q85601 | P19429 | -0.1203   |
| 117069 | Q85601 | Q8N1G1 | -0.16571  |
| 117070 | Q85601 | Q9BUF5 | -0.57394  |
| 117071 | Q85601 | P55010 | -0.33035  |
| 117072 | Q85601 | Q9H4I0 | -0.18651  |
| 117073 | Q85601 | Q8NAU1 | -1.2674   |
| 117074 | Q85601 | O15085 | -0.25012  |
| 117075 | Q85601 | Q99952 | -0.26587  |
| 117076 | Q85601 | Q9BQ65 | -0.24881  |
| 117077 | Q85601 | Q8TE60 | -1.2377   |
| 117078 | Q85601 | Q96LZ7 | -0.2713   |
| 117079 | Q85601 | Q9H205 | -1.2621   |
| 117080 | Q85601 | Q16778 | -0.72536  |
| 117081 | Q85601 | P29323 | -0.86012  |
| 117082 | Q85601 | Q9P0K1 | -0.58773  |
| 117083 | Q85601 | Q6ZS11 | -0.95298  |
| 117084 | Q85601 | Q9NYB9 | -0.2668   |
| 117085 | Q85601 | P14652 | -0.050134 |
| 117086 | Q85601 | O75844 | -0.95172  |
| 117087 | Q85601 | Q05397 | -0.22741  |
| 117088 | Q85601 | Q8N4E7 | -0.10204  |
| 117089 | Q85601 | Q13796 | -0.22718  |
| 117090 | Q85601 | Q96FC9 | -0.38218  |
| 117091 | Q85601 | O43557 | -0.69898  |
| 117092 | Q85601 | A9Z1Z3 | -0.92686  |
| 117093 | Q85601 | Q96M69 | -0.95668  |
| 117094 | Q85601 | Q9P1D8 | -0.2031   |
| 117095 | Q85601 | Q6GPI1 | -1.3742   |
| 117096 | Q85601 | Q8WUA2 | -0.50674  |
| 117097 | Q85601 | P19235 | -1.1794   |
| 117098 | Q85601 | Q8WWT9 | -0.79831  |
| 117099 | Q85601 | Q8N349 | -0.74671  |
| 117100 | Q85601 | O95239 | -0.2851   |
| 117101 | Q85601 | Q9UKA9 | -0.56464  |
| 117102 | Q85601 | Q8N5I4 | -1.1015   |
| 117103 | Q85601 | Q9UF72 | -0.9043   |
| 117104 | Q85601 | Q6HA08 | -0.62942  |
| 117105 | Q85601 | P28335 | -1.043    |
| 117106 | Q85601 | Q8NGT7 | -1.2621   |
| 117107 | Q85601 | P03956 | -1.148    |
| 117108 | Q85601 | Q9NZ53 | -0.61864  |
| 117109 | Q85601 | Q96PD7 | -0.35267  |
| 117110 | Q85601 | Q86XK7 | -0.92686  |
| 117111 | Q85601 | P09912 | -0.60468  |
| 117112 | Q85601 | Q7Z6G8 | -0.22747  |
| 117113 | Q85601 | Q96K37 | -0.86355  |
| 117114 | Q85601 | Q86U10 | -0.35448  |
| 117115 | Q85601 | Q14626 | -1.1975   |
| 117116 | Q85601 | Q96DA2 | -0.95528  |

|        |        |        |           |
|--------|--------|--------|-----------|
| 117117 | Q85601 | O75521 | -0.78122  |
| 117118 | Q85601 | Q9H598 | -0.81303  |
| 117119 | Q85601 | Q96J77 | -0.20586  |
| 117120 | Q85601 | O75031 | -0.19808  |
| 117121 | Q85601 | Q86V86 | -0.36562  |
| 117122 | Q85601 | Q9NWR8 | -0.92686  |
| 117123 | Q85601 | O43602 | -0.32433  |
| 117124 | Q85601 | P0CZ20 | -0.023229 |
| 117125 | Q85601 | Q8IYL9 | -1.4098   |
| 117126 | Q85601 | P50120 | -0.20697  |
| 117127 | Q85601 | P49961 | -1.5341   |
| 117128 | Q85601 | Q9HA47 | -0.70058  |
| 117129 | Q85601 | Q9NYY8 | -0.2899   |
| 117130 | Q85601 | Q75N90 | -1.0246   |
| 117131 | Q85601 | Q9H0U3 | -1.0239   |
| 117132 | Q85601 | Q9H9A6 | -0.23026  |
| 117133 | Q85601 | Q9H4F8 | -1.2535   |
| 117134 | Q85601 | Q4G0U5 | -0.4441   |
| 117135 | Q85601 | O15091 | -0.17149  |
| 117136 | Q85601 | Q9Y6I4 | -0.23887  |
| 117137 | Q85601 | Q8NCN4 | -0.17553  |
| 117138 | Q85601 | Q96SZ6 | -0.35986  |
| 117139 | Q85601 | Q9BRT6 | -0.25249  |
| 117140 | Q85601 | Q96A23 | -0.22709  |
| 117141 | Q85601 | Q9BYP7 | -0.42669  |
| 117142 | Q85601 | Q13564 | -0.31343  |
| 117143 | Q85601 | P47992 | -0.46381  |
| 117144 | Q85601 | Q99666 | -0.21775  |
| 117145 | Q85601 | Q8IY49 | -0.69     |
| 117146 | Q85601 | P63252 | -1.3539   |
| 117147 | Q85601 | P09493 | -0.23344  |
| 117148 | Q85601 | P01733 | -0.42093  |
| 117149 | Q85601 | Q96DB9 | -0.97537  |
| 117150 | Q85601 | Q9UN76 | -0.96471  |
| 117151 | Q85601 | Q86VZ4 | -0.92686  |
| 117152 | Q85601 | Q5T0Z8 | -0.092462 |
| 117153 | Q85601 | Q08257 | -0.46931  |
| 117154 | Q85601 | Q4VC12 | -0.28964  |
| 117155 | Q85601 | Q8IVU1 | -1.0386   |
| 117156 | Q85601 | Q9BRP7 | -0.31527  |
| 117157 | Q85601 | P41586 | -0.54648  |
| 117158 | Q85601 | Q14444 | -0.61744  |
| 117159 | Q85601 | Q8N309 | -0.22367  |
| 117160 | Q85601 | Q96E22 | -0.90083  |
| 117161 | Q85601 | Q53EP0 | -0.85357  |
| 117162 | Q85601 | Q5T5F5 | -0.2031   |
| 117163 | Q85601 | Q7Z6V5 | -0.31969  |
| 117164 | Q85601 | O15479 | -0.17445  |
| 117165 | Q85601 | Q9UPU5 | -0.66238  |
| 117166 | Q85601 | P12081 | -0.21935  |
| 117167 | Q85601 | Q8NEV9 | -0.89472  |
| 117168 | Q85601 | Q8TAF8 | -0.94464  |
| 117169 | Q85601 | Q9NVP2 | -0.19161  |
| 117170 | Q85601 | P0C628 | -1.2621   |
| 117171 | Q85601 | Q6ZSS7 | -0.92197  |
| 117172 | Q85601 | Q92949 | -0.40096  |
| 117173 | Q85601 | Q5UAW9 | -1.3775   |
| 117174 | Q85601 | Q08334 | -0.68589  |
| 117175 | Q85601 | O75309 | -1.246    |
| 117176 | Q85601 | Q8TDS7 | -1.3443   |
| 117177 | Q85601 | P49411 | -0.74747  |
| 117178 | Q85601 | O75881 | -0.62559  |
| 117179 | Q85601 | Q86VZ1 | -1.2881   |
| 117180 | Q85601 | P16070 | -0.30968  |
| 117181 | Q85601 | Q9Y2E8 | -0.83449  |
| 117182 | Q85601 | Q6NXP0 | -1.1994   |
| 117183 | Q85601 | Q8WZB0 | -0.27819  |
| 117184 | Q85601 | Q9P2P5 | -0.33113  |
| 117185 | Q85601 | P60827 | -0.96335  |
| 117186 | Q85601 | O60756 | -0.2031   |
| 117187 | Q85601 | Q8N5S9 | -0.64705  |
| 117188 | Q85601 | Q8N0S2 | -0.15841  |
| 117189 | Q85601 | Q9NYL5 | -0.67048  |
| 117190 | Q85601 | Q6UWY0 | -0.74145  |
| 117191 | Q85601 | Q6VAB6 | -0.51771  |
| 117192 | Q85601 | Q9BTV6 | -0.31914  |

|        |        |        |           |
|--------|--------|--------|-----------|
| 117193 | Q85601 | Q13219 | -1.2686   |
| 117194 | Q85601 | Q15011 | -0.55758  |
| 117195 | Q85601 | Q9UBB6 | -0.14647  |
| 117196 | Q85601 | Q43734 | -0.092462 |
| 117197 | Q85601 | P54802 | -0.82225  |
| 117198 | Q85601 | P13236 | -0.97158  |
| 117199 | Q85601 | Q96N87 | -1.0614   |
| 117200 | Q85601 | Q96KJ9 | -0.41531  |
| 117201 | Q85601 | A6NFU8 | -0.74457  |
| 117202 | Q85601 | Q8NGE5 | -1.2621   |
| 117203 | Q85601 | A0PJW8 | -0.38733  |
| 117204 | Q85601 | Q08289 | -0.3371   |
| 117205 | Q85601 | P55001 | -0.85984  |
| 117206 | Q85601 | O94955 | -0.36158  |
| 117207 | Q85601 | Q96JM4 | -0.22656  |
| 117208 | Q85601 | Q9H2U9 | -1.065    |
| 117209 | Q85601 | Q9UHY1 | -0.22741  |
| 117210 | Q85601 | Q9BTN0 | -1.1385   |
| 117211 | Q85601 | Q13488 | -0.71584  |
| 117212 | Q85601 | Q6MZQ0 | -0.53483  |
| 117213 | Q85601 | Q9UPT8 | -0.32209  |
| 117214 | Q85601 | Q5VUM1 | -0.72344  |
| 117215 | Q85601 | Q6UXD7 | -0.86184  |
| 117216 | Q85601 | A8MT82 | -0.88202  |
| 117217 | Q85601 | P17812 | -0.46285  |
| 117218 | Q85601 | Q8TBG4 | -0.34309  |
| 117219 | Q85601 | P55290 | -0.58898  |
| 117220 | Q85601 | Q9NRG7 | -0.82516  |
| 117221 | Q85601 | Q5HY92 | -0.59615  |
| 117222 | Q85601 | P48066 | -0.98313  |
| 117223 | Q85601 | Q86VZ5 | -0.40106  |
| 117224 | Q85601 | Q8TAE7 | -0.43542  |
| 117225 | Q85601 | Q02763 | -0.47785  |
| 117226 | Q85601 | P0C2W7 | -0.2031   |
| 117227 | Q85601 | Q96RQ9 | -1.0122   |
| 117228 | Q85601 | Q8NGU9 | -1.3443   |
| 117229 | Q85601 | Q9BYW1 | -0.76447  |
| 117230 | Q85601 | Q8WXC6 | -0.40614  |
| 117231 | Q85601 | Q9Y3T6 | -0.85824  |
| 117232 | Q85601 | P48023 | -0.28554  |
| 117233 | Q85601 | P35222 | -0.22885  |
| 117234 | Q85601 | Q6PI97 | -0.77128  |
| 117235 | Q85601 | O95222 | -1.2621   |
| 117236 | Q85601 | Q16816 | -0.62574  |
| 117237 | Q85601 | Q9NRR6 | -0.22702  |
| 117238 | Q85601 | P68402 | -0.17717  |
| 117239 | Q85601 | Q9UKE5 | -0.24421  |
| 117240 | Q85601 | Q96PW8 | -0.23705  |
| 117241 | Q85601 | Q8WXI8 | -0.89014  |
| 117242 | Q85601 | Q9NRD5 | -0.22718  |
| 117243 | Q85601 | P05090 | -0.62745  |
| 117244 | Q85601 | P16403 | -0.61242  |
| 117245 | Q85601 | P30512 | -0.93461  |
| 117246 | Q85601 | P01762 | -1.1406   |
| 117247 | Q85601 | O15539 | -0.78178  |
| 117248 | Q85601 | Q6UXE8 | -0.67993  |
| 117249 | Q85601 | O75084 | -0.54627  |
| 117250 | Q85601 | Q9BXR5 | -1.3306   |
| 117251 | Q85601 | Q2M385 | -0.92686  |
| 117252 | Q85601 | O15357 | -0.22741  |
| 117253 | Q85601 | Q9NVE5 | -0.66238  |
| 117254 | Q85601 | Q9NSP4 | -0.26569  |
| 117255 | Q85601 | Q9UK55 | -0.53272  |
| 117256 | Q85601 | Q13733 | -1.02     |
| 117257 | Q85601 | Q502X0 | -0.078406 |
| 117258 | Q85601 | Q9NPC4 | -0.78993  |
| 117259 | Q85601 | Q9C0J9 | -0.22535  |
| 117260 | Q85601 | Q13085 | -0.2969   |
| 117261 | Q85601 | Q3MJ13 | -0.22811  |
| 117262 | Q85601 | P19634 | -0.42491  |
| 117263 | Q85601 | P01242 | -0.86169  |
| 117264 | Q85601 | P01591 | -0.92206  |
| 117265 | Q85601 | Q96HL8 | -0.31319  |
| 117266 | Q85601 | P30492 | -1.1017   |
| 117267 | Q85601 | Q9H2F3 | -0.99667  |
| 117268 | Q85601 | O97980 | -0.79503  |

|        |        |        |          |
|--------|--------|--------|----------|
| 117269 | Q85601 | Q9UQ10 | -0.81265 |
| 117270 | Q85601 | Q7Z410 | -1.5194  |
| 117271 | Q85601 | A5X5Y0 | -0.97347 |
| 117272 | Q85601 | P15529 | -0.6591  |
| 117273 | Q85601 | Q9NZ43 | -0.24749 |
| 117274 | Q85601 | P13674 | -0.44642 |
| 117275 | Q85601 | Q99437 | -0.66449 |
| 117276 | Q85601 | Q12980 | -0.18472 |
| 117277 | Q85601 | Q8NH89 | -1.2621  |
| 117278 | Q85601 | Q17R55 | -0.92686 |
| 117279 | Q85601 | O94956 | -1.0369  |
| 117280 | Q85601 | Q9NS84 | -0.52354 |
| 117281 | Q85601 | P48507 | -0.25474 |
| 117282 | Q85601 | Q4KMX7 | -1.118   |
| 117283 | Q85601 | Q96GD0 | -0.13776 |
| 117284 | Q85601 | Q8TF05 | -0.16261 |
| 117285 | Q85601 | P20472 | -0.23728 |
| 117286 | Q85601 | I3L0S3 | -0.18276 |
| 117287 | Q85601 | Q96LM9 | -0.43906 |
| 117288 | Q85601 | Q9BWM7 | -0.85277 |
| 117289 | Q85601 | Q9BSK2 | -0.69716 |
| 117290 | Q85601 | Q02846 | -1.4861  |
| 117291 | Q85601 | Q8NA03 | -0.24591 |
| 117292 | Q85601 | Q86YN6 | -0.227   |
| 117293 | Q85601 | Q9Y6N8 | -1.1748  |
| 117294 | Q85601 | Q9NZ42 | -0.36603 |
| 117295 | Q85601 | Q96AX9 | -0.22734 |
| 117296 | Q85601 | Q9H9L4 | -0.25822 |
| 117297 | Q85601 | O00175 | -0.85582 |
| 117298 | Q85601 | Q5GH77 | -1.0386  |
| 117299 | Q85601 | Q16566 | -0.32488 |
| 117300 | Q85601 | P34130 | -0.77858 |
| 117301 | Q85601 | P43088 | -1.4884  |
| 117302 | Q85601 | P52732 | -0.3352  |
| 117303 | Q85601 | Q6MZM9 | -0.9043  |
| 117304 | Q85601 | P46091 | -1.4753  |
| 117305 | Q85601 | Q96PZ2 | -0.50749 |
| 117306 | Q85601 | Q3SY17 | -0.69716 |
| 117307 | Q85601 | Q9Y3L3 | -1.0351  |
| 117308 | Q85601 | A2RRH5 | -0.22743 |
| 117309 | Q85601 | Q8IUY3 | -0.92686 |
| 117310 | Q85601 | P43119 | -1.0355  |
| 117311 | Q85601 | Q4VNC1 | -1.0517  |
| 117312 | Q85601 | Q8WXR4 | -0.89369 |
| 117313 | Q85601 | Q7L8A9 | -0.54085 |
| 117314 | Q85601 | Q8N114 | -0.47461 |
| 117315 | Q85601 | Q8IZ08 | -1.3443  |
| 117316 | Q85601 | Q53HC5 | -0.19298 |
| 117317 | Q85601 | Q5T7P6 | -0.92686 |
| 117318 | Q85601 | Q96RP8 | -0.84367 |
| 117319 | Q85601 | Q10469 | -0.73424 |
| 117320 | Q85601 | Q6NUS8 | -0.92767 |
| 117321 | Q85601 | Q2M3T9 | -0.7671  |
| 117322 | Q85601 | Q8N7P1 | -1.0636  |
| 117323 | Q85601 | P58181 | -1.2621  |
| 117324 | Q85601 | E7ERA6 | -0.89088 |
| 117325 | Q85601 | O60486 | -1.0784  |
| 117326 | Q85601 | P43034 | -0.22949 |
| 117327 | Q85601 | Q8NGF0 | -1.2621  |
| 117328 | Q85601 | Q6ZSR3 | -0.2031  |
| 117329 | Q85601 | Q5T699 | -1.4276  |
| 117330 | Q85601 | Q9UJV3 | -0.23081 |
| 117331 | Q85601 | Q92625 | -0.22741 |
| 117332 | Q85601 | Q8NGJ4 | -1.2621  |
| 117333 | Q85601 | Q13067 | -0.67238 |
| 117334 | Q85601 | P0C7T2 | -1.2621  |
| 117335 | Q85601 | Q13011 | -0.13649 |
| 117336 | Q85601 | Q9Y3Q0 | -1.1802  |
| 117337 | Q85601 | O77932 | -0.82764 |
| 117338 | Q85601 | Q5TF21 | -0.92686 |
| 117339 | Q85601 | A6NGK3 | -0.56179 |
| 117340 | Q85601 | Q9NSA0 | -0.75111 |
| 117341 | Q85601 | P30301 | -0.96132 |
| 117342 | Q85601 | Q96KV7 | -0.22778 |
| 117343 | Q85601 | Q3MIW9 | -0.92686 |
| 117344 | Q85601 | P27449 | -0.3111  |

|        |        |        |            |
|--------|--------|--------|------------|
| 117345 | Q85601 | Q9NQA3 | -0.30672   |
| 117346 | Q85601 | Q9NQ86 | -0.43686   |
| 117347 | Q85601 | Q9Y5K8 | -0.12632   |
| 117348 | Q85601 | Q8NDZ0 | -0.0070346 |
| 117349 | Q85601 | Q8NE86 | -0.28123   |
| 117350 | Q85601 | O15173 | -1.1166    |
| 117351 | Q85601 | Q8NBI3 | -0.84481   |
| 117352 | Q85601 | Q9Y342 | -0.92096   |
| 117353 | Q85601 | Q9NRZ7 | -0.8367    |
| 117354 | Q85601 | Q5TAA0 | -0.0080852 |
| 117355 | Q85601 | O15259 | -0.22741   |
| 117356 | Q85601 | O14788 | -0.60552   |
| 117357 | Q85601 | Q9Y6A9 | -0.64276   |
| 117358 | Q85601 | P29400 | -0.95118   |
| 117359 | Q85601 | Q9UPQ0 | -0.34657   |
| 117360 | Q85601 | Q96RQ3 | -0.64841   |
| 117361 | Q85601 | Q9C0B2 | -0.2797    |
| 117362 | Q85601 | Q9BTZ2 | -0.6952    |
| 117363 | Q85601 | Q9H1D0 | -1.0405    |
| 117364 | Q85601 | Q14494 | -0.2265    |
| 117365 | Q85601 | P52735 | -0.22741   |
| 117366 | Q85601 | P23946 | -1.4731    |
| 117367 | Q85601 | A4D174 | -1.08      |
| 117368 | Q85601 | Q8TF76 | -0.57893   |
| 117369 | Q85601 | Q8IXT1 | -0.28341   |
| 117370 | Q85601 | O75078 | -1.1002    |
| 117371 | Q85601 | Q8N6P7 | -0.87154   |
| 117372 | Q85601 | Q8N475 | -0.96646   |
| 117373 | Q85601 | P04430 | -1.046     |
| 117374 | Q85601 | P35998 | -0.43412   |
| 117375 | Q85601 | P13866 | -0.20796   |
| 117376 | Q85601 | Q96PL1 | -0.9043    |
| 117377 | Q85601 | Q02818 | -0.35768   |
| 117378 | Q85601 | Q9C0B7 | -0.92686   |
| 117379 | Q85601 | Q9H0X4 | -0.92686   |
| 117380 | Q85601 | Q96A99 | -0.90591   |
| 117381 | Q85601 | Q2TAL6 | -0.92071   |
| 117382 | Q85601 | G3V0H7 | -0.9468    |
| 117383 | Q85601 | P27707 | -0.43006   |
| 117384 | Q85601 | Q495Z4 | -0.19437   |
| 117385 | Q85601 | Q8N9V3 | -0.36484   |
| 117386 | Q85601 | Q15485 | -1.2407    |
| 117387 | Q85601 | Q8N2E6 | -1.2756    |
| 117388 | Q85601 | P01710 | -1.046     |
| 117389 | Q85601 | A4D2B0 | -0.26641   |
| 117390 | Q85601 | P33993 | -0.17994   |
| 117391 | Q85601 | Q7RTU9 | -0.90423   |
| 117392 | Q85601 | Q96I85 | -0.9043    |
| 117393 | Q85601 | Q6IPU0 | -0.06409   |
| 117394 | Q85601 | Q8N8F6 | -1.0116    |
| 117395 | Q85601 | P56278 | -0.19025   |
| 117396 | Q85601 | Q5TCY1 | -0.72799   |
| 117397 | Q85601 | P68366 | -0.52528   |
| 117398 | Q85601 | O60333 | -0.26465   |
| 117399 | Q85601 | Q8NDA8 | -0.079814  |
| 117400 | Q85601 | Q8IZ63 | -0.2031    |
| 117401 | Q85601 | Q8IYS1 | -0.6076    |
| 117402 | Q85601 | Q6P0Q8 | -0.60208   |
| 117403 | Q85601 | Q86SI9 | -0.9043    |
| 117404 | Q85601 | Q7Z5S9 | -0.92686   |
| 117405 | Q85601 | P31639 | -0.72167   |
| 117406 | Q85601 | P04150 | -0.22749   |
| 117407 | Q85601 | P01893 | -1.2084    |
| 117408 | Q85601 | Q8WYG8 | -0.39878   |
| 117409 | Q85601 | O60749 | -0.22884   |
| 117410 | Q85601 | Q8ND24 | -0.29575   |
| 117411 | Q85601 | Q8NB49 | -0.67364   |
| 117412 | Q85601 | O95868 | -0.72895   |
| 117413 | Q85601 | Q9P2R3 | -0.22741   |
| 117414 | Q85601 | Q9NTN9 | -1.1722    |
| 117415 | Q85601 | Q6ZUS6 | -0.1548    |
| 117416 | Q85601 | Q05932 | -0.14625   |
| 117417 | Q85601 | Q8IYT8 | -0.79363   |
| 117418 | Q85601 | P22304 | -0.46253   |
| 117419 | Q85601 | P0DJR0 | -1.0027    |
| 117420 | Q85601 | Q9NYW1 | -1.1294    |

|        |        |        |          |
|--------|--------|--------|----------|
| 117421 | Q85601 | P17481 | -0.21633 |
| 117422 | Q85601 | Q99675 | -0.22676 |
| 117423 | Q85601 | Q9H7C9 | -0.11172 |
| 117424 | Q85601 | Q9Y2I2 | -0.26695 |
| 117425 | Q85601 | Q9BZP6 | -0.50379 |
| 117426 | Q85601 | Q8N183 | -0.31053 |
| 117427 | Q85601 | H3BV60 | -0.92686 |
| 117428 | Q85601 | Q9BWP8 | -1.0957  |
| 117429 | Q85601 | Q8NH51 | -1.2621  |
| 117430 | Q85601 | P24557 | -0.94557 |
| 117431 | Q85601 | Q8WTZ4 | -0.1356  |
| 117432 | Q85601 | P56545 | -0.39026 |
| 117433 | Q85601 | Q9HCJ3 | -0.35426 |
| 117434 | Q85601 | P0CH98 | -1.118   |
| 117435 | Q85601 | P33991 | -0.21832 |
| 117436 | Q85601 | Q9H013 | -1.2339  |
| 117437 | Q85601 | P21781 | -0.52111 |
| 117438 | Q85601 | Q5VTH9 | -0.22744 |
| 117439 | Q85601 | Q8N0X4 | -0.37326 |
| 117440 | Q85601 | O43432 | -0.21942 |
| 117441 | Q85601 | Q92581 | -0.87863 |
| 117442 | Q85601 | O94761 | -0.2617  |
| 117443 | Q85601 | Q9UHV8 | -0.35345 |
| 117444 | Q85601 | Q9H2U6 | -0.34564 |
| 117445 | Q85601 | Q6ZMB5 | -0.92686 |
| 117446 | Q85601 | A4D1S0 | -0.917   |
| 117447 | Q85601 | Q9BZW2 | -0.98266 |
| 117448 | Q85601 | O60336 | -0.31118 |
| 117449 | Q85601 | Q53H82 | -0.1022  |
| 117450 | Q85601 | Q8NE00 | -0.67993 |
| 117451 | Q85601 | Q68CZ1 | -0.21052 |
| 117452 | Q85601 | Q8TBJ5 | -0.12003 |
| 117453 | Q85601 | P51787 | -0.78646 |
| 117454 | Q85601 | O43825 | -0.81295 |
| 117455 | Q85601 | Q96DU7 | -0.38193 |
| 117456 | Q85601 | Q8NHK3 | -1.0386  |
| 117457 | Q85601 | Q96AX2 | -0.78421 |
| 117458 | Q85601 | O95995 | -0.16988 |
| 117459 | Q85601 | Q8NCM2 | -0.89795 |
| 117460 | Q85601 | Q96D31 | -0.51972 |
| 117461 | Q85601 | Q96LL9 | -0.49817 |
| 117462 | Q85601 | Q9Y4G8 | -1.0198  |
| 117463 | Q85601 | O95998 | -1.3971  |
| 117464 | Q85601 | O15554 | -0.43554 |
| 117465 | Q85601 | P18075 | -0.22741 |
| 117466 | Q85601 | P55809 | -0.35151 |
| 117467 | Q85601 | Q8IXL6 | -1.0658  |
| 117468 | Q85601 | Q86WS5 | -1.3361  |
| 117469 | Q85601 | P36915 | -0.68279 |
| 117470 | Q85601 | Q8N8Q3 | -0.23658 |
| 117471 | Q85601 | O15034 | -0.47566 |
| 117472 | Q85601 | P23229 | -0.32308 |
| 117473 | Q85601 | Q687X5 | -1.3095  |
| 117474 | Q85601 | O95214 | -0.92686 |
| 117475 | Q85601 | Q9BY07 | -0.95411 |
| 117476 | Q85601 | Q96RC9 | -1.2621  |
| 117477 | Q85601 | Q8WUH6 | -1.26    |
| 117478 | Q85601 | Q96A84 | -0.83518 |
| 117479 | Q85601 | P09681 | -0.51212 |
| 117480 | Q85601 | Q30134 | -0.68895 |
| 117481 | Q85601 | B7ZBB8 | -0.26062 |
| 117482 | Q85601 | Q8TBY0 | -0.896   |
| 117483 | Q85601 | Q9Y2T6 | -1.2472  |
| 117484 | Q85601 | Q96EZ4 | -0.2031  |
| 117485 | Q85601 | Q96MA6 | -0.57862 |
| 117486 | Q85601 | Q9BQK8 | -0.12891 |
| 117487 | Q85601 | Q15238 | -0.3209  |
| 117488 | Q85601 | Q86UU5 | -0.34129 |
| 117489 | Q85601 | Q8WWF8 | -0.22384 |
| 117490 | Q85601 | O75191 | -0.79922 |
| 117491 | Q85601 | Q8IVW1 | -0.88639 |
| 117492 | Q85601 | Q7Z5J4 | -0.17939 |
| 117493 | Q85601 | O43692 | -0.78869 |
| 117494 | Q85601 | Q5GH73 | -0.92686 |
| 117495 | Q85601 | P51572 | -0.21317 |
| 117496 | Q85601 | Q6ZVL6 | -0.92686 |

|        |        |        |           |
|--------|--------|--------|-----------|
| 117497 | Q85601 | Q9Y679 | -0.44553  |
| 117498 | Q85601 | Q8TEY7 | -0.318    |
| 117499 | Q85601 | Q6IN97 | -0.22557  |
| 117500 | Q85601 | O60575 | -0.82753  |
| 117501 | Q85601 | Q7Z434 | -0.27354  |
| 117502 | Q85601 | O60841 | -0.34497  |
| 117503 | Q85601 | Q8N446 | -0.60958  |
| 117504 | Q85601 | P08962 | -0.60893  |
| 117505 | Q85601 | O43196 | -0.62457  |
| 117506 | Q85601 | Q6ICL3 | -0.64797  |
| 117507 | Q85601 | Q6NXE6 | -0.22935  |
| 117508 | Q85601 | O14681 | -0.26365  |
| 117509 | Q85601 | A6NE01 | -0.19077  |
| 117510 | Q85601 | Q8N4Z0 | -1.2458   |
| 117511 | Q85601 | P32297 | -0.73463  |
| 117512 | Q85601 | Q96IY4 | -0.95133  |
| 117513 | Q85601 | P13985 | -0.2031   |
| 117514 | Q85601 | Q06710 | -0.22701  |
| 117515 | Q85601 | Q9Y2R4 | -0.40752  |
| 117516 | Q85601 | Q9BY89 | -0.18214  |
| 117517 | Q85601 | Q9H0E2 | -0.2253   |
| 117518 | Q85601 | Q13685 | -0.58658  |
| 117519 | Q85601 | P29034 | -0.34049  |
| 117520 | Q85601 | Q8IWT0 | -0.30245  |
| 117521 | Q85601 | Q9BSA9 | -0.92686  |
| 117522 | Q85601 | P19827 | -0.85333  |
| 117523 | Q85601 | Q9BXI6 | -0.75361  |
| 117524 | Q85601 | Q8TBR7 | -1.0386   |
| 117525 | Q85601 | Q9H773 | -0.36374  |
| 117526 | Q85601 | O15230 | -0.55547  |
| 117527 | Q85601 | O95562 | -0.55279  |
| 117528 | Q85601 | Q6UXB1 | -0.9043   |
| 117529 | Q85601 | B3EWG4 | -0.092462 |
| 117530 | Q85601 | Q9Y6E2 | -0.48801  |
| 117531 | Q85601 | Q969G9 | -0.21892  |
| 117532 | Q85601 | O94972 | -0.2274   |
| 117533 | Q85601 | Q9HBI0 | -0.45343  |
| 117534 | Q85601 | Q5T749 | -0.10147  |
| 117535 | Q85601 | P30461 | -1.1017   |
| 117536 | Q85601 | P51854 | -0.1071   |
| 117537 | Q85601 | Q8N6I4 | -0.92686  |
| 117538 | Q85601 | Q9GZV7 | -1.1027   |
| 117539 | Q85601 | Q969V3 | -0.1971   |
| 117540 | Q85601 | Q9NZJ6 | -0.24935  |
| 117541 | Q85601 | P0CG43 | -0.2031   |
| 117542 | Q85601 | P17927 | -0.94542  |
| 117543 | Q85601 | O00409 | -0.41216  |
| 117544 | Q85601 | Q3KRB8 | -1.0442   |
| 117545 | Q85601 | Q6P2N6 | -1.0386   |
| 117546 | Q85601 | Q9BX10 | -0.97274  |
| 117547 | Q85601 | Q9NYG2 | -0.61633  |
| 117548 | Q85601 | Q9NP78 | -0.79007  |
| 117549 | Q85601 | P80075 | -1.0489   |
| 117550 | Q85601 | Q8NH09 | -1.2621   |
| 117551 | Q85601 | C9JC47 | -0.2031   |
| 117552 | Q85601 | P01766 | -1.046    |
| 117553 | Q85601 | P01877 | -0.49037  |
| 117554 | Q85601 | O75962 | -0.63557  |
| 117555 | Q85601 | Q6UXI7 | -0.94818  |
| 117556 | Q85601 | Q07326 | -1.2218   |
| 117557 | Q85601 | P68400 | -0.49409  |
| 117558 | Q85601 | Q86TD4 | -0.4852   |
| 117559 | Q85601 | Q0VDI3 | -0.92686  |
| 117560 | Q85601 | Q96SI1 | -0.17861  |
| 117561 | Q85601 | Q70J99 | -0.23092  |
| 117562 | Q85601 | Q6ZVT0 | -0.082492 |
| 117563 | Q85601 | O14804 | -1.4548   |
| 117564 | Q85601 | Q5TC63 | -1.3431   |
| 117565 | Q85601 | Q92806 | -0.62562  |
| 117566 | Q85601 | Q9H0M0 | -0.22741  |
| 117567 | Q85601 | Q92503 | -0.77371  |
| 117568 | Q85601 | Q9NXH9 | -0.26242  |
| 117569 | Q85601 | P04220 | -0.49037  |
| 117570 | Q85601 | P0CW22 | -0.16418  |
| 117571 | Q85601 | Q53QZ3 | -0.9465   |
| 117572 | Q85601 | Q1EHB4 | -1.0687   |



|        |        |        |          |
|--------|--------|--------|----------|
| 117573 | Q85601 | Q8NBS3 | -0.67678 |
| 117574 | Q85601 | A8MWL6 | -0.92686 |
| 117575 | Q85601 | Q499Y3 | -0.42748 |
| 117576 | Q85601 | Q02040 | -0.14782 |
| 117577 | Q85601 | Q7Z6J2 | -0.22848 |
| 117578 | Q85601 | O75911 | -1.542   |
| 117579 | Q85601 | Q9Y4C8 | -0.4453  |
| 117580 | Q85601 | P05141 | -0.23451 |
| 117581 | Q85601 | Q13029 | -0.22731 |
| 117582 | Q85601 | O75808 | -0.68595 |
| 117583 | Q85601 | Q14520 | -1.4882  |
| 117584 | Q85601 | B6SEH8 | -0.92686 |
| 117585 | Q85601 | Q96N28 | -0.326   |
| 117586 | Q85601 | Q8NFR9 | -0.58912 |
| 117587 | Q85601 | Q7Z7M1 | -1.3639  |
| 117588 | Q85601 | P00367 | -0.18484 |
| 117589 | Q85601 | P49335 | -0.22741 |
| 117590 | Q85601 | Q9Y691 | -0.97769 |
| 117591 | Q85601 | Q9NZ56 | -0.56923 |
| 117592 | Q85601 | Q99598 | -0.02289 |
| 117593 | Q85601 | Q3ZCM7 | -0.58286 |
| 117594 | Q85601 | P33764 | -0.39113 |
| 117595 | Q85601 | Q5VY80 | -0.61387 |
| 117596 | Q85601 | Q9P203 | -0.22317 |
| 117597 | Q85601 | Q8NG85 | -1.1204  |
| 117598 | Q85601 | Q9P035 | -1.2479  |
| 117599 | Q85601 | P21754 | -0.34804 |
| 117600 | Q85601 | O95388 | -0.90602 |
| 117601 | Q85601 | Q6ZU52 | -0.38456 |
| 117602 | Q85601 | Q9NPC8 | -0.23257 |
| 117603 | Q85601 | P46597 | -0.20099 |
| 117604 | Q85601 | P01137 | -0.22741 |
| 117605 | Q85601 | P33763 | -0.26159 |
| 117606 | Q85601 | Q8WZ55 | -0.68112 |
| 117607 | Q85601 | P57730 | -0.67135 |
| 117608 | Q85601 | Q6NXT6 | -0.95271 |
| 117609 | Q85601 | Q9UGL1 | -0.27584 |
| 117610 | Q85601 | Q99426 | -0.21799 |
| 117611 | Q85601 | A8MWL7 | -0.92686 |
| 117612 | Q85601 | O60909 | -0.48078 |
| 117613 | Q85601 | Q96A47 | -0.2866  |
| 117614 | Q85601 | Q5VVB8 | -1.2979  |
| 117615 | Q85601 | Q8WZ75 | -0.96801 |
| 117616 | Q85601 | Q9H5L9 | -0.68728 |
| 117617 | Q85601 | Q96IJ6 | -0.67604 |
| 117618 | Q85601 | Q96P67 | -1.3443  |
| 117619 | Q85601 | Q9NUH8 | -0.92686 |
| 117620 | Q85601 | P30456 | -0.93461 |
| 117621 | Q85601 | P19075 | -1.1939  |
| 117622 | Q85601 | Q96A26 | -0.43035 |
| 117623 | Q85601 | P04003 | -0.26577 |
| 117624 | Q85601 | Q5CZ79 | -0.22739 |
| 117625 | Q85601 | Q6JVE5 | -0.86172 |
| 117626 | Q85601 | P46926 | -0.20957 |
| 117627 | Q85601 | Q5K4L6 | -1.3047  |
| 117628 | Q85601 | Q96D71 | -0.23051 |
| 117629 | Q85601 | Q13319 | -0.42887 |
| 117630 | Q85601 | Q3KNW5 | -0.99552 |
| 117631 | Q85601 | P19404 | -0.33869 |
| 117632 | Q85601 | P0CJ77 | -0.67838 |
| 117633 | Q85601 | Q6IN84 | -0.12822 |
| 117634 | Q85601 | P26951 | -0.97175 |
| 117635 | Q85601 | Q9P121 | -0.22824 |
| 117636 | Q85601 | Q9NW97 | -0.92686 |
| 117637 | Q85601 | Q9C0E8 | -1.0073  |
| 117638 | Q85601 | Q11130 | -0.69948 |
| 117639 | Q85601 | Q9NRW4 | -0.4478  |
| 117640 | Q85601 | P56851 | -0.84072 |
| 117641 | Q85601 | Q9H4M9 | -0.40939 |
| 117642 | Q85601 | Q6PJW8 | -0.14578 |
| 117643 | Q85601 | Q96A54 | -1.1131  |
| 117644 | Q85601 | P48553 | -0.30106 |
| 117645 | Q85601 | Q8NGX2 | -1.2621  |
| 117646 | Q85601 | Q8TB36 | -0.47835 |
| 117647 | Q85601 | Q96FE5 | -0.79634 |
| 117648 | Q85601 | P98066 | -0.70127 |

|        |        |        |           |
|--------|--------|--------|-----------|
| 117649 | Q85601 | Q9NQ30 | -0.7664   |
| 117650 | Q85601 | Q8TD10 | -0.2647   |
| 117651 | Q85601 | O75431 | -0.12968  |
| 117652 | Q85601 | Q9H3Y6 | -1.1899   |
| 117653 | Q85601 | Q00056 | -0.13902  |
| 117654 | Q85601 | Q9Y2D2 | -0.52107  |
| 117655 | Q85601 | Q6QHF9 | -0.44878  |
| 117656 | Q85601 | O95013 | -1.2621   |
| 117657 | Q85601 | O60383 | -0.61514  |
| 117658 | Q85601 | Q8TBX8 | -0.37206  |
| 117659 | Q85601 | Q86X40 | -0.229    |
| 117660 | Q85601 | P16473 | -0.7711   |
| 117661 | Q85601 | Q5K4E3 | -1.155    |
| 117662 | Q85601 | Q96HE7 | -0.55637  |
| 117663 | Q85601 | Q9NR31 | -0.35675  |
| 117664 | Q85601 | Q8WVX3 | -0.92686  |
| 117665 | Q85601 | O75473 | -1.3864   |
| 117666 | Q85601 | Q8NH42 | -1.2621   |
| 117667 | Q85601 | Q0P5P2 | -1.1603   |
| 117668 | Q85601 | Q8TD07 | -0.49507  |
| 117669 | Q85601 | Q5SY68 | -0.39113  |
| 117670 | Q85601 | P52888 | -0.45526  |
| 117671 | Q85601 | Q8WZ79 | -0.63546  |
| 117672 | Q85601 | Q9BQT8 | -0.59459  |
| 117673 | Q85601 | Q8NCH0 | -0.49842  |
| 117674 | Q85601 | Q8NA82 | -0.39358  |
| 117675 | Q85601 | Q96Q27 | -0.72046  |
| 117676 | Q85601 | A6NHY6 | -0.87069  |
| 117677 | Q85601 | P05129 | -0.44652  |
| 117678 | Q85601 | Q99527 | -1.1634   |
| 117679 | Q85601 | P49184 | -0.38615  |
| 117680 | Q85601 | Q96L73 | -0.22764  |
| 117681 | Q85601 | Q86XD8 | -0.29575  |
| 117682 | Q85601 | P01023 | -0.40865  |
| 117683 | Q85601 | Q9P1P5 | -1.31     |
| 117684 | Q85601 | Q9GZN7 | -0.22294  |
| 117685 | Q85601 | Q6ZS81 | -0.92686  |
| 117686 | Q85601 | P51793 | -1.1139   |
| 117687 | Q85601 | P0C672 | -0.92686  |
| 117688 | Q85601 | Q6QNK2 | -1.3639   |
| 117689 | Q85601 | Q9NXN4 | -0.32227  |
| 117690 | Q85601 | Q9NSI2 | -0.092462 |
| 117691 | Q85601 | Q16568 | -0.36945  |
| 117692 | Q85601 | Q5T1A1 | -0.92686  |
| 117693 | Q85601 | P52306 | -0.64292  |
| 117694 | Q85601 | B4DZS4 | -0.3285   |
| 117695 | Q85601 | Q8NCF0 | -0.89494  |
| 117696 | Q85601 | P15173 | -0.22736  |
| 117697 | Q85601 | P10114 | -0.51533  |
| 117698 | Q85601 | Q2Y0W8 | -0.95488  |
| 117699 | Q85601 | Q14432 | -0.58695  |
| 117700 | Q85601 | Q3KNS1 | -0.73449  |
| 117701 | Q85601 | Q8NH21 | -1.2621   |
| 117702 | Q85601 | Q12805 | -0.27461  |
| 117703 | Q85601 | Q13206 | -0.77354  |
| 117704 | Q85601 | Q86Y27 | -0.9043   |
| 117705 | Q85601 | Q9H7X2 | -0.92686  |
| 117706 | Q85601 | Q9NZV8 | -0.7608   |
| 117707 | Q85601 | Q16322 | -0.82466  |
| 117708 | Q85601 | P07203 | -0.27794  |
| 117709 | Q85601 | Q8NAB2 | -0.1993   |
| 117710 | Q85601 | Q8IZ73 | -0.24371  |
| 117711 | Q85601 | Q2NKX8 | -0.27285  |
| 117712 | Q85601 | Q9P0K7 | -0.22749  |
| 117713 | Q85601 | Q9UJV8 | -0.091237 |
| 117714 | Q85601 | P27918 | -0.97768  |
| 117715 | Q85601 | O00442 | -0.50428  |
| 117716 | Q85601 | P12111 | -0.8591   |
| 117717 | Q85601 | Q9BZW8 | -0.59497  |
| 117718 | Q85601 | Q6NUI2 | -0.6297   |
| 117719 | Q85601 | P28908 | -0.70475  |
| 117720 | Q85601 | Q9UL25 | -0.37282  |
| 117721 | Q85601 | P30939 | -1.3608   |
| 117722 | Q85601 | O75616 | -0.77601  |
| 117723 | Q85601 | Q8NBZ7 | -1.0413   |
| 117724 | Q85601 | Q5FWF7 | -0.22237  |

|        |        |        |           |
|--------|--------|--------|-----------|
| 117725 | Q85601 | Q9UFG5 | -1.2372   |
| 117726 | Q85601 | Q9HCJ0 | -0.51429  |
| 117727 | Q85601 | Q96S21 | -1.0068   |
| 117728 | Q85601 | P05154 | -0.5407   |
| 117729 | Q85601 | Q9NYW6 | -1.1694   |
| 117730 | Q85601 | Q96R27 | -1.2621   |
| 117731 | Q85601 | O14625 | -1.1493   |
| 117732 | Q85601 | Q9Y616 | -0.28621  |
| 117733 | Q85601 | P04000 | -1.4102   |
| 117734 | Q85601 | Q7Z5H3 | -0.27415  |
| 117735 | Q85601 | Q7L8C5 | -0.94219  |
| 117736 | Q85601 | O14657 | -0.19986  |
| 117737 | Q85601 | Q6P499 | -0.88448  |
| 117738 | Q85601 | P04141 | -0.24953  |
| 117739 | Q85601 | Q00526 | -0.58063  |
| 117740 | Q85601 | Q9Y6F8 | -0.22464  |
| 117741 | Q85601 | P05771 | -0.21361  |
| 117742 | Q85601 | Q15120 | -0.23186  |
| 117743 | Q85601 | Q9UKV5 | -0.22826  |
| 117744 | Q85601 | Q5VXM1 | -0.9043   |
| 117745 | Q85601 | Q14952 | -1.1556   |
| 117746 | Q85601 | Q9H8V3 | -0.22814  |
| 117747 | Q85601 | A4IF30 | -0.86355  |
| 117748 | Q85601 | P24723 | -0.78914  |
| 117749 | Q85601 | A1L4Q6 | -1.2751   |
| 117750 | Q85601 | Q6R327 | -0.19427  |
| 117751 | Q85601 | P51608 | -0.12452  |
| 117752 | Q85601 | Q8NH08 | -1.2621   |
| 117753 | Q85601 | Q9NXF1 | -0.68695  |
| 117754 | Q85601 | Q6KCM7 | -0.75691  |
| 117755 | Q85601 | O75023 | -0.96936  |
| 117756 | Q85601 | Q96PC2 | -0.44905  |
| 117757 | Q85601 | Q95861 | -0.25763  |
| 117758 | Q85601 | P08134 | -0.22639  |
| 117759 | Q85601 | P56373 | -0.55741  |
| 117760 | Q85601 | P56557 | -0.85179  |
| 117761 | Q85601 | Q9H2K8 | -0.30741  |
| 117762 | Q85601 | Q8NFP0 | -0.36309  |
| 117763 | Q85601 | Q9BXW7 | -0.33361  |
| 117764 | Q85601 | P20718 | -0.61852  |
| 117765 | Q85601 | Q9H8L6 | -0.5154   |
| 117766 | Q85601 | P38606 | -0.54942  |
| 117767 | Q85601 | Q68DN1 | -0.36591  |
| 117768 | Q85601 | Q6UWS5 | -0.71318  |
| 117769 | Q85601 | Q3MIX3 | -0.9875   |
| 117770 | Q85601 | Q6UW15 | -0.92817  |
| 117771 | Q85601 | P30872 | -1.3021   |
| 117772 | Q85601 | Q9UK28 | -0.69     |
| 117773 | Q85601 | Q8TED1 | -1.1756   |
| 117774 | Q85601 | Q86VF2 | -0.2276   |
| 117775 | Q85601 | Q8WXA9 | -0.2212   |
| 117776 | Q85601 | P04080 | -0.25681  |
| 117777 | Q85601 | Q86X27 | -0.86223  |
| 117778 | Q85601 | Q9UNI1 | -0.96848  |
| 117779 | Q85601 | P13796 | -0.53098  |
| 117780 | Q85601 | Q7Z3Z4 | -0.22696  |
| 117781 | Q85601 | P01722 | -1.046    |
| 117782 | Q85601 | O76081 | -0.33011  |
| 117783 | Q85601 | Q8N112 | -0.92686  |
| 117784 | Q85601 | Q5TIE3 | -0.9043   |
| 117785 | Q85601 | Q13496 | -0.38422  |
| 117786 | Q85601 | Q9UII4 | -0.37038  |
| 117787 | Q85601 | Q96NR7 | -0.53629  |
| 117788 | Q85601 | Q9Y5X9 | -0.80668  |
| 117789 | Q85601 | A0PJZ0 | -0.22741  |
| 117790 | Q85601 | Q6ZN84 | -0.35011  |
| 117791 | Q85601 | Q86Y82 | -0.3839   |
| 117792 | Q85601 | P06276 | -0.69692  |
| 117793 | Q85601 | Q8WVR3 | -0.092462 |
| 117794 | Q85601 | P03951 | -0.84349  |
| 117795 | Q85601 | O95395 | -0.50508  |
| 117796 | Q85601 | O94964 | -0.93479  |
| 117797 | Q85601 | P56470 | -0.42674  |
| 117798 | Q85601 | O15204 | -1.0927   |
| 117799 | Q85601 | Q96AQ8 | -0.75013  |
| 117800 | Q85601 | Q9NQW1 | -0.2277   |

|        |        |        |           |
|--------|--------|--------|-----------|
| 117801 | Q85601 | P17752 | -0.387    |
| 117802 | Q85601 | P63131 | -0.64385  |
| 117803 | Q85601 | Q8N7N1 | -0.12691  |
| 117804 | Q85601 | Q96AN2 | -0.053701 |
| 117805 | Q85601 | Q9H0X6 | -0.29575  |
| 117806 | Q85601 | Q96R69 | -1.2621   |
| 117807 | Q85601 | Q9UIK5 | -1.3465   |
| 117808 | Q85601 | Q8TDY4 | -0.27635  |
| 117809 | Q85601 | Q6V1P9 | -1.246    |
| 117810 | Q85601 | Q6P2I7 | -0.59801  |
| 117811 | Q85601 | O00476 | -0.7145   |
| 117812 | Q85601 | Q8NGE9 | -1.2621   |
| 117813 | Q85601 | Q9UPY6 | -0.21771  |
| 117814 | Q85601 | O15211 | -0.8697   |
| 117815 | Q85601 | O15255 | -0.45752  |
| 117816 | Q85601 | Q14656 | -0.80143  |
| 117817 | Q85601 | O14936 | -0.23156  |
| 117818 | Q85601 | Q32MK0 | -0.7463   |
| 117819 | Q85601 | O75541 | -0.24382  |
| 117820 | Q85601 | P43403 | -0.48656  |
| 117821 | Q85601 | Q6PIZ9 | -1.0247   |
| 117822 | Q85601 | Q8NGT0 | -1.2621   |
| 117823 | Q85601 | P63218 | -0.54654  |
| 117824 | Q85601 | P01270 | -0.6221   |
| 117825 | Q85601 | Q5JZY3 | -1.317    |
| 117826 | Q85601 | Q9P218 | -1.0255   |
| 117827 | Q85601 | O76024 | -0.56381  |
| 117828 | Q85601 | Q96P66 | -1.3443   |
| 117829 | Q85601 | Q9GZP0 | -0.9863   |
| 117830 | Q85601 | O43506 | -1.1535   |
| 117831 | Q85601 | Q04656 | -0.2279   |
| 117832 | Q85601 | Q8NGY0 | -1.2621   |
| 117833 | Q85601 | P78562 | -1.0124   |
| 117834 | Q85601 | Q9HCQ7 | -1.1124   |
| 117835 | Q85601 | P0CJ75 | -0.67838  |
| 117836 | Q85601 | Q6P5Q4 | -0.35589  |
| 117837 | Q85601 | Q05469 | -0.22835  |
| 117838 | Q85601 | P53609 | -0.33793  |
| 117839 | Q85601 | Q96QS6 | -1.2086   |
| 117840 | Q85601 | Q86YJ6 | -0.72312  |
| 117841 | Q85601 | Q9H4K1 | -0.27065  |
| 117842 | Q85601 | Q8IV53 | -0.20355  |
| 117843 | Q85601 | Q8N752 | -0.99477  |
| 117844 | Q85601 | A8MXX9 | -0.4562   |
| 117845 | Q85601 | Q9HBI5 | -0.22369  |
| 117846 | Q85601 | O14977 | -0.19014  |
| 117847 | Q85601 | P60983 | -0.74693  |
| 117848 | Q85601 | P21731 | -0.72355  |
| 117849 | Q85601 | Q969I6 | -1.0598   |
| 117850 | Q85601 | A0AV96 | -0.58827  |
| 117851 | Q85601 | P61568 | -0.22105  |
| 117852 | Q85601 | Q9UKB3 | -0.44461  |
| 117853 | Q85601 | P10145 | -0.5868   |
| 117854 | Q85601 | Q9HCL2 | -0.4398   |
| 117855 | Q85601 | O95977 | -1.4241   |
| 117856 | Q85601 | Q8TD20 | -0.53405  |
| 117857 | Q85601 | Q9BQI4 | -0.87832  |
| 117858 | Q85601 | Q8TDD1 | -0.18485  |
| 117859 | Q85601 | Q9H3U7 | -1.2285   |
| 117860 | Q85601 | Q9NPG1 | -0.53282  |
| 117861 | Q85601 | Q9H112 | -0.28561  |
| 117862 | Q85601 | Q71UI9 | -0.7417   |
| 117863 | Q85601 | P10321 | -1.1017   |
| 117864 | Q85601 | Q8NHP1 | -0.57159  |
| 117865 | Q85601 | P34910 | -1.0486   |
| 117866 | Q85601 | P22532 | -0.2031   |
| 117867 | Q85601 | O75443 | -1.0677   |
| 117868 | Q85601 | Q9UJQ1 | -0.89768  |
| 117869 | Q85601 | O95157 | -1.0687   |
| 117870 | Q85601 | Q9UK53 | -0.22344  |
| 117871 | Q85601 | P04181 | -0.1665   |
| 117872 | Q85601 | P09601 | -0.16977  |
| 117873 | Q85601 | A2RUB6 | -0.086583 |
| 117874 | Q85601 | Q9NS98 | -1.1959   |
| 117875 | Q85601 | Q9Y5J5 | -0.38982  |
| 117876 | Q85601 | Q8N8R5 | -0.9043   |

|        |        |        |           |
|--------|--------|--------|-----------|
| 117877 | Q85601 | Q8NA75 | -0.22727  |
| 117878 | Q85601 | Q86WK7 | -1.0903   |
| 117879 | Q85601 | Q5BJD5 | -0.92686  |
| 117880 | Q85601 | Q9ULW5 | -0.84681  |
| 117881 | Q85601 | Q8IVJ8 | -0.92686  |
| 117882 | Q85601 | A4D2H0 | -0.071612 |
| 117883 | Q85601 | Q9P296 | -0.71554  |
| 117884 | Q85601 | P28288 | -0.6635   |
| 117885 | Q85601 | P08912 | -1.0269   |
| 117886 | Q85601 | Q9UNP9 | -0.1878   |
| 117887 | Q85601 | Q96BR5 | -0.29013  |
| 117888 | Q85601 | Q6AZZ1 | -0.22805  |
| 117889 | Q85601 | Q5VYJ5 | -0.92686  |
| 117890 | Q85601 | O60237 | -0.41153  |
| 117891 | Q85601 | O14917 | -0.66929  |
| 117892 | Q85601 | Q9UBX8 | -0.52505  |
| 117893 | Q85601 | O60812 | -0.48109  |
| 117894 | Q85601 | Q96DY7 | -0.25798  |
| 117895 | Q85601 | Q8N436 | -1.1997   |
| 117896 | Q85601 | Q24JQ0 | -0.92686  |
| 117897 | Q85601 | P11488 | -0.70763  |
| 117898 | Q85601 | Q08629 | -0.7992   |
| 117899 | Q85601 | A6NKF9 | -0.92686  |
| 117900 | Q85601 | Q9BZV3 | -1.0695   |
| 117901 | Q85601 | Q9ULD8 | -0.96832  |
| 117902 | Q85601 | Q14247 | -0.23207  |
| 117903 | Q85601 | Q6PIS1 | -0.84819  |
| 117904 | Q85601 | Q86YW5 | -0.34673  |
| 117905 | Q85601 | Q8NGJ2 | -1.2621   |
| 117906 | Q85601 | Q8NEZ4 | -0.44889  |
| 117907 | Q85601 | Q6ZNR8 | -0.2031   |
| 117908 | Q85601 | P08263 | -0.2266   |
| 117909 | Q85601 | Q15041 | -0.29174  |
| 117910 | Q85601 | Q86WS4 | -0.2031   |
| 117911 | Q85601 | P05455 | -0.45181  |
| 117912 | Q85601 | Q9NSY0 | -0.71397  |
| 117913 | Q85601 | P16471 | -1.0261   |
| 117914 | Q85601 | P08686 | -0.74461  |
| 117915 | Q85601 | O43323 | -0.87655  |
| 117916 | Q85601 | Q9H0B8 | -0.98879  |
| 117917 | Q85601 | Q8N910 | -0.1566   |
| 117918 | Q85601 | Q5T4S7 | -0.20051  |
| 117919 | Q85601 | O43818 | -0.23009  |
| 117920 | Q85601 | Q4G0N8 | -1.0724   |
| 117921 | Q85601 | Q9UPN3 | -0.22811  |
| 117922 | Q85601 | Q9H2F9 | -0.14776  |
| 117923 | Q85601 | P01215 | -0.3058   |
| 117924 | Q85601 | Q9NQR9 | -0.42811  |
| 117925 | Q85601 | Q7Z419 | -0.16375  |
| 117926 | Q85601 | Q6UXG3 | -0.96779  |
| 117927 | Q85601 | O00469 | -0.75516  |
| 117928 | Q85601 | Q8N729 | -0.31878  |
| 117929 | Q85601 | Q8WTQ4 | -0.3905   |
| 117930 | Q85601 | Q16881 | -0.22275  |
| 117931 | Q85601 | P49146 | -1.1975   |
| 117932 | Q85601 | Q6UX53 | -0.38771  |
| 117933 | Q85601 | Q1HG43 | -0.7755   |
| 117934 | Q85601 | Q5JTZ9 | -0.28012  |
| 117935 | Q85601 | P0C6A0 | -0.2274   |
| 117936 | Q85601 | Q6ZS30 | -0.22741  |
| 117937 | Q85601 | Q5VZV1 | -0.30175  |
| 117938 | Q85601 | Q96PB1 | -0.92686  |
| 117939 | Q85601 | Q9Y4C0 | -1.0848   |
| 117940 | Q85601 | P0C7H8 | -0.53399  |
| 117941 | Q85601 | Q8NHU2 | -0.45161  |
| 117942 | Q85601 | Q9NYN1 | -1.2967   |
| 117943 | Q85601 | P25098 | -0.40037  |
| 117944 | Q85601 | Q96F15 | -0.93461  |
| 117945 | Q85601 | Q12967 | -0.67686  |
| 117946 | Q85601 | P62330 | -0.44323  |
| 117947 | Q85601 | Q9H1J7 | -0.88214  |
| 117948 | Q85601 | P11049 | -0.29263  |
| 117949 | Q85601 | Q6P995 | -1.0035   |
| 117950 | Q85601 | Q96T60 | -0.35638  |
| 117951 | Q85601 | Q9UL26 | -0.53092  |
| 117952 | Q85601 | P15812 | -0.95353  |

|        |        |        |           |
|--------|--------|--------|-----------|
| 117953 | Q85601 | Q8N5Z0 | -0.22187  |
| 117954 | Q85601 | Q96J65 | -1.0979   |
| 117955 | Q85601 | Q96CN0 | -0.2031   |
| 117956 | Q85601 | Q9BZS9 | -0.2031   |
| 117957 | Q85601 | P20813 | -0.70877  |
| 117958 | Q85601 | Q09013 | -0.3425   |
| 117959 | Q85601 | P57735 | -0.49578  |
| 117960 | Q85601 | P08559 | -0.20237  |
| 117961 | Q85601 | P0CI26 | -0.589    |
| 117962 | Q85601 | Q8IW00 | -1.0386   |
| 117963 | Q85601 | Q7Z404 | -0.92686  |
| 117964 | Q85601 | Q96GX5 | -0.22741  |
| 117965 | Q85601 | O75319 | -0.54649  |
| 117966 | Q85601 | Q14156 | -0.81166  |
| 117967 | Q85601 | B1AJZ1 | -0.38154  |
| 117968 | Q85601 | E7EW31 | -0.2031   |
| 117969 | Q85601 | A6NEW6 | -0.32255  |
| 117970 | Q85601 | A6NN73 | -0.40612  |
| 117971 | Q85601 | Q9H7F4 | -0.92686  |
| 117972 | Q85601 | Q8IY51 | -0.12008  |
| 117973 | Q85601 | Q8NEB7 | -0.69029  |
| 117974 | Q85601 | Q13610 | -0.22742  |
| 117975 | Q85601 | Q14943 | -1.1527   |
| 117976 | Q85601 | Q96LI9 | -0.20987  |
| 117977 | Q85601 | Q8IZF5 | -1.3639   |
| 117978 | Q85601 | Q8NFF2 | -1.0257   |
| 117979 | Q85601 | Q9H1R3 | -0.3718   |
| 117980 | Q85601 | A8MXE2 | -0.77052  |
| 117981 | Q85601 | A6QL63 | -1.0197   |
| 117982 | Q85601 | Q9Y466 | -0.22882  |
| 117983 | Q85601 | Q8IUG5 | -0.066385 |
| 117984 | Q85601 | Q9C000 | -0.22737  |
| 117985 | Q85601 | Q8IZN3 | -0.89983  |
| 117986 | Q85601 | Q9BUB5 | -0.22764  |
| 117987 | Q85601 | Q9UPN6 | -0.32041  |
| 117988 | Q85601 | Q8N9H8 | -0.66093  |
| 117989 | Q85601 | Q8N8D0 | -0.92686  |
| 117990 | Q85601 | Q7Z7M0 | -0.22741  |
| 117991 | Q85601 | O95185 | -1.0841   |
| 117992 | Q85601 | P38435 | -0.87887  |
| 117993 | Q85601 | P20591 | -0.23635  |
| 117994 | Q85601 | Q49AJ0 | -0.19974  |
| 117995 | Q85601 | O00264 | -0.203    |
| 117996 | Q85601 | Q9Y458 | -0.50118  |
| 117997 | Q85601 | P23921 | -0.081721 |
| 117998 | Q85601 | P47712 | -0.22777  |
| 117999 | Q85601 | Q8N4L1 | -0.92686  |
| 118000 | Q85601 | O95231 | -0.2274   |
| 118001 | Q85601 | Q6XR72 | -1.0166   |
| 118002 | Q85601 | Q5J8M3 | -0.87858  |
| 118003 | Q85601 | P25189 | -1.0698   |
| 118004 | Q85601 | Q16790 | -0.3852   |
| 118005 | Q85601 | Q16610 | -0.49318  |
| 118006 | Q85601 | P0CE72 | -0.39113  |
| 118007 | Q85601 | Q7Z3H4 | -0.2196   |
| 118008 | Q85601 | Q8NGV0 | -1.2621   |
| 118009 | Q85601 | Q00889 | -0.83867  |
| 118010 | Q85601 | Q6ZRF8 | -0.589    |
| 118011 | Q85601 | Q496Y0 | -0.22739  |
| 118012 | Q85601 | Q9BZL6 | -0.30979  |
| 118013 | Q85601 | Q5T7W0 | -0.22621  |
| 118014 | Q85601 | Q6IE38 | -0.82753  |
| 118015 | Q85601 | Q96DT0 | -0.33968  |
| 118016 | Q85601 | Q96A37 | -0.589    |
| 118017 | Q85601 | P09544 | -0.43874  |
| 118018 | Q85601 | Q96FV2 | -0.48382  |
| 118019 | Q85601 | Q9HCS2 | -0.64596  |
| 118020 | Q85601 | P48751 | -1.0319   |
| 118021 | Q85601 | Q9Y6A4 | -0.54101  |
| 118022 | Q85601 | P09131 | -0.82348  |
| 118023 | Q85601 | Q9NR21 | -0.38174  |
| 118024 | Q85601 | P59773 | -0.92686  |
| 118025 | Q85601 | Q9C040 | -0.22741  |
| 118026 | Q85601 | Q99935 | -0.84415  |
| 118027 | Q85601 | O75751 | -0.43316  |
| 118028 | Q85601 | Q9H720 | -0.9054   |

|        |        |        |           |
|--------|--------|--------|-----------|
| 118029 | Q85601 | Q5T8D3 | -0.95531  |
| 118030 | Q85601 | Q8N2A0 | -0.22727  |
| 118031 | Q85601 | Q06495 | -0.52936  |
| 118032 | Q85601 | Q9P0L2 | -0.97436  |
| 118033 | Q85601 | Q659A1 | -0.29984  |
| 118034 | Q85601 | Q8NBR9 | -0.35226  |
| 118035 | Q85601 | Q08170 | -0.22882  |
| 118036 | Q85601 | Q86Z23 | -0.96335  |
| 118037 | Q85601 | O60895 | -0.24979  |
| 118038 | Q85601 | Q3B7I2 | -0.33531  |
| 118039 | Q85601 | P01704 | -1.046    |
| 118040 | Q85601 | Q9NQ39 | -0.17774  |
| 118041 | Q85601 | Q96SB8 | -0.21544  |
| 118042 | Q85601 | P23610 | -0.2031   |
| 118043 | Q85601 | B2RUY7 | -0.86736  |
| 118044 | Q85601 | Q8WXH6 | -1.2476   |
| 118045 | Q85601 | Q9Y345 | -0.88195  |
| 118046 | Q85601 | P50052 | -0.83421  |
| 118047 | Q85601 | Q8NBB2 | -0.19904  |
| 118048 | Q85601 | Q9H3P7 | -0.55312  |
| 118049 | Q85601 | P0C6S8 | -0.92686  |
| 118050 | Q85601 | Q5T1S8 | -1.0456   |
| 118051 | Q85601 | Q9BWV1 | -0.55305  |
| 118052 | Q85601 | Q6FIF0 | -0.58896  |
| 118053 | Q85601 | P0C7X1 | -1.3431   |
| 118054 | Q85601 | P15153 | -0.66022  |
| 118055 | Q85601 | Q8TDB8 | -0.78648  |
| 118056 | Q85601 | Q9HAH7 | -0.087684 |
| 118057 | Q85601 | P13726 | -0.35659  |
| 118058 | Q85601 | P08319 | -0.24482  |
| 118059 | Q85601 | Q0IIN9 | -0.47134  |
| 118060 | Q85601 | P22459 | -0.54703  |
| 118061 | Q85601 | Q3LI66 | -0.2031   |
| 118062 | Q85601 | Q8WUJ1 | -0.81412  |
| 118063 | Q85601 | Q4ZHG4 | -0.62958  |
| 118064 | Q85601 | P38567 | -0.62464  |
| 118065 | Q85601 | Q8WVT3 | -0.20805  |
| 118066 | Q85601 | P43235 | -0.63069  |
| 118067 | Q85601 | Q12889 | -0.34603  |
| 118068 | Q85601 | Q9Y6Q9 | -0.46293  |
| 118069 | Q85601 | P32314 | -0.39324  |
| 118070 | Q85601 | Q96ER9 | -0.16848  |
| 118071 | Q85601 | A8MWV9 | -0.92686  |
| 118072 | Q85601 | Q8WWR8 | -0.10821  |
| 118073 | Q85601 | Q13133 | -0.23342  |
| 118074 | Q85601 | Q9UQD0 | -0.90487  |
| 118075 | Q85601 | Q9HA82 | -0.24446  |
| 118076 | Q85601 | Q9UH36 | -0.35189  |
| 118077 | Q85601 | Q96N67 | -0.67088  |
| 118078 | Q85601 | Q8N0S6 | -0.069368 |
| 118079 | Q85601 | Q9H3M0 | -0.84367  |
| 118080 | Q85601 | O00584 | -0.82159  |
| 118081 | Q85601 | Q9P0L0 | -0.29325  |
| 118082 | Q85601 | Q9NUD5 | -0.32209  |
| 118083 | Q85601 | A6NHS7 | -0.92686  |
| 118084 | Q85601 | O43868 | -0.99124  |
| 118085 | Q85601 | Q9BZJ3 | -1.3764   |
| 118086 | Q85601 | Q13003 | -0.8656   |
| 118087 | Q85601 | P49773 | -0.097283 |
| 118088 | Q85601 | Q86XH1 | -0.81985  |
| 118089 | Q85601 | Q13190 | -0.20724  |
| 118090 | Q85601 | P47985 | -1.0301   |
| 118091 | Q85601 | Q92563 | -0.99338  |
| 118092 | Q85601 | Q06187 | -0.22741  |
| 118093 | Q85601 | Q5VTB9 | -0.23322  |
| 118094 | Q85601 | O00444 | -0.22741  |
| 118095 | Q85601 | P01775 | -1.046    |
| 118096 | Q85601 | P20138 | -1.3852   |
| 118097 | Q85601 | Q9UBE8 | -0.22741  |
| 118098 | Q85601 | P25940 | -0.92519  |
| 118099 | Q85601 | Q6ZMH5 | -0.90147  |
| 118100 | Q85601 | P19105 | -0.2989   |
| 118101 | Q85601 | Q9H2C8 | -1.2621   |
| 118102 | Q85601 | P11216 | -0.26623  |
| 118103 | Q85601 | Q9NWM8 | -0.39569  |
| 118104 | Q85601 | P07942 | -0.70632  |

|        |        |        |          |
|--------|--------|--------|----------|
| 118105 | Q85601 | Q86UX2 | -0.80939 |
| 118106 | Q85601 | Q9HAK2 | -0.18627 |
| 118107 | Q85601 | Q96NJ1 | -0.2031  |
| 118108 | Q85601 | Q6P5S2 | -0.9043  |
| 118109 | Q85601 | Q9BY11 | -0.22741 |
| 118110 | Q85601 | Q9C0I1 | -0.28583 |
| 118111 | Q85601 | Q9BTV7 | -0.13941 |
| 118112 | Q85601 | P02776 | -0.68898 |
| 118113 | Q85601 | O75064 | -0.23036 |
| 118114 | Q85601 | Q13002 | -0.55805 |
| 118115 | Q85601 | Q8N7C7 | -0.89088 |
| 118116 | Q85601 | Q6UWQ7 | -0.9043  |
| 118117 | Q85601 | Q9Y5L3 | -1.2061  |
| 118118 | Q85601 | Q06432 | -0.96773 |
| 118119 | Q85601 | Q96QU6 | -0.37572 |
| 118120 | Q85601 | Q8N8F7 | -0.92686 |
| 118121 | Q85601 | Q8NGE7 | -1.2621  |
| 118122 | Q85601 | P46736 | -0.28006 |
| 118123 | Q85601 | Q9UBU2 | -1.0261  |
| 118124 | Q85601 | Q9Y5E8 | -1.2846  |
| 118125 | Q85601 | Q15550 | -0.64838 |
| 118126 | Q85601 | P50876 | -0.78424 |
| 118127 | Q85601 | Q6P9B9 | -0.35871 |
| 118128 | Q85601 | Q8N1F1 | -0.2031  |
| 118129 | Q85601 | Q9UNW1 | -0.40525 |
| 118130 | Q85601 | O43763 | -0.22837 |
| 118131 | Q85601 | Q8TEH3 | -0.68651 |
| 118132 | Q85601 | Q6ZSG2 | -0.48571 |
| 118133 | Q85601 | Q8IZ16 | -0.16857 |
| 118134 | Q85601 | Q8NEC5 | -0.6492  |
| 118135 | Q85601 | P35558 | -0.34511 |
| 118136 | Q85601 | Q92995 | -0.23393 |
| 118137 | Q85601 | Q12923 | -0.22741 |
| 118138 | Q85601 | P22413 | -0.32688 |
| 118139 | Q85601 | Q9P202 | -0.22602 |
| 118140 | Q85601 | Q13489 | -0.22741 |
| 118141 | Q85601 | Q13371 | -0.62419 |
| 118142 | Q85601 | Q9GZT5 | -0.88047 |
| 118143 | Q85601 | Q16690 | -0.43746 |
| 118144 | Q85601 | O95168 | -0.53162 |
| 118145 | Q85601 | Q07812 | -0.22735 |
| 118146 | Q85601 | Q6ZNR0 | -0.68517 |
| 118147 | Q85601 | Q13438 | -0.19253 |
| 118148 | Q85601 | Q9BZA7 | -1.3736  |
| 118149 | Q85601 | Q5JPH6 | -0.19261 |
| 118150 | Q85601 | Q7Z4N2 | -1.2011  |
| 118151 | Q85601 | Q8IUQ0 | -0.54908 |
| 118152 | Q85601 | Q9UPY5 | -0.74846 |
| 118153 | Q85601 | Q7Z6J4 | -0.95928 |
| 118154 | Q85601 | P40123 | -0.54999 |
| 118155 | Q85601 | P80511 | -0.23083 |
| 118156 | Q85601 | Q7Z3H0 | -0.2274  |
| 118157 | Q85601 | P12830 | -0.5292  |
| 118158 | Q85601 | Q969H8 | -1.2485  |
| 118159 | Q85601 | O75439 | -0.49175 |
| 118160 | Q85601 | P47902 | -0.24895 |
| 118161 | Q85601 | Q8N328 | -0.57199 |
| 118162 | Q85601 | Q53TN4 | -0.98575 |
| 118163 | Q85601 | P22612 | -0.56274 |
| 118164 | Q85601 | Q96QK8 | -0.92686 |
| 118165 | Q85601 | Q8N268 | -0.42995 |
| 118166 | Q85601 | P51159 | -0.29469 |
| 118167 | Q85601 | Q96LB2 | -1.2954  |
| 118168 | Q85601 | Q13117 | -0.73695 |
| 118169 | Q85601 | Q9NVV2 | -0.2031  |
| 118170 | Q85601 | Q96PU9 | -0.52814 |
| 118171 | Q85601 | O95970 | -0.2284  |
| 118172 | Q85601 | Q7Z5Y7 | -0.1535  |
| 118173 | Q85601 | Q96RR1 | -0.16948 |
| 118174 | Q85601 | P15502 | -0.2194  |
| 118175 | Q85601 | Q6P656 | -0.37408 |
| 118176 | Q85601 | P10966 | -0.86987 |
| 118177 | Q85601 | Q12893 | -0.38789 |
| 118178 | Q85601 | P20160 | -0.80081 |
| 118179 | Q85601 | Q8N1E2 | -0.83163 |
| 118180 | Q85601 | Q9BUB7 | -0.62114 |



|        |        |        |           |
|--------|--------|--------|-----------|
| 118181 | Q85601 | Q96BJ8 | -0.28174  |
| 118182 | Q85601 | Q03169 | -0.65824  |
| 118183 | Q85601 | Q1W209 | -0.2031   |
| 118184 | Q85601 | Q96RD7 | -0.83632  |
| 118185 | Q85601 | Q03426 | -0.68982  |
| 118186 | Q85601 | Q3B8N5 | -0.20999  |
| 118187 | Q85601 | P27987 | -0.84956  |
| 118188 | Q85601 | Q6UXH0 | -0.2938   |
| 118189 | Q85601 | A6NF34 | -0.92681  |
| 118190 | Q85601 | P40933 | -0.44168  |
| 118191 | Q85601 | P17405 | -0.32186  |
| 118192 | Q85601 | Q8N0W3 | -0.99349  |
| 118193 | Q85601 | Q13535 | -0.78382  |
| 118194 | Q85601 | Q9C0I9 | -0.22839  |
| 118195 | Q85601 | Q8ND23 | -0.22692  |
| 118196 | Q85601 | Q8TCB0 | -0.44523  |
| 118197 | Q85601 | Q5VW36 | -0.87207  |
| 118198 | Q85601 | Q53SF7 | -0.38596  |
| 118199 | Q85601 | O14782 | -0.30149  |
| 118200 | Q85601 | B1AL88 | -0.92686  |
| 118201 | Q85601 | Q6IC10 | -1.1008   |
| 118202 | Q85601 | O94979 | -0.44881  |
| 118203 | Q85601 | Q92478 | -1.0584   |
| 118204 | Q85601 | Q13332 | -0.78241  |
| 118205 | Q85601 | Q969X0 | -0.084745 |
| 118206 | Q85601 | Q9BZ98 | -0.98182  |
| 118207 | Q85601 | Q9Y2G5 | -0.17122  |
| 118208 | Q85601 | Q9H799 | -0.92686  |
| 118209 | Q85601 | O15460 | -0.61283  |
| 118210 | Q85601 | Q6NVV7 | -0.99168  |
| 118211 | Q85601 | Q9BYS1 | -0.27098  |
| 118212 | Q85601 | O15303 | -1.1839   |
| 118213 | Q85601 | Q8TF27 | -0.88202  |
| 118214 | Q85601 | Q14012 | -0.3496   |
| 118215 | Q85601 | P20337 | -0.78852  |
| 118216 | Q85601 | Q5T686 | -0.24864  |
| 118217 | Q85601 | Q92968 | -0.23224  |
| 118218 | Q85601 | O00507 | -0.51497  |
| 118219 | Q85601 | Q96HP0 | -0.17119  |
| 118220 | Q85601 | Q8WXD9 | -0.26906  |
| 118221 | Q85601 | Q96BF3 | -1.0386   |
| 118222 | Q85601 | Q03167 | -0.31972  |
| 118223 | Q85601 | Q96HJ3 | -0.092462 |
| 118224 | Q85601 | O60309 | -0.92686  |
| 118225 | Q85601 | Q9NPD7 | -0.49263  |
| 118226 | Q85601 | Q9BQS7 | -1.1322   |
| 118227 | Q85601 | O95452 | -1.0175   |
| 118228 | Q85601 | P58005 | -0.17346  |
| 118229 | Q85601 | Q9UBP4 | -0.91813  |
| 118230 | Q85601 | Q5TCH4 | -0.76879  |
| 118231 | Q85601 | Q8TCC7 | -0.79439  |
| 118232 | Q85601 | Q9H3U5 | -0.86184  |
| 118233 | Q85601 | P02144 | -0.35747  |
| 118234 | Q85601 | Q96BD6 | -0.10239  |
| 118235 | Q85601 | P25325 | -0.24513  |
| 118236 | Q85601 | Q9UPU7 | -0.92391  |
| 118237 | Q85601 | Q5TAT6 | -1.0455   |
| 118238 | Q85601 | P01622 | -1.046    |
| 118239 | Q85601 | Q8WVF5 | -0.14859  |
| 118240 | Q85601 | P0CJ70 | -0.67838  |
| 118241 | Q85601 | P58397 | -1.2377   |
| 118242 | Q85601 | Q6ZNB6 | -0.18982  |
| 118243 | Q85601 | P35241 | -0.23389  |
| 118244 | Q85601 | O94766 | -0.54729  |
| 118245 | Q85601 | Q9H2G2 | -1.0795   |
| 118246 | Q85601 | O60706 | -1.082    |
| 118247 | Q85601 | Q5SRE7 | -0.62755  |
| 118248 | Q85601 | A8MYG8 | -0.22741  |
| 118249 | Q85601 | Q9NQT8 | -0.30776  |
| 118250 | Q85601 | Q14314 | -1.1647   |
| 118251 | Q85601 | Q9Y661 | -1.1725   |
| 118252 | Q85601 | Q16891 | -0.19111  |
| 118253 | Q85601 | Q8NHP7 | -0.66093  |
| 118254 | Q85601 | Q9BYD5 | -0.10619  |
| 118255 | Q85601 | Q6ZVL8 | -0.2031   |
| 118256 | Q85601 | Q6AHZ1 | -0.22781  |

|        |        |        |            |
|--------|--------|--------|------------|
| 118257 | Q85601 | Q86V88 | -0.61068   |
| 118258 | Q85601 | P25105 | -0.87475   |
| 118259 | Q85601 | Q9NUB4 | -0.92686   |
| 118260 | Q85601 | Q5XG92 | -0.82699   |
| 118261 | Q85601 | Q6P6B1 | -0.092462  |
| 118262 | Q85601 | Q96PP8 | -0.81143   |
| 118263 | Q85601 | O14931 | -1.2177    |
| 118264 | Q85601 | O76082 | -0.41336   |
| 118265 | Q85601 | P0DKX4 | -0.26677   |
| 118266 | Q85601 | Q99836 | -0.2274    |
| 118267 | Q85601 | Q9UKU0 | -0.94735   |
| 118268 | Q85601 | Q96HR9 | -0.92686   |
| 118269 | Q85601 | Q8N7P7 | -1.3995    |
| 118270 | Q85601 | P17538 | -1.3742    |
| 118271 | Q85601 | P78312 | -0.21246   |
| 118272 | Q85601 | Q8N2R0 | -0.19669   |
| 118273 | Q85601 | Q96MF0 | -0.37263   |
| 118274 | Q85601 | Q5TEZ5 | -0.22732   |
| 118275 | Q85601 | P01133 | -0.87558   |
| 118276 | Q85601 | Q7Z6I8 | -0.0027841 |
| 118277 | Q85601 | Q9H1Z9 | -0.92686   |
| 118278 | Q85601 | P61296 | -0.22987   |
| 118279 | Q85601 | Q96B42 | -0.58759   |
| 118280 | Q85601 | Q9H310 | -0.78875   |
| 118281 | Q85601 | P08709 | -0.84335   |
| 118282 | Q85601 | Q5VW00 | -0.22731   |
| 118283 | Q85601 | P30042 | -0.20736   |
| 118284 | Q85601 | Q14680 | -0.57095   |
| 118285 | Q85601 | Q9Y6Z4 | -0.33431   |
| 118286 | Q85601 | P01744 | -1.046     |
| 118287 | Q85601 | Q76M96 | -1.0586    |
| 118288 | Q85601 | Q8IW93 | -0.83578   |
| 118289 | Q85601 | Q6ZWE6 | -0.67807   |
| 118290 | Q85601 | Q13835 | -0.22809   |
| 118291 | Q85601 | Q13145 | -0.47749   |
| 118292 | Q85601 | Q8TAT5 | -0.30034   |
| 118293 | Q85601 | A6NH13 | -0.27793   |
| 118294 | Q85601 | P13804 | -0.31383   |
| 118295 | Q85601 | Q9H3E2 | -0.26589   |
| 118296 | Q85601 | Q8IZU8 | -0.88511   |
| 118297 | Q85601 | P59646 | -0.95074   |
| 118298 | Q85601 | A4FU69 | -0.39878   |
| 118299 | Q85601 | P55061 | -0.57267   |
| 118300 | Q85601 | Q9Y3F1 | -0.2031    |
| 118301 | Q85601 | Q5T1V6 | -1.0417    |
| 118302 | Q85601 | P19801 | -0.83602   |
| 118303 | Q85601 | Q9H9S0 | -0.22804   |
| 118304 | Q85601 | Q8WYP3 | -0.77952   |
| 118305 | Q85601 | Q13670 | -0.37861   |
| 118306 | Q85601 | Q86U06 | -0.61838   |
| 118307 | Q85601 | Q9H6R7 | -0.15067   |
| 118308 | Q85601 | P01266 | -0.61373   |
| 118309 | Q85601 | Q8NB78 | -0.37449   |
| 118310 | Q85601 | Q5TZJ5 | -0.92686   |
| 118311 | Q85601 | C9JXX5 | -0.9043    |
| 118312 | Q85601 | Q6IBW4 | -0.25848   |
| 118313 | Q85601 | Q8NGA6 | -1.2621    |
| 118314 | Q85601 | O95502 | -1.0251    |
| 118315 | Q85601 | Q9NQW5 | -0.27656   |
| 118316 | Q85601 | Q9NXB9 | -0.1198    |
| 118317 | Q85601 | Q99640 | -0.22741   |
| 118318 | Q85601 | Q8TAD2 | -0.96895   |
| 118319 | Q85601 | O75897 | -0.26617   |
| 118320 | Q85601 | Q14166 | -0.27583   |
| 118321 | Q85601 | Q9HCE7 | -0.22741   |
| 118322 | Q85601 | Q8NCK7 | -0.9485    |
| 118323 | Q85601 | Q5I0X4 | -0.092462  |
| 118324 | Q85601 | Q13433 | -0.93831   |
| 118325 | Q85601 | Q3C1V9 | -0.30704   |
| 118326 | Q85601 | Q9BPY8 | -0.21407   |
| 118327 | Q85601 | Q9UNN8 | -0.31861   |
| 118328 | Q85601 | E5RJM6 | -0.22741   |
| 118329 | Q85601 | O00329 | -0.41199   |
| 118330 | Q85601 | Q9NS68 | -0.75379   |
| 118331 | Q85601 | Q01469 | -0.22449   |
| 118332 | Q85601 | Q3B8N2 | -0.3304    |

|        |        |        |          |
|--------|--------|--------|----------|
| 118333 | Q85601 | Q9BZ95 | -0.22729 |
| 118334 | Q85601 | Q9UDX4 | -1.128   |
| 118335 | Q85601 | Q8NEE8 | -0.22731 |
| 118336 | Q85601 | Q6PIV2 | -0.46676 |
| 118337 | Q85601 | O95969 | -0.95724 |
| 118338 | Q85601 | Q99726 | -0.77715 |
| 118339 | Q85601 | P01303 | -0.67682 |
| 118340 | Q85601 | Q9HB89 | -1.1632  |
| 118341 | Q85601 | P78367 | -0.22836 |
| 118342 | Q85601 | O15305 | -0.26843 |
| 118343 | Q85601 | Q8N9N7 | -0.24539 |
| 118344 | Q85601 | A4D1U4 | -0.11737 |
| 118345 | Q85601 | Q9H1P3 | -0.63909 |
| 118346 | Q85601 | P43652 | -0.84964 |
| 118347 | Q85601 | Q6ZT89 | -0.69944 |
| 118348 | Q85601 | Q5JTJ3 | -0.22686 |
| 118349 | Q85601 | P05538 | -0.70259 |
| 118350 | Q85601 | Q15915 | -0.23529 |
| 118351 | Q85601 | O95425 | -0.17709 |
| 118352 | Q85601 | Q6YN16 | -0.87416 |
| 118353 | Q85601 | Q7Z412 | -0.92313 |
| 118354 | Q85601 | P43699 | -0.32552 |
| 118355 | Q85601 | Q8NCM8 | -0.37728 |
| 118356 | Q85601 | P13073 | -0.24204 |
| 118357 | Q85601 | Q96G91 | -1.2034  |
| 118358 | Q85601 | Q96HY6 | -0.75315 |
| 118359 | Q85601 | Q9BU68 | -0.11835 |
| 118360 | Q85601 | P42702 | -1.0439  |
| 118361 | Q85601 | P04908 | -0.7417  |
| 118362 | Q85601 | Q8N7H1 | -0.52343 |
| 118363 | Q85601 | Q5SZJ8 | -0.49791 |
| 118364 | Q85601 | Q9NYX4 | -1.0765  |
| 118365 | Q85601 | Q6UWH4 | -0.69    |
| 118366 | Q85601 | Q14807 | -0.30877 |
| 118367 | Q85601 | Q9BYV1 | -0.17493 |
| 118368 | Q85601 | A6NIE9 | -1.3764  |
| 118369 | Q85601 | P31994 | -0.53715 |
| 118370 | Q85601 | Q9P2K8 | -1.0067  |
| 118371 | Q85601 | Q8TBE3 | -0.92686 |
| 118372 | Q85601 | P40616 | -0.76384 |
| 118373 | Q85601 | Q70CQ1 | -0.24402 |
| 118374 | Q85601 | Q9BT43 | -0.49965 |
| 118375 | Q85601 | P30453 | -0.93461 |
| 118376 | Q85601 | Q6P9F7 | -0.92686 |
| 118377 | Q85601 | A6NDJ8 | -0.99624 |
| 118378 | Q85601 | Q8NBI5 | -0.92197 |
| 118379 | Q85601 | Q96NY8 | -0.88002 |
| 118380 | Q85601 | Q9UHI8 | -1.1683  |
| 118381 | Q85601 | Q9H1C4 | -0.7503  |
| 118382 | Q85601 | O75603 | -0.17876 |
| 118383 | Q85601 | O43739 | -0.54815 |
| 118384 | Q85601 | Q9BQ13 | -0.1616  |
| 118385 | Q85601 | P12271 | -0.75635 |
| 118386 | Q85601 | P61925 | -0.46979 |
| 118387 | Q85601 | Q14940 | -1.0178  |
| 118388 | Q85601 | P00451 | -0.55766 |
| 118389 | Q85601 | Q8N8V2 | -1.0481  |
| 118390 | Q85601 | Q8NFU5 | -0.42525 |
| 118391 | Q85601 | Q9NV79 | -0.07034 |
| 118392 | Q85601 | Q6IQ16 | -0.22186 |
| 118393 | Q85601 | Q9BXJ5 | -0.95337 |
| 118394 | Q85601 | Q6ZNC4 | -0.589   |
| 118395 | Q85601 | O15067 | -0.45892 |
| 118396 | Q85601 | Q92556 | -0.33715 |
| 118397 | Q85601 | Q9BSD3 | -0.33981 |
| 118398 | Q85601 | Q30154 | -0.68895 |
| 118399 | Q85601 | Q5EBM0 | -0.35507 |
| 118400 | Q85601 | Q96GQ7 | -0.52507 |
| 118401 | Q85601 | A6NIU2 | -0.1808  |
| 118402 | Q85601 | Q5T753 | -0.31607 |
| 118403 | Q85601 | Q5TAG4 | -0.72764 |
| 118404 | Q85601 | Q9Y5K1 | -0.43442 |
| 118405 | Q85601 | Q13557 | -0.69645 |
| 118406 | Q85601 | P17081 | -0.89888 |
| 118407 | Q85601 | Q96K49 | -0.92686 |
| 118408 | Q85601 | P23352 | -0.67758 |

|        |        |        |           |
|--------|--------|--------|-----------|
| 118409 | Q85601 | P54855 | -0.9288   |
| 118410 | Q85601 | Q9NVA2 | -0.22709  |
| 118411 | Q85601 | P07358 | -1.0278   |
| 118412 | Q85601 | P53816 | -0.23404  |
| 118413 | Q85601 | Q9UBK7 | -1.1265   |
| 118414 | Q85601 | Q9UBY5 | -1.3218   |
| 118415 | Q85601 | P28161 | -0.24319  |
| 118416 | Q85601 | A6NI03 | -0.589    |
| 118417 | Q85601 | A8K2U0 | -0.81654  |
| 118418 | Q85601 | Q6JVE9 | -0.84824  |
| 118419 | Q85601 | P17181 | -0.95359  |
| 118420 | Q85601 | Q53FV1 | -0.98231  |
| 118421 | Q85601 | P58417 | -1.0044   |
| 118422 | Q85601 | Q13510 | -0.36254  |
| 118423 | Q85601 | Q9UJQ7 | -0.31922  |
| 118424 | Q85601 | Q6ZNE5 | -0.40204  |
| 118425 | Q85601 | Q6AI14 | -0.9986   |
| 118426 | Q85601 | P16452 | -0.22213  |
| 118427 | Q85601 | Q5SRD0 | -0.34632  |
| 118428 | Q85601 | Q8N0Z8 | -0.29345  |
| 118429 | Q85601 | Q9NPH3 | -1.7517   |
| 118430 | Q85601 | Q13873 | -0.51798  |
| 118431 | Q85601 | Q9NP50 | -0.3346   |
| 118432 | Q85601 | Q8WZ74 | -0.63505  |
| 118433 | Q85601 | Q969M1 | -0.43145  |
| 118434 | Q85601 | Q4AE62 | -0.84858  |
| 118435 | Q85601 | P19784 | -0.24449  |
| 118436 | Q85601 | Q8TEV8 | -0.2031   |
| 118437 | Q85601 | Q96FT9 | -0.45723  |
| 118438 | Q85601 | Q9BYT1 | -0.81553  |
| 118439 | Q85601 | Q99487 | -0.29108  |
| 118440 | Q85601 | P08579 | -0.22663  |
| 118441 | Q85601 | P31941 | -0.097254 |
| 118442 | Q85601 | Q0VDG4 | -0.48382  |
| 118443 | Q85601 | Q15761 | -0.97424  |
| 118444 | Q85601 | A8MXJ8 | -0.32255  |
| 118445 | Q85601 | Q9NY64 | -0.62739  |
| 118446 | Q85601 | P36406 | -0.41505  |
| 118447 | Q85601 | Q9UNZ2 | -0.45227  |
| 118448 | Q85601 | Q7Z4B0 | -0.9043   |
| 118449 | Q85601 | P59543 | -1.2301   |
| 118450 | Q85601 | Q9HCI7 | -0.30374  |
| 118451 | Q85601 | Q8TB73 | -0.85707  |
| 118452 | Q85601 | Q8NH05 | -1.2621   |
| 118453 | Q85601 | P00750 | -0.42657  |
| 118454 | Q85601 | Q99999 | -0.73362  |
| 118455 | Q85601 | Q9H4A3 | -0.53524  |
| 118456 | Q85601 | O75051 | -1.1784   |
| 118457 | Q85601 | P36537 | -0.98756  |
| 118458 | Q85601 | Q9GZZ7 | -1.0706   |
| 118459 | Q85601 | Q16048 | -0.8571   |
| 118460 | Q85601 | P43005 | -0.78208  |
| 118461 | Q85601 | A6H8Z2 | -0.2757   |
| 118462 | Q85601 | Q96SQ9 | -0.78004  |
| 118463 | Q85601 | Q8IWB7 | -0.22746  |
| 118464 | Q85601 | P02766 | -0.126    |
| 118465 | Q85601 | Q8NGQ4 | -1.2621   |
| 118466 | Q85601 | O95711 | -1.0028   |
| 118467 | Q85601 | Q13394 | -0.15509  |
| 118468 | Q85601 | O43665 | -0.24306  |
| 118469 | Q85601 | O75608 | -0.33915  |
| 118470 | Q85601 | Q5JRA6 | -0.098383 |
| 118471 | Q85601 | Q5T3I0 | -0.36086  |
| 118472 | Q85601 | P01720 | -1.046    |
| 118473 | Q85601 | Q96JC1 | -0.21538  |
| 118474 | Q85601 | Q9UPT6 | -0.22656  |
| 118475 | Q85601 | P07305 | -0.37235  |
| 118476 | Q85601 | Q9BQP7 | -0.15485  |
| 118477 | Q85601 | Q92982 | -0.94348  |
| 118478 | Q85601 | Q8WWH4 | -0.54909  |
| 118479 | Q85601 | Q9ULL1 | -0.77588  |
| 118480 | Q85601 | P30954 | -1.3232   |
| 118481 | Q85601 | O60683 | -0.22743  |
| 118482 | Q85601 | P07492 | -1.152    |
| 118483 | Q85601 | P55285 | -0.52549  |
| 118484 | Q85601 | Q8N6N3 | -0.45685  |

|        |        |        |           |
|--------|--------|--------|-----------|
| 118485 | Q85601 | Q9HCF6 | -0.92912  |
| 118486 | Q85601 | Q9BUF7 | -0.89951  |
| 118487 | Q85601 | Q96Q80 | -0.35858  |
| 118488 | Q85601 | P02790 | -0.27974  |
| 118489 | Q85601 | P17948 | -0.49467  |
| 118490 | Q85601 | O95371 | -1.2357   |
| 118491 | Q85601 | P28906 | -0.53582  |
| 118492 | Q85601 | Q9HBA0 | -0.45019  |
| 118493 | Q85601 | Q93033 | -1.0612   |
| 118494 | Q85601 | Q96PQ0 | -0.92143  |
| 118495 | Q85601 | Q9NZ38 | -0.45554  |
| 118496 | Q85601 | P55089 | -0.51378  |
| 118497 | Q85601 | Q8TCB6 | -1.2621   |
| 118498 | Q85601 | O75056 | -0.90917  |
| 118499 | Q85601 | O00391 | -1.2284   |
| 118500 | Q85601 | O15195 | -0.28954  |
| 118501 | Q85601 | P21741 | -0.87436  |
| 118502 | Q85601 | Q7L0L9 | -0.92686  |
| 118503 | Q85601 | O60487 | -0.46347  |
| 118504 | Q85601 | Q8TF72 | -0.22712  |
| 118505 | Q85601 | Q9P2C4 | -0.87702  |
| 118506 | Q85601 | Q147U7 | -0.92686  |
| 118507 | Q85601 | Q8NH64 | -1.2621   |
| 118508 | Q85601 | Q9NY35 | -0.94721  |
| 118509 | Q85601 | Q9BVJ7 | -0.22741  |
| 118510 | Q85601 | P01861 | -1.0489   |
| 118511 | Q85601 | Q9Y4P9 | -0.27286  |
| 118512 | Q85601 | P61371 | -0.22894  |
| 118513 | Q85601 | Q8N7S2 | -0.54747  |
| 118514 | Q85601 | P20851 | -1.0077   |
| 118515 | Q85601 | Q5D862 | -0.29247  |
| 118516 | Q85601 | Q9H4M7 | -0.37705  |
| 118517 | Q85601 | Q5T2D2 | -0.4138   |
| 118518 | Q85601 | P0C7N1 | -1.2621   |
| 118519 | Q85601 | Q9Y530 | -0.27693  |
| 118520 | Q85601 | Q5SNX5 | -0.2031   |
| 118521 | Q85601 | Q8N543 | -0.18134  |
| 118522 | Q85601 | P20800 | -0.5656   |
| 118523 | Q85601 | P50454 | -0.29284  |
| 118524 | Q85601 | Q6ZMR5 | -1.7945   |
| 118525 | Q85601 | Q8NGJ1 | -1.2621   |
| 118526 | Q85601 | Q6X4T0 | -0.090411 |
| 118527 | Q85601 | Q9UGJ0 | -0.70728  |
| 118528 | Q85601 | Q16619 | -0.60892  |
| 118529 | Q85601 | P01769 | -1.046    |
| 118530 | Q85601 | Q8N9F0 | -0.56854  |
| 118531 | Q85601 | Q8N4V2 | -0.75123  |
| 118532 | Q85601 | Q9H7T3 | -0.45411  |
| 118533 | Q85601 | P0CJ76 | -0.67838  |
| 118534 | Q85601 | Q8TDS4 | -1.1026   |
| 118535 | Q85601 | A4D0T7 | -0.92686  |
| 118536 | Q85601 | P00156 | -0.69757  |
| 118537 | Q85601 | Q8IYR6 | -1.2156   |
| 118538 | Q85601 | Q9UBS5 | -0.66871  |
| 118539 | Q85601 | Q9C091 | -0.92686  |
| 118540 | Q85601 | P20941 | -0.17336  |
| 118541 | Q85601 | Q9H7P9 | -0.68063  |
| 118542 | Q85601 | Q8IVL8 | -1.1567   |
| 118543 | Q85601 | Q6ZTB9 | -0.60958  |
| 118544 | Q85601 | Q8N954 | -0.36086  |
| 118545 | Q85601 | P01225 | -0.72084  |
| 118546 | Q85601 | Q9Y2J0 | -0.24222  |
| 118547 | Q85601 | Q04760 | -0.27633  |
| 118548 | Q85601 | P09848 | -0.68479  |
| 118549 | Q85601 | Q7Z2X7 | -0.097185 |
| 118550 | Q85601 | P19397 | -0.53749  |
| 118551 | Q85601 | P01602 | -1.046    |
| 118552 | Q85601 | Q9H6T3 | -0.22715  |
| 118553 | Q85601 | Q13753 | -1.213    |
| 118554 | Q85601 | Q5VU36 | -0.92686  |
| 118555 | Q85601 | Q6PIL6 | -0.91241  |
| 118556 | Q85601 | O43246 | -0.82156  |
| 118557 | Q85601 | Q9BRR6 | -0.81256  |
| 118558 | Q85601 | Q4G0I0 | -0.92686  |
| 118559 | Q85601 | Q96R67 | -1.2621   |
| 118560 | Q85601 | O14543 | -0.22741  |

|        |        |        |            |
|--------|--------|--------|------------|
| 118561 | Q85601 | Q3MIT2 | -0.29345   |
| 118562 | Q85601 | Q96A57 | -0.92686   |
| 118563 | Q85601 | Q3MII6 | -0.70169   |
| 118564 | Q85601 | P51795 | -0.96775   |
| 118565 | Q85601 | A0A183 | -0.31607   |
| 118566 | Q85601 | Q8N394 | -0.89384   |
| 118567 | Q85601 | Q9NVS9 | -0.45624   |
| 118568 | Q85601 | Q6PID8 | -0.22706   |
| 118569 | Q85601 | Q95620 | -0.62288   |
| 118570 | Q85601 | Q5VZV4 | -0.49485   |
| 118571 | Q85601 | Q8NBF4 | -1.2815    |
| 118572 | Q85601 | Q9Y4D8 | -0.71649   |
| 118573 | Q85601 | P42331 | -1.1208    |
| 118574 | Q85601 | Q8IVS8 | -0.49681   |
| 118575 | Q85601 | Q9UJA9 | -1.612     |
| 118576 | Q85601 | P56750 | -0.65513   |
| 118577 | Q85601 | Q9Y6Z7 | -0.74378   |
| 118578 | Q85601 | Q9Y371 | -0.2274    |
| 118579 | Q85601 | Q8NA54 | -0.23703   |
| 118580 | Q85601 | Q96FJ0 | -0.44199   |
| 118581 | Q85601 | Q9NXD2 | -0.48731   |
| 118582 | Q85601 | Q9BW91 | -0.36774   |
| 118583 | Q85601 | Q5XKK7 | -0.0062553 |
| 118584 | Q85601 | Q96BY9 | -0.56005   |
| 118585 | Q85601 | O96011 | -0.10161   |
| 118586 | Q85601 | Q6N022 | -0.36338   |
| 118587 | Q85601 | Q7Z494 | -0.2271    |
| 118588 | Q85601 | Q9NY25 | -0.96841   |
| 118589 | Q85601 | Q9BZI1 | -0.2294    |
| 118590 | Q85601 | Q9NQ66 | -0.22737   |
| 118591 | Q85601 | Q8IVL6 | -0.61462   |
| 118592 | Q85601 | Q8WYK1 | -1.3257    |
| 118593 | Q85601 | Q8NC42 | -0.94421   |
| 118594 | Q85601 | O60641 | -0.5403    |
| 118595 | Q85601 | Q9H1M3 | -0.86864   |
| 118596 | Q85601 | Q8N9R6 | -0.77712   |
| 118597 | Q85601 | Q16280 | -1.2394    |
| 118598 | Q85601 | Q9BWS9 | -0.82345   |
| 118599 | Q85601 | Q00688 | -0.2296    |
| 118600 | Q85601 | Q8IUC8 | -0.6934    |
| 118601 | Q85601 | Q9Y5X3 | -0.66333   |
| 118602 | Q85601 | O60609 | -0.39379   |
| 118603 | Q85601 | E7EML9 | -1.3764    |
| 118604 | Q85601 | Q9NQU5 | -0.45032   |
| 118605 | Q85601 | P01024 | -0.73135   |
| 118606 | Q85601 | Q86V24 | -1.0377    |
| 118607 | Q85601 | Q5JS54 | -0.09796   |
| 118608 | Q85601 | Q96NR2 | -0.91075   |
| 118609 | Q85601 | Q6L9T8 | -0.09606   |
| 118610 | Q85601 | Q6ZN66 | -0.97274   |
| 118611 | Q85601 | Q9NRS6 | -0.17394   |
| 118612 | Q85601 | A6NMS3 | -1.2621    |
| 118613 | Q85601 | Q9BTF0 | -0.34428   |
| 118614 | Q85601 | Q9NVE4 | -0.11754   |
| 118615 | Q85601 | P49760 | -0.58122   |
| 118616 | Q85601 | P13945 | -0.44319   |
| 118617 | Q85601 | Q08AF8 | -0.1796    |
| 118618 | Q85601 | P52209 | -0.18405   |
| 118619 | Q85601 | P16260 | -0.52946   |
| 118620 | Q85601 | A8MUU1 | -0.49134   |
| 118621 | Q85601 | Q7Z7G1 | -0.59577   |
| 118622 | Q85601 | Q14D33 | -0.92686   |
| 118623 | Q85601 | Q96P88 | -1.2765    |
| 118624 | Q85601 | Q8N3Y3 | -0.72703   |
| 118625 | Q85601 | O96024 | -0.77532   |
| 118626 | Q85601 | Q9Y297 | -0.29559   |
| 118627 | Q85601 | Q9BXX1 | -0.21092   |
| 118628 | Q85601 | B3EWG3 | -0.092462  |
| 118629 | Q85601 | Q01196 | -0.47083   |
| 118630 | Q85601 | Q96HP4 | -0.40462   |
| 118631 | Q85601 | Q5HY64 | -0.33903   |
| 118632 | Q85601 | Q15468 | -0.068819  |
| 118633 | Q85601 | Q8IYX4 | -0.59517   |
| 118634 | Q85601 | A8MWS1 | -0.9043    |
| 118635 | Q85601 | Q9NQ11 | -1.1641    |
| 118636 | Q85601 | Q9Y5M8 | -1.268     |

|        |        |        |          |
|--------|--------|--------|----------|
| 118637 | Q85601 | Q5R372 | -0.94223 |
| 118638 | Q85601 | Q9H3T3 | -1.1431  |
| 118639 | Q85601 | Q96KF2 | -0.2031  |
| 118640 | Q85601 | A6NED2 | -0.22311 |
| 118641 | Q85601 | P0C881 | -0.12765 |
| 118642 | Q85601 | A5YM69 | -0.66654 |
| 118643 | Q85601 | Q49SQ1 | -1.3483  |
| 118644 | Q85601 | Q6UX01 | -1.1183  |
| 118645 | Q85601 | Q9Y5U8 | -0.47849 |
| 118646 | Q85601 | Q9H8M5 | -0.94809 |
| 118647 | Q85601 | Q5VVW2 | -0.92441 |
| 118648 | Q85601 | Q8N4C7 | -0.55216 |
| 118649 | Q85601 | Q5SZK8 | -1.4155  |
| 118650 | Q85601 | Q8NET6 | -0.50911 |
| 118651 | Q85601 | Q8NGM9 | -1.2621  |
| 118652 | Q85601 | P15382 | -0.88278 |
| 118653 | Q85601 | Q695T7 | -1.0543  |
| 118654 | Q85601 | Q6XYQ8 | -0.88601 |
| 118655 | Q85601 | Q6YFQ2 | -0.14333 |
| 118656 | Q85601 | Q7Z695 | -1.2747  |
| 118657 | Q85601 | P12645 | -0.78268 |
| 118658 | Q85601 | Q8IU68 | -1.0116  |
| 118659 | Q85601 | Q13247 | -0.22849 |
| 118660 | Q85601 | O00746 | -0.605   |
| 118661 | Q85601 | P49765 | -0.71336 |
| 118662 | Q85601 | P04216 | -0.29613 |
| 118663 | Q85601 | P20916 | -0.94433 |
| 118664 | Q85601 | A6NKL6 | -0.92686 |
| 118665 | Q85601 | Q8WUP2 | -0.23796 |
| 118666 | Q85601 | P06703 | -0.24121 |
| 118667 | Q85601 | Q9C037 | -0.4926  |
| 118668 | Q85601 | Q13813 | -0.22741 |
| 118669 | Q85601 | Q10471 | -0.91474 |
| 118670 | Q85601 | O94851 | -0.43749 |
| 118671 | Q85601 | Q9NR97 | -0.82538 |
| 118672 | Q85601 | Q92633 | -0.3665  |
| 118673 | Q85601 | Q9NZR2 | -0.86245 |
| 118674 | Q85601 | P26367 | -0.21367 |
| 118675 | Q85601 | Q92615 | -0.896   |
| 118676 | Q85601 | Q9BW19 | -0.314   |
| 118677 | Q85601 | P04279 | -0.58982 |
| 118678 | Q85601 | C9JQL5 | -0.92669 |
| 118679 | Q85601 | Q9UHC3 | -0.55788 |
| 118680 | Q85601 | O95104 | -0.40055 |
| 118681 | Q85601 | P52757 | -0.79929 |
| 118682 | Q85601 | O75386 | -0.23923 |
| 118683 | Q85601 | Q8NGY2 | -1.2621  |
| 118684 | Q85601 | Q6NT32 | -0.75083 |
| 118685 | Q85601 | Q8WXQ8 | -1.1567  |
| 118686 | Q85601 | Q9UPX6 | -0.92686 |
| 118687 | Q85601 | Q13395 | -0.3576  |
| 118688 | Q85601 | Q8IWY4 | -0.89827 |
| 118689 | Q85601 | O14745 | -0.74171 |
| 118690 | Q85601 | Q9HAA7 | -0.44779 |
| 118691 | Q85601 | Q16827 | -0.57274 |
| 118692 | Q85601 | P48995 | -0.31014 |
| 118693 | Q85601 | P58062 | -0.26285 |
| 118694 | Q85601 | Q8NH53 | -1.2621  |
| 118695 | Q85601 | Q8TB52 | -0.36309 |
| 118696 | Q85601 | Q8TEW8 | -0.22651 |
| 118697 | Q85601 | C9JCN9 | -0.2669  |
| 118698 | Q85601 | Q3LI61 | -0.2031  |
| 118699 | Q85601 | Q9H5V8 | -1.5584  |
| 118700 | Q85601 | P14927 | -0.29813 |
| 118701 | Q85601 | Q2Q1W2 | -0.536   |
| 118702 | Q85601 | A6H8M9 | -1.246   |
| 118703 | Q85601 | Q68D91 | -0.26641 |
| 118704 | Q85601 | Q14542 | -0.4996  |
| 118705 | Q85601 | Q8N2K1 | -1.1396  |
| 118706 | Q85601 | Q13239 | -0.22741 |
| 118707 | Q85601 | Q9UQQ1 | -1.3309  |
| 118708 | Q85601 | Q8NEM2 | -0.29587 |
| 118709 | Q85601 | P51790 | -0.37577 |
| 118710 | Q85601 | P49591 | -0.13284 |
| 118711 | Q85601 | Q14153 | -0.26909 |
| 118712 | Q85601 | P10266 | -0.18032 |

|        |        |        |           |
|--------|--------|--------|-----------|
| 118713 | Q85601 | Q5TC84 | -0.46504  |
| 118714 | Q85601 | Q16585 | -0.64588  |
| 118715 | Q85601 | Q5T7P8 | -0.58436  |
| 118716 | Q85601 | Q8IVH2 | -0.24688  |
| 118717 | Q85601 | A6PVL3 | -0.72154  |
| 118718 | Q85601 | Q6YBV0 | -0.80107  |
| 118719 | Q85601 | B5MD39 | -0.31113  |
| 118720 | Q85601 | Q8TC41 | -1.0403   |
| 118721 | Q85601 | Q9UKS6 | -0.22742  |
| 118722 | Q85601 | Q9Y680 | -0.47609  |
| 118723 | Q85601 | P05161 | -0.42737  |
| 118724 | Q85601 | Q8NFZ3 | -0.5122   |
| 118725 | Q85601 | O75093 | -0.68405  |
| 118726 | Q85601 | Q03164 | -0.22667  |
| 118727 | Q85601 | Q9Y4X0 | -0.18472  |
| 118728 | Q85601 | Q96FB5 | -0.84425  |
| 118729 | Q85601 | Q9NQE7 | -0.75833  |
| 118730 | Q85601 | Q9P272 | -0.38771  |
| 118731 | Q85601 | Q8N4C9 | -0.92686  |
| 118732 | Q85601 | A8MYZ6 | -0.40096  |
| 118733 | Q85601 | Q9H222 | -0.67944  |
| 118734 | Q85601 | O14678 | -1.3051   |
| 118735 | Q85601 | O00110 | -0.15395  |
| 118736 | Q85601 | O00635 | -0.73144  |
| 118737 | Q85601 | Q9UGC6 | -0.33314  |
| 118738 | Q85601 | A6NFA0 | -0.92686  |
| 118739 | Q85601 | Q8NGE3 | -1.2621   |
| 118740 | Q85601 | P51649 | -0.38558  |
| 118741 | Q85601 | Q8IZ13 | -0.57512  |
| 118742 | Q85601 | Q99501 | -0.15684  |
| 118743 | Q85601 | Q99969 | -0.44546  |
| 118744 | Q85601 | O75140 | -0.5766   |
| 118745 | Q85601 | P59046 | -0.22712  |
| 118746 | Q85601 | Q68D51 | -0.31993  |
| 118747 | Q85601 | Q96CT7 | -0.04635  |
| 118748 | Q85601 | A6NH57 | -1.3986   |
| 118749 | Q85601 | P0CW26 | -0.023229 |
| 118750 | Q85601 | O43164 | -0.23329  |
| 118751 | Q85601 | Q13492 | -0.20941  |
| 118752 | Q85601 | P30086 | -0.38637  |
| 118753 | Q85601 | Q969N2 | -0.88791  |
| 118754 | Q85601 | P61960 | -0.33817  |
| 118755 | Q85601 | P27448 | -0.79749  |
| 118756 | Q85601 | C9JH25 | -0.92686  |
| 118757 | Q85601 | Q5T7W7 | -0.18472  |
| 118758 | Q85601 | P0C852 | -0.2031   |
| 118759 | Q85601 | O60507 | -0.76027  |
| 118760 | Q85601 | Q8IYR2 | -0.29575  |
| 118761 | Q85601 | Q6QHC5 | -0.90303  |
| 118762 | Q85601 | Q9UPQ3 | -1.2477   |
| 118763 | Q85601 | Q9P2Y4 | -0.22739  |
| 118764 | Q85601 | Q9Y6F6 | -0.71254  |
| 118765 | Q85601 | Q5VZ19 | -0.896    |
| 118766 | Q85601 | Q9BVW6 | -0.92686  |
| 118767 | Q85601 | Q6X4U4 | -0.8946   |
| 118768 | Q85601 | Q6ZN80 | -0.30558  |
| 118769 | Q85601 | A6ND48 | -1.2621   |
| 118770 | Q85601 | Q8IV48 | -0.060215 |
| 118771 | Q85601 | Q00532 | -0.6225   |
| 118772 | Q85601 | O43572 | -0.22233  |
| 118773 | Q85601 | Q5T2L2 | -0.34545  |
| 118774 | Q85601 | Q8NCG5 | -0.67869  |
| 118775 | Q85601 | Q9BXN2 | -0.55671  |
| 118776 | Q85601 | Q86Y34 | -1.3639   |
| 118777 | Q85601 | P08922 | -1.3467   |
| 118778 | Q85601 | Q8N7F7 | -0.22411  |
| 118779 | Q85601 | Q9BT09 | -0.37026  |
| 118780 | Q85601 | Q9C004 | -0.1839   |
| 118781 | Q85601 | Q9UIB8 | -1.2263   |
| 118782 | Q85601 | Q9BRT7 | -0.2031   |
| 118783 | Q85601 | Q96MR6 | -0.22769  |
| 118784 | Q85601 | Q8WXH0 | -0.23003  |
| 118785 | Q85601 | Q7RTX7 | -0.94621  |
| 118786 | Q85601 | Q15849 | -0.41204  |
| 118787 | Q85601 | Q6ZRK6 | -0.060898 |
| 118788 | Q85601 | Q5VWW1 | -0.94067  |



|        |        |        |           |
|--------|--------|--------|-----------|
| 118789 | Q85601 | P61565 | -0.7596   |
| 118790 | Q85601 | Q9UBY0 | -1.0742   |
| 118791 | Q85601 | Q8NFW8 | -0.098628 |
| 118792 | Q85601 | Q9BZJ4 | -0.6829   |
| 118793 | Q85601 | Q9H7E9 | -0.092462 |
| 118794 | Q85601 | A5PLK6 | -0.90456  |
| 118795 | Q85601 | O75487 | -1.0828   |
| 118796 | Q85601 | Q9NX14 | -0.54052  |
| 118797 | Q85601 | Q9NYR8 | -1.2395   |
| 118798 | Q85601 | O15541 | -0.32209  |
| 118799 | Q85601 | P06241 | -0.35081  |
| 118800 | Q85601 | Q86UW1 | -0.93268  |
| 118801 | Q85601 | O60755 | -1.2294   |
| 118802 | Q85601 | Q6GPH6 | -0.92686  |
| 118803 | Q85601 | P02675 | -0.85934  |
| 118804 | Q85601 | P62683 | -0.28681  |
| 118805 | Q85601 | Q99542 | -1.2176   |
| 118806 | Q85601 | P46020 | -0.1419   |
| 118807 | Q85601 | P49685 | -1.4115   |
| 118808 | Q85601 | Q9BRT3 | -0.026476 |
| 118809 | Q85601 | Q7Z5P4 | -1.3165   |
| 118810 | Q85601 | Q96H35 | -0.896    |
| 118811 | Q85601 | O95249 | -0.26575  |
| 118812 | Q85601 | Q6ZPB5 | -0.2135   |
| 118813 | Q85601 | Q8NBD8 | -0.92686  |
| 118814 | Q85601 | Q9NQC8 | -0.37137  |
| 118815 | Q85601 | A6NMP4 | -0.94087  |
| 118816 | Q85601 | Q9NX57 | -0.77548  |
| 118817 | Q85601 | Q96S38 | -0.8067   |
| 118818 | Q85601 | Q32Q52 | -0.87953  |
| 118819 | Q85601 | P40145 | -0.9503   |
| 118820 | Q85601 | Q8IXF9 | -0.85197  |
| 118821 | Q85601 | Q14093 | -0.48008  |
| 118822 | Q85601 | A6NHZ5 | -0.22631  |
| 118823 | Q85601 | Q14642 | -0.49445  |
| 118824 | Q85601 | Q9NQC1 | -0.22997  |
| 118825 | Q85601 | P08572 | -0.50238  |
| 118826 | Q85601 | Q2M3A8 | -0.79741  |
| 118827 | Q85601 | Q9NPJ1 | -0.15961  |
| 118828 | Q85601 | Q9H6L5 | -0.7296   |
| 118829 | Q85601 | Q13151 | -0.30761  |
| 118830 | Q85601 | Q8WWY7 | -0.80847  |
| 118831 | Q85601 | P01127 | -0.32884  |
| 118832 | Q85601 | P61106 | -0.32584  |
| 118833 | Q85601 | A8K830 | -0.2031   |
| 118834 | Q85601 | O75954 | -1.0729   |
| 118835 | Q85601 | Q9UMZ3 | -1.1712   |
| 118836 | Q85601 | Q9UM01 | -1.03     |
| 118837 | Q85601 | Q9Y3R4 | -0.060058 |
| 118838 | Q85601 | Q16678 | -0.7101   |
| 118839 | Q85601 | Q8NC01 | -1.2925   |
| 118840 | Q85601 | Q14569 | -0.88661  |
| 118841 | Q85601 | Q8NH54 | -1.2621   |
| 118842 | Q85601 | Q9P2D7 | -0.39553  |
| 118843 | Q85601 | Q04609 | -0.85189  |
| 118844 | Q85601 | Q9UHV5 | -0.84874  |
| 118845 | Q85601 | Q8WXX7 | -0.21116  |
| 118846 | Q85601 | Q8IVB4 | -0.92325  |
| 118847 | Q85601 | Q9Y5H3 | -1.246    |
| 118848 | Q85601 | O43295 | -1.0442   |
| 118849 | Q85601 | P0CL80 | -0.68194  |
| 118850 | Q85601 | Q7Z4Y8 | -0.33612  |
| 118851 | Q85601 | Q8IZT8 | -0.38332  |
| 118852 | Q85601 | P35475 | -0.42457  |
| 118853 | Q85601 | Q9BRP9 | -0.59406  |
| 118854 | Q85601 | Q9Y2L6 | -0.25305  |
| 118855 | Q85601 | Q8IYS2 | -0.92686  |
| 118856 | Q85601 | Q96EH3 | -0.36198  |
| 118857 | Q85601 | O75129 | -0.92686  |
| 118858 | Q85601 | Q6PI73 | -0.92686  |
| 118859 | Q85601 | Q7RTV2 | -0.22665  |
| 118860 | Q85601 | Q96EQ0 | -0.22663  |
| 118861 | Q85601 | Q9UPT9 | -0.39911  |
| 118862 | Q85601 | Q6NV74 | -0.092462 |
| 118863 | Q85601 | O14544 | -0.22707  |
| 118864 | Q85601 | P10636 | -0.1222   |

|        |        |        |          |
|--------|--------|--------|----------|
| 118865 | Q85601 | Q6NUJ5 | -0.21677 |
| 118866 | Q85601 | Q8WUA4 | -0.22734 |
| 118867 | Q85601 | Q17RQ9 | -0.92686 |
| 118868 | Q85601 | Q8TF21 | -0.22747 |
| 118869 | Q85601 | Q96P48 | -0.29823 |
| 118870 | Q85601 | P78380 | -1.4829  |
| 118871 | Q85601 | Q96ET8 | -0.92686 |
| 118872 | Q85601 | Q4VC31 | -0.16772 |
| 118873 | Q85601 | Q9NRV9 | -0.79452 |
| 118874 | Q85601 | Q6UXB2 | -1.1626  |
| 118875 | Q85601 | Q5H9B9 | -0.34814 |
| 118876 | Q85601 | Q15389 | -0.51283 |
| 118877 | Q85601 | P84090 | -0.20341 |
| 118878 | Q85601 | O43657 | -1.111   |
| 118879 | Q85601 | Q8N9I1 | -0.92686 |
| 118880 | Q85601 | Q8NDG6 | -0.48108 |
| 118881 | Q85601 | Q6P9A2 | -0.72627 |
| 118882 | Q85601 | Q9BRQ3 | -0.28116 |
| 118883 | Q85601 | Q9H2Y7 | -0.23343 |
| 118884 | Q85601 | P00749 | -0.70022 |
| 118885 | Q85601 | Q5BKX8 | -0.16602 |
| 118886 | Q85601 | Q96BN8 | -0.43845 |
| 118887 | Q85601 | Q9HBW9 | -1.3758  |
| 118888 | Q85601 | P49638 | -0.27738 |
| 118889 | Q85601 | Q8IWU5 | -0.39071 |
| 118890 | Q85601 | Q9NRC1 | -0.92686 |
| 118891 | Q85601 | Q8WWA1 | -0.92686 |
| 118892 | Q85601 | Q13576 | -0.92348 |
| 118893 | Q85601 | Q2M2I8 | -0.98143 |
| 118894 | Q85601 | Q8TCJ2 | -0.7656  |
| 118895 | Q85601 | Q6NSI1 | -0.22739 |
| 118896 | Q85601 | Q9H8G2 | -0.29993 |
| 118897 | Q85601 | Q06210 | -0.16374 |
| 118898 | Q85601 | P78383 | -0.82751 |
| 118899 | Q85601 | Q96H22 | -0.19544 |
| 118900 | Q85601 | Q96LD8 | -0.74457 |
| 118901 | Q85601 | O00292 | -0.72316 |
| 118902 | Q85601 | P10916 | -0.22567 |
| 118903 | Q85601 | P58173 | -1.2621  |
| 118904 | Q85601 | Q14185 | -0.24654 |
| 118905 | Q85601 | Q8WWX0 | -0.58286 |
| 118906 | Q85601 | Q587J8 | -0.6415  |
| 118907 | Q85601 | Q06430 | -0.87506 |
| 118908 | Q85601 | Q96AG3 | -0.47849 |
| 118909 | Q85601 | Q5JUR7 | -0.46254 |
| 118910 | Q85601 | Q16661 | -0.79943 |
| 118911 | Q85601 | Q9H1E5 | -0.90431 |
| 118912 | Q85601 | Q86U28 | -0.17331 |
| 118913 | Q85601 | P04433 | -1.046   |
| 118914 | Q85601 | Q1L5Z9 | -0.46288 |
| 118915 | Q85601 | Q8NA61 | -0.28237 |
| 118916 | Q85601 | P48723 | -0.78962 |
| 118917 | Q85601 | P36776 | -0.17207 |
| 118918 | Q85601 | P19256 | -0.67784 |
| 118919 | Q85601 | P06280 | -0.29799 |
| 118920 | Q85601 | P36969 | -0.48047 |
| 118921 | Q85601 | O95704 | -0.22645 |
| 118922 | Q85601 | Q6SJ93 | -0.50749 |
| 118923 | Q85601 | Q8WVQ1 | -0.89425 |
| 118924 | Q85601 | Q6IEV9 | -1.2621  |
| 118925 | Q85601 | Q8NFW1 | -0.76962 |
| 118926 | Q85601 | Q9NPY3 | -0.46725 |
| 118927 | Q85601 | Q7Z422 | -0.71278 |
| 118928 | Q85601 | O95563 | -0.69716 |
| 118929 | Q85601 | P08603 | -0.93631 |
| 118930 | Q85601 | Q10589 | -0.39555 |
| 118931 | Q85601 | P07451 | -0.20885 |
| 118932 | Q85601 | O76054 | -0.26085 |
| 118933 | Q85601 | Q9BVG4 | -0.18472 |
| 118934 | Q85601 | Q6IEZ7 | -1.2621  |
| 118935 | Q85601 | Q17RA5 | -0.2031  |
| 118936 | Q85601 | Q8N6F1 | -0.29384 |
| 118937 | Q85601 | Q9BSE5 | -0.19813 |
| 118938 | Q85601 | O95832 | -0.9296  |
| 118939 | Q85601 | P43234 | -0.85378 |
| 118940 | Q85601 | Q14714 | -1.0361  |

|        |        |        |           |
|--------|--------|--------|-----------|
| 118941 | Q85601 | Q15382 | -1.1994   |
| 118942 | Q85601 | P54289 | -0.87244  |
| 118943 | Q85601 | O95398 | -0.58265  |
| 118944 | Q85601 | Q92673 | -1.171    |
| 118945 | Q85601 | O14874 | -0.42062  |
| 118946 | Q85601 | Q8N653 | -0.22717  |
| 118947 | Q85601 | O60879 | -0.22199  |
| 118948 | Q85601 | Q96QR1 | -0.85147  |
| 118949 | Q85601 | O95343 | -0.22799  |
| 118950 | Q85601 | Q9Y2T3 | -0.28091  |
| 118951 | Q85601 | P01707 | -1.046    |
| 118952 | Q85601 | O75678 | -0.29575  |
| 118953 | Q85601 | Q9UL49 | -0.10677  |
| 118954 | Q85601 | A6NFX1 | -0.86355  |
| 118955 | Q85601 | P0CF74 | -1.0219   |
| 118956 | Q85601 | P0CL81 | -0.68194  |
| 118957 | Q85601 | Q13285 | -0.22973  |
| 118958 | Q85601 | P07947 | -0.62755  |
| 118959 | Q85601 | Q9TNN7 | -1.1017   |
| 118960 | Q85601 | Q8IU8  | -0.92686  |
| 118961 | Q85601 | Q96JY6 | -0.22732  |
| 118962 | Q85601 | Q9NX77 | -0.7596   |
| 118963 | Q85601 | Q6ZR93 | -0.2031   |
| 118964 | Q85601 | Q9NYM4 | -1.2793   |
| 118965 | Q85601 | Q8N2S1 | -0.49647  |
| 118966 | Q85601 | Q8IY45 | -0.20343  |
| 118967 | Q85601 | P21802 | -0.25617  |
| 118968 | Q85601 | O42043 | -0.7596   |
| 118969 | Q85601 | Q14019 | -0.20423  |
| 118970 | Q85601 | Q96P20 | -0.22705  |
| 118971 | Q85601 | O60687 | -0.36429  |
| 118972 | Q85601 | Q9UIG4 | -0.69894  |
| 118973 | Q85601 | Q96RD0 | -1.2621   |
| 118974 | Q85601 | Q8NH70 | -1.2621   |
| 118975 | Q85601 | Q8NGS5 | -1.2621   |
| 118976 | Q85601 | Q9NSA2 | -0.90169  |
| 118977 | Q85601 | Q8IU80 | -0.98844  |
| 118978 | Q85601 | P22102 | -0.42203  |
| 118979 | Q85601 | Q2L4Q9 | -1.3764   |
| 118980 | Q85601 | O15264 | -0.22741  |
| 118981 | Q85601 | P02786 | -0.75353  |
| 118982 | Q85601 | Q9GZQ6 | -1.2749   |
| 118983 | Q85601 | O75368 | -0.094436 |
| 118984 | Q85601 | Q8IY17 | -0.75955  |
| 118985 | Q85601 | Q9UJ90 | -0.91747  |
| 118986 | Q85601 | Q9UQ05 | -0.96379  |
| 118987 | Q85601 | Q86TA4 | -0.62945  |
| 118988 | Q85601 | P50552 | -0.22603  |
| 118989 | Q85601 | Q7L622 | -0.20987  |
| 118990 | Q85601 | P51798 | -1.1324   |
| 118991 | Q85601 | P07355 | -0.20339  |
| 118992 | Q85601 | Q9NZA1 | -0.21548  |
| 118993 | Q85601 | Q8IWU4 | -0.52867  |
| 118994 | Q85601 | Q5JUQ0 | -0.5444   |
| 118995 | Q85601 | Q9NVG8 | -1.3431   |
| 118996 | Q85601 | Q9NYL4 | -0.89793  |
| 118997 | Q85601 | Q9ULC0 | -1.5584   |
| 118998 | Q85601 | Q96RW7 | -1.128    |
| 118999 | Q85601 | Q9NQW7 | -0.39799  |
| 119000 | Q85601 | Q8IUC4 | -0.47024  |
| 119001 | Q85601 | A6NJI1 | -0.48595  |
| 119002 | Q85601 | Q5T4B2 | -0.51611  |
| 119003 | Q85601 | Q95604 | -1.1017   |
| 119004 | Q85601 | P08294 | -0.21904  |
| 119005 | Q85601 | Q9BYV7 | -0.64334  |
| 119006 | Q85601 | Q8N9W4 | -0.19958  |
| 119007 | Q85601 | Q00169 | -0.63657  |
| 119008 | Q85601 | P54619 | -0.42379  |
| 119009 | Q85601 | Q96DT7 | -0.2251   |
| 119010 | Q85601 | Q5VZM2 | -0.36332  |
| 119011 | Q85601 | P46940 | -0.22741  |
| 119012 | Q85601 | Q15846 | -0.77279  |
| 119013 | Q85601 | A6NC51 | -0.92686  |
| 119014 | Q85601 | Q04912 | -0.93104  |
| 119015 | Q85601 | P43250 | -1.2195   |
| 119016 | Q85601 | P0C7X0 | -0.32255  |

|        |        |        |           |
|--------|--------|--------|-----------|
| 119017 | Q85601 | O00232 | -0.10532  |
| 119018 | Q85601 | Q8NH40 | -1.2621   |
| 119019 | Q85601 | A6BM72 | -0.9115   |
| 119020 | Q85601 | Q8N201 | -0.42611  |
| 119021 | Q85601 | Q6UWL6 | -1.021    |
| 119022 | Q85601 | O43320 | -0.92032  |
| 119023 | Q85601 | Q9Y2I9 | -1.1409   |
| 119024 | Q85601 | Q5T4F4 | -0.35167  |
| 119025 | Q85601 | Q5FWF5 | -0.20268  |
| 119026 | Q85601 | Q8TAG6 | -0.16772  |
| 119027 | Q85601 | Q17RF5 | -0.9043   |
| 119028 | Q85601 | Q7Z4S6 | -0.25223  |
| 119029 | Q85601 | Q9BS92 | -0.29349  |
| 119030 | Q85601 | A2PYH4 | -0.82114  |
| 119031 | Q85601 | A2RUG3 | -0.92686  |
| 119032 | Q85601 | A6NIZ1 | -0.96608  |
| 119033 | Q85601 | Q6Pjq5 | -0.36066  |
| 119034 | Q85601 | Q8TEJ3 | -0.29575  |
| 119035 | Q85601 | P15941 | -0.52323  |
| 119036 | Q85601 | Q9NZ94 | -0.32839  |
| 119037 | Q85601 | Q13886 | -0.22212  |
| 119038 | Q85601 | Q96DZ5 | -0.66069  |
| 119039 | Q85601 | Q8TDX6 | -0.44793  |
| 119040 | Q85601 | Q96MT1 | -0.89088  |
| 119041 | Q85601 | P21128 | -0.73733  |
| 119042 | Q85601 | Q9NZW5 | -0.22454  |
| 119043 | Q85601 | Q9NSD7 | -1.4179   |
| 119044 | Q85601 | Q71RG4 | -0.92686  |
| 119045 | Q85601 | Q9P1W9 | -0.74618  |
| 119046 | Q85601 | Q5VXD3 | -0.048224 |
| 119047 | Q85601 | Q9NZC2 | -1.3726   |
| 119048 | Q85601 | O00258 | -0.43807  |
| 119049 | Q85601 | Q7Z2Z2 | -0.63729  |
| 119050 | Q85601 | Q8NCW6 | -0.57992  |
| 119051 | Q85601 | Q8IVH8 | -0.63967  |
| 119052 | Q85601 | P01834 | -1.046    |
| 119053 | Q85601 | P23582 | -0.65103  |
| 119054 | Q85601 | Q9H8X9 | -0.89983  |
| 119055 | Q85601 | O43556 | -0.74819  |
| 119056 | Q85601 | Q96BQ3 | -0.589    |
| 119057 | Q85601 | P10721 | -0.31145  |
| 119058 | Q85601 | Q5SV17 | -0.92686  |
| 119059 | Q85601 | A6NLP5 | -0.21439  |
| 119060 | Q85601 | Q9UNW8 | -1.2497   |
| 119061 | Q85601 | Q8IWA5 | -0.88418  |
| 119062 | Q85601 | Q96NL6 | -0.040822 |
| 119063 | Q85601 | Q16586 | -0.66074  |
| 119064 | Q85601 | Q96NX9 | -0.20833  |
| 119065 | Q85601 | Q9ULX7 | -0.92748  |
| 119066 | Q85601 | O60662 | -0.21366  |
| 119067 | Q85601 | P06737 | -0.31509  |
| 119068 | Q85601 | Q7RTX1 | -1.2844   |
| 119069 | Q85601 | Q6IC98 | -0.72932  |
| 119070 | Q85601 | Q9UIW0 | -0.22725  |
| 119071 | Q85601 | Q7Z2T5 | -0.53592  |
| 119072 | Q85601 | Q9BZ19 | -0.2274   |
| 119073 | Q85601 | P11086 | -0.24397  |
| 119074 | Q85601 | P21757 | -0.49547  |
| 119075 | Q85601 | Q07912 | -0.50946  |
| 119076 | Q85601 | P43026 | -0.50689  |
| 119077 | Q85601 | Q6XPR3 | -0.97914  |
| 119078 | Q85601 | Q9BXR3 | -0.23073  |
| 119079 | Q85601 | Q6W5P4 | -1.0879   |
| 119080 | Q85601 | Q9C009 | -0.37706  |
| 119081 | Q85601 | Q14651 | -0.33242  |
| 119082 | Q85601 | Q8IWA0 | -0.22807  |
| 119083 | Q85601 | Q9UKB5 | -0.9874   |
| 119084 | Q85601 | Q6ZRH7 | -1.2121   |
| 119085 | Q85601 | Q96DC9 | -0.67031  |
| 119086 | Q85601 | Q16720 | -1.018    |
| 119087 | Q85601 | O75052 | -0.22379  |
| 119088 | Q85601 | Q9C0H2 | -0.96721  |
| 119089 | Q85601 | P61626 | -0.9678   |
| 119090 | Q85601 | P36383 | -0.96153  |
| 119091 | Q85601 | Q9UGM5 | -0.87742  |
| 119092 | Q85601 | Q9UI38 | -0.55326  |

|        |        |        |           |
|--------|--------|--------|-----------|
| 119093 | Q85601 | A6NGN9 | -0.9043   |
| 119094 | Q85601 | Q07444 | -0.90584  |
| 119095 | Q85601 | Q8WWV6 | -0.99714  |
| 119096 | Q85601 | Q9UQQ2 | -0.33432  |
| 119097 | Q85601 | P22079 | -1.1036   |
| 119098 | Q85601 | Q8NGN1 | -1.2621   |
| 119099 | Q85601 | O43169 | -0.73151  |
| 119100 | Q85601 | O75526 | -0.29354  |
| 119101 | Q85601 | P50224 | -0.26051  |
| 119102 | Q85601 | Q96NE9 | -0.23644  |
| 119103 | Q85601 | Q16609 | -0.69894  |
| 119104 | Q85601 | Q9Y6X5 | -0.98181  |
| 119105 | Q85601 | Q86UE8 | -0.22741  |
| 119106 | Q85601 | P0DJD7 | -1.1749   |
| 119107 | Q85601 | O14495 | -0.31997  |
| 119108 | Q85601 | A6NDL7 | -0.30175  |
| 119109 | Q85601 | P10619 | -0.25807  |
| 119110 | Q85601 | P31213 | -0.73447  |
| 119111 | Q85601 | Q6DWJ6 | -1.3443   |
| 119112 | Q85601 | Q13237 | -0.99243  |
| 119113 | Q85601 | Q5J5C9 | -0.797    |
| 119114 | Q85601 | Q8TDZ2 | -0.22744  |
| 119115 | Q85601 | Q9UPW8 | -0.22741  |
| 119116 | Q85601 | Q5JR12 | -0.29004  |
| 119117 | Q85601 | Q96MM7 | -0.6629   |
| 119118 | Q85601 | O95196 | -0.69818  |
| 119119 | Q85601 | P19113 | -0.52982  |
| 119120 | Q85601 | Q8IXQ4 | -0.092462 |
| 119121 | Q85601 | Q9UHE5 | -0.99524  |
| 119122 | Q85601 | Q8NA97 | -0.32549  |
| 119123 | Q85601 | Q9NS39 | -0.15022  |
| 119124 | Q85601 | Q8N755 | -0.92686  |
| 119125 | Q85601 | Q13093 | -0.87923  |
| 119126 | Q85601 | Q96CT2 | -0.20034  |
| 119127 | Q85601 | Q06055 | -0.78002  |
| 119128 | Q85601 | Q8NH81 | -1.2621   |
| 119129 | Q85601 | Q71U36 | -0.19372  |
| 119130 | Q85601 | Q96LA9 | -1.3443   |
| 119131 | Q85601 | Q9Y6I0 | -0.64385  |
| 119132 | Q85601 | Q7Z388 | -0.92686  |
| 119133 | Q85601 | Q7Z5J1 | -1.5893   |
| 119134 | Q85601 | A8MPS7 | -0.18761  |
| 119135 | Q85601 | Q92508 | -0.95321  |
| 119136 | Q85601 | Q9NQ38 | -0.42654  |
| 119137 | Q85601 | Q5SY85 | -0.2689   |
| 119138 | Q85601 | Q15005 | -0.77813  |
| 119139 | Q85601 | Q02338 | -0.30905  |
| 119140 | Q85601 | Q9UKA8 | -0.81225  |
| 119141 | Q85601 | O95500 | -0.75178  |
| 119142 | Q85601 | Q96QE2 | -0.83138  |
| 119143 | Q85601 | Q9BWV7 | -0.33211  |
| 119144 | Q85601 | Q6IEE7 | -0.92686  |
| 119145 | Q85601 | P54753 | -0.98544  |
| 119146 | Q85601 | O14627 | -0.25895  |
| 119147 | Q85601 | Q9BYA6 | -0.2031   |
| 119148 | Q85601 | Q9UBH0 | -0.85772  |
| 119149 | Q85601 | P26927 | -0.87489  |
| 119150 | Q85601 | Q8TC59 | -0.46478  |
| 119151 | Q85601 | A8MUP2 | -0.32306  |
| 119152 | Q85601 | Q96HN2 | -0.27825  |
| 119153 | Q85601 | O75896 | -0.14431  |
| 119154 | Q85601 | Q0VGL1 | -0.60483  |
| 119155 | Q85601 | P50990 | -0.10174  |
| 119156 | Q85601 | Q6U949 | -0.2031   |
| 119157 | Q85601 | Q16473 | -0.22746  |
| 119158 | Q85601 | Q8TF08 | -0.70233  |
| 119159 | Q85601 | Q06124 | -0.22741  |
| 119160 | Q85601 | P01138 | -0.44819  |
| 119161 | Q85601 | O94826 | -0.22717  |
| 119162 | Q85601 | Q8IUC0 | -0.12459  |
| 119163 | Q85601 | A6NGE4 | -0.22744  |
| 119164 | Q85601 | P10635 | -0.3968   |
| 119165 | Q85601 | O43286 | -0.52874  |
| 119166 | Q85601 | Q9H6T0 | -0.061371 |
| 119167 | Q85601 | Q8IV33 | -0.18741  |
| 119168 | Q85601 | Q8NGC7 | -1.2621   |

|        |        |        |           |
|--------|--------|--------|-----------|
| 119169 | Q85601 | Q8N4X5 | -0.18319  |
| 119170 | Q85601 | Q9P2P6 | -0.30148  |
| 119171 | Q85601 | Q5MAI5 | -0.81542  |
| 119172 | Q85601 | Q9HBW1 | -0.816    |
| 119173 | Q85601 | Q6UX34 | -1.0529   |
| 119174 | Q85601 | Q9COK0 | -0.22687  |
| 119175 | Q85601 | Q8NGR3 | -1.2621   |
| 119176 | Q85601 | A6NHM9 | -0.65052  |
| 119177 | Q85601 | O95661 | -0.78796  |
| 119178 | Q85601 | O75380 | -0.20418  |
| 119179 | Q85601 | Q5TC79 | -0.22704  |
| 119180 | Q85601 | Q9BTE0 | -0.31116  |
| 119181 | Q85601 | Q9UKN7 | -0.51681  |
| 119182 | Q85601 | Q8IZC6 | -0.97795  |
| 119183 | Q85601 | Q8N0U6 | -0.2031   |
| 119184 | Q85601 | O94788 | -0.64624  |
| 119185 | Q85601 | P07686 | -0.3189   |
| 119186 | Q85601 | Q86SM5 | -1.3443   |
| 119187 | Q85601 | Q567V2 | -0.75013  |
| 119188 | Q85601 | Q7Z7G8 | -0.1808   |
| 119189 | Q85601 | Q8N8F4 | -0.021595 |
| 119190 | Q85601 | Q6L9W6 | -0.71269  |
| 119191 | Q85601 | Q7Z5M5 | -0.92686  |
| 119192 | Q85601 | P05556 | -0.25283  |
| 119193 | Q85601 | Q9UIG5 | -0.71007  |
| 119194 | Q85601 | Q9UNG2 | -0.92267  |
| 119195 | Q85601 | O75952 | -0.35619  |
| 119196 | Q85601 | Q9HB29 | -1.2179   |
| 119197 | Q85601 | Q9H208 | -1.2621   |
| 119198 | Q85601 | Q8WUJ0 | -0.44843  |
| 119199 | Q85601 | Q9Y5H8 | -1.2846   |
| 119200 | Q85601 | Q9BXL8 | -0.22065  |
| 119201 | Q85601 | E9PB15 | -0.3269   |
| 119202 | Q85601 | Q14722 | -0.78165  |
| 119203 | Q85601 | Q96KR7 | -0.10526  |
| 119204 | Q85601 | Q5BN46 | -0.6396   |
| 119205 | Q85601 | Q93088 | -0.23572  |
| 119206 | Q85601 | Q5VYY2 | -0.87626  |
| 119207 | Q85601 | Q9UHB6 | -0.33375  |
| 119208 | Q85601 | Q9P2X8 | -0.5809   |
| 119209 | Q85601 | O95990 | -0.48429  |
| 119210 | Q85601 | Q9NPG8 | -0.89983  |
| 119211 | Q85601 | Q8WYL5 | -0.30331  |
| 119212 | Q85601 | Q14CZ8 | -0.74922  |
| 119213 | Q85601 | O95838 | -1.1844   |
| 119214 | Q85601 | Q9HAC8 | -0.19766  |
| 119215 | Q85601 | Q9BTP6 | -0.40032  |
| 119216 | Q85601 | Q9BPV8 | -1.2011   |
| 119217 | Q85601 | Q9Y5G2 | -1.246    |
| 119218 | Q85601 | Q8WZ94 | -1.2621   |
| 119219 | Q85601 | P02708 | -0.74582  |
| 119220 | Q85601 | Q6Y2X3 | -0.3155   |
| 119221 | Q85601 | P59190 | -1.0576   |
| 119222 | Q85601 | Q7L513 | -0.759    |
| 119223 | Q85601 | P51148 | -0.84468  |
| 119224 | Q85601 | O15393 | -1.6488   |
| 119225 | Q85601 | Q8NE62 | -0.4699   |
| 119226 | Q85601 | Q96A33 | -0.28439  |
| 119227 | Q85601 | P13631 | -0.23243  |
| 119228 | Q85601 | Q9GZM5 | -0.69303  |
| 119229 | Q85601 | Q12999 | -0.96566  |
| 119230 | Q85601 | Q9H2B2 | -0.79461  |
| 119231 | Q85601 | P51816 | -0.3054   |
| 119232 | Q85601 | Q6UVK1 | -1.136    |
| 119233 | Q85601 | Q5T2S8 | -0.22843  |
| 119234 | Q85601 | P07996 | -0.31108  |
| 119235 | Q85601 | Q86UP6 | -0.61361  |
| 119236 | Q85601 | Q5VV16 | -0.43379  |
| 119237 | Q85601 | Q9BTD3 | -0.67993  |
| 119238 | Q85601 | Q5RHP9 | -0.068126 |
| 119239 | Q85601 | Q96CP6 | -0.92686  |
| 119240 | Q85601 | P12110 | -0.58084  |
| 119241 | Q85601 | Q9UL01 | -0.38571  |
| 119242 | Q85601 | P0CZ25 | -0.80384  |
| 119243 | Q85601 | Q969S9 | -0.61028  |
| 119244 | Q85601 | Q9HCS5 | -0.26968  |

|        |        |        |           |
|--------|--------|--------|-----------|
| 119245 | Q85601 | P00568 | -0.55665  |
| 119246 | Q85601 | Q9GZP4 | -0.28879  |
| 119247 | Q85601 | Q86TS7 | -0.2031   |
| 119248 | Q85601 | Q8NB16 | -0.22741  |
| 119249 | Q85601 | Q96NH3 | -1.1021   |
| 119250 | Q85601 | Q8TEF2 | -0.92686  |
| 119251 | Q85601 | Q86TY3 | -0.92686  |
| 119252 | Q85601 | Q86UK7 | -0.589    |
| 119253 | Q85601 | B3KVV0 | -0.92686  |
| 119254 | Q85601 | P42696 | -0.39291  |
| 119255 | Q85601 | O94907 | -0.38578  |
| 119256 | Q85601 | P36382 | -0.93044  |
| 119257 | Q85601 | Q5MNZ9 | -0.22739  |
| 119258 | Q85601 | O43405 | -0.3973   |
| 119259 | Q85601 | Q92686 | -0.35138  |
| 119260 | Q85601 | C9JLR9 | -0.57936  |
| 119261 | Q85601 | Q8N335 | -0.14619  |
| 119262 | Q85601 | P54851 | -0.93402  |
| 119263 | Q85601 | Q9Y6H8 | -0.91597  |
| 119264 | Q85601 | A6NL82 | -0.20719  |
| 119265 | Q85601 | P20338 | -0.36117  |
| 119266 | Q85601 | Q9Y5M6 | -0.40914  |
| 119267 | Q85601 | Q9GZS9 | -0.50854  |
| 119268 | Q85601 | Q6P531 | -0.75895  |
| 119269 | Q85601 | Q92823 | -0.86912  |
| 119270 | Q85601 | P48549 | -0.59417  |
| 119271 | Q85601 | Q9NUV7 | -0.84219  |
| 119272 | Q85601 | P62995 | -0.22256  |
| 119273 | Q85601 | Q8NGE8 | -1.2621   |
| 119274 | Q85601 | Q6IMN6 | -0.34729  |
| 119275 | Q85601 | Q07617 | -0.73683  |
| 119276 | Q85601 | O15090 | -0.22019  |
| 119277 | Q85601 | Q5T655 | -0.2031   |
| 119278 | Q85601 | P0CW24 | -0.070825 |
| 119279 | Q85601 | O00398 | -1.2881   |
| 119280 | Q85601 | Q9NYB5 | -1.027    |
| 119281 | Q85601 | P55259 | -1.0608   |
| 119282 | Q85601 | Q8WXF3 | -0.83663  |
| 119283 | Q85601 | Q9BQE6 | -0.23384  |
| 119284 | Q85601 | A8MZ97 | -0.92686  |
| 119285 | Q85601 | Q96E35 | -0.21542  |
| 119286 | Q85601 | Q9Y493 | -1.154    |
| 119287 | Q85601 | O95858 | -1.0729   |
| 119288 | Q85601 | Q9NZD2 | -0.46897  |
| 119289 | Q85601 | O60330 | -1.246    |
| 119290 | Q85601 | P22891 | -1.0449   |
| 119291 | Q85601 | Q8NDC0 | -0.081653 |
| 119292 | Q85601 | Q9Y2G0 | -0.085268 |
| 119293 | Q85601 | O15072 | -1.1864   |
| 119294 | Q85601 | Q13326 | -0.55508  |
| 119295 | Q85601 | P61366 | -1.1211   |
| 119296 | Q85601 | P43365 | -0.18472  |
| 119297 | Q85601 | Q8NGA2 | -1.2621   |
| 119298 | Q85601 | Q7Z6W1 | -0.92686  |
| 119299 | Q85601 | Q8TBF5 | -0.92104  |
| 119300 | Q85601 | Q8WWG1 | -1.4571   |
| 119301 | Q85601 | Q6ZS86 | -0.80464  |
| 119302 | Q85601 | Q07075 | -0.96291  |
| 119303 | Q85601 | Q6W3E5 | -0.83172  |
| 119304 | Q85601 | Q9NRF2 | -0.22741  |
| 119305 | Q85601 | Q495T6 | -1.4593   |
| 119306 | Q85601 | Q6L8H4 | -0.2031   |
| 119307 | Q85601 | Q8NGR6 | -1.2621   |
| 119308 | Q85601 | Q96E52 | -0.79414  |
| 119309 | Q85601 | Q5XUX0 | -0.22892  |
| 119310 | Q85601 | O60547 | -0.83601  |
| 119311 | Q85601 | Q8N3R9 | -0.22431  |
| 119312 | Q85601 | O75746 | -0.35058  |
| 119313 | Q85601 | Q5T7N8 | -0.96838  |
| 119314 | Q85601 | O00631 | -0.80005  |
| 119315 | Q85601 | P17643 | -0.48424  |
| 119316 | Q85601 | Q9NWW9 | -0.31218  |
| 119317 | Q85601 | Q0WX57 | -0.36987  |
| 119318 | Q85601 | Q9NZQ7 | -0.72727  |
| 119319 | Q85601 | Q3LI72 | -0.2031   |
| 119320 | Q85601 | Q6XZB0 | -1.1893   |

|        |        |        |          |
|--------|--------|--------|----------|
| 119321 | Q85601 | Q8TEB7 | -0.57553 |
| 119322 | Q85601 | P10075 | -0.35544 |
| 119323 | Q85601 | Q92847 | -0.69128 |
| 119324 | Q85601 | Q16560 | -0.53103 |
| 119325 | Q85601 | Q0P140 | -0.68265 |
| 119326 | Q85601 | Q6ZNI0 | -0.73292 |
| 119327 | Q85601 | Q9BWU1 | -0.97825 |
| 119328 | Q85601 | O60704 | -0.67061 |
| 119329 | Q85601 | O00160 | -0.46428 |
| 119330 | Q85601 | Q9Y2E4 | -0.21729 |
| 119331 | Q85601 | P55851 | -0.48776 |
| 119332 | Q85601 | Q8NA29 | -1.0373  |
| 119333 | Q85601 | P07339 | -1.0747  |
| 119334 | Q85601 | Q8IXQ8 | -0.22624 |
| 119335 | Q85601 | O43291 | -1.0187  |
| 119336 | Q85601 | Q16620 | -0.50503 |
| 119337 | Q85601 | Q9UBL9 | -0.53355 |
| 119338 | Q85601 | Q9NZB8 | -0.6676  |
| 119339 | Q85601 | Q8IU57 | -0.52832 |
| 119340 | Q85601 | Q9BU23 | -1.0116  |
| 119341 | Q85601 | Q7RTY0 | -0.9485  |
| 119342 | Q85601 | O14880 | -1.0054  |
| 119343 | Q85601 | Q96J92 | -0.89942 |
| 119344 | Q85601 | Q14406 | -0.78499 |
| 119345 | Q85601 | O43813 | -0.38823 |
| 119346 | Q85601 | Q13686 | -0.29296 |
| 119347 | Q85601 | Q8TF62 | -1.0854  |
| 119348 | Q85601 | Q8NGK3 | -1.2621  |
| 119349 | Q85601 | Q86UD3 | -1.0668  |
| 119350 | Q85601 | Q9UKU7 | -0.27962 |
| 119351 | Q85601 | Q8TE56 | -1.2377  |
| 119352 | Q85601 | Q7Z628 | -0.24769 |
| 119353 | Q85601 | Q7KYR7 | -1.0182  |
| 119354 | Q85601 | Q5T6R2 | -0.35711 |
| 119355 | Q85601 | Q9Y5A9 | -0.30073 |
| 119356 | Q85601 | O00767 | -1.1012  |
| 119357 | Q85601 | A8MTL3 | -0.29575 |
| 119358 | Q85601 | A6NCL2 | -0.53091 |
| 119359 | Q85601 | Q9BQT9 | -0.98758 |
| 119360 | Q85601 | Q8NHU6 | -0.26086 |
| 119361 | Q85601 | Q8TDX9 | -0.74827 |
| 119362 | Q85601 | Q9NY56 | -0.75732 |
| 119363 | Q85601 | Q9H7M6 | -0.29575 |
| 119364 | Q85601 | Q9H8H0 | -0.23513 |
| 119365 | Q85601 | Q9H628 | -1.2967  |
| 119366 | Q85601 | Q5T6X5 | -1.2375  |
| 119367 | Q85601 | Q8NGL1 | -1.2621  |
| 119368 | Q85601 | Q3I5F7 | -0.23703 |
| 119369 | Q85601 | A6NHC0 | -0.71688 |
| 119370 | Q85601 | P31323 | -0.22757 |
| 119371 | Q85601 | Q6ZMD2 | -0.98487 |
| 119372 | Q85601 | Q8WU43 | -0.67026 |
| 119373 | Q85601 | Q63HN8 | -0.72878 |
| 119374 | Q85601 | Q9BTX3 | -0.92686 |
| 119375 | Q85601 | P16581 | -0.42716 |
| 119376 | Q85601 | P02760 | -0.79288 |
| 119377 | Q85601 | Q99942 | -0.29673 |
| 119378 | Q85601 | Q6UXY8 | -0.92686 |
| 119379 | Q85601 | Q02487 | -1.023   |
| 119380 | Q85601 | Q8WYB5 | -0.44979 |
| 119381 | Q85601 | Q9BX73 | -0.92686 |
| 119382 | Q85601 | Q96L11 | -0.9043  |
| 119383 | Q85601 | Q9BQS8 | -0.23742 |
| 119384 | Q85601 | P98187 | -1.0055  |
| 119385 | Q85601 | P37287 | -0.39199 |
| 119386 | Q85601 | Q5VU69 | -0.25265 |
| 119387 | Q85601 | Q9BYX2 | -0.60058 |
| 119388 | Q85601 | Q16595 | -0.19539 |
| 119389 | Q85601 | Q8WUA7 | -1.2803  |
| 119390 | Q85601 | P08069 | -0.55508 |
| 119391 | Q85601 | Q07002 | -1.0325  |
| 119392 | Q85601 | P80098 | -0.96872 |
| 119393 | Q85601 | Q9NRW1 | -0.56234 |
| 119394 | Q85601 | Q8N8I0 | -0.2267  |
| 119395 | Q85601 | Q7Z3B3 | -0.30571 |
| 119396 | Q85601 | P02771 | -0.54038 |



|        |        |         |          |
|--------|--------|---------|----------|
| 119397 | Q85601 | P10632  | -0.69059 |
| 119398 | Q85601 | Q9BT67  | -0.42376 |
| 119399 | Q85601 | Q9BVG4  | -0.13709 |
| 119400 | Q85601 | P48052  | -1.0884  |
| 119401 | Q85601 | P57053  | -0.72536 |
| 119402 | Q85601 | Q6TFL4  | -0.35263 |
| 119403 | Q85601 | Q2M2E5  | -0.9043  |
| 119404 | Q85601 | P47874  | -0.37054 |
| 119405 | Q85601 | Q9Y624  | -0.75754 |
| 119406 | Q85601 | Q96LB4  | -0.38809 |
| 119407 | Q85601 | Q8TBZ2  | -0.41334 |
| 119408 | Q85601 | P46109  | -0.22741 |
| 119409 | Q85601 | P19878  | -0.22793 |
| 119410 | Q85601 | P00488  | -0.4433  |
| 119411 | Q85601 | Q9BZJ8  | -1.196   |
| 119412 | Q85601 | P63215  | -0.44388 |
| 119413 | Q85601 | Q5XG99  | -0.90538 |
| 119414 | Q85601 | Q96PF2  | -0.76205 |
| 119415 | Q85601 | P48764  | -0.58405 |
| 119416 | Q85601 | Q9BU20  | -0.94414 |
| 119417 | Q85601 | O60240  | -0.45412 |
| 119418 | Q85601 | Q8WZ82  | -0.1867  |
| 119419 | Q85601 | P81534  | -0.87643 |
| 119420 | Q85601 | Q99665  | -0.90564 |
| 119421 | Q85601 | P50851  | -0.65325 |
| 119422 | Q85601 | P56975  | -1.3438  |
| 119423 | Q85601 | Q01851  | -0.2274  |
| 119424 | Q85601 | O75828  | -0.22697 |
| 119425 | Q85601 | Q0VAA2  | -0.22741 |
| 119426 | Q85601 | A6NNZ2  | -0.58286 |
| 119427 | Q85601 | Q3LXA3  | -0.86778 |
| 119428 | Q85601 | Q96EV2  | -0.95623 |
| 119429 | Q85601 | Q99218  | -1.1282  |
| 119430 | Q85601 | Q8N5C6  | -0.41344 |
| 119431 | Q85601 | Q86TE4  | -0.9043  |
| 119432 | Q85601 | Q17RB8  | -0.46288 |
| 119433 | Q85601 | P62760  | -0.39878 |
| 119434 | Q85601 | Q2M1P5  | -0.40735 |
| 119435 | Q85601 | Q8I WV1 | -0.06502 |
| 119436 | Q85601 | Q9NUT2  | -0.61687 |
| 119437 | Q85601 | Q9H8M1  | -0.29608 |
| 119438 | Q85601 | Q14761  | -1.018   |
| 119439 | Q85601 | P01236  | -0.84043 |
| 119440 | Q85601 | Q92730  | -0.3854  |
| 119441 | Q85601 | Q15762  | -0.75069 |
| 119442 | Q85601 | P02461  | -0.41915 |
| 119443 | Q85601 | Q8IX94  | -0.79275 |
| 119444 | Q85601 | Q8NGV7  | -1.2621  |
| 119445 | Q85601 | Q8WZ64  | -0.95735 |
| 119446 | Q85601 | Q8N608  | -1.0803  |
| 119447 | Q85601 | Q6ZMP0  | -1.0324  |
| 119448 | Q85601 | Q5VT25  | -0.38056 |
| 119449 | Q85601 | Q6ZSA7  | -1.0889  |
| 119450 | Q85601 | Q5W5W9  | -0.66471 |
| 119451 | Q85601 | Q6UXN2  | -0.9043  |
| 119452 | Q85601 | Q96HZ7  | -0.2031  |
| 119453 | Q85601 | Q96HJ5  | -0.36158 |
| 119454 | Q85601 | P11464  | -0.91419 |
| 119455 | Q85601 | A7MBM2  | -0.71331 |
| 119456 | Q85601 | Q12851  | -0.37466 |
| 119457 | Q85601 | Q92598  | -0.33739 |
| 119458 | Q85601 | A4D1F6  | -0.49132 |
| 119459 | Q85601 | Q8IZD9  | -0.2166  |
| 119460 | Q85601 | Q5QJU3  | -0.36459 |
| 119461 | Q85601 | Q7Z449  | -1.0843  |
| 119462 | Q85601 | Q13057  | -0.21178 |
| 119463 | Q85601 | Q8TAC2  | -0.70613 |
| 119464 | Q85601 | A6NJ16  | -0.9043  |
| 119465 | Q85601 | P57773  | -1.0301  |
| 119466 | Q85601 | A2RU54  | -0.2324  |
| 119467 | Q85601 | Q96R84  | -1.2621  |
| 119468 | Q85601 | Q8IVF6  | -0.22736 |
| 119469 | Q85601 | P49585  | -0.31107 |
| 119470 | Q85601 | Q86VI1  | -0.2286  |
| 119471 | Q85601 | Q86W34  | -0.94449 |
| 119472 | Q85601 | O75643  | -0.2267  |

|        |        |        |           |
|--------|--------|--------|-----------|
| 119473 | Q85601 | Q92620 | -0.22388  |
| 119474 | Q85601 | Q6S5L8 | -0.50812  |
| 119475 | Q85601 | Q9UH64 | -0.87929  |
| 119476 | Q85601 | Q8NGD1 | -1.2621   |
| 119477 | Q85601 | Q8TBR5 | -0.69251  |
| 119478 | Q85601 | B1AKI9 | -0.9043   |
| 119479 | Q85601 | Q9P1Z3 | -1.2711   |
| 119480 | Q85601 | Q8TF61 | -0.57936  |
| 119481 | Q85601 | Q99986 | -0.22741  |
| 119482 | Q85601 | P01583 | -0.21707  |
| 119483 | Q85601 | Q8WY91 | -0.42502  |
| 119484 | Q85601 | O94876 | -0.92686  |
| 119485 | Q85601 | Q9Y471 | -0.95908  |
| 119486 | Q85601 | Q8IZC4 | -0.81524  |
| 119487 | Q85601 | P55899 | -1.0095   |
| 119488 | Q85601 | Q5VWN6 | -0.11965  |
| 119489 | Q85601 | P09341 | -1.1664   |
| 119490 | Q85601 | Q6Q788 | -0.43091  |
| 119491 | Q85601 | Q969J5 | -0.70444  |
| 119492 | Q85601 | Q537H7 | -0.65762  |
| 119493 | Q85601 | Q9BQ39 | -0.46668  |
| 119494 | Q85601 | O75414 | -0.5985   |
| 119495 | Q85601 | O95342 | -0.92954  |
| 119496 | Q85601 | Q6EEV4 | -0.2031   |
| 119497 | Q85601 | Q96BM1 | -0.22741  |
| 119498 | Q85601 | O95521 | -0.157    |
| 119499 | Q85601 | P22695 | -0.068858 |
| 119500 | Q85601 | P20933 | -0.38371  |
| 119501 | Q85601 | Q8NES8 | -0.86864  |
| 119502 | Q85601 | P17302 | -0.30412  |
| 119503 | Q85601 | Q14088 | -0.53975  |
| 119504 | Q85601 | Q5MJ08 | -0.61312  |
| 119505 | Q85601 | P07602 | -0.87242  |
| 119506 | Q85601 | Q17R89 | -0.34427  |
| 119507 | Q85601 | Q16849 | -0.84057  |
| 119508 | Q85601 | O15254 | -0.72367  |
| 119509 | Q85601 | Q9UKI3 | -0.70057  |
| 119510 | Q85601 | Q15043 | -0.89028  |
| 119511 | Q85601 | P53671 | -0.88922  |
| 119512 | Q85601 | Q99697 | -0.16547  |
| 119513 | Q85601 | Q701N4 | -0.2031   |
| 119514 | Q85601 | Q96DW6 | -0.66302  |
| 119515 | Q85601 | P54368 | -0.10673  |
| 119516 | Q85601 | Q5TEZ4 | -0.2031   |
| 119517 | Q85601 | O75914 | -0.75317  |
| 119518 | Q85601 | Q15788 | -0.28694  |
| 119519 | Q85601 | Q8TBZ6 | -0.30175  |
| 119520 | Q85601 | P15169 | -1.1741   |
| 119521 | Q85601 | P46952 | -0.23089  |
| 119522 | Q85601 | Q15907 | -0.72841  |
| 119523 | Q85601 | Q6IPR3 | -0.2754   |
| 119524 | Q85601 | Q16527 | -0.25148  |
| 119525 | Q85601 | O75426 | -0.36484  |
| 119526 | Q85601 | Q5VVK0 | -0.10147  |
| 119527 | Q85601 | A1L170 | -0.2031   |
| 119528 | Q85601 | Q8NBL3 | -0.92686  |
| 119529 | Q85601 | Q99259 | -0.34658  |
| 119530 | Q85601 | Q17RG1 | -0.15727  |
| 119531 | Q85601 | O43353 | -0.22741  |
| 119532 | Q85601 | Q5UCC4 | -1.4245   |
| 119533 | Q85601 | Q8TB68 | -0.816    |
| 119534 | Q85601 | Q6ZUT6 | -0.75514  |
| 119535 | Q85601 | Q96LC7 | -1.6833   |
| 119536 | Q85601 | Q8NAS9 | -0.74755  |
| 119537 | Q85601 | P84351 | -0.96439  |
| 119538 | Q85601 | O75153 | -0.10147  |
| 119539 | Q85601 | Q9NY91 | -0.90984  |
| 119540 | Q85601 | Q13705 | -0.50055  |
| 119541 | Q85601 | Q9UHD0 | -0.91136  |
| 119542 | Q85601 | Q8WXG9 | -0.64218  |
| 119543 | Q85601 | Q6IF63 | -1.2621   |
| 119544 | Q85601 | Q9Y2H6 | -0.43151  |
| 119545 | Q85601 | Q6UVW9 | -0.37393  |
| 119546 | Q85601 | Q9YNA8 | -0.28681  |
| 119547 | Q85601 | Q9BQJ4 | -0.87876  |
| 119548 | Q85601 | Q7Z5U6 | -0.22761  |

|        |        |        |           |
|--------|--------|--------|-----------|
| 119549 | Q85601 | P33261 | -0.63389  |
| 119550 | Q85601 | Q8WXA3 | -0.22682  |
| 119551 | Q85601 | P02788 | -0.27145  |
| 119552 | Q85601 | P17658 | -0.84367  |
| 119553 | Q85601 | Q96I99 | -0.66095  |
| 119554 | Q85601 | Q00765 | -0.18241  |
| 119555 | Q85601 | Q6ZSC3 | -0.896    |
| 119556 | Q85601 | Q16695 | -0.2056   |
| 119557 | Q85601 | P16066 | -1.1535   |
| 119558 | Q85601 | Q14773 | -1.6103   |
| 119559 | Q85601 | Q96KK3 | -0.44289  |
| 119560 | Q85601 | Q96NZ8 | -0.79136  |
| 119561 | Q85601 | P83110 | -0.773    |
| 119562 | Q85601 | Q05BV3 | -0.2278   |
| 119563 | Q85601 | P02686 | -0.77374  |
| 119564 | Q85601 | Q9BUV0 | -0.092462 |
| 119565 | Q85601 | A6NMB9 | -0.9668   |
| 119566 | Q85601 | Q0P641 | -0.68453  |
| 119567 | Q85601 | Q9NP73 | -0.36565  |
| 119568 | Q85601 | O60762 | -0.27558  |
| 119569 | Q85601 | Q9Y2S2 | -0.30827  |
| 119570 | Q85601 | Q6ZN54 | -0.55903  |
| 119571 | Q85601 | P98160 | -0.97488  |
| 119572 | Q85601 | Q9Y2T1 | -0.74156  |
| 119573 | Q85601 | Q6XE38 | -0.9043   |
| 119574 | Q85601 | Q9UKK9 | -0.53691  |
| 119575 | Q85601 | Q12866 | -0.69815  |
| 119576 | Q85601 | Q9P2U8 | -0.81657  |
| 119577 | Q85601 | Q14028 | -1.1806   |
| 119578 | Q85601 | P24592 | -0.70068  |
| 119579 | Q85601 | Q04826 | -1.1017   |
| 119580 | Q85601 | Q99929 | -0.236    |
| 119581 | Q85601 | Q9NYL2 | -0.22741  |
| 119582 | Q85601 | P61764 | -0.21447  |
| 119583 | Q85601 | Q14BN4 | -0.88868  |
| 119584 | Q85601 | Q8N3C7 | -0.22741  |
| 119585 | Q85601 | P03971 | -0.53605  |
| 119586 | Q85601 | Q15018 | -0.34769  |
| 119587 | Q85601 | Q12882 | -0.4952   |
| 119588 | Q85601 | Q6WKZ4 | -0.21507  |
| 119589 | Q85601 | P11117 | -0.8594   |
| 119590 | Q85601 | P13746 | -1.0428   |
| 119591 | Q85601 | Q2M238 | -0.065254 |
| 119592 | Q85601 | Q02817 | -0.37136  |
| 119593 | Q85601 | Q96EP9 | -0.96354  |
| 119594 | Q85601 | Q8TCZ2 | -1.1308   |
| 119595 | Q85601 | Q9NSY2 | -0.364    |
| 119596 | Q85601 | Q9BVV6 | -0.2031   |
| 119597 | Q85601 | Q6ZN04 | -0.22737  |
| 119598 | Q85601 | Q3KR16 | -0.24286  |
| 119599 | Q85601 | P05067 | -0.24359  |
| 119600 | Q85601 | Q6ZW31 | -0.81021  |
| 119601 | Q85601 | Q15649 | -0.27802  |
| 119602 | Q85601 | P15088 | -0.60141  |
| 119603 | Q85601 | A6NM15 | -0.81985  |
| 119604 | Q85601 | Q9H2H0 | -0.19053  |
| 119605 | Q85601 | Q9BSF4 | -0.57139  |
| 119606 | Q85601 | Q2TAP0 | -0.48401  |
| 119607 | Q85601 | P58546 | -0.22741  |
| 119608 | Q85601 | O75592 | -0.22612  |
| 119609 | Q85601 | Q6ZSI9 | -1.0551   |
| 119610 | Q85601 | Q8NGC1 | -1.2621   |
| 119611 | Q85601 | P01601 | -1.046    |
| 119612 | Q85601 | Q9BZE7 | -0.18472  |
| 119613 | Q85601 | P29762 | -0.61574  |
| 119614 | Q85601 | P13637 | -0.56206  |
| 119615 | Q85601 | Q9Y698 | -0.56849  |
| 119616 | Q85601 | Q9H2Q1 | -0.92686  |
| 119617 | Q85601 | Q9H3H5 | -0.78678  |
| 119618 | Q85601 | Q13361 | -0.94682  |
| 119619 | Q85601 | Q96KN7 | -0.1015   |
| 119620 | Q85601 | O14843 | -1.5954   |
| 119621 | Q85601 | P61266 | -0.78102  |
| 119622 | Q85601 | Q9Y5L2 | -1.1607   |
| 119623 | Q85601 | P01848 | -1.001    |
| 119624 | Q85601 | Q9ULR3 | -0.39849  |

|        |        |        |            |
|--------|--------|--------|------------|
| 119625 | Q85601 | P0CG41 | -0.92686   |
| 119626 | Q85601 | Q12952 | -0.38929   |
| 119627 | Q85601 | P31629 | -0.22741   |
| 119628 | Q85601 | Q8NBF2 | -0.23247   |
| 119629 | Q85601 | Q96J88 | -0.63815   |
| 119630 | Q85601 | Q6ZVS6 | -0.9043    |
| 119631 | Q85601 | Q9NX00 | -0.75013   |
| 119632 | Q85601 | Q15772 | -0.92679   |
| 119633 | Q85601 | Q96AY3 | -0.47609   |
| 119634 | Q85601 | Q6PEZ8 | -0.94464   |
| 119635 | Q85601 | P06732 | -0.65571   |
| 119636 | Q85601 | O43716 | -0.6624    |
| 119637 | Q85601 | A6NC42 | -0.37151   |
| 119638 | Q85601 | Q9NR99 | -0.9043    |
| 119639 | Q85601 | Q9Y2V0 | -0.48066   |
| 119640 | Q85601 | P29459 | -0.18442   |
| 119641 | Q85601 | O14559 | -0.27799   |
| 119642 | Q85601 | B2RN74 | -1.2621    |
| 119643 | Q85601 | Q6YHU6 | -0.11194   |
| 119644 | Q85601 | Q499Z3 | -0.81985   |
| 119645 | Q85601 | Q86W92 | -0.62216   |
| 119646 | Q85601 | Q86UW7 | -0.24236   |
| 119647 | Q85601 | P30046 | -0.24696   |
| 119648 | Q85601 | Q8IW70 | -0.92686   |
| 119649 | Q85601 | Q5MNZ6 | -0.22669   |
| 119650 | Q85601 | P10645 | -0.80378   |
| 119651 | Q85601 | A6NI73 | -1.4237    |
| 119652 | Q85601 | Q8WUU4 | -0.2232    |
| 119653 | Q85601 | P06127 | -0.59971   |
| 119654 | Q85601 | Q99467 | -1.0751    |
| 119655 | Q85601 | Q5TG30 | -1.0442    |
| 119656 | Q85601 | Q99685 | -0.47011   |
| 119657 | Q85601 | Q96J42 | -0.93567   |
| 119658 | Q85601 | Q9Y2G4 | -0.2274    |
| 119659 | Q85601 | Q8N465 | -0.30845   |
| 119660 | Q85601 | Q12846 | -0.24184   |
| 119661 | Q85601 | P34741 | -0.33353   |
| 119662 | Q85601 | P0C7V7 | -1.1983    |
| 119663 | Q85601 | Q17RM4 | -0.29623   |
| 119664 | Q85601 | Q9BXC0 | -1.297     |
| 119665 | Q85601 | Q969F8 | -0.8749    |
| 119666 | Q85601 | Q9BQI5 | -0.017757  |
| 119667 | Q85601 | P11597 | -0.67237   |
| 119668 | Q85601 | Q9NWX5 | -0.2274    |
| 119669 | Q85601 | Q6NSX1 | -1.0021    |
| 119670 | Q85601 | Q7Z403 | -1.0116    |
| 119671 | Q85601 | Q8N357 | -0.13058   |
| 119672 | Q85601 | P02730 | -0.37692   |
| 119673 | Q85601 | Q5VYY1 | -0.2274    |
| 119674 | Q85601 | P01699 | -1.046     |
| 119675 | Q85601 | Q96RT6 | -0.79275   |
| 119676 | Q85601 | Q8NFP7 | -0.45167   |
| 119677 | Q85601 | Q6ZVN8 | -0.24195   |
| 119678 | Q85601 | O75069 | -0.39716   |
| 119679 | Q85601 | Q9BZ68 | -0.29924   |
| 119680 | Q85601 | Q6XLA1 | -0.59053   |
| 119681 | Q85601 | Q4VXA5 | -0.92704   |
| 119682 | Q85601 | Q9NW75 | -0.40681   |
| 119683 | Q85601 | P01595 | -1.046     |
| 119684 | Q85601 | P04436 | -0.51095   |
| 119685 | Q85601 | Q9NV66 | -1.0138    |
| 119686 | Q85601 | Q9Y282 | -0.61844   |
| 119687 | Q85601 | O60443 | -0.37308   |
| 119688 | Q85601 | P28360 | -0.15283   |
| 119689 | Q85601 | Q15067 | -0.54204   |
| 119690 | Q85601 | A8MPV3 | -0.0071201 |
| 119691 | Q85601 | A8MW92 | -0.29575   |
| 119692 | Q85601 | Q15034 | -0.42904   |
| 119693 | Q85601 | Q9Y3S2 | -0.1816    |
| 119694 | Q85601 | P02814 | -0.83677   |
| 119695 | Q85601 | Q03519 | -0.3554    |
| 119696 | Q85601 | Q9C0D3 | -0.20616   |
| 119697 | Q85601 | Q8TCW9 | -1.31      |
| 119698 | Q85601 | Q8TAD4 | -0.30843   |
| 119699 | Q85601 | Q9H342 | -1.2621    |
| 119700 | Q85601 | Q13905 | -0.24828   |

|        |        |        |          |
|--------|--------|--------|----------|
| 119701 | Q85601 | Q8NA23 | -0.22756 |
| 119702 | Q85601 | P10109 | -0.20589 |
| 119703 | Q85601 | P18464 | -1.1017  |
| 119704 | Q85601 | O00548 | -0.62528 |
| 119705 | Q85601 | O75173 | -0.77994 |
| 119706 | Q85601 | Q96BA8 | -0.22614 |
| 119707 | Q85601 | Q9NV92 | -0.17734 |
| 119708 | Q85601 | Q9BQ50 | -0.17656 |
| 119709 | Q85601 | Q96L46 | -0.39963 |
| 119710 | Q85601 | Q8TDS5 | -1.2133  |
| 119711 | Q85601 | P62333 | -0.45495 |
| 119712 | Q85601 | A2RUH7 | -0.22806 |
| 119713 | Q85601 | P0C7P4 | -0.65601 |
| 119714 | Q85601 | Q9NWB1 | -0.30679 |
| 119715 | Q85601 | Q53FZ2 | -0.70526 |
| 119716 | Q85601 | O14753 | -0.21452 |
| 119717 | Q85601 | Q08174 | -1.0792  |
| 119718 | Q85601 | Q9Y2Y8 | -0.34115 |
| 119719 | Q85601 | Q8WWF5 | -0.64374 |
| 119720 | Q85601 | Q9H0A0 | -0.20191 |
| 119721 | Q85601 | Q8N957 | -0.22715 |
| 119722 | Q85601 | P41279 | -0.37857 |
| 119723 | Q85601 | Q86UD7 | -1.3431  |
| 119724 | Q85601 | Q96JW4 | -1.042   |
| 119725 | Q85601 | Q8WTU0 | -0.46957 |
| 119726 | Q85601 | P83105 | -1.2667  |
| 119727 | Q85601 | Q8WXH2 | -0.86293 |
| 119728 | Q85601 | Q8N6K4 | -0.2031  |
| 119729 | Q85601 | P41159 | -0.38795 |
| 119730 | Q85601 | P48357 | -1.0633  |
| 119731 | Q85601 | P59090 | -0.2031  |
| 119732 | Q85601 | Q16478 | -0.68559 |
| 119733 | Q85601 | Q9H374 | -0.94087 |
| 119734 | Q85601 | Q8TF71 | -0.96681 |
| 119735 | Q85601 | P23280 | -0.65181 |
| 119736 | Q85601 | Q15291 | -0.22755 |
| 119737 | Q85601 | Q8TBE7 | -0.76636 |
| 119738 | Q85601 | Q96KG7 | -0.91589 |
| 119739 | Q85601 | Q9UHC6 | -0.92416 |
| 119740 | Q85601 | O95415 | -0.92686 |
| 119741 | Q85601 | O43559 | -0.66282 |
| 119742 | Q85601 | Q96KW9 | -0.90073 |
| 119743 | Q85601 | Q9UFM2 | -1.0869  |
| 119744 | Q85601 | P15863 | -0.22684 |
| 119745 | Q85601 | Q9NVC3 | -0.72997 |
| 119746 | Q85601 | Q99570 | -0.4542  |
| 119747 | Q85601 | Q5VWC8 | -1.099   |
| 119748 | Q85601 | Q13946 | -0.22534 |
| 119749 | Q85601 | Q9GZP9 | -0.22211 |
| 119750 | Q85601 | P0CG04 | -1.046   |
| 119751 | Q85601 | Q8IZU3 | -0.21895 |
| 119752 | Q85601 | Q9Y247 | -0.26875 |
| 119753 | Q85601 | Q8WWM9 | -0.29143 |
| 119754 | Q85601 | Q96S82 | -0.21902 |
| 119755 | Q85601 | P49286 | -1.3669  |
| 119756 | Q85601 | Q9UPI3 | -0.89456 |
| 119757 | Q85601 | O76076 | -1.0147  |
| 119758 | Q85601 | Q8N350 | -1.3493  |
| 119759 | Q85601 | Q7Z7H8 | -0.58649 |
| 119760 | Q85601 | P51671 | -0.95371 |
| 119761 | Q85601 | Q6P1N9 | -0.10078 |
| 119762 | Q85601 | Q9BVA1 | -0.16206 |
| 119763 | Q85601 | P01350 | -1.0486  |
| 119764 | Q85601 | Q6PKX4 | -0.43389 |
| 119765 | Q85601 | Q09428 | -0.65567 |
| 119766 | Q85601 | Q9Y315 | -0.24127 |
| 119767 | Q85601 | Q9BRZ2 | -0.44992 |
| 119768 | Q85601 | P25713 | -0.18571 |
| 119769 | Q85601 | Q9HBF5 | -0.31795 |
| 119770 | Q85601 | O94989 | -0.52959 |
| 119771 | Q85601 | P06756 | -0.3797  |
| 119772 | Q85601 | Q8IZP6 | -0.32209 |
| 119773 | Q85601 | Q8NCS4 | -0.92686 |
| 119774 | Q85601 | P01608 | -1.046   |
| 119775 | Q85601 | Q49AM3 | -0.22421 |
| 119776 | Q85601 | Q9NUQ9 | -0.22165 |

|        |        |        |           |
|--------|--------|--------|-----------|
| 119777 | Q85601 | A6NIM6 | -0.6318   |
| 119778 | Q85601 | O94887 | -0.27957  |
| 119779 | Q85601 | P20151 | -1.3428   |
| 119780 | Q85601 | Q9HBJ7 | -0.5462   |
| 119781 | Q85601 | P78504 | -0.5749   |
| 119782 | Q85601 | Q9H6X2 | -0.57397  |
| 119783 | Q85601 | Q8NAX2 | -0.092462 |
| 119784 | Q85601 | Q9H4F1 | -0.40758  |
| 119785 | Q85601 | P78536 | -0.27198  |
| 119786 | Q85601 | P04222 | -1.1017   |
| 119787 | Q85601 | O15439 | -1.0029   |
| 119788 | Q85601 | O00299 | -0.21074  |
| 119789 | Q85601 | Q8NGL2 | -1.2621   |
| 119790 | Q85601 | Q8NC06 | -0.55312  |
| 119791 | Q85601 | Q6P2C0 | -0.29316  |
| 119792 | Q85601 | Q16627 | -0.88503  |
| 119793 | Q85601 | P23527 | -0.7417   |
| 119794 | Q85601 | Q2T9K0 | -0.92686  |
| 119795 | Q85601 | Q6GQQ9 | -0.19689  |
| 119796 | Q85601 | Q9H930 | -0.22708  |
| 119797 | Q85601 | Q8IYD9 | -0.9043   |
| 119798 | Q85601 | Q7Z2Q7 | -0.92686  |
| 119799 | Q85601 | Q9BZX4 | -0.2694   |
| 119800 | Q85601 | Q9Y271 | -1.3382   |
| 119801 | Q85601 | Q5H913 | -1.352    |
| 119802 | Q85601 | A1A5B4 | -1.0877   |
| 119803 | Q85601 | Q5RI15 | -0.76329  |
| 119804 | Q85601 | Q5VT28 | -0.25005  |
| 119805 | Q85601 | Q96EX1 | -0.92686  |
| 119806 | Q85601 | P09104 | -0.15254  |
| 119807 | Q85601 | Q5VYM1 | -0.57403  |
| 119808 | Q85601 | Q8WUK0 | -0.65258  |
| 119809 | Q85601 | P01610 | -1.046    |
| 119810 | Q85601 | Q96FL9 | -0.57992  |
| 119811 | Q85601 | Q7RTU1 | -0.25935  |
| 119812 | Q85601 | Q5VXU3 | -0.5019   |
| 119813 | Q85601 | P40198 | -0.92686  |
| 119814 | Q85601 | Q9H596 | -0.27367  |
| 119815 | Q85601 | Q9ULC3 | -0.976    |
| 119816 | Q85601 | Q96R09 | -1.2621   |
| 119817 | Q85601 | Q6ZRZ4 | -0.9043   |
| 119818 | Q85601 | P43405 | -0.31149  |
| 119819 | Q85601 | P84996 | -0.85108  |
| 119820 | Q85601 | Q400G9 | -0.69918  |
| 119821 | Q85601 | Q9H6E4 | -1.1514   |
| 119822 | Q85601 | Q6JVE6 | -0.83793  |
| 119823 | Q85601 | O95411 | -0.2031   |
| 119824 | Q85601 | P39060 | -0.48894  |
| 119825 | Q85601 | Q4V9L6 | -0.67993  |
| 119826 | Q85601 | Q2T9J0 | -0.60601  |
| 119827 | Q85601 | P50579 | -0.37945  |
| 119828 | Q85601 | Q86T23 | -0.024792 |
| 119829 | Q85601 | Q9H269 | -0.42202  |
| 119830 | Q85601 | P17516 | -0.22741  |
| 119831 | Q85601 | Q8NBI6 | -0.98394  |
| 119832 | Q85601 | Q15735 | -0.22584  |
| 119833 | Q85601 | Q13183 | -1.1387   |
| 119834 | Q85601 | Q9UI17 | -0.17685  |
| 119835 | Q85601 | Q15858 | -0.923    |
| 119836 | Q85601 | Q5TBK1 | -0.15248  |
| 119837 | Q85601 | Q9BV44 | -0.34428  |
| 119838 | Q85601 | Q8TAT8 | -0.31118  |
| 119839 | Q85601 | Q96QV1 | -0.38514  |
| 119840 | Q85601 | A4D256 | -0.73871  |
| 119841 | Q85601 | Q9NSN8 | -0.22499  |
| 119842 | Q85601 | Q7L576 | -0.17316  |
| 119843 | Q85601 | O96008 | -0.50895  |
| 119844 | Q85601 | Q5QGS0 | -0.53632  |
| 119845 | Q85601 | Q8IZJ3 | -0.98587  |
| 119846 | Q85601 | A4D0T2 | -0.92686  |
| 119847 | Q85601 | Q580R0 | -1.1391   |
| 119848 | Q85601 | A4D250 | -0.6729   |
| 119849 | Q85601 | Q8N816 | -0.92686  |
| 119850 | Q85601 | Q8N7P3 | -0.7761   |
| 119851 | Q85601 | Q5T440 | -0.21644  |
| 119852 | Q85601 | Q5HYJ3 | -0.22567  |

|        |        |        |           |
|--------|--------|--------|-----------|
| 119853 | Q85601 | A6NHS1 | -0.27693  |
| 119854 | Q85601 | Q68D86 | -0.2226   |
| 119855 | Q85601 | O60658 | -0.2276   |
| 119856 | Q85601 | Q96ES6 | -0.86184  |
| 119857 | Q85601 | Q8TAI7 | -1.0854   |
| 119858 | Q85601 | Q6UX46 | -0.9043   |
| 119859 | Q85601 | Q8N554 | -0.19729  |
| 119860 | Q85601 | Q8N336 | -0.052078 |
| 119861 | Q85601 | Q8IV08 | -0.42067  |
| 119862 | Q85601 | Q9H3D4 | -0.22713  |
| 119863 | Q85601 | Q8IYQ7 | -0.60092  |
| 119864 | Q85601 | A6NNX1 | -0.48341  |
| 119865 | Q85601 | Q5VTM2 | -0.94828  |
| 119866 | Q85601 | P49841 | -0.22768  |
| 119867 | Q85601 | P35452 | -0.23925  |
| 119868 | Q85601 | P02763 | -0.80967  |
| 119869 | Q85601 | Q3SYC2 | -0.79412  |
| 119870 | Q85601 | Q7Z3Q1 | -0.92197  |
| 119871 | Q85601 | Q99877 | -0.7417   |
| 119872 | Q85601 | P18564 | -1.2556   |
| 119873 | Q85601 | P98194 | -0.83545  |
| 119874 | Q85601 | Q8N2C7 | -0.92686  |
| 119875 | Q85601 | Q969F2 | -0.20287  |
| 119876 | Q85601 | Q96DR4 | -0.63909  |
| 119877 | Q85601 | Q9H2Y9 | -0.9468   |
| 119878 | Q85601 | Q6ZVU0 | -0.6951   |
| 119879 | Q85601 | P02775 | -0.64076  |
| 119880 | Q85601 | O43566 | -0.229    |
| 119881 | Q85601 | Q5EBL8 | -0.2267   |
| 119882 | Q85601 | Q9BXB7 | -0.57167  |
| 119883 | Q85601 | Q31610 | -1.1017   |
| 119884 | Q85601 | Q53R12 | -1.0386   |
| 119885 | Q85601 | Q8NAP1 | -0.092462 |
| 119886 | Q85601 | Q05D32 | -0.40457  |
| 119887 | Q85601 | P08195 | -0.36151  |
| 119888 | Q85601 | Q96S42 | -0.27     |
| 119889 | Q85601 | Q7Z3E1 | -0.34181  |
| 119890 | Q85601 | Q8N6N7 | -0.55312  |
| 119891 | Q85601 | Q9H568 | -0.080154 |
| 119892 | Q85601 | O95922 | -0.083001 |
| 119893 | Q85601 | Q12950 | -0.43379  |
| 119894 | Q85601 | P51993 | -0.7145   |
| 119895 | Q85601 | P18510 | -0.38975  |
| 119896 | Q85601 | O43280 | -0.50958  |
| 119897 | Q85601 | O95208 | -0.25613  |
| 119898 | Q85601 | P26998 | -0.46791  |
| 119899 | Q85601 | Q9ULI3 | -0.97178  |
| 119900 | Q85601 | O96013 | -0.78783  |
| 119901 | Q85601 | Q14289 | -0.23786  |
| 119902 | Q85601 | P17301 | -0.25956  |
| 119903 | Q85601 | Q96DA6 | -0.61078  |
| 119904 | Q85601 | Q3C1V1 | -0.092462 |
| 119905 | Q85601 | Q9P0S9 | -0.74701  |
| 119906 | Q85601 | Q4AC94 | -0.40108  |
| 119907 | Q85601 | Q684P5 | -0.34723  |
| 119908 | Q85601 | P54762 | -0.68424  |
| 119909 | Q85601 | Q96Q11 | -0.53715  |
| 119910 | Q85601 | P08100 | -0.63141  |
| 119911 | Q85601 | O43511 | -0.8649   |
| 119912 | Q85601 | Q5SRI9 | -0.58655  |
| 119913 | Q85601 | P45844 | -0.51615  |
| 119914 | Q85601 | P30556 | -0.5489   |
| 119915 | Q85601 | O00590 | -1.4358   |
| 119916 | Q85601 | O00300 | -0.94283  |
| 119917 | Q85601 | C9JG80 | -0.31801  |
| 119918 | Q85601 | Q5JRV8 | -0.92686  |
| 119919 | Q85601 | P34995 | -1.3634   |
| 119920 | Q85601 | Q9BXX5 | -0.29363  |
| 119921 | Q85601 | Q8IUM7 | -0.27669  |
| 119922 | Q85601 | Q8N123 | -0.57936  |
| 119923 | Q85601 | P55011 | -0.86484  |
| 119924 | Q85601 | Q29718 | -1.1017   |
| 119925 | Q85601 | Q5SQQ9 | -0.22739  |
| 119926 | Q85601 | Q5W111 | -0.034216 |
| 119927 | Q85601 | O00194 | -0.71512  |
| 119928 | Q85601 | Q13107 | -0.36222  |

|        |        |        |           |
|--------|--------|--------|-----------|
| 119929 | Q85601 | Q9UNU6 | -0.9831   |
| 119930 | Q85601 | Q15276 | -0.20765  |
| 119931 | Q85601 | Q16772 | -0.22688  |
| 119932 | Q85601 | Q9BPW4 | -1.0296   |
| 119933 | Q85601 | P43657 | -1.2881   |
| 119934 | Q85601 | Q14004 | -0.20633  |
| 119935 | Q85601 | Q8N1L4 | -1.0173   |
| 119936 | Q85601 | Q9Y6L7 | -1.3968   |
| 119937 | Q85601 | Q8N1I8 | -0.2031   |
| 119938 | Q85601 | Q8WWR9 | -0.39691  |
| 119939 | Q85601 | C9JVI0 | -0.66238  |
| 119940 | Q85601 | Q5VTY9 | -1.6386   |
| 119941 | Q85601 | P10745 | -1.0604   |
| 119942 | Q85601 | Q8NBV4 | -0.61026  |
| 119943 | Q85601 | Q96II8 | -0.9043   |
| 119944 | Q85601 | Q8NGI1 | -1.2621   |
| 119945 | Q85601 | P40189 | -0.48803  |
| 119946 | Q85601 | Q9GZZ6 | -0.90174  |
| 119947 | Q85601 | Q8IUR7 | -0.22754  |
| 119948 | Q85601 | Q5JU00 | -0.22708  |
| 119949 | Q85601 | Q9NY84 | -0.40558  |
| 119950 | Q85601 | O94806 | -0.24441  |
| 119951 | Q85601 | P05451 | -0.72286  |
| 119952 | Q85601 | Q4VXU2 | -0.896    |
| 119953 | Q85601 | P0DJD4 | -0.64145  |
| 119954 | Q85601 | O94854 | -1.1127   |
| 119955 | Q85601 | Q9Y2U2 | -1.0978   |
| 119956 | Q85601 | Q02446 | -0.13559  |
| 119957 | Q85601 | A8MW95 | -0.076412 |
| 119958 | Q85601 | Q9HAC7 | -0.56641  |
| 119959 | Q85601 | Q00722 | -0.48714  |
| 119960 | Q85601 | P03952 | -0.7819   |
| 119961 | Q85601 | Q9Y5I4 | -1.2846   |
| 119962 | Q85601 | Q02086 | -0.22357  |
| 119963 | Q85601 | P17735 | -0.21548  |
| 119964 | Q85601 | Q01970 | -0.34518  |
| 119965 | Q85601 | A1A5C7 | -0.92152  |
| 119966 | Q85601 | Q01432 | -0.14229  |
| 119967 | Q85601 | P42679 | -0.43991  |
| 119968 | Q85601 | P58753 | -0.22277  |
| 119969 | Q85601 | Q6P4E1 | -0.92686  |
| 119970 | Q85601 | Q8N8V4 | -0.43663  |
| 119971 | Q85601 | Q9HBH5 | -0.92862  |
| 119972 | Q85601 | Q9UIQ6 | -1.3927   |
| 119973 | Q85601 | Q8N6T0 | -0.27346  |
| 119974 | Q85601 | Q6URK8 | -0.9043   |
| 119975 | Q85601 | Q9Y573 | -0.19614  |
| 119976 | Q85601 | Q5VUE5 | -0.057149 |
| 119977 | Q85601 | Q9BPX6 | -0.50345  |
| 119978 | Q85601 | Q5W186 | -0.94321  |
| 119979 | Q85601 | O95377 | -0.97618  |
| 119980 | Q85601 | P25929 | -0.86925  |
| 119981 | Q85601 | Q9BXB5 | -0.74313  |
| 119982 | Q85601 | Q9Y3B8 | -0.16887  |
| 119983 | Q85601 | Q8N5U0 | -0.2031   |
| 119984 | Q85601 | Q6BDI9 | -0.51245  |
| 119985 | Q85601 | Q8TC44 | -0.22758  |
| 119986 | Q85601 | Q5VZP5 | -0.61295  |
| 119987 | Q85601 | Q8NGX1 | -1.2621   |
| 119988 | Q85601 | A2A2Y4 | -0.51707  |
| 119989 | Q85601 | Q6UWM7 | -0.8611   |
| 119990 | Q85601 | Q5SQS7 | -0.22741  |
| 119991 | Q85601 | Q96LT9 | -0.53103  |
| 119992 | Q85601 | Q96A28 | -0.93654  |
| 119993 | Q85601 | P17980 | -0.36699  |
| 119994 | Q85601 | O00141 | -0.51907  |
| 119995 | Q85601 | Q8IV56 | -0.54101  |
| 119996 | Q85601 | Q9NT22 | -0.77814  |
| 119997 | Q85601 | Q00872 | -0.68973  |
| 119998 | Q85601 | O76096 | -0.74305  |
| 119999 | Q85601 | Q86XS8 | -0.37284  |
| 120000 | Q85601 | A6NFE3 | -0.55053  |
| 120001 | Q85601 | P61109 | -0.9043   |
| 120002 | Q85601 | Q96MN5 | -0.22002  |
| 120003 | Q85601 | Q9NX74 | -0.55435  |
| 120004 | Q85601 | Q2TAC6 | -0.52038  |



|        |        |        |          |
|--------|--------|--------|----------|
| 120005 | Q85601 | Q7RTR8 | -1.2301  |
| 120006 | Q85601 | Q99972 | -0.91901 |
| 120007 | Q85601 | Q1L6U9 | -0.9043  |
| 120008 | Q85601 | Q9HBU1 | -0.22739 |
| 120009 | Q85601 | Q96QH8 | -0.85081 |
| 120010 | Q85601 | Q4G0T1 | -0.88043 |
| 120011 | Q85601 | Q8NFN8 | -1.31    |
| 120012 | Q85601 | Q6ZRP5 | -0.2031  |
| 120013 | Q85601 | Q13606 | -1.2621  |
| 120014 | Q85601 | Q8NH87 | -1.2621  |
| 120015 | Q85601 | Q68CQ4 | -0.18565 |
| 120016 | Q85601 | Q15399 | -1.0257  |
| 120017 | Q85601 | P15813 | -0.64024 |
| 120018 | Q85601 | P0C7N5 | -1.2621  |
| 120019 | Q85601 | Q12879 | -0.29498 |
| 120020 | Q85601 | P51659 | -0.66978 |
| 120021 | Q85601 | Q49AH0 | -0.82275 |
| 120022 | Q85601 | Q5TA77 | -0.31607 |
| 120023 | Q85601 | P78527 | -0.40638 |
| 120024 | Q85601 | P52799 | -0.96028 |
| 120025 | Q85601 | Q9P2E7 | -1.246   |
| 120026 | Q85601 | O43193 | -1.4347  |
| 120027 | Q85601 | A6NCI4 | -0.9043  |
| 120028 | Q85601 | Q99102 | -1.5118  |
| 120029 | Q85601 | Q9Y577 | -0.23645 |
| 120030 | Q85601 | Q68DE3 | -0.26984 |
| 120031 | Q85601 | Q9H4E5 | -1.0449  |
| 120032 | Q85601 | Q6UXZ3 | -0.45228 |
| 120033 | Q85601 | Q86UR5 | -0.22742 |
| 120034 | Q85601 | O75679 | -0.29575 |
| 120035 | Q85601 | Q5T9L3 | -0.30672 |
| 120036 | Q85601 | P01210 | -0.97023 |
| 120037 | Q85601 | Q8NEA9 | -0.21639 |
| 120038 | Q85601 | Q9Y2H9 | -0.6023  |
| 120039 | Q85601 | Q9HBU9 | -0.78714 |
| 120040 | Q85601 | A6NDK9 | -0.1796  |
| 120041 | Q85601 | P63121 | -0.64385 |
| 120042 | Q85601 | Q6UWF9 | -0.9043  |
| 120043 | Q85601 | A8MVZ5 | -0.92686 |
| 120044 | Q85601 | Q2KHT4 | -0.98749 |
| 120045 | Q85601 | Q5JRX3 | -0.22835 |
| 120046 | Q85601 | A7MD48 | -0.24784 |
| 120047 | Q85601 | P35442 | -0.91904 |
| 120048 | Q85601 | Q9HD67 | -0.4674  |
| 120049 | Q85601 | Q6L8G4 | -0.2031  |
| 120050 | Q85601 | P57103 | -0.82318 |
| 120051 | Q85601 | Q9P1W8 | -0.60624 |
| 120052 | Q85601 | Q5XXA6 | -0.86777 |
| 120053 | Q85601 | P07307 | -0.48712 |
| 120054 | Q85601 | Q9BY71 | -0.29083 |
| 120055 | Q85601 | Q02985 | -0.95724 |
| 120056 | Q85601 | Q9H6Y7 | -0.23309 |
| 120057 | Q85601 | Q93045 | -0.37069 |
| 120058 | Q85601 | P59796 | -1.1716  |
| 120059 | Q85601 | Q15785 | -0.56334 |
| 120060 | Q85601 | C9J202 | -0.38524 |
| 120061 | Q85601 | Q5TYW2 | -0.43663 |
| 120062 | Q85601 | P53801 | -0.14575 |
| 120063 | Q85601 | O95390 | -0.61735 |
| 120064 | Q85601 | O43426 | -0.35017 |
| 120065 | Q85601 | Q96HJ9 | -0.70527 |
| 120066 | Q85601 | Q9HB63 | -0.97034 |
| 120067 | Q85601 | P11229 | -0.83576 |
| 120068 | Q85601 | Q6BDS2 | -0.40928 |
| 120069 | Q85601 | O60503 | -1.087   |
| 120070 | Q85601 | O43490 | -0.65857 |
| 120071 | Q85601 | P35916 | -0.58549 |
| 120072 | Q85601 | Q9UMX9 | -1.0209  |
| 120073 | Q85601 | Q07889 | -0.32955 |
| 120074 | Q85601 | Q6KF10 | -0.61877 |
| 120075 | Q85601 | P0CB38 | -0.896   |
| 120076 | Q85601 | P0CW27 | -0.80849 |
| 120077 | Q85601 | P15735 | -0.55483 |
| 120078 | Q85601 | Q16581 | -1.0412  |
| 120079 | Q85601 | Q6DKI7 | -0.92686 |
| 120080 | Q85601 | P0C6T2 | -0.92686 |

|        |        |        |           |
|--------|--------|--------|-----------|
| 120081 | Q85601 | O60513 | -0.51589  |
| 120082 | Q85601 | A6NDY0 | -0.67006  |
| 120083 | Q85601 | Q8IUH8 | -1.0507   |
| 120084 | Q85601 | P38571 | -0.54721  |
| 120085 | Q85601 | Q8WXI4 | -0.34876  |
| 120086 | Q85601 | Q96L16 | -0.093285 |
| 120087 | Q85601 | Q9UJA3 | -0.19985  |
| 120088 | Q85601 | Q9NXL2 | -0.67753  |
| 120089 | Q85601 | P15289 | -0.56675  |
| 120090 | Q85601 | Q8N264 | -0.69164  |
| 120091 | Q85601 | O95258 | -0.79106  |
| 120092 | Q85601 | Q9Y272 | -0.77979  |
| 120093 | Q85601 | P50150 | -0.57258  |
| 120094 | Q85601 | P26640 | -0.19217  |
| 120095 | Q85601 | Q9GZV8 | -0.02744  |
| 120096 | Q85601 | Q96CN5 | -0.22697  |
| 120097 | Q85601 | Q9BXC9 | -0.26896  |
| 120098 | Q85601 | Q86UN2 | -0.56714  |
| 120099 | Q85601 | Q02297 | -0.26486  |
| 120100 | Q85601 | Q9UHQ9 | -0.92091  |
| 120101 | Q85601 | P12955 | -0.62198  |
| 120102 | Q85601 | Q69YN2 | -0.35285  |
| 120103 | Q85601 | Q08AE8 | -0.20153  |
| 120104 | Q85601 | Q9BVQ7 | -0.76568  |
| 120105 | Q85601 | Q9H7X0 | -0.21952  |
| 120106 | Q85601 | O75369 | -0.38961  |
| 120107 | Q85601 | P43378 | -0.23047  |
| 120108 | Q85601 | O94885 | -0.23458  |
| 120109 | Q85601 | Q9HCJ2 | -0.2889   |
| 120110 | Q85601 | P48651 | -0.95558  |
| 120111 | Q85601 | P24588 | -0.26311  |
| 120112 | Q85601 | Q96RD3 | -1.2621   |
| 120113 | Q85601 | Q8NH79 | -1.2621   |
| 120114 | Q85601 | Q9NUK0 | -0.068675 |
| 120115 | Q85601 | Q96AN5 | -0.62201  |
| 120116 | Q85601 | Q9NTX9 | -0.4741   |
| 120117 | Q85601 | Q9UHL3 | -0.46367  |
| 120118 | Q85601 | Q9Y231 | -0.54865  |
| 120119 | Q85601 | P0C6C1 | -0.22741  |
| 120120 | Q85601 | P48448 | -0.65105  |
| 120121 | Q85601 | Q14376 | -0.33867  |
| 120122 | Q85601 | Q5W0B1 | -0.29575  |
| 120123 | Q85601 | Q96KJ4 | -1.11     |
| 120124 | Q85601 | Q12884 | -0.64022  |
| 120125 | Q85601 | Q8NGM1 | -1.2621   |
| 120126 | Q85601 | Q96IK0 | -1.0269   |
| 120127 | Q85601 | Q15831 | -0.29603  |
| 120128 | Q85601 | Q9HBI1 | -0.39502  |
| 120129 | Q85601 | Q86XW9 | -0.13602  |
| 120130 | Q85601 | Q9BUN5 | -0.89124  |
| 120131 | Q85601 | P54852 | -0.96599  |
| 120132 | Q85601 | Q69YN4 | -0.094032 |
| 120133 | Q85601 | P30040 | -0.18835  |
| 120134 | Q85601 | Q8IWT1 | -0.79913  |
| 120135 | Q85601 | Q9ULK5 | -0.43172  |
| 120136 | Q85601 | O94923 | -0.54946  |
| 120137 | Q85601 | P78539 | -0.61455  |
| 120138 | Q85601 | Q9BRY0 | -0.94816  |
| 120139 | Q85601 | P25063 | -0.2031   |
| 120140 | Q85601 | Q15768 | -0.85882  |
| 120141 | Q85601 | P14621 | -0.64065  |
| 120142 | Q85601 | Q96LW2 | -1.2086   |
| 120143 | Q85601 | Q13790 | -1.0187   |
| 120144 | Q85601 | O95406 | -0.72286  |
| 120145 | Q85601 | O43719 | -0.21401  |
| 120146 | Q85601 | O00462 | -0.44412  |
| 120147 | Q85601 | Q8NH19 | -1.2621   |
| 120148 | Q85601 | Q5TGI4 | -0.22777  |
| 120149 | Q85601 | O95816 | -0.33263  |
| 120150 | Q85601 | P35070 | -1.2519   |
| 120151 | Q85601 | P46934 | -0.22742  |
| 120152 | Q85601 | P00797 | -0.94063  |
| 120153 | Q85601 | Q6N063 | -0.64113  |
| 120154 | Q85601 | Q96AM1 | -1.3443   |
| 120155 | Q85601 | Q6UWV6 | -0.7444   |
| 120156 | Q85601 | Q8TD47 | -0.074411 |

|        |        |        |          |
|--------|--------|--------|----------|
| 120157 | Q85601 | Q92963 | -0.66997 |
| 120158 | Q85601 | O00461 | -0.11643 |
| 120159 | Q85601 | A6NIL9 | -0.92686 |
| 120160 | Q85601 | Q70Z35 | -0.7142  |
| 120161 | Q85601 | Q70CQ2 | -0.41488 |
| 120162 | Q85601 | P30499 | -1.1574  |
| 120163 | Q85601 | A6NK06 | -0.3066  |
| 120164 | Q85601 | Q9P107 | -0.44278 |
| 120165 | Q85601 | Q9UKP5 | -1.2377  |
| 120166 | Q85601 | P01598 | -1.046   |
| 120167 | Q85601 | Q9Y277 | -1.038   |
| 120168 | Q85601 | Q99418 | -0.22741 |
| 120169 | Q85601 | Q5VWZ2 | -0.32176 |
| 120170 | Q85601 | Q8NDH3 | -0.63815 |
| 120171 | Q85601 | Q5W0Q7 | -0.41246 |
| 120172 | Q85601 | P01743 | -1.046   |
| 120173 | Q85601 | Q5JU69 | -1.0148  |
| 120174 | Q85601 | Q9BZD6 | -1.1714  |
| 120175 | Q85601 | Q8N1V8 | -0.43271 |
| 120176 | Q85601 | P19652 | -0.83742 |
| 120177 | Q85601 | Q9Y2H5 | -0.44245 |
| 120178 | Q85601 | Q9HA58 | -0.2031  |
| 120179 | Q85601 | Q96RU2 | -0.60258 |
| 120180 | Q85601 | P16410 | -0.37916 |
| 120181 | Q85601 | P0CW18 | -0.88468 |
| 120182 | Q85601 | P29074 | -0.22758 |
| 120183 | Q85601 | Q5EB52 | -1.0042  |
| 120184 | Q85601 | Q68CP4 | -0.91271 |
| 120185 | Q85601 | Q3LI58 | -0.2031  |
| 120186 | Q85601 | P14174 | -0.29727 |
| 120187 | Q85601 | Q8IVG9 | -0.58449 |
| 120188 | Q85601 | A6NNC1 | -0.92686 |
| 120189 | Q85601 | Q9NYA1 | -0.33677 |
| 120190 | Q85601 | Q9NVH0 | -0.66093 |
| 120191 | Q85601 | Q96SF2 | -0.5416  |
| 120192 | Q85601 | Q96MH7 | -0.3469  |
| 120193 | Q85601 | Q8N5S3 | -0.91611 |
| 120194 | Q85601 | P60509 | -1.0386  |
| 120195 | Q85601 | Q12768 | -0.49369 |
| 120196 | Q85601 | Q9BSW7 | -0.44188 |
| 120197 | Q85601 | Q9UGF5 | -1.2621  |
| 120198 | Q85601 | Q9HBM0 | -0.49809 |
| 120199 | Q85601 | Q6W0C5 | -0.15786 |
| 120200 | Q85601 | O60423 | -0.97882 |
| 120201 | Q85601 | P00736 | -1.4003  |
| 120202 | Q85601 | O95136 | -1.3061  |
| 120203 | Q85601 | Q13972 | -0.59264 |
| 120204 | Q85601 | O43505 | -0.49522 |
| 120205 | Q85601 | P49641 | -0.50363 |
| 120206 | Q85601 | Q86WD7 | -0.59534 |
| 120207 | Q85601 | P26371 | -0.2031  |
| 120208 | Q85601 | Q12809 | -0.67955 |
| 120209 | Q85601 | P30510 | -1.1574  |
| 120210 | Q85601 | O14581 | -1.2621  |
| 120211 | Q85601 | Q8NG11 | -0.92686 |
| 120212 | Q85601 | Q8IYX1 | -1.3431  |
| 120213 | Q85601 | P15086 | -1.1567  |
| 120214 | Q85601 | Q7Z4T8 | -0.74775 |
| 120215 | Q85601 | Q8N111 | -0.92686 |
| 120216 | Q85601 | A4FU01 | -0.48731 |
| 120217 | Q85601 | Q96M86 | -0.247   |
| 120218 | Q85601 | Q5VZ66 | -0.16755 |
| 120219 | Q85601 | Q9NX45 | -0.22692 |
| 120220 | Q85601 | Q6Q4G3 | -1.1908  |
| 120221 | Q85601 | Q9UBC0 | -0.22724 |
| 120222 | Q85601 | P30988 | -0.67817 |
| 120223 | Q85601 | Q6ZRY4 | -0.85824 |
| 120224 | Q85601 | P30203 | -1.1817  |
| 120225 | Q85601 | Q96SF7 | -0.43702 |
| 120226 | Q85601 | Q9P1J3 | -0.2031  |
| 120227 | Q85601 | Q6IED9 | -0.387   |
| 120228 | Q85601 | Q14982 | -0.82268 |
| 120229 | Q85601 | Q9H078 | -0.61255 |
| 120230 | Q85601 | Q6PRD7 | -0.2031  |
| 120231 | Q85601 | Q6T4P5 | -0.9586  |
| 120232 | Q85601 | P01617 | -1.046   |

|        |        |        |           |
|--------|--------|--------|-----------|
| 120233 | Q85601 | Q6UY13 | -0.9043   |
| 120234 | Q85601 | Q15319 | -0.22741  |
| 120235 | Q85601 | Q9BQF6 | -0.68942  |
| 120236 | Q85601 | Q13075 | -0.34879  |
| 120237 | Q85601 | Q6P4Q7 | -1.1367   |
| 120238 | Q85601 | Q9Y663 | -0.5342   |
| 120239 | Q85601 | Q6NY19 | -0.22744  |
| 120240 | Q85601 | Q59H18 | -0.2648   |
| 120241 | Q85601 | Q9H4A4 | -0.8325   |
| 120242 | Q85601 | Q6IEY1 | -1.2621   |
| 120243 | Q85601 | Q6ZW05 | -0.66605  |
| 120244 | Q85601 | Q9H015 | -0.47917  |
| 120245 | Q85601 | Q6NW34 | -0.92686  |
| 120246 | Q85601 | Q5T700 | -0.92686  |
| 120247 | Q85601 | Q9H3L0 | -0.15709  |
| 120248 | Q85601 | Q95947 | -0.50118  |
| 120249 | Q85601 | Q13976 | -0.39649  |
| 120250 | Q85601 | Q9BTL4 | -0.11916  |
| 120251 | Q85601 | Q8WTV0 | -0.43833  |
| 120252 | Q85601 | Q86UV6 | -0.589    |
| 120253 | Q85601 | Q0VG73 | -0.2031   |
| 120254 | Q85601 | Q5TD97 | -0.21906  |
| 120255 | Q85601 | Q63ZY6 | -0.30175  |
| 120256 | Q85601 | Q9Y5E4 | -1.2231   |
| 120257 | Q85601 | Q99250 | -0.97719  |
| 120258 | Q85601 | Q99217 | -0.88537  |
| 120259 | Q85601 | P21926 | -0.62874  |
| 120260 | Q85601 | Q5T742 | -0.9043   |
| 120261 | Q85601 | Q8TDM0 | -0.10332  |
| 120262 | Q85601 | Q9Y4B5 | -0.1977   |
| 120263 | Q85601 | P27144 | -0.62016  |
| 120264 | Q85601 | P25942 | -0.56575  |
| 120265 | Q85601 | Q6AI12 | -0.22741  |
| 120266 | Q85601 | O60476 | -0.50698  |
| 120267 | Q85601 | Q13065 | -0.44954  |
| 120268 | Q85601 | A6NMT0 | -0.22783  |
| 120269 | Q85601 | P23471 | -1.2606   |
| 120270 | Q85601 | P30483 | -1.1017   |
| 120271 | Q85601 | Q9H871 | -0.13494  |
| 120272 | Q85601 | Q96MD2 | -0.33886  |
| 120273 | Q85601 | Q96KK5 | -0.7417   |
| 120274 | Q85601 | Q96KX1 | -0.61286  |
| 120275 | Q85601 | Q7Z5L4 | -0.67709  |
| 120276 | Q85601 | P22466 | -0.5301   |
| 120277 | Q85601 | Q5TEA3 | -0.66617  |
| 120278 | Q85601 | Q9UBI9 | -0.41376  |
| 120279 | Q85601 | Q14141 | -0.21735  |
| 120280 | Q85601 | Q9HAT0 | -0.48341  |
| 120281 | Q85601 | Q92561 | -0.30806  |
| 120282 | Q85601 | Q8NGZ9 | -1.2621   |
| 120283 | Q85601 | Q8NGM8 | -1.2621   |
| 120284 | Q85601 | Q15260 | -0.28753  |
| 120285 | Q85601 | P55201 | -0.22435  |
| 120286 | Q85601 | O15042 | -0.22683  |
| 120287 | Q85601 | F7VJQ1 | -0.36108  |
| 120288 | Q85601 | P54710 | -1.0068   |
| 120289 | Q85601 | Q00295 | -0.75598  |
| 120290 | Q85601 | Q7RTX8 | -0.058676 |
| 120291 | Q85601 | Q969U6 | -0.22787  |
| 120292 | Q85601 | Q4G0Z9 | -0.4525   |
| 120293 | Q85601 | P55268 | -0.75491  |
| 120294 | Q85601 | Q7Z418 | -1.0913   |
| 120295 | Q85601 | Q96M94 | -0.33306  |
| 120296 | Q85601 | Q86VR8 | -0.95724  |
| 120297 | Q85601 | Q96BJ3 | -0.39524  |
| 120298 | Q85601 | Q8N5U1 | -0.92686  |
| 120299 | Q85601 | Q9H2A3 | -0.22818  |
| 120300 | Q85601 | Q6P179 | -1.1154   |
| 120301 | Q85601 | Q8IX01 | -0.19924  |
| 120302 | Q85601 | P15514 | -0.69759  |
| 120303 | Q85601 | Q96HH6 | -0.92686  |
| 120304 | Q85601 | Q14994 | -0.94413  |
| 120305 | Q85601 | Q04900 | -1.2503   |
| 120306 | Q85601 | Q8TC20 | -0.023923 |
| 120307 | Q85601 | Q9H221 | -0.704    |
| 120308 | Q85601 | Q8NFR3 | -0.43109  |

|        |        |        |           |
|--------|--------|--------|-----------|
| 120309 | Q85601 | Q9HCC6 | -0.21956  |
| 120310 | Q85601 | P01825 | -1.046    |
| 120311 | Q85601 | A1L429 | -0.68194  |
| 120312 | Q85601 | Q96M19 | -0.92686  |
| 120313 | Q85601 | O75677 | -0.29575  |
| 120314 | Q85601 | P51805 | -1.0843   |
| 120315 | Q85601 | Q96IZ5 | -0.896    |
| 120316 | Q85601 | P05997 | -0.90937  |
| 120317 | Q85601 | Q8WVV5 | -0.86282  |
| 120318 | Q85601 | Q13639 | -1.025    |
| 120319 | Q85601 | Q8NFI3 | -0.26309  |
| 120320 | Q85601 | Q14435 | -0.316    |
| 120321 | Q85601 | Q9H341 | -1.2621   |
| 120322 | Q85601 | Q6ZSR9 | -0.8543   |
| 120323 | Q85601 | Q9H0Z9 | -0.28438  |
| 120324 | Q85601 | Q8IVF2 | -0.2095   |
| 120325 | Q85601 | Q9UI12 | -0.097533 |
| 120326 | Q85601 | A1X283 | -0.22741  |
| 120327 | Q85601 | Q6NVU6 | -0.61262  |
| 120328 | Q85601 | P21941 | -0.42532  |
| 120329 | Q85601 | P26232 | -0.21169  |
| 120330 | Q85601 | Q8IZP2 | -0.22675  |
| 120331 | Q85601 | P68543 | -0.099968 |
| 120332 | Q85601 | P61328 | -0.29139  |
| 120333 | Q85601 | O00562 | -0.22338  |
| 120334 | Q85601 | Q8TBP0 | -1.3431   |
| 120335 | Q85601 | Q2M3V2 | -0.22741  |
| 120336 | Q85601 | Q9ULJ8 | -0.21518  |
| 120337 | Q85601 | Q9HA65 | -1.3431   |
| 120338 | Q85601 | P18428 | -0.43961  |
| 120339 | Q85601 | P30990 | -0.96283  |
| 120340 | Q85601 | Q8NCU1 | -0.32554  |
| 120341 | Q85601 | P42898 | -0.37435  |
| 120342 | Q85601 | Q8NGV5 | -1.2621   |
| 120343 | Q85601 | O00322 | -0.8914   |
| 120344 | Q85601 | Q16538 | -1.3443   |
| 120345 | Q85601 | Q6IS24 | -0.72627  |
| 120346 | Q85601 | P31277 | -0.2658   |
| 120347 | Q85601 | P49441 | -0.41311  |
| 120348 | Q85601 | Q5J8X5 | -0.92686  |
| 120349 | Q85601 | Q96LU7 | -0.9043   |
| 120350 | Q85601 | B4DYI2 | -0.90223  |
| 120351 | Q85601 | A4D0S4 | -1.219    |
| 120352 | Q85601 | Q9Y6C7 | -0.2031   |
| 120353 | Q85601 | Q9NU19 | -1.3431   |
| 120354 | Q85601 | Q8N878 | -0.36155  |
| 120355 | Q85601 | Q9BUL5 | -0.30181  |
| 120356 | Q85601 | Q9NPE2 | -0.68919  |
| 120357 | Q85601 | Q8IUW5 | -0.83069  |
| 120358 | Q85601 | Q6UW32 | -0.60148  |
| 120359 | P03346 | P20839 | -0.23768  |
| 120360 | P03346 | Q6UWJ8 | -0.50365  |
| 120361 | P03346 | Q96PB1 | -0.50365  |
| 120362 | P03346 | Q96HV5 | -0.50365  |
| 120363 | P03346 | Q9NXS3 | -0.12495  |
| 120364 | P03346 | O95210 | -0.18498  |
| 120365 | P03346 | P24394 | -0.81755  |
| 120366 | P03346 | Q8WWY8 | -1.0112   |
| 120367 | P03346 | A6NDY2 | -0.23255  |
| 120368 | P03346 | Q9UQ72 | -0.55194  |
| 120369 | P03346 | O95758 | -0.21647  |
| 120370 | P03346 | Q96B33 | -0.41247  |
| 120371 | P03346 | Q14117 | -0.22559  |
| 120372 | P03346 | Q9UN74 | -0.92414  |
| 120373 | P03346 | Q99250 | -0.72893  |
| 120374 | P03346 | Q15147 | -0.2273   |
| 120375 | P03346 | Q99578 | -0.63714  |
| 120376 | P03346 | P22792 | -0.51672  |
| 120377 | P03346 | Q3MIW9 | -0.50365  |
| 120378 | P03346 | Q96FI4 | -0.089274 |
| 120379 | P03346 | Q5BKU6 | -0.16389  |
| 120380 | P03346 | Q659C4 | -0.047771 |
| 120381 | P03346 | P29965 | -0.85645  |
| 120382 | P03346 | Q96NZ9 | -0.53519  |
| 120383 | P03346 | P0CG08 | -0.31928  |
| 120384 | P03346 | Q86X45 | -0.22741  |

|        |        |        |           |
|--------|--------|--------|-----------|
| 120385 | P03346 | Q5SWH9 | -0.50365  |
| 120386 | P03346 | O60503 | -0.87677  |
| 120387 | P03346 | Q9NX47 | -0.19812  |
| 120388 | P03346 | P0CW23 | -0.11016  |
| 120389 | P03346 | Q13705 | -0.40219  |
| 120390 | P03346 | Q14792 | -0.23101  |
| 120391 | P03346 | O00155 | -1.0977   |
| 120392 | P03346 | Q9NRR1 | -0.657    |
| 120393 | P03346 | P59095 | -0.25352  |
| 120394 | P03346 | Q6ZRG5 | -0.24505  |
| 120395 | P03346 | Q15080 | -0.31393  |
| 120396 | P03346 | P29992 | -0.69598  |
| 120397 | P03346 | Q9UKV5 | -0.22784  |
| 120398 | P03346 | P41229 | -0.24495  |
| 120399 | P03346 | P16435 | -0.71942  |
| 120400 | P03346 | P43631 | -0.73101  |
| 120401 | P03346 | Q9Y6X6 | -0.2255   |
| 120402 | P03346 | P01599 | -0.80078  |
| 120403 | P03346 | Q5HYJ1 | -0.54715  |
| 120404 | P03346 | O60673 | -0.51405  |
| 120405 | P03346 | Q75197 | -0.22752  |
| 120406 | P03346 | P68431 | -0.2151   |
| 120407 | P03346 | P00352 | -0.2972   |
| 120408 | P03346 | Q12870 | -0.22777  |
| 120409 | P03346 | P30613 | -0.31658  |
| 120410 | P03346 | Q9H1U9 | -0.36428  |
| 120411 | P03346 | Q8WWX8 | -0.66022  |
| 120412 | P03346 | Q15940 | -0.24849  |
| 120413 | P03346 | Q86VW1 | -0.7166   |
| 120414 | P03346 | P22612 | -0.4631   |
| 120415 | P03346 | Q5SXM8 | -0.12325  |
| 120416 | P03346 | O00623 | -0.22501  |
| 120417 | P03346 | Q13115 | -0.22993  |
| 120418 | P03346 | P32121 | -0.27044  |
| 120419 | P03346 | P14210 | -0.24387  |
| 120420 | P03346 | P68032 | -0.23968  |
| 120421 | P03346 | P50406 | -0.59693  |
| 120422 | P03346 | Q8N7P1 | -0.6761   |
| 120423 | P03346 | P01817 | -0.80078  |
| 120424 | P03346 | P24387 | -0.25023  |
| 120425 | P03346 | Q16795 | -0.2151   |
| 120426 | P03346 | Q9Y6Z7 | -0.44548  |
| 120427 | P03346 | Q8TBM8 | -0.54308  |
| 120428 | P03346 | Q9NR61 | -0.69627  |
| 120429 | P03346 | Q9BW61 | -0.023122 |
| 120430 | P03346 | P25106 | -0.77419  |
| 120431 | P03346 | Q9BZ72 | -0.96768  |
| 120432 | P03346 | Q9P2E2 | -0.23215  |
| 120433 | P03346 | O15503 | -0.26437  |
| 120434 | P03346 | Q580R0 | -0.31183  |
| 120435 | P03346 | Q96GE9 | -0.50365  |
| 120436 | P03346 | A1A4G5 | -0.013652 |
| 120437 | P03346 | P05155 | -0.29124  |
| 120438 | P03346 | Q9Y450 | -0.53574  |
| 120439 | P03346 | Q8N271 | -0.6901   |
| 120440 | P03346 | P37268 | -0.758    |
| 120441 | P03346 | Q9BYT3 | -0.51323  |
| 120442 | P03346 | Q13606 | -0.92763  |
| 120443 | P03346 | A4D1E9 | -0.24158  |
| 120444 | P03346 | Q9Y4F3 | -0.4406   |
| 120445 | P03346 | Q9H9P2 | -0.23071  |
| 120446 | P03346 | Q9UPU3 | -0.51667  |
| 120447 | P03346 | Q13323 | -0.19144  |
| 120448 | P03346 | A6NDX4 | -0.50365  |
| 120449 | P03346 | Q99797 | -0.25087  |
| 120450 | P03346 | Q7Z418 | -0.82743  |
| 120451 | P03346 | Q75069 | -0.13828  |
| 120452 | P03346 | Q8NGO6 | -0.30279  |
| 120453 | P03346 | Q9HCE7 | -0.22741  |
| 120454 | P03346 | Q9Y661 | -0.85763  |
| 120455 | P03346 | Q8NBP0 | -0.22739  |
| 120456 | P03346 | P10265 | -0.10663  |
| 120457 | P03346 | O15195 | -0.20419  |
| 120458 | P03346 | P10323 | -0.62679  |
| 120459 | P03346 | Q49AQ9 | -0.10718  |
| 120460 | P03346 | Q969Y0 | -0.53519  |

|        |        |        |           |
|--------|--------|--------|-----------|
| 120461 | P03346 | Q7Z3J3 | -0.22516  |
| 120462 | P03346 | Q07343 | -0.22684  |
| 120463 | P03346 | P30462 | -0.82654  |
| 120464 | P03346 | P0C862 | -0.58554  |
| 120465 | P03346 | O75094 | -0.54421  |
| 120466 | P03346 | Q8N9M1 | -0.15205  |
| 120467 | P03346 | O43614 | -1.0145   |
| 120468 | P03346 | Q70EL4 | -0.36346  |
| 120469 | P03346 | Q495M3 | -0.45212  |
| 120470 | P03346 | P80362 | -0.80078  |
| 120471 | P03346 | Q92519 | -0.22786  |
| 120472 | P03346 | Q9BZS9 | -0.013652 |
| 120473 | P03346 | P00374 | -0.14983  |
| 120474 | P03346 | Q8NCI6 | -0.19418  |
| 120475 | P03346 | Q5D0E6 | -0.24359  |
| 120476 | P03346 | Q8NB66 | -0.22741  |
| 120477 | P03346 | O43567 | -0.42736  |
| 120478 | P03346 | Q8IU89 | -0.21352  |
| 120479 | P03346 | O00506 | -0.36121  |
| 120480 | P03346 | A6NCM1 | -0.48833  |
| 120481 | P03346 | Q92918 | -0.3998   |
| 120482 | P03346 | P61421 | -0.17746  |
| 120483 | P03346 | P11150 | -0.63701  |
| 120484 | P03346 | Q2TAC2 | -0.1955   |
| 120485 | P03346 | Q2TBA0 | -0.17358  |
| 120486 | P03346 | Q9C0E8 | -0.61923  |
| 120487 | P03346 | Q03154 | -0.21273  |
| 120488 | P03346 | Q9NRJ2 | -0.013652 |
| 120489 | P03346 | Q7L5Y9 | -0.14952  |
| 120490 | P03346 | P15085 | -0.94596  |
| 120491 | P03346 | O60542 | -0.54317  |
| 120492 | P03346 | Q6UXY1 | -0.50772  |
| 120493 | P03346 | A6NNJ1 | -0.23569  |
| 120494 | P03346 | O15391 | -0.22542  |
| 120495 | P03346 | Q6ZV73 | -0.44857  |
| 120496 | P03346 | Q14573 | -0.22662  |
| 120497 | P03346 | P21462 | -0.69688  |
| 120498 | P03346 | O15213 | -0.22742  |
| 120499 | P03346 | Q9Y4J8 | -0.22733  |
| 120500 | P03346 | Q63HM9 | -0.4478   |
| 120501 | P03346 | Q7Z5M8 | -0.2289   |
| 120502 | P03346 | P13727 | -0.59976  |
| 120503 | P03346 | Q9H0W5 | -0.17617  |
| 120504 | P03346 | Q9NUT2 | -0.42457  |
| 120505 | P03346 | Q96JQ5 | -0.50365  |
| 120506 | P03346 | P31277 | -0.22442  |
| 120507 | P03346 | P08263 | -0.22735  |
| 120508 | P03346 | Q9UGI0 | -0.2262   |
| 120509 | P03346 | P20701 | -0.72659  |
| 120510 | P03346 | E5RHQ5 | -0.21962  |
| 120511 | P03346 | Q13614 | -0.22615  |
| 120512 | P03346 | Q8WUH1 | -0.177    |
| 120513 | P03346 | P05362 | -0.32668  |
| 120514 | P03346 | Q8NH19 | -0.92763  |
| 120515 | P03346 | Q9NV39 | -0.042063 |
| 120516 | P03346 | Q9H344 | -0.92763  |
| 120517 | P03346 | Q95136 | -0.95811  |
| 120518 | P03346 | Q6UXH0 | -0.21681  |
| 120519 | P03346 | Q96PY0 | -0.13098  |
| 120520 | P03346 | O15204 | -0.85174  |
| 120521 | P03346 | P53701 | -0.16742  |
| 120522 | P03346 | P16499 | -0.41044  |
| 120523 | P03346 | Q6ZST2 | -0.21929  |
| 120524 | P03346 | P05451 | -0.40958  |
| 120525 | P03346 | Q6UWH4 | -0.34727  |
| 120526 | P03346 | Q969N2 | -0.23492  |
| 120527 | P03346 | Q9BSY9 | -0.14935  |
| 120528 | P03346 | P43361 | -0.19561  |
| 120529 | P03346 | Q8WWX0 | -0.22741  |
| 120530 | P03346 | Q86TV6 | -0.22731  |
| 120531 | P03346 | A6NHU5 | -0.09597  |
| 120532 | P03346 | F7VJQ1 | -0.013652 |
| 120533 | P03346 | P00709 | -0.70952  |
| 120534 | P03346 | A2VCK2 | -0.2039   |
| 120535 | P03346 | P05177 | -0.372    |
| 120536 | P03346 | Q5T6V5 | -0.13727  |

|        |        |        |           |
|--------|--------|--------|-----------|
| 120537 | P03346 | Q8NFM4 | -0.4077   |
| 120538 | P03346 | Q9BRS2 | -0.87197  |
| 120539 | P03346 | P60891 | -0.35408  |
| 120540 | P03346 | Q9BVM2 | -0.06086  |
| 120541 | P03346 | P0C7A2 | -0.29201  |
| 120542 | P03346 | Q86WR7 | -0.016226 |
| 120543 | P03346 | Q8NGC4 | -0.92763  |
| 120544 | P03346 | P57738 | -0.50365  |
| 120545 | P03346 | O60313 | -0.38499  |
| 120546 | P03346 | B2RV13 | -0.067799 |
| 120547 | P03346 | Q5GH76 | -0.50365  |
| 120548 | P03346 | P0CB46 | -0.42377  |
| 120549 | P03346 | Q96PS1 | -0.069796 |
| 120550 | P03346 | Q99570 | -0.25436  |
| 120551 | P03346 | Q9Y6C9 | -0.36428  |
| 120552 | P03346 | Q9Y2Y1 | -0.19447  |
| 120553 | P03346 | P16401 | -0.2469   |
| 120554 | P03346 | Q6PJE2 | -0.19144  |
| 120555 | P03346 | Q15751 | -0.22979  |
| 120556 | P03346 | Q69YL0 | -0.013652 |
| 120557 | P03346 | Q8N159 | -0.12724  |
| 120558 | P03346 | P21926 | -0.38843  |
| 120559 | P03346 | Q03113 | -0.40025  |
| 120560 | P03346 | P36269 | -0.64384  |
| 120561 | P03346 | Q0VF96 | -0.22709  |
| 120562 | P03346 | P15692 | -0.26242  |
| 120563 | P03346 | Q8NDV1 | -0.40051  |
| 120564 | P03346 | P56856 | -0.41247  |
| 120565 | P03346 | O95298 | -0.094757 |
| 120566 | P03346 | P98161 | -0.22741  |
| 120567 | P03346 | Q9H3S4 | -0.28822  |
| 120568 | P03346 | A6NC51 | -0.50365  |
| 120569 | P03346 | P17693 | -0.70797  |
| 120570 | P03346 | P13761 | -0.29591  |
| 120571 | P03346 | Q96HA9 | -0.053365 |
| 120572 | P03346 | P01623 | -0.80078  |
| 120573 | P03346 | Q03014 | -0.22767  |
| 120574 | P03346 | Q3B7S5 | -0.50365  |
| 120575 | P03346 | P98172 | -0.21284  |
| 120576 | P03346 | Q9NRU3 | -0.72432  |
| 120577 | P03346 | Q6NUM6 | -0.7522   |
| 120578 | P03346 | P48736 | -0.2743   |
| 120579 | P03346 | Q6UWB1 | -0.70399  |
| 120580 | P03346 | Q9Y6F9 | -0.64184  |
| 120581 | P03346 | Q9BVX2 | -0.42231  |
| 120582 | P03346 | Q6PI78 | -0.38186  |
| 120583 | P03346 | O43292 | -0.27492  |
| 120584 | P03346 | P15311 | -0.23067  |
| 120585 | P03346 | Q16558 | -0.74425  |
| 120586 | P03346 | Q9P0Z9 | -0.36085  |
| 120587 | P03346 | Q9NU19 | -0.92582  |
| 120588 | P03346 | A6NKL6 | -0.50365  |
| 120589 | P03346 | Q5T3I0 | -0.072791 |
| 120590 | P03346 | P18089 | -0.39469  |
| 120591 | P03346 | Q8WV15 | -0.50365  |
| 120592 | P03346 | Q96IZ2 | -0.65219  |
| 120593 | P03346 | Q9H2X9 | -0.68388  |
| 120594 | P03346 | P00742 | -0.58513  |
| 120595 | P03346 | Q9NQV8 | -0.31139  |
| 120596 | P03346 | P09488 | -0.22696  |
| 120597 | P03346 | P11177 | -0.20897  |
| 120598 | P03346 | Q8N9Q2 | -0.20593  |
| 120599 | P03346 | Q30KR1 | -0.52229  |
| 120600 | P03346 | P30533 | -0.558    |
| 120601 | P03346 | Q96H15 | -0.50365  |
| 120602 | P03346 | Q9Y2K7 | -0.22702  |
| 120603 | P03346 | P49753 | -0.17573  |
| 120604 | P03346 | Q9H8M9 | -0.84793  |
| 120605 | P03346 | Q9ULZ1 | -0.56236  |
| 120606 | P03346 | Q96PY5 | -0.22729  |
| 120607 | P03346 | O95665 | -1.0571   |
| 120608 | P03346 | Q6NUT3 | -0.47711  |
| 120609 | P03346 | P58215 | -0.26957  |
| 120610 | P03346 | A6NM45 | -0.36963  |
| 120611 | P03346 | Q9BYE9 | -0.2579   |
| 120612 | P03346 | P55075 | -0.28741  |



|        |        |        |           |
|--------|--------|--------|-----------|
| 120613 | P03346 | P55808 | -0.67761  |
| 120614 | P03346 | Q6YBV0 | -0.46801  |
| 120615 | P03346 | P61073 | -0.23467  |
| 120616 | P03346 | P23634 | -0.3592   |
| 120617 | P03346 | Q9NWN3 | -0.13256  |
| 120618 | P03346 | P32881 | -0.64371  |
| 120619 | P03346 | P01710 | -0.80078  |
| 120620 | P03346 | Q8NGJ1 | -0.92763  |
| 120621 | P03346 | O15467 | -0.87338  |
| 120622 | P03346 | Q9UDT6 | -0.22732  |
| 120623 | P03346 | P02766 | -0.20128  |
| 120624 | P03346 | Q9UJ94 | -0.013652 |
| 120625 | P03346 | Q9P1W8 | -0.27088  |
| 120626 | P03346 | Q6PKH6 | -1.1855   |
| 120627 | P03346 | Q8N442 | -0.42921  |
| 120628 | P03346 | Q9H977 | -0.2274   |
| 120629 | P03346 | P01210 | -0.66272  |
| 120630 | P03346 | P13500 | -0.3429   |
| 120631 | P03346 | P34820 | -0.70708  |
| 120632 | P03346 | Q9H2C5 | -0.92763  |
| 120633 | P03346 | P52952 | -0.26363  |
| 120634 | P03346 | O95406 | -0.49529  |
| 120635 | P03346 | P22314 | -0.2252   |
| 120636 | P03346 | Q4VNC0 | -0.7956   |
| 120637 | P03346 | Q9Y694 | -0.75757  |
| 120638 | P03346 | Q6ZV56 | -0.013652 |
| 120639 | P03346 | Q8N8N0 | -0.62371  |
| 120640 | P03346 | O00270 | -1.0977   |
| 120641 | P03346 | I6L899 | -0.18502  |
| 120642 | P03346 | Q9Y487 | -0.206    |
| 120643 | P03346 | Q08188 | -0.30646  |
| 120644 | P03346 | Q5VUJ6 | -0.22942  |
| 120645 | P03346 | Q16581 | -0.83422  |
| 120646 | P03346 | Q8NDZ6 | -0.50365  |
| 120647 | P03346 | P10415 | -0.22739  |
| 120648 | P03346 | Q9BYW3 | -0.50022  |
| 120649 | P03346 | Q8TEA7 | -0.75657  |
| 120650 | P03346 | A8MT82 | -0.65984  |
| 120651 | P03346 | O00592 | -0.73232  |
| 120652 | P03346 | A8MUU1 | -0.20748  |
| 120653 | P03346 | Q96RD9 | -0.65219  |
| 120654 | P03346 | Q8NGP3 | -0.92763  |
| 120655 | P03346 | P52429 | -1.1228   |
| 120656 | P03346 | Q92545 | -0.30782  |
| 120657 | P03346 | Q9BX51 | -0.19749  |
| 120658 | P03346 | Q6NSJ0 | -0.40875  |
| 120659 | P03346 | Q93099 | -0.191    |
| 120660 | P03346 | Q9NS00 | -0.64438  |
| 120661 | P03346 | P02452 | -0.22754  |
| 120662 | P03346 | Q96N76 | -0.16     |
| 120663 | P03346 | Q6ZMU5 | -0.22752  |
| 120664 | P03346 | Q7Z5H4 | -0.91924  |
| 120665 | P03346 | Q6ZUQ5 | -0.38899  |
| 120666 | P03346 | Q9P2W7 | -0.38561  |
| 120667 | P03346 | O94830 | -0.20036  |
| 120668 | P03346 | Q9NVA4 | -0.50365  |
| 120669 | P03346 | Q8NHC8 | -0.92763  |
| 120670 | P03346 | O75352 | -0.50171  |
| 120671 | P03346 | Q9HCC8 | -0.47201  |
| 120672 | P03346 | Q53F39 | -0.21607  |
| 120673 | P03346 | P0DJD8 | -0.83835  |
| 120674 | P03346 | A6NHG4 | -0.21917  |
| 120675 | P03346 | Q86Y56 | -0.1878   |
| 120676 | P03346 | P30460 | -0.82654  |
| 120677 | P03346 | Q9BRQ0 | -0.20252  |
| 120678 | P03346 | Q14005 | -0.2256   |
| 120679 | P03346 | Q8IVU3 | -0.23714  |
| 120680 | P03346 | Q8WXF5 | -0.026769 |
| 120681 | P03346 | Q8IZA3 | -0.077245 |
| 120682 | P03346 | Q8N3J6 | -0.83942  |
| 120683 | P03346 | Q8TF30 | -0.16713  |
| 120684 | P03346 | O43181 | -0.16251  |
| 120685 | P03346 | Q01813 | -0.4557   |
| 120686 | P03346 | Q9Y3I0 | -0.31028  |
| 120687 | P03346 | P49916 | -0.22658  |
| 120688 | P03346 | O60423 | -0.75324  |

|        |        |        |           |
|--------|--------|--------|-----------|
| 120689 | P03346 | P78362 | -0.31232  |
| 120690 | P03346 | Q99706 | -0.39996  |
| 120691 | P03346 | Q902F9 | -0.35115  |
| 120692 | P03346 | A8MTJ3 | -0.54469  |
| 120693 | P03346 | Q9H1J5 | -0.46726  |
| 120694 | P03346 | Q9BXU8 | -0.20774  |
| 120695 | P03346 | Q96P26 | -0.13596  |
| 120696 | P03346 | Q9ULS6 | -0.56863  |
| 120697 | P03346 | Q96RN1 | -0.30825  |
| 120698 | P03346 | Q8NGE0 | -0.92763  |
| 120699 | P03346 | Q86YT5 | -0.5519   |
| 120700 | P03346 | O43312 | -0.20904  |
| 120701 | P03346 | Q9Y239 | -0.2274   |
| 120702 | P03346 | P18084 | -0.59361  |
| 120703 | P03346 | Q6P2H8 | -0.50365  |
| 120704 | P03346 | Q96EW2 | -0.21714  |
| 120705 | P03346 | Q02742 | -0.44128  |
| 120706 | P03346 | Q13191 | -0.22741  |
| 120707 | P03346 | P04234 | -0.30292  |
| 120708 | P03346 | P20908 | -0.65577  |
| 120709 | P03346 | Q5JYT7 | -0.19358  |
| 120710 | P03346 | Q5JTY5 | -0.48833  |
| 120711 | P03346 | Q53S58 | -0.50365  |
| 120712 | P03346 | P51688 | -0.32394  |
| 120713 | P03346 | Q2WGJ8 | -0.50365  |
| 120714 | P03346 | P09529 | -0.22741  |
| 120715 | P03346 | Q9BRV3 | -0.17032  |
| 120716 | P03346 | Q96QT4 | -1.0825   |
| 120717 | P03346 | P22830 | -0.16585  |
| 120718 | P03346 | Q00872 | -0.39541  |
| 120719 | P03346 | Q7Z2G1 | -0.34344  |
| 120720 | P03346 | Q6P1Q9 | -0.21008  |
| 120721 | P03346 | Q16853 | -0.84765  |
| 120722 | P03346 | P0C671 | -0.18462  |
| 120723 | P03346 | Q13637 | -0.49618  |
| 120724 | P03346 | Q9H4I0 | -0.18005  |
| 120725 | P03346 | Q86YN1 | -0.6081   |
| 120726 | P03346 | P40933 | -0.21294  |
| 120727 | P03346 | P78368 | -0.70713  |
| 120728 | P03346 | Q5VXJ0 | -0.58765  |
| 120729 | P03346 | Q8NFK1 | -0.62787  |
| 120730 | P03346 | P0DJD4 | -0.22879  |
| 120731 | P03346 | Q5T4T1 | -0.50365  |
| 120732 | P03346 | P14867 | -0.60924  |
| 120733 | P03346 | Q7Z2K8 | -0.40977  |
| 120734 | P03346 | Q96M89 | -0.20626  |
| 120735 | P03346 | Q6ZRM9 | -0.012202 |
| 120736 | P03346 | Q6ZNM6 | -0.1233   |
| 120737 | P03346 | P14550 | -0.22719  |
| 120738 | P03346 | Q9Y2K6 | -0.29116  |
| 120739 | P03346 | Q9NQC1 | -0.22829  |
| 120740 | P03346 | P56703 | -0.3907   |
| 120741 | P03346 | Q86XW9 | -0.14973  |
| 120742 | P03346 | O75916 | -0.30244  |
| 120743 | P03346 | Q9NZC9 | -0.21044  |
| 120744 | P03346 | O75417 | -0.27405  |
| 120745 | P03346 | P32248 | -0.44711  |
| 120746 | P03346 | Q12948 | -0.25537  |
| 120747 | P03346 | P31941 | -0.93974  |
| 120748 | P03346 | P30556 | -0.39626  |
| 120749 | P03346 | P55103 | -0.44361  |
| 120750 | P03346 | Q9NQ35 | -0.10129  |
| 120751 | P03346 | A0PG75 | -0.19531  |
| 120752 | P03346 | P38405 | -0.7419   |
| 120753 | P03346 | P09758 | -0.65628  |
| 120754 | P03346 | Q6PXP3 | -0.46408  |
| 120755 | P03346 | Q13946 | -0.22675  |
| 120756 | P03346 | Q13591 | -0.73042  |
| 120757 | P03346 | Q14977 | -0.20744  |
| 120758 | P03346 | H3BU77 | -0.071651 |
| 120759 | P03346 | Q2TVT3 | -0.2683   |
| 120760 | P03346 | Q99836 | -0.22741  |
| 120761 | P03346 | A8MPY1 | -0.47559  |
| 120762 | P03346 | Q9BY15 | -1.5039   |
| 120763 | P03346 | Q5JXA9 | -0.50365  |
| 120764 | P03346 | Q8NGF9 | -0.92763  |

|        |        |        |           |
|--------|--------|--------|-----------|
| 120765 | P03346 | Q6ZMY3 | -0.14081  |
| 120766 | P03346 | P61371 | -0.22742  |
| 120767 | P03346 | Q8N3Z3 | -0.5053   |
| 120768 | P03346 | Q58EX7 | -0.39327  |
| 120769 | P03346 | A6NIZ1 | -0.7051   |
| 120770 | P03346 | Q8TF66 | -0.50365  |
| 120771 | P03346 | Q8NC74 | -0.056448 |
| 120772 | P03346 | P01242 | -0.51511  |
| 120773 | P03346 | P33176 | -0.23003  |
| 120774 | P03346 | Q5JU67 | -0.18666  |
| 120775 | P03346 | Q99726 | -0.5397   |
| 120776 | P03346 | Q96LZ2 | -0.18342  |
| 120777 | P03346 | Q8NBN7 | -0.70492  |
| 120778 | P03346 | P61266 | -0.4834   |
| 120779 | P03346 | P29323 | -0.71481  |
| 120780 | P03346 | Q9NWQ8 | -0.2544   |
| 120781 | P03346 | P59901 | -0.22741  |
| 120782 | P03346 | Q4G0M1 | -0.53519  |
| 120783 | P03346 | A6PVI3 | -0.38451  |
| 120784 | P03346 | Q8N8A4 | -0.24556  |
| 120785 | P03346 | Q96Q91 | -0.59204  |
| 120786 | P03346 | Q99835 | -0.24113  |
| 120787 | P03346 | Q96MX0 | -0.67729  |
| 120788 | P03346 | P08240 | -0.74694  |
| 120789 | P03346 | Q96BR5 | -0.21028  |
| 120790 | P03346 | Q9Y261 | -0.27208  |
| 120791 | P03346 | Q684P5 | -0.22137  |
| 120792 | P03346 | Q96LJ7 | -0.60634  |
| 120793 | P03346 | Q6UWM5 | -0.53519  |
| 120794 | P03346 | Q9BX97 | -0.34333  |
| 120795 | P03346 | Q8WY91 | -0.098259 |
| 120796 | P03346 | Q10981 | -0.35737  |
| 120797 | P03346 | Q96A09 | -0.027266 |
| 120798 | P03346 | P55268 | -0.51217  |
| 120799 | P03346 | Q02108 | -0.40658  |
| 120800 | P03346 | Q8N4N8 | -0.25736  |
| 120801 | P03346 | P0C0E4 | -0.55877  |
| 120802 | P03346 | A0AV96 | -0.23027  |
| 120803 | P03346 | O94967 | -0.2274   |
| 120804 | P03346 | P61109 | -0.53519  |
| 120805 | P03346 | O43731 | -0.25191  |
| 120806 | P03346 | Q6ZR54 | -0.013652 |
| 120807 | P03346 | Q8IZL9 | -0.19816  |
| 120808 | P03346 | Q96MH7 | -0.18442  |
| 120809 | P03346 | Q86Y38 | -0.85319  |
| 120810 | P03346 | O60344 | -0.70024  |
| 120811 | P03346 | P42892 | -0.53009  |
| 120812 | P03346 | Q5JRX3 | -0.22456  |
| 120813 | P03346 | Q6UXR4 | -0.45356  |
| 120814 | P03346 | Q00295 | -0.45426  |
| 120815 | P03346 | Q96NC0 | -0.15459  |
| 120816 | P03346 | Q8IYB0 | -0.013652 |
| 120817 | P03346 | Q6P4A7 | -0.55017  |
| 120818 | P03346 | A8MT79 | -0.69022  |
| 120819 | P03346 | P51153 | -0.32622  |
| 120820 | P03346 | O75678 | -0.22894  |
| 120821 | P03346 | P08567 | -0.22741  |
| 120822 | P03346 | O75629 | -0.44516  |
| 120823 | P03346 | Q14435 | -0.21961  |
| 120824 | P03346 | Q9UJ83 | -0.68021  |
| 120825 | P03346 | Q8N4A0 | -0.2761   |
| 120826 | P03346 | Q96Q42 | -0.36459  |
| 120827 | P03346 | Q92523 | -0.44822  |
| 120828 | P03346 | Q96RD1 | -0.92763  |
| 120829 | P03346 | P20849 | -0.43455  |
| 120830 | P03346 | Q9BZG2 | -0.483    |
| 120831 | P03346 | P11509 | -0.51723  |
| 120832 | P03346 | Q86XA0 | -0.4428   |
| 120833 | P03346 | Q9P2P1 | -0.23208  |
| 120834 | P03346 | P04438 | -0.80078  |
| 120835 | P03346 | Q8TBC4 | -0.22692  |
| 120836 | P03346 | A6NGB9 | -0.12677  |
| 120837 | P03346 | Q9NYN1 | -0.91075  |
| 120838 | P03346 | Q6IQ20 | -0.30313  |
| 120839 | P03346 | Q6UWW8 | -0.2274   |
| 120840 | P03346 | P31751 | -0.18475  |

|        |        |        |           |
|--------|--------|--------|-----------|
| 120841 | P03346 | Q14565 | -0.20116  |
| 120842 | P03346 | P0CV99 | -0.10548  |
| 120843 | P03346 | Q8IXL9 | -0.22469  |
| 120844 | P03346 | P19438 | -0.25583  |
| 120845 | P03346 | Q05996 | -0.85871  |
| 120846 | P03346 | Q5VZ46 | -0.11938  |
| 120847 | P03346 | P01815 | -0.80078  |
| 120848 | P03346 | Q9UP65 | -0.56398  |
| 120849 | P03346 | P08603 | -0.69778  |
| 120850 | P03346 | Q8N474 | -0.2889   |
| 120851 | P03346 | P30498 | -0.76151  |
| 120852 | P03346 | P48448 | -0.34919  |
| 120853 | P03346 | P85298 | -0.25639  |
| 120854 | P03346 | Q9BZM1 | -0.54191  |
| 120855 | P03346 | P13637 | -0.51173  |
| 120856 | P03346 | Q75015 | -0.8021   |
| 120857 | P03346 | Q53FA7 | -0.50423  |
| 120858 | P03346 | Q8N2S1 | -0.26274  |
| 120859 | P03346 | P26440 | -0.233    |
| 120860 | P03346 | Q13683 | -0.45176  |
| 120861 | P03346 | Q9ULI1 | -0.22741  |
| 120862 | P03346 | Q629K1 | -0.63608  |
| 120863 | P03346 | Q8NH94 | -0.92763  |
| 120864 | P03346 | A8MPP1 | -0.24606  |
| 120865 | P03346 | Q8N4Y2 | -0.20688  |
| 120866 | P03346 | Q7Z2V1 | -0.013652 |
| 120867 | P03346 | P55042 | -0.37241  |
| 120868 | P03346 | Q92911 | -0.47206  |
| 120869 | P03346 | P31512 | -0.82332  |
| 120870 | P03346 | Q8NBD8 | -0.50365  |
| 120871 | P03346 | P01833 | -1.208    |
| 120872 | P03346 | Q96PC2 | -0.25569  |
| 120873 | P03346 | Q6PJI1 | -0.10293  |
| 120874 | P03346 | O14647 | -0.21743  |
| 120875 | P03346 | P57775 | -0.22748  |
| 120876 | P03346 | Q8NH92 | -0.92763  |
| 120877 | P03346 | Q9NQR7 | -0.013652 |
| 120878 | P03346 | A8MWA6 | -0.22825  |
| 120879 | P03346 | Q9H9V4 | -0.49734  |
| 120880 | P03346 | Q8TAI1 | -0.024568 |
| 120881 | P03346 | Q86TB3 | -0.40894  |
| 120882 | P03346 | Q8N4L1 | -0.50365  |
| 120883 | P03346 | Q75379 | -0.31422  |
| 120884 | P03346 | Q17RH7 | -0.013652 |
| 120885 | P03346 | Q86W10 | -0.86651  |
| 120886 | P03346 | Q8N6T0 | -0.050178 |
| 120887 | P03346 | Q9UPQ7 | -0.31141  |
| 120888 | P03346 | P35052 | -0.78517  |
| 120889 | P03346 | P51957 | -0.30385  |
| 120890 | P03346 | F8WFD2 | -0.088984 |
| 120891 | P03346 | Q9NYA3 | -0.14148  |
| 120892 | P03346 | Q9Y5X3 | -0.41863  |
| 120893 | P03346 | Q2PPJ7 | -0.21737  |
| 120894 | P03346 | P03928 | -0.29978  |
| 120895 | P03346 | Q15118 | -0.50692  |
| 120896 | P03346 | Q94989 | -0.22705  |
| 120897 | P03346 | Q00254 | -0.7789   |
| 120898 | P03346 | Q9BUT1 | -0.39122  |
| 120899 | P03346 | E2RYF7 | -0.53519  |
| 120900 | P03346 | Q96PB7 | -0.58132  |
| 120901 | P03346 | A6NLC5 | -0.13195  |
| 120902 | P03346 | Q9NPI5 | -0.26816  |
| 120903 | P03346 | Q92537 | -0.30782  |
| 120904 | P03346 | Q96QU1 | -1.1762   |
| 120905 | P03346 | P63027 | -0.22604  |
| 120906 | P03346 | Q8NI32 | -0.2482   |
| 120907 | P03346 | P63218 | -0.3217   |
| 120908 | P03346 | Q9UHV5 | -0.4485   |
| 120909 | P03346 | P06870 | -0.28647  |
| 120910 | P03346 | Q96EY4 | -0.020404 |
| 120911 | P03346 | P32314 | -0.2966   |
| 120912 | P03346 | P08631 | -0.23626  |
| 120913 | P03346 | Q9P266 | -0.013513 |
| 120914 | P03346 | P11362 | -0.25554  |
| 120915 | P03346 | P56202 | -0.45966  |
| 120916 | P03346 | Q92544 | -0.50365  |

|        |        |        |           |
|--------|--------|--------|-----------|
| 120917 | P03346 | Q5SYC1 | -0.28338  |
| 120918 | P03346 | P19971 | -0.23577  |
| 120919 | P03346 | Q6P4A8 | -0.44267  |
| 120920 | P03346 | Q6IF42 | -0.92763  |
| 120921 | P03346 | Q8IUR7 | -0.22747  |
| 120922 | P03346 | P43146 | -0.22748  |
| 120923 | P03346 | P25116 | -0.3639   |
| 120924 | P03346 | Q8N302 | -0.20471  |
| 120925 | P03346 | Q96LS8 | -0.083431 |
| 120926 | P03346 | P01737 | -0.23262  |
| 120927 | P03346 | Q9UM01 | -0.76086  |
| 120928 | P03346 | Q96QV1 | -0.32158  |
| 120929 | P03346 | P16471 | -0.7922   |
| 120930 | P03346 | Q6IE36 | -0.62773  |
| 120931 | P03346 | H0Y7S4 | -0.1752   |
| 120932 | P03346 | Q8IUH2 | -0.67752  |
| 120933 | P03346 | Q5VW32 | -0.17313  |
| 120934 | P03346 | A4D126 | -0.22075  |
| 120935 | P03346 | Q8TE82 | -0.21555  |
| 120936 | P03346 | P08912 | -0.76037  |
| 120937 | P03346 | P0CJ69 | -0.36125  |
| 120938 | P03346 | O14764 | -0.7525   |
| 120939 | P03346 | Q3MJ40 | -0.14988  |
| 120940 | P03346 | P30483 | -0.76151  |
| 120941 | P03346 | Q8N377 | -0.013652 |
| 120942 | P03346 | P61916 | -0.30677  |
| 120943 | P03346 | P51686 | -1.0562   |
| 120944 | P03346 | Q9Y2I1 | -0.22741  |
| 120945 | P03346 | O15523 | -0.32215  |
| 120946 | P03346 | P40197 | -0.68812  |
| 120947 | P03346 | P57087 | -0.22743  |
| 120948 | P03346 | Q8NBV8 | -0.54141  |
| 120949 | P03346 | P05771 | -0.22249  |
| 120950 | P03346 | Q92574 | -0.22737  |
| 120951 | P03346 | Q8IZS7 | -0.64878  |
| 120952 | P03346 | P81408 | -0.40968  |
| 120953 | P03346 | Q8IV35 | -0.22743  |
| 120954 | P03346 | P48060 | -1.0301   |
| 120955 | P03346 | Q01432 | -0.21115  |
| 120956 | P03346 | Q96KW9 | -0.54208  |
| 120957 | P03346 | P35670 | -0.22759  |
| 120958 | P03346 | Q86XE3 | -0.57602  |
| 120959 | P03346 | Q5T197 | -0.56385  |
| 120960 | P03346 | P19961 | -0.62397  |
| 120961 | P03346 | P49767 | -0.2733   |
| 120962 | P03346 | Q6ZR03 | -0.1405   |
| 120963 | P03346 | P00915 | -0.22471  |
| 120964 | P03346 | P35346 | -0.79762  |
| 120965 | P03346 | Q9BVK2 | -0.57557  |
| 120966 | P03346 | O75438 | -0.2513   |
| 120967 | P03346 | Q96PP4 | -0.13332  |
| 120968 | P03346 | P15151 | -0.22741  |
| 120969 | P03346 | P07203 | -0.24513  |
| 120970 | P03346 | Q2TBE0 | -0.17725  |
| 120971 | P03346 | Q9Y278 | -0.36446  |
| 120972 | P03346 | Q8IZF3 | -1.0077   |
| 120973 | P03346 | Q8NEQ5 | -0.50365  |
| 120974 | P03346 | Q53TN4 | -0.70164  |
| 120975 | P03346 | P0CF51 | -0.50365  |
| 120976 | P03346 | P10606 | -0.25548  |
| 120977 | P03346 | P04040 | -0.30158  |
| 120978 | P03346 | P29074 | -0.22749  |
| 120979 | P03346 | O00451 | -0.2323   |
| 120980 | P03346 | Q6Q8B3 | -0.50365  |
| 120981 | P03346 | Q9H3U7 | -0.89566  |
| 120982 | P03346 | E7EW31 | -0.013652 |
| 120983 | P03346 | P35749 | -0.22098  |
| 120984 | P03346 | P39060 | -0.28784  |
| 120985 | P03346 | Q15126 | -0.43308  |
| 120986 | P03346 | Q99944 | -0.91851  |
| 120987 | P03346 | Q00796 | -0.5532   |
| 120988 | P03346 | P19021 | -0.61776  |
| 120989 | P03346 | Q9BX63 | -0.2766   |
| 120990 | P03346 | P02675 | -0.68821  |
| 120991 | P03346 | Q9NYL2 | -0.22741  |
| 120992 | P03346 | Q969M1 | -0.1908   |

|        |        |        |           |
|--------|--------|--------|-----------|
| 120993 | P03346 | O60384 | -0.060525 |
| 120994 | P03346 | Q96NR3 | -0.53595  |
| 120995 | P03346 | P12955 | -0.39697  |
| 120996 | P03346 | Q9Y6Q6 | -0.22748  |
| 120997 | P03346 | Q9ULV8 | -0.22741  |
| 120998 | P03346 | Q6GTX8 | -0.23189  |
| 120999 | P03346 | P12259 | -0.28762  |
| 121000 | P03346 | Q05D32 | -0.14845  |
| 121001 | P03346 | Q9NZH0 | -0.40194  |
| 121002 | P03346 | Q9NP31 | -0.34454  |
| 121003 | P03346 | Q6IEZ7 | -0.92763  |
| 121004 | P03346 | Q63ZY6 | -0.15745  |
| 121005 | P03346 | Q5JSQ8 | -0.15931  |
| 121006 | P03346 | Q5QNW6 | -0.35085  |
| 121007 | P03346 | Q92730 | -0.22714  |
| 121008 | P03346 | Q6ZPD8 | -0.62635  |
| 121009 | P03346 | P61129 | -0.20929  |
| 121010 | P03346 | Q8IYG6 | -0.20979  |
| 121011 | P03346 | Q9NQ32 | -0.10546  |
| 121012 | P03346 | P45379 | -0.20992  |
| 121013 | P03346 | Q16584 | -0.22741  |
| 121014 | P03346 | Q9UPM9 | -0.18844  |
| 121015 | P03346 | Q9UPT6 | -0.22704  |
| 121016 | P03346 | Q6NUK4 | -0.50365  |
| 121017 | P03346 | Q8NET1 | -0.52229  |
| 121018 | P03346 | O60706 | -0.90574  |
| 121019 | P03346 | O15409 | -0.31352  |
| 121020 | P03346 | Q8N1D0 | -0.14151  |
| 121021 | P03346 | A4D1B5 | -0.16743  |
| 121022 | P03346 | Q5VXI9 | -0.58765  |
| 121023 | P03346 | Q12770 | -0.22741  |
| 121024 | P03346 | Q9HBH9 | -0.51078  |
| 121025 | P03346 | Q52LC2 | -0.46058  |
| 121026 | P03346 | Q86UV6 | -0.30279  |
| 121027 | P03346 | Q8NES3 | -0.7113   |
| 121028 | P03346 | P56748 | -0.40241  |
| 121029 | P03346 | O76002 | -0.92763  |
| 121030 | P03346 | Q9UJA9 | -1.2968   |
| 121031 | P03346 | Q5GJ75 | -0.15711  |
| 121032 | P03346 | D6RF30 | -0.15341  |
| 121033 | P03346 | Q6ZS81 | -0.50365  |
| 121034 | P03346 | O75874 | -0.20714  |
| 121035 | P03346 | Q9ULW5 | -0.58478  |
| 121036 | P03346 | A8MVP8 | -0.12915  |
| 121037 | P03346 | P35372 | -0.31138  |
| 121038 | P03346 | Q9BV23 | -0.51954  |
| 121039 | P03346 | P02790 | -0.22786  |
| 121040 | P03346 | Q8WWB3 | -0.14803  |
| 121041 | P03346 | Q5T700 | -0.50365  |
| 121042 | P03346 | Q9BS92 | -0.21411  |
| 121043 | P03346 | Q8TDV5 | -1.0276   |
| 121044 | P03346 | P36969 | -0.24325  |
| 121045 | P03346 | Q9Y234 | -0.14341  |
| 121046 | P03346 | P10153 | -0.52563  |
| 121047 | P03346 | Q5W0Z9 | -0.59087  |
| 121048 | P03346 | Q6UWL2 | -0.57602  |
| 121049 | P03346 | Q96EX3 | -0.22745  |
| 121050 | P03346 | P14778 | -0.83767  |
| 121051 | P03346 | Q9H3N1 | -0.66698  |
| 121052 | P03346 | Q9Y2E6 | -0.22537  |
| 121053 | P03346 | P11168 | -0.15016  |
| 121054 | P03346 | Q2KJ03 | -0.1144   |
| 121055 | P03346 | Q15842 | -0.64497  |
| 121056 | P03346 | Q8IYS1 | -0.23873  |
| 121057 | P03346 | P0C7U1 | -0.24413  |
| 121058 | P03346 | O75022 | -0.31463  |
| 121059 | P03346 | Q9Y4D8 | -0.41255  |
| 121060 | P03346 | Q5W5W9 | -0.42526  |
| 121061 | P03346 | Q4KMP7 | -0.77984  |
| 121062 | P03346 | Q4KWH8 | -0.22741  |
| 121063 | P03346 | O43927 | -0.64205  |
| 121064 | P03346 | Q9P273 | -0.68689  |
| 121065 | P03346 | P54803 | -0.16436  |
| 121066 | P03346 | Q8NCX0 | -0.074883 |
| 121067 | P03346 | Q9ULI0 | -0.60047  |
| 121068 | P03346 | Q96PJ5 | -0.22743  |

|        |        |        |           |
|--------|--------|--------|-----------|
| 121069 | P03346 | Q5JPE7 | -0.25443  |
| 121070 | P03346 | O75575 | -0.44785  |
| 121071 | P03346 | Q8WXT5 | -0.31352  |
| 121072 | P03346 | Q9NV64 | -0.50365  |
| 121073 | P03346 | A0AVF1 | -0.1164   |
| 121074 | P03346 | Q8TAX0 | -0.21885  |
| 121075 | P03346 | Q9Y2V0 | -0.11179  |
| 121076 | P03346 | P24390 | -0.22636  |
| 121077 | P03346 | Q2M2D7 | -0.56151  |
| 121078 | P03346 | Q9NXP7 | -0.18851  |
| 121079 | P03346 | Q8NI77 | -0.36661  |
| 121080 | P03346 | A7E2Y1 | -0.51042  |
| 121081 | P03346 | Q8WX77 | -0.51705  |
| 121082 | P03346 | Q6AI14 | -0.71464  |
| 121083 | P03346 | Q99650 | -0.44671  |
| 121084 | P03346 | Q5SZD1 | -0.088396 |
| 121085 | P03346 | Q96PN6 | -0.47488  |
| 121086 | P03346 | Q9H7T3 | -0.15556  |
| 121087 | P03346 | Q9H496 | -0.11555  |
| 121088 | P03346 | Q96T59 | -0.14514  |
| 121089 | P03346 | Q94887 | -0.22743  |
| 121090 | P03346 | Q8NHE4 | -0.45244  |
| 121091 | P03346 | Q06432 | -0.65727  |
| 121092 | P03346 | Q9NXE8 | -0.029221 |
| 121093 | P03346 | O60427 | -0.22413  |
| 121094 | P03346 | O60343 | -0.66141  |
| 121095 | P03346 | Q7Z5U6 | -0.22745  |
| 121096 | P03346 | Q93086 | -0.74789  |
| 121097 | P03346 | Q8TAM1 | -0.18027  |
| 121098 | P03346 | Q9Y4F4 | -0.2144   |
| 121099 | P03346 | Q8N6V4 | -0.13514  |
| 121100 | P03346 | Q14DG7 | -0.30782  |
| 121101 | P03346 | Q5BIV9 | -0.2482   |
| 121102 | P03346 | Q96JY6 | -0.22738  |
| 121103 | P03346 | Q12951 | -0.26938  |
| 121104 | P03346 | Q8NGI2 | -0.92763  |
| 121105 | P03346 | Q86VH5 | -0.50365  |
| 121106 | P03346 | Q9H340 | -0.92763  |
| 121107 | P03346 | Q96NW7 | -0.2282   |
| 121108 | P03346 | Q99435 | -0.22743  |
| 121109 | P03346 | P05141 | -0.22837  |
| 121110 | P03346 | P01779 | -0.80078  |
| 121111 | P03346 | Q9Y272 | -0.53584  |
| 121112 | P03346 | Q6IPX1 | -0.92582  |
| 121113 | P03346 | Q9Y5T4 | -0.43946  |
| 121114 | P03346 | Q9H6A0 | -0.21153  |
| 121115 | P03346 | Q86W92 | -0.2926   |
| 121116 | P03346 | Q99819 | -0.19095  |
| 121117 | P03346 | Q5ST30 | -0.15955  |
| 121118 | P03346 | Q00555 | -0.25075  |
| 121119 | P03346 | P23109 | -0.21116  |
| 121120 | P03346 | Q6TDU7 | -0.023293 |
| 121121 | P03346 | A6NHY2 | -0.22741  |
| 121122 | P03346 | Q8N2B8 | -0.066646 |
| 121123 | P03346 | Q8N0U6 | -0.013652 |
| 121124 | P03346 | P30464 | -0.76151  |
| 121125 | P03346 | Q2TB18 | -0.18184  |
| 121126 | P03346 | P08686 | -0.56751  |
| 121127 | P03346 | P07602 | -0.72706  |
| 121128 | P03346 | Q9NWF4 | -0.73195  |
| 121129 | P03346 | Q96JB1 | -0.42928  |
| 121130 | P03346 | P43681 | -0.57432  |
| 121131 | P03346 | Q9BRQ5 | -0.19408  |
| 121132 | P03346 | P55291 | -0.83168  |
| 121133 | P03346 | P26717 | -0.29912  |
| 121134 | P03346 | Q8N143 | -0.20145  |
| 121135 | P03346 | A8MZ26 | -0.22662  |
| 121136 | P03346 | P61769 | -0.35647  |
| 121137 | P03346 | Q9H3R2 | -1.1292   |
| 121138 | P03346 | Q9Y561 | -0.26312  |
| 121139 | P03346 | Q9H479 | -0.2025   |
| 121140 | P03346 | Q8NH21 | -0.92763  |
| 121141 | P03346 | Q8NH02 | -0.92763  |
| 121142 | P03346 | Q9H5Q3 | -0.50365  |
| 121143 | P03346 | P05109 | -0.22828  |
| 121144 | P03346 | Q8NB9  | -0.58094  |

|        |        |         |           |
|--------|--------|---------|-----------|
| 121145 | P03346 | Q86UD3  | -0.70843  |
| 121146 | P03346 | Q9P2E8  | -0.49342  |
| 121147 | P03346 | P57729  | -0.58111  |
| 121148 | P03346 | A2RUT3  | -0.50365  |
| 121149 | P03346 | Q9Y5Q5  | -1.3213   |
| 121150 | P03346 | P01719  | -0.80078  |
| 121151 | P03346 | Q9UET6  | -0.023492 |
| 121152 | P03346 | Q92953  | -0.63203  |
| 121153 | P03346 | Q8WZ55  | -0.41041  |
| 121154 | P03346 | Q99541  | -0.19213  |
| 121155 | P03346 | Q5DID0  | -1.0027   |
| 121156 | P03346 | Q86VD7  | -0.33679  |
| 121157 | P03346 | P61764  | -0.22493  |
| 121158 | P03346 | Q8N884  | -0.21539  |
| 121159 | P03346 | Q9UPY6  | -0.22517  |
| 121160 | P03346 | P23921  | -0.19819  |
| 121161 | P03346 | P15104  | -0.41892  |
| 121162 | P03346 | P52789  | -0.27816  |
| 121163 | P03346 | Q8NGR8  | -0.92763  |
| 121164 | P03346 | P0CG05  | -0.75616  |
| 121165 | P03346 | Q96NF6  | -0.50365  |
| 121166 | P03346 | Q8WZA0  | -0.096276 |
| 121167 | P03346 | Q15486  | -0.067378 |
| 121168 | P03346 | Q9P2D6  | -0.16607  |
| 121169 | P03346 | Q99758  | -0.93605  |
| 121170 | P03346 | P30989  | -0.97993  |
| 121171 | P03346 | Q8NIFY9 | -0.16176  |
| 121172 | P03346 | Q5TEZ4  | -0.013652 |
| 121173 | P03346 | P30046  | -0.21284  |
| 121174 | P03346 | P06315  | -0.80078  |
| 121175 | P03346 | O95047  | -0.92763  |
| 121176 | P03346 | Q9UK22  | -0.20297  |
| 121177 | P03346 | P55000  | -0.77847  |
| 121178 | P03346 | Q8NH41  | -0.92763  |
| 121179 | P03346 | P52701  | -0.18909  |
| 121180 | P03346 | Q9H0Y0  | -0.15057  |
| 121181 | P03346 | Q9BRQ8  | -0.21246  |
| 121182 | P03346 | P09110  | -0.22177  |
| 121183 | P03346 | Q2UY09  | -0.79457  |
| 121184 | P03346 | P02788  | -0.22802  |
| 121185 | P03346 | P22676  | -0.22709  |
| 121186 | P03346 | P98077  | -0.22741  |
| 121187 | P03346 | Q96DR7  | -0.61644  |
| 121188 | P03346 | Q8TDX5  | -0.19789  |
| 121189 | P03346 | Q96CD2  | -0.15746  |
| 121190 | P03346 | Q5ZEY9  | -0.065109 |
| 121191 | P03346 | Q71U36  | -0.21817  |
| 121192 | P03346 | Q8ND71  | -0.21861  |
| 121193 | P03346 | I3L273  | -0.28399  |
| 121194 | P03346 | Q9HAE3  | -0.22816  |
| 121195 | P03346 | Q8WTR8  | -0.53519  |
| 121196 | P03346 | Q6ZRH3  | -0.11472  |
| 121197 | P03346 | Q9H867  | -0.222    |
| 121198 | P03346 | Q71RH2  | -0.51601  |
| 121199 | P03346 | Q5JSP0  | -0.50883  |
| 121200 | P03346 | P11766  | -0.22419  |
| 121201 | P03346 | P00533  | -0.31468  |
| 121202 | P03346 | Q10589  | -0.28745  |
| 121203 | P03346 | Q8NGN3  | -0.92763  |
| 121204 | P03346 | O95832  | -0.51751  |
| 121205 | P03346 | Q0GE19  | -0.61464  |
| 121206 | P03346 | Q9H936  | -0.22824  |
| 121207 | P03346 | Q8NHC7  | -0.92763  |
| 121208 | P03346 | P03891  | -0.40036  |
| 121209 | P03346 | Q92851  | -0.22733  |
| 121210 | P03346 | Q8N6L0  | -0.59982  |
| 121211 | P03346 | P57059  | -0.23166  |
| 121212 | P03346 | O14983  | -0.35052  |
| 121213 | P03346 | Q8NET6  | -0.31423  |
| 121214 | P03346 | O14718  | -0.98165  |
| 121215 | P03346 | O75951  | -0.555    |
| 121216 | P03346 | Q04671  | -0.19804  |
| 121217 | P03346 | Q9GZU5  | -0.78554  |
| 121218 | P03346 | Q9NRE2  | -0.22152  |
| 121219 | P03346 | Q86WS3  | -0.53519  |
| 121220 | P03346 | Q0P6H9  | -0.50365  |



|        |        |        |           |
|--------|--------|--------|-----------|
| 121221 | P03346 | P47944 | -0.062279 |
| 121222 | P03346 | Q8NHS9 | -0.12862  |
| 121223 | P03346 | Q86YM7 | -0.22658  |
| 121224 | P03346 | Q96AQ9 | -0.038765 |
| 121225 | P03346 | P01774 | -0.80078  |
| 121226 | P03346 | P09211 | -0.22689  |
| 121227 | P03346 | Q86YT9 | -0.60843  |
| 121228 | P03346 | Q765P7 | -0.32477  |
| 121229 | P03346 | P34931 | -0.33218  |
| 121230 | P03346 | Q8NBN3 | -0.50365  |
| 121231 | P03346 | Q6ZRI6 | -0.054029 |
| 121232 | P03346 | P32418 | -0.41749  |
| 121233 | P03346 | Q96EU7 | -0.42136  |
| 121234 | P03346 | Q9BY50 | -0.58051  |
| 121235 | P03346 | Q9Y584 | -0.18025  |
| 121236 | P03346 | P22309 | -0.41752  |
| 121237 | P03346 | Q9NUV7 | -0.63724  |
| 121238 | P03346 | Q9H6R6 | -0.70138  |
| 121239 | P03346 | P35609 | -0.64748  |
| 121240 | P03346 | Q8N149 | -0.65731  |
| 121241 | P03346 | Q92817 | -0.22333  |
| 121242 | P03346 | Q3T906 | -0.23553  |
| 121243 | P03346 | Q9NV44 | -0.12811  |
| 121244 | P03346 | Q9Y566 | -0.22742  |
| 121245 | P03346 | Q9UKQ2 | -1.3679   |
| 121246 | P03346 | Q96FF7 | -0.013652 |
| 121247 | P03346 | Q5T442 | -0.54255  |
| 121248 | P03346 | Q9Y5W9 | -0.21892  |
| 121249 | P03346 | Q9UQ05 | -0.69662  |
| 121250 | P03346 | O00182 | -0.54874  |
| 121251 | P03346 | Q9H2D1 | -0.26614  |
| 121252 | P03346 | Q8WV35 | -0.22326  |
| 121253 | P03346 | Q86XE5 | -0.15051  |
| 121254 | P03346 | Q9NS71 | -0.30623  |
| 121255 | P03346 | Q96M98 | -0.21663  |
| 121256 | P03346 | Q9BPW9 | -0.6605   |
| 121257 | P03346 | P30874 | -0.23419  |
| 121258 | P03346 | Q6UXD5 | -0.77739  |
| 121259 | P03346 | Q9BRI3 | -0.46654  |
| 121260 | P03346 | Q14576 | -0.57712  |
| 121261 | P03346 | P98174 | -0.64256  |
| 121262 | P03346 | Q86TI2 | -0.22488  |
| 121263 | P03346 | O15041 | -0.67159  |
| 121264 | P03346 | Q9Y496 | -0.25644  |
| 121265 | P03346 | Q9UGQ3 | -0.34867  |
| 121266 | P03346 | Q8NI37 | -0.19878  |
| 121267 | P03346 | Q8IYT2 | -0.4428   |
| 121268 | P03346 | Q96L93 | -0.55738  |
| 121269 | P03346 | Q6N021 | -0.28707  |
| 121270 | P03346 | Q8IY95 | -0.6253   |
| 121271 | P03346 | A4FU28 | -0.50365  |
| 121272 | P03346 | Q96SI9 | -0.25807  |
| 121273 | P03346 | Q8IYK4 | -0.21288  |
| 121274 | P03346 | O94823 | -0.3898   |
| 121275 | P03346 | Q04756 | -0.92635  |
| 121276 | P03346 | O94941 | -0.22385  |
| 121277 | P03346 | Q2M296 | -0.43965  |
| 121278 | P03346 | P78324 | -0.84993  |
| 121279 | P03346 | P14138 | -0.57706  |
| 121280 | P03346 | A8MVM7 | -0.013652 |
| 121281 | P03346 | Q01955 | -0.3055   |
| 121282 | P03346 | P35914 | -0.25346  |
| 121283 | P03346 | Q9HC29 | -0.22739  |
| 121284 | P03346 | P48643 | -0.16203  |
| 121285 | P03346 | P0C5K7 | -0.2067   |
| 121286 | P03346 | O14827 | -0.44697  |
| 121287 | P03346 | Q96S90 | -0.20724  |
| 121288 | P03346 | Q96EK9 | -0.48833  |
| 121289 | P03346 | Q8NAT2 | -0.28301  |
| 121290 | P03346 | Q8NHX9 | -0.27137  |
| 121291 | P03346 | Q9NXL6 | -0.46994  |
| 121292 | P03346 | Q6UVM3 | -1.0091   |
| 121293 | P03346 | Q8NEV8 | -0.17249  |
| 121294 | P03346 | Q9UBN4 | -0.22741  |
| 121295 | P03346 | P11413 | -0.1692   |
| 121296 | P03346 | Q6ZSJ9 | -0.50365  |

|        |        |        |           |
|--------|--------|--------|-----------|
| 121297 | P03346 | A6NKC0 | -0.23569  |
| 121298 | P03346 | P47992 | -0.41787  |
| 121299 | P03346 | Q96PF1 | -0.22146  |
| 121300 | P03346 | Q95427 | -0.73061  |
| 121301 | P03346 | Q9H7P9 | -0.34977  |
| 121302 | P03346 | Q8IZJ4 | -0.35275  |
| 121303 | P03346 | Q96FJ8 | -0.013652 |
| 121304 | P03346 | P52569 | -0.52228  |
| 121305 | P03346 | B1AH88 | -0.013652 |
| 121306 | P03346 | Q8NGZ3 | -0.92763  |
| 121307 | P03346 | Q86UP6 | -0.34154  |
| 121308 | P03346 | Q99963 | -0.22779  |
| 121309 | P03346 | P41145 | -0.64302  |
| 121310 | P03346 | P38570 | -0.77202  |
| 121311 | P03346 | P05060 | -0.11734  |
| 121312 | P03346 | Q96P68 | -0.92894  |
| 121313 | P03346 | O00237 | -0.35489  |
| 121314 | P03346 | Q8N9T2 | -0.013652 |
| 121315 | P03346 | Q8N8Z6 | -0.67572  |
| 121316 | P03346 | Q9BYV6 | -0.22741  |
| 121317 | P03346 | Q9HBJ7 | -0.28694  |
| 121318 | P03346 | Q9Y5G7 | -0.86699  |
| 121319 | P03346 | Q9C0B6 | -0.30246  |
| 121320 | P03346 | P30519 | -0.21701  |
| 121321 | P03346 | Q8WUY1 | -0.53519  |
| 121322 | P03346 | Q9Y2D4 | -0.20118  |
| 121323 | P03346 | Q8IV50 | -0.16635  |
| 121324 | P03346 | Q2M2I3 | -0.2012   |
| 121325 | P03346 | Q53GQ0 | -0.49065  |
| 121326 | P03346 | O00358 | -0.31352  |
| 121327 | P03346 | P23582 | -0.47901  |
| 121328 | P03346 | Q8N7X2 | -0.013652 |
| 121329 | P03346 | Q8N0Y3 | -0.92763  |
| 121330 | P03346 | Q12841 | -0.73905  |
| 121331 | P03346 | Q49A17 | -0.45596  |
| 121332 | P03346 | Q9Y625 | -0.97126  |
| 121333 | P03346 | Q6UXH9 | -0.75113  |
| 121334 | P03346 | Q92823 | -0.65216  |
| 121335 | P03346 | Q5XPI4 | -0.22741  |
| 121336 | P03346 | P06318 | -0.80078  |
| 121337 | P03346 | O76094 | -0.22379  |
| 121338 | P03346 | Q6IQ26 | -0.22834  |
| 121339 | P03346 | Q9NQL2 | -0.32364  |
| 121340 | P03346 | Q8NI22 | -0.27632  |
| 121341 | P03346 | Q9NQC3 | -0.17381  |
| 121342 | P03346 | Q5NUL3 | -0.88003  |
| 121343 | P03346 | A6NFA0 | -0.50365  |
| 121344 | P03346 | O14603 | -0.1467   |
| 121345 | P03346 | Q96KG7 | -0.64089  |
| 121346 | P03346 | Q12912 | -0.59567  |
| 121347 | P03346 | Q6ICH7 | -0.67002  |
| 121348 | P03346 | A5X5Y0 | -0.66367  |
| 121349 | P03346 | A6ND36 | -0.19165  |
| 121350 | P03346 | Q8NGF1 | -0.92763  |
| 121351 | P03346 | Q13370 | -0.22668  |
| 121352 | P03346 | P01567 | -0.5412   |
| 121353 | P03346 | Q9Y5E4 | -0.87177  |
| 121354 | P03346 | B1ATL7 | -0.16098  |
| 121355 | P03346 | Q8IUX1 | -0.30782  |
| 121356 | P03346 | P08217 | -1.0507   |
| 121357 | P03346 | Q86YD3 | -1.1616   |
| 121358 | P03346 | Q8N9L9 | -0.20974  |
| 121359 | P03346 | Q9H346 | -0.92763  |
| 121360 | P03346 | A6NMA1 | -0.18321  |
| 121361 | P03346 | Q9HC57 | -0.44364  |
| 121362 | P03346 | Q96AJ9 | -0.19043  |
| 121363 | P03346 | Q5BJH2 | -0.30782  |
| 121364 | P03346 | Q59H18 | -0.22741  |
| 121365 | P03346 | Q15016 | -0.22738  |
| 121366 | P03346 | Q8N6V9 | -0.18326  |
| 121367 | P03346 | O76071 | -0.22748  |
| 121368 | P03346 | P15289 | -0.44449  |
| 121369 | P03346 | Q9BW72 | -0.44519  |
| 121370 | P03346 | Q9HDB8 | -0.15551  |
| 121371 | P03346 | Q9NYM9 | -0.2053   |
| 121372 | P03346 | Q96M63 | -0.17596  |

|        |        |        |           |
|--------|--------|--------|-----------|
| 121373 | P03346 | P53384 | -0.22171  |
| 121374 | P03346 | O95870 | -0.49089  |
| 121375 | P03346 | Q6UX15 | -0.5886   |
| 121376 | P03346 | Q8TCD5 | -0.12131  |
| 121377 | P03346 | Q5VUB5 | -0.50365  |
| 121378 | P03346 | A8MQ27 | -0.22739  |
| 121379 | P03346 | Q8NEX5 | -0.53519  |
| 121380 | P03346 | Q4G0T1 | -0.50549  |
| 121381 | P03346 | Q96JP5 | -0.20012  |
| 121382 | P03346 | P01148 | -0.75794  |
| 121383 | P03346 | Q6ZMB5 | -0.50365  |
| 121384 | P03346 | Q969S6 | -0.50365  |
| 121385 | P03346 | P15586 | -0.22962  |
| 121386 | P03346 | P53365 | -0.22654  |
| 121387 | P03346 | Q8NGQ2 | -0.92763  |
| 121388 | P03346 | Q9HCL0 | -0.94205  |
| 121389 | P03346 | Q6RUI8 | -0.026089 |
| 121390 | P03346 | Q9P0M6 | -0.48251  |
| 121391 | P03346 | Q8IWW8 | -0.20343  |
| 121392 | P03346 | O95838 | -0.87279  |
| 121393 | P03346 | Q02083 | -0.17011  |
| 121394 | P03346 | Q6UW01 | -0.5385   |
| 121395 | P03346 | Q5SQI0 | -0.17456  |
| 121396 | P03346 | Q9NQF3 | -0.22575  |
| 121397 | P03346 | Q96BH1 | -0.2241   |
| 121398 | P03346 | Q96HS1 | -0.35546  |
| 121399 | P03346 | Q30134 | -0.56914  |
| 121400 | P03346 | Q9HBL7 | -0.79688  |
| 121401 | P03346 | Q92643 | -0.35523  |
| 121402 | P03346 | Q9BTD8 | -0.22665  |
| 121403 | P03346 | O60242 | -1.0281   |
| 121404 | P03346 | Q6YHK3 | -0.80336  |
| 121405 | P03346 | B7ZAQ6 | -0.45508  |
| 121406 | P03346 | P41226 | -0.3464   |
| 121407 | P03346 | Q99677 | -1.1441   |
| 121408 | P03346 | A6NCW0 | -0.24472  |
| 121409 | P03346 | Q9UNF0 | -0.22739  |
| 121410 | P03346 | Q9UG01 | -0.31673  |
| 121411 | P03346 | P68133 | -0.094375 |
| 121412 | P03346 | Q6Q0C1 | -0.37103  |
| 121413 | P03346 | Q9Y2R4 | -0.25285  |
| 121414 | P03346 | Q9GZP1 | -0.60194  |
| 121415 | P03346 | Q92617 | -0.30782  |
| 121416 | P03346 | Q16696 | -0.59417  |
| 121417 | P03346 | Q9NY30 | -0.022751 |
| 121418 | P03346 | Q8TEU7 | -0.57364  |
| 121419 | P03346 | P42338 | -0.27837  |
| 121420 | P03346 | P52798 | -0.28558  |
| 121421 | P03346 | Q9BYN0 | -0.41712  |
| 121422 | P03346 | O95816 | -0.13944  |
| 121423 | P03346 | Q9BSJ5 | -0.50365  |
| 121424 | P03346 | Q5VSD8 | -0.042926 |
| 121425 | P03346 | P06280 | -0.18423  |
| 121426 | P03346 | Q86XD5 | -0.071152 |
| 121427 | P03346 | A8MWP4 | -0.185    |
| 121428 | P03346 | P35218 | -0.22621  |
| 121429 | P03346 | Q8TF44 | -0.22353  |
| 121430 | P03346 | Q9GZQ4 | -0.74526  |
| 121431 | P03346 | P35611 | -0.21712  |
| 121432 | P03346 | P08754 | -0.24615  |
| 121433 | P03346 | O75912 | -0.22741  |
| 121434 | P03346 | Q969Q1 | -0.22752  |
| 121435 | P03346 | Q8NGR1 | -0.92763  |
| 121436 | P03346 | Q13907 | -0.09024  |
| 121437 | P03346 | P39877 | -0.52923  |
| 121438 | P03346 | Q8NGA0 | -0.92763  |
| 121439 | P03346 | Q05707 | -0.82302  |
| 121440 | P03346 | Q4G0W2 | -0.508    |
| 121441 | P03346 | Q9Y3A6 | -0.25744  |
| 121442 | P03346 | P23327 | -0.15271  |
| 121443 | P03346 | Q8N743 | -0.65219  |
| 121444 | P03346 | Q5XG99 | -0.49519  |
| 121445 | P03346 | Q86YW0 | -0.22741  |
| 121446 | P03346 | O94907 | -0.26718  |
| 121447 | P03346 | Q68D42 | -0.50365  |
| 121448 | P03346 | Q9NX62 | -0.49538  |

|        |        |        |           |
|--------|--------|--------|-----------|
| 121449 | P03346 | A2RRP1 | -0.13357  |
| 121450 | P03346 | Q5VT33 | -0.045618 |
| 121451 | P03346 | P49189 | -0.29499  |
| 121452 | P03346 | Q8NHQ8 | -0.14184  |
| 121453 | P03346 | O75914 | -0.53239  |
| 121454 | P03346 | O75526 | -0.22451  |
| 121455 | P03346 | B5MCN3 | -0.56728  |
| 121456 | P03346 | A1L157 | -0.50365  |
| 121457 | P03346 | Q9H5V8 | -1.1616   |
| 121458 | P03346 | Q9UBA6 | -0.21776  |
| 121459 | P03346 | Q6UXA7 | -0.48356  |
| 121460 | P03346 | Q5TCX8 | -0.78793  |
| 121461 | P03346 | Q9NXD2 | -0.21937  |
| 121462 | P03346 | P30041 | -0.22584  |
| 121463 | P03346 | Q9P227 | -0.80578  |
| 121464 | P03346 | Q15124 | -0.18088  |
| 121465 | P03346 | Q6NT55 | -0.57616  |
| 121466 | P03346 | Q96LQ0 | -0.04602  |
| 121467 | P03346 | Q3B7T3 | -0.41091  |
| 121468 | P03346 | Q8NGX6 | -0.92763  |
| 121469 | P03346 | Q8NG97 | -0.92763  |
| 121470 | P03346 | P22001 | -0.56022  |
| 121471 | P03346 | Q8N4T4 | -0.4902   |
| 121472 | P03346 | Q9BSK0 | -0.031715 |
| 121473 | P03346 | P26927 | -0.57306  |
| 121474 | P03346 | Q13099 | -0.22738  |
| 121475 | P03346 | Q96Q11 | -0.30465  |
| 121476 | P03346 | Q8NBI5 | -0.50489  |
| 121477 | P03346 | P01606 | -0.80078  |
| 121478 | P03346 | Q8NDH6 | -0.12966  |
| 121479 | P03346 | Q9Y6H3 | -0.4061   |
| 121480 | P03346 | P30825 | -0.80646  |
| 121481 | P03346 | P01583 | -0.22451  |
| 121482 | P03346 | Q8TCB6 | -0.92763  |
| 121483 | P03346 | Q96RD2 | -0.92763  |
| 121484 | P03346 | Q495D7 | -0.12272  |
| 121485 | P03346 | O14905 | -0.43833  |
| 121486 | P03346 | O75828 | -0.22724  |
| 121487 | P03346 | Q9UNL2 | -0.46047  |
| 121488 | P03346 | Q5SR53 | -0.22273  |
| 121489 | P03346 | Q9HC47 | -0.48009  |
| 121490 | P03346 | P10646 | -0.63787  |
| 121491 | P03346 | P42229 | -0.22727  |
| 121492 | P03346 | Q92576 | -0.23076  |
| 121493 | P03346 | Q9NRS4 | -0.95969  |
| 121494 | P03346 | Q9C098 | -0.53938  |
| 121495 | P03346 | Q96P31 | -0.65219  |
| 121496 | P03346 | Q9UGV2 | -0.14899  |
| 121497 | P03346 | P01605 | -0.80078  |
| 121498 | P03346 | P05164 | -0.22695  |
| 121499 | P03346 | A7XYQ1 | -0.11837  |
| 121500 | P03346 | Q32M84 | -0.14274  |
| 121501 | P03346 | P0DJI9 | -0.49797  |
| 121502 | P03346 | Q96R28 | -0.92763  |
| 121503 | P03346 | Q86Y29 | -0.53519  |
| 121504 | P03346 | Q99832 | -0.15617  |
| 121505 | P03346 | Q6V1X1 | -0.22289  |
| 121506 | P03346 | Q86V40 | -0.92508  |
| 121507 | P03346 | Q6ZR62 | -0.20852  |
| 121508 | P03346 | A0PJX2 | -0.094756 |
| 121509 | P03346 | Q9H9V9 | -0.22097  |
| 121510 | P03346 | Q92673 | -0.86393  |
| 121511 | P03346 | A6NC78 | -0.1246   |
| 121512 | P03346 | Q71RC2 | -0.30714  |
| 121513 | P03346 | P25874 | -0.29916  |
| 121514 | P03346 | A8MUU9 | -0.13315  |
| 121515 | P03346 | P80370 | -0.55619  |
| 121516 | P03346 | Q92902 | -0.25749  |
| 121517 | P03346 | Q6UWB4 | -0.97407  |
| 121518 | P03346 | O14904 | -0.65579  |
| 121519 | P03346 | Q14721 | -0.22901  |
| 121520 | P03346 | P52566 | -0.35744  |
| 121521 | P03346 | Q96DB9 | -0.62679  |
| 121522 | P03346 | Q92820 | -0.4855   |
| 121523 | P03346 | Q71UI9 | -0.35085  |
| 121524 | P03346 | Q6PKG0 | -0.095327 |

|        |        |        |            |
|--------|--------|--------|------------|
| 121525 | P03346 | Q05901 | -0.68935   |
| 121526 | P03346 | Q7Z6A9 | -0.76636   |
| 121527 | P03346 | Q9BUE6 | -0.20629   |
| 121528 | P03346 | Q8IXX5 | -0.50365   |
| 121529 | P03346 | Q8NH56 | -0.92763   |
| 121530 | P03346 | Q8NH01 | -0.92763   |
| 121531 | P03346 | P13693 | -0.21224   |
| 121532 | P03346 | Q8N6G1 | -0.013652  |
| 121533 | P03346 | P04271 | -0.58567   |
| 121534 | P03346 | Q5SZK8 | -1.0267    |
| 121535 | P03346 | Q9Y5L5 | -0.17745   |
| 121536 | P03346 | P12104 | -0.22005   |
| 121537 | P03346 | P20783 | -0.42162   |
| 121538 | P03346 | Q96M95 | -0.17893   |
| 121539 | P03346 | Q86VF7 | -0.22738   |
| 121540 | P03346 | Q15619 | -0.92763   |
| 121541 | P03346 | Q9Y547 | -0.19465   |
| 121542 | P03346 | Q96QZ7 | -0.22624   |
| 121543 | P03346 | Q8N446 | -0.24849   |
| 121544 | P03346 | Q92915 | -0.29918   |
| 121545 | P03346 | Q6ZP01 | -0.22448   |
| 121546 | P03346 | Q9Y5I4 | -0.92414   |
| 121547 | P03346 | Q86VQ3 | -0.2277    |
| 121548 | P03346 | P54760 | -0.92916   |
| 121549 | P03346 | P35503 | -0.63208   |
| 121550 | P03346 | Q9GZS9 | -0.3207    |
| 121551 | P03346 | Q9GZK4 | -0.92763   |
| 121552 | P03346 | Q2MKA7 | -0.22752   |
| 121553 | P03346 | A6NMB9 | -0.62025   |
| 121554 | P03346 | Q9BZC1 | -0.23263   |
| 121555 | P03346 | Q6NUQ4 | -0.50365   |
| 121556 | P03346 | Q6ZMI3 | -0.89655   |
| 121557 | P03346 | Q14296 | -0.21012   |
| 121558 | P03346 | P20645 | -0.66931   |
| 121559 | P03346 | Q8NGP8 | -0.92763   |
| 121560 | P03346 | Q9H2M3 | -0.18259   |
| 121561 | P03346 | O00602 | -0.94636   |
| 121562 | P03346 | Q9GZV3 | -0.74977   |
| 121563 | P03346 | A2RTY3 | -0.14559   |
| 121564 | P03346 | Q6ZVW7 | -0.18298   |
| 121565 | P03346 | O43526 | -0.64452   |
| 121566 | P03346 | Q9P2B2 | -0.22741   |
| 121567 | P03346 | P27544 | -0.36277   |
| 121568 | P03346 | P43115 | -0.84261   |
| 121569 | P03346 | O96013 | -0.60782   |
| 121570 | P03346 | P12236 | -0.23017   |
| 121571 | P03346 | Q6TCH7 | -0.34727   |
| 121572 | P03346 | Q8TER5 | -0.24501   |
| 121573 | P03346 | Q86TZ1 | -0.2274    |
| 121574 | P03346 | Q6IMN6 | -0.25282   |
| 121575 | P03346 | Q9Y3P4 | -0.54345   |
| 121576 | P03346 | Q9BRJ6 | -0.0032158 |
| 121577 | P03346 | Q13126 | -0.21679   |
| 121578 | P03346 | Q9Y2T1 | -0.62146   |
| 121579 | P03346 | Q53HC9 | -0.22737   |
| 121580 | P03346 | Q7Z6J6 | -0.25737   |
| 121581 | P03346 | Q9GZU3 | -0.50365   |
| 121582 | P03346 | Q9BPY3 | -0.16906   |
| 121583 | P03346 | P36551 | -0.13367   |
| 121584 | P03346 | P04432 | -0.80078   |
| 121585 | P03346 | O15066 | -0.26834   |
| 121586 | P03346 | Q5VST9 | -0.62427   |
| 121587 | P03346 | O43315 | -0.47608   |
| 121588 | P03346 | P09884 | -0.2446    |
| 121589 | P03346 | P0C7U2 | -0.25528   |
| 121590 | P03346 | P30939 | -1.0317    |
| 121591 | P03346 | Q96M93 | -0.39586   |
| 121592 | P03346 | P0C7P1 | -0.22834   |
| 121593 | P03346 | Q15130 | -0.64688   |
| 121594 | P03346 | Q9H000 | -0.2422    |
| 121595 | P03346 | Q9UJH8 | -0.75754   |
| 121596 | P03346 | P10147 | -0.29909   |
| 121597 | P03346 | Q9NZM6 | -0.64462   |
| 121598 | P03346 | Q9BVG8 | -0.23475   |
| 121599 | P03346 | F2Z398 | -0.31309   |
| 121600 | P03346 | Q9NZ45 | -0.53146   |

|        |        |        |           |
|--------|--------|--------|-----------|
| 121601 | P03346 | Q15622 | -0.92763  |
| 121602 | P03346 | Q8WY22 | -0.41626  |
| 121603 | P03346 | Q8NH43 | -0.92763  |
| 121604 | P03346 | Q8IZ08 | -0.96376  |
| 121605 | P03346 | P78382 | -0.27849  |
| 121606 | P03346 | Q9NRP7 | -0.22741  |
| 121607 | P03346 | Q8NHL6 | -0.26586  |
| 121608 | P03346 | Q9GZN6 | -0.63973  |
| 121609 | P03346 | P0DKX0 | -0.058395 |
| 121610 | P03346 | P41221 | -0.22771  |
| 121611 | P03346 | A8MZH6 | -0.53519  |
| 121612 | P03346 | Q8NGN0 | -0.92763  |
| 121613 | P03346 | O15143 | -0.22741  |
| 121614 | P03346 | Q13277 | -0.25372  |
| 121615 | P03346 | Q15825 | -0.67787  |
| 121616 | P03346 | Q8N766 | -0.49516  |
| 121617 | P03346 | Q6IF99 | -0.92763  |
| 121618 | P03346 | Q8N326 | -0.50365  |
| 121619 | P03346 | Q9Y6J8 | -0.27756  |
| 121620 | P03346 | Q9UBE0 | -0.2266   |
| 121621 | P03346 | Q96FX8 | -0.091575 |
| 121622 | P03346 | Q8NGD0 | -0.92763  |
| 121623 | P03346 | Q96G97 | -0.38746  |
| 121624 | P03346 | Q8IYY4 | -0.23229  |
| 121625 | P03346 | Q7RTU9 | -0.25245  |
| 121626 | P03346 | P13945 | -0.3024   |
| 121627 | P03346 | Q6Pjq5 | -0.28301  |
| 121628 | P03346 | Q7L5L3 | -0.54488  |
| 121629 | P03346 | Q9P2P5 | -0.22741  |
| 121630 | P03346 | P26436 | -0.21691  |
| 121631 | P03346 | Q6UX65 | -0.48274  |
| 121632 | P03346 | Q86X10 | -0.44899  |
| 121633 | P03346 | Q5XG85 | -0.013652 |
| 121634 | P03346 | Q7Z3J2 | -0.50365  |
| 121635 | P03346 | Q8NGF8 | -0.92763  |
| 121636 | P03346 | Q9HCJ5 | -0.22535  |
| 121637 | P03346 | O14804 | -1.0948   |
| 121638 | P03346 | P17213 | -0.65102  |
| 121639 | P03346 | Q93079 | -0.35085  |
| 121640 | P03346 | P0C7M7 | -0.60999  |
| 121641 | P03346 | P29377 | -0.22754  |
| 121642 | P03346 | Q5T1Q4 | -0.47711  |
| 121643 | P03346 | Q8NDX1 | -0.46733  |
| 121644 | P03346 | Q9UM21 | -0.68784  |
| 121645 | P03346 | Q13418 | -0.28217  |
| 121646 | P03346 | Q6UXZ3 | -0.2777   |
| 121647 | P03346 | Q9NYQ6 | -0.83703  |
| 121648 | P03346 | O60431 | -0.92763  |
| 121649 | P03346 | Q92583 | -1.0454   |
| 121650 | P03346 | Q8N4C8 | -0.40931  |
| 121651 | P03346 | P15498 | -0.22741  |
| 121652 | P03346 | B6SEH9 | -0.50365  |
| 121653 | P03346 | Q13724 | -0.64256  |
| 121654 | P03346 | Q8N6Q1 | -0.50365  |
| 121655 | P03346 | O60667 | -0.43949  |
| 121656 | P03346 | Q6ZMB0 | -0.42609  |
| 121657 | P03346 | P35348 | -0.49562  |
| 121658 | P03346 | Q6ZRP5 | -0.013652 |
| 121659 | P03346 | A8MUP2 | -0.21802  |
| 121660 | P03346 | Q8N6Y1 | -0.86699  |
| 121661 | P03346 | Q5TGJ6 | -0.21529  |
| 121662 | P03346 | P31513 | -0.70841  |
| 121663 | P03346 | Q9UM22 | -0.55292  |
| 121664 | P03346 | P58173 | -0.92763  |
| 121665 | P03346 | P50613 | -0.1733   |
| 121666 | P03346 | O00219 | -0.60241  |
| 121667 | P03346 | O76050 | -0.2274   |
| 121668 | P03346 | P49747 | -0.40288  |
| 121669 | P03346 | Q99942 | -0.22741  |
| 121670 | P03346 | P56817 | -0.65614  |
| 121671 | P03346 | O75074 | -0.52685  |
| 121672 | P03346 | Q8IVV8 | -0.65219  |
| 121673 | P03346 | P0CJ73 | -0.36125  |
| 121674 | P03346 | A6NIE6 | -0.055933 |
| 121675 | P03346 | Q9BXI9 | -0.76408  |
| 121676 | P03346 | Q9UL54 | -0.52316  |

|        |        |        |           |
|--------|--------|--------|-----------|
| 121677 | P03346 | Q6ZRUS | -0.53519  |
| 121678 | P03346 | Q3SY05 | -0.16558  |
| 121679 | P03346 | P19404 | -0.22554  |
| 121680 | P03346 | Q8NCQ7 | -0.19077  |
| 121681 | P03346 | Q13740 | -0.87205  |
| 121682 | P03346 | Q04771 | -0.29608  |
| 121683 | P03346 | Q9Y2C5 | -0.68535  |
| 121684 | P03346 | Q96FV0 | -0.22737  |
| 121685 | P03346 | Q14055 | -0.59855  |
| 121686 | P03346 | Q9BWW7 | -0.2053   |
| 121687 | P03346 | P01778 | -0.80078  |
| 121688 | P03346 | Q567V2 | -0.38186  |
| 121689 | P03346 | Q9ULK6 | -0.56385  |
| 121690 | P03346 | Q9NUU6 | -0.13118  |
| 121691 | P03346 | P36897 | -0.25021  |
| 121692 | P03346 | Q9HA58 | -0.013652 |
| 121693 | P03346 | Q6IE37 | -0.62773  |
| 121694 | P03346 | Q9H720 | -0.49521  |
| 121695 | P03346 | P01720 | -0.80078  |
| 121696 | P03346 | P58549 | -0.58966  |
| 121697 | P03346 | Q8IZ69 | -0.28111  |
| 121698 | P03346 | Q96LM9 | -0.21764  |
| 121699 | P03346 | Q8NGB4 | -0.92763  |
| 121700 | P03346 | Q96M78 | -0.18719  |
| 121701 | P03346 | Q16518 | -0.29808  |
| 121702 | P03346 | Q9HBV1 | -0.39933  |
| 121703 | P03346 | Q9H0U4 | -0.28571  |
| 121704 | P03346 | P04436 | -0.24404  |
| 121705 | P03346 | Q14995 | -0.24552  |
| 121706 | P03346 | P16870 | -0.58002  |
| 121707 | P03346 | P30039 | -0.14416  |
| 121708 | P03346 | P63098 | -0.22764  |
| 121709 | P03346 | P45378 | -0.21735  |
| 121710 | P03346 | P34995 | -1.022    |
| 121711 | P03346 | Q9Y6N5 | -0.22602  |
| 121712 | P03346 | Q8N118 | -0.58909  |
| 121713 | P03346 | Q6NW40 | -0.47727  |
| 121714 | P03346 | P02753 | -0.22751  |
| 121715 | P03346 | P51690 | -0.25688  |
| 121716 | P03346 | P42261 | -0.37599  |
| 121717 | P03346 | Q8N8I0 | -0.22695  |
| 121718 | P03346 | Q9BZQ4 | -0.17587  |
| 121719 | P03346 | Q9UBT7 | -0.22751  |
| 121720 | P03346 | P08571 | -0.45303  |
| 121721 | P03346 | Q16181 | -0.22685  |
| 121722 | P03346 | P06241 | -0.29506  |
| 121723 | P03346 | B9A014 | -0.14172  |
| 121724 | P03346 | Q7L099 | -0.33976  |
| 121725 | P03346 | Q9NUV9 | -0.224    |
| 121726 | P03346 | Q94788 | -0.52163  |
| 121727 | P03346 | Q8NB14 | -0.36346  |
| 121728 | P03346 | Q07444 | -0.51733  |
| 121729 | P03346 | Q9H0Q3 | -0.61677  |
| 121730 | P03346 | P24043 | -0.54457  |
| 121731 | P03346 | Q6ZSY5 | -0.48347  |
| 121732 | P03346 | Q6ZS86 | -0.55527  |
| 121733 | P03346 | Q9Y2K2 | -0.32421  |
| 121734 | P03346 | Q9H461 | -0.25003  |
| 121735 | P03346 | A8MTA8 | -0.15286  |
| 121736 | P03346 | P40259 | -0.34628  |
| 121737 | P03346 | Q75WM6 | -0.72438  |
| 121738 | P03346 | Q94760 | -0.18863  |
| 121739 | P03346 | Q6TDP4 | -0.32454  |
| 121740 | P03346 | Q8TEV8 | -0.013652 |
| 121741 | P03346 | Q8IYB5 | -0.58625  |
| 121742 | P03346 | Q6ZTK2 | -0.25583  |
| 121743 | P03346 | Q9BZ97 | -0.50365  |
| 121744 | P03346 | Q14D33 | -0.50365  |
| 121745 | P03346 | Q01344 | -0.33529  |
| 121746 | P03346 | Q7Z4T8 | -0.43026  |
| 121747 | P03346 | P06314 | -0.80078  |
| 121748 | P03346 | K7EIZ4 | -0.013652 |
| 121749 | P03346 | P07357 | -1.2188   |
| 121750 | P03346 | P17707 | -0.18264  |
| 121751 | P03346 | Q9P265 | -0.22702  |
| 121752 | P03346 | Q9H2H9 | -0.71375  |

|        |        |        |          |
|--------|--------|--------|----------|
| 121753 | P03346 | Q5R3K3 | -0.50365 |
| 121754 | P03346 | A1A4T8 | -0.14793 |
| 121755 | P03346 | Q6UW49 | -0.19591 |
| 121756 | P03346 | Q6DKI7 | -0.50365 |
| 121757 | P03346 | P28562 | -0.23163 |
| 121758 | P03346 | A4FU01 | -0.22485 |
| 121759 | P03346 | Q9NRX6 | -0.34727 |
| 121760 | P03346 | P01568 | -0.64371 |
| 121761 | P03346 | O43300 | -0.47332 |
| 121762 | P03346 | Q0VD83 | -0.43043 |
| 121763 | P03346 | Q9UKZ4 | -0.83328 |
| 121764 | P03346 | Q6ZTR5 | -0.11074 |
| 121765 | P03346 | Q9H772 | -0.6166  |
| 121766 | P03346 | P12429 | -0.24127 |
| 121767 | P03346 | Q13308 | -0.33719 |
| 121768 | P03346 | P53004 | -0.33775 |
| 121769 | P03346 | Q9Y6G9 | -0.22592 |
| 121770 | P03346 | P49915 | -0.24581 |
| 121771 | P03346 | O95294 | -0.22741 |
| 121772 | P03346 | Q8TD84 | -0.72996 |
| 121773 | P03346 | Q14638 | -0.84173 |
| 121774 | P03346 | Q5VXH4 | -0.13456 |
| 121775 | P03346 | Q95069 | -0.7927  |
| 121776 | P03346 | P35030 | -0.67879 |
| 121777 | P03346 | Q6ZN84 | -0.17199 |
| 121778 | P03346 | P21246 | -0.55417 |
| 121779 | P03346 | Q92765 | -0.46318 |
| 121780 | P03346 | Q96MI9 | -0.21621 |
| 121781 | P03346 | Q8N6Y2 | -0.58954 |
| 121782 | P03346 | Q9H8M5 | -0.63093 |
| 121783 | P03346 | Q9BY08 | -0.6114  |
| 121784 | P03346 | P27352 | -0.67344 |
| 121785 | P03346 | Q15547 | -0.53794 |
| 121786 | P03346 | O00459 | -0.22741 |
| 121787 | P03346 | Q5T742 | -0.53519 |
| 121788 | P03346 | Q96MR6 | -0.22745 |
| 121789 | P03346 | P04183 | -0.4311  |
| 121790 | P03346 | Q9NP58 | -0.67439 |
| 121791 | P03346 | Q16653 | -0.82401 |
| 121792 | P03346 | A8MTW9 | -0.53519 |
| 121793 | P03346 | Q6ZVL6 | -0.50365 |
| 121794 | P03346 | A6NDD5 | -0.42482 |
| 121795 | P03346 | Q96IW7 | -0.20672 |
| 121796 | P03346 | O95263 | -0.22735 |
| 121797 | P03346 | P47989 | -0.41829 |
| 121798 | P03346 | Q9Y2I9 | -0.75561 |
| 121799 | P03346 | O43866 | -0.67073 |
| 121800 | P03346 | Q9NQX4 | -0.30827 |
| 121801 | P03346 | Q9HC07 | -0.41099 |
| 121802 | P03346 | Q8N0U8 | -0.50365 |
| 121803 | P03346 | Q8TCU4 | -0.11263 |
| 121804 | P03346 | Q9H6D8 | -0.6624  |
| 121805 | P03346 | P28360 | -0.19169 |
| 121806 | P03346 | Q9HAR2 | -0.99196 |
| 121807 | P03346 | P48739 | -0.20709 |
| 121808 | P03346 | P51572 | -0.22187 |
| 121809 | P03346 | P06028 | -0.80125 |
| 121810 | P03346 | Q9NYM4 | -0.92154 |
| 121811 | P03346 | Q16643 | -0.3431  |
| 121812 | P03346 | Q8NA69 | -0.11299 |
| 121813 | P03346 | Q2M3A8 | -0.14699 |
| 121814 | P03346 | Q9HCP0 | -0.72637 |
| 121815 | P03346 | Q7Z569 | -0.22743 |
| 121816 | P03346 | Q8IYW4 | -0.15917 |
| 121817 | P03346 | P55773 | -1.022   |
| 121818 | P03346 | O75783 | -1.1515  |
| 121819 | P03346 | Q8TCU6 | -0.22747 |
| 121820 | P03346 | Q8NCR9 | -0.50365 |
| 121821 | P03346 | P23510 | -0.39039 |
| 121822 | P03346 | Q9P2J2 | -0.67761 |
| 121823 | P03346 | Q8WVV5 | -0.47715 |
| 121824 | P03346 | O15427 | -0.5112  |
| 121825 | P03346 | Q15125 | -0.63553 |
| 121826 | P03346 | P55789 | -0.22862 |
| 121827 | P03346 | O60635 | -0.62497 |
| 121828 | P03346 | Q30KQ7 | -0.52229 |



|        |        |        |           |
|--------|--------|--------|-----------|
| 121829 | P03346 | Q8WZ42 | -0.27156  |
| 121830 | P03346 | P54792 | -0.37353  |
| 121831 | P03346 | Q6PEX7 | -0.50365  |
| 121832 | P03346 | Q8NFA2 | -0.2274   |
| 121833 | P03346 | Q14118 | -0.19091  |
| 121834 | P03346 | A5PKW4 | -0.95675  |
| 121835 | P03346 | Q9Y6Y9 | -0.18889  |
| 121836 | P03346 | Q9Y5W7 | -0.40277  |
| 121837 | P03346 | A1A4F0 | -0.18749  |
| 121838 | P03346 | Q86YR5 | -0.2264   |
| 121839 | P03346 | O76027 | -0.19062  |
| 121840 | P03346 | O00483 | -0.23198  |
| 121841 | P03346 | Q14563 | -0.47847  |
| 121842 | P03346 | Q9H790 | -0.17987  |
| 121843 | P03346 | Q86Y30 | -0.53519  |
| 121844 | P03346 | Q9BXS0 | -1.3275   |
| 121845 | P03346 | O60269 | -0.18078  |
| 121846 | P03346 | Q8NCU4 | -0.11746  |
| 121847 | P03346 | O95568 | -0.2128   |
| 121848 | P03346 | Q96H55 | -0.21865  |
| 121849 | P03346 | Q8N9H6 | -0.096537 |
| 121850 | P03346 | P07237 | -0.24316  |
| 121851 | P03346 | Q9NWX6 | -0.39652  |
| 121852 | P03346 | Q07973 | -0.26676  |
| 121853 | P03346 | Q5T089 | -0.1516   |
| 121854 | P03346 | P33981 | -0.66031  |
| 121855 | P03346 | Q8IVG5 | -0.20488  |
| 121856 | P03346 | Q5HYL7 | -0.50365  |
| 121857 | P03346 | Q5VYS8 | -0.22732  |
| 121858 | P03346 | P17540 | -0.69823  |
| 121859 | P03346 | Q8NGG6 | -0.92763  |
| 121860 | P03346 | Q5JPF3 | -0.16677  |
| 121861 | P03346 | P03886 | -0.22094  |
| 121862 | P03346 | Q6UXV4 | -0.40402  |
| 121863 | P03346 | Q8WY07 | -0.62791  |
| 121864 | P03346 | Q5JS54 | -0.025176 |
| 121865 | P03346 | Q9Y223 | -0.51115  |
| 121866 | P03346 | Q96EX2 | -0.56385  |
| 121867 | P03346 | O75127 | -0.21568  |
| 121868 | P03346 | Q4FZB7 | -0.22273  |
| 121869 | P03346 | Q16821 | -0.38058  |
| 121870 | P03346 | Q5TGL8 | -0.22794  |
| 121871 | P03346 | Q9BX93 | -0.63756  |
| 121872 | P03346 | Q12908 | -0.49522  |
| 121873 | P03346 | O60496 | -0.20645  |
| 121874 | P03346 | Q9P0X4 | -0.31518  |
| 121875 | P03346 | Q4KMQ1 | -0.094158 |
| 121876 | P03346 | Q9HDB9 | -0.21262  |
| 121877 | P03346 | Q9BZY9 | -0.22727  |
| 121878 | P03346 | Q92772 | -0.37399  |
| 121879 | P03346 | P04439 | -0.82654  |
| 121880 | P03346 | P17612 | -0.22683  |
| 121881 | P03346 | Q96ID5 | -0.53519  |
| 121882 | P03346 | Q969P0 | -0.222    |
| 121883 | P03346 | B1AMM8 | -0.011744 |
| 121884 | P03346 | O00421 | -1.0954   |
| 121885 | P03346 | Q15394 | -0.8219   |
| 121886 | P03346 | Q9BZP3 | -0.17356  |
| 121887 | P03346 | Q16609 | -0.3749   |
| 121888 | P03346 | Q9H013 | -0.90814  |
| 121889 | P03346 | Q9HC73 | -1.1616   |
| 121890 | P03346 | Q9P1W3 | -0.50365  |
| 121891 | P03346 | Q8NFR3 | -0.11769  |
| 121892 | P03346 | Q5T2R2 | -0.19802  |
| 121893 | P03346 | Q01638 | -0.72438  |
| 121894 | P03346 | Q8IZU9 | -0.541    |
| 121895 | P03346 | Q8NEE0 | -0.013652 |
| 121896 | P03346 | O15021 | -0.83087  |
| 121897 | P03346 | Q86SM8 | -0.96376  |
| 121898 | P03346 | P48960 | -1.6194   |
| 121899 | P03346 | Q96KR4 | -0.21444  |
| 121900 | P03346 | Q9NZN5 | -0.22741  |
| 121901 | P03346 | Q17R60 | -0.67409  |
| 121902 | P03346 | Q11203 | -0.6086   |
| 121903 | P03346 | Q6UY18 | -0.50365  |
| 121904 | P03346 | Q9Y256 | -0.84876  |

|        |        |        |           |
|--------|--------|--------|-----------|
| 121905 | P03346 | Q9HAV0 | -0.22395  |
| 121906 | P03346 | Q13790 | -0.72706  |
| 121907 | P03346 | Q9NP84 | -0.30091  |
| 121908 | P03346 | P55287 | -0.87663  |
| 121909 | P03346 | Q04759 | -0.21968  |
| 121910 | P03346 | A6NIJ9 | -0.92763  |
| 121911 | P03346 | Q9NPG8 | -0.59087  |
| 121912 | P03346 | Q4KMQ2 | -0.63169  |
| 121913 | P03346 | Q9UJJ7 | -0.1221   |
| 121914 | P03346 | O95992 | -0.61961  |
| 121915 | P03346 | P23276 | -0.40938  |
| 121916 | P03346 | Q14165 | -0.49697  |
| 121917 | P03346 | Q6GMV3 | -0.25126  |
| 121918 | P03346 | Q13057 | -0.15072  |
| 121919 | P03346 | Q9NP61 | -0.1867   |
| 121920 | P03346 | Q13939 | -0.17173  |
| 121921 | P03346 | P16233 | -0.63565  |
| 121922 | P03346 | P01588 | -0.1845   |
| 121923 | P03346 | A7E2S9 | -0.22741  |
| 121924 | P03346 | Q8N412 | -0.21222  |
| 121925 | P03346 | P13674 | -0.29083  |
| 121926 | P03346 | Q10471 | -0.68398  |
| 121927 | P03346 | Q15432 | -0.68346  |
| 121928 | P03346 | Q96M96 | -0.62925  |
| 121929 | P03346 | Q902F8 | -0.35115  |
| 121930 | P03346 | P00734 | -0.46035  |
| 121931 | P03346 | Q9BYJ4 | -0.22727  |
| 121932 | P03346 | Q9NTN3 | -0.42867  |
| 121933 | P03346 | Q14184 | -0.2308   |
| 121934 | P03346 | Q6ZU82 | -0.2534   |
| 121935 | P03346 | P41271 | -0.39542  |
| 121936 | P03346 | Q0D2H9 | -0.12192  |
| 121937 | P03346 | P0DKX4 | -0.22843  |
| 121938 | P03346 | Q495W5 | -0.40823  |
| 121939 | P03346 | Q9NUM4 | -0.43358  |
| 121940 | P03346 | O77932 | -0.48037  |
| 121941 | P03346 | Q9HCN8 | -0.20262  |
| 121942 | P03346 | P30685 | -0.76151  |
| 121943 | P03346 | Q99808 | -0.60545  |
| 121944 | P03346 | P19320 | -0.55697  |
| 121945 | P03346 | Q6NVY1 | -0.21262  |
| 121946 | P03346 | Q8N2N9 | -0.062767 |
| 121947 | P03346 | Q8TF62 | -0.82231  |
| 121948 | P03346 | Q8WWU7 | -0.75904  |
| 121949 | P03346 | P23368 | -0.53154  |
| 121950 | P03346 | P23083 | -0.58933  |
| 121951 | P03346 | Q86YC3 | -0.50365  |
| 121952 | P03346 | Q9H3N8 | -0.95878  |
| 121953 | P03346 | Q3ZCQ3 | -0.50365  |
| 121954 | P03346 | Q8WVE0 | -0.18924  |
| 121955 | P03346 | B4DJY2 | -0.5153   |
| 121956 | P03346 | Q5RI15 | -0.40195  |
| 121957 | P03346 | Q9UBU6 | -0.50365  |
| 121958 | P03346 | P09486 | -0.22625  |
| 121959 | P03346 | Q71H61 | -0.5339   |
| 121960 | P03346 | A6NE01 | -0.21938  |
| 121961 | P03346 | Q8IZK6 | -0.61316  |
| 121962 | P03346 | P01770 | -0.80078  |
| 121963 | P03346 | O15260 | -0.17726  |
| 121964 | P03346 | Q9BY11 | -0.2274   |
| 121965 | P03346 | Q68CK6 | -0.57306  |
| 121966 | P03346 | Q95741 | -0.2275   |
| 121967 | P03346 | O15294 | -0.22704  |
| 121968 | P03346 | Q16740 | -0.1162   |
| 121969 | P03346 | Q8NGZ4 | -0.92763  |
| 121970 | P03346 | Q9BX46 | -0.22725  |
| 121971 | P03346 | Q8TB92 | -0.20382  |
| 121972 | P03346 | Q12792 | -0.1911   |
| 121973 | P03346 | Q9Y5I1 | -0.92414  |
| 121974 | P03346 | P32019 | -0.22743  |
| 121975 | P03346 | P01700 | -0.80078  |
| 121976 | P03346 | Q9H2Y9 | -0.61034  |
| 121977 | P03346 | Q9HCY8 | -0.23102  |
| 121978 | P03346 | Q9BXI6 | -0.3543   |
| 121979 | P03346 | Q6UX46 | -0.53519  |
| 121980 | P03346 | Q9UHH9 | -0.27666  |

|        |        |        |           |
|--------|--------|--------|-----------|
| 121981 | P03346 | P07951 | -0.18719  |
| 121982 | P03346 | Q8TDD1 | -0.2174   |
| 121983 | P03346 | Q6NUI6 | -0.61337  |
| 121984 | P03346 | Q99424 | -0.47438  |
| 121985 | P03346 | O95528 | -0.22762  |
| 121986 | P03346 | Q9BY76 | -0.22748  |
| 121987 | P03346 | P49902 | -0.22137  |
| 121988 | P03346 | O15431 | -0.80499  |
| 121989 | P03346 | Q9P0V8 | -0.521    |
| 121990 | P03346 | Q96BD0 | -0.6563   |
| 121991 | P03346 | Q6DN14 | -0.51926  |
| 121992 | P03346 | Q14507 | -0.64076  |
| 121993 | P03346 | Q99445 | -0.19918  |
| 121994 | P03346 | Q9Y5I7 | -0.42674  |
| 121995 | P03346 | P09848 | -0.56455  |
| 121996 | P03346 | O95897 | -0.53519  |
| 121997 | P03346 | Q8WUJ0 | -0.23185  |
| 121998 | P03346 | Q8WWF6 | -0.23461  |
| 121999 | P03346 | P01111 | -0.49974  |
| 122000 | P03346 | Q7KZN9 | -0.52822  |
| 122001 | P03346 | A1L390 | -0.35457  |
| 122002 | P03346 | Q8TC41 | -0.68906  |
| 122003 | P03346 | Q8NCA5 | -0.019957 |
| 122004 | P03346 | Q58EX2 | -0.67572  |
| 122005 | P03346 | Q9BZM2 | -0.50659  |
| 122006 | P03346 | A8MV24 | -0.074435 |
| 122007 | P03346 | Q969V4 | -0.20145  |
| 122008 | P03346 | Q9Y663 | -0.32006  |
| 122009 | P03346 | P20338 | -0.27838  |
| 122010 | P03346 | Q8N4N3 | -0.078055 |
| 122011 | P03346 | Q9BZZ2 | -1.2625   |
| 122012 | P03346 | Q8IWY9 | -0.50365  |
| 122013 | P03346 | Q9Y530 | -0.047126 |
| 122014 | P03346 | A6NNH0 | -0.040934 |
| 122015 | P03346 | Q6IBS0 | -0.2691   |
| 122016 | P03346 | A2RU14 | -0.50365  |
| 122017 | P03346 | Q9ULG6 | -0.39253  |
| 122018 | P03346 | Q96PX9 | -0.35457  |
| 122019 | P03346 | Q29960 | -1.0525   |
| 122020 | P03346 | Q9Y4K0 | -0.25628  |
| 122021 | P03346 | Q13067 | -0.24641  |
| 122022 | P03346 | Q9NSY1 | -0.51366  |
| 122023 | P03346 | Q6NXT4 | -0.4338   |
| 122024 | P03346 | Q8N7I0 | -0.22542  |
| 122025 | P03346 | O95968 | -0.65384  |
| 122026 | P03346 | Q9ULT0 | -0.22706  |
| 122027 | P03346 | Q9UHC3 | -0.39582  |
| 122028 | P03346 | O43252 | -0.58627  |
| 122029 | P03346 | A1YPR0 | -0.24849  |
| 122030 | P03346 | P11844 | -0.056083 |
| 122031 | P03346 | Q2M3M2 | -0.73635  |
| 122032 | P03346 | Q15695 | -0.21036  |
| 122033 | P03346 | Q9Y5E7 | -0.92001  |
| 122034 | P03346 | Q3SX64 | -0.19866  |
| 122035 | P03346 | Q9NVI7 | -0.81746  |
| 122036 | P03346 | Q9Y575 | -0.22741  |
| 122037 | P03346 | P49788 | -0.53201  |
| 122038 | P03346 | P53597 | -0.42164  |
| 122039 | P03346 | P56559 | -0.22764  |
| 122040 | P03346 | Q9P0N9 | -0.22079  |
| 122041 | P03346 | P50238 | -0.2276   |
| 122042 | P03346 | P0C867 | -0.078677 |
| 122043 | P03346 | Q9P2K2 | -0.55387  |
| 122044 | P03346 | Q7Z5Y6 | -0.64641  |
| 122045 | P03346 | P51693 | -0.22078  |
| 122046 | P03346 | A4D2B8 | -0.16975  |
| 122047 | P03346 | P41238 | -0.49375  |
| 122048 | P03346 | Q9BSR8 | -0.42944  |
| 122049 | P03346 | Q9P2P6 | -0.24557  |
| 122050 | P03346 | P15531 | -0.21606  |
| 122051 | P03346 | H3BSY2 | -0.18099  |
| 122052 | P03346 | Q12923 | -0.22741  |
| 122053 | P03346 | Q8NGX0 | -0.92763  |
| 122054 | P03346 | O75881 | -0.49958  |
| 122055 | P03346 | O95292 | -0.20964  |
| 122056 | P03346 | Q9NQ38 | -0.27795  |

|        |        |        |           |
|--------|--------|--------|-----------|
| 122057 | P03346 | O43347 | -0.25437  |
| 122058 | P03346 | Q86YV5 | -0.87983  |
| 122059 | P03346 | Q8NBQ5 | -0.86381  |
| 122060 | P03346 | P29475 | -0.22748  |
| 122061 | P03346 | O43164 | -0.22972  |
| 122062 | P03346 | Q6EEV6 | -0.15268  |
| 122063 | P03346 | Q8TAE7 | -0.22392  |
| 122064 | P03346 | Q8NGD4 | -0.92763  |
| 122065 | P03346 | A8MTI9 | -1.413    |
| 122066 | P03346 | P56937 | -1.0349   |
| 122067 | P03346 | A1L0T0 | -0.55813  |
| 122068 | P03346 | Q9Y3B8 | -0.1765   |
| 122069 | P03346 | Q9P126 | -0.30273  |
| 122070 | P03346 | Q96MU5 | -0.53519  |
| 122071 | P03346 | Q9H0K4 | -0.19954  |
| 122072 | P03346 | Q8TB61 | -0.49734  |
| 122073 | P03346 | P08236 | -0.27691  |
| 122074 | P03346 | Q70IA8 | -0.17211  |
| 122075 | P03346 | Q9BPW5 | -0.91075  |
| 122076 | P03346 | Q96GP6 | -0.23073  |
| 122077 | P03346 | Q8TC29 | -0.197    |
| 122078 | P03346 | P0C7X1 | -0.92582  |
| 122079 | P03346 | Q9NVS9 | -0.12011  |
| 122080 | P03346 | Q6UVW9 | -0.25115  |
| 122081 | P03346 | O43827 | -0.79472  |
| 122082 | P03346 | Q6ZMM2 | -0.63149  |
| 122083 | P03346 | Q6WCQ1 | -0.22701  |
| 122084 | P03346 | Q96JP0 | -0.22743  |
| 122085 | P03346 | P46094 | -1.0406   |
| 122086 | P03346 | O75716 | -0.22961  |
| 122087 | P03346 | Q5JRM2 | -0.50365  |
| 122088 | P03346 | P53985 | -0.37229  |
| 122089 | P03346 | Q00975 | -0.53881  |
| 122090 | P03346 | Q9H1K6 | -0.17949  |
| 122091 | P03346 | Q92888 | -0.22748  |
| 122092 | P03346 | Q15615 | -0.92763  |
| 122093 | P03346 | Q8NBM4 | -0.50365  |
| 122094 | P03346 | P23435 | -0.49166  |
| 122095 | P03346 | Q8IU99 | -0.82392  |
| 122096 | P03346 | O94808 | -0.21443  |
| 122097 | P03346 | Q9NQR9 | -0.30094  |
| 122098 | P03346 | P40227 | -0.18061  |
| 122099 | P03346 | O75344 | -0.24065  |
| 122100 | P03346 | Q9BWE0 | -0.13521  |
| 122101 | P03346 | Q96KC2 | -0.92981  |
| 122102 | P03346 | P78310 | -0.22741  |
| 122103 | P03346 | Q9BS26 | -0.23412  |
| 122104 | P03346 | Q9ULI2 | -0.52927  |
| 122105 | P03346 | Q6AI08 | -0.073519 |
| 122106 | P03346 | P59540 | -1.0281   |
| 122107 | P03346 | Q92874 | -0.50642  |
| 122108 | P03346 | Q86VD9 | -0.60834  |
| 122109 | P03346 | O76076 | -0.81599  |
| 122110 | P03346 | Q9UL25 | -0.23736  |
| 122111 | P03346 | P47755 | -0.2676   |
| 122112 | P03346 | Q9UKY0 | -0.1669   |
| 122113 | P03346 | Q709C8 | -0.050282 |
| 122114 | P03346 | O14521 | -0.22855  |
| 122115 | P03346 | P43353 | -0.23662  |
| 122116 | P03346 | Q9H1Y3 | -0.88291  |
| 122117 | P03346 | Q8N292 | -0.63937  |
| 122118 | P03346 | Q8N5U0 | -0.013652 |
| 122119 | P03346 | O95363 | -0.077869 |
| 122120 | P03346 | Q96QV6 | -0.35085  |
| 122121 | P03346 | P17931 | -0.22476  |
| 122122 | P03346 | P0CG20 | -0.096237 |
| 122123 | P03346 | O43674 | -0.25973  |
| 122124 | P03346 | P0CG04 | -0.80078  |
| 122125 | P03346 | P28328 | -0.22655  |
| 122126 | P03346 | P30679 | -0.68481  |
| 122127 | P03346 | Q8NG76 | -0.92763  |
| 122128 | P03346 | Q7Z5N4 | -0.67572  |
| 122129 | P03346 | Q14246 | -1.2398   |
| 122130 | P03346 | P04181 | -0.20673  |
| 122131 | P03346 | Q9HB55 | -0.59417  |
| 122132 | P03346 | Q6ZNL6 | -0.791    |

|        |        |        |           |
|--------|--------|--------|-----------|
| 122133 | P03346 | Q1T7F1 | -0.24872  |
| 122134 | P03346 | O43602 | -0.21725  |
| 122135 | P03346 | Q9UIY3 | -0.1732   |
| 122136 | P03346 | Q8N5N4 | -0.067009 |
| 122137 | P03346 | Q8NHG8 | -0.34534  |
| 122138 | P03346 | Q4G0N4 | -0.15687  |
| 122139 | P03346 | Q9C0E4 | -0.22659  |
| 122140 | P03346 | A2RUB6 | -0.15416  |
| 122141 | P03346 | P33121 | -0.68924  |
| 122142 | P03346 | P13284 | -0.82567  |
| 122143 | P03346 | P57679 | -0.49944  |
| 122144 | P03346 | Q9H255 | -0.92763  |
| 122145 | P03346 | Q07817 | -0.2274   |
| 122146 | P03346 | Q86U06 | -0.22722  |
| 122147 | P03346 | Q96LR9 | -1.3397   |
| 122148 | P03346 | A4D1U4 | -0.10268  |
| 122149 | P03346 | Q7Z7L9 | -0.083014 |
| 122150 | P03346 | P48742 | -0.22738  |
| 122151 | P03346 | P56557 | -0.53724  |
| 122152 | P03346 | Q6UWU4 | -0.40712  |
| 122153 | P03346 | Q95365 | -0.76151  |
| 122154 | P03346 | Q6S5H5 | -0.22744  |
| 122155 | P03346 | Q6UWF9 | -0.53519  |
| 122156 | P03346 | Q9Y216 | -0.22749  |
| 122157 | P03346 | P56159 | -0.26513  |
| 122158 | P03346 | A6NGU5 | -0.47012  |
| 122159 | P03346 | B2RXH4 | -0.22501  |
| 122160 | P03346 | Q8NHC5 | -0.92763  |
| 122161 | P03346 | Q9BX59 | -0.75459  |
| 122162 | P03346 | Q3MIP1 | -0.50365  |
| 122163 | P03346 | Q9Y2S2 | -0.18615  |
| 122164 | P03346 | Q5TFG8 | -0.032105 |
| 122165 | P03346 | Q6P3S6 | -0.22729  |
| 122166 | P03346 | Q9BXT6 | -0.93012  |
| 122167 | P03346 | P48065 | -0.77117  |
| 122168 | P03346 | Q8TE67 | -0.22741  |
| 122169 | P03346 | Q86YB7 | -0.26417  |
| 122170 | P03346 | Q9H3Y0 | -0.55518  |
| 122171 | P03346 | Q8NH80 | -0.92763  |
| 122172 | P03346 | G3V0H7 | -0.61034  |
| 122173 | P03346 | O94889 | -0.15669  |
| 122174 | P03346 | O95866 | -0.62281  |
| 122175 | P03346 | P13535 | -0.12344  |
| 122176 | P03346 | Q8NAA6 | -0.20055  |
| 122177 | P03346 | Q53H96 | -0.59513  |
| 122178 | P03346 | Q12891 | -0.23108  |
| 122179 | P03346 | P05111 | -0.36445  |
| 122180 | P03346 | Q5TA89 | -0.22733  |
| 122181 | P03346 | Q8WZA6 | -0.92763  |
| 122182 | P03346 | Q96P64 | -0.65984  |
| 122183 | P03346 | Q9BRX8 | -0.18284  |
| 122184 | P03346 | Q8TCB7 | -0.22347  |
| 122185 | P03346 | P28331 | -0.21964  |
| 122186 | P03346 | P59922 | -0.92763  |
| 122187 | P03346 | P0C7W8 | -0.25135  |
| 122188 | P03346 | Q8N7S6 | -0.50365  |
| 122189 | P03346 | Q17RA5 | -0.013652 |
| 122190 | P03346 | Q9P225 | -0.4677   |
| 122191 | P03346 | P01225 | -0.22137  |
| 122192 | P03346 | Q9UL52 | -1.6162   |
| 122193 | P03346 | A6NMS7 | -0.50365  |
| 122194 | P03346 | Q01629 | -0.61612  |
| 122195 | P03346 | Q13113 | -0.50365  |
| 122196 | P03346 | A4QPH2 | -0.35117  |
| 122197 | P03346 | P09668 | -0.26105  |
| 122198 | P03346 | Q93091 | -0.38729  |
| 122199 | P03346 | Q7L0L9 | -0.50365  |
| 122200 | P03346 | Q86SF2 | -0.33391  |
| 122201 | P03346 | Q9Y2D0 | -0.22698  |
| 122202 | P03346 | O43193 | -1.0769   |
| 122203 | P03346 | P15514 | -0.45383  |
| 122204 | P03346 | Q2TAA5 | -0.59394  |
| 122205 | P03346 | P43080 | -0.44215  |
| 122206 | P03346 | Q8NFP9 | -0.22741  |
| 122207 | P03346 | Q6UXM1 | -0.50365  |
| 122208 | P03346 | Q9BSD7 | -0.64188  |

|        |        |        |           |
|--------|--------|--------|-----------|
| 122209 | P03346 | Q8IWF7 | -0.11662  |
| 122210 | P03346 | Q8NCM2 | -0.6276   |
| 122211 | P03346 | Q9NZ38 | -0.13232  |
| 122212 | P03346 | Q5TFE4 | -0.20505  |
| 122213 | P03346 | Q8IUH4 | -0.52631  |
| 122214 | P03346 | Q9H8P0 | -0.51364  |
| 122215 | P03346 | Q9BZJ7 | -0.83812  |
| 122216 | P03346 | Q4VXU2 | -0.40469  |
| 122217 | P03346 | Q9BZH6 | -0.3113   |
| 122218 | P03346 | Q9UBV7 | -0.3651   |
| 122219 | P03346 | Q96PF2 | -0.54055  |
| 122220 | P03346 | P13762 | -0.56914  |
| 122221 | P03346 | Q9H560 | -0.22741  |
| 122222 | P03346 | Q6PJ69 | -0.30279  |
| 122223 | P03346 | P32119 | -0.22621  |
| 122224 | P03346 | Q96I51 | -0.22676  |
| 122225 | P03346 | Q6DN12 | -0.51926  |
| 122226 | P03346 | Q5QGT7 | -0.61193  |
| 122227 | P03346 | Q9BQM9 | -0.21427  |
| 122228 | P03346 | Q08431 | -0.60651  |
| 122229 | P03346 | A6NM36 | -0.22754  |
| 122230 | P03346 | Q9UNE0 | -0.37707  |
| 122231 | P03346 | Q6ZT89 | -0.37103  |
| 122232 | P03346 | Q9NQH7 | -0.30801  |
| 122233 | P03346 | P51124 | -0.92944  |
| 122234 | P03346 | Q13133 | -0.22881  |
| 122235 | P03346 | P01713 | -0.80078  |
| 122236 | P03346 | Q14795 | -0.22741  |
| 122237 | P03346 | P18463 | -0.76151  |
| 122238 | P03346 | Q9HDD0 | -0.22703  |
| 122239 | P03346 | Q9NW97 | -0.50365  |
| 122240 | P03346 | Q9BTE0 | -0.17405  |
| 122241 | P03346 | Q8N8Y5 | -0.12624  |
| 122242 | P03346 | Q8NG04 | -0.46431  |
| 122243 | P03346 | A6NJS3 | -0.53519  |
| 122244 | P03346 | Q9UKR5 | -0.54793  |
| 122245 | P03346 | Q8NBB2 | -0.21628  |
| 122246 | P03346 | Q6ZSZ5 | -0.28347  |
| 122247 | P03346 | Q8IXU6 | -0.2748   |
| 122248 | P03346 | Q8NOV1 | -0.031993 |
| 122249 | P03346 | O15354 | -1.1731   |
| 122250 | P03346 | C9JDV5 | -0.18018  |
| 122251 | P03346 | P0CG23 | -0.24849  |
| 122252 | P03346 | Q86VR8 | -0.65384  |
| 122253 | P03346 | P30990 | -0.63277  |
| 122254 | P03346 | P05160 | -0.46608  |
| 122255 | P03346 | A8K554 | -0.16992  |
| 122256 | P03346 | P78552 | -0.22969  |
| 122257 | P03346 | Q9NW61 | -0.22893  |
| 122258 | P03346 | Q96B77 | -0.38186  |
| 122259 | P03346 | P59044 | -0.22697  |
| 122260 | P03346 | Q8IVW8 | -0.59652  |
| 122261 | P03346 | Q13315 | -0.32326  |
| 122262 | P03346 | P35354 | -0.22741  |
| 122263 | P03346 | O76001 | -0.92763  |
| 122264 | P03346 | Q9UKZ9 | -0.5592   |
| 122265 | P03346 | Q08397 | -0.88413  |
| 122266 | P03346 | A4D1Z8 | -0.21507  |
| 122267 | P03346 | Q6ZRR9 | -0.18855  |
| 122268 | P03346 | P20382 | -0.62459  |
| 122269 | P03346 | P63126 | -0.21346  |
| 122270 | P03346 | Q9UIW2 | -0.45753  |
| 122271 | P03346 | Q15617 | -0.92763  |
| 122272 | P03346 | Q9NWS0 | -0.084277 |
| 122273 | P03346 | P42330 | -0.22696  |
| 122274 | P03346 | O95947 | -0.41982  |
| 122275 | P03346 | Q6SZW1 | -0.21193  |
| 122276 | P03346 | Q9H8H2 | -0.20203  |
| 122277 | P03346 | Q95971 | -0.42541  |
| 122278 | P03346 | Q5T1A1 | -0.50365  |
| 122279 | P03346 | Q7L622 | -0.22339  |
| 122280 | P03346 | Q53H76 | -0.68504  |
| 122281 | P03346 | Q96L94 | -0.22538  |
| 122282 | P03346 | Q13595 | -0.22495  |
| 122283 | P03346 | Q7Z5A4 | -1.0507   |
| 122284 | P03346 | A8MZ06 | -0.22094  |

|        |        |        |           |
|--------|--------|--------|-----------|
| 122285 | P03346 | Q9NPZ5 | -0.36574  |
| 122286 | P03346 | Q9QC07 | -0.22377  |
| 122287 | P03346 | P33897 | -0.2277   |
| 122288 | P03346 | Q5W064 | -0.23507  |
| 122289 | P03346 | P51970 | -0.20636  |
| 122290 | P03346 | A6NJW4 | -0.50365  |
| 122291 | P03346 | Q9Y6I4 | -0.23017  |
| 122292 | P03346 | Q99622 | -0.14896  |
| 122293 | P03346 | Q9NRT5 | -0.11261  |
| 122294 | P03346 | P49279 | -0.33559  |
| 122295 | P03346 | Q9ULZ9 | -1.1663   |
| 122296 | P03346 | Q9BUF5 | -0.41192  |
| 122297 | P03346 | Q538Z0 | -0.013652 |
| 122298 | P03346 | O95319 | -0.23205  |
| 122299 | P03346 | Q9NQX5 | -0.50365  |
| 122300 | P03346 | Q9BRR9 | -0.75813  |
| 122301 | P03346 | Q9HBE4 | -0.6902   |
| 122302 | P03346 | Q9GZT4 | -0.42538  |
| 122303 | P03346 | Q8NER1 | -0.91887  |
| 122304 | P03346 | P02008 | -0.073917 |
| 122305 | P03346 | Q8N257 | -0.35085  |
| 122306 | P03346 | O00253 | -0.62395  |
| 122307 | P03346 | Q8TEB9 | -0.33087  |
| 122308 | P03346 | Q9NYZ4 | -0.26008  |
| 122309 | P03346 | Q8IXR5 | -0.12413  |
| 122310 | P03346 | Q96CN7 | -0.20839  |
| 122311 | P03346 | Q08ET2 | -0.80544  |
| 122312 | P03346 | Q15111 | -0.28177  |
| 122313 | P03346 | Q8TDQ1 | -0.65219  |
| 122314 | P03346 | Q9BV29 | -0.14424  |
| 122315 | P03346 | P57088 | -0.39455  |
| 122316 | P03346 | Q16557 | -0.54829  |
| 122317 | P03346 | Q8NGA8 | -0.92763  |
| 122318 | P03346 | Q5VV17 | -0.1613   |
| 122319 | P03346 | Q5T601 | -0.52578  |
| 122320 | P03346 | Q9BR01 | -0.31311  |
| 122321 | P03346 | Q658T7 | -0.25582  |
| 122322 | P03346 | Q9NQM4 | -0.19484  |
| 122323 | P03346 | P57052 | -0.22039  |
| 122324 | P03346 | P11055 | -0.13858  |
| 122325 | P03346 | P01270 | -0.46545  |
| 122326 | P03346 | Q13103 | -0.55218  |
| 122327 | P03346 | Q9UQ16 | -0.2309   |
| 122328 | P03346 | Q7L1S5 | -0.68875  |
| 122329 | P03346 | Q969S0 | -0.2723   |
| 122330 | P03346 | Q6ZS11 | -0.56569  |
| 122331 | P03346 | Q9NYZ2 | -0.51778  |
| 122332 | P03346 | Q8NGN4 | -0.92763  |
| 122333 | P03346 | Q9NRR2 | -1.0868   |
| 122334 | P03346 | Q6ZP29 | -0.53707  |
| 122335 | P03346 | Q96T91 | -0.52424  |
| 122336 | P03346 | Q5SRD0 | -0.13231  |
| 122337 | P03346 | Q9H3U1 | -0.22731  |
| 122338 | P03346 | P11274 | -0.60824  |
| 122339 | P03346 | Q7RTY8 | -1.0863   |
| 122340 | P03346 | Q6UY11 | -0.62105  |
| 122341 | P03346 | Q8WU43 | -0.17554  |
| 122342 | P03346 | Q96DR5 | -0.67543  |
| 122343 | P03346 | O96008 | -0.26796  |
| 122344 | P03346 | Q9NXN4 | -0.22104  |
| 122345 | P03346 | Q13072 | -0.53519  |
| 122346 | P03346 | Q6L8Q7 | -0.12807  |
| 122347 | P03346 | Q9P2E7 | -0.86699  |
| 122348 | P03346 | Q9P0K9 | -0.30782  |
| 122349 | P03346 | Q8N9C0 | -0.22744  |
| 122350 | P03346 | Q6ZRS4 | -0.045784 |
| 122351 | P03346 | P47710 | -0.5014   |
| 122352 | P03346 | Q92871 | -0.19626  |
| 122353 | P03346 | Q96NX5 | -0.75945  |
| 122354 | P03346 | Q6UXN8 | -0.57967  |
| 122355 | P03346 | Q86V21 | -0.34718  |
| 122356 | P03346 | Q6V702 | -0.14373  |
| 122357 | P03346 | Q96M42 | -0.27871  |
| 122358 | P03346 | P42680 | -0.85776  |
| 122359 | P03346 | Q12889 | -0.22871  |
| 122360 | P03346 | Q8WXG1 | -0.18545  |

|        |        |        |           |
|--------|--------|--------|-----------|
| 122361 | P03346 | Q6ZV80 | -0.11098  |
| 122362 | P03346 | Q8N9W6 | -0.22713  |
| 122363 | P03346 | Q9Y3D2 | -0.25658  |
| 122364 | P03346 | Q9UJV3 | -0.22872  |
| 122365 | P03346 | O75078 | -0.77708  |
| 122366 | P03346 | Q0D2K2 | -0.12146  |
| 122367 | P03346 | Q9UF47 | -0.28053  |
| 122368 | P03346 | P57737 | -0.22741  |
| 122369 | P03346 | Q96J66 | -1.0179   |
| 122370 | P03346 | O14921 | -0.22744  |
| 122371 | P03346 | Q6JEL2 | -0.18078  |
| 122372 | P03346 | Q08623 | -0.19934  |
| 122373 | P03346 | P08913 | -0.22844  |
| 122374 | P03346 | P0C645 | -0.92763  |
| 122375 | P03346 | Q15465 | -0.2274   |
| 122376 | P03346 | Q9UIX4 | -0.58028  |
| 122377 | P03346 | Q92737 | -0.57803  |
| 122378 | P03346 | Q8N111 | -0.50365  |
| 122379 | P03346 | Q6PCB0 | -0.72853  |
| 122380 | P03346 | P00451 | -0.39829  |
| 122381 | P03346 | P68363 | -0.21817  |
| 122382 | P03346 | P09693 | -0.59744  |
| 122383 | P03346 | Q9UKI2 | -0.21101  |
| 122384 | P03346 | A6ND01 | -0.52574  |
| 122385 | P03346 | P54802 | -0.13311  |
| 122386 | P03346 | Q96RF0 | -0.22741  |
| 122387 | P03346 | Q92974 | -0.22742  |
| 122388 | P03346 | P35408 | -0.37087  |
| 122389 | P03346 | Q8WUR7 | -0.21138  |
| 122390 | P03346 | Q5EBN2 | -0.30279  |
| 122391 | P03346 | Q8N144 | -0.30992  |
| 122392 | P03346 | Q6ZSI9 | -0.68447  |
| 122393 | P03346 | Q8WX94 | -0.48833  |
| 122394 | P03346 | Q5VW36 | -0.23222  |
| 122395 | P03346 | Q9H2W1 | -0.50365  |
| 122396 | P03346 | Q9BYC5 | -0.33699  |
| 122397 | P03346 | Q8NEJ0 | -0.24486  |
| 122398 | P03346 | Q9BTM1 | -0.35085  |
| 122399 | P03346 | Q9Y6Q1 | -0.22975  |
| 122400 | P03346 | Q96KA5 | -0.47742  |
| 122401 | P03346 | P07919 | -0.19868  |
| 122402 | P03346 | Q6P9F5 | -0.30279  |
| 122403 | P03346 | Q95965 | -0.68645  |
| 122404 | P03346 | Q969E2 | -0.29368  |
| 122405 | P03346 | Q9Y4B4 | -0.2186   |
| 122406 | P03346 | O60462 | -0.4978   |
| 122407 | P03346 | Q9NUZ1 | -0.33736  |
| 122408 | P03346 | P54922 | -0.014669 |
| 122409 | P03346 | Q5VTU8 | -0.16238  |
| 122410 | P03346 | Q86UU1 | -0.2274   |
| 122411 | P03346 | Q9Y639 | -0.61239  |
| 122412 | P03346 | Q96PU9 | -0.19694  |
| 122413 | P03346 | P49286 | -1.0381   |
| 122414 | P03346 | P49841 | -0.22751  |
| 122415 | P03346 | Q96KK4 | -0.92763  |
| 122416 | P03346 | Q14832 | -0.81546  |
| 122417 | P03346 | P62807 | -0.34659  |
| 122418 | P03346 | Q96T55 | -0.80486  |
| 122419 | P03346 | P51160 | -0.86091  |
| 122420 | P03346 | Q9BYF1 | -0.78595  |
| 122421 | P03346 | Q5JTV8 | -0.11601  |
| 122422 | P03346 | Q8IZ21 | -0.31804  |
| 122423 | P03346 | Q8N7R1 | -0.057167 |
| 122424 | P03346 | Q99611 | -0.63629  |
| 122425 | P03346 | Q9NZB8 | -0.34226  |
| 122426 | P03346 | Q9Y2Q3 | -0.3506   |
| 122427 | P03346 | P49223 | -0.50866  |
| 122428 | P03346 | Q96NZ1 | -0.26787  |
| 122429 | P03346 | P51460 | -0.43256  |
| 122430 | P03346 | B0YJ81 | -1.1265   |
| 122431 | P03346 | Q8IYB8 | -0.22707  |
| 122432 | P03346 | Q05397 | -0.22741  |
| 122433 | P03346 | Q6DT37 | -0.24761  |
| 122434 | P03346 | Q68DC2 | -0.22743  |
| 122435 | P03346 | Q14953 | -0.83257  |
| 122436 | P03346 | Q9Y3A4 | -0.40469  |



|        |        |        |           |
|--------|--------|--------|-----------|
| 122437 | P03346 | Q13519 | -0.68827  |
| 122438 | P03346 | P61006 | -0.43071  |
| 122439 | P03346 | Q6DD88 | -0.66364  |
| 122440 | P03346 | Q8NHW6 | -0.56712  |
| 122441 | P03346 | Q6ZRI8 | -0.6787   |
| 122442 | P03346 | Q5JT25 | -0.61238  |
| 122443 | P03346 | Q8NA70 | -0.24778  |
| 122444 | P03346 | P0CJ75 | -0.36125  |
| 122445 | P03346 | P0CAT3 | -0.17302  |
| 122446 | P03346 | O00159 | -0.19943  |
| 122447 | P03346 | Q15848 | -0.23485  |
| 122448 | P03346 | Q9UNE2 | -0.2259   |
| 122449 | P03346 | Q92623 | -0.22246  |
| 122450 | P03346 | Q6P5W5 | -0.58518  |
| 122451 | P03346 | Q96DD7 | -0.50365  |
| 122452 | P03346 | P20774 | -0.22748  |
| 122453 | P03346 | Q8TF65 | -0.22699  |
| 122454 | P03346 | Q9UN71 | -0.84938  |
| 122455 | P03346 | O75636 | -0.37385  |
| 122456 | P03346 | Q6ZS62 | -0.50365  |
| 122457 | P03346 | Q11201 | -0.60204  |
| 122458 | P03346 | P52179 | -0.37865  |
| 122459 | P03346 | P30872 | -1.0044   |
| 122460 | P03346 | Q92753 | -0.50635  |
| 122461 | P03346 | Q92520 | -0.53045  |
| 122462 | P03346 | Q00889 | -0.49742  |
| 122463 | P03346 | P10451 | -0.57315  |
| 122464 | P03346 | Q8TEQ0 | -0.22702  |
| 122465 | P03346 | Q86YV0 | -0.22738  |
| 122466 | P03346 | Q8NH55 | -0.92763  |
| 122467 | P03346 | P58876 | -0.35085  |
| 122468 | P03346 | Q9HCQ7 | -0.74801  |
| 122469 | P03346 | Q86UK0 | -0.9957   |
| 122470 | P03346 | Q9H2R5 | -1.0507   |
| 122471 | P03346 | Q9NYY3 | -0.26234  |
| 122472 | P03346 | Q96AQ8 | -0.38186  |
| 122473 | P03346 | Q9P2K1 | -0.097003 |
| 122474 | P03346 | O14990 | -0.047708 |
| 122475 | P03346 | P51452 | -0.24056  |
| 122476 | P03346 | P62191 | -0.33801  |
| 122477 | P03346 | P27987 | -0.60702  |
| 122478 | P03346 | P24903 | -0.60305  |
| 122479 | P03346 | Q9H8U3 | -0.1298   |
| 122480 | P03346 | Q2M1Z3 | -0.84606  |
| 122481 | P03346 | Q9Y2Z9 | -0.31041  |
| 122482 | P03346 | Q9H6X4 | -0.50365  |
| 122483 | P03346 | O00144 | -0.55075  |
| 122484 | P03346 | Q70JA7 | -0.32024  |
| 122485 | P03346 | Q92567 | -0.11825  |
| 122486 | P03346 | Q7Z3E2 | -0.034635 |
| 122487 | P03346 | P04629 | -0.48649  |
| 122488 | P03346 | Q15052 | -0.22742  |
| 122489 | P03346 | A6NMK8 | -0.019553 |
| 122490 | P03346 | Q9NUN5 | -0.45918  |
| 122491 | P03346 | Q5T2Q4 | -0.22048  |
| 122492 | P03346 | Q6FHJ7 | -0.26837  |
| 122493 | P03346 | Q9NQZ7 | -0.45585  |
| 122494 | P03346 | Q9BRZ2 | -0.28175  |
| 122495 | P03346 | Q86WK9 | -0.91913  |
| 122496 | P03346 | Q29974 | -0.4741   |
| 122497 | P03346 | Q99973 | -0.22741  |
| 122498 | P03346 | Q6XXX2 | -0.18889  |
| 122499 | P03346 | Q96MC2 | -0.16742  |
| 122500 | P03346 | Q8NGK0 | -0.92763  |
| 122501 | P03346 | Q99880 | -0.35085  |
| 122502 | P03346 | P38571 | -0.29225  |
| 122503 | P03346 | Q6MZW2 | -0.60326  |
| 122504 | P03346 | Q9NQ90 | -0.21429  |
| 122505 | P03346 | Q9HDC5 | -0.62623  |
| 122506 | P03346 | Q13443 | -0.52182  |
| 122507 | P03346 | Q8N8Z3 | -0.232    |
| 122508 | P03346 | Q13613 | -0.22732  |
| 122509 | P03346 | Q86XP1 | -0.45146  |
| 122510 | P03346 | Q8TC27 | -0.62581  |
| 122511 | P03346 | Q8N126 | -0.67797  |
| 122512 | P03346 | P10070 | -0.22732  |

|        |        |        |           |
|--------|--------|--------|-----------|
| 122513 | P03346 | Q3ZCQ2 | -0.013652 |
| 122514 | P03346 | P67812 | -0.58051  |
| 122515 | P03346 | P25325 | -0.22716  |
| 122516 | P03346 | Q15466 | -0.32118  |
| 122517 | P03346 | Q6P0A1 | -0.50365  |
| 122518 | P03346 | Q53RE8 | -0.22741  |
| 122519 | P03346 | O95936 | -0.41982  |
| 122520 | P03346 | Q01814 | -0.27893  |
| 122521 | P03346 | P55157 | -0.29516  |
| 122522 | P03346 | O15118 | -0.5188   |
| 122523 | P03346 | Q9BWT3 | -0.17112  |
| 122524 | P03346 | O00398 | -0.92894  |
| 122525 | P03346 | Q9UQE7 | -0.22694  |
| 122526 | P03346 | Q8N9V3 | -0.22754  |
| 122527 | P03346 | P37088 | -0.30803  |
| 122528 | P03346 | Q6UWU2 | -0.53978  |
| 122529 | P03346 | Q17RB0 | -0.023899 |
| 122530 | P03346 | Q86UD1 | -0.1022   |
| 122531 | P03346 | P41440 | -0.54567  |
| 122532 | P03346 | O75648 | -0.23085  |
| 122533 | P03346 | Q96MC5 | -0.19328  |
| 122534 | P03346 | Q07283 | -0.24408  |
| 122535 | P03346 | A2A3N6 | -0.22706  |
| 122536 | P03346 | P13497 | -0.88837  |
| 122537 | P03346 | Q8TE59 | -0.93222  |
| 122538 | P03346 | Q0D2K5 | -0.22879  |
| 122539 | P03346 | P09681 | -0.3823   |
| 122540 | P03346 | A1A4V9 | -0.078214 |
| 122541 | P03346 | P18627 | -0.5549   |
| 122542 | P03346 | Q8WXD0 | -0.83673  |
| 122543 | P03346 | Q7RTV2 | -0.22736  |
| 122544 | P03346 | Q8MH63 | -0.52123  |
| 122545 | P03346 | P84095 | -0.21242  |
| 122546 | P03346 | O43613 | -1.04     |
| 122547 | P03346 | Q32VQ0 | -0.92763  |
| 122548 | P03346 | Q66K37 | -0.22727  |
| 122549 | P03346 | P12829 | -0.22705  |
| 122550 | P03346 | Q49A92 | -0.15074  |
| 122551 | P03346 | Q8NEC7 | -0.22342  |
| 122552 | P03346 | Q8N7C4 | -0.50365  |
| 122553 | P03346 | Q9BVS4 | -0.89418  |
| 122554 | P03346 | P63127 | -0.23811  |
| 122555 | P03346 | P13533 | -0.12344  |
| 122556 | P03346 | A6NFO2 | -0.093657 |
| 122557 | P03346 | Q9UBF8 | -0.62417  |
| 122558 | P03346 | O43508 | -0.79982  |
| 122559 | P03346 | Q14699 | -0.24835  |
| 122560 | P03346 | Q9H270 | -0.22725  |
| 122561 | P03346 | Q9BTN0 | -0.76411  |
| 122562 | P03346 | Q5SY16 | -0.26802  |
| 122563 | P03346 | Q9NW68 | -0.20287  |
| 122564 | P03346 | Q75366 | -0.21065  |
| 122565 | P03346 | P30492 | -0.76151  |
| 122566 | P03346 | Q09013 | -0.28604  |
| 122567 | P03346 | Q5T4D3 | -0.50365  |
| 122568 | P03346 | Q6ZSM3 | -0.61943  |
| 122569 | P03346 | Q16512 | -0.22472  |
| 122570 | P03346 | Q9NSN8 | -0.22657  |
| 122571 | P03346 | Q9C026 | -0.368    |
| 122572 | P03346 | Q9BRL6 | -0.21687  |
| 122573 | P03346 | Q9Y4C0 | -0.74615  |
| 122574 | P03346 | P0DJD1 | -0.2242   |
| 122575 | P03346 | P02724 | -0.64304  |
| 122576 | P03346 | Q8N4U5 | -0.14359  |
| 122577 | P03346 | Q96Q07 | -0.21153  |
| 122578 | P03346 | P30491 | -0.76151  |
| 122579 | P03346 | Q8NH60 | -0.92763  |
| 122580 | P03346 | Q8IYA2 | -0.21945  |
| 122581 | P03346 | Q9H1R3 | -0.23556  |
| 122582 | P03346 | P01008 | -0.1062   |
| 122583 | P03346 | Q6P9G4 | -0.50365  |
| 122584 | P03346 | Q01668 | -0.44605  |
| 122585 | P03346 | Q6EBC2 | -0.64235  |
| 122586 | P03346 | Q86XS5 | -0.87887  |
| 122587 | P03346 | P04440 | -0.58528  |
| 122588 | P03346 | P21266 | -0.22704  |

|        |        |        |           |
|--------|--------|--------|-----------|
| 122589 | P03346 | Q8TD55 | -0.22647  |
| 122590 | P03346 | P20036 | -0.64037  |
| 122591 | P03346 | Q13936 | -0.24766  |
| 122592 | P03346 | P30459 | -0.51191  |
| 122593 | P03346 | Q8IWX7 | -0.22595  |
| 122594 | P03346 | Q7RTX9 | -0.61943  |
| 122595 | P03346 | Q96CE8 | -0.50365  |
| 122596 | P03346 | Q9Y2Y8 | -0.22881  |
| 122597 | P03346 | A4D1T9 | -0.83334  |
| 122598 | P03346 | Q13258 | -0.46677  |
| 122599 | P03346 | Q9HCS2 | -0.52315  |
| 122600 | P03346 | Q53G44 | -0.21821  |
| 122601 | P03346 | Q9H6V9 | -0.094562 |
| 122602 | P03346 | P36955 | -0.67551  |
| 122603 | P03346 | Q9H2A2 | -0.35801  |
| 122604 | P03346 | P0C646 | -0.92763  |
| 122605 | P03346 | Q8N5H7 | -0.32932  |
| 122606 | P03346 | Q9H400 | -0.49643  |
| 122607 | P03346 | Q6PID6 | -0.22739  |
| 122608 | P03346 | Q8NH72 | -0.92763  |
| 122609 | P03346 | P21281 | -0.31481  |
| 122610 | P03346 | Q8TAV5 | -0.53519  |
| 122611 | P03346 | Q6P5S2 | -0.53519  |
| 122612 | P03346 | Q9H2F9 | -0.21112  |
| 122613 | P03346 | P48058 | -0.76384  |
| 122614 | P03346 | Q69YG0 | -0.50365  |
| 122615 | P03346 | Q86Y78 | -0.53519  |
| 122616 | P03346 | Q96S37 | -0.44336  |
| 122617 | P03346 | Q2WEN9 | -0.55666  |
| 122618 | P03346 | P46098 | -0.69201  |
| 122619 | P03346 | P49862 | -1.0005   |
| 122620 | P03346 | P0C263 | -0.88651  |
| 122621 | P03346 | P45983 | -0.22741  |
| 122622 | P03346 | P28332 | -0.31265  |
| 122623 | P03346 | Q8NBT0 | -0.22751  |
| 122624 | P03346 | Q5JQS5 | -0.92763  |
| 122625 | P03346 | P15814 | -0.68781  |
| 122626 | P03346 | Q7Z7M8 | -0.43332  |
| 122627 | P03346 | Q8WUA8 | -0.53519  |
| 122628 | P03346 | P11279 | -0.71308  |
| 122629 | P03346 | Q9H2S9 | -0.28999  |
| 122630 | P03346 | Q9UGC6 | -0.22747  |
| 122631 | P03346 | Q02156 | -0.2481   |
| 122632 | P03346 | Q969M3 | -0.18118  |
| 122633 | P03346 | P15382 | -0.69829  |
| 122634 | P03346 | O95567 | -0.013652 |
| 122635 | P03346 | Q6V1P9 | -0.86699  |
| 122636 | P03346 | Q9NR31 | -0.22758  |
| 122637 | P03346 | A8MWS5 | -0.17432  |
| 122638 | P03346 | Q9Y289 | -0.61298  |
| 122639 | P03346 | Q9BWW8 | -0.5733   |
| 122640 | P03346 | Q8TCU5 | -0.24294  |
| 122641 | P03346 | Q96RU8 | -0.22796  |
| 122642 | P03346 | Q9NPR9 | -0.50365  |
| 122643 | P03346 | Q8WZ84 | -0.92763  |
| 122644 | P03346 | Q8NHS0 | -0.23883  |
| 122645 | P03346 | P23467 | -0.40559  |
| 122646 | P03346 | P55899 | -0.69897  |
| 122647 | P03346 | Q496H8 | -0.19333  |
| 122648 | P03346 | Q8N5V2 | -0.57266  |
| 122649 | P03346 | P78356 | -0.31886  |
| 122650 | P03346 | B8ZZ34 | -0.50365  |
| 122651 | P03346 | Q86YD7 | -0.2508   |
| 122652 | P03346 | Q9H841 | -0.48692  |
| 122653 | P03346 | Q8N852 | -0.50365  |
| 122654 | P03346 | A6NL88 | -0.50365  |
| 122655 | P03346 | Q6PDA7 | -0.53519  |
| 122656 | P03346 | Q8N556 | -0.22717  |
| 122657 | P03346 | P47871 | -0.71203  |
| 122658 | P03346 | P52888 | -0.25517  |
| 122659 | P03346 | Q9UPU9 | -0.059829 |
| 122660 | P03346 | Q9NR19 | -0.23556  |
| 122661 | P03346 | P49281 | -0.2269   |
| 122662 | P03346 | Q9H853 | -0.30254  |
| 122663 | P03346 | Q14094 | -0.21569  |
| 122664 | P03346 | Q8N687 | -0.52229  |

|        |        |        |           |
|--------|--------|--------|-----------|
| 122665 | P03346 | P26992 | -0.3081   |
| 122666 | P03346 | Q9Y265 | -0.31166  |
| 122667 | P03346 | Q8NGY9 | -0.8116   |
| 122668 | P03346 | Q9UPR6 | -0.19543  |
| 122669 | P03346 | Q9Y5N1 | -1.0561   |
| 122670 | P03346 | O00294 | -0.18444  |
| 122671 | P03346 | Q96EY7 | -0.21383  |
| 122672 | P03346 | Q9Y620 | -0.21196  |
| 122673 | P03346 | A0M8Q6 | -0.75616  |
| 122674 | P03346 | Q13507 | -0.25389  |
| 122675 | P03346 | Q13066 | -0.21009  |
| 122676 | P03346 | O43908 | -0.49616  |
| 122677 | P03346 | O14678 | -1.0272   |
| 122678 | P03346 | P53778 | -0.22741  |
| 122679 | P03346 | O60565 | -0.22381  |
| 122680 | P03346 | Q8TB40 | -0.22386  |
| 122681 | P03346 | O43930 | -0.88651  |
| 122682 | P03346 | Q8NBL3 | -0.50365  |
| 122683 | P03346 | Q8TDJ6 | -0.22741  |
| 122684 | P03346 | Q9Y2E5 | -0.59494  |
| 122685 | P03346 | P54646 | -0.23612  |
| 122686 | P03346 | O95352 | -0.22356  |
| 122687 | P03346 | Q60I27 | -0.53866  |
| 122688 | P03346 | Q13021 | -0.14088  |
| 122689 | P03346 | Q96RU3 | -0.22741  |
| 122690 | P03346 | A6NDE8 | -0.21009  |
| 122691 | P03346 | Q6P9G0 | -0.2192   |
| 122692 | P03346 | Q7Z2K6 | -0.93023  |
| 122693 | P03346 | Q9H9B4 | -0.48313  |
| 122694 | P03346 | Q92570 | -0.23239  |
| 122695 | P03346 | Q8N961 | -0.22741  |
| 122696 | P03346 | P12272 | -0.19144  |
| 122697 | P03346 | Q95843 | -0.30986  |
| 122698 | P03346 | Q8IV45 | -0.46882  |
| 122699 | P03346 | P28482 | -0.22741  |
| 122700 | P03346 | Q8N6M8 | -0.22685  |
| 122701 | P03346 | Q9Y6W3 | -0.36007  |
| 122702 | P03346 | Q9Y519 | -0.50365  |
| 122703 | P03346 | Q9P0V9 | -0.22543  |
| 122704 | P03346 | P16035 | -0.56479  |
| 122705 | P03346 | A5PLL7 | -0.63608  |
| 122706 | P03346 | P09210 | -0.22736  |
| 122707 | P03346 | A6NH13 | -0.066668 |
| 122708 | P03346 | O95447 | -0.14583  |
| 122709 | P03346 | Q8IUA7 | -0.84539  |
| 122710 | P03346 | Q8IYP2 | -1.0507   |
| 122711 | P03346 | O00115 | -0.22138  |
| 122712 | P03346 | O60292 | -0.57837  |
| 122713 | P03346 | Q16378 | -0.73279  |
| 122714 | P03346 | Q9ULC3 | -0.7308   |
| 122715 | P03346 | Q8NGL6 | -0.92763  |
| 122716 | P03346 | Q5R3I4 | -0.10811  |
| 122717 | P03346 | P20848 | -0.45356  |
| 122718 | P03346 | P24386 | -0.46922  |
| 122719 | P03346 | Q8TBR4 | -0.050758 |
| 122720 | P03346 | Q58FF6 | -0.28583  |
| 122721 | P03346 | Q7Z7K0 | -0.17587  |
| 122722 | P03346 | Q16348 | -0.22231  |
| 122723 | P03346 | P0C024 | -0.23527  |
| 122724 | P03346 | O00292 | -0.54533  |
| 122725 | P03346 | Q4G163 | -0.18613  |
| 122726 | P03346 | Q86SQ0 | -0.22714  |
| 122727 | P03346 | P35219 | -0.22963  |
| 122728 | P03346 | Q30KQ9 | -0.52229  |
| 122729 | P03346 | Q8IZJ1 | -0.23831  |
| 122730 | P03346 | O00217 | -0.26628  |
| 122731 | P03346 | P06313 | -0.80078  |
| 122732 | P03346 | Q8TCT6 | -0.74878  |
| 122733 | P03346 | P13688 | -0.537    |
| 122734 | P03346 | P05015 | -0.63091  |
| 122735 | P03346 | P49759 | -0.72106  |
| 122736 | P03346 | P01574 | -0.3513   |
| 122737 | P03346 | Q8N2A0 | -0.22843  |
| 122738 | P03346 | Q9UL51 | -0.8737   |
| 122739 | P03346 | A6NGC4 | -0.50365  |
| 122740 | P03346 | Q7Z5A9 | -0.55254  |

|        |        |        |           |
|--------|--------|--------|-----------|
| 122741 | P03346 | Q9BY49 | -0.71841  |
| 122742 | P03346 | Q8N7E2 | -0.21725  |
| 122743 | P03346 | Q7L4E1 | -0.50365  |
| 122744 | P03346 | Q6P4F2 | -0.18966  |
| 122745 | P03346 | O60830 | -0.15761  |
| 122746 | P03346 | Q9P0U3 | -0.20959  |
| 122747 | P03346 | Q8NCC3 | -0.64254  |
| 122748 | P03346 | Q9HCH3 | -0.22861  |
| 122749 | P03346 | Q8WWW8 | -0.2274   |
| 122750 | P03346 | Q9Y581 | -0.4183   |
| 122751 | P03346 | Q8NI60 | -0.60819  |
| 122752 | P03346 | Q96QD5 | -0.1931   |
| 122753 | P03346 | A6NCS4 | -0.24329  |
| 122754 | P03346 | Q8N443 | -0.1275   |
| 122755 | P03346 | Q8TE57 | -0.93222  |
| 122756 | P03346 | Q92752 | -0.25706  |
| 122757 | P03346 | Q6ZDQ3 | -0.22764  |
| 122758 | P03346 | Q12797 | -0.38207  |
| 122759 | P03346 | P00492 | -0.2217   |
| 122760 | P03346 | Q8NGG4 | -0.92763  |
| 122761 | P03346 | Q9UBG0 | -0.58126  |
| 122762 | P03346 | A6NDU8 | -0.15431  |
| 122763 | P03346 | Q3SY77 | -0.55213  |
| 122764 | P03346 | Q969N4 | -0.9411   |
| 122765 | P03346 | P18564 | -0.84196  |
| 122766 | P03346 | Q5VY80 | -0.3384   |
| 122767 | P03346 | Q5T1V6 | -0.69807  |
| 122768 | P03346 | Q6ZW31 | -0.46816  |
| 122769 | P03346 | O15018 | -0.22594  |
| 122770 | P03346 | Q9H293 | -0.53855  |
| 122771 | P03346 | Q9BYX7 | -0.54706  |
| 122772 | P03346 | Q96E40 | -0.18107  |
| 122773 | P03346 | Q8NHP6 | -0.34272  |
| 122774 | P03346 | P15907 | -0.69098  |
| 122775 | P03346 | P49736 | -0.22301  |
| 122776 | P03346 | Q5CZ79 | -0.2274   |
| 122777 | P03346 | Q9GZQ8 | -0.21535  |
| 122778 | P03346 | A6NEN9 | -0.19583  |
| 122779 | P03346 | O60840 | -0.63933  |
| 122780 | P03346 | Q96F05 | -0.50365  |
| 122781 | P03346 | Q9GZM6 | -0.92763  |
| 122782 | P03346 | Q5JS37 | -0.53519  |
| 122783 | P03346 | Q8NDX2 | -0.50071  |
| 122784 | P03346 | P0CV98 | -0.10548  |
| 122785 | P03346 | Q96PV0 | -0.42392  |
| 122786 | P03346 | Q8N7U9 | -0.1632   |
| 122787 | P03346 | Q9NTX5 | -0.19557  |
| 122788 | P03346 | P13236 | -0.86135  |
| 122789 | P03346 | P01563 | -0.24071  |
| 122790 | P03346 | Q5T319 | -0.013652 |
| 122791 | P03346 | Q9H3H5 | -0.55398  |
| 122792 | P03346 | Q7Z5A7 | -1.0287   |
| 122793 | P03346 | Q8N0W3 | -0.66594  |
| 122794 | P03346 | M0R1G4 | -0.17163  |
| 122795 | P03346 | A6NKD2 | -0.10548  |
| 122796 | P03346 | Q8TC57 | -0.36806  |
| 122797 | P03346 | Q15484 | -0.6937   |
| 122798 | P03346 | Q13563 | -0.25865  |
| 122799 | P03346 | P21796 | -0.20118  |
| 122800 | P03346 | Q02246 | -0.38291  |
| 122801 | P03346 | Q96RI1 | -0.2281   |
| 122802 | P03346 | Q8TDY4 | -0.22747  |
| 122803 | P03346 | Q7Z2Q7 | -0.50365  |
| 122804 | P03346 | Q8NGU2 | -0.92763  |
| 122805 | P03346 | Q6ZTY9 | -0.02905  |
| 122806 | P03346 | A0PK05 | -0.50365  |
| 122807 | P03346 | P21964 | -0.21958  |
| 122808 | P03346 | P30486 | -0.51191  |
| 122809 | P03346 | P35475 | -0.3031   |
| 122810 | P03346 | P60880 | -0.22279  |
| 122811 | P03346 | Q8NH18 | -0.92763  |
| 122812 | P03346 | P49137 | -0.22849  |
| 122813 | P03346 | Q32ZL2 | -0.65499  |
| 122814 | P03346 | Q9NWW6 | -0.66004  |
| 122815 | P03346 | O00203 | -0.20861  |
| 122816 | P03346 | P59510 | -0.86004  |

|        |        |        |            |
|--------|--------|--------|------------|
| 122817 | P03346 | Q96I99 | -0.48239   |
| 122818 | P03346 | Q6UXF7 | -0.53541   |
| 122819 | P03346 | Q9BZW4 | -0.39933   |
| 122820 | P03346 | Q9UKP3 | -0.35696   |
| 122821 | P03346 | F8VTS6 | -0.22741   |
| 122822 | P03346 | Q9UJ70 | -0.15216   |
| 122823 | P03346 | Q75N03 | -0.22134   |
| 122824 | P03346 | Q96AY4 | -0.22741   |
| 122825 | P03346 | Q2KHT4 | -0.6235    |
| 122826 | P03346 | A1L4L8 | -0.045503  |
| 122827 | P03346 | Q7Z7B7 | -0.52229   |
| 122828 | P03346 | Q9H4B7 | -0.38524   |
| 122829 | P03346 | Q86YL5 | -0.247     |
| 122830 | P03346 | P56597 | -0.2897    |
| 122831 | P03346 | Q8N2Q7 | -0.28831   |
| 122832 | P03346 | P31939 | -0.13878   |
| 122833 | P03346 | Q92685 | -0.57684   |
| 122834 | P03346 | Q9P2U8 | -0.53585   |
| 122835 | P03346 | Q96G75 | -0.19106   |
| 122836 | P03346 | O95760 | -0.1771    |
| 122837 | P03346 | Q969X1 | -0.55261   |
| 122838 | P03346 | Q7RTX8 | -0.19189   |
| 122839 | P03346 | P78312 | -0.21219   |
| 122840 | P03346 | Q00526 | -0.40624   |
| 122841 | P03346 | A8MWC7 | -0.1755    |
| 122842 | P03346 | Q96SL1 | -0.59489   |
| 122843 | P03346 | A6NLE4 | -0.65219   |
| 122844 | P03346 | Q8TCY5 | -0.39734   |
| 122845 | P03346 | Q96R84 | -0.92763   |
| 122846 | P03346 | Q8TAZ6 | -0.20969   |
| 122847 | P03346 | Q9NQX0 | -0.2073    |
| 122848 | P03346 | Q13296 | -0.138     |
| 122849 | P03346 | Q8TDU9 | -0.94191   |
| 122850 | P03346 | Q8IWN6 | -0.036897  |
| 122851 | P03346 | Q401N2 | -0.64942   |
| 122852 | P03346 | Q02809 | -0.50498   |
| 122853 | P03346 | P31213 | -0.53864   |
| 122854 | P03346 | P56180 | -1.0821    |
| 122855 | P03346 | Q8IZ52 | -0.32024   |
| 122856 | P03346 | P19957 | -0.53446   |
| 122857 | P03346 | Q9HBX8 | -0.94113   |
| 122858 | P03346 | Q96Q40 | -0.75941   |
| 122859 | P03346 | Q11206 | -0.59501   |
| 122860 | P03346 | Q6UXH1 | -0.22741   |
| 122861 | P03346 | Q49AM3 | -0.22675   |
| 122862 | P03346 | P46695 | -0.22575   |
| 122863 | P03346 | Q9H7Z7 | -0.21662   |
| 122864 | P03346 | Q5VTT2 | -0.50365   |
| 122865 | P03346 | P18505 | -0.73645   |
| 122866 | P03346 | A6NG13 | -0.52402   |
| 122867 | P03346 | Q7RTY1 | -0.62746   |
| 122868 | P03346 | Q96DU9 | -0.232     |
| 122869 | P03346 | Q86XF0 | -0.1554    |
| 122870 | P03346 | P48764 | -0.33613   |
| 122871 | P03346 | P32321 | -0.2327    |
| 122872 | P03346 | Q5TEA6 | -0.50365   |
| 122873 | P03346 | Q8NGA6 | -0.92763   |
| 122874 | P03346 | P12034 | -0.48675   |
| 122875 | P03346 | Q96PG1 | -0.50365   |
| 122876 | P03346 | P30408 | -0.54498   |
| 122877 | P03346 | Q9H0A0 | -0.0038544 |
| 122878 | P03346 | Q9NRC1 | -0.50365   |
| 122879 | P03346 | Q3KNW5 | -0.70384   |
| 122880 | P03346 | Q6GMR7 | -0.48169   |
| 122881 | P03346 | Q9BXQ6 | -0.013652  |
| 122882 | P03346 | Q9Y4E8 | -0.26735   |
| 122883 | P03346 | P26951 | -0.64195   |
| 122884 | P03346 | Q6NXR0 | -0.59424   |
| 122885 | P03346 | P40200 | -0.99686   |
| 122886 | P03346 | P55073 | -0.61025   |
| 122887 | P03346 | Q9HAD4 | -0.22741   |
| 122888 | P03346 | P46821 | -0.21158   |
| 122889 | P03346 | Q9UF56 | -0.2261    |
| 122890 | P03346 | Q9Y2P4 | -1.0362    |
| 122891 | P03346 | P30457 | -0.51191   |
| 122892 | P03346 | Q8N4K4 | -0.50365   |

|        |        |        |            |
|--------|--------|--------|------------|
| 122893 | P03346 | O94769 | -0.59449   |
| 122894 | P03346 | Q2NKX8 | -0.2146    |
| 122895 | P03346 | Q9NZF1 | -0.14453   |
| 122896 | P03346 | Q9HA77 | -0.12198   |
| 122897 | P03346 | A6PVL3 | -0.44585   |
| 122898 | P03346 | P35125 | -0.31987   |
| 122899 | P03346 | Q8NGK6 | -0.92763   |
| 122900 | P03346 | Q8TAF5 | -0.013652  |
| 122901 | P03346 | O76087 | -0.21009   |
| 122902 | P03346 | Q8WXA9 | -0.22551   |
| 122903 | P03346 | Q8NGW6 | -0.92763   |
| 122904 | P03346 | P01624 | -0.80078   |
| 122905 | P03346 | P30501 | -0.82654   |
| 122906 | P03346 | Q8N4S9 | -0.54607   |
| 122907 | P03346 | Q8NI38 | -0.22741   |
| 122908 | P03346 | P12271 | -0.42521   |
| 122909 | P03346 | Q13068 | -0.16187   |
| 122910 | P03346 | A6NJW9 | -0.65219   |
| 122911 | P03346 | Q96GT9 | -0.0065391 |
| 122912 | P03346 | P30085 | -0.21579   |
| 122913 | P03346 | Q96KV7 | -0.2275    |
| 122914 | P03346 | Q5TGU0 | -0.62121   |
| 122915 | P03346 | Q8WYK1 | -0.88459   |
| 122916 | P03346 | Q8TB36 | -0.22713   |
| 122917 | P03346 | Q15526 | -0.42396   |
| 122918 | P03346 | P32245 | -0.36974   |
| 122919 | P03346 | Q96K12 | -0.99629   |
| 122920 | P03346 | Q96BY7 | -0.1389    |
| 122921 | P03346 | Q96NX9 | -0.17152   |
| 122922 | P03346 | Q4VX62 | -0.10269   |
| 122923 | P03346 | Q8N2R8 | -0.22413   |
| 122924 | P03346 | Q8NH16 | -0.8116    |
| 122925 | P03346 | Q8NB46 | -0.22734   |
| 122926 | P03346 | Q9BVG3 | -0.30279   |
| 122927 | P03346 | Q8N3A8 | -0.26172   |
| 122928 | P03346 | Q9Y282 | -0.34408   |
| 122929 | P03346 | Q5VZT2 | -0.11726   |
| 122930 | P03346 | P27539 | -0.54183   |
| 122931 | P03346 | Q13319 | -0.20058   |
| 122932 | P03346 | Q16854 | -0.27553   |
| 122933 | P03346 | Q9UMX6 | -0.38934   |
| 122934 | P03346 | Q9UPQ8 | -0.59279   |
| 122935 | P03346 | Q49AJ0 | -0.15889   |
| 122936 | P03346 | Q502W7 | -0.053527  |
| 122937 | P03346 | Q7Z404 | -0.50365   |
| 122938 | P03346 | Q7Z7L7 | -0.19499   |
| 122939 | P03346 | Q9H3S5 | -0.56452   |
| 122940 | P03346 | Q9UIV8 | -0.27734   |
| 122941 | P03346 | Q9Y2W7 | -0.23074   |
| 122942 | P03346 | Q4ADV7 | -0.50365   |
| 122943 | P03346 | Q15735 | -0.22714   |
| 122944 | P03346 | Q9HC38 | -0.15754   |
| 122945 | P03346 | Q8N511 | -0.50365   |
| 122946 | P03346 | Q8NE79 | -0.45572   |
| 122947 | P03346 | Q15582 | -1.0505    |
| 122948 | P03346 | Q6ZMV5 | -0.040136  |
| 122949 | P03346 | Q9BW19 | -0.24865   |
| 122950 | P03346 | Q86Y39 | -0.27654   |
| 122951 | P03346 | Q96K19 | -0.72233   |
| 122952 | P03346 | Q5RGS3 | -0.50365   |
| 122953 | P03346 | O15347 | -0.3245    |
| 122954 | P03346 | P35558 | -0.25769   |
| 122955 | P03346 | P49914 | -0.24892   |
| 122956 | P03346 | Q5T8P6 | -0.185     |
| 122957 | P03346 | Q9UJU2 | -0.22098   |
| 122958 | P03346 | P19075 | -0.79041   |
| 122959 | P03346 | A6NCD4 | -0.0010842 |
| 122960 | P03346 | P0CG41 | -0.50365   |
| 122961 | P03346 | Q9UFE4 | -0.14225   |
| 122962 | P03346 | P11047 | -0.6756    |
| 122963 | P03346 | Q9GZT5 | -0.68287   |
| 122964 | P03346 | P09038 | -0.29483   |
| 122965 | P03346 | Q12907 | -0.24332   |
| 122966 | P03346 | Q9NZP5 | -0.92763   |
| 122967 | P03346 | Q8NI99 | -1.0316    |
| 122968 | P03346 | O43283 | -0.2995    |

|        |        |         |           |
|--------|--------|---------|-----------|
| 122969 | P03346 | Q6UXQ6  | -0.53519  |
| 122970 | P03346 | Q7RTR0  | -0.32859  |
| 122971 | P03346 | P43251  | -0.46597  |
| 122972 | P03346 | Q9NS66  | -0.96376  |
| 122973 | P03346 | Q9Y235  | -0.50611  |
| 122974 | P03346 | Q9GZX3  | -0.32672  |
| 122975 | P03346 | Q7L0Q8  | -0.29197  |
| 122976 | P03346 | Q8TDC3  | -0.56326  |
| 122977 | P03346 | Q9NYK5  | -0.13556  |
| 122978 | P03346 | Q8IWU2  | -0.64511  |
| 122979 | P03346 | Q8IYS5  | -1.1616   |
| 122980 | P03346 | Q96LZ3  | -0.22768  |
| 122981 | P03346 | Q9H1J7  | -0.69159  |
| 122982 | P03346 | P50897  | -0.26812  |
| 122983 | P03346 | Q7Z7F0  | -0.1633   |
| 122984 | P03346 | Q53EP0  | -0.4869   |
| 122985 | P03346 | A6NGG3  | -0.013652 |
| 122986 | P03346 | Q16270  | -0.28268  |
| 122987 | P03346 | Q9Y672  | -0.51414  |
| 122988 | P03346 | Q9H2X0  | -0.37103  |
| 122989 | P03346 | Q9NQX3  | -0.52846  |
| 122990 | P03346 | Q6ZQN5  | -0.31352  |
| 122991 | P03346 | Q5J TZ5 | -0.20726  |
| 122992 | P03346 | O60235  | -1.4982   |
| 122993 | P03346 | P14616  | -1.141    |
| 122994 | P03346 | P03979  | -0.23144  |
| 122995 | P03346 | P83859  | -0.41585  |
| 122996 | P03346 | A2A3K4  | -0.44827  |
| 122997 | P03346 | Q66K79  | -0.85414  |
| 122998 | P03346 | P06576  | -0.21442  |
| 122999 | P03346 | Q6MZQ0  | -0.20482  |
| 123000 | P03346 | Q16515  | -0.42254  |
| 123001 | P03346 | Q16828  | -0.2509   |
| 123002 | P03346 | Q8NH49  | -0.92763  |
| 123003 | P03346 | O00468  | -0.41642  |
| 123004 | P03346 | O75459  | -0.18478  |
| 123005 | P03346 | Q9HCF6  | -0.60093  |
| 123006 | P03346 | P28799  | -0.23119  |
| 123007 | P03346 | P48304  | -0.55197  |
| 123008 | P03346 | Q15488  | -0.20401  |
| 123009 | P03346 | Q9H0C2  | -0.40867  |
| 123010 | P03346 | Q6ZRF8  | -0.30279  |
| 123011 | P03346 | O00442  | -0.20831  |
| 123012 | P03346 | Q8IVS2  | -0.2963   |
| 123013 | P03346 | Q96PD2  | -0.77103  |
| 123014 | P03346 | Q05D60  | -0.17287  |
| 123015 | P03346 | Q3SYB3  | -0.31352  |
| 123016 | P03346 | Q8WXI8  | -0.4921   |
| 123017 | P03346 | A1L3X4  | -0.032105 |
| 123018 | P03346 | Q6DHV5  | -0.13562  |
| 123019 | P03346 | Q9BRP0  | -0.22657  |
| 123020 | P03346 | P35716  | -0.23134  |
| 123021 | P03346 | P33764  | -0.22815  |
| 123022 | P03346 | Q8N8F4  | -0.13787  |
| 123023 | P03346 | O94953  | -0.19881  |
| 123024 | P03346 | P51800  | -0.65493  |
| 123025 | P03346 | P01608  | -0.80078  |
| 123026 | P03346 | Q14954  | -0.73101  |
| 123027 | P03346 | P05976  | -0.22674  |
| 123028 | P03346 | Q9BXM9  | -0.1985   |
| 123029 | P03346 | O95935  | -0.31671  |
| 123030 | P03346 | Q9Y520  | -0.087483 |
| 123031 | P03346 | Q8ND94  | -0.50365  |
| 123032 | P03346 | Q7L311  | -0.50365  |
| 123033 | P03346 | P07902  | -0.049852 |
| 123034 | P03346 | Q9Y484  | -0.22734  |
| 123035 | P03346 | Q9UBN1  | -0.8149   |
| 123036 | P03346 | Q86VG3  | -0.098169 |
| 123037 | P03346 | Q9BW62  | -0.44252  |
| 123038 | P03346 | Q9H7M9  | -0.50365  |
| 123039 | P03346 | Q96QZ0  | -0.62179  |
| 123040 | P03346 | P01877  | -0.22799  |
| 123041 | P03346 | O14498  | -0.70253  |
| 123042 | P03346 | Q8N0V5  | -0.41916  |
| 123043 | P03346 | Q5VT52  | -0.12707  |
| 123044 | P03346 | Q6ZQT7  | -0.013652 |



|        |        |        |           |
|--------|--------|--------|-----------|
| 123045 | P03346 | Q8IYS2 | -0.50365  |
| 123046 | P03346 | Q9H3V2 | -0.50365  |
| 123047 | P03346 | Q8N8S7 | -0.22644  |
| 123048 | P03346 | P20594 | -1.092    |
| 123049 | P03346 | Q969D9 | -0.64235  |
| 123050 | P03346 | Q9NWM3 | -0.13176  |
| 123051 | P03346 | Q5VWM4 | -0.17032  |
| 123052 | P03346 | O00330 | -0.22283  |
| 123053 | P03346 | P40126 | -0.37255  |
| 123054 | P03346 | Q9UFH2 | -0.37338  |
| 123055 | P03346 | Q8NHH9 | -0.22566  |
| 123056 | P03346 | O95436 | -0.64331  |
| 123057 | P03346 | Q9ULT6 | -0.23157  |
| 123058 | P03346 | Q8NGH6 | -0.92763  |
| 123059 | P03346 | Q8NDV7 | -0.10783  |
| 123060 | P03346 | B7Z8K6 | -0.50365  |
| 123061 | P03346 | Q6UB99 | -0.22741  |
| 123062 | P03346 | Q92508 | -0.71681  |
| 123063 | P03346 | Q6IF82 | -0.92763  |
| 123064 | P03346 | Q8N5T2 | -0.92582  |
| 123065 | P03346 | Q8TAT8 | -0.13829  |
| 123066 | P03346 | Q5TCH4 | -0.55503  |
| 123067 | P03346 | Q9NVV0 | -0.60348  |
| 123068 | P03346 | Q969Z4 | -0.45568  |
| 123069 | P03346 | P15391 | -0.8282   |
| 123070 | P03346 | Q9H2L4 | -0.50365  |
| 123071 | P03346 | P0C091 | -1.2323   |
| 123072 | P03346 | Q15034 | -0.22741  |
| 123073 | P03346 | Q8TC20 | -0.17821  |
| 123074 | P03346 | P49411 | -0.4366   |
| 123075 | P03346 | Q13151 | -0.23229  |
| 123076 | P03346 | Q9BQK8 | -0.17378  |
| 123077 | P03346 | Q92611 | -0.20776  |
| 123078 | P03346 | Q8NFU7 | -0.15476  |
| 123079 | P03346 | Q6NUN0 | -0.74302  |
| 123080 | P03346 | P00395 | -0.17431  |
| 123081 | P03346 | Q86W25 | -0.48833  |
| 123082 | P03346 | Q3SXZ7 | -0.1727   |
| 123083 | P03346 | Q7L7L0 | -0.35085  |
| 123084 | P03346 | Q6ZVK1 | -0.50365  |
| 123085 | P03346 | Q5VXH5 | -0.17032  |
| 123086 | P03346 | Q5H943 | -0.65219  |
| 123087 | P03346 | P35575 | -0.30421  |
| 123088 | P03346 | Q9BVA0 | -0.22794  |
| 123089 | P03346 | Q15553 | -0.22825  |
| 123090 | P03346 | P24588 | -0.17517  |
| 123091 | P03346 | Q07812 | -0.2274   |
| 123092 | P03346 | Q5T4J0 | -0.42524  |
| 123093 | P03346 | Q96BZ9 | -1.177    |
| 123094 | P03346 | Q9HCB6 | -0.32459  |
| 123095 | P03346 | Q9Y490 | -0.22757  |
| 123096 | P03346 | Q94832 | -0.39785  |
| 123097 | P03346 | P46095 | -1.0135   |
| 123098 | P03346 | Q8N567 | -0.31028  |
| 123099 | P03346 | Q86T20 | -0.53519  |
| 123100 | P03346 | Q86UX2 | -0.50031  |
| 123101 | P03346 | Q5SZQ8 | -0.23543  |
| 123102 | P03346 | Q96KR6 | -0.50365  |
| 123103 | P03346 | Q8NDZ0 | -0.12708  |
| 123104 | P03346 | P11245 | -0.24053  |
| 123105 | P03346 | Q9Y5E5 | -0.73735  |
| 123106 | P03346 | Q14526 | -0.21776  |
| 123107 | P03346 | Q9Y4F1 | -0.22741  |
| 123108 | P03346 | Q9HA64 | -0.2461   |
| 123109 | P03346 | P29016 | -0.34902  |
| 123110 | P03346 | Q15836 | -0.22695  |
| 123111 | P03346 | Q9H190 | -0.22737  |
| 123112 | P03346 | Q86XE0 | -0.22139  |
| 123113 | P03346 | Q13474 | -0.22734  |
| 123114 | P03346 | Q9UBX8 | -0.36241  |
| 123115 | P03346 | A8TX70 | -0.82648  |
| 123116 | P03346 | Q99680 | -1.0977   |
| 123117 | P03346 | A6NE52 | -0.22742  |
| 123118 | P03346 | Q9P1G2 | -0.038006 |
| 123119 | P03346 | O75882 | -1.1893   |
| 123120 | P03346 | Q8N6C7 | -0.17666  |

|        |        |        |           |
|--------|--------|--------|-----------|
| 123121 | P03346 | Q9NYA4 | -0.22638  |
| 123122 | P03346 | P36952 | -0.11702  |
| 123123 | P03346 | Q8NET8 | -0.57976  |
| 123124 | P03346 | P61647 | -0.38113  |
| 123125 | P03346 | P26012 | -0.87243  |
| 123126 | P03346 | Q9NZD1 | -0.96376  |
| 123127 | P03346 | Q13882 | -0.45243  |
| 123128 | P03346 | Q6L9W6 | -0.41375  |
| 123129 | P03346 | Q9UBL9 | -0.41909  |
| 123130 | P03346 | Q9NVX7 | -0.20604  |
| 123131 | P03346 | Q8NGI6 | -0.92763  |
| 123132 | P03346 | Q04828 | -0.22721  |
| 123133 | P03346 | A6NJY1 | -0.52403  |
| 123134 | P03346 | Q8TDW0 | -0.63608  |
| 123135 | P03346 | P08908 | -0.94222  |
| 123136 | P03346 | Q8WU17 | -0.28384  |
| 123137 | P03346 | Q86XR5 | -0.49157  |
| 123138 | P03346 | Q8N1E2 | -0.54492  |
| 123139 | P03346 | P57771 | -0.33739  |
| 123140 | P03346 | P0DJD0 | -0.22407  |
| 123141 | P03346 | Q9BZD7 | -1.0389   |
| 123142 | P03346 | P25391 | -0.61208  |
| 123143 | P03346 | Q96GY0 | -0.08033  |
| 123144 | P03346 | P51684 | -0.96176  |
| 123145 | P03346 | Q6IB77 | -0.12355  |
| 123146 | P03346 | Q8NG85 | -0.8116   |
| 123147 | P03346 | P43686 | -0.32809  |
| 123148 | P03346 | Q12887 | -0.35849  |
| 123149 | P03346 | P29622 | -0.54685  |
| 123150 | P03346 | O15050 | -0.22686  |
| 123151 | P03346 | O43676 | -0.25973  |
| 123152 | P03346 | P50226 | -0.23006  |
| 123153 | P03346 | P09131 | -0.49739  |
| 123154 | P03346 | P19623 | -0.14344  |
| 123155 | P03346 | Q96TA2 | -1.0122   |
| 123156 | P03346 | Q96P69 | -0.95904  |
| 123157 | P03346 | Q6NUJ1 | -0.6749   |
| 123158 | P03346 | Q5SRD1 | -0.0786   |
| 123159 | P03346 | Q6XPR3 | -0.61474  |
| 123160 | P03346 | P35225 | -0.21765  |
| 123161 | P03346 | Q9UK17 | -0.75631  |
| 123162 | P03346 | Q07092 | -0.30812  |
| 123163 | P03346 | P35557 | -0.22198  |
| 123164 | P03346 | Q96L12 | -0.25388  |
| 123165 | P03346 | Q13087 | -0.2573   |
| 123166 | P03346 | Q3Y452 | -0.013652 |
| 123167 | P03346 | Q05513 | -0.22618  |
| 123168 | P03346 | Q8WVP7 | -0.49562  |
| 123169 | P03346 | Q8NCK7 | -0.61943  |
| 123170 | P03346 | P14384 | -0.21981  |
| 123171 | P03346 | Q8IYU2 | -0.22749  |
| 123172 | P03346 | A6NIK2 | -0.22859  |
| 123173 | P03346 | P0C5K6 | -0.013652 |
| 123174 | P03346 | O95801 | -0.089628 |
| 123175 | P03346 | Q8N475 | -0.60326  |
| 123176 | P03346 | P78410 | -0.48009  |
| 123177 | P03346 | Q8NGP2 | -0.92763  |
| 123178 | P03346 | P01850 | -0.63906  |
| 123179 | P03346 | O15481 | -0.17124  |
| 123180 | P03346 | Q96IJ6 | -0.3923   |
| 123181 | P03346 | Q92956 | -0.22742  |
| 123182 | P03346 | Q14332 | -0.46369  |
| 123183 | P03346 | P10747 | -0.22422  |
| 123184 | P03346 | Q9BZL3 | -0.50365  |
| 123185 | P03346 | Q8TAC2 | -0.3918   |
| 123186 | P03346 | Q9NRG1 | -0.22071  |
| 123187 | P03346 | P01562 | -0.63091  |
| 123188 | P03346 | A4D174 | -0.26619  |
| 123189 | P03346 | Q8NHU0 | -0.1741   |
| 123190 | P03346 | Q8N9I9 | -0.22742  |
| 123191 | P03346 | P15309 | -1.1126   |
| 123192 | P03346 | Q9ULR3 | -0.18653  |
| 123193 | P03346 | P42263 | -0.59891  |
| 123194 | P03346 | Q9UIK4 | -0.62647  |
| 123195 | P03346 | Q8WTX9 | -0.52854  |
| 123196 | P03346 | P49763 | -0.75132  |

|        |        |         |           |
|--------|--------|---------|-----------|
| 123197 | P03346 | P43363  | -0.1957   |
| 123198 | P03346 | Q8TF27  | -0.65984  |
| 123199 | P03346 | A6NL08  | -0.92763  |
| 123200 | P03346 | P04430  | -0.80078  |
| 123201 | P03346 | E7ERA6  | -0.56385  |
| 123202 | P03346 | Q9NQZ6  | -0.19805  |
| 123203 | P03346 | Q8NH07  | -0.92763  |
| 123204 | P03346 | P31025  | -0.70819  |
| 123205 | P03346 | P15374  | -0.20461  |
| 123206 | P03346 | Q6PJJ9  | -0.50365  |
| 123207 | P03346 | P57073  | -0.25579  |
| 123208 | P03346 | Q86WK6  | -0.968    |
| 123209 | P03346 | Q9Y6M5  | -0.56983  |
| 123210 | P03346 | Q92484  | -0.19003  |
| 123211 | P03346 | Q9H756  | -0.50365  |
| 123212 | P03346 | Q7Z6L0  | -0.6586   |
| 123213 | P03346 | P09104  | -0.18145  |
| 123214 | P03346 | Q8IUS5  | -0.65499  |
| 123215 | P03346 | Q5VUJ5  | -0.65984  |
| 123216 | P03346 | P0C870  | -0.20436  |
| 123217 | P03346 | Q86U37  | -0.20421  |
| 123218 | P03346 | Q9UBR1  | -0.2179   |
| 123219 | P03346 | Q9UN70  | -0.84938  |
| 123220 | P03346 | P09603  | -0.52444  |
| 123221 | P03346 | O00559  | -0.47923  |
| 123222 | P03346 | O43766  | -0.32874  |
| 123223 | P03346 | Q86XT9  | -0.61715  |
| 123224 | P03346 | Q75409  | -0.07714  |
| 123225 | P03346 | Q86UU9  | -0.56932  |
| 123226 | P03346 | Q96BQ5  | -0.029184 |
| 123227 | P03346 | Q8NGN2  | -0.92763  |
| 123228 | P03346 | Q96LT4  | -0.53681  |
| 123229 | P03346 | Q8TF64  | -0.22685  |
| 123230 | P03346 | P52788  | -0.15713  |
| 123231 | P03346 | Q8WXA8  | -0.66367  |
| 123232 | P03346 | Q9H5U6  | -0.21773  |
| 123233 | P03346 | Q6IPR3  | -0.11406  |
| 123234 | P03346 | Q9HB15  | -0.64933  |
| 123235 | P03346 | P02679  | -0.70632  |
| 123236 | P03346 | O75096  | -0.29373  |
| 123237 | P03346 | Q9P2X8  | -0.18315  |
| 123238 | P03346 | Q14831  | -0.55488  |
| 123239 | P03346 | Q9C0B0  | -0.21085  |
| 123240 | P03346 | O95407  | -0.22741  |
| 123241 | P03346 | Q9NP56  | -0.25262  |
| 123242 | P03346 | P0CG42  | -0.013652 |
| 123243 | P03346 | Q9ULJ8  | -0.22728  |
| 123244 | P03346 | Q9UK96  | -0.18817  |
| 123245 | P03346 | P28068  | -0.65645  |
| 123246 | P03346 | P59538  | -0.84404  |
| 123247 | P03346 | Q6PUV4  | -0.088309 |
| 123248 | P03346 | O00220  | -0.2274   |
| 123249 | P03346 | Q24JP5  | -0.37499  |
| 123250 | P03346 | Q67FW5  | -0.17684  |
| 123251 | P03346 | Q8NFFZ6 | -0.91924  |
| 123252 | P03346 | Q16549  | -0.75394  |
| 123253 | P03346 | Q9NUC0  | -0.11475  |
| 123254 | P03346 | Q3LFD5  | -0.36346  |
| 123255 | P03346 | Q86SU0  | -0.29563  |
| 123256 | P03346 | Q5T7N3  | -0.22741  |
| 123257 | P03346 | Q96LU7  | -0.53519  |
| 123258 | P03346 | A6NGB0  | -0.50365  |
| 123259 | P03346 | Q96F25  | -0.59637  |
| 123260 | P03346 | P48544  | -0.34629  |
| 123261 | P03346 | Q15042  | -0.077675 |
| 123262 | P03346 | Q8N690  | -0.52229  |
| 123263 | P03346 | Q8IUB5  | -0.50866  |
| 123264 | P03346 | Q8NGG3  | -0.92763  |
| 123265 | P03346 | P35590  | -0.8501   |
| 123266 | P03346 | Q8N9H9  | -0.013652 |
| 123267 | P03346 | O60548  | -0.31352  |
| 123268 | P03346 | Q5R3F8  | -0.52059  |
| 123269 | P03346 | O76038  | -0.45526  |
| 123270 | P03346 | Q68D51  | -0.19366  |
| 123271 | P03346 | Q8NFN8  | -0.9411   |
| 123272 | P03346 | Q8WX39  | -0.49301  |

|        |        |        |          |
|--------|--------|--------|----------|
| 123273 | P03346 | O75677 | -0.22845 |
| 123274 | P03346 | P21781 | -0.41786 |
| 123275 | P03346 | P54710 | -0.71766 |
| 123276 | P03346 | P35625 | -0.21956 |
| 123277 | P03346 | Q5R387 | -0.60918 |
| 123278 | P03346 | O43151 | -0.18068 |
| 123279 | P03346 | P21854 | -0.38283 |
| 123280 | P03346 | O15374 | -0.72524 |
| 123281 | P03346 | O75147 | -0.22869 |
| 123282 | P03346 | P59537 | -0.93398 |
| 123283 | P03346 | Q8N9B8 | -0.37018 |
| 123284 | P03346 | Q7RTX0 | -0.91648 |
| 123285 | P03346 | P0DM48 | -0.22731 |
| 123286 | P03346 | O00574 | -0.96374 |
| 123287 | P03346 | Q14914 | -0.45359 |
| 123288 | P03346 | P12814 | -0.26031 |
| 123289 | P03346 | Q9BTZ2 | -0.44293 |
| 123290 | P03346 | P32970 | -0.42693 |
| 123291 | P03346 | Q5TC82 | -0.22739 |
| 123292 | P03346 | P13501 | -0.69362 |
| 123293 | P03346 | Q6UXY8 | -0.50365 |
| 123294 | P03346 | Q96GE6 | -0.22726 |
| 123295 | P03346 | Q3KRB8 | -0.6787  |
| 123296 | P03346 | O43889 | -0.31096 |
| 123297 | P03346 | Q14CZ7 | -0.15835 |
| 123298 | P03346 | Q96P88 | -0.91902 |
| 123299 | P03346 | Q9Y334 | -0.3749  |
| 123300 | P03346 | Q8NF86 | -1.1339  |
| 123301 | P03346 | Q9H2U9 | -0.73061 |
| 123302 | P03346 | P01375 | -0.23953 |
| 123303 | P03346 | P01611 | -0.80078 |
| 123304 | P03346 | P23229 | -0.22745 |
| 123305 | P03346 | Q8WVI0 | -0.38186 |
| 123306 | P03346 | Q5W188 | -0.6083  |
| 123307 | P03346 | Q9Y6Y8 | -0.2118  |
| 123308 | P03346 | P48729 | -0.22741 |
| 123309 | P03346 | Q32M92 | -0.17239 |
| 123310 | P03346 | Q9P2E9 | -0.33774 |
| 123311 | P03346 | A6NC97 | -0.50365 |
| 123312 | P03346 | Q8WV83 | -0.47711 |
| 123313 | P03346 | Q96DU7 | -0.15239 |
| 123314 | P03346 | Q8TE99 | -0.52831 |
| 123315 | P03346 | Q8TDR2 | -0.39635 |
| 123316 | P03346 | Q6UXK2 | -0.70021 |
| 123317 | P03346 | Q9UQB9 | -0.46107 |
| 123318 | P03346 | Q9UPT8 | -0.20809 |
| 123319 | P03346 | P01701 | -0.80078 |
| 123320 | P03346 | Q9H082 | -0.59147 |
| 123321 | P03346 | A6NP81 | -0.16512 |
| 123322 | P03346 | Q8NBL1 | -0.18166 |
| 123323 | P03346 | Q15813 | -0.22741 |
| 123324 | P03346 | Q9HCD6 | -0.22741 |
| 123325 | P03346 | Q96JA1 | -0.50365 |
| 123326 | P03346 | Q9UGJ0 | -0.57073 |
| 123327 | P03346 | Q8NF37 | -0.42537 |
| 123328 | P03346 | P27105 | -0.21595 |
| 123329 | P03346 | Q8IY67 | -0.23061 |
| 123330 | P03346 | Q9NYU1 | -0.11971 |
| 123331 | P03346 | P10915 | -0.76604 |
| 123332 | P03346 | Q9BSN7 | -0.4984  |
| 123333 | P03346 | Q6VB85 | -0.31352 |
| 123334 | P03346 | Q9HCM3 | -0.50365 |
| 123335 | P03346 | Q9HCE0 | -0.1547  |
| 123336 | P03346 | P01766 | -0.80078 |
| 123337 | P03346 | P53674 | -0.13408 |
| 123338 | P03346 | P05543 | -0.51177 |
| 123339 | P03346 | Q96KB5 | -0.22741 |
| 123340 | P03346 | Q9UQ74 | -0.53519 |
| 123341 | P03346 | P41231 | -0.66337 |
| 123342 | P03346 | Q92526 | -0.22173 |
| 123343 | P03346 | Q0JRZ9 | -0.22664 |
| 123344 | P03346 | Q92729 | -0.50775 |
| 123345 | P03346 | P21452 | -1.0598  |
| 123346 | P03346 | Q02641 | -0.33789 |
| 123347 | P03346 | Q8N283 | -0.22739 |
| 123348 | P03346 | Q00887 | -0.55194 |

|        |        |        |           |
|--------|--------|--------|-----------|
| 123349 | P03346 | Q9Y546 | -0.21912  |
| 123350 | P03346 | Q8NCE2 | -0.2208   |
| 123351 | P03346 | Q8TAA9 | -0.21507  |
| 123352 | P03346 | Q6UWM9 | -0.54215  |
| 123353 | P03346 | Q6P7N7 | -0.50365  |
| 123354 | P03346 | Q99956 | -0.34167  |
| 123355 | P03346 | Q8IZU8 | -0.49257  |
| 123356 | P03346 | A8MTL9 | -0.50866  |
| 123357 | P03346 | O14796 | -0.22741  |
| 123358 | P03346 | P01130 | -0.33949  |
| 123359 | P03346 | Q14767 | -0.69985  |
| 123360 | P03346 | P04179 | -0.22102  |
| 123361 | P03346 | Q9H227 | -0.22711  |
| 123362 | P03346 | Q8WVZ7 | -0.67369  |
| 123363 | P03346 | Q86VY9 | -0.50365  |
| 123364 | P03346 | Q9P2Z0 | -0.028289 |
| 123365 | P03346 | O60813 | -0.13927  |
| 123366 | P03346 | O43609 | -0.21497  |
| 123367 | P03346 | Q96QE3 | -0.33604  |
| 123368 | P03346 | P55056 | -0.62027  |
| 123369 | P03346 | Q6YP21 | -0.222    |
| 123370 | P03346 | Q96JT2 | -0.48129  |
| 123371 | P03346 | Q58FF8 | -0.28583  |
| 123372 | P03346 | Q66K66 | -0.50365  |
| 123373 | P03346 | Q16659 | -0.22741  |
| 123374 | P03346 | Q4G1C9 | -0.50365  |
| 123375 | P03346 | Q9BXJ3 | -0.53519  |
| 123376 | P03346 | Q8IWB1 | -0.22987  |
| 123377 | P03346 | P02750 | -0.63802  |
| 123378 | P03346 | A6NHR8 | -0.013652 |
| 123379 | P03346 | Q6NSX1 | -0.6733   |
| 123380 | P03346 | P37108 | -0.30417  |
| 123381 | P03346 | Q15520 | -0.29445  |
| 123382 | P03346 | P06316 | -0.80078  |
| 123383 | P03346 | P16188 | -0.62987  |
| 123384 | P03346 | Q9C0H5 | -0.22769  |
| 123385 | P03346 | P09564 | -0.67464  |
| 123386 | P03346 | Q96L14 | -0.10064  |
| 123387 | P03346 | P22732 | -0.12134  |
| 123388 | P03346 | Q9NP72 | -1.0517   |
| 123389 | P03346 | Q15569 | -0.45886  |
| 123390 | P03346 | P43365 | -0.17735  |
| 123391 | P03346 | Q9Y3T6 | -0.38451  |
| 123392 | P03346 | P55809 | -0.23724  |
| 123393 | P03346 | Q9H0P0 | -0.1748   |
| 123394 | P03346 | Q8NGT7 | -0.92763  |
| 123395 | P03346 | Q9NSE4 | -0.13744  |
| 123396 | P03346 | P49441 | -0.2107   |
| 123397 | P03346 | O60928 | -0.64803  |
| 123398 | P03346 | P32322 | -0.36411  |
| 123399 | P03346 | P32247 | -0.84281  |
| 123400 | P03346 | Q8NC44 | -0.51601  |
| 123401 | P03346 | P51512 | -1.3046   |
| 123402 | P03346 | Q96IM9 | -0.13954  |
| 123403 | P03346 | Q99788 | -0.6576   |
| 123404 | P03346 | Q9UBS5 | -0.52216  |
| 123405 | P03346 | P78325 | -0.33345  |
| 123406 | P03346 | Q9NYC9 | -0.46253  |
| 123407 | P03346 | P56715 | -0.2069   |
| 123408 | P03346 | O95755 | -0.48203  |
| 123409 | P03346 | Q8NEW0 | -0.21282  |
| 123410 | P03346 | Q86TE4 | -0.53519  |
| 123411 | P03346 | Q0VF49 | -0.013652 |
| 123412 | P03346 | P01854 | -0.23565  |
| 123413 | P03346 | O14874 | -0.2158   |
| 123414 | P03346 | Q9NZJ7 | -0.22894  |
| 123415 | P03346 | A6NC42 | -0.00867  |
| 123416 | P03346 | P02042 | -0.07206  |
| 123417 | P03346 | Q92928 | -0.49428  |
| 123418 | P03346 | Q8N594 | -0.32821  |
| 123419 | P03346 | Q9NXX6 | -0.8064   |
| 123420 | P03346 | Q9UBS9 | -0.63338  |
| 123421 | P03346 | P04054 | -0.4507   |
| 123422 | P03346 | Q6VVX0 | -0.52712  |
| 123423 | P03346 | Q9NSE2 | -0.22741  |
| 123424 | P03346 | P46020 | -0.17184  |

|        |        |        |           |
|--------|--------|--------|-----------|
| 123425 | P03346 | Q8TAL6 | -0.47033  |
| 123426 | P03346 | P01712 | -0.80078  |
| 123427 | P03346 | O60266 | -0.47608  |
| 123428 | P03346 | P31947 | -0.42713  |
| 123429 | P03346 | Q9Y5F0 | -0.87177  |
| 123430 | P03346 | Q8NE09 | -0.33739  |
| 123431 | P03346 | Q8NGS2 | -0.92763  |
| 123432 | P03346 | Q5W0U4 | -0.23278  |
| 123433 | P03346 | Q8TDS5 | -0.87741  |
| 123434 | P03346 | Q8IVS8 | -0.20209  |
| 123435 | P03346 | Q8N2A8 | -0.51057  |
| 123436 | P03346 | P16112 | -0.5419   |
| 123437 | P03346 | Q8IXQ3 | -0.084838 |
| 123438 | P03346 | Q6L9T8 | -0.084128 |
| 123439 | P03346 | P10721 | -0.28669  |
| 123440 | P03346 | P17568 | -0.16697  |
| 123441 | P03346 | Q6ZUT3 | -0.31148  |
| 123442 | P03346 | P59666 | -0.68389  |
| 123443 | P03346 | P20794 | -0.22705  |
| 123444 | P03346 | Q6ICL7 | -0.50365  |
| 123445 | P03346 | Q75204 | -0.41269  |
| 123446 | P03346 | Q9P0M4 | -0.69541  |
| 123447 | P03346 | Q92535 | -0.65867  |
| 123448 | P03346 | P52926 | -0.15034  |
| 123449 | P03346 | Q9H3S3 | -1.1438   |
| 123450 | P03346 | Q6ZUU3 | -0.013652 |
| 123451 | P03346 | Q9NV23 | -0.23721  |
| 123452 | P03346 | Q86VH2 | -0.49391  |
| 123453 | P03346 | Q8N1N2 | -0.50365  |
| 123454 | P03346 | O43521 | -0.22631  |
| 123455 | P03346 | O95907 | -0.56376  |
| 123456 | P03346 | Q6IFN5 | -0.92763  |
| 123457 | P03346 | Q96AE7 | -0.22638  |
| 123458 | P03346 | O43320 | -0.68023  |
| 123459 | P03346 | Q8TB52 | -0.2009   |
| 123460 | P03346 | P02818 | -0.38047  |
| 123461 | P03346 | Q7Z7D3 | -0.70799  |
| 123462 | P03346 | Q9NTG1 | -0.78976  |
| 123463 | P03346 | Q86TD4 | -0.18858  |
| 123464 | P03346 | Q969F0 | -0.51601  |
| 123465 | P03346 | Q9UI54 | -0.013652 |
| 123466 | P03346 | O60486 | -0.65446  |
| 123467 | P03346 | Q96HU8 | -1.0183   |
| 123468 | P03346 | Q9UI09 | -0.17746  |
| 123469 | P03346 | Q5M9N0 | -0.2032   |
| 123470 | P03346 | Q9NPQ8 | -0.35941  |
| 123471 | P03346 | A8MQ11 | -0.10969  |
| 123472 | P03346 | Q96AG4 | -0.6037   |
| 123473 | P03346 | I3L1I5 | -0.025984 |
| 123474 | P03346 | Q99439 | -0.2238   |
| 123475 | P03346 | O75023 | -0.57973  |
| 123476 | P03346 | Q6AWC2 | -0.22741  |
| 123477 | P03346 | Q2M5E4 | -0.33739  |
| 123478 | P03346 | A8MPS7 | -0.16898  |
| 123479 | P03346 | O60568 | -0.23172  |
| 123480 | P03346 | Q9ULG3 | -0.013652 |
| 123481 | P03346 | Q9BZ81 | -0.19546  |
| 123482 | P03346 | Q8IWU6 | -0.31949  |
| 123483 | P03346 | P49771 | -1.2683   |
| 123484 | P03346 | P56730 | -0.97553  |
| 123485 | P03346 | Q6PH85 | -0.14227  |
| 123486 | P03346 | A6NKB5 | -0.50365  |
| 123487 | P03346 | P0C7P3 | -0.48833  |
| 123488 | P03346 | Q6UB35 | -0.50492  |
| 123489 | P03346 | A8MXV4 | -0.068976 |
| 123490 | P03346 | Q5VWC8 | -0.74273  |
| 123491 | P03346 | Q7Z3E5 | -0.22739  |
| 123492 | P03346 | Q8IYB4 | -0.22721  |
| 123493 | P03346 | Q92187 | -0.27781  |
| 123494 | P03346 | O75936 | -0.25515  |
| 123495 | P03346 | P15260 | -0.81616  |
| 123496 | P03346 | Q9Y5E3 | -0.92001  |
| 123497 | P03346 | Q8WU49 | -0.013652 |
| 123498 | P03346 | Q9H1C4 | -0.52444  |
| 123499 | P03346 | P56749 | -0.41247  |
| 123500 | P03346 | Q6UXH8 | -0.74825  |

|        |        |        |            |
|--------|--------|--------|------------|
| 123501 | P03346 | P51884 | -0.48338   |
| 123502 | P03346 | Q96LB9 | -0.65002   |
| 123503 | P03346 | Q8N7Y1 | -0.013652  |
| 123504 | P03346 | Q2T9L4 | -0.1509    |
| 123505 | P03346 | Q9H6B9 | -0.51037   |
| 123506 | P03346 | Q8N806 | -0.21798   |
| 123507 | P03346 | Q9Y343 | -0.22719   |
| 123508 | P03346 | Q8NGF6 | -0.92763   |
| 123509 | P03346 | Q6P6B7 | -0.22741   |
| 123510 | P03346 | Q9BZV2 | -0.45649   |
| 123511 | P03346 | P04085 | -0.26637   |
| 123512 | P03346 | P29320 | -0.85135   |
| 123513 | P03346 | Q86VR2 | -0.50365   |
| 123514 | P03346 | H3BN30 | -0.013652  |
| 123515 | P03346 | Q8NGY6 | -0.92763   |
| 123516 | P03346 | A6NJ08 | -0.12268   |
| 123517 | P03346 | A6NGG8 | -0.29699   |
| 123518 | P03346 | Q9BV99 | -0.2274    |
| 123519 | P03346 | P20853 | -0.61609   |
| 123520 | P03346 | Q8NGP6 | -0.92763   |
| 123521 | P03346 | Q96AD5 | -0.50268   |
| 123522 | P03346 | Q9UHF0 | -0.70629   |
| 123523 | P03346 | Q8NGJ9 | -0.92763   |
| 123524 | P03346 | Q16322 | -0.55806   |
| 123525 | P03346 | O15254 | -0.44725   |
| 123526 | P03346 | Q4G0U5 | -0.15904   |
| 123527 | P03346 | Q9P055 | -0.5055    |
| 123528 | P03346 | Q75718 | -0.63247   |
| 123529 | P03346 | Q96F44 | -0.22798   |
| 123530 | P03346 | O43451 | -0.51802   |
| 123531 | P03346 | P04004 | -0.68168   |
| 123532 | P03346 | P02812 | -0.3749    |
| 123533 | P03346 | P52945 | -0.29055   |
| 123534 | P03346 | Q9HBI0 | -0.21993   |
| 123535 | P03346 | Q7RTW8 | -0.82376   |
| 123536 | P03346 | P05121 | -0.12377   |
| 123537 | P03346 | P17050 | -0.20015   |
| 123538 | P03346 | Q9NYQ8 | -0.44204   |
| 123539 | P03346 | Q8N4P3 | -0.24464   |
| 123540 | P03346 | Q02763 | -0.41953   |
| 123541 | P03346 | P04211 | -0.80078   |
| 123542 | P03346 | Q9BZJ6 | -0.83531   |
| 123543 | P03346 | P30038 | -0.24251   |
| 123544 | P03346 | Q9NWM0 | -0.225     |
| 123545 | P03346 | Q6NW29 | -0.12061   |
| 123546 | P03346 | Q9HD23 | -0.46116   |
| 123547 | P03346 | P29353 | -0.22741   |
| 123548 | P03346 | P01892 | -0.385     |
| 123549 | P03346 | Q8NFR7 | -0.0065795 |
| 123550 | P03346 | Q86V59 | -0.12511   |
| 123551 | P03346 | Q92563 | -0.69454   |
| 123552 | P03346 | Q7Z408 | -0.65219   |
| 123553 | P03346 | Q9UIA0 | -0.39467   |
| 123554 | P03346 | P63261 | -0.094375  |
| 123555 | P03346 | O94761 | -0.22743   |
| 123556 | P03346 | Q86SY8 | -0.013652  |
| 123557 | P03346 | Q6UXX5 | -0.50365   |
| 123558 | P03346 | Q9H1M4 | -0.45808   |
| 123559 | P03346 | Q86Y22 | -1.1371    |
| 123560 | P03346 | Q8WVM8 | -0.22536   |
| 123561 | P03346 | Q96SE0 | -0.36335   |
| 123562 | P03346 | P57735 | -0.26978   |
| 123563 | P03346 | Q68G75 | -0.40736   |
| 123564 | P03346 | Q5VVQ6 | -0.15453   |
| 123565 | P03346 | P17936 | -0.22751   |
| 123566 | P03346 | Q86XR7 | -0.22657   |
| 123567 | P03346 | Q9BZK8 | -0.013652  |
| 123568 | P03346 | Q9GZX6 | -0.63474   |
| 123569 | P03346 | Q6ZS82 | -0.61769   |
| 123570 | P03346 | Q14126 | -0.66467   |
| 123571 | P03346 | Q9Y666 | -0.77697   |
| 123572 | P03346 | Q8TCG5 | -0.55697   |
| 123573 | P03346 | Q13825 | -0.20628   |
| 123574 | P03346 | Q6H3X3 | -0.24122   |
| 123575 | P03346 | Q14667 | -0.53519   |
| 123576 | P03346 | Q92542 | -0.25602   |

|        |        |        |           |
|--------|--------|--------|-----------|
| 123577 | P03346 | Q96HA4 | -0.50365  |
| 123578 | P03346 | Q8IYV9 | -0.61065  |
| 123579 | P03346 | Q6UXC1 | -0.30029  |
| 123580 | P03346 | Q5T764 | -0.31008  |
| 123581 | P03346 | Q9GZZ7 | -0.76107  |
| 123582 | P03346 | Q8IU85 | -0.47774  |
| 123583 | P03346 | A6NGU7 | -0.11154  |
| 123584 | P03346 | Q92805 | -0.2227   |
| 123585 | P03346 | Q8N398 | -0.061486 |
| 123586 | P03346 | Q15084 | -0.25273  |
| 123587 | P03346 | P51170 | -0.37771  |
| 123588 | P03346 | Q6PIY5 | -0.35138  |
| 123589 | P03346 | O15327 | -0.20829  |
| 123590 | P03346 | Q9P232 | -0.35656  |
| 123591 | P03346 | Q14449 | -0.22741  |
| 123592 | P03346 | Q8IYW2 | -0.78188  |
| 123593 | P03346 | Q15311 | -0.24495  |
| 123594 | P03346 | P54652 | -0.22602  |
| 123595 | P03346 | P01706 | -0.80078  |
| 123596 | P03346 | P01566 | -0.64371  |
| 123597 | P03346 | H0YL14 | -0.053354 |
| 123598 | P03346 | P57105 | -0.36822  |
| 123599 | P03346 | Q9Y5Y5 | -0.19057  |
| 123600 | P03346 | Q13117 | -0.32173  |
| 123601 | P03346 | P01298 | -0.58482  |
| 123602 | P03346 | Q9Y4K3 | -0.22597  |
| 123603 | P03346 | Q5TYW8 | -0.15579  |
| 123604 | P03346 | Q8IZP1 | -0.92582  |
| 123605 | P03346 | O15528 | -0.26258  |
| 123606 | P03346 | P26374 | -0.37423  |
| 123607 | P03346 | P04280 | -0.45606  |
| 123608 | P03346 | P01893 | -0.86415  |
| 123609 | P03346 | Q96PS6 | -0.50365  |
| 123610 | P03346 | O95154 | -0.22668  |
| 123611 | P03346 | Q9UMR7 | -0.84694  |
| 123612 | P03346 | Q6PIW4 | -0.22947  |
| 123613 | P03346 | Q99538 | -0.45433  |
| 123614 | P03346 | Q8IYU8 | -0.22323  |
| 123615 | P03346 | Q16777 | -0.35085  |
| 123616 | P03346 | P12318 | -0.63939  |
| 123617 | P03346 | Q96CP7 | -0.50365  |
| 123618 | P03346 | Q9HAW9 | -0.52369  |
| 123619 | P03346 | Q99954 | -0.53519  |
| 123620 | P03346 | Q8NFI9 | -0.13306  |
| 123621 | P03346 | P53420 | -0.64165  |
| 123622 | P03346 | Q8IW40 | -0.12174  |
| 123623 | P03346 | O75342 | -0.49101  |
| 123624 | P03346 | P16152 | -0.47707  |
| 123625 | P03346 | P12830 | -0.31751  |
| 123626 | P03346 | P54577 | -0.19012  |
| 123627 | P03346 | Q9Y6V7 | -0.52228  |
| 123628 | P03346 | Q8NEX9 | -0.36903  |
| 123629 | P03346 | Q9GZS0 | -0.22741  |
| 123630 | P03346 | Q9UPZ6 | -1.1548   |
| 123631 | P03346 | Q9NPH6 | -0.4763   |
| 123632 | P03346 | O15264 | -0.22741  |
| 123633 | P03346 | Q8NET4 | -0.030109 |
| 123634 | P03346 | Q4LDE5 | -0.4704   |
| 123635 | P03346 | Q5JTD7 | -0.22603  |
| 123636 | P03346 | P29275 | -0.65081  |
| 123637 | P03346 | Q05209 | -0.23088  |
| 123638 | P03346 | Q5HYI8 | -0.74667  |
| 123639 | P03346 | P53794 | -0.76389  |
| 123640 | P03346 | Q96J87 | -0.23276  |
| 123641 | P03346 | P20800 | -0.43947  |
| 123642 | P03346 | P41146 | -0.95005  |
| 123643 | P03346 | O43657 | -0.70329  |
| 123644 | P03346 | P62341 | -0.21137  |
| 123645 | P03346 | P22307 | -0.22341  |
| 123646 | P03346 | Q1A5X7 | -0.20538  |
| 123647 | P03346 | P08253 | -0.5193   |
| 123648 | P03346 | O75746 | -0.23241  |
| 123649 | P03346 | Q6UWY0 | -0.57264  |
| 123650 | P03346 | Q9C0C4 | -0.5085   |
| 123651 | P03346 | Q6ZN54 | -0.29579  |
| 123652 | P03346 | Q13671 | -0.22437  |



|        |        |        |           |
|--------|--------|--------|-----------|
| 123653 | P03346 | Q8N309 | -0.2229   |
| 123654 | P03346 | Q9Y2V3 | -0.18505  |
| 123655 | P03346 | Q8TDW7 | -1.0017   |
| 123656 | P03346 | Q13003 | -0.66468  |
| 123657 | P03346 | Q9NPA0 | -0.29368  |
| 123658 | P03346 | Q95395 | -0.30544  |
| 123659 | P03346 | Q9UK28 | -0.34727  |
| 123660 | P03346 | P35504 | -0.71329  |
| 123661 | P03346 | O75298 | -0.16     |
| 123662 | P03346 | Q96RP9 | -0.45683  |
| 123663 | P03346 | P13928 | -0.17358  |
| 123664 | P03346 | Q6GMV1 | -0.20395  |
| 123665 | P03346 | P26583 | -0.2294   |
| 123666 | P03346 | Q8WU10 | -0.22638  |
| 123667 | P03346 | A6NHI5 | -0.50365  |
| 123668 | P03346 | Q9H295 | -0.26165  |
| 123669 | P03346 | Q96BX8 | -0.25419  |
| 123670 | P03346 | Q9H2V7 | -0.22799  |
| 123671 | P03346 | Q9Y5X5 | -1.0474   |
| 123672 | P03346 | Q13324 | -0.56009  |
| 123673 | P03346 | P01912 | -0.55036  |
| 123674 | P03346 | Q6ZUS5 | -0.2445   |
| 123675 | P03346 | Q86V86 | -0.2275   |
| 123676 | P03346 | Q5SW96 | -0.22738  |
| 123677 | P03346 | Q8NCT1 | -0.18349  |
| 123678 | P03346 | P0COL4 | -1.0003   |
| 123679 | P03346 | Q15046 | -0.12302  |
| 123680 | P03346 | Q00584 | -0.64924  |
| 123681 | P03346 | Q6NUT2 | -0.80733  |
| 123682 | P03346 | P01571 | -0.57173  |
| 123683 | P03346 | P61158 | -0.1995   |
| 123684 | P03346 | Q6ZMN8 | -0.21475  |
| 123685 | P03346 | Q75487 | -0.9563   |
| 123686 | P03346 | Q9NZS2 | -0.70655  |
| 123687 | P03346 | Q9Y5G8 | -0.86699  |
| 123688 | P03346 | Q8NCL8 | -0.30782  |
| 123689 | P03346 | Q9NX78 | -0.50365  |
| 123690 | P03346 | Q8WXF7 | -0.35602  |
| 123691 | P03346 | P62502 | -0.54874  |
| 123692 | P03346 | Q02221 | -0.14111  |
| 123693 | P03346 | P20671 | -0.35085  |
| 123694 | P03346 | O43934 | -0.30782  |
| 123695 | P03346 | Q9Y5F1 | -0.92414  |
| 123696 | P03346 | Q8NGY0 | -0.92763  |
| 123697 | P03346 | Q96F46 | -0.25743  |
| 123698 | P03346 | Q9UGI6 | -0.51388  |
| 123699 | P03346 | P49761 | -0.50052  |
| 123700 | P03346 | Q8NCL4 | -0.35905  |
| 123701 | P03346 | Q9UM19 | -0.25092  |
| 123702 | P03346 | Q8IYM1 | -0.22685  |
| 123703 | P03346 | P21860 | -0.56498  |
| 123704 | P03346 | Q3SXM5 | -0.60154  |
| 123705 | P03346 | Q14931 | -0.88596  |
| 123706 | P03346 | Q14393 | -0.25565  |
| 123707 | P03346 | Q4G176 | -0.73265  |
| 123708 | P03346 | Q8IUX8 | -1.0917   |
| 123709 | P03346 | Q76070 | -0.22324  |
| 123710 | P03346 | P01595 | -0.80078  |
| 123711 | P03346 | Q4JDL3 | -0.23067  |
| 123712 | P03346 | Q63HN1 | -0.11548  |
| 123713 | P03346 | Q96MD2 | -0.1308   |
| 123714 | P03346 | P01765 | -0.80078  |
| 123715 | P03346 | Q5T2P9 | -0.65984  |
| 123716 | P03346 | Q08380 | -1.0427   |
| 123717 | P03346 | O94778 | -0.66966  |
| 123718 | P03346 | A8MT19 | -0.22203  |
| 123719 | P03346 | Q9UJD0 | -0.2267   |
| 123720 | P03346 | Q9UJU6 | -0.36029  |
| 123721 | P03346 | Q13291 | -0.23709  |
| 123722 | P03346 | O75880 | -0.17933  |
| 123723 | P03346 | Q9BSE4 | -0.44362  |
| 123724 | P03346 | Q8TED9 | -0.20111  |
| 123725 | P03346 | Q8NB25 | -0.14646  |
| 123726 | P03346 | P13804 | -0.20303  |
| 123727 | P03346 | O95156 | -0.48562  |
| 123728 | P03346 | Q96EF9 | -0.063254 |

|        |        |        |           |
|--------|--------|--------|-----------|
| 123729 | P03346 | Q99712 | -0.90881  |
| 123730 | P03346 | P55040 | -0.26638  |
| 123731 | P03346 | Q6ZNC8 | -0.52511  |
| 123732 | P03346 | P00491 | -0.19541  |
| 123733 | P03346 | Q9BXE9 | -0.91924  |
| 123734 | P03346 | Q9UHP7 | -0.83741  |
| 123735 | P03346 | P55017 | -0.21943  |
| 123736 | P03346 | Q53H64 | -0.10806  |
| 123737 | P03346 | P0CF74 | -0.75616  |
| 123738 | P03346 | P48426 | -0.22495  |
| 123739 | P03346 | Q9NRA1 | -0.22756  |
| 123740 | P03346 | Q6A1A2 | -0.79995  |
| 123741 | P03346 | O14610 | -0.91467  |
| 123742 | P03346 | Q9H0H9 | -0.1882   |
| 123743 | P03346 | C9JQL5 | -0.5153   |
| 123744 | P03346 | Q14993 | -0.88631  |
| 123745 | P03346 | P12821 | -0.63445  |
| 123746 | P03346 | Q7Z553 | -0.30087  |
| 123747 | P03346 | Q5T7N8 | -0.2096   |
| 123748 | P03346 | Q8TEY7 | -0.24844  |
| 123749 | P03346 | Q9UMQ6 | -0.67173  |
| 123750 | P03346 | Q9ULH4 | -0.47332  |
| 123751 | P03346 | Q92997 | -0.21536  |
| 123752 | P03346 | Q8IV42 | -0.54184  |
| 123753 | P03346 | P00403 | -0.41733  |
| 123754 | P03346 | Q13530 | -0.50504  |
| 123755 | P03346 | Q9Y5E2 | -0.84938  |
| 123756 | P03346 | Q5HY92 | -0.30507  |
| 123757 | P03346 | Q96EH8 | -0.22741  |
| 123758 | P03346 | P0C864 | -0.20428  |
| 123759 | P03346 | Q9NS85 | -0.22735  |
| 123760 | P03346 | P03986 | -0.72397  |
| 123761 | P03346 | Q969T3 | -0.22075  |
| 123762 | P03346 | Q5BKT4 | -0.59938  |
| 123763 | P03346 | Q9H361 | -0.22921  |
| 123764 | P03346 | Q9Y5V0 | -0.30279  |
| 123765 | P03346 | P63128 | -0.26673  |
| 123766 | P03346 | P57768 | -0.25982  |
| 123767 | P03346 | P04066 | -0.16347  |
| 123768 | P03346 | P07947 | -0.54702  |
| 123769 | P03346 | O75556 | -0.2677   |
| 123770 | P03346 | O43240 | -0.95093  |
| 123771 | P03346 | Q16555 | -0.2248   |
| 123772 | P03346 | Q14C86 | -0.70716  |
| 123773 | P03346 | P42127 | -0.72224  |
| 123774 | P03346 | Q8N9R0 | -0.013652 |
| 123775 | P03346 | P58418 | -0.70985  |
| 123776 | P03346 | Q6PF15 | -0.21939  |
| 123777 | P03346 | P23280 | -0.52158  |
| 123778 | P03346 | Q5VZR4 | -0.47509  |
| 123779 | P03346 | Q8IVN8 | -0.62502  |
| 123780 | P03346 | Q9Y679 | -0.19154  |
| 123781 | P03346 | Q9NYR9 | -0.65685  |
| 123782 | P03346 | Q96P44 | -0.51055  |
| 123783 | P03346 | P30475 | -0.82654  |
| 123784 | P03346 | P05230 | -0.25042  |
| 123785 | P03346 | Q9NQX7 | -0.12434  |
| 123786 | P03346 | P33778 | -0.35085  |
| 123787 | P03346 | Q3SXY8 | -0.32349  |
| 123788 | P03346 | F8WBI6 | -0.18948  |
| 123789 | P03346 | Q14714 | -0.71565  |
| 123790 | P03346 | Q5T481 | -0.34468  |
| 123791 | P03346 | Q9C0K0 | -0.22734  |
| 123792 | P03346 | Q8TBF2 | -0.15346  |
| 123793 | P03346 | Q96SL4 | -0.82728  |
| 123794 | P03346 | Q6ZUT9 | -0.49617  |
| 123795 | P03346 | Q8WUK0 | -0.47346  |
| 123796 | P03346 | P06127 | -0.30018  |
| 123797 | P03346 | Q6ZMJ2 | -0.77449  |
| 123798 | P03346 | Q8TCD1 | -0.20723  |
| 123799 | P03346 | P51157 | -0.93266  |
| 123800 | P03346 | Q9NYS0 | -0.65685  |
| 123801 | P03346 | P79522 | -0.068684 |
| 123802 | P03346 | Q8TC17 | -0.22741  |
| 123803 | P03346 | Q13576 | -0.62507  |
| 123804 | P03346 | Q53GS9 | -0.22947  |

|        |        |        |           |
|--------|--------|--------|-----------|
| 123805 | P03346 | Q08477 | -0.72978  |
| 123806 | P03346 | Q9ULV1 | -0.36184  |
| 123807 | P03346 | Q8IVL8 | -0.88342  |
| 123808 | P03346 | Q4AC99 | -0.22514  |
| 123809 | P03346 | P01744 | -0.80078  |
| 123810 | P03346 | Q8TBG9 | -0.43836  |
| 123811 | P03346 | P08183 | -0.30479  |
| 123812 | P03346 | Q5H9T9 | -0.17491  |
| 123813 | P03346 | A8MYB1 | -0.50365  |
| 123814 | P03346 | Q9NVF9 | -0.46827  |
| 123815 | P03346 | P04141 | -0.19726  |
| 123816 | P03346 | P54826 | -0.12751  |
| 123817 | P03346 | P32238 | -0.60096  |
| 123818 | P03346 | Q6ZWC4 | -0.091878 |
| 123819 | P03346 | Q01449 | -0.22722  |
| 123820 | P03346 | Q92620 | -0.22668  |
| 123821 | P03346 | Q9Y5G5 | -0.86699  |
| 123822 | P03346 | Q14696 | -0.060798 |
| 123823 | P03346 | Q8NBQ7 | -0.17174  |
| 123824 | P03346 | Q8N6C5 | -0.25884  |
| 123825 | P03346 | Q8N808 | -0.50365  |
| 123826 | P03346 | Q9BVW6 | -0.50365  |
| 123827 | P03346 | Q4V339 | -0.48833  |
| 123828 | P03346 | Q8TD30 | -0.2235   |
| 123829 | P03346 | O00214 | -0.20837  |
| 123830 | P03346 | P08887 | -0.28586  |
| 123831 | P03346 | P01593 | -0.80078  |
| 123832 | P03346 | P41273 | -0.83457  |
| 123833 | P03346 | Q5T7P6 | -0.50365  |
| 123834 | P03346 | O95977 | -1.098    |
| 123835 | P03346 | Q13615 | -0.21353  |
| 123836 | P03346 | Q15198 | -0.42861  |
| 123837 | P03346 | P24752 | -0.22094  |
| 123838 | P03346 | Q9NQ89 | -0.073249 |
| 123839 | P03346 | Q9BZD2 | -0.55968  |
| 123840 | P03346 | Q13795 | -0.34556  |
| 123841 | P03346 | Q7Z4Y8 | -0.12493  |
| 123842 | P03346 | Q96NH3 | -0.69984  |
| 123843 | P03346 | Q8TED1 | -0.78751  |
| 123844 | P03346 | Q9P2R7 | -0.10162  |
| 123845 | P03346 | P35790 | -0.58418  |
| 123846 | P03346 | O60478 | -0.65456  |
| 123847 | P03346 | O94827 | -0.22735  |
| 123848 | P03346 | Q6IFH4 | -0.92763  |
| 123849 | P03346 | Q9BZF1 | -0.3642   |
| 123850 | P03346 | Q93033 | -0.69515  |
| 123851 | P03346 | Q9BTY2 | -0.54472  |
| 123852 | P03346 | Q8NGD1 | -0.92763  |
| 123853 | P03346 | P40879 | -0.29424  |
| 123854 | P03346 | Q06430 | -0.57151  |
| 123855 | P03346 | Q96JD6 | -0.22716  |
| 123856 | P03346 | P30505 | -0.76151  |
| 123857 | P03346 | Q9H0C3 | -0.40465  |
| 123858 | P03346 | P09769 | -0.48445  |
| 123859 | P03346 | Q9H0X6 | -0.22624  |
| 123860 | P03346 | Q6ZMY6 | -0.2285   |
| 123861 | P03346 | P78380 | -1.2049   |
| 123862 | P03346 | P31785 | -0.60927  |
| 123863 | P03346 | Q8TCU3 | -0.50825  |
| 123864 | P03346 | P0C7W6 | -0.2037   |
| 123865 | P03346 | A5PLN9 | -0.088194 |
| 123866 | P03346 | Q8NGS8 | -0.92763  |
| 123867 | P03346 | O94955 | -0.2271   |
| 123868 | P03346 | P20718 | -0.35303  |
| 123869 | P03346 | Q13286 | -0.21278  |
| 123870 | P03346 | Q96GU1 | -0.071655 |
| 123871 | P03346 | Q9Y2M2 | -0.13806  |
| 123872 | P03346 | P54756 | -0.85463  |
| 123873 | P03346 | Q96LD8 | -0.40813  |
| 123874 | P03346 | Q8IVJ1 | -0.71559  |
| 123875 | P03346 | Q9Y5X0 | -0.2229   |
| 123876 | P03346 | Q9H0Z9 | -0.2273   |
| 123877 | P03346 | Q8N413 | -0.37103  |
| 123878 | P03346 | Q13508 | -0.43726  |
| 123879 | P03346 | Q76NI1 | -0.43012  |
| 123880 | P03346 | P0C7N8 | -0.92763  |

|        |        |        |           |
|--------|--------|--------|-----------|
| 123881 | P03346 | P41217 | -0.24409  |
| 123882 | P03346 | Q9UN72 | -0.92414  |
| 123883 | P03346 | Q8IYR0 | -0.20592  |
| 123884 | P03346 | Q16611 | -0.22738  |
| 123885 | P03346 | P01714 | -0.80078  |
| 123886 | P03346 | Q9P2S2 | -0.62876  |
| 123887 | P03346 | P46019 | -0.26174  |
| 123888 | P03346 | Q9NZL6 | -0.29676  |
| 123889 | P03346 | P63267 | -0.23584  |
| 123890 | P03346 | P10997 | -0.80668  |
| 123891 | P03346 | Q8N945 | -0.15353  |
| 123892 | P03346 | Q76EJ3 | -0.21954  |
| 123893 | P03346 | Q9HCR9 | -0.22713  |
| 123894 | P03346 | A8MWL7 | -0.50365  |
| 123895 | P03346 | O15243 | -0.3263   |
| 123896 | P03346 | Q6PJW8 | -0.15748  |
| 123897 | P03346 | Q8WWB7 | -0.11808  |
| 123898 | P03346 | P98194 | -0.73788  |
| 123899 | P03346 | Q08554 | -0.78234  |
| 123900 | P03346 | Q7Z6J2 | -0.22756  |
| 123901 | P03346 | Q9UHT9 | -0.013652 |
| 123902 | P03346 | Q9UK00 | -0.50365  |
| 123903 | P03346 | P13995 | -0.55407  |
| 123904 | P03346 | O15230 | -0.40709  |
| 123905 | P03346 | P48594 | -0.36052  |
| 123906 | P03346 | Q17R89 | -0.27428  |
| 123907 | P03346 | Q16538 | -0.96376  |
| 123908 | P03346 | Q96S42 | -0.23717  |
| 123909 | P03346 | P35212 | -0.66043  |
| 123910 | P03346 | A6NIN4 | -0.013652 |
| 123911 | P03346 | Q8N9V6 | -0.22741  |
| 123912 | P03346 | Q96LM1 | -0.017664 |
| 123913 | P03346 | Q9BZP6 | -0.43338  |
| 123914 | P03346 | P47712 | -0.22753  |
| 123915 | P03346 | Q9NX00 | -0.38186  |
| 123916 | P03346 | Q5MNZ9 | -0.2274   |
| 123917 | P03346 | O75503 | -0.19859  |
| 123918 | P03346 | Q96FV2 | -0.12148  |
| 123919 | P03346 | O43184 | -0.47157  |
| 123920 | P03346 | Q9BQ49 | -0.50365  |
| 123921 | P03346 | O94966 | -0.477    |
| 123922 | P03346 | Q9UK80 | -0.27447  |
| 123923 | P03346 | Q99102 | -1.1879   |
| 123924 | P03346 | P59827 | -0.50112  |
| 123925 | P03346 | P12107 | -0.57881  |
| 123926 | P03346 | P01137 | -0.22741  |
| 123927 | P03346 | P04745 | -0.20394  |
| 123928 | P03346 | Q8N6M0 | -0.14449  |
| 123929 | P03346 | Q96QI5 | -0.32006  |
| 123930 | P03346 | Q8TB96 | -1.0287   |
| 123931 | P03346 | Q07837 | -0.75094  |
| 123932 | P03346 | Q5VVB8 | -0.50365  |
| 123933 | P03346 | O60336 | -0.2275   |
| 123934 | P03346 | Q8IX30 | -0.22745  |
| 123935 | P03346 | P25445 | -0.22742  |
| 123936 | P03346 | Q96LV5 | -0.18577  |
| 123937 | P03346 | Q96L16 | -0.19181  |
| 123938 | P03346 | Q8N8X6 | -0.17626  |
| 123939 | P03346 | P0DJD9 | -0.83835  |
| 123940 | P03346 | O43462 | -0.54516  |
| 123941 | P03346 | A6NNX1 | -0.16811  |
| 123942 | P03346 | Q9HBA0 | -0.35168  |
| 123943 | P03346 | P12755 | -0.20266  |
| 123944 | P03346 | Q9Y5Y0 | -0.20584  |
| 123945 | P03346 | Q9NP74 | -0.17966  |
| 123946 | P03346 | Q6P1N9 | -0.18598  |
| 123947 | P03346 | Q86Y27 | -0.53519  |
| 123948 | P03346 | P07204 | -0.35146  |
| 123949 | P03346 | P01781 | -0.80078  |
| 123950 | P03346 | B5MCY1 | -0.22873  |
| 123951 | P03346 | Q9NQ36 | -0.60326  |
| 123952 | P03346 | Q9Y2I7 | -0.22684  |
| 123953 | P03346 | Q8N565 | -0.26233  |
| 123954 | P03346 | Q96BW5 | -0.16132  |
| 123955 | P03346 | Q96D53 | -0.63935  |
| 123956 | P03346 | A2RU37 | -0.12379  |

|        |        |        |            |
|--------|--------|--------|------------|
| 123957 | P03346 | P59020 | -0.22804   |
| 123958 | P03346 | O95672 | -1.0429    |
| 123959 | P03346 | P09622 | -0.22654   |
| 123960 | P03346 | Q9BWW9 | -0.57425   |
| 123961 | P03346 | Q9ULB4 | -0.76417   |
| 123962 | P03346 | P01233 | -0.5227    |
| 123963 | P03346 | Q9NV58 | -0.22665   |
| 123964 | P03346 | Q8N2C3 | -0.21512   |
| 123965 | P03346 | Q96BT1 | -0.28146   |
| 123966 | P03346 | Q8N4F4 | -0.59315   |
| 123967 | P03346 | I3L3R5 | -0.013652  |
| 123968 | P03346 | P10124 | -0.0819    |
| 123969 | P03346 | B3GLJ2 | -0.53519   |
| 123970 | P03346 | Q9H1C7 | -0.50365   |
| 123971 | P03346 | Q6NZ63 | -0.50365   |
| 123972 | P03346 | Q8NGH5 | -0.92763   |
| 123973 | P03346 | Q8N531 | -0.22285   |
| 123974 | P03346 | P40616 | -0.52462   |
| 123975 | P03346 | Q9H8M1 | -0.09953   |
| 123976 | P03346 | Q9UIM3 | -0.22705   |
| 123977 | P03346 | O60762 | -0.2242    |
| 123978 | P03346 | I3L1E1 | -0.12637   |
| 123979 | P03346 | O60909 | -0.33035   |
| 123980 | P03346 | O60383 | -0.43396   |
| 123981 | P03346 | P0C7T3 | -0.92763   |
| 123982 | P03346 | Q6Q6R5 | -0.23003   |
| 123983 | P03346 | Q6FI13 | -0.35085   |
| 123984 | P03346 | Q9NSG2 | -0.03575   |
| 123985 | P03346 | O15169 | -0.23331   |
| 123986 | P03346 | Q96B21 | -0.50365   |
| 123987 | P03346 | Q9BQE3 | -0.23077   |
| 123988 | P03346 | P12273 | -0.57738   |
| 123989 | P03346 | P78348 | -0.46237   |
| 123990 | P03346 | P50990 | -0.17951   |
| 123991 | P03346 | O95239 | -0.23991   |
| 123992 | P03346 | P25054 | -0.22723   |
| 123993 | P03346 | P23416 | -0.57039   |
| 123994 | P03346 | Q8TCF1 | -0.11133   |
| 123995 | P03346 | Q8IV16 | -0.59934   |
| 123996 | P03346 | Q5VU69 | -0.084974  |
| 123997 | P03346 | P30530 | -0.57888   |
| 123998 | P03346 | P25098 | -0.32229   |
| 123999 | P03346 | P12111 | -0.65641   |
| 124000 | P03346 | Q6IC83 | -0.23762   |
| 124001 | P03346 | O15541 | -0.22728   |
| 124002 | P03346 | Q7Z7J7 | -0.50365   |
| 124003 | P03346 | Q96MU8 | -0.22742   |
| 124004 | P03346 | Q5VZV1 | -0.2202    |
| 124005 | P03346 | Q9UKF7 | -0.23442   |
| 124006 | P03346 | Q03426 | -0.51286   |
| 124007 | P03346 | Q8IW00 | -0.65219   |
| 124008 | P03346 | Q8NAS9 | -0.17521   |
| 124009 | P03346 | Q6V0I7 | -0.29137   |
| 124010 | P03346 | Q12967 | -0.34958   |
| 124011 | P03346 | Q6PIS1 | -0.47509   |
| 124012 | P03346 | Q16644 | -0.22849   |
| 124013 | P03346 | P05452 | -0.643     |
| 124014 | P03346 | Q8N3Z0 | -0.64468   |
| 124015 | P03346 | Q8WVE7 | -0.50365   |
| 124016 | P03346 | O43278 | -0.57123   |
| 124017 | P03346 | Q8N109 | -0.65219   |
| 124018 | P03346 | Q7Z4G4 | -0.13958   |
| 124019 | P03346 | Q9BX95 | -0.52496   |
| 124020 | P03346 | Q6ICL3 | -0.16558   |
| 124021 | P03346 | O95859 | -0.78402   |
| 124022 | P03346 | Q8N3T1 | -0.40855   |
| 124023 | P03346 | Q8NCU8 | -0.50365   |
| 124024 | P03346 | Q14330 | -0.92894   |
| 124025 | P03346 | O15428 | -0.22741   |
| 124026 | P03346 | Q8NGU1 | -0.92763   |
| 124027 | P03346 | Q5SV97 | -0.0035486 |
| 124028 | P03346 | P0C7V7 | -0.81444   |
| 124029 | P03346 | Q96F15 | -0.68591   |
| 124030 | P03346 | Q8WU20 | -0.15968   |
| 124031 | P03346 | Q5VXU9 | -0.33877   |
| 124032 | P03346 | Q13948 | -0.30232   |

|        |        |        |           |
|--------|--------|--------|-----------|
| 124033 | P03346 | P20333 | -0.48313  |
| 124034 | P03346 | P22794 | -0.52507  |
| 124035 | P03346 | Q9NUJ3 | -0.083052 |
| 124036 | P03346 | Q96R09 | -0.92763  |
| 124037 | P03346 | B7ZBB8 | -0.15354  |
| 124038 | P03346 | P0CH98 | -0.27046  |
| 124039 | P03346 | Q68CJ6 | -0.21158  |
| 124040 | P03346 | Q9HCT0 | -0.42924  |
| 124041 | P03346 | Q9UHI5 | -0.24634  |
| 124042 | P03346 | Q7Z6M1 | -0.22694  |
| 124043 | P03346 | B1ANS9 | -0.22742  |
| 124044 | P03346 | O00178 | -0.49425  |
| 124045 | P03346 | Q8NGJ0 | -0.92763  |
| 124046 | P03346 | Q99572 | -0.25104  |
| 124047 | P03346 | E0CX11 | -0.53519  |
| 124048 | P03346 | Q6EEV4 | -0.013652 |
| 124049 | P03346 | A6NK97 | -0.56402  |
| 124050 | P03346 | Q86VI4 | -0.23095  |
| 124051 | P03346 | P32942 | -0.43246  |
| 124052 | P03346 | P04201 | -0.63204  |
| 124053 | P03346 | Q9NYW5 | -0.97963  |
| 124054 | P03346 | Q5TAT6 | -0.73926  |
| 124055 | P03346 | P05089 | -0.22393  |
| 124056 | P03346 | P56750 | -0.34868  |
| 124057 | P03346 | Q4W5N1 | -0.24278  |
| 124058 | P03346 | O15444 | -0.89238  |
| 124059 | P03346 | Q03403 | -0.23119  |
| 124060 | P03346 | Q96GL9 | -0.50365  |
| 124061 | P03346 | P47881 | -0.92763  |
| 124062 | P03346 | O43529 | -0.44454  |
| 124063 | P03346 | O00400 | -0.55711  |
| 124064 | P03346 | O43307 | -0.27709  |
| 124065 | P03346 | Q9UHA4 | -0.1638   |
| 124066 | P03346 | Q96LB1 | -0.93525  |
| 124067 | P03346 | Q8N661 | -0.24841  |
| 124068 | P03346 | Q9UKL4 | -0.71668  |
| 124069 | P03346 | P07205 | -0.28758  |
| 124070 | P03346 | P0DL12 | -0.048884 |
| 124071 | P03346 | P61952 | -0.29204  |
| 124072 | P03346 | Q96GX5 | -0.22741  |
| 124073 | P03346 | Q8WTY6 | -0.19802  |
| 124074 | P03346 | O14843 | -1.1927   |
| 124075 | P03346 | Q8IYT1 | -0.025833 |
| 124076 | P03346 | Q5JQC4 | -0.013652 |
| 124077 | P03346 | Q969Z3 | -0.37698  |
| 124078 | P03346 | P59773 | -0.50365  |
| 124079 | P03346 | Q9BZL6 | -0.23792  |
| 124080 | P03346 | Q9BT17 | -0.20446  |
| 124081 | P03346 | Q7RTN6 | -0.31136  |
| 124082 | P03346 | Q9NQ34 | -0.70329  |
| 124083 | P03346 | Q5GAN6 | -0.4686   |
| 124084 | P03346 | Q13422 | -0.22561  |
| 124085 | P03346 | P01215 | -0.085973 |
| 124086 | P03346 | P33908 | -0.44217  |
| 124087 | P03346 | Q15010 | -0.074494 |
| 124088 | P03346 | Q9Y5K3 | -0.20002  |
| 124089 | P03346 | Q8N2U9 | -0.50365  |
| 124090 | P03346 | Q9BYB4 | -0.22747  |
| 124091 | P03346 | Q5T4S7 | -0.18506  |
| 124092 | P03346 | Q8WWF3 | -0.50365  |
| 124093 | P03346 | Q7Z769 | -0.50365  |
| 124094 | P03346 | Q9NNX6 | -0.72866  |
| 124095 | P03346 | B4DYI2 | -0.22715  |
| 124096 | P03346 | Q96CG8 | -0.5823   |
| 124097 | P03346 | Q8NEB9 | -0.28699  |
| 124098 | P03346 | Q5T7N2 | -0.17889  |
| 124099 | P03346 | Q8N7C7 | -0.56385  |
| 124100 | P03346 | Q9NR90 | -0.30667  |
| 124101 | P03346 | Q13336 | -0.68404  |
| 124102 | P03346 | P07858 | -0.25678  |
| 124103 | P03346 | P38435 | -0.5871   |
| 124104 | P03346 | Q8N813 | -0.18016  |
| 124105 | P03346 | P01604 | -0.80078  |
| 124106 | P03346 | Q95980 | -0.29931  |
| 124107 | P03346 | Q9H2B2 | -0.51046  |
| 124108 | P03346 | Q9NR21 | -0.22032  |

|        |        |        |           |
|--------|--------|--------|-----------|
| 124109 | P03346 | Q9NYQ3 | -0.2279   |
| 124110 | P03346 | P02760 | -0.54872  |
| 124111 | P03346 | Q9BWU1 | -0.69476  |
| 124112 | P03346 | Q8NH95 | -0.92763  |
| 124113 | P03346 | Q8N9I1 | -0.50365  |
| 124114 | P03346 | Q5M8T2 | -0.42882  |
| 124115 | P03346 | Q9UHL3 | -0.12537  |
| 124116 | P03346 | Q9NSY0 | -0.41925  |
| 124117 | P03346 | Q9Y6T7 | -0.68027  |
| 124118 | P03346 | Q5W0Q7 | -0.18999  |
| 124119 | P03346 | Q8NHS2 | -0.21815  |
| 124120 | P03346 | Q9Y5M6 | -0.070837 |
| 124121 | P03346 | P27361 | -0.22741  |
| 124122 | P03346 | P34741 | -0.23792  |
| 124123 | P03346 | Q8N5Z0 | -0.22592  |
| 124124 | P03346 | P0C6P0 | -0.22018  |
| 124125 | P03346 | Q9ULH0 | -0.26645  |
| 124126 | P03346 | Q8TAD4 | -0.22243  |
| 124127 | P03346 | Q5T0J3 | -0.11035  |
| 124128 | P03346 | Q8N2G4 | -0.2482   |
| 124129 | P03346 | Q43166 | -0.22738  |
| 124130 | P03346 | Q9UJA2 | -0.37503  |
| 124131 | P03346 | P26715 | -0.85722  |
| 124132 | P03346 | P05187 | -0.87509  |
| 124133 | P03346 | Q9NQ40 | -0.73476  |
| 124134 | P03346 | Q14028 | -0.90212  |
| 124135 | P03346 | Q9BTV6 | -0.22742  |
| 124136 | P03346 | Q96JW4 | -0.71559  |
| 124137 | P03346 | P13232 | -0.20973  |
| 124138 | P03346 | Q9UHA7 | -0.74911  |
| 124139 | P03346 | H3BQW9 | -0.073266 |
| 124140 | P03346 | Q9NYJ7 | -0.6417   |
| 124141 | P03346 | P30048 | -0.22478  |
| 124142 | P03346 | O14578 | -0.60403  |
| 124143 | P03346 | Q6UWV2 | -0.22755  |
| 124144 | P03346 | P41439 | -0.55873  |
| 124145 | P03346 | Q99487 | -0.19244  |
| 124146 | P03346 | Q9Y5P2 | -0.26644  |
| 124147 | P03346 | Q8NDV3 | -0.22487  |
| 124148 | P03346 | P05534 | -0.51191  |
| 124149 | P03346 | Q92947 | -0.23686  |
| 124150 | P03346 | Q8IYS4 | -0.33696  |
| 124151 | P03346 | Q9BY12 | -0.22035  |
| 124152 | P03346 | P49760 | -0.32592  |
| 124153 | P03346 | P53671 | -0.67614  |
| 124154 | P03346 | Q13018 | -1.0132   |
| 124155 | P03346 | B6A8C7 | -0.50365  |
| 124156 | P03346 | Q9Y6A4 | -0.17902  |
| 124157 | P03346 | A6NJU9 | -0.50365  |
| 124158 | P03346 | Q15229 | -0.38973  |
| 124159 | P03346 | Q96HE7 | -0.37717  |
| 124160 | P03346 | P16619 | -0.9164   |
| 124161 | P03346 | A6NL28 | -0.21806  |
| 124162 | P03346 | Q14392 | -0.59327  |
| 124163 | P03346 | Q14976 | -0.51598  |
| 124164 | P03346 | Q6UX34 | -0.50365  |
| 124165 | P03346 | Q99969 | -0.20825  |
| 124166 | P03346 | Q13085 | -0.25107  |
| 124167 | P03346 | P49810 | -0.22537  |
| 124168 | P03346 | Q96LB0 | -0.96376  |
| 124169 | P03346 | P47736 | -0.22089  |
| 124170 | P03346 | Q9H8W3 | -0.080925 |
| 124171 | P03346 | Q9NPF7 | -0.37493  |
| 124172 | P03346 | P61026 | -0.45058  |
| 124173 | P03346 | Q5VWN6 | -0.11815  |
| 124174 | P03346 | Q9H4R4 | -0.13882  |
| 124175 | P03346 | Q8NFT8 | -0.4265   |
| 124176 | P03346 | P00738 | -0.59678  |
| 124177 | P03346 | Q6UXT8 | -0.53519  |
| 124178 | P03346 | Q16720 | -0.86464  |
| 124179 | P03346 | P59534 | -0.84404  |
| 124180 | P03346 | Q7L8C5 | -0.54105  |
| 124181 | P03346 | P18428 | -0.30278  |
| 124182 | P03346 | Q00264 | -0.22252  |
| 124183 | P03346 | P19440 | -0.25349  |
| 124184 | P03346 | Q01064 | -0.22717  |

|        |        |        |           |
|--------|--------|--------|-----------|
| 124185 | P03346 | O95057 | -1.0183   |
| 124186 | P03346 | Q15113 | -0.94144  |
| 124187 | P03346 | Q9UKR3 | -0.36174  |
| 124188 | P03346 | Q9NZ71 | -0.45007  |
| 124189 | P03346 | Q99879 | -0.35085  |
| 124190 | P03346 | Q5M7Z0 | -0.56385  |
| 124191 | P03346 | Q96C23 | -0.21225  |
| 124192 | P03346 | Q02223 | -0.94694  |
| 124193 | P03346 | Q14210 | -0.39102  |
| 124194 | P03346 | P61366 | -0.81383  |
| 124195 | P03346 | Q6ZMV7 | -0.21314  |
| 124196 | P03346 | Q8TB73 | -0.57524  |
| 124197 | P03346 | P32298 | -0.7297   |
| 124198 | P03346 | Q0VAQ4 | -0.22634  |
| 124199 | P03346 | Q32P44 | -0.22754  |
| 124200 | P03346 | Q9NVH1 | -0.19847  |
| 124201 | P03346 | Q8IWG1 | -0.19603  |
| 124202 | P03346 | Q9BUA3 | -0.10738  |
| 124203 | P03346 | B7Z1M9 | -0.19928  |
| 124204 | P03346 | P01600 | -0.80078  |
| 124205 | P03346 | Q86YW5 | -0.2657   |
| 124206 | P03346 | Q8IXV7 | -0.21136  |
| 124207 | P03346 | Q9HC10 | -0.48329  |
| 124208 | P03346 | Q86V42 | -0.041149 |
| 124209 | P03346 | A6NDL8 | -0.92763  |
| 124210 | P03346 | Q9Y2Z4 | -0.087395 |
| 124211 | P03346 | O42043 | -0.35115  |
| 124212 | P03346 | O43149 | -0.22738  |
| 124213 | P03346 | Q7Z5L2 | -0.43248  |
| 124214 | P03346 | Q96RD7 | -0.66885  |
| 124215 | P03346 | Q5H9U9 | -0.52228  |
| 124216 | P03346 | Q99755 | -0.22455  |
| 124217 | P03346 | P08709 | -0.73143  |
| 124218 | P03346 | Q11128 | -0.35692  |
| 124219 | P03346 | O75578 | -0.69814  |
| 124220 | P03346 | P54687 | -0.19732  |
| 124221 | P03346 | Q9H106 | -0.53519  |
| 124222 | P03346 | Q7Z4L5 | -0.29273  |
| 124223 | P03346 | Q6IPT4 | -0.23262  |
| 124224 | P03346 | Q5SSJ5 | -0.23392  |
| 124225 | P03346 | P25774 | -0.99901  |
| 124226 | P03346 | Q9BZG9 | -0.93489  |
| 124227 | P03346 | Q6B0K9 | -0.069068 |
| 124228 | P03346 | Q587J8 | -0.18775  |
| 124229 | P03346 | Q9BXB4 | -0.3642   |
| 124230 | P03346 | P51685 | -1.1395   |
| 124231 | P03346 | Q99988 | -0.64442  |
| 124232 | P03346 | Q8NFF2 | -0.72127  |
| 124233 | P03346 | Q5H9B9 | -0.11673  |
| 124234 | P03346 | Q8IY82 | -0.19162  |
| 124235 | P03346 | O00194 | -0.50249  |
| 124236 | P03346 | O75326 | -0.22783  |
| 124237 | P03346 | Q5TEA3 | -0.12678  |
| 124238 | P03346 | Q9Y644 | -0.77961  |
| 124239 | P03346 | O94812 | -0.22915  |
| 124240 | P03346 | Q9GZW8 | -0.50365  |
| 124241 | P03346 | O43405 | -0.22757  |
| 124242 | P03346 | Q9C0B9 | -0.20662  |
| 124243 | P03346 | P0CG21 | -0.22695  |
| 124244 | P03346 | P28039 | -0.70697  |
| 124245 | P03346 | P67936 | -0.18265  |
| 124246 | P03346 | P60893 | -0.96376  |
| 124247 | P03346 | P60903 | -0.27152  |
| 124248 | P03346 | Q14002 | -0.65707  |
| 124249 | P03346 | P40225 | -0.61225  |
| 124250 | P03346 | Q9H7V2 | -0.6262   |
| 124251 | P03346 | P36941 | -0.22743  |
| 124252 | P03346 | Q6ZSA7 | -0.74596  |
| 124253 | P03346 | O95522 | -0.16812  |
| 124254 | P03346 | Q6PJI9 | -0.22741  |
| 124255 | P03346 | Q8IXW0 | -0.045205 |
| 124256 | P03346 | A6NCF6 | -0.20778  |
| 124257 | P03346 | Q15506 | -0.20426  |
| 124258 | P03346 | O43157 | -0.70465  |
| 124259 | P03346 | Q8WVH0 | -0.15691  |
| 124260 | P03346 | O75915 | -0.40604  |



|        |        |        |           |
|--------|--------|--------|-----------|
| 124261 | P03346 | A8MQ03 | -0.074242 |
| 124262 | P03346 | P26378 | -0.34357  |
| 124263 | P03346 | A2A2Y4 | -0.25555  |
| 124264 | P03346 | O76093 | -0.47662  |
| 124265 | P03346 | Q5TDH0 | -0.20185  |
| 124266 | P03346 | Q96SA4 | -0.50365  |
| 124267 | P03346 | Q8IZF0 | -0.66507  |
| 124268 | P03346 | Q9P246 | -0.31708  |
| 124269 | P03346 | P43116 | -0.98864  |
| 124270 | P03346 | Q9BSK4 | -0.22744  |
| 124271 | P03346 | Q6P589 | -0.051783 |
| 124272 | P03346 | Q92824 | -0.77919  |
| 124273 | P03346 | Q6IEY1 | -0.92763  |
| 124274 | P03346 | A6NKF7 | -0.50365  |
| 124275 | P03346 | O95922 | -0.18083  |
| 124276 | P03346 | A3KMH1 | -0.93763  |
| 124277 | P03346 | C9JR72 | -0.20416  |
| 124278 | P03346 | Q5T0U0 | -0.1865   |
| 124279 | P03346 | Q86YQ8 | -0.22838  |
| 124280 | P03346 | Q5XKK7 | -0.1249   |
| 124281 | P03346 | P01703 | -0.80078  |
| 124282 | P03346 | Q6UX41 | -0.22846  |
| 124283 | P03346 | Q43824 | -0.59969  |
| 124284 | P03346 | Q6P087 | -0.16205  |
| 124285 | P03346 | Q9NZ72 | -0.14244  |
| 124286 | P03346 | Q96MK3 | -0.53519  |
| 124287 | P03346 | O15479 | -0.21039  |
| 124288 | P03346 | P0C2S0 | -0.49515  |
| 124289 | P03346 | Q9UJQ7 | -0.19944  |
| 124290 | P03346 | P52848 | -0.32871  |
| 124291 | P03346 | Q9UBL6 | -0.22744  |
| 124292 | P03346 | P78333 | -1.0053   |
| 124293 | P03346 | Q14775 | -0.22605  |
| 124294 | P03346 | P01816 | -0.80078  |
| 124295 | P03346 | Q7Z7G2 | -0.11447  |
| 124296 | P03346 | Q53SF7 | -0.14967  |
| 124297 | P03346 | Q9H3R0 | -0.20815  |
| 124298 | P03346 | Q9P2M4 | -0.87831  |
| 124299 | P03346 | Q8NHP7 | -0.27204  |
| 124300 | P03346 | P61296 | -0.22868  |
| 124301 | P03346 | Q9NUR3 | -0.50365  |
| 124302 | P03346 | A6BM72 | -0.56438  |
| 124303 | P03346 | P50851 | -0.42145  |
| 124304 | P03346 | Q9NRJ5 | -0.21116  |
| 124305 | P03346 | Q7Z6I6 | -0.64534  |
| 124306 | P03346 | Q8N3U1 | -0.013652 |
| 124307 | P03346 | Q9H158 | -0.92414  |
| 124308 | P03346 | Q9NSU2 | -0.18733  |
| 124309 | P03346 | Q3KRA9 | -0.08414  |
| 124310 | P03346 | Q9NY28 | -0.41456  |
| 124311 | P03346 | Q7RTY5 | -1.0507   |
| 124312 | P03346 | Q12774 | -0.47139  |
| 124313 | P03346 | Q96NR7 | -0.19143  |
| 124314 | P03346 | Q99877 | -0.35085  |
| 124315 | P03346 | P23945 | -0.43255  |
| 124316 | P03346 | Q9NRM0 | -0.40211  |
| 124317 | P03346 | Q94819 | -0.18626  |
| 124318 | P03346 | Q9BXJ1 | -0.59838  |
| 124319 | P03346 | Q58HT5 | -0.61408  |
| 124320 | P03346 | Q9UHU1 | -0.013652 |
| 124321 | P03346 | P54753 | -0.81932  |
| 124322 | P03346 | Q7KYR7 | -0.63059  |
| 124323 | P03346 | Q9UMD9 | -0.70052  |
| 124324 | P03346 | Q9NX45 | -0.22733  |
| 124325 | P03346 | P22459 | -0.26721  |
| 124326 | P03346 | Q95IE3 | -0.56914  |
| 124327 | P03346 | O43281 | -0.2264   |
| 124328 | P03346 | O15480 | -0.1967   |
| 124329 | P03346 | P51788 | -0.51745  |
| 124330 | P03346 | P12643 | -0.22741  |
| 124331 | P03346 | Q6Q788 | -0.30182  |
| 124332 | P03346 | A0AV02 | -0.60704  |
| 124333 | P03346 | P04206 | -0.80078  |
| 124334 | P03346 | Q8IV04 | -0.92582  |
| 124335 | P03346 | P60568 | -0.35749  |
| 124336 | P03346 | Q8N967 | -0.50365  |

|        |        |        |           |
|--------|--------|--------|-----------|
| 124337 | P03346 | Q14012 | -0.22893  |
| 124338 | P03346 | P14780 | -0.32165  |
| 124339 | P03346 | P48047 | -0.21442  |
| 124340 | P03346 | Q43247 | -0.2303   |
| 124341 | P03346 | Q9Y264 | -0.60495  |
| 124342 | P03346 | Q2WQJ9 | -0.50365  |
| 124343 | P03346 | Q92743 | -0.71896  |
| 124344 | P03346 | P51797 | -0.85626  |
| 124345 | P03346 | Q94759 | -0.72744  |
| 124346 | P03346 | Q6ZRY4 | -0.38451  |
| 124347 | P03346 | Q9BUV8 | -0.18627  |
| 124348 | P03346 | P55285 | -0.32456  |
| 124349 | P03346 | P23975 | -0.2525   |
| 124350 | P03346 | Q05BU3 | -0.013652 |
| 124351 | P03346 | Q9Y5Z0 | -0.65304  |
| 124352 | P03346 | Q13873 | -0.40759  |
| 124353 | P03346 | O60896 | -0.19009  |
| 124354 | P03346 | Q8TE49 | -0.22187  |
| 124355 | P03346 | Q9UHG0 | -0.19529  |
| 124356 | P03346 | O96015 | -0.17751  |
| 124357 | P03346 | Q9Y572 | -0.22741  |
| 124358 | P03346 | O00499 | -0.22741  |
| 124359 | P03346 | Q75795 | -0.64178  |
| 124360 | P03346 | O76100 | -0.92763  |
| 124361 | P03346 | O75947 | -0.22054  |
| 124362 | P03346 | Q6ZN80 | -0.22631  |
| 124363 | P03346 | Q5T1S8 | -0.71822  |
| 124364 | P03346 | P16109 | -0.22741  |
| 124365 | P03346 | Q6P988 | -0.53766  |
| 124366 | P03346 | P19801 | -0.69341  |
| 124367 | P03346 | Q9UF12 | -0.19794  |
| 124368 | P03346 | P56880 | -0.41247  |
| 124369 | P03346 | P05026 | -0.22052  |
| 124370 | P03346 | Q5VU57 | -0.21621  |
| 124371 | P03346 | Q99595 | -0.14751  |
| 124372 | P03346 | Q9H4G4 | -0.46469  |
| 124373 | P03346 | Q15672 | -0.22767  |
| 124374 | P03346 | Q8NGJ7 | -0.92763  |
| 124375 | P03346 | Q6T4P5 | -0.64184  |
| 124376 | P03346 | Q6WRX3 | -0.21534  |
| 124377 | P03346 | Q6ZVT6 | -0.11999  |
| 124378 | P03346 | P41597 | -0.45969  |
| 124379 | P03346 | Q9P1Y6 | -0.22741  |
| 124380 | P03346 | P13671 | -0.22741  |
| 124381 | P03346 | Q6UY13 | -0.53519  |
| 124382 | P03346 | P0C8F1 | -0.61249  |
| 124383 | P03346 | Q9NQ75 | -0.22591  |
| 124384 | P03346 | I1YAP6 | -0.22805  |
| 124385 | P03346 | P13805 | -0.18034  |
| 124386 | P03346 | Q8N5D6 | -0.34685  |
| 124387 | P03346 | P40123 | -0.29107  |
| 124388 | P03346 | A6NFC9 | -0.92763  |
| 124389 | P03346 | P00568 | -0.42689  |
| 124390 | P03346 | Q9Y576 | -0.29831  |
| 124391 | P03346 | A1L3Z2 | -0.093954 |
| 124392 | P03346 | Q3MIR4 | -0.19869  |
| 124393 | P03346 | Q8N3R3 | -0.15105  |
| 124394 | P03346 | A6NMN3 | -0.084045 |
| 124395 | P03346 | Q9HBU6 | -0.49995  |
| 124396 | P03346 | Q96MF6 | -0.047097 |
| 124397 | P03346 | Q9NY15 | -0.78972  |
| 124398 | P03346 | Q9Y3L3 | -0.65775  |
| 124399 | P03346 | Q86Y33 | -0.22741  |
| 124400 | P03346 | Q6NXG1 | -0.14722  |
| 124401 | P03346 | P07550 | -0.2671   |
| 124402 | P03346 | Q9UHE8 | -0.85601  |
| 124403 | P03346 | P80404 | -0.22117  |
| 124404 | P03346 | Q03431 | -0.65079  |
| 124405 | P03346 | Q7Z6B7 | -0.32315  |
| 124406 | P03346 | O60306 | -0.3115   |
| 124407 | P03346 | Q6UXG8 | -0.50365  |
| 124408 | P03346 | P49184 | -0.12906  |
| 124409 | P03346 | Q6NXN4 | -0.50365  |
| 124410 | P03346 | Q2M3G4 | -0.13742  |
| 124411 | P03346 | P54855 | -0.66079  |
| 124412 | P03346 | Q6J4K2 | -0.73155  |

|        |        |        |           |
|--------|--------|--------|-----------|
| 124413 | P03346 | Q5VSG8 | -0.34354  |
| 124414 | P03346 | Q8NGE7 | -0.92763  |
| 124415 | P03346 | P42081 | -0.2275   |
| 124416 | P03346 | P0DJ07 | -0.38186  |
| 124417 | P03346 | Q14626 | -0.84293  |
| 124418 | P03346 | Q92686 | -0.14262  |
| 124419 | P03346 | Q8N8V4 | -0.22741  |
| 124420 | P03346 | A6NH00 | -0.92763  |
| 124421 | P03346 | O14683 | -0.52013  |
| 124422 | P03346 | Q9Y3N9 | -0.92763  |
| 124423 | P03346 | P35462 | -0.28874  |
| 124424 | P03346 | P08519 | -0.95295  |
| 124425 | P03346 | P37288 | -0.34252  |
| 124426 | P03346 | C9JXX5 | -0.53519  |
| 124427 | P03346 | P47872 | -1.0881   |
| 124428 | P03346 | Q5VV16 | -0.31352  |
| 124429 | P03346 | P43354 | -0.23132  |
| 124430 | P03346 | A8K2U0 | -0.61588  |
| 124431 | P03346 | Q8IUR5 | -0.38186  |
| 124432 | P03346 | Q13368 | -0.22699  |
| 124433 | P03346 | Q9Y287 | -0.16658  |
| 124434 | P03346 | Q15768 | -0.49233  |
| 124435 | P03346 | Q75462 | -0.22745  |
| 124436 | P03346 | P18465 | -0.76151  |
| 124437 | P03346 | P01772 | -0.80078  |
| 124438 | P03346 | Q9Y646 | -0.68991  |
| 124439 | P03346 | P55058 | -0.73676  |
| 124440 | P03346 | P54317 | -0.70662  |
| 124441 | P03346 | P04000 | -1.0931   |
| 124442 | P03346 | A6NCL7 | -0.22741  |
| 124443 | P03346 | Q8IUW5 | -0.49785  |
| 124444 | P03346 | P35247 | -0.2877   |
| 124445 | P03346 | Q9UPX6 | -0.50365  |
| 124446 | P03346 | Q5VY43 | -0.62116  |
| 124447 | P03346 | P00325 | -0.38113  |
| 124448 | P03346 | Q0VDG4 | -0.12148  |
| 124449 | P03346 | Q6TFL3 | -0.12562  |
| 124450 | P03346 | Q8TDN1 | -0.56863  |
| 124451 | P03346 | Q8IVH2 | -0.23378  |
| 124452 | P03346 | P55083 | -0.88482  |
| 124453 | P03346 | Q16627 | -0.7437   |
| 124454 | P03346 | Q5T3Y7 | -0.15679  |
| 124455 | P03346 | Q92982 | -0.54033  |
| 124456 | P03346 | Q9BUF7 | -0.57304  |
| 124457 | P03346 | Q96L58 | -0.38493  |
| 124458 | P03346 | Q6ZUJ8 | -0.1806   |
| 124459 | P03346 | Q9UJW2 | -1.2466   |
| 124460 | P03346 | Q8IY47 | -0.11734  |
| 124461 | P03346 | P35442 | -0.5298   |
| 124462 | P03346 | Q9H4E5 | -0.75074  |
| 124463 | P03346 | O00533 | -1.1841   |
| 124464 | P03346 | Q9NXF1 | -0.20902  |
| 124465 | P03346 | Q95390 | -0.44667  |
| 124466 | P03346 | P55916 | -0.30272  |
| 124467 | P03346 | O60610 | -0.22737  |
| 124468 | P03346 | Q15418 | -0.22083  |
| 124469 | P03346 | Q14732 | -0.22501  |
| 124470 | P03346 | Q92609 | -0.40573  |
| 124471 | P03346 | Q9H1R2 | -0.24647  |
| 124472 | P03346 | Q8NCQ3 | -0.50365  |
| 124473 | P03346 | A6H8Z2 | -0.15305  |
| 124474 | P03346 | P02743 | -0.56625  |
| 124475 | P03346 | Q0P5N6 | -0.92981  |
| 124476 | P03346 | P51172 | -0.26274  |
| 124477 | P03346 | Q8N3J3 | -0.096468 |
| 124478 | P03346 | P01911 | -0.56914  |
| 124479 | P03346 | Q9Y3E0 | -0.24596  |
| 124480 | P03346 | Q8N715 | -0.17466  |
| 124481 | P03346 | A8MXJ8 | -0.23256  |
| 124482 | P03346 | Q5VXT5 | -0.57871  |
| 124483 | P03346 | Q9ULL1 | -0.39327  |
| 124484 | P03346 | P48307 | -0.4732   |
| 124485 | P03346 | P51687 | -0.2228   |
| 124486 | P03346 | Q9GZV9 | -0.68043  |
| 124487 | P03346 | Q9UMX9 | -0.66385  |
| 124488 | P03346 | O14773 | -0.28263  |

|        |        |        |           |
|--------|--------|--------|-----------|
| 124489 | P03346 | Q96DR8 | -0.66102  |
| 124490 | P03346 | Q9H741 | -0.53519  |
| 124491 | P03346 | Q86XT4 | -0.2282   |
| 124492 | P03346 | Q96A70 | -0.18789  |
| 124493 | P03346 | A1Z1Q3 | -0.21007  |
| 124494 | P03346 | A2RUU4 | -0.57697  |
| 124495 | P03346 | Q9UBV4 | -0.61533  |
| 124496 | P03346 | P43005 | -0.5344   |
| 124497 | P03346 | P13798 | -0.22641  |
| 124498 | P03346 | Q86YQ2 | -0.67543  |
| 124499 | P03346 | P00540 | -0.86163  |
| 124500 | P03346 | Q8N616 | -0.013652 |
| 124501 | P03346 | Q9NPG4 | -0.77753  |
| 124502 | P03346 | Q9H3Y6 | -0.87983  |
| 124503 | P03346 | Q6JVE9 | -0.53156  |
| 124504 | P03346 | Q96P66 | -0.96376  |
| 124505 | P03346 | P98164 | -0.2656   |
| 124506 | P03346 | Q8N5W8 | -0.53519  |
| 124507 | P03346 | Q6UXG2 | -0.55468  |
| 124508 | P03346 | P41279 | -0.22733  |
| 124509 | P03346 | Q5TZJ5 | -0.50365  |
| 124510 | P03346 | Q9P2N4 | -0.99689  |
| 124511 | P03346 | Q6UWV7 | -0.50365  |
| 124512 | P03346 | P31358 | -0.35312  |
| 124513 | P03346 | Q9UK53 | -0.22726  |
| 124514 | P03346 | Q9NRZ7 | -0.63617  |
| 124515 | P03346 | P25090 | -1.1854   |
| 124516 | P03346 | Q6DCA0 | -0.1336   |
| 124517 | P03346 | Q7Z4L9 | -0.22716  |
| 124518 | P03346 | Q53R12 | -0.65219  |
| 124519 | P03346 | Q5XX13 | -0.22751  |
| 124520 | P03346 | Q8TDS4 | -0.79705  |
| 124521 | P03346 | P30518 | -0.65536  |
| 124522 | P03346 | P23352 | -0.47795  |
| 124523 | P03346 | Q6DJT9 | -0.18925  |
| 124524 | P03346 | O14668 | -1.2121   |
| 124525 | P03346 | O43295 | -0.6787   |
| 124526 | P03346 | Q8N128 | -0.013652 |
| 124527 | P03346 | Q9NWC5 | -0.50365  |
| 124528 | P03346 | Q8NBU5 | -0.52984  |
| 124529 | P03346 | Q8IUZ5 | -0.21422  |
| 124530 | P03346 | Q96RI9 | -0.9411   |
| 124531 | P03346 | Q5SY80 | -0.50365  |
| 124532 | P03346 | P17174 | -0.22297  |
| 124533 | P03346 | Q6UWI2 | -0.078829 |
| 124534 | P03346 | Q76I76 | -0.37156  |
| 124535 | P03346 | P30499 | -0.82654  |
| 124536 | P03346 | Q9NX74 | -0.31911  |
| 124537 | P03346 | Q96N68 | -0.50365  |
| 124538 | P03346 | Q68CQ1 | -0.50365  |
| 124539 | P03346 | P58170 | -0.92763  |
| 124540 | P03346 | P48730 | -0.22741  |
| 124541 | P03346 | P55160 | -0.21118  |
| 124542 | P03346 | Q96SJ8 | -0.50365  |
| 124543 | P03346 | Q9UNN8 | -0.22983  |
| 124544 | P03346 | Q9NY84 | -0.25063  |
| 124545 | P03346 | Q6X784 | -0.5418   |
| 124546 | P03346 | Q14515 | -0.88035  |
| 124547 | P03346 | O95969 | -0.65384  |
| 124548 | P03346 | Q8N8A8 | -0.13232  |
| 124549 | P03346 | Q5QJ74 | -0.22723  |
| 124550 | P03346 | Q8WWV3 | -0.54499  |
| 124551 | P03346 | Q5VW00 | -0.22739  |
| 124552 | P03346 | Q9P203 | -0.22521  |
| 124553 | P03346 | Q0VAM2 | -0.44662  |
| 124554 | P03346 | O94806 | -0.22736  |
| 124555 | P03346 | Q2TAC6 | -0.42865  |
| 124556 | P03346 | P16219 | -0.25814  |
| 124557 | P03346 | Q6UWN0 | -0.2482   |
| 124558 | P03346 | Q7L0X0 | -0.47596  |
| 124559 | P03346 | O00311 | -0.22741  |
| 124560 | P03346 | O95415 | -0.50365  |
| 124561 | P03346 | Q9UNX9 | -0.80357  |
| 124562 | P03346 | Q6ZS30 | -0.22741  |
| 124563 | P03346 | Q8IZM9 | -0.62013  |
| 124564 | P03346 | Q6PIV2 | -0.30948  |

|        |        |        |           |
|--------|--------|--------|-----------|
| 124565 | P03346 | A0AVI2 | -0.50365  |
| 124566 | P03346 | O43293 | -0.24037  |
| 124567 | P03346 | P09093 | -0.6342   |
| 124568 | P03346 | Q8N4Z0 | -0.82196  |
| 124569 | P03346 | Q86XS8 | -0.23172  |
| 124570 | P03346 | Q96S79 | -0.97069  |
| 124571 | P03346 | P14222 | -0.36962  |
| 124572 | P03346 | P56199 | -0.26207  |
| 124573 | P03346 | Q6WN34 | -0.37213  |
| 124574 | P03346 | Q9Y5K1 | -0.24508  |
| 124575 | P03346 | Q8N119 | -0.98886  |
| 124576 | P03346 | A8MT33 | -0.22697  |
| 124577 | P03346 | O60231 | -0.22704  |
| 124578 | P03346 | O95813 | -0.40347  |
| 124579 | P03346 | Q6PI25 | -0.22174  |
| 124580 | P03346 | Q9P2T1 | -0.26148  |
| 124581 | P03346 | Q9BYV1 | -0.21276  |
| 124582 | P03346 | Q06033 | -0.52309  |
| 124583 | P03346 | Q15155 | -0.31197  |
| 124584 | P03346 | Q5H913 | -0.89615  |
| 124585 | P03346 | Q9NPD5 | -0.49874  |
| 124586 | P03346 | P13164 | -0.22922  |
| 124587 | P03346 | Q5VU92 | -0.22722  |
| 124588 | P03346 | Q9H0J4 | -0.22208  |
| 124589 | P03346 | Q9NUE0 | -0.61969  |
| 124590 | P03346 | A0PJY2 | -0.18606  |
| 124591 | P03346 | Q17RY0 | -0.36807  |
| 124592 | P03346 | Q6ZWE6 | -0.34185  |
| 124593 | P03346 | Q14050 | -0.52249  |
| 124594 | P03346 | P19087 | -0.68599  |
| 124595 | P03346 | Q96BI3 | -0.22776  |
| 124596 | P03346 | P43235 | -0.41846  |
| 124597 | P03346 | P06340 | -0.71332  |
| 124598 | P03346 | Q01118 | -0.69416  |
| 124599 | P03346 | Q94988 | -0.6787   |
| 124600 | P03346 | Q9H2X3 | -0.73517  |
| 124601 | P03346 | O00300 | -0.73155  |
| 124602 | P03346 | Q93070 | -0.30141  |
| 124603 | P03346 | Q8N7B6 | -0.11412  |
| 124604 | P03346 | O76096 | -0.5243   |
| 124605 | P03346 | A6NFH5 | -0.22171  |
| 124606 | P03346 | Q9UPY3 | -0.22439  |
| 124607 | P03346 | P0C7T4 | -0.013652 |
| 124608 | P03346 | H3BS89 | -0.50365  |
| 124609 | P03346 | Q96LT9 | -0.21771  |
| 124610 | P03346 | Q96IT6 | -0.013652 |
| 124611 | P03346 | O43739 | -0.30007  |
| 124612 | P03346 | A6NF34 | -0.55024  |
| 124613 | P03346 | Q17RW2 | -0.6572   |
| 124614 | P03346 | Q16655 | -0.026733 |
| 124615 | P03346 | Q8NEC5 | -0.40433  |
| 124616 | P03346 | Q9BYJ1 | -0.29346  |
| 124617 | P03346 | P00749 | -0.58704  |
| 124618 | P03346 | Q5T0D9 | -0.054546 |
| 124619 | P03346 | P36894 | -0.31742  |
| 124620 | P03346 | O95025 | -0.76999  |
| 124621 | P03346 | O95490 | -0.78617  |
| 124622 | P03346 | P55145 | -0.20476  |
| 124623 | P03346 | A6NEY8 | -0.19044  |
| 124624 | P03346 | Q8NFX0 | -0.26029  |
| 124625 | P03346 | P58511 | -0.30782  |
| 124626 | P03346 | Q96KN4 | -0.18163  |
| 124627 | P03346 | P09919 | -0.67143  |
| 124628 | P03346 | Q96T66 | -0.17237  |
| 124629 | P03346 | Q6UXB2 | -0.81138  |
| 124630 | P03346 | P42345 | -0.24356  |
| 124631 | P03346 | Q9NYT0 | -0.26615  |
| 124632 | P03346 | Q6IAN0 | -0.92161  |
| 124633 | P03346 | Q8TE77 | -0.26135  |
| 124634 | P03346 | Q7Z4S9 | -0.2274   |
| 124635 | P03346 | Q8IWZ5 | -0.30279  |
| 124636 | P03346 | Q9Y5F2 | -0.92001  |
| 124637 | P03346 | O95807 | -0.33458  |
| 124638 | P03346 | Q86WR6 | -0.18805  |
| 124639 | P03346 | Q9NWH2 | -0.50365  |
| 124640 | P03346 | Q86TI0 | -0.63985  |

|        |        |        |           |
|--------|--------|--------|-----------|
| 124641 | P03346 | Q8WZ75 | -0.58681  |
| 124642 | P03346 | P48167 | -0.29052  |
| 124643 | P03346 | P13797 | -0.22744  |
| 124644 | P03346 | Q8NGS3 | -0.92763  |
| 124645 | P03346 | O75864 | -0.22741  |
| 124646 | P03346 | Q6P9F7 | -0.50365  |
| 124647 | P03346 | O15530 | -0.2264   |
| 124648 | P03346 | Q9P2H3 | -0.22741  |
| 124649 | P03346 | Q8NGM9 | -0.92763  |
| 124650 | P03346 | Q8NBZ9 | -0.13156  |
| 124651 | P03346 | Q9P0G3 | -0.96868  |
| 124652 | P03346 | Q8IVF5 | -0.63151  |
| 124653 | P03346 | Q8NH64 | -0.92763  |
| 124654 | P03346 | Q8IW70 | -0.50365  |
| 124655 | P03346 | Q9UJ96 | -0.45396  |
| 124656 | P03346 | A6NJ69 | -0.53519  |
| 124657 | P03346 | Q8TBH0 | -0.22568  |
| 124658 | P03346 | Q8N2R0 | -0.21943  |
| 124659 | P03346 | Q5VVY1 | -0.18427  |
| 124660 | P03346 | Q7Z2D5 | -0.7457   |
| 124661 | P03346 | Q96L50 | -0.22743  |
| 124662 | P03346 | Q5HYC2 | -0.13547  |
| 124663 | P03346 | Q8NFD2 | -0.88651  |
| 124664 | P03346 | Q9UKF2 | -0.84133  |
| 124665 | P03346 | Q9C0D3 | -0.21981  |
| 124666 | P03346 | Q9NRR8 | -0.12898  |
| 124667 | P03346 | Q14123 | -0.22719  |
| 124668 | P03346 | Q9BY66 | -0.62322  |
| 124669 | P03346 | Q8IW41 | -0.22755  |
| 124670 | P03346 | Q8TE58 | -0.93222  |
| 124671 | P03346 | P60985 | -0.59211  |
| 124672 | P03346 | Q06828 | -0.78349  |
| 124673 | P03346 | P15328 | -0.76272  |
| 124674 | P03346 | Q9Y2Q0 | -0.41133  |
| 124675 | P03346 | Q13751 | -0.41477  |
| 124676 | P03346 | Q9UKQ9 | -1.0507   |
| 124677 | P03346 | Q96S82 | -0.22652  |
| 124678 | P03346 | Q9H426 | -0.23308  |
| 124679 | P03346 | P56134 | -0.30201  |
| 124680 | P03346 | Q8N6R1 | -0.42539  |
| 124681 | P03346 | Q96DN0 | -0.20305  |
| 124682 | P03346 | A6NND4 | -0.92763  |
| 124683 | P03346 | P19526 | -0.47496  |
| 124684 | P03346 | P36776 | -0.20507  |
| 124685 | P03346 | Q8WXX5 | -0.23813  |
| 124686 | P03346 | Q9P1J3 | -0.013652 |
| 124687 | P03346 | P06309 | -0.80078  |
| 124688 | P03346 | P02786 | -0.60474  |
| 124689 | P03346 | Q7LC44 | -0.26375  |
| 124690 | P03346 | Q5H9J9 | -0.076471 |
| 124691 | P03346 | P09669 | -0.28603  |
| 124692 | P03346 | Q15353 | -0.27497  |
| 124693 | P03346 | Q9NYW2 | -0.77656  |
| 124694 | P03346 | P04233 | -0.40284  |
| 124695 | P03346 | Q96MP5 | -0.14024  |
| 124696 | P03346 | Q96Q45 | -0.55494  |
| 124697 | P03346 | Q9H6L4 | -0.2289   |
| 124698 | P03346 | Q6SPF0 | -0.36125  |
| 124699 | P03346 | Q15223 | -0.35104  |
| 124700 | P03346 | P61803 | -0.51726  |
| 124701 | P03346 | Q8IX19 | -0.50365  |
| 124702 | P03346 | Q969T4 | -0.065868 |
| 124703 | P03346 | Q8WWQ2 | -0.78945  |
| 124704 | P03346 | Q9UEU0 | -0.20822  |
| 124705 | P03346 | O95460 | -0.22741  |
| 124706 | P03346 | Q9NXC5 | -0.22719  |
| 124707 | P03346 | Q6NSH3 | -0.10314  |
| 124708 | P03346 | Q8N9F7 | -0.37112  |
| 124709 | P03346 | Q8NA34 | -0.22658  |
| 124710 | P03346 | Q6UX07 | -1.1855   |
| 124711 | P03346 | O96014 | -0.33919  |
| 124712 | P03346 | Q9H422 | -0.22741  |
| 124713 | P03346 | Q9UF83 | -0.085803 |
| 124714 | P03346 | P55318 | -0.2813   |
| 124715 | P03346 | O00560 | -0.22739  |
| 124716 | P03346 | Q5TGI0 | -0.50365  |

|        |        |        |          |
|--------|--------|--------|----------|
| 124717 | P03346 | Q8N2I9 | -0.22741 |
| 124718 | P03346 | Q9BUN1 | -0.53519 |
| 124719 | P03346 | P15090 | -0.2228  |
| 124720 | P03346 | P43166 | -0.22505 |
| 124721 | P03346 | Q9C056 | -0.22721 |
| 124722 | P03346 | Q8NAC3 | -0.62645 |
| 124723 | P03346 | Q96KQ7 | -0.22741 |
| 124724 | P03346 | Q6UWF6 | -0.53519 |
| 124725 | P03346 | Q86UP9 | -0.50365 |
| 124726 | P03346 | O75317 | -0.28643 |
| 124727 | P03346 | Q8NGH3 | -0.92763 |
| 124728 | P03346 | Q9NWM8 | -0.22764 |
| 124729 | P03346 | P50607 | -0.20059 |
| 124730 | P03346 | P30447 | -0.51191 |
| 124731 | P03346 | A6NMD0 | -0.6586  |
| 124732 | P03346 | Q9ULZ3 | -0.21793 |
| 124733 | P03346 | Q8WWP7 | -0.88979 |
| 124734 | P03346 | Q9UPS6 | -0.22711 |
| 124735 | P03346 | Q9NQT6 | -0.21019 |
| 124736 | P03346 | P61587 | -0.88719 |
| 124737 | P03346 | Q8NBI3 | -0.51906 |
| 124738 | P03346 | P55085 | -0.28738 |
| 124739 | P03346 | O00515 | -0.50189 |
| 124740 | P03346 | O14842 | -0.88935 |
| 124741 | P03346 | O95498 | -0.24558 |
| 124742 | P03346 | Q9NZ32 | -0.10243 |
| 124743 | P03346 | P16871 | -0.65836 |
| 124744 | P03346 | Q7Z6J4 | -0.77422 |
| 124745 | P03346 | P56704 | -0.22741 |
| 124746 | P03346 | Q03519 | -0.22905 |
| 124747 | P03346 | Q7Z5A8 | -0.53519 |
| 124748 | P03346 | Q14093 | -0.15821 |
| 124749 | P03346 | Q5JWF8 | -0.12019 |
| 124750 | P03346 | P01625 | -0.80078 |
| 124751 | P03346 | Q8NH69 | -0.92763 |
| 124752 | P03346 | Q6ZN68 | -0.50365 |
| 124753 | P03346 | Q9H4K7 | -0.43527 |
| 124754 | P03346 | P22105 | -0.91333 |
| 124755 | P03346 | P01761 | -0.80078 |
| 124756 | P03346 | Q8N370 | -0.70038 |
| 124757 | P03346 | Q8IV08 | -0.21697 |
| 124758 | P03346 | Q9NW15 | -0.73001 |
| 124759 | P03346 | P36544 | -0.56911 |
| 124760 | P03346 | O75093 | -0.51823 |
| 124761 | P03346 | Q14004 | -0.15835 |
| 124762 | P03346 | Q8IVE3 | -0.41542 |
| 124763 | P03346 | Q13491 | -0.4534  |
| 124764 | P03346 | P08195 | -0.22574 |
| 124765 | P03346 | Q96A58 | -0.41393 |
| 124766 | P03346 | P39905 | -0.2666  |
| 124767 | P03346 | Q8NBE8 | -0.15394 |
| 124768 | P03346 | A8MXV6 | -0.50365 |
| 124769 | P03346 | Q9BRT8 | -0.48833 |
| 124770 | P03346 | P02787 | -0.20414 |
| 124771 | P03346 | Q09160 | -0.62987 |
| 124772 | P03346 | P14784 | -0.82111 |
| 124773 | P03346 | O60603 | -0.22745 |
| 124774 | P03346 | Q8N9F0 | -0.3683  |
| 124775 | P03346 | O60312 | -0.49915 |
| 124776 | P03346 | O95716 | -0.53215 |
| 124777 | P03346 | Q5RHP9 | -0.12768 |
| 124778 | P03346 | Q96LA6 | -0.65219 |
| 124779 | P03346 | Q9UHR4 | -0.2274  |
| 124780 | P03346 | Q9NWD8 | -0.50365 |
| 124781 | P03346 | O75508 | -0.56143 |
| 124782 | P03346 | Q5VV43 | -0.28872 |
| 124783 | P03346 | Q99490 | -0.4978  |
| 124784 | P03346 | Q9HCE6 | -0.22751 |
| 124785 | P03346 | O75679 | -0.22835 |
| 124786 | P03346 | Q8WWI5 | -0.4203  |
| 124787 | P03346 | A8MWS1 | -0.53519 |
| 124788 | P03346 | P00846 | -0.28392 |
| 124789 | P03346 | P0C221 | -0.23086 |
| 124790 | P03346 | Q9HA92 | -0.21661 |
| 124791 | P03346 | Q16099 | -0.52247 |
| 124792 | P03346 | A4QN01 | -0.15348 |

|        |        |        |            |
|--------|--------|--------|------------|
| 124793 | P03346 | Q6UW68 | -0.50365   |
| 124794 | P03346 | Q9BUH6 | -0.036129  |
| 124795 | P03346 | Q9BQ24 | -0.19208   |
| 124796 | P03346 | P04431 | -0.80078   |
| 124797 | P03346 | P41159 | -0.33638   |
| 124798 | P03346 | Q96FN4 | -0.22759   |
| 124799 | P03346 | Q7Z745 | -0.046772  |
| 124800 | P03346 | Q8TDN2 | -0.56863   |
| 124801 | P03346 | Q8IUW3 | -0.013807  |
| 124802 | P03346 | O75787 | -0.13354   |
| 124803 | P03346 | Q9Y2K3 | -0.25485   |
| 124804 | P03346 | Q496A3 | -0.1327    |
| 124805 | P03346 | A6NLB4 | -0.22743   |
| 124806 | P03346 | Q8NEM8 | -0.21317   |
| 124807 | P03346 | Q96L08 | -0.50365   |
| 124808 | P03346 | Q00LT1 | -0.46449   |
| 124809 | P03346 | Q9H078 | -0.36016   |
| 124810 | P03346 | Q8WZ59 | -0.50365   |
| 124811 | P03346 | P11912 | -0.65791   |
| 124812 | P03346 | P51809 | -0.22369   |
| 124813 | P03346 | Q14990 | -0.17211   |
| 124814 | P03346 | Q96NL0 | -0.10981   |
| 124815 | P03346 | Q43488 | -0.22682   |
| 124816 | P03346 | P14406 | -0.14468   |
| 124817 | P03346 | Q02978 | -0.2332    |
| 124818 | P03346 | P60602 | -0.24035   |
| 124819 | P03346 | P25021 | -1.0968    |
| 124820 | P03346 | Q7Z6W1 | -0.50365   |
| 124821 | P03346 | P10586 | -0.71363   |
| 124822 | P03346 | Q9Y2G1 | -0.13395   |
| 124823 | P03346 | P01570 | -0.64371   |
| 124824 | P03346 | O00757 | -0.16609   |
| 124825 | P03346 | Q9Y6W5 | -0.18839   |
| 124826 | P03346 | Q9BZR6 | -0.2279    |
| 124827 | P03346 | Q9Y5H3 | -0.86699   |
| 124828 | P03346 | Q8N6W0 | -0.23622   |
| 124829 | P03346 | Q96GQ7 | -0.26853   |
| 124830 | P03346 | Q6BCY4 | -0.27123   |
| 124831 | P03346 | Q9BWP8 | -0.74212   |
| 124832 | P03346 | P03923 | -0.40634   |
| 124833 | P03346 | Q6ZT12 | -0.46244   |
| 124834 | P03346 | P49682 | -0.88253   |
| 124835 | P03346 | Q95299 | -0.19873   |
| 124836 | P03346 | Q96HE9 | -0.18271   |
| 124837 | P03346 | Q5TDP6 | -0.20264   |
| 124838 | P03346 | P08620 | -0.44456   |
| 124839 | P03346 | Q99965 | -0.83067   |
| 124840 | P03346 | O00635 | -0.43822   |
| 124841 | P03346 | P11226 | -0.41271   |
| 124842 | P03346 | Q8NGZ0 | -0.92763   |
| 124843 | P03346 | Q96P47 | -0.82654   |
| 124844 | P03346 | P14555 | -0.71352   |
| 124845 | P03346 | Q8NF67 | -0.019148  |
| 124846 | P03346 | A6NL46 | -0.0092897 |
| 124847 | P03346 | Q12829 | -0.86231   |
| 124848 | P03346 | P60606 | -0.49515   |
| 124849 | P03346 | Q9NR71 | -0.5114    |
| 124850 | P03346 | Q9P1Z9 | -0.50365   |
| 124851 | P03346 | P50148 | -0.59967   |
| 124852 | P03346 | Q6NYC1 | -0.22019   |
| 124853 | P03346 | A6NH52 | -0.50365   |
| 124854 | P03346 | Q9UGP5 | -0.15209   |
| 124855 | P03346 | Q6ZU45 | -0.23439   |
| 124856 | P03346 | Q6UXX5 | -0.50031   |
| 124857 | P03346 | Q86UR5 | -0.22741   |
| 124858 | P03346 | Q495X7 | -0.30279   |
| 124859 | P03346 | Q17R55 | -0.50365   |
| 124860 | P03346 | P31431 | -0.61482   |
| 124861 | P03346 | P09912 | -0.17496   |
| 124862 | P03346 | Q8NDB2 | -0.20867   |
| 124863 | P03346 | P36896 | -0.36109   |
| 124864 | P03346 | Q5TZF3 | -0.22741   |
| 124865 | P03346 | Q9Y6N8 | -0.83801   |
| 124866 | P03346 | P37235 | -0.2603    |
| 124867 | P03346 | Q8IWT6 | -0.54719   |
| 124868 | P03346 | Q8N142 | -0.38736   |



|        |        |        |           |
|--------|--------|--------|-----------|
| 124869 | P03346 | Q86UN6 | -0.1489   |
| 124870 | P03346 | Q16665 | -0.23743  |
| 124871 | P03346 | Q9Y623 | -0.10858  |
| 124872 | P03346 | A6NNP5 | -0.16929  |
| 124873 | P03346 | Q5JUK3 | -1.0097   |
| 124874 | P03346 | Q9H0F5 | -0.2345   |
| 124875 | P03346 | Q96RA2 | -0.64065  |
| 124876 | P03346 | O60779 | -0.42357  |
| 124877 | P03346 | Q2TBC4 | -0.31358  |
| 124878 | P03346 | Q6ZU64 | -0.34272  |
| 124879 | P03346 | Q9UHF5 | -0.71368  |
| 124880 | P03346 | Q86WN2 | -0.67807  |
| 124881 | P03346 | Q75NE6 | -0.50365  |
| 124882 | P03346 | P56192 | -0.14129  |
| 124883 | P03346 | P30510 | -0.82654  |
| 124884 | P03346 | Q5BJH7 | -0.50365  |
| 124885 | P03346 | Q8N349 | -0.41763  |
| 124886 | P03346 | Q07889 | -0.22741  |
| 124887 | P03346 | Q96B18 | -0.1177   |
| 124888 | P03346 | Q16280 | -0.91723  |
| 124889 | P03346 | P01243 | -0.698    |
| 124890 | P03346 | P30049 | -0.20835  |
| 124891 | P03346 | A8MXK9 | -0.037696 |
| 124892 | P03346 | Q08499 | -0.2269   |
| 124893 | P03346 | Q03001 | -0.22776  |
| 124894 | P03346 | P08473 | -0.37384  |
| 124895 | P03346 | P22694 | -0.22701  |
| 124896 | P03346 | P20936 | -0.22741  |
| 124897 | P03346 | O60449 | -0.83397  |
| 124898 | P03346 | Q9Y241 | -0.36236  |
| 124899 | P03346 | Q5FYB0 | -0.57264  |
| 124900 | P03346 | P43246 | -0.21149  |
| 124901 | P03346 | P22492 | -0.63928  |
| 124902 | P03346 | P29218 | -0.22471  |
| 124903 | P03346 | Q9BXJ0 | -0.59838  |
| 124904 | P03346 | H3BMG3 | -0.097849 |
| 124905 | P03346 | Q68DQ2 | -0.1938   |
| 124906 | P03346 | Q9NPJ1 | -0.21955  |
| 124907 | P03346 | Q71F78 | -0.027195 |
| 124908 | P03346 | Q9P000 | -0.1102   |
| 124909 | P03346 | P16066 | -0.96877  |
| 124910 | P03346 | Q99645 | -0.56665  |
| 124911 | P03346 | Q75084 | -0.39847  |
| 124912 | P03346 | Q93084 | -0.60615  |
| 124913 | P03346 | Q9BWH2 | -0.18893  |
| 124914 | P03346 | P05014 | -0.57173  |
| 124915 | P03346 | P07333 | -0.671    |
| 124916 | P03346 | Q14202 | -0.038199 |
| 124917 | P03346 | Q96SZ5 | -0.21811  |
| 124918 | P03346 | Q9P2E5 | -0.27026  |
| 124919 | P03346 | Q8IX05 | -0.46442  |
| 124920 | P03346 | Q15078 | -0.18244  |
| 124921 | P03346 | Q9UNA3 | -0.4098   |
| 124922 | P03346 | P06858 | -0.41721  |
| 124923 | P03346 | O43182 | -0.4451   |
| 124924 | P03346 | Q76B58 | -0.30246  |
| 124925 | P03346 | Q9H9J4 | -0.52298  |
| 124926 | P03346 | Q9GZM5 | -0.42264  |
| 124927 | P03346 | Q9NYW7 | -0.78889  |
| 124928 | P03346 | A1L3X0 | -0.037526 |
| 124929 | P03346 | Q9P1C3 | -0.53519  |
| 124930 | P03346 | Q9Y3L5 | -0.5734   |
| 124931 | P03346 | D6R901 | -0.36346  |
| 124932 | P03346 | Q8WVF1 | -0.21232  |
| 124933 | P03346 | Q15717 | -0.29517  |
| 124934 | P03346 | Q9H8K7 | -0.046959 |
| 124935 | P03346 | Q96B54 | -0.30279  |
| 124936 | P03346 | B2RUY7 | -0.58901  |
| 124937 | P03346 | A6NI28 | -0.9063   |
| 124938 | P03346 | P61328 | -0.26418  |
| 124939 | P03346 | Q7Z6V5 | -0.22587  |
| 124940 | P03346 | Q96PP9 | -0.21822  |
| 124941 | P03346 | Q86XK7 | -0.50365  |
| 124942 | P03346 | Q96MS0 | -0.6723   |
| 124943 | P03346 | Q9P0L9 | -0.28731  |
| 124944 | P03346 | A6NC05 | -0.1831   |

|        |        |        |           |
|--------|--------|--------|-----------|
| 124945 | P03346 | Q7Z402 | -0.50365  |
| 124946 | P03346 | Q9BXJ4 | -0.26788  |
| 124947 | P03346 | Q6NTE8 | -0.23799  |
| 124948 | P03346 | Q96C11 | -0.15425  |
| 124949 | P03346 | Q9P212 | -0.22741  |
| 124950 | P03346 | Q02539 | -0.33783  |
| 124951 | P03346 | Q9H237 | -0.55414  |
| 124952 | P03346 | Q8IYT4 | -0.44252  |
| 124953 | P03346 | Q8NH61 | -0.92763  |
| 124954 | P03346 | P01621 | -0.80078  |
| 124955 | P03346 | P0CI25 | -0.30279  |
| 124956 | P03346 | Q6QHC5 | -0.66248  |
| 124957 | P03346 | Q96EN8 | -0.22107  |
| 124958 | P03346 | A6NM43 | -0.32907  |
| 124959 | P03346 | Q8IXE1 | -0.92763  |
| 124960 | P03346 | Q9P242 | -0.023986 |
| 124961 | P03346 | Q13253 | -0.26363  |
| 124962 | P03346 | Q63HR2 | -0.22741  |
| 124963 | P03346 | Q6P2P2 | -0.21784  |
| 124964 | P03346 | Q7L0J3 | -0.31956  |
| 124965 | P03346 | Q9UBT3 | -0.52029  |
| 124966 | P03346 | Q8TE60 | -0.93222  |
| 124967 | P03346 | P22413 | -0.25964  |
| 124968 | P03346 | P00966 | -0.19531  |
| 124969 | P03346 | O00443 | -0.30851  |
| 124970 | P03346 | Q8IUI4 | -0.13766  |
| 124971 | P03346 | Q9NRW7 | -0.22593  |
| 124972 | P03346 | P08397 | -0.084416 |
| 124973 | P03346 | Q8IY21 | -0.22611  |
| 124974 | P03346 | O76083 | -0.22724  |
| 124975 | P03346 | Q96CP2 | -0.15669  |
| 124976 | P03346 | Q9H324 | -0.34792  |
| 124977 | P03346 | P47870 | -0.48303  |
| 124978 | P03346 | P23141 | -0.22741  |
| 124979 | P03346 | Q8IWL1 | -0.71382  |
| 124980 | P03346 | Q12979 | -0.5874   |
| 124981 | P03346 | Q8N6L7 | -0.50365  |
| 124982 | P03346 | P30626 | -0.22782  |
| 124983 | P03346 | O43781 | -0.77293  |
| 124984 | P03346 | Q9H207 | -0.92763  |
| 124985 | P03346 | Q68D91 | -0.19088  |
| 124986 | P03346 | Q969W0 | -0.11152  |
| 124987 | P03346 | Q9Y2I8 | -0.22788  |
| 124988 | P03346 | Q66K14 | -1.348    |
| 124989 | P03346 | Q8IV63 | -0.42436  |
| 124990 | P03346 | Q8NGZ5 | -0.92763  |
| 124991 | P03346 | Q96LR4 | -0.53519  |
| 124992 | P03346 | Q8WWZ4 | -0.95136  |
| 124993 | P03346 | Q8WUD4 | -0.15058  |
| 124994 | P03346 | Q96JG6 | -0.13779  |
| 124995 | P03346 | P35241 | -0.22958  |
| 124996 | P03346 | P01721 | -0.80078  |
| 124997 | P03346 | Q2WGN9 | -0.2274   |
| 124998 | P03346 | Q8IZS8 | -0.63141  |
| 124999 | P03346 | Q14289 | -0.22741  |
| 125000 | P03346 | Q5T5U3 | -0.22942  |
| 125001 | P03346 | Q6S8J3 | -0.098291 |
| 125002 | P03346 | Q96NS8 | -0.14423  |
| 125003 | P03346 | P10767 | -0.73818  |
| 125004 | P03346 | Q9UBU3 | -0.2559   |
| 125005 | P03346 | A6NM10 | -0.47298  |
| 125006 | P03346 | P05496 | -0.41533  |
| 125007 | P03346 | A2RU67 | -0.50365  |
| 125008 | P03346 | P02708 | -0.57676  |
| 125009 | P03346 | Q9NZA1 | -0.22342  |
| 125010 | P03346 | O95976 | -0.77656  |
| 125011 | P03346 | P04035 | -0.50391  |
| 125012 | P03346 | Q9H4B8 | -0.43816  |
| 125013 | P03346 | A6NM62 | -0.47304  |
| 125014 | P03346 | Q96IW2 | -0.22741  |
| 125015 | P03346 | P31152 | -0.41081  |
| 125016 | P03346 | Q9Y6M0 | -0.55901  |
| 125017 | P03346 | P15018 | -0.30487  |
| 125018 | P03346 | Q9NXJ5 | -0.10247  |
| 125019 | P03346 | Q9UBK2 | -0.38386  |
| 125020 | P03346 | Q96G79 | -0.26759  |

|        |        |        |           |
|--------|--------|--------|-----------|
| 125021 | P03346 | Q96N96 | -0.22745  |
| 125022 | P03346 | Q86UF1 | -0.50365  |
| 125023 | P03346 | Q69YW2 | -0.50365  |
| 125024 | P03346 | Q9UJT0 | -0.23427  |
| 125025 | P03346 | O15259 | -0.22741  |
| 125026 | P03346 | Q15195 | -0.53519  |
| 125027 | P03346 | O15120 | -0.5131   |
| 125028 | P03346 | Q4LDR2 | -0.49515  |
| 125029 | P03346 | Q95471 | -0.22198  |
| 125030 | P03346 | Q92908 | -0.2274   |
| 125031 | P03346 | Q8IY26 | -0.65499  |
| 125032 | P03346 | Q9NVE5 | -0.36346  |
| 125033 | P03346 | Q99467 | -0.71188  |
| 125034 | P03346 | Q14500 | -0.80371  |
| 125035 | P03346 | Q96BR1 | -0.73978  |
| 125036 | P03346 | Q8IVP5 | -0.23571  |
| 125037 | P03346 | Q9H9Y4 | -0.42082  |
| 125038 | P03346 | B7ZC32 | -0.60466  |
| 125039 | P03346 | P09683 | -0.45735  |
| 125040 | P03346 | Q9BQS8 | -0.22718  |
| 125041 | P03346 | Q15256 | -0.24878  |
| 125042 | P03346 | Q6P9H5 | -0.59969  |
| 125043 | P03346 | Q9Y219 | -0.34044  |
| 125044 | P03346 | Q5VVW2 | -0.53424  |
| 125045 | P03346 | P28325 | -0.23275  |
| 125046 | P03346 | Q8NEQ6 | -0.093816 |
| 125047 | P03346 | P0C842 | -0.22553  |
| 125048 | P03346 | Q9NX05 | -0.052517 |
| 125049 | P03346 | Q9ULE3 | -0.20672  |
| 125050 | P03346 | Q96LB2 | -0.92564  |
| 125051 | P03346 | Q5JPB2 | -0.24849  |
| 125052 | P03346 | Q9Y2T6 | -0.94184  |
| 125053 | P03346 | Q4VNC1 | -0.7956   |
| 125054 | P03346 | Q8NH89 | -0.92763  |
| 125055 | P03346 | P01776 | -0.80078  |
| 125056 | P03346 | Q96K31 | -0.018666 |
| 125057 | P03346 | Q9Y6A2 | -0.72258  |
| 125058 | P03346 | Q9H5Z1 | -0.34434  |
| 125059 | P03346 | O76090 | -0.53028  |
| 125060 | P03346 | P46531 | -0.22755  |
| 125061 | P03346 | P30490 | -0.76151  |
| 125062 | P03346 | Q9NXI6 | -0.56385  |
| 125063 | P03346 | Q8IZ16 | -0.056152 |
| 125064 | P03346 | Q9NP60 | -0.80091  |
| 125065 | P03346 | Q9BSK2 | -0.36428  |
| 125066 | P03346 | P55010 | -0.18908  |
| 125067 | P03346 | O95727 | -0.67723  |
| 125068 | P03346 | O43687 | -0.54634  |
| 125069 | P03346 | Q502X0 | -0.1516   |
| 125070 | P03346 | B1ANY3 | -0.064936 |
| 125071 | P03346 | Q5TIA1 | -0.21681  |
| 125072 | P03346 | Q9NV96 | -0.19729  |
| 125073 | P03346 | Q96RP8 | -0.56863  |
| 125074 | P03346 | Q6PIY2 | -0.072918 |
| 125075 | P03346 | P51878 | -0.50235  |
| 125076 | P03346 | O95139 | -0.21212  |
| 125077 | P03346 | Q96AN5 | -0.28485  |
| 125078 | P03346 | Q86SZ3 | -0.22245  |
| 125079 | P03346 | Q9Y4D2 | -0.53822  |
| 125080 | P03346 | Q8TBJ5 | -0.18774  |
| 125081 | P03346 | Q3V5L5 | -0.44669  |
| 125082 | P03346 | Q8N139 | -0.95136  |
| 125083 | P03346 | P19022 | -0.44558  |
| 125084 | P03346 | Q96KN9 | -0.65504  |
| 125085 | P03346 | Q9UKU9 | -1.0255   |
| 125086 | P03346 | A1L429 | -0.21009  |
| 125087 | P03346 | Q5BKY6 | -0.013652 |
| 125088 | P03346 | Q7Z601 | -0.71241  |
| 125089 | P03346 | Q8N944 | -0.34806  |
| 125090 | P03346 | Q9NS61 | -0.23541  |
| 125091 | P03346 | Q8NGS1 | -0.92763  |
| 125092 | P03346 | A6QL63 | -0.5974   |
| 125093 | P03346 | Q86WT6 | -0.22921  |
| 125094 | P03346 | P51956 | -0.22741  |
| 125095 | P03346 | O75631 | -0.53883  |
| 125096 | P03346 | Q8TDW4 | -0.49139  |

|        |        |        |           |
|--------|--------|--------|-----------|
| 125097 | P03346 | Q147X3 | -0.19865  |
| 125098 | P03346 | Q9NW13 | -0.22944  |
| 125099 | P03346 | Q9HDC9 | -0.44339  |
| 125100 | P03346 | Q92882 | -0.28308  |
| 125101 | P03346 | Q5T6R2 | -0.23379  |
| 125102 | P03346 | Q96R54 | -0.92763  |
| 125103 | P03346 | O75200 | -0.53519  |
| 125104 | P03346 | Q0VDD8 | -0.42891  |
| 125105 | P03346 | P11217 | -0.22662  |
| 125106 | P03346 | Q9Y240 | -0.22835  |
| 125107 | P03346 | Q58FF3 | -0.089581 |
| 125108 | P03346 | Q13043 | -0.22965  |
| 125109 | P03346 | A6NCQ9 | -0.56385  |
| 125110 | P03346 | Q9NPI9 | -0.80357  |
| 125111 | P03346 | Q9NQA3 | -0.16264  |
| 125112 | P03346 | Q9GZK7 | -0.92763  |
| 125113 | P03346 | Q969Q4 | -0.33154  |
| 125114 | P03346 | Q8NCV1 | -0.25781  |
| 125115 | P03346 | Q96Q15 | -0.34524  |
| 125116 | P03346 | Q5T7M4 | -0.62375  |
| 125117 | P03346 | Q8TBY9 | -0.22741  |
| 125118 | P03346 | P29376 | -1.28     |
| 125119 | P03346 | Q9H269 | -0.20231  |
| 125120 | P03346 | P20023 | -0.69381  |
| 125121 | P03346 | Q9UJF2 | -0.22729  |
| 125122 | P03346 | Q86T03 | -0.60716  |
| 125123 | P03346 | Q9HC97 | -1.0977   |
| 125124 | P03346 | Q9H1D0 | -0.75289  |
| 125125 | P03346 | Q6SA08 | -0.54213  |
| 125126 | P03346 | Q9BY60 | -0.20141  |
| 125127 | P03346 | P56278 | -0.15488  |
| 125128 | P03346 | Q6ZMU1 | -0.30175  |
| 125129 | P03346 | P36957 | -0.22135  |
| 125130 | P03346 | P32249 | -0.97493  |
| 125131 | P03346 | A8MYV0 | -0.19086  |
| 125132 | P03346 | Q9NV29 | -0.30782  |
| 125133 | P03346 | Q5VYY1 | -0.2274   |
| 125134 | P03346 | Q96IV6 | -0.69138  |
| 125135 | P03346 | P27449 | -0.23274  |
| 125136 | P03346 | P10163 | -0.45606  |
| 125137 | P03346 | Q8IV31 | -0.50365  |
| 125138 | P03346 | A8MXT2 | -0.16132  |
| 125139 | P03346 | Q9NRH2 | -0.73736  |
| 125140 | P03346 | A6NER3 | -0.24641  |
| 125141 | P03346 | Q9BSE2 | -0.50365  |
| 125142 | P03346 | P07766 | -0.54144  |
| 125143 | P03346 | P63132 | -0.22599  |
| 125144 | P03346 | Q99674 | -0.66793  |
| 125145 | P03346 | Q92954 | -0.59288  |
| 125146 | P03346 | Q86UK5 | -0.29774  |
| 125147 | P03346 | Q8N162 | -0.92763  |
| 125148 | P03346 | Q5T7B8 | -0.25302  |
| 125149 | P03346 | P49703 | -0.22751  |
| 125150 | P03346 | Q9P2Q2 | -0.24615  |
| 125151 | P03346 | Q9UNP4 | -0.4239   |
| 125152 | P03346 | Q06418 | -0.58847  |
| 125153 | P03346 | Q96DY2 | -0.13231  |
| 125154 | P03346 | P21709 | -0.95145  |
| 125155 | P03346 | Q29940 | -0.76151  |
| 125156 | P03346 | Q9BTV4 | -0.13382  |
| 125157 | P03346 | Q8WXS8 | -0.89857  |
| 125158 | P03346 | P17081 | -0.69523  |
| 125159 | P03346 | Q9HBR0 | -0.62013  |
| 125160 | P03346 | Q92949 | -0.28423  |
| 125161 | P03346 | P51617 | -0.2274   |
| 125162 | P03346 | Q5JQS6 | -0.089673 |
| 125163 | P03346 | Q6ZQP7 | -0.013652 |
| 125164 | P03346 | Q9NW81 | -0.16814  |
| 125165 | P03346 | Q9NT22 | -0.44316  |
| 125166 | P03346 | P30740 | -0.098394 |
| 125167 | P03346 | Q9BQA9 | -0.18232  |
| 125168 | P03346 | Q9NQ86 | -0.23318  |
| 125169 | P03346 | Q8TDG4 | -0.2267   |
| 125170 | P03346 | P43307 | -0.36309  |
| 125171 | P03346 | P48061 | -0.55223  |
| 125172 | P03346 | P0CW19 | -0.13373  |

|        |        |        |           |
|--------|--------|--------|-----------|
| 125173 | P03346 | Q3KNT9 | -0.50365  |
| 125174 | P03346 | Q02094 | -0.56645  |
| 125175 | P03346 | A6NL82 | -0.092354 |
| 125176 | P03346 | P19544 | -0.22504  |
| 125177 | P03346 | Q9H7B7 | -0.53519  |
| 125178 | P03346 | Q5T9C9 | -0.65432  |
| 125179 | P03346 | Q5RL73 | -0.098433 |
| 125180 | P03346 | Q6NVU6 | -0.16037  |
| 125181 | P03346 | Q7RTT9 | -0.62972  |
| 125182 | P03346 | Q86TI4 | -0.22749  |
| 125183 | P03346 | Q2M2E5 | -0.53519  |
| 125184 | P03346 | Q76MJ5 | -0.72655  |
| 125185 | P03346 | P14151 | -0.37274  |
| 125186 | P03346 | Q9BXB5 | -0.3642   |
| 125187 | P03346 | Q8N6N6 | -0.2027   |
| 125188 | P03346 | Q9Y388 | -0.40469  |
| 125189 | P03346 | P22748 | -0.22868  |
| 125190 | P03346 | O00339 | -0.22743  |
| 125191 | P03346 | Q9H019 | -0.073966 |
| 125192 | P03346 | Q07954 | -0.24919  |
| 125193 | P03346 | Q569K4 | -0.12079  |
| 125194 | P03346 | Q9Y328 | -0.41301  |
| 125195 | P03346 | Q15800 | -0.78805  |
| 125196 | P03346 | P08237 | -0.39568  |
| 125197 | P03346 | P16118 | -0.184    |
| 125198 | P03346 | Q8N609 | -0.42539  |
| 125199 | P03346 | P48165 | -0.76204  |
| 125200 | P03346 | Q6PK18 | -0.73846  |
| 125201 | P03346 | Q15027 | -0.64084  |
| 125202 | P03346 | Q6ZT21 | -0.50926  |
| 125203 | P03346 | Q01433 | -0.21865  |
| 125204 | P03346 | Q8WUT4 | -0.50365  |
| 125205 | P03346 | Q75N90 | -0.65663  |
| 125206 | P03346 | Q9NR63 | -0.47161  |
| 125207 | P03346 | Q9NZM1 | -0.30277  |
| 125208 | P03346 | Q8N1X5 | -0.013652 |
| 125209 | P03346 | O15123 | -0.36691  |
| 125210 | P03346 | P42898 | -0.21501  |
| 125211 | P03346 | O15245 | -0.23909  |
| 125212 | P03346 | P32241 | -0.58432  |
| 125213 | P03346 | P17812 | -0.27933  |
| 125214 | P03346 | Q9UKI8 | -0.51452  |
| 125215 | P03346 | Q5SYE7 | -0.027462 |
| 125216 | P03346 | Q8NGI3 | -0.92763  |
| 125217 | P03346 | Q13421 | -0.34308  |
| 125218 | P03346 | Q9BZ19 | -0.22741  |
| 125219 | P03346 | O15375 | -0.7144   |
| 125220 | P03346 | Q86YT6 | -0.22739  |
| 125221 | P03346 | Q9BXR5 | -0.97872  |
| 125222 | P03346 | Q8WTP8 | -0.18353  |
| 125223 | P03346 | Q9P283 | -0.65622  |
| 125224 | P03346 | Q99715 | -0.89333  |
| 125225 | P03346 | Q7RTY3 | -0.56917  |
| 125226 | P03346 | Q569K6 | -0.15133  |
| 125227 | P03346 | Q8NBI6 | -0.6457   |
| 125228 | P03346 | Q6IC98 | -0.37     |
| 125229 | P03346 | Q6P587 | -0.19381  |
| 125230 | P03346 | P01711 | -0.80078  |
| 125231 | P03346 | P21583 | -0.39007  |
| 125232 | P03346 | P56556 | -0.10735  |
| 125233 | P03346 | Q5VT28 | -0.065776 |
| 125234 | P03346 | Q9H3R1 | -0.52678  |
| 125235 | P03346 | Q96HL8 | -0.22738  |
| 125236 | P03346 | P25311 | -0.7639   |
| 125237 | P03346 | Q30KQ1 | -0.52229  |
| 125238 | P03346 | Q8TD90 | -0.20775  |
| 125239 | P03346 | Q9GZK6 | -0.92763  |
| 125240 | P03346 | P0C7T8 | -0.50365  |
| 125241 | P03346 | Q8NDI1 | -0.22766  |
| 125242 | P03346 | O00230 | -0.62467  |
| 125243 | P03346 | P16070 | -0.24358  |
| 125244 | P03346 | P10075 | -0.10116  |
| 125245 | P03346 | Q3C1W6 | -0.30279  |
| 125246 | P03346 | P17405 | -0.20998  |
| 125247 | P03346 | Q96I85 | -0.53519  |
| 125248 | P03346 | Q96PS8 | -0.61119  |

|        |        |        |            |
|--------|--------|--------|------------|
| 125249 | P03346 | C9JLJ4 | -0.36346   |
| 125250 | P03346 | Q9HCL2 | -0.34266   |
| 125251 | P03346 | Q9H8V8 | -0.013652  |
| 125252 | P03346 | Q9H9A6 | -0.22791   |
| 125253 | P03346 | Q3KP22 | -0.1439    |
| 125254 | P03346 | Q9BRJ9 | -0.22744   |
| 125255 | P03346 | P21810 | -0.52026   |
| 125256 | P03346 | Q14324 | -0.34929   |
| 125257 | P03346 | Q9UQD0 | -0.71031   |
| 125258 | P03346 | Q96N23 | -0.0016409 |
| 125259 | P03346 | P24844 | -0.22711   |
| 125260 | P03346 | P01229 | -0.62144   |
| 125261 | P03346 | P78563 | -0.20349   |
| 125262 | P03346 | A6NMZ5 | -0.92763   |
| 125263 | P03346 | Q15005 | -0.54726   |
| 125264 | P03346 | Q14949 | -0.19114   |
| 125265 | P03346 | Q13686 | -0.2294    |
| 125266 | P03346 | Q9H0N0 | -0.23405   |
| 125267 | P03346 | Q9NZ56 | -0.27603   |
| 125268 | P03346 | Q13698 | -0.49766   |
| 125269 | P03346 | P35243 | -0.35856   |
| 125270 | P03346 | Q5T8I3 | -0.12203   |
| 125271 | P03346 | Q5GH73 | -0.50365   |
| 125272 | P03346 | Q9BQR3 | -1.0507    |
| 125273 | P03346 | Q9Y5G9 | -0.91843   |
| 125274 | P03346 | Q8NDZ9 | -0.013652  |
| 125275 | P03346 | Q9UKM7 | -0.63476   |
| 125276 | P03346 | P00367 | -0.21798   |
| 125277 | P03346 | P62955 | -0.59691   |
| 125278 | P03346 | Q8IV33 | -0.074082  |
| 125279 | P03346 | Q9Y5H6 | -0.92414   |
| 125280 | P03346 | Q9HB14 | -0.80486   |
| 125281 | P03346 | Q9HCN3 | -0.69916   |
| 125282 | P03346 | Q13797 | -0.5841    |
| 125283 | P03346 | Q9BYH1 | -0.63608   |
| 125284 | P03346 | E9PIF3 | -0.19111   |
| 125285 | P03346 | Q5T1H1 | -0.7299    |
| 125286 | P03346 | Q05655 | -0.22405   |
| 125287 | P03346 | A0PK11 | -0.50365   |
| 125288 | P03346 | Q5VW22 | -0.65984   |
| 125289 | P03346 | Q8IWT0 | -0.18481   |
| 125290 | P03346 | Q9UJ99 | -0.86699   |
| 125291 | P03346 | Q8NFB2 | -0.50365   |
| 125292 | P03346 | A8MYR8 | -0.20742   |
| 125293 | P03346 | Q0VDI3 | -0.50365   |
| 125294 | P03346 | Q6UW10 | -0.53519   |
| 125295 | P03346 | Q9Y617 | -0.12016   |
| 125296 | P03346 | Q3ZCT8 | -0.13401   |
| 125297 | P03346 | P26367 | -0.22466   |
| 125298 | P03346 | A6NI61 | -0.50365   |
| 125299 | P03346 | Q96NL1 | -0.60246   |
| 125300 | P03346 | Q6PCB8 | -0.67572   |
| 125301 | P03346 | Q6ZUX3 | -0.20134   |
| 125302 | P03346 | Q6T423 | -0.48129   |
| 125303 | P03346 | Q01113 | -1.3901    |
| 125304 | P03346 | Q9NYF5 | -0.6787    |
| 125305 | P03346 | Q60911 | -0.3307    |
| 125306 | P03346 | Q8IXS6 | -0.25466   |
| 125307 | P03346 | Q5J5C9 | -0.47078   |
| 125308 | P03346 | Q9H161 | -0.22344   |
| 125309 | P03346 | Q2TAL5 | -0.22764   |
| 125310 | P03346 | P18507 | -0.29754   |
| 125311 | P03346 | Q96I82 | -0.77028   |
| 125312 | P03346 | Q5SR56 | -0.60861   |
| 125313 | P03346 | Q1RMZ1 | -0.08452   |
| 125314 | P03346 | Q12999 | -0.5721    |
| 125315 | P03346 | P80098 | -0.88173   |
| 125316 | P03346 | O00591 | -0.50288   |
| 125317 | P03346 | P05546 | -0.51948   |
| 125318 | P03346 | Q9UPW0 | -0.31352   |
| 125319 | P03346 | Q8N1S5 | -0.55888   |
| 125320 | P03346 | Q9NR12 | -0.22576   |
| 125321 | P03346 | P52198 | -0.49955   |
| 125322 | P03346 | Q9NZC3 | -0.36669   |
| 125323 | P03346 | Q92989 | -0.18586   |
| 125324 | P03346 | Q96GW7 | -0.73497   |

|        |        |        |           |
|--------|--------|--------|-----------|
| 125325 | P03346 | Q8WXS4 | -0.62695  |
| 125326 | P03346 | Q9Y6I8 | -0.13845  |
| 125327 | P03346 | Q96A83 | -0.74381  |
| 125328 | P03346 | Q8N5C1 | -0.50365  |
| 125329 | P03346 | Q6UE05 | -0.50365  |
| 125330 | P03346 | Q9HBW1 | -0.47332  |
| 125331 | P03346 | Q7Z2R9 | -0.53519  |
| 125332 | P03346 | Q8NH03 | -0.92763  |
| 125333 | P03346 | A6NCK2 | -0.30279  |
| 125334 | P03346 | A8MVZ5 | -0.50365  |
| 125335 | P03346 | Q6ZSV7 | -0.16254  |
| 125336 | P03346 | P06850 | -0.35266  |
| 125337 | P03346 | Q8TDF5 | -0.85235  |
| 125338 | P03346 | Q6UW15 | -0.5855   |
| 125339 | P03346 | Q6P4E1 | -0.50365  |
| 125340 | P03346 | Q2MV58 | -0.52324  |
| 125341 | P03346 | P51148 | -0.64835  |
| 125342 | P03346 | P51575 | -0.38768  |
| 125343 | P03346 | P63125 | -0.23811  |
| 125344 | P03346 | Q9NPC2 | -0.8344   |
| 125345 | P03346 | Q9UKL6 | -0.20765  |
| 125346 | P03346 | Q9BV79 | -0.66631  |
| 125347 | P03346 | Q15551 | -0.54105  |
| 125348 | P03346 | Q8IUZ0 | -0.22741  |
| 125349 | P03346 | Q96R69 | -0.92763  |
| 125350 | P03346 | P32302 | -1.0021   |
| 125351 | P03346 | Q92503 | -0.43848  |
| 125352 | P03346 | Q6NTF9 | -0.54345  |
| 125353 | P03346 | Q04912 | -0.72511  |
| 125354 | P03346 | P02763 | -0.25036  |
| 125355 | P03346 | P08493 | -0.70368  |
| 125356 | P03346 | Q711Q0 | -0.013652 |
| 125357 | P03346 | Q9BYC2 | -0.19648  |
| 125358 | P03346 | Q16773 | -0.22353  |
| 125359 | P03346 | Q92485 | -0.65519  |
| 125360 | P03346 | Q7Z5Q1 | -0.22734  |
| 125361 | P03346 | O43525 | -0.7051   |
| 125362 | P03346 | Q6ZUS6 | -0.20078  |
| 125363 | P03346 | Q8N5S1 | -0.37103  |
| 125364 | P03346 | Q96KF7 | -0.50365  |
| 125365 | P03346 | Q96AP4 | -0.30279  |
| 125366 | P03346 | Q9Y6B6 | -0.2283   |
| 125367 | P03346 | Q96A54 | -0.76796  |
| 125368 | P03346 | Q92738 | -0.76848  |
| 125369 | P03346 | Q7Z5B4 | -0.41336  |
| 125370 | P03346 | Q96RR4 | -0.85054  |
| 125371 | P03346 | Q9Y5U8 | -0.17682  |
| 125372 | P03346 | P07101 | -0.2263   |
| 125373 | P03346 | O95424 | -0.10755  |
| 125374 | P03346 | P27658 | -0.8002   |
| 125375 | P03346 | Q99685 | -0.34658  |
| 125376 | P03346 | Q0VDD5 | -0.013652 |
| 125377 | P03346 | P36542 | -0.13749  |
| 125378 | P03346 | Q8WWF5 | -0.38629  |
| 125379 | P03346 | Q9C0H2 | -0.65777  |
| 125380 | P03346 | Q15262 | -0.52899  |
| 125381 | P03346 | Q9H246 | -0.17386  |
| 125382 | P03346 | Q96I36 | -0.39658  |
| 125383 | P03346 | Q96LR7 | -0.031961 |
| 125384 | P03346 | P27707 | -0.30508  |
| 125385 | P03346 | Q7Z5S9 | -0.50365  |
| 125386 | P03346 | P04062 | -0.2919   |
| 125387 | P03346 | O60333 | -0.2341   |
| 125388 | P03346 | Q9BQY6 | -0.50866  |
| 125389 | P03346 | Q5VTT5 | -0.22745  |
| 125390 | P03346 | Q8TC36 | -0.21464  |
| 125391 | P03346 | P10276 | -0.22968  |
| 125392 | P03346 | Q8NGJ2 | -0.92763  |
| 125393 | P03346 | Q7L1W4 | -0.50365  |
| 125394 | P03346 | Q05639 | -0.13424  |
| 125395 | P03346 | P50391 | -0.94853  |
| 125396 | P03346 | Q8WZA8 | -0.013652 |
| 125397 | P03346 | Q8N3K9 | -0.22754  |
| 125398 | P03346 | Q6UW78 | -0.53519  |
| 125399 | P03346 | Q9H1K4 | -0.37812  |
| 125400 | P03346 | P36383 | -0.732    |

|        |        |        |           |
|--------|--------|--------|-----------|
| 125401 | P03346 | Q9NYW1 | -0.77656  |
| 125402 | P03346 | P48547 | -0.56863  |
| 125403 | P03346 | Q9NRM7 | -0.22741  |
| 125404 | P03346 | Q7Z442 | -0.67377  |
| 125405 | P03346 | Q5JQF7 | -0.013652 |
| 125406 | P03346 | Q6P531 | -0.47012  |
| 125407 | P03346 | Q8IZ63 | -0.013652 |
| 125408 | P03346 | Q16698 | -0.2189   |
| 125409 | P03346 | Q14520 | -1.2152   |
| 125410 | P03346 | Q96DN5 | -0.42355  |
| 125411 | P03346 | O43653 | -0.2482   |
| 125412 | P03346 | Q9BXU9 | -0.39144  |
| 125413 | P03346 | Q7Z5L7 | -0.51868  |
| 125414 | P03346 | Q9Y315 | -0.073741 |
| 125415 | P03346 | P48549 | -0.32696  |
| 125416 | P03346 | P17655 | -0.23447  |
| 125417 | P03346 | Q09470 | -0.55952  |
| 125418 | P03346 | Q6PF05 | -0.0291   |
| 125419 | P03346 | Q7RTX1 | -0.96092  |
| 125420 | P03346 | Q9Y3S1 | -0.93079  |
| 125421 | P03346 | Q9C0A0 | -0.88459  |
| 125422 | P03346 | Q6P5X5 | -0.045252 |
| 125423 | P03346 | Q9BZM4 | -0.26634  |
| 125424 | P03346 | Q8IZ73 | -0.17282  |
| 125425 | P03346 | A6NJI1 | -0.085644 |
| 125426 | P03346 | P07384 | -0.22928  |
| 125427 | P03346 | A6NLP5 | -0.22511  |
| 125428 | P03346 | Q95995 | -0.21602  |
| 125429 | P03346 | P04899 | -0.24865  |
| 125430 | P03346 | Q9UBE8 | -0.22741  |
| 125431 | P03346 | Q71RG4 | -0.50365  |
| 125432 | P03346 | Q5VWZ2 | -0.22641  |
| 125433 | P03346 | Q8NCW6 | -0.33063  |
| 125434 | P03346 | Q16718 | -0.15656  |
| 125435 | P03346 | Q9H6I2 | -0.21307  |
| 125436 | P03346 | A6ND91 | -0.58038  |
| 125437 | P03346 | O00590 | -1.1448   |
| 125438 | P03346 | Q5T1B0 | -0.18176  |
| 125439 | P03346 | Q8N0V4 | -0.53519  |
| 125440 | P03346 | Q8NHK3 | -0.65219  |
| 125441 | P03346 | Q96P48 | -0.22738  |
| 125442 | P03346 | Q15831 | -0.25531  |
| 125443 | P03346 | Q9BZJ4 | -0.36024  |
| 125444 | P03346 | P01042 | -0.56006  |
| 125445 | P03346 | P0CG32 | -0.21859  |
| 125446 | P03346 | Q8NHV1 | -0.59969  |
| 125447 | P03346 | O60359 | -0.74739  |
| 125448 | P03346 | P54284 | -0.22595  |
| 125449 | P03346 | Q96RC9 | -0.92763  |
| 125450 | P03346 | Q9BQD1 | -0.21708  |
| 125451 | P03346 | Q5T5N4 | -0.13896  |
| 125452 | P03346 | Q95237 | -0.50642  |
| 125453 | P03346 | Q9Y6M9 | -0.20645  |
| 125454 | P03346 | Q9H374 | -0.1781   |
| 125455 | P03346 | Q6GMV2 | -0.059483 |
| 125456 | P03346 | P34130 | -0.48274  |
| 125457 | P03346 | P45880 | -0.26923  |
| 125458 | P03346 | P01036 | -0.6083   |
| 125459 | P03346 | Q9BW83 | -0.67864  |
| 125460 | P03346 | Q9BVA6 | -0.8197   |
| 125461 | P03346 | Q96P16 | -0.11202  |
| 125462 | P03346 | Q92506 | -0.21507  |
| 125463 | P03346 | Q6ZRH7 | -0.77702  |
| 125464 | P03346 | Q8NGU4 | -0.92763  |
| 125465 | P03346 | Q9UBM4 | -0.59528  |
| 125466 | P03346 | P10600 | -0.22741  |
| 125467 | P03346 | P50454 | -0.26378  |
| 125468 | P03346 | Q8IZQ8 | -0.40107  |
| 125469 | P03346 | Q96E39 | -0.22658  |
| 125470 | P03346 | Q7RTU7 | -0.23088  |
| 125471 | P03346 | Q15649 | -0.21267  |
| 125472 | P03346 | Q9BXU2 | -0.070272 |
| 125473 | P03346 | O94804 | -0.43457  |
| 125474 | P03346 | Q9NU02 | -0.22741  |
| 125475 | P03346 | P50213 | -0.19263  |
| 125476 | P03346 | Q32NC0 | -0.095094 |



|        |        |        |           |
|--------|--------|--------|-----------|
| 125477 | P03346 | Q8NGS6 | -0.92763  |
| 125478 | P03346 | Q2T9K0 | -0.50365  |
| 125479 | P03346 | Q9H7M6 | -0.099282 |
| 125480 | P03346 | Q5VZ03 | -0.2194   |
| 125481 | P03346 | Q9UK23 | -0.28861  |
| 125482 | P03346 | Q16595 | -0.22599  |
| 125483 | P03346 | Q92913 | -0.28617  |
| 125484 | P03346 | A6NIM6 | -0.30128  |
| 125485 | P03346 | Q96J65 | -0.83029  |
| 125486 | P03346 | Q8TBZ6 | -0.11143  |
| 125487 | P03346 | Q9NY56 | -0.4763   |
| 125488 | P03346 | P01160 | -0.1966   |
| 125489 | P03346 | O94766 | -0.38625  |
| 125490 | P03346 | Q15012 | -0.45247  |
| 125491 | P03346 | Q9ULC8 | -0.47325  |
| 125492 | P03346 | Q8N2H3 | -0.22736  |
| 125493 | P03346 | Q96FL8 | -0.56121  |
| 125494 | P03346 | Q14994 | -0.22749  |
| 125495 | P03346 | A6NI73 | -1.0047   |
| 125496 | P03346 | P62684 | -0.21346  |
| 125497 | P03346 | Q9BUB4 | -0.19106  |
| 125498 | P03346 | C9J3I9 | -0.065232 |
| 125499 | P03346 | Q08117 | -0.30575  |
| 125500 | P03346 | Q5VZ72 | -0.6107   |
| 125501 | P03346 | Q09428 | -0.54129  |
| 125502 | P03346 | Q8N456 | -0.23977  |
| 125503 | P03346 | Q8IY33 | -0.22742  |
| 125504 | P03346 | P09228 | -0.6083   |
| 125505 | P03346 | O43559 | -0.36859  |
| 125506 | P03346 | P20231 | -1.0507   |
| 125507 | P03346 | P11117 | -0.56755  |
| 125508 | P03346 | Q96RT6 | -0.39732  |
| 125509 | P03346 | P49023 | -0.19775  |
| 125510 | P03346 | Q13326 | -0.31309  |
| 125511 | P03346 | Q94880 | -0.23078  |
| 125512 | P03346 | Q9P2N2 | -0.25803  |
| 125513 | P03346 | Q8TER0 | -0.55292  |
| 125514 | P03346 | O43903 | -0.21967  |
| 125515 | P03346 | Q13188 | -0.23003  |
| 125516 | P03346 | P03971 | -0.36234  |
| 125517 | P03346 | O75071 | -0.22553  |
| 125518 | P03346 | Q7Z5G4 | -0.19656  |
| 125519 | P03346 | P61018 | -0.66334  |
| 125520 | P03346 | Q9BT73 | -0.21863  |
| 125521 | P03346 | Q9Y5B8 | -0.4911   |
| 125522 | P03346 | Q6ZW33 | -0.18964  |
| 125523 | P03346 | Q86VV8 | -0.1615   |
| 125524 | P03346 | Q96AX2 | -0.49098  |
| 125525 | P03346 | Q8NFO5 | -0.67543  |
| 125526 | P03346 | A8MVX0 | -0.29319  |
| 125527 | P03346 | Q9GZP9 | -0.13515  |
| 125528 | P03346 | Q8NDB6 | -0.40736  |
| 125529 | P03346 | Q9UPN6 | -0.22498  |
| 125530 | P03346 | Q8N465 | -0.22545  |
| 125531 | P03346 | Q5J8M3 | -0.46972  |
| 125532 | P03346 | P25024 | -0.94031  |
| 125533 | P03346 | Q5QFB9 | -0.63608  |
| 125534 | P03346 | P21145 | -0.29974  |
| 125535 | P03346 | Q8WTQ4 | -0.13717  |
| 125536 | P03346 | Q8N1V8 | -0.10329  |
| 125537 | P03346 | Q9P2X7 | -0.013652 |
| 125538 | P03346 | Q7L3V2 | -0.20886  |
| 125539 | P03346 | Q9BXD5 | -0.055975 |
| 125540 | P03346 | O15335 | -0.57468  |
| 125541 | P03346 | O75715 | -0.86197  |
| 125542 | P03346 | Q9Y2P5 | -0.72293  |
| 125543 | P03346 | Q9UN88 | -0.69527  |
| 125544 | P03346 | Q8N9S9 | -0.14435  |
| 125545 | P03346 | Q99735 | -0.51902  |
| 125546 | P03346 | P55082 | -0.65219  |
| 125547 | P03346 | Q8N2M4 | -0.50365  |
| 125548 | P03346 | Q6XLA1 | -0.2076   |
| 125549 | P03346 | Q17RM4 | -0.085912 |
| 125550 | P03346 | O95256 | -0.95316  |
| 125551 | P03346 | P04554 | -0.36699  |
| 125552 | P03346 | P0C2L3 | -0.50365  |

|        |        |        |           |
|--------|--------|--------|-----------|
| 125553 | P03346 | E9PKD4 | -0.17305  |
| 125554 | P03346 | Q9Y4D1 | -0.22624  |
| 125555 | P03346 | Q5T2N8 | -0.62025  |
| 125556 | P03346 | Q9NP86 | -0.22687  |
| 125557 | P03346 | Q19T08 | -0.88947  |
| 125558 | P03346 | P49585 | -0.20314  |
| 125559 | P03346 | P02776 | -0.59569  |
| 125560 | P03346 | Q8NH08 | -0.92763  |
| 125561 | P03346 | A4D0T2 | -0.50365  |
| 125562 | P03346 | Q2MJR0 | -0.26085  |
| 125563 | P03346 | Q9H228 | -0.88971  |
| 125564 | P03346 | Q8TAE6 | -0.094541 |
| 125565 | P03346 | Q86VI3 | -0.38988  |
| 125566 | P03346 | P18065 | -0.25546  |
| 125567 | P03346 | Q8N4V1 | -0.5086   |
| 125568 | P03346 | Q75356 | -0.25726  |
| 125569 | P03346 | Q5JST6 | -0.049538 |
| 125570 | P03346 | Q6UWR7 | -1.1451   |
| 125571 | P03346 | P06732 | -0.50139  |
| 125572 | P03346 | A6NFA1 | -0.50797  |
| 125573 | P03346 | P80419 | -0.58933  |
| 125574 | P03346 | P56696 | -0.62028  |
| 125575 | P03346 | A6NHS1 | -0.037512 |
| 125576 | P03346 | P07988 | -0.49008  |
| 125577 | P03346 | Q76KP1 | -0.41375  |
| 125578 | P03346 | P59551 | -0.82506  |
| 125579 | P03346 | P42679 | -0.28937  |
| 125580 | P03346 | Q6R6M4 | -0.24939  |
| 125581 | P03346 | Q13496 | -0.29857  |
| 125582 | P03346 | P22894 | -1.007    |
| 125583 | P03346 | Q9BWQ8 | -0.35372  |
| 125584 | P03346 | Q86V20 | -0.035705 |
| 125585 | P03346 | Q95954 | -0.14607  |
| 125586 | P03346 | Q96Q04 | -0.9537   |
| 125587 | P03346 | P02461 | -0.27629  |
| 125588 | P03346 | Q13905 | -0.2274   |
| 125589 | P03346 | Q9NYW6 | -0.80668  |
| 125590 | P03346 | Q12799 | -0.19434  |
| 125591 | P03346 | Q96P65 | -0.94113  |
| 125592 | P03346 | Q9H7F4 | -0.50365  |
| 125593 | P03346 | P36980 | -0.53519  |
| 125594 | P03346 | P21953 | -0.16907  |
| 125595 | P03346 | Q6ZSC3 | -0.40469  |
| 125596 | P03346 | A8MYX2 | -0.28789  |
| 125597 | P03346 | Q9BXJ2 | -0.40268  |
| 125598 | P03346 | A6ZKI3 | -0.057034 |
| 125599 | P03346 | Q9UGH3 | -0.45127  |
| 125600 | P03346 | Q15669 | -0.22677  |
| 125601 | P03346 | Q8N9U9 | -0.15485  |
| 125602 | P03346 | A6NHM9 | -0.42595  |
| 125603 | P03346 | Q8NDM7 | -0.053277 |
| 125604 | P03346 | Q15546 | -0.73687  |
| 125605 | P03346 | P78508 | -0.5239   |
| 125606 | P03346 | P0CG01 | -0.53519  |
| 125607 | P03346 | Q03721 | -0.55102  |
| 125608 | P03346 | Q16363 | -0.82918  |
| 125609 | P03346 | P46734 | -0.22769  |
| 125610 | P03346 | Q8IX94 | -0.39732  |
| 125611 | P03346 | D6RBQ6 | -0.36346  |
| 125612 | P03346 | Q8WUX1 | -0.69978  |
| 125613 | P03346 | Q71DI3 | -0.21383  |
| 125614 | P03346 | Q9Y397 | -0.40581  |
| 125615 | P03346 | Q9Y4A9 | -0.92763  |
| 125616 | P03346 | Q96GM1 | -0.64184  |
| 125617 | P03346 | O00755 | -0.36701  |
| 125618 | P03346 | A6Njq4 | -0.25339  |
| 125619 | P03346 | Q8TBP6 | -0.37103  |
| 125620 | P03346 | P46663 | -0.82667  |
| 125621 | P03346 | Q6ZTW0 | -0.18854  |
| 125622 | P03346 | Q9UPZ9 | -0.62792  |
| 125623 | P03346 | P22695 | -0.19132  |
| 125624 | P03346 | O60522 | -0.30886  |
| 125625 | P03346 | Q9UQB8 | -0.2274   |
| 125626 | P03346 | Q9HAW7 | -0.54653  |
| 125627 | P03346 | Q8WWZ7 | -0.76042  |
| 125628 | P03346 | Q96LR1 | -0.53519  |

|        |        |        |            |
|--------|--------|--------|------------|
| 125629 | P03346 | Q15464 | -0.40229   |
| 125630 | P03346 | P51164 | -0.63449   |
| 125631 | P03346 | Q8N5M9 | -0.63608   |
| 125632 | P03346 | A6NL99 | -0.47298   |
| 125633 | P03346 | Q8N535 | -0.084934  |
| 125634 | P03346 | Q5SW24 | -0.1177    |
| 125635 | P03346 | A0AUK8 | -0.080335  |
| 125636 | P03346 | Q86U38 | -0.11348   |
| 125637 | P03346 | Q5T699 | -0.24941   |
| 125638 | P03346 | Q9P289 | -0.22946   |
| 125639 | P03346 | Q9H579 | -0.19342   |
| 125640 | P03346 | Q8NGN1 | -0.92763   |
| 125641 | P03346 | A8MTB1 | -0.013652  |
| 125642 | P03346 | Q9H2P9 | -0.18803   |
| 125643 | P03346 | P01732 | -0.66418   |
| 125644 | P03346 | Q01415 | -0.4554    |
| 125645 | P03346 | Q6NSJ2 | -0.086193  |
| 125646 | P03346 | Q30167 | -0.56914   |
| 125647 | P03346 | P35542 | -0.49797   |
| 125648 | P03346 | Q9Y2G8 | -0.56268   |
| 125649 | P03346 | Q6PII3 | -0.0082648 |
| 125650 | P03346 | Q5T9S5 | -0.20771   |
| 125651 | P03346 | Q9BQJ4 | -0.51329   |
| 125652 | P03346 | Q8NEG0 | -0.11034   |
| 125653 | P03346 | P55283 | -0.86959   |
| 125654 | P03346 | Q6ZMC9 | -0.50365   |
| 125655 | P03346 | Q5SSQ6 | -0.19891   |
| 125656 | P03346 | Q13207 | -0.36499   |
| 125657 | P03346 | Q13423 | -0.6044    |
| 125658 | P03346 | Q9NYW3 | -0.77656   |
| 125659 | P03346 | P57796 | -0.44981   |
| 125660 | P03346 | P08559 | -0.22053   |
| 125661 | P03346 | Q86WA9 | -0.6543    |
| 125662 | P03346 | Q9NVR0 | -0.53519   |
| 125663 | P03346 | Q99259 | -0.22826   |
| 125664 | P03346 | Q8NGZ6 | -0.92763   |
| 125665 | P03346 | Q9BXA7 | -0.95208   |
| 125666 | P03346 | P00387 | -0.22567   |
| 125667 | P03346 | Q8WTR2 | -0.36226   |
| 125668 | P03346 | P48741 | -0.32249   |
| 125669 | P03346 | Q9UL26 | -0.28428   |
| 125670 | P03346 | Q96EK6 | -0.11489   |
| 125671 | P03346 | Q6NW34 | -0.50365   |
| 125672 | P03346 | Q96GQ5 | -0.50365   |
| 125673 | P03346 | Q9UNK9 | -0.1477    |
| 125674 | P03346 | A6NKX4 | -0.56402   |
| 125675 | P03346 | P21695 | -0.17376   |
| 125676 | P03346 | Q2VWP7 | -0.6719    |
| 125677 | P03346 | P01033 | -0.22607   |
| 125678 | P03346 | Q8NDD1 | -0.14134   |
| 125679 | P03346 | A1A4Y4 | -0.66148   |
| 125680 | P03346 | Q8NGH7 | -0.92763   |
| 125681 | P03346 | B7U540 | -0.76714   |
| 125682 | P03346 | Q8NHC4 | -0.92763   |
| 125683 | P03346 | Q8NFF5 | -0.37875   |
| 125684 | P03346 | Q8TD22 | -0.53637   |
| 125685 | P03346 | Q7Z469 | -0.36428   |
| 125686 | P03346 | Q9BZV3 | -0.6763    |
| 125687 | P03346 | Q6NUJ2 | -0.50365   |
| 125688 | P03346 | O75311 | -0.61689   |
| 125689 | P03346 | Q9H2M9 | -0.37548   |
| 125690 | P03346 | A8MV72 | -0.11104   |
| 125691 | P03346 | Q5JSL3 | -0.22714   |
| 125692 | P03346 | Q86WK7 | -0.66865   |
| 125693 | P03346 | Q15485 | -0.96326   |
| 125694 | P03346 | P33261 | -0.49129   |
| 125695 | P03346 | Q99983 | -0.6773    |
| 125696 | P03346 | O15172 | -0.11922   |
| 125697 | P03346 | P26441 | -0.20972   |
| 125698 | P03346 | Q5MY95 | -1.0453    |
| 125699 | P03346 | Q86YV6 | -0.88651   |
| 125700 | P03346 | Q2IOM5 | -0.61396   |
| 125701 | P03346 | Q9NYF3 | -0.037248  |
| 125702 | P03346 | P04553 | -0.36699   |
| 125703 | P03346 | Q8IYI0 | -0.067361  |
| 125704 | P03346 | Q8N7Z5 | -0.22741   |

|        |        |        |           |
|--------|--------|--------|-----------|
| 125705 | P03346 | O14657 | -0.22438  |
| 125706 | P03346 | Q9Y5A9 | -0.098895 |
| 125707 | P03346 | O43566 | -0.22758  |
| 125708 | P03346 | Q8N6Q3 | -0.24529  |
| 125709 | P03346 | Q4G0X9 | -0.22411  |
| 125710 | P03346 | P0C875 | -0.22593  |
| 125711 | P03346 | O75908 | -0.60305  |
| 125712 | P03346 | P27169 | -0.63222  |
| 125713 | P03346 | Q9BVV2 | -0.21443  |
| 125714 | P03346 | Q8N387 | -1.1264   |
| 125715 | P03346 | P08134 | -0.2269   |
| 125716 | P03346 | Q8N695 | -0.73284  |
| 125717 | P03346 | P28336 | -0.86477  |
| 125718 | P03346 | Q9HBY8 | -0.47803  |
| 125719 | P03346 | P50336 | -0.40693  |
| 125720 | P03346 | Q9UK85 | -0.78208  |
| 125721 | P03346 | A6NFY4 | -0.50365  |
| 125722 | P03346 | O75128 | -0.42583  |
| 125723 | P03346 | P43657 | -0.92894  |
| 125724 | P03346 | O95302 | -0.24827  |
| 125725 | P03346 | Q12766 | -0.22739  |
| 125726 | P03346 | Q14574 | -0.87978  |
| 125727 | P03346 | Q537H7 | -0.1423   |
| 125728 | P03346 | Q7L211 | -0.49089  |
| 125729 | P03346 | Q9BT88 | -0.23979  |
| 125730 | P03346 | Q8TAM6 | -0.22111  |
| 125731 | P03346 | P09341 | -1.0054   |
| 125732 | P03346 | Q96PL5 | -0.44291  |
| 125733 | P03346 | Q9UJ68 | -0.21195  |
| 125734 | P03346 | P14927 | -0.18842  |
| 125735 | P03346 | Q86SQ6 | -0.83878  |
| 125736 | P03346 | O96009 | -0.8864   |
| 125737 | P03346 | Q9H089 | -0.16209  |
| 125738 | P03346 | Q95460 | -1.1657   |
| 125739 | P03346 | P81172 | -0.3565   |
| 125740 | P03346 | Q8IVM7 | -0.013652 |
| 125741 | P03346 | Q96ME1 | -0.15486  |
| 125742 | P03346 | Q8NGJ5 | -0.92763  |
| 125743 | P03346 | P61565 | -0.35115  |
| 125744 | P03346 | Q641Q2 | -0.19277  |
| 125745 | P03346 | Q2HXU8 | -0.64878  |
| 125746 | P03346 | P30042 | -0.15949  |
| 125747 | P03346 | O94910 | -0.55035  |
| 125748 | P03346 | P61086 | -0.2024   |
| 125749 | P03346 | Q7Z3V4 | -0.22749  |
| 125750 | P03346 | P0C6E5 | -0.2482   |
| 125751 | P03346 | Q13470 | -0.5146   |
| 125752 | P03346 | P49327 | -0.6028   |
| 125753 | P03346 | O60721 | -0.39286  |
| 125754 | P03346 | P29466 | -0.2274   |
| 125755 | P03346 | P34998 | -0.51037  |
| 125756 | P03346 | Q9NXW2 | -0.54308  |
| 125757 | P03346 | Q9HBH0 | -0.71004  |
| 125758 | P03346 | O15119 | -0.41982  |
| 125759 | P03346 | Q9NVC3 | -0.52     |
| 125760 | P03346 | A1A5B4 | -0.70971  |
| 125761 | P03346 | Q96RU2 | -0.30571  |
| 125762 | P03346 | O60669 | -0.71411  |
| 125763 | P03346 | Q5VYX0 | -0.74531  |
| 125764 | P03346 | Q6PCT2 | -0.22433  |
| 125765 | P03346 | P15941 | -0.19066  |
| 125766 | P03346 | O60656 | -0.54062  |
| 125767 | P03346 | Q9NUB1 | -0.25036  |
| 125768 | P03346 | P36507 | -0.22757  |
| 125769 | P03346 | Q9Y5E1 | -0.87177  |
| 125770 | P03346 | Q13007 | -0.59752  |
| 125771 | P03346 | Q5HYN5 | -0.17276  |
| 125772 | P03346 | Q8NGF0 | -0.92763  |
| 125773 | P03346 | A5YM72 | -0.46519  |
| 125774 | P03346 | Q9UKX5 | -0.6377   |
| 125775 | P03346 | P17752 | -0.22729  |
| 125776 | P03346 | Q96DZ5 | -0.49022  |
| 125777 | P03346 | Q9NPY3 | -0.22756  |
| 125778 | P03346 | Q8N8A6 | -0.18458  |
| 125779 | P03346 | Q3SY17 | -0.36428  |
| 125780 | P03346 | Q8NE28 | -0.70167  |

|        |        |        |            |
|--------|--------|--------|------------|
| 125781 | P03346 | P06307 | -0.58401   |
| 125782 | P03346 | Q8NI17 | -0.35272   |
| 125783 | P03346 | P06681 | -1.1715    |
| 125784 | P03346 | O60760 | -0.22726   |
| 125785 | P03346 | P22607 | -0.30585   |
| 125786 | P03346 | Q6UXU0 | -0.53519   |
| 125787 | P03346 | Q8NGR2 | -0.92763   |
| 125788 | P03346 | P38606 | -0.44646   |
| 125789 | P03346 | O95861 | -0.22736   |
| 125790 | P03346 | Q9BRR6 | -0.57558   |
| 125791 | P03346 | Q96NR8 | -0.91905   |
| 125792 | P03346 | P05556 | -0.22741   |
| 125793 | P03346 | O94768 | -0.76446   |
| 125794 | P03346 | P23560 | -0.32503   |
| 125795 | P03346 | Q15642 | -0.52574   |
| 125796 | P03346 | Q2KHR3 | -0.30097   |
| 125797 | P03346 | Q8IVA1 | -0.2099    |
| 125798 | P03346 | Q8IYQ7 | -0.21791   |
| 125799 | P03346 | Q8TDI7 | -0.50365   |
| 125800 | P03346 | Q9BRK0 | -0.50365   |
| 125801 | P03346 | Q9H6S3 | -0.22741   |
| 125802 | P03346 | Q0VFX4 | -0.043473  |
| 125803 | P03346 | Q75845 | -0.67852   |
| 125804 | P03346 | Q9Y5L2 | -0.88413   |
| 125805 | P03346 | O60347 | -0.92582   |
| 125806 | P03346 | P63096 | -0.24558   |
| 125807 | P03346 | Q8WUJ3 | -0.22525   |
| 125808 | P03346 | P27701 | -0.23047   |
| 125809 | P03346 | Q12846 | -0.23      |
| 125810 | P03346 | P51692 | -0.2273    |
| 125811 | P03346 | Q8N335 | -0.17376   |
| 125812 | P03346 | O94826 | -0.22736   |
| 125813 | P03346 | Q5JWF2 | -0.52346   |
| 125814 | P03346 | Q8NH63 | -0.92763   |
| 125815 | P03346 | O00744 | -0.31429   |
| 125816 | P03346 | P13631 | -0.22857   |
| 125817 | P03346 | P57739 | -0.38535   |
| 125818 | P03346 | Q6UW02 | -0.7455    |
| 125819 | P03346 | Q30KQ5 | -0.52229   |
| 125820 | P03346 | P01031 | -0.70855   |
| 125821 | P03346 | Q9UGB7 | -0.20724   |
| 125822 | P03346 | Q58DX5 | -0.79753   |
| 125823 | P03346 | Q9BXS9 | -0.7052    |
| 125824 | P03346 | Q00888 | -0.54829   |
| 125825 | P03346 | Q8TEH3 | -0.38518   |
| 125826 | P03346 | P59797 | -0.0098517 |
| 125827 | P03346 | Q8TCH9 | -0.12905   |
| 125828 | P03346 | P0CE67 | -0.013652  |
| 125829 | P03346 | P86790 | -0.22763   |
| 125830 | P03346 | Q9H930 | -0.22739   |
| 125831 | P03346 | Q92838 | -0.73832   |
| 125832 | P03346 | P41235 | -0.23135   |
| 125833 | P03346 | P57057 | -0.42445   |
| 125834 | P03346 | O00187 | -0.70661   |
| 125835 | P03346 | Q8NGS4 | -0.92763   |
| 125836 | P03346 | Q969Z0 | -0.054325  |
| 125837 | P03346 | Q96E93 | -0.75684   |
| 125838 | P03346 | Q15477 | -0.22669   |
| 125839 | P03346 | Q2Y0W8 | -0.6757    |
| 125840 | P03346 | Q9BRR3 | -0.50365   |
| 125841 | P03346 | Q6PP77 | -0.65219   |
| 125842 | P03346 | P31151 | -0.22914   |
| 125843 | P03346 | Q9C0I4 | -0.50365   |
| 125844 | P03346 | Q9BXT4 | -0.22719   |
| 125845 | P03346 | Q8NEL0 | -0.14628   |
| 125846 | P03346 | Q8IZF7 | -1.0077    |
| 125847 | P03346 | P30273 | -0.51963   |
| 125848 | P03346 | Q9NZP2 | -0.92763   |
| 125849 | P03346 | Q6P5Q4 | -0.22646   |
| 125850 | P03346 | O43868 | -0.71803   |
| 125851 | P03346 | Q9HBX9 | -0.91712   |
| 125852 | P03346 | P58658 | -0.50492   |
| 125853 | P03346 | P63135 | -0.21826   |
| 125854 | P03346 | Q01650 | -0.49913   |
| 125855 | P03346 | B6SEH8 | -0.50365   |
| 125856 | P03346 | Q99999 | -0.51738   |

|        |        |        |           |
|--------|--------|--------|-----------|
| 125857 | P03346 | Q3LIE5 | -0.055825 |
| 125858 | P03346 | Q9H244 | -0.64997  |
| 125859 | P03346 | Q13445 | -0.18259  |
| 125860 | P03346 | P15509 | -1.2793   |
| 125861 | P03346 | Q9BZF2 | -0.3642   |
| 125862 | P03346 | Q8N8Q8 | -0.21092  |
| 125863 | P03346 | Q68CP4 | -0.51134  |
| 125864 | P03346 | Q8TET4 | -0.22719  |
| 125865 | P03346 | Q96SK2 | -0.50365  |
| 125866 | P03346 | Q9H239 | -0.99093  |
| 125867 | P03346 | Q5TIE3 | -0.53519  |
| 125868 | P03346 | Q8TBA6 | -0.33153  |
| 125869 | P03346 | Q8NAG6 | -0.22741  |
| 125870 | P03346 | A6NN79 | -0.50365  |
| 125871 | P03346 | Q12955 | -0.22741  |
| 125872 | P03346 | Q5SQ64 | -0.65219  |
| 125873 | P03346 | P48230 | -0.43945  |
| 125874 | P03346 | Q9BY21 | -0.89313  |
| 125875 | P03346 | Q8NG95 | -0.92763  |
| 125876 | P03346 | Q02153 | -0.50741  |
| 125877 | P03346 | Q5JTN6 | -0.22806  |
| 125878 | P03346 | P54762 | -0.55558  |
| 125879 | P03346 | P61221 | -0.2715   |
| 125880 | P03346 | Q16539 | -0.22741  |
| 125881 | P03346 | Q9H4G8 | -0.087966 |
| 125882 | P03346 | Q96AQ2 | -0.30782  |
| 125883 | P03346 | Q8TAL5 | -0.10363  |
| 125884 | P03346 | Q9UHI7 | -0.21441  |
| 125885 | P03346 | P18440 | -0.23571  |
| 125886 | P03346 | Q6ZUB1 | -0.50365  |
| 125887 | P03346 | A1L170 | -0.013652 |
| 125888 | P03346 | P08697 | -0.10996  |
| 125889 | P03346 | Q7L7V1 | -0.2251   |
| 125890 | P03346 | P46199 | -0.47698  |
| 125891 | P03346 | Q9ULL8 | -0.22713  |
| 125892 | P03346 | Q9H6X2 | -0.28581  |
| 125893 | P03346 | Q58G82 | -0.22514  |
| 125894 | P03346 | Q71037 | -0.35115  |
| 125895 | P03346 | O15231 | -0.20682  |
| 125896 | P03346 | Q8NB90 | -0.65309  |
| 125897 | P03346 | Q9P2J9 | -0.20549  |
| 125898 | P03346 | Q8NH42 | -0.92763  |
| 125899 | P03346 | Q8N7M0 | -0.092633 |
| 125900 | P03346 | Q9UHR6 | -0.032105 |
| 125901 | P03346 | Q10588 | -0.69763  |
| 125902 | P03346 | Q9GZQ6 | -0.91739  |
| 125903 | P03346 | Q96J88 | -0.25267  |
| 125904 | P03346 | Q8WW34 | -0.50365  |
| 125905 | P03346 | Q5TF58 | -0.14092  |
| 125906 | P03346 | Q9Y4F5 | -0.22307  |
| 125907 | P03346 | Q9UPI3 | -0.58887  |
| 125908 | P03346 | P58550 | -0.61316  |
| 125909 | P03346 | P06756 | -0.22746  |
| 125910 | P03346 | Q24JQ0 | -0.50365  |
| 125911 | P03346 | Q3C1V9 | -0.15629  |
| 125912 | P03346 | O43822 | -0.22737  |
| 125913 | P03346 | Q8N8E1 | -0.038754 |
| 125914 | P03346 | Q12791 | -0.50182  |
| 125915 | P03346 | Q9Y6L6 | -0.6534   |
| 125916 | P03346 | Q6PIY7 | -0.20575  |
| 125917 | P03346 | P13747 | -0.82455  |
| 125918 | P03346 | Q9UBC5 | -0.18939  |
| 125919 | P03346 | P36222 | -0.4169   |
| 125920 | P03346 | Q96JN2 | -0.38186  |
| 125921 | P03346 | Q5VTL7 | -0.53519  |
| 125922 | P03346 | Q96KK5 | -0.35085  |
| 125923 | P03346 | Q32MH5 | -0.077956 |
| 125924 | P03346 | A1L4Q6 | -0.33407  |
| 125925 | P03346 | Q1W209 | -0.013652 |
| 125926 | P03346 | P07510 | -0.79952  |
| 125927 | P03346 | Q9Y6E2 | -0.1983   |
| 125928 | P03346 | P05814 | -0.52009  |
| 125929 | P03346 | Q8NCS4 | -0.50365  |
| 125930 | P03346 | A1L1A6 | -0.50365  |
| 125931 | P03346 | Q5BJD5 | -0.50365  |
| 125932 | P03346 | Q86W67 | -0.1491   |

|        |        |         |           |
|--------|--------|---------|-----------|
| 125933 | P03346 | O14520  | -0.39498  |
| 125934 | P03346 | Q8IUUX4 | -0.8883   |
| 125935 | P03346 | Q3MHD2  | -0.083426 |
| 125936 | P03346 | Q9NV70  | -0.15163  |
| 125937 | P03346 | P01589  | -0.47708  |
| 125938 | P03346 | P0C626  | -0.91962  |
| 125939 | P03346 | P30485  | -0.76151  |
| 125940 | P03346 | A2RUG3  | -0.50365  |
| 125941 | P03346 | P43155  | -0.27183  |
| 125942 | P03346 | Q641Q3  | -0.53519  |
| 125943 | P03346 | A0PJZ3  | -0.51604  |
| 125944 | P03346 | O95236  | -0.72311  |
| 125945 | P03346 | O15439  | -0.794    |
| 125946 | P03346 | Q6ZUT1  | -0.013652 |
| 125947 | P03346 | A6NFE2  | -0.50365  |
| 125948 | P03346 | O95428  | -0.78019  |
| 125949 | P03346 | A6NJY4  | -0.50365  |
| 125950 | P03346 | P08910  | -0.34312  |
| 125951 | P03346 | Q9BV35  | -0.43961  |
| 125952 | P03346 | Q9C0B5  | -0.70787  |
| 125953 | P03346 | Q9H5K3  | -1.1024   |
| 125954 | P03346 | O43555  | -0.83571  |
| 125955 | P03346 | C9JCN9  | -0.22495  |
| 125956 | P03346 | Q53GA4  | -0.17348  |
| 125957 | P03346 | A1L453  | -1.0507   |
| 125958 | P03346 | Q9Y2H9  | -0.41916  |
| 125959 | P03346 | Q66K64  | -0.10166  |
| 125960 | P03346 | Q6ZW13  | -0.013652 |
| 125961 | P03346 | Q14213  | -0.75467  |
| 125962 | P03346 | Q6B0I6  | -0.21699  |
| 125963 | P03346 | Q14508  | -0.79569  |
| 125964 | P03346 | Q8IZU2  | -0.22744  |
| 125965 | P03346 | P13473  | -0.53436  |
| 125966 | P03346 | Q99972  | -0.60344  |
| 125967 | P03346 | Q9HBG7  | -0.60247  |
| 125968 | P03346 | Q5SNT6  | -0.19277  |
| 125969 | P03346 | P11229  | -0.62557  |
| 125970 | P03346 | O15529  | -1.0977   |
| 125971 | P03346 | O00469  | -0.53315  |
| 125972 | P03346 | O60262  | -0.33389  |
| 125973 | P03346 | Q01959  | -0.23299  |
| 125974 | P03346 | O95164  | -0.43133  |
| 125975 | P03346 | O14523  | -0.30782  |
| 125976 | P03346 | P98073  | -0.93645  |
| 125977 | P03346 | P37840  | -0.22536  |
| 125978 | P03346 | A6NDK9  | -0.12318  |
| 125979 | P03346 | Q9UBR2  | -0.60875  |
| 125980 | P03346 | Q9UBG3  | -0.23435  |
| 125981 | P03346 | Q9Y5H8  | -0.92414  |
| 125982 | P03346 | C9J202  | -0.19166  |
| 125983 | P03346 | Q8N6N3  | -0.10915  |
| 125984 | P03346 | Q2M3T9  | -0.52524  |
| 125985 | P03346 | P38484  | -0.7684   |
| 125986 | P03346 | P13765  | -0.74416  |
| 125987 | P03346 | Q6QHF9  | -0.27296  |
| 125988 | P03346 | Q6ZNW5  | -0.23212  |
| 125989 | P03346 | Q96NW4  | -0.22741  |
| 125990 | P03346 | C9JJH3  | -0.36346  |
| 125991 | P03346 | Q9HBU9  | -0.39933  |
| 125992 | P03346 | Q08174  | -0.74289  |
| 125993 | P03346 | Q9BVV8  | -0.31653  |
| 125994 | P03346 | O95786  | -0.2273   |
| 125995 | P03346 | O43187  | -0.22741  |
| 125996 | P03346 | A6NNN8  | -0.62013  |
| 125997 | P03346 | Q5I0G3  | -0.35129  |
| 125998 | P03346 | Q96CQ1  | -0.35302  |
| 125999 | P03346 | Q8N6K4  | -0.013652 |
| 126000 | P03346 | Q86UN2  | -0.30202  |
| 126001 | P03346 | Q9UGM3  | -0.22742  |
| 126002 | P03346 | Q9HCJ1  | -0.68888  |
| 126003 | P03346 | Q86UP2  | -0.66718  |
| 126004 | P03346 | Q68DH5  | -0.50365  |
| 126005 | P03346 | Q9Y233  | -0.3992   |
| 126006 | P03346 | Q6UWY5  | -0.53519  |
| 126007 | P03346 | A6NFX1  | -0.47711  |
| 126008 | P03346 | Q02388  | -0.37504  |

|        |        |        |           |
|--------|--------|--------|-----------|
| 126009 | P03346 | Q9UBK7 | -0.73524  |
| 126010 | P03346 | O14522 | -0.56413  |
| 126011 | P03346 | Q9NRD9 | -0.75476  |
| 126012 | P03346 | Q96QE4 | -0.3113   |
| 126013 | P03346 | O15460 | -0.39192  |
| 126014 | P03346 | Q8N976 | -0.2265   |
| 126015 | P03346 | Q9Y3B1 | -0.1696   |
| 126016 | P03346 | Q8IZD6 | -0.56402  |
| 126017 | P03346 | Q8N9L7 | -0.18168  |
| 126018 | P03346 | Q12884 | -0.40709  |
| 126019 | P03346 | P02729 | -0.45606  |
| 126020 | P03346 | P53609 | -0.23089  |
| 126021 | P03346 | Q07890 | -0.22741  |
| 126022 | P03346 | Q13061 | -0.51128  |
| 126023 | P03346 | Q8N6F8 | -0.18841  |
| 126024 | P03346 | P42357 | -0.22319  |
| 126025 | P03346 | Q9Y5H9 | -0.92414  |
| 126026 | P03346 | Q8TDD5 | -0.52911  |
| 126027 | P03346 | Q86V88 | -0.38507  |
| 126028 | P03346 | O43688 | -0.54258  |
| 126029 | P03346 | Q7Z3Z2 | -0.10124  |
| 126030 | P03346 | O15020 | -0.22754  |
| 126031 | P03346 | Q9UHQ9 | -0.60657  |
| 126032 | P03346 | Q8N9L1 | -0.2272   |
| 126033 | P03346 | A8MXK1 | -0.50365  |
| 126034 | P03346 | O95626 | -0.21553  |
| 126035 | P03346 | P38567 | -0.45052  |
| 126036 | P03346 | Q8NGE1 | -0.92763  |
| 126037 | P03346 | P20711 | -0.40184  |
| 126038 | P03346 | Q96BN8 | -0.15152  |
| 126039 | P03346 | Q643R3 | -0.59108  |
| 126040 | P03346 | Q4AE62 | -0.24414  |
| 126041 | P03346 | P02655 | -0.46044  |
| 126042 | P03346 | O14994 | -0.66913  |
| 126043 | P03346 | Q96JX3 | -0.43038  |
| 126044 | P03346 | Q8N5Y8 | -0.27876  |
| 126045 | P03346 | Q9UBP4 | -0.66129  |
| 126046 | P03346 | Q7Z7H5 | -0.60467  |
| 126047 | P03346 | Q96F85 | -0.25994  |
| 126048 | P03346 | Q6T310 | -0.22983  |
| 126049 | P03346 | Q3MIT2 | -0.1177   |
| 126050 | P03346 | Q5TYW2 | -0.22741  |
| 126051 | P03346 | A6NEQ2 | -0.013652 |
| 126052 | P03346 | Q53S33 | -0.3749   |
| 126053 | P03346 | Q6PIF6 | -0.57099  |
| 126054 | P03346 | Q6JBY9 | -0.084622 |
| 126055 | P03346 | Q9HCN6 | -0.22796  |
| 126056 | P03346 | Q8IY45 | -0.22332  |
| 126057 | P03346 | Q9UKP6 | -0.72378  |
| 126058 | P03346 | Q9BT22 | -0.59291  |
| 126059 | P03346 | Q8IVV2 | -0.23154  |
| 126060 | P03346 | Q13523 | -0.22741  |
| 126061 | P03346 | Q2TB90 | -0.2248   |
| 126062 | P03346 | Q9BTT6 | -0.23156  |
| 126063 | P03346 | P05156 | -1.1814   |
| 126064 | P03346 | Q6Q4G3 | -0.86427  |
| 126065 | P03346 | A6NMP4 | -0.1781   |
| 126066 | P03346 | Q96GS6 | -0.53766  |
| 126067 | P03346 | Q9UIQ6 | -1.0855   |
| 126068 | P03346 | Q9P1U1 | -0.51414  |
| 126069 | P03346 | Q96N11 | -0.10093  |
| 126070 | P03346 | Q9H9K5 | -0.37013  |
| 126071 | P03346 | Q6P474 | -0.23414  |
| 126072 | P03346 | P17301 | -0.22741  |
| 126073 | P03346 | P37173 | -0.32514  |
| 126074 | P03346 | Q8NGJ3 | -0.92763  |
| 126075 | P03346 | Q15116 | -0.38497  |
| 126076 | P03346 | Q9UHL4 | -0.72787  |
| 126077 | P03346 | Q9UHG2 | -0.58724  |
| 126078 | P03346 | O76081 | -0.22758  |
| 126079 | P03346 | Q9C0D5 | -0.24707  |
| 126080 | P03346 | Q8N6F1 | -0.20428  |
| 126081 | P03346 | Q14116 | -0.2793   |
| 126082 | P03346 | P29459 | -0.13767  |
| 126083 | P03346 | B2RU33 | -0.2274   |
| 126084 | P03346 | Q7Z6P3 | -0.79023  |



|        |        |        |           |
|--------|--------|--------|-----------|
| 126085 | P03346 | O95715 | -0.83765  |
| 126086 | P03346 | Q13976 | -0.29325  |
| 126087 | P03346 | Q4KMZ8 | -0.65219  |
| 126088 | P03346 | O75897 | -0.24047  |
| 126089 | P03346 | Q147U7 | -0.50365  |
| 126090 | P03346 | Q685J3 | -0.36197  |
| 126091 | P03346 | A6NC86 | -0.52569  |
| 126092 | P03346 | Q9Y4W6 | -0.46869  |
| 126093 | P03346 | P48723 | -0.52055  |
| 126094 | P03346 | A6NC62 | -0.072954 |
| 126095 | P03346 | Q7L8S5 | -0.11634  |
| 126096 | P03346 | A6NFT4 | -0.23943  |
| 126097 | P03346 | Q6IF63 | -0.92763  |
| 126098 | P03346 | P14416 | -0.25313  |
| 126099 | P03346 | Q6ZMG9 | -0.19865  |
| 126100 | P03346 | Q94779 | -0.27497  |
| 126101 | P03346 | P57082 | -0.28966  |
| 126102 | P03346 | P22897 | -0.78942  |
| 126103 | P03346 | Q92839 | -0.7156   |
| 126104 | P03346 | Q96S86 | -0.72027  |
| 126105 | P03346 | P06734 | -1.0982   |
| 126106 | P03346 | Q5T292 | -0.50365  |
| 126107 | P03346 | Q60861 | -0.22741  |
| 126108 | P03346 | Q9C0A6 | -0.22609  |
| 126109 | P03346 | Q86T96 | -0.3683   |
| 126110 | P03346 | Q8TAD2 | -0.71818  |
| 126111 | P03346 | P16520 | -0.22164  |
| 126112 | P03346 | Q9GIY3 | -0.56914  |
| 126113 | P03346 | Q96HP8 | -0.50365  |
| 126114 | P03346 | Q9H1Z9 | -0.50365  |
| 126115 | P03346 | P04118 | -0.52469  |
| 126116 | P03346 | P0C7L1 | -0.50866  |
| 126117 | P03346 | P55107 | -0.53877  |
| 126118 | P03346 | P25929 | -0.68112  |
| 126119 | P03346 | A1A5C7 | -0.5535   |
| 126120 | P03346 | Q8WVD5 | -0.22759  |
| 126121 | P03346 | Q9GZX7 | -0.72858  |
| 126122 | P03346 | P04083 | -0.15988  |
| 126123 | P03346 | E5RJ46 | -0.013652 |
| 126124 | P03346 | Q08828 | -0.54595  |
| 126125 | P03346 | Q9H0C1 | -0.30279  |
| 126126 | P03346 | P55317 | -0.31352  |
| 126127 | P03346 | Q6UXB8 | -1.0116   |
| 126128 | P03346 | Q9Y5Y4 | -1.0589   |
| 126129 | P03346 | Q9H223 | -0.23156  |
| 126130 | P03346 | Q9NQG6 | -0.20456  |
| 126131 | P03346 | Q9Y6L7 | -1.0649   |
| 126132 | P03346 | P47884 | -1.0188   |
| 126133 | P03346 | O76082 | -0.23672  |
| 126134 | P03346 | Q9P1A2 | -0.20241  |
| 126135 | P03346 | Q7L1T6 | -0.30248  |
| 126136 | P03346 | Q9H2B4 | -0.59654  |
| 126137 | P03346 | O60880 | -0.22741  |
| 126138 | P03346 | D3W0D1 | -0.25142  |
| 126139 | P03346 | Q5I7T1 | -0.61829  |
| 126140 | P03346 | P42684 | -0.37998  |
| 126141 | P03346 | P49821 | -0.22219  |
| 126142 | P03346 | Q8NHB7 | -0.92763  |
| 126143 | P03346 | Q8WXX4 | -0.22747  |
| 126144 | P03346 | Q8NGX1 | -0.92763  |
| 126145 | P03346 | P07686 | -0.27892  |
| 126146 | P03346 | Q5TC04 | -0.14787  |
| 126147 | P03346 | P21731 | -0.49743  |
| 126148 | P03346 | Q86VH4 | -0.50365  |
| 126149 | P03346 | Q8NGF3 | -0.92763  |
| 126150 | P03346 | P39086 | -0.52543  |
| 126151 | P03346 | P57682 | -0.22611  |
| 126152 | P03346 | P51159 | -0.23531  |
| 126153 | P03346 | P05129 | -0.38201  |
| 126154 | P03346 | O75129 | -0.50365  |
| 126155 | P03346 | O60229 | -0.78546  |
| 126156 | P03346 | Q9H015 | -0.30455  |
| 126157 | P03346 | Q6ZMH5 | -0.60695  |
| 126158 | P03346 | Q96CT2 | -0.16564  |
| 126159 | P03346 | Q9NPH3 | -1.4286   |
| 126160 | P03346 | Q93100 | -0.16328  |

|        |        |        |            |
|--------|--------|--------|------------|
| 126161 | P03346 | Q9NZU1 | -0.78025   |
| 126162 | P03346 | A6NEQ9 | -0.013652  |
| 126163 | P03346 | Q6UWM7 | -0.59467   |
| 126164 | P03346 | Q5H8A4 | -0.70012   |
| 126165 | P03346 | O15442 | -0.14259   |
| 126166 | P03346 | P10632 | -0.52876   |
| 126167 | P03346 | Q9Y231 | -0.31553   |
| 126168 | P03346 | P10145 | -0.4914    |
| 126169 | P03346 | Q9C0K7 | -0.2282    |
| 126170 | P03346 | Q9Y3B4 | -0.22627   |
| 126171 | P03346 | Q8NCG5 | -0.47605   |
| 126172 | P03346 | P20020 | -0.54643   |
| 126173 | P03346 | Q9H694 | -0.22195   |
| 126174 | P03346 | P05154 | -0.44817   |
| 126175 | P03346 | Q15415 | -0.22863   |
| 126176 | P03346 | P80511 | -0.2279    |
| 126177 | P03346 | Q92835 | -0.22741   |
| 126178 | P03346 | P07478 | -0.7149    |
| 126179 | P03346 | P46736 | -0.24757   |
| 126180 | P03346 | P43630 | -0.79087   |
| 126181 | P03346 | Q6ZRZ4 | -0.53519   |
| 126182 | P03346 | P00450 | -0.75763   |
| 126183 | P03346 | Q5QP82 | -0.22734   |
| 126184 | P03346 | Q6PCB7 | -0.51812   |
| 126185 | P03346 | Q68CR7 | -0.50365   |
| 126186 | P03346 | P63211 | -0.51408   |
| 126187 | P03346 | P49590 | -0.19588   |
| 126188 | P03346 | Q96HP0 | -0.19423   |
| 126189 | P03346 | Q8IUF1 | -0.48833   |
| 126190 | P03346 | Q86UE8 | -0.22741   |
| 126191 | P03346 | Q9BQ08 | -0.42147   |
| 126192 | P03346 | P59796 | -0.82728   |
| 126193 | P03346 | Q8N4P2 | -0.13831   |
| 126194 | P03346 | Q8IYJ0 | -0.50365   |
| 126195 | P03346 | A2VCL2 | -0.22548   |
| 126196 | P03346 | P06889 | -0.80078   |
| 126197 | P03346 | Q8N6H7 | -0.19034   |
| 126198 | P03346 | Q9NX09 | -0.13921   |
| 126199 | P03346 | Q8NGX3 | -0.92763   |
| 126200 | P03346 | O75838 | -0.22839   |
| 126201 | P03346 | Q6UWP2 | -1.1855    |
| 126202 | P03346 | P26010 | -0.90013   |
| 126203 | P03346 | Q5SRR4 | -0.53519   |
| 126204 | P03346 | P62195 | -0.61743   |
| 126205 | P03346 | P15918 | -0.22033   |
| 126206 | P03346 | Q96M19 | -0.50365   |
| 126207 | P03346 | Q86YZ3 | -0.33875   |
| 126208 | P03346 | P10092 | -0.70125   |
| 126209 | P03346 | A5D8W1 | -0.18442   |
| 126210 | P03346 | P26045 | -0.22751   |
| 126211 | P03346 | Q8NEZ3 | -0.22724   |
| 126212 | P03346 | Q5T5A4 | -0.090655  |
| 126213 | P03346 | O43520 | -0.45554   |
| 126214 | P03346 | Q6UWW9 | -0.50365   |
| 126215 | P03346 | Q13535 | -0.56746   |
| 126216 | P03346 | O60234 | -0.28979   |
| 126217 | P03346 | Q5BVD1 | -0.63608   |
| 126218 | P03346 | P06311 | -0.80078   |
| 126219 | P03346 | Q9Y653 | -1.2332    |
| 126220 | P03346 | Q9NVL1 | -0.23315   |
| 126221 | P03346 | Q96S97 | -0.50365   |
| 126222 | P03346 | Q4ZG55 | -0.50365   |
| 126223 | P03346 | Q9UBP8 | -0.12074   |
| 126224 | P03346 | A6NFM0 | -0.50365   |
| 126225 | P03346 | Q969F8 | -0.57125   |
| 126226 | P03346 | Q5DT21 | -0.22705   |
| 126227 | P03346 | Q9Y6E0 | -0.22954   |
| 126228 | P03346 | Q96S96 | -0.21641   |
| 126229 | P03346 | P0DMB2 | -0.023782  |
| 126230 | P03346 | Q96MT0 | -0.25598   |
| 126231 | P03346 | Q8NER5 | -0.82212   |
| 126232 | P03346 | Q6IA69 | -0.26912   |
| 126233 | P03346 | P00736 | -1.1411    |
| 126234 | P03346 | Q6NVV0 | -0.0015201 |
| 126235 | P03346 | Q9UQ03 | -0.22741   |
| 126236 | P03346 | Q9BZW8 | -0.25756   |

|        |        |        |           |
|--------|--------|--------|-----------|
| 126237 | P03346 | Q8WXB1 | -0.4428   |
| 126238 | P03346 | O15033 | -0.34831  |
| 126239 | P03346 | A6NNM3 | -0.2274   |
| 126240 | P03346 | Q96S53 | -0.5442   |
| 126241 | P03346 | Q8TBP0 | -0.92582  |
| 126242 | P03346 | P07288 | -0.57497  |
| 126243 | P03346 | Q6ZQW0 | -0.22271  |
| 126244 | P03346 | Q86VZ4 | -0.50365  |
| 126245 | P03346 | Q99928 | -0.53067  |
| 126246 | P03346 | O15457 | -0.17645  |
| 126247 | P03346 | Q5VSY0 | -0.063966 |
| 126248 | P03346 | Q6NXP0 | -0.29658  |
| 126249 | P03346 | Q9UBC7 | -0.44406  |
| 126250 | P03346 | P28330 | -0.24662  |
| 126251 | P03346 | Q8IUY3 | -0.50365  |
| 126252 | P03346 | Q86XJ0 | -0.50365  |
| 126253 | P03346 | Q6UXR6 | -0.53519  |
| 126254 | P03346 | Q5BKX6 | -0.47711  |
| 126255 | P03346 | Q6AZZ1 | -0.22764  |
| 126256 | P03346 | Q13639 | -0.78336  |
| 126257 | P03346 | Q86T90 | -0.22491  |
| 126258 | P03346 | P32927 | -0.3959   |
| 126259 | P03346 | C9JL84 | -0.53519  |
| 126260 | P03346 | P57727 | -1.0667   |
| 126261 | P03346 | P20138 | -1.0348   |
| 126262 | P03346 | Q8TB37 | -0.49198  |
| 126263 | P03346 | Q4KN68 | -0.13812  |
| 126264 | P03346 | P01909 | -0.65195  |
| 126265 | P03346 | A8K979 | -0.31094  |
| 126266 | P03346 | O75354 | -0.89185  |
| 126267 | P03346 | P18405 | -0.32122  |
| 126268 | P03346 | P05108 | -0.27056  |
| 126269 | P03346 | A4D0S4 | -0.82346  |
| 126270 | P03346 | Q6P1J6 | -0.57872  |
| 126271 | P03346 | Q9H5I5 | -0.61997  |
| 126272 | P03346 | Q4VC12 | -0.22541  |
| 126273 | P03346 | Q5VW38 | -0.50365  |
| 126274 | P03346 | Q9UHA2 | -0.064688 |
| 126275 | P03346 | P30536 | -0.26102  |
| 126276 | P03346 | P18283 | -0.31336  |
| 126277 | P03346 | P16298 | -0.18917  |
| 126278 | P03346 | Q96AK3 | -0.95295  |
| 126279 | P03346 | Q6N075 | -0.47711  |
| 126280 | P03346 | Q6PEY2 | -0.34967  |
| 126281 | P03346 | Q3KP44 | -0.2274   |
| 126282 | P03346 | Q5JRV8 | -0.50365  |
| 126283 | P03346 | P56378 | -0.22131  |
| 126284 | P03346 | O43511 | -0.6274   |
| 126285 | P03346 | A6NGA9 | -0.50365  |
| 126286 | P03346 | P31371 | -0.50594  |
| 126287 | P03346 | Q8J025 | -0.71263  |
| 126288 | P03346 | P23219 | -0.2472   |
| 126289 | P03346 | Q4VXA5 | -0.50389  |
| 126290 | P03346 | A8MWX3 | -0.22561  |
| 126291 | P03346 | Q8ND30 | -0.22714  |
| 126292 | P03346 | Q8NGF7 | -0.92763  |
| 126293 | P03346 | Q92963 | -0.34298  |
| 126294 | P03346 | Q6PKX4 | -0.22061  |
| 126295 | P03346 | P11801 | -0.49955  |
| 126296 | P03346 | P48201 | -0.45542  |
| 126297 | P03346 | P51888 | -0.67889  |
| 126298 | P03346 | P51864 | -0.33716  |
| 126299 | P03346 | P14735 | -0.25051  |
| 126300 | P03346 | Q15296 | -0.34314  |
| 126301 | P03346 | Q5T036 | -0.1      |
| 126302 | P03346 | P01860 | -0.75232  |
| 126303 | P03346 | Q1HG44 | -0.42539  |
| 126304 | P03346 | Q99719 | -0.22705  |
| 126305 | P03346 | Q5VXD3 | -0.16414  |
| 126306 | P03346 | Q5BKU9 | -0.14819  |
| 126307 | P03346 | Q68DN1 | -0.078889 |
| 126308 | P03346 | Q9Y2Y6 | -0.51601  |
| 126309 | P03346 | Q9HCN4 | -0.59278  |
| 126310 | P03346 | Q9Y2A9 | -0.43462  |
| 126311 | P03346 | Q9H4L4 | -0.20715  |
| 126312 | P03346 | O95214 | -0.50365  |

|        |        |        |            |
|--------|--------|--------|------------|
| 126313 | P03346 | Q9H210 | -0.92763   |
| 126314 | P03346 | P78556 | -0.95725   |
| 126315 | P03346 | Q68CL5 | -0.18984   |
| 126316 | P03346 | Q9NV35 | -0.2143    |
| 126317 | P03346 | Q8WUM9 | -0.8762    |
| 126318 | P03346 | Q96G42 | -0.20341   |
| 126319 | P03346 | Q6ZVN7 | -0.17885   |
| 126320 | P03346 | Q96DT5 | -0.48626   |
| 126321 | P03346 | Q9C0I1 | -0.22599   |
| 126322 | P03346 | Q8WUF8 | -0.55254   |
| 126323 | P03346 | O94923 | -0.23718   |
| 126324 | P03346 | Q16663 | -1.0373    |
| 126325 | P03346 | Q9BRC7 | -0.2904    |
| 126326 | P03346 | Q9BW30 | -0.1122    |
| 126327 | P03346 | P01891 | -0.51191   |
| 126328 | P03346 | Q8N2K0 | -0.48278   |
| 126329 | P03346 | O94876 | -0.50365   |
| 126330 | P03346 | Q8TDU6 | -0.96376   |
| 126331 | P03346 | P43490 | -0.11549   |
| 126332 | P03346 | P01616 | -0.75616   |
| 126333 | P03346 | Q8N6S5 | -0.50365   |
| 126334 | P03346 | P58166 | -0.45336   |
| 126335 | P03346 | Q8WZA1 | -0.42174   |
| 126336 | P03346 | Q5UCC4 | -1.004     |
| 126337 | P03346 | Q9P0N5 | -0.39496   |
| 126338 | P03346 | Q96FK6 | -0.22741   |
| 126339 | P03346 | Q9P107 | -0.25392   |
| 126340 | P03346 | P15538 | -0.33947   |
| 126341 | P03346 | Q6PJF5 | -0.64459   |
| 126342 | P03346 | Q9Y5U5 | -1.2107    |
| 126343 | P03346 | Q4G0I0 | -0.50365   |
| 126344 | P03346 | P07093 | -0.27731   |
| 126345 | P03346 | Q9BQD7 | -0.50365   |
| 126346 | P03346 | P48357 | -0.72797   |
| 126347 | P03346 | Q7L4S7 | -0.50365   |
| 126348 | P03346 | Q6ZMR5 | -1.4956    |
| 126349 | P03346 | P0CW18 | -0.56917   |
| 126350 | P03346 | O43916 | -0.3792    |
| 126351 | P03346 | Q6ZWI9 | -0.22768   |
| 126352 | P03346 | Q9Y6A1 | -0.69441   |
| 126353 | P03346 | Q9Y3X0 | -0.030099  |
| 126354 | P03346 | P59541 | -0.84404   |
| 126355 | P03346 | O43294 | -0.19752   |
| 126356 | P03346 | Q13075 | -0.22737   |
| 126357 | P03346 | Q52LW3 | -0.58798   |
| 126358 | P03346 | Q6ZMS4 | -0.24849   |
| 126359 | P03346 | Q8IYP9 | -0.59087   |
| 126360 | P03346 | Q9NY72 | -0.47037   |
| 126361 | P03346 | Q9NRD0 | -0.22725   |
| 126362 | P03346 | P10911 | -0.22732   |
| 126363 | P03346 | Q9HB20 | -0.22737   |
| 126364 | P03346 | Q9UPQ3 | -1.0049    |
| 126365 | P03346 | O94762 | -0.22715   |
| 126366 | P03346 | Q99442 | -0.43889   |
| 126367 | P03346 | Q16674 | -0.60749   |
| 126368 | P03346 | Q12947 | -0.31087   |
| 126369 | P03346 | Q9H1C3 | -0.54138   |
| 126370 | P03346 | Q68DE3 | -0.22708   |
| 126371 | P03346 | O76039 | -0.30422   |
| 126372 | P03346 | P08842 | -0.51422   |
| 126373 | P03346 | Q9Y279 | -0.22741   |
| 126374 | P03346 | Q7Z7G0 | -0.70989   |
| 126375 | P03346 | P23471 | -0.96675   |
| 126376 | P03346 | P49019 | -1.0551    |
| 126377 | P03346 | Q9GZN0 | -0.88508   |
| 126378 | P03346 | Q6UX68 | -0.50365   |
| 126379 | P03346 | Q9H6B1 | -0.0060445 |
| 126380 | P03346 | Q8WWF1 | -0.53519   |
| 126381 | P03346 | Q86VE9 | -0.54564   |
| 126382 | P03346 | O75815 | -0.51986   |
| 126383 | P03346 | Q4W5P6 | -0.53519   |
| 126384 | P03346 | Q8NAE3 | -0.030781  |
| 126385 | P03346 | Q8TC99 | -0.23737   |
| 126386 | P03346 | Q9NNZ6 | -0.36221   |
| 126387 | P03346 | P27482 | -0.22725   |
| 126388 | P03346 | Q96R45 | -0.92763   |

|        |        |        |           |
|--------|--------|--------|-----------|
| 126389 | P03346 | Q9BXP8 | -1.1172   |
| 126390 | P03346 | Q712K3 | -0.41147  |
| 126391 | P03346 | Q15345 | -0.20977  |
| 126392 | P03346 | Q9C030 | -0.22741  |
| 126393 | P03346 | A8MXB1 | -0.69022  |
| 126394 | P03346 | Q9BT76 | -0.66883  |
| 126395 | P03346 | P03950 | -0.19457  |
| 126396 | P03346 | Q9WJR5 | -0.21714  |
| 126397 | P03346 | Q9Y4B5 | -0.22164  |
| 126398 | P03346 | Q6S545 | -0.22741  |
| 126399 | P03346 | Q8NDG6 | -0.26697  |
| 126400 | P03346 | Q96SQ9 | -0.59417  |
| 126401 | P03346 | Q96LB8 | -0.65002  |
| 126402 | P03346 | Q9H6R0 | -0.22603  |
| 126403 | P03346 | P54849 | -0.81074  |
| 126404 | P03346 | Q17RQ9 | -0.50365  |
| 126405 | P03346 | Q8NGV6 | -0.92763  |
| 126406 | P03346 | Q96PH1 | -0.60709  |
| 126407 | P03346 | Q5VWT5 | -0.072307 |
| 126408 | P03346 | Q9BXA5 | -0.89313  |
| 126409 | P03346 | Q8N9S7 | -0.50365  |
| 126410 | P03346 | O00746 | -0.4648   |
| 126411 | P03346 | Q9Y320 | -0.33458  |
| 126412 | P03346 | Q7Z6G8 | -0.22743  |
| 126413 | P03346 | Q9UP95 | -0.76183  |
| 126414 | P03346 | Q05940 | -0.48401  |
| 126415 | P03346 | Q8IXQ8 | -0.22679  |
| 126416 | P03346 | P51811 | -0.18879  |
| 126417 | P03346 | Q96N67 | -0.39714  |
| 126418 | P03346 | O00141 | -0.43355  |
| 126419 | P03346 | Q9H8S5 | -0.16219  |
| 126420 | P03346 | Q9HAB3 | -0.73195  |
| 126421 | P03346 | Q6U841 | -0.58243  |
| 126422 | P03346 | Q15413 | -0.5057   |
| 126423 | P03346 | P02765 | -0.51791  |
| 126424 | P03346 | O14626 | -0.92894  |
| 126425 | P03346 | P14314 | -0.28998  |
| 126426 | P03346 | Q8WXX1 | -0.22742  |
| 126427 | P03346 | P60201 | -0.28354  |
| 126428 | P03346 | Q92604 | -0.37714  |
| 126429 | P03346 | Q7Z3S7 | -0.63606  |
| 126430 | P03346 | Q8IYS8 | -0.031302 |
| 126431 | P03346 | A6NK59 | -0.2274   |
| 126432 | P03346 | Q9HBV2 | -0.50365  |
| 126433 | P03346 | P30531 | -0.42279  |
| 126434 | P03346 | A8MTB9 | -0.50365  |
| 126435 | P03346 | Q8NHG7 | -0.097862 |
| 126436 | P03346 | Q14957 | -0.49671  |
| 126437 | P03346 | P51689 | -0.26229  |
| 126438 | P03346 | Q94856 | -0.71017  |
| 126439 | P03346 | Q9UJM8 | -0.49175  |
| 126440 | P03346 | Q43237 | -0.22127  |
| 126441 | P03346 | Q5VT98 | -0.17702  |
| 126442 | P03346 | Q8WXF0 | -0.22559  |
| 126443 | P03346 | Q2I0M4 | -0.22788  |
| 126444 | P03346 | P28827 | -0.37498  |
| 126445 | P03346 | Q99795 | -0.81273  |
| 126446 | P03346 | Q7RTS6 | -0.50365  |
| 126447 | P03346 | Q5HYM0 | -0.14627  |
| 126448 | P03346 | Q8IWZ4 | -0.30279  |
| 126449 | P03346 | Q8N819 | -0.21594  |
| 126450 | P03346 | Q96S19 | -0.10048  |
| 126451 | P03346 | Q70CQ3 | -0.69165  |
| 126452 | P03346 | Q96QD8 | -0.7812   |
| 126453 | P03346 | O43603 | -0.94374  |
| 126454 | P03346 | P80075 | -0.94723  |
| 126455 | P03346 | Q9NZP0 | -0.92763  |
| 126456 | P03346 | Q99523 | -0.23267  |
| 126457 | P03346 | Q9UKU7 | -0.2355   |
| 126458 | P03346 | C9JI98 | -0.50365  |
| 126459 | P03346 | Q9H857 | -0.1315   |
| 126460 | P03346 | Q9H7F0 | -0.82137  |
| 126461 | P03346 | H0UI37 | -0.17082  |
| 126462 | P03346 | Q9H6K4 | -0.066215 |
| 126463 | P03346 | Q86UW1 | -0.67027  |
| 126464 | P03346 | O76061 | -0.47301  |

|        |        |        |           |
|--------|--------|--------|-----------|
| 126465 | P03346 | O14545 | -0.28453  |
| 126466 | P03346 | O75911 | -1.1515   |
| 126467 | P03346 | Q9NPH0 | -0.47169  |
| 126468 | P03346 | P34972 | -0.98182  |
| 126469 | P03346 | Q8IZ13 | -0.16869  |
| 126470 | P03346 | A8MVG2 | -0.50365  |
| 126471 | P03346 | Q8IZY2 | -0.67612  |
| 126472 | P03346 | Q96N28 | -0.15714  |
| 126473 | P03346 | O43683 | -0.22741  |
| 126474 | P03346 | Q92777 | -0.28749  |
| 126475 | P03346 | Q8IWB9 | -0.65901  |
| 126476 | P03346 | Q6UWD8 | -0.50365  |
| 126477 | P03346 | Q99640 | -0.22741  |
| 126478 | P03346 | O43854 | -0.89385  |
| 126479 | P03346 | Q8TEQ8 | -0.65673  |
| 126480 | P03346 | P62805 | -0.18247  |
| 126481 | P03346 | Q9H221 | -0.54128  |
| 126482 | P03346 | P04209 | -0.80078  |
| 126483 | P03346 | Q7Z434 | -0.17276  |
| 126484 | P03346 | Q6ZN92 | -0.21482  |
| 126485 | P03346 | Q9NXF8 | -0.50714  |
| 126486 | P03346 | P0CW26 | -0.079402 |
| 126487 | P03346 | P29973 | -1.0898   |
| 126488 | P03346 | Q3SY69 | -0.2889   |
| 126489 | P03346 | Q16881 | -0.22639  |
| 126490 | P03346 | O95670 | -0.19142  |
| 126491 | P03346 | P16473 | -0.45108  |
| 126492 | P03346 | Q9Y226 | -0.59709  |
| 126493 | P03346 | Q12965 | -0.21146  |
| 126494 | P03346 | Q8TCX5 | -0.31907  |
| 126495 | P03346 | Q5TF39 | -0.7099   |
| 126496 | P03346 | A6NL05 | -0.50365  |
| 126497 | P03346 | Q96R67 | -0.92763  |
| 126498 | P03346 | O43837 | -0.18867  |
| 126499 | P03346 | P28838 | -0.04915  |
| 126500 | P03346 | Q8N8Q9 | -0.72426  |
| 126501 | P03346 | Q9Y3B3 | -0.22808  |
| 126502 | P03346 | Q8NDA8 | -0.054864 |
| 126503 | P03346 | Q8NC42 | -0.57944  |
| 126504 | P03346 | P19793 | -0.23043  |
| 126505 | P03346 | Q6P5S7 | -0.37215  |
| 126506 | P03346 | Q04760 | -0.17203  |
| 126507 | P03346 | Q7Z2W7 | -0.59193  |
| 126508 | P03346 | Q96QB1 | -0.26332  |
| 126509 | P03346 | P68106 | -0.22842  |
| 126510 | P03346 | Q9NR80 | -0.22743  |
| 126511 | P03346 | O14950 | -0.22718  |
| 126512 | P03346 | Q9Y2W3 | -0.33634  |
| 126513 | P03346 | P23469 | -0.2289   |
| 126514 | P03346 | Q9BTE6 | -0.10891  |
| 126515 | P03346 | Q687X5 | -1.0401   |
| 126516 | P03346 | O43272 | -0.24523  |
| 126517 | P03346 | Q00325 | -0.50358  |
| 126518 | P03346 | Q9NZ53 | -0.21628  |
| 126519 | P03346 | Q9NQ79 | -0.62689  |
| 126520 | P03346 | Q8NA75 | -0.22736  |
| 126521 | P03346 | Q5KU26 | -0.3471   |
| 126522 | P03346 | Q8N4V2 | -0.43869  |
| 126523 | P03346 | Q8IVF4 | -0.49947  |
| 126524 | P03346 | Q8NEG2 | -0.050784 |
| 126525 | P03346 | Q8TC12 | -1.036    |
| 126526 | P03346 | P49662 | -0.50422  |
| 126527 | P03346 | Q9UGL9 | -0.013652 |
| 126528 | P03346 | Q6IWH7 | -0.18504  |
| 126529 | P03346 | P23468 | -0.42802  |
| 126530 | P03346 | Q8N6G5 | -0.30593  |
| 126531 | P03346 | Q6UWX4 | -0.52491  |
| 126532 | P03346 | Q96DH6 | -0.24455  |
| 126533 | P03346 | O95006 | -0.92763  |
| 126534 | P03346 | Q86TN4 | -0.14785  |
| 126535 | P03346 | O95867 | -0.2482   |
| 126536 | P03346 | O43597 | -0.17719  |
| 126537 | P03346 | Q8IYD2 | -0.22484  |
| 126538 | P03346 | P06727 | -0.41415  |
| 126539 | P03346 | Q96KT7 | -0.50365  |
| 126540 | P03346 | P53667 | -0.22741  |

|        |        |        |            |
|--------|--------|--------|------------|
| 126541 | P03346 | Q86SG3 | -0.30667   |
| 126542 | P03346 | P0C7N1 | -0.92763   |
| 126543 | P03346 | E9PJI5 | -0.023974  |
| 126544 | P03346 | Q96LD4 | -0.22632   |
| 126545 | P03346 | Q9UFV1 | -0.56151   |
| 126546 | P03346 | Q9NPF2 | -0.22819   |
| 126547 | P03346 | Q9H4F8 | -0.91612   |
| 126548 | P03346 | P41732 | -0.5278    |
| 126549 | P03346 | A8MUM7 | -0.22533   |
| 126550 | P03346 | Q03135 | -0.22722   |
| 126551 | P03346 | Q9HD43 | -0.22741   |
| 126552 | P03346 | P34981 | -0.93745   |
| 126553 | P03346 | Q9BV38 | -0.22741   |
| 126554 | P03346 | Q8NHV5 | -0.21553   |
| 126555 | P03346 | P05019 | -0.22674   |
| 126556 | P03346 | Q5TOW9 | -0.16942   |
| 126557 | P03346 | O14730 | -0.31567   |
| 126558 | P03346 | P01034 | -0.26476   |
| 126559 | P03346 | P04908 | -0.35085   |
| 126560 | P03346 | Q9C0B7 | -0.50365   |
| 126561 | P03346 | P23470 | -0.93528   |
| 126562 | P03346 | Q9H427 | -0.64933   |
| 126563 | P03346 | Q9H222 | -0.49838   |
| 126564 | P03346 | Q86YS7 | -0.23018   |
| 126565 | P03346 | P35520 | -0.22718   |
| 126566 | P03346 | P58062 | -0.22721   |
| 126567 | P03346 | Q9BTF0 | -0.18327   |
| 126568 | P03346 | A6NFN9 | -0.2274    |
| 126569 | P03346 | Q8NA54 | -0.15851   |
| 126570 | P03346 | Q6ZN18 | -0.3115    |
| 126571 | P03346 | P19835 | -0.40667   |
| 126572 | P03346 | P13725 | -0.40211   |
| 126573 | P03346 | Q9ULJ7 | -0.22741   |
| 126574 | P03346 | Q7Z2X7 | -0.0089308 |
| 126575 | P03346 | Q8IYX1 | -0.92582   |
| 126576 | P03346 | P49815 | -0.22379   |
| 126577 | P03346 | P50895 | -0.96877   |
| 126578 | P03346 | O14544 | -0.22737   |
| 126579 | P03346 | Q9BYJ0 | -0.62705   |
| 126580 | P03346 | A6NLI5 | -0.30279   |
| 126581 | P03346 | O95199 | -0.22736   |
| 126582 | P03346 | Q49SQ1 | -0.97613   |
| 126583 | P03346 | P04049 | -0.22741   |
| 126584 | P03346 | Q8N165 | -0.6745    |
| 126585 | P03346 | O15013 | -0.22748   |
| 126586 | P03346 | A0ZSE6 | -0.50365   |
| 126587 | P03346 | Q8NGY5 | -0.92763   |
| 126588 | P03346 | Q14108 | -0.89852   |
| 126589 | P03346 | Q8NGT1 | -0.92763   |
| 126590 | P03346 | Q9H3M0 | -0.56863   |
| 126591 | P03346 | P43007 | -0.34347   |
| 126592 | P03346 | Q8NH54 | -0.92763   |
| 126593 | P03346 | P01619 | -0.75616   |
| 126594 | P03346 | Q8NCW5 | -0.25069   |
| 126595 | P03346 | A5YM69 | -0.17317   |
| 126596 | P03346 | Q86XR2 | -0.15289   |
| 126597 | P03346 | Q9H205 | -0.92763   |
| 126598 | P03346 | O95822 | -0.18102   |
| 126599 | P03346 | Q14416 | -1.0016    |
| 126600 | P03346 | Q9UBK5 | -0.66353   |
| 126601 | P03346 | P43403 | -0.37103   |
| 126602 | P03346 | Q9H343 | -0.92763   |
| 126603 | P03346 | Q6ZUL3 | -0.013652  |
| 126604 | P03346 | Q9H6F2 | -0.26346   |
| 126605 | P03346 | Q6P1M0 | -0.94004   |
| 126606 | P03346 | Q00973 | -0.45793   |
| 126607 | P03346 | Q8IYL9 | -1.0882    |
| 126608 | P03346 | P61165 | -0.50365   |
| 126609 | P03346 | P51654 | -0.53952   |
| 126610 | P03346 | Q8N5I2 | -0.23148   |
| 126611 | P03346 | P51854 | -0.18828   |
| 126612 | P03346 | P43220 | -0.52286   |
| 126613 | P03346 | P09543 | -0.29801   |
| 126614 | P03346 | Q3KR37 | -0.50365   |
| 126615 | P03346 | Q0ZGT2 | -0.22741   |
| 126616 | P03346 | Q8N1P7 | -0.15401   |

|        |        |        |           |
|--------|--------|--------|-----------|
| 126617 | P03346 | Q9Y3P9 | -0.22912  |
| 126618 | P03346 | Q9UKB5 | -0.6345   |
| 126619 | P03346 | P47887 | -1.0224   |
| 126620 | P03346 | Q6DKJ4 | -0.17834  |
| 126621 | P03346 | Q9NPH2 | -0.28796  |
| 126622 | P03346 | Q14692 | -0.16643  |
| 126623 | P03346 | Q6IEE7 | -0.50365  |
| 126624 | P03346 | Q9UHC7 | -0.22558  |
| 126625 | P03346 | Q9UN66 | -0.86699  |
| 126626 | P03346 | P04632 | -0.22954  |
| 126627 | P03346 | Q8N7X1 | -0.40469  |
| 126628 | P03346 | Q8WZ04 | -0.22603  |
| 126629 | P03346 | P58401 | -0.67572  |
| 126630 | P03346 | Q86XP0 | -0.22769  |
| 126631 | P03346 | Q9P0K8 | -0.31352  |
| 126632 | P03346 | Q8TBF4 | -0.22582  |
| 126633 | P03346 | Q13472 | -0.19059  |
| 126634 | P03346 | O00154 | -0.21636  |
| 126635 | P03346 | Q8N8I6 | -0.013652 |
| 126636 | P03346 | Q9BQF6 | -0.33659  |
| 126637 | P03346 | Q30KP9 | -0.52229  |
| 126638 | P03346 | P48637 | -0.3167   |
| 126639 | P03346 | Q9NYD6 | -0.24288  |
| 126640 | P03346 | Q15389 | -0.4122   |
| 126641 | P03346 | Q8WUB2 | -0.12629  |
| 126642 | P03346 | Q9Y3Q4 | -0.90478  |
| 126643 | P03346 | Q8IV20 | -0.082623 |
| 126644 | P03346 | Q9BVG9 | -0.70997  |
| 126645 | P03346 | Q96FN5 | -0.42865  |
| 126646 | P03346 | Q4G148 | -0.35441  |
| 126647 | P03346 | P52797 | -0.35475  |
| 126648 | P03346 | Q8TAV3 | -0.54698  |
| 126649 | P03346 | Q75752 | -0.50113  |
| 126650 | P03346 | P01609 | -0.80078  |
| 126651 | P03346 | Q6UXF1 | -0.30782  |
| 126652 | P03346 | Q8N8D7 | -0.65219  |
| 126653 | P03346 | P0C7W9 | -0.23295  |
| 126654 | P03346 | Q5VV42 | -0.49046  |
| 126655 | P03346 | P07108 | -0.2328   |
| 126656 | P03346 | P00797 | -0.73663  |
| 126657 | P03346 | P07451 | -0.22624  |
| 126658 | P03346 | Q9UKR0 | -1.1339   |
| 126659 | P03346 | Q18PE1 | -0.41107  |
| 126660 | P03346 | P01241 | -0.22192  |
| 126661 | P03346 | P19878 | -0.22724  |
| 126662 | P03346 | Q504U0 | -0.18277  |
| 126663 | P03346 | O60502 | -0.20024  |
| 126664 | P03346 | A1KZ92 | -0.68849  |
| 126665 | P03346 | P30411 | -0.46396  |
| 126666 | P03346 | P11498 | -0.45926  |
| 126667 | P03346 | Q9HBJ8 | -0.65369  |
| 126668 | P03346 | Q9NX04 | -0.10987  |
| 126669 | P03346 | Q99727 | -0.61831  |
| 126670 | P03346 | Q03405 | -0.60243  |
| 126671 | P03346 | P12931 | -0.2291   |
| 126672 | P03346 | Q8NGN5 | -0.92763  |
| 126673 | P03346 | Q8N697 | -0.41632  |
| 126674 | P03346 | Q6ZWL3 | -0.91398  |
| 126675 | P03346 | O15156 | -0.2223   |
| 126676 | P03346 | B1ANH7 | -0.22699  |
| 126677 | P03346 | Q9UBX5 | -0.22769  |
| 126678 | P03346 | Q86UG4 | -0.61034  |
| 126679 | P03346 | Q96L96 | -0.38932  |
| 126680 | P03346 | Q07002 | -0.76485  |
| 126681 | P03346 | I3L0S3 | -0.01038  |
| 126682 | P03346 | Q8IU80 | -0.66415  |
| 126683 | P03346 | O14788 | -0.49956  |
| 126684 | P03346 | E9PB15 | -0.14548  |
| 126685 | P03346 | Q96MD7 | -0.21866  |
| 126686 | P03346 | Q96N53 | -0.013652 |
| 126687 | P03346 | Q15406 | -0.24355  |
| 126688 | P03346 | Q8NCF0 | -0.53541  |
| 126689 | P03346 | Q8NBF4 | -0.3162   |
| 126690 | P03346 | Q8NFM1 | -0.51875  |
| 126691 | P03346 | P07585 | -0.44738  |
| 126692 | P03346 | P14598 | -0.22741  |



|        |        |        |           |
|--------|--------|--------|-----------|
| 126693 | P03346 | O43681 | -0.1634   |
| 126694 | P03346 | Q9BUJ0 | -0.29201  |
| 126695 | P03346 | Q96F83 | -0.062542 |
| 126696 | P03346 | P12081 | -0.19588  |
| 126697 | P03346 | O15417 | -0.17526  |
| 126698 | P03346 | Q8NE62 | -0.21786  |
| 126699 | P03346 | Q9UHF4 | -0.50365  |
| 126700 | P03346 | O95819 | -0.23015  |
| 126701 | P03346 | P10745 | -0.76985  |
| 126702 | P03346 | P41586 | -0.40218  |
| 126703 | P03346 | Q8IZP9 | -1.0108   |
| 126704 | P03346 | Q8WW22 | -0.12447  |
| 126705 | P03346 | Q9ULD4 | -0.22647  |
| 126706 | P03346 | Q5W111 | -0.17617  |
| 126707 | P03346 | P04920 | -0.54889  |
| 126708 | P03346 | P86478 | -0.013652 |
| 126709 | P03346 | Q99463 | -0.93944  |
| 126710 | P03346 | Q8WWA1 | -0.50365  |
| 126711 | P03346 | Q075Z2 | -0.54874  |
| 126712 | P03346 | Q8N6D5 | -0.22741  |
| 126713 | P03346 | A6NJ16 | -0.53519  |
| 126714 | P03346 | P04350 | -0.21255  |
| 126715 | P03346 | Q8IZM0 | -0.10308  |
| 126716 | P03346 | Q9UM44 | -0.30782  |
| 126717 | P03346 | Q8NGB6 | -0.92763  |
| 126718 | P03346 | Q69384 | -0.35115  |
| 126719 | P03346 | Q96FJ0 | -0.31088  |
| 126720 | P03346 | P20916 | -0.65015  |
| 126721 | P03346 | Q495A1 | -0.2275   |
| 126722 | P03346 | Q4VX76 | -0.39667  |
| 126723 | P03346 | Q3SXY7 | -0.50365  |
| 126724 | P03346 | P33151 | -0.32814  |
| 126725 | P03346 | Q8N8X9 | -0.09551  |
| 126726 | P03346 | Q16281 | -1.1258   |
| 126727 | P03346 | Q8NFX0 | -0.54     |
| 126728 | P03346 | Q8IVB5 | -0.18576  |
| 126729 | P03346 | Q8NA82 | -0.18761  |
| 126730 | P03346 | Q75830 | -0.44546  |
| 126731 | P03346 | O14894 | -0.65456  |
| 126732 | P03346 | Q8IZT8 | -0.23531  |
| 126733 | P03346 | Q9GZU0 | -0.14834  |
| 126734 | P03346 | P02748 | -0.91299  |
| 126735 | P03346 | P51178 | -0.22741  |
| 126736 | P03346 | P08319 | -0.22578  |
| 126737 | P03346 | Q96B45 | -0.1374   |
| 126738 | P03346 | Q8NBJ5 | -0.1887   |
| 126739 | P03346 | Q96B96 | -0.50365  |
| 126740 | P03346 | O15085 | -0.22741  |
| 126741 | P03346 | Q9NBP9 | -1.1142   |
| 126742 | P03346 | Q60469 | -0.68507  |
| 126743 | P03346 | Q56UN5 | -0.88651  |
| 126744 | P03346 | Q9H208 | -0.92763  |
| 126745 | P03346 | Q9H3Q1 | -0.18987  |
| 126746 | P03346 | Q9BVH7 | -0.43025  |
| 126747 | P03346 | Q8TBM7 | -0.50365  |
| 126748 | P03346 | A6NKC4 | -0.63939  |
| 126749 | P03346 | Q68DD2 | -0.2277   |
| 126750 | P03346 | Q9Y680 | -0.22753  |
| 126751 | P03346 | Q6X9E4 | -0.21426  |
| 126752 | P03346 | Q7Z4K8 | -0.30279  |
| 126753 | P03346 | O60507 | -0.45481  |
| 126754 | P03346 | Q9UBY0 | -0.78167  |
| 126755 | P03346 | Q2M243 | -0.16466  |
| 126756 | P03346 | Q96BS2 | -0.22745  |
| 126757 | P03346 | P09237 | -0.86166  |
| 126758 | P03346 | P78369 | -0.52009  |
| 126759 | P03346 | P60008 | -0.23256  |
| 126760 | P03346 | O60755 | -0.90138  |
| 126761 | P03346 | Q9UHF9 | -0.050773 |
| 126762 | P03346 | Q9BZ68 | -0.20413  |
| 126763 | P03346 | P01717 | -0.80078  |
| 126764 | P03346 | P55084 | -0.22106  |
| 126765 | P03346 | Q8N145 | -0.40333  |
| 126766 | P03346 | Q969G6 | -0.27557  |
| 126767 | P03346 | P59535 | -0.84404  |
| 126768 | P03346 | Q9H9S4 | -0.18728  |

|        |        |        |           |
|--------|--------|--------|-----------|
| 126769 | P03346 | P11230 | -0.66345  |
| 126770 | P03346 | A4D0T7 | -0.50365  |
| 126771 | P03346 | Q8N9I0 | -0.44734  |
| 126772 | P03346 | P55786 | -0.24793  |
| 126773 | P03346 | Q6PEY1 | -0.50365  |
| 126774 | P03346 | Q96LA9 | -0.96376  |
| 126775 | P03346 | O75695 | -0.34     |
| 126776 | P03346 | O15240 | -0.47263  |
| 126777 | P03346 | Q9BX69 | -0.17162  |
| 126778 | P03346 | Q8WW43 | -0.209    |
| 126779 | P03346 | O75747 | -0.60837  |
| 126780 | P03346 | P42331 | -0.75813  |
| 126781 | P03346 | Q96MT7 | -0.22741  |
| 126782 | P03346 | P01769 | -0.80078  |
| 126783 | P03346 | O75426 | -0.22721  |
| 126784 | P03346 | O75698 | -0.013652 |
| 126785 | P03346 | Q01581 | -0.21981  |
| 126786 | P03346 | P0C880 | -0.013652 |
| 126787 | P03346 | Q9C0K3 | -0.52288  |
| 126788 | P03346 | P03915 | -0.3853   |
| 126789 | P03346 | Q14031 | -0.74324  |
| 126790 | P03346 | A6NN06 | -0.013652 |
| 126791 | P03346 | Q8IY50 | -0.47711  |
| 126792 | P03346 | P46059 | -0.61886  |
| 126793 | P03346 | Q5VVM6 | -0.16724  |
| 126794 | P03346 | Q6ZNB6 | -0.10008  |
| 126795 | P03346 | Q99584 | -0.23271  |
| 126796 | P03346 | P85299 | -0.21024  |
| 126797 | P03346 | Q9HAT0 | -0.17426  |
| 126798 | P03346 | Q9H606 | -0.11033  |
| 126799 | P03346 | Q99447 | -0.20252  |
| 126800 | P03346 | P0C7V8 | -0.22742  |
| 126801 | P03346 | Q9UHK6 | -0.22374  |
| 126802 | P03346 | Q6ZVX7 | -0.028883 |
| 126803 | P03346 | Q9BRT7 | -0.013652 |
| 126804 | P03346 | P35858 | -0.48404  |
| 126805 | P03346 | Q6P158 | -0.55849  |
| 126806 | P03346 | Q9Y5Q6 | -0.44001  |
| 126807 | P03346 | Q15828 | -0.57187  |
| 126808 | P03346 | P48145 | -0.43685  |
| 126809 | P03346 | P03951 | -0.64859  |
| 126810 | P03346 | Q1L5Z9 | -0.23614  |
| 126811 | P03346 | P49802 | -0.22742  |
| 126812 | P03346 | Q96G30 | -0.1833   |
| 126813 | P03346 | P26842 | -0.43929  |
| 126814 | P03346 | O14966 | -0.73845  |
| 126815 | P03346 | Q96JQ0 | -0.84938  |
| 126816 | P03346 | Q9Y2T5 | -1.0977   |
| 126817 | P03346 | P00995 | -0.22623  |
| 126818 | P03346 | P48745 | -0.70872  |
| 126819 | P03346 | Q9Y2L9 | -0.23184  |
| 126820 | P03346 | Q9UI46 | -0.22748  |
| 126821 | P03346 | Q9Y6U3 | -0.1526   |
| 126822 | P03346 | Q5MJ08 | -0.15482  |
| 126823 | P03346 | Q8TCT8 | -0.40432  |
| 126824 | P03346 | A8MU76 | -0.024517 |
| 126825 | P03346 | Q6UXI9 | -0.87352  |
| 126826 | P03346 | Q9Y574 | -0.2275   |
| 126827 | P03346 | A6NEK1 | -0.2186   |
| 126828 | P03346 | Q7Z5L4 | -0.33888  |
| 126829 | P03346 | Q9H336 | -0.53519  |
| 126830 | P03346 | Q93088 | -0.21274  |
| 126831 | P03346 | Q99616 | -0.983    |
| 126832 | P03346 | Q9UNT1 | -0.73524  |
| 126833 | P03346 | Q15391 | -0.94611  |
| 126834 | P03346 | Q8TEW6 | -0.22687  |
| 126835 | P03346 | Q8TBQ9 | -0.34727  |
| 126836 | P03346 | Q8TBR7 | -0.65219  |
| 126837 | P03346 | Q15173 | -0.71084  |
| 126838 | P03346 | P35568 | -0.22297  |
| 126839 | P03346 | P01782 | -0.80078  |
| 126840 | P03346 | P30443 | -0.80898  |
| 126841 | P03346 | Q7L513 | -0.43096  |
| 126842 | P03346 | Q9NTI2 | -0.82865  |
| 126843 | P03346 | Q969E3 | -0.5827   |
| 126844 | P03346 | Q8N3T6 | -0.30782  |

|        |        |        |           |
|--------|--------|--------|-----------|
| 126845 | P03346 | Q9UPQ0 | -0.22736  |
| 126846 | P03346 | Q08AH1 | -0.67797  |
| 126847 | P03346 | Q6ZNI0 | -0.42524  |
| 126848 | P03346 | Q96NE9 | -0.23134  |
| 126849 | P03346 | Q8NDX5 | -0.16749  |
| 126850 | P03346 | Q15552 | -1.2859   |
| 126851 | P03346 | Q15858 | -0.66816  |
| 126852 | P03346 | Q6ZTA4 | -0.22741  |
| 126853 | P03346 | A4D1S0 | -0.50492  |
| 126854 | P03346 | P79483 | -0.69984  |
| 126855 | P03346 | Q7Z6W7 | -0.24306  |
| 126856 | P03346 | A6NGY5 | -0.92763  |
| 126857 | P03346 | Q07617 | -0.44768  |
| 126858 | P03346 | A0PJK1 | -0.61152  |
| 126859 | P03346 | P59190 | -0.75535  |
| 126860 | P03346 | A6NM03 | -0.92763  |
| 126861 | P03346 | Q9UNW8 | -0.89286  |
| 126862 | P03346 | O00160 | -0.28429  |
| 126863 | P03346 | Q9Y2I2 | -0.22763  |
| 126864 | P03346 | Q5MAI5 | -0.57086  |
| 126865 | P03346 | P18509 | -0.4692   |
| 126866 | P03346 | Q9BYW1 | -0.46408  |
| 126867 | P03346 | Q8IVF7 | -0.22493  |
| 126868 | P03346 | Q9Y2H6 | -0.22741  |
| 126869 | P03346 | A1A4S6 | -0.23366  |
| 126870 | P03346 | Q13201 | -0.57049  |
| 126871 | P03346 | Q9Y4C8 | -0.22756  |
| 126872 | P03346 | Q14722 | -0.53547  |
| 126873 | P03346 | P35443 | -0.55821  |
| 126874 | P03346 | Q7Z5L3 | -0.65184  |
| 126875 | P03346 | Q16586 | -0.42019  |
| 126876 | P03346 | Q8N131 | -0.52862  |
| 126877 | P03346 | P28476 | -0.73567  |
| 126878 | P03346 | Q08426 | -0.23916  |
| 126879 | P03346 | Q9H0I9 | -0.20037  |
| 126880 | P03346 | P58872 | -0.9251   |
| 126881 | P03346 | Q9Y236 | -0.22791  |
| 126882 | P03346 | P54619 | -0.25577  |
| 126883 | P03346 | Q6WRI0 | -0.67234  |
| 126884 | P03346 | Q8NGR3 | -0.92763  |
| 126885 | P03346 | Q5FWE3 | -0.50365  |
| 126886 | P03346 | Q8NA03 | -0.033493 |
| 126887 | P03346 | Q969L2 | -0.12903  |
| 126888 | P03346 | P07942 | -0.494    |
| 126889 | P03346 | Q9NW64 | -0.3112   |
| 126890 | P03346 | Q96EV2 | -0.40469  |
| 126891 | P03346 | Q9HAC8 | -0.22418  |
| 126892 | P03346 | Q9UQG0 | -0.22766  |
| 126893 | P03346 | Q5VZM2 | -0.22674  |
| 126894 | P03346 | P62333 | -0.34155  |
| 126895 | P03346 | A7E2F4 | -0.21669  |
| 126896 | P03346 | Q15067 | -0.36347  |
| 126897 | P03346 | Q96GW9 | -0.15809  |
| 126898 | P03346 | Q9NRH3 | -0.22285  |
| 126899 | P03346 | Q14571 | -0.42038  |
| 126900 | P03346 | Q5VYY2 | -0.58765  |
| 126901 | P03346 | Q96LD1 | -0.3134   |
| 126902 | P03346 | Q6ZV89 | -0.22616  |
| 126903 | P03346 | Q7Z7G8 | -0.20622  |
| 126904 | P03346 | O75844 | -0.73706  |
| 126905 | P03346 | P30837 | -0.30651  |
| 126906 | P03346 | P43250 | -0.93771  |
| 126907 | P03346 | Q13237 | -0.81725  |
| 126908 | P03346 | Q6Q795 | -0.013652 |
| 126909 | P03346 | P02814 | -0.56239  |
| 126910 | P03346 | Q7RTP0 | -0.63482  |
| 126911 | P03346 | Q04656 | -0.22763  |
| 126912 | P03346 | P18031 | -0.23261  |
| 126913 | P03346 | P28067 | -0.52213  |
| 126914 | P03346 | Q6UXZ4 | -0.68605  |
| 126915 | P03346 | O43291 | -0.75283  |
| 126916 | P03346 | A8MQT2 | -0.20966  |
| 126917 | P03346 | Q9H3S1 | -0.6931   |
| 126918 | P03346 | P11586 | -0.30611  |
| 126919 | P03346 | Q92819 | -0.51053  |
| 126920 | P03346 | Q53FN2 | -0.056244 |

|        |        |        |           |
|--------|--------|--------|-----------|
| 126921 | P03346 | Q8IUX7 | -0.22743  |
| 126922 | P03346 | Q9NQB0 | -0.22412  |
| 126923 | P03346 | O60575 | -0.50866  |
| 126924 | P03346 | P14618 | -0.21802  |
| 126925 | P03346 | Q8N434 | -0.45374  |
| 126926 | P03346 | P08138 | -0.22739  |
| 126927 | P03346 | P30487 | -0.76151  |
| 126928 | P03346 | O00370 | -0.21572  |
| 126929 | P03346 | O15217 | -0.22732  |
| 126930 | P03346 | P43628 | -0.31445  |
| 126931 | P03346 | Q9H0M4 | -0.22544  |
| 126932 | P03346 | Q9Y4L1 | -0.37809  |
| 126933 | P03346 | P59826 | -0.55323  |
| 126934 | P03346 | Q2TAA2 | -0.19251  |
| 126935 | P03346 | Q9H0D6 | -0.21486  |
| 126936 | P03346 | P07864 | -0.083082 |
| 126937 | P03346 | Q6ZVE7 | -0.069947 |
| 126938 | P03346 | Q96QK8 | -0.50365  |
| 126939 | P03346 | Q96MF2 | -0.27356  |
| 126940 | P03346 | Q9P0I2 | -0.30535  |
| 126941 | P03346 | Q8NA57 | -0.01199  |
| 126942 | P03346 | P59665 | -0.81489  |
| 126943 | P03346 | Q9UPS8 | -0.2274   |
| 126944 | P03346 | P07339 | -0.86833  |
| 126945 | P03346 | Q8NCM8 | -0.37884  |
| 126946 | P03346 | O75054 | -0.50365  |
| 126947 | P03346 | Q8NHR9 | -0.18937  |
| 126948 | P03346 | P59539 | -0.84404  |
| 126949 | P03346 | P46093 | -1.0977   |
| 126950 | P03346 | Q9Y2T4 | -0.22355  |
| 126951 | P03346 | Q9H0D2 | -0.22671  |
| 126952 | P03346 | Q8N129 | -0.6163   |
| 126953 | P03346 | P38398 | -0.22728  |
| 126954 | P03346 | P47898 | -0.89804  |
| 126955 | P03346 | P69892 | -0.07206  |
| 126956 | P03346 | Q9BZC7 | -0.8152   |
| 126957 | P03346 | O14924 | -0.22739  |
| 126958 | P03346 | Q02487 | -0.70793  |
| 126959 | P03346 | Q7Z7B1 | -0.59404  |
| 126960 | P03346 | Q9UKY3 | -0.51843  |
| 126961 | P03346 | P51570 | -0.30887  |
| 126962 | P03346 | Q14003 | -0.464    |
| 126963 | P03346 | Q7Z309 | -0.19327  |
| 126964 | P03346 | Q9NX36 | -0.17488  |
| 126965 | P03346 | Q14623 | -0.38221  |
| 126966 | P03346 | Q6UXD7 | -0.48129  |
| 126967 | P03346 | Q14432 | -0.44922  |
| 126968 | P03346 | Q71RS6 | -0.67469  |
| 126969 | P03346 | P01777 | -0.80078  |
| 126970 | P03346 | Q95881 | -0.24818  |
| 126971 | P03346 | Q66K80 | -0.013652 |
| 126972 | P03346 | Q9NZ08 | -0.4233   |
| 126973 | P03346 | O43759 | -0.37711  |
| 126974 | P03346 | O60307 | -0.37616  |
| 126975 | P03346 | Q9H6S1 | -0.20734  |
| 126976 | P03346 | Q16651 | -0.93609  |
| 126977 | P03346 | Q8TD33 | -0.53519  |
| 126978 | P03346 | P24593 | -0.23584  |
| 126979 | P03346 | Q5JTB6 | -0.53519  |
| 126980 | P03346 | Q9BT23 | -0.2273   |
| 126981 | P03346 | Q9H0V9 | -0.23883  |
| 126982 | P03346 | Q8IWA5 | -0.64154  |
| 126983 | P03346 | O14832 | -0.14316  |
| 126984 | P03346 | Q9NSB8 | -0.22675  |
| 126985 | P03346 | Q9UBD3 | -0.98558  |
| 126986 | P03346 | Q7Z2Z2 | -0.34691  |
| 126987 | P03346 | P08572 | -0.24987  |
| 126988 | P03346 | Q8ND24 | -0.22465  |
| 126989 | P03346 | Q9Y4C1 | -0.18452  |
| 126990 | P03346 | Q06141 | -0.68641  |
| 126991 | P03346 | Q8TC59 | -0.22689  |
| 126992 | P03346 | Q8TBK6 | -0.060525 |
| 126993 | P03346 | O76099 | -0.9673   |
| 126994 | P03346 | Q6ZN44 | -0.75807  |
| 126995 | P03346 | Q4W4Y0 | -0.16397  |
| 126996 | P03346 | Q8WXG8 | -0.22883  |

|        |        |        |             |
|--------|--------|--------|-------------|
| 126997 | P03346 | O00258 | -0.2202     |
| 126998 | P03346 | Q9BY07 | -0.68231    |
| 126999 | P03346 | P35414 | -0.77981    |
| 127000 | P03346 | Q6IMI4 | -0.23932    |
| 127001 | P03346 | P63120 | -0.23811    |
| 127002 | P03346 | Q29836 | -0.76151    |
| 127003 | P03346 | Q9BQP9 | -0.67543    |
| 127004 | P03346 | O00487 | -0.23093    |
| 127005 | P03346 | Q6ZNL0 | -0.51117    |
| 127006 | P03346 | P21757 | -0.24287    |
| 127007 | P03346 | Q9BY67 | -0.30396    |
| 127008 | P03346 | O95274 | -0.64439    |
| 127009 | P03346 | P0C7X3 | -0.10553    |
| 127010 | P03346 | Q86VF5 | -0.54624    |
| 127011 | P03346 | P20151 | -1.0327     |
| 127012 | P03346 | Q86UB9 | -0.58011    |
| 127013 | P03346 | Q96T68 | -0.2243     |
| 127014 | P03346 | Q9NSD5 | -0.74144    |
| 127015 | P03346 | Q8IUC4 | -0.22692    |
| 127016 | P03346 | Q9UKJ1 | -0.58101    |
| 127017 | P03346 | Q6UWL6 | -0.67144    |
| 127018 | P03346 | Q14643 | -0.22713    |
| 127019 | P03346 | Q6NUK1 | -0.43961    |
| 127020 | P03346 | Q9GZR7 | -0.20752    |
| 127021 | P03346 | P0C7Q5 | -0.50365    |
| 127022 | P03346 | Q9Y570 | -0.2195     |
| 127023 | P03346 | Q9NSK7 | -0.31633    |
| 127024 | P03346 | Q16625 | -0.227      |
| 127025 | P03346 | O60361 | -0.61518    |
| 127026 | P03346 | A8MUN3 | -0.53519    |
| 127027 | P03346 | Q9NS62 | -0.83019    |
| 127028 | P03346 | Q8NGL4 | -0.92763    |
| 127029 | P03346 | Q92538 | -0.22545    |
| 127030 | P03346 | Q9Y5Y7 | -0.61066    |
| 127031 | P03346 | Q5T2D3 | -0.21805    |
| 127032 | P03346 | A6NHN6 | -0.53519    |
| 127033 | P03346 | Q9UFD9 | -0.2274     |
| 127034 | P03346 | F8W1W9 | -0.10674    |
| 127035 | P03346 | P49221 | -0.21388    |
| 127036 | P03346 | Q9NRJ3 | -0.81994    |
| 127037 | P03346 | P0CG38 | -0.094375   |
| 127038 | P03346 | Q9Y6C2 | -0.34127    |
| 127039 | P03346 | Q9NRY7 | -0.69314    |
| 127040 | P03346 | Q6NUM9 | -0.36018    |
| 127041 | P03346 | Q9BZM6 | -0.36592    |
| 127042 | P03346 | O95479 | -0.55237    |
| 127043 | P03346 | O14817 | -0.79108    |
| 127044 | P03346 | Q6AZY7 | -0.548      |
| 127045 | P03346 | A6NHC0 | -0.44379    |
| 127046 | P03346 | Q63HM2 | -0.50365    |
| 127047 | P03346 | Q92626 | -0.94552    |
| 127048 | P03346 | Q8N7B7 | -0.16753    |
| 127049 | P03346 | P04070 | -0.59896    |
| 127050 | P03346 | Q5SYB0 | -0.22741    |
| 127051 | P03346 | P43632 | -0.80125    |
| 127052 | P03346 | A8MXE2 | -0.45752    |
| 127053 | P03346 | P32456 | -0.22499    |
| 127054 | P03346 | Q9Y2C3 | -0.49177    |
| 127055 | P03346 | Q04826 | -0.76151    |
| 127056 | P03346 | Q6IMI6 | -0.24069    |
| 127057 | P03346 | Q9H9S5 | -0.95042    |
| 127058 | P03346 | P81534 | -0.56012    |
| 127059 | P03346 | Q02413 | -0.46259    |
| 127060 | P03346 | P30953 | -0.92763    |
| 127061 | P03346 | Q8IY37 | -0.51573    |
| 127062 | P03346 | Q6NUR6 | -0.00073548 |
| 127063 | P03346 | Q13203 | -0.31964    |
| 127064 | P03346 | A6NEV1 | -0.035663   |
| 127065 | P03346 | Q5T750 | -0.13784    |
| 127066 | P03346 | P48052 | -0.83414    |
| 127067 | P03346 | O43623 | -0.22278    |
| 127068 | P03346 | P43119 | -0.78869    |
| 127069 | P03346 | Q9N2K0 | -0.29042    |
| 127070 | P03346 | P02671 | -0.32737    |
| 127071 | P03346 | Q13402 | -0.21289    |
| 127072 | P03346 | O95365 | -0.21728    |

|        |        |        |           |
|--------|--------|--------|-----------|
| 127073 | P03346 | Q9UH17 | -0.94783  |
| 127074 | P03346 | P01780 | -0.80078  |
| 127075 | P03346 | Q7RTR2 | -0.22741  |
| 127076 | P03346 | Q5NE16 | -0.23387  |
| 127077 | P03346 | Q9H628 | -0.91075  |
| 127078 | P03346 | P59089 | -0.19552  |
| 127079 | P03346 | P06133 | -0.65166  |
| 127080 | P03346 | Q9ULD8 | -0.6943   |
| 127081 | P03346 | A6NH21 | -0.54683  |
| 127082 | P03346 | Q14554 | -0.28985  |
| 127083 | P03346 | Q96KC9 | -0.12349  |
| 127084 | P03346 | Q15075 | -0.22444  |
| 127085 | P03346 | P27448 | -0.49851  |
| 127086 | P03346 | Q9Y6S9 | -0.64514  |
| 127087 | P03346 | Q5T6X5 | -0.89756  |
| 127088 | P03346 | Q5T4I8 | -0.20069  |
| 127089 | P03346 | P30301 | -0.71937  |
| 127090 | P03346 | P11712 | -0.45435  |
| 127091 | P03346 | Q86YS6 | -0.79023  |
| 127092 | P03346 | Q06210 | -0.20973  |
| 127093 | P03346 | P01584 | -0.22739  |
| 127094 | P03346 | P31391 | -1.0466   |
| 127095 | P03346 | Q9P2G3 | -0.14568  |
| 127096 | P03346 | Q96HB5 | -0.12375  |
| 127097 | P03346 | O75956 | -0.063245 |
| 127098 | P03346 | P24158 | -0.26145  |
| 127099 | P03346 | Q9ULW2 | -0.50613  |
| 127100 | P03346 | Q6ZQQ6 | -0.21391  |
| 127101 | P03346 | Q06413 | -0.1827   |
| 127102 | P03346 | Q08AM6 | -0.080809 |
| 127103 | P03346 | Q5T2S8 | -0.22785  |
| 127104 | P03346 | O60602 | -0.81274  |
| 127105 | P03346 | Q15239 | -0.28495  |
| 127106 | P03346 | Q96MX6 | -0.22738  |
| 127107 | P03346 | P01602 | -0.80078  |
| 127108 | P03346 | P00813 | -0.22312  |
| 127109 | P03346 | Q14766 | -0.22753  |
| 127110 | P03346 | Q07000 | -0.76151  |
| 127111 | P03346 | Q5VT66 | -0.24291  |
| 127112 | P03346 | Q8NGL1 | -0.92763  |
| 127113 | P03346 | Q86UY5 | -0.12907  |
| 127114 | P03346 | A8MV57 | -0.25089  |
| 127115 | P03346 | P35610 | -0.60351  |
| 127116 | P03346 | Q9NYY1 | -0.66249  |
| 127117 | P03346 | Q8N4B4 | -0.16423  |
| 127118 | P03346 | P08476 | -0.22741  |
| 127119 | P03346 | Q12952 | -0.28404  |
| 127120 | P03346 | Q9ULE4 | -0.069643 |
| 127121 | P03346 | Q5VUY0 | -0.22648  |
| 127122 | P03346 | Q15782 | -0.58817  |
| 127123 | P03346 | P01702 | -0.80078  |
| 127124 | P03346 | Q8N135 | -0.60858  |
| 127125 | P03346 | Q07627 | -0.14207  |
| 127126 | P03346 | P01818 | -0.80078  |
| 127127 | P03346 | Q8N3E9 | -0.33362  |
| 127128 | P03346 | Q9BXT2 | -0.61812  |
| 127129 | P03346 | Q8N7U6 | -0.22747  |
| 127130 | P03346 | P04220 | -0.26939  |
| 127131 | P03346 | Q8IVE0 | -0.15295  |
| 127132 | P03346 | P00326 | -0.386    |
| 127133 | P03346 | P86479 | -0.013652 |
| 127134 | P03346 | Q9NRI6 | -0.52424  |
| 127135 | P03346 | Q9Y673 | -0.59072  |
| 127136 | P03346 | P30926 | -0.66223  |
| 127137 | P03346 | O00631 | -0.44928  |
| 127138 | P03346 | Q9H3Q3 | -0.45107  |
| 127139 | P03346 | Q96C34 | -0.1079   |
| 127140 | P03346 | Q6P2N6 | -0.65219  |
| 127141 | P03346 | Q13748 | -0.21795  |
| 127142 | P03346 | P01773 | -0.80078  |
| 127143 | P03346 | O60337 | -0.62711  |
| 127144 | P03346 | Q9ULE0 | -0.18695  |
| 127145 | P03346 | Q13586 | -0.22191  |
| 127146 | P03346 | P84243 | -0.77541  |
| 127147 | P03346 | O00750 | -0.22743  |
| 127148 | P03346 | P54296 | -0.22892  |

|        |        |        |           |
|--------|--------|--------|-----------|
| 127149 | P03346 | Q6P1R3 | -0.052942 |
| 127150 | P03346 | Q5SRD3 | -0.65984  |
| 127151 | P03346 | P82980 | -0.22316  |
| 127152 | P03346 | Q6RVD6 | -0.013652 |
| 127153 | P03346 | Q99853 | -0.27291  |
| 127154 | P03346 | Q5T6J7 | -0.28504  |
| 127155 | P03346 | P54868 | -0.22928  |
| 127156 | P03346 | O00116 | -0.47539  |
| 127157 | P03346 | P12110 | -0.34934  |
| 127158 | P03346 | Q8NGW1 | -0.92763  |
| 127159 | P03346 | Q6YHU6 | -0.167    |
| 127160 | P03346 | Q92502 | -0.62423  |
| 127161 | P03346 | Q9NR16 | -1.1424   |
| 127162 | P03346 | Q7Z475 | -0.52123  |
| 127163 | P03346 | B9A064 | -0.53519  |
| 127164 | P03346 | P26998 | -0.11811  |
| 127165 | P03346 | P36268 | -0.48277  |
| 127166 | P03346 | Q5JQC9 | -0.16188  |
| 127167 | P03346 | P12838 | -0.65029  |
| 127168 | P03346 | Q8IYS0 | -0.50365  |
| 127169 | P03346 | Q15139 | -0.22732  |
| 127170 | P03346 | Q8TCD6 | -0.26648  |
| 127171 | P03346 | Q494V2 | -0.19512  |
| 127172 | P03346 | Q14493 | -0.5261   |
| 127173 | P03346 | Q8NHA4 | -0.92763  |
| 127174 | P03346 | Q86YH6 | -0.18169  |
| 127175 | P03346 | P61019 | -0.36478  |
| 127176 | P03346 | P00558 | -0.21031  |
| 127177 | P03346 | Q96BQ3 | -0.30279  |
| 127178 | P03346 | A6NMZ7 | -0.82648  |
| 127179 | P03346 | P49448 | -0.44798  |
| 127180 | P03346 | Q9H6U8 | -0.58193  |
| 127181 | P03346 | Q9NYB5 | -0.69842  |
| 127182 | P03346 | Q9NPF4 | -0.17569  |
| 127183 | P03346 | Q2TVT4 | -0.29276  |
| 127184 | P03346 | Q86V35 | -0.39144  |
| 127185 | P03346 | Q9BT30 | -0.30122  |
| 127186 | P03346 | Q8NHB8 | -0.92763  |
| 127187 | P03346 | O00212 | -0.83588  |
| 127188 | P03346 | C9J069 | -0.1402   |
| 127189 | P03346 | Q13069 | -0.24641  |
| 127190 | P03346 | P78509 | -0.48312  |
| 127191 | P03346 | Q6ZT98 | -0.31002  |
| 127192 | P03346 | A6NEQ0 | -0.22834  |
| 127193 | P03346 | Q6ZVC0 | -0.023986 |
| 127194 | P03346 | Q8IWB4 | -0.50365  |
| 127195 | P03346 | P07355 | -0.18561  |
| 127196 | P03346 | P61566 | -0.35115  |
| 127197 | P03346 | Q9UI72 | -0.013652 |
| 127198 | P03346 | Q6PJ21 | -0.21901  |
| 127199 | P03346 | Q9NQ66 | -0.22732  |
| 127200 | P03346 | Q5VU36 | -0.50365  |
| 127201 | P03346 | O60330 | -0.86699  |
| 127202 | P03346 | Q8NC96 | -0.10167  |
| 127203 | P03346 | Q9H209 | -0.92763  |
| 127204 | P03346 | Q6ZSR6 | -0.077242 |
| 127205 | P03346 | Q96C36 | -0.42428  |
| 127206 | P03346 | P43405 | -0.26304  |
| 127207 | P03346 | Q9NPA1 | -0.80172  |
| 127208 | P03346 | Q8TD57 | -0.49682  |
| 127209 | P03346 | Q8NGI7 | -0.92763  |
| 127210 | P03346 | Q8NGK3 | -0.92763  |
| 127211 | P03346 | P57764 | -0.22708  |
| 127212 | P03346 | Q86SG5 | -0.23339  |
| 127213 | P03346 | Q9Y3Q7 | -0.87144  |
| 127214 | P03346 | P10696 | -0.60444  |
| 127215 | P03346 | Q92696 | -0.23835  |
| 127216 | P03346 | A8MTL3 | -0.20989  |
| 127217 | P03346 | Q96KX0 | -0.51657  |
| 127218 | P03346 | Q13607 | -0.92763  |
| 127219 | P03346 | P0CI26 | -0.30279  |
| 127220 | P03346 | Q8WVE6 | -0.50365  |
| 127221 | P03346 | P13861 | -0.2274   |
| 127222 | P03346 | A1L167 | -0.52946  |
| 127223 | P03346 | P15170 | -0.10617  |
| 127224 | P03346 | F2Z333 | -0.50365  |

|        |        |        |           |
|--------|--------|--------|-----------|
| 127225 | P03346 | Q8N183 | -0.17385  |
| 127226 | P03346 | A6NLX4 | -0.50365  |
| 127227 | P03346 | P0CK97 | -0.50365  |
| 127228 | P03346 | Q96A22 | -0.12658  |
| 127229 | P03346 | O95967 | -0.26813  |
| 127230 | P03346 | P04921 | -0.20654  |
| 127231 | P03346 | Q9UNI6 | -0.24601  |
| 127232 | P03346 | Q9UJS0 | -0.27109  |
| 127233 | P03346 | Q53HC5 | -0.042197 |
| 127234 | P03346 | Q5MJ09 | -0.11555  |
| 127235 | P03346 | Q17RD7 | -0.2275   |
| 127236 | P03346 | Q09472 | -0.19842  |
| 127237 | P03346 | P31997 | -0.56188  |
| 127238 | P03346 | Q9HAT2 | -0.60445  |
| 127239 | P03346 | Q9H0A3 | -0.50365  |
| 127240 | P03346 | O75348 | -0.16523  |
| 127241 | P03346 | Q9Y600 | -0.22952  |
| 127242 | P03346 | P0DH78 | -0.22623  |
| 127243 | P03346 | Q15678 | -0.25283  |
| 127244 | P03346 | Q9H1V8 | -0.52459  |
| 127245 | P03346 | O76036 | -0.82059  |
| 127246 | P03346 | P06317 | -0.75616  |
| 127247 | P03346 | O00445 | -0.46642  |
| 127248 | P03346 | Q9P0J7 | -0.3538   |
| 127249 | P03346 | Q86XI6 | -0.14839  |
| 127250 | P03346 | Q9UHG3 | -0.38114  |
| 127251 | P03346 | Q99878 | -0.35085  |
| 127252 | P03346 | Q96GF1 | -0.51995  |
| 127253 | P03346 | P52824 | -0.22741  |
| 127254 | P03346 | A6NNH2 | -0.19749  |
| 127255 | P03346 | P08123 | -0.30171  |
| 127256 | P03346 | P50395 | -0.22119  |
| 127257 | P03346 | O75452 | -1.1896   |
| 127258 | P03346 | Q9NUG6 | -0.20262  |
| 127259 | P03346 | A6NDA9 | -0.50365  |
| 127260 | P03346 | O94956 | -0.72929  |
| 127261 | P03346 | Q8N114 | -0.22825  |
| 127262 | P03346 | Q8NGL2 | -0.92763  |
| 127263 | P03346 | O75185 | -0.40223  |
| 127264 | P03346 | Q4KMX7 | -0.27046  |
| 127265 | P03346 | Q969S9 | -0.34178  |
| 127266 | P03346 | Q00604 | -0.58829  |
| 127267 | P03346 | P28566 | -1.0317   |
| 127268 | P03346 | Q2NL67 | -0.15848  |
| 127269 | P03346 | P01775 | -0.80078  |
| 127270 | P03346 | Q8IZA0 | -0.21291  |
| 127271 | P03346 | Q6ZWT7 | -0.53015  |
| 127272 | P03346 | Q6E213 | -0.59065  |
| 127273 | P03346 | Q9H871 | -0.21586  |
| 127274 | P03346 | P13612 | -0.24776  |
| 127275 | P03346 | Q5VTQ0 | -0.12607  |
| 127276 | P03346 | Q9NY33 | -0.20841  |
| 127277 | P03346 | P51817 | -0.3334   |
| 127278 | P03346 | Q8NFB3 | -0.22744  |
| 127279 | P03346 | Q86W50 | -0.033902 |
| 127280 | P03346 | Q53LP3 | -0.22741  |
| 127281 | P03346 | P21554 | -0.58059  |
| 127282 | P03346 | Q8WW52 | -0.39933  |
| 127283 | P03346 | P21549 | -0.22338  |
| 127284 | P03346 | P0C7P2 | -0.12159  |
| 127285 | P03346 | Q9H2A7 | -1.1131   |
| 127286 | P03346 | A6NKG8 | -0.31236  |
| 127287 | P03346 | P19652 | -0.58453  |
| 127288 | P03346 | Q8WWG1 | -1.0868   |
| 127289 | P03346 | O75072 | -0.26007  |
| 127290 | P03346 | Q9BTD1 | -0.10482  |
| 127291 | P03346 | Q6P2C0 | -0.066278 |
| 127292 | P03346 | Q6XCG6 | -0.013652 |
| 127293 | P03346 | Q9H1H1 | -0.032105 |
| 127294 | P03346 | Q6DKI2 | -0.22328  |
| 127295 | P03346 | P30495 | -0.76151  |
| 127296 | P03346 | Q9C0I9 | -0.22757  |
| 127297 | P03346 | Q8NB59 | -0.41091  |
| 127298 | P03346 | A8MXU0 | -0.52229  |
| 127299 | P03346 | Q7Z4J2 | -0.40313  |
| 127300 | P03346 | P82279 | -1.0119   |



|        |        |        |           |
|--------|--------|--------|-----------|
| 127301 | P03346 | Q6UW88 | -0.83744  |
| 127302 | P03346 | A6NHA9 | -0.92763  |
| 127303 | P03346 | Q5JQD4 | -0.52424  |
| 127304 | P03346 | Q8N394 | -0.51601  |
| 127305 | P03346 | Q8NEY1 | -0.586    |
| 127306 | P03346 | P59074 | -0.19718  |
| 127307 | P03346 | Q92878 | -0.22438  |
| 127308 | P03346 | Q9NVH0 | -0.27204  |
| 127309 | P03346 | P45954 | -0.29978  |
| 127310 | P03346 | Q6QN14 | -0.26893  |
| 127311 | P03346 | P29728 | -0.17973  |
| 127312 | P03346 | Q5JT78 | -0.20124  |
| 127313 | P03346 | Q9BXC1 | -0.92894  |
| 127314 | P03346 | P55286 | -0.87314  |
| 127315 | P03346 | Q9NX52 | -0.98812  |
| 127316 | P03346 | Q9BZA0 | -0.26163  |
| 127317 | P03346 | Q86YN6 | -0.22688  |
| 127318 | P03346 | Q8IUH3 | -0.22683  |
| 127319 | P03346 | Q14642 | -0.22651  |
| 127320 | P03346 | P54132 | -0.22698  |
| 127321 | P03346 | P09960 | -0.24486  |
| 127322 | P03346 | Q9H2Y7 | -0.22841  |
| 127323 | P03346 | Q75907 | -0.40073  |
| 127324 | P03346 | Q6ZPA2 | -0.013652 |
| 127325 | P03346 | P25713 | -0.1911   |
| 127326 | P03346 | O60547 | -0.54631  |
| 127327 | P03346 | Q14703 | -0.70694  |
| 127328 | P03346 | Q95235 | -0.24112  |
| 127329 | P03346 | Q9NZ01 | -0.36971  |
| 127330 | P03346 | Q96NY8 | -0.50033  |
| 127331 | P03346 | Q64LD2 | -0.22744  |
| 127332 | P03346 | Q9UBN6 | -0.57678  |
| 127333 | P03346 | Q8WWZ1 | -0.61721  |
| 127334 | P03346 | Q9Y2C4 | -0.2086   |
| 127335 | P03346 | P02747 | -0.69919  |
| 127336 | P03346 | O60331 | -0.36225  |
| 127337 | P03346 | A6NEE1 | -0.22373  |
| 127338 | P03346 | Q96C19 | -0.22681  |
| 127339 | P03346 | Q96KS9 | -0.2085   |
| 127340 | P03346 | A8MRT5 | -0.50365  |
| 127341 | P03346 | Q6XYQ8 | -0.57489  |
| 127342 | P03346 | P80748 | -0.80078  |
| 127343 | P03346 | Q95396 | -0.20668  |
| 127344 | P03346 | Q9Y4P3 | -0.22742  |
| 127345 | P03346 | P16050 | -0.22396  |
| 127346 | P03346 | Q9UNA0 | -0.23094  |
| 127347 | P03346 | P01824 | -0.80078  |
| 127348 | P03346 | Q9UGM5 | -0.60618  |
| 127349 | P03346 | Q08257 | -0.33657  |
| 127350 | P03346 | Q8TF71 | -0.65163  |
| 127351 | P03346 | Q5T0N1 | -0.20738  |
| 127352 | P03346 | Q9Y210 | -0.22741  |
| 127353 | P03346 | Q15417 | -0.21359  |
| 127354 | P03346 | O14880 | -0.75928  |
| 127355 | P03346 | Q9H1N7 | -0.23653  |
| 127356 | P03346 | P48546 | -0.97376  |
| 127357 | P03346 | Q8IUN9 | -0.70135  |
| 127358 | P03346 | Q2TAA8 | -0.14085  |
| 127359 | P03346 | Q96GR4 | -0.59087  |
| 127360 | P03346 | O43353 | -0.22741  |
| 127361 | P03346 | A6NEC2 | -0.46684  |
| 127362 | P03346 | Q16445 | -0.62578  |
| 127363 | P03346 | Q9HBT6 | -0.82951  |
| 127364 | P03346 | Q9GZP4 | -0.17092  |
| 127365 | P03346 | Q7Z429 | -0.50365  |
| 127366 | P03346 | A6NK44 | -0.19127  |
| 127367 | P03346 | Q6UWI4 | -0.79104  |
| 127368 | P03346 | Q8IYB1 | -0.089628 |
| 127369 | P03346 | Q70UQ0 | -0.22674  |
| 127370 | P03346 | Q6ZP80 | -0.50365  |
| 127371 | P03346 | Q9Y6R1 | -0.30021  |
| 127372 | P03346 | Q9NTJ3 | -0.22623  |
| 127373 | P03346 | Q6ZQT0 | -0.20254  |
| 127374 | P03346 | Q9Y5F9 | -0.86699  |
| 127375 | P03346 | P19823 | -0.52309  |
| 127376 | P03346 | P01607 | -0.80078  |

|        |        |        |           |
|--------|--------|--------|-----------|
| 127377 | P03346 | Q9BXC0 | -0.9286   |
| 127378 | P03346 | Q9Y6F7 | -0.22694  |
| 127379 | P03346 | Q8IUQ0 | -0.28338  |
| 127380 | P03346 | A6NM66 | -0.20734  |
| 127381 | P03346 | Q149N8 | -0.30647  |
| 127382 | P03346 | P07098 | -0.58978  |
| 127383 | P03346 | Q96QS6 | -0.88651  |
| 127384 | P03346 | Q8NDC4 | -0.17589  |
| 127385 | P03346 | D6RCP7 | -0.36346  |
| 127386 | P03346 | P30291 | -0.22741  |
| 127387 | P03346 | Q6UXD1 | -0.50365  |
| 127388 | P03346 | Q8WWN9 | -0.24526  |
| 127389 | P03346 | Q96E66 | -0.22741  |
| 127390 | P03346 | P59052 | -0.03447  |
| 127391 | P03346 | Q9NYI0 | -0.26301  |
| 127392 | P03346 | P06126 | -0.29761  |
| 127393 | P03346 | F5H4A9 | -0.50365  |
| 127394 | P03346 | Q14494 | -0.2272   |
| 127395 | P03346 | Q95876 | -0.18948  |
| 127396 | P03346 | Q8TEA1 | -0.1126   |
| 127397 | P03346 | Q00767 | -0.78787  |
| 127398 | P03346 | Q8NC01 | -0.87463  |
| 127399 | P03346 | Q9NRY4 | -0.23847  |
| 127400 | P03346 | Q9H3H1 | -0.22886  |
| 127401 | P03346 | O00408 | -0.22724  |
| 127402 | P03346 | Q9UMF0 | -0.89284  |
| 127403 | P03346 | Q15208 | -0.22739  |
| 127404 | P03346 | Q9UPR5 | -0.66104  |
| 127405 | P03346 | P09429 | -0.22808  |
| 127406 | P03346 | P59025 | -0.61193  |
| 127407 | P03346 | P82251 | -0.7361   |
| 127408 | P03346 | P32971 | -0.67171  |
| 127409 | P03346 | Q9UJZ1 | -0.21018  |
| 127410 | P03346 | Q68DV7 | -0.22908  |
| 127411 | P03346 | Q96J92 | -0.66498  |
| 127412 | P03346 | O43847 | -0.2255   |
| 127413 | P03346 | Q12809 | -0.46966  |
| 127414 | P03346 | Q5FWF5 | -0.19822  |
| 127415 | P03346 | A0PJX4 | -0.79104  |
| 127416 | P03346 | P56385 | -0.13497  |
| 127417 | P03346 | P27037 | -0.31493  |
| 127418 | P03346 | O60320 | -0.50365  |
| 127419 | P03346 | Q9BQI0 | -0.3548   |
| 127420 | P03346 | Q9GZU1 | -0.58974  |
| 127421 | P03346 | Q9H596 | -0.24155  |
| 127422 | P03346 | Q9H898 | -0.20986  |
| 127423 | P03346 | Q86UD5 | -0.52409  |
| 127424 | P03346 | Q9NR00 | -0.063763 |
| 127425 | P03346 | Q9C0J1 | -0.33175  |
| 127426 | P03346 | Q9NVM1 | -0.50365  |
| 127427 | P03346 | Q8TBZ3 | -0.22741  |
| 127428 | P03346 | P01857 | -0.23314  |
| 127429 | P03346 | Q0VGL1 | -0.27597  |
| 127430 | P03346 | P03897 | -0.20758  |
| 127431 | P03346 | Q68D86 | -0.22265  |
| 127432 | P03346 | Q56A73 | -0.12887  |
| 127433 | P03346 | O60488 | -0.64771  |
| 127434 | P03346 | Q96HU1 | -0.22744  |
| 127435 | P03346 | Q2QD12 | -0.20843  |
| 127436 | P03346 | P29371 | -0.66309  |
| 127437 | P03346 | Q9Y466 | -0.22771  |
| 127438 | P03346 | Q9NXR5 | -0.22741  |
| 127439 | P03346 | P53708 | -0.65266  |
| 127440 | P03346 | A6NMB1 | -0.67197  |
| 127441 | P03346 | Q9H5L6 | -0.13225  |
| 127442 | P03346 | Q6UY09 | -0.50365  |
| 127443 | P03346 | Q658P3 | -0.41882  |
| 127444 | P03346 | Q7Z443 | -0.55056  |
| 127445 | P03346 | Q8NBP7 | -0.29207  |
| 127446 | P03346 | Q9NRC6 | -0.22826  |
| 127447 | P03346 | P84157 | -0.50365  |
| 127448 | P03346 | Q9H252 | -0.66597  |
| 127449 | P03346 | P11908 | -0.51764  |
| 127450 | P03346 | Q15070 | -0.11852  |
| 127451 | P03346 | Q03181 | -0.2311   |
| 127452 | P03346 | O00748 | -0.22741  |

|        |        |         |           |
|--------|--------|---------|-----------|
| 127453 | P03346 | Q30201  | -0.35587  |
| 127454 | P03346 | A8MVS5  | -0.50365  |
| 127455 | P03346 | Q5W150  | -0.25919  |
| 127456 | P03346 | P11086  | -0.19672  |
| 127457 | P03346 | Q9H251  | -0.34926  |
| 127458 | P03346 | P29762  | -0.31761  |
| 127459 | P03346 | Q9P275  | -0.28299  |
| 127460 | P03346 | Q5VYV0  | -0.31352  |
| 127461 | P03346 | Q96C24  | -0.22967  |
| 127462 | P03346 | A2RRL7  | -0.50365  |
| 127463 | P03346 | Q16572  | -0.71569  |
| 127464 | P03346 | Q6QAJ8  | -0.50365  |
| 127465 | P03346 | Q6EIG7  | -0.47895  |
| 127466 | P03346 | P01569  | -0.64371  |
| 127467 | P03346 | Q9H341  | -0.92763  |
| 127468 | P03346 | Q96CP6  | -0.50365  |
| 127469 | P03346 | Q6UWJ1  | -0.60995  |
| 127470 | P03346 | Q9NZI2  | -0.37702  |
| 127471 | P03346 | Q7L985  | -0.50365  |
| 127472 | P03346 | Q15620  | -0.92763  |
| 127473 | P03346 | Q8TDN7  | -0.48851  |
| 127474 | P03346 | P01614  | -0.80078  |
| 127475 | P03346 | Q8NC67  | -0.50365  |
| 127476 | P03346 | Q8N568  | -0.75235  |
| 127477 | P03346 | Q92731  | -0.22742  |
| 127478 | P03346 | Q9H2U6  | -0.11469  |
| 127479 | P03346 | Q92952  | -0.51525  |
| 127480 | P03346 | A6NFK2  | -0.13439  |
| 127481 | P03346 | Q9Y6R4  | -0.22734  |
| 127482 | P03346 | Q8NFAQ8 | -0.24119  |
| 127483 | P03346 | Q5W0A0  | -0.13398  |
| 127484 | P03346 | P12694  | -0.20342  |
| 127485 | P03346 | P63122  | -0.23811  |
| 127486 | P03346 | O15247  | -0.39652  |
| 127487 | P03346 | P51636  | -0.22708  |
| 127488 | P03346 | Q8WUA2  | -0.20128  |
| 127489 | P03346 | Q9Y4I5  | -0.061297 |
| 127490 | P03346 | Q9HC21  | -0.3626   |
| 127491 | P03346 | P51795  | -0.82135  |
| 127492 | P03346 | Q96NJ5  | -0.093221 |
| 127493 | P03346 | Q8NGX9  | -0.92763  |
| 127494 | P03346 | Q53TS8  | -0.13678  |
| 127495 | P03346 | Q5JTH9  | -0.11019  |
| 127496 | P03346 | Q01974  | -1.08     |
| 127497 | P03346 | Q9UEW8  | -0.48844  |
| 127498 | P03346 | Q8TEJ3  | -0.22666  |
| 127499 | P03346 | Q9P2D8  | -0.50365  |
| 127500 | P03346 | Q9Y6H8  | -0.62783  |
| 127501 | P03346 | Q9BXR6  | -0.52607  |
| 127502 | P03346 | Q5VU65  | -0.50365  |
| 127503 | P03346 | Q92561  | -0.22579  |
| 127504 | P03346 | Q8N4P6  | -0.22738  |
| 127505 | P03346 | P05067  | -0.22629  |
| 127506 | P03346 | Q8N5C7  | -0.20885  |
| 127507 | P03346 | O00124  | -0.10701  |
| 127508 | P03346 | Q9P0L2  | -0.79355  |
| 127509 | P03346 | Q60551  | -0.1621   |
| 127510 | P03346 | Q8TB24  | -0.31767  |
| 127511 | P03346 | Q7RTM1  | -1.0612   |
| 127512 | P03346 | Q16473  | -0.22743  |
| 127513 | P03346 | Q9H4A3  | -0.31679  |
| 127514 | P03346 | Q02252  | -0.25563  |
| 127515 | P03346 | Q92185  | -0.30312  |
| 127516 | P03346 | P34896  | -0.15907  |
| 127517 | P03346 | O75116  | -0.22725  |
| 127518 | P03346 | Q9Y619  | -0.31459  |
| 127519 | P03346 | Q95972  | -0.54259  |
| 127520 | P03346 | Q6UY01  | -0.22741  |
| 127521 | P03346 | Q86TL2  | -0.30782  |
| 127522 | P03346 | P59543  | -0.84404  |
| 127523 | P03346 | O43490  | -0.38828  |
| 127524 | P03346 | Q9UHL0  | -0.23852  |
| 127525 | P03346 | Q4V321  | -0.24641  |
| 127526 | P03346 | P62068  | -0.28787  |
| 127527 | P03346 | P0DJJ0  | -0.2248   |
| 127528 | P03346 | P0CJ71  | -0.36125  |

|        |        |        |           |
|--------|--------|--------|-----------|
| 127529 | P03346 | Q5VUJ9 | -0.22712  |
| 127530 | P03346 | Q9NYG8 | -0.80486  |
| 127531 | P03346 | Q9UJ14 | -0.47012  |
| 127532 | P03346 | Q9P2S6 | -0.22741  |
| 127533 | P03346 | Q86UW2 | -0.55523  |
| 127534 | P03346 | P17813 | -0.22285  |
| 127535 | P03346 | Q969G5 | -0.095524 |
| 127536 | P03346 | Q9Y5H0 | -0.86699  |
| 127537 | P03346 | P0DJD7 | -0.83835  |
| 127538 | P03346 | Q13163 | -0.22836  |
| 127539 | P03346 | P01704 | -0.80078  |
| 127540 | P03346 | Q16875 | -0.34693  |
| 127541 | P03346 | Q8NG81 | -0.92763  |
| 127542 | P03346 | Q9UKL2 | -1.0443   |
| 127543 | P03346 | Q562R1 | -0.33866  |
| 127544 | P03346 | Q8N441 | -0.67501  |
| 127545 | P03346 | P50150 | -0.34216  |
| 127546 | P03346 | Q9H2S6 | -0.45802  |
| 127547 | P03346 | Q5SZI1 | -0.50365  |
| 127548 | P03346 | Q8NG35 | -0.52229  |
| 127549 | P03346 | Q14841 | -0.41773  |
| 127550 | P03346 | Q9BQS2 | -0.65219  |
| 127551 | P03346 | P22033 | -0.054952 |
| 127552 | P03346 | Q9Y5H7 | -0.92414  |
| 127553 | P03346 | Q9BXL7 | -0.22735  |
| 127554 | P03346 | Q9NZQ8 | -0.71196  |
| 127555 | P03346 | Q96FM1 | -0.45182  |
| 127556 | P03346 | P10321 | -0.76151  |
| 127557 | P03346 | P35612 | -0.21516  |
| 127558 | P03346 | P49588 | -0.17379  |
| 127559 | P03346 | Q9NYZ1 | -0.50365  |
| 127560 | P03346 | Q96SB3 | -0.22721  |
| 127561 | P03346 | P62253 | -0.29491  |
| 127562 | P03346 | Q8NEW7 | -0.57043  |
| 127563 | P03346 | Q8TCA0 | -0.22744  |
| 127564 | P03346 | Q96GA7 | -0.19965  |
| 127565 | P03346 | Q8IWB6 | -0.2372   |
| 127566 | P03346 | Q8IVH8 | -0.35536  |
| 127567 | P03346 | Q96NJ1 | -0.013652 |
| 127568 | P03346 | P04090 | -0.54052  |
| 127569 | P03346 | Q9UBD6 | -0.5357   |
| 127570 | P03346 | Q13572 | -0.76636  |
| 127571 | P03346 | Q9BZM3 | -0.1999   |
| 127572 | P03346 | Q6UXR8 | -0.013652 |
| 127573 | P03346 | P06276 | -0.58237  |
| 127574 | P03346 | Q8NEY4 | -0.19951  |
| 127575 | P03346 | Q9H845 | -0.3139   |
| 127576 | P03346 | Q9UM00 | -0.47746  |
| 127577 | P03346 | Q8IX21 | -0.14771  |
| 127578 | P03346 | Q1AE95 | -0.50365  |
| 127579 | P03346 | Q8NEL9 | -0.18024  |
| 127580 | P03346 | Q99453 | -0.22661  |
| 127581 | P03346 | O60883 | -0.38947  |
| 127582 | P03346 | Q8NC56 | -0.061713 |
| 127583 | P03346 | Q9NZJ6 | -0.21362  |
| 127584 | P03346 | Q8N0W4 | -0.22744  |
| 127585 | P03346 | Q6UWE3 | -0.57697  |
| 127586 | P03346 | P80108 | -0.39004  |
| 127587 | P03346 | P29803 | -0.22548  |
| 127588 | P03346 | P0C617 | -0.92763  |
| 127589 | P03346 | Q29963 | -0.76151  |
| 127590 | P03346 | P53621 | -0.22801  |
| 127591 | P03346 | Q01151 | -0.76986  |
| 127592 | P03346 | Q9NQA5 | -0.76075  |
| 127593 | P03346 | A6NES4 | -0.089764 |
| 127594 | P03346 | Q8TF61 | -0.24111  |
| 127595 | P03346 | Q8NH81 | -0.92763  |
| 127596 | P03346 | P35221 | -0.2114   |
| 127597 | P03346 | P0C6T2 | -0.50365  |
| 127598 | P03346 | Q58FG0 | -0.28583  |
| 127599 | P03346 | A1L4K1 | -0.22742  |
| 127600 | P03346 | Q06124 | -0.22741  |
| 127601 | P03346 | Q9P2L0 | -0.22741  |
| 127602 | P03346 | Q6S5L8 | -0.22741  |
| 127603 | P03346 | Q12860 | -0.24412  |
| 127604 | P03346 | Q9NP50 | -0.010293 |

|        |        |        |           |
|--------|--------|--------|-----------|
| 127605 | P03346 | Q9Y3Q3 | -0.25267  |
| 127606 | P03346 | Q9NYL4 | -0.52445  |
| 127607 | P03346 | Q96MG2 | -0.23925  |
| 127608 | P03346 | Q96G46 | -0.37785  |
| 127609 | P03346 | Q5VU97 | -0.55978  |
| 127610 | P03346 | Q9UFV3 | -0.1513   |
| 127611 | P03346 | P02774 | -0.46955  |
| 127612 | P03346 | Q13621 | -0.62419  |
| 127613 | P03346 | P31995 | -0.22741  |
| 127614 | P03346 | Q8WZ79 | -0.38544  |
| 127615 | P03346 | Q95500 | -0.42422  |
| 127616 | P03346 | Q52M75 | -0.34647  |
| 127617 | P03346 | P23919 | -0.34619  |
| 127618 | P03346 | P0CE71 | -0.2265   |
| 127619 | P03346 | Q86UQ5 | -0.50365  |
| 127620 | P03346 | Q5SQS8 | -0.005748 |
| 127621 | P03346 | Q9BZ71 | -0.35888  |
| 127622 | P03346 | Q96D05 | -0.50365  |
| 127623 | P03346 | P18206 | -0.22185  |
| 127624 | P03346 | Q9Y217 | -0.22635  |
| 127625 | P03346 | Q9UBJ2 | -0.29037  |
| 127626 | P03346 | Q86W33 | -0.6544   |
| 127627 | P03346 | P22914 | -0.1477   |
| 127628 | P03346 | Q6JVE6 | -0.50529  |
| 127629 | P03346 | Q8NI28 | -0.50365  |
| 127630 | P03346 | P02749 | -0.33091  |
| 127631 | P03346 | Q04941 | -0.3823   |
| 127632 | P03346 | P12724 | -0.38249  |
| 127633 | P03346 | Q05315 | -0.25506  |
| 127634 | P03346 | Q8NC06 | -0.2344   |
| 127635 | P03346 | Q9NR23 | -0.57837  |
| 127636 | P03346 | P19827 | -0.55744  |
| 127637 | P03346 | Q8WVZ1 | -0.59087  |
| 127638 | P03346 | Q5JPI9 | -0.21698  |
| 127639 | P03346 | Q9NWW5 | -0.17989  |
| 127640 | P03346 | Q5PT55 | -0.60273  |
| 127641 | P03346 | P54108 | -0.48891  |
| 127642 | P03346 | Q8NHM4 | -1.041    |
| 127643 | P03346 | Q9UF72 | -0.53519  |
| 127644 | P03346 | P51861 | -0.1158   |
| 127645 | P03346 | Q9P0P0 | -0.22846  |
| 127646 | P03346 | A8MYU2 | -0.89888  |
| 127647 | P03346 | Q8N103 | -0.39589  |
| 127648 | P03346 | Q16676 | -0.31352  |
| 127649 | P03346 | P14923 | -0.53781  |
| 127650 | P03346 | Q9H4M9 | -0.26667  |
| 127651 | P03346 | Q9NQ30 | -0.45418  |
| 127652 | P03346 | Q13241 | -0.73585  |
| 127653 | P03346 | Q2M2E3 | -0.72579  |
| 127654 | P03346 | P22460 | -0.4271   |
| 127655 | P03346 | Q9UIG0 | -0.22659  |
| 127656 | P03346 | Q12899 | -0.22736  |
| 127657 | P03346 | Q52LD8 | -0.22987  |
| 127658 | P03346 | Q96PR1 | -0.43326  |
| 127659 | P03346 | P11182 | -0.20647  |
| 127660 | P03346 | Q9Y5E9 | -0.87177  |
| 127661 | P03346 | Q8NGG8 | -0.92763  |
| 127662 | P03346 | Q8N7P3 | -0.41247  |
| 127663 | P03346 | Q9H6S0 | -0.22741  |
| 127664 | P03346 | Q8N4E7 | -0.19616  |
| 127665 | P03346 | Q95409 | -0.22733  |
| 127666 | P03346 | Q8WUU8 | -0.50365  |
| 127667 | P03346 | Q75712 | -0.62938  |
| 127668 | P03346 | A6NDQ2 | -0.30279  |
| 127669 | P03346 | Q8NAB5 | -0.013652 |
| 127670 | P03346 | Q0WX57 | -0.25999  |
| 127671 | P03346 | P04155 | -0.28963  |
| 127672 | P03346 | P21291 | -0.22751  |
| 127673 | P03346 | P11487 | -0.28658  |
| 127674 | P03346 | P0C7X4 | -0.18789  |
| 127675 | P03346 | P0C7T2 | -0.92763  |
| 127676 | P03346 | P13942 | -0.60796  |
| 127677 | P03346 | Q75038 | -0.31091  |
| 127678 | P03346 | P01019 | -0.25718  |
| 127679 | P03346 | Q9NX38 | -0.10583  |
| 127680 | P03346 | Q8N158 | -0.87371  |

|        |        |        |           |
|--------|--------|--------|-----------|
| 127681 | P03346 | P49757 | -0.2273   |
| 127682 | P03346 | Q9ULB5 | -0.83801  |
| 127683 | P03346 | P35916 | -0.46759  |
| 127684 | P03346 | Q95754 | -0.6318   |
| 127685 | P03346 | Q86TW2 | -1.1108   |
| 127686 | P03346 | P24071 | -1.2977   |
| 127687 | P03346 | Q8N7L0 | -0.076196 |
| 127688 | P03346 | Q9H257 | -0.22711  |
| 127689 | P03346 | Q94991 | -0.5909   |
| 127690 | P03346 | Q9HC56 | -0.82282  |
| 127691 | P03346 | Q95757 | -0.22667  |
| 127692 | P03346 | A8MTZ7 | -0.14292  |
| 127693 | P03346 | Q7LFL8 | -0.17769  |
| 127694 | P03346 | Q9UM47 | -0.2291   |
| 127695 | P03346 | P01185 | -0.35393  |
| 127696 | P03346 | Q6P1A2 | -0.52579  |
| 127697 | P03346 | Q9BQB6 | -0.7573   |
| 127698 | P03346 | P43362 | -0.15875  |
| 127699 | P03346 | A8MV23 | -0.45356  |
| 127700 | P03346 | Q14201 | -0.13981  |
| 127701 | P03346 | Q9NZJ5 | -0.2727   |
| 127702 | P03346 | P25092 | -0.70175  |
| 127703 | P03346 | Q9UJX0 | -0.17108  |
| 127704 | P03346 | Q9BV19 | -0.066954 |
| 127705 | P03346 | A3QJZ6 | -0.21209  |
| 127706 | P03346 | Q6UWP7 | -0.62801  |
| 127707 | P03346 | Q8NEZ4 | -0.31146  |
| 127708 | P03346 | Q14469 | -0.22709  |
| 127709 | P03346 | Q9UQC9 | -1.2041   |
| 127710 | P03346 | Q5W0B7 | -0.50365  |
| 127711 | P03346 | P48023 | -0.22716  |
| 127712 | P03346 | P12532 | -0.67618  |
| 127713 | P03346 | Q96CW9 | -0.42669  |
| 127714 | P03346 | Q8N414 | -0.50365  |
| 127715 | P03346 | Q43736 | -0.1529   |
| 127716 | P03346 | Q9NUI1 | -0.77637  |
| 127717 | P03346 | A8K830 | -0.013652 |
| 127718 | P03346 | Q8WXJ9 | -0.17595  |
| 127719 | P03346 | Q6IEE8 | -0.53281  |
| 127720 | P03346 | Q5HY64 | -0.19741  |
| 127721 | P03346 | Q9UGI8 | -0.28482  |
| 127722 | P03346 | Q8NH00 | -0.92763  |
| 127723 | P03346 | Q9H892 | -0.22621  |
| 127724 | P03346 | Q8N688 | -0.52229  |
| 127725 | P03346 | Q8NF50 | -0.20899  |
| 127726 | P03346 | P05408 | -0.19677  |
| 127727 | P03346 | Q13177 | -0.22764  |
| 127728 | P03346 | P04003 | -0.22759  |
| 127729 | P03346 | P58182 | -0.92763  |
| 127730 | P03346 | P37023 | -0.29019  |
| 127731 | P03346 | Q9P0N8 | -0.77274  |
| 127732 | P03346 | Q14625 | -1.0047   |
| 127733 | P03346 | Q95544 | -0.50393  |
| 127734 | P03346 | Q86TL0 | -0.10151  |
| 127735 | P03346 | Q5T848 | -0.96376  |
| 127736 | P03346 | O15273 | -0.2199   |
| 127737 | P03346 | A6NHZ5 | -0.22722  |
| 127738 | P03346 | Q43795 | -0.24843  |
| 127739 | P03346 | P61081 | -0.2072   |
| 127740 | P03346 | Q5TCS8 | -0.63715  |
| 127741 | P03346 | Q6PEY0 | -0.65504  |
| 127742 | P03346 | Q96GX1 | -0.38824  |
| 127743 | P03346 | Q15878 | -0.59805  |
| 127744 | P03346 | Q9NS64 | -0.33975  |
| 127745 | P03346 | A8MYA2 | -0.073995 |
| 127746 | P03346 | Q99653 | -0.22747  |
| 127747 | P03346 | P23763 | -0.22591  |
| 127748 | P03346 | Q59EK9 | -0.097392 |
| 127749 | P03346 | Q9NXG6 | -0.88528  |
| 127750 | P03346 | O75879 | -0.29598  |
| 127751 | P03346 | O14810 | -0.13772  |
| 127752 | P03346 | Q9NVM6 | -0.49542  |
| 127753 | P03346 | P49638 | -0.21028  |
| 127754 | P03346 | Q96M20 | -0.22707  |
| 127755 | P03346 | Q8NGP4 | -0.92763  |
| 127756 | P03346 | Q9Y5M8 | -0.89407  |

|        |        |        |           |
|--------|--------|--------|-----------|
| 127757 | P03346 | Q9NWU1 | -0.22815  |
| 127758 | P03346 | Q96M15 | -0.23495  |
| 127759 | P03346 | P19429 | -0.18731  |
| 127760 | P03346 | Q9NS15 | -0.54243  |
| 127761 | P03346 | Q86Z23 | -0.59838  |
| 127762 | P03346 | P83593 | -0.75616  |
| 127763 | P03346 | Q9BX67 | -0.46805  |
| 127764 | P03346 | Q9BXR3 | -0.22599  |
| 127765 | P03346 | P30480 | -0.76151  |
| 127766 | P03346 | O60814 | -0.34659  |
| 127767 | P03346 | Q5VVX9 | -0.52946  |
| 127768 | P03346 | Q96G74 | -0.24221  |
| 127769 | P03346 | A4D1P6 | -0.22742  |
| 127770 | P03346 | O15047 | -0.22634  |
| 127771 | P03346 | Q9HB90 | -0.44574  |
| 127772 | P03346 | Q8WXH6 | -0.86231  |
| 127773 | P03346 | P63130 | -0.21503  |
| 127774 | P03346 | O43474 | -0.22602  |
| 127775 | P03346 | P00748 | -0.51871  |
| 127776 | P03346 | P40938 | -0.22228  |
| 127777 | P03346 | Q96KT6 | -0.013652 |
| 127778 | P03346 | P35913 | -0.31185  |
| 127779 | P03346 | P58505 | -0.067236 |
| 127780 | P03346 | Q9HCK1 | -0.060525 |
| 127781 | P03346 | Q14CB8 | -0.41269  |
| 127782 | P03346 | Q9H943 | -0.21339  |
| 127783 | P03346 | C9JQI7 | -0.50365  |
| 127784 | P03346 | P63124 | -0.23811  |
| 127785 | P03346 | Q8N6S4 | -0.2405   |
| 127786 | P03346 | Q6ZS72 | -0.087469 |
| 127787 | P03346 | P07327 | -0.22642  |
| 127788 | P03346 | Q9P0L0 | -0.21286  |
| 127789 | P03346 | Q13002 | -0.43649  |
| 127790 | P03346 | Q5T4W7 | -0.68269  |
| 127791 | P03346 | P63129 | -0.23811  |
| 127792 | P03346 | Q9BQG1 | -0.48157  |
| 127793 | P03346 | Q9Y5I0 | -0.86699  |
| 127794 | P03346 | P04843 | -0.41495  |
| 127795 | P03346 | P30532 | -0.7605   |
| 127796 | P03346 | Q99884 | -0.6832   |
| 127797 | P03346 | Q8NGP0 | -0.92763  |
| 127798 | P03346 | Q8NEF3 | -0.14853  |
| 127799 | P03346 | Q8NGE9 | -0.92763  |
| 127800 | P03346 | P06881 | -0.21428  |
| 127801 | P03346 | Q8IY34 | -0.50918  |
| 127802 | P03346 | Q9UIG8 | -0.69842  |
| 127803 | P03346 | Q8IYR6 | -0.80854  |
| 127804 | P03346 | Q8NH83 | -0.92763  |
| 127805 | P03346 | Q9UKM9 | -0.22738  |
| 127806 | P03346 | Q7Z304 | -0.6651   |
| 127807 | P03346 | Q9H0V1 | -0.49508  |
| 127808 | P03346 | Q8N4C0 | -0.15019  |
| 127809 | P03346 | Q8WW62 | -0.6061   |
| 127810 | P03346 | Q6ZVH7 | -0.2274   |
| 127811 | P03346 | O95847 | -0.37315  |
| 127812 | P03346 | Q6UXZ0 | -0.50365  |
| 127813 | P03346 | Q9NRA2 | -0.81423  |
| 127814 | P03346 | Q02297 | -0.22741  |
| 127815 | P03346 | P49917 | -0.21693  |
| 127816 | P03346 | Q9Y5K2 | -1.0432   |
| 127817 | P03346 | Q9H093 | -0.34938  |
| 127818 | P03346 | P60981 | -0.18882  |
| 127819 | P03346 | Q0IIN9 | -0.078713 |
| 127820 | P03346 | P56539 | -0.22686  |
| 127821 | P03346 | P0CF97 | -0.067997 |
| 127822 | P03346 | Q7RTZ1 | -1.069    |
| 127823 | P03346 | Q8NET5 | -0.8465   |
| 127824 | P03346 | P01620 | -0.80078  |
| 127825 | P03346 | Q9HB40 | -0.6581   |
| 127826 | P03346 | Q53EV4 | -0.22741  |
| 127827 | P03346 | Q13454 | -0.55415  |
| 127828 | P03346 | Q9NP91 | -0.79433  |
| 127829 | P03346 | Q96PD7 | -0.25803  |
| 127830 | P03346 | P01303 | -0.5205   |
| 127831 | P03346 | Q9NP80 | -0.43162  |
| 127832 | P03346 | Q8TCW9 | -0.94113  |

|        |        |         |           |
|--------|--------|---------|-----------|
| 127833 | P03346 | Q96I15  | -0.18991  |
| 127834 | P03346 | Q6ZNUJ1 | -0.22741  |
| 127835 | P03346 | Q8NGI1  | -0.92763  |
| 127836 | P03346 | Q2M2H8  | -0.49022  |
| 127837 | P03346 | Q5I0X7  | -0.22741  |
| 127838 | P03346 | Q9P260  | -0.16776  |
| 127839 | P03346 | Q9HCX4  | -0.22711  |
| 127840 | P03346 | B2RXF0  | -0.20195  |
| 127841 | P03346 | P55201  | -0.22645  |
| 127842 | P03346 | O95872  | -0.2274   |
| 127843 | P03346 | Q9UKX3  | -0.28423  |
| 127844 | P03346 | Q9NU53  | -0.50365  |
| 127845 | P03346 | P06753  | -0.2189   |
| 127846 | P03346 | P0CL82  | -0.21009  |
| 127847 | P03346 | Q7Z4R8  | -0.49975  |
| 127848 | P03346 | Q86X02  | -0.11163  |
| 127849 | P03346 | Q9HAV5  | -0.24594  |
| 127850 | P03346 | Q01740  | -0.61532  |
| 127851 | P03346 | P07332  | -0.5763   |
| 127852 | P03346 | O00338  | -0.23129  |
| 127853 | P03346 | Q7Z3T1  | -0.92763  |
| 127854 | P03346 | P06319  | -0.80078  |
| 127855 | P03346 | P48740  | -0.7062   |
| 127856 | P03346 | Q6ZNF0  | -0.56616  |
| 127857 | P03346 | O75594  | -0.48369  |
| 127858 | P03346 | Q16678  | -0.56948  |
| 127859 | P03346 | Q6NY19  | -0.22742  |
| 127860 | P03346 | Q13046  | -0.55194  |
| 127861 | P03346 | Q8TDV0  | -0.96376  |
| 127862 | P03346 | Q99935  | -0.56887  |
| 127863 | P03346 | A1KXE4  | -0.56038  |
| 127864 | P03346 | Q86WI0  | -0.50365  |
| 127865 | P03346 | Q6ZV65  | -0.070567 |
| 127866 | P03346 | Q8IWW6  | -0.75813  |
| 127867 | P03346 | Q06495  | -0.28173  |
| 127868 | P03346 | O43707  | -0.27238  |
| 127869 | P03346 | Q12805  | -0.22753  |
| 127870 | P03346 | Q9P0K1  | -0.28199  |
| 127871 | P03346 | P52961  | -0.41705  |
| 127872 | P03346 | Q2VIQ3  | -0.26135  |
| 127873 | P03346 | P0C7X0  | -0.23295  |
| 127874 | P03346 | Q3B8N2  | -0.22328  |
| 127875 | P03346 | Q16623  | -0.28929  |
| 127876 | P03346 | A8MYZ6  | -0.28789  |
| 127877 | P03346 | P49758  | -0.4229   |
| 127878 | P03346 | Q9H3W5  | -0.62126  |
| 127879 | P03346 | O95925  | -0.22677  |
| 127880 | P03346 | Q92904  | -0.22754  |
| 127881 | P03346 | Q96FC9  | -0.28507  |
| 127882 | P03346 | Q96T54  | -0.80486  |
| 127883 | P03346 | Q07001  | -0.69248  |
| 127884 | P03346 | Q9BXX0  | -0.22742  |
| 127885 | P03346 | Q6Y1H2  | -0.23901  |
| 127886 | P03346 | P37287  | -0.22782  |
| 127887 | P03346 | A9Z1Z3  | -0.50365  |
| 127888 | P03346 | Q9Y548  | -0.49508  |
| 127889 | P03346 | Q8N3I7  | -0.12206  |
| 127890 | P03346 | Q9NZY2  | -0.013652 |
| 127891 | P03346 | Q8N815  | -0.15016  |
| 127892 | P03346 | Q99624  | -0.72183  |
| 127893 | P03346 | Q86Y07  | -0.27406  |
| 127894 | P03346 | Q86T26  | -1.5174   |
| 127895 | P03346 | Q9Y6X5  | -0.65499  |
| 127896 | P03346 | A6NGW2  | -0.53519  |
| 127897 | P03346 | A8MVU1  | -0.2274   |
| 127898 | P03346 | Q86U10  | -0.22739  |
| 127899 | P03346 | Q15404  | -0.23085  |
| 127900 | P03346 | P48651  | -0.5843   |
| 127901 | P03346 | Q15197  | -1.4133   |
| 127902 | P03346 | Q9BY84  | -0.23894  |
| 127903 | P03346 | Q8NGI4  | -0.92763  |
| 127904 | P03346 | Q96MZ4  | -0.20296  |
| 127905 | P03346 | P28472  | -0.73645  |
| 127906 | P03346 | Q0P641  | -0.2023   |
| 127907 | P03346 | P01730  | -0.3171   |
| 127908 | P03346 | P59768  | -0.31118  |



|        |        |        |           |
|--------|--------|--------|-----------|
| 127909 | P03346 | Q15822 | -0.70842  |
| 127910 | P03346 | Q9BXL6 | -0.22271  |
| 127911 | P03346 | Q96NR2 | -0.21657  |
| 127912 | P03346 | Q8N5S3 | -0.23771  |
| 127913 | P03346 | Q9BST9 | -0.28404  |
| 127914 | P03346 | Q5SV17 | -0.50365  |
| 127915 | P03346 | Q13753 | -0.91723  |
| 127916 | P03346 | Q9Y471 | -0.21944  |
| 127917 | P03346 | A6NCF5 | -0.21872  |
| 127918 | P03346 | Q8NC54 | -0.50365  |
| 127919 | P03346 | P01767 | -0.80078  |
| 127920 | P03346 | A3KFT3 | -0.92763  |
| 127921 | P03346 | Q969V1 | -0.96376  |
| 127922 | P03346 | Q9BZB8 | -0.22013  |
| 127923 | P03346 | Q94886 | -1.0089   |
| 127924 | P03346 | Q6XE38 | -0.53519  |
| 127925 | P03346 | Q6ZUF6 | -0.056756 |
| 127926 | P03346 | P12109 | -0.64494  |
| 127927 | P03346 | P61626 | -0.77968  |
| 127928 | P03346 | Q96IQ7 | -0.65456  |
| 127929 | P03346 | Q43665 | -0.22748  |
| 127930 | P03346 | Q8N1L1 | -0.013652 |
| 127931 | P03346 | Q9UI40 | -0.76224  |
| 127932 | P03346 | Q16513 | -0.22448  |
| 127933 | P03346 | Q8TF17 | -0.22742  |
| 127934 | P03346 | Q5T0T0 | -0.59552  |
| 127935 | P03346 | Q5SRN2 | -0.50365  |
| 127936 | P03346 | Q8NGS9 | -0.92763  |
| 127937 | P03346 | Q9BVK8 | -0.63608  |
| 127938 | P03346 | Q5SY85 | -0.087775 |
| 127939 | P03346 | P19237 | -0.19479  |
| 127940 | P03346 | Q49AS3 | -0.074182 |
| 127941 | P03346 | Q7Z695 | -0.9514   |
| 127942 | P03346 | P08962 | -0.45931  |
| 127943 | P03346 | Q9H649 | -0.13109  |
| 127944 | P03346 | Q6PHW0 | -0.74639  |
| 127945 | P03346 | A8MUK1 | -0.25999  |
| 127946 | P03346 | Q8TBB6 | -0.54409  |
| 127947 | P03346 | P60323 | -0.16419  |
| 127948 | P03346 | Q5T6L9 | -0.50365  |
| 127949 | P03346 | P0CZ25 | -0.18522  |
| 127950 | P03346 | Q9ULX5 | -0.23345  |
| 127951 | P03346 | Q96ND0 | -0.38186  |
| 127952 | P03346 | P05181 | -0.37515  |
| 127953 | P03346 | Q14543 | -0.22741  |
| 127954 | P03346 | P54829 | -0.92069  |
| 127955 | P03346 | Q9C037 | -0.29256  |
| 127956 | P03346 | P10314 | -0.51191  |
| 127957 | P03346 | P43121 | -0.75066  |
| 127958 | P03346 | P62820 | -0.40072  |
| 127959 | P03346 | Q8WUD1 | -0.54276  |
| 127960 | P03346 | Q5T871 | -0.013652 |
| 127961 | P03346 | Q6SJ93 | -0.22045  |
| 127962 | P03346 | Q8WTR4 | -0.38702  |
| 127963 | P03346 | Q9UGP8 | -0.46678  |
| 127964 | P03346 | P20062 | -0.67573  |
| 127965 | P03346 | Q8NGN7 | -0.92763  |
| 127966 | P03346 | Q05923 | -0.22912  |
| 127967 | P03346 | P60022 | -0.65797  |
| 127968 | P03346 | P61020 | -0.34657  |
| 127969 | P03346 | Q9HBJ0 | -0.55482  |
| 127970 | P03346 | Q8NGL9 | -0.92763  |
| 127971 | P03346 | P17516 | -0.22736  |
| 127972 | P03346 | Q6ZMR3 | -0.11777  |
| 127973 | P03346 | Q969K7 | -0.30782  |
| 127974 | P03346 | Q01453 | -0.17743  |
| 127975 | P03346 | Q6ZSA8 | -0.013652 |
| 127976 | P03346 | Q6J9G0 | -1.3013   |
| 127977 | P03346 | Q96ET8 | -0.50365  |
| 127978 | P03346 | P04424 | -0.17547  |
| 127979 | P03346 | P08118 | -0.28422  |
| 127980 | P03346 | Q9NTJ4 | -0.23427  |
| 127981 | P03346 | Q9H920 | -0.56385  |
| 127982 | P03346 | Q9UI17 | -0.15519  |
| 127983 | P03346 | Q96ER9 | -0.11378  |
| 127984 | P03346 | Q6ZRN7 | -0.013652 |

|        |        |        |           |
|--------|--------|--------|-----------|
| 127985 | P03346 | Q96RK4 | -0.22722  |
| 127986 | P03346 | O14672 | -0.25167  |
| 127987 | P03346 | Q6ZPD9 | -0.50365  |
| 127988 | P03346 | Q9UBD9 | -0.22692  |
| 127989 | P03346 | Q96C12 | -0.18993  |
| 127990 | P03346 | Q9H6H4 | -0.50365  |
| 127991 | P03346 | Q16527 | -0.22957  |
| 127992 | P03346 | P17900 | -0.23121  |
| 127993 | P03346 | Q3KNS1 | -0.36934  |
| 127994 | P03346 | P80365 | -0.48156  |
| 127995 | P03346 | Q8TB03 | -0.016748 |
| 127996 | P03346 | Q12852 | -0.34178  |
| 127997 | P03346 | Q96R05 | -0.22618  |
| 127998 | P03346 | Q5SQ13 | -0.19541  |
| 127999 | P03346 | O60403 | -0.92763  |
| 128000 | P03346 | Q9BX84 | -0.629    |
| 128001 | P03346 | Q8N7X0 | -0.35163  |
| 128002 | P03346 | A6NDJ8 | -0.61238  |
| 128003 | P03346 | P23946 | -1.1427   |
| 128004 | P03346 | Q9UN19 | -0.4304   |
| 128005 | P03346 | Q70CQ1 | -0.23097  |
| 128006 | P03346 | O60237 | -0.22741  |
| 128007 | P03346 | P78330 | -0.22745  |
| 128008 | P03346 | Q9UKA8 | -0.43278  |
| 128009 | P03346 | P07948 | -0.22881  |
| 128010 | P03346 | Q9NRM1 | -0.65299  |
| 128011 | P03346 | Q8NHP8 | -0.23851  |
| 128012 | P03346 | P01876 | -0.23015  |
| 128013 | P03346 | Q5VZ89 | -0.42958  |
| 128014 | P03346 | Q86X59 | -0.24481  |
| 128015 | P03346 | Q9UEW3 | -0.71597  |
| 128016 | P03346 | O60733 | -0.22741  |
| 128017 | P03346 | Q30KQ2 | -0.52229  |
| 128018 | P03346 | Q6UX39 | -0.54277  |
| 128019 | P03346 | Q9ULC5 | -0.67314  |
| 128020 | P03346 | O75762 | -0.62699  |
| 128021 | P03346 | Q96LP2 | -0.12243  |
| 128022 | P03346 | Q13162 | -0.22624  |
| 128023 | P03346 | Q9NRJ7 | -0.87177  |
| 128024 | P03346 | P57103 | -0.62658  |
| 128025 | P03346 | P35270 | -0.22724  |
| 128026 | P03346 | Q96PN8 | -1.1126   |
| 128027 | P03346 | Q8N752 | -0.72637  |
| 128028 | P03346 | P17342 | -0.56198  |
| 128029 | P03346 | O94854 | -0.26256  |
| 128030 | P03346 | Q5SY13 | -0.013652 |
| 128031 | P03346 | Q7Z2H8 | -0.62858  |
| 128032 | P03346 | Q8WXS5 | -0.61004  |
| 128033 | P03346 | Q5TGP6 | -0.24736  |
| 128034 | P03346 | Q9ULB1 | -0.22827  |
| 128035 | P03346 | Q3ZCW2 | -0.20952  |
| 128036 | P03346 | P47756 | -0.19174  |
| 128037 | P03346 | O43586 | -0.65805  |
| 128038 | P03346 | B1AJZ9 | -0.2048   |
| 128039 | P03346 | Q5JR12 | -0.21203  |
| 128040 | P03346 | P07996 | -0.27375  |
| 128041 | P03346 | P56747 | -0.38535  |
| 128042 | P03346 | Q5TBK1 | -0.19423  |
| 128043 | P03346 | P84077 | -0.22756  |
| 128044 | P03346 | P01871 | -1.1805   |
| 128045 | P03346 | Q96PH6 | -0.54232  |
| 128046 | P03346 | Q9NZN1 | -0.39298  |
| 128047 | P03346 | Q86VE3 | -0.20973  |
| 128048 | P03346 | Q14896 | -0.39295  |
| 128049 | P03346 | Q99683 | -0.22739  |
| 128050 | P03346 | P57773 | -0.65504  |
| 128051 | P03346 | Q9H813 | -0.50365  |
| 128052 | P03346 | P39900 | -0.9099   |
| 128053 | P03346 | P46459 | -0.23386  |
| 128054 | P03346 | P50458 | -0.22741  |
| 128055 | P03346 | P06887 | -0.80078  |
| 128056 | P03346 | Q86UV7 | -0.30279  |
| 128057 | P03346 | P0C604 | -0.92763  |
| 128058 | P03346 | P07359 | -0.28909  |
| 128059 | P03346 | O60701 | -0.51809  |
| 128060 | P03346 | P53355 | -0.28     |

|        |        |        |          |
|--------|--------|--------|----------|
| 128061 | P03346 | Q8N4Q0 | -0.5347  |
| 128062 | P03346 | Q8TDF6 | -0.27117 |
| 128063 | P03346 | Q8N8R5 | -0.53519 |
| 128064 | P03346 | P36888 | -0.42024 |
| 128065 | P03346 | F5H284 | -0.12349 |
| 128066 | P03346 | Q6UXX9 | -0.54113 |
| 128067 | P03346 | P28676 | -0.22779 |
| 128068 | P03346 | Q8NFZ4 | -0.49509 |
| 128069 | P03346 | O60412 | -0.92763 |
| 128070 | P03346 | Q6ZUM4 | -0.64324 |
| 128071 | P03346 | Q9BUP0 | -0.22675 |
| 128072 | P03346 | Q5SZB4 | -0.11933 |
| 128073 | P03346 | Q96HH4 | -0.50365 |
| 128074 | P03346 | Q8N8R3 | -0.3626  |
| 128075 | P03346 | P00746 | -0.84326 |
| 128076 | P03346 | Q9NUD7 | -0.17186 |
| 128077 | P03346 | Q96A32 | -0.22729 |
| 128078 | P03346 | P49888 | -0.23554 |
| 128079 | P03346 | Q9NXG2 | -0.19083 |
| 128080 | P03346 | Q9BYE2 | -0.95969 |
| 128081 | P03346 | Q6UWW0 | -0.55201 |
| 128082 | P03346 | Q96HP4 | -0.2268  |
| 128083 | P03346 | P51793 | -0.86169 |
| 128084 | P03346 | Q16825 | -0.27279 |
| 128085 | P03346 | Q9Y6G1 | -0.50365 |
| 128086 | P03346 | Q8N2C9 | -0.17665 |
| 128087 | P03346 | A6NJZ3 | -0.92763 |
| 128088 | P03346 | Q15818 | -0.25816 |
| 128089 | P03346 | P35070 | -0.9798  |
| 128090 | P03346 | Q96JA3 | -0.2273  |
| 128091 | P03346 | Q8WW14 | -0.11419 |
| 128092 | P03346 | Q6DHY5 | -0.92582 |
| 128093 | P03346 | P19447 | -0.20986 |
| 128094 | P03346 | P01594 | -0.80078 |
| 128095 | P03346 | P48681 | -0.16667 |
| 128096 | P03346 | O43869 | -0.92763 |
| 128097 | P03346 | Q01995 | -0.2167  |
| 128098 | P03346 | Q9HAQ2 | -0.4296  |
| 128099 | P03346 | Q8WU66 | -0.48605 |
| 128100 | P03346 | Q6ZSZ6 | -0.22707 |
| 128101 | P03346 | Q9Y442 | -0.50365 |
| 128102 | P03346 | O43741 | -0.30799 |
| 128103 | P03346 | Q9UBN7 | -0.22284 |
| 128104 | P03346 | A4D2H0 | -0.17913 |
| 128105 | P03346 | P07998 | -0.17988 |
| 128106 | P03346 | Q8NA58 | -0.13648 |
| 128107 | P03346 | P55316 | -0.31352 |
| 128108 | P03346 | Q8TED4 | -0.42445 |
| 128109 | P03346 | Q9BQI3 | -0.62316 |
| 128110 | P03346 | Q15048 | -0.19936 |
| 128111 | P03346 | O43581 | -0.61591 |
| 128112 | P03346 | Q6IEV9 | -0.92763 |
| 128113 | P03346 | Q17RF5 | -0.53519 |
| 128114 | P03346 | Q6ZW05 | -0.30539 |
| 128115 | P03346 | O95182 | -0.13039 |
| 128116 | P03346 | Q9HDB5 | -0.65943 |
| 128117 | P03346 | O95372 | -0.22561 |
| 128118 | P03346 | Q3ZCN5 | -0.22631 |
| 128119 | P03346 | Q01973 | -0.69886 |
| 128120 | P03346 | Q6ZNG9 | -0.20961 |
| 128121 | P03346 | Q92564 | -0.13803 |
| 128122 | P03346 | Q99062 | -1.4445  |
| 128123 | P03346 | P14061 | -0.37519 |
| 128124 | P03346 | Q96DL1 | -0.50365 |
| 128125 | P03346 | P49903 | -0.80533 |
| 128126 | P03346 | Q9NR81 | -0.22772 |
| 128127 | P03346 | Q8WXA2 | -0.53519 |
| 128128 | P03346 | Q6XR72 | -0.70015 |
| 128129 | P03346 | A6NCD1 | -0.30279 |
| 128130 | P03346 | Q9H9P8 | -0.37599 |
| 128131 | P03346 | Q9NYX4 | -0.75078 |
| 128132 | P03346 | P18859 | -0.17548 |
| 128133 | P03346 | Q8TBE1 | -0.58907 |
| 128134 | P03346 | Q6ZSU1 | -0.2447  |
| 128135 | P03346 | P20273 | -0.38654 |
| 128136 | P03346 | Q13153 | -0.22761 |

|        |        |        |           |
|--------|--------|--------|-----------|
| 128137 | P03346 | Q96M60 | -0.14521  |
| 128138 | P03346 | Q8NEM2 | -0.055787 |
| 128139 | P03346 | Q9H8X2 | -0.38041  |
| 128140 | P03346 | Q96FQ7 | -0.14168  |
| 128141 | P03346 | Q7Z7E8 | -0.22453  |
| 128142 | P03346 | Q13232 | -0.45491  |
| 128143 | P03346 | Q8NGC2 | -0.92763  |
| 128144 | P03346 | P30988 | -0.44915  |
| 128145 | P03346 | Q96CN5 | -0.22736  |
| 128146 | P03346 | A2VDF0 | -0.11955  |
| 128147 | P03346 | P43234 | -0.5169   |
| 128148 | P03346 | Q8N6K0 | -0.50365  |
| 128149 | P03346 | Q6ZVS7 | -0.20939  |
| 128150 | P03346 | Q96AH8 | -0.46864  |
| 128151 | P03346 | P50591 | -0.50985  |
| 128152 | P03346 | Q9Y691 | -0.75294  |
| 128153 | P03346 | P61812 | -0.22741  |
| 128154 | P03346 | Q9UIB8 | -0.88776  |
| 128155 | P03346 | Q15342 | -0.4206   |
| 128156 | P03346 | Q9BX10 | -0.59619  |
| 128157 | P03346 | Q86XD8 | -0.22673  |
| 128158 | P03346 | P10619 | -0.22213  |
| 128159 | P03346 | Q96BM0 | -0.50365  |
| 128160 | P03346 | Q14939 | -0.22655  |
| 128161 | P03346 | P01617 | -0.80078  |
| 128162 | P03346 | Q8IVT5 | -0.22741  |
| 128163 | P03346 | P33402 | -0.44403  |
| 128164 | P03346 | Q9BXN1 | -0.65016  |
| 128165 | P03346 | Q5K130 | -0.20931  |
| 128166 | P03346 | A8MUH7 | -0.228    |
| 128167 | P03346 | Q8N427 | -0.29849  |
| 128168 | P03346 | Q8NGK5 | -0.92763  |
| 128169 | P03346 | Q9H6Y5 | -0.22701  |
| 128170 | P03346 | Q6NSI4 | -0.18262  |
| 128171 | P03346 | Q9H792 | -0.28999  |
| 128172 | P03346 | Q13480 | -0.22738  |
| 128173 | P03346 | Q8IW75 | -0.4178   |
| 128174 | P03346 | Q9H4I3 | -0.20386  |
| 128175 | P03346 | Q99805 | -0.53698  |
| 128176 | P03346 | Q9BWX3 | -0.31654  |
| 128177 | P03346 | P40967 | -0.78872  |
| 128178 | P03346 | O95455 | -0.66995  |
| 128179 | P03346 | P80188 | -0.27621  |
| 128180 | P03346 | Q96ER3 | -0.5079   |
| 128181 | P03346 | A2RTX5 | -0.13868  |
| 128182 | P03346 | Q9BXV9 | -0.013652 |
| 128183 | P03346 | Q5JX71 | -0.50365  |
| 128184 | P03346 | Q9NVE4 | -0.10741  |
| 128185 | P03346 | Q9H6E5 | -0.22726  |
| 128186 | P03346 | Q92496 | -0.6306   |
| 128187 | P03346 | Q0VG73 | -0.013652 |
| 128188 | P03346 | Q8N146 | -0.92763  |
| 128189 | P03346 | Q8TAB3 | -0.86699  |
| 128190 | P03346 | Q6P3W2 | -0.24795  |
| 128191 | P03346 | Q9Y5H4 | -0.86699  |
| 128192 | P03346 | Q8NGK2 | -0.92763  |
| 128193 | P03346 | Q9H6X5 | -0.17784  |
| 128194 | P03346 | Q6ZSR9 | -0.25191  |
| 128195 | P03346 | P69891 | -0.07206  |
| 128196 | P03346 | Q9UKH3 | -0.35115  |
| 128197 | P03346 | P51149 | -0.237    |
| 128198 | P03346 | Q8NGD2 | -0.92763  |
| 128199 | P03346 | P15169 | -0.949    |
| 128200 | P03346 | P50553 | -0.43397  |
| 128201 | P03346 | Q9NR99 | -0.53519  |
| 128202 | P03346 | Q8N264 | -0.4171   |
| 128203 | P03346 | Q9C0C9 | -0.52946  |
| 128204 | P03346 | Q15645 | -0.22854  |
| 128205 | P03346 | A6PVY3 | -0.23589  |
| 128206 | P03346 | Q7Z5L0 | -0.52572  |
| 128207 | P03346 | Q29983 | -0.53028  |
| 128208 | P03346 | P61601 | -0.33435  |
| 128209 | P03346 | Q6UXP9 | -0.13069  |
| 128210 | P03346 | P41247 | -0.21145  |
| 128211 | P03346 | P24001 | -0.83427  |
| 128212 | P03346 | P49840 | -0.22751  |

|        |        |        |           |
|--------|--------|--------|-----------|
| 128213 | P03346 | Q9H4L5 | -0.31394  |
| 128214 | P03346 | P17066 | -0.32249  |
| 128215 | P03346 | O75781 | -0.13696  |
| 128216 | P03346 | Q5T5W8 | -0.50365  |
| 128217 | P03346 | Q9Y2H2 | -0.21365  |
| 128218 | P03346 | P32239 | -0.44052  |
| 128219 | P03346 | P49798 | -0.22737  |
| 128220 | P03346 | Q16560 | -0.22556  |
| 128221 | P03346 | P0CW01 | -0.10548  |
| 128222 | P03346 | Q96RI0 | -1.1402   |
| 128223 | P03346 | P50876 | -0.49385  |
| 128224 | P03346 | Q6W4X9 | -0.59252  |
| 128225 | P03346 | Q8WV74 | -0.19314  |
| 128226 | P03346 | P11215 | -0.22741  |
| 128227 | P03346 | Q7L8W6 | -0.054573 |
| 128228 | P03346 | Q8NFT2 | -0.86752  |
| 128229 | P03346 | Q15008 | -0.20108  |
| 128230 | P03346 | Q7Z3S9 | -0.60002  |
| 128231 | P03346 | P84996 | -0.47339  |
| 128232 | P03346 | O15440 | -0.76445  |
| 128233 | P03346 | Q70CQ4 | -0.36346  |
| 128234 | P03346 | Q14206 | -0.41399  |
| 128235 | P03346 | Q09MP3 | -0.1205   |
| 128236 | P03346 | Q8IXS8 | -0.19954  |
| 128237 | P03346 | Q8NGD3 | -0.92763  |
| 128238 | P03346 | Q9NUQ7 | -0.22919  |
| 128239 | P03346 | Q6TCH4 | -0.50365  |
| 128240 | P03346 | Q5QJ38 | -0.22988  |
| 128241 | P03346 | Q8IWT1 | -0.60786  |
| 128242 | P03346 | O95452 | -0.68865  |
| 128243 | P03346 | Q96T75 | -0.23124  |
| 128244 | P03346 | Q9H1E1 | -0.37711  |
| 128245 | P03346 | Q6NXP6 | -0.45343  |
| 128246 | P03346 | Q00537 | -0.69476  |
| 128247 | P03346 | Q16206 | -0.96085  |
| 128248 | P03346 | Q13520 | -0.51689  |
| 128249 | P03346 | P0C866 | -0.14468  |
| 128250 | P03346 | Q14517 | -0.22951  |
| 128251 | P03346 | Q14242 | -0.39698  |
| 128252 | P03346 | P03905 | -0.41873  |
| 128253 | P03346 | Q5TF21 | -0.50365  |
| 128254 | P03346 | P47211 | -0.91274  |
| 128255 | P03346 | Q8NG98 | -0.92763  |
| 128256 | P03346 | A6PVS8 | -0.22723  |
| 128257 | P03346 | P58753 | -0.22691  |
| 128258 | P03346 | Q4LDG9 | -0.22741  |
| 128259 | P03346 | Q9UP52 | -0.74517  |
| 128260 | P03346 | Q96P09 | -0.22741  |
| 128261 | P03346 | P04433 | -0.80078  |
| 128262 | P03346 | Q9BS91 | -0.35403  |
| 128263 | P03346 | P35613 | -0.22741  |
| 128264 | P03346 | Q8NCR0 | -0.45752  |
| 128265 | P03346 | Q5NDL2 | -0.22321  |
| 128266 | P03346 | Q86XM0 | -0.77367  |
| 128267 | P03346 | Q5VX71 | -0.50365  |
| 128268 | P03346 | Q8N6M5 | -0.1008   |
| 128269 | P03346 | Q86W28 | -0.32859  |
| 128270 | P03346 | Q8TE23 | -0.93835  |
| 128271 | P03346 | E9PQX1 | -0.21715  |
| 128272 | P03346 | P20929 | -0.22719  |
| 128273 | P03346 | P12074 | -0.08719  |
| 128274 | P03346 | Q96S16 | -0.19767  |
| 128275 | P03346 | Q6UX40 | -0.4187   |
| 128276 | P03346 | Q75T13 | -0.32647  |
| 128277 | P03346 | Q8NGI8 | -0.92763  |
| 128278 | P03346 | Q9H1P3 | -0.25352  |
| 128279 | P03346 | Q96JH8 | -0.48786  |
| 128280 | P03346 | O60674 | -0.23913  |
| 128281 | P03346 | Q3KR16 | -0.22755  |
| 128282 | P03346 | Q15758 | -0.61549  |
| 128283 | P03346 | Q9UHM6 | -0.9151   |
| 128284 | P03346 | Q14651 | -0.22743  |
| 128285 | P03346 | Q6ZRI0 | -0.57198  |
| 128286 | P03346 | P62942 | -0.22768  |
| 128287 | P03346 | P49913 | -0.40193  |
| 128288 | P03346 | P30550 | -0.94695  |

|        |        |        |            |
|--------|--------|--------|------------|
| 128289 | P03346 | P01138 | -0.36507   |
| 128290 | P03346 | Q6YN16 | -0.56792   |
| 128291 | P03346 | Q6ZMP0 | -0.71988   |
| 128292 | P03346 | Q71RC9 | -0.50365   |
| 128293 | P03346 | P48029 | -0.54252   |
| 128294 | P03346 | Q96RQ3 | -0.51087   |
| 128295 | P03346 | Q02224 | -0.23431   |
| 128296 | P03346 | Q6ICG6 | -0.17676   |
| 128297 | P03346 | O75061 | -0.22727   |
| 128298 | P03346 | Q9Y6X1 | -0.29695   |
| 128299 | P03346 | Q9HC96 | -0.45426   |
| 128300 | P03346 | O95622 | -0.64356   |
| 128301 | P03346 | P28906 | -0.4669    |
| 128302 | P03346 | P03952 | -0.61327   |
| 128303 | P03346 | O43174 | -0.55739   |
| 128304 | P03346 | Q9BSA4 | -0.19392   |
| 128305 | P03346 | Q8N801 | -0.21736   |
| 128306 | P03346 | Q9BR39 | -0.21461   |
| 128307 | P03346 | Q494R4 | -0.20696   |
| 128308 | P03346 | Q6UW60 | -0.79678   |
| 128309 | P03346 | Q7Z412 | -0.21831   |
| 128310 | P03346 | O43896 | -0.30265   |
| 128311 | P03346 | P15516 | -0.51399   |
| 128312 | P03346 | Q8NA66 | -0.21285   |
| 128313 | P03346 | P0DKL9 | -0.0081781 |
| 128314 | P03346 | Q9H1B5 | -0.45786   |
| 128315 | P03346 | Q14773 | -1.2326    |
| 128316 | P03346 | Q96DC8 | -0.21478   |
| 128317 | P03346 | Q9HCG7 | -0.61919   |
| 128318 | P03346 | P02144 | -0.16903   |
| 128319 | P03346 | Q75V66 | -0.64211   |
| 128320 | P03346 | P30405 | -0.12349   |
| 128321 | P03346 | Q08708 | -0.79738   |
| 128322 | P03346 | Q70EL3 | -0.26233   |
| 128323 | P03346 | Q9Y5H5 | -0.86699   |
| 128324 | P03346 | P07099 | -0.65906   |
| 128325 | P03346 | Q8IVL0 | -0.26079   |
| 128326 | P03346 | A1X283 | -0.22741   |
| 128327 | P03346 | P23743 | -0.74954   |
| 128328 | P03346 | P18433 | -1.001     |
| 128329 | P03346 | Q765I0 | -0.52424   |
| 128330 | P03346 | P55081 | -0.47588   |
| 128331 | P03346 | P04229 | -0.47548   |
| 128332 | P03346 | Q16763 | -0.1783    |
| 128333 | P03346 | P84085 | -0.22749   |
| 128334 | P03346 | Q8NCN4 | -0.22171   |
| 128335 | P03346 | Q53RT3 | -0.76193   |
| 128336 | P03346 | P40205 | -0.17609   |
| 128337 | P03346 | Q96HD1 | -0.57043   |
| 128338 | P03346 | Q8IWA4 | -0.69496   |
| 128339 | P03346 | A1L4M7 | -0.19858   |
| 128340 | P03346 | P15056 | -0.24566   |
| 128341 | P03346 | O14782 | -0.24344   |
| 128342 | P03346 | Q9H8H3 | -0.21459   |
| 128343 | P03346 | Q9BVQ7 | -0.46876   |
| 128344 | P03346 | Q8IXB3 | -0.5153    |
| 128345 | P03346 | Q15344 | -0.2288    |
| 128346 | P03346 | Q8NB49 | -0.49301   |
| 128347 | P03346 | Q9Y5H1 | -0.86699   |
| 128348 | P03346 | P18545 | -0.088229  |
| 128349 | P03346 | Q9Y2F5 | -0.17123   |
| 128350 | P03346 | P32455 | -0.71707   |
| 128351 | P03346 | P47901 | -0.80867   |
| 128352 | P03346 | Q5JQF8 | -0.40469   |
| 128353 | P03346 | O95466 | -0.22635   |
| 128354 | P03346 | E5RG02 | -0.56917   |
| 128355 | P03346 | Q6ZSB3 | -0.20799   |
| 128356 | P03346 | Q9Y5Z6 | -0.53302   |
| 128357 | P03346 | Q6ZMT4 | -0.24156   |
| 128358 | P03346 | O75324 | -0.40176   |
| 128359 | P03346 | Q6KF10 | -0.44103   |
| 128360 | P03346 | P01135 | -0.22742   |
| 128361 | P03346 | P24592 | -0.53123   |
| 128362 | P03346 | Q9Y2U5 | -0.45559   |
| 128363 | P03346 | Q53GD3 | -0.53164   |
| 128364 | P03346 | P0C854 | -0.53519   |

|        |        |        |           |
|--------|--------|--------|-----------|
| 128365 | P03346 | Q9Y5Y6 | -1.524    |
| 128366 | P03346 | Q9C0B2 | -0.13497  |
| 128367 | P03346 | Q93096 | -0.2446   |
| 128368 | P03346 | P30043 | -0.18834  |
| 128369 | P03346 | Q15303 | -0.22741  |
| 128370 | P03346 | P56705 | -0.27258  |
| 128371 | P03346 | Q6UXQ4 | -0.53519  |
| 128372 | P03346 | Q9UDX5 | -0.35924  |
| 128373 | P03346 | Q6GTS8 | -0.91653  |
| 128374 | P03346 | Q53HR8 | -0.093527 |
| 128375 | P03346 | P30450 | -0.51191  |
| 128376 | P03346 | Q86XA9 | -0.11336  |
| 128377 | P03346 | P04278 | -0.58698  |
| 128378 | P03346 | Q96H72 | -0.31306  |
| 128379 | P03346 | Q8NDL9 | -0.19875  |
| 128380 | P03346 | A6NHL2 | -0.31236  |
| 128381 | P03346 | Q8TDB8 | -0.47475  |
| 128382 | P03346 | Q9Y5G3 | -0.86699  |
| 128383 | P03346 | Q9C009 | -0.27048  |
| 128384 | P03346 | A6NDP7 | -0.50365  |
| 128385 | P03346 | Q8IY84 | -0.95123  |
| 128386 | P03346 | Q9H607 | -0.099291 |
| 128387 | P03346 | Q2M329 | -0.089677 |
| 128388 | P03346 | P01743 | -0.80078  |
| 128389 | P03346 | Q02747 | -0.65362  |
| 128390 | P03346 | O75711 | -0.59094  |
| 128391 | P03346 | Q14728 | -0.45189  |
| 128392 | P03346 | P59861 | -0.52229  |
| 128393 | P03346 | Q9ULP9 | -0.23068  |
| 128394 | P03346 | Q9UQ53 | -0.33367  |
| 128395 | P03346 | O94964 | -0.64072  |
| 128396 | P03346 | P43003 | -0.48563  |
| 128397 | P03346 | Q43699 | -1.3375   |
| 128398 | P03346 | Q9H3K6 | -0.042465 |
| 128399 | P03346 | Q92914 | -0.29483  |
| 128400 | P03346 | Q8IUB3 | -0.55518  |
| 128401 | P03346 | Q9P2F6 | -0.75813  |
| 128402 | P03346 | Q9GZP7 | -0.88373  |
| 128403 | P03346 | Q5PR19 | -0.1165   |
| 128404 | P03346 | A6NEL2 | -0.22741  |
| 128405 | P03346 | Q8TAV4 | -0.80493  |
| 128406 | P03346 | Q96BM9 | -0.38282  |
| 128407 | P03346 | Q9NR96 | -0.45926  |
| 128408 | P03346 | Q8N8U3 | -0.18726  |
| 128409 | P03346 | Q9NX14 | -0.27654  |
| 128410 | P03346 | Q9UBR5 | -1.0848   |
| 128411 | P03346 | O60844 | -0.36812  |
| 128412 | P03346 | Q6ZMZ0 | -0.2266   |
| 128413 | P03346 | A6NDN8 | -0.22311  |
| 128414 | P03346 | O60258 | -0.70456  |
| 128415 | P03346 | P30419 | -0.15443  |
| 128416 | P03346 | Q9HC84 | -0.22666  |
| 128417 | P03346 | Q6JQN1 | -0.39269  |
| 128418 | P03346 | P30559 | -0.76705  |
| 128419 | P03346 | P48509 | -0.26604  |
| 128420 | P03346 | Q9P0T7 | -0.47039  |
| 128421 | P03346 | P49795 | -0.22743  |
| 128422 | P03346 | Q8NH37 | -0.92763  |
| 128423 | P03346 | P09382 | -0.41092  |
| 128424 | P03346 | P86481 | -0.013652 |
| 128425 | P03346 | Q9H069 | -0.2274   |
| 128426 | P03346 | P02647 | -0.27532  |
| 128427 | P03346 | Q9NZS9 | -0.57217  |
| 128428 | P03346 | Q9NP59 | -0.20575  |
| 128429 | P03346 | Q16671 | -1.157    |
| 128430 | P03346 | O95497 | -0.52904  |
| 128431 | P03346 | Q9BY19 | -0.50365  |
| 128432 | P03346 | Q8WUY9 | -0.64405  |
| 128433 | P03346 | Q92565 | -0.22744  |
| 128434 | P03346 | Q14112 | -0.35436  |
| 128435 | P03346 | P30542 | -0.31866  |
| 128436 | P03346 | P0C7T7 | -0.013652 |
| 128437 | P03346 | Q9UJT1 | -0.222    |
| 128438 | P03346 | Q14142 | -0.23261  |
| 128439 | P03346 | P21817 | -0.49154  |
| 128440 | P03346 | Q6ZV77 | -0.013652 |

|        |        |        |           |
|--------|--------|--------|-----------|
| 128441 | P03346 | Q8NBM8 | -0.71393  |
| 128442 | P03346 | Q8IVV7 | -0.075591 |
| 128443 | P03346 | Q8IVQ6 | -0.35652  |
| 128444 | P03346 | Q8N5G2 | -0.27652  |
| 128445 | P03346 | P15813 | -0.46675  |
| 128446 | P03346 | Q30KQ8 | -0.52229  |
| 128447 | P03346 | Q969J3 | -0.19961  |
| 128448 | P03346 | Q8IWD5 | -0.50365  |
| 128449 | P03346 | Q9BYI3 | -0.1956   |
| 128450 | P03346 | P08949 | -0.52521  |
| 128451 | P03346 | Q8WV16 | -0.22743  |
| 128452 | P03346 | Q16570 | -0.91289  |
| 128453 | P03346 | Q9UBC2 | -0.22741  |
| 128454 | P03346 | P08758 | -0.15442  |
| 128455 | P03346 | P12319 | -0.78673  |
| 128456 | P03346 | P51787 | -0.63697  |
| 128457 | P03346 | P39059 | -1.2207   |
| 128458 | P03346 | Q86T65 | -0.22556  |
| 128459 | P03346 | P30493 | -0.76151  |
| 128460 | P03346 | Q9Y4D7 | -0.85616  |
| 128461 | P03346 | Q96K78 | -1.0077   |
| 128462 | P03346 | Q15434 | -0.23274  |
| 128463 | P03346 | P16234 | -0.24603  |
| 128464 | P03346 | B0I1T2 | -0.46858  |
| 128465 | P03346 | P62683 | -0.21346  |
| 128466 | P03346 | Q9Y693 | -0.52022  |
| 128467 | P03346 | Q6NZY7 | -0.18987  |
| 128468 | P03346 | Q6ZVM7 | -0.18632  |
| 128469 | P03346 | Q96QS1 | -0.58099  |
| 128470 | P03346 | A8MUP6 | -0.50365  |
| 128471 | P03346 | Q8N8L6 | -0.92981  |
| 128472 | P03346 | Q96BH3 | -0.54874  |
| 128473 | P03346 | Q43561 | -0.31085  |
| 128474 | P03346 | Q6ZV60 | -0.013652 |
| 128475 | P03346 | Q9NRP0 | -0.4793   |
| 128476 | P03346 | A8MVJ9 | -0.018818 |
| 128477 | P03346 | P29122 | -0.83363  |
| 128478 | P03346 | Q9UBY5 | -1.0362   |
| 128479 | P03346 | Q9H2A9 | -0.37655  |
| 128480 | P03346 | Q8NDY4 | -0.013652 |
| 128481 | P03346 | Q9NYS7 | -0.22933  |
| 128482 | P03346 | C9JYQ0 | -0.22741  |
| 128483 | P03346 | Q9NXZ2 | -0.72406  |
| 128484 | P03346 | P50151 | -0.3217   |
| 128485 | P03346 | Q9NTX9 | -0.10445  |
| 128486 | P03346 | Q9NZJ9 | -0.16468  |
| 128487 | P03346 | Q16820 | -1.1278   |
| 128488 | P03346 | Q96G61 | -0.16981  |
| 128489 | P03346 | Q9H5Y7 | -0.5909   |
| 128490 | P03346 | Q8TCW7 | -0.50365  |
| 128491 | P03346 | P08582 | -0.31382  |
| 128492 | P03346 | Q8TAA1 | -0.41884  |
| 128493 | P03346 | Q17RR3 | -0.67031  |
| 128494 | P03346 | Q13509 | -0.38685  |
| 128495 | P03346 | Q5VZY2 | -0.58521  |
| 128496 | P03346 | Q16394 | -0.42619  |
| 128497 | P03346 | Q95473 | -0.50365  |
| 128498 | P03346 | P46940 | -0.22741  |
| 128499 | P03346 | Q96P11 | -0.13556  |
| 128500 | P03346 | Q13478 | -0.95236  |
| 128501 | P03346 | Q4KMG9 | -0.50365  |
| 128502 | P03346 | Q43749 | -0.92763  |
| 128503 | P03346 | A6NGB7 | -0.50365  |
| 128504 | P03346 | Q9UNH6 | -0.22712  |
| 128505 | P03346 | Q9Y6D0 | -0.18238  |
| 128506 | P03346 | Q8NHS4 | -0.19429  |
| 128507 | P03346 | P46439 | -0.22652  |
| 128508 | P03346 | Q8IVD9 | -0.102    |
| 128509 | P03346 | Q9BUU2 | -0.14712  |
| 128510 | P03346 | Q07864 | -0.23192  |
| 128511 | P03346 | Q95382 | -0.96697  |
| 128512 | P03346 | Q8NGG1 | -0.80857  |
| 128513 | P03346 | Q53H47 | -0.22487  |
| 128514 | P03346 | Q6UDR6 | -0.50866  |
| 128515 | P03346 | Q43548 | -0.22228  |
| 128516 | P03346 | Q9H4G1 | -0.6083   |



|        |        |        |           |
|--------|--------|--------|-----------|
| 128517 | P03346 | Q96JF0 | -0.54508  |
| 128518 | P03346 | P29400 | -0.66625  |
| 128519 | P03346 | O94911 | -1.0033   |
| 128520 | P03346 | Q8N966 | -0.59087  |
| 128521 | P03346 | Q9BX73 | -0.50365  |
| 128522 | P03346 | Q9BRQ3 | -0.078228 |
| 128523 | P03346 | P00414 | -0.27075  |
| 128524 | P03346 | Q5TON5 | -0.22741  |
| 128525 | P03346 | P54315 | -0.79644  |
| 128526 | P03346 | Q9UKJ0 | -0.22807  |
| 128527 | P03346 | Q9NPH5 | -0.62961  |
| 128528 | P03346 | P35228 | -0.2353   |
| 128529 | P03346 | Q96JJ6 | -0.73299  |
| 128530 | P03346 | Q8IVY1 | -0.50365  |
| 128531 | P03346 | Q13275 | -0.71497  |
| 128532 | P03346 | Q9NRQ5 | -0.30782  |
| 128533 | P03346 | Q15349 | -0.58536  |
| 128534 | P03346 | Q68DL7 | -0.013652 |
| 128535 | P03346 | Q9UNK4 | -0.66375  |
| 128536 | P03346 | Q9BYG0 | -0.68894  |
| 128537 | P03346 | O60391 | -0.60697  |
| 128538 | P03346 | Q13585 | -1.0398   |
| 128539 | P03346 | O60942 | -0.34227  |
| 128540 | P03346 | P33681 | -0.22741  |
| 128541 | P03346 | O14548 | -0.23244  |
| 128542 | P03346 | Q8NBS9 | -0.25541  |
| 128543 | P03346 | A6NNT2 | -0.21592  |
| 128544 | P03346 | Q9BQ50 | -0.1393   |
| 128545 | P03346 | Q6UX72 | -0.45752  |
| 128546 | P03346 | O14494 | -0.71241  |
| 128547 | P03346 | Q7Z6L1 | -0.2781   |
| 128548 | P03346 | Q99932 | -0.038579 |
| 128549 | P03346 | Q9UG22 | -0.8743   |
| 128550 | P03346 | P27930 | -0.58458  |
| 128551 | P03346 | Q9NPL8 | -0.38186  |
| 128552 | P03346 | H3BR10 | -0.013652 |
| 128553 | P03346 | Q2KHN1 | -0.22704  |
| 128554 | P03346 | Q92613 | -0.22899  |
| 128555 | P03346 | P08247 | -0.37777  |
| 128556 | P03346 | Q86WV6 | -0.18783  |
| 128557 | P03346 | P03973 | -0.19939  |
| 128558 | P03346 | Q9NXB9 | -0.19984  |
| 128559 | P03346 | P12268 | -0.45834  |
| 128560 | P03346 | Q96K21 | -0.22426  |
| 128561 | P03346 | Q9NRE1 | -0.91064  |
| 128562 | P03346 | Q86TM3 | -0.31279  |
| 128563 | P03346 | Q8NAJ2 | -0.31589  |
| 128564 | P03346 | P49895 | -0.8019   |
| 128565 | P03346 | Q14439 | -1.1224   |
| 128566 | P03346 | P19883 | -0.2273   |
| 128567 | P03346 | Q8WVV4 | -0.22627  |
| 128568 | P03346 | P16519 | -0.2271   |
| 128569 | P03346 | Q8TF76 | -0.44797  |
| 128570 | P03346 | Q96J84 | -0.48071  |
| 128571 | P03346 | P20061 | -0.55627  |
| 128572 | P03346 | Q9BT67 | -0.25837  |
| 128573 | P03346 | Q86SJ2 | -0.22749  |
| 128574 | P03346 | Q9NRN9 | -0.084938 |
| 128575 | P03346 | P01906 | -0.65195  |
| 128576 | P03346 | P05231 | -0.24089  |
| 128577 | P03346 | P51530 | -0.2307   |
| 128578 | P03346 | P80162 | -1.0342   |
| 128579 | P03346 | Q13467 | -0.28     |
| 128580 | P03346 | Q969H9 | -0.013652 |
| 128581 | P03346 | Q92959 | -0.76542  |
| 128582 | P03346 | Q8IWR0 | -0.22457  |
| 128583 | P03346 | Q9NUB4 | -0.50365  |
| 128584 | P03346 | Q8NGQ3 | -0.92763  |
| 128585 | P03346 | P58513 | -0.27416  |
| 128586 | P03346 | P02745 | -0.23399  |
| 128587 | P03346 | Q8NGC1 | -0.92763  |
| 128588 | P03346 | Q8N6D2 | -0.22354  |
| 128589 | P03346 | P61599 | -0.22004  |
| 128590 | P03346 | P22301 | -0.34383  |
| 128591 | P03346 | Q9Y696 | -0.22735  |
| 128592 | P03346 | Q5VUY2 | -0.53369  |

|        |        |        |             |
|--------|--------|--------|-------------|
| 128593 | P03346 | Q03591 | -0.68626    |
| 128594 | P03346 | Q9BWQ6 | -0.49508    |
| 128595 | P03346 | Q99466 | -0.22746    |
| 128596 | P03346 | P22003 | -0.39851    |
| 128597 | P03346 | Q9Y276 | -0.29361    |
| 128598 | P03346 | Q4G0P3 | -0.21472    |
| 128599 | P03346 | Q5TH74 | -0.02067    |
| 128600 | P03346 | Q96AG3 | -0.22719    |
| 128601 | P03346 | Q01780 | -0.17944    |
| 128602 | P03346 | P00747 | -0.33208    |
| 128603 | P03346 | P05186 | -0.81904    |
| 128604 | P03346 | Q96LM5 | -0.19848    |
| 128605 | P03346 | Q4U2R8 | -0.24811    |
| 128606 | P03346 | P01722 | -0.80078    |
| 128607 | P03346 | Q9Y3M8 | -0.22905    |
| 128608 | P03346 | Q32M88 | -0.20157    |
| 128609 | P03346 | Q01484 | -0.22744    |
| 128610 | P03346 | P48431 | -0.24453    |
| 128611 | P03346 | Q9GIP4 | -0.52123    |
| 128612 | P03346 | P51805 | -0.76104    |
| 128613 | P03346 | Q96PN7 | -0.21584    |
| 128614 | P03346 | Q6NSI8 | -0.029279   |
| 128615 | P03346 | P01889 | -0.78764    |
| 128616 | P03346 | Q9BXW7 | -0.18032    |
| 128617 | P03346 | Q9Y5G0 | -0.86699    |
| 128618 | P03346 | Q8TCZ7 | -0.016838   |
| 128619 | P03346 | Q06203 | -0.26536    |
| 128620 | P03346 | Q9P2K6 | -0.2169     |
| 128621 | P03346 | Q17RS7 | -0.21547    |
| 128622 | P03346 | O14733 | -0.22861    |
| 128623 | P03346 | Q9BYV2 | -0.45634    |
| 128624 | P03346 | Q5SZJ8 | -0.1711     |
| 128625 | P03346 | Q9UII6 | -0.55231    |
| 128626 | P03346 | Q07011 | -0.63271    |
| 128627 | P03346 | P0C623 | -0.92763    |
| 128628 | P03346 | Q9BXP2 | -0.60683    |
| 128629 | P03346 | O14525 | -0.51963    |
| 128630 | P03346 | Q9P0J1 | -0.19144    |
| 128631 | P03346 | Q9NZH6 | -0.22623    |
| 128632 | P03346 | Q8TDE3 | -0.41884    |
| 128633 | P03346 | Q13268 | -0.22292    |
| 128634 | P03346 | Q6UXV0 | -0.63912    |
| 128635 | P03346 | Q8TCG2 | -0.38168    |
| 128636 | P03346 | Q9UDW1 | -0.1438     |
| 128637 | P03346 | Q6ZW34 | -0.50365    |
| 128638 | P03346 | Q8IXR9 | -0.14965    |
| 128639 | P03346 | P50443 | -0.79186    |
| 128640 | P03346 | P17948 | -0.44364    |
| 128641 | P03346 | Q86VW2 | -0.36771    |
| 128642 | P03346 | Q8NG99 | -0.92763    |
| 128643 | P03346 | Q01085 | -0.2345     |
| 128644 | P03346 | Q16647 | -0.22746    |
| 128645 | P03346 | P08243 | -0.22073    |
| 128646 | P03346 | P98066 | -0.36338    |
| 128647 | P03346 | O14791 | -0.36253    |
| 128648 | P03346 | Q9Y5U9 | -0.52557    |
| 128649 | P03346 | Q9HCM2 | -0.58478    |
| 128650 | P03346 | O14514 | -1.1804     |
| 128651 | P03346 | Q9P244 | -0.45757    |
| 128652 | P03346 | Q9Y365 | -0.23083    |
| 128653 | P03346 | P21730 | -0.97963    |
| 128654 | P03346 | O43422 | -0.059231   |
| 128655 | P03346 | Q92629 | -0.2894     |
| 128656 | P03346 | Q6IQ22 | -0.50902    |
| 128657 | P03346 | Q5VX52 | -0.16477    |
| 128658 | P03346 | P19174 | -0.22741    |
| 128659 | P03346 | Q96N35 | -0.50365    |
| 128660 | P03346 | Q8N148 | -0.92763    |
| 128661 | P03346 | O75365 | -0.62952    |
| 128662 | P03346 | P40313 | -0.69068    |
| 128663 | P03346 | Q9BXU0 | -0.1505     |
| 128664 | P03346 | Q7Z7N9 | -0.50365    |
| 128665 | P03346 | Q9UBT6 | -0.15202    |
| 128666 | P03346 | Q9BYT8 | -0.20912    |
| 128667 | P03346 | Q9C073 | -0.00053153 |
| 128668 | P03346 | Q99679 | -1.0977     |

|        |        |        |           |
|--------|--------|--------|-----------|
| 128669 | P03346 | Q8NEP7 | -0.22247  |
| 128670 | P03346 | Q14191 | -0.22727  |
| 128671 | P03346 | Q8WU58 | -0.12635  |
| 128672 | P03346 | Q9H4I9 | -0.38186  |
| 128673 | P03346 | Q9H0Q0 | -0.19954  |
| 128674 | P03346 | Q43169 | -0.4517   |
| 128675 | P03346 | Q15283 | -0.12951  |
| 128676 | P03346 | P49685 | -1.0551   |
| 128677 | P03346 | P16662 | -0.64567  |
| 128678 | P03346 | Q9HCP6 | -0.54152  |
| 128679 | P03346 | P52823 | -0.4584   |
| 128680 | P03346 | P09923 | -0.91218  |
| 128681 | P03346 | Q96SN7 | -0.14471  |
| 128682 | P03346 | Q15274 | -0.15568  |
| 128683 | P03346 | P0C025 | -0.053788 |
| 128684 | P03346 | Q9Y5X9 | -0.6682   |
| 128685 | P03346 | Q5W0B1 | -0.2274   |
| 128686 | P03346 | P04075 | -0.24771  |
| 128687 | P03346 | Q86W47 | -0.37381  |
| 128688 | P03346 | Q6ZS94 | -0.013652 |
| 128689 | P03346 | Q9NYP7 | -0.21495  |
| 128690 | P03346 | P18085 | -0.22746  |
| 128691 | P03346 | Q9NQQ7 | -0.47711  |
| 128692 | P03346 | Q9H6Q4 | -0.12195  |
| 128693 | P03346 | Q71RG6 | -0.53519  |
| 128694 | P03346 | Q8IV48 | -0.18682  |
| 128695 | P03346 | P01733 | -0.22411  |
| 128696 | P03346 | Q53RD9 | -0.83652  |
| 128697 | P03346 | Q8N239 | -0.19187  |
| 128698 | P03346 | Q86XJ1 | -0.22383  |
| 128699 | P03346 | P50747 | -0.21577  |
| 128700 | P03346 | Q9NRH1 | -0.062212 |
| 128701 | P03346 | P78540 | -0.22614  |
| 128702 | P03346 | Q32P28 | -0.39991  |
| 128703 | P03346 | Q99558 | -0.22741  |
| 128704 | P03346 | Q8NGY7 | -0.92763  |
| 128705 | P03346 | Q9GZZ9 | -0.22236  |
| 128706 | P03346 | Q05C16 | -0.22754  |
| 128707 | P03346 | Q9GZY0 | -0.1947   |
| 128708 | P03346 | Q8TDI0 | -0.22583  |
| 128709 | P03346 | Q9HD20 | -0.58397  |
| 128710 | P03346 | P30511 | -0.82455  |
| 128711 | P03346 | Q9NZW4 | -0.78179  |
| 128712 | P03346 | A6NKX1 | -0.013652 |
| 128713 | P03346 | Q08116 | -0.44806  |
| 128714 | P03346 | P13521 | -0.47824  |
| 128715 | P03346 | Q9UHD0 | -0.71365  |
| 128716 | P03346 | Q75387 | -0.78831  |
| 128717 | P03346 | P42701 | -0.50784  |
| 128718 | P03346 | P46952 | -0.20982  |
| 128719 | P03346 | A8MZ36 | -0.21944  |
| 128720 | P03346 | P48051 | -0.22766  |
| 128721 | P03346 | Q96KT0 | -0.10977  |
| 128722 | P03346 | Q9UPV7 | -0.11011  |
| 128723 | P03346 | P16444 | -0.31969  |
| 128724 | P03346 | O00418 | -0.65596  |
| 128725 | P03346 | Q8N6C8 | -0.80884  |
| 128726 | P03346 | P22223 | -0.86486  |
| 128727 | P03346 | O75973 | -0.30644  |
| 128728 | P03346 | Q9Y689 | -0.92981  |
| 128729 | P03346 | Q96L42 | -0.66155  |
| 128730 | P03346 | Q92522 | -0.23392  |
| 128731 | P03346 | Q9P2E3 | -0.22745  |
| 128732 | P03346 | P01848 | -0.68499  |
| 128733 | P03346 | P31641 | -0.74278  |
| 128734 | P03346 | P0CJ68 | -0.36125  |
| 128735 | P03346 | P07306 | -0.27217  |
| 128736 | P03346 | Q9H4M7 | -0.22737  |
| 128737 | P03346 | P40238 | -0.76214  |
| 128738 | P03346 | O43423 | -0.19834  |
| 128739 | P03346 | Q5T3F8 | -0.91216  |
| 128740 | P03346 | Q9H313 | -0.57709  |
| 128741 | P03346 | P02686 | -0.51891  |
| 128742 | P03346 | P78524 | -0.19366  |
| 128743 | P03346 | Q9UHW9 | -0.60331  |
| 128744 | P03346 | Q96PX1 | -0.2274   |

|        |        |        |           |
|--------|--------|--------|-----------|
| 128745 | P03346 | P02462 | -0.26628  |
| 128746 | P03346 | Q8NFU4 | -0.53519  |
| 128747 | P03346 | Q30KP8 | -0.52229  |
| 128748 | P03346 | Q8IWX5 | -0.57722  |
| 128749 | P03346 | O75293 | -0.023431 |
| 128750 | P03346 | Q8NDX9 | -0.3749   |
| 128751 | P03346 | P11216 | -0.22437  |
| 128752 | P03346 | Q8NAN2 | -0.50365  |
| 128753 | P03346 | Q8NFI4 | -0.22729  |
| 128754 | P03346 | Q9BPU6 | -0.22638  |
| 128755 | P03346 | P59533 | -0.84404  |
| 128756 | P03346 | Q5VVC0 | -0.066566 |
| 128757 | P03346 | Q8IZ83 | -0.30639  |
| 128758 | P03346 | P56179 | -0.20008  |
| 128759 | P03346 | Q7LDI9 | -0.21194  |
| 128760 | P03346 | Q96NG3 | -0.22612  |
| 128761 | P03346 | Q6ZQX7 | -0.20734  |
| 128762 | P03346 | P29597 | -0.58017  |
| 128763 | P03346 | Q9GZN8 | -0.14937  |
| 128764 | P03346 | Q86U28 | -0.17828  |
| 128765 | P03346 | A6NKF9 | -0.50365  |
| 128766 | P03346 | A6NKC9 | -0.22741  |
| 128767 | P03346 | Q15031 | -0.090717 |
| 128768 | P03346 | Q9H0R3 | -0.50365  |
| 128769 | P03346 | Q9NRZ5 | -0.5391   |
| 128770 | P03346 | Q01968 | -0.22758  |
| 128771 | P03346 | P21333 | -0.22771  |
| 128772 | P03346 | Q60884 | -0.078302 |
| 128773 | P03346 | Q8IZJ6 | -0.45685  |
| 128774 | P03346 | Q8NH06 | -0.92763  |
| 128775 | P03346 | P12644 | -0.22741  |
| 128776 | P03346 | Q15811 | -0.23631  |
| 128777 | P03346 | Q75962 | -0.40086  |
| 128778 | P03346 | P52564 | -0.2282   |
| 128779 | P03346 | Q00013 | -0.22683  |
| 128780 | P03346 | Q9NPA2 | -1.1024   |
| 128781 | P03346 | O60939 | -0.578    |
| 128782 | P03346 | Q3MII6 | -0.34808  |
| 128783 | P03346 | O75841 | -0.32179  |
| 128784 | P03346 | Q6PEW0 | -0.56807  |
| 128785 | P03346 | Q8IXM6 | -0.025859 |
| 128786 | P03346 | P20142 | -0.51179  |
| 128787 | P03346 | D6RA61 | -0.36346  |
| 128788 | P03346 | Q02127 | -0.442    |
| 128789 | P03346 | Q9HCM4 | -0.24111  |
| 128790 | P03346 | P37231 | -0.23477  |
| 128791 | P03346 | Q8TD08 | -1.0844   |
| 128792 | P03346 | Q9NSA1 | -0.28691  |
| 128793 | P03346 | Q99707 | -0.18014  |
| 128794 | P03346 | P08174 | -0.85356  |
| 128795 | P03346 | O15496 | -0.47437  |
| 128796 | P03346 | Q9H7B4 | -0.22732  |
| 128797 | P03346 | Q6DHV7 | -0.22374  |
| 128798 | P03346 | A8MYZ5 | -0.22556  |
| 128799 | P03346 | Q7Z5M5 | -0.50365  |
| 128800 | P03346 | Q9Y286 | -0.8158   |
| 128801 | P03346 | Q69YJ1 | -0.34185  |
| 128802 | P03346 | A6NJI9 | -0.22009  |
| 128803 | P03346 | Q96KX2 | -0.18977  |
| 128804 | P03346 | Q8IXH8 | -0.86699  |
| 128805 | P03346 | P48645 | -0.67729  |
| 128806 | P03346 | Q9H6D5 | -0.50365  |
| 128807 | P03346 | A6NIL9 | -0.50365  |
| 128808 | P03346 | Q96P53 | -0.22741  |
| 128809 | P03346 | Q8WUT9 | -0.37103  |
| 128810 | P03346 | Q7RTV5 | -0.232    |
| 128811 | P03346 | Q8IXL7 | -0.55642  |
| 128812 | P03346 | Q14BN4 | -0.60506  |
| 128813 | P03346 | Q9H999 | -0.47039  |
| 128814 | P03346 | O95445 | -0.67548  |
| 128815 | P03346 | P13591 | -1.02     |
| 128816 | P03346 | Q6UXN9 | -0.2929   |
| 128817 | P03346 | Q9BQ51 | -1.0464   |
| 128818 | P03346 | Q14649 | -0.80997  |
| 128819 | P03346 | Q96JB8 | -0.22683  |
| 128820 | P03346 | Q12767 | -0.50365  |

|        |        |        |           |
|--------|--------|--------|-----------|
| 128821 | P03346 | Q7L5N7 | -0.52633  |
| 128822 | P03346 | Q96AW1 | -0.29402  |
| 128823 | P03346 | P61964 | -0.40175  |
| 128824 | P03346 | Q9UQ49 | -0.31796  |
| 128825 | P03346 | Q4VCS5 | -0.1969   |
| 128826 | P03346 | Q96CT7 | -0.12969  |
| 128827 | P03346 | Q16739 | -0.35534  |
| 128828 | P03346 | Q8N8K9 | -0.15455  |
| 128829 | P03346 | P26022 | -0.56386  |
| 128830 | P03346 | O00628 | -0.2274   |
| 128831 | P03346 | Q96L33 | -0.9419   |
| 128832 | P03346 | Q99986 | -0.22741  |
| 128833 | P03346 | Q9NZQ0 | -0.63722  |
| 128834 | P03346 | Q96DY7 | -0.080333 |
| 128835 | P03346 | Q9BQL6 | -0.29598  |
| 128836 | P03346 | O75044 | -0.22846  |
| 128837 | P03346 | Q6ZNE9 | -0.22454  |
| 128838 | P03346 | O00222 | -0.97116  |
| 128839 | P03346 | Q13325 | -0.22654  |
| 128840 | P03346 | A4D1N5 | -0.22129  |
| 128841 | P03346 | O00462 | -0.22396  |
| 128842 | P03346 | O00526 | -0.77679  |
| 128843 | P03346 | O60858 | -0.32864  |
| 128844 | P03346 | O95340 | -0.56584  |
| 128845 | P03346 | Q9P2N6 | -0.062712 |
| 128846 | P03346 | P63215 | -0.25034  |
| 128847 | P03346 | P49908 | -0.65871  |
| 128848 | P03346 | Q8WU67 | -0.268    |
| 128849 | P03346 | Q8TBF8 | -0.22257  |
| 128850 | P03346 | A6NIJ5 | -0.23295  |
| 128851 | P03346 | Q05952 | -0.51354  |
| 128852 | P03346 | Q96PV7 | -0.016226 |
| 128853 | P03346 | O95258 | -0.50973  |
| 128854 | P03346 | Q8N3Y3 | -0.41413  |
| 128855 | P03346 | O15063 | -0.048216 |
| 128856 | P03346 | P59910 | -0.21119  |
| 128857 | P03346 | P14621 | -0.23243  |
| 128858 | P03346 | P41181 | -0.22736  |
| 128859 | P03346 | Q8NGS7 | -0.92763  |
| 128860 | P03346 | Q9HAZ1 | -0.8094   |
| 128861 | P03346 | Q8WU68 | -0.22299  |
| 128862 | P03346 | Q68EN5 | -0.12727  |
| 128863 | P03346 | Q8IZ41 | -0.50325  |
| 128864 | P03346 | Q86SK9 | -0.81708  |
| 128865 | P03346 | P50053 | -0.21514  |
| 128866 | P03346 | P01344 | -0.22665  |
| 128867 | P03346 | Q6UY14 | -0.22784  |
| 128868 | P03346 | Q99571 | -0.3981   |
| 128869 | P03346 | P43489 | -0.64571  |
| 128870 | P03346 | P52209 | -0.10356  |
| 128871 | P03346 | Q6NV75 | -0.96376  |
| 128872 | P03346 | Q8N2G6 | -0.21634  |
| 128873 | P03346 | A1E959 | -0.46628  |
| 128874 | P03346 | Q9BXT8 | -0.23283  |
| 128875 | P03346 | A6NDI0 | -0.30279  |
| 128876 | P03346 | Q9BSF4 | -0.15893  |
| 128877 | P03346 | Q07075 | -0.72518  |
| 128878 | P03346 | E2RYF6 | -0.50365  |
| 128879 | P03346 | P15421 | -0.80125  |
| 128880 | P03346 | P31415 | -0.22431  |
| 128881 | P03346 | P18075 | -0.22741  |
| 128882 | P03346 | Q6NVV3 | -0.56569  |
| 128883 | P03346 | Q96PE2 | -0.25632  |
| 128884 | P03346 | Q9BZA8 | -0.86699  |
| 128885 | P03346 | P48995 | -0.22738  |
| 128886 | P03346 | A6NNE9 | -0.53505  |
| 128887 | P03346 | Q9HCU4 | -0.78477  |
| 128888 | P03346 | P55039 | -0.45624  |
| 128889 | P03346 | A6NHY6 | -0.15478  |
| 128890 | P03346 | Q6P996 | -0.23653  |
| 128891 | P03346 | P58335 | -0.70615  |
| 128892 | P03346 | Q6P093 | -0.9229   |
| 128893 | P03346 | Q96DT6 | -0.39399  |
| 128894 | P03346 | P53582 | -0.18742  |
| 128895 | P03346 | P49238 | -0.4602   |
| 128896 | P03346 | Q9BV87 | -0.50378  |

|        |        |        |           |
|--------|--------|--------|-----------|
| 128897 | P03346 | A6NKP2 | -0.51216  |
| 128898 | P03346 | Q9NWS6 | -0.50365  |
| 128899 | P03346 | P29590 | -0.22729  |
| 128900 | P03346 | Q9BXB1 | -0.74998  |
| 128901 | P03346 | Q8NH50 | -0.92763  |
| 128902 | P03346 | P16615 | -0.77735  |
| 128903 | P03346 | Q6ZT52 | -0.2009   |
| 128904 | P03346 | Q13183 | -0.8374   |
| 128905 | P03346 | Q9Y478 | -0.242    |
| 128906 | P03346 | Q9GZK3 | -0.92763  |
| 128907 | P03346 | Q86V85 | -0.50365  |
| 128908 | P03346 | P16389 | -0.55911  |
| 128909 | P03346 | A8MXD5 | -0.27397  |
| 128910 | P03346 | Q8NEA4 | -0.20828  |
| 128911 | P03346 | O43432 | -0.19345  |
| 128912 | P03346 | A6NHR9 | -0.30249  |
| 128913 | P03346 | Q3LXA3 | -0.66821  |
| 128914 | P03346 | O95045 | -0.10994  |
| 128915 | P03346 | P0CF75 | -0.16489  |
| 128916 | P03346 | P51649 | -0.28704  |
| 128917 | P03346 | Q14815 | -0.65083  |
| 128918 | P03346 | Q8WXI2 | -0.22741  |
| 128919 | P03346 | Q9P272 | -0.21867  |
| 128920 | P03346 | P23378 | -0.35822  |
| 128921 | P03346 | P11717 | -0.22758  |
| 128922 | P03346 | P30954 | -1.0107   |
| 128923 | P03346 | Q9BY71 | -0.22754  |
| 128924 | P03346 | Q92934 | -0.20527  |
| 128925 | P03346 | Q16706 | -0.35089  |
| 128926 | P03346 | Q9H992 | -0.18975  |
| 128927 | P03346 | Q8WTU2 | -0.62787  |
| 128928 | P03346 | Q14409 | -0.39205  |
| 128929 | P03346 | Q8IZN7 | -0.52229  |
| 128930 | P03346 | Q8NEE8 | -0.22739  |
| 128931 | P03346 | P58400 | -0.4681   |
| 128932 | P03346 | Q702N8 | -0.19947  |
| 128933 | P03346 | P51841 | -1.1508   |
| 128934 | P03346 | Q96RD6 | -0.54897  |
| 128935 | P03346 | Q9UKK9 | -0.30408  |
| 128936 | P03346 | Q6B9Z1 | -0.53519  |
| 128937 | P03346 | Q14956 | -0.75024  |
| 128938 | P03346 | Q8NG94 | -0.92763  |
| 128939 | P03346 | O43826 | -0.22859  |
| 128940 | P03346 | Q86SQ3 | -1.0524   |
| 128941 | P03346 | O43895 | -0.60525  |
| 128942 | P03346 | Q9Y426 | -0.12493  |
| 128943 | P03346 | Q9P2G9 | -0.18188  |
| 128944 | P03346 | P63123 | -0.23811  |
| 128945 | P03346 | Q9BY10 | -0.59496  |
| 128946 | P03346 | Q9UJ37 | -0.4075   |
| 128947 | P03346 | Q9Y2E4 | -0.22263  |
| 128948 | P03346 | Q9NV12 | -0.50365  |
| 128949 | P03346 | Q96BY6 | -0.27742  |
| 128950 | P03346 | P20941 | -0.21726  |
| 128951 | P03346 | Q96S44 | -0.26297  |
| 128952 | P03346 | Q92847 | -0.52567  |
| 128953 | P03346 | O60938 | -0.58779  |
| 128954 | P03346 | P22455 | -0.7332   |
| 128955 | P03346 | P0DMC3 | -0.013652 |
| 128956 | P03346 | Q96LL9 | -0.31701  |
| 128957 | P03346 | Q9HAS3 | -0.54225  |
| 128958 | P03346 | Q53QZ3 | -0.65292  |
| 128959 | P03346 | Q96LB4 | -0.16364  |
| 128960 | P03346 | Q53GG5 | -0.22741  |
| 128961 | P03346 | Q9BXA6 | -0.62801  |
| 128962 | P03346 | Q8IU54 | -0.59545  |
| 128963 | P03346 | Q9HAS0 | -0.16827  |
| 128964 | P03346 | Q96NZ8 | -0.49178  |
| 128965 | P03346 | O95255 | -1.0209   |
| 128966 | P03346 | O14926 | -0.22667  |
| 128967 | P03346 | Q9UQQ2 | -0.22741  |
| 128968 | P03346 | B2RNN3 | -0.59838  |
| 128969 | P03346 | Q9NZT1 | -0.22726  |
| 128970 | P03346 | Q86WC4 | -0.45624  |
| 128971 | P03346 | Q6XPS3 | -0.74814  |
| 128972 | P03346 | O94777 | -0.084056 |

|        |        |        |           |
|--------|--------|--------|-----------|
| 128973 | P03346 | Q96D42 | -0.37754  |
| 128974 | P03346 | P01037 | -0.6083   |
| 128975 | P03346 | Q69YZ2 | -0.50365  |
| 128976 | P03346 | Q9NVG8 | -0.92582  |
| 128977 | P03346 | O75871 | -0.65456  |
| 128978 | P03346 | Q6UXB0 | -0.53519  |
| 128979 | P03346 | Q6DRA6 | -0.35085  |
| 128980 | P03346 | Q8N4F7 | -0.56385  |
| 128981 | P03346 | O95180 | -0.57646  |
| 128982 | P03346 | P08034 | -0.62635  |
| 128983 | P03346 | Q9H330 | -0.39933  |
| 128984 | P03346 | Q8WZ26 | -0.21542  |
| 128985 | P03346 | Q8IUB2 | -0.50866  |
| 128986 | P03346 | P16150 | -0.79563  |
| 128987 | P03346 | Q99941 | -0.22275  |
| 128988 | P03346 | P47972 | -0.51284  |
| 128989 | P03346 | Q8N8U9 | -0.56507  |
| 128990 | P03346 | P55008 | -0.22737  |
| 128991 | P03346 | P55087 | -0.38318  |
| 128992 | P03346 | A6NMZ2 | -0.2288   |
| 128993 | P03346 | Q12918 | -0.71889  |
| 128994 | P03346 | Q96JQ2 | -0.35435  |
| 128995 | P03346 | P51857 | -0.22724  |
| 128996 | P03346 | C9JUS6 | -0.53519  |
| 128997 | P03346 | Q96M83 | -0.13331  |
| 128998 | P03346 | Q9NXL9 | -0.27208  |
| 128999 | P03346 | Q5FYA8 | -0.51235  |
| 129000 | P03346 | P08173 | -0.81317  |
| 129001 | P03346 | Q8WW32 | -0.29723  |
| 129002 | P03346 | Q6ZNC4 | -0.30279  |
| 129003 | P03346 | Q9BRF8 | -0.20533  |
| 129004 | P03346 | P98196 | -0.47914  |
| 129005 | P03346 | Q16798 | -0.30646  |
| 129006 | P03346 | Q8NGK9 | -0.92763  |
| 129007 | P03346 | Q8TCG1 | -0.20868  |
| 129008 | P03346 | Q9NX61 | -0.4722   |
| 129009 | P03346 | P20591 | -0.22948  |
| 129010 | P03346 | P48169 | -0.62165  |
| 129011 | P03346 | Q9NUJ1 | -0.22707  |
| 129012 | P03346 | Q9BUB5 | -0.22748  |
| 129013 | P03346 | P23515 | -0.37868  |
| 129014 | P03346 | Q99469 | -0.2274   |
| 129015 | P03346 | P51798 | -0.84965  |
| 129016 | P03346 | Q96R30 | -0.92763  |
| 129017 | P03346 | P51828 | -0.79018  |
| 129018 | P03346 | Q13822 | -0.78585  |
| 129019 | P03346 | Q9UGN4 | -0.81353  |
| 129020 | P03346 | Q9BY32 | -0.28378  |
| 129021 | P03346 | P20963 | -0.23111  |
| 129022 | P03346 | O43301 | -0.48833  |
| 129023 | P03346 | Q86UL3 | -0.44042  |
| 129024 | P03346 | O95140 | -0.54891  |
| 129025 | P03346 | Q9H672 | -0.22741  |
| 129026 | P03346 | Q8IZC4 | -0.48394  |
| 129027 | P03346 | Q16517 | -0.11032  |
| 129028 | P03346 | Q5JV73 | -0.2274   |
| 129029 | P03346 | Q9UBT2 | -0.22498  |
| 129030 | P03346 | Q8N268 | -0.2085   |
| 129031 | P03346 | P48436 | -0.24672  |
| 129032 | P03346 | Q70EL2 | -0.45872  |
| 129033 | P03346 | Q86SG6 | -0.87237  |
| 129034 | P03346 | P49746 | -0.64705  |
| 129035 | P03346 | Q5GH72 | -0.50365  |
| 129036 | P03346 | Q14410 | -0.39205  |
| 129037 | P03346 | P04839 | -0.49502  |
| 129038 | P03346 | Q9Y5P1 | -0.92763  |
| 129039 | P03346 | Q8TAT2 | -0.54776  |
| 129040 | P03346 | Q96HN2 | -0.22246  |
| 129041 | P03346 | Q9UDR5 | -0.38772  |
| 129042 | P03346 | Q6P1R4 | -0.32447  |
| 129043 | P03346 | Q6ZVS6 | -0.53519  |
| 129044 | P03346 | P18136 | -0.80078  |
| 129045 | P03346 | P11309 | -0.22746  |
| 129046 | P03346 | P07911 | -0.607    |
| 129047 | P03346 | Q9GZV7 | -0.72027  |
| 129048 | P03346 | Q8N9K7 | -0.013652 |

|        |        |        |           |
|--------|--------|--------|-----------|
| 129049 | P03346 | P51812 | -0.22506  |
| 129050 | P03346 | Q8WVJ2 | -0.16472  |
| 129051 | P03346 | Q8NGN6 | -0.92763  |
| 129052 | P03346 | Q56NI9 | -0.1672   |
| 129053 | P03346 | Q58FG1 | -0.28583  |
| 129054 | P03346 | P24723 | -0.64529  |
| 129055 | P03346 | O15303 | -0.93381  |
| 129056 | P03346 | P00480 | -0.14561  |
| 129057 | P03346 | P10644 | -0.22744  |
| 129058 | P03346 | P01834 | -0.80078  |
| 129059 | P03346 | Q9BSL1 | -0.22694  |
| 129060 | P03346 | Q8IW45 | -0.26213  |
| 129061 | P03346 | Q8TEF2 | -0.50365  |
| 129062 | P03346 | Q15915 | -0.22729  |
| 129063 | P03346 | Q5VTH2 | -0.045048 |
| 129064 | P03346 | Q8IZV5 | -0.51975  |
| 129065 | P03346 | Q86UC2 | -0.052332 |
| 129066 | P03346 | Q9NUG4 | -0.13355  |
| 129067 | P03346 | Q9UGF6 | -0.92763  |
| 129068 | P03346 | P12544 | -0.25913  |
| 129069 | P03346 | Q6NXR4 | -0.075692 |
| 129070 | P03346 | Q96KX1 | -0.24167  |
| 129071 | P03346 | Q96Q77 | -0.2276   |
| 129072 | P03346 | Q8WVC6 | -0.36617  |
| 129073 | P03346 | Q9H0X4 | -0.50365  |
| 129074 | P03346 | P26439 | -0.70203  |
| 129075 | P03346 | P49190 | -1.1124   |
| 129076 | P03346 | Q13627 | -0.22741  |
| 129077 | P03346 | A6NGE4 | -0.22742  |
| 129078 | P03346 | A2RUR9 | -0.20011  |
| 129079 | P03346 | P02808 | -0.04832  |
| 129080 | P03346 | O94813 | -0.24624  |
| 129081 | P03346 | P35222 | -0.22792  |
| 129082 | P03346 | P47888 | -0.92763  |
| 129083 | P03346 | Q8NH57 | -0.92763  |
| 129084 | P03346 | O60879 | -0.22629  |
| 129085 | P03346 | Q99946 | -0.5153   |
| 129086 | P03346 | Q8NG41 | -0.13372  |
| 129087 | P03346 | P13796 | -0.3007   |
| 129088 | P03346 | Q504Y0 | -0.55888  |
| 129089 | P03346 | P00740 | -0.96613  |
| 129090 | P03346 | Q5XLA6 | -0.26212  |
| 129091 | P03346 | Q96CN4 | -0.41109  |
| 129092 | P03346 | Q6PIU2 | -0.61905  |
| 129093 | P03346 | Q9H4D0 | -0.72965  |
| 129094 | P03346 | Q9H1Z8 | -0.5785   |
| 129095 | P03346 | Q6NUI1 | -0.025974 |
| 129096 | P03346 | A6NF89 | -0.92763  |
| 129097 | P03346 | Q9UN67 | -0.87177  |
| 129098 | P03346 | Q8NC38 | -0.10349  |
| 129099 | P03346 | P35318 | -0.22247  |
| 129100 | P03346 | Q8N4T0 | -0.88956  |
| 129101 | P03346 | Q4UJ75 | -0.2274   |
| 129102 | P03346 | Q9NSQ0 | -0.067789 |
| 129103 | P03346 | Q03164 | -0.22707  |
| 129104 | P03346 | P10720 | -0.69632  |
| 129105 | P03346 | Q9UQV4 | -0.61946  |
| 129106 | P03346 | Q9UDY6 | -0.22868  |
| 129107 | P03346 | Q9UNA1 | -0.22792  |
| 129108 | P03346 | P30508 | -0.82654  |
| 129109 | P03346 | Q8NE01 | -0.18627  |
| 129110 | P03346 | Q9NY97 | -0.29928  |
| 129111 | P03346 | Q15743 | -1.149    |
| 129112 | P03346 | Q14561 | -0.097896 |
| 129113 | P03346 | Q6IA17 | -0.22745  |
| 129114 | P03346 | Q6UXP8 | -0.53519  |
| 129115 | P03346 | Q8NBA8 | -0.12217  |
| 129116 | P03346 | Q9NZ42 | -0.16692  |
| 129117 | P03346 | Q9Y274 | -0.27775  |
| 129118 | P03346 | P27338 | -0.47025  |
| 129119 | P03346 | Q6UWT2 | -0.53519  |
| 129120 | P03346 | P28300 | -0.21916  |
| 129121 | P03346 | Q6UXV3 | -0.53519  |
| 129122 | P03346 | Q8WXD2 | -0.40367  |
| 129123 | P03346 | O75385 | -0.38299  |
| 129124 | P03346 | Q7Z4W2 | -0.555    |



|        |        |        |           |
|--------|--------|--------|-----------|
| 129125 | P03346 | Q9Y5H2 | -0.86699  |
| 129126 | P03346 | Q6NXE6 | -0.22194  |
| 129127 | P03346 | Q9P1P4 | -0.9411   |
| 129128 | P03346 | Q9NY59 | -0.32432  |
| 129129 | P03346 | P60852 | -1.0481   |
| 129130 | P03346 | Q7Z5H5 | -0.74432  |
| 129131 | P03346 | Q6ZWJ8 | -0.53519  |
| 129132 | P03346 | Q6NSJ5 | -0.50365  |
| 129133 | P03346 | P22760 | -0.65246  |
| 129134 | P03346 | Q9Y2D2 | -0.26973  |
| 129135 | P03346 | Q9Y5Z9 | -0.13082  |
| 129136 | P03346 | Q5VZ18 | -0.22741  |
| 129137 | P03346 | A6NHT5 | -0.22819  |
| 129138 | P03346 | P04217 | -0.45606  |
| 129139 | P03346 | Q86SP6 | -0.87635  |
| 129140 | P03346 | Q15165 | -0.53349  |
| 129141 | P03346 | Q6P6C2 | -0.3661   |
| 129142 | P03346 | A8K4G0 | -0.65219  |
| 129143 | P03346 | Q9NQG1 | -0.50365  |
| 129144 | P03346 | Q9Y624 | -0.45424  |
| 129145 | P03346 | P78329 | -0.22794  |
| 129146 | P03346 | P55289 | -0.83801  |
| 129147 | P03346 | Q6WKZ4 | -0.22496  |
| 129148 | P03346 | J3KSC0 | -0.33259  |
| 129149 | P03346 | Q494U1 | -0.14804  |
| 129150 | P03346 | Q8WV19 | -0.19221  |
| 129151 | P03346 | O00476 | -0.56946  |
| 129152 | P03346 | Q96HY7 | -0.19828  |
| 129153 | P03346 | Q6UWP8 | -0.53519  |
| 129154 | P03346 | Q9H5N1 | -0.16638  |
| 129155 | P03346 | Q6RI45 | -0.22752  |
| 129156 | P03346 | Q5T5X7 | -0.20597  |
| 129157 | P03346 | Q9NX31 | -0.20387  |
| 129158 | P03346 | Q8ND25 | -0.2301   |
| 129159 | P03346 | Q7RTR8 | -0.84404  |
| 129160 | P03346 | Q8NDC0 | -0.01355  |
| 129161 | P03346 | Q96R48 | -0.92763  |
| 129162 | P03346 | Q9P0W0 | -0.34398  |
| 129163 | P03346 | Q9UKJ8 | -0.84412  |
| 129164 | P03346 | Q9BY65 | -0.072392 |
| 129165 | P03346 | A6NK02 | -0.30279  |
| 129166 | P03346 | Q9NQI0 | -0.31628  |
| 129167 | P03346 | Q9Y2Q5 | -0.13413  |
| 129168 | P03346 | Q5VTM2 | -0.7214   |
| 129169 | P03346 | P04628 | -0.22741  |
| 129170 | P03346 | P54764 | -0.48927  |
| 129171 | P03346 | P08648 | -0.22749  |
| 129172 | P03346 | Q8NH51 | -0.92763  |
| 129173 | P03346 | Q9Y2K9 | -0.22741  |
| 129174 | P03346 | P61619 | -0.52269  |
| 129175 | P03346 | Q8NG83 | -0.92763  |
| 129176 | P03346 | P48066 | -0.73346  |
| 129177 | P03346 | Q5JW98 | -0.50365  |
| 129178 | P03346 | Q9UHN6 | -0.6719   |
| 129179 | P03346 | P52333 | -0.2779   |
| 129180 | P03346 | Q15904 | -0.66989  |
| 129181 | P03346 | P42681 | -0.34387  |
| 129182 | P03346 | Q6ZUX7 | -0.50365  |
| 129183 | P03346 | B7ZAP0 | -0.20562  |
| 129184 | P03346 | Q15760 | -1.0977   |
| 129185 | P03346 | Q8NH70 | -0.92763  |
| 129186 | P03346 | Q95772 | -0.50123  |
| 129187 | P03346 | Q9BPX6 | -0.22545  |
| 129188 | P03346 | Q43155 | -0.78025  |
| 129189 | P03346 | Q96L15 | -0.54898  |
| 129190 | P03346 | P01282 | -0.444    |
| 129191 | P03346 | Q9UDX3 | -0.70018  |
| 129192 | P03346 | Q9NPH9 | -0.26367  |
| 129193 | P03346 | Q9UNQ0 | -0.34561  |
| 129194 | P03346 | Q8WZ92 | -0.92763  |
| 129195 | P03346 | Q6NSI1 | -0.2274   |
| 129196 | P03346 | Q15843 | -0.22697  |
| 129197 | P03346 | O14735 | -0.49952  |
| 129198 | P03346 | Q95994 | -0.21962  |
| 129199 | P03346 | Q9UHY1 | -0.22741  |
| 129200 | P03346 | P01903 | -0.63421  |

|        |        |        |           |
|--------|--------|--------|-----------|
| 129201 | P03346 | P0C0P6 | -0.52789  |
| 129202 | P03346 | P21917 | -0.39641  |
| 129203 | P03346 | P30512 | -0.51191  |
| 129204 | P03346 | Q16878 | -0.22734  |
| 129205 | P03346 | Q96I59 | -0.077335 |
| 129206 | P03346 | Q14916 | -0.78251  |
| 129207 | P03346 | Q6ZS49 | -0.013652 |
| 129208 | P03346 | Q92478 | -0.65104  |
| 129209 | P03346 | Q9BXU1 | -0.88651  |
| 129210 | P03346 | P40394 | -0.52325  |
| 129211 | P03346 | Q16799 | -0.2236   |
| 129212 | P03346 | P0C7P4 | -0.38641  |
| 129213 | P03346 | P11049 | -0.23659  |
| 129214 | P03346 | Q5TCY1 | -0.47986  |
| 129215 | P03346 | P35240 | -0.22979  |
| 129216 | P03346 | Q13164 | -0.22741  |
| 129217 | P03346 | P17980 | -0.29404  |
| 129218 | P03346 | O60941 | -0.22709  |
| 129219 | P03346 | Q9BXU3 | -0.30279  |
| 129220 | P03346 | C9JJ37 | -0.21968  |
| 129221 | P03346 | P02652 | -0.27927  |
| 129222 | P03346 | Q8IVW4 | -0.54109  |
| 129223 | P03346 | Q9UKW4 | -0.22741  |
| 129224 | P03346 | Q8TBG4 | -0.21079  |
| 129225 | P03346 | Q5SVS4 | -0.27208  |
| 129226 | P03346 | Q8N1D5 | -0.12472  |
| 129227 | P03346 | P16402 | -0.24669  |
| 129228 | P03346 | P22749 | -0.60423  |
| 129229 | P03346 | Q8IX04 | -0.27851  |
| 129230 | P03346 | A6NHX0 | -0.040934 |
| 129231 | P03346 | Q8N6M6 | -0.29986  |
| 129232 | P03346 | Q86VD1 | -0.21514  |
| 129233 | P03346 | Q9Y6W6 | -0.24911  |
| 129234 | P03346 | P01763 | -0.80078  |
| 129235 | P03346 | A6NNB3 | -0.79828  |
| 129236 | P03346 | Q495C1 | -0.2022   |
| 129237 | P03346 | Q96HC4 | -0.23038  |
| 129238 | P03346 | Q99217 | -0.39561  |
| 129239 | P03346 | A6NML5 | -0.50365  |
| 129240 | P03346 | Q8NGC6 | -0.92763  |
| 129241 | P03346 | Q92482 | -0.31898  |
| 129242 | P03346 | P68402 | -0.15939  |
| 129243 | P03346 | O00622 | -0.34569  |
| 129244 | P03346 | O43813 | -0.25877  |
| 129245 | P03346 | P34947 | -0.3626   |
| 129246 | P03346 | O00305 | -0.22735  |
| 129247 | P03346 | P20702 | -0.24395  |
| 129248 | P03346 | Q86W34 | -0.4777   |
| 129249 | P03346 | P40145 | -0.76257  |
| 129250 | P03346 | Q9UL15 | -0.16681  |
| 129251 | P03346 | P0DM63 | -0.023974 |
| 129252 | P03346 | P29120 | -0.29741  |
| 129253 | P03346 | P49773 | -0.19988  |
| 129254 | P03346 | Q9BQT9 | -0.72965  |
| 129255 | P03346 | Q96DA2 | -0.67625  |
| 129256 | P03346 | Q9NY47 | -0.54534  |
| 129257 | P03346 | Q9NPB3 | -0.22695  |
| 129258 | P03346 | Q96KN2 | -0.8831   |
| 129259 | P03346 | Q13733 | -0.88612  |
| 129260 | P03346 | Q0IIM8 | -0.96657  |
| 129261 | P03346 | P30566 | -0.1967   |
| 129262 | P03346 | Q75L30 | -0.013652 |
| 129263 | P03346 | Q0VAF6 | -0.18207  |
| 129264 | P03346 | P04114 | -0.28789  |
| 129265 | P03346 | Q53R41 | -0.1627   |
| 129266 | P03346 | Q86UF4 | -0.15215  |
| 129267 | P03346 | Q13574 | -0.22741  |
| 129268 | P03346 | P20393 | -0.32111  |
| 129269 | P03346 | Q14609 | -0.51786  |
| 129270 | P03346 | A8MYP8 | -0.025202 |
| 129271 | P03346 | Q8N4L8 | -0.12611  |
| 129272 | P03346 | P16190 | -0.51191  |
| 129273 | P03346 | Q6ZWK4 | -0.50365  |
| 129274 | P03346 | Q94985 | -0.83396  |
| 129275 | P03346 | Q96MZ0 | -0.22672  |
| 129276 | P03346 | C9J442 | -0.53519  |

|        |        |        |           |
|--------|--------|--------|-----------|
| 129277 | P03346 | Q7RTP6 | -0.27604  |
| 129278 | P03346 | A4QMS7 | -0.10754  |
| 129279 | P03346 | P52799 | -0.63681  |
| 129280 | P03346 | P15086 | -0.88342  |
| 129281 | P03346 | Q15131 | -0.27682  |
| 129282 | P03346 | A6NNY8 | -0.36346  |
| 129283 | P03346 | P35367 | -0.46891  |
| 129284 | P03346 | Q15785 | -0.25557  |
| 129285 | P03346 | Q9HAU6 | -0.22138  |
| 129286 | P03346 | Q9H3H3 | -0.099949 |
| 129287 | P03346 | Q9NUH8 | -0.50365  |
| 129288 | P03346 | Q9Y345 | -0.60705  |
| 129289 | P03346 | Q8IUG5 | -0.20757  |
| 129290 | P03346 | Q14236 | -0.16316  |
| 129291 | P03346 | Q8NH67 | -0.92763  |
| 129292 | P03346 | Q8NGS5 | -0.92763  |
| 129293 | P03346 | Q96DA0 | -0.53541  |
| 129294 | P03346 | P56381 | -0.17006  |
| 129295 | P03346 | Q8N6T3 | -0.18104  |
| 129296 | P03346 | Q8WWL2 | -0.16038  |
| 129297 | P03346 | P29972 | -0.22733  |
| 129298 | P03346 | Q9H477 | -0.56181  |
| 129299 | P03346 | Q60882 | -0.61022  |
| 129300 | P03346 | Q53GL0 | -0.17682  |
| 129301 | P03346 | Q8WVN8 | -0.34311  |
| 129302 | P03346 | O15068 | -0.23785  |
| 129303 | P03346 | Q8IZD0 | -0.21456  |
| 129304 | P03346 | Q75477 | -0.11356  |
| 129305 | P03346 | E9PJ23 | -0.16245  |
| 129306 | P03346 | P06239 | -0.23843  |
| 129307 | P03346 | Q9Y5P4 | -0.22747  |
| 129308 | P03346 | O15498 | -0.21815  |
| 129309 | P03346 | A6NGN9 | -0.53519  |
| 129310 | P03346 | Q9NY46 | -0.50712  |
| 129311 | P03346 | Q3MIN7 | -0.52888  |
| 129312 | P03346 | Q70HW3 | -0.24257  |
| 129313 | P03346 | Q86V24 | -0.65861  |
| 129314 | P03346 | P15144 | -0.65241  |
| 129315 | P03346 | Q9H195 | -0.54584  |
| 129316 | P03346 | Q99501 | -0.20224  |
| 129317 | P03346 | O95371 | -0.89956  |
| 129318 | P03346 | O94919 | -0.46385  |
| 129319 | P03346 | Q8N1G1 | -0.16144  |
| 129320 | P03346 | Q13131 | -0.23262  |
| 129321 | P03346 | Q96N66 | -0.16031  |
| 129322 | P03346 | Q8WWU5 | -0.79447  |
| 129323 | P03346 | P14543 | -0.76945  |
| 129324 | P03346 | P00390 | -0.22702  |
| 129325 | P03346 | O95248 | -0.53808  |
| 129326 | P03346 | Q96DE9 | -0.15765  |
| 129327 | P03346 | Q8TEB7 | -0.40845  |
| 129328 | P03346 | Q4KMZ1 | -0.085836 |
| 129329 | P03346 | Q9Y5W8 | -0.36899  |
| 129330 | P03346 | Q02846 | -1.2262   |
| 129331 | P03346 | Q5VT97 | -0.46816  |
| 129332 | P03346 | O15079 | -0.22734  |
| 129333 | P03346 | P10114 | -0.27834  |
| 129334 | P03346 | Q08493 | -0.32212  |
| 129335 | P03346 | Q9NZQ7 | -0.4144   |
| 129336 | P03346 | Q7Z7A4 | -0.61904  |
| 129337 | P03346 | Q92630 | -0.39001  |
| 129338 | P03346 | Q6ZU67 | -0.051433 |
| 129339 | P03346 | P40305 | -0.26393  |
| 129340 | P03346 | Q7Z406 | -0.21968  |
| 129341 | P03346 | Q75LS8 | -0.2274   |
| 129342 | P03346 | Q04721 | -0.22741  |
| 129343 | P03346 | Q5TBE3 | -0.079042 |
| 129344 | P03346 | Q8IYE1 | -0.17171  |
| 129345 | P03346 | P05455 | -0.2104   |
| 129346 | P03346 | Q6P4F7 | -0.6787   |
| 129347 | P03346 | Q16760 | -0.46568  |
| 129348 | P03346 | Q8N3F9 | -0.50365  |
| 129349 | P03346 | Q08334 | -0.36343  |
| 129350 | P03346 | P0C851 | -0.50365  |
| 129351 | P03346 | Q8TDU5 | -0.91924  |
| 129352 | P03346 | Q16134 | -0.25989  |

|        |        |        |           |
|--------|--------|--------|-----------|
| 129353 | P03346 | Q7Z6M2 | -0.20588  |
| 129354 | P03346 | B5MD39 | -0.20152  |
| 129355 | P03346 | Q9UQ07 | -0.68008  |
| 129356 | P03346 | Q9P298 | -0.50365  |
| 129357 | P03346 | Q9NUJ7 | -0.25778  |
| 129358 | P03346 | Q9Y4G8 | -0.74936  |
| 129359 | P03346 | Q53F19 | -0.43248  |
| 129360 | P03346 | Q9Y6K0 | -0.3081   |
| 129361 | P03346 | P35236 | -0.23331  |
| 129362 | P03346 | Q99705 | -0.90735  |
| 129363 | P03346 | Q9UKU6 | -0.99515  |
| 129364 | P03346 | Q92736 | -0.2753   |
| 129365 | P03346 | Q8TD20 | -0.28514  |
| 129366 | P03346 | Q86T13 | -0.50492  |
| 129367 | P03346 | Q9BVJ7 | -0.22741  |
| 129368 | P03346 | Q8N8N7 | -0.4621   |
| 129369 | P03346 | Q9UHE5 | -0.61508  |
| 129370 | P03346 | Q6UXG3 | -0.64802  |
| 129371 | P03346 | Q2VYF4 | -0.38092  |
| 129372 | P03346 | A6NIV6 | -0.23714  |
| 129373 | P03346 | Q96T53 | -0.57866  |
| 129374 | P03346 | P09493 | -0.22666  |
| 129375 | P03346 | A6NK06 | -0.12736  |
| 129376 | P03346 | Q1MX18 | -0.22699  |
| 129377 | P03346 | P12883 | -0.12344  |
| 129378 | P03346 | P18074 | -0.24228  |
| 129379 | P03346 | A6NLX3 | -0.067125 |
| 129380 | P03346 | Q6V0L0 | -0.69703  |
| 129381 | P03346 | Q9GZZ8 | -0.33402  |
| 129382 | P03346 | Q9P217 | -0.21228  |
| 129383 | P03346 | P0C5Z0 | -0.35062  |
| 129384 | P03346 | P43629 | -0.83738  |
| 129385 | P03346 | Q6PCB6 | -0.20903  |
| 129386 | P03346 | P62745 | -0.22743  |
| 129387 | P03346 | Q01804 | -0.16909  |
| 129388 | P03346 | Q86TH1 | -0.26682  |
| 129389 | P03346 | P54107 | -0.64102  |
| 129390 | P03346 | Q9UGQ2 | -0.31412  |
| 129391 | P03346 | P01859 | -0.75232  |
| 129392 | P03346 | P0CJ92 | -0.13488  |
| 129393 | P03346 | Q9NXE4 | -0.39458  |
| 129394 | P03346 | Q6NUN7 | -0.013652 |
| 129395 | P03346 | Q9UQ90 | -0.449    |
| 129396 | P03346 | Q7Z4W1 | -0.52867  |
| 129397 | P03346 | Q15043 | -0.69823  |
| 129398 | P03346 | Q86X53 | -0.11445  |
| 129399 | P03346 | Q6ZSN1 | -0.074387 |
| 129400 | P03346 | Q9NSA0 | -0.45009  |
| 129401 | P03346 | Q9P109 | -0.30518  |
| 129402 | P03346 | Q09327 | -0.40025  |
| 129403 | P03346 | Q6ZMT9 | -0.20828  |
| 129404 | P03346 | P61567 | -0.35115  |
| 129405 | P03346 | O00626 | -0.93002  |
| 129406 | P03346 | Q9UN73 | -1.3609   |
| 129407 | P03346 | P57789 | -0.91627  |
| 129408 | P03346 | Q96II8 | -0.53519  |
| 129409 | P03346 | P50225 | -0.23609  |
| 129410 | P03346 | P11684 | -0.41692  |
| 129411 | P03346 | Q86VI1 | -0.099649 |
| 129412 | P03346 | Q15513 | -0.013652 |
| 129413 | P03346 | H7BZ55 | -0.19509  |
| 129414 | P03346 | Q9H8W2 | -0.13988  |
| 129415 | P03346 | Q6IAA8 | -0.2044   |
| 129416 | P03346 | Q8N123 | -0.24111  |
| 129417 | P03346 | Q16873 | -0.16505  |
| 129418 | P03346 | Q8WUP2 | -0.21092  |
| 129419 | P03346 | Q96RL6 | -0.67197  |
| 129420 | P03346 | Q9HA72 | -0.50365  |
| 129421 | P03346 | Q96PQ7 | -0.15213  |
| 129422 | P03346 | Q9NVL8 | -0.24509  |
| 129423 | P03346 | Q1ZYL8 | -0.53519  |
| 129424 | P03346 | P11021 | -0.22576  |
| 129425 | P03346 | Q5T9A4 | -0.56121  |
| 129426 | P03346 | P19876 | -0.88834  |
| 129427 | P03346 | P20339 | -0.39003  |
| 129428 | P03346 | Q0VAA5 | -0.4478   |

|        |        |        |           |
|--------|--------|--------|-----------|
| 129429 | P03346 | Q9Y3E2 | -0.4102   |
| 129430 | P03346 | Q08830 | -0.83975  |
| 129431 | P03346 | Q5T6X4 | -0.50365  |
| 129432 | P03346 | P32246 | -0.61374  |
| 129433 | P03346 | Q5VV63 | -0.54276  |
| 129434 | P03346 | Q8IYX4 | -0.22712  |
| 129435 | P03346 | P58512 | -0.06977  |
| 129436 | P03346 | P0C264 | -0.88651  |
| 129437 | P03346 | P12872 | -0.58821  |
| 129438 | P03346 | P0DKB6 | -0.50365  |
| 129439 | P03346 | P52895 | -0.22696  |
| 129440 | P03346 | Q8NCQ5 | -0.16716  |
| 129441 | P03346 | Q9UIJ5 | -0.56885  |
| 129442 | P03346 | P11169 | -0.16138  |
| 129443 | P03346 | Q3MUY2 | -0.74414  |
| 129444 | P03346 | Q96KN8 | -0.21553  |
| 129445 | P03346 | P16885 | -0.22741  |
| 129446 | P03346 | Q9H0K6 | -0.12758  |
| 129447 | P03346 | P26639 | -0.1406   |
| 129448 | P03346 | Q9NQC7 | -0.22225  |
| 129449 | P03346 | Q9Y275 | -0.66781  |
| 129450 | P03346 | Q5SGD2 | -0.49599  |
| 129451 | P03346 | Q494R0 | -0.013652 |
| 129452 | P03346 | P49069 | -0.13374  |
| 129453 | P03346 | Q6UXB4 | -0.23611  |
| 129454 | P03346 | O14607 | -0.22713  |
| 129455 | P03346 | P53673 | -0.067974 |
| 129456 | P03346 | Q00624 | -0.68535  |
| 129457 | P03346 | Q9N2J8 | -0.50292  |
| 129458 | P03346 | Q16617 | -0.80125  |
| 129459 | P03346 | Q96HE8 | -0.50365  |
| 129460 | P03346 | Q86VR7 | -0.50365  |
| 129461 | P03346 | Q13304 | -1.0076   |
| 129462 | P03346 | P0C0S5 | -0.41335  |
| 129463 | P03346 | Q96ES6 | -0.48129  |
| 129464 | P03346 | Q96M66 | -0.25373  |
| 129465 | P03346 | Q9BUR5 | -1.1014   |
| 129466 | P03346 | Q96IX9 | -0.21805  |
| 129467 | P03346 | O94898 | -0.45568  |
| 129468 | P03346 | Q29718 | -0.76151  |
| 129469 | P03346 | P01715 | -0.80078  |
| 129470 | P03346 | Q9GZZ6 | -0.64557  |
| 129471 | P03346 | Q5VWJ9 | -0.22671  |
| 129472 | P03346 | Q9Y230 | -0.22752  |
| 129473 | P03346 | P31937 | -0.26215  |
| 129474 | P03346 | Q9NYV4 | -0.17837  |
| 129475 | P03346 | F2Z3M2 | -0.013652 |
| 129476 | P03346 | Q5U651 | -0.2153   |
| 129477 | P03346 | P31930 | -0.34983  |
| 129478 | P03346 | P06312 | -0.80078  |
| 129479 | P03346 | P0C7V0 | -0.013652 |
| 129480 | P03346 | P51801 | -0.75688  |
| 129481 | P03346 | Q504Y3 | -0.19973  |
| 129482 | P03346 | Q8NFI5 | -0.93843  |
| 129483 | P03346 | P42694 | -0.24564  |
| 129484 | P03346 | P53634 | -0.51043  |
| 129485 | P03346 | Q9BZG1 | -0.57456  |
| 129486 | P03346 | O15075 | -0.92144  |
| 129487 | P03346 | Q8IV61 | -0.45674  |
| 129488 | P03346 | P45844 | -0.46169  |
| 129489 | P03346 | Q86SG7 | -0.54492  |
| 129490 | P03346 | P06310 | -0.80078  |
| 129491 | P03346 | Q9NP95 | -0.58367  |
| 129492 | P03346 | Q8TCT7 | -0.21856  |
| 129493 | P03346 | Q17RN3 | -0.085119 |
| 129494 | P03346 | O43915 | -0.54003  |
| 129495 | P03346 | P55001 | -0.51985  |
| 129496 | P03346 | O15031 | -0.81623  |
| 129497 | P03346 | Q5W5X9 | -0.057291 |
| 129498 | P03346 | Q9NPE6 | -0.26483  |
| 129499 | P03346 | Q9BZ23 | -0.24102  |
| 129500 | P03346 | Q96C10 | -0.22727  |
| 129501 | P03346 | Q9UF11 | -0.53725  |
| 129502 | P03346 | Q8N9W7 | -0.50365  |
| 129503 | P03346 | A6NI56 | -0.1812   |
| 129504 | P03346 | P51674 | -0.64519  |

|        |        |        |           |
|--------|--------|--------|-----------|
| 129505 | P03346 | Q5T2E6 | -0.50365  |
| 129506 | P03346 | Q9BSF0 | -0.095415 |
| 129507 | P03346 | Q8WYA0 | -0.17667  |
| 129508 | P03346 | Q96GR2 | -0.52053  |
| 129509 | P03346 | P51582 | -0.89738  |
| 129510 | P03346 | Q5RGS2 | -0.50365  |
| 129511 | P03346 | Q13361 | -0.58397  |
| 129512 | P03346 | Q7Z3Z3 | -0.22683  |
| 129513 | P03346 | Q9H0P7 | -0.26037  |
| 129514 | P03346 | Q3KNT7 | -0.12831  |
| 129515 | P03346 | Q96JK2 | -0.22741  |
| 129516 | P03346 | P29460 | -0.23239  |
| 129517 | P03346 | Q8TE73 | -0.38864  |
| 129518 | P03346 | P15153 | -0.49665  |
| 129519 | P03346 | Q7Z3B1 | -0.22768  |
| 129520 | P03346 | Q14828 | -0.13682  |
| 129521 | P03346 | O75581 | -0.2275   |
| 129522 | P03346 | Q8WXX0 | -0.49682  |
| 129523 | P03346 | Q5T7M9 | -0.63608  |
| 129524 | P03346 | Q9BZW5 | -0.39933  |
| 129525 | P03346 | P15882 | -0.53618  |
| 129526 | P03346 | Q6ZUJ4 | -0.057584 |
| 129527 | P03346 | Q9BXS1 | -0.12128  |
| 129528 | P03346 | P04798 | -0.29469  |
| 129529 | P03346 | Q69YW0 | -0.14509  |
| 129530 | P03346 | Q9NZU0 | -0.78025  |
| 129531 | P03346 | Q8N1A6 | -0.15936  |
| 129532 | P03346 | Q14641 | -0.92594  |
| 129533 | P03346 | P05981 | -0.33297  |
| 129534 | P03346 | Q9BXM7 | -0.50693  |
| 129535 | P03346 | P30414 | -0.12882  |
| 129536 | P03346 | Q8NFM7 | -0.30575  |
| 129537 | P03346 | P02730 | -0.20553  |
| 129538 | P03346 | Q92854 | -0.38738  |
| 129539 | P03346 | P53007 | -0.23303  |
| 129540 | P03346 | Q4VC31 | -0.2064   |
| 129541 | P03346 | Q6UWY2 | -1.0507   |
| 129542 | P03346 | Q9Y284 | -0.50365  |
| 129543 | P03346 | O95918 | -0.88894  |
| 129544 | P03346 | Q15612 | -0.76399  |
| 129545 | P03346 | P05305 | -0.25621  |
| 129546 | P03346 | Q6ZUC2 | -0.11112  |
| 129547 | P03346 | P07225 | -0.6428   |
| 129548 | P03346 | Q9NUL7 | -0.21253  |
| 129549 | P03346 | P28222 | -0.65161  |
| 129550 | P03346 | Q8N682 | -0.61396  |
| 129551 | P03346 | Q7Z478 | -0.22584  |
| 129552 | P03346 | Q5QGZ9 | -0.64878  |
| 129553 | P03346 | Q15053 | -0.16103  |
| 129554 | P03346 | Q9C0B1 | -0.15626  |
| 129555 | P03346 | O00142 | -0.43431  |
| 129556 | P03346 | Q8IWQ3 | -0.58793  |
| 129557 | P03346 | Q9HD45 | -0.56578  |
| 129558 | P03346 | Q9BQ16 | -0.80595  |
| 129559 | P03346 | Q96FE7 | -0.47734  |
| 129560 | P03346 | Q6ZVF9 | -0.021777 |
| 129561 | P03346 | Q9P1Q5 | -0.92763  |
| 129562 | P03346 | Q6NTF7 | -0.69987  |
| 129563 | P03346 | Q9NPU4 | -0.50365  |
| 129564 | P03346 | Q15907 | -0.53044  |
| 129565 | P03346 | Q9UI33 | -0.75839  |
| 129566 | P03346 | Q8N423 | -0.33856  |
| 129567 | P03346 | Q15814 | -0.14224  |
| 129568 | P03346 | P01764 | -0.80078  |
| 129569 | P03346 | Q7LBE3 | -0.63476  |
| 129570 | P03346 | Q6UXV1 | -0.50365  |
| 129571 | P03346 | Q8WW36 | -0.21159  |
| 129572 | P03346 | Q9NT68 | -0.372    |
| 129573 | P03346 | Q9Y5F8 | -0.86699  |
| 129574 | P03346 | Q8NDH2 | -0.17994  |
| 129575 | P03346 | Q9BR26 | -0.54303  |
| 129576 | P03346 | Q14249 | -0.20769  |
| 129577 | P03346 | O15514 | -0.15978  |
| 129578 | P03346 | A2A2Z9 | -0.22737  |
| 129579 | P03346 | Q6UVY6 | -0.89463  |
| 129580 | P03346 | Q9YNA8 | -0.21971  |

|        |        |        |           |
|--------|--------|--------|-----------|
| 129581 | P03346 | Q9Y4C4 | -0.22795  |
| 129582 | P03346 | Q14314 | -0.85909  |
| 129583 | P03346 | Q5SQQ9 | -0.22685  |
| 129584 | P03346 | Q6P5X7 | -0.50365  |
| 129585 | P03346 | P61204 | -0.24855  |
| 129586 | P03346 | Q9BWL3 | -0.58091  |
| 129587 | P03346 | O00571 | -0.39672  |
| 129588 | P03346 | Q9Y580 | -0.38744  |
| 129589 | P03346 | Q9NRF8 | -0.21547  |
| 129590 | P03346 | Q9H3Z7 | -0.20441  |
| 129591 | P03346 | Q9BX79 | -0.36803  |
| 129592 | P03346 | P31639 | -0.47968  |
| 129593 | P03346 | Q9UIL4 | -0.33869  |
| 129594 | P03346 | P28907 | -0.52664  |
| 129595 | P03346 | Q99943 | -0.46069  |
| 129596 | P03346 | P52732 | -0.24675  |
| 129597 | P03346 | Q96FT7 | -0.74083  |
| 129598 | P03346 | Q9BU23 | -0.63608  |
| 129599 | P03346 | Q14444 | -0.21209  |
| 129600 | P03346 | O15244 | -0.66083  |
| 129601 | P03346 | Q96JG8 | -0.20302  |
| 129602 | P03346 | A2CJ06 | -0.33437  |
| 129603 | P03346 | P10909 | -0.18763  |
| 129604 | P03346 | Q96RP3 | -0.62012  |
| 129605 | P03346 | P23771 | -0.2274   |
| 129606 | P03346 | Q9TQE0 | -0.47548  |
| 129607 | P03346 | P32004 | -0.45181  |
| 129608 | P03346 | Q969Y2 | -0.57541  |
| 129609 | P03346 | A6NFC5 | -0.18347  |
| 129610 | P03346 | P42658 | -0.54976  |
| 129611 | P03346 | Q8IUH5 | -0.22741  |
| 129612 | P03346 | A6NE02 | -0.41342  |
| 129613 | P03346 | Q9HC58 | -0.71054  |
| 129614 | P03346 | Q6UWV6 | -0.58698  |
| 129615 | P03346 | Q96DR4 | -0.28447  |
| 129616 | P03346 | P21802 | -0.24573  |
| 129617 | P03346 | O60729 | -0.22741  |
| 129618 | P03346 | Q2M2I8 | -0.78674  |
| 129619 | P03346 | O95377 | -0.62264  |
| 129620 | P03346 | Q7KZI7 | -0.51939  |
| 129621 | P03346 | P25067 | -0.81841  |
| 129622 | P03346 | Q8IY17 | -0.53126  |
| 129623 | P03346 | P01716 | -0.80078  |
| 129624 | P03346 | F8WCM5 | -0.37888  |
| 129625 | P03346 | Q9Y5Y9 | -0.67748  |
| 129626 | P03346 | Q13332 | -0.50855  |
| 129627 | P03346 | Q9Y6N1 | -0.41352  |
| 129628 | P03346 | P0C7M3 | -0.14514  |
| 129629 | P03346 | Q9P286 | -0.47685  |
| 129630 | P03346 | Q14973 | -0.66405  |
| 129631 | P03346 | Q9Y6M7 | -0.65183  |
| 129632 | P03346 | Q95389 | -0.67602  |
| 129633 | P03346 | P04275 | -0.22741  |
| 129634 | P03346 | Q8NDZ2 | -0.076341 |
| 129635 | P03346 | Q14168 | -0.3484   |
| 129636 | P03346 | O95484 | -0.41247  |
| 129637 | P03346 | P0DKB5 | -0.50365  |
| 129638 | P03346 | Q4ZHG4 | -0.40858  |
| 129639 | P03346 | A8MTL0 | -0.22516  |
| 129640 | P03346 | Q08E93 | -0.013652 |
| 129641 | P03346 | Q8IYD9 | -0.53519  |
| 129642 | P03346 | Q9BQ04 | -0.22808  |
| 129643 | P03346 | O14986 | -0.22532  |
| 129644 | P03346 | Q9H156 | -0.5909   |
| 129645 | P03346 | Q9P2F8 | -0.57837  |
| 129646 | P03346 | Q5W041 | -0.22756  |
| 129647 | P03346 | Q96KP6 | -0.1785   |
| 129648 | P03346 | O15054 | -0.14342  |
| 129649 | P03346 | Q8N6U8 | -1.0917   |
| 129650 | P03346 | O00501 | -0.32488  |
| 129651 | P03346 | O00391 | -0.98326  |
| 129652 | P03346 | Q12756 | -0.23331  |
| 129653 | P03346 | Q8NG08 | -0.46885  |
| 129654 | P03346 | Q9BVM4 | -0.067041 |
| 129655 | P03346 | P60508 | -0.50292  |
| 129656 | P03346 | P20309 | -0.53674  |

|        |        |        |           |
|--------|--------|--------|-----------|
| 129657 | P03346 | P01718 | -0.80078  |
| 129658 | P03346 | Q8N8J7 | -0.50365  |
| 129659 | P03346 | O43570 | -0.63862  |
| 129660 | P03346 | Q95104 | -0.22374  |
| 129661 | P03346 | P40818 | -0.25588  |
| 129662 | P03346 | Q9UIG5 | -0.21005  |
| 129663 | P03346 | Q9P0P8 | -0.17832  |
| 129664 | P03346 | Q6PKC3 | -0.6605   |
| 129665 | P03346 | Q7Z6K3 | -0.18766  |
| 129666 | P03346 | Q8IV76 | -0.23157  |
| 129667 | P03346 | O60282 | -0.26708  |
| 129668 | P03346 | Q969X0 | -0.19056  |
| 129669 | P03346 | Q5VV52 | -0.10568  |
| 129670 | P03346 | Q99592 | -0.22795  |
| 129671 | P03346 | Q9NYW0 | -0.77656  |
| 129672 | P03346 | Q969P6 | -0.23468  |
| 129673 | P03346 | O75319 | -0.26362  |
| 129674 | P03346 | Q8IV56 | -0.16189  |
| 129675 | P03346 | P03372 | -0.22743  |
| 129676 | P03346 | Q96H35 | -0.40469  |
| 129677 | P03346 | P49641 | -0.41602  |
| 129678 | P03346 | Q6P0Q8 | -0.41246  |
| 129679 | P03346 | Q8NHP1 | -0.22661  |
| 129680 | P03346 | Q9Y5X1 | -0.2274   |
| 129681 | P03346 | O14684 | -0.50506  |
| 129682 | P03346 | P37059 | -0.95143  |
| 129683 | P03346 | Q8NEG4 | -0.066964 |
| 129684 | P03346 | Q4L235 | -0.75919  |
| 129685 | P03346 | Q5TBA9 | -0.13471  |
| 129686 | P03346 | P50461 | -0.22743  |
| 129687 | P03346 | Q8TAI7 | -0.79078  |
| 129688 | P03346 | Q9H4B4 | -0.22742  |
| 129689 | P03346 | Q03395 | -0.87195  |
| 129690 | P03346 | P0CJ77 | -0.36125  |
| 129691 | P03346 | P19235 | -0.86905  |
| 129692 | P03346 | Q9UPR0 | -0.2617   |
| 129693 | P03346 | P20396 | -0.24758  |
| 129694 | P03346 | P30484 | -0.76151  |
| 129695 | P03346 | Q6URH7 | -0.20033  |
| 129696 | P03346 | O76062 | -0.821    |
| 129697 | P03346 | P48775 | -0.20007  |
| 129698 | P03346 | P31994 | -0.22741  |
| 129699 | P03346 | A8MXQ7 | -0.22741  |
| 129700 | P03346 | Q2VIR3 | -0.45145  |
| 129701 | P03346 | P10809 | -0.21203  |
| 129702 | P03346 | P0CL81 | -0.21009  |
| 129703 | P03346 | Q5VUE5 | -0.05645  |
| 129704 | P03346 | Q8N4B5 | -0.017541 |
| 129705 | P03346 | Q9NTU7 | -0.52799  |
| 129706 | P03346 | Q8NH10 | -0.92763  |
| 129707 | P03346 | Q9BXC9 | -0.21286  |
| 129708 | P03346 | Q86UX7 | -0.3306   |
| 129709 | P03346 | Q07699 | -0.67284  |
| 129710 | P03346 | Q13349 | -0.78105  |
| 129711 | P03346 | Q9H2C2 | -0.54321  |
| 129712 | P03346 | Q8NEA5 | -0.50365  |
| 129713 | P03346 | Q6IFG1 | -0.92763  |
| 129714 | P03346 | P11488 | -0.57402  |
| 129715 | P03346 | Q96A28 | -0.521    |
| 129716 | P03346 | Q5VWP2 | -0.1447   |
| 129717 | P03346 | A8MX80 | -0.035569 |
| 129718 | P03346 | P41968 | -0.59659  |
| 129719 | P03346 | Q9BYZ8 | -0.53541  |
| 129720 | P03346 | Q9GZV1 | -0.25421  |
| 129721 | P03346 | P05112 | -0.2155   |
| 129722 | P03346 | Q53FE4 | -0.17366  |
| 129723 | P03346 | Q9Y4F9 | -0.18801  |
| 129724 | P03346 | Q8N436 | -0.90989  |
| 129725 | P03346 | O43772 | -0.23458  |
| 129726 | P03346 | Q86YJ5 | -0.53436  |
| 129727 | P03346 | O95470 | -0.23069  |
| 129728 | P03346 | Q96D31 | -0.24855  |
| 129729 | P03346 | P54819 | -0.4416   |
| 129730 | P03346 | P30793 | -0.18437  |
| 129731 | P03346 | Q96GK7 | -0.24521  |
| 129732 | P03346 | Q16635 | -0.34274  |



|        |        |        |           |
|--------|--------|--------|-----------|
| 129733 | P03346 | Q9BPX7 | -0.10742  |
| 129734 | P03346 | Q2PZI1 | -0.50365  |
| 129735 | P03346 | O75443 | -0.7597   |
| 129736 | P03346 | Q8IZ81 | -0.42521  |
| 129737 | P03346 | Q6ZP98 | -0.15974  |
| 129738 | P03346 | Q5T2D2 | -0.28664  |
| 129739 | P03346 | Q5THK1 | -0.13307  |
| 129740 | P03346 | Q14680 | -0.35949  |
| 129741 | P03346 | A6NER0 | -0.92582  |
| 129742 | P03346 | Q9BYT1 | -0.4493   |
| 129743 | P03346 | Q96P50 | -0.84855  |
| 129744 | P03346 | Q86WI1 | -0.5234   |
| 129745 | P03346 | B2RC85 | -0.18745  |
| 129746 | P03346 | P0C7P0 | -0.20353  |
| 129747 | P03346 | Q5H9R4 | -0.50365  |
| 129748 | P03346 | P01189 | -0.43034  |
| 129749 | P03346 | O95147 | -0.55228  |
| 129750 | P03346 | B2RPK0 | -0.2282   |
| 129751 | P03346 | Q5U5Z8 | -0.20696  |
| 129752 | P03346 | Q8NGG2 | -0.92763  |
| 129753 | P03346 | Q6IPM2 | -0.21649  |
| 129754 | P03346 | Q9H310 | -0.55034  |
| 129755 | P03346 | Q8N9V2 | -0.29764  |
| 129756 | P03346 | Q9HC35 | -0.29282  |
| 129757 | P03346 | A6NI72 | -0.22741  |
| 129758 | P03346 | A6NCJ1 | -0.14995  |
| 129759 | P03346 | O95674 | -0.4058   |
| 129760 | P03346 | Q495N2 | -0.50365  |
| 129761 | P03346 | P29317 | -0.51084  |
| 129762 | P03346 | Q8NGC9 | -0.92763  |
| 129763 | P03346 | A8MUI8 | -0.057131 |
| 129764 | P03346 | Q149M9 | -0.48833  |
| 129765 | P03346 | Q96J77 | -0.22576  |
| 129766 | P03346 | Q9H6D3 | -0.50365  |
| 129767 | P03346 | P47895 | -0.2994   |
| 129768 | P03346 | Q9GZX9 | -0.6696   |
| 129769 | P03346 | O43323 | -0.67073  |
| 129770 | P03346 | Q8TC26 | -0.50889  |
| 129771 | P03346 | Q969M7 | -0.098086 |
| 129772 | P03346 | Q9BX68 | -0.21027  |
| 129773 | P03346 | P07307 | -0.24419  |
| 129774 | P03346 | Q96HF1 | -0.25122  |
| 129775 | P03346 | Q8IZQ5 | -0.070751 |
| 129776 | P03346 | Q6ZWK6 | -1.5174   |
| 129777 | P03346 | Q8N4L2 | -0.60716  |
| 129778 | P03346 | Q9Y2U2 | -0.80486  |
| 129779 | P03346 | Q8IW93 | -0.48966  |
| 129780 | P03346 | P11310 | -0.31741  |
| 129781 | P03346 | Q9H4G0 | -0.24113  |
| 129782 | P03346 | Q96EB6 | -0.60499  |
| 129783 | P03346 | C4AMC7 | -0.26034  |
| 129784 | P03346 | P46721 | -0.5985   |
| 129785 | P03346 | O43435 | -0.41982  |
| 129786 | P03346 | P04637 | -0.22579  |
| 129787 | P03346 | Q92833 | -0.22293  |
| 129788 | P03346 | Q9UMX5 | -0.60642  |
| 129789 | P03346 | Q9P296 | -0.3975   |
| 129790 | P03346 | Q13393 | -0.36581  |
| 129791 | P03346 | P78334 | -0.60018  |
| 129792 | P03346 | Q96RV3 | -0.50365  |
| 129793 | P03346 | Q5VZL5 | -0.20038  |
| 129794 | P03346 | Q8WWY7 | -0.49948  |
| 129795 | P03346 | Q9BWM7 | -0.53312  |
| 129796 | P03346 | Q96CU9 | -0.5576   |
| 129797 | P03346 | Q8NA23 | -0.22747  |
| 129798 | P03346 | P53779 | -0.22741  |
| 129799 | P03346 | Q17RY6 | -0.10217  |
| 129800 | P03346 | Q96N19 | -0.50365  |
| 129801 | P03346 | Q9BZF3 | -0.23113  |
| 129802 | P03346 | P02458 | -0.47501  |
| 129803 | P03346 | P22083 | -0.35542  |
| 129804 | P03346 | A4D2P6 | -0.22739  |
| 129805 | P03346 | P39656 | -0.086784 |
| 129806 | P03346 | Q6UX52 | -0.53519  |
| 129807 | P03346 | Q9H061 | -0.31011  |
| 129808 | P03346 | Q15166 | -0.59124  |

|        |        |        |           |
|--------|--------|--------|-----------|
| 129809 | P03346 | P14091 | -0.3242   |
| 129810 | P03346 | Q13433 | -0.70912  |
| 129811 | P03346 | P42356 | -0.32586  |
| 129812 | P03346 | Q9UF33 | -0.92149  |
| 129813 | P03346 | P0C7U3 | -0.59087  |
| 129814 | P03346 | Q9NRY6 | -0.31169  |
| 129815 | P03346 | Q9H6B4 | -0.51706  |
| 129816 | P03346 | Q5FWF4 | -0.21147  |
| 129817 | P03346 | P11836 | -0.67174  |
| 129818 | P03346 | Q9NQW5 | -0.20143  |
| 129819 | P03346 | Q9NUQ2 | -0.47766  |
| 129820 | P03346 | Q6ZVH6 | -0.27419  |
| 129821 | P03346 | P0C5Y9 | -0.35062  |
| 129822 | P03346 | P11465 | -0.40906  |
| 129823 | P03346 | O60341 | -0.22709  |
| 129824 | P03346 | Q96EF0 | -0.22838  |
| 129825 | P03346 | P02689 | -0.21844  |
| 129826 | P03346 | Q6ZWH5 | -0.96253  |
| 129827 | P03346 | O15258 | -0.27764  |
| 129828 | P03346 | P04150 | -0.22743  |
| 129829 | P03346 | Q5SXH7 | -0.22912  |
| 129830 | P03346 | A6NNS2 | -1.0777   |
| 129831 | P03346 | Q96J86 | -0.39933  |
| 129832 | P03346 | Q96F10 | -0.22275  |
| 129833 | P03346 | Q8N1M1 | -0.53917  |
| 129834 | P03346 | Q63HQ2 | -0.57732  |
| 129835 | P03346 | Q2L4Q9 | -1.0507   |
| 129836 | P03346 | P59091 | -0.066522 |
| 129837 | P03346 | Q8IV01 | -0.42866  |
| 129838 | P03346 | Q9Y4M8 | -0.2973   |
| 129839 | P03346 | O95081 | -0.15727  |
| 129840 | P03346 | Q8NGC8 | -0.92763  |
| 129841 | P03346 | Q9NVD3 | -0.16187  |
| 129842 | P03346 | P49768 | -0.22606  |
| 129843 | P03346 | Q8NBJ7 | -0.1258   |
| 129844 | P03346 | Q9Y259 | -0.47577  |
| 129845 | P03346 | P51449 | -0.25891  |
| 129846 | P03346 | Q6DN72 | -0.5269   |
| 129847 | P03346 | Q86WB7 | -0.53349  |
| 129848 | P03346 | Q6ZUB0 | -0.50365  |
| 129849 | P03346 | Q96LU5 | -0.26571  |
| 129850 | P03346 | O75891 | -0.29088  |
| 129851 | P03346 | Q9H114 | -0.6083   |
| 129852 | P03346 | Q9H903 | -0.57583  |
| 129853 | P03346 | Q9BWX2 | -0.10182  |
| 129854 | P03346 | O43704 | -0.23681  |
| 129855 | P03346 | A6ND48 | -0.92763  |
| 129856 | P03346 | P56373 | -0.43881  |
| 129857 | P03346 | O60499 | -0.21913  |
| 129858 | P03346 | P02746 | -0.26789  |
| 129859 | P03346 | Q9NZV5 | -0.14494  |
| 129860 | P03346 | Q9HCU0 | -0.31536  |
| 129861 | P03346 | Q14512 | -0.37897  |
| 129862 | P03346 | O95785 | -0.15626  |
| 129863 | P03346 | Q9H2C8 | -0.92763  |
| 129864 | P03346 | A8MW99 | -0.23776  |
| 129865 | P03346 | Q7Z3D4 | -0.49519  |
| 129866 | P03346 | Q9HCC0 | -0.28404  |
| 129867 | P03346 | O15212 | -0.22241  |
| 129868 | P03346 | Q6UX82 | -0.2482   |
| 129869 | P03346 | Q5SWX8 | -0.71905  |
| 129870 | P03346 | P49407 | -0.2522   |
| 129871 | P03346 | P35968 | -0.3448   |
| 129872 | P03346 | Q9BV10 | -0.56203  |
| 129873 | P03346 | O43175 | -0.57046  |
| 129874 | P03346 | A0FGR8 | -0.65219  |
| 129875 | P03346 | Q92504 | -0.65386  |
| 129876 | P03346 | Q96PE3 | -0.19528  |
| 129877 | P03346 | Q5H9E4 | -0.36428  |
| 129878 | P03346 | Q9NX94 | -0.50365  |
| 129879 | P03346 | O75355 | -0.90515  |
| 129880 | P03346 | Q6UXS9 | -0.22684  |
| 129881 | P03346 | P34969 | -1.0111   |
| 129882 | P03346 | P01880 | -1.1805   |
| 129883 | P03346 | Q8IXK2 | -0.41456  |
| 129884 | P03346 | O60811 | -0.19704  |

|        |        |        |           |
|--------|--------|--------|-----------|
| 129885 | P03346 | Q8ND99 | -0.19432  |
| 129886 | P03346 | Q9Y5J5 | -0.2136   |
| 129887 | P03346 | A6PW82 | -0.065949 |
| 129888 | P03346 | Q8N8Y2 | -0.17863  |
| 129889 | P03346 | Q8NHA6 | -0.92763  |
| 129890 | P03346 | O60256 | -0.15179  |
| 129891 | P03346 | Q96QR1 | -0.61258  |
| 129892 | P03346 | O14981 | -0.21147  |
| 129893 | P03346 | P10636 | -0.19235  |
| 129894 | P03346 | Q9Y257 | -0.79417  |
| 129895 | P03346 | Q6NS38 | -0.11302  |
| 129896 | P03346 | Q8ND23 | -0.2273   |
| 129897 | P03346 | Q8TCT9 | -0.39622  |
| 129898 | P03346 | Q9NZB2 | -0.035103 |
| 129899 | P03346 | Q12836 | -1.0417   |
| 129900 | P03346 | P09455 | -0.22497  |
| 129901 | P03346 | Q9H7X2 | -0.50365  |
| 129902 | P03346 | P35544 | -0.22724  |
| 129903 | P03346 | Q9UN81 | -0.067682 |
| 129904 | P03346 | Q8NFO6 | -0.74294  |
| 129905 | P03346 | P55011 | -0.65247  |
| 129906 | P03346 | Q8WXI4 | -0.19936  |
| 129907 | P03346 | Q9BT09 | -0.19809  |
| 129908 | P03346 | P55259 | -0.75817  |
| 129909 | P03346 | P58499 | -0.59947  |
| 129910 | P03346 | Q5TGY3 | -0.099357 |
| 129911 | P03346 | Q8WTV0 | -0.34118  |
| 129912 | P03346 | P21579 | -0.24292  |
| 129913 | P03346 | Q9NUQ9 | -0.17759  |
| 129914 | P03346 | P25101 | -0.40849  |
| 129915 | P03346 | Q6P3X3 | -0.22716  |
| 129916 | P03346 | Q5BLP8 | -0.53519  |
| 129917 | P03346 | P30044 | -0.22563  |
| 129918 | P03346 | O75121 | -0.65219  |
| 129919 | P03346 | Q8N8D9 | -0.22349  |
| 129920 | P03346 | Q3SXR2 | -0.08729  |
| 129921 | P03346 | C9JG80 | -0.21871  |
| 129922 | P03346 | Q9H7X0 | -0.21279  |
| 129923 | P03346 | Q96A05 | -0.20027  |
| 129924 | P03346 | P24310 | -0.41128  |
| 129925 | P03346 | Q6ZMI0 | -0.15015  |
| 129926 | P03346 | O95631 | -0.22741  |
| 129927 | P03346 | Q5K651 | -0.21233  |
| 129928 | P03346 | Q96NI6 | -0.50365  |
| 129929 | P03346 | Q8WY50 | -0.013652 |
| 129930 | P03346 | Q9HC98 | -0.22764  |
| 129931 | P03346 | A6NIE9 | -1.0507   |
| 129932 | P03346 | Q9Y493 | -0.77988  |
| 129933 | P03346 | Q6ZVL8 | -0.013652 |
| 129934 | P03346 | Q9HC36 | -0.20692  |
| 129935 | P03346 | Q2VPA4 | -0.44312  |
| 129936 | P03346 | Q13316 | -0.09166  |
| 129937 | P03346 | P21589 | -0.37576  |
| 129938 | P03346 | Q70Z44 | -0.72766  |
| 129939 | P03346 | Q96PX6 | -0.21883  |
| 129940 | P03346 | Q8NG48 | -0.14257  |
| 129941 | P03346 | O60725 | -0.36675  |
| 129942 | P03346 | Q8NCS7 | -0.53164  |
| 129943 | P03346 | P23527 | -0.35085  |
| 129944 | P03346 | Q8WV60 | -0.09186  |
| 129945 | P03346 | Q9BTW9 | -0.15558  |
| 129946 | P03346 | P14174 | -0.22777  |
| 129947 | P03346 | Q96PE1 | -0.90364  |
| 129948 | P03346 | Q8IWU5 | -0.36008  |
| 129949 | P03346 | O95864 | -0.69452  |
| 129950 | P03346 | P13584 | -0.5601   |
| 129951 | P03346 | Q9NUD5 | -0.17833  |
| 129952 | P03346 | Q8NGN8 | -0.92763  |
| 129953 | P03346 | Q6ZS10 | -0.54366  |
| 129954 | P03346 | K9M1U5 | -0.013652 |
| 129955 | P03346 | O15121 | -0.72424  |
| 129956 | P03346 | Q8NGG7 | -0.92763  |
| 129957 | P03346 | Q96BZ4 | -0.58363  |
| 129958 | P03346 | P0DJ93 | -0.50365  |
| 129959 | P03346 | Q8NGG0 | -0.92763  |
| 129960 | P03346 | P48735 | -0.21184  |

|        |        |        |           |
|--------|--------|--------|-----------|
| 129961 | P03346 | Q9P2W3 | -0.32095  |
| 129962 | P03346 | Q9UI42 | -0.7594   |
| 129963 | P03346 | H0Y354 | -0.084128 |
| 129964 | P03346 | Q13555 | -0.74206  |
| 129965 | P03346 | O95841 | -0.8602   |
| 129966 | P03346 | Q8WV48 | -0.50365  |
| 129967 | P03346 | Q8IZ96 | -0.67729  |
| 129968 | P03346 | Q7Z4M0 | -0.2124   |
| 129969 | P03346 | Q9Y4K4 | -0.33776  |
| 129970 | P03346 | O75563 | -0.22719  |
| 129971 | P03346 | P30040 | -0.21486  |
| 129972 | P03346 | P0C874 | -0.50365  |
| 129973 | P03346 | P52735 | -0.22741  |
| 129974 | P03346 | Q04446 | -0.10557  |
| 129975 | P03346 | P63244 | -0.22765  |
| 129976 | P03346 | Q14964 | -0.61903  |
| 129977 | P03346 | Q9H497 | -0.30873  |
| 129978 | P03346 | A8K0R7 | -0.30279  |
| 129979 | P03346 | P09105 | -0.069068 |
| 129980 | P03346 | Q8WXI3 | -0.22758  |
| 129981 | P03346 | Q8NEN9 | -0.22741  |
| 129982 | P03346 | Q14558 | -0.17328  |
| 129983 | P03346 | Q9Y6M4 | -0.80069  |
| 129984 | P03346 | O43304 | -0.56728  |
| 129985 | P03346 | Q9NYA1 | -0.28315  |
| 129986 | P03346 | Q9UMN6 | -0.22692  |
| 129987 | P03346 | Q8NFW1 | -0.46304  |
| 129988 | P03346 | Q9NWQ9 | -0.2835   |
| 129989 | P03346 | P18510 | -0.28802  |
| 129990 | P03346 | P04216 | -0.23347  |
| 129991 | P03346 | P37058 | -0.36432  |
| 129992 | P03346 | Q8NGE2 | -0.92763  |
| 129993 | P03346 | Q9UNW1 | -0.2267   |
| 129994 | P03346 | Q9H6P5 | -0.331    |
| 129995 | P03346 | Q8IXI2 | -0.4227   |
| 129996 | P03346 | Q9BY14 | -0.26436  |
| 129997 | P03346 | Q9H3Z4 | -0.26537  |
| 129998 | P03346 | P54793 | -0.57264  |
| 129999 | P03346 | P0C628 | -0.92763  |
| 130000 | P03346 | Q8N807 | -0.35492  |
| 130001 | P03346 | Q5T655 | -0.013652 |
| 130002 | P03346 | Q8N8Q1 | -0.52179  |
| 130003 | P03346 | Q4G0N0 | -0.2722   |
| 130004 | P03346 | Q8N3Y7 | -1.1033   |
| 130005 | P03346 | Q96G04 | -0.1829   |
| 130006 | P03346 | P16562 | -0.65384  |
| 130007 | P03346 | Q9NTJ5 | -0.41726  |
| 130008 | P03346 | O15550 | -0.36888  |
| 130009 | P03346 | Q8NFL0 | -0.33175  |
| 130010 | P03346 | Q9H334 | -0.31352  |
| 130011 | P03346 | P01615 | -0.80078  |
| 130012 | P03346 | Q96MM6 | -0.48833  |
| 130013 | P03346 | Q9Y277 | -0.75707  |
| 130014 | P03346 | P17538 | -1.1214   |
| 130015 | P03346 | Q16877 | -0.36967  |
| 130016 | P03346 | Q9HBG4 | -0.2438   |
| 130017 | P03346 | Q9NQ76 | -0.10463  |
| 130018 | P03346 | P52790 | -0.24528  |
| 130019 | P03346 | Q6PIV7 | -0.36428  |
| 130020 | P03346 | P58294 | -0.42808  |
| 130021 | P03346 | A2RUC4 | -0.28836  |
| 130022 | P03346 | P43304 | -0.22732  |
| 130023 | P03346 | Q9H1C0 | -0.71806  |
| 130024 | P03346 | P25103 | -0.70103  |
| 130025 | P03346 | Q15334 | -0.30079  |
| 130026 | P03346 | Q02817 | -0.22743  |
| 130027 | P03346 | P28161 | -0.22727  |
| 130028 | P03346 | B2RTY4 | -0.73681  |
| 130029 | P03346 | P51608 | -0.20342  |
| 130030 | P03346 | Q06136 | -1.0441   |
| 130031 | P03346 | Q6ZMT1 | -0.24528  |
| 130032 | P03346 | Q9H159 | -0.82951  |
| 130033 | P03346 | P24046 | -0.60981  |
| 130034 | P03346 | O43374 | -0.25106  |
| 130035 | P03346 | Q13634 | -0.87314  |
| 130036 | P03346 | O94933 | -0.5909   |

|        |        |        |           |
|--------|--------|--------|-----------|
| 130037 | P03346 | P59051 | -0.12532  |
| 130038 | P03346 | O75064 | -0.20903  |
| 130039 | P03346 | Q96MH6 | -0.55405  |
| 130040 | P03346 | Q96QP1 | -0.40894  |
| 130041 | P03346 | Q8NEE6 | -0.22625  |
| 130042 | P03346 | Q6XE24 | -0.25155  |
| 130043 | P03346 | Q16762 | -0.16198  |
| 130044 | P03346 | Q86UW7 | -0.22732  |
| 130045 | P03346 | P36021 | -0.66782  |
| 130046 | P03346 | O95985 | -0.32781  |
| 130047 | P03346 | P55344 | -0.53541  |
| 130048 | P03346 | Q9BRQ4 | -0.044633 |
| 130049 | P03346 | Q8TAG5 | -0.53519  |
| 130050 | P03346 | Q5VVJ2 | -0.2274   |
| 130051 | P03346 | Q5YKI7 | -0.30558  |
| 130052 | P03346 | Q14162 | -0.69382  |
| 130053 | P03346 | P14209 | -0.75907  |
| 130054 | P03346 | Q8N4M1 | -0.53164  |
| 130055 | P03346 | Q7LDG7 | -0.47773  |
| 130056 | P03346 | Q5VU13 | -0.50365  |
| 130057 | P03346 | Q96RB7 | -0.92763  |
| 130058 | P03346 | Q8TDV2 | -0.96376  |
| 130059 | P03346 | Q8NEP3 | -0.22741  |
| 130060 | P03346 | Q9NR30 | -0.23093  |
| 130061 | P03346 | P0C1S8 | -0.33507  |
| 130062 | P03346 | P01771 | -0.80078  |
| 130063 | P03346 | P10176 | -0.28603  |
| 130064 | P03346 | P10643 | -0.6399   |
| 130065 | P03346 | P07492 | -0.85252  |
| 130066 | P03346 | O75223 | -0.16263  |
| 130067 | P03346 | Q6NT16 | -0.48129  |
| 130068 | P03346 | P47985 | -0.78783  |
| 130069 | P03346 | Q6ZTR7 | -0.17713  |
| 130070 | P03346 | Q12768 | -0.16696  |
| 130071 | P03346 | E5RJM6 | -0.22741  |
| 130072 | P03346 | Q8IXN7 | -0.53866  |
| 130073 | P03346 | D6R9N7 | -0.36346  |
| 130074 | P03346 | Q6P656 | -0.18045  |
| 130075 | P03346 | P78363 | -0.96466  |
| 130076 | P03346 | Q7Z570 | -0.30279  |
| 130077 | P03346 | Q6UWT4 | -0.53519  |
| 130078 | P03346 | Q96M32 | -0.3238   |
| 130079 | P03346 | P01742 | -0.80078  |
| 130080 | P03346 | Q9Y2X7 | -0.22741  |
| 130081 | P03346 | P01920 | -0.56305  |
| 130082 | P03346 | O95989 | -0.10456  |
| 130083 | P03346 | P00973 | -0.39147  |
| 130084 | P03346 | P02810 | -0.053138 |
| 130085 | P03346 | Q9H0H5 | -0.23324  |
| 130086 | P03346 | P04001 | -1.0931   |
| 130087 | P03346 | O60931 | -0.71792  |
| 130088 | P03346 | Q96HJ9 | -0.18594  |
| 130089 | P03346 | Q14624 | -0.46083  |
| 130090 | P03346 | P62158 | -0.22735  |
| 130091 | P03346 | P51810 | -0.32     |
| 130092 | P03346 | Q14254 | -0.43082  |
| 130093 | P03346 | P50579 | -0.1931   |
| 130094 | P03346 | A6NCX1 | -0.19215  |
| 130095 | P03346 | Q9NVH6 | -0.15637  |
| 130096 | P03346 | Q9BY64 | -0.69334  |
| 130097 | P03346 | O00481 | -0.22896  |
| 130098 | P03346 | P10319 | -0.76151  |
| 130099 | P03346 | A6NGH7 | -0.082902 |
| 130100 | P03346 | P50583 | -0.4395   |
| 130101 | P03346 | Q96D96 | -0.57647  |
| 130102 | P03346 | Q8NHS3 | -0.22292  |
| 130103 | P03346 | Q9Y6F8 | -0.22699  |
| 130104 | P03346 | Q8TCP9 | -0.43303  |
| 130105 | P03346 | P05120 | -0.40963  |
| 130106 | P03346 | Q5VT79 | -0.17552  |
| 130107 | P03346 | P17252 | -0.2204   |
| 130108 | P03346 | Q9NWZ3 | -0.2274   |
| 130109 | P03346 | Q8NC24 | -0.74704  |
| 130110 | P03346 | A6NMV5 | -0.17707  |
| 130111 | P03346 | Q15390 | -0.13787  |
| 130112 | P03346 | O15321 | -0.60246  |

|        |        |        |           |
|--------|--------|--------|-----------|
| 130113 | P03346 | Q14849 | -0.55568  |
| 130114 | P03346 | Q96A25 | -0.30782  |
| 130115 | P03346 | Q8NH85 | -0.92763  |
| 130116 | P03346 | Q6MZM0 | -0.78011  |
| 130117 | P03346 | Q8TDS7 | -0.96376  |
| 130118 | P03346 | Q8N1H7 | -0.12959  |
| 130119 | P03346 | Q9NRW1 | -0.32668  |
| 130120 | P03346 | Q7L7X3 | -0.45977  |
| 130121 | P03346 | P01597 | -0.80078  |
| 130122 | P03346 | P48067 | -0.66941  |
| 130123 | P03346 | Q86VL8 | -0.59354  |
| 130124 | P03346 | Q9NQ60 | -0.51584  |
| 130125 | P03346 | Q5TGY1 | -0.50365  |
| 130126 | P03346 | O75192 | -0.098109 |
| 130127 | P03346 | Q7Z3H0 | -0.22741  |
| 130128 | P03346 | P04818 | -0.16712  |
| 130129 | P03346 | O95342 | -0.77143  |
| 130130 | P03346 | Q86UY6 | -0.12853  |
| 130131 | P03346 | Q0VDE8 | -0.015905 |
| 130132 | P03346 | Q5W0N0 | -0.50365  |
| 130133 | P03346 | Q96RG2 | -0.35054  |
| 130134 | P03346 | P0C7M6 | -0.17663  |
| 130135 | P03346 | P34903 | -0.61623  |
| 130136 | P03346 | P47869 | -0.51518  |
| 130137 | P03346 | Q9H354 | -0.50365  |
| 130138 | P03346 | O75689 | -0.22763  |
| 130139 | P03346 | Q8N0W5 | -0.11243  |
| 130140 | P03346 | Q9UKP4 | -0.90658  |
| 130141 | P03346 | Q9Y267 | -0.59709  |
| 130142 | P03346 | P07477 | -1.1365   |
| 130143 | P03346 | Q86TS7 | -0.013652 |
| 130144 | P03346 | Q8NGE3 | -0.92763  |
| 130145 | P03346 | P43699 | -0.26419  |
| 130146 | P03346 | Q9UHW5 | -0.51545  |
| 130147 | P03346 | Q6AWC8 | -0.042453 |
| 130148 | P03346 | Q7L523 | -0.22742  |
| 130149 | P03346 | Q14568 | -0.28583  |
| 130150 | P03346 | O94844 | -0.8668   |
| 130151 | P03346 | P16455 | -0.13139  |
| 130152 | P03346 | Q86X40 | -0.22769  |
| 130153 | P03346 | Q9C0D7 | -0.073226 |
| 130154 | P03346 | A6NFR6 | -0.50365  |
| 130155 | P03346 | P49674 | -0.22741  |
| 130156 | P03346 | Q8NGX2 | -0.92763  |
| 130157 | P03346 | Q6GV28 | -0.54575  |
| 130158 | P03346 | Q9BXB7 | -0.24847  |
| 130159 | P03346 | P16671 | -0.39057  |
| 130160 | P03346 | Q9NU39 | -0.31352  |
| 130161 | P03346 | Q15392 | -0.26557  |
| 130162 | P03346 | Q86UY8 | -0.19408  |
| 130163 | P03346 | A6NDD2 | -0.52229  |
| 130164 | P03346 | H3BRN8 | -0.13501  |
| 130165 | P03346 | Q9H972 | -0.53519  |
| 130166 | P03346 | Q31612 | -0.76151  |
| 130167 | P03346 | Q16827 | -0.41516  |
| 130168 | P03346 | O95834 | -0.29704  |
| 130169 | P03346 | Q5JPH6 | -0.11876  |
| 130170 | P03346 | D6RBM5 | -0.23363  |
| 130171 | P03346 | O75954 | -0.65456  |
| 130172 | P03346 | Q9BXS4 | -0.33191  |
| 130173 | P03346 | P29322 | -1.0251   |
| 130174 | P03346 | Q7L0R7 | -0.23041  |
| 130175 | P03346 | P11233 | -0.22748  |
| 130176 | P03346 | Q9HAW8 | -0.62644  |
| 130177 | P03346 | Q9NX07 | -0.2272   |
| 130178 | P03346 | Q9P1D8 | -0.013652 |
| 130179 | P03346 | Q5T5F5 | -0.013652 |
| 130180 | P03346 | Q68CR1 | -0.50365  |
| 130181 | P03346 | Q30KQ6 | -0.52229  |
| 130182 | P03346 | A1A519 | -0.30279  |
| 130183 | P03346 | Q9NX57 | -0.48926  |
| 130184 | P03346 | Q8WWV6 | -0.64403  |
| 130185 | P03346 | P05106 | -0.24224  |
| 130186 | P03346 | Q8NGT9 | -0.92763  |
| 130187 | P03346 | Q63ZE4 | -0.45374  |
| 130188 | P03346 | Q8WVS4 | -0.22489  |

|        |        |        |           |
|--------|--------|--------|-----------|
| 130189 | P03346 | Q9NVJ2 | -0.43832  |
| 130190 | P03346 | Q6ZT83 | -0.1011   |
| 130191 | P03346 | Q99757 | -0.23888  |
| 130192 | P03346 | P35523 | -0.6727   |
| 130193 | P03346 | Q9UPX0 | -0.65219  |
| 130194 | P03346 | Q5VZ52 | -0.17489  |
| 130195 | P03346 | Q99958 | -0.24529  |
| 130196 | P03346 | Q12974 | -0.49802  |
| 130197 | P03346 | Q96H79 | -0.069277 |
| 130198 | P03346 | P29375 | -0.24129  |
| 130199 | P03346 | P62079 | -0.50365  |
| 130200 | P03346 | Q6ISS4 | -0.53519  |
| 130201 | P03346 | Q6P1K1 | -0.49834  |
| 130202 | P03346 | Q96AM1 | -0.96376  |
| 130203 | P03346 | P05093 | -0.39849  |
| 130204 | P03346 | P52306 | -0.30722  |
| 130205 | P03346 | Q13461 | -0.31352  |
| 130206 | P03346 | P47893 | -1.0224   |
| 130207 | P03346 | A6NDH6 | -0.92763  |
| 130208 | P03346 | Q5FYB1 | -0.58633  |
| 130209 | P03346 | Q8NGY1 | -0.92763  |
| 130210 | P03346 | P15848 | -0.25469  |
| 130211 | P03346 | Q4QY38 | -0.52229  |
| 130212 | P03346 | P01258 | -0.40549  |
| 130213 | P03346 | Q9NY65 | -0.31236  |
| 130214 | P03346 | Q8NGZ2 | -0.92763  |
| 130215 | P03346 | Q9Y5F3 | -0.86699  |
| 130216 | P03346 | Q95183 | -0.70601  |
| 130217 | P03346 | Q86XP6 | -0.53519  |
| 130218 | P03346 | P01178 | -0.34219  |
| 130219 | P03346 | Q9UNU6 | -0.76741  |
| 130220 | P03346 | Q01524 | -0.65029  |
| 130221 | P03346 | Q7Z3Q1 | -0.50489  |
| 130222 | P03346 | O60271 | -0.21375  |
| 130223 | P03346 | Q9H3D4 | -0.22736  |
| 130224 | P03346 | O15037 | -0.11002  |
| 130225 | P03346 | Q8NAU1 | -0.97511  |
| 130226 | P03346 | A8MQB3 | -0.15658  |
| 130227 | P03346 | P50281 | -0.25966  |
| 130228 | P03346 | Q6ZMQ8 | -0.47537  |
| 130229 | P03346 | Q9NQS3 | -0.22757  |
| 130230 | P03346 | Q9UEF7 | -0.89702  |
| 130231 | P03346 | Q8NEX6 | -0.53519  |
| 130232 | P03346 | Q9Y6A9 | -0.44707  |
| 130233 | P03346 | P10316 | -0.51191  |
| 130234 | P03346 | Q9ULF5 | -0.55888  |
| 130235 | P03346 | P78332 | -0.28095  |
| 130236 | P03346 | Q9Y2H1 | -0.22739  |
| 130237 | P03346 | P56962 | -0.33207  |
| 130238 | P03346 | A4IF30 | -0.47711  |
| 130239 | P03346 | P82987 | -0.75037  |
| 130240 | P03346 | Q5T9L3 | -0.21555  |
| 130241 | P03346 | A2RUH7 | -0.2276   |
| 130242 | P03346 | Q6UXU4 | -0.50365  |
| 130243 | P03346 | A6NNL5 | -0.53519  |
| 130244 | P03346 | Q9Y463 | -0.22741  |
| 130245 | P03346 | P61225 | -0.66253  |
| 130246 | P03346 | Q8NG66 | -0.22741  |
| 130247 | P03346 | Q9NX55 | -0.089359 |
| 130248 | P03346 | Q8NBF6 | -0.49193  |
| 130249 | P03346 | Q86SE5 | -0.40469  |
| 130250 | P03346 | Q6UWN8 | -0.50866  |
| 130251 | P03346 | Q8IWX8 | -0.13398  |
| 130252 | P03346 | Q9H254 | -0.22753  |
| 130253 | P03346 | Q5JZY3 | -1.0397   |
| 130254 | P03346 | Q9BZS1 | -0.27497  |
| 130255 | P03346 | A6XGL0 | -0.12841  |
| 130256 | P03346 | Q9NYV9 | -0.77656  |
| 130257 | P03346 | P01112 | -0.22768  |
| 130258 | P03346 | P01275 | -0.47346  |
| 130259 | P03346 | Q5JUX0 | -0.14428  |
| 130260 | P03346 | Q9NYL5 | -0.52793  |
| 130261 | P03346 | Q9UK05 | -0.22741  |
| 130262 | P03346 | P08575 | -0.29663  |
| 130263 | P03346 | O95169 | -0.26782  |
| 130264 | P03346 | Q6UXU1 | -0.53519  |

|        |        |        |            |
|--------|--------|--------|------------|
| 130265 | P03346 | O43610 | -0.19409   |
| 130266 | P03346 | P04746 | -0.64753   |
| 130267 | P03346 | P43626 | -0.30744   |
| 130268 | P03346 | Q9NQN1 | -0.92763   |
| 130269 | P03346 | Q13636 | -0.71746   |
| 130270 | P03346 | Q9H3G5 | -0.32207   |
| 130271 | P03346 | Q9UBV2 | -0.22751   |
| 130272 | P03346 | P22234 | -0.1619    |
| 130273 | P03346 | Q06278 | -0.38156   |
| 130274 | P03346 | A8MQB9 | -0.22741   |
| 130275 | P03346 | Q8N0U2 | -0.50365   |
| 130276 | P03346 | Q16850 | -0.80761   |
| 130277 | P03346 | Q7Z7B0 | -0.22538   |
| 130278 | P03346 | Q8N1W0 | -0.50365   |
| 130279 | P03346 | A4D263 | -0.17059   |
| 130280 | P03346 | Q6P2M8 | -0.46924   |
| 130281 | P03346 | P08246 | -0.3949    |
| 130282 | P03346 | Q5T7P8 | -0.41635   |
| 130283 | P03346 | Q9H4A9 | -0.59284   |
| 130284 | P03346 | Q05469 | -0.22719   |
| 130285 | P03346 | Q14763 | -0.22746   |
| 130286 | P03346 | P20809 | -0.13721   |
| 130287 | P03346 | Q9Y5R4 | -0.14642   |
| 130288 | P03346 | Q6P3X8 | -0.0065516 |
| 130289 | P03346 | Q9UHC6 | -0.68895   |
| 130290 | P03346 | Q5MNV8 | -0.069161  |
| 130291 | P03346 | P10912 | -0.24034   |
| 130292 | P03346 | Q9BZ67 | -0.20548   |
| 130293 | P03346 | Q15648 | -0.19411   |
| 130294 | P03346 | Q969W9 | -0.57541   |
| 130295 | P03346 | Q9HAI6 | -0.0080312 |
| 130296 | P03346 | Q8NBW4 | -0.62013   |
| 130297 | P03346 | P48163 | -0.20575   |
| 130298 | P03346 | P27216 | -0.31434   |
| 130299 | P03346 | Q75425 | -0.39187   |
| 130300 | P03346 | Q969E1 | -0.52512   |
| 130301 | P03346 | P00739 | -0.6839    |
| 130302 | P03346 | P34059 | -0.30573   |
| 130303 | P03346 | Q9UKG4 | -0.81866   |
| 130304 | P03346 | P58181 | -0.92763   |
| 130305 | P03346 | O43897 | -1.0727    |
| 130306 | P03346 | O60831 | -0.22322   |
| 130307 | P03346 | Q9NRJ1 | -0.213     |
| 130308 | P03346 | Q9UN75 | -0.86699   |
| 130309 | P03346 | Q8N1T3 | -0.38487   |
| 130310 | P03346 | A6NC57 | -0.22741   |
| 130311 | P03346 | Q8NBI2 | -0.78863   |
| 130312 | P03346 | P05090 | -0.44373   |
| 130313 | P03346 | Q9BW04 | -0.12237   |
| 130314 | P03346 | Q9NRN5 | -0.70771   |
| 130315 | P03346 | P0DI80 | -0.50365   |
| 130316 | P03346 | Q9P218 | -0.74377   |
| 130317 | P03346 | Q86X24 | -0.11612   |
| 130318 | P03346 | Q07869 | -0.2316    |
| 130319 | P03346 | Q8NCJ5 | -0.22121   |
| 130320 | P03346 | O95759 | -0.93214   |
| 130321 | P03346 | P12277 | -0.21527   |
| 130322 | P03346 | Q7Z7C7 | -0.045415  |
| 130323 | P03346 | Q9Y5I2 | -1.3609    |
| 130324 | P03346 | Q06889 | -0.21946   |
| 130325 | P03346 | Q9UMZ2 | -0.22549   |
| 130326 | P03346 | Q86W74 | -0.50365   |
| 130327 | P03346 | Q9H490 | -0.61212   |
| 130328 | P03346 | Q4G0S4 | -0.42518   |
| 130329 | P03346 | Q8NGP9 | -0.92763   |
| 130330 | P03346 | P81605 | -0.79592   |
| 130331 | P03346 | Q6ZRV3 | -0.013652  |
| 130332 | P03346 | Q8N307 | -0.55937   |
| 130333 | P03346 | Q7Z4N8 | -0.35346   |
| 130334 | P03346 | Q96T52 | -0.30325   |
| 130335 | P03346 | Q6ZTI0 | -0.013652  |
| 130336 | P03346 | Q8WZ71 | -0.50365   |
| 130337 | P03346 | Q8NEV1 | -0.82958   |
| 130338 | P03346 | P0C672 | -0.50365   |
| 130339 | P03346 | Q86X52 | -0.65208   |
| 130340 | P03346 | A0PJW6 | -0.38186   |



|        |        |        |           |
|--------|--------|--------|-----------|
| 130341 | P03346 | P05000 | -0.61254  |
| 130342 | P03346 | Q8N1W1 | -0.50597  |
| 130343 | P03346 | Q9H7Y0 | -0.53519  |
| 130344 | P03346 | Q96BQ1 | -0.48717  |
| 130345 | P03346 | Q9NYK1 | -0.48177  |
| 130346 | P03346 | Q02318 | -0.29984  |
| 130347 | P03346 | Q9UK08 | -0.65887  |
| 130348 | P03346 | Q9Y3R0 | -0.22667  |
| 130349 | P03346 | Q8N2E2 | -0.53519  |
| 130350 | P03346 | Q9BT40 | -0.22717  |
| 130351 | P03346 | Q7M4L6 | -0.22741  |
| 130352 | P03346 | Q96DS6 | -0.50365  |
| 130353 | P03346 | Q58A45 | -0.22296  |
| 130354 | P03346 | Q8WZA2 | -0.22741  |
| 130355 | P03346 | Q8N8W4 | -0.18534  |
| 130356 | P03346 | Q9Y6J6 | -0.82083  |
| 130357 | P03346 | P98160 | -0.78953  |
| 130358 | P03346 | Q969V5 | -0.2274   |
| 130359 | P03346 | Q9H169 | -0.20622  |
| 130360 | P03346 | Q8N300 | -0.082191 |
| 130361 | P03346 | Q494X1 | -0.10297  |
| 130362 | P03346 | Q9NP73 | -0.21963  |
| 130363 | P03346 | Q95197 | -0.2829   |
| 130364 | P03346 | P43004 | -0.43559  |
| 130365 | P03346 | P54578 | -0.27163  |
| 130366 | P03346 | Q6ZST8 | -0.24162  |
| 130367 | P03346 | Q5K4L6 | -0.96785  |
| 130368 | P03346 | P04180 | -0.22658  |
| 130369 | P03346 | Q13464 | -0.27757  |
| 130370 | P03346 | O43147 | -0.56151  |
| 130371 | P03346 | Q6VEQ5 | -0.20933  |
| 130372 | P03346 | Q6P4I2 | -0.21287  |
| 130373 | P03346 | Q6P9H4 | -0.22739  |
| 130374 | P03346 | Q8WWM9 | -0.10455  |
| 130375 | P03346 | Q16610 | -0.28461  |
| 130376 | P03346 | A6NEH8 | -0.10932  |
| 130377 | P03346 | P01613 | -0.80078  |
| 130378 | P03346 | Q9Y6K8 | -0.312    |
| 130379 | P03346 | Q8NFZ8 | -0.67572  |
| 130380 | P03346 | Q16690 | -0.25511  |
| 130381 | P03346 | P02656 | -0.50554  |
| 130382 | P03346 | Q92628 | -0.48833  |
| 130383 | P03346 | P02768 | -0.18139  |
| 130384 | P03346 | Q96KV6 | -0.50365  |
| 130385 | P03346 | Q9BVA1 | -0.20925  |
| 130386 | P03346 | Q9H0X9 | -0.76889  |
| 130387 | P03346 | Q9UI25 | -0.013652 |
| 130388 | P03346 | P51151 | -0.30875  |
| 130389 | P03346 | Q1HG43 | -0.48934  |
| 130390 | P03346 | Q9H9B1 | -0.22741  |
| 130391 | P03346 | P07311 | -0.090559 |
| 130392 | P03346 | Q11130 | -0.43575  |
| 130393 | P03346 | Q9BXX2 | -0.22741  |
| 130394 | P03346 | Q5MNZ6 | -0.22721  |
| 130395 | P03346 | P51993 | -0.4424   |
| 130396 | P03346 | Q06481 | -0.22679  |
| 130397 | P03346 | P25942 | -0.42584  |
| 130398 | P03346 | O15270 | -0.53972  |
| 130399 | P03346 | Q9P241 | -0.49301  |
| 130400 | P03346 | P09238 | -0.9852   |
| 130401 | P03346 | Q8NEB7 | -0.37312  |
| 130402 | P03346 | Q96MV1 | -0.30782  |
| 130403 | P03346 | O14807 | -0.99905  |
| 130404 | P03346 | Q8N8F7 | -0.50365  |
| 130405 | P03346 | Q8NEB5 | -0.52009  |
| 130406 | P03346 | Q76N89 | -0.22741  |
| 130407 | P03346 | Q8IXA5 | -0.36119  |
| 130408 | P03346 | A0PJX8 | -0.50365  |
| 130409 | P03346 | Q8N7B9 | -0.22731  |
| 130410 | P03346 | P27918 | -0.76393  |
| 130411 | P03346 | Q6N063 | -0.35255  |
| 130412 | P03346 | P49643 | -0.18191  |
| 130413 | P03346 | Q5TZ20 | -0.92763  |
| 130414 | P03346 | Q6MZZ7 | -0.68447  |
| 130415 | P03346 | P53396 | -0.20406  |
| 130416 | P03346 | Q96C45 | -0.88651  |

|        |        |        |           |
|--------|--------|--------|-----------|
| 130417 | P03346 | Q9UKN1 | -0.60015  |
| 130418 | P03346 | Q96C57 | -0.10591  |
| 130419 | P03346 | Q14D04 | -0.34338  |
| 130420 | P03346 | Q6ZSN7 | -0.06081  |
| 130421 | P03346 | A6NGY3 | -0.1063   |
| 130422 | P03346 | O00180 | -0.64409  |
| 130423 | P03346 | P13569 | -0.22741  |
| 130424 | P03346 | O75937 | -0.20731  |
| 130425 | P03346 | Q86YR7 | -0.39327  |
| 130426 | P03346 | O95932 | -0.22862  |
| 130427 | P03346 | P49326 | -0.76243  |
| 130428 | P03346 | P10523 | -0.60321  |
| 130429 | P03346 | Q96GD4 | -0.75376  |
| 130430 | P03346 | Q6IQ55 | -0.33432  |
| 130431 | P03346 | P42685 | -0.31009  |
| 130432 | P03346 | P61160 | -0.49462  |
| 130433 | P03346 | Q6PEV8 | -0.20089  |
| 130434 | P03346 | Q8WUG5 | -0.7473   |
| 130435 | P03346 | Q15835 | -0.89492  |
| 130436 | P03346 | Q16842 | -0.46517  |
| 130437 | P03346 | P51813 | -0.54975  |
| 130438 | P03346 | Q9H2K8 | -0.22908  |
| 130439 | P03346 | Q969I6 | -0.75543  |
| 130440 | P03346 | P14920 | -0.22209  |
| 130441 | P03346 | Q96EQ8 | -0.33684  |
| 130442 | P03346 | P0C869 | -0.41818  |
| 130443 | P03346 | Q8NGY2 | -0.92763  |
| 130444 | P03346 | Q9H1U4 | -0.46703  |
| 130445 | P03346 | Q15077 | -0.90858  |
| 130446 | P03346 | Q6YI46 | -0.50365  |
| 130447 | P03346 | Q96SZ6 | -0.20572  |
| 130448 | P03346 | Q96RI8 | -0.9411   |
| 130449 | P03346 | Q9ULD6 | -0.22738  |
| 130450 | P03346 | Q8NGJ6 | -0.92763  |
| 130451 | P03346 | Q6ZRK6 | -0.20785  |
| 130452 | P03346 | Q6ZSG1 | -0.23171  |
| 130453 | P03346 | Q96LK8 | -0.24258  |
| 130454 | P03346 | Q658Y4 | -0.016323 |
| 130455 | P03346 | O60279 | -0.66931  |
| 130456 | P03346 | Q13651 | -0.29576  |
| 130457 | P03346 | P25089 | -1.0297   |
| 130458 | P03346 | Q8NGQ5 | -0.92763  |
| 130459 | P03346 | Q8IYU4 | -0.16972  |
| 130460 | P03346 | Q29865 | -0.76151  |
| 130461 | P03346 | Q5VTH9 | -0.22742  |
| 130462 | P03346 | O60774 | -0.79596  |
| 130463 | P03346 | Q7Z3F1 | -0.66859  |
| 130464 | P03346 | Q8N323 | -0.53519  |
| 130465 | P03346 | Q9P2C4 | -0.47982  |
| 130466 | P03346 | Q9NP90 | -0.22877  |
| 130467 | P03346 | Q6IE38 | -0.50866  |
| 130468 | P03346 | Q96A98 | -0.5397   |
| 130469 | P03346 | Q9UI66 | -0.013652 |
| 130470 | P03346 | P56470 | -0.21651  |
| 130471 | P03346 | Q86WA6 | -0.21932  |
| 130472 | P03346 | Q8NBK3 | -0.21419  |
| 130473 | P03346 | Q9BU40 | -0.59541  |
| 130474 | P03346 | Q5VUR7 | -0.2274   |
| 130475 | P03346 | Q86SG4 | -0.22628  |
| 130476 | P03346 | Q9ULV4 | -0.26112  |
| 130477 | P03346 | P01622 | -0.80078  |
| 130478 | P03346 | Q9GZM7 | -0.69185  |
| 130479 | P03346 | Q8N539 | -0.82238  |
| 130480 | P03346 | P25940 | -0.63104  |
| 130481 | P03346 | Q05682 | -0.23725  |
| 130482 | P03346 | P49796 | -0.22741  |
| 130483 | P03346 | Q9HAY6 | -0.21557  |
| 130484 | P03346 | P01596 | -0.80078  |
| 130485 | P03346 | Q9Y5R2 | -1.4079   |
| 130486 | P03346 | Q3ZAQ7 | -0.58931  |
| 130487 | P03346 | P35499 | -0.79992  |
| 130488 | P03346 | Q96A08 | -0.36695  |
| 130489 | P03346 | O00585 | -0.47441  |
| 130490 | P03346 | O95835 | -0.22738  |
| 130491 | P03346 | P05161 | -0.27592  |
| 130492 | P03346 | P07711 | -0.25535  |

|        |        |        |           |
|--------|--------|--------|-----------|
| 130493 | P03346 | Q9BT56 | -0.091339 |
| 130494 | P03346 | P47890 | -0.92763  |
| 130495 | P03346 | Q5FWF7 | -0.22673  |
| 130496 | P03346 | P28223 | -0.57322  |
| 130497 | P03346 | Q8N3P4 | -0.22539  |
| 130498 | P03346 | A6NET4 | -0.92763  |
| 130499 | P03346 | P59544 | -0.84404  |
| 130500 | P03346 | Q9Y6N3 | -0.62892  |
| 130501 | P03346 | Q5T4B2 | -0.27524  |
| 130502 | P03346 | Q9NYV8 | -0.78885  |
| 130503 | P03346 | Q6ZRR7 | -0.2274   |
| 130504 | P03346 | Q16832 | -0.94584  |
| 130505 | P03346 | Q9NZK5 | -0.54057  |
| 130506 | P03346 | Q9BXJ8 | -0.30782  |
| 130507 | P03346 | Q9NNX1 | -0.50274  |
| 130508 | P03346 | Q8NFP4 | -0.42962  |
| 130509 | P03346 | Q5T011 | -0.092877 |
| 130510 | P03346 | Q9Y4G2 | -0.20472  |
| 130511 | P03346 | Q8NGK4 | -0.92763  |
| 130512 | P03346 | A2VEC9 | -0.80824  |
| 130513 | P03346 | Q8N6G6 | -0.7672   |
| 130514 | P03346 | Q92896 | -0.42912  |
| 130515 | P03346 | Q6P047 | -0.094939 |
| 130516 | P03346 | Q99766 | -0.10086  |
| 130517 | P03346 | Q9BY79 | -0.43026  |
| 130518 | P03346 | P10275 | -0.22741  |
| 130519 | P03346 | P16189 | -0.51191  |
| 130520 | P03346 | Q96HD9 | -0.18266  |
| 130521 | P03346 | A8MYJ7 | -0.21056  |
| 130522 | P03346 | Q99536 | -0.74683  |
| 130523 | P03346 | Q8N4T8 | -0.2156   |
| 130524 | P03346 | Q9Y5G1 | -0.86699  |
| 130525 | P03346 | Q96RD3 | -0.92763  |
| 130526 | P03346 | P0C852 | -0.013652 |
| 130527 | P03346 | Q6P1M9 | -0.12712  |
| 130528 | P03346 | Q5VZV4 | -0.12507  |
| 130529 | P03346 | O60353 | -0.30519  |
| 130530 | P03346 | P22102 | -0.33797  |
| 130531 | P03346 | P0DJI8 | -0.37068  |
| 130532 | P03346 | Q96AC6 | -0.42865  |
| 130533 | P03346 | Q4J6C6 | -0.14286  |
| 130534 | P03346 | Q969X2 | -0.36744  |
| 130535 | P03346 | Q2TV78 | -0.90423  |
| 130536 | P03346 | Q96BI1 | -0.5185   |
| 130537 | P03346 | Q5VTB9 | -0.22739  |
| 130538 | P03346 | Q13442 | -0.16956  |
| 130539 | P03346 | O00244 | -0.19742  |
| 130540 | P03346 | P68371 | -0.20766  |
| 130541 | P03346 | Q9BQ31 | -0.26961  |
| 130542 | P03346 | Q08AI6 | -0.62013  |
| 130543 | P03346 | Q9GZY6 | -0.26684  |
| 130544 | P03346 | Q9UBX1 | -0.55816  |
| 130545 | P03346 | Q96PQ1 | -0.67197  |
| 130546 | P03346 | P81133 | -0.23775  |
| 130547 | P03346 | Q9BRL7 | -0.20954  |
| 130548 | P03346 | Q53H12 | -0.6095   |
| 130549 | P03346 | Q8N816 | -0.50365  |
| 130550 | P03346 | Q674R7 | -0.48228  |
| 130551 | P03346 | Q4G0G5 | -0.53519  |
| 130552 | P03346 | Q8IWK6 | -1.008    |
| 130553 | P03346 | Q02509 | -0.43668  |
| 130554 | P03346 | P09619 | -0.33682  |
| 130555 | P03346 | P01709 | -0.80078  |
| 130556 | P03346 | Q86VZ2 | -0.2373   |
| 130557 | P03346 | P19224 | -0.64006  |
| 130558 | P03346 | Q9UPC5 | -0.48923  |
| 130559 | P03346 | Q08648 | -0.56293  |
| 130560 | P03346 | P08185 | -0.62733  |
| 130561 | P03346 | A6NGE7 | -0.24788  |
| 130562 | P03346 | Q14CX5 | -0.50365  |
| 130563 | P03346 | O95249 | -0.18945  |
| 130564 | P03346 | Q9Y2B1 | -0.65456  |
| 130565 | P03346 | Q9HB29 | -0.84897  |
| 130566 | P03346 | P02741 | -0.6521   |
| 130567 | P03346 | Q8NGR9 | -0.92763  |
| 130568 | P03346 | Q8IZP7 | -0.57091  |

|        |        |        |           |
|--------|--------|--------|-----------|
| 130569 | P03346 | Q6E0U4 | -0.65384  |
| 130570 | P03346 | Q9H832 | -0.045607 |
| 130571 | P03346 | Q6P461 | -0.82016  |
| 130572 | P03346 | P51679 | -1.0691   |
| 130573 | P03346 | Q8N4W6 | -0.54308  |
| 130574 | P03346 | Q8TE96 | -0.2254   |
| 130575 | P03346 | Q494W8 | -0.52062  |
| 130576 | P03346 | P57078 | -0.22741  |
| 130577 | P03346 | Q5U649 | -0.11197  |
| 130578 | P03346 | Q9H9S3 | -0.44423  |
| 130579 | P03346 | Q86Y34 | -1.0077   |
| 130580 | P03346 | Q8WXG9 | -0.44754  |
| 130581 | P03346 | O94903 | -0.10254  |
| 130582 | P03346 | P0C838 | -0.061944 |
| 130583 | P03346 | Q96M27 | -0.1918   |
| 130584 | P03346 | P63133 | -0.22459  |
| 130585 | P03346 | P54219 | -0.25243  |
| 130586 | P03346 | P04437 | -0.26061  |
| 130587 | P03346 | Q9HBB8 | -0.77611  |
| 130588 | P03346 | P06865 | -0.32953  |
| 130589 | P03346 | A0PJE2 | -0.70492  |
| 130590 | P03346 | Q8NGC3 | -0.92763  |
| 130591 | P03346 | Q5TGZ0 | -0.28575  |
| 130592 | P03346 | Q99801 | -0.22909  |
| 130593 | P03346 | Q86YD5 | -0.64208  |
| 130594 | P03346 | P06731 | -0.34632  |
| 130595 | P03346 | Q5JS13 | -0.4421   |
| 130596 | P03346 | Q8TF21 | -0.22743  |
| 130597 | P03346 | O75676 | -0.21828  |
| 130598 | P03346 | P52803 | -0.31615  |
| 130599 | P03346 | Q8N999 | -0.059785 |
| 130600 | P03346 | P98179 | -0.22729  |
| 130601 | P03346 | Q8NH90 | -0.92763  |
| 130602 | P03346 | P01222 | -0.45643  |
| 130603 | P03346 | Q9NPB1 | -0.36942  |
| 130604 | P03346 | Q00266 | -0.41672  |
| 130605 | P03346 | Q8NH73 | -0.92763  |
| 130606 | P03346 | P0CW20 | -0.13373  |
| 130607 | P03346 | Q96FE5 | -0.48958  |
| 130608 | P03346 | Q7Z4S6 | -0.23327  |
| 130609 | P03346 | P51553 | -0.19137  |
| 130610 | P03346 | Q14CN2 | -1.1445   |
| 130611 | P03346 | Q9Y485 | -0.22742  |
| 130612 | P03346 | Q719I0 | -0.12872  |
| 130613 | P03346 | P98173 | -0.3749   |
| 130614 | P03346 | Q495Y7 | -0.14403  |
| 130615 | P03346 | Q8N4F0 | -0.67543  |
| 130616 | P03346 | Q96NA8 | -0.4021   |
| 130617 | P03346 | Q9H0L4 | -0.31471  |
| 130618 | P03346 | Q13202 | -0.26304  |
| 130619 | P03346 | Q99967 | -0.19868  |
| 130620 | P03346 | Q92887 | -0.61424  |
| 130621 | P03346 | Q12866 | -0.5663   |
| 130622 | P03346 | Q9NSA2 | -0.62435  |
| 130623 | P03346 | Q9NPR2 | -0.65622  |
| 130624 | P03346 | O43497 | -0.61719  |
| 130625 | P03346 | Q9Y271 | -1.0629   |
| 130626 | P03346 | Q9P003 | -0.49505  |
| 130627 | P03346 | Q9H2X8 | -0.50365  |
| 130628 | P03346 | Q8NGV7 | -0.92763  |
| 130629 | P03346 | Q6P1S2 | -0.42975  |
| 130630 | P03346 | Q6UXU6 | -0.50365  |
| 130631 | P03346 | Q8TB22 | -0.90147  |
| 130632 | P03346 | Q9H1E5 | -0.51282  |
| 130633 | P03346 | O95072 | -0.18715  |
| 130634 | P03346 | Q96SU4 | -0.3642   |
| 130635 | P03346 | Q15777 | -0.20125  |
| 130636 | P03346 | Q9H300 | -0.43663  |
| 130637 | P03346 | Q6ZUA9 | -0.028831 |
| 130638 | P03346 | Q8NBX0 | -0.40433  |
| 130639 | P03346 | O95744 | -0.15964  |
| 130640 | P03346 | Q9H306 | -0.96754  |
| 130641 | P03346 | Q6ZR93 | -0.013652 |
| 130642 | P03346 | P53350 | -0.22741  |
| 130643 | P03346 | Q9H0K1 | -0.25981  |
| 130644 | P03346 | Q5JUR7 | -0.2111   |

|        |        |        |           |
|--------|--------|--------|-----------|
| 130645 | P03346 | Q10472 | -0.67077  |
| 130646 | P03346 | Q8NGR5 | -0.92763  |
| 130647 | P03346 | Q9H347 | -0.22723  |
| 130648 | P03346 | Q68CQ7 | -0.42967  |
| 130649 | P03346 | Q8N7S2 | -0.19806  |
| 130650 | P03346 | Q9NUQ8 | -0.64162  |
| 130651 | P03346 | Q6IF00 | -0.92763  |
| 130652 | P03346 | P50440 | -0.1081   |
| 130653 | P03346 | Q8N8M0 | -0.15484  |
| 130654 | P03346 | P78383 | -0.5494   |
| 130655 | P03346 | Q8N6G2 | -0.1994   |
| 130656 | P03346 | P32926 | -0.61052  |
| 130657 | P03346 | Q9NP55 | -0.60516  |
| 130658 | P03346 | Q6S8J7 | -0.2272   |
| 130659 | P03346 | Q9Y6I9 | -0.53519  |
| 130660 | P03346 | P29350 | -0.22741  |
| 130661 | P03346 | Q8NGB9 | -0.92763  |
| 130662 | P03346 | O15305 | -0.12499  |
| 130663 | P03346 | Q6P5Z2 | -0.22555  |
| 130664 | P03346 | Q8WWI1 | -0.22732  |
| 130665 | P03346 | Q9Y5U4 | -0.15458  |
| 130666 | P03346 | Q13303 | -0.51286  |
| 130667 | P03346 | P63092 | -0.47914  |
| 130668 | P03346 | P01707 | -0.80078  |
| 130669 | P03346 | Q9Y5E6 | -0.92001  |
| 130670 | P03346 | Q8N485 | -0.13993  |
| 130671 | P03346 | Q16602 | -0.43086  |
| 130672 | P03346 | Q68EM7 | -0.2935   |
| 130673 | P03346 | Q8N6K7 | -0.22299  |
| 130674 | P03346 | O60487 | -0.22754  |
| 130675 | P03346 | P34897 | -0.16263  |
| 130676 | P03346 | Q86YW7 | -0.52424  |
| 130677 | P03346 | P10071 | -0.22735  |
| 130678 | P03346 | P80422 | -0.58933  |
| 130679 | P03346 | O60404 | -0.92763  |
| 130680 | P03346 | P23677 | -0.65469  |
| 130681 | P03346 | Q14257 | -0.089679 |
| 130682 | P03346 | Q8TCX1 | -0.20874  |
| 130683 | P03346 | Q9H6L2 | -0.64487  |
| 130684 | P03346 | Q9H2E6 | -0.2521   |
| 130685 | P03346 | Q8NGC0 | -0.92763  |
| 130686 | P03346 | A8MWE9 | -0.21736  |
| 130687 | P03346 | Q99470 | -0.73137  |
| 130688 | P03346 | Q14541 | -0.22803  |
| 130689 | P03346 | Q9Y4E6 | -0.22741  |
| 130690 | P03346 | Q9UP38 | -0.30309  |
| 130691 | P03346 | Q70E73 | -0.4702   |
| 130692 | P03346 | P31944 | -0.22727  |
| 130693 | P03346 | Q7Z628 | -0.22815  |
| 130694 | P03346 | O76054 | -0.22735  |
| 130695 | P03346 | Q13049 | -0.22741  |
| 130696 | P03346 | Q9BZ76 | -1.4687   |
| 130697 | P03346 | P17858 | -0.23352  |
| 130698 | P03346 | A8MUL3 | -0.013652 |
| 130699 | P03346 | P21815 | -0.74072  |
| 130700 | P03346 | O60687 | -0.22763  |
| 130701 | P03346 | Q8NGX8 | -0.92763  |
| 130702 | P03346 | Q96SM3 | -1.0652   |
| 130703 | P03346 | P19099 | -0.32818  |
| 130704 | P03346 | Q5T5S1 | -0.1447   |
| 130705 | P03346 | Q7Z4L0 | -0.37294  |
| 130706 | P03346 | Q8N7X8 | -0.50365  |
| 130707 | P03346 | Q9UKP5 | -0.93222  |
| 130708 | P03346 | Q96LJ8 | -0.02962  |
| 130709 | P03346 | A8MWP6 | -0.013652 |
| 130710 | P03346 | Q9Y258 | -0.88462  |
| 130711 | P03346 | Q8IYJ1 | -0.22812  |
| 130712 | P03346 | P22570 | -0.21424  |
| 130713 | P03346 | O95259 | -0.2337   |
| 130714 | P03346 | Q7Z7L8 | -0.04109  |
| 130715 | P03346 | Q8NDV2 | -0.95904  |
| 130716 | P03346 | P08700 | -0.42815  |
| 130717 | P03346 | Q13261 | -0.3332   |
| 130718 | P03346 | Q9UGM1 | -0.63375  |
| 130719 | P03346 | Q4VC39 | -0.50365  |
| 130720 | P03346 | Q6P575 | -0.17862  |

|        |        |        |           |
|--------|--------|--------|-----------|
| 130721 | P03346 | Q96IC2 | -0.49285  |
| 130722 | P03346 | P14902 | -0.18942  |
| 130723 | P03346 | Q6PML9 | -0.20608  |
| 130724 | P03346 | Q14594 | -0.60758  |
| 130725 | P03346 | O75019 | -0.71332  |
| 130726 | P03346 | Q9BZM5 | -0.84581  |
| 130727 | P03346 | A8MT70 | -0.30279  |
| 130728 | P03346 | E9PQR5 | -0.1761   |
| 130729 | P03346 | A8MT66 | -0.18698  |
| 130730 | P03346 | O75628 | -0.81857  |
| 130731 | P03346 | Q8NCR3 | -0.10978  |
| 130732 | P03346 | P33260 | -0.58289  |
| 130733 | P03346 | A6NN73 | -0.16656  |
| 130734 | P03346 | Q95461 | -0.40998  |
| 130735 | P03346 | Q1XH10 | -0.17152  |
| 130736 | P03346 | Q9P121 | -0.22765  |
| 130737 | P03346 | Q9BRK3 | -0.50365  |
| 130738 | P03346 | Q8N5W9 | -0.14733  |
| 130739 | P03346 | A2RU48 | -0.50365  |
| 130740 | P03346 | P06888 | -0.80078  |
| 130741 | P03346 | Q15375 | -0.59975  |
| 130742 | P03346 | Q96S21 | -0.67903  |
| 130743 | P03346 | Q32M45 | -0.53709  |
| 130744 | P03346 | A8MTJ6 | -0.23943  |
| 130745 | P03346 | Q96A29 | -0.30178  |
| 130746 | P03346 | O60741 | -0.98165  |
| 130747 | P03346 | P47897 | -0.14856  |
| 130748 | P03346 | A6NKG5 | -0.6719   |
| 130749 | P03346 | P05549 | -0.22078  |
| 130750 | P03346 | A6NKQ9 | -0.52424  |
| 130751 | P03346 | O14653 | -0.13869  |
| 130752 | P03346 | Q6UX73 | -0.53519  |
| 130753 | P03346 | Q8WY64 | -0.22741  |
| 130754 | P03346 | Q9NRB3 | -0.3096   |
| 130755 | P03346 | Q9H7X7 | -0.74667  |
| 130756 | P03346 | Q8NCU1 | -0.08502  |
| 130757 | P03346 | Q9UG63 | -0.47628  |
| 130758 | P03346 | Q8IXZ2 | -0.2179   |
| 130759 | P03346 | Q6P3R8 | -0.94145  |
| 130760 | P03346 | Q6UQ28 | -0.52201  |
| 130761 | P03346 | Q8N2F6 | -0.52192  |
| 130762 | P03346 | Q9UPN3 | -0.22753  |
| 130763 | P03346 | Q96PQ5 | -0.1669   |
| 130764 | P03346 | O15146 | -0.70575  |
| 130765 | P03346 | Q9H2X6 | -0.22741  |
| 130766 | P03346 | Q9Y5F6 | -0.86699  |
| 130767 | P03346 | Q5VZ19 | -0.40469  |
| 130768 | P03346 | Q92551 | -0.15245  |
| 130769 | P03346 | Q6ZQY2 | -0.22739  |
| 130770 | P03346 | Q96BY9 | -0.14486  |
| 130771 | P03346 | Q5T1M5 | -0.29595  |
| 130772 | P03346 | Q6ZVX9 | -0.50365  |
| 130773 | P03346 | A6NLU0 | -0.22743  |
| 130774 | P03346 | Q96BJ3 | -0.092314 |
| 130775 | P03346 | P16860 | -0.33734  |
| 130776 | P03346 | Q05823 | -0.22741  |
| 130777 | P03346 | Q7Z7B8 | -0.52229  |
| 130778 | P03346 | Q9BUA6 | -0.22735  |
| 130779 | P03346 | Q9H0W7 | -0.19192  |
| 130780 | P03346 | Q8N402 | -0.17551  |
| 130781 | P03346 | O14967 | -0.58885  |
| 130782 | P03346 | Q8NHW4 | -0.90851  |
| 130783 | P03346 | Q7Z2Y5 | -0.83672  |
| 130784 | P03346 | P30481 | -0.76151  |
| 130785 | P03346 | Q6NT46 | -0.21009  |
| 130786 | P03346 | Q0VAK6 | -0.22613  |
| 130787 | P03346 | Q95170 | -0.22773  |
| 130788 | P03346 | Q969I3 | -0.056986 |
| 130789 | P03346 | B1AKI9 | -0.53519  |
| 130790 | P03346 | Q9C091 | -0.50365  |
| 130791 | P03346 | Q8N2K1 | -0.86784  |
| 130792 | P03346 | Q6PF18 | -0.095025 |
| 130793 | P03346 | Q8WUU4 | -0.2265   |
| 130794 | P03346 | Q14830 | -0.22255  |
| 130795 | P03346 | Q6PK57 | -0.22403  |
| 130796 | P03346 | Q7Z7J9 | -0.23863  |

|        |        |        |           |
|--------|--------|--------|-----------|
| 130797 | P03346 | Q13093 | -0.68804  |
| 130798 | P03346 | Q96D59 | -0.56385  |
| 130799 | P03346 | Q5T7N7 | -0.013652 |
| 130800 | P03346 | Q9BS86 | -0.5418   |
| 130801 | P03346 | O43246 | -0.49599  |
| 130802 | P03346 | Q05586 | -0.26088  |
| 130803 | P03346 | A6NK58 | -0.13982  |
| 130804 | P03346 | Q96T60 | -0.29668  |
| 130805 | P03346 | P43320 | -0.1372   |
| 130806 | P03346 | O95857 | -0.65456  |
| 130807 | P03346 | P00519 | -0.22748  |
| 130808 | P03346 | Q9Y5G4 | -0.86699  |
| 130809 | P03346 | Q8WWM1 | -0.069647 |
| 130810 | P03346 | P59542 | -0.84404  |
| 130811 | P03346 | P35410 | -0.31728  |
| 130812 | P03346 | Q08881 | -0.32613  |
| 130813 | P03346 | Q92521 | -0.58131  |
| 130814 | P03346 | P49683 | -0.9804   |
| 130815 | P03346 | P48146 | -0.4017   |
| 130816 | P03346 | O75596 | -0.61599  |
| 130817 | P03346 | P12645 | -0.55605  |
| 130818 | P03346 | Q96LA5 | -0.59948  |
| 130819 | P03346 | Q9NX76 | -0.67729  |
| 130820 | P03346 | P01116 | -0.22771  |
| 130821 | P03346 | Q96DD0 | -0.24049  |
| 130822 | P03346 | Q12946 | -0.30831  |
| 130823 | P03346 | P31327 | -0.22568  |
| 130824 | P03346 | Q8WUE5 | -0.084071 |
| 130825 | P03346 | Q7Z6Z6 | -0.15739  |
| 130826 | P03346 | Q8IV77 | -0.91718  |
| 130827 | P03346 | Q96IX5 | -0.39658  |
| 130828 | P03346 | Q9Y5S2 | -0.64496  |
| 130829 | P03346 | Q96JY0 | -0.083205 |
| 130830 | P03346 | Q96AA3 | -0.50418  |
| 130831 | P03346 | Q6ZMN7 | -0.22981  |
| 130832 | P03346 | Q9UGM6 | -0.1741   |
| 130833 | P03346 | Q9NZV1 | -0.88375  |
| 130834 | P03346 | A8MY62 | -0.26529  |
| 130835 | P03346 | Q9ULS5 | -0.50365  |
| 130836 | P03346 | Q9NR64 | -0.18037  |
| 130837 | P03346 | A6NGS2 | -0.028005 |
| 130838 | P03346 | Q9NSD9 | -0.068843 |
| 130839 | P03346 | Q6KC79 | -0.20497  |
| 130840 | P03346 | P40939 | -0.20889  |
| 130841 | P03346 | P30479 | -0.76151  |
| 130842 | P03346 | Q8TC07 | -0.37614  |
| 130843 | P03346 | P06899 | -0.34659  |
| 130844 | P03346 | Q9ULM0 | -0.22741  |
| 130845 | P03346 | Q14032 | -0.23379  |
| 130846 | P03346 | Q9NR82 | -0.7812   |
| 130847 | P03346 | Q9HAY2 | -0.15875  |
| 130848 | P03346 | P07358 | -0.80512  |
| 130849 | P03346 | Q49AR2 | -0.083452 |
| 130850 | P03346 | Q96DM3 | -0.098937 |
| 130851 | P03346 | Q13224 | -0.25337  |
| 130852 | P03346 | Q8TAP8 | -0.046703 |
| 130853 | P03346 | Q5JU69 | -0.73736  |
| 130854 | P03346 | Q4G0N7 | -0.014767 |
| 130855 | P03346 | Q8N9X5 | -0.50365  |
| 130856 | P03346 | Q96AT9 | -0.20904  |
| 130857 | P03346 | Q96MA6 | -0.37946  |
| 130858 | P03346 | Q9HBM0 | -0.21458  |
| 130859 | P03346 | O14745 | -0.51138  |
| 130860 | P03346 | Q9UH64 | -0.2388   |
| 130861 | P03346 | Q99952 | -0.24737  |
| 130862 | P03346 | Q00722 | -0.39863  |
| 130863 | P03346 | Q8WVN6 | -1.282    |
| 130864 | P03346 | Q9BW92 | -0.13103  |
| 130865 | P03346 | Q16778 | -0.34659  |
| 130866 | P03346 | Q86W42 | -0.22753  |
| 130867 | P03346 | P11686 | -0.2219   |
| 130868 | P03346 | Q96BF3 | -0.65219  |
| 130869 | P03346 | Q58FF7 | -0.28583  |
| 130870 | P03346 | Q49A26 | -0.29287  |
| 130871 | P03346 | Q7L8L6 | -0.055284 |
| 130872 | P03346 | Q9NXH9 | -0.19671  |

|        |        |        |           |
|--------|--------|--------|-----------|
| 130873 | P03346 | Q9HC16 | -0.736    |
| 130874 | P03346 | O43557 | -0.52573  |
| 130875 | P03346 | Q07960 | -0.23001  |
| 130876 | P03346 | Q96M69 | -0.63638  |
| 130877 | P03346 | A8MWK0 | -0.78648  |
| 130878 | P03346 | Q9NQ84 | -0.91429  |
| 130879 | P03346 | Q6GPI1 | -1.1214   |
| 130880 | P03346 | Q7Z388 | -0.50365  |
| 130881 | P03346 | Q8TAG9 | -0.17483  |
| 130882 | P03346 | Q8WWT9 | -0.57658  |
| 130883 | P03346 | Q12864 | -0.7086   |
| 130884 | P03346 | Q3KPI0 | -0.50365  |
| 130885 | P03346 | Q8IZP2 | -0.22728  |
| 130886 | P03346 | Q9UKA9 | -0.2256   |
| 130887 | P03346 | Q8N5I4 | -0.70492  |
| 130888 | P03346 | Q8NGT5 | -0.92763  |
| 130889 | P03346 | P28335 | -0.77375  |
| 130890 | P03346 | P13611 | -0.81086  |
| 130891 | P03346 | Q9NRI7 | -0.013652 |
| 130892 | P03346 | P03956 | -0.83326  |
| 130893 | P03346 | Q13255 | -0.72205  |
| 130894 | P03346 | Q9UBI4 | -0.30544  |
| 130895 | P03346 | P17787 | -0.40437  |
| 130896 | P03346 | Q96K37 | -0.47711  |
| 130897 | P03346 | P55064 | -0.28911  |
| 130898 | P03346 | Q9Y508 | -0.58935  |
| 130899 | P03346 | O75521 | -0.51693  |
| 130900 | P03346 | Q9H598 | -0.59853  |
| 130901 | P03346 | Q9BSG0 | -0.53519  |
| 130902 | P03346 | O94885 | -0.22786  |
| 130903 | P03346 | Q9Y2R0 | -0.40195  |
| 130904 | P03346 | Q9NWR8 | -0.50365  |
| 130905 | P03346 | P0CZ20 | -0.079402 |
| 130906 | P03346 | Q9NPB8 | -0.20017  |
| 130907 | P03346 | P50120 | -0.22465  |
| 130908 | P03346 | P61011 | -0.2186   |
| 130909 | P03346 | P49961 | -1.2416   |
| 130910 | P03346 | O15211 | -0.49533  |
| 130911 | P03346 | Q9H0U3 | -0.77962  |
| 130912 | P03346 | Q8NE00 | -0.30782  |
| 130913 | P03346 | P61570 | -0.35115  |
| 130914 | P03346 | Q0D2K0 | -0.56569  |
| 130915 | P03346 | Q9P2H5 | -0.36346  |
| 130916 | P03346 | O14793 | -0.31228  |
| 130917 | P03346 | Q9HD64 | -0.080802 |
| 130918 | P03346 | O15091 | -0.19504  |
| 130919 | P03346 | Q13017 | -0.52625  |
| 130920 | P03346 | Q8NGR4 | -0.92763  |
| 130921 | P03346 | O95803 | -0.52678  |
| 130922 | P03346 | Q9BYP7 | -0.23446  |
| 130923 | P03346 | Q13564 | -0.22437  |
| 130924 | P03346 | Q2WGJ6 | -0.18776  |
| 130925 | P03346 | Q8IY49 | -0.34727  |
| 130926 | P03346 | Q9NRK6 | -0.80564  |
| 130927 | P03346 | Q6GPH6 | -0.50365  |
| 130928 | P03346 | A6NN90 | -0.12437  |
| 130929 | P03346 | Q9Y2C2 | -0.31739  |
| 130930 | P03346 | Q6B8I1 | -0.38582  |
| 130931 | P03346 | Q92859 | -0.54071  |
| 130932 | P03346 | Q8WXG6 | -0.2086   |
| 130933 | P03346 | Q8IVU1 | -0.63358  |
| 130934 | P03346 | Q9BRP7 | -0.11977  |
| 130935 | P03346 | Q7Z6I8 | -0.15824  |
| 130936 | P03346 | Q14088 | -0.2514   |
| 130937 | P03346 | Q96E22 | -0.57711  |
| 130938 | P03346 | Q8NA96 | -0.14514  |
| 130939 | P03346 | P23434 | -0.097152 |
| 130940 | P03346 | Q9UPU5 | -0.36346  |
| 130941 | P03346 | Q9H665 | -0.080812 |
| 130942 | P03346 | Q8NEV9 | -0.67923  |
| 130943 | P03346 | Q8TAF8 | -0.55421  |
| 130944 | P03346 | Q9NVP2 | -0.14503  |
| 130945 | P03346 | O75077 | -0.94101  |
| 130946 | P03346 | Q9HAT1 | -0.45821  |
| 130947 | P03346 | Q6ZSS7 | -0.50489  |
| 130948 | P03346 | P30504 | -0.76151  |



|        |        |        |            |
|--------|--------|--------|------------|
| 130949 | P03346 | Q5UAW9 | -1.0145    |
| 130950 | P03346 | Q96B02 | -0.13221   |
| 130951 | P03346 | B9EJG8 | -0.50365   |
| 130952 | P03346 | Q9NXU5 | -0.92981   |
| 130953 | P03346 | Q86VZ1 | -0.92894   |
| 130954 | P03346 | P24462 | -0.60973   |
| 130955 | P03346 | Q9Y2E8 | -0.57248   |
| 130956 | P03346 | Q8NA92 | -0.0073263 |
| 130957 | P03346 | O94905 | -0.14317   |
| 130958 | P03346 | Q8WZB0 | -0.20897   |
| 130959 | P03346 | P0DJH9 | -0.19401   |
| 130960 | P03346 | P60827 | -0.59838   |
| 130961 | P03346 | O60756 | -0.013652  |
| 130962 | P03346 | Q8N5S9 | -0.45495   |
| 130963 | P03346 | Q7RTS5 | -0.52425   |
| 130964 | P03346 | O95750 | -0.29956   |
| 130965 | P03346 | Q13554 | -0.57476   |
| 130966 | P03346 | Q6UXP3 | -0.50365   |
| 130967 | P03346 | O00507 | -0.29061   |
| 130968 | P03346 | Q15011 | -0.34303   |
| 130969 | P03346 | P11464 | -0.55194   |
| 130970 | P03346 | Q7RTY7 | -1.069     |
| 130971 | P03346 | Q8IYM2 | -0.11653   |
| 130972 | P03346 | Q96N87 | -0.77227   |
| 130973 | P03346 | O00634 | -0.36423   |
| 130974 | P03346 | Q96KJ9 | -0.14988   |
| 130975 | P03346 | A6NFU8 | -0.40813   |
| 130976 | P03346 | Q9H4Y5 | -0.22561   |
| 130977 | P03346 | A0PJW8 | -0.18107   |
| 130978 | P03346 | Q7RTU1 | -0.22163   |
| 130979 | P03346 | B3SHH9 | -0.65219   |
| 130980 | P03346 | Q14183 | -0.23545   |
| 130981 | P03346 | Q96JM4 | -0.22721   |
| 130982 | P03346 | Q16819 | -0.99852   |
| 130983 | P03346 | Q969H8 | -0.38812   |
| 130984 | P03346 | Q13488 | -0.52822   |
| 130985 | P03346 | Q9UBQ7 | -0.41167   |
| 130986 | P03346 | P04844 | -0.22184   |
| 130987 | P03346 | P49418 | -0.2274    |
| 130988 | P03346 | Q7L2J0 | -0.15196   |
| 130989 | P03346 | Q5VUM1 | -0.4102    |
| 130990 | P03346 | Q9UHQ4 | -0.22593   |
| 130991 | P03346 | Q5TAH2 | -0.65663   |
| 130992 | P03346 | Q8WVF2 | -0.62256   |
| 130993 | P03346 | Q969R2 | -0.46518   |
| 130994 | P03346 | P55290 | -0.34956   |
| 130995 | P03346 | P04196 | -0.23951   |
| 130996 | P03346 | Q9BZJ8 | -0.83812   |
| 130997 | P03346 | Q9Y303 | -0.20474   |
| 130998 | P03346 | Q02779 | -0.51247   |
| 130999 | P03346 | P02654 | -0.44405   |
| 131000 | P03346 | Q9HBW9 | -1.0256    |
| 131001 | P03346 | P0C2W7 | -0.013652  |
| 131002 | P03346 | Q96RQ9 | -0.71304   |
| 131003 | P03346 | Q8NGU9 | -0.96376   |
| 131004 | P03346 | A4UGR9 | -0.16466   |
| 131005 | P03346 | Q8WXC6 | -0.12845   |
| 131006 | P03346 | Q9H2Q1 | -0.50365   |
| 131007 | P03346 | Q9BVR0 | -0.2087    |
| 131008 | P03346 | Q6PI97 | -0.094017  |
| 131009 | P03346 | O95222 | -0.92763   |
| 131010 | P03346 | Q16816 | -0.47003   |
| 131011 | P03346 | Q96PZ0 | -0.20821   |
| 131012 | P03346 | Q9NRR6 | -0.2271    |
| 131013 | P03346 | Q8N3F0 | -0.041808  |
| 131014 | P03346 | Q9H2S5 | -0.22742   |
| 131015 | P03346 | P01705 | -0.80078   |
| 131016 | P03346 | Q96QE2 | -0.5201    |
| 131017 | P03346 | Q6UXT9 | -0.52521   |
| 131018 | P03346 | Q8N3H0 | -0.22397   |
| 131019 | P03346 | A0FGR9 | -0.65219   |
| 131020 | P03346 | Q9Y3A0 | -0.12849   |
| 131021 | P03346 | Q15784 | -0.22752   |
| 131022 | P03346 | Q8WWZ3 | -0.21553   |
| 131023 | P03346 | Q13231 | -0.64927   |
| 131024 | P03346 | O15539 | -0.53105   |

|        |        |        |           |
|--------|--------|--------|-----------|
| 131025 | P03346 | Q03692 | -0.70528  |
| 131026 | P03346 | Q8NG92 | -0.92763  |
| 131027 | P03346 | Q53EU6 | -0.5329   |
| 131028 | P03346 | Q95858 | -0.65456  |
| 131029 | P03346 | P29017 | -0.78465  |
| 131030 | P03346 | Q8WU79 | -0.21378  |
| 131031 | P03346 | Q96T83 | -0.2847   |
| 131032 | P03346 | Q6W3E5 | -0.54488  |
| 131033 | P03346 | Q5IJ48 | -1.2186   |
| 131034 | P03346 | P35580 | -0.11323  |
| 131035 | P03346 | Q14802 | -0.72404  |
| 131036 | P03346 | Q3MJ13 | -0.22754  |
| 131037 | P03346 | P19634 | -0.27012  |
| 131038 | P03346 | Q9NQ88 | -0.23295  |
| 131039 | P03346 | Q8TDX7 | -0.61075  |
| 131040 | P03346 | P01591 | -0.58933  |
| 131041 | P03346 | Q86X60 | -0.09073  |
| 131042 | P03346 | Q8IUK5 | -0.59893  |
| 131043 | P03346 | Q9H2F3 | -0.75162  |
| 131044 | P03346 | Q9NQ88 | -0.38709  |
| 131045 | P03346 | Q7Z410 | -1.1979   |
| 131046 | P03346 | A2VDJ0 | -0.50365  |
| 131047 | P03346 | B2RUZ4 | -0.50365  |
| 131048 | P03346 | Q9NZ43 | -0.1929   |
| 131049 | P03346 | Q9H2J7 | -0.74707  |
| 131050 | P03346 | Q99437 | -0.43867  |
| 131051 | P03346 | Q96EQ0 | -0.22725  |
| 131052 | P03346 | Q86XH1 | -0.48833  |
| 131053 | P03346 | P09958 | -0.39363  |
| 131054 | P03346 | Q9NS84 | -0.33598  |
| 131055 | P03346 | P48551 | -0.65924  |
| 131056 | P03346 | Q96GD0 | -0.2051   |
| 131057 | P03346 | Q75493 | -0.47033  |
| 131058 | P03346 | Q8NE63 | -0.75873  |
| 131059 | P03346 | P01579 | -0.23585  |
| 131060 | P03346 | P21217 | -0.45397  |
| 131061 | P03346 | Q7Z2Y8 | -0.2091   |
| 131062 | P03346 | Q00535 | -0.2008   |
| 131063 | P03346 | A4QPB2 | -0.22742  |
| 131064 | P03346 | Q5TFQ8 | -0.50365  |
| 131065 | P03346 | P98187 | -0.78303  |
| 131066 | P03346 | Q9H9L4 | -0.058121 |
| 131067 | P03346 | Q16553 | -0.3922   |
| 131068 | P03346 | Q9BV94 | -0.56879  |
| 131069 | P03346 | Q16566 | -0.23993  |
| 131070 | P03346 | Q8NCW0 | -0.46595  |
| 131071 | P03346 | K7EJ46 | -0.013652 |
| 131072 | P03346 | Q75369 | -0.22757  |
| 131073 | P03346 | Q9BVI0 | -0.23098  |
| 131074 | P03346 | P46091 | -1.0977   |
| 131075 | P03346 | Q96PZ2 | -0.17725  |
| 131076 | P03346 | P09466 | -0.65482  |
| 131077 | P03346 | Q9NS40 | -0.75266  |
| 131078 | P03346 | Q96A33 | -0.12381  |
| 131079 | P03346 | A2RRH5 | -0.22741  |
| 131080 | P03346 | Q96D21 | -0.81415  |
| 131081 | P03346 | P0C841 | -0.013652 |
| 131082 | P03346 | Q9GZY4 | -0.40195  |
| 131083 | P03346 | A4FU49 | -0.22624  |
| 131084 | P03346 | Q7L8A9 | -0.40033  |
| 131085 | P03346 | P20807 | -0.63814  |
| 131086 | P03346 | P10301 | -0.45909  |
| 131087 | P03346 | Q9NY93 | -0.30271  |
| 131088 | P03346 | Q10469 | -0.46437  |
| 131089 | P03346 | Q6NUS8 | -0.55213  |
| 131090 | P03346 | Q86YB8 | -0.45749  |
| 131091 | P03346 | Q96MC6 | -0.60861  |
| 131092 | P03346 | Q92935 | -0.67664  |
| 131093 | P03346 | Q8WWA0 | -0.88973  |
| 131094 | P03346 | P10620 | -0.17146  |
| 131095 | P03346 | Q3SXP7 | -0.50365  |
| 131096 | P03346 | P08514 | -0.22746  |
| 131097 | P03346 | Q15661 | -0.64582  |
| 131098 | P03346 | Q96MK2 | -0.13262  |
| 131099 | P03346 | Q7Z7M1 | -1.0077   |
| 131100 | P03346 | P84351 | -0.6044   |

|        |        |        |           |
|--------|--------|--------|-----------|
| 131101 | P03346 | A6NKK0 | -0.92763  |
| 131102 | P03346 | Q9Y3Q0 | -0.88867  |
| 131103 | P03346 | P24821 | -0.88703  |
| 131104 | P03346 | Q7RTY0 | -0.61943  |
| 131105 | P03346 | Q5K4E3 | -0.85859  |
| 131106 | P03346 | Q8IWR1 | -0.71964  |
| 131107 | P03346 | Q08722 | -0.25304  |
| 131108 | P03346 | Q96B70 | -0.32715  |
| 131109 | P03346 | Q5GAN4 | -0.4686   |
| 131110 | P03346 | Q5VWQ8 | -0.22713  |
| 131111 | P03346 | Q9NRD8 | -0.63555  |
| 131112 | P03346 | Q99661 | -0.25644  |
| 131113 | P03346 | Q16620 | -0.44642  |
| 131114 | P03346 | Q96FG2 | -0.1609   |
| 131115 | P03346 | Q8NE86 | -0.12285  |
| 131116 | P03346 | Q9Y2F9 | -0.21626  |
| 131117 | P03346 | P0C629 | -0.92763  |
| 131118 | P03346 | Q02161 | -0.61639  |
| 131119 | P03346 | Q9Y6V0 | -0.23689  |
| 131120 | P03346 | Q96A23 | -0.22736  |
| 131121 | P03346 | A6NL26 | -0.92763  |
| 131122 | P03346 | P02775 | -0.55878  |
| 131123 | P03346 | C9JRZ8 | -0.22727  |
| 131124 | P03346 | Q96IG2 | -0.22719  |
| 131125 | P03346 | Q8NFR9 | -0.20818  |
| 131126 | P03346 | Q8NHA8 | -0.92763  |
| 131127 | P03346 | Q9H521 | -0.22789  |
| 131128 | P03346 | Q9NY57 | -0.94145  |
| 131129 | P03346 | P10253 | -0.25549  |
| 131130 | P03346 | Q6ZV29 | -0.3044   |
| 131131 | P03346 | Q96T25 | -0.22728  |
| 131132 | P03346 | Q8N6P7 | -0.47231  |
| 131133 | P03346 | A4D1F6 | -0.22843  |
| 131134 | P03346 | P19525 | -0.31663  |
| 131135 | P03346 | P35998 | -0.33124  |
| 131136 | P03346 | P13866 | -0.1901   |
| 131137 | P03346 | Q5VWM3 | -0.21033  |
| 131138 | P03346 | P25025 | -0.92064  |
| 131139 | P03346 | Q9Y2S6 | -0.013652 |
| 131140 | P03346 | Q02818 | -0.20104  |
| 131141 | P03346 | Q92619 | -0.67474  |
| 131142 | P03346 | Q92903 | -0.61905  |
| 131143 | P03346 | Q8WTS1 | -0.21957  |
| 131144 | P03346 | P98153 | -0.59425  |
| 131145 | P03346 | Q2TAL6 | -0.65852  |
| 131146 | P03346 | Q9NST1 | -0.51952  |
| 131147 | P03346 | Q3KQV9 | -0.21753  |
| 131148 | P03346 | Q8N8P7 | -0.53519  |
| 131149 | P03346 | Q9BUM1 | -0.27356  |
| 131150 | P03346 | Q8N2E6 | -0.9537   |
| 131151 | P03346 | Q96DA6 | -0.3191   |
| 131152 | P03346 | Q15884 | -0.30782  |
| 131153 | P03346 | Q9UPU7 | -0.50474  |
| 131154 | P03346 | Q9Y5X4 | -0.22839  |
| 131155 | P03346 | P18827 | -0.4099   |
| 131156 | P03346 | Q8TBR5 | -0.19062  |
| 131157 | P03346 | Q15286 | -0.39552  |
| 131158 | P03346 | Q8N8F6 | -0.63608  |
| 131159 | P03346 | O43424 | -0.42401  |
| 131160 | P03346 | P78357 | -0.32692  |
| 131161 | P03346 | Q96T17 | -0.015293 |
| 131162 | P03346 | Q86TG1 | -0.63912  |
| 131163 | P03346 | Q9C019 | -0.30057  |
| 131164 | P03346 | O43709 | -0.3119   |
| 131165 | P03346 | P62834 | -0.22784  |
| 131166 | P03346 | Q5VTJ3 | -0.50365  |
| 131167 | P03346 | Q02790 | -0.26021  |
| 131168 | P03346 | Q6ZRC1 | -0.013652 |
| 131169 | P03346 | Q14654 | -0.53225  |
| 131170 | P03346 | C9JFL3 | -0.013652 |
| 131171 | P03346 | P08590 | -0.22704  |
| 131172 | P03346 | Q8NHJ6 | -0.22957  |
| 131173 | P03346 | Q96LT6 | -0.115    |
| 131174 | P03346 | Q95868 | -0.39828  |
| 131175 | P03346 | Q86SJ6 | -1.0687   |
| 131176 | P03346 | Q3ZCU0 | -0.22507  |

|        |        |        |           |
|--------|--------|--------|-----------|
| 131177 | P03346 | Q9NTN9 | -0.78097  |
| 131178 | P03346 | Q8NHH1 | -0.17807  |
| 131179 | P03346 | Q96MT1 | -0.56385  |
| 131180 | P03346 | Q8IYT8 | -0.5423   |
| 131181 | P03346 | P22304 | -0.35407  |
| 131182 | P03346 | P0DJR0 | -0.59969  |
| 131183 | P03346 | Q9P2X0 | -0.23974  |
| 131184 | P03346 | Q99675 | -0.22726  |
| 131185 | P03346 | Q86Y91 | -0.25074  |
| 131186 | P03346 | O14669 | -1.2121   |
| 131187 | P03346 | Q8IYM0 | -0.17327  |
| 131188 | P03346 | H3BV60 | -0.50365  |
| 131189 | P03346 | P61550 | -0.35988  |
| 131190 | P03346 | Q69YU3 | -0.2272   |
| 131191 | P03346 | P24557 | -0.73374  |
| 131192 | P03346 | Q9GZR5 | -0.098755 |
| 131193 | P03346 | Q8WTZ4 | -0.21764  |
| 131194 | P03346 | Q9HCJ3 | -0.22804  |
| 131195 | P03346 | Q15119 | -0.19943  |
| 131196 | P03346 | Q8N468 | -0.48129  |
| 131197 | P03346 | Q9P2K9 | -0.33588  |
| 131198 | P03346 | P32745 | -0.38093  |
| 131199 | P03346 | O60500 | -0.35648  |
| 131200 | P03346 | Q8N0X4 | -0.18669  |
| 131201 | P03346 | Q3SXM0 | -0.22742  |
| 131202 | P03346 | Q96CB5 | -0.22671  |
| 131203 | P03346 | Q92581 | -0.6828   |
| 131204 | P03346 | Q9NU23 | -0.14759  |
| 131205 | P03346 | Q9BYV7 | -0.38979  |
| 131206 | P03346 | Q76G19 | -0.22729  |
| 131207 | P03346 | Q9H0R6 | -0.3      |
| 131208 | P03346 | Q9UBY8 | -0.28394  |
| 131209 | P03346 | Q9BZW2 | -0.68913  |
| 131210 | P03346 | Q86UW8 | -0.72027  |
| 131211 | P03346 | Q8IVL5 | -0.38313  |
| 131212 | P03346 | Q53H82 | -0.18521  |
| 131213 | P03346 | Q15040 | -0.32511  |
| 131214 | P03346 | P22891 | -0.77254  |
| 131215 | P03346 | Q8NGC7 | -0.92763  |
| 131216 | P03346 | Q2T9F4 | -0.17289  |
| 131217 | P03346 | Q5SQH8 | -0.20778  |
| 131218 | P03346 | O95297 | -0.22381  |
| 131219 | P03346 | Q6ZMJ4 | -0.56109  |
| 131220 | P03346 | P01133 | -0.73224  |
| 131221 | P03346 | Q6S5H4 | -0.22734  |
| 131222 | P03346 | Q1W4C9 | -0.50866  |
| 131223 | P03346 | O15554 | -0.21616  |
| 131224 | P03346 | O14495 | -0.22217  |
| 131225 | P03346 | Q5ZPR3 | -0.22742  |
| 131226 | P03346 | Q86WS5 | -0.97407  |
| 131227 | P03346 | Q8NGS0 | -0.92763  |
| 131228 | P03346 | P36915 | -0.44041  |
| 131229 | P03346 | Q4VXF1 | -0.50365  |
| 131230 | P03346 | P11234 | -0.22895  |
| 131231 | P03346 | O75325 | -0.82994  |
| 131232 | P03346 | Q96LX7 | -0.16089  |
| 131233 | P03346 | Q7L1I2 | -0.45272  |
| 131234 | P03346 | Q9NTQ9 | -0.63064  |
| 131235 | P03346 | Q96M85 | -0.013652 |
| 131236 | P03346 | Q9HC23 | -0.69811  |
| 131237 | P03346 | Q8WUH6 | -0.50365  |
| 131238 | P03346 | Q96A84 | -0.55756  |
| 131239 | P03346 | Q5T1C6 | -0.058962 |
| 131240 | P03346 | O75509 | -0.22774  |
| 131241 | P03346 | Q9NZH7 | -0.68036  |
| 131242 | P03346 | O95070 | -0.14982  |
| 131243 | P03346 | Q8TBY0 | -0.40469  |
| 131244 | P03346 | Q9ULA0 | -0.29943  |
| 131245 | P03346 | Q8NGQ1 | -0.92763  |
| 131246 | P03346 | Q7Z7M9 | -0.38073  |
| 131247 | P03346 | P51606 | -0.16891  |
| 131248 | P03346 | Q15238 | -0.22759  |
| 131249 | P03346 | Q5JXX5 | -0.60096  |
| 131250 | P03346 | Q96KP4 | -0.21647  |
| 131251 | P03346 | Q8N0W7 | -0.32327  |
| 131252 | P03346 | O75191 | -0.5562   |

|        |        |        |           |
|--------|--------|--------|-----------|
| 131253 | P03346 | Q8IVW1 | -0.5599   |
| 131254 | P03346 | O43692 | -0.47148  |
| 131255 | P03346 | O95196 | -0.5584   |
| 131256 | P03346 | Q9BTP6 | -0.047317 |
| 131257 | P03346 | P09601 | -0.21845  |
| 131258 | P03346 | Q9HD89 | -0.32701  |
| 131259 | P03346 | Q6UX27 | -0.50365  |
| 131260 | P03346 | Q6IN97 | -0.22692  |
| 131261 | P03346 | P0C853 | -0.013652 |
| 131262 | P03346 | Q9NPG1 | -0.34224  |
| 131263 | P03346 | A6NM76 | -0.92763  |
| 131264 | P03346 | Q8NBH2 | -0.20783  |
| 131265 | P03346 | Q9Y6I0 | -0.23811  |
| 131266 | P03346 | Q92828 | -0.22741  |
| 131267 | P03346 | Q8NH93 | -0.92763  |
| 131268 | P03346 | Q8WWN8 | -0.64872  |
| 131269 | P03346 | O43196 | -0.34144  |
| 131270 | P03346 | P0C7U9 | -0.50365  |
| 131271 | P03346 | P47775 | -1.0979   |
| 131272 | P03346 | Q96J42 | -0.527    |
| 131273 | P03346 | P54886 | -0.50857  |
| 131274 | P03346 | P41743 | -0.22375  |
| 131275 | P03346 | Q0VD67 | -0.31038  |
| 131276 | P03346 | P32297 | -0.567    |
| 131277 | P03346 | Q96IY4 | -0.77491  |
| 131278 | P03346 | Q8N122 | -0.22741  |
| 131279 | P03346 | Q96IZ6 | -0.2143   |
| 131280 | P03346 | Q8WZ73 | -0.22741  |
| 131281 | P03346 | Q8TDI8 | -0.54098  |
| 131282 | P03346 | Q13685 | -0.31508  |
| 131283 | P03346 | B1AK53 | -0.22738  |
| 131284 | P03346 | Q8NB37 | -0.53519  |
| 131285 | P03346 | Q5RGN0 | -0.012401 |
| 131286 | P03346 | P41143 | -0.34288  |
| 131287 | P03346 | Q8NGA4 | -0.97613  |
| 131288 | P03346 | P13760 | -0.38524  |
| 131289 | P03346 | Q8NEG7 | -0.10404  |
| 131290 | P03346 | Q5THJ4 | -0.20431  |
| 131291 | P03346 | Q8IX29 | -0.22468  |
| 131292 | P03346 | Q9UK32 | -0.53886  |
| 131293 | P03346 | Q9NWL6 | -0.19523  |
| 131294 | P03346 | P04808 | -0.6897   |
| 131295 | P03346 | Q6PFW1 | -0.16658  |
| 131296 | P03346 | Q7Z4F1 | -0.64363  |
| 131297 | P03346 | P13746 | -0.62987  |
| 131298 | P03346 | Q9BYB0 | -0.22741  |
| 131299 | P03346 | Q96R72 | -0.92763  |
| 131300 | P03346 | Q8N6I4 | -0.50365  |
| 131301 | P03346 | Q6NT32 | -0.48566  |
| 131302 | P03346 | Q8N1I8 | -0.013652 |
| 131303 | P03346 | Q969V3 | -0.21889  |
| 131304 | P03346 | Q8IYW2 | -0.013652 |
| 131305 | P03346 | Q6PIU1 | -0.64485  |
| 131306 | P03346 | Q8WYL5 | -0.25718  |
| 131307 | P03346 | P17927 | -0.70096  |
| 131308 | P03346 | Q8N392 | -0.6787   |
| 131309 | P03346 | Q6JVE5 | -0.55196  |
| 131310 | P03346 | P0CJ72 | -0.36125  |
| 131311 | P03346 | Q8N7Q2 | -0.53519  |
| 131312 | P03346 | O95206 | -0.85861  |
| 131313 | P03346 | Q9NYG2 | -0.41883  |
| 131314 | P03346 | Q9NP78 | -0.65151  |
| 131315 | P03346 | P78381 | -0.2097   |
| 131316 | P03346 | Q86UQ4 | -0.95136  |
| 131317 | P03346 | Q8NH09 | -0.92763  |
| 131318 | P03346 | Q9UBP9 | -0.22741  |
| 131319 | P03346 | Q8TD06 | -0.12044  |
| 131320 | P03346 | Q96I76 | -0.054695 |
| 131321 | P03346 | Q6UXI7 | -0.60541  |
| 131322 | P03346 | Q07326 | -0.57382  |
| 131323 | P03346 | P68400 | -0.34605  |
| 131324 | P03346 | Q13070 | -0.24641  |
| 131325 | P03346 | Q8NGA5 | -0.8116   |
| 131326 | P03346 | Q8NEG5 | -0.22742  |
| 131327 | P03346 | Q92667 | -0.2244   |
| 131328 | P03346 | Q5TC63 | -0.92582  |

|        |        |        |           |
|--------|--------|--------|-----------|
| 131329 | P03346 | O43819 | -0.206    |
| 131330 | P03346 | Q14147 | -0.65792  |
| 131331 | P03346 | Q9Y4X3 | -0.8033   |
| 131332 | P03346 | Q8N865 | -0.15677  |
| 131333 | P03346 | Q1EHB4 | -0.7517   |
| 131334 | P03346 | Q8NBS3 | -0.48997  |
| 131335 | P03346 | P41587 | -1.0572   |
| 131336 | P03346 | Q499Y3 | -0.21321  |
| 131337 | P03346 | O43914 | -0.40414  |
| 131338 | P03346 | Q8IWL2 | -0.78256  |
| 131339 | P03346 | Q6P995 | -0.52022  |
| 131340 | P03346 | Q96R47 | -0.92763  |
| 131341 | P03346 | Q96I45 | -0.50365  |
| 131342 | P03346 | O75808 | -0.38708  |
| 131343 | P03346 | Q1X8D7 | -0.22732  |
| 131344 | P03346 | Q99500 | -0.96039  |
| 131345 | P03346 | Q9NQW8 | -1.0974   |
| 131346 | P03346 | B4DS77 | -0.6221   |
| 131347 | P03346 | P05538 | -0.58265  |
| 131348 | P03346 | Q38SD2 | -1.0271   |
| 131349 | P03346 | P14854 | -0.21034  |
| 131350 | P03346 | Q9NXL2 | -0.29319  |
| 131351 | P03346 | P32856 | -0.23968  |
| 131352 | P03346 | P0DKV0 | -0.19824  |
| 131353 | P03346 | Q9GZN4 | -1.0507   |
| 131354 | P03346 | Q8TAS1 | -0.22741  |
| 131355 | P03346 | A4D0Y5 | -0.013652 |
| 131356 | P03346 | Q9HBI6 | -0.87512  |
| 131357 | P03346 | Q96K76 | -0.27544  |
| 131358 | P03346 | Q8TB68 | -0.47332  |
| 131359 | P03346 | P60507 | -0.50292  |
| 131360 | P03346 | O95388 | -0.67322  |
| 131361 | P03346 | Q9HBL6 | -0.50365  |
| 131362 | P03346 | O75553 | -0.22724  |
| 131363 | P03346 | Q8TD43 | -0.68242  |
| 131364 | P03346 | P33763 | -0.23133  |
| 131365 | P03346 | Q8TBF5 | -0.58482  |
| 131366 | P03346 | P57730 | -0.31616  |
| 131367 | P03346 | Q6NXT6 | -0.55368  |
| 131368 | P03346 | Q8N7C0 | -0.74596  |
| 131369 | P03346 | Q6P499 | -0.48692  |
| 131370 | P03346 | Q6PHR2 | -0.33149  |
| 131371 | P03346 | Q9BZQ6 | -0.2234   |
| 131372 | P03346 | Q96A47 | -0.2274   |
| 131373 | P03346 | Q9UIG4 | -0.3749   |
| 131374 | P03346 | A0MZ66 | -0.22461  |
| 131375 | P03346 | O43760 | -0.51759  |
| 131376 | P03346 | Q8NGE8 | -0.92763  |
| 131377 | P03346 | Q9H5L9 | -0.15923  |
| 131378 | P03346 | Q9UMR5 | -0.22307  |
| 131379 | P03346 | Q8WTX7 | -0.032164 |
| 131380 | P03346 | Q9Y5P0 | -0.92763  |
| 131381 | P03346 | P63145 | -0.21346  |
| 131382 | P03346 | P30456 | -0.51191  |
| 131383 | P03346 | Q96EX1 | -0.50365  |
| 131384 | P03346 | P11678 | -0.37395  |
| 131385 | P03346 | Q15533 | -0.23994  |
| 131386 | P03346 | O75949 | -0.50365  |
| 131387 | P03346 | Q96EP5 | -0.29367  |
| 131388 | P03346 | P59090 | -0.013652 |
| 131389 | P03346 | Q8WVX9 | -0.9123   |
| 131390 | P03346 | Q6S9Z5 | -0.099282 |
| 131391 | P03346 | Q8N957 | -0.22738  |
| 131392 | P03346 | Q6W5P4 | -0.76518  |
| 131393 | P03346 | Q96DZ9 | -0.67729  |
| 131394 | P03346 | Q8IUG1 | -0.14451  |
| 131395 | P03346 | Q6ZQQ2 | -0.50365  |
| 131396 | P03346 | Q15614 | -0.92763  |
| 131397 | P03346 | Q14161 | -0.22741  |
| 131398 | P03346 | Q8N386 | -0.50365  |
| 131399 | P03346 | Q9NTZ6 | -0.21956  |
| 131400 | P03346 | Q9NRW4 | -0.25629  |
| 131401 | P03346 | P30488 | -0.76151  |
| 131402 | P03346 | Q9BY78 | -0.47697  |
| 131403 | P03346 | Q8NDY3 | -0.12163  |
| 131404 | P03346 | P41222 | -0.2299   |

|        |        |        |            |
|--------|--------|--------|------------|
| 131405 | P03346 | P00439 | -0.30734   |
| 131406 | P03346 | Q9NV66 | -0.7522    |
| 131407 | P03346 | Q3SYC2 | -0.54414   |
| 131408 | P03346 | Q9BZ11 | -0.84133   |
| 131409 | P03346 | Q15493 | -0.20956   |
| 131410 | P03346 | A6NEA5 | -0.12732   |
| 131411 | P03346 | Q9NQS5 | -0.92596   |
| 131412 | P03346 | O75431 | -0.19952   |
| 131413 | P03346 | P03999 | -1.0687    |
| 131414 | P03346 | Q01518 | -0.21587   |
| 131415 | P03346 | Q9UM54 | -0.16999   |
| 131416 | P03346 | Q86SI9 | -0.53519   |
| 131417 | P03346 | Q5FVE4 | -0.71404   |
| 131418 | P03346 | Q9P2D7 | -0.33857   |
| 131419 | P03346 | Q8TBX8 | -0.22495   |
| 131420 | P03346 | Q6ZS92 | -0.097566  |
| 131421 | P03346 | Q9UEE9 | -0.23515   |
| 131422 | P03346 | O43464 | -0.22717   |
| 131423 | P03346 | Q7Z4H4 | -0.52673   |
| 131424 | P03346 | Q8WVX3 | -0.50365   |
| 131425 | P03346 | O75473 | -1.0334    |
| 131426 | P03346 | P63136 | -0.22599   |
| 131427 | P03346 | Q0P5P2 | -0.53519   |
| 131428 | P03346 | Q8TD07 | -0.24651   |
| 131429 | P03346 | A6NMY6 | -0.51624   |
| 131430 | P03346 | O43306 | -0.45409   |
| 131431 | P03346 | P02778 | -0.76443   |
| 131432 | P03346 | Q9BQT8 | -0.31413   |
| 131433 | P03346 | Q96HH9 | -0.2243    |
| 131434 | P03346 | Q8NCH0 | -0.30953   |
| 131435 | P03346 | Q6ZR37 | -0.35457   |
| 131436 | P03346 | Q96Q27 | -0.32238   |
| 131437 | P03346 | Q8WYQ9 | -0.16202   |
| 131438 | P03346 | Q9Y5Q0 | -0.69564   |
| 131439 | P03346 | P22310 | -0.64006   |
| 131440 | P03346 | Q9HAU8 | -0.45988   |
| 131441 | P03346 | Q99527 | -0.93833   |
| 131442 | P03346 | Q93097 | -0.68302   |
| 131443 | P03346 | Q96L73 | -0.22745   |
| 131444 | P03346 | O95264 | -0.8351    |
| 131445 | P03346 | P01023 | -0.30907   |
| 131446 | P03346 | Q9P1P5 | -0.9411    |
| 131447 | P03346 | P04434 | -0.80078   |
| 131448 | P03346 | Q9BQG2 | -0.22741   |
| 131449 | P03346 | C9J2P7 | -0.36346   |
| 131450 | P03346 | P15291 | -0.39189   |
| 131451 | P03346 | P07498 | -0.51554   |
| 131452 | P03346 | P63121 | -0.23811   |
| 131453 | P03346 | Q86WN1 | -0.22736   |
| 131454 | P03346 | Q6QNK2 | -1.0077    |
| 131455 | P03346 | Q9NPI7 | -0.18655   |
| 131456 | P03346 | Q8NAA5 | -0.21296   |
| 131457 | P03346 | Q16568 | -0.20926   |
| 131458 | P03346 | O60825 | -0.20834   |
| 131459 | P03346 | O60678 | -0.17816   |
| 131460 | P03346 | O43825 | -0.50846   |
| 131461 | P03346 | Q9NTI7 | -0.0016473 |
| 131462 | P03346 | P17844 | -0.30457   |
| 131463 | P03346 | A8MU10 | -0.013652  |
| 131464 | P03346 | O95467 | -0.46419   |
| 131465 | P03346 | Q9UHV8 | -0.22768   |
| 131466 | P03346 | Q13206 | -0.46927   |
| 131467 | P03346 | Q08357 | -0.71362   |
| 131468 | P03346 | O75339 | -0.62383   |
| 131469 | P03346 | Q9NZV8 | -0.50701   |
| 131470 | P03346 | P01768 | -0.80078   |
| 131471 | P03346 | Q9P291 | -0.50365   |
| 131472 | P03346 | O43194 | -1.0928    |
| 131473 | P03346 | Q8NAB2 | -0.17094   |
| 131474 | P03346 | Q9BZ95 | -0.22736   |
| 131475 | P03346 | Q15726 | -0.16422   |
| 131476 | P03346 | Q6UY27 | -0.65384   |
| 131477 | P03346 | Q96HG1 | -0.013652  |
| 131478 | P03346 | Q709F0 | -0.24845   |
| 131479 | P03346 | O75388 | -1.1049    |
| 131480 | P03346 | O76074 | -0.35244   |

|        |        |        |           |
|--------|--------|--------|-----------|
| 131481 | P03346 | P07437 | -0.21022  |
| 131482 | P03346 | P43694 | -0.2274   |
| 131483 | P03346 | Q6NUI2 | -0.41413  |
| 131484 | P03346 | P28908 | -0.44586  |
| 131485 | P03346 | P25705 | -0.19252  |
| 131486 | P03346 | P35555 | -0.47327  |
| 131487 | P03346 | O75616 | -0.46785  |
| 131488 | P03346 | Q8NBZ7 | -0.78676  |
| 131489 | P03346 | Q99440 | -0.097259 |
| 131490 | P03346 | Q9HCJ0 | -0.13281  |
| 131491 | P03346 | P09871 | -1.0658   |
| 131492 | P03346 | Q9UEY8 | -0.21366  |
| 131493 | P03346 | Q9Y2B9 | -0.22508  |
| 131494 | P03346 | Q562E7 | -0.22741  |
| 131495 | P03346 | Q9Y616 | -0.2274   |
| 131496 | P03346 | P0C5J1 | -0.16432  |
| 131497 | P03346 | Q8NCG7 | -0.61463  |
| 131498 | P03346 | O15544 | -0.2261   |
| 131499 | P03346 | Q96DX4 | -0.60365  |
| 131500 | P03346 | Q15165 | -0.4847   |
| 131501 | P03346 | Q96NT3 | -0.079783 |
| 131502 | P03346 | P61106 | -0.25482  |
| 131503 | P03346 | O00322 | -0.58841  |
| 131504 | P03346 | Q13444 | -0.40629  |
| 131505 | P03346 | Q7Z698 | -0.22019  |
| 131506 | P03346 | Q9Y5L4 | -0.18195  |
| 131507 | P03346 | P30968 | -1.1369   |
| 131508 | P03346 | Q9Y342 | -0.57352  |
| 131509 | P03346 | Q5VXM1 | -0.53519  |
| 131510 | P03346 | Q93077 | -0.35085  |
| 131511 | P03346 | Q5TEV5 | -0.53519  |
| 131512 | P03346 | Q7L2K0 | -0.17742  |
| 131513 | P03346 | Q93098 | -0.65859  |
| 131514 | P03346 | Q9C0D6 | -0.22517  |
| 131515 | P03346 | P55263 | -0.34009  |
| 131516 | P03346 | Q9Y227 | -0.24724  |
| 131517 | P03346 | Q8NA56 | -0.18014  |
| 131518 | P03346 | Q6KCM7 | -0.43961  |
| 131519 | P03346 | Q6ZMV9 | -0.24294  |
| 131520 | P03346 | Q969M2 | -0.63103  |
| 131521 | P03346 | Q9UQ52 | -0.32447  |
| 131522 | P03346 | Q6PRD1 | -1.0573   |
| 131523 | P03346 | Q8NFP0 | -0.042498 |
| 131524 | P03346 | Q12950 | -0.31352  |
| 131525 | P03346 | Q7Z4H8 | -0.22048  |
| 131526 | P03346 | Q16774 | -0.39714  |
| 131527 | P03346 | Q12913 | -0.36315  |
| 131528 | P03346 | Q9BX74 | -0.71459  |
| 131529 | P03346 | C9JDP6 | -0.36963  |
| 131530 | P03346 | P05023 | -0.34925  |
| 131531 | P03346 | Q03518 | -0.27946  |
| 131532 | P03346 | Q8TAX7 | -0.030238 |
| 131533 | P03346 | Q9HBA9 | -0.39864  |
| 131534 | P03346 | Q99525 | -0.19997  |
| 131535 | P03346 | Q9UNI1 | -0.73926  |
| 131536 | P03346 | Q9Y5F7 | -0.86699  |
| 131537 | P03346 | Q9NQJ5 | -0.22768  |
| 131538 | P03346 | Q96S66 | -0.11545  |
| 131539 | P03346 | Q9UL17 | -0.36332  |
| 131540 | P03346 | P25100 | -0.93067  |
| 131541 | P03346 | Q6P4H8 | -0.50365  |
| 131542 | P03346 | Q13505 | -0.21158  |
| 131543 | P03346 | Q8N2X6 | -0.53519  |
| 131544 | P03346 | Q6P2I7 | -0.20457  |
| 131545 | P03346 | A0PJZ0 | -0.22741  |
| 131546 | P03346 | P27708 | -0.32144  |
| 131547 | P03346 | Q8NH59 | -0.92763  |
| 131548 | P03346 | Q8NFS9 | -0.41916  |
| 131549 | P03346 | Q9UI12 | -0.16403  |
| 131550 | P03346 | O95279 | -0.75162  |
| 131551 | P03346 | A2A368 | -0.17812  |
| 131552 | P03346 | Q9GZP0 | -0.66176  |
| 131553 | P03346 | Q9NXH8 | -1.0197   |
| 131554 | P03346 | P20827 | -0.29746  |
| 131555 | P03346 | Q9NQW1 | -0.22755  |
| 131556 | P03346 | O75602 | -0.22741  |



|        |        |        |            |
|--------|--------|--------|------------|
| 131557 | P03346 | P54709 | -0.43538   |
| 131558 | P03346 | Q9BZX2 | -0.42915   |
| 131559 | P03346 | Q96AN2 | -0.0056943 |
| 131560 | P03346 | Q96NU0 | -0.88459   |
| 131561 | P03346 | Q8N461 | -0.22506   |
| 131562 | P03346 | O60658 | -0.22738   |
| 131563 | P03346 | Q6PI73 | -0.50365   |
| 131564 | P03346 | Q9NVV5 | -0.13767   |
| 131565 | P03346 | Q96A61 | -0.30279   |
| 131566 | P03346 | O15255 | -0.14898   |
| 131567 | P03346 | Q14656 | -0.39396   |
| 131568 | P03346 | O14936 | -0.22898   |
| 131569 | P03346 | Q32MK0 | -0.55509   |
| 131570 | P03346 | Q3ZCM7 | -0.42989   |
| 131571 | P03346 | O43286 | -0.36576   |
| 131572 | P03346 | A8MYG8 | -0.22741   |
| 131573 | P03346 | Q9H8L6 | -0.22691   |
| 131574 | P03346 | Q6PIZ9 | -0.74232   |
| 131575 | P03346 | A6NDG6 | -0.20301   |
| 131576 | P03346 | Q8NGT0 | -0.92763   |
| 131577 | P03346 | Q15399 | -0.5873    |
| 131578 | P03346 | P01762 | -0.80078   |
| 131579 | P03346 | Q8WZ74 | -0.31139   |
| 131580 | P03346 | O76024 | -0.41072   |
| 131581 | P03346 | Q86Z14 | -0.54638   |
| 131582 | P03346 | Q9NRM6 | -1.0229    |
| 131583 | P03346 | O76080 | -0.2419    |
| 131584 | P03346 | P41180 | -0.53728   |
| 131585 | P03346 | P78562 | -0.82022   |
| 131586 | P03346 | P13987 | -0.23096   |
| 131587 | P03346 | P57054 | -0.58131   |
| 131588 | P03346 | A0PK00 | -0.30782   |
| 131589 | P03346 | A6NE21 | -0.23569   |
| 131590 | P03346 | Q86VS3 | -0.27068   |
| 131591 | P03346 | Q9UNF1 | -0.19875   |
| 131592 | P03346 | Q8WZ69 | -0.22005   |
| 131593 | P03346 | Q86YJ6 | -0.53922   |
| 131594 | P03346 | Q9H4K1 | -0.073544  |
| 131595 | P03346 | P09471 | -0.64122   |
| 131596 | P03346 | Q9UHH6 | -0.43157   |
| 131597 | P03346 | Q6UWQ5 | -0.555     |
| 131598 | P03346 | Q59F38 | -0.094114  |
| 131599 | P03346 | Q8NGE5 | -0.92763   |
| 131600 | P03346 | Q7Z422 | -0.23285   |
| 131601 | P03346 | P60983 | -0.41263   |
| 131602 | P03346 | O75110 | -0.77276   |
| 131603 | P03346 | Q96L34 | -0.22903   |
| 131604 | P03346 | C9JC47 | -0.013652  |
| 131605 | P03346 | O95007 | -0.92763   |
| 131606 | P03346 | Q6UXS0 | -0.53541   |
| 131607 | P03346 | Q9UKB3 | -0.23821   |
| 131608 | P03346 | Q01628 | -0.6569    |
| 131609 | P03346 | Q92569 | -0.22741   |
| 131610 | P03346 | P01213 | -0.61257   |
| 131611 | P03346 | Q8N1Y9 | -0.50365   |
| 131612 | P03346 | Q9BQI4 | -0.55254   |
| 131613 | P03346 | Q9Y4C5 | -0.4549    |
| 131614 | P03346 | A6PVC2 | -0.16977   |
| 131615 | P03346 | Q9Y4H2 | -0.22211   |
| 131616 | P03346 | Q96EY8 | -0.42185   |
| 131617 | P03346 | P34910 | -0.46541   |
| 131618 | P03346 | Q8TCT1 | -0.17746   |
| 131619 | P03346 | Q9Y2G3 | -0.5749    |
| 131620 | P03346 | Q9UJQ1 | -0.6341    |
| 131621 | P03346 | Q96I13 | -0.22808   |
| 131622 | P03346 | O95157 | -0.56255   |
| 131623 | P03346 | Q96CC6 | -0.35593   |
| 131624 | P03346 | P62873 | -0.26242   |
| 131625 | P03346 | O43638 | -0.29041   |
| 131626 | P03346 | Q8IXY8 | -0.12882   |
| 131627 | P03346 | Q9ULC0 | -1.1616    |
| 131628 | P03346 | P24347 | -1.0464    |
| 131629 | P03346 | A0PJX0 | -0.2276    |
| 131630 | P03346 | Q9Y5P6 | -0.42212   |
| 131631 | P03346 | Q8TAC1 | -0.36194   |
| 131632 | P03346 | Q8IVJ8 | -0.50365   |

|        |        |         |           |
|--------|--------|---------|-----------|
| 131633 | P03346 | Q9NT99  | -0.61242  |
| 131634 | P03346 | Q9UGF7  | -0.92763  |
| 131635 | P03346 | P36575  | -0.27183  |
| 131636 | P03346 | Q9Y2A7  | -0.22261  |
| 131637 | P03346 | O15455  | -0.22762  |
| 131638 | P03346 | Q5VYJ5  | -0.50365  |
| 131639 | P03346 | Q495T6  | -1.1795   |
| 131640 | P03346 | Q13956  | -0.195    |
| 131641 | P03346 | O14917  | -0.29137  |
| 131642 | P03346 | Q9UGB4  | -0.013652 |
| 131643 | P03346 | O60812  | -0.22714  |
| 131644 | P03346 | P02751  | -0.26548  |
| 131645 | P03346 | Q8N431  | -0.39492  |
| 131646 | P03346 | Q9BWV2  | -0.79447  |
| 131647 | P03346 | Q9Y2L6  | -0.23776  |
| 131648 | P03346 | Q15357  | -0.22741  |
| 131649 | P03346 | Q96PW8  | -0.22552  |
| 131650 | P03346 | Q9Y5I3  | -1.3609   |
| 131651 | P03346 | Q9NZR2  | -0.50787  |
| 131652 | P03346 | Q9UHX3  | -1.1138   |
| 131653 | P03346 | Q5VT25  | -0.22751  |
| 131654 | P03346 | Q6ZNR8  | -0.013652 |
| 131655 | P03346 | Q9H3E2  | -0.16501  |
| 131656 | P03346 | Q8NHY3  | -0.21099  |
| 131657 | P03346 | Q8NDY8  | -0.50365  |
| 131658 | P03346 | Q86WS4  | -0.013652 |
| 131659 | P03346 | A6H8M9  | -0.86699  |
| 131660 | P03346 | Q96PX8  | -0.5909   |
| 131661 | P03346 | Q2M238  | -0.15939  |
| 131662 | P03346 | Q969J5  | -0.4694   |
| 131663 | P03346 | Q502W6  | -0.18652  |
| 131664 | P03346 | P58417  | -0.6163   |
| 131665 | P03346 | P15428  | -0.22345  |
| 131666 | P03346 | Q8N910  | -0.16736  |
| 131667 | P03346 | Q14114  | -0.70318  |
| 131668 | P03346 | Q9UHT4  | -0.013652 |
| 131669 | P03346 | Q6PEZ8  | -0.56222  |
| 131670 | P03346 | Q4G0N8  | -0.79552  |
| 131671 | P03346 | P28329  | -0.22722  |
| 131672 | P03346 | Q13217  | -0.21953  |
| 131673 | P03346 | O43173  | -0.36866  |
| 131674 | P03346 | P30101  | -0.24246  |
| 131675 | P03346 | P86480  | -0.013652 |
| 131676 | P03346 | Q7Z419  | -0.21772  |
| 131677 | P03346 | Q68DA7  | -0.22573  |
| 131678 | P03346 | Q9UJV9  | -0.31919  |
| 131679 | P03346 | Q8N729  | -0.030473 |
| 131680 | P03346 | Q96DN2  | -0.60326  |
| 131681 | P03346 | Q8NGT2  | -0.92763  |
| 131682 | P03346 | Q6UX53  | -0.21912  |
| 131683 | P03346 | Q8N7C3  | -0.22819  |
| 131684 | P03346 | A6NI87  | -0.087926 |
| 131685 | P03346 | Q14344  | -0.30236  |
| 131686 | P03346 | P78536  | -0.24313  |
| 131687 | P03346 | Q5J TZ9 | -0.17186  |
| 131688 | P03346 | P86434  | -0.24088  |
| 131689 | P03346 | Q13546  | -0.22741  |
| 131690 | P03346 | P0C6A0  | -0.22741  |
| 131691 | P03346 | O15232  | -0.22741  |
| 131692 | P03346 | O75690  | -0.14451  |
| 131693 | P03346 | Q6ZN66  | -0.59619  |
| 131694 | P03346 | Q9NP94  | -0.73632  |
| 131695 | P03346 | Q07065  | -0.48845  |
| 131696 | P03346 | P15248  | -0.61431  |
| 131697 | P03346 | O00478  | -0.50365  |
| 131698 | P03346 | Q16849  | -0.54892  |
| 131699 | P03346 | P14060  | -0.6881   |
| 131700 | P03346 | P20813  | -0.543    |
| 131701 | P03346 | P15812  | -0.69142  |
| 131702 | P03346 | Q9NWW9  | -0.21103  |
| 131703 | P03346 | A7KAX9  | -0.23917  |
| 131704 | P03346 | Q8IZF4  | -1.0077   |
| 131705 | P03346 | Q96CN0  | -0.013652 |
| 131706 | P03346 | Q9UFC0  | -0.3114   |
| 131707 | P03346 | Q50LG9  | -0.50365  |
| 131708 | P03346 | P15515  | -0.088332 |

|        |        |        |           |
|--------|--------|--------|-----------|
| 131709 | P03346 | Q08AF3 | -0.27315  |
| 131710 | P03346 | O60636 | -0.58797  |
| 131711 | P03346 | Q53FZ2 | -0.53836  |
| 131712 | P03346 | P01699 | -0.80078  |
| 131713 | P03346 | Q5JUK9 | -0.042233 |
| 131714 | P03346 | P40692 | -0.13462  |
| 131715 | P03346 | Q8NAT1 | -0.58248  |
| 131716 | P03346 | Q9NZN3 | -0.31196  |
| 131717 | P03346 | Q53RY4 | -0.50365  |
| 131718 | P03346 | B1AJZ1 | -0.20312  |
| 131719 | P03346 | Q15537 | -0.79894  |
| 131720 | P03346 | Q96F81 | -0.50881  |
| 131721 | P03346 | P09327 | -0.19171  |
| 131722 | P03346 | Q6BDI9 | -0.1835   |
| 131723 | P03346 | P31644 | -0.66925  |
| 131724 | P03346 | Q15738 | -0.8022   |
| 131725 | P03346 | Q14943 | -0.81464  |
| 131726 | P03346 | Q96LI9 | -0.15425  |
| 131727 | P03346 | Q8IZ57 | -0.49919  |
| 131728 | P03346 | O60243 | -0.47541  |
| 131729 | P03346 | Q8IUE6 | -0.35085  |
| 131730 | P03346 | Q6UXP7 | -0.13717  |
| 131731 | P03346 | Q7L3T8 | -0.078967 |
| 131732 | P03346 | Q14534 | -0.8469   |
| 131733 | P03346 | Q8IZN3 | -0.59087  |
| 131734 | P03346 | P51511 | -0.53331  |
| 131735 | P03346 | Q9NS86 | -0.17745  |
| 131736 | P03346 | Q9H2S1 | -0.62039  |
| 131737 | P03346 | Q8N9H8 | -0.27204  |
| 131738 | P03346 | Q8N8D0 | -0.50365  |
| 131739 | P03346 | Q7Z7M0 | -0.22741  |
| 131740 | P03346 | P06493 | -0.22183  |
| 131741 | P03346 | Q8IZ02 | -0.22741  |
| 131742 | P03346 | Q99731 | -0.43929  |
| 131743 | P03346 | Q5T8R8 | -0.26151  |
| 131744 | P03346 | Q9BPV8 | -0.88644  |
| 131745 | P03346 | A6NLI3 | -0.18519  |
| 131746 | P03346 | Q8NH76 | -0.92763  |
| 131747 | P03346 | Q14627 | -0.82887  |
| 131748 | P03346 | P21453 | -0.61096  |
| 131749 | P03346 | O00453 | -0.30139  |
| 131750 | P03346 | P43308 | -0.5042   |
| 131751 | P03346 | P25189 | -0.65702  |
| 131752 | P03346 | Q16790 | -0.27587  |
| 131753 | P03346 | Q14836 | -0.20725  |
| 131754 | P03346 | P0CE72 | -0.22638  |
| 131755 | P03346 | Q9NS87 | -0.23067  |
| 131756 | P03346 | Q7Z3H4 | -0.22449  |
| 131757 | P03346 | Q9P1Z3 | -1.0182   |
| 131758 | P03346 | P0C6C1 | -0.22741  |
| 131759 | P03346 | Q6UW63 | -0.22288  |
| 131760 | P03346 | P49748 | -0.24156  |
| 131761 | P03346 | Q96A37 | -0.30279  |
| 131762 | P03346 | P09544 | -0.35632  |
| 131763 | P03346 | P01603 | -0.80078  |
| 131764 | P03346 | Q01459 | -0.23191  |
| 131765 | P03346 | Q96JB6 | -0.38398  |
| 131766 | P03346 | P52849 | -0.41405  |
| 131767 | P03346 | Q6ZST4 | -0.21059  |
| 131768 | P03346 | P48751 | -0.76344  |
| 131769 | P03346 | Q96MM7 | -0.38921  |
| 131770 | P03346 | P21918 | -0.60405  |
| 131771 | P03346 | Q8WWM7 | -0.039118 |
| 131772 | P03346 | Q9ULK0 | -0.57988  |
| 131773 | P03346 | Q9BXY4 | -0.58591  |
| 131774 | P03346 | P0C7U0 | -0.52059  |
| 131775 | P03346 | Q75751 | -0.22896  |
| 131776 | P03346 | P46977 | -0.16703  |
| 131777 | P03346 | Q8WXI7 | -0.75801  |
| 131778 | P03346 | Q93063 | -0.48381  |
| 131779 | P03346 | Q10713 | -0.33086  |
| 131780 | P03346 | P40198 | -0.50365  |
| 131781 | P03346 | Q3B7I2 | -0.20146  |
| 131782 | P03346 | Q8WYQ4 | -0.21909  |
| 131783 | P03346 | Q96SB8 | -0.22559  |
| 131784 | P03346 | Q9UJ55 | -0.15875  |

|        |        |        |           |
|--------|--------|--------|-----------|
| 131785 | P03346 | P09525 | -0.15818  |
| 131786 | P03346 | Q8NG68 | -0.41569  |
| 131787 | P03346 | Q2NKQ1 | -0.4768   |
| 131788 | P03346 | Q96DZ7 | -0.50365  |
| 131789 | P03346 | O43150 | -0.22741  |
| 131790 | P03346 | Q6UX06 | -0.68361  |
| 131791 | P03346 | Q9H3P7 | -0.29762  |
| 131792 | P03346 | Q96LZ7 | -0.1601   |
| 131793 | P03346 | Q5TZK3 | -0.17165  |
| 131794 | P03346 | Q9BWV1 | -0.23317  |
| 131795 | P03346 | Q4G0S7 | -0.19464  |
| 131796 | P03346 | P30520 | -0.45819  |
| 131797 | P03346 | Q00532 | -0.4119   |
| 131798 | P03346 | Q9HAH7 | -0.013982 |
| 131799 | P03346 | P13726 | -0.24191  |
| 131800 | P03346 | Q6PH81 | -0.19053  |
| 131801 | P03346 | Q9P2V4 | -0.47813  |
| 131802 | P03346 | Q8WUJ1 | -0.47245  |
| 131803 | P03346 | P61278 | -0.62909  |
| 131804 | P03346 | Q8WVT3 | -0.17626  |
| 131805 | P03346 | Q9BZ01 | -0.0617   |
| 131806 | P03346 | Q13972 | -0.40893  |
| 131807 | P03346 | A5D8V7 | -0.16894  |
| 131808 | P03346 | A8MWV9 | -0.50365  |
| 131809 | P03346 | Q96L46 | -0.22946  |
| 131810 | P03346 | Q8NGH8 | -0.92763  |
| 131811 | P03346 | Q6ZR08 | -0.49947  |
| 131812 | P03346 | Q9H339 | -0.92763  |
| 131813 | P03346 | Q01523 | -0.58925  |
| 131814 | P03346 | Q9HA82 | -0.063067 |
| 131815 | P03346 | Q9UH36 | -0.068302 |
| 131816 | P03346 | P33032 | -0.58139  |
| 131817 | P03346 | Q8N2U0 | -0.50365  |
| 131818 | P03346 | Q96PD4 | -0.38334  |
| 131819 | P03346 | Q9Y6H6 | -0.61794  |
| 131820 | P03346 | Q9UJJ9 | -0.44719  |
| 131821 | P03346 | A6NHS7 | -0.50365  |
| 131822 | P03346 | P08861 | -1.0687   |
| 131823 | P03346 | Q02383 | -0.45668  |
| 131824 | P03346 | P60059 | -0.29372  |
| 131825 | P03346 | Q9Y5T5 | -0.25146  |
| 131826 | P03346 | Q5TEJ8 | -0.23575  |
| 131827 | P03346 | P06729 | -0.62306  |
| 131828 | P03346 | Q99895 | -0.56917  |
| 131829 | P03346 | Q9HCE9 | -0.70971  |
| 131830 | P03346 | Q7L5A8 | -0.62754  |
| 131831 | P03346 | Q06187 | -0.22741  |
| 131832 | P03346 | Q9Y5Y3 | -0.96376  |
| 131833 | P03346 | Q96MF0 | -0.16058  |
| 131834 | P03346 | Q86X29 | -0.59129  |
| 131835 | P03346 | O15269 | -0.19058  |
| 131836 | P03346 | Q15381 | -0.25638  |
| 131837 | P03346 | Q8IVU9 | -0.1629   |
| 131838 | P03346 | P22680 | -0.52584  |
| 131839 | P03346 | P01814 | -0.80078  |
| 131840 | P03346 | P19105 | -0.22717  |
| 131841 | P03346 | Q6ZN03 | -0.1317   |
| 131842 | P03346 | Q9UKB1 | -0.29296  |
| 131843 | P03346 | Q9P281 | -0.18329  |
| 131844 | P03346 | P08833 | -0.63739  |
| 131845 | P03346 | O60241 | -0.99919  |
| 131846 | P03346 | Q92781 | -0.80039  |
| 131847 | P03346 | Q92786 | -0.21781  |
| 131848 | P03346 | O96005 | -0.29135  |
| 131849 | P03346 | Q5VV11 | -0.23003  |
| 131850 | P03346 | Q8NDH3 | -0.37669  |
| 131851 | P03346 | A8MPV3 | -0.14502  |
| 131852 | P03346 | Q6ZT07 | -0.96657  |
| 131853 | P03346 | Q6UWQ7 | -0.53519  |
| 131854 | P03346 | O15263 | -0.71372  |
| 131855 | P03346 | Q8NH74 | -0.92763  |
| 131856 | P03346 | Q96PB8 | -0.50365  |
| 131857 | P03346 | Q9Y5L3 | -0.914    |
| 131858 | P03346 | P06213 | -0.23829  |
| 131859 | P03346 | Q70EK9 | -0.45872  |
| 131860 | P03346 | P30203 | -0.78733  |

|        |        |        |           |
|--------|--------|--------|-----------|
| 131861 | P03346 | Q9BYL1 | -0.20575  |
| 131862 | P03346 | Q567U6 | -0.22481  |
| 131863 | P03346 | Q9NPI0 | -0.53597  |
| 131864 | P03346 | Q6DWW6 | -0.96376  |
| 131865 | P03346 | Q8TD91 | -0.20392  |
| 131866 | P03346 | Q6ZMW3 | -0.22745  |
| 131867 | P03346 | Q9BSJ8 | -0.50365  |
| 131868 | P03346 | P03901 | -0.40889  |
| 131869 | P03346 | Q9NXC2 | -1.1855   |
| 131870 | P03346 | Q8IWA6 | -0.17208  |
| 131871 | P03346 | Q96PG2 | -0.50365  |
| 131872 | P03346 | P35498 | -0.71542  |
| 131873 | P03346 | Q9P202 | -0.22702  |
| 131874 | P03346 | Q53FP2 | -0.37047  |
| 131875 | P03346 | Q9BYT9 | -0.53709  |
| 131876 | P03346 | Q13371 | -0.30463  |
| 131877 | P03346 | O95168 | -0.29145  |
| 131878 | P03346 | Q6QEF8 | -0.22741  |
| 131879 | P03346 | Q99759 | -0.37131  |
| 131880 | P03346 | P07949 | -0.59869  |
| 131881 | P03346 | P47900 | -0.74378  |
| 131882 | P03346 | A8MXZ1 | -0.23256  |
| 131883 | P03346 | Q7Z4N2 | -0.93256  |
| 131884 | P03346 | A1XBS5 | -0.21983  |
| 131885 | P03346 | Q9UPY5 | -0.4834   |
| 131886 | P03346 | P21439 | -0.87397  |
| 131887 | P03346 | Q8NDW8 | -0.17162  |
| 131888 | P03346 | O60906 | -0.55179  |
| 131889 | P03346 | Q9NUM3 | -0.55888  |
| 131890 | P03346 | Q86UE6 | -0.51517  |
| 131891 | P03346 | Q9HBE5 | -0.51292  |
| 131892 | P03346 | A1L162 | -0.15403  |
| 131893 | P03346 | Q75439 | -0.39901  |
| 131894 | P03346 | Q8N328 | -0.17476  |
| 131895 | P03346 | Q9ULK5 | -0.32275  |
| 131896 | P03346 | Q8NGB2 | -0.92763  |
| 131897 | P03346 | Q9UKR8 | -0.50365  |
| 131898 | P03346 | O14756 | -0.89385  |
| 131899 | P03346 | Q99519 | -0.31249  |
| 131900 | P03346 | E5RQL4 | -0.13798  |
| 131901 | P03346 | Q9NVV2 | -0.013652 |
| 131902 | P03346 | O15320 | -0.22006  |
| 131903 | P03346 | Q95970 | -0.2277   |
| 131904 | P03346 | Q96RR1 | -0.20709  |
| 131905 | P03346 | A6NGZ7 | -0.50365  |
| 131906 | P03346 | A8MWL6 | -0.50365  |
| 131907 | P03346 | Q5VSP4 | -0.53519  |
| 131908 | P03346 | P62330 | -0.29401  |
| 131909 | P03346 | P20160 | -0.62176  |
| 131910 | P03346 | A4D2B0 | -0.068483 |
| 131911 | P03346 | Q9BUB7 | -0.30603  |
| 131912 | P03346 | Q96BJ8 | -0.20409  |
| 131913 | P03346 | Q03169 | -0.34196  |
| 131914 | P03346 | Q96LW4 | -0.15564  |
| 131915 | P03346 | Q16787 | -0.72644  |
| 131916 | P03346 | P09172 | -0.40705  |
| 131917 | P03346 | A2A3L6 | -0.22657  |
| 131918 | P03346 | Q07108 | -0.68018  |
| 131919 | P03346 | P86791 | -0.22763  |
| 131920 | P03346 | Q9UKE5 | -0.23379  |
| 131921 | P03346 | Q86WD7 | -0.36504  |
| 131922 | P03346 | Q2M3V2 | -0.22741  |
| 131923 | P03346 | O75829 | -1.0405   |
| 131924 | P03346 | P01308 | -0.22682  |
| 131925 | P03346 | Q16552 | -0.4345   |
| 131926 | P03346 | Q9NY25 | -0.64299  |
| 131927 | P03346 | Q86W24 | -0.79111  |
| 131928 | P03346 | Q6IC10 | -0.50365  |
| 131929 | P03346 | O94979 | -0.31144  |
| 131930 | P03346 | P21728 | -0.28675  |
| 131931 | P03346 | P13385 | -0.22743  |
| 131932 | P03346 | Q15722 | -1.3543   |
| 131933 | P03346 | Q9BQ39 | -0.25828  |
| 131934 | P03346 | Q9BZ98 | -0.28185  |
| 131935 | P03346 | P06737 | -0.27361  |
| 131936 | P03346 | Q9Y2G5 | -0.096616 |

|        |        |        |           |
|--------|--------|--------|-----------|
| 131937 | P03346 | Q9NYV7 | -0.31159  |
| 131938 | P03346 | Q6NVV7 | -0.17813  |
| 131939 | P03346 | Q96JH7 | -0.21719  |
| 131940 | P03346 | P48050 | -0.2243   |
| 131941 | P03346 | O00241 | -0.42637  |
| 131942 | P03346 | Q8WYK0 | -0.20525  |
| 131943 | P03346 | Q9BV40 | -0.38863  |
| 131944 | P03346 | Q8NGG5 | -0.92763  |
| 131945 | P03346 | P20337 | -0.5696   |
| 131946 | P03346 | Q92968 | -0.2274   |
| 131947 | P03346 | Q86SH4 | -0.53519  |
| 131948 | P03346 | P45974 | -0.23307  |
| 131949 | P03346 | Q5SSG8 | -0.67602  |
| 131950 | P03346 | Q15049 | -0.18173  |
| 131951 | P03346 | Q8WXD9 | -0.22741  |
| 131952 | P03346 | Q6PL45 | -0.50365  |
| 131953 | P03346 | Q03167 | -0.26028  |
| 131954 | P03346 | Q96RJ3 | -0.4519   |
| 131955 | P03346 | Q6UXB1 | -0.53519  |
| 131956 | P03346 | Q9NPD7 | -0.19333  |
| 131957 | P03346 | Q17RB8 | -0.23614  |
| 131958 | P03346 | Q5BJE1 | -0.13827  |
| 131959 | P03346 | Q9NPE2 | -0.36549  |
| 131960 | P03346 | Q9BQE4 | -0.11439  |
| 131961 | P03346 | Q86SS6 | -0.52688  |
| 131962 | P03346 | Q9H3U5 | -0.48129  |
| 131963 | P03346 | P51589 | -0.51983  |
| 131964 | P03346 | Q96NY7 | -0.41628  |
| 131965 | P03346 | Q3MJ16 | -0.22807  |
| 131966 | P03346 | Q13643 | -0.22489  |
| 131967 | P03346 | O95399 | -0.48121  |
| 131968 | P03346 | Q8IYK8 | -1.0183   |
| 131969 | P03346 | P0CJ70 | -0.36125  |
| 131970 | P03346 | Q13702 | -0.2273   |
| 131971 | P03346 | Q86V87 | -0.019774 |
| 131972 | P03346 | P11511 | -0.30027  |
| 131973 | P03346 | Q9BXF9 | -0.15962  |
| 131974 | P03346 | Q8N5G0 | -0.50365  |
| 131975 | P03346 | Q9NZM3 | -0.34972  |
| 131976 | P03346 | Q53H54 | -0.20874  |
| 131977 | P03346 | Q5SRE7 | -0.32162  |
| 131978 | P03346 | Q9HBW0 | -0.62398  |
| 131979 | P03346 | P0CG39 | -0.098291 |
| 131980 | P03346 | O75460 | -0.29532  |
| 131981 | P03346 | P11926 | -0.2125   |
| 131982 | P03346 | Q96S52 | -0.18618  |
| 131983 | P03346 | Q14CZ8 | -0.42836  |
| 131984 | P03346 | Q8N7R7 | -0.19529  |
| 131985 | P03346 | Q8N1C3 | -0.53627  |
| 131986 | P03346 | Q9Y4I1 | -0.20112  |
| 131987 | P03346 | Q5XG92 | -0.52521  |
| 131988 | P03346 | Q96H96 | -0.40398  |
| 131989 | P03346 | Q15228 | -0.3278   |
| 131990 | P03346 | Q8TDM0 | -0.20687  |
| 131991 | P03346 | P17677 | -0.14865  |
| 131992 | P03346 | Q6ZVD8 | -0.22774  |
| 131993 | P03346 | Q9UKU0 | -0.82516  |
| 131994 | P03346 | Q6XUX3 | -0.44563  |
| 131995 | P03346 | Q9UPW5 | -0.18417  |
| 131996 | P03346 | Q8N7P7 | -0.31649  |
| 131997 | P03346 | Q8IVH4 | -0.58695  |
| 131998 | P03346 | P08574 | -0.22597  |
| 131999 | P03346 | P47929 | -0.22147  |
| 132000 | P03346 | Q9H4A4 | -0.74161  |
| 132001 | P03346 | O95185 | -0.75057  |
| 132002 | P03346 | Q96N06 | -0.053998 |
| 132003 | P03346 | P57053 | -0.34659  |
| 132004 | P03346 | P22352 | -0.6066   |
| 132005 | P03346 | Q9H7D0 | -0.22741  |
| 132006 | P03346 | Q8NFD4 | -0.18107  |
| 132007 | P03346 | Q76M96 | -0.72278  |
| 132008 | P03346 | Q16478 | -0.48759  |
| 132009 | P03346 | P34096 | -0.41247  |
| 132010 | P03346 | Q9UQ88 | -0.17074  |
| 132011 | P03346 | Q13145 | -0.27967  |
| 132012 | P03346 | Q8TAT5 | -0.15281  |

|        |        |        |           |
|--------|--------|--------|-----------|
| 132013 | P03346 | A1L4H1 | -0.62787  |
| 132014 | P03346 | O60676 | -0.43686  |
| 132015 | P03346 | P28845 | -1.0039   |
| 132016 | P03346 | Q14863 | -0.40355  |
| 132017 | P03346 | Q9BR10 | -0.48587  |
| 132018 | P03346 | P59646 | -0.59868  |
| 132019 | P03346 | A4FU69 | -0.15403  |
| 132020 | P03346 | Q9NYL9 | -0.22633  |
| 132021 | P03346 | Q8NGY3 | -0.92763  |
| 132022 | P03346 | Q8WYP3 | -0.48421  |
| 132023 | P03346 | Q13670 | -0.19807  |
| 132024 | P03346 | Q12879 | -0.2583   |
| 132025 | P03346 | Q9H6R7 | -0.14331  |
| 132026 | P03346 | P01266 | -0.51324  |
| 132027 | P03346 | Q8NB78 | -0.22696  |
| 132028 | P03346 | Q99959 | -0.2157   |
| 132029 | P03346 | Q8WXR4 | -0.72317  |
| 132030 | P03346 | Q92806 | -0.30702  |
| 132031 | P03346 | Q5T5P2 | -0.1121   |
| 132032 | P03346 | Q8WUS8 | -0.90401  |
| 132033 | P03346 | Q9H987 | -0.2273   |
| 132034 | P03346 | P05107 | -0.76397  |
| 132035 | P03346 | Q14166 | -0.13803  |
| 132036 | P03346 | Q9NZN4 | -0.23115  |
| 132037 | P03346 | Q96LP6 | -0.18473  |
| 132038 | P03346 | Q96CS7 | -0.22735  |
| 132039 | P03346 | Q00341 | -0.19517  |
| 132040 | P03346 | P78527 | -0.25849  |
| 132041 | P03346 | Q9NYP8 | -0.15759  |
| 132042 | P03346 | A4D2G3 | -0.92763  |
| 132043 | P03346 | O95711 | -0.76906  |
| 132044 | P03346 | Q86SQ4 | -1.0077   |
| 132045 | P03346 | P60763 | -0.38882  |
| 132046 | P03346 | O00329 | -0.2827   |
| 132047 | P03346 | Q8N205 | -0.24179  |
| 132048 | P03346 | P04222 | -0.76151  |
| 132049 | P03346 | Q9UDX4 | -0.70018  |
| 132050 | P03346 | Q86XX4 | -0.77619  |
| 132051 | P03346 | Q9P0W8 | -0.22899  |
| 132052 | P03346 | Q8IXB1 | -0.23237  |
| 132053 | P03346 | Q7LFX5 | -0.31322  |
| 132054 | P03346 | P48506 | -0.22825  |
| 132055 | P03346 | Q8N8P6 | -0.012325 |
| 132056 | P03346 | P35556 | -0.57527  |
| 132057 | P03346 | Q9HB89 | -0.88226  |
| 132058 | P03346 | Q9NRQ2 | -0.18061  |
| 132059 | P03346 | P20292 | -0.17038  |
| 132060 | P03346 | P01601 | -0.80078  |
| 132061 | P03346 | Q9Y6Z4 | -0.14942  |
| 132062 | P03346 | Q96DU3 | -0.66816  |
| 132063 | P03346 | P43652 | -0.59984  |
| 132064 | P03346 | Q14061 | -0.051285 |
| 132065 | P03346 | Q04844 | -0.80311  |
| 132066 | P03346 | P31321 | -0.22742  |
| 132067 | P03346 | Q2KJY2 | -0.54835  |
| 132068 | P03346 | O95425 | -0.18281  |
| 132069 | P03346 | Q8N4S7 | -0.50365  |
| 132070 | P03346 | Q52WX2 | -0.826    |
| 132071 | P03346 | O60494 | -0.22741  |
| 132072 | P03346 | Q8NC60 | -0.19387  |
| 132073 | P03346 | Q68BL7 | -0.56715  |
| 132074 | P03346 | Q96FV3 | -0.51322  |
| 132075 | P03346 | Q5QP74 | -0.013652 |
| 132076 | P03346 | P01286 | -0.38672  |
| 132077 | P03346 | P51168 | -0.27321  |
| 132078 | P03346 | Q496F6 | -0.65219  |
| 132079 | P03346 | Q9BSY4 | -0.054891 |
| 132080 | P03346 | P42702 | -0.82473  |
| 132081 | P03346 | Q8N7H1 | -0.19705  |
| 132082 | P03346 | P0CW27 | -0.17121  |
| 132083 | P03346 | Q9BTL4 | -0.050223 |
| 132084 | P03346 | Q9BYZ6 | -0.8668   |
| 132085 | P03346 | Q92876 | -0.24785  |
| 132086 | P03346 | Q53EL9 | -0.68644  |
| 132087 | P03346 | Q15399 | -0.806    |
| 132088 | P03346 | Q9P2K8 | -0.74398  |

|        |        |        |           |
|--------|--------|--------|-----------|
| 132089 | P03346 | Q8TBE3 | -0.50365  |
| 132090 | P03346 | O75140 | -0.22726  |
| 132091 | P03346 | Q9H7T0 | -0.68273  |
| 132092 | P03346 | P0CG36 | -0.6913   |
| 132093 | P03346 | Q9BT43 | -0.21632  |
| 132094 | P03346 | P30453 | -0.51191  |
| 132095 | P03346 | Q9Y337 | -0.57467  |
| 132096 | P03346 | O75610 | -0.59437  |
| 132097 | P03346 | Q00G26 | -0.22396  |
| 132098 | P03346 | P51571 | -0.45177  |
| 132099 | P03346 | O43820 | -0.52438  |
| 132100 | P03346 | Q4ZJI4 | -0.50301  |
| 132101 | P03346 | Q07325 | -0.99908  |
| 132102 | P03346 | Q9Y2C9 | -0.55508  |
| 132103 | P03346 | Q12931 | -0.26755  |
| 132104 | P03346 | Q14940 | -0.73004  |
| 132105 | P03346 | P21359 | -0.22703  |
| 132106 | P03346 | Q8N8V2 | -0.66673  |
| 132107 | P03346 | Q8NFU5 | -0.21855  |
| 132108 | P03346 | O14524 | -0.39933  |
| 132109 | P03346 | Q9NNZ3 | -0.30452  |
| 132110 | P03346 | Q9NYU2 | -0.12384  |
| 132111 | P03346 | Q9BXJ5 | -0.66241  |
| 132112 | P03346 | O75964 | -0.17725  |
| 132113 | P03346 | O15067 | -0.32196  |
| 132114 | P03346 | Q96A19 | -0.2222   |
| 132115 | P03346 | Q96A99 | -0.57639  |
| 132116 | P03346 | Q9NS93 | -0.65219  |
| 132117 | P03346 | Q30154 | -0.56914  |
| 132118 | P03346 | Q5EBM0 | -0.18087  |
| 132119 | P03346 | Q9H0I2 | -0.19137  |
| 132120 | P03346 | A6NIU2 | -0.22696  |
| 132121 | P03346 | Q9Y225 | -0.41129  |
| 132122 | P03346 | P17735 | -0.22492  |
| 132123 | P03346 | Q8IZF2 | -1.0077   |
| 132124 | P03346 | P05091 | -0.28342  |
| 132125 | P03346 | P98095 | -0.675    |
| 132126 | P03346 | P16144 | -0.47014  |
| 132127 | P03346 | A6NEH6 | -0.51601  |
| 132128 | P03346 | Q9NVA2 | -0.22735  |
| 132129 | P03346 | Q9H3T2 | -0.67979  |
| 132130 | P03346 | P53816 | -0.21609  |
| 132131 | P03346 | P16284 | -0.28883  |
| 132132 | P03346 | A6NI03 | -0.30279  |
| 132133 | P03346 | P0C7M8 | -0.50492  |
| 132134 | P03346 | O14772 | -0.56594  |
| 132135 | P03346 | Q53FV1 | -0.61849  |
| 132136 | P03346 | Q9NUL5 | -0.11703  |
| 132137 | P03346 | Q13510 | -0.20664  |
| 132138 | P03346 | Q14318 | -0.22754  |
| 132139 | P03346 | Q6ZTY8 | -0.20064  |
| 132140 | P03346 | Q7Z3Z4 | -0.22729  |
| 132141 | P03346 | P14410 | -0.43755  |
| 132142 | P03346 | Q8N4H5 | -0.19507  |
| 132143 | P03346 | Q7Z5J8 | -0.50365  |
| 132144 | P03346 | Q6UVK1 | -0.96533  |
| 132145 | P03346 | A8K7I4 | -1.1189   |
| 132146 | P03346 | A6NI47 | -0.2274   |
| 132147 | P03346 | Q9UM73 | -1.2166   |
| 132148 | P03346 | Q96AZ1 | -0.62061  |
| 132149 | P03346 | P19784 | -0.23389  |
| 132150 | P03346 | Q9Y577 | -0.23089  |
| 132151 | P03346 | Q9ULY5 | -0.57445  |
| 132152 | P03346 | P50416 | -0.23113  |
| 132153 | P03346 | Q96EK2 | -0.22916  |
| 132154 | P03346 | P0C7N5 | -0.92763  |
| 132155 | P03346 | Q08AH3 | -0.60054  |
| 132156 | P03346 | Q8N0Y5 | -0.92763  |
| 132157 | P03346 | P34913 | -0.2664   |
| 132158 | P03346 | Q8TCT0 | -0.55409  |
| 132159 | P03346 | Q49AG3 | -0.06461  |
| 132160 | P03346 | Q8NA97 | -0.23101  |
| 132161 | P03346 | Q9NY64 | -0.4368   |
| 132162 | P03346 | P36406 | -0.22773  |
| 132163 | P03346 | Q96Q06 | -0.051309 |
| 132164 | P03346 | Q96JJ7 | -0.59447  |



|        |        |        |           |
|--------|--------|--------|-----------|
| 132165 | P03346 | P26006 | -0.22746  |
| 132166 | P03346 | P0CB38 | -0.40469  |
| 132167 | P03346 | Q9HCI7 | -0.1295   |
| 132168 | P03346 | P10826 | -0.22965  |
| 132169 | P03346 | Q8NHS1 | -0.50365  |
| 132170 | P03346 | Q8NH05 | -0.92763  |
| 132171 | P03346 | P00750 | -0.30715  |
| 132172 | P03346 | O14798 | -0.52615  |
| 132173 | P03346 | Q8N6N7 | -0.233    |
| 132174 | P03346 | P61009 | -0.54726  |
| 132175 | P03346 | Q05329 | -0.23115  |
| 132176 | P03346 | O75051 | -0.88498  |
| 132177 | P03346 | P36537 | -0.69278  |
| 132178 | P03346 | Q5TEU4 | -0.20177  |
| 132179 | P03346 | Q86VV4 | -0.1902   |
| 132180 | P03346 | Q16048 | -0.53147  |
| 132181 | P03346 | P0CG37 | -0.6838   |
| 132182 | P03346 | Q6P2I3 | -0.24521  |
| 132183 | P03346 | P08294 | -0.22603  |
| 132184 | P03346 | Q96RY7 | -0.18959  |
| 132185 | P03346 | Q13608 | -0.25664  |
| 132186 | P03346 | Q6ZTB9 | -0.24849  |
| 132187 | P03346 | Q92186 | -0.21556  |
| 132188 | P03346 | Q8NGQ4 | -0.92763  |
| 132189 | P03346 | Q7LGC8 | -0.32675  |
| 132190 | P03346 | Q8NGF4 | -0.92763  |
| 132191 | P03346 | Q8NGD5 | -0.92763  |
| 132192 | P03346 | Q5VUD6 | -0.63608  |
| 132193 | P03346 | Q09019 | -0.22748  |
| 132194 | P03346 | P07305 | -0.12407  |
| 132195 | P03346 | Q86YR6 | -0.22987  |
| 132196 | P03346 | Q6ZQY3 | -0.23414  |
| 132197 | P03346 | Q8WWH4 | -0.26757  |
| 132198 | P03346 | Q6UWF5 | -0.50365  |
| 132199 | P03346 | P47883 | -0.92763  |
| 132200 | P03346 | P27487 | -0.57072  |
| 132201 | P03346 | O60683 | -0.22739  |
| 132202 | P03346 | Q9BXJ7 | -0.75561  |
| 132203 | P03346 | P48039 | -0.97042  |
| 132204 | P03346 | Q8N6R0 | -0.21367  |
| 132205 | P03346 | C9JPN9 | -0.36346  |
| 132206 | P03346 | Q9UGI9 | -0.68772  |
| 132207 | P03346 | Q96Q80 | -0.13515  |
| 132208 | P03346 | Q96EY9 | -0.22587  |
| 132209 | P03346 | P51681 | -0.37382  |
| 132210 | P03346 | Q8WXH4 | -0.22761  |
| 132211 | P03346 | Q68D20 | -0.14187  |
| 132212 | P03346 | Q8N130 | -0.61628  |
| 132213 | P03346 | Q8NGQ6 | -0.92763  |
| 132214 | P03346 | Q9HBX3 | -0.013652 |
| 132215 | P03346 | Q96PQ0 | -0.51667  |
| 132216 | P03346 | Q95704 | -0.22726  |
| 132217 | P03346 | P55089 | -0.29946  |
| 132218 | P03346 | A6NFE3 | -0.22582  |
| 132219 | P03346 | O75056 | -0.69993  |
| 132220 | P03346 | Q8TDM5 | -0.40821  |
| 132221 | P03346 | Q6ZRP7 | -0.87463  |
| 132222 | P03346 | P21741 | -0.62633  |
| 132223 | P03346 | O75367 | -0.29372  |
| 132224 | P03346 | Q9NXJ0 | -0.50365  |
| 132225 | P03346 | P22303 | -0.22742  |
| 132226 | P03346 | Q9NYK6 | -0.012765 |
| 132227 | P03346 | Q9UBM7 | -0.68111  |
| 132228 | P03346 | Q9NY35 | -0.52945  |
| 132229 | P03346 | A4D997 | -0.025946 |
| 132230 | P03346 | P16930 | -0.18256  |
| 132231 | P03346 | P01861 | -0.75232  |
| 132232 | P03346 | Q9NW08 | -0.18356  |
| 132233 | P03346 | Q9UBM8 | -0.33704  |
| 132234 | P03346 | Q1RN00 | -0.013652 |
| 132235 | P03346 | P20851 | -0.73992  |
| 132236 | P03346 | Q9C093 | -0.17602  |
| 132237 | P03346 | P19875 | -0.88795  |
| 132238 | P03346 | Q5D862 | -0.2274   |
| 132239 | P03346 | Q8NGL0 | -0.92763  |
| 132240 | P03346 | P08581 | -0.3952   |

|        |        |        |           |
|--------|--------|--------|-----------|
| 132241 | P03346 | Q92930 | -0.489    |
| 132242 | P03346 | Q5SNX5 | -0.013652 |
| 132243 | P03346 | Q8N543 | -0.17198  |
| 132244 | P03346 | Q96AZ6 | -0.1533   |
| 132245 | P03346 | Q9BU70 | -0.22712  |
| 132246 | P03346 | Q86X27 | -0.52607  |
| 132247 | P03346 | Q6X4T0 | -0.14605  |
| 132248 | P03346 | Q8N9X3 | -0.23023  |
| 132249 | P03346 | Q16619 | -0.41912  |
| 132250 | P03346 | Q7Z7H3 | -0.14941  |
| 132251 | P03346 | Q8N9P6 | -0.013652 |
| 132252 | P03346 | Q9H1K0 | -0.20379  |
| 132253 | P03346 | Q3V6T2 | -0.2093   |
| 132254 | P03346 | Q8NEN0 | -0.21446  |
| 132255 | P03346 | P01040 | -0.2187   |
| 132256 | P03346 | P0CJ76 | -0.36125  |
| 132257 | P03346 | Q8N9M5 | -0.29924  |
| 132258 | P03346 | O00519 | -0.50964  |
| 132259 | P03346 | Q9H0T7 | -0.91339  |
| 132260 | P03346 | P00156 | -0.48245  |
| 132261 | P03346 | Q9BXI3 | -0.14979  |
| 132262 | P03346 | Q9BTK2 | -0.10977  |
| 132263 | P03346 | B0FP48 | -0.50365  |
| 132264 | P03346 | Q6ICG7 | -0.013652 |
| 132265 | P03346 | Q92932 | -0.69807  |
| 132266 | P03346 | Q9H993 | -0.18638  |
| 132267 | P03346 | Q9Y5C1 | -0.51903  |
| 132268 | P03346 | P55061 | -0.27838  |
| 132269 | P03346 | P19397 | -0.24045  |
| 132270 | P03346 | Q14644 | -0.36094  |
| 132271 | P03346 | Q9H6T3 | -0.22735  |
| 132272 | P03346 | P54852 | -0.55687  |
| 132273 | P03346 | Q6UXN7 | -0.3219   |
| 132274 | P03346 | Q6PIL6 | -0.61957  |
| 132275 | P03346 | O43677 | -0.25973  |
| 132276 | P03346 | Q8NGJ4 | -0.92763  |
| 132277 | P03346 | Q96A57 | -0.50365  |
| 132278 | P03346 | Q96BN6 | -0.1208   |
| 132279 | P03346 | Q96E17 | -0.62423  |
| 132280 | P03346 | P03989 | -0.73313  |
| 132281 | P03346 | Q96EC8 | -0.51601  |
| 132282 | P03346 | Q6PID8 | -0.22691  |
| 132283 | P03346 | O95620 | -0.32447  |
| 132284 | P03346 | Q8NFX7 | -0.21859  |
| 132285 | P03346 | P60484 | -0.22741  |
| 132286 | P03346 | P20472 | -0.22581  |
| 132287 | P03346 | P42262 | -0.7552   |
| 132288 | P03346 | Q5GH70 | -0.50365  |
| 132289 | P03346 | Q6UXQ8 | -0.53519  |
| 132290 | P03346 | Q07507 | -0.86874  |
| 132291 | P03346 | Q9Y385 | -0.99126  |
| 132292 | P03346 | O60566 | -0.22741  |
| 132293 | P03346 | Q4KMG0 | -0.22745  |
| 132294 | P03346 | Q8N5K1 | -0.19685  |
| 132295 | P03346 | P29279 | -0.25915  |
| 132296 | P03346 | Q9NSE7 | -0.22617  |
| 132297 | P03346 | P26232 | -0.21333  |
| 132298 | P03346 | Q9BW91 | -0.18868  |
| 132299 | P03346 | Q9UN76 | -0.69668  |
| 132300 | P03346 | Q15517 | -0.54965  |
| 132301 | P03346 | Q6N022 | -0.22755  |
| 132302 | P03346 | Q7Z494 | -0.22719  |
| 132303 | P03346 | Q14451 | -0.22741  |
| 132304 | P03346 | Q8IVL6 | -0.38993  |
| 132305 | P03346 | Q92771 | -0.26799  |
| 132306 | P03346 | O60641 | -0.30835  |
| 132307 | P03346 | Q9H1M3 | -0.52229  |
| 132308 | P03346 | Q8N9R6 | -0.1631   |
| 132309 | P03346 | P16591 | -0.38214  |
| 132310 | P03346 | Q9BWS9 | -0.57676  |
| 132311 | P03346 | P30711 | -0.227    |
| 132312 | P03346 | Q8IUC8 | -0.41543  |
| 132313 | P03346 | Q8NH04 | -0.92763  |
| 132314 | P03346 | O60609 | -0.23859  |
| 132315 | P03346 | E7EML9 | -1.0507   |
| 132316 | P03346 | P01024 | -0.62945  |

|        |        |        |           |
|--------|--------|--------|-----------|
| 132317 | P03346 | Q9NZR1 | -0.22449  |
| 132318 | P03346 | Q32NB8 | -0.55651  |
| 132319 | P03346 | Q6ZVZ8 | -0.22741  |
| 132320 | P03346 | Q8N136 | -0.22948  |
| 132321 | P03346 | Q8IZI9 | -0.70114  |
| 132322 | P03346 | P59045 | -0.59262  |
| 132323 | P03346 | A6NMS3 | -0.92763  |
| 132324 | P03346 | Q86WT1 | -0.18676  |
| 132325 | P03346 | Q96JC1 | -0.22148  |
| 132326 | P03346 | Q9BTU6 | -0.24399  |
| 132327 | P03346 | B4E2M5 | -0.22741  |
| 132328 | P03346 | Q86VQ6 | -0.30052  |
| 132329 | P03346 | Q9Y243 | -0.16086  |
| 132330 | P03346 | Q9UHF3 | -0.62237  |
| 132331 | P03346 | Q6HA08 | -0.47969  |
| 132332 | P03346 | Q9UL19 | -0.21336  |
| 132333 | P03346 | P16260 | -0.28035  |
| 132334 | P03346 | Q96K83 | -0.098423 |
| 132335 | P03346 | P27824 | -0.183    |
| 132336 | P03346 | Q7Z7G1 | -0.2539   |
| 132337 | P03346 | Q5SY68 | -0.22986  |
| 132338 | P03346 | Q4ZIN3 | -0.3113   |
| 132339 | P03346 | Q6UWN5 | -0.28132  |
| 132340 | P03346 | O96024 | -0.47628  |
| 132341 | P03346 | P46926 | -0.20449  |
| 132342 | P03346 | Q96P56 | -0.36261  |
| 132343 | P03346 | Q9NQ11 | -0.88317  |
| 132344 | P03346 | P16949 | -0.33811  |
| 132345 | P03346 | Q5R372 | -0.63606  |
| 132346 | P03346 | Q9H3T3 | -0.76394  |
| 132347 | P03346 | Q8NGV0 | -0.92763  |
| 132348 | P03346 | P0C881 | -0.18745  |
| 132349 | P03346 | Q13477 | -0.916    |
| 132350 | P03346 | Q8N4C7 | -0.24121  |
| 132351 | P03346 | Q14681 | -0.030918 |
| 132352 | P03346 | Q9BVV7 | -0.19468  |
| 132353 | P03346 | Q8NEM0 | -0.22347  |
| 132354 | P03346 | Q9UKY4 | -0.67132  |
| 132355 | P03346 | P08311 | -0.99508  |
| 132356 | P03346 | Q969K3 | -0.22741  |
| 132357 | P03346 | Q8N769 | -0.11966  |
| 132358 | P03346 | Q8IU68 | -0.63608  |
| 132359 | P03346 | Q9BXI2 | -0.30344  |
| 132360 | P03346 | P49765 | -0.54202  |
| 132361 | P03346 | Q8NBP5 | -0.60861  |
| 132362 | P03346 | Q53HM4 | -0.010795 |
| 132363 | P03346 | A6NFZ4 | -0.53519  |
| 132364 | P03346 | Q96EZ4 | -0.013652 |
| 132365 | P03346 | Q86WA8 | -0.2221   |
| 132366 | P03346 | Q6ZU69 | -0.50365  |
| 132367 | P03346 | P02771 | -0.38901  |
| 132368 | P03346 | Q16613 | -0.10016  |
| 132369 | P03346 | A6NCE7 | -0.20577  |
| 132370 | P03346 | O94851 | -0.28707  |
| 132371 | P03346 | Q9NR97 | -0.57474  |
| 132372 | P03346 | P12018 | -0.58933  |
| 132373 | P03346 | Q8N1N0 | -0.58126  |
| 132374 | P03346 | Q6ZRX8 | -0.21323  |
| 132375 | P03346 | Q92615 | -0.40469  |
| 132376 | P03346 | P0C7Q6 | -0.50365  |
| 132377 | P03346 | H3BUK9 | -0.22733  |
| 132378 | P03346 | Q8IW92 | -0.53978  |
| 132379 | P03346 | P52757 | -0.51859  |
| 132380 | P03346 | Q8WXQ8 | -0.88342  |
| 132381 | P03346 | P40199 | -0.22744  |
| 132382 | P03346 | Q86VZ5 | -0.2687   |
| 132383 | P03346 | P23142 | -0.75378  |
| 132384 | P03346 | Q8IWY4 | -0.68718  |
| 132385 | P03346 | Q3B7J2 | -1.1764   |
| 132386 | P03346 | Q96LR5 | -0.38862  |
| 132387 | P03346 | Q3C1V0 | -0.50365  |
| 132388 | P03346 | Q9Y312 | -0.11584  |
| 132389 | P03346 | Q8NH53 | -0.92763  |
| 132390 | P03346 | Q8TEW8 | -0.22711  |
| 132391 | P03346 | P51451 | -1.0052   |
| 132392 | P03346 | Q96NB2 | -0.53637  |

|        |        |        |          |
|--------|--------|--------|----------|
| 132393 | P03346 | O14957 | -0.35613 |
| 132394 | P03346 | P08588 | -0.55194 |
| 132395 | P03346 | Q2Q1W2 | -0.29296 |
| 132396 | P03346 | Q9UBP5 | -0.22721 |
| 132397 | P03346 | Q9Y6N6 | -0.74355 |
| 132398 | P03346 | Q14542 | -0.2333  |
| 132399 | P03346 | Q8IXS2 | -0.13588 |
| 132400 | P03346 | Q13239 | -0.22741 |
| 132401 | P03346 | Q9UQQ1 | -1.0448  |
| 132402 | P03346 | Q8WUD6 | -0.38866 |
| 132403 | P03346 | P51790 | -0.22317 |
| 132404 | P03346 | Q13796 | -0.22734 |
| 132405 | P03346 | P10266 | -0.22489 |
| 132406 | P03346 | Q9BV36 | -0.21598 |
| 132407 | P03346 | Q16585 | -0.42023 |
| 132408 | P03346 | Q8N9I5 | -0.7591  |
| 132409 | P03346 | C9JVV0 | -0.50365 |
| 132410 | P03346 | O75445 | -0.58002 |
| 132411 | P03346 | Q8N614 | -0.50365 |
| 132412 | P03346 | Q9BRN9 | -0.50365 |
| 132413 | P03346 | Q96EG1 | -0.38254 |
| 132414 | P03346 | Q6ZNR0 | -0.32343 |
| 132415 | P03346 | Q94810 | -0.32654 |
| 132416 | P03346 | Q8N6Q8 | -0.04825 |
| 132417 | P03346 | O75449 | -0.2289  |
| 132418 | P03346 | A6NED2 | -0.22656 |
| 132419 | P03346 | Q9Y4X0 | -0.19085 |
| 132420 | P03346 | Q96FB5 | -0.47077 |
| 132421 | P03346 | Q9NQE7 | -0.46465 |
| 132422 | P03346 | A4D1S5 | -0.79023 |
| 132423 | P03346 | Q96L91 | -0.21377 |
| 132424 | P03346 | Q00688 | -0.22753 |
| 132425 | P03346 | Q96RJ0 | -0.91917 |
| 132426 | P03346 | Q96RQ1 | -0.16787 |
| 132427 | P03346 | Q14960 | -0.61459 |
| 132428 | P03346 | Q8NGM8 | -0.92763 |
| 132429 | P03346 | A8MVW0 | -0.50365 |
| 132430 | P03346 | P42336 | -0.2493  |
| 132431 | P03346 | O43861 | -0.6665  |
| 132432 | P03346 | Q14197 | -0.20307 |
| 132433 | P03346 | Q8NCB2 | -0.38804 |
| 132434 | P03346 | O94772 | -0.20743 |
| 132435 | P03346 | Q9NYB9 | -0.22776 |
| 132436 | P03346 | P29401 | -0.20334 |
| 132437 | P03346 | Q96M86 | -0.21573 |
| 132438 | P03346 | P15313 | -0.2165  |
| 132439 | P03346 | A6NH57 | -0.92981 |
| 132440 | P03346 | Q9UBX7 | -0.97014 |
| 132441 | P03346 | P45452 | -0.69668 |
| 132442 | P03346 | Q95084 | -0.76188 |
| 132443 | P03346 | P30086 | -0.32478 |
| 132444 | P03346 | Q9UJ42 | -0.96376 |
| 132445 | P03346 | Q96S15 | -0.22742 |
| 132446 | P03346 | Q9BRK5 | -0.22723 |
| 132447 | P03346 | C9JH25 | -0.50365 |
| 132448 | P03346 | Q96SB4 | -0.22741 |
| 132449 | P03346 | P53814 | -0.22762 |
| 132450 | P03346 | Q8IYR2 | -0.22207 |
| 132451 | P03346 | P33765 | -0.87784 |
| 132452 | P03346 | Q8N7A1 | -0.22732 |
| 132453 | P03346 | A6NMC2 | -0.17032 |
| 132454 | P03346 | Q43506 | -0.84412 |
| 132455 | P03346 | O75063 | -0.90964 |
| 132456 | P03346 | Q6X4U4 | -0.61463 |
| 132457 | P03346 | Q15772 | -0.65875 |
| 132458 | P03346 | Q6Y288 | -0.55624 |
| 132459 | P03346 | Q9UL12 | -0.15853 |
| 132460 | P03346 | O43572 | -0.2266  |
| 132461 | P03346 | Q5T2L2 | -0.22701 |
| 132462 | P03346 | P59894 | -0.18855 |
| 132463 | P03346 | Q9BXN2 | -0.40612 |
| 132464 | P03346 | P08922 | -1.0883  |
| 132465 | P03346 | Q8N7F7 | -0.22712 |
| 132466 | P03346 | Q9H2I8 | -0.22737 |
| 132467 | P03346 | Q9C004 | -0.21584 |
| 132468 | P03346 | P49842 | -0.47676 |

|        |        |        |           |
|--------|--------|--------|-----------|
| 132469 | P03346 | Q14195 | -0.22472  |
| 132470 | P03346 | Q92802 | -0.18602  |
| 132471 | P03346 | Q9NY37 | -0.69066  |
| 132472 | P03346 | Q7RTX7 | -0.72358  |
| 132473 | P03346 | Q6ZTN6 | -0.043939 |
| 132474 | P03346 | Q9UFP1 | -0.53519  |
| 132475 | P03346 | P31146 | -0.22741  |
| 132476 | P03346 | P09430 | -0.30444  |
| 132477 | P03346 | P0C843 | -0.12742  |
| 132478 | P03346 | Q15849 | -0.079334 |
| 132479 | P03346 | Q5VST6 | -0.53766  |
| 132480 | P03346 | P26572 | -0.32066  |
| 132481 | P03346 | Q8N138 | -0.12074  |
| 132482 | P03346 | A5PLK6 | -0.49523  |
| 132483 | P03346 | P13716 | -0.22186  |
| 132484 | P03346 | Q9GZT6 | -0.38186  |
| 132485 | P03346 | Q9NYR8 | -0.94625  |
| 132486 | P03346 | Q15120 | -0.22692  |
| 132487 | P03346 | P31153 | -0.41819  |
| 132488 | P03346 | Q9C0D9 | -0.59968  |
| 132489 | P03346 | Q5T2P8 | -0.17358  |
| 132490 | P03346 | Q7LGA3 | -0.323    |
| 132491 | P03346 | Q99542 | -0.93101  |
| 132492 | P03346 | Q86SH2 | -0.17538  |
| 132493 | P03346 | Q8IV38 | -0.24403  |
| 132494 | P03346 | Q7Z5P4 | -0.96147  |
| 132495 | P03346 | Q8TD46 | -0.44565  |
| 132496 | P03346 | Q8N0U7 | -0.09673  |
| 132497 | P03346 | Q96S38 | -0.49836  |
| 132498 | P03346 | Q32Q52 | -0.19662  |
| 132499 | P03346 | Q8IXF9 | -0.47298  |
| 132500 | P03346 | P30838 | -0.24455  |
| 132501 | P03346 | P13639 | -0.15567  |
| 132502 | P03346 | Q9NXS2 | -0.66383  |
| 132503 | P03346 | Q9P2U7 | -0.5262   |
| 132504 | P03346 | Q6ZVT0 | -0.17554  |
| 132505 | P03346 | A6NNM8 | -0.19112  |
| 132506 | P03346 | Q9H6L5 | -0.43316  |
| 132507 | P03346 | Q8NDA2 | -0.67289  |
| 132508 | P03346 | Q92608 | -0.22685  |
| 132509 | P03346 | P60033 | -0.23649  |
| 132510 | P03346 | P01127 | -0.25732  |
| 132511 | P03346 | A8MPX8 | -0.21918  |
| 132512 | P03346 | Q8N878 | -0.28507  |
| 132513 | P03346 | Q5VVP1 | -0.50365  |
| 132514 | P03346 | Q9UMZ3 | -0.85608  |
| 132515 | P03346 | Q6UWS5 | -0.14532  |
| 132516 | P03346 | Q96G28 | -0.13906  |
| 132517 | P03346 | Q9Y3R4 | -0.19871  |
| 132518 | P03346 | P28288 | -0.45966  |
| 132519 | P03346 | Q8N1L4 | -0.63707  |
| 132520 | P03346 | Q14569 | -0.52179  |
| 132521 | P03346 | Q587J7 | -0.23163  |
| 132522 | P03346 | Q06643 | -0.64862  |
| 132523 | P03346 | O00429 | -0.43251  |
| 132524 | P03346 | Q04609 | -0.66331  |
| 132525 | P03346 | P0CJ74 | -0.36125  |
| 132526 | P03346 | Q2QL34 | -0.58607  |
| 132527 | P03346 | Q8TEZ7 | -0.91913  |
| 132528 | P03346 | Q8IVB4 | -0.63661  |
| 132529 | P03346 | P22888 | -0.46394  |
| 132530 | P03346 | P16403 | -0.23412  |
| 132531 | P03346 | P0CL80 | -0.21009  |
| 132532 | P03346 | Q9C0K1 | -0.65867  |
| 132533 | P03346 | Q14833 | -1.0614   |
| 132534 | P03346 | A6NM11 | -0.50365  |
| 132535 | P03346 | Q9BRP9 | -0.13335  |
| 132536 | P03346 | Q6ZRR5 | -0.50365  |
| 132537 | P03346 | Q8NCL9 | -0.50365  |
| 132538 | P03346 | Q53S99 | -0.20044  |
| 132539 | P03346 | Q13387 | -0.21981  |
| 132540 | P03346 | P35663 | -0.063457 |
| 132541 | P03346 | P16422 | -0.22747  |
| 132542 | P03346 | Q53T59 | -0.20785  |
| 132543 | P03346 | Q9UPT9 | -0.26844  |
| 132544 | P03346 | Q68J44 | -0.38582  |

|        |        |        |           |
|--------|--------|--------|-----------|
| 132545 | P03346 | Q9Y6U7 | -0.56385  |
| 132546 | P03346 | Q9HA47 | -0.50151  |
| 132547 | P03346 | Q6NUJ5 | -0.22462  |
| 132548 | P03346 | Q6F5E7 | -0.13985  |
| 132549 | P03346 | Q96TA0 | -0.86699  |
| 132550 | P03346 | Q6ZR85 | -0.013652 |
| 132551 | P03346 | Q9UH65 | -0.23001  |
| 132552 | P03346 | Q9NZK7 | -0.66375  |
| 132553 | P03346 | P05113 | -0.1945   |
| 132554 | P03346 | Q9NRV9 | -0.48014  |
| 132555 | P03346 | Q92813 | -0.65963  |
| 132556 | P03346 | Q9HCJ6 | -0.64787  |
| 132557 | P03346 | Q96P20 | -0.22736  |
| 132558 | P03346 | Q14654 | -0.46125  |
| 132559 | P03346 | Q96R27 | -0.92763  |
| 132560 | P03346 | Q43143 | -0.22674  |
| 132561 | P03346 | Q9NR34 | -0.43379  |
| 132562 | P03346 | Q60245 | -0.99536  |
| 132563 | P03346 | A2A2V5 | -0.50365  |
| 132564 | P03346 | Q9UHD2 | -0.22741  |
| 132565 | P03346 | Q99748 | -0.34421  |
| 132566 | P03346 | Q9NU22 | -0.22725  |
| 132567 | P03346 | Q5U3C3 | -0.50365  |
| 132568 | P03346 | Q9HD87 | -0.50365  |
| 132569 | P03346 | P24298 | -0.22355  |
| 132570 | P03346 | Q8TCJ2 | -0.51557  |
| 132571 | P03346 | Q8N4H0 | -0.23278  |
| 132572 | P03346 | Q86Y28 | -0.53519  |
| 132573 | P03346 | A8MWY0 | -0.50365  |
| 132574 | P03346 | Q9NZG7 | -0.66287  |
| 132575 | P03346 | Q86WR0 | -0.068997 |
| 132576 | P03346 | Q9Y2U8 | -0.20944  |
| 132577 | P03346 | Q9H1F0 | -0.50866  |
| 132578 | P03346 | Q14562 | -0.21209  |
| 132579 | P03346 | Q14185 | -0.2274   |
| 132580 | P03346 | Q07654 | -0.54338  |
| 132581 | P03346 | Q15389 | -0.67197  |
| 132582 | P03346 | P47224 | -0.17553  |
| 132583 | P03346 | Q16661 | -0.49801  |
| 132584 | P03346 | H3BPM6 | -0.30779  |
| 132585 | P03346 | Q6ZW76 | -0.22741  |
| 132586 | P03346 | Q96PD6 | -0.53643  |
| 132587 | P03346 | Q8NA61 | -0.15375  |
| 132588 | P03346 | P86496 | -0.013652 |
| 132589 | P03346 | P19256 | -0.34112  |
| 132590 | P03346 | Q9UP79 | -0.92547  |
| 132591 | P03346 | Q99574 | -0.45039  |
| 132592 | P03346 | Q9Y5S8 | -0.33301  |
| 132593 | P03346 | Q14944 | -0.39576  |
| 132594 | P03346 | P41594 | -0.52108  |
| 132595 | P03346 | Q9BQB4 | -0.14972  |
| 132596 | P03346 | Q8WVQ1 | -0.69774  |
| 132597 | P03346 | Q6UXL0 | -0.4232   |
| 132598 | P03346 | Q8N4E4 | -0.2202   |
| 132599 | P03346 | Q5EG05 | -0.28073  |
| 132600 | P03346 | Q75888 | -0.46219  |
| 132601 | P03346 | Q96PL1 | -0.53519  |
| 132602 | P03346 | Q9H7L2 | -0.53519  |
| 132603 | P03346 | Q9NZV6 | -0.24002  |
| 132604 | P03346 | Q9H761 | -0.14308  |
| 132605 | P03346 | P83110 | -0.47237  |
| 132606 | P03346 | Q8IXI1 | -0.50592  |
| 132607 | P03346 | Q9BSE5 | -0.22525  |
| 132608 | P03346 | Q9HCQ5 | -0.41543  |
| 132609 | P03346 | Q5GH77 | -0.65219  |
| 132610 | P03346 | P54289 | -0.6055   |
| 132611 | P03346 | Q75310 | -0.67912  |
| 132612 | P03346 | P34925 | -0.39613  |
| 132613 | P03346 | P21754 | -0.29574  |
| 132614 | P03346 | Q9BRB3 | -0.4829   |
| 132615 | P03346 | Q6ZS52 | -0.013652 |
| 132616 | P03346 | P04626 | -0.22741  |
| 132617 | P03346 | Q96H78 | -0.37103  |
| 132618 | P03346 | Q9UMW8 | -0.28691  |
| 132619 | P03346 | Q13459 | -0.20347  |
| 132620 | P03346 | Q14679 | -0.18262  |

|        |        |        |           |
|--------|--------|--------|-----------|
| 132621 | P03346 | Q8NBR9 | -0.2233   |
| 132622 | P03346 | Q5T4F7 | -0.60715  |
| 132623 | P03346 | P22692 | -0.75798  |
| 132624 | P03346 | Q5T3U5 | -1.0179   |
| 132625 | P03346 | Q13107 | -0.2587   |
| 132626 | P03346 | Q8IU8  | -0.50365  |
| 132627 | P03346 | Q9NX77 | -0.35115  |
| 132628 | P03346 | O43808 | -0.23772  |
| 132629 | P03346 | Q56UQ5 | -0.19348  |
| 132630 | P03346 | P49447 | -0.50396  |
| 132631 | P03346 | P57058 | -1.1206   |
| 132632 | P03346 | Q969R8 | -0.18434  |
| 132633 | P03346 | P51648 | -0.77001  |
| 132634 | P03346 | Q9NY99 | -0.22671  |
| 132635 | P03346 | Q5VTE6 | -0.17262  |
| 132636 | P03346 | O95221 | -0.92763  |
| 132637 | P03346 | Q30KQ4 | -0.52229  |
| 132638 | P03346 | Q96RD0 | -0.92763  |
| 132639 | P03346 | Q86YL7 | -0.66995  |
| 132640 | P03346 | Q8IZS5 | -0.046822 |
| 132641 | P03346 | Q9BQS7 | -0.84345  |
| 132642 | P03346 | Q8N9N7 | -0.2304   |
| 132643 | P03346 | Q9HCK4 | -0.28258  |
| 132644 | P03346 | Q9ULD9 | -0.30279  |
| 132645 | P03346 | P43034 | -0.22796  |
| 132646 | P03346 | Q5GLZ8 | -0.29287  |
| 132647 | P03346 | Q6DN03 | -0.35085  |
| 132648 | P03346 | Q8IZF6 | -1.0077   |
| 132649 | P03346 | Q9UJ90 | -0.51581  |
| 132650 | P03346 | Q86UP0 | -0.73343  |
| 132651 | P03346 | P50552 | -0.22499  |
| 132652 | P03346 | Q8TE12 | -0.2268   |
| 132653 | P03346 | Q8WTT0 | -0.4921   |
| 132654 | P03346 | O95562 | -0.19221  |
| 132655 | P03346 | Q8IWU4 | -0.40596  |
| 132656 | P03346 | Q5JUQ0 | -0.12933  |
| 132657 | P03346 | P59536 | -0.84404  |
| 132658 | P03346 | Q7L0X2 | -0.12121  |
| 132659 | P03346 | Q9NZ20 | -0.5067   |
| 132660 | P03346 | Q9Y6W8 | -1.2842   |
| 132661 | P03346 | O60637 | -0.50365  |
| 132662 | P03346 | Q13635 | -0.22725  |
| 132663 | P03346 | Q6ZQY7 | -0.061449 |
| 132664 | P03346 | P60468 | -0.1502   |
| 132665 | P03346 | Q09328 | -0.39612  |
| 132666 | P03346 | Q99075 | -0.95399  |
| 132667 | P03346 | Q95604 | -0.76151  |
| 132668 | P03346 | Q14697 | -0.22405  |
| 132669 | P03346 | Q8N9W4 | -0.21907  |
| 132670 | P03346 | Q00169 | -0.34814  |
| 132671 | P03346 | Q9BUD6 | -0.73772  |
| 132672 | P03346 | Q8TDT2 | -0.96376  |
| 132673 | P03346 | Q9Y251 | -0.20177  |
| 132674 | P03346 | Q15846 | -0.44315  |
| 132675 | P03346 | Q9NPB0 | -0.46568  |
| 132676 | P03346 | Q9H7Y2 | -0.14046  |
| 132677 | P03346 | P20592 | -0.23268  |
| 132678 | P03346 | Q6P435 | -0.080403 |
| 132679 | P03346 | Q8NH40 | -0.92763  |
| 132680 | P03346 | O00754 | -0.30285  |
| 132681 | P03346 | Q8N201 | -0.13589  |
| 132682 | P03346 | P32754 | -0.22124  |
| 132683 | P03346 | Q9Y336 | -0.85709  |
| 132684 | P03346 | Q9H714 | -0.10486  |
| 132685 | P03346 | Q5T4F4 | -0.22094  |
| 132686 | P03346 | O00337 | -0.67454  |
| 132687 | P03346 | Q9P0B6 | -0.50365  |
| 132688 | P03346 | A6NMD2 | -0.14638  |
| 132689 | P03346 | Q96NN9 | -0.22512  |
| 132690 | P03346 | Q8TB33 | -0.15478  |
| 132691 | P03346 | A2PYH4 | -0.51573  |
| 132692 | P03346 | Q9UL63 | -0.22459  |
| 132693 | P03346 | Q8NGI0 | -0.92763  |
| 132694 | P03346 | Q96FZ5 | -0.67729  |
| 132695 | P03346 | Q9NZ94 | -0.22744  |
| 132696 | P03346 | P46092 | -1.0471   |

|        |        |         |           |
|--------|--------|---------|-----------|
| 132697 | P03346 | Q5JVF3  | -0.10885  |
| 132698 | P03346 | O00763  | -0.25021  |
| 132699 | P03346 | Q8TDX6  | -0.32811  |
| 132700 | P03346 | P01760  | -0.80078  |
| 132701 | P03346 | P21128  | -0.62389  |
| 132702 | P03346 | Q495Z4  | -0.11208  |
| 132703 | P03346 | Q9NSD7  | -1.0677   |
| 132704 | P03346 | P50993  | -0.46134  |
| 132705 | P03346 | Q9UHP6  | -0.22373  |
| 132706 | P03346 | Q9P1W9  | -0.52158  |
| 132707 | P03346 | P10082  | -0.53507  |
| 132708 | P03346 | P29536  | -0.22405  |
| 132709 | P03346 | Q9NVZ3  | -0.24502  |
| 132710 | P03346 | O14511  | -1.0944   |
| 132711 | P03346 | B7Z6K7  | -0.097946 |
| 132712 | P03346 | Q9H8X9  | -0.59087  |
| 132713 | P03346 | O43556  | -0.51573  |
| 132714 | P03346 | Q13950  | -0.28261  |
| 132715 | P03346 | Q8N8Q3  | -0.17507  |
| 132716 | P03346 | Q5JRS4  | -0.92763  |
| 132717 | P03346 | Q9HOR5  | -0.56249  |
| 132718 | P03346 | O43314  | -0.33741  |
| 132719 | P03346 | P55774  | -0.57168  |
| 132720 | P03346 | Q92633  | -0.228    |
| 132721 | P03346 | Q16654  | -0.34848  |
| 132722 | P03346 | P49591  | -0.099778 |
| 132723 | P03346 | P20674  | -0.17688  |
| 132724 | P03346 | Q6PL18  | -0.23504  |
| 132725 | P03346 | P49642  | -0.090208 |
| 132726 | P03346 | P19086  | -0.7627   |
| 132727 | P03346 | P24468  | -0.23253  |
| 132728 | P03346 | Q6EMK4  | -1.0287   |
| 132729 | P03346 | Q9UN42  | -0.14227  |
| 132730 | P03346 | P56706  | -0.3822   |
| 132731 | P03346 | Q7Z2T5  | -0.27604  |
| 132732 | P03346 | P02585  | -0.2267   |
| 132733 | P03346 | A6QL64  | -0.062767 |
| 132734 | P03346 | Q6UWK7  | -0.53519  |
| 132735 | P03346 | Q5TYX0  | -0.13456  |
| 132736 | P03346 | Q9UK97  | -0.19733  |
| 132737 | P03346 | Q07912  | -0.37265  |
| 132738 | P03346 | P43026  | -0.3235   |
| 132739 | P03346 | Q8I WV7 | -0.12763  |
| 132740 | P03346 | Q8NG78  | -0.92763  |
| 132741 | P03346 | Q68D85  | -0.42944  |
| 132742 | P03346 | Q86TM6  | -0.22859  |
| 132743 | P03346 | Q6ZN16  | -0.82664  |
| 132744 | P03346 | Q8IUL8  | -0.53218  |
| 132745 | P03346 | Q96DC9  | -0.40389  |
| 132746 | P03346 | Q0P651  | -0.53519  |
| 132747 | P03346 | Q9NRG0  | -0.12713  |
| 132748 | P03346 | Q6ZUG5  | -0.12009  |
| 132749 | P03346 | Q96PL2  | -0.78941  |
| 132750 | P03346 | Q8WY21  | -0.22913  |
| 132751 | P03346 | Q9NS98  | -0.80305  |
| 132752 | P03346 | Q9UI38  | -0.33659  |
| 132753 | P03346 | Q86UX6  | -0.94145  |
| 132754 | P03346 | Q96G91  | -0.93022  |
| 132755 | P03346 | P01708  | -0.80078  |
| 132756 | P03346 | P13686  | -0.29702  |
| 132757 | P03346 | O60397  | -0.15159  |
| 132758 | P03346 | Q5VWW1  | -0.58695  |
| 132759 | P03346 | P50224  | -0.2392   |
| 132760 | P03346 | Q02962  | -0.22739  |
| 132761 | P03346 | O00562  | -0.20848  |
| 132762 | P03346 | A6NCI5  | -0.50365  |
| 132763 | P03346 | Q5VYP0  | -0.50365  |
| 132764 | P03346 | O15482  | -0.39933  |
| 132765 | P03346 | Q9BSG5  | -0.53519  |
| 132766 | P03346 | Q309B1  | -0.23208  |
| 132767 | P03346 | A6NDL7  | -0.21031  |
| 132768 | P03346 | Q5JXC2  | -0.1547   |
| 132769 | P03346 | Q9NZN9  | -0.22387  |
| 132770 | P03346 | Q9NRX5  | -0.23373  |
| 132771 | P03346 | Q13630  | -0.55035  |
| 132772 | P03346 | Q8WXH5  | -0.2274   |



|        |        |        |           |
|--------|--------|--------|-----------|
| 132773 | P03346 | P43366 | -0.19602  |
| 132774 | P03346 | Q96NT0 | -0.23428  |
| 132775 | P03346 | Q9UPW8 | -0.22741  |
| 132776 | P03346 | Q9BZQ2 | -0.10077  |
| 132777 | P03346 | P19113 | -0.31857  |
| 132778 | P03346 | Q9BY89 | -0.14645  |
| 132779 | P03346 | Q01726 | -0.41972  |
| 132780 | P03346 | O75343 | -0.49105  |
| 132781 | P03346 | Q8N755 | -0.50365  |
| 132782 | P03346 | Q6IS24 | -0.42637  |
| 132783 | P03346 | O15540 | -0.22291  |
| 132784 | P03346 | Q06055 | -0.50162  |
| 132785 | P03346 | Q4VX67 | -0.50365  |
| 132786 | P03346 | Q9BQE5 | -0.85657  |
| 132787 | P03346 | Q7Z5J1 | -1.1855   |
| 132788 | P03346 | Q9Y394 | -0.70492  |
| 132789 | P03346 | A6NMU1 | -0.92763  |
| 132790 | P03346 | Q02338 | -0.22727  |
| 132791 | P03346 | Q99961 | -0.22761  |
| 132792 | P03346 | Q6NXT2 | -0.35085  |
| 132793 | P03346 | Q9NRC9 | -0.55793  |
| 132794 | P03346 | Q5T160 | -0.076875 |
| 132795 | P03346 | O60894 | -0.20304  |
| 132796 | P03346 | Q9BS40 | -0.22208  |
| 132797 | P03346 | Q8N8J0 | -0.18784  |
| 132798 | P03346 | Q9BYA6 | -0.013652 |
| 132799 | P03346 | Q9UBH0 | -0.61721  |
| 132800 | P03346 | Q9UL62 | -0.22741  |
| 132801 | P03346 | P14415 | -0.18622  |
| 132802 | P03346 | Q9Y3F1 | -0.013652 |
| 132803 | P03346 | A6NFN3 | -0.36152  |
| 132804 | P03346 | Q8IVK1 | -0.14724  |
| 132805 | P03346 | Q9ULH1 | -0.25469  |
| 132806 | P03346 | Q6U949 | -0.013652 |
| 132807 | P03346 | Q9BSA9 | -0.50365  |
| 132808 | P03346 | P98198 | -0.83369  |
| 132809 | P03346 | Q8TF08 | -0.36846  |
| 132810 | P03346 | Q8WWF8 | -0.22694  |
| 132811 | P03346 | P10635 | -0.33574  |
| 132812 | P03346 | Q6UXE8 | -0.30782  |
| 132813 | P03346 | P32320 | -0.48386  |
| 132814 | P03346 | Q9UHF1 | -0.83883  |
| 132815 | P03346 | Q7L8J4 | -0.069224 |
| 132816 | P03346 | Q9BXY5 | -0.22712  |
| 132817 | P03346 | Q8N4X5 | -0.18928  |
| 132818 | P03346 | Q6T311 | -0.92981  |
| 132819 | P03346 | Q86YG4 | -0.10841  |
| 132820 | P03346 | Q8NFJ6 | -0.97063  |
| 132821 | P03346 | P87889 | -0.20659  |
| 132822 | P03346 | Q68D06 | -0.68133  |
| 132823 | P03346 | Q9UKG9 | -0.30967  |
| 132824 | P03346 | Q9BRY0 | -0.65257  |
| 132825 | P03346 | Q6NUS6 | -0.3763   |
| 132826 | P03346 | O95661 | -0.457    |
| 132827 | P03346 | Q96LP4 | -0.1738   |
| 132828 | P03346 | Q9UQF0 | -0.42692  |
| 132829 | P03346 | Q6ZV70 | -0.19294  |
| 132830 | P03346 | Q8WY98 | -0.50365  |
| 132831 | P03346 | Q9UKN7 | -0.33823  |
| 132832 | P03346 | Q8IZC6 | -0.64398  |
| 132833 | P03346 | Q8N0Z9 | -0.50365  |
| 132834 | P03346 | P07202 | -0.77315  |
| 132835 | P03346 | Q86SM5 | -0.96376  |
| 132836 | P03346 | Q495B1 | -0.22741  |
| 132837 | P03346 | Q9BR09 | -0.15257  |
| 132838 | P03346 | P33993 | -0.22041  |
| 132839 | P03346 | Q6H9L7 | -0.23012  |
| 132840 | P03346 | Q6UWE0 | -0.22746  |
| 132841 | P03346 | Q5T035 | -0.064925 |
| 132842 | P03346 | O75952 | -0.13134  |
| 132843 | P03346 | Q9NZQ9 | -0.22603  |
| 132844 | P03346 | O75083 | -0.22744  |
| 132845 | P03346 | Q9UQ26 | -0.22741  |
| 132846 | P03346 | Q9H0B8 | -0.64399  |
| 132847 | P03346 | Q5BN46 | -0.1112   |
| 132848 | P03346 | Q5Y7A7 | -0.56914  |

|        |        |        |            |
|--------|--------|--------|------------|
| 132849 | P03346 | Q8NHC6 | -0.92763   |
| 132850 | P03346 | Q9UHB6 | -0.22706   |
| 132851 | P03346 | P10966 | -0.61252   |
| 132852 | P03346 | Q9BUY7 | -0.22651   |
| 132853 | P03346 | Q86UF2 | -0.39732   |
| 132854 | P03346 | O00168 | -0.84797   |
| 132855 | P03346 | Q12849 | -0.21824   |
| 132856 | P03346 | P01612 | -0.80078   |
| 132857 | P03346 | Q8WUX2 | -0.1559    |
| 132858 | P03346 | Q76LX8 | -0.37164   |
| 132859 | P03346 | Q8NE31 | -0.17901   |
| 132860 | P03346 | P28221 | -1.0029    |
| 132861 | P03346 | Q6ZUK4 | -0.50365   |
| 132862 | P03346 | Q7Z736 | -0.25699   |
| 132863 | P03346 | P22079 | -0.84802   |
| 132864 | P03346 | P33947 | -0.13611   |
| 132865 | P03346 | P63131 | -0.23811   |
| 132866 | P03346 | O15393 | -1.3701    |
| 132867 | P03346 | Q8NFY4 | -0.44805   |
| 132868 | P03346 | Q9H1P6 | -0.19809   |
| 132869 | P03346 | Q95450 | -0.89833   |
| 132870 | P03346 | Q96N46 | -0.22649   |
| 132871 | P03346 | Q9NYQ7 | -0.75247   |
| 132872 | P03346 | P29034 | -0.23006   |
| 132873 | P03346 | Q6UWH6 | -0.41544   |
| 132874 | P03346 | Q7L5Y1 | -0.20646   |
| 132875 | P03346 | Q9BTD3 | -0.30782   |
| 132876 | P03346 | Q14975 | -0.65406   |
| 132877 | P03346 | P98082 | -0.22724   |
| 132878 | P03346 | O95563 | -0.36428   |
| 132879 | P03346 | P0CB43 | -0.0973    |
| 132880 | P03346 | Q9UL01 | -0.22301   |
| 132881 | P03346 | Q8N6N2 | -0.20023   |
| 132882 | P03346 | O14640 | -0.2041    |
| 132883 | P03346 | Q9H8X3 | -0.16521   |
| 132884 | P03346 | P63252 | -1.0312    |
| 132885 | P03346 | Q9BQI7 | -0.67603   |
| 132886 | P03346 | Q9NQ25 | -0.66015   |
| 132887 | P03346 | Q86UK7 | -0.30279   |
| 132888 | P03346 | A6NF83 | -0.0011518 |
| 132889 | P03346 | B3KVV0 | -0.50365   |
| 132890 | P03346 | Q86VB7 | -0.7314    |
| 132891 | P03346 | P0C1H6 | -0.18486   |
| 132892 | P03346 | P42696 | -0.22725   |
| 132893 | P03346 | Q9UBH6 | -0.84583   |
| 132894 | P03346 | P36382 | -0.66393   |
| 132895 | P03346 | Q96PZ7 | -0.50365   |
| 132896 | P03346 | Q7Z6K5 | -0.1683    |
| 132897 | P03346 | Q9NS67 | -0.96376   |
| 132898 | P03346 | A6NMK7 | -0.22426   |
| 132899 | P03346 | P54851 | -0.51543   |
| 132900 | P03346 | O00341 | -0.66639   |
| 132901 | P03346 | O15382 | -0.17467   |
| 132902 | P03346 | P22004 | -0.46669   |
| 132903 | P03346 | P62070 | -0.56017   |
| 132904 | P03346 | Q5T1J6 | -0.18563   |
| 132905 | P03346 | Q6MZM9 | -0.53519   |
| 132906 | P03346 | P52907 | -0.22633   |
| 132907 | P03346 | Q6VAB6 | -0.31861   |
| 132908 | P03346 | Q8IZJ0 | -0.70114   |
| 132909 | P03346 | Q86TA4 | -0.15289   |
| 132910 | P03346 | A5D8T8 | -0.53541   |
| 132911 | P03346 | Q9UPN4 | -0.19636   |
| 132912 | P03346 | O60613 | -0.038131  |
| 132913 | P03346 | P0CW24 | -0.10374   |
| 132914 | P03346 | Q9Y366 | -0.14122   |
| 132915 | P03346 | P08172 | -0.74644   |
| 132916 | P03346 | Q17RC7 | -0.070949  |
| 132917 | P03346 | Q8WXF3 | -0.49272   |
| 132918 | P03346 | P35626 | -0.95105   |
| 132919 | P03346 | P26885 | -0.2283    |
| 132920 | P03346 | Q9BQE6 | -0.05352   |
| 132921 | P03346 | A8MZ97 | -0.50365   |
| 132922 | P03346 | Q96E35 | -0.2253    |
| 132923 | P03346 | Q15063 | -0.88807   |
| 132924 | P03346 | Q9NZD2 | -0.15836   |

|        |        |        |            |
|--------|--------|--------|------------|
| 132925 | P03346 | O15400 | -0.59701   |
| 132926 | P03346 | Q15761 | -0.74693   |
| 132927 | P03346 | Q9Y2G0 | -0.096671  |
| 132928 | P03346 | Q15072 | -0.90124   |
| 132929 | P03346 | Q8N3G9 | -0.34727   |
| 132930 | P03346 | Q8NGA2 | -0.92763   |
| 132931 | P03346 | Q14353 | -0.17648   |
| 132932 | P03346 | Q9NS28 | -0.36444   |
| 132933 | P03346 | Q9UMR3 | -0.6638    |
| 132934 | P03346 | Q08289 | -0.22728   |
| 132935 | P03346 | Q95944 | -0.93686   |
| 132936 | P03346 | Q400G9 | -0.4777    |
| 132937 | P03346 | Q5W1A9 | -0.0099555 |
| 132938 | P03346 | Q7Z4P5 | -0.22741   |
| 132939 | P03346 | Q6UX98 | -0.59087   |
| 132940 | P03346 | P42830 | -0.87427   |
| 132941 | P03346 | Q8NGR6 | -0.92763   |
| 132942 | P03346 | Q96E52 | -0.59766   |
| 132943 | P03346 | Q9NRG7 | -0.43248   |
| 132944 | P03346 | Q8NFA0 | -0.46434   |
| 132945 | P03346 | Q5U5R9 | -0.22811   |
| 132946 | P03346 | Q9NUY8 | -0.56151   |
| 132947 | P03346 | Q96MV8 | -0.53754   |
| 132948 | P03346 | A8K855 | -0.22723   |
| 132949 | P03346 | Q7Z692 | -0.50365   |
| 132950 | P03346 | P17643 | -0.2746    |
| 132951 | P03346 | Q9Y2B2 | -0.56389   |
| 132952 | P03346 | Q8NHU3 | -0.60362   |
| 132953 | P03346 | Q6IQ19 | -0.04117   |
| 132954 | P03346 | A8MV81 | -0.50365   |
| 132955 | P03346 | Q6XZB0 | -1.0112    |
| 132956 | P03346 | Q96QH8 | -0.555     |
| 132957 | P03346 | Q6NT52 | -0.52424   |
| 132958 | P03346 | Q6ZNA5 | -0.70308   |
| 132959 | P03346 | Q9H0R4 | -0.21772   |
| 132960 | P03346 | Q0P140 | -0.15592   |
| 132961 | P03346 | Q8TC92 | -1.1958    |
| 132962 | P03346 | Q60704 | -0.39808   |
| 132963 | P03346 | P28340 | -0.23801   |
| 132964 | P03346 | Q86U17 | -0.45356   |
| 132965 | P03346 | P55851 | -0.27561   |
| 132966 | P03346 | Q8NA29 | -0.74103   |
| 132967 | P03346 | Q13823 | -0.16577   |
| 132968 | P03346 | P18462 | -0.51191   |
| 132969 | P03346 | Q8NHY0 | -0.4003    |
| 132970 | P03346 | P43088 | -1.1826    |
| 132971 | P03346 | Q9H0J9 | -0.22345   |
| 132972 | P03346 | Q92747 | -0.2274    |
| 132973 | P03346 | Q6ZW35 | -0.21978   |
| 132974 | P03346 | Q9Y2T3 | -0.18034   |
| 132975 | P03346 | Q8IU57 | -0.26308   |
| 132976 | P03346 | Q8N3J2 | -0.12678   |
| 132977 | P03346 | Q9NW82 | -0.22741   |
| 132978 | P03346 | P98175 | -0.21983   |
| 132979 | P03346 | Q52LJ0 | -0.10752   |
| 132980 | P03346 | Q9UQ10 | -0.52432   |
| 132981 | P03346 | Q14406 | -0.48875   |
| 132982 | P03346 | Q5TAA0 | -0.18506   |
| 132983 | P03346 | O15438 | -0.94239   |
| 132984 | P03346 | Q6ZTC4 | -0.013652  |
| 132985 | P03346 | O15492 | -0.2275    |
| 132986 | P03346 | Q95696 | -0.22622   |
| 132987 | P03346 | Q5T5C0 | -0.22741   |
| 132988 | P03346 | P81277 | -0.33745   |
| 132989 | P03346 | Q8TE56 | -0.93222   |
| 132990 | P03346 | E7EU14 | -0.23035   |
| 132991 | P03346 | Q5JX69 | -0.50365   |
| 132992 | P03346 | A6NCS6 | -0.14205   |
| 132993 | P03346 | Q43414 | -0.26985   |
| 132994 | P03346 | Q96EM0 | -0.22645   |
| 132995 | P03346 | Q6U736 | -0.8708    |
| 132996 | P03346 | A6NCL2 | -0.21804   |
| 132997 | P03346 | Q8N9P0 | -0.10955   |
| 132998 | P03346 | Q8TDX9 | -0.39513   |
| 132999 | P03346 | Q14390 | -0.22824   |
| 133000 | P03346 | P29508 | -0.30606   |

|        |        |        |           |
|--------|--------|--------|-----------|
| 133001 | P03346 | Q8IYT3 | -0.22117  |
| 133002 | P03346 | Q8WTQ7 | -1.0898   |
| 133003 | P03346 | Q0P6D2 | -0.63608  |
| 133004 | P03346 | Q8N127 | -0.92763  |
| 133005 | P03346 | P39210 | -0.34045  |
| 133006 | P03346 | Q6PGQ1 | -0.025165 |
| 133007 | P03346 | Q9NY26 | -0.77331  |
| 133008 | P03346 | Q8TAQ9 | -0.49541  |
| 133009 | P03346 | P31323 | -0.22739  |
| 133010 | P03346 | Q6ZMD2 | -0.59652  |
| 133011 | P03346 | P20742 | -0.63733  |
| 133012 | P03346 | Q63HN8 | -0.47163  |
| 133013 | P03346 | P20336 | -0.26062  |
| 133014 | P03346 | Q9BTX3 | -0.50365  |
| 133015 | P03346 | P16581 | -0.27894  |
| 133016 | P03346 | Q5SNT2 | -0.19206  |
| 133017 | P03346 | Q9NQW7 | -0.21563  |
| 133018 | P03346 | Q8TEU8 | -0.44842  |
| 133019 | P03346 | Q5JVL4 | -0.22659  |
| 133020 | P03346 | P02649 | -0.25116  |
| 133021 | P03346 | Q96L11 | -0.53519  |
| 133022 | P03346 | O95158 | -0.4177   |
| 133023 | P03346 | P53602 | -0.37791  |
| 133024 | P03346 | O75309 | -0.86699  |
| 133025 | P03346 | Q8NGJ8 | -0.92763  |
| 133026 | P03346 | Q13885 | -0.31712  |
| 133027 | P03346 | Q9BYX2 | -0.3099   |
| 133028 | P03346 | P0CW00 | -0.10548  |
| 133029 | P03346 | Q8WUA7 | -0.8773   |
| 133030 | P03346 | P08069 | -0.45855  |
| 133031 | P03346 | Q9NRP4 | -0.19367  |
| 133032 | P03346 | Q8WV93 | -0.37512  |
| 133033 | P03346 | Q9UF02 | -0.54952  |
| 133034 | P03346 | P40617 | -0.22751  |
| 133035 | P03346 | O00175 | -0.75383  |
| 133036 | P03346 | Q8N3D4 | -0.22776  |
| 133037 | P03346 | Q7Z444 | -1.0183   |
| 133038 | P03346 | Q9Y446 | -0.22779  |
| 133039 | P03346 | Q5RIA9 | -0.48833  |
| 133040 | P03346 | Q02363 | -0.22749  |
| 133041 | P03346 | Q9Y5S1 | -0.59843  |
| 133042 | P03346 | Q8N104 | -0.52229  |
| 133043 | P03346 | P47874 | -0.15541  |
| 133044 | P03346 | Q2M3R5 | -0.50365  |
| 133045 | P03346 | Q69YU5 | -0.53519  |
| 133046 | P03346 | O95267 | -0.53429  |
| 133047 | P03346 | Q5T8D3 | -0.62521  |
| 133048 | P03346 | Q9NRA0 | -0.30087  |
| 133049 | P03346 | Q5VTE0 | -0.27982  |
| 133050 | P03346 | Q6UB28 | -0.26205  |
| 133051 | P03346 | O76000 | -0.92763  |
| 133052 | P03346 | Q8IZV2 | -0.67729  |
| 133053 | P03346 | Q8TBB0 | -0.18541  |
| 133054 | P03346 | Q9BU20 | -0.68012  |
| 133055 | P03346 | O60240 | -0.22877  |
| 133056 | P03346 | Q9P035 | -0.9324   |
| 133057 | P03346 | Q02325 | -0.53519  |
| 133058 | P03346 | Q8WZ82 | -0.19841  |
| 133059 | P03346 | Q6IQ49 | -0.11924  |
| 133060 | P03346 | Q8N5M4 | -0.22703  |
| 133061 | P03346 | Q99665 | -0.61129  |
| 133062 | P03346 | Q8IW52 | -0.5909   |
| 133063 | P03346 | P56975 | -1.0499   |
| 133064 | P03346 | Q0VAA2 | -0.22741  |
| 133065 | P03346 | A6NNZ2 | -0.42989  |
| 133066 | P03346 | Q99218 | -0.71033  |
| 133067 | P03346 | Q8N5C6 | -0.2      |
| 133068 | P03346 | P62760 | -0.23186  |
| 133069 | P03346 | Q2M1P5 | -0.24502  |
| 133070 | P03346 | P0C7N4 | -0.50365  |
| 133071 | P03346 | P0CG22 | -0.63856  |
| 133072 | P03346 | Q9Y4X1 | -0.56122  |
| 133073 | P03346 | Q8NHB1 | -0.92763  |
| 133074 | P03346 | Q14761 | -0.64406  |
| 133075 | P03346 | P01236 | -0.54871  |
| 133076 | P03346 | P0CG43 | -0.013652 |

|        |        |        |           |
|--------|--------|--------|-----------|
| 133077 | P03346 | Q15762 | -0.4804   |
| 133078 | P03346 | P00918 | -0.22618  |
| 133079 | P03346 | Q9C0G6 | -0.49947  |
| 133080 | P03346 | Q9NP70 | -0.6859   |
| 133081 | P03346 | Q8WZ64 | -0.72874  |
| 133082 | P03346 | Q8N608 | -0.65612  |
| 133083 | P03346 | O60512 | -0.22347  |
| 133084 | P03346 | Q6YFQ2 | -0.18659  |
| 133085 | P03346 | Q86V25 | -0.19475  |
| 133086 | P03346 | Q9H819 | -0.54308  |
| 133087 | P03346 | Q9HB63 | -0.67798  |
| 133088 | P03346 | Q6UXN2 | -0.53519  |
| 133089 | P03346 | Q96HZ7 | -0.013652 |
| 133090 | P03346 | Q8N8G6 | -0.15487  |
| 133091 | P03346 | Q5DX21 | -0.80492  |
| 133092 | P03346 | A7MBM2 | -0.34213  |
| 133093 | P03346 | Q96MN2 | -0.48833  |
| 133094 | P03346 | Q12851 | -0.23177  |
| 133095 | P03346 | Q92598 | -0.24423  |
| 133096 | P03346 | Q13214 | -0.67732  |
| 133097 | P03346 | Q7L775 | -0.16067  |
| 133098 | P03346 | Q5QJU3 | -0.20313  |
| 133099 | P03346 | Q0ZLH3 | -0.15725  |
| 133100 | P03346 | Q7Z449 | -0.84503  |
| 133101 | P03346 | Q13641 | -0.63876  |
| 133102 | P03346 | Q8WZ60 | -0.14128  |
| 133103 | P03346 | Q8N4C9 | -0.50365  |
| 133104 | P03346 | Q6ZRH9 | -0.013652 |
| 133105 | P03346 | Q8IVF6 | -0.22739  |
| 133106 | P03346 | Q8IZ07 | -0.22741  |
| 133107 | P03346 | Q86VU5 | -0.29279  |
| 133108 | P03346 | Q7Z7L1 | -0.29317  |
| 133109 | P03346 | Q99798 | -0.2059   |
| 133110 | P03346 | Q8IZR5 | -0.67729  |
| 133111 | P03346 | Q9Y5G6 | -0.86699  |
| 133112 | P03346 | Q4AC94 | -0.16476  |
| 133113 | P03346 | Q5TC84 | -0.10533  |
| 133114 | P03346 | C9J6K1 | -0.065131 |
| 133115 | P03346 | O95477 | -0.38215  |
| 133116 | P03346 | P21397 | -0.52755  |
| 133117 | P03346 | Q9UPM6 | -0.22741  |
| 133118 | P03346 | Q2TAP0 | -0.13641  |
| 133119 | P03346 | A6NM15 | -0.48833  |
| 133120 | P03346 | Q9HBI5 | -0.22207  |
| 133121 | P03346 | Q9UIK5 | -0.93684  |
| 133122 | P03346 | P84074 | -0.25736  |
| 133123 | P03346 | P26718 | -0.37053  |
| 133124 | P03346 | Q13434 | -0.22272  |
| 133125 | P03346 | P16104 | -0.27478  |
| 133126 | P03346 | Q8N628 | -0.92763  |
| 133127 | P03346 | Q496J9 | -0.4477   |
| 133128 | P03346 | Q5T7R7 | -0.50365  |
| 133129 | P03346 | Q96BM1 | -0.22741  |
| 133130 | P03346 | P06331 | -0.80078  |
| 133131 | P03346 | Q86X51 | -0.10443  |
| 133132 | P03346 | Q86XQ3 | -0.75795  |
| 133133 | P03346 | P20933 | -0.16266  |
| 133134 | P03346 | Q8NES8 | -0.52229  |
| 133135 | P03346 | P17302 | -0.24851  |
| 133136 | P03346 | Q01718 | -0.60026  |
| 133137 | P03346 | Q8WWQ8 | -0.56626  |
| 133138 | P03346 | Q9UNG2 | -0.70075  |
| 133139 | P03346 | Q9UKI3 | -0.24804  |
| 133140 | P03346 | Q5SVJ3 | -0.099279 |
| 133141 | P03346 | P98088 | -0.73048  |
| 133142 | P03346 | C9J302 | -0.034364 |
| 133143 | P03346 | Q8IZF5 | -1.0077   |
| 133144 | P03346 | P54368 | -0.14082  |
| 133145 | P03346 | Q9BPX5 | -0.21278  |
| 133146 | P03346 | Q8NGL3 | -0.92763  |
| 133147 | P03346 | Q99518 | -0.67061  |
| 133148 | P03346 | P51911 | -0.22236  |
| 133149 | P03346 | Q6UX01 | -0.72416  |
| 133150 | P03346 | Q8N4L4 | -0.63177  |
| 133151 | P03346 | Q695T7 | -0.78377  |
| 133152 | P03346 | Q8IXL6 | -0.71313  |

|        |        |        |           |
|--------|--------|--------|-----------|
| 133153 | P03346 | Q8NGL7 | -0.92763  |
| 133154 | P03346 | Q6ZUT6 | -0.12698  |
| 133155 | P03346 | Q96LC7 | -1.2857   |
| 133156 | P03346 | P04279 | -0.17469  |
| 133157 | P03346 | Q9NY91 | -0.56215  |
| 133158 | P03346 | Q9NSI5 | -0.22767  |
| 133159 | P03346 | P60321 | -0.14182  |
| 133160 | P03346 | P23942 | -0.68186  |
| 133161 | P03346 | O75165 | -0.21725  |
| 133162 | P03346 | P0CK96 | -0.50365  |
| 133163 | P03346 | Q9NYY8 | -0.13106  |
| 133164 | P03346 | Q9NS75 | -0.88626  |
| 133165 | P03346 | Q9Y5G2 | -0.86699  |
| 133166 | P03346 | Q9BTX7 | -0.22209  |
| 133167 | P03346 | A6NGN4 | -0.14935  |
| 133168 | P03346 | Q8NHR7 | -0.1481   |
| 133169 | P03346 | Q13410 | -1.1578   |
| 133170 | P03346 | Q8IWB7 | -0.22742  |
| 133171 | P03346 | P15502 | -0.07635  |
| 133172 | P03346 | P17658 | -0.56863  |
| 133173 | P03346 | O75899 | -0.66198  |
| 133174 | P03346 | O43761 | -0.4223   |
| 133175 | P03346 | Q7RTZ2 | -0.24386  |
| 133176 | P03346 | A0AVI4 | -0.30782  |
| 133177 | P03346 | Q96AP7 | -0.55528  |
| 133178 | P03346 | Q008S8 | -0.29319  |
| 133179 | P03346 | Q5TG53 | -0.013652 |
| 133180 | P03346 | Q96KK3 | -0.22844  |
| 133181 | P03346 | P61568 | -0.17445  |
| 133182 | P03346 | Q12794 | -0.34687  |
| 133183 | P03346 | Q05BV3 | -0.22748  |
| 133184 | P03346 | Q8NGB8 | -0.92763  |
| 133185 | P03346 | Q9NR45 | -0.19491  |
| 133186 | P03346 | Q9H2G2 | -0.84016  |
| 133187 | P03346 | Q3KQZ1 | -0.36428  |
| 133188 | P03346 | Q96SY0 | -0.15376  |
| 133189 | P03346 | Q9UKF5 | -0.82518  |
| 133190 | P03346 | O75144 | -0.83966  |
| 133191 | P03346 | P61224 | -0.2275   |
| 133192 | P03346 | Q8WZ94 | -0.92763  |
| 133193 | P03346 | Q7Z4B0 | -0.53519  |
| 133194 | P03346 | Q5VT99 | -0.74596  |
| 133195 | P03346 | Q9H6K1 | -0.18175  |
| 133196 | P03346 | Q96QU6 | -0.22505  |
| 133197 | P03346 | Q8N8H1 | -0.046532 |
| 133198 | P03346 | Q9UN86 | -0.47755  |
| 133199 | P03346 | P15954 | -0.28603  |
| 133200 | P03346 | P13598 | -0.86817  |
| 133201 | P03346 | Q2M389 | -0.17006  |
| 133202 | P03346 | A6NEW6 | -0.25339  |
| 133203 | P03346 | Q8TCC7 | -0.56266  |
| 133204 | P03346 | Q8N3C7 | -0.22741  |
| 133205 | P03346 | O75420 | -0.063301 |
| 133206 | P03346 | Q15018 | -0.11561  |
| 133207 | P03346 | Q12882 | -0.39193  |
| 133208 | P03346 | Q14894 | -0.20633  |
| 133209 | P03346 | Q9NPF8 | -0.52715  |
| 133210 | P03346 | Q9UQP3 | -0.74508  |
| 133211 | P03346 | Q96EP9 | -0.60273  |
| 133212 | P03346 | Q96IR7 | -0.31361  |
| 133213 | P03346 | Q8TCZ2 | -0.74159  |
| 133214 | P03346 | Q9NSY2 | -0.23154  |
| 133215 | P03346 | Q6ZSG2 | -0.090913 |
| 133216 | P03346 | Q8IVM8 | -0.48129  |
| 133217 | P03346 | Q9UH62 | -0.37987  |
| 133218 | P03346 | P43627 | -0.66353  |
| 133219 | P03346 | Q8WWG9 | -0.66282  |
| 133220 | P03346 | Q96JP9 | -0.90916  |
| 133221 | P03346 | P69849 | -0.49635  |
| 133222 | P03346 | Q8N1F8 | -0.2274   |
| 133223 | P03346 | Q9UNK0 | -0.59436  |
| 133224 | P03346 | P15088 | -0.41266  |
| 133225 | P03346 | A6NME0 | -0.038239 |
| 133226 | P03346 | Q8WW27 | -0.56994  |
| 133227 | P03346 | Q8NHU2 | -0.17772  |
| 133228 | P03346 | A6NGZ8 | -0.65219  |

|        |        |        |           |
|--------|--------|--------|-----------|
| 133229 | P03346 | P58397 | -0.93222  |
| 133230 | P03346 | Q13571 | -0.72962  |
| 133231 | P03346 | O75900 | -1.0349   |
| 133232 | P03346 | Q8IXZ3 | -0.21419  |
| 133233 | P03346 | O60218 | -0.24422  |
| 133234 | P03346 | Q8IX95 | -0.19473  |
| 133235 | P03346 | P16442 | -0.75735  |
| 133236 | P03346 | Q9Y698 | -0.33941  |
| 133237 | P03346 | Q9H1X3 | -0.54308  |
| 133238 | P03346 | O95398 | -0.35102  |
| 133239 | P03346 | Q08629 | -0.64295  |
| 133240 | P03346 | Q86YJ7 | -0.22741  |
| 133241 | P03346 | P01011 | -0.11358  |
| 133242 | P03346 | Q8IVL1 | -0.41557  |
| 133243 | P03346 | Q92536 | -0.75211  |
| 133244 | P03346 | P18577 | -0.61639  |
| 133245 | P03346 | Q9H095 | -0.072605 |
| 133246 | P03346 | Q5HYA8 | -0.23056  |
| 133247 | P03346 | Q02880 | -0.21633  |
| 133248 | P03346 | Q7RTY9 | -0.74693  |
| 133249 | P03346 | P05013 | -0.5325   |
| 133250 | P03346 | Q96AY3 | -0.22756  |
| 133251 | P03346 | Q9Y4R7 | -0.15934  |
| 133252 | P03346 | Q86TY3 | -0.50365  |
| 133253 | P03346 | O43716 | -0.29407  |
| 133254 | P03346 | Q6P4Q7 | -0.80006  |
| 133255 | P03346 | Q8N6L1 | -0.30535  |
| 133256 | P03346 | Q14559 | -0.2531   |
| 133257 | P03346 | B2RN74 | -0.92763  |
| 133258 | P03346 | Q9H799 | -0.50365  |
| 133259 | P03346 | Q499Z3 | -0.48833  |
| 133260 | P03346 | P47804 | -0.51682  |
| 133261 | P03346 | Q13011 | -0.20658  |
| 133262 | P03346 | Q05932 | -0.12798  |
| 133263 | P03346 | P49146 | -0.90741  |
| 133264 | P03346 | Q8TDM6 | -0.25427  |
| 133265 | P03346 | Q99678 | -1.0977   |
| 133266 | P03346 | P04207 | -0.80078  |
| 133267 | P03346 | Q5TG30 | -0.6787   |
| 133268 | P03346 | Q8TDY8 | -0.65219  |
| 133269 | P03346 | P20039 | -0.63421  |
| 133270 | P03346 | H3BQB6 | -0.18855  |
| 133271 | P03346 | Q9P1V8 | -0.22587  |
| 133272 | P03346 | O75600 | -0.1887   |
| 133273 | P03346 | Q03013 | -0.22667  |
| 133274 | P03346 | Q16540 | -0.091077 |
| 133275 | P03346 | P18858 | -0.21666  |
| 133276 | P03346 | P11597 | -0.55198  |
| 133277 | P03346 | O75976 | -0.51165  |
| 133278 | P03346 | Q9NWX5 | -0.2274   |
| 133279 | P03346 | Q7Z403 | -0.63608  |
| 133280 | P03346 | Q587I9 | -0.19221  |
| 133281 | P03346 | Q8WTQ1 | -0.52229  |
| 133282 | P03346 | O14513 | -0.077614 |
| 133283 | P03346 | O75106 | -0.39346  |
| 133284 | P03346 | P23458 | -0.40655  |
| 133285 | P03346 | Q9NUD9 | -0.56452  |
| 133286 | P03346 | Q504Y2 | -0.62858  |
| 133287 | P03346 | Q8NFP7 | -0.18038  |
| 133288 | P03346 | Q9Y2D5 | -0.13879  |
| 133289 | P03346 | Q9UIR0 | -0.50365  |
| 133290 | P03346 | Q96LL3 | -0.50365  |
| 133291 | P03346 | Q9Y6C5 | -0.49412  |
| 133292 | P03346 | P24530 | -0.65332  |
| 133293 | P03346 | Q96M34 | -0.15644  |
| 133294 | P03346 | A6NGR9 | -0.079848 |
| 133295 | P03346 | O43448 | -0.52808  |
| 133296 | P03346 | P42858 | -0.19644  |
| 133297 | P03346 | Q9P2R3 | -0.22741  |
| 133298 | P03346 | Q8NAM6 | -0.1751   |
| 133299 | P03346 | A8MW92 | -0.1964   |
| 133300 | P03346 | Q15034 | -0.26356  |
| 133301 | P03346 | A6NKT7 | -0.22443  |
| 133302 | P03346 | Q9UBM1 | -0.3308   |
| 133303 | P03346 | Q9BZX4 | -0.15288  |
| 133304 | P03346 | Q9H342 | -0.92763  |

|        |        |        |           |
|--------|--------|--------|-----------|
| 133305 | P03346 | P10109 | -0.14816  |
| 133306 | P03346 | P08254 | -0.61153  |
| 133307 | P03346 | P18464 | -0.76151  |
| 133308 | P03346 | O00548 | -0.43133  |
| 133309 | P03346 | O75173 | -0.56226  |
| 133310 | P03346 | P51955 | -0.22741  |
| 133311 | P03346 | Q9HBD1 | -0.22739  |
| 133312 | P03346 | Q7Z572 | -0.22715  |
| 133313 | P03346 | Q16563 | -0.5639   |
| 133314 | P03346 | Q96HR9 | -0.50365  |
| 133315 | P03346 | O95013 | -0.92763  |
| 133316 | P03346 | Q9BV81 | -0.49516  |
| 133317 | P03346 | Q6UX71 | -0.25594  |
| 133318 | P03346 | Q14524 | -0.24323  |
| 133319 | P03346 | Q29980 | -0.61285  |
| 133320 | P03346 | P33241 | -0.556    |
| 133321 | P03346 | O14753 | -0.22502  |
| 133322 | P03346 | Q7Z5H3 | -0.25123  |
| 133323 | P03346 | Q6Y2X3 | -0.22402  |
| 133324 | P03346 | Q8N912 | -0.50365  |
| 133325 | P03346 | Q5T890 | -0.21774  |
| 133326 | P03346 | Q9NP81 | -0.10997  |
| 133327 | P03346 | P06326 | -0.80078  |
| 133328 | P03346 | P48449 | -0.28354  |
| 133329 | P03346 | Q86UD7 | -0.92582  |
| 133330 | P03346 | Q9UK55 | -0.31765  |
| 133331 | P03346 | P41595 | -0.37437  |
| 133332 | P03346 | Q8WTU0 | -0.17954  |
| 133333 | P03346 | P83105 | -0.97219  |
| 133334 | P03346 | Q8WXH2 | -0.60978  |
| 133335 | P03346 | Q9UPE1 | -0.858    |
| 133336 | P03346 | P20366 | -0.65385  |
| 133337 | P03346 | P12882 | -0.102    |
| 133338 | P03346 | P08684 | -0.47071  |
| 133339 | P03346 | Q3MIX3 | -0.63935  |
| 133340 | P03346 | Q5GAN3 | -0.4686   |
| 133341 | P03346 | Q8N9G6 | -0.014392 |
| 133342 | P03346 | P04208 | -0.80078  |
| 133343 | P03346 | O75264 | -0.50365  |
| 133344 | P03346 | Q15771 | -0.81699  |
| 133345 | P03346 | Q8TBE7 | -0.41099  |
| 133346 | P03346 | O96001 | -0.27254  |
| 133347 | P03346 | B1AL88 | -0.50365  |
| 133348 | P03346 | Q9H553 | -0.22357  |
| 133349 | P03346 | Q15218 | -0.99123  |
| 133350 | P03346 | Q12934 | -0.25906  |
| 133351 | P03346 | Q6BAA4 | -0.22852  |
| 133352 | P03346 | Q9H5X1 | -0.16029  |
| 133353 | P03346 | Q99697 | -0.21509  |
| 133354 | P03346 | Q86X19 | -0.64487  |
| 133355 | P03346 | Q9UEE5 | -0.53991  |
| 133356 | P03346 | Q14952 | -0.78491  |
| 133357 | P03346 | Q15403 | -0.72524  |
| 133358 | P03346 | Q9ULX7 | -0.63017  |
| 133359 | P03346 | O60890 | -0.52734  |
| 133360 | P03346 | Q9H8J5 | -0.50365  |
| 133361 | P03346 | Q96NT5 | -0.28436  |
| 133362 | P03346 | P58743 | -0.58142  |
| 133363 | P03346 | P00488 | -0.28179  |
| 133364 | P03346 | A8MZ25 | -0.29915  |
| 133365 | P03346 | P42857 | -0.24632  |
| 133366 | P03346 | Q96P67 | -0.96376  |
| 133367 | P03346 | Q8N350 | -0.50365  |
| 133368 | P03346 | P51671 | -0.87234  |
| 133369 | P03346 | Q9Y5J9 | -0.039456 |
| 133370 | P03346 | Q02218 | -0.21919  |
| 133371 | P03346 | P05165 | -0.47392  |
| 133372 | P03346 | P01350 | -0.70394  |
| 133373 | P03346 | Q96C92 | -0.21163  |
| 133374 | P03346 | Q96PP8 | -0.48704  |
| 133375 | P03346 | Q6ZSK4 | -0.22911  |
| 133376 | P03346 | Q86W26 | -0.48833  |
| 133377 | P03346 | Q6ZMK1 | -0.20156  |
| 133378 | P03346 | Q9ULQ1 | -0.28313  |
| 133379 | P03346 | P60153 | -0.4686   |
| 133380 | P03346 | Q8IZP6 | -0.22734  |



|        |        |        |            |
|--------|--------|--------|------------|
| 133381 | P03346 | O95393 | -0.22741   |
| 133382 | P03346 | P20930 | -0.20892   |
| 133383 | P03346 | O75955 | -0.20499   |
| 133384 | P03346 | Q01362 | -0.73515   |
| 133385 | P03346 | Q8NH48 | -0.92763   |
| 133386 | P03346 | P14207 | -0.73685   |
| 133387 | P03346 | O60259 | -0.34924   |
| 133388 | P03346 | Q6ZVU0 | -0.21336   |
| 133389 | P03346 | P78504 | -0.44557   |
| 133390 | P03346 | Q04118 | -0.51219   |
| 133391 | P03346 | Q6ZNB7 | -0.757     |
| 133392 | P03346 | O95749 | -0.2066    |
| 133393 | P03346 | Q8TCV5 | -0.50866   |
| 133394 | P03346 | Q9H4F1 | -0.22637   |
| 133395 | P03346 | P42126 | -0.20952   |
| 133396 | P03346 | O00764 | -0.22284   |
| 133397 | P03346 | P58180 | -0.92763   |
| 133398 | P03346 | Q7Z3B0 | -0.50365   |
| 133399 | P03346 | Q9UQM7 | -0.29339   |
| 133400 | P03346 | Q7Z6K4 | -0.22741   |
| 133401 | P03346 | P06702 | -0.22756   |
| 133402 | P03346 | Q7Z4I7 | -0.21369   |
| 133403 | P03346 | A6NJG2 | -0.22741   |
| 133404 | P03346 | Q96RW7 | -0.78545   |
| 133405 | P03346 | Q8TE54 | -0.34925   |
| 133406 | P03346 | Q5VXU1 | -0.65219   |
| 133407 | P03346 | Q96M94 | -0.095911  |
| 133408 | P03346 | Q96PE5 | -0.56035   |
| 133409 | P03346 | Q99489 | -0.21653   |
| 133410 | P03346 | Q8ND61 | -0.3113    |
| 133411 | P03346 | P23443 | -0.2174    |
| 133412 | P03346 | Q5VYM1 | -0.090508  |
| 133413 | P03346 | P54750 | -0.22687   |
| 133414 | P03346 | P01610 | -0.80078   |
| 133415 | P03346 | Q96FL9 | -0.33063   |
| 133416 | P03346 | A6NGH8 | -0.22741   |
| 133417 | P03346 | Q5VXU3 | -0.20171   |
| 133418 | P03346 | Q96MI6 | -0.20169   |
| 133419 | P03346 | Q9NPF0 | -0.50477   |
| 133420 | P03346 | P59046 | -0.22737   |
| 133421 | P03346 | P49675 | -0.2338    |
| 133422 | P03346 | Q96MF4 | -0.044018  |
| 133423 | P03346 | Q9H6E4 | -0.53519   |
| 133424 | P03346 | Q15746 | -0.37748   |
| 133425 | P03346 | Q8NGK1 | -0.92763   |
| 133426 | P03346 | Q4V9L6 | -0.30782   |
| 133427 | P03346 | Q2T9J0 | -0.32221   |
| 133428 | P03346 | Q8N8V8 | -0.50365   |
| 133429 | P03346 | Q86T23 | -0.15683   |
| 133430 | P03346 | Q9Y662 | -0.42378   |
| 133431 | P03346 | Q8TDQ0 | -0.50365   |
| 133432 | P03346 | Q96K17 | -0.0029479 |
| 133433 | P03346 | Q8N7N1 | -0.19747   |
| 133434 | P03346 | Q6ZS02 | -0.20342   |
| 133435 | P03346 | P09417 | -0.26942   |
| 133436 | P03346 | Q5EB52 | -0.74647   |
| 133437 | P03346 | Q9BV44 | -0.10812   |
| 133438 | P03346 | O75380 | -0.21247   |
| 133439 | P03346 | A4D256 | -0.51022   |
| 133440 | P03346 | O75027 | -0.58642   |
| 133441 | P03346 | Q7L576 | -0.17893   |
| 133442 | P03346 | Q5H8A3 | -0.48916   |
| 133443 | P03346 | Q5QGS0 | -0.17384   |
| 133444 | P03346 | Q8IZJ3 | -0.80421   |
| 133445 | P03346 | Q14807 | -0.24395   |
| 133446 | P03346 | A6NGJ6 | -0.30279   |
| 133447 | P03346 | A4D250 | -0.18118   |
| 133448 | P03346 | B4DZS4 | -0.077444  |
| 133449 | P03346 | P80192 | -0.32983   |
| 133450 | P03346 | A2RU49 | -0.17561   |
| 133451 | P03346 | Q08345 | -0.79997   |
| 133452 | P03346 | Q9NVP4 | -0.30279   |
| 133453 | P03346 | Q8WYN0 | -0.2055    |
| 133454 | P03346 | Q9NSC7 | -0.43552   |
| 133455 | P03346 | Q9UGT4 | -0.55202   |
| 133456 | P03346 | Q9H1X1 | -0.058619  |

|        |        |        |           |
|--------|--------|--------|-----------|
| 133457 | P03346 | Q9NVT9 | -0.1659   |
| 133458 | P03346 | Q9H172 | -0.98517  |
| 133459 | P03346 | Q96CH1 | -0.96376  |
| 133460 | P03346 | Q9P0S2 | -0.2247   |
| 133461 | P03346 | P42785 | -0.23263  |
| 133462 | P03346 | P41240 | -0.22742  |
| 133463 | P03346 | Q99714 | -0.22044  |
| 133464 | P03346 | Q9Y6N7 | -0.40127  |
| 133465 | P03346 | P46597 | -0.21381  |
| 133466 | P03346 | Q9H3Y8 | -0.23188  |
| 133467 | P03346 | Q7Z407 | -0.65219  |
| 133468 | P03346 | P18135 | -0.80078  |
| 133469 | P03346 | Q99720 | -0.45606  |
| 133470 | P03346 | Q8N2C7 | -0.50365  |
| 133471 | P03346 | Q9NQV5 | -0.20028  |
| 133472 | P03346 | Q43505 | -0.30223  |
| 133473 | P03346 | Q9NXA8 | -0.23828  |
| 133474 | P03346 | A4D161 | -0.25992  |
| 133475 | P03346 | P68366 | -0.40004  |
| 133476 | P03346 | Q31610 | -0.76151  |
| 133477 | P03346 | A8MUA0 | -0.11695  |
| 133478 | P03346 | P0CAP1 | -0.22178  |
| 133479 | P03346 | Q6PL24 | -0.3514   |
| 133480 | P03346 | Q9H6A9 | -0.50365  |
| 133481 | P03346 | Q9BXW3 | -0.013652 |
| 133482 | P03346 | Q7Z3E1 | -0.22101  |
| 133483 | P03346 | Q8N6M3 | -0.30421  |
| 133484 | P03346 | Q8NGA1 | -0.92763  |
| 133485 | P03346 | Q2M3G0 | -0.9925   |
| 133486 | P03346 | P30461 | -0.76151  |
| 133487 | P03346 | O95167 | -0.25973  |
| 133488 | P03346 | Q8N5B7 | -0.22292  |
| 133489 | P03346 | Q43280 | -0.23712  |
| 133490 | P03346 | O95208 | -0.19459  |
| 133491 | P03346 | A6NN92 | -0.6086   |
| 133492 | P03346 | Q96CM8 | -0.66387  |
| 133493 | P03346 | Q9UBI6 | -0.35395  |
| 133494 | P03346 | Q9ULI3 | -0.77015  |
| 133495 | P03346 | Q13557 | -0.58207  |
| 133496 | P03346 | Q96S06 | -0.40474  |
| 133497 | P03346 | P15529 | -0.4653   |
| 133498 | P03346 | Q9HA65 | -0.92582  |
| 133499 | P03346 | Q9UK61 | -0.010742 |
| 133500 | P03346 | Q96RP7 | -0.39574  |
| 133501 | P03346 | Q9P0S9 | -0.39675  |
| 133502 | P03346 | Q9P0S3 | -0.61849  |
| 133503 | P03346 | A6NHN0 | -0.59838  |
| 133504 | P03346 | P10645 | -0.49225  |
| 133505 | P03346 | P29144 | -0.19781  |
| 133506 | P03346 | Q6Y7W6 | -0.062324 |
| 133507 | P03346 | Q5JXM2 | -0.499    |
| 133508 | P03346 | Q05193 | -0.23189  |
| 133509 | P03346 | P08100 | -0.46605  |
| 133510 | P03346 | O95573 | -0.64858  |
| 133511 | P03346 | Q5SRI9 | -0.32644  |
| 133512 | P03346 | Q6P4F1 | -0.27986  |
| 133513 | P03346 | Q8N7X4 | -0.17751  |
| 133514 | P03346 | Q7Z5P9 | -0.57693  |
| 133515 | P03346 | A1IGU5 | -0.22741  |
| 133516 | P03346 | P62699 | -0.22168  |
| 133517 | P03346 | P14679 | -0.25307  |
| 133518 | P03346 | Q8TF72 | -0.2273   |
| 133519 | P03346 | Q9BXX5 | -0.10269  |
| 133520 | P03346 | Q9BRG2 | -0.39941  |
| 133521 | P03346 | P45877 | -0.12349  |
| 133522 | P03346 | Q8WU08 | -0.94145  |
| 133523 | P03346 | Q5SQ80 | -0.22741  |
| 133524 | P03346 | A6NEL3 | -0.17322  |
| 133525 | P03346 | P12314 | -0.48137  |
| 133526 | P03346 | Q8N6U2 | -0.04924  |
| 133527 | P03346 | O00587 | -0.65558  |
| 133528 | P03346 | C9JLR9 | -0.24111  |
| 133529 | P03346 | Q16772 | -0.2273   |
| 133530 | P03346 | Q9BPW4 | -0.76601  |
| 133531 | P03346 | P62685 | -0.21346  |
| 133532 | P03346 | P20155 | -0.53219  |

|        |        |        |           |
|--------|--------|--------|-----------|
| 133533 | P03346 | Q9NZP8 | -1.1475   |
| 133534 | P03346 | P17600 | -0.292    |
| 133535 | P03346 | P30455 | -0.62987  |
| 133536 | P03346 | Q75095 | -0.22741  |
| 133537 | P03346 | Q8WWR9 | -0.037916 |
| 133538 | P03346 | C9JVI0 | -0.36346  |
| 133539 | P03346 | Q5VTY9 | -1.2393   |
| 133540 | P03346 | Q8NG11 | -0.50365  |
| 133541 | P03346 | Q8NBV4 | -0.38478  |
| 133542 | P03346 | Q5VVK5 | -0.4235   |
| 133543 | P03346 | P40189 | -0.39776  |
| 133544 | P03346 | Q6F5E8 | -0.22631  |
| 133545 | P03346 | P78417 | -0.22701  |
| 133546 | P03346 | P78423 | -0.56852  |
| 133547 | P03346 | Q5JU00 | -0.22737  |
| 133548 | P03346 | A6NCV1 | -0.92763  |
| 133549 | P03346 | O43426 | -0.22734  |
| 133550 | P03346 | Q9UHI8 | -0.88559  |
| 133551 | P03346 | Q97980 | -0.14514  |
| 133552 | P03346 | Q8IX18 | -0.51573  |
| 133553 | P03346 | Q7L014 | -0.31961  |
| 133554 | P03346 | A8MW95 | -0.16513  |
| 133555 | P03346 | Q9HAC7 | -0.19828  |
| 133556 | P03346 | Q6PII5 | -0.13045  |
| 133557 | P03346 | A6NJZ7 | -0.2274   |
| 133558 | P03346 | Q9TNN7 | -0.76151  |
| 133559 | P03346 | P54707 | -0.79328  |
| 133560 | P03346 | Q8TBB5 | -0.22702  |
| 133561 | P03346 | Q8TBE9 | -0.21215  |
| 133562 | P03346 | Q9NVE7 | -0.47039  |
| 133563 | P03346 | Q08462 | -0.64941  |
| 133564 | P03346 | Q99807 | -0.13721  |
| 133565 | P03346 | P48507 | -0.20759  |
| 133566 | P03346 | Q7Z7F1 | -0.084371 |
| 133567 | P03346 | Q2TBF2 | -0.50365  |
| 133568 | P03346 | Q6ZQN7 | -0.83573  |
| 133569 | P03346 | Q9UBQ6 | -0.94814  |
| 133570 | P03346 | Q9HBH5 | -0.62715  |
| 133571 | P03346 | A6NKW6 | -0.50365  |
| 133572 | P03346 | Q6NVV9 | -0.23457  |
| 133573 | P03346 | Q8IWF9 | -0.22191  |
| 133574 | P03346 | Q6URK8 | -0.53519  |
| 133575 | P03346 | Q8N3J5 | -0.17826  |
| 133576 | P03346 | Q9Y6J3 | -0.14184  |
| 133577 | P03346 | O43852 | -0.22721  |
| 133578 | P03346 | Q14155 | -0.22742  |
| 133579 | P03346 | Q5W186 | -0.6083   |
| 133580 | P03346 | P62491 | -0.24951  |
| 133581 | P03346 | Q8NGI9 | -0.92763  |
| 133582 | P03346 | Q5T4H9 | -0.013652 |
| 133583 | P03346 | Q9Y585 | -0.92763  |
| 133584 | P03346 | A6NDS4 | -0.92582  |
| 133585 | P03346 | Q8TC44 | -0.22734  |
| 133586 | P03346 | Q5VZP5 | -0.28661  |
| 133587 | P03346 | Q8NE35 | -0.35728  |
| 133588 | P03346 | P86397 | -0.34768  |
| 133589 | P03346 | Q9NVQ4 | -0.2776   |
| 133590 | P03346 | O95988 | -0.24024  |
| 133591 | P03346 | Q96PC5 | -0.53519  |
| 133592 | P03346 | Q5SQS7 | -0.22741  |
| 133593 | P03346 | Q8N428 | -0.33416  |
| 133594 | P03346 | Q01851 | -0.22741  |
| 133595 | P03346 | Q13451 | -0.29272  |
| 133596 | P03346 | Q9H611 | -0.24891  |
| 133597 | P03346 | Q8N1Q1 | -0.22504  |
| 133598 | P03346 | E9PAV3 | -0.04757  |
| 133599 | P03346 | Q99643 | -0.27003  |
| 133600 | P03346 | Q9ULI4 | -0.28695  |
| 133601 | P03346 | Q6ZTQ4 | -0.86699  |
| 133602 | P03346 | Q9H6R3 | -0.57595  |
| 133603 | P03346 | A6NIR3 | -0.65984  |
| 133604 | P03346 | Q8IWZ6 | -0.2152   |
| 133605 | P03346 | Q6A555 | -0.22883  |
| 133606 | P03346 | Q16831 | -0.17551  |
| 133607 | P03346 | Q1L6U9 | -0.53519  |
| 133608 | P03346 | Q5T9Z0 | -0.50365  |

|        |        |        |           |
|--------|--------|--------|-----------|
| 133609 | P03346 | P49863 | -1.0507   |
| 133610 | P03346 | Q9UJ71 | -0.84581  |
| 133611 | P03346 | Q0Z7S8 | -0.21153  |
| 133612 | P03346 | Q5U4P2 | -0.67002  |
| 133613 | P03346 | P0C879 | -0.013652 |
| 133614 | P03346 | Q8NH87 | -0.92763  |
| 133615 | P03346 | Q96S07 | -0.013652 |
| 133616 | P03346 | Q2M385 | -0.50365  |
| 133617 | P03346 | Q9UKT6 | -0.20797  |
| 133618 | P03346 | P23415 | -0.39167  |
| 133619 | P03346 | Q9NWH7 | -0.84188  |
| 133620 | P03346 | P51659 | -0.50867  |
| 133621 | P03346 | Q49AH0 | -0.47935  |
| 133622 | P03346 | Q6IEU7 | -0.92763  |
| 133623 | P03346 | Q8IUA0 | -0.50866  |
| 133624 | P03346 | P56851 | -0.49935  |
| 133625 | P03346 | Q9NS82 | -0.76504  |
| 133626 | P03346 | A2RUQ5 | -0.12875  |
| 133627 | P03346 | Q86UN3 | -0.30202  |
| 133628 | P03346 | A6NCI4 | -0.53519  |
| 133629 | P03346 | Q7Z5R6 | -0.27471  |
| 133630 | P03346 | Q16288 | -0.86461  |
| 133631 | P03346 | C9J798 | -0.63599  |
| 133632 | P03346 | Q9BYS8 | -0.31395  |
| 133633 | P03346 | Q658N2 | -0.53349  |
| 133634 | P03346 | Q8N907 | -0.42523  |
| 133635 | P03346 | P0C0S8 | -0.36293  |
| 133636 | P03346 | Q96N64 | -0.22519  |
| 133637 | P03346 | Q9NPC1 | -1.1033   |
| 133638 | P03346 | O15178 | -0.29578  |
| 133639 | P03346 | O14958 | -0.25162  |
| 133640 | P03346 | O95825 | -0.47685  |
| 133641 | P03346 | P21108 | -0.53671  |
| 133642 | P03346 | O95789 | -0.092444 |
| 133643 | P03346 | Q96A59 | -0.3782   |
| 133644 | P03346 | Q9HD67 | -0.36215  |
| 133645 | P03346 | Q02045 | -0.22732  |
| 133646 | P03346 | Q96K49 | -0.50365  |
| 133647 | P03346 | Q155Q3 | -0.22741  |
| 133648 | P03346 | Q9BZK3 | -0.065574 |
| 133649 | P03346 | Q5XXA6 | -0.59814  |
| 133650 | P03346 | Q5VT40 | -0.068368 |
| 133651 | P03346 | P10398 | -0.24526  |
| 133652 | P03346 | Q02985 | -0.65384  |
| 133653 | P03346 | Q9H6Y7 | -0.23069  |
| 133654 | P03346 | Q8TDL5 | -0.78587  |
| 133655 | P03346 | Q96EE4 | -0.53519  |
| 133656 | P03346 | O95502 | -0.75613  |
| 133657 | P03346 | P48664 | -0.78177  |
| 133658 | P03346 | P08F94 | -0.22794  |
| 133659 | P03346 | Q96R08 | -0.92763  |
| 133660 | P03346 | Q9NS68 | -0.40143  |
| 133661 | P03346 | Q5GFL6 | -0.64834  |
| 133662 | P03346 | Q96PV4 | -0.17559  |
| 133663 | P03346 | P04435 | -0.23306  |
| 133664 | P03346 | Q9UNZ2 | -0.31261  |
| 133665 | P03346 | Q4V326 | -0.24641  |
| 133666 | P03346 | Q02750 | -0.22748  |
| 133667 | P03346 | P29274 | -0.27532  |
| 133668 | P03346 | Q96A46 | -0.51778  |
| 133669 | P03346 | P05166 | -0.24198  |
| 133670 | P03346 | P08637 | -1.1659   |
| 133671 | P03346 | P15735 | -0.41989  |
| 133672 | P03346 | O95998 | -0.59533  |
| 133673 | P03346 | P08218 | -1.0507   |
| 133674 | P03346 | O60513 | -0.35826  |
| 133675 | P03346 | Q6ZXV5 | -0.50365  |
| 133676 | P03346 | A6NDY0 | -0.22781  |
| 133677 | P03346 | Q8IUH8 | -0.76827  |
| 133678 | P03346 | Q9UJA3 | -0.22099  |
| 133679 | P03346 | P59036 | -0.013652 |
| 133680 | P03346 | P51677 | -1.0158   |
| 133681 | P03346 | O00238 | -0.5902   |
| 133682 | P03346 | Q6ZVN6 | -0.11419  |
| 133683 | P03346 | Q9Y5E8 | -0.92414  |
| 133684 | P03346 | P26640 | -0.16176  |

|        |        |        |           |
|--------|--------|--------|-----------|
| 133685 | P03346 | Q5SWW7 | -0.013652 |
| 133686 | P03346 | Q68BL8 | -0.60412  |
| 133687 | P03346 | Q02505 | -0.98208  |
| 133688 | P03346 | Q02643 | -0.25759  |
| 133689 | P03346 | P17181 | -0.7191   |
| 133690 | P03346 | Q69YN2 | -0.12581  |
| 133691 | P03346 | P20648 | -0.90402  |
| 133692 | P03346 | Q8NG80 | -0.8116   |
| 133693 | P03346 | Q5T013 | -0.19809  |
| 133694 | P03346 | Q9Y6A5 | -0.1926   |
| 133695 | P03346 | Q9UHZ2 | -0.013652 |
| 133696 | P03346 | P12235 | -0.22919  |
| 133697 | P03346 | Q9HCJ2 | -0.22748  |
| 133698 | P03346 | Q9GZM8 | -0.17925  |
| 133699 | P03346 | A6NGK3 | -0.17162  |
| 133700 | P03346 | Q8NH79 | -0.92763  |
| 133701 | P03346 | Q8NGX5 | -0.92763  |
| 133702 | P03346 | Q9H773 | -0.21224  |
| 133703 | P03346 | P00441 | -0.22623  |
| 133704 | P03346 | Q9H478 | -0.15335  |
| 133705 | P03346 | Q14376 | -0.24398  |
| 133706 | P03346 | Q96KJ4 | -0.67572  |
| 133707 | P03346 | Q8NGM1 | -0.92763  |
| 133708 | P03346 | Q96IK0 | -0.63382  |
| 133709 | P03346 | P52943 | -0.22758  |
| 133710 | P03346 | Q9HBI1 | -0.22742  |
| 133711 | P03346 | Q8NDZ4 | -0.44827  |
| 133712 | P03346 | Q60895 | -0.19173  |
| 133713 | P03346 | Q95837 | -0.75534  |
| 133714 | P03346 | Q95800 | -1.0977   |
| 133715 | P03346 | Q96KW2 | -0.018609 |
| 133716 | P03346 | P16410 | -0.25107  |
| 133717 | P03346 | P25105 | -0.71534  |
| 133718 | P03346 | Q96LW2 | -0.88651  |
| 133719 | P03346 | Q8IXM7 | -0.13133  |
| 133720 | P03346 | P78539 | -0.25618  |
| 133721 | P03346 | Q8WVD3 | -0.32318  |
| 133722 | P03346 | Q9H2J1 | -0.22547  |
| 133723 | P03346 | Q15431 | -0.20399  |
| 133724 | P03346 | Q4G0G2 | -0.033503 |
| 133725 | P03346 | Q15382 | -0.88014  |
| 133726 | P03346 | A8MX76 | -0.68447  |
| 133727 | P03346 | Q96JA4 | -0.50365  |
| 133728 | P03346 | P0C6S8 | -0.50365  |
| 133729 | P03346 | Q96JK4 | -0.41535  |
| 133730 | P03346 | Q5TGI4 | -0.22741  |
| 133731 | P03346 | P07360 | -0.70329  |
| 133732 | P03346 | P46934 | -0.22741  |
| 133733 | P03346 | Q86SX6 | -0.22503  |
| 133734 | P03346 | Q7Z602 | -0.96376  |
| 133735 | P03346 | Q5TH69 | -0.59167  |
| 133736 | P03346 | P31645 | -0.22725  |
| 133737 | P03346 | Q14492 | -0.25706  |
| 133738 | P03346 | P80421 | -0.58933  |
| 133739 | P03346 | A7E2U8 | -0.09277  |
| 133740 | P03346 | Q43909 | -0.54805  |
| 133741 | P03346 | P30466 | -0.76151  |
| 133742 | P03346 | Q00461 | -0.12981  |
| 133743 | P03346 | Q9BZJ3 | -1.0507   |
| 133744 | P03346 | Q70Z35 | -0.39231  |
| 133745 | P03346 | Q96IP4 | -0.033047 |
| 133746 | P03346 | Q70CQ2 | -0.26817  |
| 133747 | P03346 | Q8NG77 | -0.92763  |
| 133748 | P03346 | Q9UHC9 | -0.22718  |
| 133749 | P03346 | Q86SR1 | -0.44078  |
| 133750 | P03346 | Q6ZTZ1 | -0.10159  |
| 133751 | P03346 | Q5JXX7 | -0.50365  |
| 133752 | P03346 | Q9HBY0 | -0.5281   |
| 133753 | P03346 | P01598 | -0.80078  |
| 133754 | P03346 | P36959 | -0.26327  |
| 133755 | P03346 | Q99418 | -0.22741  |
| 133756 | P03346 | B3KS81 | -0.14321  |
| 133757 | P03346 | Q8TCQ1 | -0.71406  |
| 133758 | P03346 | Q8TBJ4 | -0.60869  |
| 133759 | P03346 | Q9BZD6 | -0.8425   |
| 133760 | P03346 | Q75414 | -0.42115  |

|        |        |        |           |
|--------|--------|--------|-----------|
| 133761 | P03346 | P50052 | -0.66309  |
| 133762 | P03346 | Q8N655 | -0.013652 |
| 133763 | P03346 | Q9Y2H5 | -0.22741  |
| 133764 | P03346 | P33527 | -0.30729  |
| 133765 | P03346 | P21580 | -0.21119  |
| 133766 | P03346 | Q9UBU2 | -0.74352  |
| 133767 | P03346 | Q9BU79 | -0.50365  |
| 133768 | P03346 | P01374 | -0.60083  |
| 133769 | P03346 | P20815 | -0.5697   |
| 133770 | P03346 | P00167 | -0.30211  |
| 133771 | P03346 | P13224 | -0.32249  |
| 133772 | P03346 | Q8NG75 | -0.92763  |
| 133773 | P03346 | Q9H488 | -0.18758  |
| 133774 | P03346 | A6NNC1 | -0.50365  |
| 133775 | P03346 | Q96SF2 | -0.29331  |
| 133776 | P03346 | Q8NBF2 | -0.22638  |
| 133777 | P03346 | Q96B86 | -0.19743  |
| 133778 | P03346 | P60509 | -0.65219  |
| 133779 | P03346 | A8MX19 | -0.23264  |
| 133780 | P03346 | Q9BSW7 | -0.22782  |
| 133781 | P03346 | Q9UGF5 | -0.92763  |
| 133782 | P03346 | C9J1S8 | -0.30279  |
| 133783 | P03346 | A5D6W6 | -0.49936  |
| 133784 | P03346 | Q96GC9 | -0.21672  |
| 133785 | P03346 | Q9UIJ7 | -0.50653  |
| 133786 | P03346 | Q13009 | -0.39406  |
| 133787 | P03346 | Q9UBS0 | -0.43577  |
| 133788 | P03346 | P00751 | -1.0972   |
| 133789 | P03346 | Q14156 | -0.43133  |
| 133790 | P03346 | O14581 | -0.92763  |
| 133791 | P03346 | O60285 | -0.2274   |
| 133792 | P03346 | O43612 | -0.31087  |
| 133793 | P03346 | Q8NHQ9 | -0.52228  |
| 133794 | P03346 | P0C7V4 | -0.23256  |
| 133795 | P03346 | P13498 | -0.25316  |
| 133796 | P03346 | Q8NBT3 | -0.50365  |
| 133797 | P03346 | Q86U02 | -0.50365  |
| 133798 | P03346 | Q96PD5 | -0.66746  |
| 133799 | P03346 | Q96GZ6 | -0.64429  |
| 133800 | P03346 | P56746 | -0.41247  |
| 133801 | P03346 | O43921 | -0.20737  |
| 133802 | P03346 | Q9H967 | -0.22734  |
| 133803 | P03346 | Q9NP99 | -1.1671   |
| 133804 | P03346 | Q92995 | -0.22888  |
| 133805 | P03346 | Q9HAA7 | -0.15648  |
| 133806 | P03346 | Q08043 | -0.26835  |
| 133807 | P03346 | Q6IED9 | -0.12991  |
| 133808 | P03346 | Q14982 | -0.52884  |
| 133809 | P03346 | O00206 | -0.22741  |
| 133810 | P03346 | P48048 | -1.0636   |
| 133811 | P03346 | Q5KSL6 | -0.71163  |
| 133812 | P03346 | Q8TE04 | -0.29988  |
| 133813 | P03346 | Q6P9A2 | -0.42637  |
| 133814 | P03346 | Q92692 | -0.22741  |
| 133815 | P03346 | P61163 | -0.14626  |
| 133816 | P03346 | Q9BSJ1 | -0.30279  |
| 133817 | P03346 | Q16769 | -0.82468  |
| 133818 | P03346 | Q96CX6 | -0.22825  |
| 133819 | P03346 | Q92637 | -0.82506  |
| 133820 | P03346 | Q8IW03 | -0.16789  |
| 133821 | P03346 | O60309 | -0.50365  |
| 133822 | P03346 | Q15057 | -0.65984  |
| 133823 | P03346 | Q9NR20 | -0.78289  |
| 133824 | P03346 | Q9H0F7 | -0.4968   |
| 133825 | P03346 | Q86X67 | -0.19047  |
| 133826 | P03346 | Q5VZI3 | -0.50365  |
| 133827 | P03346 | Q9BQ75 | -0.22714  |
| 133828 | P03346 | Q93038 | -1.0339   |
| 133829 | P03346 | Q16822 | -0.15842  |
| 133830 | P03346 | Q8TBP5 | -0.50365  |
| 133831 | P03346 | P09326 | -0.33808  |
| 133832 | P03346 | Q9BZA7 | -1.0148   |
| 133833 | P03346 | O95747 | -0.86769  |
| 133834 | P03346 | P14770 | -0.76921  |
| 133835 | P03346 | Q8NEV4 | -0.63586  |
| 133836 | P03346 | P27144 | -0.45576  |

|        |        |        |           |
|--------|--------|--------|-----------|
| 133837 | P03346 | P05162 | -0.22663  |
| 133838 | P03346 | Q6AI12 | -0.22741  |
| 133839 | P03346 | O60476 | -0.31236  |
| 133840 | P03346 | Q13065 | -0.16187  |
| 133841 | P03346 | Q9NUN7 | -0.27017  |
| 133842 | P03346 | Q7Z6M3 | -0.76673  |
| 133843 | P03346 | P18825 | -0.25942  |
| 133844 | P03346 | Q8NGH9 | -0.92763  |
| 133845 | P03346 | P0CG06 | -0.75616  |
| 133846 | P03346 | P09936 | -0.21647  |
| 133847 | P03346 | Q8NBR0 | -0.45568  |
| 133848 | P03346 | Q96DW6 | -0.35079  |
| 133849 | P03346 | P00505 | -0.22473  |
| 133850 | P03346 | Q5S007 | -0.3742   |
| 133851 | P03346 | P22466 | -0.20376  |
| 133852 | P03346 | Q9NYW4 | -0.78889  |
| 133853 | P03346 | Q8NCC5 | -0.42445  |
| 133854 | P03346 | Q8NGZ9 | -0.92763  |
| 133855 | P03346 | Q96MS3 | -0.40504  |
| 133856 | P03346 | P29033 | -0.5397   |
| 133857 | P03346 | Q9NZH8 | -0.57928  |
| 133858 | P03346 | Q5DJT8 | -0.1741   |
| 133859 | P03346 | Q15032 | -0.09081  |
| 133860 | P03346 | Q15109 | -0.71592  |
| 133861 | P03346 | A6NHG9 | -0.92763  |
| 133862 | P03346 | Q4G0Z9 | -0.091681 |
| 133863 | P03346 | Q96A11 | -0.41941  |
| 133864 | P03346 | Q9Y3D6 | -0.22156  |
| 133865 | P03346 | Q5TEZ5 | -0.19935  |
| 133866 | P03346 | Q9Y6Q9 | -0.29282  |
| 133867 | P03346 | Q9NPC4 | -0.522    |
| 133868 | P03346 | Q01970 | -0.22728  |
| 133869 | P03346 | D6RJB6 | -0.36346  |
| 133870 | P03346 | Q8N5U1 | -0.50365  |
| 133871 | P03346 | Q0P670 | -0.50365  |
| 133872 | P03346 | Q6P179 | -0.85608  |
| 133873 | P03346 | Q96HH6 | -0.50365  |
| 133874 | P03346 | Q04900 | -0.97824  |
| 133875 | P03346 | Q9UH03 | -0.22637  |
| 133876 | P03346 | Q96033 | -0.15767  |
| 133877 | P03346 | P22059 | -0.22746  |
| 133878 | P03346 | Q9H2D6 | -0.22551  |
| 133879 | P03346 | P01825 | -0.80078  |
| 133880 | P03346 | Q969W1 | -0.66664  |
| 133881 | P03346 | P46089 | -1.0578   |
| 133882 | P03346 | P35368 | -0.60758  |
| 133883 | P03346 | Q96IZ5 | -0.40469  |
| 133884 | P03346 | P05997 | -0.64334  |
| 133885 | P03346 | Q9P104 | -0.22163  |
| 133886 | P03346 | Q8NGC5 | -0.92763  |
| 133887 | P03346 | A2RUS2 | -0.22736  |
| 133888 | P03346 | Q8NG84 | -0.92763  |
| 133889 | P03346 | Q9Y5W5 | -0.77963  |
| 133890 | P03346 | P49619 | -0.77514  |
| 133891 | P03346 | P21941 | -0.22741  |
| 133892 | P03346 | Q5H8C1 | -1.2045   |
| 133893 | P03346 | Q7L591 | -0.18997  |
| 133894 | P03346 | Q9Y228 | -0.19279  |
| 133895 | P03346 | P24311 | -0.27368  |
| 133896 | P03346 | O75923 | -0.55069  |
| 133897 | P03346 | Q16880 | -0.47748  |
| 133898 | P03346 | Q9P2X3 | -0.15252  |
| 133899 | P03346 | Q8N4G2 | -0.29965  |
| 133900 | P03346 | Q6IPW1 | -0.010546 |
| 133901 | P03346 | Q9ULL4 | -0.39911  |
| 133902 | P03346 | A6NLU5 | -0.50365  |
| 133903 | P03346 | Q8NGV5 | -0.92763  |
| 133904 | P03346 | P34982 | -1.0512   |
| 133905 | P03346 | Q02928 | -0.37723  |
| 133906 | P03346 | Q12893 | -0.088864 |
| 133907 | P03346 | Q6UWF7 | -0.53519  |
| 133908 | P03346 | Q5J8X5 | -0.50365  |
| 133909 | P03346 | P34810 | -0.65745  |
| 133910 | P03346 | P0CW21 | -0.013652 |
| 133911 | P03346 | A0A5B9 | -0.50365  |
| 133912 | P03346 | Q2M3C6 | -0.50365  |

|        |        |        |           |
|--------|--------|--------|-----------|
| 133913 | P03346 | Q9Y6C7 | -0.013652 |
| 133914 | P03346 | Q8WVB6 | -0.3651   |
| 133915 | P03346 | Q8N112 | -0.50365  |
| 133916 | P03346 | Q9BUL5 | -0.55871  |
| 133917 | P03346 | O95150 | -1.2772   |
| 133918 | P03346 | Q6UW32 | -0.11449  |
| 133919 |        |        |           |



| HTLV protein | Targeted human proteins                                                                                            | confidence level | fold change  |
|--------------|--------------------------------------------------------------------------------------------------------------------|------------------|--------------|
| 1            | [SECTION 3] Indirect PPI evidences (genes downregulated greater than 1.5 fold in total RNA in the presence of p30) |                  |              |
| 2            |                                                                                                                    |                  |              |
| 3            |                                                                                                                    |                  |              |
| 4            | HTLV1_p30                                                                                                          | NMNAT1           | 0.49203 0.05 |
| 5            | HTLV1_p30                                                                                                          | SDPR             | 0.30566 0.05 |
| 6            | HTLV1_p30                                                                                                          | GNL3L            | 0.46564 0.09 |
| 7            | HTLV1_p30                                                                                                          | FBF1             | 0.46846 0.11 |
| 8            | HTLV1_p30                                                                                                          | TMPO             | 0.15838 0.15 |
| 9            | HTLV1_p30                                                                                                          | RPL21            | 0.86977 0.16 |
| 10           | HTLV1_p30                                                                                                          | NDUFV3           | 0.40343 0.16 |
| 11           | HTLV1_p30                                                                                                          | SMURF2           | 0.52804 0.20 |
| 12           | HTLV1_p30                                                                                                          | HSF1             | 0.78198 0.24 |
| 13           | HTLV1_p30                                                                                                          | POLR2C           | 0.64095 0.25 |
| 14           | HTLV1_p30                                                                                                          | NFIA             | 0.27602 0.27 |
| 15           | HTLV1_p30                                                                                                          | EXOSC2           | 0.77531 0.32 |
| 16           | HTLV1_p30                                                                                                          | ETV4             | 0.37639 0.34 |
| 17           | HTLV1_p30                                                                                                          | PDCD4            | 1.0884 0.34  |
| 18           | HTLV1_p30                                                                                                          | CENPI            | 0.42941 0.37 |
| 19           | HTLV1_p30                                                                                                          | BPGM             | 1.1711 0.37  |
| 20           | HTLV1_p30                                                                                                          | POU3F1           | 0.24412 0.37 |
| 21           | HTLV1_p30                                                                                                          | ZSCAN20          | 0.62728 0.38 |
| 22           | HTLV1_p30                                                                                                          | ZNF124           | 0.2007 0.39  |
| 23           | HTLV1_p30                                                                                                          | MTRF1            | 0.27476 0.40 |
| 24           | HTLV1_p30                                                                                                          | NUDCD3           | 0.35289 0.40 |
| 25           | HTLV1_p30                                                                                                          | EIF5A2           | 0.71056 0.41 |
| 26           | HTLV1_p30                                                                                                          | CBFA2T2          | 0.82635 0.41 |
| 27           | HTLV1_p30                                                                                                          | PYHIN1           | 0.18039 0.41 |
| 28           | HTLV1_p30                                                                                                          | CCNC             | 1.0391 0.42  |
| 29           | HTLV1_p30                                                                                                          | POLH             | 0.21032 0.42 |
| 30           | HTLV1_p30                                                                                                          | PIN4             | 0.40702 0.43 |
| 31           | HTLV1_p30                                                                                                          | ATXN1            | 0.88897 0.44 |
| 32           | HTLV1_p30                                                                                                          | BLZF1            | 0.31818 0.44 |
| 33           | HTLV1_p30                                                                                                          | PPM1A            | 0.35275 0.44 |
| 34           | HTLV1_p30                                                                                                          | NQO1             | 0.40127 0.45 |
| 35           | HTLV1_p30                                                                                                          | DDIT4L           | 0.26939 0.45 |
| 36           | HTLV1_p30                                                                                                          | ALAS2            | 0.29461 0.45 |
| 37           | HTLV1_p30                                                                                                          | ZNF71            | 0.28926 0.45 |
| 38           | HTLV1_p30                                                                                                          | CCNO             | 0.25109 0.46 |
| 39           | HTLV1_p30                                                                                                          | TNKS2            | 0.35441 0.46 |
| 40           | HTLV1_p30                                                                                                          | POLD4            | 0.46207 0.47 |
| 41           | HTLV1_p30                                                                                                          | TRIM33           | 0.47305 0.47 |
| 42           | HTLV1_p30                                                                                                          | ESRRG            | 0.33715 0.47 |
| 43           | HTLV1_p30                                                                                                          | NUP205           | 1.0383 0.47  |
| 44           | HTLV1_p30                                                                                                          | ZNF567           | 0.22977 0.47 |
| 45           | HTLV1_p30                                                                                                          | SMARCE1          | 0.95813 0.48 |
| 46           | HTLV1_p30                                                                                                          | SH3BGR           | 0.59487 0.48 |
| 47           | HTLV1_p30                                                                                                          | ATXN1            | 0.88897 0.48 |
| 48           | HTLV1_p30                                                                                                          | AP4M1            | 0.37202 0.50 |
| 49           | HTLV1_p30                                                                                                          | BAZ2B            | 0.75803 0.50 |
| 50           | HTLV1_p30                                                                                                          | CDKN1C           | 0.59486 0.50 |
| 51           | HTLV1_p30                                                                                                          | MBD2             | 1.0442 0.50  |
| 52           | HTLV1_p30                                                                                                          | KCTD7            | 0.23659 0.50 |
| 53           | HTLV1_p30                                                                                                          | VPRBP            | 0.90852 0.50 |
| 54           | HTLV1_p30                                                                                                          | IPO9             | 0.87382 0.51 |
| 55           | HTLV1_p30                                                                                                          | ZNF165           | 0.65862 0.51 |
| 56           | HTLV1_p30                                                                                                          | CDC42            | 0.43984 0.52 |
| 57           | HTLV1_p30                                                                                                          | ATRX             | 0.52614 0.52 |
| 58           | HTLV1_p30                                                                                                          | SAMHD1           | 0.1586 0.52  |
| 59           | HTLV1_p30                                                                                                          | RSPH3            | 0.35413 0.53 |
| 60           | HTLV1_p30                                                                                                          | ZNF483           | 0.50227 0.53 |
| 61           | HTLV1_p30                                                                                                          | PRUNE            | 0.73946 0.54 |
| 62           | HTLV1_p30                                                                                                          | GOPC             | 0.77018 0.54 |
| 63           | HTLV1_p30                                                                                                          | ARIH2            | 0.46582 0.54 |
| 64           | HTLV1_p30                                                                                                          | KLF15            | 0.31943 0.54 |
| 65           | HTLV1_p30                                                                                                          | DACH1            | 0.36065 0.54 |
| 66           | HTLV1_p30                                                                                                          | ZC3H11A          | 0.36483 0.54 |
| 67           | HTLV1_p30                                                                                                          | TST              | 0.28129 0.54 |
| 68           | HTLV1_p30                                                                                                          | SMC1A            | 0.37808 0.54 |
| 69           | HTLV1_p30                                                                                                          | ZNF569           | 0.25059 0.54 |
| 70           | HTLV1_p30                                                                                                          | PHLDA1           | 0.57007 0.54 |
| 71           | HTLV1_p30                                                                                                          | RBL1             | 1.2273 0.54  |
| 72           | HTLV1_p30                                                                                                          | ASPM             | 0.27936 0.55 |
| 73           | HTLV1_p30                                                                                                          | ZNF148           | 0.69685 0.55 |
| 74           | HTLV1_p30                                                                                                          | HUS1             | 0.72112 0.55 |
| 75           | HTLV1_p30                                                                                                          |                  |              |

Section 3 - Indirect PPI evidences (genes downregulated greater than 1.5 fold in t0a1/RA3i2h25presen

|     |           |          |          |      |
|-----|-----------|----------|----------|------|
| 76  | HTLV1_p30 | EPC1     | 0.48541  | 0.55 |
| 77  | HTLV1_p30 | ZBTB40   | 0.24858  | 0.55 |
| 78  | HTLV1_p30 | ENO3     | 0.37846  | 0.56 |
| 79  | HTLV1_p30 | PAX3     | 0.67312  | 0.56 |
| 80  | HTLV1_p30 | SNURF    | 0.39389  | 0.56 |
| 81  | HTLV1_p30 | BCORL1   | 0.61791  | 0.56 |
| 82  | HTLV1_p30 | RPS20    | 0.88422  | 0.56 |
| 83  | HTLV1_p30 | CEP70    | 1.3814   | 0.56 |
| 84  | HTLV1_p30 | ZNF665   | 0.38935  | 0.56 |
| 85  | HTLV1_p30 | ZNF473   | 0.56686  | 0.56 |
| 86  | HTLV1_p30 | BEX5     | 0.85403  | 0.57 |
| 87  | HTLV1_p30 | MYH14    | 0.69922  | 0.57 |
| 88  | HTLV1_p30 | PANK1    | 0.60862  | 0.57 |
| 89  | HTLV1_p30 | ZMYM5    | 0.2378   | 0.57 |
| 90  | HTLV1_p30 | EXOC3    | 0.27848  | 0.57 |
| 91  | HTLV1_p30 | CEP76    | 0.90358  | 0.57 |
| 92  | HTLV1_p30 | OGG1     | 0.49974  | 0.57 |
| 93  | HTLV1_p30 | DSP      | 0.23748  | 0.57 |
| 94  | HTLV1_p30 | MRPL4    | 0.73176  | 0.57 |
| 95  | HTLV1_p30 | ISY1     | 0.9001   | 0.58 |
| 96  | HTLV1_p30 | RANBP17  | 0.45878  | 0.58 |
| 97  | HTLV1_p30 | ZMYM5    | 0.2378   | 0.58 |
| 98  | HTLV1_p30 | ITGB1BP1 | 0.35606  | 0.58 |
| 99  | HTLV1_p30 | MLLT10   | 1.2877   | 0.58 |
| 100 | HTLV1_p30 | ATF7IP2  | 0.85059  | 0.58 |
| 101 | HTLV1_p30 | NFAT5    | 0.12024  | 0.59 |
| 102 | HTLV1_p30 | MRE11A   | 0.1603   | 0.59 |
| 103 | HTLV1_p30 | PFDN4    | 1.1153   | 0.59 |
| 104 | HTLV1_p30 | SAMD4A   | 0.3579   | 0.59 |
| 105 | HTLV1_p30 | FIP1L1   | 1.0398   | 0.59 |
| 106 | HTLV1_p30 | PPP1R13B | 0.85509  | 0.59 |
| 107 | HTLV1_p30 | ATP5F1   | 0.28573  | 0.59 |
| 108 | HTLV1_p30 | PCM1     | 0.55287  | 0.60 |
| 109 | HTLV1_p30 | DMAP1    | 0.8302   | 0.60 |
| 110 | HTLV1_p30 | PARD6B   | 0.62295  | 0.60 |
| 111 | HTLV1_p30 | ZNF2     | 0.38137  | 0.60 |
| 112 | HTLV1_p30 | ZNF222   | 0.29235  | 0.60 |
| 113 | HTLV1_p30 | TWISTNB  | 0.1779   | 0.60 |
| 114 | HTLV1_p30 | HNRNPU   | 0.34975  | 0.61 |
| 115 | HTLV1_p30 | NOL7     | 0.8529   | 0.61 |
| 116 | HTLV1_p30 | E2F1     | 0.62832  | 0.61 |
| 117 | HTLV1_p30 | PGM5     | 0.033126 | 0.61 |
| 118 | HTLV1_p30 | POLR1A   | 0.58036  | 0.61 |
| 119 | HTLV1_p30 | SERF2    | 0.75796  | 0.61 |
| 120 | HTLV1_p30 | CARS     | 0.59731  | 0.61 |
| 121 | HTLV1_p30 | HOXB9    | 0.98819  | 0.61 |
| 122 | HTLV1_p30 | MON1B    | 0.85823  | 0.61 |
| 123 | HTLV1_p30 | ZNF202   | 0.29867  | 0.61 |
| 124 | HTLV1_p30 | FBXO32   | 0.10974  | 0.62 |
| 125 | HTLV1_p30 | HINT3    | 0.49557  | 0.62 |
| 126 | HTLV1_p30 | DCP2     | 1.0385   | 0.62 |
| 127 | HTLV1_p30 | PHKB     | 0.31572  | 0.62 |
| 128 | HTLV1_p30 | IFT57    | 0.46867  | 0.62 |
| 129 | HTLV1_p30 | ZNF583   | 0.51762  | 0.62 |
| 130 | HTLV1_p30 | KIAA0141 | 0.4753   | 0.62 |
| 131 | HTLV1_p30 | ZNF684   | 0.20437  | 0.62 |
| 132 | HTLV1_p30 | ELK1     | 1.1966   | 0.62 |
| 133 | HTLV1_p30 | MAP4     | 0.3152   | 0.63 |
| 134 | HTLV1_p30 | TPPP     | 0.35929  | 0.63 |
| 135 | HTLV1_p30 | COPS7B   | 0.17821  | 0.63 |
| 136 | HTLV1_p30 | CARD8    | 0.44567  | 0.63 |
| 137 | HTLV1_p30 | CBFA2T2  | 0.82635  | 0.63 |
| 138 | HTLV1_p30 | VGLL4    | 0.39389  | 0.63 |
| 139 | HTLV1_p30 | UBE2B    | 0.91374  | 0.63 |
| 140 | HTLV1_p30 | NUP107   | 0.8195   | 0.63 |
| 141 | HTLV1_p30 | MPHOSPH8 | 0.64513  | 0.63 |
| 142 | HTLV1_p30 | MRPS22   | 0.19627  | 0.63 |
| 143 | HTLV1_p30 | GLE1     | 0.78409  | 0.63 |
| 144 | HTLV1_p30 | MOCS2    | 0.20122  | 0.63 |
| 145 | HTLV1_p30 | NUP188   | 0.59971  | 0.63 |
| 146 | HTLV1_p30 | BAG4     | 0.31074  | 0.63 |
| 147 | HTLV1_p30 | SULT2B1  | 0.62852  | 0.64 |
| 148 | HTLV1_p30 | TSFM     | 1.0755   | 0.64 |
| 149 | HTLV1_p30 | NFKBIB   | 1.0113   | 0.64 |
| 150 | HTLV1_p30 | MAP9     | 0.79446  | 0.64 |
| 151 | HTLV1_p30 | TOX4     | 0.58949  | 0.64 |

Section 3 - Indirect PPI evidences (genes downregulated greater than 1.5 fold in t0a1/RA3i2h25presen

|     |           |         |          |      |
|-----|-----------|---------|----------|------|
| 152 | HTLV1_p30 | RANBP17 | 0.45878  | 0.64 |
| 153 | HTLV1_p30 | FDPS    | 0.52869  | 0.64 |
| 154 | HTLV1_p30 | SH3BP5  | 0.36513  | 0.64 |
| 155 | HTLV1_p30 | PRKRIP1 | 0.31171  | 0.64 |
| 156 | HTLV1_p30 | MSH3    | 0.030835 | 0.64 |
| 157 | HTLV1_p30 | SPSB4   | 0.46359  | 0.64 |
| 158 | HTLV1_p30 | TOP1    | 0.60677  | 0.64 |
| 159 | HTLV1_p30 | SOX12   | 0.35159  | 0.64 |
| 160 | HTLV1_p30 | PBX1    | 0.57258  | 0.64 |
| 161 | HTLV1_p30 | BCL9    | 0.75022  | 0.64 |
| 162 | HTLV1_p30 | PEX14   | 0.24388  | 0.64 |
| 163 | HTLV1_p30 | ZNF443  | 0.4876   | 0.64 |
| 164 | HTLV1_p30 | ZNF302  | 0.22197  | 0.65 |
| 165 | HTLV1_p30 | ELOVL7  | 0.9999   | 0.65 |
| 166 | HTLV1_p30 | NCOA5   | 1.0428   | 0.65 |
| 167 | HTLV1_p30 | ILKAP   | 0.6432   | 0.65 |
| 168 | HTLV1_p30 | POLH    | 0.21032  | 0.65 |
| 169 | HTLV1_p30 | TNRC6B  | 0.44757  | 0.65 |
| 170 | HTLV1_p30 | CTPS2   | 0.33618  | 0.65 |
| 171 | HTLV1_p30 | ATF2    | 0.78122  | 0.65 |
| 172 | HTLV1_p30 | NPAS2   | 0.51557  | 0.65 |
| 173 | HTLV1_p30 | FAM122A | 0.3662   | 0.65 |
| 174 | HTLV1_p30 | ZNF286A | 0.25299  | 0.66 |
| 175 | HTLV1_p30 | ZKSCAN2 | 0.34481  | 0.66 |
| 176 | HTLV1_p30 | BCOR    | 0.36427  | 0.66 |
| 177 | HTLV1_p30 | SORBS3  | 0.62137  | 0.66 |
| 178 | HTLV1_p30 | FZR1    | 1.1668   | 0.66 |
| 179 | HTLV1_p30 | WIPF1   | 0.16196  | 0.66 |
| 180 | HTLV1_p30 | BCL2A1  | 0.45556  | 0.66 |
| 181 | HTLV1_p30 | FLII    | 0.98457  | 0.66 |
| 182 | HTLV1_p30 | RCHY1   | 0.52843  | 0.66 |
| 183 | HTLV1_p30 | CENPF   | 0.52394  | 0.66 |
| 184 | HTLV1_p30 | SPC24   | 0.73405  | 0.66 |
| 185 | HTLV1_p30 | SENP6   | 0.38815  | 0.66 |
| 186 | HTLV1_p30 | TEX15   | 0.39984  | 0.66 |
| 187 | HTLV1_p30 | S100A4  | 0.3001   | 0.66 |
| 188 | HTLV1_p30 | SUMO1   | 0.83585  | 0.66 |
| 189 | HTLV1_p30 | ZNF766  | 0.43572  | 0.66 |
| 190 | HTLV1_p30 | EIF4G1  | 0.65365  | 0.66 |
| 191 | HTLV1_p30 | HIF1AN  | 0.58393  | 0.66 |
| 192 | HTLV1_p30 | SAP18   | 1.2352   | 0.66 |
| 193 | HTLV1_p30 | WASL    | 0.73048  | 0.66 |
| 194 | HTLV1_p30 | ZNF649  | 0.1962   | 0.66 |
| 195 | HTLV1_p30 | ZNF331  | 0.31277  | 0.66 |
| 196 | HTLV1_p30 | SMAD3   | 0.46043  | 0.66 |
| 197 | HTLV1_p30 | PPP2R1B | 0.25227  | 0.67 |
| 198 | HTLV1_p30 | CHD4    | 0.53135  | 0.67 |
| 199 | HTLV1_p30 | CHAC1   | 0.81568  | 0.67 |
| 200 | HTLV1_p30 | SPTY2D1 | 0.24937  | 0.67 |
| 201 | HTLV1_p30 | GK      | 0.34829  | 0.67 |
| 202 | HTLV1_p30 | IRF9    | 0.96962  | 0.67 |
| 203 | HTLV1_p30 | SGOL1   | 0.68952  | 0.67 |
| 204 | HTLV1_p30 | PHC2    | 0.13893  | 0.67 |
| 205 | HTLV1_p30 | POMP    | 0.42707  | 0.67 |
| 206 | HTLV1_p30 | SRA1    | 0.45833  | 0.67 |
| 207 | HTLV1_p30 | TRIM21  | 0.45316  | 0.67 |
| 208 | HTLV1_p30 | ZNF638  | 0.14786  | 0.67 |
| 209 |           |         |          |      |

| 1  | [SECTION 4] | Indirect PPI evidences (genes upregulated greater than 1.5 fold in total RNA in the presence of p30) |                         |                  |             |
|----|-------------|------------------------------------------------------------------------------------------------------|-------------------------|------------------|-------------|
| 2  |             |                                                                                                      |                         |                  |             |
| 3  |             |                                                                                                      |                         |                  |             |
| 4  | HTLV        | proein                                                                                               | Targeted human proteins | confidence level | fold change |
| 5  | HTLV1_p30   | TPI1                                                                                                 | 0.50715                 | 3.63             |             |
| 6  | HTLV1_p30   | PHF6                                                                                                 | 0.47654                 | 3.23             |             |
| 7  | HTLV1_p30   | CCDC82                                                                                               | 0.24937                 | 2.69             |             |
| 8  | HTLV1_p30   | MED18                                                                                                | 0.98887                 | 2.68             |             |
| 9  | HTLV1_p30   | SDCCAG8                                                                                              | 0.92082                 | 2.53             |             |
| 10 | HTLV1_p30   | AURKAIP1                                                                                             | 0.84438                 | 2.49             |             |
| 11 | HTLV1_p30   | ZNF652                                                                                               | 0.56957                 | 2.41             |             |
| 12 | HTLV1_p30   | TRIM5                                                                                                | 0.63635                 | 2.39             |             |
| 13 | HTLV1_p30   | CCDC88C                                                                                              | 0.24212                 | 2.31             |             |
| 14 | HTLV1_p30   | TFAM                                                                                                 | 0.88237                 | 2.28             |             |
| 15 | HTLV1_p30   | CNOT4                                                                                                | 0.91542                 | 2.28             |             |
| 16 | HTLV1_p30   | SSU72                                                                                                | 0.22305                 | 2.25             |             |
| 17 | HTLV1_p30   | PRPF31                                                                                               | 0.33639                 | 2.20             |             |
| 18 | HTLV1_p30   | GTF2H2                                                                                               | 0.49337                 | 2.17             |             |
| 19 | HTLV1_p30   | CCDC69                                                                                               | 0.78682                 | 2.16             |             |
| 20 | HTLV1_p30   | MYNN                                                                                                 | 0.20138                 | 2.16             |             |
| 21 | HTLV1_p30   | LIN54                                                                                                | 0.46638                 | 2.16             |             |
| 22 | HTLV1_p30   | BHLHB9                                                                                               | 0.38622                 | 2.16             |             |
| 23 | HTLV1_p30   | TEAD3                                                                                                | 1.0319                  | 2.13             |             |
| 24 | HTLV1_p30   | LSM11                                                                                                | 0.64813                 | 2.13             |             |
| 25 | HTLV1_p30   | LRRCC1                                                                                               | 0.84614                 | 2.12             |             |
| 26 | HTLV1_p30   | ZNF26                                                                                                | 0.34363                 | 2.11             |             |
| 27 | HTLV1_p30   | CDKN2AIPNL                                                                                           | 0.92792                 | 2.10             |             |
| 28 | HTLV1_p30   | ZFX                                                                                                  | 0.25573                 | 2.07             |             |
| 29 | HTLV1_p30   | ZNF197                                                                                               | 0.3804                  | 2.01             |             |
| 30 | HTLV1_p30   | EIF2A                                                                                                | 0.35213                 | 1.99             |             |
| 31 | HTLV1_p30   | BCL3                                                                                                 | 0.36341                 | 1.95             |             |
| 32 | HTLV1_p30   | FAM63B                                                                                               | 1.4967                  | 1.95             |             |
| 33 | HTLV1_p30   | RBM39                                                                                                | 0.77553                 | 1.94             |             |
| 34 | HTLV1_p30   | CNOT3                                                                                                | 1.5103                  | 1.90             |             |
| 35 | HTLV1_p30   | KIAA1430                                                                                             | 0.24937                 | 1.89             |             |
| 36 | HTLV1_p30   | NACAP1                                                                                               | 0.53566                 | 1.89             |             |
| 37 | HTLV1_p30   | ZEB1                                                                                                 | 0.69456                 | 1.88             |             |
| 38 | HTLV1_p30   | FANCD2                                                                                               | 0.68317                 | 1.87             |             |
| 39 | HTLV1_p30   | MATR3                                                                                                | 0.16507                 | 1.86             |             |
| 40 | HTLV1_p30   | POLR3C                                                                                               | 0.16748                 | 1.86             |             |
| 41 | HTLV1_p30   | INTS4                                                                                                | 0.54729                 | 1.84             |             |
| 42 | HTLV1_p30   | GUSBP1                                                                                               | 0.40142                 | 1.82             |             |
| 43 | HTLV1_p30   | KIAA1731                                                                                             | 0.50735                 | 1.81             |             |
| 44 | HTLV1_p30   | BBC3                                                                                                 | 0.40266                 | 1.80             |             |
| 45 | HTLV1_p30   | NECAB2                                                                                               | 0.37391                 | 1.80             |             |
| 46 | HTLV1_p30   | EMD                                                                                                  | 0.19811                 | 1.79             |             |
| 47 | HTLV1_p30   | ZNF467                                                                                               | 0.20212                 | 1.79             |             |
| 48 | HTLV1_p30   | TP73                                                                                                 | 0.27346                 | 1.79             |             |
| 49 | HTLV1_p30   | FBRS                                                                                                 | 0.32226                 | 1.77             |             |
| 50 | HTLV1_p30   | PKNOX1                                                                                               | 0.3198                  | 1.77             |             |
| 51 | HTLV1_p30   | KLF5                                                                                                 | 0.25691                 | 1.75             |             |
| 52 | HTLV1_p30   | CUL2                                                                                                 | 0.7745                  | 1.75             |             |
| 53 | HTLV1_p30   | SORBS1                                                                                               | 0.31092                 | 1.75             |             |
| 54 | HTLV1_p30   | STAP1                                                                                                | 0.76617                 | 1.75             |             |
| 55 | HTLV1_p30   | BCL10                                                                                                | 0.19354                 | 1.74             |             |
| 56 | HTLV1_p30   | FNIP1                                                                                                | 0.83638                 | 1.74             |             |
| 57 | HTLV1_p30   | ELOVL5                                                                                               | 0.17897                 | 1.73             |             |
| 58 | HTLV1_p30   | ZNF107                                                                                               | 0.37211                 | 1.73             |             |
| 59 | HTLV1_p30   | SCAMP1                                                                                               | 0.25478                 | 1.72             |             |
| 60 | HTLV1_p30   | DIP2A                                                                                                | 0.2927                  | 1.72             |             |
| 61 | HTLV1_p30   | NUB1                                                                                                 | 0.71298                 | 1.71             |             |
| 62 | HTLV1_p30   | ELP2                                                                                                 | 0.54942                 | 1.71             |             |
| 63 | HTLV1_p30   | PSMB2                                                                                                | 0.57107                 | 1.71             |             |
| 64 | HTLV1_p30   | NUDT6                                                                                                | 0.56787                 | 1.70             |             |
| 65 | HTLV1_p30   | API5                                                                                                 | 0.35381                 | 1.70             |             |
| 66 | HTLV1_p30   | HOOK3                                                                                                | 0.26595                 | 1.70             |             |
| 67 | HTLV1_p30   | LRPPRC                                                                                               | 0.90103                 | 1.69             |             |
| 68 | HTLV1_p30   | YY1AP1                                                                                               | 1.3951                  | 1.69             |             |
| 69 | HTLV1_p30   | GATAD2B                                                                                              | 0.41939                 | 1.68             |             |
| 70 | HTLV1_p30   | ZNF397                                                                                               | 0.27602                 | 1.68             |             |
| 71 | HTLV1_p30   | ATP6V1H                                                                                              | 0.056885                | 1.68             |             |
| 72 | HTLV1_p30   | TARS2                                                                                                | 0.57851                 | 1.68             |             |
| 73 | HTLV1_p30   | CCDC74A                                                                                              | 0.46157                 | 1.67             |             |
| 74 | HTLV1_p30   | HSP90B1                                                                                              | 0.8256                  | 1.67             |             |
| 75 | HTLV1_p30   | ZNF32                                                                                                | 0.21141                 | 1.67             |             |

Section 4 - Indirect PPI evidences (genes upregulated greater than 1.5 fold in tot201#NA2ist2: presence

|     |           |          |          |      |
|-----|-----------|----------|----------|------|
| 76  | HTLV1_p30 | ZKSCAN1  | 0.43208  | 1.67 |
| 77  | HTLV1_p30 | CCDC127  | 0.55913  | 1.67 |
| 78  | HTLV1_p30 | MAGEF1   | 0.071673 | 1.67 |
| 79  | HTLV1_p30 | FGFR1OP2 | 0.22364  | 1.66 |
| 80  | HTLV1_p30 | RPL35    | 1.0598   | 1.66 |
| 81  | HTLV1_p30 | VPRBP    | 0.90852  | 1.66 |
| 82  | HTLV1_p30 | TIFA     | 0.27276  | 1.65 |
| 83  | HTLV1_p30 | TOLLIP   | 0.26572  | 1.65 |
| 84  | HTLV1_p30 | ZNF548   | 0.30414  | 1.65 |
| 85  | HTLV1_p30 | PDS5A    | 0.94319  | 1.65 |
| 86  | HTLV1_p30 | ANP32A   | 1.4878   | 1.65 |
| 87  | HTLV1_p30 | PATL1    | 0.93199  | 1.65 |
| 88  | HTLV1_p30 | SEC24D   | 0.38305  | 1.65 |
| 89  | HTLV1_p30 | TMPO     | 0.15838  | 1.65 |
| 90  | HTLV1_p30 | GTF2H2   | 0.49337  | 1.64 |
| 91  | HTLV1_p30 | SKIL     | 0.26208  | 1.64 |
| 92  | HTLV1_p30 | PRICKLE1 | 0.8875   | 1.63 |
| 93  | HTLV1_p30 | SEC22B   | 0.14369  | 1.63 |
| 94  | HTLV1_p30 | POLR3D   | 0.177    | 1.63 |
| 95  | HTLV1_p30 | SETD3    | 0.25096  | 1.63 |
| 96  | HTLV1_p30 | SASS6    | 0.63845  | 1.63 |
| 97  | HTLV1_p30 | FAM63A   | 1.1916   | 1.62 |
| 98  | HTLV1_p30 | RPS10    | 1.5586   | 1.62 |
| 99  | HTLV1_p30 | FCF1     | 0.87996  | 1.61 |
| 100 | HTLV1_p30 | STRN4    | 0.34365  | 1.61 |
| 101 | HTLV1_p30 | LNX2     | 0.75722  | 1.61 |
| 102 | HTLV1_p30 | NIN      | 0.38694  | 1.61 |
| 103 | HTLV1_p30 | ZNF628   | 0.24669  | 1.61 |
| 104 | HTLV1_p30 | RRP1     | 0.75131  | 1.60 |
| 105 | HTLV1_p30 | SAFB     | 0.76988  | 1.60 |
| 106 | HTLV1_p30 | ATXN2    | 0.7552   | 1.59 |
| 107 | HTLV1_p30 | VPRBP    | 0.90852  | 1.59 |
| 108 | HTLV1_p30 | GLS      | 0.70937  | 1.59 |
| 109 | HTLV1_p30 | MZF1     | 0.64714  | 1.59 |
| 110 | HTLV1_p30 | ZNF430   | 0.4838   | 1.58 |
| 111 | HTLV1_p30 | CEP350   | 0.50552  | 1.58 |
| 112 | HTLV1_p30 | HSPD1    | 0.22074  | 1.58 |
| 113 | HTLV1_p30 | VHL      | 0.94418  | 1.57 |
| 114 | HTLV1_p30 | TFIP11   | 0.30927  | 1.57 |
| 115 | HTLV1_p30 | LUC7L2   | 0.6544   | 1.57 |
| 116 | HTLV1_p30 | CDC27    | 1.1311   | 1.57 |
| 117 | HTLV1_p30 | SUPT5H   | 0.97958  | 1.57 |
| 118 | HTLV1_p30 | SSBP3    | 0.59458  | 1.57 |
| 119 | HTLV1_p30 | ZNF175   | 0.3031   | 1.57 |
| 120 | HTLV1_p30 | MBD1     | 0.42099  | 1.57 |
| 121 | HTLV1_p30 | ZNF638   | 0.14786  | 1.56 |
| 122 | HTLV1_p30 | LIN7A    | 0.46813  | 1.56 |
| 123 | HTLV1_p30 | SUPT7L   | 0.46776  | 1.56 |
| 124 | HTLV1_p30 | TAF1B    | 0.35578  | 1.56 |
| 125 | HTLV1_p30 | ZNF92    | 0.46545  | 1.55 |
| 126 | HTLV1_p30 | ATXN7L3  | 0.83329  | 1.55 |
| 127 | HTLV1_p30 | HEATR1   | 1.043    | 1.55 |
| 128 | HTLV1_p30 | ZNF430   | 0.4838   | 1.55 |
| 129 | HTLV1_p30 | RMND5B   | 0.079678 | 1.55 |
| 130 | HTLV1_p30 | NCDN     | 0.37249  | 1.55 |
| 131 | HTLV1_p30 | PHKA1    | 0.28008  | 1.55 |
| 132 | HTLV1_p30 | DBNDD2   | 0.50131  | 1.54 |
| 133 | HTLV1_p30 | FGFR1OP  | 0.85563  | 1.54 |
| 134 | HTLV1_p30 | HDAC8    | 0.36813  | 1.54 |
| 135 | HTLV1_p30 | PRR14    | 0.24937  | 1.54 |
| 136 | HTLV1_p30 | PCGF3    | 0.85785  | 1.54 |
| 137 | HTLV1_p30 | WDHD1    | 0.30282  | 1.53 |
| 138 | HTLV1_p30 | CCT4     | 0.40261  | 1.53 |
| 139 | HTLV1_p30 | SPATS2   | 0.44203  | 1.53 |
| 140 | HTLV1_p30 | GINS4    | 0.44262  | 1.53 |
| 141 | HTLV1_p30 | LSM11    | 0.64813  | 1.53 |
| 142 | HTLV1_p30 | MRPS25   | 0.95947  | 1.53 |
| 143 | HTLV1_p30 | YRDC     | 0.61031  | 1.53 |
| 144 | HTLV1_p30 | ZNF519   | 0.44782  | 1.53 |
| 145 | HTLV1_p30 | PIAS2    | 0.74882  | 1.53 |
| 146 | HTLV1_p30 | ELOVL2   | 0.18079  | 1.53 |
| 147 | HTLV1_p30 | RANBP2   | 0.91022  | 1.53 |
| 148 | HTLV1_p30 | EPC1     | 0.48541  | 1.52 |
| 149 | HTLV1_p30 | ZNF680   | 0.49815  | 1.52 |
| 150 | HTLV1_p30 | AP3S2    | 0.07925  | 1.52 |
| 151 | HTLV1_p30 | PDP2     | 0.18697  | 1.52 |

Section 4 - Indirect PPI evidences (genes upregulated greater than 1.5 fold in total RNAi screen) Presence

|     |           |         |          |      |
|-----|-----------|---------|----------|------|
| 152 | HTLV1_p30 | OCIAD1  | 0.46318  | 1.52 |
| 153 | HTLV1_p30 | FECH    | 0.082794 | 1.52 |
| 154 | HTLV1_p30 | RPL10   | 0.87273  | 1.52 |
| 155 | HTLV1_p30 | CD2BP2  | 0.74605  | 1.51 |
| 156 | HTLV1_p30 | HABP4   | 0.99479  | 1.51 |
| 157 | HTLV1_p30 | KHSRP   | 0.87102  | 1.51 |
| 158 | HTLV1_p30 | CCDC74B | 0.46157  | 1.51 |
| 159 | HTLV1_p30 | ZMYM5   | 0.2378   | 1.51 |
| 160 | HTLV1_p30 | HIP1    | 0.35682  | 1.51 |
| 161 | HTLV1_p30 | UBE3C   | 0.4942   | 1.51 |
| 162 | HTLV1_p30 | CEP70   | 1.3814   | 1.51 |
| 163 | HTLV1_p30 | KIF2A   | 0.29899  | 1.50 |
| 164 | HTLV1_p30 | PLEKHM2 | 0.3113   | 1.50 |
| 165 | HTLV1_p30 | ZNF542  | 0.13091  | 1.50 |
| 166 | HTLV1_p30 | CC2D1A  | 0.14168  | 1.50 |
| 167 |           |         |          |      |

| [SECTION 5] Indirect PPI evidences (genes downregulated greater than 1.5 fold in the cytoplasm in the presence of p30) |              |                         |                              |
|------------------------------------------------------------------------------------------------------------------------|--------------|-------------------------|------------------------------|
|                                                                                                                        | HTLV protein | Targeted human proteins | confidence level fold change |
| 4                                                                                                                      | HTLV1_p30    | BRE                     | 0.31845 0.01                 |
| 5                                                                                                                      | HTLV1_p30    | REPS2                   | 0.35117 0.06                 |
| 6                                                                                                                      | HTLV1_p30    | HEATR6                  | 0.48229 0.11                 |
| 7                                                                                                                      | HTLV1_p30    | AKAP8L                  | 0.49779 0.11                 |
| 8                                                                                                                      | HTLV1_p30    | PELI1                   | 0.64025 0.13                 |
| 9                                                                                                                      | HTLV1_p30    | ZNF37A                  | 0.28667 0.14                 |
| 10                                                                                                                     | HTLV1_p30    | ANK1                    | 0.23817 0.16                 |
| 11                                                                                                                     | HTLV1_p30    | DLGAP4                  | 0.13406 0.20                 |
| 12                                                                                                                     | HTLV1_p30    | SAMHD1                  | 0.1586 0.21                  |
| 13                                                                                                                     | HTLV1_p30    | NCK1                    | 0.72469 0.25                 |
| 14                                                                                                                     | HTLV1_p30    | DLG1                    | 0.83302 0.26                 |
| 15                                                                                                                     | HTLV1_p30    | NUP133                  | 0.73135 0.27                 |
| 16                                                                                                                     | HTLV1_p30    | RNF146                  | 0.64211 0.28                 |
| 17                                                                                                                     | HTLV1_p30    | CDC42SE1                | 0.49591 0.28                 |
| 18                                                                                                                     | HTLV1_p30    | PATZ1                   | 0.18816 0.29                 |
| 19                                                                                                                     | HTLV1_p30    | SSBP2                   | 0.34419 0.29                 |
| 20                                                                                                                     | HTLV1_p30    | ZNF711                  | 0.5484 0.30                  |
| 21                                                                                                                     | HTLV1_p30    | VPS41                   | 0.39069 0.31                 |
| 22                                                                                                                     | HTLV1_p30    | FAM107B                 | 0.47683 0.32                 |
| 23                                                                                                                     | HTLV1_p30    | HDAC3                   | 0.50392 0.32                 |
| 24                                                                                                                     | HTLV1_p30    | SMYD2                   | 0.74098 0.35                 |
| 25                                                                                                                     | HTLV1_p30    | ARFGEF1                 | 0.61115 0.35                 |
| 26                                                                                                                     | HTLV1_p30    | GYG2                    | 0.24938 0.36                 |
| 27                                                                                                                     | HTLV1_p30    | GON4L                   | 0.57316 0.36                 |
| 28                                                                                                                     | HTLV1_p30    | ATP5F1                  | 0.28573 0.37                 |
| 29                                                                                                                     | HTLV1_p30    | RERE                    | 0.94251 0.38                 |
| 30                                                                                                                     | HTLV1_p30    | PAPOLA                  | 0.22844 0.38                 |
| 31                                                                                                                     | HTLV1_p30    | EPC1                    | 0.48541 0.39                 |
| 32                                                                                                                     | HTLV1_p30    | WTAP                    | 0.37377 0.39                 |
| 33                                                                                                                     | HTLV1_p30    | ERRFI1                  | 0.37353 0.39                 |
| 34                                                                                                                     | HTLV1_p30    | HSF1                    | 0.78198 0.40                 |
| 35                                                                                                                     | HTLV1_p30    | FANCD2                  | 0.68317 0.41                 |
| 36                                                                                                                     | HTLV1_p30    | MIER3                   | 0.47392 0.42                 |
| 37                                                                                                                     | HTLV1_p30    | TRPS1                   | 0.34568 0.43                 |
| 38                                                                                                                     | HTLV1_p30    | ATF7IP                  | 0.94906 0.43                 |
| 39                                                                                                                     | HTLV1_p30    | ZC3H13                  | 0.86928 0.43                 |
| 40                                                                                                                     | HTLV1_p30    | PPIG                    | 0.69288 0.44                 |
| 41                                                                                                                     | HTLV1_p30    | TAF1                    | 0.38579 0.44                 |
| 42                                                                                                                     | HTLV1_p30    | BRD4                    | 0.66225 0.45                 |
| 43                                                                                                                     | HTLV1_p30    | ZNF710                  | 0.21165 0.45                 |
| 44                                                                                                                     | HTLV1_p30    | TOX4                    | 0.58949 0.45                 |
| 45                                                                                                                     | HTLV1_p30    | MNS1                    | 0.80476 0.46                 |
| 46                                                                                                                     | HTLV1_p30    | CEP164                  | 1.521 0.46                   |
| 47                                                                                                                     | HTLV1_p30    | SPAG17                  | 0.50185 0.46                 |
| 48                                                                                                                     | HTLV1_p30    | RANBP2                  | 0.91022 0.47                 |
| 49                                                                                                                     | HTLV1_p30    | EXOSC1                  | 0.98343 0.47                 |
| 50                                                                                                                     | HTLV1_p30    | PCK2                    | 0.25585 0.47                 |
| 51                                                                                                                     | HTLV1_p30    | ZNF607                  | 0.36207 0.48                 |
| 52                                                                                                                     | HTLV1_p30    | EWSR1                   | 0.64756 0.48                 |
| 53                                                                                                                     | HTLV1_p30    | ZNF608                  | 1.0498 0.49                  |
| 54                                                                                                                     | HTLV1_p30    | NCOA2                   | 0.62658 0.49                 |
| 55                                                                                                                     | HTLV1_p30    | RBM25                   | 0.42896 0.49                 |
| 56                                                                                                                     | HTLV1_p30    | BICD2                   | 0.15813 0.49                 |
| 57                                                                                                                     | HTLV1_p30    | ASMTL                   | 0.5976 0.49                  |
| 58                                                                                                                     | HTLV1_p30    | RGP1                    | 0.81442 0.49                 |
| 59                                                                                                                     | HTLV1_p30    | RBMX                    | 0.60754 0.49                 |
| 60                                                                                                                     | HTLV1_p30    | DPH1                    | 0.19561 0.49                 |
| 61                                                                                                                     | HTLV1_p30    | PLSCR1                  | 0.27629 0.49                 |
| 62                                                                                                                     | HTLV1_p30    | ZBTB24                  | 0.56957 0.50                 |
| 63                                                                                                                     | HTLV1_p30    | ZMYM2                   | 0.70238 0.50                 |
| 64                                                                                                                     | HTLV1_p30    | ZZZ3                    | 0.34015 0.50                 |
| 65                                                                                                                     | HTLV1_p30    | ZZZ3                    | 0.34015 0.50                 |
| 66                                                                                                                     | HTLV1_p30    | DMD                     | 0.44053 0.50                 |
| 67                                                                                                                     | HTLV1_p30    | TATDN3                  | 0.23495 0.50                 |
| 68                                                                                                                     | HTLV1_p30    | CCNE2                   | 0.96219 0.50                 |
| 69                                                                                                                     | HTLV1_p30    | TCEAL7                  | 0.45356 0.50                 |
| 70                                                                                                                     | HTLV1_p30    | KIAA1107                | 0.17012 0.50                 |
| 71                                                                                                                     | HTLV1_p30    | CDK6                    | 0.488 0.51                   |
| 72                                                                                                                     | HTLV1_p30    | INTS6                   | 0.65124 0.51                 |
| 73                                                                                                                     | HTLV1_p30    | GINS4                   | 0.44262 0.51                 |
| 74                                                                                                                     | HTLV1_p30    | LPXN                    | 0.35812 0.51                 |

Section 5 - Indirect PPI evidences (genes downregulated greater than 1.5 fold in the presence of the protein)

|     |           |          |          |      |
|-----|-----------|----------|----------|------|
| 76  | HTLV1_p30 | ELOVL5   | 0.17897  | 0.51 |
| 77  | HTLV1_p30 | CDC37L1  | 0.25373  | 0.52 |
| 78  | HTLV1_p30 | VPS4A    | 0.45057  | 0.52 |
| 79  | HTLV1_p30 | YTHDF3   | 0.46322  | 0.52 |
| 80  | HTLV1_p30 | YTHDC1   | 0.6466   | 0.52 |
| 81  | HTLV1_p30 | MCM10    | 0.9859   | 0.52 |
| 82  | HTLV1_p30 | PIAS2    | 0.74882  | 0.52 |
| 83  | HTLV1_p30 | ZNF93    | 0.43494  | 0.52 |
| 84  | HTLV1_p30 | CEP350   | 0.50552  | 0.53 |
| 85  | HTLV1_p30 | RCL1     | 0.52746  | 0.53 |
| 86  | HTLV1_p30 | NOL3     | 0.89984  | 0.53 |
| 87  | HTLV1_p30 | TRO      | 0.27301  | 0.53 |
| 88  | HTLV1_p30 | DLST     | 0.21972  | 0.53 |
| 89  | HTLV1_p30 | TRRAP    | 0.75689  | 0.53 |
| 90  | HTLV1_p30 | NFIB     | 0.16344  | 0.53 |
| 91  | HTLV1_p30 | ZNF710   | 0.21165  | 0.53 |
| 92  | HTLV1_p30 | ZNF337   | 0.21809  | 0.53 |
| 93  | HTLV1_p30 | FLYWCH1  | 0.16987  | 0.54 |
| 94  | HTLV1_p30 | SF3B1    | 0.22879  | 0.54 |
| 95  | HTLV1_p30 | KIAA1211 | 0.24937  | 0.54 |
| 96  | HTLV1_p30 | CTNNBIP1 | 0.74772  | 0.54 |
| 97  | HTLV1_p30 | MPHOSPH9 | 0.2475   | 0.54 |
| 98  | HTLV1_p30 | AP1S1    | 0.26698  | 0.54 |
| 99  | HTLV1_p30 | TSPYL1   | 0.89424  | 0.55 |
| 100 | HTLV1_p30 | KIAA1731 | 0.50735  | 0.55 |
| 101 | HTLV1_p30 | ATRX     | 0.52614  | 0.55 |
| 102 | HTLV1_p30 | FAM63B   | 1.4967   | 0.55 |
| 103 | HTLV1_p30 | WAC      | 0.88855  | 0.55 |
| 104 | HTLV1_p30 | SKI      | 0.13003  | 0.55 |
| 105 | HTLV1_p30 | CTDP1    | 0.56063  | 0.55 |
| 106 | HTLV1_p30 | ACO2     | 0.16285  | 0.55 |
| 107 | HTLV1_p30 | MRPS12   | 0.73233  | 0.56 |
| 108 | HTLV1_p30 | PCGF3    | 0.85785  | 0.56 |
| 109 | HTLV1_p30 | AFF4     | 1.3515   | 0.56 |
| 110 | HTLV1_p30 | RPS14    | 0.72831  | 0.56 |
| 111 | HTLV1_p30 | MED12    | 0.45437  | 0.56 |
| 112 | HTLV1_p30 | FNIP1    | 0.83638  | 0.56 |
| 113 | HTLV1_p30 | BRWD1    | 0.83245  | 0.56 |
| 114 | HTLV1_p30 | GLE1     | 0.78409  | 0.56 |
| 115 | HTLV1_p30 | ZCCHC7   | 0.46382  | 0.56 |
| 116 | HTLV1_p30 | OXR1     | 0.14574  | 0.57 |
| 117 | HTLV1_p30 | EIF3B    | 0.41809  | 0.57 |
| 118 | HTLV1_p30 | SPATA18  | 0.37432  | 0.57 |
| 119 | HTLV1_p30 | GOLGA3   | 0.27173  | 0.57 |
| 120 | HTLV1_p30 | ZNF397   | 0.27602  | 0.57 |
| 121 | HTLV1_p30 | THOC2    | 0.45307  | 0.57 |
| 122 | HTLV1_p30 | EIF3A    | 1.2231   | 0.57 |
| 123 | HTLV1_p30 | HBP1     | 0.16353  | 0.57 |
| 124 | HTLV1_p30 | TFCP2L1  | 0.44388  | 0.57 |
| 125 | HTLV1_p30 | METTL9   | 0.26948  | 0.58 |
| 126 | HTLV1_p30 | ZC3HAV1  | 0.42133  | 0.58 |
| 127 | HTLV1_p30 | THEM4    | 0.67768  | 0.58 |
| 128 | HTLV1_p30 | CCDC82   | 0.24937  | 0.58 |
| 129 | HTLV1_p30 | SMARCA2  | 0.60383  | 0.58 |
| 130 | HTLV1_p30 | CLASP1   | 0.34361  | 0.58 |
| 131 | HTLV1_p30 | SH3BGR1  | 0.16541  | 0.58 |
| 132 | HTLV1_p30 | PPM1A    | 0.35275  | 0.58 |
| 133 | HTLV1_p30 | PACS2    | 0.59786  | 0.58 |
| 134 | HTLV1_p30 | HEATR2   | 0.016653 | 0.58 |
| 135 | HTLV1_p30 | CCNT2    | 0.97467  | 0.58 |
| 136 | HTLV1_p30 | CIRBP    | 0.27112  | 0.58 |
| 137 | HTLV1_p30 | ZNF675   | 0.5619   | 0.59 |
| 138 | HTLV1_p30 | IRF4     | 0.8414   | 0.59 |
| 139 | HTLV1_p30 | DHX9     | 0.32001  | 0.59 |
| 140 | HTLV1_p30 | FANCC    | 0.80726  | 0.59 |
| 141 | HTLV1_p30 | TFDP1    | 1.1233   | 0.59 |
| 142 | HTLV1_p30 | COG3     | 0.71187  | 0.59 |
| 143 | HTLV1_p30 | EIF5B    | 0.3278   | 0.59 |
| 144 | HTLV1_p30 | ZNF32    | 0.21141  | 0.59 |
| 145 | HTLV1_p30 | FXR1     | 0.014757 | 0.59 |
| 146 | HTLV1_p30 | GLTSCR1  | 0.89875  | 0.60 |
| 147 | HTLV1_p30 | PDCD10   | 0.67837  | 0.60 |
| 148 | HTLV1_p30 | AIP      | 0.79955  | 0.60 |
| 149 | HTLV1_p30 | HDDC2    | 0.28632  | 0.60 |
| 150 | HTLV1_p30 | SMARCC1  | 0.10665  | 0.60 |
| 151 | HTLV1_p30 | TFDP2    | 0.62021  | 0.60 |



|     |           |            |           |      |
|-----|-----------|------------|-----------|------|
| 152 | HTLV1_p30 | MTF1       | 0.79      | 0.60 |
| 153 | HTLV1_p30 | HSP90B1    | 0.8256    | 0.60 |
| 154 | HTLV1_p30 | FGFR1OP2   | 0.22364   | 0.61 |
| 155 | HTLV1_p30 | CENPA      | 0.23893   | 0.61 |
| 156 | HTLV1_p30 | SHMT1      | 0.26602   | 0.61 |
| 157 | HTLV1_p30 | MAP3K7     | 0.47939   | 0.61 |
| 158 | HTLV1_p30 | CDYL       | 0.21984   | 0.61 |
| 159 | HTLV1_p30 | TTC5       | 0.22269   | 0.61 |
| 160 | HTLV1_p30 | TFCP2      | 0.28267   | 0.61 |
| 161 | HTLV1_p30 | DISC1      | 0.27882   | 0.61 |
| 162 | HTLV1_p30 | DCUN1D2    | 0.0027648 | 0.61 |
| 163 | HTLV1_p30 | TFIP11     | 0.30927   | 0.61 |
| 164 | HTLV1_p30 | PRPF40A    | 0.83371   | 0.61 |
| 165 | HTLV1_p30 | CBX5       | 0.7101    | 0.62 |
| 166 | HTLV1_p30 | ZNF227     | 0.26904   | 0.62 |
| 167 | HTLV1_p30 | MIER1      | 1.0706    | 0.62 |
| 168 | HTLV1_p30 | GTF2A1     | 1.1378    | 0.62 |
| 169 | HTLV1_p30 | ARID2      | 0.44846   | 0.62 |
| 170 | HTLV1_p30 | HADHA      | 0.36045   | 0.62 |
| 171 | HTLV1_p30 | GYG2       | 0.24938   | 0.62 |
| 172 | HTLV1_p30 | RSC1A1     | 0.34102   | 0.62 |
| 173 | HTLV1_p30 | SETD4      | 0.045664  | 0.62 |
| 174 | HTLV1_p30 | CDC73      | 0.54427   | 0.62 |
| 175 | HTLV1_p30 | PRPF40A    | 0.83371   | 0.62 |
| 176 | HTLV1_p30 | PDS5B      | 0.73965   | 0.63 |
| 177 | HTLV1_p30 | MPI        | 0.14413   | 0.63 |
| 178 | HTLV1_p30 | RARS2      | 1.0723    | 0.63 |
| 179 | HTLV1_p30 | AURKAIP1   | 0.84438   | 0.63 |
| 180 | HTLV1_p30 | WDR4       | 0.84065   | 0.63 |
| 181 | HTLV1_p30 | CAND1      | 0.72005   | 0.63 |
| 182 | HTLV1_p30 | NASP       | 0.61984   | 0.63 |
| 183 | HTLV1_p30 | SH3GLB2    | 0.38819   | 0.63 |
| 184 | HTLV1_p30 | SP140      | 0.52812   | 0.63 |
| 185 | HTLV1_p30 | EIF4E2     | 0.63408   | 0.63 |
| 186 | HTLV1_p30 | CDKN2AIPNL | 0.92792   | 0.63 |
| 187 | HTLV1_p30 | PSAT1      | 0.18141   | 0.64 |
| 188 | HTLV1_p30 | TRAF3      | 0.4559    | 0.64 |
| 189 | HTLV1_p30 | ARIH2      | 0.46582   | 0.64 |
| 190 | HTLV1_p30 | RIF1       | 0.8131    | 0.64 |
| 191 | HTLV1_p30 | UBTD2      | 0.35391   | 0.64 |
| 192 | HTLV1_p30 | LDHC       | 1.0002    | 0.64 |
| 193 | HTLV1_p30 | TPD52L1    | 0.38258   | 0.64 |
| 194 | HTLV1_p30 | ASCC1      | 0.31448   | 0.64 |
| 195 | HTLV1_p30 | FIP1L1     | 1.0398    | 0.64 |
| 196 | HTLV1_p30 | DHX36      | 0.32166   | 0.64 |
| 197 | HTLV1_p30 | TTC19      | 0.85131   | 0.64 |
| 198 | HTLV1_p30 | NFATC2IP   | 0.45436   | 0.64 |
| 199 | HTLV1_p30 | CDC27      | 1.1311    | 0.64 |
| 200 | HTLV1_p30 | SUPT6H     | 0.43529   | 0.64 |
| 201 | HTLV1_p30 | TTF1       | 0.69493   | 0.64 |
| 202 | HTLV1_p30 | RPE        | 0.10981   | 0.64 |
| 203 | HTLV1_p30 | GSTZ1      | 0.67107   | 0.64 |
| 204 | HTLV1_p30 | IPO9       | 0.87382   | 0.65 |
| 205 | HTLV1_p30 | TBRG1      | 0.41251   | 0.65 |
| 206 | HTLV1_p30 | ZKSCAN3    | 0.24903   | 0.65 |
| 207 | HTLV1_p30 | CEBPZ      | 0.2973    | 0.65 |
| 208 | HTLV1_p30 | RANBP9     | 0.99641   | 0.65 |
| 209 | HTLV1_p30 | CKAP2      | 0.22913   | 0.65 |
| 210 | HTLV1_p30 | ZW10       | 0.49313   | 0.65 |
| 211 | HTLV1_p30 | MRPS25     | 0.95947   | 0.65 |
| 212 | HTLV1_p30 | MBNL1      | 0.41397   | 0.65 |
| 213 | HTLV1_p30 | SMC5       | 0.3217    | 0.65 |
| 214 | HTLV1_p30 | WAPAL      | 0.68035   | 0.65 |
| 215 | HTLV1_p30 | VPS26B     | 0.22528   | 0.65 |
| 216 | HTLV1_p30 | CFLAR      | 0.23423   | 0.65 |
| 217 | HTLV1_p30 | TNKS2      | 0.35441   | 0.65 |
| 218 | HTLV1_p30 | ZKSCAN4    | 0.25668   | 0.65 |
| 219 | HTLV1_p30 | UBE2Z      | 0.85583   | 0.65 |
| 220 | HTLV1_p30 | TCF4       | 0.48509   | 0.65 |
| 221 | HTLV1_p30 | HOOK3      | 0.26595   | 0.65 |
| 222 | HTLV1_p30 | PRPH       | 0.37466   | 0.65 |
| 223 | HTLV1_p30 | NFIB       | 0.16344   | 0.65 |
| 224 | HTLV1_p30 | DNAJB5     | 0.92441   | 0.65 |
| 225 | HTLV1_p30 | PKNOX1     | 0.3198    | 0.65 |
| 226 | HTLV1_p30 | PGM3       | 0.98672   | 0.65 |
| 227 | HTLV1_p30 | FBXW2      | 0.33409   | 0.65 |

Section 5 - Indirect PPI evidences (genes downregulated greater than 1.5 fold in the presence of HTLV1 p30)

|     |           |          |          |      |
|-----|-----------|----------|----------|------|
| 228 | HTLV1_p30 | SYCP2L   | 0.89936  | 0.66 |
| 229 | HTLV1_p30 | USH1C    | 0.36196  | 0.66 |
| 230 | HTLV1_p30 | FAM115A  | 0.2489   | 0.66 |
| 231 | HTLV1_p30 | REXO2    | 0.23108  | 0.66 |
| 232 | HTLV1_p30 | LSM2     | 0.79467  | 0.66 |
| 233 | HTLV1_p30 | ZNF793   | 0.28997  | 0.66 |
| 234 | HTLV1_p30 | FBXL4    | 0.46131  | 0.66 |
| 235 | HTLV1_p30 | LUC7L    | 0.81084  | 0.66 |
| 236 | HTLV1_p30 | CCRN4L   | 0.38387  | 0.66 |
| 237 | HTLV1_p30 | MPHOSPH8 | 0.64513  | 0.66 |
| 238 | HTLV1_p30 | MED6     | 0.62749  | 0.66 |
| 239 | HTLV1_p30 | LLGL2    | 0.74349  | 0.66 |
| 240 | HTLV1_p30 | NDNL2    | 0.75044  | 0.66 |
| 241 | HTLV1_p30 | RPE      | 0.10981  | 0.66 |
| 242 | HTLV1_p30 | PRUNE    | 0.73946  | 0.66 |
| 243 | HTLV1_p30 | RSF1     | 0.62292  | 0.66 |
| 244 | HTLV1_p30 | ACLY     | 0.24387  | 0.66 |
| 245 | HTLV1_p30 | GPRASP1  | 0.45292  | 0.66 |
| 246 | HTLV1_p30 | PNN      | 0.81129  | 0.66 |
| 247 | HTLV1_p30 | MCC      | 0.32816  | 0.66 |
| 248 | HTLV1_p30 | KPNA4    | 0.5405   | 0.66 |
| 249 | HTLV1_p30 | DIS3     | 0.66363  | 0.66 |
| 250 | HTLV1_p30 | RBM15    | 0.38304  | 0.67 |
| 251 | HTLV1_p30 | MED9     | 1.2889   | 0.67 |
| 252 | HTLV1_p30 | DDX17    | 0.6965   | 0.67 |
| 253 | HTLV1_p30 | BIRC5    | 0.24338  | 0.67 |
| 254 | HTLV1_p30 | BBX      | 0.242    | 0.67 |
| 255 | HTLV1_p30 | UPF1     | 0.62181  | 0.67 |
| 256 | HTLV1_p30 | APBB2    | 0.64553  | 0.67 |
| 257 | HTLV1_p30 | TMLHE    | 0.33741  | 0.67 |
| 258 | HTLV1_p30 | ATF7     | 0.94644  | 0.67 |
| 259 | HTLV1_p30 | HIC2     | 0.073138 | 0.67 |
| 260 | HTLV1_p30 | ZNF777   | 0.23038  | 0.67 |
| 261 | HTLV1_p30 | EPN1     | 0.052121 | 0.67 |
| 262 | HTLV1_p30 | CCS      | 0.54518  | 0.67 |
| 263 | HTLV1_p30 | ZNF367   | 0.33161  | 0.67 |
| 264 |           |          |          |      |

| 1  | [SECTION 6] Indirect PPI evidences (genes upregulated greater than 1.5 fold in the cytoplasm in the presence of p30) |                         |                  |             |
|----|----------------------------------------------------------------------------------------------------------------------|-------------------------|------------------|-------------|
| 2  |                                                                                                                      |                         |                  |             |
| 3  |                                                                                                                      |                         |                  |             |
| 4  | HTLV protein                                                                                                         | Targeted human proteins | confidence level | fold change |
| 5  | HTLV1_p30                                                                                                            | RPUSD1                  | 0.43032          | 3.57        |
| 6  | HTLV1_p30                                                                                                            | PN01                    | 0.1273           | 3.08        |
| 7  | HTLV1_p30                                                                                                            | SORBS3                  | 0.62137          | 2.98        |
| 8  | HTLV1_p30                                                                                                            | INCENP                  | 0.81933          | 2.94        |
| 9  | HTLV1_p30                                                                                                            | ATN1                    | 0.83533          | 2.92        |
| 10 | HTLV1_p30                                                                                                            | CCAR1                   | 0.92762          | 2.81        |
| 11 | HTLV1_p30                                                                                                            | CBX3                    | 0.74369          | 2.74        |
| 12 | HTLV1_p30                                                                                                            | TRAM1                   | 0.32243          | 2.71        |
| 13 | HTLV1_p30                                                                                                            | SPATA2L                 | 0.73186          | 2.65        |
| 14 | HTLV1_p30                                                                                                            | WAS                     | 0.3659           | 2.61        |
| 15 | HTLV1_p30                                                                                                            | HNRNPU                  | 0.34975          | 2.60        |
| 16 | HTLV1_p30                                                                                                            | RPS4X                   | 0.68068          | 2.56        |
| 17 | HTLV1_p30                                                                                                            | SENP6                   | 0.38815          | 2.51        |
| 18 | HTLV1_p30                                                                                                            | ZNF493                  | 0.38021          | 2.46        |
| 19 | HTLV1_p30                                                                                                            | NFRKB                   | 1.0423           | 2.40        |
| 20 | HTLV1_p30                                                                                                            | ZFP36L1                 | 0.95883          | 2.39        |
| 21 | HTLV1_p30                                                                                                            | ASXL1                   | 0.65515          | 2.37        |
| 22 | HTLV1_p30                                                                                                            | EZH2                    | 0.38814          | 2.35        |
| 23 | HTLV1_p30                                                                                                            | TPI1                    | 0.50715          | 2.32        |
| 24 | HTLV1_p30                                                                                                            | YARS                    | 0.097249         | 2.30        |
| 25 | HTLV1_p30                                                                                                            | ZNF383                  | 0.32046          | 2.30        |
| 26 | HTLV1_p30                                                                                                            | GOLGA4                  | 0.90077          | 2.29        |
| 27 | HTLV1_p30                                                                                                            | KIAA1430                | 0.24937          | 2.28        |
| 28 | HTLV1_p30                                                                                                            | NR2C1                   | 0.4401           | 2.28        |
| 29 | HTLV1_p30                                                                                                            | ZCCHC11                 | 0.65147          | 2.28        |
| 30 | HTLV1_p30                                                                                                            | UBE2E2                  | 0.82252          | 2.27        |
| 31 | HTLV1_p30                                                                                                            | PMF1                    | 1.1361           | 2.27        |
| 32 | HTLV1_p30                                                                                                            | ZNF436                  | 0.3338           | 2.24        |
| 33 | HTLV1_p30                                                                                                            | ETV5                    | 0.10416          | 2.20        |
| 34 | HTLV1_p30                                                                                                            | PDCD5                   | 0.268            | 2.19        |
| 35 | HTLV1_p30                                                                                                            | RNMT                    | 0.92061          | 2.18        |
| 36 | HTLV1_p30                                                                                                            | MAP9                    | 0.79446          | 2.14        |
| 37 | HTLV1_p30                                                                                                            | ZNF26                   | 0.34363          | 2.12        |
| 38 | HTLV1_p30                                                                                                            | BIVM                    | 0.46036          | 2.12        |
| 39 | HTLV1_p30                                                                                                            | ARIH2                   | 0.46582          | 2.12        |
| 40 | HTLV1_p30                                                                                                            | MBNL1                   | 0.41397          | 2.11        |
| 41 | HTLV1_p30                                                                                                            | MRPL19                  | 0.51314          | 2.11        |
| 42 | HTLV1_p30                                                                                                            | MALAT1                  | 0.086276         | 2.10        |
| 43 | HTLV1_p30                                                                                                            | KLHL20                  | 0.8459           | 2.09        |
| 44 | HTLV1_p30                                                                                                            | NACAP1                  | 0.53566          | 2.08        |
| 45 | HTLV1_p30                                                                                                            | NACA                    | 0.53901          | 2.08        |
| 46 | HTLV1_p30                                                                                                            | RSF1                    | 0.62292          | 2.07        |
| 47 | HTLV1_p30                                                                                                            | UHRF1BP1L               | 0.39623          | 2.06        |
| 48 | HTLV1_p30                                                                                                            | CCNY                    | 0.4883           | 2.05        |
| 49 | HTLV1_p30                                                                                                            | RPL37A                  | 0.85748          | 2.02        |
| 50 | HTLV1_p30                                                                                                            | ELMO1                   | 0.28027          | 2.02        |
| 51 | HTLV1_p30                                                                                                            | MEF2A                   | 0.30804          | 2.01        |
| 52 | HTLV1_p30                                                                                                            | ZNF574                  | 0.29588          | 2.01        |
| 53 | HTLV1_p30                                                                                                            | GTF2H2                  | 0.49337          | 2.00        |
| 54 | HTLV1_p30                                                                                                            | RPS3A                   | 1.3687           | 2.00        |
| 55 | HTLV1_p30                                                                                                            | LYST                    | 0.24147          | 1.99        |
| 56 | HTLV1_p30                                                                                                            | FUBP1                   | 0.49652          | 1.99        |
| 57 | HTLV1_p30                                                                                                            | TLE4                    | 0.55649          | 1.98        |
| 58 | HTLV1_p30                                                                                                            | GOLGA3                  | 0.27173          | 1.98        |
| 59 | HTLV1_p30                                                                                                            | ZNF354A                 | 0.32997          | 1.98        |
| 60 | HTLV1_p30                                                                                                            | TSC22D4                 | 1.2112           | 1.97        |
| 61 | HTLV1_p30                                                                                                            | RBBP6                   | 0.38765          | 1.97        |
| 62 | HTLV1_p30                                                                                                            | LYST                    | 0.24147          | 1.96        |
| 63 | HTLV1_p30                                                                                                            | UBE2D3                  | 1.0001           | 1.96        |
| 64 | HTLV1_p30                                                                                                            | SERPINB9                | 0.86267          | 1.96        |
| 65 | HTLV1_p30                                                                                                            | PIN4                    | 0.40702          | 1.95        |
| 66 | HTLV1_p30                                                                                                            | SND1                    | 0.96346          | 1.95        |
| 67 | HTLV1_p30                                                                                                            | IFT57                   | 0.46867          | 1.94        |
| 68 | HTLV1_p30                                                                                                            | TMF1                    | 1.1667           | 1.94        |
| 69 | HTLV1_p30                                                                                                            | CDKN1A                  | 0.233            | 1.93        |
| 70 | HTLV1_p30                                                                                                            | ARIH1                   | 0.56995          | 1.93        |
| 71 | HTLV1_p30                                                                                                            | SNAP29                  | 0.24622          | 1.92        |
| 72 | HTLV1_p30                                                                                                            | IARS                    | 0.90389          | 1.91        |
| 73 | HTLV1_p30                                                                                                            | CEP164                  | 1.521            | 1.90        |
| 74 | HTLV1_p30                                                                                                            | SNRPA1                  | 0.60157          | 1.89        |
| 75 | HTLV1_p30                                                                                                            | WDFY3                   | 0.5198           | 1.89        |

Section 6 - Indirect PPI evidences (genes upregulated greater than 1.5 fold in the 2014-01-23m22n4nthe presen

|     |           |          |          |      |
|-----|-----------|----------|----------|------|
| 76  | HTLV1_p30 | ANAPC7   | 0.75025  | 1.88 |
| 77  | HTLV1_p30 | ZNF431   | 0.50756  | 1.87 |
| 78  | HTLV1_p30 | UFM1     | 0.1156   | 1.87 |
| 79  | HTLV1_p30 | EWSR1    | 0.64756  | 1.87 |
| 80  | HTLV1_p30 | WTAP     | 0.37377  | 1.86 |
| 81  | HTLV1_p30 | VPS53    | 0.74498  | 1.86 |
| 82  | HTLV1_p30 | NFATC2IP | 0.45436  | 1.86 |
| 83  | HTLV1_p30 | SP100    | 0.83367  | 1.86 |
| 84  | HTLV1_p30 | AP1S2    | 0.31911  | 1.86 |
| 85  | HTLV1_p30 | WIPF1    | 0.16196  | 1.85 |
| 86  | HTLV1_p30 | JMJD1C   | 0.54348  | 1.85 |
| 87  | HTLV1_p30 | UBE3C    | 0.4942   | 1.84 |
| 88  | HTLV1_p30 | IFIH1    | 0.34679  | 1.84 |
| 89  | HTLV1_p30 | ZNF14    | 0.26437  | 1.84 |
| 90  | HTLV1_p30 | PPP1R13B | 0.85509  | 1.84 |
| 91  | HTLV1_p30 | DNAJC7   | 0.83605  | 1.83 |
| 92  | HTLV1_p30 | ZNF83    | 0.29177  | 1.83 |
| 93  | HTLV1_p30 | FUS      | 0.43023  | 1.83 |
| 94  | HTLV1_p30 | DNAJA2   | 0.96549  | 1.83 |
| 95  | HTLV1_p30 | MAGEF1   | 0.071673 | 1.82 |
| 96  | HTLV1_p30 | ARID4B   | 0.96843  | 1.82 |
| 97  | HTLV1_p30 | CPSF6    | 0.29385  | 1.82 |
| 98  | HTLV1_p30 | FAM27A   | 0.033188 | 1.82 |
| 99  | HTLV1_p30 | SUMO2    | 0.65288  | 1.82 |
| 100 | HTLV1_p30 | MBNL2    | 0.13979  | 1.81 |
| 101 | HTLV1_p30 | UBE2B    | 0.91374  | 1.80 |
| 102 | HTLV1_p30 | SF1      | 0.35465  | 1.79 |
| 103 | HTLV1_p30 | UEVLD    | 0.28316  | 1.78 |
| 104 | HTLV1_p30 | GLS      | 0.70937  | 1.78 |
| 105 | HTLV1_p30 | ZXDC     | 0.66011  | 1.78 |
| 106 | HTLV1_p30 | DTX3L    | 0.42826  | 1.78 |
| 107 | HTLV1_p30 | TP53INP1 | 0.99489  | 1.78 |
| 108 | HTLV1_p30 | FBXL14   | 0.35254  | 1.76 |
| 109 | HTLV1_p30 | PRPF38B  | 0.49481  | 1.76 |
| 110 | HTLV1_p30 | ZFR      | 0.29373  | 1.76 |
| 111 | HTLV1_p30 | EPB41    | 0.3732   | 1.76 |
| 112 | HTLV1_p30 | DNAJB9   | 0.71286  | 1.76 |
| 113 | HTLV1_p30 | ATXN2L   | 0.62701  | 1.76 |
| 114 | HTLV1_p30 | PYHIN1   | 0.18039  | 1.75 |
| 115 | HTLV1_p30 | ZFR      | 0.29373  | 1.75 |
| 116 | HTLV1_p30 | THOC2    | 0.45307  | 1.75 |
| 117 | HTLV1_p30 | ZDBF2    | 0.55061  | 1.74 |
| 118 | HTLV1_p30 | VPS13A   | 0.91327  | 1.74 |
| 119 | HTLV1_p30 | PGM2     | 0.62745  | 1.73 |
| 120 | HTLV1_p30 | USP53    | 0.5502   | 1.73 |
| 121 | HTLV1_p30 | TAF15    | 0.19205  | 1.73 |
| 122 | HTLV1_p30 | SDCCAG8  | 0.92082  | 1.73 |
| 123 | HTLV1_p30 | PHF6     | 0.47654  | 1.73 |
| 124 | HTLV1_p30 | PGBD1    | 0.2637   | 1.73 |
| 125 | HTLV1_p30 | MSTO1    | 0.13252  | 1.72 |
| 126 | HTLV1_p30 | ARGLU1   | 0.39389  | 1.72 |
| 127 | HTLV1_p30 | BARD1    | 0.29377  | 1.72 |
| 128 | HTLV1_p30 | HINT3    | 0.49557  | 1.72 |
| 129 | HTLV1_p30 | EIF3J    | 0.8284   | 1.71 |
| 130 | HTLV1_p30 | ZCCHC7   | 0.46382  | 1.71 |
| 131 | HTLV1_p30 | TCEB2    | 1.2248   | 1.71 |
| 132 | HTLV1_p30 | MZF1     | 0.64714  | 1.71 |
| 133 | HTLV1_p30 | PPHLN1   | 0.67041  | 1.70 |
| 134 | HTLV1_p30 | FLYWCH1  | 0.16987  | 1.70 |
| 135 | HTLV1_p30 | PUM2     | 0.49531  | 1.70 |
| 136 | HTLV1_p30 | FAM83H   | 0.54636  | 1.69 |
| 137 | HTLV1_p30 | IREB2    | 0.56075  | 1.69 |
| 138 | HTLV1_p30 | POGZ     | 0.40675  | 1.69 |
| 139 | HTLV1_p30 | RAD52    | 0.53357  | 1.69 |
| 140 | HTLV1_p30 | DDX26B   | 1.0959   | 1.69 |
| 141 | HTLV1_p30 | BCL10    | 0.19354  | 1.68 |
| 142 | HTLV1_p30 | ZNF404   | 0.47643  | 1.68 |
| 143 | HTLV1_p30 | ABI1     | 0.29899  | 1.68 |
| 144 | HTLV1_p30 | LYRM7    | 0.60065  | 1.67 |
| 145 | HTLV1_p30 | CDV3     | 0.56233  | 1.67 |
| 146 | HTLV1_p30 | UBE2H    | 0.73939  | 1.67 |
| 147 | HTLV1_p30 | HOXC13   | 0.40585  | 1.67 |
| 148 | HTLV1_p30 | MDH2     | 0.75212  | 1.67 |
| 149 | HTLV1_p30 | CAND1    | 0.72005  | 1.66 |
| 150 | HTLV1_p30 | ZNF382   | 0.3048   | 1.66 |
| 151 | HTLV1_p30 | PPM1A    | 0.35275  | 1.66 |

Section 6 - Indirect PPI evidences (genes upregulated greater than 1.5 fold in the 2014-01-23m22n4n1e pres

|     |           |          |          |      |
|-----|-----------|----------|----------|------|
| 152 | HTLV1_p30 | ALOX5    | 0.32454  | 1.66 |
| 153 | HTLV1_p30 | ZNF17    | 0.25339  | 1.66 |
| 154 | HTLV1_p30 | ZNF658   | 0.24611  | 1.66 |
| 155 | HTLV1_p30 | LRPPRC   | 0.90103  | 1.66 |
| 156 | HTLV1_p30 | SOX13    | 0.78384  | 1.66 |
| 157 | HTLV1_p30 | CLEC16A  | 0.23452  | 1.66 |
| 158 | HTLV1_p30 | MDM1     | 0.46462  | 1.65 |
| 159 | HTLV1_p30 | MALAT1   | 0.086276 | 1.65 |
| 160 | HTLV1_p30 | FAM46A   | 0.52367  | 1.65 |
| 161 | HTLV1_p30 | SDHC     | 0.35424  | 1.65 |
| 162 | HTLV1_p30 | MSTO1    | 0.13252  | 1.65 |
| 163 | HTLV1_p30 | GFI1     | 0.30684  | 1.65 |
| 164 | HTLV1_p30 | CDC73    | 0.54427  | 1.64 |
| 165 | HTLV1_p30 | MUM1     | 0.58259  | 1.64 |
| 166 | HTLV1_p30 | DLG1     | 0.83302  | 1.64 |
| 167 | HTLV1_p30 | PDE4B    | 0.23506  | 1.64 |
| 168 | HTLV1_p30 | NCK1     | 0.72469  | 1.64 |
| 169 | HTLV1_p30 | USP54    | 0.38153  | 1.64 |
| 170 | HTLV1_p30 | DTNBP1   | 0.28489  | 1.64 |
| 171 | HTLV1_p30 | DMTF1    | 0.86552  | 1.64 |
| 172 | HTLV1_p30 | HABP4    | 0.99479  | 1.64 |
| 173 | HTLV1_p30 | EID3     | 0.8463   | 1.64 |
| 174 | HTLV1_p30 | SH3BGRL3 | 0.15826  | 1.64 |
| 175 | HTLV1_p30 | MRPL43   | 0.54328  | 1.63 |
| 176 | HTLV1_p30 | FBXO46   | 0.96206  | 1.63 |
| 177 | HTLV1_p30 | FUBP1    | 0.49652  | 1.63 |
| 178 | HTLV1_p30 | DCUN1D1  | 0.35026  | 1.63 |
| 179 | HTLV1_p30 | MRPL30   | 0.088153 | 1.63 |
| 180 | HTLV1_p30 | SLAIN1   | 0.81906  | 1.63 |
| 181 | HTLV1_p30 | GATAD2A  | 0.75439  | 1.62 |
| 182 | HTLV1_p30 | RFX2     | 0.242    | 1.62 |
| 183 | HTLV1_p30 | BCOR     | 0.36427  | 1.62 |
| 184 | HTLV1_p30 | NPL      | 0.56488  | 1.62 |
| 185 | HTLV1_p30 | ZNF302   | 0.22197  | 1.62 |
| 186 | HTLV1_p30 | NOL6     | 0.39322  | 1.61 |
| 187 | HTLV1_p30 | FZR1     | 1.1668   | 1.61 |
| 188 | HTLV1_p30 | TRAK2    | 0.55482  | 1.61 |
| 189 | HTLV1_p30 | SMC5     | 0.3217   | 1.61 |
| 190 | HTLV1_p30 | NPHP4    | 0.79218  | 1.61 |
| 191 | HTLV1_p30 | RBM15    | 0.38304  | 1.61 |
| 192 | HTLV1_p30 | DDX6     | 0.68172  | 1.61 |
| 193 | HTLV1_p30 | IDI1     | 0.37342  | 1.61 |
| 194 | HTLV1_p30 | ZC3H12C  | 0.42931  | 1.61 |
| 195 | HTLV1_p30 | COPS8    | 0.38964  | 1.61 |
| 196 | HTLV1_p30 | SAMHD1   | 0.1586   | 1.60 |
| 197 | HTLV1_p30 | CRBN     | 0.51678  | 1.60 |
| 198 | HTLV1_p30 | SPTBN1   | 0.47635  | 1.60 |
| 199 | HTLV1_p30 | CCDC9    | 0.39895  | 1.60 |
| 200 | HTLV1_p30 | RPL35    | 1.0598   | 1.60 |
| 201 | HTLV1_p30 | KPNA3    | 1.024    | 1.60 |
| 202 | HTLV1_p30 | UBE2D3   | 1.0001   | 1.60 |
| 203 | HTLV1_p30 | PGM2L1   | 0.62358  | 1.60 |
| 204 | HTLV1_p30 | CUL5     | 0.8311   | 1.60 |
| 205 | HTLV1_p30 | FNTB     | 0.047482 | 1.60 |
| 206 | HTLV1_p30 | IRF7     | 0.56445  | 1.60 |
| 207 | HTLV1_p30 | AIM1     | 0.63292  | 1.60 |
| 208 | HTLV1_p30 | SEPSECS  | 0.56404  | 1.60 |
| 209 | HTLV1_p30 | HSPD1    | 0.22074  | 1.60 |
| 210 | HTLV1_p30 | AMOTL2   | 0.34989  | 1.59 |
| 211 | HTLV1_p30 | PBX2     | 0.51924  | 1.59 |
| 212 | HTLV1_p30 | BCORL1   | 0.61791  | 1.59 |
| 213 | HTLV1_p30 | PRICKLE1 | 0.8875   | 1.59 |
| 214 | HTLV1_p30 | TIA1     | 0.28798  | 1.59 |
| 215 | HTLV1_p30 | BAD      | 0.070743 | 1.59 |
| 216 | HTLV1_p30 | SSBP3    | 0.59458  | 1.59 |
| 217 | HTLV1_p30 | MED28    | 1.0798   | 1.59 |
| 218 | HTLV1_p30 | PELO     | 0.31856  | 1.59 |
| 219 | HTLV1_p30 | GOPC     | 0.77018  | 1.59 |
| 220 | HTLV1_p30 | POP4     | 0.94567  | 1.58 |
| 221 | HTLV1_p30 | ATXN7    | 1.0319   | 1.58 |
| 222 | HTLV1_p30 | LRCH4    | 0.42038  | 1.58 |
| 223 | HTLV1_p30 | XPO4     | 0.77357  | 1.58 |
| 224 | HTLV1_p30 | FARSB    | 0.86786  | 1.58 |
| 225 | HTLV1_p30 | UBR1     | 0.33505  | 1.58 |
| 226 | HTLV1_p30 | XPO1     | 1.0715   | 1.57 |
| 227 | HTLV1_p30 | ZMYM2    | 0.70238  | 1.57 |

Section 6 - Indirect PPI evidences (genes upregulated greater than 1.5 fold in the 2014-2013m21n4e pres

|     |           |            |          |      |
|-----|-----------|------------|----------|------|
| 228 | HTLV1_p30 | PPP3CA     | 0.44765  | 1.57 |
| 229 | HTLV1_p30 | KLC1       | 0.60572  | 1.57 |
| 230 | HTLV1_p30 | LCP2       | 0.7069   | 1.57 |
| 231 | HTLV1_p30 | UBE2D1     | 0.81042  | 1.57 |
| 232 | HTLV1_p30 | IREB2      | 0.56075  | 1.57 |
| 233 | HTLV1_p30 | GSPT2      | 0.59363  | 1.57 |
| 234 | HTLV1_p30 | PIAS2      | 0.74882  | 1.57 |
| 235 | HTLV1_p30 | ZNF320     | 0.32699  | 1.57 |
| 236 | HTLV1_p30 | CDCA7      | 0.63845  | 1.56 |
| 237 | HTLV1_p30 | TEAD2      | 0.75596  | 1.56 |
| 238 | HTLV1_p30 | ALAS2      | 0.29461  | 1.56 |
| 239 | HTLV1_p30 | KHDRBS3    | 0.8226   | 1.56 |
| 240 | HTLV1_p30 | CABLES1    | 0.8069   | 1.56 |
| 241 | HTLV1_p30 | CDKN2AIPNL | 0.92792  | 1.56 |
| 242 | HTLV1_p30 | CDC23      | 0.67236  | 1.55 |
| 243 | HTLV1_p30 | ZFP30      | 0.54106  | 1.55 |
| 244 | HTLV1_p30 | ARRDC3     | 0.25112  | 1.55 |
| 245 | HTLV1_p30 | ZNF655     | 0.90465  | 1.55 |
| 246 | HTLV1_p30 | U2AF1      | 0.52298  | 1.55 |
| 247 | HTLV1_p30 | BOLA2      | 0.38958  | 1.55 |
| 248 | HTLV1_p30 | NMRAL1     | 0.099501 | 1.55 |
| 249 | HTLV1_p30 | MICALL1    | 0.30669  | 1.55 |
| 250 | HTLV1_p30 | CCDC74A    | 0.46157  | 1.55 |
| 251 | HTLV1_p30 | TRAPPC3    | 0.38421  | 1.55 |
| 252 | HTLV1_p30 | CCDC97     | 0.24937  | 1.54 |
| 253 | HTLV1_p30 | FGFR1OP    | 0.85563  | 1.54 |
| 254 | HTLV1_p30 | SDCCAG8    | 0.92082  | 1.54 |
| 255 | HTLV1_p30 | SCML1      | 0.20918  | 1.54 |
| 256 | HTLV1_p30 | CCDC14     | 0.27024  | 1.54 |
| 257 | HTLV1_p30 | SMURF2     | 0.52804  | 1.54 |
| 258 | HTLV1_p30 | TDRD3      | 0.34443  | 1.54 |
| 259 | HTLV1_p30 | PPP2R4     | 0.49741  | 1.54 |
| 260 | HTLV1_p30 | OSGEPL1    | 0.26979  | 1.54 |
| 261 | HTLV1_p30 | LIMD1      | 0.34962  | 1.54 |
| 262 | HTLV1_p30 | CHIC2      | 0.27919  | 1.54 |
| 263 | HTLV1_p30 | ZKSCAN5    | 0.52865  | 1.54 |
| 264 | HTLV1_p30 | ZNF160     | 0.38886  | 1.54 |
| 265 | HTLV1_p30 | ILF3       | 1.2124   | 1.53 |
| 266 | HTLV1_p30 | BRD4       | 0.66225  | 1.53 |
| 267 | HTLV1_p30 | FANCA      | 0.70005  | 1.53 |
| 268 | HTLV1_p30 | NDE1       | 0.2821   | 1.53 |
| 269 | HTLV1_p30 | BRWD1      | 0.83245  | 1.53 |
| 270 | HTLV1_p30 | ZMYM2      | 0.70238  | 1.53 |
| 271 | HTLV1_p30 | TMCO6      | 1.168    | 1.53 |
| 272 | HTLV1_p30 | CINP       | 0.79069  | 1.53 |
| 273 | HTLV1_p30 | CAMTA2     | 1.228    | 1.53 |
| 274 | HTLV1_p30 | SIRT4      | 0.53395  | 1.53 |
| 275 | HTLV1_p30 | MED16      | 0.48556  | 1.53 |
| 276 | HTLV1_p30 | MUM1       | 0.58259  | 1.53 |
| 277 | HTLV1_p30 | CCNY       | 0.4883   | 1.53 |
| 278 | HTLV1_p30 | ZNF101     | 0.18328  | 1.52 |
| 279 | HTLV1_p30 | ENO3       | 0.37846  | 1.52 |
| 280 | HTLV1_p30 | POLI       | 0.25785  | 1.52 |
| 281 | HTLV1_p30 | ZNF260     | 0.25449  | 1.52 |
| 282 | HTLV1_p30 | ESF1       | 1.1533   | 1.52 |
| 283 | HTLV1_p30 | CDT1       | 0.71816  | 1.52 |
| 284 | HTLV1_p30 | MDFIC      | 1.3609   | 1.52 |
| 285 | HTLV1_p30 | ETS2       | 0.6608   | 1.51 |
| 286 | HTLV1_p30 | PTCD2      | 0.25451  | 1.51 |
| 287 | HTLV1_p30 | MDM2       | 0.31125  | 1.51 |
| 288 | HTLV1_p30 | UROD       | 0.59558  | 1.51 |
| 289 | HTLV1_p30 | FGFR1OP2   | 0.22364  | 1.51 |
| 290 | HTLV1_p30 | YRDC       | 0.61031  | 1.51 |
| 291 | HTLV1_p30 | SASS6      | 0.63845  | 1.51 |
| 292 | HTLV1_p30 | PDE4DIP    | 0.83199  | 1.51 |
| 293 | HTLV1_p30 | SETD8      | 0.58974  | 1.51 |
| 294 | HTLV1_p30 | NOL7       | 0.8529   | 1.50 |
| 295 | HTLV1_p30 | KIAA1107   | 0.17012  | 1.50 |
| 296 | HTLV1_p30 | PCBP2      | 1.0133   | 1.50 |
| 297 | HTLV1_p30 | ZNF569     | 0.25059  | 1.50 |
| 298 |           |            |          |      |

```
1 [Section 7] biological processes that the HTLV viruses may interfere with
2
3
4 [Cluster 1]GO:0060632+P biological_process [name] regulation of microtubule-based
movement [def] "Any process that modulates the rate, frequency, or extent of
microtubule-based movement, the movement of organelles, other microtubules and other
particles along microtubules, mediated by motor proteins." [GOC
5 Pathogen[ Q2Q067] interacts with 1 human partners:{P78318}
6 Pathogen[ POC214] interacts with 1 human partners:{P78318}
7 Pathogen[ P03346] interacts with 1 human partners:{P78318}
8 Pathogen[ Q85601] interacts with 1 human partners:{P78318}
9 Pathogen[ P14079] interacts with 2 human partners:{P78318;P10636}
10 Pathogen[ P03383] interacts with 1 human partners:{P78318}
11 Pathogen[ P03410] interacts with 2 human partners:{P78318;P10636}
12 Pathogen[ P14075] interacts with 1 human partners:{P78318}
13 Pathogen[ POC206] interacts with 2 human partners:{P78318;P10636}
14 Pathogen[ P03363] interacts with 1 human partners:{P78318}
15 [Cluster 2]GO:0036250+P
16 Pathogen[ Q2Q067] interacts with 1 human partners:{075381}
17 Pathogen[ POC214] interacts with 1 human partners:{075381}
18 Pathogen[ P03346] interacts with 1 human partners:{075381}
19 Pathogen[ Q85601] interacts with 1 human partners:{075381}
20 Pathogen[ P14079] interacts with 1 human partners:{075381}
21 Pathogen[ P03383] interacts with 1 human partners:{075381}
22 Pathogen[ P03410] interacts with 1 human partners:{075381}
23 Pathogen[ P14075] interacts with 1 human partners:{075381}
24 Pathogen[ POC206] interacts with 1 human partners:{075381}
25 Pathogen[ P03363] interacts with 1 human partners:{075381}
26 [Cluster 3]GO:0030073+P biological_process [name] insulin secretion [def] "The
regulated release of proinsulin from secretory granules (B granules) in the B cells of
the pancreas_ accompanied by cleavage of proinsulin to form mature insulin." [GOC
27 Pathogen[ Q2Q067] interacts with 5 human
partners:{Q13562;P35680;Q8NHW3;Q15796;P20823}
28 Pathogen[ POC214] interacts with 2 human partners:{Q8NHW3;Q15796}
29 Pathogen[ P03346] interacts with 5 human
partners:{Q15796;P20823;P35680;Q13562;Q8NHW3}
30 Pathogen[ Q85601] interacts with 5 human
partners:{Q13562;Q8NHW3;P35680;P20823;Q15796}
31 Pathogen[ P14079] interacts with 5 human
partners:{P04083;O14810;P35680;Q8NHW3;Q8WVH0}
32 Pathogen[ P03383] interacts with 1 human partners:{Q15796}
33 Pathogen[ P03410] interacts with 5 human
partners:{O14810;Q8WVH0;Q8NHW3;P35680;Q15796}
34 Pathogen[ P14075] interacts with 1 human partners:{Q15796}
35 Pathogen[ POC206] interacts with 5 human
partners:{Q15796;P35680;P20823;Q8NHW3;Q13562}
36 Pathogen[ P03363] interacts with 2 human partners:{Q8NHW3;Q15796}
37 [Cluster 4]GO:0034141+P biological_process [name] positive regulation of toll-like
receptor 3 signaling pathway [def] "Any process that activates or increases the
frequency, rate, or extent of toll-like receptor 3 signaling pathway." [GOC
38 Pathogen[ Q2Q067] interacts with 1 human partners:{Q96FA3}
39 Pathogen[ POC214] interacts with 1 human partners:{Q96FA3}
40 Pathogen[ P03346] interacts with 1 human partners:{Q96FA3}
41 Pathogen[ Q85601] interacts with 1 human partners:{Q96FA3}
42 Pathogen[ P14079] interacts with 1 human partners:{Q96FA3}
43 Pathogen[ P03383] interacts with 1 human partners:{Q96FA3}
44 Pathogen[ P03410] interacts with 1 human partners:{Q96FA3}
45 Pathogen[ P14075] interacts with 1 human partners:{Q96FA3}
46 Pathogen[ POC206] interacts with 1 human partners:{Q96FA3}
47 Pathogen[ P03363] interacts with 1 human partners:{Q96FA3}
48 [Cluster 5]GO:0034329+P biological_process [name] cell junction assembly [def] "A
cellular process that results in the aggregation, arrangement and bonding together of a
set of components to form a cell junction." [GOC
49 Pathogen[ Q2Q067] interacts with 9 human
partners:{Q14315;Q8NI35;Q9NPB6;Q9BYG5;Q9NVD7;P13647;Q9BYG4;P02533;O60716}
50 Pathogen[ POC214] interacts with 11 human
partners:{P60709;Q8NI35;P02533;O60716;Q14315;Q9NPB6;Q9BYG5;P13647;Q9NVD7;P63261;Q9BY
G4}
51 Pathogen[ P03346] interacts with 16 human
partners:{Q96AC1;Q14315;O60716;Q15149;P60709;Q9NPB6;P55196;Q8TEW0;Q8NI35;Q8N3R9;P025
33;Q9BYG5;P48059;Q9BYG4;Q9NVD7;P13647}
52 Pathogen[ Q85601] interacts with 12 human
partners:{Q9NVD7;P02533;Q9BYG5;P60709;O60716;Q8NI35;P63261;Q9NPB6;Q14315;P48059;P136
47;Q9BYG4}
53 Pathogen[ P14079] interacts with 22 human
partners:{P63261;Q8N7P3;Q9BYG5;P56750;P02533;P50552;Q8TEW0;Q15149;Q96GC9;Q14315;Q8NI
```

- 54 35;Q9BYG4;Q96AC1;P60709;Q96B33;Q8N3R9;P49023;Q9NPB6;P48059;Q9NVD7;O60716;P13647}  
Pathogen[ P03383] interacts with 6 human  
partners:{O60716;P02533;Q9BYG5;Q9NPB6;P13647;Q9BYG4}
- 55 Pathogen[ P03410] interacts with 20 human  
partners:{P02533;Q96B33;Q96GC9;Q8N7P3;O60716;Q8NI35;P50552;Q14315;P48059;Q8TEW0;Q9NP  
B6;P63261;Q9NVD7;P56750;Q15149;P13647;Q9BYG4;Q8N3R9;P60709;Q9BYG5}
- 56 Pathogen[ P14075] interacts with 6 human  
partners:{Q9BYG4;P13647;Q9BYG5;Q9NPB6;O60716;P02533}
- 57 Pathogen[ P0C206] interacts with 15 human  
partners:{O60716;P60709;Q9NVD7;Q14315;Q9BYG5;Q8N3R9;Q8TEW0;P13647;P55196;P63261;P480  
59;Q8NI35;Q9NPB6;P02533;Q9BYG4}
- 58 Pathogen[ P03363] interacts with 14 human  
partners:{P02533;P60709;Q9NPB6;Q9BYG4;P13647;Q15149;Q8N3R9;Q9BYG5;Q8NI35;P63261;Q96A  
C1;Q9NVD7;O60716;Q14315}
- 59 [Cluster 6]GO:0006614+P biological\_process [name] SRP-dependent cotranslational protein  
targeting to membrane [def] "The targeting of proteins to a membrane that occurs  
during translation and is dependent upon two key components, the signal-recognition  
particle (SRP) and the SRP receptor. SRP is a cytosolic particle that transiently binds  
to the endoplasmic reticulum (ER) signal sequence in a nascent protein, to the large  
ribosomal unit, and to the SRP receptor in the ER membrane." [ISBN
- 60 Pathogen[ Q2Q067] interacts with 85 human  
partners:{P61313;P62701;P49458;P47914;P46779;Q02543;P26373;P62750;P62273;P15880;P404  
29;P09132;P46782;P35268;P22090;P46778;P62888;P32969;P62277;P62241;P62244;P05387;P628  
61;P42766;P05386;Q9UNX3;P30050;Q15629;P18077;P62891;P61927;P39023;P62081;P61247;Q9UH  
B9;P61254;P62249;P62280;P83731;P62263;P60866;P62906;Q02878;P46777;P62899;P08708;P088  
65;Q07020;P62913;P62269;P62424;P62917;P62829;P46783;P36578;P62857;P49207;P233  
96;P63173;P18621;P39019;P61353;P62266;P42677;Q9Y3U8;P63220;P62841;P83881;P62987;P509  
14;P46776;P62854;P62753;P05388;P18124;P62851;P25398;P62910;Q92901;P46781;P27635;P615  
13;P62945;P62979}
- 61 Pathogen[ P0C214] interacts with 83 human  
partners:{P62861;P84098;P61247;P15880;P62081;P42766;P62913;P22090;Q92901;P62249;P628  
99;P62854;P39019;P62263;P62273;P23396;P18077;P05388;P62847;P62829;P26373;P27635;P467  
78;P61513;P83881;P62701;P49207;P63220;P08865;P32969;Q02543;P62266;P62277;P50914;P467  
79;P40429;P47914;P63173;P46783;P62280;Q9UNX3;Q9Y3U8;P30050;P62753;P62910;P62891;P622  
69;P46781;P61254;P62841;P62244;P62987;Q07020;P42677;P62945;P46776;Q15629;P62241;P467  
77;P83731;P35268;Q9UHB9;P62424;P60866;P62857;P49458;P61313;P08708;P05387;P25398;P619  
27;P62750;P62979;P05386;P09132;P62851;P46782;P18124;P61353;P36578;P18621;P62906;Q028  
78}
- 62 Pathogen[ P03346] interacts with 86 human  
partners:{P05387;P46779;P63173;P62917;P62249;P62913;P62861;P62277;Q02878;P62280;P390  
23;P62987;P61927;Q9UNX3;P62857;P46778;P49207;Q15629;P62266;P61254;P62424;P62273;P837  
31;P60866;P49458;P62899;P35268;P09132;P62891;P08708;P46782;P61353;P62854;Q9Y3U8;P479  
14;P08865;P61313;P25398;P61513;P05388;P62269;Q02543;P42766;P62081;P61247;P18621;P467  
81;P84098;P15880;P50914;P62829;P62979;P39019;P23396;P42677;P62750;P62701;P30050;P629  
10;P36578;P62847;Q9UHB9;P62851;P22090;P46777;Q07020;P62263;P62841;P63881;P05386;P180  
77;P46776;P62241;P62753;P62945;Q92901;P32969;P26373;P18124;P40429;P27635;P46783;P629  
06;P62244;P62888;P63220}
- 63 Pathogen[ Q85601] interacts with 85 human  
partners:{P46783;P32969;P61513;P26373;P62857;P62244;P62913;P62854;P62081;P61353;P628  
91;P46776;P18077;P61313;P05388;Q15629;P63173;P23396;P62273;P46778;P62829;P30050;P627  
53;P27635;P15880;P83881;Q07020;P39019;Q9Y3U8;P62701;P62241;P62424;P83731;P62899;P629  
45;P62263;P62861;Q02878;P39023;P61254;P49207;P62910;P62249;P62280;P47914;P84098;P087  
08;P42766;P62269;P18621;P05387;Q9UNX3;P62277;P35268;P62979;P62847;P42677;P63220;P467  
82;Q9UHB9;P46779;P62750;P62851;P62841;P62987;P22090;P61927;P36578;P05386;P08865;P612  
47;P09132;P46777;P62917;Q92901;P18124;P46781;P25398;P60866;Q02543;P62906;P50914;P622  
66;P40429;P62888}
- 64 Pathogen[ P14079] interacts with 91 human  
partners:{Q15629;Q9Y3U8;P27635;P84098;P46779;P26373;P09132;P23396;P60468;P40429;P186  
21;P83881;Q9UNX3;P46781;P83731;P61513;P62847;P39656;P62753;P39023;P62273;P25398;P433  
07;P18077;P46783;P61254;P50914;P04844;P62979;P62841;P18124;P42766;P62266;P46782;P629  
87;P62241;P32969;P22090;P62829;P60866;P62854;Q07020;P39019;P63220;P49207;P62244;P622  
63;Q02543;P62424;Q92901;P62277;P62750;P62910;P63173;P49458;P46776;P08708;P36578;P600  
59;P62906;P47914;P62280;P62899;P61353;P62081;P62945;P46777;P42677;P30050;P15880;P628  
91;P36578;P08865;P61927;P62917;P46778;P62249;P05386;P35268;P62913;P05387;P61247;P622  
69;P62701;Q9UHB9;P51571;P61313;P62851;P05388;P62857;P62861}
- 65 Pathogen[ P03383] interacts with 86 human  
partners:{P42766;P36578;P05388;P62266;P39019;P26373;P62913;P62945;P62854;P40429;P629  
87;P62891;P25398;P62280;Q07020;P49458;P62750;P05387;P62249;P62888;P62899;P61927;P467  
77;P46779;P49207;P83731;P62424;P18124;P46778;Q92901;P62753;P42677;P62753;P83881;P479  
14;P62917;P62273;Q9UNX3;P09132;P30050;P84098;P32969;P62277;P18077;P63173;Q15629;P620  
81;P61313;P08865;P62851;P46782;P62269;P63220;Q02543;P62244;Q02878;P62910;P27635;P628  
57;P62906;P46783;Q9Y3U8;P60866;P61254;P62979;P62241;P46781;P39023;Q9UHB9;P62841;P220  
90;P62701;P62829;P62263;P62847;P35268;P05386;P50914;P62861;P18621;P46776;P15880;P233  
96;P61513;P08708;P61353}
- 66 Pathogen[ P03410] interacts with 91 human  
partners:{P62861;P05386;Q02543;P61247;P62241;P62829;P49207;P26373;P61513;P62899;Q9UH



- B9;P62244;P62913;P60468;P60059;Q02878;Q92901;P15880;P46777;P46776;P62841;P30050;P05388;P46781;P18124;P62269;Q07020;P63220;P62910;P62847;P62906;P23396;P18621;P62266;P62249;P63173;P50914;P62280;P22090;P61313;P62979;P62701;P62750;P08865;Q9UNX3;P62277;P36578;P18077;P25398;P43307;P61927;P84098;P62854;P62273;P09132;P62081;P46783;Q15629;Q9Y3U8;P08708;P46782;P32969;P04844;P46779;P27635;P62987;P62857;P62263;P62424;P62888;P61254;P46778;P62945;P05387;P42766;P39019;P47914;P40429;P49458;P39023;P39656;P62917;P62851;P83731;P35268;P61353;P62891;P62753;P83881;P60866;P42677}
- 67 Pathogen[ P14075] interacts with 86 human partners: {P42766;P49207;P09132;P62857;P46781;P63220;P32969;P42677;P62913;P22090;Q02878;P62277;P62851;P08865;P62244;P08708;P61254;P46778;P05388;P83881;P46777;Q9Y3U8;P62249;P62081;Q15629;P62750;P18621;Q02543;P18124;Q9UNX3;P25398;P63173;P30050;P62979;P83731;P49458;P84098;P61247;P62753;P46782;P62891;P62861;P18077;P46779;P62917;P39023;P50914;P62269;P62847;P62910;P62273;P40429;P23396;P62241;P15880;P62987;P62841;P36578;P62266;P61513;P61313;P27635;P62888;Q92901;P35268;Q9UHB9;P62945;P46776;P46783;P62701;P62899;P47914;P62906;P05386;P61353;P39019;P62424;P62829;P62280;Q07020;P62263;P62854;P60866;P26373;P05387;P61927}
- 68 Pathogen[ P0C206] interacts with 87 human partners: {P09132;P40429;P61313;P27635;P18124;P62854;P49207;P62081;P30050;P39656;P62241;P62244;P50914;P08865;P62750;P18621;P46781;P62266;Q02543;Q07020;P83881;P46778;P62263;P62273;Q02878;P62280;P62857;P62851;P62910;P46782;P61247;P18077;P62913;P61927;P61353;P62888;P36578;P62861;P35268;P23396;P39023;P32969;P62701;P05386;P22090;P84098;P62945;P26373;P46777;P05388;P62979;P62899;P83731;P39019;Q92901;P05387;P46783;P42766;P60866;P62841;Q9UNX3;P61513;P49458;Q15629;P62277;Q9UHB9;P46776;P62906;P63173;P62987;P62891;P62269;P62753;P46779;P63220;P15880;P25398;P08708;P47914;P62847;P61254;P42677;P62829;P62249;P62424;Q9Y3U8;P62917}
- 69 Pathogen[ P03363] interacts with 84 human partners: {P62913;P09132;P18621;P05386;P62750;P23396;P42677;P63173;P08865;P62847;P18077;P05387;P84098;P42766;P62249;P05388;P36578;P62753;P62081;P62910;P61513;P46776;P61254;P62273;Q9UHB9;P32969;Q92901;P46778;P61927;P62891;P61353;P08708;P15880;P26373;P83881;P22090;P62861;P62841;Q9UNX3;P30050;P62829;P46782;P35268;P46781;P50914;P63220;P61313;P39019;P46779;Q02543;P46777;P62987;P25398;P83731;P62851;P62280;Q9Y3U8;P62888;P49458;P62244;P62277;P62906;P62266;P62945;P49207;P62241;P62424;P60866;P61247;P62899;P62857;Q02878;Q07020;P39023;P62854;P62917;P18124;P40429;P27635;P62263;P47914;P62701;P62269;P46783}
- 70 [Cluster 7]GO:0016233+P biological\_process [name] telomere capping [def] "A process in which telomeres are protected from degradation and fusion, thereby ensuring chromosome stability by protecting the ends from both degradation and from being recognized as damaged DNA. May be mediated by specific single- or double-stranded telomeric DNA binding proteins." [GOC]
- 71 Pathogen[ Q2Q067] interacts with 2 human partners: {Q15554;Q96AP0}
- 72 Pathogen[ P0C214] interacts with 1 human partners: {Q15554}
- 73 Pathogen[ P03346] interacts with 3 human partners: {Q96AP0;Q15554;Q9NUX5}
- 74 Pathogen[ Q85601] interacts with 1 human partners: {Q15554}
- 75 Pathogen[ P14079] interacts with 3 human partners: {Q9NUX5;Q15554;Q96AP0}
- 76 Pathogen[ P03383] interacts with 1 human partners: {Q15554}
- 77 Pathogen[ P03410] interacts with 3 human partners: {Q9NUX5;Q15554;Q96AP0}
- 78 Pathogen[ P14075] interacts with 2 human partners: {Q15554;Q96AP0}
- 79 Pathogen[ P0C206] interacts with 3 human partners: {Q96AP0;Q15554;Q9NUX5}
- 80 Pathogen[ P03363] interacts with 3 human partners: {Q15554;Q96AP0;Q9NUX5}
- 81 [Cluster 8]GO:0061098+P biological\_process [name] positive regulation of protein tyrosine kinase activity [def] "Any process that increases the rate, frequency, or extent of protein tyrosine kinase activity." [GOC]
- 82 Pathogen[ Q2Q067] interacts with 3 human partners: {Q8IZP0;O14641;P25063}
- 83 Pathogen[ P0C214] interacts with 3 human partners: {Q8IZP0;O14641;P25063}
- 84 Pathogen[ P03346] interacts with 4 human partners: {Q8IZP0;O14641;P25063;Q9C0H9}
- 85 Pathogen[ Q85601] interacts with 2 human partners: {O14641;Q8IZP0}
- 86 Pathogen[ P14079] interacts with 4 human partners: {O14641;Q8IZP0;Q9C0H9;P25063}
- 87 Pathogen[ P03383] interacts with 3 human partners: {P25063;O14641;Q9C0H9}
- 88 Pathogen[ P03410] interacts with 4 human partners: {P25063;Q8IZP0;Q9C0H9;O14641}
- 89 Pathogen[ P14075] interacts with 3 human partners: {O14641;Q9C0H9;P25063}
- 90 Pathogen[ P0C206] interacts with 3 human partners: {P25063;Q8IZP0;Q9C0H9}
- 91 Pathogen[ P03363] interacts with 3 human partners: {Q8IZP0;O14641;Q9C0H9}
- 92 [Cluster 9]GO:0006366+P biological\_process [name] transcription from RNA polymerase II promoter [def] "The synthesis of RNA from a DNA template by RNA polymerase II, originating at an RNA polymerase II promoter. Includes transcription of messenger RNA (mRNA) and certain small nuclear RNAs (snRNAs)." [GOC]
- 93 Pathogen[ Q2Q067] interacts with 245 human partners: {Q9UNN4;P83369;Q15573;P33240;P52434;Q92750;P01100;Q16236;Q86U42;Q99583;O75909;P10827;P20226;Q16594;P23511;Q13487;Q5VTD9;Q15928;Q9H7N4;Q9UHB7;Q13887;O00267;P61326;Q9NPJ6;P29374;Q8IYF1;P40763;P78424;P14921;Q13889;Q13148;O14503;P46937;Q9NR55;P67809;Q12986;Q9NR48;Q01130;Q95997;Q9UHF7;P62318;Q9Y2Y9;Q9H5H4;Q96AE4;Q8N3X6;P49716;Q8N684;Q96004;Q92985;Q6PK2;Q9UL49;O75478;P19388;Q5SXM2;Q02930;P52435;Q9H944;Q14119;Q16633;Q8WTR7;Q9UIS9;O00712;Q14814;P50549;P32780;O75486;O15266;P18615;P30876;P19387;P15976;Q15542;Q03933;Q92754;P61218;Q92759;O75448;Q16534;P52657;P51610;Q14934;P09086;O75971;O94993;O14776;P17676;Q8N5Y2;Q07955;Q00978;Q92905;Q9BZ17;Q16629;O60563;P11831;O43148;Q14134;Q12962;P28069;Q9UKW6;P78545;Q10570;P54845;Q12996;Q9Y4A8;Q08050;Q13287;P290

84;Q9ULW3;P38159;P52747;P55347;P62487;P62304;P55199;P84103;Q8IYB3;Q05048;Q15699;O94913;Q14938;O75529;P56693;Q86V81;Q9ULX9;P51948;Q9Y2T7;Q14585;Q14653;Q9UKD1;Q15370;O14641;P10914;Q15643;Q05519;P26368;Q03701;Q15543;O95644;O75444;P49848;O00625;P50750;Q9Y2N7;P11161;Q9Y5B0;Q6P4R8;Q15544;Q9Y603;P82094;O00268;P09874;P62380;P50613;P14678;Q9Y5S9;Q8WVJ9;Q92830;O15164;P35869;Q01081;Q16514;Q13951;Q9P2I0;Q03468;P61244;P13984;Q13243;Q15369;P62875;P23760;O14770;Q96JN0;P24928;O43812;P19838;P20823;P23193;P17861;P61201;Q09161;Q12968;Q15572;P15336;Q9Y2X0;Q8IXH7;Q9H3P2;P20290;Q15545;Q03111;Q9UKN5;P22415;Q13761;P52298;P52655;P35269;Q8TE85;Q15714;P29083;O95125;O60583;O94916;Q9UKF6;O60682;Q14493;Q86U70;Q01860;P18848;P63272;P21675;P53803;Q14241;P78347;O60508;P62306;P35232;Q9Y5B9;Q86Y01;Q9UBL3;P15407;O75376;Q9UK39;O95905;Q99814;Q16649;P62308;P52737;Q9UQR1;P35711;Q9Y651;Q02078;Q06546;Q13888;P49715;Q969L4;Q6ZN01;P18146;Q15650;Q92966;P51946;Q8WX92;Q00403;Q08945;P51003;P08651}

94 Pathogen[ POC214] interacts with 235 human partners: {Q12996;Q9BZI7;O00268;Q9UKW6;O75444;Q9UHB7;P51946;Q8WX92;Q9UKN5;Q13761;P26368;P20290;P83369;Q09161;O75486;Q13887;P61244;Q02930;P35869;P51610;O94913;Q06546;P55347;Q9UHF7;Q9Y4A8;P38159;Q9UKF6;O75909;P30876;Q96JN0;P19838;P14921;Q15573;P15336;P52657;P21675;P53803;P84103;Q86V81;P62380;Q9Y5S9;P51003;P15407;P52655;O60508;P35269;P50750;O00267;P50613;Q9Y2X0;P29084;O75478;P14678;Q14119;P62306;P01100;Q969L4;Q9NR55;P52435;O15266;P17275;Q92750;P35711;P56693;P67809;P46937;P61201;Q05048;O95125;Q12986;P11831;Q9Y2Y9;Q00403;Q9UNN4;Q12962;P10914;P61218;Q15928;Q5SXM2;Q15370;Q10570;Q15545;Q14938;Q00978;Q6P1K2;P62308;O43148;Q16594;Q8N684;Q9UKD1;P17676;Q15542;Q03933;Q5VTD9;Q14776;P49716;Q07955;P18615;Q9H944;Q9UK39;Q02078;O14503;P82094;P52298;Q9UIS9;Q8TE85;Q12968;Q14814;Q9Y2N7;P18848;Q92966;P62487;Q16633;Q14493;Q8IYB3;Q92754;O43809;O00712;Q9Y2T7;Q92985;Q13487;P51948;Q92905;Q9H5H4;P17861;P61326;Q86U70;O14641;O43812;P78347;Q15369;Q15572;P55199;O60583;Q13243;P63272;Q15544;Q9P2I0;Q8N3X6;P49848;Q15643;Q6P4R8;Q05519;Q9Y603;Q15714;O75376;Q9ULX9;Q6ZN01;P62318;Q9Y5B9;Q01081;P33240;Q16514;Q14934;Q15650;P62875;P28069;P13984;P20226;Q14653;O75529;P32780;Q15287;P24928;P52747;O60563;P05412;P62304;Q8WVJ9;O75448;P18146;Q16534;Q8WTR7;O15164;Q99814;P09086;Q92830;Q9Y5B0;P11161;Q13888;Q96AE4;P23511;Q9ULW3;Q14585;Q03111;Q9NR48;P52434;Q08945;Q8IXH7;O95905;P40763;O96004;O95997;O75971;O94916;O00625;P78545;Q9H3P2;P50549;O14770;P08651;P22415;Q8IYF1;P19387;Q13148;P23193;P19388;O95644;Q15543;Q9Y651;P16220;P35232;Q86Y01;P54845;Q9UQR1;Q86U42;Q9H7N4;Q13287;Q15699;Q99583;Q01860;Q03468;Q9NPJ6;Q92759;Q16629;P52737;P29083;P09874;O94993;P23760;Q13951;Q01130;Q16236;Q14241;Q03701}

95 Pathogen[ P03346] interacts with 278 human partners: {Q9Y5S9;Q9BZI7;P49716;P05412;P78424;Q15542;Q86U42;P15863;Q9UHF7;P46937;Q13487;P35453;Q15370;P09086;Q02078;Q09161;P10827;Q86U70;P23511;P52434;Q9NPJ6;Q08170;Q15928;Q8IYB3;P29374;Q14814;Q8IXH7;O15522;P16220;Q9UQR1;P17676;O14901;Q9ULW3;P15336;P52747;Q9BYU1;P62304;P11831;Q9UKF6;Q8N3X6;P54845;Q13148;P50549;O60563;Q03933;Q99626;Q15911;P17275;P78347;P82094;P17861;O75971;P51610;Q15573;O75486;Q8IYA7;Q13888;Q9NR55;P56693;P23760;Q9H3P2;O00712;Q92858;P53803;Q12986;P52737;Q8N684;P61218;O00268;Q08050;Q13242;Q8WTR7;Q96AE4;Q13247;Q9UBL3;P20823;O60682;Q13287;Q00978;P29084;P63272;Q8TE85;P52298;Q16629;O95644;P49715;Q9ULX9;Q92754;Q07955;Q01860;Q92750;O95997;Q08945;O75444;Q13889;O14503;P20226;Q05048;Q9H5H4;Q92766;Q14119;Q03111;Q16236;Q14934;Q9Y5B0;O96004;P62487;O75448;Q03701;Q9UHB7;P19388;Q14493;Q8NBF1;Q15699;Q9UL49;O60583;P62318;Q92830;P18848;P14921;O43148;Q15643;Q12968;Q86V81;P17542;O60508;Q9UIS9;P13984;P51003;P15976;O95125;O15266;O14641;O75478;Q06546;P67809;Q03468;P83369;P10914;Q8N5Y2;O75529;P62380;Q13951;P52435;P49848;Q9Y2N7;Q9UNN4;P08651;P62306;Q13761;P51946;Q16534;Q8WVJ9;Q14585;P52657;P50750;Q02548;O95905;O94913;Q9Y5B9;P26368;Q01081;P36954;Q16649;Q16514;Q99814;P61326;Q9Y2Y4;P35659;Q13887;O75376;P98177;Q12962;P78367;Q14653;O00267;Q5VTD9;P09874;O94993;P15407;O43809;Q92905;O75909;Q16633;Q8WX92;P84103;Q92759;Q9H944;Q9UK39;P61244;P55199;Q92481;Q6ZN01;P61201;Q15287;P21675;Q9Y2T7;P11161;Q05519;P30876;Q15369;P35269;Q01130;P55347;P14678;P28069;Q8IYF1;P35232;P61968;Q9P2I0;Q6P4R8;P19838;O75031;O00625;O43812;O94916;Q9Y651;P24928;P23193;P29083;P20290;P18146;Q9Y2X0;Q00403;Q9H7N4;O75398;Q13243;Q99583;Q9Y603;Q92985;Q9NR48;P38159;Q9UKW6;P35869;P78545;Q969L4;Q02930;Q86Y01;Q15545;Q5SXM2;P35711;Q92966;P40763;Q96JN0;Q8NEA6;P52655;Q6P1K2;Q9UKN5;Q13285;P01100;P62308;P49335;P51948;Q10570;Q12996;Q15544;P32780;O15164;Q9Y2Y9;Q15650;P18615;Q14938;P33240;Q15714;O14770;P62875;P19387;Q9UKD1;Q14134;O14776;Q14241;P22415;Q9Y4A8;Q16594;Q15543;Q99581;Q15572}

96 Pathogen[ Q85601] interacts with 250 human partners: {Q9UQR1;Q03701;Q9UNN4;P51946;P18146;P52657;Q8N3X6;Q9BZI7;Q9ULW3;Q9Y2X0;Q8TE85;P78424;Q15542;O75971;Q9UHF7;Q13487;P36954;Q15643;Q8N5Y2;Q15370;P11831;Q9Y2T7;Q02078;P17676;P09874;O43148;Q16236;Q8IYB3;Q92754;O60563;P61968;P09086;P15976;O75909;Q13243;P50750;P14921;Q9Y2N7;P08651;O75398;Q86U70;Q06546;Q05048;P62304;Q9Y603;Q01130;Q9Y2Y9;P54845;Q13148;P50549;Q13888;Q03933;Q8N684;Q13951;Q9Y651;Q9NR48;P15407;Q9UKN5;P18848;Q14814;P40763;Q14241;P28069;O60583;P61201;Q15573;Q9Y2Y4;P61326;P78545;Q15287;Q9H3P2;Q15545;P53803;P61218;O00268;O94913;O14503;Q969L4;Q9Y5B9;Q99814;O75448;Q86V81;O60682;Q00978;P51948;O15164;P18615;Q16594;Q16629;O95644;O96004;Q15714;Q07955;P20290;O14776;P51610;O95125;Q09161;Q8WX92;P10914;Q9H944;P14678;P01100;Q15572;Q14934;P22415;P62487;Q8NEA6;Q16633;Q9UBL3;Q5SXM2;P19388;P29084;Q92830;O75444;Q14653;P49716;Q8NBF1;Q03468;Q12968;Q15650;Q9UIS9;P13984;Q02930;P62306;Q96JN0;O60508;Q15928;O15266;O14641;P23511;Q92759;Q16649;P32780;O75529;Q9UKW6;P35711;Q9Y5B0;P16220;Q15699;P52435;P49848;P62318;Q92905;Q6P4R8;Q10570;Q9P2I0;P35269;Q14585;Q01081;P05412;Q9Y4A8;P29083;Q92985;Q16514;Q05519;P67809;O75376;Q9H5H4;Q15369;P83369;Q9H7N4;Q00403;P50613;O95905;P10827;O43812;O00267;P56693;O94993;P23193;Q99583;P84103;P55199;Q9UK39;P61244;Q6ZN01;P49715;P55347;Q8IXH7;Q5VTD9;Q08945;P52737;Q96AE4;Q92750;P21675;P46937;Q08050;Q12962;P19387;Q92966;O75486;P82094;P35232;P35869;P63272;Q16534;Q9UHB7;O00625;P52655;O94916;P24928;P623

- 08;P52298;P30876;P38159;P52434;Q15543;O00712;P26368;P15336;Q14119;P51003;Q86Y01;P19447;P17275;Q86U42;Q8IYF1;P19838;P20823;P62380;Q03111;Q8WTR7;Q6P1K2;P78347;O75478;P1161;Q9UKF6;P17861;Q01860;Q15544;Q14493;P52747;Q9NPJ6;Q13887;Q9ULX9;Q14938;P33240;O14770;P23760;P62875;Q95997;Q9NR55;Q8WVJ9;O43809;Q9Y5S9;Q13287;P20226;Q12986;Q13761}
- 97 Pathogen[ P14079] interacts with 242 human partners: {O14776;Q96JN0;O00625;O43809;O75031;Q14585;Q5SXM2;Q9UQR1;Q9Y5B9;Q12986;P35711;P62875;O15164;Q9Y2X0;P55199;P09874;Q15287;Q08945;Q8WTR7;Q9Y2Y4;Q15573;P35869;Q02078;O95125;Q99814;Q9UIS9;Q14241;Q06413;Q06546;O60508;P61201;Q16649;Q14653;P19387;P52747;Q9Y5B0;P35269;Q13148;P51946;Q16594;Q99581;Q92830;Q8IXH7;Q9Y2Y9;Q14938;Q15911;Q9Y2N7;Q9UKF6;Q9UKD1;P67809;Q15714;P62487;Q92966;Q9UBL3;O60682;P55347;P09086;O14641;Q8TE85;P19388;Q00403;Q9UK39;Q9H7N4;Q01860;Q15543;Q5VTD9;P11161;Q8N5Y2;Q12962;Q9BZI7;P29374;Q02930;P49715;O15266;Q14934;Q05519;P49848;Q8N684;P52435;P63272;P50549;P17275;Q86V81;P15336;Q92750;Q86U42;P62308;Q9H944;O43294;Q15370;Q92759;O75909;Q9UNN4;Q14134;Q92905;P62304;P78424;Q9Y603;Q9NPJ6;Q9ULX9;Q07955;Q92754;Q03701;O75444;Q969L4;P52657;P56693;Q16236;O95997;Q6P4R8;Q8N3X6;Q8WX92;P32780;O14770;Q14814;Q01081;P35659;P23193;P13984;Q14493;Q15407;Q00978;O75376;O60583;Q75478;Q15928;Q8IYF1;Q9NR55;P78545;Q03468;Q13761;P24928;Q8NEA6;Q15369;P51003;O14503;Q12996;Q9UKN5;P05412;Q15650;Q9Y4A8;P49716;Q16514;Q16534;P78347;Q14901;O00267;P62318;Q13287;P36954;Q9H5H4;O75486;P61244;Q13951;O75971;P01100;P23511;Q9UKW6;Q15542;Q9UHF7;O94993;P19447;Q09161;Q15643;Q8NBF1;P10914;P84103;P29083;P21675;O00268;P38159;Q6P1K2;Q9P2I0;P50750;P20290;Q15545;O00712;Q14119;P23760;O94916;P22415;P51948}
- 98 Pathogen[ P03383] interacts with 216 human partners: {Q9UQR1;Q13761;P53803;Q07955;P55199;P10914;O15266;P11831;Q15287;Q05048;P50549;Q15369;P63272;Q14653;P20290;P51003;Q9H3P2;O43148;P29084;Q969L4;O75478;P16220;P28069;Q15544;Q16633;P35269;P51948;P62318;Q9H944;Q6P4R8;Q9H5H4;P14921;O75376;Q8WVJ9;Q15572;O75486;Q15650;Q03111;Q86U70;Q13487;Q12986;P78347;Q13888;Q9Y5S9;P23511;Q9UL49;P23193;Q9UKW6;Q9Y2Y9;O95644;Q92905;Q92966;P17861;Q10570;P52655;P62304;P61201;Q15714;P61326;Q15542;O00712;Q9ULW3;Q9UK39;P52434;P61218;P26368;Q13243;O14503;Q14814;Q01860;Q08945;Q86V81;Q9NPJ6;Q00978;Q9H7N4;Q8TE85;Q9UKF6;O00267;P18146;Q9Y2T7;P38159;Q00403;P55347;Q09161;Q16629;P20226;O14770;Q13287;P08651;P52657;Q14934;O75448;O96004;P62487;O75529;Q15643;Q8N684;P51610;O94913;Q8IYB3;Q16594;Q92985;Q8IXH7;Q92985;P52747;P19387;P33240;Q15928;O60563;P84103;P50613;P13984;O95125;O14641;Q13951;P51946;P24928;Q03468;Q01130;Q92830;O00625;P17676;P09874;Q14493;P49848;Q9Y2N7;Q8N3X6;O75909;P15407;P50750;O75971;Q12968;P35711;P14678;Q9UKN5;Q9UNN4;O00268;Q01081;Q16514;Q92759;O14776;Q15573;P35232;Q16236;Q96JN0;O43809;P52298;P52737;Q99583;Q9UHB7;P01100;P11161;Q05519;Q92750;Q92754;P23760;P62875;P21675;Q6P1K2;Q96AE4;Q9Y4A8;P52435;O95997;Q8WTR7;P78545;P82094;Q9P2I0;Q9Y5B0;Q15370;Q12962;P62308;P19388;Q13148;P29083;P15336;P18848;P83369;P30876;Q02930;Q86Y01;Q15545;Q6ZN01;Q15699;Q5SXM2;P17275;Q86U42;O75444;Q14585;P61244;P19838;P35869;P56693;P67809;Q16534;P46937;Q9Y603;Q14241;Q9ULX9;O60583;Q9UHF7;Q06546;Q9Y5B9;Q9Y2X0;P32780;P18615;Q02078;Q8WX92;Q9UIS9;P62306;P22415;O95905;Q9BZI7;Q15543;Q03933;P05412}
- 99 Pathogen[ P03410] interacts with 245 human partners: {Q15650;Q92830;Q9UHF7;O60583;Q08945;P28069;O14901;Q15714;P11831;Q8NBF1;P82094;P19838;P52655;P51610;Q9UNN4;Q15572;Q6ZN01;Q01081;Q9UK39;Q9Y2Y9;P29374;P26368;Q10570;P61326;P19387;P62304;Q13889;O60508;P17861;P18615;P36954;Q9H3P2;O00268;Q12996;Q8WTR7;Q8WVJ9;Q05048;O96004;Q15543;Q16629;Q8N3X6;P17676;P23511;O94916;Q92750;Q99814;O00267;Q9Y5B9;P62306;P63272;Q12968;O95125;O60682;Q01860;P24928;Q15287;Q9UKD1;P54845;Q12962;P21675;O75031;P29083;Q14938;P18848;Q9Y2N7;O15266;Q9Y5S9;Q14493;Q14814;P78545;Q9UL49;Q14653;P51946;O75444;Q16236;Q9NPJ6;Q92905;P62380;O43294;P30876;P20226;Q15370;P62308;P14678;Q16633;O75376;P49716;O95997;P23193;Q33468;P52657;O15514;P50613;Q03933;O00712;Q9UKW6;P01100;P61244;Q9BZI7;O75486;P35659;P50549;Q9UQR1;P51003;Q9H7N4;Q9Y603;Q13148;Q15928;O43809;O95644;Q02930;P50750;P67809;O00625;Q9UHB7;O60563;P08651;Q12986;P55199;O95905;Q8IYF1;Q86Y01;Q15573;Q05519;Q8IXH7;Q8TE85;Q13287;Q8WX92;P29084;Q15369;Q16649;Q8NEA6;P52737;P52435;O94913;Q9UKN5;Q07955;P52298;Q16514;Q9P2I0;P17275;P49848;P83369;Q6P1K2;P33240;P53803;Q6P4R8;Q86U70;Q14119;O75909;P19447;P22415;P10914;Q9ULX9;Q99583;Q86V81;P62875;O14776;P09874;P16220;P56693;Q00403;Q14585;P46937;P20290;Q15699;P35269;Q8IYB3;Q16594;P61218;P05412;P61201;P51948;Q96JN0;Q9Y5B0;Q15544;Q15643;Q13888;P55347;Q01130;Q9Y2Y4;Q13951;Q969L4;Q9ULW3;Q9UKF6;P52434;Q13761;Q9UIS9;P13984;Q92966;Q02078;Q15542;Q8N684;Q16534;P62487;O43812;Q13487;Q09161;P23760;O43148;Q9Y2X0;O75478;P78347;P84103;P15407;Q9Y4A8;Q03701;Q86U42;O75529;Q9Y2T7;O94993;Q9H944;Q92985;P35232;P18146;Q5VTD9;Q13243;P78424;P38159;Q5SXM2;P15336;P11161;P19388;Q9NR55;Q8N5Y2;Q14241;P40763;P32780;Q96AE4;O75971;Q14934;Q00978;O75448;P15976;O14770;Q92759;Q06546;Q15545;Q9H5H4;Q92754;Q03111;P14921;P52747;O14641;P62318}
- 100 Pathogen[ P14075] interacts with 221 human partners: {Q16633;P28069;Q6P4R8;P51003;Q15572;P35869;P62304;Q15643;Q05519;Q12962;Q09161;Q86U70;P13984;P35659;Q9NPJ6;Q92759;O43809;P21675;Q9P2I0;Q13951;P52737;Q92966;Q9UQR1;P52657;P05412;Q15542;P18615;Q14938;Q6ZN01;Q15928;Q86V81;Q13243;P11831;P52747;P78545;P17861;Q08945;P30876;P61326;Q9UKN5;Q14493;O75444;P17275;Q9Y4A8;Q00403;P82094;Q8TE85;Q06546;O60563;O14776;Q9Y5B0;P29083;Q75971;P61244;P50613;Q13287;Q14241;Q01860;P61201;P38159;Q03933;P51610;P11161;Q08050;Q15714;P18146;P29084;Q9Y2N7;P19388;Q9Y603;Q01130;P61218;P50750;O60583;O95997;Q9ULX9;P78347;Q9H7N4;O00625;Q5SXM2;Q15544;O75448;P193

- 87;P62306;P56693;Q00978;P20226;P15336;P62308;Q92754;Q13148;Q14585;Q16594;Q92750;Q8WV  
 J9;O14503;O75376;P55347;P62487;Q03468;P35711;O96004;P35232;Q8WTR7;O14770;O75478;Q129  
 86;Q14653;P62318;P83369;Q15370;O14641;P54845;Q9UHB7;P23193;P33240;Q15650;Q9Y2T7;Q138  
 89;Q9UL49;Q05048;Q9Y5B9;P49848;Q15287;Q9UIS9;Q9H944;P24928;Q9UHF7;Q14934;Q15573;P352  
 69;Q9ULW3;P26368;Q9UK39;P52655;Q01081;Q9UKD1;Q16514;P67809;Q15545;P23511;P18848;Q8IY  
 B3;Q13487;P08651;P14921;Q02078;P50549;P51946;P32780;P55199;P01100;Q14134;O00268;P146  
 78;Q9UNN4;P20290;O00712;Q9UKW6;Q9Y5S9;Q15699;P46937;O75486;P19838;O15266;P16220;P841  
 03;Q6P1K2;O43148;Q9H3P2;O75529;O95125;P22415;Q92985;Q8N3X6;P15407;P23760;P62875;Q995  
 83;P17676;Q16236;Q8IXH7;Q96JN0;Q86Y01;Q8N684;P10914;O75909;Q9UKF6;Q92905;O00267;Q86U  
 42;Q92830;Q15369;Q16629;P52434;Q96AE4;Q14814;Q03111;P63272;Q12968;Q10570;Q02930;Q969  
 L4;Q95644;Q9Y2Y9;P09874;Q9Y2X0;O94913;O95905;Q07955;P51948;P52298;Q8WX92;P52435;O750  
 31;P53803;Q15543;Q13761;Q9BZI7;Q16534;Q13888}
- 101 Pathogen[ P0C206] interacts with 263 human  
 partners: {Q8TE85;P46937;Q13887;Q15287;O75486;Q86Y01;P67809;P10914;P33240;P78424;Q9H5  
 H4;Q16649;P62875;Q8IXH7;Q9UKF6;P14678;O60508;Q9BZI7;P23193;Q92830;Q06546;Q15545;Q079  
 55;P26368;P52298;Q16514;Q03701;Q15543;Q8N3X6;P49848;P61326;P14921;Q15911;Q01081;Q9Y4  
 A8;Q9NR55;P36954;Q02078;O15266;P50750;Q9Y2N7;P15407;P20226;P11161;Q09161;Q15544;P162  
 20;P17275;P35869;P09874;P20290;P08651;O75444;O43812;O94913;P62304;Q9Y2Y9;Q05519;Q8IY  
 B3;Q01860;Q99583;P62380;P52657;Q9H7N4;Q02548;P52737;P29374;P52655;O95997;Q8WTR7;Q9UH  
 B7;Q03933;P19388;P61218;P05412;Q8IYF1;Q8N684;O00268;Q9C0J9;Q13951;Q9UL49;Q03468;P153  
 36;Q13243;Q16629;Q86U42;Q15572;O00625;P61201;Q9Y5B9;P49715;O15164;Q12968;P56693;P510  
 03;O95905;O14770;P54845;Q9UNN4;P15976;O75529;O43809;Q13287;P29084;Q15699;Q13487;Q9Y6  
 03;Q8WVJ9;Q14241;O95125;Q14938;Q9P2I0;P13984;Q03111;P18146;P83369;O75971;Q8NEA6;O960  
 04;P19447;P17861;Q92754;Q5SXM2;P23511;Q6P1K2;P53803;O60682;Q92750;P78347;P19838;Q166  
 33;O15514;Q99581;P35269;P22415;Q9Y5B0;Q15650;P19387;P35711;Q13888;P38159;Q05048;P090  
 86;O00712;P50613;Q9UIS9;P50549;Q9ULW3;Q9UKN5;P17676;O94993;P35232;Q9NR48;P18615;Q96J  
 N0;Q12986;P29083;P51610;Q9UHF7;Q9H944;Q92985;Q9NPJ6;P01100;Q9UQR1;P20823;O94916;Q927  
 59;P62318;Q15370;P78545;Q02930;Q16534;Q12996;O43294;Q8NBF1;O75376;O00267;O75478;P407  
 63;Q15573;Q9H3P2;P61244;P23760;P52435;O14776;P62306;P62487;Q13148;P32780;Q15542;Q929  
 66;Q14934;O75909;P11831;Q08050;Q00978;Q15928;P84103;Q13889;Q9UBL3;Q9UK39;P49716;Q9UK  
 W6;P35659;Q8WX92;Q16236;Q9UKD1;O14901;Q5VTD9;P52747;Q86U70;O75448;Q14134;Q14814;O750  
 31;Q12962;P24928;Q96AE4;P55199;O75398;Q99814;Q14585;O95644;O60583;P61968;Q9Y2X0;P280  
 69;P62308;Q00403;Q01130;Q15643;O60563;Q14119;Q9Y2T7;O43148;Q14493;Q15369;Q08945;P188  
 48;Q6P4R8;Q15714;Q8N5Y2;Q13761;P52434;P82094;Q6ZNO1;Q9Y5S9;Q86V81;P10827;P21675;P519  
 46;Q9ULX9;P63272;Q969L4;P51948;Q10570;Q16594;Q14653;Q9Y2Y4;Q92905;P55347;P30876;Q9Y6  
 51}
- 102 Pathogen[ P03363] interacts with 260 human  
 partners: {Q16236;Q15911;Q14653;Q86U70;Q9UNN4;Q9NR55;Q5VTD9;Q15699;Q86Y01;O15266;O438  
 12;Q9UKD1;O14901;P18848;Q9ULW3;P35453;P49716;Q16649;Q8N5Y2;Q9UHF7;P29374;Q6P1K2;Q929  
 85;P62380;P29083;P29084;Q92766;P35711;Q13487;Q9P2I0;Q9Y5B0;Q15370;Q9Y5B0;Q14938;Q105  
 70;P49848;P17676;P18146;O00712;P19388;Q13148;Q02930;Q9UHB7;P13984;O60563;Q99626;P784  
 24;P55199;Q8WX92;Q15928;Q9UKN5;P61201;P08651;Q08170;Q06546;P30876;Q03933;Q9UKW6;Q138  
 88;Q05048;P32780;Q8IYF1;Q9Y4A8;Q92759;P23760;P19387;P09086;P61218;Q16514;O75909;P519  
 46;Q9UBL3;O75376;Q16629;Q15545;Q9C0J9;O95905;P35659;P62318;P16220;P24928;P14921;O002  
 68;P62304;Q9Y603;Q01130;O00267;Q96JN0;P55347;Q8NEA6;Q86U42;Q15369;Q92620;Q12986;Q9H5  
 H4;O94913;P35869;P17275;Q8IXH7;P18615;P61326;P54845;Q9UK39;P52657;P61244;P62306;Q055  
 19;P35269;Q9Y2Y9;P83369;Q15287;Q12962;Q8N684;P15336;Q13951;Q00403;Q8TE85;O75031;Q132  
 42;O75529;Q08050;P11831;P46937;P56693;Q8IYB3;P28069;O60583;O43809;Q14119;P38159;P527  
 37;Q15544;Q96AE4;Q03111;P26368;Q9H7N4;Q9Y5B9;Q14241;Q14814;Q9UPN6;P78545;Q92830;P510  
 03;Q9H3P2;O75444;Q14134;Q13243;P17861;P7861;Q86V81;Q9Y2N7;O94916;O96004;Q15542;P10914;P522  
 98;O43148;P50549;Q92966;P15407;P22415;P20290;Q92750;P19838;Q99814;Q16633;O75971;O951  
 25;O75448;P62487;P21675;Q9NR48;Q14585;P23193;O60682;Q9Y651;Q00978;P20226;P52655;Q9Y2  
 Y4;Q12968;P49335;Q03468;P63272;P50750;P78367;Q08945;Q6ZNO1;Q9UQR1;Q07955;O00625;Q9NP  
 J6;O75398;Q01081;O95644;Q15714;P35232;Q9BZI7;O94993;P05412;Q969L4;Q13247;Q5SXM2;P149  
 34;Q99581;O95997;O75486;O14776;Q15573;P09874;P62308;Q02548;Q8IYA7;Q8WTR7;Q9UKF6;P841  
 03;O75478;P82094;Q03701;Q13761;Q14493;P14678;Q15543;P53803;P52435;Q13287;Q15572;P524  
 34;O14641;Q16534;O15522;Q9ULX9;P33240;Q9Y2T7;Q15643;Q9UL49;Q99583;P78347;Q8WVJ9;Q018  
 60;Q9Y5S9;Q8N3X6;Q9H944;Q12996;Q92905;Q8NBF1;Q6P4R8;O14503;Q15650;P51610;P67809;P527  
 47;O60508;P23511;Q09161;Q92754;Q9UIS9;Q16594;P01100;P11161;Q02078}
- 103 [Cluster 10]GO:0071354+P biological\_process [name] cellular response to  
 interleukin-6 [def] "Any process that results in a change in state or activity of a  
 cell (in terms of movement, secretion, enzyme production, gene expression, etc.) as a  
 result of an interleukin-6 stimulus." [GOC
- 104 Pathogen[ Q2Q067] interacts with 2 human partners: {Q7Z2X4;P35232}
- 105 Pathogen[ P0C214] interacts with 2 human partners: {Q7Z2X4;P35232}
- 106 Pathogen[ P03346] interacts with 2 human partners: {Q7Z2X4;P35232}
- 107 Pathogen[ Q85601] interacts with 2 human partners: {Q7Z2X4;P35232}
- 108 Pathogen[ P14079] interacts with 3 human partners: {Q14242;P35232;Q7Z2X4}
- 109 Pathogen[ P03383] interacts with 1 human partners: {P35232}
- 110 Pathogen[ P03410] interacts with 3 human partners: {Q14242;Q7Z2X4;P35232}
- 111 Pathogen[ P14075] interacts with 1 human partners: {P35232}
- 112 Pathogen[ P0C206] interacts with 2 human partners: {Q7Z2X4;P35232}
- 113 Pathogen[ P03363] interacts with 1 human partners: {P35232}
- 114 [Cluster 11]GO:2000060+P biological\_process [name] positive regulation of protein  
 ubiquitination involved in ubiquitin-dependent protein catabolic process [def] "Any  
 process that activates or increases the frequency, rate or extent of protein

ubiquitination involved in ubiquitin-dependent protein catabolic process." [GOC

115 Pathogen[ Q2Q067] interacts with 3 human partners:{Q9NRI5;Q969H0;Q8NEZ5}

116 Pathogen[ POC214] interacts with 3 human partners:{Q9NRI5;Q969H0;P10909}

117 Pathogen[ P03346] interacts with 3 human partners:{Q9NRI5;Q8NEZ5;Q969H0}

118 Pathogen[ Q85601] interacts with 3 human partners:{Q969H0;Q9NRI5;Q8NEZ5}

119 Pathogen[ P14079] interacts with 4 human partners:{Q969H0;Q9NRI5;P10909;Q8NEZ5}

120 Pathogen[ P03383] interacts with 3 human partners:{Q9NRI5;Q969H0;Q8NEZ5}

121 Pathogen[ P03410] interacts with 4 human partners:{Q969H0;Q8NEZ5;Q9NRI5;P10909}

122 Pathogen[ P14075] interacts with 3 human partners:{Q9NRI5;Q8NEZ5;Q969H0}

123 Pathogen[ POC206] interacts with 4 human partners:{Q969H0;Q9NRI5;P10909;Q8NEZ5}

124 Pathogen[ P03363] interacts with 3 human partners:{Q8NEZ5;Q969H0;Q9NRI5}

125 [Cluster 12]GO:0034970+P biological\_process [name] histone H3-R2 methylation  
[def] "The modification of histone H3 by addition of a methyl group to arginine at  
position 2 of the histone." [GOC

126 Pathogen[ Q2Q067] interacts with 2 human partners:{Q96LA8;Q86X55}

127 Pathogen[ POC214] interacts with 2 human partners:{Q86X55;Q96LA8}

128 Pathogen[ P03346] interacts with 2 human partners:{Q86X55;Q96LA8}

129 Pathogen[ Q85601] interacts with 2 human partners:{Q86X55;Q96LA8}

130 Pathogen[ P14079] interacts with 1 human partners:{Q96LA8}

131 Pathogen[ P03383] interacts with 2 human partners:{Q86X55;Q96LA8}

132 Pathogen[ P03410] interacts with 2 human partners:{Q96LA8;Q86X55}

133 Pathogen[ P14075] interacts with 2 human partners:{Q96LA8;Q86X55}

134 Pathogen[ POC206] interacts with 2 human partners:{Q86X55;Q96LA8}

135 Pathogen[ P03363] interacts with 2 human partners:{Q96LA8;Q86X55}

136 [Cluster 13]GO:0045358+P biological\_process [name] negative regulation of  
interferon-beta biosynthetic process [def] "Any process that stops, prevents, or  
reduces the frequency, rate or extent of the chemical reactions and pathways resulting  
in the formation of interferon-beta." [GOC

137 Pathogen[ Q2Q067] interacts with 1 human partners:{Q14653}

138 Pathogen[ POC214] interacts with 1 human partners:{Q14653}

139 Pathogen[ P03346] interacts with 1 human partners:{Q14653}

140 Pathogen[ Q85601] interacts with 1 human partners:{Q14653}

141 Pathogen[ P14079] interacts with 1 human partners:{Q14653}

142 Pathogen[ P03383] interacts with 1 human partners:{Q14653}

143 Pathogen[ P03410] interacts with 1 human partners:{Q14653}

144 Pathogen[ P14075] interacts with 1 human partners:{Q14653}

145 Pathogen[ POC206] interacts with 1 human partners:{Q14653}

146 Pathogen[ P03363] interacts with 1 human partners:{Q14653}

147 [Cluster 14]GO:0048208+P biological\_process [name] COPII vesicle coating [def]  
"The addition of COPII proteins and adaptor proteins to ER membranes during the  
formation of transport vesicles, forming a vesicle coat." [GOC

148 Pathogen[ Q2Q067] interacts with 10 human  
partners:{O15027;P55735;P53992;O95486;O94855;Q53G59;Q96JE7;Q13618;O95487;Q15436}

149 Pathogen[ POC214] interacts with 10 human  
partners:{P55735;P53992;Q13618;Q15436;O95487;Q53G59;Q96JE7;O15027;O95486;O94855}

150 Pathogen[ P03346] interacts with 12 human  
partners:{P55735;O15027;Q13618;O94855;Q15436;Q96JE7;O95486;Q9HCU5;O95487;P49755;P539  
92;Q15363}

151 Pathogen[ Q85601] interacts with 10 human  
partners:{O15027;O95487;Q96JE7;Q15436;P55735;O95486;Q13618;Q53G59;O94855;P53992}

152 Pathogen[ P14079] interacts with 11 human  
partners:{O15027;O95487;Q13618;O94855;P53992;Q96JE7;Q15363;P49755;P55735;O95486;Q53G  
59}

153 Pathogen[ P03383] interacts with 10 human  
partners:{P55735;O95487;O95486;Q15436;Q13618;Q53G59;O94855;O15027;Q96JE7;P53992}

154 Pathogen[ P03410] interacts with 12 human  
partners:{Q53G59;O94855;P53992;Q13618;Q15436;O95486;Q15363;Q96JE7;Q9HCU5;O15027;P557  
35;O95487}

155 Pathogen[ P14075] interacts with 10 human  
partners:{Q96JE7;Q13618;Q53G59;O15027;P53992;P55735;O95487;Q15436;O94855;O95486}

156 Pathogen[ POC206] interacts with 12 human  
partners:{O94855;P49755;P55735;Q13618;O95486;Q96JE7;O95487;P53992;Q15363;Q53G59;O150  
27;Q15436}

157 Pathogen[ P03363] interacts with 8 human  
partners:{Q13618;Q15436;O95486;Q53G59;P53992;O95487;P55735;O94855}

158 [Cluster 15]GO:0009987+P biological\_process [name] cellular process [def] "Any  
process that is carried out at the cellular level, but not necessarily restricted to a  
single cell. For example, cell communication occurs among more than one cell, but occurs  
at the cellular level." [GOC

159 Pathogen[ Q2Q067] interacts with 4 human partners:{Q9UQ80;Q8IZP0;Q6PGN9;Q9Y5B9}

160 Pathogen[ POC214] interacts with 6 human  
partners:{Q8IZP0;P17275;Q6PGN9;Q9Y5B9;P05412;Q9UQ80}

161 Pathogen[ P03346] interacts with 6 human  
partners:{P05412;Q9UQ80;Q8IZP0;P17275;Q9Y5B9;Q6PGN9}

162 Pathogen[ Q85601] interacts with 6 human  
partners:{Q6PGN9;Q9UQ80;Q9Y5B9;P05412;Q8IZP0;P17275}

163 Pathogen[ P14079] interacts with 6 human  
partners:{Q9Y5B9;Q8IZP0;P17275;Q6PGN9;P05412;Q9UQ80}

164 Pathogen[ P03383] interacts with 5 human  
partners:{Q6PGN9;Q9UQ80;P17275;Q9Y5B9;P05412}

165 Pathogen[ P03410] interacts with 6 human  
partners:{Q9Y5B9;Q9UQ80;P17275;Q8IZP0;P05412;Q6PGN9}

166 Pathogen[ P14075] interacts with 5 human  
partners:{P05412;P17275;Q9Y5B9;Q9UQ80;Q6PGN9}

167 Pathogen[ P0C206] interacts with 6 human  
partners:{P17275;P05412;Q9Y5B9;Q6PGN9;Q8IZP0;Q9UQ80}

168 Pathogen[ P03363] interacts with 6 human  
partners:{Q8IZP0;Q9UQ80;P17275;Q6PGN9;Q9Y5B9;P05412}

169 [Cluster 16]GO:0051965+P biological\_process [name] positive regulation of synapse  
assembly [def] "Any process that activates, maintains or increases the frequency,  
rate or extent of synapse assembly, the aggregation, arrangement and bonding together of  
a set of components to form a synapse." [GOC

170 Pathogen[ Q2Q067] interacts with 2 human partners:{Q9H2P0;Q15819}

171 Pathogen[ P0C214] interacts with 2 human partners:{Q15819;Q9H2P0}

172 Pathogen[ P03346] interacts with 2 human partners:{Q9H2P0;Q15819}

173 Pathogen[ Q85601] interacts with 2 human partners:{Q9H2P0;Q15819}

174 Pathogen[ P14079] interacts with 2 human partners:{Q15819;Q9H2P0}

175 Pathogen[ P03383] interacts with 1 human partners:{Q15819}

176 Pathogen[ P03410] interacts with 1 human partners:{Q15819}

177 Pathogen[ P14075] interacts with 1 human partners:{Q15819}

178 Pathogen[ P0C206] interacts with 2 human partners:{Q15819;Q9H2P0}

179 Pathogen[ P03363] interacts with 2 human partners:{Q9H2P0;Q15819}

180 [Cluster 17]GO:0071385+P biological\_process [name] cellular response to  
glucocorticoid stimulus [def] "Any process that results in a change in state or activity  
of a cell (in terms of movement, secretion, enzyme production, gene expression, etc.) as  
a result of a glucocorticoid stimulus. Glucocorticoids are hormonal C21 corticosteroids  
synthesized from cholesterol with the ability to bind with the cortisol receptor and  
trigger similar effects. Glucocorticoids act primarily on carbohydrate and protein  
metabolism, and have anti-inflammatory effects." [GOC

181 Pathogen[ Q2Q067] interacts with 4 human partners:{P15172;Q13127;P35869;P68036}

182 Pathogen[ P0C214] interacts with 3 human partners:{P35869;P15172;Q13127}

183 Pathogen[ P03346] interacts with 4 human partners:{P68036;P15172;P35869;Q13127}

184 Pathogen[ Q85601] interacts with 4 human partners:{Q13127;P15172;P68036;P35869}

185 Pathogen[ P14079] interacts with 4 human partners:{P04083;P35869;P68036;Q13127}

186 Pathogen[ P03383] interacts with 4 human partners:{P15172;P68036;P35869;Q13127}

187 Pathogen[ P03410] interacts with 2 human partners:{P68036;Q13127}

188 Pathogen[ P14075] interacts with 4 human partners:{P35869;P68036;P15172;Q13127}

189 Pathogen[ P0C206] interacts with 4 human partners:{Q13127;P35869;P68036;P15172}

190 Pathogen[ P03363] interacts with 4 human partners:{P35869;Q13127;P15172;P68036}

191 [Cluster 18]GO:0048066+P biological\_process [name] developmental pigmentation  
[def] "The developmental process that results in the deposition of coloring matter in an  
organism, tissue or cell." [ISBN

192 Pathogen[ Q2Q067] interacts with 1 human partners:{Q6QNY0}

193 Pathogen[ P0C214] interacts with 1 human partners:{Q6QNY0}

194 Pathogen[ P03346] interacts with 1 human partners:{Q6QNY0}

195 Pathogen[ Q85601] interacts with 1 human partners:{Q6QNY0}

196 Pathogen[ P14079] interacts with 1 human partners:{Q6QNY0}

197 Pathogen[ P03383] interacts with 1 human partners:{Q6QNY0}

198 Pathogen[ P03410] interacts with 1 human partners:{Q6QNY0}

199 Pathogen[ P14075] interacts with 1 human partners:{Q6QNY0}

200 Pathogen[ P0C206] interacts with 1 human partners:{Q6QNY0}

201 Pathogen[ P03363] interacts with 1 human partners:{Q6QNY0}

202 [Cluster 19]GO:0000187+P biological\_process [name] activation of MAPK activity  
[def] "The initiation of the activity of the inactive enzyme MAP kinase by  
phosphorylation by a MAPKK." [PMID

203 Pathogen[ Q2Q067] interacts with 11 human  
partners:{Q9NYJ8;O15350;Q8N5C8;Q9Y6K9;P0CG47;P0CG48;O43318;P62987;Q15759;Q15750;P629  
79}

204 Pathogen[ P0C214] interacts with 13 human  
partners:{Q9Y6K9;O15350;O43318;Q8N5C8;P18545;P0CG48;P62987;Q15750;Q15759;P0CG47;Q139  
56;P62979;Q9NYJ8}

205 Pathogen[ P03346] interacts with 12 human  
partners:{Q9Y6K9;P62987;P0CG48;O15350;Q8N5C8;Q5T686;Q9NYJ8;Q15750;P62979;Q15759;P0CG  
47;O43318}

206 Pathogen[ Q85601] interacts with 11 human  
partners:{Q15750;Q9NYJ8;P0CG48;Q8N5C8;Q9Y6K9;P62979;Q15759;P0CG47;O15350;P62987;O433  
18}

207 Pathogen[ P14079] interacts with 20 human  
partners:{Q8N5C8;Q8N307;P0CG48;O43187;P53779;P52564;Q15750;P62979;O15350;P62987;P185  
45;Q16644;Q13956;Q15759;Q9Y6K9;Q8WU20;P49023;P0CG47;Q9Y239;Q5T686}

208 Pathogen[ P03383] interacts with 11 human  
partners:{Q9Y6K9;P62987;O43318;Q8N5C8;O15350;Q15759;P62979;P0CG47;P0CG48;Q9NYJ8;Q157

50}

209 Pathogen[ P03410] interacts with 18 human  
partners:{POCG48;Q9Y239;Q15750;O43187;Q8N307;Q13956;P62979;O43318;P18545;Q9NYJ8;Q8N5  
C8;Q5T686;P62987;P53779;O15350;Q8WU20;Q9Y6K9;POCG47}

210 Pathogen[ P14075] interacts with 12 human  
partners:{Q15750;Q15759;Q8N5C8;POCG48;P62979;O15350;Q5T686;O43318;P62987;POCG47;Q9Y6  
K9;Q9NYJ8}

211 Pathogen[ P0C206] interacts with 15 human  
partners:{POCG48;Q9Y6K9;P18545;Q5T686;Q8N5C8;O43318;Q8WU20;P62979;Q13956;Q9NYJ8;POCG  
47;O15350;Q15750;P62987;Q15759}

212 Pathogen[ P03363] interacts with 7 human  
partners:{Q9NYJ8;Q9Y6K9;O43318;Q15750;Q13480;P62987;Q8N5C8}

213 [Cluster 20]GO:0070328+P biological\_process [name] triglyceride homeostasis [def]  
"Any process involved in the maintenance of an internal steady state of triglyceride  
within an organism or cell." [GOC

214 Pathogen[ Q2Q067] interacts with 2 human partners:{Q9NP71;Q14397}

215 Pathogen[ P0C214] interacts with 2 human partners:{Q9NP71;Q14397}

216 Pathogen[ P03346] interacts with 2 human partners:{Q9NP71;Q14397}

217 Pathogen[ Q85601] interacts with 2 human partners:{Q9NP71;Q14397}

218 Pathogen[ P14079] interacts with 2 human partners:{Q14397;Q9NP71}

219 Pathogen[ P03383] interacts with 2 human partners:{Q9NP71;Q14397}

220 Pathogen[ P03410] interacts with 2 human partners:{Q14397;Q9NP71}

221 Pathogen[ P14075] interacts with 2 human partners:{Q9NP71;Q14397}

222 Pathogen[ P0C206] interacts with 2 human partners:{Q9NP71;Q14397}

223 Pathogen[ P03363] interacts with 2 human partners:{Q14397;Q9NP71}

224 [Cluster 21]GO:0032461+P biological\_process [name] positive regulation of protein  
oligomerization [def] "Any process that activates or increases the frequency, rate or  
extent of protein oligomerization." [GOC

225 Pathogen[ Q2Q067] interacts with 3 human partners:{P55957;Q13794;O14862}

226 Pathogen[ P0C214] interacts with 3 human partners:{P55957;Q13794;O14862}

227 Pathogen[ P03346] interacts with 4 human partners:{P55957;Q9Y371;O14862;Q13794}

228 Pathogen[ Q85601] interacts with 3 human partners:{P55957;O14862;Q13794}

229 Pathogen[ P14079] interacts with 4 human partners:{Q9Y371;Q13794;O14862;P55957}

230 Pathogen[ P03383] interacts with 3 human partners:{O14862;P55957;Q13794}

231 Pathogen[ P03410] interacts with 4 human partners:{O14862;Q13794;P55957;Q9Y371}

232 Pathogen[ P14075] interacts with 3 human partners:{P55957;O14862;Q13794}

233 Pathogen[ P0C206] interacts with 3 human partners:{O14862;P55957;Q13794}

234 Pathogen[ P03363] interacts with 3 human partners:{P55957;Q13794;O14862}

235 [Cluster 22]GO:0045862+P biological\_process [name] positive regulation of  
proteolysis [def] "Any process that activates or increases the frequency, rate or extent  
of the hydrolysis of a peptide bond or bonds within a protein." [GOC

236 Pathogen[ Q2Q067] interacts with 3 human partners:{Q9Y297;Q92769;Q9NWT8}

237 Pathogen[ P0C214] interacts with 3 human partners:{Q9Y297;Q9NWT8;Q92769}

238 Pathogen[ P03346] interacts with 3 human partners:{Q9NWT8;Q92769;Q9Y297}

239 Pathogen[ Q85601] interacts with 2 human partners:{Q9NWT8;Q92769}

240 Pathogen[ P14079] interacts with 5 human  
partners:{Q9NWT8;Q92769;O60502;Q9Y366;Q9NWW5}

241 Pathogen[ P03383] interacts with 2 human partners:{Q9NWT8;Q92769}

242 Pathogen[ P03410] interacts with 5 human  
partners:{Q9NWW5;O60502;Q9Y366;Q92769;Q9NWT8}

243 Pathogen[ P14075] interacts with 2 human partners:{Q92769;Q9NWT8}

244 Pathogen[ P0C206] interacts with 2 human partners:{Q92769;Q9NWT8}

245 Pathogen[ P03363] interacts with 1 human partners:{Q9NWT8}

246 [Cluster 23]GO:0008360+P biological\_process [name] regulation of cell shape [def]  
"Any process that modulates the surface configuration of a cell." [GOC

247 Pathogen[ Q2Q067] interacts with 9 human  
partners:{Q96B97;Q9ULQ0;O75400;P20073;Q9UGP4;Q00587;Q9NSI6;P35579;Q9NRR3}

248 Pathogen[ P0C214] interacts with 11 human  
partners:{Q9UGP4;Q9NRR3;Q9NRR8;Q9NSI6;Q9ULQ0;P35580;O14613;Q7Z406;P20073;O75400;Q96B  
97}

249 Pathogen[ P03346] interacts with 14 human  
partners:{Q96AC1;Q96B97;P02549;Q9UGP4;P20073;P35579;Q9NRR3;O75400;Q9NSI6;Q00587;O146  
13;P16452;Q9NVR7;Q6ZMZ3}

250 Pathogen[ Q85601] interacts with 11 human  
partners:{P35579;O75400;Q9NRR3;Q7Z406;Q9NSI6;Q96B97;O14613;P20073;Q9UGP4;P35580;Q9UL  
Q0}

251 Pathogen[ P14079] interacts with 28 human  
partners:{P16452;P35579;P09327;Q8IXS6;O14613;Q9NSI6;O75400;Q9NRR3;Q9ULQ0;O75781;Q9NR  
R8;Q96B97;Q9NVR7;Q9UKI2;Q6NZY7;Q9NP74;Q9UEE9;O60610;Q96AC1;Q6ZMZ3;O43903;Q00587;P200  
73;P02549;Q9UPY6;Q9H3Q1;Q13145;Q9UGP4}

252 Pathogen[ P03383] interacts with 9 human  
partners:{Q9ULQ0;O75400;Q9NRR3;Q9UGP4;Q9NSI6;P35580;P35579;Q00587;P20073}

253 Pathogen[ P03410] interacts with 27 human  
partners:{O75781;Q9UPY6;O43903;O60610;Q6ZMZ3;Q9UGP4;Q9NRR3;Q13145;P16452;P35579;Q9UK  
I2;Q9UEE9;Q00587;Q9H3Q1;Q6NZY7;P02549;O75400;Q9NVR7;O14613;Q9ULQ0;Q9NSI6;P35580;P200  
73;Q8IXS6;Q96B97;Q9NP74;Q9NRR8}

254 Pathogen[ P14075] interacts with 11 human partners:{Q9NSI6;Q9UGP4;Q9ULQ0;P20073;O75400;Q00587;O14613;P35579;Q9NRR3;Q9UEE9;Q9NRR8}

255 Pathogen[ POC206] interacts with 16 human partners:{Q9NSI6;Q9UGP4;Q9NRR8;Q96B97;Q9NRR3;Q9UEE9;O14613;Q9NVR7;Q6ZMZ3;P16452;P35579;O75400;Q9ULQ0;P35580;P20073;Q00587}

256 Pathogen[ P03363] interacts with 17 human partners:{Q6ZMZ3;P02549;Q9UPY6;P35579;Q96B97;Q00587;Q7L576;P20073;O75400;Q9UGP4;Q9NSI6;O14613;Q9NVR7;Q9NRR3;Q96AC1;P16452;Q9ULQ0}

257 [Cluster 24]GO:0002053+P biological\_process [name] positive regulation of mesenchymal cell proliferation [def] "The process of activating or increasing the rate or extent of mesenchymal cell proliferation. Mesenchymal cells are loosely organized embryonic cells." [GOC

258 Pathogen[ Q2Q067] interacts with 4 human partners:{P04198;P01106;P42224;P54821}

259 Pathogen[ POC214] interacts with 3 human partners:{P42224;P01106;P04198}

260 Pathogen[ P03346] interacts with 5 human partners:{P54821;Q99811;P01106;P42224;P04198}

261 Pathogen[ Q85601] interacts with 3 human partners:{P01106;P42224;P04198}

262 Pathogen[ P14079] interacts with 4 human partners:{P54826;P04198;P01106;P42224}

263 Pathogen[ P03383] interacts with 2 human partners:{P01106;P04198}

264 Pathogen[ P03410] interacts with 3 human partners:{P01106;P54826;P04198}

265 Pathogen[ P14075] interacts with 3 human partners:{P04198;P01106;P54826}

266 Pathogen[ POC206] interacts with 5 human partners:{P54821;P04198;P01106;P54826;P42224}

267 Pathogen[ P03363] interacts with 4 human partners:{P04198;P01106;P54821;Q99811}

268 [Cluster 25]GO:0001657+P biological\_process [name] ureteric bud development [def] "The process whose specific outcome is the progression of the ureteric bud over time, from its formation to the mature structure." [GOC

269 Pathogen[ Q2Q067] interacts with 11 human partners:{Q99502;Q63HK5;Q12959;P84022;O15105;O43541;O15198;Q15796;Q9NSC2;Q99717;Q15797}

270 Pathogen[ POC214] interacts with 11 human partners:{O15198;P84022;Q63HK5;O15105;Q15796;Q9NSC2;O43541;Q12959;Q99717;Q15797;Q99502}

271 Pathogen[ P03346] interacts with 13 human partners:{Q15797;Q9NSC2;Q15796;Q63HK5;Q99717;O15105;Q99502;O15198;O43680;P84022;O43541;Q15475;Q12959}

272 Pathogen[ Q85601] interacts with 11 human partners:{O15198;O43541;Q15797;Q99717;Q99502;P84022;Q12959;O15105;Q9NSC2;Q63HK5;Q15796}

273 Pathogen[ P14079] interacts with 7 human partners:{Q99502;O15198;Q15797;O43541;Q63HK5;O15105;Q9NSC2}

274 Pathogen[ P03383] interacts with 8 human partners:{O15198;Q15797;O15105;P84022;Q99717;Q9NSC2;O43541;Q15796}

275 Pathogen[ P03410] interacts with 11 human partners:{P84022;Q99502;Q12959;Q99717;O15198;Q15797;O43541;O15105;Q63HK5;Q9NSC2;Q15796}

276 Pathogen[ P14075] interacts with 8 human partners:{Q9NSC2;O43541;Q99717;Q15796;O15198;O15105;Q99502;P84022}

277 Pathogen[ POC206] interacts with 11 human partners:{P84022;O43541;Q9NSC2;Q99717;Q15796;Q63HK5;O15105;Q15797;Q99502;O15198;Q12959}

278 Pathogen[ P03363] interacts with 9 human partners:{Q12959;O15105;Q15797;O43541;Q15796;P84022;Q63HK5;Q99717;O15198}

279 [Cluster 26]GO:0007605+P biological\_process [name] sensory perception of sound [def] "The series of events required for an organism to receive an auditory stimulus, convert it to a molecular signal, and recognize and characterize the signal. Sonic stimuli are detected in the form of vibrations and are processed to form a sound." [GOC

280 Pathogen[ Q2Q067] interacts with 17 human partners:{Q12837;Q99502;P78559;P10828;P49419;Q9BZE3;Q9Y6N9;O60907;O60765;P23760;P49639;P62072;Q9Y5J7;P63173;Q495M9;Q86XK2;P46527}

281 Pathogen[ POC214] interacts with 20 human partners:{P49419;P49639;Q9UM54;O60907;Q9BZE3;Q495M9;Q9Y6N9;P46527;P62072;P63173;Q12837;O60765;Q9Y5J7;P42574;P78559;Q9Y5J7;Q86XK2;P10828;P23760;Q99502}

282 Pathogen[ P03346] interacts with 27 human partners:{Q9Y6N9;P49639;O60443;P63173;O95677;P55273;O60907;O60765;Q9BZE3;Q12837;P23760;Q9Y5J7;P42574;Q86XK2;Q99502;Q9Y664;P49419;Q15475;P78559;P62072;P10828;Q8TBZ2;Q9P2D1;P46527;P49335;Q495M9;Q15319}

283 Pathogen[ Q85601] interacts with 22 human partners:{P49639;P55273;Q9P2D1;P63173;O95677;O60907;Q9BZE3;P62072;Q9Y5J9;Q9Y5J7;Q86XK2;O60765;Q99502;Q9Y6N9;P78559;Q9UM54;P10828;Q12837;Q495M9;P23760;P49419;P46527}

284 Pathogen[ P14079] interacts with 33 human partners:{A7XYQ1;Q8NHW6;Q9Y664;Q99502;P62072;O43597;P10828;O60907;Q86XK2;Q9Y5J7;Q9UM54;Q12837;P55273;Q7RTU9;Q9P2D1;P78559;Q9BZE3;P63173;O60610;Q8TCU4;Q4KMQ1;Q9Y6N9;Q495M9;P46527;Q0ZLH3;P49639;O60443;Q9Y5J9;O60765;Q8TDI8;Q9NQ40;Q9Y5L4;P23760}

285 Pathogen[ P03383] interacts with 14 human



partners:{Q9Y5J7;O60765;P62072;O60907;Q86XK2;P63173;P49639;P46527;Q12837;P23760;P78559;P10828;Q9Y5J9;P49419}

286 Pathogen[ P03410] interacts with 36 human  
partners:{Q8TDI8;Q9Y5L4;P46527;P62072;O60610;O43597;Q99502;Q495M9;Q9Y5J7;Q9BZE3;P55273;Q8TCU4;P10828;P63173;Q9NQ40;Q9Y6M9;Q0ZLH3;Q8NEW7;A7XYQ1;Q9UM54;Q9P2D1;Q86XK2;Q7RTU9;Q9Y6N9;Q8NHW6;P49419;O60443;P49639;P78559;Q9Y5J9;P23760;O60765;Q12837;Q9Y664;O60907;Q4KMQ1}

287 Pathogen[ P14075] interacts with 15 human  
partners:{Q9Y5J9;P62072;P10828;O60765;P78559;Q12837;P46527;P63173;P49419;O60907;Q9Y5J7;Q86XK2;Q99502;P23760;Q4KMQ1}

288 Pathogen[ P0C206] interacts with 29 human  
partners:{Q9Y5L4;Q9UM54;Q86XK2;O60907;Q9Y6N9;Q8TCU4;P49639;Q9P2D1;P78559;O60765;Q9Y5J9;Q9Y5J7;Q9BZE3;Q12837;O60443;P10828;Q495M9;P55273;P46527;P42574;O43597;P23760;P62072;Q99502;Q4KMQ1;P49419;P63173;A7XYQ1;Q95677}

289 Pathogen[ P03363] interacts with 19 human  
partners:{Q9Y6N9;P10828;P63173;P49419;O60443;P78559;Q8TBZ2;P23760;O60765;O60907;P49639;Q9BZE3;Q9Y5J7;Q495M9;Q86XK2;P49335;Q9Y664;Q12837;Q15319}

290 [Cluster 27]GO:0010508+P biological\_process [name] positive regulation of autophagy  
[def] "Any process that activates, maintains or increases the rate of autophagy. Autophagy is the process in which cells digest parts of their own cytoplasm." [GOC

291 Pathogen[ Q2Q067] interacts with 5 human  
partners:{Q9P2Y5;Q6ZNE5;Q86UE4;Q8IXH6;Q96A56}

292 Pathogen[ P0C214] interacts with 6 human  
partners:{Q92934;Q86UE4;Q6ZNE5;Q8IXH6;Q9P2Y5;Q96A56}

293 Pathogen[ P03346] interacts with 6 human  
partners:{Q86UE4;Q96A56;Q6ZNE5;Q96S99;Q9P2Y5;Q8IXH6}

294 Pathogen[ Q85601] interacts with 5 human  
partners:{Q96S99;Q9P2Y5;Q86UE4;Q96A56;Q8IXH6}

295 Pathogen[ P14079] interacts with 7 human  
partners:{Q96A56;Q8IXH6;Q96S99;Q6ZNE5;Q92934;Q86UE4;Q9P2Y5}

296 Pathogen[ P03383] interacts with 5 human  
partners:{Q96A56;Q86UE4;Q8IXH6;Q9P2Y5;Q6ZNE5}

297 Pathogen[ P03410] interacts with 7 human  
partners:{Q8IXH6;Q9P2Y5;Q96S99;Q92934;Q86UE4;Q96A56;Q6ZNE5}

298 Pathogen[ P14075] interacts with 5 human  
partners:{Q9P2Y5;Q6ZNE5;Q86UE4;Q8IXH6;Q96A56}

299 Pathogen[ P0C206] interacts with 7 human  
partners:{Q8IXH6;Q9P2Y5;Q6ZNE5;Q96A56;Q92934;Q96S99;Q86UE4}

300 Pathogen[ P03363] interacts with 5 human  
partners:{Q9P2Y5;Q86UE4;Q96A56;Q6ZNE5;Q8IXH6}

301 [Cluster 28]GO:0048663+P biological\_process [name] neuron fate commitment [def]  
"The process in which the developmental fate of a cell becomes restricted such that it will develop into a neuron." [GOC

302 Pathogen[ Q2Q067] interacts with 3 human partners:{Q13485;P23769;Q9H4S2}

303 Pathogen[ P0C214] interacts with 3 human partners:{P32243;P23769;Q13485}

304 Pathogen[ P03346] interacts with 9 human  
partners:{P52954;Q7RTS3;P23769;Q9H4S2;Q8TAK6;P23759;Q13516;Q13485;P32243}

305 Pathogen[ Q85601] interacts with 4 human partners:{P23769;P32243;Q13485;Q9H4S2}

306 Pathogen[ P14079] interacts with 2 human partners:{P32243;P23769}

307 Pathogen[ P03383] interacts with 3 human partners:{Q13485;P32243;P23769}

308 Pathogen[ P03410] interacts with 3 human partners:{Q13485;P32243;P23769}

309 Pathogen[ P14075] interacts with 3 human partners:{P23769;Q13485;P32243}

310 Pathogen[ P0C206] interacts with 4 human partners:{Q9H4S2;P32243;Q13485;P23769}

311 Pathogen[ P03363] interacts with 7 human  
partners:{Q8TAK6;Q13516;Q7RTS3;P32243;Q9H4S2;P23759;Q13485}

312 [Cluster 29]GO:0000084+P biological\_process [name] S phase of mitotic cell cycle  
[def] "S phase occurring as part of the mitotic cell cycle. S phase is the part of the cell cycle during which DNA synthesis takes place. A mitotic cell cycle is one which canonically comprises four successive phases called G1, S, G2, and M and includes replication of the genome and the subsequent segregation of chromosomes into daughter cells." [GOC

313 Pathogen[ Q2Q067] interacts with 83 human  
partners:{P83369;Q15054;Q99460;O75832;P48556;P40306;P55036;P24385;P06400;O00231;O00233;P27694;Q15910;P51665;Q99741;P28072;P61024;Q9H211;A5LHX3;P35244;Q13200;P25787;Q06323;P49005;Q13415;P30304;P28065;O14818;Q9Y248;P12004;Q14181;Q14691;Q14997;P51948;P60900;Q9UL46;P61289;Q9UBD5;P15927;P28062;P56282;Q9UNM6;P25788;Q9HCU8;O75419;Q13616;Q92530;P50613;P25786;P38936;P39748;Q16401;O00232;Q13309;Q9UM11;O43913;P28074;P25789;P0CG47;Q9Y5N6;Q13416;P20618;P0CG48;P25205;P35251;P28070;P28066;O14519;Q99436;P24941;Q8TA A3;Q9BRT9;P62987;O43242;P49721;P11802;P46527;P49720;Q9BTE3;P63208;Q969L4;P51946;P62979}

314 Pathogen[ P0C214] interacts with 86 human  
partners:{Q14997;P51665;P51946;P25789;P83369;P55036;P28062;A5LHX3;P28065;O43913;P50613;Q13309;O14818;Q969L4;P11802;O43242;P61024;P63208;P46527;P48556;P40306;P35251;Q15910;P24385;P49005;Q13200;Q9HCU8;P38936;O00232;Q9Y5N6;Q9Y248;P25205;Q9BTE3;Q99460;P28066;O75832;Q14566;P51948;P49720;P28074;P0CG48;Q9UL46;Q14691;P15927;P25788;P24941;O14519;Q9UNM6;O00231;P35244;Q06323;P25786;Q9H211;Q13616;P28072;Q8TAA3;P62987;O75419;Q994

- 36;P39748;P0CG47;P25787;Q15054;Q13416;Q6Y7W6;P27694;P35998;P60900;O00233;Q9UM11;P62979;P30304;P56282;Q92530;Q15008;Q9UBD5;P28070;P06400;P20618;P49721;Q99741;Q16401;P17980;Q13415;Q14181;Q9BRT9}
- 315 Pathogen[ P03346] interacts with 89 human  
partners: {P25787;P12004;P28070;P25789;P55036;P24385;Q9HCU8;Q99460;Q9UM11;Q13616;Q9UL46;P62987;P27694;P28072;P06400;P25788;Q9Y5N6;Q14691;P28074;P49721;Q9UBD5;P35244;Q14818;Q9BRT9;P35250;Q99436;P24941;P30304;P56282;P0CG48;Q16401;A5LHX3;P28062;P49005;P61024;P20618;O00232;P11802;O75832;O00233;Q14566;P25205;P83369;Q13309;P49720;P28065;Q9Y248;P51946;P60900;P33992;P25786;O00231;Q13415;P15927;P35249;P63208;P61289;Q14181;Q15910;P62979;P28066;Q9UNM6;P33991;Q8TAA3;P0CG47;Q13416;Q14997;Q13200;P48556;P35251;P51665;P38936;P39748;Q969L4;Q06323;O75419;P46527;P40937;Q99741;O14519;Q92530;Q9H211;O43929;P51948;O43242;Q9BTE3;O43913;P40306;Q15054}
- 316 Pathogen[ Q85601] interacts with 82 human  
partners: {P51946;P28066;Q9UNM6;P60900;O43913;Q13309;P55036;Q9BTE3;P24385;P25787;P61289;P56282;P06400;P25788;P35244;O75832;Q13415;Q9Y5N6;Q13616;Q6Y7W6;Q969L4;Q9Y248;Q9UBD5;P0CG48;P49005;P30304;O14519;P51948;P61024;Q15054;P27694;P11802;P25789;O00233;Q14566;Q9BRT9;P20618;P63208;P25205;P40306;P15927;P49720;P28062;P49721;P35251;P25786;Q14691;P83369;P28072;Q13200;P50613;P28065;Q14181;P62979;Q99436;P28070;Q9HCU8;Q9UM11;Q8TAA3;Q9UL46;Q99460;O00231;P0CG47;Q13416;Q15910;P48556;P12004;P28074;Q92530;P38936;P62987;P33992;A5LHX3;P39748;Q06323;O75419;Q99741;Q9H211;O14818;P24941;Q16401;P46527}
- 317 Pathogen[ P14079] interacts with 91 human  
partners: {P28065;Q99436;O14519;P62333;Q13416;Q9BRT9;P48556;P0CG48;Q5QGS0;O75419;Q14566;P51946;Q13415;Q13309;Q9Y5N6;P40937;P40306;P55036;P28074;O00232;P49005;O43913;Q14691;Q6Y7W6;Q9H211;P49720;O00487;P25787;O75832;Q9HCU8;A5LHX3;P62979;O00233;Q9BTE3;P35998;P61289;P30304;P62987;P83369;P51665;P20618;Q8TAA3;Q99741;P50613;Q15054;P35250;Q14997;P28062;P60900;Q9UBD5;Q9UM11;P38936;Q9UNM6;P56282;P35251;Q99460;Q14818;Q9Y248;P49721;Q92530;P49642;Q14181;Q969L4;O43929;P33992;P15927;Q06323;P27694;P62191;Q96FC9;P46527;P12004;Q15910;Q15008;P43686;O43242;P25788;P63208;O00231;Q13616;P28066;Q9UL46;P35244;P0CG47;P25205;Q16401;P17980;P28072;P39748;P61024;P51948}
- 318 Pathogen[ P03383] interacts with 75 human  
partners: {O14519;Q13616;Q9UBD5;P55036;P61024;Q969L4;Q9HCU8;P62987;P51948;P25789;P60900;Q14181;P27694;P40306;O00233;P25205;Q9BTE3;P30304;P49721;Q06323;P24385;Q14997;P63208;P49005;P20618;Q9Y248;P11802;P06400;O43913;P56282;O75832;P15927;P50613;Q9Y5N6;P51946;P46527;P24941;Q9UM11;Q9UL46;Q9UNM6;P35244;P25786;Q99460;Q9BRT9;P28072;Q13200;Q15054;P28062;P28066;O75419;Q16401;P62979;O00231;P0CG47;Q13416;Q15910;Q13309;P0CG48;Q14691;P28074;Q92530;P49720;Q8TAA3;P61289;P83369;P28062;P48556;O14818;Q99436;Q9H211;P28070;Q99741;P25787;P35251;P25788}
- 319 Pathogen[ P03410] interacts with 94 human  
partners: {P28070;Q5QGS0;P46527;P35244;P25205;P55036;O43929;P0CG48;Q14181;P25786;Q13416;Q15008;Q16401;P60900;O75419;Q14997;P35998;Q99460;O00233;P51946;Q9BTE3;O00232;Q8TAA3;P48556;P49721;Q9H211;P39748;P06400;P56282;A5LHX3;P62979;Q9BRT9;P50613;Q99436;P33992;P40306;Q06323;P24385;P63208;P35251;Q13200;P25787;Q9UM11;P38936;Q13309;P30304;P24941;P83369;P11802;P28062;P51665;Q15054;O14818;Q15910;O00231;Q9UNM6;P51948;P25789;P49720;Q13616;Q969L4;Q9Y248;P62987;Q6Y7W6;P61024;O14519;P49005;P27694;Q96FC9;P28072;P15927;Q14691;P35250;Q9Y5N6;P25788;O43913;P40937;Q14566;P28066;P12004;Q9UBD5;P28065;O43242;P0CG47;P17980;O75832;P20618;P49642;Q9HCU8;Q9UL46;P28074;P61289;Q13415;Q99741}
- 320 Pathogen[ P14075] interacts with 74 human  
partners: {P55036;P25788;Q9H211;P28066;P24941;P11802;Q06323;O75832;P61024;Q8TAA3;P60900;Q9UM11;O00233;Q9UL46;Q9Y5N6;P49720;P50613;Q9UBD5;O75419;Q15910;P49005;Q13200;P48556;Q16401;P15927;P28070;Q14691;P49721;Q9Y248;O00231;P46527;P49005;Q9BTE3;P63208;P35244;P0CG48;P62979;P28062;P83369;P28074;O14519;P25205;P28065;P35251;P25786;O14818;Q15054;P62987;Q13309;P28072;P30304;P06400;Q9BRT9;O43913;P27694;P51946;Q14997;P0CG47;P25787;Q13416;Q99741;P20618;Q9HCU8;P24385;P56282;Q9UNM6;Q13616;Q14181;P61289;P40306;Q99436;Q969L4;P51948;P25789}
- 321 Pathogen[ P0C206] interacts with 87 human  
partners: {P61289;Q99436;P28062;Q9UNM6;P0CG48;Q9BTE3;O75832;P61024;P40306;P28065;Q14997;P35251;P55036;Q13309;P25786;P25788;Q9Y248;Q9HCU8;O75419;P25205;P25787;O43913;Q06323;P49720;O00232;P60900;Q9UBD5;Q13416;P49005;Q13616;P49642;Q15910;O43242;Q99741;Q9BRT9;A5LHX3;P83369;P25789;O14519;Q6Y7W6;P30291;Q15054;P50613;P20618;Q14181;P63208;Q13200;Q8TAA3;P28070;Q14691;Q99460;Q9H211;P62979;Q9Y5N6;P46527;P28066;P38936;Q9UM11;O14818;P0CG47;P28072;P30304;P56282;Q13415;P28074;P27694;Q92530;P15927;P49721;P62987;P39748;P35244;Q9UL46;P24941;Q14566;O00233;P11802;P48556;Q16401;P33992;O00231;P51946;Q969L4;P51948;P24385;P12004;P06400}
- 322 Pathogen[ P03363] interacts with 40 human  
partners: {Q14691;Q13309;P27694;Q9BTE3;Q92530;P25205;P51946;Q15910;P35251;P61289;P49005;P24941;Q14181;P35244;P15927;P06400;Q9UM11;P33992;P83369;P30304;Q9HCU8;Q13416;Q13616;Q13415;Q99741;P61024;Q9H211;P62987;P24385;Q15054;Q969L4;O14519;P11802;Q9Y248;Q9UBD5;Q9Y5N6;Q9BRT9;P63208;O75419;O43913}
- 323 [Cluster 30]GO:0033979+P biological\_process [name] box H/ACA snoRNA metabolic process [def] "The chemical reactions and pathways involving box H/ACA type small nucleolar RNA." [GOC
- 324 Pathogen[ Q2Q067] interacts with 1 human partners: {Q14978}
- 325 Pathogen[ P0C214] interacts with 1 human partners: {Q14978}
- 326 Pathogen[ P03346] interacts with 1 human partners: {Q14978}
- 327 Pathogen[ Q85601] interacts with 1 human partners: {Q14978}
- 328 Pathogen[ P14079] interacts with 1 human partners: {Q14978}

329 Pathogen[ P03383] interacts with 1 human partners:{Q14978}  
330 Pathogen[ P03410] interacts with 1 human partners:{Q14978}  
331 Pathogen[ P14075] interacts with 1 human partners:{Q14978}  
332 Pathogen[ P0C206] interacts with 1 human partners:{Q14978}  
333 Pathogen[ P03363] interacts with 1 human partners:{Q14978}  
334 [Cluster 31]GO:0002829+P biological\_process [name] negative regulation of type 2  
immune response [def] "Any process that stops, prevents, or reduces the frequency, rate,  
or extent of a type 2 immune response." [GOC  
335 Pathogen[ Q2Q067] interacts with 2 human partners:{P41182;P42226}  
336 Pathogen[ P0C214] interacts with 2 human partners:{P42226;P41182}  
337 Pathogen[ P03346] interacts with 2 human partners:{P42226;P41182}  
338 Pathogen[ Q85601] interacts with 2 human partners:{P42226;P41182}  
339 Pathogen[ P14079] interacts with 3 human partners:{P42226;P41182;Q8IU54}  
340 Pathogen[ P03383] interacts with 1 human partners:{P42226}  
341 Pathogen[ P03410] interacts with 2 human partners:{P41182;P42226}  
342 Pathogen[ P14075] interacts with 1 human partners:{P42226}  
343 Pathogen[ P0C206] interacts with 2 human partners:{P41182;P42226}  
344 Pathogen[ P03363] interacts with 1 human partners:{P42226}  
345 [Cluster 32]GO:0032260+P biological\_process [name] DNA replication involved in S  
phase [def] "The process in which new strands of genomic DNA are synthesized, using  
parental DNA as a template for DNA-dependent DNA polymerases, contributing to  
progression through S phase of the cell cycle." [GOC  
346 Pathogen[ Q2Q067] interacts with 2 human partners:{Q13156;Q14493}  
347 Pathogen[ P0C214] interacts with 2 human partners:{Q13156;Q14493}  
348 Pathogen[ P03346] interacts with 2 human partners:{Q13156;Q14493}  
349 Pathogen[ Q85601] interacts with 2 human partners:{Q13156;Q14493}  
350 Pathogen[ P14079] interacts with 2 human partners:{Q13156;Q14493}  
351 Pathogen[ P03383] interacts with 2 human partners:{Q14493;Q13156}  
352 Pathogen[ P03410] interacts with 2 human partners:{Q14493;Q13156}  
353 Pathogen[ P14075] interacts with 2 human partners:{Q14493;Q13156}  
354 Pathogen[ P0C206] interacts with 2 human partners:{Q13156;Q14493}  
355 Pathogen[ P03363] interacts with 2 human partners:{Q13156;Q14493}  
356 [Cluster 33]GO:2000639+P biological\_process [name] negative regulation of  
SREBP-mediated signaling pathway [def] "Any process that stops, prevents or reduces  
the frequency, rate or extent of SREBP-mediated signaling pathway." [GOC  
357 Pathogen[ Q2Q067] interacts with 1 human partners:{Q969H0}  
358 Pathogen[ P0C214] interacts with 1 human partners:{Q969H0}  
359 Pathogen[ P03346] interacts with 1 human partners:{Q969H0}  
360 Pathogen[ Q85601] interacts with 1 human partners:{Q969H0}  
361 Pathogen[ P14079] interacts with 1 human partners:{Q969H0}  
362 Pathogen[ P03383] interacts with 1 human partners:{Q969H0}  
363 Pathogen[ P03410] interacts with 1 human partners:{Q969H0}  
364 Pathogen[ P14075] interacts with 1 human partners:{Q969H0}  
365 Pathogen[ P0C206] interacts with 1 human partners:{Q969H0}  
366 Pathogen[ P03363] interacts with 1 human partners:{Q969H0}  
367 [Cluster 34]GO:0007512+P biological\_process [name] adult heart development [def]  
"The process whose specific outcome is the progression of the adult heart over time,  
from its formation to the mature structure." [GOC  
368 Pathogen[ Q2Q067] interacts with 3 human partners:{Q14814;P51948;P12883}  
369 Pathogen[ P0C214] interacts with 5 human  
partners:{Q14814;P35580;P51948;P12883;P13533}  
370 Pathogen[ P03346] interacts with 3 human partners:{Q14814;Q9P2D1;P51948}  
371 Pathogen[ Q85601] interacts with 6 human  
partners:{P13533;Q9P2D1;Q14814;P51948;P12883;P35580}  
372 Pathogen[ P14079] interacts with 5 human  
partners:{Q9P2D1;P12883;Q14814;O15273;P51948}  
373 Pathogen[ P03383] interacts with 4 human partners:{P51948;Q14814;P12883;P35580}  
374 Pathogen[ P03410] interacts with 7 human  
partners:{Q14814;O15273;Q9P2D1;P12883;P51948;P35580;P13533}  
375 Pathogen[ P14075] interacts with 2 human partners:{Q14814;P51948}  
376 Pathogen[ P0C206] interacts with 6 human  
partners:{P13533;Q9P2D1;P12883;Q14814;P35580;P51948}  
377 Pathogen[ P03363] interacts with 1 human partners:{Q14814}  
378 [Cluster 35]GO:0010950+P biological\_process [name] positive regulation of  
endopeptidase activity [def] "Any process that increases the frequency, rate or extent  
of endopeptidase activity, the endohydrolysis of peptide bonds within proteins." [GOC  
379 Pathogen[ Q2Q067] interacts with 2 human partners:{P61289;Q16186}  
380 Pathogen[ P0C214] interacts with 1 human partners:{Q16186}  
381 Pathogen[ P03346] interacts with 2 human partners:{P61289;Q16186}  
382 Pathogen[ Q85601] interacts with 2 human partners:{P61289;Q16186}  
383 Pathogen[ P14079] interacts with 3 human partners:{O00487;Q16186;P61289}  
384 Pathogen[ P03383] interacts with 2 human partners:{P61289;Q16186}  
385 Pathogen[ P03410] interacts with 2 human partners:{Q16186;P61289}  
386 Pathogen[ P14075] interacts with 2 human partners:{Q16186;P61289}  
387 Pathogen[ P0C206] interacts with 2 human partners:{P61289;Q16186}  
388 Pathogen[ P03363] interacts with 2 human partners:{Q16186;P61289}

389 [Cluster 36]GO:2000096+P biological\_process [name] positive regulation of Wnt receptor signaling pathway, planar cell polarity pathway [def] "Any process that activates or increases the frequency, rate or extent of Wnt receptor signaling pathway, planar cell polarity pathway." [GOC

390 Pathogen[ Q2Q067] interacts with 1 human partners:{P42568}

391 Pathogen[ P0C214] interacts with 1 human partners:{P42568}

392 Pathogen[ P03346] interacts with 3 human partners:{Q969G9;Q9Y2G4;P42568}

393 Pathogen[ Q85601] interacts with 1 human partners:{P42568}

394 Pathogen[ P14079] interacts with 1 human partners:{P42568}

395 Pathogen[ P03383] interacts with 1 human partners:{P42568}

396 Pathogen[ P03410] interacts with 3 human partners:{Q9Y2G4;Q969G9;P42568}

397 Pathogen[ P14075] interacts with 1 human partners:{P42568}

398 Pathogen[ P0C206] interacts with 3 human partners:{Q9Y2G4;P42568;Q969G9}

399 Pathogen[ P03363] interacts with 3 human partners:{Q969G9;P42568;Q9Y2G4}

400 [Cluster 37]GO:0051106+P biological\_process [name] positive regulation of DNA ligation [def] "Any process that activates or increases the frequency, rate or extent of DNA ligation, the re-formation of a broken phosphodiester bond in the DNA backbone, carried out by DNA ligase." [GOC

401 Pathogen[ Q2Q067] interacts with 1 human partners:{Q06609}

402 Pathogen[ P0C214] interacts with 1 human partners:{Q06609}

403 Pathogen[ P03346] interacts with 1 human partners:{Q06609}

404 Pathogen[ Q85601] interacts with 1 human partners:{Q06609}

405 Pathogen[ P14079] interacts with 1 human partners:{Q06609}

406 Pathogen[ P03383] interacts with 1 human partners:{Q06609}

407 Pathogen[ P03410] interacts with 1 human partners:{Q06609}

408 Pathogen[ P14075] interacts with 1 human partners:{Q06609}

409 Pathogen[ P0C206] interacts with 1 human partners:{Q06609}

410 Pathogen[ P03363] interacts with 1 human partners:{Q06609}

411 [Cluster 38]GO:0006111+P biological\_process [name] regulation of gluconeogenesis [def] "Any process that modulates the frequency, rate or extent of gluconeogenesis, the formation of glucose from noncarbohydrate precursors, such as pyruvate, amino acids and glycerol." [GOC

412 Pathogen[ Q2Q067] interacts with 3 human partners:{Q14749;P09467;Q9BQE4}

413 Pathogen[ P0C214] interacts with 3 human partners:{P09467;Q14749;Q9BQE4}

414 Pathogen[ P03346] interacts with 2 human partners:{P09467;Q14749}

415 Pathogen[ Q85601] interacts with 3 human partners:{P09467;Q14749;Q9BQE4}

416 Pathogen[ P14079] interacts with 4 human partners:{Q9BQE4;Q14749;P09467;Q9NRP4}

417 Pathogen[ P03383] interacts with 3 human partners:{P09467;Q9BQE4;Q14749}

418 Pathogen[ P03410] interacts with 4 human partners:{Q14749;P09467;Q9BQE4;Q9NRP4}

419 Pathogen[ P14075] interacts with 3 human partners:{Q9BQE4;Q14749;P09467}

420 Pathogen[ P0C206] interacts with 3 human partners:{P09467;Q9BQE4;Q14749}

421 Pathogen[ P03363] interacts with 1 human partners:{Q14749}

422 [Cluster 39]GO:0008612+P biological\_process [name] peptidyl-lysine modification to hypusine [def] "The modification of peptidyl-lysine to form hypusine, N6-(4-amino-2-hydroxybutyl)-L-lysine." [GOC

423 Pathogen[ Q2Q067] interacts with 5 human partners:{P63241;Q9BU89;Q6IS14;P49366;Q9GZV4}

424 Pathogen[ P0C214] interacts with 5 human partners:{Q6IS14;Q9BU89;Q9GZV4;P63241;P49366}

425 Pathogen[ P03346] interacts with 5 human partners:{Q9GZV4;P63241;Q6IS14;P49366;Q9BU89}

426 Pathogen[ Q85601] interacts with 4 human partners:{Q9GZV4;P63241;Q9BU89;Q6IS14}

427 Pathogen[ P14079] interacts with 5 human partners:{Q6IS14;Q9BU89;P63241;Q9GZV4;P49366}

428 Pathogen[ P03383] interacts with 4 human partners:{Q9GZV4;P63241;P49366;Q9BU89}

429 Pathogen[ P03410] interacts with 5 human partners:{Q9BU89;P49366;P63241;Q9GZV4;Q6IS14}

430 Pathogen[ P14075] interacts with 4 human partners:{Q9GZV4;P63241;P49366;Q9BU89}

431 Pathogen[ P0C206] interacts with 5 human partners:{Q9GZV4;Q6IS14;P49366;P63241;Q9BU89}

432 Pathogen[ P03363] interacts with 4 human partners:{Q9GZV4;P49366;P63241;Q6IS14}

433 [Cluster 40]GO:0008285+P biological\_process [name] negative regulation of cell proliferation [def] "Any process that stops, prevents or reduces the rate or extent of cell proliferation." [GOC

434 Pathogen[ Q2Q067] interacts with 108 human partners:{Q9NNW5;Q13118;P23381;Q9BZE4;Q99583;Q93034;P42773;Q9H4X1;P56524;P06400;Q8WYH8;P14921;Q13485;Q9UI56;Q95997;Q99816;Q99741;Q6P1J9;Q9BQA1;Q9Y2Y9;Q95751;P41182;Q01664;P51531;Q00613;Q05516;O43639;Q96AV8;Q8IZP0;P50616;P06748;P15976;Q9UNL4;Q8N196;Q9NP11;P08107;Q14896;Q14457;P11473;O14907;P05413;Q8N726;P11831;P28069;Q86UL8;Q09028;P62324;Q9NRG4;P35548;Q99608;P49356;P40337;Q9Y6P5;Q92831;Q14106;P67870;P12755;P84022;Q92796;Q63ZY3;P31949;P10914;O00255;Q13127;P49848;P29474;Q13616;Q8WVJ9;O15164;Q9NTI5;Q9UF9;Q96BK5;Q72465;P38936;Q15796;P37198;Q13363;Q15583;Q13155;Q13619;Q86U86;Q3YBR2;P42771;P17096;Q12824;O14964;P58304;Q14582;Q92845;P35232;Q96IZ0;P46527;P15407;O43324;P49918;P32929;Q96EY1;Q13617;Q15797;Q9BT81;O14879;P49715;P42772;P78543;Q00534;Q96A56;O75691;O15297}

435 Pathogen[ P0C214] interacts with 105 human

- partners: {Q14457;P29474;Q9Y6P5;P02794;Q96BK5;Q13619;Q13617;Q9H4X1;O75691;Q00613;Q8IZP0;Q13363;Q12824;P14921;Q96IZ0;P78543;O14879;P23381;P15407;P06748;Q92796;Q7Z465;Q92560;P84022;P17096;P46527;P56524;O14907;P11831;Q9Y2Y9;Q9UNL4;O14964;P10914;Q93034;Q99608;Q8N726;P05413;Q9BT81;P38936;O43639;Q09028;P32929;Q00534;P37198;P49918;P49356;Q6P1J9;Q13485;P49848;O14896;P40337;P50616;Q15796;P42771;P62324;P41182;P07093;O43324;Q13616;P12755;Q13127;P28069;Q3YBR2;Q92845;P42773;Q9H4P4;Q99816;P05412;Q8WVJ9;O15297;Q92831;O15164;Q9NPI1;Q8N196;Q86U86;P31949;O95751;Q9UFF9;Q9UI56;Q8IYB7;Q95997;Q96A56;Q9NNW5;Q9BZE4;Q8WYH8;Q15797;P67870;P35232;P51531;Q14106;P08107;Q9NTI5;Q9NRG4;Q01664;Q99583;P06400;P35548;Q96EY1;Q05516;O00255;P42772;Q63ZY3;Q13155;Q99741;Q96AV8}
- 436 Pathogen[ P03346] interacts with 134 human  
partners: {P08107;Q06945;O75691;P23381;P05412;Q99828;Q9Y238;O60443;Q9H4X1;P52954;P11473;Q92560;P55273;Q13362;P06748;Q13616;P29474;O14901;Q9UNL4;P05413;Q9BZE4;O43639;Q8WYH8;Q00613;Q9BQA1;P35548;P11831;O95751;P06400;Q7Z465;Q8IZP0;Q15797;Q15583;Q96A56;P42772;Q15796;P56524;Q9H4P4;Q9NPI1;O43815;Q99816;P25686;P02794;Q14457;Q12824;Q96AV8;Q86U86;P58304;Q92831;P49918;P37198;P42771;P49715;P17096;O95997;Q93034;Q8IYB7;Q9NRG4;Q92796;P52756;Q13155;Q14582;P14921;P84022;Q96IZ0;Q16667;P49356;P15976;Q86UL8;O00255;P10914;Q9UPQ4;Q13118;P49848;O14879;O75569;Q09028;Q9C0C7;O43324;P50616;Q8WVJ9;Q3YBR2;Q96BK5;O15297;P51161;P32929;O14907;Q9NTI5;O14896;Q8N196;P98177;P50539;P42773;P15407;P41182;P40337;Q05516;Q92481;Q99608;Q63ZY3;O15151;Q13619;Q14106;P28069;Q99593;Q13363;Q9UI56;P35232;O14964;Q13485;Q00534;Q92845;P56545;P67870;P38936;Q9Y6P5;Q9UFF9;Q99583;P62324;P51531;Q8N726;P46527;Q99741;P78543;Q01664;O15164;Q96EY1;P31949;Q9Y2Y9;Q9BT81;Q6P1J9;Q13127;Q9NNW5;Q13617}
- 437 Pathogen[ Q85601] interacts with 119 human  
partners: {Q3YBR2;Q14457;Q96IZ0;Q8N196;Q99816;P11831;Q9BQA1;Q9H4X1;O14896;O43324;P11473;P08107;Q13127;P55273;P17096;P50539;P15976;O75691;P05413;P14921;Q9BZE4;O14879;O15151;Q6P1J9;P51161;P06400;Q7Z465;Q9Y2Y9;Q15797;Q13155;Q92560;P40337;P15407;Q86UL8;P28069;P42772;Q9Y6P5;Q9NY30;P62324;P23381;Q13616;O43815;Q9UNL4;Q15583;Q14106;Q13363;Q92831;O15164;Q9UFF9;O43639;Q99608;Q9NTI5;Q00613;P12755;Q8IYB7;P10914;Q9NNW5;P51531;Q8N726;Q14582;Q96BK5;P78543;Q9UPQ4;P49848;Q63ZY3;O15297;O14907;P35548;P05412;O00255;P42771;P06748;P49356;Q92796;O14964;Q13118;P58304;Q96A56;P42773;Q09028;O95751;P50616;P29474;Q99583;Q05516;P84022;Q9NPI1;P49715;Q8WYH8;P31949;P49918;P56524;Q92845;P35232;Q9NRG4;Q86U86;P67870;P38936;Q00534;P41182;Q9H4P4;Q8IZP0;P07093;P02794;Q12824;Q99741;Q13619;Q13485;Q01664;Q96EY1;Q96AV8;Q9BT81;O95997;Q93034;Q8WVJ9;Q15796;P46527;P32929;Q13617}
- 438 Pathogen[ P14079] interacts with 128 human  
partners: {Q96A56;Q13362;P13164;Q9NPI1;O15164;P23381;P78543;Q96DY7;P12755;Q8N196;O75072;Q9BT81;P62324;O43422;O75691;Q13118;Q9NRG4;O15297;Q9Y2Y9;O43597;O14896;P11473;Q8IVL6;Q9UI56;Q15583;P31949;P17096;O43815;Q9UNL4;P49788;Q86U86;Q8WVJ9;P58304;P51531;Q8N726;Q05516;Q14106;Q8IZP0;P15976;P35232;O75569;O14907;P49918;Q99828;P05413;Q15797;Q7Z465;Q99608;O14683;P55273;Q9NTI5;Q9BZE4;P28069;Q9Y6P5;Q99741;P40337;Q00613;Q99583;Q8IYB7;P41182;Q9Y238;Q9Y6U3;Q9BQA1;P49715;Q92560;P38936;P08107;P49848;Q93034;Q702N8;Q99445;Q9NY30;Q96IZ0;O43294;Q9UFF9;P49356;Q01664;P37198;Q9P2X7;P32929;P50539;Q8IU54;P06748;P02794;O95997;Q13617;Q86UL8;Q63ZY3;O43639;P15407;Q3YBR2;Q9NNW5;Q96BK5;P67870;P46527;Q96AV8;Q13155;O75204;P42773;Q12824;Q92796;Q13616;P05412;Q92845;Q6P1J9;P56524;Q13127;Q09028;Q99816;Q14457;P52756;P50616;P28360;O14901;Q14582;O15151;O14879;O60443;O00255;Q96EY1;Q8WYH8;O43324;Q12893;O95751;Q13619;P10914;P42771;Q14201}
- 439 Pathogen[ P03383] interacts with 89 human  
partners: {P08107;Q86U86;Q14457;O14879;Q09028;P02794;Q13616;P10914;Q92831;P11831;Q9BQA1;Q9H4X1;Q13485;Q6P1J9;Q96A56;P06748;P29474;P17096;P28069;Q12824;P62324;P40337;Q14106;P14921;Q8WVJ9;Q99608;Q7Z465;Q9NRG4;Q9Y2Y9;Q93034;Q96BK5;Q99816;Q9BZE4;Q9UNL4;Q9UFF9;Q8WYH8;Q15797;O75691;Q05516;O15297;Q00534;O43324;Q13155;P06400;Q01664;P11473;P78543;P84022;P42772;P23381;P35548;O14896;P46527;P49848;P15407;P51531;Q00613;O00255;P35232;P42771;O95751;Q9UI56;P50616;Q99583;P67870;Q13617;P49918;Q15796;P56524;Q63ZY3;O95997;Q9NPI1;O14907;Q92845;Q92796;P37198;Q8N196;Q3YBR2;Q9NTI5;Q96AV8;O14964;Q9NNW5;Q96EY1;Q13363;Q99741;Q13127;Q8N726;P05412}
- 440 Pathogen[ P03410] interacts with 131 human  
partners: {P84022;Q92831;Q00613;P28069;Q96DY7;O14901;P42771;Q9UI56;P11831;Q96AV8;P46527;Q9H4X1;Q8WYH8;P02794;Q12893;Q9Y2Y9;P51161;Q9UFF9;Q13155;Q8WVJ9;O43597;O15151;O14896;Q00534;P42772;P12755;Q8N726;Q9P2X7;Q702N8;Q86U86;P05413;P49356;Q9NY30;O43639;O95751;Q99608;P32929;P23381;Q9UPQ4;Q9UNL4;Q14457;Q7Z465;Q92845;P55273;Q99445;P25686;O43294;P17096;Q9BQA1;P31949;P06748;P06400;Q9Y6U3;O95997;O75569;P11473;Q99816;Q13127;Q15583;P35548;P29474;Q99828;Q9Y6P5;O15297;Q09028;P38936;P08107;P49848;P62324;P56524;Q92796;Q9NTI5;Q15797;P49788;O75204;O14907;Q13485;Q3YBR2;P10914;Q99583;Q96IZ0;Q14106;Q8N196;Q6P1J9;O60443;Q13118;O43324;P41182;Q8IZP0;P05412;Q8IYB7;O43422;P51531;P50539;P78543;Q13616;Q14201;Q01664;Q96A56;Q13619;O43815;Q13362;Q13617;Q86UL8;P49918;Q96BK5;P15407;O75691;Q14582;O14879;P67870;P35232;Q9Y238;Q12824;Q9BT81;Q63ZY3;O00255;Q15796;P42773;Q93034;Q96EY1;P15976;Q9BZE4;O14683;Q9NPI1;P40337;Q9NNW5;P14921;Q9NRG4;Q99741;P50616}
- 441 Pathogen[ P14075] interacts with 92 human  
partners: {Q14457;P28069;Q8N196;O15297;P29474;Q9H4X1;Q99608;Q13155;Q00613;Q63ZY3;P23381;Q9NPI1;P05412;Q93034;P62324;Q9BQA1;Q92831;P11831;Q92845;Q7Z465;Q96DY7;P35548;P17096;P56524;Q00534;P42771;O95997;Q15796;Q9P2X7;Q96IZ0;Q8WVJ9;P46527;Q3YBR2;Q96BK5;Q13485;P35232;O00255;Q6P1J9;O75691;Q9Y238;Q09028;O14964;P49918;Q01664;Q14106;Q86U86;P78543;P49848;P67870;P50616;P51531;P02794;P11473;P37198;O14907;P06748;Q92796;P14921;P06400;Q96AV8;Q12824;O14896;O14879;Q9Y6P5;Q9UNL4;Q9BZE4;O95751;Q9UFF9;P42772;P08107;Q13127;Q05516;Q99741;Q13363;P84022;Q99816;P15407;Q99583;O43324;Q8WYH8;Q13616;P10914;P403

37;Q9NNW5;Q9NTI5;Q13617;Q9NRG4;Q96A56;Q9UI56;Q96EY1;Q9Y2Y9;Q8N726}

442 Pathogen[ POC206] interacts with 133 human  
partners: {O14964;P84022;Q9UFF9;P62324;P31949;O43324;P10914;Q9C0C7;Q99828;Q9H4P4;Q9H4X1;Q96IZ0;Q13127;P49848;P14921;Q92845;Q9NPI1;Q9BQA1;Q8N726;P15407;Q9NY30;O43422;P51161;O43815;P02794;Q8WYH8;Q9Y2Y9;Q96AV8;P51531;P41182;Q05516;Q99583;Q00613;Q9NRG4;Q9P2X7;O00255;Q95997;P05412;O14879;Q8N196;Q14457;P42771;P49715;P42772;O15164;Q99816;Q12824;Q96BK5;Q13616;O95751;P15976;Q86U86;Q15796;Q99741;Q96A56;Q92831;Q9NNW5;Q8WVJ9;P12755;Q9BT81;P05413;O14907;P42773;Q9UPQ4;Q13619;O15151;Q13617;O60443;Q14106;Q8IZP0;Q9UI56;P35232;P50616;Q99445;P35548;P32929;P50539;P67870;P55273;P46527;Q14582;P38936;Q99608;P08107;O43294;Q12893;O14896;Q7Z465;O43597;Q13485;Q9NTI5;Q9BZE4;P17096;P29474;P11831;Q63ZY3;Q15797;Q01664;O75691;Q13362;Q13155;O14901;Q09028;Q9Y6P5;P06748;Q92796;Q93034;Q86UL8;P56524;P28069;Q13363;Q13118;O15297;Q3YBR2;Q8IYB7;Q9UK53;P49356;Q96EY1;O43639;P23381;Q6P1J9;Q92560;P11473;P58304;Q9UNL4;Q9Y238;P40337;Q15583;P78543;Q00534;P06400;Q96DY7;P49918}

443 Pathogen[ P03363] interacts with 119 human  
partners: {Q3YBR2;P49918;Q92845;O14901;O95751;Q8IZP0;P29474;O14907;O60443;Q9H4X1;O14896;P49848;Q14582;Q96IZ0;Q96BK5;Q13362;Q63ZY3;P50539;Q09028;Q92831;Q14457;Q16667;Q9BZE4;P31949;P56545;Q8N196;P78543;P58304;Q13617;P14921;P35548;O15151;O43422;Q15797;Q14201;Q99828;O43639;P51161;P06400;P40337;P23381;P50616;O75691;P06748;O14879;Q9UNL4;Q13127;Q9Y2Y9;P11473;Q13155;Q99608;Q9BQA1;Q00534;Q92560;Q13619;Q9C0C7;P11831;Q96A56;P28069;Q13616;P08107;Q9NRG4;P42772;Q6P1J9;Q8IYB7;P62324;P17096;Q99741;Q143815;Q9NPI1;P05413;Q15796;P84022;Q7Z465;Q86U86;P10914;Q14106;Q15583;Q9Y6P5;P15407;O14964;Q9H4P4;Q8IWX8;Q9UI56;Q13485;Q8N726;Q86UL8;P35232;P05412;Q9NTI5;Q96AV8;Q00613;Q99816;P67870;Q95997;Q93034;Q9UFF9;Q13363;P42773;Q92796;O15297;Q9Y238;P37198;P51531;Q96EY1;Q9BT81;Q05516;Q8WYH8;O43324;Q99583;Q01664;Q8WVJ9;P02794;Q12824;P42771;Q9NNW5;O75569;Q13118;P52756}

444 [Cluster 41]GO:0050680+P biological\_process [name] negative regulation of epithelial cell proliferation [def] "Any process that stops, prevents or reduces the rate or extent of epithelial cell proliferation." [GOC

445 Pathogen[ Q2Q067] interacts with 13 human  
partners: {Q9Y5V3;P06400;Q6P1J9;Q9BSI4;Q12959;P19013;Q13761;Q9H4B6;P46527;P49918;P23508;P42772;Q00534}

446 Pathogen[ POC214] interacts with 13 human  
partners: {Q13761;Q9Y5V3;Q9BSI4;P46527;Q00534;Q9H4B6;P49918;Q6P1J9;Q12959;P23508;P19013;P06400;P42772}

447 Pathogen[ P03346] interacts with 14 human  
partners: {Q9BSI4;O15522;P23508;P06400;P42772;P19013;P49918;Q13761;Q9Y5V3;Q00534;Q9H4B6;P46527;Q6P1J9;Q12959}

448 Pathogen[ Q85601] interacts with 12 human  
partners: {P23508;Q6P1J9;P06400;P19013;P42772;Q9Y5V3;Q12959;P49918;Q00534;Q9H4B6;P46527;Q13761}

449 Pathogen[ P14079] interacts with 9 human  
partners: {Q9BSI4;P49918;Q9Y5V3;P54826;P23508;Q9H4B6;P46527;Q13761;Q6P1J9}

450 Pathogen[ P03383] interacts with 12 human  
partners: {Q13761;Q6P1J9;P19013;Q00534;P06400;P42772;P46527;Q9BSI4;Q9Y5V3;P49918;P23508;Q9H4B6}

451 Pathogen[ P03410] interacts with 14 human  
partners: {P46527;Q00534;P42772;Q12959;P19013;P06400;Q9BSI4;P23508;Q6P1J9;P54826;Q9Y5V3;Q13761;P49918;Q9H4B6}

452 Pathogen[ P14075] interacts with 13 human  
partners: {Q9BSI4;Q00534;P46527;Q6P1J9;Q9H4B6;P49918;P06400;P23508;P42772;Q9Y5V3;P54826;P19013;Q13761}

453 Pathogen[ POC206] interacts with 14 human  
partners: {Q9Y5V3;Q9BSI4;P42772;P19013;Q9H4B6;P46527;P54826;Q12959;Q6P1J9;Q13761;P23508;Q00534;P06400;P49918}

454 Pathogen[ P03363] interacts with 13 human  
partners: {P49918;Q12959;Q9BSI4;P23508;P06400;Q00534;P42772;Q6P1J9;Q9H4B6;Q9Y5V3;P19013;Q13761;O15522}

455 [Cluster 42]GO:0070266+P biological\_process [name] necroptosis [def] "A necrotic cell death process that results from the activation of endogenous cellular processes, such as signaling involving death domain receptors and Toll-like receptors." [GOC

456 Pathogen[ Q2Q067] interacts with 1 human partners: {Q13490}

457 Pathogen[ POC214] interacts with 1 human partners: {Q13490}

458 Pathogen[ P03346] interacts with 2 human partners: {Q13489;Q13490}

459 Pathogen[ Q85601] interacts with 1 human partners: {Q13490}

460 Pathogen[ P14079] interacts with 1 human partners: {Q13490}

461 Pathogen[ P03383] interacts with 1 human partners: {Q13490}

462 Pathogen[ P03410] interacts with 1 human partners: {Q13490}

463 Pathogen[ P14075] interacts with 1 human partners: {Q13490}

464 Pathogen[ POC206] interacts with 2 human partners: {Q13489;Q13490}

465 Pathogen[ P03363] interacts with 2 human partners: {Q13490;Q13489}

466 [Cluster 43]GO:0006401+P biological\_process [name] RNA catabolic process [def] "The chemical reactions and pathways resulting in the breakdown of RNA, ribonucleic acid, one of the two main type of nucleic acid, consisting of a long, unbranched macromolecule formed from ribonucleotides joined in 3',5'-phosphodiester linkage." [ISBN

467 Pathogen[ Q2Q067] interacts with 10 human

468 partners:{Q8TCS8;Q9NQT4;Q14103;O60930;Q12972;Q15024;Q13310;Q8TDP1;O75792;Q5TBB1}  
Pathogen[ POC214] interacts with 11 human  
partners:{Q13310;Q15024;P29728;Q5TBB1;O75792;Q14103;Q8TCS8;O60930;Q12972;Q8TDP1;Q9NQT4}

469 Pathogen[ P03346] interacts with 10 human  
partners:{O60930;Q5TBB1;Q15024;Q14103;Q8TCS8;Q13310;Q8TDP1;Q9NQT4;Q12972;O75792}

470 Pathogen[ Q85601] interacts with 10 human  
partners:{Q13310;Q14103;O75792;Q9NQT4;Q12972;Q8TCS8;Q15024;O60930;Q8TDP1;Q5TBB1}

471 Pathogen[ P14079] interacts with 12 human  
partners:{P29728;Q14103;Q15024;O75792;Q9NQT4;Q13310;Q12972;Q8TDP1;Q96AZ6;O60930;Q8TCS8;Q5TBB1}

472 Pathogen[ P03383] interacts with 10 human  
partners:{O75792;Q12972;Q8TCS8;Q9NQT4;Q14103;O60930;Q13310;Q8TDP1;Q5TBB1;Q15024}

473 Pathogen[ P03410] interacts with 12 human  
partners:{Q8TCS8;Q14103;P29728;O75792;Q8TDP1;O60930;Q15024;Q96AZ6;Q9NQT4;Q12972;Q5TBB1;Q13310}

474 Pathogen[ P14075] interacts with 10 human  
partners:{Q14103;O60930;Q5TBB1;Q9NQT4;Q13310;O75792;Q8TCS8;Q15024;Q12972;Q8TDP1}

475 Pathogen[ POC206] interacts with 11 human  
partners:{Q14103;Q8TCS8;P29728;O60930;Q13310;O75792;Q8TDP1;Q15024;Q5TBB1;Q12972;Q9NQT4}

476 Pathogen[ P03363] interacts with 9 human  
partners:{Q9NQT4;Q12972;Q5TBB1;Q15024;O75792;Q13310;Q14103;O60930;Q8TDP1}

477 [Cluster 44]GO:0042149+P biological\_process [name] cellular response to glucose starvation [def] "Any process that results in a change in state or activity of a cell (in terms of movement, secretion, enzyme production, gene expression, etc.) as a result of deprivation of glucose." [GOC

478 Pathogen[ Q2Q067] interacts with 5 human  
partners:{O43159;Q16666;Q13794;P11166;Q9BQG0}

479 Pathogen[ POC214] interacts with 5 human  
partners:{O43159;Q9BQG0;Q16666;P11166;Q13794}

480 Pathogen[ P03346] interacts with 5 human  
partners:{Q16666;Q9BQG0;O43159;P11166;Q13794}

481 Pathogen[ Q85601] interacts with 5 human  
partners:{Q16666;Q9BQG0;O43159;P11166;Q13794}

482 Pathogen[ P14079] interacts with 5 human  
partners:{P11166;Q9BQG0;Q13794;O43159;Q16666}

483 Pathogen[ P03383] interacts with 4 human partners:{Q9BQG0;O43159;Q16666;Q13794}

484 Pathogen[ P03410] interacts with 5 human  
partners:{Q16666;P11166;Q13794;O43159;Q9BQG0}

485 Pathogen[ P14075] interacts with 4 human partners:{Q16666;Q9BQG0;Q13794;O43159}

486 Pathogen[ POC206] interacts with 5 human  
partners:{O43159;Q16666;P11166;Q9BQG0;Q13794}

487 Pathogen[ P03363] interacts with 5 human  
partners:{Q13794;Q9BQG0;Q16666;O43159;P11166}

488 [Cluster 45]GO:0042026+P biological\_process [name] protein refolding [def] "The process carried out by a cell that restores the biological activity of an unfolded or misfolded protein, using helper proteins such as chaperones." [GOC

489 Pathogen[ Q2Q067] interacts with 3 human partners:{P07900;P08107;P02489}

490 Pathogen[ POC214] interacts with 3 human partners:{P02489;P10809;P08107}

491 Pathogen[ P03346] interacts with 3 human partners:{P08107;P07900;P02489}

492 Pathogen[ Q85601] interacts with 3 human partners:{P02489;P08107;P07900}

493 Pathogen[ P14079] interacts with 3 human partners:{P02489;P08107;P07900}

494 Pathogen[ P03383] interacts with 2 human partners:{P08107;P07900}

495 Pathogen[ P03410] interacts with 3 human partners:{P07900;P02489;P08107}

496 Pathogen[ P14075] interacts with 2 human partners:{P07900;P08107}

497 Pathogen[ POC206] interacts with 3 human partners:{P07900;P08107;P02489}

498 Pathogen[ P03363] interacts with 3 human partners:{P07900;P08107;P02489}

499 [Cluster 46]GO:0002903+P biological\_process [name] negative regulation of B cell apoptosis [def] "Any process that stops, prevents, or reduces the frequency, rate, or extent of B cell apoptosis." [GOC

500 Pathogen[ Q2Q067] interacts with 3 human partners:{Q96JZ2;Q9Y3T9;P41182}

501 Pathogen[ POC214] interacts with 3 human partners:{Q9Y3T9;Q96JZ2;P41182}

502 Pathogen[ P03346] interacts with 3 human partners:{Q9Y3T9;P41182;Q96JZ2}

503 Pathogen[ Q85601] interacts with 3 human partners:{Q9Y3T9;Q96JZ2;P41182}

504 Pathogen[ P14079] interacts with 3 human partners:{Q9Y3T9;P41182;Q96JZ2}

505 Pathogen[ P03383] interacts with 1 human partners:{Q9Y3T9}

506 Pathogen[ P03410] interacts with 3 human partners:{Q9Y3T9;P41182;Q96JZ2}

507 Pathogen[ P14075] interacts with 1 human partners:{Q9Y3T9}

508 Pathogen[ POC206] interacts with 3 human partners:{P41182;Q96JZ2;Q9Y3T9}

509 Pathogen[ P03363] interacts with 2 human partners:{Q96JZ2;Q9Y3T9}

510 [Cluster 47]GO:0090286+P biological\_process [name] cytoskeletal anchoring at nuclear membrane [def] "The process in which cytoskeletal filaments are directly or indirectly linked to the nuclear membrane." [GOC

511 Pathogen[ Q2Q067] interacts with 2 human partners:{Q9UH99;Q8NF91}

512 Pathogen[ POC214] interacts with 2 human partners:{Q9UH99;Q8NF91}

513 Pathogen[ P03346] interacts with 5 human partners:{Q8WXH0;Q9UH99;Q6ZMZ3;Q8NF91;O94901}

514 Pathogen[ Q85601] interacts with 3 human partners:{Q9UH99;Q8NF91;O94901}

515 Pathogen[ P14079] interacts with 5 human partners:{O94901;Q8WXH0;Q6ZMZ3;Q8NF91;Q9UH99}

516 Pathogen[ P03383] interacts with 1 human partners:{Q9UH99}

517 Pathogen[ P03410] interacts with 5 human partners:{Q6ZMZ3;Q9UH99;O94901;Q8WXH0;Q8NF91}

518 Pathogen[ P14075] interacts with 1 human partners:{Q9UH99}

519 Pathogen[ P0C206] interacts with 5 human partners:{Q9UH99;O94901;Q6ZMZ3;Q8NF91;Q8WXH0}

520 Pathogen[ P03363] interacts with 4 human partners:{Q8NF91;Q6ZMZ3;O94901;Q9UH99}

521 [Cluster 48]GO:0048240+P biological\_process [name] sperm capacitation [def] "A process required for sperm to reach fertilization competence. Sperm undergo an incompletely understood series of morphological and molecular maturational processes, termed capacitation, involving, among other processes, protein tyrosine phosphorylation and increased intracellular calcium." [GOC

522 Pathogen[ Q2Q067] interacts with 1 human partners:{043236}

523 Pathogen[ P0C214] interacts with 2 human partners:{P09622;043236}

524 Pathogen[ P03346] interacts with 1 human partners:{043236}

525 Pathogen[ Q85601] interacts with 1 human partners:{043236}

526 Pathogen[ P14079] interacts with 2 human partners:{075952;043236}

527 Pathogen[ P03383] interacts with 1 human partners:{043236}

528 Pathogen[ P03410] interacts with 2 human partners:{075952;043236}

529 Pathogen[ P14075] interacts with 1 human partners:{043236}

530 Pathogen[ P0C206] interacts with 2 human partners:{075952;043236}

531 Pathogen[ P03363] interacts with 1 human partners:{043236}

532 [Cluster 49]GO:0007632+P biological\_process [name] visual behavior [def] "The actions or reactions of an organism in response to a visual stimulus." [GOC

533 Pathogen[ Q2Q067] interacts with 2 human partners:{075161;Q9NP97}

534 Pathogen[ P0C214] interacts with 2 human partners:{075161;Q9NP97}

535 Pathogen[ P03346] interacts with 2 human partners:{075161;Q9NP97}

536 Pathogen[ Q85601] interacts with 2 human partners:{075161;Q9NP97}

537 Pathogen[ P14079] interacts with 3 human partners:{075161;Q9NP97;015259}

538 Pathogen[ P03383] interacts with 2 human partners:{Q9NP97;075161}

539 Pathogen[ P03410] interacts with 3 human partners:{Q9NP97;015259;075161}

540 Pathogen[ P14075] interacts with 2 human partners:{Q9NP97;075161}

541 Pathogen[ P0C206] interacts with 2 human partners:{Q9NP97;075161}

542 Pathogen[ P03363] interacts with 3 human partners:{075161;015259;Q9NP97}

543 [Cluster 50]GO:0051315+P biological\_process [name] attachment of spindle microtubules to kinetochore involved in mitotic sister chromatid segregation [def] "The cell cycle process in which spindle microtubules become physically associated with the proteins making up the kinetochore complex during mitosis. During mitosis, the kinetochores of sister chromosomes are situated facing opposite spindle poles and bipolar attachment of the sister chromosomes to the spindle occurs." [GOC

544 Pathogen[ Q2Q067] interacts with 2 human partners:{Q96EE3;Q96JM3}

545 Pathogen[ P0C214] interacts with 2 human partners:{Q96EE3;Q96JM3}

546 Pathogen[ P03346] interacts with 2 human partners:{Q96EE3;Q96JM3}

547 Pathogen[ Q85601] interacts with 2 human partners:{Q96JM3;Q96EE3}

548 Pathogen[ P14079] interacts with 2 human partners:{Q96JM3;Q96EE3}

549 Pathogen[ P03383] interacts with 1 human partners:{Q96EE3}

550 Pathogen[ P03410] interacts with 2 human partners:{Q96JM3;Q96EE3}

551 Pathogen[ P14075] interacts with 1 human partners:{Q96EE3}

552 Pathogen[ P0C206] interacts with 2 human partners:{Q96EE3;Q96JM3}

553 Pathogen[ P03363] interacts with 1 human partners:{Q96JM3}

554 [Cluster 51]GO:0021558+P biological\_process [name] trochlear nerve development [def] "The process whose specific outcome is the progression of the trochlear nerve over time, from its formation to the mature structure. The trochlear nerve is a motor nerve and is the only cranial nerve to exit the brain dorsally. The trochlear nerve innervates the superior oblique muscle." [GO\_REF

555 Pathogen[ Q2Q067] interacts with 1 human partners:{Q5TGS1}

556 Pathogen[ P0C214] interacts with 1 human partners:{Q5TGS1}

557 Pathogen[ P03346] interacts with 1 human partners:{Q5TGS1}

558 Pathogen[ Q85601] interacts with 1 human partners:{Q5TGS1}

559 Pathogen[ P14079] interacts with 1 human partners:{Q5TGS1}

560 Pathogen[ P03383] interacts with 1 human partners:{Q5TGS1}

561 Pathogen[ P03410] interacts with 1 human partners:{Q5TGS1}

562 Pathogen[ P14075] interacts with 1 human partners:{Q5TGS1}

563 Pathogen[ P0C206] interacts with 1 human partners:{Q5TGS1}

564 Pathogen[ P03363] interacts with 1 human partners:{Q5TGS1}

565 [Cluster 52]GO:0002262+P biological\_process [name] myeloid cell homeostasis [def] "The process of regulating the proliferation and elimination of myeloid cells such that the total number of myeloid cells within a whole or part of an organism is stable over time in the absence of an outside stimulus." [CL

566 Pathogen[ Q2Q067] interacts with 1 human partners:{Q00597}

567 Pathogen[ P0C214] interacts with 1 human partners:{Q00597}



568 Pathogen[ P03346] interacts with 1 human partners:{Q00597}  
569 Pathogen[ Q85601] interacts with 1 human partners:{Q00597}  
570 Pathogen[ P14079] interacts with 2 human partners:{Q92542;Q00597}  
571 Pathogen[ P03383] interacts with 1 human partners:{Q00597}  
572 Pathogen[ P03410] interacts with 2 human partners:{Q00597;Q92542}  
573 Pathogen[ P14075] interacts with 1 human partners:{Q00597}  
574 Pathogen[ P0C206] interacts with 2 human partners:{Q92542;Q00597}  
575 Pathogen[ P03363] interacts with 1 human partners:{Q00597}  
576 [Cluster 53]GO:0008284+P biological\_process [name] positive regulation of cell proliferation [def] "Any process that activates or increases the rate or extent of cell proliferation." [GOC  
577 Pathogen[ Q2Q067] interacts with 95 human partners:{Q68CZ2;O43365;P62701;Q9HBH1;P02538;P62633;P56524;Q9HBZ2;P04198;P24385;Q96LI5;Q13887;P27694;O95684;P14921;P01106;P46937;P46087;Q9BQA1;P18847;Q86VY4;O75794;P08151;Q04206;P30279;Q9ULV5;Q13547;Q9BWW4;O14686;P62244;Q53H80;P63241;Q15022;Q9H7S9;P20265;Q00577;Q96BF6;P28069;Q96GN5;Q08050;O95521;P27797;Q12959;O43745;Q9UHV2;Q5VWM6;Q5TA31;P49356;O60934;Q14978;Q5MJ70;O00716;Q12834;Q92769;Q9GZV5;Q9NQG5;Q9BUL8;Q5VWM5;P49366;Q5SWL7;Q8WUW1;Q13618;Q8WWQ0;P78395;Q56P03;Q9UM11;Q9BVW5;Q8WU39;Q6QNY1;Q9NR09;P31314;Q15714;P49459;P47928;P58304;Q9GZV4;Q9NP71;Q96RE7;P30305;Q9GZV4;P24941;P49006;Q9UBL3;P11802;P46527;O60810;P15407;O60809;Q9ULC4;Q00987;Q86X55;O15392;P55209;P46781;P40424}  
578 Pathogen[ P0C214] interacts with 103 human partners:{P40424;Q9BWW4;Q9HBH1;P49006;O43365;Q13887;Q969Z0;Q15022;Q5TYX0;Q13547;P02538;Q5SWL7;O95684;P46087;P14921;P31314;P15407;Q00987;Q9GZV4;A6NGN4;P11802;P46937;Q86Y37;Q9BVW5;P34897;P46527;P56524;Q9GZV5;Q04206;Q53H80;P49459;O43745;Q13618;Q9BUL8;P62701;Q00716;P78395;O60813;P24385;O75794;P63241;O60810;Q5VWM6;Q68CZ2;Q5VTA0;Q96BF6;Q9HBZ2;P20265;P49366;P47928;Q14978;Q00577;P49356;Q8WWQ0;Q9UQC2;P18847;Q92769;Q12834;Q9NQG5;P24941;Q15714;Q56P03;Q9NP71;P46781;P30305;P28069;Q8WUW1;Q12959;Q9UHV2;Q5TA31;P62244;Q9ULV5;P62633;O15392;P05412;P30279;P10909;P27797;Q96GN5;Q9NR09;Q86VY4;Q8WU39;Q9GZV4;Q5MJ70;O60884;P27694;P08151;Q86X55;Q9UM11;Q6QNY1;Q96LI5;Q5VWM5;Q5SWL8;O95521;Q5VXH4;Q96RE7;P43490;Q9ULC4;Q5VWM1;P01106;P04198;Q9H7S9;P18054}  
579 Pathogen[ P03346] interacts with 117 human partners:{Q06945;Q9HBH1;P05412;P02538;P46937;P24385;P18847;Q9NQG5;P30279;O15392;Q95684;Q9UM11;P62633;Q9GZV4;Q5MJ70;Q5VWM5;Q9BQA1;P07148;P27694;Q14774;Q00577;Q56P03;Q9GZV5;P24941;Q20634;Q13618;P56524;Q04206;P18054;Q53H80;Q9UQC2;Q08050;Q95630;P58304;Q9UBL3;P49459;Q96RE7;Q68CZ2;P63241;Q5TA31;A2RU54;O60810;Q86Z02;O60809;Q00987;Q12834;P30305;Q8WUW1;P11802;P20265;P01106;Q9BWW4;O43365;Q9NP71;P14921;Q14978;Q5VTA0;P49356;Q86VY4;P78395;Q6QNY1;Q15022;Q92769;Q8WU39;Q13547;Q8WWQ0;P46087;Q96GN5;Q01954;Q9GZV4;Q9H7S9;P49366;Q96BF6;P46781;O14686;Q86Y37;Q13887;Q9HBZ2;P15407;P27797;P04198;O60934;Q92481;P62701;O15151;P14317;P49006;P28069;Q9NR09;Q9UHV2;Q05215;Q86X55;P40424;P31314;Q5SWL8;O95521;Q9ULV5;Q5VWM1;P46527;Q13394;P55209;Q5VWM6;Q9BVW5;Q3SY56;Q9ULC4;Q9BUL8;Q96LI5;O00716;Q9Y586;Q15714;O43745;P47928;Q5SWL7;P62244;O75794;P08151;Q12959}  
580 Pathogen[ Q85601] interacts with 107 human partners:{P01106;Q9HBH1;Q14978;P02538;P08151;P62244;P46087;Q9BQA1;P62633;Q56P03;P24385;Q86X55;O95684;Q9UQC2;Q9GZV4;P14921;Q9ULV5;O15151;Q68CZ2;Q5VTA0;Q96BF6;Q9H7S9;Q9BUL8;O60813;P15407;P28069;Q969Z0;O60810;O75794;O14686;Q9GZV5;O60884;P62701;O15392;P27797;Q5SWL7;Q86Y37;P49006;P63241;Q5TA31;Q8WUW1;Q15714;Q9NP71;O43745;P27694;Q12834;Q9NQG5;P11802;Q01954;Q5VXH4;Q15022;Q53H80;Q86VY4;P30305;Q9UBL3;P40424;Q00577;Q96LI5;P18847;Q92769;Q9UHV2;Q04206;Q8WWQ0;P30279;Q9BWW4;P05412;P49356;Q9HBZ2;P49459;P58304;O95630;Q96GN5;Q9UM11;Q12959;P14317;P56524;Q96RE7;Q9NR09;P46937;Q08050;Q13547;P31314;Q5TYX0;Q13618;O43365;P04198;Q5VWM5;Q5SWL8;Q5VWM1;Q00987;P55209;Q5VWM6;Q9ULC4;P78395;Q6QNY1;P24941;O00716;Q13887;A6NGN4;P46781;Q9BVW5;P20265;P47928;P46527;Q5VT98;Q5MJ70;O60934}  
581 Pathogen[ P14079] interacts with 122 human partners:{P01215;P08151;Q14004;Q5TA31;Q53H80;Q5MJ70;Q8WU39;O60811;Q9ULC4;O43745;Q9GZV5;Q9UHV2;Q56P03;A3QJZ6;P20809;O95684;Q5VXH5;Q15714;P46781;Q9UBL3;P20265;Q08722;Q13618;P49006;Q9Y586;P01225;Q96LI5;P43490;Q5SWL7;P43307;O15392;P58304;Q13394;Q5VWM3;Q8WWQ0;P10909;Q5VT98;Q9BUL8;P34897;P46937;Q9GZV4;O60934;A6NGN4;Q9NR09;Q00987;Q9NS71;P28069;Q5TYX0;P54826;Q5VWM6;A6NMV5;P62244;P55209;O95521;Q92769;O00716;Q9UM11;Q5VWM5;O95522;Q9BQA1;Q5VTA0;Q9BWW4;Q9GZV4;Q9GZV5;O60809;Q68CZ2;Q9HBH1;P49459;Q96BF6;P46087;P04198;Q9GZV4;Q5VWM4;P49356;P04141;P13232;O43365;Q969Z0;P01106;Q00577;Q96RE7;P63241;Q5SWL8;O60813;P53602;P60602;P15407;P27694;Q96FC9;P46527;Q8WUW1;P78395;Q9HBZ2;P62633;P30305;Q9H7S9;A6NMC2;Q86VY4;Q5VXH4;P05412;O75794;Q86Y37;P56524;Q5VWM1;O15151;P62701;Q9ULV5;Q9UQC2;Q6QNY1;O60884;Q13145;Q9GZV4;Q9NP71;O60810;Q9NQG5;Q15022;Q96GN5;P47928;Q3SY56;Q14978;Q5TYW8;P49366;Q9BVW5}  
582 Pathogen[ P03383] interacts with 85 human partners:{Q9HBH1;Q14978;O75794;Q9BQA1;Q5TYX0;Q56P03;Q9UHV2;Q9BVW5;O00716;O60809;P28069;Q86VY4;O95684;P14921;P01106;Q96GN5;P40424;Q9GZV4;P27694;Q9BWW4;P18847;Q86X55;Q15714;P49006;Q9GZV4;O60810;O43365;P24385;P63241;P55209;Q15022;P11802;Q13618;Q9NP71;Q969Z0;P30279;Q9NQG5;P49366;Q5SWL7;Q12834;Q53H80;Q9ULV5;P46527;Q5TA31;P24941;Q92769;P78395;Q9UM11;P15407;P02538;P62244;O43745;Q8WU39;O60813;Q96RE7;Q9H7S9;Q5VXH4;P31314;Q13547;P46087;P62633;P04198;P56524;Q9BUL8;P46781;Q00577;Q8WWQ0;Q9NR09;Q04206;P49459;Q5VWM6;P47928;P62701;P01215;Q5VWM5;P20265;Q9ULC4;P46937;Q9GZV5;Q96LI5;O95521;P27797;Q6QNY1;Q5MJ70;P05412}  
583 Pathogen[ P03410] interacts with 131 human partners:{Q96LI5;Q9NQG5;O95684;Q04206;Q9UQC2;P28069;O15392;Q15714;Q96BF6;P04141;P536

02;Q9UHV2;P46527;O75794;Q96GN5;Q13394;Q5VVM4;Q5SWL7;Q5VXH5;Q6QNY1;P62244;P30279;Q5SWL8;O15151;Q9BWW4;P49006;P18847;P01106;Q9GZZ8;Q9HBH1;A6NGN4;Q5TYW8;P49356;O60811;Q5VWML;P46781;Q12959;Q9BUL8;Q9BVW5;Q14978;Q9Y586;P20809;Q13145;Q86X55;O60813;P49459;Q9BQA1;Q5TA31;Q9GZP9;O60809;P31314;P01215;A3QJZ6;Q5VVM6;P02538;Q95521;P62701;Q9NS71;Q00577;Q8WUW1;Q9GZV5;Q9HBZ2;P43490;Q9ULC4;Q9NR09;O00716;P24385;Q5VVM5;Q13618;O60810;P43307;Q9UM11;Q8WWQ0;Q92769;Q68CZ2;P78395;P24941;P60602;P11802;P56524;Q86VY4;P49366;Q5VT98;Q9H722;Q9NP71;P47928;Q86Y37;Q5VXH4;Q53H80;P46937;Q8WU39;P05412;Q12834;O60884;P54826;P46087;Q13547;A6NMC2;O95522;Q56P03;P55209;P63241;P27694;Q96FC9;Q96RE7;Q5MJ70;Q9H7S9;Q00987;O43745;Q9ULV5;P15407;Q9GZV4;P30305;P20265;A6NMV5;P62633;Q5VTA0;P40424;Q969Z0;P04198;Q5TYX0;O43365;P34897;Q5VVM3;O60934;Q15022;Q9GZN7;P14921;P10909;P13232;P27797}

584 Pathogen[ P14075] interacts with 93 human partners: {Q5VVM1;P28069;Q5SWL7;Q9HBH1;Q9GZV5;P46781;Q04206;Q9BUL8;Q969Z0;P24941;Q8WU39;Q8WWQ0;P40424;P49006;O95684;P05412;Q5MJ70;P11802;O60809;Q9BQA1;Q13618;Q9BWW4;P78395;P62244;Q56P03;Q9UM11;P30279;P49459;P18847;P62633;Q5VXH4;P56524;O60813;Q08050;Q15714;Q9NQG5;O95521;P20265;Q53H80;P47928;Q9GZV4;O00716;P04198;Q9UHV2;P63241;Q96LI5;O75794;O43365;Q13547;P01106;Q9BVW5;P49366;P46527;P55209;Q9NP71;Q9ULV5;P60602;Q96RE7;Q92769;Q86X55;Q6QNY1;P27797;Q5VVM5;Q5TYX0;Q96GN5;O43745;P46087;P14921;P27694;P20809;Q00577;Q9NR09;P46937;P31314;Q15022;Q9GZZ8;O60810;Q5VVM6;P24385;Q9NS71;Q5TA31;Q9GZN7;P62701;Q86VY4;P15407;Q9H7S9;P01215;Q5VTA0;P02538;Q9ULC4;P54826;Q12834;Q14978}

585 Pathogen[ POC206] interacts with 128 human partners: {P46937;Q13887;Q92769;Q86Y37;Q9GZV4;A3QJZ6;P31314;P27797;O75794;Q9NP71;P14921;Q3SY56;Q9BQA1;O95684;Q9GZN7;P15407;P02538;O43365;Q5VXH4;Q9UHV2;P78395;Q56P03;P62244;P14317;Q96LI5;P46781;P30279;Q86X55;O60934;P05412;O95630;Q13394;Q86VY4;Q9NQG5;Q6QNY1;Q5VVM5;Q13547;P34897;P30305;O60813;Q5VVM3;P43490;O00716;O60884;O14686;A6NGN4;Q5TYX0;Q9Y586;Q8WWQ0;P40424;Q5TA31;P62633;Q9GZV5;Q5TYW8;Q9H7S9;P49366;Q05215;A6NMV5;Q8WUW1;O15151;Q9ULV5;Q5VTA0;Q9NR09;Q13618;Q9BVW5;Q5SWL7;Q5VT98;Q9BWW4;P62701;P49459;Q04206;P49006;P01215;Q969Z0;Q9GZP9;P46527;P04198;P10909;Q9BUL8;Q9UM11;P20809;O15392;P55209;Q15022;Q8WU39;Q08050;P46087;P63241;O95521;P18847;Q9UBL3;Q5VVM1;O60810;O60809;P20265;Q5VVM6;P27694;Q96BF6;Q9ULC4;P01106;P56524;P28069;Q00987;Q9HBH1;P08151;P54826;P47928;P49356;Q5SWL8;Q53H80;Q9UQC2;P24941;O43745;Q12959;Q68CZ2;Q96RE7;Q96GN5;Q15714;P11802;P60602;Q12834;Q5MJ70;P58304;Q9HBZ2;Q14978;Q01954;P24385;Q00577}

586 Pathogen[ P03363] interacts with 96 human partners: {Q14978;Q9BUL8;Q12959;Q96RE7;Q9GZV4;P02538;O60809;P27694;P46087;Q8WWQ0;Q04206;P49459;P08151;Q9H7S9;O43365;P62633;Q15022;O75794;P30279;P18847;Q13618;O95684;Q56P03;P04198;Q9UBL3;Q96GN5;P58304;P14921;Q9HBZ2;O15151;P49366;P78395;P24941;P01106;Q96BF6;Q9UM11;O60813;Q9BQA1;Q08050;P46937;P20264;P28069;Q9NR09;Q9UHV2;Q9GZV5;Q5SWL7;P55209;Q9BVW5;P27797;Q86VY4;P46781;Q9NQG5;Q5MJ70;P20265;P31314;P47928;Q6QNY1;Q5VVM6;Q8WUW1;P15407;Q96LI5;Q13547;Q01954;P14317;Q68CZ2;P24385;P63241;Q9ULV5;Q5VXH4;Q5TA31;P62244;O60810;Q15714;P05412;P40424;A2RU54;Q8WU39;Q9ULC4;O43745;Q9BWW4;Q12834;Q9NP71;P11802;O00716;O95521;Q00577;P49006;Q53H80;Q9GZN7;Q5VVM5;Q05215;Q5TYX0;P62701;Q86X55;O14686;Q9UQC2}

587 [Cluster 54]GO:0000186+P biological\_process [name] activation of MAPKK activity [def] "The initiation of the activity of the inactive enzyme MAP kinase kinase by phosphorylation by a MAPKKK." [PMID

588 Pathogen[ Q2Q067] interacts with 5 human partners: {P46108;O95257;Q13233;P31946;O43318}

589 Pathogen[ POC214] interacts with 5 human partners: {O43318;O95257;Q13233;P46108;P31946}

590 Pathogen[ P03346] interacts with 5 human partners: {Q13233;P46108;P31946;O43318;O95257}

591 Pathogen[ Q85601] interacts with 5 human partners: {P31946;P46108;O95257;Q13233;O43318}

592 Pathogen[ P14079] interacts with 6 human partners: {Q9Y2Q5;P31946;Q8WU20;O75293;O95257;P46108}

593 Pathogen[ P03383] interacts with 4 human partners: {Q13233;P31946;O43318;O95257}

594 Pathogen[ P03410] interacts with 8 human partners: {Q9Y2Q5;O75293;Q13233;O43318;P46108;Q8WU20;O95257;P31946}

595 Pathogen[ P14075] interacts with 4 human partners: {O95257;O43318;P31946;Q13233}

596 Pathogen[ POC206] interacts with 7 human partners: {O75293;O43318;Q13233;P31946;O95257;Q8WU20;P46108}

597 Pathogen[ P03363] interacts with 5 human partners: {O95257;P31946;O43318;P46108;Q13233}

598 [Cluster 55]GO:0006085+P biological\_process [name] acetyl-CoA biosynthetic process [def] "The chemical reactions and pathways resulting in the formation of acetyl-CoA, a derivative of coenzyme A in which the sulfhydryl group is acetylated." [GOC

599 Pathogen[ Q2Q067] interacts with 1 human partners: {P10515}

600 Pathogen[ POC214] interacts with 1 human partners: {P10515}

601 Pathogen[ P03346] interacts with 1 human partners: {P10515}

602 Pathogen[ Q85601] interacts with 1 human partners: {P10515}

603 Pathogen[ P14079] interacts with 2 human partners: {O95822;P10515}

604 Pathogen[ P03383] interacts with 1 human partners: {P10515}

605 Pathogen[ P03410] interacts with 2 human partners: {P10515;O95822}

606 Pathogen[ P14075] interacts with 1 human partners: {P10515}

607 Pathogen[ POC206] interacts with 1 human partners: {P10515}

608 Pathogen[ P03363] interacts with 1 human partners: {P10515}

609 [Cluster 56]GO:0007224+P biological\_process [name] smoothed signaling pathway [def] "The series of molecular signals generated as a consequence of activation of the transmembrane protein Smoothened." [GOC  
610 Pathogen[ Q2Q067] interacts with 3 human partners:{P08151;Q9BVV6;Q15468}  
611 Pathogen[ P0C214] interacts with 2 human partners:{Q15468;P08151}  
612 Pathogen[ P03346] interacts with 7 human partners:{Q86Z02;P78426;O95096;Q15019;Q15468;Q9BVV6;P08151}  
613 Pathogen[ Q85601] interacts with 1 human partners:{P08151}  
614 Pathogen[ P14079] interacts with 9 human partners:{P08151;Q96GX1;P57679;Q86UK5;Q9BVV6;Q9UPM9;Q15468;Q9Y366;Q9P2K1}  
615 Pathogen[ P03383] interacts with 2 human partners:{Q9BVV6;Q15468}  
616 Pathogen[ P03410] interacts with 7 human partners:{Q15468;Q9Y366;Q9BVV6;Q96GX1;Q9P2K1;Q9UPM9;Q86UK5}  
617 Pathogen[ P14075] interacts with 2 human partners:{Q9BVV6;Q15468}  
618 Pathogen[ P0C206] interacts with 6 human partners:{Q15468;Q15019;Q9UPM9;Q9BVV6;Q9P2K1;P08151}  
619 Pathogen[ P03363] interacts with 4 human partners:{Q15468;P08151;Q9P2K1;Q9BVV6}  
620 [Cluster 57]GO:0042256+P biological\_process [name] mature ribosome assembly [def] "The aggregation, arrangement and bonding together of the large and small ribosomal subunits into a functional ribosome." [GOC  
621 Pathogen[ Q2Q067] interacts with 2 human partners:{P56537;Q9Y3A5}  
622 Pathogen[ P0C214] interacts with 2 human partners:{Q9Y3A5;P56537}  
623 Pathogen[ P03346] interacts with 2 human partners:{P56537;Q9Y3A5}  
624 Pathogen[ Q85601] interacts with 2 human partners:{Q9Y3A5;P56537}  
625 Pathogen[ P14079] interacts with 2 human partners:{P56537;Q9Y3A5}  
626 Pathogen[ P03383] interacts with 2 human partners:{P56537;Q9Y3A5}  
627 Pathogen[ P03410] interacts with 2 human partners:{P56537;Q9Y3A5}  
628 Pathogen[ P14075] interacts with 2 human partners:{P56537;Q9Y3A5}  
629 Pathogen[ P0C206] interacts with 2 human partners:{P56537;Q9Y3A5}  
630 Pathogen[ P03363] interacts with 2 human partners:{Q9Y3A5;P56537}  
631 [Cluster 58]GO:0006944+P biological\_process [name] cellular membrane fusion [def] "The cellular process that joins two lipid bilayers to form a single membrane." [GOC  
632 Pathogen[ Q2Q067] interacts with 10 human partners:{Q9UL45;Q99747;Q9H267;O95721;Q8TAT6;P54920;O00161;Q9ULZ2;O75558;Q15276}  
633 Pathogen[ P0C214] interacts with 8 human partners:{Q99747;O95721;P54920;Q8TAT6;Q9UL45;Q9ULZ2;O75558;O00161}  
634 Pathogen[ P03346] interacts with 10 human partners:{Q9ULZ2;O00161;O95721;P54920;Q9UL45;Q8TAT6;O75558;Q9H267;Q99747;Q15276}  
635 Pathogen[ Q85601] interacts with 8 human partners:{P54920;Q9ULZ2;Q9H267;O75558;Q8TAT6;O00161;O95721;Q99747}  
636 Pathogen[ P14079] interacts with 12 human partners:{Q9H295;P47224;Q15276;Q99747;O75558;O95721;Q9ULZ2;Q9UL45;Q8TAT6;O14653;P54920;Q9H267}  
637 Pathogen[ P03383] interacts with 7 human partners:{P54920;Q99747;O75558;Q9ULZ2;Q8TAT6;O00161;Q15276}  
638 Pathogen[ P03410] interacts with 12 human partners:{Q9H267;Q9ULZ2;Q9UL45;P47224;O75558;O14653;O95721;Q8TAT6;O00161;Q99747;Q15276;P54920}  
639 Pathogen[ P14075] interacts with 7 human partners:{Q8TAT6;O75558;Q99747;P54920;O00161;Q9ULZ2;Q15276}  
640 Pathogen[ P0C206] interacts with 12 human partners:{Q9UL45;O14653;P54920;O95721;Q8TAT6;O75558;P47224;O00161;Q99747;Q9ULZ2;Q9H267;Q15276}  
641 Pathogen[ P03363] interacts with 9 human partners:{P54920;O75558;Q8TAT6;Q9ULZ2;O95721;Q9H267;O00161;Q99747;Q15276}  
642 [Cluster 59]GO:0008380+P biological\_process [name] RNA splicing [def] "The process of removing sections of the primary RNA transcript to remove sequences not present in the mature form of the RNA and joining the remaining sections to form the mature form of the RNA." [GOC  
643 Pathogen[ Q2Q067] interacts with 196 human partners:{Q9UNP9;Q66PJ3;O43290;Q13573;P30153;P33240;P52434;P83876;Q96FV9;Q8TA86;Q86U42;O15234;P07910;P62312;Q9Y333;Q8WUQ7;Q8N2M8;Q9NR56;P55769;Q9Y3F4;Q9H2H8;O95391;Q9H7N4;P52272;P61326;O75494;P14866;Q15459;Q13427;Q13148;O75940;Q9BWG6;Q12872;O43447;P67809;P55795;Q01130;P62318;Q15233;Q8WWY3;Q9UHX1;Q5VTL8;Q8N684;O95400;O43390;Q13435;P19388;Q96DI7;P52435;Q15696;O43172;Q9UK45;P38919;Q14103;O60506;O00566;Q9H6T0;P30876;P19387;O00148;Q9H307;P61218;Q92945;Q8IX12;P67775;Q8NAV1;Q13838;Q9ULR0;Q07955;Q9BWJ5;Q6I9Y2;Q9UDW3;Q9BZ17;Q13769;Q8NDT2;Q16629;O75400;O94906;P31943;P49756;Q9NQ55;Q10570;Q12996;Q9BV90;P62314;P08621;P11142;P61978;Q12972;P38159;P62487;Q9UHI6;P62304;P84103;Q8IYB3;Q05048;O94913;Q14498;Q9Y6Y0;Q86V81;Q8IWX8;Q96DF8;P51816;Q96IZ7;Q05519;P26368;O43251;Q6P2Q9;Q6NZY4;Q9UBB9;Q8WXD5;Q08211;P08579;P52597;P23246;P14678;Q9Y5S9;Q01081;O75533;Q8TEQ6;O15116;Q9P2I0;P57678;P13984;Q13243;P09661;O95232;Q15366;P62875;O95218;P24928;O43809;Q86X95;O95777;Q15029;Q8NI27;Q5BKZ1;P09012;Q09161;Q9P013;Q9HCG8;Q9UQ35;Q9BUJ2;Q7RTV0;Q9UNY4;O75934;Q99590;P52298;P35269;Q15427;Q8N8D1;Q9BQ65;P62316;O43395;Q9UKF6;Q9NY27;Q9NWX8;Q6IEG0;Q14683;P53803;Q15007;Q96MU7;O60508;Q9H0G5;P62306;Q9H840;Q9Y2W2;Q15637;P35637;Q02040;P22626;Q69YN4;Q8WVK2;P18583;Q16637;P11940;Q14331;P63162;P62308;Q9UMS4;O14893;Q99459;Q12874;Q8WYA6;Q00839;A7MD48;Q9HCS7;Q9Y4Z0;O60936;O43660;Q8N1

- 644 Pathogen[ P0C214] interacts with 202 human partners: {Q5BKZ1;Q12996;Q9BZI7;Q6NZY4;Q8N163;Q16637;Q9Y2W2;Q96FV9;P62312;Q15007;O15234;O15116;P26368;Q9H6T0;P62316;Q9HCS7;Q9ULR0;Q09161;Q8IX12;Q9BQ65;Q13573;Q14331;O43172;P35637;O94913;O75934;Q66PJ3;O00148;P38159;Q9UKF6;Q6IEG0;P30876;P30153;Q9NQ55;P53803;P84103;Q86V81;Q5VTL8;Q9UDW3;Q9Y5S9;P51003;Q13769;O60508;P35269;P26599;O95400;Q9NR56;Q9H0S4;P14678;Q9NY27;Q15029;P62306;Q969L4;P52435;Q69YN4;P57678;Q15233;Q15637;P67809;Q05048;Q6P2Q9;P23246;Q9BWJ5;Q8IWX8;Q15428;Q9H307;P61218;Q13427;O43395;P11940;Q10570;Q8WXD5;P62308;Q9Y4Z0;Q9UK45;P08579;Q8NAV1;O43390;Q15366;O95232;Q8N684;O94906;Q9Y4Y9;Q9UMS4;Q96IZ7;Q07955;Q9BWG6;Q9H2H8;P55795;Q9Y333;P52298;P52272;P62487;Q9Y3C6;Q8WVK2;P62314;P07910;Q8IYB3;O43809;Q9UHX1;P18583;Q15696;P08621;Q8N8D1;Q9Y6Y0;Q14103;P62310;P55769;Q99459;P61326;Q8TEQ6;P38919;Q9UNY4;Q96DF8;Q13243;Q15427;P83876;Q9P2I0;Q99590;P52597;Q12872;Q05519;Q7RTV0;P63162;P67775;Q9BUJ2;Q15459;Q9UHI6;Q9H0G5;P51816;P62318;Q8NI27;Q01081;O75533;Q96DI7;P33240;Q9Y3F4;O75940;P62875;Q96BP3;P13984;Q12874;O95777;O75494;Q9H840;Q15287;P24928;P31943;P62304;Q96I25;P09012;Q14683;O43447;Q9P013;O60506;Q9HCG8;O14893;P09661;Q9UQ35;O43290;P52434;Q08211;Q12972;Q8WYA6;O95218;Q8NDT2;Q13435;Q00839;Q9BV90;Q96MU7;Q92945;O00566;P19387;Q13148;P22626;P19388;Q8TA86;O43251;O95391;Q02040;Q9UNP9;Q86U42;Q9NWZ8;Q13838;Q9H7N4;Q15365;Q14498;Q86X95;O43660;O75400;Q9UBB9;P49756;Q14966;Q16629;Q8N2M8;P14866;Q5VZF2;O60936;Q6I9Y2;Q01130;Q8WWY3;P11142}
- 645 Pathogen[ P03346] interacts with 239 human partners: {Q9Y5S9;Q96FV9;O95400;Q9BZI7;Q15427;P51991;Q12874;Q86U42;O15234;Q96MU7;P61978;Q8TA86;Q9ULR0;Q96DF8;O43172;Q09161;Q8IX12;Q15366;P52434;O43290;Q9H2H8;Q08170;Q9NQ55;Q9BV90;Q8N163;Q8IYB3;Q96PU8;P09651;O43447;Q99633;Q9Y3C6;Q7RTV0;P14866;P62304;P83876;Q9UKF6;O95777;Q96I25;Q13148;O95391;Q9Y4Y9;P08579;O75400;P55795;Q15007;Q15637;Q9NY27;Q9UMS4;P0DJD3;Q14498;O60506;P23246;Q9H307;Q8WXD5;P53803;P38919;P07910;Q96BP3;Q8N684;P61218;P11142;O75940;P18583;A8MWD9;P08621;Q9NX01;P11940;Q13242;P13943;Q00839;Q13247;P67775;P26599;Q9BUJ2;Q92945;Q08211;Q13769;P52298;O43390;Q9HCS7;Q16629;P22626;O94906;Q9BUQ8;Q9Y333;Q07955;Q13427;Q9BWG6;O00566;A7MD48;Q69YN4;Q9P013;Q05048;Q8IX01;Q16637;P52756;P30153;Q14103;Q9BWF3;Q9BQ65;P62487;Q8WVK2;Q92879;Q9H0G5;P19388;P35637;Q96A72;P62318;Q9Y6Y0;Q86V81;O95232;O60508;A6NDE4;Q8NDT2;P13984;Q8WYA6;P51003;P63162;Q96J01;Q5VTL8;O75934;O43660;O75643;P67809;Q9Y3F4;Q15428;Q9HCG8;Q8WUA1;Q13435;Q14683;P52435;Q9NWZ8;P62306;Q9UHI6;Q6NZY4;P49756;O94913;Q5VZF2;P26368;P55769;Q01081;O75533;Q66PJ3;P36954;Q8TEQ6;P61326;Q13838;Q9H6T0;P31942;Q9UNY4;O43251;Q15116;Q15459;Q9UDW3;Q9BWJ5;Q99590;O75554;Q9UNP9;Q14966;P42285;Q99459;Q8WWY3;O43809;Q6P2Q9;Q96DI7;Q14562;P09012;P84103;Q9UQ35;O95926;Q8IWX8;P62314;Q15233;P52272;Q15287;O60936;Q05519;P30876;P35269;Q01130;P14678;Q9H0S4;O95218;Q9BZJ0;P57678;Q9P2I0;Q8NAV1;O14893;P51513;P24928;Q02040;Q13573;Q9H7N4;Q13243;O00148;Q96IZ7;P38159;Q86X95;Q969L4;Q15029;P62316;Q9UHX1;Q8N2M8;Q15696;Q9Y2W2;Q32P51;Q8N8D1;Q8WUQ7;P52597;O75494;Q8NI27;Q12972;P62308;P62312;Q10570;Q12996;P51816;P62995;P62310;Q9UK45;Q15393;Q9NR56;P09661;Q15365;Q9BRX9;P33240;P62875;P19387;Q6I9Y2;Q9H840;Q15428;Q6IEG0;Q9NUK0;Q6N9Y9;Q5BKZ1;Q12872;Q9NWB1;Q14331;O43395}
- 646 Pathogen[ Q85601] interacts with 183 human partners: {Q9BZI7;Q15637;O15234;P49756;Q96MU7;P61978;P36954;Q9ULR0;Q9HCS7;Q9H2H8;Q9Y2W2;Q9H0S4;O43390;Q8IYB3;Q96BP3;Q7RTV0;Q13243;Q05048;P62304;Q13769;Q01130;Q9H307;O60506;Q14331;Q14103;Q14966;Q13148;O95391;O15116;Q05048;O75400;Q13573;Q15459;Q15007;Q9NY27;Q9UMS4;P61326;P22626;Q9UHX1;Q15287;O00148;P53803;O60936;P30153;Q8WYA6;P61218;Q5VTL8;O94913;Q8IX12;P08621;Q969L4;Q9P013;Q9NR56;Q8N8D1;Q86V81;Q9BUJ2;P55795;O75494;O75940;Q16629;O75934;Q9UK45;Q08211;P62316;O94906;Q07955;P55769;Q13427;Q9UBB9;Q9NQ55;Q09161;Q96DI7;P38919;P14678;Q96FV9;P62487;Q9H0G5;P19388;P35637;P11940;Q9Y6Y0;P62310;Q13435;P62314;P13984;Q8NDT2;P62306;O60508;Q05048;P35269;Q9Y4Z0;Q13838;Q14683;P52435;P62318;Q12972;Q15029;Q9NWZ8;Q8NAV1;P52597;P11142;Q9UHI6;Q6NZY4;Q9Y3C6;Q10570;P62312;Q9P2I0;P35269;Q8TA86;Q99459;Q01081;Q9UQ35;Q05519;Q9Y3F4;P67809;Q8NI27;O00566;Q9H7N4;Q9UDW3;Q99590;O43395;O43290;Q8WWY3;P67775;Q12872;P84103;Q15233;O95777;O95400;P14866;Q6P2Q9;Q96IZ7;P83876;O95218;O43447;Q8N163;Q00839;P18583;Q9NX01;P19387;Q92945;O14893;O43660;P24928;P62308;P52298;P30876;P38159;P52434;Q15696;P23246;P26368;Q9Y333;Q9HCG8;Q15365;P51003;Q66PJ3;Q5BKZ1;Q86U42;Q16637;Q8N2M8;P31943;O43172;Q14498;Q9UKF6;Q6I9Y2;Q9UNY4;P09661;P33240;Q15366;Q86X95;P62875;Q96DF8;Q12874;O43809;Q9Y5S9;Q5VZF2;Q9BWJ5;Q8WXD5;Q9H840;Q6IEG0;Q9Y4Y9}
- 647 Pathogen[ P14079] interacts with 202 human partners: {Q15637;O43809;P62875;Q96MU7;Q99459;Q9Y333;Q8N9Q2;Q8IX12;O43447;Q14004;Q15007;P57678;Q96I25;Q15287;Q9H0S4;P11142;O75934;Q8TEQ6;O75400;O94906;Q9Y2W2;O60508;Q8N163;P35637;Q5VZF2;Q99633;P19387;P35269;Q13148;O14893;Q9UKF6;Q14103;P67809;Q8N8D1;P62487;O75533;Q9UK45;Q10570;P52434;Q9UNY4;P52298;Q96DF8;Q12874;Q13243;Q9Y5S9;Q9BUJ2;Q6NZY4;O15514;P33240;P30876;P61218;Q9P013;P26368;P83876;Q14966;Q8NI27;Q6IEG0;P14866;P23246;P07910;Q13838;Q13573;Q9H840;Q9BWG6;Q9NY27;O94913;O15116;Q9Y3F4;P62312;Q15029;Q9BQ65;P53803;Q13427;Q6P2Q9;Q9UHI6;Q9NR56;P62314;Q14498;Q9HCS7;Q15427;Q08211;Q9UHX1;Q05048;Q9H307;Q00839;O43290;Q8WWY3;Q96FV9;Q15459;P62306;P14678;Q13769;O95400;Q8IYB3;Q9ULR0;Q9NWZ8;P16629;Q5BKZ1;P26599;P55795;O75940;Q9BWJ5;Q6I9Y2;P61326;O00566;Q16637;P19388;O95926;P49756;Q9UMS4;Q9H7N4;Q8TA86;Q9H6T0;A7MD48;Q66PJ3;Q02040;Q9BZI7;P11940;Q9Y4Z0;Q05519;Q7RTV0;P08621;Q9H2H8;Q92945;Q8N684;Q9UQ35;P52435;Q86V81;Q86U42;P96IZ7;O00148;P62308;O60506;Q15696;Q9UBB9;Q9Y6Y0;P09012;Q15366;O60936;P62304;Q15428;Q9NX01;P62316;P62310;Q07955;Q9H0G5;Q969L4;Q15365;Q8WUQ7;Q12972;Q8WVK2;Q8NAV1;P61978;P31943;Q9NUK0;Q01081;P13984;Q9HCG8;O95777;Q14331;O95232;P55769;P52597;O43390;Q8N2M8;Q12872;P24928;P30153;Q9NWB1;P51816;P51003;Q12996;P09661;O43172;P52756;O75494;Q15233;Q9UDW3;Q69YN4;Q14683;P62318;Q8WYA6;Q9Y4Y9;P18583;P36954;Q86X95;O43395;O95218;O15234;Q96BP3;Q8WXD5;Q8NDT2;O95391;Q09161;P22626;Q5VTL8;P84103;Q8IWX8;P38159;Q9NQ55;Q9P2I0;P63162}

- 648 Pathogen[ P03383] interacts with 185 human partners: {Q14683;Q13573;Q9NYV4;P53803;Q8N2M8;Q12872;Q07955;O15234;Q8TA86;P09661;Q15287;Q8NI27;Q05048;O75494;Q15366;P51003;Q969L4;Q9H0S4;O43390;P35269;P83876;Q02040;Q9H840;Q15459;P62318;Q96IZ7;Q9UNP9;O43290;P62312;Q5VTL8;P22626;Q8N163;P14866;Q15029;O43172;Q13769;Q96MU7;Q13838;Q9HCS7;Q9ULR0;Q9Y5S9;P55795;P62316;Q9BQ65;Q9NR56;O95218;Q96BP3;Q96FV9;Q9H2H8;Q12972;Q10570;P62304;P61326;Q9UHI6;Q8WXD5;Q6P2Q9;Q9NQ55;P38919;Q9Y4Y9;O95400;O60936;Q12874;P52434;P61218;P26368;Q13243;P63162;P30153;Q9P013;P67775;P61978;Q14331;P11940;P51816;P31943;O75400;Q99459;Q86V81;Q13435;Q9Y2W2;Q6NZY4;Q9H7N4;Q8NAV1;Q9UKF6;O94906;P38159;Q69YN4;Q09161;O43447;Q16629;Q66PJ3;P62487;Q8N684;O43395;O94913;Q8IYB3;Q16637;Q13427;O95777;A7MD48;Q9UHX1;Q9Y6Y0;P19387;P33240;P62314;P62310;P18583;P84103;Q92945;P13984;Q9H6T0;Q8TEQ6;O14893;P35637;P24928;Q01130;Q99590;Q14103;P49756;P14678;Q9Y333;Q01081;Q9Y3F4;P11142;Q15365;Q6IEG0;Q8IX12;Q8WVK2;O43809;P52298;Q8WUQ7;P09012;Q15007;Q9BWG6;Q9Y4Z0;Q9H307;O95232;Q9UK45;Q05519;Q9NY27;Q9BUJ2;P62875;Q8WY3;Q9UQ35;P52435;P57678;P55769;Q9P2I0;Q8NDT2;Q15233;Q96DF8;P62308;P23246;P19388;Q13148;Q9UBB9;O15116;Q9H0G5;Q86X95;P30876;Q9NWZ8;Q86U42;P67809;Q8N8D1;Q15637;Q9HCG8;Q8WYA6;Q00839;P08621;Q6I9Y2;Q9UNY4;P52597;O95391;Q75934;Q9UMS4;Q7RTV0;O00566;O75940;Q9BJ5;O00148;P62306;Q5BKZ1;Q9BZI7;Q14498;Q96DI7}
- 649 Pathogen[ P03410] interacts with 211 human partners: {Q8WUQ7;Q8N9Q2;P83876;Q13838;A8MWD9;Q92945;O75934;P23246;Q00839;Q9ULR0;Q15287;Q9BWJ5;Q9Y4Y9;Q9UDW3;Q8WXD5;Q01081;O95218;Q9UNY4;O14893;P26368;Q10570;P61326;P19387;Q14103;P62304;Q9NX01;O15234;Q8IX12;O60508;Q8WY3;Q15637;P36954;Q12996;Q15029;Q15696;P61978;Q9NWB1;Q05048;Q16629;Q9H840;P22626;Q15233;P11940;Q9BUJ2;Q8NI27;P62306;P24928;Q15287;Q6IEG0;P62310;Q6NZY4;O95777;Q15393;Q9Y5S9;Q96BP3;Q9H0G5;Q5VZF2;P35637;Q8TEQ6;Q15365;Q9Y333;O00148;Q9NR56;P55769;Q9Y6Y0;P11142;Q99633;P30876;P26599;Q96MU7;Q9P013;Q15366;Q9BWG6;P62308;P14678;P62316;Q9UBB9;Q9Y3F4;Q96IZ7;Q9H0S4;O15514;P14866;Q8NAV1;P09012;Q9B2I7;Q96FV9;Q9UQ35;P51003;Q9H7N4;Q13148;P43809;P08621;O43809;P67809;Q8WY3;Q9H2H8;Q9HCS7;O94906;Q9Y2W2;P07910;P08579;Q14966;P49756;O60936;Q05519;Q8WVK2;Q69YN4;Q99459;Q9NQ55;O75400;O43172;P52435;O94913;Q8N163;Q07955;P52597;P52298;Q16637;Q9P2I0;P31943;P62314;O43660;P33240;P53803;Q9UHX1;O43395;Q15428;Q14683;P09661;Q15459;O75533;Q8NDT2;Q86V81;P62875;P52272;P18583;P35269;Q13769;Q8IYB3;P38919;P61218;Q5BKZ1;Q86X95;O95400;O95232;Q01130;Q969L4;Q9Y4Z0;P30153;Q9UKF6;P52434;Q9H6T0;Q6I9Y2;Q7RTV0;P57678;Q9UMS4;P13984;Q9Y3C6;A7MD48;Q12972;Q8N684;Q9UNP9;P62487;Q99590;Q14498;O60506;Q12872;Q09161;P51816;Q96A72;Q96DF8;Q6P2Q9;O15116;P84103;P62312;Q9BQ65;Q86U42;Q9BV90;O43290;P55795;Q5VTL8;O75940;Q13243;Q12874;P67775;Q13427;P38159;Q8IWZ8;Q8TA86;Q9UHI6;P19388;O43447;Q08211;Q9UK45;P63162;Q8N8D1;Q96I25;Q9NY27;O00566;O95391;Q13573;Q13435;O43390;Q9H307;O75494;Q15007;Q14331;Q9HCG8;Q8N2M8;Q9NWZ8;Q02040;P62318}
- 650 Pathogen[ P14075] interacts with 184 human partners: {Q9H307;P51003;P22626;O00566;Q8TEQ6;Q15366;O15234;P62304;Q05519;P14866;Q9UK45;Q09161;P62316;O95232;P13984;Q86X95;P23246;P11142;Q9Y3F4;Q8WXD5;O43809;Q9P2I0;Q13573;P51816;Q14683;Q08621;Q5BKZ1;Q14103;Q86V81;Q13243;O43395;P49756;P30876;Q9H0S4;Q9UNY4;P61326;Q9UHX1;P57678;O95391;Q9Y4Z0;Q15459;P38159;Q92945;Q15428;Q96IZ7;P19388;O95400;Q01130;P61218;O95218;O95777;Q9UNP9;Q9H840;O43172;P31943;P63162;Q9H7N4;Q02040;P19387;P62306;O75494;Q8IX12;P62308;O43390;Q9UQ35;Q13148;Q66PJ3;O94906;Q9HCG8;Q12872;Q9ULR0;Q8N163;Q15029;O75400;P62312;Q16637;O75940;Q8NI27;Q99459;P62487;Q96DI7;P11940;Q15365;Q00839;Q9UHI6;Q9Y6Y0;Q6I9Y2;Q13435;Q9NY27;Q8N8D1;P62318;O15116;Q12874;P55769;Q9NR56;P33240;Q96DF8;Q6NZY4;Q9BUJ2;Q05048;Q69YN4;Q9BQ65;Q9UBB9;Q15637;Q15287;Q15007;P24928;Q96MU7;P35269;Q6P2Q9;P26368;Q01081;P67809;Q9UMS4;P09661;Q8IYB3;Q9BJ5;Q8TA86;Q9Y333;P61978;Q8NAV1;Q9NWZ8;Q15233;P67775;P30153;P09012;A7MD48;P14678;Q8NDT2;O43447;Q9HCS7;Q8WYA6;Q9Y5S9;Q99590;P35637;P83876;Q13427;O75934;P84103;Q8WVK2;Q9H0G5;P62875;Q12972;P52597;Q8N2M8;O60936;O14893;Q9H2H8;Q14331;P62314;P38919;Q8N684;Q8WUQ7;Q9Y4Y9;Q6IEG0;Q96FV9;O43290;Q9UKF6;Q13838;Q86U42;Q9NQ55;Q9NYV4;Q16629;P52434;Q9P013;Q5VTL8;P18583;Q10570;O00148;Q8WY3;Q969L4;Q14498;Q9BWG6;O94913;P62310;Q07955;P52298;P52435;P53803;Q9H6T0;Q9BZI7;Q7RTV0}
- 651 Pathogen[ P0C206] interacts with 204 human partners: {Q9BUJ2;Q6IEG0;Q9UNP9;Q15287;Q12872;Q9H0S4;Q9BV90;P67809;Q9UMS4;P33240;P62875;P83876;Q8NAV1;O00148;Q9Y3F4;Q9UKF6;Q14103;P14678;O60508;Q8TA86;O75934;Q9BZI7;Q15365;Q07955;P26368;P52298;Q9H840;P61326;Q01081;P36954;Q15696;Q09161;P18583;P55769;P30153;Q8NI27;Q8WXD5;Q14966;Q9UNY4;O94913;Q96BP3;P62304;Q05519;Q15233;Q8IYB3;Q08211;P09012;Q9H7N4;Q9BQ65;O95232;Q9NR56;O75533;P14866;Q8TEQ6;P61978;P63162;P19388;P61218;O75940;Q8N684;Q66PJ3;Q96PU8;P51816;Q9H307;Q15637;Q13243;Q12874;Q16629;Q86U42;P62314;P62316;O43390;O75494;P51003;P22626;Q02040;O43809;P67775;Q9H0G5;Q9UBB9;Q5BKZ1;Q9Y4Y9;Q9UHX1;Q8WUQ7;Q9P2I0;P13984;Q9Y4Z0;Q8WYA6;O43290;Q8N2M8;O95777;Q13769;Q9Y6Y0;Q9Y333;P23246;Q13435;Q9UQ35;P53803;Q9BWG6;O60936;Q96DF8;Q9UK45;O15514;P35269;Q86X95;Q96FV9;P19387;P38159;Q05048;Q15007;O60506;O95400;Q13573;Q9BWJ5;Q9Y3C6;Q13838;P52597;Q13427;Q8N8D1;Q14683;Q9P013;P35637;O43395;Q99590;Q96MU7;Q6P2Q9;P62318;Q6NZY4;P62318;Q7RTV0;O15234;O14893;Q8N9Q2;Q12996;Q9NY27;Q8WY3;P55795;Q8IWZ8;P52435;Q9NX01;P62306;Q9ULR0;P62487;Q13148;O43172;Q15366;Q99459;O43447;Q9HCG8;Q8IX12;Q9H6T0;Q96I27;O95218;P84103;O75400;O94906;A7MD48;Q69YN4;Q9UHI6;P24928;P62312;Q9H2H8;P49756;Q14331;Q92945;Q12972;Q96DI7;P09012;Q9NQ55;O43660;P38919;Q16637;P62308;O95391;Q9Y2W2;P08621;Q9NUK0;Q01130;P62310;Q00839;Q14498;Q9HCS7;Q9UDW3;Q8N163;Q15459;P11940;P11142;Q5VZF2;Q8WVK2;P31943;Q5VTL8;Q6I9Y2;P52434;O15116;Q15428;Q9Y5S9;Q86V81;O00566;Q9NWZ8;Q969L4;Q8NDT2;Q10570;Q15029;P30876;P57678}
- 652 Pathogen[ P03363] interacts with 247 human partners: {Q86X95;O95777;Q9Y6Y0;O75940;O95926;P62314;Q15233;O43395;A8MWD9;Q13151;Q9Y3F4;Q6NWX9;Q13595;Q9Y4Y9;P63162;Q9Y4Z0;Q15366;Q13427;Q96IZ7;Q9Y2W2;Q96J01;P23246;Q86U41;Q9P2I0;P38919;P0DJD3;Q96DF8;Q10570;O75643;P19388;Q12972;Q9NQ55;Q13148;Q12872;Q134

35;O95391;P13984;O95400;P52597;Q9NW13;Q9UHI6;Q6NZY4;P09012;Q96MU7;P62312;Q08170;O603  
06;O95232;Q9BV90;P30876;Q14331;Q8IX01;P51991;Q9HCS7;P14866;Q05048;Q15393;Q92879;Q9NW  
Z8;P35637;O75533;P19387;Q9H0G5;Q96BP3;P61218;P09651;Q9NX01;P08579;Q15459;Q9Y3C6;Q7RT  
V0;Q16629;Q96125;Q13769;P62318;Q8WYA6;Q8N8D1;Q9H307;Q8TA86;Q9BRX9;P24928;Q15427;P623  
04;Q01130;Q6P2Q9;P49756;P11940;Q86U42;Q9NR56;Q8WVY3;O14893;Q8NI27;Q9BWF3;Q32P51;Q96F  
V9;Q92620;Q9H0S4;O94913;O43447;Q9UNY4;Q96PU8;P61326;Q8IWX8;P62306;Q15116;Q05519;P352  
69;P52272;Q15029;Q15287;P57678;Q5BKZ1;Q8N684;O75400;Q9Y3B4;Q9BWJ5;Q9Y333;Q14562;P623  
16;Q13242;O95218;Q8WUQ7;Q8IYB3;Q9UDW3;O43809;P38159;P18583;P26368;Q9H7N4;Q92945;Q128  
74;Q9UPN6;P31943;O43172;Q9ULR0;Q66PJ3;P51003;O00148;Q15637;Q96LT9;Q14966;Q13243;Q8WX  
D5;Q86V81;P07910;Q9NWB1;Q8NAV1;Q8N2M8;Q8N163;O75934;P31942;O43290;Q13573;P52298;Q138  
38;Q9UHX1;Q02040;O00566;P08621;Q9H840;P22626;Q9BQ65;P83876;Q15365;P26599;P62487;O609  
36;Q14103;Q6I9Y2;P55795;Q9NY27;P62310;Q9UKM9;Q8IX12;Q07955;O43660;Q5VTL8;P51816;O605  
06;Q96E39;Q01081;Q5VZF2;Q96A72;Q9UK45;Q9BZI7;P61978;O94906;Q9HCG8;Q969L4;Q13247;Q154  
28;P55769;Q5S2Q8;Q8WVK2;A6NDE4;Q8TEQ6;Q00839;P62308;Q9P013;Q16637;Q9UKF6;P84103;Q9UM  
S4;Q14498;A7MD48;Q99633;P51513;O43390;P62995;P30153;P14678;Q16560;P53803;P52435;P096  
61;Q08211;P52434;Q99590;Q99459;Q9BUJ2;P33240;Q9UQ35;P67775;Q9H6T0;Q14683;Q15696;Q150  
07;Q9Y5S9;Q12996;Q9H2H8;Q9BWG6;O43251;Q9UNP9;P11142;Q9BZJ0;O75494;Q6IEG0;P67809;Q9NU  
K0;Q96DI7;Q69YN4;O60508;Q09161;P42285;O15234;Q8NDT2;P52756}

653 [Cluster 60]GO:0009953+P biological\_process [name] dorsal/ventral pattern formation  
[def] "The regionalization process in which the areas along the dorsal/ventral axis are  
established that will lead to differences in cell differentiation. The dorsal/ventral  
axis is defined by a line that runs orthogonal to both the anterior/posterior and  
left/right axes. The dorsal end is defined by the upper or back side of an organism. The  
ventral end is defined by the lower or front side of an organism." [GOC

654 Pathogen[ Q2Q067] interacts with 6 human  
partners:{O43364;P08151;O60663;Q15583;O75360;P14652}

655 Pathogen[ P0C214] interacts with 5 human  
partners:{P32243;O60663;O75360;Q9H469;P08151}

656 Pathogen[ P03346] interacts with 12 human  
partners:{Q9H469;Q05925;P31270;Q15583;P14652;O60663;O43364;Q9UBR4;A8MTQ0;O75360;P322  
43;P08151}

657 Pathogen[ Q85601] interacts with 7 human  
partners:{P08151;O75360;O60663;O43364;Q15583;Q9H469;P32243}

658 Pathogen[ P14079] interacts with 9 human  
partners:{P08151;O43364;Q15583;Q96BJ3;P54826;O60663;O75360;P32243;Q9Y366}

659 Pathogen[ P03383] interacts with 4 human partners:{P32243;O75360;O60663;Q96BJ3}

660 Pathogen[ P03410] interacts with 9 human  
partners:{Q9H469;Q9Y366;O60663;Q96BJ3;Q15583;O43364;P54826;P32243;O75360}

661 Pathogen[ P14075] interacts with 5 human  
partners:{O60663;Q96BJ3;O75360;P32243;P54826}

662 Pathogen[ P0C206] interacts with 11 human  
partners:{O75360;P14652;P32243;Q96BJ3;O43364;Q9UBR4;O60663;P08151;P54826;Q9H469;Q155  
83}

663 Pathogen[ P03363] interacts with 10 human  
partners:{O75360;P08151;A8MTQ0;O60663;P32243;P14652;Q05925;Q15583;O43364;Q9H469}

664 [Cluster 61]GO:0070734+P biological\_process [name] histone H3-K27 methylation  
[def] "The modification of histone H3 by addition of a methyl group to lysine at  
position 27 of the histone." [GOC

665 Pathogen[ Q2Q067] interacts with 2 human partners:{Q15910;Q92800}

666 Pathogen[ P0C214] interacts with 2 human partners:{Q15910;Q92800}

667 Pathogen[ P03346] interacts with 2 human partners:{Q92800;Q15910}

668 Pathogen[ Q85601] interacts with 2 human partners:{Q15910;Q92800}

669 Pathogen[ P14079] interacts with 2 human partners:{Q92800;Q15910}

670 Pathogen[ P03383] interacts with 2 human partners:{Q15910;Q92800}

671 Pathogen[ P03410] interacts with 2 human partners:{Q92800;Q15910}

672 Pathogen[ P14075] interacts with 2 human partners:{Q15910;Q92800}

673 Pathogen[ P0C206] interacts with 2 human partners:{Q92800;Q15910}

674 Pathogen[ P03363] interacts with 2 human partners:{Q15910;Q92800}

675 [Cluster 62]GO:0045839+P biological\_process [name] negative regulation of mitosis  
[def] "Any process that stops, prevents or reduces the rate or extent of mitosis.  
Mitosis is the division of the eukaryotic cell nucleus to produce two daughter nuclei  
that, usually, contain the identical chromosome complement to their mother." [GOC

676 Pathogen[ Q2Q067] interacts with 2 human partners:{O14757;Q9NWT8}

677 Pathogen[ P0C214] interacts with 2 human partners:{Q9NWT8;O14757}

678 Pathogen[ P03346] interacts with 2 human partners:{O14757;Q9NWT8}

679 Pathogen[ Q85601] interacts with 2 human partners:{Q9NWT8;O14757}

680 Pathogen[ P14079] interacts with 1 human partners:{Q9NWT8}

681 Pathogen[ P03383] interacts with 2 human partners:{O14757;Q9NWT8}

682 Pathogen[ P03410] interacts with 2 human partners:{Q9NWT8;O14757}

683 Pathogen[ P14075] interacts with 2 human partners:{Q9NWT8;O14757}

684 Pathogen[ P0C206] interacts with 1 human partners:{Q9NWT8}

685 Pathogen[ P03363] interacts with 2 human partners:{Q9NWT8;O14757}

686 [Cluster 63]GO:0072362+P biological\_process [name] regulation of glycolysis by  
negative regulation of transcription from RNA polymerase II promoter [def] "Any  
process that modulates the frequency, rate or extent of glycolysis by stopping,  
preventing, or reducing the frequency, rate or extent of transcription from an RNA

polymerase II promoter." [GOC  
687 Pathogen[ Q2Q067] interacts with 1 human partners:{075376}  
688 Pathogen[ POC214] interacts with 1 human partners:{075376}  
689 Pathogen[ P03346] interacts with 1 human partners:{075376}  
690 Pathogen[ Q85601] interacts with 1 human partners:{075376}  
691 Pathogen[ P14079] interacts with 1 human partners:{075376}  
692 Pathogen[ P03383] interacts with 1 human partners:{075376}  
693 Pathogen[ P03410] interacts with 1 human partners:{075376}  
694 Pathogen[ P14075] interacts with 1 human partners:{075376}  
695 Pathogen[ POC206] interacts with 1 human partners:{075376}  
696 Pathogen[ P03363] interacts with 1 human partners:{075376}  
697 [Cluster 64]GO:0038032+P biological\_process [name] termination of G-protein coupled  
receptor signaling pathway [def] "The signaling process in which G-protein coupled  
receptor signaling is brought to an end. For example, through the action of  
GTPase-activating proteins (GAPs) that act to accelerate hydrolysis of GTP to GDP on  
G-alpha proteins, thereby terminating the transduced signal." [GOC  
698 Pathogen[ Q2Q067] interacts with 2 human partners:{P41220;P35579}  
699 Pathogen[ POC214] interacts with 1 human partners:{P41220}  
700 Pathogen[ P03346] interacts with 2 human partners:{P35579;P41220}  
701 Pathogen[ Q85601] interacts with 2 human partners:{P41220;P35579}  
702 Pathogen[ P14079] interacts with 3 human partners:{P35579;P41220;Q9H3E2}  
703 Pathogen[ P03383] interacts with 2 human partners:{P41220;P35579}  
704 Pathogen[ P03410] interacts with 3 human partners:{P41220;Q9H3E2;P35579}  
705 Pathogen[ P14075] interacts with 2 human partners:{P41220;P35579}  
706 Pathogen[ POC206] interacts with 3 human partners:{Q9H3E2;P35579;P41220}  
707 Pathogen[ P03363] interacts with 2 human partners:{P35579;P41220}  
708 [Cluster 65]GO:0034127+P biological\_process [name] regulation of MyD88-independent  
toll-like receptor signaling pathway [def] "Any process that modulates the frequency,  
rate, or extent of MyD88-independent toll-like receptor signaling pathway." [GOC  
709 Pathogen[ Q2Q067] interacts with 1 human partners:{Q92985}  
710 Pathogen[ POC214] interacts with 1 human partners:{Q92985}  
711 Pathogen[ P03346] interacts with 1 human partners:{Q92985}  
712 Pathogen[ Q85601] interacts with 1 human partners:{Q92985}  
713 Pathogen[ P14079] interacts with 1 human partners:{Q92985}  
714 Pathogen[ P03383] interacts with 1 human partners:{Q92985}  
715 Pathogen[ P03410] interacts with 1 human partners:{Q92985}  
716 Pathogen[ P14075] interacts with 1 human partners:{Q92985}  
717 Pathogen[ POC206] interacts with 1 human partners:{Q92985}  
718 Pathogen[ P03363] interacts with 1 human partners:{Q92985}  
719 [Cluster 66]GO:0009582+P biological\_process [name] detection of abiotic stimulus  
[def] "The series of events in which an (non-living) abiotic stimulus is received by a  
cell and converted into a molecular signal." [GOC  
720 Pathogen[ Q2Q067] interacts with 1 human partners:{Q9UN51}  
721 Pathogen[ POC214] interacts with 1 human partners:{Q9UN51}  
722 Pathogen[ P03346] interacts with 1 human partners:{Q9UN51}  
723 Pathogen[ Q85601] interacts with 1 human partners:{Q9UN51}  
724 Pathogen[ P14079] interacts with 1 human partners:{Q9UN51}  
725 Pathogen[ P03383] interacts with 1 human partners:{Q9UN51}  
726 Pathogen[ P03410] interacts with 1 human partners:{Q9UN51}  
727 Pathogen[ P14075] interacts with 1 human partners:{Q9UN51}  
728 Pathogen[ POC206] interacts with 1 human partners:{Q9UN51}  
729 Pathogen[ P03363] interacts with 1 human partners:{Q9UN51}  
730 [Cluster 67]GO:0051602+P biological\_process [name] response to electrical stimulus  
[def] "Any process that results in a change in state or activity of a cell or an  
organism (in terms of movement, secretion, enzyme production, gene expression, etc.) as  
a result of an electrical stimulus." [GOC  
731 Pathogen[ Q2Q067] interacts with 4 human partners:{Q16656;Q9NRI5;P17861;P78543}  
732 Pathogen[ POC214] interacts with 4 human partners:{Q9NRI5;P78543;Q16656;P17861}  
733 Pathogen[ P03346] interacts with 4 human partners:{Q9NRI5;Q16656;P17861;P78543}  
734 Pathogen[ Q85601] interacts with 4 human partners:{Q16656;P78543;Q9NRI5;P17861}  
735 Pathogen[ P14079] interacts with 5 human  
partners:{P78543;P24588;Q16656;P00395;Q9NRI5}  
736 Pathogen[ P03383] interacts with 4 human partners:{Q16656;Q9NRI5;P17861;P78543}  
737 Pathogen[ P03410] interacts with 5 human  
partners:{P17861;P78543;Q9NRI5;Q16656;P24588}  
738 Pathogen[ P14075] interacts with 4 human partners:{Q16656;P17861;Q9NRI5;P78543}  
739 Pathogen[ POC206] interacts with 4 human partners:{P17861;Q16656;Q9NRI5;P78543}  
740 Pathogen[ P03363] interacts with 4 human partners:{P78543;P17861;Q16656;Q9NRI5}  
741 [Cluster 68]GO:0001309+P biological\_process [name] age-dependent telomere shortening  
[def] "Progressive reduction in length of the telomeres, the termini of eukaryotic  
chromosomes, that occurs as part of the cellular aging process." [GOC  
742 Pathogen[ Q2Q067] interacts with 2 human partners:{Q15554;P54274}  
743 Pathogen[ POC214] interacts with 2 human partners:{Q15554;P54274}  
744 Pathogen[ P03346] interacts with 2 human partners:{Q15554;P54274}  
745 Pathogen[ Q85601] interacts with 2 human partners:{Q15554;P54274}  
746 Pathogen[ P14079] interacts with 2 human partners:{P54274;Q15554}

747 Pathogen[ P03383] interacts with 2 human partners:{Q15554;P54274}

748 Pathogen[ P03410] interacts with 2 human partners:{Q15554;P54274}

749 Pathogen[ P14075] interacts with 2 human partners:{Q15554;P54274}

750 Pathogen[ P0C206] interacts with 2 human partners:{Q15554;P54274}

751 Pathogen[ P03363] interacts with 2 human partners:{Q15554;P54274}

752 [Cluster 69]GO:0070373+P biological\_process [name] negative regulation of ERK1 and ERK2 cascade [def] "Any process that stops, prevents, or reduces the frequency, rate or extent of signal transduction mediated by the ERK1 and ERK2 cascade." [GOC

753 Pathogen[ Q2Q067] interacts with 3 human partners:{Q15025;Q9UN36;Q13526}

754 Pathogen[ P0C214] interacts with 3 human partners:{Q13526;Q15025;Q9UN36}

755 Pathogen[ P03346] interacts with 3 human partners:{Q13526;Q15025;Q9UN36}

756 Pathogen[ Q85601] interacts with 3 human partners:{Q9UN36;Q13526;Q15025}

757 Pathogen[ P14079] interacts with 4 human partners:{O43597;Q15025;Q13526;Q9UN36}

758 Pathogen[ P03383] interacts with 3 human partners:{Q9UN36;Q15025;Q13526}

759 Pathogen[ P03410] interacts with 4 human partners:{O43597;Q13526;Q15025;Q9UN36}

760 Pathogen[ P14075] interacts with 3 human partners:{Q13526;Q15025;Q9UN36}

761 Pathogen[ P0C206] interacts with 4 human partners:{Q13526;Q15025;O43597;Q9UN36}

762 Pathogen[ P03363] interacts with 3 human partners:{Q9UN36;Q13526;Q15025}

763 [Cluster 70]GO:0009052+P biological\_process [name] pentose-phosphate shunt, non-oxidative branch [def] "The branch of the pentose-phosphate shunt which does not involve oxidation reactions. It comprises a series of sugar phosphate interconversions, starting with ribulose 5-P and producing fructose 6-P and glyceraldehyde 3-P." [ISBN

764 Pathogen[ Q2Q067] interacts with 2 human partners:{P37837;P49247}

765 Pathogen[ P0C214] interacts with 3 human partners:{P29401;P37837;P49247}

766 Pathogen[ P03346] interacts with 2 human partners:{P49247;P37837}

767 Pathogen[ Q85601] interacts with 2 human partners:{P37837;P49247}

768 Pathogen[ P14079] interacts with 3 human partners:{P49247;P29401;P37837}

769 Pathogen[ P03383] interacts with 2 human partners:{P37837;P49247}

770 Pathogen[ P03410] interacts with 2 human partners:{P37837;P49247}

771 Pathogen[ P14075] interacts with 2 human partners:{P49247;P37837}

772 Pathogen[ P0C206] interacts with 3 human partners:{P49247;P37837;P29401}

773 Pathogen[ P03363] interacts with 1 human partners:{P37837}

774 [Cluster 71]GO:0051153+P biological\_process [name] regulation of striated muscle cell differentiation [def] "Any process that modulates the frequency, rate or extent of striated muscle cell differentiation." [CL

775 Pathogen[ Q2Q067] interacts with 3 human partners:{P56524;Q9UKV0;Q9UQL6}

776 Pathogen[ P0C214] interacts with 3 human partners:{P56524;Q9UKV0;Q9UQL6}

777 Pathogen[ P03346] interacts with 3 human partners:{P56524;Q9UKV0;Q9UQL6}

778 Pathogen[ Q85601] interacts with 3 human partners:{Q9UKV0;Q9UQL6;P56524}

779 Pathogen[ P14079] interacts with 3 human partners:{Q9UQL6;Q9UKV0;P56524}

780 Pathogen[ P03383] interacts with 3 human partners:{Q9UQL6;Q9UKV0;P56524}

781 Pathogen[ P03410] interacts with 3 human partners:{Q9UKV0;Q9UQL6;P56524}

782 Pathogen[ P14075] interacts with 3 human partners:{P56524;Q9UKV0;Q9UQL6}

783 Pathogen[ P0C206] interacts with 3 human partners:{Q9UKV0;P56524;Q9UQL6}

784 Pathogen[ P03363] interacts with 2 human partners:{Q9UQL6;Q9UKV0}

785 [Cluster 72]GO:0019852+P biological\_process [name] L-ascorbic acid metabolic process [def] "The chemical reactions and pathways involving L-ascorbic acid, (2R)-2-[(1S)-1,2-dihydroxyethyl]-4-hydroxy-5-oxo-2,5-dihydrofuran-3-olate\_ L-ascorbic acid is vitamin C and has co-factor and anti-oxidant activities in many species." [CHEBI

786 Pathogen[ Q2Q067] interacts with 1 human partners:{P11166}

787 Pathogen[ P0C214] interacts with 1 human partners:{P11166}

788 Pathogen[ P03346] interacts with 1 human partners:{P11166}

789 Pathogen[ Q85601] interacts with 1 human partners:{P11166}

790 Pathogen[ P14079] interacts with 1 human partners:{P11166}

791 Pathogen[ P03383] interacts with 1 human partners:{P11169}

792 Pathogen[ P03410] interacts with 1 human partners:{P11166}

793 Pathogen[ P14075] interacts with 1 human partners:{P11169}

794 Pathogen[ P0C206] interacts with 1 human partners:{P11166}

795 Pathogen[ P03363] interacts with 1 human partners:{P11166}

796 [Cluster 73]GO:0071679+P biological\_process [name] commissural neuron axon guidance [def] "The process in which the migration of an axon growth cone of a commissural neuron is directed to its target in the brain in response to a combination of attractive and repulsive cues." [GOC

797 Pathogen[ Q2Q067] interacts with 1 human partners:{000712}

798 Pathogen[ P0C214] interacts with 1 human partners:{000712}

799 Pathogen[ P03346] interacts with 1 human partners:{000712}

800 Pathogen[ Q85601] interacts with 1 human partners:{000712}

801 Pathogen[ P14079] interacts with 1 human partners:{000712}

802 Pathogen[ P03383] interacts with 1 human partners:{000712}

803 Pathogen[ P03410] interacts with 1 human partners:{000712}

804 Pathogen[ P14075] interacts with 1 human partners:{000712}

805 Pathogen[ P0C206] interacts with 1 human partners:{000712}

806 Pathogen[ P03363] interacts with 1 human partners:{000712}

807 [Cluster 74]GO:0008206+P biological\_process [name] bile acid metabolic process [def] "The chemical reactions and pathways involving bile acids, any of a group of steroid carboxylic acids occurring in bile, where they are present as the sodium salts



of their amides with glycine or taurine." [GOC  
808 Pathogen[ Q2Q067] interacts with 1 human partners:{014734}  
809 Pathogen[ POC214] interacts with 1 human partners:{014734}  
810 Pathogen[ P03346] interacts with 3 human partners:{P51161;014734;000482}  
811 Pathogen[ Q85601] interacts with 3 human partners:{P51161;014734;000482}  
812 Pathogen[ P14079] interacts with 2 human partners:{000482;014734}  
813 Pathogen[ P03383] interacts with 1 human partners:{014734}  
814 Pathogen[ P03410] interacts with 2 human partners:{P51161;014734}  
815 Pathogen[ P14075] interacts with 1 human partners:{014734}  
816 Pathogen[ POC206] interacts with 3 human partners:{P51161;000482;014734}  
817 Pathogen[ P03363] interacts with 3 human partners:{014734;P51161;000482}  
818 [Cluster 75]GO:0019722+P biological\_process [name] calcium-mediated signaling  
[def] "A series of molecular signals in which a cell uses calcium ions to convert a  
signal into a response." [GOC  
819 Pathogen[ Q2Q067] interacts with 2 human partners:{Q08209;P53805}  
820 Pathogen[ POC214] interacts with 2 human partners:{Q08209;P53805}  
821 Pathogen[ P03346] interacts with 3 human partners:{P53805;Q7RTS1;Q08209}  
822 Pathogen[ Q85601] interacts with 2 human partners:{Q08209;P53805}  
823 Pathogen[ P14079] interacts with 9 human  
partners:{Q8NE86;P53805;Q7RTS1;Q9GZZ8;Q8TCU4;O43561;Q08209;Q9NZJ9;Q9GZY6}  
824 Pathogen[ P03383] interacts with 1 human partners:{P53805}  
825 Pathogen[ P03410] interacts with 9 human  
partners:{Q08209;Q9GZZ8;O43561;Q7RTS1;Q8TCU4;Q9NZJ9;Q8NE86;Q9GZY6;P53805}  
826 Pathogen[ P14075] interacts with 2 human partners:{P53805;Q9GZZ8}  
827 Pathogen[ POC206] interacts with 4 human partners:{P53805;Q8TCU4;Q8NE86;Q08209}  
828 Pathogen[ P03363] interacts with 2 human partners:{Q7RTS1;P53805}  
829 [Cluster 76]GO:0060486+P biological\_process [name] Clara cell differentiation  
[def] "The process in which a relatively unspecialized cell acquires specialized  
features of a Clara cell. A Clara cell is an unciliated epithelial cell found in the  
respiratory and terminal bronchioles." [GOC  
830 Pathogen[ Q2Q067] interacts with 1 human partners:{000712}  
831 Pathogen[ POC214] interacts with 1 human partners:{000712}  
832 Pathogen[ P03346] interacts with 1 human partners:{000712}  
833 Pathogen[ Q85601] interacts with 1 human partners:{000712}  
834 Pathogen[ P14079] interacts with 1 human partners:{000712}  
835 Pathogen[ P03383] interacts with 1 human partners:{000712}  
836 Pathogen[ P03410] interacts with 1 human partners:{000712}  
837 Pathogen[ P14075] interacts with 1 human partners:{000712}  
838 Pathogen[ POC206] interacts with 1 human partners:{000712}  
839 Pathogen[ P03363] interacts with 1 human partners:{000712}  
840 [Cluster 77]GO:0050702+P biological\_process [name] interleukin-1 beta secretion  
[def] "The regulated release of interleukin 1 beta from a cell or group of cells." [GOC  
841 Pathogen[ Q2Q067] interacts with 1 human partners:{014862}  
842 Pathogen[ POC214] interacts with 2 human partners:{Q9NPP4;014862}  
843 Pathogen[ P03346] interacts with 2 human partners:{Q9NPP4;014862}  
844 Pathogen[ Q85601] interacts with 1 human partners:{014862}  
845 Pathogen[ P14079] interacts with 2 human partners:{014862;Q9NPP4}  
846 Pathogen[ P03383] interacts with 1 human partners:{014862}  
847 Pathogen[ P03410] interacts with 2 human partners:{014862;Q9NPP4}  
848 Pathogen[ P14075] interacts with 1 human partners:{014862}  
849 Pathogen[ POC206] interacts with 1 human partners:{014862}  
850 Pathogen[ P03363] interacts with 2 human partners:{014862;Q9NPP4}  
851 [Cluster 78]GO:0033572+P biological\_process [name] transferrin transport [def]  
"The directed movement of transferrin into, out of or within a cell, or between cells,  
by means of some agent such as a transporter or pore." [GOC  
852 Pathogen[ Q2Q067] interacts with 3 human partners:{P36543;Q00610;P50570}  
853 Pathogen[ POC214] interacts with 4 human partners:{Q16864;Q9UI12;P36543;P50570}  
854 Pathogen[ P03346] interacts with 7 human  
partners:{P21283;P50570;Q9Y5K8;P36543;Q93050;Q16864;Q00610}  
855 Pathogen[ Q85601] interacts with 4 human partners:{Q00610;Q93050;P50570;P36543}  
856 Pathogen[ P14079] interacts with 11 human  
partners:{P36543;Q9Y5K8;Q00610;P61421;Q96LB4;P50570;Q8N8Y2;Q93050;Q9UI12;Q95670;Q168  
64}  
857 Pathogen[ P03383] interacts with 2 human partners:{Q00610;P36543}  
858 Pathogen[ P03410] interacts with 12 human  
partners:{Q00610;Q8N8Y2;P61421;Q93050;P50570;Q9UI12;Q96LB4;Q95670;Q16864;Q9Y5K8;Q753  
48;P36543}  
859 Pathogen[ P14075] interacts with 2 human partners:{Q00610;P36543}  
860 Pathogen[ POC206] interacts with 7 human  
partners:{P36543;Q00610;Q9UI12;Q9Y5K8;Q16864;P50570;Q93050}  
861 Pathogen[ P03363] interacts with 4 human partners:{P36543;P50570;Q00610;Q9Y5K8}  
862 [Cluster 79]GO:0001667+P biological\_process [name] amoeboid cell migration [def]  
"Cell migration that is accomplished by extension and retraction of a pseudopodium."  
[GOC  
863 Pathogen[ Q2Q067] interacts with 1 human partners:{Q7Z7K6}  
864 Pathogen[ POC214] interacts with 1 human partners:{Q7Z7K6}

865 Pathogen[ P03346] interacts with 1 human partners:{Q7Z7K6}  
866 Pathogen[ Q85601] interacts with 1 human partners:{Q7Z7K6}  
867 Pathogen[ P14079] interacts with 2 human partners:{Q01518;Q7Z7K6}  
868 Pathogen[ P03383] interacts with 1 human partners:{Q7Z7K6}  
869 Pathogen[ P03410] interacts with 2 human partners:{Q7Z7K6;Q01518}  
870 Pathogen[ P14075] interacts with 1 human partners:{Q7Z7K6}  
871 Pathogen[ P0C206] interacts with 1 human partners:{Q7Z7K6}  
872 Pathogen[ P03363] interacts with 1 human partners:{Q7Z7K6}  
873 [Cluster 80]GO:0006633+P biological\_process [name] fatty acid biosynthetic process  
[def] "The chemical reactions and pathways resulting in the formation of a fatty acid,  
any of the aliphatic monocarboxylic acids that can be liberated by hydrolysis from  
naturally occurring fats and oils. Fatty acids are predominantly straight-chain acids of  
4 to 24 carbon atoms, which may be saturated or unsaturated\_ branched fatty acids and  
hydroxy fatty acids also occur, and very long chain acids of over 30 carbons are found  
in waxes." [GOC  
874 Pathogen[ Q2Q067] interacts with 7 human  
partners:{Q9H5J4;Q9BW60;Q9GZR5;Q15185;P20823;A1L3X0;Q9HB03}  
875 Pathogen[ P0C214] interacts with 9 human  
partners:{Q9NXB9;Q9GZR5;Q9HB03;O14561;Q8TBF2;Q9NYP7;A1L3X0;Q9BW60;Q15185}  
876 Pathogen[ P03346] interacts with 5 human  
partners:{Q9BW60;Q15185;P20823;Q9H5J4;Q9HB03}  
877 Pathogen[ Q85601] interacts with 7 human  
partners:{A1L3X0;Q9BW60;Q9H5J4;Q9HB03;Q15185;Q9GZR5;P20823}  
878 Pathogen[ P14079] interacts with 10 human  
partners:{A1L3X0;O95822;Q9HB03;Q9Y478;O14561;Q15185;Q8TBF2;Q9GZR5;Q9BW60;Q9H5J4}  
879 Pathogen[ P03383] interacts with 6 human  
partners:{Q9BW60;Q9GZR5;Q9H5J4;A1L3X0;Q9HB03;Q15185}  
880 Pathogen[ P03410] interacts with 9 human  
partners:{A1L3X0;Q9GZR5;Q9H5J4;Q9BW60;O14561;Q15185;Q9HB03;Q8TBF2;O95822}  
881 Pathogen[ P14075] interacts with 7 human  
partners:{Q9H5J4;Q9BW60;Q9HB03;O14561;Q15185;A1L3X0;Q9GZR5}  
882 Pathogen[ P0C206] interacts with 9 human  
partners:{Q9HB03;Q15185;Q8TBF2;Q9H5J4;O14561;P20823;Q9GZR5;A1L3X0;Q9BW60}  
883 Pathogen[ P03363] interacts with 2 human partners:{Q9H5J4;Q15185}  
884 [Cluster 81]GO:0035137+P biological\_process [name] hindlimb morphogenesis [def]  
"The process in which the anatomical structures of the hindlimb are generated and  
organized." [GOC  
885 Pathogen[ Q2Q067] interacts with 4 human partners:{Q05516;P28356;P78337;Q9NSC2}  
886 Pathogen[ P0C214] interacts with 3 human partners:{P78337;Q9NSC2;Q05516}  
887 Pathogen[ P03346] interacts with 7 human  
partners:{P78337;Q9BXA9;Q9NSC2;P28358;P28356;Q05516;Q92481}  
888 Pathogen[ Q85601] interacts with 3 human partners:{P78337;Q05516;Q9NSC2}  
889 Pathogen[ P14079] interacts with 3 human partners:{P78337;Q05516;Q9NSC2}  
890 Pathogen[ P03383] interacts with 3 human partners:{Q05516;P78337;Q9NSC2}  
891 Pathogen[ P03410] interacts with 2 human partners:{Q9NSC2;P78337}  
892 Pathogen[ P14075] interacts with 3 human partners:{Q9NSC2;P78337;Q05516}  
893 Pathogen[ P0C206] interacts with 4 human partners:{Q9NSC2;Q05516;P78337;P28356}  
894 Pathogen[ P03363] interacts with 4 human partners:{P28356;P28358;P78337;Q05516}  
895 [Cluster 82]GO:0051260+P biological\_process [name] protein homooligomerization  
[def] "The process of creating protein oligomers, compounds composed of a small number,  
usually between three and ten, of identical component monomers. Oligomers may be formed  
by the polymerization of a number of monomers or the depolymerization of a large protein  
polymer." [GOC  
896 Pathogen[ Q2Q067] interacts with 33 human  
partners:{P04156;Q8TCS8;Q9P219;P55957;P21980;Q13829;P30793;Q9H0F6;P54274;P50502;Q86X  
R8;O95999;P02511;P38935;Q06609;Q96BF6;Q12962;O75381;P38159;Q9UII2;Q9GZY8;Q9NXV2;Q8N4  
48;Q8TBB1;Q719H9;O14656;Q9H4L7;O60299;Q96RE7;Q9H3F6;Q676U5;P02489;O60888}  
897 Pathogen[ P0C214] interacts with 38 human  
partners:{Q06609;Q9NPP4;P38159;P02489;P02511;Q13829;O60888;P55957;Q9H0F6;Q12962;Q676  
U5;O14656;Q8N448;O60299;O75381;Q9NXV2;Q9H4L7;P38935;Q96BF6;P30793;Q9UII2;Q86XR8;O959  
99;Q96MP8;Q8TCS8;Q8WZ19;Q8TBB1;Q9HD26;Q719H9;P04156;P21980;Q9H3F6;Q9P219;Q96RE7;Q9GZ  
Y8;P54274;P50502;P55072}  
898 Pathogen[ P03346] interacts with 57 human  
partners:{P21980;P38935;Q7Z5Y7;Q96MP8;Q06609;Q8WZ19;Q86XR8;O60888;Q693B1;P50502;P024  
89;O14656;Q4G0X4;Q6ZWB6;P54274;Q96SI1;P55957;Q9NXV2;Q9BQ13;Q96RE7;Q9H0F6;P55072;Q138  
29;Q7L273;Q86SE8;O95999;O75381;Q9P219;Q68DU8;Q9UII2;Q8TBC3;Q6PI47;P02511;Q9NPP4;Q146  
81;Q8N5Z5;Q9HD26;Q8TCS8;Q8N5I3;Q96BF6;Q8NC69;Q12962;Q8TBB1;O60299;Q8WVF5;Q9Y597;P041  
56;Q96CX2;Q9H8V3;Q9H3F6;P38159;Q676U5;O96011;Q9GZY8;Q17RGL;Q9H4L7;Q9UBP0}  
899 Pathogen[ Q85601] interacts with 38 human  
partners:{P02489;Q8WZ19;O60888;Q9UBP0;Q96BF6;P38935;Q96MP8;Q86SE8;Q9H0F6;P30793;Q9P2  
19;Q9UII2;Q86XR8;Q9HD26;P02511;Q8TCS8;P21980;Q9H4L7;Q676U5;P55957;O14656;Q8TBB1;Q96R  
E7;P04156;Q12962;Q96CX2;P50502;P38159;O95999;Q9H3F6;Q9NXV2;O75381;Q13829;Q9GZY8;Q066  
09;P54274;Q719H9;O60299}  
900 Pathogen[ P14079] interacts with 58 human  
partners:{P54274;Q8N307;Q7L273;O95999;Q8NBQ7;P02511;P04156;Q7Z5Y7;Q9H4L7;Q9UII2;Q9UK  
Y0;P21980;Q8N5I3;P30793;P02489;Q719H9;Q8TBB1;Q9HD26;P08758;O14656;O96011;Q12962;O608

88;Q96BF6;P11686;Q68DU8;Q9H8V3;Q9NXV2;Q9Y597;Q6PI47;Q96RE7;Q9H0F6;Q96CX2;O60299;Q8N5Z5;Q17RG1;Q4G0X4;P38935;O75381;Q676U5;Q9GZY8;Q96MP8;Q13829;Q8TBC3;Q86XR8;Q06609;Q9BQ13;P50502;Q9H3F6;Q9P219;Q8TCS8;Q8NC69;P55957;Q8WVF5;P38159;Q96SI1;Q9NPP4;Q14681}

901 Pathogen[ P03383] interacts with 28 human partners: {Q719H9;Q86XR8;Q06609;Q8TBB1;Q9H0F6;P04156;P50502;Q9HD26;O60299;P55957;P02511;Q8TCS8;P38159;Q9UII2;Q9NXV2;O75381;Q676U5;Q8N448;Q96RE7;O95999;Q12962;P38935;P21980;Q9H3F6;Q13829;Q9GZY8;P54274;O60888}

902 Pathogen[ P03410] interacts with 59 human partners: {Q86SE8;Q96BF6;Q13829;Q9P219;Q6PI47;Q8TCS8;Q9H4L7;Q9GZY8;P50502;O14656;P54274;Q8NC69;Q12962;O60299;Q8TBB1;Q8WZ19;Q9BQ13;Q8N307;O96011;Q68DU8;Q9NPP4;O75381;Q8TBC3;P30793;Q17RG1;P55957;Q6ZWB6;Q9HD26;Q96SI1;Q9UII2;Q9H3F6;Q96MP8;P38935;Q719H9;O95999;P02489;Q96CX2;P11686;Q9UKY0;P02511;Q676U5;P04156;Q8N5I3;Q14681;Q4G0X4;Q8N5Z5;Q7L273;Q8WVF5;P21980;Q96RE7;Q9H8V3;P27105;P38159;O60888;Q06609;Q7Z5Y7;Q9H0F6;Q9Y597;Q9NXV2}

903 Pathogen[ P14075] interacts with 29 human partners: {Q12962;P55957;O60888;P38159;P38935;P04156;Q676U5;Q719H9;Q9HD26;Q9GZY8;O75381;Q9NXV2;Q9UII2;P54274;Q96RE7;Q86XR8;O60299;P50502;O95999;P02511;Q8TCS8;Q8N448;P21980;Q9H3F6;P30793;Q13829;Q8TBB1;Q9H0F6;Q06609}

904 Pathogen[ P0C206] interacts with 49 human partners: {Q86XR8;Q9H4L7;Q13829;P38935;Q14681;Q8TCS8;Q9UBP0;P04156;O75381;Q9NXV2;Q96CX2;O95999;P21980;O60299;P30793;Q6PI47;Q8NC69;P54274;P50502;P38159;Q8WZ19;Q693B1;O60888;O14656;Q9P219;Q8TBB1;Q86SE8;Q9H8V3;Q9H3F6;Q17RG1;P55072;Q9UKY0;Q96MP8;O96011;Q8WVF5;Q676U5;Q9H0F6;Q719H9;Q06609;Q96BF6;Q12962;Q9GZY8;P02511;Q7Z5Y7;P02489;Q96RE7;Q9HD26;Q9UII2;P55957}

905 Pathogen[ P03363] interacts with 45 human partners: {Q719H9;Q4G0X4;O60888;Q7L273;P55957;Q96RE7;Q8N5Z5;P50502;Q8N448;Q9H4L7;Q9NXV2;Q9Y597;P04156;Q8TBB1;Q14681;Q7Z5Y7;Q96BF6;Q12962;Q96SI1;P38159;P54274;Q8NC69;Q17RG1;O75381;Q9H3F6;Q6PI47;Q13829;Q8WVF5;Q9H0F6;Q06609;Q86XR8;P02489;Q86SE8;Q9NPP4;Q8WZ19;Q9BQ13;Q9P219;O60299;Q8TBC3;Q676U5;Q9HD26;P38935;Q693B1;Q96MP8;Q9GZY8}

906 [Cluster 83]GO:0006612+P biological\_process [name] protein targeting to membrane [def] "The process of directing proteins towards a membrane, usually using signals contained within the protein." [GOC

907 Pathogen[ Q2Q067] interacts with 1 human partners: {Q9NT62}

908 Pathogen[ P0C214] interacts with 1 human partners: {Q9NT62}

909 Pathogen[ P03346] interacts with 5 human partners: {Q96A65;Q9NT62;Q9BQQ7;Q8TEW0;Q96DX8}

910 Pathogen[ Q85601] interacts with 2 human partners: {Q96A65;Q9NT62}

911 Pathogen[ P14079] interacts with 6 human partners: {Q9NT62;Q8TEW0;O60502;Q96A65;Q96DX8;Q9BQQ7}

912 Pathogen[ P03383] interacts with 1 human partners: {Q9NT62}

913 Pathogen[ P03410] interacts with 6 human partners: {O60502;Q96A65;Q9NT62;Q9BQQ7;Q8TEW0;Q96DX8}

914 Pathogen[ P14075] interacts with 1 human partners: {Q9NT62}

915 Pathogen[ P0C206] interacts with 5 human partners: {Q96DX8;Q96A65;Q8TEW0;Q9BQQ7;Q9NT62}

916 Pathogen[ P03363] interacts with 4 human partners: {Q9BQQ7;Q96DX8;Q96A65;Q9NT62}

917 [Cluster 84]GO:0034641+P biological\_process [name] cellular nitrogen compound metabolic process [def] "The chemical reactions and pathways involving various organic and inorganic nitrogenous compounds, as carried out by individual cells." [GOC

918 Pathogen[ Q2Q067] interacts with 56 human partners: {Q99460;O75832;P48556;P40306;Q96NU7;P55036;O00231;O00233;P51665;P28072;P61457;P49419;A5LHX3;Q13200;Q96GX9;P25787;Q06323;Q63HM1;P21953;Q9BV57;P28065;O14818;Q9UMX2;Q14997;P60900;Q9UL46;P34896;P61289;P28062;P15559;Q9BV20;Q16719;Q9UNM6;P25788;Q92530;P25786;Q16401;O00232;P28074;P25789;Q9UI32;P20618;O94925;P28070;P28066;Q99436;Q8TAA3;Q9UBX3;O43242;P49721;P49720;P21673;Q95190;P32929;O43708;O95571}

919 Pathogen[ P0C214] interacts with 84 human partners: {P50440;Q14997;P51665;P49419;P09417;Q9Y617;P25789;P55036;Q9NVH6;P28062;P00480;A5LHX3;P28065;P12694;O14818;Q9BV57;O43242;P61457;P12277;Q96GX9;Q16613;P48556;Q9UI32;P40306;Q13200;O00232;P32929;O95571;P54368;Q9UBX3;Q99460;P28066;O75832;P49720;P28074;P21953;P34896;P52788;Q9UL46;Q63HM1;Q9NWM0;P25788;O15382;P19623;Q9UNM6;O00231;Q06323;Q9UMX2;P25786;Q9UHY7;Q6NVY1;P28072;Q8TAA3;P09622;P54687;Q99436;Q13126;O94925;P25787;P23526;Q96NU7;Q95190;P35998;P60900;P04424;P21673;P35520;O43708;O00233;Q8N159;Q16762;Q92530;P15559;Q15008;P28070;P20618;P36957;Q16719;P49721;Q16401;P17980;Q9BV20;Q16773;Q9NZL9}

920 Pathogen[ P03346] interacts with 57 human partners: {P25787;P28070;P25789;P55036;Q99460;P23526;Q9UL46;Q9BV20;P28072;Q9UBX3;P25788;P28074;P49721;Q9NZL9;Q9BV57;O14818;Q99436;Q9UMX2;Q16401;A5LHX3;Q63HM1;P28062;Q96NU7;P21673;P15559;P20618;O00232;O75832;O00233;Q9UI32;P49419;P49720;P28065;P60900;P32929;P25786;O00231;Q9UHY7;Q16719;P61289;O43708;P28066;Q9UNM6;O94925;Q8TAA3;Q14997;Q13200;P48556;P51665;P61457;Q06323;Q92530;O43242;Q96GX9;P40306;O95571;O95190}

921 Pathogen[ Q85601] interacts with 55 human partners: {P28066;Q9UNM6;P60900;P55036;O94925;O43708;P25787;P61289;P00480;Q9UBX3;P25788;Q16719;O75832;Q16613;P21673;P21953;Q96GX9;Q9BV57;P25789;Q63HM1;O00233;Q9UMX2;P20618;P40306;P34896;P49720;P28062;P49721;Q95190;P25786;P28072;Q13200;P28065;Q99436;P28070;Q8TAA3;Q9UL46;Q99460;O00231;Q9UHY7;P23526;P48556;P28074;Q92530;A5LHX3;Q9BV20;Q9UI32;Q06323;O95571;O14818;O15382;P61457;Q16401;P49419;P32929}

- 922 Pathogen[ P14079] interacts with 83 human  
partners: {P01215;P28065;Q99436;P17707;P48775;Q8N159;P62333;P48556;P42357;P21953;Q96K  
P4;Q9Y617;P40306;Q96NU7;P55036;Q9BV20;P28074;O00232;P61457;P01225;Q9UMX2;Q63HM1;Q96N  
76;Q93099;P49720;O00487;Q95190;P25787;Q75832;Q9NVH6;O43708;A5LHX3;Q95954;O00233;P155  
59;P35998;Q9NZL9;Q8TDX5;P61289;P51665;Q16613;P20618;Q8TAA3;O95571;P54368;Q14997;O949  
25;Q14353;P28062;P60900;Q16719;Q9UNM6;Q96GX9;Q99460;P16930;O14818;P49721;P32929;Q9UI  
32;Q92530;P00480;Q16762;Q06323;P62191;Q16878;P19623;P23526;Q15008;P43686;O43242;P257  
88;O00231;P28066;Q9UL46;P04424;O15382;P50440;P21673;Q16401;Q9BV57;P17980;P28072;P348  
96}
- 923 Pathogen[ P03383] interacts with 47 human  
partners: {P55036;O94925;P25789;P60900;P34896;P40306;O00233;Q63HM1;P49721;Q06323;Q166  
13;Q14997;P61457;P20618;Q9BV57;Q16719;Q96GX9;O75832;Q8N159;Q9UL46;Q95190;Q9UNM6;P257  
86;Q99460;P28072;Q13200;P28065;P28066;Q9BV20;Q16401;O00231;P28074;Q92530;P49720;Q8TA  
A3;P61289;P01215;P28062;O95571;P48556;O14818;Q99436;P21673;P28070;P49419;P25787;P257  
88}
- 924 Pathogen[ P03410] interacts with 83 human  
partners: {P15559;P28070;P55036;Q14353;P25786;Q9NVH6;Q15008;Q16401;Q8N159;P60900;Q149  
97;P35998;Q99460;Q16719;O00233;P32929;O95954;P04424;O00232;P12694;Q8TAA3;P48556;P497  
21;O95190;Q6NVY1;P21953;P01215;P19623;Q96NU7;A5LHX3;P52788;Q9Y617;Q9UBX3;Q99436;O949  
25;Q9BV20;O43708;P40306;Q93099;Q06323;P00480;O95571;Q63HM1;Q8TDX5;Q13200;P48775;P257  
87;Q96N76;Q16762;O15382;Q16613;P28062;P51665;P49419;O14818;P21673;Q96GX9;P23526;O002  
31;Q9UNM6;P54368;P25789;P49720;P28072;Q9UI32;P17707;P16930;P25788;P28066;Q9BV57;P504  
40;Q9UMX2;P28065;O43242;Q9NZL9;P34896;P17980;O75832;P20618;Q9UL46;P28074;P61289;P614  
57}
- 925 Pathogen[ P14075] interacts with 50 human  
partners: {Q9NVH6;Q96GX9;Q16719;P55036;P25788;P28066;Q06323;O75832;Q8TAA3;P60900;P348  
96;O00233;Q9UL46;Q9BV57;P49720;Q9BV20;Q8N159;Q16613;Q13200;P48556;Q16401;P15559;P280  
70;P49721;O95571;O00231;Q92530;P49419;P28062;P28074;P28065;Q63HM1;P25786;O14818;P614  
57;P28072;Q14997;O94925;P25787;P20618;P01215;Q9UNM6;P21673;P61289;P40306;Q99436;P504  
40;Q96NU7;O95190;P25789}
- 926 Pathogen[ P0C206] interacts with 68 human  
partners: {P61289;Q99436;P28062;Q9UNM6;O75832;P40306;P28065;Q14997;Q9NZL9;Q9BV20;P550  
36;P25786;P25788;P25787;Q06323;O15382;P49720;P15559;Q9NVH6;O00232;P60900;P21953;Q9UB  
X3;O43242;A5LHX3;Q8N159;P25789;O95954;P21673;P54368;Q16719;P20618;O43708;Q13200;Q8TA  
A3;P28070;Q9UHY7;O95190;P34896;P50440;P32929;P01215;Q99460;P23526;P28066;Q9BV57;O148  
18;P61457;Q9UI32;Q96GX9;P28072;Q63HM1;O94925;P28074;P49419;Q92530;P49721;Q16762;Q9UL  
46;Q16613;O00233;O95571;P48556;P00480;Q16401;O00231;Q96NU7;Q9UMX2}
- 927 Pathogen[ P03363] interacts with 15 human  
partners: {P49419;Q92530;O94925;P61289;Q63HM1;P21673;O95571;P61457;Q9BV57;Q9UI32;Q9BV  
20;Q9UMX2;Q96GX9;O43708;O95190}
- 928 [Cluster 85]GO:000090+P biological\_process [name] mitotic anaphase [def] "Anaphase  
occurring as part of mitosis. Anaphase is the part of nuclear division in which sister  
chromatids (or chromosomes) separate and migrate towards the poles of the spindle.  
Mitosis is the cell cycle process in which, canonically, the nucleus of a eukaryotic  
cell divides to produce two daughter nuclei whose chromosome complement is identical to  
that of the mother cell." [GOC
- 929 Pathogen[ Q2Q067] interacts with 11 human  
partners: {Q14980;Q9UJX5;Q14674;Q96R06;Q9Y448;Q9UM13;Q13618;Q9UJX4;Q9Y6D9;Q96BD8;Q8WV  
K7}
- 930 Pathogen[ P0C214] interacts with 11 human  
partners: {Q96R06;Q9UJX5;Q13618;Q14980;Q96BD8;Q9UJX4;Q9Y448;Q9UM13;Q9Y6D9;Q8WVK7;Q146  
74}
- 931 Pathogen[ P03346] interacts with 11 human  
partners: {Q9Y6D9;Q96R06;Q13618;Q9UM13;Q14980;Q9UJX5;Q9UJX4;Q9Y448;Q14674;Q96BD8;Q8WV  
K7}
- 932 Pathogen[ Q85601] interacts with 11 human  
partners: {Q14674;Q96R06;Q9Y448;Q9UJX5;Q9UM13;Q96BD8;Q9Y6D9;Q14980;Q9UJX4;Q8WVK7;Q136  
18}
- 933 Pathogen[ P14079] interacts with 10 human  
partners: {Q14980;Q96R06;Q13618;Q9UJX5;Q14674;Q9Y448;Q9UM13;Q8WVK7;Q96BD8;Q9UJX4}
- 934 Pathogen[ P03383] interacts with 11 human  
partners: {Q96BD8;Q13618;Q96R06;Q9UM13;Q14674;Q8WVK7;Q14980;Q9UJX4;Q9UJX5;Q9Y448;Q9Y6  
D9}
- 935 Pathogen[ P03410] interacts with 10 human  
partners: {Q9UJX4;Q9UM13;Q96R06;Q14674;Q13618;Q9Y448;Q14980;Q8WVK7;Q9UJX5;Q96BD8}
- 936 Pathogen[ P14075] interacts with 11 human  
partners: {Q9Y6D9;Q13618;Q96R06;Q8WVK7;Q96BD8;Q9UJX5;Q9UJX4;Q14674;Q9UM13;Q14980;Q9Y4  
48}
- 937 Pathogen[ P0C206] interacts with 10 human  
partners: {Q9Y6D9;Q9UJX5;Q9Y448;Q96BD8;Q9UJX4;Q13618;Q14674;Q14980;Q9UM13;Q8WVK7}
- 938 Pathogen[ P03363] interacts with 11 human  
partners: {Q9Y6D9;Q96BD8;Q14980;Q13618;Q8WVK7;Q9UJX5;Q9UJX4;Q96R06;Q14674;Q9UM13;Q9Y4  
48}
- 939 [Cluster 86]GO:0051928+P biological\_process [name] positive regulation of calcium  
ion transport [def] "Any process that activates or increases the frequency, rate or  
extent of the directed movement of calcium ions into, out of or within a cell, or

between cells, by means of some agent such as a transporter or pore." [GOC

940 Pathogen[ Q2Q067] interacts with 1 human partners:{Q9BSW2}

941 Pathogen[ P0C214] interacts with 1 human partners:{Q9BSW2}

942 Pathogen[ P03346] interacts with 1 human partners:{Q9BSW2}

943 Pathogen[ Q85601] interacts with 1 human partners:{Q9BSW2}

944 Pathogen[ P14079] interacts with 3 human partners:{Q9BSW2;O60502;O43612}

945 Pathogen[ P03383] interacts with 1 human partners:{Q9BSW2}

946 Pathogen[ P03410] interacts with 2 human partners:{O43612;O60502}

947 Pathogen[ P14075] interacts with 1 human partners:{Q9BSW2}

948 Pathogen[ P0C206] interacts with 1 human partners:{Q9BSW2}

949 Pathogen[ P03363] interacts with 1 human partners:{Q9BSW2}

950 [Cluster 87]GO:0048676+P biological\_process [name] axon extension involved in development [def] "Long distance growth of a single axon process involved in cellular development." [GOC

951 Pathogen[ Q2Q067] interacts with 2 human partners:{Q12837;Q99608}

952 Pathogen[ P0C214] interacts with 2 human partners:{Q99608;Q12837}

953 Pathogen[ P03346] interacts with 3 human partners:{Q12837;Q99608;Q15319}

954 Pathogen[ Q85601] interacts with 2 human partners:{Q99608;Q12837}

955 Pathogen[ P14079] interacts with 3 human partners:{Q12837;Q99608;P10636}

956 Pathogen[ P03383] interacts with 2 human partners:{Q99608;Q12837}

957 Pathogen[ P03410] interacts with 3 human partners:{Q99608;P10636;Q12837}

958 Pathogen[ P14075] interacts with 2 human partners:{Q99608;Q12837}

959 Pathogen[ P0C206] interacts with 3 human partners:{P10636;Q12837;Q99608}

960 Pathogen[ P03363] interacts with 3 human partners:{Q99608;Q12837;Q15319}

961 [Cluster 88]GO:0016074+P biological\_process [name] snoRNA metabolic process [def] "The chemical reactions and pathways involving snoRNA, small nucleolar RNA, any of a class of small RNAs that are associated with the eukaryotic nucleus as components of small nucleolar ribonucleoproteins. They participate in the processing or modifications of many RNAs, mostly ribosomal RNAs (rRNAs) though snoRNAs are also known to target other classes of RNA, including spliceosomal RNAs, tRNAs, and mRNAs via a stretch of sequence that is complementary to a sequence in the targeted RNA." [GOC

962 Pathogen[ Q2Q067] interacts with 1 human partners:{P22087}

963 Pathogen[ P0C214] interacts with 1 human partners:{P22087}

964 Pathogen[ P03346] interacts with 1 human partners:{P22087}

965 Pathogen[ Q85601] interacts with 1 human partners:{P22087}

966 Pathogen[ P14079] interacts with 1 human partners:{P22087}

967 Pathogen[ P03383] interacts with 1 human partners:{P22087}

968 Pathogen[ P03410] interacts with 1 human partners:{P22087}

969 Pathogen[ P14075] interacts with 1 human partners:{P22087}

970 Pathogen[ P0C206] interacts with 1 human partners:{P22087}

971 Pathogen[ P03363] interacts with 1 human partners:{P22087}

972 [Cluster 89]GO:0042063+P biological\_process [name] gliogenesis [def] "The process that results in the generation of glial cells. This includes the production of glial progenitors and their differentiation into mature glia." [GOC

973 Pathogen[ Q2Q067] interacts with 1 human partners:{Q00534}

974 Pathogen[ P0C214] interacts with 1 human partners:{Q00534}

975 Pathogen[ P03346] interacts with 1 human partners:{Q00534}

976 Pathogen[ Q85601] interacts with 1 human partners:{Q00534}

977 Pathogen[ P14079] interacts with 1 human partners:{P04083}

978 Pathogen[ P03383] interacts with 1 human partners:{Q00534}

979 Pathogen[ P03410] interacts with 1 human partners:{Q00534}

980 Pathogen[ P14075] interacts with 1 human partners:{Q00534}

981 Pathogen[ P0C206] interacts with 1 human partners:{Q00534}

982 Pathogen[ P03363] interacts with 1 human partners:{Q00534}

983 [Cluster 90]GO:0021612+P biological\_process [name] facial nerve structural organization [def] "The process that contributes to the act of creating the structural organization of the facial nerve. This process pertains to the physical shaping of a rudimentary structure. This sensory and motor nerve supplies the muscles of facial expression and the expression and taste at the anterior two-thirds of the tongue. The principal branches are the superficial ophthalmic, buccal, palatine and hyomandibular. The main trunk synapses within pterygopalatine ganglion in the parotid gland and this ganglion then gives off nerve branches which supply the lacrimal gland and the mucous secreting glands of the nasal and oral cavities." [GO\_REF

984 Pathogen[ Q2Q067] interacts with 4 human partners:{P11161;P49639;P14652;P14653}

985 Pathogen[ P0C214] interacts with 3 human partners:{P49639;P14653;P11161}

986 Pathogen[ P03346] interacts with 4 human partners:{P49639;P14652;P14653;P11161}

987 Pathogen[ Q85601] interacts with 3 human partners:{P49639;P14653;P11161}

988 Pathogen[ P14079] interacts with 2 human partners:{P11161;P49639}

989 Pathogen[ P03383] interacts with 2 human partners:{P49639;P11161}

990 Pathogen[ P03410] interacts with 2 human partners:{P49639;P11161}

991 Pathogen[ P14075] interacts with 1 human partners:{P11161}

992 Pathogen[ P0C206] interacts with 4 human partners:{P11161;P49639;P14653;P14652}

993 Pathogen[ P03363] interacts with 4 human partners:{P49639;P14653;P14652;P11161}

994 [Cluster 91]GO:0051726+P biological\_process [name] regulation of cell cycle [def] "Any process that modulates the rate or extent of progression through the cell cycle." [GOC

995 Pathogen[ Q2Q067] interacts with 49 human  
partners: {P30281;Q99583;P24385;Q16589;P06400;Q01094;Q08999;O95257;Q9NZJ0;P30279;O00541;Q92905;Q9H7S9;P22674;P14635;P11142;Q14137;Q9Y297;P24522;Q15004;P30307;Q9BXY8;P10914;P24864;O95067;Q9H869;Q969U7;Q16543;P78396;Q13243;P38936;P20248;O96020;Q13363;Q13309;P28749;Q14209;Q96PU4;P24863;Q8N693;Q9NUQ3;P11802;Q8TDN4;Q13490;P18583;Q9Y468;P35658;Q03112;P51946}

996 Pathogen[ P0C214] interacts with 52 human  
partners: {P20248;P51946;P24863;Q16543;P30307;P24522;Q13363;Q13490;Q08999;Q8N693;Q13309;Q03112;O00541;Q92560;P17275;P11802;Q96PU4;P10914;Q9H869;P14635;P24385;Q9Y297;Q9Y468;P38936;O95257;Q9NUQ3;Q8TDN4;Q01094;P18583;Q92905;Q14137;P78396;P30281;P35658;Q13243;Q9NZJ0;O95067;P22674;Q15004;Q969U7;P05412;P28749;P24864;P30279;Q99583;Q14209;P06400;Q9BXY8;Q9H7S9;O96020;P11142;Q16589}

997 Pathogen[ P03346] interacts with 55 human  
partners: {Q9NZJ0;P30281;P05412;Q16589;P78396;Q969U7;Q92560;P24385;P30279;Q08999;Q02535;O00541;P06400;P17275;O96020;P24863;Q15004;Q8N693;Q96FS4;P24864;P11142;P18583;Q14209;Q8TDN4;Q9BXY8;O95067;P35658;Q01094;P11802;Q9H869;P14635;P10914;Q13309;Q9NUQ3;Q03112;P51946;P20248;Q9H7S9;Q16543;Q9Y468;Q92905;P28749;Q14137;Q13363;Q13490;Q96PU4;P38936;Q13243;Q99583;O95257;Q9BT7;Q9Y297;P22674;P30307;P24522}

998 Pathogen[ Q85601] interacts with 51 human  
partners: {P51946;P30281;P22674;Q16543;Q13309;O00541;P24385;Q13490;Q15004;Q08999;Q13243;P06400;Q9H7S9;Q92560;Q03112;Q9Y468;Q96PU4;Q16589;Q9NZJ0;P24522;Q13363;Q8TDN4;P10914;P11802;Q9H869;O96020;P30307;Q9BXY8;Q969U7;P14635;P11142;Q92905;P30279;P20248;P05412;O95257;P78396;Q14209;Q8N693;Q99583;P28749;P35658;P18583;P24863;P38936;O95067;P17275;Q14137;Q01094;Q9NUQ3;P24864}

999 Pathogen[ P14079] interacts with 48 human  
partners: {Q9H869;P11142;Q8IZ21;Q8N693;P30307;P28749;Q9H869;P51946;Q13309;Q9Y6A5;P78396;P24864;P35658;Q9Y468;Q13243;Q9BT7;Q14209;O95067;Q9NUQ3;Q99583;Q8TDN4;P14635;Q969U7;Q9BXY8;Q92560;P38936;P24863;P17275;P24522;Q92905;P20248;O75293;O00541;Q9NZJ0;Q14137;Q16589;Q9H7S9;Q15004;P05412;O96020;Q16543;O95257;P18583;Q01094;P10914;P22674;Q08999;Q13490}

1000 Pathogen[ P03383] interacts with 48 human  
partners: {P30307;P10914;Q16543;Q14209;Q9NZJ0;Q08999;Q01094;Q9H869;O00541;P22674;Q92905;Q9NUQ3;Q15004;Q13490;Q96PU4;P24522;P24385;Q13243;Q8N693;P14635;P11802;P06400;P78396;P30279;Q03112;P18583;Q9BXY8;P51946;O95067;O96020;P11142;Q8TDN4;Q9H7S9;Q99583;P28749;P35658;Q13309;P24863;P24864;Q969U7;P30281;P17275;Q14137;P20248;Q13363;O95257;Q9Y468;P05412}

1001 Pathogen[ P03410] interacts with 52 human  
partners: {Q16589;Q03112;Q9H869;O75293;P30279;Q16543;Q8IZ21;Q9BT7;O96020;P24522;P51946;Q13490;Q92905;P22674;O95067;P11142;Q08999;Q9Y468;Q15004;Q9Y6A5;P06400;Q9BXY8;Q14137;Q969U7;P78396;P24385;P14635;P38936;Q13309;P35658;P17275;P11802;P10914;Q99583;Q9NUQ3;P18583;P05412;P20248;P30281;P24863;P28749;Q01094;O00541;Q9H7S9;Q8N693;O95257;Q14209;Q13243;Q8TDN4;P24864;P30307;Q9NZJ0}

1002 Pathogen[ P14075] interacts with 48 human  
partners: {Q16543;P11142;P24863;O95067;Q08999;P05412;P11802;Q13243;P14635;P17275;P30281;P30279;Q9Y468;O00541;Q96PU4;O95257;Q969U7;P35658;O96020;Q14209;P78396;Q9NUQ3;Q9BXY8;Q13490;P22674;Q8N693;P20248;Q13309;Q01094;P06400;Q03112;P51946;P28749;P24522;Q14137;P24385;Q13363;Q9H7S9;Q99583;Q9NZJ0;P10914;Q92905;Q8TDN4;P30307;Q15004;P18583;P24864;Q9H869}

1003 Pathogen[ P0C206] interacts with 56 human  
partners: {O75293;Q9Y468;Q969U7;P24863;P10914;Q9NUQ3;Q8TDN4;P24522;P30307;Q13309;Q14137;Q9BXY8;P18583;P17275;Q9H869;Q99583;P30279;P05412;Q13243;P20248;Q16543;Q16589;O96020;P28749;Q08999;P30291;Q9H7S9;Q14209;Q03112;O95257;Q9Y6A5;Q01094;Q8N693;P38936;Q9NZJ0;O00541;P78396;O95067;Q9BT7;P14635;Q13363;Q15004;P24864;P11142;P11802;Q92560;P22674;P35658;Q9640;Q96PU4;P51946;P24385;Q92905;P30281;P06400;Q13490}

1004 Pathogen[ P03363] interacts with 50 human  
partners: {Q13490;Q13309;Q16589;Q969U7;P24864;Q9Y468;Q9H7S9;P24863;Q9H869;P30279;P20248;Q03112;O95257;P51946;Q8N693;P06400;P28749;P17275;Q16543;Q92560;O95067;O96020;P18583;Q08999;Q01094;P78396;Q13243;Q15004;P24522;P10914;P35658;Q14137;Q14209;P24385;Q8TDN4;P05412;Q9NUQ3;Q13363;P11802;P22674;Q96PU4;P30307;Q9NZJ0;P30281;O00541;Q99583;Q96FS4;Q92905;P11142;Q9BXY8}

1005 [Cluster 92]GO:0010633+P biological\_process [name] negative regulation of epithelial cell migration [def] "Any process that stops, prevents, or reduces the frequency, rate or extent of epithelial cell migration." [GOC

1006 Pathogen[ Q2Q067] interacts with 1 human partners: {P23508}

1007 Pathogen[ P0C214] interacts with 1 human partners: {P23508}

1008 Pathogen[ P03346] interacts with 1 human partners: {P23508}

1009 Pathogen[ Q85601] interacts with 1 human partners: {P23508}

1010 Pathogen[ P14079] interacts with 1 human partners: {P23508}

1011 Pathogen[ P03383] interacts with 1 human partners: {P23508}

1012 Pathogen[ P03410] interacts with 1 human partners: {P23508}

1013 Pathogen[ P14075] interacts with 1 human partners: {P23508}

1014 Pathogen[ P0C206] interacts with 1 human partners: {P23508}

1015 Pathogen[ P03363] interacts with 1 human partners: {P23508}

1016 [Cluster 93]GO:0034660+P biological\_process [name] ncRNA metabolic process [def] "The chemical reactions and pathways involving non-coding RNA transcripts (ncRNAs)." [GOC

1017 Pathogen[ Q2Q067] interacts with 22 human  
partners: {O14744;P62318;Q9BQA1;P54105;P62314;Q9UHI6;P62304;Q8WXD5;P14678;Q96RS0;Q8TEQ6;P57678;Q09161;P52298;P62316;P62306;Q9H840;Q16637;P62308;O14893;Q9H814;O95149}

1018 Pathogen[ POC214] interacts with 19 human  
partners: {Q16637;P62316;Q09161;Q9H814;P14678;P62306;P57678;Q8WXD5;O95149;P62308;P52298;P62314;Q8TEQ6;Q9UHI6;P62318;Q96RS0;Q9H840;P62304;O14893}

1019 Pathogen[ P03346] interacts with 22 human  
partners: {P54105;Q09161;O95149;Q9BQA1;P62304;Q9H814;Q8WXD5;O14744;P52298;Q16637;P62318;P62306;Q9UHI6;Q96RS0;Q8TEQ6;P62314;P14678;P57678;O14893;P62316;P62308;Q9H840}

1020 Pathogen[ Q85601] interacts with 21 human  
partners: {Q9BQA1;O95149;P62304;O14744;P62316;Q09161;P14678;Q9H814;P62314;P62306;Q8TEQ6;P62318;Q9UHI6;P54105;Q96RS0;O14893;P62308;P52298;Q16637;Q8WXD5;Q9H840}

1021 Pathogen[ P14079] interacts with 22 human  
partners: {P57678;Q96RS0;Q8TEQ6;O14893;P52298;Q9H840;Q9UHI6;P62314;O95149;P62306;P14678;O14744;Q16637;Q9BQA1;P62308;P62304;P62316;P54105;P62318;Q8WXD5;Q09161;Q9H814}

1022 Pathogen[ P03383] interacts with 22 human  
partners: {Q9BQA1;Q9H840;P62318;P54105;P62316;P62304;Q9UHI6;Q8WXD5;O14744;Q09161;Q16637;P62314;Q8TEQ6;O14893;O95149;P14678;Q96RS0;P52298;P57678;P62308;Q9H814;P62306}

1023 Pathogen[ P03410] interacts with 22 human  
partners: {Q96RS0;Q8WXD5;O14893;P62304;Q9H840;P62306;P54105;Q8TEQ6;Q9BQA1;P62308;P14678;P62316;Q9H814;P52298;Q16637;P62314;P57678;Q09161;O14744;Q9UHI6;O95149;P62318}

1024 Pathogen[ P14075] interacts with 22 human  
partners: {Q8TEQ6;P62304;P54105;Q09161;P62316;Q9H814;Q8WXD5;Q9BQA1;P57678;Q9H840;P62306;P62308;Q16637;Q9UHI6;P62318;O14744;Q96RS0;O95149;P14678;O14893;P62314;P52298}

1025 Pathogen[ POC206] interacts with 22 human  
partners: {Q96RS0;P14678;O95149;P52298;Q9H840;Q9BQA1;Q09161;Q8WXD5;P54105;P62304;O14744;Q8TEQ6;P62314;P62316;Q9H814;P62318;O14893;P62306;Q9UHI6;Q16637;P62308;P57678}

1026 Pathogen[ P03363] interacts with 22 human  
partners: {P62314;Q96RS0;O14744;Q9UHI6;P62318;P62304;O14893;P62306;P54105;P57678;Q9BQA1;P62316;P52298;Q9H840;Q8TEQ6;P62308;Q16637;P14678;O95149;Q9H814;Q09161}

1027 [Cluster 94]GO:0042787+P biological\_process [name] protein ubiquitination involved in ubiquitin-dependent protein catabolic process [def] "The process in which a ubiquitin group, or multiple groups, are covalently attached to the target protein, thereby initiating the degradation of that protein." [GOC

1028 Pathogen[ Q2Q067] interacts with 20 human  
partners: {O95376;Q96J02;Q9HAU4;Q9UII4;Q15386;O60260;Q96T88;Q16531;Q7Z6Z7;Q14669;Q8N1E6;Q8TBB1;Q96PM5;Q9NTX7;Q13233;Q96PU5;Q9Y3C5;Q05086;Q00987;Q7Z6E9}

1029 Pathogen[ POC214] interacts with 26 human  
partners: {Q05086;Q96J02;Q96PM5;Q9HAU4;Q00987;Q9NTX7;Q8N1E6;Q9Y3C5;O00308;Q5T447;Q96T88;Q9H0M0;Q9HCE7;Q13233;O95071;Q7Z6E9;Q15386;O95376;Q9UII4;Q8TBB1;Q14669;Q7Z6Z7;O95155;O60260;Q16531;Q96PU5}

1030 Pathogen[ P03346] interacts with 30 human  
partners: {Q96J02;Q9HAU4;Q96PU5;O95155;O95376;O95714;Q9Y3C5;Q16531;Q9UII4;Q96PM5;Q9NTX7;Q13438;Q15386;Q5T447;Q00987;Q8N1E6;Q7Z6E9;Q14669;Q8IUQ4;Q13233;Q8TBB1;O60260;Q9ULT8;Q05086;Q9H0M0;O95071;POC2W1;Q7Z6Z7;Q96T88;O00308}

1031 Pathogen[ Q85601] interacts with 22 human  
partners: {Q7Z6E9;Q96J02;Q9HAU4;Q16531;O95714;Q9Y3C5;Q96PM5;Q96PU5;Q14669;Q15386;O95155;Q8N1E6;Q96T88;Q9NTX7;Q8TBB1;O95376;O60260;Q7Z6Z7;Q05086;Q13233;O95071;Q00987}

1032 Pathogen[ P14079] interacts with 10 human  
partners: {O60260;Q16531;Q8N1E6;Q9HAU4;Q00987;Q8TBB1;Q7Z6E9;Q96J02;Q9Y3C5;Q13438}

1033 Pathogen[ P03383] interacts with 7 human  
partners: {Q8TBB1;Q13233;Q9NTX7;O60260;O95376;Q96PM5;Q16531}

1034 Pathogen[ P03410] interacts with 8 human  
partners: {Q8TBB1;Q8N1E6;O60260;Q13233;Q9Y3C5;Q16531;Q00987;Q13438}

1035 Pathogen[ P14075] interacts with 7 human  
partners: {Q96PM5;Q9NTX7;Q16531;O95376;Q13233;Q8TBB1;O60260}

1036 Pathogen[ POC206] interacts with 25 human  
partners: {Q96PU5;O95376;O00308;Q9HAU4;Q8N1E6;Q8IUQ4;Q05086;Q96J02;Q16531;O95155;Q14669;Q13233;Q15386;Q96T88;O60260;Q8TBB1;Q96PM5;Q13438;Q7Z6Z7;Q00987;Q7Z6E9;Q9NTX7;O95071;O95714;Q9Y3C5}

1037 Pathogen[ P03363] interacts with 25 human  
partners: {O95376;Q9HAU4;Q9Y3C5;Q16531;Q9ULT8;O95155;Q7Z6E9;Q9NTX7;Q8TBB1;Q05086;Q7Z6Z7;Q14669;Q96PU5;Q96PM5;O95071;Q15386;O00308;Q13438;O95714;Q96T88;Q9H0M0;Q8N1E6;Q13233;Q9UII4;Q5T447}

1038 [Cluster 95]GO:0043586+P biological\_process [name] tongue development [def] "The process whose specific outcome is the progression of the tongue over time, from its formation to the mature structure. The tongue is the movable, muscular organ on the floor of the mouth of most vertebrates, in many other mammals is the principal organ of taste, aids in the prehension of food, in swallowing, and in modifying the voice as in speech." [GOC

1039 Pathogen[ Q2Q067] interacts with 1 human partners: {Q9HAZ2}

1040 Pathogen[ POC214] interacts with 1 human partners: {Q9HAZ2}

1041 Pathogen[ P03346] interacts with 1 human partners: {Q9HAZ2}

1042 Pathogen[ Q85601] interacts with 1 human partners: {Q9HAZ2}

1043 Pathogen[ P14079] interacts with 1 human partners: {Q9HAZ2}

1044 Pathogen[ P03383] interacts with 1 human partners: {Q9HAZ2}

1045 Pathogen[ P03410] interacts with 1 human partners:{Q9HAZ2}  
1046 Pathogen[ P14075] interacts with 1 human partners:{Q9HAZ2}  
1047 Pathogen[ P0C206] interacts with 1 human partners:{Q9HAZ2}  
1048 Pathogen[ P03363] interacts with 1 human partners:{Q9HAZ2}  
1049 [Cluster 96]GO:0007519+P biological\_process [name] skeletal muscle tissue  
development [def] "The developmental sequence of events leading to the formation of  
adult muscle that occurs in the animal. In vertebrate skeletal muscle the main events are  
1050 Pathogen[ Q2Q067] interacts with 13 human  
partners:{Q9NR56;P60660;P13349;P28356;Q8N8G2;O75182;P15172;P11532;P53805;P12757;P502  
22;P61586;P23409}  
1051 Pathogen[ P0C214] interacts with 12 human  
partners:{P12757;Q9NR56;P13349;P61586;Q8N8G2;P14649;P15172;P60660;P11532;P50222;P538  
05;O75182}  
1052 Pathogen[ P03346] interacts with 21 human  
partners:{P53805;P60660;Q8N8G2;P12757;P48443;Q14774;P13349;Q9UIU6;P15172;P23409;P151  
73;P23759;O75182;P14649;P28358;P50222;P28356;Q15475;P11532;Q9NR56;P61586}  
1053 Pathogen[ Q85601] interacts with 13 human  
partners:{O75182;Q8N8G2;P15172;P13349;P14649;P12757;P11532;Q9NR56;P23409;P50222;P615  
86;P53805;P60660}  
1054 Pathogen[ P14079] interacts with 16 human  
partners:{O95425;P15502;Q06413;Q8N8G2;P11532;P13349;P23409;P53805;Q9NR56;P48443;P146  
49;P60660;P61586;O75182;P12757;P50222}  
1055 Pathogen[ P03383] interacts with 10 human  
partners:{O75182;P15172;Q9NR56;P50222;P53805;Q8N8G2;P61586;P11532;P12757;P15502}  
1056 Pathogen[ P03410] interacts with 15 human  
partners:{P23409;Q8N8G2;P50222;P11532;O75182;Q9NR56;O95425;P15502;P61586;P53805;P127  
57;P13349;P14649;P60660;Q16635}  
1057 Pathogen[ P14075] interacts with 10 human  
partners:{P11532;P15172;O75182;P53805;P12757;Q9NR56;P15502;P61586;P50222;Q8N8G2}  
1058 Pathogen[ P0C206] interacts with 17 human  
partners:{P53805;P15502;Q9NR56;P60660;P23409;P50461;P61586;P14649;P12757;P13349;P151  
72;P11532;P28356;O75182;Q8N8G2;P48443;P50222}  
1059 Pathogen[ P03363] interacts with 16 human  
partners:{Q8N8G2;Q99592;P14649;P12757;P28356;P53805;Q9NR56;P13349;P28358;P11532;P237  
59;P50222;P23409;P60660;P15172;O75182}  
1060 [Cluster 97]GO:0016071+P biological\_process [name] mRNA metabolic process [def]  
"The chemical reactions and pathways involving mRNA, messenger RNA, which is responsible  
for carrying the coded genetic 'message', transcribed from DNA, to sites of protein  
assembly at the ribosomes." [ISBN  
1061 Pathogen[ Q2Q067] interacts with 203 human  
partners:{P23588;Q92900;P61313;P30153;Q99460;P62701;O75832;P48556;O15234;P47914;Q8IU  
60;P31749;P40306;P62312;Q9Y333;P46779;Q9NQT4;P55036;Q9UPR3;P63104;P39687;Q96LI5;Q025  
43;P61326;O00231;Q8IZH2;P26373;O00233;P62750;Q8IZD4;P63151;P62273;P51665;Q9Y2L1;Q9NP  
I6;A5YKK6;P15880;P40429;Q9H074;Q06265;P28072;Q96F86;P46782;P35268;Q01105;P22090;P467  
78;Q9UK45;Q96C86;Q13868;P38919;Q14103;A5LHX3;P62888;P32969;P62277;P62241;Q13200;P622  
44;P05387;Q92945;P25787;P62861;P08107;P42766;Q06323;P67775;P04792;P05386;O75175;Q9Y3  
B2;Q9NPD3;Q86TB9;Q9BZI7;Q92973;Q14240;Q9UNX3;Q504Q3;P30050;P57721;P28065;O14818;P261  
96;P18077;P62891;P11142;Q9HAU5;P61927;Q5RKV6;P39023;P62081;P61247;O14980;Q9UIV1;P612  
54;P62249;P62280;Q14997;P83731;P60900;Q9UL46;P61289;P62263;Q86US8;Q9UKZ1;P60866;P629  
06;Q15024;O95628;Q9H0W8;Q02878;P46777;P28062;P62899;P08708;Q9UNM6;P08708;Q07020;P629  
13;P25788;P62269;Q92530;Q9Y5S9;P62424;P25786;Q9UFF9;P62917;P62829;O15116;P46783;Q8IY  
D1;P62495;P36578;Q9C0C2;P62857;Q15366;Q16401;O00232;P62847;P49207;P23396;Q09161;P280  
74;P25789;Q92540;P0CG47;P63173;P18621;Q9NZN8;P31946;P52298;P20618;P0CG48;Q92600;P280  
70;P39019;P28066;P61353;Q04637;Q99436;Q8TAA3;P62266;P42677;Q9Y3U8;P63220;P62841;P838  
81;P62987;P26651;O43242;P06730;O95453;P49721;P49720;P50914;P46776;Q8ND04;P11940;P356  
58;P62854;P62753;P05388;P60842;P18124;P62851;Q9ULM6;P25398;Q15759;Q9Y4Z0;P62910;Q929  
01;P46781;P62310;P27635;Q07352;Q96B26;P53567;P61513;Q9Y4Y9;P62945;Q9H1J1;Q6P2E9;P629  
79}  
1062 Pathogen[ P0C214] interacts with 204 human  
partners:{P62861;Q9BZI7;P84098;Q14997;P53567;P61247;P51665;P62312;O15234;Q9NZN8;O151  
16;P25789;Q09161;Q96C86;P26196;P15880;P55036;P62081;P42766;P62913;P22090;Q15024;Q929  
01;P28062;P62249;Q6P2E9;P62899;O95453;A5LHX3;P62854;P28065;P39019;P62263;P60842;P577  
21;P30153;Q9NPI6;Q9Y5S9;P62273;O95628;P23396;Q92900;P18077;P05388;Q9Y2L1;P62847;P235  
88;O14818;Q9C0C2;P62829;Q504Q3;P26373;P27635;O43242;Q9Y3B2;P46778;P04792;P61513;P838  
81;P48556;P40306;P62701;P49207;P11940;P63220;Q5RKV6;Q92540;P08865;P32969;Q02543;Q132  
00;P62266;Q9HAU5;Q9Y4Z0;Q9UK45;O00232;Q15366;Q01105;P62277;Q9UIV1;Q9Y4Y9;P50914;Q8IZ  
H2;P46779;Q07352;Q9Y333;Q99460;P52298;P28066;O75832;P40429;Q9ULM6;Q86US8;P47914;P631  
73;O14980;Q9NPD3;P46783;Q14103;P62310;P49720;P28074;P62280;P61326;A5YKK6;Q9UNX3;P0CG  
48;Q9UL46;P38919;Q9Y3U8;Q9H074;P30050;P62753;P62910;Q8ND04;P62891;P35658;Q14240;P631  
51;Q9UPR3;P25788;P62495;P62269;Q9UNM6;P67775;Q86TB9;O00231;Q06323;P46781;Q13868;P257  
86;Q8IYD1;Q8IU60;P61254;P28072;P62841;Q8TAA3;Q15287;P62244;P26651;P62987;Q04637;Q070  
20;P42677;P62945;P46776;Q99436;Q15759;P0CG47;P25787;P62241;P46777;P83731;Q9UKZ1;Q929  
73;Q9UFF9;P35268;P62424;P60866;P62857;Q92600;P35998;P60900;P61313;P08708;Q92945;P053  
87;P25398;O00233;Q9H0W8;Q96LI5;P61927;P26196;P31946;P62750;P62979;P05386;Q06265;P08107;P628  
51;P06730;Q15365;P46782;O75175;P39687;Q92530;Q15008;P18124;Q9NQT4;Q96F86;P28070;Q96B  
26;P31749;P61353;P36578;P20618;P49721;Q16401;P18621;P17980;P62906;Q8IZD4;P11142;Q028



- 78;Q9H1J1}  
1063 Pathogen[ P03346] interacts with 208 human  
partners: {P08107;Q9UPR3;Q9Y5S9;Q9BZI7;P25787;P05387;P46779;Q5RKV6;O15234;P28070;Q504  
Q3;Q9ULM6;Q09161;P63173;P25789;P55036;P06730;P62917;P62249;P62913;Q15366;P62861;Q9NP  
I6;P62277;Q02878;Q99460;Q86US8;Q9UIV1;Q96C86;O75175;Q9UL46;P62280;P39023;Q9H9A5;P629  
87;P61927;P28072;Q9UKZ1;P62857;P25788;P28074;P49721;Q9Y4Y9;Q01105;O95628;O148  
18;P46778;P49207;Q99436;P0CG48;P62266;Q16401;A5LHX3;P61254;P38919;P62495;P11142;P280  
62;P11940;P62424;P62273;P67775;P83731;Q8ND04;P60866;Q92945;Q96B26;P20618;P62899;P356  
58;P52298;O00232;P60842;Q9Y3B2;A5YKK6;Q9Y333;P35268;P62891;P08708;Q8IZH2;Q15024;Q9NZ  
N8;O95453;P30153;Q14103;O75832;P46782;P61353;O00233;Q8IU60;P62854;Q9Y3U8;Q86TB9;P479  
14;O14980;Q92973;P08865;P31749;P61313;Q9H074;P25398;Q9Y4Z0;P49720;P28065;P61513;Q6P2  
E9;P05388;P62269;P60900;Q02543;P42766;P62081;Q9Y2L1;P25786;P61247;O00231;Q14240;P186  
21;Q8IYD1;P46781;P61326;Q9HAU5;P39687;P84098;Q9NQT5;P15880;O15116;Q92540;Q07352;P612  
89;P50914;Q9COC2;P62829;P62979;P28066;Q9UNM6;P39019;P23588;P23396;P42677;Q15287;P627  
50;P31946;P62701;Q8TAA3;P30050;P63104;Q15759;P62910;P0CG47;P36578;P26196;P62847;Q149  
97;Q13200;P48556;P62851;Q9H0W8;P22090;Q04637;P53567;P51665;Q8IZD4;P46777;Q06265;Q9UF  
F9;Q07020;P62263;P62841;P83881;Q06323;P26651;P05386;Q92900;P18077;P46776;P62241;Q925  
30;Q9NQT4;P62312;P62753;Q9NPD3;Q96F86;Q96LI5;O43242;P62945;P62310;Q9UK45;P04792;Q153  
65;Q92901;P32969;P26373;P18124;P40306;P40429;Q13868;P27635;P46783;P62906;Q92600;P631  
51;P62244;P62888;Q9H1J1;P57721;P63220}  
1064 Pathogen[ Q85601] interacts with 202 human  
partners: {P46783;P32969;P28066;Q9BZI7;Q9UNM6;P61513;P60900;Q5RKV6;P26373;O15234;P628  
57;Q6P2E9;P62244;P63104;P62913;P08107;P55036;P31946;Q9NPD3;P62854;P31749;P62081;Q9NP  
I6;P61353;P62891;P46776;P18077;P25787;P61313;P05388;P63151;P62495;P61289;P06730;Q9H0  
W8;Q14240;Q92540;Q9UKZ1;P63173;P25788;P53567;P23588;P39687;Q14103;O15116;Q01105;P233  
96;P62273;Q07352;P46778;P62829;O75832;P30050;P62753;Q13868;P27635;P61326;Q15287;Q046  
37;P15880;P83881;Q07020;P30153;P39019;Q9UIV1;Q9Y3U8;P62701;P62241;P62424;P0CG48;P837  
31;Q9NZN8;P62899;Q9UFF9;P62945;Q9UK45;Q92600;Q504Q3;P62263;Q9Y2L1;P62861;Q02878;Q091  
61;Q8IZH2;Q86TB9;P39023;P38919;P61254;Q96C86;P26651;P25789;O00233;P49207;P11940;P206  
18;P62910;Q96LI5;P62310;P62249;P62280;Q9HAU5;P47914;P84098;P40306;P08708;Q92973;Q9Y4  
Z0;Q9NQT4;P49720;Q9Y3B2;A5YKK6;O95628;O95453;P42766;P28062;P11142;P49721;P62269;P623  
12;Q15024;P25786;Q8IZD4;Q9ULM6;P18621;Q8IYD1;Q8ND04;P05387;P28072;Q9UNX3;P60842;Q132  
00;P62277;Q9H074;Q9COC2;P28065;P35268;Q14980;P67775;Q06265;P62979;Q99436;P62847;P280  
70;P35658;P26196;Q86US8;P42677;P63220;Q8TAA3;Q9UL46;Q99460;O00231;Q15759;P0CG47;Q9UP  
R3;P64782;P04792;P48556;P46779;P62750;P62851;Q92945;P62841;P28074;Q96F86;P52298;Q925  
30;P62987;P22090;Q9Y333;Q15365;A5LHX3;P61927;P57721;P36578;Q06323;P05386;Q92900;O751  
75;P08865;P61247;O14818;Q96B26;P46777;P62917;Q16401;Q92901;Q15366;P18124;P46781;P253  
98;P60866;Q9Y5S9;Q02543;P62906;P50914;P62266;Q8IU60;P40429;P62888;Q9H1J1;Q9Y4Y9}  
1065 Pathogen[ P14079] interacts with 204 human  
partners: {Q9Y3U8;P27635;P84098;P46779;P28065;Q99436;Q9Y333;Q01105;P62333;O95628;P263  
73;Q15287;P48556;P60842;Q9Y3B2;P23396;Q8IZD4;P11142;P0CG48;P40429;Q92600;P06730;P577  
21;P18621;P83881;Q9H0W8;P53567;Q14103;Q8IU60;Q9UNX3;P46781;P83731;P61513;P62847;Q150  
24;P40306;Q9UK45;P62753;P52298;P55036;P35658;Q9NPI6;P28074;P39023;Q9H1J1;O00232;P622  
73;Q9Y5S9;P25398;Q9UKZ1;P62495;Q86TB9;Q96LI5;Q92540;P18077;P49720;O00487;Q9NQT4;P257  
87;Q13868;O75832;P46783;Q86US8;Q9NPD3;P61254;P50914;Q96C86;A5LHX3;Q15116;Q9H074;P623  
12;P62979;O00233;Q6P2E9;P62841;P18124;Q14240;P35998;A5YKK6;P42766;P61289;O95453;P631  
51;P62266;P46782;P62987;P62241;P51665;Q8IYD1;P20618;P23588;P32969;P63104;P22090;P628  
29;Q8TAA3;P60866;P62854;Q07020;P39019;Q9COC2;P63220;P61326;Q8IZH2;Q14997;P49207;P622  
44;P28062;P60900;P62263;Q02543;P62424;Q92901;P62277;Q9BZI7;P11940;P62750;P62910;P631  
73;Q9Y4Z0;P26196;P31946;Q8ND04;Q5RKV6;Q15759;P46776;Q96F86;P08107;Q92945;Q9UNM6;P087  
08;Q92973;Q99460;P36578;O75175;Q9UFF9;O14818;Q15366;P49721;P62906;Q9HAU5;Q9Y2L1;Q925  
30;P47914;P62280;P62310;P62899;Q15365;P61353;P62081;P62945;Q9UIV1;P46777;P42677;P300  
50;P15880;Q06323;P62891;P62191;Q9H9A5;Q92900;Q96B26;P62888;P08865;Q9UPR3;P61927;P629  
17;Q15008;Q9ULM6;P30153;P46778;P62249;P43686;O43242;P25788;Q9NZN8;O00231;P05386;P280  
66;P35268;Q9UL46;P04792;P62913;P05387;P61247;P0CG47;Q9Y4Y9;P62269;P62701;Q504Q3;Q062  
65;P61313;O15234;Q16401;P17980;P62851;Q07352;P28072;P39687;Q09161;P05388;Q04637;P628  
57;P62861}  
1066 Pathogen[ P03383] interacts with 197 human  
partners: {P08107;P42766;P36578;Q06265;P05388;P62266;P39019;P26373;O15234;Q9Y2L1;Q152  
87;Q8ND04;P62913;P62945;Q01105;P55036;Q15366;P62854;P40429;P62987;P62891;P25398;P622  
80;Q07020;Q8IU60;P62312;P25789;P62750;P60900;P05387;P62249;P62888;P62899;P31946;P619  
27;Q9H0W8;P46777;Q9Y5S9;P46779;P49207;P31749;P83731;P62424;P40306;O00233;P18124;P467  
78;Q92901;P62753;P61326;P42677;P61247;P38919;Q9Y4Y9;P49721;Q06323;P83881;Q9UFF9;P301  
53;P47914;P04792;Q9COC2;Q14997;P67775;P62196;P611940;P62917;P62273;Q07352;Q9UNX3;P206  
18;P30050;Q9Y3B2;P84098;P32969;Q09161;O95628;Q9UPR3;O75832;P62277;P18077;P23588;P067  
30;P63173;P62081;P62310;Q92945;P39687;P63104;Q9HAU5;Q92973;P61313;O14980;P08865;Q9NP  
D3;P62851;P62495;Q86US8;Q9NQT4;Q9NPI6;P46782;Q14103;A5YKK6;Q9UL46;P62269;P57721;Q9UN  
M6;P63220;Q02543;P62244;Q02878;Q9Y333;Q9UIV1;P25786;Q99460;Q15759;Q86TB9;Q8IYD1;P111  
42;Q92600;P28072;Q96B26;P62910;Q15365;P27635;Q13200;Q9ULM6;Q9H074;P28065;Q8IZD4;P628  
57;P28066;P26651;P52298;P35658;P62906;Q9Y4Z0;P46783;Q9NZN8;Q9Y3U8;P60866;Q04637;Q9UK  
45;Q5RKV6;Q96C86;P61254;Q16401;P62979;O00231;P0CG47;P62241;P46781;P39023;Q9UKZ1;P535  
67;P0CG48;P28074;P62841;Q96F86;Q92530;P49720;Q8TAA3;P61289;P22090;Q92540;P62701;P628  
29;O15116;P62263;P28062;P62847;P35268;P05386;P50914;O95453;P48556;O14818;O75175;Q929  
00;P63861;Q13868;Q99436;P18621;Q96LI5;P46776;P15880;P23396;Q15024;P28070;P61513;P257  
87;P08708;P25788;Q9BZI7;Q9H1J1;P61353;Q6P2E9}  
1067 Pathogen[ P03410] interacts with 207 human

- partners: {Q96LI5;Q92540;P62861;P05386;Q8IU60;P28070;Q9Y2L1;Q92945;Q02543;P61247;P62241;P62829;P49207;P26373;Q9NZN8;P55036;Q9Y4Y9;P61513;P0CG48;Q9UFF9;P61326;Q14103;P62899;O15234;Q95628;P62244;P62913;P25786;Q02878;Q15008;Q92901;Q92900;Q16401;P11940;P15880;P46777;P46776;P62841;P30050;Q15287;P60900;P62310;P05388;Q14997;P06730;Q9UML6;Q9UPR3;P35998;Q9NPI6;P46781;Q99460;P18124;Q9Y5S9;Q06265;P53567;O00233;Q9C0C2;Q5RKV6;Q15365;Q9Y333;Q00232;P62269;Q07020;Q13868;P57721;P63220;P62910;P62847;P62906;P11142;P39687;Q8TAA3;P31749;P04792;P23396;P18621;P48556;P49721;P62266;Q15366;P62249;Q01105;P63151;P63173;P50914;Q9HAU5;P62280;A5LHX3;P22090;P26651;P61313;Q9UIV1;P62979;Q9H1J1;Q9HA5;Q99436;P62701;Q9BZI7;P62750;Q9H074;P08865;P40306;Q9UNX3;Q06323;P62277;Q8IZH2;P36578;P18077;Q8IZD4;P25398;Q96B26;Q13200;Q96F86;P25787;P61927;P84098;P62854;Q95453;Q6P2E9;P62273;P35658;P08107;P52298;P62081;P46783;P62495;Q9UKZ1;Q92973;Q15024;Q9Y3U8;P28062;P51665;P08708;P46782;P32969;O14818;P60842;O75175;P38919;Q9NQT4;O00231;Q8ND04;Q9UNM6;P46779;Q86US8;P63104;P27635;P25789;P49720;Q8IYD1;Q9Y4Z0;P30153;P62987;Q86TB9;P62857;P62263;P62424;P62888;P61254;Q09161;P46778;Q92600;P28072;P62945;P05387;Q9NPD3;P42766;O15116;P39019;P62312;P47914;A5YKK6;Q9H0W8;P40429;Q04637;P39023;P25788;Q96C86;P62917;P62851;P67775;P83731;P28066;P35268;Q504Q3;P61353;Q9UK45;P62891;P28065;O43242;P0CG47;Q07352;P62753;P23588;P17980;P31946;Q05832;O14980;P20618;Q14240;Q9UL46;P28074;P61289;P83881;P60866;P42677;Q9Y3B2}
- 1068 Pathogen[ P14075] interacts with 196 human partners: {O95453;Q6P2E9;P42766;Q15366;P49207;O15234;P62857;P46781;P63220;P32969;Q9UK45;Q09161;P62495;P55036;P25788;P42677;P62913;Q92900;P22090;P11142;Q02878;P28066;P62277;Q9UPR3;P62851;Q06323;O75832;Q15759;Q14103;Q9UML6;P23588;P08865;Q8TAA3;Q9UKZ1;Q9NPD3;P60900;P62244;P53567;P61326;O00233;P08708;Q9UL46;Q9Y4Z0;P26196;P49720;P61254;P46778;P26651;Q92600;Q92945;Q92973;P05388;P83881;P46777;Q9Y3U8;P04792;P62249;P39687;O75175;Q9H074;Q13200;P48556;P06730;Q16401;Q9NPI6;P62081;P62750;P18621;Q96LI5;Q8IU60;P35658;Q9NZN8;Q01105;Q02543;P28070;P18124;Q9UNX3;P25398;P49721;Q9Y2L1;Q13868;P62312;O00231;Q92530;Q9NQT4;P11940;O14980;P63173;Q15365;Q95628;P30050;P31749;P57721;P0CG48;Q86US8;Q8IZD4;P62979;P83731;P84098;P28062;O15116;P28074;P61247;P62753;P46782;P62891;P62861;P28065;P18077;P46779;P62917;P39023;Q15287;Q04637;P50914;P62269;P62847;P62910;P62273;Q86TB9;Q5RKV6;P40429;P23396;P62241;P25786;P15880;O14818;P62987;Q8IYD1;P63104;Q9HAU5;P62872;Q96B26;P62841;Q9Y333;P36578;P62266;Q07352;P67775;P30153;Q14997;P61513;P61313;P27635;P62888;Q9UFF9;Q92901;P0CG47;P25787;P08107;Q9Y5S9;P35268;Q96C86;P62945;P46776;Q9H0W8;Q15024;P31946;P20618;P46783;P62701;P62899;Q9C0C2;P47914;Q9UNM6;P62906;P38919;Q9Y4Y9;Q9UIV1;P61289;P05386;P40306;P61353;P39019;P62424;Q99436;Q92540;A5YKK6;Q06265;P62851;P62280;Q9Y3B2;Q96F86;Q8ND04;Q07020;P62263;P62854;P60866;P26373;P05387;P62310;P52298;P25789;Q9BZI7;Q9H1J1;P61927}
- 1069 Pathogen[ P0C206] interacts with 205 human partners: {P61289;Q15287;P40429;Q9UFF9;P61313;P53567;Q99436;P28062;Q9UNM6;P0CG48;Q9H074;Q14103;P27635;O75832;Q9BZI7;Q504Q3;Q15365;P18124;P39687;Q86TB9;P52298;Q95453;P31749;P62854;P40306;P28065;Q14997;P61326;P49207;P26651;Q8IZH2;Q96C86;P55036;P62081;Q09161;P30050;P25786;P30153;P25788;Q9NPD3;P62241;Q5RKV6;P62244;P25787;P50914;Q13868;Q9NZN8;P08865;Q9UIV1;P62750;Q06323;P18621;Q96LI5;P46781;P62266;Q02543;P49720;Q07020;P83881;Q8IYD1;P46778;P26196;O75175;P63151;P62263;O00232;P62273;Q9NPI6;P60900;Q02878;P04792;P62495;P62280;P67775;Q96B26;P62857;P62851;O43242;P62910;Q9H9A5;Q92973;Q9Y4Y9;P46782;Q95628;A5LHX3;P06730;Q9Y4Z0;P61247;P57721;P31946;P18077;P62913;P25789;P18077;P25789;Q9Y333;P61353;P62888;P63104;Q8IZD4;P36578;Q9UK45;P62861;Q86US8;Q8ND04;P35268;P23396;P39023;Q9H0W8;P20618;P32969;Q06265;Q13200;Q8TAA3;P62701;P28070;Q6P2E9;P05386;Q96F86;P22090;P84098;P62945;Q99460;P26373;P46777;P05388;P62979;Q15024;O15234;P28066;P62899;P08107;A5YKK6;P83731;Q9Y2L1;P39019;Q92901;P05387;O14818;P46783;P42766;Q9UPR3;P60866;Q14240;Q9UKZ1;Q92600;P62841;Q15366;P0CG47;Q9Y3B2;Q9C0C2;Q9Y333;P28072;Q9HAU5;P23588;P61513;Q92900;P28074;P62277;P46776;Q92530;P62906;P62312;Q04637;Q07352;P49721;P63173;Q92945;P62987;Q9NQT4;P38919;P62891;P62269;P62753;P46779;Q9UL46;P63220;P62310;P60842;Q92540;P15880;Q9UML6;P25398;P08708;Q01105;Q15759;P11940;P11142;Q8IU60;O00233;P47914;P48556;P35658;P62847;Q16401;P61254;O15116;Q9Y5S9;O00231;P42677;P62829;P62249;P62424;Q9H1J1;Q9Y3U8;P62917}
- 1070 Pathogen[ P03363] interacts with 169 human partners: {Q96B26;Q504Q3;P62913;Q9NQT4;P18621;P05386;Q9Y4Y9;Q5RKV6;Q92973;Q9Y4Z0;P62750;Q15366;P23396;P42677;P63173;P08865;P38919;P62847;P18077;P05387;Q95628;Q95453;P84098;P42766;P62249;Q92900;P53567;P05388;P36578;P62753;P62312;Q92530;Q8ND04;P62081;P62910;P61513;P46776;Q15024;A5YKK6;O14980;Q86US8;Q9Y3B2;P61254;P62273;Q6P2E9;P32969;Q92901;Q8IYD1;P46778;P61927;P31946;Q9UPR3;P62891;P61353;P61289;P08708;Q9UKZ1;P15880;P11940;Q8IZD4;Q9NZN8;Q9NPD3;P23588;P39687;P62495;P61326;O15116;P26373;Q15287;P83881;P63151;P63104;Q9UML6;P22090;Q07352;Q9Y333;P62861;P62841;Q9UNX3;Q96F86;P30050;Q9H0W8;P62829;P08107;Q14240;P46782;Q92945;P35268;Q15717;P31749;Q9C0C2;P46781;P50914;Q9HAU5;P63220;P57721;Q9Y2L1;P61313;P39019;P52298;P26196;P35658;P46779;Q02543;P46777;P62987;Q92600;Q96LI5;Q13868;P25398;Q15365;Q14103;P83731;P62851;P62280;Q9Y3U8;P62888;O75175;P62310;P60842;Q9NQT5;P26651;Q9UIV1;Q86TB9;P62244;P62277;P62906;Q92540;Q9UK45;P62266;Q9BZI7;P62945;P49207;P62241;P62424;P60866;P61247;Q9UFF9;P62899;P62857;Q02878;Q07020;P39023;Q01105;Q96C86;P30153;P62854;P62917;P18124;P40429;P67775;P27635;P06730;P62263;P04792;P47914;Q9NPI6;P62701;Q9Y5S9;Q9H074;Q8IZH2;P11142;P62269;Q8IU60;Q09161;P46783;Q04637;Q9H1J1;O15234}
- 1071 [Cluster 98]GO:0060612+P biological\_process [name] adipose tissue development [def] "The process whose specific outcome is the progression of adipose tissue over time, from its formation to the mature structure. Adipose tissue is specialized tissue that is used to store fat." [GOC
- 1072 Pathogen[ Q2Q067] interacts with 4 human partners: {Q6ZW49;Q02930;Q14865;P15336}

1073 Pathogen[ P0C214] interacts with 5 human partners:{Q02930;Q14865;P15336;Q6ZW49;P43490}

1074 Pathogen[ P03346] interacts with 4 human partners:{P15336;Q14865;Q02930;Q6ZW49}

1075 Pathogen[ Q85601] interacts with 4 human partners:{Q02930;Q14865;Q6ZW49;P15336}

1076 Pathogen[ P14079] interacts with 6 human partners:{Q9C0B1;P43490;Q14865;Q02930;P15336;Q6ZW49}

1077 Pathogen[ P03383] interacts with 3 human partners:{Q6ZW49;P15336;Q02930}

1078 Pathogen[ P03410] interacts with 6 human partners:{P43490;Q02930;Q9C0B1;Q14865;P15336;Q6ZW49}

1079 Pathogen[ P14075] interacts with 3 human partners:{Q6ZW49;P15336;Q02930}

1080 Pathogen[ P0C206] interacts with 5 human partners:{Q6ZW49;P15336;P43490;Q02930;Q14865}

1081 Pathogen[ P03363] interacts with 4 human partners:{Q14865;Q02930;P15336;Q6ZW49}

1082 [Cluster 99]GO:0009790+P biological\_process [name] embryo development [def] "The process whose specific outcome is the progression of an embryo from its formation until the end of its embryonic life stage. The end of the embryonic stage is organism-specific. For example, for mammals, the process would begin with zygote formation and end with birth. For insects, the process would begin at zygote formation and end with larval hatching. For plant zygotic embryos, this would be from zygote formation to the end of seed dormancy. For plant vegetative embryos, this would be from the initial determination of the cell or group of cells to form an embryo until the point when the embryo becomes independent of the parent plant." [GOC

1083 Pathogen[ Q2Q067] interacts with 20 human partners:{Q9UHL9;Q9UNS1;Q13829;Q53H80;Q9H9Y6;P60174;Q14669;P78545;Q08050;O43524;Q99750;Q9H8E8;O00255;Q53G26;P78347;Q6R327;Q66K89;Q96EY1;O60921;Q9Y5P3}

1084 Pathogen[ P0C214] interacts with 21 human partners:{P50440;Q9UHL9;Q9H9Y6;P46379;Q13829;Q53H80;Q99750;Q9Y5P3;O60921;Q6R327;P78347;Q9UNS1;O60264;Q53G26;Q14669;P78545;P60174;Q66K89;Q96EY1;O00255;Q9H8E8}

1085 Pathogen[ P03346] interacts with 35 human partners:{O60921;P85037;Q9UHL9;Q7RTS3;O95171;P78347;Q9P2F5;Q9UNS1;Q9H9Y6;Q53H80;P60174;Q08050;Q9H8E8;O00409;Q13829;Q66K89;Q86SE8;Q92879;O00255;O60264;Q9C0C7;P46379;Q99750;Q14669;Q12778;Q53G26;Q01167;P98177;Q9Y5P3;P78545;O00482;Q6R327;Q9H9S0;O43524;Q96EY1}

1086 Pathogen[ Q85601] interacts with 22 human partners:{Q9UHL9;P60174;Q53G26;Q86SE8;P78545;P46379;Q14669;Q9H9Y6;Q53H80;Q9H8E8;Q99750;O60921;O00255;O00482;Q08050;Q66K89;O60264;Q13829;O95171;P78347;Q96EY1;Q9UNS1}

1087 Pathogen[ P14079] interacts with 24 human partners:{Q6R327;Q53H80;Q96A33;P25705;Q9H8E8;Q15078;Q9H488;O00482;Q9Y5P3;Q66K89;Q9UHL9;O95171;O60264;P78545;Q13829;Q9P2F5;P50440;P78347;Q9UNS1;O00255;O60921;Q96EY1;Q99750;Q9H9Y6}

1088 Pathogen[ P03383] interacts with 16 human partners:{Q9UNS1;Q9UHL9;P78347;Q9H9Y6;Q9P2F5;Q66K89;O60921;Q53H80;Q9H8E8;Q9Y5P3;O00255;Q99750;P78545;Q13829;Q96EY1;Q53G26}

1089 Pathogen[ P03410] interacts with 24 human partners:{Q86SE8;Q13829;Q53G26;Q66K89;P25705;Q96A33;Q9UHL9;P78545;Q9P2F5;O95171;Q9Y5P3;Q53H80;O60921;Q6R327;Q9UNS1;Q9H8E8;P78347;O60264;Q9H488;O00255;P50440;Q99750;Q96EY1;Q9H9Y6}

1090 Pathogen[ P14075] interacts with 19 human partners:{Q9UHL9;P78545;Q08050;Q53H80;P78347;Q53G26;Q9Y5P3;O00255;Q9H8E8;Q6R327;Q99750;Q9P2F5;Q9H9Y6;Q66K89;O60921;Q9UNS1;Q13829;P50440;Q96EY1}

1091 Pathogen[ P0C206] interacts with 28 human partners:{Q9UNS1;Q96A33;Q13829;Q9UHL9;Q9C0C7;P60174;O00255;Q53G26;Q14669;O00482;P78347;Q6R327;P50440;P78545;O60921;Q9P2F5;Q86SE8;Q9Y5P3;Q08050;Q9H9S0;Q66K89;Q9H9Y6;Q96EY1;Q53H80;P46379;Q99750;O95171;O60264}

1092 Pathogen[ P03363] interacts with 29 human partners:{P46379;Q9UHL9;Q9H8E8;Q9H9Y6;Q92879;Q99750;Q7RTS3;Q66K89;Q9Y5P3;O00409;Q53G26;O60264;O43524;Q9C0C7;Q08050;Q14669;P78545;Q9UNS1;Q01167;O95171;Q13829;O60921;Q86SE8;Q96EY1;Q53H80;Q9H9S0;P78347;Q6R327;O00482}

1093 [Cluster 100]GO:0060426+P biological\_process [name] lung vasculature development [def] "The biological process whose specific outcome is the progression of a lung vasculature from an initial condition to its mature state. This process begins with the formation of the lung vasculature and ends with the mature structure. The lung vasculature is composed of the tubule structures that carry blood or lymph in the lungs." [GOC

1094 Pathogen[ Q2Q067] interacts with 2 human partners:{P41134;Q9UJM3}

1095 Pathogen[ P0C214] interacts with 2 human partners:{Q9UJM3;P41134}

1096 Pathogen[ P03346] interacts with 3 human partners:{O43680;P41134;Q9UJM3}

1097 Pathogen[ Q85601] interacts with 2 human partners:{P41134;Q9UJM3}

1098 Pathogen[ P14079] interacts with 2 human partners:{Q9UJM3;P41134}

1099 Pathogen[ P03383] interacts with 1 human partners:{Q9UJM3}

1100 Pathogen[ P03410] interacts with 2 human partners:{P41134;Q9UJM3}

1101 Pathogen[ P14075] interacts with 1 human partners:{Q9UJM3}

1102 Pathogen[ P0C206] interacts with 2 human partners:{P41134;Q9UJM3}

1103 Pathogen[ P03363] interacts with 2 human partners:{P41134;Q9UJM3}

1104 [Cluster 101]GO:0051298+P biological\_process [name] centrosome duplication [def] "The replication of a centrosome, a structure comprised of a pair of centrioles and

peri-centriolar material from which a microtubule spindle apparatus is organized." [GOC  
1105 Pathogen[ Q2Q067] interacts with 7 human  
partners:{Q9NXR1;A6NKF1;Q8TEP8;O43303;O94986;Q6UVJ0;P24941}  
1106 Pathogen[ POC214] interacts with 7 human  
partners:{O94986;Q8TEP8;O43303;P24941;A6NKF1;Q9NXR1;Q6UVJ0}  
1107 Pathogen[ P03346] interacts with 9 human  
partners:{P24941;Q969U6;Q9NXR1;Q8TEP8;A6NKF1;O94986;P51587;Q6UVJ0;O43303}  
1108 Pathogen[ Q85601] interacts with 8 human  
partners:{Q6UVJ0;O94986;O43303;A6NKF1;Q8TEP8;Q9NXR1;P24941;P51587}  
1109 Pathogen[ P14079] interacts with 7 human  
partners:{Q6UVJ0;Q8TEP8;O94986;P51587;A6NKF1;O43303;Q9NXR1}  
1110 Pathogen[ P03383] interacts with 6 human  
partners:{Q6UVJ0;O94986;O43303;A6NKF1;Q8TEP8;P24941}  
1111 Pathogen[ P03410] interacts with 9 human  
partners:{Q8TEP8;O43303;Q9NXR1;Q6UVJ0;O94986;P24941;P51587;Q969U6;A6NKF1}  
1112 Pathogen[ P14075] interacts with 6 human  
partners:{O43303;P24941;Q6UVJ0;Q8TEP8;O94986;A6NKF1}  
1113 Pathogen[ POC206] interacts with 9 human  
partners:{O94986;P51587;Q6UVJ0;Q8TEP8;A6NKF1;Q9NXR1;P24941;Q969U6;O43303}  
1114 Pathogen[ P03363] interacts with 8 human  
partners:{A6NKF1;O43303;O94986;P24941;Q8TEP8;Q969U6;Q9NXR1;Q6UVJ0}  
1115 [Cluster 102]GO:0042742+P biological\_process [name] defense response to bacterium  
[def] "Reactions triggered in response to the presence of a bacterium that act to  
protect the cell or organism." [GOC  
1116 Pathogen[ Q2Q067] interacts with 4 human partners:{P20749;Q15744;Q02556;Q9C000}  
1117 Pathogen[ POC214] interacts with 5 human  
partners:{Q9NPP4;Q99698;Q02556;P20749;Q9C000}  
1118 Pathogen[ P03346] interacts with 7 human  
partners:{Q99698;Q9NPP4;Q02556;Q15744;P20749;Q9H112;Q9C000}  
1119 Pathogen[ Q85601] interacts with 4 human partners:{Q02556;Q15744;P20749;Q99698}  
1120 Pathogen[ P14079] interacts with 33 human  
partners:{Q30KQ8;Q30KQ9;Q30KR1;A8MXU0;P15515;Q30KQ7;Q9C000;P60022;Q15744;Q7Z434;Q8N1  
04;O15263;A6NDD2;P15516;Q9H1M4;Q30KQ1;P81172;Q7Z7B8;Q8IZN7;Q4QY38;P20749;P60602;Q7Z7  
B7;Q02556;Q99698;Q9Y239;Q30KQ6;Q8NET1;Q8N688;P59861;Q30KP9;P81534;Q9NPP4}  
1121 Pathogen[ P03383] interacts with 2 human partners:{P20749;Q02556}  
1122 Pathogen[ P03410] interacts with 32 human  
partners:{Q30KP8;P20749;Q30KR1;Q7Z7B7;Q30KP9;Q4QY38;P59861;Q9Y239;Q8N688;Q7Z7B8;Q969  
E1;Q30KQ1;Q9NPP4;Q9C000;P60022;Q30KQ6;Q7Z434;Q02556;Q8IZN7;P60602;P81172;P15515;P155  
16;Q99698;Q8N104;Q5J5C9;Q30KQ9;Q15744;Q30KQ7;Q30KQ8;P81534;O15263}  
1123 Pathogen[ P14075] interacts with 4 human partners:{P15515;Q02556;P60602;P20749}  
1124 Pathogen[ POC206] interacts with 8 human  
partners:{Q9C000;Q15744;Q99698;Q02556;P15515;Q7Z7B7;P20749;P60602}  
1125 Pathogen[ P03363] interacts with 8 human  
partners:{Q9C000;Q02556;Q15744;P15515;P20749;Q9H112;Q99698;Q9NPP4}  
1126 [Cluster 103]GO:0000183+P biological\_process [name] chromatin silencing at rDNA  
[def] "Repression of transcription of ribosomal DNA by altering the structure of  
chromatin." [PMID  
1127 Pathogen[ Q2Q067] interacts with 4 human partners:{O43463;Q8IXJ6;O43159;Q9UIF9}  
1128 Pathogen[ POC214] interacts with 5 human  
partners:{O43159;O43463;Q9UIF9;O60264;Q8IXJ6}  
1129 Pathogen[ P03346] interacts with 5 human  
partners:{O43159;Q8IXJ6;O43463;O60264;Q9UIF9}  
1130 Pathogen[ Q85601] interacts with 5 human  
partners:{Q9UIF9;O43159;O43463;Q8IXJ6;O60264}  
1131 Pathogen[ P14079] interacts with 4 human partners:{Q9UIF9;O60264;Q8IXJ6;O43159}  
1132 Pathogen[ P03383] interacts with 3 human partners:{O43463;O43159;Q9UIF9}  
1133 Pathogen[ P03410] interacts with 5 human  
partners:{Q8IXJ6;O43159;Q9UIF9;O43463;O60264}  
1134 Pathogen[ P14075] interacts with 3 human partners:{Q9UIF9;O43159;O43463}  
1135 Pathogen[ POC206] interacts with 5 human  
partners:{O43159;O43463;Q9UIF9;Q8IXJ6;O60264}  
1136 Pathogen[ P03363] interacts with 4 human partners:{O60264;Q9UIF9;O43159;O43463}  
1137 [Cluster 104]GO:0007292+P biological\_process [name] female gamete generation [def]  
"Generation of the female gamete\_ specialised haploid cells produced by meiosis and  
along with a male gamete takes part in sexual reproduction." [GOC  
1138 Pathogen[ Q2Q067] interacts with 5 human  
partners:{P63167;Q14106;Q9HD36;Q93008;O95453}  
1139 Pathogen[ POC214] interacts with 5 human  
partners:{O95453;Q93008;Q9HD36;Q14106;P63167}  
1140 Pathogen[ P03346] interacts with 5 human  
partners:{Q93008;O95453;Q14106;P63167;Q9HD36}  
1141 Pathogen[ Q85601] interacts with 5 human  
partners:{Q9HD36;Q14106;Q93008;O95453;P63167}  
1142 Pathogen[ P14079] interacts with 5 human  
partners:{P01225;Q14106;O95453;Q9HD36;P63167}  
1143 Pathogen[ P03383] interacts with 3 human partners:{Q14106;O95453;P63167}

1144 Pathogen[ P03410] interacts with 4 human partners:{Q9HD36;P63167;O95453;Q14106}  
1145 Pathogen[ P14075] interacts with 3 human partners:{O95453;Q14106;P63167}  
1146 Pathogen[ P0C206] interacts with 5 human  
partners:{O95453;Q9HD36;Q93008;P63167;Q14106}  
1147 Pathogen[ P03363] interacts with 5 human  
partners:{P63167;O95453;Q9HD36;Q14106;Q93008}  
1148 [Cluster 105]GO:0043981+P biological\_process [name] histone H4-K5 acetylation  
[def] "The modification of histone H4 by the addition of an acetyl group to a lysine  
residue at position 5 of the histone." [GOC  
1149 Pathogen[ Q2Q067] interacts with 6 human  
partners:{Q6IE81;Q9HAF1;Q96EZ8;Q9UNL4;P51610;Q7Z3B3}  
1150 Pathogen[ P0C214] interacts with 6 human  
partners:{P51610;Q9UNL4;Q9HAF1;O95251;Q6IE81;Q96EZ8}  
1151 Pathogen[ P03346] interacts with 8 human  
partners:{Q9UNL4;Q96EZ8;P51610;Q7Z3B3;O95251;Q6IE81;Q9H7Z6;Q9HAF1}  
1152 Pathogen[ Q85601] interacts with 7 human  
partners:{O95251;Q9HAF1;Q9H7Z6;Q9UNL4;P51610;Q6IE81;Q96EZ8}  
1153 Pathogen[ P14079] interacts with 9 human  
partners:{O95251;Q9UNL4;Q9HAF1;Q6IE81;P51610;Q7Z3B3;Q9P2N6;Q96EZ8;Q9H9L4}  
1154 Pathogen[ P03383] interacts with 6 human  
partners:{O95251;Q9UNL4;P51610;Q9HAF1;Q6IE81;Q96EZ8}  
1155 Pathogen[ P03410] interacts with 8 human  
partners:{Q9P2N6;P51610;O95251;Q9UNL4;Q9H9L4;Q96EZ8;Q7Z3B3;Q6IE81}  
1156 Pathogen[ P14075] interacts with 7 human  
partners:{P51610;Q7Z3B3;Q96EZ8;Q6IE81;Q9HAF1;O95251;Q9UNL4}  
1157 Pathogen[ P0C206] interacts with 10 human  
partners:{O95251;Q9H9L4;Q96EZ8;P51610;Q9HAF1;Q6IE81;Q9P2N6;Q7Z3B3;Q9UNL4;Q9H7Z6}  
1158 Pathogen[ P03363] interacts with 7 human  
partners:{Q6IE81;Q9HAF1;Q9UNL4;Q7Z3B3;Q96EZ8;O95251;P51610}  
1159 [Cluster 106]GO:0035019+P biological\_process [name] somatic stem cell maintenance  
[def] "The process in which an organism retains a population of somatic stem cells,  
undifferentiated cells in the embryo or adult which can undergo unlimited division and  
give rise to cell types of the body other than those of the germ-line." [GOC  
1160 Pathogen[ Q2Q067] interacts with 15 human  
partners:{Q13118;Q9Y6X8;O00512;Q9HAZ2;P46937;Q86UU0;Q92754;P23769;P12755;O43679;P427  
71;Q86U70;Q01860;Q15906;P17947}  
1161 Pathogen[ P0C214] interacts with 14 human  
partners:{P23769;P46937;P17947;Q15906;Q92754;Q86U70;Q9HAZ2;O43679;P42771;Q9Y6X8;P127  
55;Q86UU0;O00512;Q01860}  
1162 Pathogen[ P03346] interacts with 20 human  
partners:{Q06945;P46937;Q86U70;Q99626;P23769;Q15906;P42771;Q92754;Q01860;Q92794;Q9HC  
S4;Q13118;O00512;O43679;Q9Y6X8;P17947;Q99929;Q86UU0;Q9HAZ2;Q9H9S0}  
1163 Pathogen[ Q85601] interacts with 16 human  
partners:{Q92754;Q86U70;P23769;Q86UU0;P12755;O43679;Q9Y6X8;P42771;O00512;Q13118;Q159  
06;P17947;P46937;Q9HCS4;Q01860;Q9HAZ2}  
1164 Pathogen[ P14079] interacts with 15 human  
partners:{Q9HAZ2;P12755;Q13118;O43679;Q86U70;P46937;Q15906;Q01860;O00512;Q86UU0;Q927  
54;Q9Y6X8;P23769;P49917;P42771}  
1165 Pathogen[ P03383] interacts with 13 human  
partners:{Q86U70;P23769;Q01860;Q86UU0;Q9HAZ2;O43679;Q9Y6X8;O00512;P42771;Q92754;Q159  
06;P46937;P17947}  
1166 Pathogen[ P03410] interacts with 16 human  
partners:{P42771;O00512;Q9HAZ2;P12755;P17947;Q01860;O43679;Q15906;Q86U70;Q9Y6X8;P469  
37;Q13118;P23769;Q9HCS4;Q86UU0;Q92754}  
1167 Pathogen[ P14075] interacts with 13 human  
partners:{Q86UU0;Q86U70;O00512;Q15906;P23769;Q01860;P42771;Q92754;Q9HAZ2;O43679;Q9Y6  
X8;P17947;P46937}  
1168 Pathogen[ P0C206] interacts with 18 human  
partners:{O43679;P46937;Q9HAZ2;O00512;Q86UU0;Q01860;P42771;Q9HCS4;Q9Y6X8;P12755;Q927  
54;P49917;Q15906;P17947;P23769;Q9H9S0;Q86U70;Q13118}  
1169 Pathogen[ P03363] interacts with 17 human  
partners:{Q86U70;Q99626;Q99929;P17947;Q9Y6X8;O43679;Q9HCS4;P46937;O00512;Q86UU0;Q9H9  
S0;Q01860;P42771;Q15906;Q13118;Q92754;Q9HAZ2}  
1170 [Cluster 107]GO:0051346+P biological\_process [name] negative regulation of hydrolase  
activity [def] "Any process that stops or reduces the rate of hydrolase activity, the  
catalysis of the hydrolysis of various bonds." [GOC  
1171 Pathogen[ Q2Q067] interacts with 2 human partners:{Q9UII2;P29474}  
1172 Pathogen[ P0C214] interacts with 2 human partners:{P29474;Q9UII2}  
1173 Pathogen[ P03346] interacts with 2 human partners:{P29474;Q9UII2}  
1174 Pathogen[ Q85601] interacts with 2 human partners:{Q9UII2;P29474}  
1175 Pathogen[ P14079] interacts with 1 human partners:{Q9UII2}  
1176 Pathogen[ P03383] interacts with 2 human partners:{P29474;Q9UII2}  
1177 Pathogen[ P03410] interacts with 2 human partners:{Q9UII2;P29474}  
1178 Pathogen[ P14075] interacts with 2 human partners:{P29474;Q9UII2}  
1179 Pathogen[ P0C206] interacts with 2 human partners:{P29474;Q9UII2}  
1180 Pathogen[ P03363] interacts with 1 human partners:{P29474}

- 1181 [Cluster 108]GO:0051403+P biological\_process [name] stress-activated MAPK cascade [def] "A series of molecular signals in which a stress-activated MAP kinase cascade relays one or more of the signals\_ MAP kinase cascades involve at least three protein kinase activities and culminate in the phosphorylation and activation of a MAP kinase." [GOC]
- 1182 Pathogen[ Q2Q067] interacts with 19 human partners: {P01100;Q9NYJ8;P02511;Q8N5C8;O75582;Q9Y6K9;Q9BSQ5;P19419;P15336;P0CG47;P45984;P0CG48;O43318;P62987;Q15759;Q16829;Q02078;Q15750;P62979}
- 1183 Pathogen[ P0C214] interacts with 22 human partners: {Q9Y6K9;P15336;P02511;P01100;Q9BSQ5;P19419;O43318;Q02078;Q8N5C8;P0CG48;Q16829;O75582;P62987;Q15750;P05412;Q15759;P0CG47;P45984;P16220;P62979;Q9NYJ8;P18846}
- 1184 Pathogen[ P03346] interacts with 24 human partners: {Q9Y6K9;P05412;P45984;Q02078;P16220;P15336;P62987;P19419;P0CG48;Q8N5C8;Q9BW F3;P02511;Q9NYJ8;O75582;Q15750;Q16829;P62979;Q15759;P0CG47;P45985;O43318;P01100;P18846;Q9BSQ5}
- 1185 Pathogen[ Q85601] interacts with 22 human partners: {Q02078;Q15750;Q9NYJ8;P19419;Q16829;P18846;P0CG48;Q8N5C8;P01100;Q9Y6K9;P16220;P02511;P05412;O75582;P62979;Q15759;P0CG47;P45984;P62987;P15336;O43318;Q9BSQ5}
- 1186 Pathogen[ P14079] interacts with 27 human partners: {Q8N5C8;Q02078;P0CG48;Q06413;O43187;P53779;P52564;O75582;Q16829;P02511;Q15750;P62979;P62987;P45984;P45983;Q9BSQ5;Q16644;Q15759;Q9Y6K9;P45985;P15336;Q13164;P05412;P0CG47;Q9Y239;P01100;P19419}
- 1187 Pathogen[ P03383] interacts with 21 human partners: {O75582;P16220;Q9Y6K9;P62987;P19419;P02511;P18846;O43318;Q8N5C8;Q15759;P01100;P62979;P0CG47;P45984;P0CG48;P15336;Q9NYJ8;Q02078;Q9BSQ5;Q15750;P05412}
- 1188 Pathogen[ P03410] interacts with 25 human partners: {P0CG48;Q9Y239;P19419;Q15750;O75582;O43187;P62979;P01100;P18846;O43318;Q16829;P45985;Q9NYJ8;P02511;Q8N5C8;P16220;P05412;P45984;P62987;P53779;Q02078;Q9Y6K9;P15336;P0CG47;Q9BSQ5}
- 1189 Pathogen[ P14075] interacts with 21 human partners: {Q15750;P05412;Q15759;O75582;P19419;P15336;Q8N5C8;P0CG48;P62979;O43318;P62987;P02511;Q02078;P01100;P0CG47;Q9BSQ5;P16220;Q9Y6K9;P18846;P45984;Q9NYJ8}
- 1190 Pathogen[ P0C206] interacts with 23 human partners: {P0CG48;Q9Y6K9;Q02078;P16220;Q8N5C8;O75582;P45984;P05412;Q9BSQ5;P19419;O43318;P15336;P18846;Q16829;P01100;P62979;Q9NYJ8;P45985;P0CG47;Q15750;P62987;P02511;Q15759}
- 1191 Pathogen[ P03363] interacts with 16 human partners: {Q9NYJ8;P16220;Q9Y6K9;P19419;O43318;Q9BSQ5;Q9BWF3;Q15750;P15336;Q16829;P18846;P62987;P05412;Q8N5C8;P01100;Q02078}
- 1192 [Cluster 109]GO:0051092+P biological\_process [name] positive regulation of NF-kappaB transcription factor activity [def] "Any process that activates or increases the frequency, rate or extent of activity of the transcription factor NF-kappaB." [GOC]
- 1193 Pathogen[ Q2Q067] interacts with 32 human partners: {Q8IUD2;Q8IUC6;Q9NYB0;Q9UDY8;Q15653;Q13077;Q04206;Q12933;Q9NYJ8;O95999;P06748;Q86UE4;Q8N5C8;O75582;P60900;O14862;Q9Y6K9;P61088;P19838;P25963;P0CG47;O14920;Q00653;P0CG48;O43318;P62987;Q13404;O00463;O15111;P32929;Q15750;P62979}
- 1194 Pathogen[ P0C214] interacts with 33 human partners: {Q00653;O15111;Q9NPP4;Q9Y6K9;P19838;Q8IUC6;P06748;Q9UDY8;Q04206;Q13404;Q15653;O43318;Q86UE4;P32929;Q8N5C8;P0CG48;O95999;Q12933;P25963;O75582;P62987;Q15750;Q9NYB0;P10909;P0CG47;O14862;P60900;O00463;P62979;Q8IUD2;O14920;Q9NYJ8;P61088}
- 1195 Pathogen[ P03346] interacts with 36 human partners: {Q9Y6K9;Q13077;O00463;O15111;Q86UE4;P06748;P62987;P25963;Q9BYM8;Q15653;Q9UDY8;P0CG48;Q8IUD2;Q04206;Q13404;O95999;Q8N5C8;P61088;Q96EP0;Q9NPP4;Q9NYJ8;P60900;P32929;Q9NYB0;O75582;Q15750;P62979;Q8IUC6;P0CG47;P19838;O14920;O43318;O14862;P58546;Q00653;Q8N9B4}
- 1196 Pathogen[ Q85601] interacts with 32 human partners: {P60900;Q15750;Q9NYJ8;Q8IUC6;O00463;O15111;Q9UDY8;P0CG48;Q15653;Q13404;Q8N5C8;Q9Y6K9;Q12933;O14920;Q04206;O14862;O75582;P06748;Q86UE4;P62979;P0CG47;Q13077;P62987;Q00653;Q9NYB0;O95999;O43318;P61088;P19838;Q8IUD2;P32929;P25963}
- 1197 Pathogen[ P14079] interacts with 30 human partners: {Q9BXL7;O00463;Q8N5C8;P0CG48;O43187;O95999;O75582;Q8IUC6;Q13404;Q96EP0;Q15750;P10909;P62979;Q8IUD2;P62987;Q13077;P60900;Q9Y6K9;Q9BYM8;Q9NYB0;P32929;Q86UE4;P06748;O14862;Q12933;P0CG47;Q9Y239;Q99836;Q9NPP4;Q15653}
- 1198 Pathogen[ P03383] interacts with 28 human partners: {O75582;O14862;P06748;Q9Y6K9;P62987;Q8IUC6;Q00653;Q86UE4;P60900;Q9NYB0;O14920;O15111;Q15653;O43318;Q8N5C8;P61088;Q12933;Q13404;P25963;O95999;P62979;P0CG47;Q04206;P0CG48;Q8IUD2;Q9NYJ8;P19838;Q15750}
- 1199 Pathogen[ P03410] interacts with 36 human partners: {Q04206;P19838;P0CG48;O14920;Q9Y239;Q13077;P60900;O15111;Q15750;O75582;O14862;P32929;O43187;Q15653;Q9NPP4;P06748;P61088;P62979;O43318;Q8IUD2;O95999;Q9BXL7;O00463;Q9NYJ8;Q86UE4;Q8N5C8;Q12933;P62987;Q8IUC6;Q00653;Q13404;Q9Y6K9;P25963;Q9NYB0;P0CG47;P10909}
- 1200 Pathogen[ P14075] interacts with 28 human partners: {O15111;Q04206;Q15750;Q86UE4;P60900;O75582;P61088;Q8IUD2;Q15653;P25963;Q8N5C8;O14920;P0CG48;P62979;Q12933;O14862;O43318;P62987;P06748;O95999;Q8IUC6;P0CG47;Q13404;P19838;Q00653;Q9Y6K9;Q9NYB0;Q9NYJ8}

1201 Pathogen[ P0C206] interacts with 35 human partners: {P0C206;Q13077;O14920;Q9Y6K9;Q9UDY8;O14862;Q8N5C8;O75582;O95999;P25963;O43318;Q15653;P60900;Q8IUD2;Q12933;P61088;P19838;Q96EP0;Q04206;P32929;O15111;P62979;P10909;Q9NYJ8;O00463;P0CG47;Q9NYB0;Q8IUC6;Q00653;Q86UE4;Q15750;P06748;P62987;Q13404;Q9BYM8}

1202 Pathogen[ P03363] interacts with 25 human partners: {O14920;Q04206;Q96EP0;P25963;O15111;Q9NYJ8;Q9NYB0;Q12933;O00463;Q9Y6K9;O43318;Q86UE4;P06748;Q15750;P61088;Q15653;Q00653;Q13077;P62987;P19838;O14862;Q13404;Q9NP4;Q8N5C8;Q8IUD2}

1203 [Cluster 110]GO:0033566+P biological\_process [name] gamma-tubulin complex localization [def] "Any process in which a gamma-tubulin complex is transported to, or maintained in, a specific location." [GOC

1204 Pathogen[ Q2Q067] interacts with 2 human partners: {Q9P209;Q08AG7}

1205 Pathogen[ P0C214] interacts with 2 human partners: {Q9P209;Q08AG7}

1206 Pathogen[ P03346] interacts with 2 human partners: {Q9P209;Q08AG7}

1207 Pathogen[ Q85601] interacts with 2 human partners: {Q9P209;Q08AG7}

1208 Pathogen[ P14079] interacts with 2 human partners: {Q9P209;Q08AG7}

1209 Pathogen[ P03383] interacts with 2 human partners: {Q08AG7;Q9P209}

1210 Pathogen[ P03410] interacts with 2 human partners: {Q9P209;Q08AG7}

1211 Pathogen[ P14075] interacts with 2 human partners: {Q08AG7;Q9P209}

1212 Pathogen[ P0C206] interacts with 2 human partners: {Q9P209;Q08AG7}

1213 Pathogen[ P03363] interacts with 2 human partners: {Q9P209;Q08AG7}

1214 [Cluster 111]GO:0006607+P biological\_process [name] NLS-bearing substrate import into nucleus [def] "The directed movement of a protein bearing a nuclear localization signal (NLS) from the cytoplasm into the nucleus, across the nuclear membrane." [GOC

1215 Pathogen[ Q2Q067] interacts with 12 human partners: {Q14974;O60684;O00410;Q9UHF7;O15117;Q9NZQ3;O15131;Q9P2R6;O00505;O00629;P52292;P52294}

1216 Pathogen[ P0C214] interacts with 11 human partners: {O15117;Q9UHF7;O60684;Q9P2R6;O15131;P52294;O00505;Q9NZQ3;P52292;Q14974;O00629}

1217 Pathogen[ P03346] interacts with 12 human partners: {Q9UHF7;O00629;O00410;O00505;Q9NZQ3;Q9P2R6;O15131;P52292;O60684;O15117;P52294;Q14974}

1218 Pathogen[ Q85601] interacts with 12 human partners: {Q9P2R6;Q9UHF7;O00629;Q9NZQ3;Q14974;O15131;O15117;P52292;O00505;O60684;P52294;O00410}

1219 Pathogen[ P14079] interacts with 13 human partners: {P52294;O60684;Q14118;O15117;Q9NZQ3;O00410;Q14974;Q9P2R6;O00505;O00629;P52292;Q9UHF7;O15131}

1220 Pathogen[ P03383] interacts with 11 human partners: {Q9P2R6;O00505;O15117;P52292;Q9NZQ3;Q14974;O15131;O00629;Q9UHF7;P52294;O00410}

1221 Pathogen[ P03410] interacts with 13 human partners: {Q9UHF7;Q14974;O00505;Q9P2R6;P52294;Q9NZQ3;O00629;O60684;Q14118;O15117;O00410;P52292;O15131}

1222 Pathogen[ P14075] interacts with 11 human partners: {P52292;O15131;Q9NZQ3;Q9P2R6;O00629;O15117;O00505;P52294;Q9UHF7;O00410;Q14974}

1223 Pathogen[ P0C206] interacts with 12 human partners: {O15131;O00629;O60684;Q14974;O00505;O00410;Q9P2R6;Q9UHF7;O15117;P52294;P52292;Q9NZQ3}

1224 Pathogen[ P03363] interacts with 12 human partners: {Q9UHF7;O60684;O00410;O00505;O00629;O15117;Q14974;Q9NZQ3;O15131;Q9P2R6;P52292;P52294}

1225 [Cluster 112]GO:0006415+P biological\_process [name] translational termination [def] "The process resulting in the release of a polypeptide chain from the ribosome, usually in response to a termination codon (UAA, UAG, or UGA in the universal genetic code)." [GOC

1226 Pathogen[ Q2Q067] interacts with 86 human partners: {P61313;P62701;P47914;Q9H3J6;P46779;Q02543;P26373;P62750;P62273;P15880;P40429;P46782;P35268;P22090;P46778;Q9UGC7;P62888;P32969;P62277;P62241;O75570;P62244;P05387;P62861;P42766;P05386;Q9UNX3;P30050;P18077;P62891;P61927;P39023;P62081;P61247;P61254;P62249;P62280;P83731;P62263;P60866;P62906;Q28878;P62878;P62899;P08708;P08865;Q07020;P62913;P62269;P62424;P62917;P62829;P46783;Q8IYD1;P62495;P36578;P62857;P62847;P49207;P23396;P63173;P18621;P39019;P61353;P62266;P42677;Q9Y3U8;P63220;P62841;P83881;P62987;P50914;P46776;P62854;P62753;P05388;P18124;P62851;P25398;P62910;Q92901;P46781;P27635;P61513;P62945;P62979}

1227 Pathogen[ P0C214] interacts with 85 human partners: {P62861;P84098;P61247;Q9UGC7;P15880;P62081;P42766;P62913;P22090;Q92901;P62249;P62899;P62854;P39019;P62263;P62273;P23396;P18077;P05388;P62847;P62829;P26373;P27635;P46778;P61513;P83881;P62701;P49207;P63220;P08865;P32969;Q02543;P62266;P62277;P50914;P46779;Q14197;P40429;P47914;P63173;P46783;P62280;Q9UNX3;O75570;Q9Y3U8;P30050;P62753;P62910;P62891;P62495;P62269;Q9H3J6;P46781;Q8IYD1;P61254;P62841;P62244;P62987;Q07020;P42677;P62945;P46776;P62241;P46777;P83731;P35268;P62424;P60866;P62857;P61313;P08708;P05387;P25398;P61927;P62750;P62979;P05386;P62851;P46782;P18124;P61353;P36578;P186

- 1228 Pathogen[ P03346] interacts with 87 human  
partners: {P05387;P46779;Q9UGC7;P63173;P62917;P62249;P62913;P62861;P62277;Q02878;P62280;P39023;Q9H3J6;P62987;P61927;Q9UNX3;P62857;P46778;P49207;P62266;P61254;P62495;P62424;P62273;P83731;P60866;P62899;P35268;P62891;P08708;P46782;P61353;P62854;Q9Y3U8;O75570;P47914;P08865;P61313;P25398;P61513;P05388;P62269;Q02543;P42766;P62081;P61247;P18621;Q8IYD1;P46781;P84098;P15880;P50914;P62829;P62979;P39019;P23396;P42677;P62750;P62701;P30050;P62910;P36578;P62847;P62851;P22090;P46777;Q07020;P62263;P62841;P83881;P05386;P18077;P46776;P62241;P62753;P62945;Q92901;P32969;P26373;P18124;P40429;P27635;P46783;P62906;P62244;P62888;P63220}
- 1229 Pathogen[ Q85601] interacts with 87 human  
partners: {P46783;P32969;P61513;P26373;P62857;P62244;P62913;P62854;P62081;P61353;P62891;P46776;P18077;P61313;P05388;P62495;P63173;P23396;P62273;P46778;P62829;P30050;P62753;P27635;P15880;P83881;Q07020;P39019;Q9Y3U8;P62701;P62241;P62424;P83731;P62899;P62945;P62263;P62861;Q02878;P39023;P61254;P49207;O75570;P62910;Q9H3J6;P62249;P62280;P47914;P84098;P08708;P42766;P62269;Q9UGC7;P18621;Q8IYD1;P05387;Q9UNX3;P62277;P35268;P62979;P62847;P42677;P63220;P46782;P46779;P62750;P62851;P62841;P62987;P22090;P61927;P36578;P05386;P08865;P61247;P46777;P62917;Q92901;P18124;P46781;P25398;P08866;Q02543;P62906;P50914;P62266;P40429;P62888}
- 1230 Pathogen[ P14079] interacts with 87 human  
partners: {Q9Y3U8;P27635;P84098;P46779;P26373;P23396;P40429;P18621;P83881;Q9UNX3;P46781;P83731;P61513;P62847;P62753;P39023;P62273;P25398;P62495;Q9H3J6;P18077;O75570;P46783;P61254;P50914;P62979;P62841;P18124;P42766;P62266;P46782;P62987;P62241;Q8IYD1;P32969;P22090;P62829;P60866;P62854;Q07020;P39019;P63220;P49207;P62244;P62263;Q02543;P62424;Q92901;P62277;P62750;P62910;P63173;P46776;P08708;P36578;P62906;P47914;P62280;Q9UGC7;P62899;P61353;P62081;P62945;P46777;P42677;P30050;P62891;P62891;P08865;P61927;P62917;P46778;P62249;Q14197;P05386;P35268;P62913;P05387;P61247;P62269;P62701;P61313;P62851;P05388;P62857;P62861}
- 1231 Pathogen[ P03383] interacts with 87 human  
partners: {P42766;P36578;P05388;P62266;P39019;P26373;Q9H3J6;P62913;P62945;P62854;P40429;P62987;P62891;P25398;P62280;Q07020;P62750;P05387;P62249;P62888;P62899;P61927;P46777;P46779;P49207;P83731;P62424;P18124;P46778;Q92901;P62753;P42677;P61247;P83881;P47914;P62917;P62273;Q9UNX3;P30050;P84098;P32969;P62277;O75570;P18077;P63173;P62081;P61313;P08865;P62851;P62495;P46782;P62269;P63220;Q02543;P62244;Q02878;Q9UGC7;Q8IYD1;P62910;P27635;P62857;P62906;P46783;Q9Y3U8;P60866;P61254;P62979;P62241;P46781;P39023;P62841;P22090;P62701;P62829;P62263;P62847;P35268;P05386;P50914;P62861;P18621;P46776;P15880;P23396;P61513;P08708;P61353}
- 1232 Pathogen[ P03410] interacts with 88 human  
partners: {P62861;P05386;Q02543;P61247;P62241;P62829;P49207;P26373;P61513;P62899;P62244;P62913;Q02878;Q92901;P15880;P46777;P46776;P62841;P30050;P05388;P46781;P18124;P62269;Q07020;P63220;P62910;P62847;P62906;P23396;P18621;P62266;P62249;P63173;P50914;P62280;P22090;P61313;P62979;P62701;P62750;P08865;Q9UNX3;P62277;P36578;P18077;P25398;P61927;P84098;P62854;P62273;P62081;P46783;P62495;Q9UGC7;Q9Y3U8;Q14197;P08708;P46782;P32969;Q9H3J6;P46779;P27635;Q8IYD1;P62987;P62857;P62263;P62424;P62888;P61254;P46778;P62945;P05387;P42766;P39019;P47914;P40429;P39023;O75570;P62917;P62851;P83731;P35268;P61313;P62891;P62753;P83881;P60866;P42677}
- 1233 Pathogen[ P14075] interacts with 87 human  
partners: {P42766;P49207;Q9UGC7;P62857;P46781;P63220;P32969;P62495;P42677;P62913;P22090;Q02878;P62277;P62851;P08865;P62244;P08708;P61254;P46778;P05388;P83881;P46777;Q9Y3U8;P62249;P62081;P62750;P18621;Q02543;P18124;Q9UNX3;P25398;P63173;P30050;P62979;P83731;P84098;P61247;P62753;P46782;P62891;P62861;P18077;P46779;P62917;P39023;P50914;P62269;P62847;P62910;P62273;P40429;P23396;P62241;P15880;P62987;Q8IYD1;P62841;P36578;P62266;Q9H3J6;P61513;P61313;P27635;P62888;Q92901;P35268;P62945;P46776;P46783;P62701;P62899;P47914;P62906;P05386;P61353;P39019;P62424;P62829;P62280;O75570;Q07020;P62263;P62854;P60866;P26373;P05387;P61927}
- 1234 Pathogen[ P0C206] interacts with 88 human  
partners: {P40429;P61313;P27635;P18124;P62854;P49207;P62081;P30050;Q9UGC7;P62241;P62244;P50914;P08865;P62750;P18621;P46781;P62266;Q02543;Q07020;P83881;Q8IYD1;P46778;P62263;P62273;Q02878;P62495;P62280;Q9H3J6;P62857;P62851;P62910;P46782;P61247;P18077;P62913;P61927;P61353;P62888;P36578;P62861;P35268;P23396;P39023;P32969;P62701;P05386;P22090;P84098;P62945;P26373;P46777;P05388;P62979;P62899;P83731;P39019;Q92901;P05387;P46783;P42766;P60866;P62841;Q9UNX3;P61513;P62277;Q14197;P46776;P62906;P63173;P62987;P62891;P62269;P62753;O75570;P46779;P63220;P15880;P25398;P08708;P47914;P62847;P61254;P42677;P62829;P62249;P62424;Q9Y3U8;P62917}
- 1235 Pathogen[ P03363] interacts with 86 human  
partners: {P62913;P18621;P05386;P62750;P23396;P42677;P63173;P08865;P62847;O75570;P18077;P05387;P84098;P42766;P62249;P05388;P36578;P62753;P62081;P62910;P61513;P46776;P61254;P62273;P32969;Q92901;Q8IYD1;P46778;P61927;P62891;P61353;P08708;P15880;P62495;P26373;P83881;P22090;P62861;P62841;Q9UNX3;P30050;P62829;P46782;P35268;P46781;P50914;P63220;P61313;P39019;P46779;Q02543;P46777;P62987;P25398;Q9H3J6;P83731;P62851;P62280;Q9Y3U8;P62888;P62244;P62277;P62906;P62266;P62945;P49207;P62241;P62424;P60866;P61247;P62899;P62857;Q02878;Q07020;P39023;P62854;P62917;P18124;P40429;P27635;P62263;P47914;P62701;P62269;P46783;Q9UGC7}
- 1236 [Cluster 113]GO:0045930+P biological\_process [name] negative regulation of mitotic cell cycle [def] "Any process that stops, prevents or reduces the rate or extent of progression through the mitotic cell cycle." [GOC



1237 Pathogen[ Q2Q067] interacts with 4 human partners:{Q14160;Q12959;P84022;P46527}  
1238 Pathogen[ POC214] interacts with 4 human partners:{P84022;P46527;Q12959;Q14160}  
1239 Pathogen[ P03346] interacts with 5 human  
partners:{P84022;Q9UPQ4;Q14160;P46527;Q12959}  
1240 Pathogen[ Q85601] interacts with 6 human  
partners:{Q9NY30;Q9UPQ4;Q14160;P84022;Q12959;P46527}  
1241 Pathogen[ P14079] interacts with 4 human partners:{P54826;Q9NY30;P46527;Q14201}  
1242 Pathogen[ P03383] interacts with 3 human partners:{Q14160;P84022;P46527}  
1243 Pathogen[ P03410] interacts with 8 human  
partners:{P84022;P46527;Q9NY30;Q12959;Q9UPQ4;Q14160;P54826;Q14201}  
1244 Pathogen[ P14075] interacts with 4 human partners:{Q14160;P46527;P84022;P54826}  
1245 Pathogen[ POC206] interacts with 7 human  
partners:{P84022;Q9NY30;Q9UPQ4;Q14160;P46527;P54826;Q12959}  
1246 Pathogen[ P03363] interacts with 4 human partners:{Q12959;Q14160;Q14201;P84022}  
1247 [Cluster 114]GO:0003309+P biological\_process [name] type B pancreatic cell  
differentiation [def] "The process in which relatively unspecialized cells acquire  
specialized structural and/or functional features of a type B pancreatic cell. A type B  
pancreatic cell is a cell located towards center of the islets of Langerhans that  
secretes insulin." [CL  
1248 Pathogen[ Q2Q067] interacts with 1 human partners:{Q8HWS3}  
1249 Pathogen[ POC214] interacts with 1 human partners:{Q8HWS3}  
1250 Pathogen[ P03346] interacts with 1 human partners:{Q8HWS3}  
1251 Pathogen[ Q85601] interacts with 1 human partners:{Q8HWS3}  
1252 Pathogen[ P14079] interacts with 1 human partners:{Q8HWS3}  
1253 Pathogen[ P03383] interacts with 1 human partners:{Q8HWS3}  
1254 Pathogen[ P03410] interacts with 1 human partners:{Q8HWS3}  
1255 Pathogen[ P14075] interacts with 1 human partners:{Q8HWS3}  
1256 Pathogen[ POC206] interacts with 1 human partners:{Q8HWS3}  
1257 Pathogen[ P03363] interacts with 1 human partners:{Q8HWS3}  
1258 [Cluster 115]GO:0030030+P biological\_process [name] cell projection organization  
[def] "A process that is carried out at the cellular level which results in the  
assembly, arrangement of constituent parts, or disassembly of a prolongation or process  
extending from a cell, e.g. a flagellum or axon." [GOC  
1259 Pathogen[ Q2Q067] interacts with 19 human  
partners:{Q8WW24;P31749;P10155;Q9UPV0;D6RGH6;Q8TCI5;Q8IY31;Q9BYV8;Q9NXB0;P06396;O150  
78;Q9NVD7;O75665;Q96NB1;Q5TZA2;A6NIH7;Q9BPU9;Q15154;Q96GV9}  
1260 Pathogen[ POC214] interacts with 19 human  
partners:{O15078;D6RGH6;Q15154;Q8IY31;Q96GV9;Q9BYV8;Q8WW24;Q8TCI5;P06396;Q9UPV0;Q9NX  
B0;Q9BPU9;O75665;A6NIH7;Q9NVD7;P10155;Q96NB1;P31749;Q5TZA2}  
1261 Pathogen[ P03346] interacts with 32 human  
partners:{Q9BPU9;Q8IY31;Q15154;Q96GV9;Q9UIF3;Q9H3S7;Q8N9W5;Q9HBG6;D6RGH6;Q9BT04;Q8TA  
M2;P10155;Q9NXB0;O75665;P31749;Q8N0X2;Q8N157;Q9NVD7;Q9BYV8;Q96PY6;Q5TZA2;A6NIH7;Q8TC  
I5;P06396;O15078;Q96FT9;Q8IWN7;O14965;Q8WW24;Q92834;Q96NB1;Q9UPV0}  
1262 Pathogen[ Q85601] interacts with 23 human  
partners:{Q9NVD7;P31749;P06396;Q15154;Q96PY6;P10155;O15078;D6RGH6;Q92834;Q8TCI5;O149  
65;Q9UPV0;Q8WW24;Q9NXB0;O75665;Q9BYV8;Q9BPU9;Q5TZA2;A6NIH7;Q9BT04;Q96GV9;Q8IY31;Q96N  
B1}  
1263 Pathogen[ P14079] interacts with 49 human  
partners:{Q9PON5;Q8N4P2;Q5TZA2;P10155;Q5JQC9;O95876;Q8IY31;Q9NPI0;D6RGH6;A6NIH7;Q8N9  
W5;Q96GX1;Q86WT1;Q8N0X2;P47756;Q8N157;Q96Q45;Q92834;Q8IWN7;Q9GZS0;P56715;A0AVF1;Q9UP  
M9;Q9UI46;P61158;Q8TCI5;Q8TAM2;Q9BPU9;Q9P2L0;Q8IW40;Q9NZ20;Q8WW24;Q8TC44;Q8NA54;O150  
78;Q9UIF3;Q9P2K1;O75665;Q15154;O14965;Q9NVD7;O15259;Q96FT9;Q9NXB0;Q9BYV8;Q9UPV0;Q96N  
B1;Q96GV9;Q9BT04}  
1264 Pathogen[ P03383] interacts with 20 human  
partners:{Q8IY31;P31749;D6RGH6;P10155;Q8TCI5;Q5TZA2;Q96NB1;Q9NXB0;O15078;Q15154;Q8WW  
24;Q9BYV8;O14965;Q9UPV0;Q96PY6;A6NIH7;O75665;Q9BT04;Q96GV9;P06396}  
1265 Pathogen[ P03410] interacts with 51 human  
partners:{O75665;Q8NA54;Q96NB1;P47756;Q15154;Q9UI46;O15259;Q96FT9;Q8N0X2;Q96RY7;P063  
96;Q96Q45;Q8TAM2;D6RGH6;Q5JQC9;A0AVF1;P31749;Q9UIF3;Q8TCX1;Q9BYV8;Q8N9W5;A6NIH7;O149  
65;Q96GX1;Q9BT04;Q9NPI0;Q8N4P2;Q9BPU9;Q8IY31;Q5TZA2;Q8N157;Q9PON5;O15078;Q9P2K1;Q9UP  
M9;Q92834;O95876;Q9NZ20;Q8TC44;Q8IW40;Q8TCI5;Q9HBG6;Q9UPV0;Q96GV9;Q9NVD7;Q9NXB0;Q9P2  
L0;Q8IWN7;Q9GZS0;P56715;P10155}  
1266 Pathogen[ P14075] interacts with 21 human  
partners:{Q9BYV8;Q96GV9;Q8IY31;Q9BT04;Q5TZA2;Q9UPV0;P10155;P31749;Q9NXB0;O15078;O149  
65;Q96NB1;Q9BPU9;P06396;Q8TCI5;Q15154;Q96PY6;A6NIH7;O75665;D6RGH6;Q8N9W5}  
1267 Pathogen[ POC206] interacts with 37 human  
partners:{Q9BPU9;Q8TCI5;P06396;P31749;P56715;P47756;Q5JQC9;Q9UPM9;Q8TAM2;Q8IY31;Q9BT  
04;Q9NVD7;Q5TZA2;Q9P2K1;Q9UIF3;Q96PY6;Q9UPV0;Q96GV9;D6RGH6;Q8IWN7;P10155;O15078;Q8NA  
54;Q8N157;Q9BYV8;Q8N9W5;O75665;A6NIH7;O14965;Q15154;Q9NXB0;Q96NB1;Q96FT9;O95876;Q928  
34;Q8IW40;Q8WW24}  
1268 Pathogen[ P03363] interacts with 37 human  
partners:{Q8N0X2;Q9H3S7;P56715;Q8TAM2;Q9BYV8;O15078;Q9GZS0;Q9P2K1;Q8TCI5;P06396;Q5TZ  
A2;P10155;Q8N157;Q8IY31;P31749;Q9BPU9;Q9HBG6;Q9BT04;Q96NB1;D6RGH6;Q9UPV0;Q8IW40;A6NI  
H7;Q9UIF3;Q96GV9;Q92834;Q8IWN7;O15259;Q96FT9;Q9NVD7;Q9UI46;Q9NXB0;Q15154;Q8TC44;Q8WW  
24;Q8N9W5;O75665}  
1269 [Cluster 116]GO:0071816+P biological\_process [name] tail-anchored membrane protein

insertion into ER membrane [def] "A process of protein insertion into the endoplasmic reticulum (ER) membrane in which a tail-anchored (TA) transmembrane protein is incorporated into an endoplasmic reticulum (ER) membrane. TA transmembrane protein, also named type II transmembrane proteins, contain a single C- terminal transmembrane region." [GOC

1270 Pathogen[ Q2Q067] interacts with 2 human partners:{Q7L5D6;P11441}

1271 Pathogen[ P0C214] interacts with 3 human partners:{P46379;P11441;Q7L5D6}

1272 Pathogen[ P03346] interacts with 3 human partners:{Q7L5D6;P11441;P46379}

1273 Pathogen[ Q85601] interacts with 3 human partners:{P46379;Q7L5D6;P11441}

1274 Pathogen[ P14079] interacts with 2 human partners:{Q7L5D6;P11441}

1275 Pathogen[ P03383] interacts with 2 human partners:{Q7L5D6;P11441}

1276 Pathogen[ P03410] interacts with 2 human partners:{Q7L5D6;P11441}

1277 Pathogen[ P14075] interacts with 2 human partners:{P11441;Q7L5D6}

1278 Pathogen[ P0C206] interacts with 3 human partners:{P11441;Q7L5D6;P46379}

1279 Pathogen[ P03363] interacts with 3 human partners:{P46379;P11441;Q7L5D6}

1280 [Cluster 117]GO:0010866+P biological\_process [name] regulation of triglyceride biosynthetic process [def] "Any process that modulates the rate, frequency, or extent of triglyceride biosynthesis. Triglyceride biosynthesis is the collection of chemical reactions and pathways resulting in the formation of triglyceride, any triester of glycerol." [GOC

1281 Pathogen[ Q2Q067] interacts with 1 human partners:{Q92748}

1282 Pathogen[ P0C214] interacts with 1 human partners:{Q92748}

1283 Pathogen[ P03346] interacts with 1 human partners:{Q92748}

1284 Pathogen[ Q85601] interacts with 1 human partners:{Q92748}

1285 Pathogen[ P14079] interacts with 2 human partners:{Q8N6M3;Q92748}

1286 Pathogen[ P03383] interacts with 1 human partners:{Q92748}

1287 Pathogen[ P03410] interacts with 2 human partners:{Q92748;Q8N6M3}

1288 Pathogen[ P14075] interacts with 2 human partners:{Q92748;Q8N6M3}

1289 Pathogen[ P0C206] interacts with 2 human partners:{Q8N6M3;Q92748}

1290 Pathogen[ P03363] interacts with 1 human partners:{Q92748}

1291 [Cluster 118]GO:0070060+P biological\_process [name] 'de novo' actin filament nucleation [def] "The actin nucleation process in which actin monomers combine in the absence of any existing actin filaments\_ elongation of the actin oligomer formed by nucleation leads to the formation of an unbranched filament." [GOC

1292 Pathogen[ Q2Q067] interacts with 1 human partners:{Q8N9B5}

1293 Pathogen[ P0C214] interacts with 1 human partners:{Q8N9B5}

1294 Pathogen[ P03346] interacts with 1 human partners:{Q8N9B5}

1295 Pathogen[ Q85601] interacts with 1 human partners:{Q8N9B5}

1296 Pathogen[ P14079] interacts with 1 human partners:{Q8N9B5}

1297 Pathogen[ P03383] interacts with 1 human partners:{Q8N9B5}

1298 Pathogen[ P03410] interacts with 1 human partners:{Q8N9B5}

1299 Pathogen[ P14075] interacts with 1 human partners:{Q8N9B5}

1300 Pathogen[ P0C206] interacts with 1 human partners:{Q8N9B5}

1301 Pathogen[ P03363] interacts with 1 human partners:{Q8N9B5}

1302 [Cluster 119]GO:0031122+P biological\_process [name] cytoplasmic microtubule organization [def] "A process that is carried out at the cellular level which results in the assembly, arrangement of constituent parts, or disassembly of structures formed of microtubules and associated proteins in the cytoplasm of a cell." [GOC

1303 Pathogen[ Q2Q067] interacts with 2 human partners:{Q9P270;Q86VS8}

1304 Pathogen[ P0C214] interacts with 2 human partners:{Q86VS8;Q9P270}

1305 Pathogen[ P03346] interacts with 3 human partners:{Q86VS8;Q9P021;Q9P270}

1306 Pathogen[ Q85601] interacts with 2 human partners:{Q86VS8;Q9P270}

1307 Pathogen[ P14079] interacts with 4 human partners:{Q86VS8;Q9NZ72;Q9P270;Q9P021}

1308 Pathogen[ P03383] interacts with 2 human partners:{Q86VS8;Q9P270}

1309 Pathogen[ P03410] interacts with 4 human partners:{Q86VS8;Q9NZ72;Q9P021;Q9P270}

1310 Pathogen[ P14075] interacts with 2 human partners:{Q86VS8;Q9P270}

1311 Pathogen[ P0C206] interacts with 4 human partners:{Q9P021;Q86VS8;Q9NZ72;Q9P270}

1312 Pathogen[ P03363] interacts with 3 human partners:{Q9P021;Q86VS8;Q9P270}

1313 [Cluster 120]GO:0050434+P biological\_process [name] positive regulation of viral transcription [def] "Any process that activates or increases the frequency, rate or extent of viral transcription." [GOC

1314 Pathogen[ Q2Q067] interacts with 41 human partners:{P52434;P07737;O00267;Q13889;P19388;P52435;P32780;P18615;P30876;P19387;P61218;Q92759;O60563;P62487;P55199;P51948;Q15370;P50750;Q9Y5B0;Q13233;P50613;P13984;Q15369;P62875;P24928;Q96T23;P23193;Q09161;Q8IXH7;Q9H3P2;P52298;P35269;P63272;P53803;Q14241;Q9Y5B9;Q9P1T7;Q13888;P51946;Q8WX92;Q08945}

1315 Pathogen[ P0C214] interacts with 39 human partners:{P51946;Q8WX92;Q09161;P30876;P53803;P35269;P50750;O00267;P50613;P52435;P61218;Q15370;P18615;P52298;P62487;Q13233;P51948;Q15369;P55199;P63272;Q9Y5B9;Q9P1T7;P62875;P13984;P32780;P24928;O60563;Q96T23;Q9Y5B0;Q13888;P52434;Q08945;Q8IXH7;Q9H3P2;P19387;P23193;P19388;Q92759;Q14241}

1316 Pathogen[ P03346] interacts with 41 human partners:{Q15370;Q09161;P52434;Q8IXH7;O60563;Q13888;Q9H3P2;P53803;P61218;P63272;P52298;Q08945;Q13889;Q9Y5B0;P62487;P19388;P13984;P52435;P51946;P50750;Q9Y5B9;P36954;Q96T23;Q13233;O00267;Q8WX92;Q92759;P55199;P30876;Q15369;P35269;P07737;P24928;P23193;Q9P1T7;P51948;P32780;P18615;P62875;P19387;Q14241}

1317 Pathogen[ Q85601] interacts with 42 human partners: {P51946;P36954;Q15370;O60563;P50750;Q96T23;Q13888;Q14241;Q9H3P2;P53803;P61218;Q9Y5B9;P51948;P18615;Q09161;Q8WX92;P07737;P62487;P19388;P13984;Q92759;P32780;Q9Y5B0;P52435;P35269;Q15369;P50613;O00267;P23193;P55199;Q8IXH7;Q08945;P19387;P63272;P24928;P52298;Q13233;P30876;P52434;Q9P1T7;P19447;P62875}

1318 Pathogen[ P14079] interacts with 42 human partners: {Q9Y5B9;P62875;P55199;Q96T23;Q08945;Q14241;P19387;Q9Y5B0;P35269;P51946;Q8IXH7;P62487;P52434;P52298;O15514;P30876;P61218;Q9H3P2;P07737;Q13889;P53803;P18615;P50613;Q13888;P19388;P52435;P63272;Q15370;Q92759;Q8WX92;P32780;P23193;P13984;Q9P1T7;P24928;Q15369;O00267;P36954;P19447;Q09161;P50750;P51948}

1319 Pathogen[ P03383] interacts with 40 human partners: {P53803;P55199;Q15369;P63272;Q9H3P2;P35269;P51948;Q13233;Q13888;P23193;P52434;P61218;Q08945;Q96T23;P07737;O00267;Q09161;P62487;Q8IXH7;P19387;O60563;P50613;P13984;P51946;P24928;P50750;Q92759;P52298;P62875;P52435;Q9Y5B0;Q15370;P19388;Q9P1T7;P30876;Q14241;Q9Y5B9;P32780;P18615;Q8WX92}

1320 Pathogen[ P03410] interacts with 44 human partners: {Q08945;P19387;Q96T23;Q13889;P18615;P36954;Q9H3P2;O00267;Q9Y5B9;P63272;P24928;P51946;P30876;Q15370;Q13233;P23193;O15514;P50613;P50750;O60563;P55199;Q8IXH7;Q8WX92;Q15369;Q9P1T7;P52435;P52298;P53803;P19447;P62875;P35269;P61218;P51948;Q9Y5B0;Q13888;P52434;P13984;P62487;Q09161;P19388;Q14241;P32780;P07737;Q92759}

1321 Pathogen[ P14075] interacts with 41 human partners: {Q09161;P13984;Q92759;P18615;Q08945;P30876;O60563;Q9Y5B0;P50613;Q14241;Q9P1T7;P19388;P61218;P50750;P19387;P07737;P62487;Q15370;P23193;Q13889;Q9Y5B9;P24928;P35269;P51946;P32780;P55199;Q96T23;Q9H3P2;P62875;Q8IXH7;Q13233;O00267;Q15369;P52434;P63272;P51948;P52298;Q8WX92;P52435;P53803;Q13888}

1322 Pathogen[ P0C206] interacts with 44 human partners: {P62875;Q8IXH7;P23193;P52298;P36954;P50750;Q09161;P19388;P61218;Q96T23;Q9Y5B9;Q14241;Q13233;P13984;P19447;P53803;O15514;P35269;Q9Y5B0;P19387;Q13888;P50613;P18615;Q92759;Q15370;O00267;Q9H3P2;P52435;P62487;P32780;Q13889;Q8WX92;P24928;P55199;P07737;O60563;Q15369;Q08945;Q9P1T7;P52434;P51946;P63272;P51948;P30876}

1323 Pathogen[ P03363] interacts with 37 human partners: {Q9Y5B0;Q15370;P19388;P13984;O60563;P55199;Q8WX92;P30876;Q13888;P32780;Q92759;P19387;P61218;P51946;P24928;O00267;Q15369;Q8IXH7;P18615;P35269;Q96T23;Q9P1T7;Q9Y5B9;Q14241;Q9H3P2;P52298;P62487;P23193;P63272;P50750;Q08945;P53803;P52435;P52434;Q13233;P07737;Q09161}

1324 [Cluster 121]GO:0070358+P biological\_process [name] actin polymerization-dependent cell motility [def] "A process involved in the controlled movement of a bacterial cell powered by the continuous polymerization of actin at one pole of the cell." [GOC

1325 Pathogen[ Q2Q067] interacts with 1 human partners: {Q8N9B5}

1326 Pathogen[ P0C214] interacts with 1 human partners: {Q8N9B5}

1327 Pathogen[ P03346] interacts with 1 human partners: {Q8N9B5}

1328 Pathogen[ Q85601] interacts with 1 human partners: {Q8N9B5}

1329 Pathogen[ P14079] interacts with 1 human partners: {Q8N9B5}

1330 Pathogen[ P03383] interacts with 1 human partners: {Q8N9B5}

1331 Pathogen[ P03410] interacts with 1 human partners: {Q8N9B5}

1332 Pathogen[ P14075] interacts with 1 human partners: {Q8N9B5}

1333 Pathogen[ P0C206] interacts with 1 human partners: {Q8N9B5}

1334 Pathogen[ P03363] interacts with 1 human partners: {Q8N9B5}

1335 [Cluster 122]GO:0016180+P biological\_process [name] snRNA processing [def] "Any process involved in the conversion of a primary small nuclear RNA (snRNA) transcript into a mature snRNA molecule." [GOC

1336 Pathogen[ Q2Q067] interacts with 9 human partners: {Q9NVH2;Q96HW7;Q9NV88;Q9NVR2;Q96CB8;Q6P9B9;Q68E01;Q75QN2;Q9UL03}

1337 Pathogen[ P0C214] interacts with 8 human partners: {Q9NVH2;Q68E01;Q96HW7;Q75QN2;Q9NV88;Q96CB8;Q9NVR2;Q9UL03}

1338 Pathogen[ P03346] interacts with 10 human partners: {Q6P9B9;Q9H0H0;Q96HW7;Q75QN2;Q68E01;Q9NVH2;Q9NV88;Q96CB8;Q9UL03;Q9NVR2}

1339 Pathogen[ Q85601] interacts with 7 human partners: {Q96CB8;Q68E01;Q75QN2;Q9NVR2;Q9NV88;Q9UL03;Q96HW7}

1340 Pathogen[ P14079] interacts with 11 human partners: {Q9NV88;Q96CB8;Q9NVR2;Q75QN2;Q6P9B9;Q9NVH2;Q8N201;Q68E01;Q9H0H0;Q9UL03;Q96HW7}

1341 Pathogen[ P03383] interacts with 9 human partners: {Q68E01;Q75QN2;Q6P9B9;Q9NV88;Q96HW7;Q96CB8;Q9UL03;Q9NVH2;Q9NVR2}

1342 Pathogen[ P03410] interacts with 11 human partners: {Q9NVR2;Q96CB8;Q9UL03;Q8N201;Q9H0H0;Q9NV88;Q9NVH2;Q96HW7;Q68E01;Q75QN2;Q6P9B9}

1343 Pathogen[ P14075] interacts with 9 human partners: {Q75QN2;Q68E01;Q9NVR2;Q96HW7;Q9NVH2;Q6P9B9;Q9UL03;Q9NV88;Q96CB8}

1344 Pathogen[ P0C206] interacts with 11 human partners: {Q68E01;Q9NV88;Q9NVH2;Q9UL03;Q9H0H0;Q96HW7;Q96CB8;Q75QN2;Q9NVR2;Q6P9B9;Q8N201}

1345 Pathogen[ P03363] interacts with 10 human partners: {Q9NVR2;Q96HW7;Q75QN2;Q9UL03;Q6P9B9;Q9NVH2;Q9H0H0;Q68E01;Q9NV88;Q96CB8}

1346 [Cluster 123]GO:0050730+P biological\_process [name] regulation of peptidyl-tyrosine phosphorylation [def] "Any process that modulates the frequency, rate or extent of the

phosphorylation of peptidyl-tyrosine." [GOC

1347 Pathogen[ Q2Q067] interacts with 1 human partners:{Q15173}

1348 Pathogen[ P0C214] interacts with 1 human partners:{Q15173}

1349 Pathogen[ P03346] interacts with 1 human partners:{Q15173}

1350 Pathogen[ Q85601] interacts with 1 human partners:{Q15173}

1351 Pathogen[ P14079] interacts with 1 human partners:{Q15173}

1352 Pathogen[ P03383] interacts with 1 human partners:{Q15173}

1353 Pathogen[ P03410] interacts with 1 human partners:{Q15173}

1354 Pathogen[ P14075] interacts with 1 human partners:{Q15173}

1355 Pathogen[ P0C206] interacts with 1 human partners:{Q15173}

1356 Pathogen[ P03363] interacts with 1 human partners:{Q15173}

1357 [Cluster 124]GO:0034446+P biological\_process [name] substrate adhesion-dependent cell spreading [def] "The morphogenetic process that results in flattening of a cell as a consequence of its adhesion to a substrate." [GOC

1358 Pathogen[ Q2Q067] interacts with 3 human partners:{Q9NQ31;Q9NVD7;P63000}

1359 Pathogen[ P0C214] interacts with 3 human partners:{P63000;Q9NQ31;Q9NVD7}

1360 Pathogen[ P03346] interacts with 4 human partners:{Q9NQ31;Q9NVD7;Q9C0H9;P63000}

1361 Pathogen[ Q85601] interacts with 3 human partners:{Q9NVD7;P63000;Q9NQ31}

1362 Pathogen[ P14079] interacts with 3 human partners:{Q9NQ31;Q9C0H9;Q9NVD7}

1363 Pathogen[ P03383] interacts with 3 human partners:{Q9NQ31;P63000;Q9C0H9}

1364 Pathogen[ P03410] interacts with 4 human partners:{P63000;Q9NVD7;Q9C0H9;Q9NQ31}

1365 Pathogen[ P14075] interacts with 3 human partners:{Q9NQ31;P63000;Q9C0H9}

1366 Pathogen[ P0C206] interacts with 4 human partners:{Q9NVD7;P63000;Q9C0H9;Q9NQ31}

1367 Pathogen[ P03363] interacts with 4 human partners:{P63000;Q9NQ31;Q9NVD7;Q9C0H9}

1368 [Cluster 125]GO:0008217+P biological\_process [name] regulation of blood pressure [def] "Any process that modulates the force with which blood travels through the circulatory system. The process is controlled by a balance of processes that increase pressure and decrease pressure." [GOC

1369 Pathogen[ Q2Q067] interacts with 4 human partners:{Q6RW13;P30793;P68871;P29474}

1370 Pathogen[ P0C214] interacts with 6 human partners:{P29474;Q6RW13;P30793;P68871;P62736;P13533}

1371 Pathogen[ P03346] interacts with 4 human partners:{P29474;P62736;P68871;Q6RW13}

1372 Pathogen[ Q85601] interacts with 6 human partners:{P13533;P30793;Q6RW13;P29474;P68871;P62736}

1373 Pathogen[ P14079] interacts with 6 human partners:{P13498;Q6RW13;P51606;O60895;P30793;P68871}

1374 Pathogen[ P03383] interacts with 3 human partners:{Q6RW13;P29474;P68871}

1375 Pathogen[ P03410] interacts with 9 human partners:{P51606;P62736;O60895;P10645;P30793;P29474;P68871;Q6RW13;P13533}

1376 Pathogen[ P14075] interacts with 4 human partners:{P29474;P68871;Q6RW13;P30793}

1377 Pathogen[ P0C206] interacts with 6 human partners:{P68871;P13533;P62736;P30793;Q6RW13;P29474}

1378 Pathogen[ P03363] interacts with 3 human partners:{P29474;P68871;P62736}

1379 [Cluster 126]GO:0061303+P biological\_process [name] cornea development in camera-type eye [def] "The progression of the cornea over time, from its formation to the mature structure. The cornea is the transparent structure that covers the anterior of the eye." [GOC

1380 Pathogen[ Q2Q067] interacts with 2 human partners:{Q99456;Q8WVJ9}

1381 Pathogen[ P0C214] interacts with 2 human partners:{Q99456;Q8WVJ9}

1382 Pathogen[ P03346] interacts with 2 human partners:{Q8WVJ9;Q99456}

1383 Pathogen[ Q85601] interacts with 2 human partners:{Q99456;Q8WVJ9}

1384 Pathogen[ P14079] interacts with 2 human partners:{Q99456;Q8WVJ9}

1385 Pathogen[ P03383] interacts with 2 human partners:{Q8WVJ9;Q99456}

1386 Pathogen[ P03410] interacts with 2 human partners:{Q8WVJ9;Q99456}

1387 Pathogen[ P14075] interacts with 2 human partners:{Q8WVJ9;Q99456}

1388 Pathogen[ P0C206] interacts with 2 human partners:{Q8WVJ9;Q99456}

1389 Pathogen[ P03363] interacts with 2 human partners:{Q99456;Q8WVJ9}

1390 [Cluster 127]GO:0051026+P biological\_process [name] chiasma assembly [def] "The cell cycle process in which a connection between chromatids assembles, indicating where an exchange of homologous segments has taken place by the crossing-over of non-sister chromatids." [http

1391 Pathogen[ Q2Q067] interacts with 2 human partners:{P63146;Q8IYF3}

1392 Pathogen[ P0C214] interacts with 3 human partners:{Q9NPC3;Q8IYF3;P63146}

1393 Pathogen[ P03346] interacts with 3 human partners:{Q8IYF3;P63146;Q9NPC3}

1394 Pathogen[ Q85601] interacts with 3 human partners:{P63146;Q8IYF3;Q9NPC3}

1395 Pathogen[ P14079] interacts with 4 human partners:{O43196;Q9NPC3;P63146;Q8IYF3}

1396 Pathogen[ P03383] interacts with 2 human partners:{Q8IYF3;P63146}

1397 Pathogen[ P03410] interacts with 4 human partners:{Q9NPC3;P63146;O43196;Q8IYF3}

1398 Pathogen[ P14075] interacts with 2 human partners:{P63146;Q8IYF3}

1399 Pathogen[ P0C206] interacts with 3 human partners:{Q9NPC3;Q8IYF3;P63146}

1400 Pathogen[ P03363] interacts with 2 human partners:{Q9NPC3;P63146}

1401 [Cluster 128]GO:0050708+P biological\_process [name] regulation of protein secretion [def] "Any process that modulates the frequency, rate or extent of the controlled release of a protein from a cell or group of cells." [GOC

1402 Pathogen[ Q2Q067] interacts with 1 human partners:{P35900}

1403 Pathogen[ P0C214] interacts with 1 human partners:{P35900}

1404 Pathogen[ P03346] interacts with 3 human partners:{Q96KC8;P35900;P53367}  
1405 Pathogen[ Q85601] interacts with 1 human partners:{P35900}  
1406 Pathogen[ P14079] interacts with 2 human partners:{P35900;P0DJI8}  
1407 Pathogen[ P03383] interacts with 1 human partners:{P35900}  
1408 Pathogen[ P03410] interacts with 3 human partners:{P0DJI8;P53367;P35900}  
1409 Pathogen[ P14075] interacts with 1 human partners:{P35900}  
1410 Pathogen[ P0C206] interacts with 1 human partners:{P35900}  
1411 Pathogen[ P03363] interacts with 1 human partners:{P35900}  
1412 [Cluster 129]GO:0033158+P biological\_process [name] regulation of protein import into nucleus, translocation [def] "Any process that modulates the vectorial transfer of a protein from the cytoplasm into the nucleus, across the nuclear membrane." [GOC  
1413 Pathogen[ Q2Q067] interacts with 3 human partners:{P10599;O15527;P38936}  
1414 Pathogen[ P0C214] interacts with 3 human partners:{P38936;P10599;O15527}  
1415 Pathogen[ P03346] interacts with 3 human partners:{P10599;P38936;O15527}  
1416 Pathogen[ Q85601] interacts with 3 human partners:{O15527;P10599;P38936}  
1417 Pathogen[ P14079] interacts with 3 human partners:{O15527;P38936;P10599}  
1418 Pathogen[ P03383] interacts with 2 human partners:{O15527;P10599}  
1419 Pathogen[ P03410] interacts with 3 human partners:{P10599;P38936;O15527}  
1420 Pathogen[ P14075] interacts with 2 human partners:{O15527;P10599}  
1421 Pathogen[ P0C206] interacts with 3 human partners:{O15527;P38936;P10599}  
1422 Pathogen[ P03363] interacts with 1 human partners:{O15527}  
1423 [Cluster 130]GO:0007130+P biological\_process [name] synaptonemal complex assembly [def] "The cell cycle process in which the synaptonemal complex is formed. This is a structure that holds paired chromosomes together during prophase I of meiosis and that promotes genetic recombination." [ISBN  
1424 Pathogen[ Q2Q067] interacts with 5 human partners:{Q9UHC1;Q8IYF3;A1L190;Q9UJ98;Q9BX26}  
1425 Pathogen[ P0C214] interacts with 7 human partners:{A1L190;P46379;Q9UJ98;Q9BXT5;Q9UHC1;Q9BX26;Q8IYF3}  
1426 Pathogen[ P03346] interacts with 8 human partners:{Q9BXT5;Q9BX26;Q8IYF3;Q9UHC1;Q9UJ98;P46379;A1L190;Q92791}  
1427 Pathogen[ Q85601] interacts with 7 human partners:{Q9BXT5;Q8IYF3;P46379;Q9BX26;Q9UJ98;Q9UHC1;A1L190}  
1428 Pathogen[ P14079] interacts with 8 human partners:{Q9BXT5;Q9UHC1;Q9UJ98;Q86X24;Q92791;Q9BX26;Q8IYF3;A1L190}  
1429 Pathogen[ P03383] interacts with 5 human partners:{Q9UJ98;Q9UHC1;Q8IYF3;A1L190;Q9BX26}  
1430 Pathogen[ P03410] interacts with 7 human partners:{Q92791;Q9BX26;Q9BXT5;Q9UJ98;A1L190;Q8IYF3;Q9UHC1}  
1431 Pathogen[ P14075] interacts with 6 human partners:{Q9BX26;A1L190;Q9UJ98;Q9UHC1;Q9BXT5;Q8IYF3}  
1432 Pathogen[ P0C206] interacts with 8 human partners:{A1L190;Q92791;Q9UHC1;Q9UJ98;Q9BXT5;Q9BX26;Q8IYF3;P46379}  
1433 Pathogen[ P03363] interacts with 7 human partners:{P46379;Q9UJ98;Q9UHC1;Q92791;Q9BXT5;Q9BX26;A1L190}  
1434 [Cluster 131]GO:0006474+P biological\_process [name] N-terminal protein amino acid acetylation [def] "The acetylation of the N-terminal amino acid of proteins." [GOC  
1435 Pathogen[ Q2Q067] interacts with 3 human partners:{Q9GZZ1;P41227;Q9BXJ9}  
1436 Pathogen[ P0C214] interacts with 4 human partners:{P41227;Q16613;Q9GZZ1;Q9BXJ9}  
1437 Pathogen[ P03346] interacts with 4 human partners:{P41227;Q6N069;Q9BXJ9;Q9GZZ1}  
1438 Pathogen[ Q85601] interacts with 5 human partners:{Q6N069;Q9GZZ1;Q16613;P41227;Q9BXJ9}  
1439 Pathogen[ P14079] interacts with 5 human partners:{P41227;Q9BXJ9;Q16613;Q9GZZ1;Q6N069}  
1440 Pathogen[ P03383] interacts with 4 human partners:{Q9GZZ1;P41227;Q16613;Q9BXJ9}  
1441 Pathogen[ P03410] interacts with 5 human partners:{Q9GZZ1;P41227;Q6N069;Q16613;Q9BXJ9}  
1442 Pathogen[ P14075] interacts with 4 human partners:{P41227;Q9BXJ9;Q16613;Q9GZZ1}  
1443 Pathogen[ P0C206] interacts with 5 human partners:{Q9GZZ1;P41227;Q6N069;Q16613;Q9BXJ9}  
1444 Pathogen[ P03363] interacts with 4 human partners:{P41227;Q6N069;Q9GZZ1;Q9BXJ9}  
1445 [Cluster 132]GO:0071732+P biological\_process [name] cellular response to nitric oxide [def] "Any process that results in a change in state or activity of a cell (in terms of movement, secretion, enzyme production, gene expression, etc.) as a result of a nitric oxide stimulus." [GOC  
1446 Pathogen[ Q2Q067] interacts with 1 human partners:{P24941}  
1447 Pathogen[ P0C214] interacts with 1 human partners:{P24941}  
1448 Pathogen[ P03346] interacts with 2 human partners:{P24941;Q12778}  
1449 Pathogen[ Q85601] interacts with 1 human partners:{P24941}  
1450 Pathogen[ P14079] interacts with 1 human partners:{P11686}  
1451 Pathogen[ P03383] interacts with 1 human partners:{P24941}  
1452 Pathogen[ P03410] interacts with 2 human partners:{P11686;P24941}  
1453 Pathogen[ P14075] interacts with 1 human partners:{P24941}  
1454 Pathogen[ P0C206] interacts with 1 human partners:{P24941}  
1455 Pathogen[ P03363] interacts with 1 human partners:{P24941}  
1456 [Cluster 133]GO:0000432+P biological\_process [name] positive regulation of

transcription from RNA polymerase II promoter by glucose [def] "Any process involving glucose that activates or increases the rate of transcription from an RNA polymerase II promoter." [GOC

1457 Pathogen[ Q2Q067] interacts with 2 human partners:{P22415;Q15853}

1458 Pathogen[ P0C214] interacts with 2 human partners:{Q15853;P22415}

1459 Pathogen[ P03346] interacts with 2 human partners:{Q15853;P22415}

1460 Pathogen[ Q85601] interacts with 2 human partners:{Q15853;P22415}

1461 Pathogen[ P14079] interacts with 2 human partners:{Q15853;P22415}

1462 Pathogen[ P03383] interacts with 2 human partners:{Q15853;P22415}

1463 Pathogen[ P03410] interacts with 2 human partners:{P22415;Q15853}

1464 Pathogen[ P14075] interacts with 2 human partners:{Q15853;P22415}

1465 Pathogen[ P0C206] interacts with 2 human partners:{Q15853;P22415}

1466 Pathogen[ P03363] interacts with 2 human partners:{Q15853;P22415}

1467 [Cluster 134]GO:0060318+P biological\_process [name] definitive erythrocyte differentiation [def] "Erythrocyte differentiation which occurs as part of the process of definitive hemopoiesis." [GOC

1468 Pathogen[ Q2Q067] interacts with 3 human partners:{Q8IX07;Q9HBD4;O75376}

1469 Pathogen[ P0C214] interacts with 3 human partners:{Q9HBD4;O75376;Q8IX07}

1470 Pathogen[ P03346] interacts with 3 human partners:{Q9HBD4;Q8IX07;O75376}

1471 Pathogen[ Q85601] interacts with 3 human partners:{Q8IX07;O75376;Q9HBD4}

1472 Pathogen[ P14079] interacts with 2 human partners:{Q8IX07;O75376}

1473 Pathogen[ P03383] interacts with 2 human partners:{Q9HBD4;O75376}

1474 Pathogen[ P03410] interacts with 3 human partners:{O75376;Q8IX07;Q9HBD4}

1475 Pathogen[ P14075] interacts with 2 human partners:{Q9HBD4;O75376}

1476 Pathogen[ P0C206] interacts with 3 human partners:{O75376;Q8IX07;Q9HBD4}

1477 Pathogen[ P03363] interacts with 2 human partners:{O75376;Q9HBD4}

1478 [Cluster 135]GO:0009798+P biological\_process [name] axis specification [def] "The establishment, maintenance and elaboration of a pattern along a line or around a point." [GOC

1479 Pathogen[ Q2Q067] interacts with 1 human partners:{Q5TAB7}

1480 Pathogen[ P0C214] interacts with 1 human partners:{Q5TAB7}

1481 Pathogen[ P03346] interacts with 1 human partners:{Q5TAB7}

1482 Pathogen[ Q85601] interacts with 1 human partners:{Q5TAB7}

1483 Pathogen[ P14079] interacts with 1 human partners:{Q5TAB7}

1484 Pathogen[ P03383] interacts with 1 human partners:{Q5TAB7}

1485 Pathogen[ P03410] interacts with 1 human partners:{Q5TAB7}

1486 Pathogen[ P14075] interacts with 1 human partners:{Q5TAB7}

1487 Pathogen[ P0C206] interacts with 1 human partners:{Q5TAB7}

1488 Pathogen[ P03363] interacts with 1 human partners:{Q5TAB7}

1489 [Cluster 136]GO:0007057+P biological\_process [name] spindle assembly involved in female meiosis I [def] "The aggregation, arrangement and bonding together of a set of components to form the spindle during meiosis I of a meiotic cell cycle in females. An example of this is found in *Drosophila melanogaster*." [GOC

1490 Pathogen[ Q2Q067] interacts with 1 human partners:{Q9UKT4}

1491 Pathogen[ P0C214] interacts with 1 human partners:{Q9UKT4}

1492 Pathogen[ P03346] interacts with 1 human partners:{Q9UKT4}

1493 Pathogen[ Q85601] interacts with 1 human partners:{Q9UKT4}

1494 Pathogen[ P14079] interacts with 1 human partners:{Q9UKT4}

1495 Pathogen[ P03383] interacts with 1 human partners:{Q9UKT4}

1496 Pathogen[ P03410] interacts with 1 human partners:{Q9UKT4}

1497 Pathogen[ P14075] interacts with 1 human partners:{Q9UKT4}

1498 Pathogen[ P0C206] interacts with 1 human partners:{Q9UKT4}

1499 Pathogen[ P03363] interacts with 1 human partners:{Q9UKT4}

1500 [Cluster 137]GO:0046825+P biological\_process [name] regulation of protein export from nucleus [def] "Any process that modulates the frequency, rate or extent of the directed movement of proteins from the nucleus to the cytoplasm." [GOC

1501 Pathogen[ Q2Q067] interacts with 2 human partners:{Q8N726;O14980}

1502 Pathogen[ P0C214] interacts with 2 human partners:{Q8N726;O14980}

1503 Pathogen[ P03346] interacts with 2 human partners:{O14980;Q8N726}

1504 Pathogen[ Q85601] interacts with 2 human partners:{Q8N726;O14980}

1505 Pathogen[ P14079] interacts with 1 human partners:{Q8N726}

1506 Pathogen[ P03383] interacts with 2 human partners:{O14980;Q8N726}

1507 Pathogen[ P03410] interacts with 2 human partners:{Q8N726;O14980}

1508 Pathogen[ P14075] interacts with 2 human partners:{O14980;Q8N726}

1509 Pathogen[ P0C206] interacts with 1 human partners:{Q8N726}

1510 Pathogen[ P03363] interacts with 2 human partners:{O14980;Q8N726}

1511 [Cluster 138]GO:0007026+P biological\_process [name] negative regulation of microtubule depolymerization [def] "Any process that stops, prevents, or reduces the frequency, rate or extent of microtubule depolymerization\_prevention of depolymerization of a microtubule can result from binding by 'capping' at the plus end (e.g. by interaction with another cellular protein of structure) or by exposing microtubules to a stabilizing drug such as taxol." [GOC

1512 Pathogen[ Q2Q067] interacts with 5 human partners:{Q7Z460;Q8WWK9;Q9H9H5;O75122;Q9NPA3}

1513 Pathogen[ P0C214] interacts with 5 human partners:{Q9NPA3;O75122;Q9H9H5;Q7Z460;Q8WWK9}

1514 Pathogen[ P03346] interacts with 7 human partners:{Q93045;Q9H9H5;O75122;Q8WWK9;Q7Z460;Q96JE9;Q9NPA3}

1515 Pathogen[ Q85601] interacts with 6 human partners:{Q8WWK9;O75122;Q9H9H5;Q9BVA0;Q9NPA3;Q7Z460}

1516 Pathogen[ P14079] interacts with 8 human partners:{Q9NPA3;Q7Z460;Q9H9H5;Q93045;Q96JE9;Q8WWK9;Q9BVA0;O75122}

1517 Pathogen[ P03383] interacts with 4 human partners:{Q7Z460;Q8WWK9;Q9H9H5;Q9NPA3}

1518 Pathogen[ P03410] interacts with 8 human partners:{Q7Z460;Q8WWK9;Q96JE9;Q9H9H5;O75122;Q9NPA3;Q93045;Q9BVA0}

1519 Pathogen[ P14075] interacts with 5 human partners:{Q96JE9;Q7Z460;Q9H9H5;Q9NPA3;Q8WWK9}

1520 Pathogen[ P0C206] interacts with 8 human partners:{Q9NPA3;Q9BVA0;Q96JE9;O75122;Q93045;Q7Z460;Q8WWK9;Q9H9H5}

1521 Pathogen[ P03363] interacts with 7 human partners:{Q8WWK9;Q8NHY3;Q93045;Q7Z460;Q9NPA3;Q96JE9;Q9H9H5}

1522 [Cluster 139]GO:0033235+P biological\_process [name] positive regulation of protein sumoylation [def] "Any process that activates or increases the frequency, rate or extent of the addition of SUMO groups to a protein." [GOC

1523 Pathogen[ Q2Q067] interacts with 6 human partners:{P27540;P56524;O75925;Q8N726;Q9Y6X2;Q8N2W9}

1524 Pathogen[ P0C214] interacts with 6 human partners:{Q9Y6X2;O75925;Q8N2W9;P56524;Q8N726;P27540}

1525 Pathogen[ P03346] interacts with 7 human partners:{P56524;P27540;O75925;Q8N2W9;A9YTQ3;Q9Y6X2;Q8N726}

1526 Pathogen[ Q85601] interacts with 7 human partners:{Q9Y6X2;P27540;Q8N2W9;Q8N726;A9YTQ3;P56524;O75925}

1527 Pathogen[ P14079] interacts with 7 human partners:{Q8N2W9;Q9Y6X2;Q8N726;P27540;A9YTQ3;O75925;P56524}

1528 Pathogen[ P03383] interacts with 6 human partners:{O75925;P27540;Q8N2W9;Q9Y6X2;P56524;Q8N726}

1529 Pathogen[ P03410] interacts with 7 human partners:{O75925;Q8N726;A9YTQ3;Q9Y6X2;Q8N2W9;P27540;P56524}

1530 Pathogen[ P14075] interacts with 6 human partners:{P56524;O75925;Q8N2W9;P27540;Q9Y6X2;Q8N726}

1531 Pathogen[ P0C206] interacts with 7 human partners:{Q8N726;O75925;Q8N2W9;Q9Y6X2;P27540;P56524;A9YTQ3}

1532 Pathogen[ P03363] interacts with 6 human partners:{P27540;Q9Y6X2;O75925;A9YTQ3;Q8N726;Q8N2W9}

1533 [Cluster 140]GO:0006436+P biological\_process [name] tryptophanyl-tRNA aminoacylation [def] "The process of coupling tryptophan to tryptophanyl-tRNA, catalyzed by tryptophanyl-tRNA synthetase. In tRNA aminoacylation, the amino acid is first activated by linkage to AMP and then transferred to either the 2'- or the 3'-hydroxyl group of the 3'-adenosine residue of the tRNA." [GOC

1534 Pathogen[ Q2Q067] interacts with 1 human partners:{P23381}

1535 Pathogen[ P0C214] interacts with 2 human partners:{Q9UGM6;P23381}

1536 Pathogen[ P03346] interacts with 1 human partners:{P23381}

1537 Pathogen[ Q85601] interacts with 1 human partners:{P23381}

1538 Pathogen[ P14079] interacts with 2 human partners:{P23381;Q9UGM6}

1539 Pathogen[ P03383] interacts with 1 human partners:{P23381}

1540 Pathogen[ P03410] interacts with 2 human partners:{P23381;Q9UGM6}

1541 Pathogen[ P14075] interacts with 1 human partners:{P23381}

1542 Pathogen[ P0C206] interacts with 2 human partners:{Q9UGM6;P23381}

1543 Pathogen[ P03363] interacts with 1 human partners:{P23381}

1544 [Cluster 141]GO:0001816+P biological\_process [name] cytokine production [def] "The appearance of a cytokine due to biosynthesis or secretion following a cellular stimulus, resulting in an increase in its intracellular or extracellular levels." [GOC

1545 Pathogen[ Q2Q067] interacts with 5 human partners:{Q8NCF5;Q04864;Q5TAX3;Q13469;O75444}

1546 Pathogen[ P0C214] interacts with 6 human partners:{O75444;P11413;Q13469;Q8NCF5;Q04864;Q5TAX3}

1547 Pathogen[ P03346] interacts with 5 human partners:{Q04864;O75444;Q5TAX3;Q13469;Q8NCF5}

1548 Pathogen[ Q85601] interacts with 5 human partners:{Q13469;Q04864;O75444;Q5TAX3;Q8NCF5}

1549 Pathogen[ P14079] interacts with 4 human partners:{Q5TAX3;O75444;Q13469;Q8NCF5}

1550 Pathogen[ P03383] interacts with 5 human partners:{Q04864;Q8NCF5;Q13469;Q5TAX3;O75444}

1551 Pathogen[ P03410] interacts with 5 human partners:{Q04864;Q5TAX3;O75444;Q8NCF5;Q13469}

1552 Pathogen[ P14075] interacts with 5 human partners:{O75444;Q5TAX3;Q8NCF5;Q13469;Q04864}

1553 Pathogen[ P0C206] interacts with 5 human partners:{Q13469;O75444;Q8NCF5;Q04864;Q5TAX3}

1554 Pathogen[ P03363] interacts with 5 human partners:{O75444;Q5TAX3;Q13469;Q04864;Q8NCF5}

1555 [Cluster 142]GO:1901350+P

1556 Pathogen[ Q2Q067] interacts with 1 human partners:{Q07157}

1557 Pathogen[ P0C214] interacts with 1 human partners:{Q07157}

1558 Pathogen[ P03346] interacts with 1 human partners:{Q07157}

1559 Pathogen[ Q85601] interacts with 1 human partners:{Q07157}

1560 Pathogen[ P14079] interacts with 1 human partners:{Q07157}

1561 Pathogen[ P03383] interacts with 1 human partners:{Q07157}

1562 Pathogen[ P03410] interacts with 1 human partners:{Q07157}

1563 Pathogen[ P14075] interacts with 1 human partners:{Q07157}

1564 Pathogen[ P0C206] interacts with 1 human partners:{Q07157}

1565 Pathogen[ P03363] interacts with 1 human partners:{Q07157}

1566 [Cluster 143]GO:0006379+P biological\_process [name] mRNA cleavage [def] "Any process in which a pre-mRNA or mRNA molecule is cleaved at specific sites or in a regulated manner." [GOC

1567 Pathogen[ Q2Q067] interacts with 9 human partners:{P33240;Q10570;Q12996;Q05048;O94913;Q9UKV8;Q09161;Q9UKF6;O95707}

1568 Pathogen[ P0C214] interacts with 9 human partners:{Q12996;Q09161;O94913;Q9UKF6;Q05048;Q10570;O95707;P33240;Q9UKV8}

1569 Pathogen[ P03346] interacts with 9 human partners:{Q09161;Q9UKF6;O95707;Q05048;O94913;Q9UKV8;Q10570;Q12996;P33240}

1570 Pathogen[ Q85601] interacts with 8 human partners:{Q05048;O94913;Q09161;O95707;Q10570;Q9UKV8;Q9UKF6;P33240}

1571 Pathogen[ P14079] interacts with 9 human partners:{Q9UKV8;Q9UKF6;Q10570;P33240;O94913;O95707;Q05048;Q12996;Q09161}

1572 Pathogen[ P03383] interacts with 8 human partners:{Q05048;Q10570;Q9UKF6;Q09161;O95707;O94913;P33240;Q9UKV8}

1573 Pathogen[ P03410] interacts with 9 human partners:{Q10570;Q9UKV8;Q12996;Q05048;O95707;O94913;P33240;Q9UKF6;Q09161}

1574 Pathogen[ P14075] interacts with 8 human partners:{Q09161;P33240;Q05048;Q9UKV8;Q9UKF6;O95707;Q10570;O94913}

1575 Pathogen[ P0C206] interacts with 9 human partners:{P33240;Q9UKF6;Q09161;O94913;Q9UKV8;Q05048;O95707;Q12996;Q10570}

1576 Pathogen[ P03363] interacts with 9 human partners:{Q10570;Q05048;Q9UKV8;O94913;O95707;Q9UKF6;P33240;Q12996;Q09161}

1577 [Cluster 144]GO:0045686+P biological\_process [name] negative regulation of glial cell differentiation [def] "Any process that stops, prevents, or reduces the frequency, rate or extent of glia cell differentiation." [GOC

1578 Pathogen[ Q2Q067] interacts with 1 human partners:{Q9H9Z2}

1579 Pathogen[ P0C214] interacts with 1 human partners:{Q9H9Z2}

1580 Pathogen[ P03346] interacts with 2 human partners:{P78426;Q9H9Z2}

1581 Pathogen[ Q85601] interacts with 1 human partners:{Q9H9Z2}

1582 Pathogen[ P14079] interacts with 1 human partners:{Q9H9Z2}

1583 Pathogen[ P03383] interacts with 1 human partners:{Q9H9Z2}

1584 Pathogen[ P03410] interacts with 1 human partners:{Q9H9Z2}

1585 Pathogen[ P14075] interacts with 1 human partners:{Q9H9Z2}

1586 Pathogen[ P0C206] interacts with 1 human partners:{Q9H9Z2}

1587 Pathogen[ P03363] interacts with 2 human partners:{Q9H9Z2;Q9C056}

1588 [Cluster 145]GO:0035303+P biological\_process [name] regulation of dephosphorylation [def] "Any process that modulates the frequency, rate or extent of removal of phosphate groups from a molecule." [GOC

1589 Pathogen[ Q2Q067] interacts with 3 human partners:{Q9UPR3;Q86US8;Q92540}

1590 Pathogen[ P0C214] interacts with 3 human partners:{Q92540;Q86US8;Q9UPR3}

1591 Pathogen[ P03346] interacts with 3 human partners:{Q9UPR3;Q86US8;Q92540}

1592 Pathogen[ Q85601] interacts with 3 human partners:{Q92540;Q86US8;Q9UPR3}

1593 Pathogen[ P14079] interacts with 3 human partners:{Q92540;Q86US8;Q9UPR3}

1594 Pathogen[ P03383] interacts with 3 human partners:{Q9UPR3;Q86US8;Q92540}

1595 Pathogen[ P03410] interacts with 3 human partners:{Q92540;Q9UPR3;Q86US8}

1596 Pathogen[ P14075] interacts with 3 human partners:{Q9UPR3;Q86US8;Q92540}

1597 Pathogen[ P0C206] interacts with 3 human partners:{Q86US8;Q9UPR3;Q92540}

1598 Pathogen[ P03363] interacts with 3 human partners:{Q86US8;Q9UPR3;Q92540}

1599 [Cluster 146]GO:0051654+P biological\_process [name] establishment of mitochondrion localization [def] "The directed movement of the mitochondrion to a specific location." [GOC

1600 Pathogen[ Q2Q067] interacts with 1 human partners:{Q99689}

1601 Pathogen[ P0C214] interacts with 1 human partners:{Q99689}

1602 Pathogen[ P03346] interacts with 1 human partners:{Q99689}

1603 Pathogen[ Q85601] interacts with 1 human partners:{Q99689}

1604 Pathogen[ P14079] interacts with 1 human partners:{Q99689}

1605 Pathogen[ P03383] interacts with 1 human partners:{Q99689}

1606 Pathogen[ P03410] interacts with 1 human partners:{Q99689}

1607 Pathogen[ P14075] interacts with 1 human partners:{Q99689}

1608 Pathogen[ P0C206] interacts with 1 human partners:{Q99689}

1609 Pathogen[ P03363] interacts with 1 human partners:{Q99689}

1610 [Cluster 147]GO:0045738+P biological\_process [name] negative regulation of DNA repair [def] "Any process that stops, prevents, or reduces the frequency, rate or extent of DNA repair." [GOC

1611 Pathogen[ Q2Q067] interacts with 1 human partners:{P23396}



1612 Pathogen[ P0C214] interacts with 1 human partners:{P23396}

1613 Pathogen[ P03346] interacts with 1 human partners:{P23396}

1614 Pathogen[ Q85601] interacts with 1 human partners:{P23396}

1615 Pathogen[ P14079] interacts with 1 human partners:{P23396}

1616 Pathogen[ P03383] interacts with 1 human partners:{P23396}

1617 Pathogen[ P03410] interacts with 1 human partners:{P23396}

1618 Pathogen[ P14075] interacts with 1 human partners:{P23396}

1619 Pathogen[ P0C206] interacts with 1 human partners:{P23396}

1620 Pathogen[ P03363] interacts with 1 human partners:{P23396}

1621 [Cluster 148]GO:1901186+P

1622 Pathogen[ Q2Q067] interacts with 1 human partners:{Q06330}

1623 Pathogen[ P0C214] interacts with 1 human partners:{Q06330}

1624 Pathogen[ P03346] interacts with 1 human partners:{Q06330}

1625 Pathogen[ Q85601] interacts with 1 human partners:{Q06330}

1626 Pathogen[ P14079] interacts with 1 human partners:{Q06330}

1627 Pathogen[ P03383] interacts with 1 human partners:{Q06330}

1628 Pathogen[ P03410] interacts with 1 human partners:{Q06330}

1629 Pathogen[ P14075] interacts with 1 human partners:{Q06330}

1630 Pathogen[ P0C206] interacts with 1 human partners:{Q06330}

1631 Pathogen[ P03363] interacts with 1 human partners:{Q06330}

1632 [Cluster 149]GO:0051642+P biological\_process [name] centrosome localization [def]  
 "Any process in which a centrosome is transported to, and/or maintained in, a specific location within the cell." [GOC

1633 Pathogen[ Q2Q067] interacts with 3 human partners:{Q9UH99;Q8IY31;Q8N4C6}

1634 Pathogen[ P0C214] interacts with 3 human partners:{Q8IY31;Q9UH99;Q8N4C6}

1635 Pathogen[ P03346] interacts with 5 human partners:{Q8IY31;Q8WXH0;Q9UH99;Q8TEW0;Q8N4C6}

1636 Pathogen[ Q85601] interacts with 4 human partners:{Q9UH99;Q8N4C6;Q9GZM8;Q8IY31}

1637 Pathogen[ P14079] interacts with 6 human partners:{Q8IY31;Q8TEW0;Q8N4C6;Q8WXH0;Q9GZM8;Q9UH99}

1638 Pathogen[ P03383] interacts with 3 human partners:{Q8IY31;Q9UH99;Q8N4C6}

1639 Pathogen[ P03410] interacts with 7 human partners:{Q9GZM8;Q9UH99;Q8IY31;Q8N4C6;Q8TEW0;Q8WXH0;O43237}

1640 Pathogen[ P14075] interacts with 3 human partners:{Q8IY31;Q9UH99;Q8N4C6}

1641 Pathogen[ P0C206] interacts with 7 human partners:{Q8IY31;Q9UH99;O43237;Q9GZM8;Q8TEW0;Q8WXH0;Q8N4C6}

1642 Pathogen[ P03363] interacts with 4 human partners:{Q8IY31;Q8N4C6;O43237;Q9UH99}

1643 [Cluster 150]GO:0043967+P biological\_process [name] histone H4 acetylation [def]  
 "The modification of histone H4 by the addition of an acetyl group." [GOC

1644 Pathogen[ Q2Q067] interacts with 11 human partners:{O00213;Q9Y4A5;Q9NXR8;Q9NPF5;O96019;Q15306;Q9UBU8;O95619;Q9H2F5;P15923;Q9H0E9}

1645 Pathogen[ P0C214] interacts with 10 human partners:{O00213;Q9H2F5;O95619;P15923;Q9UBU8;Q9Y4A5;Q9H0E9;O96019;Q9NPF5;Q15306}

1646 Pathogen[ P03346] interacts with 14 human partners:{O00213;Q15788;P15923;Q15306;Q9H0E9;O96019;Q9Y4A5;Q9UBU8;P51587;O95361;Q9H2F5;O95619;Q9NXR8;Q9NPF5}

1647 Pathogen[ Q85601] interacts with 12 human partners:{O95619;O00213;Q9H2F5;Q9Y4A5;Q9H0E9;Q9UBU8;Q15306;O96019;P15923;Q9NXR8;P51587;Q9NPF5}

1648 Pathogen[ P14079] interacts with 12 human partners:{Q9Y4A5;Q9UBU8;P51587;O00213;P15923;Q15306;Q9H0E9;Q9NPF5;Q15788;Q9H2F5;O95361;O95619}

1649 Pathogen[ P03383] interacts with 10 human partners:{O00213;O96019;Q9Y4A5;Q9H2F5;P15923;Q9UBU8;Q15306;Q9H0E9;Q9NPF5;O95619}

1650 Pathogen[ P03410] interacts with 12 human partners:{O95619;O96019;Q9NPF5;Q9UBU8;O00213;P15923;Q15306;Q9H2F5;Q9Y4A5;Q9NXR8;P51587;Q9H0E9}

1651 Pathogen[ P14075] interacts with 9 human partners:{O00213;Q9H2F5;Q9UBU8;O95619;Q9Y4A5;P15923;Q9NPF5;O96019;Q15306}

1652 Pathogen[ P0C206] interacts with 14 human partners:{Q9H2F5;Q9NPF5;Q9UBU8;P51587;Q15306;Q9NXR8;O00213;O96019;Q9Y4A5;O95619;P15923;O95361;Q15788;Q9H0E9}

1653 Pathogen[ P03363] interacts with 10 human partners:{Q9NPF5;O95619;O00213;Q9H2F5;Q15306;P15923;Q9UBU8;O96019;Q9Y4A5;Q9H0E9}

1654 [Cluster 151]GO:1900063+P

1655 Pathogen[ Q2Q067] interacts with 1 human partners:{Q9GZY8}

1656 Pathogen[ P0C214] interacts with 1 human partners:{Q9GZY8}

1657 Pathogen[ P03346] interacts with 1 human partners:{Q9GZY8}

1658 Pathogen[ Q85601] interacts with 1 human partners:{Q9GZY8}

1659 Pathogen[ P14079] interacts with 2 human partners:{Q7Z434;Q9GZY8}

1660 Pathogen[ P03383] interacts with 1 human partners:{Q9GZY8}

1661 Pathogen[ P03410] interacts with 2 human partners:{Q9GZY8;Q7Z434}

1662 Pathogen[ P14075] interacts with 1 human partners:{Q9GZY8}

1663 Pathogen[ P0C206] interacts with 1 human partners:{Q9GZY8}

1664 Pathogen[ P03363] interacts with 1 human partners:{Q9GZY8}

1665 [Cluster 152]GO:0050873+P biological\_process [name] brown fat cell differentiation [def] "The process in which a relatively unspecialized cell acquires specialized features of a brown adipocyte, an animal connective tissue cell involved in adaptive thermogenesis. Brown adipocytes contain multiple small droplets of triglycerides and a high number of mitochondria." [PMID

1666 Pathogen[ Q2Q067] interacts with 6 human partners:{P41220;Q9HAZ2;P17676;Q12983;P14672;P49715}

1667 Pathogen[ P0C214] interacts with 5 human partners:{P41220;P17676;Q9HAZ2;Q12983;P14672}

1668 Pathogen[ P03346] interacts with 6 human partners:{P17676;Q12983;P49715;P41220;Q9HAZ2;P14672}

1669 Pathogen[ Q85601] interacts with 6 human partners:{P17676;P41220;P49715;Q12983;P14672;Q9HAZ2}

1670 Pathogen[ P14079] interacts with 9 human partners:{O75192;Q9HAZ2;Q0VDE8;P14672;P41220;P49715;Q12983;Q8TCY5;P02144}

1671 Pathogen[ P03383] interacts with 5 human partners:{P41220;Q12983;Q9HAZ2;P17676;P14672}

1672 Pathogen[ P03410] interacts with 7 human partners:{O75192;P02144;Q12983;Q9HAZ2;P17676;P41220;Q0VDE8}

1673 Pathogen[ P14075] interacts with 7 human partners:{Q12983;P41220;Q9HAZ2;Q0VDE8;O75192;P17676;P14672}

1674 Pathogen[ P0C206] interacts with 8 human partners:{O75192;Q9HAZ2;Q0VDE8;P49715;Q12983;P17676;P14672;P41220}

1675 Pathogen[ P03363] interacts with 5 human partners:{P17676;Q0VDE8;P41220;P14672;Q9HAZ2}

1676 [Cluster 153]GO:0045089+P biological\_process [name] positive regulation of innate immune response [def] "Any process that activates or increases the frequency, rate or extent of the innate immune response, the organism's first line of defense against infection." [GOC

1677 Pathogen[ Q2Q067] interacts with 5 human partners:{Q9BUI4;O15162;O15318;P05423;Q9H1D9}

1678 Pathogen[ P0C214] interacts with 6 human partners:{Q9BUI4;Q9H1D9;P05423;O15162;O15318;Q9NW08}

1679 Pathogen[ P03346] interacts with 5 human partners:{P05423;O15318;Q9H1D9;Q9BUI4;O15162}

1680 Pathogen[ Q85601] interacts with 6 human partners:{Q9H1D9;Q9BUI4;P05423;Q9NW08;O15162;O15318}

1681 Pathogen[ P14079] interacts with 6 human partners:{O15162;Q9NW08;Q9BUI4;P05423;O15318;Q9H1D9}

1682 Pathogen[ P03383] interacts with 3 human partners:{O15162;Q9H1D9;O15318}

1683 Pathogen[ P03410] interacts with 6 human partners:{O15318;O15162;Q9NW08;P05423;Q9H1D9;Q9BUI4}

1684 Pathogen[ P14075] interacts with 3 human partners:{O15162;Q9H1D9;O15318}

1685 Pathogen[ P0C206] interacts with 6 human partners:{Q9NW08;Q9BUI4;O15318;P05423;O15162;Q9H1D9}

1686 Pathogen[ P03363] interacts with 3 human partners:{Q9H1D9;P05423;O15318}

1687 [Cluster 154]GO:0045652+P biological\_process [name] regulation of megakaryocyte differentiation [def] "Any process that modulates the frequency, rate or extent of megakaryocyte differentiation." [GOC

1688 Pathogen[ Q2Q067] interacts with 1 human partners:{Q9Y468}

1689 Pathogen[ P0C214] interacts with 1 human partners:{Q9Y468}

1690 Pathogen[ P03346] interacts with 1 human partners:{Q9Y468}

1691 Pathogen[ Q85601] interacts with 1 human partners:{Q9Y468}

1692 Pathogen[ P14079] interacts with 2 human partners:{Q06413;Q9Y468}

1693 Pathogen[ P03383] interacts with 1 human partners:{Q9Y468}

1694 Pathogen[ P03410] interacts with 1 human partners:{Q9Y468}

1695 Pathogen[ P14075] interacts with 1 human partners:{Q9Y468}

1696 Pathogen[ P0C206] interacts with 1 human partners:{Q9Y468}

1697 Pathogen[ P03363] interacts with 1 human partners:{Q9Y468}

1698 [Cluster 155]GO:0007270+P biological\_process [name] neuron-neuron synaptic transmission [def] "The process of communication from a neuron to another neuron across a synapse." [GOC

1699 Pathogen[ Q2Q067] interacts with 1 human partners:{Q9P1A6}

1700 Pathogen[ P0C214] interacts with 1 human partners:{Q9P1A6}

1701 Pathogen[ P03346] interacts with 1 human partners:{Q9P1A6}

1702 Pathogen[ Q85601] interacts with 1 human partners:{Q9P1A6}

1703 Pathogen[ P14079] interacts with 1 human partners:{Q9P1A6}

1704 Pathogen[ P03383] interacts with 1 human partners:{Q9P1A6}

1705 Pathogen[ P03410] interacts with 2 human partners:{Q9P1A6;O60333}

1706 Pathogen[ P14075] interacts with 1 human partners:{Q9P1A6}

1707 Pathogen[ P0C206] interacts with 1 human partners:{Q9P1A6}

1708 Pathogen[ P03363] interacts with 3 human partners:{Q9NZR1;O60333;Q9P1A6}

1709 [Cluster 156]GO:0016226+P biological\_process [name] iron-sulfur cluster assembly [def] "The incorporation of iron and exogenous sulfur into a metallo-sulfur cluster." [GOC

1710 Pathogen[ Q2Q067] interacts with 5 human

1711 partners:{Q8IWL3;Q9UMS0;Q96T76;A6NFY7;Q9H1K1}  
Pathogen[ P0C214] interacts with 6 human

1712 partners:{A6NFY7;Q9H6Q4;Q8IWL3;Q9H1K1;Q9UMS0;Q96T76}  
Pathogen[ P03346] interacts with 5 human

1713 partners:{Q9H1K1;Q9UMS0;A6NFY7;Q8IWL3;Q96T76}  
Pathogen[ Q85601] interacts with 6 human

1714 partners:{Q96T76;Q9UMS0;Q9H6Q4;A6NFY7;Q8IWL3;Q9H1K1}  
Pathogen[ P14079] interacts with 8 human

1715 partners:{Q8IWL3;Q9H1K1;Q86U28;Q9BUE6;Q9UMS0;Q9H6Q4;A6NFY7;Q96T76}  
Pathogen[ P03383] interacts with 6 human

1716 partners:{Q96T76;A6NFY7;Q9H1K1;Q9H6Q4;Q9UMS0;Q8IWL3}  
Pathogen[ P03410] interacts with 8 human

1717 partners:{Q96T76;A6NFY7;Q9H6Q4;Q9H1K1;Q9UMS0;Q8IWL3;Q86U28;Q9BUE6}  
Pathogen[ P14075] interacts with 5 human

1718 partners:{A6NFY7;Q9UMS0;Q8IWL3;Q96T76;Q9H1K1}  
Pathogen[ P0C206] interacts with 8 human

1719 partners:{Q9H1K1;A6NFY7;Q86U28;Q96T76;Q9H6Q4;Q8IWL3;Q9UMS0;Q9BUE6}  
Pathogen[ P03363] interacts with 5 human

1720 partners:{Q9UMS0;A6NFY7;Q96T76;Q8IWL3;Q9H1K1}  
[Cluster 157]GO:0006486+P biological\_process [name] protein glycosylation [def] "A protein modification process that results in the addition of a sugar unit to a protein amino acid, e.g. the addition of glycan chains to proteins." [GOC

1721 Pathogen[ Q2Q067] interacts with 3 human partners:{P83436;Q14746;Q96JB2}  
1722 Pathogen[ P0C214] interacts with 7 human  
partners:{Q14746;P29728;P83436;Q86SQ9;Q9Y2G5;O15305;Q96JB2}

1723 Pathogen[ P03346] interacts with 4 human partners:{Q14746;Q96JB2;Q86SQ9;P83436}  
1724 Pathogen[ Q85601] interacts with 4 human partners:{Q14746;Q96JB2;P83436;Q86SQ9}  
1725 Pathogen[ P14079] interacts with 19 human  
partners:{Q14746;O43505;P83436;O15305;P29728;P39656;Q9BT22;Q86SQ9;Q9NYU1;Q9H488;Q3V5  
L5;Q9NYU2;Q9Y6X1;P61803;Q8NBL1;Q96JB2;Q9Y2G5;Q9UBM8;P46977}

1726 Pathogen[ P03383] interacts with 3 human partners:{Q14746;P83436;Q96JB2}  
1727 Pathogen[ P03410] interacts with 17 human  
partners:{Q3V5L5;Q96JB2;P29728;Q9Y6X1;Q9NYU1;Q86SQ9;Q9BT22;O15305;Q14746;P83436;P396  
56;Q9Y2G5;Q9H488;P61803;Q8NHY0;O43505;Q9NYU2}

1728 Pathogen[ P14075] interacts with 5 human  
partners:{Q14746;Q96JB2;O43505;Q9Y2G5;P83436}  
1729 Pathogen[ P0C206] interacts with 8 human  
partners:{P83436;P39656;P29728;Q96JB2;Q14746;Q86SQ9;Q9Y2G5;O43505}

1730 Pathogen[ P03363] interacts with 3 human partners:{P83436;Q14746;Q96JB2}

1731 [Cluster 158]GO:0032720+P biological\_process [name] negative regulation of tumor necrosis factor production [def] "Any process that stops, prevents, or reduces the frequency, rate, or extent of tumor necrosis factor production." [GOC

1732 Pathogen[ Q2Q067] interacts with 7 human  
partners:{Q8WUQ7;Q00613;O60543;P14373;Q8WVJ9;Q9UBC1;Q9BQE4}  
1733 Pathogen[ P0C214] interacts with 6 human  
partners:{Q00613;O60543;Q8WVJ9;P14373;Q9BQE4;Q9UBC1}

1734 Pathogen[ P03346] interacts with 6 human  
partners:{P14373;Q00613;Q8WVJ9;Q9UBC1;O60543;Q8WUQ7}  
1735 Pathogen[ Q85601] interacts with 6 human  
partners:{P14373;Q00613;O60543;Q8WVJ9;Q9BQE4;Q9UBC1}

1736 Pathogen[ P14079] interacts with 7 human  
partners:{P14373;Q9BQE4;O60543;Q8WVJ9;Q9UBC1;Q00613;Q8WUQ7}  
1737 Pathogen[ P03383] interacts with 6 human  
partners:{O60543;Q8WVJ9;Q9UBC1;Q9BQE4;Q00613;Q8WUQ7}

1738 Pathogen[ P03410] interacts with 6 human  
partners:{Q8WUQ7;Q00613;Q8WVJ9;Q9BQE4;Q9UBC1;O60543}  
1739 Pathogen[ P14075] interacts with 6 human  
partners:{Q9BQE4;Q00613;Q8WVJ9;Q9UBC1;O60543;Q8WUQ7}

1740 Pathogen[ P0C206] interacts with 7 human  
partners:{Q9UBC1;Q00613;Q8WVJ9;Q8WUQ7;Q9BQE4;O60543;P14373}  
1741 Pathogen[ P03363] interacts with 6 human  
partners:{O60543;P14373;Q8WUQ7;Q00613;Q9UBC1;Q8WVJ9}

1742 [Cluster 159]GO:0042088+P biological\_process [name] T-helper 1 type immune response [def] "An immune response which is associated with resistance to intracellular bacteria, fungi, and protozoa, and pathological conditions such as arthritis, and which is typically orchestrated by the production of particular cytokines by T-helper 1 cells, most notably interferon-gamma, IL-2, and lymphotoxin." [GOC

1743 Pathogen[ Q2Q067] interacts with 2 human partners:{P20749;Q01201}  
1744 Pathogen[ P0C214] interacts with 2 human partners:{Q01201;P20749}  
1745 Pathogen[ P03346] interacts with 2 human partners:{Q01201;P20749}  
1746 Pathogen[ Q85601] interacts with 2 human partners:{Q01201;P20749}  
1747 Pathogen[ P14079] interacts with 2 human partners:{Q01201;P20749}  
1748 Pathogen[ P03383] interacts with 2 human partners:{P20749;Q01201}  
1749 Pathogen[ P03410] interacts with 2 human partners:{P20749;Q01201}  
1750 Pathogen[ P14075] interacts with 2 human partners:{Q01201;P20749}  
1751 Pathogen[ P0C206] interacts with 2 human partners:{Q01201;P20749}

1752 Pathogen[ P03363] interacts with 2 human partners:{P20749;Q01201}

1753 [Cluster 160]GO:0051607+P biological\_process [name] defense response to virus  
[def] "Reactions triggered in response to the presence of a virus that act to protect  
the cell or organism." [GOC

1754 Pathogen[ Q2Q067] interacts with 38 human  
partners:{Q9Y473;Q96J02;Q14258;Q9Y6K5;Q8IUC6;Q9NQT4;Q9UII4;Q16666;P09913;Q92985;Q042  
06;O60238;Q14457;Q13158;Q9NPD3;Q00978;Q7Z2W4;Q9BUI4;O15162;Q14653;P10914;Q9NVU0;Q153  
66;P09914;O15318;Q9C035;P52630;Q12983;Q9BYX4;Q86WI3;Q9Y535;Q13568;P05423;Q9HC16;O148  
02;P42224;Q9H1D9;O14879}

1755 Pathogen[ P0C214] interacts with 44 human  
partners:{Q9NVU0;Q9Y3Z3;Q96J02;P09914;P09913;Q9BUI4;Q9Y473;Q13568;Q8IUC6;Q99698;O14879;Q9NV  
U0;Q13158;Q9C035;Q86WI3;Q9Y6K5;P29728;Q9H1D9;Q04206;P42224;P10914;Q16666;Q9BYX4;Q009  
78;Q15366;P05423;Q8WXG1;Q9Y3Z3;Q7Z2W4;Q14258;Q9HC16;Q92985;Q9NPD3;O15162;Q9UII4;O153  
18;Q9NW08;Q14653;Q12983;Q9Y535;O60238;Q86WV6;P52630;Q9NQT4;O14802}

1756 Pathogen[ P03346] interacts with 42 human  
partners:{Q9NVU0;Q9Y3Z3;Q96J02;Q99698;Q16666;Q15366;Q14258;Q13158;O60238;P05423;Q9UI  
I4;Q04206;Q9C035;Q14457;Q00978;Q12983;O15318;Q8IYM9;Q15646;P10914;Q86WI3;Q9H1D9;O148  
79;Q9Y535;P42224;Q9BUI4;Q14653;Q13568;Q9BYX4;Q8IUC6;P09913;Q70J99;Q92985;P09914;P526  
30;Q9Y473;Q9NQT4;Q9NPD3;O14802;Q9Y6K5;Q7Z2W4;O15162}

1757 Pathogen[ Q85601] interacts with 42 human  
partners:{Q14457;Q96J02;Q86WV6;Q16666;P09913;Q9NPD3;Q14258;Q9H1D9;Q8IUC6;O14879;Q131  
58;Q9Y535;Q9BUI4;Q9HC16;Q9Y2Y1;Q7Z2W4;Q86WI3;Q00978;P05423;Q9NVU0;P10914;P52630;Q146  
53;Q9Y6K5;Q9NQT4;Q04206;Q8IYM9;Q9BYX4;Q92985;P42224;Q9C035;Q9NW08;P09914;Q12983;Q9Y4  
73;O15162;O60238;Q13568;O14802;O15318;Q15366;Q99698}

1758 Pathogen[ P14079] interacts with 51 human  
partners:{P13164;O15162;P41238;Q9BYX4;P52630;P29728;Q14653;Q9C035;P09914;Q7Z2W4;Q9NW  
08;P31941;Q8IUC6;Q92985;Q9NQT4;Q9HC16;Q9NPD3;Q14258;Q7Z434;P09913;Q13568;Q9Y3Z3;Q86W  
V6;Q9BUI4;P05423;Q9Y473;Q9Y6K5;Q15366;Q12983;Q9Y2Y1;Q8IU54;Q96J02;P42224;Q13158;Q96A  
Z6;Q9NVU0;Q00978;A8MW95;Q86WI3;O14802;O15318;Q99698;Q14457;O60238;Q9H1D9;O14879;Q96C  
10;Q9Y535;P10914;Q16666;Q8WXG1}

1759 Pathogen[ P03383] interacts with 30 human  
partners:{Q14457;O14879;P10914;Q14653;Q15366;Q8IUC6;O15162;Q9Y535;P52630;Q00978;Q131  
58;Q9H1D9;Q12983;Q9NVU0;P09913;Q92985;O60238;Q9C035;Q9NPD3;Q13568;Q9NQT4;Q16666;Q9Y6  
K5;Q86WI3;Q04206;O15318;Q14258;O14802;Q9Y473;Q7Z2W4}

1760 Pathogen[ P03410] interacts with 51 human  
partners:{Q04206;Q16666;Q12983;P29728;Q70J99;P41238;Q14653;Q9BYX4;Q14457;Q15366;Q135  
68;Q14258;O15318;Q9Y535;Q8WXG1;Q7Z434;Q13158;O15162;Q86WI3;Q9HC16;Q9C035;Q9NW08;Q7Z2  
W4;Q96AZ6;P10914;P05423;Q9NQT4;Q9NRW3;Q9Y2Y1;Q9Y6K5;P09913;P31941;P52630;Q96C10;Q996  
98;Q8IUC6;Q9H1D9;Q86WV6;Q9NPD3;Q9NVU0;Q9Y3Z3;Q92985;O14879;A8MW95;P09914;O14802;Q009  
78;Q6NTF7;Q9BUI4;O60238;Q9Y473}

1761 Pathogen[ P14075] interacts with 30 human  
partners:{Q9NVU0;Q14457;P52630;Q15366;Q12983;Q04206;P09913;Q86WI3;Q9NPD3;O15162;Q009  
78;Q16666;Q13568;Q9NQT4;Q14653;Q9H1D9;O60238;Q9Y535;Q13158;Q9Y6K5;Q9C035;Q14258;Q7Z2  
W4;Q8IUC6;O14879;Q9Y473;Q92985;P10914;O14802;O15318}

1762 Pathogen[ P0C206] interacts with 49 human  
partners:{P10914;Q13568;Q86WI3;Q9NPD3;Q14258;Q9Y6K5;Q9NW08;Q96J02;O14879;Q14457;Q166  
66;P29728;Q99698;Q9BUI4;Q86WV6;Q13158;O15318;Q9Y535;A8MW95;O60238;P05423;Q9NVU0;Q129  
83;Q92985;Q04206;P09913;Q9C035;P31941;Q15366;Q6NTF7;Q8IUC6;Q00978;O15162;Q8IYM9;Q9HC  
16;Q9NQT4;Q9BYX4;P41238;Q96C10;Q9Y473;Q7Z2W4;O14802;P42224;Q9Y2Y1;Q8WXG1;Q9H1D9;P526  
30;Q14653;P09914}

1763 Pathogen[ P03363] interacts with 33 human  
partners:{Q9NQT4;Q14653;Q9Y6K5;P52630;Q9Y535;Q15366;Q92985;Q04206;Q8IY21;Q14457;P099  
14;Q14258;P09913;Q9NVU0;Q7Z2W4;Q9H1D9;Q13568;Q13158;Q9NPD3;O14879;Q16666;Q99698;P054  
23;O15318;Q86WI3;P10914;Q9C035;Q9Y3Z3;Q00978;Q9BYX4;O60238;Q9Y473;Q9UII4}

1764 [Cluster 161]GO:0048384+P biological\_process [name] retinoic acid receptor signaling  
pathway [def] "The series of molecular signals generated as a consequence of a retinoic  
acid receptor binding to one of its physiological ligands." [GOC

1765 Pathogen[ Q2Q067] interacts with 7 human  
partners:{Q13573;Q8IZD2;P62508;P28702;P55055;Q03060;P23497}

1766 Pathogen[ P0C214] interacts with 5 human  
partners:{Q13573;P23497;Q03060;P62508;Q8IZD2}

1767 Pathogen[ P03346] interacts with 9 human  
partners:{Q7RTS3;P48443;P28702;P62508;Q03060;P23497;Q13573;Q8IZD2;P55055}

1768 Pathogen[ Q85601] interacts with 6 human  
partners:{Q13573;P28702;P55055;P62508;Q03060;Q8IZD2}

1769 Pathogen[ P14079] interacts with 7 human  
partners:{P62508;P55055;Q03060;Q13573;P48443;P23497;P28702}

1770 Pathogen[ P03383] interacts with 5 human  
partners:{Q13573;P28702;P23497;P62508;Q03060}

1771 Pathogen[ P03410] interacts with 4 human partners:{Q03060;P62508;P28702;Q13573}

1772 Pathogen[ P14075] interacts with 5 human  
partners:{P23497;Q13573;P28702;Q03060;P62508}

1773 Pathogen[ P0C206] interacts with 7 human  
partners:{Q03060;P55055;P62508;Q13573;P28702;Q8IZD2;P48443}

1774 Pathogen[ P03363] interacts with 6 human  
partners:{P62508;Q7RTS3;P23497;P28702;Q13573;Q03060}

1775 [Cluster 162]GO:0051457+P biological\_process [name] maintenance of protein location in nucleus [def] "Any process in which a protein is maintained in the nucleus and prevented from moving elsewhere. These include sequestration within the nucleus, protein stabilization to prevent transport elsewhere and the active retrieval of proteins that escape the nucleus." [GOC

1776 Pathogen[ Q2Q067] interacts with 6 human partners:{Q9Y2Y0;Q9NS56;P20749;Q7Z7C8;O94864;Q5VWG9}

1777 Pathogen[ P0C214] interacts with 7 human partners:{Q9NS56;Q7Z7C8;O94864;Q5VWG9;P20749;Q9Y2Y0;P36404}

1778 Pathogen[ P03346] interacts with 9 human partners:{Q14149;Q7Z7C8;Q9NS56;O94864;P36404;P20749;Q9Y2Y0;Q5VWG9;Q13285}

1779 Pathogen[ Q85601] interacts with 7 human partners:{O94864;Q9NS56;Q7Z7C8;Q9Y2Y0;Q14149;Q5VWG9;P20749}

1780 Pathogen[ P14079] interacts with 6 human partners:{Q9Y2Y0;O94864;Q14149;Q9NS56;P20749;Q5VWG9}

1781 Pathogen[ P03383] interacts with 4 human partners:{Q9Y2Y0;O94864;P20749;Q5VWG9}

1782 Pathogen[ P03410] interacts with 5 human partners:{P20749;Q5VWG9;Q14149;O94864;Q9Y2Y0}

1783 Pathogen[ P14075] interacts with 5 human partners:{Q9Y2Y0;Q7Z7C8;Q5VWG9;O94864;P20749}

1784 Pathogen[ P0C206] interacts with 7 human partners:{Q9NS56;O94864;Q14149;Q5VWG9;P20749;Q7Z7C8;Q9Y2Y0}

1785 Pathogen[ P03363] interacts with 5 human partners:{O94864;P20749;Q7Z7C8;Q9Y2Y0;Q5VWG9}

1786 [Cluster 163]GO:0045666+P biological\_process [name] positive regulation of neuron differentiation [def] "Any process that activates or increases the frequency, rate or extent of neuron differentiation." [GOC

1787 Pathogen[ Q2Q067] interacts with 14 human partners:{Q13562;P15884;Q99081;Q12982;Q9NQ87;P37275;Q9Y4Z2;Q9UBC3;Q9H9Z2;Q15583;Q9NSC2;Q99689;P15923;P61586}

1788 Pathogen[ P0C214] interacts with 11 human partners:{P31249;Q99081;P15884;P61586;P37275;P15923;Q12982;Q99689;Q9NSC2;Q9H9Z2;Q9NQ87}

1789 Pathogen[ P03346] interacts with 24 human partners:{Q99081;P31249;Q9Y4Z2;Q15788;Q693B1;P78415;Q99689;Q15583;Q9NSC2;P15923;Q92858;Q92886;Q9UBC3;P78426;O95096;P37275;Q9NQ87;Q9H8V3;Q9H9Z2;Q12982;Q13562;P15884;P61586;Q9H2A3}

1790 Pathogen[ Q85601] interacts with 15 human partners:{Q9Y4Z2;Q12982;Q15583;Q13562;Q9NQ87;Q99689;P61586;P15923;P31249;P37275;Q99081;Q9NSC2;Q9H9Z2;P15884;Q9UBC3}

1791 Pathogen[ P14079] interacts with 18 human partners:{Q12982;Q06413;Q1HG43;Q15583;P15923;Q9H9Z2;Q9UBC3;Q99689;P61158;P61586;Q15788;Q9H8V3;P31249;P15884;Q9NQ87;Q99081;P37275;Q9NSC2}

1792 Pathogen[ P03383] interacts with 9 human partners:{Q9H9Z2;Q99689;P37275;Q9NQ87;P15923;P31249;P61586;Q99081;Q9NSC2}

1793 Pathogen[ P03410] interacts with 15 human partners:{P37275;Q1HG43;Q9NQ87;P15884;P31249;P15923;Q99081;Q15583;P61586;Q9UBC3;Q12982;Q9H9Z2;Q9H8V3;Q9NSC2;Q99689}

1794 Pathogen[ P14075] interacts with 10 human partners:{Q9NSC2;Q9H9Z2;P31249;Q9NQ87;P15923;P61586;P15884;P37275;Q99081;Q99689}

1795 Pathogen[ P0C206] interacts with 20 human partners:{Q12982;Q9NQ87;Q9NSC2;Q9Y4Z2;P61586;Q99689;Q9H9Z2;Q1HG43;Q693B1;Q99081;P15923;P15884;Q9H8V3;Q13562;P37275;Q9UBC3;P31249;Q15788;Q15583;Q9H2A3}

1796 Pathogen[ P03363] interacts with 16 human partners:{Q92886;Q9Y4Z2;P78415;P37275;Q9NQ87;P31249;P15923;Q9H9Z2;Q15583;P15884;Q99081;Q9UBC3;Q12982;Q693B1;Q99689;Q9H2A3}

1797 [Cluster 164]GO:0071398+P biological\_process [name] cellular response to fatty acid [def] "Any process that results in a change in state or activity of a cell (in terms of movement, secretion, enzyme production, gene expression, etc.) as a result of a fatty acid stimulus." [GOC

1798 Pathogen[ Q2Q067] interacts with 4 human partners:{Q01094;P14635;Q7Z2X4;P27986}

1799 Pathogen[ P0C214] interacts with 4 human partners:{P14635;Q7Z2X4;Q01094;P27986}

1800 Pathogen[ P03346] interacts with 4 human partners:{Q7Z2X4;Q01094;P14635;P27986}

1801 Pathogen[ Q85601] interacts with 4 human partners:{Q7Z2X4;P27986;P14635;Q01094}

1802 Pathogen[ P14079] interacts with 3 human partners:{P14635;Q7Z2X4;Q01094}

1803 Pathogen[ P03383] interacts with 3 human partners:{P27986;Q01094;P14635}

1804 Pathogen[ P03410] interacts with 4 human partners:{P27986;P14635;Q7Z2X4;Q01094}

1805 Pathogen[ P14075] interacts with 3 human partners:{P14635;P27986;Q01094}

1806 Pathogen[ P0C206] interacts with 4 human partners:{Q7Z2X4;P27986;Q01094;P14635}

1807 Pathogen[ P03363] interacts with 2 human partners:{Q01094;P27986}

1808 [Cluster 165]GO:0010942+P biological\_process [name] positive regulation of cell death [def] "Any process that increases the rate or frequency of cell death. Cell death is the specific activation or halting of processes within a cell so that its vital functions markedly cease, rather than simply deteriorating gradually over time, which culminates in cell death." [GOC

1809 Pathogen[ Q2Q067] interacts with 6 human

1810 partners:{P04198;P68871;P10914;P69905;P46527;Q9BRK4}  
Pathogen[ P0C214] interacts with 6 human

1811 partners:{Q9BRK4;P46527;P69905;P10914;P68871;P04198}  
Pathogen[ P03346] interacts with 6 human

1812 partners:{P69905;Q9BRK4;P10914;P68871;P04198;P46527}  
Pathogen[ Q85601] interacts with 7 human

1813 partners:{P69905;P10914;Q9BRK4;Q9BVA0;P68871;P04198;P46527}  
Pathogen[ P14079] interacts with 7 human

1814 partners:{P69905;P68871;P04198;P46527;Q9BVA0;Q9BRK4;P10914}  
Pathogen[ P03383] interacts with 6 human

1815 partners:{Q9BRK4;P10914;P69905;P68871;P46527;P04198}  
Pathogen[ P03410] interacts with 6 human

1816 partners:{P46527;P68871;P10914;P69905;P04198;Q9BVA0}  
Pathogen[ P14075] interacts with 6 human

1817 partners:{P68871;P04198;P46527;Q9BRK4;P10914;P69905}  
Pathogen[ P0C206] interacts with 6 human

1818 partners:{P68871;P10914;Q9BVA0;P69905;P46527;P04198}  
Pathogen[ P03363] interacts with 5 human

1819 partners:{P69905;P68871;Q9BRK4;P04198;P10914}  
[Cluster 166]GO:0042094+P biological\_process [name] interleukin-2 biosynthetic process [def] "The chemical reactions and pathways resulting in the formation of interleukin-2." [GOC

1820 Pathogen[ Q2Q067] interacts with 1 human partners:{Q96IZ0}  
1821 Pathogen[ P0C214] interacts with 1 human partners:{Q96IZ0}  
1822 Pathogen[ P03346] interacts with 1 human partners:{Q96IZ0}  
1823 Pathogen[ Q85601] interacts with 1 human partners:{Q96IZ0}  
1824 Pathogen[ P14079] interacts with 1 human partners:{Q96IZ0}  
1825 Pathogen[ P03383] interacts with 1 human partners:{Q96IZ0}  
1826 Pathogen[ P03410] interacts with 1 human partners:{Q96IZ0}  
1827 Pathogen[ P14075] interacts with 1 human partners:{Q96IZ0}  
1828 Pathogen[ P0C206] interacts with 1 human partners:{Q96IZ0}  
1829 Pathogen[ P03363] interacts with 1 human partners:{Q96IZ0}

1830 [Cluster 167]GO:0043383+P biological\_process [name] negative T cell selection [def] "The process of elimination of immature T cells which react strongly with self-antigens." [ISBN

1831 Pathogen[ Q2Q067] interacts with 1 human partners:{Q8N1K5}  
1832 Pathogen[ P0C214] interacts with 1 human partners:{Q8N1K5}  
1833 Pathogen[ P03346] interacts with 1 human partners:{Q8N1K5}  
1834 Pathogen[ Q85601] interacts with 1 human partners:{Q8N1K5}  
1835 Pathogen[ P14079] interacts with 1 human partners:{Q8N1K5}  
1836 Pathogen[ P03383] interacts with 1 human partners:{Q8N1K5}  
1837 Pathogen[ P03410] interacts with 1 human partners:{Q8N1K5}  
1838 Pathogen[ P14075] interacts with 1 human partners:{Q8N1K5}  
1839 Pathogen[ P0C206] interacts with 1 human partners:{Q8N1K5}  
1840 Pathogen[ P03363] interacts with 1 human partners:{Q8N1K5}

1841 [Cluster 168]GO:0042592+P biological\_process [name] homeostatic process [def] "Any biological process involved in the maintenance of an internal steady state." [GOC

1842 Pathogen[ Q2Q067] interacts with 2 human partners:{Q92793;Q15797}  
1843 Pathogen[ P0C214] interacts with 2 human partners:{Q92793;Q15797}  
1844 Pathogen[ P03346] interacts with 3 human partners:{Q15797;Q92793;O00482}  
1845 Pathogen[ Q85601] interacts with 3 human partners:{Q15797;O00482;Q92793}  
1846 Pathogen[ P14079] interacts with 3 human partners:{Q92793;Q15797;O00482}  
1847 Pathogen[ P03383] interacts with 2 human partners:{Q15797;Q92793}  
1848 Pathogen[ P03410] interacts with 2 human partners:{Q92793;Q15797}  
1849 Pathogen[ P14075] interacts with 1 human partners:{Q92793}  
1850 Pathogen[ P0C206] interacts with 3 human partners:{O00482;Q92793;Q15797}  
1851 Pathogen[ P03363] interacts with 3 human partners:{Q15797;Q92793;O00482}

1852 [Cluster 169]GO:0010868+P biological\_process [name] negative regulation of triglyceride biosynthetic process [def] "Any process that decreases the rate, frequency, or extent of triglyceride biosynthesis. Triglyceride biosynthesis is the collection of chemical reactions and pathways resulting in the formation of triglyceride, any triester of glycerol." [GOC

1853 Pathogen[ Q2Q067] interacts with 1 human partners:{Q969H0}  
1854 Pathogen[ P0C214] interacts with 1 human partners:{Q969H0}  
1855 Pathogen[ P03346] interacts with 1 human partners:{Q969H0}  
1856 Pathogen[ Q85601] interacts with 1 human partners:{Q969H0}  
1857 Pathogen[ P14079] interacts with 1 human partners:{Q969H0}  
1858 Pathogen[ P03383] interacts with 1 human partners:{Q969H0}  
1859 Pathogen[ P03410] interacts with 1 human partners:{Q969H0}  
1860 Pathogen[ P14075] interacts with 1 human partners:{Q969H0}  
1861 Pathogen[ P0C206] interacts with 1 human partners:{Q969H0}  
1862 Pathogen[ P03363] interacts with 1 human partners:{Q969H0}

1863 [Cluster 170]GO:0046833+P biological\_process [name] positive regulation of RNA export from nucleus [def] "Any process that activates or increases the frequency, rate or extent of directed movement of RNA from the nucleus into the cytoplasm." [GOC

1864 Pathogen[ Q2Q067] interacts with 1 human partners:{P52298}

1865 Pathogen[ P0C214] interacts with 1 human partners:{P52298}  
1866 Pathogen[ P03346] interacts with 1 human partners:{P52298}  
1867 Pathogen[ Q85601] interacts with 1 human partners:{P52298}  
1868 Pathogen[ P14079] interacts with 1 human partners:{P52298}  
1869 Pathogen[ P03383] interacts with 1 human partners:{P52298}  
1870 Pathogen[ P03410] interacts with 1 human partners:{P52298}  
1871 Pathogen[ P14075] interacts with 1 human partners:{P52298}  
1872 Pathogen[ P0C206] interacts with 1 human partners:{P52298}  
1873 Pathogen[ P03363] interacts with 1 human partners:{P52298}  
1874 [Cluster 171]GO:0016075+P biological\_process [name] rRNA catabolic process [def] "The chemical reactions and pathways resulting in the breakdown of rRNA, ribosomal RNA, a structural constituent of ribosomes." [GOC  
1875 Pathogen[ Q2Q067] interacts with 5 human  
partners:{Q8IZH2;Q9Y2L1;Q8WXF8;Q9NRR4;Q8TF46}  
1876 Pathogen[ P0C214] interacts with 5 human  
partners:{Q8WXF8;Q9Y2L1;Q8TF46;Q8IZH2;Q9NRR4}  
1877 Pathogen[ P03346] interacts with 5 human  
partners:{Q8WXF8;Q8IZH2;Q9Y2L1;Q9NRR4;Q8TF46}  
1878 Pathogen[ Q85601] interacts with 5 human  
partners:{Q9NRR4;Q9Y2L1;Q8IZH2;Q8WXF8;Q8TF46}  
1879 Pathogen[ P14079] interacts with 5 human  
partners:{Q8TF46;Q8IZH2;Q9NRR4;Q9Y2L1;Q8WXF8}  
1880 Pathogen[ P03383] interacts with 3 human partners:{Q9NRR4;Q9Y2L1;Q8WXF8}  
1881 Pathogen[ P03410] interacts with 5 human  
partners:{Q9Y2L1;Q8WXF8;Q8TF46;Q9NRR4;Q8IZH2}  
1882 Pathogen[ P14075] interacts with 3 human partners:{Q9Y2L1;Q8WXF8;Q9NRR4}  
1883 Pathogen[ P0C206] interacts with 5 human  
partners:{Q8IZH2;Q8WXF8;Q9NRR4;Q9Y2L1;Q8TF46}  
1884 Pathogen[ P03363] interacts with 5 human  
partners:{Q9Y2L1;Q9NRR4;Q8TF46;Q8WXF8;Q8IZH2}  
1885 [Cluster 172]GO:0032092+P biological\_process [name] positive regulation of protein  
binding [def] "Any process that activates or increases the frequency, rate or extent of  
protein binding." [GOC  
1886 Pathogen[ Q2Q067] interacts with 7 human  
partners:{Q8IUC6;P62826;Q6VY07;P11171;Q9H8T0;O00255;Q96RU7}  
1887 Pathogen[ P0C214] interacts with 9 human  
partners:{Q8IUC6;P34932;Q9H8T0;Q6VY07;P62826;Q96RU7;Q86WV6;P11171;O00255}  
1888 Pathogen[ P03346] interacts with 10 human  
partners:{P02549;P62826;P11171;Q9H8T0;O00255;O00522;Q96RU7;Q8IUC6;P34932;Q6VY07}  
1889 Pathogen[ Q85601] interacts with 9 human  
partners:{Q86WV6;Q8IUC6;P62826;P11171;Q9H8T0;Q6VY07;O00255;Q96RU7;P34932}  
1890 Pathogen[ P14079] interacts with 14 human  
partners:{Q6VY07;P11171;Q8IUC6;Q9H8T0;P35611;Q86WV6;Q96RU7;Q05682;Q15011;P62826;P025  
49;O00255;Q13145;O00522}  
1891 Pathogen[ P03383] interacts with 6 human  
partners:{Q8IUC6;Q6VY07;P62826;Q9H8T0;O00255;Q96RU7}  
1892 Pathogen[ P03410] interacts with 14 human  
partners:{Q05682;Q13145;Q9H8T0;P02549;P11171;P62826;O00522;Q96RU7;Q8IUC6;Q86WV6;Q150  
11;O00255;Q6VY07;P35611}  
1893 Pathogen[ P14075] interacts with 8 human  
partners:{O00255;Q9H8T0;P62826;Q96RU7;Q8IUC6;Q15011;P11171;Q6VY07}  
1894 Pathogen[ P0C206] interacts with 11 human  
partners:{Q9H8T0;P34932;O00255;P62826;Q86WV6;Q96RU7;Q6VY07;Q15011;Q8IUC6;O00522;P111  
71}  
1895 Pathogen[ P03363] interacts with 7 human  
partners:{P02549;Q6VY07;P34932;O00522;P11171;Q9H8T0;P62826}  
1896 [Cluster 173]GO:0050775+P biological\_process [name] positive regulation of dendrite  
morphogenesis [def] "Any process that activates or increases the frequency, rate or  
extent of dendrite morphogenesis." [GOC  
1897 Pathogen[ Q2Q067] interacts with 2 human partners:{Q9UJX6;Q15797}  
1898 Pathogen[ P0C214] interacts with 2 human partners:{Q9UJX6;Q15797}  
1899 Pathogen[ P03346] interacts with 3 human partners:{Q15797;Q9UJX6;Q9Y6R0}  
1900 Pathogen[ Q85601] interacts with 2 human partners:{Q9UJX6;Q15797}  
1901 Pathogen[ P14079] interacts with 5 human  
partners:{P24588;Q14444;Q15797;P61158;Q9UJX6}  
1902 Pathogen[ P03383] interacts with 2 human partners:{Q9UJX6;Q15797}  
1903 Pathogen[ P03410] interacts with 3 human partners:{Q15797;Q9UJX6;P24588}  
1904 Pathogen[ P14075] interacts with 1 human partners:{Q9UJX6}  
1905 Pathogen[ P0C206] interacts with 2 human partners:{Q9UJX6;Q15797}  
1906 Pathogen[ P03363] interacts with 3 human partners:{Q15797;Q9UJX6;Q9Y6R0}  
1907 [Cluster 174]GO:0032057+P biological\_process [name] negative regulation of  
translational initiation in response to stress [def] "Any process that stops, prevents  
or reduces the rate of translation initiation as a result of a stimulus indicating the  
organism is under stress." [GOC  
1908 Pathogen[ Q2Q067] interacts with 4 human partners:{Q9UI10;Q14232;Q9NR50;Q13144}  
1909 Pathogen[ P0C214] interacts with 4 human partners:{Q9UI10;Q14232;Q9NR50;Q13144}

1910 Pathogen[ P03346] interacts with 4 human partners:{Q14232;Q13144;Q9NR50;Q9UI10}

1911 Pathogen[ Q85601] interacts with 4 human partners:{Q9NR50;Q13144;Q14232;Q9UI10}

1912 Pathogen[ P14079] interacts with 4 human partners:{Q9UI10;Q13144;Q9NR50;Q14232}

1913 Pathogen[ P03383] interacts with 4 human partners:{Q9UI10;Q13144;Q9NR50;Q14232}

1914 Pathogen[ P03410] interacts with 4 human partners:{Q9NR50;Q14232;Q9UI10;Q13144}

1915 Pathogen[ P14075] interacts with 4 human partners:{Q9UI10;Q14232;Q9NR50;Q13144}

1916 Pathogen[ P0C206] interacts with 4 human partners:{Q14232;Q9NR50;Q13144;Q9UI10}

1917 Pathogen[ P03363] interacts with 3 human partners:{Q9UI10;Q9NR50;Q13144}

1918 [Cluster 175]GO:2000114+P biological\_process [name] regulation of establishment of cell polarity [def] "Any process that modulates the frequency, rate or extent of establishment of cell polarity." [GOC

1919 Pathogen[ Q2Q067] interacts with 2 human partners:{Q9Y6D6;Q14678}

1920 Pathogen[ P0C214] interacts with 2 human partners:{Q14678;Q9Y6D6}

1921 Pathogen[ P03346] interacts with 3 human partners:{Q14678;Q9Y6D6;O00522}

1922 Pathogen[ Q85601] interacts with 2 human partners:{Q14678;Q9Y6D6}

1923 Pathogen[ P14079] interacts with 3 human partners:{Q9Y6D6;Q14678;O00522}

1924 Pathogen[ P03383] interacts with 2 human partners:{Q14678;Q9Y6D6}

1925 Pathogen[ P03410] interacts with 3 human partners:{Q9Y6D6;O00522;Q14678}

1926 Pathogen[ P14075] interacts with 2 human partners:{Q9Y6D6;Q14678}

1927 Pathogen[ P0C206] interacts with 3 human partners:{Q9Y6D6;Q14678;O00522}

1928 Pathogen[ P03363] interacts with 3 human partners:{O00522;Q9Y6D6;Q14678}

1929 [Cluster 176]GO:0045184+P biological\_process [name] establishment of protein localization [def] "The directed movement of a protein to a specific location." [GOC

1930 Pathogen[ Q2Q067] interacts with 4 human partners:{P78352;Q9BQE4;Q9BQA5;Q00987}

1931 Pathogen[ P0C214] interacts with 5 human partners:{Q00987;P78352;Q9BQA5;Q9BQE4;P55072}

1932 Pathogen[ P03346] interacts with 7 human partners:{P78352;P55072;Q00987;Q9BUN8;Q9P021;Q9HB21;Q9BQA5}

1933 Pathogen[ Q85601] interacts with 5 human partners:{Q9HB21;P78352;Q9BQA5;Q00987;Q9BQE4}

1934 Pathogen[ P14079] interacts with 6 human partners:{Q9BQE4;Q9BQA5;Q00987;Q9BUN8;Q9HB21;Q9P021}

1935 Pathogen[ P03383] interacts with 4 human partners:{Q9BUN8;Q9BQE4;Q9BQA5;P78352}

1936 Pathogen[ P03410] interacts with 7 human partners:{Q9BQA5;Q9HB21;Q9BQE4;Q9BUN8;Q00987;Q9P021;P78352}

1937 Pathogen[ P14075] interacts with 4 human partners:{Q9BQE4;Q9BQA5;Q9BUN8;P78352}

1938 Pathogen[ P0C206] interacts with 8 human partners:{P78352;Q9P021;Q9BQA5;Q9BQE4;Q9BUN8;P55072;Q9HB21;Q00987}

1939 Pathogen[ P03363] interacts with 3 human partners:{Q9P021;P78352;Q9BQA5}

1940 [Cluster 177]GO:0002064+P biological\_process [name] epithelial cell development [def] "The process whose specific outcome is the progression of an epithelial cell over time, from its formation to the mature structure. An epithelial cell is a cell usually found in a two-dimensional sheet with a free surface." [GOC

1941 Pathogen[ Q2Q067] interacts with 2 human partners:{O95948;Q16254}

1942 Pathogen[ P0C214] interacts with 2 human partners:{Q16254;O95948}

1943 Pathogen[ P03346] interacts with 3 human partners:{Q16254;Q9UBC0;O95948}

1944 Pathogen[ Q85601] interacts with 2 human partners:{O95948;Q16254}

1945 Pathogen[ P14079] interacts with 2 human partners:{Q16254;O95948}

1946 Pathogen[ P03383] interacts with 1 human partners:{Q16254}

1947 Pathogen[ P03410] interacts with 2 human partners:{Q16254;O95948}

1948 Pathogen[ P14075] interacts with 1 human partners:{Q16254}

1949 Pathogen[ P0C206] interacts with 3 human partners:{Q9UBC0;Q16254;O95948}

1950 Pathogen[ P03363] interacts with 3 human partners:{Q9UBC0;O95948;Q16254}

1951 [Cluster 178]GO:0008104+P biological\_process [name] protein localization [def] "Any process in which a protein is transported to, or maintained in, a specific location." [GOC

1952 Pathogen[ Q2Q067] interacts with 14 human partners:{Q8IZW8;P41182;Q9UHC1;P06748;Q9Y3M2;Q12959;Q96RL7;Q5TZA2;P20823;Q92845;O60888;O75969;Q13501;Q9BV73}

1953 Pathogen[ P0C214] interacts with 13 human partners:{P06748;O60888;Q13501;O75969;Q9Y3M2;Q9UHC1;Q96RL7;P41182;Q12959;Q92845;Q709C8;Q9BV73;Q5TZA2}

1954 Pathogen[ P03346] interacts with 19 human partners:{Q86UU5;O60888;P06748;Q8IZW8;Q9Y3M2;O75969;Q9NQY0;P20823;Q9UHC1;P51843;Q96RL7;P41182;Q5TZA2;Q92845;P54257;Q86XP3;Q13501;Q12959;Q9BV73}

1955 Pathogen[ Q85601] interacts with 15 human partners:{O60888;Q9Y3M2;O75969;Q96RL7;Q9BV73;Q8IZW8;P06748;Q12959;Q92845;Q5TZA2;Q9UHC1;P41182;P19447;P20823;Q13501}

1956 Pathogen[ P14079] interacts with 20 human partners:{Q5TZA2;Q5JQC9;P54257;Q8IZW8;O75781;Q9UHC1;Q9BV73;Q7Z7G8;Q86UU5;P41182;Q96RL7;O60888;P06748;Q13501;Q9Y3M2;O43687;Q709C8;Q92845;O75969;P19447}

1957 Pathogen[ P03383] interacts with 11 human partners:{Q86UU5;P06748;Q96RL7;Q9UHC1;Q9BV73;Q5TZA2;Q9Y3M2;Q13501;Q92845;O75969;O60888}

1958 Pathogen[ P03410] interacts with 22 human partners:{Q709C8;O75781;Q96RL7;Q9Y3M2;Q12959;Q5JQC9;Q92845;O75969;Q13501;P06748;Q9NQ



1959 Y0;Q8IZW8;Q5TZA2;P19447;P41182;P54257;Q7Z7G8;O43687;Q86UU5;Q9BV73;O60888;Q9UHC1}  
 Pathogen[ P14075] interacts with 11 human  
 partners:{Q96RL7;O60888;Q92845;Q5TZA2;Q86UU5;O75969;Q9UHC1;Q9BV73;P06748;Q9Y3M2;Q13501}

1960 Pathogen[ P0C206] interacts with 19 human  
 partners:{Q13501;Q92845;Q5JQC9;Q5TZA2;P41182;Q8IZW8;Q709C8;Q9UHC1;P19447;Q7Z7G8;O60888;P20823;O75969;Q9BV73;Q9NQY0;P06748;Q86UU5;Q12959;Q96RL7}

1961 Pathogen[ P03363] interacts with 15 human  
 partners:{Q12959;Q92845;O60888;Q9UHC1;Q9Y3M2;P06748;Q5TZA2;Q86UU5;Q8IZW8;P54257;Q86XP3;O75969;Q96RL7;Q9NQY0;Q9BV73}

1962 [Cluster 179]GO:2000117+P biological\_process [name] negative regulation of cysteine-type endopeptidase activity [def] "Any process that stops, prevents, or reduces the frequency, rate or extent of cysteine-type endopeptidase activity." [GOC

1963 Pathogen[ Q2Q067] interacts with 1 human partners:{Q16666}

1964 Pathogen[ P0C214] interacts with 2 human partners:{Q16666;Q5JVF3}

1965 Pathogen[ P03346] interacts with 1 human partners:{Q16666}

1966 Pathogen[ Q85601] interacts with 1 human partners:{Q16666}

1967 Pathogen[ P14079] interacts with 2 human partners:{Q5JVF3;Q16666}

1968 Pathogen[ P03383] interacts with 1 human partners:{Q16666}

1969 Pathogen[ P03410] interacts with 2 human partners:{Q16666;Q5JVF3}

1970 Pathogen[ P14075] interacts with 1 human partners:{Q16666}

1971 Pathogen[ P0C206] interacts with 2 human partners:{Q16666;Q5JVF3}

1972 Pathogen[ P03363] interacts with 1 human partners:{Q16666}

1973 [Cluster 180]GO:0048386+P biological\_process [name] positive regulation of retinoic acid receptor signaling pathway [def] "Any process that activates or increases the frequency, rate or extent of retinoic acid receptor signaling pathway activity." [GOC

1974 Pathogen[ Q2Q067] interacts with 2 human partners:{P13056;Q8IXJ9}

1975 Pathogen[ P0C214] interacts with 2 human partners:{P13056;Q8IXJ9}

1976 Pathogen[ P03346] interacts with 3 human partners:{P13056;O95361;Q8IXJ9}

1977 Pathogen[ Q85601] interacts with 2 human partners:{Q8IXJ9;P13056}

1978 Pathogen[ P14079] interacts with 3 human partners:{P13056;Q8IXJ9;O95361}

1979 Pathogen[ P03383] interacts with 2 human partners:{Q8IXJ9;P13056}

1980 Pathogen[ P03410] interacts with 2 human partners:{Q8IXJ9;P13056}

1981 Pathogen[ P14075] interacts with 2 human partners:{Q8IXJ9;P13056}

1982 Pathogen[ P0C206] interacts with 3 human partners:{P13056;Q8IXJ9;O95361}

1983 Pathogen[ P03363] interacts with 2 human partners:{Q8IXJ9;P13056}

1984 [Cluster 181]GO:0008277+P biological\_process [name] regulation of G-protein coupled receptor protein signaling pathway [def] "Any process that modulates the frequency, rate or extent of G-protein coupled receptor protein signaling pathway activity." [GOC

1985 Pathogen[ Q2Q067] interacts with 3 human partners:{P63172;P41220;P81274}

1986 Pathogen[ P0C214] interacts with 4 human partners:{P41220;P81274;P63172;Q9NVN3}

1987 Pathogen[ P03346] interacts with 7 human  
 partners:{Q6ZWB6;Q68DU8;P81274;P63172;Q9NVN3;Q96CX2;P41220}

1988 Pathogen[ Q85601] interacts with 4 human partners:{P41220;P81274;P63172;Q96CX2}

1989 Pathogen[ P14079] interacts with 7 human  
 partners:{P63172;O60895;P41220;Q68DU8;Q96CX2;P81274;Q9NVN3}

1990 Pathogen[ P03383] interacts with 3 human partners:{P41220;P63172;P81274}

1991 Pathogen[ P03410] interacts with 9 human  
 partners:{O60896;O60895;P41220;P63172;Q68DU8;Q9NVN3;Q6ZWB6;Q96CX2;P81274}

1992 Pathogen[ P14075] interacts with 3 human partners:{P81274;P41220;P63172}

1993 Pathogen[ P0C206] interacts with 5 human  
 partners:{P81274;Q96CX2;P41220;P63172;Q9NVN3}

1994 Pathogen[ P03363] interacts with 3 human partners:{P81274;P63172;P41220}

1995 [Cluster 182]GO:0051318+P biological\_process [name] G1 phase [def] "A cell cycle process comprising the steps by which a cell progresses through G1 phase, one of two 'gap' phases in the cell cycle\_ G1 is the interval between the completion of DNA segregation (usually by mitosis or meiosis) and the beginning of DNA synthesis." [GOC

1996 Pathogen[ Q2Q067] interacts with 2 human partners:{P06400;Q8N720}

1997 Pathogen[ P0C214] interacts with 2 human partners:{P06400;Q8N720}

1998 Pathogen[ P03346] interacts with 2 human partners:{P06400;Q8N720}

1999 Pathogen[ Q85601] interacts with 2 human partners:{Q8N720;P06400}

2000 Pathogen[ P14079] interacts with 1 human partners:{Q8N720}

2001 Pathogen[ P03383] interacts with 2 human partners:{P06400;Q8N720}

2002 Pathogen[ P03410] interacts with 2 human partners:{Q8N720;P06400}

2003 Pathogen[ P14075] interacts with 2 human partners:{P06400;Q8N720}

2004 Pathogen[ P0C206] interacts with 2 human partners:{Q8N720;P06400}

2005 Pathogen[ P03363] interacts with 2 human partners:{Q8N720;P06400}

2006 [Cluster 183]GO:0003337+P biological\_process [name] mesenchymal to epithelial transition involved in metanephros morphogenesis [def] "A transition where a mesenchymal cell establishes apical/basolateral polarity, forms intercellular adhesive junctions, synthesizes basement membrane components and becomes an epithelial cell that will contribute to the shaping of the metanephros." [GOC

2007 Pathogen[ Q2Q067] interacts with 1 human partners:{Q9NSC2}

2008 Pathogen[ P0C214] interacts with 1 human partners:{Q9NSC2}

2009 Pathogen[ P03346] interacts with 3 human partners:{Q9NPC8;Q9NSC2;Q06710}

2010 Pathogen[ Q85601] interacts with 1 human partners:{Q9NSC2}

2011 Pathogen[ P14079] interacts with 1 human partners:{Q9NSC2}

2012 Pathogen[ P03383] interacts with 1 human partners:{Q9NSC2}

2013 Pathogen[ P03410] interacts with 1 human partners:{Q9NSC2}

2014 Pathogen[ P14075] interacts with 1 human partners:{Q9NSC2}

2015 Pathogen[ P0C206] interacts with 1 human partners:{Q9NSC2}

2016 Pathogen[ P03363] interacts with 1 human partners:{Q9NPC8}

2017 [Cluster 184]GO:0010765+P biological\_process [name] positive regulation of sodium ion transport [def] "Any process that increases the frequency, rate or extent of the directed movement of sodium ions (Na+) into, out of or within a cell, or between cells, by means of some agent such as a transporter or pore." [GOC

2018 Pathogen[ Q2Q067] interacts with 1 human partners:{P31749}

2019 Pathogen[ P0C214] interacts with 2 human partners:{O43865;P31749}

2020 Pathogen[ P03346] interacts with 2 human partners:{P31749;O43865}

2021 Pathogen[ Q85601] interacts with 2 human partners:{P31749;O43865}

2022 Pathogen[ P14079] interacts with 2 human partners:{P31751;O43865}

2023 Pathogen[ P03383] interacts with 1 human partners:{P31749}

2024 Pathogen[ P03410] interacts with 2 human partners:{P31749;O43865}

2025 Pathogen[ P14075] interacts with 1 human partners:{P31749}

2026 Pathogen[ P0C206] interacts with 2 human partners:{P31749;O43865}

2027 Pathogen[ P03363] interacts with 2 human partners:{P31749;O43865}

2028 [Cluster 185]GO:0001514+P biological\_process [name] selenocysteine incorporation [def] "The incorporation of selenocysteine into a peptide\_ uses a special tRNA that recognizes the UGA codon as selenocysteine, rather than as a termination codon. Selenocysteine is synthesized from serine before its incorporation\_ it is not a posttranslational modification of peptidyl-cysteine." [RESID

2029 Pathogen[ Q2Q067] interacts with 2 human partners:{Q9HD40;P57772}

2030 Pathogen[ P0C214] interacts with 2 human partners:{P57772;Q9HD40}

2031 Pathogen[ P03346] interacts with 2 human partners:{P57772;Q9HD40}

2032 Pathogen[ Q85601] interacts with 2 human partners:{P57772;Q9HD40}

2033 Pathogen[ P14079] interacts with 2 human partners:{P57772;Q9HD40}

2034 Pathogen[ P03383] interacts with 2 human partners:{Q9HD40;P57772}

2035 Pathogen[ P03410] interacts with 2 human partners:{P57772;Q9HD40}

2036 Pathogen[ P14075] interacts with 2 human partners:{P57772;Q9HD40}

2037 Pathogen[ P0C206] interacts with 2 human partners:{Q9HD40;P57772}

2038 Pathogen[ P03363] interacts with 3 human partners:{Q9HD40;P57772;Q9NX07}

2039 [Cluster 186]GO:0008016+P biological\_process [name] regulation of heart contraction [def] "Any process that modulates the frequency, rate or extent of heart contraction. Heart contraction is the process in which the heart decreases in volume in a characteristic way to propel blood through the body." [GOC

2040 Pathogen[ Q2Q067] interacts with 5 human partners:{P10827;P10828;P23297;Q9UBY9;P17661}

2041 Pathogen[ P0C214] interacts with 5 human partners:{Q9UBY9;P13533;P10828;P23297;P17661}

2042 Pathogen[ P03346] interacts with 6 human partners:{P10827;P23297;P17661;Q9UBY9;Q02446;P10828}

2043 Pathogen[ Q85601] interacts with 6 human partners:{P17661;P13533;P23297;Q9UBY9;P10827;P10828}

2044 Pathogen[ P14079] interacts with 7 human partners:{P10828;P10827;P23327;P23297;P17661;Q9UBY9;Q02446}

2045 Pathogen[ P03383] interacts with 4 human partners:{P17661;P23297;Q9UBY9;P10828}

2046 Pathogen[ P03410] interacts with 6 human partners:{P17661;P10828;P23327;P23297;P13533;Q9UBY9}

2047 Pathogen[ P14075] interacts with 5 human partners:{Q9UBY9;P10828;P17661;P23327;P23297}

2048 Pathogen[ P0C206] interacts with 8 human partners:{P17661;P13533;Q02446;P10828;P23327;P23297;P10827;Q9UBY9}

2049 Pathogen[ P03363] interacts with 6 human partners:{Q9UBY9;P10828;P17661;Q95319;P23297;Q02446}

2050 [Cluster 187]GO:0033088+P biological\_process [name] negative regulation of immature T cell proliferation in thymus [def] "Any process that stops, prevents, or reduces the frequency, rate or extent of immature T cell proliferation in the thymus." [GOC

2051 Pathogen[ Q2Q067] interacts with 1 human partners:{Q8N726}

2052 Pathogen[ P0C214] interacts with 1 human partners:{Q8N726}

2053 Pathogen[ P03346] interacts with 1 human partners:{Q8N726}

2054 Pathogen[ Q85601] interacts with 1 human partners:{Q8N726}

2055 Pathogen[ P14079] interacts with 1 human partners:{Q8N726}

2056 Pathogen[ P03383] interacts with 1 human partners:{Q8N726}

2057 Pathogen[ P03410] interacts with 1 human partners:{Q8N726}

2058 Pathogen[ P14075] interacts with 1 human partners:{Q8N726}

2059 Pathogen[ P0C206] interacts with 1 human partners:{Q8N726}

2060 Pathogen[ P03363] interacts with 1 human partners:{Q8N726}

2061 [Cluster 188]GO:0035051+P biological\_process [name] cardiac cell differentiation [def] "The process in which a relatively unspecialized cell acquires the specialized structural and/or functional features of a cell that will form part of the cardiac organ of an individual." [GOC

2062 Pathogen[ Q2Q067] interacts with 1 human partners:{P35712}

2063 Pathogen[ P0C214] interacts with 1 human partners:{P35712}  
2064 Pathogen[ P03346] interacts with 1 human partners:{P35712}  
2065 Pathogen[ Q85601] interacts with 1 human partners:{P35712}  
2066 Pathogen[ P14079] interacts with 2 human partners:{Q16585;P35712}  
2067 Pathogen[ P03383] interacts with 1 human partners:{P35712}  
2068 Pathogen[ P03410] interacts with 2 human partners:{P35712;Q16585}  
2069 Pathogen[ P14075] interacts with 1 human partners:{P35712}  
2070 Pathogen[ P0C206] interacts with 1 human partners:{P35712}  
2071 Pathogen[ P03363] interacts with 1 human partners:{P35712}  
2072 [Cluster 189]GO:0007249+P biological\_process [name] I-kappaB kinase/NF-kappaB cascade  
[def] "A series of reactions initiated by the activation of the transcription factor  
NF-kappaB. NF-kappaB is sequestered by the inhibitor I-kappaB, and is released when  
I-kappaB is phosphorylated by activated I-kappaB kinase." [GOC  
2073 Pathogen[ Q2Q067] interacts with 21 human  
partners:{Q95411;Q8IUC6;Q8TAD8;Q8TD23;P20749;Q9NYJ8;Q5VVH5;Q8N5C8;P10914;Q9Y6K9;Q8NF  
Z5;P0CG47;O14920;P0CG48;O43318;Q92844;P62987;O15111;Q96CG3;Q15750;P62979}  
2074 Pathogen[ P0C214] interacts with 21 human  
partners:{O15111;Q9Y6K9;Q8IUC6;Q8TAD8;Q8TD23;P10914;Q5VVH5;O43318;Q8N5C8;Q92844;P0CG  
48;P20749;Q95411;P62987;Q15750;Q96CG3;Q8NFZ5;P0CG47;P62979;O14920;Q9NYJ8}  
2075 Pathogen[ P03346] interacts with 21 human  
partners:{Q9Y6K9;O15111;P62987;Q8TD23;Q8NFZ5;P0CG48;Q5VVH5;Q8N5C8;P10914;Q9NYJ8;O954  
11;Q15750;P62979;P20749;Q8IUC6;P0CG47;O14920;O43318;Q96CG3;Q8TAD8;Q92844}  
2076 Pathogen[ Q85601] interacts with 20 human  
partners:{Q15750;Q9NYJ8;Q8IUC6;Q8TD23;O15111;Q92844;Q96CG3;P0CG48;Q5VVH5;P10914;Q8N5  
C8;Q9Y6K9;Q8NFZ5;O14920;P62979;P0CG47;Q8TAD8;P62987;O43318;P20749}  
2077 Pathogen[ P14079] interacts with 20 human  
partners:{Q92844;Q8TD23;Q8N5C8;P0CG48;O43187;Q5VVH5;Q8IUC6;Q15750;P62979;P62987;Q8NF  
Z5;Q9Y6K9;Q8TAD8;P20749;Q9Y6Y9;Q9H6S1;O95411;P0CG47;Q96CG3;P10914}  
2078 Pathogen[ P03383] interacts with 21 human  
partners:{P10914;Q9Y6K9;Q92844;Q8TAD8;P62987;Q8IUC6;O14920;Q8TD23;O15111;P20749;Q96C  
G3;Q5VVH5;O43318;Q8N5C8;O95411;P62979;P0CG47;P0CG48;Q9NYJ8;Q8NFZ5;Q15750}  
2079 Pathogen[ P03410] interacts with 24 human  
partners:{P20749;P0CG48;O14920;Q8NFZ5;O15111;Q15750;O43187;Q96CG3;Q9H6S1;Q92844;P629  
79;Q8TAD8;O43318;Q9NYJ8;Q8N5C8;P10914;Q9Y6Y9;P62987;O95411;Q8IUC6;Q8TD23;Q9Y6K9;Q5VV  
H5;P0CG47}  
2080 Pathogen[ P14075] interacts with 21 human  
partners:{Q8TAD8;O15111;Q15750;Q92844;Q8TD23;Q5VVH5;Q8NFZ5;Q8N5C8;O14920;P0CG48;P629  
79;Q96CG3;O43318;P62987;Q8IUC6;P0CG47;Q9Y6K9;P10914;O95411;P20749;Q9NYJ8}  
2081 Pathogen[ P0C206] interacts with 22 human  
partners:{P10914;P0CG48;O14920;Q92844;Q9Y6K9;Q8TAD8;Q8N5C8;Q96CG3;Q8NFZ5;O43318;Q8TD  
23;Q5VVH5;O15111;P62979;Q9NYJ8;P0CG47;O95411;Q8IUC6;P20749;Q15750;P62987;Q9H6S1}  
2082 Pathogen[ P03363] interacts with 17 human  
partners:{O14920;O95411;O15111;Q9NYJ8;Q9Y6K9;O43318;Q15750;P20749;Q5VVH5;P10914;P629  
87;Q92844;Q96CG3;Q8TD23;Q8TAD8;Q8NFZ5;Q8N5C8}  
2083 [Cluster 190]GO:0006302+P biological\_process [name] double-strand break repair  
[def] "The repair of double-strand breaks in DNA via homologous and nonhomologous  
mechanisms to reform a continuous DNA helix." [GOC  
2084 Pathogen[ Q2Q067] interacts with 35 human  
partners:{O00213;Q96SD1;Q99502;Q12888;P27694;P49959;Q7Z2E3;P35244;Q9NWX8;O95551;Q066  
09;Q9H9Q4;Q99504;O60934;Q96017;P15927;Q9NUW8;Q13426;Q8IW19;Q92993;Q6UWZ7;P12956;O602  
16;P39748;Q92499;O76064;P43351;Q9UI95;Q9ULG1;Q14676;P13010;Q9H9F9;Q96FF9;Q9NXX7;Q96R  
L1}  
2085 Pathogen[ P0C214] interacts with 38 human  
partners:{P43351;Q8IW19;Q92993;O95551;O00213;Q9H9Q4;Q06609;P49959;P13010;Q9H9F9;Q96S  
D1;Q9NWX8;Q9ULG1;Q14676;Q9UI95;Q96FF9;Q92698;Q13426;O96017;Q7Z2E3;Q6UWZ7;P15927;O602  
64;P35244;Q99504;Q96RL1;Q92499;P39748;Q12888;P27694;Q9NUW8;Q9NXX7;Q8IYW5;O76064;O602  
16;P12956;P55072;Q99502}  
2086 Pathogen[ P03346] interacts with 44 human  
partners:{Q12888;O00213;Q99828;O76064;P12956;Q06609;Q5XG87;O95551;O96017;Q96SD1;Q8IW  
19;Q96FF9;P27694;P07992;Q9H9F9;P35244;Q9ULG1;Q13426;Q9NUW8;P13010;Q96RL1;Q99502;Q9UI  
95;Q92698;P55072;Q7Z333;Q92499;Q14676;Q9NXX7;O60264;P51587;P15927;P49959;Q8IYW5;Q9NW  
V8;P43351;O60934;Q9H9Q4;Q7Z2E3;Q92993;P39748;Q99504;Q6UWZ7;O60216}  
2087 Pathogen[ Q85601] interacts with 40 human  
partners:{P43351;O00213;Q96RL1;O96017;Q9UI95;Q9H9F9;P35244;Q13426;Q99504;P49959;O602  
16;Q92499;Q92698;P27694;Q12888;Q5XG87;O76064;P15927;Q96SD1;Q99502;Q6UWZ7;Q9NWX8;Q9NU  
W8;Q9ULG1;Q8IYW5;Q8IW19;Q7Z2E3;Q92993;P39748;O60264;Q06609;Q96FF9;Q14676;Q9NXX7;P515  
87;O95551;Q9H9Q4;P13010;P12956;O60934}  
2088 Pathogen[ P14079] interacts with 38 human  
partners:{Q9ULG1;Q99502;Q9H9Q4;P13010;Q96FF9;Q5XG87;Q6UWZ7;Q92698;P51587;O60216;O002  
13;O60934;Q99828;P12956;Q9NUW8;Q9NXX7;Q9NWX8;Q96RL1;O60264;O95551;P15927;Q14676;Q96S  
D1;P27694;Q92499;Q99504;Q12888;P35244;Q06609;Q7Z2E3;Q13426;Q9H9F9;P07992;Q92993;P499  
17;P39748;P43351;Q8IW19}  
2089 Pathogen[ P03383] interacts with 28 human  
partners:{P43351;Q7Z2E3;Q99504;O00213;Q12888;Q06609;P13010;Q96RL1;Q9UI95;P27694;Q8IW  
19;Q9H9Q4;Q92993;O60216;Q9H9F9;P15927;Q13426;P35244;Q9NWX8;Q96FF9;Q9NUW8;O95551;Q924  
99;Q14676;Q9NXX7;Q6UWZ7;P12956;O96017}

2090 Pathogen[ P03410] interacts with 40 human partners: {Q96RL1;P49959;P35244;Q9UI95;Q9NXR7;Q92698;Q9NWX8;P07992;Q99502;Q9ULG1;O00213;P39748;Q96SD1;P43351;O60216;Q7Z2E3;P12956;O95551;Q99828;Q9H9F9;Q92499;P51587;Q8IW19;Q9NUW8;Q96017;Q5XG87;Q6UWZ7;Q99504;Q13426;Q12888;P13010;P27694;Q14676;Q96FF9;P15927;O60264;Q92993;O60934;Q9H9Q4;Q06609}

2091 Pathogen[ P14075] interacts with 29 human partners: {P43351;Q7Z2E3;O00213;Q99504;P12956;Q9NWX8;Q9NXR7;P15927;Q9UI95;Q92993;Q96FF9;Q6UWZ7;Q92499;Q9H9Q4;P35244;Q14676;O96017;Q8IW19;Q13426;P27694;Q9H9F9;Q12888;Q99502;P13010;Q96RL1;O60216;Q9NUW8;Q06609;O95551}

2092 Pathogen[ P0C206] interacts with 47 human partners: {O60216;Q5XG87;P13010;Q99828;P49959;Q99504;Q8IYW5;O96017;P51587;O60934;Q9NUW8;Q96SD1;Q92993;P07992;Q96FF9;O00213;P43351;Q12888;P49917;Q9H9Q4;Q7Z333;Q9ULG1;Q13426;Q14676;Q9NWX8;O95551;P55072;Q9H9F9;Q99502;Q6UWZ7;Q06609;P27694;P15927;Q8IW19;Q96RL1;P39748;P35244;O76064;Q92499;P12956;Q7Z2E3;Q9BX63;Q9UI95;Q92698;Q9UIG0;O60264;Q9NXR7}

2093 Pathogen[ P03363] interacts with 35 human partners: {P12956;Q9BX63;Q8IW19;P27694;Q7Z333;Q9ULG1;P13010;Q96RL1;O00213;Q6UWZ7;Q8IYW5;P35244;Q99828;P15927;O96017;O60264;Q9H9F9;Q13426;Q9NWX8;Q7Z2E3;Q99504;Q9NUW8;Q92499;Q9UI95;Q9H9Q4;P43351;Q9NXR7;O95551;Q06609;Q96FF9;Q14676;Q92993;Q12888;Q92698;O60216}

2094 [Cluster 191]GO:0006469+P biological\_process [name] negative regulation of protein kinase activity [def] "Any process that stops, prevents, or reduces the frequency, rate or extent of protein kinase activity." [GOC

2095 Pathogen[ Q2Q067] interacts with 26 human partners: {Q96S95;P31749;Q9BQY9;O60239;Q9UD71;Q8WY54;P06400;O95684;Q8N1N5;O95257;P61981;Q96B36;P14373;Q15633;P04792;Q8N726;Q8WXC3;P24522;Q9GZV5;Q96RU7;Q15545;Q03111;Q9H875;P49593;P49918;Q96EY1}

2096 Pathogen[ P0C214] interacts with 26 human partners: {O60239;Q9H875;P24522;O95684;Q96S95;P04792;Q9GZV5;Q8N726;Q15545;Q9UD71;O95257;Q15633;P49918;Q96B36;Q8WXC3;Q96RU7;Q8WY54;P61981;Q03111;P49593;Q9BQY9;P14373;O15524;P06400;Q96EY1;P31749}

2097 Pathogen[ P03346] interacts with 30 human partners: {O60239;Q15524;Q96S95;Q8WY54;P14373;O95684;Q8N1N5;P06400;Q9GZV5;Q15633;Q9BQY9;P49918;P49593;Q03111;Q8WXC3;Q96B36;P31749;Q9UD71;Q9H875;P61981;Q96RU7;O95257;Q15545;Q8N726;P61925;Q9C010;Q96EY1;P04792;Q8TB45;P24522}

2098 Pathogen[ Q85601] interacts with 25 human partners: {P61981;O60239;P14373;P31749;Q9UD71;O95684;P06400;P49593;Q15545;P24522;Q96S95;Q9GZV5;Q96B36;Q8N726;Q9H875;Q8WXC3;O95257;Q15633;Q96RU7;Q8WY54;P49918;P04792;Q9BQY9;Q03111;Q96EY1}

2099 Pathogen[ P14079] interacts with 28 human partners: {Q9C010;Q8WXC3;Q9UD71;P14373;P49593;Q9GZV5;O95684;Q8N726;Q8N1N5;P49918;Q03111;Q8WY54;P61981;O60239;Q7Z7J9;Q9BQY9;P24522;Q96RU7;Q9H875;Q96S95;O75293;Q8TB45;Q96B36;P04792;O95257;Q96EY1;P61925;Q15545}

2100 Pathogen[ P03383] interacts with 23 human partners: {Q9UD71;O95684;Q03111;P31749;P24522;Q8N1N5;P04792;Q96B36;P06400;Q8WXC3;Q96RU7;Q8WY54;P61981;P49918;Q96S95;Q15545;Q9H875;Q9GZV5;Q96EY1;O95257;Q9BQY9;Q15633;Q8N726}

2101 Pathogen[ P03410] interacts with 30 human partners: {O95684;Q9H875;O75293;Q15633;P61925;Q8N1N5;Q8N726;Q96S95;P24522;Q8WY54;P31749;P04792;O60239;P06400;Q9GZV5;P61981;Q96B36;Q9C010;Q7Z7J9;Q96RU7;Q8WXC3;P49593;Q8TB45;P49918;O95257;Q9UD71;Q9BQY9;Q96EY1;Q15545;Q03111}

2102 Pathogen[ P14075] interacts with 25 human partners: {Q9GZV5;O60239;O95684;O95257;P04792;Q9UD71;P61981;Q9C010;Q96B36;Q8N1N5;P31749;Q96S95;P49918;Q8WXC3;Q15545;P06400;Q15633;Q9BQY9;Q96RU7;Q8WY54;P24522;Q03111;Q96EY1;Q8N726;Q9H875}

2103 Pathogen[ P0C206] interacts with 30 human partners: {O75293;Q15545;P31749;P24522;O95684;Q8N726;Q8WY54;Q9UD71;Q9C010;Q96B36;Q9BQY9;P04792;O15524;Q96RU7;Q03111;Q9GZV5;P49593;O95257;O60239;P61981;Q8N1N5;Q15633;Q9H875;P14373;P61925;Q96EY1;Q8WXC3;P06400;P49918;Q96S95}

2104 Pathogen[ P03363] interacts with 28 human partners: {P49918;Q9H875;Q9C010;Q96B36;Q8TB45;O15524;P14373;Q9UD71;O95684;O95257;Q15545;Q8N1N5;P06400;Q15633;Q03111;Q9GZV5;P31749;P61925;Q8WXC3;P24522;Q9BQY9;Q96S95;O60239;Q8N726;P61981;Q96EY1;P04792;Q8WY54}

2105 [Cluster 192]GO:0021954+P biological\_process [name] central nervous system neuron development [def] "The process whose specific outcome is the progression of a neuron whose cell body is located in the central nervous system, from initial commitment of the cell to a neuronal fate, to the fully functional differentiated neuron." [GO\_REF

2106 Pathogen[ Q2Q067] interacts with 2 human partners: {P23769;P78543}

2107 Pathogen[ P0C214] interacts with 2 human partners: {P78543;P23769}

2108 Pathogen[ P03346] interacts with 4 human partners: {P23769;P11137;P78543;Q9H2A3}

2109 Pathogen[ Q85601] interacts with 2 human partners: {P23769;P78543}

2110 Pathogen[ P14079] interacts with 3 human partners: {P78543;P11137;P23769}

2111 Pathogen[ P03383] interacts with 2 human partners: {P23769;P78543}

2112 Pathogen[ P03410] interacts with 3 human partners: {P11137;P78543;P23769}

2113 Pathogen[ P14075] interacts with 2 human partners: {P23769;P78543}

2114 Pathogen[ P0C206] interacts with 4 human partners: {P11137;P23769;P78543;Q9H2A3}

2115 Pathogen[ P03363] interacts with 3 human partners:{P11137;P78543;Q9H2A3}

2116 [Cluster 193]GO:0000073+P biological\_process [name] spindle pole body separation [def] "A largely uncharacterized process involving the release of duplicated spindle pole bodies (SPBs) and their migration away from each other within the nuclear membrane. Duplicated SPBs are connected by a bridge structure that may be severed in order to release the SPBs from one another. Following liberation, SPBs diffuse through the nuclear membrane until they are across from each other. SPB separation must take place in order for a bipolar mitotic spindle to assemble." [GOC

2117 Pathogen[ Q2Q067] interacts with 1 human partners:{P27816}

2118 Pathogen[ P0C214] interacts with 1 human partners:{P27816}

2119 Pathogen[ P03346] interacts with 1 human partners:{P27816}

2120 Pathogen[ Q85601] interacts with 1 human partners:{P27816}

2121 Pathogen[ P14079] interacts with 1 human partners:{P27816}

2122 Pathogen[ P03383] interacts with 1 human partners:{P27816}

2123 Pathogen[ P03410] interacts with 1 human partners:{P27816}

2124 Pathogen[ P14075] interacts with 1 human partners:{P27816}

2125 Pathogen[ P0C206] interacts with 1 human partners:{P27816}

2126 Pathogen[ P03363] interacts with 1 human partners:{P27816}

2127 [Cluster 194]GO:0034063+P biological\_process [name] stress granule assembly [def] "The aggregation, arrangement and bonding together of proteins and RNA molecules to form a stress granule." [GOC

2128 Pathogen[ Q2Q067] interacts with 3 human partners:{Q14204;Q8TB72;Q99700}

2129 Pathogen[ P0C214] interacts with 5 human partners:{Q8TB72;Q14204;Q99700;Q96G01;Q14011}

2130 Pathogen[ P03346] interacts with 5 human partners:{Q96G01;Q14011;Q14204;Q8TB72;Q99700}

2131 Pathogen[ Q85601] interacts with 4 human partners:{Q14204;Q96G01;Q8TB72;Q99700}

2132 Pathogen[ P14079] interacts with 5 human partners:{Q99700;Q14204;Q8TB72;Q96G01;Q14011}

2133 Pathogen[ P03383] interacts with 2 human partners:{Q99700;Q8TB72}

2134 Pathogen[ P03410] interacts with 5 human partners:{Q99700;Q14204;Q96G01;Q14011;Q8TB72}

2135 Pathogen[ P14075] interacts with 2 human partners:{Q8TB72;Q99700}

2136 Pathogen[ P0C206] interacts with 5 human partners:{Q14011;Q8TB72;Q14204;Q99700;Q96G01}

2137 Pathogen[ P03363] interacts with 4 human partners:{Q8TB72;Q14204;Q14011;Q99700}

2138 [Cluster 195]GO:2000134+P biological\_process [name] negative regulation of G1/S transition of mitotic cell cycle [def] "Any process that stops, prevents, or reduces the frequency, rate or extent of G1/S transition of mitotic cell cycle." [GOC

2139 Pathogen[ Q2Q067] interacts with 7 human partners:{Q6P1J9;P55345;Q9NPI1;Q9NYF0;Q63ZY3;Q13642;A2A288}

2140 Pathogen[ P0C214] interacts with 7 human partners:{P55345;Q13642;A2A288;Q6P1J9;Q9NPI1;Q9NYF0;Q63ZY3}

2141 Pathogen[ P03346] interacts with 7 human partners:{A2A288;Q9NPI1;P55345;Q13642;Q9NYF0;Q63ZY3;Q6P1J9}

2142 Pathogen[ Q85601] interacts with 7 human partners:{Q6P1J9;Q9NYF0;Q13642;A2A288;Q63ZY3;Q9NPI1;P55345}

2143 Pathogen[ P14079] interacts with 7 human partners:{Q9NPI1;P55345;Q13642;Q63ZY3;A2A288;Q6P1J9;Q9NYF0}

2144 Pathogen[ P03383] interacts with 6 human partners:{Q6P1J9;A2A288;Q9NYF0;Q63ZY3;Q9NPI1;Q13642}

2145 Pathogen[ P03410] interacts with 7 human partners:{A2A288;Q6P1J9;Q9NYF0;Q13642;Q63ZY3;Q9NPI1;P55345}

2146 Pathogen[ P14075] interacts with 6 human partners:{Q63ZY3;Q9NPI1;Q13642;Q6P1J9;Q9NYF0;A2A288}

2147 Pathogen[ P0C206] interacts with 7 human partners:{Q9NPI1;Q13642;A2A288;Q63ZY3;Q9NYF0;P55345;Q6P1J9}

2148 Pathogen[ P03363] interacts with 6 human partners:{A2A288;Q63ZY3;Q9NYF0;Q6P1J9;Q9NPI1;Q13642}

2149 [Cluster 196]GO:0006195+P biological\_process [name] purine nucleotide catabolic process [def] "The chemical reactions and pathways resulting in the breakdown of a purine nucleotide, a compound consisting of nucleoside (a purine base linked to a deoxyribose or ribose sugar) esterified with a phosphate group at either the 3' or 5'-hydroxyl group of the sugar." [GOC

2150 Pathogen[ Q2Q067] interacts with 1 human partners:{P36639}

2151 Pathogen[ P0C214] interacts with 5 human partners:{Q96P26;P49902;Q8TCD5;P36639;Q9Y2T3}

2152 Pathogen[ P03346] interacts with 1 human partners:{P36639}

2153 Pathogen[ Q85601] interacts with 1 human partners:{P36639}

2154 Pathogen[ P14079] interacts with 6 human partners:{Q96P26;Q8TCD5;Q9Y2T3;P36639;P49902;Q9BXI3}

2155 Pathogen[ P03383] interacts with 1 human partners:{P36639}

2156 Pathogen[ P03410] interacts with 6 human partners:{Q96P26;P36639;Q9Y2T3;Q9BXI3;Q8TCD5;P49902}

2157 Pathogen[ P14075] interacts with 2 human partners:{P49902;P36639}

2158 Pathogen[ P0C206] interacts with 3 human partners:{P36639;P49902;Q8TCD5}

2159 Pathogen[ P03363] interacts with 1 human partners:{P36639}  
2160 [Cluster 197]GO:0045345+P biological\_process [name] positive regulation of MHC class I biosynthetic process [def] "Any process that activates or increases the frequency, rate or extent of the chemical reactions and pathways resulting in the formation of MHC class I." [GOC  
2161 Pathogen[ Q2Q067] interacts with 2 human partners:{Q86WI3;P33076}  
2162 Pathogen[ P0C214] interacts with 2 human partners:{P33076;Q86WI3}  
2163 Pathogen[ P03346] interacts with 2 human partners:{P33076;Q86WI3}  
2164 Pathogen[ Q85601] interacts with 2 human partners:{P33076;Q86WI3}  
2165 Pathogen[ P14079] interacts with 3 human partners:{P33076;Q8IU54;Q86WI3}  
2166 Pathogen[ P03383] interacts with 2 human partners:{P33076;Q86WI3}  
2167 Pathogen[ P03410] interacts with 2 human partners:{Q86WI3;P33076}  
2168 Pathogen[ P14075] interacts with 2 human partners:{Q86WI3;P33076}  
2169 Pathogen[ P0C206] interacts with 2 human partners:{Q86WI3;P33076}  
2170 Pathogen[ P03363] interacts with 2 human partners:{Q86WI3;P33076}  
2171 [Cluster 198]GO:0007175+P biological\_process [name] negative regulation of epidermal growth factor-activated receptor activity [def] "Any process that stops, prevents, or reduces the frequency, rate or extent of EGF-activated receptor activity." [GOC  
2172 Pathogen[ Q2Q067] interacts with 3 human partners:{Q9UJM3;Q9HCC9;Q8N5A5}  
2173 Pathogen[ P0C214] interacts with 3 human partners:{Q8N5A5;Q9UJM3;Q9HCC9}  
2174 Pathogen[ P03346] interacts with 5 human partners:{O75159;Q8N5A5;Q9UNH7;Q9HCC9;Q9UJM3}  
2175 Pathogen[ Q85601] interacts with 4 human partners:{Q8N5A5;Q9HCC9;Q9UJM3;Q9UNH7}  
2176 Pathogen[ P14079] interacts with 4 human partners:{Q9UNH7;Q9UJM3;Q8N5A5;Q9HCC9}  
2177 Pathogen[ P03383] interacts with 3 human partners:{Q9UJM3;Q8N5A5;Q9HCC9}  
2178 Pathogen[ P03410] interacts with 4 human partners:{Q9HCC9;Q9UNH7;Q8N5A5;Q9UJM3}  
2179 Pathogen[ P14075] interacts with 3 human partners:{Q8N5A5;Q9HCC9;Q9UJM3}  
2180 Pathogen[ P0C206] interacts with 4 human partners:{Q9UNH7;Q9HCC9;Q9UJM3;Q8N5A5}  
2181 Pathogen[ P03363] interacts with 5 human partners:{O75159;Q9HCC9;Q9UNH7;Q8N5A5;Q9UJM3}  
2182 [Cluster 199]GO:0090324+P biological\_process [name] negative regulation of oxidative phosphorylation [def] "Any process that decreases the frequency, rate or extent of the chemical reactions and pathways resulting in the phosphorylation of ADP to ATP that accompanies the oxidation of a metabolite through the operation of the respiratory chain. Oxidation of compounds establishes a proton gradient across the membrane, providing the energy for ATP synthesis." [GOC  
2183 Pathogen[ Q2Q067] interacts with 1 human partners:{Q9NP71}  
2184 Pathogen[ P0C214] interacts with 1 human partners:{Q9NP71}  
2185 Pathogen[ P03346] interacts with 1 human partners:{Q9NP71}  
2186 Pathogen[ Q85601] interacts with 1 human partners:{Q9NP71}  
2187 Pathogen[ P14079] interacts with 1 human partners:{Q9NP71}  
2188 Pathogen[ P03383] interacts with 1 human partners:{Q9NP71}  
2189 Pathogen[ P03410] interacts with 1 human partners:{Q9NP71}  
2190 Pathogen[ P14075] interacts with 1 human partners:{Q9NP71}  
2191 Pathogen[ P0C206] interacts with 1 human partners:{Q9NP71}  
2192 Pathogen[ P03363] interacts with 1 human partners:{Q9NP71}  
2193 [Cluster 200]GO:0006595+P biological\_process [name] polyamine metabolic process [def] "The chemical reactions and pathways involving polyamines, any organic compound containing two or more amino groups." [ISBN  
2194 Pathogen[ Q2Q067] interacts with 5 human partners:{Q96GX9;Q9BV57;Q9BV20;P21673;O95190}  
2195 Pathogen[ P0C214] interacts with 10 human partners:{Q9BV57;Q96GX9;P52788;Q9NWM0;P19623;Q9UHY7;Q13126;O95190;P21673;Q9BV20}  
2196 Pathogen[ P03346] interacts with 6 human partners:{Q9BV20;Q9BV57;P21673;Q9UHY7;Q96GX9;O95190}  
2197 Pathogen[ Q85601] interacts with 6 human partners:{P21673;Q96GX9;Q9BV57;O95190;Q9UHY7;Q9BV20}  
2198 Pathogen[ P14079] interacts with 7 human partners:{P17707;Q9BV20;O95190;Q96GX9;P19623;P21673;Q9BV57}  
2199 Pathogen[ P03383] interacts with 5 human partners:{Q9BV57;Q96GX9;O95190;Q9BV20;P21673}  
2200 Pathogen[ P03410] interacts with 8 human partners:{O95190;P19623;P52788;Q9BV20;P21673;Q96GX9;P17707;Q9BV57}  
2201 Pathogen[ P14075] interacts with 5 human partners:{Q96GX9;Q9BV57;Q9BV20;P21673;O95190}  
2202 Pathogen[ P0C206] interacts with 6 human partners:{Q9BV20;P21673;Q9UHY7;O95190;Q9BV57;Q96GX9}  
2203 Pathogen[ P03363] interacts with 5 human partners:{P21673;Q9BV57;Q9BV20;Q96GX9;O95190}  
2204 [Cluster 201]GO:0043623+P biological\_process [name] cellular protein complex assembly [def] "The aggregation, arrangement and bonding together of a set of components to form a protein complex, occurring at the level of an individual cell." [GOC  
2205 Pathogen[ Q2Q067] interacts with 8 human partners:{A6NGQ2;Q8NCR6;Q9UBB5;Q12933;O60535;P59047;P67870;Q5VU43}  
2206 Pathogen[ P0C214] interacts with 8 human partners:{Q8NCR6;O60535;Q5VU43;Q12933;Q9UBB5;P67870;P59047;P18846}

2207 Pathogen[ P03346] interacts with 8 human partners:{P59047;Q8NCR6;O60535;P67870;Q5VU43;Q9UBB5;A6NGQ2;P18846}

2208 Pathogen[ Q85601] interacts with 7 human partners:{P18846;Q12933;O60535;Q5VU43;P67870;Q9UBB5;P59047}

2209 Pathogen[ P14079] interacts with 8 human partners:{Q9UBB5;A6NGQ2;Q7Z5B4;Q12933;P67870;P59047;Q8NCR6;Q5VU43}

2210 Pathogen[ P03383] interacts with 8 human partners:{P18846;Q9UBB5;O60535;Q5VU43;A6NGQ2;Q12933;P67870;Q8NCR6}

2211 Pathogen[ P03410] interacts with 10 human partners:{O60535;Q7Z5B4;A6NGQ2;Q8NCR6;Q9UBB5;P59047;P18846;Q5VU43;Q12933;P67870}

2212 Pathogen[ P14075] interacts with 8 human partners:{Q5VU43;Q9UBB5;Q12933;P67870;A6NGQ2;Q8NCR6;O60535;P18846}

2213 Pathogen[ P0C206] interacts with 10 human partners:{A6NGQ2;Q9UBB5;Q7Z5B4;Q8NCR6;P18846;Q12933;P59047;O60535;P67870;Q5VU43}

2214 Pathogen[ P03363] interacts with 9 human partners:{A6NGQ2;O60535;Q12933;Q5VU43;Q8NCR6;P18846;P59047;P67870;Q9UBB5}

2215 [Cluster 202]GO:2000744+P biological\_process [name] positive regulation of anterior head development [def] "Any process that activates or increases the frequency, rate or extent of anterior head development." [GOC

2216 Pathogen[ Q2Q067] interacts with 1 human partners:{Q9BWW4}

2217 Pathogen[ P0C214] interacts with 1 human partners:{Q9BWW4}

2218 Pathogen[ P03346] interacts with 1 human partners:{Q9BWW4}

2219 Pathogen[ Q85601] interacts with 1 human partners:{Q9BWW4}

2220 Pathogen[ P14079] interacts with 1 human partners:{Q9BWW4}

2221 Pathogen[ P03383] interacts with 1 human partners:{Q9BWW4}

2222 Pathogen[ P03410] interacts with 1 human partners:{Q9BWW4}

2223 Pathogen[ P14075] interacts with 1 human partners:{Q9BWW4}

2224 Pathogen[ P0C206] interacts with 1 human partners:{Q9BWW4}

2225 Pathogen[ P03363] interacts with 1 human partners:{Q9BWW4}

2226 [Cluster 203]GO:0021522+P biological\_process [name] spinal cord motor neuron differentiation [def] "The process in which neuroepithelial cells in the ventral neural tube acquire specialized structural and/or functional features of motor neurons. Motor neurons innervate an effector (muscle or glandular) tissue and are responsible for transmission of motor impulses from the brain to the periphery. Differentiation includes the processes involved in commitment of a cell to a specific fate." [GO\_REF

2227 Pathogen[ Q2Q067] interacts with 1 human partners:{Q9ULW3}

2228 Pathogen[ P0C214] interacts with 2 human partners:{Q9ULW3;Q6Y7W6}

2229 Pathogen[ P03346] interacts with 5 human partners:{Q06945;Q9ULW3;Q95096;Q13516;P61968}

2230 Pathogen[ Q85601] interacts with 3 human partners:{Q9ULW3;P61968;Q6Y7W6}

2231 Pathogen[ P14079] interacts with 2 human partners:{Q6Y7W6;Q9ULW3}

2232 Pathogen[ P03383] interacts with 1 human partners:{Q9ULW3}

2233 Pathogen[ P03410] interacts with 3 human partners:{Q9ULW3;Q6Y7W6;Q9UBY8}

2234 Pathogen[ P14075] interacts with 1 human partners:{Q9ULW3}

2235 Pathogen[ P0C206] interacts with 3 human partners:{Q6Y7W6;Q9ULW3;P61968}

2236 Pathogen[ P03363] interacts with 2 human partners:{Q9ULW3;Q13516}

2237 [Cluster 204]GO:0060840+P biological\_process [name] artery development [def] "The progression of the artery over time, from its initial formation to the mature structure. An artery is a blood vessel that carries blood away from the heart to a capillary bed." [GOC

2238 Pathogen[ Q2Q067] interacts with 3 human partners:{Q86V48;P49639;Q9Y5J3}

2239 Pathogen[ P0C214] interacts with 3 human partners:{P49639;Q9Y5J3;Q86V48}

2240 Pathogen[ P03346] interacts with 3 human partners:{P49639;Q86V48;Q9Y5J3}

2241 Pathogen[ Q85601] interacts with 3 human partners:{P49639;Q86V48;Q9Y5J3}

2242 Pathogen[ P14079] interacts with 3 human partners:{Q9Y5J3;Q86V48;P49639}

2243 Pathogen[ P03383] interacts with 2 human partners:{P49639;Q86V48}

2244 Pathogen[ P03410] interacts with 3 human partners:{Q9Y5J3;P49639;Q86V48}

2245 Pathogen[ P14075] interacts with 1 human partners:{Q86V48}

2246 Pathogen[ P0C206] interacts with 3 human partners:{P49639;Q86V48;Q9Y5J3}

2247 Pathogen[ P03363] interacts with 3 human partners:{Q9Y5J3;Q86V48;P49639}

2248 [Cluster 205]GO:0030997+P biological\_process [name] regulation of centriole-centriole cohesion [def] "Any process that modulates the extent to which the two centrioles within a centrosome remain tightly paired\_ may be mediated by the assembly and disassembly of a proteinaceous linker." [PMID

2249 Pathogen[ Q2Q067] interacts with 1 human partners:{Q9BV73}

2250 Pathogen[ P0C214] interacts with 1 human partners:{Q9BV73}

2251 Pathogen[ P03346] interacts with 1 human partners:{Q9BV73}

2252 Pathogen[ Q85601] interacts with 1 human partners:{Q9BV73}

2253 Pathogen[ P14079] interacts with 1 human partners:{Q9BV73}

2254 Pathogen[ P03383] interacts with 1 human partners:{Q9BV73}

2255 Pathogen[ P03410] interacts with 1 human partners:{Q9BV73}

2256 Pathogen[ P14075] interacts with 1 human partners:{Q9BV73}

2257 Pathogen[ P0C206] interacts with 1 human partners:{Q9BV73}

2258 Pathogen[ P03363] interacts with 1 human partners:{Q9BV73}

2259 [Cluster 206]GO:0040008+P biological\_process [name] regulation of growth [def] "Any process that modulates the frequency, rate or extent of the growth of all or part of an

organism so that it occurs at its proper speed, either globally or in a specific part of the organism's development." [GOC

2260 Pathogen[ Q2Q067] interacts with 27 human  
partners:{P30153;Q9NXR8;Q9NPF5;Q99816;Q96019;Q86VY4;Q5PSV4;Q14511;P67775;Q95990;Q99608;Q14508;Q9H160;Q92993;Q9UBU8;Q15014;Q8WWQ0;P78395;Q9NV56;Q96MG7;Q95619;Q9H2F5;Q14512;Q15834;Q9ULC4;Q66K89;Q9H0E9}

2261 Pathogen[ P0C214] interacts with 29 human  
partners:{Q92993;Q9NNT2;P30153;Q15014;P29401;Q99608;Q969T4;P78395;Q9H2F5;Q5PSV4;Q95619;Q15834;Q8WWQ0;Q9UBU8;Q9H160;Q96MG7;P67775;Q14508;Q9NV56;Q14511;Q9H0E9;Q99816;Q86VY4;Q14512;Q15524;Q9ULC4;Q66K89;Q96019;Q9NPF5}

2262 Pathogen[ P03346] interacts with 34 human  
partners:{Q15524;Q15834;Q14511;Q693B1;Q9NV56;Q75159;Q96MG7;Q5PSV4;Q99816;Q92826;P67775;Q66K89;Q14508;Q9H0E9;P30153;Q96019;Q86VY4;P78395;Q95990;Q9UBU8;Q8WWQ0;Q9NNT2;Q9H2F5;Q15014;Q95619;Q99608;A6NDV4;Q9HA38;Q92993;Q14512;Q9ULC4;Q9H160;Q9NXR8;Q9NPF5}

2263 Pathogen[ Q85601] interacts with 29 human  
partners:{Q95619;Q99816;Q15014;Q9H2F5;Q15834;Q5PSV4;Q96MG7;Q9H0E9;Q9UBU8;P30153;Q969T4;Q96019;Q99608;Q14508;Q86VY4;Q8WWQ0;Q9HA38;P67775;Q66K89;Q92993;Q14512;Q9NV56;P17677;Q9NXR8;Q9H160;Q14511;Q9ULC4;P78395;Q9NPF5}

2264 Pathogen[ P14079] interacts with 28 human  
partners:{Q15014;P17677;Q9ULC4;Q9UBU8;A6NDV4;Q5PSV4;Q95990;P29401;Q8WWQ0;Q99608;Q9H0E9;Q9NV56;Q9NPF5;Q66K89;Q9NNT2;Q15834;Q9HA38;Q9H2F5;Q14508;Q14512;P78395;Q96MG7;P30153;Q86VY4;Q99816;Q95619;Q9H160;Q92993}

2265 Pathogen[ P03383] interacts with 25 human  
partners:{Q15014;Q96019;Q86VY4;Q5PSV4;Q99608;Q9NV56;Q9H2F5;Q9UBU8;Q99816;P30153;P67775;Q92993;Q66K89;Q9H0E9;Q9H160;Q9NPF5;Q14511;P78395;Q96MG7;Q8WWQ0;Q14512;Q95619;Q9ULC4;Q15834;Q95990}

2266 Pathogen[ P03410] interacts with 31 human  
partners:{Q95619;Q9NV56;Q15014;Q95990;Q66K89;Q96019;Q9NPF5;Q99608;Q9UBU8;A6NDV4;Q96MG7;Q9H2F5;Q99816;Q9ULC4;Q14511;Q8WWQ0;Q14508;P78395;Q9NXR8;Q86VY4;Q9H160;Q9NNT2;Q15834;P30153;Q9HA38;P17677;Q14512;P67775;Q9H0E9;Q92993;Q5PSV4}

2267 Pathogen[ P14075] interacts with 24 human  
partners:{Q14511;Q99608;Q9H2F5;Q8WWQ0;Q9UBU8;P78395;Q15014;Q5PSV4;Q95619;Q92993;Q9NPF5;Q96019;Q95990;Q15834;P67775;P30153;Q9NV56;Q66K89;Q86VY4;Q99816;Q14512;Q9H160;Q9ULC4;Q96MG7}

2268 Pathogen[ P0C206] interacts with 35 human  
partners:{Q9H2F5;Q9NPF5;P17677;Q9UBU8;Q9NNT2;P30153;P78395;Q86VY4;Q96MG7;Q99816;Q15524;Q92993;P67775;Q15014;Q9NXR8;Q9H160;Q8WWQ0;A6NDV4;Q96019;Q693B1;Q95619;Q95990;Q14508;Q15834;Q99608;Q969T4;Q9HA38;Q5PSV4;Q9ULC4;Q9NV56;Q14512;Q66K89;Q14511;Q9H0E9;P29401}

2269 Pathogen[ P03363] interacts with 32 human  
partners:{Q9NPF5;Q9H160;Q95619;Q95990;Q15834;Q75159;Q8WWQ0;Q15524;Q15014;Q9H2F5;Q66K89;P78395;Q99608;Q9UBU8;Q96019;Q14511;Q86VY4;Q92826;Q969T4;Q9NV56;Q99816;Q9ULC4;Q14508;Q96MG7;Q14512;Q9NNT2;P30153;P67775;Q5PSV4;Q9H0E9;Q92993;Q693B1}

2270 [Cluster 207]GO:0070262+P biological\_process [name] peptidyl-serine dephosphorylation [def] "The removal of phosphoric residues from peptidyl-O-phospho-L-serine to form peptidyl-serine." [GOC

2271 Pathogen[ Q2Q067] interacts with 1 human partners:{P30153}

2272 Pathogen[ P0C214] interacts with 1 human partners:{P30153}

2273 Pathogen[ P03346] interacts with 1 human partners:{P30153}

2274 Pathogen[ Q85601] interacts with 1 human partners:{P30153}

2275 Pathogen[ P14079] interacts with 1 human partners:{P30153}

2276 Pathogen[ P03383] interacts with 1 human partners:{P30153}

2277 Pathogen[ P03410] interacts with 1 human partners:{P30153}

2278 Pathogen[ P14075] interacts with 1 human partners:{P30153}

2279 Pathogen[ P0C206] interacts with 1 human partners:{P30153}

2280 Pathogen[ P03363] interacts with 1 human partners:{P30153}

2281 [Cluster 208]GO:0006048+P biological\_process [name] UDP-N-acetylglucosamine biosynthetic process [def] "The chemical reactions and pathways resulting in the formation of UDP-N-acetylglucosamine, a substance composed of N-acetylglucosamine, a common structural unit of oligosaccharides, in glycosidic linkage with uridine diphosphate." [GOC

2282 Pathogen[ Q2Q067] interacts with 2 human partners:{Q95394;Q16222}

2283 Pathogen[ P0C214] interacts with 3 human partners:{Q16222;Q95394;Q96EK6}

2284 Pathogen[ P03346] interacts with 2 human partners:{Q16222;Q95394}

2285 Pathogen[ Q85601] interacts with 3 human partners:{Q16222;Q96EK6;Q95394}

2286 Pathogen[ P14079] interacts with 3 human partners:{Q16222;Q95394;Q96EK6}

2287 Pathogen[ P03383] interacts with 1 human partners:{Q95394}

2288 Pathogen[ P03410] interacts with 3 human partners:{Q16222;Q96EK6;Q95394}

2289 Pathogen[ P14075] interacts with 2 human partners:{Q95394;Q96EK6}

2290 Pathogen[ P0C206] interacts with 3 human partners:{Q16222;Q95394;Q96EK6}

2291 Pathogen[ P03363] interacts with 1 human partners:{Q16222}

2292 [Cluster 209]GO:0030509+P biological\_process [name] BMP signaling pathway [def] "A series of molecular signals generated as a consequence of any member of the BMP (bone morphogenetic protein) family binding to a cell surface receptor." [ISBN

2293 Pathogen[ Q2Q067] interacts with 16 human  
partners:{Q9HAU4;Q13485;P41134;P61077;P35548;P17098;P12755;P51668;Q15105;Q43541;Q151



2294 Pathogen[ P0C214] interacts with 18 human partners: {O15198;Q9HAU4;Q93008;P61077;Q9HCE7;P41134;Q13485;O15105;P17098;O43541;P12755;P18146;Q6ZVN8;Q99717;P13533;Q15797;P51668;P35548}

2295 Pathogen[ P03346] interacts with 16 human partners: {Q9HAU4;Q6ZVN8;P17098;P35548;Q93008;Q15797;Q99717;O15105;P51668;P61077;O15198;Q7Z3T8;O43541;P41134;Q13485;P18146}

2296 Pathogen[ Q85601] interacts with 16 human partners: {P18146;O15198;Q9HAU4;P41134;P13533;O43541;Q15797;P51668;Q93008;P61077;P12755;P17098;Q99717;P35548;O15105;Q13485}

2297 Pathogen[ P14079] interacts with 13 human partners: {P17098;P12755;Q6ZVN8;O15198;Q9HAU4;Q15797;P61077;P51668;O43541;Q7Z3T8;P41134;P28360;O15105}

2298 Pathogen[ P03383] interacts with 12 human partners: {O15198;Q13485;Q15797;P17098;P18146;P61077;O15105;P35548;Q6ZVN8;Q99717;O43541;P51668}

2299 Pathogen[ P03410] interacts with 16 human partners: {P12755;Q99717;O15198;P41134;P35548;P17098;Q6ZVN8;Q15797;Q13485;P51668;O43541;O15105;P13533;P18146;Q7Z3T8;P61077}

2300 Pathogen[ P14075] interacts with 11 human partners: {O43541;P35548;P18146;Q99717;P61077;P17098;Q13485;Q6ZVN8;O15198;O15105;P51668}

2301 Pathogen[ P0C206] interacts with 18 human partners: {O43541;P13533;Q9HAU4;Q93008;Q99717;P18146;P12755;P41134;O15105;Q7Z3T8;P35548;Q6ZVN8;Q13485;Q15797;P61077;O15198;P51668;P17098}

2302 Pathogen[ P03363] interacts with 16 human partners: {P18146;Q9HAU4;P17098;P35548;O15105;Q15797;P19883;O43541;P41134;Q6ZVN8;P51668;Q13485;P61077;Q99717;O15198;Q93008}

2303 [Cluster 210]GO:000070+P biological\_process [name] mitotic sister chromatid segregation [def] "The cell cycle process in which replicated homologous chromosomes are organized and then physically separated and apportioned to two sets during the mitotic cell cycle. Each replicated chromosome, composed of two sister chromatids, aligns at the cell equator, paired with its homologous partner. One homolog of each morphologic type goes into each of the resulting chromosome sets." [GOC

2304 Pathogen[ Q2Q067] interacts with 11 human partners: {Q14674;Q96R06;Q13257;O43684;Q9Y448;O43264;Q9ULG1;Q9BXS6;Q14683;O95229;O14777}

2305 Pathogen[ P0C214] interacts with 11 human partners: {O43684;Q13257;O43264;Q96R06;Q9BXS6;O95229;Q9ULG1;Q14683;Q9Y448;O14777;Q14674}

2306 Pathogen[ P03346] interacts with 11 human partners: {Q9BXS6;O95229;O43684;Q96R06;Q9ULG1;O43264;O14777;Q14683;Q9Y448;Q14674;Q13257}

2307 Pathogen[ Q85601] interacts with 12 human partners: {O95229;O43264;Q9BXS6;Q14674;Q96R06;Q13257;Q9Y448;Q14683;Q9ULG1;O14777;O43684;P51955}

2308 Pathogen[ P14079] interacts with 13 human partners: {Q9ULG1;Q96R06;O95229;Q14674;Q9Y448;Q9BXS6;P51955;Q13257;O43264;Q96FC9;Q14683;O14777;O43684}

2309 Pathogen[ P03383] interacts with 10 human partners: {Q14683;Q13257;O43264;Q9BXS6;Q96R06;O95229;Q14674;O43684;Q9Y448;O14777}

2310 Pathogen[ P03410] interacts with 12 human partners: {O43684;Q9ULG1;Q96R06;Q9BXS6;Q14674;O43264;Q9Y448;Q14683;Q96FC9;O95229;O14777;Q13257}

2311 Pathogen[ P14075] interacts with 10 human partners: {Q14683;Q96R06;Q13257;Q9BXS6;O43684;O14777;O95229;Q14674;O43264;Q9Y448}

2312 Pathogen[ P0C206] interacts with 13 human partners: {P51955;O14777;Q9Y448;Q13257;Q9ULG1;Q14683;Q14674;Q9BXS6;O43684;Q9BW19;O43264;Q9NTJ3;O95229}

2313 Pathogen[ P03363] interacts with 11 human partners: {Q9ULG1;O95229;O43264;Q9BXS6;Q96R06;O43684;Q13257;Q14674;O14777;Q9Y448;Q14683}

2314 [Cluster 211]GO:0033146+P biological\_process [name] regulation of intracellular estrogen receptor signaling pathway [def] "Any process that modulates the frequency, rate or extent of the activity of an intracellular estrogen receptor signaling pathway." [GOC

2315 Pathogen[ Q2Q067] interacts with 2 human partners: {Q8WXU2;Q86X55}

2316 Pathogen[ P0C214] interacts with 2 human partners: {Q8WXU2;Q86X55}

2317 Pathogen[ P03346] interacts with 2 human partners: {Q8WXU2;Q86X55}

2318 Pathogen[ Q85601] interacts with 2 human partners: {Q86X55;Q8WXU2}

2319 Pathogen[ P14079] interacts with 1 human partners: {Q8WXU2}

2320 Pathogen[ P03383] interacts with 2 human partners: {Q86X55;Q8WXU2}

2321 Pathogen[ P03410] interacts with 2 human partners: {Q8WXU2;Q86X55}

2322 Pathogen[ P14075] interacts with 2 human partners: {Q86X55;Q8WXU2}

2323 Pathogen[ P0C206] interacts with 2 human partners: {Q86X55;Q8WXU2}

2324 Pathogen[ P03363] interacts with 2 human partners: {Q8WXU2;Q86X55}

2325 [Cluster 212]GO:0051044+P biological\_process [name] positive regulation of membrane protein ectodomain proteolysis [def] "Any process that activates or increases the frequency, rate or extent of membrane protein ectodomain peptidolysis." [GOC

2326 Pathogen[ Q2Q067] interacts with 1 human partners:{Q5HYK7}

2327 Pathogen[ P0C214] interacts with 1 human partners:{Q5HYK7}

2328 Pathogen[ P03346] interacts with 2 human partners:{Q9UKS6;Q5HYK7}

2329 Pathogen[ Q85601] interacts with 1 human partners:{Q5HYK7}

2330 Pathogen[ P14079] interacts with 2 human partners:{Q9UKS6;Q5HYK7}

2331 Pathogen[ P03383] interacts with 1 human partners:{Q5HYK7}

2332 Pathogen[ P03410] interacts with 2 human partners:{Q5HYK7;Q9UKS6}

2333 Pathogen[ P14075] interacts with 1 human partners:{Q5HYK7}

2334 Pathogen[ P0C206] interacts with 2 human partners:{Q5HYK7;Q9UKS6}

2335 Pathogen[ P03363] interacts with 2 human partners:{Q9UKS6;Q5HYK7}

2336 [Cluster 213]GO:0005979+P biological\_process [name] regulation of glycogen biosynthetic process [def] "Any process that modulates the frequency, rate or extent of the chemical reactions and pathways resulting in the formation of glycogen." [GOC

2337 Pathogen[ Q2Q067] interacts with 4 human partners:{P31749;P62140;P62136;Q9UQK1}

2338 Pathogen[ P0C214] interacts with 6 human partners:{P62140;O95685;P62136;P31749;Q9UQK1;Q9H7J1}

2339 Pathogen[ P03346] interacts with 6 human partners:{P62136;Q9UQK1;O95685;Q9H7J1;P31749;P62140}

2340 Pathogen[ Q85601] interacts with 4 human partners:{P31749;Q9UQK1;P62136;P62140}

2341 Pathogen[ P14079] interacts with 5 human partners:{Q9H7J1;P62136;O95685;P62140;Q9UQK1}

2342 Pathogen[ P03383] interacts with 5 human partners:{P62140;Q9UQK1;P31749;P62136;Q9H7J1}

2343 Pathogen[ P03410] interacts with 6 human partners:{P62136;O95685;P31749;Q9H7J1;P62140;Q9UQK1}

2344 Pathogen[ P14075] interacts with 6 human partners:{P62140;Q9UQK1;P62136;P31749;O95685;Q9H7J1}

2345 Pathogen[ P0C206] interacts with 6 human partners:{P31749;Q9UQK1;P62140;O95685;Q9H7J1;P62136}

2346 Pathogen[ P03363] interacts with 4 human partners:{P62136;P62140;P31749;Q9UQK1}

2347 [Cluster 214]GO:0002934+P

2348 Pathogen[ Q2Q067] interacts with 1 human partners:{P15924}

2349 Pathogen[ P0C214] interacts with 1 human partners:{P15924}

2350 Pathogen[ P03346] interacts with 1 human partners:{P15924}

2351 Pathogen[ Q85601] interacts with 1 human partners:{P15924}

2352 Pathogen[ P14079] interacts with 1 human partners:{P15924}

2353 Pathogen[ P03383] interacts with 1 human partners:{P15924}

2354 Pathogen[ P03410] interacts with 1 human partners:{P15924}

2355 Pathogen[ P14075] interacts with 1 human partners:{P15924}

2356 Pathogen[ P0C206] interacts with 1 human partners:{P15924}

2357 Pathogen[ P03363] interacts with 1 human partners:{P15924}

2358 [Cluster 215]GO:0006811+P biological\_process [name] ion transport [def] "The directed movement of charged atoms or small charged molecules into, out of or within a cell, or between cells, by means of some agent such as a transporter or pore." [GOC

2359 Pathogen[ Q2Q067] interacts with 4 human partners:{Q9BSW2;P36543;Q9UBX3;P24539}

2360 Pathogen[ P0C214] interacts with 8 human partners:{Q16864;Q9UI12;P36543;P36542;Q9UBX3;P24539;Q99766;Q9BSW2}

2361 Pathogen[ P03346] interacts with 12 human partners:{P21283;Q86UT5;Q9UBX3;Q9Y5K8;P36543;Q93050;O00299;Q14847;P24539;O95833;Q9BSW2;Q16864}

2362 Pathogen[ Q85601] interacts with 6 human partners:{P24539;Q9UBX3;Q93050;Q99766;Q9BSW2;P36543}

2363 Pathogen[ P14079] interacts with 40 human partners:{P36543;P0CG08;P36542;Q9Y5K8;P56134;P25705;P61421;Q8NBQ7;Q6NVV3;Q0D2K0;Q86UT5;P27352;Q96LB4;Q9BSW2;P56385;Q8NE01;Q5VTU8;Q8NE86;A1A5B4;Q14847;Q9NQ90;Q7Z4Y8;P03928;Q9BYT9;Q8N8Q9;Q8N8Y2;Q99766;B7ZAQ6;O75964;Q93050;O43687;Q9UI12;Q96BY9;P56381;O95670;O00244;Q7RTP0;Q16864;P24539;Q9H6F2}

2364 Pathogen[ P03383] interacts with 3 human partners:{Q9BSW2;P36543;P24539}

2365 Pathogen[ P03410] interacts with 43 human partners:{Q9NQ90;Q86UT5;Q0D2K0;Q99766;Q8N8Y2;P36542;P25705;B7ZAQ6;P61421;P59646;Q93050;P56385;Q9UBX3;P56381;Q8NE86;Q9H6F2;Q96BY9;Q5VTU8;P0CG08;Q15049;Q14847;P03928;Q9UI12;Q96LB4;P24539;Q9BYT9;O95670;O75964;Q6NVV3;Q96D96;Q16864;Q8N8Q9;O43687;Q7RTP0;Q8IU99;Q9Y5K8;P27352;A1A5B4;P18859;O75348;P36543;P56134;Q7Z4Y8}

2366 Pathogen[ P14075] interacts with 5 human partners:{Q9BSW2;Q99766;P24539;P56385;P36543}

2367 Pathogen[ P0C206] interacts with 17 human partners:{P36543;Q9NQ90;Q99766;P36542;Q8NE86;Q9UBX3;Q86UT5;Q9UI12;P24539;Q9Y5K8;Q16864;P0CG08;P56381;Q9BSW2;P56385;Q93050;B7ZAQ6}

2368 Pathogen[ P03363] interacts with 6 human partners:{P36543;Q14847;Q9BSW2;Q86UT5;Q9Y5K8;O95833}

2369 [Cluster 216]GO:0050678+P biological\_process [name] regulation of epithelial cell proliferation [def] "Any process that modulates the frequency, rate or extent of epithelial cell proliferation." [GOC

2370 Pathogen[ Q2Q067] interacts with 2 human partners:{P05114;P84022}

2371 Pathogen[ POC214] interacts with 3 human partners:{P36952;P84022;P05114}

2372 Pathogen[ P03346] interacts with 3 human partners:{P06401;P05114;P84022}

2373 Pathogen[ Q85601] interacts with 3 human partners:{P36952;P84022;P05114}

2374 Pathogen[ P14079] interacts with 2 human partners:{P05114;Q8WU20}

2375 Pathogen[ P03383] interacts with 3 human partners:{P36952;P84022;P05114}

2376 Pathogen[ P03410] interacts with 4 human partners:{P84022;P36952;Q8WU20;P05114}

2377 Pathogen[ P14075] interacts with 2 human partners:{P84022;P05114}

2378 Pathogen[ POC206] interacts with 5 human partners:{P84022;P06401;P05114;P36952;Q8WU20}

2379 Pathogen[ P03363] interacts with 3 human partners:{P36952;P84022;P05114}

2380 [Cluster 217]GO:0010626+P biological\_process [name] negative regulation of Schwann cell proliferation [def] "Any process that decreases the frequency or extent of the multiplication or reproduction of Schwann cells, resulting in the expansion of their population. Schwann cells are a type of glial cell in the peripheral nervous system." [GOC

2381 Pathogen[ Q2Q067] interacts with 2 human partners:{Q8N5U6;P12755}

2382 Pathogen[ POC214] interacts with 2 human partners:{Q8N5U6;P12755}

2383 Pathogen[ P03346] interacts with 2 human partners:{Q8N5U6;Q99929}

2384 Pathogen[ Q85601] interacts with 2 human partners:{P12755;Q8N5U6}

2385 Pathogen[ P14079] interacts with 2 human partners:{P12755;Q8N5U6}

2386 Pathogen[ P03383] interacts with 1 human partners:{Q8N5U6}

2387 Pathogen[ P03410] interacts with 2 human partners:{P12755;Q8N5U6}

2388 Pathogen[ P14075] interacts with 1 human partners:{Q8N5U6}

2389 Pathogen[ POC206] interacts with 2 human partners:{Q8N5U6;P12755}

2390 Pathogen[ P03363] interacts with 2 human partners:{Q8N5U6;Q99929}

2391 [Cluster 218]GO:0008298+P biological\_process [name] intracellular mRNA localization [def] "Any process in which mRNA is transported to, or maintained in, a specific location within the cell." [GOC

2392 Pathogen[ Q2Q067] interacts with 2 human partners:{O15234;O95793}

2393 Pathogen[ POC214] interacts with 3 human partners:{O15234;O95793;Q96G01}

2394 Pathogen[ P03346] interacts with 3 human partners:{Q96G01;O15234;O95793}

2395 Pathogen[ Q85601] interacts with 3 human partners:{O15234;O95793;Q96G01}

2396 Pathogen[ P14079] interacts with 3 human partners:{O95793;Q96G01;O15234}

2397 Pathogen[ P03383] interacts with 1 human partners:{O15234}

2398 Pathogen[ P03410] interacts with 3 human partners:{O15234;Q96G01;O95793}

2399 Pathogen[ P14075] interacts with 1 human partners:{O15234}

2400 Pathogen[ POC206] interacts with 3 human partners:{O95793;O15234;Q96G01}

2401 Pathogen[ P03363] interacts with 2 human partners:{O95793;O15234}

2402 [Cluster 219]GO:0006091+P biological\_process [name] generation of precursor metabolites and energy [def] "The chemical reactions and pathways resulting in the formation of precursor metabolites, substances from which energy is derived, and any process involved in the liberation of energy from these substances." [GOC

2403 Pathogen[ Q2Q067] interacts with 8 human partners:{Q9BU02;Q16656;P13073;P41236;Q9UII2;P54840;Q06455;P49715}

2404 Pathogen[ POC214] interacts with 15 human partners:{Q04446;Q9BU02;Q16656;P41236;Q06455;Q99798;Q9UII2;P12074;Q93100;P13073;P54840;P22830;Q14061;P46020;P36957}

2405 Pathogen[ P03346] interacts with 8 human partners:{Q16656;P49715;Q9UII2;P13073;Q9BU02;P54840;P41236;Q06455}

2406 Pathogen[ Q85601] interacts with 9 human partners:{Q06455;Q16656;Q9BU02;Q9UII2;P41236;Q14061;Q04446;P49715;P54840}

2407 Pathogen[ P14079] interacts with 21 human partners:{P13073;P12074;P10109;Q9UII2;Q16656;Q93100;Q02221;P41236;Q14061;O75880;P49715;P09669;Q9BU02;P22830;P46926;Q96KJ9;Q06455;P24310;P15954;P54840;P46020}

2408 Pathogen[ P03383] interacts with 7 human partners:{P13073;Q06455;Q9BU02;Q16656;Q9UII2;P54840;P41236}

2409 Pathogen[ P03410] interacts with 21 human partners:{Q96KJ9;Q02221;Q9BU02;Q14061;P54840;P15954;P46020;Q04446;P41236;P13073;P46926;Q9UII2;Q93100;P22830;Q06455;P09669;P24310;P10109;Q16656;O75880;P12074}

2410 Pathogen[ P14075] interacts with 9 human partners:{Q16656;Q93100;P13073;P41236;P54840;Q9UII2;Q06455;Q9BU02;Q14061}

2411 Pathogen[ POC206] interacts with 17 human partners:{Q06455;Q93100;P41236;P12074;Q04446;P49715;P46020;P54840;Q16656;P13073;P22830;P46926;Q99798;Q9BU02;Q14061;Q9UII2;Q02221}

2412 Pathogen[ P03363] interacts with 5 human partners:{Q06455;P41236;Q16656;P54840;Q9BU02}

2413 [Cluster 220]GO:0043406+P biological\_process [name] positive regulation of MAP kinase activity [def] "Any process that activates or increases the frequency, rate or extent of MAP kinase activity." [GOC

2414 Pathogen[ Q2Q067] interacts with 8 human partners:{Q9Y5V3;Q96IF1;Q8WYR1;P25063;Q13233;Q9BUL8;Q16890;Q5UE93}

2415 Pathogen[ POC214] interacts with 7 human partners:{Q9Y5V3;Q9BUL8;Q16890;Q13233;Q8WYR1;Q5UE93;P25063}

2416 Pathogen[ P03346] interacts with 8 human partners:{Q8WYR1;Q96IF1;Q16890;Q13233;Q9Y5V3;Q5UE93;P25063;Q9BUL8}

2417 Pathogen[ Q85601] interacts with 7 human partners:{Q16890;Q9BUL8;Q9Y5V3;Q96IF1;Q8WYR1;Q13233;Q5UE93}

2418 Pathogen[ P14079] interacts with 7 human partners:{Q16890;Q8WYR1;Q9BUL8;Q9Y5V3;Q96IF1;P25063;Q5UE93}

2419 Pathogen[ P03383] interacts with 7 human partners:{Q13233;P25063;Q9Y5V3;Q9BUL8;Q8WYR1;Q5UE93;Q16890}

2420 Pathogen[ P03410] interacts with 8 human partners:{Q5UE93;Q8WYR1;Q9BUL8;Q13233;Q96IF1;P25063;Q9Y5V3;Q16890}

2421 Pathogen[ P14075] interacts with 7 human partners:{Q9BUL8;Q8WYR1;Q5UE93;Q16890;Q13233;Q9Y5V3;P25063}

2422 Pathogen[ P0C206] interacts with 8 human partners:{Q96IF1;Q9Y5V3;Q16890;Q13233;P25063;Q9BUL8;Q5UE93;Q8WYR1}

2423 Pathogen[ P03363] interacts with 7 human partners:{Q9BUL8;Q8WYR1;Q96IF1;Q5UE93;Q16890;Q9Y5V3;Q13233}

2424 [Cluster 221]GO:0001842+P biological\_process [name] neural fold formation [def] "The process in which the neural fold is formed. The edges of the neural plate thicken and move up to form a U-shaped structure called the neural groove." [GOC

2425 Pathogen[ Q2Q067] interacts with 2 human partners:{Q86YP4;P23528}

2426 Pathogen[ P0C214] interacts with 1 human partners:{Q86YP4}

2427 Pathogen[ P03346] interacts with 2 human partners:{Q86YP4;P23528}

2428 Pathogen[ Q85601] interacts with 2 human partners:{Q86YP4;P23528}

2429 Pathogen[ P14079] interacts with 2 human partners:{Q86YP4;P23528}

2430 Pathogen[ P03383] interacts with 2 human partners:{Q86YP4;P23528}

2431 Pathogen[ P03410] interacts with 2 human partners:{Q86YP4;P23528}

2432 Pathogen[ P14075] interacts with 2 human partners:{P23528;Q86YP4}

2433 Pathogen[ P0C206] interacts with 2 human partners:{Q86YP4;P23528}

2434 Pathogen[ P03363] interacts with 2 human partners:{Q86YP4;P23528}

2435 [Cluster 222]GO:0045943+P biological\_process [name] positive regulation of transcription from RNA polymerase I promoter [def] "Any process that activates or increases the frequency, rate or extent of transcription from an RNA polymerase I promoter." [GOC

2436 Pathogen[ Q2Q067] interacts with 2 human partners:{Q9UPP1;P17480}

2437 Pathogen[ P0C214] interacts with 2 human partners:{P17480;Q9UPP1}

2438 Pathogen[ P03346] interacts with 2 human partners:{P17480;Q9UPP1}

2439 Pathogen[ Q85601] interacts with 2 human partners:{P17480;Q9UPP1}

2440 Pathogen[ P14079] interacts with 2 human partners:{P17480;Q9UPP1}

2441 Pathogen[ P03383] interacts with 2 human partners:{P17480;Q9UPP1}

2442 Pathogen[ P03410] interacts with 2 human partners:{Q9UPP1;P17480}

2443 Pathogen[ P14075] interacts with 2 human partners:{P17480;Q9UPP1}

2444 Pathogen[ P0C206] interacts with 2 human partners:{Q9UPP1;P17480}

2445 Pathogen[ P03363] interacts with 1 human partners:{P17480}

2446 [Cluster 223]GO:0060393+P biological\_process [name] regulation of pathway-restricted SMAD protein phosphorylation [def] "Any process that modulates the rate, frequency or extent of pathway-restricted SMAD protein phosphorylation. Pathway-restricted SMAD proteins and common-partner SMAD proteins are involved in the transforming growth factor beta receptor signaling pathways." [GOC

2447 Pathogen[ Q2Q067] interacts with 1 human partners:{Q13526}

2448 Pathogen[ P0C214] interacts with 1 human partners:{Q13526}

2449 Pathogen[ P03346] interacts with 1 human partners:{Q13526}

2450 Pathogen[ Q85601] interacts with 1 human partners:{Q13526}

2451 Pathogen[ P14079] interacts with 1 human partners:{Q13526}

2452 Pathogen[ P03383] interacts with 1 human partners:{Q13526}

2453 Pathogen[ P03410] interacts with 1 human partners:{Q13526}

2454 Pathogen[ P14075] interacts with 1 human partners:{Q13526}

2455 Pathogen[ P0C206] interacts with 1 human partners:{Q13526}

2456 Pathogen[ P03363] interacts with 1 human partners:{Q13526}

2457 [Cluster 224]GO:0045218+P biological\_process [name] zonula adherens maintenance [def] "Maintaining the zonula adherens junction, the cell-cell adherens junction formed near the apex of epithelial cells." [GOC

2458 Pathogen[ Q2Q067] interacts with 1 human partners:{Q9P1Y5}

2459 Pathogen[ P0C214] interacts with 1 human partners:{Q9P1Y5}

2460 Pathogen[ P03346] interacts with 2 human partners:{Q9P1Y5;Q6IQ23}

2461 Pathogen[ Q85601] interacts with 2 human partners:{Q9P1Y5;Q6IQ23}

2462 Pathogen[ P14079] interacts with 2 human partners:{Q6IQ23;Q9P1Y5}

2463 Pathogen[ P03383] interacts with 1 human partners:{Q9P1Y5}

2464 Pathogen[ P03410] interacts with 2 human partners:{Q9P1Y5;Q6IQ23}

2465 Pathogen[ P14075] interacts with 1 human partners:{Q9P1Y5}

2466 Pathogen[ P0C206] interacts with 2 human partners:{Q9P1Y5;Q6IQ23}

2467 Pathogen[ P03363] interacts with 2 human partners:{Q9P1Y5;Q6IQ23}

2468 [Cluster 225]GO:0006777+P biological\_process [name] Mo-molybdopterin cofactor biosynthetic process [def] "The chemical reactions and pathways resulting in the formation of the Mo-molybdopterin cofactor, essential for the catalytic activity of some enzymes. The cofactor consists of a mononuclear molybdenum (Mo) ion coordinated by one or two molybdopterin ligands." [http

2469 Pathogen[ Q2Q067] interacts with 2 human partners:{O96007;Q9Y697}

2470 Pathogen[ P0C214] interacts with 5 human

partners:{O96033;O95396;Q9Y697;O96007;Q8NFF5}  
 2471 Pathogen[ P03346] interacts with 2 human partners:{Q9Y697;O96007}  
 2472 Pathogen[ Q85601] interacts with 2 human partners:{Q9Y697;O96007}  
 2473 Pathogen[ P14079] interacts with 4 human partners:{Q8NFF5;O96007;O96033;Q9Y697}  
 2474 Pathogen[ P03383] interacts with 2 human partners:{Q9Y697;O96007}  
 2475 Pathogen[ P03410] interacts with 4 human partners:{Q8NFF5;Q9Y697;O96007;O96033}  
 2476 Pathogen[ P14075] interacts with 2 human partners:{O96007;Q9Y697}  
 2477 Pathogen[ P0C206] interacts with 3 human partners:{Q9Y697;O96007;O95396}  
 2478 Pathogen[ P03363] interacts with 2 human partners:{O96007;Q9Y697}  
 2479 [Cluster 226]GO:0022008+P biological\_process [name] neurogenesis [def] "Generation of cells within the nervous system." [GO\_REF  
 2480 Pathogen[ Q2Q067] interacts with 8 human  
 partners:{Q13562;Q9HAZ2;P36402;Q96SN8;Q96K30;O95359;Q9BUX1;O75410}  
 2481 Pathogen[ P0C214] interacts with 8 human  
 partners:{Q96SN8;Q99807;O95359;Q9BUX1;Q9HAZ2;Q96K30;P36402;O75410}  
 2482 Pathogen[ P03346] interacts with 16 human  
 partners:{Q9BUX1;P36402;O43379;O75410;O95359;Q92886;Q9H4Q3;P78426;Q9HCS4;Q8N960;Q96S  
 N8;Q96K30;Q9H4Q4;Q9HAZ2;Q13562;Q9H2A3}  
 2483 Pathogen[ Q85601] interacts with 10 human  
 partners:{Q9BUX1;Q96SN8;Q13562;P36402;O43379;Q9HCS4;Q96K30;O75410;O95359;Q9HAZ2}  
 2484 Pathogen[ P14079] interacts with 13 human  
 partners:{Q9HAZ2;Q96K30;Q99807;O95359;Q9Y6A5;O43379;P36402;Q8N960;O75503;P47874;O754  
 10;Q9BUX1;Q96SN8}  
 2485 Pathogen[ P03383] interacts with 6 human  
 partners:{Q9BUX1;Q96SN8;O75410;Q96K30;Q9HAZ2;P36402}  
 2486 Pathogen[ P03410] interacts with 14 human  
 partners:{Q8N960;O95359;Q9HAZ2;Q96K30;P36402;Q96SN8;Q9BUX1;Q9Y6A5;O75503;O43379;O754  
 10;Q9HCS4;Q99807;P47874}  
 2487 Pathogen[ P14075] interacts with 6 human  
 partners:{O75410;Q96SN8;Q9HAZ2;Q96K30;Q9BUX1;P36402}  
 2488 Pathogen[ P0C206] interacts with 15 human  
 partners:{O95359;Q96SN8;Q9HAZ2;Q9BUX1;Q96K30;Q9HCS4;Q9NQX0;O75410;O43379;Q9Y6A5;Q998  
 07;Q13562;P36402;Q8N960;Q9H2A3}  
 2489 Pathogen[ P03363] interacts with 12 human  
 partners:{Q92886;O75410;P36402;Q9BUX1;Q96K30;Q9HCS4;O43379;O95359;Q96SN8;Q9HAZ2;Q9H2  
 A3;Q8N960}  
 2490 [Cluster 227]GO:0030728+P biological\_process [name] ovulation [def] "The release  
 of a mature ovum/oocyte from an ovary." [GOC  
 2491 Pathogen[ Q2Q067] interacts with 1 human partners:{P48552}  
 2492 Pathogen[ P0C214] interacts with 1 human partners:{P48552}  
 2493 Pathogen[ P03346] interacts with 1 human partners:{P48552}  
 2494 Pathogen[ Q85601] interacts with 1 human partners:{P48552}  
 2495 Pathogen[ P14079] interacts with 2 human partners:{P48552;Q8TCU4}  
 2496 Pathogen[ P03383] interacts with 1 human partners:{P48552}  
 2497 Pathogen[ P03410] interacts with 2 human partners:{Q8TCU4;P48552}  
 2498 Pathogen[ P14075] interacts with 1 human partners:{P48552}  
 2499 Pathogen[ P0C206] interacts with 2 human partners:{Q8TCU4;P48552}  
 2500 Pathogen[ P03363] interacts with 1 human partners:{P48552}  
 2501 [Cluster 228]GO:0071773+P biological\_process [name] cellular response to BMP stimulus  
 [def] "Any process that results in a change in state or activity of a cell (in terms of  
 movement, secretion, enzyme production, gene expression, etc.) as a result of a bone  
 morphogenetic protein (BMP) stimulus." [GOC  
 2502 Pathogen[ Q2Q067] interacts with 2 human partners:{Q9NQ87;Q9BWX5}  
 2503 Pathogen[ P0C214] interacts with 1 human partners:{Q9NQ87}  
 2504 Pathogen[ P03346] interacts with 2 human partners:{Q9BWX5;Q9NQ87}  
 2505 Pathogen[ Q85601] interacts with 2 human partners:{Q9BWX5;Q9NQ87}  
 2506 Pathogen[ P14079] interacts with 2 human partners:{Q9BWX5;Q9NQ87}  
 2507 Pathogen[ P03383] interacts with 1 human partners:{Q9NQ87}  
 2508 Pathogen[ P03410] interacts with 2 human partners:{Q9NQ87;Q9BWX5}  
 2509 Pathogen[ P14075] interacts with 1 human partners:{Q9NQ87}  
 2510 Pathogen[ P0C206] interacts with 2 human partners:{Q9NQ87;Q9BWX5}  
 2511 Pathogen[ P03363] interacts with 2 human partners:{Q9NQ87;Q9BWX5}  
 2512 [Cluster 229]GO:0050808+P biological\_process [name] synapse organization [def] "A  
 process that is carried out at the cellular level which results in the assembly,  
 arrangement of constituent parts, or disassembly of a synapse, the junction between a  
 neuron and a target (neuron, muscle, or secretory cell)." [GOC  
 2513 Pathogen[ Q2Q067] interacts with 2 human partners:{Q9NYF0;Q16143}  
 2514 Pathogen[ P0C214] interacts with 2 human partners:{Q16143;Q9NYF0}  
 2515 Pathogen[ P03346] interacts with 2 human partners:{Q16143;Q9NYF0}  
 2516 Pathogen[ Q85601] interacts with 2 human partners:{Q9NYF0;Q16143}  
 2517 Pathogen[ P14079] interacts with 2 human partners:{Q16143;Q9NYF0}  
 2518 Pathogen[ P03383] interacts with 1 human partners:{Q9NYF0}  
 2519 Pathogen[ P03410] interacts with 2 human partners:{Q16143;Q9NYF0}  
 2520 Pathogen[ P14075] interacts with 1 human partners:{Q9NYF0}  
 2521 Pathogen[ P0C206] interacts with 2 human partners:{Q16143;Q9NYF0}  
 2522 Pathogen[ P03363] interacts with 2 human partners:{Q9NYF0;Q16143}

2523 [Cluster 230]GO:0042133+P biological\_process [name] neurotransmitter metabolic process [def] "The chemical reactions and pathways involving neurotransmitters, any of a group of substances that are released on excitation from the axon terminal of a presynaptic neuron of the central or peripheral nervous system and travel across the synaptic cleft to either excite or inhibit the target cell." [CHEBI

2524 Pathogen[ Q2Q067] interacts with 1 human partners:{P30047}

2525 Pathogen[ P0C214] interacts with 1 human partners:{P30047}

2526 Pathogen[ P03346] interacts with 1 human partners:{P30047}

2527 Pathogen[ Q85601] interacts with 1 human partners:{P30047}

2528 Pathogen[ P14079] interacts with 2 human partners:{Q9UPW5;P30047}

2529 Pathogen[ P03383] interacts with 1 human partners:{P30047}

2530 Pathogen[ P03410] interacts with 2 human partners:{P30047;Q9UPW5}

2531 Pathogen[ P14075] interacts with 1 human partners:{P30047}

2532 Pathogen[ P0C206] interacts with 2 human partners:{P30047;Q9UPW5}

2533 Pathogen[ P03363] interacts with 1 human partners:{P30047}

2534 [Cluster 231]GO:0030317+P biological\_process [name] sperm motility [def] "Any process involved in the controlled movement of a sperm cell." [GOC

2535 Pathogen[ Q2Q067] interacts with 6 human partners:{P49901;Q9H160;O14556;Q9NVM9;P31689;P07864}

2536 Pathogen[ P0C214] interacts with 5 human partners:{P49901;P07864;Q9NVM9;O14556;Q9H160}

2537 Pathogen[ P03346] interacts with 6 human partners:{Q9NVM9;Q9UIF3;O14556;P31689;P49901;Q9H160}

2538 Pathogen[ Q85601] interacts with 5 human partners:{Q9NVM9;P31689;P07864;O14556;Q9H160}

2539 Pathogen[ P14079] interacts with 9 human partners:{Q5JQC9;Q9BVM2;Q9NVM9;P07864;P31689;Q9UIF3;Q9BZX4;Q9H160;P49901}

2540 Pathogen[ P03383] interacts with 6 human partners:{P07864;Q9NVM9;P31689;Q9H160;O14556;P49901}

2541 Pathogen[ P03410] interacts with 10 human partners:{P49901;O14556;Q9NVM9;Q5JQC9;Q9BZX4;Q9UIF3;Q9H160;P31689;P07864;Q9BVM2}

2542 Pathogen[ P14075] interacts with 7 human partners:{P31689;Q9BVM2;P07864;Q9NVM9;Q9H160;P49901;O14556}

2543 Pathogen[ P0C206] interacts with 9 human partners:{Q9BVM2;P07864;Q5JQC9;P49901;Q9UIF3;Q9H160;O14556;Q9NVM9;P31689}

2544 Pathogen[ P03363] interacts with 6 human partners:{Q9H160;Q9UIF3;Q9NVM9;Q5SZQ8;O14556;P49901}

2545 [Cluster 232]GO:0051983+P biological\_process [name] regulation of chromosome segregation [def] "Any process that modulates the frequency, rate or extent of chromosome segregation, the process in which genetic material, in the form of chromosomes, is organized and then physically separated and apportioned to two or more sets." [GOC

2546 Pathogen[ Q2Q067] interacts with 1 human partners:{O43684}

2547 Pathogen[ P0C214] interacts with 1 human partners:{O43684}

2548 Pathogen[ P03346] interacts with 1 human partners:{O43684}

2549 Pathogen[ Q85601] interacts with 1 human partners:{O43684}

2550 Pathogen[ P14079] interacts with 2 human partners:{Q99661;O43684}

2551 Pathogen[ P03383] interacts with 1 human partners:{O43684}

2552 Pathogen[ P03410] interacts with 1 human partners:{O43684}

2553 Pathogen[ P14075] interacts with 1 human partners:{O43684}

2554 Pathogen[ P0C206] interacts with 1 human partners:{O43684}

2555 Pathogen[ P03363] interacts with 1 human partners:{O43684}

2556 [Cluster 233]GO:0060717+P biological\_process [name] chorion development [def] "The biological process whose specific outcome is the progression of a chorion from an initial condition to its mature state. This process begins with the formation of the structure and ends with the mature structure. The chorion is an extraembryonic membrane." [GOC

2557 Pathogen[ Q2Q067] interacts with 1 human partners:{Q6ZW49}

2558 Pathogen[ P0C214] interacts with 1 human partners:{Q6ZW49}

2559 Pathogen[ P03346] interacts with 1 human partners:{Q6ZW49}

2560 Pathogen[ Q85601] interacts with 1 human partners:{Q6ZW49}

2561 Pathogen[ P14079] interacts with 1 human partners:{Q6ZW49}

2562 Pathogen[ P03383] interacts with 1 human partners:{Q6ZW49}

2563 Pathogen[ P03410] interacts with 1 human partners:{Q6ZW49}

2564 Pathogen[ P14075] interacts with 1 human partners:{Q6ZW49}

2565 Pathogen[ P0C206] interacts with 1 human partners:{Q6ZW49}

2566 Pathogen[ P03363] interacts with 1 human partners:{Q6ZW49}

2567 [Cluster 234]GO:0043508+P biological\_process [name] negative regulation of JUN kinase activity [def] "Any process that stops, prevents, or reduces the frequency, rate or extent of JUN kinase activity." [GOC

2568 Pathogen[ Q2Q067] interacts with 4 human partners:{Q8TD23;O15350;Q53EL6;Q9UQF2}

2569 Pathogen[ P0C214] interacts with 4 human partners:{Q8TD23;O15350;Q53EL6;Q9UQF2}

2570 Pathogen[ P03346] interacts with 4 human partners:{Q8TD23;O15350;Q9UQF2;Q53EL6}

2571 Pathogen[ Q85601] interacts with 4 human partners:{Q8TD23;Q9UQF2;Q53EL6;O15350}

2572 Pathogen[ P14079] interacts with 5 human partners:{Q8TD23;Q9UQF2;Q96BJ3;O15350;Q53EL6}

2573 Pathogen[ P03383] interacts with 5 human partners:{Q53EL6;Q8TD23;Q9UQF2;O15350;Q96BJ3}

2574 Pathogen[ P03410] interacts with 5 human partners:{Q96BJ3;Q53EL6;O15350;Q9UQF2;Q8TD23}

2575 Pathogen[ P14075] interacts with 5 human partners:{Q8TD23;Q96BJ3;O15350;Q53EL6;Q9UQF2}

2576 Pathogen[ P0C206] interacts with 5 human partners:{Q9UQF2;Q96BJ3;Q8TD23;Q53EL6;O15350}

2577 Pathogen[ P03363] interacts with 3 human partners:{Q9UQF2;Q53EL6;Q8TD23}

2578 [Cluster 235]GO:0033345+P biological\_process [name] asparagine catabolic process via L-aspartate [def] "The chemical reactions and pathways resulting in the breakdown of glutamate, via the intermediate L-aspartate." [GOC

2579 Pathogen[ Q2Q067] interacts with 1 human partners:{Q7L266}

2580 Pathogen[ P0C214] interacts with 1 human partners:{Q7L266}

2581 Pathogen[ P03346] interacts with 1 human partners:{Q7L266}

2582 Pathogen[ Q85601] interacts with 1 human partners:{Q7L266}

2583 Pathogen[ P14079] interacts with 1 human partners:{Q7L266}

2584 Pathogen[ P03383] interacts with 1 human partners:{Q7L266}

2585 Pathogen[ P03410] interacts with 1 human partners:{Q7L266}

2586 Pathogen[ P14075] interacts with 1 human partners:{Q7L266}

2587 Pathogen[ P0C206] interacts with 1 human partners:{Q7L266}

2588 Pathogen[ P03363] interacts with 1 human partners:{Q7L266}

2589 [Cluster 236]GO:0014898+P biological\_process [name] cardiac muscle hypertrophy in response to stress [def] "The enlargement or overgrowth of all or part of the heart muscle due to an increase in size (not length) of individual cardiac muscle fibers, without cell division." [GOC

2590 Pathogen[ Q2Q067] interacts with 2 human partners:{P56524;O94983}

2591 Pathogen[ P0C214] interacts with 2 human partners:{P56524;O94983}

2592 Pathogen[ P03346] interacts with 2 human partners:{P56524;O94983}

2593 Pathogen[ Q85601] interacts with 2 human partners:{O94983;P56524}

2594 Pathogen[ P14079] interacts with 3 human partners:{P56524;O15273;O94983}

2595 Pathogen[ P03383] interacts with 2 human partners:{O94983;P56524}

2596 Pathogen[ P03410] interacts with 3 human partners:{O15273;P56524;O94983}

2597 Pathogen[ P14075] interacts with 2 human partners:{P56524;O94983}

2598 Pathogen[ P0C206] interacts with 2 human partners:{P56524;O94983}

2599 Pathogen[ P03363] interacts with 1 human partners:{O94983}

2600 [Cluster 237]GO:0035413+P biological\_process [name] positive regulation of catenin import into nucleus [def] "Any process that increases the rate, frequency or extent of the directed movement of a catenin protein from the cytoplasm into the nucleus." [GOC

2601 Pathogen[ Q2Q067] interacts with 4 human partners:{Q14678;Q9NYF0;P84022;Q01860}

2602 Pathogen[ P0C214] interacts with 5 human partners:{P84022;Q14678;O95071;Q9NYF0;Q01860}

2603 Pathogen[ P03346] interacts with 5 human partners:{Q14678;Q01860;P84022;Q9NYF0;O95071}

2604 Pathogen[ Q85601] interacts with 5 human partners:{Q9NYF0;Q14678;P84022;O95071;Q01860}

2605 Pathogen[ P14079] interacts with 4 human partners:{Q01860;Q14678;Q13145;Q9NYF0}

2606 Pathogen[ P03383] interacts with 4 human partners:{Q14678;Q01860;P84022;Q9NYF0}

2607 Pathogen[ P03410] interacts with 5 human partners:{P84022;Q01860;Q13145;Q9NYF0;Q14678}

2608 Pathogen[ P14075] interacts with 4 human partners:{Q01860;Q14678;P84022;Q9NYF0}

2609 Pathogen[ P0C206] interacts with 5 human partners:{P84022;Q01860;Q14678;Q9NYF0;O95071}

2610 Pathogen[ P03363] interacts with 5 human partners:{Q9NYF0;P84022;O95071;Q14678;Q01860}

2611 [Cluster 238]GO:0060394+P biological\_process [name] negative regulation of pathway-restricted SMAD protein phosphorylation [def] "Any process that decreases the rate, frequency or extent of pathway-restricted SMAD protein phosphorylation. Pathway-restricted SMAD proteins and common-partner SMAD proteins are involved in the transforming growth factor beta receptor signaling pathways." [GOC

2612 Pathogen[ Q2Q067] interacts with 2 human partners:{O15105;O43541}

2613 Pathogen[ P0C214] interacts with 2 human partners:{O15105;O43541}

2614 Pathogen[ P03346] interacts with 2 human partners:{O15105;O43541}

2615 Pathogen[ Q85601] interacts with 2 human partners:{O43541;O15105}

2616 Pathogen[ P14079] interacts with 2 human partners:{O43541;O15105}

2617 Pathogen[ P03383] interacts with 2 human partners:{O15105;O43541}

2618 Pathogen[ P03410] interacts with 2 human partners:{O43541;O15105}

2619 Pathogen[ P14075] interacts with 2 human partners:{O43541;O15105}

2620 Pathogen[ P0C206] interacts with 2 human partners:{O43541;O15105}

2621 Pathogen[ P03363] interacts with 2 human partners:{O15105;O43541}

2622 [Cluster 239]GO:0030217+P biological\_process [name] T cell differentiation [def] "The process in which a precursor cell type acquires characteristics of a more mature T-cell. A T cell is a type of lymphocyte whose defining characteristic is the expression of a T cell receptor complex." [GO\_REF

2623 Pathogen[ Q2Q067] interacts with 6 human partners:{P55895;Q9HBE1;Q02447;Q9H9Q4;P55347;P18146}

2624 Pathogen[ P0C214] interacts with 6 human partners:{Q9H9Q4;P55347;Q9HBE1;P55895;Q02447;P18146}

2625 Pathogen[ P03346] interacts with 10 human partners:{Q06945;P55895;Q9H165;Q9HBE1;P55347;Q9H9Q4;Q9P2D1;P18146;Q9Y2R2;Q02447}

2626 Pathogen[ Q85601] interacts with 7 human partners:{P18146;Q9P2D1;Q02447;P55347;P55895;Q9H9Q4;Q9HBE1}

2627 Pathogen[ P14079] interacts with 6 human partners:{Q9H9Q4;P55347;P16298;Q02447;Q9P2D1;Q9HBE1}

2628 Pathogen[ P03383] interacts with 6 human partners:{Q9HBE1;Q9H9Q4;P18146;P55347;Q02447;P55895}

2629 Pathogen[ P03410] interacts with 7 human partners:{Q02447;P55895;Q9P2D1;P55347;P18146;Q9H9Q4;Q9HBE1}

2630 Pathogen[ P14075] interacts with 6 human partners:{P18146;P55347;Q9H9Q4;Q02447;P55895;Q9HBE1}

2631 Pathogen[ P0C206] interacts with 10 human partners:{Q9HBE1;Q9P2D1;Q9Y2R2;P18146;Q9H9Q4;Q02447;P55895;Q9H165;Q13422;P55347}

2632 Pathogen[ P03363] interacts with 6 human partners:{P18146;Q9Y2R2;Q02447;P55347;Q9H9Q4;P55895}

2633 [Cluster 240]GO:0009386+P biological\_process [name] translational attenuation [def] "Translational attenuation is a regulatory mechanism analogous to ribosome-mediated transcriptional attenuation. The system requires the presence of a short ORF, called a leader peptide, encoded in the mRNA upstream of the ribosome-binding site and start codon of the gene whose translation is to be regulated. Certain conditions, such as presence of the antibiotic tetracycline in bacteria or amino acid starvation, may cause slowing or stalling of the ribosome translating the leader peptide. The stalled ribosome masks a region of the mRNA and affects which of two alternative mRNA folded structures will form, therefore controlling whether or not a ribosome will bind and initiate translation of the downstream gene. Translational attenuation is analogous to ribosome-mediated transcriptional attenuation, in which mRNA remodeling caused by ribosome stalling regulates transcriptional termination rather than translational initiation." [PMID

2634 Pathogen[ Q2Q067] interacts with 1 human partners:{Q9Y2T7}

2635 Pathogen[ P0C214] interacts with 1 human partners:{Q9Y2T7}

2636 Pathogen[ P03346] interacts with 1 human partners:{Q9Y2T7}

2637 Pathogen[ Q85601] interacts with 1 human partners:{Q9Y2T7}

2638 Pathogen[ P14079] interacts with 1 human partners:{Q9Y2T7}

2639 Pathogen[ P03383] interacts with 1 human partners:{Q9Y2T7}

2640 Pathogen[ P03410] interacts with 1 human partners:{Q9Y2T7}

2641 Pathogen[ P14075] interacts with 1 human partners:{Q9Y2T7}

2642 Pathogen[ P0C206] interacts with 1 human partners:{Q9Y2T7}

2643 Pathogen[ P03363] interacts with 1 human partners:{Q9Y2T7}

2644 [Cluster 241]GO:0090116+P biological\_process [name] C-5 methylation of cytosine [def] "The covalent transfer of a methyl group to C-5 of cytosine in a DNA molecule." [GOC

2645 Pathogen[ Q2Q067] interacts with 3 human partners:{Q9Y6K1;Q9UBC3;P26358}

2646 Pathogen[ P0C214] interacts with 2 human partners:{Q9Y6K1;P26358}

2647 Pathogen[ P03346] interacts with 4 human partners:{Q9Y6K1;Q9UBC3;P26358;O14717}

2648 Pathogen[ Q85601] interacts with 3 human partners:{P26358;Q9Y6K1;Q9UBC3}

2649 Pathogen[ P14079] interacts with 3 human partners:{Q9Y6K1;Q9UBC3;P26358}

2650 Pathogen[ P03383] interacts with 2 human partners:{Q9Y6K1;P26358}

2651 Pathogen[ P03410] interacts with 3 human partners:{P26358;Q9UBC3;Q9Y6K1}

2652 Pathogen[ P14075] interacts with 2 human partners:{Q9Y6K1;P26358}

2653 Pathogen[ P0C206] interacts with 3 human partners:{Q9Y6K1;P26358;Q9UBC3}

2654 Pathogen[ P03363] interacts with 4 human partners:{Q9Y6K1;O14717;P26358;Q9UBC3}

2655 [Cluster 242]GO:0050995+P biological\_process [name] negative regulation of lipid catabolic process [def] "Any process that stops, prevents, or reduces the frequency, rate or extent of the chemical reactions and pathways resulting in the breakdown of lipids." [GOC

2656 Pathogen[ Q2Q067] interacts with 1 human partners:{O60543}

2657 Pathogen[ P0C214] interacts with 1 human partners:{O60543}

2658 Pathogen[ P03346] interacts with 1 human partners:{O60543}

2659 Pathogen[ Q85601] interacts with 1 human partners:{O60543}

2660 Pathogen[ P14079] interacts with 1 human partners:{O60543}

2661 Pathogen[ P03383] interacts with 1 human partners:{O60543}

2662 Pathogen[ P03410] interacts with 1 human partners:{O60543}

2663 Pathogen[ P14075] interacts with 1 human partners:{O60543}

2664 Pathogen[ P0C206] interacts with 1 human partners:{O60543}

2665 Pathogen[ P03363] interacts with 1 human partners:{O60543}

2666 [Cluster 243]GO:0051492+P biological\_process [name] regulation of stress fiber assembly [def] "Any process that modulates the frequency, rate or extent of the assembly of a stress fiber, a bundle of microfilaments and other proteins found in fibroblasts." [GOC

2667 Pathogen[ Q2Q067] interacts with 1 human partners:{Q8N3V7}

2668 Pathogen[ P0C214] interacts with 1 human partners:{Q8N3V7}

2669 Pathogen[ P03346] interacts with 1 human partners:{Q8N3V7}

2670 Pathogen[ Q85601] interacts with 1 human partners:{Q8N3V7}



2671 Pathogen[ P14079] interacts with 1 human partners:{Q8N3V7}  
2672 Pathogen[ P03383] interacts with 1 human partners:{Q8N3V7}  
2673 Pathogen[ P03410] interacts with 1 human partners:{Q8N3V7}  
2674 Pathogen[ P14075] interacts with 1 human partners:{Q8N3V7}  
2675 Pathogen[ P0C206] interacts with 1 human partners:{Q8N3V7}  
2676 Pathogen[ P03363] interacts with 1 human partners:{Q8N3V7}  
2677 [Cluster 244]GO:0006782+P biological\_process [name] protoporphyrinogen IX biosynthetic process [def] "The chemical reactions and pathways resulting in the formation of protoporphyrinogen IX." [GOC  
2678 Pathogen[ Q2Q067] interacts with 6 human partners:{P10746;P22557;P13196;P06132;P08397;P48200}  
2679 Pathogen[ P0C214] interacts with 7 human partners:{P06132;P48200;P22557;P13196;P10746;P08397;P36551}  
2680 Pathogen[ P03346] interacts with 5 human partners:{P10746;P22557;P13196;P48200;P06132}  
2681 Pathogen[ Q85601] interacts with 5 human partners:{P10746;P48200;P13196;P06132;P08397}  
2682 Pathogen[ P14079] interacts with 7 human partners:{P13196;P22557;P10746;P06132;P08397;P48200;P36551}  
2683 Pathogen[ P03383] interacts with 3 human partners:{P48200;P06132;P08397}  
2684 Pathogen[ P03410] interacts with 7 human partners:{P08397;P06132;P36551;P10746;P22557;P48200;P13196}  
2685 Pathogen[ P14075] interacts with 3 human partners:{P06132;P08397;P48200}  
2686 Pathogen[ P0C206] interacts with 7 human partners:{P10746;P36551;P48200;P22557;P13196;P08397;P06132}  
2687 Pathogen[ P03363] interacts with 3 human partners:{P06132;P48200;P13196}  
2688 [Cluster 245]GO:0006323+P biological\_process [name] DNA packaging [def] "Any process in which DNA and associated proteins are formed into a compact, orderly structure." [GOC  
2689 Pathogen[ Q2Q067] interacts with 3 human partners:{Q9NR48;O14929;P41227}  
2690 Pathogen[ P0C214] interacts with 3 human partners:{P41227;O14929;Q9NR48}  
2691 Pathogen[ P03346] interacts with 4 human partners:{Q92794;P41227;Q9NR48;O14929}  
2692 Pathogen[ Q85601] interacts with 3 human partners:{Q9NR48;P41227;O14929}  
2693 Pathogen[ P14079] interacts with 2 human partners:{P41227;O14929}  
2694 Pathogen[ P03383] interacts with 2 human partners:{P41227;O14929}  
2695 Pathogen[ P03410] interacts with 3 human partners:{O14929;P41227;P04553}  
2696 Pathogen[ P14075] interacts with 2 human partners:{P41227;O14929}  
2697 Pathogen[ P0C206] interacts with 3 human partners:{P41227;O14929;Q9NR48}  
2698 Pathogen[ P03363] interacts with 3 human partners:{P41227;O14929;Q9NR48}  
2699 [Cluster 246]GO:0000380+P biological\_process [name] alternative nuclear mRNA splicing, via spliceosome [def] "The process of generating multiple mRNA molecules from a given set of exons by differential use of exons from the primary transcript(s) to form multiple mature mRNAs that vary in their exon composition." [GOC  
2700 Pathogen[ Q2Q067] interacts with 4 human partners:{O95391;P52272;Q96IZ7;P23246}  
2701 Pathogen[ P0C214] interacts with 4 human partners:{P23246;Q96IZ7;P52272;O95391}  
2702 Pathogen[ P03346] interacts with 5 human partners:{P09651;O95391;P23246;P52272;Q96IZ7}  
2703 Pathogen[ Q85601] interacts with 3 human partners:{O95391;Q96IZ7;P23246}  
2704 Pathogen[ P14079] interacts with 4 human partners:{Q14004;P23246;Q96IZ7;O95391}  
2705 Pathogen[ P03383] interacts with 3 human partners:{Q96IZ7;P23246;O95391}  
2706 Pathogen[ P03410] interacts with 4 human partners:{P23246;Q96IZ7;P52272;O95391}  
2707 Pathogen[ P14075] interacts with 3 human partners:{P23246;O95391;Q96IZ7}  
2708 Pathogen[ P0C206] interacts with 3 human partners:{P23246;Q96IZ7;O95391}  
2709 Pathogen[ P03363] interacts with 5 human partners:{Q96IZ7;P23246;O95391;P09651;P52272}  
2710 [Cluster 247]GO:0040030+P biological\_process [name] regulation of molecular function, epigenetic [def] "Any heritable epigenetic process that modulates the frequency, rate or extent of protein function by self-perpetuating conformational conversions of normal proteins in healthy cells. This is distinct from, though mechanistically analogous to, disease states associated with prion propagation and amyloidogenesis. A single protein, if it carries a glutamine/asparagine-rich ('prion') domain, can sometimes stably exist in at least two distinct physical states, each associated with a different phenotype\_ propagation of one of these traits is achieved by a self-perpetuating change in the protein from one form to the other, mediated by conformational changes in the glutamine/asparagine-rich domain. Prion domains are both modular and transferable to other proteins, on which they can confer a heritable epigenetic alteration of function\_ existing bioinformatics data indicate that they are rare in non-eukarya, but common in eukarya." [GOC  
2711 Pathogen[ Q2Q067] interacts with 1 human partners:{P49711}  
2712 Pathogen[ P0C214] interacts with 1 human partners:{P49711}  
2713 Pathogen[ P03346] interacts with 1 human partners:{P49711}  
2714 Pathogen[ Q85601] interacts with 1 human partners:{P49711}  
2715 Pathogen[ P14079] interacts with 1 human partners:{P49711}  
2716 Pathogen[ P03383] interacts with 1 human partners:{P49711}  
2717 Pathogen[ P03410] interacts with 1 human partners:{P49711}  
2718 Pathogen[ P14075] interacts with 1 human partners:{P49711}

2719 Pathogen[ P0C206] interacts with 1 human partners:{P49711}  
2720 Pathogen[ P03363] interacts with 1 human partners:{P49711}  
2721 [Cluster 248]GO:0045723+P biological\_process [name] positive regulation of fatty acid biosynthetic process [def] "Any process that activates or increases the frequency, rate or extent of the chemical reactions and pathways resulting in the formation of fatty acids." [GOC  
2722 Pathogen[ Q2Q067] interacts with 3 human partners:{P55055;Q9NP71;Q9NPA3}  
2723 Pathogen[ P0C214] interacts with 2 human partners:{Q9NPA3;Q9NP71}  
2724 Pathogen[ P03346] interacts with 3 human partners:{Q9NP71;P55055;Q9NPA3}  
2725 Pathogen[ Q85601] interacts with 3 human partners:{Q9NP71;P55055;Q9NPA3}  
2726 Pathogen[ P14079] interacts with 3 human partners:{P55055;Q9NPA3;Q9NP71}  
2727 Pathogen[ P03383] interacts with 2 human partners:{Q9NP71;Q9NPA3}  
2728 Pathogen[ P03410] interacts with 2 human partners:{Q9NP71;Q9NPA3}  
2729 Pathogen[ P14075] interacts with 2 human partners:{Q9NP71;Q9NPA3}  
2730 Pathogen[ P0C206] interacts with 3 human partners:{Q9NPA3;Q9NP71;P55055}  
2731 Pathogen[ P03363] interacts with 2 human partners:{Q9NP71;Q9NPA3}  
2732 [Cluster 249]GO:0006997+P biological\_process [name] nucleus organization [def] "A process that is carried out at the cellular level which results in the assembly, arrangement of constituent parts, or disassembly of the nucleus." [GOC  
2733 Pathogen[ Q2Q067] interacts with 4 human partners:{P02545;Q14980;Q8NF91;O15265}  
2734 Pathogen[ P0C214] interacts with 4 human partners:{Q14980;Q8NF91;O15265;P02545}  
2735 Pathogen[ P03346] interacts with 4 human partners:{O15265;P02545;Q14980;Q8NF91}  
2736 Pathogen[ Q85601] interacts with 4 human partners:{P02545;O15265;Q14980;Q8NF91}  
2737 Pathogen[ P14079] interacts with 4 human partners:{Q14980;O15265;Q8NF91;P02545}  
2738 Pathogen[ P03383] interacts with 3 human partners:{P02545;O15265;Q14980}  
2739 Pathogen[ P03410] interacts with 5 human partners:{Q14980;P04553;P02545;O15265;Q8NF91}  
2740 Pathogen[ P14075] interacts with 3 human partners:{O15265;P02545;Q14980}  
2741 Pathogen[ P0C206] interacts with 4 human partners:{O15265;Q8NF91;P02545;Q14980}  
2742 Pathogen[ P03363] interacts with 4 human partners:{Q8NF91;P02545;Q14980;O15265}  
2743 [Cluster 250]GO:0043951+P biological\_process [name] negative regulation of cAMP-mediated signaling [def] "Any process which stops, prevents, or reduces the frequency, rate or extent of cAMP-mediated signaling, a series of molecular signals in which a cell uses cyclic AMP to convert an extracellular signal into a response." [GOC  
2744 Pathogen[ Q2Q067] interacts with 3 human partners:{P49427;P63146;O60291}  
2745 Pathogen[ P0C214] interacts with 3 human partners:{P49427;O60291;P63146}  
2746 Pathogen[ P03346] interacts with 3 human partners:{P49427;P63146;O60291}  
2747 Pathogen[ Q85601] interacts with 3 human partners:{P63146;P49427;O60291}  
2748 Pathogen[ P14079] interacts with 2 human partners:{P49427;P63146}  
2749 Pathogen[ P03383] interacts with 2 human partners:{P49427;P63146}  
2750 Pathogen[ P03410] interacts with 3 human partners:{P49427;P63146;O60291}  
2751 Pathogen[ P14075] interacts with 2 human partners:{P49427;P63146}  
2752 Pathogen[ P0C206] interacts with 3 human partners:{O60291;P49427;P63146}  
2753 Pathogen[ P03363] interacts with 3 human partners:{O60291;P63146;P49427}  
2754 [Cluster 251]GO:0045668+P biological\_process [name] negative regulation of osteoblast differentiation [def] "Any process that stops, prevents, or reduces the frequency, rate or extent of osteoblast differentiation." [GOC  
2755 Pathogen[ Q2Q067] interacts with 14 human partners:{P56524;P41134;P50616;Q9UQL6;Q99966;Q9UGP4;P12755;P84022;O00255;Q8WVJ9;Q8WUI4;Q9H6W3;Q9UMX1;Q00534}  
2756 Pathogen[ P0C214] interacts with 14 human partners:{Q9UGP4;P84022;P56524;Q99966;Q00534;P41134;Q9H6W3;P50616;P12755;Q8WVJ9;Q8WUI4;Q9UMX1;Q9UQL6;O00255}  
2757 Pathogen[ P03346] interacts with 15 human partners:{Q99966;Q9UGP4;Q02535;P56524;P84022;O00255;P41134;P50616;Q8WVJ9;Q8WUI4;Q14596;Q00534;Q9H6W3;Q9UMX1;Q9UQL6}  
2758 Pathogen[ Q85601] interacts with 15 human partners:{P41134;Q9UQL6;Q99966;Q14596;P12755;Q9H6W3;O00255;P50616;P84022;Q9UGP4;P56524;Q00534;Q8WUI4;Q9UMX1;Q8WVJ9}  
2759 Pathogen[ P14079] interacts with 13 human partners:{Q9UQL6;P12755;Q8WUI4;Q9UMX1;Q8WVJ9;Q99966;Q14596;Q9H6W3;P41134;P56524;P50616;O00255;Q9UGP4}  
2760 Pathogen[ P03383] interacts with 11 human partners:{Q8WVJ9;Q9UQL6;Q00534;Q9H6W3;P84022;Q9UGP4;O00255;P50616;P56524;Q8WUI4;Q9UMX1}  
2761 Pathogen[ P03410] interacts with 15 human partners:{P84022;Q9H6W3;Q8WVJ9;Q00534;P12755;Q9UGP4;P41134;Q14596;Q8WUI4;Q9UQL6;P56524;O00255;Q9UMX1;P50616;Q99966}  
2762 Pathogen[ P14075] interacts with 11 human partners:{Q9UGP4;P56524;Q00534;Q8WVJ9;O00255;P50616;Q9H6W3;Q9UQL6;P84022;Q8WUI4;Q9UMX1}  
2763 Pathogen[ P0C206] interacts with 15 human partners:{P84022;Q9UMX1;Q9UGP4;O00255;Q14596;Q8WVJ9;P12755;P41134;P50616;Q8WUI4;Q9H6W3;Q99966;P56524;Q00534;Q9UQL6}  
2764 Pathogen[ P03363] interacts with 9 human partners:{Q9UMX1;Q9UQL6;P50616;Q9UGP4;Q00534;P41134;P84022;Q8WUI4;Q8WVJ9}

2765 [Cluster 252]GO:0043407+P biological\_process [name] negative regulation of MAP kinase activity [def] "Any process that stops, prevents, or reduces the frequency, rate or extent of MAP kinase activity." [GOC

2766 Pathogen[ Q2Q067] interacts with 3 human partners:{P41220;P37198;Q16829}

2767 Pathogen[ P0C214] interacts with 3 human partners:{P41220;P37198;Q16829}

2768 Pathogen[ P03346] interacts with 3 human partners:{P37198;Q16829;P41220}

2769 Pathogen[ Q85601] interacts with 2 human partners:{P41220;Q16829}

2770 Pathogen[ P14079] interacts with 5 human partners:{O43597;Q16829;P41220;P37198;P17405}

2771 Pathogen[ P03383] interacts with 2 human partners:{P41220;P37198}

2772 Pathogen[ P03410] interacts with 4 human partners:{O43597;P41220;Q16829;P17405}

2773 Pathogen[ P14075] interacts with 2 human partners:{P41220;P37198}

2774 Pathogen[ P0C206] interacts with 3 human partners:{Q16829;O43597;P41220}

2775 Pathogen[ P03363] interacts with 4 human partners:{Q16829;P41220;Q9C004;P37198}

2776 [Cluster 253]GO:0016310+P biological\_process [name] phosphorylation [def] "The process of introducing a phosphate group into a molecule, usually with the formation of a phosphoric ester, a phosphoric anhydride or a phosphoric amide." [ISBN

2777 Pathogen[ Q2Q067] interacts with 24 human partners:{P22392;P31749;P19367;P11387;O14757;P32189;Q16851;O75582;Q9UGP4;O96017;P50750;Q13233;P50613;O14920;P45984;O43318;P49336;P21675;P24941;P11802;O15111;Q15759;P51946;Q00534}

2778 Pathogen[ P0C214] interacts with 45 human partners:{Q9UGP4;Q14410;P51946;O15111;Q14409;P23919;Q8TE04;P21675;Q14164;P50750;P50613;P11802;O94921;P12277;Q9Y3D8;P32189;O43318;Q13057;Q96C11;O60825;Q00534;Q13233;P21127;Q00536;P14618;O96017;P49336;Q16851;Q5ZEY9;Q9H0E2;P24941;P19367;P11387;O75582;Q9BZ23;Q15759;P45984;Q9NWZ5;P16118;P22392;O14757;Q5EBM0;O14920;P00558;P31749}

2779 Pathogen[ P03346] interacts with 36 human partners:{P45984;Q00536;O15111;Q9UGP4;O96017;P21127;P49336;P24941;P19367;O14757;Q86Z02;Q9H0E2;P11802;Q16851;P31749;Q8TD19;P51946;P50750;Q9Y3D8;Q13233;O75582;P22392;P21675;Q15759;Q96PY6;P45985;P32189;Q00534;O14920;O94921;O43318;O14965;Q14164;Q9NWZ5;P11387;O00444}

2780 Pathogen[ Q85601] interacts with 35 human partners:{P51946;Q00536;P31749;O96017;P50750;Q96PY6;O15111;P49336;O60825;P32189;P16118;P11802;O14757;P11387;O14965;Q16851;Q14164;P14618;O14920;O94921;O75582;P22392;P50613;Q9UGP4;Q15759;P45984;P21675;P21127;Q13233;Q00534;O43318;P24941;P51955;Q5ZEY9;P19367}

2781 Pathogen[ P14079] interacts with 42 human partners:{P31751;Q8TE04;Q14004;O95544;Q5EBM0;Q16851;P53779;P49336;P51946;P52564;Q9UJ70;P49842;O75582;Q14410;Q96DU7;Q4G0N4;Q14164;Q9NWZ5;P32189;Q96C11;Q14409;P45984;A2RU49;P45983;P50613;P23919;P51955;Q9BZ23;P22392;Q16644;Q8IVS8;Q15759;P45985;Q13057;P21127;Q13164;Q9H0E2;O14965;Q9UGP4;Q9H999;P21675;P50750}

2782 Pathogen[ P03383] interacts with 35 human partners:{Q9NVV4;O14757;O75582;Q13233;Q8TD19;Q9NWZ5;O14920;P19367;P31749;O15111;P22392;Q00536;P11387;Q00534;P11802;O43318;P21127;Q16851;P49336;P50613;P51946;P24941;Q9UGP4;P50750;Q5ZEY9;Q15759;O94921;Q9BZ23;O14965;Q96PY6;P21675;P32189;P45984;Q5EBM0;O96017}

2783 Pathogen[ P03410] interacts with 40 human partners:{Q8IVS8;Q4G0N4;Q96DU7;O14920;Q16851;Q8TE04;Q00534;Q96C11;Q13057;P16118;P21675;O15111;Q9UGP4;O75582;Q14410;P51946;Q9NWZ5;P31749;Q5ZEY9;A2RU49;Q13233;P50613;P23919;O14965;P50750;O43318;P45985;P24941;P11802;P11387;Q9H0E2;O96017;Q5EBM0;O14757;Q9BZ23;P49336;Q14409;P45984;P53779;P32189}

2784 Pathogen[ P14075] interacts with 40 human partners:{P11387;P49336;O15111;P21675;P24941;P11802;Q9NWZ5;Q15759;O75582;Q8IVS8;P32189;P50613;Q9UGP4;Q00534;P50750;P19367;Q13057;O14920;P16118;P31749;O96017;O14965;Q8TE04;Q96C11;O43318;P49842;P21127;Q9BZ23;P51946;Q96PY6;Q13233;O94921;Q9UQ88;Q5EBM0;Q9NVV4;Q16851;O14757;P22392;P45984;Q8TD19}

2785 Pathogen[ P0C206] interacts with 51 human partners:{Q16851;P49336;O14920;P31749;Q9Y3D8;P50750;O96017;P22392;P51955;Q9UGP4;O75582;P45984;Q8TE04;Q13057;Q00536;Q5EBM0;O43318;Q96PY6;O00444;Q9NWZ5;Q9BZ23;Q8TD19;P19367;P32189;Q13233;Q5ZEY9;Q96DU7;P30291;Q9H0E2;Q14164;P50613;O15111;P45985;O60825;Q96C11;P16118;P21127;P11387;O14965;Q8IVS8;P24941;Q15759;P11802;O94921;Q99640;P14618;Q9986;Q9UIG0;P21675;P51946;Q00534}

2786 Pathogen[ P03363] interacts with 23 human partners:{Q9NWZ5;O14920;Q16851;P21127;P11387;O15111;P51946;O43318;P24941;Q8IVS8;O96017;Q9UGP4;Q00534;P31749;Q9Y3D8;P49336;Q9H0E2;P21675;P50750;P11802;Q00536;Q13233;O14757}

2787 [Cluster 254]GO:0000338+P biological\_process [name] protein deneddylation [def] "The removal of a ubiquitin-like protein of the NEDD8 type from a protein." [GOC

2788 Pathogen[ Q2Q067] interacts with 1 human partners:{Q92905}

2789 Pathogen[ P0C214] interacts with 1 human partners:{Q92905}

2790 Pathogen[ P03346] interacts with 1 human partners:{Q92905}

2791 Pathogen[ Q85601] interacts with 1 human partners:{Q92905}

2792 Pathogen[ P14079] interacts with 1 human partners:{Q92905}

2793 Pathogen[ P03383] interacts with 1 human partners:{Q92905}

2794 Pathogen[ P03410] interacts with 1 human partners:{Q92905}

2795 Pathogen[ P14075] interacts with 1 human partners:{Q92905}

2796 Pathogen[ P0C206] interacts with 1 human partners:{Q92905}  
2797 Pathogen[ P03363] interacts with 1 human partners:{Q92905}  
2798 [Cluster 255]GO:0010994+P biological\_process [name] free ubiquitin chain  
polymerization [def] "The process of creating free ubiquitin chains, compounds composed  
of a large number of ubiquitin monomers. These chains are not conjugated to a protein."  
[GOC  
2799 Pathogen[ Q2Q067] interacts with 1 human partners:{000762}  
2800 Pathogen[ P0C214] interacts with 2 human partners:{Q16763;000762}  
2801 Pathogen[ P03346] interacts with 1 human partners:{000762}  
2802 Pathogen[ Q85601] interacts with 2 human partners:{Q16763;000762}  
2803 Pathogen[ P14079] interacts with 1 human partners:{000762}  
2804 Pathogen[ P03383] interacts with 1 human partners:{000762}  
2805 Pathogen[ P03410] interacts with 1 human partners:{000762}  
2806 Pathogen[ P14075] interacts with 1 human partners:{000762}  
2807 Pathogen[ P0C206] interacts with 2 human partners:{Q16763;000762}  
2808 Pathogen[ P03363] interacts with 1 human partners:{000762}  
2809 [Cluster 256]GO:0010941+P biological\_process [name] regulation of cell death [def]  
"Any process that modulates the rate or frequency of cell death. Cell death is the  
specific activation or halting of processes within a cell so that its vital functions  
markedly cease, rather than simply deteriorating gradually over time, which culminates  
in cell death." [GOC  
2810 Pathogen[ Q2Q067] interacts with 1 human partners:{Q6NUN9}  
2811 Pathogen[ P0C214] interacts with 1 human partners:{Q6NUN9}  
2812 Pathogen[ P03346] interacts with 1 human partners:{Q6NUN9}  
2813 Pathogen[ Q85601] interacts with 1 human partners:{Q6NUN9}  
2814 Pathogen[ P14079] interacts with 2 human partners:{Q6NUN9;Q8NC60}  
2815 Pathogen[ P03383] interacts with 1 human partners:{Q6NUN9}  
2816 Pathogen[ P03410] interacts with 2 human partners:{Q8NC60;Q6NUN9}  
2817 Pathogen[ P14075] interacts with 1 human partners:{Q6NUN9}  
2818 Pathogen[ P0C206] interacts with 2 human partners:{Q6NUN9;Q9UK53}  
2819 Pathogen[ P03363] interacts with 1 human partners:{Q6NUN9}  
2820 [Cluster 257]GO:0009967+P biological\_process [name] positive regulation of signal  
transduction [def] "Any process that activates or increases the frequency, rate or  
extent of signal transduction." [GOC  
2821 Pathogen[ Q2Q067] interacts with 2 human partners:{Q9BY44;Q9NXV6}  
2822 Pathogen[ P0C214] interacts with 2 human partners:{Q9BY44;Q9NXV6}  
2823 Pathogen[ P03346] interacts with 3 human partners:{Q9NXV6;Q5T2T1;Q9BY44}  
2824 Pathogen[ Q85601] interacts with 2 human partners:{Q9BY44;Q9NXV6}  
2825 Pathogen[ P14079] interacts with 4 human partners:{P31751;Q9BY44;Q5T2T1;Q9NXV6}  
2826 Pathogen[ P03383] interacts with 2 human partners:{Q9BY44;Q9NXV6}  
2827 Pathogen[ P03410] interacts with 3 human partners:{Q9NXV6;Q5T2T1;Q9BY44}  
2828 Pathogen[ P14075] interacts with 2 human partners:{Q9NXV6;Q9BY44}  
2829 Pathogen[ P0C206] interacts with 3 human partners:{Q9NXV6;Q5T2T1;Q9BY44}  
2830 Pathogen[ P03363] interacts with 3 human partners:{Q9BY44;Q5T2T1;Q9NXV6}  
2831 [Cluster 258]GO:0006911+P biological\_process [name] phagocytosis, engulfment [def]  
"The internalization of bacteria, immune complexes and other particulate matter or of an  
apoptotic cell by phagocytosis, including the membrane and cytoskeletal processes  
required, which involves one of three mechanisms  
2832 Pathogen[ Q2Q067] interacts with 2 human partners:{P63000;Q92556}  
2833 Pathogen[ P0C214] interacts with 2 human partners:{P63000;Q92556}  
2834 Pathogen[ P03346] interacts with 2 human partners:{Q92556;P63000}  
2835 Pathogen[ Q85601] interacts with 1 human partners:{P63000}  
2836 Pathogen[ P14079] interacts with 1 human partners:{Q92556}  
2837 Pathogen[ P03383] interacts with 1 human partners:{P63000}  
2838 Pathogen[ P03410] interacts with 2 human partners:{P63000;Q92556}  
2839 Pathogen[ P14075] interacts with 1 human partners:{P63000}  
2840 Pathogen[ P0C206] interacts with 2 human partners:{Q92556;P63000}  
2841 Pathogen[ P03363] interacts with 2 human partners:{P63000;Q92556}  
2842 [Cluster 259]GO:0048169+P biological\_process [name] regulation of long-term neuronal  
synaptic plasticity [def] "A process that modulates long-term neuronal synaptic  
plasticity, the ability of neuronal synapses to change long-term as circumstances  
require. Long-term neuronal synaptic plasticity generally involves increase or decrease  
in actual synapse numbers." [GOC  
2843 Pathogen[ Q2Q067] interacts with 2 human partners:{P78352;P18146}  
2844 Pathogen[ P0C214] interacts with 2 human partners:{P78352;P18146}  
2845 Pathogen[ P03346] interacts with 2 human partners:{P78352;P18146}  
2846 Pathogen[ Q85601] interacts with 2 human partners:{P18146;P78352}  
2847 Pathogen[ P14079] interacts with 1 human partners:{O43759}  
2848 Pathogen[ P03383] interacts with 2 human partners:{P18146;P78352}  
2849 Pathogen[ P03410] interacts with 3 human partners:{O43759;P18146;P78352}  
2850 Pathogen[ P14075] interacts with 2 human partners:{P18146;P78352}  
2851 Pathogen[ P0C206] interacts with 3 human partners:{P78352;O43759;P18146}  
2852 Pathogen[ P03363] interacts with 2 human partners:{P18146;P78352}  
2853 [Cluster 260]GO:0051222+P biological\_process [name] positive regulation of protein  
transport [def] "Any process that activates or increases the frequency, rate or extent  
of the directed movement of a protein into, out of or within a cell, or between cells,

by means of some agent such as a transporter or pore." [GOC

2854 Pathogen[ Q2Q067] interacts with 1 human partners:{Q8IUR6}

2855 Pathogen[ POC214] interacts with 1 human partners:{Q8IUR6}

2856 Pathogen[ P03346] interacts with 1 human partners:{Q8IUR6}

2857 Pathogen[ Q85601] interacts with 1 human partners:{Q8IUR6}

2858 Pathogen[ P14079] interacts with 1 human partners:{Q8IUR6}

2859 Pathogen[ P03383] interacts with 1 human partners:{Q8IUR6}

2860 Pathogen[ P03410] interacts with 1 human partners:{Q8IUR6}

2861 Pathogen[ P14075] interacts with 1 human partners:{Q8IUR6}

2862 Pathogen[ POC206] interacts with 1 human partners:{Q8IUR6}

2863 Pathogen[ P03363] interacts with 1 human partners:{Q8IUR6}

2864 [Cluster 261]GO:0033540+P biological\_process [name] fatty acid beta-oxidation using acyl-CoA oxidase [def] "A fatty acid beta-oxidation pathway in which the initial step, which converts an acyl-CoA to a trans-2-enoyl-CoA, is catalyzed by acyl-CoA oxidase\_ the electrons removed by oxidation pass directly to oxygen and produce hydrogen peroxide, which is cleaved by peroxisomal catalases. Fatty acid beta-oxidation begins with the addition of coenzyme A to a fatty acid, and ends when only two or three carbons remain (as acetyl-CoA or propionyl-CoA respectively)." [GOC

2865 Pathogen[ Q2Q067] interacts with 1 human partners:{O14734}

2866 Pathogen[ POC214] interacts with 1 human partners:{O14734}

2867 Pathogen[ P03346] interacts with 1 human partners:{O14734}

2868 Pathogen[ Q85601] interacts with 1 human partners:{O14734}

2869 Pathogen[ P14079] interacts with 1 human partners:{O14734}

2870 Pathogen[ P03383] interacts with 1 human partners:{O14734}

2871 Pathogen[ P03410] interacts with 1 human partners:{O14734}

2872 Pathogen[ P14075] interacts with 1 human partners:{O14734}

2873 Pathogen[ POC206] interacts with 1 human partners:{O14734}

2874 Pathogen[ P03363] interacts with 1 human partners:{O14734}

2875 [Cluster 262]GO:0030522+P biological\_process [name] intracellular receptor mediated signaling pathway [def] "Any series of molecular signals initiated by a ligand binding to an receptor located within a cell." [GOC

2876 Pathogen[ Q2Q067] interacts with 8 human partners:{P27540;P10827;P40763;P10589;P35869;P55055;P11474;P22736}

2877 Pathogen[ POC214] interacts with 4 human partners:{P35869;P11474;P40763;P27540}

2878 Pathogen[ P03346] interacts with 17 human partners:{P10827;P06401;Q9H6Q3;P10588;P27540;P51843;P22736;O95718;O75469;P11474;P35869;O00482;P40763;P35398;Q13285;P55055;P10589}

2879 Pathogen[ Q85601] interacts with 10 human partners:{P40763;P27540;P55055;Q9H6Q3;P22736;P11474;P10827;O00482;P35869;P10589}

2880 Pathogen[ P14079] interacts with 14 human partners:{P55055;P35869;P35398;P11474;P22736;P10827;O95718;O00482;O75469;P27540;Q9H6Q3;P10588;Q8WWB7;P10589}

2881 Pathogen[ P03383] interacts with 3 human partners:{P27540;P11474;P35869}

2882 Pathogen[ P03410] interacts with 7 human partners:{P27540;P22736;Q8WWB7;P11474;P10589;P40763;Q9H6Q3}

2883 Pathogen[ P14075] interacts with 3 human partners:{P35869;P11474;P27540}

2884 Pathogen[ POC206] interacts with 16 human partners:{P10588;P35398;P06401;Q9H6Q3;P35869;O75469;P55055;P22736;O00482;P10589;O95718;Q8WWB7;P40763;P27540;P11474;P10827}

2885 Pathogen[ P03363] interacts with 8 human partners:{P27540;P11474;Q9H6Q3;P35869;P10588;P35398;P10589;O00482}

2886 [Cluster 263]GO:2000138+P biological\_process [name] positive regulation of cell proliferation involved in heart morphogenesis [def] "Any process that activates or increases the frequency, rate or extent of cell proliferation involved in heart morphogenesis." [GOC

2887 Pathogen[ Q2Q067] interacts with 1 human partners:{Q06330}

2888 Pathogen[ POC214] interacts with 1 human partners:{Q06330}

2889 Pathogen[ P03346] interacts with 1 human partners:{Q06330}

2890 Pathogen[ Q85601] interacts with 1 human partners:{Q06330}

2891 Pathogen[ P14079] interacts with 1 human partners:{Q06330}

2892 Pathogen[ P03383] interacts with 1 human partners:{Q06330}

2893 Pathogen[ P03410] interacts with 1 human partners:{Q06330}

2894 Pathogen[ P14075] interacts with 1 human partners:{Q06330}

2895 Pathogen[ POC206] interacts with 1 human partners:{Q06330}

2896 Pathogen[ P03363] interacts with 1 human partners:{Q06330}

2897 [Cluster 264]GO:0060271+P biological\_process [name] cilium morphogenesis [def] "A process that is carried out at the cellular level and in which the structure of a cilium is organized." [GOC

2898 Pathogen[ Q2Q067] interacts with 9 human partners:{Q9BVV6;Q9NXB0;P06396;Q9GZV5;O15078;Q9NVD7;O75665;A6NIH7;Q96GV9}

2899 Pathogen[ POC214] interacts with 8 human partners:{O15078;Q96GV9;Q9GZV5;P06396;Q9NXB0;O75665;A6NIH7;Q9NVD7}

2900 Pathogen[ P03346] interacts with 14 human partners:{Q9GZV5;Q96GV9;Q9H3S7;Q9HBG6;Q9NXB0;O75665;Q8N157;Q9NVD7;P36405;A6NIH7;P06396;O15078;Q96FT9;Q9BVV6}

2901 Pathogen[ Q85601] interacts with 9 human

2902 partners: {Q9NVD7;P06396;P36405;Q9GZV5;O15078;Q9NXB0;O75665;A6NIH7;Q96GV9}  
Pathogen[ P14079] interacts with 21 human

2903 partners: {Q9P0N5;O95876;Q9GZV5;A6NIH7;Q96GX1;Q8N157;O95922;Q9BVV6;Q8IWZ6;P36405;Q9UP  
M9;P61158;Q9NZ20;O75366;O15078;Q9P2K1;O75665;Q9NVD7;Q96FT9;Q9NXB0;Q96GV9}

2904 Pathogen[ P03383] interacts with 8 human  
partners: {Q9BVV6;Q9NXB0;O15078;A6NIH7;O75665;Q9GZV5;Q96GV9;P06396}

2905 Pathogen[ P03410] interacts with 21 human  
partners: {O75665;Q96FT9;P06396;P36405;Q9BVV6;A6NIH7;Q9GZV5;Q96GX1;Q8N157;Q9P0N5;O150  
78;Q9P2K1;Q9UPM9;O95876;Q9NZ20;Q9HBG6;O95922;Q96GV9;Q9NVD7;Q9NXB0;Q8IWZ6}

2906 Pathogen[ P14075] interacts with 8 human  
partners: {Q9GZV5;Q96GV9;Q9BVV6;Q9NXB0;O15078;P06396;A6NIH7;O75665}

2907 Pathogen[ P0C206] interacts with 17 human  
partners: {P06396;Q9UPM9;Q9BVV6;Q9NVD7;Q9P2K1;Q96GV9;Q9GZV5;O95922;O15078;Q8N157;O756  
65;P36405;A6NIH7;Q16181;Q9NXB0;Q96FT9;O95876}

2908 Pathogen[ P03363] interacts with 15 human  
partners: {Q9H3S7;O15078;Q9P2K1;O95922;P06396;Q8N157;Q9GZV5;Q9BVV6;Q9HBG6;A6NIH7;Q96G  
V9;Q96FT9;Q9NVD7;Q9NXB0;O75665}

2908 [Cluster 265]GO:0060347+P biological\_process [name] heart trabecula formation  
[def] "The process of creating a trabecula in the heart. A trabecula is a tissue element  
in the form of a small beam, strut or rod." [GOC

2909 Pathogen[ Q2Q067] interacts with 5 human  
partners: {Q14192;P11831;Q9Y5J3;Q9GZT9;Q9HBD4}

2910 Pathogen[ P0C214] interacts with 5 human  
partners: {Q9HBD4;Q9Y5J3;P11831;Q9GZT9;Q14192}

2911 Pathogen[ P03346] interacts with 5 human  
partners: {Q9HBD4;P11831;Q9Y5J3;Q14192;Q9GZT9}

2912 Pathogen[ Q85601] interacts with 5 human  
partners: {P11831;Q9GZT9;Q14192;Q9HBD4;Q9Y5J3}

2913 Pathogen[ P14079] interacts with 3 human partners: {Q9GZT9;Q14192;Q9Y5J3}

2914 Pathogen[ P03383] interacts with 3 human partners: {P11831;Q9HBD4;Q14192}

2915 Pathogen[ P03410] interacts with 5 human  
partners: {Q9Y5J3;P11831;Q9GZT9;Q9HBD4;Q14192}

2916 Pathogen[ P14075] interacts with 4 human partners: {Q9GZT9;Q9HBD4;P11831;Q14192}

2917 Pathogen[ P0C206] interacts with 5 human  
partners: {Q9GZT9;Q9Y5J3;P11831;Q9HBD4;Q14192}

2918 Pathogen[ P03363] interacts with 4 human partners: {Q9Y5J3;P11831;Q9HBD4;Q14192}

2919 [Cluster 266]GO:0043069+P biological\_process [name] negative regulation of programmed  
cell death [def] "Any process that stops, prevents, or reduces the frequency, rate or  
extent of programmed cell death, cell death resulting from activation of endogenous  
cellular processes." [GOC

2920 Pathogen[ Q2Q067] interacts with 4 human partners: {Q96C86;Q63ZY3;P37198;Q03112}

2921 Pathogen[ P0C214] interacts with 4 human partners: {Q96C86;Q03112;P37198;Q63ZY3}

2922 Pathogen[ P03346] interacts with 4 human partners: {Q96C86;P37198;Q03112;Q63ZY3}

2923 Pathogen[ Q85601] interacts with 3 human partners: {Q03112;Q96C86;Q63ZY3}

2924 Pathogen[ P14079] interacts with 4 human partners: {Q24JP5;Q96C86;P37198;Q63ZY3}

2925 Pathogen[ P03383] interacts with 4 human partners: {Q03112;Q96C86;Q63ZY3;P37198}

2926 Pathogen[ P03410] interacts with 4 human partners: {Q03112;Q24JP5;Q96C86;Q63ZY3}

2927 Pathogen[ P14075] interacts with 4 human partners: {Q63ZY3;P37198;Q03112;Q96C86}

2928 Pathogen[ P0C206] interacts with 3 human partners: {Q96C86;Q03112;Q63ZY3}

2929 Pathogen[ P03363] interacts with 4 human partners: {Q63ZY3;Q03112;P37198;Q96C86}

2930 [Cluster 267]GO:0070979+P biological\_process [name] protein K11-linked ubiquitination  
[def] "A protein ubiquitination process in which ubiquitin monomers are attached to a  
protein, and then ubiquitin polymers are formed by linkages between lysine residues at  
position 11 of the ubiquitin monomers. K11-linked polyubiquitination targets the  
substrate protein for degradation. The anaphase-promoting complex promotes the  
degradation of mitotic regulators by assembling K11-linked polyubiquitin chains." [GOC

2931 Pathogen[ Q2Q067] interacts with 22 human  
partners: {Q9UJX3;Q9UJX5;O00762;Q9Y2X8;Q9NYG5;Q9H1A4;P61077;Q9UJX2;P63146;P78317;Q9UM  
13;Q9NPD8;Q8NHZ8;Q9UM11;Q9UJX4;P49459;P62256;P68036;Q9UJX6;P30260;Q13042;Q9BS18}

2932 Pathogen[ P0C214] interacts with 25 human  
partners: {Q96B02;Q9UJX6;Q16763;Q9BS18;O00762;Q9UJX5;P49459;Q969T4;Q9UJX2;P78317;P610  
77;Q9H1A4;Q9Y2X8;Q8NHZ8;Q9UJX4;Q9UJX3;P62256;Q9UM11;P30260;Q9NPD8;Q96LR5;Q9NYG5;Q9UM  
13;P63146;Q13042}

2933 Pathogen[ P03346] interacts with 22 human  
partners: {P68036;Q9UM11;Q9BS18;Q9UM13;Q9NYG5;P49459;Q9Y2X8;P61077;Q9UJX6;Q13042;Q9UJ  
X5;P63146;O00762;Q9UJX2;Q9UJX3;Q8NHZ8;Q9NPD8;P78317;Q9H1A4;Q9UJX4;P62256;P30260}

2934 Pathogen[ Q85601] interacts with 26 human  
partners: {Q9UJX2;P78317;Q9UJX6;Q16763;P63146;Q9Y2X8;Q9BS18;Q8NHZ8;Q9H1A4;Q969T4;Q96B  
02;Q9NPD8;Q96LR5;P68036;P61077;Q13042;Q9UJX5;Q9UM13;Q9NYG5;O00762;Q9UJX3;P49459;Q9UJ  
X4;Q9UM11;P62256;P30260}

2935 Pathogen[ P14079] interacts with 21 human  
partners: {P68036;Q9UJX3;Q9H1A4;Q9NPD8;Q9UJX5;P61077;Q9NYG5;P62256;Q8NHZ8;Q9UM11;Q9UM  
13;Q13042;P49459;Q9UJX6;Q9Y2X8;P30260;P78317;O00762;P63146;Q9UJX4;Q9BS18}

2936 Pathogen[ P03383] interacts with 22 human  
partners: {Q8NHZ8;Q9NYG5;Q9UJX6;Q9Y2X8;O00762;P78317;Q9H1A4;Q13042;P61077;Q9UM13;Q9UM  
11;Q9BS18;Q9UJX4;P68036;Q9UJX5;P49459;Q9NPD8;P62256;P63146;Q9UJX2;P30260;Q9UJX3}

2937 Pathogen[ P03410] interacts with 21 human partners: {Q9BS18;Q9H1A4;Q9UJX4;Q9NYG5;Q9UM13;Q8NHZ8;P49459;P68036;Q9UM11;Q13042;P62256;P78317;P63146;Q9Y2X8;Q9UJX5;P30260;Q9UJX3;Q9NPD8;O00762;Q9UJX6;P61077}

2938 Pathogen[ P14075] interacts with 22 human partners: {Q9BS18;Q13042;P68036;Q9UM11;P49459;Q9Y2X8;Q9UJX2;P61077;Q9UJX6;Q9NPD8;Q8NHZ8;O00762;Q9UJX5;P78317;Q9UJX4;Q9H1A4;P62256;P63146;Q9UM13;P30260;Q9UJX3;Q9NYG5}

2939 Pathogen[ P0C206] interacts with 26 human partners: {Q16763;Q9Y2X8;Q9NPD8;Q9UJX3;P68036;Q9UJX5;Q9UJX2;Q96LR5;P78317;P30260;Q9BS18;Q9H1A4;Q9NYG5;Q9UJX4;P49459;P62256;Q9UM11;Q969T4;O00762;Q9UJX6;P61077;Q9UM13;Q96B02;Q13042;Q8NHZ8;P63146}

2940 Pathogen[ P03363] interacts with 23 human partners: {Q9UJX2;Q9NYG5;Q13042;P49459;O00762;P78317;Q8NHZ8;Q9UJX3;P63146;Q9UJX5;P30260;Q9UJX6;Q9UM11;Q9BS18;Q9UJX4;Q9H1A4;P62256;Q969T4;Q9UM13;Q9NPD8;P61077;Q9Y2X8;P68036}

2941 [Cluster 268]GO:0009629+P biological\_process [name] response to gravity [def] "Any process that results in a change in state or activity of a cell or an organism (in terms of movement, secretion, enzyme production, gene expression, etc.) as a result of a gravitational stimulus." [GOC

2942 Pathogen[ Q2Q067] interacts with 2 human partners: {P01100;P15407}

2943 Pathogen[ P0C214] interacts with 3 human partners: {P15407;P01100;P14618}

2944 Pathogen[ P03346] interacts with 2 human partners: {P15407;P01100}

2945 Pathogen[ Q85601] interacts with 3 human partners: {P15407;P01100;P14618}

2946 Pathogen[ P14079] interacts with 2 human partners: {P15407;P01100}

2947 Pathogen[ P03383] interacts with 2 human partners: {P15407;P01100}

2948 Pathogen[ P03410] interacts with 2 human partners: {P01100;P15407}

2949 Pathogen[ P14075] interacts with 2 human partners: {P01100;P15407}

2950 Pathogen[ P0C206] interacts with 3 human partners: {P15407;P01100;P14618}

2951 Pathogen[ P03363] interacts with 2 human partners: {P15407;P01100}

2952 [Cluster 269]GO:0006887+P biological\_process [name] exocytosis [def] "A process of secretion by a cell that results in the release of intracellular molecules (e.g. hormones, matrix proteins) contained within a membrane-bounded vesicle by fusion of the vesicle with the plasma membrane of a cell. This is the process in which most molecules are secreted from eukaryotic cells." [GOC

2953 Pathogen[ Q2Q067] interacts with 17 human partners: {Q9Y6D6;O95295;Q12765;Q6P1M3;P40222;Q9HCH5;O14910;Q96KP1;O95721;O60645;O00471;Q8TAC9;O00161;Q15833;Q9UPT5;Q8IYI6;Q9NUP9}

2954 Pathogen[ P0C214] interacts with 18 human partners: {Q15833;O14910;P16157;Q9UPT5;O95295;Q8TAC9;Q6P1M3;Q9HCH5;O95721;P35580;Q00536;Q12765;Q9Y6D6;O60645;P40222;Q8IYI6;O00161;O00471}

2955 Pathogen[ P03346] interacts with 29 human partners: {Q8IYI6;Q15833;Q00536;Q9UPT5;O00471;Q96A65;O95295;Q6P1M3;Q9Y6D5;Q9HCH5;P16157;Q8IYJ3;Q8TDW5;Q9Y6D6;O00161;Q8TAC9;Q9NUP9;O95721;Q9HAP6;Q5JRA6;Q969F2;Q12765;Q70J99;Q9C0H9;P40222;Q9ULU8;O60645;O14910;Q96KP1}

2956 Pathogen[ Q85601] interacts with 21 human partners: {Q8IYI6;Q00536;Q9UPT5;P16157;Q9NUP9;O14910;O00471;Q96A65;Q15833;O95295;Q8TAC9;Q6P1M3;Q9HCH5;P40222;Q12765;Q9Y6D6;P35580;Q96KP1;O00161;O60645;O95721}

2957 Pathogen[ P14079] interacts with 32 human partners: {O14810;Q86VI1;P40222;Q8TAG9;Q8IYJ3;O00471;Q9Y6D5;Q9ULU8;Q9HCH5;O60645;P16157;Q9UPT5;Q9C0H9;Q96KP1;Q9NUP9;O95721;Q6PUV4;Q15833;Q8TAC9;Q9Y6D6;Q5JRA6;Q9HAP6;Q9NV70;O95295;Q12765;Q8WVH0;Q96A65;Q8IYI6;Q7Z7G2;Q9Y2D4;Q6P1M3;Q0VAF6}

2958 Pathogen[ P03383] interacts with 17 human partners: {O95295;Q8TAC9;Q6P1M3;Q00536;Q9HCH5;Q8IYI6;Q9Y6D6;Q96KP1;O00471;Q12765;P40222;P35580;O60645;O00161;Q9UPT5;Q9C0H9;O14910}

2959 Pathogen[ P03410] interacts with 39 human partners: {Q9HCH5;Q969F2;O14910;Q15833;Q9UPT5;Q8TAC9;Q8TDW5;P16157;Q70J99;Q12765;O14810;O60645;Q6P1M3;Q9NUP9;Q8WVH0;Q9HAP6;O95295;Q0VAF6;Q7Z7G2;Q8TAG9;Q96A65;Q9Y6D6;Q8IYJ3;Q9ULU8;Q9Y6D5;Q6PUV4;P35580;Q96KP1;Q9Y2D4;Q9NV70;Q86VI1;Q9C0H9;P40222;O95721;O00471;O00161;Q9BRK5;Q8IYI6;Q5JRA6}

2960 Pathogen[ P14075] interacts with 15 human partners: {O60645;O95295;P40222;Q96KP1;Q6P1M3;Q9HCH5;Q9Y6D6;O00471;O14910;O00161;Q8TAC9;Q8IYI6;Q9C0H9;Q12765;Q9UPT5}

2961 Pathogen[ P0C206] interacts with 32 human partners: {O60645;Q9NUP9;Q969F2;O95721;Q9Y6D6;Q00536;Q96KP1;Q5JRA6;Q96A65;O00161;Q8IYJ3;P16157;Q9ULU8;Q7Z7G2;Q9Y6D5;Q9UPT5;Q86VI1;Q6PUV4;P40222;O14910;O95295;Q12765;Q9C0H9;Q8IYI6;Q9NV70;Q9HCH5;Q8TAC9;P35580;Q15833;Q6P1M3;O00471;Q8TAG9}

2962 Pathogen[ P03363] interacts with 20 human partners: {O60645;P16157;Q8IYI6;O00471;Q96A65;O14910;P40222;Q6P1M3;O95721;Q96KP1;O95295;Q12765;Q9HCH5;O00161;Q9Y6D6;Q9NUP9;Q00536;Q9UPT5;Q15833;Q9C0H9}

2963 [Cluster 270]GO:0061015+P biological\_process [name] snRNA import into nucleus [def] "The directed movement of snRNA, small nuclear ribonucleic acid into the nucleus." [GOC

2964 Pathogen[ Q2Q067] interacts with 1 human partners: {O95149}

2965 Pathogen[ P0C214] interacts with 1 human partners: {O95149}

2966 Pathogen[ P03346] interacts with 1 human partners: {O95149}

2967 Pathogen[ Q85601] interacts with 1 human partners: {O95149}

2968 Pathogen[ P14079] interacts with 1 human partners: {O95149}

2969 Pathogen[ P03383] interacts with 1 human partners:{095149}

2970 Pathogen[ P03410] interacts with 1 human partners:{095149}

2971 Pathogen[ P14075] interacts with 1 human partners:{095149}

2972 Pathogen[ P0C206] interacts with 1 human partners:{095149}

2973 Pathogen[ P03363] interacts with 1 human partners:{095149}

2974 [Cluster 271]GO:0009060+P biological\_process [name] aerobic respiration [def] "The enzymatic release of energy from organic compounds (especially carbohydrates and fats) which requires oxygen as the terminal electron acceptor." [GOC

2975 Pathogen[ Q2Q067] interacts with 4 human partners:{Q9NTG7;P21912;Q6P444;P78537}

2976 Pathogen[ P0C214] interacts with 8 human partners:{P22695;Q99643;P78537;Q9NTG7;Q6P444;P21912;Q16798;P30566}

2977 Pathogen[ P03346] interacts with 4 human partners:{Q6P444;P21912;P78537;Q9NTG7}

2978 Pathogen[ Q85601] interacts with 3 human partners:{P21912;P78537;Q9NTG7}

2979 Pathogen[ P14079] interacts with 12 human partners:{P22695;Q12887;Q6P444;P00395;Q15070;P14927;Q15526;P07919;Q9NTG7;P78537;Q15390;P21912}

2980 Pathogen[ P03383] interacts with 3 human partners:{P78537;Q9NTG7;Q6P444}

2981 Pathogen[ P03410] interacts with 12 human partners:{P78537;Q9NTG7;Q15390;Q6P444;P07919;P22695;P14927;P30566;P21912;Q99643;Q15070;Q12887}

2982 Pathogen[ P14075] interacts with 5 human partners:{P78537;Q15070;Q6P444;Q15390;Q9NTG7}

2983 Pathogen[ P0C206] interacts with 7 human partners:{P78537;Q6P444;P22695;Q15070;Q15390;Q9NTG7;P21912}

2984 Pathogen[ P03363] interacts with 2 human partners:{P78537;Q9NTG7}

2985 [Cluster 272]GO:0006695+P biological\_process [name] cholesterol biosynthetic process [def] "The chemical reactions and pathways resulting in the formation of cholesterol, cholest-5-en-3 beta-ol, the principal sterol of vertebrates and the precursor of many steroids, including bile acids and steroid hormones." [GOC

2986 Pathogen[ Q2Q067] interacts with 3 human partners:{P62633;Q14739;P14324}

2987 Pathogen[ P0C214] interacts with 7 human partners:{Q13907;Q14739;P11413;Q9BXS1;P14324;P62633;P42765}

2988 Pathogen[ P03346] interacts with 4 human partners:{Q14739;P62633;P14324;P42765}

2989 Pathogen[ Q85601] interacts with 4 human partners:{P62633;P14324;Q13907;Q14739}

2990 Pathogen[ P14079] interacts with 8 human partners:{Q9BXS1;Q9Y5U4;Q13907;Q14739;P14324;P53602;P62633;O15503}

2991 Pathogen[ P03383] interacts with 2 human partners:{P14324;P62633}

2992 Pathogen[ P03410] interacts with 9 human partners:{P53602;Q14739;Q9Y5U4;P42765;Q13907;P62633;O15503;P14324;Q9BXS1}

2993 Pathogen[ P14075] interacts with 2 human partners:{P62633;P14324}

2994 Pathogen[ P0C206] interacts with 5 human partners:{Q14739;P62633;P14324;Q13907;Q9BXS1}

2995 Pathogen[ P03363] interacts with 2 human partners:{P62633;Q14739}

2996 [Cluster 273]GO:0006434+P biological\_process [name] seryl-tRNA aminoacylation [def] "The process of coupling serine to seryl-tRNA, catalyzed by seryl-tRNA synthetase. In tRNA aminoacylation, the amino acid is first activated by linkage to AMP and then transferred to either the 2'- or the 3'-hydroxyl group of the 3'-adenosine residue of the tRNA." [GOC

2997 Pathogen[ Q2Q067] interacts with 2 human partners:{P49591;P12270}

2998 Pathogen[ P0C214] interacts with 3 human partners:{Q9NP81;P49591;P12270}

2999 Pathogen[ P03346] interacts with 1 human partners:{P12270}

3000 Pathogen[ Q85601] interacts with 1 human partners:{P12270}

3001 Pathogen[ P14079] interacts with 3 human partners:{Q9NP81;P49591;P12270}

3002 Pathogen[ P03383] interacts with 3 human partners:{P12270;Q9NP81;P49591}

3003 Pathogen[ P03410] interacts with 3 human partners:{P49591;P12270;Q9NP81}

3004 Pathogen[ P14075] interacts with 3 human partners:{P12270;Q9NP81;P49591}

3005 Pathogen[ P0C206] interacts with 3 human partners:{Q9NP81;P49591;P12270}

3006 Pathogen[ P03363] interacts with 2 human partners:{P12270;P49591}

3007 [Cluster 274]GO:0032516+P biological\_process [name] positive regulation of phosphoprotein phosphatase activity [def] "Any process that activates or increases the activity of a phosphoprotein phosphatase." [GOC

3008 Pathogen[ Q2Q067] interacts with 2 human partners:{Q86UL8;Q15257}

3009 Pathogen[ P0C214] interacts with 1 human partners:{Q15257}

3010 Pathogen[ P03346] interacts with 2 human partners:{Q15257;Q86UL8}

3011 Pathogen[ Q85601] interacts with 2 human partners:{Q86UL8;Q15257}

3012 Pathogen[ P14079] interacts with 1 human partners:{Q86UL8}

3013 Pathogen[ P03383] interacts with 1 human partners:{Q15257}

3014 Pathogen[ P03410] interacts with 2 human partners:{Q15257;Q86UL8}

3015 Pathogen[ P14075] interacts with 1 human partners:{Q15257}

3016 Pathogen[ P0C206] interacts with 2 human partners:{Q86UL8;Q15257}

3017 Pathogen[ P03363] interacts with 2 human partners:{Q15257;Q86UL8}

3018 [Cluster 275]GO:0000173+P biological\_process [name] inactivation of MAPK activity involved in osmosensory signaling pathway [def] "Any process that terminates the activity of the active enzyme MAP kinase during osmolarity sensing." [PMID

3019 Pathogen[ Q2Q067] interacts with 1 human partners:{Q9NS73}

3020 Pathogen[ P0C214] interacts with 1 human partners:{Q9NS73}



3021 Pathogen[ P03346] interacts with 1 human partners:{Q9NS73}

3022 Pathogen[ Q85601] interacts with 1 human partners:{Q9NS73}

3023 Pathogen[ P14079] interacts with 1 human partners:{Q9NS73}

3024 Pathogen[ P03383] interacts with 1 human partners:{Q9NS73}

3025 Pathogen[ P03410] interacts with 1 human partners:{Q9NS73}

3026 Pathogen[ P14075] interacts with 1 human partners:{Q9NS73}

3027 Pathogen[ P0C206] interacts with 1 human partners:{Q9NS73}

3028 Pathogen[ P03363] interacts with 1 human partners:{Q9NS73}

3029 [Cluster 276]GO:0032731+P biological\_process [name] positive regulation of interleukin-1 beta production [def] "Any process that activates or increases the frequency, rate, or extent of interleukin-1 beta production." [GOC

3030 Pathogen[ Q2Q067] interacts with 4 human partners:{Q16666;P04792;P84022;O14862}

3031 Pathogen[ P0C214] interacts with 4 human partners:{P04792;P84022;Q16666;O14862}

3032 Pathogen[ P03346] interacts with 4 human partners:{Q16666;P84022;O14862;P04792}

3033 Pathogen[ Q85601] interacts with 4 human partners:{Q16666;O14862;P84022;P04792}

3034 Pathogen[ P14079] interacts with 3 human partners:{O14862;P04792;Q16666}

3035 Pathogen[ P03383] interacts with 4 human partners:{O14862;P04792;P84022;Q16666}

3036 Pathogen[ P03410] interacts with 4 human partners:{P84022;Q16666;O14862;P04792}

3037 Pathogen[ P14075] interacts with 4 human partners:{P04792;Q16666;O14862;P84022}

3038 Pathogen[ P0C206] interacts with 4 human partners:{P84022;O14862;Q16666;P04792}

3039 Pathogen[ P03363] interacts with 4 human partners:{Q16666;P84022;O14862;P04792}

3040 [Cluster 277]GO:0071480+P biological\_process [name] cellular response to gamma radiation [def] "Any process that results in a change in state or activity of a cell (in terms of movement, secretion, enzyme production, gene expression, etc.) as a result of a gamma radiation stimulus. Gamma radiation is a form of electromagnetic radiation (EMR) or light emission of a specific frequency produced from sub-atomic particle interaction, such as electron-positron annihilation and radioactive decay. Gamma rays are generally characterized as EMR having the highest frequency and energy, and also the shortest wavelength, within the electromagnetic radiation spectrum." [GOC

3041 Pathogen[ Q2Q067] interacts with 3 human partners:{P46937;Q86VY4;P18146}

3042 Pathogen[ P0C214] interacts with 3 human partners:{P46937;P18146;Q86VY4}

3043 Pathogen[ P03346] interacts with 3 human partners:{P46937;Q86VY4;P18146}

3044 Pathogen[ Q85601] interacts with 3 human partners:{P18146;Q86VY4;P46937}

3045 Pathogen[ P14079] interacts with 3 human partners:{P13498;P46937;Q86VY4}

3046 Pathogen[ P03383] interacts with 3 human partners:{Q86VY4;P18146;P46937}

3047 Pathogen[ P03410] interacts with 3 human partners:{Q86VY4;P46937;P18146}

3048 Pathogen[ P14075] interacts with 3 human partners:{P18146;P46937;Q86VY4}

3049 Pathogen[ P0C206] interacts with 3 human partners:{P46937;Q86VY4;P18146}

3050 Pathogen[ P03363] interacts with 3 human partners:{P18146;P46937;Q86VY4}

3051 [Cluster 278]GO:0050880+P biological\_process [name] regulation of blood vessel size [def] "Any process that modulates the size of blood vessels." [GOC

3052 Pathogen[ Q2Q067] interacts with 2 human partners:{P68871;P29474}

3053 Pathogen[ P0C214] interacts with 3 human partners:{P29474;P68871;P35520}

3054 Pathogen[ P03346] interacts with 2 human partners:{P29474;P68871}

3055 Pathogen[ Q85601] interacts with 2 human partners:{P29474;P68871}

3056 Pathogen[ P14079] interacts with 1 human partners:{P68871}

3057 Pathogen[ P03383] interacts with 2 human partners:{P29474;P68871}

3058 Pathogen[ P03410] interacts with 2 human partners:{P29474;P68871}

3059 Pathogen[ P14075] interacts with 2 human partners:{P29474;P68871}

3060 Pathogen[ P0C206] interacts with 2 human partners:{P68871;P29474}

3061 Pathogen[ P03363] interacts with 2 human partners:{P29474;P68871}

3062 [Cluster 279]GO:0006874+P biological\_process [name] cellular calcium ion homeostasis [def] "Any process involved in the maintenance of an internal steady state of calcium ions at the level of a cell." [GOC

3063 Pathogen[ Q2Q067] interacts with 4 human partners:{Q96TC7;P27797;P20073;P26678}

3064 Pathogen[ P0C214] interacts with 5 human partners:{Q96TC7;P19429;P27797;P20073;P26678}

3065 Pathogen[ P03346] interacts with 5 human partners:{O75603;P20073;P26678;Q96TC7;P27797}

3066 Pathogen[ Q85601] interacts with 3 human partners:{P27797;P20073;Q96TC7}

3067 Pathogen[ P14079] interacts with 8 human partners:{P19429;O95292;P20073;Q15493;Q15011;P26678;Q96TC7;P13693}

3068 Pathogen[ P03383] interacts with 4 human partners:{Q96TC7;P26678;P20073;P27797}

3069 Pathogen[ P03410] interacts with 9 human partners:{O95292;Q96TC7;P19429;P26678;P13693;P20073;Q15011;Q15493;P27797}

3070 Pathogen[ P14075] interacts with 5 human partners:{Q96TC7;P20073;P26678;P27797;Q15011}

3071 Pathogen[ P0C206] interacts with 9 human partners:{Q96TC7;Q15493;P27797;P19429;P50461;O95292;Q15011;P26678;P20073}

3072 Pathogen[ P03363] interacts with 5 human partners:{P20073;Q96TC7;P27797;Q8IWX8;P19429}

3073 [Cluster 280]GO:0035195+P biological\_process [name] gene silencing by miRNA [def] "Downregulation of gene expression through the action of microRNAs (miRNAs), endogenous 21-24 nucleotide small RNAs processed from stem-loop RNA precursors (pre-miRNAs). Once incorporated into a RNA-induced silencing complex (RISC), miRNAs can downregulate gene expression by either of two posttranscriptional mechanisms

3074 Pathogen[ Q2Q067] interacts with 3 human partners: {A6NIX2;Q96IF1;Q9UGP4}  
3075 Pathogen[ P0C214] interacts with 2 human partners: {Q9UGP4;A6NIX2}  
3076 Pathogen[ P03346] interacts with 3 human partners: {Q9UGP4;Q96IF1;A6NIX2}  
3077 Pathogen[ Q85601] interacts with 3 human partners: {A6NIX2;Q96IF1;Q9UGP4}  
3078 Pathogen[ P14079] interacts with 3 human partners: {Q96IF1;A6NIX2;Q9UGP4}  
3079 Pathogen[ P03383] interacts with 2 human partners: {A6NIX2;Q9UGP4}  
3080 Pathogen[ P03410] interacts with 3 human partners: {Q9UGP4;Q96IF1;A6NIX2}  
3081 Pathogen[ P14075] interacts with 2 human partners: {Q9UGP4;A6NIX2}  
3082 Pathogen[ P0C206] interacts with 3 human partners: {Q9UGP4;Q96IF1;A6NIX2}  
3083 Pathogen[ P03363] interacts with 3 human partners: {Q96IF1;Q9UGP4;A6NIX2}  
3084 [Cluster 281]GO:0032259+P biological\_process [name] methylation [def] "The process in which a methyl group is covalently attached to a molecule." [GOC  
3085 Pathogen[ Q2Q067] interacts with 64 human partners: {O43463;Q96CB9;O14744;Q8IZD2;Q9NVM4;O60294;P22087;Q9H5Q4;Q96LA8;O43159;Q15910;P46087;Q9NR48;Q8WVM0;Q8NE18;Q9Y6K1;Q9Y5N5;P55345;P22061;Q9UBP6;Q92800;Q9H825;O14686;A6NHQ2;Q8TBK2;Q7L0Y3;Q6PF06;Q96DP5;Q14749;Q9UIC8;Q9NR22;O43148;Q92979;Q99873;Q9UBC3;Q9NRG4;Q8N1G2;Q15047;Q08J23;P26358;Q86Y97;Q96RS0;Q9BV86;Q96FX7;Q7L592;P04818;Q7Z5W3;Q32P41;Q9UI43;Q9BVS5;P16455;Q5T8I9;Q8TEK3;Q9UNQ2;P51580;Q9BTL3;Q9H7H0;Q9H5I1;Q86X55;Q86TU7;Q8IY81;O96028;Q8WTS6;Q9NUP7}  
3086 Pathogen[ P0C214] interacts with 80 human partners: {Q9H825;Q96FX7;Q9H8K9;Q9H5I1;P04818;Q15047;P46087;Q7L0Y3;O43159;P0C7V9;Q6PF06;A6NJ78;Q9NVM4;Q9H7H0;A6NHQ2;P51580;P40261;P34897;Q96DP5;Q9Y6K1;Q9UNQ2;P22087;Q99873;Q15910;P55345;Q8N6Q8;O43463;Q9UET6;O43148;Q7L592;Q8NE18;Q86W50;P22061;Q14749;Q7Z5W3;Q92979;P26358;Q08J23;Q8IYL2;Q5T8I9;Q9Y5N5;Q9UI43;Q86TU7;O60294;Q8IY81;Q96RS0;Q86Y97;Q9UBP6;P16455;Q32P41;Q9NUP7;Q8IXQ9;Q9BTL3;Q8TEA1;P23526;Q9NR48;Q8N1G2;Q9HCE5;Q8WVM0;Q96BT7;Q86X55;Q9UIC8;Q6IN84;Q8WTS6;Q9NQR1;Q92800;Q9NRG4;Q96CB9;Q5HYK3;Q9BV86;Q9BVS5;Q9NR22;Q9NQV7;Q8TBK2;Q8IZD2;Q96LA8;Q9H5Q4;Q8TEK3;O96028;Q9NZL9}  
3087 Pathogen[ P03346] interacts with 85 human partners: {Q08J23;Q9HCE5;Q96FX7;P50135;Q9Y6K1;P22061;Q9NQV7;A6NJ78;Q92979;Q99873;Q5T8I9;Q92800;Q9BTL3;Q86Y97;P23526;Q8IXQ9;Q32P41;Q9NQR1;A6NHQ2;Q9NZL9;Q9Y5N5;P51580;Q8TBK2;O43159;Q8IYL2;Q8TEK3;O14744;Q9UIC8;Q9BYW2;Q9H825;Q9UBC3;P26358;Q14749;O43463;Q9NRG4;Q9UNQ2;O60294;P0C7V9;O43148;Q96DP5;Q7Z624;Q8WTS6;Q86U44;Q9BVS5;P46087;P55345;Q9NR22;Q9NVM4;Q9H5Q4;Q96RS0;Q7L592;Q8N1G2;O14717;O14686;Q9UBP6;Q15910;Q8IY81;Q96BT7;Q9NUP7;Q9H7H0;Q8WVM0;Q6IN84;Q15047;Q6PF06;Q86X55;Q96GJ1;Q5HYK3;O95050;Q9BV86;P22087;Q7L0Y3;Q13029;Q7Z5W3;Q9NR48;Q9H5I1;Q13395;Q9UI43;Q8IZD2;P40261;Q9H8K9;Q96LA8;Q96CB9;O96028;Q8NE18;Q86TU7}  
3088 Pathogen[ Q85601] interacts with 69 human partners: {Q9H5I1;Q32P41;P46087;Q9NQV7;O43148;Q8N1G2;Q9NR22;Q86X55;Q9BVS5;Q8TBK2;Q9NQV7;Q92979;A6NHQ2;P16455;Q9NR48;Q8N6Q8;Q9UBP6;Q86TU7;Q9H825;Q9NVM4;Q7Z5W3;Q9BV86;O14686;Q9Y5N5;Q5T8I9;O43159;P26358;Q96FX7;O14744;O43463;Q9H7H0;Q8NE18;O60294;Q9UI43;Q8WTS6;Q99873;Q6PF06;Q08J23;Q8IYL2;Q9UET6;Q9Y6K1;Q96RS0;P22061;Q8IY81;Q8TEK3;Q9NUP7;Q86Y97;Q9BTL3;Q15910;P23526;P22087;Q9NRG4;Q9H5Q4;Q7L0Y3;Q8WVM0;Q9HCE5;Q15047;Q9UIC8;Q92800;Q8IXQ9;Q8IZD2;Q14749;Q96LA8;Q96CB9;Q9UBC3;P55345;O96028;Q9UNQ2}  
3089 Pathogen[ P14079] interacts with 93 human partners: {Q6PF06;Q92979;Q96RS0;Q9NR22;O60294;Q8TBZ6;Q9UI43;Q15047;Q9HC36;Q7L592;Q96LA8;Q9NRG4;Q7L2J0;Q9Y6K1;Q9Y5N5;Q6IPR3;Q9UNQ2;Q99873;Q9NVM4;Q5JXM2;P50135;Q8N1G2;Q9NUP7;Q9BV86;Q7Z4G4;Q86TU7;Q9NRN9;Q92800;P16455;P34897;A6NHQ2;Q32P41;Q8TEA1;Q9NZL9;O60678;Q8IY81;P0C7V9;P22087;Q9HCE5;Q9H5I1;Q86U44;Q9UIC8;A6NJ78;O43148;P55345;O14744;Q9UBC3;Q14749;Q14353;Q63ZY6;Q8TEK3;Q9UET6;Q9NQR1;P46087;Q96P11;Q08J23;P26358;Q9BTL3;Q9H649;Q8IXQ9;Q9H8K9;Q6IN84;Q8N3J2;Q9Y5R4;Q96CB9;O43159;Q8N6Q8;Q9H7H0;Q8TBK2;Q9BVS5;Q9NQV7;Q15910;P23526;Q9H5Q4;Q13395;Q9H2M3;Q8IYL2;P51580;P04818;Q5HYK3;Q96FX7;Q86Y97;Q7L0Y3;Q9BV44;Q8NE18;Q7Z624;O95050;Q96DP5;Q7Z5W3;Q8WTS6;Q86W50;Q8WVM0}  
3090 Pathogen[ P03383] interacts with 58 human partners: {Q15047;O43148;Q7L592;Q9NRG4;O43463;Q86X55;Q8IYL2;Q9UBP6;Q9H825;Q9UNQ2;Q86Y97;Q5T8I9;Q9H5Q4;Q9BVS5;Q9UI43;Q86TU7;Q7L0Y3;Q32P41;O14744;A6NJ78;P0C7V9;O43159;Q8WTS6;Q9UET6;Q99873;Q9Y6K1;Q9NR22;Q8IY81;O60294;Q6PF06;Q9Y5N5;Q08J23;Q96RS0;P22061;Q8WVM0;Q96FX7;Q8IXQ9;Q9NUP7;P46087;Q9UIC8;Q9H7H0;Q96DP5;Q15910;Q9BTL3;Q92979;Q96CB9;Q8TEK3;Q8TBK2;Q7Z5W3;P22087;Q9H5I1;Q9NQR1;P26358;Q14749;Q96LA8;Q8N1G2;Q92800;Q8NE18}  
3091 Pathogen[ P03410] interacts with 101 human partners: {Q32P41;Q7L592;Q96DP5;A6NJ78;P22087;Q96RS0;Q9H8K9;Q96LA8;Q9H825;Q14353;Q96P11;Q14749;Q9HCE5;Q9H7H0;Q15047;Q8TBZ6;Q9HC36;Q9BTL3;Q63ZY6;Q9UBP6;Q9H2M3;Q8N3J2;Q86Y97;Q8IYT2;Q9BUU2;Q9H649;Q96CB9;Q8TEK3;Q9NRN9;Q8TEA1;Q5T8I9;Q8WTS6;A6NHQ2;O95050;Q7Z4G4;Q9NVM4;Q86X55;Q6PF06;Q8TBK2;O43159;Q9NR22;Q8IYL2;Q8IXQ9;Q92979;Q92800;P26358;Q6IPR3;Q9UNQ2;Q9NQV7;Q13395;P04818;Q6IN84;Q9NQR1;Q8N1G2;Q9H5I1;Q8NE18;P16455;Q9BV44;Q9H5Q4;Q96GJ1;Q15910;O60294;P23526;Q8N6Q8;Q9UBC3;Q9UIC8;Q08J23;Q7Z5W3;P46087;Q7Z624;Q8WVM0;Q96FX7;Q9UI43;Q7L2J0;Q8IY81;Q9BV86;O43148;Q5JXM2;O43463;O14744;Q86U44;P0C7V9;Q9BVS5;Q9Y6K1;Q9Y5N5;Q86W50;P22061;Q9NUP7;P50135;Q5HYK3;O95568;Q9Y5R4;Q9UET6;Q9NZL9;P51580;P34897;Q86TU7;Q99873;P55345;Q9NRG4;Q7L0Y3}  
3092 Pathogen[ P14075] interacts with 61 human partners: {Q9H7H0;Q8N1G2;Q5HYK3;Q7L592;Q9H5Q4;Q9Y6K1;Q92979;Q9NR22;Q7L0Y3;Q6IN84;Q9UET6;Q86TU7;Q8NE18;Q15047;Q9NQR1;Q9H825;Q15910;Q92800;Q8IY81;Q8TBK2;Q7Z5W3;O60294;Q96CB9;P26358;Q9UI43;Q6PF06;Q32P41;Q9H5I1;Q8IXQ9;O14744;Q96LA8;Q99873;Q9Y5N5;Q86X55;Q9UNQ2;Q5T8I9;P22087;Q96RS0;P46087;Q9UBP6;P51580;Q9BTL3;Q9BVS5;P22061;Q9NUP7;Q8TEK3;Q8IYL2;Q86Y97;P0C7V9;O43159;O43463;Q14749;Q96FX7;O43148;Q8WVM0;Q08J23;Q9NRG4;A6NJ78;Q96DP5;Q8WTS6;Q9UIC8}  
3093 Pathogen[ P0C206] interacts with 93 human

partners: {P0C7V9; Q96RS0; Q08J23; A6NHQ2; O43159; Q9UI43; Q9Y6K1; Q9UBP6; Q96CB9; Q86W50; Q9NZL9; Q9BV86; Q9UIC8; P22061; Q99873; O14744; Q32P41; Q96GJ1; O60294; Q8NE18; Q9NRG4; Q86X55; Q9H7B4; O43463; Q96LA8; P26358; Q86TU7; Q8TBZ6; Q92800; P34897; Q7Z624; Q9NQX0; Q9UET6; Q9BTL3; O14686; Q15910; Q7Z5W3; Q8WVM0; Q9NRN9; Q5T8I9; Q6PF06; P51580; Q9UNQ2; Q9NQV7; Q8TEA1; Q8N6Q8; Q9H825; Q9HBK9; Q92979; Q96FX7; Q86Y97; Q9NVM4; Q7L0Y3; Q9BVS5; Q9NR48; Q7Z4G4; Q9NQR1; O96028; P23526; Q8WTS6; Q9NUP7; Q9H2M3; Q9H5I1; Q9HCE5; Q6IN84; Q9Y5N5; Q9NR22; P04818; Q8TEK3; P46087; Q9H5Q4; O60678; P22087; Q8TBK2; Q14749; Q9H7H0; Q15047; Q9UBC3; P55345; Q7L2J0; Q8IYL2; O43148; P16455; Q96DP5; P50135; Q8N1G2; Q8IXQ9; Q8IY81; Q5HYK3; Q6IPR3; Q7L592; A6NJ78; Q8IZD2}

3094 Pathogen[ P03363] interacts with 79 human partners: {Q32P41; Q9UNQ2; Q92979; Q96RS0; O14744; Q9H825; Q9H7H0; P46087; Q08J23; P51580; O95050; Q7Z624; P0C7V9; Q9H5I1; Q96LA8; O95568; Q8WVE0; Q9Y5R4; Q7L592; P50135; Q6PF06; Q9BV86; Q9NRN9; Q5T8I9; Q8N1G2; Q96BT7; Q15910; Q8TEK3; Q9Y6K1; Q9UET6; Q86U44; O15047; Q8TBK2; O14717; Q8IXQ9; Q8IYL2; Q9BTL3; Q9HBK9; Q9NVM4; Q9UBP6; Q9NRG4; Q8IY81; Q9NR22; Q8NE18; Q13395; Q14749; Q96FX7; P22087; Q7L0Y3; P26358; O43148; Q9UPS6; Q9HCE5; Q9Y5N5; Q9NR48; Q9UIC8; Q96028; A6NJ78; Q8N3J2; Q8WVM0; O43159; O43463; Q7Z5W3; O60294; Q9BVS5; Q7Z4G4; Q9NQR1; Q6P2P2; Q8WTS6; Q92800; Q9UBC3; Q9UI43; Q15047; Q86Y97; Q86X55; O14686; Q99873; A6NHQ2; Q9H5Q4}

3095 [Cluster 282]GO:0043281+P biological\_process [name] regulation of cysteine-type endopeptidase activity involved in apoptotic process [def] "Any process that modulates the activity of a cysteine-type endopeptidase involved in apoptosis." [GOC]

3096 Pathogen[ Q2Q067] interacts with 2 human partners: {P16455; Q14154}

3097 Pathogen[ P0C214] interacts with 4 human partners: {Q9NPP4; Q92934; P16455; Q14154}

3098 Pathogen[ P03346] interacts with 2 human partners: {Q9NPP4; Q14154}

3099 Pathogen[ Q85601] interacts with 2 human partners: {P16455; Q14154}

3100 Pathogen[ P14079] interacts with 4 human partners: {P16455; Q92934; Q14154; Q9NPP4}

3101 Pathogen[ P03383] interacts with 1 human partners: {Q14154}

3102 Pathogen[ P03410] interacts with 4 human partners: {Q92934; Q9NPP4; P16455; Q14154}

3103 Pathogen[ P14075] interacts with 1 human partners: {Q14154}

3104 Pathogen[ P0C206] interacts with 3 human partners: {Q92934; Q14154; P16455}

3105 Pathogen[ P03363] interacts with 2 human partners: {Q14154; Q9NPP4}

3106 [Cluster 283]GO:0042744+P biological\_process [name] hydrogen peroxide catabolic process [def] "The chemical reactions and pathways resulting in the breakdown of hydrogen peroxide (H2O2)." [GOC]

3107 Pathogen[ Q2Q067] interacts with 3 human partners: {Q06830; P68871; P69905}

3108 Pathogen[ P0C214] interacts with 4 human partners: {P69905; Q06830; Q16881; P68871}

3109 Pathogen[ P03346] interacts with 3 human partners: {P69905; P68871; Q06830}

3110 Pathogen[ Q85601] interacts with 3 human partners: {P69905; P68871; Q06830}

3111 Pathogen[ P14079] interacts with 2 human partners: {P69905; P68871}

3112 Pathogen[ P03383] interacts with 2 human partners: {P69905; P68871}

3113 Pathogen[ P03410] interacts with 3 human partners: {P68871; P69905; Q06830}

3114 Pathogen[ P14075] interacts with 2 human partners: {P68871; P69905}

3115 Pathogen[ P0C206] interacts with 3 human partners: {P68871; P69905; Q06830}

3116 Pathogen[ P03363] interacts with 2 human partners: {P69905; P68871}

3117 [Cluster 284]GO:0001932+P biological\_process [name] regulation of protein phosphorylation [def] "Any process that modulates the frequency, rate or extent of addition of phosphate groups into an amino acid in a protein." [GOC]

3118 Pathogen[ Q2Q067] interacts with 9 human partners: {Q9P219; Q15910; Q8TF40; P67775; Q15173; Q9P278; Q8WWQ0; Q8NFG4; O60921}

3119 Pathogen[ P0C214] interacts with 10 human partners: {Q9P278; Q8NFG4; Q15910; O60921; Q8TF40; Q15173; Q8WWQ0; P67775; Q9P219; O15524}

3120 Pathogen[ P03346] interacts with 10 human partners: {O60921; O15524; Q8TF40; Q8NFG4; P67775; Q9P278; Q9P219; Q8WWQ0; Q15910; Q15173}

3121 Pathogen[ Q85601] interacts with 9 human partners: {Q8NFG4; Q15173; Q8TF40; Q9P219; Q8WWQ0; O60921; P67775; Q15910; Q9P278}

3122 Pathogen[ P14079] interacts with 8 human partners: {O43181; Q15173; Q8WWQ0; Q8TF40; Q8NFG4; Q15910; O60921; Q9P219}

3123 Pathogen[ P03383] interacts with 8 human partners: {Q15173; P67775; Q9P278; O60921; Q8NFG4; Q8WWQ0; Q15910; Q8TF40}

3124 Pathogen[ P03410] interacts with 10 human partners: {Q9P219; Q8NFG4; Q15173; Q8WWQ0; Q15910; O60921; O43181; P67775; Q8TF40; Q9P278}

3125 Pathogen[ P14075] interacts with 8 human partners: {Q8WWQ0; Q8NFG4; Q8TF40; Q15910; Q15173; P67775; O60921; Q9P278}

3126 Pathogen[ P0C206] interacts with 10 human partners: {Q15173; Q9P278; O15524; P67775; Q15910; Q8WWQ0; Q8TF40; Q9P219; O60921; Q8NFG4}

3127 Pathogen[ P03363] interacts with 11 human partners: {P36575; Q8WWQ0; Q8TF40; O15524; Q15910; Q8NFG4; Q15173; O60921; Q9P278; Q9P219; P67775}

3128 [Cluster 285]GO:0006559+P biological\_process [name] L-phenylalanine catabolic process [def] "The chemical reactions and pathways resulting in the breakdown of phenylalanine, 2-amino-3-phenylpropanoic acid." [GOC]

3129 Pathogen[ Q2Q067] interacts with 2 human partners: {P61457; O43708}

3130 Pathogen[ P0C214] interacts with 4 human partners: {P09417; P61457; O43708; Q16773}

3131 Pathogen[ P03346] interacts with 2 human partners: {O43708; P61457}

3132 Pathogen[ Q85601] interacts with 2 human partners: {O43708; P61457}

3133 Pathogen[ P14079] interacts with 4 human partners: {P61457; Q93099; O43708; P16930}

3134 Pathogen[ P03383] interacts with 1 human partners: {P61457}

3135 Pathogen[ P03410] interacts with 4 human partners: {O43708; Q93099; P16930; P61457}

3136 Pathogen[ P14075] interacts with 1 human partners:{P61457}

3137 Pathogen[ P0C206] interacts with 2 human partners:{O43708;P61457}

3138 Pathogen[ P03363] interacts with 2 human partners:{P61457;O43708}

3139 [Cluster 286]GO:0016925+P biological\_process [name] protein sumoylation [def] "The process in which a SUMO protein (small ubiquitin-related modifier) is conjugated to a target protein via an isopeptide bond between the carboxyl terminus of SUMO with an epsilon-amino group of a lysine residue of the target protein." [GOC

3140 Pathogen[ Q2Q067] interacts with 16 human partners:{Q99502;O75925;Q9NS56;P49792;O00257;P63279;O75928;Q9GZR1;P63165;P55854;Q9Y6X2;P11161;P61956;Q9BYX4;Q96MF7;Q8N2W9}

3141 Pathogen[ P0C214] interacts with 16 human partners:{Q9Y6X2;P61956;O75925;Q9NS56;Q8N2W9;P63279;P49792;Q9BYX4;P55854;P63165;Q96MF7;O00257;Q9GZR1;P11161;O75928;Q99502}

3142 Pathogen[ P03346] interacts with 18 human partners:{Q13263;Q9GZR1;Q96MF7;P61956;P55854;P63279;O00257;Q99502;Q9H165;O75925;Q9NS56;P63165;Q8N2W9;Q9BYX4;P11161;Q9Y6X2;O75928;P49792}

3143 Pathogen[ Q85601] interacts with 17 human partners:{Q9NS56;O75928;Q9Y6X2;P61956;Q8N2W9;P63279;Q13263;Q99502;Q9BYX4;P55854;P63165;P49792;O00257;O75925;Q9GZR1;P11161;Q96MF7}

3144 Pathogen[ P14079] interacts with 15 human partners:{Q8N2W9;P63279;Q99502;Q9BYX4;Q96MF7;O75928;Q9Y6X2;P63165;P61956;O00257;P11161;P55854;Q9NS56;O75925;Q9GZR1}

3145 Pathogen[ P03383] interacts with 13 human partners:{O75925;P49792;P61956;O00257;Q8N2W9;Q96MF7;P55854;P63165;Q9Y6X2;P11161;P63279;Q9GZR1;O75928}

3146 Pathogen[ P03410] interacts with 15 human partners:{P55854;O75925;P63165;Q99502;Q9BYX4;Q9Y6X2;O75928;Q8N2W9;Q9GZR1;Q96MF7;P63279;O00257;P11161;P61956;P49792}

3147 Pathogen[ P14075] interacts with 14 human partners:{P63165;P11161;P49792;O75925;Q8N2W9;P63279;P55854;O00257;P61956;O75928;Q99502;Q96MF7;Q9Y6X2;Q9GZR1}

3148 Pathogen[ P0C206] interacts with 16 human partners:{Q9NS56;Q13263;P11161;O75925;Q8N2W9;P61956;Q9Y6X2;P49792;Q9GZR1;P55854;Q96MF7;Q9H165;Q99502;P63165;Q9BYX4;O00257}

3149 Pathogen[ P03363] interacts with 15 human partners:{Q9Y6X2;P63165;P49792;O75925;P63279;Q9UBE0;Q9BYX4;P61956;Q9GZR1;Q8N2W9;O00257;Q96MF7;P55854;O75928;P11161}

3150 [Cluster 287]GO:0010510+P biological\_process [name] regulation of acetyl-CoA biosynthetic process from pyruvate [def] "Any process that modulates the frequency, rate or extent of the chemical reactions and pathways resulting in the formation of acetyl-CoA from pyruvate." [GOC

3151 Pathogen[ Q2Q067] interacts with 1 human partners:{P10515}

3152 Pathogen[ P0C214] interacts with 6 human partners:{Q8NCN5;P11177;Q9P0J1;P09622;P10515;Q9P2J9}

3153 Pathogen[ P03346] interacts with 2 human partners:{Q8NCN5;P10515}

3154 Pathogen[ Q85601] interacts with 1 human partners:{P10515}

3155 Pathogen[ P14079] interacts with 2 human partners:{P10515;Q8NCN5}

3156 Pathogen[ P03383] interacts with 1 human partners:{P10515}

3157 Pathogen[ P03410] interacts with 2 human partners:{Q8NCN5;P10515}

3158 Pathogen[ P14075] interacts with 2 human partners:{Q8NCN5;P10515}

3159 Pathogen[ P0C206] interacts with 2 human partners:{Q8NCN5;P10515}

3160 Pathogen[ P03363] interacts with 1 human partners:{P10515}

3161 [Cluster 288]GO:0031134+P biological\_process [name] sister chromatid biorientation [def] "The cell cycle process in which sister chromatids establish stable attachments to microtubules emanating from opposite spindle poles." [PMID

3162 Pathogen[ Q2Q067] interacts with 2 human partners:{P06400;Q96JM3}

3163 Pathogen[ P0C214] interacts with 2 human partners:{Q96JM3;P06400}

3164 Pathogen[ P03346] interacts with 2 human partners:{P06400;Q96JM3}

3165 Pathogen[ Q85601] interacts with 2 human partners:{Q96JM3;P06400}

3166 Pathogen[ P14079] interacts with 1 human partners:{Q96JM3}

3167 Pathogen[ P03383] interacts with 1 human partners:{P06400}

3168 Pathogen[ P03410] interacts with 2 human partners:{Q96JM3;P06400}

3169 Pathogen[ P14075] interacts with 1 human partners:{P06400}

3170 Pathogen[ P0C206] interacts with 2 human partners:{Q96JM3;P06400}

3171 Pathogen[ P03363] interacts with 2 human partners:{P06400;Q96JM3}

3172 [Cluster 289]GO:0006511+P biological\_process [name] ubiquitin-dependent protein catabolic process [def] "The chemical reactions and pathways resulting in the breakdown of a protein or peptide by hydrolysis of its peptide bonds, initiated by the covalent attachment of a ubiquitin group, or multiple ubiquitin groups, to the protein." [GOC

3173 Pathogen[ Q2Q067] interacts with 82 human partners:{Q95376;Q9Y5K5;Q96J02;Q92890;Q93034;Q93009;Q9HAU4;Q5JXB2;Q9NS56;Q9Y5A7;O00231;O00233;Q9UJX5;P62837;P53804;Q8IYW8;O60260;P28072;O00762;O43255;Q9NVW2;Q9NZJ0;P60604;Q9UJT9;Q70EL1;Q8TEL6;P25787;P63279;P51965;Q504Q3;Q9Y311;O14818;P61077;Q9UJX2;P63146;Q9Y297;Q9UKC9;Q9UM13;P60900;Q9Y4X5;Q86T82;P51668;Q8TBB1;Q96EP1;P25788;Q13616;Q92530;P25786;Q13618;Q15369;Q5VTR2;O76064;Q13309;Q70EK8;Q9UJX4;P25789;Q93008;Q13620;Q136

- 19;Q9Y3C5;O75150;Q9UNE7;Q14139;P49459;Q96PU4;Q05086;P62256;P28066;P68036;Q9NXX8;Q8TA  
A3;Q9UKA2;Q9UJX6;Q86XK2;Q9Y252;Q8NEZ5;O15205;P63208;Q13617;Q9UKT5;Q13501;Q14999}
- 3174 Pathogen[ P0C214] interacts with 90 human  
partners: {Q05086;Q9UJX6;Q96J02;Q13619;Q13617;Q8I WV8;Q9Y3I1;P25789;Q9HAU4;Q13620;O007  
62;P46379;Q13309;Q9NS56;O14818;Q504Q3;Q92560;Q9UJX5;P63208;Q86Y37;Q96PU4;Q5JXB2;P632  
79;P49459;Q13618;Q9Y3C5;Q93034;Q14999;Q9UJX2;Q9Y297;Q9NXX8;P51965;Q93008;P61077;Q9Y5  
K5;Q13501;Q70EK8;P28066;P62253;Q9UKA2;P61086;Q95071;Q14139;Q95376;Q9NVW2;Q15369;Q9NZ  
J0;P25788;P53804;O00231;Q93009;P25786;O15205;Q9UKC9;Q13616;Q8TBB1;Q9Y252;P28072;Q928  
90;Q8TAA3;Q8TEL6;Q9UJX4;Q94952;P25787;Q86XK2;O75150;O95155;O60260;Q9Y5A7;P35998;P609  
00;P62256;Q70EL1;O00233;P51668;Q9Y4X5;Q5VTR2;Q8IYW5;O43255;Q9UNE7;O76064;Q92530;Q9UJ  
T9;Q9UM13;P63146;Q8I WV7;Q96EP1;P55072;Q9UKT5;P60604}
- 3175 Pathogen[ P03346] interacts with 104 human  
partners: {Q9NZJ0;P25787;Q96J02;Q9UKA2;Q9BXU7;Q504Q3;Q93009;P25789;Q92560;O76064;Q9HA  
U4;P68036;O75150;Q13616;Q70EK8;Q5VTR2;O95155;O95376;Q93008;Q9UJT9;P28072;Q9Y3C5;P257  
88;Q8NEZ5;O14818;Q13618;O43255;P0C7H9;Q9UM13;P63279;P0C7I0;Q86XK2;P49459;Q9NXX8;P550  
72;Q86T82;P51668;P61077;Q93034;Q13620;O00233;Q9UJX6;Q9UHP3;Q14139;Q9NS56;Q14694;P517  
84;P60604;Q9Y5A7;P51965;Q13309;Q9UJX5;P63146;Q9UKT5;Q86UV5;Q9UNE7;O00762;P46379;Q9UJ  
X2;P60900;Q8I WT3;O75604;P25786;O15205;O00231;P62837;Q8IUQ4;Q86Y37;P63208;Q8IYW5;Q8TB  
B1;P28066;Q70EL1;O60260;Q9UJX4;Q8TAA3;Q94952;Q15369;Q13619;Q8I WV8;Q14999;Q8TEL6;Q5JX  
B2;Q96PU4;Q05086;P62256;Q94782;P53804;Q9Y4X5;Q9Y252;Q95071;Q9Y297;Q9UKC9;Q92530;Q9Y3  
I1;Q92890;Q9Y5K5;A6NCW7;A0AVT1;Q9HOE7;Q9NVW2;Q96EP1;Q13501;Q13617}
- 3176 Pathogen[ Q85601] interacts with 94 human  
partners: {Q14139;Q9UJX2;P28066;Q96J02;P60900;Q9Y5T5;Q9Y3I1;Q13309;P62253;Q9HAU4;Q9NS  
56;Q9UJX6;Q9HOE7;P63146;Q93009;P25787;Q8I WV7;Q9Y3C5;P25788;Q92560;Q9UKA2;Q96PU4;Q9NZ  
J0;Q13616;P46379;Q86XK2;O95155;Q86Y37;P51668;P68036;Q93008;P61077;P63279;Q504Q3;Q9UK  
C9;P25789;O00233;Q9NXX8;P63208;O76064;Q9UJX5;P51965;Q9NQC7;Q9UM13;Q70EK8;Q9UJT9;P610  
86;Q9Y5K5;P25786;O15205;O00762;Q15369;P28072;P49459;Q8IYW5;Q8TBB1;Q86T82;O75150;O953  
76;O60260;Q9UJX4;Q5VTR2;Q9Y252;Q8TAA3;P62837;O00231;Q14999;Q92890;Q5JXB2;Q05086;P622  
56;Q92530;Q9Y5A7;Q13620;Q13618;Q96EP1;Q94952;P53804;Q95071;O43255;P60604;Q9UKT5;Q9UN  
E7;Q13619;O14818;Q9Y4X5;Q93034;Q9NVW2;Q70EL1;Q8TEL6;Q13501;Q8I WV8;Q8NEZ5;Q13617}
- 3177 Pathogen[ P14079] interacts with 75 human  
partners: {Q70EL1;O60260;P62333;P53804;Q9UKT5;P51965;P63279;Q8TEL6;Q8I WV8;P68036;Q133  
09;Q5JXB2;Q13620;Q13618;Q9UJX5;P60604;Q70EK8;O00487;P25787;Q86XK2;Q9UKC9;O00233;P359  
98;Q9HAU4;P61077;Q92890;Q8I WV7;Q8TBB1;Q8TAA3;P62256;Q9Y5K5;P51668;P60900;Q5VTR2;Q925  
60;O15205;Q9UM13;Q93034;P49459;O14818;Q9NS56;Q92560;Q96J02;Q13501;Q94952;Q9UJX6;Q141  
39;Q13617;Q5W0Q7;Q8NEZ5;P62837;Q9NZJ0;Q9Y3C5;Q15011;O00762;Q15369;Q9UKA2;Q8I WV3;P257  
88;P63208;Q9UJT9;O00231;Q13616;P28066;Q86Y37;Q9Y3I1;Q9Y5A7;Q504Q3;Q9NQC7;P63146;Q9UJ  
X4;Q14999;Q9NXX8;P28072;Q13619}
- 3178 Pathogen[ P03383] interacts with 66 human  
partners: {Q13616;Q9Y3I1;Q15369;P53804;Q8TBB1;Q9NZJ0;Q14139;P51965;Q9UJX6;P25789;P609  
00;Q8I WV8;Q5JXB2;Q93034;O00233;Q96PU4;O00762;Q86XK2;P63208;Q13618;P61077;Q9Y5A7;Q8TE  
L6;Q9NXX8;O60260;Q9UM13;P60604;Q9UKT5;O95376;P25786;P62837;Q9Y5K5;P28072;O43255;Q135  
01;P28066;Q5VTR2;Q9UKC9;Q9Y252;Q13617;Q9UJX4;O00231;P68036;Q9UJX5;Q13309;P49459;P622  
56;Q92530;P63146;Q8TAA3;Q70EK8;Q96EP1;Q94952;Q9UJX2;Q8NEZ5;O75150;O14818;O15205;Q928  
90;P63279;P51668;Q14999;P25787;P25788;Q13620;Q70EL1}
- 3179 Pathogen[ P03410] interacts with 70 human  
partners: {Q8I WV8;O15205;Q8TEL6;P25786;Q70EL1;P60900;Q13620;P35998;P51965;Q9UJX4;Q9Y3  
I1;Q8TBB1;O00233;Q9UM13;Q9NXX8;P49459;Q13501;Q9UKT5;Q8TAA3;Q9Y5A7;Q5VTR2;O60260;Q8I W  
V7;P68036;Q5JXB2;Q9UNE7;Q13618;P63208;O75150;P25787;Q15369;Q13309;Q9Y3C5;Q86XK2;Q8NE  
Z5;P62256;Q9UKC9;Q9Y4X5;P63146;O14818;Q86Y37;P51668;Q9UJX5;O00231;Q70EK8;Q9UKA2;P257  
89;Q13616;O00762;Q13619;Q9Y5K5;P63279;Q15011;Q14139;Q13617;P28072;P60604;Q9UJT9;Q949  
52;P25788;P53804;P28066;Q504Q3;Q93034;Q92890;Q9UJX6;Q96EP1;P61077;P62837;Q9NZJ0}
- 3180 Pathogen[ P14075] interacts with 66 human  
partners: {Q5VTR2;P53804;P60604;P25788;P28066;P68036;Q93034;P62837;Q13618;Q8TAA3;P609  
00;O00233;Q9Y252;P49459;Q14139;Q96PU4;P51965;Q70EL1;Q13620;Q92890;P63279;Q9Y3I1;Q9UJ  
X2;P61077;Q70EK8;Q8TEL6;O00231;O43255;Q9UJX6;Q92530;Q9UKT5;P63208;Q14999;O00762;Q9Y5  
A7;Q9UJX5;O75150;P25786;Q9UKC9;O14818;Q13309;Q8NEZ5;P28072;Q9UJX4;Q94952;P25787;O953  
76;Q86XK2;Q15011;P62256;P63146;Q13616;Q9NZJ0;Q9UM13;Q8TBB1;P51668;O60260;O15205;Q136  
17;Q15369;Q13501;Q96EP1;Q9Y5K5;Q9NXX8;Q8I WV8;P25789}
- 3181 Pathogen[ P0C206] interacts with 100 human  
partners: {Q9NQC7;Q8I WV3;Q9UKC9;Q9UJT9;Q13501;Q9NS56;Q86Y37;P62253;Q504Q3;Q92890;Q9NV  
W2;O43255;Q8IYW5;Q95376;Q13309;Q9HAU4;P25786;Q9Y5T5;Q5JXB2;P25788;Q93008;P68036;Q86X  
K2;Q96EP1;P25787;Q9UJX5;Q9UJX2;O75604;Q8IUQ4;Q05086;Q96J02;P60900;Q70EL1;P62837;P538  
04;Q9UKA2;Q93009;Q94952;O95155;O15205;Q13616;Q9HOE7;Q5VTR2;Q13620;Q9Y5K5;Q9Y4X5;P257  
89;P51965;Q14999;Q13619;Q13617;Q9UJX4;P60604;Q13618;Q8I WV7;Q9UNE7;P63208;Q14139;Q8TA  
A3;P49459;Q15011;O60260;Q8TEL6;Q8TBB1;P62256;P28066;Q86T82;O00762;O14818;P55072;Q8I W  
V8;Q9NZJ0;Q9UJX6;Q9NXX8;P28072;Q9UHP3;Q92530;P61077;Q93034;Q9Y3I1;P61086;Q9UM13;Q8NE  
Z5;Q9Y252;O76064;P46379;Q15369;Q9Y5A7;Q9UKT5;O95071;P51668;O00233;O75150;Q92560;Q9Y3  
C5;Q96PU4;O00231;P63146;Q8I WT3;Q70EK8}
- 3182 Pathogen[ P03363] interacts with 75 human  
partners: {Q14139;O95376;Q9UJX2;P46379;Q504Q3;Q9Y252;O15205;Q13309;Q96EP1;P51965;P606  
04;Q9Y5K5;P49459;P51784;O00762;Q9HAU4;Q9Y3C5;Q8NEZ5;Q9UJT9;Q92530;Q9UHP3;O75604;Q136  
18;O95155;Q5VTR2;Q13617;Q8IYW5;Q8TBB1;P63146;Q9UJX5;Q15369;Q5JXB2;Q05086;Q92890;Q9UJ  
X6;O75150;Q9UJX4;Q9UKA2;Q92560;Q13619;Q9Y3I1;O94952;Q9Y4X5;Q13616;Q14999;Q9UKT5;Q9UN  
E7;Q86T82;Q13620;P62256;P63279;Q9NXX8;O95071;Q86XK2;Q9BXU7;P51668;Q9UM13;P53804;Q8I W  
T3;P61077;Q8I WV8;Q9NVW2;Q93034;P62837;Q96PU4;Q9UKC9;O43255;Q9NZJ0;P63208;Q70EL1;Q930

08;A0AVT1;Q9Y5A7;P68036;Q8TEL6}

3183 [Cluster 290]GO:0008635+P biological\_process [name] activation of caspase activity by cytochrome c [def] "Upregulation of the activity of a caspase, any of a group of cysteine proteases involved in apoptosis, mediated by cytochrome c." [GOC

3184 Pathogen[ Q2Q067] interacts with 3 human partners:{Q9NR28;O15304;P99999}

3185 Pathogen[ P0C214] interacts with 7 human partners:{P99999;P42574;O14727;P55210;Q9NR28;O15304;Q96NN9}

3186 Pathogen[ P03346] interacts with 7 human partners:{Q9NR28;O15304;P42574;P99999;P55211;P55210;O14727}

3187 Pathogen[ Q85601] interacts with 4 human partners:{P99999;O15304;Q9NR28;P55210}

3188 Pathogen[ P14079] interacts with 4 human partners:{O15304;P55210;Q9NR28;P99999}

3189 Pathogen[ P03383] interacts with 3 human partners:{O15304;P99999;Q9NR28}

3190 Pathogen[ P03410] interacts with 4 human partners:{Q9NR28;P99999;P55210;O15304}

3191 Pathogen[ P14075] interacts with 3 human partners:{O15304;Q9NR28;P99999}

3192 Pathogen[ P0C206] interacts with 5 human partners:{P99999;Q9NR28;P42574;P55210;O15304}

3193 Pathogen[ P03363] interacts with 4 human partners:{P99999;O15304;Q9NR28;P55210}

3194 [Cluster 291]GO:0006890+P biological\_process [name] retrograde vesicle-mediated transport, Golgi to ER [def] "The directed movement of substances from the Golgi back to the endoplasmic reticulum, mediated by vesicles bearing specific protein coats such as COPI or COG." [ISBN

3195 Pathogen[ Q2Q067] interacts with 10 human partners:{O14579;P83436;P48444;P61923;Q9UBF2;Q96JB2;P53618;P35606;Q9Y678;Q9H9E3}

3196 Pathogen[ P0C214] interacts with 10 human partners:{P61923;Q9H9E3;O14579;P53618;P35606;P48444;P83436;Q9UBF2;Q9Y678;Q96JB2}

3197 Pathogen[ P03346] interacts with 14 human partners:{Q96JB2;Q9Y678;P53618;O14579;P48444;P20340;Q9H9E3;Q9UBF2;P61923;P83436;Q96KG9;P49755;P35606;Q9NRD5}

3198 Pathogen[ Q85601] interacts with 12 human partners:{P48444;O14579;Q96JB2;P61923;P83436;Q9H9E3;Q9UBF2;Q8N6T3;Q9Y678;P53618;Q96KG9;P35606}

3199 Pathogen[ P14079] interacts with 12 human partners:{P61923;P83436;O15258;P35606;Q9Y678;P49755;Q9UBF2;P48444;O14579;Q9H9E3;Q96JB2;Q96KG9}

3200 Pathogen[ P03383] interacts with 7 human partners:{Q9H9E3;O14579;P53618;P83436;Q9Y678;Q96JB2;Q9UBF2}

3201 Pathogen[ P03410] interacts with 13 human partners:{Q96JB2;P48444;P35606;O14579;O15258;Q9NRD5;Q96KG9;Q9Y678;P53618;P61923;P83436;Q9H9E3;Q9UBF2}

3202 Pathogen[ P14075] interacts with 7 human partners:{Q96JB2;Q9H9E3;Q9UBF2;P53618;Q9Y678;P83436;O14579}

3203 Pathogen[ P0C206] interacts with 15 human partners:{O14579;Q9Y678;P83436;Q8N6T3;P53618;Q9H9E3;O15258;P49755;Q96JB2;Q96KG9;P35606;P48444;Q9UBF2;Q9NRD5;P61923}

3204 Pathogen[ P03363] interacts with 11 human partners:{P48444;Q9Y678;Q9H9E3;P83436;O14579;P53618;P61923;Q96KG9;P35606;Q9UBF2;Q96JB2}

3205 [Cluster 292]GO:0022613+P biological\_process [name] ribonucleoprotein complex biogenesis [def] "A cellular process that results in the biosynthesis of constituent macromolecules, assembly, and arrangement of constituent parts of a complex containing RNA and proteins. Includes the biosynthesis of the constituent RNA and protein molecules, and those macromolecular modifications that are involved in synthesis or assembly of the ribonucleoprotein complex." [GOC

3206 Pathogen[ Q2Q067] interacts with 1 human partners:{Q96RS0}

3207 Pathogen[ P0C214] interacts with 1 human partners:{Q96RS0}

3208 Pathogen[ P03346] interacts with 1 human partners:{Q96RS0}

3209 Pathogen[ Q85601] interacts with 1 human partners:{Q96RS0}

3210 Pathogen[ P14079] interacts with 1 human partners:{Q96RS0}

3211 Pathogen[ P03383] interacts with 1 human partners:{Q96RS0}

3212 Pathogen[ P03410] interacts with 1 human partners:{Q96RS0}

3213 Pathogen[ P14075] interacts with 1 human partners:{Q96RS0}

3214 Pathogen[ P0C206] interacts with 1 human partners:{Q96RS0}

3215 Pathogen[ P03363] interacts with 1 human partners:{Q96RS0}

3216 [Cluster 293]GO:0032502+P biological\_process [name] developmental process [def] "A biological process whose specific outcome is the progression of an integrated living unit

3217 Pathogen[ Q2Q067] interacts with 1 human partners:{Q9H0G5}

3218 Pathogen[ P0C214] interacts with 1 human partners:{Q9H0G5}

3219 Pathogen[ P03346] interacts with 1 human partners:{Q9H0G5}

3220 Pathogen[ Q85601] interacts with 1 human partners:{Q9H0G5}

3221 Pathogen[ P14079] interacts with 1 human partners:{Q9H0G5}

3222 Pathogen[ P03383] interacts with 1 human partners:{Q9H0G5}

3223 Pathogen[ P03410] interacts with 1 human partners:{Q9H0G5}

3224 Pathogen[ P14075] interacts with 1 human partners:{Q9H0G5}

3225 Pathogen[ P0C206] interacts with 1 human partners:{Q9H0G5}

3226 Pathogen[ P03363] interacts with 1 human partners:{Q9H0G5}

3227 [Cluster 294]GO:0046474+P biological\_process [name] glycerophospholipid biosynthetic process [def] "The chemical reactions and pathways resulting in the formation of glycerophospholipids, any derivative of glycerophosphate that contains at least one O-acyl, O-alkyl, or O-alkenyl group attached to the glycerol residue." [ISBN

3228 Pathogen[ Q2Q067] interacts with 4 human partners:{Q96IF1;Q9UG56;Q92539;Q14693}

3229 Pathogen[ P0C214] interacts with 8 human partners:{Q8N335;P40939;Q9NPB8;Q92539;Q9BQK8;Q9UG56;Q14693;P21695}

3230 Pathogen[ P03346] interacts with 4 human partners:{Q96IF1;Q92539;Q9UG56;Q14693}

3231 Pathogen[ Q85601] interacts with 4 human partners:{Q9UG56;Q96IF1;Q92539;Q14693}

3232 Pathogen[ P14079] interacts with 9 human partners:{Q9BQK8;Q9NPB8;Q14693;Q32NB8;Q92539;Q9UG56;Q96IF1;Q9NZ20;P21695}

3233 Pathogen[ P03383] interacts with 2 human partners:{Q92539;Q14693}

3234 Pathogen[ P03410] interacts with 9 human partners:{Q9BQK8;Q14693;Q96IF1;Q9NPB8;Q9NZ20;Q92539;Q9UG56;P21695;Q16635}

3235 Pathogen[ P14075] interacts with 3 human partners:{Q92539;Q9UG56;Q14693}

3236 Pathogen[ P0C206] interacts with 6 human partners:{Q92539;Q96IF1;Q9UG56;Q9BQK8;Q9NPB8;Q14693}

3237 Pathogen[ P03363] interacts with 2 human partners:{Q92539;Q96IF1}

3238 [Cluster 295]GO:0032147+P biological\_process [name] activation of protein kinase activity [def] "Any process that initiates the activity of an inactive protein kinase." [GOC

3239 Pathogen[ Q2Q067] interacts with 4 human partners:{Q9H2P0;Q12959;Q9ULW0;Q9HAW4}

3240 Pathogen[ P0C214] interacts with 4 human partners:{Q9HAW4;Q9ULW0;Q12959;Q9H2P0}

3241 Pathogen[ P03346] interacts with 5 human partners:{Q9H2P0;Q9HAW4;Q9ULW0;Q9H8V3;Q12959}

3242 Pathogen[ Q85601] interacts with 4 human partners:{Q9ULW0;Q9HAW4;Q9H2P0;Q12959}

3243 Pathogen[ P14079] interacts with 4 human partners:{Q9ULW0;Q9H2P0;Q9HAW4;Q9H8V3}

3244 Pathogen[ P03383] interacts with 2 human partners:{Q9HAW4;Q9ULW0}

3245 Pathogen[ P03410] interacts with 4 human partners:{Q12959;Q9HAW4;Q9ULW0;Q9H8V3}

3246 Pathogen[ P14075] interacts with 2 human partners:{Q9ULW0;Q9HAW4}

3247 Pathogen[ P0C206] interacts with 5 human partners:{Q9ULW0;Q9H8V3;Q9H2P0;Q9HAW4;Q12959}

3248 Pathogen[ P03363] interacts with 4 human partners:{Q12959;Q9HAW4;Q9H2P0;Q9ULW0}

3249 [Cluster 296]GO:0014065+P biological\_process [name] phosphatidylinositol 3-kinase cascade [def] "A series of reactions, mediated by the intracellular phosphatidylinositol 3-kinase (PI3K). PI3K cascades lie downstream of many cell surface receptor linked signaling pathways and regulate numerous cellular functions." [GOC

3250 Pathogen[ Q2Q067] interacts with 4 human partners:{Q8WYR1;Q9P242;P27986;Q6ZVC0}

3251 Pathogen[ P0C214] interacts with 4 human partners:{Q9P242;Q8WYR1;Q6ZVC0;P27986}

3252 Pathogen[ P03346] interacts with 3 human partners:{Q8WYR1;Q9HB21;P27986}

3253 Pathogen[ Q85601] interacts with 5 human partners:{Q9P242;P27986;Q9HB21;Q6ZVC0;Q8WYR1}

3254 Pathogen[ P14079] interacts with 4 human partners:{Q8WYR1;Q9P242;Q9HB21;Q6ZVC0}

3255 Pathogen[ P03383] interacts with 4 human partners:{P27986;Q8WYR1;Q6ZVC0;Q9P242}

3256 Pathogen[ P03410] interacts with 5 human partners:{P27986;Q8WYR1;Q6ZVC0;Q9HB21;Q9P242}

3257 Pathogen[ P14075] interacts with 4 human partners:{Q8WYR1;Q6ZVC0;Q9P242;P27986}

3258 Pathogen[ P0C206] interacts with 5 human partners:{P27986;Q9HB21;Q9P242;Q6ZVC0;Q8WYR1}

3259 Pathogen[ P03363] interacts with 2 human partners:{Q8WYR1;P27986}

3260 [Cluster 297]GO:0006112+P biological\_process [name] energy reserve metabolic process [def] "The chemical reactions and pathways by which a cell derives energy from stored compounds such as fats or glycogen." [GOC

3261 Pathogen[ Q2Q067] interacts with 7 human partners:{P01106;P29966;P37837;P11166;Q7Z2X4;P62879;Q9NP71}

3262 Pathogen[ P0C214] interacts with 12 human partners:{P29966;P53396;P29401;Q7Z2X4;P11166;P11168;P37837;Q9UH92;Q9NP71;P62879;P16118;P01106}

3263 Pathogen[ P03346] interacts with 8 human partners:{Q7Z2X4;P62879;P37837;P01106;Q9NP71;P11166;P29966;Q9UH92}

3264 Pathogen[ Q85601] interacts with 10 human partners:{P01106;P62879;P11168;P37837;Q7Z2X4;Q9NP71;P16118;Q9UH92;P11166;P29966}

3265 Pathogen[ P14079] interacts with 10 human partners:{P24588;P29401;P11166;P29966;P01106;Q9UH92;Q7Z2X4;P81277;Q9NP71;P37837}

3266 Pathogen[ P03383] interacts with 7 human partners:{P62879;Q9UH92;P01106;P37837;Q9NP71;P11168;P29966}

3267 Pathogen[ P03410] interacts with 13 human partners:{P37837;P11166;P01106;P16118;P05141;P11168;Q7Z2X4;Q9NP71;Q9UH92;P81277;P62879;P29966;P24588}

3268 Pathogen[ P14075] interacts with 8 human partners:{P62879;Q9UH92;P01106;Q9NP71;P16118;P29966;P11168;P37837}

3269 Pathogen[ P0C206] interacts with 11 human partners:{Q7Z2X4;Q9NP71;Q9UH92;P62879;P11166;P11168;P16118;P01106;P37837;P29966;P29401}

3270 Pathogen[ P03363] interacts with 7 human partners:{P62879;Q9UH92;P01106;P37837;P29966;Q9NP71;P11166}

3271 [Cluster 298]GO:0060561+P biological\_process [name] apoptosis involved in morphogenesis [def] "The process of apoptosis that contributes to the shaping of an anatomical structure." [GOC

3272 Pathogen[ Q2Q067] interacts with 3 human partners:{Q14160;P02511;P02489}

3273 Pathogen[ P0C214] interacts with 3 human partners:{P02489;P02511;Q14160}

3274 Pathogen[ P03346] interacts with 3 human partners:{P02489;P02511;Q14160}

3275 Pathogen[ Q85601] interacts with 3 human partners:{P02489;P02511;Q14160}

3276 Pathogen[ P14079] interacts with 2 human partners:{P02511;P02489}

3277 Pathogen[ P03383] interacts with 2 human partners:{Q14160;P02511}

3278 Pathogen[ P03410] interacts with 3 human partners:{Q14160;P02489;P02511}

3279 Pathogen[ P14075] interacts with 2 human partners:{Q14160;P02511}

3280 Pathogen[ P0C206] interacts with 3 human partners:{Q14160;P02511;P02489}

3281 Pathogen[ P03363] interacts with 2 human partners:{Q14160;P02489}

3282 [Cluster 299]GO:0035264+P biological\_process [name] multicellular organism growth [def] "The increase in size or mass of an entire multicellular organism, as opposed to cell growth." [GOC

3283 Pathogen[ Q2Q067] interacts with 11 human partners:{Q9H2K2;A6NFD8;Q8WUF5;Q8N5D0;P20719;Q15468;Q92830;Q14865;P60953;O95613;P28715}

3284 Pathogen[ P0C214] interacts with 10 human partners:{Q14865;Q8N5D0;Q8WUF5;P60953;P28715;Q15468;Q9H2K2;Q92830;Q6Y7W6;O95613}

3285 Pathogen[ P03346] interacts with 17 human partners:{P28715;A6NFD8;Q9Y5W3;P07992;Q16559;P60953;Q99767;P20719;Q92830;Q9H2K2;Q8N5D0;P51587;Q8WUF5;Q14865;Q9HB21;O95613;Q15468}

3286 Pathogen[ Q85601] interacts with 13 human partners:{Q6Y7W6;Q99767;P28715;Q92830;Q9H2K2;A6NFD8;Q9HB21;Q14865;Q8WUF5;P60953;O95613;Q8N5D0;P51587}

3287 Pathogen[ P14079] interacts with 16 human partners:{Q8N5D0;P28715;Q92830;Q8WUF5;Q6Y7W6;Q14865;P51587;Q9H2K2;P35611;Q15468;Q9Y5W3;O95613;Q9HB21;A6NFD8;P07992;Q99767}

3288 Pathogen[ P03383] interacts with 6 human partners:{P60953;Q15468;Q92830;Q8WUF5;O95613;Q8N5D0}

3289 Pathogen[ P03410] interacts with 17 human partners:{Q92830;P07992;Q15468;Q99767;A6NFD8;Q9HB21;P28715;P51587;Q8N5D0;P60953;Q6Y7W6;Q9H2K2;O95613;Q14865;P35611;Q8WUF5;Q16559}

3290 Pathogen[ P14075] interacts with 6 human partners:{P60953;Q8N5D0;Q8WUF5;Q15468;O95613;Q92830}

3291 Pathogen[ P0C206] interacts with 16 human partners:{Q8WUF5;Q15468;P28715;Q92830;P51587;A6NFD8;P07992;Q6Y7W6;Q99767;O95613;P60953;Q9HB21;Q14865;Q8N5D0;P20719;Q9H2K2}

3292 Pathogen[ P03363] interacts with 11 human partners:{Q14865;Q15468;Q8N5D0;P20719;O95613;Q8WUF5;Q9H2K2;Q92830;P60953;Q99767;A6NFD8}

3293 [Cluster 300]GO:0007566+P biological\_process [name] embryo implantation [def] "Attachment of the blastocyst to the uterine lining." [GOC

3294 Pathogen[ Q2Q067] interacts with 6 human partners:{P47914;A6NGQ2;Q9H9Y6;Q15561;P59047;Q12816}

3295 Pathogen[ P0C214] interacts with 6 human partners:{Q9H9Y6;Q12816;Q15561;P47914;P07093;P59047}

3296 Pathogen[ P03346] interacts with 7 human partners:{Q13886;P59047;Q9H9Y6;Q12816;Q15561;P47914;A6NGQ2}

3297 Pathogen[ Q85601] interacts with 6 human partners:{Q9H9Y6;P47914;Q12816;P07093;Q15561;P59047}

3298 Pathogen[ P14079] interacts with 7 human partners:{Q15561;Q12816;A6NGQ2;Q96GC9;P47914;P59047;Q9H9Y6}

3299 Pathogen[ P03383] interacts with 5 human partners:{Q15561;Q9H9Y6;P47914;A6NGQ2;Q12816}

3300 Pathogen[ P03410] interacts with 7 human partners:{Q96GC9;A6NGQ2;P59047;Q15561;Q12816;P47914;Q9H9Y6}

3301 Pathogen[ P14075] interacts with 5 human partners:{Q12816;Q15561;A6NGQ2;Q9H9Y6;P47914}

3302 Pathogen[ P0C206] interacts with 6 human partners:{A6NGQ2;P59047;Q12816;Q9H9Y6;P47914;Q15561}

3303 Pathogen[ P03363] interacts with 6 human partners:{A6NGQ2;Q9H9Y6;P59047;Q15561;P47914;Q12816}

3304 [Cluster 301]GO:0042795+P biological\_process [name] snRNA transcription from RNA polymerase II promoter [def] "The synthesis of small nuclear RNA (snRNA) from a DNA template by RNA Polymerase II (Pol II), originating at a Pol II promoter." [GOC

3305 Pathogen[ Q2Q067] interacts with 1 human partners:{Q5SXM2}

3306 Pathogen[ P0C214] interacts with 1 human partners:{Q5SXM2}

3307 Pathogen[ P03346] interacts with 1 human partners:{Q5SXM2}

3308 Pathogen[ Q85601] interacts with 1 human partners:{Q5SXM2}

3309 Pathogen[ P14079] interacts with 1 human partners:{Q5SXM2}

3310 Pathogen[ P03383] interacts with 1 human partners:{Q5SXM2}

3311 Pathogen[ P03410] interacts with 1 human partners:{Q5SXM2}

3312 Pathogen[ P14075] interacts with 1 human partners:{Q5SXM2}



3313 Pathogen[ P0C206] interacts with 1 human partners:{Q5SXM2}  
3314 Pathogen[ P03363] interacts with 1 human partners:{Q5SXM2}  
3315 [Cluster 302]GO:0006384+P biological\_process [name] transcription initiation from RNA polymerase III promoter [def] "Any process involved in the assembly of the RNA polymerase III preinitiation complex (PIC) at an RNA polymerase III promoter region of a DNA template, resulting in the subsequent synthesis of RNA from that promoter. The initiation phase includes PIC assembly and the formation of the first few bonds in the RNA chain, including abortive initiation, which occurs when the first few nucleotides are repeatedly synthesized and then released. Promoter clearance, or release, is the transition between the initiation and elongation phases of transcription." [GOC  
3316 Pathogen[ Q2Q067] interacts with 3 human partners:{Q9UKN8;Q92994;Q92994}  
3317 Pathogen[ P0C214] interacts with 3 human partners:{Q9UKN8;Q92994;Q92994}  
3318 Pathogen[ P03346] interacts with 3 human partners:{Q9UKN8;Q92994;Q92994}  
3319 Pathogen[ Q85601] interacts with 3 human partners:{Q9UKN8;Q92994;Q92994}  
3320 Pathogen[ P14079] interacts with 3 human partners:{Q92994;Q9UKN8;Q92994}  
3321 Pathogen[ P03383] interacts with 3 human partners:{Q9UKN8;Q92994;Q92994}  
3322 Pathogen[ P03410] interacts with 3 human partners:{Q92994;Q9UKN8;Q92994}  
3323 Pathogen[ P14075] interacts with 3 human partners:{Q9UKN8;Q92994;Q92994}  
3324 Pathogen[ P0C206] interacts with 3 human partners:{Q9UKN8;Q92994;Q92994}  
3325 Pathogen[ P03363] interacts with 2 human partners:{Q9UKN8;Q92994;Q92994}  
3326 [Cluster 303]GO:0006833+P biological\_process [name] water transport [def] "The directed movement of water (H2O) into, out of or within a cell, or between cells, by means of some agent such as a transporter or pore." [GOC  
3327 Pathogen[ Q2Q067] interacts with 1 human partners:{Q7L804}  
3328 Pathogen[ P0C214] interacts with 1 human partners:{Q7L804}  
3329 Pathogen[ P03346] interacts with 3 human partners:{Q86UT5;Q7L804;Q9ULV0}  
3330 Pathogen[ Q85601] interacts with 1 human partners:{Q7L804}  
3331 Pathogen[ P14079] interacts with 3 human partners:{Q7L804;Q8NBQ7;Q86UT5}  
3332 Pathogen[ P03383] interacts with 1 human partners:{Q7L804}  
3333 Pathogen[ P03410] interacts with 4 human partners:{Q86UT5;Q7L804;Q9ULV0;Q13336}  
3334 Pathogen[ P14075] interacts with 1 human partners:{Q7L804}  
3335 Pathogen[ P0C206] interacts with 2 human partners:{Q86UT5;Q7L804}  
3336 Pathogen[ P03363] interacts with 2 human partners:{Q7L804;Q86UT5}  
3337 [Cluster 304]GO:0006353+P biological\_process [name] transcription termination, DNA-dependent [def] "The cellular process that completes DNA-dependent transcription, the formation of phosphodiester bonds ceases, the RNA-DNA hybrid dissociates, and RNA polymerase releases the DNA." [GOC  
3338 Pathogen[ Q2Q067] interacts with 4 human partners:{Q99551;Q6NZI2;Q9UNY4;Q15361}  
3339 Pathogen[ P0C214] interacts with 4 human partners:{Q15361;Q6NZI2;Q9UNY4;Q99551}  
3340 Pathogen[ P03346] interacts with 4 human partners:{Q6NZI2;Q15361;Q99551;Q9UNY4}  
3341 Pathogen[ Q85601] interacts with 4 human partners:{Q99551;Q6NZI2;Q15361;Q9UNY4}  
3342 Pathogen[ P14079] interacts with 4 human partners:{Q9UNY4;Q6NZI2;Q15361;Q99551}  
3343 Pathogen[ P03383] interacts with 4 human partners:{Q6NZI2;Q15361;Q99551;Q9UNY4}  
3344 Pathogen[ P03410] interacts with 4 human partners:{Q6NZI2;Q9UNY4;Q15361;Q99551}  
3345 Pathogen[ P14075] interacts with 4 human partners:{Q9UNY4;Q6NZI2;Q99551;Q15361}  
3346 Pathogen[ P0C206] interacts with 4 human partners:{Q15361;Q9UNY4;Q99551;Q6NZI2}  
3347 Pathogen[ P03363] interacts with 4 human partners:{Q9UNY4;Q6NZI2;Q15361;Q99551}  
3348 [Cluster 305]GO:0060215+P biological\_process [name] primitive hemopoiesis [def] "A first transient wave of blood cell production that, in vertebrates, gives rise to erythrocytes (red blood cells) and myeloid cells." [GOC  
3349 Pathogen[ Q2Q067] interacts with 1 human partners:{Q13769}  
3350 Pathogen[ P0C214] interacts with 1 human partners:{Q13769}  
3351 Pathogen[ P03346] interacts with 1 human partners:{Q13769}  
3352 Pathogen[ Q85601] interacts with 1 human partners:{Q13769}  
3353 Pathogen[ P14079] interacts with 1 human partners:{Q13769}  
3354 Pathogen[ P03383] interacts with 1 human partners:{Q13769}  
3355 Pathogen[ P03410] interacts with 1 human partners:{Q13769}  
3356 Pathogen[ P14075] interacts with 1 human partners:{Q13769}  
3357 Pathogen[ P0C206] interacts with 1 human partners:{Q13769}  
3358 Pathogen[ P03363] interacts with 1 human partners:{Q13769}  
3359 [Cluster 306]GO:0006346+P biological\_process [name] methylation-dependent chromatin silencing [def] "Repression of transcription by methylation of DNA, leading to the formation of heterochromatin." [GOC  
3360 Pathogen[ Q2Q067] interacts with 4 human partners:{Q9Y6K1;Q9UBC3;Q95983;Q9HBD4}  
3361 Pathogen[ P0C214] interacts with 3 human partners:{Q9HBD4;Q9Y6K1;Q95983}  
3362 Pathogen[ P03346] interacts with 5 human partners:{Q9NRZ9;Q9Y6K1;Q9HBD4;Q95983;Q9UBC3}  
3363 Pathogen[ Q85601] interacts with 4 human partners:{Q95983;Q9Y6K1;Q9HBD4;Q9UBC3}  
3364 Pathogen[ P14079] interacts with 3 human partners:{Q9Y6K1;Q9UBC3;Q95983}  
3365 Pathogen[ P03383] interacts with 3 human partners:{Q9HBD4;Q9Y6K1;Q95983}  
3366 Pathogen[ P03410] interacts with 4 human partners:{Q95983;Q9UBC3;Q9Y6K1;Q9HBD4}  
3367 Pathogen[ P14075] interacts with 3 human partners:{Q9Y6K1;Q9HBD4;Q95983}  
3368 Pathogen[ P0C206] interacts with 5 human partners:{Q9Y6K1;Q95983;Q9NRZ9;Q9HBD4;Q9UBC3}  
3369 Pathogen[ P03363] interacts with 4 human partners:{Q9Y6K1;Q9HBD4;Q95983;Q9UBC3}  
3370 [Cluster 307]GO:0007094+P biological\_process [name] mitotic cell cycle spindle

assembly checkpoint [def] "A cell cycle checkpoint that delays the metaphase/anaphase transition of a mitotic nuclear division until the spindle is correctly assembled and chromosomes are attached to the spindle." [GOC

3371 Pathogen[ Q2Q067] interacts with 23 human partners: {P49454;Q9UJX3;Q9UJX5;O00762;P54274;Q13257;O43684;Q9NYG5;Q9H1A4;P12270;P51965;Q9UJX2;Q9UM13;Q12834;P51668;Q969U7;Q8NHZ8;Q9UJX4;Q9Y6D9;Q9UI95;Q9UJX6;P30260;Q13042}

3372 Pathogen[ P0C214] interacts with 23 human partners: {Q9UJX6;O43684;Q13257;O00762;Q9UJX5;Q9UJX2;Q9UI95;P51965;Q9H1A4;Q8NHZ8;Q12834;Q969U7;Q9UJX4;Q9UJX3;P12270;P51668;P30260;P49454;Q9NYG5;Q9UM13;Q9Y6D9;P54274;Q13042}

3373 Pathogen[ P03346] interacts with 23 human partners: {Q9Y6D9;Q969U7;P12270;O43684;P54274;Q9UM13;Q9NYG5;Q9UI95;P51668;Q12834;Q9UJX6;Q13042;P51965;Q9UJX5;O00762;Q9UJX2;Q9UJX3;Q8NHZ8;Q9H1A4;Q9UJX4;P30260;Q13257;P49454}

3374 Pathogen[ Q85601] interacts with 23 human partners: {Q9UJX2;P49454;Q9UJX6;Q9UI95;Q8NHZ8;Q9H1A4;P12270;P51668;Q12834;Q13257;Q969U7;Q13042;Q9UJX5;P51965;Q9UM13;Q9Y6D9;Q9NYG5;O00762;Q9UJX3;Q9UJX4;P30260;O43684;P54274}

3375 Pathogen[ P14079] interacts with 20 human partners: {P54274;P51965;Q9UJX3;Q9H1A4;Q9UJX5;Q587J8;Q9NYG5;P51668;Q8NHZ8;P12270;Q969U7;Q9UM13;Q13042;Q13257;Q9UJX6;P30260;P49454;O00762;Q9UJX4;O43684}

3376 Pathogen[ P03383] interacts with 23 human partners: {Q13257;Q8NHZ8;P49454;Q9NYG5;P51965;Q9UJX6;P12270;Q9UI95;O00762;Q9H1A4;Q13042;Q12834;Q9UM13;O43684;Q9UJX4;Q9UJX5;Q9UJX2;Q969U7;P30260;Q9UJX3;P54274;P51668;Q9Y6D9}

3377 Pathogen[ P03410] interacts with 22 human partners: {Q9UI95;O43684;Q9H1A4;P54274;P51965;Q9UJX4;Q9NYG5;Q9UM13;Q8NHZ8;P49454;Q969U7;P12270;Q13042;P51668;Q9UJX5;Q12834;P30260;Q9UJX3;O00762;Q9UJX6;Q587J8;Q13257}

3378 Pathogen[ P14075] interacts with 23 human partners: {Q13042;Q9Y6D9;P51965;Q13257;Q969U7;O43684;Q9UI95;P12270;Q9UJX2;Q9UJX6;Q8NHZ8;P54274;O00762;Q9UJX5;Q9UJX4;Q9H1A4;Q9UM13;P30260;Q9UJX3;P51668;Q9NYG5;P49454;Q12834}

3379 Pathogen[ P0C206] interacts with 23 human partners: {Q969U7;Q9UJX3;Q9Y6D9;Q9UJX5;Q9UJX2;P49454;Q13257;P30260;P51965;P54274;Q9H1A4;Q9NYG5;Q9UJX4;O00762;Q9UJX6;O43684;Q9UM13;Q13042;P51668;Q12834;Q9UI95;Q8NHZ8;P12270}

3380 Pathogen[ P03363] interacts with 23 human partners: {Q9UJX2;Q9NYG5;Q13042;P49454;P51965;Q9Y6D9;P12270;Q969U7;O00762;Q8NHZ8;Q9UJX3;Q9UJX5;P30260;Q9UJX6;Q9UJX4;O43684;P54274;Q9H1A4;Q9UI95;Q13257;P51668;Q9UM13;Q12834}

3381 [Cluster 308]GO:0071344+P biological\_process [name] diphosphate metabolic process [def] "The chemical reactions and pathways involving diphosphate, the anion or salt of diphosphoric acid." [CHEBI

3382 Pathogen[ Q2Q067] interacts with 2 human partners: {Q9H2U2;Q15181}

3383 Pathogen[ P0C214] interacts with 1 human partners: {Q15181}

3384 Pathogen[ P03346] interacts with 2 human partners: {Q9H2U2;Q15181}

3385 Pathogen[ Q85601] interacts with 2 human partners: {Q9H2U2;Q15181}

3386 Pathogen[ P14079] interacts with 2 human partners: {Q9H2U2;Q15181}

3387 Pathogen[ P03383] interacts with 2 human partners: {Q9H2U2;Q15181}

3388 Pathogen[ P03410] interacts with 2 human partners: {Q9H2U2;Q15181}

3389 Pathogen[ P14075] interacts with 2 human partners: {Q9H2U2;Q15181}

3390 Pathogen[ P0C206] interacts with 2 human partners: {Q9H2U2;Q15181}

3391 Pathogen[ P03363] interacts with 2 human partners: {Q9H2U2;Q15181}

3392 [Cluster 309]GO:0006813+P biological\_process [name] potassium ion transport [def] "The directed movement of potassium ions (K+) into, out of or within a cell, or between cells, by means of some agent such as a transporter or pore." [GOC

3393 Pathogen[ Q2Q067] interacts with 3 human partners: {O75351;P24941;P46527}

3394 Pathogen[ P0C214] interacts with 3 human partners: {O75351;P46527;P24941}

3395 Pathogen[ P03346] interacts with 3 human partners: {P24941;O75351;P46527}

3396 Pathogen[ Q85601] interacts with 3 human partners: {O75351;P24941;P46527}

3397 Pathogen[ P14079] interacts with 3 human partners: {P46527;O75351;Q9H6F2}

3398 Pathogen[ P03383] interacts with 2 human partners: {P46527;P24941}

3399 Pathogen[ P03410] interacts with 4 human partners: {P46527;O75351;Q9H6F2;P24941}

3400 Pathogen[ P14075] interacts with 2 human partners: {P24941;P46527}

3401 Pathogen[ P0C206] interacts with 3 human partners: {P46527;O75351;P24941}

3402 Pathogen[ P03363] interacts with 2 human partners: {P24941;O75351}

3403 [Cluster 310]GO:0030579+P biological\_process [name] ubiquitin-dependent SMAD protein catabolic process [def] "The chemical reactions and pathways resulting in the breakdown of SMAD signaling proteins by ubiquitination and targeting to the proteasome." [GOC

3404 Pathogen[ Q2Q067] interacts with 3 human partners: {Q9HAU4;Q6ZNA4;Q9UNE7}

3405 Pathogen[ P0C214] interacts with 4 human partners: {Q9HAU4;Q9HCE7;Q6ZNA4;Q9UNE7}

3406 Pathogen[ P03346] interacts with 3 human partners: {Q9HAU4;Q9UNE7;Q6ZNA4}

3407 Pathogen[ Q85601] interacts with 3 human partners: {Q9HAU4;Q6ZNA4;Q9UNE7}

3408 Pathogen[ P14079] interacts with 3 human partners: {Q6ZNA4;Q9HAU4;O43294}

3409 Pathogen[ P03383] interacts with 1 human partners:{Q6ZNA4}  
3410 Pathogen[ P03410] interacts with 3 human partners:{Q6ZNA4;O43294;Q9UNE7}  
3411 Pathogen[ P14075] interacts with 1 human partners:{Q6ZNA4}  
3412 Pathogen[ P0C206] interacts with 4 human partners:{Q9HAU4;Q6ZNA4;Q9UNE7;O43294}  
3413 Pathogen[ P03363] interacts with 3 human partners:{Q9HAU4;Q6ZNA4;Q9UNE7}  
3414 [Cluster 311]GO:0060395+P biological\_process [name] SMAD protein signal transduction [def] "The cascade of processes by which a signal interacts with a receptor, causing a change in the activity of a SMAD protein, and ultimately effecting a change in the functioning of the cell." [GOC  
3415 Pathogen[ Q2Q067] interacts with 6 human partners:{P01100;Q13485;Q86UL8;Q99966;P12755;P20823}  
3416 Pathogen[ P0C214] interacts with 5 human partners:{P01100;Q99966;Q13485;P12755;P05412}  
3417 Pathogen[ P03346] interacts with 6 human partners:{P05412;Q99966;P20823;Q86UL8;Q13485;P01100}  
3418 Pathogen[ Q85601] interacts with 7 human partners:{Q99966;Q86UL8;P12755;P01100;P05412;P20823;Q13485}  
3419 Pathogen[ P14079] interacts with 5 human partners:{P12755;Q99966;Q86UL8;P05412;P01100}  
3420 Pathogen[ P03383] interacts with 3 human partners:{Q13485;P01100;P05412}  
3421 Pathogen[ P03410] interacts with 6 human partners:{P12755;P01100;Q13485;P05412;Q86UL8;Q99966}  
3422 Pathogen[ P14075] interacts with 3 human partners:{P05412;Q13485;P01100}  
3423 Pathogen[ P0C206] interacts with 7 human partners:{P05412;P12755;P01100;P20823;Q13485;Q99966;Q86UL8}  
3424 Pathogen[ P03363] interacts with 4 human partners:{Q13485;Q86UL8;P05412;P01100}  
3425 [Cluster 312]GO:0006903+P biological\_process [name] vesicle targeting [def] "The process in which vesicles are directed to specific destination membranes. Targeting involves coordinated interactions among cytoskeletal elements (microtubules or actin filaments), motor proteins, molecules at the vesicle membrane and target membrane surfaces, and vesicle cargo." [GOC  
3426 Pathogen[ Q2Q067] interacts with 3 human partners:{Q9Y6Q5;O95721;O00161}  
3427 Pathogen[ P0C214] interacts with 3 human partners:{O95721;Q9Y6Q5;O00161}  
3428 Pathogen[ P03346] interacts with 4 human partners:{Q13190;O00161;O95721;Q9Y6Q5}  
3429 Pathogen[ Q85601] interacts with 3 human partners:{Q9Y6Q5;O00161;O95721}  
3430 Pathogen[ P14079] interacts with 3 human partners:{Q9Y6Q5;O95721;Q12912}  
3431 Pathogen[ P03383] interacts with 1 human partners:{O00161}  
3432 Pathogen[ P03410] interacts with 5 human partners:{Q9Y6Q5;Q13190;Q12912;O95721;O00161}  
3433 Pathogen[ P14075] interacts with 1 human partners:{O00161}  
3434 Pathogen[ P0C206] interacts with 4 human partners:{Q9Y6Q5;O95721;O00161;Q12912}  
3435 Pathogen[ P03363] interacts with 2 human partners:{O95721;O00161}  
3436 [Cluster 313]GO:0014047+P biological\_process [name] glutamate secretion [def] "The controlled release of glutamate by a cell or group of cells. The glutamate is the most abundant excitatory neurotransmitter in the nervous system." [GOC  
3437 Pathogen[ Q2Q067] interacts with 2 human partners:{Q9UI32;O94925}  
3438 Pathogen[ P0C214] interacts with 3 human partners:{Q9UM54;Q9UI32;O94925}  
3439 Pathogen[ P03346] interacts with 3 human partners:{O14908;Q9UI32;O94925}  
3440 Pathogen[ Q85601] interacts with 3 human partners:{O94925;Q9UM54;Q9UI32}  
3441 Pathogen[ P14079] interacts with 5 human partners:{O14810;Q9UM54;O94925;Q9UI32;O14908}  
3442 Pathogen[ P03383] interacts with 1 human partners:{O94925}  
3443 Pathogen[ P03410] interacts with 5 human partners:{O14810;O14908;O94925;Q9UM54;Q9UI32}  
3444 Pathogen[ P14075] interacts with 1 human partners:{O94925}  
3445 Pathogen[ P0C206] interacts with 4 human partners:{Q9UM54;O14908;Q9UI32;O94925}  
3446 Pathogen[ P03363] interacts with 3 human partners:{O14908;O94925;Q9UI32}  
3447 [Cluster 314]GO:0032270+P biological\_process [name] positive regulation of cellular protein metabolic process [def] "Any process that activates or increases the frequency, rate or extent of the chemical reactions and pathways involving a protein, occurring at the level of an individual cell." [GOC  
3448 Pathogen[ Q2Q067] interacts with 4 human partners:{P31749;Q96T88;P55055;P25963}  
3449 Pathogen[ P0C214] interacts with 3 human partners:{Q96T88;P25963;P31749}  
3450 Pathogen[ P03346] interacts with 4 human partners:{P25963;P31749;P55055;Q96T88}  
3451 Pathogen[ Q85601] interacts with 4 human partners:{P31749;P55055;Q96T88;P25963}  
3452 Pathogen[ P14079] interacts with 1 human partners:{P55055}  
3453 Pathogen[ P03383] interacts with 2 human partners:{P31749;P25963}  
3454 Pathogen[ P03410] interacts with 2 human partners:{P31749;P25963}  
3455 Pathogen[ P14075] interacts with 2 human partners:{P25963;P31749}  
3456 Pathogen[ P0C206] interacts with 4 human partners:{P31749;P25963;P55055;Q96T88}  
3457 Pathogen[ P03363] interacts with 3 human partners:{P25963;P31749;Q96T88}  
3458 [Cluster 315]GO:0006385+P biological\_process [name] transcription elongation from RNA polymerase III promoter [def] "The extension of an RNA molecule after transcription initiation and promoter clearance at an RNA polymerase III promoter by the addition of ribonucleotides catalyzed by RNA polymerase III." [GOC  
3459 Pathogen[ Q2Q067] interacts with 15 human

3460 partners: {P52434;P19388;P61218;Q9BUI4;Q9NVU0;P62875;O15318;P53803;Q9Y535;Q9Y250;P05423;O14802;Q9H1D9;Q9Y2S0;O15160}  
Pathogen[ P0C214] interacts with 16 human

3461 partners: {Q9BUI4;P53803;Q9NVU0;Q9H1D9;Q9Y2S0;P61218;P05423;Q9Y250;O15318;Q9NW08;P62875;O15160;Q9Y535;P52434;P19388;O14802}  
Pathogen[ P03346] interacts with 15 human

3462 partners: {Q9NVU0;P52434;P05423;P53803;P61218;O15318;P19388;Q9H1D9;O15160;Q9Y250;Q9Y535;Q9BUI4;O14802;Q9Y2S0;P62875}  
Pathogen[ Q85601] interacts with 17 human

3463 partners: {Q9Y250;Q9H1D9;Q9Y535;Q9BUI4;Q9Y2Y1;P53803;Q9Y2S0;P61218;P05423;Q9NVU0;P19388;Q9NW08;P52434;O15160;O14802;O15318;P62875}  
Pathogen[ P14079] interacts with 18 human

3464 partners: {Q9Y2S0;P62875;Q9NW08;P52434;P61218;Q9Y250;P53803;P19388;Q9BUI4;P05423;O15160;Q9Y2Y1;Q9BT43;Q9NVU0;O14802;O15318;Q9H1D9;Q9Y535}  
Pathogen[ P03383] interacts with 11 human

3465 partners: {P53803;Q9Y535;P52434;P61218;Q9H1D9;Q9NVU0;P62875;O15318;P19388;O14802;Q9Y250}  
Pathogen[ P03410] interacts with 18 human

3466 partners: {Q9BT43;O15318;Q9Y535;Q9NW08;P53803;Q9Y2S0;P62875;P05423;P61218;Q9Y2Y1;O15160;P52434;Q9H1D9;Q9Y250;Q9NVU0;P19388;O14802;Q9BUI4}  
Pathogen[ P14075] interacts with 11 human

3467 partners: {Q9NVU0;P19388;P61218;Q9Y250;Q9H1D9;Q9Y535;P62875;P52434;O14802;O15318;P53803}  
Pathogen[ P0C206] interacts with 18 human

3468 partners: {P62875;Q9BT43;P19388;P61218;Q9NW08;Q9BUI4;O15318;Q9Y535;P05423;Q9NVU0;P53803;Q9Y2S0;O14802;Q9Y2Y1;Q9H1D9;Q9Y250;P52434;O15160}  
Pathogen[ P03363] interacts with 12 human

3469 partners: {Q9Y535;P19388;Q9NVU0;P61218;Q9H1D9;Q9Y250;P05423;O15318;P53803;P52434;Q9Y2S0;O15160}  
[Cluster 316]GO:0071559+P biological\_process [name] response to transforming growth factor beta stimulus [def] "Any process that results in a change in state or activity of a cell or an organism (in terms of movement, secretion, enzyme production, gene expression, etc.) as a result of a transforming growth factor beta stimulus." [GOC

3470 Pathogen[ Q2Q067] interacts with 2 human partners: {Q13485;Q99966}  
3471 Pathogen[ P0C214] interacts with 2 human partners: {Q99966;Q13485}  
3472 Pathogen[ P03346] interacts with 2 human partners: {Q99966;Q13485}  
3473 Pathogen[ Q85601] interacts with 2 human partners: {Q99966;Q13485}  
3474 Pathogen[ P14079] interacts with 1 human partners: {Q99966}  
3475 Pathogen[ P03383] interacts with 1 human partners: {Q13485}  
3476 Pathogen[ P03410] interacts with 2 human partners: {Q13485;Q99966}  
3477 Pathogen[ P14075] interacts with 1 human partners: {Q13485}  
3478 Pathogen[ P0C206] interacts with 2 human partners: {Q13485;Q99966}  
3479 Pathogen[ P03363] interacts with 1 human partners: {Q13485}

3480 [Cluster 317]GO:0048102+P biological\_process [name] autophagic cell death [def] "A form of programmed cell death that is accompanied by macroautophagy, which is characterized by the sequestration of cytoplasmic material within autophagosomes for bulk degradation by lysosomes. Autophagic cell death is characterized by lack of chromatin condensation, massive vacuolization of the cytoplasm, and accumulation of (double-membraned) autophagic vacuoles, with little or no uptake by phagocytic cells." [GOC

3481 Pathogen[ Q2Q067] interacts with 3 human partners: {Q12983;P46527;Q96A56}  
3482 Pathogen[ P0C214] interacts with 3 human partners: {P46527;Q12983;Q96A56}  
3483 Pathogen[ P03346] interacts with 4 human partners: {P55273;Q96A56;Q12983;P46527}  
3484 Pathogen[ Q85601] interacts with 4 human partners: {P55273;Q96A56;Q12983;P46527}  
3485 Pathogen[ P14079] interacts with 4 human partners: {Q96A56;P55273;Q12983;P46527}  
3486 Pathogen[ P03383] interacts with 3 human partners: {Q96A56;Q12983;P46527}  
3487 Pathogen[ P03410] interacts with 4 human partners: {P46527;Q12983;P55273;Q96A56}  
3488 Pathogen[ P14075] interacts with 3 human partners: {Q12983;P46527;Q96A56}  
3489 Pathogen[ P0C206] interacts with 4 human partners: {Q96A56;Q12983;P55273;P46527}  
3490 Pathogen[ P03363] interacts with 1 human partners: {Q96A56}

3491 [Cluster 318]GO:0010389+P biological\_process [name] regulation of G2/M transition of mitotic cell cycle [def] "Any process that modulates the rate or extent of progression from G2 phase to M phase of the mitotic cell cycle." [PMID

3492 Pathogen[ Q2Q067] interacts with 3 human partners: {P49454;Q8WWL7;Q8N726}  
3493 Pathogen[ P0C214] interacts with 3 human partners: {Q8N726;Q8WWL7;P49454}  
3494 Pathogen[ P03346] interacts with 4 human partners: {Q8WWL7;Q8N726;P61925;P49454}  
3495 Pathogen[ Q85601] interacts with 3 human partners: {P49454;Q8N726;Q8WWL7}  
3496 Pathogen[ P14079] interacts with 4 human partners: {Q8N726;Q8WWL7;P49454;P61925}  
3497 Pathogen[ P03383] interacts with 3 human partners: {P49454;Q8WWL7;Q8N726}  
3498 Pathogen[ P03410] interacts with 4 human partners: {P61925;Q8N726;Q8WWL7;P49454}  
3499 Pathogen[ P14075] interacts with 3 human partners: {Q8WWL7;P49454;Q8N726}  
3500 Pathogen[ P0C206] interacts with 4 human partners: {Q8WWL7;Q8N726;P49454;P61925}  
3501 Pathogen[ P03363] interacts with 4 human partners: {P49454;Q8WWL7;P61925;Q8N726}

3502 [Cluster 319]GO:0006766+P biological\_process [name] vitamin metabolic process [def] "The chemical reactions and pathways involving vitamins. Vitamin is a general term for a number of unrelated organic substances that occur in many foods in small amounts

and that are necessary in trace amounts for the normal metabolic functioning of the body. Vitamins may be water-soluble or fat-soluble and usually serve as components of coenzyme systems." [GOC

- 3503 Pathogen[ Q2Q067] interacts with 9 human  
partners: {Q9BU02;Q6XQN6;Q9HAB8;Q9NRN7;Q9HAN9;P11166;P34896;O96007;Q9Y697}
- 3504 Pathogen[ P0C214] interacts with 23 human  
partners: {Q96T66;Q9BU02;Q05932;Q9HAN9;Q8TE04;Q9HAB8;O96033;P42898;Q6XQN6;O95396;Q13057;P11166;P00374;Q9Y697;P34896;Q9BZQ4;O96007;Q9BZ23;Q15274;Q9NRN7;Q8NFF5;P43490;P11586}
- 3505 Pathogen[ P03346] interacts with 8 human  
partners: {Q9NRN7;Q9Y697;Q9HAN9;Q6XQN6;P11166;O96007;Q9BU02;Q9HAB8}
- 3506 Pathogen[ Q85601] interacts with 8 human  
partners: {Q9NRN7;Q9BU02;Q9Y697;Q9HAN9;Q6XQN6;P11166;P34896;O96007}
- 3507 Pathogen[ P14079] interacts with 25 human  
partners: {P00374;Q8TE04;O95544;Q8NFF5;P43490;P11166;Q96NT5;O96007;O96033;Q9BZ23;Q9BZQ4;Q6XQN6;Q13057;Q9Y697;Q9NRN7;Q9BU02;Q9HAN9;Q6IA69;Q96CD2;Q15274;Q05932;Q9NVS9;Q9HAB8;P34896;P42898}
- 3508 Pathogen[ P03383] interacts with 9 human  
partners: {Q9BU02;P34896;Q9NRN7;Q9Y697;Q9HAN9;O96007;Q9BZ23;P11169;Q9HAB8}
- 3509 Pathogen[ P03410] interacts with 23 human  
partners: {Q15274;Q9BU02;Q8NFF5;Q8TE04;P11166;Q13057;P00374;Q9Y697;Q6XQN6;P43490;O96007;Q96CD2;P42898;Q9NRN7;Q9BZ23;Q9HAN9;Q9NVS9;O96033;Q9HAB8;Q05932;Q6IA69;Q9BZQ4;P34896}
- 3510 Pathogen[ P14075] interacts with 13 human  
partners: {P11169;Q9HAB8;P34896;Q13057;Q9NVS9;Q8TE04;O96007;Q9BZ23;Q9HAN9;Q6XQN6;Q9BU02;Q9NRN7;Q9Y697}
- 3511 Pathogen[ P0C206] interacts with 17 human  
partners: {Q6XQN6;Q8TE04;Q13057;Q9Y697;O96007;P43490;Q9BZ23;P11166;Q9HAB8;P34896;Q9BZQ4;Q9HAN9;Q15274;Q9BU02;O95396;Q9NRN7;Q05932}
- 3512 Pathogen[ P03363] interacts with 7 human  
partners: {Q6XQN6;Q9HAN9;O96007;Q9Y697;Q9NRN7;Q9BU02;P11166}
- 3513 [Cluster 320]GO:0044237+P biological\_process [name] cellular metabolic process [def] "The chemical reactions and pathways by which individual cells transform chemical substances." [GOC
- 3514 Pathogen[ Q2Q067] interacts with 4 human partners: {P49770;Q9UI10;Q14232;Q9BV20}
- 3515 Pathogen[ P0C214] interacts with 5 human  
partners: {Q16795;Q9UI10;P49770;Q14232;Q9BV20}
- 3516 Pathogen[ P03346] interacts with 4 human partners: {Q9BV20;Q14232;P49770;Q9UI10}
- 3517 Pathogen[ Q85601] interacts with 4 human partners: {P49770;Q9BV20;Q14232;Q9UI10}
- 3518 Pathogen[ P14079] interacts with 5 human  
partners: {Q9UI10;Q9BV20;O15514;O95954;Q14232}
- 3519 Pathogen[ P03383] interacts with 4 human partners: {Q9UI10;P49770;Q9BV20;Q14232}
- 3520 Pathogen[ P03410] interacts with 6 human  
partners: {O95954;Q14232;O15514;P49770;Q9BV20;Q9UI10}
- 3521 Pathogen[ P14075] interacts with 4 human partners: {Q9BV20;Q9UI10;Q14232;P49770}
- 3522 Pathogen[ P0C206] interacts with 6 human  
partners: {Q9BV20;Q14232;O95954;P49770;O15514;Q9UI10}
- 3523 Pathogen[ P03363] interacts with 3 human partners: {Q9UI10;P49770;Q9BV20}
- 3524 [Cluster 321]GO:0007219+P biological\_process [name] Notch signaling pathway [def] "The series of molecular signals initiated by binding of the receptor Notch to an extracellular ligand." [GOC
- 3525 Pathogen[ Q2Q067] interacts with 51 human  
partners: {Q13573;Q96J02;Q92585;Q8IZL2;Q04726;Q9GZL7;Q9UKV0;P01106;Q9HCK5;Q9NQ87;Q13547;O15379;Q2M1K9;Q04727;Q96T58;Q96K30;Q8N5F7;Q9BUX1;Q9UQL6;Q969S8;Q92831;Q06330;Q86UW9;Q9H9G7;Q13616;O60907;Q8WUI4;Q9UKV8;O00321;Q04725;Q9HCE1;P0CG47;Q9BZK7;Q969H0;Q9Y618;Q04724;Q9Y5J3;P0CG48;P49336;P24863;Q92793;Q9UL18;P62987;Q86Y01;O75376;Q0VG99;Q96JK9;P63208;P62877;Q00534;P62979}
- 3526 Pathogen[ P0C214] interacts with 55 human  
partners: {Q96J02;Q92585;P24863;Q96T58;Q04727;Q13573;Q13547;P31249;O00321;Q969S8;Q8IZL2;O60907;Q8N5F7;Q92793;Q9Y5J3;Q9GZL7;P63208;Q2M1K9;Q06330;Q04724;Q9Y6I3;P62877;Q9HCE1;Q9UPQ9;Q00534;Q04726;P49336;P0CG48;Q9BUX1;Q9UKV0;Q9H9G7;O75376;Q8NDV7;Q96K30;O15379;Q96JK9;Q13616;Q969H0;Q9UKV8;P62987;Q92831;Q04725;P0CG47;Q9BZK7;Q9HCK5;Q9HCE1;Q8WUI4;Q86Y01;P62979;Q9NQ87;Q9Y618;Q86UW9;P01106;Q9UL18;Q9UQL6}
- 3527 Pathogen[ P03346] interacts with 57 human  
partners: {Q06330;Q969S8;P31249;Q96J02;Q92585;Q86UW9;O60907;Q9BUX1;Q13616;Q9HD90;Q0VG99;P62987;O15379;Q9H9G7;Q2M1K9;P24863;Q9UL18;P49336;Q9GZL7;P0CG48;O00321;Q92831;Q8N5F7;Q9Y5J3;Q96AX9;P01106;P62877;Q9HCK5;Q04726;Q04725;Q13547;Q04724;Q9NVX2;Q96K30;Q9NQ87;Q8WUI4;Q9UKV8;O75376;P63208;Q96T58;P62979;Q9UKV0;P0CG47;Q9BZK7;Q04727;Q00534;Q9Y6I3;Q13573;Q92793;Q9UPQ9;Q86Y01;Q9HCE1;Q9Y618;Q969H0;Q9UQL6;Q96JK9;Q8IZL2}
- 3528 Pathogen[ Q85601] interacts with 55 human  
partners: {P01106;Q9HCE1;Q969S8;Q96J02;Q92585;Q9UKV0;Q96JK9;Q9BUX1;Q969H0;Q04724;Q9HCK5;Q9UQL6;Q0VG99;Q06330;O60907;Q8N5F7;Q13573;Q2M1K9;P62877;Q9UL18;P49336;Q13616;Q9Y618;P0CG48;Q92831;Q04725;Q04726;Q86UW9;Q9H9G7;P63208;Q04727;Q9NVX2;Q8IZL2;Q9NQ87;O75376;Q9UKV8;Q96T58;P62979;P31249;P0CG47;Q9BZK7;O15379;Q9GZL7;Q9Y6I3;Q13547;P24863;P62987;Q00534;Q92793;Q8WUI4;Q9UPQ9;Q86Y01;Q96K30;Q9Y5J3;O00321}
- 3529 Pathogen[ P14079] interacts with 57 human

partners: {Q9UQL6;O15379;Q04725;Q9UKV8;Q96K30;Q9BZK7;P0CG48;Q9UL18;Q9H9G7;Q969H0;P49336;O00321;Q9Y6I3;Q96JK9;Q92542;Q9NZ42;Q92793;Q9HCE1;Q969S8;Q9HCK5;Q8WUI4;Q9GZL7;O60907;Q9UKV0;Q13573;Q8IZL2;P62979;P62877;P62987;Q9H488;Q06330;Q86Y01;Q9HJC0;P24863;Q2M1K9;Q9Y5J3;Q86UW9;P31249;Q96J02;P01106;Q04726;Q8WW43;Q04724;O75376;Q8NBL1;Q9NQ87;P63208;Q13616;Q9BUX1;Q9NVX2;P0CG47;Q92585;Q04727;Q9UPQ9;Q8NDV7;Q96T58;Q8N5F7}

3530 Pathogen[ P03383] interacts with 50 human  
partners: {Q9Y618;Q13573;Q06330;Q13616;Q92585;Q92831;Q96JK9;Q86UW9;P62987;Q9UL18;Q9BUX1;O75376;Q9UQL6;Q9UPQ9;P01106;Q04727;O60907;Q8N5F7;Q8IZL2;Q9NQ87;Q9HCK5;P63208;Q96K30;Q00534;Q04724;O00321;P31249;P49336;Q04726;Q04725;O15379;Q9UKV8;Q969H0;Q96T58;Q13547;P62979;Q9UKV0;P0CG47;Q9BZK7;P62877;Q9GZL7;P0CG48;P24863;Q2M1K9;Q8WUI4;Q86Y01;Q9HCE1;Q9H9G7;Q92793;Q969S8}

3531 Pathogen[ P03410] interacts with 58 human  
partners: {Q86UW9;Q92831;Q9Y5J3;Q9UKV0;Q9UPQ9;P0CG48;Q9UKV8;Q00534;Q04726;Q9Y6I3;P01106;Q06330;Q96K30;Q9UL18;Q9NQ87;Q9HJC0;Q9BUX1;Q8NDV7;P31249;Q04724;Q2M1K9;O00321;O75376;Q9GZL7;Q9H9G7;P62979;Q92585;Q96T58;Q8WUI4;Q9NZ42;Q9UQL6;Q8IZL2;Q96JK9;Q92793;P63208;Q969S8;Q86Y01;Q969H0;O15379;Q9HCE1;P62877;Q04727;Q9HCK5;P49336;P24863;Q13616;P62987;Q13547;Q8WW43;Q92542;Q9BZK7;Q9Y618;Q9NVX2;Q9H488;O60907;P0CG47;Q13573;Q04725}

3532 Pathogen[ P14075] interacts with 50 human  
partners: {Q04727;P49336;Q92585;P24863;Q13573;Q969S8;Q04725;Q9HCK5;Q92831;Q9H9G7;Q8N5F7;Q96T58;Q9GZL7;Q00534;Q9HCE1;P31249;Q9UKV0;Q9NQ87;Q13547;P01106;Q9Y618;O75376;P63208;Q04726;P0CG48;P62979;Q9UPQ9;Q96K30;P62987;O60907;Q96JK9;Q9UKV8;Q9BUX1;Q06330;O15379;P0CG47;Q9BZK7;Q92793;Q9UQL6;Q04724;Q9UL18;Q8WUI4;Q2M1K9;Q13616;Q8IZL2;Q86Y01;Q969H0;P62877;Q86UW9;O00321}

3533 Pathogen[ P0C206] interacts with 60 human  
partners: {Q86Y01;Q96AX9;P24863;Q9NQ87;P0CG48;P62877;P49336;Q9HCK5;Q06330;Q86UW9;Q9BUX1;Q9NZ42;O60907;Q9GZL7;Q96JK9;Q04726;Q9UKV0;Q96J02;Q96K30;Q969H0;Q9UPQ9;Q04727;Q9UKV8;Q13547;Q04725;Q92542;Q13616;O00321;Q8NDV7;Q92831;Q92793;Q9NVX2;Q9HCE1;Q13573;P63208;Q8IZL2;O15379;Q9Y5J3;Q8WUI4;P62979;Q9Y6I3;Q9BZK7;O75376;Q2M1K9;Q8N5F7;Q96T58;Q04724;P0CG47;Q9H9G7;P01106;P62987;P31249;Q969S8;Q86YT6;Q0VG99;Q9Y618;Q92585;Q9UL18;Q00534;Q9UQL6}

3534 Pathogen[ P03363] interacts with 52 human  
partners: {Q86Y01;Q96T58;Q9Y5J3;Q9GZL7;P24863;Q0VG99;Q92831;Q06330;Q9NQ87;O15379;Q9H9G7;Q969S8;Q9BZK7;Q9BUX1;O75376;O60907;Q9HCK5;Q96JK9;Q9UKV8;Q96K30;Q9UQL6;Q04726;Q04724;P01106;Q8NDV7;Q04727;P31249;O00321;Q2M1K9;Q00534;Q13616;Q9NVX2;P62877;Q8N5F7;Q9UKV0;Q86UW9;Q9HCE1;Q9Y618;P49336;Q969H0;Q13573;P62987;Q13547;Q92793;Q9UPQ9;Q9UL18;Q8WUI4;Q04725;P63208;Q8IZL2;Q92585;Q96AX9}

3535 [Cluster 322]GO:0060760+P biological\_process [name] positive regulation of response to cytokine stimulus [def] "Any process that increases the rate, frequency, or extent of a response to cytokine stimulus." [GOC  
3536 Pathogen[ Q2Q067] interacts with 1 human partners: {Q16594}  
3537 Pathogen[ P0C214] interacts with 1 human partners: {Q16594}  
3538 Pathogen[ P03346] interacts with 1 human partners: {Q16594}  
3539 Pathogen[ Q85601] interacts with 1 human partners: {Q16594}  
3540 Pathogen[ P14079] interacts with 1 human partners: {Q16594}  
3541 Pathogen[ P03383] interacts with 1 human partners: {Q16594}  
3542 Pathogen[ P03410] interacts with 1 human partners: {Q16594}  
3543 Pathogen[ P14075] interacts with 1 human partners: {Q16594}  
3544 Pathogen[ P0C206] interacts with 1 human partners: {Q16594}  
3545 Pathogen[ P03363] interacts with 1 human partners: {Q16594}

3546 [Cluster 323]GO:0002089+P biological\_process [name] lens morphogenesis in camera-type eye [def] "The process in which the anatomical structures of the lens are generated and organized. The lens is a transparent structure in the eye through which light is focused onto the retina. An example of this process is found in *Mus musculus*." [GOC  
3547 Pathogen[ Q2Q067] interacts with 3 human partners: {O00470;P12755;P02489}  
3548 Pathogen[ P0C214] interacts with 3 human partners: {O00470;P02489;P12755}  
3549 Pathogen[ P03346] interacts with 4 human partners: {O75364;Q8NHU6;P02489;O00470}  
3550 Pathogen[ Q85601] interacts with 3 human partners: {P02489;P12755;O00470}  
3551 Pathogen[ P14079] interacts with 4 human partners: {P12755;Q8NHU6;P02489;O00470}  
3552 Pathogen[ P03383] interacts with 1 human partners: {O00470}  
3553 Pathogen[ P03410] interacts with 4 human partners: {O00470;P12755;Q8NHU6;P02489}  
3554 Pathogen[ P14075] interacts with 1 human partners: {O00470}  
3555 Pathogen[ P0C206] interacts with 3 human partners: {O00470;P12755;P02489}  
3556 Pathogen[ P03363] interacts with 3 human partners: {Q8NHU6;O00470;P02489}

3557 [Cluster 324]GO:0018107+P biological\_process [name] peptidyl-threonine phosphorylation [def] "The phosphorylation of peptidyl-threonine to form peptidyl-O-phospho-L-threonine." [RESID  
3558 Pathogen[ Q2Q067] interacts with 3 human partners: {O14757;O95271;P21675}  
3559 Pathogen[ P0C214] interacts with 3 human partners: {P21675;O14757;O95271}  
3560 Pathogen[ P03346] interacts with 4 human partners: {O14757;P11137;P21675;O95271}  
3561 Pathogen[ Q85601] interacts with 3 human partners: {O14757;P21675;O95271}  
3562 Pathogen[ P14079] interacts with 5 human  
partners: {O95271;Q15078;P45983;P11137;P21675}  
3563 Pathogen[ P03383] interacts with 3 human partners: {O14757;P21675;O95271}  
3564 Pathogen[ P03410] interacts with 4 human partners: {P11137;P21675;O95271;O14757}  
3565 Pathogen[ P14075] interacts with 3 human partners: {P21675;O95271;O14757}  
3566 Pathogen[ P0C206] interacts with 3 human partners: {O95271;P11137;P21675}

3567 Pathogen[ P03363] interacts with 4 human partners:{P11137;O95271;P21675;O14757}

3568 [Cluster 325]GO:0086091+P

3569 Pathogen[ Q2Q067] interacts with 1 human partners:{P15924}

3570 Pathogen[ P0C214] interacts with 1 human partners:{P15924}

3571 Pathogen[ P03346] interacts with 1 human partners:{P15924}

3572 Pathogen[ Q85601] interacts with 1 human partners:{P15924}

3573 Pathogen[ P14079] interacts with 1 human partners:{P15924}

3574 Pathogen[ P03383] interacts with 1 human partners:{P15924}

3575 Pathogen[ P03410] interacts with 1 human partners:{P15924}

3576 Pathogen[ P14075] interacts with 1 human partners:{P15924}

3577 Pathogen[ P0C206] interacts with 1 human partners:{P15924}

3578 Pathogen[ P03363] interacts with 1 human partners:{P15924}

3579 [Cluster 326]GO:0030168+P biological\_process [name] platelet activation [def] "A series of progressive, overlapping events triggered by exposure of the platelets to subendothelial tissue. These events include shape change, adhesiveness, aggregation, and release reactions. When carried through to completion, these events lead to the formation of a stable hemostatic plug." [http

3580 Pathogen[ Q2Q067] interacts with 21 human partners:{P46108;P31749;O00186;P63104;P07737;P01009;Q6QNY0;P56945;P11831;P23528;O15162;P62328;Q8WYR1;P08697;Q13094;Q5JVS0;P27986;P63000;Q5UE93;P61586;P62937}

3581 Pathogen[ P0C214] interacts with 20 human partners:{P08697;P63000;Q5JVS0;P56945;P62993;P61586;O00186;P11831;P05121;Q13094;Q6QNY0;P10124;Q8WYR1;O15162;Q5UE93;P10909;P46108;P27986;P31749;P62328}

3582 Pathogen[ P03346] interacts with 21 human partners:{Q8WYR1;P11831;P62937;P62993;O00186;Q6QNY0;P56945;P31749;Q13094;P46108;Q5JVS0;P63104;P62328;P01009;Q5UE93;P07737;P23528;P63000;P27986;P61586;O15162}

3583 Pathogen[ Q85601] interacts with 23 human partners:{O00186;Q6QNY0;P11831;P63104;P31749;P62993;Q5JVS0;P63000;P46108;P08697;P27986;P07737;P01009;P56945;P05121;P61586;P62328;Q8WYR1;O15162;P23528;Q5UE93;P62937;Q13094}

3584 Pathogen[ P14079] interacts with 23 human partners:{Q5JVS0;O15162;Q01518;Q6QNY0;P20809;Q13094;Q8WYR1;P07737;P10909;P62937;P63104;O00186;Q8NCG7;P23528;P62328;P61586;P10124;P62993;O43561;Q5UE93;P0DJ18;P46108;Q9BYX7}

3585 Pathogen[ P03383] interacts with 21 human partners:{P27986;Q6QNY0;P56945;Q5JVS0;P11831;O15162;P31749;P62328;P08697;O00186;P62937;P63000;P07737;P01009;P63104;P61586;Q13094;P10124;Q8WYR1;Q5UE93;P23528}

3586 Pathogen[ P03410] interacts with 30 human partners:{P11831;Q13094;P27986;P05121;P0DJ18;Q5UE93;Q8NCG7;P62328;Q8WYR1;P63000;Q6QNY0;P10124;O43561;P20809;P31749;O15162;P62937;P61586;P08697;Q5JVS0;P63104;P46108;P56945;P01009;Q01518;P23528;O00186;P62993;P07737;P10909}

3587 Pathogen[ P14075] interacts with 22 human partners:{Q8WYR1;O00186;P11831;P62328;O15162;Q5UE93;P01009;P07737;P23528;P31749;Q5JVS0;P27986;Q6QNY0;P63104;P08697;P61586;Q13094;P63000;P20809;P62937;P10124;P56945}

3588 Pathogen[ P0C206] interacts with 26 human partners:{P31749;P62328;P01009;P27986;P62993;P61586;P63104;Q5JVS0;P63000;P10909;P20809;P11831;O15162;P05121;Q5UE93;P56945;P46108;Q6QNY0;Q13094;P07737;P23528;P62937;P10124;O00186;P08697;Q8WYR1}

3589 Pathogen[ P03363] interacts with 17 human partners:{P62937;Q8WYR1;P62328;P63000;P63104;P11831;Q5UE93;P31749;Q5JVS0;P23528;P46108;O00186;P56945;P27986;Q6QNY0;P07737;Q13094}

3590 [Cluster 327]GO:0008366+P biological\_process [name] axon ensheathment [def] "Any process in which the axon of a neuron is insulated, and that insulation maintained, thereby preventing dispersion of the electrical signal." [GOC

3591 Pathogen[ Q2Q067] interacts with 2 human partners:{Q03052;Q9BXM0}

3592 Pathogen[ P0C214] interacts with 2 human partners:{Q03052;Q9BXM0}

3593 Pathogen[ P03346] interacts with 3 human partners:{Q96PU8;Q03052;Q9BXM0}

3594 Pathogen[ Q85601] interacts with 2 human partners:{Q03052;Q9BXM0}

3595 Pathogen[ P14079] interacts with 3 human partners:{P02686;Q9BXM0;Q03052}

3596 Pathogen[ P03383] interacts with 1 human partners:{Q9BXM0}

3597 Pathogen[ P03410] interacts with 3 human partners:{Q9BXM0;P02686;Q03052}

3598 Pathogen[ P14075] interacts with 1 human partners:{Q9BXM0}

3599 Pathogen[ P0C206] interacts with 3 human partners:{Q96PU8;Q03052;Q9BXM0}

3600 Pathogen[ P03363] interacts with 3 human partners:{Q9BXM0;Q96PU8;Q03052}

3601 [Cluster 328]GO:0034605+P biological\_process [name] cellular response to heat [def] "Any process that results in a change in state or activity of a cell (in terms of movement, secretion, enzyme production, gene expression, etc.) as a result of a heat stimulus, a temperature stimulus above the optimal temperature for that organism." [GOC

3602 Pathogen[ Q2Q067] interacts with 6 human partners:{Q12798;Q53FT3;O14948;Q08211;Q9UBL0;P46013}

3603 Pathogen[ P0C214] interacts with 6 human partners:{Q53FT3;Q12798;O14948;Q9UBL0;P46013;Q08211}

3604 Pathogen[ P03346] interacts with 6 human partners:{Q08211;O14948;Q9UBL0;Q12798;P46013;Q53FT3}

3605 Pathogen[ Q85601] interacts with 6 human partners:{Q53FT3;Q12798;Q08211;O14948;Q9UBL0;P46013}

3606 Pathogen[ P14079] interacts with 7 human partners:{Q08211;Q9UBL0;Q53FT3;Q12798;O14948;Q9NQ40;P46013}

3607 Pathogen[ P03383] interacts with 5 human partners:{P46013;Q12798;O14948;Q53FT3;Q9UBL0}

3608 Pathogen[ P03410] interacts with 7 human partners:{Q9UBL0;O14948;P46013;Q12798;Q53FT3;Q9NQ40;Q08211}

3609 Pathogen[ P14075] interacts with 5 human partners:{Q53FT3;Q12798;O14948;P46013;Q9UBL0}

3610 Pathogen[ P0C206] interacts with 6 human partners:{O14948;Q08211;P46013;Q9UBL0;Q12798;Q53FT3}

3611 Pathogen[ P03363] interacts with 6 human partners:{Q53FT3;O14948;Q12798;Q9UBL0;P46013;Q08211}

3612 [Cluster 329]GO:0006754+P biological\_process [name] ATP biosynthetic process [def] "The chemical reactions and pathways resulting in the formation of ATP, adenosine 5'-triphosphate, a universally important coenzyme and enzyme regulator." [GOC

3613 Pathogen[ Q2Q067] interacts with 3 human partners:{O75323;Q8WYQ3;P07864}

3614 Pathogen[ P0C214] interacts with 6 human partners:{P07864;P36542;P14618;Q99766;Q8WYQ3;O75323}

3615 Pathogen[ P03346] interacts with 2 human partners:{Q8WYQ3;O75323}

3616 Pathogen[ Q85601] interacts with 4 human partners:{P07864;P14618;O75323;Q99766}

3617 Pathogen[ P14079] interacts with 14 human partners:{P36542;P56134;P25705;Q8WYQ3;P56385;Q5VTU8;Q15526;Q7Z4Y8;O75323;P03928;P07864;Q99766;O75964;P56381}

3618 Pathogen[ P03383] interacts with 3 human partners:{O75323;P07864;Q8WYQ3}

3619 Pathogen[ P03410] interacts with 13 human partners:{Q99766;Q8WYQ3;P36542;P25705;P56385;P56381;Q5VTU8;O75323;P03928;O75964;P07864;P56134;Q7Z4Y8}

3620 Pathogen[ P14075] interacts with 5 human partners:{O75323;Q8WYQ3;P07864;Q99766;P56385}

3621 Pathogen[ P0C206] interacts with 8 human partners:{P07864;Q99766;P36542;Q8WYQ3;P56381;P56385;O75323;P14618}

3622 Pathogen[ P03363] interacts with 1 human partners:{O75323}

3623 [Cluster 330]GO:0034080+P biological\_process [name] CenH3-containing nucleosome assembly at centromere [def] "The formation of nucleosomes containing the histone H3 variant CenH3 (also called CENP-A) to form centromeric chromatin\_ occurs outside the context of DNA replication." [GOC

3624 Pathogen[ Q2Q067] interacts with 17 human partners:{Q9NYP9;Q96H22;Q71F23;Q13352;Q6IPU0;Q9H3R5;P49450;P06748;Q09028;Q92674;O43482;Q96T23;Q8NG31;Q9BU64;Q16576;Q8NCD3;Q6P0N0}

3625 Pathogen[ P0C214] interacts with 17 human partners:{Q6P0N0;P06748;Q6IPU0;Q09028;P49450;Q8NCD3;O43482;Q92674;Q9NYP9;Q13352;Q16576;O60264;Q9H3R5;Q8NG31;Q96T23;Q71F23;Q9BU64}

3626 Pathogen[ P03346] interacts with 20 human partners:{Q7L2Z9;P06748;Q9BS16;Q92674;O43482;Q6P0N0;Q8NCD3;O60264;Q09028;Q96T23;Q16576;Q9BU64;P49450;Q6IPU0;Q8NG31;Q9NYP9;Q9H3R5;Q96H22;Q71F23;Q13352}

3627 Pathogen[ Q85601] interacts with 16 human partners:{Q96T23;Q71F23;Q8NG31;Q9H3R5;Q8NCD3;Q92674;Q13352;Q9NYP9;Q9BU64;Q16576;P49450;P06748;Q09028;O60264;Q6P0N0;O43482}

3628 Pathogen[ P14079] interacts with 19 human partners:{Q6P0N0;Q96T23;O43482;Q8NG31;Q6IPU0;Q16576;Q71F23;P49450;Q96H22;O60264;Q9NYP9;P06748;Q9H3R5;Q8NCD3;Q92674;Q9BU64;Q09028;Q13352;Q7L2Z9}

3629 Pathogen[ P03383] interacts with 16 human partners:{Q09028;Q6IPU0;P06748;Q9NYP9;Q96H22;Q96T23;Q13352;Q71F23;Q9BU64;Q8NCD3;Q8NG31;Q6P0N0;Q92674;Q9H3R5;O43482;Q16576}

3630 Pathogen[ P03410] interacts with 19 human partners:{Q9H3R5;Q96T23;Q96H22;Q8NG31;Q6IPU0;Q9NYP9;Q92674;P06748;Q6P0N0;Q8NCD3;Q16576;Q09028;O43482;Q71F23;P49450;O60264;Q13352;Q7L2Z9;Q9BU64}

3631 Pathogen[ P14075] interacts with 16 human partners:{Q16576;Q6IPU0;Q92674;Q96H22;Q9H3R5;Q09028;Q9BU64;Q9NYP9;P06748;Q8NCD3;Q96T23;Q13352;Q8NG31;O43482;Q6P0N0;Q71F23}

3632 Pathogen[ P0C206] interacts with 19 human partners:{Q6IPU0;Q7L2Z9;Q9NYP9;Q96T23;Q9BU64;Q92674;Q9H3R5;P49450;Q8NCD3;Q13352;O43482;Q6P0N0;Q96H22;Q16576;Q09028;P06748;Q71F23;Q8NG31;O60264}

3633 Pathogen[ P03363] interacts with 15 human partners:{Q6P0N0;Q9NYP9;Q92674;Q09028;P06748;O60264;Q96T23;Q16576;P49450;Q8NG31;Q8NCD3;Q71F23;Q9H3R5;O43482;Q13352}

3634 [Cluster 331]GO:0040015+P biological\_process [name] negative regulation of multicellular organism growth [def] "Any process that stops, prevents, or reduces the frequency, rate or extent of growth of an organism to reach its usual body size." [GOC

3635 Pathogen[ Q2Q067] interacts with 1 human partners:{Q99700}

3636 Pathogen[ P0C214] interacts with 1 human partners:{Q99700}

3637 Pathogen[ P03346] interacts with 2 human partners:{Q99700;Q7Z5J4}

3638 Pathogen[ Q85601] interacts with 1 human partners:{Q99700}

3639 Pathogen[ P14079] interacts with 2 human partners:{Q99700;Q8TCU4}

3640 Pathogen[ P03383] interacts with 1 human partners:{Q99700}

3641 Pathogen[ P03410] interacts with 2 human partners:{Q99700;Q8TCU4}



3642 Pathogen[ P14075] interacts with 1 human partners:{Q99700}

3643 Pathogen[ P0C206] interacts with 3 human partners:{Q8TCU4;Q7Z5J4;Q99700}

3644 Pathogen[ P03363] interacts with 1 human partners:{Q99700}

3645 [Cluster 332]GO:0030949+P biological\_process [name] positive regulation of vascular endothelial growth factor receptor signaling pathway [def] "Any process that activates or increases the frequency, rate or extent of vascular endothelial growth factor receptor signaling pathway activity." [GOC

3646 Pathogen[ Q2Q067] interacts with 1 human partners:{P27540}

3647 Pathogen[ P0C214] interacts with 1 human partners:{P27540}

3648 Pathogen[ P03346] interacts with 2 human partners:{Q13322;P27540}

3649 Pathogen[ Q85601] interacts with 1 human partners:{P27540}

3650 Pathogen[ P14079] interacts with 1 human partners:{P27540}

3651 Pathogen[ P03383] interacts with 1 human partners:{P27540}

3652 Pathogen[ P03410] interacts with 1 human partners:{P27540}

3653 Pathogen[ P14075] interacts with 1 human partners:{P27540}

3654 Pathogen[ P0C206] interacts with 1 human partners:{P27540}

3655 Pathogen[ P03363] interacts with 1 human partners:{P27540}

3656 [Cluster 333]GO:0060045+P biological\_process [name] positive regulation of cardiac muscle cell proliferation [def] "Any process that activates or increases the frequency, rate or extent of cardiac muscle cell proliferation." [GOC

3657 Pathogen[ Q2Q067] interacts with 2 human partners:{P14635;Q06330}

3658 Pathogen[ P0C214] interacts with 2 human partners:{Q06330;P14635}

3659 Pathogen[ P03346] interacts with 3 human partners:{Q06330;P14635;Q99593}

3660 Pathogen[ Q85601] interacts with 2 human partners:{Q06330;P14635}

3661 Pathogen[ P14079] interacts with 3 human partners:{Q06413;Q06330;P14635}

3662 Pathogen[ P03383] interacts with 2 human partners:{Q06330;P14635}

3663 Pathogen[ P03410] interacts with 2 human partners:{Q06330;P14635}

3664 Pathogen[ P14075] interacts with 2 human partners:{P14635;Q06330}

3665 Pathogen[ P0C206] interacts with 2 human partners:{Q06330;P14635}

3666 Pathogen[ P03363] interacts with 1 human partners:{Q06330}

3667 [Cluster 334]GO:0034097+P biological\_process [name] response to cytokine stimulus [def] "Any process that results in a change in state or activity of a cell or an organism (in terms of movement, secretion, enzyme production, gene expression, etc.) as a result of a cytokine stimulus." [GOC

3668 Pathogen[ Q2Q067] interacts with 14 human partners:{P01100;P40763;Q04206;P11831;Q99966;P49356;P55212;P24864;P29474;P42226;P23497;P15407;P42224;P42772}

3669 Pathogen[ P0C214] interacts with 19 human partners:{P29474;P15407;P55212;P42226;P01100;P17275;P11831;Q04206;Q16613;P42224;P05121;Q99966;P49356;P23497;P05412;P24864;P40763;O15524;P42772}

3670 Pathogen[ P03346] interacts with 18 human partners:{P05412;O15524;Q99966;P29474;P11831;P17275;P42772;Q04206;P24864;P42226;P55212;P49356;P42224;Q07820;P15407;P23497;P40763;P01100}

3671 Pathogen[ Q85601] interacts with 17 human partners:{P11831;Q99966;P15407;P40763;P42772;Q16613;P01100;Q04206;P42226;P05412;P4224;P49356;P05121;P29474;P55212;P17275;P24864}

3672 Pathogen[ P14079] interacts with 15 human partners:{P24864;P39656;P16298;Q99966;P23497;P55212;Q16613;P42226;P17275;P49356;P4224;Q8N9M5;P15407;P05412;P01100}

3673 Pathogen[ P03383] interacts with 13 human partners:{P11831;P29474;P55212;Q16613;P42226;P42772;P15407;P23497;P01100;Q04206;P24864;P17275;P05412}

3674 Pathogen[ P03410] interacts with 17 human partners:{Q04206;P11831;P05121;P42772;P49356;P01100;P29474;P17275;Q16613;P05412;P4226;P15407;P39656;P55212;P24864;P40763;Q99966}

3675 Pathogen[ P14075] interacts with 13 human partners:{P29474;P23497;Q04206;P05412;P42226;P11831;P17275;P55212;Q16613;P01100;P42772;P15407;P24864}

3676 Pathogen[ P0C206] interacts with 19 human partners:{P15407;P17275;P39656;P05412;P55212;P42772;O15524;P01100;Q04206;P40763;P29474;P11831;Q99966;P42226;P05121;Q16613;P42224;P49356;P24864}

3677 Pathogen[ P03363] interacts with 14 human partners:{P29474;Q04206;P24864;O15524;P23497;P17275;P42226;P55212;P11831;P42772;P15407;Q07820;P05412;P01100}

3678 [Cluster 335]GO:0045321+P biological\_process [name] leukocyte activation [def] "A change in morphology and behavior of a leukocyte resulting from exposure to a specific antigen, mitogen, cytokine, cellular ligand, or soluble factor." [GOC

3679 Pathogen[ Q2Q067] interacts with 1 human partners:{P17036}

3680 Pathogen[ P0C214] interacts with 2 human partners:{Q9H0E2;P17036}

3681 Pathogen[ P03346] interacts with 2 human partners:{Q9H0E2;P17036}

3682 Pathogen[ Q85601] interacts with 1 human partners:{P17036}

3683 Pathogen[ P14079] interacts with 1 human partners:{Q9H0E2}

3684 Pathogen[ P03383] interacts with 1 human partners:{P17036}

3685 Pathogen[ P03410] interacts with 2 human partners:{P17036;Q9H0E2}

3686 Pathogen[ P14075] interacts with 1 human partners:{P17036}

3687 Pathogen[ P0C206] interacts with 2 human partners:{Q9H0E2;P17036}

3688 Pathogen[ P03363] interacts with 2 human partners:{P17036;Q9H0E2}

3689 [Cluster 336]GO:0060325+P biological\_process [name] face morphogenesis [def] "The process in which the anatomical structures of the face are generated and organized. The face is the ventral division of the head." [GOC

3690 Pathogen[ Q2Q067] interacts with 5 human partners:{Q96S65;P12755;Q8WVJ9;Q14865;P55771}

3691 Pathogen[ P0C214] interacts with 5 human partners:{Q96S65;Q14865;P12755;Q8WVJ9;P55771}

3692 Pathogen[ P03346] interacts with 6 human partners:{Q96S65;Q8WVJ9;Q14865;Q9HB21;P56178;P55771}

3693 Pathogen[ Q85601] interacts with 6 human partners:{Q96S65;P12755;P55771;Q9HB21;Q14865;Q8WVJ9}

3694 Pathogen[ P14079] interacts with 8 human partners:{P12755;P55771;Q14865;Q8WVJ9;Q96S65;Q15042;Q9HB21;P28360}

3695 Pathogen[ P03383] interacts with 3 human partners:{Q96S65;P55771;Q8WVJ9}

3696 Pathogen[ P03410] interacts with 7 human partners:{Q8WVJ9;P12755;Q9HB21;Q96S65;P55771;Q14865;Q15042}

3697 Pathogen[ P14075] interacts with 3 human partners:{Q96S65;Q8WVJ9;P55771}

3698 Pathogen[ P0C206] interacts with 6 human partners:{Q96S65;P55771;Q8WVJ9;P12755;Q9HB21;Q14865}

3699 Pathogen[ P03363] interacts with 4 human partners:{Q96S65;P55771;Q14865;Q8WVJ9}

3700 [Cluster 337]GO:0048813+P biological\_process [name] dendrite morphogenesis [def] "The process in which the anatomical structures of a dendrite are generated and organized. A dendrite is a freely branching protoplasmic process of a nerve cell." [GOC

3701 Pathogen[ Q2Q067] interacts with 3 human partners:{Q9NYF0;P63000;Q02078}

3702 Pathogen[ P0C214] interacts with 3 human partners:{P63000;Q02078;Q9NYF0}

3703 Pathogen[ P03346] interacts with 6 human partners:{Q02078;Q075840;P11137;Q13492;Q9NYF0;P63000}

3704 Pathogen[ Q85601] interacts with 3 human partners:{Q02078;Q9NYF0;P63000}

3705 Pathogen[ P14079] interacts with 4 human partners:{Q13492;Q02078;P11137;Q9NYF0}

3706 Pathogen[ P03383] interacts with 3 human partners:{P63000;Q9NYF0;Q02078}

3707 Pathogen[ P03410] interacts with 5 human partners:{P11137;P63000;Q13492;Q9NYF0;Q02078}

3708 Pathogen[ P14075] interacts with 3 human partners:{Q02078;P63000;Q9NYF0}

3709 Pathogen[ P0C206] interacts with 4 human partners:{Q02078;P11137;P63000;Q9NYF0}

3710 Pathogen[ P03363] interacts with 4 human partners:{P11137;Q9NYF0;P63000;Q02078}

3711 [Cluster 338]GO:0001701+P biological\_process [name] in utero embryonic development [def] "The process whose specific outcome is the progression of the embryo in the uterus over time, from formation of the zygote in the oviduct, to birth. An example of this process is found in *Mus musculus*." [GOC

3712 Pathogen[ Q2Q067] interacts with 65 human partners:{O15525;Q9UNS2;Q9NR56;Q9HBZ2;A6NGQ2;Q63HK5;Q15293;P27694;Q8WW38;P67809;Q13485;P35712;Q15554;O96004;Q01196;Q00613;P15976;Q96ST3;Q02447;Q86YP4;Q8N5D0;Q07955;P08047;P11831;Q15561;Q9UJW3;P35227;Q99873;O60663;P14635;P63146;P55199;P59047;P56693;Q9ULX9;O60934;P84022;Q15468;O95067;P29474;Q13426;Q29830;P35226;Q8WUW1;Q13618;Q15796;O00321;Q14145;P20290;O95983;P16989;P49459;Q9HCK8;O96018;Q5TGS1;P35579;O95613;Q9BQA5;Q9HBD4;P10242;P35711;Q9NYV6;Q06546;Q15750;Q03112}

3713 Pathogen[ P0C214] interacts with 65 human partners:{P29474;P35226;P20290;P35227;Q00613;O60663;P16989;Q06546;O00321;Q8N5D0;Q15554;Q9NR56;Q03112;Q14145;P17275;Q9HBD4;P35711;P56693;P67809;P84022;P11831;Q63HK5;P49459;O96018;Q13618;Q99873;P14635;Q9Y6I3;Q99807;Q9UNS2;Q07955;Q9HBZ2;Q15561;P35580;Q13426;O95983;Q86YP4;Q13485;P55199;Q15468;Q8WW38;O95067;Q9HCK8;Q9ULX9;Q15796;O15525;Q9NYV6;Q8WUW1;P10242;Q15750;Q02447;Q92830;Q96ST3;O96004;P13533;P27694;O95613;Q9BQA5;Q15293;P59047;Q5TGS1;P35712;P08047;P63146;Q9UJW3}

3714 Pathogen[ P03346] interacts with 79 human partners:{Q96ST3;P59047;Q9HBD4;Q99873;P29474;Q00613;Q8WW38;P11831;Q9Y5W3;Q15554;P27694;P35579;P35226;P17275;Q9UJQ4;O95983;Q68CZ1;Q13426;Q13618;Q15796;P56693;P35227;O00321;Q63HK5;Q99767;P16989;P49459;O75626;O95067;Q9ULX9;Q07955;Q13351;Q8WUW1;P08047;Q15561;O60663;O96004;Q92830;P84022;P10242;Q8N5D0;P15976;Q06546;P67809;P14635;Q86YP4;P63146;Q03112;Q9HCK8;O96018;Q5TGS1;Q15750;Q9HBZ2;O95718;P35713;O60934;P55199;O15525;P35712;Q9NYV6;Q99929;Q01196;Q13485;Q9P2D1;O95613;Q9UNS2;Q9Y6I3;P20290;Q14145;Q15293;O43543;P35711;Q15468;Q02447;Q9NR56;A6NGQ2;Q9UJW3;Q9BQA5;Q9UJU5}

3715 Pathogen[ Q85601] interacts with 69 human partners:{P11831;P63146;Q15750;P15976;Q15293;P13533;Q06546;Q9P2D1;Q8WW38;Q15554;Q9UJW3;P35579;Q13426;Q03112;O60663;P35712;P10242;Q99767;Q9NR56;O95983;O96004;Q8WUW1;Q00613;O15525;Q07955;P20290;P27694;Q14145;P08047;Q92830;P14635;Q99873;Q5TGS1;Q86YP4;P35711;P67809;O96018;Q9HBZ2;P49459;Q02447;P56693;P29474;Q9HBD4;P55199;Q9BQA5;P84022;Q9HCK8;Q9UNS2;Q9NYV6;P35226;P35580;Q9Y6I3;O75626;O95613;Q13618;O95067;Q63HK5;P17275;Q13485;P16989;Q8N5D0;Q9ULX9;Q15561;Q15796;O00321;P35227;O60934;P59047;Q96ST3}

3716 Pathogen[ P14079] interacts with 74 human partners:{P35711;P35579;Q15293;P55199;Q99807;Q15561;Q9NYV6;Q8N5D0;Q06546;O00321;Q92830;O75626;P67809;Q9Y6I3;Q99873;Q96ST3;Q13618;Q9UNS2;Q68CZ1;P35712;O96004;O95067;Q02447;Q15750;P15976;Q86YP4;O60934;Q9BQA5;Q9NR56;Q14249;A6NGQ2;O95718;P35611;Q9P2D1;Q00613;P14635;Q14145;P16989;Q9UJW3;O96018;O60663;P49459;P17275;Q4AC94;Q15468;Q5TGS1;Q9UJQ4;Q9HCK8;O95983;Q13351;Q9ULX9;Q07955;P56693;O43543;P35226;Q15554;P35227;Q9Y5W3;O15525;O95613;P27694;Q63HK5;Q8WUW1;Q9HBZ2;P10242;O43819;P28360;P63146;Q13426;P59047;Q8WW

38;Q99767;P49917;P20290}

3717 Pathogen[ P03383] interacts with 59 human partners: {P35227;O96018;P16989;Q07955;P55199;Q15561;P11831;P35712;Q13485;Q9HBD4;P20290;P08047;Q9NVV6;P29474;Q8WW38;Q86YP4;Q15554;Q9UJW3;P27694;Q9NR56;Q15468;O00321;P14635;O15525;Q13618;O96004;Q03112;P84022;A6NGQ2;Q99873;Q02447;Q9BQA5;Q13426;Q92830;O60663;O95067;P35711;Q00613;P35580;P10242;Q9HCK8;O95983;Q14145;Q15796;P49459;P35579;Q96ST3;P63146;Q5TGS1;O95613;Q9UNS2;P17275;P56693;P67809;Q9ULX9;Q06546;Q8N5D0;P35226;Q15796}

3718 Pathogen[ P03410] interacts with 78 human partners: {P84022;Q92830;Q00613;P35712;O96018;P11831;Q03112;Q15293;O96004;Q15554;Q9Y6I3;Q02447;P16989;A6NGQ2;Q9BQA5;Q15750;P10242;Q4AC94;Q15468;P49459;Q9NR56;O95067;Q99767;P35579;P59047;Q86YP4;O00321;P35227;Q96ST3;Q8WW38;O60663;Q8WUW1;Q9HBZ2;P67809;Q9NVV6;O15525;P55199;Q13618;P29474;Q15561;P14635;Q5TGS1;Q9P2D1;Q07955;P17275;Q9UNS2;O95983;P63146;Q13485;Q9ULX9;Q9HCK8;P56693;P20290;Q8N5D0;Q13426;P35580;O43543;P08047;P27694;P13533;Q9UJW3;O75626;Q99807;Q63HK5;Q68CZ1;O95613;P35226;Q9HBD4;Q14145;Q15796;Q9UJQ4;P35611;P15976;O60934;Q06546;Q99873;O43819;Q14249}

3719 Pathogen[ P14075] interacts with 58 human partners: {P29474;Q96ST3;O60663;Q00613;O95067;Q15750;Q5TGS1;Q9HBD4;P16989;O96018;Q9BQA5;Q9NVV6;Q13618;P11831;Q8N5D0;Q15554;P14635;P17275;Q06546;P49459;Q15561;Q9UJW3;Q9ULX9;P56693;Q8WW38;P10242;Q15796;P35711;O96004;Q13485;O95983;Q9NR56;Q99873;P35712;Q9HCK8;P67809;P35579;Q03112;Q13426;A6NGQ2;P27694;P55199;Q02447;Q15525;P20290;Q9UNS2;Q15468;P35226;P63146;O95613;P84022;Q92830;Q14145;P35227;Q86YP4;Q07955;O00321;P08047}

3720 Pathogen[ P0C206] interacts with 78 human partners: {A6NGQ2;P84022;P67809;Q15468;Q9HCK8;Q92830;Q06546;Q96ST3;Q07955;Q9UJQ4;Q5TGS1;P13533;P17275;P20290;Q99873;Q15554;O95983;Q00613;P35226;O60934;Q9NR56;Q9P2D1;Q8WW38;P10242;O75626;P56693;Q86YP4;O15525;P15976;O00321;Q15796;Q9BQA5;Q14145;O96004;Q63HK5;Q99767;O95718;Q8WUW1;P49917;P35711;Q03112;O96018;Q13618;P16989;P59047;O95613;P08047;P49459;Q13426;Q15293;Q99807;Q02447;P35579;Q9Y6I3;Q13485;P29474;P11831;P35712;O43543;Q9HBD4;P27694;O95067;O60663;Q15750;P55199;P14635;Q8N5D0;P35580;Q86YT6;Q9NVV6;Q14249;Q15561;Q9UJW3;Q9HBZ2;Q9UNS2;Q9ULX9;P63146;P35227}

3721 Pathogen[ P03363] interacts with 67 human partners: {A6NGQ2;Q5TGS1;P29474;Q9UJQ4;P27694;P35711;Q14145;P49459;Q15468;P35227;Q8N5D0;P35579;Q15554;Q86YP4;P55199;Q02447;Q06546;Q03112;O60663;Q99929;Q13618;O95613;Q9HBZ2;P63146;Q9NR56;P17275;Q15750;O00321;P11831;Q9HCK8;Q15293;P56693;Q13426;O95067;Q9NVV6;Q92830;P35226;O15525;Q96ST3;Q9HBD4;Q9BQA5;Q15796;O95983;P84022;O96004;P59047;Q9UNS2;Q8WUW1;P20290;P35712;P10242;Q13485;Q63HK5;Q07955;Q00613;Q9UJW3;P16989;Q8WW38;P08047;O75626;Q9UJW3;Q9ULX9;Q15561;O96018;Q99767;Q99873;P67809}

3722 [Cluster 339]GO:0035694+P biological\_process [name] mitochondrial protein catabolic process [def] "The chemical reactions and pathways resulting in the breakdown of a mitochondrial protein. This process is necessary to maintain the healthy state of mitochondria and is thought to occur via the induction of an intramitochondrial lysosome-like organelle that acts to eliminate the damaged oxidised mitochondrial proteins without destroying the mitochondrial structure." [GOC

3723 Pathogen[ Q2Q067] interacts with 3 human partners: {O60238;Q12983;Q8TC71}

3724 Pathogen[ P0C214] interacts with 3 human partners: {Q12983;O60238;Q8TC71}

3725 Pathogen[ P03346] interacts with 3 human partners: {Q8TC71;O60238;Q12983}

3726 Pathogen[ Q85601] interacts with 2 human partners: {Q12983;O60238}

3727 Pathogen[ P14079] interacts with 3 human partners: {Q12983;O60238;Q8TC71}

3728 Pathogen[ P03383] interacts with 3 human partners: {Q12983;O60238;Q8TC71}

3729 Pathogen[ P03410] interacts with 3 human partners: {Q12983;Q8TC71;O60238}

3730 Pathogen[ P14075] interacts with 3 human partners: {Q12983;O60238;Q8TC71}

3731 Pathogen[ P0C206] interacts with 3 human partners: {Q8TC71;O60238;Q12983}

3732 Pathogen[ P03363] interacts with 2 human partners: {Q8TC71;O60238}

3733 [Cluster 340]GO:0010824+P biological\_process [name] regulation of centrosome duplication [def] "Any process that modulates the frequency, rate or extent of centrosome duplication. Centrosome duplication is the replication of a centrosome, a structure comprised of a pair of centrioles and peri-centriolar material from which a microtubule spindle apparatus is organized." [GOC

3734 Pathogen[ Q2Q067] interacts with 1 human partners: {O14980}

3735 Pathogen[ P0C214] interacts with 1 human partners: {O14980}

3736 Pathogen[ P03346] interacts with 2 human partners: {O14980;Q9UHD1}

3737 Pathogen[ Q85601] interacts with 2 human partners: {Q9UHD1;O14980}

3738 Pathogen[ P14079] interacts with 1 human partners: {Q9UHD1}

3739 Pathogen[ P03383] interacts with 1 human partners: {O14980}

3740 Pathogen[ P03410] interacts with 2 human partners: {Q9UHD1;O14980}

3741 Pathogen[ P14075] interacts with 1 human partners: {O14980}

3742 Pathogen[ P0C206] interacts with 1 human partners: {Q9UHD1}

3743 Pathogen[ P03363] interacts with 1 human partners: {O14980}

3744 [Cluster 341]GO:0050871+P biological\_process [name] positive regulation of B cell activation [def] "Any process that activates or increases the frequency, rate or extent of B cell activation." [GOC

3745 Pathogen[ Q2Q067] interacts with 3 human partners: {Q8IUC6;Q96FA3;Q8NFFZ5}

3746 Pathogen[ P0C214] interacts with 3 human partners: {Q8IUC6;Q96FA3;Q8NFFZ5}

3747 Pathogen[ P03346] interacts with 3 human partners: {Q8NFFZ5;Q96FA3;Q8IUC6}

3748 Pathogen[ Q85601] interacts with 3 human partners: {Q8IUC6;Q96FA3;Q8NFFZ5}

3749 Pathogen[ P14079] interacts with 3 human partners: {Q8IUC6;Q96FA3;Q8NFFZ5}

3750 Pathogen[ P03383] interacts with 3 human partners:{Q8IUC6;Q96FA3;Q8NFZ5}  
3751 Pathogen[ P03410] interacts with 3 human partners:{Q8NFZ5;Q96FA3;Q8IUC6}  
3752 Pathogen[ P14075] interacts with 3 human partners:{Q8NFZ5;Q96FA3;Q8IUC6}  
3753 Pathogen[ P0C206] interacts with 3 human partners:{Q8NFZ5;Q8IUC6;Q96FA3}  
3754 Pathogen[ P03363] interacts with 2 human partners:{Q96FA3;Q8NFZ5}  
3755 [Cluster 342]GO:0035457+P biological\_process [name] cellular response to interferon-alpha [def] "Any process that results in a change in state or activity of a cell (in terms of movement, secretion, enzyme production, gene expression, etc.) as a result of an interferon-alpha stimulus. Interferon-alpha is a type I interferon." [GOC  
3756 Pathogen[ Q2Q067] interacts with 2 human partners:{P09913;O14879}  
3757 Pathogen[ P0C214] interacts with 2 human partners:{P09913;O14879}  
3758 Pathogen[ P03346] interacts with 2 human partners:{O14879;P09913}  
3759 Pathogen[ Q85601] interacts with 2 human partners:{P09913;O14879}  
3760 Pathogen[ P14079] interacts with 2 human partners:{P09913;O14879}  
3761 Pathogen[ P03383] interacts with 2 human partners:{O14879;P09913}  
3762 Pathogen[ P03410] interacts with 2 human partners:{P09913;O14879}  
3763 Pathogen[ P14075] interacts with 2 human partners:{P09913;O14879}  
3764 Pathogen[ P0C206] interacts with 2 human partners:{O14879;P09913}  
3765 Pathogen[ P03363] interacts with 2 human partners:{P09913;O14879}  
3766 [Cluster 343]GO:0045576+P biological\_process [name] mast cell activation [def] "The change in morphology and behavior of a mast cell resulting from exposure to a cytokine, chemokine, soluble factor, or to (at least in mammals) an antigen which the mast cell has specifically bound via IgE bound to Fc-epsilonRI receptors." [GOC  
3767 Pathogen[ Q2Q067] interacts with 2 human partners:{Q13094;Q92597}  
3768 Pathogen[ P0C214] interacts with 2 human partners:{Q13094;Q92597}  
3769 Pathogen[ P03346] interacts with 2 human partners:{Q92597;Q13094}  
3770 Pathogen[ Q85601] interacts with 2 human partners:{Q92597;Q13094}  
3771 Pathogen[ P14079] interacts with 2 human partners:{Q13094;Q92597}  
3772 Pathogen[ P03383] interacts with 2 human partners:{Q92597;Q13094}  
3773 Pathogen[ P03410] interacts with 2 human partners:{Q13094;Q92597}  
3774 Pathogen[ P14075] interacts with 2 human partners:{Q13094;Q92597}  
3775 Pathogen[ P0C206] interacts with 2 human partners:{Q92597;Q13094}  
3776 Pathogen[ P03363] interacts with 2 human partners:{Q92597;Q13094}  
3777 [Cluster 344]GO:0031507+P biological\_process [name] heterochromatin assembly [def] "The assembly of chromatin into heterochromatin, a compact and highly condensed form that is often, but not always, transcriptionally silent." [GOC  
3778 Pathogen[ Q2Q067] interacts with 1 human partners:{Q8TBE0}  
3779 Pathogen[ P0C214] interacts with 1 human partners:{Q8TBE0}  
3780 Pathogen[ P03346] interacts with 1 human partners:{Q8TBE0}  
3781 Pathogen[ Q85601] interacts with 1 human partners:{Q8TBE0}  
3782 Pathogen[ P14079] interacts with 1 human partners:{Q8TBE0}  
3783 Pathogen[ P03383] interacts with 1 human partners:{Q8TBE0}  
3784 Pathogen[ P03410] interacts with 1 human partners:{Q8TBE0}  
3785 Pathogen[ P14075] interacts with 1 human partners:{Q8TBE0}  
3786 Pathogen[ P0C206] interacts with 1 human partners:{Q8TBE0}  
3787 Pathogen[ P03363] interacts with 1 human partners:{Q8TBE0}  
3788 [Cluster 345]GO:0043550+P biological\_process [name] regulation of lipid kinase activity [def] "Any process that modulates the frequency, rate or extent of lipid kinase activity, the catalysis of the transfer of a phosphate group, usually from ATP, to a simple or complex lipid." [GOC  
3789 Pathogen[ Q2Q067] interacts with 3 human partners:{P06400;Q08999;P28749}  
3790 Pathogen[ P0C214] interacts with 3 human partners:{Q08999;P28749;P06400}  
3791 Pathogen[ P03346] interacts with 3 human partners:{Q08999;P06400;P28749}  
3792 Pathogen[ Q85601] interacts with 3 human partners:{Q08999;P06400;P28749}  
3793 Pathogen[ P14079] interacts with 2 human partners:{P28749;Q08999}  
3794 Pathogen[ P03383] interacts with 3 human partners:{Q08999;P06400;P28749}  
3795 Pathogen[ P03410] interacts with 3 human partners:{Q08999;P06400;P28749}  
3796 Pathogen[ P14075] interacts with 3 human partners:{Q08999;P06400;P28749}  
3797 Pathogen[ P0C206] interacts with 3 human partners:{P28749;Q08999;P06400}  
3798 Pathogen[ P03363] interacts with 3 human partners:{P06400;P28749;Q08999}  
3799 [Cluster 346]GO:0006356+P biological\_process [name] regulation of transcription from RNA polymerase I promoter [def] "Any process that modulates the frequency, rate or extent of transcription from an RNA polymerase I promoter." [GOC  
3800 Pathogen[ Q2Q067] interacts with 4 human partners:{Q00059;P62875;P53803;P17480}  
3801 Pathogen[ P0C214] interacts with 4 human partners:{P53803;Q00059;P17480;P62875}  
3802 Pathogen[ P03346] interacts with 5 human partners:{Q00059;P53803;P17480;Q01954;P62875}  
3803 Pathogen[ Q85601] interacts with 5 human partners:{P17480;P53803;Q00059;Q01954;P62875}  
3804 Pathogen[ P14079] interacts with 4 human partners:{P62875;P53803;P17480;Q00059}  
3805 Pathogen[ P03383] interacts with 4 human partners:{P53803;Q00059;P62875;P17480}  
3806 Pathogen[ P03410] interacts with 4 human partners:{Q00059;P53803;P62875;P17480}  
3807 Pathogen[ P14075] interacts with 4 human partners:{Q00059;P17480;P62875;P53803}  
3808 Pathogen[ P0C206] interacts with 5 human partners:{P62875;P53803;Q00059;P17480;Q01954}  
3809 Pathogen[ P03363] interacts with 4 human partners:{P17480;Q00059;Q01954;P53803}

3810 [Cluster 347]GO:0043162+P biological\_process [name] ubiquitin-dependent protein catabolic process via the multivesicular body sorting pathway [def] "The chemical reactions and pathways resulting in the breakdown of a protein or peptide covalently tagged with ubiquitin, via the multivesicular body (MVB) sorting pathway\_ ubiquitin-tagged proteins are sorted into MVBs, and delivered to a lysosome/vacuole for degradation." [GOC

3811 Pathogen[ Q2Q067] interacts with 2 human partners:{Q99816;O75674}

3812 Pathogen[ P0C214] interacts with 2 human partners:{Q99816;O75674}

3813 Pathogen[ P03346] interacts with 2 human partners:{Q99816;O75674}

3814 Pathogen[ Q85601] interacts with 2 human partners:{Q99816;O75674}

3815 Pathogen[ P14079] interacts with 2 human partners:{O75674;Q99816}

3816 Pathogen[ P03383] interacts with 1 human partners:{Q99816}

3817 Pathogen[ P03410] interacts with 2 human partners:{O75674;Q99816}

3818 Pathogen[ P14075] interacts with 1 human partners:{Q99816}

3819 Pathogen[ P0C206] interacts with 2 human partners:{Q99816;O75674}

3820 Pathogen[ P03363] interacts with 2 human partners:{O75674;Q99816}

3821 [Cluster 348]GO:0002098+P biological\_process [name] tRNA wobble uridine modification [def] "The process in which a uridine in position 34 of a tRNA is post-transcriptionally modified." [GOC

3822 Pathogen[ Q2Q067] interacts with 4 human partners:{Q7Z7A3;Q9Y2Z2;Q2VPK5;Q9BTM9}

3823 Pathogen[ P0C214] interacts with 5 human partners:{Q9BTM9;Q9Y2Z2;Q95396;Q2VPK5;Q7Z7A3}

3824 Pathogen[ P03346] interacts with 4 human partners:{Q9BTM9;Q9Y2Z2;Q7Z7A3;Q2VPK5}

3825 Pathogen[ Q85601] interacts with 4 human partners:{Q9Y2Z2;Q2VPK5;Q9BTM9;Q7Z7A3}

3826 Pathogen[ P14079] interacts with 4 human partners:{Q9Y2Z2;Q2VPK5;Q7Z7A3;Q9BTM9}

3827 Pathogen[ P03383] interacts with 4 human partners:{Q7Z7A3;Q9Y2Z2;Q9BTM9;Q2VPK5}

3828 Pathogen[ P03410] interacts with 4 human partners:{Q9Y2Z2;Q7Z7A3;Q2VPK5;Q9BTM9}

3829 Pathogen[ P14075] interacts with 4 human partners:{Q9BTM9;Q9Y2Z2;Q2VPK5;Q7Z7A3}

3830 Pathogen[ P0C206] interacts with 5 human partners:{Q9Y2Z2;Q2VPK5;Q95396;Q7Z7A3;Q9BTM9}

3831 Pathogen[ P03363] interacts with 3 human partners:{Q9BTM9;Q7Z7A3;Q2VPK5}

3832 [Cluster 349]GO:0071360+P biological\_process [name] cellular response to exogenous dsRNA [def] "Any process that results in a change in state or activity of a cell (in terms of movement, secretion, enzyme production, gene expression, etc.) as a result of an exogenous double-stranded RNA stimulus." [GOC

3833 Pathogen[ Q2Q067] interacts with 2 human partners:{Q7Z2W4;P09914}

3834 Pathogen[ P0C214] interacts with 3 human partners:{P09914;Q7Z2W4;Q86WV6}

3835 Pathogen[ P03346] interacts with 2 human partners:{P09914;Q7Z2W4}

3836 Pathogen[ Q85601] interacts with 3 human partners:{Q86WV6;Q7Z2W4;P09914}

3837 Pathogen[ P14079] interacts with 4 human partners:{P09914;Q7Z2W4;Q7Z434;Q86WV6}

3838 Pathogen[ P03383] interacts with 1 human partners:{Q7Z2W4}

3839 Pathogen[ P03410] interacts with 4 human partners:{Q7Z434;Q7Z2W4;Q86WV6;P09914}

3840 Pathogen[ P14075] interacts with 1 human partners:{Q7Z2W4}

3841 Pathogen[ P0C206] interacts with 3 human partners:{Q86WV6;Q7Z2W4;P09914}

3842 Pathogen[ P03363] interacts with 2 human partners:{P09914;Q7Z2W4}

3843 [Cluster 350]GO:2000505+P biological\_process [name] regulation of energy homeostasis [def] "Any process that modulates the frequency, rate or extent of energy homeostasis." [GOC

3844 Pathogen[ Q2Q067] interacts with 1 human partners:{Q9NP71}

3845 Pathogen[ P0C214] interacts with 1 human partners:{Q9NP71}

3846 Pathogen[ P03346] interacts with 2 human partners:{Q9NP71;Q12778}

3847 Pathogen[ Q85601] interacts with 1 human partners:{Q9NP71}

3848 Pathogen[ P14079] interacts with 1 human partners:{Q9NP71}

3849 Pathogen[ P03383] interacts with 1 human partners:{Q9NP71}

3850 Pathogen[ P03410] interacts with 1 human partners:{Q9NP71}

3851 Pathogen[ P14075] interacts with 1 human partners:{Q9NP71}

3852 Pathogen[ P0C206] interacts with 1 human partners:{Q9NP71}

3853 Pathogen[ P03363] interacts with 1 human partners:{Q9NP71}

3854 [Cluster 351]GO:0036031+P biological\_process [name] recruitment of mRNA capping enzyme to RNA polymerase II holoenzyme complex [def] "The process in which the guanylyltransferase enzyme responsible for adding a 7-methylguanosine cap on pre-mRNA becomes associated with the RNA polymerase II holoenzyme complex and the 5' end of a transcript." [GOC

3855 Pathogen[ Q2Q067] interacts with 1 human partners:{Q9BTL3}

3856 Pathogen[ P0C214] interacts with 1 human partners:{Q9BTL3}

3857 Pathogen[ P03346] interacts with 1 human partners:{Q9BTL3}

3858 Pathogen[ Q85601] interacts with 1 human partners:{Q9BTL3}

3859 Pathogen[ P14079] interacts with 1 human partners:{Q9BTL3}

3860 Pathogen[ P03383] interacts with 1 human partners:{Q9BTL3}

3861 Pathogen[ P03410] interacts with 1 human partners:{Q9BTL3}

3862 Pathogen[ P14075] interacts with 1 human partners:{Q9BTL3}

3863 Pathogen[ P0C206] interacts with 1 human partners:{Q9BTL3}

3864 Pathogen[ P03363] interacts with 1 human partners:{Q9BTL3}

3865 [Cluster 352]GO:0016192+P biological\_process [name] vesicle-mediated transport [def] "A cellular transport process in which transported substances are moved in membrane-bounded vesicles\_ transported substances are enclosed in the vesicle lumen or

located in the vesicle membrane. The process begins with a step that directs a substance to the forming vesicle, and includes vesicle budding and coating. Vesicles are then targeted to, and fuse with, an acceptor membrane." [GOC

- 3866 Pathogen[ Q2Q067] interacts with 83 human  
partners: {O15027;Q9H2G9;O94973;O00186;Q9Y6D6;Q9Y6Q5;Q99747;Q10567;P56377;O60664;O43747;O95782;Q92572;O14579;Q9BQD3;P55735;Q8WXE9;P53675;Q9P299;O75865;Q9UJY4;Q9UJY5;O43752;O14662;Q8IUR0;O43617;Q8WUH2;Q86SZ2;Q9HCH5;P48444;O00189;Q9H267;P63010;Q96PC3;Q96CW1;P61923;O95159;O43264;O75396;P53677;Q9UBF2;Q00610;P61966;Q9UL33;Q15437;P53992;O95486;P06396;O75843;Q9HD42;O94855;P0DI81;P0DI82;Q9UN37;Q9Y2T2;Q9H0R1;Q13439;Q53G59;Q9BX55;Q96JE7;Q13618;Q9UQF2;P54920;P53618;Q6NUQ1;O15155;P09497;O60763;Q15833;O75154;O95487;O75558;P35606;P49006;Q9Y678;Q9Y296;P09496;Q9P2W9;P49754;Q15436;Q9NZ52;Q13367;Q9BXF3}
- 3867 Pathogen[ P0C214] interacts with 84 human  
partners: {Q96CW1;Q15833;Q6NUQ1;P61923;P55735;O75865;P49006;P49754;Q9P299;Q99747;P53992;O43264;P59780;Q9UJY5;O14579;Q9Y2T2;O00189;Q13367;Q9HD42;P53618;P35606;O00186;P48444;Q9BQD3;Q9HCH5;P54920;Q13618;Q9Y296;Q9Y6Q2;O43617;P06396;Q9H0R1;Q15436;Q8IUR0;O75843;P63010;Q10567;Q92572;P53675;Q9UBF2;O95487;Q53G59;P49257;Q9UJY4;P53677;P56377;Q15437;Q9H2G9;Q96PC3;P0DI81;Q9NZ52;O43752;O60763;Q9UQF2;Q9BXF3;O43747;O94973;Q9Y6Q5;Q13439;P09497;O75396;Q9Y6D6;O60664;Q8WXE9;P61966;P09496;O95782;Q5T215;Q9UN37;O75558;Q96JE7;P53680;Q9Y678;Q8WUH2;Q9UL33;Q9BXS5;O15155;O15027;O95486;P0DI82;Q86SZ2;O75154;Q9P2W9;O94855}
- 3868 Pathogen[ P03346] interacts with 120 human  
partners: {Q13439;Q5JU85;Q15833;O60664;P61966;P55735;O43752;Q15438;O95159;Q9H115;Q9P2W9;O15027;Q9H2G9;Q9Y5R8;Q9Y6B7;Q9BXF3;P63010;Q9P253;O43747;Q9HD42;Q92572;P53680;P49754;P49257;P56377;Q9Y6D5;O75865;Q969X5;P59780;Q13618;Q9BXS5;Q9H0R1;Q86SZ2;Q9Y678;Q12981;O43264;O95782;P53618;Q9HCH5;Q13190;O75396;Q9P299;O14579;O00189;Q8WUH2;P09497;O00186;O94855;P48553;Q9BXW6;Q9Y6D6;Q10567;Q6NUQ1;O75843;P48444;Q9Y6Q2;P20340;Q15436;Q8WXE9;Q7Z3U7;Q9UL33;Q9UPM8;Q5T215;Q15437;Q9Y296;Q96JE7;Q9Y2L5;Q96CW1;Q96AX1;Q9UBF2;Q96PC3;P0DI81;Q9UJY4;P54920;P53675;Q6DN90;P61923;Q99829;O75131;O60763;Q8N157;Q8IUR0;O95486;Q13492;P0DI82;Q9ULV0;Q9UPP2;Q5JRA6;P09497;Q9HCU5;Q13367;P49006;Q9UQF2;O95487;Q96KG9;O14617;Q7Z392;P06396;Q9UJY5;O75154;P49755;O75558;Q9Y6Q5;P35606;Q9BQD3;O94973;O15155;Q9NZ52;O14662;Q9H267;Q00610;P53992;Q15363;P53677;Q99747;Q9UN37;O43617;Q86Y82;Q9Y2T2;Q8WU76}
- 3869 Pathogen[ Q85601] interacts with 98 human  
partners: {Q13367;P61163;O60664;O00186;P54920;P53675;O75843;O15027;P48444;Q00610;Q9Y2T2;P09496;P06396;O75154;Q9BXF3;Q6NUQ1;Q9UJY4;O75396;Q9UL33;Q9BQD3;Q96CW1;Q15833;O14579;O95487;Q9P253;Q13439;O60763;Q96JE7;Q9BXS5;P56377;Q9P299;O15155;Q12981;O43264;Q9HCH5;Q8WXE9;O43747;P61923;Q9UPM8;Q9Y296;Q9NP61;P49006;P49754;Q8WUH2;Q10567;Q9P2W9;Q9UJY5;Q15436;O43617;Q9UQF2;Q9H267;O43752;Q8N6H7;Q5T215;Q9Y6Q2;Q15437;Q9UBF2;P49257;Q8N6T3;Q9Y678;Q9Y2L5;P0DI81;P55735;O95159;P53680;O75558;O95486;O94973;Q9HCH5;P0DI82;P53618;Q9H2G9;Q9Y6B7;P09497;P53677;Q9Y6D6;Q96KG9;P63010;Q92572;O75865;P61966;Q13618;P59780;Q53G59;Q9Y6Q5;O94855;P35606;Q9NZ52;Q9UN37;O14662;Q9HD42;P53992;Q9H0R1;O00189;Q86SZ2;Q99747;O95782;Q8IUR0}
- 3870 Pathogen[ P14079] interacts with 123 human  
partners: {Q9BXW6;Q6NUQ1;Q13492;Q9Y296;Q96CW1;O95070;O95159;Q6ZVE7;Q9UL33;Q969M3;P49257;P61923;O15027;Q9UPP2;Q86SZ2;Q9Y6Q5;P61966;Q9BXS5;Q00610;Q9UJY4;O95487;O60664;Q9BRL7;Q96RQ1;Q9UJY5;P35606;Q9UQF2;Q9UPM8;Q8WVT3;Q13618;Q8N157;P49006;Q99829;Q10567;Q9Y6D5;P56377;O75865;Q9Y2T2;Q9Y678;Q9Y6B7;P59780;O94855;O00189;Q9HCH5;Q587I9;Q9HD42;P53992;Q13439;Q99747;O15155;Q96JE7;Q8IUR0;P33947;Q92572;Q9NZ52;Q15363;O75843;O75558;O75396;P24390;Q9H2G9;O00186;Q15833;O95782;Q5T215;Q969X5;P49755;Q9P299;Q9Y6D6;Q7Z392;Q9BXF3;Q5JRA6;Q9UBF2;Q96AX1;Q12981;Q9NZ43;Q9P253;P09497;O43264;Q9BQD3;P63010;P53677;O14662;Q9H115;O94973;P61163;P48444;Q9UN37;Q9Y5R8;Q13367;Q8WV19;Q9H0R1;Q8WXE9;O43747;O43752;O14579;P55735;P53675;O75154;Q9Y3E0;P0DI82;P49754;P48553;O14617;Q6DN90;P0DI81;O95486;Q53G59;O95235;Q96PC3;Q9P2W9;Q8WUH2;O43617;Q15438;P53680;P54920;P09496;O60763;Q9H267;Q96KG9;Q9Y2L5;O43731;Q9Y6Q2}
- 3871 Pathogen[ P03383] interacts with 66 human  
partners: {Q96CW1;Q9UJY4;P56377;Q00610;O14579;Q9BQD3;Q92572;P55735;P53618;Q9Y678;P54920;O95487;O43264;Q13439;Q9UL33;Q8WXE9;Q10567;O00186;P49006;Q9H2G9;O95486;Q9HCH5;Q9Y296;Q9Y6D6;Q9UQF2;P53675;P49754;O00189;P53677;Q15436;Q13618;Q8IUR0;Q99747;O75558;O75843;Q9Y2T2;P63010;Q53G59;O43747;Q15437;O94855;Q9UJY5;O43617;O75865;P0DI82;P0DI81;O95782;Q9UBF2;Q9HD42;O15027;Q96JE7;Q13367;P53992;O43752;Q6NUQ1;Q9BXS5;Q9BXF3;P09497;O60664;O94973;Q9UN37;O75154;Q86SZ2;P06396;Q8WUH2;Q9NZ52}
- 3872 Pathogen[ P03410] interacts with 133 human  
partners: {Q00610;P09496;P0DI82;Q9Y6Q5;Q9HCH5;Q9UPM8;O00203;O95782;Q96PC3;Q86SZ2;Q53G59;O75154;Q96CW1;Q9H267;Q9H2G9;O75865;Q15833;Q9NZ43;Q9Y2L5;Q9BXS5;Q13190;P53680;Q9H115;P49257;P49006;O94855;Q9NZ52;Q969X5;Q7Z392;P53992;Q9P299;O43747;Q9BXF3;O75843;P06396;Q9ULV0;P48553;Q9UL33;P48444;Q10567;P35606;Q5T215;Q92572;P33947;Q9P2W9;O14662;O14579;Q8WUH2;Q9P253;O60664;Q99829;Q9Y3E0;Q6NUQ1;Q9Y5R8;O14617;P61163;Q9UJY5;Q9Y6B7;Q8WXE9;Q8WU76;O43264;O95249;P0DI81;Q13492;Q13618;Q15436;O60763;O75396;Q96KG9;Q969M3;Q15437;Q8IUR0;Q96RQ1;O15155;Q9HD42;Q9Y2T2;Q9NP61;Q9UN37;Q9Y678;Q8N157;Q9UPP2;P09497;O95486;Q15049;Q15363;Q9Y6D6;P53618;P61923;Q9Y6D5;Q96JE7;P49754;Q9H0R1;P53677;Q15438;O75558;Q9HCU5;P24390;P63010;Q9Y296;O43752;O95159;O15027;Q587I9;P59780;Q9UQF2;O43731;Q6ZVE7;P55735;O00186;P53675;Q13439;Q12981;Q13367;O43617;Q9BQD3;P61966;Q7Z3U7;Q8WV19;O95562;Q8WVT3;O94973;P56377;Q99747;Q5JRA6;Q9Y6Q2;Q9UJY4;O95070;Q9BXW6;O95487;Q9UBF2;Q96AX1;Q9BRL7;P54920}
- 3873 Pathogen[ P14075] interacts with 68 human

partners: {O43617;P09497;Q9UJY4;Q9H2G9;Q96JE7;P09496;P49006;O94973;Q96CW1;O75558;O00186;Q13618;O43752;P53675;Q9Y2T2;Q9UBF2;Q6NUQ1;Q9BQD3;Q86SZ2;Q99747;Q53G59;Q9NZ52;P54920;Q9HCH5;O95159;O15027;Q9Y6D6;P53992;P55735;Q7Z392;O75865;O00189;O95487;P49754;Q15437;P53618;Q8WXE9;Q8IUR0;P0DI81;O95782;P06396;O43747;Q15436;Q92572;P63010;Q13439;Q9Y678;O75843;Q9HD42;P56377;Q8WUH2;O94855;Q9BXS5;O75154;Q9UL33;Q9BXF3;O43264;Q9Y296;O95486;Q9UQF2;Q10567;Q00610;Q9UJY5;Q13367;P0DI82;O60664;Q9UN37;O14579}

3874 Pathogen[ P0C206] interacts with 122 human  
partners: {Q13439;O14662;P53680;P63010;O14579;P0DI82;Q9Y678;Q15437;P53675;Q9Y6B7;Q9UN37;Q587I9;P06396;O94973;Q9Y296;Q8N6T3;O75865;O75396;Q9Y6Q5;Q92572;Q9Y6Q2;P53618;Q9P299;O43747;O94855;Q10567;P54920;Q6NUQ1;O60664;O75154;Q9Y6D6;O43752;Q9H0R1;Q9Y2L5;P49754;P61966;Q8WXE9;O95070;P49755;Q5JRA6;P48553;Q9UJY4;Q00610;P55735;Q9Y2T2;O75558;Q99829;Q9UQF2;Q96KG9;P09496;Q9NP61;P61163;P59780;P53677;Q9UPM8;Q9BXF3;Q9BXS5;O15155;Q13618;O95486;Q969M3;Q6ZVE7;Q9NZ52;P09497;Q9Y6D5;P35606;Q86SZ2;P33947;Q9UJY5;Q96JE7;P49006;P24390;P49257;O95487;O60763;Q96CW1;Q8WU76;Q96AX1;P48444;Q8N157;Q8WUH2;Q7Z392;Q8IUR0;O43617;O95782;O43731;Q9H2G9;Q99747;Q12981;Q5T215;Q9UBF2;Q9UPP2;Q969X5;Q9BXW6;O14617;Q9P253;Q9BQD3;O75843;Q9HD42;Q96RQ1;Q9UL33;P53992;Q15363;Q9Y5R8;Q9HCH5;Q53G59;Q8N6H7;Q96PC3;O15027;Q15833;O95159;O43264;O00189;Q9H267;Q13367;Q9P2W9;P56377;P0DI81;O00186;P61923;Q9BRL7;Q15436}

3875 Pathogen[ P03363] interacts with 83 human  
partners: {O60763;P49754;Q99829;Q9Y2T2;O60664;Q15438;Q8WXE9;Q13367;O43747;Q9UJY4;P48444;P0DI81;Q9UQF2;Q9UPP2;Q13439;Q9Y678;P53677;Q13618;Q9NZ52;O43264;Q6NUQ1;Q9UL33;P54920;Q9BQD3;O75558;Q15436;Q9Y2L5;Q8WU76;Q00610;Q9Y6B7;O14579;O95486;P53618;Q9BXS5;Q9P299;O94973;P61923;P0DI82;P06396;Q9P2W9;Q9BXF3;Q92572;P61163;Q9UN37;Q8N157;Q9H0R1;Q9BXW6;Q9H267;Q96KG9;P63010;Q53G59;O00189;O00186;O75154;O95782;Q9H2G9;Q5JU85;P35606;Q8WUH2;O14662;Q9UBF2;P53992;O75843;Q6DN90;O95487;Q9Y296;O43617;Q9HCH5;Q9Y6D6;P48553;P49006;Q9UJY5;P09497;O43752;P53675;P55735;Q99747;O94855;Q10567;Q9HD42;Q96CW1;Q15833;Q9UPM8}

3876 [Cluster 353]GO:0007379+P biological\_process [name] segment specification [def] "The process in which segments assume individual identities\_ exemplified in insects by the actions of the products of the homeotic genes." [http

3877 Pathogen[ Q2Q067] interacts with 5 human  
partners: {O43364;Q9Y5Q3;P42568;O14641;P35226}

3878 Pathogen[ P0C214] interacts with 4 human partners: {P35226;Q9Y5Q3;P42568;O14641}

3879 Pathogen[ P03346] interacts with 6 human  
partners: {P35226;Q9Y5Q3;O43364;O14641;A6NI15;P42568}

3880 Pathogen[ Q85601] interacts with 5 human  
partners: {P42568;O43364;Q9Y5Q3;O14641;P35226}

3881 Pathogen[ P14079] interacts with 5 human  
partners: {Q9Y5Q3;O43364;O14641;P42568;P35226}

3882 Pathogen[ P03383] interacts with 4 human partners: {Q9Y5Q3;O14641;P42568;P35226}

3883 Pathogen[ P03410] interacts with 5 human  
partners: {Q9Y5Q3;O43364;P42568;P35226;O14641}

3884 Pathogen[ P14075] interacts with 4 human partners: {P42568;O14641;Q9Y5Q3;P35226}

3885 Pathogen[ P0C206] interacts with 4 human partners: {Q9Y5Q3;P35226;P42568;O43364}

3886 Pathogen[ P03363] interacts with 5 human  
partners: {P35226;P42568;O43364;O14641;Q9Y5Q3}

3887 [Cluster 354]GO:0061029+P biological\_process [name] eyelid development in camera-type eye [def] "The progression of the eyelid in a camera-type eye from its formation to the mature state. The eyelid is a membranous cover that helps protect and lubricate the eye." [GOC

3888 Pathogen[ Q2Q067] interacts with 3 human partners: {Q13547;P11831;Q92769}

3889 Pathogen[ P0C214] interacts with 3 human partners: {Q13547;P11831;Q92769}

3890 Pathogen[ P03346] interacts with 3 human partners: {P11831;Q92769;Q13547}

3891 Pathogen[ Q85601] interacts with 3 human partners: {P11831;Q92769;Q13547}

3892 Pathogen[ P14079] interacts with 1 human partners: {Q92769}

3893 Pathogen[ P03383] interacts with 3 human partners: {P11831;Q92769;Q13547}

3894 Pathogen[ P03410] interacts with 3 human partners: {P11831;Q92769;Q13547}

3895 Pathogen[ P14075] interacts with 3 human partners: {P11831;Q13547;Q92769}

3896 Pathogen[ P0C206] interacts with 3 human partners: {Q92769;Q13547;P11831}

3897 Pathogen[ P03363] interacts with 2 human partners: {P11831;Q13547}

3898 [Cluster 355]GO:0090343+P biological\_process [name] positive regulation of cell aging [def] "Any process that increases the rate, frequency, or extent of cell aging. Cell aging is the progression of the cell from its inception to the end of its lifespan." [GOC

3899 Pathogen[ Q2Q067] interacts with 1 human partners: {P02545}

3900 Pathogen[ P0C214] interacts with 1 human partners: {P02545}

3901 Pathogen[ P03346] interacts with 1 human partners: {P02545}

3902 Pathogen[ Q85601] interacts with 1 human partners: {P02545}

3903 Pathogen[ P14079] interacts with 1 human partners: {P02545}

3904 Pathogen[ P03383] interacts with 1 human partners: {P02545}

3905 Pathogen[ P03410] interacts with 1 human partners: {P02545}

3906 Pathogen[ P14075] interacts with 1 human partners: {P02545}

3907 Pathogen[ P0C206] interacts with 1 human partners: {P02545}

3908 Pathogen[ P03363] interacts with 1 human partners: {P02545}

3909 [Cluster 356]GO:0006906+P biological\_process [name] vesicle fusion [def] "Fusion of the membrane of a transport vesicle with its target membrane." [GOC

3910 Pathogen[ Q2Q067] interacts with 1 human partners:{043752}

3911 Pathogen[ P0C214] interacts with 1 human partners:{043752}

3912 Pathogen[ P03346] interacts with 1 human partners:{043752}

3913 Pathogen[ Q85601] interacts with 1 human partners:{043752}

3914 Pathogen[ P14079] interacts with 3 human partners:{Q12912;Q15075;043752}

3915 Pathogen[ P03383] interacts with 1 human partners:{043752}

3916 Pathogen[ P03410] interacts with 2 human partners:{Q12912;043752}

3917 Pathogen[ P14075] interacts with 1 human partners:{043752}

3918 Pathogen[ P0C206] interacts with 2 human partners:{043752;Q12912}

3919 Pathogen[ P03363] interacts with 1 human partners:{043752}

3920 [Cluster 357]GO:0008045+P biological\_process [name] motor axon guidance [def] "The process in which the migration of an axon growth cone of a motor neuron is directed to a specific target site in response to a combination of attractive and repulsive cues." [ISBN

3921 Pathogen[ Q2Q067] interacts with 4 human partners:{043364;P11161;P49639;P43268}

3922 Pathogen[ P0C214] interacts with 3 human partners:{P49639;P43268;P11161}

3923 Pathogen[ P03346] interacts with 9 human partners:{P49639;O75592;P50219;Q9NQ69;O43364;Q969G2;P11161;Q9UBR4;P43268}

3924 Pathogen[ Q85601] interacts with 4 human partners:{P49639;O43364;P43268;P11161}

3925 Pathogen[ P14079] interacts with 4 human partners:{O43364;P11161;O60282;P49639}

3926 Pathogen[ P03383] interacts with 3 human partners:{P49639;P43268;P11161}

3927 Pathogen[ P03410] interacts with 5 human partners:{O60282;P43268;O43364;P49639;P11161}

3928 Pathogen[ P14075] interacts with 2 human partners:{P43268;P11161}

3929 Pathogen[ P0C206] interacts with 6 human partners:{P11161;P49639;P43268;Q969G2;O43364;Q9UBR4}

3930 Pathogen[ P03363] interacts with 6 human partners:{P43268;P49639;O60282;O43364;P50219;P11161}

3931 [Cluster 358]GO:0006265+P biological\_process [name] DNA topological change [def] "The process in which a transformation is induced in the topological structure of a double-stranded DNA helix, resulting in a change in linking number." [ISBN

3932 Pathogen[ Q2Q067] interacts with 2 human partners:{P11387;P11388}

3933 Pathogen[ P0C214] interacts with 2 human partners:{P11388;P11387}

3934 Pathogen[ P03346] interacts with 2 human partners:{P11388;P11387}

3935 Pathogen[ Q85601] interacts with 3 human partners:{P11387;P11388;P19447}

3936 Pathogen[ P14079] interacts with 4 human partners:{P11388;Q13472;Q969P6;P19447}

3937 Pathogen[ P03383] interacts with 1 human partners:{P11387}

3938 Pathogen[ P03410] interacts with 4 human partners:{Q13472;P19447;P11387;P11388}

3939 Pathogen[ P14075] interacts with 1 human partners:{P11387}

3940 Pathogen[ P0C206] interacts with 4 human partners:{P19447;P11388;P11387;Q13472}

3941 Pathogen[ P03363] interacts with 2 human partners:{P11387;Q13472}

3942 [Cluster 359]GO:0048193+P biological\_process [name] Golgi vesicle transport [def] "The directed movement of substances into, out of or within the Golgi apparatus, mediated by vesicles." [GOC

3943 Pathogen[ Q2Q067] interacts with 3 human partners:{043752;O60763;P49754}

3944 Pathogen[ P0C214] interacts with 3 human partners:{P49754;O43752;O60763}

3945 Pathogen[ P03346] interacts with 4 human partners:{043752;P49754;O60763;Q08AE8}

3946 Pathogen[ Q85601] interacts with 3 human partners:{O60763;P49754;O43752}

3947 Pathogen[ P14079] interacts with 4 human partners:{Q08AE8;O43752;P49754;O60763}

3948 Pathogen[ P03383] interacts with 2 human partners:{P49754;O43752}

3949 Pathogen[ P03410] interacts with 4 human partners:{Q08AE8;O60763;P49754;O43752}

3950 Pathogen[ P14075] interacts with 2 human partners:{043752;P49754}

3951 Pathogen[ P0C206] interacts with 4 human partners:{043752;P49754;O60763;Q08AE8}

3952 Pathogen[ P03363] interacts with 4 human partners:{O60763;P49754;Q08AE8;O43752}

3953 [Cluster 360]GO:0001780+P biological\_process [name] neutrophil homeostasis [def] "The process of regulating the proliferation and elimination of neutrophils such that the total number of neutrophils within a whole or part of an organism is stable over time in the absence of an outside stimulus." [GOC

3954 Pathogen[ Q2Q067] interacts with 1 human partners:{Q03112}

3955 Pathogen[ P0C214] interacts with 1 human partners:{Q03112}

3956 Pathogen[ P03346] interacts with 1 human partners:{Q03112}

3957 Pathogen[ Q85601] interacts with 1 human partners:{Q03112}

3958 Pathogen[ P14079] interacts with 1 human partners:{P04083}

3959 Pathogen[ P03383] interacts with 1 human partners:{Q03112}

3960 Pathogen[ P03410] interacts with 1 human partners:{Q03112}

3961 Pathogen[ P14075] interacts with 1 human partners:{Q03112}

3962 Pathogen[ P0C206] interacts with 1 human partners:{Q03112}

3963 Pathogen[ P03363] interacts with 1 human partners:{Q03112}

3964 [Cluster 361]GO:0006954+P biological\_process [name] inflammatory response [def] "The immediate defensive reaction (by vertebrate tissue) to infection or injury caused by chemical or physical agents. The process is characterized by local vasodilation, extravasation of plasma into intercellular spaces and accumulation of white blood cells and macrophages." [GO\_REF

3965 Pathogen[ Q2Q067] interacts with 34 human partners:{P01100;Q96J02;P09917;P31749;Q8IUC6;P56524;Q9UKV0;Q16666;Q12986;Q99497;Q04206;Q15025;O15350;Q14934;P17676;P78545;Q13287;Q9UQL6;O75582;O14862;Q9Y6K9;Q12904;Q6P4



- 3966 R8;P19838;Q12968;Q8NFZ5;O14920;Q9BYH8;P63000;Q9UKK3;Q8NE71;O15111;Q15797;Q03112}  
Pathogen[ P0C214] interacts with 38 human  
partners: {Q96J02;Q8WV28;P09917;P63000;Q12904;O15111;Q9NPP4;Q9Y6K9;P19838;Q8IUC6;P01011;O15350;Q03112;P01100;Q9BYH8;P56524;Q12986;Q04206;Q16666;Q99497;P17676;Q12968;Q8NE71;Q6P4R8;Q9UKV0;Q9H0E2;Q15025;Q14934;O75582;Q8NFZ5;Q9UKK3;O14862;P78545;Q15797;Q13287;O14920;Q9UQL6;P31749}
- 3967 Pathogen[ P03346] interacts with 38 human  
partners: {Q9Y6K9;Q96J02;Q16666;O15111;P17676;Q15797;Q8NFZ5;Q9UKK3;P56524;Q12986;Q04206;O15350;Q13287;Q9H0E2;Q9BYH8;Q14934;Q12904;Q12968;P09917;Q9NPP4;P31749;Q03112;Q15025;O75582;Q99497;Q8IUC6;Q9UKV0;Q8NE71;Q6P4R8;P19838;Q8WV28;O14920;P78545;O14862;P01100;P63000;Q9UQL6;Q9Y263}
- 3968 Pathogen[ Q85601] interacts with 34 human  
partners: {Q96J02;Q99497;Q9UKV0;P17676;Q16666;P31749;Q8IUC6;Q9UQL6;P09917;O15111;Q15797;Q03112;P78545;Q9UKK3;P63000;P01011;P01100;Q14934;Q9Y6K9;Q12968;Q8NFZ5;O14920;Q04206;Q15025;Q6P4R8;O14862;O75582;Q8NE71;Q9BYH8;P56524;O15350;P19838;Q13287;Q12986}
- 3969 Pathogen[ P14079] interacts with 40 human  
partners: {P04083;Q9UQL6;Q96KP6;Q12986;O43187;O15553;P13498;O75582;Q9BYH8;Q8IUC6;Q99497;Q9UKV0;Q12968;Q15025;Q8NEV9;Q15797;Q9UKK3;O15350;Q8WV28;Q8NFZ5;Q14934;Q9Y6K9;Q8NE71;Q9Y263;P09917;Q96J02;O14862;Q6P4R8;Q16878;Q9Y6Y9;P78545;Q12904;Q9H0E2;P56524;Q13287;Q9Y239;P01100;Q99836;Q16666;Q9NPP4}
- 3970 Pathogen[ P03383] interacts with 30 human  
partners: {O75582;Q12904;O14862;Q9Y6K9;Q8IUC6;Q6P4R8;Q9UQL6;O14920;Q12986;Q8NE71;P31749;O15111;P63000;Q15797;Q13287;Q14934;Q03112;P17676;Q15025;Q12968;O15350;Q16666;Q9UKK3;P01100;Q9UKV0;P56524;Q04206;P78545;P19838;Q8NFZ5}
- 3971 Pathogen[ P03410] interacts with 44 human  
partners: {Q9UKV0;Q04206;P19838;Q03112;Q16666;O14920;Q8NE71;Q9Y239;Q99497;Q8NFZ5;P63000;P17676;Q12968;O15111;Q9HBL7;O75582;P78545;O14862;O43187;Q8WV28;P31749;Q9NPP4;Q15025;Q9BYH8;P01100;Q12904;Q9UQL6;Q12986;Q13287;P56524;Q15797;Q96KP6;Q6P4R8;Q8NEV9;Q9H0E2;Q9Y263;Q9Y6Y9;Q8IUC6;O15350;Q9UKK3;P09917;Q9Y6K9;Q14934;P01011}
- 3972 Pathogen[ P14075] interacts with 29 human  
partners: {Q6P4R8;O15111;Q04206;P78545;O75582;Q13287;P56524;Q9UKV0;Q16666;Q8NFZ5;O14920;P31749;Q12986;O15350;Q12904;O14862;Q15025;Q14934;Q8NE71;Q03112;P63000;Q8IUC6;P01100;P19838;Q9UQL6;Q9Y6K9;P17676;Q12968;Q9UKK3}
- 3973 Pathogen[ P0C206] interacts with 36 human  
partners: {P09917;O14920;P31749;Q9Y6K9;O14862;O75582;Q9UKV0;Q96J02;Q8NFZ5;Q16666;Q12968;Q99497;Q13287;Q15025;Q9H0E2;P19838;Q03112;P63000;Q9UKK3;P17676;Q12986;P01100;Q04206;O15111;P78545;Q9BYH8;Q8NE71;Q14934;Q8IUC6;Q15797;O15350;P01011;P56524;Q6P4R8;Q12904;Q9UQL6}
- 3974 Pathogen[ P03363] interacts with 31 human  
partners: {Q13151;Q9Y263;O14920;Q04206;P17676;Q03112;O15111;Q8WV28;Q9Y6K9;Q9UQL6;Q15797;P63000;Q12986;Q16666;P78545;P31749;Q9UKK3;Q9UKV0;Q9H0E2;P19838;O14862;Q12968;Q15025;Q8NE71;Q14934;Q8NFZ5;Q9NPP4;Q13287;Q9BYH8;Q6P4R8;P01100}
- 3975 [Cluster 362]GO:0006418+P biological\_process [name] tRNA aminoacylation for protein translation [def] "The synthesis of aminoacyl tRNA by the formation of an ester bond between the 3'-hydroxyl group of the most 3' adenosine of the tRNA, to be used in ribosome-mediated polypeptide synthesis." [GOC
- 3976 Pathogen[ Q2Q067] interacts with 24 human  
partners: {Q95363;Q9H2U2;P23381;P49591;Q9Y285;Q15046;Q15181;Q9NSD9;Q5T160;Q96I59;O43776;P41252;Q12904;P07814;Q13155;P54136;Q6PI48;Q9HA77;Q9BW92;P41250;P49589;O43324;Q9P2J5;P14868}
- 3977 Pathogen[ P0C214] interacts with 42 human  
partners: {P41250;P49589;Q9NSE4;Q12904;Q7L3T8;O95363;Q9UGM6;Q96I59;Q9NP81;P12081;P23381;P49590;P07814;Q9Y285;P41252;Q5JTP6;Q5JPH6;O43776;Q15031;P14868;P49591;P56192;P26639;P54577;A2RTX5;O43324;Q9HA77;P49588;Q96GW9;Q5T160;P47897;Q9BW92;Q6PI48;Q5D0E6;Q15181;Q9NSD9;P26640;Q15046;Q5ST30;Q13155;Q9Y2Z4;Q9P2J5}
- 3978 Pathogen[ P03346] interacts with 16 human  
partners: {P23381;Q9H2U2;P07814;O43776;P41252;P41250;Q13155;Q12904;Q9Y285;Q9P2J5;O43324;P54136;P14868;P49589;Q15181;Q6PI48}
- 3979 Pathogen[ Q85601] interacts with 26 human  
partners: {P54136;O43324;Q9NSD9;P26639;P14868;P49589;Q9P2J5;Q13155;P07814;P23381;Q15046;O43776;Q9BW92;Q9Y285;Q9HA77;P41250;Q5T160;Q5D0E6;Q9H2U2;A2RTX5;Q96I59;O95363;P47897;Q6PI48;P41252;Q15181}
- 3980 Pathogen[ P14079] interacts with 40 human  
partners: {Q9Y285;P23381;P26639;Q96GW9;Q9P2J5;Q7L3T8;Q9BW92;P54136;Q15031;Q5T160;Q5ST30;Q9NP81;P47897;O95363;P49591;A2RTX5;P14868;Q9HA77;O43776;Q5JPH6;Q9H2U2;P49589;Q15046;P41252;P41250;Q96I59;P26640;P56192;Q9NSD9;Q15181;Q9Y2Z4;Q9UGM6;Q9NSE4;Q13155;Q5D0E6;Q12904;P49588;Q6PI48;P07814;O43324}
- 3981 Pathogen[ P03383] interacts with 32 human  
partners: {Q9Y285;Q9H2U2;Q12904;Q9P2J5;P14868;Q5D0E6;Q5JPH6;P49589;Q5T160;Q15031;Q9NP81;O43324;Q13155;P23381;Q96I59;Q15046;A2RTX5;Q9Y2Z4;O95363;P07814;Q96GW9;Q9HA77;Q15181;O43776;Q6PI48;P41250;P41252;P54136;Q9NSD9;P49591;Q7L3T8;Q9BW92}
- 3982 Pathogen[ P03410] interacts with 39 human  
partners: {Q9Y285;Q9HA77;Q13155;Q9NSE4;P56192;P49589;Q5ST30;Q9BW92;P49588;P54136;P23381;Q7L3T8;O43776;P47897;P14868;Q9H2U2;Q5D0E6;Q12904;Q9NSD9;Q9P2J5;P49591;P26639;Q96I59;P41250;Q15046;O43324;Q5JPH6;Q9UGM6;P41252;Q9Y2Z4;P26640;Q96GW9;P07814;Q9NP81;A2RTX5;Q15181;O95363;Q6PI48;Q5T160}

3983 Pathogen[ P14075] interacts with 35 human partners: {Q9Y2Z4;P54136;Q13155;P41250;Q5D0E6;P23381;Q9NSD9;P41252;Q95363;Q96GW9;Q9HA77;Q9NP81;Q9Y285;Q7L3T8;P56192;Q12904;A2RTX5;Q9BW92;O43776;P14868;Q5T160;Q9P2J5;Q9H2U2;P26639;Q6PI48;Q96I59;P49589;O43324;Q5JPH6;Q15046;Q9NSE4;Q15031;P49591;Q15181;P07814}

3984 Pathogen[ P0C206] interacts with 39 human partners: {P49589;Q95363;Q9NSE4;O43324;P07814;Q9Y2Z4;P41252;Q6PI48;Q5ST30;A2RTX5;Q9UGM6;Q5JPH6;Q9NP81;Q9HA77;P41250;P26640;P49591;O43776;Q9Y285;Q9NSD9;Q5D0E6;Q5T160;Q9BW92;Q9H2U2;P56192;P54136;Q13155;P26639;Q15031;Q7L3T8;Q9P2J5;P23381;P47897;P14868;Q96GW9;Q12904;Q96I59;Q15046;Q15181}

3985 Pathogen[ P03363] interacts with 27 human partners: {Q9Y2Z4;Q9H2U2;P41252;Q9NSD9;A2RTX5;Q96I59;P14868;P49589;P41250;P47897;Q5JPH6;O43776;P23381;Q13155;P54136;Q6PI48;Q95363;Q9P2J5;Q9BW92;P49591;Q9Y285;Q7L3T8;Q15031;P07814;Q15181;Q5T160;O43324}

3986 [Cluster 363]GO:0035066+P biological\_process [name] positive regulation of histone acetylation [def] "Any process that activates or increases the frequency, rate or extent of the addition of an acetyl group to a histone protein." [GOC]

3987 Pathogen[ Q2Q067] interacts with 3 human partners: {Q6ZW49;Q9NPI1;O75582}

3988 Pathogen[ P0C214] interacts with 3 human partners: {Q6ZW49;O75582;Q9NPI1}

3989 Pathogen[ P03346] interacts with 3 human partners: {Q9NPI1;O75582;Q6ZW49}

3990 Pathogen[ Q85601] interacts with 3 human partners: {O75582;Q6ZW49;Q9NPI1}

3991 Pathogen[ P14079] interacts with 3 human partners: {Q9NPI1;O75582;Q6ZW49}

3992 Pathogen[ P03383] interacts with 3 human partners: {O75582;Q6ZW49;Q9NPI1}

3993 Pathogen[ P03410] interacts with 3 human partners: {O75582;Q6ZW49;Q9NPI1}

3994 Pathogen[ P14075] interacts with 3 human partners: {Q9NPI1;O75582;Q6ZW49}

3995 Pathogen[ P0C206] interacts with 3 human partners: {Q9NPI1;Q6ZW49;O75582}

3996 Pathogen[ P03363] interacts with 2 human partners: {Q9NPI1;Q6ZW49}

3997 [Cluster 364]GO:0060244+P biological\_process [name] negative regulation of cell proliferation involved in contact inhibition [def] "Any process that stops, prevents or reduces the rate or extent of cell proliferation in response to cell density." [GOC]

3998 Pathogen[ Q2Q067] interacts with 1 human partners: {Q9UI36}

3999 Pathogen[ P0C214] interacts with 1 human partners: {Q9UI36}

4000 Pathogen[ P03346] interacts with 1 human partners: {Q9UI36}

4001 Pathogen[ Q85601] interacts with 1 human partners: {Q9UI36}

4002 Pathogen[ P14079] interacts with 1 human partners: {Q9UI36}

4003 Pathogen[ P03383] interacts with 1 human partners: {Q9UI36}

4004 Pathogen[ P03410] interacts with 1 human partners: {Q9UI36}

4005 Pathogen[ P14075] interacts with 1 human partners: {Q9UI36}

4006 Pathogen[ P0C206] interacts with 1 human partners: {Q9UI36}

4007 Pathogen[ P03363] interacts with 1 human partners: {Q9UI36}

4008 [Cluster 365]GO:0000712+P biological\_process [name] resolution of meiotic recombination intermediates [def] "The cleavage and rejoining of intermediates, such as Holliday junctions, formed during meiotic recombination to produce two intact molecules in which genetic material has been exchanged." [GOC]

4009 Pathogen[ Q2Q067] interacts with 6 human partners: {Q92889;Q8N2Z9;A8MT69;P11388;Q8IYF3;Q8IYD8}

4010 Pathogen[ P0C214] interacts with 6 human partners: {Q92889;Q8N2Z9;P11388;P40692;Q8IYF3;Q8IYD8}

4011 Pathogen[ P03346] interacts with 6 human partners: {Q8N2Z9;P11388;A8MT69;Q8IYF3;Q92889;Q8IYD8}

4012 Pathogen[ Q85601] interacts with 7 human partners: {Q8IYD8;Q8IYF3;Q92889;A8MT69;P11388;Q8N2Z9;P40692}

4013 Pathogen[ P14079] interacts with 7 human partners: {P11388;Q8IYD8;P40692;Q8N2Z9;Q92889;A8MT69;Q8IYF3}

4014 Pathogen[ P03383] interacts with 3 human partners: {Q8N2Z9;Q8IYF3;A8MT69}

4015 Pathogen[ P03410] interacts with 7 human partners: {P40692;Q8IYD8;Q92889;P11388;A8MT69;Q8IYF3;Q8N2Z9}

4016 Pathogen[ P14075] interacts with 3 human partners: {A8MT69;Q8N2Z9;Q8IYF3}

4017 Pathogen[ P0C206] interacts with 7 human partners: {Q8IYD8;P40692;Q92889;Q8IYF3;P11388;Q8N2Z9;A8MT69}

4018 Pathogen[ P03363] interacts with 4 human partners: {Q92889;Q8N2Z9;Q8IYD8;A8MT69}

4019 [Cluster 366]GO:0016078+P biological\_process [name] tRNA catabolic process [def] "The chemical reactions and pathways resulting in the breakdown of tRNA, transfer RNA, a class of relatively small RNA molecules responsible for mediating the insertion of amino acids into the sequence of nascent polypeptide chains during protein synthesis." [GOC]

4020 Pathogen[ Q2Q067] interacts with 1 human partners: {Q99575}

4021 Pathogen[ P0C214] interacts with 1 human partners: {Q99575}

4022 Pathogen[ P03346] interacts with 1 human partners: {Q99575}

4023 Pathogen[ Q85601] interacts with 1 human partners: {Q99575}

4024 Pathogen[ P14079] interacts with 1 human partners: {Q99575}

4025 Pathogen[ P03383] interacts with 1 human partners: {Q99575}

4026 Pathogen[ P03410] interacts with 1 human partners: {Q99575}

4027 Pathogen[ P14075] interacts with 1 human partners: {Q99575}

4028 Pathogen[ P0C206] interacts with 1 human partners: {Q99575}

4029 Pathogen[ P03363] interacts with 1 human partners: {Q99575}

4030 [Cluster 367]GO:0007165+P biological\_process [name] signal transduction [def] "The

cellular process in which a signal is conveyed to trigger a change in the activity or state of a cell. Signal transduction begins with reception of a signal (e.g. a ligand binding to a receptor or receptor activation by a stimulus such as light), or for signal transduction in the absence of ligand, signal-withdrawal or the activity of a constitutively active receptor. Signal transduction ends with regulation of a downstream cellular process, e.g. regulation of transcription or regulation of a metabolic process. Signal transduction covers signaling from receptors located on the surface of the cell and signaling via molecules located within the cell. For signaling between cells, signal transduction is restricted to events at and within the receiving cell." [GOC

- 4031 Pathogen[ Q2Q067] interacts with 156 human partners: {Q2783;P27540;P30281;O00213;O75161;Q96FV9;P31749;Q9Y2Y0;Q9UNS2;O14786;O60239;Q9HBZ2;Q04726;P63104;Q9UD71;Q96C74;Q8WYA1;P29692;P40763;Q13352;P63151;Q92636;P10589;O14974;P53675;P62826;Q15596;O96019;P41970;Q15653;Q13077;Q12933;O43639;Q13625;Q6P1N0;Q14511;P55345;Q9HB58;P18850;Q8WUH2;P07900;P06748;Q66LE6;Q15172;Q13522;Q13158;O15117;P11308;Q8NEU8;P11473;Q86UL8;O00170;Q9NZQ3;P61978;O43823;Q96B67;O60711;Q14765;Q5TB30;Q9Y297;Q15173;Q9UQB3;Q96L92;Q9UIV1;Q99743;P78352;Q9UGP4;Q04695;Q07666;P67870;Q8WWW0;P31949;Q13330;Q12904;Q13114;P29474;Q9Y2N7;Q99732;Q96CV9;Q9UHY8;Q00005;Q9UGK8;P78560;P35869;Q9H160;Q9HB75;Q15185;P10599;A6NK89;P50749;P53805;P53041;Q99996;P50570;Q04725;O75312;P62879;Q9UQF2;Q9UN36;P19838;P81274;Q02833;Q99962;O15397;Q02952;O95373;P61201;P52630;P08235;Q9UKN5;Q15628;Q04724;Q9NS23;Q00653;O43318;Q9ULZ2;Q9H4B6;Q9H2L5;O14964;Q9P1Z2;P27986;O94916;Q92844;Q92793;Q92734;Q92845;P43487;P78347;P35232;Q9UKG1;Q16537;Q03060;P42226;P11802;O00463;Q99717;Q02040;P78318;Q86WH2;P27815;Q9UMX1;Q99814;Q9NR46;P42224;Q9NXR7;P22736;Q15759;Q15797;O43660;P23508;Q9H0E9;Q8N108;O75901;Q9UKL3;Q14738;Q9UBS8}
- 4032 Pathogen[ P0C214] interacts with 166 human partners: {P41970;Q9UGP4;Q02833;O00170;P29474;P18850;Q96B67;Q96FV9;O00213;Q9UKN5;O75161;P11308;O15117;Q00653;O60239;Q16537;O14786;Q12904;P35869;Q13330;Q8WWW0;P16157;Q9H2L5;Q9NRR8;Q00005;P78318;P19838;Q15628;Q9NS23;Q13625;Q5TB30;P81274;P06748;P27815;P43487;P42226;Q13158;Q14765;P11802;P31150;Q99743;Q92793;P61201;Q15172;P29692;Q66LE6;O14964;P42224;Q92734;P55345;Q04724;Q9Y297;Q99962;Q15653;Q9UKG1;P46060;Q9UNS2;O43318;O43639;Q9UD71;Q9H0M0;Q9UIV1;P50749;O14974;Q9NR46;Q9HBZ2;Q8IXF0;O75312;Q9UQB3;Q9Y2N7;P45877;Q9UHY8;Q86WH2;Q99732;P53675;Q92844;Q16881;Q9UKL3;Q15173;Q04726;Q9H4B6;Q04695;Q08AM6;Q07666;O75901;Q96L92;Q12933;P30281;P78347;Q8NEU8;P63151;Q13522;Q13352;Q8N108;P54577;Q9H0E2;Q9H160;O43823;Q9NXG0;Q9UBS8;O60711;Q9HB75;Q8WYA1;Q96CV9;P62879;Q9ULZ2;P53041;Q14511;Q9UQF2;Q9H0E9;Q92845;P62826;Q07343;Q9NV92;Q14738;Q13114;P31949;Q03060;Q15759;Q04725;Q99814;Q9NZQ3;P10599;Q9HB58;Q9Y2Y0;Q9UGK8;Q99717;P78560;P40763;O76083;P27540;Q9NXR7;Q6P1N0;O94916;P23508;P50570;Q92636;Q9P1Z2;Q99996;Q8NHQ8;Q15596;Q15797;P67870;P16220;Q92783;P35232;O00463;P53805;Q96C74;Q02040;P52630;P98171;Q15185;Q8WUH2;Q99704;P27986;O95373;P43490;Q9UN36;Q9UMX1;A6NK89;O43660;O96019;P31749;O15397}
- 4033 Pathogen[ P03346] interacts with 216 human partners: {Q15172;Q66LE6;P53805;Q96FV9;P30281;O00213;Q13077;O00463;P61978;Q99742;O60239;P11473;P50570;Q15788;O15397;Q00005;Q9UGP4;Q13362;P07900;P29373;Q14511;Q96RT1;P16220;P98171;Q92734;P06401;Q9UIV1;P06748;P29474;Q15036;O43639;O75901;P23508;P08235;Q13158;P78352;O75312;Q15797;Q15653;P78347;Q13322;Q9ULZ2;Q99962;P43487;Q96FS4;Q9NXG0;Q15185;O00170;Q13835;Q5TB30;P42226;P29692;P10588;Q13522;P06703;P27540;Q15942;Q99717;Q9Y5K6;Q8WUH2;Q15269;Q13114;Q9NV92;P55196;Q9H0E2;P16157;O15055;P62826;P62879;O15534;Q9H0E9;P11802;P18850;Q9Y371;Q8TF05;Q9Y3P8;Q9UQB3;Q15555;P78560;Q6P1N0;Q96B67;O00299;Q6ZTQ3;Q07666;A6NK89;O75161;O00327;Q9UKL3;Q12904;P11308;Q04726;Q04695;Q96CV9;Q7Z3T8;O96019;Q9UHY8;Q8IXF0;Q9NXR7;P22736;Q8NEU8;Q9H2L5;Q86UL8;O43660;Q96L92;P81274;P31749;Q15596;O60519;Q9Y4H4;P46060;Q9NZQ3;Q9UD71;O95373;P31150;Q9UBG7;Q9UBG7;P27815;Q04725;Q9Y2N7;Q9P1Z2;Q04724;P55345;Q14738;Q13330;Q02952;Q99704;P53675;Q99814;Q13625;P53041;Q12929;P50749;P42224;P35659;P78314;O95833;Q9HBZ2;Q14190;Q9UBS8;O75469;Q15628;Q96T49;Q9BUZ4;Q16537;Q9BWF2;P61201;Q8WWW0;P63104;Q8N108;Q15759;Q99996;P45985;Q96C74;Q92783;Q9UKG1;P41970;Q9HB58;P51858;Q9UQF2;Q9UGK8;P10599;A9YTQ3;P35232;Q92636;O14964;P19838;Q03060;Q9H4B6;Q8WYA1;Q92845;O94916;P67870;Q9H0M0;Q02040;Q9UNS2;O15516;O43318;Q92793;O15117;P35869;Q8WVI7;Q14765;P56645;Q9UN36;Q86WH2;Q15173;P52630;O96011;P40763;O14974;P35398;Q9Y297;Q9NR46;Q9UMX1;Q9UKN5;Q9H160;Q8TDZ2;O60711;Q9NS23;O43823;Q99743;P78318;Q02833;P31949;O14786;Q13352;Q13136;P27986;Q9Y263;Q92844;Q00653;Q8IUM7;P63151;Q99732;P10589}
- 4034 Pathogen[ Q85601] interacts with 175 human partners: {P30281;O00213;O75161;Q92734;P61978;P63104;Q96CV9;P53675;O60239;Q9ULZ2;P11473;Q9UHY8;P62879;Q9UKL3;P16157;Q08AM6;P31749;Q9UD71;Q14765;Q07666;Q92636;P31150;O15534;P46060;Q96RT1;Q04724;Q9UN36;P63151;Q9Y5K6;Q9Y2N7;P23508;P56645;O00463;Q13158;O75312;Q8WWW0;P81274;Q15797;Q00005;Q15036;Q8NEU8;P43487;Q99962;Q86UL8;Q9UKN5;P40763;P61201;P7815;P41970;Q9H0E9;Q9Y2Y0;P62826;O15516;Q92844;Q8WYA1;Q14738;O00327;Q15172;Q9UIV1;Q5TB30;Q15173;O96019;Q99814;P27540;Q02833;Q9NS23;Q66LE6;Q15653;Q9NZQ3;P50749;Q8WUH2;O43639;Q13114;Q99743;Q15596;O14786;Q9UQF2;Q9UBG7;P11802;P27986;P52630;Q5VSY0;Q96L92;O00170;Q9UQB3;Q96FV9;Q96B67;P10599;Q04725;O60711;Q13352;Q04726;O15117;Q04695;Q15555;Q16537;Q8IXF0;Q8NHQ8;Q9H2L5;O95373;Q12933;P16220;Q99717;P42226;P50570;Q9HB58;Q13330;Q15942;P22736;P78352;A6NK89;P18850;Q13625;P53041;P42224;Q9NXG0;P06748;Q8N108;P08235;Q92783;A9YTQ3;Q9HB75;Q9HBZ2;O14964;P07900;P53805;Q15185;P29474;Q15628;O75901;Q9BWF2;O15055;Q9UGP4;Q15759;Q9UNS2;Q99996;P31949;Q96C74;Q9UKG1;Q92845;Q9UGK8;Q9UBS8;O14974;Q13077;P35232;P35869;O15397;O43823;O94916;O43660;P67870;Q00653;O43318;Q92793;Q9P1Z2;P29692;Q99732;Q86WH2;Q9H160;P19838;Q14511;Q6P1N0;Q9NR46;Q9UMX1;P78347;Q03060;Q9NXR7;P78318;Q9H4B6;Q13136;P78560;P11308;P45877;P55345;P10589}
- 4035 Pathogen[ P14079] interacts with 245 human

partners: {P31751;P04083;P01215;Q02952;O95373;Q9UHY8;O75192;Q92844;Q04725;Q9BXL7;O00463;Q12929;Q9NR46;O75161;Q13362;Q99743;Q13442;Q9UD71;Q15036;Q96B67;P55039;Q9UKG1;Q92686;Q5JQC9;P35869;Q99814;P49069;Q14738;Q15596;P52630;Q6ZTQ3;Q99996;Q9NVV7;Q9NS23;P53041;O43187;P31150;Q14236;Q01518;P53779;P61201;O43422;Q8NEU8;Q5VSY0;Q9UGK8;Q99704;Q8TF05;Q9UKF7;Q8TDZ2;Q92734;Q15173;O75312;P52564;Q9Y2N7;P35398;Q16537;Q7LFL8;Q8N108;P11473;P20396;A6NK89;P08235;P98171;Q9NRR8;Q9UQF2;Q92793;O00170;Q15172;Q9UNS2;Q9BWF2;O43823;P01225;Q13522;P24588;Q13835;P16298;O14974;Q9NXG0;Q8WVI7;P31949;Q13330;Q03060;Q9Y2Y0;P43490;P40123;Q9UQB3;Q92783;Q8IXF0;Q9UMX1;P46060;P22736;O00213;P35232;Q6P1N0;Q92636;P53805;P16157;Q9Y6J3;Q8TCD1;Q13625;Q96L92;Q9Y371;O60711;Q9Y4H4;Q15797;Q14765;Q04695;P63151;Q49A92;P29692;Q9BUZ4;Q13136;Q13077;O00178;Q7Z434;P11308;P50570;Q86WH2;Q96FV9;Q9UKI2;P63104;Q96RT1;Q9H0E9;P42226;Q9UKL3;O75952;Q9ULZ2;P08758;P55345;O15117;O60239;Q9NXR7;O96011;P45877;Q8N114;Q02040;Q00005;Q99732;Q16644;Q9NZQ3;P23508;Q07666;Q9BYI3;Q15759;P09525;O75469;P45985;Q15555;P27540;Q9Y263;Q9Y478;Q9H4B6;Q66LE6;Q96T49;A6NNX1;Q02833;Q9HB58;P07900;Q15788;Q15185;A9YTD3;P50749;Q5TB30;Q8NHQ8;Q15397;P06748;B7ZAQ6;P56645;Q04726;P42224;P10588;P18850;Q86UL8;Q9UIV1;Q8WWZ3;Q7Z3T8;Q9Y5K6;Q8N9M5;Q12933;Q04724;Q96PE3;P61978;P27815;P35659;Q13158;P47874;O43639;P10599;Q9UBS8;P67870;O43561;Q9UQE7;Q96AW1;Q13164;P53675;Q9HBZ2;Q9Y3E0;Q9H2L5;P81274;P49023;P49773;Q9NV92;P10589;Q12904;P06703;P62826;Q9UKN5;O15055;Q13371;Q9BZX4;Q92845;Q9H0E2;Q8WUH2;P78347;Q8WYA1;Q9UN36;Q6PIZ9;Q9P1Z2;Q9Y239;Q13352;Q15628;O15259;Q9Y4J8;Q8IUM7;Q9HB75;Q8WWW0;Q96CV9;P17405;P41970;P78318;O15327;O75901;Q99836;Q9UGP4;Q96C74;Q9H160;Q9Y3P8;O15534;Q13114;Q9UBG7;Q99962;O96001;Q15942;O94916;Q15653}

4036 Pathogen[ P03383] interacts with 124 human  
partners: {Q9UD71;Q9Y2Y0;P27986;O00213;P62879;Q12904;Q9UKL3;O96019;P06748;P29474;Q15397;P16220;P27540;Q92844;Q96B67;Q02040;Q00653;Q15596;Q15173;P78347;P31749;Q00005;Q8NEU8;Q96FV9;Q9UBS8;P61201;Q86WH2;P52630;P53805;Q14738;O00170;Q15797;P42226;P10599;P61978;Q9UN36;Q9UQF2;P53675;P07900;Q13352;Q13330;Q15653;Q04724;Q13158;Q13625;O15117;Q9H2L5;P11802;O43318;Q13522;P62826;Q9H0E9;O75901;Q6P1N0;Q96L92;Q9UQB3;P78560;P11473;Q9H160;Q04726;P11308;P81274;Q04695;P63104;P43487;Q9NZQ3;Q12933;Q9ULZ2;Q16537;Q99717;Q9UGP4;Q14511;Q04725;O60711;Q9Y2N7;Q99732;Q9UKN5;Q9UIV1;Q15759;Q15185;P53041;Q07666;P50749;Q02833;P35232;Q9Y4H4;Q92783;Q15628;P67870;Q8N108;Q9UHY8;P41970;P23508;O75161;Q9UGK8;P78318;Q99996;O95373;Q92845;Q9NR46;Q96CV9;P01215;P18850;Q9UNS2;P29692;P30281;P19838;P35869;O14964;Q02952;Q9UMX1;P78352;Q13114;Q96C74;Q03060;A6NK89;Q9NXR7;O75312;Q9H4B6;Q9P1Z2;Q92793;Q9HB75;Q8WUH2;Q9Y3P8}

4037 Pathogen[ P03410] interacts with 243 human  
partners: {O60711;O75192;O14786;Q99743;Q5TB30;P49069;P19838;Q8WVI7;P27986;Q96PE3;P10599;Q8IXF0;Q9NXR7;Q5VSY0;Q02833;Q9HB75;Q96RT1;Q9Y239;Q96L92;P61978;P78560;O15327;Q9NR46;Q6PIZ9;Q04726;Q99996;O94916;Q99814;P98171;Q13445;O15259;B7ZAQ6;P78318;Q13077;O96019;Q8TDZ2;Q15172;A9YTD3;P16157;Q9UQE7;Q9ULZ2;Q15173;Q9Y2N7;Q9UGP4;O43639;O43561;Q99717;Q96AW1;A6NNX1;O43187;Q5JQC9;O96011;Q92845;Q9BYI3;Q99732;Q14765;Q9NS23;Q04724;Q9BZX4;Q92783;P31749;Q8N114;Q9NZQ3;Q9UKI2;O75161;O00213;Q96B67;Q03060;Q15653;P50570;P071900;Q92844;O60239;P63151;P50749;Q9Y6J3;P31949;Q13835;Q8WUH2;P06748;P01215;Q9Y3E0;Q9UIV1;Q9UKF7;Q9NV92;P33241;O15055;Q96T49;Q07666;Q7Z434;Q96FV9;Q12904;P06703;P23508;Q13158;P35659;Q9BWF2;Q9Y5K6;P11473;Q8NHQ8;Q9HBZ2;P43490;O75952;Q9P1Z2;P40123;P27540;Q15628;O43318;Q9Y4H4;Q13136;Q9Y3P8;Q92793;Q16537;P29474;Q08AM6;Q9HAT0;P49773;Q15555;Q14511;Q9UN36;P45985;Q13522;P62826;Q9UGK8;Q9UKN5;Q15942;P53805;Q9BXL7;Q9UBS8;O00170;Q13330;O00463;O43660;Q13371;P11802;P56645;Q9NRR1;Q99704;Q96CV9;Q9UNS2;P43487;Q15797;P45877;Q9H160;A6NK89;O15534;Q15036;Q15185;P22736;Q9Y371;O14974;Q12933;Q9H0E2;P16220;P53041;Q92734;P81274;Q8WWW0;Q86WH2;Q04695;Q9Y263;P30281;Q9UKL3;O43422;P42226;P63104;Q15596;O15117;P61201;Q8N108;Q92636;Q14738;Q00005;P52630;P53779;Q6ZTQ3;P10589;O75901;Q92686;P41970;Q99962;Q8NEU8;Q9UQB3;Q13362;Q00653;Q86UL8;Q8TF05;Q02952;P78347;O96001;Q9H4B6;Q66LE6;Q9UQF2;Q01518;Q15283;Q9NXG0;O00178;Q8TCD1;P53675;P67870;P11308;Q9UHY8;P35232;P29692;Q49A92;P31150;Q9Y2Y0;P78352;Q9H2L5;Q13625;O43823;Q9H0E9;Q9UD71;P08235;P40763;Q9UMX1;P18850;P62879;P27815;P47874;Q9NRR8;Q12929;O15397;Q9UKG1;Q14236;O75312;Q13442;Q6P1N0;Q7Z3T8;P24588;Q13352;P17405;Q9HB58;P46060;Q13114;Q9Y4J8;O95373;P55345;Q8WYA1;Q04725;Q9UBG7;P20396;Q02040}

4038 Pathogen[ P14075] interacts with 132 human  
partners: {P52630;P78560;P29474;O00213;Q14511;P35869;Q9NZQ3;O60239;Q00005;P35659;P81274;Q92844;Q9NR46;Q04725;P11802;P42226;Q9HB75;Q92734;Q15759;Q13522;Q92845;A6NK89;Q07666;P62879;Q9H2L5;Q9UKN5;P30281;P43487;P53675;P61201;Q9UGP4;Q9Y2Y0;Q92783;Q13442;O75312;Q9Y6J3;Q9Y2N7;Q16537;O15117;P29692;P78347;O15397;Q02040;Q99717;Q15653;Q8NEU8;Q9NXR7;Q9UD71;O75901;Q9BYI3;Q15185;P53805;P27540;Q9UQB3;P35232;P07900;Q9UKL3;O96019;Q04726;P31749;Q9H4B6;Q04695;Q02952;Q8N108;Q99996;O14964;O00170;O75161;Q12933;O95373;Q12904;Q86WH2;Q99732;P67870;O43318;Q14738;Q13158;P27986;P11473;Q9UN36;Q15173;P62826;P11308;P78318;P63104;Q9P1Z2;Q9Y3P8;Q13114;P53041;P06748;P61978;Q13625;Q15628;P23508;Q9UHY8;Q9ULZ2;Q9NV92;Q9UNS2;Q13330;Q92793;P78352;Q9UGK8;Q9UBS8;O75192;Q96B67;Q96CV9;O60711;Q8WUH2;P19838;Q03060;Q04724;Q00653;P16220;P41970;Q13352;Q02833;P01215;O43823;Q96FV9;Q9UIV1;Q9H160;Q9NRR8;Q6P1N0;Q9UMX1;Q9UQF2;Q9Y4H4;Q96C74;P50749;Q15596;Q96L92;P18850;P10599}

4039 Pathogen[ P0C206] interacts with 221 human  
partners: {O14964;Q02833;P10588;P31949;Q96L92;Q86WH2;Q03060;Q9NR46;Q9UKG1;P53805;P53675;O75952;Q9Y4H4;P78352;Q96RT1;P35398;O75192;Q13077;P06401;Q92844;P31749;Q9Y6J3;P78318;Q92845;P81274;Q13114;Q16537;P62879;Q8WVI7;Q9Y2N7;Q5JQC9;P16220;Q8NEU8;O43422;P35869;Q9UMX1;O75161;P18850;Q9UD71;Q9NRR8;Q9NV92;Q9UIV1;Q96CV9;Q13625;Q15172;Q9UKL3;P78560;O75469;Q66LE6;Q04726;P61978;Q99717;O15534;Q15185;Q15173;Q9H2L5;P50749;P53041;O43318;P63151;Q15653;P61201;O15397;Q9UHY8;Q99962;Q9UGK8;P29373;P62826;P41970;Q04725;Q9P1Z2;P43490;Q13158;Q99996;Q07666;Q13330;Q12933;Q02040;Q92783;Q9UQF2;Q9HB58;P227

36;Q9H160;Q15036;P27986;Q14738;P11308;Q15269;O14786;Q92793;P10589;O14974;O00213;O00327;P46060;P63104;Q9Y4J8;O96019;Q13522;Q9BUZ4;P16157;Q7Z3T8;P27815;P78347;Q9H0E2;P19838;Q96T49;Q99743;O15516;Q9Y3P8;Q92686;Q6ZTQ3;Q96FV9;Q6P1N0;P56645;Q96C74;Q9UQE7;Q13835;Q9UKN5;P43487;P35232;O95373;P07900;P55196;Q9UBS8;O60239;P01215;Q9H4B6;Q15942;Q8WW70;O94916;P67870;Q13352;A6NK89;Q8TF05;Q15628;Q8WUH2;P40763;O00463;P31150;Q8WYA1;Q9HB75;P98171;P45985;Q99704;Q04724;P29474;O96011;P06703;Q15797;Q5TB30;O43823;Q9Y5K6;Q02952;Q5VSY0;P42226;Q9NXG0;P35659;Q00653;Q13362;Q15596;O15055;Q92636;P27540;Q9ULZ2;Q9BWF2;P45877;Q92734;Q14765;Q15555;Q9UN36;P06748;O00170;Q99814;Q8IUM7;Q96B67;P55345;O43660;Q86UL8;Q9Y2Y0;A9YTQ3;P10599;P29692;Q9NS23;P20396;O15117;O60711;P42224;Q8NHQ8;Q8TDZ2;Q00005;Q9UQB3;Q15788;Q15759;O43639;O75312;Q99732;Q9UBG7;Q13136;P11802;Q9BYI3;O75901;P11473;Q14511;P52630;P08235;Q9H0E9;P50570;Q8N108;Q12904;Q9NZQ3;Q9HBZ2;Q9UNS2;Q04695;Q9NXR7;P23508;B7ZAQ6;Q08AM6;P30281;Q8IXF0}

4040 Pathogen[ P03363] interacts with 195 human partners: {Q9H160;P62879;Q9Y3P8;P51858;P52630;Q92845;Q8IUM7;P29474;P46060;Q14765;Q9Y263;Q96RT1;Q07666;O75161;Q9BWF2;Q9UGK8;Q13835;P36575;Q99962;P07900;Q96CV9;P27540;Q16537;Q9NXG0;Q9Y4H4;P16157;Q99996;Q9UMX1;P31150;O14786;Q96T49;Q99704;Q96L92;Q99742;Q02952;Q9UKN5;P61201;Q13362;Q9UD71;O00213;Q92734;Q9UQF2;Q92783;Q00005;Q9NR46;Q14738;P78352;Q12933;P18850;P53805;O00463;Q13625;P53041;P50570;Q9UN36;P35659;P31949;P16220;P98171;Q04726;Q9HBZ2;O43422;O43318;Q13522;Q15797;Q04724;Q15596;O75312;O43639;Q13158;P23508;Q96FV9;Q99743;P06748;P27815;P35869;P42226;P56645;P81274;Q66LE6;P78314;P10588;P11473;Q8NEU8;P63151;Q9UGP4;P63104;Q92636;Q15117;Q15653;Q9HB75;P29373;Q96019;Q9ULZ2;Q00653;P11308;P08235;Q9UHY8;P29692;Q13480;P31749;Q14511;Q13077;Q9P1Z2;Q8WYA1;O75901;P43487;O00327;Q99732;P78318;Q9Y2N7;Q9UKL3;Q8N108;O94916;Q8IXF0;Q12929;Q9H0E2;Q02040;Q9UNS2;P35398;Q15173;Q96C74;A9YTQ3;P78560;P19838;Q99814;O14964;Q9UBS8;Q02833;Q92793;Q9NS23;Q15185;O14974;Q9H4B6;Q15628;Q92844;O60239;Q5TB30;Q04725;Q15172;Q9NXR7;Q9NZQ3;Q9UV1;P50749;Q8WUH2;Q15269;Q86WH2;A6NK89;Q13114;Q13136;O43660;Q8WWW0;Q7Z5H3;Q9H2L5;Q86UL8;P35232;P61978;O15055;Q9UKF7;P67870;O95373;Q6P1N0;O15259;Q13330;P41970;Q9Y2Y0;Q9UBG7;P11802;Q9H0M0;Q9BUZ4;P30281;P62826;Q8TF05;Q9UQB3;Q13352;O15534;Q99717;P53675;O00170;Q96B67;Q6ZTQ3;P27986;P10589;Q9H0E9;P78347;Q9Y5K6;O95833;Q9UKG1;Q03060;Q96FS4;Q15942;O60711;Q15555;Q04695;O15397}

4041 [Cluster 368]GO:0032463+P biological\_process [name] negative regulation of protein homooligomerization [def] "Any process that stops, prevents, or reduces the frequency, rate or extent of protein homooligomerization." [GOC

4042 Pathogen[ Q2Q067] interacts with 1 human partners: {Q96SW2}

4043 Pathogen[ P0C214] interacts with 2 human partners: {Q96SW2;P10909}

4044 Pathogen[ P03346] interacts with 2 human partners: {Q9H165;Q96SW2}

4045 Pathogen[ Q85601] interacts with 1 human partners: {Q96SW2}

4046 Pathogen[ P14079] interacts with 2 human partners: {P10909;Q96SW2}

4047 Pathogen[ P03383] interacts with 1 human partners: {Q96SW2}

4048 Pathogen[ P03410] interacts with 2 human partners: {Q96SW2;P10909}

4049 Pathogen[ P14075] interacts with 1 human partners: {Q96SW2}

4050 Pathogen[ P0C206] interacts with 3 human partners: {Q96SW2;P10909;Q9H165}

4051 Pathogen[ P03363] interacts with 1 human partners: {Q96SW2}

4052 [Cluster 369]GO:0043666+P biological\_process [name] regulation of phosphoprotein phosphatase activity [def] "Any process that modulates the frequency, rate or extent of phosphoprotein phosphatase activity, the catalysis of the hydrolysis of phosphate from a phosphoprotein." [GOC

4053 Pathogen[ Q2Q067] interacts with 7 human partners: {P41236;Q6NXS1;Q5H9R7;Q9UPN7;P53805;Q15257;P14625}

4054 Pathogen[ P0C214] interacts with 8 human partners: {Q5H9R7;Q96PQ5;P14625;Q6NXS1;P41236;Q15257;P53805;Q9UPN7}

4055 Pathogen[ P03346] interacts with 7 human partners: {P53805;P14625;Q15257;Q5H9R7;Q6NXS1;P41236;Q9UPN7}

4056 Pathogen[ Q85601] interacts with 8 human partners: {P41236;P53805;Q9UPN7;P14625;Q6NXS1;Q96PQ5;Q15257;Q5H9R7}

4057 Pathogen[ P14079] interacts with 8 human partners: {O14990;Q9UPN7;P53805;P41236;Q6NXS1;P14625;Q5H9R7;Q96PQ5}

4058 Pathogen[ P03383] interacts with 8 human partners: {Q15257;P53805;O14990;Q6NXS1;P14625;Q5H9R7;Q9UPN7;P41236}

4059 Pathogen[ P03410] interacts with 9 human partners: {Q15257;P14625;Q5H9R7;P41236;P53805;O14990;Q96PQ5;Q6NXS1;Q9UPN7}

4060 Pathogen[ P14075] interacts with 8 human partners: {Q15257;P41236;Q5H9R7;Q6NXS1;P53805;Q9UPN7;P14625;O14990}

4061 Pathogen[ P0C206] interacts with 9 human partners: {Q6NXS1;P53805;Q5H9R7;P41236;Q96PQ5;Q9UPN7;Q15257;O14990;P14625}

4062 Pathogen[ P03363] interacts with 6 human partners: {P41236;P53805;Q6NXS1;Q9UPN7;Q15257;Q5H9R7}

4063 [Cluster 370]GO:0006309+P biological\_process [name] DNA fragmentation involved in apoptotic nuclear change [def] "The cleavage of DNA during apoptosis, which usually occurs in two stages

4064 Pathogen[ Q2Q067] interacts with 11 human partners: {Q14974;O00273;O60543;Q8N726;P99999;Q16890;Q12983;O95831;P52294;O76075;Q9BXF3}

4065 Pathogen[ P0C214] interacts with 13 human partners: {O60543;Q8N726;Q16890;O00273;P52294;P99999;P42574;Q9BXF3;Q12983;O14727;Q14974;Q96CA5;O76075}

4066 Pathogen[ P03346] interacts with 16 human partners: {P58012;Q9BXF3;P42574;Q12983;P99999;Q16890;Q13609;O95831;O76075;Q8N726;Q96CA5;O60543;O14727;P52294;O00273;Q14974}

4067 Pathogen[ Q85601] interacts with 12 human partners: {Q16890;P99999;O95831;Q9BXF3;O76075;Q14974;Q8N726;O60543;O00273;Q12983;Q96CA5;P52294}

4068 Pathogen[ P14079] interacts with 14 human partners: {Q16890;O76075;Q13609;O60543;P52294;Q8N726;Q14249;O95831;Q9BXF3;Q14974;Q12983;P99999;P07305;O00273}

4069 Pathogen[ P03383] interacts with 10 human partners: {O60543;O95831;Q12983;O00273;P99999;Q14974;Q9BXF3;P52294;Q16890;Q8N726}

4070 Pathogen[ P03410] interacts with 13 human partners: {Q14974;Q12983;Q8N726;P52294;Q9BXF3;Q13609;O76075;O00273;O95831;P99999;Q16890;O60543;Q14249}

4071 Pathogen[ P14075] interacts with 10 human partners: {Q12983;O00273;P52294;P99999;O95831;O60543;Q16890;Q14974;Q9BXF3;Q8N726}

4072 Pathogen[ P0C206] interacts with 15 human partners: {P99999;Q8N726;O76075;Q14974;Q16890;Q12983;Q9BXF3;O95831;Q13609;P42574;Q96CA5;O60543;P52294;Q14249;O00273}

4073 Pathogen[ P03363] interacts with 12 human partners: {O00273;O60543;P99999;Q9BXF3;Q13609;O76075;Q14974;Q8N726;Q16890;Q96CA5;O95831;P52294}

4074 [Cluster 371]GO:0030641+P biological\_process [name] regulation of cellular pH [def] "Any process involved in the maintenance of an internal equilibrium of hydrogen ions (protons) within a cell or between a cell and its external environment." [GOC]

4075 Pathogen[ Q2Q067] interacts with 1 human partners: {O15525}

4076 Pathogen[ P0C214] interacts with 1 human partners: {O15525}

4077 Pathogen[ P03346] interacts with 1 human partners: {O15525}

4078 Pathogen[ Q85601] interacts with 1 human partners: {O15525}

4079 Pathogen[ P14079] interacts with 1 human partners: {O15525}

4080 Pathogen[ P03383] interacts with 1 human partners: {O15525}

4081 Pathogen[ P03410] interacts with 1 human partners: {O15525}

4082 Pathogen[ P14075] interacts with 1 human partners: {O15525}

4083 Pathogen[ P0C206] interacts with 1 human partners: {O15525}

4084 Pathogen[ P03363] interacts with 1 human partners: {O15525}

4085 [Cluster 372]GO:0021879+P biological\_process [name] forebrain neuron differentiation [def] "The process in which a relatively unspecialized cell acquires specialized features of a neuron that will reside in the forebrain." [GO\_REF]

4086 Pathogen[ Q2Q067] interacts with 1 human partners: {Q07687}

4087 Pathogen[ P0C214] interacts with 1 human partners: {Q07687}

4088 Pathogen[ P03346] interacts with 5 human partners: {P56177;Q9H2C1;Q5XKR4;Q68G74;P49335}

4089 Pathogen[ Q85601] interacts with 1 human partners: {Q07687}

4090 Pathogen[ P14079] interacts with 1 human partners: {Q07687}

4091 Pathogen[ P03383] interacts with 1 human partners: {Q07687}

4092 Pathogen[ P03410] interacts with 1 human partners: {Q07687}

4093 Pathogen[ P14075] interacts with 1 human partners: {Q07687}

4094 Pathogen[ P0C206] interacts with 4 human partners: {Q07687;Q68G74;Q9H2C1;P56177}

4095 Pathogen[ P03363] interacts with 4 human partners: {P56177;Q5XKR4;P49335;Q07687}

4096 [Cluster 373]GO:0006796+P biological\_process [name] phosphate-containing compound metabolic process [def] "The chemical reactions and pathways involving the phosphate group, the anion or salt of any phosphoric acid." [GOC]

4097 Pathogen[ Q2Q067] interacts with 4 human partners: {Q9BU02;Q9H2U2;Q9H008;Q15181}

4098 Pathogen[ P0C214] interacts with 4 human partners: {Q9BU02;P07311;Q9H008;Q15181}

4099 Pathogen[ P03346] interacts with 4 human partners: {Q9H2U2;Q9BU02;Q15181;Q9H008}

4100 Pathogen[ Q85601] interacts with 4 human partners: {Q9BU02;Q9H008;Q9H2U2;Q15181}

4101 Pathogen[ P14079] interacts with 6 human partners: {P14621;P07311;Q9H008;Q9H2U2;Q9BU02;Q15181}

4102 Pathogen[ P03383] interacts with 5 human partners: {Q9H2U2;P07311;Q9BU02;Q15181;Q9H008}

4103 Pathogen[ P03410] interacts with 6 human partners: {Q9BU02;Q9H2U2;P07311;Q9H008;Q15181;P14621}

4104 Pathogen[ P14075] interacts with 5 human partners: {Q9H008;Q9H2U2;Q9BU02;P07311;Q15181}

4105 Pathogen[ P0C206] interacts with 6 human partners: {P07311;P14621;Q9H2U2;Q9H008;Q9BU02;Q15181}

4106 Pathogen[ P03363] interacts with 4 human partners: {Q9H2U2;Q9H008;Q9BU02;Q15181}

4107 [Cluster 374]GO:0021542+P biological\_process [name] dentate gyrus development [def] "The process whose specific outcome is the progression of the dentate gyrus over time, from its formation to the mature structure. The dentate gyrus is one of two interlocking gyri of the hippocampus. It contains granule cells, which project to the pyramidal cells and interneurons of the CA3 region of the ammon gyrus." [GO\_REF]

4108 Pathogen[ Q2Q067] interacts with 4 human partners: {Q13562;Q04743;P78543;Q00534}

4109 Pathogen[ P0C214] interacts with 2 human partners: {P78543;Q00534}

4110 Pathogen[ P03346] interacts with 5 human partners: {Q04743;Q00534;Q13562;P78543;Q96NK8}

4111 Pathogen[ Q85601] interacts with 3 human partners:{Q13562;P78543;Q00534}  
4112 Pathogen[ P14079] interacts with 2 human partners:{P78543;Q04743}  
4113 Pathogen[ P03383] interacts with 2 human partners:{Q00534;P78543}  
4114 Pathogen[ P03410] interacts with 3 human partners:{Q00534;P78543;Q04743}  
4115 Pathogen[ P14075] interacts with 2 human partners:{Q00534;P78543}  
4116 Pathogen[ P0C206] interacts with 4 human partners:{Q04743;Q13562;P78543;Q00534}  
4117 Pathogen[ P03363] interacts with 4 human partners:{P78543;Q00534;Q96NK8;Q04743}  
4118 [Cluster 375]GO:0090169+P biological\_process [name] regulation of spindle assembly  
[def] "Any process that modulates the rate, frequency or extent of spindle assembly.  
Spindle assembly is the aggregation, arrangement and bonding together of a set of  
components to form the spindle, the array of microtubules and associated molecules that  
serves to move duplicated chromosomes apart." [GOC  
4119 Pathogen[ Q2Q067] interacts with 2 human partners:{Q9GZR1;P78317}  
4120 Pathogen[ P0C214] interacts with 2 human partners:{P78317;Q9GZR1}  
4121 Pathogen[ P03346] interacts with 2 human partners:{Q9GZR1;P78317}  
4122 Pathogen[ Q85601] interacts with 2 human partners:{P78317;Q9GZR1}  
4123 Pathogen[ P14079] interacts with 2 human partners:{P78317;Q9GZR1}  
4124 Pathogen[ P03383] interacts with 2 human partners:{P78317;Q9GZR1}  
4125 Pathogen[ P03410] interacts with 2 human partners:{Q9GZR1;P78317}  
4126 Pathogen[ P14075] interacts with 2 human partners:{P78317;Q9GZR1}  
4127 Pathogen[ P0C206] interacts with 2 human partners:{P78317;Q9GZR1}  
4128 Pathogen[ P03363] interacts with 2 human partners:{P78317;Q9GZR1}  
4129 [Cluster 376]GO:0015074+P biological\_process [name] DNA integration [def] "The  
process in which a segment of DNA is incorporated into another, usually larger, DNA  
molecule such as a chromosome." [GOC  
4130 Pathogen[ Q2Q067] interacts with 4 human partners:{Q6R2W3;Q13129;O75531;Q12824}  
4131 Pathogen[ P0C214] interacts with 4 human partners:{Q12824;Q6R2W3;Q13129;O75531}  
4132 Pathogen[ P03346] interacts with 4 human partners:{Q6R2W3;O75531;Q13129;Q12824}  
4133 Pathogen[ Q85601] interacts with 4 human partners:{Q6R2W3;Q13129;O75531;Q12824}  
4134 Pathogen[ P14079] interacts with 6 human  
partners:{Q9NXP7;Q6ZNG9;Q13129;Q6R2W3;O75531;Q12824}  
4135 Pathogen[ P03383] interacts with 4 human partners:{Q12824;Q6R2W3;O75531;Q13129}  
4136 Pathogen[ P03410] interacts with 7 human  
partners:{Q9NXP7;Q6R2W3;Q13129;O75531;P63135;Q12824;Q6ZNG9}  
4137 Pathogen[ P14075] interacts with 4 human partners:{Q6R2W3;Q12824;Q13129;O75531}  
4138 Pathogen[ P0C206] interacts with 5 human  
partners:{Q6R2W3;Q12824;O75531;Q9NXP7;Q13129}  
4139 Pathogen[ P03363] interacts with 5 human  
partners:{Q6ZNG9;Q13129;O75531;Q6R2W3;Q12824}  
4140 [Cluster 377]GO:2000678+P biological\_process [name] negative regulation of  
transcription regulatory region DNA binding [def] "Any process that stops, prevents or  
reduces the frequency, rate or extent of transcription regulatory region DNA binding."  
[GOC  
4141 Pathogen[ Q2Q067] interacts with 4 human partners:{Q8TD23;P15976;P35548;Q9Y5J3}  
4142 Pathogen[ P0C214] interacts with 3 human partners:{Q8TD23;Q9Y5J3;P35548}  
4143 Pathogen[ P03346] interacts with 4 human partners:{P35548;Q8TD23;Q9Y5J3;P15976}  
4144 Pathogen[ Q85601] interacts with 4 human partners:{P15976;Q8TD23;P35548;Q9Y5J3}  
4145 Pathogen[ P14079] interacts with 4 human partners:{Q8TD23;P15976;Q9Y5J3;P28360}  
4146 Pathogen[ P03383] interacts with 2 human partners:{Q8TD23;P35548}  
4147 Pathogen[ P03410] interacts with 4 human partners:{Q9Y5J3;P35548;Q8TD23;P15976}  
4148 Pathogen[ P14075] interacts with 2 human partners:{Q8TD23;P35548}  
4149 Pathogen[ P0C206] interacts with 4 human partners:{P15976;Q9Y5J3;P35548;Q8TD23}  
4150 Pathogen[ P03363] interacts with 3 human partners:{Q9Y5J3;P35548;Q8TD23}  
4151 [Cluster 378]GO:0034145+P biological\_process [name] positive regulation of toll-like  
receptor 4 signaling pathway [def] "Any process that activates or increases the  
frequency, rate, or extent of toll-like receptor 4 signaling pathway." [GOC  
4152 Pathogen[ Q2Q067] interacts with 1 human partners:{Q96FA3}  
4153 Pathogen[ P0C214] interacts with 1 human partners:{Q96FA3}  
4154 Pathogen[ P03346] interacts with 1 human partners:{Q96FA3}  
4155 Pathogen[ Q85601] interacts with 1 human partners:{Q96FA3}  
4156 Pathogen[ P14079] interacts with 1 human partners:{Q96FA3}  
4157 Pathogen[ P03383] interacts with 1 human partners:{Q96FA3}  
4158 Pathogen[ P03410] interacts with 1 human partners:{Q96FA3}  
4159 Pathogen[ P14075] interacts with 1 human partners:{Q96FA3}  
4160 Pathogen[ P0C206] interacts with 1 human partners:{Q96FA3}  
4161 Pathogen[ P03363] interacts with 1 human partners:{Q96FA3}  
4162 [Cluster 379]GO:0031060+P biological\_process [name] regulation of histone methylation  
[def] "Any process that modulates the frequency, rate or extent of the covalent addition  
of methyl groups to histones." [GOC  
4163 Pathogen[ Q2Q067] interacts with 2 human partners:{Q7Z7J5;P49711}  
4164 Pathogen[ P0C214] interacts with 2 human partners:{Q7Z7J5;P49711}  
4165 Pathogen[ P03346] interacts with 2 human partners:{Q7Z7J5;P49711}  
4166 Pathogen[ Q85601] interacts with 2 human partners:{P49711;Q7Z7J5}  
4167 Pathogen[ P14079] interacts with 2 human partners:{Q7Z7J5;P49711}  
4168 Pathogen[ P03383] interacts with 2 human partners:{Q7Z7J5;P49711}  
4169 Pathogen[ P03410] interacts with 2 human partners:{Q7Z7J5;P49711}

4170 Pathogen[ P14075] interacts with 2 human partners:{P49711;Q7Z7J5}  
4171 Pathogen[ POC206] interacts with 2 human partners:{Q7Z7J5;P49711}  
4172 Pathogen[ P03363] interacts with 2 human partners:{P49711;Q7Z7J5}  
4173 [Cluster 380]GO:0031643+P biological\_process [name] positive regulation of myelination [def] "Any process that activates or increases the frequency, rate or extent of the formation of a myelin sheath around nerve axons." [GOC  
4174 Pathogen[ Q2Q067] interacts with 1 human partners:{Q8N5U6}  
4175 Pathogen[ POC214] interacts with 1 human partners:{Q8N5U6}  
4176 Pathogen[ P03346] interacts with 1 human partners:{Q8N5U6}  
4177 Pathogen[ Q85601] interacts with 1 human partners:{Q8N5U6}  
4178 Pathogen[ P14079] interacts with 2 human partners:{Q8N5U6;Q9Y2G1}  
4179 Pathogen[ P03383] interacts with 1 human partners:{Q8N5U6}  
4180 Pathogen[ P03410] interacts with 2 human partners:{Q9Y2G1;Q8N5U6}  
4181 Pathogen[ P14075] interacts with 1 human partners:{Q8N5U6}  
4182 Pathogen[ POC206] interacts with 1 human partners:{Q8N5U6}  
4183 Pathogen[ P03363] interacts with 1 human partners:{Q8N5U6}  
4184 [Cluster 381]GO:0045860+P biological\_process [name] positive regulation of protein kinase activity [def] "Any process that activates or increases the frequency, rate or extent of protein kinase activity." [GOC  
4185 Pathogen[ Q2Q067] interacts with 3 human partners:{Q9NYJ8;O76095;P30305}  
4186 Pathogen[ POC214] interacts with 4 human partners:{Q9Y376;Q86Y37;P30305;Q9NYJ8}  
4187 Pathogen[ P03346] interacts with 6 human partners:{Q9Y376;P30305;Q9NYJ8;Q86Y37;Q9BUZ4;O76095}  
4188 Pathogen[ Q85601] interacts with 5 human partners:{Q9NYJ8;Q9Y376;Q86Y37;P30305;O76095}  
4189 Pathogen[ P14079] interacts with 6 human partners:{O76095;Q9BUZ4;Q15078;P30305;Q86Y37;Q9Y376}  
4190 Pathogen[ P03383] interacts with 2 human partners:{O76095;Q9NYJ8}  
4191 Pathogen[ P03410] interacts with 5 human partners:{Q9Y376;Q9NYJ8;Q86Y37;O76095;P30305}  
4192 Pathogen[ P14075] interacts with 2 human partners:{O76095;Q9NYJ8}  
4193 Pathogen[ POC206] interacts with 6 human partners:{Q86Y37;P30305;Q9Y376;Q9BUZ4;Q9NYJ8;O76095}  
4194 Pathogen[ P03363] interacts with 4 human partners:{Q9NYJ8;Q9Y376;O76095;Q9BUZ4}  
4195 [Cluster 382]GO:0006464+P biological\_process [name] protein modification process [def] "The covalent alteration of one or more amino acids occurring in proteins, peptides and nascent polypeptides (co-translational, post-translational modifications). Includes the modification of charged tRNAs that are destined to occur in a protein (pre-translation modification)." [GOC  
4196 Pathogen[ Q2Q067] interacts with 36 human partners:{Q96J02;Q96HA8;P31749;Q9HAU4;Q9UII4;P62837;Q99816;Q15386;Q9ULC6;P49427;Q9Y2J8;P22061;Q96EZ8;P63279;Q7Z6Z7;Q14749;Q9UIC8;Q14669;P61077;Q9UKC9;O14933;Q96PU5;P61088;Q9ULW8;P11441;Q9UM07;Q05086;Q9NY27;P68036;Q9UKK3;P62987;Q86XK2;Q9NT62;Q8NEZ5;Q1442;Q6TGC4}  
4197 Pathogen[ POC214] interacts with 47 human partners:{Q05086;O14933;Q96J02;Q8IX04;Q16763;Q9HAU4;P54922;P22735;P49427;Q9NY27;Q92560;P63279;O00308;Q5T447;Q9H0M0;P61077;P22061;Q9HCE7;Q9UJ68;P50747;Q9UM07;Q9ULC6;Q6TGC4;Q14749;Q95071;Q15386;Q9UII4;Q9ULW8;P11441;Q9UKC9;P62987;Q99816;Q14669;Q9Y2J8;Q86XK2;Q9UKK3;Q7Z6Z7;A6NK58;Q9UIC8;Q96EZ8;Q9NT62;P61081;P31749;P61088;Q96HA8;Q96PU5;Q9UKT8}  
4198 Pathogen[ P03346] interacts with 52 human partners:{Q96J02;Q9ULC6;P22061;Q92560;Q9HAU4;Q96PU5;Q6TGC4;P68036;P62987;Q95714;P49427;Q8NEZ5;Q96EZ8;Q9Y2J8;Q9NY27;Q9UKK3;Q9UII4;Q9UIC8;Q99816;Q9UKT8;Q9NT62;P63279;Q86XK2;Q15386;Q14749;Q5T447;P61077;P61088;Q96MG8;Q9UHP3;P31749;Q8N841;P11441;Q14669;P62837;P53611;Q9ULW8;Q9UM07;Q96HA8;O14933;Q9ULT8;Q14442;Q05086;Q9H0M0;P22735;Q95071;Q9NV79;Q9UKC9;Q7Z6Z7;A0AVT1;Q6EMB2;O00308}  
4199 Pathogen[ Q85601] interacts with 39 human partners:{Q99816;Q96J02;Q9ULW8;Q9HAU4;Q16763;P31749;O14933;Q95714;P49427;Q9UM07;Q92560;Q9NY27;Q9UKK3;Q6TGC4;Q96PU5;Q14669;Q86XK2;Q15386;P68036;P61077;P63279;Q9UKC9;Q9Y2J8;Q9ULC6;P22061;Q9NT62;P62837;Q7Z6Z7;Q05086;P62987;P11441;Q9UIC8;P61088;Q95071;Q9UKT8;Q96EZ8;Q96HA8;Q14749;Q8NEZ5}  
4200 Pathogen[ P14079] interacts with 45 human partners:{P31751;Q14166;P54922;P63279;Q9NT62;Q14442;Q9ULC6;P68036;P22735;Q95922;Q86XK2;Q9NY27;Q96MG8;P04844;Q9UKC9;Q9HAU4;P61077;Q9UKK3;Q9Y4R7;Q96HA8;P62987;Q9ULW8;Q9Y2J8;Q9UIC8;A6PVC2;Q14749;Q9Y6X1;Q92560;Q8N841;Q96J02;Q9NV79;Q6ZVT0;P49427;Q8NEZ5;Q6EMB2;Q6TGC4;P62837;Q9Y234;Q9UM07;Q99816;A6NK58;O14933;Q9UJ68;Q96EZ8;P11441}  
4201 Pathogen[ P03383] interacts with 28 human partners:{O14933;P62987;P54922;P49427;P31749;Q99816;Q86XK2;Q9NT62;Q9ULW8;P61077;P61088;Q6TGC4;Q9UM07;P62837;Q96HA8;P22061;Q9Y2J8;Q9UIC8;Q9UKC9;Q9UKK3;Q9NY27;P68036;P11441;Q8NEZ5;Q9ULC6;Q96EZ8;Q14749;P63279}  
4202 Pathogen[ P03410] interacts with 44 human partners:{Q9Y4R7;Q14749;Q6ZVT0;P49427;Q9UM07;Q9NV79;P31749;P68036;P61088;Q14442;O14933;A6NK58;Q9ULC6;Q99816;Q9UJ68;Q9Y6X1;Q9Y234;Q96MG8;Q86XK2;Q8NEZ5;Q9UKC9;Q9NT62;P04844;P53611;Q6TGC4;Q9UIC8;Q96EZ8;P62987;Q14166;P54922;P63279;P11441;Q9Y2J8;Q95922;Q9UKK3;Q8N841;A6PVC2;P22061;Q6EMB2;Q9NY27;P61077;P62837;Q9ULW8;P22735}  
4203 Pathogen[ P14075] interacts with 29 human



partners:{Q9ULC6;Q14442;P68036;P54922;Q9UM07;P62837;P49427;Q9NT62;P61088;Q96EZ8;O14933;P63279;Q9Y2J8;P61077;Q96HA8;P31749;Q9NY27;P11441;Q9UKC9;P62987;Q8NEZ5;Q9ULW8;P22061;Q6TGC4;Q86XK2;Q14749;Q99816;Q9UKK3;Q9UIC8}

4204 Pathogen[ POC206] interacts with 53 human partners:{Q9Y234;Q16763;Q9UKC9;Q6ZVT0;Q96PU5;P31749;O00308;Q9HAU4;P68036;O14933;Q9UIC8;P22061;Q86XK2;Q05086;Q96J02;Q14442;Q9Y2J8;P62837;Q9UM07;Q99816;P11441;P49427;Q14669;Q15386;Q96EZ8;P54922;Q6TGC4;P61088;Q9ULC6;Q96HA8;Q9UKK3;O95922;Q9UJ68;Q8N841;Q9NY27;Q9UHP3;Q9UKT8;Q9NV79;Q14749;P61077;Q7Z6Z7;Q9NT62;P62987;Q9ULW8;A6NK58;Q8NEZ5;P53611;Q96MG8;O95071;P22735;Q6EMB2;O95714;Q92560}

4205 Pathogen[ P03363] interacts with 51 human partners:{Q9Y2J8;P11441;Q6EMB2;Q9HAU4;Q8NEZ5;P22314;Q9UHP3;O14933;P61081;Q9ULT8;O95922;Q9ULW8;Q96MG8;Q9NT62;P49427;Q05086;Q7Z6Z7;P61088;Q9UM07;Q92560;Q14669;Q96PU5;P31749;Q9UKK3;Q6TGC4;Q14749;Q9UKT8;Q8N841;P62987;P63279;Q96EZ8;O95071;Q86XK2;Q15386;Q96HA8;Q9UBE0;Q9UIC8;O00308;Q9NV79;Q9NY27;O95714;Q99816;P61077;P62837;Q9H0M0;Q9UKC9;Q9UII4;Q9ULC6;Q5T447;A0AVT1;P68036}

4206 [Cluster 383]GO:0010629+P biological\_process [name] negative regulation of gene expression [def] "Any process that decreases the frequency, rate or extent of gene expression. Gene expression is the process in which a gene's coding sequence is converted into a mature gene product or products (proteins or RNA). This includes the production of an RNA transcript as well as any processing to produce a mature RNA product or an mRNA (for protein-coding genes) and the translation of that mRNA into protein. Some protein processing events may be included when they are required to form an active form of a product from an inactive precursor form." [GOC

4207 Pathogen[ Q2Q067] interacts with 17 human partners:{Q9H2P0;Q9Y2X9;Q01664;P02511;Q9Y3E5;P14635;Q13127;P61244;P55055;P38936;Q14145;Q15583;P60953;Q9BQA5;P02489;P49711;Q9UQR1}

4208 Pathogen[ POC214] interacts with 17 human partners:{P61244;P02489;P02511;Q14145;P60953;P14635;O00308;P38936;Q9Y3E5;Q13127;Q9Y2X9;Q9NV92;P49711;Q9BQA5;Q9UQR1;Q01664;Q9H2P0}

4209 Pathogen[ P03346] interacts with 22 human partners:{Q9Y2B0;Q9UQR1;P06401;Q9H2P0;P02489;Q15583;P60953;Q9H165;Q9NV92;Q9Y3E5;P02511;P14635;P49711;P61244;P38936;Q9Y2X9;Q14145;Q01664;P55055;Q13127;O00308;Q9BQA5}

4210 Pathogen[ Q85601] interacts with 17 human partners:{Q9UQR1;P02489;Q13127;Q9Y2X9;Q15583;Q9Y3E5;P55055;P49711;Q14145;P14635;P02511;Q9H2P0;P61244;Q9BQA5;P60953;P38936;Q01664}

4211 Pathogen[ P14079] interacts with 20 human partners:{Q9UQR1;Q9Y3E5;P55055;Q06413;P02511;Q15583;Q9H2P0;Q9BQA5;P02489;P14635;Q14145;P38936;Q9Y2X9;Q01664;Q9NV92;Q96JY0;Q13127;Q9Y2B0;P61244;P49711}

4212 Pathogen[ P03383] interacts with 12 human partners:{Q9UQR1;P49711;P60953;P02511;P14635;Q9Y3E5;Q01664;Q9BQA5;Q14145;Q9Y2X9;P61244;Q13127}

4213 Pathogen[ P03410] interacts with 17 human partners:{Q9BQA5;Q9NV92;P61244;Q9UQR1;Q13127;Q9Y2X9;Q15583;P14635;P38936;P02489;P02511;P49711;Q9Y3E5;P60953;Q01664;Q9Y2B0;Q14145}

4214 Pathogen[ P14075] interacts with 13 human partners:{P60953;Q9UQR1;Q9BQA5;P14635;P61244;Q9Y3E5;Q01664;P02511;Q9Y2X9;Q9NV92;P49711;Q13127;Q14145}

4215 Pathogen[ POC206] interacts with 21 human partners:{Q9Y2X9;P06401;Q13127;O00308;Q9NV92;P55055;Q9BQA5;Q14145;P49711;Q9UQR1;P38936;Q9H165;P61244;P60953;Q01664;Q9Y3E5;P14635;Q9H2P0;P02511;P02489;Q15583}

4216 Pathogen[ P03363] interacts with 15 human partners:{Q14145;Q9H2P0;Q9Y2X9;P49711;P61244;Q13127;Q96JY0;Q9BQA5;Q15583;O00308;Q9UQR1;Q9Y3E5;P02489;P60953;Q01664}

4217 [Cluster 384]GO:0006268+P biological\_process [name] DNA unwinding involved in replication [def] "The process in which interchain hydrogen bonds between two strands of DNA are broken or 'melted', generating unpaired template strands for DNA replication." [ISBN

4218 Pathogen[ Q2Q067] interacts with 3 human partners:{Q06609;Q00577;P17096}

4219 Pathogen[ POC214] interacts with 4 human partners:{Q06609;P17096;Q14566;Q00577}

4220 Pathogen[ P03346] interacts with 5 human partners:{Q06609;Q00577;P17096;Q14566;P33991}

4221 Pathogen[ Q85601] interacts with 4 human partners:{P17096;Q14566;Q00577;Q06609}

4222 Pathogen[ P14079] interacts with 4 human partners:{Q14566;P17096;Q00577;Q06609}

4223 Pathogen[ P03383] interacts with 3 human partners:{Q06609;P17096;Q00577}

4224 Pathogen[ P03410] interacts with 4 human partners:{P17096;Q00577;Q14566;Q06609}

4225 Pathogen[ P14075] interacts with 3 human partners:{P17096;Q00577;Q06609}

4226 Pathogen[ POC206] interacts with 4 human partners:{P17096;Q06609;Q14566;Q00577}

4227 Pathogen[ P03363] interacts with 3 human partners:{P17096;Q06609;Q00577}

4228 [Cluster 385]GO:0007417+P biological\_process [name] central nervous system development [def] "The process whose specific outcome is the progression of the central nervous system over time, from its formation to the mature structure. The central nervous system is the core nervous system that serves an integrating and coordinating function. In vertebrates it consists of the brain, spinal cord and spinal nerves. In those invertebrates with a central nervous system it typically consists of a brain, cerebral ganglia and a nerve cord." [GOC

4229 Pathogen[ Q2Q067] interacts with 27 human

partners:{Q9HBZ2;P78424;P54259;O60260;Q01196;Q05516;O60315;P49770;Q13625;A6NFD8;Q8ND90;Q9Y4Z2;Q9H9Q4;Q99743;Q99608;O43711;Q06787;Q92529;Q13426;P53805;Q99962;O75360;P31314;Q8TE85;Q03393;Q02577;P48539}

4230 Pathogen[ POC214] interacts with 24 human partners:{Q9H9Q4;P32243;Q06787;P49770;P31314;Q13625;Q99743;Q99608;Q92529;Q99962;Q9H0M0;Q9HBZ2;Q8TE85;Q03393;Q13426;O75360;Q02577;Q99574;O60260;P53805;O60315;Q05516;Q8ND90;P54259}

4231 Pathogen[ P03346] interacts with 42 human partners:{P53805;P78424;Q99742;Q9Y4Z2;Q06787;A6NFD8;Q02535;Q8NFW5;O43711;O60315;Q99962;Q13426;P20264;P41225;Q92858;Q02575;Q8TE85;Q03393;Q06710;Q9UI15;P49770;Q13625;Q9HBZ2;Q8N157;Q05516;Q8ND90;Q99608;O60260;Q9H9Q4;P48539;Q99929;Q01196;Q9P2D1;O75360;P31314;Q9H0M0;Q92529;Q9Y4A0;P32243;Q02577;Q99743;P54259}

4232 Pathogen[ Q85601] interacts with 26 human partners:{P54259;Q8TE85;P78424;Q8ND90;O75360;Q9Y4Z2;Q9P2D1;O60315;Q99962;Q13426;Q06787;Q99743;Q99608;P49770;A6NFD8;Q02577;Q92529;Q13625;O43711;Q9HBZ2;P32243;P53805;Q05516;O60260;P31314;Q9H9Q4}

4233 Pathogen[ P14079] interacts with 32 human partners:{O60260;Q99743;Q9H9Q4;Q8TE85;Q8N157;Q05516;P53805;Q13625;Q99608;O60315;P02686;Q9P2D1;Q8ND90;O43711;P48681;Q9Y4A0;O75360;P78424;P32243;P54259;Q06787;Q02577;Q9HBZ2;Q03393;Q92529;A6NFD8;Q13426;P48539;Q8WZA0;P49917;Q99962;O96001}

4234 Pathogen[ P03383] interacts with 18 human partners:{Q02577;P32243;Q99608;O75360;Q06787;Q9H9Q4;P53805;Q05516;Q8TE85;Q13625;O60260;P48539;Q13426;O43711;P49770;P31314;Q8ND90;P54259}

4235 Pathogen[ P03410] interacts with 30 human partners:{Q99743;Q92529;P48539;P02686;Q99608;Q8WZA0;A6NFD8;O60260;P31314;P49770;Q9HBZ2;Q8TE85;Q9P2D1;P53805;Q8N157;Q13426;P32243;P54259;Q02577;Q99962;Q8ND90;O43711;Q06787;O96001;Q9Y4A0;O75360;Q13625;P78424;Q03393;Q9H9Q4}

4236 Pathogen[ P14075] interacts with 18 human partners:{Q02577;Q99608;Q8TE85;Q8ND90;P53805;Q9H9Q4;P49770;Q06787;O75360;O43711;Q13625;Q13426;P31314;Q05516;P54259;O60260;P32243;P48539}

4237 Pathogen[ POC206] interacts with 30 human partners:{Q8TE85;P78424;P53805;O43711;P31314;Q06787;Q9Y4Z2;Q05516;Q13625;Q9P2D1;A6NFD8;Q99962;O75360;P54259;P49770;Q99743;P49917;Q9H9Q4;P32243;Q13426;O60260;Q8ND90;Q8N157;Q99608;O60315;Q03393;Q92529;Q02577;P48539;Q9HBZ2}

4238 Pathogen[ P03363] interacts with 32 human partners:{Q06787;Q8NFW5;Q9Y4Z2;Q99962;O75360;O60315;P48539;P78424;P54259;Q99742;Q99929;P53805;Q13625;Q9HBZ2;P32243;Q99743;Q99608;Q92529;Q8TE85;Q13426;P20264;Q8N157;P31314;Q9H9Q4;Q8ND90;P49770;O43711;Q9H0M0;Q05516;Q02577;A6NFD8;Q9UI15}

4239 [Cluster 386]GO:0010592+P biological\_process [name] positive regulation of lamellipodium assembly [def] "Any process that increases the rate, frequency or extent of the formation of a lamellipodium, a thin sheetlike extension of the surface of a migrating cell." [GOC

4240 Pathogen[ Q2Q067] interacts with 1 human partners:{P63000}

4241 Pathogen[ POC214] interacts with 1 human partners:{P63000}

4242 Pathogen[ P03346] interacts with 1 human partners:{P63000}

4243 Pathogen[ Q85601] interacts with 1 human partners:{P63000}

4244 Pathogen[ P14079] interacts with 1 human partners:{P61158}

4245 Pathogen[ P03383] interacts with 1 human partners:{P63000}

4246 Pathogen[ P03410] interacts with 1 human partners:{P63000}

4247 Pathogen[ P14075] interacts with 1 human partners:{P63000}

4248 Pathogen[ POC206] interacts with 1 human partners:{P63000}

4249 Pathogen[ P03363] interacts with 1 human partners:{P63000}

4250 [Cluster 387]GO:0051051+P biological\_process [name] negative regulation of transport [def] "Any process that stops, prevents, or reduces the frequency, rate or extent of the directed movement of substances (such as macromolecules, small molecules, ions) into, out of or within a cell, or between cells, by means of some agent such as a transporter or pore." [GOC

4251 Pathogen[ Q2Q067] interacts with 1 human partners:{Q92681}

4252 Pathogen[ POC214] interacts with 2 human partners:{Q86U90;Q92681}

4253 Pathogen[ P03346] interacts with 2 human partners:{Q92681;Q86U90}

4254 Pathogen[ Q85601] interacts with 1 human partners:{Q92681}

4255 Pathogen[ P14079] interacts with 4 human partners:{Q92681;Q86U90;O75915;Q6PIZ9}

4256 Pathogen[ P03383] interacts with 2 human partners:{Q92681;Q86U90}

4257 Pathogen[ P03410] interacts with 4 human partners:{Q6PIZ9;Q86U90;O75915;Q92681}

4258 Pathogen[ P14075] interacts with 2 human partners:{Q92681;Q86U90}

4259 Pathogen[ POC206] interacts with 2 human partners:{Q92681;Q86U90}

4260 Pathogen[ P03363] interacts with 1 human partners:{Q92681}

4261 [Cluster 388]GO:0002009+P biological\_process [name] morphogenesis of an epithelium [def] "The process in which the anatomical structures of epithelia are generated and organized. An epithelium consists of closely packed cells arranged in one or more layers, that covers the outer surfaces of the body or lines any internal cavity or tube." [GOC

4262 Pathogen[ Q2Q067] interacts with 3 human partners:{Q9UN51;P20719;Q04695}

4263 Pathogen[ POC214] interacts with 3 human partners:{P36952;Q04695;Q9UN51}

4264 Pathogen[ P03346] interacts with 5 human partners:{Q9UN51;Q92826;P20719;Q04695;Q99593}

4265 Pathogen[ Q85601] interacts with 3 human partners:{P36952;Q04695;Q9UNS1}  
4266 Pathogen[ P14079] interacts with 3 human partners:{Q04695;P22914;Q9UNS1}  
4267 Pathogen[ P03383] interacts with 3 human partners:{Q9UNS1;P36952;Q04695}  
4268 Pathogen[ P03410] interacts with 4 human partners:{P36952;Q04695;Q9UNS1;P22914}  
4269 Pathogen[ P14075] interacts with 2 human partners:{Q04695;Q9UNS1}  
4270 Pathogen[ P0C206] interacts with 4 human partners:{Q9UNS1;P36952;P20719;Q04695}  
4271 Pathogen[ P03363] interacts with 5 human partners:{P20719;P36952;Q9UNS1;Q92826;Q04695}  
4272 [Cluster 389]GO:0007518+P biological\_process [name] myoblast cell fate determination [def] "The cell fate determination process in which a cell becomes capable of differentiating autonomously into a myoblast cell regardless of its environment\_ upon determination, the cell fate cannot be reversed. A myoblast is a mononucleate cell type that, by fusion with other myoblasts, gives rise to the myotubes that eventually develop into skeletal muscle fibers." [CL  
4273 Pathogen[ Q2Q067] interacts with 2 human partners:{000458;P15172}  
4274 Pathogen[ P0C214] interacts with 2 human partners:{000458;P15172}  
4275 Pathogen[ P03346] interacts with 2 human partners:{000458;P15172}  
4276 Pathogen[ Q85601] interacts with 2 human partners:{000458;P15172}  
4277 Pathogen[ P14079] interacts with 1 human partners:{000458}  
4278 Pathogen[ P03383] interacts with 2 human partners:{000458;P15172}  
4279 Pathogen[ P03410] interacts with 1 human partners:{000458}  
4280 Pathogen[ P14075] interacts with 2 human partners:{P15172;000458}  
4281 Pathogen[ P0C206] interacts with 2 human partners:{000458;P15172}  
4282 Pathogen[ P03363] interacts with 1 human partners:{P15172}  
4283 [Cluster 390]GO:0051301+P biological\_process [name] cell division [def] "The process resulting in the physical partitioning and separation of a cell into daughter cells." [GOC  
4284 Pathogen[ Q2Q067] interacts with 236 human partners:{P49454;Q12798;Q9Y6X3;Q96EE3;P30281;O60232;P83876;Q8IXJ6;O75351;Q9BTV5;Q9NY P9;P18754;Q7LBR1;P50995;Q14008;Q9BW66;O75909;P24385;Q7Z4H7;Q9Y266;Q96NB3;P63172;Q165 89;Q9NQW6;Q9NPB6;Q8IY18;Q6PJP8;Q14980;P06400;Q7Z5K2;Q9UJX3;Q9UJX5;O43663;Q8WWL7;Q133 52;Q9BYG5;Q6PGQ7;Q7Z460;Q9UNS1;O95997;Q86XL3;P62826;Q99816;Q99741;Q96R06;Q9H1H9;P610 24;P53990;Q99708;Q8N137;O00762;Q8NOZ3;Q94927;Q6P1K2;Q9HBM1;O75794;O75935;Q7Z7A1;Q5EE 01;P54274;Q8NDF8;Q8WYP5;A8MVW5;P42695;Q9H3R5;Q8NHV4;P30279;P62140;Q6P1M3;Q14511;Q5FB B7;Q95347;Q13257;Q86WB0;Q8N2Z9;A8MT69;P56945;Q9UJT9;Q9HC77;Q9UPV0;Q03188;Q9UNH5;Q9NV X0;Q66LE6;Q9NXR1;Q9C099;Q53HL2;O43684;Q8NBT2;Q9H981;Q14457;P63279;Q9P258;Q9NYG5;Q8NF H4;P30304;Q9H1A4;A6NKF1;O75400;O60563;P22674;P14635;Q99871;Q68DK2;Q86XI2;Q9NQS7;Q9UJ X2;Q9Y448;O43264;Q15003;Q8WUM4;Q29RF7;Q7Z7K6;P30307;Q9UM13;O43768;O43236;Q96BT3;Q08J 23;Q6PGN9;Q9BZD4;Q96DE5;O43482;O96017;P51959;O76095;Q86T82;Q12834;P41002;P36873;P692 08;Q15021;P50748;Q96EP1;P0CW71;P24864;O95067;Q9HD42;Q9BT25;Q96Q89;Q9H6D7;Q93K3;P621 36;Q99618;Q96MT8;P50613;Q9UN37;Q9NTI5;Q9BRX2;P78396;P56211;Q9H410;Q5TB80;Q8NFH3;Q8NH Z8;Q9ULW0;P20248;Q02241;O60216;O96020;O00139;Q9H4H8;Q53EZ4;A1L190;O75122;O76064;Q9Y3 E7;Q8IX90;Q8NG31;Q9UM11;Q9UJX4;Q93008;Q9UPY8;Q9Y6D9;Q9BVW5;Q9UKT4;Q96BD8;Q9UI95;Q9H9 00;P33552;O95271;O75410;P41208;Q96IY1;Q9NR09;Q96IK1;Q8IZT6;Q9ULG1;Q6PIF2;Q6DKK2;O751 54;Q86YI8;Q15182;O60583;Q9BXS6;Q69YH5;Q96MF7;Q14683;Q8WVM7;Q49MG5;P30305;P24941;Q9BU 64;Q9UJX6;O95229;O14777;Q9NVM9;Q562F6;P60006;P11802;Q9BYG4;Q9BPX3;Q8TDN4;Q96CS2;Q8ND 76;Q8N3U4;P51808;P27816;Q13042;P61586;Q15691;Q9H081;Q8WVK7;Q8TAP9;Q9BS18;Q9BTE3;Q9BX 26;Q96HI0;Q66K89;Q96FF9;O15392;Q96EA4;Q68CZ6;Q6P0N0;Q9BRK4;Q00534}  
4285 Pathogen[ P0C214] interacts with 233 human partners:{Q14457;Q9UJX6;O43768;Q9H081;Q9BPX3;Q8IY18;P53990;O43684;Q7Z3K3;Q8ND76;Q949 27;P20248;Q8TAP9;Q13257;Q86XI2;O75935;Q16763;Q96HI0;P30307;Q6P0N0;Q29RF7;Q96BT3;P621 40;Q14008;Q9BS18;O00762;O75909;Q53HL2;P56945;O75351;O43264;Q8NDF8;A1L190;P41002;Q022 41;Q15003;Q9BRK4;Q6DKK2;Q7Z4H7;P50613;P51959;Q9UJP4;Q96EA4;Q96R06;Q9BXS6;Q5EE01;Q9HD 42;P11802;Q9C099;Q8WYP5;O94921;P50748;A8MVW5;Q9BRX2;Q9UJX5;Q8NHV4;P61024;Q7Z7A1;P615 86;Q6P1M3;P42695;Q99708;Q9BVW5;Q86WB0;O95229;Q9HC77;Q66LE6;Q96EE3;P63279;Q96MT8;O602 32;Q9ULG1;P14635;Q8NBT2;P69208;P24385;P51808;O00139;Q9NVM9;Q15691;Q9UJX2;Q6P1K2;O757 94;Q562F6;Q9Y266;Q69YH5;Q9UI95;Q96FF9;O95347;Q93008;P27816;Q96CS2;Q9BTE3;Q14980;Q9BW 66;Q9UPV0;Q8TDN4;Q8N2Z9;Q6PGN9;Q6PJP8;Q03188;Q7LBR1;O75122;O43482;Q00534;Q9NPB6;Q96Q 89;Q12798;P56211;Q9H1A4;O96017;Q96BD8;Q9HBM1;Q9P258;P78396;Q9NYP9;Q08J23;Q9BT25;P302 81;Q96MF7;Q8NHZ8;Q86XL3;Q12834;P0CW71;O60583;Q9ULW0;Q13352;P83876;O43663;Q53E24;O950 67;Q9UNS1;P62136;P24941;Q99618;Q8NFH3;P22674;P30305;Q9UNH5;Q7Z7K6;Q86YI8;Q99871;Q145 11;P41208;Q96NB3;Q9Y3E7;P62826;Q9H410;O60563;Q9BX26;Q99816;O15392;Q9H6D7;Q9UPY8;Q9H3 R5;Q7Z5K2;O75410;Q8IX90;Q14683;Q8N3U4;Q8WVM7;Q8NG31;P24864;P30279;Q9UJX4;P63172;Q7Z4 60;Q9BYG5;P36873;Q9H900;A6NKF1;Q5FBB7;Q8IXJ6;Q9BTV5;P60006;Q9Y6X3;Q9NQS7;Q9NR09;Q9UJ X3;Q68CZ6;Q8NOZ3;Q8IYB7;O95997;Q68DK2;Q8WWL7;Q9UN37;Q8NFH4;Q9UM11;Q9NQR1;Q9NXR1;O952 71;Q96IY1;P49454;Q9NVX0;P18754;Q9NTI5;O43236;Q8IZT6;Q9Y448;O76064;P30304;P33552;P509 95;Q5TB80;Q9UJT9;Q7L5Y9;Q9NYG5;O60216;Q6PGQ7;Q66K89;Q9UM13;O75400;Q9BZD4;P06400;Q9UK T4;Q9Y6D9;Q9BYG4;Q15021;Q49MG5;Q9BU64;P54274;O75154;Q96EP1;Q99741;Q9H981;Q8WVK7;O960 20;Q96DE5;Q13042;O14777;Q16589;Q8N137;Q8WUM4}  
4286 Pathogen[ P03346] interacts with 267 human partners:{Q08J23;Q9NVM9;Q7Z3K3;Q66LE6;P62136;Q9Y6D9;P30281;Q8N2Z9;Q7Z7A1;Q8ND76;Q9BT 25;Q5FBB7;Q9BXS6;Q9H6D7;Q16589;P78396;Q8NFH4;Q9NRZ9;O76064;O95229;Q53GT1;P24385;Q9P2 N7;Q96MF7;P30279;Q5XG87;Q9NQW6;O96017;P60006;Q14511;O15392;O43684;Q9UM11;Q96EE3;Q8N3 U4;Q96FF9;Q7Z5K2;Q29RF7;Q99871;Q7Z4H7;P83876;Q9BS18;Q93008;Q9UJT9;Q9NQR1;Q9BX26;P064 00;Q9HD42;Q8WYJ6;A8MT69;O75410;O60563;O75935;Q96R06;O00139;P51808;Q8N137;O75400;Q69Y H5;Q15691;O96020;Q5EE01;P54274;Q8WYP5;A8MVW5;Q99708;Q9ULG1;Q8NHV4;P24941;Q6P1M3;P303

04;Q86WB0;Q9UNS1;Q9HC77;Q9NQY0;O95347;Q14141;O43264;Q9NXR1;Q99816;P24864;Q53HL2;O60232;Q9UM13;Q9H1H9;Q8IXJ6;Q9NPB6;P69208;P18754;Q14457;P63279;O43482;Q96IY1;Q9NYG5;Q6P0N0;Q9P258;Q96IK1;Q9Y5K6;Q86XI2;P61024;Q8TDN4;Q8NFH3;P41002;O95067;Q9UI95;P56211;Q86T82;Q66K89;O95997;Q8N0Z3;P62826;Q8TEW0;Q12834;P30305;Q8IYB7;Q14980;P11802;Q69YQ0;O43768;Q4BRK4;Q9UJX6;Q15555;Q5TB80;Q9Y266;P41208;O60583;O14777;Q9NVX0;Q96DE5;Q9ULW0;Q9Y3E7;O43236;Q96M5;Q96EA4;P56945;A6NKF1;Q9BPX3;P14635;Q8IZU3;Q13042;Q15021;Q9UJX5;Q9BYG5;P0CW71;Q14683;Q15019;Q8WWL7;P36873;O00762;Q14008;Q9UJX2;Q8TD19;Q60447;Q68CZ6;P33552;P20248;Q9BTV5;Q53EZ4;Q9NQS7;Q9NTI5;Q96Q89;Q9H981;Q9Y6X3;Q9UKT4;Q9BYG4;Q562F6;Q6PGN9;Q7Z7K6;Q9H081;Q8NBT2;Q9HBM1;P63172;Q9BW66;Q9UJX3;Q8NHZ8;Q6PIF2;Q9H4H8;P50995;Q9H410;P42695;O75122;Q9H1A4;Q9BU64;Q68DK2;Q02241;Q9C099;Q8TAP9;Q8WVM7;Q8NDF8;P27816;Q03188;O75909;Q8IX90;Q9UJX4;P50748;P36405;Q96PY6;Q96NB3;Q96CS2;O95271;Q9NR09;A1L190;O75351;Q12798;Q9Y448;Q6PJP8;Q96HI0;Q8N0S2;Q9P2J3;Q86YI8;Q8IZT6;Q00534;Q7Z460;Q9UHD8;P62140;P51959;Q7LBR1;O94921;O15182;Q8NG31;Q9H8V3;O94927;Q49MG5;Q86XL3;O75154;O76095;Q8WV I7;Q9BTV7;Q9UPY8;Q9UJP4;Q8IY18;O43663;Q9NYP9;Q15003;Q9H3R5;Q9BRX2;Q99741;Q9BVW5;Q6P1K2;Q6ZU15;O60216;Q8WUM4;Q96BD8;Q6PGQ7;O14965;Q9BZD4;Q99618;P22674;Q96BT3;Q9BTE3;Q13352;Q9H0E7;Q6DKK2;Q8WVK7;Q13257;Q9UNH5;P30307;P49454;Q96EP1;Q9UN37;Q9H900;Q9UBP0;Q9UPV0;Q96MT8;O75794;P61586;P53990}

4287 Pathogen[ Q85601] interacts with 257 human

partners: {Q53EZ4;Q9UJX2;Q14457;Q9NVM9;Q8NBT2;Q99816;P30281;P22674;P49454;Q6PGN9;Q9Y5T5;Q8N137;P27816;O95229;Q96DE5;Q9UJX6;Q16763;Q9BTE3;P24385;Q7Z7K6;Q9H0E7;O75154;Q02241;Q8NFH4;Q9NQW6;O96017;Q8NFH3;Q03188;O60563;P51808;P36405;Q9H900;Q95347;Q14008;O75909;Q96EE3;Q9Y5K6;Q9H6D7;Q9BT25;O15182;Q99871;Q9NQS7;Q8IY18;Q9BYG5;Q9UI95;Q9UBP0;Q9NQ R1;Q9H081;P06400;Q96PY6;Q12798;Q9P258;Q96IK1;P50995;Q96BT3;Q9BS18;O75935;Q7Z4H7;Q9UK T4;O75400;Q5EE01;Q9NVX0;Q8NHZ8;Q8WVP5;A8MVW5;Q99708;Q8NHV4;Q8ND76;Q6P1M3;P60006;O60583;Q49MG5;Q9H1A4;P62826;Q86WB0;Q7L5Y9;O75794;Q9HC77;Q16589;O43264;P42695;Q53HL2;Q9BX S6;O60232;Q9H1H9;Q9C099;Q8NG31;O15392;P30304;Q9H3R5;Q7LBR1;Q9BW66;Q66LE6;P61024;Q96E A4;Q8TDN4;Q9ULW0;P51959;P41002;O60216;Q8WVM7;Q9BX26;Q8IZT6;P63172;P56211;Q9NTI5;A6NK F1;Q29RF7;Q93008;Q96R06;Q9UJP4;P63279;Q12834;Q8IYB7;P11802;Q13257;O43663;Q8TAP9;Q7Z5 K2;O75122;Q9UNH5;O96020;P30305;O14965;Q9Y266;Q9UPV0;Q7Z3K3;Q9BPX3;Q86XL3;Q96Q89;Q13352;Q15555;Q9H981;P30307;O75351;Q5XG87;O43768;P56945;O76064;Q9Y448;Q562F6;P14635;Q8IX J6;Q13042;Q9UJX5;P62136;Q9NYP9;Q9BU64;Q14683;Q6PGQ7;Q9BZD4;Q99618;P36873;Q9UM 13;P53990;Q9BRK4;Q6DKK2;Q15691;O60447;Q96MT8;Q96BD8;Q9Y6D9;Q9UJT9;A8MT69;P33552;Q9NY G5;P30279;P20248;Q7Z7A1;Q5TB80;P78396;O94921;O00762;Q9BVA0;Q86YI8;Q9NPB6;Q8N2Z9;Q9UJ X3;Q9ULG1;P61586;P50613;Q6PIF2;Q9H4H8;O94927;Q69YQ0;Q9H410;Q68DK2;Q8NDF8;Q8IX90;Q8N3 U4;Q86T82;Q14980;Q9UJX4;Q9P2J3;Q9UM11;P50748;Q8WVK7;O76095;Q96IY1;P83876;Q8WYJ6;Q96C S2;Q9BTV5;P18754;Q9NR09;Q8WUM4;Q6PJP8;Q7Z460;Q96HI0;Q66K89;P62140;Q68XI2;Q00534;Q8N0 Z3;O95067;Q96EP1;Q96NB3;Q496M5;Q9NXR1;O95271;Q9UPY8;Q9BRX2;Q99741;Q14511;Q6P0N0;Q150 03;Q96FF9;P69208;Q9UN37;O43482;Q6P1K2;P24941;Q9Y3E7;Q9HD42;Q9Y6X3;O14777;O43684;O001 39;O75410;Q9HBM1;Q15021;Q68CZ6;Q69YH5;Q5FBB7;P51955;O95997;P54274;O43236;Q9BVW5;Q96M F7;A1L190;Q8WWL7;P24864;Q9BYG4;P41208;Q9UNS1}

4288 Pathogen[ P14079] interacts with 238 human

partners: {Q15691;Q14980;Q6P0N0;P51959;P54274;Q9NQW6;Q96IY1;Q03188;Q9BRX2;Q6PGQ7;Q9UP Y8;Q9ULG1;Q5EE01;Q96KR4;Q9BTV5;P63279;P63172;O43482;O75400;Q68DK2;Q96MF7;P30307;Q9UK T4;O43768;Q9BYG5;Q7Z460;P51808;Q8IX90;Q96BT3;Q9HBM1;Q9H4H8;Q96R06;Q96HI0;P78396;O952 71;P50995;P24864;P36873;O95229;Q8NBT2;Q9UJX3;Q76095;Q99871;Q96FF9;Q9H1A4;Q7Z3 K3;Q02241;Q9UJX5;Q9NVX0;Q8WVI7;Q96NB3;Q9BZD4;Q5XG87;O15392;P83876;Q7LBR1;P62136;O602 16;P69208;Q9BTV7;Q9Y266;Q9HD42;O95067;Q9NVM9;P68363;Q8NG31;A8MVW5;Q8ND76;Q9ULW0;Q7L5 Y9;Q9H900;Q86XL3;Q15003;Q9BTE3;Q9Y448;P56211;Q69YQ0;P30304;P60006;Q9BXS6;Q5FBB7;Q6PI F2;Q9H410;Q99618;P0CW71;Q9NR09;Q9NTI5;Q9NYG5;Q8TEW0;P33552;Q96IK1;Q99741;Q8N3U4;P506 13;Q9H981;P36405;Q8IYB7;Q8TDN4;Q99661;O43663;Q8WYJ6;P14635;Q96IY1;P51955;Q8NHV4;Q8WY P5;O95347;Q9BW66;Q9UM11;Q8IZU3;Q96Q89;Q8WUM4;Q99708;Q9UM13;Q12798;Q13042;O00139;Q155 55;Q9BYG4;Q96DE5;Q66K89;P41002;Q8N2Z9;Q13257;Q96EA4;Q9NQR1;Q562F6;Q8WVK7;Q66LE6;P621 40;Q9H1H9;Q9H6D7;Q8NFH3;P61586;Q96EE3;O75909;Q9H8V3;Q8WWL7;Q08J23;A6NKF1;Q9P258;O432 64;Q49MG5;A8MT69;Q9NYP9;Q8N0Z3;Q9C099;Q86YI8;Q6DKK2;Q9H3R5;O95997;Q9UJX6;Q86WB0;Q9UN 37;Q6PGN9;Q9BX26;Q8IXJ6;Q5TB80;Q3HL2;Q86Y91;Q8TAP9;P41208;Q9Y5K6;P20248;Q9NQS7;Q9NQ S7;Q9BPX3;O75410;Q86XI2;O60583;Q8IY18;Q9Y3E7;Q9Y6X3;Q9UQE7;Q7Z4H7;P49454;Q8N137;O751 54;Q16589;Q9BT25;O00762;O15182;P30305;Q9BU64;O75351;Q9UJP4;Q68CZ6;P62826;Q9UJT9;Q6PJ P8;Q29RF7;Q9NPB6;Q9NXR1;P50748;O96020;O75794;Q15021;Q99816;Q14457;Q7Z5K2;Q96BD8;Q9BV A0;O75122;Q14683;O14965;Q9UNS1;Q9BRK4;Q13352;O75935;Q9HC77;P42695;O60232;Q9UJX4;P539 90;P18754;O14777;Q9BS18;Q8IZT6;P27816;O43684;Q9UNH5;Q6P1M3;Q53EZ4;Q7Z7A1;P22674;O432 36;O94927;P49917;Q7Z7K6;Q6P1K2;Q9UPV0;Q9H081;Q14008;Q9BVW5;A1L190;P61024;Q96CS2}

4289 Pathogen[ P03383] interacts with 218 human

partners: {Q7Z7A1;Q14683;Q9BRK4;Q9UNS1;Q14457;Q96EE3;Q13257;P41002;P30307;Q8NHZ8;Q9NQ S7;Q03188;P62140;P49454;P50995;P56945;Q8N0Z3;O75794;Q8N2Z9;Q8NFH4;Q7Z460;P61024;Q9BV W5;Q86XI2;Q96BD8;Q96DE5;Q68DK2;Q02241;Q8NBT2;Q8N3U4;Q14008;P51808;Q9H900;Q15691;P838 76;Q9NYG5;Q9UJX6;Q8TD19;Q9NVX0;Q9H981;O43264;Q5FBB7;Q9UI95;P53990;Q9P258;O43236;Q9BX S6;P63172;P22674;O75410;Q9Y3E7;Q7Z4H7;Q5EE01;Q8WWL7;Q8WVP5;A8MVW5;P41208;Q8NHV4;Q9BT E3;Q6P1M3;P30304;Q9NYP9;Q9NVM9;Q86WB0;Q9HC77;O00762;Q6PJP8;O95347;Q12798;Q8NDF8;Q998 16;O60232;P24385;Q9Y6X3;Q9UKT4;Q9BRX2;P69208;Q9H1A4;O75400;Q7Z7K6;Q13352;Q00534;Q96E A4;O60216;Q96MF7;Q13042;P14635;Q96MT8;P11802;P06400;Q66K89;Q96BT3;P78396;Q96R06;A6NK F1;Q9H1H9;P36873;P62826;Q99618;P30279;P33552;P62136;Q12834;Q6PGN9;Q99871;Q15003;Q5TB 80;Q96CS2;P60006;P27816;Q53HL2;O94927;O95229;Q9BU64;O60563;Q7LBR1;P50613;Q9UM13;Q96H I0;P61586;Q43768;P51959;O43684;P24941;Q9BYG5;P18754;P0CW71;Q6PGQ7;Q9UNH5;Q14511;Q9BZ D4;Q9UM11;Q7Z3K3;Q08J23;Q6DKK2;O75909;Q68CZ6;Q9BS18;Q9NPB6;O95067;Q8WVK7;Q96Q89;A8MT 69;O96020;Q9BT25;Q562F6;O75935;Q86YI8;Q8TDN4;Q8ND76;Q9HBM1;O94921;Q9H4H8;Q9Y266;Q9HD 42;Q9H410;Q29RF7;O14965;Q9H081;Q8IX90;Q96FF9;Q96IY1;Q14980;Q99708;Q9UJX4;Q9UPV0;Q8NG

- 31;Q96PY6;Q96NB3;A1L190;Q6P1K2;Q9UJX5;Q9NR09;O95997;Q9Y448;Q9BW66;Q8N137;Q8WUM4;Q9H6D7;Q9ULW0;Q9C099;O14777;Q6P0N0;Q96EP1;O43663;Q49MG5;Q9UJX2;P56211;O76095;O95271;P24864;Q9NTI5;P30281;Q9H3R5;Q9UJX3;O60583;Q9UN37;Q9NQR1;Q53EZ4;Q9UPY8;O75154;P63279;Q69YH5;P20248;O43482;Q9BPX3;Q15021;P54274;Q8NFH3;Q99741;Q7Z5K2;Q8TAP9;O96017;Q9Y6D9;Q9BX26;P50748;Q8WVM7;Q9BYG4}
- 4290 Pathogen[ P03410] interacts with 256 human partners: {Q03188;Q9UKT4;Q9BS18;Q9Y6G9;P83876;Q8IX90;Q7Z460;O60583;Q86Y91;O15392;Q29RF7;Q8IXJ6;Q9H981;Q8WVI7;Q96Q89;O75154;Q16589;Q86WB0;O75794;Q9UI95;P51808;Q99708;Q9H3R5;O43684;Q9H6D7;P30279;P50995;P27816;Q9H1A4;Q96NB3;O00139;Q00534;Q99618;Q9NXR1;Q8TEW8;Q66K89;Q9HC77;Q9H410;Q8NG31;Q53HL2;Q9BTV7;Q8NFH4;O75351;Q9H1H9;P54274;O96020;Q9UQE7;Q7Z7A1;Q146BT3;Q9NVM9;Q7Z5K2;Q9UJX4;Q9NMG5;Q8WVL7;Q14008;Q9BVW5;Q9UM13;Q9BTE3;P62136;P42695;P36405;O15182;Q14457;Q9ULG1;P63172;P50748;Q9NYP9;Q8NHZ8;P22674;Q96HI0;O95067;Q69YQ0;Q15003;Q6P1M3;Q562F6;Q12798;Q8N137;P06400;Q6DKK2;Q9UNH5;Q96R06;O95997;Q6ZU15;Q9BXS6;Q9NQW6;Q8TAP9;Q6P0N0;O60216;P50613;Q68CZ6;Q96CS2;P41002;Q5EE01;Q9BTV5;P53990;O43264;Q96MF7;Q8IZT6;Q7Z7K6;P49454;Q9NQY0;Q9Y5K6;O95347;P78396;O14965;Q96EA4;Q9P2J3;Q99816;Q9NR09;O60563;Q8NHV4;Q8N0Z3;P24385;Q9Y3E7;Q96IY1;Q96KR4;Q9Y448;Q14980;P33552;P14635;Q9BX26;Q15555;Q9UM11;Q14511;O75400;Q15691;Q13042;O43236;P62826;P62140;P51959;P61586;Q6PJP8;P30304;P24941;Q9NQR1;P0CW71;Q9HD42;Q9BRX2;Q9UN37;O95271;O43482;P11802;Q6P1K2;Q8IZU3;Q9NVX0;Q9NTI5;O75909;Q14683;O60232;Q96DE5;Q9BZD4;O60447;Q8WVK7;Q69YH5;Q8WYJ6;O96017;P36873;Q9HBM1;Q5XG87;A8MVW5;Q6PGQ7;Q96EE3;O75410;Q9UJX5;O75935;Q9UY8;Q8N3U4;Q9NH8;Q53EZ4;Q8IYB7;O94277;P20248;O43768;Q96T23;Q12834;Q9UJX6;Q9UM13;Q5FBB7;Q08J23;Q9UJX3;Q9ULW0;P69208;P56945;Q9UN37;O00762;P68363;Q5TB80;Q8IY18;P63279;P61024;Q6PIF2;Q8TEW0;A8MT69;Q9NPB6;Q7Z3K3;Q9UPV0;Q8WVM7;Q9H900;Q9Y266;O95229;Q9H081;Q9UJP4;Q96FF9;O76095;Q9C099;P60006;Q66LE6;P18754;Q9H8V3;Q6PGN9;A6NKF1;Q99871;Q96BD8;P30305;A1L190;Q9UJT9;Q9BPX3;Q86XI2;Q9H4H8;Q9P258;P41208;Q8WUM4;Q68DK2;Q8TDN4;P24864;P56211;Q8WYP5;O75122;Q8NFH3;Q7L5Y9;Q8ND76;Q7LBR1;Q9BT25;P30307;Q86XL3;Q9UJX6;Q96EP1;Q49MG5;Q7Z4H7;Q13352;Q9BYG4;Q9BVA0;O14777;Q9BYG5;Q02241;Q9BU64;Q15021;O43663;Q8N2Z9;Q8N0S2;Q9BW66;Q13257;Q9NQS7;Q96IK1;Q99741;Q86YI8}
- 4291 Pathogen[ P14075] interacts with 221 human partners: {Q14457;Q96MT8;A8MT69;Q99871;Q14511;Q9BS18;P60006;Q9Y266;Q13042;Q9H1H9;O95067;P24941;Q14683;P53990;Q9Y6D9;Q02241;O43663;P11802;Q9H081;Q8NDF8;P61024;Q7Z4H7;Q562F6;O75410;O43236;Q49MG5;O76095;Q9UKT4;Q9NQS7;Q9Y6X3;Q8WVM7;P51959;P14635;Q7LBR1;Q9UM11;Q96R06;P51808;Q8WVK7;P30281;P30279;Q5EE01;Q8WUM4;O60563;Q86XI2;Q8WYP5;A8MVW5;P50613;Q8NHV4;Q7Z460;Q9BX26;Q6P1M3;Q9BRX2;Q86WB0;Q96IY1;Q13257;Q68CZ6;Q00534;Q9HC77;A1L190;Q9BYG4;Q9BXS6;O60232;Q9NQR1;O60583;Q7L5Y9;O95997;O43684;Q12798;P62140;Q9BW66;Q96BD8;Q9UI95;P63279;O96020;P63172;O75794;O14777;Q9UJX2;Q9BT25;Q96FF9;P36873;O95229;O95347;O75400;Q9BVW5;Q69YH5;Q9Y3E7;P62136;P78396;Q9UJX6;Q8N2Z9;Q8NHZ8;Q9BTE3;Q9UPV0;P69208;Q9H3R5;Q9ULW0;Q96HI0;P50995;Q68DK2;P54274;Q9UPY8;Q96DE5;O00762;Q9BU64;Q96EA4;O00139;O43768;Q9P258;P22674;O75935;Q9UJX5;O96017;P0CW71;Q7Z5K2;O14965;Q8WVL7;Q15691;Q9NYP9;Q5TB80;Q96EE3;Q8N137;Q9C099;P20248;P62826;Q96BT3;Q96CS2;Q86YI8;Q5FBB7;P61586;Q9H4H8;P30304;P06400;Q9H410;P41208;Q8IX90;Q66K89;Q7Z7K6;A6NKF1;Q8NFH3;Q9UJX4;Q9H900;Q53EZ4;Q9BRK4;Q53HL2;Q29RF7;Q6PGN9;Q9NVX0;Q9UN37;P50748;P18754;Q9NR09;Q8ND76;Q96PY6;Q9HD42;Q9BYG5;Q99741;O94927;P83876;Q9H981;Q9HBM1;Q9H1A4;P56211;Q6P1K2;P24385;O75154;Q9NPB6;Q15003;Q99816;Q13352;Q14008;Q99618;P41002;Q96MF7;Q08J23;O43264;Q8TAP9;O95271;Q9UM13;Q14980;O94921;O75909;Q03188;Q7Z3K3;Q8NG31;Q9UJX3;Q9NVM9;Q8NBT2;Q9NTI5;Q9NYG5;P49454;Q6P0N0;Q6PJP8;Q99708;Q96IK1;Q9UNH5;Q9BPX3;Q9H6D7;Q96Q89;P27816;P30307;Q7Z7A1;Q8NFH4;Q9Y448;O60216;Q6PGQ7;Q8NBT2;Q9BZD4;Q12834;Q15021;Q96NB3;Q6DKK2;P33552;P56945;Q8N0Z3;Q96EP1;Q9UN37;Q8N3U4;P24864;Q8TD19}
- 4292 Pathogen[ P0C206] interacts with 278 human partners: {O95271;Q9UN37;Q16763;Q96EE3;Q9HBM1;Q9UJT9;O15182;Q68DK2;Q9P2N7;O60216;Q8N137;Q9BPX3;Q08J23;Q8WYP5;Q8WVL7;Q5XG87;Q9BTE3;P83876;Q9UN37;P69208;Q496M5;Q9BVA0;P61024;Q7LBR1;O75794;Q9C099;Q9HC77;Q14008;Q96Q89;Q8TDN4;Q9UJX3;Q9H900;Q9UBP0;Q96KR4;Q99708;Q8WVI7;Q15019;P30307;Q9H981;Q9Y3E7;O96017;Q9Y5T5;Q9Y6D9;Q93008;Q9ULW0;P18754;Q96HI0;A1L190;P51955;Q86XL3;O75154;Q96EP1;Q9UJX5;Q9NQW6;P56211;Q9UJX2;Q9BTV5;P50995;P30279;Q6PJP8;Q66LE6;Q15691;O95997;Q9H081;O14777;Q7Z5K2;P42695;Q9Y448;Q99618;Q9BT25;Q29RF7;Q9BYG5;Q6PGQ7;Q9NYP9;Q14457;Q15021;Q96PY6;Q9BZD4;P20248;Q9UPV0;Q8IZT6;Q9H410;P30305;P62826;Q99816;Q6PGN9;P49454;Q16589;Q8TD19;Q9H1H9;Q99741;Q13257;Q9BX26;Q8IZU3;Q9H081;O96020;Q9BU64;Q14141;Q02241;Q9Y6X3;Q9BW66;O43236;Q8IX90;P61586;Q9NVX0;Q69YQ0;Q96FF9;Q9UJP4;Q9BS18;Q15003;P30291;O75122;Q86Y91;O75410;Q9UKT4;Q5EE01;P54274;Q8TEW0;Q6P1K2;Q9H1A4;Q6DKK2;Q6ZU15;Q8NBT2;O60447;A8MVW5;P27816;Q96BD8;A6NKF1;Q9H3R5;Q8WYJ6;Q96NB3;P49917;Q9NYG5;Q9UNH5;Q9UJX4;Q86XI2;Q7L5Y9;Q9UPY8;Q9UQE7;P50613;Q9NR09;O95347;Q9BVW5;Q9ULG1;P51959;P51808;Q14683;Q96IY1;Q9P2J3;P53990;Q9NQR1;Q9Y6G9;Q7Z7K6;Q96BT3;Q7Z3K3;Q8NDF8;O43768;Q96CS2;O43663;Q13352;Q7Z4H7;Q5FBB7;P49916;Q9NPB6;Q9UM11;Q86T82;O94927;Q53HL2;O00762;O43482;Q96MF7;Q9H8V3;Q49MG5;Q8NHV4;O15392;Q6P0N0;O00139;Q9NTI5;P0CW71;Q8N0S2;Q8IXJ6;Q9P258;Q9NQY0;P62140;Q9UJX6;O75909;P36405;Q8NFH4;Q8WUM4;P33552;P30304;Q86YI8;Q562F6;Q9Y5K6;O75400;Q7Z7A1;Q69YH5;P78396;Q9H6D7;Q99871;P41208;Q8N3U4;Q9NR09;Q86WB0;Q8N0Z3;O95067;Q9NXR1;P56945;Q96EA4;Q9HD42;Q96DE5;Q8ND76;Q8TAP9;Q8N2Z9;Q16181;Q15555;Q9BTV7;Q12798;P14635;P60006;Q9BXS6;O43684;O60583;O14965;Q14980;Q9UM13;Q96MT8;Q7Z460;Q9NVM9;O75351;Q9NQS7;O75935;Q66K89;Q8NFH3;P63172;P36873;Q13042;Q8IYB7;O76064;Q8IY18;P50748;O60563;Q96IK1;Q9BW19;O43264;P24864;P24941;Q68CZ6;Q8WVM7;Q9NTJ3;Q8NG31;Q9BRX2;Q9Y266;P41002;Q5TB80;P11802;O60232;P22674;Q6P1M3;O94921;Q14511;Q12834;Q8WVK7;Q9UI95;Q9BYG4;Q8NHZ8;A8MT69;Q03188;P62136;Q99986;O76095;Q9H4H8;P24385;O95229;Q6PIF2;Q00534;P30281;P06400}
- 4293 Pathogen[ P03363] interacts with 245 human partners: {Q9UJX2;O75410;Q9NYG5;Q96EA4;A6NKF1;Q69YH5;Q9BZD4;Q96IK1;Q13042;P49454;Q96EP1;Q6P0N0;Q96IY1;Q8WVL7;Q6P1K2;P62136;Q9NYP9;Q7Z7K6;P69208;Q7Z7A1;Q16589;Q9Y6D9;Q9HC

77;Q9UNH5;Q08J23;Q86WB0;Q9H081;Q9H981;Q9ULG1;P36873;P24864;Q8NFH4;O00762;Q15021;O605  
63;Q95229;Q96DE5;Q9BRK4;Q96MT8;Q96BD8;Q9BTE3;Q9UJT9;P62140;P33552;Q8NHV4;O75794;P302  
79;Q8WYP5;Q9NQW6;O60232;Q14457;P20248;O95347;Q8NFH3;Q9P2N7;Q86XI2;Q14980;Q9Y266;Q156  
91;O75909;Q9ULW0;O43264;Q8NBT2;O60447;P68363;Q8ND76;Q8NHZ8;Q9H6D7;Q02241;Q9NPB6;Q8N2  
Z9;Q9P258;Q9UJX3;Q9BT25;Q66K89;Q9H4H8;Q9C099;Q53HL2;Q8WVK7;Q9BXS6;Q9H410;P24941;P507  
48;Q9UJX5;Q6PGQ7;P41208;Q49MG5;Q68DK2;P06400;Q9BYG4;Q8WYJ6;Q8IX90;P41002;Q9NVA2;Q9UJ  
X6;P50995;Q9FBB7;Q66LE6;Q9UM11;Q9BS18;Q9UJX4;O96017;O75351;Q9H900;P30304;O75400;Q005  
34;Q5EE01;Q6PGN9;A8MVW5;Q99708;Q9UPY8;Q9UN37;Q8IYM1;P27816;Q6P1M3;Q96R06;O60583;Q53E  
Z4;P60006;Q68CZ6;O43684;O95067;O96020;Q12798;Q6PIF2;O94927;Q6DKK2;Q8WUM4;Q9NR09;P631  
72;Q8IYB7;Q9BW66;Q14511;P54274;Q9BVW5;Q9NQS7;Q8NDF8;Q99741;P61024;Q9NVX0;Q86T82;P783  
96;Q8WVM7;Q9UNS1;O75935;Q9Y3E7;Q9HBM1;Q7LBR1;Q7Z460;Q9UKT4;O43768;O95271;Q9BPX3;Q9H1  
A4;Q9UHD8;Q9UI95;Q03188;Q8NG31;Q13257;Q8N0Z3;P63279;Q96CS2;Q7Z3K3;Q99871;P83876;Q6PJ  
P8;Q9BYG5;P51808;Q29RF7;Q99618;O76095;O75154;P0CW71;Q9UPV0;P24385;Q9P2J3;P42695;Q96B  
T3;Q9UM13;P56945;Q8TDN4;Q96HI0;O15182;P51959;Q9UJP4;Q9NVM9;P56211;Q9NQY0;Q9H3R5;Q9NT  
I5;Q9BRX2;Q6ZU15;Q99816;Q8N3U4;O14777;Q9NQR1;Q96Q89;O95997;Q12834;Q14008;Q9Y448;O434  
82;Q96FF9;Q9H1H9;Q9Y6X3;P11802;Q53GT1;O43663;Q562F6;P22674;Q9NXR1;Q14141;O00139;P187  
54;Q99719;P30307;Q7Z5K2;P30281;P62826;Q8IY18;Q13352;Q7Z4H7;Q5TB80;Q96NB3;Q96MF7;Q8IZ  
U3;Q93008;Q86XL3;Q8IZT6;Q14683;Q9Y5K6;O43236;Q9BTV5;Q15003;Q9BX26;A8MT69;Q15555;Q9HD  
42;A1L190;Q8TAP9;O60216;Q69YQ0;Q8N137;P53990}

4294 [Cluster 391]GO:0048546+P biological\_process [name] digestive tract morphogenesis  
[def] "The process in which the anatomical structures of the digestive tract are  
generated and organized. The digestive tract is the anatomical structure through which  
food passes and is processed." [GOC

4295 Pathogen[ Q2Q067] interacts with 3 human partners: {P08151;O15350;P56693}  
4296 Pathogen[ P0C214] interacts with 3 human partners: {O15350;P56693;P08151}  
4297 Pathogen[ P03346] interacts with 3 human partners: {P56693;O15350;P08151}  
4298 Pathogen[ Q85601] interacts with 3 human partners: {P08151;P56693;O15350}  
4299 Pathogen[ P14079] interacts with 4 human partners: {P08151;O15350;Q8IWX6;P56693}  
4300 Pathogen[ P03383] interacts with 2 human partners: {O15350;P56693}  
4301 Pathogen[ P03410] interacts with 3 human partners: {P56693;O15350;Q8IWX6}  
4302 Pathogen[ P14075] interacts with 2 human partners: {P56693;O15350}  
4303 Pathogen[ P0C206] interacts with 3 human partners: {P56693;O15350;P08151}  
4304 Pathogen[ P03363] interacts with 2 human partners: {P08151;P56693}

4305 [Cluster 392]GO:0046324+P biological\_process [name] regulation of glucose import  
[def] "Any process that modulates the frequency, rate or extent of the import of the  
hexose monosaccharide glucose into a cell or organelle." [GOC

4306 Pathogen[ Q2Q067] interacts with 2 human partners: {Q9BZE9;Q9UKG1}  
4307 Pathogen[ P0C214] interacts with 2 human partners: {Q9UKG1;Q9BZE9}  
4308 Pathogen[ P03346] interacts with 2 human partners: {Q9BZE9;Q9UKG1}  
4309 Pathogen[ Q85601] interacts with 2 human partners: {Q9BZE9;Q9UKG1}  
4310 Pathogen[ P14079] interacts with 2 human partners: {Q9UKG1;Q9BZE9}  
4311 Pathogen[ P03383] interacts with 1 human partners: {Q9BZE9}  
4312 Pathogen[ P03410] interacts with 2 human partners: {Q9BZE9;Q9UKG1}  
4313 Pathogen[ P14075] interacts with 1 human partners: {Q9BZE9}  
4314 Pathogen[ P0C206] interacts with 2 human partners: {Q9UKG1;Q9BZE9}  
4315 Pathogen[ P03363] interacts with 2 human partners: {Q9BZE9;Q9UKG1}

4316 [Cluster 393]GO:0043457+P biological\_process [name] regulation of cellular  
respiration [def] "Any process that modulates the frequency, rate or extent of cellular  
respiration, the enzymatic release of energy from organic compounds." [GOC

4317 Pathogen[ Q2Q067] interacts with 2 human partners: {Q8TCS8;Q9HAZ2}  
4318 Pathogen[ P0C214] interacts with 2 human partners: {Q9HAZ2;Q8TCS8}  
4319 Pathogen[ P03346] interacts with 2 human partners: {Q8TCS8;Q9HAZ2}  
4320 Pathogen[ Q85601] interacts with 2 human partners: {Q8TCS8;Q9HAZ2}  
4321 Pathogen[ P14079] interacts with 4 human partners: {Q9HAZ2;Q9NZ45;Q8NC60;Q8TCS8}  
4322 Pathogen[ P03383] interacts with 2 human partners: {Q8TCS8;Q9HAZ2}  
4323 Pathogen[ P03410] interacts with 4 human partners: {Q8TCS8;Q9HAZ2;Q8NC60;Q9NZ45}  
4324 Pathogen[ P14075] interacts with 2 human partners: {Q9HAZ2;Q8TCS8}  
4325 Pathogen[ P0C206] interacts with 2 human partners: {Q9HAZ2;Q8TCS8}  
4326 Pathogen[ P03363] interacts with 1 human partners: {Q9HAZ2}

4327 [Cluster 394]GO:0009950+P biological\_process [name] dorsal/ventral axis specification  
[def] "The establishment, maintenance and elaboration of the dorsal/ventral axis. The  
dorsal/ventral axis is defined by a line that runs orthogonal to both the  
anterior/posterior and left/right axes. The dorsal end is defined by the upper or back  
side of an organism. The ventral end is defined by the lower or front side of an  
organism." [GOC

4328 Pathogen[ Q2Q067] interacts with 2 human partners: {Q99750;Q9HC62}  
4329 Pathogen[ P0C214] interacts with 2 human partners: {Q99750;Q9HC62}  
4330 Pathogen[ P03346] interacts with 3 human partners: {Q99750;Q9HC62;Q9UIW0}  
4331 Pathogen[ Q85601] interacts with 2 human partners: {Q9HC62;Q99750}  
4332 Pathogen[ P14079] interacts with 2 human partners: {Q9HC62;Q99750}  
4333 Pathogen[ P03383] interacts with 2 human partners: {Q99750;Q9HC62}  
4334 Pathogen[ P03410] interacts with 2 human partners: {Q9HC62;Q99750}  
4335 Pathogen[ P14075] interacts with 2 human partners: {Q9HC62;Q99750}  
4336 Pathogen[ P0C206] interacts with 2 human partners: {Q9HC62;Q99750}  
4337 Pathogen[ P03363] interacts with 3 human partners: {Q9UIW0;Q99750;Q9HC62}

4338 [Cluster 395]GO:0048814+P biological\_process [name] regulation of dendrite

morphogenesis [def] "Any process that modulates the frequency, rate or extent of dendrite morphogenesis." [GOC

4339 Pathogen[ Q2Q067] interacts with 1 human partners:{Q9Y250}

4340 Pathogen[ P0C214] interacts with 1 human partners:{Q9Y250}

4341 Pathogen[ P03346] interacts with 1 human partners:{Q9Y250}

4342 Pathogen[ Q85601] interacts with 1 human partners:{Q9Y250}

4343 Pathogen[ P14079] interacts with 1 human partners:{Q9Y250}

4344 Pathogen[ P03383] interacts with 1 human partners:{Q9Y250}

4345 Pathogen[ P03410] interacts with 1 human partners:{Q9Y250}

4346 Pathogen[ P14075] interacts with 1 human partners:{Q9Y250}

4347 Pathogen[ P0C206] interacts with 1 human partners:{Q9Y250}

4348 Pathogen[ P03363] interacts with 1 human partners:{Q9Y250}

4349 [Cluster 396]GO:0006275+P biological\_process [name] regulation of DNA replication [def] "Any process that modulates the frequency, rate or extent of DNA replication." [GOC

4350 Pathogen[ Q2Q067] interacts with 6 human partners:{P30153;P67775;D6RGH6;P12004;Q9BVC3;O75496}

4351 Pathogen[ P0C214] interacts with 5 human partners:{D6RGH6;P30153;O75496;Q9BVC3;P67775}

4352 Pathogen[ P03346] interacts with 7 human partners:{P12004;Q02535;D6RGH6;P67775;P30153;Q9BVC3;O75496}

4353 Pathogen[ Q85601] interacts with 6 human partners:{O75496;P30153;D6RGH6;Q9BVC3;P67775;P12004}

4354 Pathogen[ P14079] interacts with 6 human partners:{D6RGH6;Q9BVC3;Q9UQE7;P12004;P30153;O75496}

4355 Pathogen[ P03383] interacts with 5 human partners:{D6RGH6;P30153;P67775;Q9BVC3;O75496}

4356 Pathogen[ P03410] interacts with 7 human partners:{Q9UQE7;D6RGH6;Q9BVC3;P30153;O75496;P67775;P12004}

4357 Pathogen[ P14075] interacts with 5 human partners:{Q9BVC3;P67775;P30153;O75496;D6RGH6}

4358 Pathogen[ P0C206] interacts with 7 human partners:{O75496;P30153;D6RGH6;P67775;Q9UQE7;Q9BVC3;P12004}

4359 Pathogen[ P03363] interacts with 5 human partners:{Q9BVC3;D6RGH6;O75496;P30153;P67775}

4360 [Cluster 397]GO:0006807+P biological\_process [name] nitrogen compound metabolic process [def] "The chemical reactions and pathways involving organic or inorganic compounds that contain nitrogen, including (but not limited to) nitrogen fixation, nitrification, denitrification, assimilatory/dissimilatory nitrate reduction and the interconversion of nitrogenous organic matter and ammonium." [CHEBI

4361 Pathogen[ Q2Q067] interacts with 2 human partners:{Q14865;Q9NQR4}

4362 Pathogen[ P0C214] interacts with 2 human partners:{Q14865;Q9NQR4}

4363 Pathogen[ P03346] interacts with 3 human partners:{Q9NQR4;Q14865;Q86X76}

4364 Pathogen[ Q85601] interacts with 2 human partners:{Q9NQR4;Q14865}

4365 Pathogen[ P14079] interacts with 3 human partners:{Q14865;Q6IA69;Q9NQR4}

4366 Pathogen[ P03383] interacts with 1 human partners:{Q9NQR4}

4367 Pathogen[ P03410] interacts with 4 human partners:{Q86X76;Q9NQR4;Q14865;Q6IA69}

4368 Pathogen[ P14075] interacts with 1 human partners:{Q9NQR4}

4369 Pathogen[ P0C206] interacts with 3 human partners:{Q9NQR4;Q14865;Q86X76}

4370 Pathogen[ P03363] interacts with 2 human partners:{Q14865;Q9NQR4}

4371 [Cluster 398]GO:0030866+P biological\_process [name] cortical actin cytoskeleton organization [def] "A process that is carried out at the cellular level which results in the assembly, arrangement of constituent parts, or disassembly of actin-based cytoskeletal structures in the cell cortex, i.e. just beneath the plasma membrane." [GOC

4372 Pathogen[ Q2Q067] interacts with 5 human partners:{Q5VSL9;Q9Y2J2;P27797;Q12959;P11171}

4373 Pathogen[ P0C214] interacts with 4 human partners:{Q5VSL9;Q12959;P27797;P11171}

4374 Pathogen[ P03346] interacts with 6 human partners:{P11171;O43491;Q9Y2J2;P27797;Q5VSL9;Q12959}

4375 Pathogen[ Q85601] interacts with 5 human partners:{Q9Y2J2;P27797;P11171;Q5VSL9;Q12959}

4376 Pathogen[ P14079] interacts with 3 human partners:{Q9Y2J2;P11171;Q5VSL9}

4377 Pathogen[ P03383] interacts with 2 human partners:{Q5VSL9;P27797}

4378 Pathogen[ P03410] interacts with 6 human partners:{Q12959;Q5VSL9;P11171;O43491;Q9Y2J2;P27797}

4379 Pathogen[ P14075] interacts with 4 human partners:{Q9Y2J2;Q5VSL9;P27797;P11171}

4380 Pathogen[ P0C206] interacts with 6 human partners:{P27797;Q5VSL9;O43491;Q12959;Q9Y2J2;P11171}

4381 Pathogen[ P03363] interacts with 6 human partners:{Q12959;P27797;Q5VSL9;P11171;O43491;Q9Y2J2}

4382 [Cluster 399]GO:0032467+P biological\_process [name] positive regulation of cytokinesis [def] "Any process that activates or increases the frequency, rate or extent of cytokinesis." [GOC

4383 Pathogen[ Q2Q067] interacts with 1 human partners:{Q7Z7K6}

4384 Pathogen[ P0C214] interacts with 1 human partners:{Q7Z7K6}

4385 Pathogen[ P03346] interacts with 1 human partners:{Q7Z7K6}

4386 Pathogen[ Q85601] interacts with 1 human partners:{Q7Z7K6}  
4387 Pathogen[ P14079] interacts with 1 human partners:{Q7Z7K6}  
4388 Pathogen[ P03383] interacts with 1 human partners:{Q7Z7K6}  
4389 Pathogen[ P03410] interacts with 1 human partners:{Q7Z7K6}  
4390 Pathogen[ P14075] interacts with 1 human partners:{Q7Z7K6}  
4391 Pathogen[ P0C206] interacts with 1 human partners:{Q7Z7K6}  
4392 Pathogen[ P03363] interacts with 1 human partners:{Q7Z7K6}  
4393 [Cluster 400]GO:0045292+P biological\_process [name] nuclear mRNA cis splicing, via spliceosome [def] "The joining together, after removal of an intervening sequence composed of one or more introns, of two segments of the same RNA molecule via spliceosomal catalysis to produce an mRNA composed only of exon sequences that all came from the same primary transcript." [GOC  
4394 Pathogen[ Q2Q067] interacts with 2 human partners:{Q96C86;P52298}  
4395 Pathogen[ P0C214] interacts with 2 human partners:{Q96C86;P52298}  
4396 Pathogen[ P03346] interacts with 3 human partners:{Q96C86;P52298;O75554}  
4397 Pathogen[ Q85601] interacts with 2 human partners:{Q96C86;P52298}  
4398 Pathogen[ P14079] interacts with 2 human partners:{P52298;Q96C86}  
4399 Pathogen[ P03383] interacts with 2 human partners:{P52298;Q96C86}  
4400 Pathogen[ P03410] interacts with 2 human partners:{P52298;Q96C86}  
4401 Pathogen[ P14075] interacts with 2 human partners:{Q96C86;P52298}  
4402 Pathogen[ P0C206] interacts with 2 human partners:{P52298;Q96C86}  
4403 Pathogen[ P03363] interacts with 2 human partners:{P52298;Q96C86}  
4404 [Cluster 401]GO:0050870+P biological\_process [name] positive regulation of T cell activation [def] "Any process that activates or increases the frequency, rate or extent of T cell activation." [GOC  
4405 Pathogen[ Q2Q067] interacts with 4 human partners:{Q9UDY8;Q12933;O95999;O43318}  
4406 Pathogen[ P0C214] interacts with 5 human partners:{Q9UDY8;O43318;O95999;Q12933;P10809}  
4407 Pathogen[ P03346] interacts with 3 human partners:{Q9UDY8;O95999;O43318}  
4408 Pathogen[ Q85601] interacts with 4 human partners:{Q9UDY8;Q12933;O95999;O43318}  
4409 Pathogen[ P14079] interacts with 4 human partners:{Q9BXL7;O95999;Q08722;Q12933}  
4410 Pathogen[ P03383] interacts with 3 human partners:{O43318;Q12933;O95999}  
4411 Pathogen[ P03410] interacts with 5 human partners:{O43318;O95999;Q9BXL7;Q08722;Q12933}  
4412 Pathogen[ P14075] interacts with 3 human partners:{Q12933;O43318;O95999}  
4413 Pathogen[ P0C206] interacts with 4 human partners:{Q9UDY8;O95999;O43318;Q12933}  
4414 Pathogen[ P03363] interacts with 2 human partners:{Q12933;O43318}  
4415 [Cluster 402]GO:1900028+P  
4416 Pathogen[ Q2Q067] interacts with 1 human partners:{Q14678}  
4417 Pathogen[ P0C214] interacts with 1 human partners:{Q14678}  
4418 Pathogen[ P03346] interacts with 1 human partners:{Q14678}  
4419 Pathogen[ Q85601] interacts with 1 human partners:{Q14678}  
4420 Pathogen[ P14079] interacts with 1 human partners:{Q14678}  
4421 Pathogen[ P03383] interacts with 1 human partners:{Q14678}  
4422 Pathogen[ P03410] interacts with 1 human partners:{Q14678}  
4423 Pathogen[ P14075] interacts with 1 human partners:{Q14678}  
4424 Pathogen[ P0C206] interacts with 1 human partners:{Q14678}  
4425 Pathogen[ P03363] interacts with 1 human partners:{Q14678}  
4426 [Cluster 403]GO:0048666+P biological\_process [name] neuron development [def] "The process whose specific outcome is the progression of a neuron over time, from initial commitment of the cell to a specific fate, to the fully functional differentiated cell." [GOC  
4427 Pathogen[ Q2Q067] interacts with 7 human partners:{Q01196;O15350;Q14457;P11831;Q99608;P40426;Q92562}  
4428 Pathogen[ P0C214] interacts with 5 human partners:{Q14457;O15350;P11831;Q99608;Q92562}  
4429 Pathogen[ P03346] interacts with 13 human partners:{Q9NZR4;O75364;Q05925;Q9HD90;P11831;P40426;P19622;P10588;Q14457;O15350;Q92562;Q99608;Q01196}  
4430 Pathogen[ Q85601] interacts with 6 human partners:{Q14457;P11831;Q92562;Q99608;O15350;P40426}  
4431 Pathogen[ P14079] interacts with 6 human partners:{Q92562;Q06413;Q99608;O15350;P10588;Q14457}  
4432 Pathogen[ P03383] interacts with 4 human partners:{Q14457;P11831;Q99608;O15350}  
4433 Pathogen[ P03410] interacts with 6 human partners:{P40426;Q92562;P11831;Q99608;Q14457;O15350}  
4434 Pathogen[ P14075] interacts with 4 human partners:{Q14457;Q99608;P11831;O15350}  
4435 Pathogen[ P0C206] interacts with 7 human partners:{P10588;Q92562;Q14457;P40426;Q99608;P11831;O15350}  
4436 Pathogen[ P03363] interacts with 8 human partners:{P19622;Q9NZR4;Q14457;P10588;Q99608;P11831;Q05925;P40426}  
4437 [Cluster 404]GO:0042517+P biological\_process [name] positive regulation of tyrosine phosphorylation of Stat3 protein [def] "Any process that activates or increases the frequency, rate or extent of the introduction of a phosphate group to a tyrosine residue of a Stat3 protein." [GOC  
4438 Pathogen[ Q2Q067] interacts with 1 human partners:{Q9Y2Y0}



4439 Pathogen[ P0C214] interacts with 1 human partners:{Q9Y2Y0}

4440 Pathogen[ P03346] interacts with 1 human partners:{Q9Y2Y0}

4441 Pathogen[ Q85601] interacts with 1 human partners:{Q9Y2Y0}

4442 Pathogen[ P14079] interacts with 1 human partners:{Q9Y2Y0}

4443 Pathogen[ P03383] interacts with 1 human partners:{Q9Y2Y0}

4444 Pathogen[ P03410] interacts with 1 human partners:{Q9Y2Y0}

4445 Pathogen[ P14075] interacts with 1 human partners:{Q9Y2Y0}

4446 Pathogen[ P0C206] interacts with 1 human partners:{Q9Y2Y0}

4447 Pathogen[ P03363] interacts with 1 human partners:{Q9Y2Y0}

4448 [Cluster 405]GO:0060539+P biological\_process [name] diaphragm development [def] "The progression of the diaphragm over time from its initial formation to the mature structure. The diaphragm is a skeletal muscle that is responsible for contraction and expansion of the lungs." [GOC

4449 Pathogen[ Q2Q067] interacts with 2 human partners:{P80723;O60682}

4450 Pathogen[ P0C214] interacts with 1 human partners:{P80723}

4451 Pathogen[ P03346] interacts with 4 human partners:{P50219;P80723;O60682;O43680}

4452 Pathogen[ Q85601] interacts with 2 human partners:{O60682;P80723}

4453 Pathogen[ P14079] interacts with 2 human partners:{O60682;P80723}

4454 Pathogen[ P03383] interacts with 1 human partners:{P80723}

4455 Pathogen[ P03410] interacts with 2 human partners:{O60682;P80723}

4456 Pathogen[ P14075] interacts with 1 human partners:{P80723}

4457 Pathogen[ P0C206] interacts with 2 human partners:{O60682;P80723}

4458 Pathogen[ P03363] interacts with 3 human partners:{O60682;P80723;P50219}

4459 [Cluster 406]GO:0031001+P biological\_process [name] response to brefeldin A [def] "Any process that results in a change in state or activity of a cell or an organism (in terms of movement, secretion, enzyme production, gene expression, etc.) as a result of a brefeldin A stimulus." [GOC

4460 Pathogen[ Q2Q067] interacts with 1 human partners:{Q8IV36}

4461 Pathogen[ P0C214] interacts with 1 human partners:{Q8IV36}

4462 Pathogen[ P03346] interacts with 1 human partners:{Q8IV36}

4463 Pathogen[ Q85601] interacts with 1 human partners:{Q8IV36}

4464 Pathogen[ P14079] interacts with 1 human partners:{Q8IV36}

4465 Pathogen[ P03383] interacts with 1 human partners:{Q8IV36}

4466 Pathogen[ P03410] interacts with 1 human partners:{Q8IV36}

4467 Pathogen[ P14075] interacts with 1 human partners:{Q8IV36}

4468 Pathogen[ P0C206] interacts with 1 human partners:{Q8IV36}

4469 Pathogen[ P03363] interacts with 1 human partners:{Q8IV36}

4470 [Cluster 407]GO:0001817+P biological\_process [name] regulation of cytokine production [def] "Any process that modulates the frequency, rate, or extent of production of a cytokine." [GOC

4471 Pathogen[ Q2Q067] interacts with 3 human partners:{P57075;Q13114;P32519}

4472 Pathogen[ P0C214] interacts with 3 human partners:{P32519;P57075;Q13114}

4473 Pathogen[ P03346] interacts with 4 human partners:{P57075;Q13114;Q9Y2Y4;P32519}

4474 Pathogen[ Q85601] interacts with 4 human partners:{P32519;Q9Y2Y4;P57075;Q13114}

4475 Pathogen[ P14079] interacts with 4 human partners:{Q9Y2Y4;P57075;P32519;Q13114}

4476 Pathogen[ P03383] interacts with 2 human partners:{P32519;Q13114}

4477 Pathogen[ P03410] interacts with 4 human partners:{P57075;P32519;Q9Y2Y4;Q13114}

4478 Pathogen[ P14075] interacts with 2 human partners:{P32519;Q13114}

4479 Pathogen[ P0C206] interacts with 4 human partners:{Q13114;P32519;P57075;Q9Y2Y4}

4480 Pathogen[ P03363] interacts with 4 human partners:{P32519;P57075;Q9Y2Y4;Q13114}

4481 [Cluster 408]GO:0006826+P biological\_process [name] iron ion transport [def] "The directed movement of iron (Fe) ions into, out of or within a cell, or between cells, by means of some agent such as a transporter or pore." [GOC

4482 Pathogen[ Q2Q067] interacts with 2 human partners:{P02792;P48200}

4483 Pathogen[ P0C214] interacts with 3 human partners:{P02794;P48200;P02792}

4484 Pathogen[ P03346] interacts with 3 human partners:{P02792;P02794;P48200}

4485 Pathogen[ Q85601] interacts with 3 human partners:{P48200;P02792;P02794}

4486 Pathogen[ P14079] interacts with 2 human partners:{P48200;P02794}

4487 Pathogen[ P03383] interacts with 2 human partners:{P02794;P48200}

4488 Pathogen[ P03410] interacts with 3 human partners:{P02794;P48200;P02792}

4489 Pathogen[ P14075] interacts with 2 human partners:{P02794;P48200}

4490 Pathogen[ P0C206] interacts with 3 human partners:{P02794;P48200;P02792}

4491 Pathogen[ P03363] interacts with 2 human partners:{P48200;P02794}

4492 [Cluster 409]GO:0006661+P biological\_process [name] phosphatidylinositol biosynthetic process [def] "The chemical reactions and pathways resulting in the formation of phosphatidylinositol, any glycopospholipid in which the sn-glycerol 3-phosphate residue is esterified to the 1-hydroxyl group of 1D-myo-inositol." [CHEBI

4493 Pathogen[ Q2Q067] interacts with 4 human partners:{Q8WYR1;Q92562;P27986;Q5UE93}

4494 Pathogen[ P0C214] interacts with 7 human partners:{O15056;Q92562;Q08AM6;Q8WYR1;Q5UE93;Q13615;P27986}

4495 Pathogen[ P03346] interacts with 5 human partners:{Q8WYR1;Q92562;O15056;Q5UE93;P27986}

4496 Pathogen[ Q85601] interacts with 5 human partners:{Q08AM6;Q92562;P27986;Q8WYR1;Q5UE93}

4497 Pathogen[ P14079] interacts with 5 human partners:{Q92562;Q8WYR1;Q96PE3;Q5UE93;O15327}

4498 Pathogen[ P03383] interacts with 3 human partners:{P27986;Q8WYR1;Q5UE93}  
4499 Pathogen[ P03410] interacts with 7 human  
partners:{Q92562;P27986;Q96PE3;Q5UE93;Q8WYR1;O15327;Q08AM6}  
4500 Pathogen[ P14075] interacts with 3 human partners:{Q8WYR1;Q5UE93;P27986}  
4501 Pathogen[ P0C206] interacts with 6 human  
partners:{Q92562;Q13615;P27986;Q5UE93;Q08AM6;Q8WYR1}  
4502 Pathogen[ P03363] interacts with 4 human partners:{Q8WYR1;Q5UE93;O15056;P27986}  
4503 [Cluster 410]GO:0060323+P biological\_process [name] head morphogenesis [def] "The  
process in which the anatomical structures of the head are generated and organized. The  
head is the anterior-most division of the body." [GOC  
4504 Pathogen[ Q2Q067] interacts with 1 human partners:{Q9BWW4}  
4505 Pathogen[ P0C214] interacts with 1 human partners:{Q9BWW4}  
4506 Pathogen[ P03346] interacts with 1 human partners:{Q9BWW4}  
4507 Pathogen[ Q85601] interacts with 1 human partners:{Q9BWW4}  
4508 Pathogen[ P14079] interacts with 1 human partners:{Q9BWW4}  
4509 Pathogen[ P03383] interacts with 1 human partners:{Q9BWW4}  
4510 Pathogen[ P03410] interacts with 1 human partners:{Q9BWW4}  
4511 Pathogen[ P14075] interacts with 1 human partners:{Q9BWW4}  
4512 Pathogen[ P0C206] interacts with 1 human partners:{Q9BWW4}  
4513 Pathogen[ P03363] interacts with 1 human partners:{Q9BWW4}  
4514 [Cluster 411]GO:0006975+P biological\_process [name] DNA damage induced protein  
phosphorylation [def] "The widespread phosphorylation of various molecules, triggering  
many downstream processes, that occurs in response to the detection of DNA damage." [GOC  
4515 Pathogen[ Q2Q067] interacts with 2 human partners:{O14757;O96017}  
4516 Pathogen[ P0C214] interacts with 2 human partners:{O96017;O14757}  
4517 Pathogen[ P03346] interacts with 2 human partners:{O96017;O14757}  
4518 Pathogen[ Q85601] interacts with 2 human partners:{O96017;O14757}  
4519 Pathogen[ P14079] interacts with 1 human partners:{P52564}  
4520 Pathogen[ P03383] interacts with 2 human partners:{O14757;O96017}  
4521 Pathogen[ P03410] interacts with 2 human partners:{O96017;O14757}  
4522 Pathogen[ P14075] interacts with 2 human partners:{O96017;O14757}  
4523 Pathogen[ P0C206] interacts with 1 human partners:{O96017}  
4524 Pathogen[ P03363] interacts with 2 human partners:{O96017;O14757}  
4525 [Cluster 412]GO:0007172+P biological\_process [name] signal complex assembly [def]  
"The aggregation, arrangement and bonding together of a set of components to form a  
complex capable of relaying a signal within a cell." [GOC  
4526 Pathogen[ Q2Q067] interacts with 2 human partners:{O43639;P16333}  
4527 Pathogen[ P0C214] interacts with 2 human partners:{O43639;P16333}  
4528 Pathogen[ P03346] interacts with 2 human partners:{O43639;P16333}  
4529 Pathogen[ Q85601] interacts with 2 human partners:{P16333;O43639}  
4530 Pathogen[ P14079] interacts with 3 human partners:{P16333;O43639;P49023}  
4531 Pathogen[ P03383] interacts with 1 human partners:{P16333}  
4532 Pathogen[ P03410] interacts with 2 human partners:{O43639;P16333}  
4533 Pathogen[ P14075] interacts with 1 human partners:{P16333}  
4534 Pathogen[ P0C206] interacts with 2 human partners:{P16333;O43639}  
4535 Pathogen[ P03363] interacts with 2 human partners:{O43639;P16333}  
4536 [Cluster 413]GO:0097150+P biological\_process [name] neuronal stem cell maintenance  
[def] "The process in which an organism retains a population of neuronal stem cells,  
undifferentiated cells that originate from the neuroectoderm and have the capacity both  
to perpetually self-renew without differentiating and to generate multiple types of  
lineage-restricted progenitors." [CL  
4537 Pathogen[ Q2Q067] interacts with 3 human partners:{Q86VS8;Q15154;Q9BXP5}  
4538 Pathogen[ P0C214] interacts with 3 human partners:{Q15154;Q86VS8;Q9BXP5}  
4539 Pathogen[ P03346] interacts with 3 human partners:{Q86VS8;Q15154;Q9BXP5}  
4540 Pathogen[ Q85601] interacts with 3 human partners:{Q15154;Q86VS8;Q9BXP5}  
4541 Pathogen[ P14079] interacts with 3 human partners:{Q86VS8;Q15154;Q9BXP5}  
4542 Pathogen[ P03383] interacts with 3 human partners:{Q15154;Q86VS8;Q9BXP5}  
4543 Pathogen[ P03410] interacts with 3 human partners:{Q15154;Q9BXP5;Q86VS8}  
4544 Pathogen[ P14075] interacts with 3 human partners:{Q15154;Q86VS8;Q9BXP5}  
4545 Pathogen[ P0C206] interacts with 3 human partners:{Q86VS8;Q9BXP5;Q15154}  
4546 Pathogen[ P03363] interacts with 3 human partners:{Q86VS8;Q9BXP5;Q15154}  
4547 [Cluster 414]GO:0006888+P biological\_process [name] ER to Golgi vesicle-mediated  
transport [def] "The directed movement of substances from the endoplasmic reticulum  
(ER) to the Golgi, mediated by COP II vesicles. Small COP II coated vesicles form from  
the ER and then fuse directly with the cis-Golgi. Larger structures are transported  
along microtubules to the cis-Golgi." [GOC  
4548 Pathogen[ Q2Q067] interacts with 19 human  
partners:{P55735;O43617;O43264;O75396;Q9UL33;Q15437;P53992;O95486;Q96JB2;O94855;P0DI  
81;P0DI82;Q53G59;Q13618;O15155;O95487;Q9Y296;Q9P2W9;Q15436}  
4549 Pathogen[ P0C214] interacts with 23 human  
partners:{P55735;P16157;P53992;O43264;Q13618;Q9Y296;O43617;Q15436;O95487;Q53G59;P492  
57;Q15437;P0DI81;Q9HD26;O75396;Q96JB2;Q9UL33;O15155;O95486;P0DI82;Q9P2W9;P55072;O948  
55}  
4550 Pathogen[ P03346] interacts with 31 human  
partners:{P55735;Q9P2W9;Q9Y5R8;Q96JB2;Q70SY1;P49257;Q969X5;Q13618;O43264;Q13190;O753  
96;P55072;P16157;O94855;Q15436;Q9UL33;Q15437;Q9HD26;Q9Y296;Q9Y2L5;P0DI81;O95486;P0DI

82;Q9HCU5;O95487;P49755;O15155;P53992;Q15363;O43617;Q9UBP0}

4551 Pathogen[ Q85601] interacts with 24 human partners: {P16157;O75396;Q9UL33;O95487;Q9UBP0;O15155;O43264;Q96JB2;Q9Y296;Q9P2W9;Q15436;O43617;Q15437;Q9HD26;P49257;Q9Y2L5;P0DI81;P55735;O95486;P0DI82;Q13618;Q53G59;O94855;P53992}

4552 Pathogen[ P14079] interacts with 30 human partners: {Q9Y296;Q9UL33;P49257;O95487;Q9BRL7;Q13618;O94855;P53992;P16157;O15155;Q15363;O75396;Q9HD26;Q969X5;P49755;Q9NZ43;O14653;O43264;Q9Y5R8;P55735;Q9H0V9;P0DI82;Q96JB2;P0DI81;O95486;Q53G59;Q9P2W9;O43617;Q96S06;Q9Y2L5}

4553 Pathogen[ P03383] interacts with 17 human partners: {P55735;O95487;O43264;Q9UL33;Q9HD26;Q96JB2;O95486;Q9Y296;Q15436;Q13618;Q53G59;Q15437;O94855;O43617;P0DI82;P0DI81;P53992}

4554 Pathogen[ P03410] interacts with 34 human partners: {P0DI82;Q53G59;Q9NZ43;Q9H0V9;Q9Y2L5;Q13190;Q96JB2;P49257;O94855;Q969X5;P53992;P16157;Q9UL33;Q9P2W9;Q9Y5R8;O43264;O95249;Q9HD26;P0DI81;Q13618;Q15436;O75396;Q15437;O15155;O95486;Q15363;Q96S06;Q9HCU5;Q9Y296;O14653;P55735;O43617;O95487;Q9BRL7}

4555 Pathogen[ P14075] interacts with 17 human partners: {O43617;Q96JB2;Q13618;Q53G59;Q9HD26;P53992;P55735;O95487;Q15437;P0DI81;Q15436;O94855;Q9UL33;O43264;Q9Y296;O95486;P0DI82}

4556 Pathogen[ P0C206] interacts with 32 human partners: {P0DI82;Q15437;Q9Y296;O75396;Q9UBP0;O94855;O14653;Q9Y2L5;P49755;Q96JB2;P55735;P16157;O15155;Q13618;O95486;P49257;O95487;P55072;O43617;Q969X5;Q9UL33;P53992;Q15363;Q9Y5R8;Q53G59;O43264;Q9HD26;Q9P2W9;Q96S06;P0DI81;Q9BRL7;Q15436}

4557 Pathogen[ P03363] interacts with 19 human partners: {P16157;P0DI81;Q13618;O43264;Q9UL33;Q15436;Q9Y2L5;O95486;P0DI82;Q9P2W9;Q53G59;P53992;O95487;Q9Y296;O43617;P55735;Q9HD26;O94855;Q96JB2}

4558 [Cluster 415]GO:0007132+P biological\_process [name] meiotic metaphase I [def] "Metaphase occurring as part of meiosis I. Metaphase is the part of nuclear division in which, canonically, chromosomes become aligned on the equatorial plate of the cell. Meiosis I is the first phase of meiosis, in which cells divide and homologous chromosomes are paired and segregated from each other." [GOC

4559 Pathogen[ Q2Q067] interacts with 1 human partners: {P35579}

4560 Pathogen[ P0C214] interacts with 1 human partners: {Q9NPC3}

4561 Pathogen[ P03346] interacts with 2 human partners: {P35579;Q9NPC3}

4562 Pathogen[ Q85601] interacts with 2 human partners: {P35579;Q9NPC3}

4563 Pathogen[ P14079] interacts with 2 human partners: {P35579;Q9NPC3}

4564 Pathogen[ P03383] interacts with 1 human partners: {P35579}

4565 Pathogen[ P03410] interacts with 2 human partners: {Q9NPC3;P35579}

4566 Pathogen[ P14075] interacts with 1 human partners: {P35579}

4567 Pathogen[ P0C206] interacts with 2 human partners: {Q9NPC3;P35579}

4568 Pathogen[ P03363] interacts with 2 human partners: {P35579;Q9NPC3}

4569 [Cluster 416]GO:0008616+P biological\_process [name] queuosine biosynthetic process [def] "The chemical reactions and pathways resulting in the formation of queuosines, any of a series of nucleosides found in tRNA and having an additional pentenyl ring added via an NH group to the methyl group of 7-methylguanosine. The pentenyl ring may carry other substituents." [GOC

4570 Pathogen[ Q2Q067] interacts with 2 human partners: {Q9H974;Q9BXR0}

4571 Pathogen[ P0C214] interacts with 2 human partners: {Q9BXR0;Q9H974}

4572 Pathogen[ P03346] interacts with 2 human partners: {Q9BXR0;Q9H974}

4573 Pathogen[ Q85601] interacts with 2 human partners: {Q9BXR0;Q9H974}

4574 Pathogen[ P14079] interacts with 2 human partners: {Q9BXR0;Q9H974}

4575 Pathogen[ P03383] interacts with 2 human partners: {Q9H974;Q9BXR0}

4576 Pathogen[ P03410] interacts with 1 human partners: {Q9H974}

4577 Pathogen[ P14075] interacts with 2 human partners: {Q9H974;Q9BXR0}

4578 Pathogen[ P0C206] interacts with 2 human partners: {Q9H974;Q9BXR0}

4579 Pathogen[ P03363] interacts with 2 human partners: {Q9BXR0;Q9H974}

4580 [Cluster 417]GO:0006388+P biological\_process [name] tRNA splicing, via endonucleolytic cleavage and ligation [def] "Splicing of tRNA substrates via recognition of the folded RNA structure that brings the 5' and 3' splice sites into proximity and cleavage of the RNA at both the 3' and 5' splice sites by an endonucleolytic mechanism, followed by ligation of the exons." [GOC

4581 Pathogen[ Q2Q067] interacts with 3 human partners: {Q8NCE0;Q9BSV6;Q7Z6J9}

4582 Pathogen[ P0C214] interacts with 3 human partners: {Q9BSV6;Q8NCE0;Q7Z6J9}

4583 Pathogen[ P03346] interacts with 3 human partners: {Q7Z6J9;Q9BSV6;Q8NCE0}

4584 Pathogen[ Q85601] interacts with 3 human partners: {Q9BSV6;Q7Z6J9;Q8NCE0}

4585 Pathogen[ P14079] interacts with 4 human partners: {Q86TN4;Q9BSV6;Q8NCE0;Q7Z6J9}

4586 Pathogen[ P03383] interacts with 3 human partners: {Q7Z6J9;Q8NCE0;Q9BSV6}

4587 Pathogen[ P03410] interacts with 4 human partners: {Q7Z6J9;Q9BSV6;Q86TN4;Q8NCE0}

4588 Pathogen[ P14075] interacts with 3 human partners: {Q9BSV6;Q7Z6J9;Q8NCE0}

4589 Pathogen[ P0C206] interacts with 3 human partners: {Q9BSV6;Q7Z6J9;Q8NCE0}

4590 Pathogen[ P03363] interacts with 3 human partners: {Q9BSV6;Q7Z6J9;Q8NCE0}

4591 [Cluster 418]GO:0021984+P biological\_process [name] adenohypophysis development [def] "The progression of the adenohypophysis over time from its initial formation until its mature state. The adenohypophysis is the anterior part of the pituitary. It secretes a variety of hormones and its function is regulated by the hypothalamus." [GO\_REF

4592 Pathogen[ Q2Q067] interacts with 2 human partners: {Q9H4S2;O75360}

4593 Pathogen[ POC214] interacts with 1 human partners:{075360}

4594 Pathogen[ P03346] interacts with 2 human partners:{Q9H4S2;075360}

4595 Pathogen[ Q85601] interacts with 2 human partners:{075360;Q9H4S2}

4596 Pathogen[ P14079] interacts with 1 human partners:{075360}

4597 Pathogen[ P03383] interacts with 1 human partners:{075360}

4598 Pathogen[ P03410] interacts with 1 human partners:{075360}

4599 Pathogen[ P14075] interacts with 1 human partners:{075360}

4600 Pathogen[ POC206] interacts with 2 human partners:{075360;Q9H4S2}

4601 Pathogen[ P03363] interacts with 2 human partners:{075360;Q9H4S2}

4602 [Cluster 419]GO:0001837+P biological\_process [name] epithelial to mesenchymal transition [def] "A transition where an epithelial cell loses apical/basolateral polarity, severs intercellular adhesive junctions, degrades basement membrane components and becomes a migratory mesenchymal cell." [GOC

4603 Pathogen[ Q2Q067] interacts with 3 human partners:{P26447;Q06330;O95644}

4604 Pathogen[ POC214] interacts with 3 human partners:{Q06330;P26447;O95644}

4605 Pathogen[ P03346] interacts with 6 human partners:{Q06330;Q13263;O95644;O95863;P26447;Q99729}

4606 Pathogen[ Q85601] interacts with 4 human partners:{P26447;Q06330;O95644;Q13263}

4607 Pathogen[ P14079] interacts with 5 human partners:{O95644;Q06330;P26447;Q8N5W9;P28360}

4608 Pathogen[ P03383] interacts with 2 human partners:{Q06330;O95644}

4609 Pathogen[ P03410] interacts with 4 human partners:{P26447;Q06330;O95644;Q8N5W9}

4610 Pathogen[ P14075] interacts with 3 human partners:{Q8N5W9;Q06330;O95644}

4611 Pathogen[ POC206] interacts with 5 human partners:{P26447;Q06330;Q13263;Q8N5W9;O95644}

4612 Pathogen[ P03363] interacts with 4 human partners:{P26447;Q06330;Q99729;O95644}

4613 [Cluster 420]GO:0051444+P biological\_process [name] negative regulation of ubiquitin-protein ligase activity [def] "Any process that stops, prevents, or reduces the frequency, rate or extent of ubiquitin ligase activity, the catalysis of the reaction

4614 Pathogen[ Q2Q067] interacts with 2 human partners:{Q8N726;O15105}

4615 Pathogen[ POC214] interacts with 2 human partners:{Q8N726;O15105}

4616 Pathogen[ P03346] interacts with 2 human partners:{O15105;Q8N726}

4617 Pathogen[ Q85601] interacts with 2 human partners:{Q8N726;O15105}

4618 Pathogen[ P14079] interacts with 3 human partners:{Q8N726;Q9UL15;O15105}

4619 Pathogen[ P03383] interacts with 2 human partners:{O15105;Q8N726}

4620 Pathogen[ P03410] interacts with 3 human partners:{Q8N726;Q9UL15;O15105}

4621 Pathogen[ P14075] interacts with 2 human partners:{O15105;Q8N726}

4622 Pathogen[ POC206] interacts with 2 human partners:{Q8N726;O15105}

4623 Pathogen[ P03363] interacts with 2 human partners:{O15105;Q8N726}

4624 [Cluster 421]GO:0045082+P biological\_process [name] positive regulation of interleukin-10 biosynthetic process [def] "Any process that activates or increases the frequency, rate or extent of the chemical reactions and pathways resulting in the formation of interleukin-10." [GOC

4625 Pathogen[ Q2Q067] interacts with 2 human partners:{P20749;Q15306}

4626 Pathogen[ POC214] interacts with 2 human partners:{P20749;Q15306}

4627 Pathogen[ P03346] interacts with 2 human partners:{Q15306;P20749}

4628 Pathogen[ Q85601] interacts with 2 human partners:{Q15306;P20749}

4629 Pathogen[ P14079] interacts with 2 human partners:{Q15306;P20749}

4630 Pathogen[ P03383] interacts with 2 human partners:{P20749;Q15306}

4631 Pathogen[ P03410] interacts with 2 human partners:{P20749;Q15306}

4632 Pathogen[ P14075] interacts with 2 human partners:{Q15306;P20749}

4633 Pathogen[ POC206] interacts with 2 human partners:{Q15306;P20749}

4634 Pathogen[ P03363] interacts with 2 human partners:{Q15306;P20749}

4635 [Cluster 422]GO:0007049+P biological\_process [name] cell cycle [def] "The progression of biochemical and morphological phases and events that occur in a cell during successive cell replication or nuclear replication events. Canonically, the cell cycle comprises the replication and segregation of genetic material followed by the division of the cell, but in endocycles or syncytial cells nuclear replication or nuclear division may not be followed by cell division." [GOC

4636 Pathogen[ Q2Q067] interacts with 381 human partners:{P04156;P49454;Q92900;Q12798;Q9Y6X3;O43463;Q9UPP1;Q9NNW5;Q96EE3;P30281;O60232;P83876;Q8IXJ6;O75351;Q9BTV5;Q9NYP9;Q99865;P18754;Q7LBR1;P50995;Q14008;P42773;Q9H4X1;O75461;Q9BW66;O75909;A0AVK6;Q8IZD2;P24385;Q7Z4H7;Q9Y266;Q96NB3;O95273;Q15398;P63172;Q7Z2Z1;Q16589;Q9NQW6;Q9NPB6;Q8IY18;Q8WW12;Q6PJP8;Q14980;O00267;P06400;Q7Z5K2;Q9UJX3;Q9UJX5;O43663;P41220;Q01094;Q08999;Q8WWL7;Q13352;Q9BYG5;Q6PGQ7;Q7Z460;Q9UNS1;Q7Z6K1;O95997;Q86XL3;P62826;Q99816;Q99741;Q6P1J9;P19474;Q15554;Q96R06;Q9H1H9;P61024;Q15326;P49427;P53990;Q99708;Q8N9N5;Q13111;Q8N137;O00762;O43255;Q8N0Z3;O94927;Q6P1K2;Q9HBM1;O75794;Q5UIP0;Q9H211;Q96T88;O75935;Q7Z7A1;Q5EE01;P54274;O00743;Q8NDF8;Q8WWK9;Q8WY P5;A8MVW5;O75896;P42695;Q9BPZ2;P50548;Q8NHV4;P30279;P62140;Q6P1M3;Q6NXT1;Q13625;Q14511;Q96AV8;Q5TKA1;Q5FBB7;O95347;Q13257;Q86WB0;Q8N2Z9;A8MT69;Q9UBU7;Q9UJT9;Q9UPV0;Q03188;O14757;Q9UNH5;Q9NVX0;Q9UNL4;Q66LE6;Q9NXR1;Q6MZZ7;O15350;P35638;Q8TDY2;Q9NPI1;Q9C099;Q53HL2;Q8IX12;O43684;Q8NBT2;P51610;Q9H981;Q14457;P63279;D6RGH6;Q9P258;Q9NYG5;Q8NFH4;Q8NEU8;P30304;Q9H1A4;A6NKF1;O75400;O60563;Q9NVI1;Q8N726;Q9BSD3;Q9028;P22674;P14635;Q8IXM3;Q99871;P58340;Q68DK2;Q86XI2;Q08050;Q9NQS7;Q96IF1;Q13112;Q9UJX2;Q99549;Q9Y448;P24522;O43264;Q15003;Q8WUM4;Q29RF7;Q7Z7K6;P30307;Q14186;Q6NT89;Q9UM13;O43768;O432

36;Q96BT3;Q08J23;Q6PGN9;P51948;Q92831;Q07666;Q9BZD4;O60934;P61289;Q96DE5;Q9BXY8;O434  
82;O96017;P51959;Q5MJ68;Q14978;Q5MJ70;O76095;Q86T82;O00716;Q12834;P41002;P36873;P692  
08;Q15021;Q9BVC3;P50748;Q96EP1;P0CW71;O75496;P24864;O95067;Q9HD42;P50750;Q8TAE8;Q9BT  
25;Q96Q89;Q8NI51;Q9H6D7;Q7Z3K3;P62136;O75419;Q99618;Q96MT8;Q16254;Q6K0P9;P50613;A6NC  
L1;Q9UN37;P35869;Q9NTI5;Q9Y6B2;Q92733;Q9BRX2;P78396;P56211;Q9H410;Q8IYD1;Q5TB80;Q8TC  
Y9;Q8NFH3;Q9U749;Q8NHZ8;Q9ULW0;P38936;P20248;Q02241;O60216;O96020;O00139;Q9H4H8;Q53E  
Z4;A1L190;Q9UJ98;O75122;O76064;Q5TZA2;Q8IXZ4;Q9Y3E7;Q8IX90;P28749;Q8NG31;O75943;Q9UM  
11;Q9UJX4;Q8N371;Q93008;Q9UPY8;Q13620;Q6UVJ0;Q9Y6D9;Q13526;Q9BVW5;Q9UKT4;Q6NUQ1;Q96B  
D8;Q9UI95;Q9H900;P33552;O95271;Q8NA72;O75410;P41208;Q96IY1;Q9NR09;Q3YBR2;Q14209;Q9BR  
P1;Q96IK1;P42771;Q8IZT6;Q9ULG1;Q6PIF2;Q12824;Q6DKK2;Q9NS23;P25205;O75154;P46013;Q86Y  
I8;Q14676;P49336;Q96PU4;Q9H2L5;O15182;O60583;Q8IXT1;Q9BXS6;Q69YH5;Q96MF7;Q9P287;Q146  
83;Q8WVM7;Q49MG5;P21675;P30305;O14519;Q15007;P24941;Q9NUQ3;P49321;Q9UJX6;O95229;Q141  
88;O14777;Q9UKG1;Q9NVM9;Q562F6;P60006;B2CW77;P11802;Q9Y421;Q9BYG4;Q9BPX3;P46527;Q8TD  
N4;Q8NCD3;Q96CS2;Q8ND76;Q8N3U4;P51808;Q8NDN9;P18583;Q9ULC4;Q13042;P61586;Q9Y222;Q9H5  
I1;Q15691;Q9H081;Q8WVK7;Q9H3M7;Q9Y250;Q9NVV9;Q8TAP9;Q9HAW4;P05783;Q9BS18;Q9BTE3;Q9BX  
26;Q96HI0;Q14207;Q66K89;Q99459;P49918;Q96FF9;Q13227;O15392;Q96EA4;Q68CZ6;Q9P0W2;Q6P0  
N0;Q9BRK4;P42772;Q9H2G4;Q9BV73;Q9BXW9;O60477;P51946;Q9UKL3;Q00534;O15297}

4637

Pathogen[ P0C214] interacts with 382 human

partners: {Q14457;Q9UJX6;O43768;Q6NUQ1;Q9H081;Q9BPX3;Q8IY18;P53990;O43684;Q8NI51;D6RG  
H0;Q7Z3K3;Q8N371;Q15007;Q8ND76;O94927;P20248;P51946;Q8TAP9;A6NCL1;Q13257;Q86XI2;P412  
20;O75935;Q16254;Q9H4X1;Q16763;Q95111;Q8IX12;Q96HI0;Q8WW12;P30307;P19474;Q6P0N0;Q29R  
F7;A0AVK6;P35869;P24522;Q14207;P51610;Q96BT3;Q13620;O75896;P62140;Q14008;Q5UIP0;P057  
83;O75461;P23919;Q9BS18;Q12824;O00762;Q9H2L5;O75909;Q53HL2;O75351;O43264;Q8NDF8;Q089  
99;A1L190;P41002;Q02241;Q9NS23;Q15003;P21675;Q9BRK4;Q99865;Q9BPZ2;Q6DKK2;Q13625;Q7Z4  
H7;Q6K0P9;Q15554;P50750;Q92900;O00267;P50613;Q9H3M7;Q13112;P49427;P51959;Q9UJP4;O153  
50;Q96EA4;O75496;Q96R06;Q8NA72;Q9BXS6;Q6NT89;Q5EE01;Q9HD42;P11802;Q13111;Q9C099;Q135  
26;Q8WYP5;O94921;P50748;A8MVW5;Q9BRX2;P50548;Q9UJX5;Q8NHV4;P61024;Q7Z7A1;Q9UJ98;P615  
86;Q6P1M3;Q8N9N5;P42695;Q99708;Q86Y37;Q9BVW5;Q8IXM3;Q86WB0;P46527;Q96PU4;O95229;Q9UN  
L4;Q66LE6;Q96EE3;P63279;Q96MT8;O60232;Q8TDY2;Q9ULG1;P14635;O00716;Q8NBT2;Q8N726;P692  
08;O60477;P24385;P51808;O00139;Q9NVM9;Q14676;Q9UBU7;Q15691;Q92733;Q9UJX2;Q9HAW4;Q5MJ  
68;Q6P1K2;O43463;O75794;Q9UKG1;Q562F6;Q9Y266;Q69YH5;Q9UI95;P38936;Q96FF9;O95347;Q96T  
88;P25205;Q09028;Q93008;Q9NUQ3;P50749;Q9Y250;Q96CS2;Q9BTE3;Q14980;Q9BW66;Q9UPV0;Q8TD  
N4;Q8N2Z9;Q6PGN9;Q6PJP8;Q03188;Q9Y421;Q01094;Q7LBR1;Q8NCD3;O75122;O43482;Q14566;Q005  
34;Q9NPB6;Q96Q89;Q12798;P18583;Q14186;P56211;P21127;Q9H1A4;Q00536;Q9UKL3;P51948;Q9NV  
V9;O96017;Q14978;Q96BD8;Q8IXT1;Q07666;P49336;Q9P0W2;Q9HBM1;Q99459;Q99549;P49918;Q9P2  
58;P78396;Q1UNY9;Q15398;Q6P1J9;Q8TCY9;Q08J23;Q9BT25;Q9Y6B2;Q6MZF7;P30281;Q96MF7;Q8NE  
U8;Q8NHZ8;Q86XL3;Q12834;P0CW71;O60583;Q9ULW0;Q13352;P83876;O43663;Q8TAE8;Q53EZ4;O950  
67;Q9NVI1;Q9UNS1;P62136;P24941;P49321;O14519;Q99618;Q9BVC3;Q8NFH3;P42771;P22674;Q9BR  
P1;P30305;Q9UNH5;Q9H211;Q8NDN9;Q7Z7K6;Q8IYD1;Q86YI8;Q9H2G4;Q99871;Q13227;Q14511;Q3YB  
R2;Q8IXZ4;Q14207;O75943;Q9BSD3;P41208;Q9BNB3;Q9Y3E7;Q9H410;P62826;Q99410;P62826;Q9BX  
26;Q99816;O15392;Q9H6D7;Q9UPY8;Q7Z5K2;O15297;O75410;Q9BXW9;Q8IX90;P28749;O95273;Q146  
83;Q92831;O75419;Q8N3U4;P58340;Q8WVM7;Q9NPI1;Q8NG31;P24864;P30279;Q9UJX4;P04156;P631  
72;Q7Z460;Q9BV73;Q9BYG5;P36873;Q9H900;A6NKF1;Q5FBB7;Q8IXJ6;O60925;Q9BTV5;P60006;Q9Y6  
X3;Q9NQS7;Q9NR09;Q9UJX3;Q68CZ6;Q8N0Z3;Q8WVK7;P46013;Q8IYB7;O95997;O00743;Q5MJ70;Q68D  
K2;Q96SL7;Q5TKA1;Q9NNW5;Q9UN37;Q9P287;Q8NFH4;Q9UM11;P40692;O14757;Q9NQR1;Q9NXR1;O952  
71;Q96IY1;Q7Z6K1;P49454;Q15326;Q9NVX0;O43255;P18754;Q9NTI5;O43236;Q8IZT6;Q9Y448;O760  
64;P30304;P33552;P50995;Q5TB80;Q9ULC4;Q9UJT9;Q7L5Y9;Q9NYG5;Q14209;O60216;Q6UVJ0;Q6PG  
Q7;Q66K89;Q9UM13;O75400;Q9BZD4;Q14188;Q9UPP1;P06400;Q9BXY8;Q5XUX0;Q7Z2Z1;Q9UKT4;Q9Y6  
D9;P42772;Q9BYG4;Q15021;P35638;Q5TZA2;Q49MG5;P54274;O75154;Q96EP1;Q99741;Q9H981;Q8WV  
K7;Q8IZD2;P36404;O96020;Q96DE5;Q13042;Q14777;Q16589;Q96AV8;Q9Y222;Q8N137;Q8WUM4}

4638

Pathogen[ P03346] interacts with 440 human

partners: {Q08J23;B2CW77;Q9NVM9;Q7Z3K3;Q66LE6;P62136;Q9Y6D9;P30281;Q8N2Z9;Q8NI51;Q7Z7  
A1;Q8ND76;Q9BT25;Q5FBB7;Q9BXS6;Q9H6D7;O00743;Q16589;P78396;Q8NFH4;Q9NRZ9;Q00536;Q9H4  
X1;Q6NT89;Q8IX12;O76064;Q9Y657;O95229;Q14207;P55273;Q9NVI1;P24385;Q7Z2Z1;Q9P2N7;Q96M  
F7;P30279;Q5XG87;P05783;Q9NQW6;O60017;P60006;Q14511;Q96RT1;O15392;O43684;Q08999;Q9UM  
11;Q96EE3;Q8N3U4;Q96FF9;Q9UNL4;Q693B1;Q5MJ70;Q9BSD3;Q9P0W2;Q8TCY9;Q7Z5K2;Q8TAE8;Q29R  
F7;Q99871;P35638;Q7Z4H7;P83876;Q9BS18;Q93008;Q15554;Q9UJT9;Q9NQR1;Q9BRP1;Q9BX26;P211  
27;P49427;P06400;Q9HD42;Q8WYJ6;A8MT69;Q14188;O75410;O60563;O75935;Q96R06;Q8IXM3;O001  
39;P51808;Q8N137;O75400;Q69YH5;Q15691;O96020;Q5EE01;P54274;P49336;Q15007;Q8WYP5;A8MV  
W5;Q99708;Q9ULG1;Q8WW12;Q8NHV4;P24941;P51610;Q6P1M3;P30304;P50548;P42772;Q6MZF7;Q8NA  
72;Q86WB0;Q9H2G4;Q9UNS1;Q9NQY0;Q9NPI1;O43255;O14757;O95347;Q14141;O43264;Q9UBU7;Q9NX  
R1;Q99816;P24864;Q53HL2;O60232;Q9UM13;Q9H1H9;Q8IXJ6;Q8TDY2;P18583;Q9NPB6;Q96IF1;Q9NX  
01;Q08050;Q14209;P69208;P18754;Q7Z6K1;Q14457;Q12824;P63279;Q96AV8;O43482;Q96IY1;Q9NY  
G5;P85340;Q6P0N0;D6RGH6;Q9P258;Q92831;Q96IK1;O15350;P49918;Q9Y5K6;Q13526;Q16254;Q86X  
I2;P61024;Q8TDM4;Q9BXY8;Q8NFH3;P41002;P42771;O95067;Q9UI95;O00409;P56211;P49321;Q010  
94;Q86T82;Q66K89;O43463;O75896;O95997;Q8N0Z3;P62826;Q8TEW0;Q12834;P30305;Q8IYB7;Q8NC  
D3;Q13620;Q14980;P11802;Q69YQ0;O43768;Q13098;O75943;Q9BRK4;Q9Y222;Q9UJX6;Q14566;Q155  
55;Q5TB80;Q9Y421;P25205;Q9Y266;P41208;Q8NFT6;O60583;Q14186;O14777;Q07666;Q5T686;Q5MJ  
68;Q6NUQ1;Q9UKL3;Q9HAW4;Q14676;Q9NVX0;Q96DE5;Q14978;Q9ULW0;Q9BPZ2;Q9UJX6;Q562F6;Q496  
M5;Q13227;Q96EA4;Q15398;Q16667;A6NKF1;Q8NEU8;Q9H2L5;Q9BPX3;P14635;Q8IZU3;O60477;Q9UJ  
98;O60519;Q13042;Q15021;Q9UJX5;Q92599;Q9BYG5;P0CW71;Q14683;Q15019;Q9NUQ3;Q8WWL7;P368  
73;Q09028;O00762;Q14008;P51587;Q9UJX2;Q8TD19;P51946;O60447;Q68CZ6;Q9Y250;P50750;Q3YB  
R2;O15297;P33552;P20248;A6NCL1;P33992;P36404;Q9BTV5;Q53EZ4;Q9NQS7;Q9NTI5;Q96Q89;Q131  
11;O75604;Q9H981;O95273;Q9Y6X3;Q9UKT4;Q8IUQ4;Q9BYG4;Q562F6;Q8IYD1;Q6PGN9;Q13625;Q7Z7  
K6;P50749;Q8N9N5;Q9H081;Q86Y37;Q9UPP1;Q8NBT2;Q9HBM1;P63172;Q9BW66;Q9UJX3;P98177;Q8NH  
Z8;Q5UIP0;Q6PIF2;Q9H4H8;P61289;P0CG13;O00267;P50995;Q9H410;P42773;P42695;O75122;Q9H1

A4;Q99459;Q68DK2;Q02241;Q92733;Q9C099;Q8TAP9;Q8WVM7;Q8NDF8;P33991;Q03188;O75909;Q8IX90;P28749;Q8N371;O60934;Q9UJX4;P50748;P36405;P21675;Q15326;Q9BXW9;Q96PY6;Q96NB3;Q96CS2;Q5TKA1;O95271;O75461;Q9UKG1;O60925;P19474;Q5TZA2;Q9NR09;Q99549;A1L190;P04156;O75351;Q12798;Q9Y6B2;Q9Y448;Q8WVK9;Q9BVC3;Q6PJP8;Q96HI0;Q8N0S2;Q9P2J3;Q86YI8;Q8IZT6;Q8NDN9;Q00534;Q96PU4;P46013;Q8IXT1;Q7Z460;Q9UHD8;P62140;P51959;Q7LBR1;O94921;P38936;Q9P287;Q01582;Q8IXZ4;Q8NG31;Q9H8V3;O94927;Q49MG5;Q86XL3;P41220;O75154;O76095;P35869;Q8WV17;Q9H5I1;Q9BTV7;Q9UPY8;Q13112;Q8N726;Q9UJXP4;Q8IY18;O43663;O75419;Q92900;P46527;Q9NYP9;P62952;Q15003;Q99865;A0AVK6;Q9BRX2;Q99741;Q9BVW5;O14519;Q9UBZ4;Q6NXT1;Q9ULC4;Q9H211;P84090;Q6P1K2;Q6K0P9;Q6ZU15;Q9NVV9;O60216;Q8WUM4;Q96BD8;Q6PGQ7;Q9H3M7;Q9NS23;P51948;O14965;Q9BZD4;Q99618;P22674;O00716;Q6UVJ0;Q8IZD2;Q5XUX0;Q96BT3;Q9BTE3;Q6P1J9;Q96T88;Q13352;Q9H0E7;Q6DKK2;Q8WVK7;Q13257;Q5UNH5;P30307;P49454;Q96EP1;Q9UN37;O75496;P24522;Q9H900;Q9UBP0;Q9NNW5;Q9UPV0;Q96MT8;O75794;P61586;Q9BV73;P53990}

4639 Pathogen[ Q85601] interacts with 408 human partners: {Q53EZ4;Q9UJX2;Q3YBR2;Q14457;Q9UBZ4;Q9NVM9;Q8NBT2;P51946;Q9H5I1;Q99816;P30281;P22674;Q8NI51;Q9Y250;P49454;Q14978;O75496;Q6PGN9;Q9Y5T5;Q8N137;Q00536;Q9H4X1;O95229;Q9UKL3;Q96DE5;Q9UJX6;Q16763;P55273;Q9BTE3;P24385;Q7Z2Z1;Q7Z7K6;Q9H0E7;O75154;Q6UVJ0;Q02241;Q8NPF4;Q9NQW6;O96017;Q07666;Q8NPF3;Q03188;O60563;Q6NUQ1;P51808;Q9P0W2;P36405;Q9H900;Q15398;Q8N371;Q08999;O95347;Q14008;O75909;Q8WVK9;Q96EE3;Q96RT1;P50750;Q9Y5K6;Q9BXW9;Q9H6D7;Q9BT25;O15182;Q99871;Q9NQS7;Q8IY18;Q9BYG5;P61289;P50548;Q15554;Q6P1J9;P41220;Q9UI95;Q9UBP0;Q9NQR1;Q9H081;P49427;P06400;Q92733;Q96PY6;Q12798;Q9P258;Q96IK1;P50995;Q96BT3;Q9BS18;O75935;Q7Z4H7;Q13112;Q9UKT4;Q8NEU8;O75400;Q9NVX0;Q8NHZ8;P49336;Q15007;Q8WYP5;A8MVW5;Q99708;Q8NHV4;Q8ND76;Q6P1M3;P60006;O60583;Q8NFT6;P42772;Q49MG5;Q9H1A4;P62826;Q86WB0;Q7L5Y9;Q96PU4;O75794;Q16589;O43264;P42695;Q14188;Q53HL2;Q9UNL4;Q9BXS6;O60232;P24522;Q9H1H9;Q8TDY2;Q8IX12;Q9C099;Q8NG31;Q6NXT1;Q9UBU7;O15392;D6RGH6;P30304;Q92831;O14519;Q86Y37;Q9NS23;Q7LBR1;Q99549;Q9BW66;Q66LE6;P51948;P61024;Q96EA4;Q8TDN4;Q9ULW0;P51959;P41002;P50749;O60216;Q8WVM7;Q9BX26;Q8IZT6;P63172;P56211;P49321;Q9NTI5;A6NKF1;Q29RF7;O43463;Q93008;Q96R06;Q9UJP4;P63279;P51610;Q12834;Q8IYB7;Q8NCD3;Q8IZX4;O95273;Q9NNW5;P11802;Q13257;O43663;Q8TAP9;O14757;Q7Z5K2;O75943;O75122;Q9UNH5;Q14566;O96020;P30305;O14965;Q9Y266;Q9BVC3;Q9UPV0;Q7Z3K3;Q14186;Q9Y6B2;Q9BPX3;Q86XL3;Q96Q89;Q13352;Q9NVV9;O75461;Q15555;Q9H981;P30307;O75351;Q5XG87;Q9BXY8;O43768;O76064;Q9Y448;Q13098;Q8N726;Q9BP22;P05783;P25205;Q9H2L5;Q9NVI1;Q6PIF2;Q9H4H8;P14635;Q8IXJ6;Q9HAW4;Q9UJ98;Q13042;Q9UJX5;Q9BV73;P58340;P62136;Q9NYP9;Q13526;Q9NQC7;Q14683;Q6PGQ7;Q08T23;Q9BZD4;Q99618;P36873;Q9UM13;P53990;Q9BRK4;Q6DKK2;Q15691;O60447;Q96MT8;Q96BD8;Q9Y6D9;Q9UJT9;O15297;A8MT69;P33552;Q9NYG5;P30279;Q5UIP0;Q9Y222;P20248;Q99459;Q96T88;Q7Z7A1;Q5TB80;P78396;Q8IYD1;Q94921;Q13625;P42771;Q8N9N5;O00762;Q9BVA0;Q86YI8;Q9UPP1;Q61254;Q9NPNB6;Q8N2Z9;Q9UJX3;Q9ULG1;P61586;Q14209;P50613;Q6PIF2;Q9H4H8;O94927;Q5MJ68;O00267;Q69YQ0;Q9H410;P42773;Q09028;Q68DK2;Q14207;Q8NDF8;Q8IX90;P28749;Q8N3U4;Q86T82;Q14980;Q96IF1;Q9NPI1;Q9UJX4;Q9P2J3;Q9UM11;Q6NT89;P50748;Q15326;Q8WVK7;O76095;Q96IY1;P83876;P49918;Q8WYJ6;Q8IXM3;Q9BRP1;Q96CS2;Q5TKA1;Q9UKG1;Q9BTV5;P18583;Q7Z6K1;P18754;Q5TZA2;P21675;Q9NR09;Q9NX01;P04156;Q8050;Q8WUM4;P35869;O00743;Q6PJP8;P21127;Q7Z460;Q96HI0;Q8NDN9;O15350;P46013;Q66K89;Q9H2G4;P62140;P38936;Q86XI2;P33992;Q9P287;Q13620;Q00534;Q8N0Z3;Q13111;O95067;Q96EP1;P19474;Q96NB3;P40692;Q496M5;Q9NXR1;O95271;Q9UPY8;O43255;O75419;Q92900;A0AVK6;Q9BRX2;Q12824;Q99741;Q14511;Q6P0N0;Q9ULC4;Q9H211;Q15003;Q96FF9;P69208;Q9UN37;O43482;Q6P1K2;Q6K0P9;P24941;Q9Y3E7;Q9HD42;Q9H3M7;Q9Y6X3;Q14777;Q8TAE8;Q14676;O00716;O43684;Q8IZD2;O00139;Q13227;O75410;Q9HBM1;P51587;Q96AV8;Q15021;A6NCL1;Q68CZ6;Q69YH5;Q01094;Q5FBB7;P51955;O95997;P54274;Q9NUQ3;Q6MZP7;Q8NAV8;O43236;Q9BVW5;P46527;Q96MF7;A1L190;P35638;Q8WWL7;P24864;Q5MJ70;Q9BYG4;O60934;P41208;Q9UNS1}

4640 Pathogen[ P14079] interacts with 406 human partners: {P04083;Q9NY59;Q5XUX0;Q8IXM3;Q15691;Q6NUQ1;Q14980;Q6P0N0;O14519;P51959;Q9BPZ2;P54274;Q9NQW6;Q8NA72;Q99459;Q96IY1;Q9NPI1;Q8IX12;Q03188;Q9BRX2;Q14004;Q15007;Q5TZA2;Q96DY7;Q6PGQ7;Q9UPY8;Q5MJ70;O60925;Q9ULG1;Q5EE01;Q96KR4;Q9BTV5;P63279;Q8IZX4;Q9UKG1;Q6UVJ0;P35869;P63172;O75419;O43482;O75400;Q68DK2;Q9ULC4;Q96MF7;P30307;Q14566;Q9NS23;Q9UKT4;O43268;Q9BT87;D6RGH6;Q9BYG5;Q7Z460;Q8NEU8;P51808;Q8IX90;Q96BT3;Q14186;P49336;P51946;O15297;Q9HBM1;Q9H4H8;A6NCL1;Q96R06;Q96HI0;P78396;O75896;O95271;P50995;Q8NDN9;P24864;Q7Z6K1;Q8TDY2;P36873;Q16254;O95229;Q8NBT2;Q13620;Q9UJX3;P04156;O76095;P40692;Q14207;Q9UBZ4;Q99871;Q13098;Q99549;Q96FF9;Q9NVV9;Q69YH5;Q9H1A4;Q7Z3K3;Q02241;Q9UJX5;Q9NVX0;Q8WVI7;B2CW77;Q96NB3;Q9BZD4;Q9H211;Q5XG87;Q9UNL4;O15392;P83876;Q7LBR1;Q9Y250;P62136;P51587;O60216;P69208;Q9BTV7;Q14209;Q8N726;Q9Y266;Q9HD42;O95067;Q9NVM9;Q6K0P9;Q5MJ68;Q9BV73;Q8NG31;A8MVW5;Q9BSK0;Q8ND76;Q9ULW0;Q13111;Q9BXW9;Q13111;Q7L5Y9;P41220;Q9H900;Q13625;O60934;Q9BSD3;Q86XL3;P49918;Q15003;Q9BTE3;Q9Y448;O75461;P56211;Q69YQ0;Q9NUQ3;P62952;P61289;P30304;P60006;P51610;O15350;Q9BXS6;Q6N021;Q5FBB7;Q6PIF2;Q9H410;Q9H5I1;P55273;Q99618;P0CW71;O60477;Q9NR09;Q8IYD1;Q9NTI5;Q9Y421;Q96RT1;Q9NVI1;Q15078;Q9Y6G5;Q8TEW0;P33552;Q9BRP1;Q96IK1;Q99741;Q8IXT1;Q8N3U4;P50613;Q9H981;Q99865;Q9UKL3;P33640;Q8IYB7;Q8TDN4;Q9P0W2;Q9HAW4;Q99661;Q8N9N5;Q6NXT1;P54826;O43663;Q9WYU6;P23919;Q8WW12;Q6MZP7;P14635;Q8NHZ8;P51955;O75943;Q9UJ98;Q8NHV4;P19474;Q8WYP5;O00716;Q96IF1;O95347;Q9BW66;Q9UM11;Q8IZU3;Q96Q89;Q9UPP1;Q8WUM4;Q99708;Q9H2G4;Q9BXY8;Q07666;P38936;Q9UM13;Q12798;Q13042;O00139;Q15555;Q9BYG4;Q96DE5;Q66K89;P41002;Q8N2Z9;Q13257;Q96EA4;Q9NQR1;Q56298;Q9BVC3;Q8WVK7;Q66LE6;P62140;Q9H1H9;P24522;Q9H6D7;Q8NPF3;P61586;Q96EE3;O75909;Q9H8V3;Q8WWL7;Q08J23;P50749;A6NKF1;Q9P258;O43903;O43264;Q9NX01;Q49MG5;A8MT69;Q13227;P84090;P35638;Q9NYP9;P21127;Q8N0Z3;Q9C099;Q86YI8;Q6DKK2;Q6NT89;P05783;Q8TAE8;O95997;Q9UJX6;Q86WB0;Q9UN37;P33992;Q6PGN9;Q9BX26;Q8IXJ6;Q5TB80;Q53HL2;Q15554;Q8WVK9;Q86Y91;Q8TAP9;P50548;P41208;Q9Y5K6;P20248;Q8NPF4;Q9NQS7;Q14676;P49427;Q9BPX3;Q8NCD3;O75410;Q3YBR2;Q9NNW5;Q86XI2;Q92900;O60583;Q8IY18;Q9Y3E7;Q96FC9;P46527;Q9Y6X3;Q96AV8;Q9UQE7;Q8N371;Q9H3M7;Q13164;Q7Z4H7;P49454;Q8N137;O75154;Q16589;Q9H2L5;Q9BT25;P49321;O00762;O15182;H0YL14;P30305;O75351;Q9UJP4;Q68CZ6;P42773;Q12824;P62826;Q9UJT9;A0AV

K6;O95273;Q6PJP8;Q29RF7;Q9NPB6;Q9NXR1;Q9Y6B2;P50748;O96020;Q13526;O75794;Q86Y37;Q6P1J9;Q15021;Q09028;Q99816;Q14457;Q7Z5K2;Q5UIP0;Q96BD8;Q9BVA0;O75122;Q14683;O00267;O14965;Q5TKA1;Q9UNSL;Q7Z2Z1;Q9BRK4;P18583;Q01094;Q13352;O75935;Q9NQC7;P42695;Q14188;Q9P287;O60232;P25205;Q9UJX4;P53990;O75496;Q15326;P18754;O14777;Q9BS18;O00743;Q8NFT6;Q8IZT6;O43684;Q9Y657;Q9UNH5;Q9UBU7;Q6P1M3;Q53EZ4;Q8NI51;Q7Z7A1;P22674;O43236;Q8TCY9;O94927;P49917;Q9Y222;Q7Z7K6;P21675;Q6P1K2;P58340;Q14978;P0CG13;Q9UPV0;Q08999;P50750;Q9H081;P42771;Q14008;Q92733;Q9BVW5;Q5T686;A1L190;P46013;Q15398;P61024;P51948;Q96CS2}

4641 Pathogen[ P03383] interacts with 357 human partners: {Q7Z7A1;Q14683;Q9BRK4;Q9UNSL;Q14457;Q96EE3;O14519;Q9NYV4;Q13257;P41002;P30307;Q8NHZ8;Q9NQS7;Q09028;Q03188;Q8NI51;P62140;Q14978;P49454;P50995;P19474;Q92831;Q8N0Z3;Q8IXT1;O75794;O14757;Q8N2Z9;Q8NFH4;Q9H4X1;Q7Z460;Q6UVJ0;P61024;Q6P1J9;Q9BVW5;Q86XI2;O00716;Q9UKL3;Q14209;Q96BD8;Q9BPZ2;Q96DE5;Q68DK2;Q7Z6K1;Q02241;Q8NBT2;Q8N3U4;Q12824;Q14008;P51808;Q9H900;Q15691;P83876;P51948;Q9NYG5;O75896;Q08999;Q5UIP0;Q8WWK9;Q9UJX6;Q9BSK0;Q8TD19;Q01094;P04156;Q9NVX0;P58340;Q9H981;O43264;Q5FBB7;P41220;Q15554;Q9UI95;P53990;P49427;Q9P258;O43236;Q9BXS6;P63172;Q9BXW9;P22674;O43463;O75410;Q9Y3E7;Q7Z4H7;Q9UJ98;Q9NUQ3;Q5EE01;Q8WWL7;Q8NEU8;P25205;Q8WYP5;A8MVW5;P41208;P46013;Q8NHV4;Q9BTE3;Q6P1M3;P30304;Q9BV73;Q6MZP7;Q9NYP9;Q9NVM9;Q86WB0;Q96PU4;P24522;Q92733;D6RGH6;P35638;O00762;O75461;Q6PJP8;O95347;Q12798;Q00536;Q8NDF8;Q99816;Q9UNL4;Q5TKA1;O60232;P24385;Q9Y6X3;Q8TDY2;Q9UKT4;Q9BRP1;Q9BRX2;Q8IZX4;P69208;Q9H1A4;O75400;Q99459;P49321;O15297;Q7Z7K6;P05783;Q13352;Q00534;Q96EA4;O60216;Q96MF7;Q13625;Q13042;O00267;Q9H2L5;P14635;Q96MT8;P11802;P06400;Q66K89;Q8WWL2;Q96BT3;P78396;Q96R06;P21127;A6NKF1;Q9H1H9;P36873;P62826;Q99618;P30279;P33552;P62136;Q12834;Q6PGN9;Q99871;Q5TZA2;Q15326;Q15003;P51610;Q99549;P49336;Q5TB80;Q14186;Q96CS2;P60006;Q53HL2;O94927;Q9NVI1;O95229;Q9NVV9;P18583;O60563;Q7Z2Z1;Q13111;Q7LBR1;P50613;Q9BXY8;Q8N9N5;P42772;Q9Y6B2;Q9UM13;Q96H10;P61586;P51946;O43768;P46527;Q9HAW4;P51959;O43684;P24941;Q9BYG5;P18754;P0CW71;Q6PGQ7;Q9UNH5;Q14511;Q9BZD4;Q9UM11;Q7Z3K3;Q16254;Q5MJ68;Q08J23;Q6DKK2;O75909;Q68CZ6;Q9BS18;P50750;Q9NPB6;O95067;Q8WVK7;O15350;Q96Q89;A8MT69;O96020;Q9BT25;Q562F6;Q8IYD1;O75935;Q07666;Q86YI8;Q8TDN4;O43255;Q8ND76;Q9HEM1;O94921;P50749;Q9P0W2;Q9H4H8;Q9Y266;Q8IXM3;Q9HD42;Q6K0P9;Q9H410;Q29RF7;Q8IX12;P42771;Q14207;O14965;Q8TCY9;Q9H081;Q8IX90;P28749;Q15007;Q96FF9;Q6IY1;Q14980;Q99708;O75419;Q9UJX4;Q14188;Q9UPV0;Q9H2G4;Q8NCD3;Q8NG31;P49918;Q96PY6;P21675;Q96NB3;A1L190;O60925;Q6P1K2;Q9UJX5;Q9NQR1;Q9H3M7;Q99997;Q99865;Q9Y448;Q9BW66;Q8N137;Q8WUM4;Q9Y222;Q9H6D7;Q9NPI1;Q13227;P62952;P50548;Q6NUQ1;Q8NA72;Q8N371;Q9ULW0;Q9P287;P61289;Q9C099;O14777;Q9BSD3;Q6P0N0;Q8TAE8;Q96EP1;O43663;Q49MG5;Q9UJX2;P56211;O76095;Q14676;Q3YBR2;O95271;P24864;Q9NTI5;P30281;O95273;O00743;Q96AV8;Q9Y421;P35869;Q9BVC3;Q9ULC4;Q9NNW5;Q9UJX3;P84090;O60583;Q92900;Q9H5I1;Q9UPP1;Q13112;Q9NQR1;Q9H211;Q53EZ4;Q8NDN9;Q9UPY8;Q5XUX0;B2CW77;O75154;P63279;Q96YH5;P20248;O43482;A0AVK6;Q9BPX3;Q15021;O60477;Q13526;P54274;Q8NFH3;Q6NT89;O75496;Q99741;Q7Z5K2;Q8TAP9;Q8N726;O96017;Q9Y6D9;Q13620;Q5MJ70;Q9BX26;Q9Y250;P50748;Q8WVM7;Q9BYG4}

4642 Pathogen[ P03410] interacts with 419 human partners: {Q03188;Q9UKT4;Q9BS18;Q9Y6G9;P83876;Q92831;Q8IX90;Q7Z460;O60583;Q86Y91;P49321;Q96DY7;O15392;Q29RF7;Q8IXJ6;P42771;Q9UPP1;P40692;Q9H981;Q96AV8;Q13227;Q8IZX4;Q8WVI7;Q96Q89;O75154;P46527;Q16589;Q9H4X1;O75461;P25205;P51610;Q86WB0;O75794;Q9UI95;P51808;Q99708;P35638;Q96RT1;Q9NX01;Q8IX12;O43684;Q9H6D7;Q9NVI1;P30279;O43903;P50995;O75943;Q9H1A4;Q96NB3;O00139;Q9NVV9;Q9BSD3;Q00534;P42772;Q99618;Q9NXR1;Q15554;Q15398;Q8TEW8;Q66K89;Q92900;Q8N726;Q8NG31;P49427;O00267;Q53HL2;Q9BTV7;Q99549;Q8NFH4;O75351;Q9H1H9;P54274;O75419;O96020;P41220;P46013;P21675;Q9BXW9;Q13620;Q9UQE7;Q7Z7A1;Q96BT3;Q13098;Q9NVM9;Q6NXT1;Q13526;Q6UVJ0;Q7Z5K2;Q9UJX4;Q9NYG5;P24522;Q8N9N5;Q8WWL7;Q8WVK9;Q14008;P51946;Q14207;Q9BVW5;Q16254;Q9UM13;Q8TCY9;D6RGH6;Q9BTE3;Q9P287;Q8NFT6;Q14978;Q9UNL4;P62136;Q9P0W2;Q9BSK0;P42695;P36405;O15182;Q14457;Q9ULG1;P63172;O95273;Q8TDY2;P55273;P50748;Q9NYP9;Q8NHZ8;Q9NS23;Q6N021;P22674;Q96H10;Q95067;P84090;P85299;Q69YQ0;Q9HAW4;Q9H3M7;Q15003;Q6P1M3;Q562F6;Q12798;Q9BPZ2;Q08999;Q9H211;Q8N137;Q5TKA1;P50749;P06400;Q9BXY8;Q6DKK2;Q99865;Q9UNH5;Q96R06;O95997;Q6NUQ1;Q6ZU15;Q9BXS6;Q5MJ68;Q5XUX0;Q9NQW6;Q8TAP9;Q6P0N0;Q8NCD3;Q14188;O60216;P50613;Q68CZ6;Q96CS2;P41002;Q07666;Q5EE01;Q9BTV5;P53990;P33992;O43264;P23919;Q96MF7;Q8IZT6;Q7Z7K6;P49454;Q9NQY0;Q9Y5K6;O95347;P78396;O14965;Q96EA4;P58340;Q96IF1;P50750;Q9P2J3;Q9ULC4;Q9NQR1;Q9H3M7;Q99816;Q8NHV4;O00716;Q8N0Z3;P24385;Q9Y3E7;Q9UBZ4;Q96IY1;H0YL14;Q96KR4;Q8NDN9;Q9Y448;Q14980;O15297;Q09028;P33552;P14635;Q9BX26;Q99459;Q15555;Q9UM11;Q14511;O75400;P38936;Q15691;Q13042;P0CG13;O43236;Q9Y6B2;P62826;P62140;P51959;P61586;Q6PJP8;P30304;P24941;Q9NQR1;P0CW71;B2CW77;Q9HD42;Q9BRX2;Q5TZA2;Q9UN37;O95271;P51587;O43482;P11802;Q6P1K2;Q13111;Q8IZU3;Q9NVX0;Q9UBU7;Q9H5I1;Q9NTI5;P62952;Q13112;O75909;Q15326;Q14683;O60232;Q3YBR2;Q14186;Q8IXT1;Q96DE5;Q9BZD4;O60447;Q8WVK7;Q9BVC3;Q69YH5;Q6K0P9;P04156;Q8WYJ6;Q9NUQ3;Q86Y37;O96017;P18583;P36873;Q9HEM1;Q5XG87;A8MVW5;Q6PGQ7;Q96EE3;O14757;Q9UJ98;Q6P1J9;Q8IXM3;O75410;Q9UJX5;O75935;Q9UPY8;Q8N3U4;Q9UH84;Q53EZ4;Q7Z2Z1;Q8IYB7;P49336;O94927;P20248;Q5T686;Q9Y222;O43768;P30281;Q9UKL3;Q12834;Q8NBT2;Q8WWL2;Q8NA72;P51948;Q8NI51;P54826;P28749;Q5FBB7;Q8IYD1;Q08J23;Q9UJX3;Q9ULW0;P69208;Q9UNSL;O00762;O75496;Q01094;Q5TB80;Q8IY18;O60925;P63279;P61024;Q6PIF2;Q8TEW0;A8MT69;Q9NPB6;O15350;Q7Z3K3;Q9UPV0;Q8WVM7;O14519;Q8NEU8;Q6MZP7;Q9Y250;P50548;Q96FC9;Q9H900;Q9Y266;Q9Y657;O95229;Q9H081;Q5MJ70;Q14676;Q9UJP4;Q96FF9;P49918;O76095;Q9C099;O43463;P60006;Q66LE6;P18754;Q5UIP0;Q9H8V3;Q96GN9;A6NKF1;Q99871;Q96BD8;Q14209;P30305;A1L190;Q9UJT9;Q9BPX3;Q8N371;Q86XI2;Q9H4H8;O60477;Q12824;Q14566;Q9H2L5;Q13625;Q9H2G4;Q9P258;P41208;Q8WUM4;Q68DK2;Q8TDN4;P24864;P56211;Q8WYP5;O75122;Q8NFH3;Q9BRP1;Q7L5Y9;P42773;P05783;Q9BV73;Q8ND76;Q7LBR1;Q9BT25;Q9Y421;O75896;P30307;Q92733;Q86XL3;O00743;Q9UJX6;Q96EP1;Q49MG5;Q9UKG1;Q7Z4H7;O60934;Q6NT89;A6NCL1;Q13352;A0AVK6;Q9NPI1;Q9BYG4;Q9BVA0;O14777;Q9NNW5;Q9BYG5;Q02241;Q15021;O43663;Q8N2Z9;P61289;Q8N0S2;Q9BW66;Q15007;Q13257;Q9NQS7;Q96IK1;Q99741;Q86YI8}

4643 Pathogen[ P14075] interacts with 365 human



partners: {P49321;Q14457;Q96MT8;A8MT69;P49336;Q99871;O15297;Q8NI51;Q14511;Q9BS18;P358  
69;Q9BRP1;Q9H4X1;P60006;P62952;Q9Y266;Q9H211;Q8N9N5;Q92900;Q14207;P50548;Q13042;Q7Z2  
Z1;Q9NVI1;Q8IXT1;P21675;Q9H1H9;O95067;P24941;Q99865;P05783;Q14683;P53990;Q08999;Q8N3  
71;Q9Y6D9;Q02241;O43663;Q9NPI1;Q5MJ70;P11802;Q9H081;Q8NDF8;Q9BPZ2;P61024;Q92831;Q7Z4  
H7;Q562F6;O75410;O43236;Q15554;Q49MG5;O76095;Q9UKT4;P49427;Q9NQS7;Q9Y6X3;Q8WVM7;P519  
59;Q07666;P14635;Q9H2L5;Q9UM11;Q96R06;P51808;Q8WVK7;P30281;P30279;Q5EE01;Q8WU  
M4;O60563;Q96DY7;Q86XI2;Q8WYP5;A8MVW5;P50613;Q8WW12;Q6NUQ1;Q8NHV4;Q7Z460;Q9BX26;Q6P1  
M3;Q9UPP1;Q9BRX2;P51610;O75419;Q86WB0;Q96PU4;Q96IY1;Q08050;Q13257;Q68CZ6;Q00534;A1L1  
90;P42771;P41220;P04156;Q8NDN9;Q9BYG4;Q13620;B2CW77;Q9BXS6;O60232;Q9NQR1;P35638;Q8TD  
Y2;P50750;O60583;Q7L5Y9;O95997;Q9Y250;O43684;Q6UVJ0;Q5TZA2;Q12798;P62140;O00716;Q9BW  
66;Q8IX12;Q13111;Q8NEU8;Q96BD8;Q9UI95;P63279;Q96020;Q5MJ68;P63172;O75794;Q9H2G4;Q142  
09;O14777;Q9UJX2;Q6K0P9;Q9BT25;Q96FF9;P36873;O95229;O95347;O75400;Q9BVW5;P46527;O432  
55;Q69YH5;Q9Y3E7;P62136;Q3YBR2;P78396;Q9UJX6;Q99459;Q8N2Z9;O00743;Q9NUQ3;Q8NHZ8;Q9BT  
E3;Q9UPV0;P69208;Q9BVC3;Q5TKA1;Q6P1J9;Q14186;Q09028;Q9ULW0;Q96HI0;Q9UKL3;Q9UJ98;P509  
95;Q68DK2;Q9HAW4;P54274;Q9H5I1;Q9UPY8;Q96DE5;O00762;Q15326;Q96EA4;Q9BXY8;O00139;P499  
18;Q7Z6K1;O43768;Q9P258;P22674;O75935;Q9UJX5;O14519;Q9Y6B2;Q14676;Q96017;O15350;Q162  
54;Q13526;P0CW71;P25205;Q7Z5K2;O14965;Q6MZP7;Q5T686;Q8WWL7;Q15007;Q15691;Q9Y421;Q9BV  
73;Q9NYP9;Q5TB80;Q96EE3;Q8N137;Q9C099;P20248;P19474;P62826;Q96BT3;Q96CS2;Q8IYD1;P211  
27;Q86YI8;Q9H3M7;Q13227;Q5FBB7;Q99549;Q01094;P61586;H0YL14;Q9H4H8;P30304;P06400;Q136  
25;Q9H410;Q96AV8;P41208;Q12824;P51946;O60477;Q8IX90;P28749;O75896;Q66K89;Q7Z7K6;A6NK  
F1;Q8NFH3;Q9UJX4;Q9Y222;Q9UJX4;Q9H900;Q53EZ4;Q9NVM9;Q00267;Q8TDN4;Q53HL2;Q29RF7;P24522;Q6PGN9;P427  
72;Q8NCD3;Q8IXM3;Q9NVX0;O60925;Q9UNSL;P50748;O43463;P18754;Q9NR09;Q8ND76;Q96PY6;Q9HD  
42;Q8WVK9;Q9BYG5;Q99741;O94927;O95273;P83876;Q9H981;Q9HBM1;Q5UIP0;Q9H1A4;P56211;Q6P1  
K2;P24385;O75154;Q9NPN6;Q9P287;Q15003;Q99816;Q13352;Q14008;Q99618;P41002;Q96MF7;Q08J  
23;Q6NT89;O43264;Q8TAP9;O75496;O95271;Q13112;Q9UM13;Q14980;O94921;Q9UQ88;O75909;Q031  
88;P61289;Q7Z3K3;Q8NG31;Q9UJX3;O43482;Q9NVM9;Q00267;Q8TDN4;Q9NSD3;Q9NNW5;Q9NTI5;Q141  
88;Q9NYG5;P49454;Q6P0N0;Q6PJP8;D6RGH6;Q99708;Q9NYV4;Q96IK1;Q9UNH5;Q9ULC4;Q9BPX3;P460  
13;Q9H6D7;Q96Q89;P30307;P84090;Q7Z7A1;Q8NFH4;P54826;Q9Y448;O75461;Q9NVV9;O60216;Q8TC  
Y9;Q92733;Q6PGQ7;Q9BXW9;Q8NBT2;Q9BZD4;P18583;A0AVK6;Q8TAE8;O14757;Q5XUX0;Q12834;Q149  
78;Q9P0W2;Q8N726;P50749;Q15021;Q96NB3;Q6DKD2;P33552;Q8NA72;Q8N0Z3;Q96EP1;Q9UN37;P519  
48;Q9BSK0;Q8N3U4;Q8IXZ4;P58340;Q24864;Q8TD19}

4644

Pathogen[ P0C206] interacts with 453 human

partners: {O95271;Q9UNSL;P61289;Q9NQC7;Q13112;Q16763;Q96EE3;Q9HBM1;Q6NXT1;Q8TAE8;Q9UJ  
T9;O15182;Q68DK2;Q8N371;Q9P2N7;O60216;Q8N137;Q9BPX3;Q08J23;Q14188;Q8WYP5;Q8WWL7;P583  
40;Q5XG87;Q9BTE3;O95273;Q9UKG1;P83876;Q9UN37;Q86Y37;P49336;P69208;Q496M5;Q6K0P9;Q9BV  
A0;Q99865;Q8N9N5;Q96RT1;P61024;Q8IXM3;Q7LBR1;O75794;Q9C099;O75496;Q14008;Q9NUQ3;Q96Q  
89;Q9H4X1;Q8TDN4;Q8WW12;Q5UIP0;Q9UJX3;Q9H900;P24522;Q9NPI1;O00743;Q9UBP0;Q96KR4;Q5MJ  
68;O43255;Q99708;Q8N726;Q13526;P50750;Q8WVI7;Q15019;P30307;Q9H981;Q9Y3E7;O96017;P041  
56;Q9BXY8;P18583;Q9Y5T5;Q8NEU8;Q9Y6D9;P35869;Q8NA72;Q6NUQ1;Q93008;Q9ULW0;P18754;Q96H  
I0;O75419;Q2733;A1L190;Q5T686;P51955;Q86XL3;Q75154;P25205;Q96EP1;P51587;A6NCL1;Q96A  
V8;Q9UJX5;Q5TZA2;Q96IF1;Q9NQW6;P56211;Q9UJX2;Q9BTV5;Q15554;Q13625;P50995;Q9UKL3;P302  
79;Q13111;Q6PJP8;O60934;O75604;Q66LE6;Q15691;O60477;Q00536;O95997;P40692;Q9H081;O147  
77;Q8IUQ4;O43463;P46013;Q9UPP1;Q8IYD1;Q7Z5K2;P42695;Q8NI51;Q9Y448;Q99618;Q9BT25;Q9H2  
L5;P50749;Q29RF7;Q9BYG5;Q9BPZ2;Q6PGQ7;Q9NYP9;Q14457;Q15021;Q96PY6;Q8NFT6;Q9BZD4;P202  
48;Q8IXT1;Q9UVJ0;P42771;Q9UPV0;Q14186;Q8IZT6;Q9H410;Q9UBZ4;P42772;P30305;Q9UBZ4;P628  
26;Q99816;Q9P287;Q6PGN9;D6RGH6;Q12824;P49454;P49321;O75896;Q16589;Q07666;Q8TD19;O007  
16;Q9H1H9;Q5TKA1;Q99741;Q13257;Q15326;Q9BX26;Q8IZU3;Q92831;Q9H0E7;O96020;P49427;Q9NN  
W5;Q14141;Q02241;Q9Y6X3;Q13620;Q8IXZ4;Q16254;Q9BW66;O43236;Q8IX90;P28749;O75943;Q9NV  
I1;P61586;Q9NVX0;Q9Y421;Q69YQ0;Q08999;O14519;Q96FF9;Q9UJP4;Q9BS18;Q15003;P30291;O751  
22;Q86Y91;O75410;Q9UKT4;Q5EE01;P54274;P42773;Q8TEW0;Q8TCY9;Q6P1K2;Q9H1A4;Q6DKZ6;Q6ZU  
15;Q8NBT2;O60447;A8MVW5;Q14209;Q96BD8;A6NKF1;Q8WYJ6;Q96NB3;P49917;O60925;Q9NYG5;Q9UN  
H5;Q9UJX4;Q86XI2;Q15007;Q693B1;Q9P0W2;Q7L5Y9;Q9UPY8;Q9UQE7;P50613;Q9NR09;O95347;Q9BV  
W5;Q9BRP1;Q9ULG1;Q9UBU7;P51959;Q8NCD3;P51808;P51610;Q14683;Q14676;Q96T88;Q96IY1;Q9P2  
J3;P53990;Q9NQR1;Q9H211;Q9Y6G9;Q01094;Q7Z7K6;Q96BT3;Q6MZP7;Q7Z3K3;A0AVK6;Q8NDF8;P057  
83;P55273;P46527;O43768;Q96CS2;Q8TDY2;O43663;Q13352;Q5FBB7;Q7Z4H7;Q99916;Q9NPN6;P389  
36;Q9UM11;Q86T82;O94927;Q9Y222;Q53HL2;O00762;O43482;Q96MF7;Q9H5I1;Q9H8V3;Q49MG5;Q9BV  
73;O00267;Q8NHV4;Q9H2G4;O15392;Q6P0N0;O00139;Q9NTI5;Q9Y657;P0CW71;Q8N0S2;Q8IXJ6;Q9NX  
01;Q9P258;Q9NQY0;P62140;Q9UJX6;Q99459;O75909;P36405;Q9Y6B2;Q8NFH4;Q8WUM4;Q08050;P335  
52;Q13098;Q8IX12;P30304;Q86YI8;Q13422;Q562F6;Q6NT89;Q9Y5K6;O75400;Q7Z7A1;Q69YH5;B2CW  
77;P78396;Q9H6D7;Q92900;Q9H3M7;Q99871;P41208;O15350;Q7Z2Z1;Q8N3U4;Q9NRZ9;Q86WB0;P0CG  
13;Q8N0Z3;O95067;Q9NXR1;Q96EA4;Q9HD42;Q09028;P21127;Q96DE5;Q8ND76;Q8NDN9;Q8TAP9;Q9UL  
C4;Q8N2Z9;Q5XUX0;Q16181;Q15555;Q9BTV7;Q12798;P84090;P14635;P60006;H0YL14;Q9BXS6;O436  
84;O60583;Q7Z6K1;Q9BSK0;Q9BXW9;O14965;Q14980;P41220;Q9UM13;Q96MT8;Q7Z460;Q9NVM9;O753  
51;Q9NS23;P54826;Q9NQS7;O75935;Q66K89;Q8NFH3;O15297;P63172;Q3YBR2;P36873;Q13042;Q8IY  
B7;Q9UK53;P50548;O76064;Q8IY18;Q99549;P50748;O60563;Q15398;Q96IK1;Q9HAW4;Q13227;Q9BW  
19;O75461;O43264;P24864;P24941;Q8WVK9;P62952;Q68CZ6;Q14566;Q8WVM7;Q9NTJ3;Q8NG31;Q9BR  
X2;Q9Y266;P41002;Q5TB80;P11802;O60232;Q6P1J9;Q9Y250;Q9BVC3;P22674;Q6P1M3;O94921;Q145  
11;Q12834;Q8WVK7;Q5MJ70;Q9UI95;Q9BYG4;P35638;Q99640;Q14207;Q96PU4;Q8NHZ8;Q9BSD3;A8MT  
69;P33992;Q03188;P62136;Q9UNL4;Q9NVV9;Q8IZD2;Q99986;P21675;O76095;P51946;Q14978;Q9H4  
H8;P51948;P24385;O95229;P19474;Q6PIF2;Q00534;P30281;P06400;Q96DY7;P49918}

4645

Pathogen[ P03363] interacts with 396 human

partners: {Q8IXZ4;Q9BSD3;Q9UJX2;Q3YBR2;Q13112;P05783;O75410;Q9NYG5;P49918;Q96EA4;Q149  
78;Q9NVI1;P62952;A6NKF1;Q69YH5;O75461;Q9BZD4;Q9UJ98;Q96IK1;Q13042;P49454;Q96EP1;Q6P0  
N0;Q96IY1;Q96RT1;Q8WWL7;Q07666;Q6P1K2;P62136;Q9NYP9;Q7Z7K6;Q9HAW4;P69208;Q7Z7A1;Q165  
89;Q9Y6D9;Q9UNH5;Q08J23;Q9H4X1;Q86WB0;Q9H081;Q9H981;Q9ULG1;P36873;P24864;Q8NFH4;Q9BX  
W9;O00762;Q15021;P49321;O60563;P21127;Q92900;O95229;Q13227;Q96DE5;Q9BRK4;Q15554;Q9NV



V9;Q9H5I1;Q96MT8;Q96BD8;Q9BTE3;Q7Z2Z1;Q9UJT9;P62140;P33552;Q8NHV4;O75794;P58340;P30279;Q8IXM3;Q90Q28;Q92831;Q8WYP5;Q9NQW6;O60232;Q14457;P20248;Q8WWL2;P25205;Q8WWK9;O95347;Q8NFH3;Q9P2N7;Q86XI2;Q14980;Q13111;Q9Y266;O75604;Q5TKA1;Q6MZP7;Q6NXT1;Q15691;Q9NX01;O75909;Q9ULW0;Q8IYD1;P51946;O43264;Q8NBT2;Q13625;O60447;Q8N9N5;Q15398;Q7Z6K1;Q6NUQ1;Q16667;Q6NT89;Q8ND76;Q9H3M7;Q9Y657;Q16254;B2CW77;Q8NHZ8;Q9H6D7;Q5MJ68;Q02241;Q9NPB6;O00743;Q90X29;Q9P258;Q9UJX3;Q9BT25;Q66K89;Q9C099;Q53HL2;Q8WVK7;P61289;Q9BVC3;P50548;Q9BXS6;Q9H410;O00267;P24941;P50748;Q9H4156;Q9UJX5;Q6PGQ7;Q9BPZ2;P41208;Q49MG5;Q13526;Q68DK2;P49427;P06400;Q9BYG4;Q8NI51;O00409;Q8WYJ6;Q8IX90;P28749;P41002;P35869;Q9NVA2;Q9UJX6;P50995;Q5FBB7;Q96IF1;Q66LE6;Q9UM11;P33992;Q9UNL4;Q9BS18;Q9UJX4;O96017;O75351;Q9H900;P30304;Q8NEU8;O75400;Q5TZA2;Q15326;Q8NDN9;Q00534;Q5EE01;Q6PGN9;A8MVW5;Q99549;Q99708;Q9BRP1;Q08050;Q9UPY8;Q9UN37;Q8IYM1;O60925;Q6P1M3;Q96R06;O60583;Q53EZ4;P60006;Q68CZ6;O43684;O95067;O96020;Q12798;P18583;Q92599;Q6PIF2;O94927;Q6DKK2;P42772;Q8WUM4;Q9NR09;P63172;Q6K0P9;Q9Y250;Q6P1J9;Q8IYB7;Q08999;P0CG13;Q9BW66;Q9H2G4;Q14511;P54274;Q9BVW5;Q01094;Q9NQS7;Q8TAE8;Q8NDF8;Q99741;P61024;Q9NVX0;P19474;Q86T82;P78396;Q9NPI1;Q9H211;Q8WVM7;O60477;Q5MJ70;Q9UNS1;O75935;Q9UKL3;Q9Y3E7;Q9HBM1;Q5UIP0;A0AVK6;Q7LBR1;A6NCL1;Q13620;Q7Z460;Q9UKT4;O43768;Q8TCY9;O95271;Q9BPX3;Q9H1A4;Q9UHD8;P24522;P49336;Q9UI95;P35638;Q8TDY2;Q03188;Q8NG31;Q13257;Q14209;Q8NCD3;Q8N0Z3;P63279;Q96CS2;Q7Z3K3;Q99871;P83876;Q6PJP8;P41220;Q9BYG5;P51808;Q29RF7;Q99618;O76095;O75154;P0CW71;Q9NS23;D6RGH6;Q9UPV0;P24385;P21675;Q9P2J3;P42695;O75496;Q96BT3;Q9UM13;Q8TDM4;Q96HI0;Q8N726;O15182;P51959;P50749;Q9UJP4;P50750;Q14186;Q8IX12;Q9NVM9;O43463;Q14188;Q92733;P56211;Q9NQY0;Q96T88;Q9H2L5;Q9NTI5;Q96AV8;Q9BRX2;Q6ZU15;Q99816;Q9NUQ3;O14519;Q8N3U4;Q9ULC4;O14777;Q9NQR1;Q96Q89;O95997;Q9Y6B2;Q12834;Q14008;Q14207;Q9Y448;O43482;O95273;Q96FF9;Q8NA72;P42773;Q9H1H9;Q9Y6X3;O15297;P11802;P46013;O43663;Q562F6;P22674;Q14676;O00716;Q9NXR1;Q96PU4;Q14141;O00139;O43255;Q5XUX0;P18754;Q99719;P30307;Q7Z5K2;P30281;O75943;Q9P0W2;P62826;Q9P287;Q8IY18;Q99459;Q13352;Q7Z4H7;Q99865;Q5TB80;Q96NB3;Q96MF7;Q00536;Q8IZU3;Q93008;Q86XL3;Q8IZT6;Q14683;Q9Y5K6;O43236;Q15007;Q9UKG1;Q9BTV5;Q15003;Q12824;P42771;Q9BV73;Q9BSK0;Q693B1;O75419;Q9BX26;Q9NNW5;Q9Y222;A8MT69;Q15555;Q9HD42;A1L190;Q9Y421;P51610;Q13098;Q8TAP9;O60216;Q6UVJ0;Q69YQ0;O14757;Q8IXT1;Q8N137;P53990;Q9BXY8}

4646 [Cluster 423]GO:0042989+P biological\_process [name] sequestering of actin monomers [def] "The selective interaction of actin monomers with specific molecules that inhibit their polymerization by preventing their access to other monomers." [GOC

4647 Pathogen[ Q2Q067] interacts with 5 human partners:{P63313;O14604;P0CG35;P62328;P0CG34}

4648 Pathogen[ P0C214] interacts with 5 human partners:{P63313;P0CG35;P0CG34;O14604;P62328}

4649 Pathogen[ P03346] interacts with 5 human partners:{P0CG34;O14604;P63313;P62328;P0CG35}

4650 Pathogen[ Q85601] interacts with 5 human partners:{P0CG34;P62328;P0CG35;O14604;P63313}

4651 Pathogen[ P14079] interacts with 5 human partners:{P0CG34;O14604;P62328;P0CG35;P63313}

4652 Pathogen[ P03383] interacts with 5 human partners:{P62328;P63313;P0CG35;O14604;P0CG34}

4653 Pathogen[ P03410] interacts with 5 human partners:{P62328;P0CG35;P0CG34;O14604;P63313}

4654 Pathogen[ P14075] interacts with 5 human partners:{P0CG34;P62328;P63313;O14604;P0CG35}

4655 Pathogen[ P0C206] interacts with 5 human partners:{O14604;P0CG35;P0CG34;P62328;P63313}

4656 Pathogen[ P03363] interacts with 5 human partners:{P0CG35;P62328;P63313;P0CG34;O14604}

4657 [Cluster 424]GO:0032933+P biological\_process [name] SREBP-mediated signaling pathway [def] "A series of molecular signals from the endoplasmic reticulum to the nucleus generated as a consequence of altered levels of one or more lipids, and resulting in the activation of transcription by SREBP." [GOC

4658 Pathogen[ Q2Q067] interacts with 1 human partners:{Q9BY44}

4659 Pathogen[ P0C214] interacts with 1 human partners:{Q9BY44}

4660 Pathogen[ P03346] interacts with 1 human partners:{Q9BY44}

4661 Pathogen[ Q85601] interacts with 1 human partners:{Q9BY44}

4662 Pathogen[ P14079] interacts with 3 human partners:{Q9Y5U4;Q9BY44;O15503}

4663 Pathogen[ P03383] interacts with 1 human partners:{Q9BY44}

4664 Pathogen[ P03410] interacts with 3 human partners:{Q9Y5U4;Q9BY44;O15503}

4665 Pathogen[ P14075] interacts with 1 human partners:{Q9BY44}

4666 Pathogen[ P0C206] interacts with 1 human partners:{Q9BY44}

4667 Pathogen[ P03363] interacts with 1 human partners:{Q9BY44}

4668 [Cluster 425]GO:0031145+P biological\_process [name] anaphase-promoting complex-dependent proteasomal ubiquitin-dependent protein catabolic process [def] "The chemical reactions and pathways resulting in the breakdown of a protein or peptide by hydrolysis of its peptide bonds, initiated by the covalent attachment of ubiquitin, with ubiquitin-protein ligation catalyzed by the anaphase-promoting complex, and mediated by the proteasome." [PMID

4669 Pathogen[ Q2Q067] interacts with 66 human partners:{Q99460;O75832;P48556;P40306;P55036;O00231;O00233;Q9UJX3;Q9UJX5;P51665;O95997;P28072;O00762;A5LHX3;Q13257;Q13200;P25787;Q06323;O43684;Q9NYG5;Q9H1A4;P51965;P28065;O14818;P14635;Q9UJX2;Q9Y297;Q9UM13;Q14997;P60900;Q9UL46;P61289;Q12834;P51668;P280

62;Q9UNM6;P25788;Q13616;Q92530;P25786;Q8NHZ8;Q16401;O00232;Q13309;Q9UM11;Q9UJX4;P28074;P25789;Q9UKT4;P0CG47;P20618;P0C48;P28070;P28066;Q99436;P24941;Q8TAA3;Q9UJX6;P62987;O43242;P30260;P49721;P49720;Q13042;P63208;P62979}

4670 Pathogen[ P0C214] interacts with 69 human partners: {Q9UJX6;Q14997;P51665;O43684;Q13257;P25789;Q16763;P55036;P28062;A5LHX3;O00762;P28065;Q13309;O14818;O43242;Q9UJX5;P63208;P48556;P40306;P14635;Q13200;Q9UJX2;Q9Y297;O00232;P51965;Q99460;P28066;O75832;Q9H1A4;P49720;P28074;P0CG48;Q9UL46;Q8NHZ8;Q12834;P25788;P24941;Q9UNM6;O00231;Q06323;P25786;Q13616;P28072;Q8TAA3;P62987;Q99436;Q9UJX4;P0CG47;P25787;Q9UJX3;Q95997;P35998;P60900;O00233;Q9UM11;P51668;P62979;P30260;Q92530;Q9NYG5;Q15008;Q9UM13;P28070;Q9UKT4;P20618;P49721;Q16401;P17980;Q13042}

4671 Pathogen[ P03346] interacts with 67 human partners: {P25787;P28070;P25789;P55036;O43684;Q99460;Q9UM11;Q13616;Q9UL46;P62987;P28072;P25788;P28074;P49721;O14818;Q99436;P24941;P0CG48;Q16401;A5LHX3;Q9UM13;P28062;Q9NYG5;P20618;O00232;P51668;Q95997;Q12834;O75832;O00233;Q9UJX6;P14635;Q13042;P51965;Q13309;Q9UJX5;P49720;P28065;O00762;Q9UJX2;P60900;P25786;O00231;Q9UKT4;Q9UJX3;Q8NHZ8;P63208;P61289;Q9H1A4;P62979;P28066;Q9UNM6;Q9UJX4;Q8TAA3;P0CG47;Q14997;Q13200;P48556;P51665;Q06323;P30260;Q9Y297;Q92530;O14965;O43242;P40306;Q13257}

4672 Pathogen[ Q85601] interacts with 63 human partners: {Q9UJX2;P28066;Q9UNM6;P60900;Q13309;P55036;Q9UJX6;Q16763;P25787;P61289;P25788;Q9UKT4;Q8NHZ8;O75832;Q9H1A4;Q13616;P0CG48;P51668;Q12834;Q13257;P25789;O00233;O14965;P20618;P63208;P40306;P14635;Q13042;Q9UJX5;P51965;P49720;Q9UM13;P28062;P49721;Q9NYG5;P25786;O00762;P28072;Q9UJX3;Q13200;P28065;P62979;Q99436;P28070;Q9UJX4;Q9UM11;Q8TAA3;Q9UL46;Q99460;O00231;P0CG47;P48556;P28074;Q92530;P62987;A5LHX3;Q06323;P30260;O14818;P24941;O43684;Q16401;Q95997}

4673 Pathogen[ P14079] interacts with 66 human partners: {P28065;Q99436;P62333;P48556;P51965;P0CG48;Q9UKT4;Q13309;P40306;Q9UJX3;P55036;P28074;O00232;Q9H1A4;Q9UJX5;P49720;O00487;P25787;O75832;A5LHX3;P62979;O00233;P35998;P61289;P62987;P51665;P20618;Q9NYG5;Q8TAA3;Q14997;P51668;P14635;Q8NHZ8;P28062;P60900;Q9UM11;Q9UM13;Q13042;Q9UNM6;Q13257;Q99460;O14818;P49721;Q92530;Q95997;Q9UJX6;P30260;Q06323;P62191;O00762;Q15008;P43686;O43242;P25788;P63208;O00231;Q13616;P28066;Q9UL46;P0CG47;O14965;Q16401;Q9UJX4;P17980;O43684;P28072}

4674 Pathogen[ P03383] interacts with 62 human partners: {Q13257;Q8NHZ8;Q13616;P55036;P62987;Q9NYG5;P51965;Q9UJX6;P25789;P60900;P40306;O00233;O00762;P49721;Q06323;Q9UKT4;Q14997;Q9H1A4;P63208;P20618;Q13042;P14635;Q12834;O75832;Q9UM13;O43684;P24941;Q9UM11;Q9UL46;Q9UNM6;P25786;P25786;Q99460;P28072;Q13200;P28065;P28066;O14965;Q9UJX4;Q16401;P62979;O00231;P0CG47;Q9UJX5;Q13309;Q95997;P0CG48;P28074;Q92530;P49720;Q8TAA3;P61289;Q9UJX2;P28062;P30260;P48556;O14818;Q9UJX3;Q99436;P28070;P51668;P25787;P25788}

4675 Pathogen[ P03410] interacts with 67 human partners: {Q9UKT4;P28070;P55036;P0CG48;O43684;Q9H1A4;P25786;Q15008;Q16401;P60900;Q14997;P35998;P51965;Q99460;Q9UJX4;Q9NYG5;O00233;Q9UM13;O00232;Q8NHZ8;Q8TAA3;P48556;P49721;Q95997;A5LHX3;P62979;Q99436;O14965;P40306;Q06323;P63208;Q13200;P25787;P14635;Q9UM11;Q13042;Q13309;P24941;P28062;P51665;O14818;P51668;Q9UJX5;O00231;Q9UNM6;Q12834;P30260;P25789;P49720;Q13616;Q9UJX3;P62987;O00762;P28072;P25788;P28066;P28065;O43242;Q9UJX6;P0CG47;P17980;O75832;P20618;Q9UL46;P28074;P61289;Q13257}

4676 Pathogen[ P14075] interacts with 61 human partners: {P55036;P25788;Q13042;P28066;P24941;Q06323;O75832;Q8TAA3;Q9UKT4;P60900;P14635;Q9UM11;O00233;Q9UL46;P49720;P51965;Q13257;Q95997;O43684;Q13200;P48556;Q16401;P28070;Q9UJX2;P49721;O00231;Q9UJX6;Q8NHZ8;Q92530;P63208;P0CG48;P62979;O00762;P28062;P28074;Q9UJX5;P28065;O14965;P25786;O14818;P62987;Q13309;P28072;Q14997;Q9UJX4;P0CG47;P25787;P20618;Q9H1A4;Q9UNM6;Q13616;Q9UM13;P30260;P61289;Q9UJX3;P40306;P51668;Q9NYG5;Q99436;Q12834;P25789}

4677 Pathogen[ P0C206] interacts with 66 human partners: {P61289;Q16763;Q99436;P28062;Q9UNM6;P0CG48;O75832;P40306;P28065;Q14997;Q9UJX3;P55036;Q13309;P25786;P25788;P25787;Q9UJX5;Q9UJX2;Q06323;Q95997;P49720;O00232;P60900;Q13616;O43242;Q13257;P30260;A5LHX3;P25789;P51965;Q9UKT4;Q9H1A4;Q9NYG5;Q9UJX4;P20618;P63208;Q13200;Q8TAA3;P28070;Q99460;P62979;P28066;Q9UM11;O00762;O14818;Q9UJX6;P0CG47;P28072;P28074;Q92530;P49721;P14635;O43684;P62987;O14965;Q9UM13;Q9UL46;Q13042;P24941;P51668;O00233;P48556;Q16401;Q12834;Q8NHZ8;O00231}

4678 Pathogen[ P03363] interacts with 27 human partners: {Q9UJX2;Q9NYG5;Q13309;Q13042;P51965;O00762;Q92530;Q8NHZ8;Q9UJX3;P61289;P24941;Q9UJX5;P30260;Q9UJX6;Q9UM11;Q9UJX4;Q13616;O43684;Q9UKT4;Q9H1A4;P62987;Q13257;P51668;Q9UM13;Q95997;Q12834;P63208}

4679 [Cluster 426]GO:0019933+P biological\_process [name] cAMP-mediated signaling [def] "A series of molecular signals in which a cell uses cyclic AMP to convert an extracellular signal into a response." [GOC

4680 Pathogen[ Q2Q067] interacts with 1 human partners: {Q13542}

4681 Pathogen[ P0C214] interacts with 1 human partners: {Q13542}

4682 Pathogen[ P03346] interacts with 1 human partners: {Q13542}

4683 Pathogen[ Q85601] interacts with 1 human partners: {Q13542}

4684 Pathogen[ P14079] interacts with 2 human partners: {O43181;Q13542}

4685 Pathogen[ P03383] interacts with 1 human partners: {Q13542}

4686 Pathogen[ P03410] interacts with 2 human partners: {Q13542;O43181}

4687 Pathogen[ P14075] interacts with 1 human partners: {Q13542}

4688 Pathogen[ P0C206] interacts with 1 human partners: {Q13542}

4689 Pathogen[ P03363] interacts with 1 human partners: {Q13542}

4690 [Cluster 427]GO:0008630+P biological\_process [name] DNA damage response, signal transduction resulting in induction of apoptosis [def] "A cascade of processes initiated by the detection of DNA damage and resulting in the induction of apoptosis (programmed cell death)." [GOC

4691 Pathogen[ Q2Q067] interacts with 11 human partners:{Q14526;Q9NS56;O95243;O60543;O15350;O96017;Q9P278;Q03468;Q9UHD4;Q9BZF9;P23025}

4692 Pathogen[ P0C214] interacts with 13 human partners:{O95243;Q14526;Q9P278;Q14164;O60543;P23025;Q9NS56;O15350;O96017;Q9UHD4;Q9BZF9;P40692;Q03468}

4693 Pathogen[ P03346] interacts with 13 human partners:{O96017;O15350;Q9P278;Q14526;Q9NS56;Q03468;P51587;O95243;P23025;Q9BZF9;O60543;Q14164;Q9UHD4}

4694 Pathogen[ Q85601] interacts with 14 human partners:{Q9NS56;P23025;O96017;Q9BZF9;O95243;Q9UHD4;Q14526;Q14164;Q03468;O60543;O15350;P40692;Q9P278;P51587}

4695 Pathogen[ P14079] interacts with 12 human partners:{O60543;P40692;Q14164;P51587;P23025;O15350;O95243;Q9NS56;Q9BZF9;Q03468;P52701;Q9UHD4}

4696 Pathogen[ P03383] interacts with 10 human partners:{O60543;Q14526;Q9BZF9;Q9UHD4;Q9P278;O95243;Q03468;P23025;O15350;O96017}

4697 Pathogen[ P03410] interacts with 13 human partners:{P23025;P40692;Q14526;Q9UHD4;Q03468;O95243;P52701;P51587;O96017;Q9BZF9;O15350;O60543;Q9P278}

4698 Pathogen[ P14075] interacts with 10 human partners:{Q9UHD4;Q14526;P23025;Q03468;O96017;O15350;O60543;O95243;Q9BZF9;Q9P278}

4699 Pathogen[ P0C206] interacts with 15 human partners:{Q9NS56;O96017;P52701;P51587;P40692;Q9P278;Q03468;Q14164;Q9UHD4;O15350;Q14526;O60543;Q9BZF9;O95243;P23025}

4700 Pathogen[ P03363] interacts with 8 human partners:{O60543;Q14526;P23025;O96017;Q9BZF9;O95243;Q03468;Q9P278}

4701 [Cluster 428]GO:0070997+P biological\_process [name] neuron death [def] "The process of cell death in a neuron." [GOC

4702 Pathogen[ Q2Q067] interacts with 2 human partners:{Q6NUN9;O60260}

4703 Pathogen[ P0C214] interacts with 2 human partners:{O60260;Q6NUN9}

4704 Pathogen[ P03346] interacts with 2 human partners:{O60260;Q6NUN9}

4705 Pathogen[ Q85601] interacts with 2 human partners:{Q6NUN9;O60260}

4706 Pathogen[ P14079] interacts with 3 human partners:{O60260;Q6NUN9;Q9UL15}

4707 Pathogen[ P03383] interacts with 2 human partners:{O60260;Q6NUN9}

4708 Pathogen[ P03410] interacts with 3 human partners:{O60260;Q6NUN9;Q9UL15}

4709 Pathogen[ P14075] interacts with 2 human partners:{Q6NUN9;O60260}

4710 Pathogen[ P0C206] interacts with 2 human partners:{Q6NUN9;O60260}

4711 Pathogen[ P03363] interacts with 1 human partners:{Q6NUN9}

4712 [Cluster 429]GO:0048935+P biological\_process [name] peripheral nervous system neuron development [def] "The process whose specific outcome is the progression of a neuron whose cell body is located in the peripheral nervous system, from initial commitment of the cell to a neuronal fate, to the fully functional differentiated neuron." [GOC

4713 Pathogen[ Q2Q067] interacts with 5 human partners:{Q01196;P50549;O95948;P28356;Q13761}

4714 Pathogen[ P0C214] interacts with 3 human partners:{Q13761;P50549;O95948}

4715 Pathogen[ P03346] interacts with 6 human partners:{P50549;P28358;O95948;Q13761;P28356;Q01196}

4716 Pathogen[ Q85601] interacts with 3 human partners:{P50549;O95948;Q13761}

4717 Pathogen[ P14079] interacts with 3 human partners:{O95948;P50549;Q13761}

4718 Pathogen[ P03383] interacts with 2 human partners:{Q13761;P50549}

4719 Pathogen[ P03410] interacts with 3 human partners:{O95948;P50549;Q13761}

4720 Pathogen[ P14075] interacts with 2 human partners:{P50549;Q13761}

4721 Pathogen[ P0C206] interacts with 4 human partners:{P50549;P28356;Q13761;O95948}

4722 Pathogen[ P03363] interacts with 5 human partners:{O95948;P28356;P28358;P50549;Q13761}

4723 [Cluster 430]GO:0045647+P biological\_process [name] negative regulation of erythrocyte differentiation [def] "Any process that stops, prevents, or reduces the frequency, rate or extent of erythrocyte differentiation." [GOC

4724 Pathogen[ Q2Q067] interacts with 5 human partners:{Q9Y5Q3;Q9Y2Y9;P20719;P25791;Q86U70}

4725 Pathogen[ P0C214] interacts with 4 human partners:{Q9Y2Y9;Q9Y5Q3;P25791;Q86U70}

4726 Pathogen[ P03346] interacts with 5 human partners:{Q86U70;Q9Y5Q3;P20719;P25791;Q9Y2Y9}

4727 Pathogen[ Q85601] interacts with 4 human partners:{Q86U70;Q9Y2Y9;Q9Y5Q3;P25791}

4728 Pathogen[ P14079] interacts with 4 human partners:{Q9Y5Q3;Q9Y2Y9;Q86U70;P25791}

4729 Pathogen[ P03383] interacts with 4 human partners:{Q9Y5Q3;Q86U70;Q9Y2Y9;P25791}

4730 Pathogen[ P03410] interacts with 4 human partners:{Q9Y2Y9;P25791;Q9Y5Q3;Q86U70}

4731 Pathogen[ P14075] interacts with 4 human partners:{Q86U70;P25791;Q9Y5Q3;Q9Y2Y9}

4732 Pathogen[ P0C206] interacts with 5 human partners:{Q9Y5Q3;Q9Y2Y9;P25791;Q86U70;P20719}

4733 Pathogen[ P03363] interacts with 5 human

partners:{Q86U70;P20719;Q9Y2Y9;P25791;Q9Y5Q3}

4734 [Cluster 431]GO:0006610+P biological\_process [name] ribosomal protein import into nucleus [def] "The directed movement of a ribosomal protein from the cytoplasm into the nucleus, across the nuclear membrane." [GOC

4735 Pathogen[ Q2Q067] interacts with 4 human partners:{Q14974;Q9UI26;O00410;P62829}

4736 Pathogen[ P0C214] interacts with 3 human partners:{Q9UI26;P62829;Q14974}

4737 Pathogen[ P03346] interacts with 4 human partners:{Q9UI26;O00410;P62829;Q14974}

4738 Pathogen[ Q85601] interacts with 4 human partners:{Q9UI26;P62829;Q14974;O00410}

4739 Pathogen[ P14079] interacts with 4 human partners:{P62829;O00410;Q9UI26;Q14974}

4740 Pathogen[ P03383] interacts with 4 human partners:{Q9UI26;Q14974;P62829;O00410}

4741 Pathogen[ P03410] interacts with 4 human partners:{P62829;Q14974;O00410;Q9UI26}

4742 Pathogen[ P14075] interacts with 4 human partners:{Q9UI26;O00410;Q14974;P62829}

4743 Pathogen[ P0C206] interacts with 4 human partners:{Q14974;O00410;Q9UI26;P62829}

4744 Pathogen[ P03363] interacts with 4 human partners:{O00410;P62829;Q14974;Q9UI26}

4745 [Cluster 432]GO:0032786+P biological\_process [name] positive regulation of transcription elongation, DNA-dependent [def] "Any process that activates or increases the frequency, rate or extent of transcription elongation, the extension of an RNA molecule after transcription initiation and promoter clearance by the addition of ribonucleotides catalyzed by a DNA-dependent RNA polymerase." [GOC

4746 Pathogen[ Q2Q067] interacts with 7 human partners:{Q9HB65;O00267;P05114;P55199;Q03468;P63272;Q9Y5B9}

4747 Pathogen[ P0C214] interacts with 7 human partners:{O00267;P55199;P63272;Q9Y5B9;Q9HB65;P05114;Q03468}

4748 Pathogen[ P03346] interacts with 7 human partners:{Q9HB65;P05114;P63272;Q03468;Q9Y5B9;O00267;P55199}

4749 Pathogen[ Q85601] interacts with 7 human partners:{Q9Y5B9;Q03468;O00267;P55199;P63272;Q9HB65;P05114}

4750 Pathogen[ P14079] interacts with 7 human partners:{Q9Y5B9;P55199;P05114;P63272;Q03468;Q9HB65;O00267}

4751 Pathogen[ P03383] interacts with 7 human partners:{P55199;P63272;O00267;Q9HB65;Q03468;P05114;Q9Y5B9}

4752 Pathogen[ P03410] interacts with 7 human partners:{O00267;Q9Y5B9;P63272;Q03468;P55199;P05114;Q9HB65}

4753 Pathogen[ P14075] interacts with 7 human partners:{Q03468;Q9Y5B9;P55199;Q9HB65;O00267;P63272;P05114}

4754 Pathogen[ P0C206] interacts with 7 human partners:{Q9HB65;P05114;Q03468;Q9Y5B9;O00267;P55199;P63272}

4755 Pathogen[ P03363] interacts with 7 human partners:{P55199;Q9HB65;O00267;Q9Y5B9;P05114;Q03468;P63272}

4756 [Cluster 433]GO:0007506+P biological\_process [name] gonadal mesoderm development [def] "The process whose specific outcome is the progression of the gonadal mesoderm over time, from its formation to the mature structure. The gonadal mesoderm is the middle layer of the three primary germ layers of the embryo which will go on to form the gonads of the organism." [GOC

4757 Pathogen[ Q2Q067] interacts with 1 human partners:{Q01534}

4758 Pathogen[ P0C214] interacts with 6 human partners:{P0CW01;P0CV99;Q01534;P0CW00;P0CV98;A6NKD2}

4759 Pathogen[ P03346] interacts with 1 human partners:{Q01534}

4760 Pathogen[ Q85601] interacts with 6 human partners:{P0CW01;Q01534;P0CV98;P0CW00;A6NKD2;P0CV99}

4761 Pathogen[ P14079] interacts with 1 human partners:{Q01534}

4762 Pathogen[ P03383] interacts with 1 human partners:{Q01534}

4763 Pathogen[ P03410] interacts with 1 human partners:{Q01534}

4764 Pathogen[ P14075] interacts with 1 human partners:{Q01534}

4765 Pathogen[ P0C206] interacts with 6 human partners:{P0CV98;Q01534;A6NKD2;P0CW01;P0CW00;P0CV99}

4766 Pathogen[ P03363] interacts with 1 human partners:{Q01534}

4767 [Cluster 434]GO:0034773+P biological\_process [name] histone H4-K20 trimethylation [def] "The modification of histone H4 by addition of three methyl groups to lysine at position 20 of the histone." [GOC

4768 Pathogen[ Q2Q067] interacts with 1 human partners:{Q86Y97}

4769 Pathogen[ P0C214] interacts with 1 human partners:{Q86Y97}

4770 Pathogen[ P03346] interacts with 1 human partners:{Q86Y97}

4771 Pathogen[ Q85601] interacts with 1 human partners:{Q86Y97}

4772 Pathogen[ P14079] interacts with 1 human partners:{Q86Y97}

4773 Pathogen[ P03383] interacts with 1 human partners:{Q86Y97}

4774 Pathogen[ P03410] interacts with 1 human partners:{Q86Y97}

4775 Pathogen[ P14075] interacts with 1 human partners:{Q86Y97}

4776 Pathogen[ P0C206] interacts with 1 human partners:{Q86Y97}

4777 Pathogen[ P03363] interacts with 1 human partners:{Q86Y97}

4778 [Cluster 435]GO:0060565+P biological\_process [name] inhibition of mitotic anaphase-promoting complex activity [def] "Any process that prevents the activation of anaphase-promoting complex activity regulating the mitotic cell cycle." [GOC

4779 Pathogen[ Q2Q067] interacts with 1 human partners:{Q9UKT4}

4780 Pathogen[ P0C214] interacts with 1 human partners:{Q9UKT4}

4781 Pathogen[ P03346] interacts with 1 human partners:{Q9UKT4}

4782 Pathogen[ Q85601] interacts with 1 human partners:{Q9UKT4}  
4783 Pathogen[ P14079] interacts with 1 human partners:{Q9UKT4}  
4784 Pathogen[ P03383] interacts with 1 human partners:{Q9UKT4}  
4785 Pathogen[ P03410] interacts with 1 human partners:{Q9UKT4}  
4786 Pathogen[ P14075] interacts with 1 human partners:{Q9UKT4}  
4787 Pathogen[ P0C206] interacts with 1 human partners:{Q9UKT4}  
4788 Pathogen[ P03363] interacts with 1 human partners:{Q9UKT4}  
4789 [Cluster 436]GO:0006283+P biological\_process [name] transcription-coupled  
nucleotide-excision repair [def] "The nucleotide-excision repair process that carries  
out preferential repair of DNA lesions on the actively transcribed strand of the DNA  
duplex. In addition, the transcription-coupled nucleotide-excision repair pathway is  
required for the recognition and repair of a small subset of lesions that are not  
recognized by the global genome nucleotide excision repair pathway." [PMID  
4790 Pathogen[ Q2Q067] interacts with 35 human  
partners:{Q2YD98;Q15054;P52434;Q93009;Q92889;P27694;Q13889;P19388;P52435;P35244;P327  
80;P05114;P30876;P19387;P61218;Q92759;P49005;P12004;P62487;P51948;P15927;P56282;Q9HC  
U8;P50613;Q03468;P62875;P24928;Q13216;P23193;P35251;P53803;Q9HCS7;Q13888;P28715;P519  
46}  
4791 Pathogen[ P0C214] interacts with 32 human  
partners:{P51946;Q9HCS7;P30876;Q92889;P53803;P50613;P52435;P61218;P35251;P49005;Q9HC  
U8;Q13216;P28715;P62487;P51948;P15927;P35244;Q93009;P62875;P32780;P24928;Q15054;Q138  
88;P52434;P27694;P19387;P23193;P19388;P05114;P56282;Q03468;Q92759}  
4792 Pathogen[ P03346] interacts with 39 human  
partners:{P12004;Q93009;P28715;P52434;Q9HCU8;P27694;P07992;P35244;P35250;Q13888;P562  
82;P05114;P53803;P61218;P49005;Q9HCS7;Q13889;P62487;P19388;Q03468;P52435;P51946;P369  
54;P15927;P35249;Q13216;Q2YD98;Q92759;Q92889;P30876;P35251;P24928;P23193;P40937;P519  
48;P32780;P62875;Q15054;P19387}  
4793 Pathogen[ Q85601] interacts with 35 human  
partners:{P51946;P36954;Q9HCS7;Q93009;P56282;Q13888;Q13216;P35244;P53803;P61218;P490  
05;P51948;Q15054;P27694;Q92889;P28715;P62487;P19388;Q03468;P15927;Q92759;P32780;P524  
35;P35251;P50613;P23193;Q9HCU8;P19387;P12004;P24928;P30876;P52434;P05114;P19447;P628  
75}  
4794 Pathogen[ P14079] interacts with 40 human  
partners:{P62875;P05114;P28715;P19387;P51946;P62487;P40937;P52434;P49005;P05114;P308  
76;P61218;Q9HCU8;Q13216;Q13889;P53803;Q9HCS7;P50613;Q13888;Q15054;P35250;P19388;P562  
82;P52435;P35251;Q92759;Q92889;P32780;P15927;P23193;P27694;Q03468;P12004;P24928;Q2YD  
98;P35244;P36954;P07992;P19447;P51948}  
4795 Pathogen[ P03383] interacts with 30 human  
partners:{P53803;Q9HCU8;Q13216;P51948;Q9HCS7;Q13888;P23193;P27694;P52434;P61218;P490  
05;P56282;P62487;P15927;P19387;P50613;P51946;P24928;Q03468;P35244;Q92759;Q15054;P051  
14;P62875;P52435;P19388;P30876;Q2YD98;P32780;P35251}  
4796 Pathogen[ P03410] interacts with 40 human  
partners:{P35244;P19387;Q13889;P36954;P07992;P24928;P51946;P30876;Q92889;P56282;P231  
93;Q03468;P28715;P05114;P50613;Q9HCS7;P35251;P52435;P53803;Q2YD98;P19447;P62875;Q150  
54;P61218;P13216;P51948;Q13888;P52434;P62487;P49005;P27694;P15927;P35250;P40937;P193  
88;P12004;P32780;P05114;Q92759;Q9HCU8}  
4797 Pathogen[ P14075] interacts with 31 human  
partners:{Q92759;P30876;P50613;P19388;P61218;Q13216;P49005;P19387;P15927;P62487;Q034  
68;P35244;P23193;Q13889;Q2YD98;P24928;P35251;Q15054;P27694;P51946;P32780;Q9HCS7;Q9HC  
U8;P56282;P62875;P52434;P51948;P52435;P53803;P05114;Q13888}  
4798 Pathogen[ P0C206] interacts with 39 human  
partners:{Q2YD98;P62875;P28715;P23193;P35251;P36954;P05114;Q9HCU8;P19388;P61218;Q034  
68;Q93009;P49005;Q13216;P07992;P19447;P53803;P05114;Q15054;P19387;Q13888;P50613;Q928  
89;Q92759;P52435;P62487;P32780;Q13889;P56282;P27694;P15927;P24928;P35244;Q9HCS7;P524  
34;P51946;P51948;P12004;P30876}  
4799 Pathogen[ P03363] interacts with 27 human  
partners:{P27694;P19388;P30876;Q9HCS7;Q13888;P32780;Q92759;P19387;P61218;P51946;Q2YD  
98;Q92889;P35251;P24928;P49005;P35244;P15927;Q9HCU8;P05114;P62487;P23193;Q03468;Q150  
54;Q13216;P53803;P52435;P52434}  
4800 [Cluster 437]GO:0043653+P biological\_process [name] mitochondrial fragmentation  
involved in apoptosis [def] "The change in the morphology of the mitochondria in an  
apoptotic cell from a highly branched network to a fragmented vesicular form." [GOC  
4801 Pathogen[ Q2Q067] interacts with 3 human partners:{Q9GZY8;Q12983;Q9NT62}  
4802 Pathogen[ P0C214] interacts with 3 human partners:{Q12983;Q9NT62;Q9GZY8}  
4803 Pathogen[ P03346] interacts with 3 human partners:{Q9NT62;Q12983;Q9GZY8}  
4804 Pathogen[ Q85601] interacts with 3 human partners:{Q9NT62;Q12983;Q9GZY8}  
4805 Pathogen[ P14079] interacts with 3 human partners:{Q9NT62;Q12983;Q9GZY8}  
4806 Pathogen[ P03383] interacts with 3 human partners:{Q9NT62;Q12983;Q9GZY8}  
4807 Pathogen[ P03410] interacts with 3 human partners:{Q12983;Q9GZY8;Q9NT62}  
4808 Pathogen[ P14075] interacts with 3 human partners:{Q12983;Q9NT62;Q9GZY8}  
4809 Pathogen[ P0C206] interacts with 3 human partners:{Q12983;Q9GZY8;Q9NT62}  
4810 Pathogen[ P03363] interacts with 2 human partners:{Q9NT62;Q9GZY8}  
4811 [Cluster 438]GO:0060044+P biological\_process [name] negative regulation of cardiac  
muscle cell proliferation [def] "Any process that stops, prevents, or reduces the  
frequency, rate or extent of cardiac muscle cell proliferation." [GOC  
4812 Pathogen[ Q2Q067] interacts with 1 human partners:{Q9H4B6}

4813 Pathogen[ P0C214] interacts with 1 human partners:{Q9H4B6}  
4814 Pathogen[ P03346] interacts with 2 human partners:{Q99593;Q9H4B6}  
4815 Pathogen[ Q85601] interacts with 1 human partners:{Q9H4B6}  
4816 Pathogen[ P14079] interacts with 1 human partners:{Q9H4B6}  
4817 Pathogen[ P03383] interacts with 1 human partners:{Q9H4B6}  
4818 Pathogen[ P03410] interacts with 1 human partners:{Q9H4B6}  
4819 Pathogen[ P14075] interacts with 1 human partners:{Q9H4B6}  
4820 Pathogen[ P0C206] interacts with 1 human partners:{Q9H4B6}  
4821 Pathogen[ P03363] interacts with 1 human partners:{Q9H4B6}  
4822 [Cluster 439]GO:0045600+P biological\_process [name] positive regulation of fat cell differentiation [def] "Any process that activates or increases the frequency, rate or extent of adipocyte differentiation." [GOC  
4823 Pathogen[ Q2Q067] interacts with 6 human partners:{P31749;Q05516;Q76L83;Q9NYF0;Q86X55;P49715}  
4824 Pathogen[ P0C214] interacts with 6 human partners:{Q76L83;Q86X55;P16220;Q9NYF0;Q05516;P31749}  
4825 Pathogen[ P03346] interacts with 10 human partners:{P16220;P49715;P31749;O60519;Q5VYS4;Q05516;Q9NYF0;Q86X55;Q76L83;Q9H7C9}  
4826 Pathogen[ Q85601] interacts with 7 human partners:{P31749;Q86X55;Q9NYF0;P16220;Q76L83;Q05516;P49715}  
4827 Pathogen[ P14079] interacts with 7 human partners:{Q0VDE8;Q76L83;Q05516;Q5VYS4;P49715;Q9H7C9;Q9NYF0}  
4828 Pathogen[ P03383] interacts with 6 human partners:{P16220;P31749;Q86X55;Q05516;Q76L83;Q9NYF0}  
4829 Pathogen[ P03410] interacts with 8 human partners:{Q5VYS4;Q86X55;P31749;Q76L83;P16220;Q9NYF0;Q9H7C9;Q0VDE8}  
4830 Pathogen[ P14075] interacts with 7 human partners:{Q76L83;P31749;Q86X55;Q0VDE8;Q05516;P16220;Q9NYF0}  
4831 Pathogen[ P0C206] interacts with 9 human partners:{Q76L83;P31749;P16220;Q05516;Q86X55;Q0VDE8;P49715;Q5VYS4;Q9NYF0}  
4832 Pathogen[ P03363] interacts with 9 human partners:{Q0VDE8;Q9H7C9;P16220;Q9NYF0;Q5VYS4;P31749;Q76L83;Q05516;Q86X55}  
4833 [Cluster 440]GO:0010625+P biological\_process [name] positive regulation of Schwann cell proliferation [def] "Any process that increases the frequency or rate of the multiplication or reproduction of Schwann cells, resulting in the expansion of their population. Schwann cells are a type of glial cell in the peripheral nervous system." [GOC  
4834 Pathogen[ Q2Q067] interacts with 1 human partners:{P14136}  
4835 Pathogen[ P0C214] interacts with 1 human partners:{P14136}  
4836 Pathogen[ P03346] interacts with 1 human partners:{P14136}  
4837 Pathogen[ Q85601] interacts with 1 human partners:{P14136}  
4838 Pathogen[ P14079] interacts with 1 human partners:{P14136}  
4839 Pathogen[ P03383] interacts with 1 human partners:{P14136}  
4840 Pathogen[ P03410] interacts with 1 human partners:{P14136}  
4841 Pathogen[ P14075] interacts with 1 human partners:{P14136}  
4842 Pathogen[ P0C206] interacts with 1 human partners:{P14136}  
4843 Pathogen[ P03363] interacts with 1 human partners:{P14136}  
4844 [Cluster 441]GO:0030031+P biological\_process [name] cell projection assembly [def] "Formation of a prolongation or process extending from a cell, e.g. a flagellum or axon." [GOC  
4845 Pathogen[ Q2Q067] interacts with 2 human partners:{Q9BZW7;P40121}  
4846 Pathogen[ P0C214] interacts with 2 human partners:{P40121;Q9BZW7}  
4847 Pathogen[ P03346] interacts with 2 human partners:{P40121;Q9BZW7}  
4848 Pathogen[ Q85601] interacts with 2 human partners:{P40121;Q9BZW7}  
4849 Pathogen[ P14079] interacts with 2 human partners:{P40121;Q9BZW7}  
4850 Pathogen[ P03383] interacts with 1 human partners:{Q9BZW7}  
4851 Pathogen[ P03410] interacts with 2 human partners:{Q9BZW7;P40121}  
4852 Pathogen[ P14075] interacts with 1 human partners:{Q9BZW7}  
4853 Pathogen[ P0C206] interacts with 2 human partners:{P40121;Q9BZW7}  
4854 Pathogen[ P03363] interacts with 2 human partners:{Q9BZW7;P40121}  
4855 [Cluster 442]GO:0046499+P biological\_process [name] S-adenosylmethioninamine metabolic process [def] "The chemical reactions and pathways involving S-adenosylmethioninamine, (5-deoxy-5-adenosyl)(3-aminopropyl) methylsulfonium salt." [GOC  
4856 Pathogen[ Q2Q067] interacts with 2 human partners:{Q9Y6K1;Q9UBC3}  
4857 Pathogen[ P0C214] interacts with 1 human partners:{Q9Y6K1}  
4858 Pathogen[ P03346] interacts with 2 human partners:{Q9Y6K1;Q9UBC3}  
4859 Pathogen[ Q85601] interacts with 2 human partners:{Q9Y6K1;Q9UBC3}  
4860 Pathogen[ P14079] interacts with 2 human partners:{Q9Y6K1;Q9UBC3}  
4861 Pathogen[ P03383] interacts with 1 human partners:{Q9Y6K1}  
4862 Pathogen[ P03410] interacts with 2 human partners:{Q9UBC3;Q9Y6K1}  
4863 Pathogen[ P14075] interacts with 1 human partners:{Q9Y6K1}  
4864 Pathogen[ P0C206] interacts with 2 human partners:{Q9Y6K1;Q9UBC3}  
4865 Pathogen[ P03363] interacts with 2 human partners:{Q9Y6K1;Q9UBC3}  
4866 [Cluster 443]GO:0045727+P biological\_process [name] positive regulation of translation [def] "Any process that activates or increases the frequency, rate or extent

of the chemical reactions and pathways resulting in the formation of proteins by the translation of mRNA." [GOC

4867 Pathogen[ Q2Q067] interacts with 15 human  
partners:{P62701;Q9BZQ8;Q9H074;P20749;P38919;Q9BZI7;Q9BRP8;Q9BY77;Q04695;Q9H9Z2;Q9NY43;Q8NE71;P11940;Q71UM5;Q9H1J1}

4868 Pathogen[ P0C214] interacts with 17 human  
partners:{Q9BY77;Q9BZI7;Q9BRP8;Q9UPU9;P62701;Q71UM5;P11940;Q8NE71;Q04695;Q9BZQ8;P38919;Q9H074;P20749;Q9H9Z2;Q14011;Q9NY43;Q9H1J1}

4869 Pathogen[ P03346] interacts with 17 human  
partners:{Q06945;Q9BZI7;Q14011;P38919;Q71UM5;P11940;Q04695;Q9H074;Q9BZQ8;Q9BY77;P20749;P62701;Q8NE71;Q9BRP8;Q9H9Z2;Q9NY43;Q9H1J1}

4870 Pathogen[ Q85601] interacts with 16 human  
partners:{Q9BZI7;Q71UM5;P62701;Q9BRP8;Q9BZQ8;P38919;Q9BY77;P11940;Q04695;Q9H074;Q8NE71;Q9UPU9;Q9H9Z2;Q9NY43;P20749;Q9H1J1}

4871 Pathogen[ P14079] interacts with 18 human  
partners:{Q9H1J1;O43432;Q9UPU9;Q9H074;Q9NY43;Q9H9Z2;Q04695;Q9BY77;Q9BZI7;P11940;Q9Y6X1;Q9BRP8;Q8NE71;Q71UM5;P20749;Q14011;P62701;Q9BZQ8}

4872 Pathogen[ P03383] interacts with 15 human  
partners:{Q9H9Z2;Q8NE71;P20749;P38919;Q71UM5;P11940;Q9BZQ8;Q04695;Q9BY77;Q9H074;Q9NY43;P62701;Q9BRP8;Q9BZI7;Q9H1J1}

4873 Pathogen[ P03410] interacts with 19 human  
partners:{P20749;Q8NE71;P11940;O43432;Q9H1J1;P62701;Q9BZI7;Q9H074;Q9Y6X1;Q9UPU9;Q14011;P38919;Q04695;Q9BY77;Q9H9Z2;Q9BZQ8;Q9NY43;Q71UM5;Q9BRP8}

4874 Pathogen[ P14075] interacts with 15 human  
partners:{Q9BRP8;Q9H9Z2;Q9H074;P11940;Q04695;Q9NY43;Q9BZQ8;Q8NE71;P62701;P38919;P20749;Q9BY77;Q71UM5;Q9BZI7;Q9H1J1}

4875 Pathogen[ P0C206] interacts with 17 human  
partners:{Q9BZQ8;Q9H074;Q9BZI7;Q9NY43;Q9BY77;Q14011;Q9H9Z2;Q9UPU9;P62701;Q71UM5;Q8NE71;P20749;P38919;P11940;Q04695;Q9BRP8;Q9H1J1}

4876 Pathogen[ P03363] interacts with 18 human  
partners:{P38919;Q9BZQ8;P11940;Q9BRP8;P20749;Q9BY77;Q9UPU9;Q15717;Q9H9Z2;Q14011;Q71UM5;Q8NE71;Q9BZI7;Q9NY43;P62701;Q9H074;Q04695;Q9H1J1}

4877 [Cluster 444]GO:0010883+P biological\_process [name] regulation of lipid storage  
[def] "Any process that modulates the rate, frequency or extent of lipid storage. Lipid storage is the accumulation and maintenance in cells or tissues of lipids, compounds soluble in organic solvents but insoluble or sparingly soluble in aqueous solvents. Lipid reserves can be accumulated during early developmental stages for mobilization and utilization at later stages of development." [GOC

4878 Pathogen[ Q2Q067] interacts with 1 human partners:{Q969H0}

4879 Pathogen[ P0C214] interacts with 1 human partners:{Q969H0}

4880 Pathogen[ P03346] interacts with 1 human partners:{Q969H0}

4881 Pathogen[ Q85601] interacts with 1 human partners:{Q969H0}

4882 Pathogen[ P14079] interacts with 2 human partners:{Q969H0;Q9C0B1}

4883 Pathogen[ P03383] interacts with 1 human partners:{Q969H0}

4884 Pathogen[ P03410] interacts with 2 human partners:{Q969H0;Q9C0B1}

4885 Pathogen[ P14075] interacts with 1 human partners:{Q969H0}

4886 Pathogen[ P0C206] interacts with 1 human partners:{Q969H0}

4887 Pathogen[ P03363] interacts with 1 human partners:{Q969H0}

4888 [Cluster 445]GO:0010827+P biological\_process [name] regulation of glucose transport  
[def] "Any process that modulates the frequency, rate or extent of glucose transport. Glucose transport is the directed movement of the hexose monosaccharide glucose into, out of or within a cell, or between cells, by means of some agent such as a transporter or pore." [GOC

4889 Pathogen[ Q2Q067] interacts with 29 human  
partners:{Q96EE3;P52948;Q12769;Q96HA1;P49790;P49792;O75694;P78406;Q99567;Q8N1F7;Q7Z3B4;Q8NFH4;P12270;Q9BW27;Q8TEM1;Q9BVL2;Q9UKX7;Q9NRG9;Q8NFH3;P37198;Q92621;Q96RU7;O15504;P57740;Q8WUM0;P35658;Q8NFH5;Q5SRE5;Q14397}

4890 Pathogen[ P0C214] interacts with 29 human  
partners:{Q8NFH5;Q8TEM1;P78406;P57740;Q99567;Q8N1F7;O75694;Q96EE3;P49792;Q9UKX7;P49790;P37198;Q9BW27;Q9NRG9;P35658;Q8NFH3;Q14397;Q96RU7;O15504;P12270;Q8NFH4;Q9BVL2;Q5SRE5;Q7Z3B4;Q8WUM0;P52948;Q92621;Q12769;Q96HA1}

4891 Pathogen[ P03346] interacts with 29 human  
partners:{Q8TEM1;Q8NFH4;Q8WUM0;P12270;Q12769;Q96EE3;Q99567;Q9UKX7;O75694;Q9NRG9;P78406;P57740;Q9BVL2;Q8N1F7;Q8NFH5;P37198;Q8NFH3;P35658;Q5SRE5;Q92621;Q9BW27;Q96RU7;Q14397;P49790;Q96HA1;Q7Z3B4;O15504;P49792;P52948}

4892 Pathogen[ Q85601] interacts with 28 human  
partners:{Q8TEM1;Q5SRE5;Q8NFH4;Q8NFH3;Q96EE3;Q12769;P78406;P57740;Q9NRG9;Q8WUM0;Q8N1F7;P12270;O75694;O15504;Q9BW27;Q92621;P52948;Q9UKX7;Q8NFH5;Q96RU7;P35658;Q14397;Q99567;P49792;Q9BVL2;Q96HA1;Q7Z3B4;P49790}

4893 Pathogen[ P14079] interacts with 28 human  
partners:{Q8NFH5;Q9BW27;Q96HA1;P57740;Q8N1F7;P35658;Q92621;Q8TEM1;Q9UKX7;Q9BVL2;O15504;Q8WUM0;P12270;Q99567;Q8NFH3;Q96EE3;P37198;P49790;Q96RU7;Q8NFH4;P78406;Q7Z3B4;Q14397;Q12769;Q5SRE5;Q9NRG9;O75694;P52948}

4894 Pathogen[ P03383] interacts with 29 human  
partners:{Q9BVL2;Q96EE3;O15504;Q8WUM0;Q92621;P49792;Q8NFH4;P12270;P52948;P78406;P57740;Q8NFH5;Q8N1F7;Q8TEM1;Q12769;Q99567;Q14397;Q9BW27;Q5SRE5;Q96RU7;P35658;Q96HA1;Q9NR

4895 G9;P37198;Q9UKX7;Q7Z3B4;P49790;O75694;Q8NFH3}  
 Pathogen[ P03410] interacts with 28 human  
 partners:{Q99567;Q14397;Q7Z3B4;Q9BW27;Q9UKX7;Q8NFH4;Q5SRE5;P52948;O15504;O75694;P784  
 06;Q96HA1;Q8N1F7;P49790;P12270;P35658;Q8NFH5;Q8TEM1;Q96EE3;Q96RU7;Q8WUM0;P57740;Q127  
 69;Q9NRG9;Q8NFH3;Q9BVL2;Q92621;P49792}

4896 Pathogen[ P14075] interacts with 29 human  
 partners:{P78406;P57740;P49792;Q8N1F7;Q9UKX7;P35658;P12270;Q92621;Q96HA1;Q9BW27;Q8TE  
 M1;Q96EE3;P37198;Q5SRE5;Q14397;Q96RU7;Q8NFH3;O15504;Q99567;Q12769;Q9BVL2;P49790;Q8WU  
 M0;O75694;Q9NRG9;Q7Z3B4;Q8NFH4;Q8NFH5;P52948}

4897 Pathogen[ P0C206] interacts with 27 human  
 partners:{Q96EE3;Q92621;P49790;Q5SRE5;Q8NFH5;Q9NRG9;Q7Z3B4;Q96HA1;P57740;Q96RU7;Q8WU  
 M0;P49792;Q8TEM1;Q9UKX7;O75694;Q99567;Q8NFH4;P78406;Q14397;O15504;Q12769;Q8NFH3;Q8N1  
 F7;P35658;Q9BW27;Q9BVL2;P12270}

4898 Pathogen[ P03363] interacts with 26 human  
 partners:{Q7Z3B4;Q5SRE5;P12270;Q8NFH4;Q14397;Q8NFH3;Q12769;Q9UKX7;Q9NRG9;Q8WUM0;Q9BV  
 L2;Q99567;Q96HA1;P49792;P35658;O75694;P49790;P57740;P78406;P52948;O15504;P37198;Q8N1  
 F7;Q92621;Q8NFH5;Q9BW27}

4899 [Cluster 446]GO:0055007+P biological\_process [name] cardiac muscle cell  
 differentiation [def] "The process in which a cardiac muscle precursor cell acquires  
 specialized features of a cardiac muscle cell. Cardiac muscle cells are striated muscle  
 cells that are responsible for heart contraction." [GOC

4900 Pathogen[ Q2Q067] interacts with 4 human partners:{P15172;P27797;Q9Y3M2;Q9HB71}  
 4901 Pathogen[ P0C214] interacts with 4 human partners:{P15172;Q9Y3M2;P27797;Q9HB71}  
 4902 Pathogen[ P03346] interacts with 5 human  
 partners:{Q9Y3M2;P15172;Q9HB71;P27797;Q99593}

4903 Pathogen[ Q85601] interacts with 4 human partners:{P15172;Q9Y3M2;P27797;Q9HB71}  
 4904 Pathogen[ P14079] interacts with 2 human partners:{Q9HB71;Q9Y3M2}  
 4905 Pathogen[ P03383] interacts with 4 human partners:{P15172;Q9HB71;Q9Y3M2;P27797}  
 4906 Pathogen[ P03410] interacts with 3 human partners:{Q9HB71;Q9Y3M2;P27797}  
 4907 Pathogen[ P14075] interacts with 4 human partners:{P15172;P27797;Q9Y3M2;Q9HB71}  
 4908 Pathogen[ P0C206] interacts with 3 human partners:{Q9HB71;P27797;P15172}  
 4909 Pathogen[ P03363] interacts with 4 human partners:{Q9HB71;Q9Y3M2;P27797;P15172}

4910 [Cluster 447]GO:0050771+P biological\_process [name] negative regulation of  
 axonogenesis [def] "Any process that stops, prevents, or reduces the frequency, rate  
 or extent of axonogenesis." [GOC

4911 Pathogen[ Q2Q067] interacts with 1 human partners:{P61586}  
 4912 Pathogen[ P0C214] interacts with 3 human partners:{P31150;P61586;P52565}  
 4913 Pathogen[ P03346] interacts with 3 human partners:{P52565;P31150;P61586}  
 4914 Pathogen[ Q85601] interacts with 3 human partners:{P31150;P52565;P61586}  
 4915 Pathogen[ P14079] interacts with 4 human partners:{P52565;P31150;P02686;P61586}  
 4916 Pathogen[ P03383] interacts with 1 human partners:{P61586}  
 4917 Pathogen[ P03410] interacts with 5 human  
 partners:{P02686;P61586;Q9BZR6;P31150;P52565}

4918 Pathogen[ P14075] interacts with 1 human partners:{P61586}  
 4919 Pathogen[ P0C206] interacts with 3 human partners:{P52565;P61586;P31150}  
 4920 Pathogen[ P03363] interacts with 2 human partners:{P52565;P31150}

4921 [Cluster 448]GO:0006098+P biological\_process [name] pentose-phosphate shunt [def]  
 "The process in which glucose is oxidized, coupled to NADPH synthesis. Glucose 6-P is  
 oxidized with the formation of carbon dioxide (CO<sub>2</sub>), ribulose 5-phosphate and reduced  
 NADP\_ ribulose 5-P then enters a series of reactions interconverting sugar phosphates.  
 The pentose phosphate pathway is a major source of reducing equivalents for biosynthesis  
 reactions and is also important for the conversion of hexoses to pentoses." [ISBN

4922 Pathogen[ Q2Q067] interacts with 4 human partners:{O95336;P37837;P60174;P49247}  
 4923 Pathogen[ P0C214] interacts with 8 human  
 partners:{P52209;P11413;P29401;P37837;Q96AT9;O95336;P60174;P49247}

4924 Pathogen[ P03346] interacts with 4 human partners:{P49247;O95336;P60174;P37837}  
 4925 Pathogen[ Q85601] interacts with 4 human partners:{P60174;O95336;P37837;P49247}  
 4926 Pathogen[ P14079] interacts with 5 human  
 partners:{P52209;P49247;P29401;O95336;P37837}

4927 Pathogen[ P03383] interacts with 2 human partners:{P37837;P49247}  
 4928 Pathogen[ P03410] interacts with 4 human partners:{P37837;P52209;O95336;P49247}  
 4929 Pathogen[ P14075] interacts with 3 human partners:{O95336;P49247;P37837}

4930 Pathogen[ P0C206] interacts with 5 human  
 partners:{P60174;O95336;P49247;P37837;P29401}

4931 Pathogen[ P03363] interacts with 2 human partners:{P37837;O95336}

4932 [Cluster 449]GO:0006398+P biological\_process [name] histone mRNA 3'-end processing  
 [def] "Any process involved in forming the mature 3' end of a histone mRNA molecule."  
 [GOC

4933 Pathogen[ Q2Q067] interacts with 6 human  
 partners:{P83369;Q8WTR7;Q9Y534;Q9P2I0;Q9UKF6;Q14493}

4934 Pathogen[ P0C214] interacts with 6 human  
 partners:{P83369;Q9UKF6;Q9Y534;Q14493;Q9P2I0;Q8WTR7}

4935 Pathogen[ P03346] interacts with 6 human  
 partners:{Q9UKF6;Q8WTR7;Q9Y534;Q14493;P83369;Q9P2I0}

4936 Pathogen[ Q85601] interacts with 6 human  
 partners:{Q9Y534;Q9P2I0;P83369;Q8WTR7;Q9UKF6;Q14493}



4937 Pathogen[ P14079] interacts with 6 human partners: {Q8WTR7;Q9UKF6;P83369;Q9Y534;Q14493;Q9P2I0}

4938 Pathogen[ P03383] interacts with 6 human partners: {Q9UKF6;Q14493;Q8WTR7;Q9P2I0;Q9Y534;P83369}

4939 Pathogen[ P03410] interacts with 6 human partners: {Q9Y534;Q8WTR7;Q14493;Q9P2I0;P83369;Q9UKF6}

4940 Pathogen[ P14075] interacts with 6 human partners: {Q9P2I0;Q14493;Q8WTR7;P83369;Q9Y534;Q9UKF6}

4941 Pathogen[ POC206] interacts with 6 human partners: {Q9UKF6;Q8WTR7;Q9P2I0;P83369;Q14493;Q9Y534}

4942 Pathogen[ P03363] interacts with 6 human partners: {Q9P2I0;P83369;Q8WTR7;Q9UKF6;Q9Y534;Q14493}

4943 [Cluster 450]GO:0010586+P biological\_process [name] miRNA metabolic process [def] "The chemical reactions and pathways involving miRNA, microRNA, a class of single-stranded RNA molecules of about 21-23 nucleotides in length, which regulates gene expression." [PMID

4944 Pathogen[ Q2Q067] interacts with 4 human partners: {Q9NRR4;Q5TAX3;Q9H9Z2;Q7Z5W3}

4945 Pathogen[ POC214] interacts with 4 human partners: {Q7Z5W3;Q9NRR4;Q9H9Z2;Q5TAX3}

4946 Pathogen[ P03346] interacts with 4 human partners: {Q5TAX3;Q9NRR4;Q9H9Z2;Q7Z5W3}

4947 Pathogen[ Q85601] interacts with 4 human partners: {Q7Z5W3;Q9NRR4;Q5TAX3;Q9H9Z2}

4948 Pathogen[ P14079] interacts with 4 human partners: {Q9H9Z2;Q5TAX3;Q9NRR4;Q7Z5W3}

4949 Pathogen[ P03383] interacts with 4 human partners: {Q9NRR4;Q9H9Z2;Q5TAX3;Q7Z5W3}

4950 Pathogen[ P03410] interacts with 4 human partners: {Q5TAX3;Q9NRR4;Q7Z5W3;Q9H9Z2}

4951 Pathogen[ P14075] interacts with 4 human partners: {Q9H9Z2;Q5TAX3;Q7Z5W3;Q9NRR4}

4952 Pathogen[ POC206] interacts with 4 human partners: {Q7Z5W3;Q9H9Z2;Q9NRR4;Q5TAX3}

4953 Pathogen[ P03363] interacts with 4 human partners: {Q9H9Z2;Q9NRR4;Q5TAX3;Q7Z5W3}

4954 [Cluster 451]GO:0002526+P biological\_process [name] acute inflammatory response [def] "Inflammation which comprises a rapid, short-lived, relatively uniform response to acute injury or antigenic challenge and is characterized by accumulations of fluid, plasma proteins, and granulocytic leukocytes. An acute inflammatory response occurs within a matter of minutes or hours, and either resolves within a few days or becomes a chronic inflammatory response." [GO\_REF

4955 Pathogen[ Q2Q067] interacts with 3 human partners: {P09917;O60356;O15527}

4956 Pathogen[ POC214] interacts with 3 human partners: {P09917;O60356;O15527}

4957 Pathogen[ P03346] interacts with 3 human partners: {P09917;O60356;O15527}

4958 Pathogen[ Q85601] interacts with 3 human partners: {O15527;P09917;O60356}

4959 Pathogen[ P14079] interacts with 4 human partners: {P60022;O15527;P09917;O60356}

4960 Pathogen[ P03383] interacts with 2 human partners: {O15527;O60356}

4961 Pathogen[ P03410] interacts with 4 human partners: {P60022;O15527;O60356;P09917}

4962 Pathogen[ P14075] interacts with 2 human partners: {O15527;O60356}

4963 Pathogen[ POC206] interacts with 3 human partners: {P09917;O15527;O60356}

4964 Pathogen[ P03363] interacts with 2 human partners: {O15527;O60356}

4965 [Cluster 452]GO:2000233+P biological\_process [name] negative regulation of rRNA processing [def] "Any process that stops, prevents, or reduces the frequency, rate or extent of rRNA processing." [GOC

4966 Pathogen[ Q2Q067] interacts with 1 human partners: {Q6PI26}

4967 Pathogen[ POC214] interacts with 1 human partners: {Q6PI26}

4968 Pathogen[ P03346] interacts with 1 human partners: {Q6PI26}

4969 Pathogen[ Q85601] interacts with 1 human partners: {Q6PI26}

4970 Pathogen[ P14079] interacts with 1 human partners: {Q6PI26}

4971 Pathogen[ P03383] interacts with 1 human partners: {Q6PI26}

4972 Pathogen[ P03410] interacts with 1 human partners: {Q6PI26}

4973 Pathogen[ P14075] interacts with 1 human partners: {Q6PI26}

4974 Pathogen[ POC206] interacts with 1 human partners: {Q6PI26}

4975 Pathogen[ P03363] interacts with 1 human partners: {Q6PI26}

4976 [Cluster 453]GO:0034616+P biological\_process [name] response to laminar fluid shear stress [def] "Any process that results in a change in state or activity of a cell or an organism (in terms of movement, secretion, enzyme production, gene expression, etc.) as a result of a laminar fluid shear stress stimulus. Laminar fluid flow is the force acting on an object in a system where the fluid is moving across a solid surface in parallel layers. As an example, laminar shear stress can be seen where blood flows against the luminal side of blood vessel walls." [GOC

4977 Pathogen[ Q2Q067] interacts with 3 human partners: {P14921;O15105;O43541}

4978 Pathogen[ POC214] interacts with 3 human partners: {P14921;O15105;O43541}

4979 Pathogen[ P03346] interacts with 4 human partners: {Q9Y5W3;O15105;P14921;O43541}

4980 Pathogen[ Q85601] interacts with 3 human partners: {P14921;O43541;O15105}

4981 Pathogen[ P14079] interacts with 3 human partners: {O43541;Q9Y5W3;O15105}

4982 Pathogen[ P03383] interacts with 3 human partners: {P14921;O15105;O43541}

4983 Pathogen[ P03410] interacts with 3 human partners: {O43541;O15105;P14921}

4984 Pathogen[ P14075] interacts with 3 human partners: {O43541;O15105;P14921}

4985 Pathogen[ POC206] interacts with 3 human partners: {O43541;P14921;O15105}

4986 Pathogen[ P03363] interacts with 3 human partners: {P14921;O15105;O43541}

4987 [Cluster 454]GO:0038061+P

4988 Pathogen[ Q2Q067] interacts with 2 human partners: {Q13490;P60510}

4989 Pathogen[ POC214] interacts with 3 human partners: {Q13490;Q14164;P60510}

4990 Pathogen[ P03346] interacts with 4 human partners: {Q13489;Q13490;Q14164;P60510}

4991 Pathogen[ Q85601] interacts with 3 human partners:{Q13490;Q14164;P60510}

4992 Pathogen[ P14079] interacts with 3 human partners:{Q14164;P60510;Q13490}

4993 Pathogen[ P03383] interacts with 2 human partners:{Q13490;P60510}

4994 Pathogen[ P03410] interacts with 2 human partners:{P60510;Q13490}

4995 Pathogen[ P14075] interacts with 2 human partners:{P60510;Q13490}

4996 Pathogen[ P0C206] interacts with 4 human partners:{Q14164;Q13489;P60510;Q13490}

4997 Pathogen[ P03363] interacts with 3 human partners:{Q13490;Q13489;P60510}

4998 [Cluster 455]GO:0044027+P biological\_process [name] hypermethylation of CpG island  
[def] "An increase in the epigenetic methylation of cytosine and adenosine residues in a CpG island in DNA. CpG islands are genomic regions that contain a high frequency of the CG dinucleotide and are often associated with the transcription start site of genes."  
[GOC

4999 Pathogen[ Q2Q067] interacts with 2 human partners:{Q9Y6K1;P17947}

5000 Pathogen[ P0C214] interacts with 2 human partners:{P17947;Q9Y6K1}

5001 Pathogen[ P03346] interacts with 2 human partners:{Q9Y6K1;P17947}

5002 Pathogen[ Q85601] interacts with 2 human partners:{Q9Y6K1;P17947}

5003 Pathogen[ P14079] interacts with 1 human partners:{Q9Y6K1}

5004 Pathogen[ P03383] interacts with 2 human partners:{Q9Y6K1;P17947}

5005 Pathogen[ P03410] interacts with 2 human partners:{P17947;Q9Y6K1}

5006 Pathogen[ P14075] interacts with 2 human partners:{Q9Y6K1;P17947}

5007 Pathogen[ P0C206] interacts with 2 human partners:{Q9Y6K1;P17947}

5008 Pathogen[ P03363] interacts with 2 human partners:{P17947;Q9Y6K1}

5009 [Cluster 456]GO:0072014+P biological\_process [name] proximal tubule development  
[def] "The process whose specific outcome is the progression of the proximal tubule over time, from its formation to the mature structure. In mammals, the proximal tubule is a nephron tubule that connects Bowman's capsule to the descending thin limb of the loop of Henle. It has a brush border epithelial morphology." [GOC

5010 Pathogen[ Q2Q067] interacts with 1 human partners:{Q9NQ87}

5011 Pathogen[ P0C214] interacts with 1 human partners:{Q9NQ87}

5012 Pathogen[ P03346] interacts with 1 human partners:{Q9NQ87}

5013 Pathogen[ Q85601] interacts with 1 human partners:{Q9NQ87}

5014 Pathogen[ P14079] interacts with 1 human partners:{Q9NQ87}

5015 Pathogen[ P03383] interacts with 1 human partners:{Q9NQ87}

5016 Pathogen[ P03410] interacts with 1 human partners:{Q9NQ87}

5017 Pathogen[ P14075] interacts with 1 human partners:{Q9NQ87}

5018 Pathogen[ P0C206] interacts with 1 human partners:{Q9NQ87}

5019 Pathogen[ P03363] interacts with 1 human partners:{Q9NQ87}

5020 [Cluster 457]GO:2000774+P biological\_process [name] positive regulation of cellular senescence [def] "Any process that activates or increases the frequency, rate or extent of cellular senescence." [GOC

5021 Pathogen[ Q2Q067] interacts with 2 human partners:{P42771;P17096}

5022 Pathogen[ P0C214] interacts with 2 human partners:{P17096;P42771}

5023 Pathogen[ P03346] interacts with 2 human partners:{P42771;P17096}

5024 Pathogen[ Q85601] interacts with 2 human partners:{P17096;P42771}

5025 Pathogen[ P14079] interacts with 2 human partners:{P17096;P42771}

5026 Pathogen[ P03383] interacts with 2 human partners:{P17096;P42771}

5027 Pathogen[ P03410] interacts with 2 human partners:{P42771;P17096}

5028 Pathogen[ P14075] interacts with 2 human partners:{P17096;P42771}

5029 Pathogen[ P0C206] interacts with 2 human partners:{P42771;P17096}

5030 Pathogen[ P03363] interacts with 2 human partners:{P17096;P42771}

5031 [Cluster 458]GO:0008585+P biological\_process [name] female gonad development [def] "The process whose specific outcome is the progression of the female gonad over time, from its formation to the mature structure." [GOC

5032 Pathogen[ Q2Q067] interacts with 2 human partners:{Q14865;O15360}

5033 Pathogen[ P0C214] interacts with 2 human partners:{Q14865;O15360}

5034 Pathogen[ P03346] interacts with 9 human partners:{O15360;Q9NQ69;A6NF36;P51587;Q14865;Q9HB21;Q96MM3;Q68G74;Q13285}

5035 Pathogen[ Q85601] interacts with 4 human partners:{Q9HB21;Q14865;O15360;P51587}

5036 Pathogen[ P14079] interacts with 5 human partners:{A6NF36;Q14865;P51587;Q9HB21;O15360}

5037 Pathogen[ P03383] interacts with 2 human partners:{A6NF36;O15360}

5038 Pathogen[ P03410] interacts with 5 human partners:{A6NF36;Q9HB21;P51587;O15360;Q14865}

5039 Pathogen[ P14075] interacts with 2 human partners:{O15360;A6NF36}

5040 Pathogen[ P0C206] interacts with 7 human partners:{O15360;Q96MM3;P51587;Q68G74;Q9HB21;Q14865;A6NF36}

5041 Pathogen[ P03363] interacts with 5 human partners:{Q14865;O15360;P19883;Q96MM3;A6NF36}

5042 [Cluster 459]GO:0007043+P biological\_process [name] cell-cell junction assembly  
[def] "The aggregation, arrangement and bonding together of a set of components to form a junction between cells." [GOC

5043 Pathogen[ Q2Q067] interacts with 3 human partners:{Q9BYG5;Q07157;Q8WUI4}

5044 Pathogen[ P0C214] interacts with 3 human partners:{Q9BYG5;Q8WUI4;Q07157}

5045 Pathogen[ P03346] interacts with 4 human partners:{Q9BYG5;Q9Y4G6;Q07157;Q8WUI4}

5046 Pathogen[ Q85601] interacts with 3 human partners:{Q9BYG5;Q07157;Q8WUI4}

5047 Pathogen[ P14079] interacts with 4 human partners:{Q9BYG5;Q07157;Q8WUI4;Q9Y4G6}

5048 Pathogen[ P03383] interacts with 3 human partners:{Q07157;Q9BYG5;Q8WUI4}

5049 Pathogen[ P03410] interacts with 4 human partners:{Q8WUI4;Q07157;Q9Y4G6;Q9BYG5}

5050 Pathogen[ P14075] interacts with 3 human partners:{Q07157;Q9BYG5;Q8WUI4}

5051 Pathogen[ P0C206] interacts with 3 human partners:{Q9BYG5;Q8WUI4;Q07157}

5052 Pathogen[ P03363] interacts with 4 human partners:{Q07157;Q9Y4G6;Q9BYG5;Q8WUI4}

5053 [Cluster 460]GO:0033601+P biological\_process [name] positive regulation of mammary gland epithelial cell proliferation [def] "Any process that activates or increases the rate or extent of mammary gland epithelial cell proliferation." [GOC

5054 Pathogen[ Q2Q067] interacts with 2 human partners:{P24385;Q9H7S9}

5055 Pathogen[ P0C214] interacts with 2 human partners:{P24385;Q9H7S9}

5056 Pathogen[ P03346] interacts with 2 human partners:{P24385;Q9H7S9}

5057 Pathogen[ Q85601] interacts with 2 human partners:{P24385;Q9H7S9}

5058 Pathogen[ P14079] interacts with 1 human partners:{Q9H7S9}

5059 Pathogen[ P03383] interacts with 2 human partners:{P24385;Q9H7S9}

5060 Pathogen[ P03410] interacts with 2 human partners:{P24385;Q9H7S9}

5061 Pathogen[ P14075] interacts with 2 human partners:{P24385;Q9H7S9}

5062 Pathogen[ P0C206] interacts with 2 human partners:{Q9H7S9;P24385}

5063 Pathogen[ P03363] interacts with 2 human partners:{Q9H7S9;P24385}

5064 [Cluster 461]GO:0016079+P biological\_process [name] synaptic vesicle exocytosis [def] "Fusion of intracellular membrane-bounded vesicles with the pre-synaptic membrane of the neuronal cell resulting in release of neurotransmitter into the synaptic cleft." [GOC

5065 Pathogen[ Q2Q067] interacts with 1 human partners:{O95295}

5066 Pathogen[ P0C214] interacts with 1 human partners:{O95295}

5067 Pathogen[ P03346] interacts with 1 human partners:{O95295}

5068 Pathogen[ Q85601] interacts with 1 human partners:{O95295}

5069 Pathogen[ P14079] interacts with 4 human partners:{O14810;Q6PUV4;O95295;Q8WVH0}

5070 Pathogen[ P03383] interacts with 1 human partners:{O95295}

5071 Pathogen[ P03410] interacts with 4 human partners:{O14810;Q8WVH0;O95295;Q6PUV4}

5072 Pathogen[ P14075] interacts with 1 human partners:{O95295}

5073 Pathogen[ P0C206] interacts with 2 human partners:{Q6PUV4;O95295}

5074 Pathogen[ P03363] interacts with 1 human partners:{O95295}

5075 [Cluster 462]GO:0043312+P biological\_process [name] neutrophil degranulation [def] "The regulated exocytosis of secretory granules containing preformed mediators such as proteases, lipases, and inflammatory mediators by a neutrophil." [ISBN

5076 Pathogen[ Q2Q067] interacts with 2 human partners:{O00186;Q15833}

5077 Pathogen[ P0C214] interacts with 2 human partners:{Q15833;O00186}

5078 Pathogen[ P03346] interacts with 2 human partners:{Q15833;O00186}

5079 Pathogen[ Q85601] interacts with 2 human partners:{O00186;Q15833}

5080 Pathogen[ P14079] interacts with 2 human partners:{O00186;Q15833}

5081 Pathogen[ P03383] interacts with 1 human partners:{O00186}

5082 Pathogen[ P03410] interacts with 2 human partners:{Q15833;O00186}

5083 Pathogen[ P14075] interacts with 1 human partners:{O00186}

5084 Pathogen[ P0C206] interacts with 2 human partners:{Q15833;O00186}

5085 Pathogen[ P03363] interacts with 2 human partners:{O00186;Q15833}

5086 [Cluster 463]GO:0016998+P biological\_process [name] cell wall macromolecule catabolic process [def] "The chemical reactions and pathways resulting in the breakdown of macromolecules that form part of a cell wall." [GOC

5087 Pathogen[ Q2Q067] interacts with 1 human partners:{Q8NI08}

5088 Pathogen[ P0C214] interacts with 2 human partners:{Q8N573;Q8NI08}

5089 Pathogen[ P03346] interacts with 2 human partners:{Q8N573;Q8NI08}

5090 Pathogen[ Q85601] interacts with 1 human partners:{Q8NI08}

5091 Pathogen[ P14079] interacts with 5 human partners:{Q8N573;Q8IV50;Q96S90;Q8NI08;Q5XG99}

5092 Pathogen[ P03383] interacts with 1 human partners:{Q8NI08}

5093 Pathogen[ P03410] interacts with 3 human partners:{Q8NI08;Q8N573;Q8IV50}

5094 Pathogen[ P14075] interacts with 1 human partners:{Q8NI08}

5095 Pathogen[ P0C206] interacts with 2 human partners:{Q8NI08;Q8N573}

5096 Pathogen[ P03363] interacts with 1 human partners:{Q8NI08}

5097 [Cluster 464]GO:0006924+P biological\_process [name] activation-induced cell death of T cells [def] "A type of T cell apoptosis that occurs towards the end of the expansion phase following the initial activation of mature T cells by antigen and is triggered by T cell receptor stimulation and signals transmitted via various surface-expressed members of the TNF receptor family such as Fas ligand, Fas, and TNF and the p55 and p75 TNF receptors." [GOC

5098 Pathogen[ Q2Q067] interacts with 4 human partners:{P31749;O15304;Q53G26;Q96EY1}

5099 Pathogen[ P0C214] interacts with 4 human partners:{Q53G26;O15304;Q96EY1;P31749}

5100 Pathogen[ P03346] interacts with 4 human partners:{O15304;P31749;Q53G26;Q96EY1}

5101 Pathogen[ Q85601] interacts with 4 human partners:{P31749;Q53G26;O15304;Q96EY1}

5102 Pathogen[ P14079] interacts with 2 human partners:{O15304;Q96EY1}

5103 Pathogen[ P03383] interacts with 4 human partners:{O15304;P31749;Q96EY1;Q53G26}

5104 Pathogen[ P03410] interacts with 4 human partners:{Q53G26;P31749;Q96EY1;O15304}

5105 Pathogen[ P14075] interacts with 4 human partners:{Q53G26;O15304;P31749;Q96EY1}

5106 Pathogen[ P0C206] interacts with 4 human partners:{P31749;Q53G26;Q96EY1;O15304}

5107 Pathogen[ P03363] interacts with 4 human partners:{O15304;Q53G26;P31749;Q96EY1}

5108 [Cluster 465]GO:0045214+P biological\_process [name] sarcomere organization [def]

"The myofibril assembly process that results in the organization of muscle actomyosin into sarcomeres. The sarcomere is the repeating unit of a myofibril in a muscle cell, composed of an array of overlapping thick and thin filaments between two adjacent Z discs." [GOC

5109 Pathogen[ Q2Q067] interacts with 4 human partners:{P11831;P08727;Q15327;Q86TC9}

5110 Pathogen[ P0C214] interacts with 7 human partners:{Q15327;P11831;Q86TC9;P08727;Q2V2M9;P13533;P63261}

5111 Pathogen[ P03346] interacts with 5 human partners:{Q86TC9;P08727;P11831;Q15327;Q2V2M9}

5112 Pathogen[ Q85601] interacts with 7 human partners:{Q86TC9;P11831;P13533;Q2V2M9;P63261;Q15327;P08727}

5113 Pathogen[ P14079] interacts with 8 human partners:{P63261;Q86TC9;Q702N8;Q15327;Q2V2M9;P08727;O15273;Q9BR09}

5114 Pathogen[ P03383] interacts with 3 human partners:{P11831;P08727;Q15327}

5115 Pathogen[ P03410] interacts with 10 human partners:{P11831;Q702N8;Q9BR09;Q15327;O15273;Q2V2M9;P63261;P13533;P08727;Q86TC9}

5116 Pathogen[ P14075] interacts with 3 human partners:{P08727;P11831;Q15327}

5117 Pathogen[ P0C206] interacts with 8 human partners:{Q86TC9;P13533;P08727;Q15327;Q2V2M9;P63261;Q9BR09;P11831}

5118 Pathogen[ P03363] interacts with 7 human partners:{Q86TC9;Q9BR09;Q15327;P08727;P11831;Q2V2M9;P63261}

5119 [Cluster 466]GO:0035545+P biological\_process [name] determination of left/right asymmetry in nervous system [def] "The establishment of the nervous system with respect to the left and right halves." [GOC

5120 Pathogen[ Q2Q067] interacts with 1 human partners:{O60481}

5121 Pathogen[ P0C214] interacts with 1 human partners:{O60481}

5122 Pathogen[ P03346] interacts with 1 human partners:{O60481}

5123 Pathogen[ Q85601] interacts with 1 human partners:{O60481}

5124 Pathogen[ P14079] interacts with 1 human partners:{O60481}

5125 Pathogen[ P03383] interacts with 1 human partners:{O60481}

5126 Pathogen[ P03410] interacts with 1 human partners:{O60481}

5127 Pathogen[ P14075] interacts with 1 human partners:{O60481}

5128 Pathogen[ P0C206] interacts with 1 human partners:{O60481}

5129 Pathogen[ P03363] interacts with 1 human partners:{O60481}

5130 [Cluster 467]GO:0035494+P biological\_process [name] SNARE complex disassembly [def] "The disaggregation of the SNARE protein complex into its constituent components. The SNARE complex is a protein complex involved in membrane fusion\_ a stable ternary complex consisting of a four-helix bundle, usually formed from one R-SNARE and three Q-SNAREs with an ionic layer sandwiched between hydrophobic layers." [GOC

5131 Pathogen[ Q2Q067] interacts with 1 human partners:{P54920}

5132 Pathogen[ P0C214] interacts with 1 human partners:{P54920}

5133 Pathogen[ P03346] interacts with 2 human partners:{Q9H115;P54920}

5134 Pathogen[ Q85601] interacts with 1 human partners:{P54920}

5135 Pathogen[ P14079] interacts with 2 human partners:{Q9H115;P54920}

5136 Pathogen[ P03383] interacts with 1 human partners:{P54920}

5137 Pathogen[ P03410] interacts with 2 human partners:{Q9H115;P54920}

5138 Pathogen[ P14075] interacts with 1 human partners:{P54920}

5139 Pathogen[ P0C206] interacts with 1 human partners:{P54920}

5140 Pathogen[ P03363] interacts with 1 human partners:{P54920}

5141 [Cluster 468]GO:0045872+P biological\_process [name] positive regulation of rhodopsin gene expression [def] "Any process that activates or increases the frequency, rate or extent of rhodopsin gene expression." [GOC

5142 Pathogen[ Q2Q067] interacts with 1 human partners:{P54845}

5143 Pathogen[ P0C214] interacts with 1 human partners:{P54845}

5144 Pathogen[ P03346] interacts with 1 human partners:{P54845}

5145 Pathogen[ Q85601] interacts with 1 human partners:{P54845}

5146 Pathogen[ P14079] interacts with 1 human partners:{P54845}

5147 Pathogen[ P03383] interacts with 1 human partners:{P54845}

5148 Pathogen[ P03410] interacts with 1 human partners:{P54845}

5149 Pathogen[ P14075] interacts with 1 human partners:{P54845}

5150 Pathogen[ P0C206] interacts with 1 human partners:{P54845}

5151 Pathogen[ P03363] interacts with 1 human partners:{P54845}

5152 [Cluster 469]GO:0051707+P biological\_process [name] response to other organism [def] "Any process that results in a change in state or activity of a cell or an organism (in terms of movement, secretion, enzyme production, gene expression, etc.) as a result of a stimulus from another living organism." [GOC

5153 Pathogen[ Q2Q067] interacts with 1 human partners:{Q14457}

5154 Pathogen[ P0C214] interacts with 1 human partners:{Q14457}

5155 Pathogen[ P03346] interacts with 1 human partners:{Q14457}

5156 Pathogen[ Q85601] interacts with 1 human partners:{Q14457}

5157 Pathogen[ P14079] interacts with 1 human partners:{Q14457}

5158 Pathogen[ P03383] interacts with 1 human partners:{Q14457}

5159 Pathogen[ P03410] interacts with 1 human partners:{Q14457}

5160 Pathogen[ P14075] interacts with 1 human partners:{Q14457}

5161 Pathogen[ P0C206] interacts with 1 human partners:{Q14457}

5162 Pathogen[ P03363] interacts with 1 human partners:{Q14457}

5163 [Cluster 470]GO:0050852+P biological\_process [name] T cell receptor signaling pathway [def] "A series of molecular signals initiated by the cross-linking of an antigen receptor on a T cell." [GOC

5164 Pathogen[ Q2Q067] interacts with 25 human partners: {Q9UDY8;Q04206;Q9NYJ8;O95999;P56945;Q86WV1;O15117;Q9Y6K9;P61088;Q13094;P16333;P19838;Q8N1K5;P42768;P25963;POCG47;O14920;POCG48;O75791;O43318;P27986;P62987;Q13404;O15111;P62979}

5165 Pathogen[ P0C214] interacts with 25 human partners: {O15117;O15111;Q9Y6K9;P56945;P19838;Q9UDY8;Q04206;Q13404;Q13094;O43318;POCG48;O95999;P25963;P62987;P16333;Q86WV1;POCG47;O75791;P62979;P42768;P27986;Q8N1K5;O14920;Q9NYJ8;P61088}

5166 Pathogen[ P03346] interacts with 28 human partners: {Q9Y6K9;O15111;P42768;P62987;P25963;Q9BYM8;Q9UDY8;POCG48;Q04206;Q13404;O95999;P61088;P16333;Q96EP0;P56945;Q9NYJ8;Q13094;P62979;POCG47;P19838;O14920;O43318;O15117;Q9Y2R2;Q8N1K5;Q86WV1;P27986;O75791}

5167 Pathogen[ Q85601] interacts with 25 human partners: {Q9NYJ8;O15111;Q9UDY8;P16333;POCG48;Q13404;P27986;Q86WV1;Q9Y6K9;O15117;P56945;Q8N1K5;O14920;Q04206;P42768;P62979;POCG47;P62987;O95999;O43318;P61088;P19838;Q13094;O75791;P25963}

5168 Pathogen[ P14079] interacts with 20 human partners: {Q9BXL7;Q86WV1;POCG48;O95999;Q13404;Q13094;Q96EP0;P62979;P62987;P50552;O15117;O75791;Q9Y6K9;P16333;Q9BYM8;O43561;Q8N1K5;POCG47;Q6PIZ9;P42768}

5169 Pathogen[ P03383] interacts with 24 human partners: {P27986;P56945;O75791;Q9Y6K9;P62987;O14920;O15111;Q86WV1;O15117;O43318;P61088;Q8N1K5;Q13404;P42768;P25963;Q13094;O95999;P62979;POCG47;Q04206;POCG48;Q9NYJ8;P16333;P19838}

5170 Pathogen[ P03410] interacts with 29 human partners: {Q04206;P19838;Q13094;P27986;POCG48;O14920;Q86WV1;P20963;Q6PIZ9;O15111;O43561;P42768;P16333;P61088;P62979;Q8N1K5;O43318;P50552;O95999;Q9BXL7;Q9NYJ8;O15117;P62987;P56945;Q13404;Q9Y6K9;P25963;POCG47;O75791}

5171 Pathogen[ P14075] interacts with 24 human partners: {O15111;Q04206;O75791;P61088;P42768;O15117;P25963;P16333;Q86WV1;O14920;POCG48;P62979;Q8N1K5;O43318;P27986;P62987;O95999;Q13094;POCG47;Q13404;P19838;Q9Y6K9;P56945;Q9NYJ8}

5172 Pathogen[ P0C206] interacts with 28 human partners: {POCG48;O14920;Q9Y6K9;Q9UDY8;Q8N1K5;O95999;P25963;O43318;Q9Y2R2;O75791;P27986;P61088;P19838;Q96EP0;Q04206;Q86WV1;O15111;P62979;Q9NYJ8;POCG47;P16333;P56945;P62987;Q13404;Q13094;P42768;Q9BYM8;O15117}

5173 Pathogen[ P03363] interacts with 22 human partners: {O14920;Q04206;Q9Y2R2;Q86WV1;Q96EP0;P25963;O15111;Q9NYJ8;P42768;Q9Y6K9;Q8N1K5;O43318;O75791;P61088;O15117;P16333;P62987;P19838;P56945;Q13404;P27986;Q13094}

5174 [Cluster 471]GO:0006065+P biological\_process [name] UDP-glucuronate biosynthetic process [def] "The chemical reactions and pathways resulting in the formation of UDP-glucuronate, a substance composed of glucuronic acid in glycosidic linkage with uridine diphosphate." [GOC

5175 Pathogen[ Q2Q067] interacts with 1 human partners: {Q16851}

5176 Pathogen[ P0C214] interacts with 1 human partners: {Q16851}

5177 Pathogen[ P03346] interacts with 1 human partners: {Q16851}

5178 Pathogen[ Q85601] interacts with 1 human partners: {Q16851}

5179 Pathogen[ P14079] interacts with 1 human partners: {Q16851}

5180 Pathogen[ P03383] interacts with 1 human partners: {Q16851}

5181 Pathogen[ P03410] interacts with 1 human partners: {Q16851}

5182 Pathogen[ P14075] interacts with 1 human partners: {Q16851}

5183 Pathogen[ P0C206] interacts with 1 human partners: {Q16851}

5184 Pathogen[ P03363] interacts with 1 human partners: {Q16851}

5185 [Cluster 472]GO:0019919+P biological\_process [name] peptidyl-arginine methylation, to asymmetrical-dimethyl arginine [def] "The process of methylation of peptidyl-arginine to form peptidyl-N(omega),N(omega)-dimethyl-L-arginine." [RESID

5186 Pathogen[ Q2Q067] interacts with 3 human partners: {Q96LA8;Q9NR22;Q86X55}

5187 Pathogen[ P0C214] interacts with 3 human partners: {Q86X55;Q9NR22;Q96LA8}

5188 Pathogen[ P03346] interacts with 3 human partners: {Q9NR22;Q86X55;Q96LA8}

5189 Pathogen[ Q85601] interacts with 3 human partners: {Q9NR22;Q86X55;Q96LA8}

5190 Pathogen[ P14079] interacts with 3 human partners: {Q9NR22;Q96LA8;O60678}

5191 Pathogen[ P03383] interacts with 3 human partners: {Q86X55;Q9NR22;Q96LA8}

5192 Pathogen[ P03410] interacts with 3 human partners: {Q96LA8;Q86X55;Q9NR22}

5193 Pathogen[ P14075] interacts with 3 human partners: {Q9NR22;Q96LA8;Q86X55}

5194 Pathogen[ P0C206] interacts with 4 human partners: {Q86X55;Q96LA8;Q9NR22;O60678}

5195 Pathogen[ P03363] interacts with 3 human partners: {Q96LA8;Q9NR22;Q86X55}

5196 [Cluster 473]GO:0022417+P biological\_process [name] protein maturation by protein folding [def] "The process of assisting in the covalent and noncovalent assembly of single chain polypeptides or multisubunit complexes into the correct tertiary structure that results in the attainment of the full functional capacity of a protein." [GOC

5197 Pathogen[ Q2Q067] interacts with 2 human partners: {O00170;P27797}

5198 Pathogen[ P0C214] interacts with 2 human partners: {O00170;P27797}

5199 Pathogen[ P03346] interacts with 2 human partners: {O00170;P27797}

5200 Pathogen[ Q85601] interacts with 2 human partners: {P27797;O00170}

5201 Pathogen[ P14079] interacts with 1 human partners:{000170}

5202 Pathogen[ P03383] interacts with 2 human partners:{000170;P27797}

5203 Pathogen[ P03410] interacts with 2 human partners:{000170;P27797}

5204 Pathogen[ P14075] interacts with 2 human partners:{000170;P27797}

5205 Pathogen[ P0C206] interacts with 2 human partners:{P27797;000170}

5206 Pathogen[ P03363] interacts with 2 human partners:{P27797;000170}

5207 [Cluster 474]GO:0010226+P biological\_process [name] response to lithium ion [def] "Any process that results in a change in state or activity of a cell or an organism (in terms of movement, secretion, enzyme production, gene expression, etc.) as a result of a lithium (Li+) ion stimulus." [GOC

5208 Pathogen[ Q2Q067] interacts with 1 human partners:{Q99933}

5209 Pathogen[ P0C214] interacts with 2 human partners:{P68133;Q99933}

5210 Pathogen[ P03346] interacts with 1 human partners:{Q99933}

5211 Pathogen[ Q85601] interacts with 2 human partners:{P68133;Q99933}

5212 Pathogen[ P14079] interacts with 2 human partners:{Q99933;P68133}

5213 Pathogen[ P03383] interacts with 1 human partners:{Q99933}

5214 Pathogen[ P03410] interacts with 2 human partners:{Q99933;P68133}

5215 Pathogen[ P14075] interacts with 1 human partners:{Q99933}

5216 Pathogen[ P0C206] interacts with 2 human partners:{Q99933;P68133}

5217 Pathogen[ P03363] interacts with 2 human partners:{P68133;Q99933}

5218 [Cluster 475]GO:0050872+P biological\_process [name] white fat cell differentiation [def] "The process in which a relatively unspecialized cell acquires specialized features of a white adipocyte, an animal connective tissue cell involved in energy storage. White adipocytes have cytoplasmic lipids arranged in a unique vacuole." [PMID

5219 Pathogen[ Q2Q067] interacts with 3 human partners:{Q9HAZ2;Q13363;P49715}

5220 Pathogen[ P0C214] interacts with 2 human partners:{Q13363;Q9HAZ2}

5221 Pathogen[ P03346] interacts with 4 human partners:{P49715;Q13363;P56545;Q9HAZ2}

5222 Pathogen[ Q85601] interacts with 3 human partners:{Q13363;P49715;Q9HAZ2}

5223 Pathogen[ P14079] interacts with 3 human partners:{Q9HAZ2;Q0VDE8;P49715}

5224 Pathogen[ P03383] interacts with 2 human partners:{Q9HAZ2;Q13363}

5225 Pathogen[ P03410] interacts with 2 human partners:{Q9HAZ2;Q0VDE8}

5226 Pathogen[ P14075] interacts with 3 human partners:{Q9HAZ2;Q0VDE8;Q13363}

5227 Pathogen[ P0C206] interacts with 4 human partners:{Q9HAZ2;Q0VDE8;P49715;Q13363}

5228 Pathogen[ P03363] interacts with 4 human partners:{Q0VDE8;P56545;Q13363;Q9HAZ2}

5229 [Cluster 476]GO:0003162+P biological\_process [name] atrioventricular node development [def] "The process whose specific outcome is the progression of the atrioventricular (AV) node over time, from its formation to the mature structure. The AV node is part of the cardiac conduction system that controls the timing of ventricle contraction by receiving electrical signals from the sinoatrial (SA) node and relaying them to the His-Purkinje system." [GOC

5230 Pathogen[ Q2Q067] interacts with 1 human partners:{Q92585}

5231 Pathogen[ P0C214] interacts with 1 human partners:{Q92585}

5232 Pathogen[ P03346] interacts with 1 human partners:{Q92585}

5233 Pathogen[ Q85601] interacts with 1 human partners:{Q92585}

5234 Pathogen[ P14079] interacts with 1 human partners:{Q92585}

5235 Pathogen[ P03383] interacts with 1 human partners:{Q92585}

5236 Pathogen[ P03410] interacts with 1 human partners:{Q92585}

5237 Pathogen[ P14075] interacts with 1 human partners:{Q92585}

5238 Pathogen[ P0C206] interacts with 1 human partners:{Q92585}

5239 Pathogen[ P03363] interacts with 1 human partners:{Q92585}

5240 [Cluster 477]GO:0032526+P biological\_process [name] response to retinoic acid [def] "Any process that results in a change in state or activity of a cell or an organism (in terms of movement, secretion, enzyme production, gene expression, etc.) as a result of a retinoic acid stimulus." [GOC

5241 Pathogen[ Q2Q067] interacts with 4 human partners:{P36956;Q9NVR5;P23497;Q8IXJ9}

5242 Pathogen[ P0C214] interacts with 3 human partners:{Q9NVR5;Q8IXJ9;P23497}

5243 Pathogen[ P03346] interacts with 8 human partners:{Q15788;P55273;P36956;P48443;Q9NVR5;O95361;P23497;Q8IXJ9}

5244 Pathogen[ Q85601] interacts with 4 human partners:{P55273;Q8IXJ9;P36956;Q9NVR5}

5245 Pathogen[ P14079] interacts with 11 human partners:{Q9NVR5;O14828;Q8WZ82;Q8IXJ9;P48443;P23497;P55273;P11686;Q15788;O95361;P36956}

5246 Pathogen[ P03383] interacts with 3 human partners:{Q8IXJ9;P23497;Q9NVR5}

5247 Pathogen[ P03410] interacts with 7 human partners:{P36956;O14828;P55273;Q9NVR5;P11686;Q8WZ82;Q8IXJ9}

5248 Pathogen[ P14075] interacts with 3 human partners:{P23497;Q8IXJ9;Q9NVR5}

5249 Pathogen[ P0C206] interacts with 9 human partners:{O14828;P36956;Q9NVR5;Q8IXJ9;O95361;P55273;Q8WZ82;Q15788;P48443}

5250 Pathogen[ P03363] interacts with 4 human partners:{Q8IXJ9;Q9NVR5;P23497;Q8WZ82}

5251 [Cluster 478]GO:0045590+P biological\_process [name] negative regulation of regulatory T cell differentiation [def] "Any process that stops, prevents, or reduces the rate of differentiation of regulatory T cells." [ISBN

5252 Pathogen[ Q2Q067] interacts with 1 human partners:{P10914}

5253 Pathogen[ P0C214] interacts with 1 human partners:{P10914}

5254 Pathogen[ P03346] interacts with 1 human partners:{P10914}

5255 Pathogen[ Q85601] interacts with 1 human partners:{P10914}

5256 Pathogen[ P14079] interacts with 1 human partners:{P10914}  
5257 Pathogen[ P03383] interacts with 1 human partners:{P10914}  
5258 Pathogen[ P03410] interacts with 1 human partners:{P10914}  
5259 Pathogen[ P14075] interacts with 1 human partners:{P10914}  
5260 Pathogen[ P0C206] interacts with 1 human partners:{P10914}  
5261 Pathogen[ P03363] interacts with 1 human partners:{P10914}  
5262 [Cluster 479]GO:2000191+P biological\_process [name] regulation of fatty acid transport [def] "Any process that modulates the frequency, rate or extent of fatty acid transport." [GOC  
5263 Pathogen[ Q2Q067] interacts with 1 human partners:{075376}  
5264 Pathogen[ P0C214] interacts with 1 human partners:{075376}  
5265 Pathogen[ P03346] interacts with 1 human partners:{075376}  
5266 Pathogen[ Q85601] interacts with 1 human partners:{075376}  
5267 Pathogen[ P14079] interacts with 1 human partners:{075376}  
5268 Pathogen[ P03383] interacts with 1 human partners:{075376}  
5269 Pathogen[ P03410] interacts with 1 human partners:{075376}  
5270 Pathogen[ P14075] interacts with 1 human partners:{075376}  
5271 Pathogen[ P0C206] interacts with 1 human partners:{075376}  
5272 Pathogen[ P03363] interacts with 1 human partners:{075376}  
5273 [Cluster 480]GO:0034184+P biological\_process [name] positive regulation of maintenance of mitotic sister chromatid cohesion [def] "Any process that increases the extent to which the association between sister chromatids of a replicated chromosome is maintained during a mitotic cell cycle." [GOC  
5274 Pathogen[ Q2Q067] interacts with 2 human partners:{Q8IY18;Q96MF7}  
5275 Pathogen[ P0C214] interacts with 2 human partners:{Q8IY18;Q96MF7}  
5276 Pathogen[ P03346] interacts with 2 human partners:{Q96MF7;Q8IY18}  
5277 Pathogen[ Q85601] interacts with 2 human partners:{Q8IY18;Q96MF7}  
5278 Pathogen[ P14079] interacts with 2 human partners:{Q96MF7;Q8IY18}  
5279 Pathogen[ P03383] interacts with 1 human partners:{Q96MF7}  
5280 Pathogen[ P03410] interacts with 2 human partners:{Q96MF7;Q8IY18}  
5281 Pathogen[ P14075] interacts with 1 human partners:{Q96MF7}  
5282 Pathogen[ P0C206] interacts with 2 human partners:{Q96MF7;Q8IY18}  
5283 Pathogen[ P03363] interacts with 2 human partners:{Q8IY18;Q96MF7}  
5284 [Cluster 481]GO:0090232+P biological\_process [name] positive regulation of spindle checkpoint [def] "Any process that increases the rate, frequency, or extent of the spindle checkpoint, a cell cycle checkpoint that delays the metaphase/anaphase transition until the spindle is correctly assembled and oriented, and chromosomes are attached to the spindle." [GOC  
5285 Pathogen[ Q2Q067] interacts with 1 human partners:{Q92597}  
5286 Pathogen[ P0C214] interacts with 1 human partners:{Q92597}  
5287 Pathogen[ P03346] interacts with 1 human partners:{Q92597}  
5288 Pathogen[ Q85601] interacts with 1 human partners:{Q92597}  
5289 Pathogen[ P14079] interacts with 1 human partners:{Q92597}  
5290 Pathogen[ P03383] interacts with 1 human partners:{Q92597}  
5291 Pathogen[ P03410] interacts with 1 human partners:{Q92597}  
5292 Pathogen[ P14075] interacts with 1 human partners:{Q92597}  
5293 Pathogen[ P0C206] interacts with 1 human partners:{Q92597}  
5294 Pathogen[ P03363] interacts with 1 human partners:{Q92597}  
5295 [Cluster 482]GO:1900025+P  
5296 Pathogen[ Q2Q067] interacts with 2 human partners:{Q63HQ0;Q14678}  
5297 Pathogen[ P0C214] interacts with 2 human partners:{Q14678;Q63HQ0}  
5298 Pathogen[ P03346] interacts with 2 human partners:{Q14678;Q63HQ0}  
5299 Pathogen[ Q85601] interacts with 2 human partners:{Q63HQ0;Q14678}  
5300 Pathogen[ P14079] interacts with 2 human partners:{Q63HQ0;Q14678}  
5301 Pathogen[ P03383] interacts with 2 human partners:{Q14678;Q63HQ0}  
5302 Pathogen[ P03410] interacts with 2 human partners:{Q14678;Q63HQ0}  
5303 Pathogen[ P14075] interacts with 2 human partners:{Q63HQ0;Q14678}  
5304 Pathogen[ P0C206] interacts with 2 human partners:{Q63HQ0;Q14678}  
5305 Pathogen[ P03363] interacts with 2 human partners:{Q63HQ0;Q14678}  
5306 [Cluster 483]GO:0002091+P biological\_process [name] negative regulation of receptor internalization [def] "Any process that stops, prevents, or reduces the frequency, rate or extent of receptor internalization." [GOC  
5307 Pathogen[ Q2Q067] interacts with 1 human partners:{Q99700}  
5308 Pathogen[ P0C214] interacts with 1 human partners:{Q99700}  
5309 Pathogen[ P03346] interacts with 1 human partners:{Q99700}  
5310 Pathogen[ Q85601] interacts with 1 human partners:{Q99700}  
5311 Pathogen[ P14079] interacts with 1 human partners:{Q99700}  
5312 Pathogen[ P03383] interacts with 1 human partners:{Q99700}  
5313 Pathogen[ P03410] interacts with 1 human partners:{Q99700}  
5314 Pathogen[ P14075] interacts with 1 human partners:{Q99700}  
5315 Pathogen[ P0C206] interacts with 1 human partners:{Q99700}  
5316 Pathogen[ P03363] interacts with 1 human partners:{Q99700}  
5317 [Cluster 484]GO:0006303+P biological\_process [name] double-strand break repair via nonhomologous end joining [def] "The repair of a double-strand break in DNA in which the two broken ends are rejoined with little or no sequence complementarity. Information at the DNA ends may be lost due to the modification of broken DNA ends." [PMID

5318 Pathogen[ Q2Q067] interacts with 8 human partners:{Q8IY18;P49959;Q9H9Q4;Q13426;P12956;O76064;Q96MF7;P13010}

5319 Pathogen[ POC214] interacts with 9 human partners:{Q8IY18;Q9H9Q4;P49959;P13010;Q13426;Q96MF7;P40692;O76064;P12956}

5320 Pathogen[ P03346] interacts with 8 human partners:{O76064;P12956;Q96MF7;Q13426;P13010;P49959;Q9H9Q4;Q8IY18}

5321 Pathogen[ Q85601] interacts with 9 human partners:{Q8IY18;Q13426;P49959;O76064;P40692;Q9H9Q4;P13010;P12956;Q96MF7}

5322 Pathogen[ P14079] interacts with 9 human partners:{Q96MF7;Q9H9Q4;P13010;P40692;O00487;P12956;Q8IY18;Q13426;P49917}

5323 Pathogen[ P03383] interacts with 5 human partners:{P13010;Q9H9Q4;Q96MF7;Q13426;P12956}

5324 Pathogen[ P03410] interacts with 8 human partners:{P49959;P40692;Q96MF7;P12956;Q13426;Q8IY18;P13010;Q9H9Q4}

5325 Pathogen[ P14075] interacts with 5 human partners:{P12956;Q9H9Q4;Q13426;P13010;Q96MF7}

5326 Pathogen[ POC206] interacts with 10 human partners:{P13010;P49959;P40692;P49917;Q9H9Q4;Q13426;Q96MF7;O76064;Q8IY18;P12956}

5327 Pathogen[ P03363] interacts with 6 human partners:{P12956;P13010;Q13426;Q9H9Q4;Q8IY18;Q96MF7}

5328 [Cluster 485]GO:0005977+P biological\_process [name] glycogen metabolic process [def] "The chemical reactions and pathways involving glycogen, a polydisperse, highly branched glucan composed of chains of D-glucose residues in alpha-(1->4) glycosidic linkage, joined together by alpha-(1->6) glycosidic linkages." [ISBN

5329 Pathogen[ Q2Q067] interacts with 11 human partners:{P31749;P62140;P41236;Q6NXS1;Q13522;P35573;Q14749;P36873;P62136;P13807;Q9UQK1}

5330 Pathogen[ POC214] interacts with 18 human partners:{Q04446;Q96PQ5;P62140;Q6NXS1;P41236;P35573;O95685;Q14749;Q93100;Q13522;P62136;O95278;P36873;P46020;P13807;P31749;Q9UQK1;Q9H7J1}

5331 Pathogen[ P03346] interacts with 14 human partners:{P62136;Q9UQK1;P13807;O95685;Q9H7J1;Q13522;P35573;Q14749;P31749;P36873;Q6NXS1;P62140;O95278;P41236}

5332 Pathogen[ Q85601] interacts with 13 human partners:{P13807;P31749;Q9UQK1;O95278;P35573;P62136;P36873;P41236;Q04446;Q6NXS1;P62140;Q96PQ5;Q14749}

5333 Pathogen[ P14079] interacts with 17 human partners:{P31751;Q9H7J1;P36873;Q13522;P13807;Q93100;P62136;P41236;Q86XI6;Q14749;O95685;Q6NXS1;P62140;Q9UQK1;P35573;P46020;Q96PQ5}

5334 Pathogen[ P03383] interacts with 12 human partners:{P62140;Q9UQK1;P31749;P13807;P35573;Q13522;P36873;P62136;Q6NXS1;Q9H7J1;P41236;Q14749}

5335 Pathogen[ P03410] interacts with 18 human partners:{Q14749;P46020;Q04446;P62136;P35573;O95685;P31749;Q9H7J1;P41236;Q93100;Q86XI6;Q13522;P62140;P13807;P36873;Q96PQ5;Q6NXS1;Q9UQK1}

5336 Pathogen[ P14075] interacts with 14 human partners:{Q13522;Q93100;P41236;P62140;Q6NXS1;Q9UQK1;P36873;P62136;P31749;P35573;Q14749;P13807;O95685;Q9H7J1}

5337 Pathogen[ POC206] interacts with 19 human partners:{Q6NXS1;P31749;Q93100;P41236;Q9UQK1;Q04446;P13807;P46020;Q13522;Q86XI6;O95278;P62140;Q96PQ5;Q14749;O95685;P36873;Q9H7J1;P62136;P35573}

5338 Pathogen[ P03363] interacts with 11 human partners:{P62136;P13807;P36873;P62140;P41236;Q13522;Q6NXS1;P31749;Q14749;Q9UQK1;P35573}

5339 [Cluster 486]GO:0051123+P biological\_process [name] RNA polymerase II transcriptional preinitiation complex assembly [def] "The aggregation, arrangement and bonding together of proteins on an RNA polymerase II promoter DNA to form the transcriptional preinitiation complex (PIC), the formation of which is a prerequisite for transcription by RNA polymerase." [GOC

5340 Pathogen[ Q2Q067] interacts with 3 human partners:{P52657;P21675;Q9UI36}

5341 Pathogen[ POC214] interacts with 3 human partners:{P52657;P21675;Q9UI36}

5342 Pathogen[ P03346] interacts with 3 human partners:{P52657;P21675;Q9UI36}

5343 Pathogen[ Q85601] interacts with 3 human partners:{P52657;Q9UI36;P21675}

5344 Pathogen[ P14079] interacts with 3 human partners:{Q9UI36;P52657;P21675}

5345 Pathogen[ P03383] interacts with 3 human partners:{P52657;P21675;Q9UI36}

5346 Pathogen[ P03410] interacts with 3 human partners:{Q9UI36;P21675;P52657}

5347 Pathogen[ P14075] interacts with 3 human partners:{P21675;P52657;Q9UI36}

5348 Pathogen[ POC206] interacts with 3 human partners:{P52657;Q9UI36;P21675}

5349 Pathogen[ P03363] interacts with 3 human partners:{P52657;Q9UI36;P21675}

5350 [Cluster 487]GO:0006396+P biological\_process [name] RNA processing [def] "Any process involved in the conversion of one or more primary RNA transcripts into one or more mature RNA molecules." [GOC

5351 Pathogen[ Q2Q067] interacts with 44 human partners:{Q8TCS8;Q96FV9;Q86U42;P55265;P14866;Q15459;Q99575;Q12872;Q14690;Q8WXF8;Q9NR4;Q96DI7;O43172;Q14103;O60506;O00566;O94906;P31943;Q12996;Q9UHK0;P61978;Q9UHI6;P54253;Q05048;Q14498;Q8IWZ8;O60832;Q13310;Q9UBB9;P52597;Q9Y5S9;Q9BRS8;Q9Y2P8;Q96S94;Q9BU



5352 J2;Q9H9J2;P62306;Q9Y2W2;Q93062;Q92841;Q00839;Q9HCS7;O95900;Q9UK58}  
 Pathogen[ POC214] interacts with 49 human  
 partners: {Q12996;Q13310;Q96S94;Q9Y2W2;Q96FV9;Q9HCS7;Q9H9J2;Q8WXF8;O43172;P54253;Q9Y5S9;Q92841;P62306;P55265;Q05048;Q8IWZ8;Q9UHK0;Q94906;Q9UK58;Q9Y2P8;Q99575;Q14103;Q9BRS8;P52597;Q8TCS8;Q12872;Q95900;Q9BUJ2;Q15459;Q9UHI6;Q9NRR4;Q96DI7;Q14690;O60832;P31943;O00442;Q96G01;O60506;O60293;Q00839;O00566;Q6IN84;Q86U42;Q14498;O15042;Q93062;Q9UBB9;P14866;Q9NS39}

5353 Pathogen[ P03346] interacts with 64 human  
 partners: {Q96G01;Q9Y5S9;Q96FV9;Q86U42;P61978;O15042;O43172;Q93062;Q96S94;P55265;P14866;Q95900;Q92841;Q8WXF8;Q4G0J3;Q9NS39;Q14498;O60506;P31943;Q00839;O60832;Q9NYH9;Q9BUJ2;Q9HCS7;Q94906;O00566;Q05048;Q8IX01;P52756;Q14103;Q9BWF3;Q7Z333;Q9Y2P8;Q15020;Q86U42;Q9UHK0;Q8TCS8;P62306;Q9UHI6;Q9UK58;P31942;Q15459;O60293;O14979;Q99575;Q96DI7;Q14562;Q8IWZ8;Q8WWH5;Q6IN84;Q9NRR4;Q9BZJ0;Q13310;P51513;P54253;P29558;Q13395;Q9Y2W2;Q9BRS8;Q14690;P52597;Q12996;Q9H9J2;Q12872}

5354 Pathogen[ Q85601] interacts with 42 human  
 partners: {P61978;Q9HCS7;Q9Y2W2;Q99575;Q05048;Q9UK58;O60506;Q13310;Q14103;Q15459;Q9NRR4;Q9BRS8;Q9BUJ2;Q14690;Q94906;Q9UBB9;Q96DI7;Q96FV9;P62306;Q8TCS8;Q96G01;P52597;Q9UHI6;Q9Y2P8;Q8WXF8;O00566;O60293;Q9UHK0;P55265;Q12872;Q96S94;P14866;Q00839;P54253;Q9H9J2;Q86U42;P31943;O43172;Q14498;O60832;Q9Y5S9;Q93062}

5355 Pathogen[ P14079] interacts with 55 human  
 partners: {O00442;O60293;P41238;Q94906;Q9HC36;Q9Y2W2;Q14103;O60832;Q9Y5S9;Q9BUJ2;Q96S94;Q93062;P14866;Q13310;Q9NS39;Q9UHI6;Q9UHK0;P54253;Q14498;Q9HCS7;Q05048;Q00839;Q96FV9;Q15459;P62306;O00566;Q9UK58;P55265;Q9NYH9;Q9BRS8;Q9NRR4;Q86U42;Q99575;O60506;Q9UBB9;Q6IN84;Q96G01;Q9H9J2;P61978;P31943;O15042;Q8WXF8;P52597;Q12872;Q96Q11;Q9Y2P8;Q13395;Q12996;O43172;P52756;Q95900;Q8TCS8;Q8IWZ8;Q14690;Q8WWH5}

5356 Pathogen[ P03383] interacts with 40 human  
 partners: {Q9NRR4;Q12872;Q05048;Q9UK58;Q9Y2P8;Q15459;P14866;O43172;Q9HCS7;Q9Y5S9;Q99575;Q96FV9;Q92841;Q9UHI6;Q8TCS8;P61978;P31943;Q14690;Q9Y2W2;Q9BRS8;Q94906;Q9UHK0;Q14103;P54253;Q8WXF8;Q9BUJ2;Q9H9J2;P55265;Q13310;Q9UBB9;Q95900;Q86U42;Q00839;P52597;O60832;O00566;P62306;Q14498;Q93062;Q96DI7}

5357 Pathogen[ P03410] interacts with 53 human  
 partners: {Q96Q11;Q8WXF8;Q00839;O60293;Q8TCS8;Q14103;O15042;Q93062;Q12996;O00442;P61978;Q9HC36;Q05048;Q9BUJ2;P62306;Q99575;Q9UHK0;Q9Y5S9;P41238;Q9NYH9;O60832;Q9UBB9;P55265;Q9H9J2;P14866;Q9NRR4;Q96FV9;Q9HCS7;Q94906;Q9Y2W2;O43172;P52597;Q13395;Q6IN84;P31943;Q15459;Q96G01;Q96S94;Q8WWH5;Q14498;O60506;Q12872;Q95900;Q86U42;P54253;Q9Y2P8;Q9UK58;Q8IWZ8;Q9UHI6;Q13310;Q9BRS8;O00566;Q14690}

5358 Pathogen[ P14075] interacts with 42 human  
 partners: {O00566;P54253;P14866;Q14690;P55265;Q14103;Q6IN84;Q15459;O43172;Q93062;P31943;P62306;Q9H9J2;Q8WWH5;Q94906;Q12872;Q95900;Q96DI7;Q9UHK0;Q00839;Q9UHI6;Q13310;Q9Y2P8;Q9Y2W2;Q9BUJ2;Q05048;Q9UBB9;Q8WXF8;Q9BRS8;Q9NRR4;P61978;O60832;Q8TCS8;Q9HCS7;Q9UK58;Q92841;Q9Y5S9;P52597;Q96FV9;Q86U42;Q14498;Q99575}

5359 Pathogen[ POC206] interacts with 53 human  
 partners: {Q9BUJ2;Q12872;Q14103;Q8WWH5;P55265;Q8TCS8;Q14690;Q9UHK0;P14866;P61978;Q9BRS8;Q9NS39;Q86U42;Q96S94;Q9UBB9;Q9NYH9;Q9UK58;Q96FV9;Q7Z333;Q05048;O60506;Q13310;P52597;Q8WXF8;Q12996;Q9NRR4;Q95900;Q92841;Q9Y2P8;Q6IN84;O60832;Q8IWZ8;P62306;O43172;O60293;Q99575;Q94906;Q9H9J2;Q9UHI6;O15042;Q96DI7;P41238;Q93062;Q9Y2W2;Q00839;Q14498;Q9HCS7;Q15459;P31943;Q9Y5S9;O00566;Q96G01;P54253}

5360 Pathogen[ P03363] interacts with 63 human  
 partners: {O60832;Q96S94;Q15020;Q9Y2W2;Q86UA1;Q7Z333;Q12872;P52597;Q9UHI6;Q9NS39;Q99575;Q8IX01;Q9HCS7;P14866;Q05048;Q15459;P29558;Q9Y2P8;Q9UHK0;Q95900;Q4G0J3;O60293;Q9H9J2;Q8N302;Q86U42;Q9BWF3;Q96FV9;Q8IWZ8;P62306;Q14690;Q9UK58;Q14562;Q92841;P31943;O43172;O14979;Q13310;Q13395;P31942;P54253;O00566;P55265;Q9NRR4;Q9BRS8;Q8IWZ8;Q14103;Q95319;O60506;P61978;Q94906;Q8WWH5;P05455;Q00839;Q14498;P51513;O15042;Q9BUJ2;Q8WXF8;Q9Y5S9;Q12996;Q9BZJ0;Q96DI7;P52756}

5361 [Cluster 488]GO:0018283+P biological\_process [name] iron incorporation into metallo-sulfur cluster [def] "The incorporation of iron into a metallo-sulfur cluster." [GOC]

5362 Pathogen[ Q2Q067] interacts with 1 human partners: {Q9Y697}

5363 Pathogen[ POC214] interacts with 1 human partners: {Q9Y697}

5364 Pathogen[ P03346] interacts with 1 human partners: {Q9Y697}

5365 Pathogen[ Q85601] interacts with 1 human partners: {Q9Y697}

5366 Pathogen[ P14079] interacts with 1 human partners: {Q9Y697}

5367 Pathogen[ P03383] interacts with 1 human partners: {Q9Y697}

5368 Pathogen[ P03410] interacts with 1 human partners: {Q9Y697}

5369 Pathogen[ P14075] interacts with 1 human partners: {Q9Y697}

5370 Pathogen[ POC206] interacts with 1 human partners: {Q9Y697}

5371 Pathogen[ P03363] interacts with 1 human partners: {Q9Y697}

5372 [Cluster 489]GO:0010833+P biological\_process [name] telomere maintenance via telomere lengthening [def] "Any process that contributes to the maintenance of proper telomeric length and structure by affecting and monitoring the activity of telomeric proteins and lengthening the telomeric DNA." [GOC]

5373 Pathogen[ Q2Q067] interacts with 3 human partners: {Q9NYB0;Q9BSI4;Q9H668}

5374 Pathogen[ POC214] interacts with 3 human partners: {Q9BSI4;Q9NYB0;Q9H668}

5375 Pathogen[ P03346] interacts with 3 human partners: {Q9BSI4;Q9H668;Q9NYB0}

5376 Pathogen[ Q85601] interacts with 2 human partners: {Q9H668;Q9NYB0}

5377 Pathogen[ P14079] interacts with 4 human partners: {Q9H668;Q9BSI4;Q9NYB0;Q8NAM6}

5378 Pathogen[ P03383] interacts with 2 human partners:{Q9NYB0;Q9BSI4}

5379 Pathogen[ P03410] interacts with 3 human partners:{Q9H668;Q9BSI4;Q9NYB0}

5380 Pathogen[ P14075] interacts with 3 human partners:{Q9BSI4;Q9NYB0;Q9H668}

5381 Pathogen[ P0C206] interacts with 3 human partners:{Q9BSI4;Q9H668;Q9NYB0}

5382 Pathogen[ P03363] interacts with 3 human partners:{Q9NYB0;Q9BSI4;Q9H668}

5383 [Cluster 490]GO:0072112+P biological\_process [name] glomerular visceral epithelial cell differentiation [def] "The process in which a relatively unspecialized cell acquires specialized features of a glomerular visceral epithelial cell. A glomerular visceral epithelial cell is a specialized epithelial cell that contains \"feet\" that interdigitate with the \"feet\" of other glomerular epithelial cells." [GOC

5384 Pathogen[ Q2Q067] interacts with 2 human partners:{P25063;P80723}

5385 Pathogen[ P0C214] interacts with 2 human partners:{P25063;P80723}

5386 Pathogen[ P03346] interacts with 2 human partners:{P80723;P25063}

5387 Pathogen[ Q85601] interacts with 1 human partners:{P80723}

5388 Pathogen[ P14079] interacts with 2 human partners:{P25063;P80723}

5389 Pathogen[ P03383] interacts with 2 human partners:{P25063;P80723}

5390 Pathogen[ P03410] interacts with 2 human partners:{P25063;P80723}

5391 Pathogen[ P14075] interacts with 2 human partners:{P80723;P25063}

5392 Pathogen[ P0C206] interacts with 2 human partners:{P25063;P80723}

5393 Pathogen[ P03363] interacts with 1 human partners:{P80723}

5394 [Cluster 491]GO:0022011+P biological\_process [name] myelination in peripheral nervous system [def] "The process in which neuronal axons and dendrites become coated with a segmented lipid-rich sheath (myelin) to enable faster and more energetically efficient conduction of electrical impulses. The sheath is formed by the cell membranes of Schwann cells in the peripheral nervous system. Adjacent myelin segments are separated by a non-myelinated stretch of axon called a node of Ranvier." [GO\_REF

5395 Pathogen[ Q2Q067] interacts with 3 human partners:{Q03052;P20265;P12755}

5396 Pathogen[ P0C214] interacts with 3 human partners:{Q03052;P20265;P12755}

5397 Pathogen[ P03346] interacts with 2 human partners:{Q03052;P20265}

5398 Pathogen[ Q85601] interacts with 3 human partners:{Q03052;P12755;P20265}

5399 Pathogen[ P14079] interacts with 4 human partners:{P12755;P20265;Q14118;Q03052}

5400 Pathogen[ P03383] interacts with 1 human partners:{P20265}

5401 Pathogen[ P03410] interacts with 4 human partners:{P12755;Q03052;Q14118;P20265}

5402 Pathogen[ P14075] interacts with 1 human partners:{P20265}

5403 Pathogen[ P0C206] interacts with 3 human partners:{P12755;Q03052;P20265}

5404 Pathogen[ P03363] interacts with 2 human partners:{P20265;Q03052}

5405 [Cluster 492]GO:0006956+P biological\_process [name] complement activation [def] "Any process involved in the activation of any of the steps of the complement cascade, which allows for the direct killing of microbes, the disposal of immune complexes, and the regulation of other immune processes\_ the initial steps of complement activation involve one of three pathways, the classical pathway, the alternative pathway, and the lectin pathway, all of which lead to the terminal complement pathway." [GO\_REF

5406 Pathogen[ Q2Q067] interacts with 1 human partners:{Q9H4X1}

5407 Pathogen[ P0C214] interacts with 2 human partners:{Q9H4X1;P10909}

5408 Pathogen[ P03346] interacts with 1 human partners:{Q9H4X1}

5409 Pathogen[ Q85601] interacts with 1 human partners:{Q9H4X1}

5410 Pathogen[ P14079] interacts with 1 human partners:{P10909}

5411 Pathogen[ P03383] interacts with 1 human partners:{Q9H4X1}

5412 Pathogen[ P03410] interacts with 2 human partners:{Q9H4X1;P10909}

5413 Pathogen[ P14075] interacts with 1 human partners:{Q9H4X1}

5414 Pathogen[ P0C206] interacts with 2 human partners:{Q9H4X1;P10909}

5415 Pathogen[ P03363] interacts with 1 human partners:{Q9H4X1}

5416 [Cluster 493]GO:0033133+P biological\_process [name] positive regulation of glucokinase activity [def] "Any process that activates or increases the frequency, rate or extent of glucokinase activity, the catalysis of the transfer of a phosphate group, usually from ATP, to a glucose molecule." [GOC

5417 Pathogen[ Q2Q067] interacts with 1 human partners:{Q14397}

5418 Pathogen[ P0C214] interacts with 4 human partners:{Q92934;O60825;Q14397;P16118}

5419 Pathogen[ P03346] interacts with 1 human partners:{Q14397}

5420 Pathogen[ Q85601] interacts with 3 human partners:{O60825;P16118;Q14397}

5421 Pathogen[ P14079] interacts with 2 human partners:{Q92934;Q14397}

5422 Pathogen[ P03383] interacts with 1 human partners:{Q14397}

5423 Pathogen[ P03410] interacts with 3 human partners:{Q14397;P16118;Q92934}

5424 Pathogen[ P14075] interacts with 2 human partners:{P16118;Q14397}

5425 Pathogen[ P0C206] interacts with 4 human partners:{Q92934;O60825;P16118;Q14397}

5426 Pathogen[ P03363] interacts with 1 human partners:{Q14397}

5427 [Cluster 494]GO:0007128+P biological\_process [name] meiotic prophase I [def] "Prophase occurring as part of meiosis I. Prophase is the part of nuclear division in which, canonically, chromosomes condense and the two daughter centrioles and their asters migrate toward the poles of the cell. Meiosis I is the first phase of meiosis, in which cells divide and homologous chromosomes are paired and segregated from each other." [GOC

5428 Pathogen[ Q2Q067] interacts with 3 human partners:{Q6PIF2;Q9BX26;O60671}

5429 Pathogen[ P0C214] interacts with 2 human partners:{O60671;Q9BX26}

5430 Pathogen[ P03346] interacts with 4 human partners:{Q9BX26;Q6PIF2;O60671;Q8N0S2}

5431 Pathogen[ Q85601] interacts with 3 human partners:{Q9BX26;Q6PIF2;O60671}

5432 Pathogen[ P14079] interacts with 5 human partners:{O60671;O43432;Q6PIF2;Q9BX26;Q96JY0}

5433 Pathogen[ P03383] interacts with 2 human partners:{O60671;Q9BX26}

5434 Pathogen[ P03410] interacts with 5 human partners:{O43432;Q9BX26;O60671;Q6PIF2;Q8N0S2}

5435 Pathogen[ P14075] interacts with 2 human partners:{Q9BX26;O60671}

5436 Pathogen[ P0C206] interacts with 4 human partners:{Q9BX26;Q8N0S2;O60671;Q6PIF2}

5437 Pathogen[ P03363] interacts with 4 human partners:{O60671;Q6PIF2;Q96JY0;Q9BX26}

5438 [Cluster 495]GO:0043374+P biological\_process [name] CD8-positive, alpha-beta T cell differentiation [def] "The process in which a relatively unspecialized T cell acquires specialized features of a mature CD8-positive, alpha-beta T cell." [ISBN

5439 Pathogen[ Q2Q067] interacts with 2 human partners:{P10914;Q01826}

5440 Pathogen[ P0C214] interacts with 2 human partners:{P10914;Q01826}

5441 Pathogen[ P03346] interacts with 3 human partners:{P15863;P10914;Q01826}

5442 Pathogen[ Q85601] interacts with 2 human partners:{P10914;Q01826}

5443 Pathogen[ P14079] interacts with 2 human partners:{Q01826;P10914}

5444 Pathogen[ P03383] interacts with 2 human partners:{P10914;Q01826}

5445 Pathogen[ P03410] interacts with 2 human partners:{Q01826;P10914}

5446 Pathogen[ P14075] interacts with 2 human partners:{Q01826;P10914}

5447 Pathogen[ P0C206] interacts with 2 human partners:{P10914;Q01826}

5448 Pathogen[ P03363] interacts with 2 human partners:{Q01826;P10914}

5449 [Cluster 496]GO:0071243+P biological\_process [name] cellular response to arsenic-containing substance [def] "Any process that results in a change in state or activity of a cell (in terms of movement, secretion, enzyme production, gene expression, etc.) as a result of an arsenic stimulus from compounds containing arsenic, including arsenates, arsenites, and arsenides." [GOC

5450 Pathogen[ Q2Q067] interacts with 3 human partners:{P10746;P06132;P08397}

5451 Pathogen[ P0C214] interacts with 3 human partners:{P06132;P10746;P08397}

5452 Pathogen[ P03346] interacts with 2 human partners:{P10746;P06132}

5453 Pathogen[ Q85601] interacts with 3 human partners:{P10746;P06132;P08397}

5454 Pathogen[ P14079] interacts with 3 human partners:{P10746;P06132;P08397}

5455 Pathogen[ P03383] interacts with 2 human partners:{P06132;P08397}

5456 Pathogen[ P03410] interacts with 3 human partners:{P08397;P06132;P10746}

5457 Pathogen[ P14075] interacts with 2 human partners:{P06132;P08397}

5458 Pathogen[ P0C206] interacts with 3 human partners:{P10746;P08397;P06132}

5459 Pathogen[ P03363] interacts with 1 human partners:{P06132}

5460 [Cluster 497]GO:0007368+P biological\_process [name] determination of left/right symmetry [def] "The establishment of an organism's body plan or part of an organism with respect to the left and right halves. The pattern can either be symmetric, such that the halves are mirror images, or asymmetric where the pattern deviates from this symmetry." [GOC

5461 Pathogen[ Q2Q067] interacts with 6 human partners:{O60481;P48380;Q15468;Q5TAB7;Q15583;Q9UMX1}

5462 Pathogen[ P0C214] interacts with 5 human partners:{Q5TAB7;Q15468;P48380;Q9UMX1;O60481}

5463 Pathogen[ P03346] interacts with 9 human partners:{Q15583;Q68CZ1;P48380;O60481;P78367;Q5TAB7;O75593;Q15468;Q9UMX1}

5464 Pathogen[ Q85601] interacts with 5 human partners:{O60481;Q15583;Q5TAB7;P48380;Q9UMX1}

5465 Pathogen[ P14079] interacts with 11 human partners:{O60481;Q68CZ1;Q15583;P48380;Q9UMX1;Q86VV8;Q8IWZ6;O15066;Q15468;Q9Y366;Q5TAB7}

5466 Pathogen[ P03383] interacts with 5 human partners:{Q5TAB7;P48380;Q15468;O60481;Q9UMX1}

5467 Pathogen[ P03410] interacts with 11 human partners:{Q86VV8;Q5TAB7;O60481;Q15468;Q8TCX1;Q9Y366;Q15583;P48380;Q8IWZ6;Q68CZ1;Q9UMX1}

5468 Pathogen[ P14075] interacts with 5 human partners:{O60481;P48380;Q5TAB7;Q15468;Q9UMX1}

5469 Pathogen[ P0C206] interacts with 6 human partners:{Q15468;O60481;Q9UMX1;P48380;Q5TAB7;Q15583}

5470 Pathogen[ P03363] interacts with 8 human partners:{Q15468;O60481;Q9UMX1;Q5TAB7;Q15583;O15066;P78367;P48380}

5471 [Cluster 498]GO:0048146+P biological\_process [name] positive regulation of fibroblast proliferation [def] "Any process that activates or increases the frequency, rate or extent of multiplication or reproduction of fibroblast cells." [GOC

5472 Pathogen[ Q2Q067] interacts with 10 human partners:{Q01094;P01106;P49356;Q13426;P15408;P35226;P38936;Q15583;P11802;Q00534}

5473 Pathogen[ P0C214] interacts with 10 human partners:{P35226;P11802;P15408;P38936;Q01094;Q00534;Q13426;P49356;P05412;P01106}

5474 Pathogen[ P03346] interacts with 12 human partners:{P05412;P35226;Q15583;Q13426;P15408;P06703;Q01094;P11802;P01106;P49356;Q00534;P38936}

5475 Pathogen[ Q85601] interacts with 11 human partners:{P01106;Q13426;Q15583;P11802;P05412;P49356;P35226;P38936;Q00534;Q01094;P15408}

5476 Pathogen[ P14079] interacts with 12 human partners: {O43181;Q15583;P38936;P49356;P01106;P35226;P06703;P05412;Q01094;P15408;Q13426;P49917}

5477 Pathogen[ P03383] interacts with 8 human partners: {Q01094;P01106;Q00534;P15408;P11802;Q13426;P35226;P05412}

5478 Pathogen[ P03410] interacts with 13 human partners: {Q00534;P01106;P49356;P15408;P06703;Q15583;P38936;P11802;Q13426;P05412;Q01094;O43181;P35226}

5479 Pathogen[ P14075] interacts with 8 human partners: {P05412;P11802;Q00534;P15408;P01106;Q01094;Q13426;P35226}

5480 Pathogen[ P0C206] interacts with 13 human partners: {P35226;P05412;P49917;Q13426;Q01094;P38936;P06703;P01106;P49356;P11802;P15408;Q15583;Q00534}

5481 Pathogen[ P03363] interacts with 9 human partners: {P01106;Q00534;Q13426;Q01094;P35226;Q15583;P05412;P11802;P15408}

5482 [Cluster 499]GO:0010457+P biological\_process [name] centriole-centriole cohesion [def] "The process in which the two centrioles within a centrosome remain tightly paired." [GOC

5483 Pathogen[ Q2Q067] interacts with 3 human partners: {Q5FBB7;Q66GS9;Q9BV73}

5484 Pathogen[ P0C214] interacts with 3 human partners: {Q66GS9;Q9BV73;Q5FBB7}

5485 Pathogen[ P03346] interacts with 3 human partners: {Q5FBB7;Q66GS9;Q9BV73}

5486 Pathogen[ Q85601] interacts with 3 human partners: {Q66GS9;Q9BV73;Q5FBB7}

5487 Pathogen[ P14079] interacts with 3 human partners: {Q66GS9;Q9BV73;Q5FBB7}

5488 Pathogen[ P03383] interacts with 3 human partners: {Q5FBB7;Q9BV73;Q66GS9}

5489 Pathogen[ P03410] interacts with 3 human partners: {Q66GS9;Q5FBB7;Q9BV73}

5490 Pathogen[ P14075] interacts with 3 human partners: {Q66GS9;Q9BV73;Q5FBB7}

5491 Pathogen[ P0C206] interacts with 3 human partners: {Q66GS9;Q5FBB7;Q9BV73}

5492 Pathogen[ P03363] interacts with 3 human partners: {Q66GS9;Q5FBB7;Q9BV73}

5493 [Cluster 500]GO:0030182+P biological\_process [name] neuron differentiation [def] "The process in which a relatively unspecialized cell acquires specialized features of a neuron." [GOC

5494 Pathogen[ Q2Q067] interacts with 23 human partners: {Q12837;P06400;Q01196;A6NFD8;Q99933;P17676;P20265;O60663;P23769;O43711;Q6IQ32;Q92769;Q6RSH7;Q8NFXJ8;P54920;P61201;P31314;O95831;Q9NY43;Q86U70;Q04743;P28370;P78543}

5495 Pathogen[ P0C214] interacts with 19 human partners: {Q6IQ32;P32243;O60663;P78543;P31314;P23769;P61201;Q8NFXJ8;P54920;P17676;P20265;Q12837;P28370;Q99933;Q86U70;Q92769;P06400;Q9NY43;Q6RSH7}

5496 Pathogen[ P03346] interacts with 39 human partners: {Q6RSH7;P50219;Q86U70;A6NFD8;Q9P2K5;P17676;Q05925;Q02535;P48443;P06400;O43711;Q12837;P23769;P19622;Q04743;Q92858;Q92886;Q04741;Q86Z02;Q93045;P20265;O60663;P17542;Q92769;Q6IQ32;P54920;P31273;Q8NFXJ8;O95831;P61201;P28370;Q01196;P31314;P32243;P78543;Q9NY43;P58546;Q99933;Q9H2A3}

5497 Pathogen[ Q85601] interacts with 24 human partners: {P54920;P17676;O95831;Q9P2K5;Q86U70;P06400;P61201;O60663;P23769;Q9NY30;Q6IQ32;Q8NFXJ8;Q99933;P78543;Q92769;A6NFD8;O43711;P32243;Q6RSH7;P28370;P31314;Q12837;Q9NY43;P20265}

5498 Pathogen[ P14079] interacts with 29 human partners: {P78543;Q06413;P61201;Q16517;P20265;P28370;Q86U70;Q9NY43;P48443;Q969N2;Q12837;Q15078;O95831;Q9NQX7;Q93045;Q9NX09;Q92769;O43711;O60663;Q99933;Q9NY30;P32243;Q04743;Q6RSH7;Q6IQ32;A6NFD8;P23769;P54920;Q8NFXJ8}

5499 Pathogen[ P03383] interacts with 20 human partners: {P32243;P54920;Q86U70;P28370;P61201;P23769;O95831;P06400;Q6RSH7;Q6IQ32;P78543;Q92769;O60663;P17676;O43711;Q12837;P31314;Q99933;Q9NY43;P20265}

5500 Pathogen[ P03410] interacts with 31 human partners: {Q99933;P17676;Q16517;Q9NY30;Q9P2K5;A6NFD8;P06400;P31314;O60663;Q6IQ32;Q92769;Q9NQX7;Q86U70;O95831;Q9BVA1;Q8NFXJ8;P61201;Q6RSH7;P78543;P32243;P23769;Q969N2;O43711;P20265;Q12837;Q9NY43;Q04743;Q9NX09;Q93045;P28370;P54920}

5501 Pathogen[ P14075] interacts with 20 human partners: {Q99933;O60663;Q86U70;P23769;P61201;Q12837;P20265;Q6RSH7;P54920;Q9NY43;Q92769;P78543;O95831;O43711;P28370;P06400;Q6IQ32;P31314;P17676;P32243}

5502 Pathogen[ P0C206] interacts with 29 human partners: {Q92769;O43711;P31314;Q9NY43;Q04743;Q9NY30;P54920;Q99933;Q8NFXJ8;A6NFD8;P61201;Q12837;Q93045;Q6RSH7;P32243;P17676;O95831;Q9P2K5;Q6IQ32;Q9NQX7;P28370;P23769;P20265;Q86U70;O60663;P48443;P78543;P06400;Q9H2A3}

5503 Pathogen[ P03363] interacts with 30 human partners: {Q92886;Q86U70;P31273;P19622;P17676;P61201;O60663;P54920;P78543;P32243;P06400;Q93045;Q6RSH7;P20265;P31314;Q05925;Q9P2K5;O43711;Q6IQ32;Q04741;P28370;Q8NFXJ8;Q9NY43;Q12837;P50219;Q99933;Q04743;O95831;A6NFD8;Q9H2A3}

5504 [Cluster 501]GO:0051272+P biological\_process [name] positive regulation of cellular component movement [def] "Any process that activates or increases the frequency, rate or extent of the movement of a cellular component." [GOC

5505 Pathogen[ Q2Q067] interacts with 3 human partners: {P14921;P41182;P39019}

5506 Pathogen[ P0C214] interacts with 3 human partners: {P39019;P14921;P41182}

5507 Pathogen[ P03346] interacts with 3 human partners: {P14921;P41182;P39019}

5508 Pathogen[ Q85601] interacts with 3 human partners: {P14921;P39019;P41182}

5509 Pathogen[ P14079] interacts with 2 human partners:{P39019;P41182}

5510 Pathogen[ P03383] interacts with 2 human partners:{P39019;P14921}

5511 Pathogen[ P03410] interacts with 3 human partners:{P41182;P39019;P14921}

5512 Pathogen[ P14075] interacts with 2 human partners:{P14921;P39019}

5513 Pathogen[ P0C206] interacts with 3 human partners:{P14921;P41182;P39019}

5514 Pathogen[ P03363] interacts with 2 human partners:{P14921;P39019}

5515 [Cluster 502]GO:0001189+P biological\_process [name] RNA polymerase I transcriptional preinitiation complex assembly at the promoter for the nuclear large rRNA transcript [def] "The aggregation, arrangement and bonding together of proteins on CORE promoter element DNA of the nuclear large ribosomal RNA (rRNA) transcript to form a transcriptional preinitiation complex (PIC), the formation of which is a prerequisite for transcription from the large rRNA promoter, resulting in the subsequent synthesis of the large rRNA transcript." [GOC

5516 Pathogen[ Q2Q067] interacts with 1 human partners:{Q53T94}

5517 Pathogen[ P0C214] interacts with 1 human partners:{Q53T94}

5518 Pathogen[ P03346] interacts with 1 human partners:{Q53T94}

5519 Pathogen[ Q85601] interacts with 1 human partners:{Q53T94}

5520 Pathogen[ P14079] interacts with 1 human partners:{Q53T94}

5521 Pathogen[ P03383] interacts with 1 human partners:{Q53T94}

5522 Pathogen[ P03410] interacts with 1 human partners:{Q53T94}

5523 Pathogen[ P14075] interacts with 1 human partners:{Q53T94}

5524 Pathogen[ P0C206] interacts with 1 human partners:{Q53T94}

5525 Pathogen[ P03363] interacts with 1 human partners:{Q53T94}

5526 [Cluster 503]GO:0033120+P biological\_process [name] positive regulation of RNA splicing [def] "Any process that activates or increases the frequency, rate or extent of RNA splicing." [GOC

5527 Pathogen[ Q2Q067] interacts with 2 human partners:{075525;Q8WVV9}

5528 Pathogen[ P0C214] interacts with 2 human partners:{075525;Q8WVV9}

5529 Pathogen[ P03346] interacts with 2 human partners:{Q8WVV9;075525}

5530 Pathogen[ Q85601] interacts with 1 human partners:{075525}

5531 Pathogen[ P14079] interacts with 2 human partners:{Q8WVV9;075525}

5532 Pathogen[ P03383] interacts with 2 human partners:{Q8WVV9;075525}

5533 Pathogen[ P03410] interacts with 2 human partners:{Q8WVV9;075525}

5534 Pathogen[ P14075] interacts with 2 human partners:{075525;Q8WVV9}

5535 Pathogen[ P0C206] interacts with 2 human partners:{Q8WVV9;075525}

5536 Pathogen[ P03363] interacts with 2 human partners:{075525;Q8WVV9}

5537 [Cluster 504]GO:0071407+P biological\_process [name] cellular response to organic cyclic compound [def] "Any process that results in a change in state or activity of a cell (in terms of movement, secretion, enzyme production, gene expression, etc.) as a result of an organic cyclic compound stimulus." [GOC

5538 Pathogen[ Q2Q067] interacts with 10 human partners:{P78406;P08238;P14635;Q9Y297;O15198;P16455;P46527;Q99717;Q15797;P49715}

5539 Pathogen[ P0C214] interacts with 9 human partners:{O15198;P78406;P46527;P14635;Q9Y297;P16455;Q99717;Q15797;P40692}

5540 Pathogen[ P03346] interacts with 9 human partners:{Q15797;P78406;Q99717;P49715;O15198;P14635;P46527;Q9Y297;P08238}

5541 Pathogen[ Q85601] interacts with 10 human partners:{O15198;Q15797;P16455;P78406;P14635;Q99717;P08238;P49715;P40692;P46527}

5542 Pathogen[ P14079] interacts with 11 human partners:{P10109;P13498;P40692;O15198;P16455;Q15797;P14635;P49715;P08238;P78406;P46527}

5543 Pathogen[ P03383] interacts with 7 human partners:{O15198;P78406;Q15797;P14635;P46527;Q99717;P08238}

5544 Pathogen[ P03410] interacts with 10 human partners:{P40692;P46527;P08238;Q99717;O15198;P78406;P14635;Q15797;P16455;P10109}

5545 Pathogen[ P14075] interacts with 6 human partners:{P14635;P78406;Q99717;P08238;P46527;O15198}

5546 Pathogen[ P0C206] interacts with 10 human partners:{P40692;Q99717;P49715;P08238;P46527;Q15797;P78406;P14635;O15198;P16455}

5547 Pathogen[ P03363] interacts with 5 human partners:{Q15797;P78406;Q99717;P08238;O15198}

5548 [Cluster 505]GO:0071218+P biological\_process [name] cellular response to misfolded protein [def] "Any process that results in a change in state or activity of a cell (in terms of movement, secretion, enzyme production, gene expression, etc.) as a result of a misfolded protein stimulus." [GOC

5549 Pathogen[ Q2Q067] interacts with 2 human partners:{P54252;Q9UNE7}

5550 Pathogen[ P0C214] interacts with 3 human partners:{Q96B02;Q9UNE7;P54252}

5551 Pathogen[ P03346] interacts with 2 human partners:{Q9UNE7;P54252}

5552 Pathogen[ Q85601] interacts with 3 human partners:{Q96B02;P54252;Q9UNE7}

5553 Pathogen[ P14079] interacts with 1 human partners:{P54252}

5554 Pathogen[ P03383] interacts with 1 human partners:{P54252}

5555 Pathogen[ P03410] interacts with 2 human partners:{P54252;Q9UNE7}

5556 Pathogen[ P14075] interacts with 1 human partners:{P54252}

5557 Pathogen[ P0C206] interacts with 3 human partners:{P54252;Q9UNE7;Q96B02}

5558 Pathogen[ P03363] interacts with 2 human partners:{P54252;Q9UNE7}

5559 [Cluster 506]GO:0039535+P

5560 Pathogen[ Q2Q067] interacts with 1 human partners:{Q13490}

5561 Pathogen[ P0C214] interacts with 1 human partners:{Q13490}

5562 Pathogen[ P03346] interacts with 2 human partners:{Q13489;Q13490}

5563 Pathogen[ Q85601] interacts with 1 human partners:{Q13490}

5564 Pathogen[ P14079] interacts with 1 human partners:{Q13490}

5565 Pathogen[ P03383] interacts with 1 human partners:{Q13490}

5566 Pathogen[ P03410] interacts with 1 human partners:{Q13490}

5567 Pathogen[ P14075] interacts with 1 human partners:{Q13490}

5568 Pathogen[ P0C206] interacts with 2 human partners:{Q13489;Q13490}

5569 Pathogen[ P03363] interacts with 2 human partners:{Q13490;Q13489}

5570 [Cluster 507]GO:0005999+P biological\_process [name] xylulose biosynthetic process  
[def] "The chemical reactions and pathways resulting in the formation of xylulose, the  
ketopentose threo-2-pentulose." [ISBN

5571 Pathogen[ Q2Q067] interacts with 1 human partners:{P37837}

5572 Pathogen[ P0C214] interacts with 2 human partners:{P29401;P37837}

5573 Pathogen[ P03346] interacts with 1 human partners:{P37837}

5574 Pathogen[ Q85601] interacts with 1 human partners:{P37837}

5575 Pathogen[ P14079] interacts with 2 human partners:{P29401;P37837}

5576 Pathogen[ P03383] interacts with 1 human partners:{P37837}

5577 Pathogen[ P03410] interacts with 1 human partners:{P37837}

5578 Pathogen[ P14075] interacts with 1 human partners:{P37837}

5579 Pathogen[ P0C206] interacts with 2 human partners:{P37837;P29401}

5580 Pathogen[ P03363] interacts with 1 human partners:{P37837}

5581 [Cluster 508]GO:0032728+P biological\_process [name] positive regulation of  
interferon-beta production [def] "Any process that activates or increases the  
frequency, rate, or extent of interferon-beta production." [GOC

5582 Pathogen[ Q2Q067] interacts with 11 human  
partners:{Q92985;Q7Z2W4;Q9BUI4;Q14653;P10914;O15318;Q9BYX4;P05423;O14802;Q9H1D9;Q8IU  
D6}

5583 Pathogen[ P0C214] interacts with 12 human  
partners:{Q9BUI4;Q9H1D9;Q8IUD6;P10914;Q9BYX4;P05423;Q7Z2W4;Q92985;O15318;Q9NW08;Q146  
53;O14802}

5584 Pathogen[ P03346] interacts with 11 human  
partners:{Q8IUD6;P05423;O15318;P10914;Q9H1D9;Q9BUI4;Q14653;Q9BYX4;Q92985;O14802;Q7Z2  
W4}

5585 Pathogen[ Q85601] interacts with 12 human  
partners:{Q9H1D9;Q9BUI4;Q7Z2W4;Q8IUD6;P05423;P10914;Q14653;Q9BYX4;Q92985;Q9NW08;O148  
02;O15318}

5586 Pathogen[ P14079] interacts with 13 human  
partners:{Q9BYX4;Q14653;Q7Z2W4;Q9NW08;Q92985;Q7Z434;Q9BUI4;P05423;O14802;O15318;Q9H1  
D9;Q8IUD6;P10914}

5587 Pathogen[ P03383] interacts with 7 human  
partners:{P10914;Q14653;Q9H1D9;Q92985;O15318;O14802;Q7Z2W4}

5588 Pathogen[ P03410] interacts with 12 human  
partners:{Q14653;Q9BYX4;O15318;Q7Z434;Q9NW08;Q7Z2W4;P10914;P05423;Q9H1D9;Q92985;O148  
02;Q9BUI4}

5589 Pathogen[ P14075] interacts with 7 human  
partners:{Q14653;Q9H1D9;Q7Z2W4;Q92985;P10914;O14802;O15318}

5590 Pathogen[ P0C206] interacts with 12 human  
partners:{P10914;Q9NW08;Q9BUI4;Q8IUD6;O15318;P05423;Q92985;Q9BYX4;Q7Z2W4;O14802;Q9H1  
D9;Q14653}

5591 Pathogen[ P03363] interacts with 9 human  
partners:{Q14653;Q92985;Q7Z2W4;Q9H1D9;P05423;O15318;P10914;Q8IUD6;Q9BYX4}

5592 [Cluster 509]GO:0070208+P biological\_process [name] protein heterotrimerization  
[def] "The formation of a protein heterotrimer, a macromolecular structure consisting of  
three noncovalently associated subunits, of which not all are identical." [GOC

5593 Pathogen[ Q2Q067] interacts with 2 human partners:{P67775;P12757}

5594 Pathogen[ P0C214] interacts with 2 human partners:{P12757;P67775}

5595 Pathogen[ P03346] interacts with 2 human partners:{P12757;P67775}

5596 Pathogen[ Q85601] interacts with 2 human partners:{P12757;P67775}

5597 Pathogen[ P14079] interacts with 1 human partners:{P12757}

5598 Pathogen[ P03383] interacts with 2 human partners:{P67775;P12757}

5599 Pathogen[ P03410] interacts with 2 human partners:{P12757;P67775}

5600 Pathogen[ P14075] interacts with 2 human partners:{P12757;P67775}

5601 Pathogen[ P0C206] interacts with 2 human partners:{P67775;P12757}

5602 Pathogen[ P03363] interacts with 2 human partners:{P12757;P67775}

5603 [Cluster 510]GO:2000377+P biological\_process [name] regulation of reactive oxygen  
species metabolic process [def] "Any process that modulates the frequency, rate or  
extent of reactive oxygen species metabolic process." [GOC

5604 Pathogen[ Q2Q067] interacts with 3 human partners:{O60260;Q08050;Q7Z2X4}

5605 Pathogen[ P0C214] interacts with 3 human partners:{Q7Z2X4;Q9H4P4;O60260}

5606 Pathogen[ P03346] interacts with 4 human partners:{Q9H4P4;Q08050;Q7Z2X4;O60260}

5607 Pathogen[ Q85601] interacts with 4 human partners:{Q7Z2X4;O60260;Q08050;Q9H4P4}

5608 Pathogen[ P14079] interacts with 3 human partners:{O60260;P46695;Q7Z2X4}

5609 Pathogen[ P03383] interacts with 1 human partners:{O60260}

5610 Pathogen[ P03410] interacts with 3 human partners:{O60260;Q7Z2X4;P46695}

5611 Pathogen[ P14075] interacts with 2 human partners:{Q08050;O60260}

5612 Pathogen[ P0C206] interacts with 4 human partners:{Q7Z2X4;Q9H4P4;O60260;Q08050}

5613 Pathogen[ P03363] interacts with 2 human partners:{Q08050;Q9H4P4}

5614 [Cluster 511]GO:0000303+P biological\_process [name] response to superoxide [def] "Any process that results in a change in state or activity of a cell or an organism (in terms of movement, secretion, enzyme production, gene expression, etc.) as a result of a superoxide stimulus. Superoxide is the anion, oxygen-, formed by addition of one electron to dioxygen (O2) or any compound containing the superoxide anion." [GOC

5615 Pathogen[ Q2Q067] interacts with 1 human partners:{Q03468}

5616 Pathogen[ P0C214] interacts with 1 human partners:{Q03468}

5617 Pathogen[ P03346] interacts with 1 human partners:{Q03468}

5618 Pathogen[ Q85601] interacts with 1 human partners:{Q03468}

5619 Pathogen[ P14079] interacts with 1 human partners:{Q03468}

5620 Pathogen[ P03383] interacts with 1 human partners:{Q03468}

5621 Pathogen[ P03410] interacts with 1 human partners:{Q03468}

5622 Pathogen[ P14075] interacts with 1 human partners:{Q03468}

5623 Pathogen[ P0C206] interacts with 1 human partners:{Q03468}

5624 Pathogen[ P03363] interacts with 1 human partners:{Q03468}

5625 [Cluster 512]GO:0042347+P biological\_process [name] negative regulation of NF-kappaB import into nucleus [def] "Any process that stops, prevents, or reduces the frequency, rate or extent of the transfer of NF-kappaB, a transcription factor for eukaryotic RNA polymerase II promoters, from the cytoplasm into the nucleus, across the nuclear membrane." [GOC

5626 Pathogen[ Q2Q067] interacts with 1 human partners:{Q9BZF9}

5627 Pathogen[ P0C214] interacts with 1 human partners:{Q9BZF9}

5628 Pathogen[ P03346] interacts with 1 human partners:{Q9BZF9}

5629 Pathogen[ Q85601] interacts with 2 human partners:{Q9BZF9;Q9NQC7}

5630 Pathogen[ P14079] interacts with 2 human partners:{Q9BZF9;Q9NQC7}

5631 Pathogen[ P03383] interacts with 1 human partners:{Q9BZF9}

5632 Pathogen[ P03410] interacts with 1 human partners:{Q9BZF9}

5633 Pathogen[ P14075] interacts with 1 human partners:{Q9BZF9}

5634 Pathogen[ P0C206] interacts with 2 human partners:{Q9NQC7;Q9BZF9}

5635 Pathogen[ P03363] interacts with 1 human partners:{Q9BZF9}

5636 [Cluster 513]GO:0032012+P biological\_process [name] regulation of ARF protein signal transduction [def] "Any process that modulates the frequency, rate or extent of ARF protein signal transduction." [GOC

5637 Pathogen[ Q2Q067] interacts with 1 human partners:{Q9Y6D6}

5638 Pathogen[ P0C214] interacts with 1 human partners:{Q9Y6D6}

5639 Pathogen[ P03346] interacts with 6 human partners:{Q5JU85;Q15438;Q9Y6D5;Q9Y6D6;Q6DN90;Q9UPP2}

5640 Pathogen[ Q85601] interacts with 1 human partners:{Q9Y6D6}

5641 Pathogen[ P14079] interacts with 5 human partners:{Q9UPP2;Q9Y6D5;Q9Y6D6;Q6DN90;Q15438}

5642 Pathogen[ P03383] interacts with 1 human partners:{Q9Y6D6}

5643 Pathogen[ P03410] interacts with 4 human partners:{Q9UPP2;Q9Y6D6;Q9Y6D5;Q15438}

5644 Pathogen[ P14075] interacts with 1 human partners:{Q9Y6D6}

5645 Pathogen[ P0C206] interacts with 3 human partners:{Q9Y6D6;Q9Y6D5;Q9UPP2}

5646 Pathogen[ P03363] interacts with 5 human partners:{Q15438;Q9UPP2;Q5JU85;Q6DN90;Q9Y6D6}

5647 [Cluster 514]GO:0048011+P biological\_process [name] nerve growth factor receptor signaling pathway [def] "The series of molecular signals generated as a consequence of the nerve growth factor receptor binding to one of its physiological ligands." [GOC

5648 Pathogen[ Q2Q067] interacts with 53 human partners:{P46108;Q9Y3A2;O94973;P31749;Q9Y5V3;O95782;P40763;Q13352;P62258;Q04206;Q00994;Q5T1C6;Q96B36;Q13547;O15379;P56945;Q9NY61;P63010;Q96CW1;O43524;Q99608;O75582;Q9BPZ7;Q00610;Q9BVC4;Q92769;Q92529;P42575;P19419;P19838;Q96RU7;Q99962;P25963;P0CG47;O14920;P31946;Q9UKN5;P0CG48;P27986;P63000;P62987;P09496;P46527;Q6R327;P61586;O15111;Q00987;P22736;Q15759;Q16829;Q13501;Q02078;P62979}

5649 Pathogen[ P0C214] interacts with 58 human partners:{Q9BPZ7;Q96CW1;Q9UKN5;O60346;P63000;O15111;Q9Y5V3;Q9BVC4;Q13547;P56945;P19838;P62993;Q92934;Q00987;Q00994;P19419;P61586;P46527;Q04206;Q99608;Q92529;Q99962;Q9NY61;P52565;Q02078;Q13501;P63010;Q6R327;P0CG48;Q96B36;Q92769;Q13352;P42574;P25963;O15379;Q16829;O75582;P62987;Q96RU7;O94973;Q15759;P0CG47;P40763;P09496;Q5T1C6;O95782;P16220;P46108;P31946;P62979;P53680;P98171;P27986;O14920;P42575;P31749;P18846;Q9Y3A2}

5650 Pathogen[ P03346] interacts with 66 human partners:{Q9Y3A2;O60346;Q02078;O15111;P16220;P98171;P63010;P62987;O15379;P25963;Q9BVC4;P53680;Q9BPZ7;P42575;Q99962;P62258;P19419;P0CG48;Q04206;Q12802;O95782;P62993;P42574;Q00994;P52565;P09496;Q00987;Q96B36;P56945;P22736;P31749;Q92769;Q13547;Q96CW1;Q9NY61;Q12778;O75582;P98177;Q9Y5V3;P46108;Q16829;P62979;Q96RU7;Q99608;Q5VV41;P31946;P55211;Q15759;P0CG47;P19838;O14920;Q9H8V3;Q6R327;Q92529;P46527;O94973;P40763;O43524;Q9UKN5;P63000;Q00610;Q13352;P27986;P18846;Q13501;P61586}

5651 Pathogen[ Q85601] interacts with 58 human partners:{O60346;Q02078;P31946;Q00610;P31749;P62993;P09496;Q96CW1;Q9NY61;O15111;Q9BPZ7;Q99962;Q9UKN5;P19419;P40763;Q16829;Q9Y3A2;P63000;P46108;P18846;Q96B36;P0CG48;P52565;Q99608;Q96015;P27986;Q9BVC4;Q13352;P56945;P62258;Q92769;P42575;P16220;O14920;Q04206;Q9Y5V3;P22736;Q92529;P53680;O75582;P61586;P62979;O94973;Q96RU7;Q15759;P0CG47;O153

79;P63010;Q13547;Q00994;P62987;Q00987;P19838;Q5T1C6;Q13501;P46527;O95782;P25963}  
5652 Pathogen[ P14079] interacts with 62 human  
partners: {Q6R327;O15379;Q96CW1;P52565;Q02078;P0CG48;Q06413;Q00610;Q9Y3A2;Q9NY61;O755  
82;Q16829;Q92542;P98171;Q9NZ42;Q00994;P22736;O60346;P62979;Q9BVC4;Q99608;P62987;Q009  
87;P10911;Q12802;P45983;Q9Y5V3;O95782;Q16644;Q9NX09;Q92769;Q92934;P31946;Q15759;Q5T1  
C6;P61586;Q9H8V3;Q8WU20;P63010;P62258;Q13501;O94973;Q8WW43;Q96RU7;P62993;P46527;Q131  
64;Q96B36;P42575;Q9UKN5;Q9BPZ7;O96015;Q92529;P0CG47;Q13352;P53680;Q99836;P46108;P094  
96;P19419;Q99962;Q5VV41}  
5653 Pathogen[ P03383] interacts with 43 human  
partners: {Q96CW1;P27986;Q9NY61;P56945;O75582;Q00610;P16220;P62987;O14920;P31946;Q996  
08;P31749;Q9BPZ7;O15111;P19419;P63000;P98171;O15111;P42575;O75582;Q99608;Q9BPZ7;Q9NY61;Q135  
10;P46527;Q92769;Q9Y5V3;Q9UKN5;O15379;O95782;Q15759;P25963;Q13501;Q13547;Q96RU7;P629  
79;P0CG47;Q04206;P0CG48;O94973;P19838;P62258;Q5T1C6;Q02078}  
5654 Pathogen[ P03410] interacts with 68 human  
partners: {Q00610;P09496;P62258;Q04206;O95782;P19838;P46527;Q96CW1;Q92529;P27986;P0CG  
48;O14920;P53680;P19419;P63000;P98171;O15111;P42575;O75582;Q99608;Q9BPZ7;Q9NY61;Q135  
01;P31749;Q92934;Q9BVC4;P62979;P18846;Q9NZ42;Q00994;Q96B36;Q16829;Q92769;Q5T1C6;Q9UK  
N5;P61586;O15379;Q5VV41;P22736;P16220;Q6R327;Q96RU7;P63010;Q9Y5V3;O60346;P46108;P629  
87;P56945;Q13547;Q9BZR6;Q8WW43;Q02078;Q92542;Q99962;Q00987;Q9Y3A2;Q9H8V3;Q8WU20;P259  
63;P52565;P62993;P40763;Q9NX09;O94973;P0CG47;Q13352;P31946;O96015}  
5655 Pathogen[ P14075] interacts with 45 human  
partners: {Q99608;O15111;P09496;Q04206;O94973;Q96CW1;Q15759;Q9UKN5;O75582;P19419;Q9NY  
61;Q00994;Q5T1C6;P25963;Q13547;P46527;Q9BPZ7;Q96B36;O14920;P31749;P0CG48;P62979;Q927  
69;Q6R327;O95782;P27986;P62987;P61586;Q02078;P63000;Q96RU7;O15379;P63010;P0CG47;P198  
38;P16220;P31946;Q13352;Q9Y3A2;Q9Y5V3;Q00610;Q13501;P56945;P18846;P62258}  
5656 Pathogen[ P0C206] interacts with 66 human  
partners: {P53680;P63010;Q13501;Q92769;P0CG48;O94973;O14920;P31749;Q9NZ42;Q02078;P162  
20;O75582;Q96B36;P52565;P25963;Q9Y5V3;P19419;Q00610;Q13547;Q99962;P18846;Q92542;P227  
36;Q16829;Q00994;P27986;P62993;Q96RU7;P09496;P61586;P31946;Q92934;P19838;Q6R327;P630  
00;P62258;Q9UKN5;Q8WU20;O15379;Q04206;Q96CW1;O15111;P62979;Q5T1C6;P46527;Q13352;Q996  
08;Q9BPZ7;P42574;Q9H8V3;P40763;O95782;P98171;P0CG47;P42575;P56945;O60346;P46108;Q925  
29;P62987;Q00987;Q9NY61;Q15759;Q9Y3A2;O96015;Q9BVC4}  
5657 Pathogen[ P03363] interacts with 42 human  
partners: {Q9BVC4;P62258;Q96B36;Q99962;O14920;Q04206;P52565;Q5VV41;Q9UKN5;P25963;O151  
11;O15379;P31946;P16220;P98171;P19419;Q00610;P63000;O94973;Q99608;Q92529;P10911;O435  
24;Q9NY61;Q16829;P31749;P18846;P63010;P62987;P46108;Q13547;Q00994;P19838;O95782;P569  
45;Q9Y5V3;Q9Y3A2;Q13352;P27986;Q6R327;Q96CW1;Q02078}  
5658 [Cluster 515]GO:0055070+P biological\_process [name] copper ion homeostasis [def]  
"Any process involved in the maintenance of an internal steady state of copper ions  
within an organism or cell." [GOC  
5659 Pathogen[ Q2Q067] interacts with 2 human partners: {Q9NTM9;Q8N668}  
5660 Pathogen[ P0C214] interacts with 3 human partners: {Q8N668;P98170;Q9NTM9}  
5661 Pathogen[ P03346] interacts with 3 human partners: {Q8N668;Q9NTM9;P98170}  
5662 Pathogen[ Q85601] interacts with 2 human partners: {P98170;Q8N668}  
5663 Pathogen[ P14079] interacts with 3 human partners: {Q9NTM9;Q8N668;O43819}  
5664 Pathogen[ P03383] interacts with 1 human partners: {Q8N668}  
5665 Pathogen[ P03410] interacts with 3 human partners: {Q9NTM9;Q8N668;O43819}  
5666 Pathogen[ P14075] interacts with 2 human partners: {Q9NTM9;Q8N668}  
5667 Pathogen[ P0C206] interacts with 3 human partners: {P98170;Q8N668;Q9NTM9}  
5668 Pathogen[ P03363] interacts with 3 human partners: {Q8N668;P98170;Q9NTM9}  
5669 [Cluster 516]GO:0070507+P biological\_process [name] regulation of microtubule  
cytoskeleton organization [def] "Any process that modulates the frequency, rate or  
extent of the formation, arrangement of constituent parts, or disassembly of  
cytoskeletal structures comprising microtubules and their associated proteins." [GOC  
5670 Pathogen[ Q2Q067] interacts with 1 human partners: {Q9P1Y5}  
5671 Pathogen[ P0C214] interacts with 1 human partners: {Q9P1Y5}  
5672 Pathogen[ P03346] interacts with 1 human partners: {Q9P1Y5}  
5673 Pathogen[ Q85601] interacts with 2 human partners: {Q9P1Y5;Q9NQC7}  
5674 Pathogen[ P14079] interacts with 3 human partners: {Q15078;Q9P1Y5;Q9NQC7}  
5675 Pathogen[ P03383] interacts with 1 human partners: {Q9P1Y5}  
5676 Pathogen[ P03410] interacts with 1 human partners: {Q9P1Y5}  
5677 Pathogen[ P14075] interacts with 1 human partners: {Q9P1Y5}  
5678 Pathogen[ P0C206] interacts with 2 human partners: {Q9NQC7;Q9P1Y5}  
5679 Pathogen[ P03363] interacts with 1 human partners: {Q9P1Y5}  
5680 [Cluster 517]GO:0019367+P biological\_process [name] fatty acid elongation, saturated  
fatty acid [def] "Elongation of a saturated fatty acid chain." [GOC  
5681 Pathogen[ Q2Q067] interacts with 5 human  
partners: {Q9H5J4;Q9BW60;Q9GZR5;A1L3X0;Q9HB03}  
5682 Pathogen[ P0C214] interacts with 4 human partners: {Q9GZR5;Q9HB03;A1L3X0;Q9BW60}  
5683 Pathogen[ P03346] interacts with 3 human partners: {Q9BW60;Q9H5J4;Q9HB03}  
5684 Pathogen[ Q85601] interacts with 5 human  
partners: {A1L3X0;Q9BW60;Q9H5J4;Q9HB03;Q9GZR5}  
5685 Pathogen[ P14079] interacts with 5 human  
partners: {A1L3X0;Q9HB03;Q9GZR5;Q9BW60;Q9H5J4}  
5686 Pathogen[ P03383] interacts with 5 human  
partners: {Q9BW60;Q9GZR5;Q9H5J4;A1L3X0;Q9HB03}



5687 Pathogen[ P03410] interacts with 5 human partners:{A1L3X0;Q9GZR5;Q9H5J4;Q9BW60;Q9HB03}

5688 Pathogen[ P14075] interacts with 5 human partners:{Q9H5J4;Q9BW60;Q9HB03;A1L3X0;Q9GZR5}

5689 Pathogen[ P0C206] interacts with 5 human partners:{Q9HB03;Q9H5J4;Q9GZR5;A1L3X0;Q9BW60}

5690 Pathogen[ P03363] interacts with 1 human partners:{Q9H5J4}

5691 [Cluster 518]GO:0045670+P biological\_process [name] regulation of osteoclast differentiation [def] "Any process that modulates the frequency, rate or extent of osteoclast differentiation." [GOC

5692 Pathogen[ Q2Q067] interacts with 3 human partners:{P19532;O75030;P11474}

5693 Pathogen[ P0C214] interacts with 4 human partners:{P11474;Q9BRX8;O75030;P19532}

5694 Pathogen[ P03346] interacts with 3 human partners:{O75030;P19532;P11474}

5695 Pathogen[ Q85601] interacts with 3 human partners:{O75030;P19532;P11474}

5696 Pathogen[ P14079] interacts with 4 human partners:{P11474;Q9BRX8;P19532;O75030}

5697 Pathogen[ P03383] interacts with 3 human partners:{O75030;P11474;P19532}

5698 Pathogen[ P03410] interacts with 4 human partners:{O75030;P19532;P11474;Q9BRX8}

5699 Pathogen[ P14075] interacts with 3 human partners:{O75030;P11474;P19532}

5700 Pathogen[ P0C206] interacts with 4 human partners:{O75030;P19532;P11474;Q9BRX8}

5701 Pathogen[ P03363] interacts with 3 human partners:{P11474;O75030;P19532}

5702 [Cluster 519]GO:0042220+P biological\_process [name] response to cocaine [def] "Any process that results in a change in state or activity of a cell or an organism (in terms of movement, secretion, enzyme production, gene expression, etc.) as a result of a cocaine stimulus. Cocaine is a crystalline alkaloid obtained from the leaves of the coca plant." [CHEBI

5703 Pathogen[ Q2Q067] interacts with 1 human partners:{Q9UQL6}

5704 Pathogen[ P0C214] interacts with 1 human partners:{Q9UQL6}

5705 Pathogen[ P03346] interacts with 2 human partners:{P50135;Q9UQL6}

5706 Pathogen[ Q85601] interacts with 1 human partners:{Q9UQL6}

5707 Pathogen[ P14079] interacts with 3 human partners:{Q9UQL6;P50135;P17405}

5708 Pathogen[ P03383] interacts with 1 human partners:{Q9UQL6}

5709 Pathogen[ P03410] interacts with 3 human partners:{Q9UQL6;P50135;P17405}

5710 Pathogen[ P14075] interacts with 1 human partners:{Q9UQL6}

5711 Pathogen[ P0C206] interacts with 2 human partners:{P50135;Q9UQL6}

5712 Pathogen[ P03363] interacts with 2 human partners:{P50135;Q9UQL6}

5713 [Cluster 520]GO:2000393+P biological\_process [name] negative regulation of lamellipodium morphogenesis [def] "Any process that stops, prevents or reduces the frequency, rate or extent of lamellipodium morphogenesis." [GOC

5714 Pathogen[ Q2Q067] interacts with 1 human partners:{Q14678}

5715 Pathogen[ P0C214] interacts with 1 human partners:{Q14678}

5716 Pathogen[ P03346] interacts with 1 human partners:{Q14678}

5717 Pathogen[ Q85601] interacts with 1 human partners:{Q14678}

5718 Pathogen[ P14079] interacts with 1 human partners:{Q14678}

5719 Pathogen[ P03383] interacts with 1 human partners:{Q14678}

5720 Pathogen[ P03410] interacts with 1 human partners:{Q14678}

5721 Pathogen[ P14075] interacts with 1 human partners:{Q14678}

5722 Pathogen[ P0C206] interacts with 1 human partners:{Q14678}

5723 Pathogen[ P03363] interacts with 1 human partners:{Q14678}

5724 [Cluster 521]GO:0010862+P biological\_process [name] positive regulation of pathway-restricted SMAD protein phosphorylation [def] "Any process that increases the rate, frequency or extent of pathway-restricted SMAD protein phosphorylation. Pathway-restricted SMAD proteins and common-partner SMAD proteins are involved in the transforming growth factor beta receptor signaling pathways." [GOC

5725 Pathogen[ Q2Q067] interacts with 3 human partners:{Q13485;P67870;Q93062}

5726 Pathogen[ P0C214] interacts with 3 human partners:{Q13485;P67870;Q93062}

5727 Pathogen[ P03346] interacts with 3 human partners:{Q93062;Q13485;P67870}

5728 Pathogen[ Q85601] interacts with 3 human partners:{P67870;Q13485;Q93062}

5729 Pathogen[ P14079] interacts with 2 human partners:{Q93062;P67870}

5730 Pathogen[ P03383] interacts with 3 human partners:{Q13485;P67870;Q93062}

5731 Pathogen[ P03410] interacts with 3 human partners:{Q93062;Q13485;P67870}

5732 Pathogen[ P14075] interacts with 3 human partners:{Q93062;Q13485;P67870}

5733 Pathogen[ P0C206] interacts with 3 human partners:{P67870;Q13485;Q93062}

5734 Pathogen[ P03363] interacts with 2 human partners:{Q13485;P67870}

5735 [Cluster 522]GO:0045821+P biological\_process [name] positive regulation of glycolysis [def] "Any process that activates or increases the frequency, rate or extent of glycolysis." [GOC

5736 Pathogen[ Q2Q067] interacts with 3 human partners:{P27540;O14556;Q9NP71}

5737 Pathogen[ P0C214] interacts with 3 human partners:{O14556;Q9NP71;P27540}

5738 Pathogen[ P03346] interacts with 3 human partners:{P27540;Q9NP71;O14556}

5739 Pathogen[ Q85601] interacts with 3 human partners:{P27540;Q9NP71;O14556}

5740 Pathogen[ P14079] interacts with 2 human partners:{P27540;Q9NP71}

5741 Pathogen[ P03383] interacts with 3 human partners:{P27540;Q9NP71;O14556}

5742 Pathogen[ P03410] interacts with 3 human partners:{O14556;P27540;Q9NP71}

5743 Pathogen[ P14075] interacts with 3 human partners:{P27540;Q9NP71;O14556}

5744 Pathogen[ P0C206] interacts with 3 human partners:{Q9NP71;O14556;P27540}

5745 Pathogen[ P03363] interacts with 3 human partners:{P27540;Q9NP71;O14556}

5746 [Cluster 523]GO:0030278+P biological\_process [name] regulation of ossification  
[def] "Any process that modulates the frequency, rate or extent of bone formation." [GOC]

5747 Pathogen[ Q2Q067] interacts with 3 human partners:{P11161;P11474;P40424}

5748 Pathogen[ P0C214] interacts with 4 human partners:{P40424;P11474;Q8WXG1;P11161}

5749 Pathogen[ P03346] interacts with 3 human partners:{P11161;P11474;P40424}

5750 Pathogen[ Q85601] interacts with 3 human partners:{P40424;P11474;P11161}

5751 Pathogen[ P14079] interacts with 3 human partners:{P11474;P11161;Q8WXG1}

5752 Pathogen[ P03383] interacts with 3 human partners:{P40424;P11474;P11161}

5753 Pathogen[ P03410] interacts with 4 human partners:{Q8WXG1;P11474;P40424;P11161}

5754 Pathogen[ P14075] interacts with 3 human partners:{P40424;P11474;P11161}

5755 Pathogen[ P0C206] interacts with 4 human partners:{P11161;P40424;P11474;Q8WXG1}

5756 Pathogen[ P03363] interacts with 3 human partners:{P11474;P40424;P11161}

5757 [Cluster 524]GO:0001661+P biological\_process [name] conditioned taste aversion  
[def] "A conditioned aversion to a specific chemical compound as a result of that compound being coupled with a noxious stimulus." [GOC]

5758 Pathogen[ Q2Q067] interacts with 1 human partners:{P01100}

5759 Pathogen[ P0C214] interacts with 1 human partners:{P01100}

5760 Pathogen[ P03346] interacts with 1 human partners:{P01100}

5761 Pathogen[ Q85601] interacts with 1 human partners:{P01100}

5762 Pathogen[ P14079] interacts with 1 human partners:{P01100}

5763 Pathogen[ P03383] interacts with 1 human partners:{P01100}

5764 Pathogen[ P03410] interacts with 1 human partners:{P01100}

5765 Pathogen[ P14075] interacts with 1 human partners:{P01100}

5766 Pathogen[ P0C206] interacts with 1 human partners:{P01100}

5767 Pathogen[ P03363] interacts with 1 human partners:{P01100}

5768 [Cluster 525]GO:0051146+P biological\_process [name] striated muscle cell differentiation [def] "The process in which a relatively unspecialized cell acquires specialized features of a striated muscle cell\_ striated muscle fibers are divided by transverse bands into striations, and cardiac and voluntary muscle are types of striated muscle." [CL]

5769 Pathogen[ Q2Q067] interacts with 4 human partners:{P31749;P06400;Q12982;P15172}

5770 Pathogen[ P0C214] interacts with 4 human partners:{P15172;Q12982;P06400;P31749}

5771 Pathogen[ P03346] interacts with 5 human partners:{P06400;P15172;P31749;Q12982;P58546}

5772 Pathogen[ Q85601] interacts with 4 human partners:{P31749;P15172;P06400;Q12982}

5773 Pathogen[ P14079] interacts with 1 human partners:{Q12982}

5774 Pathogen[ P03383] interacts with 3 human partners:{P15172;P31749;P06400}

5775 Pathogen[ P03410] interacts with 3 human partners:{P31749;P06400;Q12982}

5776 Pathogen[ P14075] interacts with 3 human partners:{P15172;P31749;P06400}

5777 Pathogen[ P0C206] interacts with 4 human partners:{Q12982;P31749;P15172;P06400}

5778 Pathogen[ P03363] interacts with 4 human partners:{P06400;P31749;P15172;Q12982}

5779 [Cluster 526]GO:0045022+P biological\_process [name] early endosome to late endosome transport [def] "The directed movement of substances, in membrane-bounded vesicles, from the early sorting endosomes to the late sorting endosomes\_ transport occurs along microtubules and can be experimentally blocked with microtubule-depolymerizing drugs." [ISBN]

5780 Pathogen[ Q2Q067] interacts with 4 human partners:{Q8N612;Q9H8T0;Q86VS8;Q96ED9}

5781 Pathogen[ P0C214] interacts with 4 human partners:{Q96ED9;Q8N612;Q86VS8;Q9H8T0}

5782 Pathogen[ P03346] interacts with 5 human partners:{Q86VS8;Q8N612;Q9H8T0;Q96ED9;Q9UJC3}

5783 Pathogen[ Q85601] interacts with 4 human partners:{Q86VS8;Q8N612;Q9H8T0;Q96ED9}

5784 Pathogen[ P14079] interacts with 6 human partners:{Q9UJC3;Q86VS8;Q96ED9;Q9H8T0;Q15075;Q8N612}

5785 Pathogen[ P03383] interacts with 4 human partners:{Q8N612;Q9H8T0;Q86VS8;Q96ED9}

5786 Pathogen[ P03410] interacts with 5 human partners:{Q9UJC3;Q9H8T0;Q86VS8;Q96ED9;Q8N612}

5787 Pathogen[ P14075] interacts with 4 human partners:{Q8N612;Q9H8T0;Q86VS8;Q96ED9}

5788 Pathogen[ P0C206] interacts with 5 human partners:{Q9H8T0;Q86VS8;Q96ED9;Q8N612;Q9UJC3}

5789 Pathogen[ P03363] interacts with 6 human partners:{Q86VS8;Q96ED9;Q9H8T0;Q96NW4;Q8N612;Q9UJC3}

5790 [Cluster 527]GO:0046578+P biological\_process [name] regulation of Ras protein signal transduction [def] "Any process that modulates the frequency, rate or extent of Ras protein signal transduction." [GOC]

5791 Pathogen[ Q2Q067] interacts with 3 human partners:{Q08050;P37198;Q13501}

5792 Pathogen[ P0C214] interacts with 2 human partners:{Q13501;P37198}

5793 Pathogen[ P03346] interacts with 3 human partners:{Q08050;P37198;Q13501}

5794 Pathogen[ Q85601] interacts with 2 human partners:{Q08050;Q13501}

5795 Pathogen[ P14079] interacts with 2 human partners:{P37198;Q13501}

5796 Pathogen[ P03383] interacts with 2 human partners:{Q13501;P37198}

5797 Pathogen[ P03410] interacts with 1 human partners:{Q13501}

5798 Pathogen[ P14075] interacts with 3 human partners:{Q08050;P37198;Q13501}

5799 Pathogen[ P0C206] interacts with 2 human partners:{Q13501;Q08050}

5800 Pathogen[ P03363] interacts with 2 human partners:{Q08050;P37198}

5801 [Cluster 528]GO:0031123+P biological\_process [name] RNA 3'-end processing [def] "Any process involved in forming the mature 3' end of an RNA molecule." [GOC]

5802 Pathogen[ Q2Q067] interacts with 4 human partners: {Q5TAX3;Q9H9Z2;Q6ZN17;P51003}

5803 Pathogen[ P0C214] interacts with 4 human partners: {Q6ZN17;P51003;Q9H9Z2;Q5TAX3}

5804 Pathogen[ P03346] interacts with 4 human partners: {P51003;Q5TAX3;Q9H9Z2;Q6ZN17}

5805 Pathogen[ Q85601] interacts with 4 human partners: {Q6ZN17;Q5TAX3;P51003;Q9H9Z2}

5806 Pathogen[ P14079] interacts with 4 human partners: {Q9H9Z2;Q5TAX3;P51003;Q6ZN17}

5807 Pathogen[ P03383] interacts with 4 human partners: {P51003;Q9H9Z2;Q6ZN17;Q5TAX3}

5808 Pathogen[ P03410] interacts with 4 human partners: {Q5TAX3;P51003;Q9H9Z2;Q6ZN17}

5809 Pathogen[ P14075] interacts with 4 human partners: {P51003;Q9H9Z2;Q5TAX3;Q6ZN17}

5810 Pathogen[ P0C206] interacts with 4 human partners: {P51003;Q6ZN17;Q9H9Z2;Q5TAX3}

5811 Pathogen[ P03363] interacts with 4 human partners: {Q6ZN17;P51003;Q9H9Z2;Q5TAX3}

5812 [Cluster 529]GO:0032330+P biological\_process [name] regulation of chondrocyte differentiation [def] "Any process that modulates the frequency, rate or extent of chondrocyte differentiation." [GOC

5813 Pathogen[ Q2Q067] interacts with 2 human partners: {Q9UHF7;O75444}

5814 Pathogen[ P0C214] interacts with 2 human partners: {O75444;Q9UHF7}

5815 Pathogen[ P03346] interacts with 2 human partners: {Q9UHF7;O75444}

5816 Pathogen[ Q85601] interacts with 2 human partners: {Q9UHF7;O75444}

5817 Pathogen[ P14079] interacts with 4 human partners: {Q9Y6U3;O75444;Q92896;Q9UHF7}

5818 Pathogen[ P03383] interacts with 2 human partners: {O75444;Q9UHF7}

5819 Pathogen[ P03410] interacts with 4 human partners: {Q9UHF7;O75444;Q9Y6U3;Q92896}

5820 Pathogen[ P14075] interacts with 2 human partners: {O75444;Q9UHF7}

5821 Pathogen[ P0C206] interacts with 2 human partners: {O75444;Q9UHF7}

5822 Pathogen[ P03363] interacts with 2 human partners: {Q9UHF7;O75444}

5823 [Cluster 530]GO:0050732+P biological\_process [name] negative regulation of peptidyl-tyrosine phosphorylation [def] "Any process that stops, prevents, or reduces the frequency, rate or extent of the phosphorylation of peptidyl-tyrosine." [GOC

5824 Pathogen[ Q2Q067] interacts with 1 human partners: {Q9UJM3}

5825 Pathogen[ P0C214] interacts with 1 human partners: {Q9UJM3}

5826 Pathogen[ P03346] interacts with 2 human partners: {Q9NSI8;Q9UJM3}

5827 Pathogen[ Q85601] interacts with 1 human partners: {Q9UJM3}

5828 Pathogen[ P14079] interacts with 1 human partners: {Q9UJM3}

5829 Pathogen[ P03383] interacts with 1 human partners: {Q9UJM3}

5830 Pathogen[ P03410] interacts with 1 human partners: {Q9UJM3}

5831 Pathogen[ P14075] interacts with 1 human partners: {Q9UJM3}

5832 Pathogen[ P0C206] interacts with 1 human partners: {Q9UJM3}

5833 Pathogen[ P03363] interacts with 2 human partners: {Q9NSI8;Q9UJM3}

5834 [Cluster 531]GO:0006086+P biological\_process [name] acetyl-CoA biosynthetic process from pyruvate [def] "The chemical reactions and pathways resulting in the formation of acetyl-CoA from pyruvate." [GOC

5835 Pathogen[ Q2Q067] interacts with 1 human partners: {P10515}

5836 Pathogen[ P0C214] interacts with 3 human partners: {P11177;P09622;P10515}

5837 Pathogen[ P03346] interacts with 1 human partners: {P10515}

5838 Pathogen[ Q85601] interacts with 1 human partners: {P10515}

5839 Pathogen[ P14079] interacts with 1 human partners: {P10515}

5840 Pathogen[ P03383] interacts with 1 human partners: {P10515}

5841 Pathogen[ P03410] interacts with 1 human partners: {P10515}

5842 Pathogen[ P14075] interacts with 1 human partners: {P10515}

5843 Pathogen[ P0C206] interacts with 1 human partners: {P10515}

5844 Pathogen[ P03363] interacts with 1 human partners: {P10515}

5845 [Cluster 532]GO:0030488+P biological\_process [name] tRNA methylation [def] "The posttranscriptional addition of methyl groups to specific residues in a tRNA molecule." [GOC

5846 Pathogen[ Q2Q067] interacts with 4 human partners: {Q08J23;Q96FX7;Q32P41;Q9BVS5}

5847 Pathogen[ P0C214] interacts with 5 human partners: {Q96FX7;Q08J23;Q32P41;Q96BT7;Q9BVS5}

5848 Pathogen[ P03346] interacts with 5 human partners: {Q08J23;Q96FX7;Q32P41;Q9BVS5;Q96BT7}

5849 Pathogen[ Q85601] interacts with 4 human partners: {Q32P41;Q9BVS5;Q96FX7;Q08J23}

5850 Pathogen[ P14079] interacts with 4 human partners: {Q32P41;Q08J23;Q9BVS5;Q96FX7}

5851 Pathogen[ P03383] interacts with 4 human partners: {Q9BVS5;Q32P41;Q08J23;Q96FX7}

5852 Pathogen[ P03410] interacts with 4 human partners: {Q32P41;Q08J23;Q96FX7;Q9BVS5}

5853 Pathogen[ P14075] interacts with 4 human partners: {Q32P41;Q9BVS5;Q96FX7;Q08J23}

5854 Pathogen[ P0C206] interacts with 4 human partners: {Q08J23;Q32P41;Q96FX7;Q9BVS5}

5855 Pathogen[ P03363] interacts with 5 human partners: {Q32P41;Q08J23;Q96BT7;Q96FX7;Q9BVS5}

5856 [Cluster 533]GO:0030534+P biological\_process [name] adult behavior [def] "Behavior in a fully developed and mature organism." [GOC

5857 Pathogen[ Q2Q067] interacts with 1 human partners: {O15525}

5858 Pathogen[ P0C214] interacts with 1 human partners: {O15525}

5859 Pathogen[ P03346] interacts with 1 human partners: {O15525}

5860 Pathogen[ Q85601] interacts with 1 human partners: {O15525}

5861 Pathogen[ P14079] interacts with 2 human partners: {Q7Z2T5;O15525}

5862 Pathogen[ P03383] interacts with 1 human partners: {O15525}

5863 Pathogen[ P03410] interacts with 1 human partners: {O15525}

5864 Pathogen[ P14075] interacts with 1 human partners: {O15525}

5865 Pathogen[ P0C206] interacts with 1 human partners: {O15525}

- 5866 Pathogen[ P03363] interacts with 1 human partners:{O15525}
- 5867 [Cluster 534]GO:0005975+P biological\_process [name] carbohydrate metabolic process [def] "The chemical reactions and pathways involving carbohydrates, any of a group of organic compounds based of the general formula Cx(H2O)y. Includes the formation of carbohydrate derivatives by the addition of a carbohydrate residue to another molecule." [GOC
- 5868 Pathogen[ Q2Q067] interacts with 78 human partners:{Q86W56;Q96EE3;P31749;P52948;Q12769;Q96HA1;P07195;P49790;P49792;Q16775;P13929;O75694;P15121;P78406;P19367;O95336;P05062;P62140;P34949;Q99567;Q8N1F7;P41236;Q6NXS1;P37837;Q13522;Q7Z3B4;Q8NFH4;P35573;P12270;O95394;P60174;P36871;P11166;P32189;P07902;Q16851;Q9UIV1;Q9BW27;Q96G03;Q8TEM1;P46976;P09972;P54840;P36873;Q12904;Q9BVL2;P09467;P18669;P62136;P13807;Q9UKX7;P04406;Q9NRG9;Q8NFH3;P40925;P15259;P37198;Q9UQK1;Q92621;Q9BYZ2;P07738;O15504;P57740;P06744;O14556;P40926;P00338;Q8WUM0;Q9UBX3;P14672;P06733;P35658;P49247;Q8NFH5;Q6PCE3;P07864;Q5SRE5;Q14397}
- 5869 Pathogen[ P0C214] interacts with 115 human partners:{Q04446;Q14410;Q8IX04;Q96PQ5;P52209;P11413;Q12904;Q14409;Q8N335;Q8NFH5;P62140;Q6NXS1;P35558;Q16775;P07864;Q15486;P15259;O75390;Q5I0G3;Q8TEM1;Q9H227;P41236;P78406;P57740;Q99567;P29401;Q8N1F7;O75694;P48735;Q96EE3;P49792;Q9UKX7;Q86W56;Q6ZMR3;P40926;P32189;O75330;O14556;P35573;Q9BXD5;P46976;Q9UIV1;P05062;Q96C11;Q6PCE3;Q9Y2G5;P11166;Q9UBX3;O60825;P15121;P11168;O95685;P13929;Q96G03;P37837;P09467;P49790;Q96AT9;P50213;P37198;P36871;Q15124;Q9BW27;P14618;P09104;Q16851;O15488;Q99536;Q9NRG9;P35658;Q93100;Q13522;P62136;O95278;P19367;Q8NFH3;P06733;P09972;Q14397;Q16822;O15504;P34949;P07902;P54840;O95394;P36873;P12270;P16118;P60174;Q8NFH4;Q9BVL2;P07738;Q9BYZ2;P48163;Q5SRE5;P14672;P46020;O00757;Q7Z3B4;P13807;P04406;P49247;P00558;Q8WUM0;P52948;Q92621;P31749;P07195;P51553;Q12769;Q9UQK1;Q9H7J1;P21695;P16278;Q96HA1}
- 5870 Pathogen[ P03346] interacts with 84 human partners:{O75390;Q8TEM1;P62136;Q9UQK1;P09972;Q8NFH4;Q8WUM0;P13807;P12270;P04406;P49247;Q12769;Q96EE3;Q9UIV1;Q99567;Q9UKX7;O95685;P13929;Q9UBX3;O75694;O95336;Q9NRG9;P78406;P57740;Q9BVL2;Q8N1F7;P07738;P19367;P15121;P60174;Q9H7J1;Q13522;Q8NFH5;P09467;P35573;P37198;Q8NFH3;P35658;O75330;P46976;P36871;P06733;Q6PCE3;P37837;Q5SRE5;P16278;Q92621;P9BW27;P18669;Q12904;O14556;Q16851;Q8WVB3;P31749;P36873;P40926;P11166;P00338;Q14397;Q96G03;P54840;O95394;P07195;Q86W56;P34949;P15259;P32189;P49790;P06744;P05062;P62140;Q96HA1;P40925;Q16775;O95278;P41236;P14672;Q7Z3B4;Q8TDQ7;O15504;Q9BYZ2;P49792;P52948}
- 5871 Pathogen[ Q85601] interacts with 88 human partners:{Q8TEM1;Q5SRE5;P60174;P34949;P13807;P11168;P31749;Q8NFH4;Q8NFH3;Q6ZMR3;Q96EE3;Q15486;Q12769;Q9UBX3;Q9UQK1;O95336;P78406;P57740;O75330;Q9NRG9;P18669;O60825;Q9BXD5;Q8WUM0;Q8N1F7;P37837;Q9UIV1;P06733;O00757;P06744;P12270;P05062;P32189;P49247;O75694;O95278;P16118;P15259;O15504;Q16851;Q9BW27;P07864;P46976;P11166;P35573;O14556;Q92621;P14618;Q15124;P62136;P13929;P36873;P36871;P09972;Q9BYZ2;P52948;P41236;Q9UKX7;Q8NFH5;P15121;P09467;P35658;Q14397;Q04446;P40925;O95394;P07195;Q99567;Q6NXS1;P07902;P54840;Q6PCE3;P62140;P49792;P04406;Q9BVL2;Q96HA1;Q96PQ5;Q16775;P07738;P14672;Q7Z3B4;P00338;P49790;Q96G03;Q86W56;P40926;P19367}
- 5872 Pathogen[ P14079] interacts with 115 human partners:{P31751;O94923;Q8NFH5;A8MPS7;P15259;Q9BW27;Q96HA1;P16278;Q9H7J1;O43505;Q16851;P04066;P00338;P36873;P57740;Q8N1F7;Q14410;P35658;P52209;Q4G0N0;P14672;Q13522;P13807;P54802;Q92621;Q8TDQ7;P35475;P49247;Q8TEM1;P09972;Q93100;P62136;Q9NTJ4;P29401;P32189;Q96C23;P06744;Q96C11;Q9BRB3;Q9Y303;Q15124;Q14409;P11166;P06733;Q9P2X0;P07738;P06280;P41236;Q9UKX7;P07195;Q86XI6;O95394;Q9BVL2;Q9H488;O15504;Q9UL01;P46976;Q6ZMR3;Q8WUM0;P54803;P12270;O95685;Q04760;Q6P575;Q32M88;Q99567;Q6NXS1;P34949;P62140;Q9UQK1;P35573;P07864;Q8NFH3;Q96EE3;P37198;P49790;P46926;O95336;Q6PCE3;Q9BXD5;Q9UIV1;Q16775;P13929;P17050;Q8NFH4;P78406;Q7Z3B4;Q86W56;Q15486;P18669;Q14397;P07902;P21695;Q96G03;Q12904;P09467;O75330;Q12769;P40925;P54840;Q9Y2G5;Q9BYZ2;P36871;Q5SRE5;Q9NRG9;O75694;Q8WVB3;Q9UBM8;Q49AQ9;P46020;O15488;P52948;P04406;P37837;Q96PQ5}
- 5873 Pathogen[ P03383] interacts with 76 human partners:{Q9BVL2;Q96EE3;O15504;Q8WUM0;P62140;P34949;Q92621;P49792;Q8NFH4;Q96G03;Q12904;P40926;Q9UQK1;P12270;P19367;P00338;Q9BYZ2;P52948;P07902;P31749;P07864;P78406;P57740;Q8NFH5;P18669;P13807;P09467;P09972;Q8N1F7;P40925;P37837;P35573;P49247;Q8TEM1;Q13522;Q12769;Q6PCE3;P36873;P11168;P62136;Q99567;Q14397;P07738;Q16822;Q16851;P06744;Q9BW27;P46976;Q86W56;O14556;P07195;Q6ZMR3;Q6NXS1;P04406;Q9UIV1;P34949;Q9H7J1;Q16775;Q5SRE5;P35658;Q96HA1;O95394;Q9NRG9;P32189;P11169;P54840;P37198;Q9UKX7;P41236;P14672;P06733;Q7Z3B4;P49790;O75694;P15259;Q8NFH3;P22732}
- 5874 Pathogen[ P03410] interacts with 118 human partners:{Q99567;P54803;Q14397;P46976;Q7Z3B4;Q4G0N0;Q9BW27;Q9BYZ2;Q16822;P22732;O75330;Q8TDQ7;O14556;P06744;Q6PCE3;P04066;Q16851;P37837;P36871;Q9UKX7;P11166;P54840;Q96C11;Q8NFH4;P16118;P46020;Q5SRE5;P54802;P52948;Q14410;O15504;P07902;P11168;Q04446;P62136;P06733;P35573;Q9BXD5;Q6ZMR3;P34949;O95685;P16278;O75694;P31749;Q15124;P78406;Q96HA1;P05062;Q9UIV1;Q9H7J1;P09467;Q9UBX3;P07195;P41236;O00757;Q12904;Q8N1F7;P46926;P52209;Q93100;Q86XI6;Q15486;P49790;P09972;Q9NTJ4;P12270;Q13522;P62140;P07738;P35658;P00338;Q8NFH5;Q16775;Q8TEM1;P13807;Q9BRB3;P15259;Q96C23;P36873;Q96EE3;P04406;Q14409;P18669;O15488;Q86W56;Q96G03;A8MPS7;P13929;P40926;Q8WUM0;Q8WVB3;Q49AQ9;P07864;O95336;P40925;P32189;Q6P575;Q9UL01;Q96PQ5;Q32M88;P57740;Q04760;Q12769;Q9Y2G5;Q9H488;O95394;Q6NXS1;Q9NRG9;Q8NFH3;Q9P2X0;Q9BVL2;P49247;Q92621;O43505;O75390;P49792;P21695;Q9UQK1}
- 5875 Pathogen[ P14075] interacts with 84 human partners:{P11169;P06733;P40925;P06744;Q13522;P78406;P57740;P32189;Q16822;P34949;Q93100;P49792;Q8N1F7;P18669;P19367;P41236;P22732;Q96G03;Q9UKX7;P40926;P62140;P35658;P122

- 70;P46976;P54840;Q9BXD5;Q6NXS1;Q92621;P07195;Q9UQK1;Q6PCE3;P36873;P62136;Q96HA1;P16118;Q9BW27;P31749;P07902;P04406;O43505;Q12904;Q8TEM1;Q96C11;Q96EE3;P37198;P07864;Q9Y2G5;Q5SRE5;O95336;P35573;Q14397;Q8NFH3;P00338;O95394;O15504;P09972;P15259;P49247;Q9BYZ2;Q99567;Q12769;P11168;P13807;Q86W56;O95685;Q9BVL2;P49790;Q8WUM0;O75330;P07738;Q9UIV1;P14672;P37837;O75694;Q9NRG9;P09467;Q7Z3B4;Q8NFH4;Q16851;Q8NFH5;O14556;Q16775;Q9H7J1;P52948}
- 5876 Pathogen[ P0C206] interacts with 112 human partners: {P06733;Q96EE3;Q16851;Q92621;P07195;Q6NXS1;P05062;P49790;Q6ZMR3;P07864;P31749;Q5SRE5;Q8NFH5;Q93100;Q9NRG9;Q6P575;P50213;P46976;P60174;Q96G03;P41236;Q7Z3B4;Q9UQK1;Q9UIV1;Q04446;P09467;O95394;Q96HA1;Q16822;Q9UBX3;Q04760;P57740;P34949;P11166;P19367;P32189;A8MPS7;P13807;Q15124;Q9UL01;Q49AQ9;Q16775;Q6PCE3;P46020;Q8WUM0;P54840;P11168;P49792;Q13522;Q8TEM1;P06744;Q9UKX7;Q86W56;Q8WVB3;O14556;O75330;Q96C23;O75694;Q86XI6;Q8TDQ7;P40925;O00757;O95278;Q15486;P04406;P40926;P07902;Q99567;P62140;O60825;Q8NFH4;O95336;Q96C11;P16278;P09972;Q96PQ5;O75390;P16118;P14672;Q9BYZ2;P78406;Q14397;P46926;O15504;P15121;Q12769;P49247;P07738;O95685;Q8NFH3;P36873;Q9BXD5;P00338;Q8N1F7;P13929;P37837;P35658;Q9Y2G5;Q9H7J1;Q9BW27;P18669;Q12904;P14618;P62136;Q9BVL2;P36871;O43505;P15259;O15488;P12270;P29401;P35573}
- 5877 Pathogen[ P03363] interacts with 59 human partners: {Q7Z3B4;P62136;P13807;P06744;Q5SRE5;P12270;P18669;P36873;Q16851;Q8NFH4;P62140;Q14397;P40925;P41236;Q8NFH3;Q12769;P06733;P09972;Q9UKX7;Q13522;Q9BYZ2;Q6NXS1;Q9NRG9;Q8WUM0;Q9BVL2;Q99567;P31749;P37837;P04406;Q96HA1;P49792;P35658;P54840;O75694;P49790;P57740;Q9UQK1;Q9UIV1;O95336;P14672;P78406;Q86W56;Q8WVB3;P52948;O15504;Q6PCE3;P37198;O14556;P35573;Q8N1F7;Q92621;Q8NFH5;P46976;P15259;P11166;Q9BW27;Q96G03;Q9BXD5;Q8TDQ7}
- 5878 [Cluster 535]GO:0050687+P biological\_process [name] negative regulation of defense response to virus [def] "Any process that stops, prevents or reduces the rate or extent of antiviral mechanisms, thereby facilitating viral replication." [GOC
- 5879 Pathogen[ Q2Q067] interacts with 2 human partners: {Q96J02;Q15366}
- 5880 Pathogen[ P0C214] interacts with 2 human partners: {Q96J02;Q15366}
- 5881 Pathogen[ P03346] interacts with 2 human partners: {Q96J02;Q15366}
- 5882 Pathogen[ Q85601] interacts with 2 human partners: {Q96J02;Q15366}
- 5883 Pathogen[ P14079] interacts with 2 human partners: {Q15366;Q96J02}
- 5884 Pathogen[ P03383] interacts with 1 human partners: {Q15366}
- 5885 Pathogen[ P03410] interacts with 1 human partners: {Q15366}
- 5886 Pathogen[ P14075] interacts with 1 human partners: {Q15366}
- 5887 Pathogen[ P0C206] interacts with 2 human partners: {Q96J02;Q15366}
- 5888 Pathogen[ P03363] interacts with 1 human partners: {Q15366}
- 5889 [Cluster 536]GO:0006836+P biological\_process [name] neurotransmitter transport [def] "The directed movement of a neurotransmitter into, out of or within a cell, or between cells, by means of some agent such as a transporter or pore. Neurotransmitters are any chemical substance that is capable of transmitting (or inhibiting the transmission of) a nerve impulse from a neuron to another cell." [GOC
- 5890 Pathogen[ Q2Q067] interacts with 1 human partners: {Q05084}
- 5891 Pathogen[ P0C214] interacts with 1 human partners: {Q05084}
- 5892 Pathogen[ P03346] interacts with 1 human partners: {Q05084}
- 5893 Pathogen[ Q85601] interacts with 1 human partners: {Q05084}
- 5894 Pathogen[ P14079] interacts with 5 human partners: {O14810;Q05084;Q6PUV4;Q8WVH0;Q7Z7G2}
- 5895 Pathogen[ P03383] interacts with 1 human partners: {Q05084}
- 5896 Pathogen[ P03410] interacts with 5 human partners: {O14810;Q8WVH0;Q05084;Q7Z7G2;Q6PUV4}
- 5897 Pathogen[ P14075] interacts with 1 human partners: {Q05084}
- 5898 Pathogen[ P0C206] interacts with 3 human partners: {Q7Z7G2;Q6PUV4;Q05084}
- 5899 Pathogen[ P03363] interacts with 1 human partners: {Q05084}
- 5900 [Cluster 537]GO:0045039+P biological\_process [name] protein import into mitochondrial inner membrane [def] "The process comprising the import of proteins into the mitochondrion from outside the organelle and their insertion into the mitochondrial inner membrane. The translocase of the outer membrane complex mediates the passage of these proteins across the outer membrane, after which they are guided by either of two inner membrane translocase complexes into their final destination in the inner membrane." [GOC
- 5901 Pathogen[ Q2Q067] interacts with 4 human partners: {O60220;Q9Y5J6;P62072;Q9Y5J7}
- 5902 Pathogen[ P0C214] interacts with 5 human partners: {O60220;P62072;Q9Y5J9;Q9Y5J6;Q9Y5J7}
- 5903 Pathogen[ P03346] interacts with 4 human partners: {Q9Y5J7;Q9Y5J6;O60220;P62072}
- 5904 Pathogen[ Q85601] interacts with 5 human partners: {P62072;Q9Y5J9;Q9Y5J6;O60220;Q9Y5J7}
- 5905 Pathogen[ P14079] interacts with 5 human partners: {P62072;Q9Y5J7;O60220;Q9Y5J9;Q9Y5L4}
- 5906 Pathogen[ P03383] interacts with 5 human partners: {Q9Y5J7;P62072;O60220;Q9Y5J6;Q9Y5J9}
- 5907 Pathogen[ P03410] interacts with 6 human partners: {Q9Y5L4;P62072;Q9Y5J7;Q9Y5J6;Q9Y5J9;O60220}
- 5908 Pathogen[ P14075] interacts with 5 human partners: {Q9Y5J9;P62072;O60220;Q9Y5J7;Q9Y5J6}
- 5909 Pathogen[ P0C206] interacts with 6 human

partners:{Q9Y5L4;Q9Y5J6;O60220;Q9Y5J9;Q9Y5J7;P62072}

5910 Pathogen[ P03363] interacts with 1 human partners:{Q9Y5J7}

5911 [Cluster 538]GO:0006382+P biological\_process [name] adenosine to inosine editing [def] "The conversion of an adenosine residue to inosine in an RNA molecule by deamination." [PMID

5912 Pathogen[ Q2Q067] interacts with 1 human partners:{P55265}

5913 Pathogen[ P0C214] interacts with 1 human partners:{P55265}

5914 Pathogen[ P03346] interacts with 1 human partners:{P55265}

5915 Pathogen[ Q85601] interacts with 1 human partners:{P55265}

5916 Pathogen[ P14079] interacts with 1 human partners:{P55265}

5917 Pathogen[ P03383] interacts with 1 human partners:{P55265}

5918 Pathogen[ P03410] interacts with 1 human partners:{P55265}

5919 Pathogen[ P14075] interacts with 1 human partners:{P55265}

5920 Pathogen[ P0C206] interacts with 1 human partners:{P55265}

5921 Pathogen[ P03363] interacts with 1 human partners:{P55265}

5922 [Cluster 539]GO:0051091+P biological\_process [name] positive regulation of sequence-specific DNA binding transcription factor activity [def] "Any process that activates or increases the frequency, rate or extent of activity of a transcription factor, any factor involved in the initiation or regulation of transcription." [GOC

5923 Pathogen[ Q2Q067] interacts with 26 human partners:{Q13562;P31749;Q9H4X1;P56524;Q12888;Q12933;P52657;P63279;Q9Y4Z2;P11831;Q9UQL6;Q15173;Q8N0Z2;O14641;P51532;Q14865;Q16514;Q9HBH7;Q12824;Q02577;P23497;O00463;P15923;Q15651;P53567;Q8N9B5}

5924 Pathogen[ P0C214] interacts with 24 human partners:{P53567;Q9H4X1;Q8N0Z2;Q15651;Q14865;Q12824;P52657;Q9HBH7;P56524;P11831;P63279;Q15173;P15923;O14641;Q12933;Q16514;P23497;Q8N9B5;Q02577;Q12888;O00463;Q9UQL6;P31749;P51532}

5925 Pathogen[ P03346] interacts with 30 human partners:{Q12888;O00463;Q9Y4Z2;Q8N0Z2;Q9H4X1;Q8N9B5;P11831;Q9HBH7;P51532;P15923;P56524;Q92886;Q12824;P63279;P78426;O14641;O95096;P31749;P52657;Q16514;Q14865;P23497;P53567;Q15651;Q15173;Q13562;Q02577;Q9UQL6;Q8N9B4;Q9H2A3}

5926 Pathogen[ Q85601] interacts with 25 human partners:{P52657;P11831;Q9H4X1;P31749;Q9Y4Z2;Q9UQL6;O00463;P53567;Q15173;Q15651;P63279;Q12888;Q13562;P51532;O14641;Q12933;Q02577;Q16514;Q9HBH7;Q14865;P15923;P56524;Q8N0Z2;Q12824;Q8N9B5}

5927 Pathogen[ P14079] interacts with 22 human partners:{Q9UQL6;O00463;P63279;Q15173;P53567;Q8N9B5;O14641;P51532;Q14865;P15923;P23497;Q7Z434;Q15651;Q9HBH7;P52657;Q8N0Z2;Q12933;Q02577;Q12824;Q12888;P56524;Q16514}

5928 Pathogen[ P03383] interacts with 22 human partners:{Q02577;Q12888;P11831;Q9H4X1;Q12824;Q9UQL6;Q15173;P31749;P15923;Q15651;P52657;O14641;Q12933;Q9HBH7;Q16514;Q8N0Z2;P23497;P56524;Q8N9B5;P51532;P53567;P63279}

5929 Pathogen[ P03410] interacts with 25 human partners:{P11831;Q9H4X1;Q15173;P53567;P31749;Q15651;P15923;P52657;Q7Z434;Q9UQL6;Q16514;O00463;Q9NRR1;P56524;Q9HBH7;Q12933;P51532;Q12888;Q8N9B5;P63279;Q02577;Q8N0Z2;Q12824;Q14865;O14641}

5930 Pathogen[ P14075] interacts with 22 human partners:{Q9H4X1;Q02577;P23497;P52657;P11831;P51532;P53567;P56524;P63279;P15923;Q8N0Z2;P31749;O14641;Q9HBH7;Q12933;Q15173;Q16514;Q12824;Q9UQL6;Q12888;Q8N9B5;Q15651}

5931 Pathogen[ P0C206] interacts with 24 human partners:{P53567;Q16514;P31749;Q9H4X1;P51532;Q9Y4Z2;P52657;Q15173;Q12824;Q12933;Q8N9B5;Q15651;Q12888;P15923;Q9HBH7;O00463;Q13562;P11831;Q14865;P56524;Q02577;Q8N0Z2;Q9H2A3;Q9UQL6}

5932 Pathogen[ P03363] interacts with 26 human partners:{Q92886;Q9Y4Z2;Q14865;Q9H4X1;P53567;P51532;Q16514;Q9HBH7;Q12933;O00463;Q9UQL6;P23497;Q8N0Z2;P52657;P15923;P11831;P31749;Q15173;P63279;Q15651;O14641;Q8N9B5;Q12824;Q12888;Q02577;Q9H2A3}

5933 [Cluster 540]GO:0002474+P biological\_process [name] antigen processing and presentation of peptide antigen via MHC class I [def] "The process in which an antigen-presenting cell expresses a peptide antigen on its cell surface in association with an MHC class I protein complex. Class I here refers to classical class I molecules." [GOC

5934 Pathogen[ Q2Q067] interacts with 49 human partners:{Q99460;O75832;P48556;P40306;P55036;O00231;O00233;P51665;P55735;P28072;A5LHX3;Q13200;P25787;Q06323;P28065;O14818;P27797;Q14997;P60900;Q9UL46;P61289;P53992;O95486;P28062;Q9UNM6;P25788;O94855;Q92530;P25786;Q16401;O00232;P28074;P25789;P0CG47;P20618;P0CG48;P49459;O95487;P28070;P28066;Q99436;Q8TAA3;P62987;O43242;P49721;P49720;Q13867;Q15436;P62979}

5935 Pathogen[ P0C214] interacts with 51 human partners:{Q14997;P51665;P55735;P25789;P55036;P28062;A5LHX3;P53992;P28065;O14818;Q13867;O43242;P49459;P48556;P40306;Q13200;Q15436;O00232;Q99460;P28066;O75832;O95487;P49720;P28074;P0CG48;Q9UL46;P25788;Q9UNM6;O00231;Q06323;P25786;P28072;Q8TAA3;P62987;Q99436;P27797;P0CG47;P25787;P35998;P60900;O00233;P62979;Q92530;Q15008;O95486;P28070;P20618;P49721;Q16401;P17980;O94855}

5936 Pathogen[ P03346] interacts with 49 human partners:{P25787;P55735;P28070;P25789;P55036;Q99460;Q9UL46;P62987;P28072;P25788;P28074;P49721;O14818;Q99436;P0CG48;Q16401;A5LHX3;P28062;P49459;P20618;O00232;O94855;O758

- 32;O00233;Q15436;P49720;P28065;P60900;P25786;O00231;P61289;O95486;P62979;P27797;P28066;Q9UNM6;Q13867;Q8TAA3;P0CG47;Q14997;Q13200;P48556;O95487;P51665;Q06323;Q92530;O43242;P53992;P40306}
- 5937 Pathogen[ Q85601] interacts with 45 human  
partners: {P28066;Q9UNM6;P60900;P55036;P25787;O95487;P61289;P25788;O75832;P27797;P0CG48;Q15436;Q13867;P25789;O00233;P20618;P40306;P49720;P28062;P49721;P55735;P25786;P28072;Q13200;P49459;P28065;O95486;P62979;Q99436;P28070;Q8TAA3;Q9UL46;Q99460;O00231;P0CG47;P48556;P28074;Q92530;P62987;A5LHX3;O94855;Q06323;O14818;P53992;Q16401}
- 5938 Pathogen[ P14079] interacts with 54 human  
partners: {P28065;Q99436;P62333;P48556;P60468;P0CG48;O95487;P40306;P13498;P55036;P28074;O00232;P49720;O00487;P25787;O94855;O75832;P29144;A5LHX3;P53992;P62979;O00233;P35998;P61289;P62987;P51665;P20618;Q8TAA3;Q14997;P28062;P60900;Q9UNM6;Q13867;P49459;Q99460;O14818;P49721;P60059;Q92530;Q06323;P62191;P55735;Q15008;P43686;O43242;P25788;O00231;P28066;O95486;Q9UL46;P0CG47;Q16401;P17980;P28072}
- 5939 Pathogen[ P03383] interacts with 45 human  
partners: {P55036;P62987;P55735;P25789;P60900;O95487;P40306;O00233;P49721;Q06323;O95486;Q14997;P20618;Q15436;O75832;O94855;Q13867;Q9UL46;Q9UNM6;P25786;Q99460;P28072;Q13200;P28065;P28066;Q16401;P62979;O00231;P0CG47;P53992;P49459;P0CG48;P28074;Q92530;P49720;Q8TAA3;P61289;P28062;P48556;O14818;Q99436;P28070;P25787;P27797;P25788}
- 5940 Pathogen[ P03410] interacts with 53 human  
partners: {P28070;P55036;P0CG48;P60468;P25786;P60059;Q15008;Q16401;O94855;P53992;P60900;Q14997;P35998;Q99460;O00233;O00232;Q13867;P49459;Q8TAA3;P48556;P49721;A5LHX3;P62979;Q99436;P40306;Q06323;Q15436;Q13200;P25787;P28062;O95486;P51665;O14818;O00231;Q9UNM6;P25789;P49720;P62987;P28072;P55735;P25788;P28066;P28065;O43242;P0CG47;P17980;O75832;P20618;O95487;Q9UL46;P28074;P61289;P27797}
- 5941 Pathogen[ P14075] interacts with 44 human  
partners: {P55036;P25788;P28066;Q06323;O75832;Q8TAA3;P60900;O00233;Q9UL46;P49720;P49459;Q13200;P48556;Q16401;P28070;P53992;P49721;P55735;O00231;Q92530;O95487;P0CG48;P62979;P28062;P28074;P28065;P27797;P25786;O14818;P62987;P28072;Q15436;Q13867;Q14997;P0CG47;P25787;P20618;O94855;Q9UNM6;P61289;P40306;Q99436;O95486;P25789}
- 5942 Pathogen[ P0C206] interacts with 49 human  
partners: {P61289;Q99436;P28062;Q9UNM6;P0CG48;O75832;P27797;P40306;P28065;Q14997;P55036;P25786;O94855;P25788;P29144;P25787;Q06323;P49720;O00232;P60900;P55735;O43242;A5LHX3;P25789;Q13867;O95486;P20618;Q13200;Q8TAA3;P28070;P49459;O95487;Q99460;P62979;P28066;O14818;P0CG47;P28072;P28074;Q92530;P49721;P53992;P62987;Q9UL46;O00233;P48556;Q16401;O00231;Q15436}
- 5943 Pathogen[ P03363] interacts with 12 human  
partners: {P49459;Q92530;Q15436;P61289;O95486;Q13867;P27797;P62987;P53992;O95487;P55735;O94855}
- 5944 [Cluster 541]GO:0043066+P biological\_process [name] negative regulation of apoptotic process [def] "Any process that stops, prevents, or reduces the frequency, rate or extent of cell death by apoptotic process." [GOC
- 5945 Pathogen[ Q2Q067] interacts with 134 human  
partners: {P04156;Q13562;O95411;Q96J02;P22392;Q6FI81;O75832;P31749;Q99502;Q9HBZ2;Q7Z6J0;P16594;P63104;Q9NS56;P55265;O15519;Q9BUP3;Q8IVG9;P01106;P46937;Q9Y3T9;Q12982;P35680;P38646;P41182;Q01664;Q9UDY8;O43255;Q96TA1;O00273;P20749;O00257;O60543;Q04206;O60238;Q13547;Q13257;O15379;Q99933;Q14192;Q9BWW4;P06748;P15976;Q96ST3;O15350;Q9NY61;Q8TDY2;Q96GX9;P02511;P08107;Q14457;P04792;Q86YC2;P63241;Q86UE4;P35227;P23528;O95521;P63146;P62714;P35548;Q5VWM6;O14508;P40337;P56693;Q99728;P51948;P51959;Q9UBF6;P84022;O76095;Q92843;Q15468;Q8IYF3;Q92769;O43715;Q17LG56;O43541;P29474;Q9HBUL8;Q5VWM5;O14746;P35226;Q9H160;Q9HB75;O75030;Q5SWL7;P38936;P50453;P37198;Q99687;Q8WWQ0;P19838;P78395;O95865;O43504;O75360;Q86VP1;Q12983;Q9Y2M5;Q9NR09;P16989;Q9HBM6;O95817;Q15714;Q9HCK8;O43318;P27986;Q9BQE4;P13010;Q15121;P02489;P46527;O60810;P78318;Q13490;O60809;P18583;P22681;Q00987;P05783;Q96EY1;O15392;Q9NYV6;O60936;Q9H1Y0;O14879;Q16548;P28715;P14625;P78543;O95429}
- 5946 Pathogen[ P0C214] interacts with 147 human  
partners: {P22681;Q14457;P29474;Q9BWW4;Q96J02;Q9Y3T9;P35226;Q13257;Q7Z6J0;P35227;O95817;P14625;P16989;O14746;Q99728;Q5TYX0;P05783;Q13547;Q13490;Q5SWL7;P78318;P19838;P78543;P13010;P02489;O14879;P02511;O60543;P06748;Q00987;P51959;Q9NS56;O15350;A6NGN4;Q9UDY8;P55265;P56693;P46937;P04792;P84022;P46527;O43715;Q04206;Q96GX9;Q15121;Q8TDY2;Q5JVF3;Q9BUL8;O75030;P78395;O60813;P05121;P63241;Q9NY61;O43318;P52565;P38936;Q16594;O60810;Q86UE4;Q5VWM6;Q5VTA0;Q9HBZ2;O15519;P62714;Q16548;P28715;O75832;O00273;P98170;Q9BUP3;P18583;P37198;P51948;O95865;Q99933;Q9HBM6;Q86VP1;Q12982;Q8WWQ0;Q9Y2M5;Q9HD36;Q92769;Q15468;P20749;O00257;Q9H160;Q96TA1;P40337;Q15714;Q9HCK8;P38646;P42574;Q9BZZ5;P10809;Q14192;O95411;Q99687;P41182;O95429;O43541;O15379;Q9HB75;O14508;Q9NYV6;Q9BRT3;O75360;Q86YC2;Q12983;P50453;Q92843;O15392;P05412;Q9H1Y0;O43504;P04156;P10909;P05120;O60238;Q96ST3;P42765;Q9NR09;Q92614;P22392;Q9BQE4;Q5VWM5;Q7LG56;Q6FI81;Q5SWL8;O95521;Q5VXH4;P08107;O43255;Q96CA5;Q01664;P27986;Q8IYF3;Q5VWM1;P01106;Q9UBF6;P35548;Q96EY1;P63146;P31749;O60936;P18054;Q99502}
- 5947 Pathogen[ P03346] interacts with 170 human  
partners: {P08107;Q06945;Q96ST3;Q96J02;P05412;O75603;P46937;P28715;Q99687;P55273;P05783;O15392;Q86UE4;P55265;P06748;P29474;Q13489;Q5VWM5;P14625;P35548;P07148;Q7Z6J0;O15379;P02489;Q9BUP3;Q99728;P35226;Q92614;O60238;Q9UDY8;P07992;Q49MI3;P20264;P56693;P13010;O43255;Q12981;P35227;Q04206;P18054;Q8IVG9;P98170;P18583;P23759;Q14457;P42574;Q8IYF3;O00257;P16989;P62714;O15350;Q99502;P63241;O75030;P37198;P52565;O60810;Q12983;Q92843;O60809;O14508;Q00987;O15519;Q9Y371;O75832;P01106;Q9BRT3;Q9BWW4;P38646;Q9NS

- 56;P84022;Q5VTA0;P02511;Q7LG56;O43541;Q96TA1;Q9NQS1;P15976;P31749;P78395;O95863;P63146;Q92769;Q14192;Q9HB75;O14879;Q13547;O95817;Q9HBM6;Q8WWQ0;Q9HCK8;O14746;Q9BZZ5;Q9NY61;Q15121;P35680;Q9Y3T9;Q12778;O95865;O95411;P22392;Q86YC2;Q07820;Q9HBZ2;P78367;Q8N157;P50453;Q9NQ03;P41182;P40337;O43504;P20749;Q92481;O60936;Q15151;P63104;Q9NYV6;Q9UBR4;P42765;Q16548;Q9NR09;P04156;Q13490;Q9H1Y0;Q9HC24;P19838;P22681;O75360;Q9H7C9;P51959;P38936;P23528;O43318;Q9Y2M5;O76095;Q6F181;O95429;Q12982;Q5SWL8;O95521;Q5VWM1;Q13562;P46527;Q96CA5;Q5VWM6;O43715;Q15468;O60543;P78543;Q9HD36;Q9H160;Q9BUL8;Q8TD22;Q01664;P51948;Q9UBF6;Q86VP1;Q96EY1;P78318;P04792;Q96GX9;Q15714;P27986;Q13257;Q99933;O00273;O95379;Q5SWL7;Q16594}
- 5948 Pathogen[ Q85601] interacts with 145 human partners: {Q14457;P01106;Q96J02;P02489;O43715;P63104;O75360;P08107;Q92614;P22681;Q9NS56;P55273;P31749;Q86VP1;Q13490;P63146;Q99687;P15976;P62714;Q8IYF3;Q9HD36;O14879;O15151;Q9NY61;Q5VTA0;Q16548;O43541;Q9BUL8;O60813;Q9UDY8;P40337;O75030;O75832;Q12982;O60810;Q99728;Q9BZZ5;Q12981;O60936;Q15121;P98170;Q8TDY2;O15392;Q5SWL7;Q6FI81;P51948;P63241;P51959;P52565;Q16594;Q15714;Q96GX9;O14508;Q13257;P27986;Q5VXH4;Q13562;Q9HBM6;P28715;Q7Z6J0;Q96TA1;Q7LG56;P05783;Q99933;O60543;P78543;Q92769;Q9UBF6;Q9H1Y0;Q04206;P02511;Q99502;Q8WWQ0;Q14192;Q92843;Q9BWW4;P35548;O00273;P35680;P05412;P06748;P22392;Q86YC2;Q86UE4;P05121;Q9HB75;Q9HBZ2;P50453;P56693;P55265;P29474;P84022;Q9Y3T9;Q9HCK8;P05120;O76095;O14746;Q9NYV6;Q12983;P14625;O15379;P18583;P38646;Q9NR09;P04156;P46937;P04792;P35226;Q9Y2M5;O15350;Q13547;Q5TYX0;P38936;P23528;P41182;O43318;Q5VWM5;O00257;Q5SWL8;O43255;Q5VWM1;Q9H160;Q00987;Q96CA5;O60238;Q5VWM6;P19838;Q95429;P16989;Q95817;P78395;Q9BUP3;Q01664;O15519;Q96EY1;P20749;P78318;A6NGN4;P13010;O95865;Q9BQE4;P46527;Q5VT98;P35227;Q96ST3}
- 5949 Pathogen[ P14079] interacts with 174 human partners: {P31751;P04083;O15379;Q9BW72;P51959;P52565;O14746;P78543;Q12982;Q9NVQ4;Q9NYV6;Q99502;O60811;P28715;Q9BQE4;Q16548;A3QJZ6;Q8TDZ2;Q16594;Q14192;O15519;Q5VXH5;O43597;Q92614;P09912;O95817;Q15714;Q8TDY2;P35680;Q9NY61;P13010;Q96ST3;O60543;Q9UBF6;P02511;P04156;O76095;Q8N157;O95429;Q8IVG9;Q9HC24;Q5SWL7;O15392;O75832;P15976;Q5VWM3;Q8WWQ0;P10909;Q5VT98;Q9BUL8;P46937;Q86YC2;O43715;Q9Y371;P02489;A6NGN4;Q9H1Y0;O15350;Q7LG56;P55273;Q9NR09;Q6FI81;Q00987;Q9BUP3;P63104;Q99687;Q5TYX0;P45983;P40337;P08758;Q9Y3T9;P54826;P41182;Q5VWM6;A6NMV5;O00257;O95379;Q4760;Q94760;P22392;P22392;O95521;P55265;Q92769;P23528;Q5VWM5;O95522;Q15121;Q8N201;Q5VTA0;Q9BWW4;P38936;Q9BRT3;O60809;Q9HD36;P09525;Q99933;P08107;P48681;Q96GX9;Q13257;Q12981;Q5VWM4;O75360;Q15468;Q9Y2M5;Q01664;P37198;Q9HCK8;P46695;O60936;P04141;Q5JVJF3;Q12983;P13232;Q9NS56;Q86UE4;Q96J02;Q9NQ03;P06748;P01106;P50453;P61803;P05783;P56693;O43541;P63241;P35226;P14625;Q5SWL8;O15038;O60813;P35227;P20749;P38646;P46527;Q13164;P78395;P15941;Q9HBZ2;O43504;Q96TA1;A6NMC2;Q9H7C9;Q5VXH4;P05412;Q96JY0;P04792;O75030;O95411;Q14457;O60238;P28360;Q9BZZ5;Q5VWM1;O15151;P18583;O14879;P63146;Q9HB75;O60810;Q9NQS1;P78318;Q96EY1;Q8IYF3;P07992;Q9H160;O95865;Q9HBM6;P13693;Q5TYW8;O00273;Q13490;Q92843;P51948}
- 5950 Pathogen[ P03383] interacts with 115 human partners: {P35227;P08107;Q14457;Q13257;O14879;P27986;P16989;Q9NY61;Q5TYX0;O60809;Q9NYV6;P06748;P13010;P29474;O95865;O60543;P51948;Q86UE4;P40337;P04156;P38646;P01106;Q9BWW4;P31749;O75360;P20749;O00257;Q13490;P02511;Q15714;P62714;P22392;O60810;O75030;Q9HBM6;Q15468;Q9BZZ5;O60936;Q15121;Q86VP1;Q8TDY2;P04792;P05783;P63241;Q9H1Y0;Q12983;O43318;Q01664;Q9Y3T9;Q5SWL7;Q96GX9;O75832;Q8IYF3;Q16594;P78543;P84022;Q9H160;O60238;P18583;Q96TA1;O00273;P63104;P35548;Q9BQE4;Q14192;P46527;P51959;Q99687;Q92769;Q9UBF6;O43715;P78395;Q16548;O43541;O14746;O95411;P14625;O15379;O15350;O60813;O43255;P50453;Q5VXH4;Q13547;Q99933;O43504;Q9HCK8;Q9BUL8;Q9BUP3;Q8WWQ0;Q9NR09;Q04206;P78318;P55265;Q5VWM6;Q86YC2;Q9Y2M5;Q96ST3;P63146;P23528;P37198;O76095;Q5VWM5;P19838;P56693;P46937;Q9NQ03;Q96EY1;O95521;O95429;Q8IVG9;Q6FI81;P35226;Q9HB75;P05412}
- 5951 Pathogen[ P03410] interacts with 174 human partners: {P84022;Q9BRT3;Q99933;Q9BZZ5;P20749;Q9HC24;Q04206;P62714;O15392;Q15714;P04141;P19838;Q96TA1;P46527;Q9BW72;P27986;P05121;Q15121;Q9HB75;Q5VWM4;Q5SWL7;Q5VXH5;O43504;Q12983;Q9H1Y0;O43597;Q5SWL8;O15151;P38646;P15941;P01106;P16989;P07992;Q99502;O14746;A6NGN4;P78318;Q5TYW8;Q16548;Q8TDZ2;O60811;P15941;Q92614;Q5VWM1;Q9BUL8;O75030;O15151;P14625;Q15468;Q13490;Q9NY61;Q14457;Q8TDY2;O00273;P55273;O60813;O95379;P09912;O95865;Q9HD36;Q92843;P31749;P04792;Q99687;Q9Y3T9;P06748;O60809;Q8IVG9;A3QJZ6;Q5VWM6;P55265;P28715;O95817;P35227;Q96ST3;Q9BQE4;O95521;Q86VP1;P42765;Q9HBZ2;Q9UBF6;Q9NYV6;Q9NR09;O43318;Q8N201;O43715;Q5VWM5;P35548;P29474;O60936;O60810;Q8WWQ0;Q9HBM6;P38936;Q92769;O14508;P02489;P51959;P08107;Q7Z6J0;P78395;O95429;Q86UE4;P02511;O15379;Q5JVJF3;Q8N157;Q5VT98;Q9H160;P63146;Q9BUP3;Q9Y371;P13693;Q9HCK8;P04156;P56693;P18583;Q5VXH4;P46937;P41182;Q16594;Q96GX9;P05412;O43541;P50453;Q6FI81;P63104;P51948;P54826;Q9H7C9;P78543;Q13547;Q01664;A6NMC2;P35680;P13010;Q12982;O95522;O95411;P63241;O15350;Q9UBY8;O60543;P46695;Q00987;O76095;O00257;O75360;P23528;O14879;Q4760;Q94760;Q8IYF3;A6NMV5;P35226;Q5VTA0;P52565;P61803;Q86YC2;P05783;Q9NQS1;Q5TYX0;Q14192;Q96EY1;P15976;Q7LG56;Q5VWM3;O60238;Q9Y2M5;O75832;P40337;P10909;Q13257;P13232}
- 5952 Pathogen[ P14075] interacts with 119 human partners: {Q14457;Q5VWM1;Q9BZZ5;Q9BQE4;P29474;Q5SWL7;Q99933;Q96ST3;Q9BUP3;Q96GX9;Q12983;O00273;Q04206;Q8WWQ0;P16989;Q99687;P05783;O75030;P55265;O14746;P05412;O75832;Q9HB75;O60809;Q9NYV6;Q9BWW4;Q86UE4;P78395;O76095;P51959;Q9H1Y0;O43541;Q86YC2;Q9NY61;P35548;Q5VXH4;O60813;Q15714;Q13257;O95521;P04156;Q8TDY2;Q16548;P04792;Q8IVG9;P56693;P63241;P38646;Q13547;Q16594;P01106;P46527;Q96TA1;O43255;P23528;O00257;P31749;Q86VP1;Q01664;Q13490;O95865;O15350;Q92769;P78543;Q9NQS1;O60543;Q9HCK8;O60238;O43318;P27986;Q5VWM5;P37198;Q5TYX0;P78318;P63104;P06748;O75360;P02511;P50453;P02511;O14879;O15379;O43504;Q9Y3T9;P08107;Q15468;Q9NR09;P46937;P35226;O43715;P19838;O60810;Q99502;Q5VWM6;P63146;P13010;P84022;Q9Y2M5;O60936;Q6FI81;Q15121;P40337;P14625;Q5VTA0;Q9H160;P548



- 26;P18583;Q14192;Q9UBF6;O95411;P22392;Q96EY1;Q8IYF3;P35227;O95429;P20749;P51948;Q9HB  
M6}
- 5953 Pathogen[ P0C206] interacts with 171 human  
partners: {P46937;Q12982;P84022;O43541;Q92769;Q9NS56;Q15468;Q9HCK8;P28715;P13010;O758  
32;A3QJZ6;Q96ST3;P55265;P31749;Q9BUP3;P78318;Q7Z6J0;Q6FI81;O43255;P04156;Q9UDY8;P185  
83;Q9HD36;P05030;Q86YC2;P22392;Q9BZZ5;Q5VXH4;P78395;Q99933;Q86VP1;Q15121;P41182;P352  
26;P52565;P05412;Q96J02;O14879;Q14457;O43318;Q96TA1;Q5VWM5;Q13547;P04792;Q7LGS6;P981  
70;O60813;Q5VWM3;Q04760;P56693;P50453;P15976;A6NGN4;Q5TYX0;Q5JVF3;Q13257;Q9H160;P279  
86;P38646;Q8WWQ0;O15519;O95865;O43504;P07992;O75360;Q9UBF6;Q5TYW8;Q16548;A6NMV5;O602  
38;O43715;P63104;Q9NQ03;Q12983;O15151;O60936;P19838;Q92843;Q9BQE4;Q5VTA0;P22681;Q9NR  
09;P16989;Q5SWL7;Q5VT98;O95429;O15379;Q9H1Y0;P51959;Q9BWW4;P35680;P35548;Q04206;Q8IV  
G9;O14508;Q99728;P05783;P55273;P46527;Q8TDY2;P10909;Q9BUL8;Q8N157;P38936;P08107;P627  
14;Q92614;P42574;O15392;O43597;Q13489;Q9HB75;O95411;Q13562;Q96GX9;P29474;Q12981;P632  
41;Q01664;Q99502;O95521;P20749;O95379;Q9HC24;Q5VWM1;P05121;O60810;O95817;O60809;O153  
50;Q8IYF3;Q99687;Q9HBM6;Q86UE4;Q5VWM6;Q96CA5;Q14192;Q9UBR4;Q9Y2M5;P01106;P06748;O002  
57;O60543;Q00987;P02511;P54826;P02489;Q8TDZ2;Q96EY1;Q5SWL8;Q9NY61;P23528;Q9NYV6;Q9Y3  
T9;O00273;Q15714;Q9NQS1;Q9BRT3;Q8N201;Q9HBZ2;O14746;O76095;P40337;P51948;P14625;P631  
46;P78543;P35227;Q16594;Q13490}
- 5954 Pathogen[ P03363] interacts with 133 human  
partners: {P22681;Q86VP1;P05783;Q9H160;Q9BUL8;Q13490;Q9BZZ5;P29474;O00273;O60543;Q9BU  
P3;O60809;O75360;Q9NQS1;P62714;Q8WWQ0;Q04206;O15519;P52565;Q15468;O95411;P35227;Q9NV  
Q4;P13010;Q14457;O15379;Q9H7C9;Q9UBF6;Q15121;P78543;P35548;Q9HBZ2;O15151;Q6FI81;P783  
95;O43318;P50453;O14746;P04156;P63146;Q86UE4;P40337;P01106;Q16548;P06748;O14879;O435  
04;O95817;O60813;Q9NZN9;Q9NQ03;P63104;P20749;Q9HD36;Q9HB75;Q9NY61;Q9HCK8;P46937;P566  
93;P20264;P18583;P08107;Q8N157;Q9NR09;O75030;Q9Y2M5;Q9NYV6;P31749;Q5SWL7;Q13489;Q96J  
Y0;P35226;P38646;Q96ST3;Q92843;O43541;O95379;P78318;P84022;P98170;Q8TDY2;P55265;Q5VW  
M6;Q13257;P23528;Q9Y3T9;Q13547;P23759;P19838;O76095;O60936;Q92614;Q9HBM6;P63241;O958  
65;P51959;Q5VXH4;P78367;Q7Z6J0;Q99687;Q07820;Q96CA5;O60810;Q15714;Q8IVG9;P05412;Q96G  
X9;Q9BWW4;P16989;O14508;P02489;Q99728;O95521;Q96TA1;O95429;P37198;O43255;Q96EY1;Q49M  
I3;O43715;O60238;O00257;P27986;Q5VWM5;Q99933;P04792;Q01664;Q12982;Q5TYX0;Q9H1Y0;Q86Y  
C2;Q16594;Q14192}
- 5955 [Cluster 542]GO:0006200+P biological\_process [name] ATP catabolic process [def]  
"The chemical reactions and pathways resulting in the breakdown of ATP, adenosine  
5'-triphosphate, a universally important coenzyme and enzyme regulator." [GOC
- 5956 Pathogen[ Q2Q067] interacts with 19 human  
partners: {Q6VMQ6;O75351;Q6NVH7;Q14204;Q9UHC1;O76031;P07900;Q96S55;P54278;Q96Q89;P128  
83;Q9UKV3;Q15257;Q9ULG1;Q86WJ1;P35579;Q8NE71;Q9NTK5;P24539}
- 5957 Pathogen[ P0C214] interacts with 30 human  
partners: {Q14527;A8MQ11;Q96S55;Q6VMQ6;O75351;Q9UI12;P53396;Q14204;Q9ULG1;Q15257;P365  
42;O76031;Q8NE71;O43681;Q96Q89;Q9UHC1;P24539;P10809;O60264;Q6NVH7;P12883;P13533;Q9UK  
V3;P54278;P35998;P40692;Q9NTK5;Q15008;Q86WJ1;P55072}
- 5958 Pathogen[ P03346] interacts with 23 human  
partners: {P07900;P35579;Q14527;Q9ULG1;Q15257;Q14204;P55072;Q9UKV3;O76031;Q9UHC1;Q9NT  
K5;Q96S55;P24539;Q6VMQ6;O60264;Q96Q89;P54278;Q6NVH7;Q8NE71;O75351;Q86WJ1;P54277;Q9NR  
D5}
- 5959 Pathogen[ Q85601] interacts with 26 human  
partners: {Q9NTK5;P24539;P13533;P35579;A8MQ11;Q6NVH7;Q14204;O43681;Q96Q89;O75351;Q9UK  
V3;Q9ULG1;P12883;P07900;Q8NE71;Q96S55;P54278;Q9UHC1;O76031;Q86WJ1;P40692;O60264;Q6VM  
Q6;P19447;Q14527;Q15257}
- 5960 Pathogen[ P14079] interacts with 40 human  
partners: {P36542;P35579;P62333;Q9ULG1;P56134;P25705;P40692;Q14204;P54278;P56385;Q9UH  
C1;P35998;A8MQ11;Q6NVH7;P68032;Q6VMQ6;P03928;Q9UKV3;O43681;Q96Q89;Q96S55;Q8NE71;Q86W  
J1;P07900;O60264;O95744;P12883;P54277;Q9NTK5;O75964;P62191;Q9UI12;P56381;Q15008;O753  
51;P43686;O76031;P52701;P24539;P19447}
- 5961 Pathogen[ P03383] interacts with 15 human  
partners: {P54278;Q15257;Q6NVH7;Q8NE71;Q9NTK5;Q9UHC1;Q6VMQ6;P07900;Q96S55;Q9UKV3;Q96Q  
89;P12883;O76031;P35579;P24539}
- 5962 Pathogen[ P03410] interacts with 41 human  
partners: {Q14204;P40692;Q96Q89;Q8NE71;P36542;Q15008;P25705;O75351;P35998;P54277;Q9NT  
K5;Q15257;Q9ULG1;P35579;P56385;P07900;Q96S55;Q6NVH7;Q6VMQ6;P56381;O60333;O76031;Q9NR  
D5;Q9UKV3;P52701;P03928;P19447;P12883;Q9UI12;P24539;O95744;O75964;Q86WJ1;A8MQ11;P135  
33;P54278;O60264;O43681;P18859;P56134;Q9UHC1}
- 5963 Pathogen[ P14075] interacts with 15 human  
partners: {Q15257;Q9UKV3;O76031;P07900;Q9NTK5;Q9UHC1;Q6VMQ6;Q8NE71;P35579;P24539;P542  
78;P56385;Q6NVH7;Q96S55;Q96Q89}
- 5964 Pathogen[ P0C206] interacts with 34 human  
partners: {P54278;Q6VMQ6;Q96Q89;P13533;P52701;O43681;P36542;P40692;Q9UHC1;A8MQ11;P194  
47;P54277;Q14204;P12883;Q9ULG1;P07900;Q9UI12;Q96S55;P24539;P35579;P55072;Q9NTK5;Q145  
27;Q8NE71;Q86WJ1;P56381;Q6NVH7;O76031;O75351;Q9NRD5;P56385;Q15257;Q9UKV3;O60264}
- 5965 Pathogen[ P03363] interacts with 21 human  
partners: {Q6VMQ6;P07900;Q9ULG1;P35579;Q9UKV3;Q9UHC1;Q9NTK5;Q14204;O60264;O75351;P542  
78;Q14527;P54277;O76031;Q96S55;Q15257;Q8NE71;Q6NVH7;Q96Q89;O60333;Q86WJ1}
- 5966 [Cluster 543]GO:000226+P biological\_process [name] microtubule cytoskeleton  
organization [def] "A process that is carried out at the cellular level which results  
in the assembly, arrangement of constituent parts, or disassembly of cytoskeletal  
structures comprising microtubules and their associated proteins." [GOC

5967 Pathogen[ Q2Q067] interacts with 31 human partners: {Q8WW24;Q8WZ33;P54252;Q6VN20;Q9P219;Q96RT8;Q7Z460;Q96SN8;O95359;Q15532;Q96RT7;Q9UBK9;Q9BSJ2;O15265;P04406;P12036;Q9NRI5;P23258;O75410;Q14244;Q9UGJ1;O95613;Q86VS8;Q66K74;P18583;Q96M29;P60510;Q96ED9;P07197;Q8IYK2;Q96CW5}

5968 Pathogen[ POC214] interacts with 31 human partners: {Q9BSJ2;Q9NRI5;Q96ED9;Q96SN8;Q8WW24;P23258;Q96CW5;Q96RT7;Q9UGJ1;O95359;P60510;Q86VS8;P18583;Q14244;Q96RT8;Q15532;O75410;P12036;Q7Z460;O15265;Q8WZ33;Q6VN20;P07197;O95613;Q9P219;Q9UBK9;Q96M29;P04406;P54252;Q66K74;Q8IYK2}

5969 Pathogen[ P03346] interacts with 37 human partners: {O95166;Q8IYK2;Q9NRI5;O15265;P04406;Q86VS8;P23258;Q96RT8;O75410;Q9UIF3;O95359;Q8WZ33;Q66K74;P18583;Q96M29;Q96CW5;Q8TEW0;Q9P219;Q15532;P07197;P12036;Q8N960;Q96SN8;Q6VN20;Q9UGJ1;Q96ED9;Q14244;Q9BSJ2;Q7Z460;O95613;Q96RT7;A6NC98;Q9UBK9;Q8WW24;P60510;Q9UJC3;P54252}

5970 Pathogen[ Q85601] interacts with 33 human partners: {Q15532;Q86VS8;O15265;Q96RT8;O95166;Q14244;P12036;Q96SN8;Q66K74;Q96CW5;Q8WZ33;Q6VN20;P54252;P23258;Q9P219;Q9BXF9;Q9BSJ2;Q8WW24;Q9UGJ1;Q96M29;P07197;P60510;Q9NRI5;P18583;Q7Z460;P04406;O95613;Q9UBK9;Q96ED9;Q9GZM8;O75410;O95359;Q96RT7}

5971 Pathogen[ P14079] interacts with 42 human partners: {Q6VN20;O95166;Q8WZ33;Q15532;Q9UJC3;Q7Z460;O95359;Q8IYK2;Q9Y6A5;Q86VS8;Q96ED9;Q66K74;Q9UGJ1;P12036;P54252;Q9BXF9;Q9NRI5;P68363;Q14244;Q96M29;Q8N960;Q8TEW0;P07197;Q96RT8;P23258;Q9UBK9;Q96RT7;Q9BSJ2;Q9GZM8;Q8WW24;Q969V4;O95613;O75410;P60510;Q9UIF3;O15265;P18583;Q96SN8;Q9P219;Q96CW5;P10636;P04406}

5972 Pathogen[ P03383] interacts with 23 human partners: {Q14244;Q8WZ33;Q7Z460;Q9BSJ2;Q9NRI5;P12036;Q96SN8;O75410;Q96CW5;Q15532;Q96M29;P54252;P18583;O15265;Q8IYK2;P07197;P04406;Q8WW24;Q86VS8;Q96ED9;O95613;Q9UBK9;P60510}

5973 Pathogen[ P03410] interacts with 43 human partners: {Q7Z460;Q8N960;Q9P219;Q9UJC3;O95359;Q8IYK2;P12036;Q9BXF9;Q9GZM8;P60510;A6NC98;Q96SN8;P54252;Q86VS8;Q9Y6A5;Q9UIF3;Q9UBK9;O95166;Q6VN20;Q8WZ33;Q96ED9;P18583;O75410;Q66K74;Q9BSJ2;P04406;P10636;Q9NRI5;Q96RT8;P23258;P68363;Q8TEW0;O15265;Q96CW5;Q96RT7;O95613;Q15532;Q14244;Q969V4;Q96M29;Q9UGJ1;O43237;P07197}

5974 Pathogen[ P14075] interacts with 22 human partners: {O15265;O75410;Q15532;Q7Z460;P60510;Q96SN8;Q9NRI5;P54252;P12036;P04406;Q9UBK9;Q8IYK2;P07197;Q8WZ33;Q86VS8;O95613;Q96M29;Q9BSJ2;P18583;Q96CW5;Q96ED9;Q14244}

5975 Pathogen[ POC206] interacts with 41 human partners: {O95359;Q96SN8;P18583;Q96RT7;Q96CW5;Q9UIF3;Q8WZ33;O15265;Q15532;O43237;P10636;P54252;Q9GZM8;Q9UGJ1;Q66K74;Q86VS8;Q96ED9;Q14244;P30291;O75410;Q8TEW0;P12036;Q6VN20;O95613;Q9Y6A5;Q9P219;Q9NRI5;P04406;P23258;Q9BXF9;Q96M29;Q9UBK9;Q9UJC3;P60510;Q7Z460;Q8IYK2;Q9BSJ2;Q8N960;O95166;Q8WW24;P07197}

5976 Pathogen[ P03363] interacts with 40 human partners: {O75410;Q86VS8;P07197;Q14244;Q96ED9;Q66K74;Q8WZ33;Q8IYK2;Q969V4;O95613;P68363;A6NC98;P54252;Q15532;Q96M29;Q9UBK9;Q9BXF9;P18583;Q96RT8;P04406;O15265;Q7Z460;P60510;Q9UIF3;Q96RT7;Q9NRI5;Q9UGJ1;O95359;Q6VN20;P12036;P23258;Q9P219;O43237;O95166;Q9BSJ2;Q8WW24;Q96CW5;Q96SN8;Q8N960;Q9UJC3}

5977 [Cluster 544]GO:0060575+P biological\_process [name] intestinal epithelial cell differentiation [def] "The process in which a relatively unspecialized cell acquires specialized features of a columnar/cuboidal epithelial cell of the intestine." [GOC

5978 Pathogen[ Q2Q067] interacts with 2 human partners: {Q9BWX5;Q9H4B6}

5979 Pathogen[ POC214] interacts with 1 human partners: {Q9H4B6}

5980 Pathogen[ P03346] interacts with 2 human partners: {Q9BWX5;Q9H4B6}

5981 Pathogen[ Q85601] interacts with 2 human partners: {Q9BWX5;Q9H4B6}

5982 Pathogen[ P14079] interacts with 2 human partners: {Q9BWX5;Q9H4B6}

5983 Pathogen[ P03383] interacts with 1 human partners: {Q9H4B6}

5984 Pathogen[ P03410] interacts with 2 human partners: {Q9BWX5;Q9H4B6}

5985 Pathogen[ P14075] interacts with 1 human partners: {Q9H4B6}

5986 Pathogen[ POC206] interacts with 2 human partners: {Q9BWX5;Q9H4B6}

5987 Pathogen[ P03363] interacts with 2 human partners: {Q9BWX5;Q9H4B6}

5988 [Cluster 545]GO:0021895+P biological\_process [name] cerebral cortex neuron differentiation [def] "The process in which a relatively unspecialized cell acquires specialized features of a neuron residing in the cerebral cortex." [GO\_REF

5989 Pathogen[ Q2Q067] interacts with 1 human partners: {P47928}

5990 Pathogen[ POC214] interacts with 1 human partners: {P47928}

5991 Pathogen[ P03346] interacts with 2 human partners: {P50542;P47928}

5992 Pathogen[ Q85601] interacts with 1 human partners: {P47928}

5993 Pathogen[ P14079] interacts with 2 human partners: {P50542;P47928}

5994 Pathogen[ P03383] interacts with 1 human partners: {P47928}

5995 Pathogen[ P03410] interacts with 2 human partners: {P47928;P50542}

5996 Pathogen[ P14075] interacts with 1 human partners: {P47928}

5997 Pathogen[ POC206] interacts with 2 human partners: {P50542;P47928}

5998 Pathogen[ P03363] interacts with 1 human partners: {P47928}

5999 [Cluster 546]GO:0043154+P biological\_process [name] negative regulation of cysteine-type endopeptidase activity involved in apoptotic process [def] "Any process that stops, prevents, or reduces the frequency, rate or extent of a cysteine-type endopeptidase activity involved in the apoptotic process." [GOC

6000 Pathogen[ Q2Q067] interacts with 15 human partners: {P31749;Q7Z6J0;O43255;P02511;O43715;O75190;O43541;P50453;O43504;P06744;P024

89;P78318;P22736;Q96EY1;O15392}  
6001 Pathogen[ P0C214] interacts with 14 human partners: {Q7Z6J0;P78318;P02489;P02511;O75190;O43715;P98170;O43541;P50453;O15392;O43504;O43255;Q96EY1;P31749}  
6002 Pathogen[ P03346] interacts with 21 human partners: {P55273;O15392;O75190;P07148;Q7Z6J0;P02489;O43255;P98170;P02511;O43541;P22736;P31749;P50453;O43504;Q92481;P06744;O43715;Q8TDZ2;Q96EY1;P78318;O95379}  
6003 Pathogen[ Q85601] interacts with 16 human partners: {P02489;O43715;P55273;P31749;O75190;O43541;P98170;P06744;O15392;Q7Z6J0;P02511;P22736;P50453;O43255;Q96EY1;P78318}  
6004 Pathogen[ P14079] interacts with 20 human partners: {P31751;P09327;Q8TDZ2;P09912;P02511;O15392;P22736;P06744;O43715;O75190;P02489;P55273;O95379;Q8N201;P50453;O43541;Q15011;O43504;P78318;Q96EY1}  
6005 Pathogen[ P03383] interacts with 11 human partners: {P31749;P02511;O75190;P06744;O43715;O43541;O43255;P50453;O43504;P78318;Q96EY1}  
6006 Pathogen[ P03410] interacts with 20 human partners: {O15392;P06744;O43504;P78318;Q8TDZ2;P55273;O95379;P09912;P31749;Q8N201;O43715;P02489;Q7Z6J0;O75190;P02511;P22736;O43541;P50453;Q15011;Q96EY1}  
6007 Pathogen[ P14075] interacts with 12 human partners: {P06744;O43541;O43255;P31749;P78318;P02511;P50453;O43504;O75190;O43715;Q15011;Q96EY1}  
6008 Pathogen[ P0C206] interacts with 21 human partners: {O43541;P31749;P78318;Q7Z6J0;O43255;P98170;P50453;P22736;O43504;O43715;P06744;Q15011;P55273;O15392;O95379;P02511;P02489;Q8TDZ2;Q96EY1;Q8N201;O75190}  
6009 Pathogen[ P03363] interacts with 14 human partners: {O75190;P06744;P50453;O43504;P31749;O43541;O95379;P78318;P98170;Q7Z6J0;P02489;O43255;Q96EY1;O43715}  
6010 [Cluster 547]GO:0000212+P biological\_process [name] meiotic spindle organization [def] "A process that is carried out at the cellular level which results in the assembly, arrangement of constituent parts, or disassembly of the microtubule spindle during a meiotic cell cycle." [GOC  
6011 Pathogen[ Q2Q067] interacts with 3 human partners: {Q14674;P23258;P35579}  
6012 Pathogen[ P0C214] interacts with 2 human partners: {P23258;Q14674}  
6013 Pathogen[ P03346] interacts with 3 human partners: {P23258;P35579;Q14674}  
6014 Pathogen[ Q85601] interacts with 3 human partners: {P35579;Q14674;P23258}  
6015 Pathogen[ P14079] interacts with 3 human partners: {P35579;Q14674;P23258}  
6016 Pathogen[ P03383] interacts with 2 human partners: {Q14674;P35579}  
6017 Pathogen[ P03410] interacts with 3 human partners: {P35579;Q14674;P23258}  
6018 Pathogen[ P14075] interacts with 2 human partners: {P35579;Q14674}  
6019 Pathogen[ P0C206] interacts with 3 human partners: {P35579;P23258;Q14674}  
6020 Pathogen[ P03363] interacts with 3 human partners: {P35579;Q14674;P23258}  
6021 [Cluster 548]GO:0046689+P biological\_process [name] response to mercury ion [def] "Any process that results in a change in state or activity of a cell or an organism (in terms of movement, secretion, enzyme production, gene expression, etc.) as a result of a mercury ion stimulus." [GOC  
6022 Pathogen[ Q2Q067] interacts with 2 human partners: {P15259;P06132}  
6023 Pathogen[ P0C214] interacts with 3 human partners: {P50440;P06132;P15259}  
6024 Pathogen[ P03346] interacts with 2 human partners: {P06132;P15259}  
6025 Pathogen[ Q85601] interacts with 2 human partners: {P15259;P06132}  
6026 Pathogen[ P14079] interacts with 3 human partners: {P15259;P06132;P50440}  
6027 Pathogen[ P03383] interacts with 2 human partners: {P06132;P15259}  
6028 Pathogen[ P03410] interacts with 3 human partners: {P06132;P15259;P50440}  
6029 Pathogen[ P14075] interacts with 3 human partners: {P06132;P15259;P50440}  
6030 Pathogen[ P0C206] interacts with 3 human partners: {P50440;P06132;P15259}  
6031 Pathogen[ P03363] interacts with 2 human partners: {P06132;P15259}  
6032 [Cluster 549]GO:0042304+P biological\_process [name] regulation of fatty acid biosynthetic process [def] "Any process that modulates the frequency, rate or extent of the chemical reactions and pathways resulting in the formation of fatty acids, any of the aliphatic monocarboxylic acids that can be liberated by hydrolysis from naturally occurring fats and oils." [GOC  
6033 Pathogen[ Q2Q067] interacts with 1 human partners: {Q9NP71}  
6034 Pathogen[ P0C214] interacts with 1 human partners: {Q9NP71}  
6035 Pathogen[ P03346] interacts with 1 human partners: {Q9NP71}  
6036 Pathogen[ Q85601] interacts with 1 human partners: {Q9NP71}  
6037 Pathogen[ P14079] interacts with 1 human partners: {Q9NP71}  
6038 Pathogen[ P03383] interacts with 1 human partners: {Q9NP71}  
6039 Pathogen[ P03410] interacts with 1 human partners: {Q9NP71}  
6040 Pathogen[ P14075] interacts with 1 human partners: {Q9NP71}  
6041 Pathogen[ P0C206] interacts with 1 human partners: {Q9NP71}  
6042 Pathogen[ P03363] interacts with 1 human partners: {Q9NP71}  
6043 [Cluster 550]GO:0060750+P biological\_process [name] epithelial cell proliferation involved in mammary gland duct elongation [def] "The multiplication or reproduction of mammary gland branch epithelial cells, resulting in the elongation of the branch. The mammary gland branch differs from the bud in that it is not the initial curved portion of the outgrowth." [GOC

6044 Pathogen[ Q2Q067] interacts with 1 human partners:{Q92754}  
6045 Pathogen[ P0C214] interacts with 1 human partners:{Q92754}  
6046 Pathogen[ P03346] interacts with 1 human partners:{Q92754}  
6047 Pathogen[ Q85601] interacts with 1 human partners:{Q92754}  
6048 Pathogen[ P14079] interacts with 1 human partners:{Q92754}  
6049 Pathogen[ P03383] interacts with 1 human partners:{Q92754}  
6050 Pathogen[ P03410] interacts with 1 human partners:{Q92754}  
6051 Pathogen[ P14075] interacts with 1 human partners:{Q92754}  
6052 Pathogen[ P0C206] interacts with 1 human partners:{Q92754}  
6053 Pathogen[ P03363] interacts with 1 human partners:{Q92754}  
6054 [Cluster 551]GO:0046330+P biological\_process [name] positive regulation of JNK cascade [def] "Any process that activates or increases the frequency, rate or extent of signal transduction mediated by the JNK cascade." [GOC  
6055 Pathogen[ Q2Q067] interacts with 5 human partners:{P08697;Q16890;Q969S3;P60953;O43318}  
6056 Pathogen[ P0C214] interacts with 5 human partners:{P08697;Q969S3;P60953;O43318;Q16890}  
6057 Pathogen[ P03346] interacts with 5 human partners:{Q969S3;P60953;Q16890;Q9BUZ4;O43318}  
6058 Pathogen[ Q85601] interacts with 5 human partners:{Q16890;P08697;Q969S3;P60953;O43318}  
6059 Pathogen[ P14079] interacts with 5 human partners:{Q16890;Q9BUZ4;Q9Y239;Q969S3;Q99836}  
6060 Pathogen[ P03383] interacts with 5 human partners:{P60953;P08697;O43318;Q16890;Q969S3}  
6061 Pathogen[ P03410] interacts with 6 human partners:{Q9Y239;Q969S3;O43318;P08697;P60953;Q16890}  
6062 Pathogen[ P14075] interacts with 5 human partners:{P60953;Q969S3;Q16890;O43318;P08697}  
6063 Pathogen[ P0C206] interacts with 6 human partners:{Q16890;O43318;Q9BUZ4;Q969S3;P60953;P08697}  
6064 Pathogen[ P03363] interacts with 5 human partners:{O43318;Q16890;Q9BUZ4;P60953;Q969S3}  
6065 [Cluster 552]GO:0030388+P biological\_process [name] fructose 1,6-bisphosphate metabolic process [def] "The chemical reactions and pathways involving fructose 1,6-bisphosphate, also known as FBP. The D enantiomer is a metabolic intermediate in glycolysis and gluconeogenesis." [ISBN  
6066 Pathogen[ Q2Q067] interacts with 2 human partners:{P05062;P09972}  
6067 Pathogen[ P0C214] interacts with 2 human partners:{P05062;P09972}  
6068 Pathogen[ P03346] interacts with 2 human partners:{P09972;P05062}  
6069 Pathogen[ Q85601] interacts with 2 human partners:{P05062;P09972}  
6070 Pathogen[ P14079] interacts with 1 human partners:{P09972}  
6071 Pathogen[ P03383] interacts with 1 human partners:{P09972}  
6072 Pathogen[ P03410] interacts with 2 human partners:{P05062;P09972}  
6073 Pathogen[ P14075] interacts with 1 human partners:{P09972}  
6074 Pathogen[ P0C206] interacts with 2 human partners:{P05062;P09972}  
6075 Pathogen[ P03363] interacts with 1 human partners:{P09972}  
6076 [Cluster 553]GO:0043461+P biological\_process [name] proton-transporting ATP synthase complex assembly [def] "The aggregation, arrangement and bonding together of a proton-transporting ATP synthase (also known as F-type ATPase), a two-sector ATPase found in the inner membrane of mitochondria and chloroplasts, and in bacterial plasma membranes." [GOC  
6077 Pathogen[ Q2Q067] interacts with 1 human partners:{Q8N5M1}  
6078 Pathogen[ P0C214] interacts with 1 human partners:{Q8N5M1}  
6079 Pathogen[ P03346] interacts with 1 human partners:{Q8N5M1}  
6080 Pathogen[ Q85601] interacts with 1 human partners:{Q8N5M1}  
6081 Pathogen[ P14079] interacts with 1 human partners:{Q8N5M1}  
6082 Pathogen[ P03383] interacts with 1 human partners:{Q8N5M1}  
6083 Pathogen[ P03410] interacts with 1 human partners:{Q8N5M1}  
6084 Pathogen[ P14075] interacts with 1 human partners:{Q8N5M1}  
6085 Pathogen[ P0C206] interacts with 1 human partners:{Q8N5M1}  
6086 Pathogen[ P03363] interacts with 1 human partners:{Q8N5M1}  
6087 [Cluster 554]GO:0043496+P biological\_process [name] regulation of protein homodimerization activity [def] "Any process that modulates the frequency, rate or extent of protein homodimerization, interacting selectively with an identical protein to form a homodimer." [GOC  
6088 Pathogen[ Q2Q067] interacts with 2 human partners:{Q8IUC6;Q05084}  
6089 Pathogen[ P0C214] interacts with 2 human partners:{Q8IUC6;Q05084}  
6090 Pathogen[ P03346] interacts with 2 human partners:{Q05084;Q8IUC6}  
6091 Pathogen[ Q85601] interacts with 2 human partners:{Q8IUC6;Q05084}  
6092 Pathogen[ P14079] interacts with 3 human partners:{Q05084;Q8IUC6;Q96BJ3}  
6093 Pathogen[ P03383] interacts with 3 human partners:{Q8IUC6;Q05084;Q96BJ3}  
6094 Pathogen[ P03410] interacts with 3 human partners:{Q05084;Q96BJ3;Q8IUC6}  
6095 Pathogen[ P14075] interacts with 3 human partners:{Q96BJ3;Q8IUC6;Q05084}  
6096 Pathogen[ P0C206] interacts with 3 human partners:{Q96BJ3;Q8IUC6;Q05084}  
6097 Pathogen[ P03363] interacts with 1 human partners:{Q05084}

6098 [Cluster 555]GO:0048598+P biological\_process [name] embryonic morphogenesis [def] "The process in which anatomical structures are generated and organized during the embryonic phase. The embryonic phase begins with zygote formation. The end of the embryonic phase is organism-specific. For example, it would be at birth for mammals, larval hatching for insects and seed dormancy in plants." [GOC

6099 Pathogen[ Q2Q067] interacts with 2 human partners:{O60315;Q9NYF0}

6100 Pathogen[ P0C214] interacts with 2 human partners:{O60315;Q9NYF0}

6101 Pathogen[ P03346] interacts with 3 human partners:{O60315;Q9NYF0;Q15363}

6102 Pathogen[ Q85601] interacts with 2 human partners:{O60315;Q9NYF0}

6103 Pathogen[ P14079] interacts with 4 human partners:{O60315;Q15363;P54826;Q9NYF0}

6104 Pathogen[ P03383] interacts with 1 human partners:{Q9NYF0}

6105 Pathogen[ P03410] interacts with 3 human partners:{Q15363;Q9NYF0;P54826}

6106 Pathogen[ P14075] interacts with 2 human partners:{Q9NYF0;P54826}

6107 Pathogen[ P0C206] interacts with 4 human partners:{O60315;Q9NYF0;Q15363;P54826}

6108 Pathogen[ P03363] interacts with 2 human partners:{O60315;Q9NYF0}

6109 [Cluster 556]GO:0021557+P biological\_process [name] oculomotor nerve development [def] "The process whose specific outcome is the progression of the oculomotor nerve over time, from its formation to the mature structure. This motor nerve innervates all extraocular muscles except the superior oblique and the lateral rectus muscles. The superior division supplies the levator palpebrae superioris and superior rectus muscles. The inferior division supplies the medial rectus, inferior rectus and inferior oblique muscles. This nerve also innervates the striated muscles of the eyelid. Pupillary constriction and lens movement are mediated by this nerve for near vision. In the orbit the inferior division sends branches that enter the ciliary ganglion where they form functional contacts (synapses) with the ganglion cells. The ganglion cells send nerve fibers into the back of the eye where they travel to ultimately innervate the ciliary muscle and the constrictor pupillae muscle." [GO\_REF

6110 Pathogen[ Q2Q067] interacts with 1 human partners:{Q5TGS1}

6111 Pathogen[ P0C214] interacts with 1 human partners:{Q5TGS1}

6112 Pathogen[ P03346] interacts with 1 human partners:{Q5TGS1}

6113 Pathogen[ Q85601] interacts with 1 human partners:{Q5TGS1}

6114 Pathogen[ P14079] interacts with 1 human partners:{Q5TGS1}

6115 Pathogen[ P03383] interacts with 1 human partners:{Q5TGS1}

6116 Pathogen[ P03410] interacts with 1 human partners:{Q5TGS1}

6117 Pathogen[ P14075] interacts with 1 human partners:{Q5TGS1}

6118 Pathogen[ P0C206] interacts with 1 human partners:{Q5TGS1}

6119 Pathogen[ P03363] interacts with 1 human partners:{Q5TGS1}

6120 [Cluster 557]GO:0045806+P biological\_process [name] negative regulation of endocytosis [def] "Any process that stops, prevents, or reduces the frequency, rate or extent of endocytosis." [GOC

6121 Pathogen[ Q2Q067] interacts with 1 human partners:{Q8TAC9}

6122 Pathogen[ P0C214] interacts with 1 human partners:{Q8TAC9}

6123 Pathogen[ P03346] interacts with 3 human partners:{Q92622;Q9UKS6;Q8TAC9}

6124 Pathogen[ Q85601] interacts with 1 human partners:{Q8TAC9}

6125 Pathogen[ P14079] interacts with 3 human partners:{Q9UKS6;Q8TAC9;Q92622}

6126 Pathogen[ P03383] interacts with 1 human partners:{Q8TAC9}

6127 Pathogen[ P03410] interacts with 2 human partners:{Q8TAC9;Q9UKS6}

6128 Pathogen[ P14075] interacts with 1 human partners:{Q8TAC9}

6129 Pathogen[ P0C206] interacts with 3 human partners:{Q92622;Q8TAC9;Q9UKS6}

6130 Pathogen[ P03363] interacts with 2 human partners:{Q92622;Q9UKS6}

6131 [Cluster 558]GO:0071375+P biological\_process [name] cellular response to peptide hormone stimulus [def] "Any process that results in a change in state or activity of a cell (in terms of movement, secretion, enzyme production, gene expression, etc.) as a result of a peptide hormone stimulus. A peptide hormone is any of a class of peptides that are secreted into the blood stream and have endocrine functions in living animals." [GOC

6132 Pathogen[ Q2Q067] interacts with 2 human partners:{P10914;P61244}

6133 Pathogen[ P0C214] interacts with 2 human partners:{P61244;P10914}

6134 Pathogen[ P03346] interacts with 3 human partners:{P78426;P10914;P61244}

6135 Pathogen[ Q85601] interacts with 2 human partners:{P10914;P61244}

6136 Pathogen[ P14079] interacts with 2 human partners:{P61244;P10914}

6137 Pathogen[ P03383] interacts with 2 human partners:{P10914;P61244}

6138 Pathogen[ P03410] interacts with 2 human partners:{P61244;P10914}

6139 Pathogen[ P14075] interacts with 2 human partners:{P61244;P10914}

6140 Pathogen[ P0C206] interacts with 2 human partners:{P10914;P61244}

6141 Pathogen[ P03363] interacts with 2 human partners:{P61244;P10914}

6142 [Cluster 559]GO:0035282+P biological\_process [name] segmentation [def] "The regionalization process that divides an organism or part of an organism into a series of semi-repetitive parts, or segments, often arranged along a longitudinal axis." [PMID

6143 Pathogen[ Q2Q067] interacts with 2 human partners:{O14641;Q96AP0}

6144 Pathogen[ P0C214] interacts with 1 human partners:{O14641}

6145 Pathogen[ P03346] interacts with 2 human partners:{Q96AP0;O14641}

6146 Pathogen[ Q85601] interacts with 1 human partners:{O14641}

6147 Pathogen[ P14079] interacts with 2 human partners:{O14641;Q96AP0}

6148 Pathogen[ P03383] interacts with 1 human partners:{O14641}

6149 Pathogen[ P03410] interacts with 2 human partners:{Q96AP0;O14641}

6150 Pathogen[ P14075] interacts with 2 human partners:{Q96AP0;O14641}

6151 Pathogen[ P0C206] interacts with 1 human partners:{Q96AP0}

6152 Pathogen[ P03363] interacts with 2 human partners:{Q96AP0;O14641}

6153 [Cluster 560]GO:0036092+P

6154 Pathogen[ Q2Q067] interacts with 2 human partners:{Q92562;P27986}

6155 Pathogen[ P0C214] interacts with 2 human partners:{Q92562;P27986}

6156 Pathogen[ P03346] interacts with 2 human partners:{Q92562;P27986}

6157 Pathogen[ Q85601] interacts with 2 human partners:{Q92562;P27986}

6158 Pathogen[ P14079] interacts with 3 human partners:{Q92562;Q96PE3;O15327}

6159 Pathogen[ P03383] interacts with 1 human partners:{P27986}

6160 Pathogen[ P03410] interacts with 4 human partners:{Q92562;P27986;Q96PE3;O15327}

6161 Pathogen[ P14075] interacts with 1 human partners:{P27986}

6162 Pathogen[ P0C206] interacts with 2 human partners:{Q92562;P27986}

6163 Pathogen[ P03363] interacts with 1 human partners:{P27986}

6164 [Cluster 561]GO:0042221+P biological\_process [name] response to chemical stimulus [def] "Any process that results in a change in state or activity of a cell or an organism (in terms of movement, secretion, enzyme production, gene expression, etc.) as a result of a chemical stimulus." [GOC

6165 Pathogen[ Q2Q067] interacts with 4 human partners:{P05062;O95999;P62714;Q9NVR5}

6166 Pathogen[ P0C214] interacts with 4 human partners:{Q9NVR5;P05062;P62714;O95999}

6167 Pathogen[ P03346] interacts with 4 human partners:{Q9NVR5;P62714;O95999;P05062}

6168 Pathogen[ Q85601] interacts with 4 human partners:{P62714;P05062;O95999;Q9NVR5}

6169 Pathogen[ P14079] interacts with 3 human partners:{Q9NVR5;O14828;O95999}

6170 Pathogen[ P03383] interacts with 3 human partners:{P62714;O95999;Q9NVR5}

6171 Pathogen[ P03410] interacts with 5 human partners:{P62714;O14828;P05062;Q9NVR5;O95999}

6172 Pathogen[ P14075] interacts with 3 human partners:{O95999;Q9NVR5;P62714}

6173 Pathogen[ P0C206] interacts with 5 human partners:{P05062;O14828;O95999;Q9NVR5;P62714}

6174 Pathogen[ P03363] interacts with 2 human partners:{Q9NVR5;P62714}

6175 [Cluster 562]GO:0016926+P biological\_process [name] protein desumoylation [def] "The process in which a SUMO protein (small ubiquitin-related modifier) is cleaved from its target protein." [GOC

6176 Pathogen[ Q2Q067] interacts with 2 human partners:{Q9GZR1;Q9HC62}

6177 Pathogen[ P0C214] interacts with 2 human partners:{Q9GZR1;Q9HC62}

6178 Pathogen[ P03346] interacts with 2 human partners:{Q9GZR1;Q9HC62}

6179 Pathogen[ Q85601] interacts with 2 human partners:{Q9HC62;Q9GZR1}

6180 Pathogen[ P14079] interacts with 3 human partners:{Q9HC62;Q5W0Q7;Q9GZR1}

6181 Pathogen[ P03383] interacts with 2 human partners:{Q9HC62;Q9GZR1}

6182 Pathogen[ P03410] interacts with 2 human partners:{Q9GZR1;Q9HC62}

6183 Pathogen[ P14075] interacts with 2 human partners:{Q9HC62;Q9GZR1}

6184 Pathogen[ P0C206] interacts with 2 human partners:{Q9HC62;Q9GZR1}

6185 Pathogen[ P03363] interacts with 2 human partners:{Q9HC62;Q9GZR1}

6186 [Cluster 563]GO:0048239+P biological\_process [name] negative regulation of DNA recombination at telomere [def] "Any process that stops, prevents, or reduces the frequency, rate or extent of genetic recombination within the telomere." [GOC

6187 Pathogen[ Q2Q067] interacts with 1 human partners:{Q9NYB0}

6188 Pathogen[ P0C214] interacts with 1 human partners:{Q9NYB0}

6189 Pathogen[ P03346] interacts with 1 human partners:{Q9NYB0}

6190 Pathogen[ Q85601] interacts with 1 human partners:{Q9NYB0}

6191 Pathogen[ P14079] interacts with 1 human partners:{Q9NYB0}

6192 Pathogen[ P03383] interacts with 1 human partners:{Q9NYB0}

6193 Pathogen[ P03410] interacts with 1 human partners:{Q9NYB0}

6194 Pathogen[ P14075] interacts with 1 human partners:{Q9NYB0}

6195 Pathogen[ P0C206] interacts with 1 human partners:{Q9NYB0}

6196 Pathogen[ P03363] interacts with 1 human partners:{Q9NYB0}

6197 [Cluster 564]GO:0045814+P biological\_process [name] negative regulation of gene expression, epigenetic [def] "Any epigenetic process that stops, prevents or reduces the rate of gene expression." [GOC

6198 Pathogen[ Q2Q067] interacts with 5 human partners:{P14373;Q9NS37;Q9UBC3;Q9H2F5;P17947}

6199 Pathogen[ P0C214] interacts with 4 human partners:{Q9NS37;P17947;Q9H2F5;P14373}

6200 Pathogen[ P03346] interacts with 5 human partners:{P14373;Q9UBC3;Q9H2F5;P17947;Q9NS37}

6201 Pathogen[ Q85601] interacts with 5 human partners:{Q9H2F5;P14373;P17947;Q9NS37;Q9UBC3}

6202 Pathogen[ P14079] interacts with 4 human partners:{P14373;Q9NS37;Q9UBC3;Q9H2F5}

6203 Pathogen[ P03383] interacts with 3 human partners:{Q9H2F5;Q9NS37;P17947}

6204 Pathogen[ P03410] interacts with 4 human partners:{Q9NS37;P17947;Q9H2F5;Q9UBC3}

6205 Pathogen[ P14075] interacts with 3 human partners:{Q9H2F5;P17947;Q9NS37}

6206 Pathogen[ P0C206] interacts with 5 human partners:{Q9H2F5;Q9NS37;P17947;Q9UBC3;P14373}

6207 Pathogen[ P03363] interacts with 5 human partners:{P14373;Q9NS37;P17947;Q9H2F5;Q9UBC3}

6208 [Cluster 565]GO:0022900+P biological\_process [name] electron transport chain [def] "A process in which a series of electron carriers operate together to transfer electrons

from donors to any of several different terminal electron acceptors to generate a transmembrane electrochemical gradient." [GOC

6209 Pathogen[ Q2Q067] interacts with 16 human partners: {P35754;O43920;P31040;P56181;P38117;O75489;O96000;O95178;O43678;O75251;O75306;P99999;P10599;Q9P0J0;P21912;E9PQ53}

6210 Pathogen[ P0C214] interacts with 31 human partners: {Q16795;P35754;O75306;O43678;P22695;Q99643;P56556;P28331;O43920;O95299;P17568;Q16718;O14561;O95298;Q16881;P99999;Q9P0J0;P38117;O96000;E9PQ53;O95182;O75489;O14521;P10599;O75251;Q9UI09;P21912;P56181;O95178;P13804;Q96NN9}

6211 Pathogen[ P03346] interacts with 18 human partners: {P31040;P56181;O75489;O43678;O95178;Q9NS18;O43396;P21912;P99999;O43920;P38117;E9PQ53;O75251;P35754;P10599;O96000;O75306;Q9P0J0}

6212 Pathogen[ Q85601] interacts with 12 human partners: {Q9P0J0;P99999;O75306;P21912;O43678;P56181;O96000;P10599;O43920;P31040;E9PQ53;P35754}

6213 Pathogen[ P14079] interacts with 55 human partners: {Q6P4F2;P56181;P22695;O43674;A6NC05;O43677;O43181;O95169;P56556;O95139;P10109;P13498;O96000;O95167;O75306;P00395;P00403;P17568;Q9UDW1;P14927;P13804;Q86Y39;O95182;P07919;Q6P2C0;O14949;P38117;P35754;P31040;O43676;O43678;P51970;O95178;O75251;O14561;Q9UI09;P00156;O95299;E9PQ53;Q9P0J0;O14569;O75489;P03923;P10599;Q16718;P03897;O14521;O43920;O15239;P99999;O00483;P03901;P03886;O95298;P21912}

6214 Pathogen[ P03383] interacts with 13 human partners: {O75251;P31040;O96000;O43678;O43920;O75489;P10599;O75306;O95178;P99999;E9PQ53;Q9P0J0;P56181}

6215 Pathogen[ P03410] interacts with 57 human partners: {O95168;O43674;O14569;P56556;P10599;P17568;P13804;P35754;O95178;O75380;O43678;O75251;O95299;P51970;Q6P2C0;O43920;Q9UI09;O96000;P07919;O95167;Q6P4F2;O15239;Q9Y6M9;P38117;P22695;P03886;O00483;O95298;O75438;Q9UDW1;E9PQ53;P56181;P00156;O14561;P14927;P31040;O75489;Q86Y39;P21912;P99999;Q99643;P03897;O43677;O95169;O43181;O14521;Q16718;O75306;P00403;P10109;O43676;O14949;A6NC05;P03901;Q9P0J0;P03923;O95182}

6216 Pathogen[ P14075] interacts with 20 human partners: {O43674;P56181;O96000;O95182;O43677;P31040;O43920;O75306;O14561;O95298;O43678;P99999;O75251;E9PQ53;P38117;O75489;O95178;Q9P0J0;O43676;P10599}

6217 Pathogen[ P0C206] interacts with 29 human partners: {Q6P2C0;P99999;P56181;Q9NS18;O75251;Q9UDW1;O43920;O14521;O75306;O95182;P38117;P35754;Q9UI09;O95298;P22695;O14561;O00483;P17568;O95178;P31040;Q9P0J0;O43678;O75489;E9PQ53;P10599;P21912;O96000;O43674;P56556}

6218 Pathogen[ P03363] interacts with 7 human partners: {P31040;P99999;P35754;Q9P0J0;O43396;O96000;P56181}

6219 [Cluster 566]GO:0032446+P biological\_process [name] protein modification by small protein conjugation [def] "A protein modification process in which one or more groups of a small protein, such as ubiquitin or a ubiquitin-like protein, are covalently attached to a target protein." [GOC

6220 Pathogen[ Q2Q067] interacts with 1 human partners: {O15205}

6221 Pathogen[ P0C214] interacts with 1 human partners: {O15205}

6222 Pathogen[ P03346] interacts with 1 human partners: {O15205}

6223 Pathogen[ Q85601] interacts with 1 human partners: {O15205}

6224 Pathogen[ P14079] interacts with 2 human partners: {Q9H0Y0;O15205}

6225 Pathogen[ P03383] interacts with 1 human partners: {O15205}

6226 Pathogen[ P03410] interacts with 2 human partners: {Q9H0Y0;O15205}

6227 Pathogen[ P14075] interacts with 1 human partners: {O15205}

6228 Pathogen[ P0C206] interacts with 1 human partners: {O15205}

6229 Pathogen[ P03363] interacts with 1 human partners: {O15205}

6230 [Cluster 567]GO:0034111+P biological\_process [name] negative regulation of homotypic cell-cell adhesion [def] "Any process that stops, prevents, or reduces the frequency, rate, or extent of homotypic cell-cell adhesion." [GOC

6231 Pathogen[ Q2Q067] interacts with 1 human partners: {Q9H7S9}

6232 Pathogen[ P0C214] interacts with 1 human partners: {Q9H7S9}

6233 Pathogen[ P03346] interacts with 1 human partners: {Q9H7S9}

6234 Pathogen[ Q85601] interacts with 1 human partners: {Q9H7S9}

6235 Pathogen[ P14079] interacts with 1 human partners: {Q9H7S9}

6236 Pathogen[ P03383] interacts with 1 human partners: {Q9H7S9}

6237 Pathogen[ P03410] interacts with 1 human partners: {Q9H7S9}

6238 Pathogen[ P14075] interacts with 1 human partners: {Q9H7S9}

6239 Pathogen[ P0C206] interacts with 1 human partners: {Q9H7S9}

6240 Pathogen[ P03363] interacts with 1 human partners: {Q9H7S9}

6241 [Cluster 568]GO:0045078+P biological\_process [name] positive regulation of interferon-gamma biosynthetic process [def] "Any process that activates or increases the frequency, rate or extent of the chemical reactions and pathways resulting in the formation of interferon-gamma." [GOC

6242 Pathogen[ Q2Q067] interacts with 2 human partners: {Q8IX07;P53567}

6243 Pathogen[ P0C214] interacts with 2 human partners: {P53567;Q8IX07}

6244 Pathogen[ P03346] interacts with 2 human partners: {Q8IX07;P53567}

6245 Pathogen[ Q85601] interacts with 2 human partners: {P53567;Q8IX07}

6246 Pathogen[ P14079] interacts with 3 human partners: {P53567;Q8NEV9;Q8IX07}

6247 Pathogen[ P03383] interacts with 1 human partners: {P53567}

6248 Pathogen[ P03410] interacts with 3 human partners:{P53567;Q8IX07;Q8NEV9}

6249 Pathogen[ P14075] interacts with 1 human partners:{P53567}

6250 Pathogen[ P0C206] interacts with 2 human partners:{P53567;Q8IX07}

6251 Pathogen[ P03363] interacts with 1 human partners:{P53567}

6252 [Cluster 569]GO:0090201+P biological\_process [name] negative regulation of release of cytochrome c from mitochondria [def] "Any process that decreases the rate, frequency or extent of release of cytochrome c from mitochondria, the process in which cytochrome c is enabled to move from the mitochondrial intermembrane space into the cytosol, which is an early step in apoptosis and leads to caspase activation." [GOC

6253 Pathogen[ Q2Q067] interacts with 3 human partners:{O75832;P31749;O60260}

6254 Pathogen[ P0C214] interacts with 3 human partners:{O75832;O60260;P31749}

6255 Pathogen[ P03346] interacts with 3 human partners:{O75832;P31749;O60260}

6256 Pathogen[ Q85601] interacts with 3 human partners:{P31749;O75832;O60260}

6257 Pathogen[ P14079] interacts with 3 human partners:{O60260;O75832;Q9H300}

6258 Pathogen[ P03383] interacts with 3 human partners:{P31749;O75832;O60260}

6259 Pathogen[ P03410] interacts with 3 human partners:{P31749;O60260;O75832}

6260 Pathogen[ P14075] interacts with 3 human partners:{O75832;P31749;O60260}

6261 Pathogen[ P0C206] interacts with 3 human partners:{O75832;P31749;O60260}

6262 Pathogen[ P03363] interacts with 1 human partners:{P31749}

6263 [Cluster 570]GO:0034983+P biological\_process [name] peptidyl-lysine deacetylation [def] "The removal of an acetyl group from an acetylated lysine residue in a peptide or protein." [GOC

6264 Pathogen[ Q2Q067] interacts with 3 human partners:{P56524;Q9UKV0;Q9NTG7}

6265 Pathogen[ P0C214] interacts with 3 human partners:{P56524;Q9NTG7;Q9UKV0}

6266 Pathogen[ P03346] interacts with 3 human partners:{P56524;Q9UKV0;Q9NTG7}

6267 Pathogen[ Q85601] interacts with 3 human partners:{Q9UKV0;P56524;Q9NTG7}

6268 Pathogen[ P14079] interacts with 3 human partners:{Q9UKV0;P56524;Q9NTG7}

6269 Pathogen[ P03383] interacts with 3 human partners:{Q9NTG7;Q9UKV0;P56524}

6270 Pathogen[ P03410] interacts with 3 human partners:{Q9UKV0;Q9NTG7;P56524}

6271 Pathogen[ P14075] interacts with 3 human partners:{P56524;Q9UKV0;Q9NTG7}

6272 Pathogen[ P0C206] interacts with 3 human partners:{Q9UKV0;P56524;Q9NTG7}

6273 Pathogen[ P03363] interacts with 2 human partners:{Q9UKV0;Q9NTG7}

6274 [Cluster 571]GO:0061157+P biological\_process [name] mRNA destabilization [def] "Any process that decreases the stability of an mRNA molecule, making it more vulnerable to degradative processes. Messenger RNA is the intermediate molecule between DNA and protein. It includes UTR and coding sequences. It does not contain introns." [GOC

6275 Pathogen[ Q2Q067] interacts with 1 human partners:{Q96LI5}

6276 Pathogen[ P0C214] interacts with 1 human partners:{Q96LI5}

6277 Pathogen[ P03346] interacts with 2 human partners:{Q96LI5;Q86XN8}

6278 Pathogen[ Q85601] interacts with 1 human partners:{Q96LI5}

6279 Pathogen[ P14079] interacts with 1 human partners:{Q96LI5}

6280 Pathogen[ P03383] interacts with 1 human partners:{Q96LI5}

6281 Pathogen[ P03410] interacts with 1 human partners:{Q96LI5}

6282 Pathogen[ P14075] interacts with 1 human partners:{Q96LI5}

6283 Pathogen[ P0C206] interacts with 2 human partners:{Q96LI5;Q86XN8}

6284 Pathogen[ P03363] interacts with 1 human partners:{Q96LI5}

6285 [Cluster 572]GO:0006694+P biological\_process [name] steroid biosynthetic process [def] "The chemical reactions and pathways resulting in the formation of steroids, compounds with a 1,2,cyclopentanoperhydrophenanthrene nucleus\_ includes de novo formation and steroid interconversion by modification." [GOC

6286 Pathogen[ Q2Q067] interacts with 3 human partners:{Q9NZI6;P14324;P40424}

6287 Pathogen[ P0C214] interacts with 5 human partners:{P40424;Q13907;Q9BXS1;P14324;Q9NZI6}

6288 Pathogen[ P03346] interacts with 4 human partners:{Q9NZI6;P51843;P14324;P40424}

6289 Pathogen[ Q85601] interacts with 4 human partners:{P40424;P14324;Q9NZI6;Q13907}

6290 Pathogen[ P14079] interacts with 6 human partners:{Q9BXS1;Q13907;P14324;Q9NZI6;Q9UKR5;P53602}

6291 Pathogen[ P03383] interacts with 3 human partners:{P40424;P14324;Q9NZI6}

6292 Pathogen[ P03410] interacts with 6 human partners:{P53602;Q9NZI6;Q13907;P40424;P14324;Q9BXS1}

6293 Pathogen[ P14075] interacts with 3 human partners:{P40424;P14324;Q9NZI6}

6294 Pathogen[ P0C206] interacts with 5 human partners:{P40424;P14324;Q13907;Q9BXS1;Q9NZI6}

6295 Pathogen[ P03363] interacts with 2 human partners:{Q9NZI6;P40424}

6296 [Cluster 573]GO:0050881+P biological\_process [name] musculoskeletal movement [def] "The movement of an organism or part of an organism using mechanoreceptors, the nervous system, striated muscle and/or the skeletal system." [GOC

6297 Pathogen[ Q2Q067] interacts with 2 human partners:{Q63HK5;Q9P1Q0}

6298 Pathogen[ P0C214] interacts with 3 human partners:{Q63HK5;Q9P1Q0;Q6Y7W6}

6299 Pathogen[ P03346] interacts with 2 human partners:{Q63HK5;Q9P1Q0}

6300 Pathogen[ Q85601] interacts with 3 human partners:{Q6Y7W6;Q9P1Q0;Q63HK5}

6301 Pathogen[ P14079] interacts with 3 human partners:{Q6Y7W6;Q9P1Q0;Q63HK5}

6302 Pathogen[ P03383] interacts with 1 human partners:{Q9P1Q0}

6303 Pathogen[ P03410] interacts with 4 human partners:{Q9P1Q0;Q6Y7W6;Q9UBY8;Q63HK5}

6304 Pathogen[ P14075] interacts with 1 human partners:{Q9P1Q0}

6305 Pathogen[ P0C206] interacts with 3 human partners:{Q9P1Q0;Q63HK5;Q6Y7W6}



6306 Pathogen[ P03363] interacts with 2 human partners:{Q9P1Q0;Q63HK5}  
6307 [Cluster 574]GO:0006222+P biological\_process [name] UMP biosynthetic process [def]  
"The chemical reactions and pathways resulting in the formation of UMP, uridine  
monophosphate." [ISBN  
6308 Pathogen[ Q2Q067] interacts with 1 human partners:{P11172}  
6309 Pathogen[ P0C214] interacts with 1 human partners:{P11172}  
6310 Pathogen[ P03346] interacts with 1 human partners:{P11172}  
6311 Pathogen[ Q85601] interacts with 1 human partners:{P11172}  
6312 Pathogen[ P14079] interacts with 1 human partners:{P11172}  
6313 Pathogen[ P03383] interacts with 1 human partners:{P11172}  
6314 Pathogen[ P03410] interacts with 1 human partners:{P11172}  
6315 Pathogen[ P14075] interacts with 1 human partners:{P11172}  
6316 Pathogen[ P0C206] interacts with 1 human partners:{P11172}  
6317 Pathogen[ P03363] interacts with 1 human partners:{P11172}  
6318 [Cluster 575]GO:0019674+P biological\_process [name] NAD metabolic process [def]  
"The chemical reactions and pathways involving nicotinamide adenine dinucleotide (NAD),  
a coenzyme present in most living cells and derived from the B vitamin nicotinic acid."  
[GOC  
6319 Pathogen[ Q2Q067] interacts with 3 human partners:{P07195;Q6XQN6;Q9HAN9}  
6320 Pathogen[ P0C214] interacts with 7 human  
partners:{Q96T66;Q9HAN9;Q6XQN6;Q9BZQ4;Q15274;P43490;P07195}  
6321 Pathogen[ P03346] interacts with 3 human partners:{Q9HAN9;Q6XQN6;P07195}  
6322 Pathogen[ Q85601] interacts with 3 human partners:{Q9HAN9;Q6XQN6;P07195}  
6323 Pathogen[ P14079] interacts with 9 human  
partners:{O95544;Q4G0N4;P43490;P07195;Q9BZQ4;Q6XQN6;Q9HAN9;Q6IA69;Q15274}  
6324 Pathogen[ P03383] interacts with 2 human partners:{Q9HAN9;P07195}  
6325 Pathogen[ P03410] interacts with 8 human  
partners:{Q15274;Q4G0N4;Q6XQN6;P07195;P43490;Q9HAN9;Q6IA69;Q9BZQ4}  
6326 Pathogen[ P14075] interacts with 3 human partners:{P07195;Q9HAN9;Q6XQN6}  
6327 Pathogen[ P0C206] interacts with 6 human  
partners:{P07195;Q6XQN6;P43490;Q9BZQ4;Q9HAN9;Q15274}  
6328 Pathogen[ P03363] interacts with 2 human partners:{Q6XQN6;Q9HAN9}  
6329 [Cluster 576]GO:0051972+P biological\_process [name] regulation of telomerase activity  
[def] "Any process that modulates the frequency, rate or extent of telomerase activity,  
the catalysis of the reaction  
6330 Pathogen[ Q2Q067] interacts with 1 human partners:{Q96BK5}  
6331 Pathogen[ P0C214] interacts with 1 human partners:{Q96BK5}  
6332 Pathogen[ P03346] interacts with 1 human partners:{Q96BK5}  
6333 Pathogen[ Q85601] interacts with 1 human partners:{Q96BK5}  
6334 Pathogen[ P14079] interacts with 1 human partners:{Q96BK5}  
6335 Pathogen[ P03383] interacts with 1 human partners:{Q96BK5}  
6336 Pathogen[ P03410] interacts with 1 human partners:{Q96BK5}  
6337 Pathogen[ P14075] interacts with 1 human partners:{Q96BK5}  
6338 Pathogen[ P0C206] interacts with 1 human partners:{Q96BK5}  
6339 Pathogen[ P03363] interacts with 1 human partners:{Q96BK5}  
6340 [Cluster 577]GO:0001937+P biological\_process [name] negative regulation of  
endothelial cell proliferation [def] "Any process that stops, prevents, or reduces the  
rate or extent of endothelial cell proliferation." [GOC  
6341 Pathogen[ Q2Q067] interacts with 4 human partners:{Q9H4X1;Q9UII2;Q12904;P42224}  
6342 Pathogen[ P0C214] interacts with 4 human partners:{Q9H4X1;Q12904;P42224;Q9UII2}  
6343 Pathogen[ P03346] interacts with 5 human  
partners:{Q9H4X1;Q9UII2;Q12904;P42224;O00522}  
6344 Pathogen[ Q85601] interacts with 3 human partners:{Q9H4X1;Q9UII2;P42224}  
6345 Pathogen[ P14079] interacts with 5 human  
partners:{P25705;Q9UII2;P42224;Q12904;O00522}  
6346 Pathogen[ P03383] interacts with 3 human partners:{Q9H4X1;Q12904;Q9UII2}  
6347 Pathogen[ P03410] interacts with 5 human  
partners:{Q9H4X1;P25705;Q12904;Q9UII2;O00522}  
6348 Pathogen[ P14075] interacts with 3 human partners:{Q9H4X1;Q9UII2;Q12904}  
6349 Pathogen[ P0C206] interacts with 5 human  
partners:{Q9H4X1;P42224;Q9UII2;O00522;Q12904}  
6350 Pathogen[ P03363] interacts with 2 human partners:{Q9H4X1;O00522}  
6351 [Cluster 578]GO:0071277+P biological\_process [name] cellular response to calcium ion  
[def] "Any process that results in a change in state or activity of a cell (in terms of  
movement, secretion, enzyme production, gene expression, etc.) as a result of a calcium  
ion stimulus." [GOC  
6352 Pathogen[ Q2Q067] interacts with 6 human  
partners:{P01100;Q5T752;O43745;Q9HB71;P13645;Q02078}  
6353 Pathogen[ P0C214] interacts with 9 human  
partners:{Q5T752;P01100;P17275;O43745;Q02078;P17535;P05412;Q9HB71;P13645}  
6354 Pathogen[ P03346] interacts with 11 human  
partners:{P05412;Q02078;P17275;P17535;Q9HB71;Q5T752;P13645;Q9H8V3;P01100;P53539;O437  
45}  
6355 Pathogen[ Q85601] interacts with 9 human  
partners:{Q02078;O43745;P01100;P17535;P13645;P05412;P17275;Q9HB71;P53539}  
6356 Pathogen[ P14079] interacts with 12 human

partners:{Q02078;Q06413;O43745;P20292;Q9HB71;Q5T752;P13645;P17275;Q9H8V3;P05412;P01100;P17535}

6357 Pathogen[ P03383] interacts with 9 human  
partners:{Q5T752;P13645;Q9HB71;O43745;P01100;P17535;P17275;Q02078;P05412}

6358 Pathogen[ P03410] interacts with 11 human  
partners:{P13645;Q9HB71;P01100;P17535;P17275;P05412;Q02078;O43745;Q9H8V3;P20292;Q5T752}

6359 Pathogen[ P14075] interacts with 9 human  
partners:{P05412;P17275;P13645;Q5T752;O43745;Q02078;P01100;P17535;Q9HB71}

6360 Pathogen[ P0C206] interacts with 12 human  
partners:{Q9HB71;Q02078;P17275;P05412;P13645;P17535;Q5T752;P01100;P53539;Q9H8V3;P20292;O43745}

6361 Pathogen[ P03363] interacts with 10 human  
partners:{P17535;P13645;Q9HB71;P53539;P17275;Q5T752;P05412;O43745;P01100;Q02078}

6362 [Cluster 579]GO:0018101+P biological\_process [name] peptidyl-citrulline biosynthetic process from peptidyl-arginine [def] "The hydrolysis of peptidyl-arginine to form peptidyl-citrulline." [RESID

6363 Pathogen[ Q2Q067] interacts with 5 human  
partners:{Q9ULC6;Q9Y2J8;Q9ULW8;Q9UM07;Q6TGC4}

6364 Pathogen[ P0C214] interacts with 5 human  
partners:{Q9UM07;Q9ULC6;Q6TGC4;Q9ULW8;Q9Y2J8}

6365 Pathogen[ P03346] interacts with 5 human  
partners:{Q9ULC6;Q6TGC4;Q9Y2J8;Q9ULW8;Q9UM07}

6366 Pathogen[ Q85601] interacts with 5 human  
partners:{Q9ULW8;Q9UM07;Q6TGC4;Q9Y2J8;Q9ULC6}

6367 Pathogen[ P14079] interacts with 5 human  
partners:{Q9ULC6;Q9ULW8;Q9Y2J8;Q6TGC4;Q9UM07}

6368 Pathogen[ P03383] interacts with 5 human  
partners:{Q9ULW8;Q6TGC4;Q9UM07;Q9Y2J8;Q9ULC6}

6369 Pathogen[ P03410] interacts with 5 human  
partners:{Q9UM07;Q9ULC6;Q6TGC4;Q9Y2J8;Q9ULW8}

6370 Pathogen[ P14075] interacts with 5 human  
partners:{Q9ULC6;Q9UM07;Q9Y2J8;Q9ULW8;Q6TGC4}

6371 Pathogen[ P0C206] interacts with 5 human  
partners:{Q9Y2J8;Q9UM07;Q6TGC4;Q9ULC6;Q9ULW8}

6372 Pathogen[ P03363] interacts with 5 human  
partners:{Q9Y2J8;Q9ULW8;Q9UM07;Q6TGC4;Q9ULC6}

6373 [Cluster 580]GO:0006413+P biological\_process [name] translational initiation [def] "The process preceding formation of the peptide bond between the first two amino acids of a protein. This includes the formation of a complex of the ribosome, mRNA, and an initiation complex that contains the first aminoacyl-tRNA." [ISBN

6374 Pathogen[ Q2Q067] interacts with 125 human  
partners:{P23588;P05198;Q7L2H7;P61313;Q99613;P62701;P47914;P46779;O00303;O60841;Q9BY44;Q02543;P26373;Q9UBQ5;P62750;P47813;P62273;P15880;P40429;Q9H074;P46782;P35268;P22090;P49770;P62778;P62888;P32969;P62277;P56537;P62241;P62244;P05387;Q14152;P62861;P42766;P05386;Q96DP5;Q92905;Q9Y262;Q14240;Q9UNX3;P30050;O43583;P18077;P62891;Q13541;P61927;P39023;P62081;P61247;P61254;Q9UI10;P62249;P62280;P83731;P62263;P60866;P62906;Q14232;Q02878;P46777;P62899;P78344;Q9NR50;P08708;P41567;P08865;Q07020;P62913;O14602;P62269;P60228;P62424;P62917;P62829;P46783;P36578;Q9UKV8;P62857;P62847;O75822;P49207;Q13144;P23396;Q9H2K0;P20042;O60573;P63173;P18621;P9UJA5;P39019;P61353;O15371;Q04637;P62266;P42677;Q9Y3U8;P63220;P62841;Q8NE71;P83881;P62987;P06730;P50914;P46776;P11940;P62854;P62753;P05388;P60842;P18124;P62851;P25398;Q15056;P62910;Q92901;P46781;P27635;O75821;O15372;Q13347;P61513;P41214;P62945;P62979}

6375 Pathogen[ P0C214] interacts with 130 human  
partners:{P62861;P84098;P61247;P60228;P15880;P62081;P42766;Q9UI10;P62913;P22090;O60841;Q92901;P62249;P62899;P62854;P39019;P62263;P60842;P49770;Q9Y262;Q9BY44;P62273;O60739;P23396;P18077;P05388;O15372;P62847;P23588;P62829;P26373;Q14152;P27635;P47813;P46778;Q8N5X7;A6NMX2;Q99613;O14602;Q96DP5;O75821;P61513;P78344;P83881;Q15056;P62701;P49207;P11940;Q14232;P63220;P08865;P32969;Q02543;P62266;P62277;Q8N9N8;P50914;P46779;O00303;P40429;P41091;P47914;Q8NE71;P63173;P46783;Q92905;Q9NR50;P62280;Q9UNX3;Q9Y3U8;Q9H074;P30050;P62753;P62910;Q13144;P62891;Q14240;Q7L2H7;P62269;P41567;P46781;P61254;Q9UKV8;P62841;P62244;P62987;Q04637;Q07020;P42677;P62945;O75822;P46776;P05198;P62241;P46777;P55884;P83731;P35268;P62424;P60866;P62857;Q9UJA5;Q9H2K0;P61313;P08708;B5ME19;P20042;P05387;P25398;Q9UBQ5;P61927;P62750;P62979;P05386;P62851;P06730;P46782;P56537;P18124;O43583;P61353;P36578;O15371;P18621;Q13541;Q13347;P62906;O60573;Q02878;P41214}

6376 Pathogen[ P03346] interacts with 133 human  
partners:{P41567;O60739;P05387;P46779;B5ME19;P63173;P06730;P62917;P62249;P62913;P62861;P62277;Q02878;P41091;P47813;Q9UBQ5;P62280;P39023;P62987;P61927;Q9UNX3;P62857;Q13541;Q13347;O60841;P46778;P49207;Q8N5X7;P62266;P78344;P61254;P56537;O60573;Q15056;P11940;P62424;P62273;P55884;P83731;P60866;P62899;Q14152;O75821;P60842;P35268;O14602;P62891;P08708;O00303;P46782;P61353;O43583;P62854;Q9Y3U8;P47914;Q14232;P08865;Q96DP5;P60228;P61313;Q9H074;P25398;P61513;P05388;P62269;Q02543;P42766;P62081;Q7L2H7;P61247;Q14240;P49770;P18621;P46781;P84098;P15880;Q9UKV8;P50914;P62829;P62979;Q8N9N8;Q99613;Q92905;O75822;P39019;P23588;P23396;Q9BY44;P42677;P62750;P62701;P30050;P62701;P36578;Q8NE71;P62847;P62851;Q9UJA5;P22090;Q9H2K0;Q04637;A6NMX2;P46777;O15371;Q07020;P62263;P62841;P83881;P41214;P05386;P18077;Q13144;P20042;P46776;P62241;Q9NR50;P62753;O15372;P629

- 45;Q92901;P32969;P26373;Q9UI10;P18124;P40429;P27635;P46783;Q9Y262;P62906;P62244;P62888;P63220;P05198}
- 6377 Pathogen[ Q85601] interacts with 125 human  
partners: {P46783;P32969;P61513;P26373;P62857;P62244;P62913;P62854;P62081;P61353;P62891;P46776;P47813;P18077;P61313;P41091;Q99613;P05388;Q9UBQ5;P06730;Q14240;P63173;P23588;P23396;P62273;P46778;P62829;Q8N5X7;P30050;P62753;P27635;Q04637;P15880;P65637;P83881;Q07020;Q9Y3U8;P39019;Q9Y3U8;Q9NR50;P62701;P62241;P62424;O00303;P83731;P62899;P20042;Q13144;P62945;P49770;P62263;Q13541;P62861;Q02878;P39023;P61254;O15371;B5ME19;P49207;P60228;P11940;P62910;P62249;P62280;P47914;P84098;P08708;P42766;O60573;P62269;Q92905;Q9Y262;P18621;P05387;P78344;Q9UNX3;P60842;Q9UKV8;P62277;Q9H074;P35268;P62979;Q7L2H7;Q13347;P62847;O75822;Q8NE71;P41567;Q14152;P05198;P42677;P63220;P46782;P46779;Q9UJA5;P62750;P62851;P62841;O15372;P62987;P22090;P61927;P36578;P41214;P05386;O43583;P08865;P61247;Q14232;O75821;P46777;P62917;Q92901;Q9UI10;P18124;P46781;P25398;P60866;Q02543;P62906;P50914;P62266;P40429;P62888}
- 6378 Pathogen[ P14079] interacts with 132 human  
partners: {Q9Y3U8;P27635;Q8N9N8;P84098;P46779;Q7L2H7;A6NMX2;P20042;Q9UKV8;P26373;P60842;O14602;P23396;Q15056;P40429;O00303;O75821;P06730;O60739;Q9UI10;Q9H2K0;P18621;P47813;P83881;P41567;Q9BY44;Q9UNX3;P46781;P83731;P61513;P62847;P41091;P62753;P65637;P39023;P62273;O43432;P25398;P18077;P46783;P05198;P61254;P50914;P46199;Q9H074;P62979;P62841;P18124;Q14240;P42766;P62266;O15371;P46782;P62987;Q13144;P62241;Q13541;P78344;P23588;P32969;P22090;P62829;O60573;B5ME19;P60866;P62854;Q9NR50;Q07020;P39019;P63220;P49207;P62244;P62263;Q02543;P62424;Q92901;P62277;O75822;P11940;P62750;P62910;P63173;P46776;Q8NE71;P08708;Q99613;Q8N5X7;P36578;O43583;Q9UJA5;Q92905;P62906;P47914;P62280;Q9Y262;P62899;P61353;P62081;P62945;P46777;P42677;P30050;O60841;P15880;P62891;P62888;P08865;P61927;P62917;P46778;P62249;Q13347;P05386;P35268;Q14232;P62913;P41214;P05387;Q9UBQ5;P61247;P62269;P62701;P61313;Q14152;Q96DP5;P62851;P05388;Q04637;O15372;P62857;P55884;P62861}
- 6379 Pathogen[ P03383] interacts with 122 human  
partners: {P42766;P36578;P05388;P62266;P39019;P26373;P62913;P62945;P62854;P40429;P62987;P62891;P25398;P62280;Q07020;P62750;O15371;P05387;P62249;P62888;P62899;Q9UBQ5;P60228;P61927;Q8NE71;P46777;P46779;P41567;P49207;P65637;P83731;P62424;Q92905;Q9UI10;P18124;P46778;Q92901;P62753;Q9Y262;P42677;P61247;P83881;P47914;O60841;P11940;Q14152;P62917;P62273;O60573;Q9UNX3;P30050;P84098;Q9BY44;O14602;P32969;P20042;P62277;Q13144;P18077;P23588;P06730;P63173;Q9NR50;P62081;Q13541;P61313;P08865;P62851;P47813;P46782;P41214;Q9H2K0;P62269;P63220;P05198;Q02543;P62244;Q02878;Q7L2H7;P49770;P78344;P62910;P27635;Q9UKV8;Q9H074;P62857;Q99613;O75822;P62906;P46783;Q9Y3U8;P60866;Q04637;P61254;P62979;Q96DP5;P62241;P46781;Q14232;Q13347;P39023;O43583;Q9UJA5;P62841;P22090;P62701;P62829;P62263;P62847;P35268;P05386;P50914;P62861;P18621;O15372;P46776;O75821;P15880;P23396;P61513;P08708;P61353}
- 6380 Pathogen[ P03410] interacts with 135 human  
partners: {P62861;Q96DP5;P05386;Q02543;P61247;P62241;P62829;P49207;P26373;P61513;Q9NR50;P62899;Q8NE71;Q9UKV8;P62244;O60841;P62913;O75822;Q02878;Q92901;P11940;B5ME19;O15372;P15880;P46777;P46776;P62841;P30050;P05388;P06730;P46781;P18124;Q9H2K0;P20042;P46199;Q92905;P62269;Q07020;P63220;P62910;P62847;P62906;Q7L2H7;P23396;Q14232;P18621;P62266;O43583;P62249;P63173;P50914;P62280;O43432;P22090;P61313;P62979;Q99613;P47813;Q13541;Q14152;P41214;P62701;P49770;P62750;Q9H074;P41567;P55884;P08865;Q9UNX3;P62277;O15371;P36578;P18077;Q9UJA5;P25398;P61927;P84098;P62854;P62273;O60739;P62081;P46783;Q15056;Q9Y3U8;P08708;P46782;P32969;O14602;P60842;O00303;P46779;P27635;O60573;O75821;P62987;Q9BY44;P62857;Q8N5X7;Q8N9N8;Q13347;P62263;P41091;P62424;P62888;P61254;P46778;P62945;P05387;P42766;P39019;P47914;P40429;Q04637;P39023;Q9Y262;A6NMX2;P62917;P62851;P83731;P65637;P60228;P35268;P61353;P62891;P62753;P78344;Q9UBQ5;P23588;Q9UI10;Q14240;P83881;P60866;Q13144;P42677;P05198}
- 6381 Pathogen[ P14075] interacts with 123 human  
partners: {P42766;P49207;P62857;P46781;P63220;P32969;P42677;P62913;P22090;O60841;P56537;P20042;Q02878;P62277;O15372;Q7L2H7;P62851;P23588;P08865;P62244;P08708;P61254;P46778;P05388;P78344;P83881;Q99613;O75821;P46777;Q9Y3U8;P62249;Q9H074;P06730;P62081;P62750;P18621;Q02543;Q9UI10;P18124;Q9UNX3;P25398;P47813;P05198;O15371;O43583;P11940;P60228;P63173;P30050;Q9H2K0;P62979;O60573;P83731;P84098;O60739;Q14232;P61247;P62753;P46782;P62891;P62861;P18077;P46779;P62917;P39023;P41214;Q04637;P50914;P62269;P62847;P62910;P62273;P40429;P23396;P62241;P15880;Q8NE71;P49770;P62987;O14602;Q9UKV8;P62841;P36578;P62266;Q9Y262;Q13347;P61513;O75822;P61313;P27635;P62888;Q92901;P35268;Q9NR50;P62945;P46776;Q9UJA5;P46783;P62701;Q13144;P62899;P47914;P62906;P41567;Q9UBQ5;P05386;Q92905;P61353;P39019;P62424;Q9BY44;P62829;P62280;Q13541;Q07020;P62263;Q96DP5;P62854;P60866;P26373;P05387;Q14152;P61927}
- 6382 Pathogen[ P0C206] interacts with 131 human  
partners: {P41091;Q7L2H7;P40429;P61313;Q13541;Q9H074;Q99613;P27635;P20042;P18124;P62854;P49207;P62081;P30050;O14602;P62241;P62244;P50914;P08865;P62750;P18621;P46781;P62266;Q02543;Q14232;P41567;Q07020;P83881;P46778;P62263;P62273;Q02878;Q9UKV8;P62280;Q8N9N8;P62857;P62910;P62910;Q9NR50;P46782;P06730;P61247;Q13144;P18077;P62913;P61927;P61353;P62888;P36578;P60228;P49770;P62861;P05198;O60841;Q8N5X7;P35268;P23396;P39023;P32969;P62701;P05386;P22090;O60739;Q9H2K0;B5ME19;P84098;P62945;P26373;Q14152;P46777;P05388;Q9UI10;P62979;A6NMX2;O15371;P62899;P47813;P65637;P83731;P39019;Q92901;P05387;P46783;P42766;P60866;Q14240;P62841;Q8NE71;Q9UNX3;Q9UJA5;P23588;P61513;P78344;Q9BY44;P62277;O60573;P46776;P62906;P41214;Q04637;P63173;O43583;P62987;O75821;P62987;P62857;P62753;Q13347;P46779;P63220;P60842;P15880;P25398;O00303;P08708;P11940;Q96DP5;P47914;P62847;Q9Y262;P61254;O15372;O75822;P42677;P62829;P62249;P62424;Q92905;Q9Y3U8;Q9UBQ5;P629

17}

6383 Pathogen[ P03363] interacts with 129 human partners: {P62913;O60739;P18621;P05386;O15371;P62750;P23396;P42677;P63173;P08865;P62847;P18077;P05387;Q9BY44;P84098;P42766;P62249;P05388;O60841;P36578;Q13347;P62753;P62081;P62910;P61513;P46776;Q9UI10;P61254;P62273;P32969;Q92901;P46778;Q15056;P61927;O14602;Q9UBQ5;P62891;Q14152;Q9UKV8;P61353;P08708;P11940;O15372;P41091;P41567;P23588;P05198;P626373;P83881;P22090;P62861;P62841;Q9UNX3;Q9NR50;P30050;Q8N5X7;P62829;Q14240;P46782;P35268;P20042;P46781;P47813;P50914;A6NMX2;P56537;P63220;Q7L2H7;P61313;P39019;P46779;Q02543;P46777;P62987;P25398;B5ME19;Q9UJA5;P49770;P60228;P83731;P62851;P62280;Q9Y3U8;P62888;P41214;P60842;P62244;P62277;O43583;P62906;Q8NE71;P62266;P62945;P49207;P62241;P62424;P60866;Q9Y262;P61247;O60573;Q13144;P62899;P62857;Q02878;Q13541;O75821;P78344;Q07020;P39023;P62854;P62917;P55884;P18124;P40429;P27635;P06730;P62263;P47914;P62701;Q9H074;Q92905;O75822;P62269;P46783;Q8N9N8;Q99613;Q04637;O00303}

6384 [Cluster 581]GO:0090267+P biological\_process [name] positive regulation of mitotic cell cycle spindle assembly checkpoint [def] "Any process that increases the rate, frequency, or extent of the mitotic cell cycle spindle assembly checkpoint, a cell cycle checkpoint that delays the metaphase/anaphase transition of a mitotic nuclear division until the spindle is correctly assembled and chromosomes are attached to the spindle." [GOC

6385 Pathogen[ Q2Q067] interacts with 1 human partners: {Q13257}

6386 Pathogen[ P0C214] interacts with 2 human partners: {Q13257;Q5JVF3}

6387 Pathogen[ P03346] interacts with 1 human partners: {Q13257}

6388 Pathogen[ Q85601] interacts with 1 human partners: {Q13257}

6389 Pathogen[ P14079] interacts with 2 human partners: {Q13257;Q5JVF3}

6390 Pathogen[ P03383] interacts with 1 human partners: {Q13257}

6391 Pathogen[ P03410] interacts with 3 human partners: {Q9Y6G9;Q5JVF3;Q13257}

6392 Pathogen[ P14075] interacts with 1 human partners: {Q13257}

6393 Pathogen[ P0C206] interacts with 3 human partners: {Q5JVF3;Q13257;Q9Y6G9}

6394 Pathogen[ P03363] interacts with 1 human partners: {Q13257}

6395 [Cluster 582]GO:0007435+P biological\_process [name] salivary gland morphogenesis [def] "The process in which the anatomical structures of the salivary gland are generated and organized." [GOC

6396 Pathogen[ Q2Q067] interacts with 1 human partners: {O60716}

6397 Pathogen[ P0C214] interacts with 1 human partners: {O60716}

6398 Pathogen[ P03346] interacts with 1 human partners: {O60716}

6399 Pathogen[ Q85601] interacts with 1 human partners: {O60716}

6400 Pathogen[ P14079] interacts with 1 human partners: {O60716}

6401 Pathogen[ P03383] interacts with 1 human partners: {O60716}

6402 Pathogen[ P03410] interacts with 1 human partners: {O60716}

6403 Pathogen[ P14075] interacts with 1 human partners: {O60716}

6404 Pathogen[ P0C206] interacts with 1 human partners: {O60716}

6405 Pathogen[ P03363] interacts with 1 human partners: {O60716}

6406 [Cluster 583]GO:0002026+P biological\_process [name] regulation of the force of heart contraction [def] "Any process that modulates the extent of heart contraction, changing the force with which blood is propelled." [GOC

6407 Pathogen[ Q2Q067] interacts with 1 human partners: {P26678}

6408 Pathogen[ P0C214] interacts with 2 human partners: {P13533;P26678}

6409 Pathogen[ P03346] interacts with 2 human partners: {P26678;O76003}

6410 Pathogen[ Q85601] interacts with 2 human partners: {P13533;O76003}

6411 Pathogen[ P14079] interacts with 2 human partners: {O76003;P26678}

6412 Pathogen[ P03383] interacts with 1 human partners: {P26678}

6413 Pathogen[ P03410] interacts with 3 human partners: {O76003;P26678;P13533}

6414 Pathogen[ P14075] interacts with 1 human partners: {P26678}

6415 Pathogen[ P0C206] interacts with 4 human partners: {P13533;P50461;O76003;P26678}

6416 Pathogen[ P03363] interacts with 1 human partners: {O76003}

6417 [Cluster 584]GO:0045926+P biological\_process [name] negative regulation of growth [def] "Any process that stops, prevents or reduces the rate or extent of growth, the increase in size or mass of all or part of an organism." [GOC

6418 Pathogen[ Q2Q067] interacts with 13 human partners: {Q8TCS8;P07438;Q8WYH8;Q9BXH1;Q93083;Q9UNL4;P13640;P04732;P04733;P80294;P04731;P80297;P02795}

6419 Pathogen[ P0C214] interacts with 14 human partners: {Q9UNL4;P13640;P80297;Q9BXH1;P04732;Q8TCS8;P02795;P04733;P07438;P80294;P04731;Q93083;Q8WYH8;P51553}

6420 Pathogen[ P03346] interacts with 14 human partners: {Q9UNL4;Q8WYH8;P04732;P80294;P07438;P04733;P13640;Q93083;P80297;Q8N339;Q8TCS8;P02795;P04731;Q9BXH1}

6421 Pathogen[ Q85601] interacts with 14 human partners: {P80294;Q9BXH1;P04732;Q93083;P07438;Q9UNL4;P02795;Q8N339;P80297;P04733;Q8TCS8;Q8WYH8;P04731;P13640}

6422 Pathogen[ P14079] interacts with 14 human partners: {P80297;Q93083;P02795;Q8N339;Q9UNL4;P80294;P07438;Q9BXH1;P13640;P04731;P04732;P04733;Q8WYH8;Q8TCS8}

6423 Pathogen[ P03383] interacts with 13 human partners: {P04733;P80294;Q93083;P13640;P80297;Q9UNL4;Q8TCS8;Q8WYH8;P02795;P04732;P04731;Q9BXH1;P07438}

- 6424 Pathogen[ P03410] interacts with 14 human partners: {Q8WYH8;Q8TCS8;P07438;P80297;Q9BXH1;P04733;Q9UNL4;Q8N339;P13640;P04731;P02795;Q93083;P80294;P04732}
- 6425 Pathogen[ P14075] interacts with 13 human partners: {P04733;P80297;P07438;Q93083;P13640;Q9BXH1;P80294;Q9UNL4;Q8TCS8;P02795;P04731;Q8WYH8;P04732}
- 6426 Pathogen[ P0C206] interacts with 14 human partners: {P07438;P13640;Q8TCS8;Q8WYH8;P04732;Q9BXH1;P04733;P80294;Q93083;P04731;Q8N339;P02795;Q9UNL4;P80297}
- 6427 Pathogen[ P03363] interacts with 12 human partners: {P80294;P80297;P02795;P13640;P04732;Q9UNL4;P04731;P07438;P04733;Q9BXH1;Q93083;Q8WYH8}
- 6428 [Cluster 585]GO:0006281+P biological\_process [name] DNA repair [def] "The process of restoring DNA after damage. Genomes are subject to damage by chemical and physical agents in the environment (e.g. UV and ionizing radiations, chemical mutagens, fungal and bacterial toxins, etc.) and by free radicals or alkylating agents endogenously generated in metabolism. DNA is also damaged because of errors during its replication. A variety of different DNA repair pathways have been reported that include direct reversal, base excision repair, nucleotide excision repair, photoreactivation, bypass, double-strand break repair pathway, and mismatch repair pathway." [PMID
- 6429 Pathogen[ Q2Q067] interacts with 239 human partners: {Q9Y253;Q92900;Q9Y5K5;Q9NWS1;Q2YD98;Q15054;Q9P2Y5;P25490;P52434;P0C1Z6;Q9Y2M0;Q6NVH7;Q96SD1;Q93009;Q9BW66;Q99502;Q6ZW49;Q7Z2Z1;Q99638;Q86UA6;Q8IY18;Q12888;Q6PJ8;Q92889;Q9HB96;P27694;P49959;Q96LA8;Q13889;Q95257;Q6NS38;Q52LR7;Q7Z589;Q95997;Q8N0Z6;Q15233;Q96019;Q95243;Q99708;P18887;Q13111;Q00167;Q9C086;P36639;Q96T88;P19388;P52435;Q9UIF7;Q7Z2E3;Q9UHC1;Q969S2;Q96B01;P35244;Q95347;P32780;Q8N2Z9;A8MT69;Q9UPV0;Q96EZ8;Q96S55;Q9UNA4;P06748;P30876;Q14757;Q9NWX8;P19387;P61218;Q92759;Q96AH0;P54727;Q9H981;Q53TQ3;Q9UBZ9;Q92547;Q86YC2;P49005;Q16531;Q95551;P38935;Q13156;Q9BQ15;Q7Z6Z7;Q9NVI1;Q00597;Q43542;Q06609;Q9H9Q4;Q8NBZ0;P11388;P54725;Q14669;P61077;P22674;P63165;Q68DK2;P27695;Q08050;Q13112;P12004;Q43502;P63146;P06746;P24522;Q1ZZU3;P62487;Q99504;P29372;Q8NB91;A4GXA9;Q9BTP7;Q99728;P51948;Q60934;Q96017;Q9BQ83;P15927;Q8N140;Q8N3C0;Q9NPD8;Q2TAK8;Q9NUW8;Q00255;Q7LG56;P56282;P54278;Q9UQ84;Q9NPI8;P50750;Q6P4R8;Q8WXE1;P09874;Q13426;Q9HCU8;Q96Q83;P50613;Q8IWL9;P23246;P61088;P46100;Q9NRY2;Q6UWZ7;Q15527;Q03468;P12956;Q68E01;Q60216;P39748;Q6WBX8;Q9UBU8;P62875;P24928;Q96HA7;Q15014;Q76064;Q13216;Q43299;P43351;Q75943;P78549;P23193;Q9UM11;Q9H816;Q13620;P0CG47;Q13619;Q13569;Q14686;Q96T76;P04818;Q9UI95;Q96MG7;P41208;Q96NY9;Q86XK3;Q19AV6;Q9UNE7;Q9ULG1;Q0VG06;Q9UHN1;P0CG48;P49459;P35251;Q14676;Q96AY2;Q9Y294;Q96PK6;Q9NUS5;P16455;Q86WJ1;Q01831;Q96MF7;Q6ZRQ5;Q9P287;Q14683;Q9NPD8;P53803;P24941;Q9BQA5;P13010;Q8IY92;Q9UUK3;Q9NRD1;Q9Y5B9;P62987;Q92466;Q9H040;P13051;Q60870;Q6ZYL4;Q15287;Q6P1K8;Q9HAW4;Q9UMS4;Q6PI98;Q9NX6;Q9H9F9;Q8IYD8;Q60671;Q15360;Q9NXR7;Q96RL1;Q9HCS7;Q16526;P62877;Q53HV7;Q13888;Q8NG50;Q60921;P28715;Q9NW38;Q9BXW9;Q8N9B5;P51946;Q6NZ36;P78543;Q08945;Q71UM5;P23025;P62979}
- 6430 Pathogen[ P0C214] interacts with 238 human partners: {P43351;Q8IWL9;Q95551;Q96B02;Q95243;Q8IY18;Q15287;Q9H9Q4;P51946;Q13619;Q9HC57;P27695;Q00597;Q06609;Q9H040;P04818;P24522;Q99728;Q13620;Q13156;Q9BQ83;Q96S55;P49959;Q9H816;P30876;Q8WXE1;Q52LR7;Q9NXX6;P78543;Q92889;P13010;P06746;Q9H9F9;P53803;Q8N0Z6;Q53TQ3;P06748;P50750;Q92900;Q2TAK8;P50613;Q13112;Q15014;P23025;Q00167;Q9C086;Q96SD1;P52435;Q13111;Q53HV7;Q15233;Q96NY9;Q9NWX8;Q99708;Q9UBZ9;P23246;Q6ZYL4;P54725;Q6NZ36;Q9NUS5;Q96AH0;Q7Z589;P49459;P61218;Q9ULG1;Q71UM5;P35251;Q6WBX8;Q9NRD1;Q9Y2M0;P20585;Q14676;P49005;Q68E01;Q14686;P38935;Q9HAW4;P62877;Q9HCU8;Q9UI95;Q6ZRQ5;Q96PK6;Q96B01;P62875;Q9P2Y5;P54727;Q75943;P32780;P41208;P16455;P24928;Q86YC2;P62987;Q9NPI8;Q60671;Q9Y294;Q8N9B5;Q14669;Q9BXW9;Q14683;Q01831;Q16526;P39748;Q1ZZU3;P0CG47;Q9UUK3;Q15054;Q13888;Q12888;Q7Z6Z7;P78549;P29372;P52434;Q08945;Q9UQ84;Q95997;P27694;Q9NUW8;Q9NXR7;Q68DK2;P54278;Q8IY92;Q9NWS1;Q92547;Q9P287;Q86UA6;Q9BQA5;P19387;Q9NPD8;P23193;Q86XK3;Q9UM11;P19388;Q15527;P40692;Q13569;Q14757;Q92466;Q7LG56;Q99638;P62979;Q19AV6;Q8IYW5;Q96EZ8;Q96Q83;Q9UNE7;Q76064;Q9NPD8;P56282;Q96HA7;Q8NG50;Q16531;Q9Y253;Q60216;Q8IYD8;Q86WJ1;Q03468;Q96019;Q92759;Q7Z2Z1;P63146;P12956;Q00255;Q9NRY2;P61088;P13051;Q96T76;Q9BQ15;Q8NBZ0;Q9NW38;P09874;Q9H981;Q8N140;Q9BTP7;P55072;Q96LA8;Q9UHN1;Q99502}
- 6431 Pathogen[ P03346] interacts with 269 human partners: {Q60921;Q12888;Q9NS91;Q8N2Z9;P12004;Q9Y253;Q8NB91;P46063;Q13263;Q93009;P38935;Q7L9B9;P28715;Q7Z5Q5;Q76064;P52434;Q95677;Q96HA7;P12956;Q9NVI1;Q7Z2Z1;Q9HCU8;Q06609;Q96MF7;Q95551;Q96017;Q6ZRQ5;Q96SD1;P46100;Q8N9B5;Q6PCD5;Q9UM11;Q8IWL9;P06748;Q52LR7;Q00167;P11388;Q43502;P62987;P27694;Q95714;A8MT69;Q99728;Q86XK3;Q96EZ8;Q9C086;Q6P1K8;Q9UNA4;P07992;Q9H9F9;P35244;Q6WBX8;Q15360;Q9UBZ9;Q99708;P35250;Q9ULG1;P25490;P24941;Q13426;Q9UMS4;Q49AN0;Q16531;Q13156;Q96AH0;P23246;Q13888;P56282;Q96MG7;P0CG48;Q9UUK3;Q9NUW8;P13010;P53803;Q14757;Q95347;Q7Z589;Q2TAK8;P36639;Q71UM5;Q0VG06;P61218;Q9UHN1;Q08050;Q8WV22;Q96RL1;Q16526;Q9UIF7;Q96AY2;P49005;P49459;Q99638;Q99502;Q6PI98;Q9UI95;Q92698;Q68E01;Q9HCS7;P55072;P61077;Q95997;Q9BTP7;Q08945;P0C1Z6;Q8N3C0;Q13620;Q13889;Q96NY9;P61088;Q75943;Q6NZ36;Q7Z333;Q9UHC1;Q8N0Z6;P62487;Q969S2;P41208;Q60870;P19388;Q53HV7;Q9HAW4;Q14676;Q14694;Q96019;Q7LG56;Q8N140;Q96S55;Q9NXR7;Q03468;Q00255;Q15287;Q9BQ15;Q15315;Q6ZYL4;P63146;Q01831;Q14683;Q9NWS1;Q9UBU8;P52435;Q9UNE7;P130

51;Q9H040;P51587;P20585;Q8WXE1;P51946;P63165;P29372;P50750;Q96B01;O43542;Q9Y5B9;Q8NG  
50;Q14669;Q13111;Q9H981;P36954;Q9NRD1;Q9NUS5;Q53TQ3;O75771;Q6TAR4;Q19AV6;P15927;Q9Y2  
Y4;P54727;Q86YC2;Q9BW66;P35249;Q86UA6;Q9NPD8;Q13216;P49959;Q2YD98;Q9HB96;Q8IYW5;Q8NB  
Z0;P09874;Q15014;Q9NWW8;Q96Q83;Q68DK2;P62979;P78549;P43351;Q92759;O60934;P18887;Q152  
33;Q92889;Q92547;P30876;Q00597;Q9BXW9;P0CG47;Q9UQ84;Q9H9Q4;Q13619;Q13569;Q9UGN5;O952  
43;P54725;P54278;Q6NVH7;Q9NRY2;Q8IYD8;Q7Z2E3;Q6P4R8;P23025;O60671;Q6PJP8;P35251;Q9Y6  
F1;Q96FW1;Q9BQ83;P24928;P23193;P27695;Q9NPI8;Q9P287;O94782;Q9NP87;O43299;P39748;O952  
57;Q92466;Q9P2Y5;Q9NW38;Q13112;O95071;Q86WJ1;Q8IY92;O43543;Q8IY18;Q92900;Q9H816;Q995  
04;Q6UWZ7;O15527;Q9Y2M0;P40937;P06746;Q1ZZU3;Q9UBZ4;P78543;Q9Y294;Q7Z6Z7;O60216;Q96P  
K6;P54277;P51948;A4GXA9;P22674;Q9Y5K5;P32780;Q96LA8;Q96T88;Q96T76;P62875;Q15054;P193  
87;Q6ZW49;P24522;Q9UPV0;Q9NXX6;Q9BQA5;Q14686}

6432 Pathogen[ Q85601] interacts with 260 human  
partners: {P43351;Q9UBZ4;P51946;P22674;Q15014;Q9NWS1;Q9Y2M0;P36954;O15527;Q9HCS7;Q96T  
76;P09874;O43502;O15315;Q96PK6;Q96HA7;P23025;Q53TQ3;Q7Z2Z1;Q9BTP7;P63146;Q96RL1;Q018  
31;O96017;Q6ZYL4;Q93009;Q96AH0;O95347;Q8IYD8;Q9UQ84;Q8WXE1;P50750;Q52LR7;Q92547;Q9H0  
40;P18887;Q969S2;Q6NZ36;P13051;Q9BXW9;Q8IY18;Q16531;Q9UI95;P56282;Q9P2Y5;Q19AV6;O957  
14;Q68E01;P38935;O95677;Q9Y294;Q13888;Q9C086;P16455;Q13112;Q13216;Q9H9F9;P62877;Q9NU  
S5;P35244;Q86UA6;Q99708;A4GXA9;Q13426;Q9UMS4;Q49AN0;Q6NVH7;Q6PCD5;Q9NPI8;Q96MG7;Q9Y2  
Y4;Q1ZZU3;Q9UKK3;Q99728;P53803;Q9UBU8;Q99504;Q2TAK8;P36639;P25490;P61218;P24522;Q96A  
Y2;O43299;O95243;Q71UM5;Q9BQ15;Q9Y5B9;O96019;Q14669;Q9UGP5;P49959;P0CG48;P49005;Q96B  
02;Q9BW66;P51948;Q9NPD8;O60216;Q92698;Q6P1K8;Q9NRY2;Q15054;P61077;P27694;Q6ZRQ5;O435  
42;Q00597;Q96FI4;P0C1Z6;Q12888;Q96NY9;Q92889;O14757;Q7Z589;O75943;Q13263;P28715;Q8NG  
50;Q8N0Z6;P62487;Q14686;O60870;P19388;Q9UPV0;Q8NBZ0;Q9Y6F1;Q03468;Q9HB96;Q6PI98;Q9H9  
81;Q7LG56;Q8N140;O76064;P54727;Q8IY92;Q9NVI1;P15927;Q92759;Q9HAW4;P32780;P78543;Q146  
83;P52435;Q96SD1;P54725;Q99502;P20585;Q9UBZ9;Q53HV7;Q6P4R8;A8MT69;Q96B01;O60921;Q9Y5  
K5;Q6UWZ7;Q9NWW8;P35251;P11388;Q96T88;Q9UBT6;O95257;O00255;Q9NUW8;Q6TAR4;P06748;Q9NW  
38;Q86YC2;Q8N2Z9;Q9ULG1;Q13569;P50613;P49459;Q8IYW5;Q6ZW49;P23193;Q68DK2;P62979;Q8IW  
19;O15360;Q6NS38;Q9HCU8;Q9BQA5;Q15233;Q9UM11;O60671;P0CG47;P63165;Q96Q83;Q96S55;Q9UI  
F7;P54278;O15287;Q08945;Q9UGN5;Q08050;Q9UHC1;Q7Z6Z7;Q13156;Q6WBX8;P19387;Q7Z2E3;Q6PJ  
P8;P06746;P12004;Q86WJ1;Q9BQ83;P24928;P30876;P62987;Q9P287;Q13620;P52434;Q13111;Q0VG  
06;Q9NP87;P23246;P39748;P40692;P78549;Q92466;P61088;Q16526;O95071;P19447;O00167;Q929  
00;Q9H816;Q96EZ8;Q9NXX6;Q9UNE7;Q8WV22;Q13619;Q06609;Q86XK3;Q9UHN1;Q8N9B5;Q9Y253;P249  
41;Q9UNA4;P27695;Q14676;P46100;Q9NXX7;Q99638;P51587;O95551;P62875;O95997;Q96LA8;Q9H9  
Q4;P13010;P12956;Q96MF7;Q9NS91;Q8N3C0;P29372;O60934;P41208;Q9NRD1}

6433 Pathogen[ P14079] interacts with 253 human  
partners: {O60671;Q9Y5B9;P62875;P11388;Q15014;O15315;Q9NWS1;P20585;Q9BQ15;Q8TAT5;P098  
74;P78543;Q08945;Q9ULG1;Q9UIF7;Q9Y2Y4;Q96B01;P0CG48;Q9UNA4;Q99502;Q8NB91;Q68DK2;P287  
15;Q96MF7;Q16526;Q9UBU8;Q96LA8;Q96NY9;P19387;Q52LR7;P51946;Q9C0B1;Q9UGP5;Q8IYD8;Q9UG  
N5;P62487;Q8N9B5;Q9H9Q4;P40937;P13010;Q13620;P52434;P40692;Q9UBZ4;Q6WBX8;Q49AN0;Q9NP  
I8;Q9H040;Q9NPD8;Q16531;Q8NG50;P49005;O15514;P30876;P61088;Q00597;Q6UWZ7;P61218;Q8WXE1;P542  
78;P29372;O00487;Q92698;P51587;O60216;Q9UHC1;P23246;Q8NBZ0;Q6NZ36;Q9HCU8;Q9UBZ9;Q131  
12;Q13216;P16455;Q13889;Q9BXW9;P53803;Q13111;P62979;Q86YC2;O60934;O15527;P63165;P785  
49;Q9BQA5;O60870;Q13156;Q9HCS7;P61077;Q9UKK3;Q96AH0;Q96AY2;P23025;P62877;P62987;Q7LG  
56;Q9BQ50;Q7L9B9;A4GXA9;Q2TAK8;Q6NVH7;P46100;Q9NVI1;Q6PI98;P50613;Q9H981;Q13888;Q150  
54;P12956;Q9HAW4;P35250;Q9NUW8;Q9NXX7;Q9Y5K5;P19388;Q9UMS4;Q8N8Q3;O75943;Q96HA7;Q6ZY  
L4;P36639;O95347;Q9BW66;Q9UM11;Q7Z5Q5;Q99708;Q0VG06;Q96S55;Q6NS38;Q9NWW8;O95243;P562  
82;P52435;Q8N2Z9;P18887;P35251;P49459;Q86WJ1;Q19AV6;P24522;P0C1Z6;Q969S2;Q6ZW49;Q86U  
A6;Q92759;Q96FI4;Q71UM5;Q92889;Q68E01;P27695;Q9Y2M0;Q1ZZU3;A8MT69;Q96RL1;Q8N140;O955  
51;P06748;O43502;Q9NSU2;P54277;O95997;Q9NP87;Q6P4R8;Q8N0Z6;O43543;P32780;Q53HV7;P412  
08;P06746;P15927;Q14676;Q92547;Q9Y253;P23193;O43299;Q96SD1;P27694;Q92900;Q8IY18;Q996  
38;Q9HB96;Q9UQE7;Q9NRD1;Q99504;Q03468;Q9BTP7;Q92466;P38935;P12004;Q9NRY2;Q96MG7;P249  
28;Q9NUS5;Q01831;Q9BQ83;O00167;P52701;Q6PJP8;Q13569;Q9Y294;Q12888;Q6P1K8;Q2YD98;Q9UH  
N1;P25490;Q6ZRQ5;Q15233;P35244;Q06609;Q14683;Q9NW38;P0CG47;P54727;Q96Q83;O95257;Q7Z2  
Z1;P36954;Q7Z2E3;Q53TQ3;Q9P2Y5;O00255;P04818;Q9UBT6;P63146;Q9H816;Q96EZ8;Q9P287;O153  
60;Q9NXX6;Q13426;Q9UQ84;Q7Z589;Q96T76;Q14686;O60921;Q9Y6F1;Q96PK6;Q9H9F9;P07992;Q96F  
W1;P19447;O43542;Q86XK3;Q13619;P13051;P22674;Q8IY92;P49917;P39748;Q9UPV0;P50750;P433  
51;P51948;Q8IW19}

6434 Pathogen[ P03383] interacts with 198 human  
partners: {P43351;Q86UA6;Q14683;Q7Z2E3;P53803;Q99504;Q9Y253;Q9UHN1;Q15014;Q12888;O147  
57;Q8N2Z9;Q96T76;Q06609;O60671;P06746;O96019;P06748;Q68E01;P13010;Q9NXX6;Q9HCU8;Q9NW  
S1;O00167;Q68DK2;P54278;Q6ZYL4;P62987;Q13216;P51948;Q8WXE1;Q52LR7;Q6P4R8;P36639;Q96R  
L1;Q9H981;Q6NVH7;Q9HCS7;O15527;Q9UI95;Q13888;P23193;Q19AV6;P27694;Q53HV7;Q53TQ3;Q9BX  
W9;P22674;Q9C086;A4GXA9;Q9UHC1;P41208;Q8IW19;Q14686;Q96B01;Q9H9Q4;P24522;Q6PJP8;O953  
47;Q9UBU8;P52434;P61218;Q08945;Q71UM5;P49005;Q6ZW49;Q9NUS5;Q96S55;O60216;Q96MF7;Q6P1  
K8;Q01831;Q6PI98;Q9H9F9;O60921;P61077;Q6WBX8;P61088;P56282;Q7Z589;P62487;P46100;P293  
72;Q6ZRQ5;O60870;O95243;Q9H816;P78543;Q9NVI1;P15927;P19387;Q96PK6;Q7Z2Z1;Q13111;P506  
13;Q9H040;P51946;P24928;Q03468;Q9HAW4;O15287;Q9BQA5;P24941;Q13426;Q9Y294;Q96AY2;P098  
74;P23025;Q9UM11;P54725;Q2TAK8;P63165;P50750;Q8NBZ0;P35244;A8MT69;O00255;P0C1Z6;Q9Y5  
K5;Q8N140;Q9Y2M0;Q9NRY2;P54727;Q9UBZ9;Q92759;Q15054;Q13569;O43299;Q9HB96;Q9NWW8;Q8IY  
92;Q99708;Q9P2Y5;Q99638;Q9UKK3;Q9UPV0;P62979;Q00597;Q86XK3;P0CG47;P62875;Q96MG7;Q9NU  
W8;P62877;P52435;Q8N9B5;O95997;O15360;Q9BQ15;P49459;Q9BW66;Q86YC2;Q15233;P0CG48;Q9NP  
D8;O43542;P38935;Q96HA7;P18887;P27695;O95551;P63146;P23246;P19388;Q16531;Q96Q83;Q9P2  
87;Q13156;Q9NRD1;Q92547;Q14676;Q92466;P30876;Q9NW38;P13051;Q96EZ8;Q96AH0;Q9NPI8;Q1ZZ  
U3;Q92900;Q13112;Q9Y5B9;Q2YD98;P32780;Q9NXX7;Q9BQ83;Q9BTP7;Q6UWZ7;Q96LA8;Q9UMS4;O952  
57;Q0VG06;P12956;O96017;P35251;Q13620;Q96NY9;Q16526}

6435 Pathogen[ P03410] interacts with 264 human

partners: {Q96RL1;Q96FW1;Q08945;P23025;P49959;P40692;Q9H981;P18887;P23246;P35244;Q9H040;Q96FI4;Q9UI95;P0CG48;Q9NXR7;Q96T76;Q99708;P19387;P20585;Q96LA8;Q13889;Q96PK6;Q9NRD1;Q8N3C0;P36954;Q9NVI1;Q96AY2;Q9H816;Q6PI98;Q9P2Y5;Q52LR7;O75943;Q15014;Q9BQ15;Q92698;Q8IYD8;Q9NWV8;Q92900;Q9BQ50;Q15233;A4GXA9;P36639;P63165;P07992;Q9Y5B9;O15315;Q99502;Q9NUS5;P24928;O96019;Q9BQA5;Q9UBT6;Q9BUN9;Q13620;Q9UQE7;Q14686;Q1ZZU3;P54277;O43542;Q8NB91;P24522;Q19AV6;Q53TQ3;P51946;Q9XNA4;Q9P287;Q6WBX8;O60870;Q86UA6;Q8WXE1;Q9ULG1;Q8NG50;Q9UBU8;P49459;Q2TAK8;P22674;Q6ZYL4;Q9HAW4;O43299;P06746;P30876;Q92889;Q96S55;Q96Q83;P39748;P06748;Q6NVH7;P56282;Q9NSU2;Q9BTP7;P61088;Q96SD1;P43351;O95997;P23193;Q03468;Q9BQ83;Q9NXX6;P62979;P54725;P28715;Q8TAT5;Q6NS38;P78549;P0C1Z6;Q92466;O15514;O60216;P50613;Q01831;P25490;Q53HV7;Q9Y6F1;Q96MF7;Q96MG7;O95347;O95243;Q7Z2E3;P50750;Q7Z5Q5;Q9HCS7;Q9UGP5;Q9UBZ9;P12956;Q9UNE7;Q9UBZ4;O95551;P38935;P35251;P52701;Q9UM11;P52435;Q8IY92;O43502;Q9Y294;O15287;Q9H9F9;Q9NPI8;Q6PJP8;P04818;P24941;Q99638;Q00597;O15527;Q9Y253;Q96AH0;Q9UGN5;P51587;Q13111;Q6TAR4;Q2TB18;Q96NY9;P53803;Q13569;Q6P4R8;Q13112;Q2YD98;P16455;P62877;P19447;Q8IWI9;P63146;Q14683;Q13156;Q9NUW8;P62875;Q15054;P09874;Q16526;O96017;O14757;O60671;P46100;Q49AN0;Q9HB96;Q6UWZ7;O60921;Q99504;Q7Z2Z1;P61218;Q16531;Q13426;O15360;Q12888;Q86WJ1;Q92547;P11388;Q13216;P51948;Q13888;P78543;Q9Y2Y4;P52434;Q9NPD8;Q96EZ8;P62987;Q8N9B5;P27695;O00167;Q13619;Q9UMS4;Q8IY18;P13010;O43543;Q9Y5K5;Q9NWS1;Q86XK3;A8MT69;Q8N140;P62487;Q9UPV0;Q9UKK3;Q969S2;P49005;P27694;P54278;Q8NOZ6;Q14676;P13051;P15927;P35250;Q9NP87;Q9UQ84;Q9C0B1;Q6NZ36;O95257;Q9Y2M0;Q9NW38;P40937;Q96B01;O00255;P41208;Q9UHN1;P19388;Q68DK2;Q9C086;P12004;P32780;Q68E01;Q86YC2;Q86Y49;Q6ZWA9;P29372;Q6P1K8;Q7LG56;P0CG47;Q92759;O60934;Q9NY2;Q7L9B9;Q71UM5;Q9UIF7;Q0VG06;Q9UHC1;Q9HCU8;Q9H9Q4;P61077;Q06609;Q8N2Z9;Q7Z589;Q9BW66;Q8NBZ0;P54727;Q6ZRQ5}

6436 Pathogen[ P14075] interacts with 204 human

partners: {P43351;Q9P2Y5;P13051;A8MT69;Q6P4R8;Q7Z2E3;Q8NB91;P63165;Q9HB96;Q92900;Q99504;P23246;Q92759;P12956;Q7Z2Z1;Q9NVI1;O15360;Q9BQ83;P24941;Q9UBZ9;Q14683;Q9UBU8;P23025;Q8WXE1;Q2TAK8;Q52LR7;Q9BQA5;Q96Q83;Q15014;Q08945;P27695;Q8N140;Q68E01;P30876;Q9UM11;Q9C086;Q01831;Q9NWV8;Q86YC2;Q14686;P61088;Q6ZYL4;P0C1Z6;P49459;P50613;P36639;Q6ZW49;Q9BQ15;P38935;Q9NPI8;O15527;Q53HV7;Q08050;O95257;Q96EZ8;P06746;Q13620;P19388;P61218;Q6ZRQ5;P50750;Q9UIF7;O95997;O60671;Q9BTP7;Q13216;P49005;P19387;O00167;Q9H040;Q96FW1;Q9BW66;Q13111;Q9NXR7;P15927;Q9UI95;P61077;Q95347;Q6UWZ7;Q9NUW8;P99638;Q9NPD8;P62487;Q9Y2M0;Q03468;Q99638;O60870;O00255;Q9UPV0;Q13156;Q9H9Q4;Q9NWS1;Q68DK2;O96019;Q9HAW4;P46100;P35244;Q8NBZ0;Q19AV6;P0CG48;P62979;Q9Y253;Q96HA7;P22674;Q53TQ3;P23193;Q96LA8;Q14676;O96017;Q96PK6;Q9UHC1;Q13889;Q6PI98;Q2YD98;P78543;Q9Y5B9;Q96NY9;P24928;Q8IWI19;P54727;Q9H816;P35251;Q16531;Q15054;P62987;O6748;Q9UMS4;Q96AH0;O43542;O15287;Q13426;P41208;P27694;Q9NXX6;Q15233;P51946;P22780;O60921;Q9HCS7;Q9UHN1;Q9NRD1;P24522;P0CG47;Q96B01;P54725;Q16526;O95243;Q9Y294;Q9H9F9;Q96AY2;Q86UA6;Q12888;Q9H981;Q99502;P54278;Q9HCU8;P63146;P13010;Q9P287;P56282;Q0VG06;Q6NVH7;Q96S55;P62875;Q96MF7;Q13569;Q7Z589;Q92466;Q00597;Q13112;Q1ZZU3;P29372;Q6PJP8;Q99708;Q92547;P52434;Q86XK3;Q6WBX8;Q8N9B5;Q96RL1;Q13619;Q6P1K8;O60216;Q9NRY2;Q9BXW9;Q8IY92;Q96MG7;O14757;Q9NUS5;Q9NUW8;Q06609;P09874;P62877;Q96T76;P18887;Q9Y5K5;P51948;A4GXA9;O43299;Q9UKK3;O95551;P52435;P53803;Q71UM5;Q13888}

6437 Pathogen[ P0C206] interacts with 281 human

partners: {P27695;Q96HA7;O43542;Q13112;Q9Y253;Q8WXE1;O43502;Q9NPI8;Q68DK2;Q2YD98;O60216;Q9UMS4;P0CG48;P54278;Q8N140;P62875;P62877;Q9NPD8;Q96Q83;Q19AV6;Q9Y2M0;P28715;P13010;P54725;Q6PCD5;Q96AY2;O15360;P23193;Q17RS7;Q9UHN1;O00167;Q8WV22;Q9P2Y5;P38935;Q68E01;P49959;P36639;Q9UBU8;Q99504;Q9BQ15;Q9UQ84;P24522;Q9NSU2;P35251;P36954;Q99708;Q13263;P50750;Q9H981;Q8IYW5;O96017;Q9UBT6;Q9BTP7;O15527;P09874;Q6ZW49;Q86YC2;P25490;Q9UNA4;Q9HCU8;Q13156;P52701;P51587;Q15233;Q6NS38;Q7Z5Q5;Q6NZ36;Q13111;Q6PJP8;O60934;Q9HB96;Q8IYD8;O00255;O95997;P40692;P19388;O60870;P61218;P46100;Q6PI98;Q9NUW8;Q96LA8;Q03468;Q52LR7;Q6WBX8;P06746;Q9UHC1;Q96MG7;Q9Y5B9;Q9NS91;Q9UPV0;Q96SD1;Q16531;Q7LG56;Q8NOZ6;Q9UBZ4;Q93009;Q9H816;Q9P287;Q8NBZ0;P49005;Q86XK3;Q15014;Q9BQA5;Q0VG06;Q14669;Q13216;Q8NB91;Q13620;Q9BW66;Q8N9B5;O94762;O43299;A4GXA9;Q9UGP5;O75943;Q53HV7;Q9NRY2;Q9NVI1;Q9Y5K5;Q9Y6F1;P07992;P19447;Q96EZ8;Q9C086;Q6P1K8;Q99638;P23246;P54277;P43351;O96019;P53803;Q13619;Q13569;Q9NRD1;P0C1Z6;P61088;Q96NY9;Q12888;P49917;Q16526;O15514;Q15054;Q9H9Q4;P19387;Q7Z333;Q13888;O15287;Q9UGN5;Q9UQE7;P50613;O95347;O95257;Q7L9B9;Q9UKK3;Q9UNE7;Q9ULG1;P49459;Q13426;Q14683;Q96FW1;Q14676;Q96T88;O15315;Q9NWV8;Q92889;Q7Z589;Q8TAT5;Q01831;Q71UM5;Q96PK6;Q14686;Q99728;P62979;Q92759;O95551;P54727;P49916;Q9UM11;Q96S55;O60921;Q96MF7;Q9NP87;Q96FI4;Q9UBZ9;P55072;P52435;P04818;P62487;P32780;P0CG47;Q96T76;Q08050;Q969S2;Q9Y294;Q9H9F9;Q99502;Q13889;Q86WJ1;Q6ZRQ5;Q92900;P41208;O60671;P56282;Q7Z2Z1;Q00597;O43543;Q6UWZ7;Q06609;P27694;P20585;P11388;P15927;P24928;Q8N2Z9;Q6ZYL4;Q8IWI9;P61077;P06748;Q92466;Q96RL1;Q7Z6Z7;P63165;Q2TAK8;P62987;Q6NVH7;Q9BXW9;P39748;P35244;Q96B01;Q49AN0;Q9BQ83;Q96B02;Q92547;Q9H040;O76064;P13051;Q8IY18;P12956;Q8IY92;Q9HAW4;Q9HCS7;P24941;Q08945;Q1ZZU3;O95071;P16455;Q7Z2E3;Q9NTJ3;Q6P4R8;P29372;O95714;O95243;P22674;P23025;Q9UIF7;Q6TAR4;Q9BX63;Q8NG50;O95677;Q9UI95;P52434;Q9NXX6;P18887;Q8N3C0;Q92698;A8MT69;Q9NW38;Q53TQ3;P51946;Q96AH0;Q9NXR7;P51948;Q9NUS5;P63146;P78543;Q9Y2Y4;P12004;Q9NWS1;P30876;P78549}

6438 Pathogen[ P03363] interacts with 240 human

partners: {Q13112;Q92547;Q9H816;Q9BQ50;P12956;O94762;Q9NW38;P18887;Q9BX63;Q15233;Q9NVI1;Q8IWI9;O15287;P23246;P27694;Q9UGN5;Q6ZYL4;Q9HAW4;Q9Y5K5;Q7Z333;O15527;Q19AV6;P54727;O15360;P49459;Q9P2Y5;Q9H981;Q9ULG1;Q8NG50;P19388;Q6P1K8;Q9BXW9;Q00597;Q9NXX6;Q92900;Q7Z2Z1;Q9BTP7;P30876;Q96LA8;Q9Y2M0;P13010;Q96RL1;Q9HCS7;Q01831;Q13888;Q6UWZ7;Q15014;O95347;Q13111;P32780;Q16531;Q7L9B9;Q92759;P19387;Q9UHC1;Q96AH0;P61218;O95257;Q9Y253;P51946;P25490;Q2YD98;Q8N140;Q52LR7;O60671;Q7Z589;Q96FI4;Q92889;Q9Y294;P35251;P23025;P78543;P13051;Q8N2Z9;Q1ZZU3;Q9NUS5;P24928;P49005;P24941;Q8IYW5;P35244;P63146;P41208;Q68DK2;Q14686;P15927;Q14807;P06748;Q96PK6;Q9UM11;P46100;Q9C086;Q86UA6;O96017;Q7Z6

Z7;P61088;P29372;Q9H9F9;Q6NZ36;Q13619;Q9UBU8;Q96Q83;Q99708;Q08050;Q9HCU8;P20585;Q14669;Q13426;Q86XK3;O96019;Q49AN0;Q8NB91;P63165;Q96T76;P62877;Q9Y5B9;P46063;Q9BQ15;Q13156;P54278;Q9NWX8;Q9BW66;Q9UKK3;Q7Z2E3;P06746;Q6PCD5;Q9UNE7;P0C1Z6;Q7Z5Q5;O60870;Q8IYD8;P54277;Q9BQA5;Q99504;Q9H040;Q9NUW8;Q13620;Q9BQ83;P24522;Q9UI95;Q96AY2;Q9UIF7;Q9H9Q4;P62987;O95243;Q6WBX8;Q96EZ8;Q9NP87;O43542;O95071;Q8N0Z6;Q6PJP8;Q8IY92;Q96S55;P54725;P62487;Q9UPV0;Q99638;P23193;Q2TAK8;Q92466;Q13569;Q71UM5;Q16526;Q9Y2Y4;P43351;Q9NXR7;Q9NPD8;O95714;Q03468;P50750;O00167;Q08945;O60921;O95551;Q96T88;Q15054;P35771;Q8WV22;Q06609;Q9HB96;Q6NVH7;P61077;O95997;Q9UHN1;Q9UNA4;P09874;Q96MG7;Q99728;Q9UMS4;Q13216;Q9NPI8;Q53TQ3;Q6ZW49;Q68E01;Q0VG06;A4GXA9;P22674;Q14676;Q96NY9;Q86WJ1;Q9NWS1;P53803;P52435;Q9UBZ9;P36639;O75943;P52434;Q9NS91;Q9NRD1;Q9P287;Q8IY18;Q96HA7;Q5T890;Q969S2;Q96MF7;Q8NBZ0;Q14683;Q8N9B5;P38935;Q6ZRQ5;Q53HV7;Q9Y6F1;Q6P4R8;Q96FW1;Q9NRY2;Q12888;Q92698;Q96B01;Q8WXE1;A8MT69;Q86YC2;Q8N3C0;O60216;O43502;O43299;Q6TAR4;Q6PI98;O15315;O14757}

6439 [Cluster 586]GO:0031442+P biological\_process [name] positive regulation of mRNA 3'-end processing [def] "Any process that activates or increases the frequency, rate or extent of mRNA 3'-end processing." [GOC

6440 Pathogen[ Q2Q067] interacts with 5 human partners:{Q8WVC0;Q6P1J9;P14635;Q09161;Q8N7H5}

6441 Pathogen[ P0C214] interacts with 5 human partners:{Q09161;P14635;Q6P1J9;Q8N7H5;Q8WVC0}

6442 Pathogen[ P03346] interacts with 5 human partners:{Q09161;P14635;Q8WVC0;Q6P1J9;Q8N7H5}

6443 Pathogen[ Q85601] interacts with 5 human partners:{Q8WVC0;Q6P1J9;Q09161;P14635;Q8N7H5}

6444 Pathogen[ P14079] interacts with 5 human partners:{P14635;Q8WVC0;Q6P1J9;Q8N7H5;Q09161}

6445 Pathogen[ P03383] interacts with 5 human partners:{Q6P1J9;P14635;Q09161;Q8WVC0;Q8N7H5}

6446 Pathogen[ P03410] interacts with 5 human partners:{Q8WVC0;Q8N7H5;P14635;Q6P1J9;Q09161}

6447 Pathogen[ P14075] interacts with 5 human partners:{Q09161;P14635;Q8WVC0;Q8N7H5;Q6P1J9}

6448 Pathogen[ P0C206] interacts with 5 human partners:{Q09161;Q8N7H5;Q8WVC0;P14635;Q6P1J9}

6449 Pathogen[ P03363] interacts with 4 human partners:{Q8WVC0;Q6P1J9;Q8N7H5;Q09161}

6450 [Cluster 587]GO:0007163+P biological\_process [name] establishment or maintenance of cell polarity [def] "Any cellular process that results in the specification, formation or maintenance of anisotropic intracellular organization or cell growth patterns." [GOC

6451 Pathogen[ Q2Q067] interacts with 7 human partners:{Q9BYG5;Q7Z460;Q12959;Q9NVD7;O75122;P60953;Q14244}

6452 Pathogen[ P0C214] interacts with 7 human partners:{P60953;O75122;Q14244;Q12959;Q7Z460;Q9BYG5;Q9NVD7}

6453 Pathogen[ P03346] interacts with 9 human partners:{Q8WXH0;P60953;Q8TEW0;Q9BYG5;O75122;Q9NVD7;Q14244;Q7Z460;Q12959}

6454 Pathogen[ Q85601] interacts with 7 human partners:{Q9NVD7;Q9BYG5;Q14244;O75122;Q12959;P60953;Q7Z460}

6455 Pathogen[ P14079] interacts with 10 human partners:{Q01518;Q9BYG5;Q7Z460;P40123;Q14244;Q8TEW0;P61158;Q8WXH0;O75122;Q9NVD7}

6456 Pathogen[ P03383] interacts with 4 human partners:{Q14244;Q7Z460;P60953;Q9BYG5}

6457 Pathogen[ P03410] interacts with 11 human partners:{Q7Z460;Q12959;P40123;P60953;Q8TEW0;Q9NVD7;Q01518;Q14244;O75122;Q8WXH0;Q9BYG5}

6458 Pathogen[ P14075] interacts with 4 human partners:{P60953;Q7Z460;Q9BYG5;Q14244}

6459 Pathogen[ P0C206] interacts with 9 human partners:{Q9NVD7;Q9BYG5;Q14244;O75122;Q8TEW0;P60953;Q8WXH0;Q7Z460;Q12959}

6460 Pathogen[ P03363] interacts with 6 human partners:{Q12959;Q14244;Q7Z460;Q9BYG5;Q9NVD7;P60953}

6461 [Cluster 588]GO:0090128+P biological\_process [name] regulation of synapse maturation [def] "Any process that modulates the extent of synapse maturation, the process that organizes a synapse so that it attains its fully functional state." [GOC

6462 Pathogen[ Q2Q067] interacts with 1 human partners:{Q9NRI5}

6463 Pathogen[ P0C214] interacts with 1 human partners:{Q9NRI5}

6464 Pathogen[ P03346] interacts with 1 human partners:{Q9NRI5}

6465 Pathogen[ Q85601] interacts with 1 human partners:{Q9NRI5}

6466 Pathogen[ P14079] interacts with 1 human partners:{Q9NRI5}

6467 Pathogen[ P03383] interacts with 1 human partners:{Q9NRI5}

6468 Pathogen[ P03410] interacts with 1 human partners:{Q9NRI5}

6469 Pathogen[ P14075] interacts with 1 human partners:{Q9NRI5}

6470 Pathogen[ P0C206] interacts with 1 human partners:{Q9NRI5}

6471 Pathogen[ P03363] interacts with 1 human partners:{Q9NRI5}

6472 [Cluster 589]GO:0021799+P biological\_process [name] cerebral cortex radially oriented cell migration [def] "The migration of cells in the developing cerebral cortex in which cells move from the ventricular and/or subventricular zone toward the surface of the brain." [GO\_REF

6473 Pathogen[ Q2Q067] interacts with 3 human partners:{P20265;Q9NRI5;P63000}

6474 Pathogen[ P0C214] interacts with 3 human partners:{P63000;Q9NRI5;P20265}



6475 Pathogen[ P03346] interacts with 4 human partners:{Q9NRI5;P20264;P20265;P63000}  
6476 Pathogen[ Q85601] interacts with 4 human partners:{P63000;Q9NRI5;Q9GZM8;P20265}  
6477 Pathogen[ P14079] interacts with 4 human partners:{P20265;Q9NRI5;Q15078;Q9GZM8}  
6478 Pathogen[ P03383] interacts with 3 human partners:{Q9NRI5;P63000;P20265}  
6479 Pathogen[ P03410] interacts with 4 human partners:{P63000;Q9GZM8;Q9NRI5;P20265}  
6480 Pathogen[ P14075] interacts with 3 human partners:{P20265;Q9NRI5;P63000}  
6481 Pathogen[ P0C206] interacts with 4 human partners:{Q9GZM8;P63000;Q9NRI5;P20265}  
6482 Pathogen[ P03363] interacts with 4 human partners:{P63000;P20264;P20265;Q9NRI5}  
6483 [Cluster 590]GO:0007254+P biological\_process [name] JNK cascade [def] "A cascade of protein kinase activities, culminating in the phosphorylation and activation of a member of the JUN kinase subfamily of stress-activated protein kinases, which in turn are a subfamily of mitogen-activated protein (MAP) kinases that is activated primarily by cytokines and exposure to environmental stress." [GOC  
6484 Pathogen[ Q2Q067] interacts with 13 human partners:{Q9NYJ8;Q8TDY2;Q8N5C8;Q9Y6K9;Q13233;P0CG47;P45984;P0CG48;O43318;P62987;Q13227;Q15750;P62979}  
6485 Pathogen[ P0C214] interacts with 13 human partners:{Q9Y6K9;Q8TDY2;O43318;Q8N5C8;Q13233;P0CG48;Q13227;P62987;Q15750;P0CG47;P45984;P62979;Q9NYJ8}  
6486 Pathogen[ P03346] interacts with 16 human partners:{Q9Y6K9;P45984;P62987;P0CG48;Q8TDY2;Q8N5C8;Q13098;Q13227;Q9NYJ8;P46109;Q13233;Q15750;P62979;P0CG47;P45985;O43318}  
6487 Pathogen[ Q85601] interacts with 14 human partners:{Q15750;Q9NYJ8;Q8TDY2;P0CG48;Q8N5C8;Q9Y6K9;Q13098;P62979;P0CG47;P45984;Q13233;P62987;O43318;Q13227}  
6488 Pathogen[ P14079] interacts with 19 human partners:{Q8N5C8;P0CG48;O43187;P53779;Q8TDY2;Q13098;P46109;Q15750;P62979;P62987;P45984;Q6NZY7;P45983;Q9Y6K9;P45985;Q13227;P0CG47;Q9Y239;Q99836}  
6489 Pathogen[ P03383] interacts with 13 human partners:{Q9Y6K9;P62987;Q13233;Q8TDY2;O43318;Q8N5C8;P62979;P0CG47;P45984;Q13227;P0CG48;Q9NYJ8;Q15750}  
6490 Pathogen[ P03410] interacts with 20 human partners:{Q13227;P0CG48;Q9Y239;Q13098;Q15750;O43187;Q8TDY2;Q13233;Q6NZY7;P62979;O43318;P45985;Q9NYJ8;Q8N5C8;P45984;P62987;P53779;Q9Y6K9;P46109;P0CG47}  
6491 Pathogen[ P14075] interacts with 13 human partners:{Q15750;Q8TDY2;Q8N5C8;P0CG48;P62979;O43318;P62987;Q13227;P0CG47;Q9Y6K9;Q13233;P45984;Q9NYJ8}  
6492 Pathogen[ P0C206] interacts with 15 human partners:{P0CG48;Q9Y6K9;Q8N5C8;P45984;O43318;Q13233;P62979;Q8TDY2;Q9NYJ8;P45985;P0CG47;Q13098;Q15750;P62987;Q13227}  
6493 Pathogen[ P03363] interacts with 11 human partners:{Q13227;Q9NYJ8;Q9Y6K9;P46109;O43318;Q15750;Q8TDY2;P62987;Q8N5C8;Q13233;Q13098}  
6494 [Cluster 591]GO:0000472+P biological\_process [name] endonucleolytic cleavage to generate mature 5'-end of SSU-rRNA from (SSU-rRNA, 5.8S rRNA, LSU-rRNA) [def] "Endonucleolytic cleavage between the 5'-External Transcribed Spacer (5'-ETS) and the 5' end of the SSU-rRNA of a tricistronic rRNA transcript that contains the Small Subunit (SSU) rRNA, the 5.8S rRNA, and the Large Subunit (LSU) rRNA in that order from 5' to 3' along the primary transcript, to produce the mature end of the SSU-rRNA." [GOC  
6495 Pathogen[ Q2Q067] interacts with 2 human partners:{P78316;O75691}  
6496 Pathogen[ P0C214] interacts with 2 human partners:{O75691;P78316}  
6497 Pathogen[ P03346] interacts with 2 human partners:{O75691;P78316}  
6498 Pathogen[ Q85601] interacts with 2 human partners:{O75691;P78316}  
6499 Pathogen[ P14079] interacts with 2 human partners:{O75691;P78316}  
6500 Pathogen[ P03383] interacts with 2 human partners:{O75691;P78316}  
6501 Pathogen[ P03410] interacts with 2 human partners:{P78316;O75691}  
6502 Pathogen[ P14075] interacts with 2 human partners:{P78316;O75691}  
6503 Pathogen[ P0C206] interacts with 2 human partners:{P78316;O75691}  
6504 Pathogen[ P03363] interacts with 2 human partners:{O75691;P78316}  
6505 [Cluster 592]GO:0050688+P biological\_process [name] regulation of defense response to virus [def] "Any process that modulates the frequency, rate or extent of the antiviral response of a cell or organism." [GOC  
6506 Pathogen[ Q2Q067] interacts with 3 human partners:{Q9UII4;Q13114;P09914}  
6507 Pathogen[ P0C214] interacts with 3 human partners:{P09914;Q9UII4;Q13114}  
6508 Pathogen[ P03346] interacts with 3 human partners:{Q9UII4;Q13114;P09914}  
6509 Pathogen[ Q85601] interacts with 2 human partners:{Q13114;P09914}  
6510 Pathogen[ P14079] interacts with 3 human partners:{P09914;Q8NEV9;Q13114}  
6511 Pathogen[ P03383] interacts with 1 human partners:{Q13114}  
6512 Pathogen[ P03410] interacts with 3 human partners:{Q8NEV9;P09914;Q13114}  
6513 Pathogen[ P14075] interacts with 1 human partners:{Q13114}  
6514 Pathogen[ P0C206] interacts with 2 human partners:{Q13114;P09914}  
6515 Pathogen[ P03363] interacts with 3 human partners:{P09914;Q13114;Q9UII4}  
6516 [Cluster 593]GO:0006473+P biological\_process [name] protein acetylation [def] "The addition of an acetyl group to a protein amino acid. An acetyl group is CH3CO-, derived from acetic [ethanoic] acid." [GOC  
6517 Pathogen[ Q2Q067] interacts with 6 human

6518 partners:{Q8WYH8;Q92985;Q9UNL4;O60356;Q92831;P10914}  
Pathogen[ P0C214] interacts with 6 human

6519 partners:{Q9UNL4;P10914;Q92985;O60356;Q92831;Q8WYH8}  
Pathogen[ P03346] interacts with 7 human

6520 partners:{Q9UNL4;Q8WYH8;Q92831;P10914;Q12778;O60356;Q92985}  
Pathogen[ Q85601] interacts with 6 human

6521 partners:{Q9UNL4;Q92831;P10914;Q92985;Q8WYH8;O60356}  
Pathogen[ P14079] interacts with 5 human

6522 partners:{Q92985;Q9UNL4;O60356;Q8WYH8;P10914}  
Pathogen[ P03383] interacts with 6 human

6523 partners:{P10914;Q92831;Q9UNL4;Q8WYH8;Q92985;O60356}  
Pathogen[ P03410] interacts with 6 human

6524 partners:{Q92831;Q8WYH8;Q9UNL4;P10914;O60356;Q92985}  
Pathogen[ P14075] interacts with 6 human

6525 partners:{Q92831;O60356;Q9UNL4;Q92985;Q8WYH8;P10914}  
Pathogen[ P0C206] interacts with 6 human

6526 partners:{P10914;Q8WYH8;Q92831;O60356;Q92985;Q9UNL4}  
Pathogen[ P03363] interacts with 6 human

6527 partners:{Q92985;O60356;Q92831;Q9UNL4;P10914;Q8WYH8}  
[Cluster 594]GO:0071285+P biological\_process [name] cellular response to lithium ion  
[def] "Any process that results in a change in state or activity of a cell (in terms of  
movement, secretion, enzyme production, gene expression, etc.) as a result of a lithium  
(Li+) ion stimulus." [GOC

6528 Pathogen[ Q2Q067] interacts with 6 human  
partners:{Q14934;P27797;Q13426;Q12968;P46527;P49715}

6529 Pathogen[ P0C214] interacts with 5 human  
partners:{P46527;Q12968;Q13426;Q14934;P27797}

6530 Pathogen[ P03346] interacts with 7 human  
partners:{Q13426;P15173;P49715;Q14934;Q12968;P27797;P46527}

6531 Pathogen[ Q85601] interacts with 6 human  
partners:{Q13426;P27797;Q14934;Q12968;P49715;P46527}

6532 Pathogen[ P14079] interacts with 6 human  
partners:{Q12968;P49715;Q14934;P46527;Q13426;P49917}

6533 Pathogen[ P03383] interacts with 5 human  
partners:{Q14934;P46527;Q13426;Q12968;P27797}

6534 Pathogen[ P03410] interacts with 5 human  
partners:{P46527;Q12968;Q13426;Q14934;P27797}

6535 Pathogen[ P14075] interacts with 5 human  
partners:{P46527;P27797;Q14934;Q13426;Q12968}

6536 Pathogen[ P0C206] interacts with 7 human  
partners:{P27797;P49715;Q12968;P49917;Q13426;P46527;Q14934}

6537 Pathogen[ P03363] interacts with 4 human partners:{Q13426;P27797;Q12968;Q14934}

6538 [Cluster 595]GO:0048704+P biological\_process [name] embryonic skeletal system  
morphogenesis [def] "The process in which the anatomical structures of the skeleton  
are generated and organized during the embryonic phase." [GOC

6539 Pathogen[ Q2Q067] interacts with 25 human  
partners:{O43365;O43364;Q99502;P04198;P09067;P31274;P31268;P13349;P17483;P28356;P352  
27;P09629;Q12959;P20719;Q15699;Q99750;Q00056;O00255;P35226;P14651;Q9UPW6;P09016;P146  
52;P14653;P54821}

6540 Pathogen[ P0C214] interacts with 15 human  
partners:{P35226;O43365;P35227;P31249;P13349;Q99750;P14651;P14653;Q12959;P09629;Q9UP  
W6;Q15699;O00255;P04198;Q99502}

6541 Pathogen[ P03346] interacts with 38 human  
partners:{Q9NPC8;P31249;P54821;P31268;Q99811;Q9UPW6;P13349;P35226;Q00056;Q9UIU6;P352  
27;P14652;Q99502;P14653;P17483;P31274;P20719;Q9BT04;O43364;O43365;Q15699;P28358;O002  
55;P17481;Q95076;P28356;Q99750;P09629;Q15475;P09016;P04198;P31267;P56915;P09067;P175  
09;P14651;Q12959;Q96SF7}

6542 Pathogen[ Q85601] interacts with 18 human  
partners:{P09629;Q9UPW6;P13349;P14653;O43364;Q15699;Q99502;Q99750;O00255;P31249;Q129  
59;P31274;P35226;P14651;O43365;P04198;Q9BT04;P35227}

6543 Pathogen[ P14079] interacts with 16 human  
partners:{Q9UPW6;O43364;Q99502;P13349;Q15699;P09629;P31274;P04198;P31249;O43365;P352  
26;P35227;O00255;P14651;Q99750;Q9BT04}

6544 Pathogen[ P03383] interacts with 12 human  
partners:{P35227;Q9UPW6;O43365;P31249;O00255;P04198;Q99750;P09629;Q15699;Q9BT04;P352  
26;P14651}

6545 Pathogen[ P03410] interacts with 17 human  
partners:{P31274;Q99502;P09629;Q12959;P14651;P31249;Q9UPW6;P35227;Q9BT04;O43364;Q156  
99;P13349;P35226;O00255;P04198;Q99750;O43365}

6546 Pathogen[ P14075] interacts with 12 human  
partners:{P31249;Q9BT04;P04198;O43365;O00255;P09629;Q9UPW6;Q99750;Q15699;P35226;Q995  
02;P35227}

6547 Pathogen[ P0C206] interacts with 26 human  
partners:{O43365;P09067;Q9BT04;P54821;P35226;O00255;P14651;P31268;P17483;Q15699;P146  
53;P14652;P13349;Q9UPW6;P04198;Q99502;O43364;P31274;P09629;P28356;P20719;P31249;P090  
16;Q12959;Q99750;P35227}

6548 Pathogen[ P03363] interacts with 33 human partners: {Q12959;Q15699;P09067;P31274;P35227;P31267;O43365;P14651;P28356;Q99750;P20719;P04198;P17481;P17483;P13349;P17509;P31249;P14653;P28358;P56915;P35226;P14652;P31268;Q00056;Q9BT04;P54821;P09016;O95076;P09629;O43364;Q99811;Q9UPW6;Q9NPC8}

6549 [Cluster 596]GO:0003009+P biological\_process [name] skeletal muscle contraction [def] "A process in which force is generated within skeletal muscle tissue, resulting in a change in muscle geometry. Force generation involves a chemo-mechanical energy conversion step that is carried out by the actin/myosin complex activity, which generates force through ATP hydrolysis. In the skeletal muscle, the muscle contraction takes advantage of an ordered sarcomeric structure and in most cases it is under voluntary control." [GOC

6550 Pathogen[ Q2Q067] interacts with 3 human partners: {P48788;A2IDD5;O14920}

6551 Pathogen[ POC214] interacts with 3 human partners: {P48788;A2IDD5;O14920}

6552 Pathogen[ P03346] interacts with 3 human partners: {A2IDD5;O14920;P48788}

6553 Pathogen[ Q85601] interacts with 3 human partners: {P48788;O14920;A2IDD5}

6554 Pathogen[ P14079] interacts with 5 human partners: {P13805;P48788;A2IDD5;O15273;Q6JBY9}

6555 Pathogen[ P03383] interacts with 3 human partners: {O14920;P48788;A2IDD5}

6556 Pathogen[ P03410] interacts with 6 human partners: {O14920;O15273;A2IDD5;P48788;P13805;Q6JBY9}

6557 Pathogen[ P14075] interacts with 4 human partners: {Q6JBY9;O14920;A2IDD5;P48788}

6558 Pathogen[ POC206] interacts with 4 human partners: {Q6JBY9;O14920;A2IDD5;P48788}

6559 Pathogen[ P03363] interacts with 3 human partners: {A2IDD5;O14920;P48788}

6560 [Cluster 597]GO:0009948+P biological\_process [name] anterior/posterior axis specification [def] "The establishment, maintenance and elaboration of the anterior/posterior axis. The anterior-posterior axis is defined by a line that runs from the head or mouth of an organism to the tail or opposite end of the organism." [GOC

6561 Pathogen[ Q2Q067] interacts with 4 human partners: {P12755;Q99496;Q9Y5J3;Q86U70}

6562 Pathogen[ POC214] interacts with 4 human partners: {Q9Y5J3;Q86U70;P12755;Q99496}

6563 Pathogen[ P03346] interacts with 3 human partners: {Q86U70;Q9Y5J3;Q99496}

6564 Pathogen[ Q85601] interacts with 4 human partners: {Q86U70;P12755;Q99496;Q9Y5J3}

6565 Pathogen[ P14079] interacts with 4 human partners: {P12755;Q86U70;Q99496;Q9Y5J3}

6566 Pathogen[ P03383] interacts with 2 human partners: {Q86U70;Q99496}

6567 Pathogen[ P03410] interacts with 4 human partners: {Q9Y5J3;Q99496;P12755;Q86U70}

6568 Pathogen[ P14075] interacts with 2 human partners: {Q86U70;Q99496}

6569 Pathogen[ POC206] interacts with 4 human partners: {P12755;Q9Y5J3;Q86U70;Q99496}

6570 Pathogen[ P03363] interacts with 3 human partners: {Q86U70;Q9Y5J3;Q99496}

6571 [Cluster 598]GO:0032757+P biological\_process [name] positive regulation of interleukin-8 production [def] "Any process that activates or increases the frequency, rate, or extent of interleukin-8 production." [GOC

6572 Pathogen[ Q2Q067] interacts with 2 human partners: {P35638;Q13158}

6573 Pathogen[ POC214] interacts with 3 human partners: {Q13158;P05121;P35638}

6574 Pathogen[ P03346] interacts with 2 human partners: {P35638;Q13158}

6575 Pathogen[ Q85601] interacts with 3 human partners: {Q13158;P05121;P35638}

6576 Pathogen[ P14079] interacts with 3 human partners: {Q7Z434;P35638;Q13158}

6577 Pathogen[ P03383] interacts with 2 human partners: {P35638;Q13158}

6578 Pathogen[ P03410] interacts with 4 human partners: {P05121;P35638;Q7Z434;Q13158}

6579 Pathogen[ P14075] interacts with 2 human partners: {P35638;Q13158}

6580 Pathogen[ POC206] interacts with 3 human partners: {Q13158;P05121;P35638}

6581 Pathogen[ P03363] interacts with 2 human partners: {Q13158;P35638}

6582 [Cluster 599]GO:0045064+P biological\_process [name] T-helper 2 cell differentiation [def] "The process in which a relatively unspecialized T cell acquires specialized features of a T-helper 2 (Th2) cell. A Th2 cell is a CD4-positive, alpha-beta T cell that has the phenotype GATA-3-positive and produces interleukin-4." [CL

6583 Pathogen[ Q2Q067] interacts with 1 human partners: {P20749}

6584 Pathogen[ POC214] interacts with 1 human partners: {P20749}

6585 Pathogen[ P03346] interacts with 1 human partners: {P20749}

6586 Pathogen[ Q85601] interacts with 1 human partners: {P20749}

6587 Pathogen[ P14079] interacts with 1 human partners: {P20749}

6588 Pathogen[ P03383] interacts with 1 human partners: {P20749}

6589 Pathogen[ P03410] interacts with 1 human partners: {P20749}

6590 Pathogen[ P14075] interacts with 1 human partners: {P20749}

6591 Pathogen[ POC206] interacts with 1 human partners: {P20749}

6592 Pathogen[ P03363] interacts with 1 human partners: {P20749}

6593 [Cluster 600]GO:0060056+P biological\_process [name] mammary gland involution [def] "The tissue remodeling that removes differentiated mammary epithelia during weaning." [GOC

6594 Pathogen[ Q2Q067] interacts with 2 human partners: {P78545;Q3C1V8}

6595 Pathogen[ POC214] interacts with 2 human partners: {P78545;Q3C1V8}

6596 Pathogen[ P03346] interacts with 2 human partners: {Q3C1V8;P78545}

6597 Pathogen[ Q85601] interacts with 2 human partners: {P78545;Q3C1V8}

6598 Pathogen[ P14079] interacts with 2 human partners: {Q3C1V8;P78545}

6599 Pathogen[ P03383] interacts with 2 human partners: {P78545;Q3C1V8}

6600 Pathogen[ P03410] interacts with 2 human partners: {P78545;Q3C1V8}

6601 Pathogen[ P14075] interacts with 2 human partners: {P78545;Q3C1V8}

6602 Pathogen[ POC206] interacts with 2 human partners: {Q3C1V8;P78545}

6603 Pathogen[ P03363] interacts with 2 human partners:{Q3C1V8;P78545}

6604 [Cluster 601]GO:0043086+P biological\_process [name] negative regulation of catalytic activity [def] "Any process that stops or reduces the activity of an enzyme." [GOC

6605 Pathogen[ Q2Q067] interacts with 12 human partners:{O14974;Q8N5D0;Q86VP6;Q9UMX2;Q9NZL4;P15559;Q9NZU7;O96018;Q9H3M7;O95190;Q8N163;Q9Y314}

6606 Pathogen[ P0C214] interacts with 15 human partners:{Q9NZL4;Q8N163;Q8N5D0;Q9H3M7;O96018;P54368;O14974;P18545;Q9UMX2;Q9NZU7;Q13956;O95190;P15559;Q86VP6;Q9Y314}

6607 Pathogen[ P03346] interacts with 13 human partners:{Q8N163;Q9NZL4;Q9NZU7;Q9UMX2;P15559;Q8N5D0;O96018;Q86VP6;P61925;O14974;Q9H3M7;O95190;Q9Y314}

6608 Pathogen[ Q85601] interacts with 11 human partners:{Q9NZU7;Q86VP6;Q9UMX2;O95190;O96018;Q8N163;O14974;Q9NZL4;Q9H3M7;Q8N5D0;Q9Y314}

6609 Pathogen[ P14079] interacts with 23 human partners:{Q8N5D0;Q8N163;P05408;Q9Y314;Q9UMX2;O14974;O95190;P15559;P18545;P54368;Q13956;O96018;P48681;O60256;P05814;P13232;Q9H3M7;Q14558;Q86VP6;Q9BS40;Q9NZL4;Q9NZU7;P61925}

6610 Pathogen[ P03383] interacts with 8 human partners:{O96018;Q8N163;O95190;Q86VP6;Q9NZL4;Q9H3M7;Q8N5D0;Q9Y314}

6611 Pathogen[ P03410] interacts with 22 human partners:{P15559;O96018;P61925;Q13956;Q9H3M7;O95190;Q9BS40;Q8N163;P18545;Q14558;P05408;O14974;Q86VP6;Q8N5D0;Q9NZU7;O60256;P54368;Q9NZL4;Q9Y314;Q9UMX2;P05814;P13232}

6612 Pathogen[ P14075] interacts with 9 human partners:{O96018;Q8N5D0;P15559;Q8N163;Q86VP6;Q9H3M7;Q9NZL4;O95190;Q9Y314}

6613 Pathogen[ P0C206] interacts with 16 human partners:{P18545;P15559;Q9NZU7;O14974;P54368;O96018;O95190;Q9NZL4;Q13956;Q9H3M7;Q8N5D0;P61925;Q86VP6;Q8N163;Q9Y314;Q9UMX2}

6614 Pathogen[ P03363] interacts with 12 human partners:{Q8N5D0;Q9NZL4;Q9H3M7;P61925;Q9NZU7;Q8N163;O14974;Q9UMX2;Q86VP6;O96018;O95190;Q9Y314}

6615 [Cluster 602]GO:0071922+P biological\_process [name] regulation of cohesin localization to chromatin [def] "Any process that modulates the frequency, rate or extent of a process in which a cohesin complex is transported to, or maintained at, a part of a chromosome that is organized into chromatin." [GOC

6616 Pathogen[ Q2Q067] interacts with 3 human partners:{P06400;Q7Z5K2;Q96FF9}

6617 Pathogen[ P0C214] interacts with 3 human partners:{Q96FF9;Q7Z5K2;P06400}

6618 Pathogen[ P03346] interacts with 3 human partners:{Q96FF9;Q7Z5K2;P06400}

6619 Pathogen[ Q85601] interacts with 3 human partners:{P06400;Q7Z5K2;Q96FF9}

6620 Pathogen[ P14079] interacts with 2 human partners:{Q96FF9;Q7Z5K2}

6621 Pathogen[ P03383] interacts with 3 human partners:{P06400;Q96FF9;Q7Z5K2}

6622 Pathogen[ P03410] interacts with 3 human partners:{Q7Z5K2;P06400;Q96FF9}

6623 Pathogen[ P14075] interacts with 3 human partners:{Q96FF9;Q7Z5K2;P06400}

6624 Pathogen[ P0C206] interacts with 3 human partners:{Q7Z5K2;Q96FF9;P06400}

6625 Pathogen[ P03363] interacts with 3 human partners:{P06400;Q96FF9;Q7Z5K2}

6626 [Cluster 603]GO:0006363+P biological\_process [name] termination of RNA polymerase I transcription [def] "The process in which the synthesis of an RNA molecule by RNA polymerase I using a DNA template is completed. RNAP I termination requires binding of a terminator protein so specific sequences downstream of the transcription unit." [GOC

6627 Pathogen[ Q2Q067] interacts with 19 human partners:{O95602;Q15573;P52434;Q13889;P32780;Q6NZI2;Q92759;Q9H9Y6;P51948;P50613;Q15572;P53803;Q53T94;P17480;Q15361;Q9Y2S0;Q13888;O15160;P51946}

6628 Pathogen[ P0C214] interacts with 18 human partners:{P51946;Q15573;Q9H9Y6;P53803;Q15361;P50613;Q9Y2S0;Q6NZI2;P51948;Q15572;P17480;P32780;O15160;O95602;Q13888;P52434;Q53T94;Q92759}

6629 Pathogen[ P03346] interacts with 18 human partners:{P52434;Q15573;Q13888;P53803;Q9H9Y6;Q6NZI2;Q53T94;Q13889;P17480;Q15361;P51946;O15160;Q92759;O95602;P51948;P32780;Q9Y2S0;Q15572}

6630 Pathogen[ Q85601] interacts with 19 human partners:{P51946;P17480;O95602;Q13888;Q15573;P53803;Q9Y2S0;P51948;Q9H9Y6;Q15572;Q53T94;Q92759;P32780;P50613;Q6NZI2;P52434;Q15361;P19447;O15160}

6631 Pathogen[ P14079] interacts with 20 human partners:{Q9Y2S0;Q15573;P51946;P52434;Q13889;P53803;Q15572;P50613;Q13888;P17480;O15160;Q92759;P32780;Q6NZI2;O95602;Q15361;Q53T94;P19447;Q9H9Y6;P51948}

6632 Pathogen[ P03383] interacts with 16 human partners:{P53803;O95602;P51948;Q15572;Q6NZI2;Q13888;Q9H9Y6;P52434;Q15361;P50613;P51946;Q92759;Q15573;P17480;P32780;Q53T94}

6633 Pathogen[ P03410] interacts with 20 human partners:{Q6NZI2;Q15572;Q13889;P51946;P50613;Q15573;O95602;P53803;P19447;Q9Y2S0;P51948;O15160;Q13888;P52434;Q53T94;Q15361;P32780;Q92759;Q9H9Y6;P17480}

6634 Pathogen[ P14075] interacts with 17 human partners:{P17480;Q15572;Q92759;Q53T94;P50613;Q6NZI2;Q13889;Q15573;Q9H9Y6;P51946;P32780;O95602;Q15361;P52434;P51948;P53803;Q13888}

6635 Pathogen[ P0C206] interacts with 20 human partners:{Q53T94;Q15361;O95602;Q15572;P19447;P53803;Q13888;P50613;Q9Y2S0;Q6NZI2;Q927

59;Q15573;P32780;Q13889;Q9H9Y6;P17480;P52434;O15160;P51946;P51948}

6636 Pathogen[ P03363] interacts with 16 human  
partners:{Q9H9Y6;Q13888;P32780;Q92759;P51946;O95602;Q53T94;P17480;Q6NZI2;Q15361;Q15573;P53803;Q15572;P52434;Q9Y2S0;O15160}

6637 [Cluster 604]GO:0009966+P biological\_process [name] regulation of signal transduction [def] "Any process that modulates the frequency, rate or extent of signal transduction." [GOC]

6638 Pathogen[ Q2Q067] interacts with 10 human  
partners:{Q01196;P61981;P41236;Q6NXS1;O14508;P37198;P78318;Q9NRR3;Q7Z699;Q9H2G4}

6639 Pathogen[ P0C214] interacts with 10 human  
partners:{Q9NRR3;Q96PQ5;Q6NXS1;P78318;Q7Z699;P41236;P37198;O14508;Q9H2G4;P61981}

6640 Pathogen[ P03346] interacts with 11 human  
partners:{Q9NRR3;Q9NS18;Q9H2G4;P37198;O14508;Q6NXS1;P61981;Q01196;Q7Z699;P41236;P78318}

6641 Pathogen[ Q85601] interacts with 9 human  
partners:{P61981;O14508;Q9NRR3;P41236;Q6NXS1;Q9H2G4;Q7Z699;Q96PQ5;P78318}

6642 Pathogen[ P14079] interacts with 12 human  
partners:{Q9NRR3;O14990;O43597;P41236;P61981;Q7Z699;Q9H2G4;Q6NXS1;P37198;O14508;P78318;Q96PQ5}

6643 Pathogen[ P03383] interacts with 8 human  
partners:{O14990;Q9NRR3;Q6NXS1;Q9H2G4;P61981;P78318;P37198;P41236}

6644 Pathogen[ P03410] interacts with 11 human  
partners:{O43597;Q7Z699;P78318;Q9NRR3;P41236;P61981;O14508;O14990;Q96PQ5;Q6NXS1;Q9H2G4}

6645 Pathogen[ P14075] interacts with 8 human  
partners:{P41236;Q6NXS1;Q9H2G4;P61981;P37198;P78318;Q9NRR3;O14990}

6646 Pathogen[ P0C206] interacts with 12 human  
partners:{Q6NXS1;Q9NS18;P78318;P41236;Q9NRR3;O14508;P61981;Q9H2G4;O43597;Q96PQ5;Q7Z699;O14990}

6647 Pathogen[ P03363] interacts with 10 human  
partners:{P41236;Q6NXS1;Q7Z699;Q9H2G4;P78318;P61981;Q9NRR3;Q9C004;O14508;P37198}

6648 [Cluster 605]GO:0006665+P biological\_process [name] sphingolipid metabolic process [def] "The chemical reactions and pathways involving sphingolipids, any of a class of lipids containing the long-chain amine diol sphingosine or a closely related base (a sphingoid)." [GOC]

6649 Pathogen[ Q2Q067] interacts with 2 human partners:{Q96G23;Q8WWR8}

6650 Pathogen[ P0C214] interacts with 6 human  
partners:{Q8WWR8;Q9HA82;Q9H227;Q9Y3R4;Q96G23;P16278}

6651 Pathogen[ P03346] interacts with 3 human partners:{P16278;Q96G23;Q8WWR8}

6652 Pathogen[ Q85601] interacts with 1 human partners:{Q96G23}

6653 Pathogen[ P14079] interacts with 17 human  
partners:{Q9NY59;P16278;Q9NXE4;Q9HA82;Q9NRX5;P06280;P27544;Q8NFR3;P54803;Q96G23;Q13510;Q95292;Q969W0;Q8NBK3;Q8WWR8;Q9Y3R4;P17405}

6654 Pathogen[ P03383] interacts with 1 human partners:{Q8WWR8}

6655 Pathogen[ P03410] interacts with 14 human  
partners:{P54803;Q95292;P16278;P27544;Q9NXE4;Q96G23;Q13510;Q9NRX5;Q9HA82;Q969W0;Q9Y3R4;P17405;Q8WWR8;Q8NFR3}

6656 Pathogen[ P14075] interacts with 3 human partners:{Q8WWR8;Q13510;Q969W0}

6657 Pathogen[ P0C206] interacts with 8 human  
partners:{Q96G23;Q8NFR3;Q95292;Q9Y3R4;Q9HA82;Q969W0;Q8WWR8;P16278}

6658 Pathogen[ P03363] interacts with 1 human partners:{Q96G23}

6659 [Cluster 606]GO:0045604+P biological\_process [name] regulation of epidermal cell differentiation [def] "Any process that modulates the frequency, rate or extent of epidermal cell differentiation." [GOC]

6660 Pathogen[ Q2Q067] interacts with 3 human partners:{O15525;Q9ULX9;Q14145}

6661 Pathogen[ P0C214] interacts with 3 human partners:{Q14145;Q9ULX9;O15525}

6662 Pathogen[ P03346] interacts with 3 human partners:{Q9ULX9;O15525;Q14145}

6663 Pathogen[ Q85601] interacts with 3 human partners:{O15525;Q14145;Q9ULX9}

6664 Pathogen[ P14079] interacts with 3 human partners:{Q14145;Q9ULX9;O15525}

6665 Pathogen[ P03383] interacts with 3 human partners:{O15525;Q14145;Q9ULX9}

6666 Pathogen[ P03410] interacts with 3 human partners:{O15525;Q9ULX9;Q14145}

6667 Pathogen[ P14075] interacts with 3 human partners:{Q9ULX9;O15525;Q14145}

6668 Pathogen[ P0C206] interacts with 3 human partners:{O15525;Q14145;Q9ULX9}

6669 Pathogen[ P03363] interacts with 3 human partners:{Q14145;O15525;Q9ULX9}

6670 [Cluster 607]GO:0060373+P biological\_process [name] regulation of ventricular cardiomyocyte membrane depolarization [def] "Any process that modulates the establishment or extent of a membrane potential in the depolarizing direction away from the resting potential in a ventricular cardiomyocyte." [GOC]

6671 Pathogen[ Q2Q067] interacts with 1 human partners:{O15105}

6672 Pathogen[ P0C214] interacts with 1 human partners:{O15105}

6673 Pathogen[ P03346] interacts with 1 human partners:{O15105}

6674 Pathogen[ Q85601] interacts with 1 human partners:{O15105}

6675 Pathogen[ P14079] interacts with 1 human partners:{O15105}

6676 Pathogen[ P03383] interacts with 1 human partners:{O15105}

6677 Pathogen[ P03410] interacts with 1 human partners:{O15105}

6678 Pathogen[ P14075] interacts with 1 human partners:{O15105}

6679 Pathogen[ POC206] interacts with 1 human partners:{015105}

6680 Pathogen[ P03363] interacts with 1 human partners:{015105}

6681 [Cluster 608]GO:0051382+P biological\_process [name] kinetochore assembly [def] "The aggregation, arrangement and bonding together of a set of components to form the kinetochore, a multisubunit complex that is located at the centromeric region of DNA and provides an attachment point for the spindle microtubules." [GOC

6682 Pathogen[ Q2Q067] interacts with 7 human partners:{P49454;Q5EE01;P49450;Q03188;Q96BT3;Q7Z3K3;Q9H081}

6683 Pathogen[ POC214] interacts with 7 human partners:{Q9H081;Q7Z3K3;Q96BT3;Q5EE01;P49450;Q03188;P49454}

6684 Pathogen[ P03346] interacts with 7 human partners:{Q7Z3K3;Q5EE01;Q9H081;Q03188;P49450;Q96BT3;P49454}

6685 Pathogen[ Q85601] interacts with 7 human partners:{P49454;Q03188;Q9H081;Q96BT3;Q5EE01;Q7Z3K3;P49450}

6686 Pathogen[ P14079] interacts with 7 human partners:{Q03188;Q5EE01;Q96BT3;Q7Z3K3;P49450;P49454;Q9H081}

6687 Pathogen[ P03383] interacts with 6 human partners:{Q03188;P49454;Q5EE01;Q96BT3;Q7Z3K3;Q9H081}

6688 Pathogen[ P03410] interacts with 7 human partners:{Q03188;Q96BT3;Q5EE01;P49454;P49450;Q7Z3K3;Q9H081}

6689 Pathogen[ P14075] interacts with 6 human partners:{Q9H081;Q5EE01;Q96BT3;Q03188;Q7Z3K3;P49454}

6690 Pathogen[ POC206] interacts with 7 human partners:{Q9H081;P49454;Q5EE01;P49450;Q96BT3;Q7Z3K3;Q03188}

6691 Pathogen[ P03363] interacts with 7 human partners:{P49454;Q9H081;Q5EE01;P49450;Q03188;Q7Z3K3;Q96BT3}

6692 [Cluster 609]GO:0043985+P biological\_process [name] histone H4-R3 methylation [def] "The modification of histone H4 by addition of a methyl group to arginine at position 3 of the histone." [GOC

6693 Pathogen[ Q2Q067] interacts with 5 human partners:{O14744;Q9NVM4;Q96LA8;Q99873;Q9NQ92}

6694 Pathogen[ POC214] interacts with 4 human partners:{Q9NVM4;Q99873;Q9NQ92;Q96LA8}

6695 Pathogen[ P03346] interacts with 5 human partners:{Q9NQ92;Q99873;O14744;Q9NVM4;Q96LA8}

6696 Pathogen[ Q85601] interacts with 5 human partners:{Q9NQ92;Q9NVM4;O14744;Q99873;Q96LA8}

6697 Pathogen[ P14079] interacts with 5 human partners:{Q96LA8;Q99873;Q9NVM4;O14744;Q9NQ92}

6698 Pathogen[ P03383] interacts with 4 human partners:{Q9NQ92;O14744;Q99873;Q96LA8}

6699 Pathogen[ P03410] interacts with 5 human partners:{Q96LA8;Q9NVM4;Q9NQ92;O14744;Q99873}

6700 Pathogen[ P14075] interacts with 4 human partners:{O14744;Q96LA8;Q99873;Q9NQ92}

6701 Pathogen[ POC206] interacts with 5 human partners:{Q99873;O14744;Q96LA8;Q9NVM4;Q9NQ92}

6702 Pathogen[ P03363] interacts with 5 human partners:{O14744;Q96LA8;Q9NVM4;Q9NQ92;Q99873}

6703 [Cluster 610]GO:0006506+P biological\_process [name] GPI anchor biosynthetic process [def] "The chemical reactions and pathways resulting in the formation of a glycosylphosphatidylinositol (GPI) anchor that attaches some membrane proteins to the lipid bilayer of the cell membrane. The phosphatidylinositol group is linked via the C-6 hydroxyl residue of inositol to a carbohydrate chain which is itself linked to the protein via an ethanolamine phosphate group, its amino group forming an amide linkage with the C-terminal carboxyl of the protein. Some GPI anchors have variants on this canonical linkage." [GOC

6704 Pathogen[ Q2Q067] interacts with 2 human partners:{Q96I23;Q14442}

6705 Pathogen[ POC214] interacts with 1 human partners:{Q9UJH9}

6706 Pathogen[ P03346] interacts with 2 human partners:{Q14442;Q96I23}

6707 Pathogen[ Q85601] interacts with 1 human partners:{Q9UJH9}

6708 Pathogen[ P14079] interacts with 16 human partners:{O43292;Q14442;Q96S52;P57054;Q9BRB3;Q9Y2B2;O94777;Q969N2;Q9P2X0;Q9UJH9;Q9H20;Q9H490;Q8TBF5;Q96I23;Q3MUY2;Q96FM1}

6709 Pathogen[ P03383] interacts with 1 human partners:{Q96I23}

6710 Pathogen[ P03410] interacts with 11 human partners:{Q96FM1;Q9Y2B2;O94777;Q14442;Q96S52;Q9UJH9;Q96I23;Q9BRB3;Q969N2;Q9H490;Q9P2X0}

6711 Pathogen[ P14075] interacts with 4 human partners:{O94777;Q14442;Q96I23;Q9UJH9}

6712 Pathogen[ POC206] interacts with 5 human partners:{Q9UJH9;Q96I23;Q14442;O94777;Q9Y2B2}

6713 Pathogen[ P03363] interacts with 1 human partners:{Q96I23}

6714 [Cluster 611]GO:0032929+P biological\_process [name] negative regulation of superoxide anion generation [def] "Any process that stops, prevents, or reduces the frequency, rate or extent of enzymatic generation of superoxide by a cell." [GOC

6715 Pathogen[ Q2Q067] interacts with 1 human partners:{Q9NY61}

6716 Pathogen[ POC214] interacts with 1 human partners:{Q9NY61}

6717 Pathogen[ P03346] interacts with 1 human partners:{Q9NY61}

6718 Pathogen[ Q85601] interacts with 1 human partners:{Q9NY61}

6719 Pathogen[ P14079] interacts with 1 human partners:{Q9NY61}  
6720 Pathogen[ P03383] interacts with 1 human partners:{Q9NY61}  
6721 Pathogen[ P03410] interacts with 1 human partners:{Q9NY61}  
6722 Pathogen[ P14075] interacts with 1 human partners:{Q9NY61}  
6723 Pathogen[ P0C206] interacts with 1 human partners:{Q9NY61}  
6724 Pathogen[ P03363] interacts with 1 human partners:{Q9NY61}  
6725 [Cluster 612]GO:0045087+P biological\_process [name] innate immune response [def]  
"Innate immune responses are defense responses mediated by germline encoded components  
that directly recognize components of potential pathogens." [GO\_REF  
6726 Pathogen[ Q2Q067] interacts with 84 human  
partners:{P01100;Q96J02;Q14258;Q8WUQ7;Q9Y6K5;Q8IUC6;Q9UII4;P55265;Q9BRV8;Q16666;P099  
13;Q9UDY8;Q92985;Q15653;Q04206;Q12933;Q9NYJ8;P08238;O95999;Q9H171;Q13158;Q53H80;Q147  
90;P61077;Q7Z2W4;Q8N5C8;Q8WXC3;Q9BUI4;O75582;Q14653;P10914;O14933;O14862;Q9Y6K9;Q131  
14;Q13233;A7MCY6;Q9BQ95;P61088;P10599;Q9NVU0;Q15366;P09914;Q96FA3;P19419;P19838;O153  
18;Q86VP1;P15336;Q13526;P25963;P0CG47;O14920;Q9C000;Q9BYX4;P45984;Q00653;P0CG48;O433  
18;Q92844;Q92793;O94817;Q86WI3;P62987;Q13404;Q9HAT8;Q9Y535;Q13568;Q9H3M7;O15111;P054  
23;Q9Y2Z0;Q9HC16;O14802;Q15759;Q16829;Q9H1D9;Q9H1Y0;Q02078;O14879;Q15750;Q8IUD6;P146  
25;P62979}  
6727 Pathogen[ P0C214] interacts with 95 human  
partners:{O14933;Q96J02;Q00653;P14625;O15111;Q9NPP4;Q9Y6K9;P09914;P09913;P19838;Q9BR  
V8;P15336;Q9BUI4;Q13568;Q8IUC6;O14879;Q9NVU0;Q14164;Q9H3M7;Q9H171;Q13158;Q9UDY8;P011  
00;Q86WI3;P55265;Q9Y6K5;Q13526;Q92793;Q96FA3;P19419;P29728;Q9H1D9;Q8IUD6;Q04206;Q53H  
80;Q9HAT8;Q13404;P10914;Q16666;Q9BYX4;Q15653;O43318;Q15366;P05423;Q8WXC3;Q9Y3Z3;Q7Z2  
W4;P61077;A7MCY6;Q02078;Q8N5C8;Q14258;Q9HC16;Q13233;Q92844;Q92985;Q9Y2Z0;P0CG48;Q86V  
P1;O95999;Q12933;O94817;Q9UII4;Q8WXC3;Q9H0E2;O15318;P25963;Q16829;Q9NW08;Q14653;O755  
82;P62987;Q15750;P05412;Q9H1Y0;Q9Y535;Q13114;P10909;Q15759;Q6P589;P0CG47;P10599;Q9BQ  
95;P45984;Q86WV6;O14862;P16220;P62979;O14920;O14802;Q9NYJ8;P61088;P18846;Q14790;Q9C0  
00}  
6728 Pathogen[ P03346] interacts with 92 human  
partners:{Q9NVU0;Q9Y3Z3;Q9Y6K9;Q96J02;P05412;P45984;Q02078;Q16666;O15111;Q15366;Q9Y2  
Z0;Q14258;P16220;A7MCY6;P55265;P15336;P14625;P62987;Q13158;P25963;Q9H171;Q15653;Q9UD  
Y8;Q9BRV8;Q8IUD6;P05423;P19419;P0CG48;Q9UII4;Q04206;Q53H80;Q13526;Q13114;Q9H0E2;P610  
77;Q96FA3;Q13404;O95999;Q8N5C8;P61088;Q8WXC3;O15318;Q9NPP4;Q86UT6;Q15646;P10914;Q9NY  
J8;Q86WI3;Q9H1D9;O14879;Q9HAT8;Q9Y535;Q13233;O75582;Q15750;Q9BUI4;Q14653;Q16829;Q135  
68;P62979;Q9BYX4;Q8IUC6;Q14790;Q15759;P0CG47;P45985;O14933;P10599;Q9H1Y0;P19838;P099  
13;Q14920;O43318;Q92793;Q92985;P09914;O94817;Q8WUQ7;O14862;P08238;P01100;Q9H3M7;O148  
02;Q14164;Q86VP1;Q9Y6K5;Q9BQ95;Q92844;P18846;Q00653;Q7Z2W4;Q9C000}  
6729 Pathogen[ Q85601] interacts with 90 human  
partners:{Q96J02;Q86WV6;Q02078;Q16666;P09913;Q86VP1;O14933;Q15750;Q14258;Q9H1D9;Q9NY  
J8;Q9Y2Z0;Q8IUC6;O14879;Q13158;O15111;Q9Y535;Q9BUI4;Q9UDY8;Q9BQ95;Q9HC16;Q9Y2Y1;Q147  
90;P19419;Q9HAT8;Q92844;Q16829;Q7Z2W4;P18846;Q86WI3;P0CG48;Q8IUD6;Q15653;P05423;Q131  
14;Q9NVU0;P61077;O94817;Q96FA3;Q13404;P10914;Q8N5C8;P01100;Q53H80;P10599;Q14653;Q141  
64;Q9Y6K9;Q9Y6K5;Q9H171;Q12933;Q13526;Q9NQC7;P16220;Q9H1Y0;O14920;Q04206;Q8WXC3;P082  
38;A7MCY6;Q9BYX4;O14862;P05412;Q92985;O75582;P62979;P55265;Q9NW08;P09914;Q15759;P0CG  
47;P45984;P14625;Q13233;P62987;Q00653;O95999;P15336;O43318;Q92793;P61088;Q6P589;P198  
38;Q13568;Q9H3M7;O14802;O15318;Q9BRV8;Q15366;P25963}  
6730 Pathogen[ P14079] interacts with 110 human  
partners:{Q92844;P13164;Q9BQ95;Q9HAT8;Q53H80;Q8WXC3;Q8N5C8;Q02078;P0CG48;Q06413;Q9BY  
X4;P29728;O43187;P53779;Q14653;O15553;P09914;O95999;Q7Z2W4;Q9BT09;P52564;Q9NW08;P319  
41;P13498;P39656;O75582;Q16829;Q8IUC6;Q92985;Q13404;Q92793;Q9H171;Q9C000;Q14164;Q9HC  
16;Q15750;P10909;P62979;P60022;Q8NEV9;Q14258;P61077;Q9H1Y0;P62987;Q96FA3;Q7Z434;P099  
13;P45984;P45983;Q13568;O15263;Q14790;Q9Y3Z3;Q16644;P55265;Q86WV6;Q9BUI4;P05423;Q157  
59;Q9Y6K9;P08238;Q9Y6K5;P45985;Q9H1M4;P15336;Q15366;Q9Y2Y1;A7MCY6;Q96J02;O14862;Q8WU  
Q7;P14625;Q12933;Q86UT6;Q13158;Q96AZ6;Q9NVU0;P10599;Q9Y6Y9;Q9H3M7;Q13164;O94817;Q9BR  
V8;Q86WI3;O14802;O15318;P05412;Q6P589;Q13526;Q9H0E2;Q9H1D9;P0CG47;Q9Y239;O14879;Q9Y2  
Z0;Q9NQC7;O14933;P01100;Q96C10;Q99836;Q9Y535;Q8IUD6;P10914;P19419;Q13114;Q16666;Q8WX  
G1;P81534;Q9NPP4;Q15653}  
6731 Pathogen[ P03383] interacts with 74 human  
partners:{O14879;P10914;O75582;Q14653;O14862;Q15366;O14933;P16220;Q9Y6K9;Q92844;P629  
87;Q8IUC6;Q13233;Q00653;O14920;O15111;Q9Y535;P19419;Q9BQ95;Q86VP1;P10599;P18846;Q156  
53;Q9H1Y0;Q13158;Q9H1D9;O43318;Q9NVU0;P61077;P09913;Q8N5C8;P61088;Q53H80;Q92985;Q129  
33;Q13568;Q13404;Q9H171;Q8WXC3;P14625;Q15759;Q16666;P25963;Q9Y6K5;O95999;Q8WUQ7;Q9BR  
V8;Q86WI3;P01100;P62979;P0CG47;Q96FA3;Q9H3M7;Q04206;P55265;O15318;P45984;P0CG48;O948  
17;Q14258;P15336;Q9NYJ8;P19838;P08238;Q13114;O14802;A7MCY6;Q92793;Q13526;Q02078;Q9HA  
T8;Q7Z2W4;Q15750;P05412}  
6732 Pathogen[ P03410] interacts with 107 human  
partners:{Q8WUQ7;Q04206;P19838;P10599;P0CG48;Q16666;O14920;Q9Y239;Q9H1Y0;Q9Y2Z0;P194  
19;P29728;P08238;O15111;Q9BT09;Q15750;Q96FA3;Q13526;O75582;O14862;Q14653;O43187;P146  
25;Q9BYX4;Q9H3M7;Q15653;Q9NPP4;Q15366;Q92844;Q9C000;P60022;P61088;Q13233;P55265;P629  
79;Q9H171;Q13568;O94817;Q14258;O15318;Q9Y535;P01100;P18846;Q86VP1;O14933;Q8WXC3;Q7Z4  
34;Q13158;Q86WI3;Q9HC16;O43318;Q16829;Q86UT6;Q92793;Q9NW08;O95999;P45985;Q9NYJ8;Q7Z2  
W4;Q96AZ6;Q8N5C8;P10914;Q8NEV9;P05423;Q12933;Q9H0E2;P16220;Q9HAT8;Q53H80;P05412;Q9Y2  
Y1;Q9Y6K5;Q9Y6Y9;P09913;Q9BQ95;P45984;P31941;Q96C10;P62987;P53779;Q8WXC3;Q02078;Q6P5  
89;Q8IUC6;Q9H1D9;Q86WV6;Q00653;Q9NVU0;Q13404;Q9Y6K9;P25963;Q9Y3Z3;Q92985;O14879;P396  
56;P15336;P09914;Q9BRV8;O14802;P0CG47;Q9BUI4;P81534;O15263;Q13114;P61077;A7MCY6;P109  
09}

- 6733 Pathogen[ P14075] interacts with 74 human partners: {Q9NVU0;Q15366;Q9BRV8;O15111;Q04206;Q15750;P09913;P55265;Q92844;P05412;Q86W13;Q15759;Q9H1Y0;O75582;P61088;P19419;Q53H80;O14933;P15336;Q15653;Q16666;P08238;P25963;P61077;Q8N5C8;Q13568;O14920;P0CG48;P62979;Q86VP1;Q14653;Q12933;Q13526;O14862;Q8WC3;Q9H1D9;O43318;Q9HAT8;Q9Y535;Q13158;Q96FA3;Q9Y6K5;P62987;Q13114;Q9H3M7;Q14258;O95999;Q9BQ95;Q02078;Q7Z2W4;Q8IUC6;O14879;P01100;O94817;P0CG47;Q92793;Q13404;P19838;Q00653;P16220;Q9Y6K9;Q92985;Q13233;P10914;Q8WUQ7;P14625;O14802;A7MCY6;Q9H171;O15318;P18846;P10599;P45984;Q9NYJ8}
- 6734 Pathogen[ POC206] interacts with 100 human partners: {A7MCY6;Q9NQC7;Q9C000;P10914;P0CG48;Q9Y2Z0;Q13568;O14920;P55265;Q92844;Q9Y6K9;Q13114;Q02078;Q13526;Q9UDY8;P16220;P39656;O14862;Q86W13;O14933;Q8N5C8;Q14258;O75582;Q86VP1;P45984;Q9Y6K5;O95999;P05412;P25963;Q9NW08;Q96J02;P19419;Q9HAT8;O14879;O43318;Q16666;P15336;P29728;Q15653;Q9BUI4;Q8IUD6;Q86WV6;P18846;Q13158;O15318;Q12933;Q16829;Q13233;Q8WUQ7;Q9Y535;Q6P589;Q92793;P05423;Q9NVU0;Q9H0E2;P61088;P19838;Q14164;P08238;Q9H1Y0;Q9H171;Q92985;P01100;Q04206;P09913;O15111;P62979;Q14790;P10909;Q9BRV8;Q9NYJ8;P31941;P45985;Q15366;P0CG47;Q8IUC6;O94817;Q96FA3;Q9H3M7;Q00653;Q9HC16;P61077;Q15750;P62987;Q9BYX4;Q13404;Q96C10;P10599;Q7Z2W4;O14802;Q9Y2Y1;Q8WXG1;Q53H80;Q15759;Q9H1D9;Q9BQ95;P14625;Q8WXC3;Q14653;P09914}
- 6735 Pathogen[ P03363] interacts with 75 human partners: {Q86VP1;Q14653;Q9Y6K5;Q9Y535;A7MCY6;Q15366;Q92985;O14920;Q04206;Q9BQ95;Q8IY21;Q9C000;O14933;P25963;P09914;Q14258;P09913;O15111;Q9NVU0;Q9NYJ8;Q7Z2W4;Q9H1D9;Q12933;Q13568;Q9H3M7;P16220;Q9BRV8;Q9Y6K9;P19419;O43318;Q13526;Q13158;O14879;Q15750;Q16666;P61088;P15336;Q15653;Q8WUQ7;Q16829;Q00653;Q96FA3;P05423;O15318;P18846;Q86W13;Q8WC3;Q9H0E2;P10914;P55265;P62987;Q9Y2Z0;Q9Y3Z3;P19838;Q92793;Q8IUD6;O14862;Q92844;Q9H171;Q94114;Q9BYX4;P05412;P61077;Q13404;Q9HAT8;Q9NPP4;Q8N5C8;Q53H80;P08238;Q13233;Q9UI4;O19817;Q9H1Y0;P01100;Q02078}
- 6736 [Cluster 613]GO:0042462+P biological\_process [name] eye photoreceptor cell development [def] "Development of a photoreceptor, a sensory cell in the eye that reacts to the presence of light. They usually contain a pigment that undergoes a chemical change when light is absorbed, thus stimulating a nerve." [GOC
- 6737 Pathogen[ Q2Q067] interacts with 1 human partners: {O15078}
- 6738 Pathogen[ POC214] interacts with 1 human partners: {O15078}
- 6739 Pathogen[ P03346] interacts with 2 human partners: {Q96KN7;O15078}
- 6740 Pathogen[ Q85601] interacts with 1 human partners: {O15078}
- 6741 Pathogen[ P14079] interacts with 2 human partners: {O15078;Q96KN7}
- 6742 Pathogen[ P03383] interacts with 1 human partners: {O15078}
- 6743 Pathogen[ P03410] interacts with 2 human partners: {Q96KN7;O15078}
- 6744 Pathogen[ P14075] interacts with 1 human partners: {O15078}
- 6745 Pathogen[ POC206] interacts with 2 human partners: {Q96KN7;O15078}
- 6746 Pathogen[ P03363] interacts with 2 human partners: {O15078;Q96KN7}
- 6747 [Cluster 614]GO:0006310+P biological\_process [name] DNA recombination [def] "Any process in which a new genotype is formed by reassortment of genes resulting in gene combinations different from those that were present in the parents. In eukaryotes genetic recombination can occur by chromosome assortment, intrachromosomal recombination, or nonreciprocal interchromosomal recombination. Intrachromosomal recombination occurs by crossing over. In bacteria it may occur by genetic transformation, conjugation, transduction, or F-duction." [ISBN
- 6748 Pathogen[ Q2Q067] interacts with 60 human partners: {Q9Y5K5;P25490;P0C1Z6;Q6NVH7;Q96SD1;Q15631;Q6ZW49;P55895;Q86UA6;Q8IY18;P27694;P49959;Q15233;Q96019;Q9C086;Q96B01;P35244;O95347;Q96EZ8;Q9H981;Q53TQ3;Q86YC2;P38935;O43542;Q06609;Q9H9Q4;Q8NBZ0;P27695;O43502;A4GXA9;Q9BQ83;P15927;Q8N140;Q06330;Q9UQ84;Q6P4R8;Q13426;P23246;P46100;P12956;O60216;Q9UBU8;P43351;Q14686;Q96MG7;Q96NY9;Q19AV6;Q9ULG1;Q96AY2;Q96PK6;Q96MF7;Q14683;Q9NP87;P13010;Q8IY92;O60870;Q6PI98;Q9NXX6;Q9H9F9;Q8NG50}
- 6749 Pathogen[ POC214] interacts with 60 human partners: {P43351;Q8IY18;Q9H9Q4;P27695;Q06609;Q9BQ83;P49959;Q9NXX6;P13010;Q9H9F9;Q53TQ3;Q9C086;Q96SD1;Q15233;Q96NY9;P23246;Q9ULG1;Q06330;Q14686;P38935;O95347;Q6ZW49;P0C1Z6;Q9Y5K5;Q92698;O60870;P55895;Q6PI98;Q13426;O43542;Q96AY2;P46100;Q96MF7;Q9UBU8;Q6P4R8;P15927;Q96MG7;O43502;Q6NVH7;P35244;Q96PK6;A4GXA9;Q96B01;Q86YC2;Q14683;Q15631;Q9UQ84;P27694;Q8IY92;Q86UA6;Q9NP87;Q19AV6;Q96EZ8;Q8NG50;O60216;O96019;P12956;Q8NBZ0;Q9H981;Q8N140}
- 6750 Pathogen[ P03346] interacts with 71 human partners: {Q06330;P46063;P38935;P12956;Q06609;Q96MF7;Q96SD1;Q9BWT6;P46100;O43502;P27694;Q96EZ8;Q9C086;P07992;Q9H9F9;P35244;Q9P2W1;Q9ULG1;P25490;Q13426;P55895;P23246;Q96MG7;P13010;O95347;Q8WV22;Q96AY2;Q6PI98;Q92698;P0C1Z6;Q96NY9;O60870;Q96019;Q8N140;Q15631;O15315;Q14683;Q9UBU8;P51587;Q96B01;O43542;Q8NG50;Q9H981;Q53TQ3;O75771;Q19AV6;P15927;Q86YC2;Q86UA6;P49959;Q8NBZ0;P43351;Q15233;Q9UQ84;Q9H9Q4;Q6NVH7;Q6P4R8;Q9BQ83;P27695;Q9NP87;Q8IY92;O43543;Q8IY18;Q9UBZ4;O60216;Q96PK6;A4GXA9;Q9Y5K5;Q6ZW49;Q9NXX6;Q14686}
- 6751 Pathogen[ Q85601] interacts with 65 human partners: {P43351;Q9UBZ4;O43502;O15315;Q96PK6;Q53TQ3;O95347;Q9UQ84;Q8IY18;Q19AV6;Q06330;P38935;Q9C086;Q9H9F9;P35244;Q86UA6;A4GXA9;Q13426;Q6NVH7;Q96MG7;Q9UBU8;P25490;Q96AY2;O96019;P49959;O60216;Q92698;P27694;O43542;P0C1Z6;Q96NY9;Q8NG50;Q14686;O60870;Q8NBZ0;Q6PI98;Q9H981;Q8N140;Q8IY92;P15927;Q14683;Q96SD1;Q6P4R8;Q96B01;Q9Y5K5;Q86YC2;Q9ULG1;Q6ZW49;Q15233;Q9BQ83;Q9NP87;P23246;Q96EZ8;Q9NXX6;Q8WV22;Q06609;P27695;P46100;P55895;P51587;Q15631;Q9H9Q4;P13010;P12956;Q96MF7}



- 6752 Pathogen[ P14079] interacts with 66 human partners: {O15315;Q9ULG1;Q96B01;Q96MF7;Q9UBU8;Q96NY9;Q9H9Q4;P13010;Q9UBZ4;Q9BWT6;Q8NG50;Q92698;P51587;O60216;P23246;Q8NBZ0;Q86YC2;O60870;Q96AY2;A4GXA9;Q6NVH7;P46100;Q6PI98;Q06330;Q9H981;Q15631;P12956;Q7Z4M0;Q9Y5K5;O95347;Q19AV6;P0C1Z6;Q6ZW49;Q86UA6;P27695;Q8N140;O43502;Q9NSU2;Q9NP87;Q6P4R8;O43543;P15927;Q96SD1;P27694;Q8IY18;P38935;Q96MG7;Q9BQ83;P25490;Q15233;P35244;Q06609;Q14683;Q53TQ3;Q96EZ8;Q9NXX6;Q13426;Q9UQ84;Q14686;Q96PK6;Q9H9F9;P07992;O43542;Q8IY92;P49917;P43351}
- 6753 Pathogen[ P03383] interacts with 51 human partners: {P43351;Q86UA6;Q14683;Q06330;Q06609;Q96019;P13010;Q9NXX6;Q6P4R8;Q9H981;Q6NVH7;Q19AV6;P27694;Q53TQ3;Q9C086;A4GXA9;Q14686;Q96B01;Q9H9Q4;O95347;Q9UBU8;Q6ZW49;Q15631;O60216;Q96MF7;Q6PI98;Q9H9F9;P46100;O60870;P15927;Q96PK6;Q13426;Q96AY2;Q8NBZ0;P35244;P55895;P0C1Z6;Q9Y5K5;Q8N140;Q8IY92;Q96MG7;Q86YC2;Q15233;O43542;P38935;P27695;P23246;Q96EZ8;Q9BQ83;P12956;Q96NY9}
- 6754 Pathogen[ P03410] interacts with 71 human partners: {P49959;Q9H981;P23246;P35244;Q96PK6;Q96AY2;Q6PI98;Q9BRV3;Q92698;Q15233;A4GX9;P07992;Q06330;O15315;Q96019;Q14686;O43542;Q19AV6;Q53TQ3;O60870;Q86UA6;Q9ULG1;Q8NG50;Q9UBU8;P55895;Q7Z4M0;Q6NVH7;Q9NSU2;Q96SD1;P43351;Q9BQ83;Q9NXX6;P0C1Z6;O60216;P25490;Q96MF7;Q96MG7;O95347;P12956;Q9UBZ4;Q9BWT6;P38935;Q8IY92;O43502;Q9H9F9;P51587;Q96NY9;Q6P4R8;Q14683;P46100;Q13426;P63135;Q96EZ8;P27695;Q8IY18;P13010;O43543;Q9Y5K5;Q8N140;Q15631;P27694;P15927;Q9NP87;Q9UQ84;Q96B01;Q9C086;Q86YC2;Q6ZW49;Q9H9Q4;Q06609;Q8NBZ0}
- 6755 Pathogen[ P14075] interacts with 51 human partners: {P43351;Q6P4R8;P23246;P12956;Q9BQ83;Q14683;Q9UBU8;P27695;Q8N140;Q9C086;Q86YC2;Q14686;P0C1Z6;Q6ZW49;P38935;Q96EZ8;P15927;O95347;O60870;Q9H9Q4;Q96019;P46100;P35244;Q8NBZ0;Q19AV6;Q15631;Q53TQ3;Q96PK6;Q6PI98;Q96NY9;O43542;Q13426;P27694;Q9NXX6;Q06330;Q15233;Q96B01;Q9H9F9;Q96AY2;Q86UA6;Q9H981;P13010;Q6NVH7;Q96MF7;P55895;O60216;Q8IY92;Q96MG7;Q06609;Q9Y5K5;A4GXA9}
- 6756 Pathogen[ P0C206] interacts with 71 human partners: {P27695;O43542;O43502;O60216;Q8N140;Q19AV6;P13010;Q96AY2;Q8WV22;P38935;Q06330;P49959;Q9UBU8;Q9UQ84;Q9NSU2;Q9H981;Q6ZW49;Q86YC2;P25490;P51587;Q15233;O60870;P46100;Q6PI98;Q15631;Q96MG7;Q96SD1;Q9UBZ4;Q8NBZ0;O94762;A4GXA9;Q9Y5K5;P07992;Q96EZ8;Q9C086;P23246;P43351;Q96019;P0C1Z6;Q96NY9;P49917;Q9H9Q4;O95347;Q9ULG1;Q13426;Q14683;O15315;Q96PK6;Q14686;P49916;P55895;Q96MF7;Q9NP87;Q9H9F9;O43543;Q06609;P27694;P15927;Q6NVH7;P35244;Q96B01;Q9BQ83;Q8IY18;P12956;Q8IY92;Q9NTJ3;Q6P4R8;Q8NG50;Q9NXX6;Q92698;Q53TQ3}
- 6757 Pathogen[ P03363] interacts with 63 human partners: {P12956;O94762;Q15233;P23246;P27694;Q9Y5K5;Q19AV6;Q9H981;Q9ULG1;Q8NG50;Q9NXX6;P13010;O95347;Q06330;P25490;Q8N140;Q15631;P35244;Q14686;P15927;Q96PK6;P46100;Q9C086;Q86UA6;Q9H9F9;Q9UBU8;Q13426;Q96019;P46063;P0C1Z6;O60870;Q9BQ83;Q96AY2;Q9H9Q4;Q96EZ8;Q9NP87;O43542;Q8IY92;P43351;O75771;Q8WV22;Q06609;Q6NVH7;P55895;Q96MG7;Q53TQ3;Q6ZW49;A4GXA9;Q96NY9;Q8IY18;Q96MF7;Q8NBZ0;Q9BWT6;Q14683;P38935;Q6P4R8;Q92698;Q96B01;Q86YC2;O60216;O43502;Q6PI98;O15315}
- 6758 [Cluster 615]GO:0050690+P biological\_process [name] regulation of defense response to virus by virus [def] "Any viral process that modulates the frequency, rate, or extent of the antiviral response of the host cell or organism." [GOC]
- 6759 Pathogen[ Q2Q067] interacts with 14 human partners: {O94973;Q9Y6Q5;Q10567;P56377;O43747;O95782;Q6VY07;P63010;Q96PC3;Q96CW1;P61966;Q9BXS5;P63000;Q92556}
- 6760 Pathogen[ P0C214] interacts with 16 human partners: {Q96CW1;P63000;Q9UI12;P63010;Q10567;P56377;Q6VY07;Q92556;Q96PC3;O43747;O94973;Q9Y6Q5;P61966;O95782;P53680;Q9BXS5}
- 6761 Pathogen[ P03346] interacts with 15 human partners: {P61966;P63010;O43747;P53680;P56377;Q9BXS5;O95782;Q10567;Q96CW1;Q96PC3;Q9Y6Q5;O94973;Q6VY07;Q92556;P63000}
- 6762 Pathogen[ Q85601] interacts with 14 human partners: {Q96CW1;Q9BXS5;P56377;P63000;O43747;Q10567;Q6VY07;P53680;O94973;Q96PC3;P63010;P61966;Q9Y6Q5;O95782}
- 6763 Pathogen[ P14079] interacts with 15 human partners: {Q6VY07;Q96CW1;Q9Y6Q5;P61966;Q9BXS5;Q92556;Q10567;P56377;O95782;P63010;O94973;O43747;Q9UI12;Q96PC3;P53680}
- 6764 Pathogen[ P03383] interacts with 10 human partners: {Q96CW1;P56377;Q10567;Q6VY07;P63000;P63010;O43747;O95782;Q9BXS5;O94973}
- 6765 Pathogen[ P03410] interacts with 17 human partners: {Q9Y6Q5;O95782;Q96PC3;Q96CW1;Q9BXS5;P53680;P20963;P63000;O43747;Q10567;Q92556;Q9UI12;P63010;P61966;Q6VY07;O94973;P56377}
- 6766 Pathogen[ P14075] interacts with 10 human partners: {O94973;Q96CW1;O95782;O43747;P63000;P63010;P56377;Q9BXS5;Q10567;Q6VY07}
- 6767 Pathogen[ P0C206] interacts with 16 human partners: {P53680;P63010;O94973;Q92556;Q9Y6Q5;O43747;Q10567;P61966;Q9BXS5;Q6VY07;P63000;Q9UI12;Q96CW1;O95782;Q96PC3;P56377}
- 6768 Pathogen[ P03363] interacts with 10 human partners: {O43747;P63000;Q9BXS5;O94973;Q6VY07;P63010;Q92556;O95782;Q10567;Q96CW1}
- 6769 [Cluster 616]GO:0015991+P biological\_process [name] ATP hydrolysis coupled proton transport [def] "The transport of protons against an electrochemical gradient, using energy from ATP hydrolysis." [GOC]
- 6770 Pathogen[ Q2Q067] interacts with 1 human partners: {P36543}

6771 Pathogen[ P0C214] interacts with 3 human partners:{Q16864;Q9UI12;P36543}

6772 Pathogen[ P03346] interacts with 4 human partners:{P21283;P36543;Q93050;Q16864}

6773 Pathogen[ Q85601] interacts with 2 human partners:{Q93050;P36543}

6774 Pathogen[ P14079] interacts with 7 human partners:{P36543;P25705;P61421;Q8N8Y2;Q93050;Q9UI12;Q16864}

6775 Pathogen[ P03383] interacts with 1 human partners:{P36543}

6776 Pathogen[ P03410] interacts with 7 human partners:{Q8N8Y2;P25705;P61421;Q93050;Q9UI12;Q16864;P36543}

6777 Pathogen[ P14075] interacts with 1 human partners:{P36543}

6778 Pathogen[ P0C206] interacts with 4 human partners:{P36543;Q9UI12;Q16864;Q93050}

6779 Pathogen[ P03363] interacts with 1 human partners:{P36543}

6780 [Cluster 617]GO:0016575+P biological\_process [name] histone deacetylation [def] "The modification of histones by removal of acetyl groups." [GOC

6781 Pathogen[ Q2Q067] interacts with 18 human partners:{Q8IXJ6;P56524;Q9BY41;Q9UKV0;Q13547;O94776;O15379;Q9NQX1;Q9UQL6;Q969S8;Q96DB2;Q92769;Q8WUI4;Q9UBU8;Q96PK6;Q9UIF9;Q9NSC2;P35232}

6782 Pathogen[ P0C214] interacts with 18 human partners:{Q13547;Q969S8;Q96DB2;P56524;Q9UIF9;O94776;Q92769;Q9UBU8;Q9UKV0;Q9NSC2;O15379;Q96PK6;Q9NQX1;Q8IXJ6;Q8WUI4;P35232;Q9UQL6;Q9BY41}

6783 Pathogen[ P03346] interacts with 18 human partners:{Q969S8;Q9NQX1;Q96DB2;O15379;Q9NSC2;P56524;O94776;Q8IXJ6;Q92769;Q9UBU8;Q13547;Q9BY41;Q9UIF9;Q8WUI4;Q9UKV0;P35232;Q96PK6;Q9UQL6}

6784 Pathogen[ Q85601] interacts with 18 human partners:{Q969S8;Q9UKV0;Q96DB2;Q96PK6;Q9BY41;O94776;Q9UQL6;Q9UIF9;Q9UBU8;Q9NQX1;Q8IXJ6;Q92769;P56524;O15379;P35232;Q13547;Q9NSC2;Q8WUI4}

6785 Pathogen[ P14079] interacts with 17 human partners:{Q9UQL6;O15379;Q9NQX1;Q9UBU8;Q96DB2;Q969S8;Q8WUI4;Q9UKV0;P35232;Q92769;Q9UIF9;Q9BY41;Q8IXJ6;P56524;O94776;Q96PK6;Q9NSC2}

6786 Pathogen[ P03383] interacts with 16 human partners:{O94776;Q9UQL6;Q9UBU8;Q9NQX1;Q96PK6;Q92769;Q9NSC2;O15379;Q9UIF9;P35232;Q13547;Q9BY41;Q9UKV0;P56524;Q8WUI4;Q969S8}

6787 Pathogen[ P03410] interacts with 18 human partners:{Q9UKV0;Q8IXJ6;Q96PK6;Q9BY41;Q9UBU8;Q8WUI4;Q9UQL6;Q969S8;Q92769;O15379;P56524;O94776;Q13547;Q9UIF9;Q9NSC2;P35232;Q9NQX1;Q96DB2}

6788 Pathogen[ P14075] interacts with 16 human partners:{Q9BY41;Q9NSC2;Q969S8;Q9UBU8;P56524;O94776;Q9UKV0;Q13547;P35232;Q9NQX1;Q96PK6;Q92769;Q9UIF9;O15379;Q9UQL6;Q8WUI4}

6789 Pathogen[ P0C206] interacts with 18 human partners:{Q9NQX1;Q92769;Q9UBU8;Q9NSC2;Q96DB2;Q9UKV0;Q13547;O94776;P35232;O15379;Q8WUI4;Q96PK6;Q9UIF9;Q8IXJ6;Q9BY41;P56524;Q969S8;Q9UQL6}

6790 Pathogen[ P03363] interacts with 13 human partners:{Q9NQX1;Q9BY41;O15379;Q969S8;Q9UQL6;Q96PK6;Q9UBU8;Q9UIF9;Q9UKV0;Q13547;Q8WUI4;P35232;O94776}

6791 [Cluster 618]GO:0032434+P biological\_process [name] regulation of proteasomal ubiquitin-dependent protein catabolic process [def] "Any process that modulates the frequency, rate or extent of the breakdown of a protein or peptide by hydrolysis of its peptide bonds, initiated by the covalent attachment of ubiquitin, and mediated by the proteasome." [GOC

6792 Pathogen[ Q2Q067] interacts with 4 human partners:{P54727;P54725;Q9NRR5;Q8N668}

6793 Pathogen[ P0C214] interacts with 4 human partners:{Q9NRR5;P54725;Q8N668;P54727}

6794 Pathogen[ P03346] interacts with 4 human partners:{Q8N668;Q9NRR5;P54727;P54725}

6795 Pathogen[ Q85601] interacts with 4 human partners:{Q9NRR5;P54727;P54725;Q8N668}

6796 Pathogen[ P14079] interacts with 3 human partners:{Q9NRR5;Q8N668;P54727}

6797 Pathogen[ P03383] interacts with 4 human partners:{Q8N668;P54725;P54727;Q9NRR5}

6798 Pathogen[ P03410] interacts with 4 human partners:{Q9NRR5;P54725;Q8N668;P54727}

6799 Pathogen[ P14075] interacts with 4 human partners:{Q8N668;P54727;Q9NRR5;P54725}

6800 Pathogen[ P0C206] interacts with 4 human partners:{P54725;Q9NRR5;P54727;Q8N668}

6801 Pathogen[ P03363] interacts with 4 human partners:{P54727;Q8N668;Q9NRR5;P54725}

6802 [Cluster 619]GO:0031627+P biological\_process [name] telomeric loop formation [def] "The process in which linear telomeric DNA is remodeled into duplex loops, by the invasion of a 3' single-stranded overhang into the duplex region." [GOC

6803 Pathogen[ Q2Q067] interacts with 2 human partners:{Q15554;Q9H816}

6804 Pathogen[ P0C214] interacts with 2 human partners:{Q9H816;Q15554}

6805 Pathogen[ P03346] interacts with 2 human partners:{Q15554;Q9H816}

6806 Pathogen[ Q85601] interacts with 2 human partners:{Q15554;Q9H816}

6807 Pathogen[ P14079] interacts with 2 human partners:{Q15554;Q9H816}

6808 Pathogen[ P03383] interacts with 2 human partners:{Q15554;Q9H816}

6809 Pathogen[ P03410] interacts with 2 human partners:{Q9H816;Q15554}

6810 Pathogen[ P14075] interacts with 2 human partners:{Q15554;Q9H816}

6811 Pathogen[ P0C206] interacts with 2 human partners:{Q15554;Q9H816}

6812 Pathogen[ P03363] interacts with 2 human partners:{Q9H816;Q15554}

6813 [Cluster 620]GO:0055015+P biological\_process [name] ventricular cardiac muscle cell development [def] "The process whose specific outcome is the progression of a ventricular cardiac muscle cell over time, from its formation to the mature state. Cardiac muscle cells are striated muscle cells that are responsible for heart contraction. The ventricle is the part of the heart that pumps blood out of the organ."

```

[GOC
6814 Pathogen[ Q2Q067] interacts with 4 human partners:{P02545;Q14192;P14635;Q9H1Y0}
6815 Pathogen[ P0C214] interacts with 5 human
partners:{P14635;P35580;Q14192;Q9H1Y0;P02545}
6816 Pathogen[ P03346] interacts with 4 human partners:{P02545;P14635;Q14192;Q9H1Y0}
6817 Pathogen[ Q85601] interacts with 5 human
partners:{P02545;P14635;Q9H1Y0;Q14192;P35580}
6818 Pathogen[ P14079] interacts with 4 human partners:{Q14192;Q9H1Y0;P14635;P02545}
6819 Pathogen[ P03383] interacts with 5 human
partners:{P02545;Q9H1Y0;P14635;Q14192;P35580}
6820 Pathogen[ P03410] interacts with 5 human
partners:{Q9H1Y0;P14635;P02545;P35580;Q14192}
6821 Pathogen[ P14075] interacts with 4 human partners:{Q9H1Y0;P14635;P02545;Q14192}
6822 Pathogen[ P0C206] interacts with 5 human
partners:{Q9H1Y0;P02545;Q14192;P14635;P35580}
6823 Pathogen[ P03363] interacts with 3 human partners:{P02545;Q9H1Y0;Q14192}
6824 [Cluster 621]GO:0008156+P biological_process [name] negative regulation of DNA
replication [def] "Any process that stops, prevents, or reduces the frequency, rate or
extent of DNA replication." [GOC
6825 Pathogen[ Q2Q067] interacts with 11 human
partners:{Q9BZE4;Q7Z5K2;Q99741;P54274;Q29RF7;P31949;O75496;O75943;Q15361;Q9H2G4;O609
21}
6826 Pathogen[ P0C214] interacts with 11 human
partners:{Q29RF7;Q15361;O75496;O60921;Q9H2G4;O75943;Q7Z5K2;P31949;Q9BZE4;P54274;Q997
41}
6827 Pathogen[ P03346] interacts with 11 human
partners:{O60921;Q9BZE4;Q7Z5K2;Q29RF7;P54274;Q9H2G4;O75943;Q15361;Q99741;P31949;O754
96}
6828 Pathogen[ Q85601] interacts with 11 human
partners:{O75496;Q9BZE4;Q29RF7;Q7Z5K2;O75943;O60921;P31949;Q9H2G4;Q15361;Q99741;P542
74}
6829 Pathogen[ P14079] interacts with 12 human
partners:{P54274;P31949;Q9BZE4;Q99741;O75943;Q9H2G4;O43612;Q29RF7;Q15361;Q7Z5K2;O609
21;O75496}
6830 Pathogen[ P03383] interacts with 9 human
partners:{Q9BZE4;O60921;Q15361;Q29RF7;Q9H2G4;P54274;O75496;Q99741;Q7Z5K2}
6831 Pathogen[ P03410] interacts with 12 human
partners:{Q29RF7;O75943;O43612;P54274;Q7Z5K2;P31949;O60921;O75496;Q15361;Q9H2G4;Q9BZ
E4;Q99741}
6832 Pathogen[ P14075] interacts with 9 human
partners:{Q9H2G4;P54274;Q7Z5K2;O60921;Q9BZE4;Q29RF7;Q99741;Q15361;O75496}
6833 Pathogen[ P0C206] interacts with 11 human
partners:{P31949;O75496;Q15361;Q7Z5K2;Q29RF7;Q99741;O75943;P54274;O60921;Q9H2G4;Q9BZ
E4}
6834 Pathogen[ P03363] interacts with 11 human
partners:{Q9BZE4;P31949;Q9H2G4;P54274;Q99741;Q29RF7;Q15361;O75496;O60921;Q7Z5K2;O759
43}
6835 [Cluster 622]GO:0034766+P biological_process [name] negative regulation of ion
transmembrane transport [def] "Any process that stops, prevents, or reduces the
frequency, rate or extent of the directed movement of ions from one side of a membrane
to the other." [GOC
6836 Pathogen[ Q2Q067] interacts with 1 human partners:{Q96SW2}
6837 Pathogen[ P0C214] interacts with 1 human partners:{Q96SW2}
6838 Pathogen[ P03346] interacts with 1 human partners:{Q96SW2}
6839 Pathogen[ Q85601] interacts with 1 human partners:{Q96SW2}
6840 Pathogen[ P14079] interacts with 1 human partners:{Q96SW2}
6841 Pathogen[ P03383] interacts with 1 human partners:{Q96SW2}
6842 Pathogen[ P03410] interacts with 1 human partners:{Q96SW2}
6843 Pathogen[ P14075] interacts with 1 human partners:{Q96SW2}
6844 Pathogen[ P0C206] interacts with 1 human partners:{Q96SW2}
6845 Pathogen[ P03363] interacts with 1 human partners:{Q96SW2}
6846 [Cluster 623]GO:0048853+P biological_process [name] forebrain morphogenesis [def]
"The process in which the anatomical structures of the forebrain are generated and
organized. The forebrain is the anterior of the three primary divisions of the
developing chordate brain or the corresponding part of the adult brain (in vertebrates,
includes especially the cerebral hemispheres, the thalamus, and the hypothalamus and
especially in higher vertebrates is the main control center for sensory and associative
information processing, visceral functions, and voluntary motor functions)." [GOC
6847 Pathogen[ Q2Q067] interacts with 1 human partners:{Q9Y5K5}
6848 Pathogen[ P0C214] interacts with 1 human partners:{Q9Y5K5}
6849 Pathogen[ P03346] interacts with 2 human partners:{Q9UBX0;Q9Y5K5}
6850 Pathogen[ Q85601] interacts with 2 human partners:{Q9UBX0;Q9Y5K5}
6851 Pathogen[ P14079] interacts with 1 human partners:{Q9Y5K5}
6852 Pathogen[ P03383] interacts with 1 human partners:{Q9Y5K5}
6853 Pathogen[ P03410] interacts with 1 human partners:{Q9Y5K5}
6854 Pathogen[ P14075] interacts with 1 human partners:{Q9Y5K5}

```

6855 Pathogen[ P0C206] interacts with 2 human partners:{Q9Y5K5;Q9UBX0}  
6856 Pathogen[ P03363] interacts with 2 human partners:{Q9Y5K5;Q9UBX0}  
6857 [Cluster 624]GO:0001819+P biological\_process [name] positive regulation of cytokine production [def] "Any process that activates or increases the frequency, rate or extent of production of a cytokine." [GOC  
6858 Pathogen[ Q2Q067] interacts with 3 human partners:{Q96LR2;Q16666;Q96FA3}  
6859 Pathogen[ P0C214] interacts with 3 human partners:{Q96FA3;Q16666;Q96LR2}  
6860 Pathogen[ P03346] interacts with 3 human partners:{Q16666;Q96LR2;Q96FA3}  
6861 Pathogen[ Q85601] interacts with 3 human partners:{Q16666;Q96FA3;Q96LR2}  
6862 Pathogen[ P14079] interacts with 4 human partners:{Q9BXL7;Q96FA3;Q96LR2;Q16666}  
6863 Pathogen[ P03383] interacts with 3 human partners:{Q96LR2;Q16666;Q96FA3}  
6864 Pathogen[ P03410] interacts with 4 human partners:{Q16666;Q96FA3;Q9BXL7;Q96LR2}  
6865 Pathogen[ P14075] interacts with 3 human partners:{Q16666;Q96FA3;Q96LR2}  
6866 Pathogen[ P0C206] interacts with 3 human partners:{Q16666;Q96LR2;Q96FA3}  
6867 Pathogen[ P03363] interacts with 3 human partners:{Q16666;Q96FA3;Q96LR2}  
6868 [Cluster 625]GO:0045213+P biological\_process [name] neurotransmitter receptor metabolic process [def] "The chemical reactions and pathways involving neurotransmitter receptors." [GOC  
6869 Pathogen[ Q2Q067] interacts with 1 human partners:{P11532}  
6870 Pathogen[ P0C214] interacts with 1 human partners:{P11532}  
6871 Pathogen[ P03346] interacts with 1 human partners:{P11532}  
6872 Pathogen[ Q85601] interacts with 1 human partners:{P11532}  
6873 Pathogen[ P14079] interacts with 1 human partners:{P11532}  
6874 Pathogen[ P03383] interacts with 1 human partners:{P11532}  
6875 Pathogen[ P03410] interacts with 1 human partners:{P11532}  
6876 Pathogen[ P14075] interacts with 1 human partners:{P11532}  
6877 Pathogen[ P0C206] interacts with 1 human partners:{P11532}  
6878 Pathogen[ P03363] interacts with 1 human partners:{P11532}  
6879 [Cluster 626]GO:0044267+P biological\_process [name] cellular protein metabolic process [def] "The chemical reactions and pathways involving a specific protein, rather than of proteins in general, occurring at the level of an individual cell. Includes protein modification." [GOC  
6880 Pathogen[ Q2Q067] interacts with 154 human partners:{Q9BTW9;P23588;P05198;P61313;Q99613;P62701;P49458;P47914;P46779;O00303;O60841;Q9HAV7;Q02543;P26373;P29692;Q9UBQ5;P62750;P47813;P62273;P38646;P55735;P15880;P40429;P09132;P46782;Q96B49;P35268;P24534;P22090;P49770;P46778;P26641;P34949;P62888;P32969;P62277;P62241;O75347;P62244;P05387;Q14152;P62861;P42766;Q8TAA5;P05386;Q99471;P63241;Q14240;Q9UNX3;O95394;P30050;Q15629;P18077;P62891;Q13541;P27797;Q9BU89;P61927;P39023;P62081;P61247;Q9UHB9;P61254;Q9UI10;P17987;Q15388;P62249;P62280;P83731;P62263;Q16222;P60866;P62906;O60220;P53992;Q14232;Q9Y5J6;Q9NQP4;Q02878;P46777;O95486;P62899;Q9NR50;P08708;P50991;P08865;Q07020;P62913;O94855;P62269;P60228;Q9UHV9;P62424;P49366;P62917;P62829;P46783;Q8IYD1;P62495;P36578;P62857;P62072;P62847;O75822;P49207;Q13144;P23396;Q9Y5J7;O43615;P20042;P63173;P18621;O14925;Q9P0U1;O95487;P61758;P39019;P61353;O15371;Q04637;Q9GZV4;P62266;P42677;Q9Y3U8;P63220;P62841;P83881;P62987;P06730;P78371;P50914;P46776;P11940;P62854;P62753;P05388;Q15436;P60842;P18124;P62851;P25398;Q14442;Q15056;P62910;Q92901;P68104;P46781;P27635;O75821;O15372;Q13347;P61513;P62945;P62979}  
6881 Pathogen[ P0C214] interacts with 170 human partners:{P62861;P84098;P61247;P60228;P55735;P60709;P15880;P62081;P42766;Q9UI10;P62913;P22090;Q99832;O60841;Q9BU89;Q92901;P62249;P49368;Q15388;P62899;P62854;Q13505;P53992;P39019;P62263;Q9HAV7;O75347;P60842;P49770;P78371;P48643;P61758;P62273;P23396;P18077;Q9GZV4;Q16222;P05388;O15372;P62847;P23588;Q9BTW9;P62829;P26373;O60220;Q14152;P27635;P47813;P46778;Q99613;Q9Y512;O75821;P61513;P29692;P83881;Q15056;P62701;P49207;P11940;Q14232;P63220;P26641;P08865;P32969;Q02543;P62266;P63241;Q15436;P55789;P62277;P50914;P62072;P49366;P46779;O00303;O14925;Q9UHV9;P40429;P41091;P47914;P63173;P13639;P46783;Q95487;P49257;Q9NR50;P62280;Q9UNX3;Q9Y3U8;P30050;O43615;P62753;P62910;Q13144;P62911;Q8NBJ7;Q14240;Q9Y5J9;P62495;P38646;P62269;P10809;Q9Y5J6;P46781;Q8TAA5;Q8IYD1;P61254;P62841;P62244;P62987;Q04637;Q07020;P42677;P62945;O75822;P46776;P05198;Q15629;P27797;P34949;Q3ZCQ8;O95394;Q9Y5J7;P62241;Q99471;P46777;O60925;P55884;P24534;P83731;P35268;O15305;Q6Y7W6;P17987;Q9UHB9;P62424;P60866;Q8N4Q1;P62857;Q96B49;P49458;P61313;P08708;Q9P0U1;P20042;Q96EK6;P05387;P50991;P25398;Q9UBQ5;Q9NQP4;P61927;P62750;P62979;P05386;P09132;P62851;P06730;P46782;P18124;O95486;P61353;P36578;O15371;P18621;Q13541;Q13347;P62906;O94855;Q02878}  
6882 Pathogen[ P03346] interacts with 168 human partners:{O14925;P05387;P46779;P55735;P63173;P06730;P62917;P62249;P62913;P62861;P62277;Q02878;P41091;Q9NS69;P47813;Q8N4Q1;Q9UBQ5;Q9GZV4;P62280;P39023;Q6ZW61;Q9Y3D7;P62987;P61927;Q9UNX3;Q99471;Q9UHV9;P62857;Q13541;Q13347;O60841;P49257;P46778;P49207;O43615;Q9NQP4;Q15629;Q9P0U1;P78371;P62266;P60709;P26641;Q9Y5J7;Q99426;P61254;P62495;Q16222;Q15056;P11940;P29692;P62424;P62273;P55884;P83731;P60866;P49458;P63241;P62899;Q14152;O75821;P60842;P35268;P09132;O94855;P62891;P78708;O75347;O00303;Q46782;Q9HAV7;P61353;P62854;P38646;Q9Y3U8;P47914;Q9Y5J6;Q14232;P08865;Q15436;P60228;P61313;P25398;O60220;Q9Y512;P50991;P61513;P05388;P62269;P49368;Q02543;P42766;P62081;P49366;P61247;Q14240;P49770;Q96B49;P18621;Q8IYD1;P46781;P62072;P84098;P15880;P50914;P62829;O95486;P62979;P27797;Q99613;P24534;O75822;P39019;P23588;P23396;P42677;P62750;P62701;P30050;Q9HCU5;Q3ZCQ8;P62910;O95394;P36578;O60925;P15388;P15388;P62847;Q9BU89;Q9UHB9;P62851;P22090;O95487;Q14442;Q04637;P46777;O15371;Q07020;P62263;P62841;P83881;P05386;P18077;Q13347;P20042;P46776;P62241;P61758;Q9NR50;Q8TAA5;P62753;O15372;P62945;P53992;Q92901;P329

- 69;P26373;Q9UI10;P18124;P40429;P27635;P68104;P46783;P62906;P62244;P62888;P63220;P05198;P17987}
- 6883 Pathogen[ Q85601] interacts with 158 human partners: {P46783;P32969;O14925;P61513;P26373;P62857;P62244;P62913;P34949;P62854;P62081;P61353;Q8TAA5;Q15388;Q9NQP4;P62891;P46776;P47813;P18077;P61313;P41091;Q99613;P05388;Q9UBQ5;Q9GZV4;P62495;Q15629;O95487;P06730;Q14240;Q99471;P63173;P23588;P62072;P23396;P62273;Q9Y5J9;Q9Y5J6;P46778;P62829;P30050;P62753;P27635;Q9UHV9;O60220;Q04637;Q9Y5J7;P15880;Q9BTW9;Q6Y7W6;P83881;Q07020;P39019;P26641;Q9Y3U8;Q9NR50;P61758;P62701;P62241;P62424;P27797;O00303;P83731;P17987;P63241;P62899;P20042;Q13144;P62945;Q15436;P49770;P24534;P62263;Q13541;P62861;Q02878;P39023;P60709;P61254;O15371;Q16222;P49207;P60228;P11940;Q9Y512;P62910;P62249;P62280;P50991;P47914;P84098;P08708;P49257;P42766;O75347;P62269;P68104;P55735;Q3ZCQ8;Q9HAV7;P18621;Q8IYD1;P05387;Q9UNX3;P60842;P62277;O43615;P35268;Q96EK6;O95486;P62979;Q13347;P62847;O75822;Q14152;P05198;P42677;P63220;O95394;P38646;P46782;Q9UHB9;P46779;P62750;P62851;P62841;O15372;Q13505;P62987;P78371;P22090;P48643;P61927;P29692;P36578;O94855;P05386;Q9BU89;P08865;P61247;Q14232;O75821;P09132;P46777;P53992;P62917;Q92901;Q9UI10;P18124;P46781;P25398;P60866;Q02543;P62906;P50914;P62266;P40429;P62888}
- 6884 Pathogen[ P14079] interacts with 208 human partners: {Q5SRI9;Q15629;Q9Y3U8;P27635;O43292;P84098;P46779;Q3ZCQ8;O43615;Q9BTW9;P48643;P20042;Q8N4H5;P26373;P49257;P09132;P60842;P23396;O60925;Q15056;Q8N307;P60468;Q9Y3D7;P40429;Q16222;O00303;Q14442;O15305;O75821;P06730;Q9UI10;P18621;O95487;Q96S52;P47813;P83881;P62072;Q13505;P68104;Q9UNX3;P46781;P83731;P61513;P62847;P41091;P39656;P62753;Q9P0U1;P26641;P39023;P62273;P25398;P50991;P62495;P57054;Q6Y7W6;P43307;Q96B49;P18077;O94855;P46783;P78371;P05198;P61254;P50914;P68363;Q9BT22;Q9UHV9;Q9BRB3;P53992;P04844;Q9Y5J7;P50990;Q9NQP4;Q9Y2B2;P62979;P62841;O94777;P18124;P61758;Q14240;P42766;Q969N2;O14925;Q9NS69;P62266;P29692;O15371;P46782;P62987;Q9NYU1;Q13144;P62241;Q9BVV7;Q13541;Q8IYD1;Q15388;P23588;O95394;P32969;P22090;P62829;O75431;P60866;P62854;Q9NR50;Q07020;P39019;P63220;Q15814;P49207;P62244;Q9BU89;P24534;P62263;Q02543;P62424;Q92901;Q9NYU2;P62277;O75822;P11940;P62750;P62910;P63173;P49458;Q99426;P46776;P17987;P08708;Q99613;P34949;P36578;Q8NB7;P60709;P13639;Q9Y512;P55789;P60059;P62906;Q8NBK3;P47914;P62280;P61803;P62899;Q8N4Q1;Q9H490;P63241;Q99595;P61353;P62081;P62945;P46777;P42677;P30050;O60841;P15880;Q8TAX7;P62891;P38646;O60220;P62888;P08865;P55735;P15941;P61927;P62917;O75347;Q96AA3;Q96EK6;P46778;P62249;Q6Z61;Q99471;Q13347;P05386;P35268;O95486;Q14232;P62913;P49368;P05387;Q9UBQ5;P61247;Q8TBF5;P62269;P62701;Q9UHB9;Q9Y5J9;P51571;Q9GZV4;P61313;Q14152;Q5SSG8;Q9Y5L4;Q9UBM8;P62851;P05388;Q04637;O15372;P46977;Q9HAV7;P49366;P62857;P55884;P62861;Q8TAA5}
- 6885 Pathogen[ P03383] interacts with 149 human partners: {P42766;P36578;P05388;P62266;P39019;P34949;P26373;Q9Y5J7;Q9UHV9;P62913;P62945;P62854;P40429;P62987;P62891;P25398;P62280;P55735;Q07020;P49458;P62750;P62072;O15371;P05387;P62249;P38646;P62888;O95487;P62899;Q9UBQ5;P61927;P24534;P46777;P46779;P49207;P83731;P62424;Q9UI10;O14925;P18124;P46778;O43615;Q9HAV7;Q92901;P62753;Q9GZV4;P42677;P61247;P83881;O95486;P26641;P47914;O60841;P11940;Q14152;P62917;P62273;O60220;Q9UNX3;P63241;Q9NQP4;P09132;P30050;Q15436;P84098;Q96B49;P32969;P20042;P49366;P62277;Q13144;P18077;P23588;P06730;P63173;Q9NR50;Q15629;P62081;O75347;Q9Y5J6;Q13541;P61313;P08865;O94855;P62851;P62495;Q15388;P47813;P46782;P62269;P68104;P63220;P05198;Q99471;Q02543;P62244;Q02878;P49770;Q8IYD1;P62910;P27635;Q9P0U1;Q8TAA5;P62857;Q99613;P78371;O75822;P62906;P46783;Q9Y3U8;P60866;Q04637;P61254;P62979;O95394;P62241;P46781;Q14232;O60925;Q13347;P39023;P53992;Q9BU89;Q9UHB9;P62841;P22090;P62701;P62829;P29692;P62263;P62847;P35268;P05386;P50914;Q9Y5J9;P61758;P62861;P18621;O15372;P46776;O75821;P15880;P23396;P61513;P27797;P08708;P61353;Q13505}
- 6886 Pathogen[ P03410] interacts with 210 human partners: {Q8N4H5;P62861;P05386;Q9Y5L4;Q02543;Q9Y512;P61247;P62241;P17987;P62829;P49207;P26373;Q9BU89;P61513;P49368;Q9NR50;Q99832;P68104;P62072;P62899;Q96B49;P48643;Q9UHB9;P62244;Q15388;O60841;P62913;Q8NB7;O75822;Q5SSG8;P60468;P49257;P38646;P60059;Q02878;Q92901;O94855;P11940;O15372;P15880;P46777;P46776;P62841;P30050;P53992;P05388;Q6Z61;Q9Y5J7;P06730;P15941;Q9Y2B2;P46781;P18124;Q13505;P20042;Q16222;Q8TAA5;Q8N307;P62269;P34949;Q07020;P63220;P62910;P62847;P62906;P23396;O94777;Q14232;P18621;P62266;Q9NS69;Q96EK6;P62249;Q15814;P63173;P50914;P62280;Q8TAX7;Q14442;P22090;P13639;P61313;P62979;Q99613;P47813;Q96S52;Q13541;Q14152;P62701;P49770;P62750;Q5SRI9;P55884;O14925;P08865;Q99595;Q9UNX3;P62277;O15371;P36578;P18077;Q99471;Q15436;P25398;P43307;Q96DR8;P61927;P84098;P62854;P62273;Q3ZCQ8;P09132;P50990;Q9NYU1;P62081;P46783;P62495;Q9BTW9;Q15056;P61758;P49366;Q15629;Q9Y3U8;O43615;O95486;Q9Y3D7;Q9BRB3;P08708;P46782;P32969;Q9BVV7;P60842;O00303;Q9BT22;P04844;P46779;Q9HCU5;O15305;Q9Y5J6;P27635;Q9NQP4;Q8IYD1;O75347;Q9Y5J9;O75821;P62987;P68363;Q969N2;P24534;O60925;P62857;Q6Y7W6;P78371;P63241;Q9UHV9;Q13347;Q9UBY8;P62263;P41091;Q9P0U1;P62424;O60220;P62888;P61254;P46778;P62945;P05387;Q9HAV7;P42766;P26641;P39019;P47914;Q9GZV4;P40429;Q04637;P55735;P49458;P39023;P39656;P29692;P55789;Q99426;P62917;P62851;P83731;Q9H490;O95394;P60228;P35268;P61803;P61313;Q9P2X0;P62891;Q8N4Q1;P62753;Q9UBQ5;P23588;Q9UI10;P60709;P50991;O95487;Q14240;Q9NYU2;P83881;P60866;O75431;Q13144;P42677;P05198;P27797}
- 6887 Pathogen[ P14075] interacts with 158 human partners: {Q9P0U1;P42766;O14925;P49207;P09132;Q13505;P62857;P46781;P63220;P32969;Q9HAV7;P62495;O94777;P42677;P62913;Q9Y5J9;P22090;O60841;P20042;Q96B49;Q02878;Q5SRI9;Q14442;P62277;Q6Z61;O15372;P62072;O75347;P62851;P68104;P23588;P08865;P62244;P08708;Q15388;P61254;P46778;Q8TAA5;P34949;P05388;P26641;P83881;P075821;P46777;P29692;Q9GZV4;Q9Y3U8;P62249;P78371;P06730;P62081;Q15629;P63241;P62750;P18621;Q02543;Q9UI10;P18124;Q9UNX3;P53992;P25398;P38646;P55735;P47813;Q9UHV9;P05198;O15371;P49366;Q9BU89;P119

40;Q8TAX7;P60228;P63173;P30050;O95487;P62979;P83731;P49458;P84098;Q9Y512;Q14232;P61247;P62753;P46782;P62891;P62861;P18077;P46779;P62917;P39023;Q04637;P50914;P62269;P62847;P62910;P62273;P27797;P40429;P23396;O60220;P62241;P15880;Q9NQP4;P49770;P62987;Q8IYD1;Q15436;P62841;P36578;P62266;P55789;P61758;Q13347;P61513;O75822;P61313;P27635;P62888;Q92901;O95394;O60925;P35268;Q9NR50;Q9UHB9;P62945;Q9Y5J7;P46776;O94855;P46783;P62701;Q13144;P62899;P47914;P62906;Q9UBQ5;P05386;Q96EK6;P61353;P39019;P62424;O95486;P24534;Q9Y5J6;Q99471;P62829;P62280;Q13541;Q9NS69;Q07020;P62263;P62854;P60866;P26373;O43615;P05387;Q14152;P61927}

6888 Pathogen[ P0C206] interacts with 181 human partners: {P41091;P09132;P40429;Q8NB7;P61313;Q5SRI9;P48643;Q13541;Q9Y5L4;Q99613;P60709;P27635;Q9Y5J6;Q9GZV4;P20042;P18124;P62W61;P55789;P62854;P27797;Q16222;P49207;P62081;P30050;O94855;P39656;Q96B49;P62241;P62244;P50914;P08865;P62750;P18621;P46781;P62266;Q02543;Q9BTW9;Q14232;Q9HAV7;O95394;Q07020;P83881;Q8IYD1;P46778;Q14442;O60220;P62263;P62273;Q02878;P55735;Q9Y5J9;O94777;P50991;P62495;P62280;P26641;P17987;P34949;P62857;P62851;Q99471;P62910;P38646;Q9NR50;Q9Y512;P46782;Q8N4Q1;Q9Y5J7;P06730;P61247;Q15814;Q9UHV9;Q13144;P18077;P62913;P61927;Q6Y7W6;P61353;P62888;Q99426;O43615;Q3ZCQ8;P36578;P60228;P49770;P62861;P05198;O60925;O60841;Q9Y3D7;P35268;P23396;P39023;O95486;P32969;Q9NS69;P62701;P05386;P22090;P49257;O95487;P84098;P62945;P26373;Q14152;P46777;P05388;Q9UI10;P62979;Q9P0U1;Q9Y2B2;O15371;O14925;P62899;P47813;Q8TAA5;P83731;Q13505;P39019;Q92901;P05387;Q15388;P46783;P42766;P60866;Q14240;Q96EK6;P62841;P62072;P63241;Q9UNX3;P23588;P61513;P24534;P49368;P49458;P61758;Q15629;P62277;Q9UHB9;P46776;P62906;Q04637;P63173;P53992;P62987;O75347;O75821;P62891;P62269;P29692;P62753;Q13347;P46779;P63220;P60842;Q9BU89;P15880;P25398;O00303;P08708;P11940;Q8N4H5;P47914;P68104;P62847;P78371;Q9NQP4;P61254;O15372;Q8TAX7;O75822;P42677;P62829;P62249;P62424;Q9Y3U8;Q9UBQ5;P62917;Q15436}

6889 Pathogen[ P03363] interacts with 157 human partners: {P62913;P09132;P18621;O75347;P05386;Q9GZV4;O15371;P62750;P23396;P42677;P63173;P08865;P62847;P18077;Q16222;P05387;P84098;P42766;P60709;P62249;P05388;O60841;P36578;Q13347;P62753;Q9UHV9;P62081;P62910;P61513;P46776;Q9UI10;P61254;P62273;Q9UHB9;Q15388;P32969;O14925;Q92901;Q8IYD1;P46778;Q15056;P61927;Q9UBQ5;P62891;P68363;Q14152;Q15436;P61353;P23588;Q3ZCQ8;P08708;O95486;P15880;P11940;Q99471;O15371;P41091;P62899;P62495;P05198;P26373;P50991;P83881;Q13748;O43615;P22090;P62861;P62841;Q9UNX3;Q9NR50;P30050;O60925;P62829;P26641;Q14240;P46782;P35268;Q99426;P29692;P27797;P20042;P46781;P47813;P50914;P38646;Q9Y5J7;Q9P0U1;Q15814;Q9BTW9;P63220;P17987;P61313;P39019;P46779;Q02543;P46777;Q8TAA5;P62987;P61758;Q9Y512;P25398;Q6ZW61;P49770;P60228;P83731;P62851;P62280;Q9Y3U8;P62888;P49458;P63241;P60842;P62244;P62277;P62906;P78371;P62266;P62945;P53992;P49207;P62241;P62424;O95487;P60866;P61247;P24534;Q13144;P62899;P62857;Q02878;Q9NQ4;Q13541;O75821;Q9NS69;Q07020;P39023;P62854;P62917;P55884;P48643;P18124;P40429;P27635;P06730;P62263;P55735;P47914;P62701;O94855;P68104;O75822;P62269;P49368;P46783;Q99613;Q04637;O00303}

6890 [Cluster 627]GO:0042327+P biological\_process [name] positive regulation of phosphorylation [def] "Any process that activates or increases the frequency, rate or extent of addition of phosphate groups to a molecule." [GOC

6891 Pathogen[ Q2Q067] interacts with 4 human partners: {Q7L9L4;Q92990;O95999;Q15750}

6892 Pathogen[ P0C214] interacts with 3 human partners: {Q7L9L4;O95999;Q15750}

6893 Pathogen[ P03346] interacts with 5 human partners: {Q92990;Q13322;Q7L9L4;O95999;Q15750}

6894 Pathogen[ Q85601] interacts with 3 human partners: {Q15750;Q7L9L4;O95999}

6895 Pathogen[ P14079] interacts with 4 human partners: {O95999;Q15750;Q92990;Q7L9L4}

6896 Pathogen[ P03383] interacts with 4 human partners: {Q7L9L4;O95999;Q92990;Q15750}

6897 Pathogen[ P03410] interacts with 4 human partners: {Q15750;Q7L9L4;O95999;Q92990}

6898 Pathogen[ P14075] interacts with 4 human partners: {Q92990;Q15750;O95999;Q7L9L4}

6899 Pathogen[ P0C206] interacts with 4 human partners: {O95999;Q92990;Q7L9L4;Q15750}

6900 Pathogen[ P03363] interacts with 3 human partners: {Q92990;Q15750;Q7L9L4}

6901 [Cluster 628]GO:0033673+P biological\_process [name] negative regulation of kinase activity [def] "Any process that stops, prevents, or reduces the frequency, rate or extent of kinase activity, the catalysis of the transfer of a phosphate group, usually from ATP, to a substrate molecule." [GOC

6902 Pathogen[ Q2Q067] interacts with 4 human partners: {Q96IF1;Q8WTW4;P46527;P49918}

6903 Pathogen[ P0C214] interacts with 3 human partners: {Q8WTW4;P46527;P49918}

6904 Pathogen[ P03346] interacts with 4 human partners: {Q96IF1;Q8WTW4;P49918;P46527}

6905 Pathogen[ Q85601] interacts with 4 human partners: {Q8WTW4;Q96IF1;P49918;P46527}

6906 Pathogen[ P14079] interacts with 4 human partners: {P49918;Q96IF1;Q8WTW4;P46527}

6907 Pathogen[ P03383] interacts with 3 human partners: {Q8WTW4;P46527;P49918}

6908 Pathogen[ P03410] interacts with 4 human partners: {P46527;Q8WTW4;Q96IF1;P49918}

6909 Pathogen[ P14075] interacts with 3 human partners: {P46527;Q8WTW4;P49918}

6910 Pathogen[ P0C206] interacts with 4 human partners: {Q96IF1;P46527;Q8WTW4;P49918}

6911 Pathogen[ P03363] interacts with 3 human partners: {P49918;Q96IF1;Q8WTW4}

6912 [Cluster 629]GO:0009416+P biological\_process [name] response to light stimulus [def] "Any process that results in a change in state or activity of a cell or an organism (in terms of movement, secretion, enzyme production, gene expression, etc.) as a result of a light stimulus, electromagnetic radiation of wavelengths classified as infrared, visible or ultraviolet light." [GOC

6913 Pathogen[ Q2Q067] interacts with 3 human partners: {P01100;Q9UN2;O14503}

6914 Pathogen[ P0C214] interacts with 6 human partners: {P01100;P17275;Q16613;Q9UN2;O14503;P22830}

6915 Pathogen[ P03346] interacts with 5 human partners: {P17275;O15534;O14503;Q9UNS2;P01100}

6916 Pathogen[ Q85601] interacts with 6 human partners: {O15534;Q16613;O14503;P01100;Q9UNS2;P17275}

6917 Pathogen[ P14079] interacts with 7 human partners: {Q9UNS2;Q16613;P17275;P22830;O14503;P01100;O15534}

6918 Pathogen[ P03383] interacts with 5 human partners: {Q16613;O14503;P01100;Q9UNS2;P17275}

6919 Pathogen[ P03410] interacts with 6 human partners: {P01100;P17275;P22830;Q16613;Q9UNS2;O15534}

6920 Pathogen[ P14075] interacts with 5 human partners: {P17275;Q16613;O14503;P01100;Q9UNS2}

6921 Pathogen[ P0C206] interacts with 6 human partners: {P17275;O15534;P01100;P22830;Q16613;Q9UNS2}

6922 Pathogen[ P03363] interacts with 5 human partners: {P17275;Q9UNS2;O15534;O14503;P01100}

6923 [Cluster 630]GO:0032464+P biological\_process [name] positive regulation of protein homooligomerization [def] "Any process that activates or increases the frequency, rate or extent of protein homooligomerization." [GOC

6924 Pathogen[ Q2Q067] interacts with 4 human partners: {P55957;Q9BXH1;Q96LC9;O00198}

6925 Pathogen[ P0C214] interacts with 4 human partners: {O00198;Q96LC9;P55957;Q9BXH1}

6926 Pathogen[ P03346] interacts with 4 human partners: {Q96LC9;P55957;O00198;Q9BXH1}

6927 Pathogen[ Q85601] interacts with 4 human partners: {Q96LC9;Q9BXH1;O00198;P55957}

6928 Pathogen[ P14079] interacts with 5 human partners: {Q13323;Q9BXH1;Q96LC9;O00198;P55957}

6929 Pathogen[ P03383] interacts with 4 human partners: {Q96LC9;P55957;O00198;Q9BXH1}

6930 Pathogen[ P03410] interacts with 5 human partners: {Q9BXH1;O00198;Q96LC9;P55957;Q13323}

6931 Pathogen[ P14075] interacts with 4 human partners: {P55957;Q96LC9;Q9BXH1;O00198}

6932 Pathogen[ P0C206] interacts with 4 human partners: {Q9BXH1;Q96LC9;O00198;P55957}

6933 Pathogen[ P03363] interacts with 4 human partners: {P55957;Q96LC9;O00198;Q9BXH1}

6934 [Cluster 631]GO:0002087+P biological\_process [name] regulation of respiratory gaseous exchange by neurological system process [def] "A process carried out by the nervous system that is required for the proper control of respiratory gaseous exchange. This process occurs in the respiratory center of the brain in vertebrates." [GOC

6935 Pathogen[ Q2Q067] interacts with 4 human partners: {Q63HK5;P40426;O43711;O94925}

6936 Pathogen[ P0C214] interacts with 2 human partners: {Q63HK5;O94925}

6937 Pathogen[ P03346] interacts with 4 human partners: {P40426;O43711;Q63HK5;O94925}

6938 Pathogen[ Q85601] interacts with 4 human partners: {O94925;O43711;P40426;Q63HK5}

6939 Pathogen[ P14079] interacts with 3 human partners: {O94925;O43711;Q63HK5}

6940 Pathogen[ P03383] interacts with 2 human partners: {O94925;O43711}

6941 Pathogen[ P03410] interacts with 4 human partners: {P40426;O94925;O43711;Q63HK5}

6942 Pathogen[ P14075] interacts with 2 human partners: {O43711;O94925}

6943 Pathogen[ P0C206] interacts with 4 human partners: {O43711;Q63HK5;P40426;O94925}

6944 Pathogen[ P03363] interacts with 4 human partners: {O94925;O43711;Q63HK5;P40426}

6945 [Cluster 632]GO:0048511+P biological\_process [name] rhythmic process [def] "Any process pertinent to the generation and maintenance of rhythms in the physiology of an organism." [GOC

6946 Pathogen[ Q2Q067] interacts with 10 human partners: {Q10587;Q8WYA1;Q9UNS1;Q16534;Q99743;Q9UKT7;Q9UK39;Q16649;Q16526;Q10586}

6947 Pathogen[ P0C214] interacts with 11 human partners: {Q99743;Q16613;Q9UKT7;Q10587;Q10586;Q9UK39;Q9UNS1;Q49AN0;Q8WYA1;Q16534;Q16526}

6948 Pathogen[ P03346] interacts with 16 human partners: {Q9UKT7;Q49AN0;Q9UNS1;Q16526;O15055;O15534;O00327;Q16534;Q16649;Q9UK39;Q10586;Q8WYA1;O15516;P56645;Q10587;Q99743}

6949 Pathogen[ Q85601] interacts with 17 human partners: {O15534;P56645;Q49AN0;O15516;Q8WYA1;Q16613;O00327;Q10587;Q99743;Q9UKT7;Q16649;Q9UK39;O15055;Q16534;Q16526;Q10586;Q9UNS1}

6950 Pathogen[ P14079] interacts with 16 human partners: {Q9UH36;Q99743;Q10587;Q16526;Q16649;Q49AN0;Q16613;Q9UK39;P56645;Q9UKT7;O15055;Q16534;Q8WYA1;Q9UNS1;Q10586;O15534}

6951 Pathogen[ P03383] interacts with 7 human partners: {Q9UNS1;Q9UK39;Q16613;Q9UKT7;Q10586;Q16534;Q16526}

6952 Pathogen[ P03410] interacts with 16 human partners: {Q99743;Q9UKT7;Q9UK39;O15055;Q9UH36;Q16649;P56645;Q16613;O15534;Q16526;Q49AN0;Q10586;Q9UNS1;Q10587;Q16534;Q8WYA1}

6953 Pathogen[ P14075] interacts with 7 human partners: {Q9UKT7;Q16613;Q10586;Q9UK39;Q9UNS1;Q16526;Q16534}

6954 Pathogen[ P0C206] interacts with 18 human partners: {Q9UNS1;Q16649;O15534;Q10587;O00327;Q9UKT7;Q99743;Q16526;O15516;P56645;Q16534;Q8WYA1;Q9UH36;Q9UK39;O15055;Q49AN0;Q16613;Q10586}

6955 Pathogen[ P03363] interacts with 15 human partners: {Q16649;Q10586;Q99743;P56645;Q9UK39;Q49AN0;Q8WYA1;O00327;Q9UNS1;Q16526;O15055;Q9UKT7;Q16534;O15534;Q10587}

6956 [Cluster 633]GO:0032514+P biological\_process [name] positive regulation of protein

phosphatase type 2B activity [def] "Any process that activates or increases the activity of the enzyme protein phosphatase type 2B." [GOC

6957 Pathogen[ Q2Q067] interacts with 1 human partners:{Q13023}

6958 Pathogen[ P0C214] interacts with 1 human partners:{Q13023}

6959 Pathogen[ P03346] interacts with 1 human partners:{Q13023}

6960 Pathogen[ Q85601] interacts with 1 human partners:{Q13023}

6961 Pathogen[ P14079] interacts with 1 human partners:{Q13023}

6962 Pathogen[ P03383] interacts with 1 human partners:{Q13023}

6963 Pathogen[ P03410] interacts with 1 human partners:{Q13023}

6964 Pathogen[ P14075] interacts with 1 human partners:{Q13023}

6965 Pathogen[ P0C206] interacts with 1 human partners:{Q13023}

6966 Pathogen[ P03363] interacts with 1 human partners:{Q13023}

6967 [Cluster 634]GO:0035970+P biological\_process [name] peptidyl-threonine dephosphorylation [def] "The removal of phosphoric residues from peptidyl-O-phospho-L-threonine to form peptidyl-threonine." [GOC

6968 Pathogen[ Q2Q067] interacts with 6 human partners:{Q8WY54;O15355;P35813;O75688;P49593;O15297}

6969 Pathogen[ P0C214] interacts with 6 human partners:{P35813;Q9P0J1;O15297;Q8WY54;P49593;O75688}

6970 Pathogen[ P03346] interacts with 6 human partners:{P35813;Q8WY54;P49593;O15297;O75688;O15355}

6971 Pathogen[ Q85601] interacts with 6 human partners:{O75688;P49593;O15355;O15297;Q8WY54;P35813}

6972 Pathogen[ P14079] interacts with 6 human partners:{P49593;O15297;P35813;Q8WY54;O75688;O15355}

6973 Pathogen[ P03383] interacts with 4 human partners:{O15297;P35813;O15355;Q8WY54}

6974 Pathogen[ P03410] interacts with 6 human partners:{O15355;P35813;Q8WY54;O75688;O15297;P49593}

6975 Pathogen[ P14075] interacts with 4 human partners:{O15297;P35813;Q8WY54;O15355}

6976 Pathogen[ P0C206] interacts with 6 human partners:{Q8WY54;P49593;O15355;O75688;O15297;P35813}

6977 Pathogen[ P03363] interacts with 4 human partners:{O15355;O15297;O75688;Q8WY54}

6978 [Cluster 635]GO:0021506+P biological\_process [name] anterior neuropore closure [def] "The joining together of the neural folds of the rostral opening of the neural tube. The anterior neuropore appears before the process of neural tube closure is complete." [GO\_REF

6979 Pathogen[ Q2Q067] interacts with 1 human partners:{Q86YP4}

6980 Pathogen[ P0C214] interacts with 1 human partners:{Q86YP4}

6981 Pathogen[ P03346] interacts with 1 human partners:{Q86YP4}

6982 Pathogen[ Q85601] interacts with 1 human partners:{Q86YP4}

6983 Pathogen[ P14079] interacts with 1 human partners:{Q86YP4}

6984 Pathogen[ P03383] interacts with 1 human partners:{Q86YP4}

6985 Pathogen[ P03410] interacts with 1 human partners:{Q86YP4}

6986 Pathogen[ P14075] interacts with 1 human partners:{Q86YP4}

6987 Pathogen[ P0C206] interacts with 1 human partners:{Q86YP4}

6988 Pathogen[ P03363] interacts with 1 human partners:{Q86YP4}

6989 [Cluster 636]GO:0031468+P biological\_process [name] nuclear envelope reassembly [def] "The reformation of the nuclear envelope following its breakdown in the context of a normal process." [GOC

6990 Pathogen[ Q2Q067] interacts with 1 human partners:{P50402}

6991 Pathogen[ P0C214] interacts with 1 human partners:{P50402}

6992 Pathogen[ P03346] interacts with 1 human partners:{P50402}

6993 Pathogen[ Q85601] interacts with 1 human partners:{P50402}

6994 Pathogen[ P14079] interacts with 1 human partners:{P50402}

6995 Pathogen[ P03383] interacts with 1 human partners:{P50402}

6996 Pathogen[ P03410] interacts with 1 human partners:{P50402}

6997 Pathogen[ P14075] interacts with 1 human partners:{P50402}

6998 Pathogen[ P0C206] interacts with 1 human partners:{P50402}

6999 Pathogen[ P03363] interacts with 1 human partners:{P50402}

7000 [Cluster 637]GO:0031116+P biological\_process [name] positive regulation of microtubule polymerization [def] "Any process that activates or increases the frequency, rate or extent of microtubule polymerization." [GOC

7001 Pathogen[ Q2Q067] interacts with 4 human partners:{P54274;Q9P270;Q6PGN9;P46527}

7002 Pathogen[ P0C214] interacts with 5 human partners:{P46527;Q6PGN9;Q9P270;P54274;P36404}

7003 Pathogen[ P03346] interacts with 6 human partners:{P54274;P36404;Q6PGN9;P30622;Q9P270;P46527}

7004 Pathogen[ Q85601] interacts with 5 human partners:{Q6PGN9;P30622;Q9P270;P54274;P46527}

7005 Pathogen[ P14079] interacts with 6 human partners:{P54274;Q6PGN9;Q9P270;P46527;P30622;P10636}

7006 Pathogen[ P03383] interacts with 4 human partners:{Q6PGN9;P46527;Q9P270;P54274}

7007 Pathogen[ P03410] interacts with 6 human partners:{P46527;P30622;P54274;P10636;Q6PGN9;Q9P270}

7008 Pathogen[ P14075] interacts with 4 human partners:{P46527;P54274;Q6PGN9;Q9P270}

7009 Pathogen[ P0C206] interacts with 6 human



partners:{Q6PGN9;P30622;P10636;P54274;P46527;Q9P270}

7010 Pathogen[ P03363] interacts with 4 human partners:{Q6PGN9;P30622;P54274;Q9P270}

7011 [Cluster 638]GO:0032784+P biological\_process [name] regulation of transcription elongation, DNA-dependent [def] "Any process that modulates the frequency, rate or extent of transcription elongation, the extension of an RNA molecule after transcription initiation and promoter clearance by the addition of ribonucleotides catalyzed by a DNA-dependent RNA polymerase." [GOC

7012 Pathogen[ Q2Q067] interacts with 12 human partners:{Q96FV9;O00267;Q8IYF1;Q15560;Q7KZ85;Q03468;Q5BKZ1;P23193;O75764;P43897;Q86U70;Q8N163}

7013 Pathogen[ P0C214] interacts with 12 human partners:{Q5BKZ1;Q8N163;Q96FV9;O75764;O00267;Q7KZ85;Q15560;P43897;Q86U70;Q8IYF1;P23193;Q03468}

7014 Pathogen[ P03346] interacts with 14 human partners:{Q96FV9;Q7KZ85;Q86U70;Q8N163;Q8N8B7;Q15560;O75764;P43897;Q03468;O00267;Q8IYF1;P23193;O43719;Q5BKZ1}

7015 Pathogen[ Q85601] interacts with 12 human partners:{Q86U70;Q15560;Q96FV9;Q03468;Q7KZ85;O00267;P23193;P43897;Q8N163;O75764;Q5BKZ1;Q8IYF1}

7016 Pathogen[ P14079] interacts with 13 human partners:{Q15560;Q8N8B7;Q8N163;Q86U70;Q96FV9;P43897;Q5BKZ1;Q7KZ85;O75764;P23193;Q8IYF1;Q03468;O00267}

7017 Pathogen[ P03383] interacts with 10 human partners:{Q8N163;Q86U70;P23193;Q96FV9;Q15560;O00267;Q03468;P43897;Q5BKZ1;Q7KZ85}

7018 Pathogen[ P03410] interacts with 13 human partners:{O00267;Q7KZ85;O75764;P23193;Q03468;Q15560;Q96FV9;Q8IYF1;Q8N163;Q86U70;Q5BKZ1;Q8N8B7;P43897}

7019 Pathogen[ P14075] interacts with 10 human partners:{Q86U70;Q5BKZ1;Q7KZ85;Q15560;Q8N163;Q03468;P43897;P23193;Q96FV9;O00267}

7020 Pathogen[ P0C206] interacts with 13 human partners:{P23193;Q8IYF1;O75764;Q03468;Q5BKZ1;P43897;Q8N8B7;Q96FV9;Q15560;Q7KZ85;O00267;Q86U70;Q8N163}

7021 Pathogen[ P03363] interacts with 14 human partners:{Q86U70;P43897;O75764;Q8IYF1;Q8N8B7;O00267;Q96FV9;Q7KZ85;Q5BKZ1;Q8N163;P23193;Q03468;Q15560;O43719}

7022 [Cluster 639]GO:0000012+P biological\_process [name] single strand break repair [def] "The repair of single strand breaks in DNA. Repair of such breaks is mediated by the same enzyme systems as are used in base excision repair." [http

7023 Pathogen[ Q2Q067] interacts with 4 human partners:{P18887;Q7Z2E3;Q9NUW8;Q8IW19}

7024 Pathogen[ P0C214] interacts with 4 human partners:{Q8IW19;P18887;Q7Z2E3;Q9NUW8}

7025 Pathogen[ P03346] interacts with 5 human partners:{Q8IW19;Q9NUW8;Q6ZNB5;P18887;Q7Z2E3}

7026 Pathogen[ Q85601] interacts with 4 human partners:{P18887;Q9NUW8;Q8IW19;Q7Z2E3}

7027 Pathogen[ P14079] interacts with 6 human partners:{Q6ZNB5;Q9NUW8;P18887;Q7Z2E3;P49917;Q8IW19}

7028 Pathogen[ P03383] interacts with 4 human partners:{Q7Z2E3;Q8IW19;Q9NUW8;P18887}

7029 Pathogen[ P03410] interacts with 5 human partners:{P18887;Q7Z2E3;Q8IW19;Q9NUW8;Q6ZNB5}

7030 Pathogen[ P14075] interacts with 4 human partners:{Q7Z2E3;Q8IW19;Q9NUW8;P18887}

7031 Pathogen[ P0C206] interacts with 6 human partners:{Q6ZNB5;Q9NUW8;P49917;Q8IW19;Q7Z2E3;P18887}

7032 Pathogen[ P03363] interacts with 5 human partners:{P18887;Q8IW19;Q7Z2E3;Q6ZNB5;Q9NUW8}

7033 [Cluster 640]GO:0048489+P biological\_process [name] synaptic vesicle transport [def] "The directed movement of substances in synaptic membrane-bounded vesicles within the neuron along the cytoskeleton either toward or away from the neuronal cell body." [GOC

7034 Pathogen[ Q2Q067] interacts with 2 human partners:{O14910;P50570}

7035 Pathogen[ P0C214] interacts with 2 human partners:{O14910;P50570}

7036 Pathogen[ P03346] interacts with 2 human partners:{P50570;O14910}

7037 Pathogen[ Q85601] interacts with 2 human partners:{O14910;P50570}

7038 Pathogen[ P14079] interacts with 1 human partners:{P50570}

7039 Pathogen[ P03383] interacts with 1 human partners:{O14910}

7040 Pathogen[ P03410] interacts with 2 human partners:{O14910;P50570}

7041 Pathogen[ P14075] interacts with 1 human partners:{O14910}

7042 Pathogen[ P0C206] interacts with 2 human partners:{O14910;P50570}

7043 Pathogen[ P03363] interacts with 2 human partners:{O14910;P50570}

7044 [Cluster 641]GO:0039530+P

7045 Pathogen[ Q2Q067] interacts with 2 human partners:{Q92985;Q14653}

7046 Pathogen[ P0C214] interacts with 2 human partners:{Q92985;Q14653}

7047 Pathogen[ P03346] interacts with 2 human partners:{Q14653;Q92985}

7048 Pathogen[ Q85601] interacts with 2 human partners:{Q14653;Q92985}

7049 Pathogen[ P14079] interacts with 2 human partners:{Q14653;Q92985}

7050 Pathogen[ P03383] interacts with 2 human partners:{Q14653;Q92985}

7051 Pathogen[ P03410] interacts with 2 human partners:{Q14653;Q92985}

7052 Pathogen[ P14075] interacts with 2 human partners:{Q14653;Q92985}

7053 Pathogen[ P0C206] interacts with 2 human partners:{Q92985;Q14653}

7054 Pathogen[ P03363] interacts with 2 human partners:{Q14653;Q92985}

7055 [Cluster 642]GO:0046620+P biological\_process [name] regulation of organ growth  
[def] "Any process that modulates the frequency, rate or extent of growth of an organ of an organism." [GOC

7056 Pathogen[ Q2Q067] interacts with 1 human partners:{Q9H4B6}

7057 Pathogen[ P0C214] interacts with 1 human partners:{Q9H4B6}

7058 Pathogen[ P03346] interacts with 1 human partners:{Q9H4B6}

7059 Pathogen[ Q85601] interacts with 1 human partners:{Q9H4B6}

7060 Pathogen[ P14079] interacts with 3 human partners:{Q7Z7C7;Q9H4B6;Q96JY0}

7061 Pathogen[ P03383] interacts with 1 human partners:{Q9H4B6}

7062 Pathogen[ P03410] interacts with 2 human partners:{Q7Z7C7;Q9H4B6}

7063 Pathogen[ P14075] interacts with 2 human partners:{Q9H4B6;Q7Z7C7}

7064 Pathogen[ P0C206] interacts with 2 human partners:{Q7Z7C7;Q9H4B6}

7065 Pathogen[ P03363] interacts with 2 human partners:{Q96JY0;Q9H4B6}

7066 [Cluster 643]GO:0007275+P biological\_process [name] multicellular organismal development [def] "The biological process whose specific outcome is the progression of a multicellular organism over time from an initial condition (e.g. a zygote or a young adult) to a later condition (e.g. a multicellular animal or an aged adult)." [GOC

7067 Pathogen[ Q2Q067] interacts with 191 human partners:{Q95376;Q13562;P49454;Q14526;Q43365;Q8IUD2;Q9H3C7;P62701;Q92988;Q9UHL9;Q43364;P31749;Q99583;Q8WUQ7;O14786;Q93009;Q96D98;Q99502;O75474;Q5D1E8;P09067;Q9Y266;Q96NB3;Q63HK5;Q5TAP6;Q9BUP3;Q8TD31;Q99081;Q5VTD9;Q14160;O00470;Q0D2K3;Q8NEM7;O95257;O60481;Q9UNS1;P31274;Q8IXK0;P31268;Q9H1B4;P48380;P35712;Q8N9N5;Q9NQ87;P13349;O43255;O96004;Q9UL49;Q8HWS3;O00167;P08151;A6NKD9;P22090;Q9UM82;Q9BXL5;Q00994;Q05195;Q9NZI5;Q14814;P39880;Q96AQ6;P17483;O15266;P41134;Q8N196;Q16626;Q9NXX1;Q6S96;P28356;P52594;Q86YF9;Q16534;Q2M1K9;Q6ZNA4;Q9Y3R5;P17036;P17482;P11308;Q53H80;Q8N5Y2;Q9Y4Z2;O00458;Q96EK5;P09017;Q5BJF6;P11831;P60174;P15172;O43248;Q9Y295;Q9NZP6;O60663;Q9P2T0;P78545;P09629;P58340;P54845;Q00444;Q9NYF0;Q99966;Q9UQB3;Q99504;P35548;P20719;Q15699;Q96KR1;Q14997;Q9UGP4;Q99750;Q96M53;P25791;O43711;Q5MJ70;O14641;P50221;P56279;Q00056;Q9P2R6;Q15468;P31276;Q8ND56;Q9ULH7;Q8WVJ9;Q13045;Q9BSQ5;Q16621;P14651;O75030;Q9UPW6;Q3ZCT1;Q7Z7C8;O00139;P78337;Q5TAB7;P23760;Q9HBH7;P49639;Q92499;Q0VDD7;Q9UN36;P09016;Q9H4S2;Q9NR15;Q15583;Q13155;Q07687;Q9Y2P7;Q8N1K5;Q9H3P2;O43186;O95238;P31314;Q13642;P14652;Q04724;Q9Y5J3;Q8N488;P58304;Q86U70;Q01860;O60869;P61962;Q8N6I1;Q04743;Q02577;P55771;P50222;Q16576;Q03060;P14653;Q7L190;Q6R327;Q9UMX1;Q99814;Q14689;Q16352;Q0VG99;Q53QV2;Q9Y255;Q01534;Q9UI36;P23409;Q13105;P54821;Q9NYP3;Q02078;Q7Z699;P31269;Q03112;P31260;Q9BXJ9}

7068 Pathogen[ P0C214] interacts with 178 human partners:{Q9UGP4;O00470;Q14997;Q14526;P51114;Q9UHL9;Q05195;P11308;P32243;O43365;O14786;P49639;Q8ND56;P22090;O60663;Q86M53;O95238;Q9Y5L5;Q8TD31;P78337;Q8IXK0;P31249;Q96KR1;Q9NRI5;Q7Z699;O43186;P31314;O00458;Q9Y255;Q99081;P13349;O00167;Q03112;Q16621;P0CW01;Q9BSQ5;O15266;Q16587;Q9Y5J3;Q00994;Q9HBH7;Q16352;Q9Y295;Q8N9N5;P61962;Q14689;Q9NZI5;P15172;Q9P2R6;Q7Z7C8;P11831;Q2M1K9;Q63HK5;Q53H80;Q02386;P17482;A0MZ66;P62701;Q0VDD7;O75030;O00139;Q04724;Q9NYP3;Q9Y266;Q99750;Q8N6I1;Q9P2T0;P0CV99;Q9H3C7;P14651;Q5VTD9;O43248;Q9NZP6;Q01534;O95257;Q53QV2;Q02078;Q5TAB7;Q13642;Q99966;Q9UQB3;Q14814;Q9H1B4;Q13045;Q9BUP3;Q6R327;Q07687;P41134;P25791;Q8N488;Q86U70;Q96D98;O14641;O95376;P14653;Q9BX40;Q15468;P50222;Q9UNS1;Q16576;P0CW00;Q9BXJ9;Q5VZL5;P07093;Q99504;Q93009;Q96AQ6;Q14160;Q9UI36;Q6ZNA4;Q96NB3;Q5TAP6;P39880;Q92499;Q8WVJ9;O75474;Q16534;P58340;Q02577;Q8N196;Q03060;Q9UM82;P17036;Q99814;P09629;Q5BJF6;Q0D2K3;O96004;Q5MJ70;P50221;A6NKD9;Q9UPW6;P08151;O14727;P48380;P78545;Q5H9L4;Q9H3P2;Q9ULH7;Q92988;P52594;P60174;O60869;Q9NXX1;Q3ZCT1;Q9Y3R5;Q86YF9;P49454;Q8IUD2;P54845;Q5D1E8;O43255;Q9NQ87;Q9NYF0;Q7L190;Q8N1K5;Q15699;Q9UN36;Q9UMX1;P56279;Q99583;Q9Y2P7;Q01860;P35712;Q13105;P35548;Q8HWS3;P31749;Q13155;P31276;P0CV98;P23760;Q6S96;A6NKD2;P55771;P31269;O60481;Q99502}

7069 Pathogen[ P03346] interacts with 364 human partners:{A6NKD9;P31271;Q99081;P85037;Q6S96;Q8NEA9;Q9NPC8;Q9NRI5;Q9BZE0;P31249;P54821;P47902;P17097;P56279;Q9UHL9;O75603;P49639;Q16621;P15863;Q9NZR4;Q01534;P35453;Q9Y4Z2;O75364;P31260;Q9NRZ9;Q16352;Q93009;Q8ND56;Q02078;Q02386;P52954;Q86U70;Q86UUS;P31268;Q9Y657;Q99811;Q6QHK4;Q9Y283;O95677;Q99966;Q9UGP4;Q9UD57;P50221;Q96PU8;Q14814;P78337;Q99598;O15522;Q7RTS3;Q01538;Q16626;Q96KR1;Q9UPW6;Q5TAP6;Q9Y2P7;Q9H2W2;Q9H2Z4;Q693B1;Q5MJ70;Q05925;Q9NU63;P78415;Q3B8N5;Q03828;P35548;Q02535;O00167;Q9HD90;P11831;P31270;O95376;Q0VG99;O00458;Q9NP62;Q9BUP3;Q8NFW5;Q14774;P0CB47;Q9UM82;Q9HBH7;Q99784;P13349;O43711;Q96M53;P54845;O60393;Q9BX40;Q9UBI9;Q96AQ6;Q96HZ4;O00139;Q99626;Q00056;Q2M1K9;Q7Z7C8;Q9UIU6;Q15583;Q9H4S2;P48380;Q8IYA7;O75474;P20264;Q8IUD2;P15172;P41225;P23760;Q9UL68;Q9H3P2;P19622;Q9UN36;Q04743;Q92858;Q99426;P31276;O43255;P23409;Q9ULH7;Q9HBG6;O14682;Q53H80;Q8TAK6;Q6W0C5;Q9NXX1;O95238;Q13835;Q9P2T0;Q92886;Q96JY9;P56177;P60174;Q9H4W6;Q92826;Q04741;Q63HK5;P15173;Q9BPY8;P23759;Q96QS3;P14652;O43186;Q9NP08;P58340;Q9NZI5;P58304;A6NJT0;Q02575;Q99502;Q9UBX0;Q9BYE0;Q14586;Q00994;O60902;O75030;O43364;P14653;O00192;P31269;A2RU54;P13378;P17483;Q9Y5J3;P31274;Q9H1B4;Q01860;Q9NZP6;Q96SQ7;P20719;Q8TD31;P61962;P78426;Q86SE8;Q9Y255;Q9BT04;Q9BQW3;Q92766;Q86YF9;Q86W54;Q9UB3;Q9HB31;O60663;Q14526;O96004;P17036;O43364;Q13155;Q9Y266;O43365;Q15699;Q9UL49;P28358;P50222;Q9Y3R5;Q92499;Q06710;Q9P215;Q8HWS3;P11308;P25791;P31275;Q9Y295;P17542;O60481;O95231;Q96D98;O15266;O14641;O95096;P31749;P17481;O95863;Q96GD3;Q8N5Y2;P49640;Q8NEA9;O60479;P41134;Q9P2R6;O95076;Q03112;Q9C0C7;Q04724;P52594;O00470;P28356;O60447;P09017;Q16534;Q8WVJ9;Q9NZC4;Q02548;Q99750;Q5JUK2;Q9629;Q9BXL5;Q9BXJ9;P5D1E8;Q8N6I1;Q9NQ87;P31273;Q8IUQ4;Q15475;O14627;Q99814;Q16576;Q8N9N5;Q9Y5R6;Q13105;Q6ZNA4;Q8N196;Q53QV2;A6NI15;P98177;Q5BJF6;P09016;Q07820;Q96EK5;Q3ZCT1;Q05195;Q5VTD9;Q13642;Q14190;P783

64;P09630;A6NNA5;Q9BUZ4;O95475;P31267;Q9NYF0;Q13516;P10072;P62701;P35712;P32242;Q9NY  
P3;Q96NB3;A6NMT0;A8MTQ0;Q0VDD7;O43763;Q7L190;Q99929;Q9GZZ0;Q99593;Q5XKR4;Q8TBZ2;Q149  
97;Q9UH73;Q03060;P56178;P22090;Q0D2K3;P31314;Q14160;Q5H9L4;Q5TAB7;Q8IXK0;P51114;Q130  
45;Q9NQL9;Q7Z699;O75398;Q99583;P39880;Q95257;Q8N488;O60869;Q9Y458;P78545;Q9HAK2;Q9Y6  
R0;Q6R327;Q9UN36;Q9UI36;Q9H9S0;Q9NQZ2;Q16587;Q13562;Q99504;Q13394;Q15468;P32243;Q9H3  
C7;Q75386;P0C2W1;Q8N1K5;Q8WUQ7;Q9NQZ3;Q5BKK8;P56915;Q9UMX1;Q02577;O14727;O95343;Q96N  
K8;Q9UIW0;P53539;P09067;P17509;Q9Y586;Q00444;O43248;Q96IK5;O14786;P49454;Q9UJC3;P146  
51;P35452;P17482;Q14689;Q9HCC6;Q8N100;Q68CQ4;Q9UBP0;Q8NHV9;Q9BSQ5;Q9HBU1;Q9NUK0;P081  
51;Q92988;Q99581;P55771;Q9UJU5;Q9H2A3}

7070

Pathogen[ Q85601] interacts with 208 human

partners: {Q8IXK0;Q9P2R6;Q8N196;P49454;P17097;Q9UHL9;O00458;P49639;P09629;Q8N5Y2;P081  
51;P60174;P11831;Q02078;O60481;Q14586;O43316;P31749;P41134;Q9Y4Z2;Q14689;Q01538;Q930  
09;Q9UPW6;P61962;Q14202;P15172;Q04724;Q9UN36;A6NNA5;O75398;P17036;Q86U70;Q02386;Q0VG  
99;Q9UBP0;Q16621;P56279;O95677;P13349;P54845;P14653;Q9Y283;O43248;Q7Z7C8;Q13155;Q2M1  
K9;Q86SE8;Q99966;P0CW01;Q9H3C7;O75030;Q5H9L4;Q14814;Q0VDD7;Q05195;Q03112;O60663;Q015  
34;Q9NYF0;Q95789;P78545;Q9H3P2;Q9ULH7;Q96KR1;Q99504;O43364;Q13045;Q13642;P35712;Q155  
83;P0CV98;P62701;Q99814;Q5BJF6;P78337;P52594;Q92499;Q86VD1;O14786;O96004;Q9H1B4;P0CW  
00;Q9NZP6;O75474;Q9UM82;P55771;Q13562;Q16587;Q86W54;Q8N6I1;Q53H80;Q9UQB3;Q14526;Q9Y2  
66;P31260;P23409;P50222;P25791;Q9Y295;Q9UBX0;P78364;Q96D98;Q8N1K5;O15266;O14641;Q9Y4  
I5;P58340;Q15699;Q16576;Q99502;Q6SJ96;Q9UI36;O60447;Q02577;Q99750;Q9BXJ9;P35548;Q9NQ  
87;O95257;Q14160;Q9HBH7;O00470;Q8N9N5;O43711;Q53QV2;Q9BX40;P58304;Q3ZCT1;P32243;Q995  
83;Q0D2K3;P31249;O95376;A6NKD9;P31271;P10072;Q9UGP4;Q9P2T0;Q6ZNA4;P31274;Q9NRI5;A6NK  
D2;Q5VTD9;Q7L190;Q16534;Q00994;P50221;Q99081;P31314;P14651;Q96M53;Q7Z699;Q9Y3R5;Q5TA  
B7;P22090;O43365;Q16352;P39880;P31276;Q96NB3;Q9Y2P7;Q8N488;Q9BQW3;O60869;P48380;Q9NX  
R1;Q9BT04;P07093;P17677;O43255;O00167;Q9BSQ5;Q63HK5;Q7Z7L9;P0CV99;Q8IUD2;Q9UMX1;Q9GZ  
M8;Q9BUP3;Q9NZI5;Q9H4S2;Q9NU63;P53539;P31269;Q01860;Q03060;Q96AQ6;Q00139;Q00444;Q131  
05;Q07687;Q8HWS3;P23760;P11308;Q8TD31;Q9Y5J3;Q86YF9;Q5D1E8;Q8WVJ9;P51114;P17482;Q5VZ  
L5;O95238;Q8ND56;Q5MJ70;Q92988;Q9UNS1}

7071

Pathogen[ P14079] interacts with 245 human

partners: {P31751;Q9NY59;Q6R327;Q8WYA0;Q9UPW6;Q8WUH1;Q9HAK2;P08151;Q8NEM7;Q14004;Q53H  
80;Q5MJ70;Q5D1E8;P17677;O43364;Q02078;Q99814;Q06413;Q8N196;Q99502;Q8IZ21;P10072;Q9UJ  
C3;Q7Z7L9;P78337;P13349;Q01534;Q5H9L4;Q9Y255;O60481;Q9UM82;Q16517;P23409;Q99581;O435  
97;Q8ND56;Q96M53;Q95789;Q9NP84;Q9NR12;Q14641;Q9BXJ9;Q9Y586;P39880;Q15583;P55771;Q138  
35;Q86U70;A0MZ66;Q15699;Q03060;Q96NB3;P48380;Q9UQB3;Q01538;Q8IV56;Q9H3P2;P35712;Q9UM  
X1;Q8WVJ9;Q00994;Q6ZNA4;Q99966;P58304;Q9Y266;A6NC42;O96004;A6NKD9;P52594;Q9P2T0;Q9NR  
I5;Q13105;Q13394;Q9Y5L5;Q13045;Q9Y4F9;Q96K83;Q9H1B4;O60869;Q9Y2P7;Q8IUD2;Q9P3C7;O001  
15;Q9P215;P31271;Q96BJ3;Q5TAP6;Q9NU63;P54845;Q9BUZ4;Q3Y452;P09629;Q16576;Q9Y4I5;P113  
08;Q86VV8;O96005;Q9BUP3;P22090;P31276;Q86UU5;Q9NZC4;P78364;Q14202;Q99583;Q9BSQ5;Q8HW  
S3;Q9H4W6;Q96D98;Q8N9N5;Q9BQW3;Q9Y6A4;Q7Z699;P31274;Q5BJF6;Q9UL49;Q14997;Q13642;Q3ZC  
T1;P17097;Q01860;Q5VTD9;Q9UBI9;Q0VDD7;Q8N5Y2;P20930;Q9UEE9;Q9ULH7;A6NGB9;O95238;O437  
11;Q96EK5;Q96PU9;Q14093;O60663;O15266;Q99426;Q9NQZ2;P31269;P25791;P48681;O00139;Q165  
87;Q2M1K9;Q9P2R6;Q68CQ4;Q7L190;Q9Y5J3;Q8IXK0;Q9HBH7;Q8N1H7;Q9NZP6;P35663;Q9NYP3;Q154  
68;Q96AQ6;P31249;Q14689;Q9NZI5;Q9UHL9;Q86VD1;Q9H3Y8;Q14586;O43365;Q9UI36;Q16621;P619  
62;Q8TD31;Q6SJ96;Q00444;Q9GZM8;Q8WUQ7;P32243;Q8WWZ3;Q04743;Q05195;Q16626;Q8N488;Q076  
87;Q14814;Q04724;Q9NUK0;O00458;O75293;Q9Y283;Q96KR1;Q86YF9;Q63HK5;Q92499;Q025  
77;A6NNA5;Q13155;Q8N1K5;Q2TAA8;Q99504;P78545;P41134;Q9BX40;P49454;Q86SH2;Q02386;Q995  
98;Q6W0C5;Q9BXL5;Q6UW49;P56279;Q9NQ87;Q99081;Q8IW03;O00167;Q96JY0;Q9NXR1;Q9Y3R5;O750  
30;P49639;Q5TAB7;Q16534;O75474;P28360;Q92988;O00470;Q9UN36;O95257;Q9UNS1;P62701;O431  
51;Q8N6I1;Q9BZE0;Q6IQ19;P50222;Q9UGP4;Q53QV2;Q9Y657;P50221;P14651;P58340;Q99750;Q5VZ  
L5;Q7Z5L4;Q9NYF0;Q9Y295;Q5T5P2;P23760;Q9BT04}

7072

Pathogen[ P03383] interacts with 154 human

partners: {Q0VDD7;Q9UNS1;Q9H1B4;Q02577;Q99504;O00470;P49454;Q9UHL9;O00458;Q5TAB7;Q152  
66;Q86UU5;P11831;Q16352;Q0D2K3;Q9BX40;P35712;Q9UPW6;Q8HWS3;Q9H3P2;Q9Y5L5;O00167;Q9Y2  
P7;Q14160;P32243;Q16626;Q8N6I1;P15172;P55771;Q8WVJ9;Q14526;Q07687;P58340;P50262;A6NK  
D9;Q86U70;Q9NRI5;Q9P2R6;Q9UL49;P31749;Q9Y295;P17482;Q96AQ6;Q5H9L4;P48380;P50222;Q5D1  
E8;O75474;Q9NQ87;P31276;O75030;O43365;Q15468;Q96KR1;Q6ZNA4;Q14814;Q01860;Q14997;Q9UN  
36;Q04724;P78337;Q8TD31;Q13155;Q9NZP6;P31249;Q9BXL5;Q53H80;Q9UQB3;O96004;Q03112;Q8N1  
K5;Q16621;P54845;Q9Y3R5;P49639;P25791;P11308;Q00994;Q8N9N5;Q9BXJ9;P35548;Q13105;Q96D  
98;Q8N488;O14641;Q53QV2;Q05195;P17036;O60663;Q9UGP4;Q6SJ96;O43711;Q9HBH7;Q99081;Q9UL  
H7;O95376;Q7L190;Q8ND56;P61962;O43255;Q5BJF6;P31269;Q9Y266;Q3ZCT1;P31314;Q9P2T0;Q8WU  
Q7;Q99583;Q96EK5;O95238;O43186;P39880;P23760;Q9NYF0;Q99750;Q9NYP3;Q96NB3;Q9BUP3;Q86Y  
F9;P78545;Q96M53;P50221;Q01534;P22090;Q13045;Q9NZI5;Q92499;P62701;Q2M1K9;O60481;O608  
69;Q8N196;Q96BJ3;P09629;Q8IUD2;Q13642;Q9UI36;Q15699;Q9UM82;Q9H3C7;Q16534;P56279;Q9BT  
04;Q9UMX1;Q92988;P52594;Q03060;O95257;Q16576;Q02078;P14651;Q9BSQ5;Q9UBI9;Q5MJ70}

7073

Pathogen[ P03410] interacts with 233 human

partners: {Q9Y2P7;Q14202;Q8WUQ7;Q96AQ6;O14786;Q9Y5J3;Q86VV8;P35712;Q9UI36;Q86SE8;P234  
09;Q96EK5;P11831;Q8IXK0;Q6ZNA4;Q03112;Q9UJC3;Q13394;P52594;Q14526;O95238;O00470;Q131  
55;P56279;A6NKD9;Q8TD31;Q9P2T0;P17482;O75293;A6NGB9;Q5TAB7;Q9H3P2;Q8WVJ9;O43597;Q96N  
B3;Q00139;O96004;P31274;Q9NXR1;P31276;Q9P2R6;Q7Z699;O96005;Q9GZM8;Q8IZ21;Q99814;O604  
81;Q99502;Q01860;Q16517;P54845;P25791;Q9ULH7;Q9Y4I5;Q14997;P09629;Q9NQZ2;Q9NQ87;Q96K  
R1;P50222;Q8N6I1;P50221;O15266;Q9Y255;Q9UGP4;Q7L190;P14651;Q9UHL9;Q14814;Q16352;P785  
45;Q9UL49;Q8N9N5;O75030;O75474;Q15468;Q9UBI9;Q9Y586;Q01534;P31249;Q6UW49;Q04724;Q9NZ  
I5;Q14689;Q2M1K9;P41134;P31749;Q03060;Q9UEE9;A6NNA5;Q0VDD7;Q9Y283;Q13835;Q8TCX1;P313  
14;Q14160;P22090;Q13045;Q9UPW6;Q9Y295;A0MZ66;Q5TAP6;P62701;Q0D2K3;Q17036;Q8N1K5;O606  
63;Q16576;Q96BJ3;P49454;P58340;O95789;P10072;P20930;Q00994;Q99081;Q15583;Q9BT04;Q929  
88;Q5H9L4;Q07687;P35548;Q86YF9;Q53QV2;Q6IQ19;Q8IUD2;Q9UM82;Q01538;Q9UN36;Q02386;P356

63;Q6SJ96;Q92499;Q16621;P04553;Q9BQW3;Q5D1E8;Q96K83;Q5VZL5;Q9HBH7;Q9H3C7;Q86U70;Q8WY  
A0;P31269;Q9P215;P48380;Q99583;Q68CQ4;Q9BUP3;O60447;Q9BXL5;Q53H80;Q8N196;O43364;Q156  
99;P61962;P55771;Q5BJF6;Q8NEM7;Q9H1B4;Q14093;Q99504;Q9NYF0;P13349;Q13642;Q8N488;Q995  
98;P39880;P49639;O43151;Q6R327;Q86SH2;P51114;Q9NYP3;Q8IV56;Q9NRI5;P32243;Q14586;Q8ND  
56;Q9UNS1;O60869;Q3Y452;O00167;Q7Z7L9;Q86VD1;Q9HBG6;Q02577;P17677;Q02078;Q16534;Q9UQ  
B3;O00115;P23760;Q9Y266;Q9Y657;O43711;Q5MJ70;Q9Y5L5;Q63HK5;Q3ZCT1;Q13105;Q9H4W6;Q9UQ  
57;Q9NP84;Q16626;P11308;Q86UU5;Q5VTD9;Q99426;P78364;Q04743;Q8N5Y2;Q9NU63;Q9UMX1;Q6W0  
C5;Q96M53;Q99750;O43365;Q96D98;A6NC42;O00458;Q5T5P2;Q9BSQ5;Q9NZP6;P17097;P78337;Q9BX  
40;Q05195;Q8HWS3;O14641;Q9BXJ9;Q16587;Q99966}

7074 Pathogen[ P14075] interacts with 162 human

partners: {Q8N196;Q96AQ6;Q16576;Q9UHL9;Q9BUP3;O60663;Q16352;Q02577;Q86U70;Q9Y266;Q131  
55;Q8N9N5;P22090;Q99504;Q13105;P17482;P78337;Q14526;O75030;Q96KR1;Q8TD31;Q9Y295;Q9BX  
L5;Q8N488;Q5MJ70;Q14160;Q9UM82;P11831;O60481;Q9NYP3;Q9BXJ9;P78545;O00470;Q0D2K3;Q9P2  
R6;Q01860;Q9UGP4;Q9BX40;P48380;Q5TAB7;P35548;P15172;Q00994;P17036;O43186;O95257;Q53H  
80;Q5VZL5;P31249;Q9BT04;Q92988;Q7Z7C8;Q8IUD2;O00167;Q9NQ87;O43365;Q9NZP6;Q13642;Q051  
95;Q6SJ96;Q9UBI9;P39880;Q8WVJ9;Q9NR15;Q07687;Q9Y255;P56279;P31269;O43255;Q9UQB3;Q96B  
J3;Q86UU5;O96004;P09629;Q92499;P25791;P31749;Q6ZNA4;O00139;Q5BJF6;Q9UPW6;Q96M53;Q96D  
98;Q8N1K5;O14641;Q9HBH7;P54845;Q6IQ19;P50221;Q9UL49;P35712;P55771;Q6R327;Q8N6I1;Q9UN  
36;O75474;Q99750;P11308;O00458;Q01534;Q9Y5L5;Q3ZCT1;O43711;Q5D1E8;Q03112;Q02078;Q9Y3  
R5;Q8IV56;Q8NEM7;Q5H9L4;Q14997;P52594;Q9UEE9;Q9P2T0;Q7L190;Q9NZI5;Q9BSQ5;Q9UNS1;Q9UI  
36;O95376;Q15468;Q15699;P31314;Q9Y2P7;P31276;A6NKD9;Q03060;Q04724;Q9H3C7;Q53QV2;Q3Y4  
52;Q99502;O15266;Q9H3P2;P61962;P62701;Q16621;Q9H1B4;P23760;Q99583;O60869;Q2M1K9;Q8WU  
Q7;Q99081;Q9NYF0;P49454;Q16626;P32243;Q14814;Q86YF9;Q9UMX1;Q0VDD7;Q8HWS3;P50222;Q8ND  
56;Q96NB3;Q13045;Q9ULH7;Q96EK5;P58340;Q5TAP6;Q16534}

7075 Pathogen[ P0C206] interacts with 282 human

partners: {Q02386;Q8HWS3;Q9UNS1;O75293;Q8IW03;Q86VD1;Q07687;A6NKD9;Q9NQ87;Q9BZE0;Q9BX  
L5;P58340;Q03060;Q15468;Q05195;O60481;Q00444;Q9Y295;Q9UHL9;Q8N9N5;Q0VDD7;O00167;Q9C0  
C7;O43711;P31269;P31314;Q5VZL5;P31749;O60393;Q01538;P17677;Q14997;Q99504;Q9BUP3;Q9NZ  
I5;P60174;Q9UBP0;Q5BJF6;O43255;Q02078;Q14586;O15266;Q8ND56;A6NNA5;Q8N6I1;O75474;O953  
76;Q9BX40;P78364;Q13642;O43365;Q04743;Q9Y5R6;P09067;O43151;O75030;Q9UMX1;Q9Y5L5;Q86Y  
F9;Q9UGP4;Q7L190;Q9BT04;Q01860;Q9Y422;A6NC42;Q8TD31;P54821;Q8N1K5;Q6ZNA4;P49639;Q995  
83;Q99598;O00470;Q02548;Q9Y4I5;Q13045;Q9UEE9;Q8IUQ4;Q13394;Q9BSQ5;P50221;Q96PU8;Q9UL  
49;P14651;Q92988;Q8N196;Q0D2K3;P23409;Q9P215;Q8IUD2;P31268;P17483;P10072;Q93009;P494  
54;P48380;P55771;Q8WYA0;Q9Y3R5;P54845;O00458;Q15699;Q9Y586;P0CV98;O95238;Q00994;Q8WV  
J9;Q96HZ4;Q9GZM8;Q8WUQ7;P50461;P11308;Q9Y283;Q9P2R6;O14786;O96004;Q9BYE0;Q16587;P146  
53;Q01534;Q63HK5;P41134;P14652;Q9UM82;Q99426;P51114;A6NKD2;P78337;O43248;Q9UBZ4;P496  
40;O60447;Q14202;Q96NB3;Q9H4S2;Q6R327;Q99581;Q03112;Q693B1;Q99081;O95257;Q13835;P322  
43;Q9Y255;P17482;P62701;Q9Y5J3;P13349;Q8N488;Q96KR1;Q53QV2;Q6IQ19;Q14160;Q96B3;P355  
48;Q96EK5;P22090;Q9UPW6;Q96AQ6;Q5D1E8;Q3ZCT1;Q16626;Q9NR15;P53539;Q5H9L4;P78545;Q9H1  
B4;Q16534;Q86SE8;A0MZ66;Q9HBH7;O43597;Q9H3P2;O00139;P23760;P25791;Q9Y657;P61962;Q2M1  
K9;O60869;Q04724;Q13562;Q9Y2P7;Q5TAB7;P11831;Q7Z7L9;Q13422;Q99966;Q86W54;Q8IV56;Q995  
02;Q6SJ96;Q8IXK0;Q8WUH1;A6NGB9;Q9BQW3;Q96D98;Q13155;Q5T5P2;Q16576;P35712;P31271;Q166  
21;Q9NRZ9;Q68CQ4;Q9NYF0;Q3Y452;P17097;P15172;Q5VTD9;Q9NXX1;Q9H9S0;Q86U70;O43364;Q148  
14;P31274;O60663;Q7Z7C8;Q6W0C5;P35663;Q9P2T0;P0CW01;Q9NZP6;Q9UN36;O75398;Q9UJC3;Q9NZ  
C4;Q99814;P39880;Q96K83;P09629;P56279;Q14689;Q86UU5;Q14526;P28356;Q16532;Q02577;P207  
19;P08151;Q9NUK0;Q9NQZ2;Q96M53;Q13105;P31249;Q9H4W6;Q9UBX0;Q92499;Q5BKX8;Q9BXJ9;Q9H3  
C7;Q53H80;Q9HAK2;Q9UBI9;Q9NU63;Q9UI36;Q9UQB3;P09016;Q0VG99;Q9Y266;O43763;Q99750;Q8N5  
Y2;O95789;Q9NYP3;Q7Z699;Q5TAP6;O43316;Q5MJ70;O95677;P58304;Q9NP62;P0CW00;Q9ULH7;P312  
60;P0CV99;P56177;Q15583;P17036;P31276;Q9H2A3;P50222}

7076 Pathogen[ P03363] interacts with 331 human

partners: {O95376;Q5BJF6;Q92886;Q16587;P56179;Q3Y452;Q8TAK6;Q86U70;Q53QV2;Q5VTD9;Q156  
99;Q96M53;Q6SJ96;Q15266;P31273;Q9UIW0;Q13105;P35453;Q5T5P2;Q8NFW5;P49454;Q8N5Y2;Q995  
92;Q9Y4Z2;Q9UHL9;Q9BUP3;P19622;Q13835;Q92766;P47902;Q9NZR4;P78415;A6NC42;Q9NYP3;P090  
67;P55771;Q0VDD7;Q9Y5J3;P31274;Q16352;Q99598;Q05474;Q15468;O60481;Q5JUK2;A6NKD9;Q023  
86;O14682;Q1Z3Z4;Q3ZCT1;Q99626;Q14526;Q13516;P56177;Q9UMX1;O14786;P08151;P0CBA7;P535  
39;Q7L190;P31267;O43365;A8MTQ0;Q9Y3R5;P58340;Q8TBZ2;Q0VG99;P14651;Q8NEM7;Q03112;O606  
63;Q9BXL5;P56279;Q99929;O43763;Q9Y266;P28356;P23760;Q9NQ87;Q99750;Q9UBI9;P20719;Q7RT  
S3;O95257;P31271;Q0D2K3;Q14093;Q14160;Q9HBH7;Q9H2W2;Q13045;Q96HZ4;Q9P215;P17481;O604  
47;Q8N9N5;Q9UN36;O60902;O94967;Q9Y657;Q9Y295;Q8N196;O43316;Q16621;P58304;Q8N488;Q8N1  
K5;Q9NYF0;P35548;Q8IXK0;P32243;O60479;Q9BSQ5;O95231;Q04724;Q8N302;O43248;P49639;Q9Y5  
R6;Q14689;P17483;Q9H4S2;Q7L576;P13349;P17509;P31249;Q96PU8;P54845;Q9BYE0;Q6ZNA4;Q9BX  
40;P14653;P50221;Q13155;Q8N9W6;P25791;P10072;Q9UGP4;Q9UD57;Q2M1K9;Q9P2T0;P22090;Q929  
04;Q9C0C7;P13378;P11831;Q16576;Q8WUQ7;Q9BPY8;Q7Z699;P20264;Q9UI36;P28358;Q00444;P569  
15;P11308;O95238;Q9GZZ0;O75030;Q15717;Q99426;Q14814;A6NJT0;Q9NZC4;P78545;Q86UU5;P317  
49;P32242;Q9H3P2;Q96JY0;Q6IQ19;P14652;Q9NP08;O43186;P31260;A6NMT0;Q7Z7C8;Q96AQ6;P170  
36;Q9ULH7;Q9HBG6;Q5MJ70;P41134;Q99504;Q9UNS1;P31268;Q5TAP6;P31314;Q9HCC6;Q9NZI5;O960  
04;Q9H2Z4;Q92499;Q00056;Q92826;Q9BT04;O00470;Q96EK5;Q5TAB7;Q05925;Q15583;Q9BQW3;Q5XK  
R4;Q9Y283;P51114;P54821;Q96NK8;P23759;Q00994;Q9UM82;Q9HB31;Q16626;Q99814;P09016;P312  
76;Q68CQ4;P50222;O60869;Q92988;P35712;O60393;Q8NEA9;Q01534;O43711;Q3B8N5;Q8ND56;O950  
76;Q05195;P17482;P23409;O00167;P31269;Q63HK5;Q07820;Q9NR15;Q9C056;O75398;Q7Z5H3;Q5BK  
X8;Q96QS3;Q9H3C7;Q04741;Q5D1E8;A2RU54;Q13642;O75386;Q96J94;Q99581;Q9C004;Q9NZP6;Q9NQ  
Z3;P09629;P61962;P35452;Q96SQ7;O95343;Q02548;Q8IYA7;Q86SE8;O43364;Q03828;P52594;Q990  
81;O00192;Q86YF9;Q9BUZ4;P48380;Q96KR1;Q9NXX1;Q9Y6R0;O00139;O43255;O95475;Q9P2R6;P096  
30;Q96D98;Q99811;Q86W54;Q8N6I1;O14641;Q8NHV9;Q16534;Q9NR12;Q9UQB3;P09017;Q9UJ05;O155  
22;P39880;Q53H80;Q9H9S0;Q07687;Q8HWS3;P78337;P15172;Q5H9L4;Q8IUD2;Q9UPW6;Q96NB3;Q8TD  
31;Q9UL49;Q99583;Q9NPC8;Q8WVJ9;Q86SH2;A6NNA5;Q9BZE0;P62701;Q01860;Q9BXJ9;Q6R327;P312

75;P35663;Q03060;Q9Y5L5;O14627;Q9H3U1;Q693B1;Q9H1B4;Q9HBU1;O95789;Q04743;Q9NUK0;Q6W0  
C5;Q02577;Q9UBX0;Q9H2A3;P49640;Q6QHK4;Q9Y2P7;Q9UJC3;Q02078}

7077 [Cluster 644]GO:0060789+P biological\_process [name] hair follicle placode formation  
[def] "The developmental process in which a hair placode forms. An hair follicle placode  
is a thickening of the ectoderm that will give rise to the hair follicle bud." [GOC

7078 Pathogen[ Q2Q067] interacts with 3 human partners:{Q13547;Q92769;P60953}  
7079 Pathogen[ P0C214] interacts with 3 human partners:{Q13547;P60953;Q92769}  
7080 Pathogen[ P03346] interacts with 3 human partners:{P60953;Q92769;Q13547}  
7081 Pathogen[ Q85601] interacts with 3 human partners:{Q92769;P60953;Q13547}  
7082 Pathogen[ P14079] interacts with 1 human partners:{Q92769}  
7083 Pathogen[ P03383] interacts with 3 human partners:{P60953;Q92769;Q13547}  
7084 Pathogen[ P03410] interacts with 3 human partners:{Q92769;P60953;Q13547}  
7085 Pathogen[ P14075] interacts with 3 human partners:{P60953;Q13547;Q92769}  
7086 Pathogen[ P0C206] interacts with 3 human partners:{Q92769;Q13547;P60953}  
7087 Pathogen[ P03363] interacts with 2 human partners:{Q13547;P60953}

7088 [Cluster 645]GO:0097191+P biological\_process [name] extrinsic apoptotic signaling  
pathway [def] "A series of molecular signals in which a signal is conveyed from the cell  
surface to trigger the apoptotic death of a cell. The pathway starts with either a  
ligand binding to a cell surface receptor, or a ligand being withdrawn from a cell  
surface receptor (e.g. in the case of signaling by dependence receptors), and ends when  
the execution phase of apoptosis is triggered." [GOC

7089 Pathogen[ Q2Q067] interacts with 3 human partners:{Q13158;Q14790;Q15628}  
7090 Pathogen[ P0C214] interacts with 5 human  
partners:{Q15628;Q92934;Q13158;Q13015;Q14790}  
7091 Pathogen[ P03346] interacts with 4 human partners:{Q13158;Q13015;Q15628;Q14790}  
7092 Pathogen[ Q85601] interacts with 4 human partners:{Q13158;Q14790;Q13015;Q15628}  
7093 Pathogen[ P14079] interacts with 5 human  
partners:{Q14790;Q92934;Q13158;Q13015;Q15628}  
7094 Pathogen[ P03383] interacts with 3 human partners:{Q13158;Q13015;Q15628}  
7095 Pathogen[ P03410] interacts with 4 human partners:{Q13015;Q92934;Q13158;Q15628}  
7096 Pathogen[ P14075] interacts with 3 human partners:{Q13015;Q13158;Q15628}  
7097 Pathogen[ P0C206] interacts with 5 human  
partners:{Q13158;Q92934;Q13015;Q14790;Q15628}  
7098 Pathogen[ P03363] interacts with 3 human partners:{Q13015;Q13158;Q15628}

7099 [Cluster 646]GO:0008584+P biological\_process [name] male gonad development [def]  
"The process whose specific outcome is the progression of the male gonad over time, from  
its formation to the mature structure." [GOC

7100 Pathogen[ Q2Q067] interacts with 16 human  
partners:{Q9HBE1;O75534;Q9UMX3;Q13772;Q9Y5R5;P15976;O60356;Q16626;Q92754;Q13495;Q8IY  
F3;Q14865;O60248;P16989;Q5T230;O15360}

7101 Pathogen[ P0C214] interacts with 15 human  
partners:{P16989;O95633;Q14865;Q13772;Q9HBE1;Q5T230;Q92754;Q9UMX3;O60356;O15360;O755  
34;Q8IYF3;O60248;Q13495;Q9Y5R5}

7102 Pathogen[ P03346] interacts with 25 human  
partners:{Q16626;O60248;P07992;O15360;O75534;Q9NQ69;Q8IYF3;P16989;Q9Y5R5;Q92754;Q5T2  
30;P51843;Q92527;A6NDE4;P15976;Q9Y5R6;Q13495;Q14865;Q9HBE1;Q96MM3;O60356;Q9UMX3;Q132  
85;Q13772;O95633}

7103 Pathogen[ Q85601] interacts with 15 human  
partners:{Q5T230;Q13495;Q92754;P15976;Q8IYF3;O75534;Q9UMX3;O60248;Q13772;Q14865;O153  
60;O60356;Q9Y5R5;P16989;Q9HBE1}

7104 Pathogen[ P14079] interacts with 18 human  
partners:{Q13772;Q13323;Q5T230;Q9Y5R5;Q14865;P15976;P16989;O60248;O75534;Q9UMX3;Q927  
54;Q16626;O60356;O15360;Q9HBE1;Q8IYF3;P07992;Q13495}

7105 Pathogen[ P03383] interacts with 14 human  
partners:{P16989;O75534;Q16626;Q9HBE1;O60248;Q9Y5R5;Q9UMX3;Q13495;Q8IYF3;Q92754;Q5T2  
30;O15360;Q13772;O60356}

7106 Pathogen[ P03410] interacts with 17 human  
partners:{Q13772;Q13495;Q5T230;P16989;P07992;O75534;Q9UMX3;O60356;O15360;O60248;Q166  
26;Q8IYF3;Q14865;P15976;Q92754;Q9HBE1;Q13323}

7107 Pathogen[ P14075] interacts with 14 human  
partners:{O15360;Q9Y5R5;P16989;O60248;Q13495;Q9UMX3;Q92754;O60356;Q5T230;Q13772;O755  
34;Q16626;Q8IYF3;Q9HBE1}

7108 Pathogen[ P0C206] interacts with 20 human  
partners:{O15360;Q96MM3;Q9Y5R6;O95633;Q9HBE1;Q9UMX3;P15976;Q13495;P07992;O75534;Q927  
54;O60356;O60248;P16989;Q9Y5R5;Q16626;Q5T230;Q8IYF3;Q13772;Q14865}

7109 Pathogen[ P03363] interacts with 15 human  
partners:{Q14865;O15360;O60356;Q96MM3;Q9Y5R6;Q13495;Q9Y5R5;O75534;Q5T230;Q16626;A6ND  
E4;P16989;O60248;Q9UMX3;Q92754}

7110 [Cluster 647]GO:0048387+P biological\_process [name] negative regulation of retinoic  
acid receptor signaling pathway [def] "Any process that stops, prevents, or reduces the  
frequency, rate or extent of retinoic acid receptor signaling pathway activity." [GOC

7111 Pathogen[ Q2Q067] interacts with 11 human  
partners:{Q15910;O95521;P27797;Q5VVM6;Q5VVM5;Q5SWL7;P78395;Q15583;O60810;O60809;Q8IX  
J9}

7112 Pathogen[ P0C214] interacts with 16 human  
partners:{Q5TYX0;Q5SWL7;A6NGN4;Q15910;P78395;O60813;O60810;Q5VVM6;Q5VTA0;Q8IXJ9;P277

97;Q5VWM5;Q5SWL8;O95521;Q5VXH4;Q5VWM1}

7113 Pathogen[ P03346] interacts with 15 human  
partners: {Q5VWM5;Q15583;O15090;O60810;O60809;Q5VTA0;P78395;Q15910;P27797;Q8IXJ9;Q5SWL8;O95521;Q5VWM1;Q5VWM6;Q5SWL7}

7114 Pathogen[ Q85601] interacts with 17 human  
partners: {Q5VTA0;O60813;O60810;Q8IXJ9;Q15583;P27797;Q5SWL7;Q5VXH4;Q15910;Q5TYX0;Q5VWM5;Q5SWL8;Q5VWM1;Q5VWM6;P78395;A6NGN4;Q5VT98}

7115 Pathogen[ P14079] interacts with 27 human  
partners: {O60811;A3QJZ6;Q8IXJ9;Q5VXH5;Q15583;Q5SWL7;Q5VWM3;Q5VT98;A6NGN4;Q5TYX0;Q5VWM6;A6NMV5;O95521;Q5VWM5;O95522;Q5VTA0;O60809;Q5VWM4;Q5SWL8;O60813;P78395;Q15910;A6NMC2;Q5VXH4;Q5VWM1;O60810;Q5TYW8}

7116 Pathogen[ P03383] interacts with 13 human  
partners: {Q8IXJ9;Q5TYX0;O60809;O60810;Q5SWL7;P78395;O60813;Q5VXH4;Q15910;Q5VWM6;Q5VWM5;O95521;P27797}

7117 Pathogen[ P03410] interacts with 28 human  
partners: {Q5VWM4;Q5SWL7;Q5VXH5;Q5SWL8;A6NGN4;Q5TYW8;O60811;Q5VWM1;O60813;O60809;A3QJZ6;Q5VWM6;O95521;Q15583;Q5VWM5;O60810;P78395;Q8IXJ9;Q5VT98;Q5VXH4;Q15910;A6NMC2;O95522;A6NMV5;Q5VTA0;Q5TYX0;Q5VWM3;P27797}

7118 Pathogen[ P14075] interacts with 15 human  
partners: {Q5VWM1;Q5SWL7;Q8IXJ9;O60809;P78395;Q5VXH4;O60813;O95521;Q15910;P27797;Q5VWM5;Q5TYX0;O60810;Q5VWM6;Q5VTA0}

7119 Pathogen[ P0C206] interacts with 23 human  
partners: {A3QJZ6;P27797;Q5VXH4;P78395;Q5VWM5;O60813;Q5VWM3;Q15910;A6NGN4;Q5TYX0;Q5TYW8;A6NMV5;Q5VTA0;Q8IXJ9;Q5SWL7;Q5VT98;O95521;Q5VWM1;O60810;O60809;Q5VWM6;Q5SWL8;Q15583}

7120 Pathogen[ P03363] interacts with 14 human  
partners: {Q8IXJ9;O60809;Q15910;P78395;O60813;Q5SWL7;P27797;Q15583;Q5VWM6;Q5VXH4;O60810;O95521;Q5VWM5;Q5TYX0}

7121 [Cluster 648]GO:0060334+P biological\_process [name] regulation of interferon-gamma-mediated signaling pathway [def] "Any process that modulates the rate, frequency or extent of the series of molecular events generated as a consequence of interferon-gamma binding to a cell surface receptor." [GOC

7122 Pathogen[ Q2Q067] interacts with 5 human  
partners: {O75925;P08238;P63165;Q16543;P42224}

7123 Pathogen[ P0C214] interacts with 5 human  
partners: {Q16543;O75925;P42224;P63165;O15524}

7124 Pathogen[ P03346] interacts with 7 human  
partners: {O15524;O75925;P17706;P63165;Q16543;P42224;P08238}

7125 Pathogen[ Q85601] interacts with 5 human  
partners: {Q16543;P08238;P42224;P63165;O75925}

7126 Pathogen[ P14079] interacts with 5 human  
partners: {P63165;P08238;P42224;O75925;Q16543}

7127 Pathogen[ P03383] interacts with 4 human partners: {O75925;Q16543;P63165;P08238}

7128 Pathogen[ P03410] interacts with 4 human partners: {O75925;Q16543;P08238;P63165}

7129 Pathogen[ P14075] interacts with 4 human partners: {P63165;Q16543;O75925;P08238}

7130 Pathogen[ P0C206] interacts with 7 human  
partners: {O75925;Q16543;O15524;P08238;P63165;P42224;P17706}

7131 Pathogen[ P03363] interacts with 6 human  
partners: {P17706;O15524;Q16543;P63165;O75925;P08238}

7132 [Cluster 649]GO:0030853+P biological\_process [name] negative regulation of granulocyte differentiation [def] "Any process that stops, prevents, or reduces the frequency, rate or extent of granulocyte differentiation." [GOC

7133 Pathogen[ Q2Q067] interacts with 2 human partners: {Q9HAZ2;Q01196}

7134 Pathogen[ P0C214] interacts with 1 human partners: {Q9HAZ2}

7135 Pathogen[ P03346] interacts with 2 human partners: {Q01196;Q9HAZ2}

7136 Pathogen[ Q85601] interacts with 1 human partners: {Q9HAZ2}

7137 Pathogen[ P14079] interacts with 1 human partners: {Q9HAZ2}

7138 Pathogen[ P03383] interacts with 1 human partners: {Q9HAZ2}

7139 Pathogen[ P03410] interacts with 1 human partners: {Q9HAZ2}

7140 Pathogen[ P14075] interacts with 1 human partners: {Q9HAZ2}

7141 Pathogen[ P0C206] interacts with 1 human partners: {Q9HAZ2}

7142 Pathogen[ P03363] interacts with 1 human partners: {Q9HAZ2}

7143 [Cluster 650]GO:0014074+P biological\_process [name] response to purine-containing compound [def] "Any process that results in a change in state or activity of a cell or an organism (in terms of movement, secretion, enzyme production, gene expression, etc.) as a result of a purine-containing compound stimulus." [CHEBI

7144 Pathogen[ Q2Q067] interacts with 1 human partners: {P24864}

7145 Pathogen[ P0C214] interacts with 1 human partners: {P24864}

7146 Pathogen[ P03346] interacts with 1 human partners: {P24864}

7147 Pathogen[ Q85601] interacts with 1 human partners: {P24864}

7148 Pathogen[ P14079] interacts with 1 human partners: {P24864}

7149 Pathogen[ P03383] interacts with 1 human partners: {P24864}

7150 Pathogen[ P03410] interacts with 1 human partners: {P24864}

7151 Pathogen[ P14075] interacts with 1 human partners: {P24864}

7152 Pathogen[ P0C206] interacts with 1 human partners: {P24864}

7153 Pathogen[ P03363] interacts with 1 human partners: {P24864}

- 7154 [Cluster 651]GO:0032088+P biological\_process [name] negative regulation of NF-kappaB transcription factor activity [def] "Any process that stops, prevents, or reduces the frequency, rate or extent of the activity of the transcription factor NF-kappaB." [GOC
- 7155 Pathogen[ Q2Q067] interacts with 29 human  
partners: {Q96J02;O75832;Q8WUQ7;Q93009;Q9BRU2;P19474;Q86VX2;Q7Z4G1;Q8TD23;P55345;Q99684;Q8TBK2;Q5TAX3;O15304;Q8WXC3;O14862;Q13114;Q9HCU9;Q96FA3;O94874;Q86VP1;P23396;Q9UBC1;P25963;P42771;Q86WI3;Q8N668;Q96EY1;Q8N2W9}
- 7156 Pathogen[ P0C214] interacts with 28 human  
partners: {Q96J02;P19474;Q9BRU2;P23396;Q8TD23;Q8N2W9;Q7Z4G1;Q86WI3;Q96FA3;Q8N668;P55345;O94874;O75832;Q86VP1;Q9HCU9;Q8WXC3;P42771;P25963;Q93009;Q13114;O14862;Q99684;Q86VX2;O15304;Q9UBC1;Q96EY1;Q8TBK2;Q5TAX3}
- 7157 Pathogen[ P03346] interacts with 32 human  
partners: {Q96J02;Q7Z4G1;Q93009;Q9BRU2;Q86VX2;Q8N668;P25963;Q9BYM8;Q8TD23;Q8TBK2;O15304;P42771;Q13114;Q96FA3;Q8WXC3;O75832;Q5TAX3;P51397;O94972;Q99684;Q86WI3;Q9HCU9;P55345;Q9UBC1;Q8N2W9;P23396;P19474;O94874;Q8WUQ7;O14862;Q86VP1;Q96EY1}
- 7158 Pathogen[ Q85601] interacts with 29 human  
partners: {Q96J02;Q86VP1;Q9BRU2;Q93009;Q8TBK2;Q8TD23;P23396;O75832;O15304;Q86WI3;Q8N2W9;Q13114;Q96FA3;Q5TAX3;Q9NQC7;Q9HCU9;Q8WXC3;O14862;Q8N668;P42771;Q99684;Q86VX2;Q7Z4G1;P19474;O94874;Q96EY1;P55345;Q9UBC1;P25963}
- 7159 Pathogen[ P14079] interacts with 30 human  
partners: {Q8N2W9;Q8TD23;Q8WXC3;P23396;Q43187;O15304;O94874;Q99684;O75832;Q9UBC1;Q7Z4G1;Q96FA3;Q86VX2;P55345;Q5TAX3;P19474;Q9BYM8;Q8N668;Q96J02;O14862;Q8WUQ7;Q9HCU9;Q8TBK2;P51397;Q86WI3;Q9NQC7;Q9BRU2;Q96EY1;Q13114;P42771}
- 7160 Pathogen[ P03383] interacts with 27 human  
partners: {P19474;O14862;Q9BRU2;O15304;Q8N668;Q8TD23;Q9UBC1;Q86VP1;Q8N2W9;Q5TAX3;O75832;Q9HCU9;Q8WXC3;P25963;P42771;Q99684;Q8WUQ7;Q86WI3;Q96FA3;P51397;Q86VX2;Q8TBK2;O94874;Q13114;P23396;Q96EY1;Q7Z4G1}
- 7161 Pathogen[ P03410] interacts with 27 human  
partners: {Q8WUQ7;P42771;Q5TAX3;Q96FA3;O14862;O43187;Q9BRU2;P23396;Q8N2W9;Q99684;Q8TBK2;Q86VX2;Q86VP1;Q86WI3;P51397;Q9UBC1;Q7Z4G1;Q8WXC3;O94874;Q8TD23;P25963;Q8N668;Q96EY1;O75832;Q13114;P55345;O15304}
- 7162 Pathogen[ P14075] interacts with 27 human  
partners: {Q9BRU2;Q86WI3;O94874;O75832;Q8TD23;P42771;Q7Z4G1;Q5TAX3;Q8N668;Q8N2W9;O15304;Q8TBK2;P25963;P51397;Q86VP1;Q9UBC1;Q99684;O14862;Q9HCU9;Q8WXC3;Q96FA3;P23396;P19474;Q13114;Q86VX2;Q8WUQ7;Q96EY1}
- 7163 Pathogen[ P0C206] interacts with 32 human  
partners: {Q9NQC7;Q9HCU9;O75832;Q9UBC1;Q7Z4G1;Q13114;O14862;Q86WI3;Q9BRU2;Q86VP1;P25963;Q8N2W9;Q96J02;P42771;Q93009;Q86VX2;Q8WUQ7;P23396;P51397;Q8TD23;O94874;Q5TAX3;Q99684;Q96FA3;Q8TBK2;P55345;Q8N668;Q9BYM8;Q96EY1;O15304;P19474;Q8WXC3}
- 7164 Pathogen[ P03363] interacts with 26 human  
partners: {Q86VP1;Q86VX2;Q99684;O94972;P23396;Q9HCU9;Q9BRU2;P25963;O15304;Q8TBK2;Q8N668;Q8WUQ7;Q96FA3;Q86WI3;P19474;Q8WXC3;Q5TAX3;O14862;Q8TD23;Q13114;Q7Z4G1;Q96EY1;Q8N2W9;O94874;Q9UBC1;P42771}
- 7165 [Cluster 652]GO:0006362+P biological\_process [name] transcription elongation from RNA polymerase I promoter [def] "The extension of an RNA molecule after transcription initiation and promoter clearance at an RNA polymerase I specific promoter by the addition of ribonucleotides catalyzed by RNA polymerase I." [GOC
- 7166 Pathogen[ Q2Q067] interacts with 17 human  
partners: {O95602;Q15573;P52434;Q13889;P32780;Q92759;Q9H9Y6;P51948;P50613;Q15572;P53803;Q53T94;P17480;Q9Y2S0;Q13888;O15160;P51946}
- 7167 Pathogen[ P0C214] interacts with 16 human  
partners: {P51946;Q15573;Q9H9Y6;P53803;P50613;Q9Y2S0;P51948;Q15572;P17480;P32780;O15160;O95602;Q13888;P52434;Q53T94;Q92759}
- 7168 Pathogen[ P03346] interacts with 16 human  
partners: {P52434;Q15573;Q13888;P53803;Q9H9Y6;Q53T94;Q13889;P17480;P51946;O15160;Q92759;O95602;P51948;P32780;Q9Y2S0;Q15572}
- 7169 Pathogen[ Q85601] interacts with 17 human  
partners: {P51946;P17480;O95602;Q13888;Q15573;P53803;Q9Y2S0;P51948;Q9H9Y6;Q15572;Q53T94;Q92759;P32780;P50613;P52434;P19447;O15160}
- 7170 Pathogen[ P14079] interacts with 18 human  
partners: {Q9Y2S0;Q15573;P51946;P52434;Q13889;P53803;Q15572;P50613;Q13888;P17480;O15160;Q92759;P32780;O95602;Q53T94;P19447;Q9H9Y6;P51948}
- 7171 Pathogen[ P03383] interacts with 14 human  
partners: {P53803;O95602;P51948;Q15572;Q13888;Q9H9Y6;P52434;P50613;P51946;Q92759;Q15573;P17480;P32780;Q53T94}
- 7172 Pathogen[ P03410] interacts with 18 human  
partners: {Q15572;Q13889;P51946;P50613;Q15573;O95602;P53803;P19447;Q9Y2S0;P51948;O15160;Q13888;P52434;Q53T94;P32780;Q92759;Q9H9Y6;P17480}
- 7173 Pathogen[ P14075] interacts with 15 human  
partners: {P17480;Q15572;Q92759;Q53T94;P50613;Q13889;Q15573;Q9H9Y6;P51946;P32780;O95602;P52434;P51948;P53803;Q13888}
- 7174 Pathogen[ P0C206] interacts with 18 human  
partners: {Q53T94;O95602;Q15572;P19447;P53803;Q13888;P50613;Q9Y2S0;Q92759;Q15573;P32780;Q13889;Q9H9Y6;P17480;P52434;O15160;P51946;P51948}
- 7175 Pathogen[ P03363] interacts with 14 human  
partners: {Q9H9Y6;Q13888;P32780;Q92759;P51946;O95602;Q53T94;P17480;Q15573;P53803;Q155

72;P52434;Q9Y2S0;O15160}

7176 [Cluster 653]GO:0035148+P biological\_process [name] tube formation [def] "Creation of the central hole of a tube in an anatomical structure through which gases and/or liquids flow." [GOC

7177 Pathogen[ Q2Q067] interacts with 1 human partners:{Q86SQ7}

7178 Pathogen[ P0C214] interacts with 1 human partners:{Q86SQ7}

7179 Pathogen[ P03346] interacts with 1 human partners:{Q86SQ7}

7180 Pathogen[ Q85601] interacts with 1 human partners:{Q86SQ7}

7181 Pathogen[ P14079] interacts with 1 human partners:{Q86SQ7}

7182 Pathogen[ P03383] interacts with 1 human partners:{Q86SQ7}

7183 Pathogen[ P03410] interacts with 1 human partners:{Q86SQ7}

7184 Pathogen[ P14075] interacts with 1 human partners:{Q86SQ7}

7185 Pathogen[ P0C206] interacts with 1 human partners:{Q86SQ7}

7186 Pathogen[ P03363] interacts with 1 human partners:{Q86SQ7}

7187 [Cluster 654]GO:2000706+P biological\_process [name] negative regulation of dense core granule biogenesis [def] "Any process that stops, prevents or reduces the frequency, rate or extent of dense core granule biogenesis." [GOC

7188 Pathogen[ Q2Q067] interacts with 1 human partners:{Q13127}

7189 Pathogen[ P0C214] interacts with 1 human partners:{Q13127}

7190 Pathogen[ P03346] interacts with 1 human partners:{Q13127}

7191 Pathogen[ Q85601] interacts with 1 human partners:{Q13127}

7192 Pathogen[ P14079] interacts with 1 human partners:{Q13127}

7193 Pathogen[ P03383] interacts with 1 human partners:{Q13127}

7194 Pathogen[ P03410] interacts with 1 human partners:{Q13127}

7195 Pathogen[ P14075] interacts with 1 human partners:{Q13127}

7196 Pathogen[ P0C206] interacts with 1 human partners:{Q13127}

7197 Pathogen[ P03363] interacts with 1 human partners:{Q13127}

7198 [Cluster 655]GO:0045646+P biological\_process [name] regulation of erythrocyte differentiation [def] "Any process that modulates the frequency, rate or extent of erythrocyte differentiation." [GOC

7199 Pathogen[ Q2Q067] interacts with 3 human partners:{Q5VTD9;P17947;Q00534}

7200 Pathogen[ P0C214] interacts with 3 human partners:{P17947;Q5VTD9;Q00534}

7201 Pathogen[ P03346] interacts with 3 human partners:{Q5VTD9;P17947;Q00534}

7202 Pathogen[ Q85601] interacts with 3 human partners:{Q5VTD9;P17947;Q00534}

7203 Pathogen[ P14079] interacts with 1 human partners:{Q5VTD9}

7204 Pathogen[ P03383] interacts with 2 human partners:{Q00534;P17947}

7205 Pathogen[ P03410] interacts with 3 human partners:{Q00534;P17947;Q5VTD9}

7206 Pathogen[ P14075] interacts with 2 human partners:{Q00534;P17947}

7207 Pathogen[ P0C206] interacts with 3 human partners:{P17947;Q5VTD9;Q00534}

7208 Pathogen[ P03363] interacts with 3 human partners:{Q5VTD9;P17947;Q00534}

7209 [Cluster 656]GO:0006468+P biological\_process [name] protein phosphorylation [def] "The process of introducing a phosphate group on to a protein." [GOC

7210 Pathogen[ Q2Q067] interacts with 64 human partners:{P52434;Q92585;P31749;P24385;A6NGQ2;Q9BY44;Q13889;Q92985;Q00613;P19388;P52435;P32780;P30876;O14757;P61218;Q92759;O15117;P11308;O60563;P15172;P14635;P23528;O95163;Q14765;P62487;O75582;P51948;O96017;P10914;Q96IZ7;P24864;P50750;Q13233;P50613;O15198;O15164;Q9P278;Q15796;P62875;P24928;Q13363;Q8WTW4;Q96RU7;O60885;O14920;Q13761;Q9NR09;P45984;O43318;P49336;P27986;P30305;O14519;P24941;P11802;Q99717;O15111;O15392;Q15759;Q13888;O60921;P51946;Q00534}

7211 Pathogen[ P0C214] interacts with 67 human partners:{O15198;Q92585;P51946;Q9P278;Q13761;P11308;O15117;O15111;Q969Z0;Q00613;Q13363;P30876;Q9BY44;Q14164;Q8WTW4;P50750;P50613;Q14765;P52435;P11802;O94921;P15172;P10914;P61218;P14635;P24385;O43318;Q96IZ7;O60921;P62487;Q00534;Q13233;P21127;Q92985;Q00536;P51948;O96017;P49336;P24941;O14519;Q15796;P30305;P62875;P32780;P24928;O75582;O60563;O15392;Q96RU7;O15164;P24864;Q15759;O60885;Q13888;Q9NR09;P45984;Q99717;P52434;Q15797;P19388;P16220;O14757;P27986;O95163;O14920;Q92759;P31749}

7212 Pathogen[ P03346] interacts with 86 human partners:{O60921;Q92585;Q13263;P45984;Q00536;O15111;P52434;P24385;O96017;P16220;O15392;Q00613;P21127;Q14149;Q15797;O60563;P49336;P24941;Q13888;P15172;Q15796;O14757;P24864;O95163;P61218;Q8WTW4;Q99717;Q8IZE3;Q86Z02;Q9P278;Q6P3W7;O15198;P30305;Q13889;P11802;Q8TF05;P62487;P19388;P11308;Q496M5;P31749;P14635;P10914;P52435;O75569;Q13761;Q8TD19;P51946;P50750;P36954;Q13233;O75582;Q96RU7;Q92759;Q9BY44;O60885;P30876;Q15759;Q96PY6;P45985;Q9NR09;Q13363;Q00534;Q96KG9;P24928;O14920;O94921;P23528;O43318;O15117;Q92985;Q96IZ7;Q6ZN04;Q14765;O14519;P51948;O14965;Q14164;Q8NB16;P32780;O15164;Q9NRD5;A6NGQ2;P27986;P62875;O00444}

7213 Pathogen[ Q85601] interacts with 77 human partners:{P51946;O15198;Q92585;P36954;Q00536;P31749;P24385;Q14765;O96017;O60563;P50750;P15172;Q96PY6;O15111;Q15797;Q13888;P49336;Q969Z0;Q9BY44;P61218;Q8WTW4;O15392;Q13363;O14519;P51948;O15164;Q14149;Q00613;P10914;P11802;P27986;O14757;Q13263;P62487;P30305;O14965;P19388;Q14164;O15117;P14635;Q92759;P32780;P16220;Q99717;P52435;O14920;O60921;Q92985;O94921;O75582;P50613;Q96RU7;O60885;Q15759;Q96IZ7;P45984;Q9NR09;P21127;Q96KG9;P24928;Q13233;P30876;P23528;Q00534;P52434;O43318;Q496M5;P19447;O95163;Q9P278;P24941;P62875;P11308;P51955;Q15796;Q13761;P24864}

7214 Pathogen[ P14079] interacts with 77 human partners:{P31751;O14519;P62875;O15164;Q14004;Q9NYY8;O43187;P53779;Q8TF05;P49336;P51946;P52564;P24864;P62487;Q9BY44;P49842;O75582;P52434;Q92985;O15198;P16298;O15514;P308



- 76;Q14164;P61218;O15392;O95163;O75569;Q587J8;Q13889;Q53R41;Q15797;Q14765;A6NGQ2;Q7L8L6;P11308;Q14CZ7;Q9NR09;P45984;Q15078;Q14149;P45983;P50613;Q13888;Q00613;O15117;P19388;P14635;P51955;Q16644;Q8IVS8;P23528;Q15759;P45985;P52435;Q8WTW4;Q96IZ7;Q92759;Q969Z0;P21127;Q96RU7;P32780;O60885;Q13164;P30305;Q13761;P24928;O14965;P36954;Q92585;O60921;P19447;P10914;P50750;Q96KG9;O96001;P51948}
- 7215 Pathogen[ P03383] interacts with 68 human partners: {O14519;Q13761;Q9NYV4;Q8WTW4;P27986;O15198;Q92585;P10914;O14757;O75582;O95163;P16220;P51948;Q13233;Q96IZ7;Q8TD19;P15172;O14920;Q13888;P31749;O15111;Q00536;P52434;P24385;P61218;Q15797;Q00534;O15117;P14635;Q9P278;P11802;O43318;Q9BY44;O60921;P21127;Q969Z0;P62487;P49336;Q92985;P11308;O60563;P50613;A6NGQ2;P51946;P24928;P24941;Q99717;P50750;Q15759;Q00613;O94921;Q92759;O14965;Q96RU7;O60885;P62875;Q96PY6;Q15796;P52435;Q9NR09;P45984;P19388;P23528;P30876;P24864;P32780;Q13363;O96017}
- 7216 Pathogen[ P03410] interacts with 83 human partners: {Q00613;Q8IVS8;O15392;P27986;Q7L8L6;O14920;Q13889;Q53R41;P36954;Q8IZE3;Q9NY8;O60885;Q00534;A6NGQ2;P24928;Q8NB16;Q14149;O15111;Q8WTW4;O75582;Q99717;P51946;O43187;O15198;Q14765;P31749;P30876;Q96IZ7;Q13233;O15514;P50613;Q92585;O75569;O14965;P50750;Q9NR09;O60563;O43318;P24385;Q9NRD5;P14635;Q96KG9;P52435;P45985;P24941;O95163;P11802;Q15797;P19447;P10914;P62875;P16220;O96017;O14757;O60921;P61218;P49336;O15117;P51948;Q96RU7;Q13888;P45984;P52434;Q13761;Q9BY44;P53779;Q14CZ7;P62487;O14519;Q8TF05;O96001;P23528;P30305;Q92985;P11308;Q15796;P19388;P24864;P32780;Q969Z0;Q9P278;Q587J8;Q92759}
- 7217 Pathogen[ P14075] interacts with 70 human partners: {P49336;Q92585;O15111;Q00613;Q92759;Q969Z0;P24941;P11802;Q15759;P30876;P14635;O75582;Q8IVS8;O60563;P50613;P15172;Q96IZ7;Q00534;P19388;P61218;P50750;O15117;Q99717;Q15796;P23528;Q8WTW4;P62487;O14920;P31749;O14519;O96017;Q13889;O14965;P24928;O43318;P27986;O15198;P49842;P11308;P21127;A6NGQ2;P51946;Q96RU7;P32780;Q95163;O60921;O60885;Q9NR09;Q96PY6;P16220;P24385;Q13363;Q92985;P62875;Q13233;P10914;O94921;Q9UQ88;Q9NYV4;P52434;Q9BY44;Q9P278;O14757;P51948;P52435;Q13761;P24864;P45984;Q8TD19;Q13888}
- 7218 Pathogen[ P0C206] interacts with 92 human partners: {A6NGQ2;P10914;P62875;P49336;Q496M5;O14920;P31749;P36954;Q13263;P50750;O96017;P16220;P51955;O75582;P45984;Q00613;Q00536;Q99717;P19388;P61218;Q9P278;O43318;Q96PY6;O00444;P30305;O15164;Q8TD19;Q96KG9;Q15796;Q6P3W7;P27986;Q13233;Q96RU7;P11308;P19447;O95163;O14519;P30291;Q14164;O15514;Q6ZN04;Q13888;P50613;Q9NR09;Q92985;O60885;Q14149;Q969Z0;O15111;Q92759;O60921;Q8TF05;O15392;P52435;P62487;P45985;P32780;Q96IZ7;Q15797;Q13889;Q9BY44;P15172;P21127;Q14765;P24928;P14635;O15198;O14965;Q13363;O15117;O60563;P23528;Q8IVS8;Q9NRD5;P24864;P24941;Q15759;Q9NY8;P11802;Q13761;O94921;P52434;Q99640;Q92585;Q99986;P51946;P51948;P24385;Q8WTW4;Q00534;Q7L8L6;P30876}
- 7219 Pathogen[ P03363] interacts with 61 human partners: {A6NGQ2;Q14765;Q96IZ7;Q92985;O14920;P19388;Q9BY44;P24864;O60563;P21127;P30876;Q13888;P32780;Q92759;O15111;P61218;P51946;P16220;P24928;O43318;P24941;Q15797;Q8IVS8;O96017;O60885;Q00534;O15117;P11308;Q9NR09;P31749;Q8NB16;Q96KG9;Q15796;O95163;P49336;P10914;P23528;P62487;P24385;Q8WTW4;P50750;O60921;Q00613;O14519;Q8IZE3;Q13363;Q9P278;P11802;Q13761;P52435;Q8TF05;P52434;P15172;Q99717;P27986;Q00536;O15198;Q13233;Q92585;O75569;O14757}
- 7220 [Cluster 657]GO:0021846+P biological\_process [name] cell proliferation in forebrain [def] "The creation of greater cell numbers in the forebrain due to cell division of progenitor cells." [GO\_REF
- 7221 Pathogen[ Q2Q067] interacts with 3 human partners: {O60315;Q9NRI5;Q04743}
- 7222 Pathogen[ P0C214] interacts with 2 human partners: {Q9NRI5;O60315}
- 7223 Pathogen[ P03346] interacts with 5 human partners: {Q9NRI5;O60315;Q04743;Q96QS3;Q9H2C1}
- 7224 Pathogen[ Q85601] interacts with 2 human partners: {O60315;Q9NRI5}
- 7225 Pathogen[ P14079] interacts with 3 human partners: {Q9NRI5;O60315;Q04743}
- 7226 Pathogen[ P03383] interacts with 1 human partners: {Q9NRI5}
- 7227 Pathogen[ P03410] interacts with 2 human partners: {Q9NRI5;Q04743}
- 7228 Pathogen[ P14075] interacts with 1 human partners: {Q9NRI5}
- 7229 Pathogen[ P0C206] interacts with 4 human partners: {Q04743;Q9H2C1;Q9NRI5;O60315}
- 7230 Pathogen[ P03363] interacts with 4 human partners: {O60315;Q9NRI5;Q96QS3;Q04743}
- 7231 [Cluster 658]GO:0006783+P biological\_process [name] heme biosynthetic process [def] "The chemical reactions and pathways resulting in the formation of heme, any compound of iron complexed in a porphyrin (tetrapyrrole) ring, from less complex precursors." [GOC
- 7232 Pathogen[ Q2Q067] interacts with 6 human partners: {P10746;P22557;P13196;P20823;P06132;P08397}
- 7233 Pathogen[ P0C214] interacts with 8 human partners: {P06132;P22557;P13196;P10746;P08397;Q5T440;P36551;P22830}
- 7234 Pathogen[ P03346] interacts with 6 human partners: {P10746;P20823;P22557;P13196;Q5T440;P06132}
- 7235 Pathogen[ Q85601] interacts with 5 human partners: {P10746;P13196;P06132;P08397;P20823}
- 7236 Pathogen[ P14079] interacts with 10 human partners: {P13196;Q12887;P22557;P10746;P06132;P08397;Q9P0S9;P22830;P36551;Q5T440}
- 7237 Pathogen[ P03383] interacts with 2 human partners: {P06132;P08397}
- 7238 Pathogen[ P03410] interacts with 10 human partners: {P08397;Q5T440;P06132;P36551;P10746;P22557;P22830;Q9P0S9;Q12887;P13196}
- 7239 Pathogen[ P14075] interacts with 3 human partners: {P06132;Q5T440;P08397}

7240 Pathogen[ P0C206] interacts with 9 human partners:{P10746;P36551;P22557;P20823;P22830;Q5T440;P13196;P08397;P06132}

7241 Pathogen[ P03363] interacts with 2 human partners:{P06132;P13196}

7242 [Cluster 659]GO:0014823+P biological\_process [name] response to activity [def] "Any process that results in a change in state or activity of a cell or an organism (in terms of movement, secretion, enzyme production, gene expression, etc.) as a result of an activity stimulus." [GOC]

7243 Pathogen[ Q2Q067] interacts with 2 human partners:{Q9UKX2;Q16836}

7244 Pathogen[ P0C214] interacts with 3 human partners:{Q9UKX2;P35558;Q9Y623}

7245 Pathogen[ P03346] interacts with 2 human partners:{Q16836;Q9UKX2}

7246 Pathogen[ Q85601] interacts with 3 human partners:{Q9UKX2;Q16836;Q9Y623}

7247 Pathogen[ P14079] interacts with 3 human partners:{Q9UKX2;O43819;Q16836}

7248 Pathogen[ P03383] interacts with 2 human partners:{Q16836;Q9UKX2}

7249 Pathogen[ P03410] interacts with 3 human partners:{Q9UKX2;Q16836;O43819}

7250 Pathogen[ P14075] interacts with 2 human partners:{Q9UKX2;Q16836}

7251 Pathogen[ P0C206] interacts with 3 human partners:{Q9Y623;Q16836;Q9UKX2}

7252 Pathogen[ P03363] interacts with 2 human partners:{Q16836;Q9UKX2}

7253 [Cluster 660]GO:0003311+P biological\_process [name] pancreatic D cell differentiation [def] "The process in which relatively unspecialized cells acquire specialized structural and functional features that characterize a pancreatic delta cell. A delta cell is a cell of the pancreas that produces somatostatin." [GOC]

7254 Pathogen[ Q2Q067] interacts with 1 human partners:{Q8HWS3}

7255 Pathogen[ P0C214] interacts with 1 human partners:{Q8HWS3}

7256 Pathogen[ P03346] interacts with 1 human partners:{Q8HWS3}

7257 Pathogen[ Q85601] interacts with 1 human partners:{Q8HWS3}

7258 Pathogen[ P14079] interacts with 1 human partners:{Q8HWS3}

7259 Pathogen[ P03383] interacts with 1 human partners:{Q8HWS3}

7260 Pathogen[ P03410] interacts with 1 human partners:{Q8HWS3}

7261 Pathogen[ P14075] interacts with 1 human partners:{Q8HWS3}

7262 Pathogen[ P0C206] interacts with 1 human partners:{Q8HWS3}

7263 Pathogen[ P03363] interacts with 1 human partners:{Q8HWS3}

7264 [Cluster 661]GO:2000146+P biological\_process [name] negative regulation of cell motility [def] "Any process that stops, prevents, or reduces the frequency, rate or extent of cell motility." [GOC]

7265 Pathogen[ Q2Q067] interacts with 1 human partners:{Q13526}

7266 Pathogen[ P0C214] interacts with 1 human partners:{Q13526}

7267 Pathogen[ P03346] interacts with 1 human partners:{Q13526}

7268 Pathogen[ Q85601] interacts with 1 human partners:{Q13526}

7269 Pathogen[ P14079] interacts with 1 human partners:{Q13526}

7270 Pathogen[ P03383] interacts with 1 human partners:{Q13526}

7271 Pathogen[ P03410] interacts with 1 human partners:{Q13526}

7272 Pathogen[ P14075] interacts with 1 human partners:{Q13526}

7273 Pathogen[ P0C206] interacts with 1 human partners:{Q13526}

7274 Pathogen[ P03363] interacts with 1 human partners:{Q13526}

7275 [Cluster 662]GO:0007338+P biological\_process [name] single fertilization [def] "The union of male and female gametes to form a zygote." [GOC]

7276 Pathogen[ Q2Q067] interacts with 5 human partners:{Q99497;P49901;O14599;O75969;Q96CW5}

7277 Pathogen[ P0C214] interacts with 6 human partners:{P49901;O14645;Q99497;O14599;Q96CW5;O75969}

7278 Pathogen[ P03346] interacts with 7 human partners:{O75969;Q96CW5;Q86SE8;O14599;Q99497;O14645;P49901}

7279 Pathogen[ Q85601] interacts with 6 human partners:{Q99497;O14599;O75969;Q86SE8;Q96CW5;O14645}

7280 Pathogen[ P14079] interacts with 10 human partners:{Q5JQC9;O14609;Q99497;O00124;P46926;O14645;O75969;O14599;P49901;Q96CW5}

7281 Pathogen[ P03383] interacts with 4 human partners:{Q96CW5;P49901;O14599;O75969}

7282 Pathogen[ P03410] interacts with 11 human partners:{Q86SE8;P49901;Q99497;O14599;Q5JQC9;O75969;P46926;Q96CW5;O14645;O14609;O00124}

7283 Pathogen[ P14075] interacts with 4 human partners:{O75969;O14599;P49901;Q96CW5}

7284 Pathogen[ P0C206] interacts with 11 human partners:{O14645;Q5JQC9;P49901;Q96CW5;Q99497;O14599;O00124;O75969;Q86SE8;P46926;O14609}

7285 Pathogen[ P03363] interacts with 6 human partners:{O14599;O14645;O75969;Q86SE8;P49901;Q96CW5}

7286 [Cluster 663]GO:0072560+P biological\_process [name] type B pancreatic cell maturation [def] "A developmental process, independent of morphogenetic (shape) change, that is required for a type B pancreatic cell to attain its fully functional state. A type B pancreatic cell is a cell located towards center of the islets of Langerhans that secretes insulin." [CL]

7287 Pathogen[ Q2Q067] interacts with 1 human partners:{P48380}

7288 Pathogen[ P0C214] interacts with 1 human partners:{P48380}

7289 Pathogen[ P03346] interacts with 2 human partners:{P48380;P78426}

7290 Pathogen[ Q85601] interacts with 1 human partners:{P48380}

7291 Pathogen[ P14079] interacts with 1 human partners:{P48380}

7292 Pathogen[ P03383] interacts with 1 human partners:{P48380}

7293 Pathogen[ P03410] interacts with 1 human partners:{P48380}

7294 Pathogen[ P14075] interacts with 1 human partners:{P48380}

7295 Pathogen[ P0C206] interacts with 1 human partners:{P48380}

7296 Pathogen[ P03363] interacts with 1 human partners:{P48380}

7297 [Cluster 664]GO:0044346+P biological\_process [name] fibroblast apoptosis [def] "Apoptosis of a fibroblast, a connective tissue cell which secretes an extracellular matrix rich in collagen and other macromolecules." [CL

7298 Pathogen[ Q2Q067] interacts with 1 human partners:{P01106}

7299 Pathogen[ P0C214] interacts with 1 human partners:{P01106}

7300 Pathogen[ P03346] interacts with 1 human partners:{P01106}

7301 Pathogen[ Q85601] interacts with 1 human partners:{P01106}

7302 Pathogen[ P14079] interacts with 1 human partners:{P01106}

7303 Pathogen[ P03383] interacts with 1 human partners:{P01106}

7304 Pathogen[ P03410] interacts with 1 human partners:{P01106}

7305 Pathogen[ P14075] interacts with 1 human partners:{P01106}

7306 Pathogen[ P0C206] interacts with 1 human partners:{P01106}

7307 Pathogen[ P03363] interacts with 1 human partners:{P01106}

7308 [Cluster 665]GO:0036018+P biological\_process [name] cellular response to erythropoietin [def] "Any process that results in a change in state or activity of a cell (in terms of movement, secretion, enzyme production, gene expression, etc.) as a result of an erythropoietin stimulus." [GOC

7309 Pathogen[ Q2Q067] interacts with 2 human partners:{P80297;P02795}

7310 Pathogen[ P0C214] interacts with 2 human partners:{P80297;P02795}

7311 Pathogen[ P03346] interacts with 2 human partners:{P80297;P02795}

7312 Pathogen[ Q85601] interacts with 2 human partners:{P02795;P80297}

7313 Pathogen[ P14079] interacts with 2 human partners:{P80297;P02795}

7314 Pathogen[ P03383] interacts with 2 human partners:{P80297;P02795}

7315 Pathogen[ P03410] interacts with 2 human partners:{P80297;P02795}

7316 Pathogen[ P14075] interacts with 2 human partners:{P80297;P02795}

7317 Pathogen[ P0C206] interacts with 2 human partners:{P02795;P80297}

7318 Pathogen[ P03363] interacts with 2 human partners:{P80297;P02795}

7319 [Cluster 666]GO:0009794+P biological\_process [name] regulation of mitotic cell cycle, embryonic [def] "Any process that modulates the frequency, rate or extent of replication and segregation of genetic material in the embryo." [GOC

7320 Pathogen[ Q2Q067] interacts with 1 human partners:{Q66K89}

7321 Pathogen[ P0C214] interacts with 1 human partners:{Q66K89}

7322 Pathogen[ P03346] interacts with 1 human partners:{Q66K89}

7323 Pathogen[ Q85601] interacts with 1 human partners:{Q66K89}

7324 Pathogen[ P14079] interacts with 1 human partners:{Q66K89}

7325 Pathogen[ P03383] interacts with 1 human partners:{Q66K89}

7326 Pathogen[ P03410] interacts with 1 human partners:{Q66K89}

7327 Pathogen[ P14075] interacts with 1 human partners:{Q66K89}

7328 Pathogen[ P0C206] interacts with 1 human partners:{Q66K89}

7329 Pathogen[ P03363] interacts with 1 human partners:{Q66K89}

7330 [Cluster 667]GO:2000373+P biological\_process [name] positive regulation of DNA topoisomerase (ATP-hydrolyzing) activity [def] "Any process that activates or increases the frequency, rate or extent of DNA topoisomerase (ATP-hydrolyzing) activity." [GOC

7331 Pathogen[ Q2Q067] interacts with 2 human partners:{Q96T88;O15162}

7332 Pathogen[ P0C214] interacts with 2 human partners:{Q96T88;O15162}

7333 Pathogen[ P03346] interacts with 2 human partners:{Q96T88;O15162}

7334 Pathogen[ Q85601] interacts with 2 human partners:{Q96T88;O15162}

7335 Pathogen[ P14079] interacts with 1 human partners:{O15162}

7336 Pathogen[ P03383] interacts with 1 human partners:{O15162}

7337 Pathogen[ P03410] interacts with 1 human partners:{O15162}

7338 Pathogen[ P14075] interacts with 1 human partners:{O15162}

7339 Pathogen[ P0C206] interacts with 2 human partners:{Q96T88;O15162}

7340 Pathogen[ P03363] interacts with 1 human partners:{Q96T88}

7341 [Cluster 668]GO:0003416+P biological\_process [name] endochondral bone growth [def] "The increase in size or mass of an endochondral bone that contributes to the shaping of the bone." [GOC

7342 Pathogen[ Q2Q067] interacts with 1 human partners:{P35548}

7343 Pathogen[ P0C214] interacts with 1 human partners:{P35548}

7344 Pathogen[ P03346] interacts with 1 human partners:{P35548}

7345 Pathogen[ Q85601] interacts with 1 human partners:{P35548}

7346 Pathogen[ P14079] interacts with 1 human partners:{P57679}

7347 Pathogen[ P03383] interacts with 1 human partners:{P35548}

7348 Pathogen[ P03410] interacts with 1 human partners:{P35548}

7349 Pathogen[ P14075] interacts with 1 human partners:{P35548}

7350 Pathogen[ P0C206] interacts with 1 human partners:{P35548}

7351 Pathogen[ P03363] interacts with 1 human partners:{P35548}

7352 [Cluster 669]GO:0007369+P biological\_process [name] gastrulation [def] "A complex and coordinated series of cellular movements that occurs at the end of cleavage during embryonic development of most animals. The details of gastrulation vary from species to species, but usually result in the formation of the three primary germ layers, ectoderm,

mesoderm and endoderm." [GOC

7353 Pathogen[ Q2Q067] interacts with 7 human partners:{Q8NEM7;Q13485;P54198;P11831;P84022;Q13618;Q15796}

7354 Pathogen[ POC214] interacts with 8 human partners:{P54198;P84022;P11831;Q13618;Q16881;Q13485;Q15796;P09622}

7355 Pathogen[ P03346] interacts with 9 human partners:{Q9H2W2;P11831;Q13618;Q15796;P84022;Q8NEM7;Q13485;P56915;P54198}

7356 Pathogen[ Q85601] interacts with 6 human partners:{P54198;P11831;P84022;Q13618;Q13485;Q15796}

7357 Pathogen[ P14079] interacts with 3 human partners:{Q8NEM7;Q13618;P54198}

7358 Pathogen[ P03383] interacts with 6 human partners:{P11831;Q13485;Q13618;P84022;Q15796;P54198}

7359 Pathogen[ P03410] interacts with 7 human partners:{P84022;P11831;P54198;Q13618;Q13485;Q8NEM7;Q15796}

7360 Pathogen[ P14075] interacts with 7 human partners:{Q13618;P11831;Q15796;P54198;Q13485;Q8NEM7;P84022}

7361 Pathogen[ POC206] interacts with 6 human partners:{P84022;P54198;Q15796;Q13618;Q13485;P11831}

7362 Pathogen[ P03363] interacts with 9 human partners:{P54198;Q8NEM7;Q13618;Q9H2W2;P11831;P56915;Q15796;P84022;Q13485}

7363 [Cluster 670]GO:0043029+P biological\_process [name] T cell homeostasis [def] "The process of regulating the proliferation and elimination of T cells such that the total number of T cells within a whole or part of an organism is stable over time in the absence of an outside stimulus." [GOC

7364 Pathogen[ Q2Q067] interacts with 3 human partners:{Q13794;Q8N5P1;O95067}

7365 Pathogen[ POC214] interacts with 3 human partners:{Q13794;O95067;P42574}

7366 Pathogen[ P03346] interacts with 4 human partners:{P42574;O95067;Q8N5P1;Q13794}

7367 Pathogen[ Q85601] interacts with 3 human partners:{Q8N5P1;O95067;Q13794}

7368 Pathogen[ P14079] interacts with 4 human partners:{P16298;O95067;Q13794;Q8N5P1}

7369 Pathogen[ P03383] interacts with 2 human partners:{O95067;Q13794}

7370 Pathogen[ P03410] interacts with 3 human partners:{O95067;Q13794;Q8N5P1}

7371 Pathogen[ P14075] interacts with 2 human partners:{O95067;Q13794}

7372 Pathogen[ POC206] interacts with 4 human partners:{Q8N5P1;P42574;O95067;Q13794}

7373 Pathogen[ P03363] interacts with 3 human partners:{Q13794;O95067;Q8N5P1}

7374 [Cluster 671]GO:0048268+P biological\_process [name] clathrin coat assembly [def] "The process that results in the assembly of clathrin triskelia into the ordered structure known as a clathrin cage." [GOC

7375 Pathogen[ Q2Q067] interacts with 2 human partners:{O00291;P63010}

7376 Pathogen[ POC214] interacts with 3 human partners:{P63010;P53680;O00291}

7377 Pathogen[ P03346] interacts with 5 human partners:{P63010;P53680;O00291;P42566;Q13492}

7378 Pathogen[ Q85601] interacts with 3 human partners:{P53680;O00291;P63010}

7379 Pathogen[ P14079] interacts with 5 human partners:{Q13492;O00291;P42566;P63010;P53680}

7380 Pathogen[ P03383] interacts with 2 human partners:{O00291;P63010}

7381 Pathogen[ P03410] interacts with 6 human partners:{P53680;Q0JRZ9;O00291;Q13492;P63010;P42566}

7382 Pathogen[ P14075] interacts with 2 human partners:{O00291;P63010}

7383 Pathogen[ POC206] interacts with 4 human partners:{P53680;P63010;O00291;P42566}

7384 Pathogen[ P03363] interacts with 2 human partners:{P63010;O00291}

7385 [Cluster 672]GO:0000185+P biological\_process [name] activation of MAPKKK activity [def] "Any process that initiates the activity of the inactive enzyme MAP kinase kinase." [PMID

7386 Pathogen[ Q2Q067] interacts with 2 human partners:{O95257;Q15750}

7387 Pathogen[ POC214] interacts with 2 human partners:{O95257;Q15750}

7388 Pathogen[ P03346] interacts with 3 human partners:{Q6Q0C0;Q15750;O95257}

7389 Pathogen[ Q85601] interacts with 3 human partners:{Q15750;O95257;Q6Q0C0}

7390 Pathogen[ P14079] interacts with 3 human partners:{Q15750;O75293;O95257}

7391 Pathogen[ P03383] interacts with 2 human partners:{O95257;Q15750}

7392 Pathogen[ P03410] interacts with 3 human partners:{O75293;Q15750;O95257}

7393 Pathogen[ P14075] interacts with 2 human partners:{Q15750;O95257}

7394 Pathogen[ POC206] interacts with 4 human partners:{O75293;O95257;Q15750;Q6Q0C0}

7395 Pathogen[ P03363] interacts with 2 human partners:{O95257;Q15750}

7396 [Cluster 673]GO:0003007+P biological\_process [name] heart morphogenesis [def] "The developmental process in which the heart is generated and organized. The heart is a hollow, muscular organ, which, by contracting rhythmically, keeps up the circulation of the blood." [GOC

7397 Pathogen[ Q2Q067] interacts with 3 human partners:{O14641;Q6STE5;Q15750}

7398 Pathogen[ POC214] interacts with 3 human partners:{Q6STE5;O14641;Q15750}

7399 Pathogen[ P03346] interacts with 4 human partners:{O14641;Q6STE5;Q15750;Q9P2D1}

7400 Pathogen[ Q85601] interacts with 4 human partners:{Q15750;Q6STE5;Q9P2D1;O14641}

7401 Pathogen[ P14079] interacts with 5 human partners:{Q6STE5;O14641;Q15750;Q9P2D1;P28360}

7402 Pathogen[ P03383] interacts with 3 human partners:{Q6STE5;O14641;Q15750}

7403 Pathogen[ P03410] interacts with 4 human partners:{Q15750;Q9P2D1;Q6STE5;O14641}

7404 Pathogen[ P14075] interacts with 3 human partners:{Q15750;O14641;Q6STE5}

7405 Pathogen[ P0C206] interacts with 4 human partners:{Q6STE5;Q9P2D1;Q15750;Q9UIG0}  
7406 Pathogen[ P03363] interacts with 3 human partners:{Q6STE5;Q15750;O14641}  
7407 [Cluster 674]GO:0070542+P biological\_process [name] response to fatty acid [def]  
"Any process that results in a change in state or activity of a cell or an organism (in  
terms of movement, secretion, enzyme production, gene expression, etc.) as a result of a  
fatty acid stimulus." [CHEBI  
7408 Pathogen[ Q2Q067] interacts with 3 human partners:{P36956;P05413;P27986}  
7409 Pathogen[ P0C214] interacts with 2 human partners:{P05413;P27986}  
7410 Pathogen[ P03346] interacts with 3 human partners:{P05413;P36956;P27986}  
7411 Pathogen[ Q85601] interacts with 3 human partners:{P05413;P27986;P36956}  
7412 Pathogen[ P14079] interacts with 3 human partners:{Q9Y5U4;P05413;P36956}  
7413 Pathogen[ P03383] interacts with 1 human partners:{P27986}  
7414 Pathogen[ P03410] interacts with 4 human partners:{P36956;P27986;P05413;Q9Y5U4}  
7415 Pathogen[ P14075] interacts with 1 human partners:{P27986}  
7416 Pathogen[ P0C206] interacts with 3 human partners:{P36956;P27986;P05413}  
7417 Pathogen[ P03363] interacts with 2 human partners:{P05413;P27986}  
7418 [Cluster 675]GO:0051653+P biological\_process [name] spindle localization [def] "Any  
process in which is the spindle is transported to, and/or maintained in, a specific  
location." [GOC  
7419 Pathogen[ Q2Q067] interacts with 1 human partners:{O00401}  
7420 Pathogen[ P0C214] interacts with 1 human partners:{O00401}  
7421 Pathogen[ P03346] interacts with 1 human partners:{O00401}  
7422 Pathogen[ Q85601] interacts with 1 human partners:{O00401}  
7423 Pathogen[ P14079] interacts with 2 human partners:{P61158;O00401}  
7424 Pathogen[ P03383] interacts with 1 human partners:{O00401}  
7425 Pathogen[ P03410] interacts with 1 human partners:{O00401}  
7426 Pathogen[ P14075] interacts with 1 human partners:{O00401}  
7427 Pathogen[ P0C206] interacts with 1 human partners:{O00401}  
7428 Pathogen[ P03363] interacts with 1 human partners:{O00401}  
7429 [Cluster 676]GO:0060335+P biological\_process [name] positive regulation of  
interferon-gamma-mediated signaling pathway [def] "Any process that increases the rate,  
frequency or extent of the series of molecular events generated as a consequence of  
interferon-gamma binding to a cell surface receptor." [GOC  
7430 Pathogen[ Q2Q067] interacts with 1 human partners:{Q86WI3}  
7431 Pathogen[ P0C214] interacts with 1 human partners:{Q86WI3}  
7432 Pathogen[ P03346] interacts with 1 human partners:{Q86WI3}  
7433 Pathogen[ Q85601] interacts with 1 human partners:{Q86WI3}  
7434 Pathogen[ P14079] interacts with 1 human partners:{Q86WI3}  
7435 Pathogen[ P03383] interacts with 1 human partners:{Q86WI3}  
7436 Pathogen[ P03410] interacts with 1 human partners:{Q86WI3}  
7437 Pathogen[ P14075] interacts with 1 human partners:{Q86WI3}  
7438 Pathogen[ P0C206] interacts with 1 human partners:{Q86WI3}  
7439 Pathogen[ P03363] interacts with 1 human partners:{Q86WI3}  
7440 [Cluster 677]GO:0060218+P biological\_process [name] hemopoietic stem cell  
differentiation [def] "The process in which a relatively unspecialized cell acquires  
specialized features of a hemopoietic stem cell. A stem cell is a cell that retains the  
ability to divide and proliferate throughout life to provide progenitor cells that can  
differentiate into specialized cells." [GOC  
7441 Pathogen[ Q2Q067] interacts with 5 human  
partners:{P17483;P11831;P13010;Q8TDD2;Q00534}  
7442 Pathogen[ P0C214] interacts with 4 human partners:{P13010;P11831;Q00534;Q8TDD2}  
7443 Pathogen[ P03346] interacts with 6 human  
partners:{P11831;P13010;P17483;Q8TDD2;P17542;Q00534}  
7444 Pathogen[ Q85601] interacts with 4 human partners:{P11831;Q8TDD2;Q00534;P13010}  
7445 Pathogen[ P14079] interacts with 2 human partners:{P13010;Q8TDD2}  
7446 Pathogen[ P03383] interacts with 3 human partners:{P11831;P13010;Q00534}  
7447 Pathogen[ P03410] interacts with 4 human partners:{P11831;Q00534;Q8TDD2;P13010}  
7448 Pathogen[ P14075] interacts with 3 human partners:{P11831;Q00534;P13010}  
7449 Pathogen[ P0C206] interacts with 5 human  
partners:{P13010;P17483;P11831;Q8TDD2;Q00534}  
7450 Pathogen[ P03363] interacts with 5 human  
partners:{P13010;Q8TDD2;P17483;Q00534;P11831}  
7451 [Cluster 678]GO:0007010+P biological\_process [name] cytoskeleton organization  
[def] "A process that is carried out at the cellular level which results in the  
assembly, arrangement of constituent parts, or disassembly of cytoskeletal structures."  
[GOC  
7452 Pathogen[ Q2Q067] interacts with 37 human  
partners:{P52742;P07737;Q8WX93;Q96B97;P35080;O14639;P63313;P08779;O14604;P08729;A6NI  
X2;Q14511;Q6H8Q1;Q9ULQ0;O75400;P60673;P12035;P23528;Q9NZQ3;P0CG35;Q15532;P62328;Q9UG  
P4;P05787;P0CG34;P48668;O43790;Q9NSI6;Q8WWQ0;Q5T5Y3;P19013;Q9Y2M5;Q5HYK7;P63000;Q015  
46;Q9BXF3;P17661}  
7453 Pathogen[ P0C214] interacts with 39 human  
partners:{Q9UGP4;P35080;P08729;P63000;P12035;P16157;P52742;P63313;Q13515;O14639;P057  
87;Q5HYK7;Q9NSI6;P0CG35;P08779;P48668;Q9ULQ0;A6NIX2;P0CG34;O14604;Q8WWQ0;Q9Y2M5;Q5VZ  
L5;Q5T5Y3;Q14511;Q9BXF3;Q15532;P60673;Q9NZQ3;Q6H8Q1;Q01546;P19013;P98171;O43790;Q7L5  
Y9;O75400;Q96B97;P62328;P17661}

7454 Pathogen[ P03346] interacts with 44 human partners: {Q5T5Y3;P08729;Q96B97;Q8WX93;Q9UGP4;Q9BFX3;Q14511;P08779;P98171;O14639;Q13515;O75400;P0CG34;Q9NSI6;Q96FS4;P05787;P19013;P48668;P52742;Q08495;Q6H8Q1;P16157;Q15532;P17661;P60673;P35080;Q9NZQ3;O43790;Q8WWQ0;A6NIX2;P12035;O14604;Q6ZMZ3;O94929;P63313;P62328;Q5HYK7;P0CG35;P07737;P23528;Q9Y2M5;Q01546;Q8TDZ2;P63000}

7455 Pathogen[ Q85601] interacts with 43 human partners: {O14639;P08729;Q15532;Q8WX93;P16157;Q9BFX3;P08779;Q14202;Q5HYK7;P17661;A6NIX2;P05787;P19013;O75400;P35080;O95789;Q7L5Y9;P63000;Q9NZQ3;P0CG34;Q6H8Q1;P07737;Q13515;P52742;Q01546;O43790;P48668;Q8WWQ0;Q5T5Y3;Q9NSI6;Q96B97;P12035;P60673;Q9UGP4;P62328;Q9Y2M5;P0CG35;P23528;Q14511;O14604;Q9ULQ0;Q5VZL5;P63313}

7456 Pathogen[ P14079] interacts with 65 human partners: {Q8N6M3;P48668;O95425;P09327;P52742;Q08495;Q15532;P08779;Q9NSI6;O75400;P0CG34;Q01518;Q9ULQ0;Q8TDZ2;O95789;O75781;P98171;P47756;Q8WX93;O14604;O14639;P40123;Q16585;P07737;O94929;P08729;Q8WWQ0;P35080;P16157;O95954;Q7L5Y9;Q96B97;Q01546;P60673;Q14202;Q92629;Q9NZQ3;P23528;O60610;Q15726;Q9BFX3;P62328;O15195;A6NIX2;Q6ZMZ3;Q9Y2M5;Q13326;Q71RC2;Q6H8Q1;Q5HYK7;Q96LD1;Q5T5Y3;O75366;P0CG35;Q99439;Q13515;P49023;O43790;P17661;Q9UPY6;P63313;P12035;Q8NHR9;Q9UGP4;Q5VZL5}

7457 Pathogen[ P03383] interacts with 34 human partners: {P08729;P35080;P19013;Q13515;O14639;Q5HYK7;P17661;A6NIX2;Q9ULQ0;P62328;P63000;Q15532;P63313;O75400;P07737;P08779;P05787;Q9NZQ3;Q01546;P52742;P12035;Q9UGP4;Q14511;P0CG35;Q9NSI6;P48668;Q5T5Y3;Q8WWQ0;Q9Y2M5;P23528;Q9BFX3;O14604;O43790;P0CG34}

7458 Pathogen[ P03410] interacts with 65 human partners: {Q14202;Q15726;Q8NHR9;Q71RC2;O75781;Q5HYK7;Q9UPY6;P62328;P35080;P47756;P17661;O60610;P63000;P98171;Q6ZMZ3;Q8TDZ2;P12035;Q9BFX3;P16157;P0CG35;P0CG34;Q9UGP4;P19013;O95954;Q6H8Q1;Q13515;O14639;P05787;Q9NZQ3;O94929;P48668;Q16585;Q8N6M3;P08779;O95789;P40123;Q5T5Y3;O95425;P60673;A6NIX2;Q14511;O75400;Q8WWQ0;Q99439;O14604;Q5VZL5;Q08495;Q9ULQ0;Q9NSI6;O43790;Q01546;Q96B97;Q92629;P08729;Q01518;Q13326;P23528;Q15532;P63313;P07737;Q7L5Y9;Q8WX93;P52742;Q9Y2M5;Q96LD1}

7459 Pathogen[ P14075] interacts with 37 human partners: {P48668;P08729;Q14511;P0CG34;Q9NZQ3;Q8WWQ0;P62328;Q15532;Q9NSI6;Q9UGP4;O43790;P17661;Q13515;Q5VZL5;Q5HYK7;Q7L5Y9;P12035;Q9ULQ0;P63313;O75400;P07737;P23528;O14604;P08779;P52742;Q5T5Y3;A6NIX2;P0CG35;O14639;P63000;Q8N6M3;P35080;Q9Y2M5;Q9BFX3;Q01546;P19013;P05787}

7460 Pathogen[ P0C206] interacts with 51 human partners: {O14604;P0CG35;P0CG34;P05787;P17661;P08779;Q5VZL5;P60673;P47756;Q9NSI6;Q9UGP4;Q13515;Q96B97;P62328;A6NIX2;Q5T5Y3;P08729;Q8WX93;Q15532;Q8WWQ0;O94929;O95954;Q6ZMZ3;P19013;P16157;Q14202;Q8N6M3;Q9BFX3;Q7L5Y9;Q5HYK7;P63000;P35080;P48668;P52742;Q01546;P98171;O75400;Q08495;Q9ULQ0;P63313;O14639;Q9Y2M5;P07737;P12035;Q8TDZ2;P23528;O95789;Q14511;Q6H8Q1;Q9NZQ3;O43790}

7461 Pathogen[ P03363] interacts with 46 human partners: {P08779;Q6ZMZ3;Q8WWQ0;Q9UPY6;P35080;P0CG35;P16157;P60673;P62328;Q96B97;P63313;Q8NHR9;P98171;Q15532;P48668;P63000;P05787;Q08495;Q9BFX3;O75400;Q9UGP4;O43790;Q9NSI6;Q9Y2M5;Q14511;Q6H8Q1;P17661;P0CG34;P23528;Q8WX93;P08729;Q9NZQ3;P12035;A6NIX2;P19013;Q5HYK7;Q01546;P52742;O14604;Q9ULQ0;Q96FS4;P07737;O14639;O95789;Q13515;Q5T5Y3}

7462 [Cluster 679]GO:0060286+P biological\_process [name] flagellar cell motility [def] "Cell motility due to the motion of one or more flagella." [GOC]

7463 Pathogen[ Q2Q067] interacts with 1 human partners: {Q9NVR5}

7464 Pathogen[ P0C214] interacts with 1 human partners: {Q9NVR5}

7465 Pathogen[ P03346] interacts with 1 human partners: {Q9NVR5}

7466 Pathogen[ Q85601] interacts with 1 human partners: {Q9NVR5}

7467 Pathogen[ P14079] interacts with 2 human partners: {Q9NVR5;Q9UFE4}

7468 Pathogen[ P03383] interacts with 1 human partners: {Q9NVR5}

7469 Pathogen[ P03410] interacts with 2 human partners: {Q9UFE4;Q9NVR5}

7470 Pathogen[ P14075] interacts with 1 human partners: {Q9NVR5}

7471 Pathogen[ P0C206] interacts with 2 human partners: {Q9NVR5;Q9UFE4}

7472 Pathogen[ P03363] interacts with 1 human partners: {Q9NVR5}

7473 [Cluster 680]GO:0061418+P

7474 Pathogen[ Q2Q067] interacts with 21 human partners: {P27540;P62837;P61077;P40337;O14867;Q15370;P51668;Q9Y2N7;Q9NWT6;Q15369;Q96KS0;Q9H6Z9;P0CG47;P0CG48;Q9GZT9;Q92793;P62987;Q99814;Q13617;P62877;P62979}

7475 Pathogen[ P0C214] interacts with 20 human partners: {Q13617;Q92793;Q96KS0;Q15370;P62877;P61077;Q9Y2N7;O14867;Q9H6Z9;P0CG48;Q15369;P40337;Q9GZT9;P62987;P0CG47;Q99814;P27540;P51668;P62979;Q9NWT6}

7476 Pathogen[ P03346] interacts with 21 human partners: {Q15370;P62987;P0CG48;P27540;P51668;P61077;O14867;P62877;Q9Y2N7;Q9GZT9;P62837;Q99814;P62979;P40337;Q15369;P0CG47;Q96KS0;Q9NWT6;Q92793;Q9H6Z9;Q13617}

7477 Pathogen[ Q85601] interacts with 21 human partners: {Q15370;Q9H6Z9;Q9Y2N7;P62877;P40337;Q9NWT6;Q99814;P27540;P0CG48;P51668;P61077;Q9GZT9;Q96KS0;Q15369;O14867;P62979;P62837;P0CG47;P62987;Q92793;Q13617}

7478 Pathogen[ P14079] interacts with 21 human partners: {O14867;Q9GZT9;Q99814;P0CG48;Q9Y2N7;Q92793;P62979;P61077;P62877;P62987;P40337;P51668;Q9NWT6;P27540;Q9H6Z9;Q15370;Q13617;P62837;Q15369;P0CG47;Q96KS0}

7479 Pathogen[ P03383] interacts with 18 human partners: {Q15369;Q9NWT6;P27540;P62987;P40337;Q96KS0;P61077;Q9Y2N7;Q9H6Z9;P62837;Q13617;P62979;P0CG47;P62877;Q15370;P0CG48;Q92793;P51668}

7480 Pathogen[ P03410] interacts with 21 human

7481 partners:{POCG48;Q9NWT6;Q96KS0;Q9H6Z9;Q99814;Q9Y2N7;Q15370;P62979;Q9GZT9;P27540;Q92793;Q15369;P62877;P51668;P62987;Q13617;O14867;POCG47;P40337;P61077;P62837}  
Pathogen[ P14075] interacts with 19 human

7482 partners:{Q96KS0;Q9GZT9;P62837;Q9Y2N7;P61077;P27540;POCG48;P62979;Q15370;P62987;Q9NWT6;POCG47;Q92793;P40337;P51668;Q13617;Q15369;P62877;Q9H6Z9}  
Pathogen[ POC206] interacts with 21 human

7483 partners:{POCG48;P62877;O14867;Q9Y2N7;Q96KS0;Q9GZT9;P62837;Q92793;Q13617;Q9NWT6;P62979;Q15370;POCG47;Q9H6Z9;P27540;P61077;Q99814;P62987;Q15369;P51668;P40337}  
Pathogen[ P03363] interacts with 15 human

7484 partners:{Q15370;P27540;Q9H6Z9;Q13617;O14867;Q15369;P40337;P62877;Q9Y2N7;P62987;Q99814;Q92793;P51668;P61077;P62837}  
[Cluster 681]GO:0019233+P biological\_process [name] sensory perception of pain [def] "The series of events required for an organism to receive a painful stimulus, convert it to a molecular signal, and recognize and characterize the signal. Pain is medically defined as the physical sensation of discomfort or distress caused by injury or illness, so can hence be described as a harmful stimulus which signals current (or impending) tissue damage. Pain may come from extremes of temperature, mechanical damage, electricity or from noxious chemical substances. This is a neurological process." [http

7485 Pathogen[ Q2Q067] interacts with 2 human partners:{P09917;Q99608}  
7486 Pathogen[ POC214] interacts with 2 human partners:{P09917;Q99608}  
7487 Pathogen[ P03346] interacts with 4 human partners:{P09917;P17481;Q99608;Q15700}  
7488 Pathogen[ Q85601] interacts with 2 human partners:{P09917;Q99608}  
7489 Pathogen[ P14079] interacts with 4 human partners:{Q15700;Q99608;P09917;Q9H6L5}  
7490 Pathogen[ P03383] interacts with 1 human partners:{Q99608}  
7491 Pathogen[ P03410] interacts with 4 human partners:{Q99608;Q9H6L5;Q15700;P09917}  
7492 Pathogen[ P14075] interacts with 1 human partners:{Q99608}  
7493 Pathogen[ POC206] interacts with 4 human partners:{P09917;Q15700;Q9H6L5;Q99608}  
7494 Pathogen[ P03363] interacts with 3 human partners:{P17481;Q15700;Q99608}

7495 [Cluster 682]GO:0015893+P biological\_process [name] drug transport [def] "The directed movement of a drug, a substance used in the diagnosis, treatment or prevention of a disease, into, out of or within a cell, or between cells, by means of some agent such as a transporter or pore." [GOC

7496 Pathogen[ Q2Q067] interacts with 1 human partners:{Q5T2W1}  
7497 Pathogen[ POC214] interacts with 1 human partners:{Q5T2W1}  
7498 Pathogen[ P03346] interacts with 1 human partners:{Q5T2W1}  
7499 Pathogen[ Q85601] interacts with 1 human partners:{Q5T2W1}  
7500 Pathogen[ P14079] interacts with 1 human partners:{Q5T2W1}  
7501 Pathogen[ P03383] interacts with 1 human partners:{Q5T2W1}  
7502 Pathogen[ P03410] interacts with 1 human partners:{Q5T2W1}  
7503 Pathogen[ P14075] interacts with 1 human partners:{Q5T2W1}  
7504 Pathogen[ POC206] interacts with 1 human partners:{Q5T2W1}  
7505 Pathogen[ P03363] interacts with 1 human partners:{Q5T2W1}

7506 [Cluster 683]GO:0071877+P biological\_process [name] regulation of adrenergic receptor signaling pathway [def] "Any process that modulates the frequency, rate or extent of an adrenergic receptor signaling pathway activity. An adrenergic receptor signaling pathway is the series of molecular signals generated as a consequence of an adrenergic receptor binding to one of its physiological ligands." [GOC

7507 Pathogen[ Q2Q067] interacts with 1 human partners:{P41220}  
7508 Pathogen[ POC214] interacts with 1 human partners:{P41220}  
7509 Pathogen[ P03346] interacts with 1 human partners:{P41220}  
7510 Pathogen[ Q85601] interacts with 1 human partners:{P41220}  
7511 Pathogen[ P14079] interacts with 1 human partners:{P41220}  
7512 Pathogen[ P03383] interacts with 1 human partners:{P41220}  
7513 Pathogen[ P03410] interacts with 1 human partners:{P41220}  
7514 Pathogen[ P14075] interacts with 1 human partners:{P41220}  
7515 Pathogen[ POC206] interacts with 1 human partners:{P41220}  
7516 Pathogen[ P03363] interacts with 1 human partners:{P41220}

7517 [Cluster 684]GO:0016202+P biological\_process [name] regulation of striated muscle tissue development [def] "Any process that modulates the frequency, rate or extent of striated muscle development." [GOC

7518 Pathogen[ Q2Q067] interacts with 2 human partners:{P49454;P84022}  
7519 Pathogen[ POC214] interacts with 2 human partners:{P84022;P49454}  
7520 Pathogen[ P03346] interacts with 3 human partners:{P84022;P58546;P49454}  
7521 Pathogen[ Q85601] interacts with 2 human partners:{P49454;P84022}  
7522 Pathogen[ P14079] interacts with 1 human partners:{P49454}  
7523 Pathogen[ P03383] interacts with 2 human partners:{P49454;P84022}  
7524 Pathogen[ P03410] interacts with 2 human partners:{P84022;P49454}  
7525 Pathogen[ P14075] interacts with 2 human partners:{P84022;P49454}  
7526 Pathogen[ POC206] interacts with 2 human partners:{P84022;P49454}  
7527 Pathogen[ P03363] interacts with 2 human partners:{P49454;P84022}

7528 [Cluster 685]GO:0006987+P biological\_process [name] activation of signaling protein activity involved in unfolded protein response [def] "The conversion of a specific protein, possessing protein kinase and endoribonuclease activities, to an active form as a result of signaling via the unfolded protein response." [GOC

7529 Pathogen[ Q2Q067] interacts with 20 human  
partners:{P05198;P02545;Q9P0U4;P18847;P18850;P35638;Q9UBS4;Q14203;P27797;Q15173;Q9UB

7530 S3;Q9BQ90;P17861;P18848;Q93075;O14595;Q13105;Q9H2G4;P14625;Q14999}  
Pathogen[ POC214] interacts with 19 human  
partners: {P18850;P14625;O14595;Q14203;Q9UBS3;Q14999;Q9UBS4;P18848;Q15173;P17861;P18847;Q93075;Q9H2G4;P05198;P27797;P02545;Q13105;P35638;Q9BQ90}

7531 Pathogen[ P03346] interacts with 22 human  
partners: {Q9UBS3;P18847;P14625;P35638;P17861;Q9H2G4;Q14203;P02545;Q9BQ90;P18850;P18848;Q9P0U4;Q13105;P27797;Q9UBS4;Q9HCU5;Q14999;P51858;Q15173;Q93075;O14595;P05198}

7532 Pathogen[ Q85601] interacts with 21 human  
partners: {P02545;Q9UBS3;P18848;Q9UBS4;Q15173;P27797;Q14203;Q9P0U4;P18847;Q9BQ90;Q8N6T3;P18850;P05198;P14625;Q14999;Q9H2G4;Q93075;O14595;P17861;Q13105;P35638}

7533 Pathogen[ P14079] interacts with 27 human  
partners: {Q95070;O14773;Q9BQ90;P61421;Q15173;Q9UBS3;Q9UBS4;P43307;P05198;Q13105;P35611;Q9H2G4;Q9Y6X1;O95292;Q969H8;O14653;Q93075;P35638;Q9P0U4;P18850;P14625;Q96FC9;Q15011;P02545;Q14999;Q14203;O43731}

7534 Pathogen[ P03383] interacts with 18 human  
partners: {P02545;Q93075;Q15173;Q14203;P18847;P17861;P35638;Q9UBS4;Q9UBS3;Q13105;P05198;P14625;Q9H2G4;P18848;P18850;Q9BQ90;Q14999;P27797}

7535 Pathogen[ P03410] interacts with 30 human  
partners: {Q95292;P35638;P17861;Q9P0U4;P18847;P18848;P61421;Q15173;P14625;Q93075;Q9UBS3;P43307;Q9Y6X1;P02545;Q9HCU5;Q9UBS4;Q96FC9;Q15011;O14653;Q13105;O43731;Q9H2G4;P18850;P35611;Q9BQ90;Q95070;Q14203;Q5MNZ9;P05198;P27797}

7536 Pathogen[ P14075] interacts with 19 human  
partners: {Q9UBS3;Q13105;P17861;P18847;P35638;Q93075;Q9H2G4;P05198;Q14999;P02545;P27797;Q15173;P18848;Q15011;Q14203;Q9UBS4;P14625;P18850;Q9BQ90}

7537 Pathogen[ POC206] interacts with 26 human  
partners: {Q9P0U4;Q8N6T3;P27797;O14653;P18850;Q9UBS4;Q95070;Q15173;P17861;O95292;Q14999;P05198;Q93075;Q15011;Q9H2G4;O43731;Q9BQ90;P18847;P02545;Q9UBS3;O14595;Q14203;Q13105;P18848;P35638;P14625}

7538 Pathogen[ P03363] interacts with 20 human  
partners: {P51858;P18848;Q13105;P02545;Q93075;P18847;P18850;Q9UBS3;Q9P0U4;P05198;Q9BQ90;Q14999;Q9H2G4;P27797;Q9UBS4;P17861;P35638;Q15173;Q14203;O14595}

7539 [Cluster 686]GO:0045749+P biological\_process [name] negative regulation of S phase of mitotic cell cycle [def] "Any process that stops, prevents, or reduces the frequency, rate or extent of S phase of mitotic cell cycle activity." [GOC]

7540 Pathogen[ Q2Q067] interacts with 8 human  
partners: {O00213;P06400;Q6P1J9;P41182;Q92870;Q9HD42;P51532;Q8N7H5}

7541 Pathogen[ POC214] interacts with 9 human  
partners: {O00213;Q9HD42;Q8IWE4;Q6P1J9;Q8N7H5;P41182;P06400;Q92870;P51532}

7542 Pathogen[ P03346] interacts with 10 human  
partners: {O00213;P06400;Q9HD42;P51532;Q8IWE4;Q92870;P41182;Q8IUI8;Q6P1J9;Q8N7H5}

7543 Pathogen[ Q85601] interacts with 9 human  
partners: {O00213;Q6P1J9;P06400;P51532;Q92870;Q8IWE4;P41182;Q9HD42;Q8N7H5}

7544 Pathogen[ P14079] interacts with 9 human  
partners: {P51532;Q9HD42;O00213;P41182;Q8IUI8;Q6P1J9;Q8N7H5;Q92870;Q8IWE4}

7545 Pathogen[ P03383] interacts with 8 human  
partners: {O00213;Q6P1J9;P06400;Q8IWE4;Q92870;Q9HD42;P51532;Q8N7H5}

7546 Pathogen[ P03410] interacts with 10 human  
partners: {Q8IWE4;O00213;P06400;Q8N7H5;Q9HD42;Q8IUI8;Q6P1J9;P41182;P51532;Q92870}

7547 Pathogen[ P14075] interacts with 7 human  
partners: {O00213;P51532;Q92870;Q8N7H5;Q6P1J9;P06400;Q9HD42}

7548 Pathogen[ POC206] interacts with 9 human  
partners: {P51532;P41182;Q8IWE4;O00213;Q8N7H5;Q92870;Q9HD42;Q6P1J9;P06400}

7549 Pathogen[ P03363] interacts with 7 human  
partners: {O00213;P51532;P06400;Q6P1J9;Q92870;Q8N7H5;Q9HD42}

7550 [Cluster 687]GO:0070423+P biological\_process [name] nucleotide-binding oligomerization domain containing signaling pathway [def] "Any series of molecular signals generated as a consequence of binding to a nucleotide-binding oligomerization domain containing (NOD) protein." [GOC]

7551 Pathogen[ Q2Q067] interacts with 15 human  
partners: {Q96J02;Q9NYJ8;Q14790;Q8N5C8;Q9Y6K9;P61088;P0CG47;O14920;P0CG48;O43318;P62987;Q13404;O15111;Q15750;P62979}

7552 Pathogen[ POC214] interacts with 15 human  
partners: {Q96J02;O15111;Q9Y6K9;Q13404;O43318;Q8N5C8;P0CG48;P62987;Q15750;P0CG47;P62979;O14920;Q9NYJ8;P61088;Q14790}

7553 Pathogen[ P03346] interacts with 15 human  
partners: {Q9Y6K9;Q96J02;O15111;P62987;P0CG48;Q13404;Q8N5C8;P61088;Q9NYJ8;Q15750;P62979;Q14790;P0CG47;O14920;O43318}

7554 Pathogen[ Q85601] interacts with 16 human  
partners: {Q96J02;Q15750;Q9NYJ8;O15111;Q14790;P0CG48;Q13404;Q8N5C8;Q9Y6K9;Q9NQC7;O14920;P62979;P0CG47;P62987;O43318;P61088}

7555 Pathogen[ P14079] interacts with 14 human  
partners: {Q8N5C8;P0CG48;O43187;P52564;Q13404;Q15750;P62979;P62987;Q14790;Q9Y6K9;Q96J02;P0CG47;Q9Y239;Q9NQC7}

7556 Pathogen[ P03383] interacts with 13 human  
partners: {Q9Y6K9;P62987;O14920;O15111;O43318;Q8N5C8;P61088;Q13404;P62979;P0CG47;P0CG48;Q9NYJ8;Q15750}



7557 Pathogen[ P03410] interacts with 15 human partners: {P0CG48;O14920;Q9Y239;O15111;Q15750;O43187;P61088;P62979;O43318;Q9NYJ8;Q8N5C8;P62987;Q13404;Q9Y6K9;P0CG47}

7558 Pathogen[ P14075] interacts with 13 human partners: {O15111;Q15750;P61088;Q8N5C8;O14920;P0CG48;P62979;O43318;P62987;P0CG47;Q13404;Q9Y6K9;Q9NYJ8}

7559 Pathogen[ P0C206] interacts with 16 human partners: {Q9NQC7;P0CG48;O14920;Q9Y6K9;Q8N5C8;Q96J02;O43318;P61088;O15111;P62979;Q14790;Q9NYJ8;P0CG47;Q15750;P62987;Q13404}

7560 Pathogen[ P03363] interacts with 10 human partners: {O14920;O15111;Q9NYJ8;Q9Y6K9;O43318;Q15750;P61088;P62987;Q13404;Q8N5C8}

7561 [Cluster 688]GO:0090009+P biological\_process [name] primitive streak formation [def] "The developmental process pertaining to the initial formation of the primitive streak from unspecified parts. The primitive streak is a ridge of cells running along the midline of the embryo where the mesoderm ingresses. It defines the anterior-posterior axis." [GOC

7562 Pathogen[ Q2Q067] interacts with 1 human partners: {P11831}

7563 Pathogen[ P0C214] interacts with 2 human partners: {P32243;P11831}

7564 Pathogen[ P03346] interacts with 2 human partners: {P11831;P32243}

7565 Pathogen[ Q85601] interacts with 2 human partners: {P11831;P32243}

7566 Pathogen[ P14079] interacts with 1 human partners: {P32243}

7567 Pathogen[ P03383] interacts with 2 human partners: {P11831;P32243}

7568 Pathogen[ P03410] interacts with 2 human partners: {P11831;P32243}

7569 Pathogen[ P14075] interacts with 2 human partners: {P11831;P32243}

7570 Pathogen[ P0C206] interacts with 2 human partners: {P32243;P11831}

7571 Pathogen[ P03363] interacts with 2 human partners: {P32243;P11831}

7572 [Cluster 689]GO:0030520+P biological\_process [name] intracellular estrogen receptor signaling pathway [def] "Any series of molecular signals generated as a consequence of an intracellular estrogen receptor binding to one of its physiological ligands. The pathway begins with receptor-ligand binding, and ends with regulation of a downstream cellular process (e.g. transcription)." [GOC

7573 Pathogen[ Q2Q067] interacts with 9 human partners: {Q12837;Q15424;O75528;O14497;O43251;Q96KS0;Q14686;Q15545;Q96PK6}

7574 Pathogen[ P0C214] interacts with 9 human partners: {O75528;O14497;Q96KS0;Q14686;Q15545;Q12837;Q96PK6;Q15424;O43251}

7575 Pathogen[ P03346] interacts with 9 human partners: {Q12837;O75528;O14497;O43251;Q96KS0;Q15424;Q15545;Q96PK6;Q14686}

7576 Pathogen[ Q85601] interacts with 8 human partners: {Q96PK6;O75528;Q15424;Q15545;O14497;Q14686;Q96KS0;Q12837}

7577 Pathogen[ P14079] interacts with 8 human partners: {O75528;O14497;Q12837;Q15424;Q96KS0;Q14686;Q96PK6;Q15545}

7578 Pathogen[ P03383] interacts with 8 human partners: {O14497;O75528;Q14686;Q96KS0;Q96PK6;Q12837;Q15424;Q15545}

7579 Pathogen[ P03410] interacts with 8 human partners: {Q96PK6;Q96KS0;O14497;Q14686;O75528;Q15424;Q12837;Q15545}

7580 Pathogen[ P14075] interacts with 8 human partners: {Q96KS0;Q14686;Q12837;O14497;O75528;Q96PK6;Q15424;Q15545}

7581 Pathogen[ P0C206] interacts with 8 human partners: {O75528;Q15545;Q96KS0;Q12837;O14497;Q96PK6;Q14686;Q15424}

7582 Pathogen[ P03363] interacts with 8 human partners: {O14497;Q15545;Q14686;Q96PK6;Q15424;Q12837;O43251;O75528}

7583 [Cluster 690]GO:0048168+P biological\_process [name] regulation of neuronal synaptic plasticity [def] "A process that modulates neuronal synaptic plasticity, the ability of neuronal synapses to change as circumstances require. They may alter function, such as increasing or decreasing their sensitivity, or they may increase or decrease in actual numbers." [GOC

7584 Pathogen[ Q2Q067] interacts with 3 human partners: {O14503;Q9UBB6;P11161}

7585 Pathogen[ P0C214] interacts with 3 human partners: {Q9UBB6;O14503;P11161}

7586 Pathogen[ P03346] interacts with 3 human partners: {O14503;P11161;Q9UBB6}

7587 Pathogen[ Q85601] interacts with 2 human partners: {O14503;P11161}

7588 Pathogen[ P14079] interacts with 3 human partners: {P11161;Q9UBB6;O14503}

7589 Pathogen[ P03383] interacts with 3 human partners: {Q9UBB6;O14503;P11161}

7590 Pathogen[ P03410] interacts with 2 human partners: {Q9UBB6;P11161}

7591 Pathogen[ P14075] interacts with 3 human partners: {P11161;O14503;Q9UBB6}

7592 Pathogen[ P0C206] interacts with 2 human partners: {P11161;Q9UBB6}

7593 Pathogen[ P03363] interacts with 3 human partners: {Q9UBB6;O14503;P11161}

7594 [Cluster 691]GO:0035646+P biological\_process [name] endosome to melanosome transport [def] "The directed movement of substances from endosomes to the melanosome, a specialised lysosome-related organelle." [PMID

7595 Pathogen[ Q2Q067] interacts with 4 human partners: {Q9UL45;Q6QNY0;Q8TDH9;Q9BXS5}

7596 Pathogen[ P0C214] interacts with 4 human partners: {Q8TDH9;Q6QNY0;Q9UL45;Q9BXS5}

7597 Pathogen[ P03346] interacts with 4 human partners: {Q9BXS5;Q6QNY0;Q9UL45;Q8TDH9}

7598 Pathogen[ Q85601] interacts with 3 human partners: {Q6QNY0;Q9BXS5;Q8TDH9}

7599 Pathogen[ P14079] interacts with 4 human partners: {Q9BXS5;Q6QNY0;Q9UL45;Q8TDH9}

7600 Pathogen[ P03383] interacts with 3 human partners: {Q6QNY0;Q8TDH9;Q9BXS5}

7601 Pathogen[ P03410] interacts with 4 human partners: {Q9BXS5;Q6QNY0;Q9UL45;Q8TDH9}

7602 Pathogen[ P14075] interacts with 3 human partners:{Q6QNY0;Q8TDH9;Q9BXS5}  
7603 Pathogen[ P0C206] interacts with 4 human partners:{Q9UL45;Q8TDH9;Q9BXS5;Q6QNY0}  
7604 Pathogen[ P03363] interacts with 3 human partners:{Q9BXS5;Q8TDH9;Q6QNY0}  
7605 [Cluster 692]GO:0015992+P biological\_process [name] proton transport [def] "The directed movement of protons (hydrogen ions) into, out of or within a cell, or between cells, by means of some agent such as a transporter or pore." [GOC  
7606 Pathogen[ Q2Q067] interacts with 2 human partners:{P36543;P24539}  
7607 Pathogen[ P0C214] interacts with 6 human partners:{Q16864;Q9UI12;P36543;P36542;P24539;Q99766}  
7608 Pathogen[ P03346] interacts with 6 human partners:{P21283;Q9Y5K8;P36543;Q93050;P24539;Q16864}  
7609 Pathogen[ Q85601] interacts with 4 human partners:{P24539;Q93050;Q99766;P36543}  
7610 Pathogen[ P14079] interacts with 20 human partners:{P36543;P36542;Q9Y5K8;P56134;P25705;P61421;Q96LB4;P56385;Q5VTU8;Q7Z4Y8;P03928;Q8N8Y2;Q99766;O75964;Q93050;Q9UI12;P56381;O95670;Q16864;P24539}  
7611 Pathogen[ P03383] interacts with 2 human partners:{P36543;P24539}  
7612 Pathogen[ P03410] interacts with 23 human partners:{Q99766;Q8N8Y2;P36542;P25705;P61421;Q93050;P56385;P56381;Q5VTU8;P03928;Q9UI12;Q96LB4;P24539;O95670;O75964;Q96D96;Q16864;Q9Y5K8;P18859;O75348;P36543;P56134;Q7Z4Y8}  
7613 Pathogen[ P14075] interacts with 4 human partners:{Q99766;P24539;P56385;P36543}  
7614 Pathogen[ P0C206] interacts with 10 human partners:{P36543;Q99766;P36542;Q9UI12;P24539;Q9Y5K8;Q16864;P56381;P56385;Q93050}  
7615 Pathogen[ P03363] interacts with 2 human partners:{P36543;Q9Y5K8}  
7616 [Cluster 693]GO:0007029+P biological\_process [name] endoplasmic reticulum organization [def] "A process that is carried out at the cellular level which results in the assembly, arrangement of constituent parts, or disassembly of the endoplasmic reticulum." [GOC  
7617 Pathogen[ Q2Q067] interacts with 3 human partners:{O15027;Q9Y3R5;Q96JE7}  
7618 Pathogen[ P0C214] interacts with 3 human partners:{Q9Y3R5;Q96JE7;O15027}  
7619 Pathogen[ P03346] interacts with 5 human partners:{O15027;Q12981;Q9Y3R5;Q96JE7;P50542}  
7620 Pathogen[ Q85601] interacts with 4 human partners:{O15027;Q96JE7;Q12981;Q9Y3R5}  
7621 Pathogen[ P14079] interacts with 6 human partners:{O15027;Q96JE7;P50542;Q12981;Q9NZ43;Q9Y3R5}  
7622 Pathogen[ P03383] interacts with 3 human partners:{Q9Y3R5;O15027;Q96JE7}  
7623 Pathogen[ P03410] interacts with 5 human partners:{Q9NZ43;Q96JE7;P50542;O15027;Q12981}  
7624 Pathogen[ P14075] interacts with 3 human partners:{Q96JE7;O15027;Q9Y3R5}  
7625 Pathogen[ P0C206] interacts with 5 human partners:{Q9Y3R5;P50542;Q96JE7;Q12981;O15027}  
7626 Pathogen[ P03363] interacts with 1 human partners:{Q9Y3R5}  
7627 [Cluster 694]GO:0006921+P biological\_process [name] cellular component disassembly involved in apoptosis [def] "The breakdown of structures such as organelles, proteins, or other macromolecular structures during apoptosis." [GOC  
7628 Pathogen[ Q2Q067] interacts with 20 human partners:{Q14974;P02545;P20700;O00273;P15924;Q13794;Q14790;Q07157;P55212;P06396;Q9UDY2;P49354;Q96BY2;Q9UKV3;Q01826;P08670;Q13490;Q9HAW4;P52294;O76075}  
7629 Pathogen[ P0C214] interacts with 22 human partners:{P49354;Q13490;Q96BY2;P55212;P15924;P06396;P20700;Q9HAW4;Q13794;O00273;P52294;P08670;P42574;Q9UDY2;Q01826;Q9UKV3;Q14974;P02545;P55210;Q07157;O76075;Q14790}  
7630 Pathogen[ P03346] interacts with 25 human partners:{P15924;Q9UDY2;P20700;Q15149;Q13835;P42574;P55212;Q96BY2;P02545;Q9UKV3;Q13813;Q9HAW4;P49354;Q07157;P08670;O76075;Q14790;Q13490;P55210;P06396;P52294;Q01826;Q13794;O00273;Q14974}  
7631 Pathogen[ Q85601] interacts with 21 human partners:{P20700;P02545;Q13490;P06396;P08670;Q14790;Q9UDY2;Q96BY2;O76075;Q14974;P15924;P49354;Q9UKV3;Q9HAW4;O00273;Q01826;Q07157;P55212;P52294;Q13794;P55210}  
7632 Pathogen[ P14079] interacts with 28 human partners:{O76075;Q9UDY2;P49354;P15924;Q07157;Q13835;P52294;Q01826;P55212;P35611;Q15149;Q9HAW4;Q14790;Q96BY2;Q9UKV3;P55210;Q14974;Q13794;O43903;P20700;P08670;Q16625;P02545;Q13813;P07305;O00273;Q13490;P10636}  
7633 Pathogen[ P03383] interacts with 17 human partners:{P02545;P15924;P55212;P08670;Q01826;Q13490;Q07157;O00273;P20700;Q9UKV3;Q9HAW4;Q14974;Q13794;P52294;Q9UDY2;Q96BY2;P06396}  
7634 Pathogen[ P03410] interacts with 27 human partners:{P49354;P15924;Q14974;O43903;P52294;P06396;O76075;Q13490;P20700;O00273;Q96BY2;Q9HAW4;Q13794;Q13835;Q9UDY2;Q9UKV3;Q07157;P02545;Q01826;P08670;Q16625;P10636;Q15149;P55212;Q13813;P35611;P55210}  
7635 Pathogen[ P14075] interacts with 17 human partners:{Q96BY2;O00273;Q07157;P55212;P20700;Q9UKV3;Q01826;Q9HAW4;P52294;P02545;Q13490;P06396;Q13794;P08670;Q9UDY2;Q14974;P15924}  
7636 Pathogen[ P0C206] interacts with 24 human partners:{P06396;O76075;Q14974;P55212;Q9UDY2;P10636;P49354;Q13835;Q96BY2;Q14790;P42574;P15924;Q07157;P02545;Q01826;P20700;P08670;P52294;Q9HAW4;P55210;O00273;Q9UKV3;Q13794;Q13490}

7637 Pathogen[ P03363] interacts with 23 human partners:{Q13490;O00273;Q13835;Q9HAW4;P02545;Q9UKV3;Q13794;P20700;Q01826;P49354;Q07157;P15924;P06396;P55212;Q15149;Q96BY2;O76075;P08670;Q14974;Q9UDY2;P55210;Q13813;P52294}

7638 [Cluster 695]GO:0001919+P biological\_process [name] regulation of receptor recycling [def] "Any process that modulates the frequency, rate, or extent of receptor recycling." [GOC]

7639 Pathogen[ Q2Q067] interacts with 1 human partners:{Q9NZZ3}

7640 Pathogen[ P0C214] interacts with 1 human partners:{Q9NZZ3}

7641 Pathogen[ P03346] interacts with 1 human partners:{Q9NZZ3}

7642 Pathogen[ Q85601] interacts with 1 human partners:{Q9NZZ3}

7643 Pathogen[ P14079] interacts with 2 human partners:{Q6IAA8;Q9NZZ3}

7644 Pathogen[ P03383] interacts with 1 human partners:{Q9NZZ3}

7645 Pathogen[ P03410] interacts with 2 human partners:{Q9NZZ3;Q6IAA8}

7646 Pathogen[ P14075] interacts with 1 human partners:{Q9NZZ3}

7647 Pathogen[ P0C206] interacts with 1 human partners:{Q9NZZ3}

7648 Pathogen[ P03363] interacts with 1 human partners:{Q9NZZ3}

7649 [Cluster 696]GO:0006407+P biological\_process [name] rRNA export from nucleus [def] "The directed movement of rRNA from the nucleus to the cytoplasm\_ the rRNA is usually in the form of ribonucleoproteins." [GOC]

7650 Pathogen[ Q2Q067] interacts with 1 human partners:{P08865}

7651 Pathogen[ P0C214] interacts with 1 human partners:{P08865}

7652 Pathogen[ P03346] interacts with 1 human partners:{P08865}

7653 Pathogen[ Q85601] interacts with 1 human partners:{P08865}

7654 Pathogen[ P14079] interacts with 1 human partners:{P08865}

7655 Pathogen[ P03383] interacts with 1 human partners:{P08865}

7656 Pathogen[ P03410] interacts with 1 human partners:{P08865}

7657 Pathogen[ P14075] interacts with 1 human partners:{P08865}

7658 Pathogen[ P0C206] interacts with 1 human partners:{P08865}

7659 Pathogen[ P03363] interacts with 1 human partners:{P08865}

7660 [Cluster 697]GO:0001510+P biological\_process [name] RNA methylation [def] "Posttranscriptional addition of a methyl group to either a nucleotide or 2'-O ribose in a polyribonucleotide. Usually uses S-adenosylmethionine as a cofactor." [GOC]

7661 Pathogen[ Q2Q067] interacts with 5 human partners:{Q96RS0;Q7Z5W3;Q9UI43;Q5T8I9;Q8IY81}

7662 Pathogen[ P0C214] interacts with 8 human partners:{Q9UET6;Q7Z5W3;Q5T8I9;Q9UI43;Q8IY81;Q96RS0;Q9HCE5;Q6IN84}

7663 Pathogen[ P03346] interacts with 9 human partners:{Q9HCE5;Q5T8I9;Q86U44;Q96RS0;Q8IY81;Q6IN84;Q7Z5W3;Q13395;Q9UI43}

7664 Pathogen[ Q85601] interacts with 7 human partners:{Q7Z5W3;Q5T8I9;Q9UI43;Q9UET6;Q96RS0;Q8IY81;Q9HCE5}

7665 Pathogen[ P14079] interacts with 11 human partners:{Q96RS0;Q9UI43;Q9HC36;Q7L2J0;Q8IY81;Q9HCE5;Q86U44;Q9UET6;Q6IN84;Q13395;Q7Z5W3}

7666 Pathogen[ P03383] interacts with 6 human partners:{Q5T8I9;Q9UI43;Q9UET6;Q8IY81;Q96RS0;Q7Z5W3}

7667 Pathogen[ P03410] interacts with 12 human partners:{Q96RS0;Q9HCE5;Q9HC36;Q5T8I9;Q13395;Q6IN84;Q7Z5W3;Q9UI43;Q7L2J0;Q8IY81;Q86U44;Q9UET6}

7668 Pathogen[ P14075] interacts with 7 human partners:{Q6IN84;Q9UET6;Q8IY81;Q7Z5W3;Q9UI43;Q5T8I9;Q96RS0}

7669 Pathogen[ P0C206] interacts with 9 human partners:{Q96RS0;Q9UI43;Q9UET6;Q7Z5W3;Q5T8I9;Q9HCE5;Q6IN84;Q7L2J0;Q8IY81}

7670 Pathogen[ P03363] interacts with 9 human partners:{Q96RS0;Q5T8I9;Q9UET6;Q86U44;Q8IY81;Q13395;Q9HCE5;Q7Z5W3;Q9UI43}

7671 [Cluster 698]GO:2000352+P biological\_process [name] negative regulation of endothelial cell apoptosis [def] "Any process that stops, prevents or reduces the frequency, rate or extent of endothelial cell apoptosis." [GOC]

7672 Pathogen[ Q2Q067] interacts with 1 human partners:{Q8NFX5}

7673 Pathogen[ P0C214] interacts with 1 human partners:{Q8NFX5}

7674 Pathogen[ P03346] interacts with 2 human partners:{Q8NFX5;O00522}

7675 Pathogen[ Q85601] interacts with 1 human partners:{Q8NFX5}

7676 Pathogen[ P14079] interacts with 3 human partners:{O60895;Q8NFX5;O00522}

7677 Pathogen[ P03383] interacts with 1 human partners:{Q8NFX5}

7678 Pathogen[ P03410] interacts with 3 human partners:{Q8NFX5;O60895;O00522}

7679 Pathogen[ P14075] interacts with 1 human partners:{Q8NFX5}

7680 Pathogen[ P0C206] interacts with 2 human partners:{Q8NFX5;O00522}

7681 Pathogen[ P03363] interacts with 2 human partners:{O00522;Q8NFX5}

7682 [Cluster 699]GO:0031508+P biological\_process [name] centromeric heterochromatin assembly [def] "The assembly of chromatin into heterochromatin near the centromere." [GOC]

7683 Pathogen[ Q2Q067] interacts with 1 human partners:{Q7Z7K6}

7684 Pathogen[ P0C214] interacts with 1 human partners:{Q7Z7K6}

7685 Pathogen[ P03346] interacts with 2 human partners:{Q9NRZ9;Q7Z7K6}

7686 Pathogen[ Q85601] interacts with 1 human partners:{Q7Z7K6}

7687 Pathogen[ P14079] interacts with 1 human partners:{Q7Z7K6}

7688 Pathogen[ P03383] interacts with 1 human partners:{Q7Z7K6}

7689 Pathogen[ P03410] interacts with 1 human partners:{Q7Z7K6}

7690 Pathogen[ P14075] interacts with 1 human partners:{Q7Z7K6}

7691 Pathogen[ P0C206] interacts with 2 human partners:{Q7Z7K6;Q9NRZ9}

7692 Pathogen[ P03363] interacts with 1 human partners:{Q7Z7K6}

7693 [Cluster 700]GO:0045730+P biological\_process [name] respiratory burst [def] "A phase of elevated metabolic activity, during which oxygen consumption increases\_ this leads to the production, by an NADH dependent system, of hydrogen peroxide (H2O2), superoxide anions and hydroxyl radicals." [ISBN

7694 Pathogen[ Q2Q067] interacts with 2 human partners:{P25063;P18669}

7695 Pathogen[ P0C214] interacts with 1 human partners:{P25063}

7696 Pathogen[ P03346] interacts with 2 human partners:{P18669;P25063}

7697 Pathogen[ Q85601] interacts with 1 human partners:{P18669}

7698 Pathogen[ P14079] interacts with 4 human partners:{P13498;P31358;P25063;P18669}

7699 Pathogen[ P03383] interacts with 2 human partners:{P18669;P25063}

7700 Pathogen[ P03410] interacts with 3 human partners:{P31358;P25063;P18669}

7701 Pathogen[ P14075] interacts with 2 human partners:{P18669;P25063}

7702 Pathogen[ P0C206] interacts with 2 human partners:{P25063;P18669}

7703 Pathogen[ P03363] interacts with 1 human partners:{P18669}

7704 [Cluster 701]GO:0070886+P biological\_process [name] positive regulation of calcineurin-NFAT signaling pathway [def] "Any process that activates or increases the frequency, rate or extent of signaling via the calcineurin-NFAT signaling pathway." [GOC

7705 Pathogen[ Q2Q067] interacts with 1 human partners:{O43745}

7706 Pathogen[ P0C214] interacts with 1 human partners:{O43745}

7707 Pathogen[ P03346] interacts with 2 human partners:{Q9NZU5;O43745}

7708 Pathogen[ Q85601] interacts with 2 human partners:{Q9NZU5;O43745}

7709 Pathogen[ P14079] interacts with 2 human partners:{O43745;Q9NZU5}

7710 Pathogen[ P03383] interacts with 1 human partners:{O43745}

7711 Pathogen[ P03410] interacts with 1 human partners:{O43745}

7712 Pathogen[ P14075] interacts with 1 human partners:{O43745}

7713 Pathogen[ P0C206] interacts with 2 human partners:{Q9NZU5;O43745}

7714 Pathogen[ P03363] interacts with 2 human partners:{Q9NZU5;O43745}

7715 [Cluster 702]GO:2000178+P biological\_process [name] negative regulation of neural precursor cell proliferation [def] "Any process that stops, prevents, or reduces the frequency, rate or extent of neural precursor cell proliferation." [GOC

7716 Pathogen[ Q2Q067] interacts with 3 human partners:{Q8NHM5;P23769;P78543}

7717 Pathogen[ P0C214] interacts with 3 human partners:{P78543;P23769;Q8NHM5}

7718 Pathogen[ P03346] interacts with 3 human partners:{P23769;Q8NHM5;P78543}

7719 Pathogen[ Q85601] interacts with 3 human partners:{P23769;P78543;Q8NHM5}

7720 Pathogen[ P14079] interacts with 3 human partners:{P78543;Q8NHM5;P23769}

7721 Pathogen[ P03383] interacts with 2 human partners:{P23769;P78543}

7722 Pathogen[ P03410] interacts with 2 human partners:{P78543;P23769}

7723 Pathogen[ P14075] interacts with 2 human partners:{P23769;P78543}

7724 Pathogen[ P0C206] interacts with 3 human partners:{Q8NHM5;P23769;P78543}

7725 Pathogen[ P03363] interacts with 1 human partners:{P78543}

7726 [Cluster 703]GO:0032020+P biological\_process [name] ISG15-protein conjugation [def] "The covalent addition to a protein of ISG15, a ubiquitin-like protein." [GOC

7727 Pathogen[ Q2Q067] interacts with 3 human partners:{Q9UII4;P51965;O14933}

7728 Pathogen[ P0C214] interacts with 4 human partners:{O14933;P51965;Q9UII4;Q96LR5}

7729 Pathogen[ P03346] interacts with 3 human partners:{Q9UII4;P51965;O14933}

7730 Pathogen[ Q85601] interacts with 3 human partners:{O14933;Q96LR5;P51965}

7731 Pathogen[ P14079] interacts with 2 human partners:{P51965;O14933}

7732 Pathogen[ P03383] interacts with 2 human partners:{O14933;P51965}

7733 Pathogen[ P03410] interacts with 2 human partners:{P51965;O14933}

7734 Pathogen[ P14075] interacts with 2 human partners:{P51965;O14933}

7735 Pathogen[ P0C206] interacts with 3 human partners:{O14933;Q96LR5;P51965}

7736 Pathogen[ P03363] interacts with 3 human partners:{P51965;O14933;Q9UII4}

7737 [Cluster 704]GO:2000677+P biological\_process [name] regulation of transcription regulatory region DNA binding [def] "Any process that modulates the frequency, rate or extent of transcription regulatory region DNA binding." [GOC

7738 Pathogen[ Q2Q067] interacts with 1 human partners:{Q8TEK3}

7739 Pathogen[ P0C214] interacts with 1 human partners:{Q8TEK3}

7740 Pathogen[ P03346] interacts with 1 human partners:{Q8TEK3}

7741 Pathogen[ Q85601] interacts with 1 human partners:{Q8TEK3}

7742 Pathogen[ P14079] interacts with 1 human partners:{Q8TEK3}

7743 Pathogen[ P03383] interacts with 1 human partners:{Q8TEK3}

7744 Pathogen[ P03410] interacts with 1 human partners:{Q8TEK3}

7745 Pathogen[ P14075] interacts with 1 human partners:{Q8TEK3}

7746 Pathogen[ P0C206] interacts with 1 human partners:{Q8TEK3}

7747 Pathogen[ P03363] interacts with 1 human partners:{Q8TEK3}

7748 [Cluster 705]GO:0010803+P biological\_process [name] regulation of tumor necrosis factor-mediated signaling pathway [def] "Any process that modulates the rate or extent of the tumor necrosis factor-mediated signaling pathway. The tumor necrosis factor-mediated signaling pathway is the series of molecular signals generated as a consequence of tumor necrosis factor binding to a cell surface receptor." [GOC

7749 Pathogen[ Q2Q067] interacts with 1 human partners:{Q9H0F6}

7750 Pathogen[ P0C214] interacts with 1 human partners:{Q9H0F6}  
7751 Pathogen[ P03346] interacts with 2 human partners:{Q9H0F6;Q86Z02}  
7752 Pathogen[ Q85601] interacts with 1 human partners:{Q9H0F6}  
7753 Pathogen[ P14079] interacts with 1 human partners:{Q9H0F6}  
7754 Pathogen[ P03383] interacts with 1 human partners:{Q9H0F6}  
7755 Pathogen[ P03410] interacts with 1 human partners:{Q9H0F6}  
7756 Pathogen[ P14075] interacts with 1 human partners:{Q9H0F6}  
7757 Pathogen[ P0C206] interacts with 1 human partners:{Q9H0F6}  
7758 Pathogen[ P03363] interacts with 1 human partners:{Q9H0F6}  
7759 [Cluster 706]GO:0019441+P biological\_process [name] tryptophan catabolic process to  
kynurenine [def] "The chemical reactions and pathways resulting in the breakdown of  
tryptophan into other compounds, including kynurenine." [GOC  
7760 Pathogen[ Q2Q067] interacts with 2 human partners:{Q63HM1;Q16719}  
7761 Pathogen[ P0C214] interacts with 2 human partners:{Q63HM1;Q16719}  
7762 Pathogen[ P03346] interacts with 2 human partners:{Q63HM1;Q16719}  
7763 Pathogen[ Q85601] interacts with 2 human partners:{Q16719;Q63HM1}  
7764 Pathogen[ P14079] interacts with 3 human partners:{P48775;Q63HM1;Q16719}  
7765 Pathogen[ P03383] interacts with 2 human partners:{Q63HM1;Q16719}  
7766 Pathogen[ P03410] interacts with 3 human partners:{Q16719;Q63HM1;P48775}  
7767 Pathogen[ P14075] interacts with 2 human partners:{Q16719;Q63HM1}  
7768 Pathogen[ P0C206] interacts with 2 human partners:{Q16719;Q63HM1}  
7769 Pathogen[ P03363] interacts with 1 human partners:{Q63HM1}  
7770 [Cluster 707]GO:0006428+P biological\_process [name] isoleucyl-tRNA aminoacylation  
[def] "The process of coupling isoleucine to isoleucyl-tRNA, catalyzed by isoleucyl-tRNA  
synthetase. In tRNA aminoacylation, the amino acid is first activated by linkage to AMP  
and then transferred to either the 2'- or the 3'-hydroxyl group of the 3'-adenosine  
residue of the tRNA." [GOC  
7771 Pathogen[ Q2Q067] interacts with 1 human partners:{P41252}  
7772 Pathogen[ P0C214] interacts with 2 human partners:{Q9NSE4;P41252}  
7773 Pathogen[ P03346] interacts with 1 human partners:{P41252}  
7774 Pathogen[ Q85601] interacts with 1 human partners:{P41252}  
7775 Pathogen[ P14079] interacts with 2 human partners:{P41252;Q9NSE4}  
7776 Pathogen[ P03383] interacts with 1 human partners:{P41252}  
7777 Pathogen[ P03410] interacts with 2 human partners:{Q9NSE4;P41252}  
7778 Pathogen[ P14075] interacts with 2 human partners:{P41252;Q9NSE4}  
7779 Pathogen[ P0C206] interacts with 2 human partners:{Q9NSE4;P41252}  
7780 Pathogen[ P03363] interacts with 1 human partners:{P41252}  
7781 [Cluster 708]GO:0042278+P biological\_process [name] purine nucleoside metabolic  
process [def] "The chemical reactions and pathways involving one of a family of organic  
molecules consisting of a purine base covalently bonded to a sugar ribose (a  
ribonucleoside) or deoxyribose (a deoxyribonucleoside)." [GOC  
7782 Pathogen[ Q2Q067] interacts with 1 human partners:{Q9BQ69}  
7783 Pathogen[ P0C214] interacts with 1 human partners:{Q9BQ69}  
7784 Pathogen[ P03346] interacts with 1 human partners:{Q9BQ69}  
7785 Pathogen[ Q85601] interacts with 1 human partners:{Q9BQ69}  
7786 Pathogen[ P14079] interacts with 1 human partners:{Q9Y530}  
7787 Pathogen[ P03383] interacts with 1 human partners:{Q9BQ69}  
7788 Pathogen[ P03410] interacts with 2 human partners:{Q9Y530;Q9BQ69}  
7789 Pathogen[ P14075] interacts with 1 human partners:{Q9BQ69}  
7790 Pathogen[ P0C206] interacts with 2 human partners:{Q9Y530;Q9BQ69}  
7791 Pathogen[ P03363] interacts with 1 human partners:{Q9BQ69}  
7792 [Cluster 709]GO:2000348+P biological\_process [name] regulation of CD40 signaling  
pathway [def] "Any process that modulates the frequency, rate or extent of signaling via  
the CD40 signaling pathway." [GOC  
7793 Pathogen[ Q2Q067] interacts with 1 human partners:{Q9H0F6}  
7794 Pathogen[ P0C214] interacts with 1 human partners:{Q9H0F6}  
7795 Pathogen[ P03346] interacts with 1 human partners:{Q9H0F6}  
7796 Pathogen[ Q85601] interacts with 1 human partners:{Q9H0F6}  
7797 Pathogen[ P14079] interacts with 1 human partners:{Q9H0F6}  
7798 Pathogen[ P03383] interacts with 1 human partners:{Q9H0F6}  
7799 Pathogen[ P03410] interacts with 1 human partners:{Q9H0F6}  
7800 Pathogen[ P14075] interacts with 1 human partners:{Q9H0F6}  
7801 Pathogen[ P0C206] interacts with 1 human partners:{Q9H0F6}  
7802 Pathogen[ P03363] interacts with 1 human partners:{Q9H0F6}  
7803 [Cluster 710]GO:0045086+P biological\_process [name] positive regulation of  
interleukin-2 biosynthetic process [def] "Any process that activates or increases the  
frequency, rate or extent of the chemical reactions and pathways resulting in the  
formation of interleukin-2." [GOC  
7804 Pathogen[ Q2Q067] interacts with 2 human partners:{Q92990;Q15306}  
7805 Pathogen[ P0C214] interacts with 1 human partners:{Q15306}  
7806 Pathogen[ P03346] interacts with 2 human partners:{Q92990;Q15306}  
7807 Pathogen[ Q85601] interacts with 1 human partners:{Q15306}  
7808 Pathogen[ P14079] interacts with 3 human partners:{Q9BXL7;Q15306;Q92990}  
7809 Pathogen[ P03383] interacts with 2 human partners:{Q15306;Q92990}  
7810 Pathogen[ P03410] interacts with 3 human partners:{Q15306;Q9BXL7;Q92990}  
7811 Pathogen[ P14075] interacts with 2 human partners:{Q92990;Q15306}

7812 Pathogen[ P0C206] interacts with 2 human partners:{Q15306;Q92990}  
7813 Pathogen[ P03363] interacts with 2 human partners:{Q92990;Q15306}  
7814 [Cluster 711]GO:0061312+P biological\_process [name] BMP signaling pathway involved in heart development [def] "A series of molecular signals generated as a consequence of any member of the BMP (bone morphogenetic protein) family binding to a cell surface receptor and contributing to the progression of the heart over time." [GOC  
7815 Pathogen[ Q2Q067] interacts with 1 human partners:{P35548}  
7816 Pathogen[ P0C214] interacts with 1 human partners:{P35548}  
7817 Pathogen[ P03346] interacts with 1 human partners:{P35548}  
7818 Pathogen[ Q85601] interacts with 1 human partners:{P35548}  
7819 Pathogen[ P14079] interacts with 1 human partners:{P28360}  
7820 Pathogen[ P03383] interacts with 1 human partners:{P35548}  
7821 Pathogen[ P03410] interacts with 1 human partners:{P35548}  
7822 Pathogen[ P14075] interacts with 1 human partners:{P35548}  
7823 Pathogen[ P0C206] interacts with 1 human partners:{P35548}  
7824 Pathogen[ P03363] interacts with 1 human partners:{P35548}  
7825 [Cluster 712]GO:0045736+P biological\_process [name] negative regulation of cyclin-dependent protein kinase activity [def] "Any process that stops, prevents, or reduces the frequency, rate or extent of CDK activity." [GOC  
7826 Pathogen[ Q2Q067] interacts with 8 human partners:{Q01664;Q96MH2;O94992;Q92831;O00255;P38936;P42771;P46527}  
7827 Pathogen[ P0C214] interacts with 9 human partners:{P46527;P38936;Q96MH2;P42574;P42771;O94992;Q92831;Q01664;O00255}  
7828 Pathogen[ P03346] interacts with 9 human partners:{P42574;Q92831;P42771;O00255;O94992;Q96MH2;P38936;P46527;Q01664}  
7829 Pathogen[ Q85601] interacts with 8 human partners:{Q96MH2;Q92831;O00255;P42771;O94992;P38936;Q01664;P46527}  
7830 Pathogen[ P14079] interacts with 8 human partners:{P38936;Q01664;O94992;Q96SZ6;P46527;Q96MH2;O00255;P42771}  
7831 Pathogen[ P03383] interacts with 7 human partners:{Q96MH2;Q92831;Q01664;P46527;O00255;O94992;P42771}  
7832 Pathogen[ P03410] interacts with 8 human partners:{Q92831;P42771;P46527;P38936;Q01664;O00255;O94992;Q96MH2}  
7833 Pathogen[ P14075] interacts with 7 human partners:{Q92831;Q96MH2;P42771;P46527;O94992;O00255;Q01664}  
7834 Pathogen[ P0C206] interacts with 9 human partners:{O00255;Q96MH2;P42771;Q92831;O94992;P46527;P38936;P42574;Q01664}  
7835 Pathogen[ P03363] interacts with 5 human partners:{O94992;Q92831;Q96MH2;Q01664;P42771}  
7836 [Cluster 713]GO:0045682+P biological\_process [name] regulation of epidermis development [def] "Any process that modulates the frequency, rate or extent of epidermis development." [GOC  
7837 Pathogen[ Q2Q067] interacts with 4 human partners:{P22392;Q92754;Q15742;Q13506}  
7838 Pathogen[ P0C214] interacts with 4 human partners:{Q15742;Q13506;Q92754;P22392}  
7839 Pathogen[ P03346] interacts with 4 human partners:{Q92754;Q15742;Q13506;P22392}  
7840 Pathogen[ Q85601] interacts with 4 human partners:{Q92754;Q13506;Q15742;P22392}  
7841 Pathogen[ P14079] interacts with 4 human partners:{Q13506;Q15742;P22392;Q92754}  
7842 Pathogen[ P03383] interacts with 4 human partners:{P22392;Q15742;Q13506;Q92754}  
7843 Pathogen[ P03410] interacts with 3 human partners:{Q15742;Q92754;Q13506}  
7844 Pathogen[ P14075] interacts with 4 human partners:{Q13506;Q92754;Q15742;P22392}  
7845 Pathogen[ P0C206] interacts with 4 human partners:{P22392;Q92754;Q15742;Q13506}  
7846 Pathogen[ P03363] interacts with 3 human partners:{Q13506;Q15742;Q92754}  
7847 [Cluster 714]GO:0019079+P biological\_process [name] viral genome replication [def] "Any process involved directly in viral genome replication, including viral nucleotide metabolism." [ISBN  
7848 Pathogen[ Q2Q067] interacts with 4 human partners:{Q9NZI7;Q13363;O43504;Q12857}  
7849 Pathogen[ P0C214] interacts with 4 human partners:{Q13363;Q9NZI7;Q12857;O43504}  
7850 Pathogen[ P03346] interacts with 7 human partners:{Q12857;P35659;O43504;Q13363;P56545;Q9NZI7;O43719}  
7851 Pathogen[ Q85601] interacts with 3 human partners:{Q12857;Q13363;Q9NZI7}  
7852 Pathogen[ P14079] interacts with 4 human partners:{Q9NZI7;P35659;O43504;Q12857}  
7853 Pathogen[ P03383] interacts with 4 human partners:{Q12857;O43504;Q9NZI7;Q13363}  
7854 Pathogen[ P03410] interacts with 4 human partners:{O43504;Q12857;P35659;Q9NZI7}  
7855 Pathogen[ P14075] interacts with 5 human partners:{P35659;Q9NZI7;Q12857;O43504;Q13363}  
7856 Pathogen[ P0C206] interacts with 5 human partners:{Q9NZI7;O43504;Q12857;P35659;Q13363}  
7857 Pathogen[ P03363] interacts with 7 human partners:{P35659;P56545;O43504;Q9NZI7;Q13363;Q12857;O43719}  
7858 [Cluster 715]GO:0008333+P biological\_process [name] endosome to lysosome transport [def] "The directed movement of substances from endosomes to lysosomes." [GOC  
7859 Pathogen[ Q2Q067] interacts with 13 human partners:{Q99816;Q9H1H9;Q8N612;Q9H9C1;Q9H8T0;Q9NZZ3;O60291;Q9Y3E7;Q9UPV9;O14964;Q96NA2;Q86VS8;Q96ED9}  
7860 Pathogen[ P0C214] interacts with 12 human partners:{Q9UPV9;Q96ED9;Q96NA2;O14964;Q8N612;Q86VS8;Q9H8T0;Q9Y3E7;Q99816;O60291;Q9NZ

Z3;Q9H9C1}

7861 Pathogen[ P03346] interacts with 17 human partners: {Q86VS8;Q8N612;Q99626;Q96NA2;Q99816;Q9H1H9;Q6P3W7;Q9NZZ3;Q9H8T0;Q9Y3E7;Q9UPV9;Q9UGU5;O60291;Q96ED9;Q9H9C1;O14964;Q9UJC3}

7862 Pathogen[ Q85601] interacts with 13 human partners: {Q99816;Q86VS8;Q9H1H9;Q9UPV9;Q8N612;Q9H9C1;O60291;Q9H8T0;Q9NZZ3;O14964;Q96NA2;Q96ED9;Q9Y3E7}

7863 Pathogen[ P14079] interacts with 11 human partners: {Q96NA2;Q9UJC3;Q9H9C1;Q86VS8;Q96ED9;Q9H8T0;Q9H1H9;Q8N612;Q9Y3E7;Q9NZZ3;Q99816}

7864 Pathogen[ P03383] interacts with 12 human partners: {Q9Y3E7;Q9NZZ3;Q9H9C1;Q99816;Q8N612;Q9H1H9;Q9H8T0;Q9UPV9;Q86VS8;Q96ED9;O14964;Q96NA2}

7865 Pathogen[ P03410] interacts with 13 human partners: {Q9UJC3;Q9H1H9;Q9H8T0;Q86VS8;Q99816;Q9Y3E7;Q9UPV9;Q96ED9;Q9NZZ3;Q8N612;Q9H9C1;O60291;Q96NA2}

7866 Pathogen[ P14075] interacts with 12 human partners: {Q9H1H9;Q8N612;Q96NA2;Q9H9C1;Q9UPV9;Q9Y3E7;Q9H8T0;O14964;Q9NZZ3;Q86VS8;Q99816;Q96ED9}

7867 Pathogen[ P0C206] interacts with 15 human partners: {O14964;O60291;Q9Y3E7;Q9H8T0;Q99816;Q9H1H9;Q9UPV9;Q6P3W7;Q86VS8;Q96ED9;Q8N612;Q96NA2;Q9NZZ3;Q9UJC3;Q9H9C1}

7868 Pathogen[ P03363] interacts with 15 human partners: {Q86VS8;Q9UPV9;Q96ED9;Q9H9C1;O60291;Q99626;Q9NZZ3;Q9Y3E7;Q9H8T0;O14964;Q96NA2;Q8N612;Q99816;Q9H1H9;Q9UJC3}

7869 [Cluster 716]GO:0070374+P biological\_process [name] positive regulation of ERK1 and ERK2 cascade [def] "Any process that activates or increases the frequency, rate or extent of signal transduction mediated by the ERK1 and ERK2 cascade." [GOC

7870 Pathogen[ Q2Q067] interacts with 2 human partners: {P08697;Q969H0}

7871 Pathogen[ P0C214] interacts with 2 human partners: {P08697;Q969H0}

7872 Pathogen[ P03346] interacts with 2 human partners: {Q6UWF3;Q969H0}

7873 Pathogen[ Q85601] interacts with 2 human partners: {Q969H0;P08697}

7874 Pathogen[ P14079] interacts with 5 human partners: {Q969H0;O43597;Q6UWF3;P78524;Q9Y239}

7875 Pathogen[ P03383] interacts with 3 human partners: {P08697;Q6UWF3;Q969H0}

7876 Pathogen[ P03410] interacts with 6 human partners: {Q9Y239;O43597;Q969H0;P08697;Q6UWF3;P78524}

7877 Pathogen[ P14075] interacts with 3 human partners: {P08697;Q6UWF3;Q969H0}

7878 Pathogen[ P0C206] interacts with 4 human partners: {Q969H0;Q6UWF3;O43597;P08697}

7879 Pathogen[ P03363] interacts with 2 human partners: {Q6UWF3;Q969H0}

7880 [Cluster 717]GO:0043473+P biological\_process [name] pigmentation [def] "The deposition or aggregation of coloring matter in an organism, tissue or cell." [GOC

7881 Pathogen[ Q2Q067] interacts with 9 human partners: {Q9UL45;Q969F9;Q6QNY0;Q99966;Q92562;Q9HB07;O75030;Q86YV9;Q9UPZ3}

7882 Pathogen[ P0C214] interacts with 10 human partners: {Q969F9;Q99698;Q86YV9;O75030;Q92562;Q6QNY0;Q99966;Q9HB07;Q9UL45;Q9UPZ3}

7883 Pathogen[ P03346] interacts with 11 human partners: {Q86YV9;Q99698;Q99966;Q05925;Q92562;O75030;Q6QNY0;Q969F9;Q9UL45;Q9HB07;Q9UPZ3}

7884 Pathogen[ Q85601] interacts with 9 human partners: {Q9UPZ3;Q6QNY0;Q99966;O75030;Q92562;Q86YV9;Q969F9;Q9HB07;Q99698}

7885 Pathogen[ P14079] interacts with 11 human partners: {Q86YV9;Q92562;Q6QNY0;Q9HB07;Q92902;Q99966;Q9UPZ3;Q9UL45;Q969F9;Q99698;O75030}

7886 Pathogen[ P03383] interacts with 6 human partners: {Q6QNY0;Q969F9;O75030;Q9HB07;Q86YV9;Q9UPZ3}

7887 Pathogen[ P03410] interacts with 11 human partners: {Q92562;Q9HB07;Q92902;Q6QNY0;O75030;Q9UL45;Q9UPZ3;Q86YV9;Q99698;Q969F9;Q99966}

7888 Pathogen[ P14075] interacts with 6 human partners: {O75030;Q9HB07;Q86YV9;Q6QNY0;Q969F9;Q9UPZ3}

7889 Pathogen[ P0C206] interacts with 10 human partners: {Q9UL45;Q9UPZ3;O75030;Q92562;Q969F9;Q99698;Q9HB07;Q99966;Q6QNY0;Q86YV9}

7890 Pathogen[ P03363] interacts with 8 human partners: {Q9UPZ3;O75030;Q92902;Q99698;Q05925;Q9HB07;Q969F9;Q6QNY0}

7891 [Cluster 718]GO:0032967+P biological\_process [name] positive regulation of collagen biosynthetic process [def] "Any process that activates or increases the frequency, rate or extent of the chemical reactions and pathways resulting in the formation of collagen, any of a group of fibrous proteins of very high tensile strength that form the main component of connective tissue in animals." [GOC

7892 Pathogen[ Q2Q067] interacts with 3 human partners: {Q9H4X1;Q92769;P08697}

7893 Pathogen[ P0C214] interacts with 3 human partners: {P08697;Q9H4X1;Q92769}

7894 Pathogen[ P03346] interacts with 3 human partners: {Q9H4X1;Q8IYA7;Q92769}

7895 Pathogen[ Q85601] interacts with 3 human partners: {Q9H4X1;P08697;Q92769}

7896 Pathogen[ P14079] interacts with 1 human partners: {Q92769}

7897 Pathogen[ P03383] interacts with 3 human partners: {Q9H4X1;P08697;Q92769}

7898 Pathogen[ P03410] interacts with 3 human partners:{Q9H4X1;Q92769;P08697}  
7899 Pathogen[ P14075] interacts with 3 human partners:{Q9H4X1;Q92769;P08697}  
7900 Pathogen[ P0C206] interacts with 3 human partners:{Q92769;Q9H4X1;P08697}  
7901 Pathogen[ P03363] interacts with 2 human partners:{Q9H4X1;Q8IYA7}  
7902 [Cluster 719]GO:0048732+P biological\_process [name] gland development [def] "The process whose specific outcome is the progression of a gland over time, from its formation to the mature structure. A gland is an organ specialised for secretion." [GOC  
7903 Pathogen[ Q2Q067] interacts with 2 human partners:{P35869;O75360}  
7904 Pathogen[ P0C214] interacts with 2 human partners:{P35869;O75360}  
7905 Pathogen[ P03346] interacts with 3 human partners:{O43680;O75360;P35869}  
7906 Pathogen[ Q85601] interacts with 2 human partners:{O75360;P35869}  
7907 Pathogen[ P14079] interacts with 2 human partners:{P35869;O75360}  
7908 Pathogen[ P03383] interacts with 2 human partners:{O75360;P35869}  
7909 Pathogen[ P03410] interacts with 1 human partners:{O75360}  
7910 Pathogen[ P14075] interacts with 2 human partners:{P35869;O75360}  
7911 Pathogen[ P0C206] interacts with 3 human partners:{P35869;O75360;Q13422}  
7912 Pathogen[ P03363] interacts with 2 human partners:{O75360;P35869}  
7913 [Cluster 720]GO:0070269+P biological\_process [name] pyroptosis [def] "A type of programmed cell death that results from the apical activation of caspase-1." [PMID  
7914 Pathogen[ Q2Q067] interacts with 1 human partners:{O14862}  
7915 Pathogen[ P0C214] interacts with 2 human partners:{Q9NPP4;O14862}  
7916 Pathogen[ P03346] interacts with 2 human partners:{Q9NPP4;O14862}  
7917 Pathogen[ Q85601] interacts with 1 human partners:{O14862}  
7918 Pathogen[ P14079] interacts with 2 human partners:{O14862;Q9NPP4}  
7919 Pathogen[ P03383] interacts with 1 human partners:{O14862}  
7920 Pathogen[ P03410] interacts with 2 human partners:{O14862;Q9NPP4}  
7921 Pathogen[ P14075] interacts with 1 human partners:{O14862}  
7922 Pathogen[ P0C206] interacts with 1 human partners:{O14862}  
7923 Pathogen[ P03363] interacts with 2 human partners:{O14862;Q9NPP4}  
7924 [Cluster 721]GO:0043973+P biological\_process [name] histone H3-K4 acetylation [def] "The modification of histone H3 by the addition of an acetyl group to a lysine residue at position 4 of the histone." [GOC  
7925 Pathogen[ Q2Q067] interacts with 1 human partners:{Q86U70}  
7926 Pathogen[ P0C214] interacts with 1 human partners:{Q86U70}  
7927 Pathogen[ P03346] interacts with 1 human partners:{Q86U70}  
7928 Pathogen[ Q85601] interacts with 1 human partners:{Q86U70}  
7929 Pathogen[ P14079] interacts with 1 human partners:{Q86U70}  
7930 Pathogen[ P03383] interacts with 1 human partners:{Q86U70}  
7931 Pathogen[ P03410] interacts with 1 human partners:{Q86U70}  
7932 Pathogen[ P14075] interacts with 1 human partners:{Q86U70}  
7933 Pathogen[ P0C206] interacts with 1 human partners:{Q86U70}  
7934 Pathogen[ P03363] interacts with 1 human partners:{Q86U70}  
7935 [Cluster 722]GO:0055088+P biological\_process [name] lipid homeostasis [def] "Any process involved in the maintenance of an internal steady state of lipid within an organism or cell." [GOC  
7936 Pathogen[ Q2Q067] interacts with 3 human partners:{Q969H0;P22415;Q15853}  
7937 Pathogen[ P0C214] interacts with 3 human partners:{Q969H0;Q15853;P22415}  
7938 Pathogen[ P03346] interacts with 3 human partners:{Q15853;Q969H0;P22415}  
7939 Pathogen[ Q85601] interacts with 3 human partners:{Q15853;Q969H0;P22415}  
7940 Pathogen[ P14079] interacts with 3 human partners:{Q969H0;Q15853;P22415}  
7941 Pathogen[ P03383] interacts with 3 human partners:{Q969H0;Q15853;P22415}  
7942 Pathogen[ P03410] interacts with 3 human partners:{Q969H0;P22415;Q15853}  
7943 Pathogen[ P14075] interacts with 3 human partners:{Q15853;P22415;Q969H0}  
7944 Pathogen[ P0C206] interacts with 3 human partners:{Q969H0;Q15853;P22415}  
7945 Pathogen[ P03363] interacts with 3 human partners:{Q15853;Q969H0;P22415}  
7946 [Cluster 723]GO:0050679+P biological\_process [name] positive regulation of epithelial cell proliferation [def] "Any process that activates or increases the rate or extent of epithelial cell proliferation." [GOC  
7947 Pathogen[ Q2Q067] interacts with 4 human partners:{P22392;Q99502;P01106;P30279}  
7948 Pathogen[ P0C214] interacts with 5 human partners:{Q92934;P30279;P22392;P01106;Q99502}  
7949 Pathogen[ P03346] interacts with 6 human partners:{P30279;Q99502;P01106;Q01954;P22392;P56178}  
7950 Pathogen[ Q85601] interacts with 5 human partners:{P01106;Q01954;Q99502;P30279;P22392}  
7951 Pathogen[ P14079] interacts with 6 human partners:{Q99502;P54826;P22392;Q92934;Q9GZZ8;P01106}  
7952 Pathogen[ P03383] interacts with 3 human partners:{P01106;P22392;P30279}  
7953 Pathogen[ P03410] interacts with 6 human partners:{P30279;P01106;Q9GZZ8;Q99502;Q92934;P54826}  
7954 Pathogen[ P14075] interacts with 6 human partners:{P30279;P01106;Q9GZZ8;Q99502;P54826;P22392}  
7955 Pathogen[ P0C206] interacts with 7 human partners:{P22392;P30279;Q92934;Q99502;P01106;P54826;Q01954}  
7956 Pathogen[ P03363] interacts with 4 human partners:{P56179;P30279;P01106;Q01954}  
7957 [Cluster 724]GO:0006282+P biological\_process [name] regulation of DNA repair [def]



"Any process that modulates the frequency, rate or extent of DNA repair." [GOC  
7958 Pathogen[ Q2Q067] interacts with 5 human  
partners:{Q9Y253;P50750;P61088;Q15819;Q13404}  
7959 Pathogen[ P0C214] interacts with 5 human  
partners:{P50750;Q13404;Q15819;Q9Y253;P61088}  
7960 Pathogen[ P03346] interacts with 6 human  
partners:{Q9Y253;Q13404;P61088;P50750;O94782;Q15819}  
7961 Pathogen[ Q85601] interacts with 5 human  
partners:{P50750;Q13404;P61088;Q9Y253;Q15819}  
7962 Pathogen[ P14079] interacts with 4 human partners:{Q15819;Q13404;Q9Y253;P50750}  
7963 Pathogen[ P03383] interacts with 5 human  
partners:{Q9Y253;P61088;Q15819;Q13404;P50750}  
7964 Pathogen[ P03410] interacts with 5 human  
partners:{P61088;Q15819;P50750;Q9Y253;Q13404}  
7965 Pathogen[ P14075] interacts with 5 human  
partners:{Q15819;P61088;P50750;Q9Y253;Q13404}  
7966 Pathogen[ P0C206] interacts with 5 human  
partners:{Q9Y253;P50750;P61088;Q15819;Q13404}  
7967 Pathogen[ P03363] interacts with 5 human  
partners:{Q9Y253;P61088;P50750;Q13404;Q15819}  
7968 [Cluster 725]GO:0030889+P biological\_process [name] negative regulation of B cell  
proliferation [def] "Any process that stops, prevents or reduces the rate or extent of  
B cell proliferation." [GOC  
7969 Pathogen[ Q2Q067] interacts with 3 human partners:{P41218;Q8N726;Q96IZ0}  
7970 Pathogen[ P0C214] interacts with 4 human partners:{Q96IZ0;P41218;Q8N726;P42574}  
7971 Pathogen[ P03346] interacts with 5 human  
partners:{P42574;O75626;P41218;Q96IZ0;Q8N726}  
7972 Pathogen[ Q85601] interacts with 4 human partners:{Q96IZ0;Q8N726;P41218;O75626}  
7973 Pathogen[ P14079] interacts with 5 human  
partners:{P41218;O75626;Q8N726;Q96IZ0;O14836}  
7974 Pathogen[ P03383] interacts with 3 human partners:{Q96IZ0;P41218;Q8N726}  
7975 Pathogen[ P03410] interacts with 5 human  
partners:{Q8N726;P41218;O14836;Q96IZ0;O75626}  
7976 Pathogen[ P14075] interacts with 3 human partners:{P41218;Q96IZ0;Q8N726}  
7977 Pathogen[ P0C206] interacts with 5 human  
partners:{Q96IZ0;Q8N726;O75626;P41218;P42574}  
7978 Pathogen[ P03363] interacts with 4 human partners:{Q96IZ0;P41218;Q8N726;O75626}  
7979 [Cluster 726]GO:0002051+P biological\_process [name] osteoblast fate commitment  
[def] "The commitment of mesenchymal cells to the specific cell fate of an osteoblast.  
An osteoblast is a bone-forming cell which secretes an extracellular matrix.  
Hydroxyapatite crystals are then deposited into the matrix to form bone." [GOC  
7980 Pathogen[ Q2Q067] interacts with 3 human partners:{O00255;Q99717;Q15797}  
7981 Pathogen[ P0C214] interacts with 3 human partners:{Q99717;Q15797;O00255}  
7982 Pathogen[ P03346] interacts with 3 human partners:{Q15797;Q99717;O00255}  
7983 Pathogen[ Q85601] interacts with 3 human partners:{Q15797;Q99717;O00255}  
7984 Pathogen[ P14079] interacts with 2 human partners:{Q15797;O00255}  
7985 Pathogen[ P03383] interacts with 3 human partners:{Q15797;Q99717;O00255}  
7986 Pathogen[ P03410] interacts with 3 human partners:{Q99717;Q15797;O00255}  
7987 Pathogen[ P14075] interacts with 2 human partners:{Q99717;O00255}  
7988 Pathogen[ P0C206] interacts with 3 human partners:{O00255;Q99717;Q15797}  
7989 Pathogen[ P03363] interacts with 2 human partners:{Q15797;Q99717}  
7990 [Cluster 727]GO:0006611+P biological\_process [name] protein export from nucleus  
[def] "The directed movement of a protein from the nucleus into the cytoplasm." [GOC  
7991 Pathogen[ Q2Q067] interacts with 15 human  
partners:{Q96QU8;P55265;Q8TD31;P38646;P62826;P61970;P63241;P27797;O14980;P11161;Q9UI  
A9;Q9HAV4;O15504;Q9UKK6;P35658}  
7992 Pathogen[ P0C214] interacts with 17 human  
partners:{Q9UIA9;Q8TD31;P55265;O43865;Q9HAV4;P63241;Q96QU8;Q9HCE7;O14980;Q9UKK6;P356  
58;P38646;P62826;P27797;O15504;P11161;P61970}  
7993 Pathogen[ P03346] interacts with 16 human  
partners:{Q9HAV4;P55265;Q96QU8;P63241;P35658;Q9UIA9;Q8TD31;P62826;P38646;O14980;P277  
97;P11161;P61970;O43865;Q9UKK6;O15504}  
7994 Pathogen[ Q85601] interacts with 16 human  
partners:{Q9HAV4;Q9UIA9;P62826;O43865;P61970;P27797;P63241;O15504;Q9UKK6;Q96QU8;O149  
80;P55265;P35658;P38646;P11161;Q8TD31}  
7995 Pathogen[ P14079] interacts with 14 human  
partners:{P61970;P35658;O15504;O43865;P11161;P55265;Q9UKK6;Q8TD31;P63241;P38646;Q9UI  
A9;Q9HAV4;P62826;Q96QU8}  
7996 Pathogen[ P03383] interacts with 15 human  
partners:{O15504;Q9UIA9;P38646;P63241;Q8TD31;P62826;O14980;Q9HAV4;P35658;P11161;P552  
65;Q96QU8;P61970;Q9UKK6;P27797}  
7997 Pathogen[ P03410] interacts with 16 human  
partners:{Q8TD31;P38646;Q96QU8;O15504;P55265;P62826;P35658;P63241;Q9HAV4;Q9UIA9;P111  
61;O43865;Q9UKK6;O14980;P61970;P27797}  
7998 Pathogen[ P14075] interacts with 15 human  
partners:{P55265;Q8TD31;P61970;P11161;P63241;P35658;Q9HAV4;P38646;O14980;P27797;P628

26;Q9UIA9;Q96QU8;O15504;Q9UKK6}

7999 Pathogen[ POC206] interacts with 15 human partners: {P55265;P27797;Q9UKK6;P11161;Q8TD31;Q96QU8;P62826;O43865;P38646;Q9HAV4;P63241;O15504;Q9UIA9;P61970;P35658}

8000 Pathogen[ P03363] interacts with 16 human partners: {Q9HAV4;P61970;O14980;Q96QU8;P27797;P38646;P35658;P55265;O43865;Q9UKK6;P63241;O15504;P62826;Q8TD31;Q9UIA9;P11161}

8001 [Cluster 728]GO:0060071+P biological\_process [name] Wnt receptor signaling pathway, planar cell polarity pathway [def] "The series of molecular signals initiated by binding of a Wnt protein to a receptor on the surface of the target cell where activated receptors signal via downstream effectors including C-Jun N-terminal kinase (JNK) to modulate cytoskeletal elements and control cell polarity." [GOC

8002 Pathogen[ Q2Q067] interacts with 2 human partners: {O14641;P63000}

8003 Pathogen[ POC214] interacts with 2 human partners: {P63000;O14641}

8004 Pathogen[ P03346] interacts with 2 human partners: {O14641;P63000}

8005 Pathogen[ Q85601] interacts with 2 human partners: {P63000;O14641}

8006 Pathogen[ P14079] interacts with 1 human partners: {O14641}

8007 Pathogen[ P03383] interacts with 2 human partners: {P63000;O14641}

8008 Pathogen[ P03410] interacts with 2 human partners: {P63000;O14641}

8009 Pathogen[ P14075] interacts with 2 human partners: {O14641;P63000}

8010 Pathogen[ POC206] interacts with 1 human partners: {P63000}

8011 Pathogen[ P03363] interacts with 2 human partners: {P63000;O14641}

8012 [Cluster 729]GO:0035690+P biological\_process [name] cellular response to drug [def] "Any process that results in a change in state or activity of a cell (in terms of movement, secretion, enzyme production, gene expression, etc.) as a result of a drug stimulus. A drug is a substance used in the diagnosis, treatment or prevention of a disease." [GOC

8013 Pathogen[ Q2Q067] interacts with 9 human partners: {Q8WY54;Q08209;P01106;O14862;P09467;Q13127;Q15327;P49593;P02795}

8014 Pathogen[ POC214] interacts with 10 human partners: {P09417;Q15327;P09467;Q08209;P02795;Q13127;Q8WY54;P49593;O14862;P01106}

8015 Pathogen[ P03346] interacts with 9 human partners: {Q8WY54;Q15327;P09467;P49593;P01106;P02795;Q08209;O14862;Q13127}

8016 Pathogen[ Q85601] interacts with 9 human partners: {P01106;Q13127;P49593;P02795;Q08209;O14862;Q15327;P09467;Q8WY54}

8017 Pathogen[ P14079] interacts with 11 human partners: {Q06413;P49593;P02795;P16298;Q8WY54;Q15327;P01106;O14862;P09467;Q13127;Q08209}

8018 Pathogen[ P03383] interacts with 7 human partners: {O14862;P01106;P09467;P02795;Q15327;Q8WY54;Q13127}

8019 Pathogen[ P03410] interacts with 9 human partners: {Q08209;P01106;O14862;Q8WY54;Q15327;P09467;Q13127;P02795;P49593}

8020 Pathogen[ P14075] interacts with 7 human partners: {Q15327;P01106;O14862;Q8WY54;P02795;Q13127;P09467}

8021 Pathogen[ POC206] interacts with 9 human partners: {Q13127;Q8WY54;O14862;Q15327;P09467;P49593;Q08209;P01106;P02795}

8022 Pathogen[ P03363] interacts with 6 human partners: {P02795;Q15327;P01106;Q13127;O14862;Q8WY54}

8023 [Cluster 730]GO:0016568+P biological\_process [name] chromatin modification [def] "The alteration of DNA, protein, or sometimes RNA, in chromatin, which may result in changing the chromatin structure." [GOC

8024 Pathogen[ Q2Q067] interacts with 169 human partners: {O43463;Q9UPP1;O00213;Q9Y4A5;Q13185;O14744;P56524;Q9BY41;Q8IZD2;Q99502;Q9NV M4;Q92922;P55895;Q9NXR8;Q5VTD9;P06400;Q9NPF5;Q9C005;Q9UKV0;Q08999;Q8WYH8;Q96LA8;Q52L R7;O43159;Q7Z589;Q15910;O75151;Q9NR48;O43189;Q96019;Q9HCS52;Q9NPG3;Q8N9N5;Q9HAF1;Q150 59;O00167;Q96T88;Q9Y6K1;O14929;O00257;Q13547;Q9NP66;O15379;Q9NQX1;Q92800;Q96EZ8;Q9NW V8;O95503;Q95931;Q9UNL4;Q15542;O14686;Q6ZRS2;Q9Y6J0;P54198;P51610;Q8TBE0;Q8N5Y2;Q150 22;Q8NHM5;Q14CW9;Q09028;Q9UKL0;Q9UQL6;Q9NRG4;P0C860;Q99504;Q6W2J9;Q15047;Q5H9F3;Q969 S8;Q96BD5;P26358;Q96DB2;Q969G3;Q96JM7;Q7Z3B3;Q75177;Q92925;Q96ES7;P25440;Q92769;O144 97;O00255;Q86Y97;Q05BQ5;P51532;Q8NI51;Q9H4L7;Q12873;P35226;Q9H160;O75530;Q96GM5;P829 70;Q92993;Q6UWZ7;Q9UPW6;Q8NFD5;Q8WUI4;O75164;Q9UBU8;Q3L8U1;Q5VTR2;Q99543;Q9H6W3;Q96T 23;Q15014;Q9H7L9;Q58F21;Q969R5;O76064;Q94805;P28749;Q68DK7;Q8TDB6;Q8N371;Q14839;Q86U 86;Q9BZK7;Q9NV56;O75150;Q9UM07;O14646;O95619;Q12824;P49459;Q9HCK8;Q86YI8;Q9Y294;Q9UI F9;Q68CP9;Q8TAQ2;Q01826;Q9H2F5;Q9NPA8;Q15652;Q8TEK3;P28370;Q16576;Q9UBL3;Q6STE5;Q8NA 19;Q8NDN9;O75376;Q9Y468;Q15651;Q8IXJ9;Q9H5I1;Q9H7E2;P49711;Q14781;Q7LBC6;Q9NXR7;Q86X 55;Q06587;Q96RL1;Q9NQ92;Q9BTA9;Q9P0W2;Q12830;Q86TU7;Q9H0E9;Q9H2G4;Q15906;O96028;Q8WT S6;Q9BXF3;Q9NRC8}

8025 Pathogen[ POC214] interacts with 173 human partners: {Q92993;Q8NI51;P54198;O00213;Q14527;Q8N371;Q58F21;P35226;Q8NA19;Q15059;Q9H5 I1;Q15022;P51610;Q15047;Q15651;Q13547;Q12824;Q08999;O14497;Q52LR7;Q969S8;P46379;O431 59;Q96DB2;Q12873;Q15014;O00167;Q14CW9;O75530;Q92560;Q9NVM4;O14929;Q8N9N5;Q9NWX8;Q6ZR S2;P56524;Q6W2J9;Q9Y6K1;Q96BD5;Q15906;Q5H9F3;Q95931;Q9UNL4;Q3L8U1;Q7Z589;Q6STE5;P494 59;O95503;Q15910;O75164;O75151;Q9H4L7;Q9Y468;O43463;Q8TBE0;Q8TAQ2;Q9H2F5;Q96T88;Q155 42;Q5VTD9;O95619;Q09028;Q92922;Q9UM07;Q969G3;P28370;Q9UIF9;P55895;Q9P0W2;Q96TU7;Q9H0E9;Q9H2G4;Q15906;O96028;Q8WT S6;Q9BXF3;Q9NRC8}

- U7;Q99504;O15379;Q96RL1;O95251;P82970;Q8NDN9;Q9NV56;Q86YI8;Q9H2G4;Q86Y97;Q9Y4A5;Q9H0E9;Q9BXF3;Q9Y294;Q9H8M2;P49711;Q14781;Q01826;P28749;Q96T23;Q9NQX1;Q86U86;Q9H7E2;Q9BZK7;P0C860;O75150;Q8IXM2;Q9NR48;Q99543;Q9NXR7;Q68CP9;Q9UPW6;Q9BTA9;Q86X55;O14646;Q9NRC8;Q8WYH8;Q8WUI4;Q8WTS6;Q9NQ92;Q9NQR1;Q8NFD5;Q92800;Q5VTR2;Q94805;Q8TDB6;Q8IYW5;Q969R5;Q96EZ8;Q9NRG4;O76064;O75177;Q9NP66;Q96ES7;Q96GM5;O96019;Q7LBC6;Q9UQL6;Q9UPP1;P06400;Q9HC52;O00255;Q12830;Q14839;Q9NQV7;Q9Y6J0;Q9NPF5;P51532;Q8IZD2;Q96LA8;Q8TEK3;Q68DK7;Q96028;Q9H7L9;Q9BY41;Q9NPG3;Q99502;Q8NHM5}
- 8026 Pathogen[ P03346] interacts with 194 human partners: {Q9NPG3;Q14781;Q969S8;P0C860;Q8NI51;O00213;Q12830;Q15542;Q9NQ92;Q9Y6K1;Q9NQX1;Q96ES7;Q92560;O76064;Q9NQV7;O95677;Q9BXF3;Q8IXM2;Q8WYB5;Q96GM5;Q9UPW6;Q9C005;O75150;Q08999;Q9UKL0;Q99543;Q52LR7;Q9UNL4;Q92800;Q86Y97;Q9P0W2;Q8WYH8;Q5VTR2;O00167;Q96DB2;O75530;Q9NV56;Q9H7E2;O15379;Q9NQR1;Q8NFD5;P06400;Q15291;P51532;P35226;Q7LBC6;Q96EZ8;O43159;Q14527;Q8NA19;P51610;P55895;Q92925;Q8TD26;Q8TEK3;Q9HC52;Q9H2G4;O14744;P56524;Q15906;Q5H9F3;O95931;Q7Z589;Q6WOC5;Q9BYW2;Q96RL1;Q12824;O00257;Q86U86;P26358;Q9UBL3;O14646;P49459;P25440;Q99502;Q15652;O75151;O43463;Q15059;Q86SE8;Q9H0E9;Q9NRG4;Q9NP66;Q58F21;Q92794;O96019;Q9NXR7;Q7Z3B3;Q969R5;O43189;Q96JM7;O00255;Q9Y4A5;Q8WTS6;Q8N5Y2;Q15022;Q92769;O95251;Q9UBU8;O75164;Q9Y6J0;O60264;Q13547;Q09028;Q6STE5;P46379;Q9HC8;O14497;Q05BQ5;Q92784;Q9BY41;Q9NVM4;P49711;O94805;Q9H2F5;Q9UIF9;P82970;Q96T23;Q9H8M2;Q68DK7;Q16576;Q8N9N5;Q8WUI4;O14686;Q9UPP1;P35659;O75376;Q9Y468;Q8IYW5;Q5VTD9;Q6ZRS2;Q15910;Q15014;Q9NWW8;P28749;Q8N371;O95619;Q9UM07;Q96BD5;Q969G3;Q9UKV0;Q9H7Z6;Q92922;Q9BZK7;B2RXH2;Q9UGL1;Q15047;P28370;Q9H7L9;Q86X55;Q12873;Q86YI8;Q8NDN9;Q8IXJ9;Q9P2D1;Q8TBE0;Q8TDB6;Q9HAF1;Q8NHM5;Q92993;Q15651;Q9NR48;Q14CW9;Q9H6W3;Q9H5I1;Q3L8U1;Q9NQZ2;Q99504;Q6UWZ7;Q68CP9;Q8TAQ2;Q9NPA8;Q9Y294;Q06587;Q9H160;Q13185;Q9NRC8;Q8IZD2;Q9UQL6;O95503;Q01826;P54198;Q6W2J9;Q96LA8;Q9NXR8;O14929;Q96T88;Q14839;Q9H4L7;O75177;O96028;Q9BTA9;Q9NPF5;Q86TU7}
- 8027 Pathogen[ Q85601] interacts with 184 human partners: {O95619;Q969S8;Q9H5I1;Q8NI51;Q99543;O00213;Q9NRC8;Q15014;Q15542;Q9Y5T5;P54198;Q8N5Y2;Q9UKV0;Q9H2F5;Q9H7E2;Q96DB2;Q9NQV7;Q9H8M2;Q8TDB6;Q96RL1;Q9BXF3;Q9P0W2;Q8N371;Q9UPW6;Q86X55;Q08999;Q9BY41;Q52LR7;Q96BD5;Q9NPG3;Q9UQL6;Q9UIF9;Q3L8U1;Q6STE5;O75151;Q8TBE0;Q14CW9;Q9P2D1;O95251;Q9NQR1;P06400;O95677;Q96T23;Q9Y294;Q9HAF1;Q9UM07;Q9Y6J0;Q86SE8;Q92560;Q92925;Q9NR48;Q9Y468;Q9NQ92;Q9Y4A5;Q86TU7;Q9NVM4;Q9H0E9;P46379;Q9BTA9;O14686;O95931;Q9UBU8;Q99504;Q9H7Z6;Q9UNL4;Q8IXJ9;Q96ES7;O43159;O14497;O96019;P26358;Q8NA19;O14646;O95503;O14744;O43463;Q15651;P49711;Q15059;P51610;Q12830;Q969R5;Q9H6W3;Q15022;Q7Z589;Q96GM5;Q9UBL3;Q9NP66;Q9NQX1;P51532;Q969G3;O76064;O14929;Q96JM7;Q68DK7;Q8WTS6;Q92769;Q9C005;Q16576;Q8IXM2;Q12873;Q99502;Q05BQ5;Q8NFD5;Q9H4L7;Q8NHM5;Q6UWZ7;Q9NWW8;O75530;Q9Y6K1;Q6ZRS2;Q96T88;P82970;O00255;Q01826;O75376;Q8N9N5;Q86YI8;Q13185;Q9UPP1;P49459;Q8IYW5;Q09028;Q8TEK3;P28749;Q5H9F3;O75150;Q86Y97;Q5VTR2;Q9HCK8;Q15906;Q8WYH8;Q9BZK7;P56524;O15379;Q5VTD9;O43189;Q15910;Q9NPA8;P25440;O75164;P28370;P35226;Q8NDN9;Q9NRG4;Q13547;Q8TD26;Q9H2G4;Q86U86;Q92993;Q15652;Q15047;Q8WUI4;O60264;Q92800;Q9NV56;O00257;Q7LBC6;Q14527;O94805;O00167;Q9NXR8;Q9H160;Q96EZ8;Q92922;Q9H7L9;Q68CP9;Q12824;Q8TAQ2;Q9UKL0;Q06587;Q58F21;Q8IZD2;Q9NXR7;P55895;Q9HC52;Q96LA8;Q14839;P0C860;O75177;Q6W2J9;O96028;Q9NPF5;Q14781}
- 8028 Pathogen[ P14079] interacts with 167 human partners: {Q9UQL6;O15379;Q9UPW6;Q9NQX1;Q68DK7;Q15014;Q9Y4A5;Q96T23;Q05BQ5;O75151;Q9BZK7;Q6STE5;Q99502;Q15047;Q9C005;Q9H8M2;Q9UBU8;P28749;Q96LA8;Q52LR7;Q96DB2;Q9NRG4;Q9Y6K1;Q8IXJ9;Q8NDN9;O95503;Q9NP66;Q9UBL3;Q58F21;Q9NVM4;Q9HC52;P28370;Q9Y468;Q9BTA9;Q9H4L7;Q969S8;Q14CW9;Q8WUI4;Q92922;O95251;P51532;Q6UWZ7;Q9UNL4;Q86U86;O14646;Q01826;Q86TU7;O95931;P54198;Q9UKV0;Q92800;O00213;Q6ZRS2;Q15059;O14497;Q9HAF1;Q8NHM5;Q8TAQ2;Q15652;Q8NA19;P51610;Q16576;Q12873;Q9H5I1;Q9H0E9;Q6W2J9;P82970;Q9H6W3;Q9P2D1;Q8TD26;Q5H9F3;O43189;Q15651;Q99543;Q9P0W2;Q96019;O14744;Q8N9N5;Q9NXR7;Q15906;Q13185;O00257;Q14781;O14929;O75530;Q5VTD9;Q96BD5;Q8N5Y2;Q9NV56;Q969R5;Q9NPF5;Q92769;Q5VTR2;Q9UPP1;Q8TEK3;Q9H2G4;Q92560;Q9NQZ2;Q9NPG3;Q9NWW8;Q96JM7;Q9UIF9;Q9BXF3;Q12830;Q9NQR1;P49459;Q96GM5;Q9BY41;Q8NFD5;P26358;Q7Z3B3;Q9HCK8;Q9UKL0;Q96RL1;O60264;Q96ES7;Q9H2F5;Q86YI8;P35226;Q9H7E2;Q14839;P35659;P25440;Q8IXM2;O43159;O75376;P0C860;Q8N371;Q99504;Q9NQV7;Q6W0C5;Q15910;Q68CP9;Q12824;Q9P2N6;O00167;Q9Y294;Q9UM07;P56524;Q9H7L9;Q09028;Q9NRC8;O95619;O43151;O00255;Q96EZ8;Q86Y97;Q7Z589;Q15542;P49711;Q9H9L4;Q15022;Q9NPA8;Q9NQ92;O75177;Q8WYH8;Q92925;Q8WTS6;Q8NI51;Q9H160;Q92993;Q3L8U1;Q7LBC6;Q08999;Q9Y6J0;Q8TBE0;Q06587}
- 8029 Pathogen[ P03383] interacts with 151 human partners: {Q86U86;Q8IXJ9;Q09028;P0C860;Q99504;Q8NI51;O00213;Q15014;Q12830;Q15047;Q14839;O14497;Q9NQ92;Q9UPW6;O96019;Q96ES7;O00167;Q9NPA8;Q12824;Q08999;O94805;Q9BTA9;P25440;P49711;Q52LR7;O75376;Q9UQL6;Q96RL1;O95503;O95251;Q9H7E2;Q9NP66;Q9Y4A5;Q96BD5;Q9NRG4;O43463;Q9NV56;Q9H7L9;Q86X55;Q01826;O00257;Q6STE5;P28370;Q9HC52;Q9H2F5;Q06587;Q15542;O95931;Q9UBU8;Q86Y97;Q9UNL4;O14646;Q8WYH8;O75177;O43189;Q92993;O75151;Q15651;Q96T23;Q86TU7;Q9H6W3;Q9NQX1;Q15022;P06400;O14744;O75164;Q14CW9;Q9H0E9;O43159;Q6W2J9;Q7Z589;Q96GM5;Q8WTS6;P51610;Q12873;Q68DK7;Q13185;Q9H160;Q15652;Q8N9N5;Q969G3;Q9Y6K1;O14929;Q96JM7;Q9NPF5;Q9Y294;Q92769;Q68CP9;Q9C005;Q9UM07;Q05BQ5;O15379;P55895;Q9UIF9;P82970;O00255;Q9NPG3;Q86YI8;Q92925;Q9P0W2;Q8TAQ2;Q99543;Q9NWW8;Q58F21;Q13547;Q5VTR2;Q9BY41;P28749;Q9UKL0;Q5H9F3;Q3L8U1;Q9HCK8;Q9H2G4;Q9UKV0;Q15906;Q15059;Q9BZK7;P56524;Q15910;P49459;P51532;Q8TBE0;Q9HAF1;Q8N371;Q969R5;Q8NFD5;Q92922;Q8TEK3;Q8WUI4;O95619;Q9BZK7;Q7LBC6;Q96EZ8;O75150;P54198;Q9H5I1;Q9UPP1;Q9NQR1;P26358;Q8NDN9;Q9NXR7;Q6UWZ7;Q96LA8;Q16576;P35226;Q92800;Q969S8;Q9NRC8;Q9Y468;O75530;Q14781}
- 8030 Pathogen[ P03410] interacts with 174 human partners: {Q96RL1;Q9UKV0;Q9UPP1;Q86SE8;O95619;Q9H6W3;Q9P2N6;P51610;Q9Y6J0;Q8WYH8;Q12873;Q9NXR7;Q9H4L7;Q96LA8;Q96T23;Q9NV56;Q9BY41;P54198;Q6W2J9;O95503;Q15047;Q52LR7;Q15014;O14929;Q8NA19;Q15652;P82970;Q9NWW8;O95251;P0C860;Q99502;Q86U86;Q96GM5;O14497;Q9UM

- 07;Q96019;Q9BXF3;Q9NQZ2;Q86Y97;Q9NPF5;O14646;Q8N9N5;Q8TEK3;Q12830;Q9UNL4;Q95931;Q9P0W2;Q8WTS6;Q14CW9;Q9H9L4;Q9UBU8;Q9NVM4;Q86X55;P49459;Q5H9F3;O00213;P55895;Q5VTR2;Q08999;Q9Y468;Q15651;Q15906;P06400;O75376;Q96ES7;Q15059;Q9UPW6;Q9NPG3;O43159;Q8NFD5;O75177;Q7LBC6;Q9NP66;Q8WUI4;P35659;Q9C005;Q16576;Q9H8M2;Q9UQL6;Q9H2F5;Q05BQ5;Q92925;Q92800;P26358;O75151;Q9NPA8;Q6ZRS2;Q969S8;Q8NDN9;O75150;Q969G3;Q9NQV7;Q09028;Q8IXM2;Q92769;Q9Y4A5;Q94805;Q96JM7;Q9Y294;Q9P2D1;Q9NQR1;Q9NXR8;O15379;P56524;Q8IXJ9;Q9H5I1;Q92922;Q014826;Q9H7L9;Q8TBE0;Q9HCK8;Q9H7E2;Q13185;Q6UWZ7;Q15910;Q99504;P51532;Q9NQ92;P49711;O43151;Q8NI51;P28749;Q96EZ8;O43189;Q9BTA9;Q3L8U1;Q13547;O00167;Q8TAQ2;Q9UIF9;Q15542;Q9BZK7;Q06587;Q68CP9;O43463;O14744;Q9NRC8;O00257;Q8TD26;Q96BD5;Q9UKL0;Q6STE5;Q14781;O60264;Q8N371;Q99543;Q9Y6K1;O75164;Q5VTD9;Q12824;P35226;O00255;Q9H2G4;Q9H0E9;Q14839;Q9NQX1;Q92993;Q8N5Y2;Q58F21;Q6W0C5;Q969R5;Q7Z3B3;Q15022;Q86TU7;Q9HC52;P28370;O75530;Q68DK7;Q7Z589;Q9NRG4;Q96DB2;Q86YI8;P25440}
- 8031 Pathogen[ P14075] interacts with 152 human partners: {Q3L8U1;Q5VTR2;Q14781;Q9BY41;Q15059;Q8NI51;O00213;Q16576;O14646;Q9Y6K1;P35659;Q8N9N5;Q99504;Q9H2F5;Q969R5;Q969S8;Q96GM5;Q9UBU8;P25440;Q08999;Q8N371;Q8IXJ9;Q52LR7;Q15542;Q95503;Q9UM07;Q15906;Q15014;P51532;Q9NWX8;P49459;Q9UKL0;Q5H9F3;Q9UPP1;Q86TU7;Q9Y468;Q14839;P51610;Q15652;Q7Z3B3;P56524;Q96EZ8;Q15047;O95619;Q95931;Q7LBC6;Q92922;Q8NDN9;Q9NQR1;Q15910;Q92800;Q99543;O00167;Q9Y4A5;Q9UKV0;O14929;Q9NXR7;Q9H2G4;Q13547;P54198;P26358;Q92993;O14497;O75376;Q01826;Q6UWZ7;O00257;O00255;Q09028;Q9NPF5;O96019;Q06587;Q9H5I1;Q14CW9;Q9NQX1;Q9UPW6;O14744;Q9HAF1;Q58F21;Q96JM7;Q96LA8;Q12830;Q6W2J9;Q92769;Q86U86;P0C860;Q9C005;Q68CP9;Q86X55;Q13185;Q9HCK8;Q05BQ5;O43189;O75150;Q9BTA9;Q9NPA8;Q9HC52;Q92925;Q9H6W3;Q9UIF9;Q8TBE0;O95251;P82970;Q8TAQ2;Q86YI8;Q96BD5;P28370;P06400;Q9NP66;Q12824;Q94805;Q9NV56;P28749;O15379;Q8TEK3;Q86Y97;Q9UNL4;Q9H7E2;O43159;P49711;Q9BZK7;Q96T23;O43463;P35226;Q9Y294;Q15022;Q9NRC8;Q9UQL6;Q8NFD5;Q99502;Q8WUI4;Q8WYH8;Q9BXF3;Q7Z589;Q6STE5;Q96ES7;Q9H160;Q68DK7;P55895;Q12873;Q75151;Q96RL1;Q9NRG4;Q9NQ92;Q9P0W2;Q9H7L9;Q15651;Q8WTS6;O75530;O75177;Q9NPG3}
- 8032 Pathogen[ P0C206] interacts with 195 human partners: {Q9Y468;Q9NQX1;Q8N371;Q9H4L7;Q92769;Q9C005;Q96JM7;O75530;Q9HCK8;O43159;Q8N9N5;O00167;Q8NA19;Q9H2F5;O95251;Q9Y6K1;Q9NPF5;Q8TD26;Q68DK7;Q9UBU8;Q99504;Q9HC52;P51532;Q8IYW5;Q9Y5T5;O43151;Q8WYH8;Q6W2J9;O14744;Q9H7E2;P35226;Q9UKL0;Q96DB2;Q9NRG4;Q86X55;O00255;Q9H7B4;Q6STE5;Q05BQ5;Q9P2D1;Q9UKV0;O43463;Q9UPP1;P54198;O75177;Q96LA8;Q8NI51;Q52LR7;P26358;Q86TU7;Q92800;Q7LBC6;Q6ZRS2;Q96T23;Q92922;Q13547;Q9UM07;Q9H9L4;Q9NQX0;Q92993;Q12824;Q92925;O14686;Q15910;Q15014;Q86U86;Q8TAQ2;Q9NXR8;Q5VTR2;Q9H160;Q14781;P28749;Q8TDB6;Q96EZ8;Q08999;O75151;Q9H8M2;Q9NQV7;Q14839;O00213;Q9NPG3;O14646;O14497;Q96019;Q92784;Q15651;P82970;P0C860;Q96J0;Q9BXF3;Q9P0W2;Q86Y97;Q9Y4A5;Q9NVM4;Q8IXJ9;Q95619;O14929;Q9NR48;O15379;Q9NP66;Q14CW9;P49459;P51610;Q15906;Q5H9F3;Q8WUI4;Q99543;Q96T88;P49711;Q9NWX8;Q06587;O95931;Q9NQR1;Q9UPW6;Q7Z589;Q9H6W3;Q9UIF9;O96028;Q8WTS6;Q8NHM5;Q9NQ92;Q9HAF1;P55895;Q86SE8;Q96ES7;Q9BZK7;Q9H5I1;O75376;Q9NRC8;Q9H2G4;Q9BTA9;P25440;Q15022;Q8TBE0;P28370;Q14527;Q15652;Q9H7L9;Q15542;Q8IXM2;Q8TEK3;Q86YI8;Q13422;Q9Y294;Q9502;Q9UBL3;P35659;Q969R5;Q15059;Q16576;Q13185;Q96GM5;Q1826;Q6UWZ7;O75164;Q969G3;Q5VTD9;Q09028;Q8NFD5;Q8NDN9;Q6W0C5;Q15047;Q58F21;Q96RL1;Q9BY41;Q9NV56;P56524;O00257;Q9NQZ2;Q969S8;O76064;Q9P2N6;O43189;P46379;Q9NPA8;Q7Z3B3;Q12830;Q8N5Y2;O75150;Q92560;Q9H0E9;Q95677;Q94805;Q9UNL4;Q8IZD2;Q12873;Q9H7Z6;Q96BD5;O60264;Q9NXR7;Q68CP9;O95503;Q3L8U1;P06400;Q9UQL6}
- 8033 Pathogen[ P03363] interacts with 167 human partners: {Q9NQX1;Q9NPF5;P46379;Q8IXM2;Q9H160;Q9Y6J0;Q5VTD9;Q95619;Q8TDB6;O14744;Q8IXJ9;Q96JM7;Q68DK7;Q3L8U1;Q12830;Q8N5Y2;P54198;Q92925;P49459;Q6STE5;Q9Y468;Q9H8M2;Q58F21;Q14781;Q99543;Q9H5I1;Q9BY41;Q9H4L7;Q15022;Q96LA8;Q09028;Q96RL1;Q15291;Q9HC52;O00213;Q6UWZ7;Q9H7L9;Q15014;Q8TAQ2;Q6ZRS2;O15379;Q9H2F5;P51532;P82970;Q969S8;Q9BZK7;Q9H7E2;Q01826;Q9UBL3;O14497;Q52LR7;O75376;Q8N9N5;Q7Z589;Q15910;P35659;Q15910;Q9NPG3;Q5VTR2;Q9UQL6;O75164;Q8TEK3;Q9Y6K1;O75530;Q8IYW5;O15047;Q14839;P06400;Q13185;Q15652;Q8NI51;P28749;O43189;Q9HAF1;Q9C005;P49711;O75150;Q9UNL4;Q96BD5;O60264;Q9UM07;Q9BXF3;Q8NDN9;Q96T23;Q92560;Q9UBU8;Q9NVM4;Q9HCK8;Q16576;O96019;Q9NRG4;Q08999;Q9NWX8;Q9H2G4;Q14527;Q9UIF9;P35226;Q9UKV0;Q969G3;O95931;Q99504;Q7Z3B3;P26358;Q86U86;Q15542;Q94805;O14929;Q9NPA8;P0C860;Q9UPS6;Q96EZ8;Q13547;Q15651;Q9NR48;O14646;Q14CW9;Q06028;Q9H0E9;Q8WUI4;Q9NXR7;Q8NA19;Q9Y4A5;O00167;Q8TD26;O43159;O43463;P25440;Q96T88;Q12873;P28370;Q15059;Q9UKL0;Q9NQR1;Q9NQ92;P55895;Q86SE8;Q06587;Q8NFD5;Q96GM5;Q96ES7;Q6W2J9;Q92922;Q8WTS6;Q9P0W2;Q68CP9;Q95503;Q92800;Q95251;Q9UPW6;O00257;Q15047;Q9NRC8;Q9BTA9;Q9NP66;Q86Y97;Q8TBE0;Q8WYH8;Q9H0E9;Q92993;Q12824;Q86X55;Q5H9F3;O14686;Q15906;O75177;P51610;Q6W0C5}
- 8034 [Cluster 731]GO:0034314+P biological\_process [name] Arp2/3 complex-mediated actin nucleation [def] "The actin nucleation process in which actin monomers combine to form a new branch on the side of an existing actin filament\_ mediated by the Arp2/3 protein complex and its interaction with other proteins." [GOC
- 8035 Pathogen[ Q2Q067] interacts with 1 human partners: {Q8N9B5}
- 8036 Pathogen[ P0C214] interacts with 1 human partners: {Q8N9B5}
- 8037 Pathogen[ P03346] interacts with 2 human partners: {Q8N9B5;A8K0Z3}
- 8038 Pathogen[ Q85601] interacts with 1 human partners: {Q8N9B5}
- 8039 Pathogen[ P14079] interacts with 4 human partners: {Q8N9B5;Q6VEQ5;Q9NQA3;A8K0Z3}
- 8040 Pathogen[ P03383] interacts with 1 human partners: {Q8N9B5}
- 8041 Pathogen[ P03410] interacts with 4 human partners: {Q6VEQ5;Q8N9B5;Q9NQA3;A8K0Z3}
- 8042 Pathogen[ P14075] interacts with 1 human partners: {Q8N9B5}
- 8043 Pathogen[ P0C206] interacts with 2 human partners: {Q8N9B5;Q6VEQ5}
- 8044 Pathogen[ P03363] interacts with 1 human partners: {Q8N9B5}
- 8045 [Cluster 732]GO:0060047+P biological\_process [name] heart contraction [def] "The multicellular organismal process in which the heart decreases in volume in a

characteristic way to propel blood through the body." [GOC

8046 Pathogen[ Q2Q067] interacts with 2 human partners:{P60953;Q9H1Y0}

8047 Pathogen[ P0C214] interacts with 3 human partners:{P60953;P19429;Q9H1Y0}

8048 Pathogen[ P03346] interacts with 3 human partners:{P60953;Q9H1Y0;P10916}

8049 Pathogen[ Q85601] interacts with 2 human partners:{Q9H1Y0;P60953}

8050 Pathogen[ P14079] interacts with 4 human partners:{P19429;P10916;Q9H1Y0;P68032}

8051 Pathogen[ P03383] interacts with 2 human partners:{P60953;Q9H1Y0}

8052 Pathogen[ P03410] interacts with 4 human partners:{P10916;Q9H1Y0;P19429;P60953}

8053 Pathogen[ P14075] interacts with 2 human partners:{P60953;Q9H1Y0}

8054 Pathogen[ P0C206] interacts with 3 human partners:{P19429;Q9H1Y0;P60953}

8055 Pathogen[ P03363] interacts with 4 human partners:{P19429;P60953;Q9H1Y0;P10916}

8056 [Cluster 733]GO:0046587+P biological\_process [name] positive regulation of calcium-dependent cell-cell adhesion [def] "Any process that activates or increases the frequency, rate or extent of calcium-dependent cell-cell adhesion." [GOC

8057 Pathogen[ Q2Q067] interacts with 1 human partners:{Q92845}

8058 Pathogen[ P0C214] interacts with 1 human partners:{Q92845}

8059 Pathogen[ P03346] interacts with 1 human partners:{Q92845}

8060 Pathogen[ Q85601] interacts with 1 human partners:{Q92845}

8061 Pathogen[ P14079] interacts with 1 human partners:{Q92845}

8062 Pathogen[ P03383] interacts with 1 human partners:{Q92845}

8063 Pathogen[ P03410] interacts with 1 human partners:{Q92845}

8064 Pathogen[ P14075] interacts with 1 human partners:{Q92845}

8065 Pathogen[ P0C206] interacts with 1 human partners:{Q92845}

8066 Pathogen[ P03363] interacts with 1 human partners:{Q92845}

8067 [Cluster 734]GO:0006325+P biological\_process [name] chromatin organization [def] "Any process that results in the specification, formation or maintenance of the physical structure of eukaryotic chromatin." [GOC

8068 Pathogen[ Q2Q067] interacts with 15 human partners:{P05204;O43463;Q15910;O00570;Q9NP66;P05114;Q9H320;Q15424;Q9UQL6;Q2TAK8;O14497;O94805;O60248;Q01826;Q9P0W2}

8069 Pathogen[ P0C214] interacts with 15 human partners:{O14497;Q2TAK8;P05204;Q15910;O43463;Q9P0W2;Q15424;Q01826;Q9H320;P05114;O94805;Q9NP66;O60248;Q9UQL6;O00570}

8070 Pathogen[ P03346] interacts with 16 human partners:{O60248;Q9P0W2;P05114;Q2TAK8;O00570;O43463;Q9NP66;Q9HCS4;O14497;O94805;Q15910;Q15424;Q9H320;P05204;Q9UQL6;Q01826}

8071 Pathogen[ Q85601] interacts with 16 human partners:{Q9P0W2;Q9H320;Q9UQL6;Q15424;Q2TAK8;O14497;O43463;Q9NP66;O60248;Q01826;Q15910;O00570;P05114;Q9HCS4;O94805;P05204}

8072 Pathogen[ P14079] interacts with 14 human partners:{Q9UQL6;Q9H320;P05114;Q9NP66;Q01826;O14497;Q2TAK8;Q9P0W2;O94805;O60248;Q15424;P05204;O00570;Q15910}

8073 Pathogen[ P03383] interacts with 15 human partners:{O14497;O94805;O60248;Q9UQL6;P05204;O00570;Q9NP66;O43463;Q01826;Q2TAK8;Q9P0W2;P05114;Q15910;Q9H320;Q15424}

8074 Pathogen[ P03410] interacts with 16 human partners:{O14497;Q9P0W2;Q2TAK8;Q15424;Q9NP66;Q9UQL6;O00570;O94805;Q01826;Q15910;Q9HCS4;P05204;O60248;O43463;Q9H320;P05114}

8075 Pathogen[ P14075] interacts with 15 human partners:{P05204;O60248;Q2TAK8;Q15910;O00570;O14497;Q01826;Q15424;Q9H320;Q9NP66;O94805;O43463;Q9UQL6;Q9P0W2;P05114}

8076 Pathogen[ P0C206] interacts with 16 human partners:{P05114;P05204;O43463;Q9H320;Q9HCS4;Q15910;O60248;O00570;O14497;Q9P0W2;Q9NP66;Q15424;Q01826;Q2TAK8;O94805;Q9UQL6}

8077 Pathogen[ P03363] interacts with 16 human partners:{Q01826;O14497;Q15910;Q9UQL6;Q9HCS4;Q9H320;Q15424;O94805;P05114;Q2TAK8;O00570;O43463;O60248;Q9P0W2;P05204;Q9NP66}

8078 [Cluster 735]GO:0016482+P biological\_process [name] cytoplasmic transport [def] "The directed movement of substances (such as macromolecules, small molecules, ions) into, out of, or within the cytoplasm of a cell." [GOC

8079 Pathogen[ Q2Q067] interacts with 1 human partners:{075494}

8080 Pathogen[ P0C214] interacts with 1 human partners:{075494}

8081 Pathogen[ P03346] interacts with 1 human partners:{075494}

8082 Pathogen[ Q85601] interacts with 1 human partners:{075494}

8083 Pathogen[ P14079] interacts with 1 human partners:{075494}

8084 Pathogen[ P03383] interacts with 1 human partners:{075494}

8085 Pathogen[ P03410] interacts with 1 human partners:{075494}

8086 Pathogen[ P14075] interacts with 1 human partners:{075494}

8087 Pathogen[ P0C206] interacts with 1 human partners:{075494}

8088 Pathogen[ P03363] interacts with 1 human partners:{075494}

8089 [Cluster 736]GO:0071479+P biological\_process [name] cellular response to ionizing radiation [def] "Any process that results in a change in state or activity of a cell (in terms of movement, secretion, enzyme production, gene expression, etc.) as a result of a ionizing radiation stimulus. Ionizing radiation is radiation with sufficient energy to remove electrons from atoms and may arise from spontaneous decay of unstable isotopes, resulting in alpha and beta particles and gamma rays. Ionizing radiation also

includes X-rays." [GOC  
8090 Pathogen[ Q2Q067] interacts with 10 human  
partners:{Q9NVH2;Q99638;Q16666;Q9BSD3;P24522;P38936;Q9ULG1;P16455;O60671;O60921}  
8091 Pathogen[ POC214] interacts with 11 human  
partners:{Q9NVH2;P24522;P62993;Q16666;Q9ULG1;P38936;O60921;Q9BSD3;P16455;O60671;Q996  
38}  
8092 Pathogen[ P03346] interacts with 12 human  
partners:{O60921;Q16666;Q9BSD3;Q9ULG1;P62993;Q99638;Q9NVH2;O60671;P38936;O15516;Q9H8  
V3;P24522}  
8093 Pathogen[ Q85601] interacts with 10 human  
partners:{Q16666;P62993;P16455;O15516;P24522;O60921;Q9ULG1;O60671;P38936;Q99638}  
8094 Pathogen[ P14079] interacts with 12 human  
partners:{O60671;Q9ULG1;P16455;Q9NVH2;Q9BSD3;P38936;P24522;Q9H8V3;P62993;Q99638;O609  
21;Q16666}  
8095 Pathogen[ P03383] interacts with 7 human  
partners:{O60671;P24522;O60921;Q16666;Q99638;Q9BSD3;Q9NVH2}  
8096 Pathogen[ P03410] interacts with 12 human  
partners:{Q16666;Q9BSD3;P24522;Q9ULG1;P38936;Q99638;P16455;O60671;O60921;Q9NVH2;Q9H8  
V3;P62993}  
8097 Pathogen[ P14075] interacts with 7 human  
partners:{O60671;Q16666;Q99638;Q9NVH2;O60921;P24522;Q9BSD3}  
8098 Pathogen[ POC206] interacts with 13 human  
partners:{P24522;Q16666;Q9NVH2;P62993;Q99638;O15516;Q9ULG1;P38936;O60921;Q9H8V3;O606  
71;P16455;Q9BSD3}  
8099 Pathogen[ P03363] interacts with 8 human  
partners:{Q9BSD3;Q9ULG1;O60671;Q16666;P24522;Q9NVH2;Q99638;O60921}  
8100 [Cluster 737]GO:0032268+P biological\_process [name] regulation of cellular protein  
metabolic process [def] "Any process that modulates the frequency, rate or extent of  
the chemical reactions and pathways involving a protein, occurring at the level of an  
individual cell." [GOC  
8101 Pathogen[ Q2Q067] interacts with 1 human partners:{Q04323}  
8102 Pathogen[ POC214] interacts with 1 human partners:{Q04323}  
8103 Pathogen[ P03346] interacts with 1 human partners:{Q04323}  
8104 Pathogen[ Q85601] interacts with 1 human partners:{Q04323}  
8105 Pathogen[ P14079] interacts with 1 human partners:{Q04323}  
8106 Pathogen[ P03383] interacts with 1 human partners:{Q04323}  
8107 Pathogen[ P03410] interacts with 1 human partners:{Q04323}  
8108 Pathogen[ P14075] interacts with 1 human partners:{Q04323}  
8109 Pathogen[ POC206] interacts with 1 human partners:{Q04323}  
8110 Pathogen[ P03363] interacts with 1 human partners:{Q04323}  
8111 [Cluster 738]GO:0031120+P biological\_process [name] snRNA pseudouridine synthesis  
[def] "The intramolecular conversion of uridine to pseudouridine in an snRNA molecule."  
[GOC  
8112 Pathogen[ Q2Q067] interacts with 2 human partners:{Q96HR8;Q9NY12}  
8113 Pathogen[ POC214] interacts with 2 human partners:{Q9NY12;Q96HR8}  
8114 Pathogen[ P03346] interacts with 2 human partners:{Q9NY12;Q96HR8}  
8115 Pathogen[ Q85601] interacts with 2 human partners:{Q96HR8;Q9NY12}  
8116 Pathogen[ P14079] interacts with 2 human partners:{Q96HR8;Q9NY12}  
8117 Pathogen[ P03383] interacts with 2 human partners:{Q9NY12;Q96HR8}  
8118 Pathogen[ P03410] interacts with 2 human partners:{Q9NY12;Q96HR8}  
8119 Pathogen[ P14075] interacts with 2 human partners:{Q96HR8;Q9NY12}  
8120 Pathogen[ POC206] interacts with 2 human partners:{Q9NY12;Q96HR8}  
8121 Pathogen[ P03363] interacts with 2 human partners:{Q9NY12;Q96HR8}  
8122 [Cluster 739]GO:000076+P biological\_process [name] DNA replication checkpoint  
[def] "A cell cycle checkpoint that prevents the initiation of nuclear division until  
DNA replication is complete, thereby ensuring that progeny inherit a full complement of  
the genome." [GOC  
8123 Pathogen[ Q2Q067] interacts with 6 human  
partners:{Q99638;Q99741;Q9H211;O75419;O75943;Q9BVW5}  
8124 Pathogen[ POC214] interacts with 6 human  
partners:{Q9BVW5;Q9H211;O75943;O75419;Q99638;Q99741}  
8125 Pathogen[ P03346] interacts with 6 human  
partners:{Q99638;O75943;O75419;Q99741;Q9BVW5;Q9H211}  
8126 Pathogen[ Q85601] interacts with 6 human  
partners:{O75943;O75419;Q99741;Q9H211;Q99638;Q9BVW5}  
8127 Pathogen[ P14079] interacts with 6 human  
partners:{O75419;Q9H211;Q99741;O75943;Q99638;Q9BVW5}  
8128 Pathogen[ P03383] interacts with 5 human  
partners:{Q9BVW5;O75419;Q99638;Q9H211;Q99741}  
8129 Pathogen[ P03410] interacts with 6 human  
partners:{O75943;O75419;Q9BVW5;Q9H211;Q99638;Q99741}  
8130 Pathogen[ P14075] interacts with 5 human  
partners:{Q9H211;O75419;Q9BVW5;Q99638;Q99741}  
8131 Pathogen[ POC206] interacts with 6 human  
partners:{O75419;Q99741;O75943;Q99638;Q9BVW5;Q9H211}  
8132 Pathogen[ P03363] interacts with 6 human

partners:{Q9BVW5;Q99741;Q9H211;Q99638;O75943;O75419}

8133 [Cluster 740]GO:2000212+P biological\_process [name] negative regulation of glutamate metabolic process [def] "Any process that stops, prevents, or reduces the frequency, rate or extent of glutamate metabolic process." [GOC

8134 Pathogen[ Q2Q067] interacts with 1 human partners:{Q86WG3}

8135 Pathogen[ P0C214] interacts with 1 human partners:{Q86WG3}

8136 Pathogen[ P03346] interacts with 1 human partners:{Q86WG3}

8137 Pathogen[ Q85601] interacts with 1 human partners:{Q86WG3}

8138 Pathogen[ P14079] interacts with 1 human partners:{Q86WG3}

8139 Pathogen[ P03383] interacts with 1 human partners:{Q86WG3}

8140 Pathogen[ P03410] interacts with 1 human partners:{Q86WG3}

8141 Pathogen[ P14075] interacts with 1 human partners:{Q86WG3}

8142 Pathogen[ P0C206] interacts with 1 human partners:{Q86WG3}

8143 Pathogen[ P03363] interacts with 1 human partners:{Q86WG3}

8144 [Cluster 741]GO:0060291+P biological\_process [name] long-term synaptic potentiation [def] "A process that modulates synaptic plasticity such that synapses are changed resulting in the increase in the rate, or frequency of synaptic transmission at the synapse." [GOC

8145 Pathogen[ Q2Q067] interacts with 1 human partners:{P14136}

8146 Pathogen[ P0C214] interacts with 2 human partners:{P14136;P07093}

8147 Pathogen[ P03346] interacts with 1 human partners:{P14136}

8148 Pathogen[ Q85601] interacts with 2 human partners:{P14136;P07093}

8149 Pathogen[ P14079] interacts with 1 human partners:{P14136}

8150 Pathogen[ P03383] interacts with 1 human partners:{P14136}

8151 Pathogen[ P03410] interacts with 1 human partners:{P14136}

8152 Pathogen[ P14075] interacts with 1 human partners:{P14136}

8153 Pathogen[ P0C206] interacts with 1 human partners:{P14136}

8154 Pathogen[ P03363] interacts with 1 human partners:{P14136}

8155 [Cluster 742]GO:0080009+P biological\_process [name] mRNA methylation [def] "The posttranscriptional addition of methyl groups to specific residues in an mRNA molecule." [PMID

8156 Pathogen[ Q2Q067] interacts with 1 human partners:{Q8N1G2}

8157 Pathogen[ P0C214] interacts with 1 human partners:{Q8N1G2}

8158 Pathogen[ P03346] interacts with 1 human partners:{Q8N1G2}

8159 Pathogen[ Q85601] interacts with 1 human partners:{Q8N1G2}

8160 Pathogen[ P14079] interacts with 1 human partners:{Q8N1G2}

8161 Pathogen[ P03383] interacts with 1 human partners:{Q8N1G2}

8162 Pathogen[ P03410] interacts with 1 human partners:{Q8N1G2}

8163 Pathogen[ P14075] interacts with 1 human partners:{Q8N1G2}

8164 Pathogen[ P0C206] interacts with 1 human partners:{Q8N1G2}

8165 Pathogen[ P03363] interacts with 1 human partners:{Q8N1G2}

8166 [Cluster 743]GO:0050851+P biological\_process [name] antigen receptor-mediated signaling pathway [def] "A series of molecular signals initiated by the cross-linking of an antigen receptor on a B or T cell." [GOC

8167 Pathogen[ Q2Q067] interacts with 2 human partners:{Q9NZD8;P56945}

8168 Pathogen[ P0C214] interacts with 2 human partners:{P56945;Q9NZD8}

8169 Pathogen[ P03346] interacts with 4 human partners:{Q9H6Q3;Q8I WV1;Q9NZD8;P56945}

8170 Pathogen[ Q85601] interacts with 2 human partners:{P56945;Q9H6Q3}

8171 Pathogen[ P14079] interacts with 2 human partners:{Q9H6Q3;Q8I WV1}

8172 Pathogen[ P03383] interacts with 2 human partners:{P56945;Q9NZD8}

8173 Pathogen[ P03410] interacts with 3 human partners:{Q8I WV1;P56945;Q9H6Q3}

8174 Pathogen[ P14075] interacts with 3 human partners:{Q8I WV1;Q9NZD8;P56945}

8175 Pathogen[ P0C206] interacts with 3 human partners:{Q9H6Q3;Q8I WV1;P56945}

8176 Pathogen[ P03363] interacts with 3 human partners:{Q9H6Q3;P56945;Q9NZD8}

8177 [Cluster 744]GO:0043484+P biological\_process [name] regulation of RNA splicing [def] "Any process that modulates the frequency, rate or extent of RNA splicing, the process of removing sections of the primary RNA transcript to remove sequences not present in the mature form of the RNA and joining the remaining sections to form the mature form of the RNA." [GOC

8178 Pathogen[ Q2Q067] interacts with 11 human partners:{Q9NR56;Q9H6T0;P31943;P08621;P51816;O43251;P52597;Q58F21;Q02040;P18583;A7MD48}

8179 Pathogen[ P0C214] interacts with 11 human partners:{Q58F21;Q9H6T0;Q9NR56;P18583;P08621;P52597;P51816;P31943;O43251;Q02040;Q5VZF2}

8180 Pathogen[ P03346] interacts with 15 human partners:{P18583;P08621;P31943;A7MD48;Q92879;Q58F21;Q5VZF2;Q9H6T0;O43251;Q02040;P52597;P51816;Q9NR56;Q9NUK0;Q9NWB1}

8181 Pathogen[ Q85601] interacts with 7 human partners:{P08621;Q9NR56;P52597;P18583;P31943;Q58F21;Q5VZF2}

8182 Pathogen[ P14079] interacts with 13 human partners:{Q5VZF2;Q58F21;Q9NR56;Q9H6T0;A7MD48;Q02040;P08621;P31943;Q9NUK0;P52597;Q9NWB1;P51816;P18583}

8183 Pathogen[ P03383] interacts with 10 human partners:{Q02040;Q9NR56;P51816;P31943;A7MD48;P18583;Q9H6T0;Q58F21;P08621;P52597}

8184 Pathogen[ P03410] interacts with 12 human

partners:{Q9NWB1;Q5VZF2;Q9NR56;P08621;P52597;P31943;P18583;Q9H6T0;A7MD48;P51816;Q58F21;Q02040}  
 8185 Pathogen[ P14075] interacts with 10 human  
 partners:{P51816;P08621;P31943;Q02040;Q58F21;Q9NR56;A7MD48;P52597;P18583;Q9H6T0}  
 8186 Pathogen[ P0C206] interacts with 12 human  
 partners:{P18583;Q9NR56;P51816;Q02040;P52597;Q9H6T0;A7MD48;Q58F21;P08621;Q9NUK0;Q5VZF2;P31943}  
 8187 Pathogen[ P03363] interacts with 15 human  
 partners:{P52597;Q58F21;Q92879;Q9NR56;P18583;P31943;Q9NWB1;Q02040;P08621;P51816;Q5VZF2;A7MD48;Q9H6T0;O43251;Q9NUK0}  
 8188 [Cluster 745]GO:0042255+P biological\_process [name] ribosome assembly [def] "The aggregation, arrangement and bonding together of the mature ribosome and of its subunits." [GOC  
 8189 Pathogen[ Q2Q067] interacts with 6 human  
 partners:{Q9BY44;Q2NL82;P06748;Q9H320;Q9Y221;Q7Z6M4}  
 8190 Pathogen[ P0C214] interacts with 6 human  
 partners:{Q9BY44;P06748;Q2NL82;Q7Z6M4;Q9Y221;Q9H320}  
 8191 Pathogen[ P03346] interacts with 6 human  
 partners:{P06748;Q9Y221;Q2NL82;Q7Z6M4;Q9BY44;Q9H320}  
 8192 Pathogen[ Q85601] interacts with 6 human  
 partners:{Q7Z6M4;Q9H320;Q9BY44;Q9Y221;P06748;Q2NL82}  
 8193 Pathogen[ P14079] interacts with 7 human  
 partners:{Q9H320;Q2NL82;Q9BY44;Q14692;P06748;Q7Z6M4;Q9Y221}  
 8194 Pathogen[ P03383] interacts with 6 human  
 partners:{P06748;Q9BY44;Q2NL82;Q9Y221;Q7Z6M4;Q9H320}  
 8195 Pathogen[ P03410] interacts with 7 human  
 partners:{Q14692;P06748;Q9BY44;Q9H320;Q2NL82;Q9Y221;Q7Z6M4}  
 8196 Pathogen[ P14075] interacts with 6 human  
 partners:{Q2NL82;Q9Y221;Q9H320;P06748;Q9BY44;Q7Z6M4}  
 8197 Pathogen[ P0C206] interacts with 7 human  
 partners:{Q7Z6M4;Q14692;Q9H320;Q9BY44;P06748;Q9Y221;Q2NL82}  
 8198 Pathogen[ P03363] interacts with 5 human  
 partners:{Q9BY44;P06748;Q9H320;Q2NL82;Q9Y221}  
 8199 [Cluster 746]GO:0045776+P biological\_process [name] negative regulation of blood pressure [def] "Any process in which the force of blood traveling through the circulatory system is decreased." [GOC  
 8200 Pathogen[ Q2Q067] interacts with 2 human partners:{P30793;P27986}  
 8201 Pathogen[ P0C214] interacts with 2 human partners:{P30793;P27986}  
 8202 Pathogen[ P03346] interacts with 1 human partners:{P27986}  
 8203 Pathogen[ Q85601] interacts with 2 human partners:{P30793;P27986}  
 8204 Pathogen[ P14079] interacts with 1 human partners:{P30793}  
 8205 Pathogen[ P03383] interacts with 1 human partners:{P27986}  
 8206 Pathogen[ P03410] interacts with 2 human partners:{P27986;P30793}  
 8207 Pathogen[ P14075] interacts with 2 human partners:{P27986;P30793}  
 8208 Pathogen[ P0C206] interacts with 2 human partners:{P30793;P27986}  
 8209 Pathogen[ P03363] interacts with 1 human partners:{P27986}  
 8210 [Cluster 747]GO:0045671+P biological\_process [name] negative regulation of osteoclast differentiation [def] "Any process that stops, prevents, or reduces the frequency, rate or extent of osteoclast differentiation." [GOC  
 8211 Pathogen[ Q2Q067] interacts with 3 human partners:{Q8TD23;Q14106;P27986}  
 8212 Pathogen[ P0C214] interacts with 4 human partners:{O95633;Q8TD23;Q14106;P27986}  
 8213 Pathogen[ P03346] interacts with 4 human partners:{Q8TD23;Q14106;O95633;P27986}  
 8214 Pathogen[ Q85601] interacts with 3 human partners:{Q8TD23;Q14106;P27986}  
 8215 Pathogen[ P14079] interacts with 2 human partners:{Q8TD23;Q14106}  
 8216 Pathogen[ P03383] interacts with 3 human partners:{P27986;Q14106;Q8TD23}  
 8217 Pathogen[ P03410] interacts with 3 human partners:{P27986;Q14106;Q8TD23}  
 8218 Pathogen[ P14075] interacts with 3 human partners:{Q8TD23;Q14106;P27986}  
 8219 Pathogen[ P0C206] interacts with 4 human partners:{O95633;P27986;Q14106;Q8TD23}  
 8220 Pathogen[ P03363] interacts with 3 human partners:{Q14106;Q8TD23;P27986}  
 8221 [Cluster 748]GO:0051592+P biological\_process [name] response to calcium ion [def] "Any process that results in a change in state or activity of a cell or an organism (in terms of movement, secretion, enzyme production, gene expression, etc.) as a result of a calcium ion stimulus." [GOC  
 8222 Pathogen[ Q2Q067] interacts with 7 human  
 partners:{P50995;P24385;O75340;Q08209;P51948;Q96FQ6;Q9H3M7}  
 8223 Pathogen[ P0C214] interacts with 10 human  
 partners:{P60709;Q9H3M7;Q16613;O75340;P24385;P51948;Q08209;Q96FQ6;P63261;P50995}  
 8224 Pathogen[ P03346] interacts with 9 human  
 partners:{P24385;Q96FQ6;Q9UBV8;P60709;O75340;P50995;Q08209;Q9H3M7;P51948}  
 8225 Pathogen[ Q85601] interacts with 10 human  
 partners:{Q96FQ6;P24385;P50995;Q16613;P51948;Q08209;P60709;P63261;O75340;Q9H3M7}  
 8226 Pathogen[ P14079] interacts with 10 human  
 partners:{P63261;P41238;P50995;Q16613;O75340;P60709;Q9UBV8;Q9H3M7;Q08209;P51948}  
 8227 Pathogen[ P03383] interacts with 5 human  
 partners:{P50995;P51948;Q16613;P24385;Q9H3M7}  
 8228 Pathogen[ P03410] interacts with 12 human



partners:{P50995;Q08209;P41238;Q9H3M7;P55157;Q9UBV8;P24385;Q16613;P51948;P63261;O75340;P60709}

8229 Pathogen[ P14075] interacts with 5 human partners:{Q16613;P50995;Q9H3M7;P24385;P51948}

8230 Pathogen[ P0C206] interacts with 12 human partners:{O75340;P60709;Q9UBV8;P50995;P63261;Q9H3M7;Q08209;P41238;Q16613;Q96FQ6;P51948;P24385}

8231 Pathogen[ P03363] interacts with 7 human partners:{P60709;O75340;Q9H3M7;P50995;Q9UBV8;P24385;P63261}

8232 [Cluster 749]GO:0031915+P biological\_process [name] positive regulation of synaptic plasticity [def] "A process that increases synaptic plasticity, the ability of synapses to change as circumstances require. They may alter function, such as increasing or decreasing their sensitivity, or they may increase or decrease in actual numbers." [GOC

8233 Pathogen[ Q2Q067] interacts with 2 human partners:{Q12834;Q9UJX6}

8234 Pathogen[ P0C214] interacts with 2 human partners:{Q9UJX6;Q12834}

8235 Pathogen[ P03346] interacts with 2 human partners:{Q12834;Q9UJX6}

8236 Pathogen[ Q85601] interacts with 2 human partners:{Q9UJX6;Q12834}

8237 Pathogen[ P14079] interacts with 2 human partners:{Q6PUV4;Q9UJX6}

8238 Pathogen[ P03383] interacts with 2 human partners:{Q9UJX6;Q12834}

8239 Pathogen[ P03410] interacts with 3 human partners:{Q6PUV4;Q12834;Q9UJX6}

8240 Pathogen[ P14075] interacts with 2 human partners:{Q9UJX6;Q12834}

8241 Pathogen[ P0C206] interacts with 3 human partners:{Q6PUV4;Q9UJX6;Q12834}

8242 Pathogen[ P03363] interacts with 2 human partners:{Q9UJX6;Q12834}

8243 [Cluster 750]GO:0050689+P biological\_process [name] negative regulation of defense response to virus by host [def] "Any host process that results in the inhibition of antiviral immune response mechanisms, thereby facilitating viral replication. The host is defined as the larger of the organisms involved in a symbiotic interaction." [GOC

8244 Pathogen[ Q2Q067] interacts with 3 human partners:{Q15633;Q14653;P09914}

8245 Pathogen[ P0C214] interacts with 3 human partners:{P09914;Q15633;Q14653}

8246 Pathogen[ P03346] interacts with 3 human partners:{Q15633;Q14653;P09914}

8247 Pathogen[ Q85601] interacts with 3 human partners:{Q14653;Q15633;P09914}

8248 Pathogen[ P14079] interacts with 2 human partners:{Q14653;P09914}

8249 Pathogen[ P03383] interacts with 2 human partners:{Q14653;Q15633}

8250 Pathogen[ P03410] interacts with 3 human partners:{Q15633;Q14653;P09914}

8251 Pathogen[ P14075] interacts with 2 human partners:{Q14653;Q15633}

8252 Pathogen[ P0C206] interacts with 3 human partners:{Q15633;Q14653;P09914}

8253 Pathogen[ P03363] interacts with 3 human partners:{Q14653;P09914;Q15633}

8254 [Cluster 751]GO:0048568+P biological\_process [name] embryonic organ development [def] "Development, taking place during the embryonic phase, of a tissue or tissues that work together to perform a specific function or functions. Development pertains to the process whose specific outcome is the progression of a structure over time, from its formation to the mature structure. Organs are commonly observed as visibly distinct structures, but may also exist as loosely associated clusters of cells that work together to perform a specific function or functions." [GOC

8255 Pathogen[ Q2Q067] interacts with 2 human partners:{Q8WW38;P40424}

8256 Pathogen[ P0C214] interacts with 3 human partners:{P40424;Q9Y6I3;Q8WW38}

8257 Pathogen[ P03346] interacts with 7 human partners:{Q8WW38;P07992;Q9BYW2;P40424;Q9Y6I3;Q13394;Q9Y586}

8258 Pathogen[ Q85601] interacts with 3 human partners:{Q8WW38;P40424;Q9Y6I3}

8259 Pathogen[ P14079] interacts with 5 human partners:{Q9Y6I3;Q9Y586;Q13394;Q8WW38;P07992}

8260 Pathogen[ P03383] interacts with 2 human partners:{Q8WW38;P40424}

8261 Pathogen[ P03410] interacts with 6 human partners:{Q13394;Q9Y6I3;P07992;Q9Y586;Q8WW38;P40424}

8262 Pathogen[ P14075] interacts with 2 human partners:{P40424;Q8WW38}

8263 Pathogen[ P0C206] interacts with 6 human partners:{Q8WW38;Q13394;Q9Y586;P40424;P07992;Q9Y6I3}

8264 Pathogen[ P03363] interacts with 2 human partners:{P40424;Q8WW38}

8265 [Cluster 752]GO:0072554+P biological\_process [name] blood vessel lumenization [def] "The process in which a developing blood vessel forms an endothelial lumen through which blood will flow." [GOC

8266 Pathogen[ Q2Q067] interacts with 1 human partners:{Q06330}

8267 Pathogen[ P0C214] interacts with 1 human partners:{Q06330}

8268 Pathogen[ P03346] interacts with 1 human partners:{Q06330}

8269 Pathogen[ Q85601] interacts with 1 human partners:{Q06330}

8270 Pathogen[ P14079] interacts with 1 human partners:{Q06330}

8271 Pathogen[ P03383] interacts with 1 human partners:{Q06330}

8272 Pathogen[ P03410] interacts with 1 human partners:{Q06330}

8273 Pathogen[ P14075] interacts with 1 human partners:{Q06330}

8274 Pathogen[ P0C206] interacts with 1 human partners:{Q06330}

8275 Pathogen[ P03363] interacts with 1 human partners:{Q06330}

8276 [Cluster 753]GO:0030011+P biological\_process [name] maintenance of cell polarity [def] "The maintenance of established anisotropic intracellular organization or cell growth patterns." [GOC

8277 Pathogen[ Q2Q067] interacts with 1 human partners:{P54259}

8278 Pathogen[ P0C214] interacts with 1 human partners:{P54259}

8279 Pathogen[ P03346] interacts with 1 human partners:{P54259}  
8280 Pathogen[ Q85601] interacts with 1 human partners:{P54259}  
8281 Pathogen[ P14079] interacts with 1 human partners:{P54259}  
8282 Pathogen[ P03383] interacts with 1 human partners:{P54259}  
8283 Pathogen[ P03410] interacts with 1 human partners:{P54259}  
8284 Pathogen[ P14075] interacts with 1 human partners:{P54259}  
8285 Pathogen[ P0C206] interacts with 1 human partners:{P54259}  
8286 Pathogen[ P03363] interacts with 1 human partners:{P54259}  
8287 [Cluster 754]GO:0048538+P biological\_process [name] thymus development [def] "The process whose specific outcome is the progression of the thymus over time, from its formation to the mature structure. The thymus is a symmetric bi-lobed organ involved primarily in the differentiation of immature to mature T cells, with unique vascular, nervous, epithelial, and lymphoid cell components." [GOC  
8288 Pathogen[ Q2Q067] interacts with 4 human partners:{O43365;O95067;P10242;P40424}  
8289 Pathogen[ P0C214] interacts with 4 human partners:{P40424;O43365;O95067;P10242}  
8290 Pathogen[ P03346] interacts with 9 human partners:{P15863;Q9UIU6;O95067;O43365;P10242;P46109;Q15475;P61968;P40424}  
8291 Pathogen[ Q85601] interacts with 5 human partners:{P61968;P10242;P40424;O43365;O95067}  
8292 Pathogen[ P14079] interacts with 4 human partners:{P46109;O95067;O43365;P10242}  
8293 Pathogen[ P03383] interacts with 4 human partners:{P40424;O43365;O95067;P10242}  
8294 Pathogen[ P03410] interacts with 5 human partners:{P10242;O95067;P40424;P46109;O43365}  
8295 Pathogen[ P14075] interacts with 4 human partners:{O95067;P40424;P10242;O43365}  
8296 Pathogen[ P0C206] interacts with 6 human partners:{O43365;P10242;P40424;Q13422;O95067;P61968}  
8297 Pathogen[ P03363] interacts with 5 human partners:{O43365;P46109;O95067;P10242;P40424}  
8298 [Cluster 755]GO:0051209+P biological\_process [name] release of sequestered calcium ion into cytosol [def] "The process in which calcium ions sequestered in the endoplasmic reticulum or mitochondria are released into the cytosolic compartment." [GOC  
8299 Pathogen[ Q2Q067] interacts with 1 human partners:{Q9BXH1}  
8300 Pathogen[ P0C214] interacts with 1 human partners:{Q9BXH1}  
8301 Pathogen[ P03346] interacts with 2 human partners:{Q9P2D0;Q9BXH1}  
8302 Pathogen[ Q85601] interacts with 2 human partners:{Q9BXH1;Q9P2D0}  
8303 Pathogen[ P14079] interacts with 2 human partners:{Q9BXH1;Q9P2D0}  
8304 Pathogen[ P03383] interacts with 1 human partners:{Q9BXH1}  
8305 Pathogen[ P03410] interacts with 2 human partners:{Q9BXH1;Q9P2D0}  
8306 Pathogen[ P14075] interacts with 1 human partners:{Q9BXH1}  
8307 Pathogen[ P0C206] interacts with 2 human partners:{Q9BXH1;Q9P2D0}  
8308 Pathogen[ P03363] interacts with 3 human partners:{Q9P2D0;Q8IWX8;Q9BXH1}  
8309 [Cluster 756]GO:0006699+P biological\_process [name] bile acid biosynthetic process [def] "The chemical reactions and pathways resulting in the formation of bile acids, any of a group of steroid carboxylic acids occurring in bile." [GOC  
8310 Pathogen[ Q2Q067] interacts with 2 human partners:{O14734;P20823}  
8311 Pathogen[ P0C214] interacts with 1 human partners:{O14734}  
8312 Pathogen[ P03346] interacts with 2 human partners:{P20823;O14734}  
8313 Pathogen[ Q85601] interacts with 2 human partners:{O14734;P20823}  
8314 Pathogen[ P14079] interacts with 1 human partners:{O14734}  
8315 Pathogen[ P03383] interacts with 1 human partners:{O14734}  
8316 Pathogen[ P03410] interacts with 1 human partners:{O14734}  
8317 Pathogen[ P14075] interacts with 1 human partners:{O14734}  
8318 Pathogen[ P0C206] interacts with 2 human partners:{P20823;O14734}  
8319 Pathogen[ P03363] interacts with 1 human partners:{O14734}  
8320 [Cluster 757]GO:0061101+P biological\_process [name] neuroendocrine cell differentiation [def] "The process in which a relatively unspecialized cell acquires specialized structural and/or functional features of a neuroendocrine cell. A neuroendocrine cell is a cell that receives input from a neuron which controls the secretion of an endocrine substance." [GOC  
8321 Pathogen[ Q2Q067] interacts with 1 human partners:{Q9P287}  
8322 Pathogen[ P0C214] interacts with 1 human partners:{Q9P287}  
8323 Pathogen[ P03346] interacts with 1 human partners:{Q9P287}  
8324 Pathogen[ Q85601] interacts with 1 human partners:{Q9P287}  
8325 Pathogen[ P14079] interacts with 1 human partners:{Q9P287}  
8326 Pathogen[ P03383] interacts with 1 human partners:{Q9P287}  
8327 Pathogen[ P03410] interacts with 1 human partners:{Q9P287}  
8328 Pathogen[ P14075] interacts with 1 human partners:{Q9P287}  
8329 Pathogen[ P0C206] interacts with 1 human partners:{Q9P287}  
8330 Pathogen[ P03363] interacts with 1 human partners:{Q9P287}  
8331 [Cluster 758]GO:0016050+P biological\_process [name] vesicle organization [def] "A process that is carried out at the cellular level which results in the assembly, arrangement of constituent parts, or disassembly of a vesicle." [GOC  
8332 Pathogen[ Q2Q067] interacts with 2 human partners:{O00401;Q9UKT4}  
8333 Pathogen[ P0C214] interacts with 2 human partners:{O00401;Q9UKT4}  
8334 Pathogen[ P03346] interacts with 6 human partners:{Q7Z3T8;P42566;Q9UKT4;Q96S99;O00401;Q9ULU8}

8335 Pathogen[ Q85601] interacts with 3 human partners:{000401;Q96S99;Q9UKT4}  
8336 Pathogen[ P14079] interacts with 6 human  
partners:{Q9UKT4;Q9ULU8;P42566;Q96S99;Q7Z3T8;000401}  
8337 Pathogen[ P03383] interacts with 2 human partners:{Q9UKT4;000401}  
8338 Pathogen[ P03410] interacts with 6 human  
partners:{Q9UKT4;Q96S99;000401;Q9ULU8;P42566;Q7Z3T8}  
8339 Pathogen[ P14075] interacts with 2 human partners:{Q9UKT4;000401}  
8340 Pathogen[ P0C206] interacts with 6 human  
partners:{Q9UKT4;Q7Z3T8;Q9ULU8;000401;Q96S99;P42566}  
8341 Pathogen[ P03363] interacts with 2 human partners:{Q9UKT4;000401}  
8342 [Cluster 759]GO:0001787+P biological\_process [name] natural killer cell proliferation  
[def] "The expansion of a natural killer cell population by cell division." [GOC  
8343 Pathogen[ Q2Q067] interacts with 1 human partners:{Q99607}  
8344 Pathogen[ P0C214] interacts with 1 human partners:{Q99607}  
8345 Pathogen[ P03346] interacts with 1 human partners:{Q99607}  
8346 Pathogen[ Q85601] interacts with 1 human partners:{Q99607}  
8347 Pathogen[ P14079] interacts with 1 human partners:{Q99607}  
8348 Pathogen[ P03383] interacts with 1 human partners:{Q99607}  
8349 Pathogen[ P03410] interacts with 1 human partners:{Q99607}  
8350 Pathogen[ P14075] interacts with 1 human partners:{Q99607}  
8351 Pathogen[ P0C206] interacts with 1 human partners:{Q99607}  
8352 Pathogen[ P03363] interacts with 1 human partners:{Q99607}  
8353 [Cluster 760]GO:0001738+P biological\_process [name] morphogenesis of a polarized  
epithelium [def] "The morphogenetic process in which the anatomical structures of a  
polarized epithelium are generated and organized. A polarized epithelium is an  
epithelium where the epithelial sheet is oriented with respect to the planar axis." [GOC  
8354 Pathogen[ Q2Q067] interacts with 1 human partners:{060716}  
8355 Pathogen[ P0C214] interacts with 1 human partners:{060716}  
8356 Pathogen[ P03346] interacts with 2 human partners:{060716;Q8N157}  
8357 Pathogen[ Q85601] interacts with 1 human partners:{060716}  
8358 Pathogen[ P14079] interacts with 2 human partners:{Q8N157;060716}  
8359 Pathogen[ P03383] interacts with 1 human partners:{060716}  
8360 Pathogen[ P03410] interacts with 2 human partners:{060716;Q8N157}  
8361 Pathogen[ P14075] interacts with 1 human partners:{060716}  
8362 Pathogen[ P0C206] interacts with 2 human partners:{060716;Q8N157}  
8363 Pathogen[ P03363] interacts with 2 human partners:{Q8N157;060716}  
8364 [Cluster 761]GO:0070301+P biological\_process [name] cellular response to hydrogen  
peroxide [def] "Any process that results in a change in state or activity of a cell  
(in terms of movement, secretion, enzyme production, gene expression, etc.) as a result  
of a hydrogen peroxide (H2O2) stimulus." [CHEBI  
8365 Pathogen[ Q2Q067] interacts with 3 human partners:{P14921;Q99497;Q12983}  
8366 Pathogen[ P0C214] interacts with 3 human partners:{P14921;Q99497;Q12983}  
8367 Pathogen[ P03346] interacts with 7 human  
partners:{P07148;Q9Y5W3;Q12983;P14921;Q99497;Q9HB21;Q9H8V3}  
8368 Pathogen[ Q85601] interacts with 4 human partners:{Q99497;P14921;Q9HB21;Q12983}  
8369 Pathogen[ P14079] interacts with 6 human  
partners:{P04083;Q99497;Q9H8V3;Q12983;Q9Y5W3;Q9HB21}  
8370 Pathogen[ P03383] interacts with 2 human partners:{P14921;Q12983}  
8371 Pathogen[ P03410] interacts with 5 human  
partners:{Q99497;Q12983;Q9HB21;Q9H8V3;P14921}  
8372 Pathogen[ P14075] interacts with 2 human partners:{Q12983;P14921}  
8373 Pathogen[ P0C206] interacts with 5 human  
partners:{P14921;Q99497;Q12983;Q9H8V3;Q9HB21}  
8374 Pathogen[ P03363] interacts with 1 human partners:{P14921}  
8375 [Cluster 762]GO:0015879+P biological\_process [name] carnitine transport [def] "The  
directed movement of carnitine into, out of or within a cell, or between cells, by means  
of some agent such as a transporter or pore. Carnitine is a compound that participates  
in the transfer of acyl groups across the inner mitochondrial membrane." [GOC  
8376 Pathogen[ Q2Q067] interacts with 1 human partners:{Q5T2W1}  
8377 Pathogen[ P0C214] interacts with 1 human partners:{Q5T2W1}  
8378 Pathogen[ P03346] interacts with 1 human partners:{Q5T2W1}  
8379 Pathogen[ Q85601] interacts with 1 human partners:{Q5T2W1}  
8380 Pathogen[ P14079] interacts with 1 human partners:{Q5T2W1}  
8381 Pathogen[ P03383] interacts with 1 human partners:{Q5T2W1}  
8382 Pathogen[ P03410] interacts with 1 human partners:{Q5T2W1}  
8383 Pathogen[ P14075] interacts with 1 human partners:{Q5T2W1}  
8384 Pathogen[ P0C206] interacts with 1 human partners:{Q5T2W1}  
8385 Pathogen[ P03363] interacts with 1 human partners:{Q5T2W1}  
8386 [Cluster 763]GO:0034767+P biological\_process [name] positive regulation of ion  
transmembrane transport [def] "Any process that activates or increases the frequency,  
rate or extent of the directed movement of ions from one side of a membrane to the  
other." [GOC  
8387 Pathogen[ Q2Q067] interacts with 1 human partners:{Q5T2W1}  
8388 Pathogen[ P0C214] interacts with 1 human partners:{Q5T2W1}  
8389 Pathogen[ P03346] interacts with 1 human partners:{Q5T2W1}  
8390 Pathogen[ Q85601] interacts with 1 human partners:{Q5T2W1}

8391 Pathogen[ P14079] interacts with 1 human partners:{Q5T2W1}

8392 Pathogen[ P03383] interacts with 1 human partners:{Q5T2W1}

8393 Pathogen[ P03410] interacts with 1 human partners:{Q5T2W1}

8394 Pathogen[ P14075] interacts with 1 human partners:{Q5T2W1}

8395 Pathogen[ P0C206] interacts with 1 human partners:{Q5T2W1}

8396 Pathogen[ P03363] interacts with 1 human partners:{Q5T2W1}

8397 [Cluster 764]GO:0042098+P biological\_process [name] T cell proliferation [def] "The expansion of a T cell population by cell division. Follows T cell activation." [GOC

8398 Pathogen[ Q2Q067] interacts with 3 human partners:{P30281;P40306;Q9UDY8}

8399 Pathogen[ P0C214] interacts with 3 human partners:{Q9UDY8;P40306;P30281}

8400 Pathogen[ P03346] interacts with 4 human partners:{P30281;Q9UDY8;Q9Y2Y4;P40306}

8401 Pathogen[ Q85601] interacts with 4 human partners:{P30281;Q9UDY8;Q9Y2Y4;P40306}

8402 Pathogen[ P14079] interacts with 4 human partners:{Q9Y2Y4;P40306;Q92542;P16298}

8403 Pathogen[ P03383] interacts with 2 human partners:{P40306;P30281}

8404 Pathogen[ P03410] interacts with 4 human partners:{P40306;P30281;Q9Y2Y4;Q92542}

8405 Pathogen[ P14075] interacts with 2 human partners:{P30281;P40306}

8406 Pathogen[ P0C206] interacts with 5 human partners:{P40306;Q9UDY8;Q92542;Q9Y2Y4;P30281}

8407 Pathogen[ P03363] interacts with 2 human partners:{Q9Y2Y4;P30281}

8408 [Cluster 765]GO:0051568+P biological\_process [name] histone H3-K4 methylation [def] "The modification of histone H3 by addition of a methyl group to lysine at position 4 of the histone." [GOC

8409 Pathogen[ Q2Q067] interacts with 6 human partners:{Q8IZD2;Q6ZW49;Q9C005;Q9P0U4;O14686;Q9UBL3}

8410 Pathogen[ P0C214] interacts with 3 human partners:{Q6ZW49;Q9C005;Q8IZD2}

8411 Pathogen[ P03346] interacts with 7 human partners:{Q9C005;Q15291;Q9UBL3;Q9P0U4;O14686;Q8IZD2;Q6ZW49}

8412 Pathogen[ Q85601] interacts with 6 human partners:{O14686;Q9UBL3;Q9P0U4;Q9C005;Q6ZW49;Q8IZD2}

8413 Pathogen[ P14079] interacts with 4 human partners:{Q9C005;Q9UBL3;Q6ZW49;Q9P0U4}

8414 Pathogen[ P03383] interacts with 2 human partners:{Q6ZW49;Q9C005}

8415 Pathogen[ P03410] interacts with 3 human partners:{Q9P0U4;Q9C005;Q6ZW49}

8416 Pathogen[ P14075] interacts with 2 human partners:{Q6ZW49;Q9C005}

8417 Pathogen[ P0C206] interacts with 6 human partners:{Q9P0U4;Q9C005;Q6ZW49;O14686;Q9UBL3;Q8IZD2}

8418 Pathogen[ P03363] interacts with 8 human partners:{Q15291;Q9UBL3;Q9P0U4;O15047;Q9C005;Q9UPS6;Q6ZW49;O14686}

8419 [Cluster 766]GO:0045773+P biological\_process [name] positive regulation of axon extension [def] "Any process that activates or increases the frequency, rate or extent of axon extension." [GOC

8420 Pathogen[ Q2Q067] interacts with 2 human partners:{Q9H2P0;Q9UJX6}

8421 Pathogen[ P0C214] interacts with 2 human partners:{Q9UJX6;Q9H2P0}

8422 Pathogen[ P03346] interacts with 2 human partners:{Q9H2P0;Q9UJX6}

8423 Pathogen[ Q85601] interacts with 3 human partners:{Q9UJX6;Q9H2P0;Q9GZM8}

8424 Pathogen[ P14079] interacts with 5 human partners:{Q9NP84;Q9H2P0;Q9GZM8;Q9UJX6;P10636}

8425 Pathogen[ P03383] interacts with 1 human partners:{Q9UJX6}

8426 Pathogen[ P03410] interacts with 4 human partners:{Q9GZM8;P10636;Q9NP84;Q9UJX6}

8427 Pathogen[ P14075] interacts with 1 human partners:{Q9UJX6}

8428 Pathogen[ P0C206] interacts with 4 human partners:{P10636;Q9GZM8;Q9UJX6;Q9H2P0}

8429 Pathogen[ P03363] interacts with 2 human partners:{Q9H2P0;Q9UJX6}

8430 [Cluster 767]GO:0021547+P biological\_process [name] midbrain-hindbrain boundary initiation [def] "The regionalization process that gives rise to the midbrain-hindbrain boundary. The midbrain-hindbrain domain of the embryonic brain is comprised of the mesencephalic vesicle and the first rhombencephalic vesicle at early somitogenesis stages. An organizing center at the boundary patterns the midbrain and hindbrain primordia of the neural plate." [GO\_REF

8431 Pathogen[ Q2Q067] interacts with 1 human partners:{Q9BWW4}

8432 Pathogen[ P0C214] interacts with 1 human partners:{Q9BWW4}

8433 Pathogen[ P03346] interacts with 1 human partners:{Q9BWW4}

8434 Pathogen[ Q85601] interacts with 1 human partners:{Q9BWW4}

8435 Pathogen[ P14079] interacts with 1 human partners:{Q9BWW4}

8436 Pathogen[ P03383] interacts with 1 human partners:{Q9BWW4}

8437 Pathogen[ P03410] interacts with 1 human partners:{Q9BWW4}

8438 Pathogen[ P14075] interacts with 1 human partners:{Q9BWW4}

8439 Pathogen[ P0C206] interacts with 1 human partners:{Q9BWW4}

8440 Pathogen[ P03363] interacts with 1 human partners:{Q9BWW4}

8441 [Cluster 768]GO:0002070+P biological\_process [name] epithelial cell maturation [def] "The developmental process, independent of morphogenetic (shape) change, that is required for an epithelial cell to attain its fully functional state. An epithelial cell is a cell usually found in a two-dimensional sheet with a free surface." [GOC

8442 Pathogen[ Q2Q067] interacts with 3 human partners:{Q9NZI6;Q9UK73;P17861}

8443 Pathogen[ P0C214] interacts with 3 human partners:{P17861;Q9NZI6;Q9UK73}

8444 Pathogen[ P03346] interacts with 4 human partners:{P06401;Q9NZI6;P17861;Q9UK73}

8445 Pathogen[ Q85601] interacts with 3 human partners:{Q9UK73;Q9NZI6;P17861}

8446 Pathogen[ P14079] interacts with 2 human partners:{Q9UK73;Q9NZI6}

8447 Pathogen[ P03383] interacts with 3 human partners:{Q9UK73;P17861;Q9NZI6}  
8448 Pathogen[ P03410] interacts with 3 human partners:{P17861;Q9UK73;Q9NZI6}  
8449 Pathogen[ P14075] interacts with 3 human partners:{Q9UK73;P17861;Q9NZI6}  
8450 Pathogen[ P0C206] interacts with 4 human partners:{P06401;Q9UK73;P17861;Q9NZI6}  
8451 Pathogen[ P03363] interacts with 3 human partners:{Q9NZI6;P17861;Q9UK73}  
8452 [Cluster 769]GO:0006949+P biological\_process [name] syncytium formation [def] "The formation of a syncytium, a mass of cytoplasm containing several nuclei enclosed within a single plasma membrane. Syncytia are normally derived from single cells that fuse or fail to complete cell division." [ISBN  
8453 Pathogen[ Q2Q067] interacts with 1 human partners:{P51959}  
8454 Pathogen[ P0C214] interacts with 1 human partners:{P51959}  
8455 Pathogen[ P03346] interacts with 2 human partners:{P07992;P51959}  
8456 Pathogen[ Q85601] interacts with 1 human partners:{P51959}  
8457 Pathogen[ P14079] interacts with 2 human partners:{P51959;P07992}  
8458 Pathogen[ P03383] interacts with 1 human partners:{P51959}  
8459 Pathogen[ P03410] interacts with 2 human partners:{P07992;P51959}  
8460 Pathogen[ P14075] interacts with 1 human partners:{P51959}  
8461 Pathogen[ P0C206] interacts with 2 human partners:{P07992;P51959}  
8462 Pathogen[ P03363] interacts with 1 human partners:{P51959}  
8463 [Cluster 770]GO:0002328+P biological\_process [name] pro-B cell differentiation [def] "The process in which a precursor cell type acquires the specialized features of a pro-B cell. Pro-B cells are the earliest stage of the B cell lineage and undergo heavy chain D and J gene rearrangements, although they are not fully committed." [GOC  
8464 Pathogen[ Q2Q067] interacts with 1 human partners:{Q13426}  
8465 Pathogen[ P0C214] interacts with 1 human partners:{Q13426}  
8466 Pathogen[ P03346] interacts with 2 human partners:{Q06945;Q13426}  
8467 Pathogen[ Q85601] interacts with 1 human partners:{Q13426}  
8468 Pathogen[ P14079] interacts with 2 human partners:{Q13426;P49917}  
8469 Pathogen[ P03383] interacts with 1 human partners:{Q13426}  
8470 Pathogen[ P03410] interacts with 1 human partners:{Q13426}  
8471 Pathogen[ P14075] interacts with 1 human partners:{Q13426}  
8472 Pathogen[ P0C206] interacts with 2 human partners:{P49917;Q13426}  
8473 Pathogen[ P03363] interacts with 1 human partners:{Q13426}  
8474 [Cluster 771]GO:0043267+P biological\_process [name] negative regulation of potassium ion transport [def] "Any process that stops, prevents, or reduces the frequency, rate or extent of the directed movement of potassium ions (K+) into, out of or within a cell, or between cells, by means of some agent such as a transporter or pore." [GOC  
8475 Pathogen[ Q2Q067] interacts with 1 human partners:{P29474}  
8476 Pathogen[ P0C214] interacts with 1 human partners:{P29474}  
8477 Pathogen[ P03346] interacts with 1 human partners:{P29474}  
8478 Pathogen[ Q85601] interacts with 1 human partners:{P29474}  
8479 Pathogen[ P14079] interacts with 2 human partners:{P24588;O43612}  
8480 Pathogen[ P03383] interacts with 1 human partners:{P29474}  
8481 Pathogen[ P03410] interacts with 3 human partners:{O43612;P29474;P24588}  
8482 Pathogen[ P14075] interacts with 1 human partners:{P29474}  
8483 Pathogen[ P0C206] interacts with 1 human partners:{P29474}  
8484 Pathogen[ P03363] interacts with 1 human partners:{P29474}  
8485 [Cluster 772]GO:0032700+P biological\_process [name] negative regulation of interleukin-17 production [def] "Any process that stops, prevents, or reduces the frequency, rate, or extent of production of any member of the interleukin-17 family of cytokines." [GOC  
8486 Pathogen[ Q2Q067] interacts with 1 human partners:{P04156}  
8487 Pathogen[ P0C214] interacts with 1 human partners:{P04156}  
8488 Pathogen[ P03346] interacts with 1 human partners:{P04156}  
8489 Pathogen[ Q85601] interacts with 1 human partners:{P04156}  
8490 Pathogen[ P14079] interacts with 2 human partners:{P04156;P29459}  
8491 Pathogen[ P03383] interacts with 1 human partners:{P04156}  
8492 Pathogen[ P03410] interacts with 2 human partners:{P04156;P29459}  
8493 Pathogen[ P14075] interacts with 1 human partners:{P04156}  
8494 Pathogen[ P0C206] interacts with 1 human partners:{P04156}  
8495 Pathogen[ P03363] interacts with 1 human partners:{P04156}  
8496 [Cluster 773]GO:2000300+P biological\_process [name] regulation of synaptic vesicle exocytosis [def] "Any process that modulates the frequency, rate or extent of synaptic vesicle exocytosis." [GOC  
8497 Pathogen[ Q2Q067] interacts with 1 human partners:{P35080}  
8498 Pathogen[ P0C214] interacts with 1 human partners:{P35080}  
8499 Pathogen[ P03346] interacts with 1 human partners:{P35080}  
8500 Pathogen[ Q85601] interacts with 1 human partners:{P35080}  
8501 Pathogen[ P14079] interacts with 1 human partners:{P35080}  
8502 Pathogen[ P03383] interacts with 1 human partners:{P35080}  
8503 Pathogen[ P03410] interacts with 1 human partners:{P35080}  
8504 Pathogen[ P14075] interacts with 1 human partners:{P35080}  
8505 Pathogen[ P0C206] interacts with 1 human partners:{P35080}  
8506 Pathogen[ P03363] interacts with 1 human partners:{P35080}  
8507 [Cluster 774]GO:0007143+P biological\_process [name] female meiosis [def] "A cell cycle process comprising the steps by which a cell progresses through the nuclear

division phase of a meiotic cell cycle in the female germline." [GOC

8508 Pathogen[ Q2Q067] interacts with 1 human partners:{Q9BX26}

8509 Pathogen[ POC214] interacts with 1 human partners:{Q9BX26}

8510 Pathogen[ P03346] interacts with 1 human partners:{Q9BX26}

8511 Pathogen[ Q85601] interacts with 1 human partners:{Q9BX26}

8512 Pathogen[ P14079] interacts with 1 human partners:{Q9BX26}

8513 Pathogen[ P03383] interacts with 1 human partners:{Q9BX26}

8514 Pathogen[ P03410] interacts with 1 human partners:{Q9BX26}

8515 Pathogen[ P14075] interacts with 1 human partners:{Q9BX26}

8516 Pathogen[ POC206] interacts with 1 human partners:{Q9BX26}

8517 Pathogen[ P03363] interacts with 1 human partners:{Q9BX26}

8518 [Cluster 775]GO:0000381+P biological\_process [name] regulation of alternative nuclear mRNA splicing, via spliceosome [def] "Any process that modulates the frequency, rate or extent of alternative splicing of nuclear mRNAs." [GOC

8519 Pathogen[ Q2Q067] interacts with 7 human partners:{Q9NR56;Q8NDT2;P15172;P49756;P38159;O43251;Q9H0G5}

8520 Pathogen[ POC214] interacts with 8 human partners:{P38159;P26599;Q9NR56;P15172;Q9H0G5;Q8NDT2;O43251;P49756}

8521 Pathogen[ P03346] interacts with 12 human partners:{P0DJD3;P15172;P26599;P52756;Q9BWF3;Q9H0G5;Q8NDT2;P49756;O43251;P38159;P62995;Q9NR56}

8522 Pathogen[ Q85601] interacts with 6 human partners:{P49756;P15172;Q9NR56;Q9H0G5;Q8NDT2;P38159}

8523 Pathogen[ P14079] interacts with 7 human partners:{Q9NR56;P26599;P49756;Q9H0G5;P52756;Q8NDT2;P38159}

8524 Pathogen[ P03383] interacts with 6 human partners:{P15172;Q9NR56;P38159;P49756;Q8NDT2;Q9H0G5}

8525 Pathogen[ P03410] interacts with 6 human partners:{Q9H0G5;Q9NR56;P26599;P49756;Q8NDT2;P38159}

8526 Pathogen[ P14075] interacts with 6 human partners:{P49756;P38159;P15172;Q9NR56;Q8NDT2;Q9H0G5}

8527 Pathogen[ POC206] interacts with 6 human partners:{Q9NR56;Q9H0G5;P38159;P15172;P49756;Q8NDT2}

8528 Pathogen[ P03363] interacts with 14 human partners:{P0DJD3;Q9H0G5;P49756;Q9NR56;Q9BWF3;Q9J87;P38159;P26599;Q5SZQ8;P62995;P15172;O43251;Q8NDT2;P52756}

8529 [Cluster 776]GO:0031069+P biological\_process [name] hair follicle morphogenesis [def] "The process in which the anatomical structures of the hair follicle are generated and organized." [GOC

8530 Pathogen[ Q2Q067] interacts with 6 human partners:{Q7Z3Z0;Q01196;Q7Z3Y8;Q3SY84;Q13761;P60953}

8531 Pathogen[ POC214] interacts with 5 human partners:{Q13761;Q7Z3Y8;Q3SY84;P60953;Q7Z3Z0}

8532 Pathogen[ P03346] interacts with 7 human partners:{Q3SY84;Q7Z3Y8;Q7Z3Z0;P60953;O95863;Q13761;Q01196}

8533 Pathogen[ Q85601] interacts with 5 human partners:{Q3SY84;Q7Z3Y8;Q7Z3Z0;P60953;Q13761}

8534 Pathogen[ P14079] interacts with 4 human partners:{Q3SY84;Q7Z3Z0;Q7Z3Y8;Q13761}

8535 Pathogen[ P03383] interacts with 5 human partners:{Q13761;Q7Z3Z0;P60953;Q7Z3Y8;Q3SY84}

8536 Pathogen[ P03410] interacts with 5 human partners:{Q7Z3Z0;Q3SY84;P60953;Q13761;Q7Z3Y8}

8537 Pathogen[ P14075] interacts with 5 human partners:{P60953;Q7Z3Z0;Q7Z3Y8;Q3SY84;Q13761}

8538 Pathogen[ POC206] interacts with 5 human partners:{Q7Z3Z0;P60953;Q7Z3Y8;Q3SY84;Q13761}

8539 Pathogen[ P03363] interacts with 6 human partners:{Q3SY84;Q7Z3Y8;P19883;Q7Z3Z0;Q13761;P60953}

8540 [Cluster 777]GO:0001892+P biological\_process [name] embryonic placenta development [def] "The embryonically driven process whose specific outcome is the progression of the placenta over time, from its formation to the mature structure. The placenta is an organ of metabolic interchange between fetus and mother, partly of embryonic origin and partly of maternal origin." [GOC

8541 Pathogen[ Q2Q067] interacts with 10 human partners:{P27540;Q00613;Q02447;P17676;P08047;P23769;P19484;Q99814;Q12830;P49715}

8542 Pathogen[ POC214] interacts with 9 human partners:{Q00613;P19484;P23769;P17676;Q02447;Q99814;P27540;P08047;Q12830}

8543 Pathogen[ P03346] interacts with 13 human partners:{Q12830;P17676;P19484;Q00613;P23769;P27540;O75626;P49715;P08047;Q99814;O95718;Q02447;Q9UJU5}

8544 Pathogen[ Q85601] interacts with 11 human partners:{P17676;P19484;P23769;Q99814;P27540;Q00613;Q12830;P08047;Q02447;P49715;O75626}

8545 Pathogen[ P14079] interacts with 11 human partners:{Q99814;O75626;Q02447;P19484;O95718;Q00613;P49715;P27540;Q12830;P04141;P23769}

8546 Pathogen[ P03383] interacts with 8 human partners: {Q12830;P08047;P27540;P19484;P23769;Q02447;P17676;Q00613}

8547 Pathogen[ P03410] interacts with 11 human partners: {Q00613;P04141;P17676;Q02447;Q99814;Q12830;P19484;P27540;P23769;P08047;Q75626}

8548 Pathogen[ P14075] interacts with 8 human partners: {Q00613;P23769;P19484;P27540;Q12830;Q02447;P17676;P08047}

8549 Pathogen[ P0C206] interacts with 12 human partners: {Q00613;Q75626;P49715;P19484;Q95718;P17676;P08047;Q02447;P23769;P27540;Q99814;Q12830}

8550 Pathogen[ P03363] interacts with 10 human partners: {Q12830;P27540;P17676;Q02447;Q99814;P19484;Q00613;P08047;Q75626;Q9UJU5}

8551 [Cluster 778]GO:0048012+P biological\_process [name] hepatocyte growth factor receptor signaling pathway [def] "The series of molecular signals generated as a consequence of the hepatocyte growth factor binding to one of its physiological ligands." [GOC]

8552 Pathogen[ Q2Q067] interacts with 2 human partners: {O14786;P56945}

8553 Pathogen[ P0C214] interacts with 2 human partners: {O14786;P56945}

8554 Pathogen[ P03346] interacts with 2 human partners: {P56945;O14786}

8555 Pathogen[ Q85601] interacts with 2 human partners: {O14786;P56945}

8556 Pathogen[ P14079] interacts with 1 human partners: {Q8N307}

8557 Pathogen[ P03383] interacts with 1 human partners: {P56945}

8558 Pathogen[ P03410] interacts with 3 human partners: {O14786;Q8N307;P56945}

8559 Pathogen[ P14075] interacts with 1 human partners: {P56945}

8560 Pathogen[ P0C206] interacts with 2 human partners: {O14786;P56945}

8561 Pathogen[ P03363] interacts with 2 human partners: {O14786;P56945}

8562 [Cluster 779]GO:0034142+P biological\_process [name] toll-like receptor 4 signaling pathway [def] "Any series of molecular signals generated as a consequence of binding to toll-like receptor 4." [GOC]

8563 Pathogen[ Q2Q067] interacts with 33 human partners: {P01100;Q8IUC6;Q92985;Q15653;Q04206;Q9NYJ8;Q8N5C8;Q75582;Q14653;Q9Y6K9;Q13114;Q13233;P61088;Q96FA3;P19419;P19838;P15336;P25963;P0CG47;O14920;P45984;Q00653;P0CG48;O43318;P62987;Q13404;Q9HAT8;O15111;Q15759;Q16829;Q02078;Q15750;P62979}

8564 Pathogen[ P0C214] interacts with 37 human partners: {Q00653;O15111;Q9Y6K9;P19838;P15336;Q8IUC6;Q14164;P01100;Q96FA3;P19419;Q04206;Q9HAT8;Q13404;Q15653;O43318;Q02078;Q8N5C8;Q13233;Q92985;P0CG48;P25963;Q16829;Q14653;Q75582;P62987;Q15750;P05412;Q13114;Q15759;P0CG47;P45984;P16220;P62979;O14920;Q9NYJ8;P61088;P18846}

8565 Pathogen[ P03346] interacts with 38 human partners: {Q9Y6K9;P05412;P45984;Q02078;O15111;P16220;P15336;P62987;P25963;Q15653;P19419;P0CG48;Q04206;Q13114;Q96FA3;Q13404;Q8N5C8;P61088;Q9NYJ8;Q9HAT8;Q13233;Q75582;Q15750;Q14653;Q16829;P62979;Q8IUC6;Q15759;P0CG47;P45985;P19838;O14920;O43318;Q92985;P01100;Q14164;P18846;Q00653}

8566 Pathogen[ Q85601] interacts with 37 human partners: {Q02078;Q15750;Q9NYJ8;Q8IUC6;O15111;P19419;Q9HAT8;Q16829;P18846;P0CG48;Q15653;Q13114;Q96FA3;Q13404;Q8N5C8;P01100;Q14653;Q14164;Q9Y6K9;P16220;O14920;Q04206;P05412;Q92985;Q75582;P62979;Q15759;P0CG47;P45984;Q13233;P62987;Q00653;P15336;O43318;P61088;P19838;P25963}

8567 Pathogen[ P14079] interacts with 37 human partners: {Q96KP6;Q9HAT8;Q8N5C8;Q02078;P0CG48;Q06413;O43187;P53779;Q14653;P52564;Q75582;Q16829;Q8IUC6;Q92985;Q13404;Q14164;Q15750;P62979;P62987;Q96FA3;P45984;P45983;Q16644;Q15759;Q9Y6K9;P45985;P15336;Q9Y6Y9;Q13164;P05412;P0CG47;Q9Y239;P01100;Q99836;P19419;Q13114;Q15653}

8568 Pathogen[ P03383] interacts with 35 human partners: {Q75582;Q14653;P16220;Q9Y6K9;P62987;Q8IUC6;Q13233;Q00653;O14920;O15111;P19419;P18846;Q15653;O43318;Q8N5C8;P61088;Q92985;Q13404;Q15759;P25963;P01100;P62979;P0CG47;Q96FA3;Q04206;P45984;P0CG48;P15336;Q9NYJ8;P19838;Q13114;Q02078;Q9HAT8;Q15750;P05412}

8569 Pathogen[ P03410] interacts with 41 human partners: {Q04206;P19838;P0CG48;O14920;Q9Y239;P19419;O15111;Q15750;Q96FA3;Q75582;Q14653;O43187;Q15653;P61088;Q13233;P62979;P01100;P18846;O43318;Q16829;P45985;Q9NYJ8;Q96KP6;Q8N5C8;P16220;Q9HAT8;P05412;Q9Y6Y9;P45984;P62987;P53779;Q02078;Q8IUC6;Q00653;Q13404;Q9Y6K9;P25963;Q92985;P15336;P0CG47;Q13114}

8570 Pathogen[ P14075] interacts with 35 human partners: {O15111;Q04206;Q15750;P05412;Q15759;Q75582;P61088;P19419;P15336;Q15653;P25963;Q8N5C8;O14920;P0CG48;P62979;Q14653;O43318;Q9HAT8;Q96FA3;P62987;Q13114;Q02078;Q8IUC6;P01100;P0CG47;Q13404;P19838;Q00653;P16220;Q9Y6K9;Q92985;Q13233;P18846;P45984;Q9NYJ8}

8571 Pathogen[ P0C206] interacts with 38 human partners: {P0CG48;O14920;Q9Y6K9;Q13114;Q02078;P16220;Q8N5C8;Q75582;P45984;P05412;P25963;P19419;Q9HAT8;O43318;P15336;Q15653;P18846;Q16829;Q13233;P61088;P19838;Q14164;Q92985;P01100;Q04206;O15111;P62979;Q9NYJ8;P45985;P0CG47;Q8IUC6;Q96FA3;Q00653;Q15750;P62987;Q13404;Q15759;Q14653}

8572 Pathogen[ P03363] interacts with 29 human partners: {Q14653;Q92985;O14920;Q04206;P25963;O15111;Q9NYJ8;P16220;Q9Y6K9;P19419;O43318;Q15750;P61088;P15336;Q15653;Q16829;Q00653;Q96FA3;P18846;P62987;P19838;Q13114;P05412;Q13404;Q9HAT8;Q8N5C8;Q13233;P01100;Q02078}

8573 [Cluster 780]GO:0016574+P biological\_process [name] histone ubiquitination [def] "The modification of histones by addition of ubiquitin groups." [GOC  
8574 Pathogen[ Q2Q067] interacts with 8 human  
partners:{Q9HC52;Q96T88;Q15022;Q7Z6Z7;P61088;P35226;Q99496;Q06587}  
8575 Pathogen[ P0C214] interacts with 8 human  
partners:{P35226;Q15022;Q96T88;Q06587;Q99496;Q7Z6Z7;Q9HC52;P61088}  
8576 Pathogen[ P03346] interacts with 8 human  
partners:{P35226;Q9HC52;P61088;Q15022;Q99496;Q7Z6Z7;Q06587;Q96T88}  
8577 Pathogen[ Q85601] interacts with 8 human  
partners:{Q15022;Q96T88;Q99496;Q7Z6Z7;P35226;P61088;Q06587;Q9HC52}  
8578 Pathogen[ P14079] interacts with 5 human  
partners:{Q9HC52;Q99496;P35226;Q15022;Q06587}  
8579 Pathogen[ P03383] interacts with 6 human  
partners:{Q9HC52;Q06587;Q15022;P61088;Q99496;P35226}  
8580 Pathogen[ P03410] interacts with 6 human  
partners:{Q99496;P61088;Q06587;P35226;Q15022;Q9HC52}  
8581 Pathogen[ P14075] interacts with 6 human  
partners:{P61088;Q06587;Q9HC52;Q99496;P35226;Q15022}  
8582 Pathogen[ P0C206] interacts with 8 human  
partners:{Q9HC52;P35226;P61088;Q96T88;Q06587;Q15022;Q7Z6Z7;Q99496}  
8583 Pathogen[ P03363] interacts with 8 human  
partners:{Q15022;Q9HC52;Q99496;Q7Z6Z7;P61088;P35226;Q96T88;Q06587}  
8584 [Cluster 781]GO:0000320+P biological\_process [name] re-entry into mitotic cell cycle  
[def] "The resumption of the mitotic cell division cycle by cells that were in a  
quiescent or other non-dividing state." [GOC  
8585 Pathogen[ Q2Q067] interacts with 2 human partners:{P24385;P41002}  
8586 Pathogen[ P0C214] interacts with 2 human partners:{P41002;P24385}  
8587 Pathogen[ P03346] interacts with 2 human partners:{P24385;P41002}  
8588 Pathogen[ Q85601] interacts with 2 human partners:{P24385;P41002}  
8589 Pathogen[ P14079] interacts with 1 human partners:{P41002}  
8590 Pathogen[ P03383] interacts with 2 human partners:{P41002;P24385}  
8591 Pathogen[ P03410] interacts with 2 human partners:{P41002;P24385}  
8592 Pathogen[ P14075] interacts with 2 human partners:{P24385;P41002}  
8593 Pathogen[ P0C206] interacts with 2 human partners:{P41002;P24385}  
8594 Pathogen[ P03363] interacts with 2 human partners:{P41002;P24385}  
8595 [Cluster 782]GO:0035279+P biological\_process [name] mRNA cleavage involved in gene  
silencing by miRNA [def] "The process in which microRNAs (miRNAs) direct the cleavage  
of target mRNAs. Once incorporated into a RNA-induced silencing complex (RISC), a miRNA  
will typically direct cleavage by base pairing with near-perfect complementarity to the  
target mRNA. Many plant miRNAs downregulate gene expression through this mechanism."  
[GOC  
8596 Pathogen[ Q2Q067] interacts with 2 human partners:{Q9UKV8;Q9HCE1}  
8597 Pathogen[ P0C214] interacts with 2 human partners:{Q9HCE1;Q9UKV8}  
8598 Pathogen[ P03346] interacts with 2 human partners:{Q9UKV8;Q9HCE1}  
8599 Pathogen[ Q85601] interacts with 2 human partners:{Q9HCE1;Q9UKV8}  
8600 Pathogen[ P14079] interacts with 2 human partners:{Q9UKV8;Q9HCE1}  
8601 Pathogen[ P03383] interacts with 2 human partners:{Q9UKV8;Q9HCE1}  
8602 Pathogen[ P03410] interacts with 2 human partners:{Q9UKV8;Q9HCE1}  
8603 Pathogen[ P14075] interacts with 2 human partners:{Q9HCE1;Q9UKV8}  
8604 Pathogen[ P0C206] interacts with 2 human partners:{Q9UKV8;Q9HCE1}  
8605 Pathogen[ P03363] interacts with 2 human partners:{Q9UKV8;Q9HCE1}  
8606 [Cluster 783]GO:0021985+P biological\_process [name] neurohypophysis development  
[def] "The progression of the neurohypophysis over time from its initial formation until  
its mature state. The neurohypophysis is the part of the pituitary gland that secretes  
hormones involved in blood pressure regulation." [GO\_REF  
8607 Pathogen[ Q2Q067] interacts with 1 human partners:{P20265}  
8608 Pathogen[ P0C214] interacts with 1 human partners:{P20265}  
8609 Pathogen[ P03346] interacts with 2 human partners:{P20265;Q5XKR4}  
8610 Pathogen[ Q85601] interacts with 1 human partners:{P20265}  
8611 Pathogen[ P14079] interacts with 1 human partners:{P20265}  
8612 Pathogen[ P03383] interacts with 1 human partners:{P20265}  
8613 Pathogen[ P03410] interacts with 1 human partners:{P20265}  
8614 Pathogen[ P14075] interacts with 1 human partners:{P20265}  
8615 Pathogen[ P0C206] interacts with 1 human partners:{P20265}  
8616 Pathogen[ P03363] interacts with 2 human partners:{P20265;Q5XKR4}  
8617 [Cluster 784]GO:0060428+P biological\_process [name] lung epithelium development  
[def] "The biological process whose specific outcome is the progression of the lung  
epithelium from an initial condition to its mature state. This process begins with the  
formation of lung epithelium and ends with the mature structure. The lung epithelium is  
the specialized epithelium that lines the inside of the lung." [GOC  
8618 Pathogen[ Q2Q067] interacts with 1 human partners:{Q9UJM3}  
8619 Pathogen[ P0C214] interacts with 1 human partners:{Q9UJM3}  
8620 Pathogen[ P03346] interacts with 1 human partners:{Q9UJM3}  
8621 Pathogen[ Q85601] interacts with 1 human partners:{Q9UJM3}  
8622 Pathogen[ P14079] interacts with 1 human partners:{Q9UJM3}  
8623 Pathogen[ P03383] interacts with 1 human partners:{Q9UJM3}



8624 Pathogen[ P03410] interacts with 1 human partners:{Q9UJM3}  
8625 Pathogen[ P14075] interacts with 1 human partners:{Q9UJM3}  
8626 Pathogen[ P0C206] interacts with 1 human partners:{Q9UJM3}  
8627 Pathogen[ P03363] interacts with 1 human partners:{Q9UJM3}  
8628 [Cluster 785]GO:0048856+P biological\_process [name] anatomical structure development [def] "The biological process whose specific outcome is the progression of an anatomical structure from an initial condition to its mature state. This process begins with the formation of the structure and ends with the mature structure, whatever form that may be including its natural destruction. An anatomical structure is any biological entity that occupies space and is distinguished from its surroundings. Anatomical structures can be macroscopic such as a carpel, or microscopic such as an acrosome." [GO\_REF  
8629 Pathogen[ Q2Q067] interacts with 2 human partners:{Q99502;P39019}  
8630 Pathogen[ P0C214] interacts with 3 human partners:{P32243;P39019;Q99502}  
8631 Pathogen[ P03346] interacts with 6 human partners:{Q9UIU6;Q99502;Q15475;P39019;P32243;Q9HBU1}  
8632 Pathogen[ Q85601] interacts with 3 human partners:{P39019;Q99502;P32243}  
8633 Pathogen[ P14079] interacts with 3 human partners:{Q99502;P39019;P32243}  
8634 Pathogen[ P03383] interacts with 2 human partners:{P39019;P32243}  
8635 Pathogen[ P03410] interacts with 3 human partners:{Q99502;P32243;P39019}  
8636 Pathogen[ P14075] interacts with 3 human partners:{Q99502;P39019;P32243}  
8637 Pathogen[ P0C206] interacts with 3 human partners:{P32243;P39019;Q99502}  
8638 Pathogen[ P03363] interacts with 3 human partners:{P32243;P39019;Q9HBU1}  
8639 [Cluster 786]GO:0048009+P biological\_process [name] insulin-like growth factor receptor signaling pathway [def] "The series of molecular signals generated as a consequence of the insulin-like growth factor receptor binding to one of its physiological ligands." [GOC  
8640 Pathogen[ Q2Q067] interacts with 2 human partners:{P31749;P27986}  
8641 Pathogen[ P0C214] interacts with 4 human partners:{O75420;Q6Y7W6;P27986;P31749}  
8642 Pathogen[ P03346] interacts with 3 human partners:{Q13322;P31749;P27986}  
8643 Pathogen[ Q85601] interacts with 4 human partners:{P31749;O75420;Q6Y7W6;P27986}  
8644 Pathogen[ P14079] interacts with 2 human partners:{Q6Y7W6;O75420}  
8645 Pathogen[ P03383] interacts with 2 human partners:{P27986;P31749}  
8646 Pathogen[ P03410] interacts with 4 human partners:{P27986;P31749;O75420;Q6Y7W6}  
8647 Pathogen[ P14075] interacts with 2 human partners:{P31749;P27986}  
8648 Pathogen[ P0C206] interacts with 4 human partners:{P31749;O75420;P27986;Q6Y7W6}  
8649 Pathogen[ P03363] interacts with 2 human partners:{P31749;P27986}  
8650 [Cluster 787]GO:0005981+P biological\_process [name] regulation of glycogen catabolic process [def] "Any process that modulates the frequency, rate or extent of the chemical reactions and pathways resulting in the breakdown of glycogen." [GOC  
8651 Pathogen[ Q2Q067] interacts with 3 human partners:{P62140;P62136;Q9UQK1}  
8652 Pathogen[ P0C214] interacts with 5 human partners:{P62140;O95685;P62136;Q9UQK1;Q9H7J1}  
8653 Pathogen[ P03346] interacts with 5 human partners:{P62136;Q9UQK1;O95685;Q9H7J1;P62140}  
8654 Pathogen[ Q85601] interacts with 3 human partners:{Q9UQK1;P62136;P62140}  
8655 Pathogen[ P14079] interacts with 5 human partners:{Q9H7J1;P62136;O95685;P62140;Q9UQK1}  
8656 Pathogen[ P03383] interacts with 4 human partners:{P62140;Q9UQK1;P62136;Q9H7J1}  
8657 Pathogen[ P03410] interacts with 5 human partners:{P62136;O95685;Q9H7J1;P62140;Q9UQK1}  
8658 Pathogen[ P14075] interacts with 5 human partners:{P62140;Q9UQK1;P62136;O95685;Q9H7J1}  
8659 Pathogen[ P0C206] interacts with 5 human partners:{Q9UQK1;P62140;O95685;Q9H7J1;P62136}  
8660 Pathogen[ P03363] interacts with 3 human partners:{P62136;P62140;Q9UQK1}  
8661 [Cluster 788]GO:0060041+P biological\_process [name] retina development in camera-type eye [def] "The process whose specific outcome is the progression of the retina over time, from its formation to the mature structure. The retina is the innermost layer or coating at the back of the eyeball, which is sensitive to light and in which the optic nerve terminates." [GOC  
8662 Pathogen[ Q2Q067] interacts with 9 human partners:{O75161;Q12837;Q99471;P12755;O15078;Q8TC05;P61244;Q15583;O43186}  
8663 Pathogen[ P0C214] interacts with 10 human partners:{O15078;O75161;P05937;P61244;O43186;Q8TC05;P35580;Q12837;P12755;Q99471}  
8664 Pathogen[ P03346] interacts with 15 human partners:{Q9HD90;Q99471;Q12837;Q15583;O43186;O43316;Q96KN7;P05937;Q8N8E2;O75161;Q8TC05;P61244;Q9P2D1;O15078;Q9UIW0}  
8665 Pathogen[ Q85601] interacts with 12 human partners:{O75161;O43316;Q9P2D1;Q8TC05;Q99471;Q15583;O15078;P12755;P61244;P35580;Q8N8E2;Q12837}  
8666 Pathogen[ P14079] interacts with 17 human partners:{P05937;O75161;P12755;Q15583;Q92902;Q9UPW5;Q12837;Q9P2D1;P56715;Q7Z3Z2;Q8TC05;O15078;Q99471;P61244;O15259;Q96KN7;Q8N8E2}  
8667 Pathogen[ P03383] interacts with 8 human partners:{Q8TC05;O15078;Q99471;Q12837;P35580;O43186;O75161;P61244}  
8668 Pathogen[ P03410] interacts with 19 human

8669 partners:{Q8N8E2;Q8TC05;Q9UPW5;P12755;O15259;Q92902;Q96KN7;O75161;Q7Z3Z2;P61244;Q15583;Q99471;Q9P2D1;P05937;O15078;P35580;Q9UBY8;Q12837;P56715}  
Pathogen[ P14075] interacts with 7 human

8670 partners:{Q8TC05;P61244;Q12837;O43186;O15078;O75161;Q99471}  
Pathogen[ P0C206] interacts with 16 human

8671 partners:{P56715;O75161;Q8TC05;Q9P2D1;Q8N8E2;Q99471;Q96KN7;P12755;Q12837;O15078;P61244;Q13422;Q9UPW5;P35580;O43316;Q15583}  
Pathogen[ P03363] interacts with 15 human

8672 partners:{Q9UIW0;Q8TC05;O75161;P56715;O15078;O43316;Q99471;P61244;Q92902;O43186;Q15583;O15259;Q12837;P05937;Q96KN7}  
[Cluster 789]GO:0048286+P biological\_process [name] lung alveolus development  
[def] "The process whose specific outcome is the progression of the alveolus over time, from its formation to the mature structure. The alveolus is a sac for holding air in the lungs\_ formed by the terminal dilation of air passageways." [GOC

8673 Pathogen[ Q2Q067] interacts with 3 human partners:{Q68CZ2;P20719;Q9UJM3}  
8674 Pathogen[ P0C214] interacts with 2 human partners:{Q9UJM3;Q68CZ2}  
8675 Pathogen[ P03346] interacts with 4 human partners:{Q68CZ2;P20719;O43680;Q9UJM3}  
8676 Pathogen[ Q85601] interacts with 2 human partners:{Q68CZ2;Q9UJM3}  
8677 Pathogen[ P14079] interacts with 2 human partners:{Q9UJM3;Q68CZ2}  
8678 Pathogen[ P03383] interacts with 1 human partners:{Q9UJM3}  
8679 Pathogen[ P03410] interacts with 2 human partners:{Q68CZ2;Q9UJM3}  
8680 Pathogen[ P14075] interacts with 1 human partners:{Q9UJM3}  
8681 Pathogen[ P0C206] interacts with 3 human partners:{Q9UJM3;P20719;Q68CZ2}  
8682 Pathogen[ P03363] interacts with 3 human partners:{P20719;Q68CZ2;Q9UJM3}

8683 [Cluster 790]GO:0031167+P biological\_process [name] rRNA methylation [def] "The posttranscriptional addition of methyl groups to specific residues in an rRNA molecule." [GOC

8684 Pathogen[ Q2Q067] interacts with 4 human partners:{Q9H5Q4;Q8WVM0;Q9UI43;Q9UNQ2}  
8685 Pathogen[ P0C214] interacts with 4 human partners:{Q9UNQ2;Q9UI43;Q8WVM0;Q9H5Q4}  
8686 Pathogen[ P03346] interacts with 4 human partners:{Q9UNQ2;Q9H5Q4;Q8WVM0;Q9UI43}  
8687 Pathogen[ Q85601] interacts with 4 human partners:{Q9UI43;Q9H5Q4;Q8WVM0;Q9UNQ2}  
8688 Pathogen[ P14079] interacts with 5 human  
partners:{Q9UI43;Q9UNQ2;Q96FB5;Q9H5Q4;Q8WVM0}

8689 Pathogen[ P03383] interacts with 4 human partners:{Q9UNQ2;Q9H5Q4;Q9UI43;Q8WVM0}  
8690 Pathogen[ P03410] interacts with 5 human  
partners:{Q9UNQ2;Q9H5Q4;Q96FB5;Q8WVM0;Q9UI43}

8691 Pathogen[ P14075] interacts with 4 human partners:{Q9H5Q4;Q9UI43;Q9UNQ2;Q8WVM0}  
8692 Pathogen[ P0C206] interacts with 4 human partners:{Q9UI43;Q8WVM0;Q9UNQ2;Q9H5Q4}  
8693 Pathogen[ P03363] interacts with 4 human partners:{Q9UNQ2;Q8WVM0;Q9UI43;Q9H5Q4}

8694 [Cluster 791]GO:0060913+P biological\_process [name] cardiac cell fate determination  
[def] "The process involved in cardiac cell fate commitment. Once determination has taken place, a cell becomes committed to differentiate down a particular pathway regardless of its environment." [GOC

8695 Pathogen[ Q2Q067] interacts with 1 human partners:{Q01860}  
8696 Pathogen[ P0C214] interacts with 1 human partners:{Q01860}  
8697 Pathogen[ P03346] interacts with 1 human partners:{Q01860}  
8698 Pathogen[ Q85601] interacts with 1 human partners:{Q01860}  
8699 Pathogen[ P14079] interacts with 1 human partners:{Q01860}  
8700 Pathogen[ P03383] interacts with 1 human partners:{Q01860}  
8701 Pathogen[ P03410] interacts with 1 human partners:{Q01860}  
8702 Pathogen[ P14075] interacts with 1 human partners:{Q01860}  
8703 Pathogen[ P0C206] interacts with 1 human partners:{Q01860}  
8704 Pathogen[ P03363] interacts with 1 human partners:{Q01860}

8705 [Cluster 792]GO:0019682+P biological\_process [name] glyceraldehyde-3-phosphate metabolic process [def] "The chemical reactions and pathways involving glyceraldehyde-3-phosphate, an important intermediate in glycolysis." [GOC

8706 Pathogen[ Q2Q067] interacts with 2 human partners:{P37837;P60174}  
8707 Pathogen[ P0C214] interacts with 2 human partners:{P37837;P60174}  
8708 Pathogen[ P03346] interacts with 2 human partners:{P60174;P37837}  
8709 Pathogen[ Q85601] interacts with 2 human partners:{P60174;P37837}  
8710 Pathogen[ P14079] interacts with 1 human partners:{P37837}  
8711 Pathogen[ P03383] interacts with 1 human partners:{P37837}  
8712 Pathogen[ P03410] interacts with 1 human partners:{P37837}  
8713 Pathogen[ P14075] interacts with 1 human partners:{P37837}  
8714 Pathogen[ P0C206] interacts with 2 human partners:{P60174;P37837}  
8715 Pathogen[ P03363] interacts with 1 human partners:{P37837}

8716 [Cluster 793]GO:0010225+P biological\_process [name] response to UV-C [def] "Any process that results in a change in state or activity of a cell or an organism (in terms of movement, secretion, enzyme production, gene expression, etc.) as a result of a UV-C radiation stimulus. UV-C radiation (UV-C light) spans the wavelengths 100 to 290 nm." [GOC

8717 Pathogen[ Q2Q067] interacts with 5 human  
partners:{Q9Y253;P25490;P20749;P05114;P28715}

8718 Pathogen[ P0C214] interacts with 5 human  
partners:{Q8IWE4;P28715;P20749;P05114;Q9Y253}

8719 Pathogen[ P03346] interacts with 7 human

8720 partners: {Q9Y253;P28715;P25490;P05114;Q8IWE4;P51587;P20749}  
Pathogen[ Q85601] interacts with 7 human

8721 partners: {P25490;P28715;Q8IWE4;P05114;Q9Y253;P20749;P51587}  
Pathogen[ P14079] interacts with 7 human

8722 partners: {P05114;P28715;P51587;P20749;Q9Y253;P25490;Q8IWE4}  
Pathogen[ P03383] interacts with 4 human partners: {Q9Y253;P20749;Q8IWE4;P05114}

8723 Pathogen[ P03410] interacts with 7 human

8724 partners: {P20749;Q8IWE4;P28715;P25490;Q9Y253;P51587;P05114}  
Pathogen[ P14075] interacts with 3 human partners: {Q9Y253;P20749;P05114}

8725 Pathogen[ P0C206] interacts with 7 human

8726 partners: {Q9Y253;P28715;P05114;P25490;P51587;Q8IWE4;P20749}  
Pathogen[ P03363] interacts with 4 human partners: {Q9Y253;P25490;P20749;P05114}

8727 [Cluster 794]GO:0008340+P biological\_process [name] determination of adult lifespan  
[def] "The control of viability and duration in the adult phase of the life-cycle." [GOC

8728 Pathogen[ Q2Q067] interacts with 4 human partners: {Q9BXH1;Q9NZI6;P28069;P28715}

8729 Pathogen[ P0C214] interacts with 5 human  
partners: {Q99807;Q9BXH1;P28715;P28069;Q9NZI6}

8730 Pathogen[ P03346] interacts with 4 human partners: {P28715;Q9NZI6;P28069;Q9BXH1}

8731 Pathogen[ Q85601] interacts with 4 human partners: {Q9BXH1;P28069;P28715;Q9NZI6}

8732 Pathogen[ P14079] interacts with 6 human  
partners: {Q99807;P28715;Q9BXH1;P28069;Q9NZI6;P52701}

8733 Pathogen[ P03383] interacts with 3 human partners: {P28069;Q9NZI6;Q9BXH1}

8734 Pathogen[ P03410] interacts with 6 human  
partners: {P28069;Q9BXH1;P28715;P52701;Q9NZI6;Q99807}

8735 Pathogen[ P14075] interacts with 3 human partners: {P28069;Q9BXH1;Q9NZI6}

8736 Pathogen[ P0C206] interacts with 6 human  
partners: {P28715;P52701;Q9BXH1;Q99807;Q9NZI6;P28069}

8737 Pathogen[ P03363] interacts with 3 human partners: {P28069;Q9NZI6;Q9BXH1}

8738 [Cluster 795]GO:0042069+P biological\_process [name] regulation of catecholamine  
metabolic process [def] "Any process that modulates the frequency, rate or extent of  
the chemical reactions and pathways involving catecholamines." [GOC

8739 Pathogen[ Q2Q067] interacts with 1 human partners: {Q6RSH7}

8740 Pathogen[ P0C214] interacts with 1 human partners: {Q6RSH7}

8741 Pathogen[ P03346] interacts with 1 human partners: {Q6RSH7}

8742 Pathogen[ Q85601] interacts with 1 human partners: {Q6RSH7}

8743 Pathogen[ P14079] interacts with 1 human partners: {Q6RSH7}

8744 Pathogen[ P03383] interacts with 1 human partners: {Q6RSH7}

8745 Pathogen[ P03410] interacts with 1 human partners: {Q6RSH7}

8746 Pathogen[ P14075] interacts with 1 human partners: {Q6RSH7}

8747 Pathogen[ P0C206] interacts with 1 human partners: {Q6RSH7}

8748 Pathogen[ P03363] interacts with 1 human partners: {Q6RSH7}

8749 [Cluster 796]GO:0031424+P biological\_process [name] keratinization [def] "The  
process in which the cytoplasm of the outermost cells of the vertebrate epidermis is  
replaced by keratin. Keratinization occurs in the stratum corneum, feathers, hair,  
claws, nails, hooves, and horns." [GOC

8750 Pathogen[ Q2Q067] interacts with 15 human  
partners: {P35908;P35321;Q9H0F6;O60437;P23490;Q5T752;P22528;Q8NEY8;Q04695;Q9UBC9;P225  
31;Q674X7;Q96PI1;P60953;P07476}

8751 Pathogen[ P0C214] interacts with 15 human  
partners: {P35321;Q5T752;P07476;P22735;Q9H0F6;P60953;O60437;P35908;P23490;Q674X7;Q046  
95;P22531;Q8NEY8;Q9UBC9;Q96PI1}

8752 Pathogen[ P03346] interacts with 39 human  
partners: {Q5T751;O60437;P35321;P35325;Q5TA76;O14633;Q5TA79;P35326;Q5T7P2;P07476;Q5T7  
53;Q9BYE4;P60953;Q9H0F6;Q9UBC9;Q9BYD5;P35908;Q5TA82;Q9BYE3;Q96PI1;Q04695;Q96RM1;P225  
31;Q5T752;A0A183;P23490;P22532;Q5T5B0;Q5TCM9;Q5T7P3;Q8NEY8;Q5T754;Q5TA78;P22528;Q5TA  
81;Q674X7;P22735;Q5T5A8;Q5TA77}

8753 Pathogen[ Q85601] interacts with 11 human  
partners: {P35321;O60437;Q9H0F6;Q04695;P22531;P60953;Q8NEY8;P35908;Q674X7;P23490;Q9UB  
C9}

8754 Pathogen[ P14079] interacts with 39 human  
partners: {A0A183;P22528;P22531;P35326;P35908;Q5T751;P22735;P07476;Q9BYE4;Q5TA79;O604  
37;Q9BYE3;Q5T7P2;Q96RM1;Q5TA82;Q04695;Q9BYD5;Q5T753;Q5T752;O14633;Q5TCM9;Q5TA81;P353  
21;P35325;P23490;Q5T754;Q5T7P3;Q5TA77;Q92817;Q9UBC9;P22532;Q9H0F6;Q5TA76;Q5T5A8;Q8NE  
Y8;Q96PI1;Q674X7;Q5TA78;Q5T5B0}

8755 Pathogen[ P03383] interacts with 19 human  
partners: {P23490;Q9BYE4;P35321;Q9H0F6;Q5T752;P60953;Q96PI1;Q9UBC9;Q96RM1;Q04695;P225  
31;P07476;P22532;P22528;P35908;O14633;O60437;P35325;Q8NEY8}

8756 Pathogen[ P03410] interacts with 40 human  
partners: {Q5TA78;P23490;Q5T7P2;P22531;Q9UBC9;P35325;P22528;Q9BYE4;Q5T5A8;Q5T754;Q8NE  
Y8;P35321;Q5T7P3;Q5T751;Q5TA79;Q5TA81;P35908;Q5TA82;O14633;Q674X7;Q9BYE3;Q96PI1;Q96R  
M1;Q04695;P60953;Q5TCM9;A0A183;Q5TA77;P22532;P35326;Q5TA76;Q5T5B0;Q92817;Q5T753;O604  
37;Q9BYD5;Q5T752;Q9H0F6;P07476;P22735}

8757 Pathogen[ P14075] interacts with 35 human  
partners: {P60953;Q96PI1;Q5T7P2;Q5TA82;P35321;P22532;Q9UBC9;P35325;Q5T5A8;Q5T753;P234  
90;Q04695;P35908;Q5T752;Q96RM1;Q5T751;P22531;Q5TCM9;Q5TA79;Q8NEY8;Q5TA76;Q5TA81;P225  
28;Q9BYE4;Q9BYE3;Q5TA78;Q5TA77;O60437;Q5T7P3;P07476;Q5T5B0;O14633;Q9H0F6;A0A183;Q5T7

54}

8758 Pathogen[ P0C206] interacts with 39 human partners: {Q9BYE4;Q5T754;Q9UBC9;Q9BYE3;P35325;Q96PI1;Q5T5A8;P22531;Q5T5B0;Q5T753;Q96RM1;Q9BYD5;P35326;O14633;Q5TA76;Q5TA82;O60437;P23490;Q5T7P3;Q5T752;P35321;Q5TA79;Q5TA77;A0A183;P60953;Q9H0F6;P22532;Q5T751;Q5TA81;Q674X7;Q5TA78;Q5TCM9;P22735;Q8NEY8;P07476;P35908;Q04695;Q5T7P2;P22528}

8759 Pathogen[ P03363] interacts with 23 human partners: {P22531;P22532;P35321;Q9BYE4;O60437;P23490;Q9UBC9;P35326;P35908;Q8NEY8;Q96RM1;Q5T752;Q9BYD5;P35325;P22528;O14633;Q674X7;P07476;Q96PI1;Q9H0F6;P60953;Q92817;Q04695}

8760 [Cluster 797]GO:0070914+P biological\_process [name] UV-damage excision repair [def] "A DNA repair process that is initiated by an endonuclease that introduces a single-strand incision immediately 5' of a UV-induced damage site. UV-damage excision repair acts on both cyclobutane pyrimidine dimers (CPDs) and pyrimidine-pyrimidone 6-4 photoproducts (6-4PPs)." [GOC

8761 Pathogen[ Q2Q067] interacts with 2 human partners: {Q9ULG1;Q9H9F9}

8762 Pathogen[ P0C214] interacts with 2 human partners: {Q9H9F9;Q9ULG1}

8763 Pathogen[ P03346] interacts with 2 human partners: {Q9H9F9;Q9ULG1}

8764 Pathogen[ Q85601] interacts with 2 human partners: {Q9H9F9;Q9ULG1}

8765 Pathogen[ P14079] interacts with 2 human partners: {Q9ULG1;Q9H9F9}

8766 Pathogen[ P03383] interacts with 1 human partners: {Q9H9F9}

8767 Pathogen[ P03410] interacts with 2 human partners: {Q9ULG1;Q9H9F9}

8768 Pathogen[ P14075] interacts with 1 human partners: {Q9H9F9}

8769 Pathogen[ P0C206] interacts with 2 human partners: {Q9ULG1;Q9H9F9}

8770 Pathogen[ P03363] interacts with 2 human partners: {Q9ULG1;Q9H9F9}

8771 [Cluster 798]GO:0048854+P biological\_process [name] brain morphogenesis [def] "The process in which the anatomical structures of the brain are generated and organized. The brain is one of the two components of the central nervous system and is the center of thought and emotion. It is responsible for the coordination and control of bodily activities and the interpretation of information from the senses (sight, hearing, smell, etc.)." [GOC

8772 Pathogen[ Q2Q067] interacts with 1 human partners: {O95613}

8773 Pathogen[ P0C214] interacts with 1 human partners: {O95613}

8774 Pathogen[ P03346] interacts with 1 human partners: {O95613}

8775 Pathogen[ Q85601] interacts with 1 human partners: {O95613}

8776 Pathogen[ P14079] interacts with 1 human partners: {O95613}

8777 Pathogen[ P03383] interacts with 1 human partners: {O95613}

8778 Pathogen[ P03410] interacts with 1 human partners: {O95613}

8779 Pathogen[ P14075] interacts with 1 human partners: {O95613}

8780 Pathogen[ P0C206] interacts with 1 human partners: {O95613}

8781 Pathogen[ P03363] interacts with 1 human partners: {O95613}

8782 [Cluster 799]GO:0002467+P biological\_process [name] germinal center formation [def] "The process in which germinal centers form. A germinal center is a specialized microenvironment formed when activated B cells enter lymphoid follicles. Germinal centers are the foci for B cell proliferation and somatic hypermutation." [GO\_REF

8783 Pathogen[ Q2Q067] interacts with 3 human partners: {P41182;P20749;Q00653}

8784 Pathogen[ P0C214] interacts with 3 human partners: {Q00653;P20749;P41182}

8785 Pathogen[ P03346] interacts with 4 human partners: {P41182;P20749;Q70J99;Q00653}

8786 Pathogen[ Q85601] interacts with 3 human partners: {Q00653;P41182;P20749}

8787 Pathogen[ P14079] interacts with 3 human partners: {Q06413;P41182;P20749}

8788 Pathogen[ P03383] interacts with 2 human partners: {Q00653;P20749}

8789 Pathogen[ P03410] interacts with 4 human partners: {P20749;Q70J99;P41182;Q00653}

8790 Pathogen[ P14075] interacts with 2 human partners: {Q00653;P20749}

8791 Pathogen[ P0C206] interacts with 3 human partners: {P41182;P20749;Q00653}

8792 Pathogen[ P03363] interacts with 2 human partners: {P20749;Q00653}

8793 [Cluster 800]GO:0045990+P biological\_process [name] carbon catabolite regulation of transcription [def] "A transcription regulation process in which the presence of one carbon source leads to the modulation of the frequency, rate, or extent of transcription of specific genes involved in the metabolism of other carbon sources." [GOC

8794 Pathogen[ Q2Q067] interacts with 1 human partners: {P22415}

8795 Pathogen[ P0C214] interacts with 1 human partners: {P22415}

8796 Pathogen[ P03346] interacts with 1 human partners: {P22415}

8797 Pathogen[ Q85601] interacts with 1 human partners: {P22415}

8798 Pathogen[ P14079] interacts with 1 human partners: {P22415}

8799 Pathogen[ P03383] interacts with 1 human partners: {P22415}

8800 Pathogen[ P03410] interacts with 1 human partners: {P22415}

8801 Pathogen[ P14075] interacts with 1 human partners: {P22415}

8802 Pathogen[ P0C206] interacts with 1 human partners: {P22415}

8803 Pathogen[ P03363] interacts with 1 human partners: {P22415}

8804 [Cluster 801]GO:0018076+P biological\_process [name] N-terminal peptidyl-lysine acetylation [def] "The acetylation of the N-terminal lysine of proteins." [GOC

8805 Pathogen[ Q2Q067] interacts with 2 human partners: {Q92831;Q92793}

8806 Pathogen[ P0C214] interacts with 2 human partners: {Q92793;Q92831}

8807 Pathogen[ P03346] interacts with 2 human partners: {Q92831;Q92793}

8808 Pathogen[ Q85601] interacts with 2 human partners: {Q92831;Q92793}

8809 Pathogen[ P14079] interacts with 1 human partners: {Q92793}

8810 Pathogen[ P03383] interacts with 2 human partners:{Q92831;Q92793}

8811 Pathogen[ P03410] interacts with 2 human partners:{Q92831;Q92793}

8812 Pathogen[ P14075] interacts with 2 human partners:{Q92831;Q92793}

8813 Pathogen[ P0C206] interacts with 2 human partners:{Q92831;Q92793}

8814 Pathogen[ P03363] interacts with 2 human partners:{Q92831;Q92793}

8815 [Cluster 802]GO:0008643+P biological\_process [name] carbohydrate transport [def] "The directed movement of carbohydrate into, out of or within a cell, or between cells, by means of some agent such as a transporter or pore. Carbohydrates are any of a group of organic compounds based of the general formula C<sub>x</sub>(H<sub>2</sub>O)<sub>y</sub>." [GOC

8816 Pathogen[ Q2Q067] interacts with 4 human partners:{P31749;P11166;Q15121;P14672}

8817 Pathogen[ P0C214] interacts with 5 human partners:{Q15121;P11166;P11168;P14672;P31749}

8818 Pathogen[ P03346] interacts with 4 human partners:{P31749;Q15121;P11166;P14672}

8819 Pathogen[ Q85601] interacts with 5 human partners:{P11168;P31749;Q15121;P11166;P14672}

8820 Pathogen[ P14079] interacts with 6 human partners:{P31751;Q96G79;P14672;P11166;Q15121;Q96AA3}

8821 Pathogen[ P03383] interacts with 6 human partners:{P31749;Q15121;P11168;P11169;P14672;P22732}

8822 Pathogen[ P03410] interacts with 7 human partners:{P22732;Q15121;Q9BRV3;P11166;P11168;P31749;Q96G79}

8823 Pathogen[ P14075] interacts with 6 human partners:{P11169;P22732;P31749;P11168;Q15121;P14672}

8824 Pathogen[ P0C206] interacts with 5 human partners:{P31749;Q15121;P11166;P11168;P14672}

8825 Pathogen[ P03363] interacts with 4 human partners:{Q15121;P31749;P14672;P11166}

8826 [Cluster 803]GO:0010956+P biological\_process [name] negative regulation of calcidiol 1-monooxygenase activity [def] "Any process that decreases the rate, frequency or extent of calcidiol 1-monooxygenase activity. Calcidiol 1-monooxygenase activity is the catalysis of the reaction

8827 Pathogen[ Q2Q067] interacts with 2 human partners:{Q99684;P19838}

8828 Pathogen[ P0C214] interacts with 2 human partners:{P19838;Q99684}

8829 Pathogen[ P03346] interacts with 2 human partners:{Q99684;P19838}

8830 Pathogen[ Q85601] interacts with 2 human partners:{Q99684;P19838}

8831 Pathogen[ P14079] interacts with 1 human partners:{Q99684}

8832 Pathogen[ P03383] interacts with 2 human partners:{Q99684;P19838}

8833 Pathogen[ P03410] interacts with 2 human partners:{P19838;Q99684}

8834 Pathogen[ P14075] interacts with 2 human partners:{Q99684;P19838}

8835 Pathogen[ P0C206] interacts with 2 human partners:{P19838;Q99684}

8836 Pathogen[ P03363] interacts with 2 human partners:{Q99684;P19838}

8837 [Cluster 804]GO:0009303+P biological\_process [name] rRNA transcription [def] "The synthesis of ribosomal RNA (rRNA), any RNA that forms part of the ribosomal structure, from a DNA template." [GOC

8838 Pathogen[ Q2Q067] interacts with 10 human partners:{Q95602;Q92664;Q9GZS1;Q9H9Y6;O75607;Q92994;Q12789;P42771;O15446;Q9NRC8}

8839 Pathogen[ P0C214] interacts with 11 human partners:{Q92664;Q9H9Y6;O15446;O75607;Q12789;Q9GZS1;Q92994;P42771;Q95602;Q9NRC8;Q9BYG3}

8840 Pathogen[ P03346] interacts with 11 human partners:{Q9H9Y6;P42771;Q9BYG3;Q92994;O15446;Q95602;O75607;Q12789;Q92664;Q9NRC8;Q9GZS1}

8841 Pathogen[ Q85601] interacts with 10 human partners:{Q9NRC8;Q92664;Q95602;Q92994;Q9GZS1;O75607;Q9H9Y6;P42771;O15446;Q12789}

8842 Pathogen[ P14079] interacts with 11 human partners:{Q92664;Q92994;O15446;Q9GZS1;Q12789;Q9BYG3;O75607;Q95602;Q9NRC8;Q9H9Y6;P42771}

8843 Pathogen[ P03383] interacts with 9 human partners:{Q95602;Q9H9Y6;Q9GZS1;O75607;Q92994;P42771;Q12789;O15446;Q9NRC8}

8844 Pathogen[ P03410] interacts with 11 human partners:{P42771;Q92994;Q95602;Q9BYG3;Q9GZS1;Q12789;Q92664;O15446;Q9NRC8;Q9H9Y6;O75607}

8845 Pathogen[ P14075] interacts with 9 human partners:{Q12789;Q9GZS1;O75607;P42771;Q92994;Q9H9Y6;Q95602;Q9NRC8;O15446}

8846 Pathogen[ P0C206] interacts with 11 human partners:{Q9BYG3;Q95602;O75607;Q92664;P42771;O15446;Q9NRC8;Q9GZS1;Q92994;Q9H9Y6;Q12789}

8847 Pathogen[ P03363] interacts with 10 human partners:{Q9H9Y6;O75607;Q95602;Q9GZS1;O15446;Q92664;Q9BYG3;Q12789;Q9NRC8;P42771}

8848 [Cluster 805]GO:0006913+P biological\_process [name] nucleocytoplasmic transport [def] "The directed movement of molecules between the nucleus and the cytoplasm." [GOC

8849 Pathogen[ Q2Q067] interacts with 22 human partners:{P52948;P39687;O75694;P62826;Q01105;Q6NXT1;Q8TF68;P06748;Q7Z3B4;Q8NDT2;P63241;Q9BQG0;Q99966;Q96IZ7;Q9BVL2;Q9HAP2;Q9NRG9;P37198;Q92621;Q9H0G5;Q8NEZ5;Q9H1J1}

8850 Pathogen[ P0C214] interacts with 22 human partners:{P06748;Q9BQG0;O75694;P63241;Q01105;Q96IZ7;Q8TF68;Q99966;P37198;Q9NRG9;Q9UH92;Q9H0G5;Q6NXT1;P62826;Q8NDT2;Q9BVL2;P39687;Q7Z3B4;P52948;Q92621;Q9HAP2;Q9H1J1}

8851 Pathogen[ P03346] interacts with 23 human partners: {Q99966;Q9BQG0;P06748;O75694;Q8NEZ5;Q9NRG9;Q01105;Q9BVL2;P63241;P37198;P62826;Q8TF68;Q9H0G5;Q92621;Q8NDT2;Q9HAP2;P39687;Q9UH92;Q96IZ7;Q6NXT1;Q7Z3B4;Q9H1J1;P52948}

8852 Pathogen[ Q85601] interacts with 22 human partners: {Q9BQG0;P39687;Q01105;Q99966;Q9NRG9;P62826;Q6NXT1;P63241;O75694;Q9UH92;Q9H0G5;Q8NDT2;Q92621;P52948;Q9HAP2;P06748;Q8TF68;Q96IZ7;Q9BVL2;Q7Z3B4;Q8NEZ5;Q9H1J1}

8853 Pathogen[ P14079] interacts with 23 human partners: {Q01105;Q9H1J1;Q92621;Q99966;Q9HAP2;Q8TF68;Q9BVL2;Q6NXT1;Q9BQG0;Q96IZ7;P37198;P06748;Q9H0G5;Q9UH92;P63241;Q8NEZ5;Q7Z3B4;P62826;Q9NRG9;O75694;Q8NDT2;P39687;P52948}

8854 Pathogen[ P03383] interacts with 20 human partners: {Q9BVL2;Q9BQG0;Q92621;Q9UH92;Q01105;P06748;Q96IZ7;P52948;P63241;P62826;P39687;Q9NRG9;Q8NDT2;Q9HAP2;P37198;Q9H0G5;Q8NEZ5;Q7Z3B4;O75694;Q9H1J1}

8855 Pathogen[ P03410] interacts with 22 human partners: {Q7Z3B4;Q8TF68;Q6NXT1;Q9H0G5;P52948;O75694;P39687;Q01105;P06748;Q96IZ7;Q9H1J1;P62826;Q8NEZ5;Q8NDT2;Q9BQG0;Q9HAP2;P63241;Q9UH92;Q9NRG9;Q9BVL2;Q92621;Q99966}

8856 Pathogen[ P14075] interacts with 20 human partners: {Q9HAP2;Q96IZ7;Q9UH92;P39687;P63241;Q01105;Q92621;Q9BQG0;P37198;P62826;Q8NEZ5;P06748;Q8NDT2;Q9BVL2;Q9H0G5;O75694;Q9NRG9;Q7Z3B4;P52948;Q9H1J1}

8857 Pathogen[ POC206] interacts with 21 human partners: {Q6NXT1;Q92621;P39687;Q9UH92;Q9NRG9;Q7Z3B4;P62826;Q9H0G5;Q9BQG0;O75694;Q9HAP2;Q96IZ7;P63241;Q99966;P06748;Q8TF68;Q8NEZ5;Q01105;Q9BVL2;Q8NDT2;Q9H1J1}

8858 Pathogen[ P03363] interacts with 22 human partners: {Q7Z3B4;Q96IZ7;Q9UH92;Q8NEZ5;Q9H0G5;Q6NXT1;Q9BQG0;Q9HAP2;P06748;P39687;Q9NRG9;Q9BVL2;Q8TF68;O75694;P63241;P52948;Q01105;P37198;P62826;Q92621;Q9H1J1;Q8NDT2}

8859 [Cluster 806]GO:0001757+P biological\_process [name] somite specification [def] "The process in which individual somites establish identity during embryogenesis." [GOC

8860 Pathogen[ Q2Q067] interacts with 3 human partners: {Q0D2K3;P50221;P50222}

8861 Pathogen[ POC214] interacts with 3 human partners: {P50222;Q0D2K3;P50221}

8862 Pathogen[ P03346] interacts with 3 human partners: {P50221;P50222;Q0D2K3}

8863 Pathogen[ Q85601] interacts with 3 human partners: {P50222;Q0D2K3;P50221}

8864 Pathogen[ P14079] interacts with 3 human partners: {Q0D2K3;P50222;P50221}

8865 Pathogen[ P03383] interacts with 3 human partners: {Q0D2K3;P50222;P50221}

8866 Pathogen[ P03410] interacts with 3 human partners: {P50222;P50221;Q0D2K3}

8867 Pathogen[ P14075] interacts with 3 human partners: {Q0D2K3;P50221;P50222}

8868 Pathogen[ POC206] interacts with 3 human partners: {P50221;Q0D2K3;P50222}

8869 Pathogen[ P03363] interacts with 3 human partners: {Q0D2K3;P50221;P50222}

8870 [Cluster 807]GO:0055003+P biological\_process [name] cardiac myofibril assembly [def] "The process whose specific outcome is the progression of the cardiac myofibril over time, from its formation to the mature structure. A cardiac myofibril is a myofibril specific to cardiac muscle cells." [GOC

8871 Pathogen[ Q2Q067] interacts with 1 human partners: {P11831}

8872 Pathogen[ POC214] interacts with 2 human partners: {P11831;P35580}

8873 Pathogen[ P03346] interacts with 2 human partners: {P11831;P10916}

8874 Pathogen[ Q85601] interacts with 2 human partners: {P11831;P35580}

8875 Pathogen[ P14079] interacts with 3 human partners: {P10916;P68032;O15273}

8876 Pathogen[ P03383] interacts with 2 human partners: {P11831;P35580}

8877 Pathogen[ P03410] interacts with 4 human partners: {P11831;P10916;O15273;P35580}

8878 Pathogen[ P14075] interacts with 1 human partners: {P11831}

8879 Pathogen[ POC206] interacts with 3 human partners: {P50461;P11831;P35580}

8880 Pathogen[ P03363] interacts with 2 human partners: {P11831;P10916}

8881 [Cluster 808]GO:0001732+P biological\_process [name] formation of translation initiation complex [def] "Joining of the large subunit, with release of IF2/eIF2 and IF3/eIF3. This leaves the functional ribosome at the AUG, with the methionyl/formyl-methionyl-tRNA positioned at the P site." [GOC

8882 Pathogen[ Q2Q067] interacts with 2 human partners: {Q14152;O15371}

8883 Pathogen[ POC214] interacts with 2 human partners: {Q14152;O15371}

8884 Pathogen[ P03346] interacts with 2 human partners: {Q14152;O15371}

8885 Pathogen[ Q85601] interacts with 2 human partners: {O15371;Q14152}

8886 Pathogen[ P14079] interacts with 2 human partners: {O15371;Q14152}

8887 Pathogen[ P03383] interacts with 2 human partners: {O15371;Q14152}

8888 Pathogen[ P03410] interacts with 2 human partners: {Q14152;O15371}

8889 Pathogen[ P14075] interacts with 2 human partners: {O15371;Q14152}

8890 Pathogen[ POC206] interacts with 2 human partners: {Q14152;O15371}

8891 Pathogen[ P03363] interacts with 2 human partners: {O15371;Q14152}

8892 [Cluster 809]GO:0046627+P biological\_process [name] negative regulation of insulin receptor signaling pathway [def] "Any process that stops, prevents, or reduces the frequency, rate or extent of insulin receptor signaling." [GOC

8893 Pathogen[ Q2Q067] interacts with 3 human partners: {Q14678;Q04206;Q7Z2X4}

8894 Pathogen[ POC214] interacts with 4 human partners: {Q14678;Q04206;Q7Z2X4;O15524}

8895 Pathogen[ P03346] interacts with 5 human partners: {O15524;Q14678;Q13322;Q04206;Q7Z2X4}

8896 Pathogen[ Q85601] interacts with 3 human partners: {Q7Z2X4;Q04206;Q14678}

8897 Pathogen[ P14079] interacts with 2 human partners: {Q7Z2X4;Q14678}

8898 Pathogen[ P03383] interacts with 2 human partners: {Q14678;Q04206}

8899 Pathogen[ P03410] interacts with 3 human partners:{Q04206;Q7Z2X4;Q14678}

8900 Pathogen[ P14075] interacts with 2 human partners:{Q04206;Q14678}

8901 Pathogen[ P0C206] interacts with 4 human partners:{Q7Z2X4;Q14678;O15524;Q04206}

8902 Pathogen[ P03363] interacts with 3 human partners:{Q04206;O15524;Q14678}

8903 [Cluster 810]GO:0048699+P biological\_process [name] generation of neurons [def] "The process in which nerve cells are generated. This includes the production of neuroblasts and their differentiation into neurons." [GOC

8904 Pathogen[ Q2Q067] interacts with 2 human partners:{P36402;Q00534}

8905 Pathogen[ P0C214] interacts with 2 human partners:{Q00534;P36402}

8906 Pathogen[ P03346] interacts with 7 human partners:{Q7RTS3;P36402;Q9UIU6;P17542;Q9HCS4;Q15475;Q00534}

8907 Pathogen[ Q85601] interacts with 3 human partners:{P36402;Q00534;Q9HCS4}

8908 Pathogen[ P14079] interacts with 2 human partners:{P36402;P10636}

8909 Pathogen[ P03383] interacts with 2 human partners:{Q00534;P36402}

8910 Pathogen[ P03410] interacts with 4 human partners:{Q00534;P36402;P10636;Q9HCS4}

8911 Pathogen[ P14075] interacts with 2 human partners:{Q00534;P36402}

8912 Pathogen[ P0C206] interacts with 4 human partners:{Q9HCS4;P10636;P36402;Q00534}

8913 Pathogen[ P03363] interacts with 4 human partners:{P36402;Q7RTS3;Q9HCS4;Q00534}

8914 [Cluster 811]GO:0045616+P biological\_process [name] regulation of keratinocyte differentiation [def] "Any process that modulates the frequency, rate or extent of keratinocyte differentiation." [GOC

8915 Pathogen[ Q2Q067] interacts with 3 human partners:{Q9NSB2;O76013;Q9UJM3}

8916 Pathogen[ P0C214] interacts with 3 human partners:{O76013;Q9NSB2;Q9UJM3}

8917 Pathogen[ P03346] interacts with 3 human partners:{Q9NSB2;O76013;Q9UJM3}

8918 Pathogen[ Q85601] interacts with 3 human partners:{O76013;Q9UJM3;Q9NSB2}

8919 Pathogen[ P14079] interacts with 3 human partners:{Q9UJM3;O76013;Q9NSB2}

8920 Pathogen[ P03383] interacts with 3 human partners:{Q9NSB2;Q9UJM3;O76013}

8921 Pathogen[ P03410] interacts with 3 human partners:{O76013;Q9NSB2;Q9UJM3}

8922 Pathogen[ P14075] interacts with 3 human partners:{Q9NSB2;O76013;Q9UJM3}

8923 Pathogen[ P0C206] interacts with 3 human partners:{Q9NSB2;O76013;Q9UJM3}

8924 Pathogen[ P03363] interacts with 3 human partners:{O76013;Q9NSB2;Q9UJM3}

8925 [Cluster 812]GO:0007612+P biological\_process [name] learning [def] "Any process in an organism in which a relatively long-lasting adaptive behavioral change occurs as the result of experience." [ISBN

8926 Pathogen[ Q2Q067] interacts with 4 human partners:{Q9UQB3;P78352;Q9NRG9;P15407}

8927 Pathogen[ P0C214] interacts with 5 human partners:{P15407;P78352;Q9UQB3;Q9NRG9;P05412}

8928 Pathogen[ P03346] interacts with 5 human partners:{P05412;P78352;Q9NRG9;Q9UQB3;P15407}

8929 Pathogen[ Q85601] interacts with 5 human partners:{Q9NRG9;P15407;Q9UQB3;P05412;P78352}

8930 Pathogen[ P14079] interacts with 5 human partners:{P16298;Q9UQB3;P15407;P05412;Q9NRG9}

8931 Pathogen[ P03383] interacts with 5 human partners:{Q9UQB3;P15407;Q9NRG9;P78352;P05412}

8932 Pathogen[ P03410] interacts with 5 human partners:{P05412;Q9UQB3;P15407;P78352;Q9NRG9}

8933 Pathogen[ P14075] interacts with 5 human partners:{P05412;Q9UQB3;P78352;P15407;Q9NRG9}

8934 Pathogen[ P0C206] interacts with 5 human partners:{P78352;Q9NRG9;P15407;P05412;Q9UQB3}

8935 Pathogen[ P03363] interacts with 5 human partners:{P78352;Q9NRG9;P15407;P05412;Q9UQB3}

8936 [Cluster 813]GO:0051365+P biological\_process [name] cellular response to potassium ion starvation [def] "Any process that results in a change in state or activity of a cell (in terms of movement, secretion, enzyme production, gene expression, etc.) as a result of deprivation of potassium ions." [GOC

8937 Pathogen[ Q2Q067] interacts with 1 human partners:{O00198}

8938 Pathogen[ P0C214] interacts with 2 human partners:{O00198;P05412}

8939 Pathogen[ P03346] interacts with 2 human partners:{P05412;O00198}

8940 Pathogen[ Q85601] interacts with 2 human partners:{O00198;P05412}

8941 Pathogen[ P14079] interacts with 2 human partners:{O00198;P05412}

8942 Pathogen[ P03383] interacts with 2 human partners:{O00198;P05412}

8943 Pathogen[ P03410] interacts with 2 human partners:{O00198;P05412}

8944 Pathogen[ P14075] interacts with 2 human partners:{P05412;O00198}

8945 Pathogen[ P0C206] interacts with 2 human partners:{P05412;O00198}

8946 Pathogen[ P03363] interacts with 2 human partners:{O00198;P05412}

8947 [Cluster 814]GO:0032355+P biological\_process [name] response to estradiol stimulus [def] "Any process that results in a change in state or activity of a cell or an organism (in terms of movement, secretion, enzyme production, gene expression, etc.) as a result of stimulus by estradiol, a C18 steroid hormone hydroxylated at C3 and C17 that acts as a potent estrogen." [GOC

8948 Pathogen[ Q2Q067] interacts with 21 human partners:{Q9HBZ2;P55957;Q13033;P40763;P14921;Q16656;P30279;P02511;Q14790;P27797;O14508;P55212;P24864;P29474;P35869;O15527;P27986;P06132;Q9H3M7;P08397;Q9UBS8}

8949 Pathogen[ P0C214] interacts with 23 human

partners:{P06132;P29474;P35869;P14921;P02511;Q16656;P55212;Q9H3M7;Q13033;P55957;Q9HBZ2;P08397;P09104;Q9UBS8;O14508;P24864;P30279;P27797;P40763;O15527;O15524;P27986;Q14790}

8950 Pathogen[ P03346] interacts with 25 human partners:{O15524;Q15788;P30279;P29474;Q16656;P55957;P24864;P55212;O14508;P14921;P02511;Q13033;P51587;P06132;Q9HBZ2;Q9UBS8;P27797;Q14790;Q13029;P35869;O15527;P40763;Q9H3M7;O14965;P27986}

8951 Pathogen[ Q85601] interacts with 23 human partners:{O15527;P14921;Q16656;Q14790;P40763;P27797;O14508;P27986;O14965;P02511;P30279;P55957;P06132;Q13033;Q9HBZ2;P29474;Q9UBS8;P08397;P35869;P55212;Q9H3M7;P51587;P24864}

8952 Pathogen[ P14079] interacts with 19 human partners:{P04083;P35869;P24864;P02511;Q13033;Q16656;P51587;O15527;P55212;P06132;Q14790;P08397;Q15788;O14508;Q9UBS8;Q9H3M7;Q9HBZ2;O14965;P55957}

8953 Pathogen[ P03383] interacts with 18 human partners:{P27986;P29474;P55212;P14921;Q16656;O15527;P55957;Q9UBS8;P02511;P30279;P06132;O14965;Q9H3M7;P08397;Q13033;P24864;P35869;P27797}

8954 Pathogen[ P03410] interacts with 21 human partners:{P27986;P08397;P30279;Q9H3M7;P06132;P55957;Q9HBZ2;O14965;P29474;O14508;Q9UBS8;O15527;P51587;P02511;Q13033;Q16656;P55212;P24864;P40763;P14921;P27797}

8955 Pathogen[ P14075] interacts with 18 human partners:{P29474;P35869;P55957;P06132;Q16656;P30279;P55212;O15527;P08397;O14965;P27797;P27986;Q9H3M7;P14921;P02511;Q9UBS8;Q13033;P24864}

8956 Pathogen[ P0C206] interacts with 25 human partners:{P27797;P14921;P35869;O15527;P51587;P30279;P55212;O15524;P27986;Q16656;Q9UBS8;O14508;Q14790;P40763;P29474;Q9H3M7;Q13033;O14965;P02511;P08397;P24864;Q15788;P06132;P55957;Q9HBZ2}

8957 Pathogen[ P03363] interacts with 18 human partners:{P29474;P55957;O15527;P24864;O15524;P30279;Q9H3M7;P06132;Q13033;P14921;Q9HBZ2;P35869;P55212;P27797;Q16656;Q9UBS8;O14508;P27986}

8958 [Cluster 815]GO:0035162+P biological\_process [name]embryonic hemopoiesis [def] "The stages of blood cell formation that take place within the embryo." [GOC

8959 Pathogen[ Q2Q067] interacts with 5 human partners:{Q01196;P15976;P25791;Q8IX07;P40424}

8960 Pathogen[ P0C214] interacts with 3 human partners:{P40424;P25791;Q8IX07}

8961 Pathogen[ P03346] interacts with 8 human partners:{Q13351;Q92794;P25791;P17542;P15976;Q8IX07;P40424;Q01196}

8962 Pathogen[ Q85601] interacts with 4 human partners:{P15976;P40424;P25791;Q8IX07}

8963 Pathogen[ P14079] interacts with 4 human partners:{P15976;P25791;Q8IX07;Q13351}

8964 Pathogen[ P03383] interacts with 2 human partners:{P40424;P25791}

8965 Pathogen[ P03410] interacts with 4 human partners:{P25791;Q8IX07;P40424;P15976}

8966 Pathogen[ P14075] interacts with 2 human partners:{P40424;P25791}

8967 Pathogen[ P0C206] interacts with 4 human partners:{P15976;P40424;P25791;Q8IX07}

8968 Pathogen[ P03363] interacts with 2 human partners:{P25791;P40424}

8969 [Cluster 816]GO:0002028+P biological\_process [name] regulation of sodium ion transport [def] "Any process that modulates the frequency, rate or extent of the directed movement of sodium ions (Na+) into, out of or within a cell, or between cells, by means of some agent such as a transporter or pore." [GOC

8970 Pathogen[ Q2Q067] interacts with 2 human partners:{P29474;Q04917}

8971 Pathogen[ P0C214] interacts with 2 human partners:{P29474;Q04917}

8972 Pathogen[ P03346] interacts with 2 human partners:{P29474;Q04917}

8973 Pathogen[ Q85601] interacts with 2 human partners:{Q04917;P29474}

8974 Pathogen[ P14079] interacts with 1 human partners:{Q04917}

8975 Pathogen[ P03383] interacts with 1 human partners:{P29474}

8976 Pathogen[ P03410] interacts with 2 human partners:{Q04917;P29474}

8977 Pathogen[ P14075] interacts with 1 human partners:{P29474}

8978 Pathogen[ P0C206] interacts with 2 human partners:{Q04917;P29474}

8979 Pathogen[ P03363] interacts with 2 human partners:{P29474;Q04917}

8980 [Cluster 817]GO:0046685+P biological\_process [name] response to arsenic-containing substance [def] "Any process that results in a change in state or activity of a cell or an organism (in terms of movement, secretion, enzyme production, gene expression, etc.) as a result of an arsenic stimulus from compounds containing arsenic, including arsenates, arsenites, and arsenides." [GOC

8981 Pathogen[ Q2Q067] interacts with 3 human partners:{P78317;P38936;Q9BXP5}

8982 Pathogen[ P0C214] interacts with 6 human partners:{Q9HBK9;P38936;P78317;P36551;P22830;Q9BXP5}

8983 Pathogen[ P03346] interacts with 4 human partners:{Q9BXP5;P78317;P38936;Q9HBK9}

8984 Pathogen[ Q85601] interacts with 3 human partners:{P78317;Q9BXP5;P38936}

8985 Pathogen[ P14079] interacts with 6 human partners:{P38936;P22830;Q9HBK9;P78317;P36551;Q9BXP5}

8986 Pathogen[ P03383] interacts with 2 human partners:{P78317;Q9BXP5}

8987 Pathogen[ P03410] interacts with 6 human partners:{Q9HBK9;Q9BXP5;P36551;P38936;P78317;P22830}

8988 Pathogen[ P14075] interacts with 2 human partners:{P78317;Q9BXP5}

8989 Pathogen[ P0C206] interacts with 6 human partners:{P36551;P78317;Q9HBK9;P22830;P38936;Q9BXP5}



8990 Pathogen[ P03363] interacts with 3 human partners:{Q9BXP5;P78317;Q9HBK9}

8991 [Cluster 818]GO:0051573+P biological\_process [name] negative regulation of histone H3-K9 methylation [def] "Any process that stops, prevents, or reduces the frequency, rate or extent of the covalent addition of a methyl group to the lysine at position 9 of histone H3." [GOC]

8992 Pathogen[ Q2Q067] interacts with 2 human partners:{Q9UBC3;P26358}

8993 Pathogen[ P0C214] interacts with 1 human partners:{P26358}

8994 Pathogen[ P03346] interacts with 3 human partners:{Q9UBC3;P26358;Q02548}

8995 Pathogen[ Q85601] interacts with 2 human partners:{P26358;Q9UBC3}

8996 Pathogen[ P14079] interacts with 2 human partners:{Q9UBC3;P26358}

8997 Pathogen[ P03383] interacts with 1 human partners:{P26358}

8998 Pathogen[ P03410] interacts with 2 human partners:{P26358;Q9UBC3}

8999 Pathogen[ P14075] interacts with 1 human partners:{P26358}

9000 Pathogen[ P0C206] interacts with 3 human partners:{Q02548;P26358;Q9UBC3}

9001 Pathogen[ P03363] interacts with 3 human partners:{P26358;Q02548;Q9UBC3}

9002 [Cluster 819]GO:0010509+P biological\_process [name] polyamine homeostasis [def] "Any biological process involved in the maintenance of an internal steady state of a polyamine." [GOC]

9003 Pathogen[ Q2Q067] interacts with 1 human partners:{Q9GZV4}

9004 Pathogen[ P0C214] interacts with 1 human partners:{Q9GZV4}

9005 Pathogen[ P03346] interacts with 1 human partners:{Q9GZV4}

9006 Pathogen[ Q85601] interacts with 1 human partners:{Q9GZV4}

9007 Pathogen[ P14079] interacts with 1 human partners:{Q9GZV4}

9008 Pathogen[ P03383] interacts with 1 human partners:{Q9GZV4}

9009 Pathogen[ P03410] interacts with 1 human partners:{Q9GZV4}

9010 Pathogen[ P14075] interacts with 1 human partners:{Q9GZV4}

9011 Pathogen[ P0C206] interacts with 1 human partners:{Q9GZV4}

9012 Pathogen[ P03363] interacts with 1 human partners:{Q9GZV4}

9013 [Cluster 820]GO:0051028+P biological\_process [name] mRNA transport [def] "The directed movement of mRNA, messenger ribonucleic acid, into, out of or within a cell, or between cells, by means of some agent such as a transporter or pore." [GOC]

9014 Pathogen[ Q2Q067] interacts with 74 human partners:{Q96EE3;Q96FV9;O15234;P52948;Q12769;Q96HA1;P49790;P61326;P49792;P61579;Q9NPJ8;P55735;Q9H2T7;O75694;Q9H1B4;A8CG34;Q8WYP5;P38919;Q9UBU9;P61573;Q99567;Q8N1F7;Q69383;Q92945;P52594;Q7Z3B4;P42704;Q13838;Q6I9Y2;Q8NFH4;Q9BZI7;Q13769;P63241;P12270;Q9UND3;O14980;Q9BW27;Q86V81;P61576;Q53GS7;Q8TEM1;P61572;P61571;Q06787;Q9BVL2;Q9UKX7;Q6IS14;Q9Y5S9;Q8NFH3;Q9UIA9;P61574;P37198;A6NF01;Q8NI27;Q92621;Q14764;Q09161;O15504;P57740;Q9HC62;Q95271;Q9H4D5;P52298;P61575;Q14493;Q8WUM0;Q9GZV4;Q9NPA8;P35658;P61578;Q96QD9;Q8NFH5;Q5SRE5;Q9H1J1}

9015 Pathogen[ P0C214] interacts with 77 human partners:{Q9BZI7;Q96FV9;P55735;O15234;Q09161;Q6IS14;Q06787;Q9UIA9;Q8NFH5;O00159;Q86V81;Q9Y5S9;P61571;Q13769;Q9GZV4;Q8TEM1;Q14764;P57740;Q99567;P61572;Q8WYP5;Q9UND3;P61573;Q8N1F7;O75694;P42704;Q96EE3;Q9NPJ8;P49792;Q9UKX7;P61575;P63241;A8CG34;P52298;Q14493;Q9H1B4;P49790;A6NF01;O14980;P37198;Q9BW27;Q53GS7;P61326;P38919;P61576;P61574;P35658;Q9NPA8;Q8NFH3;P61579;Q8NI27;P61578;Q69383;Q9NUU7;O15504;Q9UMR2;Q9HC62;P12270;P52594;Q92945;Q9H2T7;Q96QD9;Q8NFH4;Q9BVL2;Q9H4D5;Q95271;Q5SRE5;Q13838;Q7Z3B4;Q8WUM0;P52948;Q92621;Q9UBU9;Q12769;Q6I9Y2;Q9H1J1;Q96HA1}

9016 Pathogen[ P03346] interacts with 82 human partners:{Q8TEM1;Q9Y5S9;Q96FV9;Q9BZI7;P55735;O15234;Q8NFH4;Q8WUM0;Q09161;Q06787;P12270;P61579;Q96PU8;Q12769;Q9H2T7;P09651;Q96EE3;Q99567;Q9GZV4;Q14764;Q9UKX7;O75694;Q9UMR2;P57740;P61578;Q8WYP5;Q9BVL2;P61573;Q8N1F7;Q53GS7;P38919;Q8NFH5;Q92945;Q13769;P63241;P37198;Q8NFH3;P35658;P52298;Q9H1B4;P61571;Q9UIA9;Q6IS14;P61572;Q5SRE5;Q9BTX1;Q14493;Q92621;Q96A72;Q9BW27;Q86V81;O14980;Q96J01;P61574;P42704;P52594;Q96QD9;P61326;Q13838;Q9NUU7;Q9H4D5;Q9HC62;Q9UBU9;Q95271;A8CG34;Q9UND3;P49790;P61575;Q96HA1;P61576;Q32P51;A6NF01;Q69383;Q7Z3B4;Q9NPA8;Q8NI27;Q9NPJ8;O15504;Q6I9Y2;P49792;Q9H1J1;P52948}

9017 Pathogen[ Q85601] interacts with 76 human partners:{Q8TEM1;Q9BZI7;Q5SRE5;O15234;Q9UIA9;Q8NFH4;Q8NFH3;Q96EE3;Q9GZV4;A8CG34;Q13769;Q12769;Q9UBU9;P57740;Q53GS7;Q8WYP5;Q9HC62;Q06787;P61326;P61573;Q8WUM0;Q8N1F7;Q9H4D5;Q9UMR2;Q9NPJ8;Q14764;Q86V81;P63241;P52594;P12270;Q9H1B4;O75694;Q09161;O15504;P38919;Q96FV9;Q9BW27;P61576;O00159;Q92621;Q13838;Q69383;P42704;Q9NUU7;P55735;P52948;A6NF01;Q96QD9;Q9UKX7;P61571;P61579;Q8NI27;Q8NFH5;P61572;O14980;P61575;P35658;Q99567;Q9NPA8;P61574;Q92945;Q9H2T7;P49792;P52298;Q9BVL2;Q96HA1;P61578;Q95271;Q9UND3;Q7Z3B4;Q6I9Y2;P49790;Q14493;Q9Y5S9;Q6IS14;Q9H1J1}

9018 Pathogen[ P14079] interacts with 72 human partners:{Q8NFH5;Q9BW27;Q96HA1;P61576;Q9H4D5;Q95271;P57740;Q8N1F7;Q6IS14;Q9NPJ8;P52298;P35658;Q9H1J1;A6NF01;A8CG34;Q9Y5S9;Q92621;Q8TEM1;P61579;Q8NI27;P42704;Q9UBU9;P52594;Q13838;Q9H1B4;Q96FV9;Q9UKX7;Q9BVL2;Q13769;O15504;P61572;Q6I9Y2;P61326;Q8WUM0;Q9HC62;P12270;Q53GS7;Q9UND3;Q8WYP5;Q9BZI7;P61573;Q99567;P61571;Q92945;Q86V81;Q8NFH3;Q96E3;P37198;P49790;P61574;P63241;Q8NFH4;Q14764;Q14493;Q14933;Q06787;Q9UIA9;P55735;Q12769;Q9H2T7;Q96QD9;P61578;P61575;Q5SRE5;Q9GZV4;O15234;O75694;Q9NPA8;Q9BTX1;Q09161;P52948;Q69383}

9019 Pathogen[ P03383] interacts with 74 human partners:{Q9BVL2;Q9H1B4;Q96EE3;O15504;Q8WUM0;Q9UBU9;O15234;Q92621;P49792;Q8NFH4;Q8NI27;P61574;Q9UIA9;Q9NPA8;P61572;A6NF01;P55735;Q9H4D5;P61571;P12270;Q13769;Q13838;A8CG34;Q9Y5S9;P52948;P57740;Q8NFH5;Q8WYP5;Q96FV9;Q06787;P61326;Q9GZV4;P61573;Q8N1F7;P38919;P61575;Q86V81;Q8TEM1;Q53GS7;P63241;Q12769;Q09161;Q99567;Q9BW27;Q92945;Q9H2T7;O149

80;Q14493;Q96QD9;Q9BTX1;Q5SRE5;P52298;P35658;Q96HA1;P61579;Q9UND3;Q9HC62;P42704;Q69383;P37198;Q9UKX7;O95271;P61576;P61578;Q7Z3B4;P52594;Q6I9Y2;P49790;Q14764;O75694;Q9NPJ8;Q8NFH3;Q9BZI7;Q9H1J1}

9020 Pathogen[ P03410] interacts with 78 human partners: {Q99567;Q13838;Q7Z3B4;P61576;Q9BW27;Q92945;P61578;P52594;P61326;O15234;A6NF01;Q9UKX7;Q8NI27;Q8NFH4;Q9Y5S9;Q5SRE5;Q14493;P52948;O15504;O00159;O75694;Q96HA1;Q69383;Q9H1J1;Q9BZI7;Q96FV9;Q96QD9;Q8N1F7;Q9H4D5;P61573;Q9UMR2;Q9NPA8;P49790;Q14764;Q9HC62;P61571;P12270;Q9NUU7;P35658;P52298;P61574;O95271;Q8NFH5;Q9UND3;P42704;Q8TEM1;Q86V81;Q9UBU9;Q96EE3;Q9H1B4;Q13769;P61572;P38919;Q9NPJ8;Q9H2T7;Q6I9Y2;Q8WUM0;P63241;A8CG34;Q09161;Q96A72;Q06787;Q9GZV4;P57740;P55735;Q12769;Q9UIA9;P61579;Q8WYP5;Q8NFH3;P61575;Q9BVL2;Q9BTX1;Q92621;O14980;P49792;Q6IS14;Q53GS7}

9021 Pathogen[ P14075] interacts with 74 human partners: {P42704;Q69383;P61575;O15234;Q09161;Q14764;Q86V81;P61576;Q13769;Q9H2T7;P61579;P61326;A8CG34;Q14493;P57740;P61572;Q8WYP5;Q92945;Q53GS7;P61573;P49792;Q8N1F7;Q9NPJ8;Q9UKX7;Q9GZV4;P63241;P35658;P12270;A6NF01;Q92621;P55735;P61574;Q8NI27;Q9BTX1;Q96QD9;Q96HA1;O14980;Q9BW27;Q6I9Y2;P61571;Q8TEM1;Q9UND3;Q9HC62;Q9NPA8;Q96EE3;P37198;Q5SRE5;Q06787;Q9UIA9;P52594;Q8NFH3;O15504;Q9Y5S9;Q99567;Q12769;Q9UBU9;Q9BVL2;P49790;Q9H1B4;Q8WUM0;O95271;P38919;Q9H4D5;Q96FV9;Q13838;O75694;Q7Z3B4;Q8NFH4;Q8NFH5;P61578;P52948;P52298;Q9BZI7;Q9H1J1}

9022 Pathogen[ P0C206] interacts with 75 human partners: {O95271;Q53GS7;P61572;Q96EE3;Q92621;Q8WYP5;Q9GZV4;Q9BZI7;P49790;Q6IS14;P52298;P61576;Q5SRE5;Q8NFH5;Q9NUU7;P61326;Q09161;Q06787;Q8NI27;Q7Z3B4;Q9HC62;Q96HA1;Q96PU8;P55735;P57740;Q13769;Q9NPJ8;Q8WUM0;P49792;Q8TEM1;Q9UKX7;Q9H4D5;Q96FV9;Q13838;Q9UBU9;O75694;O00159;P61575;P61571;Q9BTX1;O15234;Q9H1B4;A6NF01;Q9H2T7;Q99567;Q8NFH4;P61574;P63241;Q96QD9;P42704;O15504;A8CG34;Q9UIA9;Q12769;Q92945;Q9UMR2;P38919;Q9UND3;Q8NFH3;Q8N1F7;Q9NPA8;P61579;Q14493;P61578;P35658;Q6I9Y2;Q9BW27;Q69383;Q9BVL2;Q9Y5S9;Q86V81;Q14764;P12270;Q9H1J1;P61573}

9023 Pathogen[ P03363] interacts with 80 human partners: {Q06787;Q53GS7;Q7Z3B4;Q9GZV4;Q9H4D5;Q96J01;P38919;Q5SRE5;P12270;Q8NFH4;Q9UND3;Q8WYP5;Q8NFH3;O14980;Q12769;Q9H2T7;Q69383;P09651;Q9NUU7;P42704;A6NF01;Q13769;A8CG34;Q9UKX7;Q9UBU9;Q8NI27;Q32P51;P61575;Q96FV9;Q96PU8;P61326;Q96QD9;P61578;Q8WUM0;Q9BVL2;Q99567;Q92945;P61571;Q9HC62;Q86V81;Q9NPJ8;O95271;Q96HA1;P49792;P52298;Q13838;P35658;Q9NPA8;O75694;P49790;P61572;P61574;P57740;Q6I9Y2;Q9UMR2;Q9BTX1;P63241;Q96A72;Q9BZI7;P52948;P61579;O15504;P52594;Q6IS14;Q14493;P37198;Q8N1F7;Q92621;Q14764;Q8NFH5;P55735;Q9Y5S9;Q9H1B4;Q9BW27;Q9UIA9;P61573;P61576;Q09161;Q9H1J1;O15234}

9024 [Cluster 821]GO:0090083+P biological\_process [name] regulation of inclusion body assembly [def] "Any process that modulates the rate, frequency, or extent of inclusion body assembly. Inclusion body assembly is the aggregation, arrangement and bonding together of a set of components to form an inclusion body." [GOC]

9025 Pathogen[ Q2Q067] interacts with 1 human partners: {Q9Y6H5}

9026 Pathogen[ P0C214] interacts with 1 human partners: {Q9Y6H5}

9027 Pathogen[ P03346] interacts with 1 human partners: {Q9Y6H5}

9028 Pathogen[ Q85601] interacts with 1 human partners: {Q9Y6H5}

9029 Pathogen[ P14079] interacts with 2 human partners: {Q9Y6H5;Q9UL15}

9030 Pathogen[ P03383] interacts with 1 human partners: {Q9Y6H5}

9031 Pathogen[ P03410] interacts with 2 human partners: {Q9Y6H5;Q9UL15}

9032 Pathogen[ P14075] interacts with 1 human partners: {Q9Y6H5}

9033 Pathogen[ P0C206] interacts with 1 human partners: {Q9Y6H5}

9034 Pathogen[ P03363] interacts with 1 human partners: {Q9Y6H5}

9035 [Cluster 822]GO:0071333+P biological\_process [name] cellular response to glucose stimulus [def] "Any process that results in a change in state or activity of a cell (in terms of movement, secretion, enzyme production, gene expression, etc.) as a result of a glucose stimulus." [GOC]

9036 Pathogen[ Q2Q067] interacts with 3 human partners: {Q08209;Q96ST3;Q9UL36}

9037 Pathogen[ P0C214] interacts with 3 human partners: {Q9UL36;Q08209;Q96ST3}

9038 Pathogen[ P03346] interacts with 4 human partners: {Q06945;Q96ST3;Q9UL36;Q08209}

9039 Pathogen[ Q85601] interacts with 3 human partners: {Q08209;Q9UL36;Q96ST3}

9040 Pathogen[ P14079] interacts with 4 human partners: {Q9UL36;Q96ST3;P13498;Q08209}

9041 Pathogen[ P03383] interacts with 1 human partners: {Q96ST3}

9042 Pathogen[ P03410] interacts with 3 human partners: {Q08209;Q96ST3;Q9UL36}

9043 Pathogen[ P14075] interacts with 1 human partners: {Q96ST3}

9044 Pathogen[ P0C206] interacts with 3 human partners: {Q96ST3;Q9UL36;Q08209}

9045 Pathogen[ P03363] interacts with 2 human partners: {Q96ST3;Q9UL36}

9046 [Cluster 823]GO:0021666+P biological\_process [name] rhombomere 5 formation [def] "The process that gives rise to rhombomere 5. This process pertains to the initial formation of a structure from unspecified parts. Rhombomeres are transverse segments of the developing rhombencephalon. Rhombomeres are lineage restricted, express different genes from one another, and adopt different developmental fates. Rhombomeres are numbered in anterior to posterior order." [GO\_REF]

9047 Pathogen[ Q2Q067] interacts with 1 human partners: {P11161}

9048 Pathogen[ P0C214] interacts with 1 human partners: {P11161}

9049 Pathogen[ P03346] interacts with 1 human partners: {P11161}

9050 Pathogen[ Q85601] interacts with 1 human partners: {P11161}

9051 Pathogen[ P14079] interacts with 1 human partners: {P11161}

9052 Pathogen[ P03383] interacts with 1 human partners: {P11161}

9053 Pathogen[ P03410] interacts with 1 human partners: {P11161}

9054 Pathogen[ P14075] interacts with 1 human partners:{P11161}  
9055 Pathogen[ POC206] interacts with 1 human partners:{P11161}  
9056 Pathogen[ P03363] interacts with 1 human partners:{P11161}  
9057 [Cluster 824]GO:0010810+P biological\_process [name] regulation of cell-substrate adhesion [def] "Any process that modulates the frequency, rate or extent of cell-substrate adhesion. Cell-substrate adhesion is the attachment of a cell to the underlying substrate via adhesion molecules." [GOC  
9058 Pathogen[ Q2Q067] interacts with 1 human partners:{P54252}  
9059 Pathogen[ POC214] interacts with 1 human partners:{P54252}  
9060 Pathogen[ P03346] interacts with 1 human partners:{P54252}  
9061 Pathogen[ Q85601] interacts with 1 human partners:{P54252}  
9062 Pathogen[ P14079] interacts with 1 human partners:{P54252}  
9063 Pathogen[ P03383] interacts with 1 human partners:{P54252}  
9064 Pathogen[ P03410] interacts with 1 human partners:{P54252}  
9065 Pathogen[ P14075] interacts with 1 human partners:{P54252}  
9066 Pathogen[ POC206] interacts with 1 human partners:{P54252}  
9067 Pathogen[ P03363] interacts with 1 human partners:{P54252}  
9068 [Cluster 825]GO:0001947+P biological\_process [name] heart looping [def] "The characteristic morphogenetic movements where the primitive heart tube loops asymmetrically. This looping brings the primitive heart chambers into alignment preceding their future integration." [GOC  
9069 Pathogen[ Q2Q067] interacts with 6 human partners:{O60481;O96004;P11831;P84022;Q15468;Q9UMX1}  
9070 Pathogen[ POC214] interacts with 6 human partners:{P84022;P11831;Q15468;O96004;Q9UMX1;O60481}  
9071 Pathogen[ P03346] interacts with 10 human partners:{P52954;P11831;O96004;P84022;O60481;Q8N157;P35713;O75593;Q15468;Q9UMX1}  
9072 Pathogen[ Q85601] interacts with 5 human partners:{P11831;O60481;O96004;P84022;Q9UMX1}  
9073 Pathogen[ P14079] interacts with 10 human partners:{Q06413;O60481;Q8N157;Q9UMX1;O96004;Q8N3I7;Q8IWZ6;Q4AC94;Q15468;Q9Y366}  
9074 Pathogen[ P03383] interacts with 6 human partners:{P11831;Q15468;O96004;P84022;O60481;Q9UMX1}  
9075 Pathogen[ P03410] interacts with 11 human partners:{P84022;P11831;O96004;O60481;Q4AC94;Q15468;Q9Y366;Q8N157;Q8N3I7;Q8IWZ6;Q9UMX1}  
9076 Pathogen[ P14075] interacts with 6 human partners:{P11831;O60481;O96004;Q15468;P84022;Q9UMX1}  
9077 Pathogen[ POC206] interacts with 9 human partners:{P84022;Q15468;O60481;Q9UMX1;Q8N3I7;O96004;Q8N157;P11831;Q86YT6}  
9078 Pathogen[ P03363] interacts with 7 human partners:{Q15468;O60481;Q9UMX1;P11831;Q8N157;P84022;O96004}  
9079 [Cluster 826]GO:0030837+P biological\_process [name] negative regulation of actin filament polymerization [def] "Any process that stops, prevents, or reduces the frequency, rate or extent of actin polymerization." [GOC  
9080 Pathogen[ Q2Q067] interacts with 3 human partners:{Q9Y6D6;P35080;Q14678}  
9081 Pathogen[ POC214] interacts with 4 human partners:{P35080;Q14678;Q2V2M9;Q9Y6D6}  
9082 Pathogen[ P03346] interacts with 4 human partners:{Q14678;Q2V2M9;Q9Y6D6;P35080}  
9083 Pathogen[ Q85601] interacts with 4 human partners:{Q2V2M9;P35080;Q14678;Q9Y6D6}  
9084 Pathogen[ P14079] interacts with 4 human partners:{P35080;Q9Y6D6;Q2V2M9;Q14678}  
9085 Pathogen[ P03383] interacts with 3 human partners:{P35080;Q14678;Q9Y6D6}  
9086 Pathogen[ P03410] interacts with 4 human partners:{P35080;Q9Y6D6;Q2V2M9;Q14678}  
9087 Pathogen[ P14075] interacts with 3 human partners:{Q9Y6D6;P35080;Q14678}  
9088 Pathogen[ POC206] interacts with 4 human partners:{Q9Y6D6;Q2V2M9;Q14678;P35080}  
9089 Pathogen[ P03363] interacts with 4 human partners:{P35080;Q2V2M9;Q9Y6D6;Q14678}  
9090 [Cluster 827]GO:0090402+P biological\_process [name] oncogene-induced senescence [def] "A cellular senescence process associated with the dismantling of a cell as a response to oncogenic stress, such as the activation of the Ras oncogenic family." [GOC  
9091 Pathogen[ Q2Q067] interacts with 1 human partners:{P17096}  
9092 Pathogen[ POC214] interacts with 1 human partners:{P17096}  
9093 Pathogen[ P03346] interacts with 1 human partners:{P17096}  
9094 Pathogen[ Q85601] interacts with 1 human partners:{P17096}  
9095 Pathogen[ P14079] interacts with 1 human partners:{P17096}  
9096 Pathogen[ P03383] interacts with 1 human partners:{P17096}  
9097 Pathogen[ P03410] interacts with 1 human partners:{P17096}  
9098 Pathogen[ P14075] interacts with 1 human partners:{P17096}  
9099 Pathogen[ POC206] interacts with 1 human partners:{P17096}  
9100 Pathogen[ P03363] interacts with 1 human partners:{P17096}  
9101 [Cluster 828]GO:0045778+P biological\_process [name] positive regulation of ossification [def] "Any process that activates or increases the frequency, rate or extent of bone formation." [GOC  
9102 Pathogen[ Q2Q067] interacts with 2 human partners:{Q05516;Q14106}  
9103 Pathogen[ POC214] interacts with 2 human partners:{Q14106;Q05516}  
9104 Pathogen[ P03346] interacts with 3 human partners:{Q05516;Q92832;Q14106}  
9105 Pathogen[ Q85601] interacts with 2 human partners:{Q14106;Q05516}  
9106 Pathogen[ P14079] interacts with 3 human partners:{Q05516;Q14106;Q92832}

9107 Pathogen[ P03383] interacts with 2 human partners:{Q14106;Q05516}  
9108 Pathogen[ P03410] interacts with 2 human partners:{Q92832;Q14106}  
9109 Pathogen[ P14075] interacts with 2 human partners:{Q14106;Q05516}  
9110 Pathogen[ P0C206] interacts with 3 human partners:{Q05516;Q14106;Q92832}  
9111 Pathogen[ P03363] interacts with 3 human partners:{Q92832;Q14106;Q05516}  
9112 [Cluster 829]GO:0032869+P biological\_process [name] cellular response to insulin stimulus [def] "Any process that results in a change in state or activity of a cell (in terms of movement, secretion, enzyme production, gene expression, etc.) as a result of an insulin stimulus. Insulin is a polypeptide hormone produced by the islets of Langerhans of the pancreas in mammals, and by the homologous organs of other organisms." [GOC  
9113 Pathogen[ Q2Q067] interacts with 18 human partners:{P31749;Q9UKV0;P30279;P05062;P36956;Q8N5D0;Q9UQL6;P63146;Q92831;P09467;P09874;Q96RU7;P22415;P27986;Q9BQE4;Q9BX66;P14672;Q14693}  
9114 Pathogen[ P0C214] interacts with 17 human partners:{Q8N5D0;Q9BX66;P05062;P09467;Q9UKV0;Q96RU7;Q92831;P30279;P22415;Q9BQE4;P14672;P27986;Q9UQL6;P63146;P31749;P09874;Q14693}  
9115 Pathogen[ P03346] interacts with 17 human partners:{P30279;P36956;Q92831;P09467;Q9BX66;Q8N5D0;P31749;P63146;P09874;Q96RU7;Q9UKV0;P05062;P14672;Q9UQL6;P27986;P22415;Q14693}  
9116 Pathogen[ Q85601] interacts with 18 human partners:{Q9UKV0;P09874;P31749;P63146;Q9UQL6;Q9BX66;Q92831;P05062;P27986;P22415;P36956;P30279;Q96RU7;P09467;P14672;Q8N5D0;Q9BQE4;Q14693}  
9117 Pathogen[ P14079] interacts with 15 human partners:{P31751;Q9UQL6;P09874;P41238;Q8N5D0;Q9BQE4;Q14693;P14672;Q9UKV0;Q96RU7;P09467;Q9BX66;P36956;P63146;P22415}  
9118 Pathogen[ P03383] interacts with 15 human partners:{P27986;Q92831;Q9UQL6;P31749;P09467;P30279;Q9BQE4;P09874;Q96RU7;Q9UKV0;P63146;P14672;Q8N5D0;P22415;Q14693}  
9119 Pathogen[ P03410] interacts with 18 human partners:{Q92831;Q9UKV0;P36956;P27986;P30279;P41238;P31749;P05062;P09467;Q9BQE4;Q14693;Q9UQL6;P63146;P22415;P09874;Q8N5D0;Q96RU7;Q9BX66}  
9120 Pathogen[ P14075] interacts with 15 human partners:{Q9BQE4;Q92831;Q8N5D0;P30279;Q9UKV0;P31749;P27986;Q96RU7;Q9UQL6;P63146;P22415;P14672;P09467;P09874;Q14693}  
9121 Pathogen[ P0C206] interacts with 19 human partners:{P05062;P31749;P09874;P30279;P09467;Q9UKV0;P36956;Q92831;P27986;Q96RU7;Q9BQE4;P22415;Q9BX66;P14672;Q8N5D0;P41238;Q14693;P63146;Q9UQL6}  
9122 Pathogen[ P03363] interacts with 12 human partners:{Q9BX66;Q8N5D0;P30279;Q92831;Q9UQL6;P63146;P31749;Q9UKV0;P22415;P14672;P09874;P27986}  
9123 [Cluster 830]GO:0051593+P biological\_process [name] response to folic acid [def] "Any process that results in a change in state or activity of a cell or an organism (in terms of movement, secretion, enzyme production, gene expression, etc.) as a result of a folic acid stimulus." [GOC  
9124 Pathogen[ Q2Q067] interacts with 5 human partners:{Q16656;P06396;O15527;O60765;P16455}  
9125 Pathogen[ P0C214] interacts with 6 human partners:{Q16656;P06396;O60765;P16455;P35520;O15527}  
9126 Pathogen[ P03346] interacts with 4 human partners:{O60765;Q16656;P06396;O15527}  
9127 Pathogen[ Q85601] interacts with 5 human partners:{O15527;P06396;Q16656;P16455;O60765}  
9128 Pathogen[ P14079] interacts with 4 human partners:{Q16656;P16455;O15527;O60765}  
9129 Pathogen[ P03383] interacts with 4 human partners:{O60765;Q16656;O15527;P06396}  
9130 Pathogen[ P03410] interacts with 5 human partners:{P06396;O15527;P16455;Q16656;O60765}  
9131 Pathogen[ P14075] interacts with 4 human partners:{Q16656;O60765;O15527;P06396}  
9132 Pathogen[ P0C206] interacts with 5 human partners:{P06396;O15527;O60765;Q16656;P16455}  
9133 Pathogen[ P03363] interacts with 4 human partners:{O15527;O60765;P06396;Q16656}  
9134 [Cluster 831]GO:0033262+P biological\_process [name] regulation of DNA replication involved in S phase [def] "Any process that modulates the frequency, rate or extent of DNA replication that contributes to the progression through S phase of the cell cycle." [GOC  
9135 Pathogen[ Q2Q067] interacts with 1 human partners:{Q9BVW5}  
9136 Pathogen[ P0C214] interacts with 1 human partners:{Q9BVW5}  
9137 Pathogen[ P03346] interacts with 1 human partners:{Q9BVW5}  
9138 Pathogen[ Q85601] interacts with 1 human partners:{Q9BVW5}  
9139 Pathogen[ P14079] interacts with 1 human partners:{Q9BVW5}  
9140 Pathogen[ P03383] interacts with 1 human partners:{Q9BVW5}  
9141 Pathogen[ P03410] interacts with 1 human partners:{Q9BVW5}  
9142 Pathogen[ P14075] interacts with 1 human partners:{Q9BVW5}  
9143 Pathogen[ P0C206] interacts with 1 human partners:{Q9BVW5}  
9144 Pathogen[ P03363] interacts with 1 human partners:{Q9BVW5}  
9145 [Cluster 832]GO:2000795+P biological\_process [name] negative regulation of epithelial cell proliferation involved in lung morphogenesis [def] "Any process that stops,

prevents or reduces the frequency, rate or extent of epithelial cell proliferation involved in lung morphogenesis." [PMID

9146 Pathogen[ Q2Q067] interacts with 1 human partners:{000712}

9147 Pathogen[ P0C214] interacts with 1 human partners:{000712}

9148 Pathogen[ P03346] interacts with 1 human partners:{000712}

9149 Pathogen[ Q85601] interacts with 1 human partners:{000712}

9150 Pathogen[ P14079] interacts with 1 human partners:{000712}

9151 Pathogen[ P03383] interacts with 1 human partners:{000712}

9152 Pathogen[ P03410] interacts with 1 human partners:{000712}

9153 Pathogen[ P14075] interacts with 1 human partners:{000712}

9154 Pathogen[ P0C206] interacts with 1 human partners:{000712}

9155 Pathogen[ P03363] interacts with 1 human partners:{000712}

9156 [Cluster 833]GO:0045843+P biological\_process [name] negative regulation of striated muscle tissue development [def] "Any process that stops, prevents, or reduces the frequency, rate or extent of striated muscle development." [GOC

9157 Pathogen[ Q2Q067] interacts with 3 human partners:{Q8IXJ6;Q9NQ29;O60248}

9158 Pathogen[ P0C214] interacts with 3 human partners:{Q9NQ29;Q8IXJ6;O60248}

9159 Pathogen[ P03346] interacts with 3 human partners:{O60248;Q8IXJ6;Q9NQ29}

9160 Pathogen[ Q85601] interacts with 3 human partners:{Q8IXJ6;O60248;Q9NQ29}

9161 Pathogen[ P14079] interacts with 3 human partners:{Q9NQ29;O60248;Q8IXJ6}

9162 Pathogen[ P03383] interacts with 2 human partners:{O60248;Q9NQ29}

9163 Pathogen[ P03410] interacts with 3 human partners:{Q8IXJ6;Q9NQ29;O60248}

9164 Pathogen[ P14075] interacts with 2 human partners:{O60248;Q9NQ29}

9165 Pathogen[ P0C206] interacts with 3 human partners:{O60248;Q9NQ29;Q8IXJ6}

9166 Pathogen[ P03363] interacts with 2 human partners:{O60248;Q9NQ29}

9167 [Cluster 834]GO:0030903+P biological\_process [name] notochord development [def] "The process whose specific outcome is the progression of the notochord over time, from its formation to the mature structure. The notochord is a mesoderm-derived structure located ventral of the developing nerve cord. In vertebrates, the notochord serves as a core around which other mesodermal cells form the vertebrae. In the most primitive chordates, which lack vertebrae, the notochord persists as a substitute for a vertebral column." [GOC

9168 Pathogen[ Q2Q067] interacts with 3 human partners:{P46937;Q15562;Q15468}

9169 Pathogen[ P0C214] interacts with 3 human partners:{P46937;Q15468;Q15562}

9170 Pathogen[ P03346] interacts with 5 human partners:{Q15562;P46937;Q02535;A8MTQ0;Q15468}

9171 Pathogen[ Q85601] interacts with 2 human partners:{Q15562;P46937}

9172 Pathogen[ P14079] interacts with 3 human partners:{P46937;Q15468;Q15562}

9173 Pathogen[ P03383] interacts with 3 human partners:{Q15562;Q15468;P46937}

9174 Pathogen[ P03410] interacts with 3 human partners:{Q15468;P46937;Q15562}

9175 Pathogen[ P14075] interacts with 3 human partners:{Q15562;Q15468;P46937}

9176 Pathogen[ P0C206] interacts with 3 human partners:{P46937;Q15468;Q15562}

9177 Pathogen[ P03363] interacts with 4 human partners:{Q15468;Q15562;A8MTQ0;P46937}

9178 [Cluster 835]GO:0001522+P biological\_process [name] pseudouridine synthesis [def] "The intramolecular conversion of uridine to pseudouridine within an RNA molecule. This posttranscriptional base modification occurs in tRNA, rRNA, and snRNAs." [GOC

9179 Pathogen[ Q2Q067] interacts with 6 human partners:{Q9Y606;Q9NPE3;O60832;Q9BZE2;Q96CM3;O95900}

9180 Pathogen[ P0C214] interacts with 9 human partners:{Q3MIT2;Q9NPE3;Q9UJJ7;Q9BZE2;O95900;O60832;Q9Y606;Q8IZ73;Q96CM3}

9181 Pathogen[ P03346] interacts with 8 human partners:{Q9Y606;O95900;Q9BZE2;O60832;Q8N0Z8;Q8WWH5;Q9NPE3;Q96CM3}

9182 Pathogen[ Q85601] interacts with 6 human partners:{Q9BZE2;Q9Y606;Q9UJJ7;Q9NPE3;Q96CM3;O60832}

9183 Pathogen[ P14079] interacts with 14 human partners:{Q9NPE3;Q9BZE2;Q3MIT2;Q96CM3;Q6P087;O60832;Q8IZ73;Q96PZ0;Q8N0Z8;Q9H0K6;Q9Y606;Q9UJJ7;O95900;Q8WWH5}

9184 Pathogen[ P03383] interacts with 6 human partners:{Q9NPE3;Q9BZE2;Q9Y606;O95900;Q96CM3;O60832}

9185 Pathogen[ P03410] interacts with 13 human partners:{Q8IZ73;O60832;Q9UJJ7;Q96CM3;Q8N0Z8;Q9BZE2;Q8WWH5;Q9Y606;Q9NPE3;O95900;Q6P087;Q9H0K6;Q3MIT2}

9186 Pathogen[ P14075] interacts with 9 human partners:{Q8N0Z8;Q9Y606;Q8WWH5;O95900;Q9NPE3;Q9UJJ7;Q9BZE2;O60832;Q96CM3}

9187 Pathogen[ P0C206] interacts with 11 human partners:{Q9NPE3;Q8WWH5;Q8IZ73;Q9UJJ7;Q9BZE2;Q6P087;O95900;O60832;Q9Y606;Q8N0Z8;Q96CM3}

9188 Pathogen[ P03363] interacts with 8 human partners:{O60832;Q9BZE2;Q9Y606;O95900;Q9NPE3;Q8N0Z8;Q8WWH5;Q96CM3}

9189 [Cluster 836]GO:0033327+P biological\_process [name] Leydig cell differentiation [def] "The process in which a relatively unspecialized cell acquires specialized structural and/or functional features of a Leydig cell. A Leydig cell is a testosterone-secreting cell in the interstitial area, between the seminiferous tubules, in the testis." [GOC

9190 Pathogen[ Q2Q067] interacts with 2 human partners:{P24385;Q15637}

9191 Pathogen[ P0C214] interacts with 2 human partners:{Q15637;P24385}

9192 Pathogen[ P03346] interacts with 4 human partners: {P24385;Q15637;P51843;Q9HB21}

9193 Pathogen[ Q85601] interacts with 3 human partners: {Q15637;P24385;Q9HB21}

9194 Pathogen[ P14079] interacts with 3 human partners: {Q15637;P10620;Q9HB21}

9195 Pathogen[ P03383] interacts with 2 human partners: {P24385;Q15637}

9196 Pathogen[ P03410] interacts with 3 human partners: {Q15637;Q9HB21;P24385}

9197 Pathogen[ P14075] interacts with 2 human partners: {Q15637;P24385}

9198 Pathogen[ P0C206] interacts with 3 human partners: {Q15637;Q9HB21;P24385}

9199 Pathogen[ P03363] interacts with 2 human partners: {Q15637;P24385}

9200 [Cluster 837]GO:0035455+P biological\_process [name] response to interferon-alpha  
 [def] "Any process that results in a change in state or activity of a cell or an organism (in terms of movement, secretion, enzyme production, gene expression, etc.) as a result of an interferon-alpha stimulus. Interferon-alpha is a type I interferon." [GOC]

9201 Pathogen[ Q2Q067] interacts with 2 human partners: {P55265;Q9Y2M5}

9202 Pathogen[ P0C214] interacts with 2 human partners: {P55265;Q9Y2M5}

9203 Pathogen[ P03346] interacts with 2 human partners: {P55265;Q9Y2M5}

9204 Pathogen[ Q85601] interacts with 2 human partners: {P55265;Q9Y2M5}

9205 Pathogen[ P14079] interacts with 3 human partners: {P13164;P55265;Q9Y2M5}

9206 Pathogen[ P03383] interacts with 2 human partners: {P55265;Q9Y2M5}

9207 Pathogen[ P03410] interacts with 2 human partners: {P55265;Q9Y2M5}

9208 Pathogen[ P14075] interacts with 2 human partners: {P55265;Q9Y2M5}

9209 Pathogen[ P0C206] interacts with 2 human partners: {P55265;Q9Y2M5}

9210 Pathogen[ P03363] interacts with 2 human partners: {Q9Y2M5;P55265}

9211 [Cluster 838]GO:0045622+P biological\_process [name] regulation of T-helper cell differentiation  
 [def] "Any process that modulates the frequency, rate or extent of T-helper cell differentiation." [GOC]

9212 Pathogen[ Q2Q067] interacts with 1 human partners: {Q15306}

9213 Pathogen[ P0C214] interacts with 1 human partners: {Q15306}

9214 Pathogen[ P03346] interacts with 1 human partners: {Q15306}

9215 Pathogen[ Q85601] interacts with 1 human partners: {Q15306}

9216 Pathogen[ P14079] interacts with 1 human partners: {Q15306}

9217 Pathogen[ P03383] interacts with 1 human partners: {Q15306}

9218 Pathogen[ P03410] interacts with 1 human partners: {Q15306}

9219 Pathogen[ P14075] interacts with 1 human partners: {Q15306}

9220 Pathogen[ P0C206] interacts with 1 human partners: {Q15306}

9221 Pathogen[ P03363] interacts with 1 human partners: {Q15306}

9222 [Cluster 839]GO:0032873+P biological\_process [name] negative regulation of stress-activated MAPK cascade  
 [def] "Any process that stops, prevents, or reduces the frequency, rate or extent of signal transduction mediated by the stress-activated MAPK cascade." [GOC]

9223 Pathogen[ Q2Q067] interacts with 3 human partners: {P01106;Q08050;P78318}

9224 Pathogen[ P0C214] interacts with 2 human partners: {P78318;P01106}

9225 Pathogen[ P03346] interacts with 4 human partners: {Q08050;P01106;Q12778;P78318}

9226 Pathogen[ Q85601] interacts with 3 human partners: {P01106;Q08050;P78318}

9227 Pathogen[ P14079] interacts with 2 human partners: {P01106;P78318}

9228 Pathogen[ P03383] interacts with 2 human partners: {P01106;P78318}

9229 Pathogen[ P03410] interacts with 2 human partners: {P01106;P78318}

9230 Pathogen[ P14075] interacts with 3 human partners: {Q08050;P01106;P78318}

9231 Pathogen[ P0C206] interacts with 3 human partners: {P78318;Q08050;P01106}

9232 Pathogen[ P03363] interacts with 3 human partners: {P01106;Q08050;P78318}

9233 [Cluster 840]GO:0051271+P biological\_process [name] negative regulation of cellular component movement  
 [def] "Any process that stops, prevents, or reduces the frequency, rate or extent of the movement of a cellular component." [GOC]

9234 Pathogen[ Q2Q067] interacts with 2 human partners: {P23497;P46527}

9235 Pathogen[ P0C214] interacts with 2 human partners: {P46527;P23497}

9236 Pathogen[ P03346] interacts with 2 human partners: {P23497;P46527}

9237 Pathogen[ Q85601] interacts with 1 human partners: {P46527}

9238 Pathogen[ P14079] interacts with 2 human partners: {P23497;P46527}

9239 Pathogen[ P03383] interacts with 2 human partners: {P46527;P23497}

9240 Pathogen[ P03410] interacts with 1 human partners: {P46527}

9241 Pathogen[ P14075] interacts with 2 human partners: {P23497;P46527}

9242 Pathogen[ P0C206] interacts with 1 human partners: {P46527}

9243 Pathogen[ P03363] interacts with 1 human partners: {P23497}

9244 [Cluster 841]GO:0061136+P biological\_process [name] regulation of proteasomal protein catabolic process  
 [def] "Any process that modulates the rate, frequency, or extent of the chemical reactions and pathways resulting in the breakdown of a protein or peptide by hydrolysis of its peptide bonds that is mediated by the proteasome." [GOC]

9245 Pathogen[ Q2Q067] interacts with 4 human partners: {Q9Y5K5;Q8WXU2;Q9Y297;P61289}

9246 Pathogen[ P0C214] interacts with 3 human partners: {Q9Y297;Q9Y5K5;Q8WXU2}

9247 Pathogen[ P03346] interacts with 4 human partners: {Q8WXU2;P61289;Q9Y297;Q9Y5K5}

9248 Pathogen[ Q85601] interacts with 3 human partners: {P61289;Q8WXU2;Q9Y5K5}

9249 Pathogen[ P14079] interacts with 4 human partners: {O00487;P61289;Q8WXU2;Q9Y5K5}

9250 Pathogen[ P03383] interacts with 3 human partners: {Q9Y5K5;P61289;Q8WXU2}

9251 Pathogen[ P03410] interacts with 3 human partners: {Q8WXU2;Q9Y5K5;P61289}

9252 Pathogen[ P14075] interacts with 3 human partners: {P61289;Q8WXU2;Q9Y5K5}

9253 Pathogen[ P0C206] interacts with 3 human partners: {P61289;Q9Y5K5;Q8WXU2}

9254 Pathogen[ P03363] interacts with 3 human partners: {Q9Y5K5;P61289;Q8WXU2}

9255 [Cluster 842]GO:0002281+P biological\_process [name] macrophage activation involved in immune response [def] "A change in morphology and behavior of a macrophage resulting from exposure to a cytokine, chemokine, cellular ligand, or soluble factor, leading to the initiation or perpetuation of an immune response." [GOC

9256 Pathogen[ Q2Q067] interacts with 2 human partners:{Q8IUC6;Q9Y2G9}

9257 Pathogen[ P0C214] interacts with 2 human partners:{Q9Y2G9;Q8IUC6}

9258 Pathogen[ P03346] interacts with 2 human partners:{Q9Y2G9;Q8IUC6}

9259 Pathogen[ Q85601] interacts with 2 human partners:{Q8IUC6;Q9Y2G9}

9260 Pathogen[ P14079] interacts with 2 human partners:{Q8IUC6;Q9Y2G9}

9261 Pathogen[ P03383] interacts with 2 human partners:{Q8IUC6;Q9Y2G9}

9262 Pathogen[ P03410] interacts with 2 human partners:{Q9Y2G9;Q8IUC6}

9263 Pathogen[ P14075] interacts with 2 human partners:{Q9Y2G9;Q8IUC6}

9264 Pathogen[ P0C206] interacts with 2 human partners:{Q8IUC6;Q9Y2G9}

9265 Pathogen[ P03363] interacts with 1 human partners:{Q9Y2G9}

9266 [Cluster 843]GO:0085020+P biological\_process [name] protein K6-linked ubiquitination [def] "A protein ubiquitination process in which a polymer of ubiquitin, formed by linkages between lysine residues at position 6 of the ubiquitin monomers, is added to a protein. K6-linked ubiquitination is involved in DNA repair." [GOC

9267 Pathogen[ Q2Q067] interacts with 5 human partners:{Q9Y2X8;P78317;Q99728;Q9NPD8;Q9Y252}

9268 Pathogen[ P0C214] interacts with 6 human partners:{Q16763;Q99728;P78317;Q9Y2X8;Q9Y252;Q9NPD8}

9269 Pathogen[ P03346] interacts with 5 human partners:{Q99728;Q9Y2X8;Q9NPD8;P78317;Q9Y252}

9270 Pathogen[ Q85601] interacts with 6 human partners:{P78317;Q16763;Q9Y2X8;Q99728;Q9NPD8;Q9Y252}

9271 Pathogen[ P14079] interacts with 3 human partners:{Q9NPD8;Q9Y2X8;P78317}

9272 Pathogen[ P03383] interacts with 4 human partners:{Q9Y2X8;P78317;Q9Y252;Q9NPD8}

9273 Pathogen[ P03410] interacts with 3 human partners:{P78317;Q9Y2X8;Q9NPD8}

9274 Pathogen[ P14075] interacts with 4 human partners:{Q9Y252;Q9Y2X8;Q9NPD8;P78317}

9275 Pathogen[ P0C206] interacts with 6 human partners:{Q16763;Q9Y2X8;Q9NPD8;P78317;Q99728;Q9Y252}

9276 Pathogen[ P03363] interacts with 5 human partners:{Q9Y252;P78317;Q9NPD8;Q99728;Q9Y2X8}

9277 [Cluster 844]GO:0010944+P biological\_process [name] negative regulation of transcription by competitive promoter binding [def] "Any process that stops, prevents, or reduces the frequency, rate or extent of DNA-dependent transcription using a mechanism that involves direct competition for interaction with a promoter binding site." [GOC

9278 Pathogen[ Q2Q067] interacts with 3 human partners:{O15105;P35232;Q9UI36}

9279 Pathogen[ P0C214] interacts with 4 human partners:{O15105;Q9UI36;P16220;P35232}

9280 Pathogen[ P03346] interacts with 5 human partners:{P16220;O15105;Q9C0J9;P35232;Q9UI36}

9281 Pathogen[ Q85601] interacts with 4 human partners:{P16220;Q9UI36;P35232;O15105}

9282 Pathogen[ P14079] interacts with 4 human partners:{P35232;Q9UI36;P15941;O15105}

9283 Pathogen[ P03383] interacts with 4 human partners:{P16220;O15105;P35232;Q9UI36}

9284 Pathogen[ P03410] interacts with 5 human partners:{Q9UI36;P15941;P16220;O15105;P35232}

9285 Pathogen[ P14075] interacts with 4 human partners:{P35232;O15105;Q9UI36;P16220}

9286 Pathogen[ P0C206] interacts with 5 human partners:{P16220;Q9C0J9;O15105;P35232;Q9UI36}

9287 Pathogen[ P03363] interacts with 5 human partners:{Q9C0J9;P16220;O15105;Q9UI36;P35232}

9288 [Cluster 845]GO:0051351+P biological\_process [name] positive regulation of ligase activity [def] "Any process that activates or increases the frequency, rate or extent of ligase activity, the catalysis of the ligation of two substances with concomitant breaking of a diphosphate linkage, usually in a nucleoside triphosphate." [GOC

9289 Pathogen[ Q2Q067] interacts with 3 human partners:{Q9H9Q4;Q13426;Q9NPA3}

9290 Pathogen[ P0C214] interacts with 3 human partners:{Q9H9Q4;Q9NPA3;Q13426}

9291 Pathogen[ P03346] interacts with 3 human partners:{Q13426;Q9H9Q4;Q9NPA3}

9292 Pathogen[ Q85601] interacts with 3 human partners:{Q13426;Q9NPA3;Q9H9Q4}

9293 Pathogen[ P14079] interacts with 3 human partners:{Q9NPA3;Q9H9Q4;Q13426}

9294 Pathogen[ P03383] interacts with 3 human partners:{Q9H9Q4;Q13426;Q9NPA3}

9295 Pathogen[ P03410] interacts with 3 human partners:{Q13426;Q9NPA3;Q9H9Q4}

9296 Pathogen[ P14075] interacts with 3 human partners:{Q9H9Q4;Q9NPA3;Q13426}

9297 Pathogen[ P0C206] interacts with 3 human partners:{Q9NPA3;Q9H9Q4;Q13426}

9298 Pathogen[ P03363] interacts with 3 human partners:{Q13426;Q9H9Q4;Q9NPA3}

9299 [Cluster 846]GO:0040014+P biological\_process [name] regulation of multicellular organism growth [def] "Any process that modulates the frequency, rate or extent of growth of the body of an organism so that it reaches its usual body size." [GOC

9300 Pathogen[ Q2Q067] interacts with 4 human partners:{Q9H2K2;P40763;O15379;O75376}

9301 Pathogen[ P0C214] interacts with 4 human partners:{O75376;O15379;Q9H2K2;P40763}

9302 Pathogen[ P03346] interacts with 4 human partners:{O15379;Q9H2K2;O75376;P40763}

9303 Pathogen[ Q85601] interacts with 4 human partners:{P40763;Q9H2K2;O75376;O15379}

9304 Pathogen[ P14079] interacts with 6 human partners:{O15379;Q9C0B1;Q9H2K2;Q14353;O75376;P81277}

9305 Pathogen[ P03383] interacts with 2 human partners:{075376;015379}  
9306 Pathogen[ P03410] interacts with 7 human  
partners:{Q14353;075376;015379;Q9H2K2;P81277;Q9C0B1;P40763}  
9307 Pathogen[ P14075] interacts with 2 human partners:{075376;015379}  
9308 Pathogen[ P0C206] interacts with 4 human partners:{015379;075376;P40763;Q9H2K2}  
9309 Pathogen[ P03363] interacts with 3 human partners:{015379;075376;Q9H2K2}  
9310 [Cluster 847]GO:0042168+P biological\_process [name] heme metabolic process [def]  
"The chemical reactions and pathways involving heme, any compound of iron complexed in a  
porphyrin (tetrapyrrole) ring." [GOC  
9311 Pathogen[ Q2Q067] interacts with 1 human partners:{P06132}  
9312 Pathogen[ P0C214] interacts with 1 human partners:{P06132}  
9313 Pathogen[ P03346] interacts with 1 human partners:{P06132}  
9314 Pathogen[ Q85601] interacts with 1 human partners:{P06132}  
9315 Pathogen[ P14079] interacts with 1 human partners:{P06132}  
9316 Pathogen[ P03383] interacts with 1 human partners:{P06132}  
9317 Pathogen[ P03410] interacts with 1 human partners:{P06132}  
9318 Pathogen[ P14075] interacts with 1 human partners:{P06132}  
9319 Pathogen[ P0C206] interacts with 1 human partners:{P06132}  
9320 Pathogen[ P03363] interacts with 1 human partners:{P06132}  
9321 [Cluster 848]GO:0021869+P biological\_process [name] forebrain ventricular zone  
progenitor cell division [def] "The mitotic division of a basal progenitor giving  
rise to two neurons." [GO\_REF  
9322 Pathogen[ Q2Q067] interacts with 1 human partners:{P20265}  
9323 Pathogen[ P0C214] interacts with 1 human partners:{P20265}  
9324 Pathogen[ P03346] interacts with 2 human partners:{P20264;P20265}  
9325 Pathogen[ Q85601] interacts with 1 human partners:{P20265}  
9326 Pathogen[ P14079] interacts with 1 human partners:{P20265}  
9327 Pathogen[ P03383] interacts with 1 human partners:{P20265}  
9328 Pathogen[ P03410] interacts with 1 human partners:{P20265}  
9329 Pathogen[ P14075] interacts with 1 human partners:{P20265}  
9330 Pathogen[ P0C206] interacts with 1 human partners:{P20265}  
9331 Pathogen[ P03363] interacts with 2 human partners:{P20264;P20265}  
9332 [Cluster 849]GO:0006409+P biological\_process [name] tRNA export from nucleus [def]  
"The directed movement of tRNA from the nucleus to the cytoplasm." [GOC  
9333 Pathogen[ Q2Q067] interacts with 1 human partners:{043592}  
9334 Pathogen[ P0C214] interacts with 1 human partners:{043592}  
9335 Pathogen[ P03346] interacts with 1 human partners:{043592}  
9336 Pathogen[ Q85601] interacts with 1 human partners:{043592}  
9337 Pathogen[ P14079] interacts with 1 human partners:{043592}  
9338 Pathogen[ P03383] interacts with 1 human partners:{043592}  
9339 Pathogen[ P03410] interacts with 1 human partners:{043592}  
9340 Pathogen[ P14075] interacts with 1 human partners:{043592}  
9341 Pathogen[ P0C206] interacts with 1 human partners:{043592}  
9342 Pathogen[ P03363] interacts with 1 human partners:{043592}  
9343 [Cluster 850]GO:0008306+P biological\_process [name] associative learning [def]  
"Learning by associating a stimulus (the cause) with a particular outcome (the effect)."  
[ISBN  
9344 Pathogen[ Q2Q067] interacts with 2 human partners:{P11831;P78543}  
9345 Pathogen[ P0C214] interacts with 2 human partners:{P78543;P11831}  
9346 Pathogen[ P03346] interacts with 2 human partners:{P11831;P78543}  
9347 Pathogen[ Q85601] interacts with 2 human partners:{P11831;P78543}  
9348 Pathogen[ P14079] interacts with 1 human partners:{P78543}  
9349 Pathogen[ P03383] interacts with 2 human partners:{P11831;P78543}  
9350 Pathogen[ P03410] interacts with 3 human partners:{P11831;P78543;Q9UBY8}  
9351 Pathogen[ P14075] interacts with 2 human partners:{P11831;P78543}  
9352 Pathogen[ P0C206] interacts with 2 human partners:{P11831;P78543}  
9353 Pathogen[ P03363] interacts with 2 human partners:{P78543;P11831}  
9354 [Cluster 851]GO:0040007+P biological\_process [name] growth [def] "The increase in  
size or mass of an entire organism, a part of an organism or a cell." [GOC  
9355 Pathogen[ Q2Q067] interacts with 3 human partners:{Q15424;095067;Q9P1Q0}  
9356 Pathogen[ P0C214] interacts with 3 human partners:{095067;Q15424;Q9P1Q0}  
9357 Pathogen[ P03346] interacts with 3 human partners:{095067;Q9P1Q0;Q15424}  
9358 Pathogen[ Q85601] interacts with 3 human partners:{Q15424;Q9P1Q0;095067}  
9359 Pathogen[ P14079] interacts with 3 human partners:{Q9P1Q0;095067;Q15424}  
9360 Pathogen[ P03383] interacts with 3 human partners:{095067;Q9P1Q0;Q15424}  
9361 Pathogen[ P03410] interacts with 3 human partners:{095067;Q15424;Q9P1Q0}  
9362 Pathogen[ P14075] interacts with 3 human partners:{095067;Q15424;Q9P1Q0}  
9363 Pathogen[ P0C206] interacts with 3 human partners:{Q9P1Q0;Q15424;095067}  
9364 Pathogen[ P03363] interacts with 3 human partners:{Q9P1Q0;Q15424;095067}  
9365 [Cluster 852]GO:0001659+P biological\_process [name] temperature homeostasis [def] "A  
homeostatic process in which an organism modulates its internal body temperature." [GOC  
9366 Pathogen[ Q2Q067] interacts with 2 human partners:{P40763;060543}  
9367 Pathogen[ P0C214] interacts with 2 human partners:{060543;P40763}  
9368 Pathogen[ P03346] interacts with 3 human partners:{Q12778;P40763;060543}  
9369 Pathogen[ Q85601] interacts with 2 human partners:{P40763;060543}  
9370 Pathogen[ P14079] interacts with 2 human partners:{Q9C0B1;060543}



9371 Pathogen[ P03383] interacts with 1 human partners:{O60543}

9372 Pathogen[ P03410] interacts with 3 human partners:{O60543;Q9C0B1;P40763}

9373 Pathogen[ P14075] interacts with 1 human partners:{O60543}

9374 Pathogen[ P0C206] interacts with 2 human partners:{P40763;O60543}

9375 Pathogen[ P03363] interacts with 1 human partners:{O60543}

9376 [Cluster 853]GO:0010390+P biological\_process [name] histone monoubiquitination  
[def] "The modification of histones by addition of a single ubiquitin group." [PMID

9377 Pathogen[ Q2Q067] interacts with 10 human  
partners:{Q8WVC0;Q6PD62;Q6P1J9;Q96T88;P51965;Q5VTR2;Q8TDB6;O75150;Q8N7H5;Q9BTA9}

9378 Pathogen[ P0C214] interacts with 10 human  
partners:{P51965;Q96T88;Q6P1J9;Q8N7H5;Q8WVC0;O75150;Q9BTA9;Q5VTR2;Q8TDB6;Q6PD62}

9379 Pathogen[ P03346] interacts with 10 human  
partners:{Q6PD62;O75150;Q5VTR2;P51965;Q8WVC0;Q8TDB6;Q6P1J9;Q96T88;Q8N7H5;Q9BTA9}

9380 Pathogen[ Q85601] interacts with 10 human  
partners:{Q6PD62;Q8TDB6;Q8WVC0;Q6P1J9;Q9BTA9;P51965;Q96T88;O75150;Q5VTR2;Q8N7H5}

9381 Pathogen[ P14079] interacts with 7 human  
partners:{P51965;Q9BTA9;Q6PD62;Q5VTR2;Q8WVC0;Q6P1J9;Q8N7H5}

9382 Pathogen[ P03383] interacts with 8 human  
partners:{Q6P1J9;Q9BTA9;P51965;Q6PD62;Q8WVC0;Q5VTR2;O75150;Q8N7H5}

9383 Pathogen[ P03410] interacts with 8 human  
partners:{Q8WVC0;Q6PD62;P51965;Q5VTR2;Q8N7H5;O75150;Q6P1J9;Q9BTA9}

9384 Pathogen[ P14075] interacts with 8 human  
partners:{Q5VTR2;Q8WVC0;P51965;Q8N7H5;Q6P1J9;Q6PD62;O75150;Q9BTA9}

9385 Pathogen[ P0C206] interacts with 10 human  
partners:{Q6PD62;Q5VTR2;Q8TDB6;P51965;Q8N7H5;Q96T88;Q8WVC0;Q9BTA9;O75150;Q6P1J9}

9386 Pathogen[ P03363] interacts with 10 human  
partners:{Q8TDB6;P51965;Q8WVC0;Q5VTR2;O75150;Q6P1J9;Q96T88;Q8N7H5;Q9BTA9;Q6PD62}

9387 [Cluster 854]GO:0000184+P biological\_process [name] nuclear-transcribed mRNA  
catabolic process, nonsense-mediated decay [def] "The nonsense-mediated decay pathway  
for nuclear-transcribed mRNAs degrades mRNAs in which an amino-acid codon has changed to  
a nonsense codon\_ this prevents the translation of such mRNAs into truncated, and  
potentially harmful, proteins." [GOC

9388 Pathogen[ Q2Q067] interacts with 113 human  
partners:{Q92900;P61313;P30153;P62701;O15234;P47914;Q8IU60;P46779;Q9UPR3;Q02543;P613  
26;P26373;P62750;Q8IZD4;P63151;P62273;Q9NPI6;P15880;P40429;P46782;P35268;P22090;P467  
78;Q96C86;P38919;P62888;P32969;P62277;P62241;P62244;P05387;P62861;P42766;P67775;P053  
86;Q9BZI7;Q9UNX3;Q504Q3;P30050;Q9BRP8;P18077;P62891;Q9HAU5;P61927;P39023;P62081;P612  
47;P61254;P62249;P62280;O43310;P83731;P62263;Q86US8;P60866;P62906;Q9H0W8;Q02878;P467  
77;P62899;P08708;P08865;Q07020;P62913;P62269;P60228;Q9Y5S9;P62424;P62917;P62829;P467  
83;Q8IYD1;P62495;P36578;P62857;P62847;P49207;P62396;Q09161;Q92540;P63173;P18621;P522  
98;Q9NPI6;P39019;P61353;Q04637;P62266;P42677;Q9Y3U8;P63220;P62841;P83881;P62987;O954  
53;P50914;P46776;Q8ND04;P11940;P62854;P62753;P05388;P18124;P62851;P25398;P62910;Q929  
01;P46781;P27635;P61513;P62945;Q9H1J1;P62979}

9389 Pathogen[ P0C214] interacts with 113 human  
partners:{P62861;Q9BZI7;P84098;P61247;P60228;O15234;Q09161;Q96C86;P15880;P62081;P427  
66;P62913;P22090;Q92901;P62249;P62899;O95453;P62854;P39019;P62263;Q9BRP8;P30153;Q9NP  
I6;Q9Y5S9;P62273;P23396;Q92900;P18077;P05388;P62847;P62829;Q504Q3;P26373;P27635;Q9NP  
J4;P46778;P61513;P83881;P62701;P49207;P11940;P63220;Q92540;P08865;P32969;Q02543;P622  
66;Q9HAU5;P15170;P62277;P50914;P46779;P52298;P40429;Q86US8;P47914;P63173;P46783;P622  
80;P61326;Q9UNX3;P38919;Q9Y3U8;P30050;P62753;P62910;Q8ND04;P62891;O43310;P63151;Q9UP  
R3;P62495;P62269;P67775;P46781;Q8IYD1;Q8IU60;P61254;P62841;Q15287;P62244;P62987;Q046  
37;Q07020;P42677;P62945;P46776;P62241;P46777;P83731;P35268;P62424;P60866;P62857;P613  
13;P08708;P05387;P25398;Q9H0W8;P61927;P62750;P62979;P05386;P62851;P46782;P18124;P613  
53;P36578;P18621;P62906;Q8IZD4;Q02878;Q9H1J1}

9390 Pathogen[ P03346] interacts with 115 human  
partners:{Q9UPR3;Q9Y5S9;Q9BZI7;P05387;P46779;O15234;Q504Q3;Q09161;P63173;P62917;P622  
49;P62913;P62861;Q9NPI6;P62277;Q02878;Q86US8;Q96C86;P62280;P39023;P62987;P61927;Q9UN  
X3;P62857;P46778;P49207;P62266;P61254;P38919;P62495;P11940;P62424;P62273;P67775;P837  
31;Q8ND04;P60866;P62899;P52298;Q9NPI6;P35268;P62891;P08708;O95453;P30153;P46782;P613  
53;Q8IU60;P62854;Q9Y3U8;P47914;P08865;P60228;P61313;P25398;P61513;P05388;P62269;Q025  
43;P42766;P62081;P61247;P18621;Q8IYD1;P46781;P61326;Q9HAU5;P84098;P15880;Q92540;P509  
14;P62829;P62979;P39019;P23396;P42677;Q15287;O43310;P62750;P62701;P30050;P62910;P365  
78;P62847;P62851;Q9H0W8;P22090;Q04637;Q8IZD4;P46777;Q9BRP8;Q07020;P62263;P62841;P838  
81;P05386;Q92900;P18077;P46776;P62241;P62753;P62851;P62841;P62945;Q92901;P32969;P26373;P18124;P404  
29;P27635;P46783;P62906;P63151;P62244;P62888;Q9H1J1;P63220}

9391 Pathogen[ Q85601] interacts with 116 human  
partners:{P46783;P32969;Q9BZI7;P61513;P26373;O15234;P62857;P62244;P62913;P62854;P620  
81;Q9NPI6;P61353;P62891;P46776;P18077;P61313;P05388;P63151;P62495;Q9H0W8;Q92540;P631  
73;P23396;P62273;P46778;P62829;P30050;P62753;P27635;P61326;Q15287;Q04637;P15880;P838  
81;Q07020;P30153;P39019;Q9Y3U8;P62701;P62241;P62424;P83731;P62899;P62945;Q9BRP8;Q504  
Q3;P62263;P62861;Q02878;Q09161;P39023;P38919;P61254;Q96C86;P49207;P60228;P11940;P629  
10;P62249;P62280;P15170;Q9HAU5;P47914;P84098;P08708;O95453;P42766;P62269;Q8IZD4;Q9NP  
J4;P18621;Q8IYD1;Q8ND04;P05387;Q9UNX3;P62277;P35268;P67775;P62979;P62847;Q86US8;P426  
77;P63220;Q9UPR3;P46782;P46779;P62750;P62851;P62841;P62945;P52298;P62987;P22090;P61927;P365  
78;P05386;Q92900;O43310;P08865;P61247;P46777;P62917;Q92901;P18124;P46781;P25398;P608  
66;Q9Y5S9;Q02543;P62906;P50914;P62266;Q8IU60;P40429;P62888;Q9H1J1}



partners:{Q99966;Q9H116;P31270;Q9NSC2;Q99502;O43680;P01106;Q9NSA3;Q06710;Q15475;P40424;Q13485;Q12959;Q9UJU5}

9402 Pathogen[ Q85601] interacts with 9 human  
partners:{P01106;Q9H116;Q99966;P40424;Q99502;Q12959;Q9NSC2;Q9NSA3;Q13485}

9403 Pathogen[ P14079] interacts with 5 human  
partners:{Q99502;Q99966;P01106;Q9NSC2;Q9H116}

9404 Pathogen[ P03383] interacts with 6 human  
partners:{Q13485;P01106;P40424;Q9NSA3;Q9NSC2;Q9H116}

9405 Pathogen[ P03410] interacts with 9 human  
partners:{Q9NSA3;P01106;Q99502;Q12959;Q9H116;Q13485;Q9NSC2;P40424;Q99966}

9406 Pathogen[ P14075] interacts with 7 human  
partners:{Q9NSC2;P40424;Q9H116;P01106;Q13485;Q9NSA3;Q99502}

9407 Pathogen[ P0C206] interacts with 9 human  
partners:{Q9NSA3;Q9NSC2;P40424;Q13485;Q9H116;Q99966;Q99502;P01106;Q12959}

9408 Pathogen[ P03363] interacts with 7 human  
partners:{Q12959;P01106;Q9NSA3;Q13485;P40424;Q9H116;Q9UJU5}

9409 [Cluster 856]GO:0051897+P biological\_process [name] positive regulation of protein kinase B signaling cascade [def] "Any process that activates or increases the frequency, rate or extent of the protein kinase B signaling cascade, a series of reactions mediated by the intracellular serine/threonine kinase protein kinase B." [GOC  
9410 Pathogen[ Q2Q067] interacts with 5 human  
partners:{Q86VY4;Q86UE4;Q8WYR1;Q99687;O95429}

9411 Pathogen[ P0C214] interacts with 5 human  
partners:{Q86UE4;Q8WYR1;Q99687;O95429;Q86VY4}

9412 Pathogen[ P03346] interacts with 5 human  
partners:{Q99687;Q86UE4;Q8WYR1;Q86VY4;O95429}

9413 Pathogen[ Q85601] interacts with 5 human  
partners:{Q99687;Q86VY4;Q86UE4;Q8WYR1;O95429}

9414 Pathogen[ P14079] interacts with 6 human  
partners:{O43597;O95429;Q8WYR1;Q99687;Q86UE4;Q86VY4}

9415 Pathogen[ P03383] interacts with 5 human  
partners:{Q86VY4;Q86UE4;Q99687;Q8WYR1;O95429}

9416 Pathogen[ P03410] interacts with 6 human  
partners:{Q8WYR1;O43597;Q99687;O95429;Q86UE4;Q86VY4}

9417 Pathogen[ P14075] interacts with 5 human  
partners:{Q99687;Q8WYR1;Q86UE4;Q86VY4;O95429}

9418 Pathogen[ P0C206] interacts with 6 human  
partners:{Q86VY4;O95429;O43597;Q99687;Q86UE4;Q8WYR1}

9419 Pathogen[ P03363] interacts with 5 human  
partners:{Q8WYR1;Q86UE4;Q86VY4;Q99687;O95429}

9420 [Cluster 857]GO:0000154+P biological\_process [name] rRNA modification [def] "The covalent alteration of one or more nucleotides within an rRNA molecule to produce an rRNA molecule with a sequence that differs from that coded genetically." [GOC  
9421 Pathogen[ Q2Q067] interacts with 3 human partners:{Q9H5Q4;Q8WVM0;Q9UNQ2}

9422 Pathogen[ P0C214] interacts with 3 human partners:{Q9UNQ2;Q8WVM0;Q9H5Q4}

9423 Pathogen[ P03346] interacts with 3 human partners:{Q9UNQ2;Q9H5Q4;Q8WVM0}

9424 Pathogen[ Q85601] interacts with 3 human partners:{Q9H5Q4;Q8WVM0;Q9UNQ2}

9425 Pathogen[ P14079] interacts with 4 human partners:{Q9UNQ2;Q96FB5;Q9H5Q4;Q8WVM0}

9426 Pathogen[ P03383] interacts with 3 human partners:{Q9UNQ2;Q9H5Q4;Q8WVM0}

9427 Pathogen[ P03410] interacts with 4 human partners:{Q9UNQ2;Q9H5Q4;Q96FB5;Q8WVM0}

9428 Pathogen[ P14075] interacts with 3 human partners:{Q9H5Q4;Q9UNQ2;Q8WVM0}

9429 Pathogen[ P0C206] interacts with 3 human partners:{Q8WVM0;Q9UNQ2;Q9H5Q4}

9430 Pathogen[ P03363] interacts with 3 human partners:{Q9UNQ2;Q8WVM0;Q9H5Q4}

9431 [Cluster 858]GO:0006953+P biological\_process [name] acute-phase response [def] "An acute inflammatory response that involves non-antibody proteins whose concentrations in the plasma increase in response to infection or injury of homeothermic animals." [ISBN  
9432 Pathogen[ Q2Q067] interacts with 6 human  
partners:{P40763;P01009;P17676;O15162;P08697;P49715}

9433 Pathogen[ P0C214] interacts with 5 human  
partners:{P08697;P01011;P17676;O15162;P40763}

9434 Pathogen[ P03346] interacts with 5 human  
partners:{P17676;P49715;P01009;P40763;O15162}

9435 Pathogen[ Q85601] interacts with 7 human  
partners:{P17676;P40763;P01011;P08697;P01009;P49715;O15162}

9436 Pathogen[ P14079] interacts with 3 human partners:{O15162;P49715;P0DJ18}

9437 Pathogen[ P03383] interacts with 4 human partners:{O15162;P08697;P01009;P17676}

9438 Pathogen[ P03410] interacts with 7 human  
partners:{P0DJ18;P17676;O15162;P08697;P01009;P40763;P01011}

9439 Pathogen[ P14075] interacts with 4 human partners:{O15162;P01009;P08697;P17676}

9440 Pathogen[ P0C206] interacts with 7 human  
partners:{P49715;P01009;P17676;P40763;O15162;P01011;P08697}

9441 Pathogen[ P03363] interacts with 1 human partners:{P17676}

9442 [Cluster 859]GO:0007099+P biological\_process [name] centriole replication [def] "The cell cycle process in which a daughter centriole is formed perpendicular to an existing centriole. An immature centriole contains a ninefold radially symmetric array of single microtubules\_ mature centrioles consist of a radial array of nine microtubule

triplets, doublets, or singlets depending upon the species and cell type." [GOC

9443 Pathogen[ Q2Q067] interacts with 7 human  
partners:{Q8N137;Q9HC77;Q66GS9;O43303;O75665;Q6UVJ0;P41208}

9444 Pathogen[ POC214] interacts with 7 human  
partners:{Q9HC77;O43303;Q66GS9;P41208;O75665;Q6UVJ0;Q8N137}

9445 Pathogen[ P03346] interacts with 8 human  
partners:{Q8N137;Q9HC77;P41208;Q66GS9;O75665;Q6UVJ0;O43303;O00444}

9446 Pathogen[ Q85601] interacts with 7 human  
partners:{Q8N137;Q6UVJ0;Q9HC77;O43303;Q66GS9;O75665;P41208}

9447 Pathogen[ P14079] interacts with 7 human  
partners:{Q6UVJ0;Q66GS9;O43303;P41208;Q8N137;O75665;Q9HC77}

9448 Pathogen[ P03383] interacts with 7 human  
partners:{Q6UVJ0;O43303;P41208;Q9HC77;Q66GS9;Q8N137;O75665}

9449 Pathogen[ P03410] interacts with 7 human  
partners:{O75665;O43303;Q66GS9;Q9HC77;Q6UVJ0;Q8N137;P41208}

9450 Pathogen[ P14075] interacts with 7 human  
partners:{O43303;Q9HC77;Q6UVJ0;Q66GS9;Q8N137;P41208;O75665}

9451 Pathogen[ POC206] interacts with 8 human  
partners:{Q8N137;Q9HC77;O00444;Q6UVJ0;Q66GS9;O75665;P41208;O43303}

9452 Pathogen[ P03363] interacts with 7 human  
partners:{Q9HC77;Q66GS9;O43303;P41208;Q6UVJ0;O75665;Q8N137}

9453 [Cluster 860]GO:0070935+P biological\_process [name] 3'-UTR-mediated mRNA  
stabilization [def] "An mRNA stabilization process in which one or more RNA-binding  
proteins associate with the 3'-untranslated region (UTR) of an mRNA." [GOC

9454 Pathogen[ Q2Q067] interacts with 2 human partners:{Q13148;P26651}

9455 Pathogen[ POC214] interacts with 2 human partners:{P26651;Q13148}

9456 Pathogen[ P03346] interacts with 2 human partners:{Q13148;P26651}

9457 Pathogen[ Q85601] interacts with 2 human partners:{Q13148;P26651}

9458 Pathogen[ P14079] interacts with 2 human partners:{Q13148;Q99836}

9459 Pathogen[ P03383] interacts with 2 human partners:{P26651;Q13148}

9460 Pathogen[ P03410] interacts with 2 human partners:{P26651;Q13148}

9461 Pathogen[ P14075] interacts with 2 human partners:{P26651;Q13148}

9462 Pathogen[ POC206] interacts with 2 human partners:{P26651;Q13148}

9463 Pathogen[ P03363] interacts with 4 human partners:{Q13151;Q13148;Q15717;P26651}

9464 [Cluster 861]GO:0006165+P biological\_process [name] nucleoside diphosphate  
phosphorylation [def] "The process of introducing a phosphate group into a nucleoside  
diphosphate to produce a nucleoside triphosphate." [GOC

9465 Pathogen[ Q2Q067] interacts with 1 human partners:{P22392}

9466 Pathogen[ POC214] interacts with 1 human partners:{P22392}

9467 Pathogen[ P03346] interacts with 1 human partners:{P22392}

9468 Pathogen[ Q85601] interacts with 1 human partners:{P22392}

9469 Pathogen[ P14079] interacts with 2 human partners:{P22392;Q86XW9}

9470 Pathogen[ P03383] interacts with 1 human partners:{P22392}

9471 Pathogen[ P03410] interacts with 1 human partners:{Q86XW9}

9472 Pathogen[ P14075] interacts with 1 human partners:{P22392}

9473 Pathogen[ POC206] interacts with 2 human partners:{P22392;Q86XW9}

9474 Pathogen[ P03363] interacts with 1 human partners:{Q86XW9}

9475 [Cluster 862]GO:0006090+P biological\_process [name] pyruvate metabolic process  
[def] "The chemical reactions and pathways involving pyruvate, 2-oxopropanoate." [GOC

9476 Pathogen[ Q2Q067] interacts with 4 human partners:{P07195;P10515;P00338;P07864}

9477 Pathogen[ POC214] interacts with 10 human  
partners:{Q8NCN5;P11177;P07864;O60825;Q9P0J1;P09622;P10515;Q9P2J9;Q16798;P07195}

9478 Pathogen[ P03346] interacts with 4 human partners:{Q8NCN5;P00338;P07195;P10515}

9479 Pathogen[ Q85601] interacts with 5 human  
partners:{O60825;P07864;P07195;P10515;P00338}

9480 Pathogen[ P14079] interacts with 5 human  
partners:{P00338;P07195;P07864;P10515;Q8NCN5}

9481 Pathogen[ P03383] interacts with 4 human partners:{P00338;P07864;P07195;P10515}

9482 Pathogen[ P03410] interacts with 5 human  
partners:{P07195;P00338;Q8NCN5;P07864;P10515}

9483 Pathogen[ P14075] interacts with 5 human  
partners:{Q8NCN5;P07195;P07864;P10515;P00338}

9484 Pathogen[ POC206] interacts with 6 human  
partners:{P07195;P07864;O60825;Q8NCN5;P00338;P10515}

9485 Pathogen[ P03363] interacts with 1 human partners:{P10515}

9486 [Cluster 863]GO:0032211+P biological\_process [name] negative regulation of telomere  
maintenance via telomerase [def] "Any process that stops, prevents, or reduces the  
frequency, rate or extent of the addition of telomeric repeats by telomerase." [GOC

9487 Pathogen[ Q2Q067] interacts with 3 human partners:{P54274;Q9BSI4;Q96AP0}

9488 Pathogen[ POC214] interacts with 2 human partners:{Q9BSI4;P54274}

9489 Pathogen[ P03346] interacts with 4 human partners:{Q9BSI4;Q96AP0;P54274;Q9NUX5}

9490 Pathogen[ Q85601] interacts with 1 human partners:{P54274}

9491 Pathogen[ P14079] interacts with 4 human partners:{P54274;Q9NUX5;Q9BSI4;Q96AP0}

9492 Pathogen[ P03383] interacts with 2 human partners:{Q9BSI4;P54274}

9493 Pathogen[ P03410] interacts with 4 human partners:{Q9NUX5;Q96AP0;P54274;Q9BSI4}

9494 Pathogen[ P14075] interacts with 3 human partners:{Q9BSI4;Q96AP0;P54274}

9495 Pathogen[ P0C206] interacts with 4 human partners:{Q96AP0;Q9BSI4;P54274;Q9NUX5}

9496 Pathogen[ P03363] interacts with 4 human partners:{Q9BSI4;Q96AP0;P54274;Q9NUX5}

9497 [Cluster 864]GO:0071896+P biological\_process [name] protein localization to adherens junction [def] "Any process in which a protein is transported to, and/or maintained at the adherens junction." [GOC

9498 Pathogen[ Q2Q067] interacts with 2 human partners:{Q14160;P15924}

9499 Pathogen[ P0C214] interacts with 2 human partners:{P15924;Q14160}

9500 Pathogen[ P03346] interacts with 3 human partners:{P15924;Q5T2T1;Q14160}

9501 Pathogen[ Q85601] interacts with 2 human partners:{P15924;Q14160}

9502 Pathogen[ P14079] interacts with 2 human partners:{P15924;Q5T2T1}

9503 Pathogen[ P03383] interacts with 2 human partners:{P15924;Q14160}

9504 Pathogen[ P03410] interacts with 3 human partners:{P15924;Q14160;Q5T2T1}

9505 Pathogen[ P14075] interacts with 2 human partners:{Q14160;P15924}

9506 Pathogen[ P0C206] interacts with 3 human partners:{Q5T2T1;Q14160;P15924}

9507 Pathogen[ P03363] interacts with 3 human partners:{Q14160;Q5T2T1;P15924}

9508 [Cluster 865]GO:0003198+P biological\_process [name] epithelial to mesenchymal transition involved in endocardial cushion formation [def] "A transition where a cardiac epithelial cell loses apical/basolateral polarity, severs intercellular adhesive junctions, degrades basement membrane components and becomes a migratory mesenchymal cell that will contribute to the formation of the endocardial cushion." [GOC

9509 Pathogen[ Q2Q067] interacts with 4 human partners:{Q9NQ87;P35548;Q06330;Q9Y5J3}

9510 Pathogen[ P0C214] interacts with 4 human partners:{Q9Y5J3;Q06330;Q9NQ87;P35548}

9511 Pathogen[ P03346] interacts with 4 human partners:{Q06330;P35548;Q9Y5J3;Q9NQ87}

9512 Pathogen[ Q85601] interacts with 4 human partners:{Q06330;P35548;Q9NQ87;Q9Y5J3}

9513 Pathogen[ P14079] interacts with 4 human partners:{Q06330;Q9Y5J3;Q9NQ87;P28360}

9514 Pathogen[ P03383] interacts with 3 human partners:{Q06330;Q9NQ87;P35548}

9515 Pathogen[ P03410] interacts with 4 human partners:{Q9Y5J3;Q06330;Q9NQ87;P35548}

9516 Pathogen[ P14075] interacts with 3 human partners:{P35548;Q9NQ87;Q06330}

9517 Pathogen[ P0C206] interacts with 4 human partners:{Q9NQ87;Q06330;Q9Y5J3;P35548}

9518 Pathogen[ P03363] interacts with 4 human partners:{Q9Y5J3;Q06330;Q9NQ87;P35548}

9519 [Cluster 866]GO:0009996+P biological\_process [name]negative regulation of cell fate specification [def] "Any process that restricts, stops or prevents a cell from adopting a specific cell fate." [GOC

9520 Pathogen[ Q2Q067] interacts with 1 human partners:{Q99684}

9521 Pathogen[ P0C214] interacts with 1 human partners:{Q99684}

9522 Pathogen[ P03346] interacts with 1 human partners:{Q99684}

9523 Pathogen[ Q85601] interacts with 1 human partners:{Q99684}

9524 Pathogen[ P14079] interacts with 1 human partners:{Q99684}

9525 Pathogen[ P03383] interacts with 1 human partners:{Q99684}

9526 Pathogen[ P03410] interacts with 1 human partners:{Q99684}

9527 Pathogen[ P14075] interacts with 1 human partners:{Q99684}

9528 Pathogen[ P0C206] interacts with 1 human partners:{Q99684}

9529 Pathogen[ P03363] interacts with 1 human partners:{Q99684}

9530 [Cluster 867]GO:0035338+P biological\_process [name] long-chain fatty-acyl-CoA biosynthetic process [def] "The chemical reactions and pathways resulting in the formation of a long-chain fatty-acyl-CoA any derivative of coenzyme A in which the sulfhydryl group is in a thioester linkage with a long-chain fatty-acyl group. Long-chain fatty-acyl-CoAs have chain lengths ranging from C12-18." [ISBN

9531 Pathogen[ Q2Q067] interacts with 5 human partners:{Q9H5J4;Q9BW60;Q9GZR5;A1L3X0;Q9HB03}

9532 Pathogen[ P0C214] interacts with 7 human partners:{Q9NXB9;P53396;Q9GZR5;Q9HB03;Q9NYP7;A1L3X0;Q9BW60}

9533 Pathogen[ P03346] interacts with 3 human partners:{Q9BW60;Q9H5J4;Q9HB03}

9534 Pathogen[ Q85601] interacts with 5 human partners:{A1L3X0;Q9BW60;Q9H5J4;Q9HB03;Q9GZR5}

9535 Pathogen[ P14079] interacts with 5 human partners:{A1L3X0;Q9HB03;Q9GZR5;Q9BW60;Q9H5J4}

9536 Pathogen[ P03383] interacts with 5 human partners:{Q9BW60;Q9GZR5;Q9H5J4;A1L3X0;Q9HB03}

9537 Pathogen[ P03410] interacts with 5 human partners:{A1L3X0;Q9GZR5;Q9H5J4;Q9BW60;Q9HB03}

9538 Pathogen[ P14075] interacts with 5 human partners:{Q9H5J4;Q9BW60;Q9HB03;A1L3X0;Q9GZR5}

9539 Pathogen[ P0C206] interacts with 5 human partners:{Q9HB03;Q9H5J4;Q9GZR5;A1L3X0;Q9BW60}

9540 Pathogen[ P03363] interacts with 1 human partners:{Q9H5J4}

9541 [Cluster 868]GO:0014075+P biological\_process [name] response to amine stimulus [def] "Any process that results in a change in state or activity of a cell or an organism (in terms of movement, secretion, enzyme production, gene expression, etc.) as a result of an amine stimulus. An amine is a compound formally derived from ammonia by replacing one, two or three hydrogen atoms by hydrocarbyl groups." [CHEBI

9542 Pathogen[ Q2Q067] interacts with 1 human partners:{P06132}

9543 Pathogen[ P0C214] interacts with 1 human partners:{P06132}

9544 Pathogen[ P03346] interacts with 2 human partners:{P50135;P06132}

9545 Pathogen[ Q85601] interacts with 1 human partners:{P06132}

9546 Pathogen[ P14079] interacts with 2 human partners:{P50135;P06132}

9547 Pathogen[ P03383] interacts with 1 human partners:{P06132}

9548 Pathogen[ P03410] interacts with 2 human partners:{P06132;P50135}

9549 Pathogen[ P14075] interacts with 1 human partners:{P06132}

9550 Pathogen[ P0C206] interacts with 2 human partners:{P50135;P06132}

9551 Pathogen[ P03363] interacts with 2 human partners:{P50135;P06132}

9552 [Cluster 869]GO:0051329+P biological\_process [name] interphase of mitotic cell cycle [def] "Interphase occurring as part of the mitotic cell cycle. Canonically, interphase is the stage of the cell cycle during which the biochemical and physiologic functions of the cell are performed and replication of chromatin occurs. A mitotic cell cycle is one which canonically comprises four successive phases called G1, S, G2, and M and includes replication of the genome and the subsequent segregation of chromosomes into daughter cells." [GOC

9553 Pathogen[ Q2Q067] interacts with 2 human partners:{Q96ST3;Q96FF9}

9554 Pathogen[ P0C214] interacts with 2 human partners:{Q96FF9;Q96ST3}

9555 Pathogen[ P03346] interacts with 2 human partners:{Q96ST3;Q96FF9}

9556 Pathogen[ Q85601] interacts with 2 human partners:{Q96FF9;Q96ST3}

9557 Pathogen[ P14079] interacts with 2 human partners:{Q96ST3;Q96FF9}

9558 Pathogen[ P03383] interacts with 2 human partners:{Q96FF9;Q96ST3}

9559 Pathogen[ P03410] interacts with 2 human partners:{Q96ST3;Q96FF9}

9560 Pathogen[ P14075] interacts with 2 human partners:{Q96ST3;Q96FF9}

9561 Pathogen[ P0C206] interacts with 2 human partners:{Q96ST3;Q96FF9}

9562 Pathogen[ P03363] interacts with 2 human partners:{Q96ST3;Q96FF9}

9563 [Cluster 870]GO:0097202+P

9564 Pathogen[ Q2Q067] interacts with 1 human partners:{Q16666}

9565 Pathogen[ P0C214] interacts with 1 human partners:{Q16666}

9566 Pathogen[ P03346] interacts with 1 human partners:{Q16666}

9567 Pathogen[ Q85601] interacts with 1 human partners:{Q16666}

9568 Pathogen[ P14079] interacts with 1 human partners:{Q16666}

9569 Pathogen[ P03383] interacts with 1 human partners:{Q16666}

9570 Pathogen[ P03410] interacts with 1 human partners:{Q16666}

9571 Pathogen[ P14075] interacts with 1 human partners:{Q16666}

9572 Pathogen[ P0C206] interacts with 1 human partners:{Q16666}

9573 Pathogen[ P03363] interacts with 1 human partners:{Q16666}

9574 [Cluster 871]GO:0035065+P biological\_process [name] regulation of histone acetylation [def] "Any process that modulates the frequency, rate or extent of the addition of an acetyl group to a histone protein." [GOC

9575 Pathogen[ Q2Q067] interacts with 3 human partners:{P23769;Q9Y6B2;P49711}

9576 Pathogen[ P0C214] interacts with 3 human partners:{P23769;Q9Y6B2;P49711}

9577 Pathogen[ P03346] interacts with 3 human partners:{P23769;P49711;Q9Y6B2}

9578 Pathogen[ Q85601] interacts with 3 human partners:{P23769;P49711;Q9Y6B2}

9579 Pathogen[ P14079] interacts with 3 human partners:{Q9Y6B2;P23769;P49711}

9580 Pathogen[ P03383] interacts with 3 human partners:{P49711;P23769;Q9Y6B2}

9581 Pathogen[ P03410] interacts with 3 human partners:{Q9Y6B2;P49711;P23769}

9582 Pathogen[ P14075] interacts with 3 human partners:{P23769;Q9Y6B2;P49711}

9583 Pathogen[ P0C206] interacts with 3 human partners:{P49711;P23769;Q9Y6B2}

9584 Pathogen[ P03363] interacts with 2 human partners:{P49711;Q9Y6B2}

9585 [Cluster 872]GO:0021503+P biological\_process [name] neural fold bending [def] "The morphogenesis of the neural fold elevations that results in the movement of the tips of the elevations towards each other in order to fuse." [GO\_REF

9586 Pathogen[ Q2Q067] interacts with 1 human partners:{Q86V48}

9587 Pathogen[ P0C214] interacts with 1 human partners:{Q86V48}

9588 Pathogen[ P03346] interacts with 1 human partners:{Q86V48}

9589 Pathogen[ Q85601] interacts with 1 human partners:{Q86V48}

9590 Pathogen[ P14079] interacts with 1 human partners:{Q86V48}

9591 Pathogen[ P03383] interacts with 1 human partners:{Q86V48}

9592 Pathogen[ P03410] interacts with 1 human partners:{Q86V48}

9593 Pathogen[ P14075] interacts with 1 human partners:{Q86V48}

9594 Pathogen[ P0C206] interacts with 1 human partners:{Q86V48}

9595 Pathogen[ P03363] interacts with 1 human partners:{Q86V48}

9596 [Cluster 873]GO:0050847+P biological\_process [name] progesterone receptor signaling pathway [def] "Any series of molecular signals generated as a consequence of a progesterone binding to its receptor." [GOC

9597 Pathogen[ Q2Q067] interacts with 1 human partners:{P35232}

9598 Pathogen[ P0C214] interacts with 2 human partners:{O95071;P35232}

9599 Pathogen[ P03346] interacts with 4 human partners:{Q13886;P06401;P35232;O95071}

9600 Pathogen[ Q85601] interacts with 2 human partners:{P35232;O95071}

9601 Pathogen[ P14079] interacts with 1 human partners:{P35232}

9602 Pathogen[ P03383] interacts with 1 human partners:{P35232}

9603 Pathogen[ P03410] interacts with 1 human partners:{P35232}

9604 Pathogen[ P14075] interacts with 1 human partners:{P35232}

9605 Pathogen[ P0C206] interacts with 3 human partners:{P06401;P35232;O95071}

9606 Pathogen[ P03363] interacts with 2 human partners:{O95071;P35232}

9607 [Cluster 874]GO:0030224+P biological\_process [name] monocyte differentiation [def] "The process in which a relatively unspecialized myeloid precursor cell acquires the specialized features of a monocyte." [GOC

9608 Pathogen[ Q2Q067] interacts with 6 human

9609 partners:{Q16666;Q02447;Q13769;P13640;O00625;P35579}  
Pathogen[ P0C214] interacts with 6 human

9610 partners:{Q13769;Q16666;P13640;P05412;Q02447;O00625}  
Pathogen[ P03346] interacts with 7 human

9611 partners:{P05412;Q16666;P35579;Q13769;P13640;O00625;Q02447}  
Pathogen[ Q85601] interacts with 7 human

9612 partners:{Q16666;Q13769;P35579;P05412;Q02447;O00625;P13640}  
Pathogen[ P14079] interacts with 7 human

9613 partners:{O00625;P35579;Q02447;Q13769;P13640;P05412;Q16666}  
Pathogen[ P03383] interacts with 7 human

9614 partners:{P13640;Q13769;Q02447;O00625;Q16666;P35579;P05412}  
Pathogen[ P03410] interacts with 7 human

9615 partners:{Q16666;Q02447;P35579;P13640;O00625;Q13769;P05412}  
Pathogen[ P14075] interacts with 7 human

9616 partners:{P05412;Q13769;O00625;Q16666;P13640;P35579;Q02447}  
Pathogen[ P0C206] interacts with 7 human

9617 partners:{P13640;P05412;Q16666;O00625;Q13769;Q02447;P35579}  
Pathogen[ P03363] interacts with 7 human

9618 partners:{P35579;Q02447;P13640;Q13769;Q16666;O00625;P05412}  
[Cluster 875]GO:0051436+P biological\_process [name] negative regulation of  
ubiquitin-protein ligase activity involved in mitotic cell cycle [def] "Any process  
that stops, prevents, or reduces the frequency, rate or extent of ubiquitin ligase  
activity that contributes to the mitotic cell cycle." [GOC

9619 Pathogen[ Q2Q067] interacts with 56 human  
partners:{Q99460;O75832;P48556;P40306;P55036;O00231;O00233;Q9UJX3;Q9UJX5;P51665;P280  
72;O00762;Q13257;Q13200;P25787;Q06323;O43684;Q9NYG5;Q9H1A4;P51965;P28065;O14818;Q9UJ  
X2;Q9UM13;P60900;Q9UL46;P61289;Q12834;P51668;P28062;Q9UNM6;P25788;Q92530;P25786;Q8NH  
Z8;Q16401;O00232;Q9UM11;Q9UJX4;P28074;P25789;Q9UKT4;P0CG47;P20618;P0CG48;P28070;P280  
66;Q99436;Q9UJX6;P62987;O43242;P30260;P49721;P49720;Q13042;P62979}

9620 Pathogen[ P0C214] interacts with 58 human  
partners:{Q9UJX6;P51665;O43684;Q13257;P25789;P55036;P28062;O00762;P28065;O14818;O432  
42;Q9UJX5;P48556;P40306;Q13200;Q9UJX2;O00232;P51965;Q99460;P28066;O75832;Q9H1A4;P497  
20;P28074;P0CG48;Q9UL46;Q8NHZ8;Q12834;P25788;Q9UNM6;O00231;Q06323;P25786;P28072;P629  
87;Q99436;Q9UJX4;P0CG47;P25787;Q9UJX3;P35998;P60900;O00233;Q9UM11;P51668;P62979;P302  
60;Q92530;Q9NYG5;Q15008;Q9UM13;P28070;Q9UKT4;P20618;P49721;Q16401;P17980;Q13042}

9621 Pathogen[ P03346] interacts with 56 human  
partners:{P25787;P28070;P25789;P55036;O43684;Q99460;Q9UM11;Q9UL46;P62987;P28072;P257  
88;P28074;P49721;O14818;Q99436;P0CG48;Q16401;Q9UM13;P28062;Q9NYG5;P20618;O00232;P516  
68;Q12834;O75832;O00233;Q9UJX6;Q13042;P51965;Q9UJX5;P49720;P28065;O00762;Q9UJX2;P609  
00;P25786;O00231;Q9UKT4;Q9UJX3;Q8NHZ8;P61289;Q9H1A4;P62979;P28066;Q9UNM6;Q9UJX4;P0CG  
47;Q13200;P48556;P51665;Q06323;P30260;Q92530;O43242;P40306;Q13257}

9622 Pathogen[ Q85601] interacts with 53 human  
partners:{Q9UJX2;P28066;Q9UNM6;P60900;P55036;Q9UJX6;P25787;P61289;P25788;Q9UKT4;Q8NH  
Z8;O75832;Q9H1A4;P0CG48;P51668;Q12834;Q13257;P25789;O00233;P20618;P40306;Q13042;Q9UJ  
X5;P51965;P49720;Q9UM13;P28062;P49721;Q9NYG5;P25786;O00762;P28072;Q9UJX3;Q13200;P280  
65;P62979;Q99436;P28070;Q9UJX4;Q9UM11;Q9UL46;Q99460;O00231;P0CG47;P48556;P28074;Q925  
30;P62987;Q06323;P30260;O14818;O43684;Q16401}

9623 Pathogen[ P14079] interacts with 57 human  
partners:{P28065;Q99436;P62333;P48556;P51965;P0CG48;Q9UKT4;P40306;Q9UJX3;P55036;P280  
74;O00232;Q9H1A4;Q9UJX5;P49720;O00487;P25787;O75832;P62979;O00233;P35998;P61289;P629  
87;P51665;P20618;Q9NYG5;P51668;Q8NHZ8;P28062;P60900;Q9UM11;Q9UM13;Q13042;Q9UNM6;Q132  
57;Q99460;O14818;P49721;Q92530;Q9UJX6;P30260;Q06323;P62191;O00762;Q15008;P43686;O432  
42;P25788;O00231;P28066;Q9UL46;P0CG47;Q16401;Q9UJX4;P17980;O43684;P28072}

9624 Pathogen[ P03383] interacts with 53 human  
partners:{Q13257;Q8NHZ8;P55036;P62987;Q9NYG5;P51965;Q9UJX6;P25789;P60900;P40306;O002  
33;O00762;P49721;Q06323;Q9UKT4;Q9H1A4;P20618;Q13042;Q12834;O75832;Q9UM13;O43684;Q9UM  
11;Q9UL46;Q9UNM6;P25786;Q99460;P28072;Q13200;P28065;P28066;Q9UJX4;Q16401;P62979;O002  
31;P0CG47;Q9UJX5;P0CG48;P28074;Q92530;P49720;P61289;Q9UJX2;P28062;P30260;P48556;O148  
18;Q9UJX3;Q99436;P28070;P51668;P25787;P25788}

9625 Pathogen[ P03410] interacts with 57 human  
partners:{Q9UKT4;P28070;P55036;P0CG48;O43684;Q9H1A4;P25786;Q15008;Q16401;P60900;P359  
98;P51965;Q99460;Q9UJX4;Q9NYG5;O00233;Q9UM13;O00232;Q8NHZ8;P48556;P49721;P62979;Q994  
36;P40306;Q06323;Q13200;P25787;Q9UM11;Q13042;P28062;P51665;O14818;P51668;Q9UJX5;O002  
31;Q9UNM6;Q12834;P30260;P25789;P49720;Q9UJX3;P62987;O00762;P28072;P25788;P28066;P280  
65;O43242;Q9UJX6;P0CG47;P17980;O75832;P20618;Q9UL46;P28074;P61289;Q13257}

9626 Pathogen[ P14075] interacts with 52 human  
partners:{P55036;P25788;Q13042;P28066;Q06323;O75832;Q9UKT4;P60900;Q9UM11;O00233;Q9UL  
46;P49720;P51965;Q13257;O43684;Q13200;P48556;Q16401;P28070;Q9UJX2;P49721;O00231;Q9UJ  
X6;Q8NHZ8;Q92530;P0CG48;P62979;O00762;P28062;P28074;Q9UJX5;P28065;P25786;P629  
87;P28072;Q9UJX4;P0CG47;P25787;P20618;Q9H1A4;Q9UNM6;Q9UM13;P30260;P61289;Q9UJX3;P403  
06;P51668;Q9NYG5;Q99436;Q12834;P25789}

9627 Pathogen[ P0C206] interacts with 55 human  
partners:{P61289;Q99436;P28062;Q9UNM6;P0CG48;O75832;P40306;P28065;Q9UJX3;P55036;P257  
86;P25788;P25787;Q9UJX5;Q9UJX2;Q06323;P49720;O00232;P60900;O43242;Q13257;P30260;P257  
89;P51965;Q9UKT4;Q9H1A4;Q9NYG5;Q9UJX4;P20618;Q13200;P28070;Q99460;P62979;P28066;Q9UM  
11;O00762;O14818;Q9UJX6;P0CG47;P28072;P28074;Q92530;P49721;O43684;P62987;Q9UM13;Q9UL

46;Q13042;P51668;O00233;P48556;Q16401;Q12834;Q8NHZ8;O00231}  
9628 Pathogen[ P03363] interacts with 22 human  
partners: {Q9UJX2;Q9NYG5;Q13042;P51965;O00762;Q92530;Q8NHZ8;Q9UJX3;P61289;Q9UJX5;P302  
60;Q9UJX6;Q9UM11;Q9UJX4;O43684;Q9UKT4;Q9H1A4;P62987;Q13257;P51668;Q9UM13;Q12834}  
9629 [Cluster 876]GO:0045793+P biological\_process [name] positive regulation of cell size  
[def] "Any process that increases cell size." [GOC  
9630 Pathogen[ Q2Q067] interacts with 2 human partners: {O15350;Q8TDY2}  
9631 Pathogen[ P0C214] interacts with 2 human partners: {O15350;Q8TDY2}  
9632 Pathogen[ P03346] interacts with 2 human partners: {Q8TDY2;O15350}  
9633 Pathogen[ Q85601] interacts with 2 human partners: {Q8TDY2;O15350}  
9634 Pathogen[ P14079] interacts with 2 human partners: {Q8TDY2;O15350}  
9635 Pathogen[ P03383] interacts with 2 human partners: {Q8TDY2;O15350}  
9636 Pathogen[ P03410] interacts with 2 human partners: {Q8TDY2;O15350}  
9637 Pathogen[ P14075] interacts with 2 human partners: {Q8TDY2;O15350}  
9638 Pathogen[ P0C206] interacts with 2 human partners: {Q8TDY2;O15350}  
9639 Pathogen[ P03363] interacts with 1 human partners: {Q8TDY2}  
9640 [Cluster 877]GO:0006260+P biological\_process [name] DNA replication [def] "The  
cellular metabolic process in which a cell duplicates one or more molecules of DNA. DNA  
replication begins when specific sequences, known as origins of replication, are  
recognized and bound by initiation proteins, and ends when the original DNA molecule has  
been completely duplicated and the copies topologically separated. The unit of  
replication usually corresponds to the genome of the cell, an organelle, or a virus. The  
template for replication can either be an existing DNA molecule or RNA." [GOC  
9641 Pathogen[ Q2Q067] interacts with 97 human  
partners: {P49454;Q9Y253;Q92900;Q15054;P52948;Q9NRF9;Q9BW66;Q7Z2Z1;Q99638;Q96E14;P276  
94;Q8WYH8;Q99741;Q13829;P08729;Q13111;Q9H211;P33316;Q01105;Q8NDF8;Q9NZJ0;P11387;O007  
12;Q5TKA1;P35244;Q9UBU7;O60318;Q96S55;Q9UNA4;O14757;P49789;Q9UNL4;Q96ST3;Q9UBZ9;P490  
05;Q13415;P38935;P30304;P11388;Q09028;Q9Y248;Q13112;P12004;Q14181;P06746;Q14691;Q150  
04;P30307;Q14938;P31350;Q9UBD5;P15927;Q9BVC3;P0CW71;Q7LG56;P56282;Q8WXE1;Q9HCU8;O754  
19;A6NCL1;P20962;P39748;Q6WBX8;Q99543;O75943;P54098;Q7L590;O43913;Q14686;P04818;Q9Y5  
N6;Q13416;Q3YBR2;Q9UHN1;P25205;P35251;Q96PK6;Q9H9A7;P24941;P49321;Q9BRT9;P35232;Q9Y5  
B9;Q16576;Q04837;O75792;Q12857;O60870;Q9HAW4;Q9BTE3;Q66K89;O60671;P55209;O60921;Q76F  
K4;Q08945;P08651}  
9642 Pathogen[ P0C214] interacts with 99 human  
partners: {P08729;A6NCL1;P30307;P04818;P31350;Q96S55;Q8NDF8;Q8WXE1;P49789;P06746;O439  
13;P54098;Q13829;Q92900;Q7L590;P33316;Q13112;Q13111;Q9UBZ9;O60318;Q9UNL4;P35251;Q6WB  
X8;P49005;Q9UBU7;Q14686;P38935;Q9HAW4;Q14938;Q9HCU8;Q9Y5N6;O75792;Q01105;Q9Y248;P252  
05;Q09028;Q9BTE3;Q9BW66;O60921;Q9H9A7;Q14566;O60870;O00712;Q9UNA4;P0CW71;Q9NZJ0;Q146  
91;P15927;P24941;P49321;Q8WZ19;Q76FK4;Q16576;Q9BVC3;P35244;Q9Y5B9;P11388;Q96PK6;Q150  
04;Q9NRF9;O95251;Q9H211;P23921;Q3YBR2;O75943;P11387;O60671;Q12857;O60671;P20962;P397  
48;Q15054;Q96ST3;Q13416;Q08945;P27694;Q99543;Q5TKA1;P08651;Q8WYH8;O14757;P35232;Q7LG  
56;Q99638;P49454;Q04837;P30304;P56282;Q96E14;Q9Y253;Q66K89;Q9UBD5;Q7Z2Z1;P52948;Q997  
41;Q13415;Q14181;Q9UHN1;Q9BRT9}  
9643 Pathogen[ P03346] interacts with 111 human  
partners: {O60921;Q9NZJ0;Q96ST3;P12004;Q9Y253;P08729;P46063;Q9BRX5;P38935;Q7Z5Q5;Q7Z2  
Z1;Q9HCU8;Q5XG87;Q8WZ19;Q99543;Q9UNL4;P54098;Q8WYH8;P11388;P27694;Q12857;Q9Y5N6;Q146  
91;Q01105;Q9UNA4;Q9UBD5;P35244;Q15004;Q6WBX8;Q9BRT9;Q9UBZ9;P35250;P24941;P30304;P562  
82;O00712;O60318;P49789;O14757;Q9UBU7;Q9UHN1;P49005;Q99638;Q9NRF9;P49321;Q13829;Q66K  
89;Q08945;O75943;Q9H9A7;Q14566;P25205;O60870;Q9HAW4;P31350;Q7LG56;Q96S55;P0CW71;O952  
51;Q9Y248;Q09028;P08651;Q8WXE1;Q3YBR2;A6NCL1;Q9Y5B9;P33992;Q13111;Q13415;Q96E14;Q165  
76;P15927;Q9BW66;P35249;P0CG13;Q14181;Q8NDF8;P33991;Q5TKA1;Q13416;P35232;Q9BVC3;O606  
71;P35251;P20962;P39748;Q13112;P29558;O75419;Q92900;Q04837;P55209;P40937;Q99741;P067  
46;Q7L590;Q9H211;O43929;Q96PK6;Q9BTE3;O43913;Q14938;Q15054;P30307;P49454;P11387;Q76F  
K4;O75792;Q14686;P33316;P52948}  
9644 Pathogen[ Q85601] interacts with 102 human  
partners: {Q3YBR2;Q99543;P49454;P08729;O43913;Q96PK6;Q7L590;Q9BTE3;Q7Z2Z1;Q8WZ19;Q150  
04;Q8WXE1;P49789;P08651;O95251;P56282;Q12857;P38935;Q01105;Q13112;P35244;Q13415;Q9Y5  
N6;O60318;Q9NZJ0;Q9UNL4;O75792;P33316;Q9UBU7;Q9Y248;Q9Y5B9;Q9UBD5;Q9UGP5;P49005;P303  
04;Q9BW66;P49321;Q15054;P31350;P27694;Q9NRF9;O14757;O75943;P11387;Q14566;Q9H9A7;Q146  
86;Q9BRT9;O60870;Q9BVC3;P30307;Q5XG87;Q7LG56;P54098;P25205;P15927;Q9HAW4;Q16576;Q9UB  
Z9;Q76FK4;O60921;P52948;P35251;P11388;Q9UBT6;Q14691;Q14181;Q09028;Q8NDF8;Q9HCU8;O606  
71;Q8WYH8;Q96S55;Q5TKA1;Q13416;Q08945;Q6WBX8;P35232;P06746;P12004;Q66K89;P33992;P209  
62;Q13111;O00712;P39748;Q13829;O75419;Q92900;Q04837;P55209;Q99741;Q9H211;Q9UHN1;Q96E  
14;Q9Y253;P24941;Q9UNA4;Q99638;Q14938;A6NCL1;Q96ST3}  
9645 Pathogen[ P14079] interacts with 113 human  
partners: {O60671;Q04837;Q9Y5B9;P11388;Q01105;Q13416;Q9BRT9;Q15513;Q08945;Q7L590;Q9UN  
A4;O75419;P30307;Q14566;P20962;Q13415;A6NCL1;Q14938;Q9UGP5;Q9Y5N6;P40937;Q96ST3;Q6WB  
X8;O75792;P49005;O43913;Q14691;O95251;Q9H211;Q5XG87;Q9UNL4;Q8WXE1;Q96LW4;Q9BWE0;P087  
29;P35232;Q9HCU8;Q9UBZ9;Q13112;Q13111;Q7Z7C7;P31350;Q9BTE3;O60870;Q9H9A7;P33316;P303  
04;Q16576;Q7LG56;P0CW71;P08651;Q99741;Q99543;Q15054;Q9HAW4;P35250;Q9NRF9;O75943;P552  
09;O60318;Q9UBD5;Q9BW66;Q7Z5Q5;Q96S55;P56282;Q66K89;P35251;Q9BVC3;Q9Y248;P49642;Q9NS  
U2;Q14181;O43929;P33992;P06746;P15927;Q9Y253;P27694;Q3YBR2;Q92900;Q99638;P49454;Q9NZ  
J0;P38935;P12004;P49321;Q13829;P54098;Q15004;Q9UHN1;Q09028;P49789;P35244;Q96E14;Q5TK  
A1;Q7Z2Z1;Q12857;Q969P6;P04818;Q9UBT6;P25205;Q14686;O60921;Q96PK6;Q8WYH8;Q9BRX5;Q9UB  
U7;Q4G0Z9;P49917;P39748;P52948;P0CG13;O00712}  
9646 Pathogen[ P03383] interacts with 85 human



partners:{P30307;Q09028;Q9Y253;Q9UHN1;P08729;P49454;Q9UBD5;O14757;Q01105;O60671;P06746;Q9HCU8;Q9NZJ0;Q8WXE1;P49789;O75792;O95251;Q7L590;Q14181;P52948;P27694;Q15004;P25205;Q9BTE3;Q14686;P30304;O00712;O60318;Q8NDF8;Q9UNL4;Q5TKA1;Q08945;Q8WYH8;P11387;P49321;P49005;Q96S55;Q9Y248;P55209;P31350;Q66K89;O60921;O43913;Q6WBX8;P56282;Q9H9A7;P08651;O60870;P15927;Q96PK6;Q7Z2Z1;Q13111;Q12857;P20962;P54098;Q9Y5N6;Q9HAW4;P24941;P0CW71;P35244;Q9BRT9;Q9UBZ9;Q15054;P35232;Q96E14;Q99543;O75419;Q99638;Q13416;Q9BW66;P33316;Q96ST3;P38935;Q14691;Q3YBR2;Q13829;Q04837;Q9BVC3;Q92900;Q13112;Q9Y5B9;Q9H211;Q16576;Q99741;P35251}

9647 Pathogen[ P03410] interacts with 117 human partners:{Q9BWE0;Q08945;P49321;P35244;P25205;Q13829;Q8WYH8;O43929;P31350;Q96LW4;Q96PK6;O75943;Q14181;Q13416;Q66K89;Q92900;O95251;Q9Y5B9;Q04837;O75419;Q9UBT6;Q14686;Q14938;Q76FK4;P52948;O75792;Q9UNA4;Q12857;Q9BTE3;Q6WBX8;O60870;Q8WZ19;Q9UNL4;Q8WXE1;Q15513;Q4G0Z9;Q9HAW4;P06746;Q9H211;Q96S55;Q01105;Q15004;Q5TKA1;P39748;P56282;Q9NSU2;Q96ST3;Q9BRT9;O00712;P33992;Q16576;P49454;P33316;Q7Z5Q5;P08651;Q9UGP5;Q9UBZ9;P38935;P35251;P49789;Q09028;P0CG13;P04818;P30304;P24941;Q99638;Q9Y253;P0CW71;Q13111;Q9UBU7;Q13112;Q7Z7C7;P11387;Q3YBR2;Q9H9A7;Q15054;Q9BVC3;Q9NRF9;Q5XG87;O14757;O60671;O60921;Q7Z2Z1;Q7L590;P20962;P11388;O60318;Q9Y248;Q9BRX5;P55209;Q96E14;P49005;P27694;P15927;Q14691;P35250;P08729;Q9Y5N6;Q99543;P35232;O43913;P40937;Q14566;P23921;Q9UHN1;P12004;Q9UBD5;P54098;P30307;Q7LG56;A6NCL1;P49642;Q9HCU8;Q9BW66;Q9NZJ0;Q13415;Q99741}

9648 Pathogen[ P14075] interacts with 87 human partners:{P49321;P11387;Q96ST3;P08729;Q16576;Q96E14;P54098;Q9H211;Q92900;Q7Z2Z1;P31350;P24941;Q9UBZ9;Q8WXE1;Q14938;Q8NDF8;Q08945;Q14686;Q9Y5N6;Q9UBD5;P38935;O75419;P06746;O60671;Q99543;P49005;Q9BW66;Q13111;P15927;Q01105;Q14691;P20962;Q9Y248;Q3YBR2;P55209;Q9BTE3;P35232;Q99638;O60870;Q9BVC3;Q5TKA1;Q09028;Q12857;Q9HAW4;P35244;Q9Y253;Q96PK6;P0CW71;P25205;Q9Y5B9;P35251;Q15054;O95251;P08651;P30304;P33316;Q9BRT9;O43913;P27694;Q66K89;O60921;Q9UNL4;O75792;Q9UHN1;Q15513;P49789;O00712;Q13416;Q9HCU8;P56282;Q96S55;Q8WYH8;Q13829;Q9NZJ0;Q13112;Q14181;Q7L590;Q04837;P49454;Q9H9A7;P30307;Q6WBX8;Q15004;O14757;Q7Z7C7;P52948}

9649 Pathogen[ P0C206] interacts with 111 human partners:{Q15513;P33316;Q13112;Q9Y253;Q8WXE1;Q13829;Q5XG87;Q9BTE3;Q9UHN1;Q96ST3;P38935;O95251;Q9NRF9;Q9NSU2;P35251;P30307;Q9UBT6;Q9Y248;P08651;Q9UNA4;Q9HCU8;O75419;Q8WYH8;P25205;A6NCL1;O43913;Q7Z5Q5;Q13111;O60870;P08729;Q6WBX8;P06746;P54098;Q9UBD5;O60318;Q9Y5B9;Q7LG56;Q13416;P20962;P49454;P49005;P49321;P49642;Q5TKA1;Q99741;Q96E14;Q9BRT9;Q14938;Q9BW66;Q9UGP5;O75943;Q12857;Q99638;Q7Z7C7;P49917;Q15054;Q8WZ19;O00712;Q14181;Q9UBU7;P35232;Q14691;Q99543;P49789;O75792;Q9H211;Q96PK6;Q14686;Q76FK4;Q8NDF8;Q9Y5N6;P49916;Q96S55;O60921;Q9H9A7;Q9UBZ9;P55209;P0CW71;Q9NCL1;P04818;P30304;Q92900;Q04837;O60671;Q16576;P56282;Q13415;Q7Z2Z1;P0CG13;P27694;Q09028;P11388;P15927;P11387;P39748;P35244;Q66K89;Q3YBR2;Q9HAW4;Q15004;Q01105;P24941;Q08945;Q14566;Q9BVC3;Q9BRX5;P33992;Q9UNL4;P31350;P12004;Q7L590}

9650 Pathogen[ P03363] interacts with 98 human partners:{Q3YBR2;Q13112;Q9H9A7;Q14691;P49454;P27694;Q9HAW4;Q14938;O00712;P33316;P49321;Q92900;Q99543;Q9BTE3;P11387;Q7Z2Z1;P08651;Q09028;P25205;Q9NRF9;Q13111;Q9BRX5;Q5TKA1;Q9Y253;O60671;P29558;P35251;Q66K89;Q9BVC3;P49005;P24941;Q14181;P35244;Q14686;P15927;Q96PK6;P54098;P33992;Q9UNL4;O75792;P30304;Q9HCU8;Q16576;Q13416;Q13415;Q9Y5B9;P46063;P20962;P0CG13;Q9BW66;Q96E14;P55209;Q8NDF8;P06746;Q99741;Q96ST3;O60318;Q7Z5Q5;O60870;Q15004;Q9H211;A6NCL1;P49789;Q6WBX8;Q4G0Z9;P08729;Q96S55;P0CW71;Q99638;Q13829;Q08945;O60921;Q04837;P35232;Q15054;Q7L590;P52948;Q9UHN1;Q9UNA4;Q8WZ19;Q9Y248;Q01105;Q9UBD5;Q9UBZ9;P30307;Q9NZJ0;O75943;O95251;Q9Y5N6;Q9BRT9;Q12857;Q76FK4;Q8WYH8;P38935;O75419;Q8WXE1;O14757;O43913}

9651 [Cluster 878]GO:0000301+P biological\_process [name] retrograde transport, vesicle recycling within Golgi [def] "The retrograde movement of substances within the Golgi, mediated by COP I vesicles. Cis-Golgi vesicles are constantly moving forward through the Golgi stack by cisternal progression, eventually becoming trans-Golgi vesicles. They then selectively transport membrane and luminal proteins from the trans- to the medial-Golgi while leaving others behind in the trans-Golgi cisternae\_ similarly, they selectively move proteins from the medial- to the cis-Golgi." [ISBN

9652 Pathogen[ Q2Q067] interacts with 1 human partners:{P39880}

9653 Pathogen[ P0C214] interacts with 1 human partners:{P39880}

9654 Pathogen[ P03346] interacts with 1 human partners:{P39880}

9655 Pathogen[ Q85601] interacts with 1 human partners:{P39880}

9656 Pathogen[ P14079] interacts with 1 human partners:{P39880}

9657 Pathogen[ P03383] interacts with 1 human partners:{P39880}

9658 Pathogen[ P03410] interacts with 1 human partners:{P39880}

9659 Pathogen[ P14075] interacts with 1 human partners:{P39880}

9660 Pathogen[ P0C206] interacts with 1 human partners:{P39880}

9661 Pathogen[ P03363] interacts with 1 human partners:{P39880}

9662 [Cluster 879]GO:0001867+P biological\_process [name] complement activation, lectin pathway [def] "Any process involved in the activation of any of the steps of the lectin pathway of the complement cascade which allows for the direct killing of microbes and the regulation of other immune processes." [GOC

9663 Pathogen[ Q2Q067] interacts with 1 human partners:{P04264}

9664 Pathogen[ P0C214] interacts with 1 human partners:{P04264}

9665 Pathogen[ P03346] interacts with 1 human partners:{P04264}

9666 Pathogen[ Q85601] interacts with 1 human partners:{P04264}

9667 Pathogen[ P14079] interacts with 1 human partners:{P04264}

9668 Pathogen[ P03383] interacts with 1 human partners:{P04264}

9669 Pathogen[ P03410] interacts with 1 human partners:{P04264}  
9670 Pathogen[ P14075] interacts with 1 human partners:{P04264}  
9671 Pathogen[ P0C206] interacts with 1 human partners:{P04264}  
9672 Pathogen[ P03363] interacts with 1 human partners:{P04264}  
9673 [Cluster 880]GO:0045898+P biological\_process [name] regulation of RNA polymerase II transcriptional preinitiation complex assembly [def] "Any process that modulates the frequency, rate or extent of RNA polymerase II transcriptional preinitiation complex assembly." [GOC  
9674 Pathogen[ Q2Q067] interacts with 1 human partners:{Q6VMQ6}  
9675 Pathogen[ P0C214] interacts with 1 human partners:{Q6VMQ6}  
9676 Pathogen[ P03346] interacts with 1 human partners:{Q6VMQ6}  
9677 Pathogen[ Q85601] interacts with 1 human partners:{Q6VMQ6}  
9678 Pathogen[ P14079] interacts with 1 human partners:{Q6VMQ6}  
9679 Pathogen[ P03383] interacts with 1 human partners:{Q6VMQ6}  
9680 Pathogen[ P03410] interacts with 1 human partners:{Q6VMQ6}  
9681 Pathogen[ P14075] interacts with 1 human partners:{Q6VMQ6}  
9682 Pathogen[ P0C206] interacts with 1 human partners:{Q6VMQ6}  
9683 Pathogen[ P03363] interacts with 1 human partners:{Q6VMQ6}  
9684 [Cluster 881]GO:0006364+P biological\_process [name] rRNA processing [def] "Any process involved in the conversion of a primary ribosomal RNA (rRNA) transcript into one or more mature rRNA molecules." [GOC  
9685 Pathogen[ Q2Q067] interacts with 84 human partners:{Q9H583;O43463;Q9Y3A2;P62312;Q9NQ4;Q9Y324;P56182;Q9UQ80;P22087;Q5TAP6;Q9GZL7;Q99547;Q9H5Q4;O43159;Q14690;P46087;Q9Y2L1;Q9UJK0;Q8WVM0;Q06265;Q14684;Q9NV31;Q13868;P38919;O00566;Q13601;Q96G21;Q9Y237;A6NHQ2;Q96HR8;Q9H6R4;O00541;Q9Y3B2;Q9NPD3;Q9NE3;Q8N726;Q92979;P18077;Q9H6Y2;O75607;Q14137;Q5RKV6;Q9Y3A5;P62081;Q9BVI4;P61254;P62249;Q9H9Y2;O60832;Q14978;Q15024;P46777;P08708;P62913;Q96EU6;Q9Y4W2;Q9BVJ6;O00567;P57678;Q8N0V3;P62857;P78316;P62847;Q9NY12;Q9UI43;Q13901;Q9Y2X3;Q8TED0;P39019;Q9BRU9;P62841;Q9UNQ2;Q9Y2W2;Q969E8;O95707;P50914;Q14331;P62753;P18124;Q8IY81;Q96B26;Q76FK4;O95478;O75691}  
9686 Pathogen[ P0C214] interacts with 88 human partners:{Q9BVJ6;Q9Y2W2;P62312;O75691;Q9UJK0;P62081;Q9NV31;P62913;Q15024;Q14331;Q9H6Y2;Q9NPE3;P62249;Q95478;Q969E8;P39019;P46087;O43159;P18077;Q9Y2L1;P62847;Q9H0S4;O00541;Q96EU6;A6NHQ2;P57678;Q9Y3B2;Q9GZL7;O00567;Q9UNQ2;Q9BVI4;Q96G21;O75607;P22087;Q8N726;Q9H6Y2;Q9H6R4;Q13901;Q99547;Q9NY12;O43463;Q9UET6;P50914;Q9BRU9;O95707;Q9Y237;Q9NPD3;Q14978;Q14137;Q92979;Q9Y324;P38919;P62753;Q76FK4;Q9UI43;Q9Y4W2;Q8IV48;Q8IY81;Q13868;Q14690;P61254;Q8TED0;Q5TAP6;P62841;O60832;P46777;Q9H9Y2;Q14684;P56182;Q8WVM0;P62857;Q8N0V3;P08708;O00566;Q13601;Q9UQ80;Q06265;Q9Y3A5;P18124;Q9NQ4;Q96B26;Q9Y2X3;Q9H583;Q9NV06;Q9H5Q4;Q96HR8;Q9Y3A2}  
9687 Pathogen[ P03346] interacts with 94 human partners:{Q9BVJ6;O75691;Q9Y3A2;Q5RKV6;P62249;P62913;Q92979;Q9Y324;O00567;Q5TAP6;O00541;Q9UQ80;P62857;A6NHQ2;P56182;O43159;Q9GZL7;O95707;P61254;P38919;Q9H583;Q96G21;O60832;Q9NYH9;Q96B26;O43818;Q9Y3B2;O43463;Q9BVI4;O00566;P08708;Q15024;Q9UNQ2;Q9NV06;Q9Y2X3;Q14978;Q9Y237;Q9NX24;Q96EU6;Q9BRU9;Q8N0V3;Q9NV31;P46087;P78316;P62081;Q9Y2L1;Q9H5Q4;Q9H6Y2;Q9NQ4;P50914;Q14684;P42285;Q8IY81;P39019;Q8WVM0;O75607;Q9H0S4;Q14137;P62847;P57678;Q12788;Q99547;Q9NPE3;P22087;P46777;Q06265;Q8NI36;P62841;Q13601;Q8N726;Q9NY12;Q969E8;Q9UI43;P18077;Q9Y2W2;Q96HR8;Q14690;Q9Y5J1;O95478;Q9NQ4;Q9UJK0;Q8TED0;P62312;P62753;Q9NPD3;Q9Y4W2;P18124;Q13901;Q13868;Q9H9Y2;Q9Y3A5;Q76FK4;Q14331;Q9H6R4}  
9688 Pathogen[ Q85601] interacts with 85 human partners:{Q9NV31;Q14978;Q5RKV6;Q9BRU9;P62857;P46087;P62913;Q9UJK0;Q9NPD3;O00541;Q9Y2W2;P62081;Q9Y324;Q9H0S4;Q8N0V3;Q9UQ80;P18077;O75691;Q99547;Q96HR8;Q14331;Q92979;Q9Y4W2;Q96EU6;A6NHQ2;Q14684;Q9H9Y2;P62753;Q9BVJ6;Q13868;Q9Y3A5;Q9Y3A2;P39019;Q96G21;O43159;Q14690;Q9H6Y2;O43463;Q9Y2L1;O75607;O95707;P38919;P61254;P62249;Q8TED0;Q13901;Q8N726;Q9UI43;P08708;Q969E8;Q9NQ4;Q9Y3B2;Q76FK4;P62312;Q9UET6;Q15024;O00566;O95478;Q8IY81;Q13601;Q06265;P62847;Q9GZL7;Q9NV06;Q9NPE3;O00567;P22087;Q9H5Q4;P62841;Q8WVM0;P56182;Q9NY12;Q9H6R4;Q14137;Q9BVI4;Q9H583;Q9Y2X3;Q9Y237;Q96B26;O60832;P46777;P18124;P50914;P78316;Q9UNQ2}  
9689 Pathogen[ P14079] interacts with 86 human partners:{Q8IV48;Q92979;P57678;Q9H0S4;Q9Y3B2;Q9NV31;Q9NPE3;Q9UI43;Q9Y2X3;Q9Y2W2;O75691;Q9Y3A2;Q9Y237;Q9UNQ2;P62847;Q15024;P62753;Q9BRU9;O60832;Q13901;Q9GZL7;Q8TED0;P18077;Q9NQ4;Q13868;Q8N726;Q9NPD3;P61254;P50914;Q969E8;P62312;Q9Y3A5;Q9UJK0;Q8N0V3;A6NHQ2;Q96HR8;P62841;P18124;O95707;Q5TAP6;Q8IY81;P22087;Q9BVJ6;Q9BVI4;O00567;Q9H6R4;P39019;O00566;Q9NV06;Q9NYH9;Q9H583;P56182;Q5RKV6;Q9NY12;P08708;Q9UET6;P46087;P78316;Q9Y4W2;Q14684;Q9Y2L1;Q9Y324;O95478;Q13601;P62081;P46777;Q9H9Y2;Q96AZ6;O43159;Q14331;Q96B26;O00541;O75607;Q14137;Q96G21;Q9H5Q4;P62249;P62913;Q99547;Q9UQ80;Q06265;Q14690;Q14978;Q8WVM0;Q96EU6;P62857}  
9690 Pathogen[ P03383] interacts with 81 human partners:{Q06265;O95478;Q14978;P39019;Q13601;Q9Y2L1;Q99547;P62913;Q9Y324;Q9BVJ6;Q9H0S4;O00567;P62312;P62249;Q5TAP6;O00541;P46777;Q9H6Y2;O43463;Q8N0V3;P18124;P62753;Q9UNQ2;P38919;Q9H5Q4;O75691;Q14331;Q9NPE3;Q9UI43;Q14690;Q9H6R4;Q9Y2W2;Q14684;Q9Y3B2;Q9Y3A2;Q96G21;O43159;O95707;P18077;Q9UET6;P62081;O75607;Q9UJK0;Q9H583;Q9NV31;Q9NPD3;Q969E8;Q9BVI4;Q9NQ4;Q8IY81;P78316;Q9NY12;Q96B26;Q8WVM0;Q9Y3A5;Q96HR8;P62857;P46087;Q9BRU9;Q5RKV6;P61254;Q9UQ80;Q9GZL7;Q9Y2X3;P56182;P57678;Q96EU6;Q92979;P62841;P62847;P50914;P22087;Q14137;Q13868;O60832;Q15024;Q9Y4W2;Q13901;O00566;Q8N726;P08708}  
9691 Pathogen[ P03410] interacts with 94 human partners:{Q969E8;Q9Y2L1;P22087;Q9BVI4;P78316;Q9UJK0;P62913;Q8IV48;Q14684;Q8N726;Q9NV

- 06;P46777;P62841;Q96G21;Q9UQ80;P18124;Q06265;Q76FK4;Q5RKY6;Q14978;A6NHQ2;Q13868;P62847;Q9NYH9;O60832;P62249;P50914;Q14137;Q9H0S4;Q9GZL7;O43159;Q5TAP6;Q9Y2X3;Q9BRU9;Q92979;Q9NX24;P18077;Q9UNQ2;Q9Y2W2;Q9Y4W2;O00567;Q95707;Q96B26;O43818;Q9H9Y2;P62081;Q9H6R4;Q15024;Q96AZ6;Q9NY12;P08708;Q9H5Q4;P38919;Q9NQT4;P56182;Q99547;Q13901;P46087;Q8WVMO;Q9UI43;Q9NPE3;P57678;Q9BVJ6;O00541;Q96EU6;P62857;Q96HR8;Q8IY81;P61254;Q9Y324;Q9NP D3;Q13601;Q95478;O43463;Q9Y3A2;Q9NV31;P39019;P62312;O75691;Q9H583;Q8N0V3;Q8TED0;Q9Y3A5;Q9Y237;Q9Y5J1;Q9UET6;P62753;O00566;Q9H6Y2;Q14690;Q12788;Q14331;O75607;Q9Y3B2}
- 9692 Pathogen[ P14075] interacts with 82 human  
partners: {O00566;P62857;Q9H5Q4;Q9H583;Q14690;P62913;Q969E8;Q8N0V3;O75607;Q92979;Q9H6R4;Q9NPD3;Q9H0S4;P08708;P57678;Q9UET6;Q13901;P61254;Q9GZL7;O00541;P46777;P56182;P62249;Q13601;Q8IY81;P62081;O00567;Q9H6Y2;P18124;Q9BRU9;Q9Y2L1;P78316;Q9UI43;Q96HR8;Q13868;P62312;Q9NQT4;O75691;Q9NPE3;Q9Y2W2;P62753;Q14684;P18077;Q9NV31;Q9UNQ2;P50914;P62847;Q5RKY6;P22087;P46087;Q9UJK0;Q96B26;P62841;Q96EU6;Q9Y4W2;O60832;Q9H9Y2;Q9Y324;Q96G21;Q9UQ80;O43159;O95478;Q99547;Q9BVI4;O43463;Q14137;Q15024;Q8WVM0;Q14331;Q9BVJ6;P38919;Q9Y3A2;Q9NY12;O95707;P39019;Q06265;Q9Y2X3;Q9Y3B2;Q14978;Q8N726;Q5TAP6;Q9Y3A5}
- 9693 Pathogen[ POC206] interacts with 90 human  
partners: {Q9H0S4;Q8N0V3;Q9NPE3;A6NHQ2;Q13601;Q96G21;O43159;O95478;Q9BVI4;P18124;Q9UI43;Q9Y324;Q96EU6;Q8N726;P62081;Q14137;Q9NY12;O75607;Q14690;Q9NPD3;Q5RKY6;P50914;Q13868;Q9GZL7;Q8IY48;O43463;O00567;Q9H6Y2;Q9UET6;Q96B26;P62857;P78316;Q8WVM0;P18077;Q9NYH9;Q9H583;P62913;Q9UNQ2;Q9H6R4;Q99547;Q9Y2X3;Q92979;Q9Y5J1;Q06265;O95707;Q9NV06;Q8TE D0;P46777;Q76FK4;Q9UJK0;Q9BRU9;Q15024;Q13901;P56182;Q9Y2L1;P39019;O60832;Q96HR8;P62841;O00541;Q9Y3B2;Q9NV31;P46087;Q9Y237;O75691;Q9H5Q4;Q9Y3A5;Q969E8;P22087;Q9H9Y2;P62312;Q9UQ80;Q14331;Q9NQT4;P38919;P62753;Q9Y2W2;P08708;Q9Y3A2;Q9Y4W2;Q8IY81;Q5TAP6;P62847;P61254;O00566;Q14684;Q14978;P62249;Q9BVJ6;P57678}
- 9694 Pathogen[ P03363] interacts with 91 human  
partners: {Q96B26;O60832;P62913;Q9UNQ2;Q9NX24;Q9NQT4;Q14978;Q92979;Q5RKY6;Q9BVJ6;Q9Y2W2;Q9BRU9;P38919;Q96EU6;P46087;P62847;Q9Y2X3;P18077;Q9GZL7;Q8N0V3;P62249;Q9Y4W2;O75607;P62753;P62312;P62081;Q9Y324;Q14331;O95478;Q9H9Y2;Q15024;Q99547;P56182;Q9Y3B2;P61254;Q9NY12;Q9Y3A5;O00567;Q9NV31;Q13901;Q9UET6;P08708;Q13601;Q9UQ80;Q969E8;Q9NPD3;O75691;Q9H0S4;O43818;Q9UJK0;O95707;P57678;Q14684;Q14690;P62841;Q9Y5J1;Q8IY81;P50914;Q9NPE3;P22087;Q5TAP6;Q9Y2L1;P39019;Q14137;O00566;P46777;Q96G21;Q13868;Q9H583;Q9Y237;Q8WVMO;Q8N726;Q9NQT5;O43159;O43463;Q9H6R4;Q9Y3A2;P78316;P62857;Q9H6Y2;Q9UI43;O00541;P18124;Q9NV06;Q76FK4;Q96HR8;Q9BVI4;Q8TED0;A6NHQ2;Q9H5Q4;P42285}
- 9695 [Cluster 882]GO:0007131+P biological\_process [name] reciprocal meiotic recombination [def] "The cell cycle process in which double strand breaks are formed and repaired through a double Holliday junction intermediate. This results in the equal exchange of genetic material between non-sister chromatids in a pair of homologous chromosomes. These reciprocal recombinant products ensure the proper segregation of homologous chromosomes during meiosis I and create genetic diversity." [PMID
- 9696 Pathogen[ Q2Q067] interacts with 9 human  
partners: {P49959;Q9UHC1;Q06609;O43502;Q9BQ90;P54278;O60216;A1L190;P43351}
- 9697 Pathogen[ POC214] interacts with 12 human  
partners: {P43351;A8MQ11;Q06609;P49959;A1L190;P20585;Q9UHC1;O43502;P54278;P40692;O60216;Q9BQ90}
- 9698 Pathogen[ P03346] interacts with 13 human  
partners: {Q06609;O43502;Q9BQ90;Q9UHC1;O15315;P20585;O75771;P49959;P43351;P54278;A1L190;O60216;P54277}
- 9699 Pathogen[ Q85601] interacts with 13 human  
partners: {P43351;O43502;O15315;A8MQ11;P49959;O60216;Q9BQ90;P20585;P54278;Q9UHC1;P40692;Q06609;A1L190}
- 9700 Pathogen[ P14079] interacts with 17 human  
partners: {O43196;O15315;P20585;Q9BQ90;P40692;P54278;O60216;Q9UHC1;Q7Z7C7;A8MQ11;O95744;O43502;P54277;P52701;Q06609;A1L190;P43351}
- 9701 Pathogen[ P03383] interacts with 7 human  
partners: {P43351;Q06609;P54278;Q9UHC1;O60216;A1L190;Q9BQ90}
- 9702 Pathogen[ P03410] interacts with 18 human  
partners: {P49959;P40692;P20585;O15315;P54277;P43351;O60216;P52701;O43502;Q7Z7C7;O95744;O43196;A8MQ11;P54278;A1L190;Q9BQ90;Q9UHC1;Q06609}
- 9703 Pathogen[ P14075] interacts with 8 human  
partners: {P43351;A1L190;Q9UHC1;P54278;O60216;Q06609;Q7Z7C7;Q9BQ90}
- 9704 Pathogen[ POC206] interacts with 17 human  
partners: {O43502;O60216;P54278;P49959;A1L190;P52701;P40692;Q9UHC1;A8MQ11;P54277;P43351;Q7Z7C7;O15315;P49916;Q9BQ90;Q06609;P20585}
- 9705 Pathogen[ P03363] interacts with 12 human  
partners: {Q9UHC1;Q9BQ90;P20585;P54278;P54277;P43351;O75771;Q06609;A1L190;O60216;O43502;O15315}
- 9706 [Cluster 883]GO:0007548+P biological\_process [name] sex differentiation [def] "The establishment of the sex of an organism by physical differentiation." [GOC
- 9707 Pathogen[ Q2Q067] interacts with 11 human  
partners: {Q05066;Q5VZB9;Q96MA1;Q8IXT2;Q9Y5R5;Q96SC8;Q92674;Q92600;Q14781;Q01534;P40424}
- 9708 Pathogen[ POC214] interacts with 7 human  
partners: {P40424;Q01534;Q5VZB9;Q92674;Q14781;Q92600;Q9Y5R5}
- 9709 Pathogen[ P03346] interacts with 14 human  
partners: {Q14781;Q01534;Q05066;Q92674;Q9Y5R5;O43680;Q8IXT2;Q9Y5R6;Q96MA1;Q96SC8;P40424;Q9NQL9;Q5VZB9;Q92600}

- 9710 Pathogen[ Q85601] interacts with 10 human  
partners: {Q8IXT2;Q96MA1;Q96SC8;Q01534;Q92600;Q92674;P40424;Q5VZB9;Q9Y5R5;Q14781}
- 9711 Pathogen[ P14079] interacts with 9 human  
partners: {Q96SC8;Q92600;Q01534;Q8IXT2;Q9Y5R5;Q14781;Q5VZB9;Q96MA1;Q92674}
- 9712 Pathogen[ P03383] interacts with 6 human  
partners: {Q9Y5R5;P40424;Q92600;Q01534;Q92674;Q14781}
- 9713 Pathogen[ P03410] interacts with 9 human  
partners: {Q01534;Q92674;Q5VZB9;Q96SC8;Q96MA1;Q92600;Q14781;P40424;Q8IXT2}
- 9714 Pathogen[ P14075] interacts with 6 human  
partners: {Q14781;Q9Y5R5;P40424;Q92674;Q92600;Q01534}
- 9715 Pathogen[ P0C206] interacts with 12 human  
partners: {Q9Y5R6;Q05066;Q14781;P40424;Q96MA1;Q01534;Q92674;Q5VZB9;Q8IXT2;Q9Y5R5;Q92600;Q96SC8}
- 9716 Pathogen[ P03363] interacts with 12 human  
partners: {Q92674;Q14781;Q96SC8;Q9Y5R6;Q05066;Q96MA1;Q8IXT2;Q9Y5R5;Q92600;Q01534;P40424;Q5VZB9}
- 9717 [Cluster 884]GO:0051437+P biological\_process [name] positive regulation of ubiquitin-protein ligase activity involved in mitotic cell cycle [def] "Any process that activates, maintains or increases the rate of ubiquitin ligase activity that contributes to the mitotic cell cycle." [GOC
- 9718 Pathogen[ Q2Q067] interacts with 61 human  
partners: {Q99460;O75832;P48556;P40306;P55036;O00231;O00233;Q9UJX3;Q9UJX5;P51665;P28072;O00762;A5LHX3;Q13200;P25787;Q06323;Q9NYG5;Q9H1A4;P51965;P28065;O14818;P14635;Q9UJX2;Q9Y297;Q9UM13;Q14997;P60900;Q9UL46;P61289;Q12834;P51668;P28062;Q9UNM6;P25788;Q13616;Q92530;P25786;Q8NHZ8;Q16401;O00232;Q9UM11;Q9UJX4;P28074;P25789;Q9UKT4;P0CG47;P20618;P0CG48;P28070;P28066;Q99436;Q8TAA3;Q9UJX6;P62987;O43242;P30260;P49721;P49720;Q13042;P63208;P62979}
- 9719 Pathogen[ P0C214] interacts with 63 human  
partners: {Q9UJX6;Q14997;P51665;P25789;P55036;P28062;A5LHX3;O00762;P28065;O14818;O43242;Q9UJX5;P63208;P48556;P40306;P14635;Q13200;Q9UJX2;Q9Y297;O00232;P51965;Q99460;P28066;O75832;Q9H1A4;P49720;P28074;P0CG48;Q9UL46;Q8NHZ8;Q12834;P25788;Q9UNM6;O00231;Q06323;P25786;Q13616;P28072;Q8TAA3;P62987;Q99436;Q9UJX4;P0CG47;P25787;Q9UJX3;P35998;P60900;O00233;Q9UM11;P51668;P62979;P30260;Q92530;Q9NYG5;Q15008;Q9UM13;P28070;Q9UKT4;P20618;P49721;Q16401;P17980;Q13042}
- 9720 Pathogen[ P03346] interacts with 61 human  
partners: {P25787;P28070;P25789;P55036;Q99460;Q9UM11;Q13616;Q9UL46;P62987;P28072;P25788;P28074;P49721;O14818;Q99436;P0CG48;Q16401;A5LHX3;Q9UM13;P28062;Q9NYG5;P20618;O00232;P51668;Q12834;O75832;O00233;Q9UJX6;P14635;Q13042;P51965;Q9UJX5;P49720;P28065;O00762;Q9UJX2;P60900;P25786;O00231;Q9UKT4;Q9UJX3;Q8NHZ8;P63208;P61289;Q9H1A4;P62979;P28066;Q9UNM6;Q9UJX4;Q8TAA3;P0CG47;Q14997;Q13200;P48556;P51665;Q06323;P30260;Q9Y297;Q92530;O43242;P40306}
- 9721 Pathogen[ Q85601] interacts with 56 human  
partners: {Q9UJX2;P28066;Q9UNM6;P60900;P55036;Q9UJX6;P25787;P61289;P25788;Q9UKT4;Q8NHZ8;O75832;Q9H1A4;Q13616;P0CG48;P51668;Q12834;P25789;O00233;P20618;P63208;P40306;P14635;Q13042;Q9UJX5;P51965;P49720;Q9UM13;P28062;P49721;Q9NYG5;P25786;O00762;P28072;Q9UJX3;Q13200;P28065;P62979;Q99436;P28070;Q9UJX4;Q9UM11;Q8TAA3;Q9UL46;Q99460;O00231;P0CG47;P48556;P28074;Q92530;P62987;A5LHX3;Q06323;P30260;O14818;Q16401}
- 9722 Pathogen[ P14079] interacts with 61 human  
partners: {P28065;Q99436;P62333;P48556;P51965;P0CG48;Q9UKT4;P40306;Q9UJX3;P55036;P28074;O00232;Q9H1A4;Q9UJX5;P49720;O00487;P25787;O75832;A5LHX3;P62979;O00233;P35998;P61289;P62987;P51665;P20618;Q9NYG5;Q8TAA3;Q14997;P51668;P14635;Q8NHZ8;P28062;P60900;Q9UM11;Q9UM13;Q13042;Q9UNM6;Q99460;O14818;P49721;Q92530;Q9UJX6;P30260;Q06323;P62191;O00762;Q15008;P43686;O43242;P25788;P63208;O00231;Q13616;P28066;Q9UL46;P0CG47;Q16401;Q9UJX4;P17980;P28072}
- 9723 Pathogen[ P03383] interacts with 56 human  
partners: {Q8NHZ8;Q13616;P55036;P62987;Q9NYG5;P51965;Q9UJX6;P25789;P60900;P40306;O00233;O00762;P49721;Q06323;Q9UKT4;Q14997;Q9H1A4;P63208;P20618;Q13042;P14635;Q12834;O75832;Q9UM13;Q9UM11;Q9UL46;Q9UNM6;P25786;Q99460;P28072;Q13200;P28065;P28066;Q9UJX4;Q16401;P62979;O00231;P0CG47;Q9UJX5;P0CG48;P28074;Q92530;P49720;Q8TAA3;P61289;Q9UJX2;P28062;P30260;P48556;O14818;Q9UJX3;Q99436;P28070;P51668;P25787;P25788}
- 9724 Pathogen[ P03410] interacts with 61 human  
partners: {Q9UKT4;P28070;P55036;P0CG48;Q9H1A4;P25786;Q15008;Q16401;P60900;Q14997;P35998;P51965;Q99460;Q9UJX4;Q9NYG5;O00233;Q9UM13;O00232;Q8NHZ8;Q8TAA3;P48556;P49721;A5LHX3;P62979;Q99436;P40306;Q06323;P63208;Q13200;P25787;P14635;Q9UM11;Q13042;P28062;P51665;O14818;P51668;Q9UJX5;O00231;Q9UNM6;Q12834;P30260;P25789;P49720;Q13616;Q9UJX3;P62987;O00762;P28072;P25788;P28066;P28065;O43242;Q9UJX6;P0CG47;P17980;O75832;P20618;Q9UL46;P28074;P61289}
- 9725 Pathogen[ P14075] interacts with 55 human  
partners: {P55036;P25788;Q13042;P28066;Q06323;O75832;Q8TAA3;Q9UKT4;P60900;P14635;Q9UM11;O00233;Q9UL46;P49720;P51965;Q13200;P48556;Q16401;P28070;Q9UJX2;P49721;O00231;Q9UJX6;Q8NHZ8;Q92530;P63208;P0CG48;P62979;O00762;P28062;P28074;Q9UJX5;P28065;P25786;O14818;P62987;P28072;Q14997;Q9UJX4;P0CG47;P25787;P20618;Q9H1A4;Q9UNM6;Q13616;Q9UM13;P30260;P61289;Q9UJX3;P40306;P51668;Q9NYG5;Q99436;Q12834;P25789}
- 9726 Pathogen[ P0C206] interacts with 59 human  
partners: {P61289;Q99436;P28062;Q9UNM6;P0CG48;O75832;P40306;P28065;Q14997;Q9UJX3;P55036;P25786;P25788;P25787;Q9UJX5;Q9UJX2;Q06323;P49720;O00232;P60900;Q13616;O43242;P302

60;A5LHX3;P25789;P51965;Q9UKT4;Q9H1A4;Q9NYG5;Q9UJX4;P20618;P63208;Q13200;Q8TAA3;P28070;Q99460;P62979;P28066;Q9UM11;O00762;O14818;Q9UJX6;P0CG47;P28072;P28074;Q92530;P49721;P14635;P62987;Q9UM13;Q9UL46;Q13042;P51668;O00233;P48556;Q16401;Q12834;Q8NHZ8;O00231}

9727 Pathogen[ P03363] interacts with 22 human partners:{Q9UJX2;Q9NYG5;Q13042;P51965;O00762;Q92530;Q8NHZ8;Q9UJX3;P61289;Q9UJX5;P30260;Q9UJX6;Q9UM11;Q9UJX4;Q13616;Q9UKT4;Q9H1A4;P62987;P51668;Q9UM13;Q12834;P63208}

9728 [Cluster 885]GO:0051597+P biological\_process [name] response to methylmercury [def] "Any process that results in a change in state or activity of a cell or an organism (in terms of movement, secretion, enzyme production, gene expression, etc.) as a result of a methylmercury stimulus." [GOC

9729 Pathogen[ Q2Q067] interacts with 3 human partners:{P24864;P06132;P08397}

9730 Pathogen[ P0C214] interacts with 5 human partners:{P06132;P08397;P24864;P36551;P22830}

9731 Pathogen[ P03346] interacts with 2 human partners:{P24864;P06132}

9732 Pathogen[ Q85601] interacts with 3 human partners:{P06132;P08397;P24864}

9733 Pathogen[ P14079] interacts with 5 human partners:{P24864;P06132;P08397;P22830;P36551}

9734 Pathogen[ P03383] interacts with 3 human partners:{P06132;P08397;P24864}

9735 Pathogen[ P03410] interacts with 5 human partners:{P08397;P06132;P36551;P22830;P24864}

9736 Pathogen[ P14075] interacts with 3 human partners:{P06132;P08397;P24864}

9737 Pathogen[ P0C206] interacts with 5 human partners:{P36551;P22830;P08397;P24864;P06132}

9738 Pathogen[ P03363] interacts with 2 human partners:{P24864;P06132}

9739 [Cluster 886]GO:0006641+P biological\_process [name] triglyceride metabolic process [def] "The chemical reactions and pathways involving triglyceride, any triester of glycerol. The three fatty acid residues may all be the same or differ in any permutation. Triglycerides are important components of plant oils, animal fats and animal plasma lipoproteins." [ISBN

9740 Pathogen[ Q2Q067] interacts with 1 human partners:{P32189}

9741 Pathogen[ P0C214] interacts with 1 human partners:{P32189}

9742 Pathogen[ P03346] interacts with 2 human partners:{P32189;Q8TAU0}

9743 Pathogen[ Q85601] interacts with 1 human partners:{P32189}

9744 Pathogen[ P14079] interacts with 4 human partners:{Q9Y5U4;P32189;Q8TCU4;O15503}

9745 Pathogen[ P03383] interacts with 1 human partners:{P32189}

9746 Pathogen[ P03410] interacts with 5 human partners:{Q9Y5U4;Q8TCU4;P55157;P32189;O15503}

9747 Pathogen[ P14075] interacts with 1 human partners:{P32189}

9748 Pathogen[ P0C206] interacts with 3 human partners:{Q8TCU4;P32189;Q8TAU0}

9749 Pathogen[ P03363] interacts with 1 human partners:{Q8TAU0}

9750 [Cluster 887]GO:0051084+P biological\_process [name] 'de novo' posttranslational protein folding [def] "The process of assisting in the correct noncovalent folding of newly formed polypeptides or folding intermediates of polypeptides that have exited the ribosome and/or have been stabilized and transferred by other chaperone proteins. This process could involve several cycles of ATP hydrolysis." [GOC

9751 Pathogen[ Q2Q067] interacts with 9 human partners:{Q9BTW9;O75347;Q99471;P17987;Q9NQP4;P50991;Q9UHV9;P61758;P78371}

9752 Pathogen[ P0C214] interacts with 15 human partners:{P60709;Q99832;P49368;O75347;P78371;P48643;P61758;Q9BTW9;Q9UHV9;Q99471;O60925;P17987;P50991;Q9NQP4;O60613}

9753 Pathogen[ P03346] interacts with 13 human partners:{Q99471;Q9UHV9;Q9NQP4;P78371;P60709;Q99426;O75347;Q9Y371;P50991;P49368;O60925;P61758;P17987}

9754 Pathogen[ Q85601] interacts with 12 human partners:{Q9NQP4;Q99471;Q9UHV9;O60613;Q9BTW9;P61758;P17987;P60709;P50991;O75347;P78371;P48643}

9755 Pathogen[ P14079] interacts with 20 human partners:{Q9BTW9;P48643;O60925;P50991;P78371;O60613;P68363;Q9UHV9;P50990;Q9NQP4;P61758;Q9Y371;Q15814;Q9NYU2;Q99426;P17987;P60709;O75347;Q99471;P49368}

9756 Pathogen[ P03383] interacts with 8 human partners:{Q9UHV9;O60613;Q9NQP4;O75347;Q99471;P78371;O60925;P61758}

9757 Pathogen[ P03410] interacts with 22 human partners:{P17987;P49368;Q99832;O60613;P48643;Q15814;Q99471;P50990;Q9BTW9;P61758;Q9Y371;Q9BVA1;Q9NQP4;O75347;P68363;O60925;P78371;Q9UHV9;Q99426;P60709;P50991;Q9NYU2}

9758 Pathogen[ P14075] interacts with 8 human partners:{O75347;P78371;Q9UHV9;O60613;Q9NQP4;P61758;O60925;Q99471}

9759 Pathogen[ P0C206] interacts with 16 human partners:{P48643;P60709;Q9BTW9;P50991;O60613;P17987;Q99471;Q15814;Q9UHV9;Q99426;O60925;P49368;P61758;O75347;P78371;Q9NQP4}

9760 Pathogen[ P03363] interacts with 17 human partners:{O75347;P60709;Q9UHV9;P68363;Q99471;P50991;Q13748;O60925;Q99426;Q15814;Q9BTW9;P17987;P61758;P78371;Q9NQP4;P48643;P49368}

9761 [Cluster 888]GO:0016556+P biological\_process [name] mRNA modification [def] "The covalent alteration of one or more nucleotides within an mRNA molecule to produce an mRNA molecule with a sequence that differs from that coded genetically." [GOC

9762 Pathogen[ Q2Q067] interacts with 2 human partners:{P55265;Q9UBS4}  
9763 Pathogen[ POC214] interacts with 2 human partners:{P55265;Q9UBS4}  
9764 Pathogen[ P03346] interacts with 3 human partners:{P55265;Q9UBS4;Q9NQ94}  
9765 Pathogen[ Q85601] interacts with 2 human partners:{Q9UBS4;P55265}  
9766 Pathogen[ P14079] interacts with 4 human partners:{P41238;Q9UBS4;Q9NQ94;P55265}  
9767 Pathogen[ P03383] interacts with 2 human partners:{Q9UBS4;P55265}  
9768 Pathogen[ P03410] interacts with 3 human partners:{P41238;P55265;Q9UBS4}  
9769 Pathogen[ P14075] interacts with 2 human partners:{P55265;Q9UBS4}  
9770 Pathogen[ POC206] interacts with 3 human partners:{P55265;Q9UBS4;P41238}  
9771 Pathogen[ P03363] interacts with 3 human partners:{Q9UBS4;P55265;Q9NQ94}  
9772 [Cluster 889]GO:0033962+P biological\_process [name] cytoplasmic mRNA processing body assembly [def] "The aggregation, arrangement and bonding together of proteins and RNA molecules to form a cytoplasmic mRNA processing body." [GOC  
9773 Pathogen[ Q2Q067] interacts with 6 human partners:{Q14204;Q86TB9;P26196;Q9UGP4;Q8ND56;Q99700}  
9774 Pathogen[ POC214] interacts with 6 human partners:{Q9UGP4;P26196;Q8ND56;Q14204;Q99700;Q86TB9}  
9775 Pathogen[ P03346] interacts with 6 human partners:{Q8ND56;Q9UGP4;Q14204;Q99700;Q86TB9;P26196}  
9776 Pathogen[ Q85601] interacts with 6 human partners:{Q14204;Q86TB9;P26196;Q9UGP4;Q99700;Q8ND56}  
9777 Pathogen[ P14079] interacts with 6 human partners:{Q8ND56;Q99700;Q14204;Q86TB9;P26196;Q9UGP4}  
9778 Pathogen[ P03383] interacts with 5 human partners:{Q99700;P26196;Q9UGP4;Q8ND56;Q86TB9}  
9779 Pathogen[ P03410] interacts with 5 human partners:{Q99700;Q14204;Q9UGP4;Q8ND56;Q86TB9}  
9780 Pathogen[ P14075] interacts with 5 human partners:{P26196;Q9UGP4;Q86TB9;Q99700;Q8ND56}  
9781 Pathogen[ POC206] interacts with 6 human partners:{Q86TB9;Q8ND56;Q9UGP4;P26196;Q14204;Q99700}  
9782 Pathogen[ P03363] interacts with 6 human partners:{Q14204;Q9UGP4;P26196;Q8ND56;Q86TB9;Q99700}  
9783 [Cluster 890]GO:0033630+P biological\_process [name] positive regulation of cell adhesion mediated by integrin [def] "Any process that activates or increases the frequency, rate, or extent of cell adhesion mediated by integrin." [GOC  
9784 Pathogen[ Q2Q067] interacts with 1 human partners:{Q96LB3}  
9785 Pathogen[ POC214] interacts with 1 human partners:{Q96LB3}  
9786 Pathogen[ P03346] interacts with 1 human partners:{Q96LB3}  
9787 Pathogen[ Q85601] interacts with 1 human partners:{Q96LB3}  
9788 Pathogen[ P14079] interacts with 1 human partners:{Q96LB3}  
9789 Pathogen[ P03383] interacts with 1 human partners:{Q96LB3}  
9790 Pathogen[ P03410] interacts with 1 human partners:{Q96LB3}  
9791 Pathogen[ P14075] interacts with 1 human partners:{Q96LB3}  
9792 Pathogen[ POC206] interacts with 1 human partners:{Q96LB3}  
9793 Pathogen[ P03363] interacts with 1 human partners:{Q96LB3}  
9794 [Cluster 891]GO:0007243+P biological\_process [name] intracellular protein kinase cascade [def] "A series of reactions that occur within the cell, mediated by protein kinases, which occurs as a result of a single trigger reaction or compound." [GOC  
9795 Pathogen[ Q2Q067] interacts with 7 human partners:{O15117;Q15532;O75582;O14713;Q9NP71;P26651;Q15759}  
9796 Pathogen[ POC214] interacts with 9 human partners:{O15117;Q9NP71;O75582;P26651;Q15532;Q15759;P16118;Q99704;O14713}  
9797 Pathogen[ P03346] interacts with 9 human partners:{Q15532;Q9NP71;Q9UKA4;O14713;Q99704;O75582;Q15759;O15117;P26651}  
9798 Pathogen[ Q85601] interacts with 8 human partners:{Q15532;O14713;Q9NP71;P16118;P26651;O15117;O75582;Q15759}  
9799 Pathogen[ P14079] interacts with 9 human partners:{Q9UKA4;Q15532;Q99704;O75582;O15117;Q15759;O14713;Q9NP71;O96001}  
9800 Pathogen[ P03383] interacts with 7 human partners:{O75582;O14713;Q15532;O15117;Q9NP71;Q15759;P26651}  
9801 Pathogen[ P03410] interacts with 10 human partners:{Q9UKA4;P16118;O75582;O14713;P26651;Q99704;Q9NP71;O15117;O96001;Q15532}  
9802 Pathogen[ P14075] interacts with 8 human partners:{Q15759;Q15532;O14713;O75582;P26651;O15117;Q9NP71;P16118}  
9803 Pathogen[ POC206] interacts with 10 human partners:{Q9NP71;P26651;O75582;O14713;Q15532;Q99704;P16118;O15117;Q15759;Q9UKA4}  
9804 Pathogen[ P03363] interacts with 6 human partners:{Q99704;Q15532;O14713;O15117;P26651;Q9NP71}  
9805 [Cluster 892]GO:0055085+P biological\_process [name] transmembrane transport [def] "The process in which a solute is transported from one side of a membrane to the other." [GOC  
9806 Pathogen[ Q2Q067] interacts with 36 human partners:{P02792;Q96EE3;P52948;Q12769;Q96HA1;P49790;P49792;O75694;P78406;P19367;P36543;Q99567;Q8N1F7;Q7L804;Q7Z3B4;Q8NFH4;P12270;P11166;Q9BW27;Q8TEM1;Q9BVL2;Q9UKX7;Q9NRG9;Q8NFH3;P37198;Q92621;O15504;P57740;P40855;Q8WUM0;Q9UBX3;P14672;P35658;Q8NFH5;Q5SR

E5;Q14397}  
9807 Pathogen[ POC214] interacts with 40 human  
partners:{P02794;Q16864;Q8NFH5;Q9UI12;Q8TEM1;P40855;P78406;P57740;Q99567;Q8N1F7;O75694;Q96EE3;P49792;Q9UKX7;P36543;P11166;Q7L804;Q9UBX3;P11168;P49790;P37198;Q9BW27;Q9NRG9;P35658;P19367;Q8NFH3;Q14397;O15504;P02792;P12270;Q8NFH4;Q9BVL2;Q5SRE5;P14672;Q7Z3B4;Q8WUM0;P52948;Q92621;Q12769;Q96HA1}  
9808 Pathogen[ P03346] interacts with 43 human  
partners:{Q8TEM1;P02792;P21283;Q8NFH4;Q8WUM0;P12270;Q12769;Q96EE3;Q99567;Q9UKX7;Q9UBX3;Q9Y5K8;O75694;Q9NRG9;P78406;P57740;Q9BVL2;Q8N1F7;P19367;P36543;P02794;Q93050;Q8NFH5;P37198;Q8NFH3;P35658;Q5SRE5;Q92621;Q9BW27;Q7L804;P11166;Q14397;Q9ULV0;P56589;P49790;P40855;Q16864;Q96HA1;P14672;Q7Z3B4;O15504;P49792;P52948}  
9809 Pathogen[ Q85601] interacts with 38 human  
partners:{Q8TEM1;Q5SRE5;P11168;Q8NFH4;Q8NFH3;Q7L804;Q96EE3;Q12769;Q9UBX3;P78406;P57740;Q9NRG9;Q93050;Q8WUM0;Q8N1F7;P12270;O75694;O15504;Q9BW27;P11166;Q92621;P52948;Q9UKX7;Q8NFH5;P35658;Q14397;Q99567;P02792;P49792;Q9BVL2;Q96HA1;P14672;P02794;Q7Z3B4;P49790;P40855;P19367;P36543}  
9810 Pathogen[ P14079] interacts with 47 human  
partners:{P36543;Q8NFH5;Q9Y5K8;Q7L804;Q9BW27;Q96HA1;P40855;P61421;P56589;P57740;Q8N1F7;P35658;Q96LB4;P14672;O00400;Q92621;Q8TEM1;P11166;Q96NT5;Q6ZSS7;Q9UKX7;Q9BVL2;O15504;Q8WUM0;P12270;Q99567;Q8NFH3;Q96ES6;Q8N8Y2;Q96EE3;P37198;P49790;P02794;Q8NFH4;Q93050;P78406;Q7Z3B4;Q9UI12;Q14397;O95670;Q12769;Q16864;Q5SRE5;Q9NRG9;O75694;Q15849;P52948}  
9811 Pathogen[ P03383] interacts with 37 human  
partners:{Q9BVL2;Q96EE3;O15504;Q8WUM0;P02794;Q7L804;Q92621;P49792;Q8NFH4;P12270;P19367;P52948;P78406;P57740;Q8NFH5;Q8N1F7;Q8TEM1;Q12769;P11168;Q99567;Q14397;Q9BW27;Q5SRE5;P35658;Q96HA1;Q9NRG9;P11169;P36543;P37198;Q9UKX7;P14672;Q7Z3B4;P49790;O75694;P40855;Q8NFH3;P22732}  
9812 Pathogen[ P03410] interacts with 54 human  
partners:{Q99567;Q14397;Q7Z3B4;Q9BW27;Q7L804;P22732;P02794;Q8N8Y2;Q9UKX7;P11166;Q8NFH4;P61421;Q9ULV0;O00400;Q5SRE5;P05141;P52948;O15504;P11168;O75694;Q93050;P78406;P40855;Q96HA1;Q9UBX3;Q8N1F7;Q13336;P49790;P12270;P35658;Q8NFH5;Q8TEM1;Q9UI12;Q96LB4;Q15849;Q96EE3;O95670;Q96D96;Q16864;Q6ZSS7;Q8WUM0;Q96ES6;P56589;P57740;P02792;Q12769;Q9Y5K8;Q9NRG9;Q8NFH3;Q9BVL2;O75348;P36543;Q92621;P49792}  
9813 Pathogen[ P14075] interacts with 37 human  
partners:{P11169;P40855;P78406;P57740;P49792;Q8N1F7;P19367;P22732;Q9UKX7;P35658;P12270;Q92621;Q96HA1;Q9BW27;Q7L804;Q8TEM1;P02794;Q96EE3;P37198;Q5SRE5;Q14397;Q8NFH3;O15504;Q99567;Q12769;P11168;Q9BVL2;P49790;Q8WUM0;P14672;O75694;Q9NRG9;Q7Z3B4;Q8NFH4;Q8NFH5;P52948;P36543}  
9814 Pathogen[ POC206] interacts with 42 human  
partners:{Q96EE3;Q92621;P36543;P49790;Q5SRE5;Q8NFH5;Q9NRG9;P02794;P56589;Q7Z3B4;Q96HA1;Q9UBX3;P57740;P11166;P19367;Q8WUM0;P11168;P49792;Q8TEM1;Q9UKX7;O75694;P40855;Q9UI12;P02792;Q99567;Q9Y5K8;Q16864;Q8NFH4;P14672;P78406;Q14397;Q15849;O15504;Q12769;Q7L804;Q8NFH3;Q8N1F7;P35658;Q9BW27;Q9BVL2;Q93050;P12270}  
9815 Pathogen[ P03363] interacts with 33 human  
partners:{Q7Z3B4;Q7L804;Q5SRE5;P12270;Q8NFH4;P36543;Q14397;Q8NFH3;Q12769;Q9UKX7;Q9NRG9;Q8WUM0;Q9BVL2;Q99567;Q96HA1;P49792;P35658;O75694;P49790;P40855;P57740;Q9Y5K8;P14672;P78406;P52948;O15504;P37198;Q8N1F7;Q92621;Q8NFH5;P02794;P11166;Q9BW27}  
9816 [Cluster 893]GO:0046755+P biological\_process [name] non-lytic virus budding [def] "A form of viral release in which the viral particles bud out through cellular membranes without causing cell lysis. It is also a form of viral envelopment." [ISBN  
9817 Pathogen[ Q2Q067] interacts with 1 human partners:{Q99816}  
9818 Pathogen[ POC214] interacts with 1 human partners:{Q99816}  
9819 Pathogen[ P03346] interacts with 1 human partners:{Q99816}  
9820 Pathogen[ Q85601] interacts with 1 human partners:{Q99816}  
9821 Pathogen[ P14079] interacts with 1 human partners:{Q99816}  
9822 Pathogen[ P03383] interacts with 1 human partners:{Q99816}  
9823 Pathogen[ P03410] interacts with 1 human partners:{Q99816}  
9824 Pathogen[ P14075] interacts with 1 human partners:{Q99816}  
9825 Pathogen[ POC206] interacts with 1 human partners:{Q99816}  
9826 Pathogen[ P03363] interacts with 1 human partners:{Q99816}  
9827 [Cluster 894]GO:0016311+P biological\_process [name] dephosphorylation [def] "The process of removing one or more phosphoric (ester or anhydride) residues from a molecule." [ISBN  
9828 Pathogen[ Q2Q067] interacts with 7 human  
partners:{Q9BU02;Q08209;Q9UNH5;Q9BV47;P09467;P35813;Q16829}  
9829 Pathogen[ POC214] interacts with 11 human  
partners:{Q9BU02;P35813;Q9BV47;O15194;Q8TCD5;P09467;Q08209;O95278;Q16829;Q9UNH5;Q13615}  
9830 Pathogen[ P03346] interacts with 17 human  
partners:{P43378;P35813;Q9H3S7;Q86WG5;P09467;O15194;Q9BV47;Q16667;P17706;Q96QG7;Q16829;Q9BU02;Q08209;O95278;Q9Y2R2;P24666;Q9UNH5}  
9831 Pathogen[ Q85601] interacts with 10 human  
partners:{O15194;Q9BU02;Q16829;O95278;Q9BV47;Q08209;Q9UNH5;P09467;P35813;Q96QG7}  
9832 Pathogen[ P14079] interacts with 13 human  
partners:{O15194;Q8TCD5;Q16829;P16298;Q96QG7;P35813;Q9BV47;Q9BU02;Q86WG5;Q9UNW1;P09467;Q08209;Q9UNH5}

9833 Pathogen[ P03383] interacts with 4 human partners:{Q9BU02;P09467;P35813;Q9UNH5}

9834 Pathogen[ P03410] interacts with 13 human partners:{Q96QG7;Q9BU02;P35813;Q08209;Q9UNH5;P09467;Q16829;Q8TCD5;P24666;Q9UNW1;Q9BV47;Q15194;Q86WG5}

9835 Pathogen[ P14075] interacts with 4 human partners:{P35813;Q9BU02;P09467;Q9UNH5}

9836 Pathogen[ P0C206] interacts with 15 human partners:{Q9BV47;Q13615;P09467;Q96QG7;Q9Y2R2;Q16829;P24666;Q9UNH5;Q8TCD5;O95278;Q08209;Q15194;Q9BU02;P17706;P35813}

9837 Pathogen[ P03363] interacts with 13 human partners:{P17706;Q9H3S7;Q9UNH5;Q9Y2R2;P43378;Q16667;Q16829;Q86WG5;Q12923;Q96QG7;Q9BV47;Q9BU02;P24666}

9838 [Cluster 895]GO:0010468+P biological\_process [name] regulation of gene expression [def] "Any process that modulates the frequency, rate or extent of gene expression. Gene expression is the process in which a gene's coding sequence is converted into a mature gene product or products (proteins or RNA). This includes the production of an RNA transcript as well as any processing to produce a mature RNA product or an mRNA (for protein-coding genes) and the translation of that mRNA into protein. Some protein processing events may be included when they are required to form an active form of a product from an inactive precursor form." [GOC

9839 Pathogen[ Q2Q067] interacts with 23 human partners:{Q9UM63;Q9HBE1;Q15910;P62714;P26358;Q14106;P10914;P35226;P35869;O75030;Q9UPW6;P21399;P42771;O96018;Q01860;Q9BQA5;Q04743;P11802;P10242;Q14207;Q6RFH8;P48200;Q00534}

9840 Pathogen[ P0C214] interacts with 23 human partners:{P35226;P35869;Q14207;Q9HBE1;P11802;P10914;O96018;Q15910;O75030;P48200;Q8WV60;P62714;Q00534;Q6RFH8;P26358;P42771;P10242;Q9UPW6;Q9BQA5;Q9UM63;P21399;Q14106;Q01860}

9841 Pathogen[ P03346] interacts with 32 human partners:{O75364;Q14207;Q9UPW6;P35226;Q8IYA7;Q04743;Q9BYW2;Q99767;P26358;P62714;O75030;Q9UM63;P42771;Q01860;P11802;Q6UW56;P10242;P10914;P48200;O96018;P78411;Q15910;Q9HBE1;Q92832;Q14106;Q00534;Q6RFH8;P35869;P21399;Q9H9S0;Q9GZV8;Q9BQA5}

9842 Pathogen[ Q85601] interacts with 24 human partners:{Q9UPW6;P62714;P21399;O75030;Q8WV60;P48200;P10242;Q99767;Q14106;P26358;P10914;P11802;Q9UM63;O96018;P42771;Q14207;Q9BQA5;Q15910;P35869;P35226;Q00534;Q6RFH8;Q01860;Q9HBE1}

9843 Pathogen[ P14079] interacts with 27 human partners:{Q9UPW6;P35869;Q14207;P21399;P16298;Q14106;Q9BQA5;Q8WV60;Q01860;Q6RFH8;O96018;Q92832;P48200;P26358;P04141;P13232;P35226;Q04743;Q15910;Q9GZV8;P10242;O75030;Q9UM63;Q9HBE1;Q99767;P10914;P42771}

9844 Pathogen[ P03383] interacts with 21 human partners:{O96018;P10914;Q9UPW6;Q9HBE1;Q14106;P62714;O75030;Q6RFH8;P48200;Q01860;Q00534;P11802;Q9BQA5;P42771;Q14207;P10242;Q15910;Q9UM63;P35869;P26358;P35226}

9845 Pathogen[ P03410] interacts with 28 human partners:{P62714;P42771;P04141;O96018;Q00534;Q8WV60;Q01860;Q9BQA5;P10242;O75030;Q14207;Q99767;Q9UPW6;Q92832;Q9GZV8;Q6RFH8;P26358;P21399;P11802;P10914;Q14106;Q9UM63;Q15910;P48200;P35226;Q04743;Q9HBE1;P13232}

9846 Pathogen[ P14075] interacts with 21 human partners:{P35869;Q6RFH8;Q14207;Q9UM63;O75030;O96018;P11802;Q9BQA5;Q01860;Q00534;P42771;Q15910;P10242;P26358;Q9UPW6;Q14106;P62714;P35226;P48200;P10914;Q9HBE1}

9847 Pathogen[ P0C206] interacts with 30 human partners:{P10914;Q8WV60;Q04743;P35869;O75030;Q9HBE1;Q01860;P35226;P78411;Q9UM63;P10242;Q6UW56;P26358;P42771;Q15910;Q9BQA5;P48200;Q99767;O96018;Q14106;Q6RFH8;Q9UPW6;P62714;Q9H9S0;Q92832;Q9GZV8;P11802;P21399;Q14207;Q00534}

9848 Pathogen[ P03363] interacts with 27 human partners:{P62714;Q6UW56;Q15910;P48200;P78411;Q9UM63;P35869;Q00534;Q92832;O75030;P35226;Q9BQA5;P26358;P10914;Q14106;Q6RFH8;P10242;Q8IYA7;Q14207;P11802;Q9H9S0;O96018;Q9UPW6;Q99767;Q01860;P42771;Q04743}

9849 [Cluster 896]GO:0051973+P biological\_process [name] positive regulation of telomerase activity [def] "Any process that activates or increases the frequency, rate or extent of telomerase activity, the catalysis of the reaction

9850 Pathogen[ Q2Q067] interacts with 2 human partners:{Q96AP0;Q9BUR4}

9851 Pathogen[ P0C214] interacts with 1 human partners:{Q9BUR4}

9852 Pathogen[ P03346] interacts with 3 human partners:{Q96AP0;Q9BUR4;Q9NUX5}

9853 Pathogen[ Q85601] interacts with 1 human partners:{Q9BUR4}

9854 Pathogen[ P14079] interacts with 4 human partners:{Q9NUX5;Q9BUR4;Q6UWI2;Q96AP0}

9855 Pathogen[ P03383] interacts with 1 human partners:{Q9BUR4}

9856 Pathogen[ P03410] interacts with 4 human partners:{Q9NUX5;Q96AP0;Q6UWI2;Q9BUR4}

9857 Pathogen[ P14075] interacts with 3 human partners:{Q96AP0;Q9BUR4;Q6UWI2}

9858 Pathogen[ P0C206] interacts with 4 human partners:{Q96AP0;Q9BUR4;Q9NUX5;Q6UWI2}

9859 Pathogen[ P03363] interacts with 3 human partners:{Q9BUR4;Q96AP0;Q9NUX5}

9860 [Cluster 897]GO:0046826+P biological\_process [name] negative regulation of protein export from nucleus [def] "Any process that stops, prevents, or reduces the frequency, rate or extent of the directed movement of proteins from the nucleus into the cytoplasm." [GOC

9861 Pathogen[ Q2Q067] interacts with 2 human partners:{Q99728;P10599}

9862 Pathogen[ P0C214] interacts with 3 human partners:{Q99728;P46060;P10599}



9863 Pathogen[ P03346] interacts with 4 human partners:{Q06945;Q99728;P46060;P10599}  
9864 Pathogen[ Q85601] interacts with 3 human partners:{P46060;Q99728;P10599}  
9865 Pathogen[ P14079] interacts with 2 human partners:{P46060;P10599}  
9866 Pathogen[ P03383] interacts with 1 human partners:{P10599}  
9867 Pathogen[ P03410] interacts with 2 human partners:{P10599;P46060}  
9868 Pathogen[ P14075] interacts with 1 human partners:{P10599}  
9869 Pathogen[ P0C206] interacts with 3 human partners:{P46060;Q99728;P10599}  
9870 Pathogen[ P03363] interacts with 2 human partners:{P46060;Q99728}  
9871 [Cluster 898]GO:0048295+P biological\_process [name] positive regulation of isotype switching to IgE isotypes [def] "Any process that activates or increases the frequency, rate or extent of isotype switching to IgE isotypes." [GOC  
9872 Pathogen[ Q2Q067] interacts with 1 human partners:{P42226}  
9873 Pathogen[ P0C214] interacts with 1 human partners:{P42226}  
9874 Pathogen[ P03346] interacts with 1 human partners:{P42226}  
9875 Pathogen[ Q85601] interacts with 1 human partners:{P42226}  
9876 Pathogen[ P14079] interacts with 1 human partners:{P42226}  
9877 Pathogen[ P03383] interacts with 1 human partners:{P42226}  
9878 Pathogen[ P03410] interacts with 1 human partners:{P42226}  
9879 Pathogen[ P14075] interacts with 1 human partners:{P42226}  
9880 Pathogen[ P0C206] interacts with 1 human partners:{P42226}  
9881 Pathogen[ P03363] interacts with 1 human partners:{P42226}  
9882 [Cluster 899]GO:0001556+P biological\_process [name] oocyte maturation [def] "A developmental process, independent of morphogenetic (shape) change, that is required for an oocyte to attain its fully functional state. Oocyte maturation commences after reinitiation of meiosis commonly starting with germinal vesicle breakdown, and continues up to the second meiotic arrest prior to fertilization." [GOC  
9883 Pathogen[ Q2Q067] interacts with 4 human partners:{P14635;O43524;Q9UKT4;P30305}  
9884 Pathogen[ P0C214] interacts with 3 human partners:{P14635;P30305;Q9UKT4}  
9885 Pathogen[ P03346] interacts with 5 human partners:{P30305;P14635;P51587;Q9UKT4;O43524}  
9886 Pathogen[ Q85601] interacts with 4 human partners:{Q9UKT4;P30305;P14635;P51587}  
9887 Pathogen[ P14079] interacts with 4 human partners:{Q9UKT4;P51587;P14635;P30305}  
9888 Pathogen[ P03383] interacts with 2 human partners:{Q9UKT4;P14635}  
9889 Pathogen[ P03410] interacts with 4 human partners:{Q9UKT4;P14635;P51587;P30305}  
9890 Pathogen[ P14075] interacts with 2 human partners:{Q9UKT4;P14635}  
9891 Pathogen[ P0C206] interacts with 4 human partners:{P51587;P30305;Q9UKT4;P14635}  
9892 Pathogen[ P03363] interacts with 2 human partners:{O43524;Q9UKT4}  
9893 [Cluster 900]GO:0006569+P biological\_process [name] tryptophan catabolic process [def] "The chemical reactions and pathways resulting in the breakdown of tryptophan, the chiral amino acid 2-amino-3-(1H-indol-3-yl)propanoic acid." [ISBN  
9894 Pathogen[ Q2Q067] interacts with 2 human partners:{Q63HM1;Q16719}  
9895 Pathogen[ P0C214] interacts with 3 human partners:{Q63HM1;Q16719;Q16773}  
9896 Pathogen[ P03346] interacts with 2 human partners:{Q63HM1;Q16719}  
9897 Pathogen[ Q85601] interacts with 2 human partners:{Q16719;Q63HM1}  
9898 Pathogen[ P14079] interacts with 4 human partners:{P48775;Q63HM1;Q8TDX5;Q16719}  
9899 Pathogen[ P03383] interacts with 2 human partners:{Q63HM1;Q16719}  
9900 Pathogen[ P03410] interacts with 4 human partners:{Q16719;Q63HM1;Q8TDX5;P48775}  
9901 Pathogen[ P14075] interacts with 2 human partners:{Q16719;Q63HM1}  
9902 Pathogen[ P0C206] interacts with 2 human partners:{Q16719;Q63HM1}  
9903 Pathogen[ P03363] interacts with 1 human partners:{Q63HM1}  
9904 [Cluster 901]GO:0006879+P biological\_process [name] cellular iron ion homeostasis [def] "Any process involved in the maintenance of an internal steady state of iron ions at the level of a cell." [GOC  
9905 Pathogen[ Q2Q067] interacts with 8 human partners:{P02792;Q8IVG9;P01106;P36543;Q86VX9;P22557;P21399;P48200}  
9906 Pathogen[ P0C214] interacts with 10 human partners:{P02794;Q16864;Q9UI12;Q86VX9;P36543;P48200;P22557;P02792;P21399;P01106}  
9907 Pathogen[ P03346] interacts with 13 human partners:{P02792;P21283;Q9Y5K8;P36543;Q86VX9;Q8IVG9;P02794;Q93050;P22557;P01106;P48200;Q16864;P21399}  
9908 Pathogen[ Q85601] interacts with 8 human partners:{P01106;P21399;Q93050;P48200;Q86VX9;P02792;P02794;P36543}  
9909 Pathogen[ P14079] interacts with 18 human partners:{P36543;Q9Y5K8;P61421;Q86VX9;Q96LB4;P21399;Q8IVG9;P22557;Q96NT5;P48200;Q8N8Y2;P81172;P01106;P02794;Q93050;Q9UI12;O95670;Q16864}  
9910 Pathogen[ P03383] interacts with 6 human partners:{P02794;P01106;P48200;Q86VX9;P36543;Q8IVG9}  
9911 Pathogen[ P03410] interacts with 19 human partners:{P02794;Q8N8Y2;P01106;P61421;Q93050;Q8IVG9;P22557;P21399;Q9UI12;Q96LB4;P81172;O95670;Q16864;Q86VX9;P48200;P02792;Q9Y5K8;O75348;P36543}  
9912 Pathogen[ P14075] interacts with 6 human partners:{Q86VX9;Q8IVG9;P01106;P02794;P48200;P36543}  
9913 Pathogen[ P0C206] interacts with 13 human partners:{P36543;P02794;P48200;P22557;Q9UI12;Q86VX9;Q8IVG9;P02792;Q9Y5K8;Q16864;P01106;P21399;Q93050}  
9914 Pathogen[ P03363] interacts with 7 human

partners:{P36543;P48200;P01106;Q86VX9;Q9Y5K8;Q8IVG9;P02794}

9915 [Cluster 902]GO:0060928+P biological\_process [name] atrioventricular node cell development [def] "The process whose specific outcome is the progression of an atrioventricular (AV) node cell over time, from its formation to the mature state." [GOC

9916 Pathogen[ Q2Q067] interacts with 1 human partners:{Q92585}

9917 Pathogen[ P0C214] interacts with 1 human partners:{Q92585}

9918 Pathogen[ P03346] interacts with 1 human partners:{Q92585}

9919 Pathogen[ Q85601] interacts with 1 human partners:{Q92585}

9920 Pathogen[ P14079] interacts with 1 human partners:{Q92585}

9921 Pathogen[ P03383] interacts with 1 human partners:{Q92585}

9922 Pathogen[ P03410] interacts with 1 human partners:{Q92585}

9923 Pathogen[ P14075] interacts with 1 human partners:{Q92585}

9924 Pathogen[ P0C206] interacts with 1 human partners:{Q92585}

9925 Pathogen[ P03363] interacts with 1 human partners:{Q92585}

9926 [Cluster 903]GO:0030422+P biological\_process [name] production of siRNA involved in RNA interference [def] "Cleavage of double-stranded RNA to form small interfering RNA molecules (siRNAs) of 21-23 nucleotides, in the context of RNA interference." [GOC

9927 Pathogen[ Q2Q067] interacts with 1 human partners:{Q15633}

9928 Pathogen[ P0C214] interacts with 1 human partners:{Q15633}

9929 Pathogen[ P03346] interacts with 2 human partners:{Q15633;O75569}

9930 Pathogen[ Q85601] interacts with 1 human partners:{Q15633}

9931 Pathogen[ P14079] interacts with 1 human partners:{O75569}

9932 Pathogen[ P03383] interacts with 1 human partners:{Q15633}

9933 Pathogen[ P03410] interacts with 2 human partners:{Q15633;O75569}

9934 Pathogen[ P14075] interacts with 1 human partners:{Q15633}

9935 Pathogen[ P0C206] interacts with 1 human partners:{Q15633}

9936 Pathogen[ P03363] interacts with 2 human partners:{Q15633;O75569}

9937 [Cluster 904]GO:0006414+P biological\_process [name] translational elongation [def] "The successive addition of amino acid residues to a nascent polypeptide chain during protein biosynthesis." [GOC

9938 Pathogen[ Q2Q067] interacts with 92 human partners:{P61313;P62701;Q8NHW5;P47914;P46779;Q02543;P26373;P29692;P62750;P62273;P15880;P40429;P46782;P35268;P24534;P22090;P46778;P26641;P62888;P32969;P62277;P62241;P62244;P05387;P62861;P42766;P05386;P63241;Q9UNX3;P30050;P18077;P62891;P61927;P39023;P62081;P61247;P61254;P62249;P62280;P83731;P62263;P60866;P62906;Q02878;P46777;P62899;P08708;P08865;Q07020;P62913;P62269;Q6IS14;P62424;P62917;P57772;P62829;P46783;P36578;P62857;P62847;P49207;P23396;P63173;P18621;Q658K8;P43897;P39019;P61353;Q9GZV4;P62266;P42677;Q9Y3U8;P63220;P62841;P83881;P62987;P50914;P46776;P62854;P62753;P05388;P18124;P62851;P25398;P62910;Q92901;P68104;P46781;P27635;P61513;P62945;P62979}

9939 Pathogen[ P0C214] interacts with 93 human partners:{P62861;P84098;P61247;Q8NHW5;P15880;Q6IS14;P62081;P42766;P62913;P22090;Q92901;P62249;P62899;P62854;P39019;P62263;P57772;P62273;P23396;P18077;Q9GZV4;P05388;P62847;P62829;P26373;P27635;P46778;P61513;P29692;P83881;P62701;P49207;P63220;P26641;P08865;P32969;Q02543;P62266;P63241;P62277;P50914;P46779;P40429;P47914;P63173;P13639;P46783;P43897;P62280;Q9UNX3;Q9Y3U8;P30050;P62753;P62910;P62891;P62269;P46781;P61254;P62841;P62244;P62987;Q07020;P42677;P62945;P46776;P62241;P46777;P24534;P83731;P35268;P62424;P60866;P62857;P61313;P08708;P05387;P25398;P26640;P61927;P62750;P62979;P05386;P62851;P46782;P18124;Q05639;Q5VTE0;P61353;P36578;P18621;Q658K8;P62906;Q02878}

9940 Pathogen[ P03346] interacts with 94 human partners:{P05387;Q8NHW5;P46779;P63173;P62917;P62249;P62913;P62861;P62277;Q02878;Q9GZV4;P62280;P39023;P57772;P62987;P61927;Q9UNX3;P62857;P46778;P49207;P62266;P26641;P61254;P29692;P62424;P62273;P83731;P60866;P63241;P62899;P35268;P62891;P08708;Q6IS14;P46782;P61353;P62854;Q9Y3U8;P47914;P43897;P08865;P61313;P25398;P61513;P05388;P62269;Q02543;P42766;P62081;P61247;P18621;P46781;P84098;Q969K4;P15880;P50914;P62829;P62979;P24534;P39019;P23396;P42677;P62750;P62701;P30050;P62910;P36578;P62847;P62851;P22090;P46777;Q07020;P62263;P62841;Q658K8;P83881;P05386;P18077;P46776;P62241;P62753;P62945;Q92901;P32969;P26373;P18124;P40429;P27635;P68104;P46783;P62906;P62244;P62888;P63220}

9941 Pathogen[ Q85601] interacts with 95 human partners:{P46783;P32969;P61513;Q8NHW5;P26373;P62857;P62244;P62913;P62854;P62081;P61353;P62891;P46776;P18077;P61313;P05388;Q9GZV4;Q5VTE0;P57772;P63173;P23396;P62273;P46778;P62829;P30050;P62753;P27635;P15880;P83881;Q07020;P39019;Q658K8;P26641;Q9Y3U8;P62701;P62241;P62424;P83731;P63241;P62899;P62945;P24534;P62263;P62861;Q02878;P39023;P61254;P49207;P62910;P62249;P62280;P47914;P84098;P08708;P42766;P62269;P68104;P18621;P05387;Q9UNX3;P62277;P35268;P43897;P62979;P62847;P42677;P63220;P46782;P46779;P62750;P62851;P62841;P62987;P22090;P61927;P29692;P36578;P05386;P08865;P61247;Q05639;P46777;P62917;Q92901;P18124;P46781;P25398;P60866;Q02543;P62906;P50914;Q6IS14;P62266;P40429;P62888}

9942 Pathogen[ P14079] interacts with 96 human partners:{Q9Y3U8;P27635;P84098;P46779;P26373;P23396;P40429;P18621;Q658K8;P83881;P68104;Q9UNX3;P46781;P83731;P61513;P62847;Q6IS14;P62753;P57772;P26641;P39023;P62273;P25398;P18077;P46783;P61254;P50914;P62979;P62841;P18124;P42766;P62266;P29692;P46782;P62987;P62241;P32969;P22090;P62829;P60866;P43897;Q96RP9;P62854;Q07020;P39019;P63220;P49207;P62244;P24534;P62263;Q02543;P62424;Q92901;P62277;P62750;P62910;P63173;P46776;P08708;P36578;P62640;P13639;P62906;P47914;P62280;P62899;P63241;P61353;P62081;P62945;P46777;P42677;P30050;P15880;P62891;P62888;P08865;P61927;P62917;P46778;P62249;P05386;P35268;P62913;P05387;P61247;P62269;P62701;Q9GZV4;P61313;P62851;P49411;P05388;P62857;P628

61;Q8NHW5}  
9943 Pathogen[ P03383] interacts with 92 human partners: {P42766;P36578;P05388;P62266;Q8NHW5;P39019;P26373;P62913;P62945;P62854;P40429;P62987;P62891;P25398;Q658K8;P62280;Q07020;P62750;P05387;P62249;P62888;P57772;P62899;P61927;P24534;P46777;P46779;P49207;P83731;P62424;P18124;P46778;Q92901;P62753;Q9GZV4;P42677;P61247;P83881;P26641;P47914;P62917;P62273;Q9UNX3;P63241;P30050;P84098;P32969;P62277;P18077;P63173;P62081;P61313;P08865;P62851;P46782;P62269;P68104;P63220;Q02543;P62244;Q02878;P62910;P27635;P43897;P62857;P62906;P46783;Q9Y3U8;P60866;P61254;P62979;P62241;P46781;P39023;P62841;P22090;P62701;P62829;P29692;P62263;P62847;P35268;P05386;P50914;P62861;P18621;P46776;P15880;P23396;P61513;P08708;P61353}  
9944 Pathogen[ P03410] interacts with 98 human partners: {P62861;P05386;Q8NHW5;Q02543;P61247;P62241;P62829;P49207;P26373;P61513;P68104;P62899;P62244;P62913;Q02878;Q92901;P15880;P46777;P46776;P62841;P30050;P05388;P46781;P18124;Q96RP9;P62269;Q07020;P63220;P62910;P62847;P62906;P23396;P18621;P62266;P62249;P63173;P50914;P62280;P22090;P13639;P61313;P62979;P62701;P62750;Q969K4;P08865;Q9UNX3;P62277;P36578;P18077;P25398;P61927;P84098;P62854;P62273;P62081;P46783;Q9Y3U8;P08708;P46782;P32969;Q658K8;P46779;P27635;P57772;P62987;P24534;P62857;P26640;P63241;P62263;P62424;P62888;P61254;P46778;P62945;P05387;P42766;P26641;P39019;P47914;Q9GZV4;P40429;P39023;P29692;P62917;P62851;P83731;P35268;P61353;P62891;P62753;P49411;P43897;P83881;P60866;P42677;Q6IS14}  
9945 Pathogen[ P14075] interacts with 91 human partners: {P42766;P49207;P62857;P46781;P63220;P32969;P42677;P62913;P22090;Q02878;P62277;Q658K8;P62851;P68104;P57772;P08865;P62244;P08708;P61254;P46778;P05388;P26641;P83881;P46777;P29692;Q9GZV4;Q9Y3U8;P62249;P62081;P63241;P62750;P18621;Q02543;P18124;Q9UNX3;P25398;P63173;P30050;P62979;P43897;P83731;P84098;P61247;P62753;P46782;P62891;P62861;P18077;P46779;P62917;P39023;P50914;P62269;P62847;P62910;P62273;P40429;P23396;P62241;P15880;P62987;P62841;P36578;P62266;P61513;P61313;P27635;P62888;Q92901;P35268;P62945;P46776;P46783;P62701;P62899;P47914;P62906;P05386;P61353;P39019;P62424;P24534;P62829;P62280;Q07020;P62263;P62854;P60866;P26373;P05387;P61927}  
9946 Pathogen[ P0C206] interacts with 94 human partners: {P40429;P61313;Q8NHW5;P27635;Q9GZV4;P18124;Q6IS14;P62854;P49207;P62081;P30050;P62241;P62244;P50914;P08865;P62750;P18621;P46781;P62266;Q02543;Q658K8;Q07020;P83881;P46778;P62263;P62273;Q02878;P62280;P26641;P62857;P62851;P62910;P26640;P46782;P61247;P18077;P62913;P61927;P61353;P62888;P43897;P36578;P62861;P35268;P23396;P39023;P32969;P62701;P05386;P22090;P84098;P62945;P26373;P46777;P05388;P62979;P57772;P2899;P83731;P39019;Q92901;P05387;P46783;P42766;P60866;P62841;P63241;Q9UNX3;P61513;P24534;P62277;P46776;P62906;P63173;P62987;P62891;P62269;P29692;P62753;P46779;P63220;P15880;P25398;P08708;P47914;P68104;P62847;P61254;P42677;P62829;P62249;P62424;Q9Y3U8;P62917}  
9947 Pathogen[ P03363] interacts with 92 human partners: {P62913;P43897;P18621;P05386;Q8NHW5;Q9GZV4;P62750;P23396;P42677;P63173;P08865;P62847;P18077;P05387;P84098;P42766;P62249;P05388;P36578;P62753;P62081;P62910;P61513;P46776;P61254;P62273;P32969;Q92901;P46778;P61927;P62891;P61353;P08708;P15880;P57772;P26373;P83881;P22090;P62861;P62841;Q9UNX3;P30050;P62829;P26641;P46782;P35268;P29692;P46781;P50914;P63220;P61313;P39019;P46779;Q02543;P46777;P62987;P25398;P83731;P62851;P62280;Q9Y3U8;P62888;P63241;P62244;P62277;P62906;P62266;P62945;P49207;P62241;P62424;P60866;P61247;P24534;P62899;P62857;Q02878;Q6IS14;Q07020;P39023;P62854;P62917;P18124;P40429;P27635;P62263;P47914;P62701;Q658K8;P68104;P62269;P46783}  
9948 [Cluster 905]GO:0010631+P biological\_process [name] epithelial cell migration [def] "The orderly movement of epithelial cells from one site to another, often during the development of a multicellular organism." [GOC  
9949 Pathogen[ Q2Q067] interacts with 1 human partners: {Q8WY41}  
9950 Pathogen[ P0C214] interacts with 1 human partners: {Q8WY41}  
9951 Pathogen[ P03346] interacts with 1 human partners: {Q8WY41}  
9952 Pathogen[ Q85601] interacts with 1 human partners: {Q8WY41}  
9953 Pathogen[ P14079] interacts with 1 human partners: {Q8WY41}  
9954 Pathogen[ P03383] interacts with 1 human partners: {Q8WY41}  
9955 Pathogen[ P03410] interacts with 1 human partners: {Q8WY41}  
9956 Pathogen[ P14075] interacts with 1 human partners: {Q8WY41}  
9957 Pathogen[ P0C206] interacts with 1 human partners: {Q8WY41}  
9958 Pathogen[ P03363] interacts with 1 human partners: {Q8WY41}  
9959 [Cluster 906]GO:0030888+P biological\_process [name] regulation of B cell proliferation [def] "Any process that modulates the frequency, rate or extent of B cell proliferation." [GOC  
9960 Pathogen[ Q2Q067] interacts with 2 human partners: {P35869;Q9UKT9}  
9961 Pathogen[ P0C214] interacts with 2 human partners: {P35869;Q9UKT9}  
9962 Pathogen[ P03346] interacts with 2 human partners: {Q9UKT9;P35869}  
9963 Pathogen[ Q85601] interacts with 2 human partners: {P35869;Q9UKT9}  
9964 Pathogen[ P14079] interacts with 2 human partners: {P35869;Q9UKT9}  
9965 Pathogen[ P03383] interacts with 2 human partners: {Q9UKT9;P35869}  
9966 Pathogen[ P03410] interacts with 1 human partners: {Q9UKT9}  
9967 Pathogen[ P14075] interacts with 2 human partners: {P35869;Q9UKT9}  
9968 Pathogen[ P0C206] interacts with 2 human partners: {P35869;Q9UKT9}  
9969 Pathogen[ P03363] interacts with 2 human partners: {P35869;Q9UKT9}  
9970 [Cluster 907]GO:0060391+P biological\_process [name] positive regulation of SMAD protein import into nucleus [def] "Any process that increases the rate, frequency or extent of SMAD protein import into the nucleus, i.e. the directed movement of a SMAD

proteins from the cytoplasm into the nucleus. Pathway-restricted SMAD proteins and common-partner SMAD proteins are involved in the transforming growth factor beta receptor signaling pathways." [GOC

9971 Pathogen[ Q2Q067] interacts with 3 human partners:{Q13485;Q01860;Q93062}

9972 Pathogen[ P0C214] interacts with 3 human partners:{Q13485;Q93062;Q01860}

9973 Pathogen[ P03346] interacts with 3 human partners:{Q93062;Q01860;Q13485}

9974 Pathogen[ Q85601] interacts with 3 human partners:{Q13485;Q01860;Q93062}

9975 Pathogen[ P14079] interacts with 2 human partners:{Q93062;Q01860}

9976 Pathogen[ P03383] interacts with 3 human partners:{Q13485;Q01860;Q93062}

9977 Pathogen[ P03410] interacts with 3 human partners:{Q93062;Q01860;Q13485}

9978 Pathogen[ P14075] interacts with 3 human partners:{Q01860;Q93062;Q13485}

9979 Pathogen[ P0C206] interacts with 3 human partners:{Q01860;Q13485;Q93062}

9980 Pathogen[ P03363] interacts with 2 human partners:{Q13485;Q01860}

9981 [Cluster 908]GO:0006488+P biological\_process [name] dolichol-linked oligosaccharide biosynthetic process [def] "The chemical reactions and pathways resulting in the formation of dolichol-linked oligosaccharide, usually by a stepwise addition of glycosyl chains to endoplasmic reticulum membrane-bound dolichol-P." [GOC

9982 Pathogen[ Q2Q067] interacts with 3 human partners:{P34949;O95394;Q16222}

9983 Pathogen[ P0C214] interacts with 5 human partners:{Q16222;P34949;O95394;O15305;Q96EK6}

9984 Pathogen[ P03346] interacts with 3 human partners:{Q16222;O95394;P34949}

9985 Pathogen[ Q85601] interacts with 4 human partners:{P34949;Q16222;Q96EK6;O95394}

9986 Pathogen[ P14079] interacts with 10 human partners:{Q16222;O15305;Q9BT22;O94777;O75352;Q9P2X0;O95394;P34949;Q96AA3;Q96EK6}

9987 Pathogen[ P03383] interacts with 2 human partners:{P34949;O95394}

9988 Pathogen[ P03410] interacts with 9 human partners:{Q16222;P34949;O94777;Q96EK6;Q9BT22;O15305;O75352;O95394;Q9P2X0}

9989 Pathogen[ P14075] interacts with 4 human partners:{O94777;P34949;O95394;Q96EK6}

9990 Pathogen[ P0C206] interacts with 5 human partners:{Q16222;O95394;O94777;P34949;Q96EK6}

9991 Pathogen[ P03363] interacts with 1 human partners:{Q16222}

9992 [Cluster 909]GO:0007599+P biological\_process [name] hemostasis [def] "The stopping of bleeding (loss of body fluid) or the arrest of the circulation to an organ or part." [ISBN

9993 Pathogen[ Q2Q067] interacts with 6 human partners:{Q9NQG7;Q01543;P01009;P20073;Q16621;P06744}

9994 Pathogen[ P0C214] interacts with 7 human partners:{Q9NQG7;Q9UK55;Q16621;P05546;Q01543;P01008;P20073}

9995 Pathogen[ P03346] interacts with 6 human partners:{Q9NQG7;Q16621;P20073;P01009;P06744;Q01543}

9996 Pathogen[ Q85601] interacts with 7 human partners:{Q9NQG7;Q16621;P06744;P01009;Q01543;P20073;P01008}

9997 Pathogen[ P14079] interacts with 7 human partners:{Q9NQG7;P06744;P08758;Q01543;Q16621;P20073;P13928}

9998 Pathogen[ P03383] interacts with 7 human partners:{Q9NQG7;P01009;P01008;P06744;Q16621;Q01543;P20073}

9999 Pathogen[ P03410] interacts with 6 human partners:{Q9NQG7;P06744;Q16621;P20073;P01009;Q01543}

10000 Pathogen[ P14075] interacts with 6 human partners:{Q9NQG7;P06744;Q01543;P01009;P20073;Q16621}

10001 Pathogen[ P0C206] interacts with 7 human partners:{Q9NQG7;P01008;P01009;P06744;Q16621;P20073;Q01543}

10002 Pathogen[ P03363] interacts with 5 human partners:{Q9NQG7;P06744;Q01543;Q16621;P20073}

10003 [Cluster 910]GO:0035924+P biological\_process [name] cellular response to vascular endothelial growth factor stimulus [def] "Any process that results in a change in state or activity of a cell (in terms of movement, secretion, enzyme production, gene expression, etc.) as a result of a vascular endothelial growth factor stimulus." [GOC

10004 Pathogen[ Q2Q067] interacts with 3 human partners:{P04792;P13640;P22736}

10005 Pathogen[ P0C214] interacts with 2 human partners:{P04792;P13640}

10006 Pathogen[ P03346] interacts with 3 human partners:{P13640;P22736;P04792}

10007 Pathogen[ Q85601] interacts with 3 human partners:{P22736;P04792;P13640}

10008 Pathogen[ P14079] interacts with 5 human partners:{P22736;O60895;P54826;P13640;P04792}

10009 Pathogen[ P03383] interacts with 2 human partners:{P13640;P04792}

10010 Pathogen[ P03410] interacts with 5 human partners:{O60895;P04792;P13640;P22736;P54826}

10011 Pathogen[ P14075] interacts with 3 human partners:{P04792;P13640;P54826}

10012 Pathogen[ P0C206] interacts with 4 human partners:{P13640;P04792;P22736;P54826}

10013 Pathogen[ P03363] interacts with 2 human partners:{P13640;P04792}

10014 [Cluster 911]GO:0060396+P biological\_process [name] growth hormone receptor signaling pathway [def] "The series of molecular signals generated as a consequence of growth hormone receptor binding to its physiological ligand." [GOC

10015 Pathogen[ Q2Q067] interacts with 3 human partners:{P40763;O14508;P27986}

10016 Pathogen[ P0C214] interacts with 3 human partners:{O14508;P40763;P27986}

10017 Pathogen[ P03346] interacts with 3 human partners:{O14508;P40763;P27986}

10018 Pathogen[ Q85601] interacts with 3 human partners:{P40763;O14508;P27986}  
10019 Pathogen[ P14079] interacts with 2 human partners:{O14508;P49023}  
10020 Pathogen[ P03383] interacts with 1 human partners:{P27986}  
10021 Pathogen[ P03410] interacts with 3 human partners:{P27986;O14508;P40763}  
10022 Pathogen[ P14075] interacts with 1 human partners:{P27986}  
10023 Pathogen[ P0C206] interacts with 3 human partners:{P27986;O14508;P40763}  
10024 Pathogen[ P03363] interacts with 2 human partners:{O14508;P27986}  
10025 [Cluster 912]GO:0006011+P biological\_process [name] UDP-glucose metabolic process  
[def] "The chemical reactions and pathways involving UDP-glucose,  
uridinediphosphoglucose, a substance composed of glucose in glycosidic linkage with  
uridine diphosphate." [GOC  
10026 Pathogen[ Q2Q067] interacts with 1 human partners:{Q16851}  
10027 Pathogen[ P0C214] interacts with 1 human partners:{Q16851}  
10028 Pathogen[ P03346] interacts with 1 human partners:{Q16851}  
10029 Pathogen[ Q85601] interacts with 1 human partners:{Q16851}  
10030 Pathogen[ P14079] interacts with 1 human partners:{Q16851}  
10031 Pathogen[ P03383] interacts with 1 human partners:{Q16851}  
10032 Pathogen[ P03410] interacts with 1 human partners:{Q16851}  
10033 Pathogen[ P14075] interacts with 1 human partners:{Q16851}  
10034 Pathogen[ P0C206] interacts with 1 human partners:{Q16851}  
10035 Pathogen[ P03363] interacts with 1 human partners:{Q16851}  
10036 [Cluster 913]GO:0032962+P biological\_process [name] positive regulation of inositol  
trisphosphate biosynthetic process [def] "Any process that activates or increases the  
frequency, rate or extent of the chemical reactions and pathways resulting in the  
formation of inositol trisphosphate." [GOC  
10037 Pathogen[ Q2Q067] interacts with 1 human partners:{P28069}  
10038 Pathogen[ P0C214] interacts with 1 human partners:{P28069}  
10039 Pathogen[ P03346] interacts with 1 human partners:{P28069}  
10040 Pathogen[ Q85601] interacts with 1 human partners:{P28069}  
10041 Pathogen[ P14079] interacts with 1 human partners:{P28069}  
10042 Pathogen[ P03383] interacts with 1 human partners:{P28069}  
10043 Pathogen[ P03410] interacts with 1 human partners:{P28069}  
10044 Pathogen[ P14075] interacts with 1 human partners:{P28069}  
10045 Pathogen[ P0C206] interacts with 1 human partners:{P28069}  
10046 Pathogen[ P03363] interacts with 1 human partners:{P28069}  
10047 [Cluster 914]GO:0045014+P biological\_process [name] negative regulation of  
transcription by glucose [def] "Any process involving glucose that stops, prevents or  
reduces the rate of transcription. The presence of glucose in the growth medium inhibits  
the synthesis of certain enzymes in bacteria growing on the medium. For example,  
transcription of some catabolic operons is under negative control by specific repressors  
and glucose is an anti-inducer of xylose utilization and glycerol kinase." [ISBN  
10048 Pathogen[ Q2Q067] interacts with 1 human partners:{Q9HD42}  
10049 Pathogen[ P0C214] interacts with 1 human partners:{Q9HD42}  
10050 Pathogen[ P03346] interacts with 1 human partners:{Q9HD42}  
10051 Pathogen[ Q85601] interacts with 1 human partners:{Q9HD42}  
10052 Pathogen[ P14079] interacts with 1 human partners:{Q9HD42}  
10053 Pathogen[ P03383] interacts with 1 human partners:{Q9HD42}  
10054 Pathogen[ P03410] interacts with 1 human partners:{Q9HD42}  
10055 Pathogen[ P14075] interacts with 1 human partners:{Q9HD42}  
10056 Pathogen[ P0C206] interacts with 1 human partners:{Q9HD42}  
10057 Pathogen[ P03363] interacts with 1 human partners:{Q9HD42}  
10058 [Cluster 915]GO:0043491+P biological\_process [name] protein kinase B signaling  
cascade [def] "A series of reactions, mediated by the intracellular serine/threonine  
kinase protein kinase B, which occurs as a result of a single trigger reaction or  
compound." [GOC  
10059 Pathogen[ Q2Q067] interacts with 2 human partners:{P31749;Q5T1C6}  
10060 Pathogen[ P0C214] interacts with 2 human partners:{Q5T1C6;P31749}  
10061 Pathogen[ P03346] interacts with 1 human partners:{P31749}  
10062 Pathogen[ Q85601] interacts with 2 human partners:{P31749;Q5T1C6}  
10063 Pathogen[ P14079] interacts with 2 human partners:{P31751;Q5T1C6}  
10064 Pathogen[ P03383] interacts with 2 human partners:{P31749;Q5T1C6}  
10065 Pathogen[ P03410] interacts with 2 human partners:{P31749;Q5T1C6}  
10066 Pathogen[ P14075] interacts with 2 human partners:{Q5T1C6;P31749}  
10067 Pathogen[ P0C206] interacts with 2 human partners:{P31749;Q5T1C6}  
10068 Pathogen[ P03363] interacts with 1 human partners:{P31749}  
10069 [Cluster 916]GO:0031053+P biological\_process [name] primary miRNA processing [def]  
"Any process involved in the conversion of a primary microRNA transcript into a  
pre-microRNA molecule." [GOC  
10070 Pathogen[ Q2Q067] interacts with 5 human  
partners:{Q8WYQ5;P84022;Q15796;Q15797;Q9BXP5}  
10071 Pathogen[ P0C214] interacts with 5 human  
partners:{P84022;Q15796;Q15797;Q8WYQ5;Q9BXP5}  
10072 Pathogen[ P03346] interacts with 5 human  
partners:{Q15797;Q15796;Q9BXP5;P84022;Q8WYQ5}  
10073 Pathogen[ Q85601] interacts with 5 human  
partners:{Q15797;Q8WYQ5;Q9BXP5;P84022;Q15796}

10074 Pathogen[ P14079] interacts with 3 human partners:{Q15797;Q8WYQ5;Q9BXP5}  
10075 Pathogen[ P03383] interacts with 5 human  
partners:{Q8WYQ5;Q15797;P84022;Q15796;Q9BXP5}  
10076 Pathogen[ P03410] interacts with 5 human  
partners:{P84022;Q9BXP5;Q8WYQ5;Q15797;Q15796}  
10077 Pathogen[ P14075] interacts with 4 human partners:{Q15796;Q9BXP5;P84022;Q8WYQ5}  
10078 Pathogen[ P0C206] interacts with 5 human  
partners:{P84022;Q15796;Q9BXP5;Q15797;Q8WYQ5}  
10079 Pathogen[ P03363] interacts with 5 human  
partners:{Q9BXP5;Q15797;Q15796;P84022;Q8WYQ5}  
10080 [Cluster 917]GO:0070842+P biological\_process [name] aggresome assembly [def] "The  
aggregation, arrangement and bonding together of a set of components to form an  
aggresome\_ requires the microtubule cytoskeleton and dynein." [GOC  
10081 Pathogen[ Q2Q067] interacts with 2 human partners:{O60260;O15205}  
10082 Pathogen[ P0C214] interacts with 3 human partners:{O15205;O60260;P55072}  
10083 Pathogen[ P03346] interacts with 4 human partners:{P55072;O94972;O15205;O60260}  
10084 Pathogen[ Q85601] interacts with 2 human partners:{O15205;O60260}  
10085 Pathogen[ P14079] interacts with 2 human partners:{O60260;O15205}  
10086 Pathogen[ P03383] interacts with 2 human partners:{O60260;O15205}  
10087 Pathogen[ P03410] interacts with 2 human partners:{O15205;O60260}  
10088 Pathogen[ P14075] interacts with 2 human partners:{O60260;O15205}  
10089 Pathogen[ P0C206] interacts with 3 human partners:{O15205;O60260;P55072}  
10090 Pathogen[ P03363] interacts with 2 human partners:{O15205;O94972}  
10091 [Cluster 918]GO:0048311+P biological\_process [name] mitochondrion distribution  
[def] "Any process that establishes the spatial arrangement of mitochondria between and  
within cells." [GOC  
10092 Pathogen[ Q2Q067] interacts with 2 human partners:{Q86WG3;Q02078}  
10093 Pathogen[ P0C214] interacts with 3 human partners:{Q02078;Q9BUK6;Q86WG3}  
10094 Pathogen[ P03346] interacts with 3 human partners:{Q02078;Q9BUK6;Q86WG3}  
10095 Pathogen[ Q85601] interacts with 3 human partners:{Q02078;Q86WG3;Q9BUK6}  
10096 Pathogen[ P14079] interacts with 3 human partners:{Q02078;Q86WG3;Q9BUK6}  
10097 Pathogen[ P03383] interacts with 2 human partners:{Q86WG3;Q02078}  
10098 Pathogen[ P03410] interacts with 3 human partners:{Q86WG3;Q9BUK6;Q02078}  
10099 Pathogen[ P14075] interacts with 2 human partners:{Q86WG3;Q02078}  
10100 Pathogen[ P0C206] interacts with 3 human partners:{Q02078;Q9BUK6;Q86WG3}  
10101 Pathogen[ P03363] interacts with 2 human partners:{Q86WG3;Q02078}  
10102 [Cluster 919]GO:0048496+P biological\_process [name] maintenance of organ identity  
[def] "The process in which the identity of an organ is maintained. Identity is  
considered to be the aggregate of characteristics by which a structure is recognized."  
[GOC  
10103 Pathogen[ Q2Q067] interacts with 1 human partners:{Q15051}  
10104 Pathogen[ P0C214] interacts with 1 human partners:{Q15051}  
10105 Pathogen[ P03346] interacts with 1 human partners:{Q15051}  
10106 Pathogen[ Q85601] interacts with 1 human partners:{Q15051}  
10107 Pathogen[ P14079] interacts with 1 human partners:{Q15051}  
10108 Pathogen[ P03383] interacts with 1 human partners:{Q15051}  
10109 Pathogen[ P03410] interacts with 1 human partners:{Q15051}  
10110 Pathogen[ P14075] interacts with 1 human partners:{Q15051}  
10111 Pathogen[ P0C206] interacts with 1 human partners:{Q15051}  
10112 Pathogen[ P03363] interacts with 1 human partners:{Q15051}  
10113 [Cluster 920]GO:0090090+P biological\_process [name] negative regulation of canonical  
Wnt receptor signaling pathway [def] "Any process that decreases the rate, frequency,  
or extent of the Wnt receptor signaling pathway through beta-catenin, the series of  
molecular signals initiated by binding of a Wnt protein to a frizzled family receptor on  
the surface of the target cell, followed by propagation of the signal via beta-catenin,  
and ending with a change in transcription of target genes." [GOC  
10114 Pathogen[ Q2Q067] interacts with 19 human  
partners:{O43255;P08151;Q8N7J2;P35638;Q5JTC6;Q99471;P42568;Q9Y3M2;Q9NYF0;Q9UGP4;P566  
93;Q96MT3;Q92769;Q9GZV5;Q04725;O95996;P23508;P18146;O60716}  
10115 Pathogen[ P0C214] interacts with 18 human  
partners:{Q9UGP4;O60716;P56693;Q9GZV5;P42568;Q96MT3;Q9Y3M2;Q92769;P18146;Q04725;Q994  
71;Q8N7J2;P08151;P23508;O43255;Q9NYF0;Q5JTC6;P35638}  
10116 Pathogen[ P03346] interacts with 25 human  
partners:{Q9Y283;Q9UGP4;O60716;Q9Y3M2;P35638;P23508;Q99471;Q8N7J2;Q9GZV5;P56693;O432  
55;Q969G9;Q6P3W7;Q96MT3;Q06190;Q92769;Q04725;Q9Y2G4;O95996;Q9NYF0;P42568;Q969F2;P181  
46;Q5JTC6;P08151}  
10117 Pathogen[ Q85601] interacts with 21 human  
partners:{P18146;P08151;P42568;Q9Y3M2;P23508;Q99471;Q9Y283;Q9NYF0;Q9GZV5;Q96MT3;O607  
16;Q04725;Q92769;Q9NQC7;Q5JTC6;P56693;O95996;Q9UGP4;Q8N7J2;O43255;P35638}  
10118 Pathogen[ P14079] interacts with 20 human  
partners:{Q04725;P08151;Q9GZV5;Q8N7J2;P42568;Q92769;P23508;O95996;P35638;P56693;Q061  
90;Q9Y3M2;Q9Y283;Q99471;Q5JTC6;Q96MT3;Q9NQC7;O60716;Q9UGP4;Q9NYF0}  
10119 Pathogen[ P03383] interacts with 17 human  
partners:{O60716;Q96MT3;P35638;P18146;P42568;Q92769;Q9UGP4;Q04725;Q8N7J2;Q99471;Q5JT  
C6;Q9Y3M2;O43255;Q9NYF0;P23508;P56693;Q9GZV5}  
10120 Pathogen[ P03410] interacts with 23 human

- partners: {Q969F2;P35638;Q9Y3M2;Q9UGP4;O60716;Q9Y283;Q9BQB4;Q06190;P23508;Q9GZV5;Q9Y2G4;Q99471;Q92769;O95996;Q969G9;P56693;P42568;Q9NYF0;Q5JTC6;Q8N7J2;P18146;Q96MT3;Q04725}
- 10121 Pathogen[ P14075] interacts with 17 human  
partners: {Q9GZV5;Q96MT3;Q04725;Q9UGP4;P18146;P35638;P42568;P56693;O43255;Q8N7J2;Q92769;Q5JTC6;P23508;Q9Y3M2;O60716;Q9NYF0;Q99471}
- 10122 Pathogen[ P0C206] interacts with 25 human  
partners: {Q9NQC7;O60716;Q06190;Q92769;O43255;Q969F2;Q96MT3;Q9UGP4;Q9Y2G4;Q04725;P56693;Q99471;O95996;Q6P3W7;Q9Y283;P18146;Q9GZV5;Q8N7J2;P42568;Q9NYF0;P08151;P35638;Q969G9;Q5JTC6;P23508}
- 10123 Pathogen[ P03363] interacts with 22 human  
partners: {Q5JTC6;O95996;P18146;P08151;Q96MT3;Q06190;Q969G9;Q9Y3M2;Q9NYF0;Q99471;P23508;Q9UGP4;P56693;Q9GZV5;P35638;Q9Y283;Q04725;P42568;O43255;O60716;Q9Y2G4;Q8N7J2}
- 10124 [Cluster 921]GO:0019058+P biological\_process [name] viral infectious cycle [def] "A set of processes which all viruses follow to ensure survival\_ includes attachment and entry of the virus particle, decoding of genome information, translation of viral mRNA by host ribosomes, genome replication, and assembly and release of viral particles containing the genome." [ISBN
- 10125 Pathogen[ Q2Q067] interacts with 87 human  
partners: {Q14974;P61313;P62701;O95639;Q86U42;P47914;P46779;Q02543;P26373;P62750;P62273;P62826;P15880;P40429;P46782;P35268;P22090;P46778;P62888;P32969;P62277;P62241;P62244;P05387;P62861;P42766;P05386;Q9UNX3;P30050;P18077;P62891;P61927;P39023;P62081;P61247;O14980;P61254;P62249;P62280;P83731;P62263;P60866;P62906;Q02878;P46777;P62899;P08708;P08865;Q07020;P62913;P62269;P62424;P62917;P62829;P46783;P36578;P62857;P62847;P49207;P23396;P63173;P18621;P39019;P61353;P62266;P42677;Q9Y3U8;P63220;P62841;P83881;P62987;P50914;P46776;P62854;P62753;P05388;P52294;P18124;P62851;P25398;P62910;Q92901;P46781;P27635;P61513;P62945;P62979}
- 10126 Pathogen[ P0C214] interacts with 85 human  
partners: {P62861;P84098;P61247;P15880;P62081;P42766;P62913;P22090;Q92901;P62249;P62899;P62854;P39019;P62263;P62273;P23396;P18077;P05388;P62847;P62829;P26373;P27635;P46778;P61513;P83881;P62701;P49207;P63220;P08865;P32969;Q02543;P62266;P62277;P50914;P46779;P40429;P47914;P63173;O14980;P46783;P52294;P62280;Q9UNX3;Q9Y3U8;P30050;P62753;P62910;P62891;P62269;P46781;P61254;O95639;P62841;P62244;P62987;P62826;Q07020;P42677;P62945;P46776;P62241;P46777;P83731;P35268;P62424;P60866;P62857;Q14974;P61313;P08708;P05387;P25398;P61927;P62750;P62979;P05386;P62851;Q86U42;P46782;P18124;P61353;P36578;P18621;P62906;Q02878}
- 10127 Pathogen[ P03346] interacts with 88 human  
partners: {P05387;O95639;P46779;Q86U42;P63173;P62917;P62249;P62913;P62861;P62277;Q02878;P62280;P39023;P62987;P61927;Q9UNX3;P62857;P46778;P49207;P62266;P61254;P62424;P62273;P83731;P60866;P62899;P35268;P62826;P62891;P08708;P46782;P61353;P62854;Q9Y3U8;P47914;O14980;P08865;P61313;P25398;P61513;P05388;P62269;Q02543;P42766;P62081;P61247;P18621;P46781;P84098;P15880;P50914;P62829;P62979;P39019;P23396;P42677;P62750;P62701;P30050;P62910;P36578;P62847;P62851;P22090;P46777;Q07020;P62263;P62841;P83881;P05386;P18077;P46776;P62241;P62753;P62945;P52294;Q92901;P32969;P26373;P18124;P40429;P27635;P46783;P62906;P62244;Q14974;P62888;P63220}
- 10128 Pathogen[ Q85601] interacts with 88 human  
partners: {P46783;P32969;P61513;P26373;P62857;P62244;P62913;P62854;P62081;P61353;P62891;P46776;P18077;P61313;P05388;P63173;P23396;P62273;P46778;P62829;P30050;P62753;P27635;P62826;P15880;P83881;Q07020;P39019;Q9Y3U8;P62701;P62241;P62424;P83731;P62899;P62945;P62263;P62861;Q02878;Q14974;P39023;P61254;P49207;P62910;P62249;P62280;P47914;P84098;P08708;P42766;P62269;P18621;P05387;Q9UNX3;P62277;P35268;O14980;P62979;P62847;P42677;P63220;O95639;P46782;P46779;P62750;P62851;P62841;P62987;P22090;P61927;P36578;P05386;Q86U42;P08865;P61247;P52294;P46777;P62917;Q92901;P18124;P46781;P25398;P60866;Q02543;P62906;P50914;P62266;P40429;P62888}
- 10129 Pathogen[ P14079] interacts with 87 human  
partners: {Q9Y3U8;P27635;P84098;P46779;P26373;P23396;P40429;P18621;P83881;Q9UNX3;P46781;P83731;P61513;P62847;P62753;P39023;P62273;P25398;P52294;P18077;P46783;P61254;P50914;O95639;P62979;P62841;P18124;P42766;P62266;P61550;P46782;P62987;P62241;P32969;P22090;P62829;P60866;P62854;Q07020;P39019;P63220;P49207;P62244;P62263;Q02543;P62424;Q92901;P62277;P62750;P62910;P63173;P46776;P08708;Q14974;Q86U42;P36578;P62906;P47914;P62280;P62899;P61353;P62081;P62945;P46777;P42677;P30050;P15880;P62891;P62888;P08865;P61927;P62917;P46778;P62249;P62826;P05386;P35268;P62913;P05387;P61247;P62269;P62701;P61313;P62851;P05388;P62857;P62861}
- 10130 Pathogen[ P03383] interacts with 87 human  
partners: {P42766;P36578;P05388;P62266;P39019;P26373;P62913;P62945;P62854;P40429;P62987;P62891;P25398;P62280;Q07020;P62750;P05387;P62249;P62888;P62899;P61927;P46777;P46779;P49207;P83731;P62424;P18124;P46778;Q92901;P62753;P42677;P61247;P83881;P47914;P62917;P62273;Q9UNX3;P30050;P84098;P62826;P32969;P62277;P18077;P63173;P62081;P61313;O14980;P08865;P62851;P46782;P62269;P63220;Q02543;P62244;Q02878;P62910;P27635;Q14974;P62857;P62906;P46783;Q9Y3U8;P60866;P61254;P62979;P62241;P46781;P39023;P62841;P22090;P62701;P62829;P62263;P62847;P35268;P05386;P50914;Q86U42;P62861;P18621;P52294;P46776;P15880;P23396;P61513;P08708;P61353}
- 10131 Pathogen[ P03410] interacts with 89 human  
partners: {P62861;P05386;Q02543;P61247;P62241;P62829;P49207;P26373;P61513;O95639;P61550;Q14974;P62899;P62244;P62913;Q02878;Q92901;P15880;P46777;P46776;P62841;P52294;P30050;P05388;P46781;P18124;P62269;Q07020;P63220;P62910;P62847;P62906;P23396;P18621;P622

- 66;P62249;P63173;P50914;P62280;P22090;P61313;P62979;P62701;P62750;P08865;Q9UNX3;P62277;P36578;P18077;P25398;P61927;P84098;P62854;P62826;P62273;P62081;P46783;Q9Y3U8;P08708;P46782;P32969;P46779;P27635;P62987;P62857;P62263;P62424;P62888;P61254;P46778;P62945;P05387;P42766;P39019;P47914;Q86U42;P40429;P39023;P62917;P62851;P83731;P35268;P61353;P62891;P62753;O14980;P83881;P60866;P42677}
- 10132 Pathogen[ P14075] interacts with 87 human  
partners: {P42766;P49207;P62857;P46781;P63220;P32969;P42677;P62913;P22090;Q02878;P62277;P62851;P08865;P62244;P08708;P61254;P46778;P05388;P83881;P46777;Q9Y3U8;P62249;P62081;P62750;P18621;Q02543;P18124;Q9UNX3;P25398;O14980;P63173;P30050;P52294;P62979;P83731;P84098;P61247;P62753;P46782;P62891;P62861;P18077;P46779;P62917;P39023;P50914;P62269;P62847;P62910;P62273;P40429;P23396;P62241;P15880;P62826;P62987;P62841;P36578;P62266;P61513;P61313;P27635;P62888;Q92901;P35268;P62945;P46776;P46783;Q14974;P62701;P62899;P47914;P62906;P05386;Q86U42;P61353;P39019;P62424;P62829;P62280;Q07020;P62263;P62854;P60866;P26373;P05387;P61927}
- 10133 Pathogen[ P0C206] interacts with 87 human  
partners: {P40429;P61313;P27635;P18124;P62854;P49207;P62081;P30050;P62241;P62244;P50914;P08865;P62750;P18621;P46781;P62266;Q02543;Q14974;Q07020;P83881;P46778;P62263;P62273;Q86U42;Q02878;P62826;P62280;P62857;P62851;P62910;P46782;P61247;P18077;P62913;P61927;P61353;P62888;P36578;P62861;P35268;P23396;P39023;P32969;P62701;P05386;P22090;P84098;P62945;P26373;P46777;P05388;P62979;P62899;P83731;P39019;Q92901;P05387;P46783;P42766;P60866;P62841;Q9UNX3;Q95639;P61513;P62277;P46776;P62906;P63173;P62987;P62891;P62269;P62753;P46779;P52294;P63220;P15880;P25398;P08708;P47914;P62847;P61254;P42677;P62829;P62249;P62424;Q9Y3U8;P62917}
- 10134 Pathogen[ P03363] interacts with 86 human  
partners: {P62913;P18621;P05386;P62750;P23396;P42677;P63173;P08865;P62847;P18077;P05387;P84098;P42766;P62249;P05388;P36578;P62753;P62081;P62910;P61513;P46776;O14980;P61254;P62273;P32969;Q92901;P46778;P61927;P62891;P61353;P08708;P15880;Q86U42;P26373;P83881;P22090;P62861;P62841;Q9UNX3;P30050;P62829;P46782;P35268;P46781;P50914;P63220;P61313;P39019;P46779;Q02543;P46777;P62987;Q14974;P25398;P83731;P62851;P62280;Q9Y3U8;P62888;P62244;P62277;P62906;P62266;P62945;P49207;P62241;P62424;P60866;P61247;P62899;P62857;Q02878;Q07020;P39023;P62854;P62826;P62917;P18124;P40429;P27635;P62263;P47914;P62701;P62269;P46783;P52294}
- 10135 [Cluster 922]GO:0042176+P biological\_process [name] regulation of protein catabolic process [def] "Any process that modulates the frequency, rate or extent of the chemical reactions and pathways resulting in the breakdown of a protein by the destruction of the native, active configuration, with or without the hydrolysis of peptide bonds." [GOC]
- 10136 Pathogen[ Q2Q067] interacts with 11 human  
partners: {Q99460;Q13200;P67775;O14980;O96017;Q9UNN5;Q96PU5;P60953;O14964;O43242;Q00987}
- 10137 Pathogen[ P0C214] interacts with 12 human  
partners: {Q00987;O43242;O14964;P60953;Q13200;Q99460;O14980;O96017;Q9UNN5;P67775;P68543;Q96PU5}
- 10138 Pathogen[ P03346] interacts with 13 human  
partners: {Q96PU5;O96017;Q99460;P60953;P67775;Q00987;O00327;O14980;Q9UNN5;Q13200;O14964;O43242;P68543}
- 10139 Pathogen[ Q85601] interacts with 11 human  
partners: {O96017;O00327;Q96PU5;Q9UNN5;Q13200;O14964;O14980;P67775;Q99460;P60953;Q00987}
- 10140 Pathogen[ P14079] interacts with 5 human  
partners: {Q00987;Q9UNN5;Q99460;P68543;O43242}
- 10141 Pathogen[ P03383] interacts with 8 human  
partners: {P60953;P67775;Q9UNN5;O14980;Q99460;Q13200;O14964;O96017}
- 10142 Pathogen[ P03410] interacts with 10 human  
partners: {Q9UNN5;Q99460;P68543;Q13200;O96017;P60953;Q00987;P67775;O43242;O14980}
- 10143 Pathogen[ P14075] interacts with 7 human  
partners: {P60953;Q13200;O14980;O14964;Q9UNN5;O96017;P67775}
- 10144 Pathogen[ P0C206] interacts with 12 human  
partners: {Q9UNN5;O14964;Q96PU5;O96017;P68543;P67775;O43242;O00327;Q13200;Q99460;P60953;Q00987}
- 10145 Pathogen[ P03363] interacts with 8 human  
partners: {Q9UNN5;O14980;O96017;Q96PU5;O00327;O14964;P60953;P67775}
- 10146 [Cluster 923]GO:0009952+P biological\_process [name] anterior/posterior pattern specification [def] "The regionalization process in which specific areas of cell differentiation are determined along the anterior-posterior axis. The anterior-posterior axis is defined by a line that runs from the head or mouth of an organism to the tail or opposite end of the organism." [GOC]
- 10147 Pathogen[ Q2Q067] interacts with 39 human  
partners: {Q13562;O43365;P25490;O43364;P09067;O60481;Q13485;P35680;P31274;P31268;Q05516;P17483;P28356;P17482;P09017;O43248;P35227;P09629;P42568;Q00444;P35548;P20719;Q15699;Q00056;P31276;Q9NSA3;O75533;P14651;Q15796;P49639;P09016;P14652;Q04743;P14653;Q06587;Q12830;P40424;P31260;P78543}
- 10148 Pathogen[ P0C214] interacts with 24 human  
partners: {P40424;P32243;O43365;P35227;P49639;P31249;P78543;P42568;P17482;P14651;O43248;Q9NSA3;Q06587;P14653;Q13485;Q15796;O75533;P09629;Q15699;P35548;Q05516;Q12830;P31276;O60481}
- 10149 Pathogen[ P03346] interacts with 59 human



partners:{P31249;P47902;Q12830;P49639;P35453;P31260;P31268;P35548;P31270;Q99626;Q00056;P25490;Q15796;Q04743;P31276;P35227;P14652;P14653;P13378;Q86Z02;P17483;P31274;P20719;O43364;O43365;Q15699;Q9NSA3;P28358;O60481;P17481;Q96GD3;P28356;P09017;P09629;P46109;P35680;O75533;P31273;O14627;P09016;P09630;Q05516;P31267;P32242;P42568;P40424;Q13485;O75593;Q13562;P32243;P78543;Q06587;P09067;P17509;Q00444;O43248;P14651;P17482;Q9HBU1}

10150 Pathogen[ Q85601] interacts with 30 human partners:{P49639;P09629;O60481;P42568;P14653;O43248;P25490;O43364;Q12830;Q13562;P31260;P40424;P78543;Q15699;P35548;P35680;P32243;Q05516;P31249;P31274;P14651;O43365;P31276;Q9NSA3;Q13485;Q06587;Q00444;Q15796;P17482;P35227}

10151 Pathogen[ P14079] interacts with 24 human partners:{P78543;O43364;O60481;P35680;O75533;P46109;Q15699;Q05516;P09629;P42568;P31276;P31274;Q12830;P31249;O43365;Q00444;P32243;Q04743;P35227;P25490;P49639;P28360;P14651;Q06587}

10152 Pathogen[ P03383] interacts with 21 human partners:{P35227;Q12830;Q13485;P32243;P40424;P17482;P31276;Q06587;O43365;Q05516;P31249;Q9NSA3;P78543;P49639;P35548;P42568;Q15796;O60481;P09629;Q15699;P14651}

10153 Pathogen[ P03410] interacts with 27 human partners:{P17482;P31274;Q9NSA3;P31276;O60481;P09629;P14651;Q12830;P31249;P35227;P25490;P35548;Q13485;O75533;O43364;Q15699;P42568;P49639;P78543;P32243;P35680;Q06587;P40424;Q04743;Q15796;P46109;O43365}

10154 Pathogen[ P14075] interacts with 19 human partners:{P17482;P40424;O60481;P35548;P42568;P31249;Q15796;O43365;Q13485;P09629;Q06587;Q12830;P78543;Q9NSA3;Q15699;P31276;Q05516;P32243;P35227}

10155 Pathogen[ P0C206] interacts with 39 human partners:{O60481;Q00444;Q9NSA3;O43365;Q04743;P09067;P25490;Q05516;P49639;O75533;P14651;P31268;P17483;Q15699;Q15796;P40424;P14653;P14652;O43248;P32243;P17482;P35680;P35548;Q06587;P42568;Q13485;Q13562;O43364;P31274;P09629;P28356;P20719;P31249;P09016;Q12830;P31260;P31276;P78543;P35227}

10156 Pathogen[ P03363] interacts with 53 human partners:{Q15699;P31273;P35453;Q12830;P47902;P09067;P31274;O60481;P35227;Q99626;P31267;O43365;P14651;P28356;O75533;P20719;P25490;P17481;P78543;P46109;P35548;P32243;O43248;P49639;P17483;P17509;P31249;P14653;P13378;Q9NSA3;P28358;Q00444;P32242;P14652;P31260;Q15796;P31268;Q00056;P09016;P31276;Q13485;P17482;P40424;P42568;P09629;Q06587;O43364;P09630;P09017;Q05516;O14627;Q9HBU1;Q04743}

10157 [Cluster 924]GO:0001675+P biological\_process [name] acrosome assembly [def] "The formation of the acrosome from the spermatid Golgi." [GOC

10158 Pathogen[ Q2Q067] interacts with 2 human partners:{P62380;Q8NG31}

10159 Pathogen[ P0C214] interacts with 2 human partners:{P62380;Q8NG31}

10160 Pathogen[ P03346] interacts with 2 human partners:{P62380;Q8NG31}

10161 Pathogen[ Q85601] interacts with 2 human partners:{Q8NG31;P62380}

10162 Pathogen[ P14079] interacts with 2 human partners:{Q8NG31;P62380}

10163 Pathogen[ P03383] interacts with 1 human partners:{Q8NG31}

10164 Pathogen[ P03410] interacts with 2 human partners:{Q8NG31;P62380}

10165 Pathogen[ P14075] interacts with 1 human partners:{Q8NG31}

10166 Pathogen[ P0C206] interacts with 2 human partners:{P62380;Q8NG31}

10167 Pathogen[ P03363] interacts with 2 human partners:{P62380;Q8NG31}

10168 [Cluster 925]GO:0048850+P biological\_process [name] hypophysis morphogenesis [def] "The process in which the anatomical structures of the hypophysis are generated and organized. The pituitary gland is an endocrine gland that secretes hormones that regulate many other glands." [GOC

10169 Pathogen[ Q2Q067] interacts with 1 human partners:{O75360}

10170 Pathogen[ P0C214] interacts with 1 human partners:{O75360}

10171 Pathogen[ P03346] interacts with 1 human partners:{O75360}

10172 Pathogen[ Q85601] interacts with 1 human partners:{O75360}

10173 Pathogen[ P14079] interacts with 1 human partners:{O75360}

10174 Pathogen[ P03383] interacts with 1 human partners:{O75360}

10175 Pathogen[ P03410] interacts with 1 human partners:{O75360}

10176 Pathogen[ P14075] interacts with 1 human partners:{O75360}

10177 Pathogen[ P0C206] interacts with 1 human partners:{O75360}

10178 Pathogen[ P03363] interacts with 1 human partners:{O75360}

10179 [Cluster 926]GO:0030325+P biological\_process [name] adrenal gland development [def] "The process whose specific outcome is the progression of the adrenal gland over time, from its formation to the mature structure. This gland can either be a discrete structure located bilaterally above each kidney, or a cluster of cells in the head kidney that perform the functions of the adrenal gland. In either case, this organ consists of two cells types, aminergic chromaffin cells and steroidogenic cortical cells." [GOC

10180 Pathogen[ Q2Q067] interacts with 3 human partners:{Q14865;Q9NSC2;P40424}

10181 Pathogen[ P0C214] interacts with 4 human partners:{P40424;O95633;Q14865;Q9NSC2}

10182 Pathogen[ P03346] interacts with 6 human partners:{Q9NSC2;P51843;Q14865;P40424;Q13285;O95633}

10183 Pathogen[ Q85601] interacts with 3 human partners:{P40424;Q14865;Q9NSC2}

10184 Pathogen[ P14079] interacts with 3 human partners:{P10109;Q14865;Q9NSC2}

10185 Pathogen[ P03383] interacts with 2 human partners:{P40424;Q9NSC2}

10186 Pathogen[ P03410] interacts with 4 human partners:{P10109;Q9NSC2;Q14865;P40424}

10187 Pathogen[ P14075] interacts with 2 human partners:{Q9NSC2;P40424}  
10188 Pathogen[ P0C206] interacts with 4 human partners:{O95633;Q9NSC2;P40424;Q14865}  
10189 Pathogen[ P03363] interacts with 2 human partners:{Q14865;P40424}  
10190 [Cluster 927]GO:0003016+P biological\_process [name] respiratory system process  
[def] "A system process carried out by the organs and tissues of the respiratory system.  
The respiratory system is an organ system responsible for respiratory gaseous exchange."  
[GOC  
10191 Pathogen[ Q2Q067] interacts with 2 human partners:{P20719;Q99608}  
10192 Pathogen[ P0C214] interacts with 1 human partners:{Q99608}  
10193 Pathogen[ P03346] interacts with 2 human partners:{P20719;Q99608}  
10194 Pathogen[ Q85601] interacts with 1 human partners:{Q99608}  
10195 Pathogen[ P14079] interacts with 1 human partners:{Q99608}  
10196 Pathogen[ P03383] interacts with 1 human partners:{Q99608}  
10197 Pathogen[ P03410] interacts with 1 human partners:{Q99608}  
10198 Pathogen[ P14075] interacts with 1 human partners:{Q99608}  
10199 Pathogen[ P0C206] interacts with 2 human partners:{Q99608;P20719}  
10200 Pathogen[ P03363] interacts with 2 human partners:{P20719;Q99608}  
10201 [Cluster 928]GO:0006349+P biological\_process [name] regulation of gene expression by  
genetic imprinting [def] "Heritable alterations in the activity of a gene that depend  
on whether it passed through the paternal or the maternal germline, but that are not  
encoded by DNA itself." [GOC  
10202 Pathogen[ Q2Q067] interacts with 7 human  
partners:{Q9NVM4;Q9Y6K1;Q9UJW3;Q9UBC3;Q8NI51;O75530;P49711}  
10203 Pathogen[ P0C214] interacts with 6 human  
partners:{Q8NI51;O75530;Q9NVM4;Q9Y6K1;P49711;Q9UJW3}  
10204 Pathogen[ P03346] interacts with 8 human  
partners:{Q8NI51;Q9Y6K1;Q9NU63;O75530;Q9UBC3;Q9NVM4;P49711;Q9UJW3}  
10205 Pathogen[ Q85601] interacts with 8 human  
partners:{Q8NI51;Q9UJW3;Q9NVM4;P49711;O75530;Q9Y6K1;Q9NU63;Q9UBC3}  
10206 Pathogen[ P14079] interacts with 8 human  
partners:{Q9Y6K1;Q9NVM4;Q9NU63;Q9UBC3;O75530;Q9UJW3;P49711;Q8NI51}  
10207 Pathogen[ P03383] interacts with 5 human  
partners:{Q8NI51;P49711;Q9UJW3;Q9Y6K1;O75530}  
10208 Pathogen[ P03410] interacts with 8 human  
partners:{Q9NVM4;P49711;Q9UBC3;Q8NI51;Q9UJW3;Q9Y6K1;Q9NU63;O75530}  
10209 Pathogen[ P14075] interacts with 5 human  
partners:{Q8NI51;Q9Y6K1;Q9UJW3;P49711;O75530}  
10210 Pathogen[ P0C206] interacts with 8 human  
partners:{O75530;Q9Y6K1;Q8NI51;Q9NVM4;P49711;Q9UBC3;Q9NU63;Q9UJW3}  
10211 Pathogen[ P03363] interacts with 7 human  
partners:{Q9Y6K1;O75530;Q8NI51;P49711;Q9NVM4;Q9UJW3;Q9UBC3}  
10212 [Cluster 929]GO:0022607+P biological\_process [name] cellular component assembly  
[def] "The aggregation, arrangement and bonding together of a cellular component." [GOC  
10213 Pathogen[ Q2Q067] interacts with 1 human partners:{Q86U70}  
10214 Pathogen[ P0C214] interacts with 1 human partners:{Q86U70}  
10215 Pathogen[ P03346] interacts with 1 human partners:{Q86U70}  
10216 Pathogen[ Q85601] interacts with 1 human partners:{Q86U70}  
10217 Pathogen[ P14079] interacts with 1 human partners:{Q86U70}  
10218 Pathogen[ P03383] interacts with 1 human partners:{Q86U70}  
10219 Pathogen[ P03410] interacts with 1 human partners:{Q86U70}  
10220 Pathogen[ P14075] interacts with 1 human partners:{Q86U70}  
10221 Pathogen[ P0C206] interacts with 1 human partners:{Q86U70}  
10222 Pathogen[ P03363] interacts with 1 human partners:{Q86U70}  
10223 [Cluster 930]GO:0010991+P biological\_process [name] negative regulation of SMAD  
protein complex assembly [def] "Any process that decreases the rate, frequency, or  
extent of SMAD protein complex assembly. SMAD protein complex assembly is the  
aggregation, arrangement and bonding together of a set of components to form a protein  
complex that contains SMAD proteins." [GOC  
10224 Pathogen[ Q2Q067] interacts with 2 human partners:{O43541;P35813}  
10225 Pathogen[ P0C214] interacts with 2 human partners:{P35813;O43541}  
10226 Pathogen[ P03346] interacts with 2 human partners:{P35813;O43541}  
10227 Pathogen[ Q85601] interacts with 2 human partners:{O43541;P35813}  
10228 Pathogen[ P14079] interacts with 2 human partners:{P35813;O43541}  
10229 Pathogen[ P03383] interacts with 2 human partners:{P35813;O43541}  
10230 Pathogen[ P03410] interacts with 2 human partners:{P35813;O43541}  
10231 Pathogen[ P14075] interacts with 2 human partners:{P35813;O43541}  
10232 Pathogen[ P0C206] interacts with 2 human partners:{O43541;P35813}  
10233 Pathogen[ P03363] interacts with 1 human partners:{O43541}  
10234 [Cluster 931]GO:0001835+P biological\_process [name] blastocyst hatching [def] "The  
hatching of the cellular blastocyst from the zona pellucida." [GOC  
10235 Pathogen[ Q2Q067] interacts with 3 human partners:{Q99708;Q12824;Q9HBD4}  
10236 Pathogen[ P0C214] interacts with 3 human partners:{Q12824;Q9HBD4;Q99708}  
10237 Pathogen[ P03346] interacts with 3 human partners:{Q9HBD4;Q99708;Q12824}  
10238 Pathogen[ Q85601] interacts with 3 human partners:{Q99708;Q9HBD4;Q12824}  
10239 Pathogen[ P14079] interacts with 2 human partners:{Q99708;Q12824}  
10240 Pathogen[ P03383] interacts with 3 human partners:{Q9HBD4;Q12824;Q99708}

10241 Pathogen[ P03410] interacts with 3 human partners:{Q99708;Q12824;Q9HBD4}  
10242 Pathogen[ P14075] interacts with 3 human partners:{Q9HBD4;Q12824;Q99708}  
10243 Pathogen[ P0C206] interacts with 3 human partners:{Q99708;Q12824;Q9HBD4}  
10244 Pathogen[ P03363] interacts with 3 human partners:{Q99708;Q9HBD4;Q12824}  
10245 [Cluster 932]GO:0045765+P biological\_process [name] regulation of angiogenesis  
[def] "Any process that modulates the frequency, rate or extent of angiogenesis." [GOC  
10246 Pathogen[ Q2Q067] interacts with 6 human  
partners:{P23381;Q9BUP3;P41134;P04264;P13489;Q9GZT9}  
10247 Pathogen[ P0C214] interacts with 7 human  
partners:{P13489;P04264;P23381;P05121;Q9BUP3;P41134;Q9GZT9}  
10248 Pathogen[ P03346] interacts with 6 human  
partners:{P23381;P13489;Q9BUP3;P41134;Q9GZT9;P04264}  
10249 Pathogen[ Q85601] interacts with 7 human  
partners:{P41134;P23381;Q9GZT9;P04264;P05121;P13489;Q9BUP3}  
10250 Pathogen[ P14079] interacts with 7 human  
partners:{Q9GZT9;P23381;P13489;Q9BUP3;Q13164;P41134;P04264}  
10251 Pathogen[ P03383] interacts with 4 human partners:{P23381;P04264;P13489;Q9BUP3}  
10252 Pathogen[ P03410] interacts with 7 human  
partners:{P13489;P05121;P04264;P23381;P41134;Q9GZT9;Q9BUP3}  
10253 Pathogen[ P14075] interacts with 5 human  
partners:{Q9BUP3;Q9GZT9;P23381;P13489;P04264}  
10254 Pathogen[ P0C206] interacts with 7 human  
partners:{Q9BUP3;Q9GZT9;P13489;P04264;P41134;P05121;P23381}  
10255 Pathogen[ P03363] interacts with 5 human  
partners:{Q9BUP3;P13489;P23381;P41134;P04264}  
10256 [Cluster 933]GO:0035108+P biological\_process [name] limb morphogenesis [def] "The  
process in which the anatomical structures of a limb are generated and organized. A limb  
is an appendage of an animal used for locomotion or grasping. Examples include legs,  
arms or some types of fin." [ISBN  
10257 Pathogen[ Q2Q067] interacts with 1 human partners:{O95613}  
10258 Pathogen[ P0C214] interacts with 1 human partners:{O95613}  
10259 Pathogen[ P03346] interacts with 4 human partners:{P35453;Q03828;Q68CZ1;O95613}  
10260 Pathogen[ Q85601] interacts with 1 human partners:{O95613}  
10261 Pathogen[ P14079] interacts with 3 human partners:{Q68CZ1;P35475;O95613}  
10262 Pathogen[ P03383] interacts with 1 human partners:{O95613}  
10263 Pathogen[ P03410] interacts with 2 human partners:{Q68CZ1;O95613}  
10264 Pathogen[ P14075] interacts with 1 human partners:{O95613}  
10265 Pathogen[ P0C206] interacts with 1 human partners:{O95613}  
10266 Pathogen[ P03363] interacts with 3 human partners:{P35453;O95613;Q03828}  
10267 [Cluster 934]GO:0042797+P biological\_process [name] tRNA transcription from RNA  
polymerase III promoter [def] "The synthesis of transfer RNA (tRNA) from a DNA template  
by RNA Polymerase III (Pol III), originating at a Pol III promoter." [GOC  
10268 Pathogen[ Q2Q067] interacts with 4 human partners:{Q9Y5Q8;Q9UKN8;Q12789;Q969F1}  
10269 Pathogen[ P0C214] interacts with 4 human partners:{Q9Y5Q8;Q9UKN8;Q12789;Q969F1}  
10270 Pathogen[ P03346] interacts with 6 human  
partners:{Q9Y5Q8;Q9UKN8;Q8WUA4;Q9Y5Q9;Q969F1;Q12789}  
10271 Pathogen[ Q85601] interacts with 4 human partners:{Q9UKN8;Q9Y5Q8;Q12789;Q969F1}  
10272 Pathogen[ P14079] interacts with 6 human  
partners:{Q9UKN8;Q9Y5Q9;Q969F1;Q9Y5Q8;Q12789;Q8WUA4}  
10273 Pathogen[ P03383] interacts with 4 human partners:{Q9UKN8;Q969F1;Q9Y5Q8;Q12789}  
10274 Pathogen[ P03410] interacts with 6 human  
partners:{Q9Y5Q9;Q969F1;Q9Y5Q8;Q12789;Q8WUA4;Q9UKN8}  
10275 Pathogen[ P14075] interacts with 4 human partners:{Q969F1;Q12789;Q9Y5Q8;Q9UKN8}  
10276 Pathogen[ P0C206] interacts with 6 human  
partners:{Q969F1;Q8WUA4;Q9Y5Q9;Q9Y5Q8;Q9UKN8;Q12789}  
10277 Pathogen[ P03363] interacts with 6 human  
partners:{Q969F1;Q8WUA4;Q9Y5Q9;Q12789;Q9UKN8;Q9Y5Q8}  
10278 [Cluster 935]GO:0007095+P biological\_process [name] mitotic cell cycle G2/M  
transition DNA damage checkpoint [def] "A mitotic cell cycle checkpoint that blocks  
cell cycle progression from G2 to M phase in response to DNA damage." [GOC  
10279 Pathogen[ Q2Q067] interacts with 3 human partners:{O60934;P51959;P20248}  
10280 Pathogen[ P0C214] interacts with 2 human partners:{P20248;P51959}  
10281 Pathogen[ P03346] interacts with 5 human  
partners:{P20248;P98177;O60934;P51959;Q96M02}  
10282 Pathogen[ Q85601] interacts with 4 human partners:{Q96M02;P51959;P20248;O60934}  
10283 Pathogen[ P14079] interacts with 4 human partners:{P51959;O60934;Q96M02;P20248}  
10284 Pathogen[ P03383] interacts with 2 human partners:{P51959;P20248}  
10285 Pathogen[ P03410] interacts with 4 human partners:{Q96M02;P51959;P20248;O60934}  
10286 Pathogen[ P14075] interacts with 2 human partners:{P51959;P20248}  
10287 Pathogen[ P0C206] interacts with 4 human partners:{Q96M02;O60934;P20248;P51959}  
10288 Pathogen[ P03363] interacts with 3 human partners:{P20248;Q96M02;P51959}  
10289 [Cluster 936]GO:0050776+P biological\_process [name] regulation of immune response  
[def] "Any process that modulates the frequency, rate or extent of the immune response,  
the immunological reaction of an organism to an immunogenic stimulus." [GOC  
10290 Pathogen[ Q2Q067] interacts with 3 human partners:{P41182;Q92985;P84022}  
10291 Pathogen[ P0C214] interacts with 3 human partners:{P84022;Q92985;P41182}

10292 Pathogen[ P03346] interacts with 4 human partners:{Q9H6Q3;P84022;P41182;Q92985}  
10293 Pathogen[ Q85601] interacts with 4 human partners:{Q9H6Q3;Q92985;P84022;P41182}  
10294 Pathogen[ P14079] interacts with 7 human  
partners:{Q9BXL7;P13164;Q8IVK1;Q92985;P41182;Q9H6Q3;Q9UBK5}  
10295 Pathogen[ P03383] interacts with 2 human partners:{Q92985;P84022}  
10296 Pathogen[ P03410] interacts with 8 human  
partners:{P84022;Q9UBK5;P20963;Q9BXL7;P41182;Q8IVK1;Q92985;Q9H6Q3}  
10297 Pathogen[ P14075] interacts with 3 human partners:{Q8IVK1;Q92985;P84022}  
10298 Pathogen[ P0C206] interacts with 5 human  
partners:{P84022;Q9H6Q3;P41182;Q92985;Q8IVK1}  
10299 Pathogen[ P03363] interacts with 3 human partners:{Q92985;Q9H6Q3;P84022}  
10300 [Cluster 937]GO:0002042+P biological\_process [name] cell migration involved in  
sprouting angiogenesis [def] "The orderly movement of endothelial cells into the  
extracellular matrix in order to form new blood vessels involved in sprouting  
angiogenesis." [PMID  
10301 Pathogen[ Q2Q067] interacts with 2 human partners:{P11831;P22736}  
10302 Pathogen[ P0C214] interacts with 1 human partners:{P11831}  
10303 Pathogen[ P03346] interacts with 2 human partners:{P11831;P22736}  
10304 Pathogen[ Q85601] interacts with 2 human partners:{P11831;P22736}  
10305 Pathogen[ P14079] interacts with 1 human partners:{P22736}  
10306 Pathogen[ P03383] interacts with 1 human partners:{P11831}  
10307 Pathogen[ P03410] interacts with 2 human partners:{P11831;P22736}  
10308 Pathogen[ P14075] interacts with 1 human partners:{P11831}  
10309 Pathogen[ P0C206] interacts with 2 human partners:{P22736;P11831}  
10310 Pathogen[ P03363] interacts with 1 human partners:{P11831}  
10311 [Cluster 938]GO:0008033+P biological\_process [name] tRNA processing [def] "The  
process in which a pre-tRNA molecule is converted to a mature tRNA, ready for addition  
of an aminoacyl group." [GOC  
10312 Pathogen[ Q2Q067] interacts with 42 human  
partners:{O95363;P78346;P62312;O60294;P49591;P22087;O75818;Q8NCE0;Q99575;Q9Y606;Q9BU  
L9;Q7Z7A3;Q15046;Q9UBP6;Q9H777;Q9Y2Z2;A6NHQ2;Q7L0Y3;Q9H4B0;Q9BSV6;O75817;Q08J23;P570  
81;Q2VPK5;P78345;Q96FX7;Q969H6;Q8WW01;Q32P41;Q9BZE2;Q9UJA5;Q9BVS5;Q9BQ52;Q9H974;Q7Z6  
J9;O95707;Q9BXR0;Q9BTM9;Q9H633;O95900;Q9NUP7;O95059}  
10313 Pathogen[ P0C214] interacts with 47 human  
partners:{Q9BTM9;P62312;Q3MIT2;Q96FX7;O75818;Q9H633;Q9BUL9;O95363;Q969H6;Q7L0Y3;A6NH  
Q2;P78345;Q9H777;Q9Y2Z2;P22087;O95396;Q9BXR0;P49591;Q9BSV6;O95059;O95707;Q9H3H1;Q995  
75;O75817;Q2VPK5;Q9BZE2;Q9BQ52;Q08J23;P57081;Q8IYL2;O95900;O60294;Q9H4B0;P49588;Q9UB  
P6;Q7Z7A3;Q32P41;Q9NUP7;Q9UJA5;Q9H974;Q15046;Q9Y606;P78346;Q8WW01;Q8NCE0;Q9BVS5;Q7Z6  
J9}  
10314 Pathogen[ P03346] interacts with 44 human  
partners:{Q08J23;Q9Y606;Q96FX7;Q9BTM9;P78346;Q9H633;Q32P41;O95900;A6NHQ2;Q7Z6J9;Q8IY  
L2;Q9BZE2;Q969H6;O95707;Q9Y2Z2;Q9H4B0;Q9BUL9;O60294;O75817;Q9BVS5;Q7Z7A3;O75818;O147  
17;Q8N0Z8;Q9H777;Q9UBP6;Q99575;Q9NUP7;Q8WWH5;P78345;Q9BXR0;Q9H974;Q96GJ1;Q9UJA5;P220  
87;Q7L0Y3;Q8WW01;Q2VPK5;O95059;Q9BQ52;P62312;Q9BSV6;P57081;Q8NCE0}  
10315 Pathogen[ Q85601] interacts with 40 human  
partners:{Q9BUL9;Q32P41;Q9BQ52;Q9BXR0;P78346;Q99575;Q9BZE2;Q9BVS5;O95059;Q9Y606;A6NH  
Q2;Q9UBP6;Q969H6;Q9Y2Z2;Q9H974;Q15046;Q96FX7;Q2VPK5;Q9BSV6;Q9H777;O95707;O60294;O758  
17;O75818;Q9BTM9;Q08J23;Q8IYL2;P57081;Q7Z7A3;P62312;Q9NUP7;Q7Z6J9;O95363;P78345;Q9UJ  
A5;P22087;Q7L0Y3;Q8WW01;Q9H633;Q8NCE0}  
10316 Pathogen[ P14079] interacts with 61 human  
partners:{Q5VV42;Q7Z2T5;P78346;Q9BRP7;O60294;O75817;Q9BZE2;Q6IPR3;Q86TN4;Q3MIT2;Q9H7  
77;Q9NUP7;Q9BSV6;Q9Y2Z2;O95363;P49591;Q7Z4G4;Q8WW01;P62312;A6NHQ2;Q32P41;Q8NCE0;O957  
07;P57081;P22087;O95059;Q9NPF4;Q96P20;O75648;Q15046;Q8N0Z8;Q9BXR0;Q2VPK5;Q7Z6J9;Q995  
75;Q08J23;Q9BUL9;Q9UJA5;Q9H0K6;Q9H633;Q9BQ52;Q9NWX6;Q9Y606;Q9H4B0;O75818;Q96GJ1;Q9BV  
S5;Q96Q11;P78345;O15091;Q9H3H1;P49588;Q8IYL2;Q7Z7A3;O95900;Q96FX7;Q9H974;Q7L0Y3;Q9BT  
M9;Q96EY9;Q8WWH5}  
10317 Pathogen[ P03383] interacts with 42 human  
partners:{P78345;Q9H974;Q9H4B0;Q9H777;P62312;Q969H6;Q9H633;Q7Z7A3;Q99575;Q7Z6J9;Q8IY  
L2;Q9UBP6;Q8NCE0;O95059;Q9Y2Z2;Q9BVS5;Q7L0Y3;Q9BZE2;Q32P41;Q9BQ52;O95707;O75817;Q9BS  
V6;Q9Y606;Q9BTM9;O60294;Q15046;P57081;Q08J23;O95363;O75818;Q9BXR0;Q96FX7;Q9NUP7;Q9UJ  
A5;O95900;Q9BUL9;Q2VPK5;P22087;P49591;P78346;Q8WW01}  
10318 Pathogen[ P03410] interacts with 60 human  
partners:{Q9BRP7;Q32P41;O75648;Q96Q11;P22087;O75127;Q96EY9;Q7Z6J9;P78346;Q9H974;P783  
45;Q9Y2Z2;Q99575;Q9UBP6;P49588;Q9NPF4;A6NHQ2;Q9BQ52;Q7Z4G4;Q9H4B0;Q7Z7A3;Q9H3H1;Q9BS  
V6;Q8IYL2;P49591;Q6IPR3;Q9UJA5;O95707;Q9BUL9;Q8N0Z8;O75818;Q2VPK5;Q9H777;Q9BZE2;Q150  
46;Q96GJ1;Q8WWH5;O60294;Q9Y606;Q08J23;O15091;Q96FX7;P57081;O95900;Q9BTM9;Q86TN4;Q9H0  
K6;P62312;Q969H6;Q8NCE0;Q9BVS5;Q9H633;Q3MIT2;Q9NUP7;Q9NWX6;O75817;O95363;O95059;Q8WW  
01;Q7L0Y3}  
10319 Pathogen[ P14075] interacts with 46 human  
partners:{Q9H974;Q8N0Z8;Q9BTM9;Q9BSV6;Q7Z6J9;Q9H3H1;O75648;Q7L0Y3;Q9Y606;Q9BXR0;Q9Y2  
Z2;O95363;Q8WWH5;O60294;O95900;P62312;Q32P41;Q9H777;O75817;Q8WW01;Q8NCE0;P57081;Q2VP  
K5;Q9BQ52;Q7Z7A3;P22087;P78345;P78346;Q9UBP6;Q9BVS5;Q9BZE2;Q9NUP7;Q8IYL2;O95059;Q9H6  
33;Q96FX7;Q9UJA5;Q9H4B0;Q08J23;Q15046;Q9BUL9;O95707;O75818;P49591;Q99575;Q969H6}  
10320 Pathogen[ P0C206] interacts with 54 human  
partners:{O95363;Q9BUL9;Q08J23;A6NHQ2;Q8WWH5;Q9BSV6;Q9UBP6;Q9H4B0;Q32P41;Q96GJ1;O602  
94;O75818;Q9BRP7;O95059;Q9Y2Z2;P49591;Q969H6;O15091;Q9BZE2;Q96FX7;Q2VPK5;Q7L0Y3;Q9BV

- S5;Q9H974;O95707;P57081;Q7Z4G4;O75817;Q9NUP7;P78345;O95900;Q9H3H1;Q9Y606;Q9NPF4;Q9UJ  
A5;Q7Z6J9;Q8WW01;Q9H777;P22087;Q99575;Q9BXR0;Q96EY9;P62312;Q8NCE0;Q8N0Z8;Q8IYL2;P783  
46;Q9BQ52;Q9H633;Q6IPR3;O95396;Q7Z7A3;Q15046;Q9BTM9}
- 10321 Pathogen[ P03363] interacts with 41 human  
partners: {Q32P41;Q9BZE2;Q08J23;Q9BXR0;Q9BSV6;O95059;P62312;Q99575;O75817;Q9Y606;O758  
18;O95900;Q9BTM9;O14717;Q8IYL2;Q7Z7A3;O95707;Q9H633;Q9UBP6;Q2VPK5;Q9H974;Q96FX7;P220  
87;P57081;Q7L0Y3;Q8WW01;O95363;Q9UJA5;Q8N0Z8;P49591;O60294;Q969H6;P78345;Q9BVS5;Q8WW  
H5;Q7Z4G4;P78346;Q7Z6J9;Q8NCE0;Q9BUL9;A6NHQ2}
- 10322 [Cluster 939]GO:0042384+P biological\_process [name] cilium assembly [def] "The  
assembly of a cilium, a specialized eukaryotic organelle that consists of a filiform  
extrusion of the cell surface. Each cilium is bounded by an extrusion of the cytoplasmic  
membrane, and contains a regular longitudinal array of microtubules, anchored basally in  
a centriole." [GOC
- 10323 Pathogen[ Q2Q067] interacts with 19 human  
partners: {P48380;Q3B820;O95948;Q9UPV0;Q86YF9;D6RGH6;Q96QF0;Q9Y3M2;Q9BYV8;Q9NXB0;Q162  
54;O15078;Q9BUN5;Q96NB1;Q15051;Q95613;Q9BPU9;Q15154;A8MTZ0}
- 10324 Pathogen[ P0C214] interacts with 18 human  
partners: {O15078;D6RGH6;Q16254;Q15154;Q15051;Q9BYV8;Q9UPV0;Q9NXB0;Q9BPU9;Q9Y3M2;A8MT  
Z0;Q3B820;P48380;O95613;O95948;Q86YF9;Q96QF0;Q96NB1}
- 10325 Pathogen[ P03346] interacts with 28 human  
partners: {Q9Y3M2;Q9BPU9;Q15154;Q68CZ1;P48380;A8MTZ0;D6RGH6;Q16254;Q9UBC0;Q15051;Q9BT  
04;Q86YF9;Q8TAM2;Q9NXB0;O95948;Q15019;Q8N0X2;Q8N157;Q3B820;Q9BYV8;Q96PY6;O95613;O150  
78;Q92834;Q96NB1;Q9UPV0;Q9BUN5;Q96QF0}
- 10326 Pathogen[ Q85601] interacts with 21 human  
partners: {Q15154;Q9Y3M2;A8MTZ0;Q96PY6;O15078;D6RGH6;Q92834;Q9UPV0;Q9NXB0;O95948;Q150  
51;Q9BYV8;Q16254;Q3B820;Q9BPU9;O95613;P48380;Q9BT04;Q86YF9;Q96NB1;Q96QF0}
- 10327 Pathogen[ P14079] interacts with 41 human  
partners: {Q9PON5;Q9NPI0;D6RGH6;Q96GX1;Q16254;Q8N0X2;O95948;Q8N157;Q68CZ1;Q96Q45;Q928  
34;P48380;Q8NPF9;Q8N3I7;Q8IYY4;Q9Y4R7;Q9GZS0;A0AVF1;Q9BUN5;Q9UPM9;Q8TAM2;Q96QF0;Q4AC  
94;Q9BPU9;Q8TCU4;Q9P2L0;Q8TC44;Q9Y3M2;Q3B820;O95613;Q15051;Q86YF9;O15078;Q9P2K1;Q151  
54;A8MTZ0;Q9NXB0;Q9BYV8;Q9UPV0;Q96NB1;Q9BT04}
- 10328 Pathogen[ P03383] interacts with 19 human  
partners: {Q15051;Q96QF0;Q9BUN5;P48380;A8MTZ0;D6RGH6;Q96NB1;Q9NXB0;O15078;Q16254;Q151  
54;Q9BYV8;Q9Y3M2;Q9UPV0;Q96PY6;Q86YF9;Q3B820;O95613;Q9BT04}
- 10329 Pathogen[ P03410] interacts with 42 human  
partners: {Q3B820;Q9Y4R7;Q96NB1;Q8NPF9;Q15154;Q8N0X2;Q96RY7;Q9Y3M2;Q96Q45;Q4AC94;Q8TA  
M2;Q16254;D6RGH6;A0AVF1;Q8TCU4;O95948;Q8TCX1;Q9BYV8;A8MTZ0;Q96GX1;Q9BT04;Q86YF9;Q9NP  
I0;Q9BPU9;Q8N157;Q9PON5;P48380;O15078;Q8N3I7;Q9P2K1;Q9UPM9;Q92834;Q9BUN5;Q15051;Q96Q  
F0;Q8TC44;Q9UPV0;Q9NXB0;Q9P2L0;Q68CZ1;O95613;Q9GZS0}
- 10330 Pathogen[ P14075] interacts with 20 human  
partners: {Q9BYV8;Q15051;P48380;Q9BT04;Q9BUN5;Q9UPV0;Q9NXB0;O15078;Q16254;Q96NB1;Q9BP  
U9;Q15154;Q96QF0;Q96PY6;O95613;Q9Y3M2;A8MTZ0;D6RGH6;Q86YF9;Q3B820}
- 10331 Pathogen[ P0C206] interacts with 30 human  
partners: {Q9BPU9;Q15019;Q9UPM9;Q8TAM2;Q86YF9;Q9BT04;Q8TCU4;Q9P2K1;Q96PY6;Q9UBC0;Q9UP  
V0;D6RGH6;P48380;Q8N3I7;Q16254;Q96QF0;O95613;Q9BUN5;O15078;Q8N157;Q9BYV8;Q3B820;Q8NF  
J9;Q15154;Q9NXB0;Q96NB1;Q15051;A8MTZ0;Q92834;O95948}
- 10332 Pathogen[ P03363] interacts with 29 human  
partners: {Q9UBC0;Q15051;Q8N0X2;O95948;Q8TAM2;Q9BYV8;Q3B820;O15078;Q9GZS0;Q9P2K1;O956  
13;Q16254;Q9Y3M2;A8MTZ0;Q8N157;Q9BPU9;Q9BT04;Q96NB1;D6RGH6;Q9UPV0;Q92834;Q86YF9;P483  
80;Q8NPF9;Q9NXB0;Q15154;Q8TC44;Q9BUN5;Q96QF0}
- 10333 [Cluster 940]GO:0070830+P biological\_process [name] tight junction assembly [def]  
"The aggregation, arrangement and bonding together of a set of components to form a  
tight junction, an occluding cell-cell junction that is composed of a branching network  
of sealing strands that completely encircles the apical end of each cell in an  
epithelial sheet." [GOC
- 10334 Pathogen[ Q2Q067] interacts with 9 human  
partners: {Q9BTW9;Q8NI35;Q9NPB6;Q9BYG5;Q86UE4;P11831;Q12959;Q68DX3;Q9BYG4}
- 10335 Pathogen[ P0C214] interacts with 10 human  
partners: {Q68DX3;Q8NI35;Q9BTW9;P11831;Q86UE4;Q9NPB6;Q12959;Q9BYG5;Q9BYG4;P36404}
- 10336 Pathogen[ P03346] interacts with 14 human  
partners: {Q68DX3;Q86UE4;P11831;O43815;Q9NPB6;Q8TEW0;Q8NI35;Q8N3R9;Q9BYG5;Q5T2T1;P364  
04;Q9BYG4;Q9H8V3;Q12959}
- 10337 Pathogen[ Q85601] interacts with 10 human  
partners: {P11831;Q9BYG5;O43815;Q9BTW9;Q8NI35;Q68DX3;Q9NPB6;Q86UE4;Q12959;Q9BYG4}
- 10338 Pathogen[ P14079] interacts with 16 human  
partners: {Q9BTW9;Q68DX3;Q8N7P3;Q9BYG5;P56750;Q5T2T1;O43815;O60895;Q8TEW0;Q8NI35;Q9BY  
G4;Q96B33;Q9H8V3;Q86UE4;Q8N3R9;Q9NPB6}
- 10339 Pathogen[ P03383] interacts with 6 human  
partners: {P11831;Q86UE4;Q9BYG5;Q9NPB6;Q68DX3;Q9BYG4}
- 10340 Pathogen[ P03410] interacts with 18 human  
partners: {P11831;Q96B33;Q8N7P3;O60895;Q12959;Q8NI35;Q5T2T1;Q9BTW9;Q86UE4;Q8TEW0;O438  
15;Q9NPB6;Q9H8V3;P56750;Q68DX3;Q9BYG4;Q8N3R9;Q9BYG5}
- 10341 Pathogen[ P14075] interacts with 6 human  
partners: {Q68DX3;P11831;Q86UE4;Q9BYG4;Q9NPB6}
- 10342 Pathogen[ P0C206] interacts with 14 human  
partners: {O43815;Q9BTW9;Q9BYG5;Q8N3R9;Q8TEW0;Q5T2T1;Q8NI35;Q9NPB6;Q9H8V3;P11831;Q86U

E4;Q68DX3;Q12959;Q9BYG4}

10343 Pathogen[ P03363] interacts with 12 human partners: {Q12959;Q9NPB6;Q5T2T1;Q86UE4;Q9BYG4;P11831;O43815;Q8N3R9;Q9BTW9;Q9BYG5;Q8NI35;Q68DX3}

10344 [Cluster 941]GO:0032609+P biological\_process [name] interferon-gamma production [def] "The appearance of interferon-gamma due to biosynthesis or secretion following a cellular stimulus, resulting in an increase in its intracellular or extracellular levels. Interferon-gamma is also known as type II interferon." [GOC

10345 Pathogen[ Q2Q067] interacts with 1 human partners: {Q13761}

10346 Pathogen[ P0C214] interacts with 1 human partners: {Q13761}

10347 Pathogen[ P03346] interacts with 1 human partners: {Q13761}

10348 Pathogen[ Q85601] interacts with 1 human partners: {Q13761}

10349 Pathogen[ P14079] interacts with 1 human partners: {Q13761}

10350 Pathogen[ P03383] interacts with 1 human partners: {Q13761}

10351 Pathogen[ P03410] interacts with 1 human partners: {Q13761}

10352 Pathogen[ P14075] interacts with 1 human partners: {Q13761}

10353 Pathogen[ P0C206] interacts with 1 human partners: {Q13761}

10354 Pathogen[ P03363] interacts with 1 human partners: {Q13761}

10355 [Cluster 942]GO:0048754+P biological\_process [name] branching morphogenesis of a tube [def] "The process in which the anatomical structures of branches in a tube are generated and organized. A tube is a long hollow cylinder." [GOC

10356 Pathogen[ Q2Q067] interacts with 5 human partners: {P04198;Q9UNSL;P35680;Q9NXB0;P62136}

10357 Pathogen[ P0C214] interacts with 4 human partners: {Q9NXB0;Q9UNSL;P62136;P04198}

10358 Pathogen[ P03346] interacts with 5 human partners: {P62136;Q9UNSL;Q9NXB0;P35680;P04198}

10359 Pathogen[ Q85601] interacts with 5 human partners: {Q9NXB0;P62136;P35680;P04198;Q9UNSL}

10360 Pathogen[ P14079] interacts with 7 human partners: {O43597;P35680;P62136;P04198;P49023;Q9UNSL;Q9NXB0}

10361 Pathogen[ P03383] interacts with 4 human partners: {Q9UNSL;P62136;Q9NXB0;P04198}

10362 Pathogen[ P03410] interacts with 6 human partners: {O43597;P62136;Q9UNSL;P35680;Q9NXB0;P04198}

10363 Pathogen[ P14075] interacts with 4 human partners: {P04198;P62136;Q9NXB0;Q9UNSL}

10364 Pathogen[ P0C206] interacts with 6 human partners: {Q9UNSL;P35680;P04198;O43597;Q9NXB0;P62136}

10365 Pathogen[ P03363] interacts with 4 human partners: {P62136;P04198;Q9UNSL;Q9NXB0}

10366 [Cluster 943]GO:0010424+P biological\_process [name] DNA methylation on cytosine within a CG sequence [def] "The covalent transfer of a methyl group to C-5 or N-4 of a cytosine located within a CG sequence in a DNA molecule." [GOC

10367 Pathogen[ Q2Q067] interacts with 3 human partners: {Q9Y6K1;Q9UBC3;Q9HBD4}

10368 Pathogen[ P0C214] interacts with 2 human partners: {Q9HBD4;Q9Y6K1}

10369 Pathogen[ P03346] interacts with 3 human partners: {Q9Y6K1;Q9HBD4;Q9UBC3}

10370 Pathogen[ Q85601] interacts with 3 human partners: {Q9Y6K1;Q9HBD4;Q9UBC3}

10371 Pathogen[ P14079] interacts with 2 human partners: {Q9Y6K1;Q9UBC3}

10372 Pathogen[ P03383] interacts with 2 human partners: {Q9HBD4;Q9Y6K1}

10373 Pathogen[ P03410] interacts with 3 human partners: {Q9UBC3;Q9Y6K1;Q9HBD4}

10374 Pathogen[ P14075] interacts with 2 human partners: {Q9Y6K1;Q9HBD4}

10375 Pathogen[ P0C206] interacts with 3 human partners: {Q9Y6K1;Q9HBD4;Q9UBC3}

10376 Pathogen[ P03363] interacts with 3 human partners: {Q9Y6K1;Q9HBD4;Q9UBC3}

10377 [Cluster 944]GO:0055119+P biological\_process [name] relaxation of cardiac muscle [def] "The process in which the extent of cardiac muscle contraction is reduced." [GOC

10378 Pathogen[ Q2Q067] interacts with 1 human partners: {P41220}

10379 Pathogen[ P0C214] interacts with 1 human partners: {P41220}

10380 Pathogen[ P03346] interacts with 1 human partners: {P41220}

10381 Pathogen[ Q85601] interacts with 1 human partners: {P41220}

10382 Pathogen[ P14079] interacts with 1 human partners: {P41220}

10383 Pathogen[ P03383] interacts with 1 human partners: {P41220}

10384 Pathogen[ P03410] interacts with 1 human partners: {P41220}

10385 Pathogen[ P14075] interacts with 1 human partners: {P41220}

10386 Pathogen[ P0C206] interacts with 1 human partners: {P41220}

10387 Pathogen[ P03363] interacts with 1 human partners: {P41220}

10388 [Cluster 945]GO:0006520+P biological\_process [name] cellular amino acid metabolic process [def] "The chemical reactions and pathways involving amino acids, carboxylic acids containing one or more amino groups, as carried out by individual cells." [CHEBI

10389 Pathogen[ Q2Q067] interacts with 3 human partners: {Q9UI32;P18848;Q03393}

10390 Pathogen[ P0C214] interacts with 6 human partners: {P09417;P00480;P42898;Q9UI32;P18848;Q03393}

10391 Pathogen[ P03346] interacts with 4 human partners: {Q03393;P20132;Q9UI32;P18848}

10392 Pathogen[ Q85601] interacts with 3 human partners: {P00480;P18848;Q9UI32}

10393 Pathogen[ P14079] interacts with 7 human partners: {P20132;Q93099;Q9UI32;P00480;Q03393;Q03154;P42898}

10394 Pathogen[ P03383] interacts with 1 human partners: {P18848}

10395 Pathogen[ P03410] interacts with 8 human partners: {P18848;P20132;Q93099;P00480;O75600;P42898;Q9UI32;Q03393}

10396 Pathogen[ P14075] interacts with 1 human partners: {P18848}

10397 Pathogen[ P0C206] interacts with 5 human partners:{P20132;Q9UI32;Q03393;P18848;P00480}

10398 Pathogen[ P03363] interacts with 2 human partners:{P18848;Q9UI32}

10399 [Cluster 946]GO:0046329+P biological\_process [name] negative regulation of JNK cascade [def] "Any process that stops, prevents, or reduces the frequency, rate or extent of signal transduction mediated by the JNK cascade." [GOC]

10400 Pathogen[ Q2Q067] interacts with 11 human partners:{Q96J02;P31749;Q15326;Q8TD23;O15379;Q9NYF0;O00255;Q9UQF2;O75376;Q13227;Q03112}

10401 Pathogen[ P0C214] interacts with 11 human partners:{Q96J02;Q8TD23;Q03112;O75376;O15379;Q13227;Q9UQF2;Q15326;Q9NYF0;O00255;P31749}

10402 Pathogen[ P03346] interacts with 11 human partners:{Q96J02;O15379;Q8TD23;Q13227;P31749;O00255;Q03112;O75376;Q9NYF0;Q15326;Q9UQF2}

10403 Pathogen[ Q85601] interacts with 11 human partners:{Q96J02;P31749;Q8TD23;Q03112;Q9NYF0;Q9UQF2;O00255;O75376;Q15326;O15379;Q13227}

10404 Pathogen[ P14079] interacts with 11 human partners:{O15379;Q8TD23;O75072;Q9UQF2;Q96BJ3;Q13227;Q96J02;O75376;O00255;Q15326;Q9NYF0}

10405 Pathogen[ P03383] interacts with 11 human partners:{O75376;P31749;Q8TD23;Q9UQF2;Q15326;Q03112;O15379;O00255;Q9NYF0;Q13227;Q96BJ3}

10406 Pathogen[ P03410] interacts with 11 human partners:{Q13227;Q03112;P31749;O75376;Q96BJ3;O15379;Q15326;Q9NYF0;Q9UQF2;Q8TD23;O00255}

10407 Pathogen[ P14075] interacts with 11 human partners:{Q8TD23;O75376;Q96BJ3;O00255;P31749;Q15326;Q13227;Q03112;O15379;Q9NYF0;Q9UQF2}

10408 Pathogen[ P0C206] interacts with 12 human partners:{P31749;O00255;Q96J02;Q9UQF2;Q15326;Q03112;O15379;Q96BJ3;Q8TD23;O75376;Q9NYF0;Q13227}

10409 Pathogen[ P03363] interacts with 9 human partners:{Q13227;Q03112;Q9UQF2;O15379;O75376;Q9NYF0;Q15326;P31749;Q8TD23}

10410 [Cluster 947]GO:0007501+P biological\_process [name] mesodermal cell fate specification [def] "The cell fate determination process in which a cell becomes capable of differentiating autonomously into a mesoderm cell in an environment that is neutral with respect to the developmental pathway\_ upon specification, the cell fate can be reversed." [GOC]

10411 Pathogen[ Q2Q067] interacts with 1 human partners:{O00167}

10412 Pathogen[ P0C214] interacts with 1 human partners:{O00167}

10413 Pathogen[ P03346] interacts with 3 human partners:{Q9NPC8;O00167;P31270}

10414 Pathogen[ Q85601] interacts with 1 human partners:{O00167}

10415 Pathogen[ P14079] interacts with 1 human partners:{O00167}

10416 Pathogen[ P03383] interacts with 1 human partners:{O00167}

10417 Pathogen[ P03410] interacts with 1 human partners:{O00167}

10418 Pathogen[ P14075] interacts with 1 human partners:{O00167}

10419 Pathogen[ P0C206] interacts with 1 human partners:{O00167}

10420 Pathogen[ P03363] interacts with 2 human partners:{O00167;Q9NPC8}

10421 [Cluster 948]GO:0003254+P biological\_process [name] regulation of membrane depolarization [def] "Any process that modulates the rate, frequency or extent of membrane depolarization. Membrane depolarization is the process in which membrane potential changes in the depolarizing direction from the resting potential, usually from negative to positive." [GOC]

10422 Pathogen[ Q2Q067] interacts with 1 human partners:{Q13642}

10423 Pathogen[ P0C214] interacts with 1 human partners:{Q13642}

10424 Pathogen[ P03346] interacts with 1 human partners:{Q13642}

10425 Pathogen[ Q85601] interacts with 1 human partners:{Q13642}

10426 Pathogen[ P14079] interacts with 1 human partners:{Q13642}

10427 Pathogen[ P03383] interacts with 1 human partners:{Q13642}

10428 Pathogen[ P03410] interacts with 1 human partners:{Q13642}

10429 Pathogen[ P14075] interacts with 1 human partners:{Q13642}

10430 Pathogen[ P0C206] interacts with 1 human partners:{Q13642}

10431 Pathogen[ P03363] interacts with 1 human partners:{Q13642}

10432 [Cluster 949]GO:0032321+P biological\_process [name] positive regulation of Rho GTPase activity [def] "Any process that activates or increases the activity of a GTPase of the Rho family." [GOC]

10433 Pathogen[ Q2Q067] interacts with 4 human partners:{Q99569;Q9UJM3;Q13526;Q8TE85}

10434 Pathogen[ P0C214] interacts with 6 human partners:{Q13526;Q9UJM3;Q8TE85;O14613;P05412;P98171}

10435 Pathogen[ P03346] interacts with 8 human partners:{P05412;P98171;Q99569;O14613;Q13526;Q8TE85;Q9H8V3;Q9UJM3}

10436 Pathogen[ Q85601] interacts with 6 human partners:{Q99569;Q8TE85;Q13526;P05412;O14613;Q9UJM3}

10437 Pathogen[ P14079] interacts with 8 human partners:{Q99569;Q8TE85;Q13526;P05412;O14613;Q9UJM3}

10438 Pathogen[ P03383] interacts with 4 human partners: {Q9UJM3;Q8TE85;Q13526;P05412}

10439 Pathogen[ P03410] interacts with 8 human partners: {P98171;Q13526;Q8TE85;O14613;P05412;Q9H8V3;Q9UJM3;Q99569}

10440 Pathogen[ P14075] interacts with 5 human partners: {P05412;Q8TE85;Q9UJM3;Q13526;O14613}

10441 Pathogen[ P0C206] interacts with 8 human partners: {Q8TE85;Q13526;O14613;P05412;Q99569;Q9H8V3;P98171;Q9UJM3}

10442 Pathogen[ P03363] interacts with 7 human partners: {P98171;Q13526;Q99569;Q8TE85;O14613;P05412;Q9UJM3}

10443 [Cluster 950]GO:0006471+P biological\_process [name] protein ADP-ribosylation [def] "The transfer, from NAD, of ADP-ribose to protein amino acids." [RESID

10444 Pathogen[ Q2Q067] interacts with 8 human partners: {Q8IXJ6;Q9H2K2;Q9Y6E7;Q9NTG7;Q8N6T7;P09874;O95271;Q9UKK3}

10445 Pathogen[ P0C214] interacts with 8 human partners: {Q9NTG7;Q8N6T7;Q9H2K2;Q9UKK3;Q8IXJ6;O95271;Q9Y6E7;P09874}

10446 Pathogen[ P03346] interacts with 10 human partners: {Q9UKK3;Q8IXJ6;Q9Y6E7;Q9H2K2;Q8N6T7;P09874;Q9UGN5;O95271;Q9Y6F1;Q9NTG7}

10447 Pathogen[ Q85601] interacts with 10 human partners: {P09874;Q9UKK3;Q9Y6E7;Q9H2K2;Q9Y6F1;Q8IXJ6;Q8N6T7;Q9UGN5;O95271;Q9NTG7}

10448 Pathogen[ P14079] interacts with 9 human partners: {P09874;O95271;Q9UGN5;Q9H2K2;Q9UKK3;Q8N6T7;Q8IXJ6;Q9NTG7;Q9Y6F1}

10449 Pathogen[ P03383] interacts with 6 human partners: {Q8N6T7;Q9NTG7;P09874;Q9Y6E7;Q9UKK3;O95271}

10450 Pathogen[ P03410] interacts with 9 human partners: {Q8IXJ6;Q9NTG7;Q8N6T7;Q9Y6F1;Q9UGN5;O95271;P09874;Q9UKK3;Q9H2K2}

10451 Pathogen[ P14075] interacts with 6 human partners: {Q8N6T7;Q9Y6E7;Q9NTG7;O95271;P09874;Q9UKK3}

10452 Pathogen[ P0C206] interacts with 10 human partners: {O95271;P09874;Q9Y6F1;Q8N6T7;Q9UGN5;Q9UKK3;Q8IXJ6;Q9NTG7;Q9H2K2;Q9Y6E7}

10453 Pathogen[ P03363] interacts with 9 human partners: {Q9Y6E7;Q9UGN5;Q9H2K2;Q8N6T7;Q9UKK3;O95271;Q9NTG7;P09874;Q9Y6F1}

10454 [Cluster 951]GO:0043503+P biological\_process [name] skeletal muscle fiber adaptation [def] "Any process in which the skeletal muscle fibers change their phenotypic profiles in response to altered functional demands and a variety of signals. Muscle fibers are formed by the maturation of myotubes. They can be classed as slow, intermediate/fast or fast." [GOC

10455 Pathogen[ Q2Q067] interacts with 1 human partners: {P15172}

10456 Pathogen[ P0C214] interacts with 2 human partners: {P68133;P15172}

10457 Pathogen[ P03346] interacts with 1 human partners: {P15172}

10458 Pathogen[ Q85601] interacts with 2 human partners: {P68133;P15172}

10459 Pathogen[ P14079] interacts with 1 human partners: {P68133}

10460 Pathogen[ P03383] interacts with 1 human partners: {P15172}

10461 Pathogen[ P03410] interacts with 1 human partners: {P68133}

10462 Pathogen[ P14075] interacts with 1 human partners: {P15172}

10463 Pathogen[ P0C206] interacts with 2 human partners: {P68133;P15172}

10464 Pathogen[ P03363] interacts with 2 human partners: {P68133;P15172}

10465 [Cluster 952]GO:0043534+P biological\_process [name] blood vessel endothelial cell migration [def] "The orderly movement of an endothelial cell into the extracellular matrix in order to form new blood vessels during angiogenesis." [PMID

10466 Pathogen[ Q2Q067] interacts with 4 human partners: {P41134;P04792;Q6RSH7;P35579}

10467 Pathogen[ P0C214] interacts with 3 human partners: {P04792;P41134;Q6RSH7}

10468 Pathogen[ P03346] interacts with 5 human partners: {Q6RSH7;P35579;P41134;P35713;P04792}

10469 Pathogen[ Q85601] interacts with 4 human partners: {P41134;P35579;Q6RSH7;P04792}

10470 Pathogen[ P14079] interacts with 4 human partners: {P35579;Q6RSH7;P41134;P04792}

10471 Pathogen[ P03383] interacts with 3 human partners: {P04792;Q6RSH7;P35579}

10472 Pathogen[ P03410] interacts with 4 human partners: {P41134;P35579;P04792;Q6RSH7}

10473 Pathogen[ P14075] interacts with 3 human partners: {Q6RSH7;P04792;P35579}

10474 Pathogen[ P0C206] interacts with 4 human partners: {P04792;P41134;Q6RSH7;P35579}

10475 Pathogen[ P03363] interacts with 4 human partners: {P35579;Q6RSH7;P41134;P04792}

10476 [Cluster 953]GO:0060338+P biological\_process [name] regulation of type I interferon-mediated signaling pathway [def] "Any process that modulates the rate, frequency or extent of a type I interferon-mediated signaling pathway. A type I interferon-mediated signaling pathway is the series of molecular events generated as a consequence of a type I interferon binding to a cell surface receptor." [GOC

10477 Pathogen[ Q2Q067] interacts with 4 human partners: {P08238;Q16543;P52630;P42224}

10478 Pathogen[ P0C214] interacts with 4 human partners: {Q16543;P42224;P52630;O15524}

10479 Pathogen[ P03346] interacts with 5 human partners: {O15524;Q16543;P42224;P52630;P08238}

10480 Pathogen[ Q85601] interacts with 4 human partners: {Q16543;P52630;P08238;P42224}

10481 Pathogen[ P14079] interacts with 4 human partners: {P52630;P08238;P42224;Q16543}

10482 Pathogen[ P03383] interacts with 3 human partners: {Q16543;P52630;P08238}

10483 Pathogen[ P03410] interacts with 3 human partners: {Q16543;P08238;P52630}

10484 Pathogen[ P14075] interacts with 3 human partners: {P52630;Q16543;P08238}

10485 Pathogen[ P0C206] interacts with 5 human



partners:{Q16543;O15524;P08238;P42224;P52630}

10486 Pathogen[ P03363] interacts with 4 human partners:{P52630;O15524;Q16543;P08238}

10487 [Cluster 954]GO:0072156+P biological\_process [name] distal tubule morphogenesis [def] "The process in which the anatomical structures of a distal tubule are generated and organized. The distal tubule is a nephron tubule that begins at the macula densa and extends to the connecting tubule." [GOC

10488 Pathogen[ Q2Q067] interacts with 1 human partners:{Q9UH77}

10489 Pathogen[ P0C214] interacts with 1 human partners:{Q9UH77}

10490 Pathogen[ P03346] interacts with 1 human partners:{Q9UH77}

10491 Pathogen[ Q85601] interacts with 1 human partners:{Q9UH77}

10492 Pathogen[ P14079] interacts with 1 human partners:{Q9UH77}

10493 Pathogen[ P03383] interacts with 1 human partners:{Q9UH77}

10494 Pathogen[ P03410] interacts with 1 human partners:{Q9UH77}

10495 Pathogen[ P14075] interacts with 1 human partners:{Q9UH77}

10496 Pathogen[ P0C206] interacts with 1 human partners:{Q9UH77}

10497 Pathogen[ P03363] interacts with 1 human partners:{Q9UH77}

10498 [Cluster 955]GO:0071514+P biological\_process [name] genetic imprinting [def] "Any process that modulates the frequency, rate or extent of the chemical reactions and pathways involving macromolecules by a mechanism that is mediated by DNA, is mitotically or meiotically heritable, or is stably self-propagated in the cytoplasm of a resting cell, and does not entail a change in DNA sequence." [GOC

10499 Pathogen[ Q2Q067] interacts with 1 human partners:{Q99608}

10500 Pathogen[ P0C214] interacts with 1 human partners:{Q99608}

10501 Pathogen[ P03346] interacts with 1 human partners:{Q99608}

10502 Pathogen[ Q85601] interacts with 1 human partners:{Q99608}

10503 Pathogen[ P14079] interacts with 1 human partners:{Q99608}

10504 Pathogen[ P03383] interacts with 1 human partners:{Q99608}

10505 Pathogen[ P03410] interacts with 1 human partners:{Q99608}

10506 Pathogen[ P14075] interacts with 1 human partners:{Q99608}

10507 Pathogen[ P0C206] interacts with 1 human partners:{Q99608}

10508 Pathogen[ P03363] interacts with 1 human partners:{Q99608}

10509 [Cluster 956]GO:0045619+P biological\_process [name] regulation of lymphocyte differentiation [def] "Any process that modulates the frequency, rate or extent of lymphocyte differentiation." [GOC

10510 Pathogen[ Q2Q067] interacts with 1 human partners:{Q9UKT9}

10511 Pathogen[ P0C214] interacts with 1 human partners:{Q9UKT9}

10512 Pathogen[ P03346] interacts with 1 human partners:{Q9UKT9}

10513 Pathogen[ Q85601] interacts with 1 human partners:{Q9UKT9}

10514 Pathogen[ P14079] interacts with 1 human partners:{Q9UKT9}

10515 Pathogen[ P03383] interacts with 1 human partners:{Q9UKT9}

10516 Pathogen[ P03410] interacts with 1 human partners:{Q9UKT9}

10517 Pathogen[ P14075] interacts with 1 human partners:{Q9UKT9}

10518 Pathogen[ P0C206] interacts with 1 human partners:{Q9UKT9}

10519 Pathogen[ P03363] interacts with 1 human partners:{Q9UKT9}

10520 [Cluster 957]GO:0006408+P biological\_process [name] snRNA export from nucleus [def] "The directed movement of snRNA from the nucleus to the cytoplasm." [GOC

10521 Pathogen[ Q2Q067] interacts with 2 human partners:{P52298;Q9H814}

10522 Pathogen[ P0C214] interacts with 2 human partners:{Q9H814;P52298}

10523 Pathogen[ P03346] interacts with 2 human partners:{Q9H814;P52298}

10524 Pathogen[ Q85601] interacts with 2 human partners:{Q9H814;P52298}

10525 Pathogen[ P14079] interacts with 2 human partners:{P52298;Q9H814}

10526 Pathogen[ P03383] interacts with 2 human partners:{P52298;Q9H814}

10527 Pathogen[ P03410] interacts with 2 human partners:{Q9H814;P52298}

10528 Pathogen[ P14075] interacts with 2 human partners:{Q9H814;P52298}

10529 Pathogen[ P0C206] interacts with 2 human partners:{P52298;Q9H814}

10530 Pathogen[ P03363] interacts with 2 human partners:{P52298;Q9H814}

10531 [Cluster 958]GO:0051289+P biological\_process [name] protein homotetramerization [def] "The formation of a protein homotetramer, a macromolecular structure consisting of four noncovalently associated identical subunits." [GOC

10532 Pathogen[ Q2Q067] interacts with 13 human partners:{P61457;Q6UUV9;Q14749;Q9UII2;P34896;P09972;P09467;P49366;Q6UUV7;O94925;Q53ET0;P32929;Q9H0N5}

10533 Pathogen[ P0C214] interacts with 17 human partners:{Q9UI08;Q6UUV7;P61457;P34897;P32929;P49366;Q9H0N5;P09467;Q9UII2;Q53ET0;Q14749;P34896;Q6UUV9;P09972;O94925;Q9NPJ3;Q16698}

10534 Pathogen[ P03346] interacts with 14 human partners:{P09972;Q53ET0;Q9UI08;P09467;Q14749;Q9UII2;P32929;Q6UUV9;P49366;O94925;Q6UUV7;P61457;Q9H0N5;Q9NPJ3}

10535 Pathogen[ Q85601] interacts with 13 human partners:{Q9Y5T5;Q53ET0;O94925;Q9H0N5;Q6UUV9;Q9UII2;P34896;P09972;P09467;Q6UUV7;Q14749;P61457;P32929}

10536 Pathogen[ P14079] interacts with 16 human partners:{P61457;Q9UII2;P09972;Q9H773;P34897;P50552;Q9NPJ3;Q9H0N5;Q14749;O94925;P32929;Q9NWX6;P09467;P34896;P49366;Q9UI08}

10537 Pathogen[ P03383] interacts with 12 human partners:{O94925;Q6UUV9;P34896;P09467;P09972;P61457;P49366;Q9UII2;Q6UUV7;Q9H0N5;Q53E

10538 T0;Q14749}  
Pathogen[ P03410] interacts with 19 human  
partners: {Q9UUU7;Q9UI08;Q14749;Q9H773;P32929;Q9NPJ3;Q6UUUV9;P09467;O94925;Q53ET0;Q9UI  
I2;P09972;P50552;P49366;Q9H0N5;Q9NWX6;P34897;P34896;P61457}

10539 Pathogen[ P14075] interacts with 12 human  
partners: {P34896;Q53ET0;P49366;Q9UII2;Q9H0N5;Q6UUUV9;P61457;O94925;P09972;Q6UUUV7;Q147  
49;P09467}

10540 Pathogen[ P0C206] interacts with 17 human  
partners: {Q9NPJ3;Q9Y5T5;P09467;P34897;Q9UI08;P49366;Q6UUUV9;P34896;P32929;P61457;O949  
25;Q53ET0;P09972;Q14749;Q9H0N5;Q6UUUV7;Q9UII2}

10541 Pathogen[ P03363] interacts with 11 human  
partners: {Q9NPJ3;Q53ET0;Q9H0N5;O94925;P09972;P49366;P61457;Q9UI08;Q14749;Q6UUUV9;Q6UU  
V7}

10542 [Cluster 959]GO:0007498+P biological\_process [name] mesoderm development [def] "The  
process whose specific outcome is the progression of the mesoderm over time, from its  
formation to the mature structure. The mesoderm is the middle germ layer that develops  
into muscle, bone, cartilage, blood and connective tissue." [GOC

10543 Pathogen[ Q2Q067] interacts with 4 human partners: {Q13485;P67775;Q86YC2;Q9UKT9}

10544 Pathogen[ P0C214] interacts with 5 human  
partners: {Q14696;Q13485;P67775;Q86YC2;Q9UKT9}

10545 Pathogen[ P03346] interacts with 7 human  
partners: {P78415;Q9UKT9;P67775;Q9BYE0;O95863;Q86YC2;Q13485}

10546 Pathogen[ Q85601] interacts with 4 human partners: {Q86YC2;P67775;Q13485;Q9UKT9}

10547 Pathogen[ P14079] interacts with 3 human partners: {Q14696;Q86YC2;Q9UKT9}

10548 Pathogen[ P03383] interacts with 5 human  
partners: {Q13485;P67775;Q14696;Q9UKT9;Q86YC2}

10549 Pathogen[ P03410] interacts with 5 human  
partners: {Q9UKT9;Q13485;Q14696;P67775;Q86YC2}

10550 Pathogen[ P14075] interacts with 5 human  
partners: {Q86YC2;Q13485;Q14696;Q9UKT9;P67775}

10551 Pathogen[ P0C206] interacts with 7 human  
partners: {Q86YC2;P67775;Q9BYE0;Q13485;Q13422;Q9UKT9;Q14696}

10552 Pathogen[ P03363] interacts with 6 human  
partners: {P78415;Q9BYE0;Q13485;Q9UKT9;P67775;Q86YC2}

10553 [Cluster 960]GO:0070314+P biological\_process [name] G1 to G0 transition [def] "A  
cell cycle arrest process that results in arrest during G1 phase, whereupon the cell  
enters a specialized resting state known as G0 or quiescence." [GOC

10554 Pathogen[ Q2Q067] interacts with 1 human partners: {Q15910}

10555 Pathogen[ P0C214] interacts with 1 human partners: {Q15910}

10556 Pathogen[ P03346] interacts with 1 human partners: {Q15910}

10557 Pathogen[ Q85601] interacts with 1 human partners: {Q15910}

10558 Pathogen[ P14079] interacts with 1 human partners: {Q15910}

10559 Pathogen[ P03383] interacts with 1 human partners: {Q15910}

10560 Pathogen[ P03410] interacts with 1 human partners: {Q15910}

10561 Pathogen[ P14075] interacts with 1 human partners: {Q15910}

10562 Pathogen[ P0C206] interacts with 1 human partners: {Q15910}

10563 Pathogen[ P03363] interacts with 1 human partners: {Q15910}

10564 [Cluster 961]GO:0016567+P biological\_process [name] protein ubiquitination [def]  
"The process in which one or more ubiquitin groups are added to a protein." [GOC

10565 Pathogen[ Q2Q067] interacts with 164 human  
partners: {O95376;Q2YD98;Q8NH2;Q96J02;Q5TAQ9;Q8WV44;P31749;Q14258;Q93034;Q9UPN9;Q9HA  
U4;Q7Z6J0;Q5JXB2;Q13356;Q9Y5A7;Q8WW12;Q9UJX3;Q9UJX5;Q9Y4B6;Q96DX5;P62837;P53804;Q8IW  
V8;Q15386;Q13829;P19474;O60260;Q9UDY8;P49427;O00762;Q9Y2X8;O43255;Q96T88;Q9NVW2;Q9NZ  
J0;Q12933;P14373;P60604;Q86WB0;Q9UJT9;Q8TEL6;Q6ZNA4;P63279;Q6VVB1;Q16531;Q9NYG5;Q9H1  
A4;Q7Z6Z7;P51965;Q9Y3I1;Q86VP6;P35227;Q14669;P61077;Q8IXQ5;Q9UJX2;P63146;Q9Y297;Q96G  
25;Q9UK73;P78317;Q9H2C0;Q5TA31;Q86Y13;O14508;Q9UM13;P40337;Q99728;Q96DE5;Q15370;Q9Y4  
X5;Q9UBF6;Q9NPD8;O14933;Q12834;P41002;O95628;P51668;Q8TBB1;Q96EP1;Q13114;Q96PM5;Q86U  
W9;Q9NTX7;Q6RSH7;Q96PU5;Q13616;Q99618;Q8TEB1;Q969P5;O15164;P61088;Q9Y4L5;O60291;Q53G  
59;Q8NHZ8;Q13618;Q99496;Q5VTR2;Q96FA3;Q9UKT7;O76064;Q13309;Q15819;Q9UK99;Q9NWF9;Q132  
16;Q8TDB6;Q9HOC5;Q9UM11;Q9C035;Q9UJX4;O43791;Q13620;Q99619;Q13619;Q9Y2M5;Q969H0;O751  
50;Q9NR09;Q8TCJ0;Q9UNE7;Q14139;P49459;Q96PU4;Q05086;P62256;P68036;Q96SW2;Q9H3F6;Q9UJ  
X6;Q9NRD1;P61962;Q14512;Q92466;Q86Y01;Q96A44;P30260;Q86XK2;Q9HAT8;Q9UH90;Q9Y252;O004  
63;Q9UH77;Q13042;P22681;Q9NT62;Q00987;Q9UMS4;Q9BS18;Q66K89;O15205;P63208;Q06587;Q136  
17;Q9UKT5;P62877;Q8IUD6;Q7Z6E9;Q9NW38;Q9NXF7;Q13064;Q9UBS8;Q14999}

10566 Pathogen[ P0C214] interacts with 195 human  
partners: {P22681;Q05086;O14933;Q96B02;Q9UJX6;Q9UKA1;Q96J02;Q14527;Q9H832;Q13619;Q136  
17;Q8IUV8;Q9Y3I1;Q7Z6J0;Q16763;Q96PM5;P35227;Q8WW12;P19474;Q9HAU4;Q9UK99;Q99728;Q136  
20;Q8WV44;Q9BS18;O00762;P41002;Q9UH90;Q96A44;O95628;Q13829;Q00987;Q13309;P49427;Q9UJ  
P4;Q9C035;Q9UDY8;Q96FA3;Q9UJX5;Q9NXF7;P63208;Q86WB0;P61962;Q9NTX7;Q96PU4;Q5JXB2;Q8IU  
D6;P63279;Q9HAT8;P49459;Q8NH2;Q8NG27;Q13618;Q93034;Q969T4;Q15370;Q9NRD1;Q14999;Q9UJ  
X2;Q9Y297;Q8NH2H9;P62877;O00308;Q5T447;Q13064;P51965;Q96T88;Q9UKT7;P78317;Q9H0M0;Q9NW  
F9;Q9UMS4;Q5TAQ9;P61077;Q13216;Q9HCE7;Q14258;Q969P5;P62253;Q96DX5;Q15819;Q9H1A4;Q53G  
59;P61086;O95071;Q7Z6E9;Q06587;Q9Y2X8;Q9Y4B6;Q14139;Q13356;Q6P050;Q15386;O95376;Q129  
33;Q9NVW2;O43791;Q96SW2;Q9Y2M5;Q8NHZ8;Q12834;Q9NZJ0;P40337;P53804;Q9UBS8;Q8WZ19;Q996  
18;O15205;Q99619;O14508;Q13616;Q8TBB1;Q9Y252;Q969H0;Q8IXQ5;Q5TA31;Q6ZNA4;Q99496;Q9H4  
P4;Q14669;O60291;Q8TEL6;O15164;Q13114;Q9UJX4;O94952;Q9NPC3;Q86XK2;Q9H469;Q86Y13;O751

- 50;Q9NR09;Q9UJX3;Q7Z6Z7;O95155;O60260;Q9Y5A7;Q9UK73;Q712K3;P62256;Q9Y4L5;Q9H3F6;Q9UM11;Q9H2C0;P51668;P14373;O14512;O00463;Q92466;Q86Y01;Q9Y4X5;Q96G25;Q5VTR2;P30260;Q8TD B6;Q8IYW5;Q8TCJ0;O43255;Q9NT62;Q9UNE7;Q96CA5;O15524;O76064;Q9NPD8;Q9UPN9;P61081;Q9UJ T9;Q96LR5;Q9NYG5;Q16531;Q86UW9;Q66K89;Q86VP6;Q9UM13;Q9UBF6;Q9UH77;Q5XUX0;P63146;Q6VV B1;P31749;P61088;Q9NV06;Q96PU5;Q9NW38;Q8TEB1;Q8IYW7;Q96EP1;P55072;Q6RSH7;Q9UKT5;Q9UK T8;P60604;Q96DE5;Q13042;Q9H0C5}
- 10567 Pathogen[ P03346] interacts with 225 human partners: {Q9NZJ0;Q8NEA9;Q9NS91;Q9UPN9;Q96J02;O00463;Q5T6F0;O75592;Q9UKT7;Q13263;Q153 70;Q6RSH7;Q86UW9;Q9H9P5;O15524;O76064;Q9HAU4;Q53GT1;Q9P2N7;Q9H765;Q9H469;Q8WZ19;Q96P U5;P68036;Q14258;P14373;Q6PCD5;Q96NS5;O75150;Q9UM11;Q9UH77;Q13616;Q9NWF9;Q5VTR2;Q7Z6 J0;O95155;Q96A44;Q9BS18;O95376;Q9UJT9;O95714;P49427;Q99728;Q9UDY8;Q8NH2;O75159;Q8IU D6;O95628;Q14527;Q8WW12;Q9UMS4;Q8IXQ5;Q969U6;Q16531;Q13618;Q86WB0;Q58WW2;Q8WXK3;Q96P M5;Q9H4P4;O43255;Q6P050;P35227;O14682;Q9NTX7;Q9UKT8;Q9UM13;Q9C035;Q8WV22;Q9H2C0;Q9NT 62;P63279;Q9NYG5;Q9NRJ4;Q86XK2;Q13438;Q15386;P49459;Q9Y2X8;P41002;Q5TA31;O60662;Q131 14;Q9Y4B6;P55072;Q969P5;Q13829;P51668;Q66K89;Q5T447;Q96AX9;P61077;Q93034;O14508;Q009 87;P61962;Q12834;Q96FA3;Q13620;P61088;Q9UKA1;Q96G25;Q96SW2;Q9UJX6;P62877;Q96DX5;Q9NV 06;Q8TCJ0;Q14139;Q96DE5;Q8IYM9;P60604;Q9Y5A7;P31749;O94972;Q13042;P51965;Q13309;Q9UJ X5;Q7Z6E9;Q5TAQ9;P63146;Q9UKT5;Q9UNE7;O00762;Q9UJX2;Q9Y6I7;Q9NXF7;Q9HAT8;Q8N2H9;Q146 69;O15205;P62837;Q13064;Q99619;Q9NRD1;Q8IUQ4;O43791;Q9C040;Q6ZNA4;Q6Q0C0;Q9UJX3;Q8NH Z8;P63208;Q9NPD8;Q99496;Q13356;Q13216;P78317;Q2YD98;Q8IYW5;Q8TBB1;Q6VVVB1;Q9UBS8;Q9H1 A4;P40337;O60291;Q9BUZ4;Q9UH90;O60260;Q7Z6J8;Q9UJX4;O94952;Q9NPC3;Q13619;Q8IYW8;P194 74;O14933;Q14999;Q9NR09;Q86VP6;Q9ULT8;Q8TEL6;Q5H9S7;Q9P2J3;Q9UK99;Q9Y4L5;Q5JXB2;Q96P U4;P22681;Q05086;P62256;Q8TDB6;Q9H0M0;Q9H3F6;Q9Y2M5;P53804;O14512;Q9Y4X5;Q92466;Q9Y2 52;Q9NW38;Q86Y01;O95071;Q96BD6;Q9UJP4;Q9BZR9;P30260;Q96CA5;Q8NG27;Q9Y297;Q969H0;P0C2 W1;Q7Z6Z7;Q06587;Q9Y3I1;O94822;Q8TEC5;Q99618;Q9UBF6;Q8TEB1;O15164;Q5XUX0;A0AVT1;Q9UK 73;Q96T88;Q86Y13;Q9NVW2;Q96EP1;Q6IQ16;Q9H0C5;Q8WV44;O00308;Q13617;Q15819}
- 10568 Pathogen[ Q85601] interacts with 196 human partners: {Q14139;Q9UJX2;Q7Z6E9;Q9UPN9;Q96J02;P78317;Q15370;Q13064;Q9Y3I1;Q13309;P622 53;P22681;Q9HAU4;Q96DE5;P14373;Q9UJX6;Q16763;P31749;Q8TDB6;P63146;O14933;Q8WZ19;Q142 58;Q8WV44;Q969H0;P61962;Q16531;Q8IYW7;O00463;Q96A44;O95714;P49427;Q9Y2X8;Q9BS18;Q9UD Y8;Q13216;P62877;Q96SW2;P40337;Q8NHZ8;Q9UMS4;Q6PCD5;Q9H1A4;Q86WB0;Q9HAT8;Q96PM5;Q96P U4;Q99728;Q9Y4L5;Q9NZJ0;Q13616;Q6P050;Q96G25;Q96PU5;Q969T4;Q86VP6;Q9BZR9;Q14669;Q9NW F9;Q5TAQ9;Q86XK2;Q8IUD6;Q15386;O95155;Q96DX5;Q96B02;O15164;Q9NPD8;P41002;Q5TA31;Q131 14;Q9Y4B6;O43791;P51668;Q96LR5;P68036;P61077;Q9UJP4;P63279;O14508;Q12834;Q96FA3;Q9UK A1;Q13263;O60291;Q8TEB1;Q7Z6J0;Q9H2C0;Q9UKT7;Q86UW9;Q9UK73;P63208;O76064;Q8WZ19;Q130 42;Q9UJX5;Q12933;P51965;Q8IXQ5;Q9UBF6;Q9H469;Q99618;O95628;Q9UM13;Q8IYM9;Q9UJT9;Q9NY G5;P61086;O15205;Q96T88;O00762;Q9NTX7;Q9NW38;Q9UJX3;Q99496;Q13356;P49459;Q8IYW5;Q8TB B1;Q6VVVB1;Q9H0C5;Q9C035;Q9NXF7;O75150;O95376;O60260;Q9NT62;Q9UJX4;Q9P2J3;Q5VTR2;Q9UM 11;Q9Y252;P62837;Q9NPC3;Q6RSH7;Q4G163;Q6ZNA4;Q14999;Q9H832;Q9NR09;Q9UBS8;Q7Z6Z7;Q9NV 06;Q9Y2M5;Q9UK99;Q5JXB2;Q05086;Q66K89;P62256;Q9Y5A7;Q13620;Q13618;Q96EP1;O94952;Q9H3 F6;Q53G59;Q9H4P4;P19474;P53804;O14512;Q92466;Q86Y01;P61088;O95071;Q14527;O43255;Q138 29;Q9UKT8;P30260;Q6Q0C0;Q9UH77;Q00987;P60604;Q8TCJ0;Q96CA5;Q8NG27;Q9UKT5;Q9UNE7;Q8WV 22;Q13619;Q8NH2;Q06587;Q9Y4X5;Q93034;Q86Y13;Q9NVW2;Q99619;Q8TEL6;Q8IYW8;Q9NS91;Q969 P5;P35227;Q9NRD1;Q9UH90;Q13617;Q15819}
- 10569 Pathogen[ P14079] interacts with 149 human partners: {Q5TAQ9;Q5XUX0;O00463;O60260;P53804;O15164;Q9UKT5;O95628;Q9HAT8;P51965;Q5TA 31;P63279;P14373;Q9NXF7;Q8TEL6;Q9NT62;Q969H0;Q9C035;Q8IYW8;P68036;Q13309;Q5JXB2;Q158 19;Q9UBF6;Q13620;Q9UJX3;Q13618;Q9H1A4;Q9NPD8;Q9UJX5;Q16531;P60604;Q8N2H9;Q66K64;Q6ZN A4;Q8TCJ0;Q969P5;Q86XK2;Q8WXJ9;Q13216;Q7Z6J8;Q9HAU4;Q14258;P61077;Q9BUZ4;P62877;Q96F A3;Q8IYW7;Q9NR09;Q00987;Q8TBB1;Q9NYG5;P62256;Q9UK73;Q9NPC3;P40337;Q7Z6E9;Q9NV 06;Q8WW12;Q86Y01;Q99496;P51668;Q8NHZ8;Q9UMS4;Q9H2C0;Q13356;Q15345;Q9UPN9;Q9NWF9;P194 74;Q9UH90;Q9UM11;Q5H9S7;Q4G163;Q5VTR2;O15205;Q9UM13;Q13042;Q6P050;Q96DE5;Q93034;Q66K 89;P41002;P49459;Q86UW9;Q15370;Q9Y4B6;Q9Y2M5;Q9UK99;Q96DX5;Q96J02;P61962;O94952;Q9UJ X6;Q86WB0;Q14139;Q96A44;Q13617;Q9UH77;Q13064;O14508;Q12933;P35227;Q9Y2X8;O14512;P494 27;P30260;Q6RSH7;Q9UBS8;O43791;P78317;Q9UKT7;Q62837;Q9NRD1;Q9NZJ0;Q92466;O00762;Q9UJ P4;Q13829;P63208;Q9UJT9;Q13616;Q96SW2;Q86VP6;Q53G59;Q5T6F0;Q2YD98;Q8WV44;Q9Y3I1;Q9NW 38;Q9Y5A7;Q96G25;O14933;Q8TEB1;P63146;Q9UJX4;Q14999;Q9BS18;Q9H3F6;Q99619;Q8IUD6;Q136 19;Q13114;Q9BR09;Q13438;Q8NH2;Q06587;Q9H0C5}
- 10570 Pathogen[ P03383] interacts with 130 human partners: {P35227;P41002;Q8NHZ8;Q13616;P19474;Q9Y3I1;Q86UW9;Q9Y4B6;Q6P050;O14933;P538 04;Q8TBB1;Q96DE5;Q9NZJ0;Q13216;Q9NYG5;Q13356;Q14139;P51965;Q9UJX6;P40337;Q9H0C5;Q9UK 73;Q9UPN9;Q8IYW8;Q5JXB2;P49427;P31749;O43791;Q93034;Q9Y2X8;Q96SW2;Q9UBS8;Q86WB0;Q96P U4;Q06587;O00762;Q9NTX7;Q96G25;Q6ZNA4;Q86XK2;P78317;Q9H1A4;Q9H2C0;Q9NT62;P63208;Q96D X5;Q13064;Q9UKT7;Q13042;Q6RSH7;Q66K89;Q8WW12;Q13618;Q9618;Q99618;Q9NXF7;P610 88;Q12834;Q9Y5A7;Q8TEL6;Q9C035;O60260;Q9UM13;P60604;Q96A44;Q15819;Q53G59;Q5TA31;Q129 33;Q9UBF6;Q9UKT5;Q9UM11;O95376;Q9UH77;Q9BS18;Q86VP6;Q96PM5;Q8TCJ0;P62837;P61962;O432 55;Q99496;Q969H0;Q9H832;Q5VTR2;Q9Y252;Q13617;Q9UJX4;Q96FA3;P68036;Q9UJX5;P62877;Q9NR 09;Q13309;P49459;Q15370;Q9Y2M5;Q9NPD8;Q14258;P62256;P63146;Q16531;Q96EP1;O94952;Q9H3 F6;Q9NRD1;Q9UJX2;O14512;Q8NH2;Q92466;Q9NW38;Q86Y01;Q13829;P30260;O75150;Q9NWF9;O152 05;Q9UJX3;Q13114;Q2YD98;Q5XUX0;P63279;Q9UMS4;P51668;Q14999;Q99619;Q9HAT8;Q13620}
- 10571 Pathogen[ P03410] interacts with 154 human partners: {Q86UW9;Q8IYW8;Q9BS18;Q8NH2;Q4G163;Q9UH77;Q9H469;Q53G59;Q86WB0;Q8WXJ9;Q9UK T7;Q13829;Q6ZNA4;O15205;Q99496;Q9NRD1;O95628;Q96SW2;Q8TEL6;Q9UK99;Q9H1A4;Q99618;Q96G 25;Q66K89;P49427;Q9NV06;Q8TCJ0;Q8WV44;Q13620;Q9NWF9;P51965;Q96FA3;Q9BR09;Q9UJX4;Q9NY G5;Q96DX5;Q9Y3I1;Q8TBB1;Q8IXQ5;Q9UM13;Q9NPC3;Q8WZ19;Q8NHZ8;P49459;Q9UKT5;P31749;Q9Y5 A7;Q5VTR2;Q15370;Q5TA31;O60260;Q8IYW7;P68036;P61088;Q5XUX0;P35227;Q92466;Q14258;Q158

19;P41002;O14933;Q5JXB2;Q8N2H9;Q13356;Q9UBF6;Q9P2J3;Q9NR09;Q9C035;Q9UNE7;Q9H3F6;Q13618;P63208;Q86Y01;O75150;Q5H9S7;Q99619;Q8TEB1;Q9UM11;Q13042;Q8WXX3;O14508;Q13309;Q969H0;Q7Z6J0;Q86XK2;Q9UBS8;Q969P5;P62256;O00463;P78317;Q2YD98;P62877;Q9Y4X5;P63146;Q9H0C5;Q96A44;Q96DE5;Q9Y2X8;Q86VP6;Q13064;Q12933;Q9NT62;P51668;Q9HAT8;Q9UJX5;P61962;Q5T6F0;Q6P050;Q16531;Q9UK73;Q12834;Q8WW12;P30260;Q13216;Q66K64;Q6RSH7;Q969U6;Q13616;Q9UJX3;Q9NPD8;O00762;Q13619;Q9UMS4;P63279;Q7Z6J8;Q9H2C0;Q06587;Q14139;O60291;Q13617;Q9UJX4;Q90987;P60604;O14512;Q5TAQ9;O43791;Q9NW38;Q9UJT9;O94952;P53804;Q96NS5;Q9NXF7;Q9Y4B6;Q93034;Q13438;Q9UJX6;Q96EP1;Q9Y2M5;Q9UPN9;Q13114;P40337;P61077;P62837;Q9NZJ0}

10572 Pathogen[ P14075] interacts with 129 human partners: {Q5VTR2;P53804;P60604;Q9BS18;Q9UK73;Q15819;Q96PM5;Q13042;Q9H2C0;P68036;Q9NTX7;Q93034;P62837;Q13618;Q6P050;Q99619;Q13064;P49427;Q9NT62;Q9UM11;P61088;Q9UKT7;Q9Y252;P49459;Q8WW12;Q14139;Q86WB0;Q96PU4;P51965;Q53G59;Q6RSH7;Q13620;O14933;Q13216;Q7Z6J8;Q9Y2X8;P63279;Q9Y3I1;Q9UJX2;P61077;Q8TEL6;O43255;Q96A44;Q9NW38;Q9UJX6;Q9NPD8;Q8NHZ8;Q96DX5;Q9UKT5;P63208;Q96SW2;Q14999;Q95628;Q9NWF9;Q06587;P31749;Q96DE5;Q6ZNA4;O00762;Q9Y5A7;Q15370;Q9UJX5;Q12933;Q2YD98;Q9UPN9;Q8TCJ0;O75150;Q9HAT8;Q86VP6;Q96FA3;P19474;Q16531;Q13309;Q9UH77;Q9C035;Q13114;P78317;Q9UMS4;Q14258;Q8NHY2;Q99496;Q66K89;Q9UJX4;O94952;Q5H9S7;Q9NRD1;O95376;Q9NR09;Q9UBS8;Q9NXF7;Q9H0C5;Q86XK2;O43791;Q9H1A4;P62256;P63146;Q5TA31;P61962;Q9H3F6;Q99618;Q9Y2M5;P41002;O14512;Q13829;Q92466;Q13616;Q9NZJ0;Q86Y01;Q9UM13;Q96G25;Q8TBB1;P40337;P30260;Q9UJX3;P51668;Q9NYG5;O60260;Q969H0;O15205;Q13617;Q9UBF6;Q5XUX0;Q12834;P62877;P35227;Q86UW9;Q96EP1;Q8IYW8;Q9Y4B6}

10573 Pathogen[ P0C206] interacts with 216 human partners: {Q16763;Q9Y2X8;Q9UJT9;Q86Y01;Q2YD98;Q96AX9;Q9P2N7;Q9H765;Q9UMS4;Q96PU5;Q8IXQ5;Q13829;O60291;P62877;Q9NPD8;P62253;Q6PCD5;Q8TEB1;Q8N2H9;Q8WV22;Q9H4P4;P31749;Q86UW9;Q96DX5;Q8WW12;Q9UJX3;Q9UPN9;Q9Y4L5;Q7Z6J0;Q13114;O43791;Q9NVW2;O43255;Q13263;Q8IYW5;O95376;Q13309;O00308;Q9HAU4;Q9UDY8;Q6P050;Q5JXB2;P68036;O14933;Q8NG27;Q9UK73;Q86XK2;Q14258;Q96EP1;Q9UJX5;Q9UJX2;Q6ZNA4;Q969P5;O94822;Q9UJX5;Q99619;Q8IUQ4;Q05086;Q96J02;Q9HAT8;Q9UH90;Q9NWF9;Q99618;Q969H0;Q96LR5;P62837;P53804;Q9NS91;Q16531;Q9NPC3;O15164;O94952;Q8IUD6;O15524;O95155;O15205;Q13616;Q12933;P78317;Q8TCJ0;P49427;Q14669;P30260;Q5VTR2;Q13216;Q13620;O95628;Q5TA31;Q8TDB6;Q15386;Q9UBF6;Q9Y4X5;Q712K3;Q9UJX4;Q9BS18;P51965;Q14999;Q13064;Q9H1A4;Q13619;Q9BUZ4;Q9NRD1;Q9UKT7;P61088;Q13617;Q96SW2;Q9NYG5;Q9UJX4;Q8WV219;Q7Z6J8;P60604;P22681;Q9NR09;Q13618;Q9BZR9;Q6RSH7;Q8NHY2;Q9IWW7;Q9UNE7;P63208;Q14139;P49459;Q9UBS8;Q96T88;Q06587;Q9NV06;Q9P2J3;O14508;O60260;Q8TEL6;Q99728;Q8TBB1;P62256;Q15370;Q9UM11;Q15819;Q969T4;O00762;Q5TAQ9;Q9H3F6;Q9C035;Q9NRJ4;P55072;Q8IYW8;Q9BR09;P61962;O00463;Q9NZJ0;Q9H0C5;Q14527;Q9UJX6;Q13356;Q9UKT8;Q96FA3;Q8IYW9;Q5H9S7;Q9H832;Q9NXF7;Q86WB0;Q96CA5;Q5T6F0;Q96PM5;Q13438;Q96DE5;Q9Y2M5;Q9UK99;Q5XUX0;Q8WV44;P61077;Q93034;Q92466;Q7Z627;Q9NT62;Q9Y3I1;P61086;P14373;Q02987;Q9Y4B6;Q9UM13;O14512;Q7Z6E9;Q9NTX7;Q53G59;Q66K89;Q96B02;Q13042;Q9Y252;O76064;Q4G163;Q96A44;Q9H469;Q96G25;Q86VP6;Q86YT6;Q9Y5A7;Q9UKT5;O95071;P51668;Q9UH77;P41002;Q6VVB1;O75150;O95714;Q9H2C0;Q86Y13;Q12834;Q6Q0C0;Q969U6;Q99496;Q96PU4;Q8NHZ8;Q9NW38;P40337;P63146;P19474;P35227}

10574 Pathogen[ P03363] interacts with 222 human partners: {Q14139;O95376;P22681;Q9UJX2;Q9NWF9;Q9NYG5;Q96JP0;Q96A44;Q86Y01;Q9NW38;Q9Y252;Q8TDB6;O15205;Q13309;O75159;Q9H832;O94972;Q13042;Q96EP1;P51965;Q8WXX3;P60604;Q15370;Q9BZR9;Q96NS5;Q9BR09;Q86WB0;P49459;O95628;Q9H9P5;O15524;O14682;O00762;P35227;Q9HAU4;O60291;Q96DE5;P14373;P22314;Q9UJT9;Q9H765;Q86Y13;Q14933;Q7Z569;Q8WW12;P61081;Q14258;Q9P2N7;Q13356;Q16531;Q9ULT8;Q13618;O95155;Q7Z6E9;Q12933;O00463;Q2YD98;Q9H0C5;Q9NTX7;P78317;Q9NPC3;Q8NHZ8;Q9UBF6;Q8WV44;Q9UJX3;Q5VTR2;Q66K89;Q13617;Q99496;Q9UPN9;Q8IYW5;Q5TAQ9;Q8TBB1;Q6VVB1;P63146;Q9UJX5;Q9NT62;Q8N2H9;P30260;P49427;P40337;Q5JXB2;Q05086;P41002;Q9NXF7;Q9Y6I7;Q9C040;Q6P050;Q9UJX6;O75150;Q9UM11;Q6ZNA4;Q9BS18;Q7Z6J8;Q8NG27;Q9UJX4;Q96DE5;P61088;Q6RSH7;Q13619;Q9Y3I1;O94952;Q14669;Q8IXQ5;Q5T6F0;Q9Y4X5;Q13616;Q14999;P62877;Q9NR09;Q96FA3;Q96PU5;Q9Y2M5;Q8TEB1;Q9UK99;P31749;Q14527;Q9UKT5;Q6PCD5;Q9UNE7;Q86UW9;P19474;Q9UH90;Q13620;Q9UKT8;Q99619;Q9H1A4;Q96PM5;Q969H0;P62256;Q9C035;Q53G59;Q969T4;P63279;Q9UKA1;Q9H3F6;O95071;Q96SW2;Q9UBS8;Q86XK2;Q99618;Q9H4P4;Q15386;P51668;Q9UBE0;Q13829;Q8IUD6;Q9P2J3;Q969P5;Q92466;Q8NEA9;O00308;Q13438;Q9UM13;Q9NPD8;O95714;Q9UJX4;Q5TA31;Q6IQL6;Q7Z650;Q9UH77;P53804;Q13114;Q8TCJ0;Q96T88;Q96CA5;Q96DX5;Q9Y4L5;Q86VP6;Q8WV22;P61077;Q8IYW8;Q9NVW2;Q93034;O14508;P61962;Q12834;Q9NRJ4;Q8NHY2;Q06587;Q99728;Q9UMS4;O94822;Q9HAT8;Q13216;O60662;Q8TEC5;Q9Y2X8;P62837;O14512;Q53G59;Q969U6;Q9H0M0;Q9UKT7;Q9H2C0;Q8WZ19;Q9BUZ4;Q96PU4;O43255;Q5XUX0;Q9Y4B6;Q9NZJ0;Q9NS91;Q9NRD1;Q9UK73;Q96G25;Q66K64;Q58WW2;Q9NWX5;Q9NV06;P63208;Q9H469;Q7Z7E8;Q5T447;O43791;A0AVT1;Q9Y5A7;Q96AX9;P68036;Q96BD6;Q8TEL6;Q15819}

10575 [Cluster 962]GO:0006878+P biological\_process [name] cellular copper ion homeostasis [def] "Any process involved in the maintenance of an internal steady state of copper ions at the level of a cell." [GOC

10576 Pathogen[ Q2Q067] interacts with 2 human partners: {P04156;P02795}

10577 Pathogen[ P0C214] interacts with 2 human partners: {P02795;P04156}

10578 Pathogen[ P03346] interacts with 2 human partners: {P02795;P04156}

10579 Pathogen[ Q85601] interacts with 2 human partners: {P02795;P04156}

10580 Pathogen[ P14079] interacts with 6 human partners: {P02795;P04156;Q9UKY0;O75880;O00244;O43819}

10581 Pathogen[ P03383] interacts with 2 human partners: {P04156;P02795}

10582 Pathogen[ P03410] interacts with 5 human partners: {Q9UKY0;P02795;P04156;O75880;O43819}

10583 Pathogen[ P14075] interacts with 2 human partners: {P04156;P02795}

10584 Pathogen[ P0C206] interacts with 3 human partners: {P04156;Q9UKY0;P02795}

10585 Pathogen[ P03363] interacts with 2 human partners: {P02795;P04156}

10586 [Cluster 963]GO:0045445+P biological\_process [name] myoblast differentiation [def]

"The process in which a relatively unspecialized cell acquires specialized features of a myoblast. A myoblast is a mononucleate cell type that, by fusion with other myoblasts, gives rise to the myotubes that eventually develop into striated muscle fibers." [CL

10587 Pathogen[ Q2Q067] interacts with 5 human  
partners: {Q92585;Q9NR56;P06400;P15172;Q9BQA5}

10588 Pathogen[ P0C214] interacts with 5 human  
partners: {Q92585;Q9NR56;P15172;Q9BQA5;P06400}

10589 Pathogen[ P03346] interacts with 5 human  
partners: {Q92585;P06400;P15172;Q9NR56;Q9BQA5}

10590 Pathogen[ Q85601] interacts with 5 human  
partners: {Q92585;P15172;P06400;Q9NR56;Q9BQA5}

10591 Pathogen[ P14079] interacts with 3 human partners: {Q9BQA5;Q9NR56;Q92585}

10592 Pathogen[ P03383] interacts with 5 human  
partners: {Q92585;P15172;Q9NR56;P06400;Q9BQA5}

10593 Pathogen[ P03410] interacts with 4 human partners: {Q9BQA5;Q9NR56;P06400;Q92585}

10594 Pathogen[ P14075] interacts with 5 human  
partners: {Q92585;Q9BQA5;P15172;Q9NR56;P06400}

10595 Pathogen[ P0C206] interacts with 5 human  
partners: {Q9NR56;Q9BQA5;P15172;Q92585;P06400}

10596 Pathogen[ P03363] interacts with 5 human  
partners: {Q9NR56;P06400;Q9BQA5;P15172;Q92585}

10597 [Cluster 964]GO:0072659+P biological\_process [name] protein localization in plasma membrane [def] "A process in which a protein is transported to, or maintained in, a specific location in the plasma membrane." [GOC

10598 Pathogen[ Q2Q067] interacts with 3 human partners: {Q12959;Q14244;O95429}

10599 Pathogen[ P0C214] interacts with 3 human partners: {Q14244;O95429;Q12959}

10600 Pathogen[ P03346] interacts with 4 human partners: {Q96S99;Q14244;O95429;Q12959}

10601 Pathogen[ Q85601] interacts with 4 human partners: {Q96S99;Q14244;Q12959;O95429}

10602 Pathogen[ P14079] interacts with 5 human  
partners: {P31751;O95429;O60895;Q14244;Q96S99}

10603 Pathogen[ P03383] interacts with 2 human partners: {Q14244;O95429}

10604 Pathogen[ P03410] interacts with 7 human  
partners: {Q96S99;O60895;O60895;Q0JRZ9;Q12959;O95429;Q14244}

10605 Pathogen[ P14075] interacts with 2 human partners: {O95429;Q14244}

10606 Pathogen[ P0C206] interacts with 4 human partners: {Q14244;O95429;Q96S99;Q12959}

10607 Pathogen[ P03363] interacts with 3 human partners: {Q12959;Q14244;O95429}

10608 [Cluster 965]GO:0043149+P biological\_process [name] stress fiber assembly [def] "The aggregation, arrangement and bonding together of a set of components to form a stress fiber. A stress fiber is a contractile actin filament bundle that consists of short actin filaments with alternating polarity." [GOC

10609 Pathogen[ Q2Q067] interacts with 5 human  
partners: {Q13829;P11831;Q13618;Q9BX66;P61586}

10610 Pathogen[ P0C214] interacts with 6 human  
partners: {Q13829;P61586;Q9BX66;P11831;Q13618;Q8WZ19}

10611 Pathogen[ P03346] interacts with 6 human  
partners: {Q8WZ19;P11831;Q13618;Q9BX66;Q13829;P61586}

10612 Pathogen[ Q85601] interacts with 6 human  
partners: {P11831;Q8WZ19;Q9BX66;P61586;Q13618;Q13829}

10613 Pathogen[ P14079] interacts with 5 human  
partners: {P15502;Q13618;P61586;Q13829;Q9BX66}

10614 Pathogen[ P03383] interacts with 5 human  
partners: {P11831;Q13618;P61586;Q13829;P15502}

10615 Pathogen[ P03410] interacts with 7 human  
partners: {P11831;Q13829;Q8WZ19;Q13618;P15502;P61586;Q9BX66}

10616 Pathogen[ P14075] interacts with 5 human  
partners: {Q13618;P11831;P15502;P61586;Q13829}

10617 Pathogen[ P0C206] interacts with 7 human  
partners: {Q13829;P15502;P61586;Q8WZ19;Q13618;Q9BX66;P11831}

10618 Pathogen[ P03363] interacts with 5 human  
partners: {Q9BX66;Q13618;P11831;Q13829;Q8WZ19}

10619 [Cluster 966]GO:0046777+P biological\_process [name] protein autophosphorylation [def] "The phosphorylation by a protein of one or more of its own amino acid residues, or residues on an identical protein." [ISBN

10620 Pathogen[ Q2Q067] interacts with 7 human  
partners: {P05198;P31749;Q7L9L4;O96017;Q13233;O15164;P21675}

10621 Pathogen[ P0C214] interacts with 8 human  
partners: {P21675;Q7L9L4;Q13233;O96017;P05198;O15164;P46020;P31749}

10622 Pathogen[ P03346] interacts with 10 human  
partners: {Q13263;O96017;Q7L9L4;P31749;Q13233;P21675;Q6ZN04;O14965;O15164;P05198}

10623 Pathogen[ Q85601] interacts with 10 human  
partners: {P31749;O96017;O15164;Q13263;O14965;P05198;P21675;Q7L9L4;Q13233;P51955}

10624 Pathogen[ P14079] interacts with 8 human  
partners: {O15164;P05198;Q7L9L4;P51955;Q13164;O14965;P46020;P21675}

10625 Pathogen[ P03383] interacts with 8 human  
partners: {Q9NYV4;Q13233;P31749;Q7L9L4;P05198;O14965;P21675;O96017}

10626 Pathogen[ P03410] interacts with 8 human

10627 partners:{P46020;P21675;P31749;Q7L9L4;Q13233;O14965;O96017;P05198}  
Pathogen[ P14075] interacts with 8 human

10628 partners:{P21675;P05198;P31749;O96017;O14965;Q7L9L4;Q13233;Q9NYV4}  
Pathogen[ POC206] interacts with 13 human

10629 partners:{P31749;Q13263;O96017;P51955;O15164;Q13233;P46020;P05198;Q6ZN04;Q7L9L4;O14965;Q99986;P21675}  
Pathogen[ P03363] interacts with 6 human

10630 partners:{P05198;O96017;P31749;Q7L9L4;P21675;Q13233}  
[Cluster 967]GO:0018095+P biological\_process [name] protein polyglutamylation  
[def] "The addition of one or more alpha-linked glutamyl units to the gamma carboxyl group of peptidyl-glutamic acid." [RESID

10631 Pathogen[ Q2Q067] interacts with 1 human partners:{Q9BYV8}  
10632 Pathogen[ POC214] interacts with 1 human partners:{Q9BYV8}  
10633 Pathogen[ P03346] interacts with 2 human partners:{Q8N841;Q9BYV8}  
10634 Pathogen[ Q85601] interacts with 1 human partners:{Q9BYV8}  
10635 Pathogen[ P14079] interacts with 3 human partners:{O95922;Q8N841;Q9BYV8}  
10636 Pathogen[ P03383] interacts with 1 human partners:{Q9BYV8}  
10637 Pathogen[ P03410] interacts with 3 human partners:{Q9BYV8;O95922;Q8N841}  
10638 Pathogen[ P14075] interacts with 1 human partners:{Q9BYV8}  
10639 Pathogen[ POC206] interacts with 3 human partners:{O95922;Q8N841;Q9BYV8}  
10640 Pathogen[ P03363] interacts with 3 human partners:{Q9BYV8;O95922;Q8N841}

10641 [Cluster 968]GO:0051290+P biological\_process [name] protein heterotetramerization  
[def] "The formation of a protein heterotetramer, a macromolecular structure consisting of four noncovalently associated subunits, of which not all are identical." [GOC

10642 Pathogen[ Q2Q067] interacts with 2 human partners:{P31350;P09972}  
10643 Pathogen[ POC214] interacts with 3 human partners:{P31350;P23921;P09972}  
10644 Pathogen[ P03346] interacts with 2 human partners:{P09972;P31350}  
10645 Pathogen[ Q85601] interacts with 2 human partners:{P31350;P09972}  
10646 Pathogen[ P14079] interacts with 3 human partners:{Q86YH6;P09972;P31350}  
10647 Pathogen[ P03383] interacts with 2 human partners:{P09972;P31350}  
10648 Pathogen[ P03410] interacts with 4 human partners:{P31350;P09972;P23921;Q86YH6}  
10649 Pathogen[ P14075] interacts with 2 human partners:{P31350;P09972}  
10650 Pathogen[ POC206] interacts with 2 human partners:{P09972;P31350}  
10651 Pathogen[ P03363] interacts with 1 human partners:{P09972}

10652 [Cluster 969]GO:0071888+P biological\_process [name] macrophage apoptosis [def] "The process of apoptosis in a macrophage." [CL

10653 Pathogen[ Q2Q067] interacts with 1 human partners:{Q14653}  
10654 Pathogen[ POC214] interacts with 1 human partners:{Q14653}  
10655 Pathogen[ P03346] interacts with 1 human partners:{Q14653}  
10656 Pathogen[ Q85601] interacts with 1 human partners:{Q14653}  
10657 Pathogen[ P14079] interacts with 1 human partners:{Q14653}  
10658 Pathogen[ P03383] interacts with 1 human partners:{Q14653}  
10659 Pathogen[ P03410] interacts with 1 human partners:{Q14653}  
10660 Pathogen[ P14075] interacts with 1 human partners:{Q14653}  
10661 Pathogen[ POC206] interacts with 1 human partners:{Q14653}  
10662 Pathogen[ P03363] interacts with 1 human partners:{Q14653}

10663 [Cluster 970]GO:0003203+P biological\_process [name] endocardial cushion morphogenesis  
[def] "The process in which the anatomical structure of the endocardial cushion is generated and organized. The endocardial cushion is a specialized region of mesenchymal cells that will give rise to the heart septa and valves." [GOC

10664 Pathogen[ Q2Q067] interacts with 2 human partners:{Q9NQ87;Q9Y5J3}  
10665 Pathogen[ POC214] interacts with 2 human partners:{Q9Y5J3;Q9NQ87}  
10666 Pathogen[ P03346] interacts with 2 human partners:{Q9Y5J3;Q9NQ87}  
10667 Pathogen[ Q85601] interacts with 2 human partners:{Q9NQ87;Q9Y5J3}  
10668 Pathogen[ P14079] interacts with 2 human partners:{Q9Y5J3;Q9NQ87}  
10669 Pathogen[ P03383] interacts with 1 human partners:{Q9NQ87}  
10670 Pathogen[ P03410] interacts with 2 human partners:{Q9Y5J3;Q9NQ87}  
10671 Pathogen[ P14075] interacts with 1 human partners:{Q9NQ87}  
10672 Pathogen[ POC206] interacts with 2 human partners:{Q9NQ87;Q9Y5J3}  
10673 Pathogen[ P03363] interacts with 2 human partners:{Q9Y5J3;Q9NQ87}

10674 [Cluster 971]GO:0021675+P biological\_process [name] nerve development [def] "The process whose specific outcome is the progression of a nerve over time, from its formation to the mature structure." [GO\_REF

10675 Pathogen[ Q2Q067] interacts with 1 human partners:{Q9BXM0}  
10676 Pathogen[ POC214] interacts with 1 human partners:{Q9BXM0}  
10677 Pathogen[ P03346] interacts with 2 human partners:{P50219;Q9BXM0}  
10678 Pathogen[ Q85601] interacts with 1 human partners:{Q9BXM0}  
10679 Pathogen[ P14079] interacts with 1 human partners:{Q9BXM0}  
10680 Pathogen[ P03383] interacts with 1 human partners:{Q9BXM0}  
10681 Pathogen[ P03410] interacts with 1 human partners:{Q9BXM0}  
10682 Pathogen[ P14075] interacts with 1 human partners:{Q9BXM0}  
10683 Pathogen[ POC206] interacts with 1 human partners:{Q9BXM0}  
10684 Pathogen[ P03363] interacts with 2 human partners:{Q9BXM0;P50219}

10685 [Cluster 972]GO:0043010+P biological\_process [name] camera-type eye development  
[def] "The process whose specific outcome is the progression of the camera-type eye over time, from its formation to the mature structure. The camera-type eye is an organ of

sight that receives light through an aperture and focuses it through a lens, projecting it on a photoreceptor field." [GOC

10686 Pathogen[ Q2Q067] interacts with 14 human partners: {Q13562;Q15293;P13349;P05813;Q9ULV5;P02511;P55347;P12755;Q13233;O75030;P07315;P58304;Q7Z6M4;P02489}

10687 Pathogen[ P0C214] interacts with 12 human partners: {P07315;P55347;P02489;P02511;P13349;P05813;O75030;Q7Z6M4;Q13233;P12755;Q9ULV5;Q15293}

10688 Pathogen[ P03346] interacts with 20 human partners: {Q9HD90;P02489;P13349;Q68CZ1;P58304;O75030;P02511;Q13233;Q7Z6M4;P07315;P55347;P05813;Q9P2D1;Q15293;Q9ULV5;Q13562;Q13394;O95343;Q9UIW0;Q9Y586}

10689 Pathogen[ Q85601] interacts with 15 human partners: {P02489;P07315;Q7Z6M4;Q9ULV5;Q15293;Q9P2D1;P13349;O75030;P12755;Q13562;P02511;P58304;P55347;Q13233;P05813}

10690 Pathogen[ P14079] interacts with 21 human partners: {Q15293;P05813;P12755;P13349;P55347;P02511;Q9Y586;Q68CZ1;P58304;Q13394;P02489;I3L1E1;P53673;Q9P2D1;P54826;Q15042;Q7Z6M4;P07315;O75030;Q9ULV5;P43320}

10691 Pathogen[ P03383] interacts with 8 human partners: {Q13233;P02511;O75030;P55347;Q9ULV5;Q7Z6M4;P05813;P07315}

10692 Pathogen[ P03410] interacts with 20 human partners: {P43320;Q13394;Q15293;P07315;P12755;O75030;Q9Y586;Q13233;I3L1E1;P02489;Q9P2D1;P02511;P13349;P05813;P54826;P55347;Q9ULV5;Q68CZ1;Q15042;Q7Z6M4}

10693 Pathogen[ P14075] interacts with 10 human partners: {P53673;O75030;P05813;P55347;Q9ULV5;P02511;Q13233;P07315;P54826;Q7Z6M4}

10694 Pathogen[ P0C206] interacts with 20 human partners: {Q7Z6M4;O75030;I3L1E1;Q9P2D1;Q13394;P53673;Q9Y586;Q13233;P07315;P12755;P05813;Q9ULV5;P13349;Q15293;Q13562;P02511;P54826;P02489;P58304;P55347}

10695 Pathogen[ P03363] interacts with 12 human partners: {Q9UIW0;P58304;P55347;P13349;Q15293;O75030;Q9ULV5;P07315;P02489;O95343;Q13233;P05813}

10696 [Cluster 973]GO:0000085+P biological\_process [name] G2 phase of mitotic cell cycle [def] "G2 phase occurring as part of the mitotic cell cycle. G2 phase is the interval between the completion of DNA synthesis and the beginning of DNA segregation (mitosis in a mitotic cell cycle). A mitotic cell cycle is one which canonically comprises four successive phases called G1, S, G2, and M and includes replication of the genome and the subsequent segregation of chromosomes into daughter cells." [GOC

10697 Pathogen[ Q2Q067] interacts with 7 human partners: {P49454;Q01094;Q9NYZ3;O00716;Q99543;P52292;P24941}

10698 Pathogen[ P0C214] interacts with 7 human partners: {O00716;Q01094;P24941;Q9NYZ3;P52292;Q99543;P49454}

10699 Pathogen[ P03346] interacts with 8 human partners: {Q99543;P24941;O00409;Q01094;Q9NYZ3;P52292;O00716;P49454}

10700 Pathogen[ Q85601] interacts with 7 human partners: {Q99543;P49454;Q9NYZ3;P52292;P24941;O00716;Q01094}

10701 Pathogen[ P14079] interacts with 6 human partners: {Q9NYZ3;Q99543;O00716;P49454;Q01094;P52292}

10702 Pathogen[ P03383] interacts with 7 human partners: {P49454;O00716;Q01094;P52292;P24941;Q9NYZ3;Q99543}

10703 Pathogen[ P03410] interacts with 7 human partners: {Q9NYZ3;P49454;O00716;P24941;Q01094;Q99543;P52292}

10704 Pathogen[ P14075] interacts with 7 human partners: {P52292;P24941;Q99543;O00716;Q01094;Q9NYZ3;P49454}

10705 Pathogen[ P0C206] interacts with 7 human partners: {P49454;O00716;Q99543;Q01094;Q9NYZ3;P24941;P52292}

10706 Pathogen[ P03363] interacts with 8 human partners: {P49454;Q99543;P24941;O00409;Q01094;Q9NYZ3;O00716;P52292}

10707 [Cluster 974]GO:1900246+P

10708 Pathogen[ Q2Q067] interacts with 1 human partners: {Q7Z2W4}

10709 Pathogen[ P0C214] interacts with 1 human partners: {Q7Z2W4}

10710 Pathogen[ P03346] interacts with 1 human partners: {Q7Z2W4}

10711 Pathogen[ Q85601] interacts with 1 human partners: {Q7Z2W4}

10712 Pathogen[ P14079] interacts with 2 human partners: {Q7Z2W4;Q96C10}

10713 Pathogen[ P03383] interacts with 1 human partners: {Q7Z2W4}

10714 Pathogen[ P03410] interacts with 2 human partners: {Q7Z2W4;Q96C10}

10715 Pathogen[ P14075] interacts with 1 human partners: {Q7Z2W4}

10716 Pathogen[ P0C206] interacts with 2 human partners: {Q96C10;Q7Z2W4}

10717 Pathogen[ P03363] interacts with 2 human partners: {Q8IY21;Q7Z2W4}

10718 [Cluster 975]GO:0042993+P biological\_process [name] positive regulation of transcription factor import into nucleus [def] "Any process that activates or increases the frequency, rate or extent of the movement of a transcription factor from the cytoplasm to the nucleus." [GOC

10719 Pathogen[ Q2Q067] interacts with 2 human partners: {Q9NPF5;P84022}

10720 Pathogen[ P0C214] interacts with 3 human partners: {P84022;Q86WV6;Q9NPF5}

10721 Pathogen[ P03346] interacts with 2 human partners: {P84022;Q9NPF5}

10722 Pathogen[ Q85601] interacts with 3 human partners: {Q86WV6;P84022;Q9NPF5}

10723 Pathogen[ P14079] interacts with 3 human partners: {Q7Z434;Q9NPF5;Q86WV6}

10724 Pathogen[ P03383] interacts with 2 human partners:{P84022;Q9NPF5}  
10725 Pathogen[ P03410] interacts with 4 human partners:{P84022;Q9NPF5;Q7Z434;Q86WV6}  
10726 Pathogen[ P14075] interacts with 2 human partners:{Q9NPF5;P84022}  
10727 Pathogen[ P0C206] interacts with 3 human partners:{P84022;Q9NPF5;Q86WV6}  
10728 Pathogen[ P03363] interacts with 2 human partners:{Q9NPF5;P84022}  
10729 [Cluster 976]GO:0009409+P biological\_process [name] response to cold [def] "Any process that results in a change in state or activity of a cell or an organism (in terms of movement, secretion, enzyme production, gene expression, etc.) as a result of a cold stimulus, a temperature stimulus below the optimal temperature for that organism." [GOC  
10730 Pathogen[ Q2Q067] interacts with 4 human partners:{P01100;P10827;Q14790;P16989}  
10731 Pathogen[ P0C214] interacts with 4 human partners:{P16989;P01100;Q14011;Q14790}  
10732 Pathogen[ P03346] interacts with 5 human partners:{P10827;Q14011;P16989;Q14790;P01100}  
10733 Pathogen[ Q85601] interacts with 4 human partners:{Q14790;P01100;P10827;P16989}  
10734 Pathogen[ P14079] interacts with 8 human partners:{P20396;P00403;P10827;Q14790;P16989;Q14011;P01100;Q8WXI4}  
10735 Pathogen[ P03383] interacts with 2 human partners:{P16989;P01100}  
10736 Pathogen[ P03410] interacts with 6 human partners:{P16989;P01100;Q8WXI4;Q14011;P00403;P20396}  
10737 Pathogen[ P14075] interacts with 2 human partners:{P16989;P01100}  
10738 Pathogen[ P0C206] interacts with 7 human partners:{Q8WXI4;Q14011;P16989;P01100;Q14790;P20396;P10827}  
10739 Pathogen[ P03363] interacts with 3 human partners:{Q14011;P16989;P01100}  
10740 [Cluster 977]GO:0060340+P biological\_process [name] positive regulation of type I interferon-mediated signaling pathway [def] "Any process that increases the rate, frequency or extent of a type I interferon-mediated signaling pathway. A type I interferon-mediated signaling pathway is the series of molecular events generated as a consequence of a type I interferon binding to a cell surface receptor." [GOC  
10741 Pathogen[ Q2Q067] interacts with 2 human partners:{Q13158;Q86WI3}  
10742 Pathogen[ P0C214] interacts with 2 human partners:{Q13158;Q86WI3}  
10743 Pathogen[ P03346] interacts with 2 human partners:{Q13158;Q86WI3}  
10744 Pathogen[ Q85601] interacts with 2 human partners:{Q13158;Q86WI3}  
10745 Pathogen[ P14079] interacts with 3 human partners:{Q7Z434;Q13158;Q86WI3}  
10746 Pathogen[ P03383] interacts with 2 human partners:{Q13158;Q86WI3}  
10747 Pathogen[ P03410] interacts with 3 human partners:{Q7Z434;Q13158;Q86WI3}  
10748 Pathogen[ P14075] interacts with 2 human partners:{Q86WI3;Q13158}  
10749 Pathogen[ P0C206] interacts with 2 human partners:{Q86WI3;Q13158}  
10750 Pathogen[ P03363] interacts with 2 human partners:{Q13158;Q86WI3}  
10751 [Cluster 978]GO:0045595+P biological\_process [name] regulation of cell differentiation [def] "Any process that modulates the frequency, rate or extent of cell differentiation, the process in which relatively unspecialized cells acquire specialized structural and functional features." [GOC  
10752 Pathogen[ Q2Q067] interacts with 5 human partners:{P30153;Q9UL49;P67775;P20265;Q13490}  
10753 Pathogen[ P0C214] interacts with 4 human partners:{Q13490;P30153;P20265;P67775}  
10754 Pathogen[ P03346] interacts with 10 human partners:{A6NJT0;P67775;O43316;P20265;P30153;Q9UL49;O95096;Q92481;Q13490;Q9H9S0}  
10755 Pathogen[ Q85601] interacts with 5 human partners:{O43316;Q13490;P30153;P67775;P20265}  
10756 Pathogen[ P14079] interacts with 4 human partners:{P20265;Q9UL49;P30153;Q13490}  
10757 Pathogen[ P03383] interacts with 5 human partners:{Q9UL49;Q13490;P30153;P67775;P20265}  
10758 Pathogen[ P03410] interacts with 5 human partners:{Q9UL49;Q13490;P30153;P20265;P67775}  
10759 Pathogen[ P14075] interacts with 5 human partners:{P20265;Q13490;Q9UL49;P67775;P30153}  
10760 Pathogen[ P0C206] interacts with 7 human partners:{P30153;Q9UL49;P67775;P20265;Q9H9S0;O43316;Q13490}  
10761 Pathogen[ P03363] interacts with 8 human partners:{Q13490;O43316;A6NJT0;P20265;P30153;Q9H9S0;P67775;Q9UL49}  
10762 [Cluster 979]GO:0043616+P biological\_process [name] keratinocyte proliferation [def] "The multiplication or reproduction of keratinocytes, resulting in the expansion of a cell population. Keratinocytes are epidermal cells which synthesize keratin and undergo a characteristic change as they move upward from the basal layers of the epidermis to the cornified (horny) layer of the skin." [CL  
10763 Pathogen[ Q2Q067] interacts with 2 human partners:{P35908;O14896}  
10764 Pathogen[ P0C214] interacts with 2 human partners:{P35908;O14896}  
10765 Pathogen[ P03346] interacts with 2 human partners:{P35908;O14896}  
10766 Pathogen[ Q85601] interacts with 2 human partners:{O14896;P35908}  
10767 Pathogen[ P14079] interacts with 2 human partners:{P35908;O14896}  
10768 Pathogen[ P03383] interacts with 2 human partners:{O14896;P35908}  
10769 Pathogen[ P03410] interacts with 2 human partners:{O14896;P35908}  
10770 Pathogen[ P14075] interacts with 2 human partners:{P35908;O14896}  
10771 Pathogen[ P0C206] interacts with 2 human partners:{O14896;P35908}  
10772 Pathogen[ P03363] interacts with 3 human partners:{O14896;P19883;P35908}  
10773 [Cluster 980]GO:0043547+P biological\_process [name] positive regulation of GTPase



activity [def] "Any process that activates or increases the activity of a GTPase." [GOC]

10774 Pathogen[ Q2Q067] interacts with 8 human partners:{Q9BTW9;P41220;Q12982;Q9Y2B5;Q5TB30;Q8N336;P43487;Q15276}

10775 Pathogen[ P0C214] interacts with 12 human partners:{Q9Y2B5;P41220;Q5TB30;P43487;Q9BTW9;P31150;P46060;P52565;Q8N336;Q12982;Q6GYQ0;P98171}

10776 Pathogen[ P03346] interacts with 13 human partners:{P98171;P43487;Q8N336;Q96FS4;Q5TB30;P52565;P46060;P31150;Q6GYQ0;P41220;Q12982;Q15276;Q9Y2B5}

10777 Pathogen[ Q85601] interacts with 12 human partners:{P31150;P46060;P41220;P43487;Q12982;Q9BTW9;Q5TB30;Q9NP61;P52565;Q8N6H7;Q9Y2B5;Q8N6T3}

10778 Pathogen[ P14079] interacts with 13 human partners:{P52565;Q9BTW9;Q12982;P31150;P98171;Q8N336;Q15276;P46060;P41220;Q9H5N1;Q9Y2B5;Q5TB30;Q15042}

10779 Pathogen[ P03383] interacts with 4 human partners:{P41220;Q9Y2B5;P43487;Q15276}

10780 Pathogen[ P03410] interacts with 15 human partners:{Q5TB30;P98171;P41220;Q9Y2B5;Q8N336;Q9BTW9;Q9NP61;P43487;Q12982;Q9H5N1;P31150;P52565;Q15042;P46060;Q15276}

10781 Pathogen[ P14075] interacts with 5 human partners:{P43487;Q8N336;P41220;Q9Y2B5;Q15276}

10782 Pathogen[ P0C206] interacts with 16 human partners:{Q12982;Q8N6T3;Q9BTW9;P52565;Q9Y2B5;Q9NP61;P46060;P43487;P31150;P98171;Q9H5N1;Q8N336;Q5TB30;P41220;Q8N6H7;Q15276}

10783 Pathogen[ P03363] interacts with 15 human partners:{Q9Y2B5;P46060;P52565;P31150;P98171;Q8N336;P43487;Q9BTW9;P41220;Q5TB30;Q96NW4;Q7Z5H3;Q12982;Q96FS4;Q15276}

10784 [Cluster 981]GO:0034341+P biological\_process [name] response to interferon-gamma [def] "Any process that results in a change in state or activity of a cell or an organism (in terms of movement, secretion, enzyme production, gene expression, etc.) as a result of an interferon-gamma stimulus. Interferon-gamma is also known as type II interferon." [GOC]

10785 Pathogen[ Q2Q067] interacts with 9 human partners:{Q9Y5A7;P30793;Q99966;Q13137;Q16719;P23497;Q96EY1;O15205;P33076}

10786 Pathogen[ P0C214] interacts with 9 human partners:{P33076;Q99966;Q13137;P30793;O15205;P23497;Q9Y5A7;Q96EY1;Q16719}

10787 Pathogen[ P03346] interacts with 8 human partners:{Q99966;P33076;Q13137;Q9Y5A7;O15205;Q16719;P23497;Q96EY1}

10788 Pathogen[ Q85601] interacts with 8 human partners:{P33076;Q16719;Q99966;P30793;Q13137;O15205;Q9Y5A7;Q96EY1}

10789 Pathogen[ P14079] interacts with 10 human partners:{P13164;P33076;Q99966;P30793;P23497;Q16719;O15205;Q13137;Q9Y5A7;Q96EY1}

10790 Pathogen[ P03383] interacts with 7 human partners:{P33076;Q16719;Q13137;Q9Y5A7;P23497;O15205;Q96EY1}

10791 Pathogen[ P03410] interacts with 8 human partners:{Q13137;O15205;Q16719;Q9Y5A7;P30793;P33076;Q96EY1;Q99966}

10792 Pathogen[ P14075] interacts with 8 human partners:{Q16719;P23497;P33076;Q13137;Q9Y5A7;P30793;O15205;Q96EY1}

10793 Pathogen[ P0C206] interacts with 8 human partners:{Q13137;O15205;P30793;P33076;Q16719;Q99966;Q96EY1;Q9Y5A7}

10794 Pathogen[ P03363] interacts with 6 human partners:{O15205;P23497;P33076;Q96EY1;Q13137;Q9Y5A7}

10795 [Cluster 982]GO:0031623+P biological\_process [name] receptor internalization [def] "A receptor-mediated endocytosis process that results in the movement of receptors from the plasma membrane to the inside of the cell. The process begins when cell surface receptors are monoubiquitinated following ligand-induced activation. Receptors are subsequently taken up into endocytic vesicles from where they are either targeted to the lysosome or vacuole for degradation or recycled back to the plasma membrane." [GOC]

10796 Pathogen[ Q2Q067] interacts with 2 human partners:{Q00610;P50570}

10797 Pathogen[ P0C214] interacts with 2 human partners:{P62993;P50570}

10798 Pathogen[ P03346] interacts with 4 human partners:{P50570;P62993;Q13492;Q00610}

10799 Pathogen[ Q85601] interacts with 3 human partners:{Q00610;P62993;P50570}

10800 Pathogen[ P14079] interacts with 5 human partners:{Q13492;Q00610;O60895;P50570;P62993}

10801 Pathogen[ P03383] interacts with 1 human partners:{Q00610}

10802 Pathogen[ P03410] interacts with 6 human partners:{Q00610;O60896;O60895;P50570;Q13492;P62993}

10803 Pathogen[ P14075] interacts with 1 human partners:{Q00610}

10804 Pathogen[ P0C206] interacts with 3 human partners:{Q00610;P62993;P50570}

10805 Pathogen[ P03363] interacts with 2 human partners:{P50570;Q00610}

10806 [Cluster 983]GO:0019730+P biological\_process [name] antimicrobial humoral response [def] "An immune response against microbes mediated through a body fluid. Examples of this process are seen in the antimicrobial humoral response of *Drosophila melanogaster* and *Mus musculus*." [GOC]

10807 Pathogen[ Q2Q067] interacts with 1 human partners:{P20749}

10808 Pathogen[ P0C214] interacts with 1 human partners:{P20749}

10809 Pathogen[ P03346] interacts with 1 human partners:{P20749}

10810 Pathogen[ Q85601] interacts with 1 human partners:{P20749}

10811 Pathogen[ P14079] interacts with 1 human partners:{P20749}

10812 Pathogen[ P03383] interacts with 1 human partners:{P20749}

10813 Pathogen[ P03410] interacts with 1 human partners:{P20749}

10814 Pathogen[ P14075] interacts with 1 human partners:{P20749}

10815 Pathogen[ P0C206] interacts with 1 human partners:{P20749}

10816 Pathogen[ P03363] interacts with 1 human partners:{P20749}

10817 [Cluster 984]GO:0050663+P biological\_process [name] cytokine secretion [def] "The regulated release of cytokines from a cell or group of cells. Cytokines are any of a group of proteins that function to control the survival, growth and differentiation of tissues and cells, and which have autocrine and paracrine activity." [GOC

10818 Pathogen[ Q2Q067] interacts with 1 human partners:{Q13094}

10819 Pathogen[ P0C214] interacts with 1 human partners:{Q13094}

10820 Pathogen[ P03346] interacts with 1 human partners:{Q13094}

10821 Pathogen[ Q85601] interacts with 1 human partners:{Q13094}

10822 Pathogen[ P14079] interacts with 1 human partners:{Q13094}

10823 Pathogen[ P03383] interacts with 1 human partners:{Q13094}

10824 Pathogen[ P03410] interacts with 1 human partners:{Q13094}

10825 Pathogen[ P14075] interacts with 1 human partners:{Q13094}

10826 Pathogen[ P0C206] interacts with 1 human partners:{Q13094}

10827 Pathogen[ P03363] interacts with 1 human partners:{Q13094}

10828 [Cluster 985]GO:0002455+P biological\_process [name] humoral immune response mediated by circulating immunoglobulin [def] "An immune response dependent upon secreted immunoglobulin. An example of this process is found in *Mus musculus*." [GO\_REF

10829 Pathogen[ Q2Q067] interacts with 2 human partners:{P20749;Q9UQ84}

10830 Pathogen[ P0C214] interacts with 2 human partners:{P20749;Q9UQ84}

10831 Pathogen[ P03346] interacts with 2 human partners:{P20749;Q9UQ84}

10832 Pathogen[ Q85601] interacts with 2 human partners:{Q9UQ84;P20749}

10833 Pathogen[ P14079] interacts with 2 human partners:{P20749;Q9UQ84}

10834 Pathogen[ P03383] interacts with 1 human partners:{P20749}

10835 Pathogen[ P03410] interacts with 2 human partners:{P20749;Q9UQ84}

10836 Pathogen[ P14075] interacts with 1 human partners:{P20749}

10837 Pathogen[ P0C206] interacts with 2 human partners:{Q9UQ84;P20749}

10838 Pathogen[ P03363] interacts with 1 human partners:{P20749}

10839 [Cluster 986]GO:0045657+P biological\_process [name] positive regulation of monocyte differentiation [def] "Any process that activates or increases the frequency, rate or extent of monocyte differentiation." [GOC

10840 Pathogen[ Q2Q067] interacts with 2 human partners:{Q9NSA3;Q9UKV3}

10841 Pathogen[ P0C214] interacts with 3 human partners:{Q9NSA3;P05412;Q9UKV3}

10842 Pathogen[ P03346] interacts with 3 human partners:{P05412;Q9UKV3;Q9NSA3}

10843 Pathogen[ Q85601] interacts with 3 human partners:{Q9UKV3;P05412;Q9NSA3}

10844 Pathogen[ P14079] interacts with 3 human partners:{Q9H295;Q9UKV3;P05412}

10845 Pathogen[ P03383] interacts with 3 human partners:{Q9NSA3;Q9UKV3;P05412}

10846 Pathogen[ P03410] interacts with 3 human partners:{Q9NSA3;Q9UKV3;P05412}

10847 Pathogen[ P14075] interacts with 3 human partners:{P05412;Q9UKV3;Q9NSA3}

10848 Pathogen[ P0C206] interacts with 3 human partners:{Q9NSA3;P05412;Q9UKV3}

10849 Pathogen[ P03363] interacts with 3 human partners:{Q9UKV3;Q9NSA3;P05412}

10850 [Cluster 987]GO:0034393+P biological\_process [name] positive regulation of smooth muscle cell apoptosis [def] "Any process that activates or increases the frequency, rate, or extent of smooth muscle cell apoptosis." [GOC

10851 Pathogen[ Q2Q067] interacts with 2 human partners:{Q96IL0;P42771}

10852 Pathogen[ P0C214] interacts with 2 human partners:{Q96IL0;P42771}

10853 Pathogen[ P03346] interacts with 2 human partners:{Q96IL0;P42771}

10854 Pathogen[ Q85601] interacts with 2 human partners:{Q96IL0;P42771}

10855 Pathogen[ P14079] interacts with 3 human partners:{Q96IL0;P29459;P42771}

10856 Pathogen[ P03383] interacts with 1 human partners:{P42771}

10857 Pathogen[ P03410] interacts with 3 human partners:{P42771;Q96IL0;P29459}

10858 Pathogen[ P14075] interacts with 1 human partners:{P42771}

10859 Pathogen[ P0C206] interacts with 2 human partners:{P42771;Q96IL0}

10860 Pathogen[ P03363] interacts with 1 human partners:{P42771}

10861 [Cluster 988]GO:0030500+P biological\_process [name] regulation of bone mineralization [def] "Any process that modulates the frequency, rate or extent of bone mineralization." [GOC

10862 Pathogen[ Q2Q067] interacts with 1 human partners:{Q9NUQ3}

10863 Pathogen[ P0C214] interacts with 1 human partners:{Q9NUQ3}

10864 Pathogen[ P03346] interacts with 3 human partners:{Q96BA8;Q9NUQ3;Q14596}

10865 Pathogen[ Q85601] interacts with 2 human partners:{Q14596;Q9NUQ3}

10866 Pathogen[ P14079] interacts with 2 human partners:{Q14596;Q9NUQ3}

10867 Pathogen[ P03383] interacts with 1 human partners:{Q9NUQ3}

10868 Pathogen[ P03410] interacts with 2 human partners:{Q14596;Q9NUQ3}

10869 Pathogen[ P14075] interacts with 1 human partners:{Q9NUQ3}

10870 Pathogen[ P0C206] interacts with 2 human partners:{Q9NUQ3;Q14596}

10871 Pathogen[ P03363] interacts with 1 human partners:{Q9NUQ3}

10872 [Cluster 989]GO:0030538+P biological\_process [name] embryonic genitalia morphogenesis

[def] "The process, occurring in the embryo, by which the anatomical structures of the genitalia are generated and organized." [GOC

10873 Pathogen[ Q2Q067] interacts with 1 human partners:{P36402}

10874 Pathogen[ P0C214] interacts with 1 human partners:{P36402}

10875 Pathogen[ P03346] interacts with 1 human partners:{P36402}

10876 Pathogen[ Q85601] interacts with 1 human partners:{P36402}

10877 Pathogen[ P14079] interacts with 1 human partners:{P36402}

10878 Pathogen[ P03383] interacts with 1 human partners:{P36402}

10879 Pathogen[ P03410] interacts with 1 human partners:{P36402}

10880 Pathogen[ P14075] interacts with 1 human partners:{P36402}

10881 Pathogen[ P0C206] interacts with 1 human partners:{P36402}

10882 Pathogen[ P03363] interacts with 1 human partners:{P36402}

10883 [Cluster 990]GO:0051798+P biological\_process [name] positive regulation of hair follicle development [def] "Any process that activates or increases the frequency, rate or extent of hair follicle development." [GOC

10884 Pathogen[ Q2Q067] interacts with 2 human partners:{Q04695;Q15628}

10885 Pathogen[ P0C214] interacts with 2 human partners:{Q15628;Q04695}

10886 Pathogen[ P03346] interacts with 2 human partners:{Q04695;Q15628}

10887 Pathogen[ Q85601] interacts with 2 human partners:{Q04695;Q15628}

10888 Pathogen[ P14079] interacts with 2 human partners:{Q04695;Q15628}

10889 Pathogen[ P03383] interacts with 2 human partners:{Q04695;Q15628}

10890 Pathogen[ P03410] interacts with 2 human partners:{Q15628;Q04695}

10891 Pathogen[ P14075] interacts with 2 human partners:{Q04695;Q15628}

10892 Pathogen[ P0C206] interacts with 2 human partners:{Q15628;Q04695}

10893 Pathogen[ P03363] interacts with 3 human partners:{P19883;Q15628;Q04695}

10894 [Cluster 991]GO:0046602+P biological\_process [name] regulation of mitotic centrosome separation [def] "Any process that modulates the frequency, rate or extent of the separation of duplicated centrosome components at the beginning of mitosis." [GOC

10895 Pathogen[ Q2Q067] interacts with 1 human partners:{O14757}

10896 Pathogen[ P0C214] interacts with 1 human partners:{O14757}

10897 Pathogen[ P03346] interacts with 1 human partners:{O14757}

10898 Pathogen[ Q85601] interacts with 2 human partners:{O14757;P51955}

10899 Pathogen[ P14079] interacts with 1 human partners:{P51955}

10900 Pathogen[ P03383] interacts with 1 human partners:{O14757}

10901 Pathogen[ P03410] interacts with 1 human partners:{O14757}

10902 Pathogen[ P14075] interacts with 1 human partners:{O14757}

10903 Pathogen[ P0C206] interacts with 1 human partners:{P51955}

10904 Pathogen[ P03363] interacts with 1 human partners:{O14757}

10905 [Cluster 992]GO:0048808+P biological\_process [name] male genitalia morphogenesis [def] "The process in which the anatomical structures of male genitalia are generated and organized." [GOC

10906 Pathogen[ Q2Q067] interacts with 1 human partners:{Q9BX26}

10907 Pathogen[ P0C214] interacts with 1 human partners:{Q9BX26}

10908 Pathogen[ P03346] interacts with 1 human partners:{Q9BX26}

10909 Pathogen[ Q85601] interacts with 1 human partners:{Q9BX26}

10910 Pathogen[ P14079] interacts with 1 human partners:{Q9BX26}

10911 Pathogen[ P03383] interacts with 1 human partners:{Q9BX26}

10912 Pathogen[ P03410] interacts with 1 human partners:{Q9BX26}

10913 Pathogen[ P14075] interacts with 1 human partners:{Q9BX26}

10914 Pathogen[ P0C206] interacts with 1 human partners:{Q9BX26}

10915 Pathogen[ P03363] interacts with 1 human partners:{Q9BX26}

10916 [Cluster 993]GO:0016572+P biological\_process [name] histone phosphorylation [def] "The modification of histones by addition of phosphate groups." [GOC

10917 Pathogen[ Q2Q067] interacts with 3 human partners:{P14635;O75582;P24941}

10918 Pathogen[ P0C214] interacts with 3 human partners:{P14635;P24941;O75582}

10919 Pathogen[ P03346] interacts with 3 human partners:{P24941;P14635;O75582}

10920 Pathogen[ Q85601] interacts with 3 human partners:{P14635;O75582;P24941}

10921 Pathogen[ P14079] interacts with 2 human partners:{O75582;P14635}

10922 Pathogen[ P03383] interacts with 3 human partners:{O75582;P14635;P24941}

10923 Pathogen[ P03410] interacts with 3 human partners:{O75582;P14635;P24941}

10924 Pathogen[ P14075] interacts with 3 human partners:{P24941;P14635;O75582}

10925 Pathogen[ P0C206] interacts with 4 human partners:{O75582;P14635;P24941;Q9UIG0}

10926 Pathogen[ P03363] interacts with 1 human partners:{P24941}

10927 [Cluster 994]GO:0006935+P biological\_process [name] chemotaxis [def] "The directed movement of a motile cell or organism, or the directed growth of a cell guided by a specific chemical concentration gradient. Movement may be towards a higher concentration (positive chemotaxis) or towards a lower concentration (negative chemotaxis)." [ISBN

10928 Pathogen[ Q2Q067] interacts with 3 human partners:{Q9BW27;Q12904;P15407}

10929 Pathogen[ P0C214] interacts with 4 human partners:{Q12904;P15407;Q9BW27;P05546}

10930 Pathogen[ P03346] interacts with 3 human partners:{Q9BW27;Q12904;P15407}

10931 Pathogen[ Q85601] interacts with 2 human partners:{P15407;Q9BW27}

10932 Pathogen[ P14079] interacts with 7 human partners:{Q9BW27;Q96DZ9;P60022;O15263;Q8TAZ6;P15407;Q12904}

10933 Pathogen[ P03383] interacts with 3 human partners:{Q12904;Q9BW27;P15407}

10934 Pathogen[ P03410] interacts with 11 human partners:{Q9BW27;O14960;Q96DZ9;Q8TAZ6;Q9HBL7;P60022;P33241;Q12904;P15407;Q9NRJ3;O152

63}

10935 Pathogen[ P14075] interacts with 3 human partners:{Q9BW27;Q12904;P15407}

10936 Pathogen[ P0C206] interacts with 4 human partners:{P15407;Q9BW27;Q12904;Q8TAZ6}

10937 Pathogen[ P03363] interacts with 2 human partners:{P15407;Q9BW27}

10938 [Cluster 995]GO:0010875+P biological\_process [name] positive regulation of cholesterol efflux [def] "Any process that increases the frequency, rate or extent of cholesterol efflux. Cholesterol efflux is the directed movement of cholesterol, cholest-5-en-3-beta-ol, out of a cell or organelle." [GOC

10939 Pathogen[ Q2Q067] interacts with 2 human partners:{P55055;P25963}

10940 Pathogen[ P0C214] interacts with 1 human partners:{P25963}

10941 Pathogen[ P03346] interacts with 2 human partners:{P25963;P55055}

10942 Pathogen[ Q85601] interacts with 2 human partners:{P55055;P25963}

10943 Pathogen[ P14079] interacts with 1 human partners:{P55055}

10944 Pathogen[ P03383] interacts with 1 human partners:{P25963}

10945 Pathogen[ P03410] interacts with 1 human partners:{P25963}

10946 Pathogen[ P14075] interacts with 1 human partners:{P25963}

10947 Pathogen[ P0C206] interacts with 2 human partners:{P25963;P55055}

10948 Pathogen[ P03363] interacts with 1 human partners:{P25963}

10949 [Cluster 996]GO:0000087+P biological\_process [name] M phase of mitotic cell cycle [def] "M phase occurring as part of the mitotic cell cycle. M phase is the part of the cell cycle during which nuclear division takes place. A mitotic cell cycle is one which canonically comprises four successive phases called G1, S, G2, and M and includes replication of the genome and the subsequent segregation of chromosomes into daughter cells." [GOC

10950 Pathogen[ Q2Q067] interacts with 74 human partners:{P49454;Q96EE3;Q96H22;P52948;Q71F23;Q14008;Q12769;Q9Y266;Q15398;Q99547;P49792;Q13352;Q7Z460;P55735;Q6IPU0;Q6P1K2;Q9HBM1;Q8WYP5;Q9H3R5;Q5FBB7;P49450;Q13257;Q8N2Z9;Q03188;Q9NXR1;Q53HL2;Q43684;Q8NBT2;Q9P258;Q8NFH4;P30304;Q9NQS7;Q43264;Q14980;P30307;Q92674;Q9BW27;Q96BT3;Q9BZD4;Q9NSP4;Q12834;P36873;P50748;Q96Q89;Q99550;Q9H410;Q8NFH3;Q02241;Q60216;Q00139;Q75122;Q8NG31;Q9Y6D9;Q9UKT4;P57740;Q96BD8;Q9H900;Q96IY1;Q8WUM0;Q14683;Q8WVM7;P30305;Q9BU64;P42677;Q95229;Q14777;Q562F6;Q9BPU9;Q8N3U4;Q15691;Q9H081;Q8WVK7;Q15392;Q96EA4}

10951 Pathogen[ P0C214] interacts with 76 human partners:{Q9H081;Q43684;P55735;Q13257;P30307;Q96BT3;Q14008;Q53HL2;Q43264;Q02241;Q96EA4;P57740;Q8WYP5;P50748;Q95229;Q96EE3;P49792;Q6IPU0;Q8NBT2;Q00139;Q15691;Q99547;Q6P1K2;P46060;Q562F6;Q9Y266;P49450;Q8N2Z9;Q03188;Q75122;Q92674;Q96Q89;Q14980;Q9BW27;Q96BD8;Q9HBM1;Q9BPU9;Q9P258;Q15398;Q12834;Q13352;Q9BQQ3;Q99550;Q8NFH3;P30305;Q9H410;Q15392;Q9H3R5;P42677;Q14683;Q8N3U4;Q8WVM7;Q8NG31;Q7Z460;P36873;Q9H900;Q5FBB7;Q9NQS7;Q9NSP4;Q71F23;Q8NFH4;Q8N0S6;Q9NXR1;Q96IY1;P49454;P30304;Q60216;Q9BZD4;Q8WUM0;Q9UKT4;Q9Y6D9;P52948;Q9BU64;Q12769;Q8WVK7;Q14777}

10952 Pathogen[ P03346] interacts with 80 human partners:{Q9Y6D9;Q8N2Z9;P55735;Q5FBB7;Q8NFH4;Q8WUM0;Q95229;Q7L2Z9;Q12769;Q15392;Q43684;Q96EE3;Q8N3U4;Q9BS16;Q9BPU9;Q92674;Q00139;P57740;Q15691;Q8WYP5;P30304;Q43264;Q9NXR1;Q53HL2;Q96IY1;Q9P258;Q8NFH3;Q12834;P30305;Q9Y266;Q14777;Q9BW27;Q14980;Q96EA4;Q15398;P46060;Q14683;P36873;Q14008;Q9NQS7;Q96Q89;Q9UKT4;Q562F6;Q9H081;Q8NBT2;Q9HBM1;Q9H410;P30622;Q75122;Q9BU64;Q9BQQ3;Q02241;Q8WVM7;Q03188;P42677;P50748;P49450;Q99550;Q99547;Q7Z460;Q6IPU0;Q8NG31;Q8N0S6;Q9H3R5;Q9NSP4;Q96H22;Q6P1K2;Q60216;Q96BD8;Q9BZD4;Q96BT3;Q71F23;Q13352;Q8WVK7;Q13257;P30307;P49454;Q9H900;P49792;P52948}

10953 Pathogen[ Q85601] interacts with 75 human partners:{Q8NBT2;P49454;Q95229;Q02241;Q8NFH4;Q8NFH3;Q03188;Q9H900;Q15398;Q14008;P46060;Q96EE3;Q9BQQ3;Q99547;Q9NQS7;Q12769;Q9H081;Q9P258;Q96BT3;Q9UKT4;P57740;Q8WYP5;P30622;Q8WUM0;Q71F23;Q43264;Q53HL2;Q8NG31;Q15392;P30304;Q9H3R5;Q96EA4;Q60216;Q8WVM7;Q12834;Q13257;Q92674;Q75122;P30305;Q9Y266;Q96Q89;Q9BW27;Q13352;P30307;Q562F6;Q9BU64;Q14683;Q9BZD4;P36873;Q15691;Q96BD8;Q9Y6D9;P55735;P52948;P49450;Q99550;Q8N2Z9;Q9H410;Q14980;Q8N3U4;P42677;P50748;Q8WVK7;Q96IY1;Q9BPU9;Q7Z460;P49792;Q9NXR1;Q6P1K2;Q9GZM8;Q14777;Q43684;Q00139;Q9HBM1;Q5FBB7}

10954 Pathogen[ P14079] interacts with 78 human partners:{Q15691;Q96IY1;Q03188;Q9BW27;P30307;Q9UKT4;Q7Z460;Q96BT3;Q9HBM1;Q8N0S6;P36873;P57740;Q95229;Q8NBT2;Q02241;Q9BZD4;Q15392;Q60216;Q9Y266;P46060;Q8NG31;Q6IPU0;Q9H900;P30304;Q5FBB7;Q9H410;Q8N3U4;Q9NSP4;Q99661;Q71F23;Q8WUM0;Q8WYP5;Q96Q89;Q00139;Q8N2Z9;Q13257;Q96EA4;Q562F6;Q8WVK7;P49450;Q96H22;Q8NFH3;Q96EE3;Q9BPU9;Q9P258;Q43264;Q9BQQ3;Q9H3R5;Q9GZM8;Q53HL2;P42677;Q8NFH4;Q9NQS7;Q92674;P55735;Q9UQE7;P49454;P30305;Q9BU64;Q9NXR1;P50748;Q12769;Q95235;Q99547;Q96BD8;Q75122;Q14683;Q13352;Q7L2Z9;Q14777;Q43684;Q99550;P30622;Q6P1K2;P52948;Q9H081;Q14008;Q15398}

10955 Pathogen[ P03383] interacts with 64 human partners:{Q14683;Q96EE3;Q13257;P30307;Q8WUM0;Q9NQS7;Q03188;P49454;Q99547;P49792;Q8N2Z9;Q8NFH4;Q7Z460;Q6IPU0;Q96BD8;Q02241;Q8NBT2;Q8N3U4;Q14008;Q9H900;Q15691;P55735;Q43264;Q5FBB7;P52948;Q9P258;P57740;Q8WYP5;P30304;P42677;Q9UKT4;Q96H22;Q13352;Q96EA4;Q60216;Q96BT3;Q12769;P36873;Q71F23;Q12834;Q53HL2;Q95229;Q96H22;Q9BU64;Q14980;Q43684;Q9BZD4;Q8WVK7;Q96Q89;Q562F6;Q9HBM1;Q9Y266;Q9H410;Q9H081;Q96IY1;Q8NG31;Q6P1K2;Q14777;Q92674;Q9H3R5;Q8NFH3;Q9Y6D9;P50748;Q8WVM7}

10956 Pathogen[ P03410] interacts with 80 human partners:{Q03188;Q9UKT4;Q7Z460;Q15392;Q9BW27;Q96Q89;Q9NSP4;Q9H3R5;Q8N0S6;Q43684;Q96H22;P30622;Q9BQQ3;Q00139;Q9NXR1;Q15398;Q9H410;Q8NG31;Q9GZM8;Q53HL2;Q8NFH4;Q6IPU0;Q9UQE7;Q96BT3;P52948;Q14008;P50748;Q562F6;Q92674;Q60216;Q43264;P49454;Q96EA4;Q96IY1;Q15691;Q9BPU9;P30304;Q6P1K2;Q99550;Q71F23;Q14683;Q9BZD4;Q8WVK7;P36873;Q9HBM1;Q96EE3;Q8N3

U4;Q12834;Q8NBT2;Q99547;P49450;Q5FBB7;Q8WUM0;Q8WVM7;Q9H900;Q9Y266;Q95229;Q9H081;Q96B  
D8;P57740;P55735;P30305;Q12769;Q9P258;Q8WYP5;O75122;Q8NFB3;P30307;Q13352;P46060;Q7L2  
Z9;O14980;O14777;P49792;Q02241;Q9BU64;Q8N2Z9;Q13257;Q9NQS7;P42677}

10957 Pathogen[ P14075] interacts with 66 human  
partners: {Q6IPU0;P42677;Q9Y266;Q14683;Q9Y6D9;Q02241;Q9H081;Q562F6;Q9UKT4;Q9NQS7;Q8WV  
M7;Q92674;Q8WVK7;P57740;Q8WYP5;Q7Z460;P49792;Q96IY1;Q13257;Q96H22;O43684;Q96BD8;O147  
77;P55735;P30305;Q95229;Q8N2Z9;Q9H3R5;O14980;Q9BW27;Q9BU64;Q96EA4;O00139;Q9P258;Q156  
91;Q96EE3;Q96BT3;Q9BPU9;Q5FBB7;P30304;Q9H410;Q8NFB3;Q9H900;Q53HL2;Q99547;P50748;Q127  
69;Q9HBM1;Q6P1K2;Q13352;Q14008;Q8WUM0;O43264;Q03188;Q8NG31;P49454;Q96Q89;P30307;Q71F  
23;Q8NFB4;O60216;Q8NBT2;Q9BZD4;Q12834;P52948;Q8N3U4}

10958 Pathogen[ P0C206] interacts with 79 human  
partners: {Q9BPU9;Q96EE3;Q9HBM1;O60216;Q8WYP5;Q6IPU0;Q9NSP4;Q14008;Q96Q89;Q9H900;P303  
07;Q9Y6D9;Q7L2Z9;Q15691;Q9H081;O14777;Q8N0S6;Q9BZD4;P55735;Q99550;Q9H410;P30305;P577  
40;P49454;P30622;Q13257;Q9BU64;Q02241;Q9GZM8;O75122;Q92674;Q8WUM0;Q9UKT4;Q99547;P460  
60;Q6P1K2;P49792;Q8NBT2;Q96BD8;Q9H3R5;Q9UQE7;P49450;Q14683;Q96IY1;Q96BT3;Q13352;Q5FB  
B7;Q53HL2;O15392;O00139;Q9P258;Q96H22;Q8NFB4;P30304;Q562F6;Q8N3U4;Q9NXR1;Q96EA4;Q8N2  
Z9;Q12769;O43684;Q9BQQ3;Q7Z460;Q9NQS7;Q8NFB3;P36873;P50748;Q15398;Q71F23;O43264;Q8WV  
M7;Q8NG31;Q9Y266;Q12834;Q8WVK7;Q9BW27;Q03188;P42677;O95229}

10959 Pathogen[ P03363] interacts with 69 human  
partners: {Q96EA4;Q9BZD4;P46060;P49454;Q96IY1;Q6P1K2;P42677;Q9Y6D9;Q9H081;P36873;Q926  
74;Q8NFB4;Q95229;Q96BD8;Q8WYP5;Q8NFB3;Q9Y266;Q99547;O14980;Q12769;Q15691;O43264;Q995  
50;Q8NBT2;Q15398;Q02241;Q8N2Z9;Q9P258;Q53HL2;Q8WVK7;Q9H410;P50748;Q5FBB7;Q9H900;P303  
04;Q8WUM0;P30622;O43684;P49450;Q9NQS7;Q9BPU9;Q9NSP4;Q8WVM7;Q9HBM1;Q7Z460;Q9UKT4;P497  
92;Q03188;Q8NG31;Q13257;Q71F23;P57740;Q96BT3;Q9H3R5;P52948;Q8N3U4;O14777;Q96Q89;Q128  
34;Q14008;Q562F6;Q9NXR1;O00139;P30307;Q13352;P55735;Q14683;Q9BW27;O60216}

10960 [Cluster 997]GO:0031056+P biological\_process [name] regulation of histone  
modification [def] "Any process that modulates the frequency, rate or extent of the  
covalent alteration of a histone." [GOC

10961 Pathogen[ Q2Q067] interacts with 2 human partners: {P63146;P50750}

10962 Pathogen[ P0C214] interacts with 2 human partners: {P50750;P63146}

10963 Pathogen[ P03346] interacts with 2 human partners: {P63146;P50750}

10964 Pathogen[ Q85601] interacts with 2 human partners: {P63146;P50750}

10965 Pathogen[ P14079] interacts with 2 human partners: {P63146;P50750}

10966 Pathogen[ P03383] interacts with 2 human partners: {P50750;P63146}

10967 Pathogen[ P03410] interacts with 2 human partners: {P50750;P63146}

10968 Pathogen[ P14075] interacts with 2 human partners: {P50750;P63146}

10969 Pathogen[ P0C206] interacts with 2 human partners: {P50750;P63146}

10970 Pathogen[ P03363] interacts with 2 human partners: {P63146;P50750}

10971 [Cluster 998]GO:0007492+P biological\_process [name] endoderm development [def] "The  
process whose specific outcome is the progression of the endoderm over time, from its  
formation to the mature structure. The endoderm is the innermost germ layer that  
develops into the gastrointestinal tract, the lungs and associated tissues." [GOC

10972 Pathogen[ Q2Q067] interacts with 7 human  
partners: {Q13485;P35680;O43248;P84022;Q15796;P55771;Q12830}

10973 Pathogen[ P0C214] interacts with 7 human  
partners: {P32243;P84022;O43248;Q13485;Q15796;Q12830;P55771}

10974 Pathogen[ P03346] interacts with 10 human  
partners: {Q12830;Q9H2W2;Q15796;Q9UBC0;P84022;P35680;Q13485;P32243;O43248;P55771}

10975 Pathogen[ Q85601] interacts with 8 human  
partners: {O43248;Q12830;P55771;P35680;P32243;P84022;Q13485;Q15796}

10976 Pathogen[ P14079] interacts with 4 human partners: {P35680;P55771;Q12830;P32243}

10977 Pathogen[ P03383] interacts with 6 human  
partners: {Q12830;Q13485;P32243;P55771;P84022;Q15796}

10978 Pathogen[ P03410] interacts with 7 human  
partners: {P84022;Q12830;Q13485;P55771;P32243;P35680;Q15796}

10979 Pathogen[ P14075] interacts with 6 human  
partners: {Q15796;Q13485;Q12830;P55771;P84022;P32243}

10980 Pathogen[ P0C206] interacts with 9 human  
partners: {P84022;Q9UBC0;P55771;Q15796;O43248;P32243;P35680;Q13485;Q12830}

10981 Pathogen[ P03363] interacts with 9 human  
partners: {Q9UBC0;Q12830;P55771;Q9H2W2;P32243;O43248;Q15796;P84022;Q13485}

10982 [Cluster 999]GO:0022010+P biological\_process [name] central nervous system  
myelination [def] "The process in which neuronal axons and dendrites become coated with  
a segmented lipid-rich sheath (myelin) to enable faster and more energetically efficient  
conduction of electrical impulses. The sheath is formed by the cell membranes of  
oligodendrocytes in the central nervous system. Adjacent myelin segments are separated  
by a non-myelinated stretch of axon called a node of Ranvier." [GO\_REF

10983 Pathogen[ Q2Q067] interacts with 1 human partners: {P47928}

10984 Pathogen[ P0C214] interacts with 1 human partners: {P47928}

10985 Pathogen[ P03346] interacts with 2 human partners: {P45381;P47928}

10986 Pathogen[ Q85601] interacts with 1 human partners: {P47928}

10987 Pathogen[ P14079] interacts with 3 human partners: {P45381;P47928;Q9Y2G1}

10988 Pathogen[ P03383] interacts with 1 human partners: {P47928}

10989 Pathogen[ P03410] interacts with 3 human partners: {P45381;Q9Y2G1;P47928}

10990 Pathogen[ P14075] interacts with 1 human partners: {P47928}

10991 Pathogen[ P0C206] interacts with 2 human partners: {P45381;P47928}

10992 Pathogen[ P03363] interacts with 2 human partners:{P47928;Q9C056}  
10993 [Cluster 1000]GO:0007264+P biological\_process [name] small GTPase mediated signal  
transduction [def] "Any series of molecular signals in which a small monomeric GTPase  
relays one or more of the signals." [GOC  
10994 Pathogen[ Q2Q067] interacts with 9 human  
partners:{P62826;O43255;Q53G26;P27348;P31946;P60953;P63000;P61586;Q96EY1}  
10995 Pathogen[ P0C214] interacts with 13 human  
partners:{P63000;P27348;P31150;P61586;P60953;P52565;Q53G26;P62826;P31946;O43255;P981  
71;Q96EY1;P36404}  
10996 Pathogen[ P03346] interacts with 21 human  
partners:{P98171;O43255;P27348;Q12802;P60953;P52565;P62826;P20340;P31150;P36404;Q53G  
26;O00522;Q3YEC7;Q969Q5;Q5VV41;P36405;P31946;Q9H8V3;P63000;Q96EY1;P61586}  
10997 Pathogen[ Q85601] interacts with 12 human  
partners:{P31946;P36405;P31150;Q53G26;P62826;P63000;P52565;P27348;P61586;P60953;O432  
55;Q96EY1}  
10998 Pathogen[ P14079] interacts with 16 human  
partners:{P52565;P31150;P47224;P98171;Q59EK9;P10911;Q12802;P36405;P31946;P27348;P615  
86;Q9H8V3;P62826;Q96EY1;O00522;Q5VV41}  
10999 Pathogen[ P03383] interacts with 9 human  
partners:{P31946;P60953;P63000;P62826;P61586;O43255;Q96EY1;Q53G26;P27348}  
11000 Pathogen[ P03410] interacts with 17 human  
partners:{Q53G26;P63000;Q59EK9;P98171;P27348;P36405;P62826;P61586;Q5VV41;P47224;O005  
22;P60953;Q9H8V3;P31150;P52565;Q96EY1;P31946}  
11001 Pathogen[ P14075] interacts with 9 human  
partners:{P60953;Q53G26;O43255;P62826;P61586;P27348;P63000;P31946;Q96EY1}  
11002 Pathogen[ P0C206] interacts with 17 human  
partners:{O43255;P52565;Q53G26;P62826;P27348;P47224;P61586;P31946;P63000;Q9H8V3;P609  
53;P31150;P98171;P36405;Q59EK9;Q96EY1;O00522}  
11003 Pathogen[ P03363] interacts with 17 human  
partners:{P27348;P52565;Q5VV41;P31150;Q969Q5;P31946;P98171;P63000;Q53G26;P10911;O005  
22;Q7Z5H3;O43255;Q96EY1;P62826;P60953;Q3YEC7}  
11004 [Cluster 1001]GO:0010212+P biological\_process [name] response to ionizing radiation  
[def] "Any process that results in a change in state or activity of a cell or an  
organism (in terms of movement, secretion, enzyme production, gene expression, etc.) as  
a result of a ionizing radiation stimulus. Ionizing radiation is radiation with  
sufficient energy to remove electrons from atoms and may arise from spontaneous decay of  
unstable isotopes, resulting in alpha and beta particles and gamma rays. Ionizing  
radiation also includes X-rays." [PMID  
11005 Pathogen[ Q2Q067] interacts with 22 human  
partners:{Q96SD1;Q99502;Q6ZW49;Q7Z2Z1;Q13625;Q9NWV8;Q96AH0;Q92547;Q9BQ15;Q9H9Q4;Q9UB  
C3;Q99504;Q13426;Q9NRY2;Q6UWZ7;P12956;Q68E01;O76064;P02533;Q6PJJG6;Q9NXR7;Q96RL1}  
11006 Pathogen[ P0C214] interacts with 24 human  
partners:{Q9H9Q4;P02533;Q6PJJG6;Q13625;Q96SD1;Q9NWV8;Q96AH0;Q68E01;Q6ZW49;Q92698;Q134  
26;Q6UWZ7;Q99504;Q96RL1;Q8WTP8;Q9NXR7;Q92547;Q8IYW5;O76064;Q7Z2Z1;P12956;Q9NRY2;Q9BQ  
15;Q99502}  
11007 Pathogen[ P03346] interacts with 27 human  
partners:{O76064;P12956;Q6PJJG6;Q7Z2Z1;Q96SD1;Q6PCD5;Q13426;Q96AH0;Q96RL1;Q9UBC3;Q995  
02;Q92698;Q68E01;Q9NXR7;P02533;Q9BQ15;Q13625;Q8IYW5;Q9NWV8;Q92547;Q9H9Q4;Q96PY6;Q9NR  
Y2;Q99504;Q6UWZ7;Q6ZW49;Q96M02}  
11008 Pathogen[ Q85601] interacts with 27 human  
partners:{Q96M02;Q6PJJG6;P02533;Q7Z2Z1;Q96RL1;Q96AH0;Q92547;Q96PY6;Q68E01;Q13426;Q6PC  
D5;Q99504;Q9BQ15;Q92698;Q9NRY2;O76064;Q96SD1;Q99502;Q6UWZ7;Q9NWV8;Q13625;Q8IYW5;Q6ZW  
49;Q9NXR7;Q9H9Q4;P12956;Q9UBC3}  
11009 Pathogen[ P14079] interacts with 27 human  
partners:{Q9BQ15;Q99502;Q9H9Q4;Q6UWZ7;Q92698;Q13625;Q96AH0;P02533;Q6PJJG6;Q96M02;P129  
56;Q9NXR7;Q9UBC3;P48681;Q9NWV8;Q6ZW49;Q68E01;Q96RL1;Q92547;Q96SD1;Q99504;Q9NRY2;Q7Z2  
Z1;Q13426;Q8WZA0;P49917;Q8WTP8}  
11010 Pathogen[ P03383] interacts with 19 human  
partners:{Q99504;Q6PJJG6;P02533;Q68E01;Q96RL1;Q9H9Q4;Q6ZW49;Q13625;Q7Z2Z1;Q13426;Q9NR  
Y2;Q9NWV8;Q96PY6;Q9BQ15;Q92547;Q96AH0;Q9NXR7;Q6UWZ7;P12956}  
11011 Pathogen[ P03410] interacts with 25 human  
partners:{Q96RL1;Q96M02;Q8WTP8;P02533;Q9NXR7;Q9BQ15;Q92698;Q9NWV8;Q99502;Q8WZA0;Q6PJ  
G6;Q96SD1;P12956;Q96AH0;Q6UWZ7;Q99504;Q7Z2Z1;Q13426;Q92547;Q9UBC3;Q13625;Q68E01;Q6ZW  
49;Q9NRY2;Q9H9Q4}  
11012 Pathogen[ P14075] interacts with 20 human  
partners:{Q99504;P12956;Q7Z2Z1;Q68E01;Q9NWV8;Q6ZW49;Q9BQ15;Q9NXR7;Q6PJJG6;Q6UWZ7;Q9H9  
Q4;Q96AH0;Q13625;Q13426;Q96PY6;Q99502;Q92547;Q96RL1;P02533;Q9NRY2}  
11013 Pathogen[ P0C206] interacts with 28 human  
partners:{Q96M02;Q6PCD5;Q68E01;Q99504;Q9BQ15;Q8IYW5;Q6ZW49;Q13625;Q96PY6;Q96SD1;Q9NR  
Y2;Q6PJJG6;P49917;Q9H9Q4;Q13426;Q9NWV8;Q99502;Q7Z2Z1;Q6UWZ7;Q9UBC3;Q96RL1;Q92547;O760  
64;P12956;P02533;Q92698;Q96AH0;Q9NXR7}  
11014 Pathogen[ P03363] interacts with 23 human  
partners:{Q92547;P12956;P02533;Q7Z2Z1;Q96RL1;Q6UWZ7;Q96AH0;Q13625;Q96M02;Q8IYW5;Q134  
26;Q9BQ15;Q9NWV8;Q6PCD5;Q99504;Q9H9Q4;Q9NXR7;Q6PJJG6;Q6ZW49;Q68E01;Q9UBC3;Q9NRY2;Q926  
98}  
11015 [Cluster 1002]GO:0007020+P biological\_process [name] microtubule nucleation [def]

"The 'de novo' formation of a microtubule, in which tubulin heterodimers form metastable oligomeric aggregates, some of which go on to support formation of a complete microtubule. Microtubule nucleation usually occurs from a specific site within a cell."  
[ISBN

- 11016 Pathogen[ Q2Q067] interacts with 12 human  
partners:{Q96RT8;Q7Z460;Q9HC77;Q9NXR1;Q9P270;Q96S59;Q96RT7;Q9BSJ2;O75122;Q6QNY1;Q9UGJ1;Q96CW5}
- 11017 Pathogen[ POC214] interacts with 12 human  
partners:{Q9BSJ2;Q9HC77;Q96CW5;Q96RT7;Q9UGJ1;O75122;Q96S59;Q96RT8;Q7Z460;Q6QNY1;Q9NXR1;Q9P270}
- 11018 Pathogen[ P03346] interacts with 12 human  
partners:{Q96RT8;Q9HC77;Q9NXR1;Q96CW5;Q96S59;Q6QNY1;Q9UGJ1;O75122;Q9BSJ2;Q7Z460;Q96RT7;Q9P270}
- 11019 Pathogen[ Q85601] interacts with 12 human  
partners:{Q96RT8;Q9HC77;Q96CW5;O75122;Q9BSJ2;Q96S59;Q9UGJ1;Q7Z460;Q9NXR1;Q9P270;Q6QNY1;Q96RT7}
- 11020 Pathogen[ P14079] interacts with 12 human  
partners:{Q7Z460;Q9UGJ1;Q96RT8;Q96RT7;Q9BSJ2;Q9P270;Q9NXR1;Q96S59;O75122;Q6QNY1;Q9HC77;Q96CW5}
- 11021 Pathogen[ P03383] interacts with 7 human  
partners:{Q7Z460;Q9BSJ2;Q96CW5;Q9HC77;Q96S59;Q9P270;Q6QNY1}
- 11022 Pathogen[ P03410] interacts with 12 human  
partners:{Q7Z460;Q6QNY1;Q9NXR1;Q9HC77;Q96S59;Q9BSJ2;Q96RT8;Q96CW5;Q9P270;Q96RT7;O75122;Q9UGJ1}
- 11023 Pathogen[ P14075] interacts with 7 human  
partners:{Q7Z460;Q9HC77;Q96S59;Q6QNY1;Q9P270;Q9BSJ2;Q96CW5}
- 11024 Pathogen[ POC206] interacts with 11 human  
partners:{Q9HC77;Q96RT7;Q96CW5;Q6QNY1;Q9UGJ1;O75122;Q9NXR1;Q9P270;Q96S59;Q7Z460;Q9BSJ2}
- 11025 Pathogen[ P03363] interacts with 11 human  
partners:{Q9HC77;Q96RT8;Q7Z460;Q6QNY1;Q9P270;Q96RT7;Q9UGJ1;Q96S59;Q9NXR1;Q9BSJ2;Q96CW5}
- 11026 [Cluster 1003]GO:0031065+P biological\_process [name] positive regulation of histone deacetylation [def] "Any process that activates or increases the frequency, rate or extent of the removal of acetyl groups from histones." [GOC
- 11027 Pathogen[ Q2Q067] interacts with 5 human  
partners:{P36956;Q13363;Q8WYK2;O75376;Q14693}
- 11028 Pathogen[ POC214] interacts with 3 human partners:{Q13363;O75376;Q14693}
- 11029 Pathogen[ P03346] interacts with 5 human  
partners:{P36956;O75376;Q13363;Q8WYK2;Q14693}
- 11030 Pathogen[ Q85601] interacts with 5 human  
partners:{Q13363;P36956;O75376;Q8WYK2;Q14693}
- 11031 Pathogen[ P14079] interacts with 4 human partners:{Q8WYK2;Q14693;O75376;P36956}
- 11032 Pathogen[ P03383] interacts with 3 human partners:{O75376;Q13363;Q14693}
- 11033 Pathogen[ P03410] interacts with 4 human partners:{P36956;Q8WYK2;O75376;Q14693}
- 11034 Pathogen[ P14075] interacts with 3 human partners:{O75376;Q13363;Q14693}
- 11035 Pathogen[ POC206] interacts with 5 human  
partners:{Q8WYK2;P36956;O75376;Q13363;Q14693}
- 11036 Pathogen[ P03363] interacts with 3 human partners:{O75376;Q8WYK2;Q13363}
- 11037 [Cluster 1004]GO:0006672+P biological\_process [name] ceramide metabolic process [def] "The chemical reactions and pathways involving ceramides, any N-acylated sphingoid." [ISBN
- 11038 Pathogen[ Q2Q067] interacts with 3 human partners:{P30153;Q92636;P67775}
- 11039 Pathogen[ POC214] interacts with 3 human partners:{P30153;P67775;Q92636}
- 11040 Pathogen[ P03346] interacts with 3 human partners:{P67775;P30153;Q92636}
- 11041 Pathogen[ Q85601] interacts with 3 human partners:{Q92636;P30153;P67775}
- 11042 Pathogen[ P14079] interacts with 4 human partners:{Q92636;Q13510;P30153;Q8N138}
- 11043 Pathogen[ P03383] interacts with 2 human partners:{P30153;P67775}
- 11044 Pathogen[ P03410] interacts with 6 human  
partners:{Q8N138;Q13510;Q92636;P30153;Q9UBY8;P67775}
- 11045 Pathogen[ P14075] interacts with 3 human partners:{Q13510;P67775;P30153}
- 11046 Pathogen[ POC206] interacts with 3 human partners:{P30153;P67775;Q92636}
- 11047 Pathogen[ P03363] interacts with 3 human partners:{Q92636;P30153;P67775}
- 11048 [Cluster 1005]GO:0035050+P biological\_process [name] embryonic heart tube development [def] "The process whose specific outcome is the progression of the embryonic heart tube over time, from its formation to the mature structure. The heart tube forms as the heart rudiment from the heart field." [GOC
- 11049 Pathogen[ Q2Q067] interacts with 1 human partners:{O96004}
- 11050 Pathogen[ POC214] interacts with 1 human partners:{O96004}
- 11051 Pathogen[ P03346] interacts with 3 human partners:{Q9HBG6;O96004;P35713}
- 11052 Pathogen[ Q85601] interacts with 1 human partners:{O96004}
- 11053 Pathogen[ P14079] interacts with 1 human partners:{O96004}
- 11054 Pathogen[ P03383] interacts with 1 human partners:{O96004}
- 11055 Pathogen[ P03410] interacts with 2 human partners:{O96004;Q9HBG6}
- 11056 Pathogen[ P14075] interacts with 1 human partners:{O96004}
- 11057 Pathogen[ POC206] interacts with 1 human partners:{O96004}

11058 Pathogen[ P03363] interacts with 2 human partners:{Q9HBG6;O96004}  
11059 [Cluster 1006]GO:0042992+P biological\_process [name] negative regulation of transcription factor import into nucleus [def] "Any process that stops, prevents, or reduces the frequency, rate or extent of the movement of a transcription factor from the cytoplasm to the nucleus." [GOC  
11060 Pathogen[ Q2Q067] interacts with 1 human partners:{Q9UMX1}  
11061 Pathogen[ P0C214] interacts with 1 human partners:{Q9UMX1}  
11062 Pathogen[ P03346] interacts with 1 human partners:{Q9UMX1}  
11063 Pathogen[ Q85601] interacts with 1 human partners:{Q9UMX1}  
11064 Pathogen[ P14079] interacts with 1 human partners:{Q9UMX1}  
11065 Pathogen[ P03383] interacts with 1 human partners:{Q9UMX1}  
11066 Pathogen[ P03410] interacts with 1 human partners:{Q9UMX1}  
11067 Pathogen[ P14075] interacts with 1 human partners:{Q9UMX1}  
11068 Pathogen[ P0C206] interacts with 1 human partners:{Q9UMX1}  
11069 Pathogen[ P03363] interacts with 1 human partners:{Q9UMX1}  
11070 [Cluster 1007]GO:0035024+P biological\_process [name] negative regulation of Rho protein signal transduction [def] "Any process that stops, prevents, or reduces the frequency, rate or extent of Rho protein signal transduction." [GOC  
11071 Pathogen[ Q2Q067] interacts with 5 human partners:{Q8N9R8;Q14678;Q13829;P41182;Q13618}  
11072 Pathogen[ P0C214] interacts with 6 human partners:{Q13829;Q14678;Q13618;Q8N9R8;Q8WZ19;P41182}  
11073 Pathogen[ P03346] interacts with 6 human partners:{Q8WZ19;Q14678;Q13618;Q13829;P41182;Q8N9R8}  
11074 Pathogen[ Q85601] interacts with 6 human partners:{Q8WZ19;Q8N9R8;Q14678;Q13618;P41182;Q13829}  
11075 Pathogen[ P14079] interacts with 5 human partners:{Q13618;P41182;Q8N9R8;Q13829;Q14678}  
11076 Pathogen[ P03383] interacts with 4 human partners:{Q14678;Q13618;Q13829;Q8N9R8}  
11077 Pathogen[ P03410] interacts with 6 human partners:{Q13829;Q8WZ19;Q13618;Q8N9R8;P41182;Q14678}  
11078 Pathogen[ P14075] interacts with 4 human partners:{Q13618;Q8N9R8;Q14678;Q13829}  
11079 Pathogen[ P0C206] interacts with 6 human partners:{Q13829;P41182;Q14678;Q8WZ19;Q13618;Q8N9R8}  
11080 Pathogen[ P03363] interacts with 5 human partners:{Q13618;Q13829;Q8N9R8;Q8WZ19;Q14678}  
11081 [Cluster 1008]GO:0022616+P biological\_process [name] DNA strand elongation [def] "The DNA metabolic process in which a DNA strand is synthesized by adding nucleotides to the 3' end of an existing DNA stand." [GOC  
11082 Pathogen[ Q2Q067] interacts with 1 human partners:{O14746}  
11083 Pathogen[ P0C214] interacts with 1 human partners:{O14746}  
11084 Pathogen[ P03346] interacts with 1 human partners:{O14746}  
11085 Pathogen[ Q85601] interacts with 1 human partners:{O14746}  
11086 Pathogen[ P14079] interacts with 1 human partners:{O14746}  
11087 Pathogen[ P03383] interacts with 1 human partners:{O14746}  
11088 Pathogen[ P03410] interacts with 1 human partners:{O14746}  
11089 Pathogen[ P14075] interacts with 1 human partners:{O14746}  
11090 Pathogen[ P0C206] interacts with 1 human partners:{O14746}  
11091 Pathogen[ P03363] interacts with 1 human partners:{O14746}  
11092 [Cluster 1009]GO:0051036+P biological\_process [name] regulation of endosome size [def] "Any process that modulates the volume of an endosome, a membrane-bounded organelle that carries materials newly ingested by endocytosis." [GOC  
11093 Pathogen[ Q2Q067] interacts with 1 human partners:{Q9Y3E7}  
11094 Pathogen[ P0C214] interacts with 1 human partners:{Q9Y3E7}  
11095 Pathogen[ P03346] interacts with 1 human partners:{Q9Y3E7}  
11096 Pathogen[ Q85601] interacts with 1 human partners:{Q9Y3E7}  
11097 Pathogen[ P14079] interacts with 1 human partners:{Q9Y3E7}  
11098 Pathogen[ P03383] interacts with 1 human partners:{Q9Y3E7}  
11099 Pathogen[ P03410] interacts with 1 human partners:{Q9Y3E7}  
11100 Pathogen[ P14075] interacts with 1 human partners:{Q9Y3E7}  
11101 Pathogen[ P0C206] interacts with 1 human partners:{Q9Y3E7}  
11102 Pathogen[ P03363] interacts with 1 human partners:{Q9Y3E7}  
11103 [Cluster 1010]GO:0072593+P biological\_process [name] reactive oxygen species metabolic process [def] "The chemical reactions and pathways involving a reactive oxygen species, any molecules or ions formed by the incomplete one-electron reduction of oxygen. They contribute to the microbicidal activity of phagocytes, regulation of signal transduction and gene expression, and the oxidative damage to biopolymers." [CHEBI  
11104 Pathogen[ Q2Q067] interacts with 6 human partners:{O75489;Q13794;Q9UII2;Q9P0J0;Q12983;Q9UI32}  
11105 Pathogen[ P0C214] interacts with 8 human partners:{P28331;Q9UI32;Q13794;Q9UII2;Q9P0J0;Q12983;O75489;P18054}  
11106 Pathogen[ P03346] interacts with 8 human partners:{O75489;P18054;Q12983;Q9UI32;Q9UII2;Q5TCZ1;Q9P0J0;Q13794}  
11107 Pathogen[ Q85601] interacts with 5 human partners:{Q9P0J0;Q9UII2;Q12983;Q9UI32;Q13794}  
11108 Pathogen[ P14079] interacts with 9 human



11109 partners:{043181;Q9UII2;Q9NX09;Q13794;Q9P0J0;Q12983;Q9UI32;075489;Q5TCZ1}  
Pathogen[ P03383] interacts with 5 human

11110 partners:{075489;Q12983;Q9UII2;Q13794;Q9P0J0}  
Pathogen[ P03410] interacts with 9 human

11111 partners:{Q12983;Q13794;Q9UII2;075489;043181;Q9UI32;Q5TCZ1;Q9P0J0;Q9NX09}  
Pathogen[ P14075] interacts with 5 human

11112 partners:{Q12983;Q9UII2;Q13794;075489;Q9P0J0}  
Pathogen[ P0C206] interacts with 7 human

11113 partners:{Q5TCZ1;Q12983;Q9P0J0;Q9UI32;075489;Q9UII2;Q13794}  
Pathogen[ P03363] interacts with 4 human partners:{Q13794;Q5TCZ1;Q9P0J0;Q9UI32}

11114 [Cluster 1011]GO:0006897+P biological\_process [name] endocytosis [def] "A vesicle-mediated transport process in which cells take up external materials or membrane constituents by the invagination of a small region of the plasma membrane to form a new membrane-bounded vesicle." [GOC

11115 Pathogen[ Q2Q067] interacts with 20 human  
partners:{094973;Q10567;P56377;043747;095782;Q96B97;000291;060784;Q8WXE9;Q96PC3;P61966;Q14677;P50570;Q99962;P63000;P09496;Q9P0V3;Q96ED9;Q13367;Q15276}

11116 Pathogen[ P0C214] interacts with 25 human  
partners:{P63000;Q9UII2;Q9P0V3;Q96ED9;Q9UM54;Q13367;Q9Y6Q2;Q9Y6I3;Q99962;Q10567;Q8IV I9;P56377;Q96PC3;060784;Q9BQI5;043747;094973;Q8WXE9;P61966;P09496;P50570;095782;000291;Q96B97;Q14677}

11117 Pathogen[ P03346] interacts with 36 human  
partners:{Q13596;P61966;095405;Q96B97;P50570;Q92622;Q9UKS6;Q8IVI9;043747;P56377;Q99962;Q96T51;095782;000291;P09496;060784;Q10567;Q9Y6Q2;Q8WXE9;060493;Q9P0V3;P42566;Q96PC3;Q13492;Q9UJ41;Q96ED9;Q13367;095219;060749;Q9Y6I3;Q9BQI5;094973;Q14677;P63000;075146;Q15276}

11118 Pathogen[ Q85601] interacts with 26 human  
partners:{Q13367;Q13596;P09496;P56377;Q99962;Q96T51;P63000;Q8WXE9;043747;Q9UJ41;Q10567;Q14677;Q9Y6Q2;P50570;Q8IVI9;Q96B97;094973;Q96PC3;Q9Y6I3;000291;Q9P0V3;Q9UM54;P61966;Q96ED9;060784;095782}

11119 Pathogen[ P14079] interacts with 42 human  
partners:{Q13492;P61966;000291;075146;Q6UX01;Q9Y6I3;060493;Q9UKS6;Q96ED9;Q14677;Q10567;Q15276;P42566;P56377;095405;Q96B97;Q9UJ41;Q9UM54;060784;Q9P0V3;Q9H5N1;P50570;Q8IV I9;095782;Q96T51;Q8NC96;Q15075;Q9BQI5;Q9NVZ3;060749;Q13596;094973;Q9NQ60;Q13367;Q8WX E9;043747;Q9UII2;Q96PC3;Q92622;P09496;Q99962;Q9Y6Q2}

11120 Pathogen[ P03383] interacts with 15 human  
partners:{P56377;Q8WXE9;Q10567;P63000;000291;043747;Q9BQI5;095782;Q96ED9;060784;Q13367;Q14677;Q9P0V3;094973;Q15276}

11121 Pathogen[ P03410] interacts with 44 human  
partners:{Q8NC96;P09496;000203;095782;Q96PC3;095405;Q9UJ41;Q9NQ60;P63000;Q13596;Q9Y6 I3;Q9NVZ3;Q0JRZ9;043747;060749;Q9P0V3;Q10567;Q8IVI9;P50570;000291;075146;Q8WXE9;Q9UM Z2;095219;Q9UM54;Q13492;Q14677;Q9UKS6;Q96ED9;Q9UII2;060784;Q9BQI5;Q96T51;Q96B97;Q99962;Q9H5N1;Q13367;P61966;P42566;094973;P56377;Q9Y6Q2;060493;Q15276}

11122 Pathogen[ P14075] interacts with 16 human  
partners:{Q9BQI5;Q9P0V3;P09496;094973;000291;Q8WXE9;095782;Q14677;043747;P63000;P56377;Q10567;Q13367;060784;Q96ED9;Q15276}

11123 Pathogen[ P0C206] interacts with 37 human  
partners:{Q9UM54;094973;000291;060784;Q9Y6Q2;Q8NC96;043747;Q10567;Q96B97;P61966;Q8WX E9;Q96T51;060493;Q99962;Q13596;P09496;Q96ED9;Q92622;060749;P63000;Q9UII2;095405;Q9Y6 I3;Q9BQI5;095782;Q14677;Q9UJ41;Q9H5N1;P42566;Q9P0V3;Q96PC3;Q8IVI9;Q13367;P50570;Q15276;Q9UKS6;P56377}

11124 Pathogen[ P03363] interacts with 30 human  
partners:{P36575;Q99962;Q96ED9;Q8IVI9;Q8WXE9;Q13367;Q9P0V3;043747;095219;Q96B97;060784;P50570;Q96RUC;P63000;060493;Q96T51;094973;060749;Q9UJ41;095405;Q92622;Q14677;095782;Q9UKS6;Q13596;075146;Q9BQI5;000291;Q15276;Q10567}

11125 [Cluster 1012]GO:0071228+P biological\_process [name] cellular response to tumor cell [def] "Any process that results in a change in state or activity of a cell (in terms of movement, secretion, enzyme production, gene expression, etc.) as a result of a stimulus from a tumor cell." [GOC

11126 Pathogen[ Q2Q067] interacts with 1 human partners:{Q9H3M7}

11127 Pathogen[ P0C214] interacts with 1 human partners:{Q9H3M7}

11128 Pathogen[ P03346] interacts with 1 human partners:{Q9H3M7}

11129 Pathogen[ Q85601] interacts with 1 human partners:{Q9H3M7}

11130 Pathogen[ P14079] interacts with 1 human partners:{Q9H3M7}

11131 Pathogen[ P03383] interacts with 1 human partners:{Q9H3M7}

11132 Pathogen[ P03410] interacts with 1 human partners:{Q9H3M7}

11133 Pathogen[ P14075] interacts with 1 human partners:{Q9H3M7}

11134 Pathogen[ P0C206] interacts with 1 human partners:{Q9H3M7}

11135 Pathogen[ P03363] interacts with 1 human partners:{Q9H3M7}

11136 [Cluster 1013]GO:0033209+P biological\_process [name] tumor necrosis factor-mediated signaling pathway [def] "A series of molecular signals generated as a consequence of a tumor necrosis factor binding to a cell surface receptor." [GOC

11137 Pathogen[ Q2Q067] interacts with 9 human  
partners:{Q9BRA2;Q86VX2;Q12933;Q8WXC3;014862;Q13114;Q15628;P05783;P42224}

11138 Pathogen[ P0C214] interacts with 9 human  
partners:{P05783;Q15628;Q9BRA2;P42224;Q12933;Q8WXC3;Q13114;014862;Q86VX2}

11139 Pathogen[ P03346] interacts with 9 human partners: {P05783;Q9BRA2;Q9H305;Q86VX2;Q13114;Q8WXC3;P42224;Q15628;O14862}

11140 Pathogen[ Q85601] interacts with 9 human partners: {Q9BRA2;Q13114;P05783;Q12933;Q8WXC3;O14862;P42224;Q15628;Q86VX2}

11141 Pathogen[ P14079] interacts with 10 human partners: {Q8WXC3;Q9H305;Q86VX2;P05783;O14862;P42224;Q12933;Q9BRA2;Q15628;Q13114}

11142 Pathogen[ P03383] interacts with 8 human partners: {O14862;Q9BRA2;P05783;Q12933;Q8WXC3;Q15628;Q86VX2;Q13114}

11143 Pathogen[ P03410] interacts with 9 human partners: {Q9H305;O14862;Q9BRA2;Q86VX2;Q15628;Q12933;Q8WXC3;P05783;Q13114}

11144 Pathogen[ P14075] interacts with 8 human partners: {P05783;Q9BRA2;Q12933;O14862;Q8WXC3;Q13114;Q86VX2;Q15628}

11145 Pathogen[ P0C206] interacts with 10 human partners: {Q9H305;Q13114;O14862;Q12933;Q86VX2;P05783;Q15628;Q9BRA2;P42224;Q8WXC3}

11146 Pathogen[ P03363] interacts with 9 human partners: {P05783;Q86VX2;Q12933;Q9H305;Q8WXC3;Q9BRA2;O14862;Q15628;Q13114}

11147 [Cluster 1014]GO:0010587+P biological\_process [name] miRNA catabolic process [def] "The chemical reactions and pathways resulting in the breakdown of miRNA, microRNA, a class of single-stranded RNA molecules of about 21-23 nucleotides in length, which regulates gene expression." [PMID]

11148 Pathogen[ Q2Q067] interacts with 3 human partners: {Q5TAX3;Q9H9Z2;Q6ZN17}

11149 Pathogen[ P0C214] interacts with 3 human partners: {Q6ZN17;Q9H9Z2;Q5TAX3}

11150 Pathogen[ P03346] interacts with 3 human partners: {Q5TAX3;Q9H9Z2;Q6ZN17}

11151 Pathogen[ Q85601] interacts with 3 human partners: {Q6ZN17;Q5TAX3;Q9H9Z2}

11152 Pathogen[ P14079] interacts with 3 human partners: {Q9H9Z2;Q5TAX3;Q6ZN17}

11153 Pathogen[ P03383] interacts with 3 human partners: {Q9H9Z2;Q6ZN17;Q5TAX3}

11154 Pathogen[ P03410] interacts with 3 human partners: {Q5TAX3;Q9H9Z2;Q6ZN17}

11155 Pathogen[ P14075] interacts with 3 human partners: {Q9H9Z2;Q5TAX3;Q6ZN17}

11156 Pathogen[ P0C206] interacts with 3 human partners: {Q6ZN17;Q9H9Z2;Q5TAX3}

11157 Pathogen[ P03363] interacts with 3 human partners: {Q6ZN17;Q9H9Z2;Q5TAX3}

11158 [Cluster 1015]GO:0009304+P biological\_process [name] tRNA transcription [def] "The synthesis of transfer RNA (tRNA) from a DNA template." [GOC]

11159 Pathogen[ Q2Q067] interacts with 2 human partners: {Q92994;Q12789}

11160 Pathogen[ P0C214] interacts with 2 human partners: {Q12789;Q92994}

11161 Pathogen[ P03346] interacts with 2 human partners: {Q92994;Q12789}

11162 Pathogen[ Q85601] interacts with 2 human partners: {Q92994;Q12789}

11163 Pathogen[ P14079] interacts with 2 human partners: {Q92994;Q12789}

11164 Pathogen[ P03383] interacts with 2 human partners: {Q92994;Q12789}

11165 Pathogen[ P03410] interacts with 2 human partners: {Q92994;Q12789}

11166 Pathogen[ P14075] interacts with 2 human partners: {Q12789;Q92994}

11167 Pathogen[ P0C206] interacts with 2 human partners: {Q92994;Q12789}

11168 Pathogen[ P03363] interacts with 1 human partners: {Q12789}

11169 [Cluster 1016]GO:0051775+P biological\_process [name] response to redox state [def] "Any process that results in a change in state or activity of a cell or an organism (in terms of movement, secretion, enzyme production, gene expression, etc.) as a result of a stimulus indicating redox state. Redox state refers to the balance of oxidized versus reduced forms of electron donors and acceptors in an organelle, cell or organ\_ plastoquinone, glutathione (GSH/GSSG), and nicotinamide nucleotides (NAD+/NADH and NADP+/NADPH) are among the most important." [GOC]

11170 Pathogen[ Q2Q067] interacts with 3 human partners: {Q8IXJ6;Q9UBF6;Q9BQE4}

11171 Pathogen[ P0C214] interacts with 3 human partners: {Q8IXJ6;Q9BQE4;Q9UBF6}

11172 Pathogen[ P03346] interacts with 3 human partners: {Q9NS18;Q8IXJ6;Q9UBF6}

11173 Pathogen[ Q85601] interacts with 3 human partners: {Q8IXJ6;Q9UBF6;Q9BQE4}

11174 Pathogen[ P14079] interacts with 3 human partners: {Q9BQE4;Q9UBF6;Q8IXJ6}

11175 Pathogen[ P03383] interacts with 2 human partners: {Q9BQE4;Q9UBF6}

11176 Pathogen[ P03410] interacts with 3 human partners: {Q8IXJ6;Q9BQE4;Q9UBF6}

11177 Pathogen[ P14075] interacts with 2 human partners: {Q9BQE4;Q9UBF6}

11178 Pathogen[ P0C206] interacts with 4 human partners: {Q9NS18;Q9UBF6;Q9BQE4;Q8IXJ6}

11179 Pathogen[ P03363] interacts with 1 human partners: {Q9UBF6}

11180 [Cluster 1017]GO:2000279+P biological\_process [name] negative regulation of DNA biosynthetic process [def] "Any process that stops, prevents or reduces the frequency, rate or extent of DNA biosynthetic process." [GOC]

11181 Pathogen[ Q2Q067] interacts with 2 human partners: {Q9UI56;Q15327}

11182 Pathogen[ P0C214] interacts with 2 human partners: {Q15327;Q9UI56}

11183 Pathogen[ P03346] interacts with 2 human partners: {Q15327;Q9UI56}

11184 Pathogen[ Q85601] interacts with 1 human partners: {Q15327}

11185 Pathogen[ P14079] interacts with 2 human partners: {Q9UI56;Q15327}

11186 Pathogen[ P03383] interacts with 2 human partners: {Q9UI56;Q15327}

11187 Pathogen[ P03410] interacts with 2 human partners: {Q9UI56;Q15327}

11188 Pathogen[ P14075] interacts with 2 human partners: {Q15327;Q9UI56}

11189 Pathogen[ P0C206] interacts with 2 human partners: {Q15327;Q9UI56}

11190 Pathogen[ P03363] interacts with 2 human partners: {Q15327;Q9UI56}

11191 [Cluster 1018]GO:0000730+P biological\_process [name] DNA recombinase assembly [def] "The aggregation, arrangement and bonding together of strand exchange proteins (recombinases) into higher order oligomers on single-stranded DNA." [PMID]

11192 Pathogen[ Q2Q067] interacts with 5 human

11193 partners:{P27694;P35244;Q06609;P15927;P43351}  
Pathogen[ P0C214] interacts with 5 human

11194 partners:{P43351;Q06609;P15927;P35244;P27694}  
Pathogen[ P03346] interacts with 5 human

11195 partners:{Q06609;P27694;P35244;P15927;P43351}  
Pathogen[ Q85601] interacts with 5 human

11196 partners:{P43351;P35244;P27694;P15927;Q06609}  
Pathogen[ P14079] interacts with 5 human

11197 partners:{P15927;P27694;P35244;Q06609;P43351}  
Pathogen[ P03383] interacts with 5 human

11198 partners:{P43351;Q06609;P27694;P15927;P35244}  
Pathogen[ P03410] interacts with 5 human

11199 partners:{P35244;P43351;P27694;P15927;Q06609}  
Pathogen[ P14075] interacts with 5 human

11200 partners:{P43351;P15927;P35244;P27694;Q06609}  
Pathogen[ P0C206] interacts with 5 human

11201 partners:{P43351;Q06609;P27694;P15927;P35244}  
Pathogen[ P03363] interacts with 5 human

11202 partners:{P27694;P35244;P15927;P43351;Q06609}  
[Cluster 1019]GO:0043966+P biological\_process [name] histone H3 acetylation [def]  
"The modification of histone H3 by the addition of an acetyl group." [GOC

11203 Pathogen[ Q2Q067] interacts with 27 human  
partners:{Q9NRF9;Q16594;Q8WYH8;Q6IE81;O75478;O75486;Q9UNL4;Q9H0E3;Q12962;O75529;Q9H8E8;Q92831;Q15306;Q9ULM3;O75528;Q01658;Q96ES7;Q92830;Q16514;Q9Y6J9;O94864;Q9NS73;O43318;Q9HBD4;P15923;Q96BN2;P17947}

11204 Pathogen[ P0C214] interacts with 28 human  
partners:{O75486;O75528;Q9Y6J9;O75478;Q9HBD4;P17947;Q9UNL4;Q12962;Q96BN2;O94864;O43318;Q16594;P15923;Q9NS73;Q9NRF9;Q16514;O95251;O75529;Q6IE81;Q92831;Q01658;Q92830;Q8WYH8;Q96ES7;Q9ULM3;Q9H8E8;Q9H0E3;Q15306}

11205 Pathogen[ P03346] interacts with 33 human  
partners:{Q9Y6J9;Q96ES7;Q9HBD4;Q8WYB5;Q9UNL4;Q8WYH8;O75486;P15923;Q9ULM3;Q9H8E8;Q15306;Q9H0E3;Q92831;Q9NR33;Q9NRF9;Q92830;Q96BN2;Q92794;O94864;O75478;O75528;O75529;O95251;P151587;Q9NS73;O95361;Q16514;Q12962;Q6IE81;P17947;Q01658;O43318;Q16594}

11206 Pathogen[ Q85601] interacts with 29 human  
partners:{O94864;O75528;O95251;Q9H0E3;Q9UNL4;Q96ES7;Q15306;Q92831;Q16594;Q9Y6J9;Q9NRF9;Q9NS73;Q92830;O75529;Q9H8E8;Q9ULM3;Q16514;Q01658;P15923;Q6IE81;Q9HBD4;Q8WYH8;P17947;Q96BN2;Q12962;O75486;O43318;O75478;P151587}

11207 Pathogen[ P14079] interacts with 27 human  
partners:{Q9H0E3;Q9Y6J9;O75528;Q16594;Q92830;Q9H8E8;O95251;Q9UNL4;O75529;P151587;O94864;P15923;Q15306;Q9ULM3;Q96BN2;Q6IE81;Q9NRF9;Q12962;Q96ES7;O75478;O95361;Q16514;O75486;Q01658;Q9NR33;Q8WYH8;Q9NS73}

11208 Pathogen[ P03383] interacts with 27 human  
partners:{Q9Y6J9;Q92831;Q9HBD4;Q9ULM3;Q96ES7;O75528;O75478;O75486;O95251;O94864;Q9NS73;P15923;Q9UNL4;Q8WYH8;Q96BN2;Q15306;O43318;O75529;Q16594;Q9H8E8;Q92830;Q16514;Q12962;Q6IE81;Q01658;P17947;Q9H0E3}

11209 Pathogen[ P03410] interacts with 30 human  
partners:{Q92830;Q92831;Q8WYH8;O95251;P17947;Q12962;Q9NS73;O75528;Q9UNL4;Q9ULM3;Q96ES7;P15923;Q15306;O75486;Q9H0E3;O43318;Q96BN2;Q16514;P151587;Q01658;O94864;Q9NRF9;Q9Y6J9;Q16594;Q9NR33;Q9H8E8;O75478;O75529;Q9HBD4;Q6IE81}

11210 Pathogen[ P14075] interacts with 27 human  
partners:{Q9Y6J9;Q12962;Q9HBD4;Q92831;Q01658;Q96BN2;P15923;Q16594;Q9H0E3;O94864;Q6IE81;O75478;O75528;Q9H8E8;Q9ULM3;O43318;Q15306;P17947;Q16514;O95251;Q9UNL4;O75486;O75529;Q8WYH8;Q96ES7;Q92830;Q9NS73}

11211 Pathogen[ P0C206] interacts with 30 human  
partners:{O75486;O75528;Q92830;Q16514;O95251;Q9NRF9;Q9ULM3;O94864;Q9NR33;Q8WYH8;P151587;O43318;Q15306;Q9Y6J9;O75529;Q92831;Q9H0E3;Q01658;P15923;O95361;P17947;Q96ES7;O75478;Q6IE81;Q9HBD4;Q96BN2;Q12962;Q9NS73;Q9UNL4;Q16594}

11212 Pathogen[ P03363] interacts with 29 human  
partners:{Q6IE81;Q9H8E8;Q92831;Q9NRF9;P17947;Q16514;O94864;O43318;Q15306;Q9UNL4;Q12962;P15923;O75529;Q96BN2;Q92830;Q9HBD4;O75486;Q9H0E3;Q9NR33;O75478;Q96ES7;Q9ULM3;Q01658;Q9NS73;O95251;Q8WYH8;Q9Y6J9;O75528;Q16594}

11213 [Cluster 1020]GO:0006917+P biological\_process [name] induction of apoptosis [def] "A process that directly activates any of the steps required for cell death by apoptosis." [GOC

11214 Pathogen[ Q2Q067] interacts with 81 human  
partners:{Q9UM63;P30153;Q13118;Q9Y3A2;P0C1Z6;P42773;Q93009;Q9NR28;Q96KQ4;Q7Z6J0;Q9BUP3;O00291;Q9UHR5;Q9UMX3;P21980;P14921;O75940;Q96QA5;P30793;Q9BXH1;O00273;P54274;O75489;Q00994;O60238;Q13625;P55345;O95999;Q9UER7;O60356;P67775;P17676;Q9NYF8;Q13794;P63241;Q9NZC7;Q8N726;O15304;Q96AQ7;O43524;Q9UHI6;Q9UK73;P61247;Q96CJ1;O75618;Q92782;Q14653;P84022;P55212;Q69YI7;P10914;Q9Y6K9;Q13114;P42575;P78560;O00198;Q7Z465;Q16890;Q9PJ0;Q92785;P23396;Q8WV24;Q12983;Q13761;Q9C000;Q15628;P42771;Q8N8D1;Q9UHD4;O14737;Q96RE7;Q96IZ0;P46527;P42224;P22736;Q9UPG8;Q9Y2A4;P17947;Q8N9B5;O76075;Q96A56}

11215 Pathogen[ P0C214] interacts with 85 human  
partners:{O00198;P61247;Q96CJ1;Q13761;Q7Z6J0;O14681;Q9Y6K9;Q9Y2A4;P14921;Q15628;P30153;Q96IZ0;Q92934;Q13625;P23396;P55212;Q7Z465;O75618;Q00994;P31483;P84022;P17947;P46527;P42224;P10914;Q9UPG8;Q8N726;P55345;P63241;Q16890;P17676;Q9NZC7;Q13794;P0C1Z6;Q9BX

- H1;O00273;P30793;Q9BUP3;Q9UHR5;Q8N8D1;Q9UER7;Q9UHD4;Q9P0J0;O95999;Q96QA5;Q9UMX3;O60356;P42574;P67775;P42771;Q9UHI6;Q69YI7;Q93009;Q96KQ4;O75940;Q14653;Q12983;P42773;Q9H4P4;Q8N9B5;Q13114;O75489;O60238;P21980;P78560;Q9UK73;Q96A56;Q8WV24;Q9UM63;P55210;Q9NR28;Q96AQ7;Q96RE7;Q92782;O15304;Q92785;O76075;O00291;P42575;P54274;Q9NYF8;Q9C000;Q96N9;O14737;Q9Y3A2}
- 11216 Pathogen[ P03346] interacts with 95 human partners: {P21980;Q9Y6K9;Q96CJ1;Q9Y3A2;O60443;Q93009;P58012;Q8WV24;Q8N9B5;P17676;O14737;O75489;Q7Z6J0;Q9H305;Q9UHR5;Q96KQ4;Q9BUP3;Q7Z465;Q9NR28;O60238;P54274;P42575;O15304;Q96A56;Q9H4P4;Q12981;O75940;P42574;P67775;Q96RE7;Q00994;Q96AQ7;P63241;Q9UM63;P42771;P55212;Q13114;O00291;Q12983;P0C1Z6;O95999;P30153;P78560;Q16890;P14921;P84022;Q96IZ0;P22736;P10914;P31483;Q9UPQ4;Q13118;Q9N9C7;O75569;Q13761;Q9UHI6;P55345;O75618;Q9UER7;Q96QA5;P61247;O00198;Q13625;P42224;Q14653;P42773;Q15628;P23396;Q9BWF2;O76075;Q96S99;Q92832;Q69YI7;P17947;Q99593;Q9HA38;O60356;P55210;Q9UPG8;Q9UMX3;Q9P0J0;Q9Y2A4;Q8N726;Q9NYF8;P46527;O43524;Q9BXH1;Q8N8D1;Q9UHD4;Q92785;Q9UK73;Q13794;O00273;Q92782;Q9C000}
- 11217 Pathogen[ Q85601] interacts with 86 human partners: {Q16890;Q96IZ0;Q9N9C7;Q96CJ1;Q9UPG8;P17676;Q9P0J0;Q96S99;Q9BXH1;Q8WV24;Q93009;P14921;Q7Z465;P23396;O15304;Q9UER7;Q9Y3A2;Q12981;P30153;Q9NR28;Q8N8D1;Q9UMX3;O76075;Q96AQ7;O75940;P63241;Q9UHD4;Q13114;Q92782;O00198;P30793;P0C1Z6;P10914;Q96KQ4;Q7Z6J0;Q14653;Q9Y6K9;Q92785;Q9UK73;Q8N726;Q9UM63;Q9Y2A4;Q9N9C7;P42575;Q9UPQ4;P21980;Q9UHI6;O75618;P22736;Q9HA38;O00273;Q13625;P42771;P42224;Q13118;Q96A56;P42773;P67775;Q15628;P84022;Q9BWF2;Q12983;Q96RE7;P17947;O60356;O00291;Q00994;P55212;O95999;Q9H4P4;P19447;O60238;P61247;O14737;Q8N9B5;Q9BUP3;Q9UHR5;P78560;Q9NYF8;P54274;Q13794;P55210;P46527;P55345;Q13761;Q69YI7}
- 11218 Pathogen[ P14079] interacts with 94 human partners: {Q96A56;P54274;Q16890;O75618;O76075;P23396;O00291;Q8WV24;Q14653;Q9Y3A2;Q13118;O95999;Q8N8D1;O15304;Q96CJ1;Q8N9B5;Q92782;Q9NP84;Q13323;Q9BWF2;Q9C000;P21980;Q9BXK5;Q00994;Q8N726;P22736;Q9H305;Q92785;O75569;Q96S99;Q13625;Q9UHI6;P30793;Q7Z465;Q9BXH1;P55212;Q9BUP3;Q9NYF8;Q9UK73;O75940;P55345;Q9UPG8;Q9Y287;Q8N114;Q9N9C7;Q9UER7;Q96AQ7;O14737;Q92934;P55210;Q96QA5;Q9Y6K9;Q92832;Q12981;P0C1Z6;Q9NR28;Q96IZ0;Q9UHR5;Q13794;Q9P0J0;Q12983;Q9UMX3;Q9HA38;Q96RE7;P42224;P63241;Q9Y2A4;O75489;O00198;P46527;Q13761;O60356;Q6UX65;P42773;P30153;Q69YI7;P42575;Q96KQ4;Q96FX8;Q9UM63;O60238;P61247;Q9Y239;O60443;Q9N9C7;Q15628;O14681;Q9UHD4;P19447;P31483;P10914;Q13114;O00273;P42771}
- 11219 Pathogen[ P03383] interacts with 68 human partners: {Q13761;P10914;O14737;Q14653;Q96A56;P55212;Q9Y6K9;P14921;Q9UK73;Q96CJ1;Q9UHR5;O15304;Q7Z465;O75618;Q96KQ4;O75489;Q96AQ7;Q9UHI6;Q9UMX3;Q96IZ0;P61247;P30153;P67775;Q92782;P63241;Q9UHD4;Q13625;Q12983;Q9Y3A2;P78560;O00291;P84022;O60238;Q00994;O00273;P46527;P17676;Q9NYF8;Q9UER7;P0C1Z6;Q96RE7;O95999;P42771;Q15628;Q9BUP3;Q8N9B5;O00198;Q9UM63;P21980;Q92785;O14681;Q13794;Q9BXH1;Q9P0J0;Q9Y2A4;Q8N8D1;Q8WV24;Q9NR28;Q16890;Q13114;P23396;P17947;Q96QA5;P54274;O75940;Q8N726;O60356;Q69YI7}
- 11220 Pathogen[ P03410] interacts with 99 human partners: {P84022;Q9H305;P42771;P61247;P46527;O14681;Q9Y239;Q12983;Q96S99;P78560;P17676;Q8N726;P17947;Q9NR28;Q9BXH1;P54274;Q9UHD4;O00198;P42575;Q96AQ7;Q69YI7;O76075;Q9N9C7;Q9UPG8;Q14653;Q9UPQ4;Q7Z465;O00273;Q8N114;P23396;Q92934;Q92785;Q9Y287;Q9C000;Q13794;O00291;Q96KQ4;P30793;P0C1Z6;Q92832;O75569;Q9BWF2;Q00994;Q15628;Q8WV24;Q9UER7;O95999;Q92782;Q96FX8;Q7Z6J0;Q9UMX3;Q6UX65;P19447;P10914;O60356;P22736;Q96IZ0;Q9BUP3;O75489;P31483;Q9UM63;O60443;Q13118;Q96CJ1;Q9UK73;P30153;Q9HA38;Q13761;Q8N9B5;Q96A56;P63241;Q16890;Q96QA5;P21980;Q96RE7;Q9NYF8;Q9Y3A2;Q9P0J0;Q9Y6K9;Q9NP84;O75618;Q12981;O75940;P67775;Q13625;P55212;Q9UHI6;P42773;Q8N8D1;Q9Y2A4;O60238;O14737;Q13114;Q13323;P55345;P14921;P55210;Q9UHR5;O15304}
- 11221 Pathogen[ P14075] interacts with 71 human partners: {P78560;Q9UK73;Q9BUP3;Q12983;Q9UHD4;Q96FX8;O00273;O14681;Q96KQ4;Q9UM63;Q9UMX3;Q92782;Q7Z465;Q9Y2A4;Q9UHR5;P55212;P0C1Z6;Q00994;P42771;Q96QA5;P63241;O15304;Q9NYF8;Q96IZ0;Q8WV24;P46527;Q92785;Q96AQ7;O75940;O00291;Q9NR28;P54274;Q9UHI6;O75618;Q8N8D1;Q14653;Q96RE7;P61247;Q16890;Q9BXH1;O60238;Q96CJ1;P23396;P17947;Q13114;O14737;O60356;P14921;O95999;Q13794;Q13625;Q15628;P67775;P30153;Q69YI7;Q9Y6K9;P84022;P21980;Q9UER7;P17676;P30793;O75489;Q9Y287;P10914;Q9Y3A2;Q8N9B5;Q9P0J0;Q96A56;Q8N726;O00198;Q13761}
- 11222 Pathogen[ P0C206] interacts with 99 human partners: {Q9N9C7;Q9C000;P84022;P10914;P31483;Q9H4P4;Q9H305;Q9BUP3;Q96IZ0;Q9Y6K9;P14921;O00291;Q7Z6J0;Q13114;Q8N726;Q9NR28;Q9Y287;P30153;O14737;Q9UK73;Q96FX8;Q13625;P78560;Q9UHR5;O76075;Q9UMX3;O95999;P21980;O75940;Q9UM63;P55212;Q16890;Q9UER7;O75618;P42771;Q93009;Q9BXH1;P67775;Q96KQ4;P22736;P30793;Q96A56;Q00994;Q8N9B5;P61247;P19447;Q92934;O60356;Q92782;Q92785;P54274;P42773;O60238;Q9UPQ4;O14681;Q12983;P0C1Z6;O60443;Q9NYF8;P23396;P17676;Q96CJ1;Q8N8D1;O00198;P46527;P17947;Q96AQ7;Q15628;Q96S99;Q9HA38;P42574;Q7Z465;Q9P0J0;Q12981;P63241;Q9UHD4;O75489;Q9N9C7;Q9UPG8;P42575;Q9BWF2;Q9BXK5;Q9UHI6;Q92832;Q96QA5;P55345;Q13118;P42224;P55210;O15304;Q96RE7;Q9Y3A2;O00273;Q13761;Q9Y2A4;Q69YI7;Q13794;Q8WV24;Q14653}
- 11223 Pathogen[ P03363] interacts with 76 human partners: {O75940;Q14653;Q96RE7;O00273;P23396;Q9BUP3;Q9BWF2;Q96AQ7;O60443;O60356;P17676;Q9C000;Q9UHI6;Q96IZ0;Q69YI7;O75618;Q13794;Q8WV24;P17947;O15304;Q13625;Q8N8D1;Q9Y6K9;P14921;Q9UER7;Q9Y2A4;Q9UM63;Q96KQ4;O00198;O43524;Q9H305;P55212;Q92832;Q96A56;Q96QA5;Q9UPG8;Q9NR28;Q9P0J0;P54274;Q9UHR5;O76075;P0C1Z6;P84022;Q92782;Q7Z465;P10914;Q9NYF8;Q00994;P78560;Q9H4P4;Q15628;P63241;Q8N726;Q16890;Q7Z6J0;Q13114;O14737;Q96CJ1;P61247;P55210;Q9Y3A2;P42773;P31483;Q9BXH1;Q13761;P30153;Q9UK73;O60238;P67775;Q9UMX3;Q8N9B5;P42771;O00291;O75569;Q13118;Q92785}

11224 [Cluster 1021]GO:0002268+P biological\_process [name] follicular dendritic cell differentiation [def] "The process in which a relatively unspecialized precursor cell acquires the specialized features of a follicular dendritic cell." [GOC

11225 Pathogen[ Q2Q067] interacts with 2 human partners:{P20749;Q00653}

11226 Pathogen[ P0C214] interacts with 2 human partners:{Q00653;P20749}

11227 Pathogen[ P03346] interacts with 2 human partners:{P20749;Q00653}

11228 Pathogen[ Q85601] interacts with 2 human partners:{Q00653;P20749}

11229 Pathogen[ P14079] interacts with 1 human partners:{P20749}

11230 Pathogen[ P03383] interacts with 2 human partners:{Q00653;P20749}

11231 Pathogen[ P03410] interacts with 2 human partners:{P20749;Q00653}

11232 Pathogen[ P14075] interacts with 2 human partners:{Q00653;P20749}

11233 Pathogen[ P0C206] interacts with 2 human partners:{P20749;Q00653}

11234 Pathogen[ P03363] interacts with 2 human partners:{P20749;Q00653}

11235 [Cluster 1022]GO:2000632+P biological\_process [name] negative regulation of pre-miRNA processing [def] "Any process that stops, prevents or reduces the frequency, rate or extent of pre-microRNA processing." [GOC

11236 Pathogen[ Q2Q067] interacts with 1 human partners:{Q7Z5W3}

11237 Pathogen[ P0C214] interacts with 1 human partners:{Q7Z5W3}

11238 Pathogen[ P03346] interacts with 1 human partners:{Q7Z5W3}

11239 Pathogen[ Q85601] interacts with 1 human partners:{Q7Z5W3}

11240 Pathogen[ P14079] interacts with 1 human partners:{Q7Z5W3}

11241 Pathogen[ P03383] interacts with 1 human partners:{Q7Z5W3}

11242 Pathogen[ P03410] interacts with 1 human partners:{Q7Z5W3}

11243 Pathogen[ P14075] interacts with 1 human partners:{Q7Z5W3}

11244 Pathogen[ P0C206] interacts with 1 human partners:{Q7Z5W3}

11245 Pathogen[ P03363] interacts with 1 human partners:{Q7Z5W3}

11246 [Cluster 1023]GO:0007409+P biological\_process [name] axonogenesis [def] "Generation of a long process of a neuron, that carries efferent (outgoing) action potentials from the cell body towards target cells." [GOC

11247 Pathogen[ Q2Q067] interacts with 4 human partners:{O00213;Q12837;Q9BYG5;Q99608}

11248 Pathogen[ P0C214] interacts with 9 human partners:{O00213;P60709;A0MZ66;Q99608;P35580;Q12837;Q9BYG5;P16220;P63261}

11249 Pathogen[ P03346] interacts with 15 human partners:{O00213;O15522;P16220;Q12837;P60709;P06703;Q8TEW0;Q9BYG5;O75840;P11137;Q13492;Q99608;P56178;Q9Y6R0;Q9UIW0}

11250 Pathogen[ Q85601] interacts with 8 human partners:{O00213;Q9BYG5;Q99608;P60709;P63261;P16220;P35580;Q12837}

11251 Pathogen[ P14079] interacts with 12 human partners:{Q13492;P63261;Q9BYG5;A0MZ66;O00213;Q12837;Q99608;Q8TEW0;P60709;P11137;P06703;P10636}

11252 Pathogen[ P03383] interacts with 6 human partners:{O00213;P16220;Q99608;Q9BYG5;Q12837;P35580}

11253 Pathogen[ P03410] interacts with 15 human partners:{P11137;Q99608;O00213;A0MZ66;P06703;Q13492;P16220;P10636;P35580;Q9BZR6;Q8TEW0;P63261;Q12837;P60709;Q9BYG5}

11254 Pathogen[ P14075] interacts with 5 human partners:{O00213;Q99608;Q12837;Q9BYG5;P16220}

11255 Pathogen[ P0C206] interacts with 13 human partners:{P60709;P16220;Q9BYG5;P10636;Q12837;O00213;Q8TEW0;P11137;P63261;Q99608;A0MZ66;P06703;P35580}

11256 Pathogen[ P03363] interacts with 11 human partners:{Q9UIW0;P11137;P60709;O00213;P16220;Q99608;Q9BYG5;P63261;Q9Y6R0;O15522;Q12837}

11257 [Cluster 1024]GO:0006767+P biological\_process [name] water-soluble vitamin metabolic process [def] "The chemical reactions and pathways involving any of a diverse group of vitamins that are soluble in water." [GOC

11258 Pathogen[ Q2Q067] interacts with 9 human partners:{Q9BU02;Q6XQN6;Q9HAB8;Q9NRN7;Q9HAN9;P11166;P34896;O96007;Q9Y697}

11259 Pathogen[ P0C214] interacts with 23 human partners:{Q96T66;Q9BU02;Q05932;Q9HAN9;Q8TE04;Q9HAB8;O96033;P42898;Q6XQN6;O95396;Q13057;P11166;P00374;Q9Y697;P34896;Q9BZQ4;O96007;Q9BZ23;Q15274;Q9NRN7;Q8NFF5;P43490;P11586}

11260 Pathogen[ P03346] interacts with 8 human partners:{Q9NRN7;Q9Y697;Q9HAN9;Q6XQN6;P11166;O96007;Q9BU02;Q9HAB8}

11261 Pathogen[ Q85601] interacts with 8 human partners:{Q9NRN7;Q9BU02;Q9Y697;Q9HAN9;Q6XQN6;P11166;P34896;O96007}

11262 Pathogen[ P14079] interacts with 25 human partners:{P00374;Q8TE04;O95544;Q8NFF5;P43490;P11166;Q96NT5;O96007;O96033;Q9BZ23;Q9BZQ4;Q6XQN6;Q13057;Q9Y697;Q9NRN7;Q9BU02;Q9HAN9;Q6IA69;Q96CD2;Q15274;Q05932;Q9NVS9;Q9HAB8;P34896;P42898}

11263 Pathogen[ P03383] interacts with 9 human partners:{Q9BU02;P34896;Q9NRN7;Q9Y697;Q9HAN9;O96007;Q9BZ23;P11169;Q9HAB8}

11264 Pathogen[ P03410] interacts with 23 human partners:{Q15274;Q9BU02;Q8NFF5;Q8TE04;P11166;Q13057;P00374;Q9Y697;Q6XQN6;P43490;O96007;Q96CD2;P42898;Q9NRN7;Q9BZ23;Q9HAN9;Q9NVS9;O96033;Q9HAB8;Q05932;Q6IA69;Q9BZQ4;P34896}

11265 Pathogen[ P14075] interacts with 13 human partners: {P11169;Q9HAB8;P34896;Q13057;Q9NVS9;Q8TE04;O96007;Q9BZ23;Q9HAN9;Q6XQN6;Q9BU02;Q9NRN7;Q9Y697}

11266 Pathogen[ POC206] interacts with 17 human partners: {Q6XQN6;Q8TE04;Q13057;Q9Y697;O96007;P43490;Q9BZ23;P11166;Q9HAB8;P34896;Q9BZ04;Q9HAN9;Q15274;Q9BU02;O95396;Q9NRN7;Q05932}

11267 Pathogen[ P03363] interacts with 7 human partners: {Q6XQN6;Q9HAN9;O96007;Q9Y697;Q9NRN7;Q9BU02;P11166}

11268 [Cluster 1025]GO:0010957+P biological\_process [name] negative regulation of vitamin D biosynthetic process [def] "Any process that decreases the rate, frequency or extent of a vitamin D biosynthetic process. Vitamin D biosynthesis is the chemical reactions and pathways resulting in the formation of vitamin D, any of a group of related, fat-soluble compounds that are derived from delta-5,7 steroids and play a central role in calcium metabolism. Specific forms of vitamin D include calciferol (ergocalciferol\_ vitamin D2) and cholecalciferol (calciol\_ vitamin D3)." [GOC

11269 Pathogen[ Q2Q067] interacts with 2 human partners: {Q99684;P19838}

11270 Pathogen[ POC214] interacts with 2 human partners: {P19838;Q99684}

11271 Pathogen[ P03346] interacts with 3 human partners: {O95863;Q99684;P19838}

11272 Pathogen[ Q85601] interacts with 2 human partners: {Q99684;P19838}

11273 Pathogen[ P14079] interacts with 1 human partners: {Q99684}

11274 Pathogen[ P03383] interacts with 2 human partners: {Q99684;P19838}

11275 Pathogen[ P03410] interacts with 2 human partners: {P19838;Q99684}

11276 Pathogen[ P14075] interacts with 2 human partners: {Q99684;P19838}

11277 Pathogen[ POC206] interacts with 2 human partners: {P19838;Q99684}

11278 Pathogen[ P03363] interacts with 2 human partners: {Q99684;P19838}

11279 [Cluster 1026]GO:0042060+P biological\_process [name] wound healing [def] "The series of events that restore integrity to a damaged tissue, following an injury." [GOC

11280 Pathogen[ Q2Q067] interacts with 14 human partners: {Q9UKI9;Q14160;Q8IVN3;P41970;Q9NVK5;P15924;P35548;P49356;Q9UBC9;P84022;P06396;Q13233;Q8TE85;Q15797}

11281 Pathogen[ POC214] interacts with 16 human partners: {P41970;P15924;P84022;Q9UKI9;P06396;P05121;Q8TE85;Q13233;P49356;Q14160;Q9NVK5;P05120;Q8IVN3;Q15797;Q9UBC9;P35548}

11282 Pathogen[ P03346] interacts with 17 human partners: {P15924;Q99612;P35548;Q15797;Q9UKI9;Q9NVK5;Q8TE85;Q9UBC9;Q8IVN3;P84022;P49356;Q01954;Q13233;Q5JRA6;P41970;Q14160;P06396}

11283 Pathogen[ Q85601] interacts with 18 human partners: {Q8TE85;P06396;Q15797;P41970;Q01954;P15924;Q8IVN3;Q9NVK5;P35548;Q14160;Q9UKI9;Q99612;P49356;P05121;P84022;P05120;Q13233;Q9UBC9}

11284 Pathogen[ P14079] interacts with 12 human partners: {Q8TE85;P15924;Q15797;Q99612;Q8IVN3;Q5JRA6;P49356;Q9NVK5;Q9UBC9;Q9UKI9;Q99439;P41970}

11285 Pathogen[ P03383] interacts with 12 human partners: {P15924;Q9UKI9;Q14160;Q13233;Q15797;Q8TE85;Q8IVN3;Q9UBC9;P84022;P35548;P41970;P06396}

11286 Pathogen[ P03410] interacts with 17 human partners: {P84022;P05121;P15924;Q9UBC9;P49356;P06396;Q9NVK5;Q13233;Q14160;P35548;Q8TE85;Q99439;Q8IVN3;Q15797;Q9UKI9;P41970;Q5JRA6}

11287 Pathogen[ P14075] interacts with 11 human partners: {Q9UBC9;Q14160;Q8TE85;P35548;P06396;Q9UKI9;P41970;Q8IVN3;P84022;Q13233;P15924}

11288 Pathogen[ POC206] interacts with 18 human partners: {Q8TE85;P84022;P06396;Q9UBC9;Q5JRA6;P41970;Q13233;Q9NVK5;Q8IVN3;Q99612;Q14160;P35548;Q9UKI9;P15924;Q15797;P05121;P49356;Q01954}

11289 Pathogen[ P03363] interacts with 15 human partners: {Q14160;Q9UBC9;Q9UKI9;Q9NVK5;Q99612;P35548;Q15797;P15924;P06396;Q8TE85;P84022;Q01954;P41970;Q8IVN3;Q13233}

11290 [Cluster 1027]GO:0009301+P biological\_process [name] snRNA transcription [def] "The synthesis of small nuclear RNA (snRNA) from a DNA template." [GOC

11291 Pathogen[ Q2Q067] interacts with 4 human partners: {Q13487;Q5SXM2;Q8IXW5;Q92966}

11292 Pathogen[ POC214] interacts with 4 human partners: {Q8IXW5;Q5SXM2;Q92966;Q13487}

11293 Pathogen[ P03346] interacts with 4 human partners: {Q13487;Q8IXW5;Q5SXM2;Q92966}

11294 Pathogen[ Q85601] interacts with 4 human partners: {Q13487;Q5SXM2;Q8IXW5;Q92966}

11295 Pathogen[ P14079] interacts with 4 human partners: {Q5SXM2;Q92966;Q13487;Q8IXW5}

11296 Pathogen[ P03383] interacts with 4 human partners: {Q13487;Q92966;Q8IXW5;Q5SXM2}

11297 Pathogen[ P03410] interacts with 4 human partners: {Q92966;Q13487;Q8IXW5;Q5SXM2}

11298 Pathogen[ P14075] interacts with 4 human partners: {Q8IXW5;Q92966;Q5SXM2;Q13487}

11299 Pathogen[ POC206] interacts with 4 human partners: {Q8IXW5;Q13487;Q5SXM2;Q92966}

11300 Pathogen[ P03363] interacts with 4 human partners: {Q13487;Q8IXW5;Q92966;Q5SXM2}

11301 [Cluster 1028]GO:0045217+P biological\_process [name] cell-cell junction maintenance [def] "The maintenance of junctions between cells." [GOC

11302 Pathogen[ Q2Q067] interacts with 1 human partners: {Q9NPB6}

11303 Pathogen[ POC214] interacts with 1 human partners: {Q9NPB6}

11304 Pathogen[ P03346] interacts with 1 human partners: {Q9NPB6}

11305 Pathogen[ Q85601] interacts with 1 human partners: {Q9NPB6}

11306 Pathogen[ P14079] interacts with 1 human partners: {Q9NPB6}

11307 Pathogen[ P03383] interacts with 1 human partners:{Q9NPB6}  
11308 Pathogen[ P03410] interacts with 1 human partners:{Q9NPB6}  
11309 Pathogen[ P14075] interacts with 1 human partners:{Q9NPB6}  
11310 Pathogen[ P0C206] interacts with 1 human partners:{Q9NPB6}  
11311 Pathogen[ P03363] interacts with 1 human partners:{Q9NPB6}  
11312 [Cluster 1029]GO:0030219+P biological\_process [name] megakaryocyte differentiation [def] "The process in which a myeloid precursor cell acquires specialized features of a megakaryocyte." [GOC  
11313 Pathogen[ Q2Q067] interacts with 5 human partners:{P15976;Q02447;P08047;Q8IX07;P42772}  
11314 Pathogen[ P0C214] interacts with 4 human partners:{Q8IX07;Q02447;P08047;P42772}  
11315 Pathogen[ P03346] interacts with 6 human partners:{P42772;P08047;P17542;P15976;Q8IX07;Q02447}  
11316 Pathogen[ Q85601] interacts with 5 human partners:{P15976;P42772;P08047;Q8IX07;Q02447}  
11317 Pathogen[ P14079] interacts with 4 human partners:{P20809;Q02447;P15976;Q8IX07}  
11318 Pathogen[ P03383] interacts with 3 human partners:{P08047;P42772;Q02447}  
11319 Pathogen[ P03410] interacts with 6 human partners:{P42772;Q02447;P20809;Q8IX07;P08047;P15976}  
11320 Pathogen[ P14075] interacts with 4 human partners:{Q02447;P20809;P42772;P08047}  
11321 Pathogen[ P0C206] interacts with 6 human partners:{P42772;P15976;P08047;Q02447;P20809;Q8IX07}  
11322 Pathogen[ P03363] interacts with 3 human partners:{Q02447;P42772;P08047}  
11323 [Cluster 1030]GO:0071276+P biological\_process [name] cellular response to cadmium ion [def] "Any process that results in a change in state or activity of a cell (in terms of movement, secretion, enzyme production, gene expression, etc.) as a result of a cadmium (Cd) ion stimulus." [GOC  
11324 Pathogen[ Q2Q067] interacts with 8 human partners:{P13640;P04732;P04733;P06396;O15527;P80294;P04731;P80297}  
11325 Pathogen[ P0C214] interacts with 8 human partners:{P06396;P13640;P80297;P04732;P04733;P80294;P04731;O15527}  
11326 Pathogen[ P03346] interacts with 8 human partners:{P04732;P80294;P04733;P13640;P80297;P04731;P06396;O15527}  
11327 Pathogen[ Q85601] interacts with 8 human partners:{O15527;P80294;P06396;P04732;P80297;P04733;P04731;P13640}  
11328 Pathogen[ P14079] interacts with 7 human partners:{P80297;P80294;O15527;P13640;P04731;P04732;P04733}  
11329 Pathogen[ P03383] interacts with 8 human partners:{P04733;P80294;P13640;O15527;P80297;P04732;P04731;P06396}  
11330 Pathogen[ P03410] interacts with 8 human partners:{P80297;P04733;P06396;P13640;P04731;O15527;P80294;P04732}  
11331 Pathogen[ P14075] interacts with 8 human partners:{P04733;P80297;O15527;P13640;P06396;P80294;P04731;P04732}  
11332 Pathogen[ P0C206] interacts with 8 human partners:{P13640;P06396;O15527;P04732;P04733;P80294;P04731;P80297}  
11333 Pathogen[ P03363] interacts with 8 human partners:{P80294;P80297;O15527;P13640;P04732;P06396;P04731;P04733}  
11334 [Cluster 1031]GO:0043968+P biological\_process [name] histone H2A acetylation [def] "The modification of histone H2A by the addition of an acetyl group." [GOC  
11335 Pathogen[ Q2Q067] interacts with 9 human partners:{Q9Y4A5;Q9NXR8;Q9NPF5;O96019;Q9HAF1;Q9UBU8;O95619;Q9H2F5;Q9H0E9}  
11336 Pathogen[ P0C214] interacts with 8 human partners:{Q9H2F5;O95619;Q9HAF1;Q9UBU8;Q9Y4A5;Q9H0E9;O96019;Q9NPF5}  
11337 Pathogen[ P03346] interacts with 9 human partners:{Q9H0E9;O96019;Q9Y4A5;Q9UBU8;Q9H2F5;O95619;Q9HAF1;Q9NXR8;Q9NPF5}  
11338 Pathogen[ Q85601] interacts with 9 human partners:{O95619;Q9H2F5;Q9HAF1;Q9Y4A5;Q9H0E9;Q9UBU8;O96019;Q9NXR8;Q9NPF5}  
11339 Pathogen[ P14079] interacts with 7 human partners:{Q9Y4A5;Q9UBU8;Q9HAF1;Q9H0E9;Q9NPF5;Q9H2F5;O95619}  
11340 Pathogen[ P03383] interacts with 8 human partners:{O96019;Q9Y4A5;Q9H2F5;Q9UBU8;Q9H0E9;Q9NPF5;Q9HAF1;O95619}  
11341 Pathogen[ P03410] interacts with 8 human partners:{O95619;O96019;Q9NPF5;Q9UBU8;Q9H2F5;Q9Y4A5;Q9NXR8;Q9H0E9}  
11342 Pathogen[ P14075] interacts with 7 human partners:{Q9H2F5;Q9UBU8;O95619;Q9Y4A5;Q9NPF5;O96019;Q9HAF1}  
11343 Pathogen[ P0C206] interacts with 9 human partners:{Q9H2F5;Q9NPF5;Q9UBU8;Q9NXR8;O96019;Q9Y4A5;O95619;Q9HAF1;Q9H0E9}  
11344 Pathogen[ P03363] interacts with 8 human partners:{Q9NPF5;O95619;Q9H2F5;Q9HAF1;Q9UBU8;O96019;Q9Y4A5;Q9H0E9}  
11345 [Cluster 1032]GO:0006000+P biological\_process [name] fructose metabolic process [def] "The chemical reactions and pathways involving fructose, the ketohehexose arabino-2-hexulose. Fructose exists in a open chain form or as a ring compound. D-fructose is the sweetest of the sugars and is found free in a large number of fruits and honey." [ISBN  
11346 Pathogen[ Q2Q067] interacts with 3 human partners:{P05062;P09972;P09467}  
11347 Pathogen[ P0C214] interacts with 6 human

11348 Pathogen[ P03346] interacts with 3 human partners:{P09972;P09467;P05062}  
11349 Pathogen[ Q85601] interacts with 6 human partners:{O60825;O00757;P05062;P16118;P09972;P09467}  
11350 Pathogen[ P14079] interacts with 2 human partners:{P09972;P09467}  
11351 Pathogen[ P03383] interacts with 2 human partners:{P09467;P09972}  
11352 Pathogen[ P03410] interacts with 5 human partners:{P16118;P05062;P09467;O00757;P09972}  
11353 Pathogen[ P14075] interacts with 3 human partners:{P16118;P09972;P09467}  
11354 Pathogen[ P0C206] interacts with 6 human partners:{P05062;P09467;O00757;O60825;P09972;P16118}  
11355 Pathogen[ P03363] interacts with 1 human partners:{P09972}  
11356 [Cluster 1033]GO:0006622+P biological\_process [name] protein targeting to lysosome [def] "The process of directing proteins towards the lysosome using signals contained within the protein." [GOC  
11357 Pathogen[ Q2Q067] interacts with 2 human partners:{Q8IWIJ2;Q9Y2T2}  
11358 Pathogen[ P0C214] interacts with 2 human partners:{Q8IWIJ2;Q9Y2T2}  
11359 Pathogen[ P03346] interacts with 3 human partners:{Q7Z3T8;Q8IWIJ2;Q9Y2T2}  
11360 Pathogen[ Q85601] interacts with 2 human partners:{Q8IWIJ2;Q9Y2T2}  
11361 Pathogen[ P14079] interacts with 3 human partners:{Q9Y2T2;Q8IWIJ2;Q7Z3T8}  
11362 Pathogen[ P03383] interacts with 2 human partners:{Q8IWIJ2;Q9Y2T2}  
11363 Pathogen[ P03410] interacts with 4 human partners:{O00203;Q9Y2T2;Q8IWIJ2;Q7Z3T8}  
11364 Pathogen[ P14075] interacts with 2 human partners:{Q9Y2T2;Q8IWIJ2}  
11365 Pathogen[ P0C206] interacts with 3 human partners:{Q9Y2T2;Q7Z3T8;Q8IWIJ2}  
11366 Pathogen[ P03363] interacts with 2 human partners:{Q9Y2T2;Q8IWIJ2}  
11367 [Cluster 1034]GO:0006541+P biological\_process [name] glutamine metabolic process [def] "The chemical reactions and pathways involving glutamine, 2-amino-4-carbamoylbutanoic acid." [GOC  
11368 Pathogen[ Q2Q067] interacts with 2 human partners:{Q9UI32;O94925}  
11369 Pathogen[ P0C214] interacts with 4 human partners:{Q9UI32;Q9NRF8;O94925;P17812}  
11370 Pathogen[ P03346] interacts with 2 human partners:{Q9UI32;O94925}  
11371 Pathogen[ Q85601] interacts with 2 human partners:{O94925;Q9UI32}  
11372 Pathogen[ P14079] interacts with 6 human partners:{P17812;Q9NRF8;O94925;Q9UI32;P49915;O15067}  
11373 Pathogen[ P03383] interacts with 1 human partners:{O94925}  
11374 Pathogen[ P03410] interacts with 6 human partners:{P49915;Q9NRF8;P17812;O94925;O15067;Q9UI32}  
11375 Pathogen[ P14075] interacts with 1 human partners:{O94925}  
11376 Pathogen[ P0C206] interacts with 2 human partners:{Q9UI32;O94925}  
11377 Pathogen[ P03363] interacts with 2 human partners:{O94925;Q9UI32}  
11378 [Cluster 1035]GO:0042345+P biological\_process [name] regulation of NF-kappaB import into nucleus [def] "Any process that modulates the frequency, rate or extent of the transfer of NF-kappaB, a transcription factor for eukaryotic RNA polymerase II promoters, from the cytoplasm into the nucleus, across the nuclear membrane." [GOC  
11379 Pathogen[ Q2Q067] interacts with 3 human partners:{P20749;Q06830;P25963}  
11380 Pathogen[ P0C214] interacts with 3 human partners:{Q06830;P20749;P25963}  
11381 Pathogen[ P03346] interacts with 3 human partners:{P25963;P20749;Q06830}  
11382 Pathogen[ Q85601] interacts with 3 human partners:{Q06830;P20749;P25963}  
11383 Pathogen[ P14079] interacts with 1 human partners:{P20749}  
11384 Pathogen[ P03383] interacts with 2 human partners:{P20749;P25963}  
11385 Pathogen[ P03410] interacts with 3 human partners:{P20749;P25963;Q06830}  
11386 Pathogen[ P14075] interacts with 2 human partners:{P25963;P20749}  
11387 Pathogen[ P0C206] interacts with 3 human partners:{P25963;P20749;Q06830}  
11388 Pathogen[ P03363] interacts with 2 human partners:{P25963;P20749}  
11389 [Cluster 1036]GO:0047497+P biological\_process [name] mitochondrion transport along microtubule [def] "The directed movement of a mitochondrion along a microtubule, mediated by motor proteins." [GOC  
11390 Pathogen[ Q2Q067] interacts with 3 human partners:{P42704;Q9UBK9;Q66K74}  
11391 Pathogen[ P0C214] interacts with 3 human partners:{P42704;Q9UBK9;Q66K74}  
11392 Pathogen[ P03346] interacts with 3 human partners:{Q66K74;P42704;Q9UBK9}  
11393 Pathogen[ Q85601] interacts with 3 human partners:{Q66K74;P42704;Q9UBK9}  
11394 Pathogen[ P14079] interacts with 4 human partners:{Q66K74;P42704;Q9UBK9;P10636}  
11395 Pathogen[ P03383] interacts with 2 human partners:{P42704;Q9UBK9}  
11396 Pathogen[ P03410] interacts with 5 human partners:{Q9UBK9;O60333;P42704;Q66K74;P10636}  
11397 Pathogen[ P14075] interacts with 2 human partners:{P42704;Q9UBK9}  
11398 Pathogen[ P0C206] interacts with 4 human partners:{P10636;Q66K74;P42704;Q9UBK9}  
11399 Pathogen[ P03363] interacts with 4 human partners:{Q66K74;P42704;Q9UBK9;O60333}  
11400 [Cluster 1037]GO:0006608+P biological\_process [name] snRNP protein import into nucleus [def] "The directed movement of a small nuclear ribonucleoprotein from the cytoplasm into the nucleus, across the nuclear membrane." [GOC  
11401 Pathogen[ Q2Q067] interacts with 1 human partners:{Q9Y2X3}  
11402 Pathogen[ P0C214] interacts with 1 human partners:{Q9Y2X3}  
11403 Pathogen[ P03346] interacts with 1 human partners:{Q9Y2X3}  
11404 Pathogen[ Q85601] interacts with 1 human partners:{Q9Y2X3}  
11405 Pathogen[ P14079] interacts with 1 human partners:{Q9Y2X3}



11406 Pathogen[ P03383] interacts with 1 human partners:{Q9Y2X3}  
11407 Pathogen[ P03410] interacts with 1 human partners:{Q9Y2X3}  
11408 Pathogen[ P14075] interacts with 1 human partners:{Q9Y2X3}  
11409 Pathogen[ P0C206] interacts with 1 human partners:{Q9Y2X3}  
11410 Pathogen[ P03363] interacts with 1 human partners:{Q9Y2X3}  
11411 [Cluster 1038]GO:0090179+P biological\_process [name] planar cell polarity pathway involved in neural tube closure [def] "The series of molecular signals initiated by binding of a Wnt protein to a receptor on the surface of the target cell where activated receptors signal via downstream effectors that modulates the establishment of planar polarity contributing to neural tube closure." [GOC  
11412 Pathogen[ Q2Q067] interacts with 2 human partners:{O14641;Q8TE85}  
11413 Pathogen[ P0C214] interacts with 2 human partners:{Q8TE85;O14641}  
11414 Pathogen[ P03346] interacts with 2 human partners:{Q8TE85;O14641}  
11415 Pathogen[ Q85601] interacts with 2 human partners:{Q8TE85;O14641}  
11416 Pathogen[ P14079] interacts with 2 human partners:{O14641;Q8TE85}  
11417 Pathogen[ P03383] interacts with 2 human partners:{Q8TE85;O14641}  
11418 Pathogen[ P03410] interacts with 2 human partners:{Q8TE85;O14641}  
11419 Pathogen[ P14075] interacts with 2 human partners:{Q8TE85;O14641}  
11420 Pathogen[ P0C206] interacts with 1 human partners:{Q8TE85}  
11421 Pathogen[ P03363] interacts with 2 human partners:{Q8TE85;O14641}  
11422 [Cluster 1039]GO:0060236+P biological\_process [name] regulation of mitotic spindle organization [def] "Any process that modulates the rate, frequency or extent of the assembly, arrangement of constituent parts, or disassembly of the microtubule spindle during a mitotic cell cycle." [GOC  
11423 Pathogen[ Q2Q067] interacts with 3 human partners:{Q6PGQ7;Q6PGN9;Q9ULW0}  
11424 Pathogen[ P0C214] interacts with 3 human partners:{Q6PGN9;Q9ULW0;Q6PGQ7}  
11425 Pathogen[ P03346] interacts with 3 human partners:{Q9ULW0;Q6PGN9;Q6PGQ7}  
11426 Pathogen[ Q85601] interacts with 3 human partners:{Q6PGN9;Q9ULW0;Q6PGQ7}  
11427 Pathogen[ P14079] interacts with 3 human partners:{Q6PGQ7;Q9ULW0;Q6PGN9}  
11428 Pathogen[ P03383] interacts with 3 human partners:{Q6PGN9;Q6PGQ7;Q9ULW0}  
11429 Pathogen[ P03410] interacts with 3 human partners:{Q6PGQ7;Q9ULW0;Q6PGN9}  
11430 Pathogen[ P14075] interacts with 3 human partners:{Q9ULW0;Q6PGN9;Q6PGQ7}  
11431 Pathogen[ P0C206] interacts with 3 human partners:{Q9ULW0;Q6PGQ7;Q6PGN9}  
11432 Pathogen[ P03363] interacts with 3 human partners:{Q9ULW0;Q6PGQ7;Q6PGN9}  
11433 [Cluster 1040]GO:0031937+P biological\_process [name] positive regulation of chromatin silencing [def] "Any process that activates or increases the frequency, rate or extent of chromatin silencing." [GOC  
11434 Pathogen[ Q2Q067] interacts with 1 human partners:{Q8N108}  
11435 Pathogen[ P0C214] interacts with 1 human partners:{Q8N108}  
11436 Pathogen[ P03346] interacts with 1 human partners:{Q8N108}  
11437 Pathogen[ Q85601] interacts with 1 human partners:{Q8N108}  
11438 Pathogen[ P14079] interacts with 1 human partners:{Q8N108}  
11439 Pathogen[ P03383] interacts with 1 human partners:{Q8N108}  
11440 Pathogen[ P03410] interacts with 1 human partners:{Q8N108}  
11441 Pathogen[ P14075] interacts with 1 human partners:{Q8N108}  
11442 Pathogen[ P0C206] interacts with 1 human partners:{Q8N108}  
11443 Pathogen[ P03363] interacts with 1 human partners:{Q8N108}  
11444 [Cluster 1041]GO:0043085+P biological\_process [name] positive regulation of catalytic activity [def] "Any process that activates or increases the activity of an enzyme." [GOC  
11445 Pathogen[ Q2Q067] interacts with 8 human partners:{O15519;Q16082;Q9UBU7;Q9UKN8;Q9UJW3;P31946;P35251;Q8IY92}  
11446 Pathogen[ P0C214] interacts with 8 human partners:{Q16082;Q9UKN8;P35251;Q9UBU7;O15519;Q8IY92;P31946;Q9UJW3}  
11447 Pathogen[ P03346] interacts with 11 human partners:{Q16082;P59103;Q9UBU7;O15519;Q86SE8;Q9UKN8;O75569;P31946;P35251;Q8IY92;Q9UJW3}  
11448 Pathogen[ Q85601] interacts with 9 human partners:{P31946;Q9UJW3;Q86SE8;Q9UBU7;Q9UKN8;Q8IY92;P35251;Q16082;O15519}  
11449 Pathogen[ P14079] interacts with 16 human partners:{Q16873;Q8IZ21;O15519;P20292;Q9UKN8;P59103;Q92542;Q9NZ42;O75569;Q9UJW3;P31946;P35251;Q16082;Q8WW43;Q9UBU7;Q8IY92}  
11450 Pathogen[ P03383] interacts with 6 human partners:{Q9UKN8;P31946;Q9UJW3;Q8IY92;Q16082;P35251}  
11451 Pathogen[ P03410] interacts with 17 human partners:{Q86SE8;Q8IZ21;O15519;O75569;Q9NZ42;P35251;Q8IY92;Q16873;Q16082;Q9UBU7;Q8WW43;Q92542;Q9UJW3;P20292;Q9UKN8;P59103;P31946}  
11452 Pathogen[ P14075] interacts with 7 human partners:{Q9UJW3;Q16082;P35251;Q9UKN8;P31946;P59103;Q8IY92}  
11453 Pathogen[ P0C206] interacts with 13 human partners:{P35251;Q9NZ42;Q92542;O15519;P31946;Q16082;Q9UBU7;Q9UKN8;Q86SE8;P20292;P59103;Q8IY92;Q9UJW3}  
11454 Pathogen[ P03363] interacts with 10 human partners:{Q16082;O15519;P31946;P35251;Q8IY92;Q9UBE0;Q9UJW3;Q86SE8;Q9UKN8;O75569}  
11455 [Cluster 1042]GO:0042552+P biological\_process [name] myelination [def] "The process in which myelin sheaths are formed and maintained around neurons. Oligodendrocytes in

the brain and spinal cord and Schwann cells in the peripheral nervous system wrap axons with compact layers of their plasma membrane. Adjacent myelin segments are separated by a non-myelinated stretch of axon called a node of Ranvier." [GOC

11456 Pathogen[ Q2Q067] interacts with 8 human  
partners: {Q03052;P49770;Q9UI10;P11161;Q15742;Q13506;Q13144;P17028}

11457 Pathogen[ P0C214] interacts with 8 human  
partners: {Q03052;Q15742;Q9UI10;P49770;Q13506;Q13144;P17028;P11161}

11458 Pathogen[ P03346] interacts with 11 human  
partners: {Q96PU8;Q03052;Q86WG5;Q15742;Q13506;P49770;P17028;Q13516;P11161;Q13144;Q9UI10}

11459 Pathogen[ Q85601] interacts with 8 human  
partners: {P17028;Q03052;Q13506;Q15742;Q13144;P49770;P11161;Q9UI10}

11460 Pathogen[ P14079] interacts with 10 human  
partners: {Q13506;Q86VE9;Q9UI10;Q15742;Q13144;P02686;P11161;Q86WG5;Q03052;P17028}

11461 Pathogen[ P03383] interacts with 7 human  
partners: {Q9UI10;Q15742;Q13506;Q13144;P49770;P11161;P17028}

11462 Pathogen[ P03410] interacts with 11 human  
partners: {Q86VE9;P02686;Q03052;P49770;P17028;Q15742;P11161;Q9UI10;Q13506;Q86WG5;Q13144}

11463 Pathogen[ P14075] interacts with 7 human  
partners: {Q13506;P11161;Q9UI10;P49770;P17028;Q15742;Q13144}

11464 Pathogen[ P0C206] interacts with 9 human  
partners: {P11161;Q96PU8;Q13144;Q15742;P49770;Q9UI10;Q03052;P17028;Q13506}

11465 Pathogen[ P03363] interacts with 11 human  
partners: {Q13516;Q9UI10;P17028;Q96PU8;Q13506;Q86WG5;Q15742;P49770;Q13144;Q03052;P11161}

11466 [Cluster 1043]GO:0006433+P biological\_process [name] prolyl-tRNA aminoacylation [def] "The process of coupling proline to prolyl-tRNA, catalyzed by prolyl-tRNA synthetase. In tRNA aminoacylation, the amino acid is first activated by linkage to AMP and then transferred to either the 2'- or the 3'-hydroxyl group of the 3'-adenosine residue of the tRNA." [GOC

11467 Pathogen[ Q2Q067] interacts with 1 human partners: {P07814}

11468 Pathogen[ P0C214] interacts with 2 human partners: {Q7L3T8;P07814}

11469 Pathogen[ P03346] interacts with 1 human partners: {P07814}

11470 Pathogen[ Q85601] interacts with 1 human partners: {P07814}

11471 Pathogen[ P14079] interacts with 2 human partners: {Q7L3T8;P07814}

11472 Pathogen[ P03383] interacts with 2 human partners: {P07814;Q7L3T8}

11473 Pathogen[ P03410] interacts with 2 human partners: {Q7L3T8;P07814}

11474 Pathogen[ P14075] interacts with 2 human partners: {Q7L3T8;P07814}

11475 Pathogen[ P0C206] interacts with 2 human partners: {P07814;Q7L3T8}

11476 Pathogen[ P03363] interacts with 2 human partners: {Q7L3T8;P07814}

11477 [Cluster 1044]GO:0051014+P biological\_process [name] actin filament severing [def] "The process in which an actin filament is broken down into smaller filaments." [GOC

11478 Pathogen[ Q2Q067] interacts with 1 human partners: {P06396}

11479 Pathogen[ P0C214] interacts with 1 human partners: {P06396}

11480 Pathogen[ P03346] interacts with 1 human partners: {P06396}

11481 Pathogen[ Q85601] interacts with 1 human partners: {P06396}

11482 Pathogen[ P14079] interacts with 2 human partners: {P09327;Q9Y6U3}

11483 Pathogen[ P03383] interacts with 1 human partners: {P06396}

11484 Pathogen[ P03410] interacts with 2 human partners: {P06396;Q9Y6U3}

11485 Pathogen[ P14075] interacts with 1 human partners: {P06396}

11486 Pathogen[ P0C206] interacts with 1 human partners: {P06396}

11487 Pathogen[ P03363] interacts with 1 human partners: {P06396}

11488 [Cluster 1045]GO:0060216+P biological\_process [name] definitive hemopoiesis [def] "A second wave of blood cell production that, in vertebrates, generates long-term hemopoietic stem cells that continuously provide erythroid, myeloid and lymphoid lineages throughout adulthood." [GOC

11489 Pathogen[ Q2Q067] interacts with 9 human  
partners: {O00470;Q01196;P12980;P17483;Q02447;P08047;P23769;Q13951;P14651}

11490 Pathogen[ P0C214] interacts with 7 human  
partners: {O00470;P23769;P14651;Q02447;P08047;P12980;Q13951}

11491 Pathogen[ P03346] interacts with 11 human  
partners: {P23769;Q86Z02;P17483;P08047;P12980;P17542;Q13951;O00470;Q01196;Q02447;P14651}

11492 Pathogen[ Q85601] interacts with 7 human  
partners: {P12980;Q13951;P23769;P08047;O00470;Q02447;P14651}

11493 Pathogen[ P14079] interacts with 6 human  
partners: {Q02447;P12980;O00470;Q13951;P23769;P14651}

11494 Pathogen[ P03383] interacts with 7 human  
partners: {O00470;P08047;P23769;P12980;Q02447;Q13951;P14651}

11495 Pathogen[ P03410] interacts with 7 human  
partners: {O00470;Q02447;P14651;P12980;Q13951;P23769;P08047}

11496 Pathogen[ P14075] interacts with 6 human  
partners: {Q13951;O00470;P23769;Q02447;P12980;P08047}

11497 Pathogen[ P0C206] interacts with 8 human  
partners: {O00470;Q13951;P14651;P12980;P17483;P08047;Q02447;P23769}

11498 Pathogen[ P03363] interacts with 7 human partners:{Q02447;P14651;P17483;Q13951;O00470;P12980;P08047}

11499 [Cluster 1046]GO:0019478+P biological\_process [name] D-amino acid catabolic process [def] "The chemical reactions and pathways resulting in the breakdown of D-amino acids, the D-enantiomers of amino acids." [GOC

11500 Pathogen[ Q2Q067] interacts with 2 human partners:{Q8TEA8;Q96FN9}

11501 Pathogen[ P0C214] interacts with 2 human partners:{Q8TEA8;Q96FN9}

11502 Pathogen[ P03346] interacts with 2 human partners:{Q8TEA8;Q96FN9}

11503 Pathogen[ Q85601] interacts with 2 human partners:{Q8TEA8;Q96FN9}

11504 Pathogen[ P14079] interacts with 2 human partners:{Q8TEA8;Q96FN9}

11505 Pathogen[ P03383] interacts with 2 human partners:{Q96FN9;Q8TEA8}

11506 Pathogen[ P03410] interacts with 2 human partners:{Q8TEA8;Q96FN9}

11507 Pathogen[ P14075] interacts with 2 human partners:{Q96FN9;Q8TEA8}

11508 Pathogen[ P0C206] interacts with 2 human partners:{Q96FN9;Q8TEA8}

11509 Pathogen[ P03363] interacts with 2 human partners:{Q8TEA8;Q96FN9}

11510 [Cluster 1047]GO:0010826+P biological\_process [name] negative regulation of centrosome duplication [def] "Any process that decreases the frequency, rate or extent of centrosome duplication. Centrosome duplication is the replication of a centrosome, a structure comprised of a pair of centrioles and peri-centriolar material from which a microtubule spindle apparatus is organized." [GOC

11511 Pathogen[ Q2Q067] interacts with 2 human partners:{P06748;P41002}

11512 Pathogen[ P0C214] interacts with 2 human partners:{P41002;P06748}

11513 Pathogen[ P03346] interacts with 2 human partners:{P06748;P41002}

11514 Pathogen[ Q85601] interacts with 2 human partners:{P41002;P06748}

11515 Pathogen[ P14079] interacts with 2 human partners:{P41002;P06748}

11516 Pathogen[ P03383] interacts with 2 human partners:{P41002;P06748}

11517 Pathogen[ P03410] interacts with 2 human partners:{P06748;P41002}

11518 Pathogen[ P14075] interacts with 2 human partners:{P06748;P41002}

11519 Pathogen[ P0C206] interacts with 2 human partners:{P06748;P41002}

11520 Pathogen[ P03363] interacts with 2 human partners:{P06748;P41002}

11521 [Cluster 1048]GO:0046677+P biological\_process [name] response to antibiotic [def] "Any process that results in a change in state or activity of a cell or an organism (in terms of movement, secretion, enzyme production, gene expression, etc.) as a result of an antibiotic stimulus. An antibiotic is a chemical substance produced by a microorganism which has the capacity to inhibit the growth of or to kill other microorganisms." [GOC

11522 Pathogen[ Q2Q067] interacts with 10 human partners:{P10746;P14921;P41134;Q14790;Q8N5P1;P62714;Q96IZ7;P12757;Q00987;P33076}

11523 Pathogen[ P0C214] interacts with 9 human partners:{P12757;P14921;Q00987;P33076;Q96IZ7;P62714;P10746;P41134;Q14790}

11524 Pathogen[ P03346] interacts with 10 human partners:{P12757;P10746;P33076;P62714;Q00987;P14921;P41134;Q8N5P1;Q14790;Q96IZ7}

11525 Pathogen[ Q85601] interacts with 10 human partners:{P33076;P41134;P62714;P14921;P10746;Q14790;P12757;Q8N5P1;Q96IZ7;Q00987}

11526 Pathogen[ P14079] interacts with 10 human partners:{P33076;P10746;Q14249;Q00987;Q14790;P61158;Q96IZ7;Q8N5P1;P41134;P12757}

11527 Pathogen[ P03383] interacts with 5 human partners:{P33076;Q96IZ7;P14921;P62714;P12757}

11528 Pathogen[ P03410] interacts with 10 human partners:{P62714;P41134;Q96IZ7;P10746;Q8N5P1;P12757;Q00987;P33076;Q14249;P14921}

11529 Pathogen[ P14075] interacts with 5 human partners:{Q96IZ7;P33076;P12757;P14921;P62714}

11530 Pathogen[ P0C206] interacts with 11 human partners:{P10746;P14921;P33076;P41134;P12757;Q8N5P1;Q14790;P62714;Q96IZ7;Q00987;Q14249}

11531 Pathogen[ P03363] interacts with 7 human partners:{Q96IZ7;P62714;P12757;P14921;Q8N5P1;P41134;P33076}

11532 [Cluster 1049]GO:0008633+P biological\_process [name] activation of pro-apoptotic gene products [def] "The conversion of proteins that induce or sustain apoptosis to an active form." [GOC

11533 Pathogen[ Q2Q067] interacts with 14 human partners:{P31749;P55957;P30419;Q9BXH1;Q12933;P63167;Q13158;Q13794;Q14790;P84022;Q96LC9;P31946;Q15628;Q96FJ2}

11534 Pathogen[ P0C214] interacts with 16 human partners:{Q15628;Q92934;Q96LC9;Q13158;P84022;P55957;Q13794;Q9BXH1;Q12933;Q96FJ2;P30419;P48454;P31946;P31749;P63167;Q14790}

11535 Pathogen[ P03346] interacts with 14 human partners:{Q96FJ2;Q96LC9;Q13158;P55957;P84022;P10144;P31749;Q15628;P31946;Q14790;P48454;P63167;Q9BXH1;Q13794}

11536 Pathogen[ Q85601] interacts with 15 human partners:{P10144;Q96LC9;P31946;Q9BXH1;P31749;Q13158;Q14790;Q12933;P55957;Q15628;P84022;P30419;P48454;P63167;Q13794}

11537 Pathogen[ P14079] interacts with 17 human partners:{P48454;Q96FJ2;Q9BXH1;P45983;Q14790;Q92934;P31946;P30419;Q13794;Q12933;Q96LC9;Q13158;P63167;Q15628;P10144;P55957;P40305}

11538 Pathogen[ P03383] interacts with 12 human

11539 partners:{Q96LC9;P31946;Q96FJ2;P31749;P55957;Q13158;P84022;Q12933;Q15628;Q13794;Q9BXH1;P63167}  
Pathogen[ P03410] interacts with 17 human  
partners:{P84022;P10144;Q9BXH1;Q96LC9;P31749;Q92934;P30419;P63167;Q13794;P55957;Q13158;Q15628;P63098;P48454;Q12933;P40305;P31946}

11540 Pathogen[ P14075] interacts with 13 human  
partners:{P55957;Q96LC9;P31749;Q96FJ2;Q12933;Q9BXH1;Q13158;Q13794;Q15628;P31946;P40305;P84022;P63167}

11541 Pathogen[ P0C206] interacts with 17 human  
partners:{P84022;P10144;P40305;P31749;P30419;P63167;Q13158;Q9BXH1;Q12933;Q96LC9;P31946;Q92934;Q14790;Q15628;P48454;P55957;Q13794}

11542 Pathogen[ P03363] interacts with 13 human  
partners:{P55957;P63167;Q96LC9;Q13794;Q12933;P31946;Q13158;P10144;P31749;P84022;Q15628;Q9BXH1;Q96FJ2}

11543 [Cluster 1050]GO:0015671+P biological\_process [name] oxygen transport [def] "The directed movement of oxygen (O2) into, out of or within a cell, or between cells, by means of some agent such as a transporter or pore." [GOC

11544 Pathogen[ Q2Q067] interacts with 3 human partners:{P01106;P68871;P69905}

11545 Pathogen[ P0C214] interacts with 8 human  
partners:{P02042;P69905;Q9NPG2;P68871;P69892;P02100;P69891;P01106}

11546 Pathogen[ P03346] interacts with 5 human  
partners:{P02100;Q9NPG2;P69905;P01106;P68871}

11547 Pathogen[ Q85601] interacts with 8 human  
partners:{P01106;P69905;P02042;P02100;P69892;P68871;Q9NPG2;P69891}

11548 Pathogen[ P14079] interacts with 13 human  
partners:{Q8WWM9;P02042;Q9NPG2;P69891;P02100;P09105;P69905;P02008;P68871;P01106;Q6B0K9;P02144;P69892}

11549 Pathogen[ P03383] interacts with 3 human partners:{P01106;P69905;P68871}

11550 Pathogen[ P03410] interacts with 13 human  
partners:{Q6B0K9;P02008;P02144;P02100;P01106;P09105;Q8WWM9;P68871;P02042;Q9NPG2;P69892;P69905;P69891}

11551 Pathogen[ P14075] interacts with 3 human partners:{P68871;P01106;P69905}

11552 Pathogen[ P0C206] interacts with 12 human  
partners:{P68871;Q6B0K9;P02100;P69892;P02008;P69891;Q9NPG2;P69905;P09105;P01106;P02042;Q8WWM9}

11553 Pathogen[ P03363] interacts with 3 human partners:{P69905;P68871;P01106}

11554 [Cluster 1051]GO:0006537+P biological\_process [name] glutamate biosynthetic process [def] "The chemical reactions and pathways resulting in the formation of glutamate, the anion of 2-aminopentanedioic acid." [GOC

11555 Pathogen[ Q2Q067] interacts with 1 human partners:{094925}

11556 Pathogen[ P0C214] interacts with 1 human partners:{094925}

11557 Pathogen[ P03346] interacts with 1 human partners:{094925}

11558 Pathogen[ Q85601] interacts with 1 human partners:{094925}

11559 Pathogen[ P14079] interacts with 1 human partners:{094925}

11560 Pathogen[ P03383] interacts with 1 human partners:{094925}

11561 Pathogen[ P03410] interacts with 1 human partners:{094925}

11562 Pathogen[ P14075] interacts with 1 human partners:{094925}

11563 Pathogen[ P0C206] interacts with 1 human partners:{094925}

11564 Pathogen[ P03363] interacts with 1 human partners:{094925}

11565 [Cluster 1052]GO:0032868+P biological\_process [name] response to insulin stimulus [def] "Any process that results in a change in state or activity of a cell or an organism (in terms of movement, secretion, enzyme production, gene expression, etc.) as a result of an insulin stimulus. Insulin is a polypeptide hormone produced by the islets of Langerhans of the pancreas in mammals, and by the homologous organs of other organisms." [GOC

11566 Pathogen[ Q2Q067] interacts with 8 human  
partners:{Q04206;P05413;Q99966;P11161;P61244;P27986;Q16836;P18146}

11567 Pathogen[ P0C214] interacts with 13 human  
partners:{P61244;P00480;P35558;Q04206;Q16613;P40939;P05413;Q99966;P14618;P18146;P11161;P16118;P27986}

11568 Pathogen[ P03346] interacts with 9 human  
partners:{Q99966;P05413;Q16836;Q13322;Q04206;P61244;P11161;P18146;P27986}

11569 Pathogen[ Q85601] interacts with 12 human  
partners:{P18146;P05413;P00480;Q99966;Q16613;P16118;P27986;P14618;Q04206;P61244;Q16836;P11161}

11570 Pathogen[ P14079] interacts with 10 human  
partners:{P31751;Q9Y5U4;Q99966;P05413;Q16613;P11161;P00480;P81277;P61244;Q16836}

11571 Pathogen[ P03383] interacts with 7 human  
partners:{P27986;Q16836;Q16613;P18146;P11161;Q04206;P61244}

11572 Pathogen[ P03410] interacts with 13 human  
partners:{Q04206;P27986;P05413;P16118;Q9Y5U4;P61244;P00480;Q16613;Q16836;P81277;P18146;P11161;Q99966}

11573 Pathogen[ P14075] interacts with 8 human  
partners:{Q04206;P61244;P11161;P18146;Q16613;P16118;Q16836;P27986}

11574 Pathogen[ P0C206] interacts with 12 human  
partners:{P11161;Q16836;P27986;P18146;P05413;Q04206;P61244;Q99966;P16118;Q16613;P004

- 80;P14618}
- 11575 Pathogen[ P03363] interacts with 7 human  
partners: {Q16836;Q04206;P18146;P61244;P05413;P27986;P11161}
- 11576 [Cluster 1053]GO:0010976+P biological\_process [name] positive regulation of neuron projection development [def] "Any process that increases the rate, frequency or extent of neuron projection development. Neuron projection development is the process whose specific outcome is the progression of a neuron projection over time, from its formation to the mature structure. A neuron projection is any process extending from a neural cell, such as axons or dendrites (collectively called neurites)." [GOC
- 11577 Pathogen[ Q2Q067] interacts with 6 human  
partners: {Q9H2P0;O43439;Q15173;Q92562;Q15819;Q99689}
- 11578 Pathogen[ P0C214] interacts with 8 human  
partners: {Q92562;O43439;Q15819;Q15173;Q99689;P07093;P18846;Q9H2P0}
- 11579 Pathogen[ P03346] interacts with 11 human  
partners: {Q9H2P0;Q99689;Q92562;Q9H165;Q93045;Q496M5;O43439;P54257;Q15173;P18846;Q15819}
- 11580 Pathogen[ Q85601] interacts with 10 human  
partners: {Q15173;P18846;Q92562;O43439;Q9H2P0;Q9BVA0;Q99689;Q496M5;P07093;Q15819}
- 11581 Pathogen[ P14079] interacts with 10 human  
partners: {Q92562;P54257;Q15173;O43439;Q15819;Q9H2P0;Q93045;Q99689;O75366;Q9BVA0}
- 11582 Pathogen[ P03383] interacts with 5 human  
partners: {Q15173;Q99689;P18846;Q15819;O43439}
- 11583 Pathogen[ P03410] interacts with 9 human  
partners: {Q92562;O43439;Q15173;Q15819;P18846;P54257;Q93045;Q9BVA0;Q99689}
- 11584 Pathogen[ P14075] interacts with 5 human  
partners: {Q15819;Q15173;O43439;P18846;Q99689}
- 11585 Pathogen[ P0C206] interacts with 11 human  
partners: {Q496M5;Q9BVA0;Q92562;Q15173;P18846;Q99689;Q93045;Q15819;Q9H165;Q9H2P0;O43439}
- 11586 Pathogen[ P03363] interacts with 8 human  
partners: {Q9H2P0;O43439;Q93045;P18846;Q15173;P54257;Q99689;Q15819}
- 11587 [Cluster 1054]GO:0007067+P biological\_process [name] mitosis [def] "A cell cycle process comprising the steps by which the nucleus of a eukaryotic cell divides\_ the process involves condensation of chromosomal DNA into a highly compacted form. Canonically, mitosis produces two daughter nuclei whose chromosome complement is identical to that of the mother cell." [GOC
- 11588 Pathogen[ Q2Q067] interacts with 187 human  
partners: {P49454;Q12798;Q9Y6X3;Q96EE3;O60232;P83876;Q8IXJ6;Q9BTV5;Q9NYP9;P18754;Q14008;O75909;Q7Z4H7;Q9Y266;Q96NB3;P63172;Q16589;Q9NQW6;Q8IY18;Q6PJP8;Q14980;Q7Z5K2;Q9UJX3;Q9UJX5;Q13352;Q6PGQ7;Q7Z460;Q9UNSL1;O14974;Q95997;Q86XL3;P53675;P62826;Q99741;Q96R06;Q99708;O00762;Q8N0Z3;O94927;Q6P1K2;Q9HBM1;O75935;Q5EE01;P54274;Q8NDF8;A8MVW5;P42695;Q8NHV4;Q14511;Q5FBB7;O95347;Q13257;Q86WB0;Q8N2Z9;A8MT69;Q9UJT9;Q9UPV0;Q03188;Q9NVX0;Q66LE6;Q9NXR1;Q9C099;Q53HL2;O43684;Q8NBT2;Q9H981;P63279;Q9P258;Q9NYG5;Q8NHF4;P30304;Q9H1A4;A6NKF1;P14635;Q99871;Q86XI2;Q9NQS7;Q14203;O43823;Q9UJX2;Q9Y448;O43264;Q15003;Q29RF7;Q7Z7K6;P30307;Q9UM13;O43768;Q96BT3;Q08J23;Q96BT3;Q13561;Q6PGN9;Q9BZD4;Q96DE5;O43482;O96017;P51959;Q14978;Q00610;O76095;Q86T82;Q12834;P41002;P69208;Q15021;P50748;Q96EP1;P0CW71;O95067;Q9BT25;Q96Q89;Q9H6D7;Q99618;Q96MT8;Q9NTI5;P78396;P56211;Q9H410;Q5TB80;Q8NHF3;P53041;Q8NHZ8;Q9ULW0;P20248;Q02241;O60216;O75665;O00139;Q9H4H8;Q53EZ4;O75122;O76064;Q8IX90;Q8NG31;Q9UM11;Q9UJX4;Q93008;Q9UPY8;Q9Y6D9;Q9BVW5;Q9UKT4;Q86U86;Q96BD8;Q9UI95;Q9H900;O95271;P41208;Q96IY1;Q9NR09;Q96IK1;O95619;Q93008;O14974;Q8IZT6;Q9ULG1;Q14980;Q9BXS6;Q69YH5;Q96MF7;Q14683;Q8WVM7;Q49MG5;P30305;P24941;Q9UJX6;O95229;O14777;Q9NVX0;P60006;Q9BPX3;Q96CS2;Q8N3U4;P51808;Q13042;Q15691;Q9H081;Q8WVK7;Q8TAP9;Q9Y2Z0;Q9BS18;Q9BTE3;Q66K89;Q96FF9;O15392;Q96EA4;Q68CZ6;Q6P0N0;Q9BRK4}
- 11589 Pathogen[ P0C214] interacts with 183 human  
partners: {Q9UJX6;O43768;Q9H081;Q9BPX3;Q8IY18;O43684;O94927;P20248;Q8TAP9;Q13257;Q86XI2;O75935;P30307;Q6P0N0;Q29RF7;Q96BT3;Q14008;Q9BS18;O00762;O75909;Q53HL2;O43264;Q8NDF8;P41002;Q02241;Q15003;Q9BRK4;Q14203;Q7Z4H7;P51959;Q9UJP4;Q96EA4;Q96R06;Q9BXS6;Q5EE01;Q9C099;P50748;A8MVW5;Q9UJX5;Q8NHV4;P42695;Q99708;Q9BVW5;Q86WB0;O95229;Q66LE6;Q96E3;P63279;Q96MT8;O60232;Q9ULG1;P14635;Q8NBT2;P69208;P51808;O00139;Q9NVM9;Q15691;Q9UJX2;Q6P1K2;Q9Y266;Q69YH5;Q9UI95;Q96FF9;O95347;O95619;Q93008;O14974;Q96CS2;Q9BTE3;Q14980;Q9UPV0;Q8N2Z9;Q6PGN9;Q6PJP8;Q03188;O75122;O43482;P53675;Q96Q89;Q12798;P56211;P21127;Q9H1A4;Q96017;Q14978;Q96BD8;Q9HBM1;Q9Y2Z0;Q9P258;P78396;Q9NYP9;Q08J23;Q9BT25;Q96MF7;Q8NHZ8;Q86XL3;Q12834;P0CW71;Q9ULW0;Q13352;P83876;Q53EZ4;O95067;Q9UNSL1;O43823;P24941;Q99618;Q8NHF3;P30305;Q7Z7K6;P53041;Q86YI8;Q99871;Q14511;P41208;Q96NB3;P62826;Q9H410;O75665;O15392;Q9H6D7;Q9UPY8;Q7Z5K2;Q8IX90;Q14683;Q8WVM7;Q8NG31;Q9UJX4;P63172;Q86U86;Q7Z460;Q9H900;A6NKF1;Q5FBB7;Q8IXJ6;Q9BTV5;P60006;Q9Y6X3;Q9NQS7;Q9NR09;Q9UJX3;Q68CZ6;Q8N0Z3;Q8IYB7;O95997;Q8NHF4;Q9UM11;Q9NQR1;Q9NXR1;O95271;Q96IY1;P49454;Q9NVX0;P18754;Q9NTI5;Q8IZT6;Q9Y448;O76064;P30304;Q13561;Q5TB80;Q9UJT9;Q9NYG5;O60216;Q6PGQ7;Q66K89;Q9UM13;Q9BZD4;Q9UKT4;Q9Y6D9;Q15021;Q49MG5;P54274;Q96EP1;Q99741;Q9H981;Q8WVK7;Q96DE5;Q13042;O14777;Q16589}
- 11590 Pathogen[ P03346] interacts with 205 human  
partners: {Q08J23;Q9NVM9;Q66LE6;Q9Y6D9;Q8N2Z9;Q9BT25;Q5FBB7;Q9BXS6;Q9H6D7;Q16589;P78396;Q8NHF4;Q9NRZ9;O76064;O95229;Q9Y2Z0;Q9P2F7;Q96MF7;Q5XG87;Q9NQW6;O96017;P60006;Q14511;O15392;O43684;Q9UM11;Q96EE3;Q8N3U4;Q96NF9;Q7Z5K2;Q29RF7;Q99871;Q7Z4H7;P83876;Q9BS18;Q93008;Q9UJT9;Q9NQR1;P21127;A8MT69;O75935;Q96R06;O00139;P51808;Q69YH5;Q15691;Q5EE01;P54274;A8MVW5;Q99708;Q9ULG1;Q8NHV4;P24941;P30304;Q86WB0;Q9UNSL1;O95347;O43264;Q9NV

- R1;Q53HL2;O60232;Q9UM13;Q8IXJ6;Q9NX01;P69208;P18754;P63279;O43482;Q96IY1;Q9NYG5;Q86U86;Q6P0N0;Q9P258;Q96IK1;Q14203;Q9Y5K6;Q86XI2;Q8NHF3;P41002;O95067;Q9UI95;P56211;Q86T82;Q66K89;O95997;Q8N0Z3;P62826;Q12834;P30305;Q8IYB7;Q14980;O43768;Q9BRK4;Q9UJX6;Q15555;Q5TB80;Q9Y266;P41208;O14777;Q9NVX0;Q96DE5;Q14978;O75665;Q9ULW0;Q496M5;Q96EA4;A6NKF1;Q9BPX3;P14635;Q13042;Q15021;Q9UJX5;P0CW71;Q14683;Q15019;O00762;Q14008;Q9UJX2;Q8TD19;Q68CZ6;P20248;Q9BTV5;Q53EZ4;Q9NQS7;Q9NTI5;Q96Q89;Q9H981;P53675;Q9Y6X3;Q9UKT4;Q6PGN9;Q7Z7K6;P53041;Q9H081;Q8NBT2;Q9HBM1;P63172;Q9UJX3;Q8NHZ8;Q9H4H8;Q9H410;P42695;P30622;O75122;Q9H1A4;Q02241;Q9C099;Q8TAP9;Q8WVM7;Q8NDF8;Q03188;O75909;Q8IX90;O95619;Q9UJX4;P50748;Q96PY6;Q96NB3;Q96CS2;O95271;Q9NR09;Q12798;Q9Y448;Q6PJP8;Q9P2J3;Q86YI8;Q8IZT6;Q7Z460;P51959;O15182;Q8NG31;O94927;O49MG5;Q86XL3;O76095;Q9UPY8;Q9UJP4;Q8IY18;Q9NYP9;Q15003;O14974;Q99741;Q9BVW5;Q6P1K2;Q60216;Q96BD8;Q6PGQ7;O43823;O14965;Q9BZD4;Q99618;Q00610;Q96BT3;Q9BTE3;Q13352;Q9H0E7;Q8WVK7;Q13257;P30307;P49454;Q96EP1;Q9H900;Q9UPV0;Q96MT8;Q13561}
- 11591 Pathogen[ Q85601] interacts with 203 human partners: {Q53EZ4;Q9UJX2;Q9NVM9;Q8NBT2;O95619;P49454;Q14978;Q6PGN9;Q9Y5T5;P53675;O95229;Q96DE5;Q9UJX6;Q00610;Q9BTE3;Q7Z7K6;Q9H0E7;Q02241;Q8NHF4;Q9NQW6;O96017;Q8NHF3;Q03188;P51808;Q9H900;O95347;Q14008;O75909;Q96EE3;Q9Y2Z0;Q9Y5K6;Q9H6D7;Q9BT25;O15182;Q99871;Q9NQS7;Q8IY18;Q9UI95;Q9NQR1;Q9H081;Q96PY6;Q12798;Q9P258;Q96IK1;Q96BT3;Q9BS18;O75935;Q7Z4H7;Q9UKT4;Q5EE01;Q9NVX0;Q8NHZ8;A8MVW5;Q99708;Q8NHV4;P60006;P30622;Q49MG5;Q9H1A4;P62826;Q86WB0;Q16589;O43264;P42695;Q53HL2;Q9BXS6;O60232;Q9C099;Q8NG31;O15392;P30304;Q14203;Q66LE6;Q96EA4;Q9ULW0;P51959;P41002;O60216;Q8WVM7;Q8IZT6;P63172;P56211;Q9NTI5;A6NKF1;Q29RF7;Q93008;Q96R06;Q9UJP4;P63279;Q12834;Q8IYB7;Q13257;Q8TAP9;Q7Z5K2;O75122;P30305;O14965;Q9Y266;Q9UPV0;Q9BPX3;Q86XL3;Q96Q89;Q13352;Q15555;Q9H981;P30307;O75665;Q5XG87;O43768;O76064;Q9Y448;P14635;Q8IXJ6;Q13042;Q9UJX5;Q9NYP9;Q14683;Q6PGQ7;Q08J23;Q9BZD4;Q99618;Q9UM13;Q9BRK4;Q15691;Q96MT8;Q96BD8;Q9Y6D9;Q9UJT9;A8MT69;Q9NYG5;P20248;Q5TB80;P78396;P53041;O00762;Q9BVA0;Q86YI8;Q8N2Z9;Q9UJX3;Q9ULG1;Q9H4H8;O94927;Q9H410;Q8NDF8;Q8IX90;Q8N3U4;Q86T82;Q14980;Q9UJX4;Q9P2J3;Q9UM11;P50748;Q8WVK7;O76095;Q96IY1;P83876;Q96CS2;Q9BTV5;P18754;Q9NR09;Q9NX01;O14974;Q6PJP8;P21127;Q7Z460;O43823;Q66K89;Q86U86;Q86XI2;Q8N0Z3;O95067;Q96EP1;Q96NB3;Q496M5;Q9NXR1;O95271;Q9UPY8;Q99741;Q14511;Q6P0N0;Q15003;Q96FF9;P69208;O43482;Q6P1K2;P24941;Q9Y6X3;O14777;O43684;O00139;Q9HBM1;Q15021;Q68CZ6;Q69YH5;Q5FBB7;P51955;O95997;P54274;Q9BVW5;Q96MF7;Q13561;P41208;Q9UNS1}
- 11592 Pathogen[ P14079] interacts with 189 human partners: {Q15691;Q14980;Q6P0N0;P51959;P54274;Q9NQW6;Q96IY1;Q03188;Q6PGQ7;Q9UPY8;Q9ULG1;Q5EE01;Q96KR4;Q9BTV5;P63279;Q00610;P63172;O43482;Q96MF7;P30307;P53041;Q9UKT4;O43768;Q7Z460;P51808;Q8IX90;Q96BT3;Q9HBM1;Q9H4H8;Q96R06;P78396;O95271;O95229;Q8NBT2;Q9UJX3;O76095;Q99871;Q96FF9;O43823;Q69YH5;Q9H1A4;Q02241;Q9UJX5;O14974;Q9NVX0;Q96NB3;Q9BZD4;Q5XG87;Q86U86;O15392;P83876;O60216;P69208;Q9Y266;O95067;Q9NVM9;Q8NG31;A8MVW5;Q9ULW0;Q9H900;Q86XL3;Q15003;Q9BTE3;Q9Y448;P56211;P30304;P60006;Q9BXS6;Q5FBB7;Q9H410;Q99618;P9CWR71;Q8N0Z3;Q9NTI5;Q9NYG5;Q96IK1;Q99741;Q8N3U4;Q9H981;Q8IYB7;Q9661;P14635;Q8NHZ8;P51955;Q8NHV4;O95347;Q9UM11;Q96Q89;Q99708;Q9UM13;Q12798;Q13042;O00139;Q15555;Q96DE5;Q66K89;P41002;Q8N2Z9;Q13257;Q96EA4;Q9NQR1;Q8WVK7;Q66LE6;Q9H6D7;Q8NHF3;Q96EE3;O75909;Q08J23;A6NKF1;Q9P258;Q13561;O43264;Q9NX01;Q49MG5;A8MT69;Q9NYP9;P21127;Q8N0Z3;Q9C099;Q86YI8;O95997;Q9UJX6;Q86WB0;Q6PGN9;Q8IXJ6;Q5TB80;Q53HL2;Q86Y91;Q8TAP9;P41208;Q9Y5K6;P20248;Q9NQS7;Q9BPX3;Q86XI2;Q8IY18;Q9Y6X3;Q9UQE7;Q7Z4H7;P49454;P53675;Q16589;Q9BT25;O00762;O15182;P30305;Q9UJP4;Q68CZ6;O75665;P62826;Q9UJT9;Q6PJP8;Q29RF7;Q9NXR1;P50748;Q15021;O95619;Q7Z5K2;Q96BD8;Q9BVA0;O75122;Q14683;O14965;Q9UNS1;Q9BRK4;Q13352;O75935;Q9Y2Z0;P42695;O60232;Q9UJX4;P18754;O14777;Q9BS18;Q14203;Q8IZT6;O43684;Q53EZ4;O94927;Q7Z7K6;P30622;Q6P1K2;Q14978;Q9UPV0;Q9H081;Q14008;Q9BVW5;Q96CS2}
- 11593 Pathogen[ P03383] interacts with 168 human partners: {Q14683;Q9BRK4;Q86U86;Q9UNS1;Q96EE3;Q13257;P41002;P30307;Q8NHZ8;Q9NQS7;Q03188;Q14978;P49454;Q8N0Z3;Q8N2Z9;Q8NHF4;Q7Z460;Q9BVW5;Q86XI2;Q96BD8;Q00610;Q96DE5;Q02241;Q8NBT2;Q8N3U4;Q14008;P51808;Q9H900;Q15691;P83876;Q9NYG5;Q9UJX6;Q8TD19;Q9NVX0;Q9H981;O43264;Q5FBB7;Q9UI95;Q9P258;Q9BXS6;P63172;Q14203;Q7Z4H7;Q5EE01;A8MVW5;P41208;Q8NHV4;Q9BTE3;P30304;Q9NYP9;Q9NVM9;Q86WB0;O00762;Q6PJP8;O95347;Q12798;Q8NDF8;O60232;Q9Y6X3;Q9UKT4;P69208;Q9H1A4;P53675;Q7Z7K6;Q13352;Q96EA4;O60216;Q96MF7;Q13042;P14635;Q96MT8;Q66K89;Q96BT3;P78396;Q96R06;P21127;A6NKF1;P62826;Q99618;Q12834;Q6PGN9;Q99871;Q15003;Q5TB80;Q96CS2;P60006;Q53HL2;O94927;O95229;Q9UM13;O43768;P51959;O43684;P24941;P18754;P0CW71;Q6PGQ7;Q14511;Q9BZD4;Q9UM11;Q08J23;O75909;Q68CZ6;Q9BS18;O95067;Q8WVK7;Q96Q89;A8MT69;Q9BT25;P53041;O75935;Q86YI8;Q9HBM1;Q9H4H8;Q9Y266;Q9H410;Q29RF7;O14965;Q9H081;Q8IX90;Q96FF9;Q96IY1;Q14980;Q99708;Q9UJX4;Q9UPV0;Q8NG31;Q96PY6;Q96NB3;Q6P1K2;Q9UJX5;Q9NR09;O95997;Q9Y448;Q9H6D7;Q9ULW0;Q13561;Q9C099;O14777;Q6P0N0;Q96EP1;Q49MG5;Q9UJX2;P56211;O76095;O95619;O95271;Q9NTI5;Q9UJX3;O75665;Q9NQR1;Q53EZ4;Q9UPY8;P63279;Q69YH5;P20248;O43482;Q9BPX3;Q15021;P54274;Q8NHF3;Q99741;Q7Z5K2;Q8TAP9;O96017;Q9Y6D9;P50748;Q8WVM7}
- 11594 Pathogen[ P03410] interacts with 194 human partners: {Q03188;Q00610;Q9UKT4;Q9BS18;Q9Y6G9;P83876;Q8IX90;O75665;Q7Z460;Q86Y91;O15392;Q29RF7;Q8IXJ6;O95619;Q9H981;Q96Q89;Q16589;Q86WB0;Q9UI95;P51808;Q99708;Q9NX01;O43684;P30622;Q9H6D7;Q13561;Q9H1A4;Q96NB3;O00139;Q9Y2Z0;Q99618;Q9NXR1;Q66K89;Q9H410;Q8NG31;Q53HL2;Q86U86;Q8NHF4;P54274;Q9UQE7;Q96BT3;Q9NVM9;Q7Z5K2;Q9UJX4;Q9NYG5;Q14008;Q9BVW5;Q9UM13;Q9BTE3;Q14978;P42695;O15182;Q9ULG1;P63172;P50748;Q9NYP9;Q8NHZ8;O95067;Q15003;Q12798;Q96R06;O95997;Q9BXS6;Q9NQW6;Q8TAP9;Q6P0N0;O60216;Q68CZ6;Q96CS2;P41002;Q5EE01;Q9BTV5;O43264;Q96MF7;Q8IZT6;Q7Z7K6;P49454;Q9Y5K6;O95347;P78396;O14965;Q96EA4;Q9P2J3;Q9NR09;Q8NHV4;Q8N0Z3;Q96IY1;Q96KR4;Q9Y448;Q14980;P14635;Q15555;Q9UM11;Q14511;Q15691;Q13042;P62826;P51959;Q6PJP8;P30304;P24941;Q9NQR1;P0CW71;O95271;O43482;Q6P1K2;Q9NVX0;Q9NTI5;O75909;Q14683;O60232;Q96DE5;Q9BZD4;O14974;Q8WVK7;Q69YH5;Q9BVA1;O96017;Q9HB

- M1;Q5XG87;A8MVW5;P53041;Q6PGQ7;Q96EE3;Q9UJX5;O75935;Q9UPY8;Q8N3U4;Q53EZ4;Q8IYB7;O94927;P20248;O43768;Q12834;Q8NBT2;Q5FBB7;Q08J23;Q9UJX3;Q9ULW0;P69208;Q9UNS1;O00762;Q5TB80;Q8IY18;P63279;A8MT69;Q9UPV0;Q8WVM7;Q9H900;Q9Y266;O95229;Q9H081;Q9UJP4;Q96FF9;O76095;Q9C099;P60006;Q66LE6;P18754;Q6PGN9;A6NKF1;Q99871;Q96BD8;P30305;P53675;Q9UJT9;Q9BPX3;Q86XI2;Q9H4H8;O43823;Q9P258;P41208;P56211;O75122;Q8NFH3;Q9BT25;P30307;Q86XL3;Q9UJX6;Q96EP1;Q49MG5;Q7Z4H7;Q13352;Q9BVA0;O14777;Q14203;Q02241;Q15021;Q8N2Z9;Q13257;Q9NQ S7;Q96IK1;Q99741;Q86YI8}
- 11595 Pathogen[ P14075] interacts with 172 human  
partners: {Q96MT8;A8MT69;Q99871;Q14511;Q9BS18;P60006;Q9Y266;Q13042;O95067;P24941;Q14683;Q9Y6D9;Q02241;Q9H081;Q8NDF8;Q7Z4H7;Q49MG5;O76095;Q9UKT4;Q9NQS7;Q9Y6X3;Q8WVM7;P51959;P14635;Q9UM11;Q96R06;P51808;Q8WVK7;Q5EE01;P53675;Q86XI2;A8MVW5;Q8NHV4;Q7Z460;Q13561;Q86WB0;Q96IY1;Q13257;Q68CZ6;O95619;Q9BXS6;O60232;Q9NQR1;O95997;O43684;Q12798;Q96BD8;Q9UI95;P63279;P63172;O14777;Q9UJX2;Q9BT25;Q96FF9;O95229;O95347;Q9BVW5;Q69YH5;P78396;Q9UJX6;Q8N2Z9;Q8NHZ8;Q9BTE3;Q9UPV0;P69208;Q9ULW0;P54274;Q9UPY8;Q96DE5;O00762;Q96EA4;O00139;O43768;Q9P258;O75935;Q9UJX5;O96017;Q86U86;P0CW71;Q7Z5K2;O14965;Q15691;Q9NY P9;Q5TB80;Q96EE3;Q9C099;P20248;P62826;Q96BT3;Q96CS2;P53041;P21127;Q86YI8;Q5FBB7;Q9H4 H8;P30304;Q9H410;P41208;Q8IX90;Q66K89;Q7Z7K6;A6NKF1;Q8NFH3;Q9UJX4;Q9H900;Q53EZ4;Q9BR K4;Q53HL2;Q29RF7;Q6PGN9;Q9NVX0;Q9UNS1;P50748;P18754;Q9NR09;Q96PY6;Q99741;O94927;P838 76;Q9H981;O75665;Q9HBM1;Q9H1A4;P56211;Q6P1K2;Q14203;Q15003;Q13352;Q14008;Q99618;P410 02;Q96MF7;Q08J23;O43264;Q8TAP9;O95271;O43823;Q9UM13;Q14980;Q9UQ88;O75909;Q03188;Q8NG 31;Q9UJX3;O43482;Q9NVM9;Q9NTI5;Q9NYG5;P49454;Q6P0N0;Q6PJP8;Q99708;Q96IK1;Q9BPX3;Q9H6 D7;Q96Q89;P30307;Q8NFH4;Q9Y448;O60216;Q6PGQ7;Q8NBT2;Q9BZD4;Q12834;Q14978;Q00610;Q150 21;Q96NB3;Q8N0Z3;Q96EP1;Q8N3U4;Q8TD19}
- 11596 Pathogen[ P0C206] interacts with 214 human  
partners: {O95271;Q9UNS1;Q96EE3;Q9HBM1;Q9UJT9;O15182;Q9P2N7;O60216;Q9BPX3;Q08J23;Q5XG 87;Q9Y2Z0;Q9BTE3;P83876;P53675;P69208;Q496M5;Q9BVA0;Q9C099;Q14008;Q96Q89;Q9UJX3;Q9H9 00;Q96KR4;Q99708;Q15019;P30307;Q9H981;O96017;Q9Y5T5;Q9Y6D9;Q93008;Q9ULW0;P18754;P519 55;Q86XL3;Q96EP1;Q9UJX5;Q9NQW6;P56211;Q9UJX2;Q9BTV5;Q6PJP8;Q66LE6;Q15691;O95997;Q9H0 81;O14777;Q7Z5K2;P42695;Q9Y448;Q99618;Q9BT25;Q29RF7;P53041;Q6PGQ7;Q9NYP9;Q15021;Q96P Y6;Q00610;Q9BZD4;P20248;Q9UPV0;Q8IZT6;Q9H410;P30305;P62826;Q6PGN9;P49454;Q16589;Q8TD 19;P30622;Q86U86;Q99741;Q13257;Q9HOE7;Q02241;Q9Y6X3;Q8IX90;Q9NVX0;Q9UJF9;Q9UJP4;Q9BS 18;O14974;Q15003;P30291;O75122;Q86Y91;Q9UKT4;Q5EE01;P54274;Q6P1K2;Q9H1A4;Q8NBT2;A8MV W5;Q96BD8;A6NKF1;Q96NB3;Q9NYG5;Q9UJX4;Q86XI2;Q9UPY8;Q9UQE7;Q9NR09;O95347;Q9BVW5;O956 19;Q9ULG1;P51959;P51808;Q14683;Q96IY1;Q9P2J3;Q9NQR1;Q9Y6G9;Q7Z7K6;Q96BT3;Q8NDF8;O437 68;Q96CS2;Q13352;Q7Z4H7;Q5FBB7;Q9UM11;Q86T82;O94927;Q53HL2;O00762;O43482;Q96MF7;Q49M G5;Q8NHV4;O15392;Q6P0N0;O00139;Q9NTI5;P0CW71;Q8IXJ6;Q9NX01;Q9P258;O75665;Q9UJX6;Q135 61;O75909;Q8NFH4;P30304;Q86YI8;O43823;Q9Y5K6;Q69YH5;P78396;Q9H6D7;Q99871;P41208;Q8N3 U4;Q9NRZ9;Q86WB0;Q8N0Z3;O95067;Q9NXR1;Q96EA4;P21127;Q96DE5;Q8TAP9;Q8N2Z9;Q16181;Q155 55;Q12798;P14635;P60006;Q9BXS6;O43684;O14965;Q14980;Q9UM13;Q96MT8;Q7Z460;Q9NVM9;Q9NQ S7;Q14203;O75935;Q66K89;Q8NFH3;P63172;Q13042;Q8IYB7;O76064;Q8IY18;P50748;Q9BPX3;Q9BW 19;O43264;P24941;Q68CZ6;Q8WVM7;Q9NTJ3;Q8NG31;Q9Y266;P41002;Q5TB80;O60232;Q14511;Q128 34;Q8WVK7;Q9UI95;Q99640;Q8NHZ8;A8MT69;Q03188;Q99986;O76095;Q14978;Q9H4H8;O95229}
- 11597 Pathogen[ P03363] interacts with 190 human  
partners: {Q9UJX2;Q9NYG5;Q96EA4;Q14978;O95619;A6NKF1;Q69YH5;Q9BZD4;Q96IK1;Q13042;P494 54;Q96EP1;Q6P0N0;Q96IY1;Q6P1K2;Q9NYP9;Q7Z7K6;P69208;Q16589;Q9Y6D9;Q08J23;Q86WB0;Q9H0 81;Q9H981;Q9ULG1;Q8NFH4;O00762;Q15021;P21127;O95229;Q96DE5;Q9BRK4;Q96MT8;Q96BD8;Q9BT E3;Q9UJT9;Q8NHV4;Q9NQW6;O60232;P20248;Q13561;O95347;Q8NFH3;Q9P2N7;Q86XI2;Q14980;Q9Y2 66;Q15691;Q9NX01;O75909;Q9ULW0;O43264;Q8NBT2;Q9HC35;P53041;Q8NHZ8;Q9H6D7;Q02241;Q8N2 Z9;Q9P258;Q9UJX3;Q9BT25;Q66K89;Q9H4H8;Q9C099;Q53HL2;Q00610;Q8WVK7;Q9BXS6;Q9H410;P249 41;P50748;Q9UJX5;Q6PGQ7;P41208;Q49MG5;Q14807;Q8IX90;P41002;Q9UJX6;Q5FBB7;Q66LE6;Q9UM 11;Q9BS18;Q9UJX4;O96017;Q9H900;P30304;Q5EE01;Q6PGN9;A8MVW5;Q99708;P30622;Q9UPY8;Q96R 06;Q53EZ4;P60006;Q68CZ6;O43684;O95067;Q12798;O94927;Q9NR09;P63172;Q8IYB7;Q14511;P542 74;Q9BVW5;Q9NQS7;Q8NDF8;Q99741;Q9NVX0;Q86T82;P78396;Q8WVM7;Q9UNS1;O75935;Q9HBM1;Q7Z4 60;Q9UKT4;O43768;O95271;Q9BPX3;Q9H1A4;Q9UI95;Q86U86;Q03188;Q8NG31;Q9Y2Z0;Q13257;Q8N0 Z3;P63279;Q96CS2;Q99871;P83876;Q6PJP8;P51808;Q29RF7;Q99618;O76095;P0CW71;O14974;Q9UP V0;Q9P2J3;P42695;Q96BT3;Q9UM13;O15182;P51959;Q9UJP4;Q9NVM9;P56211;Q9NTI5;Q8N3U4;O147 77;Q9NQR1;Q96Q89;O95997;Q12834;Q14008;Q9Y448;O43482;Q96FF9;Q9Y6X3;Q9NXR1;O00139;P187 54;P30307;Q7Z5K2;P62826;Q8IY18;Q13352;Q7Z4H7;P53675;Q5TB80;Q96NB3;Q96MF7;Q93008;Q86X L3;Q8IZT6;Q14683;Q14203;Q9Y5K6;Q9BTV5;Q15003;A8MT69;Q15555;Q8TAP9;O60216;O75665}
- 11598 [Cluster 1055]GO:0006096+P biological\_process [name] glycolysis [def] "The chemical reactions and pathways resulting in the breakdown of a monosaccharide (generally glucose) into pyruvate, with the concomitant production of a small amount of ATP. Glycolysis begins with phosphorylation of a monosaccharide (generally glucose) on the sixth carbon by a hexokinase, and ends with the production of pyruvate. Pyruvate may be converted to ethanol, lactate, or other small molecules, or fed into the TCA cycle."  
[GOC]
- 11599 Pathogen[ Q2Q067] interacts with 20 human  
partners: {Q9ULD0;P07195;Q8N0Y7;P13929;P10515;P19367;A6NNW6;P05062;P60174;P09972;P186 69;P04406;P15259;Q9BYZ2;P07738;P06744;O14556;P00338;P06733;P07864}
- 11600 Pathogen[ P0C214] interacts with 24 human  
partners: {P11177;P07864;P15259;Q6ZMR3;O14556;P05062;O60825;P13929;A6NNW6;P14618;P091 04;P19367;Q9ULD0;P06733;P09972;Q8N0Y7;P16118;P60174;P07738;Q9BYZ2;P10515;P04406;P005 58;P07195}
- 11601 Pathogen[ P03346] interacts with 19 human  
partners: {P09972;P04406;A6NNW6;P13929;P07738;P19367;Q9ULD0;P60174;P06733;P18669;O145 56;Q8N0Y7;P00338;P07195;P15259;P06744;P05062;P10515;Q9BYZ2}

11602 Pathogen[ Q85601] interacts with 23 human partners: {P60174;Q6ZMR3;P18669;O60825;P06733;P06744;P05062;P16118;P15259;P07864;O14556;P14618;P13929;P09972;Q9BYZ2;P07195;P04406;Q8N0Y7;P07738;P10515;Q9ULD0;P00338;P19367}

11603 Pathogen[ P14079] interacts with 17 human partners: {P15259;P00338;P09972;A6NNW6;P06744;P06733;P07738;P07195;Q6ZMR3;P07864;P13929;P10515;P18669;Q9BYZ2;Q8N0Y7;Q9ULD0;P04406}

11604 Pathogen[ P03383] interacts with 18 human partners: {A6NNW6;P19367;P00338;Q9BYZ2;P07864;P18669;P09972;Q9ULD0;P07738;P06744;O14556;P07195;Q6ZMR3;P04406;Q8N0Y7;P10515;P06733;P15259}

11605 Pathogen[ P03410] interacts with 20 human partners: {Q9BYZ2;O14556;P06744;Q9ULD0;P16118;P06733;Q6ZMR3;P05062;P07195;P09972;P07738;P00338;Q8N0Y7;P15259;P04406;P18669;P13929;P07864;A6NNW6;P10515}

11606 Pathogen[ P14075] interacts with 18 human partners: {P06733;P06744;P18669;P19367;P07195;P16118;P04406;A6NNW6;P07864;P10515;Q9ULD0;P00338;P09972;P15259;Q9BYZ2;P07738;O14556;Q8N0Y7}

11607 Pathogen[ P0C206] interacts with 24 human partners: {P06733;P07195;P05062;Q6ZMR3;P07864;P60174;Q9ULD0;A6NNW6;P19367;P06744;O14556;P04406;Q8N0Y7;O60825;P09972;P16118;Q9BYZ2;P07738;P00338;P10515;P13929;P18669;P14618;P15259}

11608 Pathogen[ P03363] interacts with 12 human partners: {P06744;P18669;P06733;Q9ULD0;P09972;Q9BYZ2;A6NNW6;Q8N0Y7;P04406;P10515;O14556;P15259}

11609 [Cluster 1056]GO:0000415+P biological\_process [name] negative regulation of histone H3-K36 methylation [def] "Any process that stops, prevents, or reduces the frequency, rate or extent of the covalent addition of a methyl group to the lysine at position 36 of histone H3." [GOC

11610 Pathogen[ Q2Q067] interacts with 1 human partners: {Q6W2J9}

11611 Pathogen[ P0C214] interacts with 1 human partners: {Q6W2J9}

11612 Pathogen[ P03346] interacts with 1 human partners: {Q6W2J9}

11613 Pathogen[ Q85601] interacts with 1 human partners: {Q6W2J9}

11614 Pathogen[ P14079] interacts with 1 human partners: {Q6W2J9}

11615 Pathogen[ P03383] interacts with 1 human partners: {Q6W2J9}

11616 Pathogen[ P03410] interacts with 1 human partners: {Q6W2J9}

11617 Pathogen[ P14075] interacts with 1 human partners: {Q6W2J9}

11618 Pathogen[ P0C206] interacts with 1 human partners: {Q6W2J9}

11619 Pathogen[ P03363] interacts with 1 human partners: {Q6W2J9}

11620 [Cluster 1057]GO:0051591+P biological\_process [name] response to cAMP [def] "Any process that results in a change in state or activity of a cell or an organism (in terms of movement, secretion, enzyme production, gene expression, etc.) as a result of a cAMP (cyclic AMP, adenosine 3',5'-cyclophosphate) stimulus." [GOC

11621 Pathogen[ Q2Q067] interacts with 12 human partners: {P01100;P22392;Q04206;P30279;P05062;P36956;P21953;Q99966;P27986;P15407;P42224;Q86X55}

11622 Pathogen[ P0C214] interacts with 16 human partners: {P15407;P12694;P01100;P17275;Q04206;Q16613;P42224;P05062;Q99966;P21953;P05412;P30279;P16118;Q86X55;P22392;P27986}

11623 Pathogen[ P03346] interacts with 14 human partners: {P05412;Q99966;P30279;P36956;P17275;Q04206;O43316;P42224;P22392;P15407;Q86X55;P05062;P01100;P27986}

11624 Pathogen[ Q85601] interacts with 17 human partners: {O43316;Q86X55;Q99966;P15407;Q16613;P21953;P05062;P16118;P27986;P01100;P36956;Q04206;P30279;P05412;P42224;P22392;P17275}

11625 Pathogen[ P14079] interacts with 13 human partners: {O43181;P21953;Q99966;Q16613;P22392;P17275;P11686;P42224;P15407;Q16878;P05412;P36956;P01100}

11626 Pathogen[ P03383] interacts with 10 human partners: {P27986;Q86X55;P22392;Q16613;P30279;P15407;P01100;Q04206;P17275;P05412}

11627 Pathogen[ P03410] interacts with 17 human partners: {Q04206;P36956;P27986;P30279;P16118;P12694;Q86X55;P21953;P05062;P01100;P11686;P17275;Q16613;P05412;O43181;P15407;Q99966}

11628 Pathogen[ P14075] interacts with 11 human partners: {Q04206;P05412;P17275;P30279;Q16613;P16118;Q86X55;P27986;P01100;P15407;P22392}

11629 Pathogen[ P0C206] interacts with 17 human partners: {P05062;P15407;P17275;P22392;P30279;Q86X55;P05412;P21953;P36956;P27986;P01100;Q04206;Q99966;P16118;Q16613;P42224;O43316}

11630 Pathogen[ P03363] interacts with 9 human partners: {Q04206;P30279;O43316;P17275;P15407;P05412;P27986;Q86X55;P01100}

11631 [Cluster 1058]GO:0045722+P biological\_process [name] positive regulation of gluconeogenesis [def] "Any process that activates or increases the frequency, rate or extent of gluconeogenesis." [GOC

11632 Pathogen[ Q2Q067] interacts with 1 human partners: {P56211}

11633 Pathogen[ P0C214] interacts with 1 human partners: {P56211}

11634 Pathogen[ P03346] interacts with 2 human partners: {P56211;Q12778}

11635 Pathogen[ Q85601] interacts with 1 human partners: {P56211}



11636 Pathogen[ P14079] interacts with 1 human partners:{P56211}

11637 Pathogen[ P03383] interacts with 1 human partners:{P56211}

11638 Pathogen[ P03410] interacts with 1 human partners:{P56211}

11639 Pathogen[ P14075] interacts with 1 human partners:{P56211}

11640 Pathogen[ P0C206] interacts with 1 human partners:{P56211}

11641 Pathogen[ P03363] interacts with 1 human partners:{P56211}

11642 [Cluster 1059]GO:0051491+P biological\_process [name] positive regulation of filopodium assembly [def] "Any process that activates or increases the frequency, rate or extent of the assembly of a filopodium, a thin, stiff protrusion extended by the leading edge of a motile cell such as a crawling fibroblast or amoeba, or an axonal growth cone." [GOC

11643 Pathogen[ Q2Q067] interacts with 2 human partners:{O00401;P11831}

11644 Pathogen[ P0C214] interacts with 3 human partners:{P11831;Q9BRT3;O00401}

11645 Pathogen[ P03346] interacts with 3 human partners:{P11831;Q9BRT3;O00401}

11646 Pathogen[ Q85601] interacts with 2 human partners:{O00401;P11831}

11647 Pathogen[ P14079] interacts with 4 human partners:{O75781;Q9BRT3;P61158;O00401}

11648 Pathogen[ P03383] interacts with 2 human partners:{P11831;O00401}

11649 Pathogen[ P03410] interacts with 4 human partners:{Q9BRT3;P11831;O75781;O00401}

11650 Pathogen[ P14075] interacts with 2 human partners:{P11831;O00401}

11651 Pathogen[ P0C206] interacts with 3 human partners:{O00401;P11831;Q9BRT3}

11652 Pathogen[ P03363] interacts with 2 human partners:{P11831;O00401}

11653 [Cluster 1060]GO:0048096+P biological\_process [name] chromatin-mediated maintenance of transcription [def] "Maintenance of transcription by remodelling of chromatin into an 'open configuration'. Once established, this regulation is mitotically stable and is maintained over many cell divisions. It is also heritable." [GOC

11654 Pathogen[ Q2Q067] interacts with 4 human partners:{O14757;Q96GM5;Q8NFD5}

11655 Pathogen[ P0C214] interacts with 4 human partners:{O14497;O14757;Q8NFD5;Q96GM5}

11656 Pathogen[ P03346] interacts with 4 human partners:{Q96GM5;Q8NFD5;O14757;O14497}

11657 Pathogen[ Q85601] interacts with 4 human partners:{O14497;O14757;Q96GM5;Q8NFD5}

11658 Pathogen[ P14079] interacts with 3 human partners:{O14497;Q96GM5;Q8NFD5}

11659 Pathogen[ P03383] interacts with 4 human partners:{O14757;O14497;Q96GM5;Q8NFD5}

11660 Pathogen[ P03410] interacts with 4 human partners:{Q96GM5;O14497;Q8NFD5;O14757}

11661 Pathogen[ P14075] interacts with 4 human partners:{Q96GM5;O14497;Q8NFD5;O14757}

11662 Pathogen[ P0C206] interacts with 4 human partners:{O14497;Q96GM5;Q8NFD5;Q9UIG0}

11663 Pathogen[ P03363] interacts with 4 human partners:{O14497;Q8NFD5;Q96GM5;O14757}

11664 [Cluster 1061]GO:0045605+P biological\_process [name] negative regulation of epidermal cell differentiation [def] "Any process that stops, prevents, or reduces the frequency, rate or extent of epidermal cell differentiation." [GOC

11665 Pathogen[ Q2Q067] interacts with 1 human partners:{Q15910}

11666 Pathogen[ P0C214] interacts with 1 human partners:{Q15910}

11667 Pathogen[ P03346] interacts with 1 human partners:{Q15910}

11668 Pathogen[ Q85601] interacts with 1 human partners:{Q15910}

11669 Pathogen[ P14079] interacts with 1 human partners:{Q15910}

11670 Pathogen[ P03383] interacts with 1 human partners:{Q15910}

11671 Pathogen[ P03410] interacts with 1 human partners:{Q15910}

11672 Pathogen[ P14075] interacts with 1 human partners:{Q15910}

11673 Pathogen[ P0C206] interacts with 1 human partners:{Q15910}

11674 Pathogen[ P03363] interacts with 1 human partners:{Q15910}

11675 [Cluster 1062]GO:0006426+P biological\_process [name] glycyl-tRNA aminoacylation [def] "The process of coupling glycine to glycyl-tRNA, catalyzed by glycyl-tRNA synthetase. In tRNA aminoacylation, the amino acid is first activated by linkage to AMP and then transferred to either the 2'- or the 3'-hydroxyl group of the 3'-adenosine residue of the tRNA." [GOC

11676 Pathogen[ Q2Q067] interacts with 2 human partners:{Q9UHN1;P41250}

11677 Pathogen[ P0C214] interacts with 2 human partners:{P41250;Q9UHN1}

11678 Pathogen[ P03346] interacts with 2 human partners:{Q9UHN1;P41250}

11679 Pathogen[ Q85601] interacts with 2 human partners:{P41250;Q9UHN1}

11680 Pathogen[ P14079] interacts with 2 human partners:{P41250;Q9UHN1}

11681 Pathogen[ P03383] interacts with 2 human partners:{Q9UHN1;P41250}

11682 Pathogen[ P03410] interacts with 2 human partners:{P41250;Q9UHN1}

11683 Pathogen[ P14075] interacts with 2 human partners:{P41250;Q9UHN1}

11684 Pathogen[ P0C206] interacts with 2 human partners:{Q9UHN1;P41250}

11685 Pathogen[ P03363] interacts with 2 human partners:{P41250;Q9UHN1}

11686 [Cluster 1063]GO:0046785+P biological\_process [name] microtubule polymerization [def] "The addition of tubulin heterodimers to one or both ends of a microtubule." [GOC

11687 Pathogen[ Q2Q067] interacts with 3 human partners:{Q9HC77;O94811;Q9UKT4}

11688 Pathogen[ P0C214] interacts with 3 human partners:{O94811;Q9HC77;Q9UKT4}

11689 Pathogen[ P03346] interacts with 3 human partners:{Q9HC77;Q9UKT4;O94811}

11690 Pathogen[ Q85601] interacts with 3 human partners:{Q9UKT4;Q9HC77;O94811}

11691 Pathogen[ P14079] interacts with 3 human partners:{Q9UKT4;O94811;Q9HC77}

11692 Pathogen[ P03383] interacts with 3 human partners:{O94811;Q9HC77;Q9UKT4}

11693 Pathogen[ P03410] interacts with 3 human partners:{Q9UKT4;Q9HC77;O94811}

11694 Pathogen[ P14075] interacts with 3 human partners:{O94811;Q9UKT4;Q9HC77}

11695 Pathogen[ P0C206] interacts with 3 human partners:{Q9HC77;O94811;Q9UKT4}

11696 Pathogen[ P03363] interacts with 3 human partners:{Q9HC77;O94811;Q9UKT4}

11697 [Cluster 1064]GO:0060487+P biological\_process [name] lung epithelial cell

differentiation [def] "The process in which a relatively unspecialized cell acquires specialized features of an epithelial cell that contributes to the epithelium of the lung." [GOC

11698 Pathogen[ Q2Q067] interacts with 4 human partners: {Q99502;Q14980;P81274;Q9H4B6}

11699 Pathogen[ P0C214] interacts with 4 human partners: {P81274;Q14980;Q9H4B6;Q99502}

11700 Pathogen[ P03346] interacts with 4 human partners: {Q99502;Q14980;P81274;Q9H4B6}

11701 Pathogen[ Q85601] interacts with 4 human partners: {P81274;Q99502;Q14980;Q9H4B6}

11702 Pathogen[ P14079] interacts with 4 human partners: {Q14980;Q99502;Q9H4B6;P81274}

11703 Pathogen[ P03383] interacts with 3 human partners: {P81274;Q14980;Q9H4B6}

11704 Pathogen[ P03410] interacts with 4 human partners: {Q99502;Q14980;P81274;Q9H4B6}

11705 Pathogen[ P14075] interacts with 4 human partners: {P81274;Q9H4B6;Q99502;Q14980}

11706 Pathogen[ P0C206] interacts with 4 human partners: {P81274;Q9H4B6;Q99502;Q14980}

11707 Pathogen[ P03363] interacts with 3 human partners: {Q14980;P81274;Q9H4B6}

11708 [Cluster 1065]GO:0040009+P biological\_process [name] regulation of growth rate  
[def] "Any process that modulates the rate of growth of all or part of an organism." [GOC

11709 Pathogen[ Q2Q067] interacts with 2 human partners: {P09874;Q7Z465}

11710 Pathogen[ P0C214] interacts with 2 human partners: {Q7Z465;P09874}

11711 Pathogen[ P03346] interacts with 2 human partners: {Q7Z465;P09874}

11712 Pathogen[ Q85601] interacts with 2 human partners: {P09874;Q7Z465}

11713 Pathogen[ P14079] interacts with 2 human partners: {P09874;Q7Z465}

11714 Pathogen[ P03383] interacts with 2 human partners: {Q7Z465;P09874}

11715 Pathogen[ P03410] interacts with 2 human partners: {Q7Z465;P09874}

11716 Pathogen[ P14075] interacts with 2 human partners: {Q7Z465;P09874}

11717 Pathogen[ P0C206] interacts with 2 human partners: {P09874;Q7Z465}

11718 Pathogen[ P03363] interacts with 2 human partners: {Q7Z465;P09874}

11719 [Cluster 1066]GO:0045624+P biological\_process [name] positive regulation of T-helper cell differentiation  
[def] "Any process that activates or increases the frequency, rate or extent of T-helper cell differentiation." [GOC

11720 Pathogen[ Q2Q067] interacts with 1 human partners: {P10242}

11721 Pathogen[ P0C214] interacts with 1 human partners: {P10242}

11722 Pathogen[ P03346] interacts with 1 human partners: {P10242}

11723 Pathogen[ Q85601] interacts with 1 human partners: {P10242}

11724 Pathogen[ P14079] interacts with 1 human partners: {P10242}

11725 Pathogen[ P03383] interacts with 1 human partners: {P10242}

11726 Pathogen[ P03410] interacts with 1 human partners: {P10242}

11727 Pathogen[ P14075] interacts with 1 human partners: {P10242}

11728 Pathogen[ P0C206] interacts with 1 human partners: {P10242}

11729 Pathogen[ P03363] interacts with 1 human partners: {P10242}

11730 [Cluster 1067]GO:0035520+P biological\_process [name] monoubiquitinated protein deubiquitination  
[def] "The removal of the ubiquitin group from a monoubiquitinated protein." [GOC

11731 Pathogen[ Q2Q067] interacts with 1 human partners: {P54252}

11732 Pathogen[ P0C214] interacts with 1 human partners: {P54252}

11733 Pathogen[ P03346] interacts with 2 human partners: {O94782;P54252}

11734 Pathogen[ Q85601] interacts with 1 human partners: {P54252}

11735 Pathogen[ P14079] interacts with 1 human partners: {P54252}

11736 Pathogen[ P03383] interacts with 1 human partners: {P54252}

11737 Pathogen[ P03410] interacts with 1 human partners: {P54252}

11738 Pathogen[ P14075] interacts with 1 human partners: {P54252}

11739 Pathogen[ P0C206] interacts with 1 human partners: {P54252}

11740 Pathogen[ P03363] interacts with 1 human partners: {P54252}

11741 [Cluster 1068]GO:0032273+P biological\_process [name] positive regulation of protein polymerization  
[def] "Any process that activates or increases the frequency, rate or extent of the process of creating protein polymers." [GOC

11742 Pathogen[ Q2Q067] interacts with 1 human partners: {O94811}

11743 Pathogen[ P0C214] interacts with 1 human partners: {O94811}

11744 Pathogen[ P03346] interacts with 1 human partners: {O94811}

11745 Pathogen[ Q85601] interacts with 1 human partners: {O94811}

11746 Pathogen[ P14079] interacts with 1 human partners: {O94811}

11747 Pathogen[ P03383] interacts with 1 human partners: {O94811}

11748 Pathogen[ P03410] interacts with 1 human partners: {O94811}

11749 Pathogen[ P14075] interacts with 1 human partners: {O94811}

11750 Pathogen[ P0C206] interacts with 1 human partners: {O94811}

11751 Pathogen[ P03363] interacts with 1 human partners: {O94811}

11752 [Cluster 1069]GO:0043367+P biological\_process [name] CD4-positive, alpha-beta T cell differentiation  
[def] "The process in which a relatively unspecialized T cell acquires specialized features of a mature CD4-positive, alpha-beta T cell." [CL

11753 Pathogen[ Q2Q067] interacts with 1 human partners: {Q01826}

11754 Pathogen[ P0C214] interacts with 2 human partners: {Q8WXG1;Q01826}

11755 Pathogen[ P03346] interacts with 3 human partners: {P15863;Q8TAU0;Q01826}

11756 Pathogen[ Q85601] interacts with 1 human partners: {Q01826}

11757 Pathogen[ P14079] interacts with 2 human partners: {Q01826;Q8WXG1}

11758 Pathogen[ P03383] interacts with 1 human partners: {Q01826}

11759 Pathogen[ P03410] interacts with 2 human partners: {Q8WXG1;Q01826}

11760 Pathogen[ P14075] interacts with 1 human partners: {Q01826}

11761 Pathogen[ P0C206] interacts with 3 human partners:{Q01826;Q8TAU0;Q8WXG1}  
11762 Pathogen[ P03363] interacts with 2 human partners:{Q01826;Q8TAU0}  
11763 [Cluster 1070]GO:0009649+P biological\_process [name] entrainment of circadian clock  
[def] "The synchronization of a circadian rhythm to environmental time cues such as  
light." [GOC  
11764 Pathogen[ Q2Q067] interacts with 2 human partners:{Q8WYA1;O14503}  
11765 Pathogen[ P0C214] interacts with 3 human partners:{O60346;O14503;Q8WYA1}  
11766 Pathogen[ P03346] interacts with 6 human  
partners:{O60346;O15534;O14503;Q8WYA1;O15516;Q8N100}  
11767 Pathogen[ Q85601] interacts with 5 human  
partners:{O60346;O15534;O15516;Q8WYA1;O14503}  
11768 Pathogen[ P14079] interacts with 4 human partners:{O60346;O14503;Q8WYA1;O15534}  
11769 Pathogen[ P03383] interacts with 1 human partners:{O14503}  
11770 Pathogen[ P03410] interacts with 3 human partners:{O15534;O60346;Q8WYA1}  
11771 Pathogen[ P14075] interacts with 1 human partners:{O14503}  
11772 Pathogen[ P0C206] interacts with 4 human partners:{O15534;O15516;Q8WYA1;O60346}  
11773 Pathogen[ P03363] interacts with 3 human partners:{Q8WYA1;O15534;O14503}  
11774 [Cluster 1071]GO:0033153+P biological\_process [name] T cell receptor V(D)J  
recombination [def] "The process in which T cell receptor V, D, and J, or V and J gene  
segments, depending on the specific locus, are recombined within a single locus  
utilizing the conserved heptamer and nonamer recombination signal sequences (RSS)." [GOC  
11775 Pathogen[ Q2Q067] interacts with 1 human partners:{P36402}  
11776 Pathogen[ P0C214] interacts with 1 human partners:{P36402}  
11777 Pathogen[ P03346] interacts with 1 human partners:{P36402}  
11778 Pathogen[ Q85601] interacts with 1 human partners:{P36402}  
11779 Pathogen[ P14079] interacts with 2 human partners:{P36402;P49917}  
11780 Pathogen[ P03383] interacts with 1 human partners:{P36402}  
11781 Pathogen[ P03410] interacts with 1 human partners:{P36402}  
11782 Pathogen[ P14075] interacts with 1 human partners:{P36402}  
11783 Pathogen[ P0C206] interacts with 2 human partners:{P49917;P36402}  
11784 Pathogen[ P03363] interacts with 1 human partners:{P36402}  
11785 [Cluster 1072]GO:0043065+P biological\_process [name] positive regulation of apoptotic  
process [def] "Any process that activates or increases the frequency, rate or extent of  
cell death by apoptotic process." [GOC  
11786 Pathogen[ Q2Q067] interacts with 63 human  
partners:{Q13562;O00213;Q9NR28;P55957;Q9Y5V3;Q99638;Q9NXR8;Q14160;Q9UMX3;P09913;P411  
82;Q01664;O00273;Q05516;O60238;Q6PI26;Q9UNL4;O60356;O15350;P41218;Q14934;Q13158;Q8WY  
N3;Q9NYF8;Q13794;Q9NXC7;P11388;Q9UHI6;P35548;P20719;O43236;Q99728;Q9UNN5;P55212;O002  
55;Q13127;P29474;Q13233;P42575;Q15327;O00198;Q969S3;P50570;Q15257;Q12983;O95238;Q157  
14;Q9H4B6;P27986;Q9BZF9;Q96IZ0;P15407;P27469;Q9H3M7;O43324;Q96A26;P62753;Q8WYA6;Q96E  
Y1;O15205;Q8N163;Q8N9B5;Q8N2W9}  
11787 Pathogen[ P0C214] interacts with 67 human  
partners:{O00198;P27469;P29474;Q8N163;O00213;Q969S3;Q15327;Q9NPP4;Q9Y5V3;Q99728;O952  
38;P09913;Q96IZ0;Q92934;P15407;Q8WYN3;P55212;Q9H3M7;Q13158;O15350;Q8N2W9;Q13015;Q6PI  
26;P55957;P41218;Q9UNL4;Q15257;Q8IWE4;Q9NXC7;Q13794;O00273;Q13233;Q9H4B6;Q9UNN5;P627  
53;Q9UMX3;O60356;Q15714;P10809;Q9UHI6;P41182;P11388;O15205;O43324;Q13127;Q14934;Q141  
60;Q12983;P05412;Q8N9B5;P10909;O60238;Q9BZF9;Q8WYA6;P50570;Q99638;Q9NR28;O43236;Q016  
64;P27986;P35548;Q96EY1;Q05516;P42575;O00255;Q9NYF8;P18054}  
11788 Pathogen[ P03346] interacts with 80 human  
partners:{P31271;Q06945;Q969S3;P05412;O00213;P50570;Q15788;Q8N163;P58012;Q8N9B5;P294  
74;O14901;Q9UNL4;P35548;Q02535;P11388;Q13158;Q9NR28;Q9BYM8;Q99728;P27469;O60238;P425  
75;Q8WYN3;P55957;Q6PI26;Q15257;Q96A26;Q15327;P18054;O95238;Q99638;O15350;P55212;Q129  
83;Q8IWE4;P20719;P41218;P52756;Q14934;Q96IZ0;O43236;Q9NPP4;Q8WYA6;Q9UNN5;O00255;Q9UP  
Q4;Q9NXC7;Q9C0C7;O43324;Q9UHI6;O15205;O00198;Q8IUQ4;Q13233;Q13015;Q9Y5V3;Q8N2W9;P154  
07;P41182;Q05516;O60356;Q9BZF9;Q9H4B6;P09913;Q14160;Q9UMX3;Q9H8V3;Q9NYF8;Q13562;Q9H3  
M7;P62753;Q01664;Q96EY1;Q9NXR8;Q15714;P27986;Q13794;O00273;Q13127}  
11789 Pathogen[ Q85601] interacts with 66 human  
partners:{Q96IZ0;Q9NXC7;O00213;O43324;P09913;Q13127;Q13158;Q9BZF9;P15407;P62753;Q6PI  
26;Q99728;Q9UNL4;Q8WYA6;Q9NR28;Q9UMX3;Q8N2W9;P27469;Q15714;O00198;P27986;Q13562;Q149  
34;Q8WYN3;Q969S3;Q9UNN5;P42575;Q9UPQ4;Q9Y5V3;Q9UHI6;P41218;P50570;P55957;P35548;O002  
73;O15205;P05412;P11388;Q15327;Q14160;O00255;Q13015;P29474;Q05516;P31271;Q12983;Q8N1  
63;O60356;O15350;Q13233;Q8IWE4;P55212;P41182;Q9NXR8;Q15257;O60238;Q8N9B5;Q9H3M7;Q016  
64;Q96EY1;Q9H4B6;Q99638;Q9NYF8;Q13794;O43236;O95238}  
11790 Pathogen[ P14079] interacts with 73 human  
partners:{P04083;Q8N2W9;P11388;P41218;P27469;Q8N163;Q15714;Q8N9B5;P62753;Q9UNL4;Q055  
16;O00213;P10909;Q9UHI6;P31271;Q14249;O15350;P55212;P09913;P50570;Q9NYF8;P08758;Q9Y5  
V3;P41182;Q9UNN5;Q9Y6U3;Q9NXC7;O95238;Q92934;Q14934;O15205;Q9H4B6;Q9BYM8;Q9NR28;Q96I  
Z0;Q15788;Q9H8V3;Q01664;Q13794;P46695;Q12983;Q9UMX3;Q96A26;Q15327;Q13158;Q9BZF9;P154  
07;Q6PI26;O00198;Q99638;Q9H3M7;Q6UWH6;O60356;P42575;Q8WYN3;P05412;Q13127;Q13015;P527  
56;O60238;P28360;O14901;Q8WYA6;O00255;Q969S3;P17405;Q96EY1;O43324;O43236;P55957;O002  
73;Q9NPP4;Q8IWE4}  
11791 Pathogen[ P03383] interacts with 57 human  
partners:{P27986;O00213;P29474;P55212;P27469;Q14160;Q13233;Q8N163;Q15257;O43236;Q9BZ  
F9;P55957;P62753;Q6PI26;Q15714;Q9UHI6;Q9UMX3;Q96IZ0;Q96A26;Q9UNL4;Q8WYN3;Q05516;Q8N2  
W9;O43324;Q13158;Q12983;Q8IWE4;Q01664;P41218;P09913;Q14934;O60238;O00273;P35548;Q9UN  
N5;Q13015;Q9Y5V3;Q9NYF8;P15407;O15350;O00255;Q15327;Q99638;O95238;Q9H3M7;Q8N9B5;O001

- 11792 98;Q13794;O15205;Q9NR28;Q8WYA6;Q96EY1;Q9H4B6;Q13127;Q969S3;O60356;P05412}  
Pathogen[ P03410] interacts with 73 human  
partners: {O14901;Q15714;P27986;O15205;Q9UNN5;O95238;Q12983;Q8IWE4;Q13015;Q9NR28;P41218;O00198;P42575;Q6PI26;Q9NZC7;Q15257;Q969S3;Q9UPQ4;Q9UNL4;O00273;Q9H3M7;O00213;Q92934;Q8N2W9;P50570;Q9NPP4;Q13794;Q9Y6U3;Q13233;Q14160;Q15327;P55957;Q13158;Q8WYA6;Q13127;P35548;P29474;O43236;Q8WYN3;Q8N163;P27469;Q99638;Q9UMX3;Q9NXR8;Q96A26;O60356;Q96IZ0;Q6UWH6;O43324;P41182;P05412;P11388;P09913;Q9Y5V3;Q9BZF9;Q8N9B5;Q01664;O15350;P46695;Q9NYF8;Q9H4B6;P15407;Q9H8V3;O00255;P55212;Q9UHI6;Q14934;Q96EY1;O60238;P62753;P17405;Q14249;P10909}
- 11793 Pathogen[ P14075] interacts with 55 human  
partners: {P29474;Q15257;O00213;Q969S3;Q12983;P55957;O00273;P09913;P05412;Q96A26;Q9UMX3;Q14160;O43236;P55212;P41218;Q6PI26;P35548;Q15327;Q15714;Q13015;Q8N2W9;Q9NYF8;Q96IZ0;Q8N163;Q99638;O00255;Q9NR28;Q9UHI6;Q9H4B6;Q9UNN5;Q01664;P62753;O15350;O60238;Q14934;Q13158;P27986;Q9H3M7;O60356;Q13794;Q9UNL4;Q8WYA6;Q13127;Q05516;Q9BZF9;P27469;P15407;O43324;Q13233;Q9Y5V3;O15205;Q8WYN3;Q8N9B5;Q96EY1;O00198}
- 11794 Pathogen[ P0C206] interacts with 77 human  
partners: {Q9UNN5;O43324;Q9C0C7;Q96IZ0;Q13127;Q9NR28;P15407;P41182;Q05516;Q15327;Q9UMX3;O00255;P05412;Q8IUQ4;Q8N2W9;Q9Y5V3;P55212;Q8IWE4;O15205;Q13158;Q96A26;P41218;O95238;Q9NXR8;P27986;Q13233;Q8N9B5;O43236;Q8WYA6;Q92934;Q99638;O60356;O00213;O60238;Q9UPQ4;Q12983;Q969S3;Q9NYF8;Q6PI26;Q13015;Q14160;P35548;P09913;Q9H4B6;O00198;Q99728;P10909;Q9H8V3;Q14934;Q13562;P29474;Q01664;Q9H3M7;Q9NZC7;P31271;O15350;O14901;P27469;P42575;P11388;Q9UHI6;P62753;P20719;Q9BZF9;Q9BYM8;Q96EY1;Q15788;Q14249;Q8N163;O00273;Q15714;Q15257;Q8WYN3;P50570;P55957;Q9UNL4;Q13794}
- 11795 Pathogen[ P03363] interacts with 60 human  
partners: {Q9UNN5;O14901;O15205;P29474;P55957;O00273;O60356;Q9UHI6;Q96IZ0;P62753;O00213;P41218;Q13794;P09913;P20719;P31271;Q14160;P50570;Q9H3M7;Q8WYA6;Q13015;P35548;Q13158;Q15327;O00198;Q9UNL4;Q13127;Q9BZF9;P55212;Q9C0C7;Q8WYN3;Q6PI26;O95238;Q9NR28;Q8N163;Q9NYF8;P15407;Q99638;Q9H4B6;P27469;Q9Y5V3;Q15257;Q15714;P05412;Q14934;Q99728;Q9NP4;Q96EY1;Q8N2W9;Q05516;O60238;P27986;Q969S3;O43324;Q9UMX3;Q8N9B5;Q13233;Q01664;O43236;P52756}
- 11796 [Cluster 1073]GO:0060762+P biological\_process [name] regulation of branching involved in mammary gland duct morphogenesis [def] "Any process that modulates the rate, frequency, or extent of branching involved in mammary gland duct morphogenesis." [GOC
- 11797 Pathogen[ Q2Q067] interacts with 3 human partners: {P41161;P43268;Q99623}
- 11798 Pathogen[ P0C214] interacts with 3 human partners: {Q99623;P43268;P41161}
- 11799 Pathogen[ P03346] interacts with 3 human partners: {P41161;Q99623;P43268}
- 11800 Pathogen[ Q85601] interacts with 3 human partners: {Q99623;P41161;P43268}
- 11801 Pathogen[ P14079] interacts with 2 human partners: {Q99623;P41161}
- 11802 Pathogen[ P03383] interacts with 3 human partners: {P41161;P43268;Q99623}
- 11803 Pathogen[ P03410] interacts with 3 human partners: {P41161;Q99623;P43268}
- 11804 Pathogen[ P14075] interacts with 2 human partners: {P43268;Q99623}
- 11805 Pathogen[ P0C206] interacts with 3 human partners: {Q99623;P43268;P41161}
- 11806 Pathogen[ P03363] interacts with 3 human partners: {Q99623;P43268;P41161}
- 11807 [Cluster 1074]GO:0006810+P biological\_process [name] transport [def] "The directed movement of substances (such as macromolecules, small molecules, ions) into, out of or within a cell, or between cells, or within a multicellular organism by means of some agent such as a transporter or pore." [GOC
- 11808 Pathogen[ Q2Q067] interacts with 333 human  
partners: {Q92783;Q7Z3C6;Q14974;Q8TCS8;Q9UI26;Q4G0F5;Q96EE3;Q8IUD2;O15027;O75351;Q9H2G9;Q96FV9;O60684;Q94973;O15234;P31749;P52948;Q7LBR1;Q12769;O00186;Q9Y6D6;Q9Y6Q5;O00410;Q99747;Q10567;Q96HA1;O15126;P56377;Q92681;Q63HQ0;Q96QU8;O60664;O43747;P63172;Q9Y4P1;P49790;O95782;O60296;Q9H444;Q2VPB7;Q9NVU7;Q92572;P61326;O60784;P49792;P61579;Q14579;Q7Z6B0;Q9NPJ8;Q8TF09;P55735;Q9H2T7;O75694;Q9H1B4;P62826;Q99816;Q9BSW2;Q9NUL3;Q9H1H9;Q9P299;Q14204;O75865;Q6PD74;Q96B49;Q8WV92;Q9UJY4;Q9BRG1;A8CG34;P36543;Q9UJY5;Q8WY5;O94829;Q9UP83;P38919;P63167;O43752;Q9UBU9;O14662;Q53FT3;Q8IUR0;O43617;P83436;P61573;Q96EY5;P61970;Q99567;Q8N1F7;Q9C0E2;Q8N1B4;Q86SZ2;Q69383;Q13432;Q9UBQ0;Q7L804;Q92945;P48444;P52594;Q9Y3R5;Q7Z3B4;P42704;O14910;O00189;Q7Z614;Q13838;Q96P70;Q6I9Y2;Q8NFH4;Q9BZI7;Q96N16;Q13769;P63241;Q96KP1;Q92973;P12270;P05413;Q9H267;P63010;Q96PC3;P54105;Q9NP97;Q9Y5L0;Q8N612;P11166;Q15629;O15069;Q96QF0;O75886;Q9UND3;O75381;Q14203;Q96CW1;P61923;O43745;P60520;O95721;O95159;Q8N0Z2;O43264;O75396;O15127;Q8WUM4;Q96L92;O14980;Q13428;O60645;Q15388;P53677;Q5HYI7;Q05084;O15131;O00471;Q9UBF2;Q9BYV8;Q9BW27;O43768;O14787;Q9H9C1;Q86V81;P61576;Q53GS7;Q8TEM1;Q9H8T0;Q96BW9;Q8TEX9;Q14746;P61572;Q92624;P84022;P61571;P61966;P68871;Q9UL33;A9QM74;Q06787;Q5VIR6;Q15437;P55060;A5D8V6;O60220;P53992;Q9Y5J6;O95486;Q9BVL2;Q96D46;Q96RL7;O75843;Q9HD42;Q96JB2;O94855;P0DI81;Q02410;P0DI82;Q9UQN3;O15078;Q9UQX7;Q9HD47;Q6IS14;Q9UN37;Q9Y5S9;Q8IWI2;Q96H20;Q9Y2T2;Q9H0R1;Q8TD16;Q9H7P6;Q9NZZ3;Q9Y4E1;Q53G59;Q8NFH3;O00505;Q9BXS5;Q9UIA9;Q99996;P61574;Q96JE7;Q9UQ41;Q13618;Q86VQ0;P69905;Q9NRA8;Q9HAV4;Q7L5D6;P37198;A6NF01;Q86WG3;Q8NI27;Q8TAC9;Q92621;P54920;P62072;Q9Y3E7;O75436;Q96QK1;Q14764;O43299;O15397;Q9P1Q0;Q13228;Q9H9H4;O95373;Q96CF2;Q09161;Q9Y5J7;P53618;Q9H009;Q9H0U6;O00629;O15504;O43615;Q6NUQ1;P57740;Q9HC62;P11441;O95271;Q9H4D5;Q6ULP2;P52292;O15155;P52298;A6NIH7;Q9NP79;Q9H6Z4;Q8IUR6;O60763;Q9UQK6;O00161;Q15833;O14925;O75382;O75154;Q9P0U1;Q13409;P61575;O95487;O43633;O14964;Q9NUS5;Q5T2W1;O75558;Q8WUM0;O96018;P35606;Q96FJ2;Q8WTW3;Q9GZV4;Q96NA2;Q9NP48;O43592;Q9UQK3;P49321;Q8WUX9;O60518;Q9UBX3;Q9Y678;Q9BX66;Q15121;Q99689;Q676U5;Q9P4T5;Q86VS8;Q9Y296;P14672;Q9P2W9;Q9BXF6;P51808;Q13765;Q86VN1;Q9NT62;Q9658;Q96ED9;P61578;Q96QD9;P49754;Q8NFH5;P52294;Q15436;Q9H9E3;O75674;Q96GV9;Q8NEZ2;Q9Y3A3;Q9NZ52;Q9H814;Q8IYI6;O14576;Q13367;Q5SRE5;Q15276;Q96CW6;Q9NUP9;O95149;P24539;Q9H1J1}

- 11809 Pathogen[ P0C214] interacts with 356 human partners: {P60520;Q96BW9;Q9BZI7;O94829;Q96CWL;Q8TEX9;O43768;Q15833;Q9UI26;Q6NUQ1;O15078;Q9Y5L0;P61923;Q96FV9;Q8IWI2;P55735;O75865;O15234;A9QM74;O14910;Q14746;Q16864;P49754;Q09161;Q6IS14;Q06787;Q9UIA9;Q8NOZ2;O14787;Q9P299;Q8WUX9;Q8NFH5;Q96CF2;Q8N2H4;P55060;Q96P70;Q99747;Q15388;Q92624;Q13505;O75351;P53992;O43264;P02042;Q9H9E3;Q9UI12;Q9H0U6;P59780;Q9UJY5;Q99698;O00159;P46379;Q96ED9;Q86V81;Q9UPT5;Q14203;Q9Y5S9;P61571;Q13769;Q9GZV4;Q9Y4E1;Q8TEML;Q9H814;Q96QK1;Q8TAC9;Q9UM54;O14579;Q9NP79;Q14764;Q9H444;O60220;Q8TF09;Q9Y2T2;Q96GV9;Q96D46;P57740;O00189;Q13367;Q9HD42;Q9Y4P1;Q99567;P61572;P53618;Q8WYP5;O60684;P35606;Q9UND3;P84022;O00186;P48444;Q9BYV8;P61573;Q9BX66;Q8N1F7;Q9NUS5;O75694;P42704;Q96NA2;Q641Q2;P83436;P69905;Q96EE3;Q15121;O14964;Q676U5;Q14204;Q9HA V4;Q9NPJ8;O43745;O95721;P49792;O75381;O75886;Q96018;P54920;Q13618;O15127;Q9UKX7;P36543;Q9Y296;O60296;O43617;P61575;P05413;P51808;Q9UQN3;Q7Z614;Q9UK41;O95149;Q9H0R1;Q8N612;Q2VPB7;P63241;Q15436;P36542;O15131;Q8IUR0;O75843;A8CG34;Q9H089;P62072;P11166;Q7L804;Q96QU8;Q13428;Q5T2W1;Q9UBX3;Q53FT3;P23786;Q9BY43;O43299;Q9H7P6;P63010;P52298;Q10567;Q9NPG2;Q7LBR1;P11168;O14925;Q92681;Q86VS8;Q92572;Q9H1B4;P49790;Q96EY5;O43681;A6NF01;O14980;P37198;P68871;Q9BW27;P52294;Q9UBF2;P69892;O95487;Q53G59;P49257;Q9H8T0;Q9UJY4;O15126;Q53GS7;P61326;Q9BRG1;P53677;P38919;Q9UKK6;P61576;Q96L92;P56377;Q15437;O43615;P24539;P61574;Q9NUL3;P35658;O43592;Q9Y5J9;Q8TCS8;Q9H2G9;Q9NPA8;P02100;P49321;Q99689;Q9BQQ3;Q13765;Q96PC3;Q9NVU7;P0DI81;Q8NFH3;Q9NZ52;Q9Y5J6;P61579;P11441;Q7Z6B0;Q96RL7;Q8NI27;P61578;Q8TD16;Q8NEZ2;Q9BXF6;O43752;Q8N1B4;O60763;O00505;Q7L5D6;Q9Y3E7;Q9HD26;Q60784;P62826;Q8IUR6;Q99816;O43747;Q9HD42;Q99766;Q69383;O75436;Q5VIR6;Q94973;Q9NNUU7;Q9P1Q0;Q96G01;Q9Y6Q5;P63172;Q9H009;Q9UBQ0;Q15629;O14576;O15504;Q02410;Q3ZCQ8;Q9Y5J7;Q9NZZ3;Q9UKK3;Q96FJ2;Q9BSW2;Q9UP83;O75396;Q6ULP2;Q9Y6D6;Q5SNT6;Q9UMR2;Q92973;Q9NP97;A6NIH7;O60664;Q9HC62;Q6PD74;P61966;Q8N4Q1;P52292;P12270;O15069;Q96B49;Q96H20;Q14974;O95782;A5D8V6;Q5T215;Q05084;O60645;Q9P0U1;P52594;Q92945;Q9H2T7;Q9UN37;Q9Y3A3;O7558;Q9H9C1;Q86WG3;Q99996;Q96QD9;Q8NFH4;Q9BVL2;Q13409;Q92783;Q9H4D5;Q13228;O43633;O75674;Q9H9H4;P69891;Q5HYI7;Q9Y3R5;O95271;Q63HQ0;Q96JE7;Q8IUD2;P53680;Q9Y678;P61970;Q5SRE5;Q9NT62;P14672;Q96JB2;Q13838;O95373;Q9C0E2;Q9UL33;Q8IYI6;Q96QF0;Q9H6Z4;Q7Z3B4;Q9BXS5;O00161;O15155;O15027;O60518;Q8WUM0;O95486;Q86VN1;P52948;Q92621;P31749;O15397;Q4G0F5;P0DI82;Q9UBU9;Q12769;Q86SZ2;O00629;O75154;Q13432;Q8WTW3;Q7Z3C6;Q9P2W9;Q6I9Y2;P55072;P63167;O00471;Q96CW6;O94855;Q9NRA8;Q9H1J1;Q96N16;Q8WUM4;Q96HA1}
- 11810 Pathogen[ P03346] interacts with 445 human partners: {O95166;Q8TEML;Q92681;Q13596;Q8TEX9;Q8IYI6;Q96G01;O75382;Q15833;Q9Y5S9;Q9UI26;P54105;Q96FV9;P21283;O14925;Q9BZI7;O60664;Q4G0F5;P61966;P55735;O15234;Q5VIR6;Q96FJ2;Q86XT2;Q9H1M0;Q96P70;O43752;Q8NOZ2;Q96QK1;Q14746;Q8NFH4;Q99698;Q8WUM0;Q86VQ0;O00629;O95159;Q9UI161;O15397;Q9H115;Q7Z3C6;Q5JWR5;Q9UPT5;Q9HAV4;Q06787;Q9P2W9;O15027;P12270;Q9H2G9;O14576;P61579;Q9Y4P1;Q9Y5R8;P29373;Q13228;Q5T2W1;Q96PU8;Q9Y6B7;O95149;Q9NS69;Q9UP83;O00471;Q12769;Q96A65;Q8N4Q1;Q9H2T7;Q86VS8;P09651;Q96EE3;Q99567;Q96N16;Q96JB2;Q15036;P05413;Q9GZV4;Q14764;P63010;O14787;A5D8V6;Q2VPB7;Q9P253;P07148;Q9UKX7;Q8N612;O43747;Q9Y3D7;Q9UBX3;Q9Y5K8;O75694;Q9HD42;Q92572;P60520;Q96MW5;P60520;Q96U06;P53680;Q9C0E2;P49754;Q9UMR2;Q96GV9;Q92543;P51808;P57740;P02100;P61578;Q99689;P49257;P56377;Q8WYP5;Q96QU8;O43615;Q15629;Q9P0U1;Q9H814;Q9BVL2;Q9Y6D5;O75865;Q969X5;P59780;Q13618;Q8WTW3;O75886;P61573;Q8IUD2;Q8NEZ2;Q9BXS5;Q9UKK3;Q8N1F7;Q96T51;Q9H0R1;O00410;Q86S22;Q96NA2;Q9Y5H7;Q53GS7;P36543;Q9Y678;P38919;Q12981;O43264;O95782;P23786;Q99816;P53618;Q9UMY4;Q9H1H9;Q86VN1;Q13190;Q86VN1;Q8IUR6;Q9NPG2;Q60296;Q99767;Q93050;O75396;O00505;Q7Z614;Q8NFH5;Q9UK41;Q14204;Q7L5D6;Q9P299;Q9UBQ0;Q9H173;Q14203;O14579;P69905;Q92945;Q9BX66;O00189;Q05084;Q13769;P63241;P37198;P55060;Q8NFH3;P35658;P52298;P55072;P49321;Q9UID3;Q9HD47;O60784;Q01469;Q9H1B4;Q53HI1;A8K0Z3;P61571;Q02410;Q96H20;Q9UIA9;O00186;P62826;Q96FZ7;Q8TF09;Q9BT04;O94855;Q7Z6B0;Q6IS14;O43768;O75381;P61572;P48553;Q5SRE5;Q13432;Q9BTX1;O15069;O60518;Q96CF2;Q9NZZ3;O00299;Q9NRS6;O43592;Q92621;Q96A72;Q9Y2V7;Q9Y3R5;Q9BXW6;Q9Y6D6;Q10567;Q6NUQ1;Q9BW27;O00161;Q8NAA4;Q9BUN8;Q9Y5J6;P84022;Q14847;Q86V81;O75843;O14980;P48444;P20340;Q92973;Q9H8T0;Q15436;Q9Y3E7;Q7L804;Q9H9E3;O60493;Q7Z3U7;Q9UL33;Q9UPM8;Q8TAC9;Q96J01;Q9NUP9;Q5T215;P24539;Q96L92;P31749;Q9UNH7;Q15437;O43633;Q9Y3A3;Q9HD26;Q9Y296;Q9Y587;Q96JE7;O95373;Q9H444;Q6PD74;Q8N2H4;P11441;Q9Y2L5;P61574;P42704;O15131;O60220;Q8TCS8;Q96CWL;Q6ZP65;O95721;P46379;Q86AX1;P52594;Q9UBF2;Q8WV92;Q9H9H4;P42566;Q96PC3;Q96RL7;Q9NVU7;P0DI81;Q9UJY4;Q8N1B4;Q9Y5X2;P51161;P54920;A9QM74;Q15121;Q8IZS6;Q96QD9;Q8TD16;Q96B49;Q9NUS5;P61923;O96018;P61326;Q9BRG1;Q13838;P11166;Q13428;P62072;P63172;O15126;O95833;O60763;Q8IUR0;P30622;Q9UQN3;O95486;Q9HAP6;Q9BQQ3;Q9BYV8;O75436;P83436;Q08AE8;P68871;Q9NUU7;Q9P1Q0;Q969Q5;P0DI82;Q9ULV0;Q9UJ41;Q5JRA6;Q9Y4E1;Q9H4D5;Q9H009;P36405;Q96ED9;Q9HCU5;Q9HC62;Q99996;Q13409;Q9BY43;Q969F2;Q92783;Q9UBU9;Q13367;O95271;O95219;Q9NP79;A8CG34;P52292;Q6ULP2;Q9H9C1;Q15388;Q9UND3;O75351;P50542;Q9HA38;A6NIH7;P49790;O60684;P61575;Q9Y5L0;Q9BXF6;O14964;Q9BSW2;P63167;Q5HYI7;Q16864;Q86YS3;O95487;Q9H6Z4;Q96KG9;O14617;O60749;Q7Z392;Q7LBR1;Q9NRA8;O15078;Q9H8V3;P61970;Q96HA1;Q9UKK6;Q9UJY5;O43299;P61576;O75154;Q13283;Q15035;O43933;Q96BW9;P49755;O75558;O75674;Q9Y6Q5;O94829;Q676U5;Q63HQ0;P35606;Q9ULU8;P14672;Q9Y2J0;Q6FIF0;O94973;Q32P51;Q96EY5;A6NF01;O15155;Q13765;Q69383;Q92624;Q7Z3B4;Q9NPA8;Q9NZ52;Q8NI27;O14662;Q8WUM4;Q9H7P6;Q9H267;Q9NP97;P52294;Q96D46;O60645;P53992;O14910;Q96K P1;Q15363;Q86WG3;Q9NPJ8;Q9BVK6;Q9UJC3;P53677;Q99747;O43745;O15504;Q8IWI2;Q9UN37;Q53FT3;Q6I9Y2;O43617;Q86Y82;Q8WUX9;Q15276;Q9Y2T2;Q96CW6;O15127;P49792;Q96QF0;Q14974;Q9H1J1;P52948;Q8WU76}
- 11811 Pathogen[ Q85601] interacts with 385 human partners: {Q8TEML;Q13367;Q13596;Q8IYI6;Q96QK1;Q9UI26;O14925;Q9BZI7;Q99816;O60664;Q63HQ0;O00186;Q8IWI2;Q5SRE5;P54920;P69905;O15234;O15126;Q13409;Q14746;O00629;Q53FT3;O75843;P11168;Q9UPT5;Q9HAV4;Q9UIA9;Q9NP79;O15027;P48444;Q9NP97;Q19Y2T2;P31749;P24539;Q9NNUU9;Q9UQN3;O75154;Q5T2W1;Q8NFH4;O95149;Q15388;O14910;Q8NFH3;Q6NUQ1;P51808;P36405;O00471;Q96A65;Q8N2H4;Q9H7P6;Q86VS8;Q8IUR6;Q7L804;Q9UJY4;Q96EE3;Q9BQQ3;Q96H20;O75396;Q9HD

47;P05413;Q9GZV4;Q9UL33;Q96CW1;Q15629;Q15833;O14579;O95487;Q9P253;A8CG34;Q96P70;Q13769;Q12769;Q8TAC9;O95166;Q9UBU9;O60763;P51161;Q96JE7;Q9UBX3;Q9H0U6;Q8WV92;Q9BXS6;Q86Y53;Q15036;Q9UP83;P62072;Q9BXS5;P02042;P57740;Q53GS7;Q9Y4P1;Q9NUS5;Q9BRG1;P56377;Q9Y5J9;Q9Y5J6;Q8WYP5;Q9HC62;Q9P299;O15155;Q06787;Q93050;P30622;P61326;P62826;O60220;P61573;Q9UKK3;Q8WUM0;Q8N1F7;Q96T51;Q9Y5J7;Q9H4D5;P46379;Q12981;Q9UMR2;O43264;Q14204;Q15121;Q9H9H4;Q86VN1;Q96JB2;O43747;Q9NPJ8;P61923;Q96L7;P83436;Q9H1H9;Q9UPM8;O43299;Q8IZS6;Q9Y296;Q9NP61;P61970;O15078;Q99767;Q14764;O43633;Q7Z614;Q86V81;Q7L5D6;Q5VIR6;Q14203;P49754;Q6ZP65;Q7LBR1;P63241;P52594;Q9UJ41;P12270;Q10567;Q9H6Z4;P63172;Q9P2W9;Q4G0F5;P49321;O75886;Q9UJY5;Q15436;Q96BW9;Q8N612;Q9H1B4;O75694;Q9H089;Q9C0E2;O43617;O43745;P02100;Q96FZ7;Q9H9C1;Q8WTW3;Q09161;O15504;Q14974;Q8WUX9;Q9H267;O94829;Q7Z3C6;O43752;P38919;Q86CF2;Q96L92;Q96FV9;Q8N6H7;O60518;Q43681;O60296;Q5T215;O15131;Q9BW27;Q92624;P69892;P61576;Q9H814;O00159;O75351;Q9H8T0;Q9UK41;Q9H9E3;O43768;Q92681;Q9UKK6;Q96D46;P11166;Q9BY43;Q92621;Q13428;Q9BXF6;O95373;Q15437;P55060;Q92973;Q9Y3A3;Q9UBF2;Q9HD26;Q13838;P49257;Q96QU8;Q9H444;Q69383;Q8N6T3;Q9Y678;Q9Y2L5;O15069;Q15035;Q8TEX9;Q8TCS8;Q96G01;Q13765;P0DI81;P42704;Q8N1B4;Q9NUU7;P55735;Q13228;A9QM74;Q676U5;Q9HA38;P52948;P54105;O14576;A6NF01;Q86VQ0;Q96QD9;Q8TD16;Q9UKX7;Q9BYV8;O95159;Q3ZCQ8;P61571;P61579;O96018;Q8NI27;P53680;Q92783;Q9NZZ3;Q8NFH5;Q99689;P61572;O14787;O14964;O43615;O75558;O14980;O95486;P61575;O94973;Q96PC3;Q7Z6B0;O75382;O75436;P35658;P68871;Q9NUL3;Q9P1Q0;P0DI82;Q2VPB7;P84022;Q9NPG2;P53618;Q9NT62;P60520;Q9H2G9;Q9Y6B7;Q9H009;Q99766;Q86WG3;Q99996;P53677;O43933;Q99567;P52292;Q6ULP2;Q9UBQ0;O15127;Q9NPA8;A6NIH7;P61574;Q8WUM4;Q9Y6D6;Q13432;O15397;P69891;Q02410;Q9NRA8;Q5HYI7;Q96KG9;P63010;Q92945;Q9H2T7;P49792;Q13505;P52298;Q9Y3R5;Q92572;O75865;Q9UM54;P61966;Q13618;P59780;Q9BVL2;Q96HA1;Q53G59;P11441;P61578;Q96NA2;Q9Y6Q5;Q8N0Z2;O95271;Q9BT04;O00505;O94855;O75381;P35606;Q8NEZ2;Q9NZ52;P14672;O60684;Q96KP1;Q8IUD2;Q6PD74;Q96EY5;Q9Y5L0;O43592;Q96ED9;Q9UND3;Q7Z3B4;Q9UNH7;Q9UN37;Q9GZM8;O14662;Q9Y3E7;Q8TF09;Q9HD42;P52294;O00161;Q6I9Y2;P49790;Q9UID3;P63167;O60645;P53992;Q05084;Q9BSW2;Q96N16;Q9H0R1;O60784;O95721;O00189;Q96GV9;Q86SZ2;Q99698;O00410;Q99747;Q9Y5S9;Q6IS14;Q9NVU7;Q96CW6;O75674;Q96QF0;O95782;P36543;Q9H1J1;A5D8V6;Q8IUR0}

11812

Pathogen[ P14079] interacts with 530 human

partners: {P31751;P36543;Q13228;Q15629;Q8NFH5;Q9BXW6;Q96QK1;Q9H9H4;Q6NUQ1;O95373;P0CG08;O75886;Q8TF09;Q9Y296;Q96CW1;O95070;O95159;Q8WMM9;Q3ZCQ8;O14810;P36542;O43615;Q96G79;O15069;Q9Y5K8;O95166;Q7L804;Q9BW27;Q8N4H5;P02042;Q6ZVE7;Q14746;Q96NA2;Q53S99;Q96HA1;Q86VN1;Q9UNH7;Q9UL33;Q5HYI7;Q969M3;P49257;Q9NPG2;P61923;O15027;P61970;P69891;Q86SZ2;Q96CF2;Q9Y6Q5;Q96EY5;Q15036;P61966;Q9Y4E1;Q6ULP2;Q05084;P56134;Q6ZVM7;Q9BXS5;P60468;Q9Y3D7;O14828;Q86WG3;P63172;O43745;Q99996;Q9NT62;Q9UJY4;Q9UJC3;Q92681;Q96H20;P83436;Q9UID3;Q1HG44;O43768;P47224;P51808;Q13765;P02100;A6NIH7;P25705;P61421;Q9H009;Q9UKF7;Q96P70;Q9NVU7;O95487;Q8NBQ7;Q6NVV3;P61576;Q16517;Q8WWL2;Q9H0U6;Q1HG43;O60664;P62072;Q9H4D5;Q9BRL7;Q0D2K0;O95271;Q86VI4;Q9H9C1;Q13505;Q96RQ1;Q96FJ2;Q8TAG9;Q9NWF4;Q2VPB7;Q86VS8;Q9UJY5;P05408;P57740;O60493;Q8N1F7;Q7L5D6;Q6IS14;Q9NPJ8;Q86XT2;P52298;P35658;Q9H1K0;P35606;Q9BY43;Q63HQ0;Q9P0U1;P27352;Q96ED9;Q9UPM8;Q8WVT3;Q13618;Q9H1J1;Q9H0Y0;Q02410;P14672;A6NF01;O00400;O00471;Q9BVK6;Q10567;A8CG34;Q9Y5S9;O43592;Q9Y6D5;Q9NP79;Q9ULU8;Q9BSW2;Q14204;Q96BW9;Q15276;Q9H7P6;P42566;P56377;Q92621;O75865;P52294;P09105;O60518;Q9Y2T2;Q9Y678;Q6VEQ5;Q92783;P56385;Q9Y6B7;Q96B49;Q8TEM1;P61579;Q7LBR1;Q8NE01;Q9H8T0;Q13428;Q86TL0;Q5VTU8;O60684;Q8WV83;Q8NI27;P59780;O94855;O00189;Q9P1Q0;P42704;Q8H7I9;Q9UBU9;P52594;Q9HD42;Q13838;Q75674;O60645;Q92624;Q8NE86;Q8N9S9;O60895;Q99442;Q96D46;Q86YS3;A1A5B4;Q9NRS6;P53992;P69905;Q9Y5J7;Q9UJ41;Q14847;Q99747;Q9H1B4;Q9UM54;O60784;Q8IUD2;Q96L92;Q9UPT5;Q7Z3C6;Q9H3E2;O15155;O75352;P11166;P05413;Q5T1Q4;Q4G0F5;Q96NT5;Q9UKK3;O14925;Q0VD83;P02008;Q9NS69;Q9NQ90;O95149;Q96JE7;Q9Y4P1;Q96N16;Q8IUR0;Q9H5N1;Q9H269;P33947;Q7Z4Y8;Q92572;Q9NS52;Q96KP1;Q96FV9;Q9BVV7;Q9NP97;O00461;Q9UKX7;Q15363;Q15388;O75843;Q9BUM8;O75558;Q15012;O75396;Q9BVL2;O75431;Q9Y2V7;Q7Z7G8;Q13769;P24390;Q9H2G9;O15504;O00186;Q9HD26;Q9NUP9;P68871;O95721;Q6PUV4;Q08AE8;Q5JWR5;Q96CW6;Q15833;P36405;Q9Y3A3;P61572;Q6I9Y2;P50542;P61326;Q8N609;Q96RL7;Q8WUM0;Q9HC62;P60520;O95782;Q99689;Q5T215;P12270;Q53GS7;P03928;Q9UND3;Q8WTW3;Q53FT3;Q86UW1;Q9Y5X2;Q9BXF6;Q96T51;O94829;Q6N075;Q8NC96;Q8TAC9;Q8WYP5;O43681;Q9BZI7;Q9NQA3;Q969E2;O00410;Q969X5;O96018;O43633;Q9UN42;Q15121;P49755;Q9P299;Q8WUM4;Q9Y6X1;P61573;Q641Q2;Q9NUL3;Q9Y6D6;Q7Z392;Q9BYT9;Q9HAB3;Q9UI26;Q99567;P61571;Q9NVZ3;Q92945;Q8WUX9;Q5JRA6;Q14974;P55060;Q92973;Q96QF0;Q86V81;Q9UBF2;Q96AX1;Q12981;Q9UP83;Q8N8Q9;Q9H1H9;Q9NZ43;P05814;Q9UKK6;A5D8V6;Q8NFH3;O60749;Q96ES6;Q8N8Y2;Q9P253;Q96EE3;Q7Z412;Q6PD74;Q9H8V3;Q9HA6;Q8NEZ2;P37198;Q5VIR6;O14653;Q9Y5U8;Q13409;Q53HI1;P51811;O43264;Q8IWI2;Q9NV70;P60059;P63010;Q99766;Q15035;O15397;P49790;P53677;Q9BQQ3;Q9HA38;P61574;A9QM74;Q6ZP65;O14662;Q9H115;Q13596;O00505;Q9H6Z4;B7ZAQ6;Q8N4Q1;O94973;Q5T2W1;Q8WVH0;Q9GZM8;Q8N1B4;Q8N2H4;Q96G01;P48444;O75964;Q9UN37;Q8TEX9;Q7Z614;O60831;Q96FZ7;P63241;Q99595;Q8N0Z2;Q8N612;O60296;Q9Y5R8;Q96MW5;Q6B0K9;Q96A65;Q8IYI6;Q13367;Q13432;Q8NFH4;Q8WV19;Q93050;Q14764;Q9H0R1;A8K0Z3;O43299;O43747;O60220;P63167;Q9UBQ0;Q7Z3B4;O43752;O95563;O15078;Q06787;O14579;Q9Y3E7;Q9UI12;O14787;Q9UIA9;P55735;Q96BY9;P56381;Q8WV92;Q7Z7G2;Q92543;Q9H9E3;O75154;Q9Y3E0;O95670;O75381;Q676U5;P49321;Q9HAV4;Q96AA3;Q5SRD1;Q9UMY4;O75351;P0DI82;P49754;P48553;Q96JB2;Q9NUS5;O14617;Q9NZZ3;P62826;P0DI81;O75436;P02144;O14576;Q01469;Q8IZS6;O95486;Q53G59;Q9H444;Q9BRG1;O00244;Q9Y3R5;Q12769;O95235;Q96PC3;Q99698;Q9Y2D4;Q7RTP0;Q16864;Q9H2T7;Q96QD9;Q99816;Q9BX66;Q9UM29;P24539;P54105;Q86VQ0;Q8IY50;Q9Y5L0;P69892;P61578;O43617;Q9Y5J9;Q9NUN5;P61575;Q9NRA8;Q5SRE5;Q9GZV4;Q9NQ40;O15234;O75694;O00629;P53680;P52292;O75382;Q8TD16;Q9BYV8;Q9Y5L4;P54920;Q9NPA8;O15131;Q9C0E2;Q14203;Q8TCS8;Q9BTX1;Q15849;Q09161;P11441;Q99767;Q9Y587;Q9H6F2;O60763;Q5SNT6;Q9H267;Q9H089;Q9UQN3;Q8IUR6;P30622;P52948;Q9NZD2;Q7Z6B0;Q69383;Q96KG9;Q9Y2L5;Q96GV9;Q9BT04;O43731;Q9H814;Q9HD47}

11813

Pathogen[ P03383] interacts with 306 human

partners: {Q96BW9;Q9BVL2;Q92681;Q9H1B4;O96018;Q96EE3;O15504;Q13228;Q96CW1;Q8WUM0;Q9UI

26;Q9UJY4;Q7L5D6;Q9HD47;Q7L804;Q9UBU9;Q8IWIJ2;O15234;Q9Y5J7;P56377;O15126;Q92621;Q14746;P49792;Q8NFH4;Q8NI27;P61574;Q7Z3C6;Q9UIA9;Q9H9E3;O15397;O14579;Q92572;Q8IUR6;Q9NPA8;P51808;Q7Z6B0;Q9UP83;P61572;A6NF01;P55735;Q96QF0;O94829;P53618;Q9H4D5;P54105;Q8WUX9;P62072;P83436;Q9Y678;Q96RL7;Q8N1B4;P54920;Q96H20;O95487;O43264;P61571;P12270;Q96FJ2;Q5T2W1;Q13769;Q9UL33;Q13838;Q9HD26;A8CG34;Q86G33;Q9Y5S9;Q8TAC9;P52948;Q9H7P6;P31749;P63172;Q14203;Q9Y3E7;Q9BUN8;P57740;Q9Y4P1;Q99689;Q10567;Q8NFH5;Q96P70;O14925;Q8WY P5;Q9NZZ3;O43615;Q96FV9;Q06787;O00186;Q9H9C1;P69905;P61326;Q9GZV4;P75886;P61573;Q8N1F7;Q96JB2;Q9H2G9;P68871;P38919;Q8NEZ2;Q15121;Q99816;O95486;Q8IYI6;Q8TCS8;Q9Y296;Q9Y6D6;Q9NT62;O00505;P49321;P61575;Q7Z614;Q86V81;Q8TEM1;O60220;Q9Y4E1;Q9NUS5;P49754;Q53GS7;P63241;O00189;Q96KP1;Q13432;P53677;Q15436;Q13618;Q96D46;Q12769;Q8N2H4;Q8N612;A9QM74;Q96B49;Q9H1H9;P62826;P11168;Q8WTW3;Q99161;Q6PD74;Q99567;Q96L92;O15069;Q05084;Q8IUR0;O60296;Q13428;Q15629;Q9Y3R5;Q9BW27;P55060;P84022;P52292;Q99747;O75558;Q96N16;Q9H8T0;Q92945;Q9UK41;Q7LBR1;Q86VQ0;Q9H2T7;O75843;O43633;Q9Y5J6;Q9Y2T2;Q92973;P63010;Q9BSW2;O43768;Q53G59;O14980;O43747;Q15437;Q9HAV4;O94855;O00471;O15078;Q9UJY5;Q15388;Q9BXF6;O43617;Q9H444;O75865;Q9NP97;P0DI82;Q96QD9;Q5HYI7;O75381;Q9H9H4;Q13765;O95149;P0DI81;O43745;Q676U5;O95782;Q9BYV8;Q9BTX1;Q86VS8;Q9C0E2;Q9UBF2;Q9BRG1;Q8N0Z2;O14787;Q14974;Q96ED9;O43299;Q9HD42;Q9P0U1;O15027;O60784;Q5SRE5;O15131;Q92783;P52298;O75436;P35658;Q9P1Q0;Q9UKK3;O15127;Q9H009;Q96HA1;P61579;Q96QK1;Q9H6Z4;Q96JE7;Q13367;Q53FT3;Q6ULP2;Q9UND3;Q9HC62;P53992;Q96QU8;P11169;A6NIH7;P42704;O60645;Q8WUM4;O43752;O60518;Q9NRA8;Q02410;Q99996;O95373;Q69383;Q8TF09;Q6NUQ1;O60831;P61970;O43592;P36543;P37198;Q9UKX7;P11441;O00161;Q9BXS5;O95271;Q8IUD2;Q9UBQ0;Q92624;Q9NUL3;Q9UPT5;P14672;P61576;Q9Y3A3;O60664;O94973;P63167;Q9Y5L0;O00629;Q9Y5J9;O14964;Q63HQ0;P61578;Q7Z3B4;Q9BT04;Q86V N1;Q9UN37;P24539;P52294;P52594;Q6I9Y2;P49790;Q14764;Q96EY5;O75694;O75154;O14910;Q9NP J8;Q96GV9;Q9UQN3;Q86SZ2;Q96NA2;Q8NFH3;O00410;Q2VPB7;Q15276;Q5VIR6;Q9UKK6;Q9H814;Q9NV U7;Q96CW6;Q9H0U6;P22732;Q9NZ52;Q9BZI7;Q9H1J1;Q13505}

11814

Pathogen[ P03410] interacts with 566 human

partners: {P84022;Q8N4H5;Q99567;Q6PD74;Q9Y6G9;Q9H0Y0;Q13838;Q8NC96;Q9NQ90;Q5SNT6;P0DI82;Q9Y6Q5;Q5SRD1;Q14204;P49321;Q9UPM8;Q7Z3B4;P61576;O95563;O00203;Q9BW27;Q6B0K9;Q96018;Q7L804;Q9Y5L4;Q8IZS6;O95782;Q92945;Q0D2K0;Q96PC3;Q86SZ2;Q53G59;O75154;Q96CW1;Q86VQ0;Q96RL7;P61578;Q969F2;O14910;Q9H267;Q9H2G9;P22732;Q6N075;Q15121;Q9UJC3;P51808;P51161;O75865;Q9NAA4;Q6ZVM7;Q9H1M0;P02008;P52594;O14828;Q14974;Q8TCS8;P61326;P62072;A9QM74;P02144;Q15833;Q96B49;O15234;O43633;O00505;A6NF01;Q7Z614;Q9NZ43;P47710;Q9Y2L5;Q9UP T5;Q13409;P30622;Q99766;P02100;Q9BXS5;Q96L92;Q13190;Q99442;Q8N8Y2;Q9UJ41;Q9BQQ3;Q15388;P53680;Q9NP97;Q7L5D6;Q9BRV3;Q96JB2;Q8TAC9;Q9H7P6;Q9UP83;Q9H115;Q86XT2;Q9UKX7;O60896;P60468;P49257;Q5T2W1;Q9Y2J0;Q9H9H4;P36542;P60059;Q8TF09;Q13596;P11166;Q99996;O60895;Q1HG43;O94855;Q9Y4P1;Q9GZM8;Q9NZ52;Q969X5;Q9NVZ3;P25705;Q8NI27;Q9NP79;Q7Z392;Q9NUS5;P52294;Q13445;P54105;Q8NFH4;B7ZAQ6;Q86UW1;O75351;P05413;P53992;Q9Y2V7;Q9H1H9;Q08A E8;Q16517;Q9P299;O75674;P55060;O75382;O43747;Q9Y5J7;Q9H3E2;O75843;P61421;Q9ULV0;P48553;O60749;Q13505;O15069;O00400;Q9Y5S9;Q96QU8;P60520;Q5SRE5;P05141;O14810;Q9UL33;P48444;Q96P70;P52948;O15504;Q8N1B4;Q10567;P11168;Q969E2;P35606;Q7Z6B0;Q9NRA8;Q5T215;P36405;Q9HAB3;Q86WG3;Q92572;P63172;O00159;P33947;P59646;O60645;Q9P2W9;Q9H8T0;Q9HD47;O75694;O14662;Q93050;Q96CW6;Q92783;Q9BY43;P31749;P09105;Q99767;O14579;Q96QK1;O43299;P63167;Q9NS69;P56385;Q9NUP9;P02766;Q53FT3;Q1HG44;Q96N16;Q86VS8;O75381;Q86VN1;Q9NQ40;P55157;Q9P253;Q86VI4;Q8WVH0;O60664;Q96HA1;Q9Y3E0;Q9UMY4;Q6NUQ1;Q8N2H4;Q69383;Q8TD16;Q9UK F7;P23786;Q9TEH3;Q9UBX3;Q9Y5R8;Q9BYV8;O00461;Q50084;O14617;Q9H1J1;Q96B99;Q9UJY5;Q9Y587;Q9Y6B7;Q8N609;Q02410;Q9BZI7;Q9H009;Q96FV9;Q8WU76;Q9UMZ2;Q96QD9;O43264;Q8N1F7;A6NI H7;O95249;Q9HAP6;O95219;A5D8V6;Q9UBQ0;Q9UNH7;Q9HD26;O14925;Q9H4D5;Q99595;Q8WWM9;O95166;P56381;Q13336;Q53HI1;Q99816;Q9UM54;Q96MW5;Q86YS3;Q92624;Q8NE86;P61573;Q86TL0;Q9UM R2;Q9BT04;Q9NPA8;Q9Y3E7;P0DI81;Q13618;Q15436;Q8WUX9;Q9BVK6;O14576;Q9H6F2;Q8NEZ2;O60763;Q9Y5L0;P49790;Q9Y6X1;Q9H814;Q14764;Q9UQN3;Q7Z7G2;Q9IUD2;Q9NUN5;Q9HC62;P68871;P61571;O75396;Q96BY9;P12270;Q96KG9;Q969M3;Q15437;Q5VTU8;Q9NUU7;P62826;O00629;Q8TAG9;O60684;Q3ZCQ8;Q8IUR0;P0CG08;Q9BUN8;Q96RQ1;P35658;P52298;P61574;Q96ED9;Q8IY50;O15155;Q92973;Q9HD42;O14787;Q9Y2T2;Q9NP61;Q9UN37;O95271;Q96A65;Q9Y678;Q8NFH5;O94829;Q641Q2;Q9UN D3;Q9Y3A3;Q15629;O43615;O95486;P42704;Q8TEM1;O15127;Q5HYI7;Q15049;Q14847;P03928;Q8WV92;Q15363;Q9BXP6;P05408;Q9UI12;Q15036;O15078;Q9Y3D7;Q96LB4;Q96G01;P24539;Q676U5;Q9H444;Q86V81;Q9NWF4;O60784;Q9UN42;Q15849;Q9NZZ3;Q9Y6D6;Q9Y4E1;Q9H089;Q9H1K0;Q8N9S9;Q9UL U8;Q9NVU7;P53618;Q9UBU9;Q9NT62;O75436;P61923;Q9Y6D5;Q96EE3;Q9H173;Q96JE7;Q9BRG1;Q9NZ D2;P47224;Q8WTW3;Q8N612;Q9H1B4;Q9BYT9;Q9NRS6;Q13769;O95670;P61572;P38919;P49754;Q6VE Q5;Q96F77;Q6PUV4;Q9H0R1;O60296;Q8IUR6;Q9Y5U8;O75964;Q8WWL2;P53677;P02042;O43768;Q9NU L3;O75558;Q96T51;Q9HCU5;P24390;Q9Y5J6;P11169;Q9P1Q0;P63010;Q9NPJ8;Q9H2T7;Q4G0F5;Q96QF0;Q96D46;Q9Y5J9;P50542;Q14746;Q6NVV3;Q9HA38;Q6I9Y2;Q96KP1;Q9NPG2;Q96D96;Q16864;Q8WUM0;Q99698;Q96ES6;Q63HQ0;Q7Z7G8;Q6ULP2;Q13428;P11441;Q9Y296;O43752;Q0VD83;P63241;Q8N8Q9;O95159;A8CG34;Q96GV9;Q9P0U1;Q9UKK3;O15027;Q587I9;O60220;Q9Y2D4;Q96G79;Q9H9C1;Q99161;O14653;Q9NV70;Q8N0Z2;Q96A72;O75352;Q7RTP0;Q6ZP65;Q01469;Q13228;Q96EY5;Q06787;Q15035;O00410;P59780;Q9UI26;P83436;O43745;Q9H8V3;Q5VIR6;O43731;Q9GZV4;Q2VPB7;Q8IUR9;Q6ZVE7;P57740;P55735;Q9H5N1;O00186;P69892;Q12981;O95721;Q13367;Q96NA2;O60831;Q13765;O43617;Q12769;Q7Z3C6;P52292;Q13432;P69905;Q9HAV4;Q96H20;Q8IXU6;O43592;P51811;Q9Y5K8;P61966;Q7Z3 U7;Q9UIA9;O15126;Q96CF2;P61579;Q8WV19;O95562;P27352;Q8WUM4;Q9H6Z4;Q9H269;O15131;Q8WY P5;O43681;Q8NFH3;P42566;O00471;O00161;P61575;Q9BVL2;Q92681;Q7LBR1;A1A5B4;Q5JWR5;Q8WY T3;Q9NQA3;O94973;Q9H9E3;P56377;Q8N4Q1;P18859;O15397;Q9UID3;O75348;Q9UKK6;Q15012;Q99747;Q92543;Q9BTX1;Q9BX66;P36543;Q8IWIJ2;O60518;Q92621;Q9C0E2;Q8IYI6;Q5JRA6;O43237;O75886;Q9UJY4;O60493;P56134;O95070;Q9BXW6;A8K0Z3;O14980;O95373;Q14203;O95487;P05814;P49792;Q15276;Q7Z4Y8;Q9Y5X2;Q9H0U6;Q9UBF2;O95149;Q96AX1;P69891;O75431;Q9BRL7;P61970;P54920;Q99689;Q6IS14;Q53GS7}

11815

Pathogen[ P14075] interacts with 316 human

partners: {P11169;P49321;Q9H6Z4;P42704;Q69383;Q9UI26;Q96RL7;Q9P0U1;P68871;P52292;O436



17;O15131;O14925;P61575;O15234;Q13505;Q9C0E2;P54105;Q9UJY4;Q02410;Q14746;Q9NP97;Q86W  
G3;Q9H2G9;Q9BYV8;Q09161;Q96JB2;Q96EY5;Q9H814;Q53FT3;Q14764;Q9Y5J9;Q96JE7;Q92681;Q96B  
49;Q96D46;Q9BSW2;Q9H1H9;O60645;O15069;O96018;Q8N1B4;Q9NUL3;O94973;P62072;Q8N2H4;Q9H9  
E3;Q96CW1;O75558;O75886;Q86V81;O00186;Q96P70;Q13618;P61576;Q13769;Q96BW9;P61970;Q8N6  
12;Q9H2T7;O14787;O43752;Q9NT62;O15127;P61579;P61326;Q7LBR1;Q9H444;A8CG34;Q96GV9;Q96N  
16;P51808;P57740;Q96KP1;Q8WUX9;Q8WUM4;Q15388;P61572;Q9Y2T2;Q8WYP5;Q9UBF2;Q6NUQ1;Q929  
45;Q53GS7;Q96SZ2;Q92973;P61573;P49792;Q92783;Q9Y4P1;Q8N1F7;Q9NP79;Q99747;Q53G59;Q9NZ  
52;Q9UBQ0;O00629;Q9NPJ8;P54920;Q86VN1;Q676U5;Q9BT04;Q96NA2;Q86VQ0;P22732;Q9UKX7;Q9HD  
26;O60296;Q9GZV4;Q8TF09;O15397;Q7Z614;Q8IUD2;O95159;Q9UK41;O15027;Q9H9C1;Q86VI4;Q156  
29;P63241;O15126;P35658;Q9Y6D6;P12270;Q9HAV4;P63172;A6NF01;P53992;Q9NVU7;Q92621;Q8NE  
Z2;Q8N0Z2;P55735;O00471;Q96H20;P61574;Q7Z392;Q5HYI7;O75381;Q9Y3E7;Q92624;Q8NI27;O004  
61;Q9H9H4;O43592;Q9BTX1;O00505;Q96QD9;Q96HA1;O60831;O14980;Q9BW27;Q75865;O00189;P522  
94;P31749;O95487;Q6I9Y2;Q99996;Q9H8T0;O15078;O14964;Q9UP83;P49754;Q96FJ2;O43768;Q154  
37;Q7Z6B0;O14910;O95373;Q7L804;P61571;O60518;P11441;Q8TEM1;P53618;Q9UQN3;Q9UND3;Q9HC  
62;Q13765;Q8IUR0;Q63HQ0;P0DI81;O95782;Q9NPA8;Q9BUN8;Q96EE3;Q8IWI2;P37198;O60220;O437  
45;O00410;Q5SRE5;P62826;Q9NZZ3;Q06787;O43747;Q9UIA9;Q1HG44;Q9HD47;Q15436;Q9Y3A3;Q925  
72;Q99766;O95149;Q9Y3R5;P24539;Q13228;Q5VIR6;Q5T2W1;O94829;P52594;O75436;O00161;Q9P1  
Q0;Q8NFH3;P63010;Q9H009;Q8TCS8;Q96QU8;Q05084;Q9Y678;Q9H0U6;Q9BXF6;A9QM74;O15504;Q9H7  
P6;Q13428;Q96QF0;Q9Y5S9;Q6ULP2;O75843;Q8TAC9;Q9HD42;A6NIH7;Q9BRG1;Q7L5D6;Q99567;P563  
77;Q9Y5L0;Q9Y5J7;Q12769;Q2VPB7;P11168;Q8IYI6;Q86VS8;P56385;O94855;Q9BXS5;O75154;Q9NR  
A8;Q9UBU9;Q14974;Q14203;P84022;Q9BVL2;Q53HI1;P49790;Q99816;Q9UL33;Q9H1B4;Q8WUM0;O432  
64;Q15121;O95271;P38919;Q9H4D5;Q96FV9;Q13838;Q9Y296;P14672;Q13432;O75694;Q641Q2;O954  
86;Q8IUR6;Q7Z3B4;Q9Y5J6;Q8NFH4;Q9UKK6;Q10567;P63167;P83436;P55060;Q9NS69;Q9Y4E1;Q8NF  
H5;Q9NUS5;Q9UJY5;Q13367;Q7Z3C6;O43615;P0DI82;O60664;O60784;P61578;Q96ED9;Q8WTW3;Q6PD  
74;Q9UN37;P52948;Q96L92;Q15276;P52298;O43299;Q96CW6;Q9UKK3;Q9UPT5;Q99689;Q96QK1;Q9BZ  
I7;P36543;O14579;Q9H1J1;P69905;Q9Y5U8}

11816

Pathogen[ P0C206] interacts with 480 human

partners: {O95271;Q53GS7;Q7Z3C6;P61572;Q96EE3;O14964;Q9BRG1;O14662;O60645;P84022;P536  
80;P63010;Q9Y3A3;Q92621;Q9BVK6;Q4G0F5;P68871;Q96L92;Q9NUP9;O14579;Q8WYP5;Q63HQ0;O151  
31;O43933;O15127;Q9Y5L4;P0DI82;Q9Y5L0;Q9Y678;Q8IUR6;Q15437;Q6B0K9;Q8WUX9;Q9Y6B7;Q9UN  
37;Q8H7I9;Q9U5M4;Q9Y5J6;Q9GZV4;Q8N9S9;Q9BZI7;P83436;O94973;P36543;Q9NEZ2;P49790;O148  
28;Q6IS14;O95149;P52298;Q9Y296;Q9NQ90;P61576;Q9H444;P31749;Q8N6T3;Q7LBR1;O75865;Q9H0  
U6;Q5SRE5;Q9NP97;O14576;O75396;Q8NFH5;Q13432;Q9Y2V7;Q9NUU7;P61326;Q9Y6Q5;Q99766;Q8TC  
S8;Q92572;O43592;O60784;Q969F2;Q641Q2;Q9UKK6;Q9Y3E7;P02100;Q9UNH7;Q9Y5U8;P69892;Q8NC  
96;Q09161;P53618;Q9P299;O43747;Q9BXF6;Q9H9E3;O60518;Q06787;O94855;Q92681;Q8NI27;Q105  
67;O14653;P54920;Q6NUQ1;Q9NVU7;P51161;Q96B49;O60664;Q9NRS6;O95721;Q9Y4P1;O75154;P541  
05;O75381;Q9BT04;Q9Y6D6;A9QM74;Q15121;O75382;Q7Z3B4;Q9Y2J0;Q13228;O43681;Q2VPB7;O437  
52;Q9H0R1;O00629;O60684;P02008;Q9Y2L5;Q9H8T0;P49754;P63167;P36542;Q9H1K0;Q8NE86;P619  
66;Q14974;Q9HC62;Q96HA1;Q9UQN3;Q96PU8;O95070;Q96QV0;O00505;Q96T51;O60220;Q96KP1;Q86V  
Q0;Q86VN1;O60493;Q96P70;P49755;Q5JRA6;P48553;Q99698;Q9UJY4;Q8TF09;O15397;Q96JB2;O608  
31;Q8IUD2;P55735;Q9Y5J9;O94829;Q6ZP65;Q9Y2T2;Q15035;Q14746;Q9UBX3;P29373;Q13596;P628  
26;Q99816;Q5HYI7;P57740;Q96GV9;P11441;P49321;O75558;Q99996;Q9Y3R5;Q92783;Q9Y4E1;Q9H1  
H9;Q969E2;P30622;P47224;P11166;Q1HG44;P50542;Q96KG9;O43237;Q96A65;Q92973;Q15036;O004  
10;Q9GZM8;Q96N16;Q13409;Q8N4Q1;Q9HAV4;O43299;Q9Y5J7;P23786;Q5T2W1;Q5SRD1;Q86VS8;Q9NP  
61;Q9UK41;Q9P1Q0;Q9Y587;Q92624;Q96ED9;Q9H9H4;P69891;Q13769;P05413;Q9NPJ8;O00161;Q96D  
46;Q99689;P59780;Q8N2H4;P53677;Q9NPG2;Q9NZD2;Q8WUM0;Q9UBQ0;P69905;O14787;O43615;P111  
68;Q9H7P6;Q3ZCQ8;Q96QF0;Q99767;P49792;O60749;Q8TEM1;Q9H814;Q1HG43;Q6VEQ5;Q9UKX7;Q9HD  
47;Q9H089;Q14204;Q9UPM8;Q13428;Q9H4D5;Q96FV9;Q9UP83;Q9ULU8;A5D8V6;Q7Z7G2;Q6ULP2;Q9BX  
S5;O15155;O96018;Q13618;Q9Y3D7;O95486;Q9UKK3;Q969M3;Q8WTW3;Q5VIR6;Q13838;Q9NS69;Q96H  
20;Q6ZVE7;Q9N252;Q9UBU9;Q53HI1;Q9Y6D5;Q95373;P51808;Q9UPT5;P35606;Q9NEZ2;Q86S22;Q756  
94;O00159;Q7Z7G8;P61575;P33947;Q9UJY5;Q96JE7;Q86XT2;O00461;P61571;Q9UI12;P24390;P091  
05;P49257;Q8TEX9;O95487;O60763;Q96CW1;Q9BTX1;Q9Y6G9;O60296;O15078;Q9BUN8;Q8IZS6;Q9P0  
U1;Q6PUV4;O43633;O43768;Q8WU76;Q96AX1;P48444;O15234;Q6PD74;O14925;Q9H1B4;Q9NUL3;Q9BY  
V8;P24539;A6NF01;O15069;Q9HA38;Q13505;Q9H8V3;Q5SNT3;Q15388;O14910;Q7Z392;P60520;Q9H2  
T7;P55072;Q8IUR0;Q7Z614;O43617;Q8N612;Q96CF2;Q7L5D6;O95782;Q9H6Z4;Q9UJ41;Q99567;Q9H5  
N1;Q9Y5K8;P55060;O43731;Q16864;P36405;Q9H2G9;Q8NFH4;Q99747;A6NIH7;Q8IYI6;Q8WUM4;Q9BX  
66;P62072;P0CG08;Q12981;Q9BY43;Q9H009;P61574;P42566;Q9UID3;P63241;Q5T215;Q676U5;Q96Q  
D9;Q9UBF2;O75436;Q86TL0;Q969X5;Q9BXW6;P14672;P56381;Q8WWL2;Q15629;O14617;Q9P253;P427  
04;O75843;Q9HD42;Q15849;Q96NA2;Q96RQ1;Q9UN42;Q9UL33;O15504;Q9NP79;A8CG34;Q96QK1;Q9UI  
A9;Q9NZZ3;Q9C0E2;Q12769;Q92945;Q9UJ3;Q7L804;Q9UMR2;P53992;Q96FZ7;Q15363;Q9NT62;Q9NV  
70;P38919;Q9Y5R8;O75886;Q9UND3;Q9BQQ3;Q8N1B4;O75351;Q7Z6B0;Q8TAC9;Q14203;Q53G59;Q014  
69;Q8NFH3;P02042;P52294;Q8N6H7;P63172;Q86WG3;O15126;Q8WV92;Q96PC3;Q9BSW2;O15027;Q86Y  
S3;Q15833;P46379;O95159;Q8N1F7;Q9NPA8;P61579;Q8N0Z2;O75674;O43264;O00189;Q8TD16;Q137  
65;O43745;Q9H9C1;Q8N4H5;Q53FT3;P61970;Q9HD26;P56385;P52292;P61578;P35658;Q95166;Q9H2  
67;O00471;Q8IWI2;Q13367;Q9P2W9;Q6I9Y2;Q05084;Q8WMM9;Q08AE8;Q96RL7;Q15276;Q8TAC9;Q9BW  
27;Q69383;Q96EY5;Q5JWR5;Q9BVL2;Q96CW6;P56377;Q93050;Q9Y5S9;Q86V81;Q9UI26;Q14764;P0DI  
81;O00186;P61923;P12270;Q9NRA8;Q9NUS5;B7ZAQ6;Q96G01;Q96BW9;Q9BRL7;Q9H1J1;Q02410;P615  
73;Q15436}

11817

Pathogen[ P03363] interacts with 366 human

partners: {O60763;Q53FT3;Q96D46;P49754;P46379;Q08AE8;Q86VS8;O14787;Q9UID3;Q06787;Q53G  
S7;Q7Z3B4;Q92973;Q9GZV4;P69905;Q9H4D5;Q96J01;Q9Y2T2;O43933;Q9UNH7;O60664;P38919;P631  
67;Q7L804;P11441;O60645;O60684;Q96ED9;Q5SRE5;Q9NRA8;Q86VQ0;P12270;Q9BYV8;Q9BX66;Q9H9  
F1;Q13367;Q8NFH4;Q13428;Q9UND3;P49321;Q9UP83;Q92543;P36543;P68871;O43747;Q9HAV4;Q9BZ  
F3;Q9UJY4;P61970;Q99996;P48444;O75886;Q63HQ0;P0DI81;Q96L92;O15078;Q96L92;Q8N1B4;Q96905;Q9Y3  
R5;Q13228;A9QM74;Q8WYP5;Q9H444;O95219;Q8IYI6;Q92783;Q8NFH3;Q9NVU7;O14980;O00471;Q127  
69;O00410;Q13283;Q96QK1;Q96A65;Q9Y678;P53677;O14910;Q9H2T7;Q69383;Q13618;O00505;O607



84;Q15388;P09651;O14925;Q9NZ52;Q9NUU7;Q14847;O43264;Q9NUL3;Q01469;O75436;P42704;Q6NU  
Q1;A6NF01;Q96P70;Q9UL33;Q13769;Q14204;P54920;Q9H9E3;Q15121;O75558;Q15436;Q9NUS5;Q9Y2  
L5;A8CG34;P83436;Q8WU76;Q9NZZ3;Q9UKX7;O15069;Q9Y6B7;O14579;Q9C0E2;Q3ZCQ8;Q13765;O954  
86;Q9UBU9;P51161;Q9NT62;P53618;P60520;Q8NI27;Q32P51;P61575;Q96H20;Q96FV9;Q9UMY4;Q9BX  
S5;O00629;O60493;Q9HD47;Q96T51;Q9P299;Q9H0U6;O94973;Q96PU8;P61923;Q9P1Q0;P61326;Q8N0  
Z2;P0DI82;Q8NAA4;O60296;Q6ZP65;O60749;Q9UJ41;P54105;Q96QD9;Q14746;O75351;Q8IZS6;Q9P2  
W9;Q96BW9;Q92572;P61578;Q9Y4E1;O43615;Q8WUM0;Q9BVL2;Q96QU8;Q99567;P30622;P29373;Q9JW  
R5;Q9UN37;Q8TF09;Q6ULP2;Q5VWJ9;Q8WUM4;Q9H0R1;Q86WG3;Q86VN1;P63172;Q92945;Q99698;Q9BX  
W6;P61571;Q9BRG1;O95721;Q9H267;Q15035;P31749;Q9UKK3;Q13432;Q96KP1;Q9HC62;Q7Z3C6;Q024  
10;Q9BSW2;Q9Y5J7;Q9P0U1;Q9UK41;O75381;Q8TEX9;P02766;Q86V81;Q96KG9;P05413;P63010;O756  
74;Q9Y3E7;Q9NPF8;P84022;Q05084;Q7LBR1;O43768;Q95271;Q96HA1;P49792;P52298;Q138  
38;P35658;Q9BT04;Q53G59;Q9NPA8;Q14974;Q8WTW3;Q9H8T0;O75694;Q9UKK6;P49790;O00189;Q9Y5  
L0;Q13409;P61572;O14964;O00186;Q96EY5;P51808;O75154;Q7Z614;P61574;O75382;P57740;Q9BX  
F6;Q9UBQ0;Q619Y2;Q5VIR6;Q6FIF0;Q9UMR2;O95782;Q9BTX1;Q9H2G9;O94829;A6NIH7;Q9Y5K8;Q8WV  
92;Q92681;Q8IWI2;P63241;Q5HYI7;O15126;P35606;Q96RL7;Q8NEZ2;Q96GV9;O15131;O14662;Q2VP  
B7;Q9H6Z4;P14672;Q96A72;Q96NA2;Q8IUR6;Q9UBF2;Q9BZI7;Q8N612;Q6PD74;P53992;O75843;Q9UK  
F7;Q9UI26;O95487;Q99816;O95373;P52948;Q13596;Q9Y296;P61579;O15127;O43745;Q9Y4P1;O436  
17;Q9UQN3;Q9Y3A3;O15504;Q9H7P6;Q9H1H9;P52594;Q6IS14;O00161;P55060;Q9NP97;Q9H009;Q7Z6  
B0;Q9NP79;Q9NS69;Q9Y6D6;Q9NUP9;P37198;P48553;Q676U5;P62826;Q9H9H4;O43592;P52292;Q8N1  
F7;Q9UJY5;O43752;Q96N16;O43237;Q92621;Q8TD16;Q14764;Q8NFH5;O60518;Q5T2W1;O96018;Q8WW  
L2;Q8IUD2;Q7L5D6;Q95166;Q96FJ2;Q95149;P55735;Q14203;Q99767;Q99747;Q9HD26;O95833;P111  
66;Q9Y5S9;Q9H814;O94855;Q8WUX9;Q15276;O14576;Q10567;Q9H1B4;Q9BW27;Q9UIA9;P61573;Q96C  
W6;P61576;Q9HD42;O15397;Q9UPT5;Q96QF0;Q96CW1;Q09161;Q15833;O43299;Q99689;Q9H1J1;P522  
94;O15234;Q9UPM8;Q96CF2;Q4G0F5;A5D8V6;Q9UJC3;Q96JB2}

11818 [Cluster 1075]GO:0035136+P biological\_process [name] forelimb morphogenesis [def]  
"The process in which the anatomical structures of the forelimb are generated and  
organized." [GOC

11819 Pathogen[ Q2Q067] interacts with 3 human partners:{Q05516;P28356;Q9NSC2}  
11820 Pathogen[ P0C214] interacts with 2 human partners:{Q9NSC2;Q05516}  
11821 Pathogen[ P03346] interacts with 7 human  
partners:{Q9BXA9;Q9NSC2;P28358;P28356;Q05516;Q92481;Q99593}  
11822 Pathogen[ Q85601] interacts with 2 human partners:{Q05516;Q9NSC2}  
11823 Pathogen[ P14079] interacts with 2 human partners:{Q05516;Q9NSC2}  
11824 Pathogen[ P03383] interacts with 2 human partners:{Q05516;Q9NSC2}  
11825 Pathogen[ P03410] interacts with 1 human partners:{Q9NSC2}  
11826 Pathogen[ P14075] interacts with 2 human partners:{Q9NSC2;Q05516}  
11827 Pathogen[ P0C206] interacts with 3 human partners:{Q9NSC2;Q05516;P28356}  
11828 Pathogen[ P03363] interacts with 3 human partners:{P28356;P28358;Q05516}  
11829 [Cluster 1076]GO:0048608+P biological\_process [name] reproductive structure  
development [def] "The reproductive developmental process whose specific outcome is the  
progression of structures that will be used in the process of creating new individuals  
from one or more parents, from their formation to the mature structures." [GOC

11830 Pathogen[ Q2Q067] interacts with 3 human partners:{Q12959;P35869;P20823}  
11831 Pathogen[ P0C214] interacts with 2 human partners:{P35869;Q12959}  
11832 Pathogen[ P03346] interacts with 4 human partners:{P20823;O43680;P35869;Q12959}  
11833 Pathogen[ Q85601] interacts with 3 human partners:{Q12959;P35869;P20823}  
11834 Pathogen[ P14079] interacts with 1 human partners:{P35869}  
11835 Pathogen[ P03383] interacts with 1 human partners:{P35869}  
11836 Pathogen[ P03410] interacts with 1 human partners:{Q12959}  
11837 Pathogen[ P14075] interacts with 1 human partners:{P35869}  
11838 Pathogen[ P0C206] interacts with 3 human partners:{P35869;P20823;Q12959}  
11839 Pathogen[ P03363] interacts with 2 human partners:{Q12959;P35869}  
11840 [Cluster 1077]GO:0090231+P biological\_process [name] regulation of spindle checkpoint  
[def] "Any process that modulates the rate, frequency, or extent of the spindle  
checkpoint, a cell cycle checkpoint that delays the metaphase/anaphase transition until  
the spindle is correctly assembled and oriented, and chromosomes are attached to the  
spindle." [GOC

11841 Pathogen[ Q2Q067] interacts with 1 human partners:{Q96SN8}  
11842 Pathogen[ P0C214] interacts with 1 human partners:{Q96SN8}  
11843 Pathogen[ P03346] interacts with 2 human partners:{Q96SN8;Q9H0E7}  
11844 Pathogen[ Q85601] interacts with 2 human partners:{Q9H0E7;Q96SN8}  
11845 Pathogen[ P14079] interacts with 1 human partners:{Q96SN8}  
11846 Pathogen[ P03383] interacts with 1 human partners:{Q96SN8}  
11847 Pathogen[ P03410] interacts with 1 human partners:{Q96SN8}  
11848 Pathogen[ P14075] interacts with 1 human partners:{Q96SN8}  
11849 Pathogen[ P0C206] interacts with 2 human partners:{Q96SN8;Q9H0E7}  
11850 Pathogen[ P03363] interacts with 1 human partners:{Q96SN8}  
11851 [Cluster 1078]GO:0045415+P biological\_process [name] negative regulation of  
interleukin-8 biosynthetic process [def] "Any process that stops, prevents, or reduces  
the frequency, rate or extent of the chemical reactions and pathways resulting in the  
formation of interleukin-8." [GOC

11852 Pathogen[ Q2Q067] interacts with 1 human partners:{P20749}  
11853 Pathogen[ P0C214] interacts with 1 human partners:{P20749}  
11854 Pathogen[ P03346] interacts with 1 human partners:{P20749}  
11855 Pathogen[ Q85601] interacts with 1 human partners:{P20749}  
11856 Pathogen[ P14079] interacts with 1 human partners:{P20749}

11857 Pathogen[ P03383] interacts with 1 human partners:{P20749}  
11858 Pathogen[ P03410] interacts with 1 human partners:{P20749}  
11859 Pathogen[ P14075] interacts with 1 human partners:{P20749}  
11860 Pathogen[ P0C206] interacts with 1 human partners:{P20749}  
11861 Pathogen[ P03363] interacts with 1 human partners:{P20749}  
11862 [Cluster 1079]GO:0042711+P biological\_process [name] maternal behavior [def]  
"Female behaviors associated with the care and rearing of offspring." [GOC  
11863 Pathogen[ Q2Q067] interacts with 2 human partners:{Q9UBB5;O60535}  
11864 Pathogen[ P0C214] interacts with 3 human partners:{O60535;Q8IXF0;Q9UBB5}  
11865 Pathogen[ P03346] interacts with 3 human partners:{Q8IXF0;O60535;Q9UBB5}  
11866 Pathogen[ Q85601] interacts with 3 human partners:{Q8IXF0;O60535;Q9UBB5}  
11867 Pathogen[ P14079] interacts with 2 human partners:{Q9UBB5;Q8IXF0}  
11868 Pathogen[ P03383] interacts with 2 human partners:{Q9UBB5;O60535}  
11869 Pathogen[ P03410] interacts with 3 human partners:{Q8IXF0;O60535;Q9UBB5}  
11870 Pathogen[ P14075] interacts with 2 human partners:{Q9UBB5;O60535}  
11871 Pathogen[ P0C206] interacts with 3 human partners:{Q9UBB5;O60535;Q8IXF0}  
11872 Pathogen[ P03363] interacts with 3 human partners:{O60535;Q8IXF0;Q9UBB5}  
11873 [Cluster 1080]GO:0051781+P biological\_process [name] positive regulation of cell  
division [def] "Any process that activates or increases the frequency, rate or extent  
of cell division." [GOC  
11874 Pathogen[ Q2Q067] interacts with 4 human partners:{Q6ZN28;P67809;Q1MSJ5;O00255}  
11875 Pathogen[ P0C214] interacts with 4 human partners:{Q1MSJ5;P67809;Q6ZN28;O00255}  
11876 Pathogen[ P03346] interacts with 5 human  
partners:{P17542;P67809;O00255;Q1MSJ5;Q6ZN28}  
11877 Pathogen[ Q85601] interacts with 4 human partners:{Q1MSJ5;O00255;P67809;Q6ZN28}  
11878 Pathogen[ P14079] interacts with 5 human  
partners:{P67809;Q1MSJ5;Q9NS71;Q6ZN28;O00255}  
11879 Pathogen[ P03383] interacts with 4 human partners:{Q1MSJ5;Q6ZN28;O00255;P67809}  
11880 Pathogen[ P03410] interacts with 5 human  
partners:{Q9NS71;P67809;Q1MSJ5;Q6ZN28;O00255}  
11881 Pathogen[ P14075] interacts with 5 human  
partners:{O00255;P67809;Q6ZN28;Q9NS71;Q1MSJ5}  
11882 Pathogen[ P0C206] interacts with 4 human partners:{P67809;O00255;Q6ZN28;Q1MSJ5}  
11883 Pathogen[ P03363] interacts with 3 human partners:{Q1MSJ5;Q6ZN28;P67809}  
11884 [Cluster 1081]GO:0032689+P biological\_process [name] negative regulation of  
interferon-gamma production [def] "Any process that stops, prevents, or reduces the  
frequency, rate, or extent of interferon-gamma production. Interferon-gamma is also  
known as type II interferon." [GOC  
11885 Pathogen[ Q2Q067] interacts with 1 human partners:{P04156}  
11886 Pathogen[ P0C214] interacts with 1 human partners:{P04156}  
11887 Pathogen[ P03346] interacts with 1 human partners:{P04156}  
11888 Pathogen[ Q85601] interacts with 1 human partners:{P04156}  
11889 Pathogen[ P14079] interacts with 2 human partners:{P04156;O95760}  
11890 Pathogen[ P03383] interacts with 1 human partners:{P04156}  
11891 Pathogen[ P03410] interacts with 2 human partners:{O95760;P04156}  
11892 Pathogen[ P14075] interacts with 1 human partners:{P04156}  
11893 Pathogen[ P0C206] interacts with 1 human partners:{P04156}  
11894 Pathogen[ P03363] interacts with 1 human partners:{P04156}  
11895 [Cluster 1082]GO:0046209+P biological\_process [name] nitric oxide metabolic process  
[def] "The chemical reactions and pathways involving nitric oxide, nitrogen monoxide  
(NO), a colorless gas only slightly soluble in water." [GOC  
11896 Pathogen[ Q2Q067] interacts with 8 human  
partners:{P31749;P30793;P07900;O00401;P29474;Q03393;P30047;Q9Y314}  
11897 Pathogen[ P0C214] interacts with 11 human  
partners:{P29474;O75608;P35270;P00374;Q03393;P30793;Q8IVI9;O00401;P30047;P31749;Q9Y3  
14}  
11898 Pathogen[ P03346] interacts with 9 human  
partners:{O75608;P07900;P29474;Q8IVI9;Q03393;P30047;P31749;O00401;Q9Y314}  
11899 Pathogen[ Q85601] interacts with 8 human  
partners:{O00401;P31749;P30793;P30047;Q8IVI9;P07900;P29474;Q9Y314}  
11900 Pathogen[ P14079] interacts with 9 human  
partners:{P00374;Q9Y314;O75608;P30793;Q8IVI9;P07900;Q03393;P30047;O00401}  
11901 Pathogen[ P03383] interacts with 6 human  
partners:{P29474;P31749;P07900;O00401;P30047;Q9Y314}  
11902 Pathogen[ P03410] interacts with 11 human  
partners:{P30047;P00374;Q8IVI9;O00401;P31749;P07900;P30793;P29474;O75608;Q9Y314;Q033  
93}  
11903 Pathogen[ P14075] interacts with 7 human  
partners:{P29474;P07900;P31749;O00401;P30047;P30793;Q9Y314}  
11904 Pathogen[ P0C206] interacts with 10 human  
partners:{P31749;O75608;P30793;P30047;P07900;O00401;P29474;Q03393;Q8IVI9;Q9Y314}  
11905 Pathogen[ P03363] interacts with 7 human  
partners:{P29474;P07900;Q8IVI9;P31749;O00401;P30047;Q9Y314}  
11906 [Cluster 1083]GO:0000096+P biological\_process [name] sulfur amino acid metabolic  
process [def] "The chemical reactions and pathways involving amino acids containing  
sulfur, comprising cysteine, homocysteine, methionine and selenocysteine." [GOC

11907 Pathogen[ Q2Q067] interacts with 7 human  
partners:{Q96GX9;Q9BV57;Q9BV20;Q9Y697;Q9UBX3;P32929;O95571}

11908 Pathogen[ P0C214] interacts with 13 human  
partners:{Q9BV57;Q96GX9;P32929;O95571;Q9UBX3;Q9Y697;Q9UHY7;Q13126;P23526;P35520;Q16762;Q9BV20;Q9NZL9}

11909 Pathogen[ P03346] interacts with 10 human  
partners:{P23526;Q9BV20;Q9UBX3;Q9NZL9;Q9BV57;Q9Y697;P32929;Q9UHY7;Q96GX9;O95571}

11910 Pathogen[ Q85601] interacts with 9 human  
partners:{Q9UBX3;Q9Y697;Q96GX9;Q9BV57;Q9UHY7;P23526;Q9BV20;O95571;P32929}

11911 Pathogen[ P14079] interacts with 11 human  
partners:{Q96KP4;Q9BV20;Q9NZL9;O95571;Q96GX9;Q9Y697;P32929;Q16762;Q16878;P23526;Q9BV57}

11912 Pathogen[ P03383] interacts with 5 human  
partners:{Q9Y697;Q9BV57;Q96GX9;Q9BV20;O95571}

11913 Pathogen[ P03410] interacts with 10 human  
partners:{P32929;Q9Y697;Q9UBX3;Q9BV20;O95571;Q16762;Q96GX9;P23526;Q9BV57;Q9NZL9}

11914 Pathogen[ P14075] interacts with 5 human  
partners:{Q96GX9;Q9BV57;Q9BV20;O95571;Q9Y697}

11915 Pathogen[ P0C206] interacts with 11 human  
partners:{Q9NZL9;Q9BV20;Q9Y697;Q9UBX3;Q9UHY7;P32929;P23526;Q9BV57;Q96GX9;Q16762;O95571}

11916 Pathogen[ P03363] interacts with 5 human  
partners:{Q9Y697;O95571;Q9BV57;Q9BV20;Q96GX9}

11917 [Cluster 1084]GO:0006297+P biological\_process [name] nucleotide-excision repair, DNA gap filling [def] "Repair of the gap in the DNA helix by DNA polymerase and DNA ligase after the portion of the strand containing the lesion has been removed by pyrimidine-dimer repair enzymes." [ISBN

11918 Pathogen[ Q2Q067] interacts with 10 human  
partners:{Q15054;P27694;P35244;P49005;P12004;P06746;P15927;P56282;Q9HCU8;P35251}

11919 Pathogen[ P0C214] interacts with 9 human  
partners:{P06746;P35251;P49005;Q9HCU8;P15927;P35244;Q15054;P27694;P56282}

11920 Pathogen[ P03346] interacts with 13 human  
partners:{P12004;Q9HCU8;P27694;P35244;P35250;P56282;P49005;P15927;P35249;P35251;P40937;P06746;Q15054}

11921 Pathogen[ Q85601] interacts with 11 human  
partners:{P56282;P35244;P49005;Q15054;P27694;P15927;P35251;Q9UBT6;Q9HCU8;P06746;P12004}

11922 Pathogen[ P14079] interacts with 15 human  
partners:{Q5QGS0;P40937;P49005;Q9HCU8;Q15054;P35250;P56282;P35251;P06746;P15927;P27694;P12004;P35244;Q9UBT6;P49917}

11923 Pathogen[ P03383] interacts with 9 human  
partners:{P06746;Q9HCU8;P27694;P49005;P56282;P15927;P35244;Q15054;P35251}

11924 Pathogen[ P03410] interacts with 14 human  
partners:{Q5QGS0;P35244;Q9UBT6;P06746;P56282;P35251;Q15054;P49005;P27694;P15927;P35250;P40937;P12004;Q9HCU8}

11925 Pathogen[ P14075] interacts with 9 human  
partners:{P06746;P49005;P15927;P35244;P35251;Q15054;P27694;Q9HCU8;P56282}

11926 Pathogen[ P0C206] interacts with 12 human  
partners:{P35251;Q9UBT6;Q9HCU8;P06746;P49005;P49917;Q15054;P56282;P27694;P15927;P35244;P12004}

11927 Pathogen[ P03363] interacts with 8 human  
partners:{P27694;P35251;P49005;P35244;P15927;Q9HCU8;P06746;Q15054}

11928 [Cluster 1085]GO:0036016+P biological\_process [name] cellular response to interleukin-3 [def] "Any process that results in a change in state or activity of a cell (in terms of movement, secretion, enzyme production, gene expression, etc.) as a result of an interleukin-3 stimulus." [GOC

11929 Pathogen[ Q2Q067] interacts with 1 human partners:{P02795}

11930 Pathogen[ P0C214] interacts with 1 human partners:{P02795}

11931 Pathogen[ P03346] interacts with 1 human partners:{P02795}

11932 Pathogen[ Q85601] interacts with 1 human partners:{P02795}

11933 Pathogen[ P14079] interacts with 1 human partners:{P02795}

11934 Pathogen[ P03383] interacts with 1 human partners:{P02795}

11935 Pathogen[ P03410] interacts with 1 human partners:{P02795}

11936 Pathogen[ P14075] interacts with 1 human partners:{P02795}

11937 Pathogen[ P0C206] interacts with 1 human partners:{P02795}

11938 Pathogen[ P03363] interacts with 1 human partners:{P02795}

11939 [Cluster 1086]GO:0048557+P biological\_process [name] embryonic digestive tract morphogenesis [def] "The process in which the anatomical structures of the digestive tract are generated and organized during embryonic development. The digestive tract is the anatomical structure through which food passes and is processed." [GOC

11940 Pathogen[ Q2Q067] interacts with 2 human partners:{P36402;P35680}

11941 Pathogen[ P0C214] interacts with 1 human partners:{P36402}

11942 Pathogen[ P03346] interacts with 4 human partners:{P36402;Q14774;O43680;P35680}

11943 Pathogen[ Q85601] interacts with 2 human partners:{P35680;P36402}

11944 Pathogen[ P14079] interacts with 2 human partners:{P35680;P36402}

11945 Pathogen[ P03383] interacts with 1 human partners:{P36402}

11946 Pathogen[ P03410] interacts with 2 human partners:{P36402;P35680}  
11947 Pathogen[ P14075] interacts with 1 human partners:{P36402}  
11948 Pathogen[ P0C206] interacts with 2 human partners:{P35680;P36402}  
11949 Pathogen[ P03363] interacts with 1 human partners:{P36402}  
11950 [Cluster 1087]GO:0010719+P biological\_process [name] negative regulation of epithelial to mesenchymal transition [def] "Any process that decreases the rate, frequency, or extent of epithelial to mesenchymal transition. Epithelial to mesenchymal transition where an epithelial cell loses apical/basolateral polarity, severs intercellular adhesive junctions, degrades basement membrane components and becomes a migratory mesenchymal cell." [GOC  
11951 Pathogen[ Q2Q067] interacts with 2 human partners:{P67775;O15105}  
11952 Pathogen[ P0C214] interacts with 2 human partners:{O15105;P67775}  
11953 Pathogen[ P03346] interacts with 3 human partners:{P67775;O15105;Q99593}  
11954 Pathogen[ Q85601] interacts with 2 human partners:{P67775;O15105}  
11955 Pathogen[ P14079] interacts with 1 human partners:{O15105}  
11956 Pathogen[ P03383] interacts with 2 human partners:{P67775;O15105}  
11957 Pathogen[ P03410] interacts with 2 human partners:{O15105;P67775}  
11958 Pathogen[ P14075] interacts with 2 human partners:{O15105;P67775}  
11959 Pathogen[ P0C206] interacts with 2 human partners:{P67775;O15105}  
11960 Pathogen[ P03363] interacts with 2 human partners:{O15105;P67775}  
11961 [Cluster 1088]GO:0070265+P biological\_process [name] necrotic cell death [def] "A cell death process that is morphologically characterized by a gain in cell volume (oncosis), swelling of organelles, plasma membrane rupture and subsequent loss of intracellular contents." [PMID  
11962 Pathogen[ Q2Q067] interacts with 1 human partners:{Q13158}  
11963 Pathogen[ P0C214] interacts with 1 human partners:{Q13158}  
11964 Pathogen[ P03346] interacts with 1 human partners:{Q13158}  
11965 Pathogen[ Q85601] interacts with 1 human partners:{Q13158}  
11966 Pathogen[ P14079] interacts with 2 human partners:{O60502;Q13158}  
11967 Pathogen[ P03383] interacts with 1 human partners:{Q13158}  
11968 Pathogen[ P03410] interacts with 2 human partners:{O60502;Q13158}  
11969 Pathogen[ P14075] interacts with 1 human partners:{Q13158}  
11970 Pathogen[ P0C206] interacts with 1 human partners:{Q13158}  
11971 Pathogen[ P03363] interacts with 1 human partners:{Q13158}  
11972 [Cluster 1089]GO:2000110+P biological\_process [name] negative regulation of macrophage apoptosis [def] "Any process that stops, prevents, or reduces the frequency, rate or extent of macrophage apoptosis." [GOC  
11973 Pathogen[ Q2Q067] interacts with 1 human partners:{Q92985}  
11974 Pathogen[ P0C214] interacts with 1 human partners:{Q92985}  
11975 Pathogen[ P03346] interacts with 1 human partners:{Q92985}  
11976 Pathogen[ Q85601] interacts with 1 human partners:{Q92985}  
11977 Pathogen[ P14079] interacts with 1 human partners:{Q92985}  
11978 Pathogen[ P03383] interacts with 1 human partners:{Q92985}  
11979 Pathogen[ P03410] interacts with 1 human partners:{Q92985}  
11980 Pathogen[ P14075] interacts with 1 human partners:{Q92985}  
11981 Pathogen[ P0C206] interacts with 1 human partners:{Q92985}  
11982 Pathogen[ P03363] interacts with 1 human partners:{Q92985}  
11983 [Cluster 1090]GO:0002062+P biological\_process [name] chondrocyte differentiation [def] "The process in which a chondroblast acquires specialized structural and/or functional features of a chondrocyte. A chondrocyte is a polymorphic cell that forms cartilage." [GOC  
11984 Pathogen[ Q2Q067] interacts with 2 human partners:{O00712;Q14814}  
11985 Pathogen[ P0C214] interacts with 2 human partners:{Q14814;O00712}  
11986 Pathogen[ P03346] interacts with 4 human partners:{Q9NPC8;Q14814;Q70SY1;O00712}  
11987 Pathogen[ Q85601] interacts with 2 human partners:{Q14814;O00712}  
11988 Pathogen[ P14079] interacts with 3 human partners:{Q06413;Q14814;O00712}  
11989 Pathogen[ P03383] interacts with 2 human partners:{O00712;Q14814}  
11990 Pathogen[ P03410] interacts with 3 human partners:{Q14814;O00712;Q9NRR1}  
11991 Pathogen[ P14075] interacts with 2 human partners:{O00712;Q14814}  
11992 Pathogen[ P0C206] interacts with 2 human partners:{O00712;Q14814}  
11993 Pathogen[ P03363] interacts with 3 human partners:{O00712;Q14814;Q9NPC8}  
11994 [Cluster 1091]GO:0070534+P biological\_process [name] protein K63-linked ubiquitination [def] "A protein ubiquitination process in which a polymer of ubiquitin, formed by linkages between lysine residues at position 63 of the ubiquitin monomers, is added to a protein. K63-linked ubiquitination does not target the substrate protein for degradation, but is involved in several pathways, notably as a signal to promote error-free DNA postreplication repair." [GOC  
11995 Pathogen[ Q2Q067] interacts with 13 human partners:{O95376;Q96J02;O60260;Q9Y2X8;Q12933;Q8N726;P63146;P78317;Q9NPD8;P61088;O76064;Q9UNE7;Q13404}  
11996 Pathogen[ P0C214] interacts with 19 human partners:{Q96J02;Q16763;Q13404;Q969T4;Q8N726;O00308;P78317;P62253;Q9Y2X8;O95376;Q12933;O60260;Q8IYW5;Q9UNE7;O76064;Q9NPD8;Q96LR5;P63146;P61088}  
11997 Pathogen[ P03346] interacts with 14 human partners:{Q96J02;O76064;O95376;Q9Y2X8;Q13404;P61088;P63146;Q9UNE7;Q9NPD8;P78317;Q8IYW5;O60260;Q8N726;O00308}

11998 Pathogen[ Q85601] interacts with 18 human  
partners: {Q96J02;P78317;P62253;Q16763;P63146;Q9Y2X8;Q969T4;Q9NPD8;Q96LR5;Q13404;O76064;Q8N726;Q12933;Q8IYW5;O95376;O60260;P61088;Q9UNE7}

11999 Pathogen[ P14079] interacts with 9 human  
partners: {O60260;Q13404;Q9NPD8;Q8N726;Q96J02;Q12933;Q9Y2X8;P78317;P63146}

12000 Pathogen[ P03383] interacts with 10 human  
partners: {Q9Y2X8;P78317;P61088;O60260;Q12933;Q13404;O95376;Q9NPD8;P63146;Q8N726}

12001 Pathogen[ P03410] interacts with 10 human  
partners: {Q8N726;O60260;P61088;Q9UNE7;P78317;P63146;Q9Y2X8;Q12933;Q9NPD8;Q13404}

12002 Pathogen[ P14075] interacts with 10 human  
partners: {P61088;Q9Y2X8;Q9NPD8;Q12933;P78317;O95376;Q13404;P63146;O60260;Q8N726}

12003 Pathogen[ P0C206] interacts with 19 human  
partners: {Q16763;Q9Y2X8;Q9NPD8;P62253;Q8N726;Q8IYW5;O95376;O00308;Q96J02;Q96LR5;Q12933;P78317;P61088;Q9UNE7;O60260;Q969T4;Q13404;O76064;P63146}

12004 Pathogen[ P03363] interacts with 13 human  
partners: {O95376;Q12933;P78317;Q8IYW5;P63146;P61088;Q9UNE7;Q969T4;O00308;Q8N726;Q9NPD8;Q13404;Q9Y2X8}

12005 [Cluster 1092]GO:0035563+P biological\_process [name] positive regulation of chromatin binding [def] "Any process that increases the frequency, rate or extent of chromatin binding. Chromatin binding is the selective interaction with chromatin, the network of fibers of DNA, protein, and sometimes RNA, that make up the chromosomes of the eukaryotic nucleus during interphase." [GOC

12006 Pathogen[ Q2Q067] interacts with 1 human partners: {Q71SY5}

12007 Pathogen[ P0C214] interacts with 1 human partners: {Q71SY5}

12008 Pathogen[ P03346] interacts with 1 human partners: {Q71SY5}

12009 Pathogen[ Q85601] interacts with 1 human partners: {Q71SY5}

12010 Pathogen[ P14079] interacts with 1 human partners: {Q71SY5}

12011 Pathogen[ P03383] interacts with 1 human partners: {Q71SY5}

12012 Pathogen[ P03410] interacts with 1 human partners: {Q71SY5}

12013 Pathogen[ P14075] interacts with 1 human partners: {Q71SY5}

12014 Pathogen[ P0C206] interacts with 1 human partners: {Q71SY5}

12015 Pathogen[ P03363] interacts with 1 human partners: {Q71SY5}

12016 [Cluster 1093]GO:0046886+P biological\_process [name] positive regulation of hormone biosynthetic process [def] "Any process that activates or increases the frequency, rate or extent of the chemical reactions and pathways resulting in the formation of hormones." [GOC

12017 Pathogen[ Q2Q067] interacts with 1 human partners: {P27540}

12018 Pathogen[ P0C214] interacts with 1 human partners: {P27540}

12019 Pathogen[ P03346] interacts with 1 human partners: {P27540}

12020 Pathogen[ Q85601] interacts with 1 human partners: {P27540}

12021 Pathogen[ P14079] interacts with 1 human partners: {P27540}

12022 Pathogen[ P03383] interacts with 1 human partners: {P27540}

12023 Pathogen[ P03410] interacts with 1 human partners: {P27540}

12024 Pathogen[ P14075] interacts with 1 human partners: {P27540}

12025 Pathogen[ P0C206] interacts with 1 human partners: {P27540}

12026 Pathogen[ P03363] interacts with 1 human partners: {P27540}

12027 [Cluster 1094]GO:0001843+P biological\_process [name] neural tube closure [def] "The last step in the formation of the neural tube, where the paired neural folds are brought together and fuse at the dorsal midline." [GOC

12028 Pathogen[ Q2Q067] interacts with 14 human  
partners: {P07737;Q14160;Q15562;O60315;O95999;Q15699;Q96MT3;P12755;O14641;Q15468;Q92830;Q15583;Q9NSC2;Q9UMX1}

12029 Pathogen[ P0C214] interacts with 13 human  
partners: {Q96MT3;O14641;O95999;Q15468;Q9NSC2;P12755;Q14160;Q92830;O14727;Q15562;O60315;Q15699;Q9UMX1}

12030 Pathogen[ P03346] interacts with 21 human  
partners: {Q15562;O60315;Q9UJQ4;Q15583;Q9NSC2;Q9HGB6;Q9BYW2;Q9BT04;O95999;Q96MT3;Q15699;Q92830;O14641;P61968;Q9ULT8;P07737;Q14160;O75398;Q15468;Q9UMX1;O14727}

12031 Pathogen[ Q85601] interacts with 16 human  
partners: {P61968;O75398;O60315;Q15583;P12755;P07737;Q96MT3;Q92830;O14641;Q15699;Q15562;Q14160;Q9NSC2;O95999;Q9BT04;Q9UMX1}

12032 Pathogen[ P14079] interacts with 17 human  
partners: {P12755;Q8IZ21;O95999;Q92830;O14641;Q15583;Q15699;Q9UMX1;P07737;O60315;P50552;Q15468;Q9UJQ4;Q15562;Q96MT3;Q9NSC2;Q9BT04}

12033 Pathogen[ P03383] interacts with 12 human  
partners: {Q15562;Q14160;Q96MT3;Q15468;P07737;O14641;Q92830;Q9NSC2;O95999;Q15699;Q9BT04;Q9UMX1}

12034 Pathogen[ P03410] interacts with 18 human  
partners: {Q92830;P12755;Q8IZ21;Q15468;Q14160;Q15583;Q9BT04;P50552;O95999;Q15699;Q9HGB6;Q9NSC2;Q96MT3;Q9UJQ4;Q15562;P07737;Q9UMX1;O14641}

12035 Pathogen[ P14075] interacts with 12 human  
partners: {Q9NSC2;Q96MT3;Q14160;Q15562;Q9BT04;P07737;O14641;O95999;Q15468;Q15699;Q92830;Q9UMX1}

12036 Pathogen[ P0C206] interacts with 17 human  
partners: {Q15468;Q92830;Q9UJQ4;Q96MT3;Q9UMX1;Q9NSC2;Q9BT04;O95999;Q15699;P12755;Q14160;Q15562;O60315;O75398;P61968;P07737;Q15583}

12037 Pathogen[ P03363] interacts with 16 human partners: {Q15699;Q9UJQ4;Q15468;O60315;Q9UMX1;Q15562;Q96MT3;Q9ULT8;Q14160;Q92830;Q9HBG6;Q9BT04;Q15583;O75398;O14641;P07737}

12038 [Cluster 1095]GO:0035105+P biological\_process [name] sterol regulatory element binding protein import into nucleus [def] "The transfer of a sterol regulatory element binding protein (SREBP) into the nucleus, across the nuclear membrane, in response to altered levels of one or more lipids. SREBPs are transcription factors that bind sterol regulatory elements (SREs), DNA motifs found in the promoters of target genes." [GOC

12039 Pathogen[ Q2Q067] interacts with 1 human partners: {P02545}

12040 Pathogen[ P0C214] interacts with 1 human partners: {P02545}

12041 Pathogen[ P03346] interacts with 1 human partners: {P02545}

12042 Pathogen[ Q85601] interacts with 1 human partners: {P02545}

12043 Pathogen[ P14079] interacts with 1 human partners: {P02545}

12044 Pathogen[ P03383] interacts with 1 human partners: {P02545}

12045 Pathogen[ P03410] interacts with 1 human partners: {P02545}

12046 Pathogen[ P14075] interacts with 1 human partners: {P02545}

12047 Pathogen[ P0C206] interacts with 1 human partners: {P02545}

12048 Pathogen[ P03363] interacts with 1 human partners: {P02545}

12049 [Cluster 1096]GO:0035872+P biological\_process [name] nucleotide-binding domain, leucine rich repeat containing receptor signaling pathway [def] "A series of molecular signals generated as a consequence of a nucleotide-binding domain, leucine rich repeat containing receptor (NLR) binding to one of its physiological ligands. NLRs are cytoplasmic receptors defined by their tripartite domain architecture that contains

12050 Pathogen[ Q2Q067] interacts with 21 human partners: {Q96J02;Q9NYJ8;P08238;Q14790;Q8N5C8;O14862;Q9Y6K9;P61088;P10599;P0CG47;O14920;Q9C000;P0CG48;O43318;P62987;Q13404;Q9H3M7;O15111;Q9Y2Z0;Q15750;P62979}

12051 Pathogen[ P0C214] interacts with 21 human partners: {Q96J02;O15111;Q9NPP4;Q9Y6K9;Q9H3M7;Q13404;O43318;Q8N5C8;Q9Y2Z0;P0CG48;P62987;Q15750;P0CG47;P10599;O14862;P62979;O14920;Q9NYJ8;P61088;Q14790;Q9C000}

12052 Pathogen[ P03346] interacts with 22 human partners: {Q9Y6K9;Q96J02;O15111;Q9Y2Z0;P62987;P0CG48;Q13404;Q8N5C8;P61088;Q9NPP4;Q9NYJ8;Q15750;P62979;Q14790;P0CG47;P10599;O14920;O43318;O14862;P08238;Q9H3M7;Q9C000}

12053 Pathogen[ Q85601] interacts with 21 human partners: {Q96J02;Q15750;Q9NYJ8;Q9Y2Z0;O15111;Q14790;P0CG48;Q13404;Q8N5C8;P10599;Q9Y6K9;Q9NQC7;O14920;P08238;O14862;P62979;P0CG47;P62987;O43318;P61088;Q9H3M7}

12054 Pathogen[ P14079] interacts with 22 human partners: {Q8N5C8;P0CG48;O43187;O15553;P52564;Q13404;Q9C000;Q15750;P62979;P62987;Q14790;Q9Y6K9;P08238;Q96J02;O14862;P10599;Q9H3M7;P0CG47;Q9Y2Z0;Q9Y2Z0;Q9NQC7;Q9NPP4}

12055 Pathogen[ P03383] interacts with 17 human partners: {O14862;Q9Y6K9;P62987;O14920;O15111;P10599;O43318;Q8N5C8;P61088;Q13404;P62979;P0CG47;Q9H3M7;P0CG48;Q9NYJ8;P08238;Q15750}

12056 Pathogen[ P03410] interacts with 22 human partners: {P10599;P0CG48;O14920;Q9Y2Z0;Q9Y2Z0;P08238;O15111;Q15750;O14862;O43187;Q9H3M7;Q9NPP4;Q9C000;P61088;P62979;O43318;Q9NYJ8;Q8N5C8;P62987;Q13404;Q9Y6K9;P0CG47}

12057 Pathogen[ P14075] interacts with 17 human partners: {O15111;Q15750;P61088;P08238;Q8N5C8;O14920;P0CG48;P62979;O14862;O43318;P62987;Q9H3M7;P0CG47;Q13404;Q9Y6K9;P10599;Q9NYJ8}

12058 Pathogen[ P0C206] interacts with 22 human partners: {Q9NQC7;Q9C000;P0CG48;Q9Y2Z0;O14920;Q9Y6K9;O14862;Q8N5C8;Q96J02;O43318;P61088;P08238;O15111;P62979;Q14790;Q9NYJ8;P0CG47;Q9H3M7;Q15750;P62987;Q13404;P10599}

12059 Pathogen[ P03363] interacts with 16 human partners: {O14920;Q9C000;O15111;Q9NYJ8;Q9H3M7;Q9Y6K9;O43318;Q15750;P61088;P62987;Q9Y2Z0;O14862;Q13404;Q9NPP4;Q8N5C8;P08238}

12060 [Cluster 1097]GO:0006749+P biological\_process [name] glutathione metabolic process [def] "The chemical reactions and pathways involving glutathione, the tripeptide glutamylcysteinylglycine, which acts as a coenzyme for some enzymes and as an antioxidant in the protection of sulfhydryl groups in enzymes and other proteins\_ it has a specific role in the reduction of hydrogen peroxide (H2O2) and oxidized ascorbate, and it participates in the gamma-glutamyl cycle." [CHEBI

12061 Pathogen[ Q2Q067] interacts with 3 human partners: {Q16775;P32929;O43708}

12062 Pathogen[ P0C214] interacts with 5 human partners: {O75874;P11413;Q16775;P32929;O43708}

12063 Pathogen[ P03346] interacts with 4 human partners: {Q9NS18;P32929;O43708;Q16775}

12064 Pathogen[ Q85601] interacts with 3 human partners: {O43708;Q16775;P32929}

12065 Pathogen[ P14079] interacts with 9 human partners: {Q4G0N0;Q9BX51;B5MD39;O43708;Q14390;Q04760;P32929;P10620;Q16775}

12066 Pathogen[ P03383] interacts with 1 human partners: {Q16775}

12067 Pathogen[ P03410] interacts with 6 human partners: {Q4G0N0;B5MD39;P32929;O43708;Q16775;Q04760}

12068 Pathogen[ P14075] interacts with 1 human partners: {Q16775}

12069 Pathogen[ P0C206] interacts with 5 human partners: {Q9NS18;Q04760;Q16775;O43708;P32929}

12070 Pathogen[ P03363] interacts with 1 human partners: {O43708}

12071 [Cluster 1098]GO:0006270+P biological\_process [name] DNA-dependent DNA replication initiation [def] "The process in which DNA replication is started\_ this involves the separation of a stretch of the DNA double helix, the recruitment of DNA polymerases and

- the initiation of polymerase action." [ISBN
- 12072 Pathogen[ Q2Q067] interacts with 12 human  
partners: {P49427;Q13415;Q13156;Q00577;Q14181;P56282;P24864;O75419;O96020;O43913;Q13416;P25205}
- 12073 Pathogen[ P0C214] interacts with 13 human  
partners: {Q13156;O43913;P49427;P25205;Q14566;Q00577;O75419;P24864;Q13416;P56282;O96020;Q13415;Q14181}
- 12074 Pathogen[ P03346] interacts with 16 human  
partners: {P49427;Q00577;O96020;Q13156;P56282;P24864;Q14566;P25205;P33992;Q13415;Q14181;P33991;Q13416;O75419;O43929;O43913}
- 12075 Pathogen[ Q85601] interacts with 14 human  
partners: {O43913;P56282;P49427;Q13415;Q14566;O96020;Q00577;P25205;Q14181;Q13416;Q13156;P33992;O75419;P24864}
- 12076 Pathogen[ P14079] interacts with 16 human  
partners: {Q13416;O75419;Q14566;Q13415;P24864;O43913;Q13156;P56282;P49642;Q14181;O43929;Q00577;P33992;P49427;O96020;P25205}
- 12077 Pathogen[ P03383] interacts with 11 human  
partners: {Q14181;P49427;P25205;O43913;P56282;O96020;O75419;Q13416;Q00577;Q13156;P24864}
- 12078 Pathogen[ P03410] interacts with 16 human  
partners: {P25205;O43929;Q14181;Q13416;P49427;O75419;O96020;P56282;Q00577;P33992;Q13156;O43913;Q14566;P24864;P49642;Q13415}
- 12079 Pathogen[ P14075] interacts with 11 human  
partners: {P49427;O75419;O96020;Q13156;P25205;O43913;Q00577;Q13416;P56282;Q14181;P24864}
- 12080 Pathogen[ P0C206] interacts with 15 human  
partners: {O75419;Q13156;P25205;O43913;Q13416;P49642;O96020;P49427;Q14181;P56282;Q13415;P24864;Q14566;P33992;Q00577}
- 12081 Pathogen[ P03363] interacts with 12 human  
partners: {P24864;P25205;Q14181;P49427;P33992;Q13416;O96020;Q13415;Q13156;Q00577;O75419;O43913}
- 12082 [Cluster 1099]GO:0030216+P biological\_process [name] keratinocyte differentiation [def] "The process in which a relatively unspecialized cell acquires specialized features of a keratinocyte." [GOC
- 12083 Pathogen[ Q2Q067] interacts with 17 human  
partners: {Q9UKI9;P35321;Q03052;P46937;Q99816;P23490;O14896;P15924;P22528;Q9UBC9;P22531;P13645;Q9H4B6;Q9HBD4;P07476;Q9H3M7;O60716}
- 12084 Pathogen[ P0C214] interacts with 18 human  
partners: {Q03052;P35321;O60716;P07476;P22735;Q9H3M7;P15924;Q9HBD4;P46937;Q9UKI9;P23490;Q9H4B6;P22531;O14896;P42574;Q99816;Q9UBC9;P13645}
- 12085 Pathogen[ P03346] interacts with 25 human  
partners: {P15924;P46937;P35321;Q9HBD4;P35325;Q03052;O60716;O95171;P35326;Q9UKI9;P07476;Q99816;Q9BYE4;P42574;Q9UBC9;Q96RM1;P22531;P13645;P23490;P22532;O14896;P22528;Q9H4B6;P22735;Q9H3M7}
- 12086 Pathogen[ Q85601] interacts with 16 human  
partners: {Q99816;O14896;P35321;Q03052;P15924;O60716;P22531;P13645;Q9UKI9;Q9HBD4;P46937;P23490;O95171;Q9UBC9;Q9H3M7;Q9H4B6}
- 12087 Pathogen[ P14079] interacts with 26 human  
partners: {P04083;P22528;P22531;P35326;P22735;O14896;P07476;P15924;Q9BYE4;P46937;Q96RM1;P13645;P20930;P35321;Q9H4B6;P35325;P23490;O95171;Q92817;Q9UBC9;P22532;Q9UKI9;Q9H3M7;Q03052;Q99816;O60716}
- 12088 Pathogen[ P03383] interacts with 20 human  
partners: {P23490;P15924;O60716;Q9BYE4;P35321;Q9HBD4;Q9UKI9;Q99816;P13645;Q9UBC9;Q96RM1;O14896;P22531;P07476;P22532;P22528;Q9H3M7;P46937;Q9H4B6;P35325}
- 12089 Pathogen[ P03410] interacts with 27 human  
partners: {P13645;P23490;P15924;P22531;Q9UBC9;O14896;P35325;P22528;Q9BYE4;O60716;P35321;Q9H3M7;Q03052;O95171;P20930;Q99816;P46937;Q96RM1;Q9UKI9;P22532;P35326;Q9H4B6;Q9HBD4;Q92817;Q15517;P07476;P22735}
- 12090 Pathogen[ P14075] interacts with 20 human  
partners: {P35321;P22532;Q9UBC9;Q9HBD4;P35325;P23490;P13645;Q9H4B6;Q96RM1;P22531;Q9H3M7;O14896;P22528;Q9BYE4;P46937;Q9UKI9;Q99816;P07476;O60716;P15924}
- 12091 Pathogen[ P0C206] interacts with 25 human  
partners: {P46937;O60716;Q9BYE4;Q9UBC9;P35325;P22531;P13645;Q96RM1;Q99816;P35326;P23490;P35321;Q9H4B6;Q9UKI9;Q03052;P42574;O14896;P15924;P22532;Q9H3M7;Q9HBD4;P22735;P07476;O95171;P22528}
- 12092 Pathogen[ P03363] interacts with 24 human  
partners: {P22531;P13645;P22532;O14896;P35321;Q9BYE4;P23490;Q9UBC9;Q9UKI9;Q9H3M7;P35326;P15924;Q96RM1;P46937;P35325;Q9HBD4;P22528;O95171;P07476;Q9H4B6;Q99816;O60716;Q92817;Q03052}
- 12093 [Cluster 1100]GO:0043280+P biological\_process [name] positive regulation of cysteine-type endopeptidase activity involved in apoptotic process [def] "Any process that activates or increases the activity of a cysteine-type endopeptidase involved in the apoptotic process." [GOC
- 12094 Pathogen[ Q2Q067] interacts with 9 human  
partners: {P01106;Q13794;Q96IL0;O00255;Q13127;Q9Y2G2;Q9BZF9;P49593;Q9BT81}
- 12095 Pathogen[ P0C214] interacts with 11 human

partners:{Q92934;Q96IL0;Q9BT81;Q13794;Q9Y2G2;Q13127;P49593;Q9BZF9;P01106;O00255;P18054}  
 12096 Pathogen[ P03346] interacts with 12 human  
 partners:{P58012;Q9NX02;Q96IL0;P18054;P49593;P01106;O00255;Q9BZF9;Q9Y2G2;Q9BT81;Q13794;Q13127}  
 12097 Pathogen[ Q85601] interacts with 9 human  
 partners:{P01106;Q13127;P49593;Q9BZF9;Q9Y2G2;O00255;Q96IL0;Q9BT81;Q13794}  
 12098 Pathogen[ P14079] interacts with 10 human  
 partners:{P49593;Q9BT81;Q96IL0;Q92934;Q13794;P01106;Q9Y2G2;Q9BZF9;Q13127;O00255}  
 12099 Pathogen[ P03383] interacts with 6 human  
 partners:{P01106;Q9BZF9;O00255;Q9Y2G2;Q13794;Q13127}  
 12100 Pathogen[ P03410] interacts with 10 human  
 partners:{Q9Y2G2;P01106;Q96IL0;Q92934;Q13794;Q13127;Q9BZF9;P49593;Q9BT81;O00255}  
 12101 Pathogen[ P14075] interacts with 6 human  
 partners:{P01106;O00255;Q13794;Q13127;Q9BZF9;Q9Y2G2}  
 12102 Pathogen[ P0C206] interacts with 10 human  
 partners:{Q9Y2G2;Q13127;O00255;Q9BT81;Q92934;P49593;P01106;Q9BZF9;Q96IL0;Q13794}  
 12103 Pathogen[ P03363] interacts with 7 human  
 partners:{Q13794;Q9NX02;P01106;Q13127;Q9BZF9;Q9Y2G2;Q9BT81}  
 12104 [Cluster 1101]GO:0030198+P biological\_process [name] extracellular matrix organization  
 [def] "A process that is carried out at the cellular level which results in the assembly, arrangement of constituent parts, or disassembly of an extracellular matrix."  
 [GOC  
 12105 Pathogen[ Q2Q067] interacts with 9 human  
 partners:{O00213;P13349;P20749;P14136;P78545;Q6RSH7;Q00653;Q9HBD4;P23284}  
 12106 Pathogen[ P0C214] interacts with 10 human  
 partners:{O00213;Q00653;P36952;P13349;Q9HBD4;P14136;P23284;P20749;P78545;Q6RSH7}  
 12107 Pathogen[ P03346] interacts with 9 human  
 partners:{O00213;Q6RSH7;Q9HBD4;P13349;P14136;P20749;P78545;Q00653;P23284}  
 12108 Pathogen[ Q85601] interacts with 10 human  
 partners:{O00213;P36952;P13349;P78545;P14136;P23284;Q9HBD4;Q6RSH7;Q00653;P20749}  
 12109 Pathogen[ P14079] interacts with 11 human  
 partners:{P15502;P13349;Q8IVL6;O00213;Q96JX3;P14136;Q13316;P20749;Q6RSH7;P78545;P23284}  
 12110 Pathogen[ P03383] interacts with 10 human  
 partners:{O00213;Q9HBD4;Q00653;P36952;P20749;P14136;Q6RSH7;P23284;P78545;P15502}  
 12111 Pathogen[ P03410] interacts with 13 human  
 partners:{P20749;P78545;O00213;P15502;Q96JX3;P36952;P13349;Q6RSH7;P23284;P14136;Q00653;Q9HBD4;Q13316}  
 12112 Pathogen[ P14075] interacts with 9 human  
 partners:{O00213;Q9HBD4;P23284;P78545;Q6RSH7;P14136;P15502;Q00653;P20749}  
 12113 Pathogen[ P0C206] interacts with 12 human  
 partners:{P15502;Q13316;P36952;O00213;Q6RSH7;P14136;P13349;P23284;P78545;P20749;Q00653;Q9HBD4}  
 12114 Pathogen[ P03363] interacts with 10 human  
 partners:{P23284;O00213;P36952;P13349;P20749;Q6RSH7;Q00653;P78545;Q9HBD4;P14136}  
 12115 [Cluster 1102]GO:0045651+P biological\_process [name] positive regulation of macrophage differentiation  
 [def] "Any process that activates or increases the frequency, rate or extent of macrophage differentiation." [GOC  
 12116 Pathogen[ Q2Q067] interacts with 2 human partners:{P06400;Q14790}  
 12117 Pathogen[ P0C214] interacts with 2 human partners:{P06400;Q14790}  
 12118 Pathogen[ P03346] interacts with 2 human partners:{P06400;Q14790}  
 12119 Pathogen[ Q85601] interacts with 2 human partners:{P06400;Q14790}  
 12120 Pathogen[ P14079] interacts with 1 human partners:{Q14790}  
 12121 Pathogen[ P03383] interacts with 1 human partners:{P06400}  
 12122 Pathogen[ P03410] interacts with 1 human partners:{P06400}  
 12123 Pathogen[ P14075] interacts with 1 human partners:{P06400}  
 12124 Pathogen[ P0C206] interacts with 2 human partners:{Q14790;P06400}  
 12125 Pathogen[ P03363] interacts with 1 human partners:{P06400}  
 12126 [Cluster 1103]GO:1900102+P  
 12127 Pathogen[ Q2Q067] interacts with 1 human partners:{Q8IUR6}  
 12128 Pathogen[ P0C214] interacts with 1 human partners:{Q8IUR6}  
 12129 Pathogen[ P03346] interacts with 1 human partners:{Q8IUR6}  
 12130 Pathogen[ Q85601] interacts with 1 human partners:{Q8IUR6}  
 12131 Pathogen[ P14079] interacts with 1 human partners:{Q8IUR6}  
 12132 Pathogen[ P03383] interacts with 1 human partners:{Q8IUR6}  
 12133 Pathogen[ P03410] interacts with 1 human partners:{Q8IUR6}  
 12134 Pathogen[ P14075] interacts with 1 human partners:{Q8IUR6}  
 12135 Pathogen[ P0C206] interacts with 1 human partners:{Q8IUR6}  
 12136 Pathogen[ P03363] interacts with 1 human partners:{Q8IUR6}  
 12137 [Cluster 1104]GO:0006513+P biological\_process [name] protein monoubiquitination  
 [def] "Addition of a single ubiquitin group to a protein." [GOC  
 12138 Pathogen[ Q2Q067] interacts with 16 human  
 partners:{Q9NS56;Q99816;P19474;O60260;Q9NZJ0;Q7Z6Z7;P61077;P63146;Q9UKC9;Q9NPD8;Q13616;O60291;Q53G59;Q13618;P62877;Q9NW38}  
 12139 Pathogen[ P0C214] interacts with 18 human



12140 Pathogen[ P03346] interacts with 15 human partners: {Q96B02;P19474;Q9NS56;Q13618;P62877;P61077;Q53G59;Q9NZJ0;Q9UKC9;Q13616;Q99816;O60291;Q7Z6Z7;O60260;Q712K3;Q9NPD8;P63146;Q9NW38}

12141 Pathogen[ Q85601] interacts with 17 human partners: {Q99816;Q9NS56;P63146;P62877;Q9NZJ0;Q13616;Q96B02;Q9NPD8;P61077;Q9UKC9;O60291;Q9NW38;O60260;Q7Z6Z7;Q13618;Q53G59;P19474}

12142 Pathogen[ P14079] interacts with 14 human partners: {O60260;Q13618;Q9NPD8;Q9UKC9;P61077;P62877;P19474;Q9NS56;Q9NZJ0;Q13616;Q53G59;Q99816;Q9NW38;P63146}

12143 Pathogen[ P03383] interacts with 13 human partners: {Q13616;P19474;Q9NZJ0;Q99816;Q13618;P61077;O60260;Q53G59;Q9UKC9;P62877;Q9NPD8;P63146;Q9NW38}

12144 Pathogen[ P03410] interacts with 13 human partners: {Q53G59;O60260;Q99816;Q13618;Q9UKC9;P62877;P63146;Q13616;Q9NPD8;O60291;Q9NW38;P61077;Q9NZJ0}

12145 Pathogen[ P14075] interacts with 13 human partners: {Q13618;Q53G59;P61077;Q9NW38;Q9NPD8;P19474;Q9UKC9;P63146;Q99816;Q13616;Q9NZJ0;O60260;P62877}

12146 Pathogen[ P0C206] interacts with 18 human partners: {Q9UKC9;Q9NS56;O60291;P62877;Q9NPD8;Q99816;Q13616;Q712K3;Q13618;O60260;Q9NZJ0;P61077;Q7Z6Z7;Q53G59;Q96B02;Q9NW38;P63146;P19474}

12147 Pathogen[ P03363] interacts with 14 human partners: {Q9NW38;O60291;Q13618;P63146;Q7Z6Z7;Q13616;P62877;P19474;Q53G59;Q9NPD8;Q99816;P61077;Q9UKC9;Q9NZJ0}

12148 [Cluster 1105]GO:0031670+P biological\_process [name] cellular response to nutrient [def] "Any process that results in a change in state or activity of a cell (in terms of movement, secretion, enzyme production, gene expression, etc.) as a result of a nutrient stimulus." [GOC

12149 Pathogen[ Q2Q067] interacts with 3 human partners: {P24864;Q9UKN5;P42772}

12150 Pathogen[ P0C214] interacts with 3 human partners: {Q9UKN5;P24864;P42772}

12151 Pathogen[ P03346] interacts with 3 human partners: {P42772;P24864;Q9UKN5}

12152 Pathogen[ Q85601] interacts with 3 human partners: {Q9UKN5;P42772;P24864}

12153 Pathogen[ P14079] interacts with 2 human partners: {P24864;Q9UKN5}

12154 Pathogen[ P03383] interacts with 3 human partners: {P42772;Q9UKN5;P24864}

12155 Pathogen[ P03410] interacts with 3 human partners: {P42772;Q9UKN5;P24864}

12156 Pathogen[ P14075] interacts with 3 human partners: {Q9UKN5;P42772;P24864}

12157 Pathogen[ P0C206] interacts with 3 human partners: {P42772;Q9UKN5;P24864}

12158 Pathogen[ P03363] interacts with 3 human partners: {P24864;Q9UKN5;P42772}

12159 [Cluster 1106]GO:0050714+P biological\_process [name] positive regulation of protein secretion [def] "Any process that activates or increases the frequency, rate or extent of the controlled release of a protein from a cell or group of cells." [GOC

12160 Pathogen[ Q2Q067] interacts with 2 human partners: {O00213;Q15327}

12161 Pathogen[ P0C214] interacts with 2 human partners: {O00213;Q15327}

12162 Pathogen[ P03346] interacts with 2 human partners: {O00213;Q15327}

12163 Pathogen[ Q85601] interacts with 2 human partners: {O00213;Q15327}

12164 Pathogen[ P14079] interacts with 3 human partners: {Q8NEV8;O00213;Q15327}

12165 Pathogen[ P03383] interacts with 2 human partners: {O00213;Q15327}

12166 Pathogen[ P03410] interacts with 3 human partners: {O00213;Q15327;Q8NEV8}

12167 Pathogen[ P14075] interacts with 2 human partners: {O00213;Q15327}

12168 Pathogen[ P0C206] interacts with 2 human partners: {Q15327;O00213}

12169 Pathogen[ P03363] interacts with 2 human partners: {O00213;Q15327}

12170 [Cluster 1107]GO:0090234+P biological\_process [name] regulation of kinetochore assembly [def] "Any process that modulates the rate, frequency, or extent of kinetochore assembly, the aggregation, arrangement and bonding together of a set of components to form the kinetochore, a multisubunit complex that is located at the centromeric region of DNA and provides an attachment point for the spindle microtubules." [GOC

12171 Pathogen[ Q2Q067] interacts with 2 human partners: {Q9GZR1;P78317}

12172 Pathogen[ P0C214] interacts with 2 human partners: {P78317;Q9GZR1}

12173 Pathogen[ P03346] interacts with 2 human partners: {Q9GZR1;P78317}

12174 Pathogen[ Q85601] interacts with 2 human partners: {P78317;Q9GZR1}

12175 Pathogen[ P14079] interacts with 2 human partners: {P78317;Q9GZR1}

12176 Pathogen[ P03383] interacts with 2 human partners: {P78317;Q9GZR1}

12177 Pathogen[ P03410] interacts with 2 human partners: {Q9GZR1;P78317}

12178 Pathogen[ P14075] interacts with 2 human partners: {P78317;Q9GZR1}

12179 Pathogen[ P0C206] interacts with 2 human partners: {P78317;Q9GZR1}

12180 Pathogen[ P03363] interacts with 2 human partners: {P78317;Q9GZR1}

12181 [Cluster 1108]GO:0006312+P biological\_process [name] mitotic recombination [def] "The exchange, reciprocal or nonreciprocal, of genetic material between one DNA molecule and a homologous region of DNA that occurs during mitotic cell cycles." [GOC

12182 Pathogen[ Q2Q067] interacts with 3 human partners: {Q06609;P11388;P43351}

12183 Pathogen[ P0C214] interacts with 3 human partners: {P43351;Q06609;P11388}

12184 Pathogen[ P03346] interacts with 4 human partners: {Q06609;P11388;P07992;P43351}

12185 Pathogen[ Q85601] interacts with 3 human partners: {P43351;P11388;Q06609}

12186 Pathogen[ P14079] interacts with 4 human partners:{P11388;Q06609;P07992;P43351}  
12187 Pathogen[ P03383] interacts with 2 human partners:{P43351;Q06609}  
12188 Pathogen[ P03410] interacts with 4 human partners:{P07992;P43351;P11388;Q06609}  
12189 Pathogen[ P14075] interacts with 2 human partners:{P43351;Q06609}  
12190 Pathogen[ P0C206] interacts with 4 human partners:{P07992;P43351;Q06609;P11388}  
12191 Pathogen[ P03363] interacts with 2 human partners:{P43351;Q06609}  
12192 [Cluster 1109]GO:0031100+P biological\_process [name] organ regeneration [def] "The regrowth of a lost or destroyed organ." [GOC  
12193 Pathogen[ Q2Q067] interacts with 14 human partners:{P24385;Q16656;Q9HAU5;P09972;P24864;P38936;Q15466;P04818;P16989;P46013;P08397;P60842;P49715;Q14693}  
12194 Pathogen[ P0C214] interacts with 18 human partners:{P04818;P16989;P60842;Q16656;P40261;P24385;Q9HAU5;P38936;P08397;P14618;P09972;P24864;P46013;P16118;Q15524;P31939;Q15466;Q14693}  
12195 Pathogen[ P03346] interacts with 14 human partners:{P09972;Q15524;P24385;Q16656;Q15466;P24864;P16989;P60842;P49715;Q9HAU5;P46013;P38936;P40261;Q14693}  
12196 Pathogen[ Q85601] interacts with 15 human partners:{P24385;Q15466;Q16656;P16118;Q9HAU5;P14618;P09972;P60842;P49715;P08397;P46013;P38936;P16989;Q14693;P24864}  
12197 Pathogen[ P14079] interacts with 14 human partners:{P60842;Q14693;P24864;P31939;Q16656;P09972;P16989;P49715;P38936;P08397;Q9HAU5;Q15466;P04818;P46013}  
12198 Pathogen[ P03383] interacts with 10 human partners:{P16989;Q16656;P46013;P09972;P24385;Q9HAU5;Q15466;P08397;P24864;Q14693}  
12199 Pathogen[ P03410] interacts with 15 human partners:{P08397;P16989;P16118;P46013;Q9HAU5;Q14693;P24385;P09972;P38936;P04818;Q15466;P31939;P60842;Q16656;P24864}  
12200 Pathogen[ P14075] interacts with 11 human partners:{P16989;Q16656;P08397;P16118;Q9HAU5;P09972;Q15466;P24385;P46013;Q14693;P24864}  
12201 Pathogen[ P0C206] interacts with 18 human partners:{Q15466;P46013;P49715;Q15524;P31939;Q16656;P16989;P38936;P04818;Q9HAU5;P09972;P16118;P08397;P60842;Q14693;P24864;P14618;P24385}  
12202 Pathogen[ P03363] interacts with 10 human partners:{Q15466;P24864;Q15524;P09972;Q9HAU5;Q16656;P24385;P60842;P16989;P46013}  
12203 [Cluster 1110]GO:0043268+P biological\_process [name] positive regulation of potassium ion transport [def] "Any process that activates or increases the frequency, rate or extent of the directed movement of potassium ions (K+) into, out of or within a cell, or between cells, by means of some agent such as a transporter or pore." [GOC  
12204 Pathogen[ Q2Q067] interacts with 2 human partners:{Q12959;Q13642}  
12205 Pathogen[ P0C214] interacts with 2 human partners:{Q13642;Q12959}  
12206 Pathogen[ P03346] interacts with 2 human partners:{Q13642;Q12959}  
12207 Pathogen[ Q85601] interacts with 2 human partners:{Q13642;Q12959}  
12208 Pathogen[ P14079] interacts with 1 human partners:{Q13642}  
12209 Pathogen[ P03383] interacts with 1 human partners:{Q13642}  
12210 Pathogen[ P03410] interacts with 3 human partners:{Q12959;Q13642;P33176}  
12211 Pathogen[ P14075] interacts with 1 human partners:{Q13642}  
12212 Pathogen[ P0C206] interacts with 2 human partners:{Q13642;Q12959}  
12213 Pathogen[ P03363] interacts with 3 human partners:{Q12959;P33176;Q13642}  
12214 [Cluster 1111]GO:0042472+P biological\_process [name] inner ear morphogenesis [def] "The process in which the anatomical structures of the inner ear are generated and organized. The inner ear is the structure in vertebrates that contains the organs of balance and hearing. It consists of soft hollow sensory structures (the membranous labyrinth) containing fluid (endolymph) surrounded by fluid (perilymph) and encased in a bony cavity (the bony labyrinth). It consists of two chambers, the sacculus and utriculus, from which arise the cochlea and semicircular canals respectively." [GOC  
12215 Pathogen[ Q2Q067] interacts with 8 human partners:{Q9Y5Q3;Q99502;Q99684;P23769;Q9Y6N9;P49639;Q495M9;P54821}  
12216 Pathogen[ P0C214] interacts with 9 human partners:{P32243;P49639;Q9UM54;Q495M9;P23769;Q9Y6N9;Q9Y5Q3;Q99684;Q99502}  
12217 Pathogen[ P03346] interacts with 21 human partners:{Q9Y6N9;P54821;P49639;Q99811;Q9UIU6;P23769;Q92858;P52951;Q92886;Q9Y5Q3;Q99502;A2RU54;Q06710;Q99684;Q15475;P32242;P56178;Q9P2D1;P32243;Q495M9;Q15319}  
12218 Pathogen[ Q85601] interacts with 10 human partners:{P49639;Q9P2D1;P23769;Q9Y5Q3;Q99502;Q9Y6N9;P32243;Q99684;Q9UM54;Q495M9}  
12219 Pathogen[ P14079] interacts with 14 human partners:{A7XYQ1;Q9Y5U4;Q9Y5Q3;Q99502;Q43597;Q99684;Q9UM54;Q9P2D1;P32243;Q9Y6N9;Q495M9;P49639;P23769;Q15503}  
12220 Pathogen[ P03383] interacts with 5 human partners:{P32243;Q9Y5Q3;P23769;P49639;Q99684}  
12221 Pathogen[ P03410] interacts with 15 human partners:{Q43597;Q99502;Q495M9;Q9Y5U4;Q99684;Q8NEW7;A7XYQ1;Q9Y5Q3;Q9UM54;Q9P2D1;Q9Y6N9;P49639;P32243;P23769;Q15503}  
12222 Pathogen[ P14075] interacts with 5 human partners:{P23769;Q99684;Q9Y5Q3;Q99502;P32243}

12223 Pathogen[ P0C206] interacts with 13 human partners:{Q9UM54;Q9Y5Q3;Q9Y6N9;P54821;P49639;Q9P2D1;P32243;Q495M9;O43597;Q99684;P23769;Q99502;A7XYQ1}

12224 Pathogen[ P03363] interacts with 14 human partners:{Q92886;P56179;Q9Y6N9;Q99684;P32243;P49639;P32242;P54821;Q495M9;P52951;A2RU54;Q99811;Q9Y5Q3;Q15319}

12225 [Cluster 1112]GO:0019915+P biological\_process [name] lipid storage [def] "The accumulation and maintenance in cells or tissues of lipids, compounds soluble in organic solvents but insoluble or sparingly soluble in aqueous solvents. Lipid reserves can be accumulated during early developmental stages for mobilization and utilization at later stages of development." [GOC]

12226 Pathogen[ Q2Q067] interacts with 2 human partners:{O60543;P48552}

12227 Pathogen[ P0C214] interacts with 2 human partners:{P48552;O60543}

12228 Pathogen[ P03346] interacts with 2 human partners:{P48552;O60543}

12229 Pathogen[ Q85601] interacts with 2 human partners:{O60543;P48552}

12230 Pathogen[ P14079] interacts with 3 human partners:{P48552;O60543;Q99541}

12231 Pathogen[ P03383] interacts with 2 human partners:{O60543;P48552}

12232 Pathogen[ P03410] interacts with 2 human partners:{O60543;P48552}

12233 Pathogen[ P14075] interacts with 2 human partners:{O60543;P48552}

12234 Pathogen[ P0C206] interacts with 2 human partners:{O60543;P48552}

12235 Pathogen[ P03363] interacts with 2 human partners:{O60543;P48552}

12236 [Cluster 1113]GO:0010821+P biological\_process [name] regulation of mitochondrion organization [def] "Any process that modulates the frequency, rate or extent of a process involved in the formation, arrangement of constituent parts, or disassembly of a mitochondrion." [GOC]

12237 Pathogen[ Q2Q067] interacts with 2 human partners:{Q9GZY8;Q9H4A6}

12238 Pathogen[ P0C214] interacts with 2 human partners:{Q9H4A6;Q9GZY8}

12239 Pathogen[ P03346] interacts with 2 human partners:{Q9H4A6;Q9GZY8}

12240 Pathogen[ Q85601] interacts with 2 human partners:{Q9H4A6;Q9GZY8}

12241 Pathogen[ P14079] interacts with 2 human partners:{Q9GZY8;Q9H4A6}

12242 Pathogen[ P03383] interacts with 2 human partners:{Q9H4A6;Q9GZY8}

12243 Pathogen[ P03410] interacts with 2 human partners:{Q9GZY8;Q9H4A6}

12244 Pathogen[ P14075] interacts with 2 human partners:{Q9GZY8;Q9H4A6}

12245 Pathogen[ P0C206] interacts with 2 human partners:{Q9H4A6;Q9GZY8}

12246 Pathogen[ P03363] interacts with 2 human partners:{Q9H4A6;Q9GZY8}

12247 [Cluster 1114]GO:0036302+P

12248 Pathogen[ Q2Q067] interacts with 1 human partners:{Q06330}

12249 Pathogen[ P0C214] interacts with 1 human partners:{Q06330}

12250 Pathogen[ P03346] interacts with 1 human partners:{Q06330}

12251 Pathogen[ Q85601] interacts with 1 human partners:{Q06330}

12252 Pathogen[ P14079] interacts with 1 human partners:{Q06330}

12253 Pathogen[ P03383] interacts with 1 human partners:{Q06330}

12254 Pathogen[ P03410] interacts with 1 human partners:{Q06330}

12255 Pathogen[ P14075] interacts with 1 human partners:{Q06330}

12256 Pathogen[ P0C206] interacts with 1 human partners:{Q06330}

12257 Pathogen[ P03363] interacts with 1 human partners:{Q06330}

12258 [Cluster 1115]GO:0051154+P biological\_process [name] negative regulation of striated muscle cell differentiation [def] "Any process that stops, prevents, or reduces the frequency, rate or extent of striated muscle cell differentiation." [CL]

12259 Pathogen[ Q2Q067] interacts with 2 human partners:{Q15910;P67809}

12260 Pathogen[ P0C214] interacts with 2 human partners:{P67809;Q15910}

12261 Pathogen[ P03346] interacts with 2 human partners:{P67809;Q15910}

12262 Pathogen[ Q85601] interacts with 2 human partners:{P67809;Q15910}

12263 Pathogen[ P14079] interacts with 3 human partners:{P67809;Q15910;P28360}

12264 Pathogen[ P03383] interacts with 2 human partners:{Q15910;P67809}

12265 Pathogen[ P03410] interacts with 2 human partners:{P67809;Q15910}

12266 Pathogen[ P14075] interacts with 2 human partners:{Q15910;P67809}

12267 Pathogen[ P0C206] interacts with 2 human partners:{P67809;Q15910}

12268 Pathogen[ P03363] interacts with 2 human partners:{Q15910;P67809}

12269 [Cluster 1116]GO:0043403+P biological\_process [name] skeletal muscle tissue regeneration [def] "The regrowth of skeletal muscle tissue to repair injured or damaged muscle fibers in the postnatal stage." [GOC]

12270 Pathogen[ Q2Q067] interacts with 3 human partners:{P13929;O60248;P23409}

12271 Pathogen[ P0C214] interacts with 3 human partners:{P13929;P14618;O60248}

12272 Pathogen[ P03346] interacts with 5 human partners:{O60248;P13929;P23409;P23759;P58546}

12273 Pathogen[ Q85601] interacts with 4 human partners:{P23409;P14618;P13929;O60248}

12274 Pathogen[ P14079] interacts with 3 human partners:{P23409;O60248;P13929}

12275 Pathogen[ P03383] interacts with 1 human partners:{O60248}

12276 Pathogen[ P03410] interacts with 3 human partners:{P23409;P13929;O60248}

12277 Pathogen[ P14075] interacts with 1 human partners:{O60248}

12278 Pathogen[ P0C206] interacts with 4 human partners:{P23409;O60248;P13929;P14618}

12279 Pathogen[ P03363] interacts with 3 human partners:{P23759;P23409;O60248}

12280 [Cluster 1117]GO:0002318+P biological\_process [name] myeloid progenitor cell differentiation [def] "The process in which a precursor cell type acquires the specialized features of a myeloid progenitor cell. Myeloid progenitor cells include

progenitor cells for any of the myeloid lineages." [GOC

12281 Pathogen[ Q2Q067] interacts with 2 human partners:{Q01196;P58340}

12282 Pathogen[ P0C214] interacts with 1 human partners:{P58340}

12283 Pathogen[ P03346] interacts with 2 human partners:{P58340;Q01196}

12284 Pathogen[ Q85601] interacts with 1 human partners:{P58340}

12285 Pathogen[ P14079] interacts with 1 human partners:{P58340}

12286 Pathogen[ P03383] interacts with 1 human partners:{P58340}

12287 Pathogen[ P03410] interacts with 1 human partners:{P58340}

12288 Pathogen[ P14075] interacts with 1 human partners:{P58340}

12289 Pathogen[ P0C206] interacts with 1 human partners:{P58340}

12290 Pathogen[ P03363] interacts with 1 human partners:{P58340}

12291 [Cluster 1118]GO:0051918+P biological\_process [name] negative regulation of fibrinolysis [def] "Any process that stops, prevents, or reduces the frequency, rate or extent of fibrinolysis, an ongoing process that solubilizes fibrin, resulting in the removal of small blood clots." [GOC

12292 Pathogen[ Q2Q067] interacts with 2 human partners:{P08697;P22415}

12293 Pathogen[ P0C214] interacts with 3 human partners:{P08697;P05121;P22415}

12294 Pathogen[ P03346] interacts with 1 human partners:{P22415}

12295 Pathogen[ Q85601] interacts with 3 human partners:{P08697;P22415;P05121}

12296 Pathogen[ P14079] interacts with 1 human partners:{P22415}

12297 Pathogen[ P03383] interacts with 2 human partners:{P08697;P22415}

12298 Pathogen[ P03410] interacts with 3 human partners:{P05121;P08697;P22415}

12299 Pathogen[ P14075] interacts with 2 human partners:{P08697;P22415}

12300 Pathogen[ P0C206] interacts with 3 human partners:{P22415;P05121;P08697}

12301 Pathogen[ P03363] interacts with 1 human partners:{P22415}

12302 [Cluster 1119]GO:0070837+P biological\_process [name] dehydroascorbic acid transport [def] "The directed movement of dehydroascorbate into, out of or within a cell, or between cells, by means of some agent such as a transporter or pore. Dehydroascorbate, 5-(1,2-dihydroxyethyl)furan-2,3,4(5H)-trione, is an oxidized form of vitamin C." [GOC

12303 Pathogen[ Q2Q067] interacts with 1 human partners:{P11166}

12304 Pathogen[ P0C214] interacts with 2 human partners:{P11166;P11168}

12305 Pathogen[ P03346] interacts with 1 human partners:{P11166}

12306 Pathogen[ Q85601] interacts with 2 human partners:{P11168;P11166}

12307 Pathogen[ P14079] interacts with 1 human partners:{P11166}

12308 Pathogen[ P03383] interacts with 1 human partners:{P11168}

12309 Pathogen[ P03410] interacts with 2 human partners:{P11166;P11168}

12310 Pathogen[ P14075] interacts with 1 human partners:{P11168}

12311 Pathogen[ P0C206] interacts with 2 human partners:{P11166;P11168}

12312 Pathogen[ P03363] interacts with 1 human partners:{P11166}

12313 [Cluster 1120]GO:0021629+P biological\_process [name] olfactory nerve structural organization [def] "The process that contributes to the act of creating the structural organization of the oculomotor nerve. This process pertains to the physical shaping of a rudimentary structure. The olfactory nerve is a collection of sensory nerve rootlets that extend down from the olfactory bulb to the olfactory mucosa of the upper parts of the nasal cavity. This nerve conducts odor information to the brainstem." [GO\_REF

12314 Pathogen[ Q2Q067] interacts with 1 human partners:{P11532}

12315 Pathogen[ P0C214] interacts with 1 human partners:{P11532}

12316 Pathogen[ P03346] interacts with 1 human partners:{P11532}

12317 Pathogen[ Q85601] interacts with 1 human partners:{P11532}

12318 Pathogen[ P14079] interacts with 1 human partners:{P11532}

12319 Pathogen[ P03383] interacts with 1 human partners:{P11532}

12320 Pathogen[ P03410] interacts with 1 human partners:{P11532}

12321 Pathogen[ P14075] interacts with 1 human partners:{P11532}

12322 Pathogen[ P0C206] interacts with 1 human partners:{P11532}

12323 Pathogen[ P03363] interacts with 1 human partners:{P11532}

12324 [Cluster 1121]GO:0031953+P biological\_process [name] negative regulation of protein autophosphorylation [def] "Any process that stops, prevents or decreases the rate of the phosphorylation by a protein of one or more of its own residues." [GOC

12325 Pathogen[ Q2Q067] interacts with 1 human partners:{Q9UJM3}

12326 Pathogen[ P0C214] interacts with 2 human partners:{Q9UJM3;P05412}

12327 Pathogen[ P03346] interacts with 2 human partners:{P05412;Q9UJM3}

12328 Pathogen[ Q85601] interacts with 2 human partners:{P05412;Q9UJM3}

12329 Pathogen[ P14079] interacts with 2 human partners:{Q9UJM3;P05412}

12330 Pathogen[ P03383] interacts with 2 human partners:{Q9UJM3;P05412}

12331 Pathogen[ P03410] interacts with 2 human partners:{P05412;Q9UJM3}

12332 Pathogen[ P14075] interacts with 2 human partners:{P05412;Q9UJM3}

12333 Pathogen[ P0C206] interacts with 2 human partners:{P05412;Q9UJM3}

12334 Pathogen[ P03363] interacts with 2 human partners:{P05412;Q9UJM3}

12335 [Cluster 1122]GO:0008631+P biological\_process [name] induction of apoptosis by oxidative stress [def] "The activation, by oxidative stress, of any of the steps required for cell death by apoptosis." [GOC

12336 Pathogen[ Q2Q067] interacts with 4 human partners:{Q9NR28;Q9UBF6;Q969S3;Q9BZF9}

12337 Pathogen[ P0C214] interacts with 5 human partners:{Q969S3;P42574;Q9BZF9;Q9NR28;Q9UBF6}

12338 Pathogen[ P03346] interacts with 5 human

partners:{Q969S3;Q9NR28;P42574;Q9BZF9;Q9UBF6}

12339 Pathogen[ Q85601] interacts with 4 human partners:{Q9BZF9;Q9NR28;Q969S3;Q9UBF6}

12340 Pathogen[ P14079] interacts with 4 human partners:{Q9UBF6;Q9NR28;Q9BZF9;Q969S3}

12341 Pathogen[ P03383] interacts with 4 human partners:{Q9BZF9;Q9UBF6;Q9NR28;Q969S3}

12342 Pathogen[ P03410] interacts with 4 human partners:{Q9NR28;Q969S3;Q9UBF6;Q9BZF9}

12343 Pathogen[ P14075] interacts with 4 human partners:{Q969S3;Q9NR28;Q9BZF9;Q9UBF6}

12344 Pathogen[ P0C206] interacts with 5 human partners:{Q9NR28;Q9UBF6;Q969S3;P42574;Q9BZF9}

12345 Pathogen[ P03363] interacts with 4 human partners:{Q9UBF6;Q9BZF9;Q9NR28;Q969S3}

12346 [Cluster 1123]GO:0032735+P biological\_process [name] positive regulation of interleukin-12 production [def] "Any process that activates or increases the frequency, rate, or extent of interleukin-12 production." [GOC

12347 Pathogen[ Q2Q067] interacts with 1 human partners:{Q02556}

12348 Pathogen[ P0C214] interacts with 2 human partners:{Q02556;P10809}

12349 Pathogen[ P03346] interacts with 1 human partners:{Q02556}

12350 Pathogen[ Q85601] interacts with 1 human partners:{Q02556}

12351 Pathogen[ P14079] interacts with 1 human partners:{Q02556}

12352 Pathogen[ P03383] interacts with 1 human partners:{Q02556}

12353 Pathogen[ P03410] interacts with 1 human partners:{Q02556}

12354 Pathogen[ P14075] interacts with 1 human partners:{Q02556}

12355 Pathogen[ P0C206] interacts with 1 human partners:{Q02556}

12356 Pathogen[ P03363] interacts with 1 human partners:{Q02556}

12357 [Cluster 1124]GO:0051208+P biological\_process [name] sequestering of calcium ion [def] "The process of binding or confining calcium ions such that they are separated from other components of a biological system." [GOC

12358 Pathogen[ Q2Q067] interacts with 2 human partners:{P27797;P14625}

12359 Pathogen[ P0C214] interacts with 2 human partners:{P14625;P27797}

12360 Pathogen[ P03346] interacts with 2 human partners:{P14625;P27797}

12361 Pathogen[ Q85601] interacts with 2 human partners:{P27797;P14625}

12362 Pathogen[ P14079] interacts with 1 human partners:{P14625}

12363 Pathogen[ P03383] interacts with 2 human partners:{P14625;P27797}

12364 Pathogen[ P03410] interacts with 2 human partners:{P14625;P27797}

12365 Pathogen[ P14075] interacts with 2 human partners:{P27797;P14625}

12366 Pathogen[ P0C206] interacts with 2 human partners:{P27797;P14625}

12367 Pathogen[ P03363] interacts with 1 human partners:{P27797}

12368 [Cluster 1125]GO:0042306+P biological\_process [name] regulation of protein import into nucleus [def] "Any process that modulates the frequency, rate or extent of movement of proteins from the cytoplasm to the nucleus." [GOC

12369 Pathogen[ Q2Q067] interacts with 1 human partners:{Q14978}

12370 Pathogen[ P0C214] interacts with 1 human partners:{Q14978}

12371 Pathogen[ P03346] interacts with 1 human partners:{Q14978}

12372 Pathogen[ Q85601] interacts with 1 human partners:{Q14978}

12373 Pathogen[ P14079] interacts with 1 human partners:{Q14978}

12374 Pathogen[ P03383] interacts with 1 human partners:{Q14978}

12375 Pathogen[ P03410] interacts with 1 human partners:{Q14978}

12376 Pathogen[ P14075] interacts with 1 human partners:{Q14978}

12377 Pathogen[ P0C206] interacts with 1 human partners:{Q14978}

12378 Pathogen[ P03363] interacts with 1 human partners:{Q14978}

12379 [Cluster 1126]GO:0006207+P biological\_process [name] 'de novo' pyrimidine base biosynthetic process [def] "The chemical reactions and pathways resulting in the formation of pyrimidine bases, 1,3-diazine, organic nitrogenous bases, beginning with the synthesis of a pyrimidine ring from simpler precursors." [GOC

12380 Pathogen[ Q2Q067] interacts with 1 human partners:{P11172}

12381 Pathogen[ P0C214] interacts with 1 human partners:{P11172}

12382 Pathogen[ P03346] interacts with 1 human partners:{P11172}

12383 Pathogen[ Q85601] interacts with 1 human partners:{P11172}

12384 Pathogen[ P14079] interacts with 1 human partners:{P11172}

12385 Pathogen[ P03383] interacts with 1 human partners:{P11172}

12386 Pathogen[ P03410] interacts with 1 human partners:{P11172}

12387 Pathogen[ P14075] interacts with 1 human partners:{P11172}

12388 Pathogen[ P0C206] interacts with 1 human partners:{P11172}

12389 Pathogen[ P03363] interacts with 1 human partners:{P11172}

12390 [Cluster 1127]GO:0035048+P biological\_process [name] splicing factor protein import into nucleus [def] "The directed movement of a pre-mRNA splicing factor from the cytoplasm into the nucleus, across the nuclear membrane." [GOC

12391 Pathogen[ Q2Q067] interacts with 1 human partners:{Q9Y5L0}

12392 Pathogen[ P0C214] interacts with 1 human partners:{Q9Y5L0}

12393 Pathogen[ P03346] interacts with 1 human partners:{Q9Y5L0}

12394 Pathogen[ Q85601] interacts with 1 human partners:{Q9Y5L0}

12395 Pathogen[ P14079] interacts with 1 human partners:{Q9Y5L0}

12396 Pathogen[ P03383] interacts with 1 human partners:{Q9Y5L0}

12397 Pathogen[ P03410] interacts with 1 human partners:{Q9Y5L0}

12398 Pathogen[ P14075] interacts with 1 human partners:{Q9Y5L0}

12399 Pathogen[ P0C206] interacts with 1 human partners:{Q9Y5L0}

12400 Pathogen[ P03363] interacts with 1 human partners:{Q9Y5L0}

12401 [Cluster 1128]GO:0071549+P biological\_process [name] cellular response to

dexamethasone stimulus [def] "Any process that results in a change in state or activity of a cell (in terms of movement, secretion, enzyme production, gene expression, etc.) as a result of a dexamethasone stimulus." [GOC

12402 Pathogen[ Q2Q067] interacts with 2 human partners:{Q01664;P08397}

12403 Pathogen[ P0C214] interacts with 3 human partners:{P08397;P22830;Q01664}

12404 Pathogen[ P03346] interacts with 2 human partners:{P55211;Q01664}

12405 Pathogen[ Q85601] interacts with 2 human partners:{P08397;Q01664}

12406 Pathogen[ P14079] interacts with 3 human partners:{P08397;Q01664;P22830}

12407 Pathogen[ P03383] interacts with 2 human partners:{Q01664;P08397}

12408 Pathogen[ P03410] interacts with 3 human partners:{P08397;P22830;Q01664}

12409 Pathogen[ P14075] interacts with 2 human partners:{P08397;Q01664}

12410 Pathogen[ P0C206] interacts with 3 human partners:{P22830;Q01664;P08397}

12411 Pathogen[ P03363] interacts with 1 human partners:{Q01664}

12412 [Cluster 1129]GO:0031119+P biological\_process [name] tRNA pseudouridine synthesis [def] "The intramolecular conversion of uridine to pseudouridine in a tRNA molecule." [GOC

12413 Pathogen[ Q2Q067] interacts with 2 human partners:{Q9Y606;Q9BZE2}

12414 Pathogen[ P0C214] interacts with 2 human partners:{Q9BZE2;Q9Y606}

12415 Pathogen[ P03346] interacts with 2 human partners:{Q9Y606;Q9BZE2}

12416 Pathogen[ Q85601] interacts with 2 human partners:{Q9BZE2;Q9Y606}

12417 Pathogen[ P14079] interacts with 2 human partners:{Q9BZE2;Q9Y606}

12418 Pathogen[ P03383] interacts with 2 human partners:{Q9BZE2;Q9Y606}

12419 Pathogen[ P03410] interacts with 2 human partners:{Q9BZE2;Q9Y606}

12420 Pathogen[ P14075] interacts with 2 human partners:{Q9Y606;Q9BZE2}

12421 Pathogen[ P0C206] interacts with 2 human partners:{Q9BZE2;Q9Y606}

12422 Pathogen[ P03363] interacts with 2 human partners:{Q9BZE2;Q9Y606}

12423 [Cluster 1130]GO:0043388+P biological\_process [name] positive regulation of DNA binding [def] "Any process that increases the frequency, rate or extent of DNA binding. DNA binding is any process in which a gene product interacts selectively with DNA (deoxyribonucleic acid)." [GOC

12424 Pathogen[ Q2Q067] interacts with 7 human partners:{Q15306;P12755;P10599;O60885;O60869;Q9HBD4;P53567}

12425 Pathogen[ P0C214] interacts with 7 human partners:{P53567;Q9HBD4;P12755;O60885;P10599;O60869;Q15306}

12426 Pathogen[ P03346] interacts with 6 human partners:{Q9HBD4;Q15306;O60885;P10599;P53567;O60869}

12427 Pathogen[ Q85601] interacts with 7 human partners:{P53567;Q15306;P12755;P10599;Q9HBD4;O60885;O60869}

12428 Pathogen[ P14079] interacts with 6 human partners:{P12755;P53567;O60869;Q15306;P10599;O60885}

12429 Pathogen[ P03383] interacts with 6 human partners:{Q9HBD4;P10599;Q15306;O60885;P53567;O60869}

12430 Pathogen[ P03410] interacts with 7 human partners:{P10599;O60885;P12755;P53567;Q15306;O60869;Q9HBD4}

12431 Pathogen[ P14075] interacts with 6 human partners:{Q9HBD4;P53567;Q15306;O60885;O60869;P10599}

12432 Pathogen[ P0C206] interacts with 7 human partners:{P53567;Q15306;P12755;O60885;O60869;Q9HBD4;P10599}

12433 Pathogen[ P03363] interacts with 5 human partners:{P53567;Q15306;O60885;Q9HBD4;O60869}

12434 [Cluster 1131]GO:0051256+P biological\_process [name] spindle midzone assembly involved in mitosis [def] "The formation of the spindle midzone, the area in the center of the spindle where the spindle microtubules from opposite poles overlap, as a part of the process of mitosis." [GOC

12435 Pathogen[ Q2Q067] interacts with 1 human partners:{Q02241}

12436 Pathogen[ P0C214] interacts with 1 human partners:{Q02241}

12437 Pathogen[ P03346] interacts with 1 human partners:{Q02241}

12438 Pathogen[ Q85601] interacts with 1 human partners:{Q02241}

12439 Pathogen[ P14079] interacts with 1 human partners:{Q02241}

12440 Pathogen[ P03383] interacts with 1 human partners:{Q02241}

12441 Pathogen[ P03410] interacts with 1 human partners:{Q02241}

12442 Pathogen[ P14075] interacts with 1 human partners:{Q02241}

12443 Pathogen[ P0C206] interacts with 1 human partners:{Q02241}

12444 Pathogen[ P03363] interacts with 1 human partners:{Q02241}

12445 [Cluster 1132]GO:0045899+P biological\_process [name] positive regulation of RNA polymerase II transcriptional preinitiation complex assembly [def] "Any process that activates or increases the frequency, rate or extent of RNA polymerase II transcriptional preinitiation complex assembly." [GOC

12446 Pathogen[ Q2Q067] interacts with 2 human partners:{Q86VP6;P35869}

12447 Pathogen[ P0C214] interacts with 2 human partners:{P35869;Q86VP6}

12448 Pathogen[ P03346] interacts with 2 human partners:{Q86VP6;P35869}

12449 Pathogen[ Q85601] interacts with 2 human partners:{Q86VP6;P35869}

12450 Pathogen[ P14079] interacts with 2 human partners:{P35869;Q86VP6}

12451 Pathogen[ P03383] interacts with 2 human partners:{Q86VP6;P35869}

12452 Pathogen[ P03410] interacts with 1 human partners:{Q86VP6}

12453 Pathogen[ P14075] interacts with 2 human partners:{P35869;Q86VP6}

12454 Pathogen[ P0C206] interacts with 2 human partners:{P35869;Q86VP6}  
12455 Pathogen[ P03363] interacts with 2 human partners:{P35869;Q86VP6}  
12456 [Cluster 1133]GO:0006729+P biological\_process [name] tetrahydrobiopterin biosynthetic process [def] "The chemical reactions and pathways resulting in the formation of tetrahydrobiopterin, the reduced form of biopterin (2-amino-4-hydroxy-6-(1,2-dihydroxypropyl)-pteridine). It functions as a hydroxylation coenzyme, e.g. in the conversion of phenylalanine to tyrosine." [CHEBI  
12457 Pathogen[ Q2Q067] interacts with 4 human partners:{P30793;P61457;Q03393;Q9H0N5}  
12458 Pathogen[ P0C214] interacts with 6 human partners:{P09417;P61457;P35270;Q9H0N5;Q03393;P30793}  
12459 Pathogen[ P03346] interacts with 3 human partners:{Q03393;P61457;Q9H0N5}  
12460 Pathogen[ Q85601] interacts with 3 human partners:{Q9H0N5;P30793;P61457}  
12461 Pathogen[ P14079] interacts with 4 human partners:{P61457;P30793;Q9H0N5;Q03393}  
12462 Pathogen[ P03383] interacts with 2 human partners:{P61457;Q9H0N5}  
12463 Pathogen[ P03410] interacts with 4 human partners:{P30793;Q9H0N5;Q03393;P61457}  
12464 Pathogen[ P14075] interacts with 3 human partners:{Q9H0N5;P61457;P30793}  
12465 Pathogen[ P0C206] interacts with 4 human partners:{P30793;P61457;Q03393;Q9H0N5}  
12466 Pathogen[ P03363] interacts with 2 human partners:{Q9H0N5;P61457}  
12467 [Cluster 1134]GO:0048015+P biological\_process [name] phosphatidylinositol-mediated signaling [def] "A series of molecular signals in which a cell uses a phosphatidylinositol-mediated signaling to convert a signal into a response. Phosphatidylinositols include phosphatidylinositol (PtdIns) and its phosphorylated derivatives." [GOC  
12468 Pathogen[ Q2Q067] interacts with 24 human partners:{P31749;Q96R06;O00762;Q5T1C6;Q96B36;P11388;P12004;O43524;Q9BPZ7;Q9BVC4;P06396;P39748;Q96RU7;P04818;P33552;P27986;O95229;O14777;P46527;Q6R327;P61586;O15111;Q00987;P22736}  
12469 Pathogen[ P0C214] interacts with 26 human partners:{Q9BPZ7;O60346;O15111;Q9BVC4;P04818;O00762;Q92934;Q00987;Q96R06;P62166;P61586;P46527;O95229;P06396;Q6R327;Q96B36;Q9UQC2;P11388;Q96RU7;P39748;Q5T1C6;P16220;P33552;P27986;P31749;O14777}  
12470 Pathogen[ P03346] interacts with 31 human partners:{P12004;O60346;O15111;O95229;P16220;P11388;Q9BVC4;Q96R06;Q9BPZ7;Q9UQC2;Q00987;O14777;Q96B36;P22736;P31749;O00762;P33552;Q12778;P98177;P35249;P62166;Q96RU7;P55211;P06396;P39748;Q6R327;P46527;O43524;O14965;P27986;P61586}  
12471 Pathogen[ Q85601] interacts with 26 human partners:{O60346;O95229;P31749;P06396;Q9UQC2;O15111;Q9BPZ7;Q96B36;Q96R06;P27986;Q9BVC4;O14965;P16220;P33552;P22736;P11388;O00762;P61586;Q96RU7;P12004;P39748;Q00987;P62166;Q5T1C6;O14777;P46527}  
12472 Pathogen[ P14079] interacts with 24 human partners:{Q6R327;P11388;Q96R06;O95229;P22736;O60346;Q9BVC4;Q00987;P33552;Q92934;Q5T1C6;P62166;P61586;Q96RU7;P46527;Q96B36;P12004;O00762;Q9BPZ7;O14965;Q9UQC2;P04818;O14777;P39748}  
12473 Pathogen[ P03383] interacts with 17 human partners:{P27986;P16220;P31749;Q9BPZ7;O15111;O00762;Q96B36;Q96R06;P33552;O95229;P61586;P46527;O14965;Q96RU7;O14777;Q5T1C6;P06396}  
12474 Pathogen[ P03410] interacts with 29 human partners:{Q9UQC2;P46527;P27986;O15111;P06396;Q9BPZ7;P31749;Q92934;P39748;Q9BVC4;Q96R06;O14965;Q96B36;P33552;Q5T1C6;P61586;P04818;P22736;P16220;Q6R327;P11388;Q96RU7;O60346;O00762;O95229;Q00987;P62166;P12004;O14777}  
12475 Pathogen[ P14075] interacts with 18 human partners:{O15111;Q96R06;Q5T1C6;O14777;O95229;P46527;Q9BPZ7;Q96B36;P31749;O00762;O14965;Q6R327;P27986;P06396;P61586;Q96RU7;P16220;P33552}  
12476 Pathogen[ P0C206] interacts with 28 human partners:{P06396;P31749;P16220;P62166;Q96B36;O14777;P22736;P27986;Q96RU7;P61586;Q92934;Q6R327;O15111;Q5T1C6;P46527;Q9BPZ7;O00762;P04818;P33552;O60346;P11388;Q00987;O14965;P39748;Q9UQC2;Q9BVC4;O95229;P12004}  
12477 Pathogen[ P03363] interacts with 15 human partners:{Q9BVC4;Q96B36;O00762;O95229;P33552;O15111;P16220;P06396;O43524;Q96R06;P31749;O14777;P27986;Q6R327;Q9UQC2}  
12478 [Cluster 1135]GO:0070145+P biological\_process [name] mitochondrial asparaginyl-tRNA aminoacylation [def] "The process of coupling asparagine to asparaginyl-tRNA in a mitochondrion, catalyzed by asparaginyl-tRNA synthetase. In tRNA aminoacylation, the amino acid is first activated by linkage to AMP and then transferred to either the 2'- or the 3'-hydroxyl group of the 3'-adenosine residue of the tRNA." [GOC  
12479 Pathogen[ Q2Q067] interacts with 1 human partners:{Q6PI48}  
12480 Pathogen[ P0C214] interacts with 1 human partners:{Q6PI48}  
12481 Pathogen[ P03346] interacts with 1 human partners:{Q6PI48}  
12482 Pathogen[ Q85601] interacts with 1 human partners:{Q6PI48}  
12483 Pathogen[ P14079] interacts with 1 human partners:{Q6PI48}  
12484 Pathogen[ P03383] interacts with 1 human partners:{Q6PI48}  
12485 Pathogen[ P03410] interacts with 1 human partners:{Q6PI48}  
12486 Pathogen[ P14075] interacts with 1 human partners:{Q6PI48}  
12487 Pathogen[ P0C206] interacts with 1 human partners:{Q6PI48}  
12488 Pathogen[ P03363] interacts with 1 human partners:{Q6PI48}  
12489 [Cluster 1136]GO:0001934+P biological\_process [name] positive regulation of protein

phosphorylation [def] "Any process that activates or increases the frequency, rate or extent of addition of phosphate groups to amino acids within a protein." [GOC

12490 Pathogen[ Q2Q067] interacts with 14 human  
partners:{P30281;P31749;P24385;Q9BZQ8;P30279;Q8TDY2;Q9H8T0;O14641;Q13526;Q9HC62;P60953;P27986;Q9HAT8;P02489}

12491 Pathogen[ P0C214] interacts with 14 human  
partners:{P02489;Q13526;P60953;Q9HAT8;Q8TDY2;P24385;Q9H8T0;Q9BZQ8;O14641;P30281;P30279;Q9HC62;P27986;P31749}

12492 Pathogen[ P03346] interacts with 14 human  
partners:{P30281;P24385;P30279;P02489;Q8TDY2;P60953;Q13526;Q9H8T0;O14641;P31749;Q9BZQ8;Q9HAT8;Q9HC62;P27986}

12493 Pathogen[ Q85601] interacts with 14 human  
partners:{P30281;P02489;P31749;P24385;Q9HC62;Q9HAT8;Q8TDY2;Q9BZQ8;P27986;Q9H8T0;O14641;Q13526;P30279;P60953}

12494 Pathogen[ P14079] interacts with 12 human  
partners:{P31751;Q9HAT8;Q8TDY2;O14641;P24588;O43432;Q9H8T0;P02489;Q7Z434;Q9HC62;Q13526;Q9BZQ8}

12495 Pathogen[ P03383] interacts with 13 human  
partners:{P27986;P31749;P60953;P24385;Q8TDY2;P30279;Q9BZQ8;Q9H8T0;O14641;Q9HC62;P30281;Q13526;Q9HAT8}

12496 Pathogen[ P03410] interacts with 17 human  
partners:{P27986;P30279;Q13526;Q8TDY2;Q9H8T0;P31749;O43432;Q7Z434;P24385;Q9HC62;P02489;Q9HAT8;P30281;P60953;Q9BZQ8;P24588;O14641}

12497 Pathogen[ P14075] interacts with 13 human  
partners:{P60953;P30281;P30279;Q8TDY2;P31749;Q9H8T0;O14641;Q9BZQ8;Q13526;Q9HC62;Q9HAT8;P27986;P24385}

12498 Pathogen[ P0C206] interacts with 13 human  
partners:{Q9BZQ8;P31749;Q13526;P30279;Q9H8T0;Q9HC62;Q9HAT8;P27986;Q8TDY2;P60953;P02489;P24385;P30281}

12499 Pathogen[ P03363] interacts with 14 human  
partners:{Q9BZQ8;P30279;Q13526;P31749;Q9HC62;Q8TDY2;Q9H8T0;P24385;P02489;Q9HAT8;P30281;O14641;P60953;P27986}

12500 [Cluster 1137]GO:0060548+P biological\_process [name] negative regulation of cell death [def] "Any process that decreases the rate or frequency of cell death. Cell death is the specific activation or halting of processes within a cell so that its vital functions markedly cease, rather than simply deteriorating gradually over time, which culminates in cell death." [GOC

12501 Pathogen[ Q2Q067] interacts with 9 human  
partners:{Q8WW38;Q13485;Q99497;Q15562;O60260;Q9Y6J0;Q9HB71;Q6IQ32;P16455}

12502 Pathogen[ P0C214] interacts with 9 human  
partners:{Q6IQ32;Q99497;Q13485;Q8WW38;P16455;O60260;Q15562;Q9HB71;Q9Y6J0}

12503 Pathogen[ P03346] interacts with 10 human  
partners:{Q06945;Q15562;Q8WW38;Q6ZPB5;Q9HB71;Q9Y6J0;Q6IQ32;Q99497;O60260;Q13485}

12504 Pathogen[ Q85601] interacts with 9 human  
partners:{Q99497;Q8WW38;P16455;Q9Y6J0;Q6IQ32;Q15562;O60260;Q13485;Q9HB71}

12505 Pathogen[ P14079] interacts with 9 human  
partners:{O60260;Q6ZPB5;Q99497;P16455;Q9HB71;Q15562;Q6IQ32;Q8WW38;Q9Y6J0}

12506 Pathogen[ P03383] interacts with 7 human  
partners:{Q13485;Q15562;Q8WW38;Q6IQ32;Q6ZPB5;Q9HB71;O60260}

12507 Pathogen[ P03410] interacts with 10 human  
partners:{Q9Y6J0;Q9HB71;Q99497;O60260;Q8WW38;Q6IQ32;P16455;Q13485;Q6ZPB5;Q15562}

12508 Pathogen[ P14075] interacts with 7 human  
partners:{Q15562;Q8WW38;Q13485;Q6IQ32;Q6ZPB5;O60260;Q9HB71}

12509 Pathogen[ P0C206] interacts with 10 human  
partners:{Q9HB71;Q8WW38;Q99497;Q9Y6J0;Q6IQ32;O60260;Q15562;Q13485;Q6ZPB5;P16455}

12510 Pathogen[ P03363] interacts with 7 human  
partners:{Q9Y6J0;Q9HB71;Q15562;Q6ZPB5;Q13485;Q6IQ32;Q8WW38}

12511 [Cluster 1138]GO:0000089+P biological\_process [name] mitotic metaphase [def] "Metaphase occurring as part of mitosis. Metaphase is the part of nuclear division in which, canonically, chromosomes become aligned on the equatorial plate of the cell. Mitosis is the cell cycle process in which, canonically, the nucleus of a eukaryotic cell divides to produce two daughter nuclei whose chromosome complement is identical to that of the mother cell." [ISBN

12512 Pathogen[ Q2Q067] interacts with 4 human partners:{Q53HL2;O00541;Q9Y6D9;Q9UKT4}

12513 Pathogen[ P0C214] interacts with 4 human partners:{Q53HL2;O00541;Q9UKT4;Q9Y6D9}

12514 Pathogen[ P03346] interacts with 4 human partners:{Q9Y6D9;O00541;Q53HL2;Q9UKT4}

12515 Pathogen[ Q85601] interacts with 4 human partners:{O00541;Q9UKT4;Q53HL2;Q9Y6D9}

12516 Pathogen[ P14079] interacts with 3 human partners:{Q9UKT4;Q53HL2;O00541}

12517 Pathogen[ P03383] interacts with 4 human partners:{O00541;Q9UKT4;Q53HL2;Q9Y6D9}

12518 Pathogen[ P03410] interacts with 3 human partners:{Q9UKT4;Q53HL2;O00541}

12519 Pathogen[ P14075] interacts with 4 human partners:{Q9Y6D9;Q9UKT4;O00541;Q53HL2}

12520 Pathogen[ P0C206] interacts with 4 human partners:{Q9Y6D9;Q9UKT4;Q53HL2;O00541}

12521 Pathogen[ P03363] interacts with 4 human partners:{Q9Y6D9;Q53HL2;Q9UKT4;O00541}

12522 [Cluster 1139]GO:0017126+P biological\_process [name] nucleogenesis [def] "A cellular process that results in the biosynthesis of constituent macromolecules, assembly, and arrangement of constituent parts of a nucleolus, a small, dense body one



or more of which are present in the nucleus of eukaryotic cells." [GOC

12523 Pathogen[ Q2Q067] interacts with 1 human partners:{Q9H9Y6}

12524 Pathogen[ P0C214] interacts with 1 human partners:{Q9H9Y6}

12525 Pathogen[ P03346] interacts with 1 human partners:{Q9H9Y6}

12526 Pathogen[ Q85601] interacts with 1 human partners:{Q9H9Y6}

12527 Pathogen[ P14079] interacts with 1 human partners:{Q9H9Y6}

12528 Pathogen[ P03383] interacts with 1 human partners:{Q9H9Y6}

12529 Pathogen[ P03410] interacts with 1 human partners:{Q9H9Y6}

12530 Pathogen[ P14075] interacts with 1 human partners:{Q9H9Y6}

12531 Pathogen[ P0C206] interacts with 1 human partners:{Q9H9Y6}

12532 Pathogen[ P03363] interacts with 1 human partners:{Q9H9Y6}

12533 [Cluster 1140]GO:0048871+P biological\_process [name] multicellular organismal homeostasis [def] "Any process involved in the maintenance of an internal steady state at the level of the multicellular organism." [GOC

12534 Pathogen[ Q2Q067] interacts with 2 human partners:{Q8WUF5;Q99608}

12535 Pathogen[ P0C214] interacts with 2 human partners:{Q8WUF5;Q99608}

12536 Pathogen[ P03346] interacts with 2 human partners:{Q8WUF5;Q99608}

12537 Pathogen[ Q85601] interacts with 2 human partners:{Q99608;Q8WUF5}

12538 Pathogen[ P14079] interacts with 2 human partners:{Q8WUF5;Q99608}

12539 Pathogen[ P03383] interacts with 2 human partners:{Q99608;Q8WUF5}

12540 Pathogen[ P03410] interacts with 2 human partners:{Q99608;Q8WUF5}

12541 Pathogen[ P14075] interacts with 2 human partners:{Q99608;Q8WUF5}

12542 Pathogen[ P0C206] interacts with 2 human partners:{Q8WUF5;Q99608}

12543 Pathogen[ P03363] interacts with 2 human partners:{Q8WUF5;Q99608}

12544 [Cluster 1141]GO:0070286+P biological\_process [name] axonemal dynein complex assembly [def] "The aggregation, arrangement and bonding together of a set of components to form an axonemal dynein complex, a dynein complex found in eukaryotic cilia and flagella, in which the motor domain heads interact with adjacent microtubules to generate a sliding force which is converted to a bending motion." [GOC

12545 Pathogen[ Q2Q067] interacts with 1 human partners:{Q9NVR5}

12546 Pathogen[ P0C214] interacts with 1 human partners:{Q9NVR5}

12547 Pathogen[ P03346] interacts with 2 human partners:{Q9NVR5;Q8N9W5}

12548 Pathogen[ Q85601] interacts with 1 human partners:{Q9NVR5}

12549 Pathogen[ P14079] interacts with 4 human partners:{Q9NVR5;Q8N9W5;Q8IW40;Q9UFE4}

12550 Pathogen[ P03383] interacts with 1 human partners:{Q9NVR5}

12551 Pathogen[ P03410] interacts with 4 human partners:{Q9UFE4;Q8N9W5;Q9NVR5;Q8IW40}

12552 Pathogen[ P14075] interacts with 2 human partners:{Q9NVR5;Q8N9W5}

12553 Pathogen[ P0C206] interacts with 4 human partners:{Q9NVR5;Q9UFE4;Q8N9W5;Q8IW40}

12554 Pathogen[ P03363] interacts with 3 human partners:{Q9NVR5;Q8IW40;Q8N9W5}

12555 [Cluster 1142]GO:0017148+P biological\_process [name] negative regulation of translation [def] "Any process that stops, prevents, or reduces the frequency, rate or extent of the chemical reactions and pathways resulting in the formation of proteins by the translation of mRNA." [GOC

12556 Pathogen[ Q2Q067] interacts with 11 human partners:{O00425;C9JE40;Q9Y6M1;P38919;Q13541;P27797;Q9Y2T7;Q9P0J0;O60516;Q8WY41;Q13542}

12557 Pathogen[ P0C214] interacts with 16 human partners:{P51114;C9JE40;P31483;O00425;Q9UPU9;O60516;Q9NZI8;Q13542;Q9Y2T7;Q9P0J0;P38919;Q8WY41;P27797;Q9Y6M1;Q14011;Q13541}

12558 Pathogen[ P03346] interacts with 16 human partners:{Q13542;Q14011;Q9Y6M1;O00425;Q13541;Q9NZI8;P38919;Q9BWF3;P31483;Q8WY41;P27797;Q9Y2T7;P51114;Q9P0J0;O60516;C9JE40}

12559 Pathogen[ Q85601] interacts with 13 human partners:{Q9Y2T7;Q9P0J0;C9JE40;P27797;O60516;Q13541;P38919;Q9Y6M1;O00425;Q8WY41;Q9UPU9;P51114;Q13542}

12560 Pathogen[ P14079] interacts with 13 human partners:{Q8WY41;C9JE40;Q9UPU9;Q14444;Q13541;Q9Y2T7;Q9Y6M1;Q9P0J0;Q13542;Q14011;O60516;O00425;P31483}

12561 Pathogen[ P03383] interacts with 10 human partners:{P38919;Q9Y2T7;Q13542;Q13541;Q8WY41;C9JE40;O00425;Q9P0J0;O60516;P27797}

12562 Pathogen[ P03410] interacts with 15 human partners:{Q13541;Q9UPU9;P31483;Q13542;Q14011;P38919;P51114;O00425;Q9P0J0;O60516;Q9Y2T7;Q8WY41;C9JE40;Q9Y6M1;P27797}

12563 Pathogen[ P14075] interacts with 10 human partners:{Q13542;O60516;Q9Y2T7;P27797;Q8WY41;O00425;P38919;Q9P0J0;Q13541;C9JE40}

12564 Pathogen[ P0C206] interacts with 15 human partners:{Q13541;P31483;P27797;C9JE40;Q14011;Q8WY41;P51114;Q13542;Q9UPU9;Q9P0J0;P38919;Q9Y6M1;Q9Y2T7;O60516;O00425}

12565 Pathogen[ P03363] interacts with 17 human partners:{P38919;O00425;Q9Y6M1;Q8WY41;Q9BWF3;C9JE40;Q9UPU9;Q9NZI8;Q9P0J0;P27797;Q14011;P51114;P31483;Q13541;Q9Y2T7;O60516;Q13542}

12566 [Cluster 1143]GO:0031102+P biological\_process [name] neuron projection regeneration [def] "The regrowth of neuronal processes such as axons or dendrites in response to their loss or damage." [GOC

12567 Pathogen[ Q2Q067] interacts with 1 human partners:{P14136}

12568 Pathogen[ P0C214] interacts with 1 human partners:{P14136}

12569 Pathogen[ P03346] interacts with 1 human partners:{P14136}  
12570 Pathogen[ Q85601] interacts with 1 human partners:{P14136}  
12571 Pathogen[ P14079] interacts with 1 human partners:{P14136}  
12572 Pathogen[ P03383] interacts with 1 human partners:{P14136}  
12573 Pathogen[ P03410] interacts with 1 human partners:{P14136}  
12574 Pathogen[ P14075] interacts with 1 human partners:{P14136}  
12575 Pathogen[ P0C206] interacts with 1 human partners:{P14136}  
12576 Pathogen[ P03363] interacts with 1 human partners:{P14136}  
12577 [Cluster 1144]GO:0032880+P biological\_process [name] regulation of protein localization [def] "Any process that modulates the frequency, rate or extent of any process in which a protein is transported to, or maintained in, a specific location." [GOC  
12578 Pathogen[ Q2Q067] interacts with 6 human partners:{P31749;Q6PGQ7;P63165;O76021;Q86WG3;Q969H0}  
12579 Pathogen[ P0C214] interacts with 8 human partners:{O76021;Q9BXT5;P52565;P63165;Q969H0;Q86WG3;Q6PGQ7;P31749}  
12580 Pathogen[ P03346] interacts with 13 human partners:{O76021;O75592;Q9BXT5;P52565;Q8N960;P31749;Q15019;P63165;Q13492;Q9ULV0;Q969H0;Q6PGQ7;Q86WG3}  
12581 Pathogen[ Q85601] interacts with 8 human partners:{Q9BXT5;P31749;Q969H0;P52565;Q6PGQ7;Q86WG3;P63165;O76021}  
12582 Pathogen[ P14079] interacts with 12 human partners:{Q13492;P52565;Q6PGQ7;Q9BXT5;Q86WG3;O95876;Q969H0;Q16517;P63165;Q8N960;P45983;O76021}  
12583 Pathogen[ P03383] interacts with 6 human partners:{Q86WG3;P31749;Q6PGQ7;P63165;Q969H0;O76021}  
12584 Pathogen[ P03410] interacts with 13 human partners:{Q8N960;P63165;Q16517;Q9ULV0;Q86WG3;P31749;Q13492;Q969H0;Q9BXT5;O95876;Q6PGQ7;O76021;P52565}  
12585 Pathogen[ P14075] interacts with 7 human partners:{P63165;O76021;Q86WG3;P31749;Q9BXT5;Q969H0;Q6PGQ7}  
12586 Pathogen[ P0C206] interacts with 11 human partners:{P31749;Q15019;P52565;Q6PGQ7;Q969H0;Q9BXT5;O76021;P63165;Q86WG3;O95876;Q8N960}  
12587 Pathogen[ P03363] interacts with 9 human partners:{P52565;Q6PGQ7;O76021;P63165;Q86WG3;P31749;Q969H0;Q9BXT5;Q8N960}  
12588 [Cluster 1145]GO:0042246+P biological\_process [name] tissue regeneration [def] "The regrowth of lost or destroyed tissues." [GOC  
12589 Pathogen[ Q2Q067] interacts with 4 human partners:{Q8IVN3;P14635;P06396;Q16352}  
12590 Pathogen[ P0C214] interacts with 7 human partners:{P50440;Q9UK55;Q16352;P14635;P06396;P05121;Q8IVN3}  
12591 Pathogen[ P03346] interacts with 4 human partners:{Q16352;Q8IVN3;P14635;P06396}  
12592 Pathogen[ Q85601] interacts with 6 human partners:{P06396;Q8IVN3;P14635;P05121;Q16352;P17677}  
12593 Pathogen[ P14079] interacts with 6 human partners:{P17677;P48230;P14635;Q8IVN3;Q92982;P50440}  
12594 Pathogen[ P03383] interacts with 4 human partners:{Q16352;P14635;Q8IVN3;P06396}  
12595 Pathogen[ P03410] interacts with 9 human partners:{P05121;P06396;Q16352;P14635;Q8IVN3;Q9NZG7;P48230;P17677;P50440}  
12596 Pathogen[ P14075] interacts with 5 human partners:{Q16352;P14635;P06396;Q8IVN3;P50440}  
12597 Pathogen[ P0C206] interacts with 7 human partners:{P06396;P17677;Q8IVN3;P50440;P05121;P14635;Q16352}  
12598 Pathogen[ P03363] interacts with 3 human partners:{Q16352;P06396;Q8IVN3}  
12599 [Cluster 1146]GO:0007468+P biological\_process [name] regulation of rhodopsin gene expression [def] "Any process that modulates the frequency, rate or extent of rhodopsin gene expression. This includes transcriptional, translational, or posttranslational regulation." [GOC  
12600 Pathogen[ Q2Q067] interacts with 1 human partners:{P54845}  
12601 Pathogen[ P0C214] interacts with 1 human partners:{P54845}  
12602 Pathogen[ P03346] interacts with 1 human partners:{P54845}  
12603 Pathogen[ Q85601] interacts with 1 human partners:{P54845}  
12604 Pathogen[ P14079] interacts with 1 human partners:{P54845}  
12605 Pathogen[ P03383] interacts with 1 human partners:{P54845}  
12606 Pathogen[ P03410] interacts with 1 human partners:{P54845}  
12607 Pathogen[ P14075] interacts with 1 human partners:{P54845}  
12608 Pathogen[ P0C206] interacts with 1 human partners:{P54845}  
12609 Pathogen[ P03363] interacts with 1 human partners:{P54845}  
12610 [Cluster 1147]GO:0032066+P biological\_process [name] nucleolus to nucleoplasm transport [def] "The directed movement of substances from the nucleolus to the nucleoplasm." [GOC  
12611 Pathogen[ Q2Q067] interacts with 2 human partners:{Q9Y3T9;Q3YBR2}  
12612 Pathogen[ P0C214] interacts with 2 human partners:{Q9Y3T9;Q3YBR2}  
12613 Pathogen[ P03346] interacts with 2 human partners:{Q3YBR2;Q9Y3T9}  
12614 Pathogen[ Q85601] interacts with 2 human partners:{Q3YBR2;Q9Y3T9}  
12615 Pathogen[ P14079] interacts with 2 human partners:{Q9Y3T9;Q3YBR2}

12616 Pathogen[ P03383] interacts with 2 human partners:{Q9Y3T9;Q3YBR2}  
12617 Pathogen[ P03410] interacts with 2 human partners:{Q9Y3T9;Q3YBR2}  
12618 Pathogen[ P14075] interacts with 2 human partners:{Q3YBR2;Q9Y3T9}  
12619 Pathogen[ P0C206] interacts with 2 human partners:{Q3YBR2;Q9Y3T9}  
12620 Pathogen[ P03363] interacts with 2 human partners:{Q3YBR2;Q9Y3T9}  
12621 [Cluster 1148]GO:0070171+P biological\_process [name] negative regulation of tooth mineralization [def] "Any process that stops, prevents, or reduces the frequency, rate or extent of tooth mineralization, the deposition of calcium salts in tooth structures." [GOC  
12622 Pathogen[ Q2Q067] interacts with 1 human partners:{Q6W2J9}  
12623 Pathogen[ P0C214] interacts with 1 human partners:{Q6W2J9}  
12624 Pathogen[ P03346] interacts with 1 human partners:{Q6W2J9}  
12625 Pathogen[ Q85601] interacts with 1 human partners:{Q6W2J9}  
12626 Pathogen[ P14079] interacts with 1 human partners:{Q6W2J9}  
12627 Pathogen[ P03383] interacts with 1 human partners:{Q6W2J9}  
12628 Pathogen[ P03410] interacts with 1 human partners:{Q6W2J9}  
12629 Pathogen[ P14075] interacts with 1 human partners:{Q6W2J9}  
12630 Pathogen[ P0C206] interacts with 1 human partners:{Q6W2J9}  
12631 Pathogen[ P03363] interacts with 1 human partners:{Q6W2J9}  
12632 [Cluster 1149]GO:0007253+P biological\_process [name] cytoplasmic sequestering of NF-kappaB [def] "The selective interaction of the transcription factor NF-kappaB with specific molecules in the cytoplasm, thereby inhibiting its translocation into the nucleus." [GOC  
12633 Pathogen[ Q2Q067] interacts with 4 human partners:{075832;Q15653;Q9UNN5;P25963}  
12634 Pathogen[ P0C214] interacts with 4 human partners:{Q15653;075832;Q9UNN5;P25963}  
12635 Pathogen[ P03346] interacts with 4 human partners:{P25963;Q15653;075832;Q9UNN5}  
12636 Pathogen[ Q85601] interacts with 4 human partners:{075832;Q15653;Q9UNN5;P25963}  
12637 Pathogen[ P14079] interacts with 3 human partners:{075832;Q9UNN5;Q15653}  
12638 Pathogen[ P03383] interacts with 4 human partners:{Q15653;075832;Q9UNN5;P25963}  
12639 Pathogen[ P03410] interacts with 4 human partners:{Q9UNN5;Q15653;P25963;075832}  
12640 Pathogen[ P14075] interacts with 4 human partners:{075832;Q15653;P25963;Q9UNN5}  
12641 Pathogen[ P0C206] interacts with 4 human partners:{Q9UNN5;075832;P25963;Q15653}  
12642 Pathogen[ P03363] interacts with 3 human partners:{Q9UNN5;P25963;Q15653}  
12643 [Cluster 1150]GO:0022409+P biological\_process [name] positive regulation of cell-cell adhesion [def] "Any process that activates or increases the rate or extent of cell adhesion to another cell." [GOC  
12644 Pathogen[ Q2Q067] interacts with 1 human partners:{015105}  
12645 Pathogen[ P0C214] interacts with 2 human partners:{095633;015105}  
12646 Pathogen[ P03346] interacts with 2 human partners:{015105;095633}  
12647 Pathogen[ Q85601] interacts with 1 human partners:{015105}  
12648 Pathogen[ P14079] interacts with 2 human partners:{Q08722;015105}  
12649 Pathogen[ P03383] interacts with 1 human partners:{015105}  
12650 Pathogen[ P03410] interacts with 2 human partners:{Q08722;015105}  
12651 Pathogen[ P14075] interacts with 1 human partners:{015105}  
12652 Pathogen[ P0C206] interacts with 2 human partners:{095633;015105}  
12653 Pathogen[ P03363] interacts with 1 human partners:{015105}  
12654 [Cluster 1151]GO:0071902+P biological\_process [name] positive regulation of protein serine/threonine kinase activity [def] "Any process that increases the rate, frequency, or extent of protein serine/threonine kinase activity." [GOC  
12655 Pathogen[ Q2Q067] interacts with 1 human partners:{P67775}  
12656 Pathogen[ P0C214] interacts with 1 human partners:{P67775}  
12657 Pathogen[ P03346] interacts with 1 human partners:{P67775}  
12658 Pathogen[ Q85601] interacts with 1 human partners:{P67775}  
12659 Pathogen[ P14079] interacts with 2 human partners:{043597;Q15078}  
12660 Pathogen[ P03383] interacts with 1 human partners:{P67775}  
12661 Pathogen[ P03410] interacts with 2 human partners:{043597;P67775}  
12662 Pathogen[ P14075] interacts with 1 human partners:{P67775}  
12663 Pathogen[ P0C206] interacts with 2 human partners:{P67775;043597}  
12664 Pathogen[ P03363] interacts with 1 human partners:{P67775}  
12665 [Cluster 1152]GO:0032025+P biological\_process [name] response to cobalt ion [def] "Any process that results in a change in state or activity of a cell or an organism (in terms of movement, secretion, enzyme production, gene expression, etc.) as a result of a cobalt ion stimulus." [GOC  
12666 Pathogen[ Q2Q067] interacts with 2 human partners:{Q14790;P08397}  
12667 Pathogen[ P0C214] interacts with 3 human partners:{P08397;P18846;Q14790}  
12668 Pathogen[ P03346] interacts with 2 human partners:{Q14790;P18846}  
12669 Pathogen[ Q85601] interacts with 3 human partners:{Q14790;P18846;P08397}  
12670 Pathogen[ P14079] interacts with 2 human partners:{Q14790;P08397}  
12671 Pathogen[ P03383] interacts with 2 human partners:{P18846;P08397}  
12672 Pathogen[ P03410] interacts with 2 human partners:{P08397;P18846}  
12673 Pathogen[ P14075] interacts with 2 human partners:{P08397;P18846}  
12674 Pathogen[ P0C206] interacts with 3 human partners:{P18846;Q14790;P08397}  
12675 Pathogen[ P03363] interacts with 1 human partners:{P18846}  
12676 [Cluster 1153]GO:0060135+P biological\_process [name] maternal process involved in female pregnancy [def] "A reproductive process occurring in the mother that allows an embryo or fetus to develop within it." [GOC

12677 Pathogen[ Q2Q067] interacts with 2 human partners:{000255;P49459}  
12678 Pathogen[ POC214] interacts with 3 human partners:{P49459;P35520;O00255}  
12679 Pathogen[ P03346] interacts with 2 human partners:{P49459;O00255}  
12680 Pathogen[ Q85601] interacts with 2 human partners:{000255;P49459}  
12681 Pathogen[ P14079] interacts with 3 human partners:{P24588;P49459;O00255}  
12682 Pathogen[ P03383] interacts with 2 human partners:{000255;P49459}  
12683 Pathogen[ P03410] interacts with 3 human partners:{P49459;O00255;P24588}  
12684 Pathogen[ P14075] interacts with 2 human partners:{P49459;O00255}  
12685 Pathogen[ POC206] interacts with 2 human partners:{000255;P49459}  
12686 Pathogen[ P03363] interacts with 1 human partners:{P49459}  
12687 [Cluster 1154]GO:0030239+P biological\_process [name] myofibril assembly [def] "Formation of myofibrils, the repeating units of striated muscle." [GOC  
12688 Pathogen[ Q2Q067] interacts with 1 human partners:{Q9NP98}  
12689 Pathogen[ POC214] interacts with 3 human partners:{Q9NP98;P35580;P13533}  
12690 Pathogen[ P03346] interacts with 2 human partners:{P28289;Q9NP98}  
12691 Pathogen[ Q85601] interacts with 3 human partners:{P13533;P35580;Q9NP98}  
12692 Pathogen[ P14079] interacts with 3 human partners:{Q9NP98;P28289;Q9BR09}  
12693 Pathogen[ P03383] interacts with 2 human partners:{P35580;Q9NP98}  
12694 Pathogen[ P03410] interacts with 5 human partners:{Q9NP98;Q9BR09;P28289;P35580;P13533}  
12695 Pathogen[ P14075] interacts with 1 human partners:{Q9NP98}  
12696 Pathogen[ POC206] interacts with 4 human partners:{P13533;Q9NP98;Q9BR09;P35580}  
12697 Pathogen[ P03363] interacts with 3 human partners:{Q9BR09;Q9NP98;P28289}  
12698 [Cluster 1155]GO:0048468+P biological\_process [name] cell development [def] "The process whose specific outcome is the progression of the cell over time, from its formation to the mature structure. Cell development does not include the steps involved in committing a cell to a specific fate." [GOC  
12699 Pathogen[ Q2Q067] interacts with 6 human partners:{Q9ULV5;P15976;O14896;O75444;Q14865;P15923}  
12700 Pathogen[ POC214] interacts with 5 human partners:{O75444;Q14865;P15923;O14896;Q9ULV5}  
12701 Pathogen[ P03346] interacts with 10 human partners:{P07992;P15923;O75444;P15976;O95096;O14896;P78411;Q14865;P50542;Q9ULV5}  
12702 Pathogen[ Q85601] interacts with 6 human partners:{O14896;P15976;Q9ULV5;O75444;Q14865;P15923}  
12703 Pathogen[ P14079] interacts with 8 human partners:{O14896;Q14865;P15976;P15923;P50542;O75444;Q9ULV5;P07992}  
12704 Pathogen[ P03383] interacts with 4 human partners:{P15923;O14896;Q9ULV5;O75444}  
12705 Pathogen[ P03410] interacts with 8 human partners:{O14896;P07992;O75444;P15923;P50542;Q9ULV5;Q14865;P15976}  
12706 Pathogen[ P14075] interacts with 4 human partners:{O75444;P15923;Q9ULV5;O14896}  
12707 Pathogen[ POC206] interacts with 9 human partners:{O75444;P78411;P15976;P50542;P07992;Q9ULV5;P15923;O14896;Q14865}  
12708 Pathogen[ P03363] interacts with 6 human partners:{Q14865;O14896;P78411;P15923;O75444;Q9ULV5}  
12709 [Cluster 1156]GO:0045927+P biological\_process [name] positive regulation of growth [def] "Any process that activates or increases the rate or extent of growth, the increase in size or mass of all or part of an organism." [GOC  
12710 Pathogen[ Q2Q067] interacts with 2 human partners:{Q9NZI6;P49593}  
12711 Pathogen[ POC214] interacts with 2 human partners:{Q9NZI6;P49593}  
12712 Pathogen[ P03346] interacts with 2 human partners:{Q9NZI6;P49593}  
12713 Pathogen[ Q85601] interacts with 2 human partners:{P49593;Q9NZI6}  
12714 Pathogen[ P14079] interacts with 2 human partners:{P49593;Q9NZI6}  
12715 Pathogen[ P03383] interacts with 1 human partners:{Q9NZI6}  
12716 Pathogen[ P03410] interacts with 2 human partners:{P49593;Q9NZI6}  
12717 Pathogen[ P14075] interacts with 1 human partners:{Q9NZI6}  
12718 Pathogen[ POC206] interacts with 2 human partners:{P49593;Q9NZI6}  
12719 Pathogen[ P03363] interacts with 1 human partners:{Q9NZI6}  
12720 [Cluster 1157]GO:0046676+P biological\_process [name] negative regulation of insulin secretion [def] "Any process that stops, prevents, or reduces the frequency, rate or extent of the regulated release of insulin." [GOC  
12721 Pathogen[ Q2Q067] interacts with 6 human partners:{O00233;Q08209;Q9Y6E7;P36956;Q13127;Q16836}  
12722 Pathogen[ POC214] interacts with 4 human partners:{Q08209;Q13127;O00233;Q9Y6E7}  
12723 Pathogen[ P03346] interacts with 6 human partners:{P36956;Q16836;Q9Y6E7;O00233;Q08209;Q13127}  
12724 Pathogen[ Q85601] interacts with 6 human partners:{Q13127;Q9Y6E7;Q08209;O00233;P36956;Q16836}  
12725 Pathogen[ P14079] interacts with 5 human partners:{O00233;Q13127;P36956;Q08209;Q16836}  
12726 Pathogen[ P03383] interacts with 4 human partners:{O00233;Q16836;Q9Y6E7;Q13127}  
12727 Pathogen[ P03410] interacts with 5 human partners:{P36956;Q08209;O00233;Q13127;Q16836}  
12728 Pathogen[ P14075] interacts with 4 human partners:{O00233;Q9Y6E7;Q16836;Q13127}  
12729 Pathogen[ POC206] interacts with 6 human partners:{Q13127;Q16836;P36956;Q08209;O00233;Q9Y6E7}

12730 Pathogen[ P03363] interacts with 3 human partners:{Q9Y6E7;Q16836;Q13127}

12731 [Cluster 1158]GO:0032981+P biological\_process [name] mitochondrial respiratory chain complex I assembly [def] "The aggregation, arrangement and bonding together of a set of components to form mitochondrial respiratory chain complex I." [GOC

12732 Pathogen[ Q2Q067] interacts with 7 human partners:{Q43920;Q9P032;Q330K2;Q9BU61;O75251;Q7L592;O95831}

12733 Pathogen[ P0C214] interacts with 6 human partners:{Q9BU61;O43920;Q7L592;O75251;Q9P032;Q330K2}

12734 Pathogen[ P03346] interacts with 7 human partners:{Q9BU61;Q9P032;O43920;Q7L592;O95831;O75251;Q330K2}

12735 Pathogen[ Q85601] interacts with 5 human partners:{O95831;Q330K2;O43920;Q9BU61;Q9P032}

12736 Pathogen[ P14079] interacts with 9 human partners:{O43181;Q7L592;Q330K2;Q15070;O95831;O75251;Q9P032;O43920;Q9BU61}

12737 Pathogen[ P03383] interacts with 7 human partners:{Q330K2;O75251;Q9BU61;Q7L592;O43920;O95831;Q9P032}

12738 Pathogen[ P03410] interacts with 10 human partners:{Q7L592;O75251;O43920;Q9BU61;O95831;Q330K2;O43181;Q15070;Q9P032;Q16635}

12739 Pathogen[ P14075] interacts with 8 human partners:{Q7L592;Q15070;O43920;Q9BU61;O95831;Q330K2;O75251;Q9P032}

12740 Pathogen[ P0C206] interacts with 8 human partners:{Q9P032;O75251;O43920;Q9BU61;Q330K2;Q15070;O95831;Q7L592}

12741 Pathogen[ P03363] interacts with 5 human partners:{Q330K2;Q7L592;Q9P032;Q9BU61;O95831}

12742 [Cluster 1159]GO:0001818+P biological\_process [name] negative regulation of cytokine production [def] "Any process that stops, prevents, or reduces the rate of production of a cytokine." [GOC

12743 Pathogen[ Q2Q067] interacts with 3 human partners:{O75582;Q9UN36;P19838}

12744 Pathogen[ P0C214] interacts with 3 human partners:{P19838;O75582;Q9UN36}

12745 Pathogen[ P03346] interacts with 3 human partners:{O75582;P19838;Q9UN36}

12746 Pathogen[ Q85601] interacts with 3 human partners:{Q9UN36;O75582;P19838}

12747 Pathogen[ P14079] interacts with 2 human partners:{O75582;Q9UN36}

12748 Pathogen[ P03383] interacts with 3 human partners:{O75582;Q9UN36;P19838}

12749 Pathogen[ P03410] interacts with 3 human partners:{P19838;O75582;Q9UN36}

12750 Pathogen[ P14075] interacts with 3 human partners:{O75582;Q9UN36;P19838}

12751 Pathogen[ P0C206] interacts with 3 human partners:{O75582;P19838;Q9UN36}

12752 Pathogen[ P03363] interacts with 2 human partners:{Q9UN36;P19838}

12753 [Cluster 1160]GO:0006884+P biological\_process [name] cell volume homeostasis [def] "Any process involved in maintaining the steady state of a cell's volume. The cell's volume refers to the three-dimensional space occupied by a cell." [GOC

12754 Pathogen[ Q2Q067] interacts with 2 human partners:{P54105;Q16254}

12755 Pathogen[ P0C214] interacts with 1 human partners:{Q16254}

12756 Pathogen[ P03346] interacts with 2 human partners:{P54105;Q16254}

12757 Pathogen[ Q85601] interacts with 2 human partners:{P54105;Q16254}

12758 Pathogen[ P14079] interacts with 3 human partners:{Q16254;P35611;P54105}

12759 Pathogen[ P03383] interacts with 2 human partners:{P54105;Q16254}

12760 Pathogen[ P03410] interacts with 3 human partners:{P54105;Q16254;P35611}

12761 Pathogen[ P14075] interacts with 2 human partners:{P54105;Q16254}

12762 Pathogen[ P0C206] interacts with 2 human partners:{P54105;Q16254}

12763 Pathogen[ P03363] interacts with 2 human partners:{Q16254;P54105}

12764 [Cluster 1161]GO:0001502+P biological\_process [name] cartilage condensation [def] "The condensation of mesenchymal cells that have been committed to differentiate into chondrocytes." [ISBN

12765 Pathogen[ Q2Q067] interacts with 5 human partners:{P10827;P04198;P13349;Q15699;Q9UMQ3}

12766 Pathogen[ P0C214] interacts with 4 human partners:{P13349;Q9UMQ3;Q15699;P04198}

12767 Pathogen[ P03346] interacts with 6 human partners:{P10827;P13349;A6NJTO;Q15699;P04198;Q9UMQ3}

12768 Pathogen[ Q85601] interacts with 5 human partners:{P13349;Q9UMQ3;Q15699;P10827;P04198}

12769 Pathogen[ P14079] interacts with 5 human partners:{P13349;Q15699;P10827;P04198;Q9UMQ3}

12770 Pathogen[ P03383] interacts with 3 human partners:{Q9UMQ3;P04198;Q15699}

12771 Pathogen[ P03410] interacts with 4 human partners:{Q9UMQ3;Q15699;P13349;P04198}

12772 Pathogen[ P14075] interacts with 3 human partners:{P04198;Q9UMQ3;Q15699}

12773 Pathogen[ P0C206] interacts with 5 human partners:{Q9UMQ3;Q15699;P13349;P04198;P10827}

12774 Pathogen[ P03363] interacts with 5 human partners:{Q15699;P04198;P13349;A6NJTO;Q9UMQ3}

12775 [Cluster 1162]GO:0046386+P biological\_process [name] deoxyribose phosphate catabolic process [def] "The chemical reactions and pathways resulting in the breakdown of deoxyribose phosphate, the phosphorylated sugar 2-deoxy-erythro-pentose." [ISBN

12776 Pathogen[ Q2Q067] interacts with 1 human partners:{Q96G03}

12777 Pathogen[ P0C214] interacts with 2 human partners:{Q9Y315;Q96G03}

12778 Pathogen[ P03346] interacts with 1 human partners:{Q96G03}

12779 Pathogen[ Q85601] interacts with 1 human partners:{Q96G03}

12780 Pathogen[ P14079] interacts with 2 human partners:{Q9Y315;Q96G03}  
12781 Pathogen[ P03383] interacts with 1 human partners:{Q96G03}  
12782 Pathogen[ P03410] interacts with 2 human partners:{Q9Y315;Q96G03}  
12783 Pathogen[ P14075] interacts with 2 human partners:{Q96G03;Q9Y315}  
12784 Pathogen[ P0C206] interacts with 2 human partners:{Q96G03;Q9Y315}  
12785 Pathogen[ P03363] interacts with 2 human partners:{Q9Y315;Q96G03}  
12786 [Cluster 1163]GO:000278+P biological\_process [name] mitotic cell cycle [def]  
"Progression through the phases of the mitotic cell cycle, the most common eukaryotic cell cycle, which canonically comprises four successive phases called G1, S, G2, and M and includes replication of the genome and the subsequent segregation of chromosomes into daughter cells. In some variant cell cycles nuclear replication or nuclear division may not be followed by cell division, or G1 and G2 phases may be absent." [GOC  
12787 Pathogen[ Q2Q067] interacts with 248 human partners:{P49454;P30153;Q15054;Q96EE3;Q99460;O75832;P48556;Q96H22;P52948;Q71F23;P40306;Q14008;P42773;Q12769;P55036;P24385;Q9Y266;Q96RT8;Q9P209;Q14980;P06400;O00231;O00233;Q9UJX3;Q9UJX5;P27694;P49792;Q01094;O95684;Q08999;Q13352;P62258;Q7Z460;P51665;P55735;O95997;Q6IPU0;Q99741;Q96GY3;P28072;P61024;O43805;Q14204;O00762;Q6P1K2;Q9HBM1;Q9H211;O75935;Q7Z7A1;Q5EE01;Q8WYP5;P61981;Q9H3R5;Q8NHV4;Q13547;P63167;A5LHX3;Q5TKA1;Q5FB7;P35244;P49450;Q13257;Q86XR8;Q8N2Z9;Q9UBU7;P07900;Q9NQX1;Q9HC77;Q9UPV0;Q03188;Q9NVX0;Q9NXR1;Q6MZF7;Q13200;A8K8P3;P25787;Q53HL2;Q06323;Q96SN8;O43684;Q8NBT2;P49005;Q13415;Q9P258;Q9NYG5;Q8NFH4;Q13156;P30304;Q9H1A4;P51965;Q5BJF6;Q5JTW2;P11388;P28065;Q09028;O14818;P14635;Q9Y248;Q8TEP8;Q9NQS7;Q14203;Q9UJX2;P12004;Q14181;Q9Y297;Q14691;O43264;Q9Y5P8;O14980;P30307;Q14186;Q92674;Q9UM13;Q14997;Q9BYV8;Q9BW27;Q96BT3;Q8NHQ1;P51948;Q13561;P31350;Q66GS9;P60900;Q9UL46;Q9BZD4;P61289;O43303;Q9UBD5;Q96RT7;Q9NSP4;P15927;O00716;Q12834;P36873;P51668;P50748;P28062;Q96EP1;O75496;P56282;P24864;O95067;Q9BSJ2;Q9UNM6;P25788;Q9HCU8;O75419;Q13616;Q96MT8;Q16254;Q92530;O15078;P50613;Q15329;P25786;P78396;Q9H410;Q8NFH3;Q99996;Q8NHZ8;P38936;P20248;Q02241;O60216;P39748;O75665;O96020;Q16401;O00139;Q99496;O94986;O75122;O00232;Q13309;P28749;Q8NG31;Q9UM11;Q7L590;P23258;Q9UJX4;O43913;P28074;P25789;Q9Y6D9;Q9UKT4;P0CG47;P57740;Q96BD8;P04818;Q9H900;Q9Y5N6;Q13416;P10244;P41208;Q96IY1;Q14209;P20618;P42771;Q86SQ7;P0CG48;P25205;P35251;Q86YI8;Q13409;P28070;Q8WUM0;P28066;Q9UGJ1;O95613;Q14683;Q8WVM7;P30305;Q99436;P24941;Q8TAA3;Q9BU64;Q9BRT9;P42677;Q9UJX6;O95229;P62987;O43242;Q14188;O14777;Q562F6;P30260;P49721;Q9BPU9;P11802;P46527;P49720;Q8N3U4;Q13042;Q15691;Q9H081;Q8WVK7;Q15154;O15392;P63208;Q96EA4;P42772;Q52LA3;Q9BV73;P51946;Q96CW5;Q00534;Q8TAP6;P62979}  
12788 Pathogen[ P0C214] interacts with 250 human partners:{Q9UJX6;Q14997;Q9H081;O15078;P51665;O43684;P55735;P20248;P51946;Q13257;O75935;Q16254;P25789;O43805;P55036;P30307;Q9BSJ2;Q15154;P04818;Q96BT3;Q13156;P31350;P28062;Q14008;O94986;A5LHX3;Q13547;O00762;Q53HL2;O43264;P28065;O95684;Q08999;P30153;Q02241;O43913;Q14203;Q9P209;Q8NHQ1;Q7L590;P50613;Q13309;O14818;Q96EA4;O75496;Q96SN8;P57740;Q5EE01;P11802;A8K8P3;O43242;Q8WYP5;P50748;Q9UJX5;Q8NHV4;P61024;Q7Z7A1;P63208;Q9BYV8;P46527;O95229;P23258;Q9HC77;Q5JTW2;Q96EE3;P48556;Q96MT8;Q14204;P49792;P40306;Q6IPU0;P35251;P14635;O00716;Q8NBT2;P24385;O00139;P49005;Q96CW5;Q9UBU7;Q15691;Q13200;Q9UJX2;Q9Y297;Q6P1K2;P46060;Q562F6;Q9Y266;Q9HCU8;P38936;O00232;Q9Y5N6;P51965;Q9Y248;Q96RT7;Q9UGJ1;P25205;Q09028;P10244;P49450;Q14980;Q8TEP8;Q9UPV0;Q8N2Z9;Q03188;O43303;Q99460;P28066;Q01094;O75832;P00374;O75122;Q14566;Q92674;Q00534;Q14186;O14980;Q9H1A4;Q9BW27;P51948;Q96BD8;Q66GS9;P49720;P28074;Q9HBM1;Q9BPU9;P0CG48;Q9UL46;Q9P258;Q86XR8;P78396;Q6MZF7;Q8NHZ8;Q12834;Q13352;Q14691;Q15329;O95067;P15927;P25788;P24941;Q9BQQ3;Q9UNM6;Q8NFH3;O00231;P42771;P35244;Q06323;P11388;P30305;P25786;Q8TAP6;Q96RT8;Q9H211;Q13616;Q86YI8;P28072;P41208;Q8TAA3;Q99496;P62987;Q9H410;P42773;O75665;O15392;Q9H3R5;P42677;P28749;Q14683;O75419;Q8N3U4;Q99436;Q8WVM7;Q8NG31;P24864;Q9UJX4;Q9NQX1;Q7Z460;Q9BV73;P39748;P61981;P0CG47;P25787;P36873;Q9H900;Q5FBB7;Q15054;Q13416;Q9NQS7;Q9UJX3;Q5BJF6;Q9NSP4;Q86SQ7;O95997;P27694;Q71F23;Q52LA3;Q5TKA1;P35998;P60900;Q9Y5P8;O95613;Q9996;Q8NFH4;O00233;Q9UM11;Q13409;P51668;Q8N0S6;Q9NXR1;Q96IY1;P62979;P30260;P49454;Q9NVX0;P30304;P56282;Q13561;Q92530;Q9NYG5;O15008;Q14209;O60216;Q9UBD5;Q9UM13;Q9BZD4;Q8WUM0;Q14188;P28070;P06400;Q9UKT4;Q9Y6D9;P52948;P42772;Q9BU64;Q12769;P49721;Q96EP1;Q99741;Q16401;Q8WVK7;O96020;P63167;P17980;Q13415;Q14181;Q13042;O14777;Q9BRT9}  
12789 Pathogen[ P03346] interacts with 263 human partners:{P10244;Q9Y6D9;P25787;Q8N2Z9;P12004;Q96GY3;P55735;Q7Z7A1;Q5FBB7;P28070;P78396;Q8NFH4;Q8WUM0;Q9NQX1;P25789;P55036;O95229;P55273;P24385;Q7L2Z9;Q9HCU8;P07900;Q86XR8;Q12769;Q5JTW2;O15392;O43684;O95684;Q08999;Q99460;Q9UM11;Q96EE3;Q8N3U4;Q13616;Q9BS16;Q9UL46;P23258;Q96RT8;P11388;Q15329;Q9BPU9;P62987;P27694;P28072;Q92674;P06400;P25788;Q9Y5N6;Q14691;P28074;Q14188;P49721;Q15154;O75935;O00139;P57740;Q15691;O96020;Q5EE01;Q9UBD5;P35244;O14818;Q8WYP5;Q9BRT9;P35250;P62258;Q8NHV4;Q99436;P24941;P30304;Q13156;P42772;Q6MZF7;P56282;P0CG48;Q16401;A5LHX3;Q9HC77;O43264;Q9UBU7;Q9NXR1;P24864;Q53HL2;Q9P209;Q9UM13;P28062;Q14209;Q96IY1;Q9NYG5;P49005;Q9P258;Q14204;Q14203;Q16254;Q96CW5;P61024;P20618;Q8NFH3;P42771;O95067;O00232;Q01094;P51668;O95997;O43805;Q12834;P30305;Q14980;Q8TEP8;P11802;P30153;Q9Y5P8;O75832;O00233;Q9UJX6;Q14566;P25205;Q9Y266;P41208;Q14186;O14777;Q9BW27;O14980;Q9NVX0;P31350;Q66GS9;O75665;Q96EA4;P14635;Q86SQ7;Q13042;O94986;Q13309;P46060;Q9UJX5;Q96SN8;P49720;P28065;Q14683;Q9Y248;P36873;Q13547;Q09028;O00762;Q14008;Q9UJX2;P51946;P60900;Q9UGJ1;P20248;P33992;Q9NQS7;P25786;Q8TAP6;O00231;Q13415;Q9UKT4;Q562F6;P15927;Q9H081;Q8NBT2;Q9HBM1;Q9UJX3;Q5BJF6;P35249;Q8NHZ8;P63208;Q99496;P61289;Q9H410;Q14181;P42773;P30622;O75122;Q9H1A4;Q9BU64;P62979;P28066;Q9UNM6;P61981;Q9BQQ3;Q02241;Q9BYV8;Q8WVM7;P33991;Q03188;P28749;Q9UJX4;P42677;Q9Y216;P50748;Q8TAA3;P49450;P0CG47;Q99996;Q13409;Q8NHQ1;Q13416;Q14997;Q13200;P48556;P63167;Q86YI8;O00534;P35251;Q9BSJ2;Q7Z460;Q6IPU0;P51665;P38936;O95613;Q8NG31;O15078;Q96RT7;P39748;Q8N0S6;Q06323;P30260;O75419;P46527;Q9H3R5;Q9Y297;A8K8P3;P40937;Q997

- 41;Q7L590;Q92530;Q9H211;Q9NSP4;Q96H22;O43929;Q6P1K2;O60216;Q96BD8;P51948;O14965;Q9BZD4;O43242;O00716;Q96BT3;Q52LA3;O43913;Q71F23;Q13352;P40306;Q15054;Q8WVK7;Q13257;P30307;P49454;O43303;Q96EP1;O75496;Q9H900;P49792;Q9UPV0;Q96MT8;Q13561;O00444;P52948;Q9BV73}
- 12790 Pathogen[ Q85601] interacts with 249 human partners: {Q9UJX2;Q8NHQ1;Q8NBT2;P51946;P28066;P61163;Q9UNM6;P60900;P61981;P49454;O75496;Q52LA3;O43913;Q13409;Q13309;P55036;O95229;Q7L590;Q9UJX6;P55273;P24385;Q02241;Q8NFH4;O94986;Q8NFH3;Q15154;Q03188;Q9H900;O95684;Q08999;Q14008;P25787;P46060;Q96EE3;Q9BQQ3;Q9NQS7;Q96RT8;P61289;Q15329;Q12769;P56282;Q9H081;P06400;P25788;Q9P258;Q96SN8;Q96BT3;O75935;Q9UKT4;P57740;Q5EE01;P35244;Q9NVX0;Q8NHZ8;Q8WYP5;O75832;Q8NHV4;P30622;P42772;Q13415;Q9H1A4;Q9Y5N6;Q8WUM0;Q71F23;Q9HC77;Q13616;O43264;Q14204;Q14188;Q53HL2;Q9P209;P30153;Q8NG31;Q9UBU7;O15078;Q9Y248;Q9UBD5;O15392;P0CG48;P49005;P30304;Q5BJF6;Q9Y2I6;Q9H3R5;Q14203;Q96CW5;P51948;P61024;Q96EA4;O60216;Q8WVM7;O43303;Q15054;P51668;P31350;P27694;Q12834;Q5JTW2;Q8TEP8;P11802;Q13257;P23258;Q92674;P25789;O00233;O75122;Q14566;O96020;P30305;O14965;Q9BRT9;Q9Y266;Q9UPV0;Q14186;Q86XR8;P20618;Q9BSJ2;Q9BW27;Q13352;Q9NXX1;Q66GS9;P30307;Q86SQ7;O75665;P63208;P25205;P40306;Q562F6;Q9UGJ1;P14635;P15927;Q13042;Q9UJX5;Q9BV73;P51965;Q9BU64;P62258;P49720;Q14683;Q9BZD4;P36873;Q9UM13;P28062;Q15691;P49721;Q96MT8;Q96BD8;Q9Y6D9;Q9NYG5;P55735;P52948;P20248;P35251;P25786;Q9BYV8;P11388;Q7Z7A1;P49450;Q14691;P78396;P10244;P42771;O00762;Q86YI8;P28072;Q16254;Q8N2Z9;Q9UJX3;Q13200;Q14209;P50613;Q99496;P28065;P07900;Q9H410;Q14181;P42773;Q09028;O14980;P62979;Q99436;P28070;P28749;Q9HCU8;Q8N3U4;Q14980;Q9UJX4;P42677;Q9UM11;P50748;Q8TAP6;Q8TAA3;Q9UL46;Q8WVK7;Q99460;Q96IY1;O00231;P0CG47;Q99996;Q9BPU9;Q5TKA1;Q13416;Q13156;P48556;Q7Z460;P12004;Q13547;P28074;P49792;Q92530;P38936;P62987;P33992;O95613;Q00534;O95067;Q96EP1;A5LHX3;P39748;Q9NXR1;Q06323;P30260;O75419;A8K8P3;Q99741;Q9H211;O14818;Q6P1K2;Q9GZM8;P24941;O14777;O00716;O43684;P63167;O00139;Q9HBM1;Q16401;Q01094;Q5FB7;P51955;O43805;O95997;Q6MZP7;Q9Y5P8;Q96RT7;P46527;Q13561;P24864;P41208}
- 12791 Pathogen[ P14079] interacts with 258 human partners: {Q15691;Q14980;P28065;Q99436;P00374;Q9NXX1;P11388;Q96IY1;Q03188;P62333;Q9BW27;Q13416;Q9BRT9;P48556;P51965;Q7L590;Q5EE01;P0CG48;O75419;P30307;Q14566;Q99996;Q9UKT4;Q8TEP8;P28749;Q7Z460;Q96BT3;Q14186;P51946;Q13415;Q9HBM1;O95684;Q9P209;Q13309;Q8N0S6;P78396;Q9Y5N6;P24864;P10244;P36873;Q52LA3;P57740;P40306;P40937;P40306;Q16254;O95229;Q8NBT2;Q9UJX3;P55036;O94986;P28074;O00232;Q9H1A4;Q9UGJ1;Q02241;Q9UJX5;P49005;Q9NVX0;Q14204;Q15329;Q5JTW2;O43913;Q14691;Q9BZD4;Q9H211;Q66GS9;O15392;P49720;O00487;P25787;O60216;Q14209;O75832;Q9Y266;P46060;O95067;Q9BV73;Q9HCU8;Q8NG31;A5LHX3;Q6IPU0;P62979;Q9H900;A8K8P3;O00233;Q8TAP6;P31350;P35998;Q13156;P61289;P30304;P62987;Q5FB7;Q9H410;P55273;P51665;P20618;Q9NYG5;Q8TAA3;Q99741;Q8N3U4;P50613;Q9NSP4;Q15054;P61981;Q99661;Q5BJF6;P35250;Q71F23;Q8WUM0;Q6MZP7;Q14997;Q99496;P51668;P14635;Q8NHZ8;P51955;Q8NHV4;P28062;P60900;Q8WYP5;Q9UBD5;O00716;Q9UM11;P38936;Q9UM13;Q96RT8;Q13042;O00139;Q9UNM6;P56282;Q8N2Z9;Q13257;Q96EA4;P35251;Q562F6;Q8WVK7;P49450;P23258;Q99460;Q96H22;Q96RT7;Q8NFH3;P07900;Q96EE3;O14818;Q9BPU9;Q9P258;Q9Y248;Q13409;Q13561;P49721;Q8TCU4;O43264;Q92530;Q9BQQ3;P49642;Q9BSJ2;P62258;O43303;Q86YI8;Q14181;O43929;Q9H3R5;P61163;Q9GZM8;O95997;Q9UJX6;P33992;Q53HL2;Q86Y91;Q86SQ7;P41208;P42677;P20248;Q8NFH4;Q9NQS7;P15927;P30260;Q06323;O95613;P27694;P63167;P62191;O15078;Q92674;P46527;P55735;Q9UQE7;P49454;P12004;O00762;P30305;Q8NHQ1;Q9BU64;Q15008;P42773;O75665;P30153;P43686;O43242;P25788;Q15154;P63208;O00231;Q13616;P28066;Q9Y5P8;Q86XR8;Q9UL46;Q9NXR1;P50748;Q96020;Q12769;O95235;Q09028;Q9Y2I6;P35244;Q96BD8;O75122;Q14683;P0CG47;O14965;Q5TKA1;Q96GY3;Q01094;Q13352;O75935;Q7L2Z9;Q9HC77;P04818;Q14188;Q96SN8;P25205;Q16401;Q9UJX4;Q9BYV8;P17980;O75496;O14777;Q14203;O43684;P28072;Q9UBU7;O43805;Q7Z7A1;P30622;P39748;Q6P1K2;Q96CW5;P52948;Q9UPV0;Q08999;Q9H081;P42771;Q14008;P61024;P51948}
- 12792 Pathogen[ P03383] interacts with 220 human partners: {Q7Z7A1;Q14683;Q96EE3;Q13257;Q15329;P10244;P30307;Q8WUM0;Q8NHZ8;Q9NQS7;Q09028;Q13616;Q03188;P49454;Q86XR8;Q9UBD5;P49792;Q8N2Z9;Q8NFH4;Q7Z460;P55036;P61024;Q6IPU0;Q9BSJ2;O00716;Q14209;Q96BD8;Q9HCU8;Q02241;Q8NBT2;Q8N3U4;O94986;P62987;Q14008;Q9H900;Q15691;P51948;Q9NYG5;P55735;O95684;O08999;P51965;Q9UJX6;P25789;P60900;Q01094;Q9NVX0;O43264;Q5FB7;Q7L590;Q96GY3;Q14181;P52948;P27694;Q9P258;Q14203;Q96SN8;P40306;P57740;Q5EE01;O00233;Q96CW5;O43303;P25205;Q8WYP5;P41208;Q8NHV4;P30304;Q9BV73;Q6MZP7;P42677;Q9HC77;O00762;P49721;Q06323;Q5TKA1;P24385;Q9UKT4;P30153;Q96H22;Q14997;Q9H1A4;P63208;P49005;P07900;Q13352;Q00534;Q96EA4;P20618;O60216;Q13042;Q9Y248;Q9NXX1;P14635;Q96MT8;P11802;P06400;P31350;Q96BT3;P78396;Q12769;P36873;A8K8P3;O43913;Q8TEP8;Q71F23;Q12834;Q9Y5P8;P56282;O75832;Q14186;Q53HL2;P15927;O95229;Q9BW27;Q9BU64;Q66GS9;Q86SQ7;P50613;P42772;Q9UM13;Q9Y5N6;P51946;P46527;O14980;O43684;O15078;P24941;Q9BZD4;Q9UM11;Q16254;Q9UL46;Q9UNM6;Q15154;O95067;P35244;Q8WVK7;P25786;Q99460;Q9BRT9;Q9BYV8;O96020;Q52LA3;Q562F6;O75935;Q86YI8;P28072;Q9HBM1;Q13200;Q15054;Q5BJF6;Q9Y266;Q99496;P28065;Q9H410;P42771;P28066;Q13547;O14965;Q9H081;P28749;Q96IY1;Q14980;O75419;Q9UJX4;Q14188;Q9UPV0;Q16401;Q8TAP6;P62979;Q8NG31;O00231;P61981;P0CG47;Q9P209;Q13416;Q6P1K2;Q9UJX5;Q13309;O95997;Q99996;P0CG48;Q14691;P28074;Q92530;P49720;Q8TAA3;O95613;Q13561;P61289;O14777;Q13156;Q96EP1;Q9UJX2;P28062;P24864;P30260;Q92674;P48556;Q9H3R5;P63167;O14818;Q9UJX3;O75665;P62258;Q99436;Q9H211;P20248;P28070;Q8NFH3;Q8NHQ1;P51668;O75496;Q99741;P25787;Q9Y6D9;P35251;P25788;P50748;Q8WVM7}
- 12793 Pathogen[ P03410] interacts with 264 human partners: {Q03188;Q9UKT4;O95684;P62258;O75665;Q7Z460;Q86Y91;Q14204;O15392;P42771;P28070;Q9BW27;P46527;P35244;P25205;P55036;O43929;P31350;P0CG48;Q52LA3;Q9NSP4;Q9H3R5;Q8N0S6;Q99496;O43684;Q96H22;Q15329;Q13409;P30622;Q8TEP8;Q9BQQ3;Q13561;Q9H1A4;Q9Y2I6;O00139;O43303;Q14181;Q00534;P25786;Q13416;Q66GS9;P42772;Q9NXR1;Q15008;Q9HC77;Q9H410;Q16401;Q99996;Q8NG31;Q9GZM8;Q15154;Q53HL2;Q8NFH4;Q6IPU0;P60900;O75419;O96020;Q14997;Q9UJX6;Q7Z7A1;Q96BT3;P35998;P51965;Q99460;P00374;Q9UJX4;Q9NYG5;P52948;O00233;Q14008;Q96S

N8;P51946;Q16254;Q9UM13;O00232;P55273;P50748;Q8NHZ8;O95067;Q8TAA3;Q8TCU4;P48556;Q562  
F6;P63167;Q9P209;P49721;Q92674;P07900;Q08999;Q9H211;Q5TKA1;P39748;P06400;P56282;O959  
97;A5LHX3;P62979;Q9BYV8;Q14188;Q9BRT9;O60216;P50613;P61163;Q99436;Q5EE01;P33992;O432  
64;P49454;P78396;Q14965;Q96EA4;P40306;P61981;O43805;Q06323;Q8NHV4;O00716;P24385;Q96I  
Y1;P63208;P35251;Q13200;O94986;P10244;P25787;Q14980;Q09028;Q8TAP6;P14635;Q9UM11;P389  
36;Q15691;Q13042;Q96GY3;Q13309;Q9BPU9;P04818;P30304;P24941;P11802;Q6P1K2;Q9NVX0;Q9UB  
U7;P28062;Q71F23;P51665;Q14683;Q13156;O15078;Q14186;Q9BZD4;Q8WVK7;Q15054;O14818;P368  
73;Q9HBM1;Q86SQ7;Q96EE3;P51668;Q9UJX5;Q5BJF6;O75935;Q8N3U4;Q9BSJ2;Q7L590;P20248;O002  
31;Q9UNM6;Q12834;Q8NBT2;P30260;P11388;P51948;P49450;P28749;P25789;Q5FBB7;P49720;Q136  
16;P30153;Q9UJX3;Q9Y248;Q96RT8;P23258;P62987;Q13547;O00762;O75496;Q8WUM0;Q01094;P610  
24;Q9UPV0;Q8WVM7;Q6MZP7;P49005;P27694;Q9H900;Q9Y266;P28072;O95229;Q9H081;P15927;Q146  
91;P35250;Q96CW5;Q96BD8;Q14209;Q9Y5N6;P57740;P55735;P30305;P25788;Q96RT7;Q12769;O956  
13;O43913;P40937;Q14566;Q9P258;P41208;Q9NQX1;P28066;P24864;P12004;Q8WYP5;O75122;Q8NF  
H3;Q9UBD5;P42773;Q9BV73;P28065;O43242;P30307;Q9UJX6;Q96EP1;P0CG47;Q9UGJ1;Q13352;Q5JT  
W2;P46060;A8K8P3;P17980;Q7L2Z9;O75832;O14980;P20618;P49642;Q9HCU8;Q9Y5P8;O14777;Q142  
03;P49792;Q9UL46;Q02241;Q9BU64;P28074;Q8N2Z9;P61289;Q13257;Q9NQS7;Q13415;P42677;Q997  
41;Q86YI8}

12794 Pathogen[ P14075] interacts with 221 human

partners: {Q96MT8;Q9Y5P8;Q6IPU0;O43303;Q9BYV8;P55036;P25788;P42677;Q9Y266;Q9H211;Q130  
42;P31350;P28066;O95067;P24941;Q14683;O95684;Q08999;Q9Y6D9;Q02241;P11802;Q06323;O758  
32;Q9H081;P61024;Q562F6;Q8TAA3;Q9UKT4;P60900;Q9NQS7;Q8WVM7;P14635;Q9UM11;O00233;Q926  
74;Q9UL46;Q8WVK7;P57740;Q9Y5N6;Q5EE01;P49720;Q8WYP5;Q86SQ7;P50613;Q8NHV4;Q7Z460;Q52L  
A3;Q9UBD5;Q13561;O75419;P49792;P51965;A8K8P3;Q96IY1;Q13257;Q00534;Q9HC77;P42771;P102  
44;O95997;Q96H22;O43684;Q96SN8;P49005;Q13200;P48556;O00716;Q16401;Q8NHQ1;P15927;Q96B  
D8;O96020;P28070;Q14691;Q14209;O14777;P61981;Q13547;Q9UJX2;P49721;P55735;P36873;O952  
29;Q8TEP8;Q9Y248;O00231;P46527;P78396;Q9UJX6;Q8N2Z9;Q8NHZ8;Q92530;Q9UPV0;P63208;Q5TK  
A1;P07900;Q9H3R5;Q13156;Q14186;Q09028;O14980;Q9BW27;P35244;P0CG48;Q66GS9;P62979;Q999  
96;O00762;O15078;Q9BU64;Q96EA4;O00139;Q5BJF6;Q9NQX1;P28062;Q9P258;P28074;O75935;Q9UJ  
X5;Q86XR8;Q16254;P25205;P28065;O14965;Q6MZP7;Q15691;Q9BV73;Q96EE3;P20248;P35251;P257  
86;Q8TAP6;O14818;Q15054;Q96BT3;P62987;Q13309;Q9BPU9;Q86YI8;P28072;Q5FBB7;Q01094;Q994  
96;P30304;P06400;Q9BRT9;Q9H410;O94986;O43913;P41208;P27694;P30153;P15946;Q14997;Q151  
54;P28749;Q8NFH3;Q9UJX4;Q9H900;Q53HL2;P0CG47;P42772;Q9NVX0;P25787;Q13416;P50748;Q127  
69;Q99741;O75665;Q9HBM1;P20618;Q9HCU8;Q9H1A4;Q6P1K2;P24385;Q15329;O95613;Q9P209;Q142  
03;P56282;Q13352;Q14008;Q8WUM0;Q9UNM6;O43264;Q13616;O75496;Q9UM13;Q14181;Q14980;Q031  
88;P30260;P1289;Q8NG31;Q7L590;Q9UJX3;P40306;Q14188;P51668;Q9NYG5;P49454;Q9BSJ2;Q994  
36;P30307;Q7Z7A1;Q71F23;Q8NFH4;O60216;P63167;Q8NBT2;Q9BZD4;Q12834;Q96CW5;Q96GY3;Q96E  
P1;P52948;P51948;P62258;Q8N3U4;P25789;P24864}

12795 Pathogen[ P0C206] interacts with 263 human

partners: {Q9BPU9;P61289;Q5JTW2;Q96EE3;Q9HBM1;Q9NQX1;Q99436;P28062;O60216;Q9UNM6;Q86X  
R8;Q14188;P0CG48;Q8WYP5;Q15329;O94986;O75832;Q6IPU0;P61024;Q9NSP4;Q96SN8;P40306;O754  
96;P28065;Q9HC77;Q14997;Q86SQ7;Q14008;Q9UJX3;Q9H900;P35251;Q5BJF6;O95684;P55036;P303  
07;Q13309;P25786;P30153;Q9Y6D9;P25788;Q9Y248;Q96RT7;Q9HCU8;Q7L2Z9;O75419;Q13156;P519  
55;P25205;Q96EP1;P25787;Q9UJX5;O43913;Q8TCU4;Q9UJX2;Q96CW5;Q06323;P63167;Q15691;O959  
97;Q9H081;P49720;O14777;Q8N0S6;O00444;O00232;Q9BZD4;P20248;P60900;Q9UBD5;P42771;P557  
35;A8K8P3;Q9UPV0;Q13547;Q14186;Q13416;Q9H410;P42772;P30305;P57740;P49454;P49005;Q999  
96;Q13616;O00716;P49642;P30622;Q5TKA1;O43242;Q99741;Q13257;O96020;Q9BU64;P30260;Q022  
41;Q9GZM8;Q9BRT9;Q13409;Q16254;A5LHX3;P28749;Q9UGJ1;Q8TEP8;Q9NVX0;P61163;Q08999;P257  
89;P30291;P51965;O75122;Q86Y91;Q92674;Q8WUM0;Q8TAP6;Q9UKT4;Q5EE01;P42773;P46060;Q6P1  
K2;Q9H1A4;P49792;Q8NBT2;Q14209;Q96BD8;Q52LA3;Q9H3R5;Q14204;Q15054;Q9NYG5;P10244;Q9UJ  
X4;Q9UQE7;P06613;P49450;O95613;P62258;P20618;Q14188;P63208;Q9UBU7;Q13200;Q8TAA3;P280  
70;P07900;Q14691;Q14683;Q96IY1;Q99460;Q9H211;Q01094;Q96BT3;Q6MZP7;P61981;O15078;P629  
79;Q9Y5N6;Q66GS9;P55273;P46527;Q13352;Q5FBB7;P28066;Q9BYV8;P38936;Q9UM11;Q53HL2;O007  
62;Q9BV73;Q8NHV4;O14818;O15392;P23258;O00139;P04818;Q9P258;O75665;Q9UJX6;P0CG47;Q96H  
22;Q13561;Q8NFH4;P28072;P30304;Q86YI8;Q562F6;Q7Z7A1;P78396;P41208;P56282;Q13415;Q8N3  
U4;P28074;P27694;O95067;Q9NXR1;Q96EA4;Q90928;P11388;Q92530;P15927;Q8N2Z9;Q9P209;P497  
21;Q12769;P14635;O43684;P62987;O14965;Q9BQQ3;Q14980;P39748;O43805;P35244;Q9UM13;Q96M  
T8;Q7Z460;Q9NQS7;Q14203;O75935;Q9UL46;Q15154;Q8NFH3;P36873;Q13042;Q8NHQ1;P50748;Q71F  
23;O43264;P24864;Q9Y5P8;P24941;Q9BSJ2;P51668;Q14566;Q8WVM7;Q8NG31;Q9Y266;O00233;P118  
02;P48556;Q16401;Q12834;Q8WVK7;Q99496;Q99640;Q9BW27;Q8NHZ8;P33992;Q03188;Q96GY3;O002  
31;P51946;P42677;P31350;P51948;Q9Y2I6;P24385;O95229;Q00534;P12004;P06400;O43303;Q7L5  
90}

12796 Pathogen[ P03363] interacts with 195 human

partners: {Q5BJF6;Q9NQX1;Q9UJX2;Q9NYG5;Q96EA4;Q9Y5P8;Q9Y2I6;Q14691;Q9BZD4;Q13309;P460  
60;P62258;Q13042;P49454;Q96EP1;Q96IY1;P51965;Q6P1K2;P42677;P27694;Q7Z7A1;A8K8P3;P079  
00;Q9Y6D9;P63167;Q9HC77;Q9H081;Q9BYV8;P36873;Q52LA3;P24864;Q92674;Q8NFH4;O00762;O952  
29;Q99996;Q96MT8;Q96BD8;O15078;Q92530;Q8NHV4;O43805;Q09028;Q8WYP5;Q66GS9;P20248;Q96G  
Y3;Q13561;P25205;Q8NFH3;O43303;Q14980;Q9Y266;O14980;Q5TKA1;Q12769;Q6MZP7;Q15691;O956  
84;P51946;O43264;Q8NHQ1;Q8NBT2;O95613;O94986;Q14204;Q16254;P35251;Q8NHZ8;Q02241;Q8N2  
Z9;Q9P258;Q9UJX3;Q99496;Q53HL2;Q8WVK7;P61289;Q8TAP6;P49005;Q9H410;P24941;P50748;Q141  
81;P35244;Q9UJX5;P41208;Q9P209;P15927;P30260;P06400;P28749;Q9UJX6;Q5FBB7;Q9UM11;Q8TE  
P8;P33992;Q9UJX4;Q9H900;P30304;Q00534;Q5EE01;Q5JTW2;P61163;Q8WUM0;P30622;Q9HCU8;Q134  
16;Q13616;O43684;O95067;O96020;P42772;Q13415;Q13156;P49450;Q08999;Q01094;Q9NQS7;Q997  
41;P61024;Q96RT8;Q9NVX0;Q9BPU9;P78396;Q9NSP4;Q9H211;Q8WVM7;O75935;Q9HBM1;Q7Z460;Q9UK  
T4;P10244;Q9H1A4;P49792;Q03188;Q8NG31;P62987;Q13257;Q14209;Q13547;Q71F23;Q13409;Q9UP  
V0;P57740;P51668;P24385;O75496;Q96BT3;Q9UM13;Q96RT7;Q14186;P61981;Q14188;Q9UGJ1;Q9H3  
R5;Q15054;Q7L590;P52948;Q8N3U4;O14777;Q86XR8;O95997;Q12834;Q14008;P42773;P11802;Q562



F6;O00716;Q9NXR1;Q9Y248;P23258;O00139;Q9UBD5;P30153;P30307;Q86SQ7;Q13352;Q9Y5N6;Q9BR  
T9;Q15154;P63208;Q15329;P55735;Q14683;Q14203;Q9BSJ2;P42771;Q9BV73;Q9BW27;O75419;O602  
16;O75665;Q96CW5;Q96SN8;O43913}

12797 [Cluster 1164]GO:0006452+P biological\_process [name] translational frameshifting  
[def] "A mechanism whereby different proteins may result from a single mRNA molecule,  
due to a change in the parsing of three nucleotides per codon relative to an initiating  
AUG codon." [GOC

12798 Pathogen[ Q2Q067] interacts with 3 human partners:{P63241;Q6IS14;Q9GZV4}  
12799 Pathogen[ P0C214] interacts with 3 human partners:{Q6IS14;Q9GZV4;P63241}  
12800 Pathogen[ P03346] interacts with 3 human partners:{Q9GZV4;P63241;Q6IS14}  
12801 Pathogen[ Q85601] interacts with 3 human partners:{Q9GZV4;P63241;Q6IS14}  
12802 Pathogen[ P14079] interacts with 3 human partners:{Q6IS14;P63241;Q9GZV4}  
12803 Pathogen[ P03383] interacts with 2 human partners:{Q9GZV4;P63241}  
12804 Pathogen[ P03410] interacts with 3 human partners:{P63241;Q9GZV4;Q6IS14}  
12805 Pathogen[ P14075] interacts with 2 human partners:{Q9GZV4;P63241}  
12806 Pathogen[ P0C206] interacts with 3 human partners:{Q9GZV4;Q6IS14;P63241}  
12807 Pathogen[ P03363] interacts with 3 human partners:{Q9GZV4;P63241;Q6IS14}

12808 [Cluster 1165]GO:0071233+P biological\_process [name] cellular response to leucine  
[def] "Any process that results in a change in state or activity of a cell (in terms of  
movement, secretion, enzyme production, gene expression, etc.) as a result of a leucine  
stimulus." [GOC

12809 Pathogen[ Q2Q067] interacts with 1 human partners:{Q8IYW8}  
12810 Pathogen[ P0C214] interacts with 2 human partners:{Q8IYW8;Q8IYW7}  
12811 Pathogen[ P03346] interacts with 1 human partners:{Q8IYW8}  
12812 Pathogen[ Q85601] interacts with 2 human partners:{Q8IYW7;Q8IYW8}  
12813 Pathogen[ P14079] interacts with 2 human partners:{Q8IYW8;Q8IYW7}  
12814 Pathogen[ P03383] interacts with 1 human partners:{Q8IYW8}  
12815 Pathogen[ P03410] interacts with 2 human partners:{Q8IYW8;Q8IYW7}  
12816 Pathogen[ P14075] interacts with 1 human partners:{Q8IYW8}  
12817 Pathogen[ P0C206] interacts with 2 human partners:{Q8IYW7;Q8IYW8}  
12818 Pathogen[ P03363] interacts with 1 human partners:{Q8IYW8}

12819 [Cluster 1166]GO:0030516+P biological\_process [name] regulation of axon extension  
[def] "Any process that modulates the rate, direction or extent of axon extension." [GOC

12820 Pathogen[ Q2Q067] interacts with 1 human partners:{Q9NY43}  
12821 Pathogen[ P0C214] interacts with 1 human partners:{Q9NY43}  
12822 Pathogen[ P03346] interacts with 1 human partners:{Q9NY43}  
12823 Pathogen[ Q85601] interacts with 1 human partners:{Q9NY43}  
12824 Pathogen[ P14079] interacts with 1 human partners:{Q9NY43}  
12825 Pathogen[ P03383] interacts with 1 human partners:{Q9NY43}  
12826 Pathogen[ P03410] interacts with 1 human partners:{Q9NY43}  
12827 Pathogen[ P14075] interacts with 1 human partners:{Q9NY43}  
12828 Pathogen[ P0C206] interacts with 1 human partners:{Q9NY43}  
12829 Pathogen[ P03363] interacts with 1 human partners:{Q9NY43}

12830 [Cluster 1167]GO:0008645+P biological\_process [name] hexose transport [def] "The  
directed movement of hexose into, out of or within a cell, or between cells, by means of  
some agent such as a transporter or pore. Hexoses are any aldoses with a chain of six  
carbon atoms in the molecule." [GOC

12831 Pathogen[ Q2Q067] interacts with 31 human  
partners:{Q96EE3;P52948;Q12769;Q96HA1;P49790;P49792;O75694;P78406;P19367;Q99567;Q8N1  
F7;Q7Z3B4;Q8NFH4;P12270;P11166;Q9BW27;Q8TEM1;Q9BVL2;Q9UKX7;Q9NRG9;Q8NFH3;P37198;Q926  
21;O15504;P57740;Q8WUM0;P14672;P35658;Q8NFH5;Q5SRE5;Q14397}

12832 Pathogen[ P0C214] interacts with 32 human  
partners:{Q8NFH5;Q8TEM1;P78406;P57740;Q99567;Q8N1F7;O75694;Q96EE3;P49792;Q9UKX7;P111  
66;P11168;P49790;P37198;Q9BW27;Q9NRG9;P35658;P19367;Q8NFH3;Q14397;O15504;P12270;Q8NF  
H4;Q9BVL2;Q5SRE5;P14672;Q7Z3B4;Q8WUM0;P52948;Q92621;Q12769;Q96HA1}

12833 Pathogen[ P03346] interacts with 31 human  
partners:{Q8TEM1;Q8NFH4;Q8WUM0;P12270;Q12769;Q96EE3;Q99567;Q9UKX7;O75694;Q9NRG9;P784  
06;P57740;Q9BVL2;Q8N1F7;P19367;Q8NFH5;P37198;Q8NFH3;P35658;Q5SRE5;Q92621;Q9BW27;P111  
66;Q14397;P49790;Q96HA1;P14672;Q7Z3B4;O15504;P49792;P52948}

12834 Pathogen[ Q85601] interacts with 31 human  
partners:{Q8TEM1;Q5SRE5;P11168;Q8NFH4;Q8NFH3;Q96EE3;Q12769;P78406;P57740;Q9NRG9;Q8WU  
M0;Q8N1F7;P12270;O75694;O15504;Q9BW27;P11166;Q92621;P52948;Q9UKX7;Q8NFH5;P35658;Q143  
97;Q99567;P49792;Q9BVL2;Q96HA1;P14672;Q7Z3B4;P49790;P19367}

12835 Pathogen[ P14079] interacts with 29 human  
partners:{Q8NFH5;Q9BW27;Q96HA1;P57740;Q8N1F7;P35658;P14672;Q92621;Q8TEM1;P11166;Q9UK  
X7;Q9BVL2;O15504;Q8WUM0;P12270;Q99567;Q8NFH3;Q96EE3;P37198;P49790;Q8NFH4;P78406;Q7Z3  
B4;Q14397;Q12769;Q5SRE5;Q9NRG9;O75694;P52948}

12836 Pathogen[ P03383] interacts with 33 human  
partners:{Q9BVL2;Q96EE3;O15504;Q8WUM0;Q92621;P49792;Q8NFH4;P12270;P19367;P52948;P784  
06;P57740;Q8NFH5;Q8N1F7;Q8TEM1;Q12769;P11168;Q99567;Q14397;Q9BW27;Q5SRE5;P35658;Q96H  
A1;Q9NRG9;P11169;P37198;Q9UKX7;P14672;Q7Z3B4;P49790;O75694;Q8NFH3;P22732}

12837 Pathogen[ P03410] interacts with 30 human  
partners:{Q99567;Q14397;Q7Z3B4;Q9BW27;P22732;Q9UKX7;P11166;Q8NFH4;Q5SRE5;P52948;O155  
04;P11168;O75694;P78406;Q96HA1;Q8N1F7;P49790;P12270;P35658;Q8NFH5;Q8TEM1;Q96EE3;Q8WU  
M0;P57740;Q12769;Q9NRG9;Q8NFH3;Q9BVL2;Q92621;P49792}

12838 Pathogen[ P14075] interacts with 33 human

12839 partners: {P11169;P78406;P57740;P49792;Q8N1F7;P19367;P22732;Q9UKX7;P35658;P12270;Q92621;Q96HA1;Q9BW27;Q8TEM1;Q96EE3;P37198;Q5SRE5;Q14397;Q8NFH3;O15504;Q99567;Q12769;P11168;Q9BVL2;P49790;Q8WUM0;P14672;O75694;Q9NRG9;Q7Z3B4;Q8NFH4;Q8NFH5;P52948}  
Pathogen[ POC206] interacts with 30 human  
partners: {Q96EE3;Q92621;P49790;Q5SRE5;Q8NFH5;Q9NRG9;Q7Z3B4;Q96HA1;P57740;P11166;P19367;Q8WUM0;P11168;P49792;Q8TEM1;Q9UKX7;O75694;Q99567;Q8NFH4;P14672;P78406;Q14397;O15504;Q12769;Q8NFH3;Q8N1F7;P35658;Q9BW27;Q9BVL2;P12270}

12840 Pathogen[ P03363] interacts with 28 human  
partners: {Q7Z3B4;Q5SRE5;P12270;Q8NFH4;Q14397;Q8NFH3;Q12769;Q9UKX7;Q9NRG9;Q8WUM0;Q9BVL2;Q99567;Q96HA1;P49792;P35658;O75694;P49790;P57740;P14672;P78406;P52948;O15504;P37198;Q8N1F7;Q92621;Q8NFH5;P11166;Q9BW27}

12841 [Cluster 1168]GO:0048709+P biological\_process [name] oligodendrocyte differentiation [def] "The process in which a relatively unspecialized cell acquires the specialized features of an oligodendrocyte. An oligodendrocyte is a type of glial cell involved in myelinating the axons of neurons in the central nervous system." [GOC]

12842 Pathogen[ Q2Q067] interacts with 5 human  
partners: {P42773;Q9UMX3;P35712;P56693;P35711}

12843 Pathogen[ POC214] interacts with 5 human  
partners: {P35711;P56693;Q9UMX3;P42773;P35712}

12844 Pathogen[ P03346] interacts with 8 human  
partners: {Q96A65;P56693;P78426;P42773;Q13516;P35712;Q9UMX3;P35711}

12845 Pathogen[ Q85601] interacts with 6 human  
partners: {Q96A65;P35712;Q9UMX3;P35711;P42773;P56693}

12846 Pathogen[ P14079] interacts with 7 human  
partners: {P35711;P35712;Q9UMX3;P56693;Q96A65;P42773;Q9Y2G1}

12847 Pathogen[ P03383] interacts with 4 human partners: {P35712;Q9UMX3;P35711;P56693}

12848 Pathogen[ P03410] interacts with 6 human  
partners: {P35712;Q9Y2G1;Q9UMX3;Q96A65;P56693;P42773}

12849 Pathogen[ P14075] interacts with 4 human partners: {Q9UMX3;P56693;P35711;P35712}

12850 Pathogen[ POC206] interacts with 6 human  
partners: {Q9UMX3;P56693;Q96A65;P42773;P35711;P35712}

12851 Pathogen[ P03363] interacts with 8 human  
partners: {P35711;Q13516;Q96A65;P56693;P35712;Q9C056;P42773;Q9UMX3}

12852 [Cluster 1169]GO:0016557+P biological\_process [name] peroxisome membrane biogenesis [def] "The process in which a peroxisome membrane is synthesized, aggregates, and bonds together." [GOC]

12853 Pathogen[ Q2Q067] interacts with 1 human partners: {P40855}

12854 Pathogen[ POC214] interacts with 1 human partners: {P40855}

12855 Pathogen[ P03346] interacts with 2 human partners: {P56589;P40855}

12856 Pathogen[ Q85601] interacts with 1 human partners: {P40855}

12857 Pathogen[ P14079] interacts with 4 human partners: {Q9Y5Y5;O75192;P40855;P56589}

12858 Pathogen[ P03383] interacts with 1 human partners: {P40855}

12859 Pathogen[ P03410] interacts with 4 human partners: {O75192;Q9Y5Y5;P40855;P56589}

12860 Pathogen[ P14075] interacts with 2 human partners: {P40855;O75192}

12861 Pathogen[ POC206] interacts with 3 human partners: {O75192;P56589;P40855}

12862 Pathogen[ P03363] interacts with 1 human partners: {P40855}

12863 [Cluster 1170]GO:0001516+P biological\_process [name] prostaglandin biosynthetic process [def] "The chemical reactions and pathways resulting in the formation of prostaglandins, any of a group of biologically active metabolites which contain a cyclopentane ring." [GOC]

12864 Pathogen[ Q2Q067] interacts with 1 human partners: {Q15185}

12865 Pathogen[ POC214] interacts with 2 human partners: {Q8TBF2;Q15185}

12866 Pathogen[ P03346] interacts with 1 human partners: {Q15185}

12867 Pathogen[ Q85601] interacts with 1 human partners: {Q15185}

12868 Pathogen[ P14079] interacts with 2 human partners: {Q15185;Q8TBF2}

12869 Pathogen[ P03383] interacts with 1 human partners: {Q15185}

12870 Pathogen[ P03410] interacts with 2 human partners: {Q15185;Q8TBF2}

12871 Pathogen[ P14075] interacts with 1 human partners: {Q15185}

12872 Pathogen[ POC206] interacts with 2 human partners: {Q15185;Q8TBF2}

12873 Pathogen[ P03363] interacts with 1 human partners: {Q15185}

12874 [Cluster 1171]GO:0070848+P biological\_process [name] response to growth factor stimulus [def] "Any process that results in a change in state or activity of a cell or an organism (in terms of movement, secretion, enzyme production, gene expression, etc.) as a result of a growth factor stimulus." [GOC]

12875 Pathogen[ Q2Q067] interacts with 3 human partners: {P01106;P12757;P27986}

12876 Pathogen[ POC214] interacts with 3 human partners: {P12757;P27986;P01106}

12877 Pathogen[ P03346] interacts with 3 human partners: {P12757;P01106;P27986}

12878 Pathogen[ Q85601] interacts with 3 human partners: {P01106;P12757;P27986}

12879 Pathogen[ P14079] interacts with 3 human partners: {P11686;P01106;P12757}

12880 Pathogen[ P03383] interacts with 3 human partners: {P27986;P01106;P12757}

12881 Pathogen[ P03410] interacts with 4 human partners: {P27986;P01106;P11686;P12757}

12882 Pathogen[ P14075] interacts with 3 human partners: {P01106;P12757;P27986}

12883 Pathogen[ POC206] interacts with 3 human partners: {P27986;P12757;P01106}

12884 Pathogen[ P03363] interacts with 3 human partners: {P12757;P01106;P27986}

12885 [Cluster 1172]GO:0000492+P biological\_process [name] box C/D snoRNP assembly [def] "The aggregation, arrangement and bonding together of proteins and a box C/D snoRNA to

form a box C/D small nucleolar ribonucleoprotein (snoRNP) complex." [GOC

12886 Pathogen[ Q2Q067] interacts with 2 human partners:{Q9NWK9;Q9UHK0}

12887 Pathogen[ POC214] interacts with 3 human partners:{Q9NWK9;Q9UHK0;Q9NWS0}

12888 Pathogen[ P03346] interacts with 2 human partners:{Q9NWK9;Q9UHK0}

12889 Pathogen[ Q85601] interacts with 2 human partners:{Q9NWK9;Q9UHK0}

12890 Pathogen[ P14079] interacts with 3 human partners:{Q9UHK0;Q9NWS0;Q9NWK9}

12891 Pathogen[ P03383] interacts with 2 human partners:{Q9NWK9;Q9UHK0}

12892 Pathogen[ P03410] interacts with 3 human partners:{Q9UHK0;Q9NWS0;Q9NWK9}

12893 Pathogen[ P14075] interacts with 2 human partners:{Q9UHK0;Q9NWK9}

12894 Pathogen[ POC206] interacts with 3 human partners:{Q9NWK9;Q9UHK0;Q9NWS0}

12895 Pathogen[ P03363] interacts with 2 human partners:{Q9UHK0;Q9NWK9}

12896 [Cluster 1173]GO:0045429+P biological\_process [name] positive regulation of nitric oxide biosynthetic process [def] "Any process that activates or increases the frequency, rate or extent of the chemical reactions and pathways resulting in the formation of nitric oxide." [GOC

12897 Pathogen[ Q2Q067] interacts with 6 human partners:{P31749;Q8IUC6;P08238;P07900;P68871;O95865}

12898 Pathogen[ POC214] interacts with 4 human partners:{Q8IUC6;P68871;O95865;P31749}

12899 Pathogen[ P03346] interacts with 6 human partners:{P07900;P31749;O95865;P68871;Q8IUC6;P08238}

12900 Pathogen[ Q85601] interacts with 6 human partners:{P31749;Q8IUC6;P08238;P07900;P68871;O95865}

12901 Pathogen[ P14079] interacts with 6 human partners:{P31751;Q8IUC6;P68871;P08238;P07900;O95865}

12902 Pathogen[ P03383] interacts with 6 human partners:{O95865;Q8IUC6;P31749;P68871;P07900;P08238}

12903 Pathogen[ P03410] interacts with 6 human partners:{P08238;O95865;P31749;P07900;P68871;Q8IUC6}

12904 Pathogen[ P14075] interacts with 6 human partners:{P68871;P08238;P07900;P31749;O95865;Q8IUC6}

12905 Pathogen[ POC206] interacts with 6 human partners:{P68871;P31749;O95865;P08238;P07900;Q8IUC6}

12906 Pathogen[ P03363] interacts with 5 human partners:{P07900;P68871;P31749;O95865;P08238}

12907 [Cluster 1174]GO:0019725+P biological\_process [name] cellular homeostasis [def] "Any process involved in the maintenance of an internal steady state at the level of the cell." [GOC

12908 Pathogen[ Q2Q067] interacts with 1 human partners:{Q8WXF8}

12909 Pathogen[ POC214] interacts with 1 human partners:{Q8WXF8}

12910 Pathogen[ P03346] interacts with 2 human partners:{Q8WXF8;Q07820}

12911 Pathogen[ Q85601] interacts with 1 human partners:{Q8WXF8}

12912 Pathogen[ P14079] interacts with 1 human partners:{Q8WXF8}

12913 Pathogen[ P03383] interacts with 1 human partners:{Q8WXF8}

12914 Pathogen[ P03410] interacts with 1 human partners:{Q8WXF8}

12915 Pathogen[ P14075] interacts with 1 human partners:{Q8WXF8}

12916 Pathogen[ POC206] interacts with 1 human partners:{Q8WXF8}

12917 Pathogen[ P03363] interacts with 2 human partners:{Q07820;Q8WXF8}

12918 [Cluster 1175]GO:0048599+P biological\_process [name] oocyte development [def] "The process whose specific outcome is the progression of an oocyte over time, from initial commitment of the cell to its specific fate, to the fully functional differentiated cell." [GOC

12919 Pathogen[ Q2Q067] interacts with 1 human partners:{Q9Y2T7}

12920 Pathogen[ POC214] interacts with 1 human partners:{Q9Y2T7}

12921 Pathogen[ P03346] interacts with 2 human partners:{Q6QHK4;Q9Y2T7}

12922 Pathogen[ Q85601] interacts with 1 human partners:{Q9Y2T7}

12923 Pathogen[ P14079] interacts with 2 human partners:{Q7Z7C7;Q9Y2T7}

12924 Pathogen[ P03383] interacts with 1 human partners:{Q9Y2T7}

12925 Pathogen[ P03410] interacts with 2 human partners:{Q7Z7C7;Q9Y2T7}

12926 Pathogen[ P14075] interacts with 2 human partners:{Q9Y2T7;Q7Z7C7}

12927 Pathogen[ POC206] interacts with 2 human partners:{Q7Z7C7;Q9Y2T7}

12928 Pathogen[ P03363] interacts with 2 human partners:{Q9Y2T7;Q6QHK4}

12929 [Cluster 1176]GO:0042130+P biological\_process [name] negative regulation of T cell proliferation [def] "Any process that stops, prevents or reduces the rate or extent of T cell proliferation." [GOC

12930 Pathogen[ Q2Q067] interacts with 4 human partners:{Q92990;Q12959;Q96FA3;Q96IZ0}

12931 Pathogen[ POC214] interacts with 3 human partners:{Q96IZ0;Q96FA3;Q12959}

12932 Pathogen[ P03346] interacts with 4 human partners:{Q92990;Q96FA3;Q96IZ0;Q12959}

12933 Pathogen[ Q85601] interacts with 3 human partners:{Q96IZ0;Q96FA3;Q12959}

12934 Pathogen[ P14079] interacts with 3 human partners:{Q96FA3;Q92990;Q96IZ0}

12935 Pathogen[ P03383] interacts with 3 human partners:{Q96IZ0;Q96FA3;Q92990}

12936 Pathogen[ P03410] interacts with 4 human partners:{Q96FA3;Q12959;Q92990;Q96IZ0}

12937 Pathogen[ P14075] interacts with 3 human partners:{Q92990;Q96IZ0;Q96FA3}

12938 Pathogen[ POC206] interacts with 4 human partners:{Q96IZ0;Q92990;Q96FA3;Q12959}

12939 Pathogen[ P03363] interacts with 4 human partners:{Q12959;Q96IZ0;Q92990;Q96FA3}

12940 [Cluster 1177]GO:0007144+P biological\_process [name] female meiosis I [def] "The cell cycle process in which the first meiotic division occurs in the female germline." [GOC

12941 Pathogen[ Q2Q067] interacts with 2 human partners:{Q9UHC1;P30305}  
12942 Pathogen[ P0C214] interacts with 2 human partners:{Q9UHC1;P30305}  
12943 Pathogen[ P03346] interacts with 2 human partners:{P30305;Q9UHC1}  
12944 Pathogen[ Q85601] interacts with 2 human partners:{P30305;Q9UHC1}  
12945 Pathogen[ P14079] interacts with 2 human partners:{Q9UHC1;P30305}  
12946 Pathogen[ P03383] interacts with 1 human partners:{Q9UHC1}  
12947 Pathogen[ P03410] interacts with 2 human partners:{P30305;Q9UHC1}  
12948 Pathogen[ P14075] interacts with 1 human partners:{Q9UHC1}  
12949 Pathogen[ P0C206] interacts with 2 human partners:{Q9UHC1;P30305}  
12950 Pathogen[ P03363] interacts with 1 human partners:{Q9UHC1}  
12951 [Cluster 1178]GO:0048490+P biological\_process [name] anterograde synaptic vesicle transport [def] "The directed movement of substances in synaptic membrane-bounded vesicles within the neuron, along the cytoskeleton, away from the neuronal cell body." [GOC  
12952 Pathogen[ Q2Q067] interacts with 12 human partners:{Q9UL45;Q92572;O95295;Q9NUP1;Q6QNY0;Q96EV8;Q8TDH9;P53677;Q9Y2T2;Q6QNY1;P78537;Q13367}  
12953 Pathogen[ P0C214] interacts with 13 human partners:{P59780;O95295;Q9Y2T2;Q13367;P78537;Q8TDH9;Q6QNY0;Q92572;P53677;Q9UL45;Q96EV8;Q9NUP1;Q6QNY1}  
12954 Pathogen[ P03346] interacts with 14 human partners:{O95295;Q92572;P59780;Q6QNY0;P78537;Q96EV8;Q6QNY1;Q9UL45;Q13367;O14617;Q8TDH9;Q9NUP1;P53677;Q9Y2T2}  
12955 Pathogen[ Q85601] interacts with 12 human partners:{Q13367;Q6QNY0;Q9Y2T2;Q9NUP1;O95295;P78537;Q96EV8;P53677;Q92572;P59780;Q6QNY1;Q8TDH9}  
12956 Pathogen[ P14079] interacts with 14 human partners:{Q6QNY0;Q9Y2T2;P59780;Q92572;Q9UL45;Q8TDH9;P53677;O95295;Q13367;Q96EV8;Q9NUP1;O14617;Q6QNY1;P78537}  
12957 Pathogen[ P03383] interacts with 11 human partners:{Q6QNY0;Q92572;O95295;Q8TDH9;P78537;Q9NUP1;P53677;Q96EV8;Q9Y2T2;Q13367;Q6QNY1}  
12958 Pathogen[ P03410] interacts with 15 human partners:{Q9NUP1;O00203;P78537;Q6QNY1;Q6QNY0;Q92572;O14617;Q9UL45;O95295;Q9Y2T2;P53677;P59780;Q13367;Q8TDH9;Q96EV8}  
12959 Pathogen[ P14075] interacts with 10 human partners:{P78537;O95295;Q9Y2T2;Q6QNY1;Q6QNY0;Q9NUP1;Q92572;Q8TDH9;Q96EV8;Q13367}  
12960 Pathogen[ P0C206] interacts with 14 human partners:{P78537;Q9UL45;Q92572;Q6QNY1;Q9Y2T2;Q8TDH9;P59780;P53677;Q96EV8;O95295;O14617;Q9NUP1;Q6QNY0;Q13367}  
12961 Pathogen[ P03363] interacts with 10 human partners:{Q9Y2T2;Q13367;P53677;P78537;Q92572;Q6QNY1;O95295;Q8TDH9;Q6QNY0;Q9NUP1}  
12962 [Cluster 1179]GO:0042391+P biological\_process [name] regulation of membrane potential [def] "Any process that modulates the establishment or extent of a membrane potential, the electric potential existing across any membrane arising from charges in the membrane itself and from the charges present in the media on either side of the membrane." [GOC  
12963 Pathogen[ Q2Q067] interacts with 3 human partners:{Q12959;Q96PU5;Q9HD47}  
12964 Pathogen[ P0C214] interacts with 5 human partners:{O00308;Q12959;P09622;Q9HD47;Q96PU5}  
12965 Pathogen[ P03346] interacts with 4 human partners:{Q96PU5;Q9HD47;O00308;Q12959}  
12966 Pathogen[ Q85601] interacts with 3 human partners:{Q9HD47;Q96PU5;Q12959}  
12967 Pathogen[ P14079] interacts with 2 human partners:{Q702N8;Q9HD47}  
12968 Pathogen[ P03383] interacts with 1 human partners:{Q9HD47}  
12969 Pathogen[ P03410] interacts with 4 human partners:{Q702N8;Q12959;Q9HD47;P33176}  
12970 Pathogen[ P14075] interacts with 1 human partners:{Q9HD47}  
12971 Pathogen[ P0C206] interacts with 4 human partners:{Q96PU5;O00308;Q9HD47;Q12959}  
12972 Pathogen[ P03363] interacts with 5 human partners:{Q12959;P33176;Q9HD47;Q96PU5;O00308}  
12973 [Cluster 1180]GO:0090266+P biological\_process [name] regulation of mitotic cell cycle spindle assembly checkpoint [def] "Any process that modulates the rate, frequency, or extent of the mitotic cell cycle spindle assembly checkpoint, a cell cycle checkpoint that delays the metaphase/anaphase transition of a mitotic nuclear division until the spindle is correctly assembled and chromosomes are attached to the spindle." [GOC  
12974 Pathogen[ Q2Q067] interacts with 1 human partners:{P60006}  
12975 Pathogen[ P0C214] interacts with 1 human partners:{P60006}  
12976 Pathogen[ P03346] interacts with 2 human partners:{P60006;Q9H0E7}  
12977 Pathogen[ Q85601] interacts with 2 human partners:{Q9H0E7;P60006}  
12978 Pathogen[ P14079] interacts with 1 human partners:{P60006}  
12979 Pathogen[ P03383] interacts with 1 human partners:{P60006}  
12980 Pathogen[ P03410] interacts with 1 human partners:{P60006}  
12981 Pathogen[ P14075] interacts with 1 human partners:{P60006}  
12982 Pathogen[ P0C206] interacts with 2 human partners:{Q9H0E7;P60006}  
12983 Pathogen[ P03363] interacts with 1 human partners:{P60006}  
12984 [Cluster 1181]GO:0048812+P biological\_process [name] neuron projection morphogenesis [def] "The process in which the anatomical structures of a neuron projection are generated and organized. A neuron projection is any process extending from a neural

cell, such as axons or dendrites." [GOC  
12985 Pathogen[ Q2Q067] interacts with 7 human  
partners:{P63172;Q96EV8;P11532;Q9P242;Q99700;Q66K74;Q6ZVC0}  
12986 Pathogen[ POC214] interacts with 9 human  
partners:{A0MZ66;Q9P242;Q99700;P11532;Q96EV8;Q6ZVC0;P10909;P63172;Q66K74}  
12987 Pathogen[ P03346] interacts with 6 human  
partners:{P50219;Q66K74;Q99700;Q96EV8;P63172;P11532}  
12988 Pathogen[ Q85601] interacts with 7 human  
partners:{Q66K74;P11532;Q9P242;P63172;Q96EV8;Q6ZVC0;Q99700}  
12989 Pathogen[ P14079] interacts with 9 human  
partners:{P63172;P11532;Q99700;Q66K74;A0MZ66;P10909;Q9P242;Q96EV8;Q6ZVC0}  
12990 Pathogen[ P03383] interacts with 6 human  
partners:{P63172;Q99700;Q96EV8;P11532;Q6ZVC0;Q9P242}  
12991 Pathogen[ P03410] interacts with 9 human  
partners:{Q99700;Q6ZVC0;P11532;P63172;A0MZ66;Q66K74;Q9P242;Q96EV8;P10909}  
12992 Pathogen[ P14075] interacts with 6 human  
partners:{P11532;Q6ZVC0;Q9P242;P63172;Q96EV8;Q99700}  
12993 Pathogen[ POC206] interacts with 10 human  
partners:{Q66K74;P30291;Q99700;Q96EV8;P10909;A0MZ66;Q9P242;P11532;P63172;Q6ZVC0}  
12994 Pathogen[ P03363] interacts with 5 human  
partners:{Q66K74;P63172;P11532;Q99700;P50219}  
12995 [Cluster 1182]GO:0006778+P biological\_process [name] porphyrin-containing compound  
metabolic process [def] "The chemical reactions and pathways involving any member of a  
large group of derivatives or analogs of porphyrin. Porphyrins consists of a ring of  
four pyrrole nuclei linked each to the next at their alpha positions through a methine  
group." [GOC  
12996 Pathogen[ Q2Q067] interacts with 5 human  
partners:{P10746;P22557;P13196;P06132;P08397}  
12997 Pathogen[ POC214] interacts with 8 human  
partners:{P06132;P22557;P13196;P10746;P08397;P30043;P36551;P22830}  
12998 Pathogen[ P03346] interacts with 4 human partners:{P10746;P22557;P13196;P06132}  
12999 Pathogen[ Q85601] interacts with 4 human partners:{P10746;P13196;P06132;P08397}  
13000 Pathogen[ P14079] interacts with 7 human  
partners:{P13196;P22557;P10746;P06132;P08397;P22830;P36551}  
13001 Pathogen[ P03383] interacts with 2 human partners:{P06132;P08397}  
13002 Pathogen[ P03410] interacts with 7 human  
partners:{P08397;P06132;P36551;P10746;P22557;P22830;P13196}  
13003 Pathogen[ P14075] interacts with 2 human partners:{P06132;P08397}  
13004 Pathogen[ POC206] interacts with 7 human  
partners:{P10746;P36551;P22557;P22830;P13196;P08397;P06132}  
13005 Pathogen[ P03363] interacts with 2 human partners:{P06132;P13196}  
13006 [Cluster 1183]GO:0006422+P biological\_process [name] aspartyl-tRNA aminoacylation  
[def] "The process of coupling aspartate to aspartyl-tRNA, catalyzed by aspartyl-tRNA  
synthetase. In tRNA aminoacylation, the amino acid is first activated by linkage to AMP  
and then transferred to either the 2'- or the 3'-hydroxyl group of the 3'-adenosine  
residue of the tRNA." [GOC  
13007 Pathogen[ Q2Q067] interacts with 1 human partners:{P14868}  
13008 Pathogen[ POC214] interacts with 1 human partners:{P14868}  
13009 Pathogen[ P03346] interacts with 1 human partners:{P14868}  
13010 Pathogen[ Q85601] interacts with 1 human partners:{P14868}  
13011 Pathogen[ P14079] interacts with 1 human partners:{P14868}  
13012 Pathogen[ P03383] interacts with 1 human partners:{P14868}  
13013 Pathogen[ P03410] interacts with 1 human partners:{P14868}  
13014 Pathogen[ P14075] interacts with 1 human partners:{P14868}  
13015 Pathogen[ POC206] interacts with 1 human partners:{P14868}  
13016 Pathogen[ P03363] interacts with 1 human partners:{P14868}  
13017 [Cluster 1184]GO:0034770+P biological\_process [name] histone H4-K20 methylation  
[def] "The modification of histone H4 by addition of one or more methyl groups to lysine  
at position 20 of the histone." [GOC  
13018 Pathogen[ Q2Q067] interacts with 2 human partners:{Q86Y97;Q9UIF9}  
13019 Pathogen[ POC214] interacts with 2 human partners:{Q9UIF9;Q86Y97}  
13020 Pathogen[ P03346] interacts with 2 human partners:{Q86Y97;Q9UIF9}  
13021 Pathogen[ Q85601] interacts with 2 human partners:{Q9UIF9;Q86Y97}  
13022 Pathogen[ P14079] interacts with 2 human partners:{Q9UIF9;Q86Y97}  
13023 Pathogen[ P03383] interacts with 2 human partners:{Q86Y97;Q9UIF9}  
13024 Pathogen[ P03410] interacts with 2 human partners:{Q86Y97;Q9UIF9}  
13025 Pathogen[ P14075] interacts with 2 human partners:{Q9UIF9;Q86Y97}  
13026 Pathogen[ POC206] interacts with 2 human partners:{Q86Y97;Q9UIF9}  
13027 Pathogen[ P03363] interacts with 2 human partners:{Q9UIF9;Q86Y97}  
13028 [Cluster 1185]GO:0030185+P biological\_process [name] nitric oxide transport [def]  
"The directed movement of nitric oxide, nitrogen monoxide, into, out of or within a  
cell, or between cells, by means of some agent such as a transporter or pore." [GOC  
13029 Pathogen[ Q2Q067] interacts with 1 human partners:{P68871}  
13030 Pathogen[ POC214] interacts with 1 human partners:{P68871}  
13031 Pathogen[ P03346] interacts with 1 human partners:{P68871}  
13032 Pathogen[ Q85601] interacts with 1 human partners:{P68871}

13033 Pathogen[ P14079] interacts with 1 human partners:{P68871}  
13034 Pathogen[ P03383] interacts with 1 human partners:{P68871}  
13035 Pathogen[ P03410] interacts with 1 human partners:{P68871}  
13036 Pathogen[ P14075] interacts with 1 human partners:{P68871}  
13037 Pathogen[ P0C206] interacts with 1 human partners:{P68871}  
13038 Pathogen[ P03363] interacts with 1 human partners:{P68871}  
13039 [Cluster 1186]GO:0010452+P biological\_process [name] histone H3-K36 methylation  
[def] "The modification of histone H3 by addition of a methyl group to lysine at  
position 36 of the histone." [GOC  
13040 Pathogen[ Q2Q067] interacts with 2 human partners:{Q9NRG4;Q86TU7}  
13041 Pathogen[ P0C214] interacts with 2 human partners:{Q86TU7;Q9NRG4}  
13042 Pathogen[ P03346] interacts with 3 human partners:{Q9BYW2;Q9NRG4;Q86TU7}  
13043 Pathogen[ Q85601] interacts with 2 human partners:{Q86TU7;Q9NRG4}  
13044 Pathogen[ P14079] interacts with 2 human partners:{Q9NRG4;Q86TU7}  
13045 Pathogen[ P03383] interacts with 2 human partners:{Q9NRG4;Q86TU7}  
13046 Pathogen[ P03410] interacts with 2 human partners:{Q86TU7;Q9NRG4}  
13047 Pathogen[ P14075] interacts with 2 human partners:{Q86TU7;Q9NRG4}  
13048 Pathogen[ P0C206] interacts with 2 human partners:{Q9NRG4;Q86TU7}  
13049 Pathogen[ P03363] interacts with 1 human partners:{Q9NRG4}  
13050 [Cluster 1187]GO:2000824+P biological\_process [name] negative regulation of androgen  
receptor activity [def] "Any process that stops, prevents or reduces the frequency,  
rate or extent of androgen receptor activity." [GOC  
13051 Pathogen[ Q2Q067] interacts with 1 human partners:{Q9NQ87}  
13052 Pathogen[ P0C214] interacts with 1 human partners:{Q9NQ87}  
13053 Pathogen[ P03346] interacts with 2 human partners:{Q9NQ87;O75593}  
13054 Pathogen[ Q85601] interacts with 1 human partners:{Q9NQ87}  
13055 Pathogen[ P14079] interacts with 1 human partners:{Q9NQ87}  
13056 Pathogen[ P03383] interacts with 1 human partners:{Q9NQ87}  
13057 Pathogen[ P03410] interacts with 1 human partners:{Q9NQ87}  
13058 Pathogen[ P14075] interacts with 1 human partners:{Q9NQ87}  
13059 Pathogen[ P0C206] interacts with 1 human partners:{Q9NQ87}  
13060 Pathogen[ P03363] interacts with 1 human partners:{Q9NQ87}  
13061 [Cluster 1188]GO:0075732+P  
13062 Pathogen[ Q2Q067] interacts with 2 human partners:{P49790;O00505}  
13063 Pathogen[ P0C214] interacts with 2 human partners:{P49790;O00505}  
13064 Pathogen[ P03346] interacts with 2 human partners:{O00505;P49790}  
13065 Pathogen[ Q85601] interacts with 2 human partners:{O00505;P49790}  
13066 Pathogen[ P14079] interacts with 2 human partners:{P49790;O00505}  
13067 Pathogen[ P03383] interacts with 2 human partners:{O00505;P49790}  
13068 Pathogen[ P03410] interacts with 2 human partners:{O00505;P49790}  
13069 Pathogen[ P14075] interacts with 2 human partners:{O00505;P49790}  
13070 Pathogen[ P0C206] interacts with 2 human partners:{P49790;O00505}  
13071 Pathogen[ P03363] interacts with 2 human partners:{O00505;P49790}  
13072 [Cluster 1189]GO:0034501+P biological\_process [name] protein localization to  
kinetochore [def] "Any process in which a protein is transported to, or maintained at,  
the kinetochore." [GOC  
13073 Pathogen[ Q2Q067] interacts with 4 human partners:{O43264;Q96JM3;Q8NG31;Q96EA4}  
13074 Pathogen[ P0C214] interacts with 4 human partners:{O43264;Q96EA4;Q8NG31;Q96JM3}  
13075 Pathogen[ P03346] interacts with 4 human partners:{O43264;Q96EA4;Q96JM3;Q8NG31}  
13076 Pathogen[ Q85601] interacts with 4 human partners:{Q96JM3;O43264;Q8NG31;Q96EA4}  
13077 Pathogen[ P14079] interacts with 4 human partners:{Q8NG31;Q96EA4;Q96JM3;O43264}  
13078 Pathogen[ P03383] interacts with 3 human partners:{O43264;Q96EA4;Q8NG31}  
13079 Pathogen[ P03410] interacts with 4 human partners:{Q96JM3;Q8NG31;O43264;Q96EA4}  
13080 Pathogen[ P14075] interacts with 3 human partners:{Q96EA4;O43264;Q8NG31}  
13081 Pathogen[ P0C206] interacts with 4 human partners:{Q96JM3;Q96EA4;O43264;Q8NG31}  
13082 Pathogen[ P03363] interacts with 4 human partners:{Q96EA4;O43264;Q96JM3;Q8NG31}  
13083 [Cluster 1190]GO:0060326+P biological\_process [name] cell chemotaxis [def] "The  
directed movement of a motile cell guided by a specific chemical concentration gradient.  
Movement may be towards a higher concentration (positive chemotaxis) or towards a lower  
concentration (negative chemotaxis)." [GOC  
13084 Pathogen[ Q2Q067] interacts with 4 human partners:{P56945;P17482;Q8N1I0;Q96JJ3}  
13085 Pathogen[ P0C214] interacts with 4 human partners:{P56945;P17482;Q8N1I0;Q96JJ3}  
13086 Pathogen[ P03346] interacts with 5 human  
partners:{Q96JJ3;P56945;Q5VV41;Q8N1I0;P17482}  
13087 Pathogen[ Q85601] interacts with 4 human partners:{Q96JJ3;P56945;Q8N1I0;P17482}  
13088 Pathogen[ P14079] interacts with 3 human partners:{Q96JJ3;Q8N1I0;Q5VV41}  
13089 Pathogen[ P03383] interacts with 2 human partners:{P56945;P17482}  
13090 Pathogen[ P03410] interacts with 5 human  
partners:{P17482;Q5VV41;P56945;Q8N1I0;Q96JJ3}  
13091 Pathogen[ P14075] interacts with 2 human partners:{P17482;P56945}  
13092 Pathogen[ P0C206] interacts with 4 human partners:{P17482;Q96JJ3;Q8N1I0;P56945}  
13093 Pathogen[ P03363] interacts with 5 human  
partners:{Q5VV41;Q8N1I0;P56945;P17482;Q96JJ3}  
13094 [Cluster 1191]GO:0019054+P biological\_process [name] modulation by virus of host  
cellular process [def] "The process in which a virus effects a change in the cellular  
pathways and activities of its host organism." [GOC

13095 Pathogen[ Q2Q067] interacts with 2 human partners:{095639;Q86U42}  
13096 Pathogen[ P0C214] interacts with 2 human partners:{095639;Q86U42}  
13097 Pathogen[ P03346] interacts with 2 human partners:{095639;Q86U42}  
13098 Pathogen[ Q85601] interacts with 2 human partners:{095639;Q86U42}  
13099 Pathogen[ P14079] interacts with 2 human partners:{095639;Q86U42}  
13100 Pathogen[ P03383] interacts with 1 human partners:{Q86U42}  
13101 Pathogen[ P03410] interacts with 2 human partners:{095639;Q86U42}  
13102 Pathogen[ P14075] interacts with 1 human partners:{Q86U42}  
13103 Pathogen[ P0C206] interacts with 2 human partners:{Q86U42;095639}  
13104 Pathogen[ P03363] interacts with 1 human partners:{Q86U42}  
13105 [Cluster 1192]GO:0006417+P biological\_process [name] regulation of translation  
[def] "Any process that modulates the frequency, rate or extent of the chemical  
reactions and pathways resulting in the formation of proteins by the translation of  
mRNA." [GOC  
13106 Pathogen[ Q2Q067] interacts with 53 human  
partners:{P05198;O00425;O15234;P31749;A9UHW6;Q9UQ80;Q9BSH4;Q9BY44;P61326;P41220;Q9BZ  
Q8;Q9HCK5;Q9H074;P82979;P08729;O75807;Q9Y6M1;O43639;P38919;Q15633;Q9BRP8;Q13541;O435  
24;Q9BY77;Q9UI10;O43310;P62263;Q14232;Q8ND56;P78344;Q9H9G7;O43918;Q9Y5S9;Q9BRS8;O605  
16;Q9UKV8;P16333;Q8WY41;Q13144;Q09161;P21399;Q9BPZ3;O60573;Q8TB72;P52298;Q99700;Q9UL  
18;Q04637;P06730;Q13542;P46781;P48200;Q07352}  
13107 Pathogen[ P0C214] interacts with 63 human  
partners:{Q9BY77;Q8TB72;P82979;P08729;O15234;P41220;Q09161;Q8ND56;Q9UI10;P62263;Q9BR  
P8;Q9BY44;Q9Y5S9;O75807;Q8N5X7;A6NMX2;O00425;Q9UPU9;P78344;O60516;Q14232;P48200;Q5SW  
A1;Q9NZI8;Q8NEJ9;Q13542;O43639;Q9BPZ3;Q99700;Q9UPQ9;Q07352;Q15633;P52298;P61326;Q9BR  
S8;Q9BZQ8;P38919;Q9H074;Q9BX40;Q13144;A9UHW6;O43310;Q14671;Q9H9G7;Q8NDV7;P46781;Q9UK  
V8;O43918;P16333;Q04637;Q8WY41;P05198;Q9Y6M1;Q9HCK5;Q9HJC0;Q9UQ80;P21399;P06730;Q9BS  
H4;Q9UL18;P31749;Q13541;O60573}  
13108 Pathogen[ P03346] interacts with 66 human  
partners:{Q9Y5S9;P08729;O15234;Q8ND56;Q13542;Q09161;P06730;Q9BPZ3;Q96PU8;Q14671;O439  
18;O43639;Q9UQ80;Q9Y6M1;O00425;Q9BX40;Q13541;Q9H9G7;Q9UL18;Q8N5X7;Q15633;Q9NZI8;P783  
44;P38919;O60573;P82979;Q96J94;Q5SWA1;P52298;Q8TB72;P16333;Q9HCK5;Q99700;Q14232;Q8NE  
J9;A9UHW6;P31749;Q9H074;Q9BZQ8;Q9BY77;P48200;P46781;P61326;Q9UKV8;Q07352;Q8WY41;Q96K  
C8;Q9BY44;O43310;Q04637;Q92616;A6NMX2;Q9BRP8;P41220;P62263;Q9UPQ9;P21399;Q13144;O435  
24;Q9BRS8;Q9BSH4;O75807;O60516;P58546;Q9UI10;P05198}  
13109 Pathogen[ Q85601] interacts with 58 human  
partners:{P08729;O15234;Q9BSH4;P31749;Q9UQ80;Q9HCK5;P21399;P06730;P41220;P16333;Q073  
52;Q9UL18;Q8N5X7;P61326;P48200;Q04637;Q9BY44;Q5SWA1;Q9BRS8;O60516;Q13144;O43639;Q9BR  
P8;P62263;Q13541;Q09161;Q9BZQ8;P82979;P38919;Q9BY77;Q9Y6M1;Q9H9G7;Q8TB72;O60573;Q9BP  
Z3;O00425;P78344;Q9BX40;Q9UKV8;Q9H074;Q15633;Q8WY41;P05198;A9UHW6;P52298;Q9UPQ9;O758  
07;O43310;Q9UPU9;Q14671;Q14232;Q99700;O43918;Q9UI10;P46781;Q9Y5S9;Q13542;Q8ND56}  
13110 Pathogen[ P14079] interacts with 63 human  
partners:{P31751;A6NMX2;Q9UKV8;A9UHW6;Q8WY41;Q9UL18;Q9H9G7;Q5SWA1;P06730;Q9UI10;Q8ND  
56;Q9BY44;Q99700;P46781;P82979;P52298;P21399;Q9HCK5;Q9Y5S9;O43432;Q9UPU9;O75807;P051  
98;P08729;Q9BSH4;Q9H074;P41220;Q9BY77;Q8TB72;Q13144;Q13541;P78344;O60573;P61326;P622  
63;Q9HJC0;Q9BPZ3;Q9BRP8;P16333;Q9BRS8;P16333;Q9BRS8;Q92616;P48200;Q9P2X3;O43310;Q9Y6M1;Q135  
42;O43918;O43639;Q9BX40;O60516;O00425;Q14232;Q8NEJ9;Q14671;Q9UQ80;Q9BZQ8;O15234;Q073  
52;Q09161;Q04637;Q9UPQ9;Q8NDV7}  
13111 Pathogen[ P03383] interacts with 52 human  
partners:{P08729;O15234;Q9BX40;Q9BSH4;Q9UL18;Q9UPQ9;P41220;Q9Y5S9;P31749;A9UHW6;Q997  
00;Q9UI10;P61326;P48200;P38919;Q8TB72;Q9HCK5;Q5SWA1;Q07352;O60573;Q9BRS8;Q9BY44;Q135  
42;Q09161;Q9BZQ8;Q13144;P06730;Q13541;P05198;Q8ND56;P82979;P78344;Q9BY77;Q9UKV8;Q9H0  
74;O43918;Q8WY41;P52298;Q04637;Q9UQ80;P46781;Q14232;O43310;O75807;O00425;P62263;P163  
33;O60516;Q9BPZ3;Q9H9G7;Q9BRP8;Q15633}  
13112 Pathogen[ P03410] interacts with 66 human  
partners:{Q99700;Q9UPQ9;P61326;O15234;Q9UKV8;Q15633;Q9BPZ3;P41220;Q9UL18;P06730;Q9UQ  
80;P46781;Q9Y5S9;O43639;Q9HJC0;Q8NDV7;O43918;P31749;Q14232;P16333;P82979;Q8NEJ9;O434  
32;Q9H9G7;Q13541;Q9H074;Q96EY7;A9UHW6;P21399;P52298;Q9UPU9;O43310;Q9P2X3;Q5SWA1;Q9HC  
K5;Q13542;O75807;P38919;Q92616;O60573;Q8ND56;Q9BY44;O00425;Q9BY77;Q8N5X7;P62263;Q091  
61;P48200;Q9BZQ8;P08729;Q04637;O60516;Q14671;Q8WY41;A6NMX2;Q9BSH4;Q8TB72;Q9BRS8;Q073  
52;P78344;Q9UI10;Q9BX40;Q9Y6M1;Q13144;Q9BRP8;P05198}  
13113 Pathogen[ P14075] interacts with 54 human  
partners:{P82979;P08729;O15234;Q8TB72;P46781;Q8NEJ9;Q09161;Q13542;Q9HCK5;O60516;Q9BR  
P8;P61326;Q9H9G7;Q9BX40;O43918;P78344;P41220;Q5SWA1;Q9H074;Q9P2X3;P06730;Q9UI10;A9UH  
W6;P05198;P16333;P31749;O60573;Q14232;Q9BSH4;Q9BZQ8;Q9UPQ9;Q04637;O75807;Q9BRS8;Q9UK  
V8;Q07352;Q15633;Q8WY41;Q9UQ80;O43310;Q9Y5S9;Q9UL18;Q99700;P48200;Q13144;O00425;P389  
19;Q9BPZ3;Q9BY44;Q13541;P62263;Q8ND56;Q9BY77;P52298}  
13114 Pathogen[ P0C206] interacts with 63 human  
partners:{A9UHW6;Q9BZQ8;Q13541;Q9H074;Q9HCK5;P52298;P31749;P61326;Q8ND56;Q9BX40;Q091  
61;O75807;P46781;Q14232;Q9BY77;Q96PU8;Q9BRS8;P08729;P62263;Q9UPQ9;Q9UKV8;Q8TB72;Q8ND  
V7;Q8WY41;P06730;P48200;Q13144;Q92616;Q8NEJ9;O43918;P05198;Q8N5X7;Q13542;Q99700;Q9UP  
U9;Q9BPZ3;Q9UI10;A6NMX2;O15234;Q5SWA1;Q15633;P16333;Q9H9G7;P78344;Q9BY44;O60573;Q046  
37;Q07352;Q9UQ80;P38919;Q9BSH4;P41220;O43310;Q9P2X3;Q9Y6M1;O43639;O60516;P21399;Q9Y5  
S9;Q14671;Q9UL18;Q9BRP8;O00425}  
13115 Pathogen[ P03363] interacts with 66 human  
partners:{Q8TB72;P38919;Q9BY44;O43310;Q7Z3Z4;Q9BZQ8;Q9BSH4;A9UHW6;Q9UI10;Q9H9G7;O004  
25;Q9HCK5;P48200;Q9UKV8;Q9Y6M1;O43639;Q8WY41;Q15633;Q9UQ80;Q8NDV7;Q9BRP8;Q96PU8;P613

- 26;P05198;Q9BX40;Q8N9W6;O43524;Q92904;Q07352;Q8N5X7;Q9BY77;Q9BPZ3;Q9UPU9;Q9NZI8;P31749;P16333;P46781;A6NMX2;P52298;O75807;P08729;P41220;P82979;Q9BRS8;Q9UPQ9;Q9UL18;Q8ND56;Q92616;Q14671;Q96J94;O60573;Q13144;O43918;Q99700;Q13541;P78344;Q8NEJ9;P06730;P62263;Q9Y5S9;Q9H074;O60516;Q13542;Q09161;Q04637;O15234}
- 13116 [Cluster 1193]GO:0051297+P biological\_process [name] centrosome organization [def] "A process that is carried out at the cellular level which results in the assembly, arrangement of constituent parts, or disassembly of a centrosome, a structure comprised of a pair of centrioles and peri-centriolar material from which a microtubule spindle apparatus is organized." [GOC
- 13117 Pathogen[ Q2Q067] interacts with 17 human partners:{Q14008;Q7Z4H7;O14974;O94927;A8MVW5;Q9NVX0;Q96SN8;Q99871;Q15004;Q9UBK9;Q9BT25;Q9H6D7;Q12873;Q5TZA2;Q96CS2;Q15154;Q68CZ6}
- 13118 Pathogen[ P0C214] interacts with 18 human partners:{O94927;Q15154;Q14008;Q7Z4H7;Q12873;Q96SN8;A8MVW5;O14974;Q96CS2;Q9BT25;Q15004;Q99871;Q9H6D7;Q68CZ6;Q9UBK9;Q9NVX0;Q5TZA2;P36404}
- 13119 Pathogen[ P03346] interacts with 19 human partners:{Q9BT25;Q9H6D7;Q99871;Q7Z4H7;Q15154;Q15004;A8MVW5;Q9NVX0;Q96SN8;Q14008;Q68CZ6;P36404;Q96CS2;Q5TZA2;Q12873;O94927;O14974;Q9UBK9;Q76N32}
- 13120 Pathogen[ Q85601] interacts with 18 human partners:{Q15154;Q15004;Q14008;Q9H6D7;Q9BT25;Q99871;Q96SN8;Q7Z4H7;Q9NVX0;A8MVW5;Q76N32;Q12873;O94927;Q96CS2;Q5TZA2;O14974;Q9UBK9;Q68CZ6}
- 13121 Pathogen[ P14079] interacts with 18 human partners:{Q5TZA2;Q99871;O14974;Q9NVX0;A8MVW5;Q76N32;Q12873;Q9UBK9;Q9H6D7;Q7Z4H7;Q9BT25;Q68CZ6;Q15154;Q15004;Q96SN8;O94927;Q14008;Q96CS2}
- 13122 Pathogen[ P03383] interacts with 16 human partners:{Q14008;Q9NVX0;Q96SN8;Q7Z4H7;Q15004;A8MVW5;Q99871;Q5TZA2;Q12873;Q96CS2;O94927;Q68CZ6;Q15154;Q9BT25;Q9H6D7;Q9UBK9}
- 13123 Pathogen[ P03410] interacts with 18 human partners:{Q12873;Q9H6D7;Q15154;Q14008;Q96SN8;Q15004;Q9UBK9;Q68CZ6;Q96CS2;Q5TZA2;Q9NVX0;O14974;A8MVW5;O94927;Q99871;Q76N32;Q9BT25;Q7Z4H7}
- 13124 Pathogen[ P14075] interacts with 16 human partners:{Q99871;Q7Z4H7;A8MVW5;Q68CZ6;Q96SN8;Q5TZA2;Q9BT25;Q9UBK9;Q96CS2;Q15154;Q9NVX0;O94927;Q14008;Q12873;Q9H6D7;Q15004}
- 13125 Pathogen[ P0C206] interacts with 18 human partners:{Q96SN8;Q14008;Q5TZA2;Q9BT25;Q9NVX0;O14974;A8MVW5;Q96CS2;Q7Z4H7;O94927;Q76N32;Q9H6D7;Q99871;Q9UBK9;Q15154;Q15004;Q68CZ6;Q12873}
- 13126 Pathogen[ P03363] interacts with 18 human partners:{Q76N32;Q9H6D7;Q9BT25;Q9UBK9;Q5TZA2;A8MVW5;Q68CZ6;O94927;Q9NVX0;Q15004;Q96CS2;Q99871;O14974;Q12873;Q14008;Q7Z4H7;Q15154;Q96SN8}
- 13127 [Cluster 1194]GO:0016561+P biological\_process [name] protein import into peroxisome matrix, translocation [def] "The process in which proteins are moved across the peroxisomal membrane into the matrix. It is likely that the peroxisome targeting sequence receptor remains associated with cargo proteins during translocation." [PMID
- 13128 Pathogen[ Q2Q067] interacts with 1 human partners:{075381}
- 13129 Pathogen[ P0C214] interacts with 1 human partners:{075381}
- 13130 Pathogen[ P03346] interacts with 2 human partners:{075381;P50542}
- 13131 Pathogen[ Q85601] interacts with 1 human partners:{075381}
- 13132 Pathogen[ P14079] interacts with 2 human partners:{P50542;075381}
- 13133 Pathogen[ P03383] interacts with 1 human partners:{075381}
- 13134 Pathogen[ P03410] interacts with 2 human partners:{075381;P50542}
- 13135 Pathogen[ P14075] interacts with 1 human partners:{075381}
- 13136 Pathogen[ P0C206] interacts with 2 human partners:{075381;P50542}
- 13137 Pathogen[ P03363] interacts with 1 human partners:{075381}
- 13138 [Cluster 1195]GO:0006397+P biological\_process [name] mRNA processing [def] "Any process involved in the conversion of a primary mRNA transcript into one or more mature mRNA(s) prior to translation into polypeptide." [GOC
- 13139 Pathogen[ Q2Q067] interacts with 194 human partners:{Q9UNP9;O43290;Q13573;Q8TCS8;P83369;P33240;O75525;P83876;O95639;Q96FV9;Q6UN15;Q86U42;O15234;P07910;P62312;Q9Y333;Q8WUQ7;Q8N2M8;Q9NR56;P55769;Q9Y3F4;P55265;Q9H2H8;O95391;Q9H7N4;Q96LI5;P52272;P61326;O75494;Q8NCE0;P14866;Q15459;Q13148;A6NK39;O75940;Q9BWG6;Q12872;O43447;Q14690;P67809;Q01130;P62318;Q92797;Q15233;Q8WWY3;Q9UHX1;Q5VTL8;Q8N684;O43390;Q13435;Q96DI7;Q15696;O43172;Q9UK45;Q8WTR7;P38919;O60506;Q9H6T0;O00148;Q9H307;Q92945;Q9Y534;Q8NAV1;Q13838;Q9ULR0;Q07955;Q9BWJ5;Q6I9Y2;Q9UDW3;Q13769;Q8NDT2;Q16629;O75400;O94906;O43148;P31943;P49756;Q10570;Q12996;Q9BV90;P62314;P08621;P11142;P61978;Q16630;Q12972;P38159;Q9UHI6;Q9BSV6;P62304;P84103;Q8N1G2;Q8IYB3;Q05048;O94913;Q14498;Q86V81;Q8IWZ8;Q07666;Q96DF8;P51816;Q96IZ7;Q05519;P26368;O43251;Q6P2Q9;Q6NZY4;Q9UBB9;Q8WDX5;P08579;P52597;P23246;P14678;Q9Y5S9;Q9GZX7;Q01081;O75533;Q8TEQ6;O15116;Q9P2I0;P57678;Q13243;P09661;O95232;Q8WVV9;O95218;O43809;Q86X95;O95777;Q15029;Q92499;Q8NI27;Q5BKZ1;P09012;Q09161;Q9P013;O43791;Q8WW01;Q9HCG8;Q9UQ35;Q7RTV0;Q9UNY4;O75934;Q99590;P52298;Q15427;Q9BQ65;P62316;O43395;Q9UKF6;Q14493;Q9NY27;Q9NWZ8;Q6IEG0;Q15007;Q96MU7;O60508;Q9H0G5;P62306;Q9H840;Q9Y2W2;Q7Z6J9;Q15637;Q02040;P22626;Q69YN4;O60870;Q9BTL3;Q9NVV4;Q8WVK2;P18583;Q16637;P11940;Q14331;Q9NP77;P62308;Q9UMS4;O14893;Q99459;Q12874;Q8WYA6;Q00839;A7MD48;Q9HCS7;Q9Y4Z0;O60936;O43660;Q8N163;P62310;Q969L4;Q15428;A8MSY0;Q9Y4Y9;P51003}
- 13140 Pathogen[ P0C214] interacts with 202 human partners:{Q5BKZ1;Q12996;Q6NZY4;Q8N163;Q16637;Q9Y2W2;Q96FV9;P62312;Q15007;O15234;O151



16;P26368;Q9H6T0;P62316;Q9HCS7;Q9ULR0;P83369;Q09161;Q9BQ65;Q13573;Q14331;O43172;O94913;A6NK39;O75934;O00148;P38159;Q9UKF6;Q6IEG0;P84103;Q86V81;Q5VTL8;Q9UDW3;Q9Y5Z9;P51003;Q13769;O60508;P26599;Q9NR56;Q9HOS4;P14678;Q9NY27;Q15029;P62306;Q969L4;Q9P2N5;P55265;Q69YN4;P57678;Q15233;Q15637;Q92797;P67809;Q05048;Q6P2Q9;P23246;Q9BJW5;Q8IWZ8;Q15428;Q9H307;O43395;P11940;Q10570;Q8WXD5;A8MSY0;Q8WV60;P62308;Q9Y4Z0;Q9UK45;O43148;P08579;Q8NAV1;O43390;O95232;Q8N684;Q16630;O94906;Q9Y4Y9;Q9UMS4;Q96IZ7;Q07955;Q9Y534;Q9BWG6;Q9BSV6;Q9H2H8;O75525;Q9Y333;P52298;P52272;Q9Y3C6;Q8WVK2;P62314;P07910;Q14493;Q8IYB3;O60870;O43809;Q9UHX1;P18583;Q15696;P08621;P62310;Q07666;P55769;Q99459;P61326;Q8TEQ6;P38919;Q9UNY4;O43791;Q96DF8;Q13243;Q15427;P83876;Q9P2I0;Q99590;P52597;Q8TCS8;Q12872;Q05519;Q7RTV0;Q15459;Q9UHI6;Q9H0G5;P51816;P62318;Q8NI27;Q01081;O75533;Q96DI7;Q14690;P33240;Q9Y3F4;O75940;Q96BP3;Q12874;Q95777;O75494;O95639;Q9H840;Q15287;P31943;Q92499;P62304;Q96I25;P09012;Q8WTR7;O43447;Q9P013;O60506;Q9BTL3;Q9HCG8;O14893;A6NG73;Q9GZX7;P09661;Q9UQ35;O43290;Q8N1G2;Q12972;Q8WYA6;O95218;Q8NDT2;Q13435;Q00839;Q9BV90;Q96MU7;Q92945;Q13148;P22626;O43251;Q96LI5;O95391;Q02040;Q9UNP9;Q86U42;Q9NVV4;Q9NWZ8;Q13838;Q9H7N4;Q14498;Q8WW01;Q86X95;Q8WV9;Q9NP77;O43660;O75400;Q9UBB9;P49756;Q16629;Q8NCE0;Q8N2M8;P14866;Q5VZF2;Q60936;Q6UN15;Q7Z6J9;Q6I9Y2;Q01130;Q8WWY3;P11142;Q9NS39}

13141 Pathogen[ P03346] interacts with 238 human partners: {Q9Y5S9;Q96FV9;Q15427;P51991;O95639;Q12874;Q86U42;O15234;Q96MU7;P61978;Q9ULR0;Q96DF8;O43172;Q09161;O43290;Q9H2H8;Q08170;Q9BV90;Q8N163;Q8IYB3;Q96PU8;P09651;O43447;Q99633;Q9Y3C6;Q7RTV0;P55265;P14866;Q9BTL3;P62304;P83876;Q9UKF6;O95777;Q96I25;Q9P2N5;Q13148;Q9Y3F4;Q9Y4Y9;P08579;O75400;Q9NS39;Q9UDW3;Q9UK45;Q15007;Q7Z6J9;Q8WVV9;Q15637;Q9NY27;Q9UMS4;P0DJJ3;Q14498;O60506;P23246;Q9H307;Q8WXD5;P38919;P07910;Q96BP3;Q8N684;P11142;A8MSY0;O75940;P18583;A8MWD9;P08621;Q9NX01;P11940;Q13242;Q6UN15;Q8WTR7;P31943;Q00839;Q13247;P26599;Q9Y534;Q92945;Q13769;P52298;O43390;A6NK39;Q9HCS7;Q16629;P22626;O94906;Q9BUQ8;Q9Y333;Q07955;Q9BWG6;A7MD48;Q69YN4;Q9P013;Q05048;Q8IX01;Q16637;P52756;Q9BWG6;Q9BQ65;Q8WVK2;Q92879;Q9H0G5;O60870;Q14493;Q96A72;Q07666;P62318;Q15287;Q92499;O43148;Q86V81;O95232;O60508;A6NDE4;Q8NDT2;Q8WYA6;P51003;Q96J01;Q5VTL8;O75934;O43660;O75643;P67809;P83369;Q9Y3F4;Q9Y4Z0;Q9HCG8;Q86UA1;Q13435;Q8TCS8;Q9NWZ8;P62306;Q9UHI6;Q6NZY4;P49756;Q9NVV4;O94913;Q5VZF2;P26368;P55769;Q01081;O75533;Q8TEQ6;Q8N1G2;O43791;P61326;Q13838;Q9H6T0;P31942;Q9UNY4;O43251;O15116;Q15459;Q9UDW3;Q9BWJ5;Q99590;O75554;Q9UNP9;P42285;Q99459;Q8WWY3;O43809;Q6P2Q9;Q96DI7;Q14562;P09012;P84103;Q9UQ35;Q92797;O95926;Q8IWZ8;P62314;Q15233;P52272;Q15287;O60936;Q05519;Q01130;P14678;Q9H0S4;O95218;Q9BZJ0;P57678;Q9P2I0;Q8NAV1;O14893;Q02040;Q9C0J8;Q13573;Q8WW01;Q9H7N4;Q13243;O00148;O75525;Q96IZ7;P38159;Q86X95;Q969L4;Q9NP77;Q15029;P62316;Q9UHX1;Q8N2M8;Q15696;Q9Y2W2;Q32P51;Q14690;Q8WUQ7;P52597;Q9NQ94;O75494;Q8NI27;Q12972;P62308;P62312;Q10570;Q166LI5;Q12996;Q9BSV6;P51816;P22995;P62310;Q9UK45;Q15393;Q9NR56;P09661;Q9BRX9;P33240;A6NG73;Q16630;Q8NCE0;Q6I9Y2;Q9H840;Q15428;Q6IEG0;Q9NUK0;Q6NWX9;Q5BKZ1;Q12872;Q9NWB1;Q14331;O43395}

13142 Pathogen[ Q85601] interacts with 179 human partners: {Q9Y534;Q15637;O15234;P49756;Q96MU7;P61978;Q9ULR0;Q9HCS7;O43148;Q8N1G2;Q9H2H8;Q9Y2W2;A6NK39;Q9H0S4;O43390;Q8IYB3;Q07666;Q96BP3;Q7RTV0;Q13243;Q05048;P62304;Q13769;Q01130;Q9H307;O60506;Q14331;Q9P2N5;Q13148;O95391;O15116;Q8N684;O75400;Q13573;Q15459;Q15007;Q8WV60;Q9NY27;Q9UMS4;P61326;P22626;Q9UHX1;Q15287;O00148;O60936;Q9GZX7;Q8WYA6;Q5VTL8;O94913;P08621;Q969L4;Q9P013;Q9NR56;Q86V81;Q14690;O75494;O75940;Q92499;Q16629;O75934;O43791;Q9UK45;P62316;O94906;Q9Y55;P55769;Q9BSV6;Q9UBB9;Q09161;Q96DI7;P38919;P14678;Q96FV9;Q9H0G5;O60870;P11940;Q96LI5;P62310;Q13435;P62314;Q8NDT2;P62306;O95232;O60508;Q8TEQ6;Q9Y4Z0;Q13838;P62318;Q12972;Q8TCS8;Q15029;Q9NWZ8;Q8NAV1;P52597;P11142;Q9UHI6;Q6NZY4;Q9Y3C6;Q10570;P62312;Q9P2I0;Q99459;Q01081;Q9UQ35;Q05519;Q9Y3F4;P67809;A8MSY0;Q8NI27;P83369;Q9H7N4;Q9UDW3;Q99590;O43395;O43290;Q8WWY3;P55265;Q12872;Q7Z6J9;P84103;Q92797;Q15233;O95777;Q9BTL3;P14866;Q6P2Q9;O95639;Q96IZ7;P83876;O95218;O43447;Q8N163;Q00839;P18583;Q9NX01;Q6UN15;Q92945;O14893;O43660;P62308;P52298;P38159;Q15696;P23246;P26368;Q9NVV4;Q8WW01;Q9Y333;Q9HCG8;O75525;P51003;Q5BKZ1;Q86U42;Q16637;Q8N2M8;P31943;O43172;Q8WTR7;Q14498;Q9UKF6;Q6I9Y2;Q9UNY4;Q14493;P09661;P33240;A6NG73;Q86X95;Q96DF8;Q12874;O43809;Q9Y5S9;Q8NCE0;Q5VZF2;Q9BWJ5;Q8WXD5;Q9H840;Q6IEG0;Q9Y4Y9}

13143 Pathogen[ P14079] interacts with 205 human partners: {Q15637;O43809;Q96MU7;Q99459;Q9Y333;Q8N9Q2;O43447;Q14004;Q15007;P57678;Q96I25;Q8WVV9;Q15287;Q9H0S4;Q8WTR7;P11142;P41238;O75934;Q8TEQ6;O75400;O94906;Q9Y2W2;O60508;Q8N163;Q5VZF2;Q99633;Q13148;O14893;Q9UKF6;P67809;O75533;Q9UK45;Q10570;Q9UNY4;P52298;Q96DF8;Q12874;A8MSY0;Q13243;Q8N1G2;Q9Y5S9;Q6NZY4;P33240;Q9BSV6;Q96LI5;Q9P013;P26368;P83876;Q8NI27;Q6IEG0;P14866;P23246;P07910;Q13838;Q13573;Q9H840;Q8WW01;Q9BWG6;Q9NY27;O94913;O15116;Q9NS39;O95639;Q9Y3F4;P62312;Q15029;Q9BQ65;Q6P2Q9;Q8NCE0;Q9UHI6;Q9NR56;O60870;P62314;Q14498;Q9HCS7;Q15427;Q9UHX1;Q05048;Q9NQ94;Q9H307;Q00839;O43290;Q8WY3;Q96FV9;P83369;Q15459;Q92797;P62306;P14678;Q13769;Q8IYB3;Q9ULR0;Q9NWZ8;O43148;Q16629;Q5BKZ1;Q9GZX7;P26599;Q8WV60;O75940;Q9BWJ5;Q9Y534;Q6I9Y2;P61326;Q16637;O95926;P49756;Q9UMS4;Q9H7N4;Q9H6T0;A7MD48;Q02040;P55265;P11940;Q9Y4Z0;Q07666;Q05519;Q7RTV0;P08621;Q9H2H8;Q92945;Q8N684;Q9UQ35;O75525;Q7Z6J9;Q86V81;Q86U42;Q96IZ7;Q9NVV4;O00148;Q16630;P62308;O60506;Q15696;Q9UBB9;P09012;Q9BTL3;O60936;P62304;Q15428;Q9NX01;P62316;P62310;Q07955;Q9NP77;Q9H0G5;Q969L4;Q8WUQ7;Q12972;Q8WVK2;Q8NAV1;P61978;P31943;Q9NUK0;Q01081;Q14493;Q9HCG8;O95777;Q14331;O43791;Q92499;O95232;P55769;A6NG73;P52597;O43390;Q8N2M8;Q12872;Q9P2N5;Q9NWB1;P51816;P51003;Q12996;P09661;A6NK39;Q8WW27;O43172;P52756;O75494;Q15233;Q9UDW3;Q69YN4;P62318;Q8WYA6;Q9Y4Y9;Q6UN15;P18583;Q86X95;O43395;O95218;O15234;Q96BP3;Q8WXD5;Q8NDT2;Q8TCS8;O95391;Q09161;P22626;Q5VTL8;P84103;Q8IWZ8;Q9UK59;Q14690;P38159;Q9P2I0}

13144 Pathogen[ P03383] interacts with 180 human partners: {Q13573;Q9NYV4;A6NG73;Q9NVV4;Q8N2M8;Q12872;Q07955;O15234;P09661;Q15287;Q8NI27;Q05048;O75494;A6NK39;P51003;O43148;Q969L4;Q9H0S4;O43390;P83876;Q02040;Q9H840;Q154



A6;Q9H307;Q9BRX9;Q16630;Q15427;P62304;Q01130;Q6P2Q9;P49756;P11940;Q86U42;Q9NR56;Q8WWY3;Q14893;Q8NI27;Q9BWF3;Q32P51;Q96FV9;Q6UN15;Q92620;Q9H0S4;O94913;O43447;Q9UNY4;Q96P U8;Q9P2N5;Q92797;P61326;A6NK39;Q8IWX8;P62306;O15116;Q05519;P52272;P83369;Q15029;Q152 87;P57678;Q5BKZ1;Q9BTL3;Q8N684;O75400;Q9Y3B4;Q14690;Q9BWJ5;Q9Y333;Q14562;P62316;Q132 42;Q96JN7;O95218;Q8WUQ7;Q8IYB3;Q9UDW3;O43809;P38159;P18583;P26368;Q9H7N4;Q92945;Q128 74;Q9UPN6;P31943;O43172;Q9ULR0;P51003;O00148;Q15637;Q96LT9;O60870;Q13243;Q8WXD5;Q86V 81;P07910;Q9NWB1;Q8NAV1;Q8N2M8;Q8N163;O75934;Q8WW01;P31942;Q92499;O43290;Q13573;P522 98;Q13838;O43148;Q9UHX1;Q02040;P08621;P55265;Q9H840;Q96LI5;P22626;Q9BQ65;P83876;P265 99;O60936;Q6I9Y2;Q9NY27;P62310;Q9UKM9;O95319;Q07955;O43660;Q5VTL8;P51816;O60506;Q96E 39;Q01081;Q5VZF2;Q96A72;Q9UK45;P61978;O94906;Q9HCG8;Q969L4;Q13247;Q15428;P55769;Q5SZ Q8;Q8WVK2;A6NDE4;Q8TEQ6;Q00839;P62308;Q9P013;Q16637;Q8WTR7;Q9UKF6;Q9Y534;P84103;Q9UM S4;Q14498;A7MD48;Q99633;Q7Z6J9;O43390;Q8N6W0;P62995;Q14493;P14678;Q16560;P09661;Q995 90;Q99459;P33240;Q9UQ35;O75525;Q9H6T0;Q15696;Q15007;A6NG73;Q9Y5S9;Q8NCE0;Q8WVV9;Q129 96;Q9H2H8;Q9BWG6;O43251;Q9UNP9;P11442;O43791;Q9BZJ0;O75494;Q6IEG0;Q9NQ94;P67809;Q9NU K0;Q96DI7;Q69YN4;Q9NP77;O60508;Q09161;P42285;O15234;Q8NDT2;P52756}

13149 [Cluster 1196]GO:0048708+P biological\_process [name] astrocyte differentiation [def] "The process in which a relatively unspecialized cell acquires the specialized features of an astrocyte. An astrocyte is the most abundant type of glial cell. Astrocytes provide support for neurons and regulate the environment in which they function." [GOC]

13150 Pathogen[ Q2Q067] interacts with 3 human partners:{P40763;Q13144;P08397}

13151 Pathogen[ P0C214] interacts with 3 human partners:{P08397;Q13144;P40763}

13152 Pathogen[ P03346] interacts with 3 human partners:{O95096;Q13144;P40763}

13153 Pathogen[ Q85601] interacts with 3 human partners:{P40763;Q13144;P08397}

13154 Pathogen[ P14079] interacts with 2 human partners:{Q13144;P08397}

13155 Pathogen[ P03383] interacts with 2 human partners:{Q13144;P08397}

13156 Pathogen[ P03410] interacts with 3 human partners:{P08397;P40763;Q13144}

13157 Pathogen[ P14075] interacts with 2 human partners:{P08397;Q13144}

13158 Pathogen[ P0C206] interacts with 3 human partners:{Q13144;P40763;P08397}

13159 Pathogen[ P03363] interacts with 1 human partners:{Q13144}

13160 [Cluster 1197]GO:0006228+P biological\_process [name] UTP biosynthetic process [def] "The chemical reactions and pathways resulting in the formation of UTP, uridine (5'-)triphosphate." [ISBN]

13161 Pathogen[ Q2Q067] interacts with 1 human partners:{P22392}

13162 Pathogen[ P0C214] interacts with 1 human partners:{P22392}

13163 Pathogen[ P03346] interacts with 1 human partners:{P22392}

13164 Pathogen[ Q85601] interacts with 1 human partners:{P22392}

13165 Pathogen[ P14079] interacts with 2 human partners:{P22392;Q86XW9}

13166 Pathogen[ P03383] interacts with 1 human partners:{P22392}

13167 Pathogen[ P03410] interacts with 1 human partners:{Q86XW9}

13168 Pathogen[ P14075] interacts with 1 human partners:{P22392}

13169 Pathogen[ P0C206] interacts with 2 human partners:{P22392;Q86XW9}

13170 Pathogen[ P03363] interacts with 1 human partners:{Q86XW9}

13171 [Cluster 1198]GO:0007281+P biological\_process [name] germ cell development [def] "The process whose specific outcome is the progression of an immature germ cell over time, from its formation to the mature structure (gamete). A germ cell is any reproductive cell in a multicellular organism." [GOC]

13172 Pathogen[ Q2Q067] interacts with 5 human partners:{P31749;Q86YF9;Q00597;Q9H9Z2;Q99717}

13173 Pathogen[ P0C214] interacts with 5 human partners:{Q00597;Q9H9Z2;Q99717;Q86YF9;P31749}

13174 Pathogen[ P03346] interacts with 11 human partners:{Q8NHU6;P07992;Q99717;O75626;Q86YF9;Q92879;P31749;Q00597;Q9H9Z2;O75398;Q9GZ V8}

13175 Pathogen[ Q85601] interacts with 7 human partners:{P31749;O75398;Q00597;Q99717;O75626;Q9H9Z2;Q86YF9}

13176 Pathogen[ P14079] interacts with 8 human partners:{O75626;Q8NHU6;Q00597;Q9H9Z2;Q86YF9;Q9GZV8;Q9Y236;P07992}

13177 Pathogen[ P03383] interacts with 5 human partners:{Q9H9Z2;P31749;Q99717;Q00597;Q86YF9}

13178 Pathogen[ P03410] interacts with 9 human partners:{P07992;Q8NHU6;Q99717;P31749;Q9GZV8;Q86YF9;Q00597;Q9H9Z2;O75626}

13179 Pathogen[ P14075] interacts with 5 human partners:{Q9H9Z2;Q99717;P31749;Q00597;Q86YF9}

13180 Pathogen[ P0C206] interacts with 9 human partners:{P31749;Q86YF9;Q99717;O75626;P07992;Q9H9Z2;Q00597;O75398;Q9GZV8}

13181 Pathogen[ P03363] interacts with 10 human partners:{Q8NHU6;Q00597;Q92879;Q92904;P31749;Q9H9Z2;O75398;Q86YF9;O75626;Q99717}

13182 [Cluster 1199]GO:0043105+P biological\_process [name] negative regulation of GTP cyclohydrolase I activity [def] "Any process that stops or reduces the activity of the enzyme GTP cyclohydrolase I." [GOC]

13183 Pathogen[ Q2Q067] interacts with 1 human partners:{P30047}

13184 Pathogen[ P0C214] interacts with 1 human partners:{P30047}

13185 Pathogen[ P03346] interacts with 1 human partners:{P30047}

13186 Pathogen[ Q85601] interacts with 1 human partners:{P30047}

13187 Pathogen[ P14079] interacts with 1 human partners:{P30047}

13188 Pathogen[ P03383] interacts with 1 human partners:{P30047}  
13189 Pathogen[ P03410] interacts with 1 human partners:{P30047}  
13190 Pathogen[ P14075] interacts with 1 human partners:{P30047}  
13191 Pathogen[ P0C206] interacts with 1 human partners:{P30047}  
13192 Pathogen[ P03363] interacts with 1 human partners:{P30047}  
13193 [Cluster 1200]GO:0048870+P biological\_process [name] cell motility [def] "Any process involved in the controlled self-propelled movement of a cell that results in translocation of the cell from one place to another." [GOC  
13194 Pathogen[ Q2Q067] interacts with 4 human partners:{P14921;P12755;Q8WUW1;P63000}  
13195 Pathogen[ P0C214] interacts with 5 human partners:{P63000;P14921;Q16658;P12755;Q8WUW1}  
13196 Pathogen[ P03346] interacts with 4 human partners:{Q8WUW1;P14921;Q16658;P63000}  
13197 Pathogen[ Q85601] interacts with 4 human partners:{P14921;P63000;Q8WUW1;P12755}  
13198 Pathogen[ P14079] interacts with 3 human partners:{P12755;Q16658;Q8WUW1}  
13199 Pathogen[ P03383] interacts with 2 human partners:{P14921;P63000}  
13200 Pathogen[ P03410] interacts with 5 human partners:{Q16658;P12755;P63000;Q8WUW1;P14921}  
13201 Pathogen[ P14075] interacts with 2 human partners:{P14921;P63000}  
13202 Pathogen[ P0C206] interacts with 5 human partners:{P14921;P12755;Q8WUW1;P63000;Q16658}  
13203 Pathogen[ P03363] interacts with 4 human partners:{P14921;P63000;Q8WUW1;Q16658}  
13204 [Cluster 1201]GO:0030382+P biological\_process [name] sperm mitochondrion organization [def] "A process that is carried out at the cellular level which results in the assembly, arrangement of constituent parts, or disassembly of sperm mitochondria\_ the process in which they take on their characteristic morphology\_ they are flattened, elongated, and arranged circumferentially into a tight helical coil around the tail-dense fibers of the mature sperm." [GOC  
13205 Pathogen[ Q2Q067] interacts with 1 human partners:{043236}  
13206 Pathogen[ P0C214] interacts with 1 human partners:{043236}  
13207 Pathogen[ P03346] interacts with 1 human partners:{043236}  
13208 Pathogen[ Q85601] interacts with 1 human partners:{043236}  
13209 Pathogen[ P14079] interacts with 1 human partners:{043236}  
13210 Pathogen[ P03383] interacts with 1 human partners:{043236}  
13211 Pathogen[ P03410] interacts with 1 human partners:{043236}  
13212 Pathogen[ P14075] interacts with 1 human partners:{043236}  
13213 Pathogen[ P0C206] interacts with 1 human partners:{043236}  
13214 Pathogen[ P03363] interacts with 1 human partners:{043236}  
13215 [Cluster 1202]GO:0030521+P biological\_process [name] androgen receptor signaling pathway [def] "Any series of molecular signals generated as a consequence of an androgen binding to its receptor." [GOC  
13216 Pathogen[ Q2Q067] interacts with 28 human partners:{Q96HR3;O75925;P06400;Q9NPJ6;P62826;Q15596;Q13772;Q93074;Q14192;Q9UER7;O75448;O60244;O75928;P48552;P78317;O14497;Q9UHV7;P24864;P50613;Q9NVC6;Q92993;Q15466;Q9Y2X0;Q05086;Q9Y2W1;P31689;P61586;Q9UBS8}  
13217 Pathogen[ P0C214] interacts with 27 human partners:{Q05086;Q92993;Q13772;O75925;O14497;P48552;P50613;Q9Y2X0;Q93074;P61586;Q96HR3;Q9NVC6;O60244;P78317;Q9UER7;Q9UBS8;Q14192;Q9UHV7;P62826;O75448;P24864;Q15596;Q9Y2W1;Q9NPJ6;P06400;Q15466;O75928}  
13218 Pathogen[ P03346] interacts with 28 human partners:{Q15788;Q9NPJ6;P06400;Q15466;Q96HR3;Q93074;P24864;O60244;P62826;O75448;O75925;Q15596;Q14192;O14497;Q9UER7;P31689;P78317;Q9UBS8;Q9NVC6;P48552;Q05086;Q92993;Q9Y2X0;Q9Y2W1;O75928;Q13772;Q9UHV7;P61586}  
13219 Pathogen[ Q85601] interacts with 28 human partners:{P78317;Q9Y2X0;O75928;P31689;Q15466;P06400;Q9UHV7;P62826;Q9UER7;O14497;O75448;Q15596;Q14192;Q13772;P61586;P50613;Q9UBS8;Q05086;P48552;Q92993;Q9Y2W1;O60244;Q96HR3;O75925;Q93074;Q9NPJ6;Q9NVC6;P24864}  
13220 Pathogen[ P14079] interacts with 29 human partners:{P48552;Q13772;O60244;Q9Y2X0;Q15596;O75928;Q14192;P24864;Q96HR3;Q9NVC6;O14497;O75448;P50613;Q9UER7;Q9UHV7;P61586;O43294;Q15788;Q9NPJ6;O75925;Q9UBS8;P31689;P78317;Q93074;Q969W9;P62826;Q15466;Q9Y2W1;Q92993}  
13221 Pathogen[ P03383] interacts with 27 human partners:{O75925;O14497;Q15596;O60244;Q9UBS8;P78317;Q92993;Q9NPJ6;P31689;Q93074;P06400;Q96HR3;P62826;O75448;P50613;P61586;Q14192;Q15466;Q9UER7;Q13772;P48552;Q9UHV7;Q9NVC6;P24864;Q9Y2W1;Q9Y2X0;O75928}  
13222 Pathogen[ P03410] interacts with 29 human partners:{Q9Y2W1;O75925;Q969W9;Q13772;O14497;Q9NVC6;Q9NPJ6;O75928;O43294;P06400;P50613;Q9UER7;P62826;P61586;Q9UBS8;P78317;Q15466;Q96HR3;Q15596;O60244;Q9UHV7;P31689;Q9Y2X0;Q93074;P48552;Q92993;P24864;O75448;Q14192}  
13223 Pathogen[ P14075] interacts with 27 human partners:{P31689;Q9NPJ6;Q96HR3;P50613;O75925;O75448;Q92993;O14497;Q93074;Q9UHV7;O60244;O75928;P62826;P78317;P61586;P06400;Q9NVC6;Q13772;Q9UBS8;P48552;Q15466;Q9UER7;Q9Y2W1;Q14192;Q9Y2X0;Q15596;P24864}  
13224 Pathogen[ P0C206] interacts with 29 human partners:{Q15466;Q96HR3;O75925;Q05086;Q9UER7;P62826;Q92993;Q9UHV7;P78317;P61586;O14497;P50613;Q9UBS8;Q9NPJ6;Q9Y2W1;O43294;O60244;Q15596;Q9NVC6;Q13772;Q14192;O75448;Q9Y2X0;P48552;P24864;Q15788;Q93074;P31689;P06400}

13225 Pathogen[ P03363] interacts with 22 human partners: {Q15466;P24864;Q96HR3;O14497;P78317;Q9UER7;Q15596;P06400;Q05086;P48552;Q9NV C6;Q9UHV7;O75925;Q93074;Q9UBS8;O75448;Q9NPJ6;O60244;P62826;Q92993;O75928;Q14192}

13226 [Cluster 1203]GO:0043525+P biological\_process [name] positive regulation of neuron apoptosis [def] "Any process that activates or increases the frequency, rate or extent of cell death of neurons by apoptosis." [GOC

13227 Pathogen[ Q2Q067] interacts with 8 human partners: {Q9BXH1;Q99933;Q13794;P55212;P15559;P42575;O00198;P18848}

13228 Pathogen[ POC214] interacts with 12 human partners: {O00198;P55212;Q13794;Q9BXH1;P18848;Q99933;P42574;P05412;P55210;P61081;P155 59;P42575}

13229 Pathogen[ P03346] interacts with 13 human partners: {P05412;P42575;P42574;P15559;P55212;P18848;O00198;Q92481;P55211;P55210;Q9BX H1;Q99933;Q13794}

13230 Pathogen[ Q85601] interacts with 9 human partners: {Q9BXH1;P18848;O00198;Q99933;P42575;P05412;P55212;Q13794;P55210}

13231 Pathogen[ P14079] interacts with 10 human partners: {P15559;Q9BXH1;P55212;Q15078;P55210;Q99933;Q13794;O00198;P42575;P05412}

13232 Pathogen[ P03383] interacts with 7 human partners: {P55212;Q99933;O00198;Q13794;P18848;Q9BXH1;P05412}

13233 Pathogen[ P03410] interacts with 10 human partners: {P15559;Q99933;Q9BXH1;O00198;P18848;P42575;Q13794;P05412;P55212;P55210}

13234 Pathogen[ P14075] interacts with 8 human partners: {Q99933;P05412;P55212;P15559;Q9BXH1;P18848;Q13794;O00198}

13235 Pathogen[ POC206] interacts with 11 human partners: {Q99933;P15559;P05412;P55212;Q9BXH1;O00198;P42574;P42575;P55210;P18848;Q137 94}

13236 Pathogen[ P03363] interacts with 9 human partners: {P18848;P61081;Q13794;O00198;P55212;P05412;P55210;Q9BXH1;Q99933}

13237 [Cluster 1204]GO:0001709+P biological\_process [name] cell fate determination [def] "A process involved in cell fate commitment. Once determination has taken place, a cell becomes committed to differentiate down a particular pathway regardless of its environment." [ISBN

13238 Pathogen[ Q2Q067] interacts with 3 human partners: {O43364;P23769;Q9NY43}

13239 Pathogen[ POC214] interacts with 2 human partners: {P23769;Q9NY43}

13240 Pathogen[ P03346] interacts with 4 human partners: {P23769;O43364;Q07820;Q9NY43}

13241 Pathogen[ Q85601] interacts with 3 human partners: {P23769;O43364;Q9NY43}

13242 Pathogen[ P14079] interacts with 3 human partners: {O43364;Q9NY43;P23769}

13243 Pathogen[ P03383] interacts with 2 human partners: {P23769;Q9NY43}

13244 Pathogen[ P03410] interacts with 3 human partners: {O43364;P23769;Q9NY43}

13245 Pathogen[ P14075] interacts with 2 human partners: {P23769;Q9NY43}

13246 Pathogen[ POC206] interacts with 3 human partners: {Q9NY43;P23769;O43364}

13247 Pathogen[ P03363] interacts with 3 human partners: {Q07820;O43364;Q9NY43}

13248 [Cluster 1205]GO:0032204+P biological\_process [name] regulation of telomere maintenance [def] "Any process that modulates the frequency, rate or extent of a process that affects and monitors the activity of telomeric proteins and the length of telomeric DNA." [GOC

13249 Pathogen[ Q2Q067] interacts with 1 human partners: {P01106}

13250 Pathogen[ POC214] interacts with 1 human partners: {P01106}

13251 Pathogen[ P03346] interacts with 1 human partners: {P01106}

13252 Pathogen[ Q85601] interacts with 1 human partners: {P01106}

13253 Pathogen[ P14079] interacts with 1 human partners: {P01106}

13254 Pathogen[ P03383] interacts with 1 human partners: {P01106}

13255 Pathogen[ P03410] interacts with 1 human partners: {P01106}

13256 Pathogen[ P14075] interacts with 1 human partners: {P01106}

13257 Pathogen[ POC206] interacts with 1 human partners: {P01106}

13258 Pathogen[ P03363] interacts with 1 human partners: {P01106}

13259 [Cluster 1206]GO:0006979+P biological\_process [name] response to oxidative stress [def] "Any process that results in a change in state or activity of a cell or an organism (in terms of movement, secretion, enzyme production, gene expression, etc.) as a result of oxidative stress, a state often resulting from exposure to high levels of reactive oxygen species, e.g. superoxide anions, hydrogen peroxide (H2O2), and hydroxyl radicals." [GOC

13260 Pathogen[ Q2Q067] interacts with 21 human partners: {P04156;Q6XQN6;Q99497;P36639;P62324;Q06830;P04264;P15559;Q7LG56;O75306;O155 27;Q03468;O75475;Q13216;P19838;P20823;P28074;Q14872;Q99814;Q9H3M7;P23025}

13261 Pathogen[ POC214] interacts with 30 human partners: {P50440;O75306;Q8N573;O75874;P04264;Q14872;P56556;P19838;Q9H3M7;P23025;Q6XQ N6;Q99497;Q5SWA1;Q99807;Q06830;Q13216;Q9UJ68;Q16881;P28074;P36639;P62324;O75475;P041 56;P10909;Q99814;Q9UI09;O15527;Q7LG56;P15559;Q03468}

13262 Pathogen[ P03346] interacts with 25 human partners: {Q8N573;P28074;P07992;Q14872;O75475;P36639;Q5SWA1;P20823;P15559;O00151;Q6XQ N6;Q7LG56;Q03468;Q99814;Q13216;Q99497;Q06830;P04156;P23025;P19838;O75306;P62324;P042 64;O15527;Q9H3M7}

13263 Pathogen[ Q85601] interacts with 24 human partners: {Q99497;O15527;P23025;O75306;Q13216;Q14872;P62324;P36639;O00151;Q5SWA1;Q998

14;Q96FI4;Q6XQN6;Q03468;Q7LG56;P04264;Q06830;P04156;P28074;O75475;P19447;P19838;P20823;Q9H3M7}

13264 Pathogen[ P14079] interacts with 37 human partners: {Q8WWM9;Q8N573;Q99807;P56556;Q99814;Q5SWA1;P62324;P04156;P28074;O75475;O75306;P00395;Q99497;P10909;Q13216;O00151;O15527;P15559;P23025;Q7LG56;P36639;Q6XQN6;Q9Y6D0;Q9UI09;Q96FI4;Q14872;P03897;Q9H3M7;Q03468;P04264;O00244;P50440;Q9UJ68;P07992;P19447;Q6AZY7;Q14201}

13265 Pathogen[ P03383] interacts with 15 human partners: {Q13216;P62324;P04156;P36639;O15527;Q5SWA1;O75306;Q14872;Q03468;P23025;O75306;P04264;Q9H3M7;P28074;P19838}

13266 Pathogen[ P03410] interacts with 38 human partners: {P15559;O95168;P23025;P19838;Q96FI4;P56556;Q99497;P36639;P07992;Q99814;P04264;Q9UI09;Q9H3M7;Q03468;Q6XQN6;Q8WWM9;Q9UJ68;O15527;P62324;Q14872;P19447;Q5SWA1;P04156;Q13216;P03897;Q14201;Q9Y6D0;O75306;O75475;Q99807;O00151;P50440;Q6AZY7;Q8N573;Q7LG56;Q06830;P28074;P10909}

13267 Pathogen[ P14075] interacts with 19 human partners: {P23025;P62324;O75475;P36639;O15527;P04156;Q5SWA1;Q13216;P15559;O75306;Q03468;P28074;P04264;Q9Y6D0;Q9H3M7;P19838;Q6XQN6;P50440;Q14872}

13268 Pathogen[ P0C206] interacts with 35 human partners: {P62324;P36639;P04156;Q6XQN6;O15527;O75306;P04264;P15559;Q03468;Q7LG56;Q9UI09;Q99497;Q13216;P07992;O75475;P19447;P19838;P50440;Q9UJ68;Q99807;O00151;P20823;P10909;Q5SWA1;Q96FI4;Q14872;Q9H3M7;Q9Y6D0;P28074;Q8N573;Q99814;Q06830;P23025;P56556;Q8WWM9}

13269 Pathogen[ P03363] interacts with 17 human partners: {Q6XQN6;O15527;Q96FI4;Q9H3M7;P23025;O75475;P04156;Q14201;Q14872;Q13480;P62324;P19838;Q99814;Q03468;Q13216;P04264;P36639}

13270 [Cluster 1207]GO:0050860+P biological\_process [name] negative regulation of T cell receptor signaling pathway [def] "Any process that stops, prevents, or reduces the frequency, rate or extent of signaling pathways initiated by the cross-linking of an antigen receptor on a T cell." [GOC]

13271 Pathogen[ Q2Q067] interacts with 4 human partners: {P04156;P57075;Q96IZ0;P32519}

13272 Pathogen[ P0C214] interacts with 4 human partners: {Q96IZ0;P32519;P57075;P04156}

13273 Pathogen[ P03346] interacts with 6 human partners: {Q9NRX4;P57075;Q96IZ0;P32519;P04156;Q9Y2R2}

13274 Pathogen[ Q85601] interacts with 4 human partners: {Q96IZ0;P32519;P57075;P04156}

13275 Pathogen[ P14079] interacts with 5 human partners: {Q9NRX4;P04156;P57075;P32519;Q96IZ0}

13276 Pathogen[ P03383] interacts with 3 human partners: {P04156;Q96IZ0;P32519}

13277 Pathogen[ P03410] interacts with 5 human partners: {P57075;P32519;Q9NRX4;Q96IZ0;P04156}

13278 Pathogen[ P14075] interacts with 3 human partners: {P04156;Q96IZ0;P32519}

13279 Pathogen[ P0C206] interacts with 6 human partners: {Q96IZ0;P04156;Q9NRX4;Q9Y2R2;P32519;P57075}

13280 Pathogen[ P03363] interacts with 5 human partners: {Q9Y2R2;Q96IZ0;P04156;P32519;P57075}

13281 [Cluster 1208]GO:0060766+P biological\_process [name] negative regulation of androgen receptor signaling pathway [def] "Any process that decreases the rate, frequency, or extent of the androgen receptor signaling pathway." [GOC]

13282 Pathogen[ Q2Q067] interacts with 5 human partners: {Q9NQ87;Q13547;O75928;P51532;P35232}

13283 Pathogen[ P0C214] interacts with 5 human partners: {Q13547;P35232;Q9NQ87;P51532;O75928}

13284 Pathogen[ P03346] interacts with 7 human partners: {P51532;O43680;Q13547;Q9NQ87;P35232;O75593;O75928}

13285 Pathogen[ Q85601] interacts with 5 human partners: {O75928;P51532;Q9NQ87;P35232;Q13547}

13286 Pathogen[ P14079] interacts with 4 human partners: {O75928;P51532;P35232;Q9NQ87}

13287 Pathogen[ P03383] interacts with 5 human partners: {Q9NQ87;P35232;Q13547;P51532;O75928}

13288 Pathogen[ P03410] interacts with 5 human partners: {Q9NQ87;O75928;P51532;Q13547;P35232}

13289 Pathogen[ P14075] interacts with 5 human partners: {P51532;Q9NQ87;Q13547;P35232;O75928}

13290 Pathogen[ P0C206] interacts with 4 human partners: {Q9NQ87;P51532;Q13547;P35232}

13291 Pathogen[ P03363] interacts with 5 human partners: {Q9NQ87;P51532;Q13547;P35232;O75928}

13292 [Cluster 1209]GO:0010922+P biological\_process [name] positive regulation of phosphatase activity [def] "Any process that increases the rate or frequency of phosphatase activity. Phosphatases catalyze the hydrolysis of phosphoric monoesters, releasing inorganic phosphate." [GOC]

13293 Pathogen[ Q2Q067] interacts with 1 human partners: {O43745}

13294 Pathogen[ P0C214] interacts with 1 human partners: {O43745}

13295 Pathogen[ P03346] interacts with 1 human partners: {O43745}

13296 Pathogen[ Q85601] interacts with 1 human partners: {O43745}

13297 Pathogen[ P14079] interacts with 1 human partners: {O43745}

13298 Pathogen[ P03383] interacts with 1 human partners: {O43745}

13299 Pathogen[ P03410] interacts with 1 human partners:{043745}

13300 Pathogen[ P14075] interacts with 1 human partners:{043745}

13301 Pathogen[ P0C206] interacts with 1 human partners:{043745}

13302 Pathogen[ P03363] interacts with 1 human partners:{043745}

13303 [Cluster 1210]GO:0045892+P biological\_process [name] negative regulation of transcription, DNA-dependent [def] "Any process that stops, prevents, or reduces the frequency, rate or extent of cellular DNA-dependent transcription." [GOC

13304 Pathogen[ Q2Q067] interacts with 280 human partners:{P49454;Q9H4I2;Q9BYE7;Q13573;Q9NZI7;Q6VMQ6;Q8IXJ6;Q03989;Q9Y6X8;Q13185;Q9UPN9;P56524;P10827;Q9HAU4;Q9Y5V3;Q6NUN9;Q13033;Q9UQ80;Q9BRU2;Q9HBE1;Q63HK5;Q9Y3Q8;P06400;Q0D2K3;P29374;Q9NPF5;Q01094;Q9UKV0;Q9LW38;Q9NPI1;Q02447;Q2M1K9;Q04727;Q96T58;Q86YP4;P63210;P67809;Q13485;Q6IV72;Q9UNS1;Q9UI56;P13056;P31268;Q9UHF7;Q99816;Q9UBB5;Q15596;P48380;P35712;P41182;Q9Y2X9;Q86VX2;P10828;Q01664;P18847;P51531;P41970;Q8WXF8;Q9BW11;Q9NQ87;Q15697;Q9NZL3;Q96004;Q43439;Q01105;P37275;Q05516;Q32MZ4;P20749;Q9NVW2;Q00257;Q04206;Q13547;Q9UIS9;P55345;Q99684;Q9UDV7;Q96AQ6;Q94776;Q15379;P41134;Q14192;Q9NQX1;Q9UER7;Q9UNL4;Q9Y2G9;Q6S9J6;Q96ST3;P35638;Q9NPI1;Q02447;Q2M1K9;Q04727;Q96T58;Q86YP4;P63279;Q75362;Q9ULJ3;Q8TBE0;P17676;Q53H80;Q96MH2;Q9NYF8;P11473;Q99471;Q96RJ6;Q75182;Q8NDT2;Q8N5F7;Q95416;Q9H7S9;Q6NT76;Q00577;Q96BF6;Q9UJW3;P78545;P63165;Q9NS37;Q9BQ0;Q15723;Q9UBC3;Q08050;P11142;Q75381;Q9UKL0;Q95521;Q5TB30;P27797;Q9UQL6;Q8N5P1;Q9Y3M2;Q99549;Q43593;Q9Y297;Q99966;Q96SR6;P54253;Q94992;P35548;Q5VWM6;Q6W2J9;Q75582;Q9UGP4;Q96S8;P26358;Q75618;Q96MT3;Q07666;Q9UKY1;Q96T37;Q96SZ4;Q969G3;P10914;Q9ULM3;P16383;Q92769;Q9H091;Q00255;Q15105;Q43251;Q06330;Q75496;P14859;Q8IZ40;Q13127;Q9HCU9;Q9HD42;Q9H116;Q53EL6;Q96E29;Q12906;Q719H9;P51532;Q15742;Q5VWM5;P86452;Q8WVJ9;Q15164;Q13506;Q75530;Q9Y6B2;Q96QR8;Q14865;Q92993;Q5SWL7;Q8WUI4;Q9P0J0;Q4VCO5;P55055;P12956;Q15796;Q9BT49;Q75164;Q04725;Q9H6W3;Q96T23;Q13363;Q86X95;Q9H7L9;Q8NPF8;Q9NYW8;P19838;Q96RU7;P78395;P20823;P61201;Q9Y2P7;Q75346;Q14529;Q9Y543;Q8IXH7;Q96QT6;Q9BZK7;Q15545;Q9UID6;P27348;P31946;Q13901;P42771;P17096;Q04724;Q99623;P80723;Q9Y5J3;Q9HCK8;P47928;Q9NP71;Q8N693;Q8TAQ2;Q96RE7;Q86U70;Q14582;Q5TGS1;Q9NSC2;Q9GZX5;Q9H2F5;Q96MN9;Q9BQA5;P13010;P35232;P49593;Q8N6I1;P45973;P55771;Q16576;Q8IY57;P23497;P46527;P10242;Q8NB12;Q14978;Q60810;P06733;P15834;Q60809;Q75376;Q9Y468;P49711;Q8N5A5;P83916;Q00987;Q14602;Q14781;Q9UQR1;P49571;P49918;Q15392;Q06587;Q96RL1;P23409;Q9BT81;Q9P1T7;P17014;P49715;Q03112;P17947;P17028;Q8WX92;P15822;Q8N2W9;P33076}

13305 Pathogen[ P0C214] interacts with 279 human partners:{P41970;Q9Y3Q8;Q9UGP4;Q92993;Q15742;Q9BW11;Q03989;Q8WX92;Q9NS37;Q14529;Q9UID6;Q96T58;Q15697;Q04727;Q9HAU4;Q8WXF8;Q9Y5V3;Q13573;Q9BRU2;Q9BT49;Q5TYX0;Q13363;Q9Y2G9;Q9UHF7;Q13547;Q14865;Q5SWL7;Q6VMQ6;P19838;Q8N5A5;Q969S8;P13010;P54253;Q96QR8;Q5TB30;P27348;Q00987;Q8N693;P33076;Q75618;Q9HBE1;A6NGN4;Q8N2W9;Q03112;P83916;Q75530;Q75496;Q8N5F7;Q9HD42;Q75362;Q9BQ0;Q9Y5J3;P35711;P67809;Q13033;P61201;Q8NPF8;Q96QT6;Q12906;P17096;P17947;P46527;P56524;Q6W2J9;Q99623;Q6NT76;Q96SR6;Q53EL6;Q96MN9;Q04206;Q9UNL4;Q2M1K9;Q63HK5;Q53H80;P63279;P37275;P10914;Q16666;Q75381;Q06330;Q15910;Q32MZ4;P78395;Q60813;Q75164;P55345;Q04724;Q9H091;Q13901;Q9Y297;Q9Y468;Q15545;Q00308;Q9BT81;Q96SZ4;Q6IV72;Q8TBE0;Q8TAQ2;Q9H2F5;Q8N6I1;Q96MT3;Q9GZX5;Q60810;Q9H4I2;P17676;Q01105;Q9H0M0;P86452;Q5VWM6;Q5VTA0;Q96BF6;Q9NZI7;Q14503;P13056;Q9UIS9;Q99966;Q01094;Q9ULJ3;Q13506;Q15834;Q969G3;Q43439;P47928;P41134;Q95416;Q96MH2;Q9UER7;Q94776;Q07666;P63165;Q06587;Q00577;P17014;Q9P0J0;Q9Y3M2;Q99549;P49918;Q86U70;Q9Y543;Q96RJ6;Q9UKL0;P26358;Q9Y6B2;Q9NVW2;Q8IZ40;Q86YP4;Q13485;Q9H6W3;P18847;Q9NYW8;Q9BYE7;Q92769;Q15105;Q9UH92;P20749;Q9HAZ2;P17028;P16383;Q9UKV0;Q9HCU9;Q8WW38;Q00257;Q9UNS1;Q96E29;Q9HCK8;Q13185;Q16576;Q15226;Q75376;Q15796;P42771;Q9NSC2;Q14192;Q43593;P41182;Q9Y6X8;Q9NP71;Q15379;P06733;Q96RL1;Q9P1T7;Q13127;Q75346;Q96AQ6;Q9Y2X9;Q75582;P10242;P23497;Q94992;Q99816;Q15392;Q05412;Q8WVJ9;P49711;Q14781;Q04781;Q96RU7;Q719H9;Q15164;Q9NPI1;Q96T23;Q9NQX1;P27797;Q96JB3;Q04725;Q9UDV7;Q99471;Q9BZK7;Q8IXJ6;Q96ST3;P45973;P49593;Q14978;Q0D2K3;Q9UI56;Q8IXH7;P80723;Q96004;Q14602;Q8NDT2;P48380;P78545;Q99684;Q6NUN9;Q86VX2;Q9BQA5;Q9UQR1;Q9UBB5;P10828;Q15596;Q8WUI4;Q43251;P35232;Q9NQ87;Q5VWM5;Q5SWL8;P31946;Q95521;P51531;Q5VXH4;Q8NB12;P49454;Q9UQR1;Q96RE7;Q9NZL3;Q9NQ87;Q01664;Q9UPN9;P15822;P14859;Q86X95;Q5VWM1;Q9Y2P7;Q5TGS1;P35712;Q9ULM3;Q9UQL6;P06400;Q4VCO5;P35548;Q96T37;Q05516;P12956;Q00255;P35638;Q9H7S9;Q9NPF5;P51532;Q9NYF8;Q6S9J6;Q96LA8;Q8IY57;Q15723;Q75182;Q9UJW3;Q9H7L9;P11142;Q9H116;P55771}

13306 Pathogen[ P03346] interacts with 327 human partners:{Q15723;Q06330;P85037;Q6S9J6;Q14781;Q969S8;Q9BZE0;Q96ST3;Q9UPN9;Q03989;P05412;Q9Y467;Q9UHF7;Q13263;Q96QR8;Q16666;Q9NQX1;P10827;P11473;Q86U70;P31268;P45973;Q9HAU4;P86452;P12956;Q99966;Q9UGP4;Q9BRU2;P18847;Q15834;Q9H091;P29374;P58012;Q8IXH7;Q8WYB5;Q9H116;Q15392;Q9UQR1;Q75362;Q9UKL0;Q9BQ0;Q9Y2P7;P17676;Q14901;Q9UNL4;Q4VCO5;Q5VWM5;Q9Y3M2;P35638;P35548;Q02535;Q8WW38;Q75530;Q86VX2;Q9UQ80;Q15379;Q9NQ87;Q99471;Q8NFW5;P06400;Q9HD42;P51532;Q00577;Q96SZ4;Q8WXF8;Q9Y3Q8;Q96AQ6;Q01105;Q15911;Q2M1K9;Q32MZ4;Q8N693;P80723;Q14978;P14859;Q9NSC2;P48380;P20264;Q15796;Q9BW11;P56524;P13010;Q9UNL4;Q96QT6;Q9NPI1;P23409;Q8N5A5;P27348;Q04206;Q8IZ40;P33076;Q53H80;Q99816;Q12906;Q94776;Q9ULJ3;P13056;Q9NQ69;P11142;Q8IXJ6;Q9ULM3;Q63HK5;Q5TB30;Q08050;Q9UDV7;Q9BYE7;Q96RL1;Q9UBC3;Q9P2Y4;P63279;Q00257;Q9NP08;P26358;P20823;Q96RE7;P49918;Q15105;Q9UBX0;P17014;Q43316;P42771;Q8N5F7;P49593;Q00409;Q96RJ6;Q60810;Q01094;Q01094;P17096;Q9Y5J3;Q75182;Q9NYW8;Q60809;Q00987;Q15534;Q14503;P06733;Q96MT3;Q75381;Q43593;Q96004;P51843;Q96MN9;Q9NP71;Q07666;Q9BT49;Q14582;Q92794;Q15742;Q9HCS4;P10242;Q9UIS9;Q5VTA0;Q8NDT2;P51397;Q13033;P67809;Q15596;Q9UNH7;Q00255;P78395;Q95863;P10914;Q6VMQ6;Q96GD3;P41134;Q9H4I2;Q86YP4;Q9684;Q92769;Q9Y2G9;Q14192;Q04725;Q75164;Q9HCU9;Q13547;Q03112;Q96E29;Q04724;Q9HCK8;P48059;Q13506;P63165;Q7Z4V0;Q8WVJ9;P55345;P49711;Q75618;Q9Y6X8;P84550;Q9H7S9;Q8NB12;Q75346;Q9UER7;P37275;Q8N6I1;Q9NQ87;Q9H2F5;Q96BF6;Q43439;Q12778;Q96T23;Q16576;Q8WUI4;Q75582;Q8NPF8;Q43251;P16383;Q5TGS1;Q75376;Q9Y5V3;Q9Y468;Q8N2W9;Q14190;Q148

65;P35713;Q15910;Q96T58;O75469;Q9HBE1;P27797;P41182;Q8N5P1;Q96RU7;P17028;Q8WX92;Q05516;P20749;Q92481;P61201;Q969G3;P31946;P35712;Q9UKV0;Q9H7Z6;Q9BZK7;Q99623;Q04727;P41970;P10828;Q9UGL1;P17947;Q9Y543;Q99549;Q13363;P83916;Q9GZX5;Q9Y6B2;A9YTQ3;O94992;Q9H7L9;Q9UI56;P35232;Q96MH2;O15226;P19838;P23497;Q13485;Q0D2K3;Q8TBE0;P56545;Q9UKY1;P54253;Q9H0M0;Q9Y2X9;Q9P1T7;Q92993;Q9UH92;Q13573;Q9UID6;Q15697;P51531;Q9P0J0;Q6NUN9;Q9Y458;Q86X95;P78545;Q9NZL3;Q9H6W3;Q15545;Q8IY57;Q5SWL8;O95521;Q9HAZ2;Q6IV72;Q6VWM1;Q6NT76;Q9NYF8;P46527;Q14602;P35711;Q5VVM6;Q9Y297;Q9TAQ2;Q9NS37;Q95343;P15822;Q06587;Q02447;Q9UBB5;Q01664;Q96SR6;Q13185;Q9UQL6;O15164;Q96T37;Q53EL6;O95416;O14529;P55055;Q6W2J9;Q9BT81;Q96LA8;Q9NZI7;Q13901;Q9NVW2;P49454;O75496;Q13127;Q96JB3;P47928;Q9UJW3;Q5SWL7;O00308;Q9BQA5;Q9NPF5;P55771}

13307 Pathogen[ Q85601] interacts with 292 human

partners: {Q9UQR1;Q969S8;Q99816;Q9UPN9;O75182;Q96MH2;Q03989;P49454;O75496;Q9UHF7;Q9UKV0;Q96QR8;Q9H2F5;P17676;Q16666;P11473;Q96SZ4;P83916;Q9P0J0;O14529;P33076;Q9HAU4;Q9BT49;P31946;Q96JB3;Q9ULJ3;Q13127;O43316;Q9BRU2;P17096;Q96SR6;P41134;Q15834;Q96RL1;Q07666;P17028;O15534;Q9UQ80;Q9BQG0;O94776;Q04724;P86452;Q9UQL6;Q8NB12;Q8TBE0;Q9Y3M2;Q86U70;Q8WW38;Q9UJW3;Q5VTA0;Q9NQR1;Q99471;P06400;Q06330;Q96QT6;Q96BF6;Q9H7S9;P49593;Q96T23;Q8N5F7;Q9Y3Q8;Q01105;O60813;Q13573;Q9H116;Q2M1K9;Q99966;P15822;Q13506;O14978;Q03112;P14859;Q9Y468;P61201;P41970;P78545;O60810;Q9Y2X9;Q6NUN9;Q9UER7;Q15545;Q8N5A5;Q15723;Q9H7Z6;Q9UNL4;O14503;P35712;P06733;Q5TB30;P10242;O15392;P27797;P16383;O15226;Q13363;P26358;Q5SWL7;Q99549;P17014;Q8N2W9;O15164;O43439;Q15742;Q6NT76;Q15596;O96004;P80723;Q9NP71;P55055;P49711;Q9UID6;P63279;Q9NYW8;Q8WX92;P10914;Q99623;Q9H6W3;Q9UH92;Q96MT3;P55771;Q5VXH4;P51531;Q8N6I1;Q13263;Q53H80;Q9GZX5;Q9H4I2;P23409;Q9Y6B2;Q04725;Q8NFJ8;Q00577;Q9NQX1;P51532;Q9UIS9;Q9UBX0;Q8NDT2;Q969G3;Q13901;Q96MN9;Q14582;Q8IXJ6;P18847;Q12906;Q5TGS1;Q9UDV7;Q86YP4;O95416;P35711;Q92769;Q04206;P45973;Q16576;Q9UJW3;Q9HCU9;Q9NZL3;Q9Y5V3;Q04727;P27348;Q6SJ96;Q96E29;Q14192;P11142;O75618;Q9Y6X8;P35548;O75346;O75530;Q8WJF8;P05412;Q9Y543;Q9NQ87;Q9BYE7;Q00255;P67809;P42771;Q75376;Q13185;O75582;Q14865;A9YTQ3;Q53EL6;Q13033;Q32MZ4;P10827;Q96T58;Q8N693;Q02447;O94992;Q99684;P48059;Q96RU7;Q8N5P1;Q0D2K3;Q05516;Q9BQA5;Q9NPI1;Q9HCK8;P49715;Q9UGP4;P63165;P49918;P37275;Q96RJ6;Q8IXH7;Q9BZK7;P56524;O15379;Q96RE7;P17947;Q15910;Q08050;O75164;P35232;O15105;Q96T37;Q9BW11;Q13547;Q9UKY1;O75362;Q5TYX0;P54253;Q86VX2;P13056;Q9NSC2;Q92993;P10828;P41182;Q9P1T7;Q8IZ40;Q9NS37;Q15697;Q8WUI4;Q9Y2P7;P48380;Q9HCS4;P45393;Q6VMQ6;Q5VVM5;O00257;Q8IY57;Q5SWL8;O75381;Q6IV72;Q5VWM1;Q63HK5;Q00987;Q9H7L9;Q14602;Q5VVM6;P19838;P20823;Q8TAQ2;Q9UKL0;Q13485;Q9UNH7;P78395;Q06587;Q9H091;Q9UBB5;Q9HD42;Q01664;Q96AQ6;P20749;Q9BT81;A6NGN4;Q9Y2G9;Q01094;Q9NZI7;Q86X95;Q9NYF8;Q9NVW2;Q9Y5J3;Q96LA8;Q8WVJ9;Q15796;P13010;P12956;Q719H9;P47928;Q9UBC3;P46527;Q5VT98;Q6W2J9;P55345;Q9HBE1;P35638;Q9NPF5;Q9HAZ2;Q14781;Q96ST3;Q9UN51}

13308 Pathogen[ P14079] interacts with 293 human

partners: {Q9UQL6;Q9UQR1;O15379;Q8N2W9;Q9BW11;Q04725;P35711;Q99623;Q9NQX1;Q9NPI1;Q01105;P13056;O15164;Q9HAZ2;O75346;Q9UNH7;P16383;P33076;Q96RJ6;Q96T23;O75618;Q13506;Q53H80;P55055;O95416;P11142;P63279;Q9BZK7;Q96T37;Q9UIS9;O60811;Q8N693;Q15596;P49593;Q9BT81;P14859;P61201;Q96LA8;A3QZ6;P23409;Q14192;Q5VXH5;Q8IXH7;Q15911;Q96QR8;O75362;Q15723;P67809;Q4VC05;O43439;P11473;P13010;Q96ST3;O75582;P10828;Q6NUN9;Q13033;Q9UBB5;Q99549;Q9UI56;Q9P2Y4;Q9Y468;Q969S8;P55771;Q8WUI4;Q13901;Q86U70;Q8N5A5;Q12906;Q96SR6;P17096;P48380;P51532;Q5SWL7;Q9UNL4;Q9GZX5;Q15742;Q14865;Q99684;O15392;P35712;Q9UID6;Q8WVJ9;Q99966;P51531;Q9UKV0;Q05516;Q96004;Q9HD42;Q13573;Q02447;Q15232;Q5VVM3;Q32MZ4;Q5VT98;Q8TAQ2;Q86YP4;Q9Y2P7;P49918;Q9Y3Q8;Q96E29;P63165;Q96SZ4;Q9BQA5;Q9NS37;Q9HAU4;P54253;Q9UJW3;P06733;Q9NYW8;P10827;A6NGN4;Q03989;P23497;Q16576;Q719H9;Q96MN9;Q00987;Q9NYF8;Q15078;Q9UKY1;Q5TYX0;Q6WJ29;P45973;Q6NT76;Q06330;Q9H6W3;Q86VX2;Q9NZI7;Q9NZL3;P12956;P55345;Q96QT6;Q9Y5V3;P41182;Q5VVM6;A6NMV5;Q13185;Q6VMQ6;Q9UBC3;O00257;Q14781;O75530;Q9UPN9;Q9UJW3;Q9UER7;Q95521;Q9NPF5;Q92769;Q8IY57;P29374;Q5VVM5;O95522;P31946;Q5VTA0;P49715;Q07666;O60809;O75469;Q2M1K9;Q9BQG0;Q9BYE7;Q9NQR1;Q8NB12;Q9Y5J3;Q96BF6;Q15697;P27348;O14978;Q5VVM4;Q9Y2X9;Q5TGS1;A9YTQ3;P26358;Q96AQ6;Q01664;Q9HCK8;Q9P0J0;P15822;Q15834;Q5TB30;O94992;Q9UKL0;Q9H091;Q96RL1;Q8IU54;P35638;Q9H2F5;Q9UDV7;Q6SJJ9;Q9UH92;Q00577;Q96RE7;Q9HCU9;Q96RU7;Q8IXJ6;Q8WX92;Q5SWL8;Q8N5P1;Q0D2K3;O60813;Q04724;Q9Y3M2;P20749;O75182;Q14602;O75376;O14529;Q63HK5;P17014;P46527;Q9P1T7;Q8WJF8;P78545;P41134;P78395;P49454;P51397;O75381;Q9NS86;O15226;Q15910;Q9NQ87;P80723;Q9H7S9;A6NMC2;Q99471;O14503;Q5VXH4;Q9BT49;P05412;P83916;Q9Y6B2;Q8IZ40;P10242;P56524;Q9H7L9;Q13127;Q99816;Q9H4I2;P28360;O15105;Q5VVM1;P48059;O14901;Q9Y6X8;Q9UQ80;Q14582;Q96MH2;O94726;Q9UN51;Q01094;Q86X95;Q96MT3;P86452;O00255;Q8N6I1;Q9BRU2;Q9NP71;O60810;O43593;Q9BZEO;Q9HBE1;Q8NDT2;Q9UHF7;P41970;P49711;O75496;Q8WJF8;Q04727;Q8WW38;P47928;P37275;Q9UGP4;Q9Y2G9;Q9NSC2;Q6IV72;P10914;Q9ULJ3;O15534;Q92993;Q16666;Q9H116;Q96T58;Q53EL6;Q5TYW8;Q8TBE0;Q15545;P42771;P17028;Q06587;Q8N5F7}

13309 Pathogen[ P03383] interacts with 245 human

partners: {Q9UQR1;Q96MH2;Q9UN51;Q13573;Q06330;Q15723;Q9BQG0;O75182;Q719H9;P49454;P10914;Q9NYW8;Q32MZ4;Q53EL6;Q9UH92;Q5TYX0;Q0D2K3;O75582;P35712;Q01105;Q13485;Q96SZ4;P33076;O60809;P13010;Q9UJW3;P17096;Q9BRU2;Q9Y2P7;Q9H4I2;Q9HBE1;Q8N6I1;O94776;P49711;Q15596;Q01094;P55771;O75376;Q8WVJ9;Q9UQL6;Q4VC05;Q96RL1;P31946;Q8WW38;Q86YP4;Q86U70;Q04727;Q6NT76;Q9UJW3;Q9UPN9;O75362;P14859;Q8N5F7;Q96AQ6;O75618;Q9H7L9;P18847;P20749;O00257;P61201;P48380;P37275;Q9Y3Q8;Q96MT3;Q9NQ87;O60810;Q9H2F5;Q06587;Q15742;Q6VMQ6;P35638;Q99816;Q9UNL4;O14503;Q96QT6;Q9BYE7;Q92993;Q05516;Q9GZX5;Q8N693;Q96T23;Q8N2W9;Q04724;Q9H6W3;Q9NQX1;P06400;Q9UBB5;Q9NP71;Q01664;O75164;P17014;P83916;Q5SWL7;Q9HAZ2;Q6W2J9;Q53H80;Q13506;O96004;P11473;O15105;Q99549;Q03112;O14978;Q8IXH7;Q13185;P86452;P45973;Q9UID6;Q969G3;Q9Y6B2;P35548;Q96MN9;Q02447;Q14192;P46527;Q9NPF5;Q9BQA5;Q92769;Q9UGP4;P17676;Q04725;Q9HCU9;P78395;Q9Y5V3;Q9NYF8;Q6SJJ9;Q6IY96;Q9NSC2;O75381;P63165;Q9ULJ3;Q6IV72;Q8N5A5;Q99471;P35711;Q15697;Q9Y6X8;Q8IZ40;P51531;P15822;O15379;Q9UER7;Q9Y3M2;O00255;P11142;O60813;Q16666;Q07666;Q96RE7;Q9H7S9;Q8TAQ2;P35232;Q9HD42;Q5VXH4;O949



92;P42771;Q96T58;Q99684;Q13547;Q9UI56;Q12906;Q96RU7;Q9UKL0;P54253;P10242;P23497;Q9H16;Q9HCK8;Q8WXF8;Q9UQ80;Q9UKV0;Q9NZI7;P49918;Q15796;Q9BZK7;P56524;P41970;Q00577;Q15910;Q04206;P78545;Q6NUN9;Q8IY57;Q5VWM6;P51532;Q96SR6;Q14602;P80723;Q9NPI1;Q8NDT2;Q96ST3;Q9Y2G9;Q8TBE0;P51397;Q86VX2;Q5TGS1;Q9Y2X9;Q9P1T7;Q13033;P10828;P16383;Q9NS37;P47928;Q2M1K9;Q8WUI4;Q86X95;Q9NZL3;Q5VWM5;Q9P0J0;Q15545;P06733;P19838;Q96QR8;P17028;P67809;P13056;Q9UHF7;Q43439;Q15834;Q9H091;Q9NQR1;Q75346;Q9BT49;P26358;P17947;P63279;Q95521;Q96LA8;Q15226;Q13363;Q16576;Q13901;Q99623;Q969S8;Q8WX92;Q9UIS9;Q9Y468;Q75496;P12956;Q13127;Q75530;P27797;Q14781;P05412;P27348}

13310

Pathogen[ P03410] interacts with 291 human

partners: {Q96RL1;Q9Y2P7;Q96AQ6;P20749;Q9Y5J3;Q9UKV0;Q9UHF7;Q96QT6;Q04206;Q96JB3;Q14901;Q15392;Q9NS86;P35712;Q5TB30;Q8IXJ6;P42771;Q9UI56;Q96BF6;P23409;Q9H6W3;Q43439;Q9NS37;Q8WXF8;P19838;P46527;Q9NYW8;Q03112;P29374;Q9NZL3;Q16666;Q9UDV7;P35638;Q96LA8;Q15697;Q96T23;Q4VC05;Q5VWM4;Q5SWL7;Q6W2J9;Q5VXH5;P37275;Q8WVJ9;Q9HAZ2;Q06896;P15822;Q5SWL8;Q9Y2G9;Q96004;P17676;Q96SZ4;Q9H4I2;P18847;Q02447;P63165;P17947;Q06330;Q99549;A6NGN4;Q5TYW8;Q60811;A9YTQ3;Q9BQA5;Q9BYE7;Q03989;Q9NQ87;Q9UQ80;Q5VWM1;Q9Y3M2;Q8N6I1;Q9UGP4;P10242;Q9NPF5;P14859;Q75582;P27348;P78545;Q9UNL4;P06733;Q9Y543;Q75182;Q9ULJ3;Q60813;Q04724;Q9UBB5;Q96T37;Q9BRU2;P11142;Q2M1K9;P41134;P17096;Q9Y3Q8;Q8N2W9;P45973;Q9Y468;Q86YP4;Q01105;P10828;Q9BT49;Q32MZ4;Q75381;P06400;Q60809;Q9H116;Q9ULM3;Q75376;Q99684;A3QJZ6;Q5VWM6;Q86VX2;Q96ST3;Q95521;Q96T58;Q8WW38;Q0D2K3;Q00577;Q15226;Q07666;Q6IV72;Q96SR6;Q6VMQ6;Q8WUI4;Q16576;P49454;Q9UQR1;P11473;Q9UQL6;Q9H2F5;Q9BW11;Q9UNH7;Q96MN9;P26358;P67809;Q99816;Q13127;Q9Y2X9;P12956;Q5VWM5;Q99471;P35548;Q969S8;Q719H9;Q60810;Q6NUN9;Q8IXH7;Q8IY57;Q8WX92;Q969G3;Q99623;Q9P1T7;Q9UER7;P51397;Q92769;Q9Y6B2;Q8N5A5;Q5TGS1;P17028;Q6SJ96;P78395;Q9NQR1;Q9HD42;Q75362;Q15379;P56524;P17014;Q5VT98;Q13033;Q86U70;Q9NP71;Q14602;Q15534;P47928;P48380;Q13485;P10914;Q04727;Q9H7L9;Q8NDT2;Q8TBE0;Q9HCK8;Q53EL6;Q8N5P1;Q15834;P86452;Q9Y6X8;Q5VXH4;Q8NPF8;Q53H80;Q6GZX5;P55771;Q13185;Q15910;P41182;P51532;Q9BQG0;Q75346;P48059;P05412;Q86X95;P49711;Q15105;Q9UBC3;Q15596;P61201;Q96RU7;P51531;Q13901;Q15742;Q9Y5V3;Q9UIS9;Q9UNSL;Q94776;Q9HCS4;Q13547;Q01664;Q75496;A6NMC2;Q01094;Q8NB12;Q8TAQ2;P13010;Q14978;P63279;P49593;Q95522;P83916;P41970;P80723;Q9BZK7;Q9H091;Q06587;Q8IZ40;Q96RE7;Q9NYF8;Q9H7S9;Q00987;Q9UJW3;P49918;Q63HK5;Q8N693;Q9UH92;Q00257;Q9P0J0;Q9UKL0;Q75618;Q9NZI7;Q14781;P54253;Q14582;Q96QR8;Q9NSC2;P35232;Q9UID6;A6NMV5;Q75164;Q96E29;Q96MT3;Q9BT81;Q14865;Q5VTA0;Q95416;P16383;Q00255;Q15796;Q9NQX1;Q92993;Q15723;Q9UKY1;Q94992;P33076;Q12906;Q5TYX0;Q14192;Q5VWM3;Q15545;Q9NPI1;Q9UPN9;Q43593;P31946;Q9HBE1;Q13506;Q13573;Q96MH2;P55345;Q75530;Q96RJ6;Q04725;P13056;Q99966;P27797;Q14529}

13311

Pathogen[ P14075] interacts with 245 human

partners: {Q04727;Q5VWM1;Q9NZL3;Q14781;P06733;Q96AQ6;Q5SWL7;Q96ST3;Q9NSC2;Q16576;P63165;Q96QR8;P54253;Q14602;Q96MT3;Q86U70;Q86X95;P23497;Q9H2F5;P12956;P11142;Q9BRU2;Q04206;Q9H4I2;Q13573;Q5TGS1;Q969S8;Q96QT6;Q9UQR1;Q9NPI1;P05412;Q04725;Q9BQA5;Q60809;Q8IY57;P14859;P10828;Q13506;P78545;P78395;Q15697;P51532;Q07666;Q96SZ4;Q8N5F7;Q0D2K3;Q75582;P80723;Q9H6H2;Q9H116;Q13901;Q75362;Q6NUN9;Q9UKL0;Q96T58;P18847;Q9Y468;P61201;Q9UGP4;P48380;P35548;Q5VXH4;P17096;P56524;Q60813;Q08050;Q9UJW3;Q9NYW8;Q9P1T7;Q95521;P42771;P33076;Q9UH92;Q53H80;Q15226;Q94776;Q9NQR1;P35638;Q719H9;P15822;P47928;Q15910;Q12906;Q9H091;P45973;Q9UKV0;Q8WW38;Q9BT49;Q8N2W9;Q9UBB5;Q9NZI7;P63279;P10242;Q16666;Q15796;Q01105;Q9NQ87;Q9NYF8;Q9ULJ3;Q9BYE7;Q75182;Q13547;P26358;Q6SJ96;P13056;Q8WVJ9;Q92993;Q14583;Q75376;P46527;Q9HAZ2;Q75381;Q8N5A5;P35711;Q00257;Q6S004;Q6MNN9;Q13485;P35232;Q94992;Q00255;Q9NP71;Q9NPF5;Q06587;Q9BQG0;Q75618;P51397;Q9NQX1;P49918;Q01664;Q96LA8;Q96RE7;Q9Y6B2;Q6W2J9;Q99684;Q8N693;Q92769;Q99623;Q15834;P35712;Q9HCU9;Q13185;P86452;P55771;Q6VMQ6;Q96E29;Q9UIS9;Q9HCK8;Q9UPN9;Q9UHF7;Q8N6I1;Q9ULM3;P27797;Q15723;P51531;P11473;Q5VWM5;Q9Y6X8;Q9H6W3;Q6IV72;Q5TYX0;Q8WXF8;P17947;Q8TBE0;Q8TAQ2;P67809;Q15545;Q86VX2;Q53EL6;Q99549;Q01094;Q14978;Q15105;P06400;P83916;Q03112;P27348;P17028;Q15742;Q06330;Q9Y2G9;Q9UQ80;Q96RU7;Q15379;Q8NDT2;Q9UNL4;Q02447;Q9Y2X9;P49711;Q9BZK7;Q96T23;Q00577;Q9UNSL;P16383;Q13127;Q9HD42;Q32MZ4;Q9Y2P7;Q43439;Q05516;Q4VC05;P19838;Q9UQL6;Q04724;Q9Y3Q8;Q60810;P31946;Q5VWM6;Q13363;P13010;P41970;Q9UER7;Q99816;Q9Y3M2;Q9H7S9;P17676;P37275;Q8WUI4;Q8IXH7;Q2M1K9;Q75496;P10914;Q5VTA0;Q9Y5V3;P49454;Q9GZX5;Q13033;Q96RL1;Q9P0J0;Q99471;Q9NS37;Q6MT76;Q14192;Q9UI56;Q8IZ40;Q9H7L9;Q75346;Q75164;Q15596;P20749;Q86YP4;Q75530;Q8WX92;Q9HBE1}

13312

Pathogen[ P0C206] interacts with 310 human

partners: {Q9UID6;Q9UNSL;P06733;Q6NUN9;Q9Y468;Q15723;Q9HCU9;Q9NQX1;Q9Y2X9;P67809;Q9NQ87;P10914;Q92769;Q9BZE0;Q75530;Q8IXH7;P16383;Q9HCK8;Q96T37;P13010;P45973;A3QJZ6;Q96ST3;Q15545;Q9H2F5;Q6IV72;Q6VMQ6;P27797;Q9NPF5;Q06330;Q9NP71;Q75496;Q18847;Q9HAZ2;Q13127;Q9UPN9;Q15911;P51532;Q9NPI1;Q9ULM3;Q9NVW2;Q13263;Q5TGS1;Q8N6I1;Q9H4I2;Q9UNH7;Q00308;Q9UBB5;Q9HAU4;Q96MT3;Q9UDV7;Q5VXH4;Q9HBE1;Q9BRU2;P78395;Q9BT49;Q6W2J9;Q9UGP4;Q9NSC2;Q75381;Q75582;Q15697;P51531;Q9H091;P41182;Q05516;Q14529;Q9UKL0;Q75496;P29374;Q96QR8;Q00255;Q99623;Q14602;P05412;Q15534;Q9UKV0;Q8WW38;Q8N2W9;Q9Y5V3;Q96MH2;Q8NPF8;Q96LA8;P10242;Q0D2K3;P23409;Q16666;P26358;Q04727;P55055;Q9UER7;Q5VWM5;Q75618;Q96T23;P61201;P42771;Q9ULJ3;Q13547;P13056;P49715;Q94776;P31268;Q9HCS4;Q15164;Q99816;P41970;Q60813;Q9NQX0;Q5VWM3;Q04725;Q9Y3Q8;Q92993;P27348;P49454;P48380;Q86YP4;P55771;Q07666;Q86VX2;Q15910;A6NGN4;Q9NZI7;Q5TYX0;Q99471;Q15796;Q8TAQ2;Q4VC05;Q9BQA5;P33076;Q15226;Q8WVJ9;Q9Y6X8;Q14781;Q9P2Y4;Q96E29;Q96RU7;Q9NZL3;Q96004;P31946;Q9BT81;Q75346;Q63HK5;Q5TYW8;P49593;Q15742;P41134;Q9H7S9;Q03989;Q9NJB3;A6NMV5;Q32MZ4;Q8IZ40;Q15105;Q9BYE7;P19838;Q9NYF8;Q86X95;P10828;P35711;Q03112;Q5VTA0;P83916;Q9BQG0;Q9UIS9;Q5SWL7;Q9Y543;Q13573;P17676;P51397;Q5VT98;Q94992;Q9UI56;P35232;Q15379;P80723;Q9Y5J3;Q96MN9;Q8WXF8;Q9UHF7;Q8N5P1;P48059;Q8WUI4;P49711;P35548;Q04206;Q06587;P86452;Q9NQR1;Q96AQ6;Q9H6W3;Q01094;Q9UQR1;Q20823;Q95416;Q9NS37;Q02447;Q15834;Q8N693;P46527;P78545;P17947;Q13901;P17028;Q9BZK7;Q75376;Q9GZX5;Q53EL6;Q15392;Q13485;Q8IXJ6;Q8TBE0;Q9H116;Q2M1K9;Q8N5A5;Q9P0J0;Q96T58;Q9H7L9;Q04724;Q99684;P17096;Q9Y6B2;Q9Y2P7;Q08050;Q13422;Q01664;Q999

66;Q5TB30;O95521;P20749;P18847;Q6S9J96;Q719H9;Q8IY57;Q9BW11;O75362;Q5VVM1;Q15596;P37275;Q8WX92;O60810;Q16576;O60809;P35712;Q13185;O75164;Q5VVM6;O14901;Q8NB12;Q9Y2G9;Q969G3;Q86U70;Q9HD42;Q14192;Q96BF6;Q9UQ80;Q9NYW8;Q9UBC3;Q96QT6;Q96RL1;P84550;P63165;P55345;Q14865;P56524;Q13033;O43439;O00257;A9YTQ3;Q00987;Q13363;Q9NS86;Q96SZ4;P15822;P47928;Q969S8;Q9UBX0;Q99549;O43593;Q5SWL8;Q53H80;P12956;P17014;Q6NT76;Q01105;Q96SR6;P11142;Q8N5A5;Q96RE7;Q12906;P11473;Q9P1T7;Q96RJ6;O14978;O43316;P35638;O75182;Q9UJW3;Q9UNL4;P10827;Q9H7Z6;P14859;Q9UKY1;Q13506;P54253;Q8NDT2;P06400;Q00577;Q9UQL6;P49918}

13313 Pathogen[ P03363] interacts with 285 human partners: {Q719H9;Q86X95;Q9NQX1;Q9NPF5;Q5TGS1;Q15911;P49918;Q86VX2;Q86U70;P12956;Q96QT6;Q6S9J96;Q99684;Q32MZ4;O14901;Q15834;Q8NFW5;Q03989;Q96RE7;P49454;Q6VMQ6;Q99592;P10828;Q07666;P27348;Q9UHF7;P29374;O60809;Q99623;Q96T58;Q9UNH7;P35711;Q96RJ6;Q9UH92;P55771;Q9H091;Q9Y5J3;O14978;Q14865;Q9NZL3;O14529;Q04206;P17676;Q9HCU9;P83916;Q9Y468;Q9HAU4;Q14582;Q14781;Q86YP4;Q4VC05;Q9H7S9;P86452;O94992;Q9BRU2;Q8WX92;Q96SR6;P61201;Q02447;Q9ULJ3;O75618;Q96MT3;Q96LA8;P13010;Q96RL1;Q03112;Q9NS37;Q9H7L9;P18847;P45973;O75346;P37275;Q06330;Q8TAQ2;Q9NQ87;P17947;O15379;Q9H2F5;P51532;Q0D2K3;P06733;Q9BQGO;Q969S8;Q9BZK7;O43439;Q9Y6X8;P31946;O75376;Q15910;Q15545;P56545;Q9UDV7;Q13033;Q53EL6;O43316;Q13901;Q96QR8;Q9Y3M2;Q9UQL6;O75164;Q9UER7;P35548;Q9UPN9;Q9Y467;O75530;Q6NUN9;P78395;O15105;Q6NT76;Q04724;Q15596;Q8N693;Q9HCS4;P17028;Q9Y2X9;Q99471;P23497;P06400;Q13185;Q9UQ80;Q96E29;Q96BF6;Q04727;O00409;Q8IXH7;P49711;Q9UNL4;Q13127;Q8IY57;P11473;Q16666;Q9Y3Q8;O60813;Q6IV72;Q9UGP4;Q2MIK9;Q96T23;P20749;Q9Y2G9;Q9P1T7;P15822;O43593;Q99549;Q14602;Q08050;O15226;Q9HCK8;Q16576;P20264;P14859;P63165;Q12906;Q8N5P1;Q8N5F7;P78545;Q13506;Q9P0J0;P17096;Q8NB12;Q5SWL7;Q01094;Q9UKV0;P27797;Q9NP08;Q969G3;Q96ST3;Q96AQ6;Q8N5A5;Q9NP11;O75381;Q9BW11;P41134;Q9BQA5;Q9UNS1;Q8IZ40;Q15796;Q15723;P31268;Q9NZI7;Q9UKY1;P47928;O96004;P26358;P35638;Q15742;P10914;Q13573;P54253;Q9NYF8;Q5VVM6;P63279;A9YTQ3;Q13547;Q96T37;P19838;Q96SZ4;Q15697;Q9UI56;P33076;P35712;O75496;O00308;P10242;Q8WUI4;Q5TB30;P17014;Q04725;O75362;Q13485;P23409;Q5VXH4;Q63HK5;Q9Y5V3;Q9UQ71;P84550;O60810;P35232;P05412;Q96MN9;Q9BT49;Q9H116;P80723;Q99816;Q9UJW3;Q9UKL0;Q9NQ1;Q8NFJ8;Q9NVW2;Q9Y6B2;Q9Y543;Q9NP71;O95343;P41970;Q13363;Q8WW38;Q06587;O95416;P16383;Q9H0M0;Q6W2J9;Q9UML3;P48380;O95521;Q01105;P51531;Q00577;Q8N2W9;Q8N6I1;Q9UBC3;Q53H80;Q9BT81;Q9NYW8;Q9UID6;Q96MH2;Q05516;O15534;Q8WXF8;Q9GZX5;O00257;Q9H4I2;Q8TBE0;P13056;Q5VVM5;Q01664;Q8WVJ9;O75182;Q9BYE7;Q5TYX0;Q9BZE0;Q92993;Q9P2Y4;P42771;O43251;O14503;P11142;Q9HD42;P67809;O94776;Q9UBB5;Q9UIS9;Q9HAZ2;Q9UBX0;Q14192;Q8NDT2;Q9Y2P7}

13314 [Cluster 1211]GO:2001076+P biological\_process [name] positive regulation of metanephric ureteric bud development [def] "Any process that activates or increases the frequency, rate or extent of metanephric ureteric bud development." [GOC

13315 Pathogen[ Q2Q067] interacts with 1 human partners: {P80723}

13316 Pathogen[ P0C214] interacts with 1 human partners: {P80723}

13317 Pathogen[ P03346] interacts with 1 human partners: {P80723}

13318 Pathogen[ Q85601] interacts with 1 human partners: {P80723}

13319 Pathogen[ P14079] interacts with 1 human partners: {P80723}

13320 Pathogen[ P03383] interacts with 1 human partners: {P80723}

13321 Pathogen[ P03410] interacts with 1 human partners: {P80723}

13322 Pathogen[ P14075] interacts with 1 human partners: {P80723}

13323 Pathogen[ P0C206] interacts with 1 human partners: {P80723}

13324 Pathogen[ P03363] interacts with 1 human partners: {P80723}

13325 [Cluster 1212]GO:0007184+P biological\_process [name] SMAD protein import into nucleus [def] "The directed movement of a SMAD proteins from the cytoplasm into the nucleus. Pathway-restricted SMAD proteins and common-partner SMAD proteins are involved in the transforming growth factor beta receptor signaling pathways." [GOC

13326 Pathogen[ Q2Q067] interacts with 2 human partners: {Q01082;P50616}

13327 Pathogen[ P0C214] interacts with 3 human partners: {Q01082;P50616;P05412}

13328 Pathogen[ P03346] interacts with 4 human partners: {P05412;O95405;Q01082;P50616}

13329 Pathogen[ Q85601] interacts with 3 human partners: {Q01082;P05412;P50616}

13330 Pathogen[ P14079] interacts with 4 human partners: {Q01082;O95405;P05412;P50616}

13331 Pathogen[ P03383] interacts with 2 human partners: {P50616;P05412}

13332 Pathogen[ P03410] interacts with 4 human partners: {O95405;P05412;Q01082;P50616}

13333 Pathogen[ P14075] interacts with 2 human partners: {P05412;P50616}

13334 Pathogen[ P0C206] interacts with 4 human partners: {Q01082;P05412;P50616;O95405}

13335 Pathogen[ P03363] interacts with 4 human partners: {Q01082;P50616;O95405;P05412}

13336 [Cluster 1213]GO:0045190+P biological\_process [name] isotype switching [def] "The switching of activated B cells from IgM biosynthesis to biosynthesis of other isotypes of immunoglobulin, accomplished through a recombination process involving an intrachromosomal deletion involving switch regions that reside 5' of each constant region gene segment in the immunoglobulin heavy chain locus." [ISBN

13337 Pathogen[ Q2Q067] interacts with 6 human partners: {Q5RKV6;O60934;Q9UQ84;Q13426;Q9GZX7;O76064}

13338 Pathogen[ P0C214] interacts with 7 human partners: {Q5RKV6;Q13426;Q9GZX7;Q9UQ84;P40692;Q8IYW5;O76064}

13339 Pathogen[ P03346] interacts with 8 human partners: {Q5RKV6;O76064;P07992;Q13426;Q9NQ5;Q8IYW5;O60934;Q9UQ84}

13340 Pathogen[ Q85601] interacts with 8 human partners: {Q5RKV6;Q9UQ84;Q13426;Q9GZX7;O76064;Q8IYW5;P40692;O60934}

13341 Pathogen[ P14079] interacts with 9 human partners: {P40692;O60934;Q9GZX7;Q5RKV6;P52701;Q13426;Q9UQ84;P07992;P49917}

13342 Pathogen[ P03383] interacts with 2 human partners: {Q13426;Q5RKV6}

13343 Pathogen[ P03410] interacts with 8 human

13344 partners:{P40692;P07992;Q5RKV6;P52701;Q9GZX7;Q13426;Q9UQ84;O60934}  
Pathogen[ P14075] interacts with 2 human partners:{Q5RKV6;Q13426}

13345 Pathogen[ POC206] interacts with 11 human  
partners:{Q9UQ84;Q8IYW5;Q5RKV6;P52701;O60934;P40692;P07992;P49917;Q9GZX7;Q13426;O76064}

13346 Pathogen[ P03363] interacts with 4 human partners:{Q5RKV6;Q8IYW5;Q13426;Q9NQT5}

13347 [Cluster 1214]GO:0043568+P biological\_process [name] positive regulation of insulin-like growth factor receptor signaling pathway [def] "Any process that increases the frequency, rate or extent of insulin-like growth factor receptor signaling." [GOC  
13348 Pathogen[ Q2Q067] interacts with 1 human partners:{Q8WWQ0}  
13349 Pathogen[ POC214] interacts with 1 human partners:{Q8WWQ0}  
13350 Pathogen[ P03346] interacts with 1 human partners:{Q8WWQ0}  
13351 Pathogen[ Q85601] interacts with 1 human partners:{Q8WWQ0}  
13352 Pathogen[ P14079] interacts with 1 human partners:{Q8WWQ0}  
13353 Pathogen[ P03383] interacts with 1 human partners:{Q8WWQ0}  
13354 Pathogen[ P03410] interacts with 1 human partners:{Q8WWQ0}  
13355 Pathogen[ P14075] interacts with 1 human partners:{Q8WWQ0}  
13356 Pathogen[ POC206] interacts with 1 human partners:{Q8WWQ0}  
13357 Pathogen[ P03363] interacts with 1 human partners:{Q8WWQ0}

13358 [Cluster 1215]GO:0045597+P biological\_process [name] positive regulation of cell differentiation [def] "Any process that activates or increases the frequency, rate or extent of cell differentiation." [GOC  
13359 Pathogen[ Q2Q067] interacts with 11 human  
partners:{Q13562;Q12837;Q9ULV5;Q9Y4Z2;P11831;P40337;O00255;P24864;P08697;O15198;Q15797}

13360 Pathogen[ POC214] interacts with 11 human  
partners:{O15198;P08697;P17275;P11831;Q12837;P40337;Q9ULV5;P24864;P10909;Q15797;O00255}

13361 Pathogen[ P03346] interacts with 15 human  
partners:{Q9Y4Z2;Q9HD90;P11831;Q15797;Q99626;Q12837;P17275;P24864;O43316;O15198;O95096;O00255;P40337;Q9ULV5;Q13562}

13362 Pathogen[ Q85601] interacts with 13 human  
partners:{O15198;P11831;O43316;Q9Y4Z2;Q9ULV5;Q15797;P40337;P08697;Q13562;O00255;P17275;Q12837;P24864}

13363 Pathogen[ P14079] interacts with 9 human  
partners:{P24864;O15198;P10909;Q15797;Q12837;P40337;P17275;Q9ULV5;O00255}

13364 Pathogen[ P03383] interacts with 10 human  
partners:{O15198;P11831;P40337;P08697;Q15797;Q9ULV5;Q12837;O00255;P24864;P17275}

13365 Pathogen[ P03410] interacts with 11 human  
partners:{P11831;O15198;P08697;P17275;Q15797;Q9ULV5;Q12837;O00255;P24864;P40337;P10909}

13366 Pathogen[ P14075] interacts with 9 human  
partners:{P11831;P17275;Q12837;O00255;Q9ULV5;O15198;P08697;P40337;P24864}

13367 Pathogen[ POC206] interacts with 14 human  
partners:{P17275;Q9Y4Z2;O00255;Q12837;Q9ULV5;P10909;Q13562;P11831;Q15797;O15198;P24864;O43316;P40337;P08697}

13368 Pathogen[ P03363] interacts with 11 human  
partners:{Q9Y4Z2;P24864;Q99626;O43316;Q15797;P40337;P17275;P11831;Q9ULV5;Q12837;O15198}

13369 [Cluster 1216]GO:0032508+P biological\_process [name] DNA duplex unwinding [def] "The process in which interchain hydrogen bonds between two strands of DNA are broken or 'melted', generating a region of unpaired single strands." [GOC  
13370 Pathogen[ Q2Q067] interacts with 8 human  
partners:{P49959;P38935;O60934;Q8N3C0;P46100;Q92499;Q9ULG1;Q9HCK8}

13371 Pathogen[ POC214] interacts with 8 human  
partners:{P49959;Q9ULG1;P38935;Q8N3C0;Q14566;P46100;Q9HCK8;Q92499}

13372 Pathogen[ P03346] interacts with 13 human  
partners:{P46063;P38935;P46100;Q9ULG1;Q8N3C0;Q7Z333;Q14566;Q92499;Q9HCK8;Q9NUX5;P49959;P33991;O60934}

13373 Pathogen[ Q85601] interacts with 9 human  
partners:{P38935;P49959;Q92499;Q14566;Q9ULG1;Q9HCK8;P46100;Q8N3C0;O60934}

13374 Pathogen[ P14079] interacts with 9 human  
partners:{Q9ULG1;Q14566;Q9NUX5;O60934;P46100;Q9HCK8;Q92499;Q96FC9;P38935}

13375 Pathogen[ P03383] interacts with 4 human partners:{P46100;Q9HCK8;P38935;Q92499}

13376 Pathogen[ P03410] interacts with 11 human  
partners:{P49959;Q9NUX5;Q8N3C0;Q9ULG1;P38935;Q92499;Q9HCK8;P46100;Q96FC9;Q14566;O60934}

13377 Pathogen[ P14075] interacts with 4 human partners:{P38935;Q92499;P46100;Q9HCK8}

13378 Pathogen[ POC206] interacts with 12 human  
partners:{Q9HCK8;P38935;P49959;O60934;P46100;O94762;Q7Z333;Q9ULG1;Q9NUX5;Q92499;Q14566;Q8N3C0}

13379 Pathogen[ P03363] interacts with 10 human  
partners:{O94762;Q7Z333;Q9ULG1;P46100;Q9HCK8;P46063;Q92499;Q9NUX5;P38935;Q8N3C0}

13380 [Cluster 1217]GO:0032878+P biological\_process [name] regulation of establishment or maintenance of cell polarity [def] "Any process that modulates the frequency, rate or

extent of the specification, formation or maintenance of anisotropic intracellular organization or cell growth patterns." [GOC

13381 Pathogen[ Q2Q067] interacts with 1 human partners:{Q6P1M3}

13382 Pathogen[ P0C214] interacts with 1 human partners:{Q6P1M3}

13383 Pathogen[ P03346] interacts with 1 human partners:{Q6P1M3}

13384 Pathogen[ Q85601] interacts with 1 human partners:{Q6P1M3}

13385 Pathogen[ P14079] interacts with 1 human partners:{Q6P1M3}

13386 Pathogen[ P03383] interacts with 1 human partners:{Q6P1M3}

13387 Pathogen[ P03410] interacts with 1 human partners:{Q6P1M3}

13388 Pathogen[ P14075] interacts with 1 human partners:{Q6P1M3}

13389 Pathogen[ P0C206] interacts with 1 human partners:{Q6P1M3}

13390 Pathogen[ P03363] interacts with 1 human partners:{Q6P1M3}

13391 [Cluster 1218]GO:0001702+P biological\_process [name] gastrulation with mouth forming second [def] "A gastrulation process in which the initial invagination becomes the anus and the mouth forms second." [GOC

13392 Pathogen[ Q2Q067] interacts with 5 human partners:{Q13485;Q9NYF0;Q99496;Q86U70;Q13105}

13393 Pathogen[ P0C214] interacts with 5 human partners:{Q86U70;Q13485;Q99496;Q9NYF0;Q13105}

13394 Pathogen[ P03346] interacts with 5 human partners:{Q86U70;Q13105;Q99496;Q9NYF0;Q13485}

13395 Pathogen[ Q85601] interacts with 5 human partners:{Q86U70;Q9NYF0;Q99496;Q13485;Q13105}

13396 Pathogen[ P14079] interacts with 5 human partners:{Q86U70;Q13105;Q99496;Q8WU20;Q9NYF0}

13397 Pathogen[ P03383] interacts with 5 human partners:{Q13485;Q86U70;Q13105;Q99496;Q9NYF0}

13398 Pathogen[ P03410] interacts with 6 human partners:{Q99496;Q86U70;Q13485;Q9NYF0;Q8WU20;Q13105}

13399 Pathogen[ P14075] interacts with 5 human partners:{Q86U70;Q13105;Q13485;Q99496;Q9NYF0}

13400 Pathogen[ P0C206] interacts with 6 human partners:{Q8WU20;Q13485;Q9NYF0;Q86U70;Q13105;Q99496}

13401 Pathogen[ P03363] interacts with 5 human partners:{Q86U70;Q13105;Q9NYF0;Q99496;Q13485}

13402 [Cluster 1219]GO:0061314+P biological\_process [name] Notch signaling involved in heart development [def] "The series of molecular signals initiated by binding of an extracellular ligand to a Notch receptor on the surface of the target cell and contributing to the progression of the heart over time." [GOC

13403 Pathogen[ Q2Q067] interacts with 2 human partners:{Q06330;Q9Y5J3}

13404 Pathogen[ P0C214] interacts with 2 human partners:{Q9Y5J3;Q06330}

13405 Pathogen[ P03346] interacts with 3 human partners:{Q06330;Q9Y5J3;Q95863}

13406 Pathogen[ Q85601] interacts with 2 human partners:{Q06330;Q9Y5J3}

13407 Pathogen[ P14079] interacts with 2 human partners:{Q06330;Q9Y5J3}

13408 Pathogen[ P03383] interacts with 1 human partners:{Q06330}

13409 Pathogen[ P03410] interacts with 2 human partners:{Q9Y5J3;Q06330}

13410 Pathogen[ P14075] interacts with 1 human partners:{Q06330}

13411 Pathogen[ P0C206] interacts with 2 human partners:{Q06330;Q9Y5J3}

13412 Pathogen[ P03363] interacts with 2 human partners:{Q9Y5J3;Q06330}

13413 [Cluster 1220]GO:0009058+P biological\_process [name] biosynthetic process [def] "The chemical reactions and pathways resulting in the formation of substances\_ typically the energy-requiring part of metabolism in which simpler substances are transformed into more complex ones." [GOC

13414 Pathogen[ Q2Q067] interacts with 6 human partners:{Q9HAN9;Q330K2;Q96DP5;P22557;P13196;Q9NR50}

13415 Pathogen[ P0C214] interacts with 11 human partners:{Q96T66;Q05932;Q9HAN9;Q96DP5;P22557;P13196;Q13057;Q9NR50;Q9BZQ4;Q330K2;Q16773}

13416 Pathogen[ P03346] interacts with 6 human partners:{P22557;P13196;Q9HAN9;Q96DP5;Q330K2;Q9NR50}

13417 Pathogen[ Q85601] interacts with 4 human partners:{Q330K2;Q9NR50;P13196;Q9HAN9}

13418 Pathogen[ P14079] interacts with 11 human partners:{P42357;P13196;Q330K2;P22557;Q9NR50;Q9BZQ4;Q13057;Q9HAN9;P30039;Q05932;Q96DP5}

13419 Pathogen[ P03383] interacts with 4 human partners:{Q330K2;Q9NR50;Q9HAN9;Q96DP5}

13420 Pathogen[ P03410] interacts with 11 human partners:{P30039;Q96DP5;Q9NR50;Q13057;P22557;Q75600;Q9HAN9;Q330K2;Q05932;Q9BZQ4;P13196}

13421 Pathogen[ P14075] interacts with 5 human partners:{Q13057;Q330K2;Q9NR50;Q9HAN9;Q96DP5}

13422 Pathogen[ P0C206] interacts with 10 human partners:{Q330K2;Q13057;Q9NR50;P22557;P30039;Q9BZQ4;Q9HAN9;P13196;Q96DP5;Q05932}

13423 Pathogen[ P03363] interacts with 4 human partners:{Q330K2;Q9HAN9;Q9NR50;P13196}

13424 [Cluster 1221]GO:0010614+P biological\_process [name] negative regulation of cardiac muscle hypertrophy [def] "Any process that decreases the rate, frequency or extent of the enlargement or overgrowth of all or part of the heart due to an increase in size

(not length) of individual cardiac muscle fibers, without cell division." [GOC

13425 Pathogen[ Q2Q067] interacts with 1 human partners:{P41220}

13426 Pathogen[ POC214] interacts with 1 human partners:{P41220}

13427 Pathogen[ P03346] interacts with 2 human partners:{O76003;P41220}

13428 Pathogen[ Q85601] interacts with 2 human partners:{P41220;O76003}

13429 Pathogen[ P14079] interacts with 2 human partners:{P41220;O76003}

13430 Pathogen[ P03383] interacts with 1 human partners:{P41220}

13431 Pathogen[ P03410] interacts with 2 human partners:{O76003;P41220}

13432 Pathogen[ P14075] interacts with 1 human partners:{P41220}

13433 Pathogen[ POC206] interacts with 2 human partners:{O76003;P41220}

13434 Pathogen[ P03363] interacts with 2 human partners:{O76003;P41220}

13435 [Cluster 1222]GO:0001889+P biological\_process [name] liver development [def] "The process whose specific outcome is the progression of the liver over time, from its formation to the mature structure. The liver is an exocrine gland which secretes bile and functions in metabolism of protein and carbohydrate and fat, synthesizes substances involved in the clotting of the blood, synthesizes vitamin A, detoxifies poisonous substances, stores glycogen, and breaks down worn-out erythrocytes." [GOC

13436 Pathogen[ Q2Q067] interacts with 21 human partners:{P24385;O75151;P35680;Q01196;Q04206;P30279;P05062;O95948;Q8TDY2;Q02447;P08047;Q08050;Q9HAU5;P84022;P24864;Q14865;P20823;Q9HBD4;P06132;P53567;P49715}

13437 Pathogen[ POC214] interacts with 22 human partners:{P06132;P53567;P09417;P00480;Q14865;Q9HBD4;P84022;Q04206;Q8TDY2;P24385;O75151;Q9HAU5;Q8WV60;P05062;P14618;P05412;Q02447;P24864;P30279;Q96EK6;O95948;P08047}

13438 Pathogen[ P03346] interacts with 27 human partners:{P05412;Q9HBD4;P24385;P30279;O15522;Q14774;Q68CZ1;Q04206;P24864;Q8TDY2;Q08050;P20823;O75151;P49715;Q9UBC0;Q13351;P08047;P84022;O95948;P35680;Q9HAU5;P06132;Q14865;Q01196;P05062;P53567;Q02447}

13439 Pathogen[ Q85601] interacts with 25 human partners:{P24385;O75151;P00480;P53567;Q8WV60;Q8TDY2;P05062;P08047;Q9HAU5;P14618;O95948;Q04206;P30279;P35680;P05412;P06132;Q14865;Q02447;Q96EK6;Q9HBD4;P84022;P49715;Q08050;P20823;P24864}

13440 Pathogen[ P14079] interacts with 17 human partners:{O75151;P53567;P24864;Q8TDY2;P35680;O95948;Q68CZ1;Q14865;Q02447;Q8WV60;P06132;P49715;Q13351;Q9HAU5;P00480;Q96EK6;P05412}

13441 Pathogen[ P03383] interacts with 14 human partners:{Q9HBD4;P08047;P24385;Q8TDY2;O75151;P30279;P84022;P06132;Q9HAU5;Q02447;Q04206;P53567;P24864;P05412}

13442 Pathogen[ P03410] interacts with 22 human partners:{P84022;Q04206;P30279;Q02447;Q8WV60;P53567;Q8TDY2;Q96EK6;O95948;Q9HAU5;P06132;P05062;O75151;P00480;P24385;P05412;P35680;P08047;Q68CZ1;Q14865;Q9HBD4;P24864}

13443 Pathogen[ P14075] interacts with 16 human partners:{Q04206;P06132;Q9HBD4;P05412;P53567;P30279;Q08050;Q8TDY2;Q9HAU5;Q02447;P24385;P84022;Q96EK6;O75151;P24864;P08047}

13444 Pathogen[ POC206] interacts with 26 human partners:{P84022;P53567;P05062;Q8WV60;P30279;P05412;Q9UBC0;P49715;O75151;P08047;P35680;Q04206;P20823;Q02447;Q8TDY2;Q96EK6;Q9HAU5;Q08050;Q9HBD4;Q14865;P24864;P06132;P00480;P14618;P24385;O95948}

13445 Pathogen[ P03363] interacts with 18 human partners:{Q9UBC0;O95948;Q14865;Q04206;P24864;P53567;Q02447;P30279;P06132;Q08050;Q9HBD4;Q9HAU5;P84022;Q8TDY2;P24385;P05412;P08047;O15522}

13446 [Cluster 1223]GO:0046902+P biological\_process [name] regulation of mitochondrial membrane permeability [def] "Any process that modulates the frequency, rate or extent of the passage or uptake of molecules by the mitochondrial membrane." [GOC

13447 Pathogen[ Q2Q067] interacts with 3 human partners:{P55957;Q13794;Q12983}

13448 Pathogen[ POC214] interacts with 5 human partners:{Q92934;P30405;P55957;Q13794;Q12983}

13449 Pathogen[ P03346] interacts with 3 human partners:{P55957;Q12983;Q13794}

13450 Pathogen[ Q85601] interacts with 4 human partners:{P30405;P55957;Q12983;Q13794}

13451 Pathogen[ P14079] interacts with 4 human partners:{Q92934;Q13794;Q12983;P55957}

13452 Pathogen[ P03383] interacts with 3 human partners:{P55957;Q12983;Q13794}

13453 Pathogen[ P03410] interacts with 5 human partners:{Q12983;Q92934;Q13794;P55957;P30405}

13454 Pathogen[ P14075] interacts with 3 human partners:{Q12983;P55957;Q13794}

13455 Pathogen[ POC206] interacts with 5 human partners:{Q92934;Q12983;P30405;P55957;Q13794}

13456 Pathogen[ P03363] interacts with 2 human partners:{P55957;Q13794}

13457 [Cluster 1224]GO:0034101+P biological\_process [name] erythrocyte homeostasis [def] "Any process of regulating the production and elimination of erythrocytes within an organism." [GOC

13458 Pathogen[ Q2Q067] interacts with 4 human partners:{Q06830;P08708;P62847;P48200}

13459 Pathogen[ POC214] interacts with 4 human partners:{P62847;P48200;Q06830;P08708}

13460 Pathogen[ P03346] interacts with 6 human partners:{Q9Y5W3;P08708;P48200;Q06830;P62847;P17509}

13461 Pathogen[ Q85601] interacts with 4 human partners:{P48200;P08708;P62847;Q06830}

13462 Pathogen[ P14079] interacts with 4 human partners:{P62847;P08708;P48200;Q9Y5W3}

13463 Pathogen[ P03383] interacts with 3 human partners:{P48200;P62847;P08708}

13464 Pathogen[ P03410] interacts with 4 human partners:{P62847;P08708;P48200;Q06830}  
13465 Pathogen[ P14075] interacts with 3 human partners:{P08708;P62847;P48200}  
13466 Pathogen[ P0C206] interacts with 4 human partners:{P48200;Q06830;P08708;P62847}  
13467 Pathogen[ P03363] interacts with 4 human partners:{P62847;P48200;P08708;P17509}  
13468 [Cluster 1225]GO:0006359+P biological\_process [name] regulation of transcription from RNA polymerase III promoter [def] "Any process that modulates the frequency, rate or extent of transcription from an RNA polymerase III promoter." [GOC  
13469 Pathogen[ Q2Q067] interacts with 5 human partners:{Q9BUI4;P52747;Q14585;O15318;Q9H1D9}  
13470 Pathogen[ P0C214] interacts with 6 human partners:{Q9BUI4;Q9H1D9;O15318;P52747;P36508;Q14585}  
13471 Pathogen[ P03346] interacts with 6 human partners:{P36508;P52747;O15318;Q9H1D9;Q14585;Q9BUI4}  
13472 Pathogen[ Q85601] interacts with 6 human partners:{Q9H1D9;Q9BUI4;P36508;Q14585;P52747;O15318}  
13473 Pathogen[ P14079] interacts with 6 human partners:{Q14585;P52747;Q9BUI4;P36508;O15318;Q9H1D9}  
13474 Pathogen[ P03383] interacts with 4 human partners:{Q9H1D9;P52747;O15318;Q14585}  
13475 Pathogen[ P03410] interacts with 6 human partners:{P36508;O15318;Q14585;Q9H1D9;Q9BUI4;P52747}  
13476 Pathogen[ P14075] interacts with 4 human partners:{P52747;Q14585;Q9H1D9;O15318}  
13477 Pathogen[ P0C206] interacts with 6 human partners:{Q9BUI4;O15318;P36508;P52747;Q14585;Q9H1D9}  
13478 Pathogen[ P03363] interacts with 5 human partners:{Q9H1D9;P36508;O15318;Q14585;P52747}  
13479 [Cluster 1226]GO:0051683+P biological\_process [name] establishment of Golgi localization [def] "The directed movement of the Golgi to a specific location." [GOC  
13480 Pathogen[ Q2Q067] interacts with 2 human partners:{P60953;Q9Y678}  
13481 Pathogen[ P0C214] interacts with 2 human partners:{P60953;Q9Y678}  
13482 Pathogen[ P03346] interacts with 2 human partners:{Q9Y678;P60953}  
13483 Pathogen[ Q85601] interacts with 2 human partners:{Q9Y678;P60953}  
13484 Pathogen[ P14079] interacts with 1 human partners:{Q9Y678}  
13485 Pathogen[ P03383] interacts with 2 human partners:{Q9Y678;P60953}  
13486 Pathogen[ P03410] interacts with 2 human partners:{Q9Y678;P60953}  
13487 Pathogen[ P14075] interacts with 2 human partners:{P60953;Q9Y678}  
13488 Pathogen[ P0C206] interacts with 2 human partners:{Q9Y678;P60953}  
13489 Pathogen[ P03363] interacts with 2 human partners:{Q9Y678;P60953}  
13490 [Cluster 1227]GO:0031103+P biological\_process [name] axon regeneration [def] "The regrowth of axons following their loss or damage." [GOC  
13491 Pathogen[ Q2Q067] interacts with 1 human partners:{Q16612}  
13492 Pathogen[ P0C214] interacts with 2 human partners:{P05412;Q16612}  
13493 Pathogen[ P03346] interacts with 2 human partners:{P05412;Q16612}  
13494 Pathogen[ Q85601] interacts with 2 human partners:{Q16612;P05412}  
13495 Pathogen[ P14079] interacts with 2 human partners:{P05412;Q16612}  
13496 Pathogen[ P03383] interacts with 2 human partners:{Q16612;P05412}  
13497 Pathogen[ P03410] interacts with 2 human partners:{Q16612;P05412}  
13498 Pathogen[ P14075] interacts with 1 human partners:{P05412}  
13499 Pathogen[ P0C206] interacts with 2 human partners:{P05412;Q16612}  
13500 Pathogen[ P03363] interacts with 2 human partners:{P05412;Q16612}  
13501 [Cluster 1228]GO:0003215+P biological\_process [name] cardiac right ventricle morphogenesis [def] "The process in which the right cardiac ventricle is generated and organized." [GOC  
13502 Pathogen[ Q2Q067] interacts with 1 human partners:{Q8WUF5}  
13503 Pathogen[ P0C214] interacts with 1 human partners:{Q8WUF5}  
13504 Pathogen[ P03346] interacts with 3 human partners:{Q06945;Q8WUF5;O75593}  
13505 Pathogen[ Q85601] interacts with 1 human partners:{Q8WUF5}  
13506 Pathogen[ P14079] interacts with 1 human partners:{Q8WUF5}  
13507 Pathogen[ P03383] interacts with 1 human partners:{Q8WUF5}  
13508 Pathogen[ P03410] interacts with 1 human partners:{Q8WUF5}  
13509 Pathogen[ P14075] interacts with 1 human partners:{Q8WUF5}  
13510 Pathogen[ P0C206] interacts with 1 human partners:{Q8WUF5}  
13511 Pathogen[ P03363] interacts with 1 human partners:{Q8WUF5}  
13512 [Cluster 1229]GO:2001145+P biological\_process [name] negative regulation of phosphatidylinositol-3,4,5-trisphosphate 5-phosphatase activity [def] "Any process that stops, prevents or reduces the frequency, rate or extent of phosphatidylinositol-3,4,5-trisphosphate 5-phosphatase activity." [GOC  
13513 Pathogen[ Q2Q067] interacts with 1 human partners:{O95429}  
13514 Pathogen[ P0C214] interacts with 1 human partners:{O95429}  
13515 Pathogen[ P03346] interacts with 1 human partners:{O95429}  
13516 Pathogen[ Q85601] interacts with 1 human partners:{O95429}  
13517 Pathogen[ P14079] interacts with 1 human partners:{O95429}  
13518 Pathogen[ P03383] interacts with 1 human partners:{O95429}  
13519 Pathogen[ P03410] interacts with 1 human partners:{O95429}  
13520 Pathogen[ P14075] interacts with 1 human partners:{O95429}  
13521 Pathogen[ P0C206] interacts with 1 human partners:{O95429}  
13522 Pathogen[ P03363] interacts with 1 human partners:{O95429}

13523 [Cluster 1230]GO:0070213+P biological\_process [name] protein auto-ADP-ribosylation [def] "The ADP-ribosylation by a protein of one or more of its own amino acid residues, or residues on an identical protein." [GOC

13524 Pathogen[ Q2Q067] interacts with 2 human partners:{Q9H2K2;O95271}

13525 Pathogen[ P0C214] interacts with 2 human partners:{Q9H2K2;O95271}

13526 Pathogen[ P03346] interacts with 2 human partners:{Q9H2K2;O95271}

13527 Pathogen[ Q85601] interacts with 2 human partners:{Q9H2K2;O95271}

13528 Pathogen[ P14079] interacts with 2 human partners:{O95271;Q9H2K2}

13529 Pathogen[ P03383] interacts with 1 human partners:{O95271}

13530 Pathogen[ P03410] interacts with 2 human partners:{O95271;Q9H2K2}

13531 Pathogen[ P14075] interacts with 1 human partners:{O95271}

13532 Pathogen[ P0C206] interacts with 2 human partners:{O95271;Q9H2K2}

13533 Pathogen[ P03363] interacts with 2 human partners:{Q9H2K2;O95271}

13534 [Cluster 1231]GO:0010043+P biological\_process [name] response to zinc ion [def] "Any process that results in a change in state or activity of a cell or an organism (in terms of movement, secretion, enzyme production, gene expression, etc.) as a result of a zinc ion stimulus." [GOC

13535 Pathogen[ Q2Q067] interacts with 3 human partners:{P05062;P02533;P08397}

13536 Pathogen[ P0C214] interacts with 5 human partners:{P00480;P02533;Q16613;P05062;P08397}

13537 Pathogen[ P03346] interacts with 2 human partners:{P02533;P05062}

13538 Pathogen[ Q85601] interacts with 5 human partners:{P02533;P00480;Q16613;P05062;P08397}

13539 Pathogen[ P14079] interacts with 5 human partners:{P41238;P02533;Q16613;P08397;P00480}

13540 Pathogen[ P03383] interacts with 3 human partners:{P02533;Q16613;P08397}

13541 Pathogen[ P03410] interacts with 7 human partners:{P02533;P08397;P41238;P05062;P00480;Q16613;Q96D96}

13542 Pathogen[ P14075] interacts with 3 human partners:{Q16613;P08397;P02533}

13543 Pathogen[ P0C206] interacts with 6 human partners:{P05062;P41238;P08397;Q16613;P02533;P00480}

13544 Pathogen[ P03363] interacts with 1 human partners:{P02533}

13545 [Cluster 1232]GO:0060744+P biological\_process [name] mammary gland branching involved in thelarche [def] "The process in which the branching structure of the mammary gland duct is generated and organized during the period of sexual maturity in mammals. The mammary gland is a large compound sebaceous gland that in female mammals is modified to secrete milk." [GOC

13546 Pathogen[ Q2Q067] interacts with 1 human partners:{Q99623}

13547 Pathogen[ P0C214] interacts with 1 human partners:{Q99623}

13548 Pathogen[ P03346] interacts with 1 human partners:{Q99623}

13549 Pathogen[ Q85601] interacts with 1 human partners:{Q99623}

13550 Pathogen[ P14079] interacts with 1 human partners:{Q99623}

13551 Pathogen[ P03383] interacts with 1 human partners:{Q99623}

13552 Pathogen[ P03410] interacts with 1 human partners:{Q99623}

13553 Pathogen[ P14075] interacts with 1 human partners:{Q99623}

13554 Pathogen[ P0C206] interacts with 1 human partners:{Q99623}

13555 Pathogen[ P03363] interacts with 1 human partners:{Q99623}

13556 [Cluster 1233]GO:0000723+P biological\_process [name] telomere maintenance [def] "Any process that contributes to the maintenance of proper telomeric length and structure by affecting and monitoring the activity of telomeric proteins and the length of telomeric DNA. These processes includes those that shorten and lengthen the telomeric DNA sequences." [GOC

13557 Pathogen[ Q2Q067] interacts with 30 human partners:{Q15054;Q96SD1;Q92889;P27694;Q9NYB0;Q15554;P54274;Q9BSI4;P35244;Q9H668;P49005;P12004;Q14181;O60934;Q86US8;O60832;P15927;P56282;Q96AP0;P09874;Q9HCU8;O14746;Q15185;P12956;P39748;Q2NKJ3;Q9H816;P35251;P13010;Q9UKT5}

13558 Pathogen[ P0C214] interacts with 27 human partners:{O14746;Q9H816;Q92889;P13010;Q9BSI4;Q15554;Q96SD1;P35251;P49005;Q9HCU8;Q86US8;P15927;P35244;O60832;Q9NYB0;P39748;Q15054;Q9H668;P27694;Q15185;P56282;P12956;P54274;P09874;Q14181;Q9UKT5;Q2NKJ3}

13559 Pathogen[ P03346] interacts with 35 human partners:{Q9BSI4;Q96AP0;P12004;P12956;Q9HCU8;Q96SD1;Q86US8;Q15554;P27694;P54274;P35244;P35250;P56282;Q15185;P13010;O60832;P49005;Q9UKT5;Q9H668;O14746;Q9NUX5;Q9NYB0;Q16695;P15927;P35249;Q14181;P09874;O60934;Q92889;P35251;P39748;Q9H816;P40937;Q15054;Q2NKJ3}

13560 Pathogen[ Q85601] interacts with 28 human partners:{P09874;Q15554;P56282;P35244;Q2NKJ3;P49005;Q15054;P27694;Q92889;P15927;Q96SD1;Q9H668;P35251;Q14181;Q15185;Q9HCU8;Q86US8;O14746;P12004;Q9NYB0;P39748;Q9H816;Q9UKT5;O60832;P54274;P13010;P12956;O60934}

13561 Pathogen[ P14079] interacts with 34 human partners:{Q9H668;P54274;Q9UKT5;O14746;P09874;Q9NUX5;P40937;P13010;Q9BSI4;O60832;P49005;Q86US8;Q9HCU8;O60934;Q15054;P12956;P35250;P56282;P35251;Q9NYB0;Q15185;Q92889;P49642;Q14181;Q15554;P15927;Q96SD1;P27694;P12004;P35244;Q2NKJ3;Q9H816;Q96AP0;P39748}

13562 Pathogen[ P03383] interacts with 23 human partners:{P13010;Q9HCU8;Q9NYB0;Q15554;Q14181;P27694;P49005;P56282;Q9H816;P15927;Q86US8;Q9UKT5;P09874;Q9BSI4;O14746;P35244;Q15185;Q15054;Q2NKJ3;O60832;P54274;P12956;P352

51}  
13563 Pathogen[ P03410] interacts with 34 human  
partners:{P35244;Q9NUX5;Q9H816;Q14181;Q15554;Q96AP0;O14746;P54274;Q9UKT5;Q9H668;O608  
32;Q92889;P39748;Q9BSI4;P56282;Q96SD1;P12956;P35251;Q15185;Q15054;P09874;Q86US8;P130  
10;P49005;P27694;P15927;P35250;Q2NKJ3;Q9NYB0;P40937;P12004;O60934;P49642;Q9HCU8}  
13564 Pathogen[ P14075] interacts with 25 human  
partners:{P12956;O14746;Q15554;Q9BSI4;Q2NKJ3;P49005;P15927;Q96AP0;Q15185;Q9UKT5;P352  
44;P54274;Q86US8;Q9H816;P35251;Q15054;O60832;P27694;Q9HCU8;P13010;P56282;Q14181;P098  
74;Q9NYB0;Q9H668}  
13565 Pathogen[ P0C206] interacts with 32 human  
partners:{Q2NKJ3;P13010;Q96AP0;P35251;P09874;Q9HCU8;Q15554;O60934;Q15185;Q96SD1;Q9BS  
I4;Q9H668;Q9H816;P49005;P49642;P54274;Q86US8;Q15054;Q14181;Q92889;O60832;Q9NYB0;P562  
82;P27694;Q9NUX5;P15927;P39748;P35244;P12956;Q9UKT5;O14746;P12004}  
13566 Pathogen[ P03363] interacts with 27 human  
partners:{O60832;Q9H816;P12956;P27694;Q15554;P13010;Q86US8;Q9NYB0;Q92889;P35251;P490  
05;O14746;Q14181;P35244;Q9BSI4;Q16695;P15927;Q96AP0;Q9HCU8;P54274;Q9UKT5;Q9H668;Q9NU  
X5;Q15185;Q2NKJ3;Q15054;P09874}  
13567 [Cluster 1234]GO:0032212+P biological\_process [name] positive regulation of telomere  
maintenance via telomerase [def] "Any process that activates or increases the  
frequency, rate or extent of the addition of telomeric repeats by telomerase." [GOC  
13568 Pathogen[ Q2Q067] interacts with 2 human partners:{Q9H2K2;O95271}  
13569 Pathogen[ P0C214] interacts with 2 human partners:{Q9H2K2;O95271}  
13570 Pathogen[ P03346] interacts with 3 human partners:{Q9H2K2;Q9NUX5;O95271}  
13571 Pathogen[ Q85601] interacts with 2 human partners:{Q9H2K2;O95271}  
13572 Pathogen[ P14079] interacts with 3 human partners:{Q9NUX5;O95271;Q9H2K2}  
13573 Pathogen[ P03383] interacts with 1 human partners:{O95271}  
13574 Pathogen[ P03410] interacts with 3 human partners:{Q9NUX5;O95271;Q9H2K2}  
13575 Pathogen[ P14075] interacts with 1 human partners:{O95271}  
13576 Pathogen[ P0C206] interacts with 3 human partners:{O95271;Q9NUX5;Q9H2K2}  
13577 Pathogen[ P03363] interacts with 3 human partners:{Q9H2K2;O95271;Q9NUX5}  
13578 [Cluster 1235]GO:0051384+P biological\_process [name] response to glucocorticoid  
stimulus [def] "Any process that results in a change in state or activity of a cell  
or an organism (in terms of movement, secretion, enzyme production, gene expression,  
etc.) as a result of a glucocorticoid stimulus. Glucocorticoids are hormonal C21  
corticosteroids synthesized from cholesterol with the ability to bind with the cortisol  
receptor and trigger similar effects. Glucocorticoids act primarily on carbohydrate and  
protein metabolism, and have anti-inflammatory effects." [GOC  
13579 Pathogen[ Q2Q067] interacts with 9 human  
partners:{P24385;P05062;P35573;P21953;P38936;P04818;Q8N8D1;P27986;P49715}  
13580 Pathogen[ P0C214] interacts with 12 human  
partners:{P04818;P12694;P24385;P05121;P35573;P38936;P05062;Q8N8D1;P21953;Q16822;P161  
18;P27986}  
13581 Pathogen[ P03346] interacts with 8 human  
partners:{P50135;P24385;P35573;P49715;P05062;P38936;Q8N8D1;P27986}  
13582 Pathogen[ Q85601] interacts with 10 human  
partners:{P24385;Q8N8D1;P21953;P05062;P16118;P27986;P35573;P05121;P49715;P38936}  
13583 Pathogen[ P14079] interacts with 10 human  
partners:{P04083;P21953;Q8N8D1;P50135;P49715;P38936;P11686;P35573;Q16878;P04818}  
13584 Pathogen[ P03383] interacts with 5 human  
partners:{P27986;P24385;P35573;Q16822;Q8N8D1}  
13585 Pathogen[ P03410] interacts with 14 human  
partners:{Q16822;P27986;P05121;P16118;P12694;P35573;P21953;P05062;P24385;P38936;P116  
86;P04818;P50135;Q8N8D1}  
13586 Pathogen[ P14075] interacts with 6 human  
partners:{Q16822;P16118;Q8N8D1;P27986;P35573;P24385}  
13587 Pathogen[ P0C206] interacts with 13 human  
partners:{P05062;Q16822;P21953;P49715;P27986;Q8N8D1;P38936;P04818;P16118;P05121;P501  
35;P24385;P35573}  
13588 Pathogen[ P03363] interacts with 5 human  
partners:{P50135;Q8N8D1;P24385;P35573;P27986}  
13589 [Cluster 1236]GO:0060039+P biological\_process [name] pericardium development [def]  
"The process whose specific outcome is the progression of the pericardium over time,  
from its formation to the mature structure. The pericardium is a double-walled sac that  
contains the heart and the roots of the aorta, vena cava and the pulmonary artery." [GOC  
13590 Pathogen[ Q2Q067] interacts with 3 human partners:{P84022;Q15796;Q03112}  
13591 Pathogen[ P0C214] interacts with 3 human partners:{Q03112;P84022;Q15796}  
13592 Pathogen[ P03346] interacts with 6 human  
partners:{Q68CZ1;Q15796;Q9BYW2;P84022;Q03112;Q99593}  
13593 Pathogen[ Q85601] interacts with 3 human partners:{Q03112;P84022;Q15796}  
13594 Pathogen[ P14079] interacts with 1 human partners:{Q68CZ1}  
13595 Pathogen[ P03383] interacts with 3 human partners:{Q03112;P84022;Q15796}  
13596 Pathogen[ P03410] interacts with 4 human partners:{P84022;Q03112;Q68CZ1;Q15796}  
13597 Pathogen[ P14075] interacts with 3 human partners:{Q15796;Q03112;P84022}  
13598 Pathogen[ P0C206] interacts with 3 human partners:{P84022;Q15796;Q03112}  
13599 Pathogen[ P03363] interacts with 3 human partners:{Q03112;Q15796;P84022}  
13600 [Cluster 1237]GO:0046632+P biological\_process [name] alpha-beta T cell differentiation



[def] "The process in which a precursor cell type acquires the specialized features of an alpha-beta T cell. An alpha-beta T cell is a T cell that expresses an alpha-beta T cell receptor complex." [CL

13601 Pathogen[ Q2Q067] interacts with 2 human partners:{P36402;P35268}

13602 Pathogen[ P0C214] interacts with 2 human partners:{P36402;P35268}

13603 Pathogen[ P03346] interacts with 2 human partners:{P36402;P35268}

13604 Pathogen[ Q85601] interacts with 2 human partners:{P36402;P35268}

13605 Pathogen[ P14079] interacts with 3 human partners:{P04083;P36402;P35268}

13606 Pathogen[ P03383] interacts with 2 human partners:{P36402;P35268}

13607 Pathogen[ P03410] interacts with 2 human partners:{P36402;P35268}

13608 Pathogen[ P14075] interacts with 2 human partners:{P36402;P35268}

13609 Pathogen[ P0C206] interacts with 2 human partners:{P35268;P36402}

13610 Pathogen[ P03363] interacts with 2 human partners:{P36402;P35268}

13611 [Cluster 1238]GO:0006184+P biological\_process [name] GTP catabolic process [def] "The chemical reactions and pathways resulting in the breakdown of GTP, guanosine triphosphate." [ISBN

13612 Pathogen[ Q2Q067] interacts with 17 human partners:{Q9BZE4;Q9BVP2;O60841;Q9NVN8;P62826;P30793;O43236;P57772;Q8IYD1;P50570;P62879;Q15029;P23258;P60953;P63000;P61586;P68104}

13613 Pathogen[ P0C214] interacts with 24 human partners:{P63000;O60841;P57772;Q15029;P61586;P23258;P60953;P15170;Q9H089;P41091;P30793;P13639;A4D1E9;Q8IYD1;P62879;P62826;Q9NVN8;P50570;Q9BZE4;O43236;Q05639;Q5VTE0;Q9BV P2;P36404}

13614 Pathogen[ P03346] interacts with 21 human partners:{P50570;P41091;Q9BZE4;P23258;P57772;O60841;P60953;P62826;P62879;P20340;O432 36;P36404;Q8IYD1;P36405;Q9UHD8;Q15029;Q9NVN8;P63000;P68104;Q9BVP2;P61586}

13615 Pathogen[ Q85601] interacts with 23 human partners:{P62879;P36405;P41091;Q9BZE4;Q5VTE0;P57772;P62826;P63000;Q9H089;P30793;P232 58;P15170;Q15029;P68104;P50570;Q8IYD1;P61586;P60953;A4D1E9;Q9NVN8;Q05639;Q9BVP2;O432 36}

13616 Pathogen[ P14079] interacts with 29 human partners:{Q9BVP2;Q9H4K7;P68104;P41091;P57772;A4D1E9;P68363;P46199;Q15029;P30793;O001 78;P50570;Q8IYD1;Q9BZE4;Q96RP9;P36405;Q15814;Q8NC60;Q14692;P23258;P61586;P13639;Q969 S9;Q8N442;O60841;P62826;P49411;O43236;Q9H089}

13617 Pathogen[ P03383] interacts with 15 human partners:{P62879;Q9NVN8;Q15029;P57772;O43236;P60953;P63000;Q9BZE4;O60841;P62826;P615 86;P68104;Q8IYD1;Q9BVP2;A4D1E9}

13618 Pathogen[ P03410] interacts with 36 human partners:{Q9H4K7;Q9NVN8;P68104;Q15029;O60841;P63000;Q14692;Q96RP9;P46199;P36405;Q969 S9;P50570;Q15814;P30793;P13639;Q8NC60;Q8N442;O43236;P62826;P15170;P61586;Q9H089;Q9BV A1;Q9UHD8;Q8IYD1;P57772;P60953;Q9BVP2;A4D1E9;P23258;P68363;P41091;O00178;P62879;Q9BZ E4;P49411}

13619 Pathogen[ P14075] interacts with 16 human partners:{P60953;O60841;P68104;P57772;O43236;P62879;A4D1E9;Q9NVN8;Q15029;P62826;Q8IY D1;P61586;P63000;Q9BZE4;P30793;Q9BVP2}

13620 Pathogen[ P0C206] interacts with 23 human partners:{P41091;Q9NVN8;P62879;Q9BVP2;Q14692;Q8IYD1;P62826;P30793;O43236;Q15814;P615 86;Q9H089;O60841;P63000;P57772;P60953;P23258;Q9BZE4;P36405;A4D1E9;P68104;P50570;Q150 29}

13621 Pathogen[ P03363] interacts with 21 human partners:{P62879;Q9NVN8;O60841;Q8IYD1;P50570;P68363;Q9BZE4;P63000;P41091;P57772;Q150 29;Q13748;Q15814;Q9UHD8;Q9BVP2;P23258;Q99719;P62826;P60953;O43236;P68104}

13622 [Cluster 1239]GO:0007625+P biological\_process [name] grooming behavior [def] "The specific actions or reactions of an organism relating to grooming, cleaning and brushing to remove dirt and parasites." [GOC

13623 Pathogen[ Q2Q067] interacts with 1 human partners:{P07741}

13624 Pathogen[ P0C214] interacts with 1 human partners:{P07741}

13625 Pathogen[ P03346] interacts with 2 human partners:{P17481;P07741}

13626 Pathogen[ Q85601] interacts with 1 human partners:{P07741}

13627 Pathogen[ P14079] interacts with 1 human partners:{P07741}

13628 Pathogen[ P03383] interacts with 1 human partners:{P07741}

13629 Pathogen[ P03410] interacts with 1 human partners:{P07741}

13630 Pathogen[ P14075] interacts with 1 human partners:{P07741}

13631 Pathogen[ P0C206] interacts with 1 human partners:{P07741}

13632 Pathogen[ P03363] interacts with 2 human partners:{P17481;P07741}

13633 [Cluster 1240]GO:0016578+P biological\_process [name] histone deubiquitination [def] "The modification of histones by removal of ubiquitin groups." [GOC

13634 Pathogen[ Q2Q067] interacts with 7 human partners:{Q9Y4A5;O75486;Q14CW9;Q12962;O15265;Q92830;Q9NPA8}

13635 Pathogen[ P0C214] interacts with 7 human partners:{O75486;Q14CW9;Q12962;Q9NPA8;Q9Y4A5;Q92830;O15265}

13636 Pathogen[ P03346] interacts with 7 human partners:{O15265;O75486;Q92830;Q9Y4A5;Q12962;Q14CW9;Q9NPA8}

13637 Pathogen[ Q85601] interacts with 8 human partners:{Q9Y5T5;O15265;Q14CW9;Q9Y4A5;Q92830;Q9NPA8;Q12962;O75486}

13638 Pathogen[ P14079] interacts with 7 human

13639 partners: {Q9Y4A5;Q92830;Q14CW9;Q12962;O15265;O75486;Q9NPA8}  
Pathogen[ P03383] interacts with 7 human

13640 partners: {Q9NPA8;O75486;Q9Y4A5;Q14CW9;O15265;Q92830;Q12962}  
Pathogen[ P03410] interacts with 7 human

13641 partners: {Q92830;Q12962;Q14CW9;O75486;Q9NPA8;Q9Y4A5;O15265}  
Pathogen[ P14075] interacts with 7 human

13642 partners: {Q12962;O15265;Q9Y4A5;Q14CW9;Q9NPA8;O75486;Q92830}  
Pathogen[ P0C206] interacts with 8 human

13643 partners: {O75486;Q92830;Q9Y5T5;O15265;Q9Y4A5;Q14CW9;Q12962;Q9NPA8}  
Pathogen[ P03363] interacts with 7 human

13644 partners: {Q12962;Q92830;O15265;Q9NPA8;Q14CW9;Q9Y4A5;O75486}  
[Cluster 1241]GO:0030036+P biological\_process [name] actin cytoskeleton organization  
[def] "A process that is carried out at the cellular level which results in the  
assembly, arrangement of constituent parts, or disassembly of cytoskeletal structures  
comprising actin filaments and their associated proteins." [GOC

13645 Pathogen[ Q2Q067] interacts with 25 human  
partners: {O15511;O75161;P54252;Q9Y613;P07737;P35080;P63313;O43516;P41182;O14604;P631  
67;O00401;P11831;P60673;P23528;P0CG35;P62328;P11171;P0CG34;Q9BR76;Q9NVD7;Q8WUW1;P609  
53;P61586;Q92556}

13646 Pathogen[ P0C214] interacts with 28 human  
partners: {P35080;O75161;P63313;P61586;P11831;P60953;Q9Y613;P0CG35;O43516;P0CG34;P355  
80;O14613;O14604;Q16658;Q92556;P41182;Q8WUW1;Q2V2M9;P60673;O60925;O00401;Q9NVD7;P111  
71;P54252;P62328;Q9BR76;P63167;O15511}

13647 Pathogen[ P03346] interacts with 37 human  
partners: {Q5JU85;Q96AC1;P02549;Q9NSV4;O15511;O43516;Q9Y613;P11831;P0CG34;Q27J81;P609  
53;Q9BR76;O14613;Q2V2M9;Q8WUW1;O75161;P11171;Q7Z3U7;P60673;P35080;Q6DN90;O14604;P411  
82;Q9NVD7;Q9UPP2;P63313;P62328;O60925;Q16658;P63167;P0CG35;P07737;P23528;O00401;Q925  
56;P54252;P61586}

13648 Pathogen[ Q85601] interacts with 27 human  
partners: {O00401;O75161;O15511;P11831;Q9NVD7;Q2V2M9;Q9Y613;P35080;P11171;P0CG34;Q8WU  
W1;Q9BR76;P54252;P07737;O43516;O14613;P60673;P61586;P60953;P62328;P35580;P0CG35;P235  
28;P41182;P63167;O14604;P63313}

13649 Pathogen[ P14079] interacts with 45 human  
partners: {O43516;O75161;Q9UPP2;O60925;O14613;Q8IZ21;P0CG34;Q01518;P11171;A4UGR9;Q166  
58;Q9NR12;P47756;O14604;Q92556;P54252;P07737;P35080;P60673;P50552;Q9Y613;P35611;O155  
11;P41182;P23528;O60610;Q702N8;P62328;Q96KX2;Q96AC1;P61586;Q9BR76;P0CG35;Q8N5W9;P631  
67;Q8WUW1;Q2V2M9;Q6DN90;P02549;Q9NVD7;P63313;O15259;Q8NHR9;Q27J81;O00401}

13650 Pathogen[ P03383] interacts with 20 human  
partners: {P11831;P35080;O15511;P60953;P62328;P63313;P07737;O43516;O00401;Q9Y613;P542  
52;P61586;P0CG35;P35580;O60925;O75161;P23528;P63167;O14604;P0CG34}

13651 Pathogen[ P03410] interacts with 46 human  
partners: {O15511;Q8NHR9;Q96KX2;P11831;Q27J81;Q16658;P62328;P35080;P47756;O60610;Q8IZ  
21;Q702N8;O15259;O43516;P0CG35;P0CG34;O00401;O75161;P63167;P54252;P02549;Q8WUW1;P111  
71;P60673;Q92556;P50552;P61586;O14613;O14604;Q8N5W9;Q9UPP2;Q9Y613;Q9BR76;P41182;Q2V2  
M9;P60953;P35580;A4UGR9;O60925;Q9NVD7;Q01518;P23528;Q7Z3U7;P63313;P07737;P35611}

13652 Pathogen[ P14075] interacts with 22 human  
partners: {P60953;P0CG34;Q8N5W9;P11831;P62328;Q9Y613;P63313;O15511;P54252;P07737;P235  
28;O43516;O00401;O14604;O75161;O14613;P0CG35;P61586;O60925;P35080;P63167;P11171}

13653 Pathogen[ P0C206] interacts with 34 human  
partners: {O14604;O15511;P0CG35;P0CG34;Q92556;P60673;P47756;O43516;Q9BR76;O75161;Q9NV  
D7;P41182;P62328;Q2V2M9;P63167;O14613;Q27J81;P54252;P61586;Q8WUW1;O60925;Q16658;P350  
80;O00401;P60953;P11831;Q9Y613;Q9UPP2;P63313;Q8N5W9;P07737;P35580;P23528;P11171}

13654 Pathogen[ P03363] interacts with 37 human  
partners: {O75161;P63167;P02549;P35080;P0CG35;P60673;Q9BR76;P62328;Q9UPP2;P63313;Q8NH  
R9;Q9NSV4;P54252;Q9Y613;P11831;O60925;P11171;O14613;Q92556;Q2V2M9;P0CG34;Q8WUW1;P235  
28;Q5JU85;O00401;O43516;Q6DN90;Q27J81;O15259;Q96AC1;Q9NVD7;O14604;Q9NR12;Q16658;P609  
53;P07737;O15511}

13655 [Cluster 1242]GO:0045598+P biological\_process [name] regulation of fat cell  
differentiation [def] "Any process that modulates the frequency, rate or extent of  
adipocyte differentiation." [GOC

13656 Pathogen[ Q2Q067] interacts with 2 human partners: {Q7Z7C8;Q14693}

13657 Pathogen[ P0C214] interacts with 2 human partners: {Q7Z7C8;Q14693}

13658 Pathogen[ P03346] interacts with 2 human partners: {Q7Z7C8;Q14693}

13659 Pathogen[ Q85601] interacts with 2 human partners: {Q7Z7C8;Q14693}

13660 Pathogen[ P14079] interacts with 2 human partners: {Q14693;Q8TCU4}

13661 Pathogen[ P03383] interacts with 1 human partners: {Q14693}

13662 Pathogen[ P03410] interacts with 2 human partners: {Q8TCU4;Q14693}

13663 Pathogen[ P14075] interacts with 2 human partners: {Q7Z7C8;Q14693}

13664 Pathogen[ P0C206] interacts with 3 human partners: {Q8TCU4;Q7Z7C8;Q14693}

13665 Pathogen[ P03363] interacts with 1 human partners: {Q7Z7C8}

13666 [Cluster 1243]GO:0043248+P biological\_process [name] proteasome assembly [def] "The  
aggregation, arrangement and bonding together of a mature, active proteasome complex."  
[GOC

13667 Pathogen[ Q2Q067] interacts with 5 human  
partners: {O00231;Q9Y244;Q969U7;O95456;Q16186}

13668 Pathogen[ P0C214] interacts with 5 human

13669 partners:{Q95456;Q16186;Q9Y244;O00231;Q969U7}  
Pathogen[ P03346] interacts with 5 human

13670 partners:{Q95456;Q969U7;O00231;Q9Y244;Q16186}  
Pathogen[ Q85601] interacts with 5 human

13671 partners:{Q9Y244;Q969U7;Q95456;O00231;Q16186}  
Pathogen[ P14079] interacts with 5 human

13672 partners:{Q16186;Q9Y244;Q969U7;Q95456;O00231}  
Pathogen[ P03383] interacts with 5 human

13673 partners:{Q9Y244;O00231;Q95456;Q969U7;Q16186}  
Pathogen[ P03410] interacts with 5 human

13674 partners:{Q95456;Q969U7;Q9Y244;O00231;Q16186}  
Pathogen[ P14075] interacts with 5 human

13675 partners:{Q16186;Q969U7;Q9Y244;O00231;Q95456}  
Pathogen[ P0C206] interacts with 5 human

13676 partners:{Q969U7;Q16186;Q95456;Q9Y244;O00231}  
Pathogen[ P03363] interacts with 4 human partners:{Q16186;Q969U7;Q95456;Q9Y244}

13677 [Cluster 1244]GO:0007339+P biological\_process [name] binding of sperm to zona pellucida [def] "The process in which the sperm binds to the zona pellucida glycoprotein layer of the egg. The process begins with the attachment of the sperm plasma membrane to the zona pellucida and includes attachment of the acrosome inner membrane to the zona pellucida after the acrosomal reaction takes place." [GOC

13678 Pathogen[ Q2Q067] interacts with 2 human partners:{P49901;Q14157}

13679 Pathogen[ P0C214] interacts with 2 human partners:{P49901;Q14157}

13680 Pathogen[ P03346] interacts with 2 human partners:{Q14157;P49901}

13681 Pathogen[ Q85601] interacts with 1 human partners:{Q14157}

13682 Pathogen[ P14079] interacts with 2 human partners:{Q14157;P49901}

13683 Pathogen[ P03383] interacts with 2 human partners:{P49901;Q14157}

13684 Pathogen[ P03410] interacts with 2 human partners:{Q14157;P49901}

13685 Pathogen[ P14075] interacts with 2 human partners:{Q14157;P49901}

13686 Pathogen[ P0C206] interacts with 2 human partners:{P49901;Q14157}

13687 Pathogen[ P03363] interacts with 2 human partners:{Q14157;P49901}

13688 [Cluster 1245]GO:0000718+P biological\_process [name] nucleotide-excision repair, DNA damage removal [def] "The removal of the oligonucleotide that contains the DNA damage. The oligonucleotide is formed by dual incisions that flank the site of DNA damage." [GOC

13689 Pathogen[ Q2Q067] interacts with 17 human  
partners:{Q92889;P27694;Q13889;P35244;P32780;Q92759;P54727;Q16531;P51948;P15927;P50613;Q01831;Q92466;Q13888;P28715;P51946;P23025}

13690 Pathogen[ P0C214] interacts with 16 human  
partners:{P51946;Q92889;P50613;P23025;P28715;P51948;P15927;P35244;P54727;P32780;Q01831;Q13888;P27694;Q92466;Q16531;Q92759}

13691 Pathogen[ P03346] interacts with 17 human  
partners:{P28715;P27694;P07992;P35244;Q16531;Q13888;Q13889;Q01831;P51946;P15927;P54727;Q92759;Q92889;P23025;Q92466;P51948;P32780}

13692 Pathogen[ Q85601] interacts with 17 human  
partners:{P51946;P23025;Q01831;Q16531;Q13888;P35244;P51948;P27694;Q92889;P28715;P54727;P15927;Q92759;P32780;P50613;Q92466;P19447}

13693 Pathogen[ P14079] interacts with 19 human  
partners:{P28715;P51946;Q16531;Q13889;P23025;P50613;Q13888;Q92759;Q92889;P32780;P15927;P27694;Q92466;Q01831;P35244;P54727;P07992;P19447;P51948}

13694 Pathogen[ P03383] interacts with 14 human  
partners:{P51948;Q13888;P27694;Q01831;P15927;P50613;P51946;P23025;P35244;P54727;Q92759;Q16531;Q92466;P32780}

13695 Pathogen[ P03410] interacts with 19 human  
partners:{P23025;P35244;Q13889;P07992;P51946;Q92889;P28715;Q92466;P50613;Q01831;P19447;Q16531;P51948;Q13888;P27694;P15927;P32780;Q92759;P54727}

13696 Pathogen[ P14075] interacts with 15 human  
partners:{Q92759;P23025;Q01831;P50613;P15927;P35244;Q13889;P54727;Q16531;P27694;P51946;P32780;Q92466;P51948;Q13888}

13697 Pathogen[ P0C206] interacts with 19 human  
partners:{P28715;Q16531;P07992;P19447;Q13888;P50613;Q92889;Q01831;Q92759;P54727;P32780;Q13889;P27694;P15927;Q92466;P35244;P23025;P51946;P51948}

13698 Pathogen[ P03363] interacts with 13 human  
partners:{P27694;P54727;Q01831;Q13888;P32780;Q16531;Q92759;P51946;Q92889;P23025;P35244;P15927;Q92466}

13699 [Cluster 1246]GO:0045165+P biological\_process [name] cell fate commitment [def] "The commitment of cells to specific cell fates and their capacity to differentiate into particular kinds of cells. Positional information is established through protein signals that emanate from a localized source within a cell (the initial one-cell zygote) or within a developmental field." [ISBN

13700 Pathogen[ Q2Q067] interacts with 14 human  
partners:{Q13562;O60806;O43364;Q99502;P35712;Q99684;O95948;O75030;Q15796;O15370;P31314;Q9NY43;P58304;P35711}

13701 Pathogen[ P0C214] interacts with 13 human  
partners:{P32243;P31314;P35711;O75030;P42574;Q15796;O60806;Q99684;O95948;O15370;P35712;Q9NY43;Q99502}

13702 Pathogen[ P03346] interacts with 23 human

partners: {Q7RTS3;O15370;Q9HD90;Q15796;O60806;Q92886;P42574;P58304;O75626;Q99502;O75030;Q9UBC0;O43364;P17542;O95948;Q99684;P35712;P31314;Q13562;P35711;P32243;Q9NY43;Q9H2A3}

13703 Pathogen[ Q85601] interacts with 17 human partners: {O75030;O43364;P35712;O60806;Q13562;O15370;O95948;P35711;Q99502;P58304;P32243;Q99684;P31314;O75626;P17677;Q9NY43;Q15796}

13704 Pathogen[ P14079] interacts with 16 human partners: {P35711;P17677;O43364;Q99502;O15370;O75626;O43597;O95948;Q99684;P35712;P58304;Q9NY43;P54826;O43294;P32243;O75030}

13705 Pathogen[ P03383] interacts with 9 human partners: {P35712;P32243;O75030;P35711;O15370;Q99684;P31314;Q15796;Q9NY43}

13706 Pathogen[ P03410] interacts with 17 human partners: {P35712;O43597;O60806;Q99502;O75030;O43294;O95948;P31314;Q99684;O43364;P54826;P32243;P17677;O75626;O15370;Q9NY43;Q15796}

13707 Pathogen[ P14075] interacts with 11 human partners: {O75030;Q15796;P35711;Q9NY43;Q99684;P35712;O15370;P31314;Q99502;P32243;P54826}

13708 Pathogen[ P0C206] interacts with 23 human partners: {P31314;P17677;Q9NY43;O75030;Q9UBC0;O75626;Q15796;P35711;P32243;O43294;P42574;O43597;Q99684;O15370;Q13562;Q99502;P35712;O43364;P54826;O60806;P58304;Q9H2A3;O95948}

13709 Pathogen[ P03363] interacts with 18 human partners: {Q92886;O15370;Q9UBC0;Q99684;O95948;P35711;Q7RTS3;P58304;P32243;O75030;Q15796;P31314;P35712;O60806;O43364;Q9NY43;O75626;Q9H2A3}

13710 [Cluster 1247]GO:0060363+P biological\_process [name] cranial suture morphogenesis [def] "The process in which any suture between cranial bones is generated and organized." [GOC]

13711 Pathogen[ Q2Q067] interacts with 1 human partners: {P35548}

13712 Pathogen[ P0C214] interacts with 1 human partners: {P35548}

13713 Pathogen[ P03346] interacts with 1 human partners: {P35548}

13714 Pathogen[ Q85601] interacts with 1 human partners: {P35548}

13715 Pathogen[ P14079] interacts with 2 human partners: {Q9Y5U4;O15503}

13716 Pathogen[ P03383] interacts with 1 human partners: {P35548}

13717 Pathogen[ P03410] interacts with 3 human partners: {Q9Y5U4;P35548;O15503}

13718 Pathogen[ P14075] interacts with 1 human partners: {P35548}

13719 Pathogen[ P0C206] interacts with 1 human partners: {P35548}

13720 Pathogen[ P03363] interacts with 1 human partners: {P35548}

13721 [Cluster 1248]GO:0010832+P biological\_process [name] negative regulation of myotube differentiation [def] "Any process that decreases the frequency, rate or extent of myotube differentiation. Myotube differentiation is the process in which a relatively unspecialized cell acquires specialized features of a myotube cell. Myotubes are multinucleated cells that are formed when proliferating myoblasts exit the cell cycle, differentiate and fuse." [GOC]

13722 Pathogen[ Q2Q067] interacts with 4 human partners: {P56524;Q13547;O15379;Q9UQL6}

13723 Pathogen[ P0C214] interacts with 4 human partners: {Q13547;P56524;O15379;Q9UQL6}

13724 Pathogen[ P03346] interacts with 5 human partners: {O15379;P56524;Q9C0J9;Q13547;Q9UQL6}

13725 Pathogen[ Q85601] interacts with 4 human partners: {Q9UQL6;P56524;O15379;Q13547}

13726 Pathogen[ P14079] interacts with 3 human partners: {Q9UQL6;O15379;P56524}

13727 Pathogen[ P03383] interacts with 4 human partners: {Q9UQL6;O15379;Q13547;P56524}

13728 Pathogen[ P03410] interacts with 4 human partners: {Q9UQL6;O15379;P56524;Q13547}

13729 Pathogen[ P14075] interacts with 4 human partners: {P56524;Q13547;O15379;Q9UQL6}

13730 Pathogen[ P0C206] interacts with 5 human partners: {Q9C0J9;Q13547;O15379;P56524;Q9UQL6}

13731 Pathogen[ P03363] interacts with 4 human partners: {O15379;Q9C0J9;Q9UQL6;Q13547}

13732 [Cluster 1249]GO:0006355+P biological\_process [name] regulation of transcription, DNA-dependent [def] "Any process that modulates the frequency, rate or extent of cellular DNA-dependent transcription." [GOC]

13733 Pathogen[ Q2Q067] interacts with 1658 human partners: {E7ETH6;Q13562;Q0D2J5;Q12901;P05204;O60806;Q9HC78;Q09FC8;Q96EI5;Q9H4I2;Q01844;Q9NZ81;Q9UNP9;Q9UM63;Q96SQ5;Q9BUE0;Q9Y473;Q9BYE7;Q14526;Q9Y5K5;P30153;Q8WV37;Q9UNN4;Q8N859;O43365;P52742;Q15573;Q9BRH9;Q9UKI9;Q8NG57;Q96N77;Q9NWB6;C9JN71;Q14151;Q12905;O43463;Q9UPP1;Q7RTT3;Q9NZI7;Q8IUD2;Q8WZ33;P27540;P17544;O75525;Q13118;P25490;Q33E94;Q6VMQ6;Q8NCF5;Q92750;P01100;Q03989;P22392;Q9UK13;P35789;Q6V9R5;Q8NA42;O00213;Q9HB65;Q9Y6X8;Q92585;Q92988;Q8N187;Q96FV9;O43167;Q2M218;Q04864;P81877;Q9UHL9;Q9UJN7;P0C1Z6;Q16236;Q03923;Q9Y4A5;Q9UEG4;P62633;P54252;Q9BUG6;Q96S65;A6NDX5;O43364;Q8NEM1;Q71F23;O15525;Q13185;Q9UC06;Q14258;Q99583;Q2KHR2;Q6Z28;O75155;Q8IZL2;P98182;Q8IX15;Q12837;Q9H7X3;O14744;Q9UPN9;Q9Y5Q3;Q03052;O75461;P56524;Q9UK11;Q9BY41;P17029;Q12796;P52738;Q10587;A8MTY0;Q9HAW0;O75909;Q9Y3C7;A0AVK6;Q8N228;Q9UMS5;Q96D98;Q9H7R0;Q96PE6;Q8IZD2;A6NFQ7;Q99502;Q9H3H9;Q8IZ26;Q7Z353;P60002;Q9HBZ2;Q9BRR0;Q6ZW49;Q5VUG0;P10827;Q8WVY6;A6NJL1;P04198;P15884;P20226;Q9NVM4;Q04726;Q96HR3;O43361;P10243;Q9Y462;Q99417;Q9Y5V3;P09067;Q96NI8;Q9GZW5;Q92681;Q16594;Q9UGU0;O75925;Q92922;Q6NUN9;Q8N9R8;P39687;Q9UJL9;Q9UQ80;O60304;Q9BRU2;P23511;P24278;Q8NEP9;Q9H063;Q8WVCO;Q05066;Q8NEF9;Q6ZQV5;Q9HBE1;Q06416;Q8TAD8;Q9NXR8;Q13487;Q63HK5;P0CJ88;Q99081;Q8N0Y2;Q9Y2D1;Q92664;Q5VTD9;Q15928;Q96K75;Q9Y3Q8;Q9UHB7;Q12888;Q9H175;Q6XD76;O00291;O00470;Q9UBX2;Q9UHR5;Q13887;O00267;Q96RK1;P06400;Q8TA94;Q6ZN32;Q9H9T3;Q9NPJ6;O75534;O75494;Q8WYA1;Q0D2K3;Q96I24;P293

74;Q9NPF5;Q86YE8;P51825;Q08AN1;Q9C005;Q01094;P58317;Q8IYF1;Q9UKV0;Q14678;Q8WW38;Q089  
99;Q6ZMY9;P40763;Q9H5Q4;Q8WYH8;P78424;Q8N8Z8;P14921;Q5VZB9;Q6ZS27;Q9NYB0;A6NP11;Q9UL  
59;Q96LA8;O15226;Q8N4W9;Q13889;Q13352;P01106;Q9H2P0;Q13148;P10073;Q52LR7;O14503;Q9HA  
Z2;P36402;O43159;Q7Z589;Q12872;Q16666;P46937;Q15910;Q9NR55;Q16533;O75151;Q9Y3T9;O604  
81;Q6IE81;Q7KZF4;P67809;O95402;Q6PD62;Q13485;A6NGD5;Q5SXM1;Q01543;Q6IV72;A8MVS1;Q9UN  
S1;Q9HAJ7;P10589;Q8N2I2;Q6ECI4;Q9UC07;P35680;Q14549;Q9P0U4;Q9H9D4;Q12986;Q9NR48;P312  
74;O95997;P13056;Q9C0F0;P131268;Q6ZT77;Q8IUE1;Q1UHF7;O43189;P62508;Q6P1J9;Q9ULD5;P515  
08;Q9UBB5;Q0PNE2;Q14590;A5YKK6;Q15596;P48380;Q8WVM0;O14813;Q9NTW7;Q16656;Q9Y2Y9;Q96N  
G8;P35712;Q6ZNO6;Q15233;P41182;Q9Y2X9;P54259;Q9H5H4;P10828;Q96AE4;Q15562;Q9GZS3;Q460  
N3;O96019;Q9HC52;Q01664;P55197;Q8NBB4;O00570;Q8N3X6;P82979;Q96H40;P49910;Q8N5U6;Q153  
26;Q9NZV7;Q96IS3;Q86UQ8;P18847;Q9UHX1;P0CJ78;P51531;Q8N9N5;Q32MQ0;P49716;P41970;Q9HA  
F1;Q6P2D0;Q9HCL3;Q6U7Q0;Q13111;Q8WXF8;A6NIX2;Q8TD23;Q9BW11;Q9NQ87;Q5PSV4;P13349;Q96S  
K3;P61457;Q96IT1;Q147U1;Q15697;Q96LW1;Q9NZL3;Q6VUC0;O96004;Q92985;Q6P1K2;Q15059;Q9UL  
49;Q7Z6R9;Q8HWS3;Q7L2R6;O00167;Q8N1B3;P08151;Q9BZE3;Q9C086;P49750;Q01196;Q00613;O434  
39;Q99676;O75478;Q9BRG1;Q86UU0;Q96T88;Q13772;Q96SL8;P37275;Q8IYW8;Q14140;O75081;Q5SX  
M2;Q05516;Q32MZ4;P20749;Q8NF64;Q05481;Q02930;Q9HD15;Q9NVW2;Q8NCK3;Q460N5;Q8NDW4;O002  
57;O60543;O75820;Q9NZI6;P49116;Q7Z7J5;P10074;Q9HCD5;O60315;Q04206;Q99551;Q8WYP5;Q9P0  
L1;Q9H944;P12980;Q14119;P50548;Q9H4Z2;Q92870;Q6P9A1;Q96MA1;Q16633;Q9ULV5;Q8IXT2;Q96P  
Q6;Q86SE9;Q8N782;Q96NL3;Q8WTR7;Q6P1N0;Q13547;A8MV65;Q9NP66;Q05195;Q8TAW3;Q96AV8;Q9BT  
T4;Q9BXX3;P63167;P51815;P14373;Q5VWX1;Q14103;Q9UIS9;O00712;Q9NZI5;Q99990;Q93074;Q8TF  
20;Q01201;Q6UUV9;Q9HB58;Q6ZR52;Q15528;Q99684;P25271;Q9UDV7;Q14814;P39880;P18850;Q8TF  
68;Q3KQV3;P50549;P32780;Q99594;O94983;Q8WUH2;Q8IUE0;Q9P255;A6H8Y1;Q8NC26;P17483;P143  
16;O43296;Q6R2W3;Q76L83;O94776;Q9H4T2;O15379;O75486;O15266;P36956;P18615;A6NFD8;O959  
48;O14709;C9JBD0;P41161;Q08ER8;P0C7M4;Q9BQ87;Q14192;Q5T5D7;Q9BWW4;Q9NQX1;Q7Z5D8;Q9Y5  
R5;Q92800;Q6NZI2;Q96EZ8;Q15633;Q6ZMW2;O95503;Q4LE39;Q9UER7;Q16520;P15976;O95931;Q9BW  
X5;Q9H307;Q5T3J3;O75586;Q8N196;Q9Y2G9;Q96JC9;Q9H0E3;Q2M3W8;Q15542;O14686;O15535;Q6MZ  
P7;Q6S9J6;Q7RTT5;Q03933;P28356;Q92754;Q9HC44;Q96ST3;O14628;Q8TBC5;Q96RK0;Q8N8G2;O153  
50;Q6ZSS3;Q92759;Q6ZRS2;P35638;Q8TDY2;O75448;Q92945;Q9UFW8;Q9NPI1;P54198;Q6ISB3;Q024  
47;Q99909;Q9NSD4;Q16534;Q2M1K9;Q04727;Q96T58;Q8WY36;Q8N1L9;O60244;Q5HYR2;Q86YP4;Q96S  
C8;P52657;O14896;Q8IX12;Q9Y534;P41218;O00401;P67775;Q8WUF5;P17030;P51610;Q14934;Q9H9  
81;Q9BWP2;P17031;Q7Z340;P42704;Q8UE3;Q53TQ3;P09086;O75362;Q16670;Q8N95;Q9Y5A6;Q9Y3  
Y2;Q8TF47;O75971;O75175;P17036;O94993;Q9ULJ3;O14776;Q8TBE0;D6RGH6;P17040;Q15560;P176  
76;Q2QGD7;P17482;Q9P086;P17010;O95625;P11308;Q53H80;P17038;Q8N5Y2;Q7L1Q6;Q9Y4Z2;Q9UK  
12;Q96MH2;Q8WYN3;P38935;Q8NDY6;E9PGG2;Q9NYF8;P08047;Q8TC21;P11473;Q7RTU5;Q00978;Q994  
71;Q9UHX3;Q96C28;O75928;Q7RTT6;Q96RJ6;O75182;Q8NDT2;Q13342;Q9ULJ6;Q15022;O43829;P164  
15;Q9BSM1;Q8NCH5;Q5VVH5;Q86Y25;Q01892;P0CG00;Q8N5F7;Q96JS3;Q8N3S3;P09017;Q8N184;Q96N  
J6;P22670;O60563;Q8WUB8;O95416;Q13129;Q9H7S9;Q8N726;P11831;P20265;Q7Z3V5;P15172;P0C7  
T5;Q3SXZ3;Q86VP6;O43248;Q6NT76;Q14CW9;P28702;Q9UFB7;Q6IQ21;Q00577;P48552;Q13398;Q53G  
I3;Q8IU81;Q96PT3;Q96MR9;P48378;Q15561;Q8NBZ0;Q14134;Q96BV0;O75446;P35227;A8MT65;A6NK  
53;Q12962;Q86TJ2;P28069;Q9BUY5;Q9028;O60663;Q9UKW6;Q15424;P78545;B2RXXF5;Q9BF19;Q7KZ  
85;Q8N3J9;Q9Y2P0;P09629;P63165;Q9NS37;Q9BQG0;Q9Y2H8;Q9UQR0;Q96AQ7;P52743;Q96GN5;Q499  
Z4;P54845;Q8IXH6;P42568;Q15937;Q9Y4A8;Q9BXG8;Q9ULK4;Q00444;P27695;Q15723;Q15744;Q9GZ  
R2;Q8N7G0;Q8IX03;Q08050;Q68EA5;P11142;O15405;P61978;Q9Y5B6;O95163;P62324;Q9UKL0;O607  
11;Q14765;Q96IF1;P29084;Q13112;Q68DY1;Q5TB30;Q8IXW5;Q7RTV3;Q12972;P27797;Q9UQL6;Q8N5  
P1;Q8TAK5;Q00059;O43524;P53999;Q96G23;Q99549;Q9HCG1;O43593;Q96G25;Q9ULW3;Q6P280;Q9NR  
G4;Q5PRF9;Q99966;O95159;Q8TAU3;Q9UQB3;Q92994;Q8N5J4;Q9UL58;Q13469;Q8N0Z2;Q5U623;P527  
47;Q9UHV2;P78412;Q96SR6;P0C860;P55347;A6NLW8;Q5THR3;P78317;P11532;Q14929;Q99504;Q5T6  
19;Q96CJ1;P23769;P54253;Q14593;Q15929;O94992;P35548;P55199;Q4G112;Q9UIV1;Q8TB69;Q997  
43;P20719;Q5T6S3;Q15072;Q15935;P15036;Q96C00;Q9BYK8;Q8IVP9;Q6W2J9;P51826;Q14186;Q63H  
K3;Q96608;P40426;Q59GR2;Q15699;Q9U1L5;Q12800;A8MZ59;Q15532;O60828;Q8NE65;O75524;A8MU  
V8;Q9P243;Q9ULM2;Q15047;Q14938;O75529;Q9BQ70;Q96N38;A8MWA4;Q9UGP4;P40337;Q5SVQ8;Q9BT  
C8;Q5H9F3;A8MQ14;Q14498;P56693;Q92748;Q9H9C1;Q8N7R0;Q96CX3;Q8IWS0;Q969S8;O14867;Q96F  
24;P17032;P19532;Q96BD5;Q6P9G9;P26358;Q9ULX9;P51948;Q9Y2T7;Q52M93;O75618;P15621;Q928  
31;Q92782;Q14585;O43711;Q9NQX6;P17022;Q9H5J8;Q07666;Q99576;Q14653;Q68DI1;P51504;Q9UK  
Y1;Q75505;Q8N8C0;Q13495;Q9Y2D9;Q965Z4;Q15654;Q96DB2;P56270;Q6IQ32;A2RRD8;Q15306;B4DX  
R9;Q9UKD1;Q6NX45;O96017;Q15370;P17098;O75437;Q8NF99;O14948;Q13360;Q9H1I8;P84022;P784  
14;Q63ZY3;Q99856;Q6P9A3;P50221;B1APH4;Q6P1X5;P10914;Q92539;Q9ULM3;Q8N140;Q96JM7;A6ND  
Z8;P0C7X5;Q8IYH5;Q13330;Q8TEE9;Q8N3C0;O00716;P0CJ89;O60284;O75177;O75528;Q8WUU5;P163  
83;Q9Y6K9;O95628;P0CJ90;Q96GC6;Q92925;Q76KX8;Q00056;A6NHJ4;Q9P2R6;Q01658;Q6NSW7;P283  
47;Q96ES7;Q8N895;Q96N22;Q92541;A8MX4;Q8N141;P31276;Q02878;P25440;O15499;Q03924;Q96L  
X8;Q9UBK9;Q92769;Q5JNZ3;O14497;Q03701;Q9Y2Q1;Q9H091;O00255;O15105;Q6PK81;Q96NG5;Q063  
30;P14859;Q15543;Q9UHV7;Q8IZ40;Q7Z3K6;A6NNF4;O95644;Q9GZV5;Q96EK7;O75444;Q13127;Q9P2  
J8;O95780;P49848;O43541;Q6PF04;Q9HCU9;Q9NWA0;Q9HD42;P12525;Q14135;Q9Y2V2;P28324;Q2M1  
V0;Q9BR84;Q9NQG5;Q9H116;Q9H869;Q86Y97;Q9Y6X2;P50752;Q9Y2N7;Q99732;Q96E29;Q9UBB9;Q9UB  
W7;Q9ULH7;P11161;Q9NWT6;Q6P4R8;Q15544;Q9Y603;Q12906;Q9HAP2;Q9UN79;O15265;Q05BQ5;Q719  
H9;P82094;P48382;A6NDR6;O00268;P09874;P51532;Q8NI51;A0JLT2;Q6P2C8;P15622;Q6RSH7;P0DI  
81;Q96K62;Q3KP31;Q5JVG8;O43830;Q16254;Q68CJ9;O43918;P41212;P0CJ86;Q49A33;P50613;P154  
08;O15198;Q15742;P23246;Q12873;Q9NVC6;P86452;P25208;Q8WVJ9;Q96H20;Q92830;O15164;Q3SY  
52;Q13506;P35226;B4DX44;Q15329;P35869;Q9H160;Q8NI08;Q9UWF9;O75530;Q8N988;P59923;Q9Y6  
B2;Q9BQY4;Q96QR8;Q14865;Q9GZN2;P0CJ85;Q96RS0;Q13045;Q8TE02;Q969J2;Q16514;Q5VUA4;Q9NY  
T6;Q8NHW3;Q494X3;A6NM28;P82970;Q9Y2L8;Q8IYB9;P46100;Q16621;Q92993;Q8IX07;O60907;Q6IA  
86;P10599;Q32M78;O15527;Q9H9Z2;O60225;P14651;P53805;Q03468;Q6UUV7;O75030;O14771;Q9UP  
W6;Q9NQZ8;P0CH99;P61244;Q8NFD5;Q8WUI4;Q8N823;P17041;P13984;Q8N9K5;P55055;Q9UIH9;Q9BS  
G1;P0CJ79;Q3MJ62;P12956;Q15796;Q8N7M2;Q9BT49;O60765;Q8NB50;O75475;Q15369;Q3ZCT1;P505  
70;Q02080;Q8N9N2;Q8N344;Q9UKV8;Q9NSI6;Q9NRL2;O00321;Q7Z7C8;O75164;Q5HYK9;Q9UBU8;P783  
37;Q02556;Q99496;Q3L8U1;P12524;P23760;O00472;Q04725;Q5VTR2;O95218;Q8N9Z0;Q96S94;Q995

43;O14593;Q92785;O14770;Q96JN0;P24928;Q2VY69;Q9Y6J9;Q99607;Q7Z591;Q9H6W3;P19419;Q86V  
E0;Q96T23;Q13363;P49639;Q8N7U7;Q86X95;Q9UQF2;P51523;Q13503;Q86YW9;Q15014;Q9H7L9;Q8NF  
J8;Q9H963;Q58F21;Q92499;O15370;Q99687;Q969R5;Q9NYW8;P41162;Q9NX70;Q5BKZ1;Q9BYN7;Q96G  
E5;Q9NQ33;Q86UP8;P09016;Q8N720;P51786;Q9BWT1;O43812;Q15466;P19838;Q8IZX4;Q96RU7;Q9H4  
S2;Q02833;O94805;A8K0S8;Q14145;P78395;O60675;P28749;Q9HCZ1;Q8NB42;P43268;P20823;Q96N  
M4;Q15583;P23193;O75360;A6NJG6;Q9HBT7;P17861;Q7687;Q8TBZ5;Q9HAH1;Q7RTU4;Q8N371;Q9Y2  
P7;Q6P3V2;Q12968;O75346;Q15572;Q14588;Q6PJJG2;O14529;P52630;O60248;Q9HCE1;Q9H501;Q148  
39;Q6ZMV8;Q9Y543;P15336;Q9Y2X0;O95073;Q14592;Q8IXH7;O94864;Q6AZW8;Q6NSZ9;Q9BUJ2;Q86V  
15;P28698;Q9H3P2;Q8NFZ5;Q9BYV9;Q6ZNG0;Q8N9F8;Q9P2K3;P0C7V5;P20290;O43186;P17021;Q86U  
86;Q7RTV0;P08235;Q14686;Q9UNY4;O95983;Q96T76;Q96QT6;Q9BZK7;Q9UI95;Q15545;Q9NV56;Q9UI  
D6;Q14872;Q969H0;Q9UDV6;Q3KNV8;Q15170;Q9NZN8;Q5CZA5;Q03111;Q96HQ0;Q9UKN5;Q9UNY5;P224  
15;P10244;Q9H707;Q96MG7;Q6VB84;Q9UM07;Q06455;Q13761;Q9NSJ1;Q9UKT9;Q9UMQ3;Q5JVS0;P526  
55;P19484;O14646;Q13901;P16989;O95238;B4DU55;Q6PG37;P31314;O60290;O75373;Q9Y618;Q8IW  
36;Q14209;O95619;Q96CS4;Q49AA0;P43356;Q9HBM6;P42771;P17096;P14652;Q04724;P35269;Q8TE  
85;P11474;Q99623;Q8IUR6;Q9GZU2;Q86TJ5;Q12824;Q15714;O43513;Q00653;Q8IVC4;Q9Y5J3;Q8N4  
88;Q9UK10;P42166;A8MUZ8;P29083;Q9NY43;Q96EK4;Q96SE7;Q9NWB7;P35251;Q9HCK8;P47974;Q7RT  
U0;Q8N7H5;O43318;Q7L945;Q8NDQ6;Q92600;O75764;Q13106;P49336;Q86XF7;Q5TEC3;Q9UUL8;Q9Y2  
94;Q969V6;Q5T230;O95125;Q96PK6;Q9UIF9;P58304;O60583;Q68CP9;P24863;Q9H808;Q16385;O949  
16;P17019;P0CG31;Q9NP71;Q9NPJ4;Q8N693;O60682;Q9BYH8;Q8TAQ2;P0C7X2;Q96RE7;Q92793;Q86U  
70;Q8WYK2;Q9Y2G7;Q14582;Q8IYX0;Q01860;Q9H204;P18848;Q5TGS1;Q9UJW7;Q9NSC2;P68036;Q926  
70;Q9UL18;P52736;Q01826;P63272;Q96NJ3;Q86XN6;P21675;Q9GZX5;Q9H8G1;Q9H2F5;Q49AM1;Q96M  
N9;Q15853;Q9NPA8;Q96RN5;Q9BQA5;P13010;Q14241;Q9NUQ3;P78347;P17025;A6NK75;P35232;Q9UB  
D0;Q15652;O60869;Q9HBD4;Q8N587;Q9Y5B9;Q8N7Q3;Q7Z398;Q8N611;P13682;Q8IYI8;Q86V71;Q047  
43;Q53T94;P52744;Q14188;A6NE82;Q02577;A6NN14;Q96JL9;P55771;P28370;P50222;Q16576;P0CB  
33;Q6ZNH5;Q9NWS9;Q3ZCX4;Q8IV54;Q9BX82;Q03060;Q9UBL3;Q6STE5;Q13404;P42226;Q9POT4;Q8IY  
57;Q96PT4;Q5HWG9;Q5H9L2;Q5HY98;Q9Y2W1;Q9UIF8;Q96IZ0;Q15637;A6NLF2;A6NJ46;Q8NA19;Q8NE  
K5;Q9Y692;P55198;Q71SY5;Q6XYB7;Q969X6;Q9Y252;Q8WXI9;P14653;Q13952;P15923;P10242;Q8NB  
12;O43309;O14978;O60422;Q6ZN79;Q99717;P06733;Q15834;P15407;Q9H7R5;Q02040;Q12857;Q9C0  
F3;Q8N972;Q6ZYL4;Q13568;Q3B7T1;Q13490;Q9H0M5;Q96BN2;Q7L190;Q8NDN9;Q6IPX3;Q9ULC4;O753  
76;Q6VN08;P57086;Q8NHY6;Q9UK39;Q8TBZ8;Q16384;Q86VN1;Q9UIE0;Q9Y468;Q9Y222;Q8IXJ9;Q68D  
Y9;Q5VIY5;P0CG24;O75290;Q3T8J9;Q9H5I1;Q9UMX1;P22681;O95905;Q8WXF1;Q9H814;Q6P1K8;Q8WX  
B4;P49711;P40425;Q8N5A5;Q9H3M7;Q93062;Q969E4;Q9Y250;Q16649;Q9NVV9;Q53ET0;P17480;Q928  
41;Q0VG99;Q9BWM5;Q8TF32;Q16600;Q2M3X9;P52737;Q6PI98;Q6ZV50;Q96JK9;Q14781;Q9UQR1;Q8TA  
F7;Q8N7K0;Q9H9F9;Q14207;Q86YD1;Q15776;Q66K89;Q9P031;Q08AG5;Q53QV2;Q7LBC6;Q99459;P357  
11;P42224;A6NKF2;Q86W11;P51522;P22736;Q6ZN17;A6NEJ1;Q86X55;O94763;Q9UN30;O15392;Q7RT  
U3;Q96PM9;Q96BR6;Q8IYN2;Q96IR2;Q6RFH8;Q06587;Q9UI36;Q9UJW7;Q96Y61;Q969W8;Q96RL1;Q6ZN  
A1;Q15361;P43355;Q96QE5;O95201;O43345;Q15759;Q9NYV6;Q9NQ92;Q8TDD2;Q9BTA9;Q15797;Q5FW  
F6;Q16526;Q8N393;P23409;Q9P0W2;P07199;O75157;Q8WTZ3;Q8NAP3;Q96ND8;Q96LW9;Q12830;Q3MI  
S6;Q9UL36;Q9BT81;Q06547;Q8TAQ5;Q13105;Q9NVJ2;Q6ZNG1;Q9Y651;Q86TU7;P68104;Q8IYN0;P548  
21;Q96JC4;O15015;Q02078;Q9UPG8;Q9P1T7;Q9UJW7;Q9BXP5;Q96LI6;Q05422;Q06546;Q9Y2  
A4;Q07352;P21506;P40424;Q14584;Q13888;Q9Y6R6;Q9H0E9;P31269;Q86XU0;P53567;P17014;P497  
15;Q8N108;Q5QJE6;Q9Y224;Q6ZMS7;P17023;Q9Y242;Q8NDP4;Q6ZN01;Q9H2G4;Q96EB1;P18146;Q031  
12;Q15906;Q15650;P17947;P17028;Q92966;O96028;P31260;P32519;P51946;Q8WX92;P15822;Q105  
86;Q9UKL3;Q03936;Q00403;Q8WTS6;Q14693;Q9BXJ9;Q8N2W9;P78543;P17024;Q7Z401;Q7Z5L9;Q089  
45;Q71F56;Q96A56;A8K8V0;P98168;Q9UBS8;O60716;P33076;Q7Z3I7;Q9UK58;Q03938;Q8TF39;O602  
24;Q3C1V8;P08651;Q9NRC8}

13734

Pathogen[ P0C214] interacts with 1671 human

partners: {P41970;Q9NWB7;P22681;Q9Y3Q8;P40424;Q86UD4;A6NDX5;Q9UGP4;Q6ZN55;Q92993;Q5BK  
K1;Q02833;Q6NX49;Q6PDB4;O00470;O00268;Q9UKW6;Q92618;Q96S94;P53567;Q06732;Q8NEK5;O754  
44;Q9NQZ8;Q9HA82;Q14526;Q03052;P82979;P18850;Q9BWW4;O15198;Q15742;Q9BW11;Q8NI51;P541  
98;Q03989;Q9HAJ7;Q9Y6X2;Q6IQ32;D6RGH6;Q96C28;Q9UHB7;Q96FV9;O00213;Q92585;Q14527;Q8N3  
71;Q96MU6;Q9P255;Q9Y3T9;O14813;Q9UHL9;P51946;P24863;Q8WX92;Q9UKN5;Q96CJ1;Q58F21;Q96R  
E9;P35226;Q8NA19;Q13761;Q9NZN8;Q8IX03;Q96S65;Q7Z2F6;A8MUV8;A6H8Y1;Q05195;Q15059;O432  
96;Q6ZN17;Q9NS37;Q16254;Q8TBZ8;Q96QE5;Q8IZC7;O75467;Q6ZN11;O14529;Q96LW9;Q9UID6;P202  
90;P11308;Q00653;P27695;P32243;Q8N228;O43365;Q6ZNA1;Q9POT4;P35789;O75486;Q8NDQ6;Q9H5  
I1;Q13887;P35227;P49639;Q8IX12;Q96T58;P17032;P61244;Q14593;Q15697;A6NGD5;A8MVS1;Q9HC  
Z1;Q02930;Q04727;P56270;O43829;Q15022;A0AVK6;Q8WXF8;Q00613;P35869;Q9Y5V3;P51508;Q134  
69;Q7Z398;O60663;Q8N0Z2;Q9NRL2;Q5JVS0;P42166;P16989;Q14207;P51610;P11474;O75528;A8MQ  
14;Q15047;Q13330;Q71SY5;P52743;Q9BRU2;O95238;Q13952;Q9Y6K9;Q9BT49;Q8IV54;Q17R26;Q065  
46;Q13363;Q9Y6J9;O75461;Q9P0L1;Q86YD1;P17010;O95633;Q63HK3;Q9Y2G9;Q0ULD5;P55347;A8K8  
V0;Q9UHF7;Q8N9N2;Q9Y4A8;O75764;O43830;Q7Z591;Q13547;Q9BS34;Q9Y2A4;Q14865;P60002;Q6PE  
W1;P78337;Q9HCD5;P0CI00;Q12824;Q14872;Q8N7Q3;Q13490;Q13772;Q86SE9;P31249;Q8IYN0;Q149  
29;Q8NF64;P17023;Q9BX82;O75909;Q6R2W3;Q9Y2D9;O00321;Q6VMQ6;Q14591;Q96JN0;Q9Y5A6;Q6ZN  
57;P51814;Q5T5D7;Q08999;P19838;Q05481;Q6UUUV7;P14921;A6NHJ4;Q96SQ5;Q96LW5;Q92664;P0CB  
33;Q9UL59;P30153;O75925;P52744;Q6ZNH5;Q15573;Q96IZ0;O14497;Q7Z5D8;Q5LUR7;Q5JVG8;Q8IW  
Y8;Q8NC26;O75586;Q8N5A5;P15336;Q9UFW8;Q969S8;Q9P086;P78543;Q9Y473;Q06547;Q13568;P526  
57;Q96LW1;P13010;Q8IZL2;A6NP11;P54253;Q9H9F9;Q96I27;Q9UJL8;P21675;O15535;Q9H175;Q153  
61;Q96QR8;Q8TD17;Q6PG37;O43159;O60716;Q53TQ3;Q96LI6;Q9NTW7;Q8TF45;O43186;P48552;Q9BS  
M1;Q8NG57;Q16656;Q9C0F0;O75820;Q96F24;Q9BWM5;Q8TAQ5;P31314;P52742;Q5TB30;Q96DB2;O605  
43;Q14587;Q12873;P15407;Q9NPC7;P51825;P52655;O95628;Q8WYN3;P35269;P50750;Q86UE3;Q9UI  
H9;Q9HD15;Q8TBC5;P19484;P25208;Q99081;Q9GZU2;Q8NDP4;O00267;Q96CX3;Q96NJ3;Q8N693;P527  
38;P50613;Q92841;Q3T8J9;Q9H3M7;Q8TAD8;Q7KZ85;Q13112;Q15014;P33076;Q9Y2X0;Q96RR0;P290  
84;Q5JVG2;P0CG31;Q7Z6R9;Q96K62;O75618;Q96BR6;Q9HBE1;Q8NCA9;P42226;Q5H9I0;Q7L2R6;Q460  
N5;Q7RTU4;P15884;Q96EI5;Q8NHW3;O75478;Q8TD23;O60907;Q9P2F9;O12350;P13349;Q8N587;Q998  
56;Q8TAU3;O00167;Q8N2W9;Q14119;Q14CW9;Q03112;Q9UJN7;P17019;Q9BQ87;Q8N0Y2;Q8IVP9;Q9UC  
06;C9JN71;O75157;O75530;Q02080;Q9Y2V2;Q8N1B3;Q5T230;Q14765;Q9BZE3;Q9C086;Q8N5F7;Q68D

Y1;Q8NDY6;Q16621;Q5MCW4;P01100;Q16384;Q99676;Q8NCK3;Q9NR55;Q14145;Q93074;P05204;O152  
66;P17275;Q8N823;Q9NVM4;Q92750;Q9UNY5;Q8NEP9;Q9HD42;Q08AN1;P17022;Q12800;Q9HBD4;O753  
62;Q13111;P32519;Q9NPJ4;Q9NUA8;O60224;Q9BQG0;Q8WYP5;Q99743;Q15233;P23769;Q5T6S3;Q927  
93;Q16587;P50548;Q7Z7K2;Q9Y5J3;Q969W8;Q15637;P35711;Q9UIF8;P19419;P56693;P67809;Q499  
Z4;P15408;Q9BUE0;Q96GE5;P53999;Q8N9N5;P46937;Q9NX70;O95625;Q86XU0;P61457;Q8NFJ8;Q8N8  
G2;Q96QT6;Q7Z5L9;Q8TF20;O43167;Q6P9A1;P81877;P84022;O75437;P23246;Q6ZRS2;Q6ZYL4;Q129  
06;Q6PK81;Q6P1L6;Q9UL58;P17096;Q5U623;O95125;Q9NWA0;Q9NZI5;Q5TYW1;P15172;Q6PFO4;Q76L  
83;Q9BYH8;Q86WZ6;P17947;Q9P2R6;Q9H808;Q9H3H9;P56524;Q16533;Q9GZV5;Q9UK11;Q7Z7C8;Q6W2  
J9;Q86YE8;Q99623;Q9NR11;Q96CS4;Q9Y6Y1;O14709;P17029;Q9H501;Q6NT76;Q99576;P42704;Q146  
78;P17544;P41218;Q12986;P11831;Q9Y2Y9;Q96BD5;Q00403;Q15906;Q96SR6;Q5JUW0;Q8NAP3;Q9UK  
13;Q96HR3;Q99417;Q9UNN4;Q5H9F3;Q99990;P17026;Q96MN9;Q8NCF5;Q96SK3;Q04206;Q9NW07;Q9NV  
C6;Q16520;O95931;Q5HY98;Q3L8U1;Q2M1K9;Q7Z589;Q63HK5;Q6STE5;Q12962;Q9H307;O75123;Q53H  
80;Q2M3W8;Q06455;Q9Y5Q3;P42224;Q02386;Q15973;Q13404;Q3MJ62;P42568;P37275;Q68CJ9;P283  
47;Q3KP31;Q6NZI2;P10914;Q8NI08;Q8N8C0;Q9NZ81;Q16666;Q96NM4;Q15928;P17482;Q8TDY2;Q8IX  
W5;Q5SXM2;Q96BN2;Q9ULJ6;O95503;Q86TJ2;Q9UPG8;Q96K58;Q9Y5B6;A8MT65;Q6ISB3;Q9UKI9;Q9H8  
69;Q49AM1;Q96JC4;Q99608;Q06330;P98168;Q12905;P35251;Q7Z3I7;Q15910;Q15370;Q99607;Q32M  
Z4;O00716;Q8IZ26;O75030;Q9NSI6;Q8N726;P78395;Q8N9F8;P17024;Q9Y232;Q9Y2Q1;Q6ZR52;O147  
71;Q9H6Q4;Q12901;Q96NG5;Q96N77;O75164;P55198;Q8N5J4;Q96SE7;O75151;Q04724;Q9H091;Q9BT  
T4;Q6ZMS7;Q86WP2;Q6ZNI9;P07199;Q13901;P17038;Q9Y468;Q9UC07;Q14686;O94864;Q15545;Q96E  
K7;P38935;Q494X3;Q14938;Q96MR9;Q9Y2P0;O60244;Q7RTU5;Q15170;Q96K75;Q9UII5;Q6P1  
K2;Q4V348;O43463;Q9BT81;Q7KZF4;Q96SZ4;A6NLF2;Q9H063;Q6IV72;Q8N141;Q8TBE0;P51786;Q5VV  
H5;Q9BY31;Q3B7T1;Q8TAQ2;Q01844;Q9UI95;Q15560;Q9H2F5;O43318;Q96BV0;Q6P1K8;A6NEJ1;Q5SV  
Q8;Q6IA86;Q92541;Q16594;Q8N883;Q8N6I1;Q3SXZ3;Q9GZX5;Q9NXT0;Q9UKD1;P51523;Q9H4I2;Q147  
U1;Q9HCE1;Q9BSK1;P17676;P24278;Q96T88;P17031;Q5PSV4;A8MV65;P43355;Q9HCX3;P78317;Q155  
42;Q16385;P14651;Q9UIV1;Q03933;Q5VTD9;O95619;Q13398;Q53GI3;Q09028;Q9HBT8;P86452;Q8N7  
U7;Q99909;O14776;O43248;Q9UK58;Q5VZB9;O60290;Q1NUQ3;P49716;Q6ZW49;Q10587;Q8N5U6;P102  
44;Q8N344;P18615;Q9BQI9;P17030;Q10586;Q9Y534;Q6VUC0;Q9Y250;Q03936;Q5QJE6;Q96NL3;P0C1  
Z6;O60828;Q8TF68;Q9H944;Q9BYK8;Q9NZI7;P57086;Q9Y5K5;Q2VWA4;Q9UK39;P48382;Q9HBZ2;P202  
65;Q7RTT4;Q5VWG9;Q53QV2;Q02078;Q86XN6;O14503;P11532;Q7RTT5;Q15561;P82094;Q07352;Q8N3  
C0;O95201;Q8TC21;Q969E4;P28698;O75525;Q00059;Q15633;Q9NWS9;Q14258;Q9Y3C7;Q92922;Q8IX  
F0;P15622;Q96EC14;Q5VUG0;Q9UM07;Q6ZSS3;Q9BRR0;Q13208;Q9N08;Q8N859;Q13129;P13056;Q9UI59;Q999  
66;Q9HC78;Q8TE85;Q9UQB3;P10243;Q12968;Q01094;Q14814;O75446;Q86VE0;Q9Y2N7;B1APH4;Q9UL  
36;P18848;Q92966;Q9ULJ3;Q92681;Q96RN5;Q16633;Q9ULM6;O14867;P17535;A6NIX2;Q13506;Q997  
32;Q3KNV8;Q7Z7J5;Q9Y6R6;Q49AA0;Q8N3S3;Q92754;Q15834;O43439;O00712;Q15528;Q8WY36;Q130  
45;Q9UHX1;Q9Y2T7;Q7Z340;Q6ZNG1;Q8IXJ9;Q14186;Q9UIF9;Q8IYH5;Q12837;Q6P198;P49116;Q012  
01;P21127;Q9UHT5;Q92985;Q07687;Q9HAF1;P49750;Q9BQ70;A0JLT2;Q9BWT1;Q35ET0;Q9UKL3;Q96I  
T1;Q9Y224;Q13487;O60765;P15923;Q06730;Q9UJU3;Q86UQ8;Q8N184;Q71F56;Q9UGU0;Q86Y25;B4DX  
R9;Q04726;Q8IWS0;P51948;Q8WXF1;O95416;Q96MH2;O75373;Q5HYR2;Q8WTZ3;Q8NEF9;Q14103;Q9NV  
V9;P28370;Q9UER7;O94776;O96017;Q92539;Q9Y2H8;Q15929;Q07666;Q8N4W9;A8MXY4;Q14151;P631  
65;P49336;Q96PE6;Q3ZCX4;Q68DI1;Q9P0W2;O60225;Q8N488;Q9H5H4;Q02556;Q05687;P17861;Q8N9  
R8;Q00577;Q6P280;Q5VUA4;Q16600;P17014;Q6RFH8;O95983;Q8N9K5;Q99459;Q8NF99;Q9UJW7;Q8TB  
Z5;Q9HBM6;Q49A33;O14948;A5YKK6;Q99549;Q8N2I2;O75290;Q86U70;Q9Y543;Q96JF6;Q9BRG1;Q96D  
98;Q9GZW5;P46100;Q96RJ6;A6NDZ8;P0C7T5;Q6P9A3;Q6AW86;O43513;Q9UKL0;P26358;O43812;Q6ZM  
W4;Q9UNY4;O05440;Q8TF47;P51826;Q92994;Q6DD87;Q96JM7;O43189;Q6P1J9;P14653;Q9Y6B2;P515  
02;Q6MZP7;O00422;Q96N95;Q8TF39;Q9NVW2;P78347;Q8IZ40;Q86YP4;Q6P2D0;Q13485;Q9H6W3;Q9C0  
F3;Q9H7X3;Q96N22;A6NE82;Q15369;P55197;Q9NYT6;Q03924;Q15572;Q969X6;Q86YW9;Q5FWF6;P188  
47;Q9Y242;Q9NYW8;Q08AG5;Q9BYE7;Q92769;Q86TJ5;O15105;P55199;O60583;Q9C005;Q9H8G1;Q86U  
P8;Q9UH92;Q9UBU8;Q13352;Q8N108;P63272;Q15544;P20749;Q9HAZ2;Q8N7M2;P17028;Q9P2J8;O957  
80;P0CH99;P98169;Q8N3X6;P49848;Q15329;P50222;P28324;Q3MIS6;Q6P4R8;Q9UMS5;P16383;Q9UK  
V0;Q9HCU9;Q8WW3;Q96G23;O00257;Q15652;B4DU55;Q9NQG5;Q9H160;Q9NQX6;Q96MG7;Q12872;Q96R  
K1;Q9UNS1;Q96E29;P51815;Q9NPA8;Q6ZS27;O14896;P51522;Q8N393;Q6ZN28;O15060;P40337;Q9BU  
G6;Q9Y603;Q9UBS8;Q15714;Q7RTV0;Q9HCK8;Q15654;Q6ZMY9;Q9UN79;Q92925;Q8WXI9;Q05BQ5;P174  
80;Q8N7H5;E7ETH6;Q13185;Q16576;Q2QGD7;O15226;O75376;Q49AN0;Q96N58;P0DI81;P17020;Q9UL  
X9;Q76KX8;P67775;Q6ZN01;Q9BUJ2;P19532;Q15796;P42771;Q9NSC2;Q96I24;Q969J2;Q9ULM2;Q141  
92;P62324;Q6UUV9;O43593;O15525;Q86V71;Q9Y3M9;P17027;Q86TU7;Q86UQ0;Q10543;O60381;Q96G  
C6;Q99687;Q99594;P41182;Q9Y6X8;O60711;Q6P9G9;Q03923;Q9BXJ9;Q99504;Q9Y5B9;Q9NP71;Q9UQ  
R0;Q8N972;Q9BQY4;P17098;Q6ZT77;P21506;O43541;Q7L1Q6;Q8IYB9;O15379;Q9UN30;P06733;Q96R  
L1;Q01892;Q96PK6;Q0PNE2;Q6P1X5;Q9P1T7;Q96JK9;P43268;Q9Y2D1;Q96RS0;Q9UBW7;O75475;Q9NY  
V6;Q8TE02;Q16514;O95251;Q4LE28;Q8IXH6;Q7RTU3;Q8WYA1;P17035;P82970;Q8NDN9;P0C7X5;Q8IX  
07;P48378;Q9UJL9;Q9NV56;Q9H9Z2;Q6U7Q0;Q13127;Q14934;Q4LE39;Q8NDW4;Q8BSG1;O75155;Q156  
50;P28069;Q2VY69;Q9Y252;O75346;A2RRD8;Q6ZNG0;P13984;Q15072;P20226;Q969H0;Q96JS3;P136  
82;Q9H2G4;Q9BTC8;Q9UHV2;Q15424;Q86W11;Q6NSZ9;A8MWA4;O75534;Q14653;Q8IZX4;Q86Y97;Q9UI  
36;Q6P2C8;Q5SXM1;O75494;Q96ND8;O75529;Q86UU0;Q9H4T2;P32780;Q9Y4A5;Q9UQF2;Q9UKV8;O753  
60;P17040;Q9H0E9;Q6V9R5;Q8WVC0;Q9Y2X9;Q14140;P58317;Q9UDV6;Q96C00;P10074;P24928;O439  
18;Q68EA5;Q99496;P36402;Q8TAK5;P52747;Q8IYX0;O75582;P10242;Q9UHV7;Q8N9Z0;Q6XND7;Q145  
93;Q14135;Q9NV72;Q9ULV5;Q5VIY5;Q5THR3;Q8WUB8;Q9Y462;Q9UEG4;Q15935;P22670;Q9H9T3;P398  
80;O60806;Q9UBD0;P62633;Q9UKT9;P36508;Q7L945;Q15532;O43345;O60563;Q9Y294;Q8IUR6;O949  
92;Q6IE81;O15392;Q92499;P43356;P05412;Q9H8M2;Q9UMQ3;Q9Y2G7;P17041;Q8NB50;O95073;Q9NY  
B0;Q96HQ0;Q8WVJ9;Q6NX45;P49711;Q14781;Q8NFZ5;Q10826;Q02447;Q12857;Q96RU7;Q9NZ  
I6;P28749;Q92831;Q8N8Z8;P17021;O75448;Q719H9;P18146;Q16534;Q8TEE9;Q9HC44;Q96JL9;Q9H2  
04;P0C7X2;Q8WTR7;Q8N187;Q8IU81;P0CG00;O15164;P15621;Q0D2J5;P0CJ78;Q02577;Q9NP11;Q5PR  
F9;Q8N196;Q8IVC4;Q96MX3;Q14584;Q96T23;Q3SY52;Q9NQX1;P27797;Q15853;A6NK75;Q86U86;Q6ZN  
06;Q9H1I0;Q03060;Q7Z401;Q9GZR2;P57071;Q15759;Q6IQ21;Q9P031;Q96JB3;P40425;Q9ZV50;Q165  
26;Q04725;Q14592;P17036;O43309;P17039;Q9NX65;Q8TAF7;P98182;P0C7V5;Q9UDV7;Q98H14;P090  
86;Q99471;Q8NB42;Q460N3;Q01658;Q6PJG2;Q9BZK7;Q96H40;Q92830;Q52M93;Q96GN5;Q12796;Q96S  
T3;O60925;P0C860;P09629;Q8N8L2;A6NNF4;P10599;Q9HB58;Q59GR2;Q96SL8;P11161;Q13888;Q6ZR

F7;Q9UJW8;Q6ZMV8;Q5T619;Q96AE4;O15265;Q96PQ6;Q7RTT3;Q9UFF9;Q12888;Q9NSD4;P23511;Q8NH  
Y6;Q8IW36;Q8WWY6;Q9ULW3;Q14585;Q03111;Q99717;O14978;P15036;P16415;Q6ZQV5;Q9UIE0;Q2M2  
18;Q0D2K3;Q9NR48;Q08945;Q969V6;Q8IXH7;Q8N7K0;Q04864;Q9HCG1;Q9NZV7;Q95905;Q8IYN2;Q5TE  
C3;P40763;Q00401;Q9H9D4;A8MUZ8;Q8WZ33;Q8WVMO;Q0VGE8;Q96004;Q12972;Q9JBD0;Q9H5J8;Q08E  
R8;Q00472;Q95218;Q7RTT6;Q9UJH3;Q9NWB6;Q7RTU0;P27540;P49910;Q9BR84;Q86V15;Q95997;Q8TB  
69;P50221;Q6GYQ0;Q99543;Q8NDT2;Q75971;Q71F23;Q9H707;Q92600;Q96N38;Q9HBT7;Q68CP9;Q9HA  
W0;Q9UPW6;P08151;Q9BTA9;Q9UFB7;Q6P1N0;Q94916;Q96H20;Q86X55;Q50570;A6NN28;P48380;Q96A  
56;Q53T94;P78545;Q99684;Q5H9L4;Q9H3P2;P50549;Q9HCL3;Q9ULH7;O14770;Q6NUN9;Q9P243;Q929  
88;P22392;Q9BSN8;P41162;Q92945;Q13342;Q9BUY5;Q9HB65;Q8N3J9;Q9BQA5;P08651;A6NFI3;Q157  
76;P22415;Q9BYN7;Q8IYF1;Q9H9C1;Q9UM63;Q8N782;Q9UQ80;O14646;Q9NRC8;Q13148;Q9UBB5;P108  
28;Q7RTV3;P23193;Q8N1W2;Q15596;Q9H7R0;Q13503;Q8WYH8;Q15797;P52736;O15527;Q95644;Q155  
43;Q9Y651;Q8WUI4;P16220;Q13360;Q96NJ6;O60869;P14373;Q95948;Q9P2K3;Q94763;P35232;Q8WT  
S6;Q3KQV3;Q9NQ92;P17017;Q9NQR1;O14628;P53805;Q9BV97;Q8NFD5;Q3ZCT1;Q92800;Q5T3J3;Q8NA  
42;A6NKF2;Q15562;Q96H86;O60315;Q96G25;Q8N895;Q02040;Q9Y3D2;Q9ULK4;O15370;P51531;Q32M  
78;P52630;Q5VTR2;Q96AQ7;Q94805;Q5VWX1;Q8NB12;Q6ZN32;Q8IUD2;P0CJ79;Q9UNP9;Q96NG8;P548  
45;Q96JC9;Q15326;Q9UQR1;Q6P3V2;Q8IX15;Q6ZSB9;Q9Y2W1;Q96RE7;Q92748;Q96EB1;O15499;Q969  
R5;Q9UBK9;Q6AZW8;Q96EZ8;Q14590;Q9NZL3;Q86XF7;Q9NQ87;Q9Y618;P62508;Q9NRG4;Q96EK4;Q96E  
G3;Q8WUH2;Q9H963;Q92782;Q01664;Q9UPN9;Q6PD62;Q75177;Q14498;Q75175;Q9NP66;Q9BS31;Q5EB  
L2;P39687;Q9ULC4;Q8NE65;Q5CZA5;Q95163;P15822;Q96LX8;Q7L190;O60284;Q9NQ33;Q8WV37;Q156  
99;P52746;Q9HOM5;P14859;Q9NSJ1;Q9UK12;Q96ES7;Q96N20;Q9Y3Y2;Q9UMX1;Q9Y692;Q8WXB4;Q995  
83;Q86X95;Q14209;Q93062;Q9H3M9;Q9Y2P7;Q01860;Q9Y2L8;Q2M3X9;Q66K89;Q66NI8;Q866V6;Q5TG  
S1;P01106;Q92785;Q3C1V8;Q95402;Q43361;O60675;P14316;Q99551;Q9UL18;Q8NEM1;Q2KHR2;Q750  
81;O60248;Q03468;A6NK53;P35712;Q96019;Q13495;O60304;Q9ULM3;Q14188;Q9H7R5;Q7LBC6;Q9NP  
J6;Q9UQL6;Q9UPP1;Q13105;Q86VN1;P41161;Q9UBB9;P06400;Q92759;P35548;P08047;Q00291;Q09F  
C9;Q14966;Q8IYI8;Q8TA94;Q05516;Q9HC52;Q7Z3K6;P12956;Q8HWS3;Q9GZS3;Q00255;Q12830;Q96P  
M8;Q92870;P12980;B4DX44;P52737;Q14839;Q8TF50;Q9BXP5;Q63ZY3;Q8N1L9;P54252;P0CG24;Q68D  
Y9;O15405;A6NJL1;Q9NQV7;Q9NY43;P35638;Q5HYK9;Q9HAH1;Q14588;P29083;P31276;Q33E94;Q6IP  
X3;Q9Y5R5;Q15466;Q96T76;P04198;Q7Z3V5;Q8NBZ0;A8MTY0;Q9UK10;Q8TDD2;Q9H7S9;Q9NPF5;Q8TA  
W3;Q9UJW9;P09874;Q5JNZ3;Q5T0F9;O15015;Q6ZN79;P17025;P51532;P47974;Q9HAP2;Q9H981;Q159  
37;P18846;Q9NYF8;Q94993;Q8N140;P23760;Q6SJ96;Q1ZD2;P54259;P10073;P52740;Q5EBM4;P631  
67;Q928P0;Q9H1A8;Q9H5Q4;Q9H0E3;Q8IY57;Q86T29;Q15723;O75182;Q8NBB4;Q94892;Q00570;Q166  
70;Q32MQ0;Q9BXG8;Q75928;Q7L3S4;Q96028;Q6RSH7;Q16236;Q92670;Q9H7L9;Q94983;P11142;P527  
41;Q14693;Q96IR2;Q8N988;Q9H116;P55771;Q9BY41;Q02878;Q8TF32;Q8N8J6;P31269;Q15306;P599  
23;Q5H9L2;Q9NWT6;Q14241;P41212;Q96AV8;Q03938;Q4G112;O60481;Q03701;Q9Y222;Q99502;Q3KN  
S6;Q8N720;Q8NHM5;A6NN14;Q9BRH9}

13735

Pathogen[ P03346] interacts with 2127 human

partners: {Q86UQ0;E7ETH6;Q96T92;Q15723;A6NK53;Q6R2W3;Q92681;Q12888;P31271;Q06330;Q990  
81;P85037;Q3C1V8;Q06945;P10244;Q6S9J6;Q3KNS6;P53805;Q14781;Q96NG5;Q5JVG2;Q9NPP8;Q96F  
V9;Q13886;Q969S8;O15265;Q9Y6Y1;P08048;Q9BZE0;Q5JUN0;Q12901;Q05481;Q9Y6J9;Q8N7U7;P312  
49;Q6PD62;Q7KZ85;P0C860;Q95201;Q9NWS9;Q062T3;Q9UPW9;P49716;P54821;Q9Z398;Q8NI  
51;Q03989;P47902;P05412;Q9UKS7;Q96N20;Q00213;Q9Y467;Q92585;P17097;Q96CJ1;Q3KNV8;Q128  
30;P78424;Q9NZU5;Q15542;Q9UHL9;Q96LW1;Q75603;P49639;Q16621;P57071;Q5T5D7;Q75592;Q7Z7  
K2;Q9NQ92;P61978;Q99742;Q9HBT8;P15863;Q15562;Q9UHF7;P46937;Q96S65;Q13487;Q13263;Q9NZ  
R4;Q96RK0;Q494X3;Q9Y3Y2;A8MXY4;P35453;Q9NQX6;Q15370;Q9ULM6;Q9Y4Z2;Q75364;Q8N0Z2;P312  
60;Q9NR83;Q14207;Q6RSH7;P98182;Q9NRZ9;P50219;Q8TF39;P09086;Q02078;Q95159;Q023  
86;P38935;Q16666;Q9NQX1;P52954;Q96ES7;P10827;Q9UMS5;Q8N4W9;Q9HB65;E9PGG2;P49910;P0CJ  
88;P11473;Q86U70;Q3MJ62;P31268;Q8WXF1;P50570;Q94892;Q15788;P28324;P23511;Q9HBD4;Q8N6  
53;A6NGD5;O15535;Q8IX12;Q8IZM8;Q9NPA5;P55198;Q3SY89;P86452;Q9NQV7;Q99811;A2RRD8;Q6P1  
L6;Q53ET0;Q6QHK4;P0CG31;Q9HAH1;Q99687;Q95402;Q08AN1;Q95677;Q9H8N7;Q96NJ6;Q95625;P129  
56;Q9A33;Q14207;Q9BRR0;Q8IUE1;C9JN71;Q99966;Q6ZRF7;Q9NPP6;Q9UGP4;Q7Z340;Q012  
01;Q9BRU2;Q5T1R4;Q8N7R0;Q9P031;Q96MR9;O60907;Q8WV37;Q9NZV7;Q8WTZ3;Q9UD57;P50221;P188  
47;Q94915;Q9NQG5;Q96C00;Q8N1L9;Q15928;Q86YD1;Q15834;P29373;Q8N8G2;Q14135;O14813;Q146  
78;Q9H091;Q96EK4;Q7RTS1;Q02878;Q9BWM5;Q14591;Q99612;P29374;P68036;Q9BUY5;Q9UEG4;Q7Z5  
71;P58012;Q14258;Q14814;P78337;Q96017;Q8IXH7;P36508;Q93062;Q96S94;Q9Y2P0;A6NN14;Q9NX  
90;Q8NCA9;O75446;P14373;O15522;Q8WYB5;Q52M93;Q9H116;Q96C55;Q12905;Q32MQ0;Q01538;Q8NA  
F0;Q3KNW1;A6NFD8;Q8IVW6;Q15916;Q9ULD5;P46100;Q9GZR2;Q9UPW6;A6NJ46;Q9C005;P16220;O153  
92;O60765;Q9BV97;Q8IZC7;Q9UQR1;Q08999;P56270;P17039;Q2QGD7;Q75362;Q9UKL0;Q9BQ0;Q9Y2  
P7;Q9H3M9;Q8NAP8;Q9H2W2;O60248;Q5HYK9;P06401;Q9UL59;Q43918;Q9H0M5;P43355;Q96BA8;P176  
76;Q7RTV0;Q9H2Z4;Q03052;Q9UIV1;O43167;P78414;Q16384;Q99543;Q9Y4X4;P19484;P17098;Q86V  
71;O15370;Q52LR7;O14901;P0C7T5;Q8NC26;Q96NJ3;P36402;Q9ULW3;O75175;Q75586;P26633;P153  
36;Q9UIF8;Q92800;Q99607;Q86Y97;O60716;Q9BQY4;Q9P0W2;Q96HQ0;Q05925;Q9NU63;Q13129;Q9Y2  
V2;P78415;Q2M218;P36956;P52739;O15209;Q05066;P0CJ78;Q8N187;Q3B8N5;Q8N141;Q8WYH8;Q5VT  
R2;Q7Z3V5;Q9H2P0;Q8IU81;Q03828;Q16656;Q9C0F0;Q00613;Q6ZT77;Q9UL58;Q8NCN2;P35638;P355  
48;Q8N823;Q8WW38;Q6ZQV5;P52747;Q9BYU1;Q00167;Q9Y2L8;Q96DB2;P08235;Q8TAK5;Q06547;Q9HD  
90;Q75530;P11831;P31270;Q15329;Q9UHR5;Q3KQV3;Q43296;Q9NV56;Q8TAQ5;Q6PEW1;Q9BXA9;Q86T  
J5;Q0VG99;P28347;Q9Y5W3;Q9UQ80;Q8IUE0;Q96K75;Q43309;O15379;Q5FWF6;Q9ULM2;Q460N3;Q9NP  
62;Q6ZSB9;Q7Z3I7;Q9UKT9;Q9P0T4;Q12857;Q99594;Q06732;Q96H40;Q9NQR1;Q8NFD5;Q99471;Q7Z5  
D8;Q71SY5;Q8N3X6;P21127;Q8NFW5;P48443;Q8IXW5;P06400;P0CJ87;Q8N7M2;Q75123;P48378;Q4G1  
12;Q96IQ9;Q14590;Q9HD42;P0CH99;P40426;Q14774;Q96K62;Q9NW07;Q6V9R5;P35789;Q9GZV5;Q8NE  
F9;P52740;Q9NR11;Q8TD23;Q15291;Q08AG5;P51532;P13349;Q43711;Q00577;P35226;P54845;Q969  
W8;Q13148;Q15797;Q70SY1;Q14188;Q9GZV5;O60393;P50549;Q00059;Q969X6;Q7LBC6;Q12772;Q96S  
Z4;Q96EZ8;Q8N1B3;Q96MU6;Q8NFX5;Q9BZE3;Q92841;Q9C086;O60315;O60563;P0C7Q3;Q8WXP8;Q9BW  
X5;P48382;Q03933;Q60290;Q6P1K8;P17027;Q9Y3Q8;Q5MCW4;Q96HZ4;P51786;Q9UKI9;Q99626;Q947  
63;Q12837;Q03936;Q16559;Q9H9F9;P96JG9;Q00056;Q15911;Q2M1K9;P17275;P78347;Q32MZ4;Q86T  
29;A8MUV8;P82094;Q95628;Q147U1;Q8TD17;Q14587;P52738;Q9NQV6;Q8TF45;P49116;P0CB33;Q154  
66;Q9UJQ4;Q8N680;Q6XYB7;P24863;Q7Z7C8;Q9NZI6;Q9UIU6;P14316;Q9UL18;A8MVS1;P24278;P493



36;Q8WYN3;P17861;Q8WYP5;Q96KM6;Q8NEP9;P23769;Q14872;O43159;Q8NE65;Q9NSI6;Q5VIY5;Q9HD15;Q14527;Q96HR3;Q8N693;P25490;P0C7M4;Q15583;Q8N5U6;P19419;O95983;Q9H4S2;Q96A56;Q15637;Q9NS18;O14978;Q8NA19;Q15633;O75971;P51610;Q0PNE2;Q49AN0;O75505;Q15573;P14859;Q6P280;Q9NSC2;Q5TOB9;O75486;O43313;P48380;Q8IYA7;Q8N393;Q14498;P25208;P50548;Q8IWI9;P23246;Q96I27;Q8TF20;Q13888;Q8NF99;Q92925;Q8IX15;Q6MZP7;P52741;Q9NR55;Q8TD26;P55197;Q96M67;Q9C0A1;P20264;Q8WZ33;Q86YE8;P15923;Q5QEJ6;Q9H307;Q6ZMY9;Q6VB84;P78413;O75820;Q86WP2;Q8IUD2;Q9HC52;P15172;Q9H2G4;Q15796;Q86WZ6;P41225;P56693;O75475;P49750;O14744;Q9BW11;P23760;Q8IZ20;P56524;Q6NSW7;P15408;Q9UL68;Q9H3P2;Q9UK11;P17535;P13010;Q86YW9;Q8IYH5;O43298;O14709;P19622;Q6NX45;Q9UN51;O00712;A6NE82;Q5PSV4;Q3SY52;Q04743;O75534;Q71F56;Q15906;Q92858;Q93074;Q96QT6;Q9NP11;P31276;Q5H9F3;P17026;Q99856;P17022;P23409;A6NFQ7;Q8N5A5;Q727J5;Q9ULH7;Q8TBC5;Q16520;Q09593;Q12986;Q5HY98;P35227;Q7Z589;Q04206;Q8IZ40;Q5T3J3;Q68DI1;P33076;Q9HAJ7;Q86UE3;Q53H80;P51826;Q8TAK6;Q9H9D4;Q8IV54;P0CJ85;Q3MIS6;Q8N9K5;Q8N895;P52737;O95238;Q12906;Q7L3S4;O95163;O94776;P28698;Q6ZMS7;Q9ULJ3;P13056;Q9NQ69;O00321;Q9UN30;Q6PJG2;P11142;O00268;P52951;P82979;O60806;Q92886;P41161;Q8TDY2;P56177;Q96CS4;Q9P0L1;O60244;Q9BYW2;Q96IF1;Q9H4W6;Q9ULM3;Q92826;Q04741;Q6ISB3;Q86VNL1;Q63HK5;Q5TB30;P15173;Q08050;Q9BYP8;Q17R26;Q8IX03;Q14209;P12525;P42226;P52742;Q9UDV7;Q8IUR6;Q9C0D4;Q9BYE7;Q15306;Q8WTR7;Q96RL1;Q9Y5Q3;P15622;Q8NDQ6;Q9P2Y4;P23759;P10588;Q96QS3;Q9HCK0;Q8IVC4;Q96AE4;Q12824;Q9NQ33;P14652;Q96AV8;Q8TA94;Q9C0F3;Q6PG37;O43186;Q9NX65;Q16526;Q8TF32;Q9NRJ4;O00257;Q9Y2D1;P27540;Q8N5J4;A8MQ14;Q9NP08;Q86UD4;Q96SE7;Q86U86;Q969V6;Q9HCG1;Q9BTT4;Q9NZI5;P58304;D6RGH6;P16989;P26358;A6NJT0;Q15560;P67775;Q9P2F9;Q8TAF7;Q9UBL3;Q99717;P0C7X2;Q14646;Q92748;P20823;Q9H0E9;Q9Y3M9;Q96BR9;P17038;Q92831;Q9H4Q3;P25440;P0CJ89;Q02575;Q96RE7;A6NK75;Q9H609;O15350;Q96N38;O15105;O75626;Q9NTW7;Q9BUJ2;Q8NDY6;Q99502;Q9BSM1;Q96EK7;Q9UBX0;Q9Y534;Q92945;Q9BYE0;O60682;Q9NRL2;Q14586;Q16254;Q7RTU5;Q00978;Q6P198;P29084;Q04864;Q7RTT6;Q96AQ7;P17014;O60902;O75030;Q92670;Q9Y5R5;Q8N587;P10074;O43316;Q9UM63;Q5VVH5;P0CI00;Q8NB42;O60224;Q9NV72;P14653;P42771;P63272;Q86VK4;Q3SXZ3;Q8WUH2;Q8TE85;Q9UI95;Q8N5F7;O00570;O00409;P31269;A6NEJ1;Q96RJ6;Q15652;Q96BV0;Q9H165;Q09FC8;A2RU54;Q8N859;P52743;P13378;O15090;Q86Z02;P17483;Q8NBB4;P42166;O00472;O75151;Q03923;Q8TEE9;O75764;O00291;Q96EI5;O95644;Q8NCP5;Q8TAP4;Q6XD76;Q9UJW8;Q86V15;Q9BYH8;Q01094;Q9BY31;Q2VWA4;Q6NZI2;Q9NUA8;P17032;P49715;A5YK6;Q9NPJ4;Q8N2I2;Q9ULX9;P17096;Q13398;Q66K89;P53GI3;Q92754;Q8NF64;Q8N554;A6NJL1;P17025;O43463;Q9Y5J3;O15055;P15621;P31274;Q9UBC0;P17010;O43345;Q6P9A1;O15059;P59817;A8MT65;Q01860;Q92750;Q9HCX3;Q9ULJ6;O75182;Q6EKJ0;Q96SQ7;O95997;Q96H20;O14867;Q08945;Q9H3H9;Q9NYW8;P20719;O00151;Q13351;Q9BQ19;P0CG40;O15198;Q0VGE8;Q9NZ81;O75444;Q8N7K0;Q9H4T2;Q53T94;P78426;Q8NDX6;Q9NSD4;Q9P086;P0C1Z6;Q499Z4;Q8N3C0;Q13404;P0CJ90;Q6P9G9;O15534;P08047;P9BQW3;Q9BXP5;Q92870;Q9H582;P12980;Q13889;Q9H0E9;O14503;Q15853;Q96LW9;Q8TF68;P06733;P20226;Q9HC78;P41218;O00422;P20265;Q9H5H4;Q8N9F8;Q92766;Q96H501;Q96JM2;Q8TDD2;P98168;P18850;Q9H963;P17480;Q9UK10;Q3B7T1;Q9H869;P22670;Q7Z5L9;Q8WY36;Q9NZN8;Q14119;O95600;Q8N8E2;Q96CX3;Q9UFW8;A8MUZ8;P52736;Q9H5J8;Q14919;P30153;Q03111;Q5VUG0;P98169;O75155;O43593;Q96G25;Q14592;Q16236;Q15561;Q14934;Q86W54;Q14103;Q9UQB3;Q9HB31;O60225;O15060;O60663;Q14526;Q5U623;Q16650;Q9Y222;O43680;Q15532;P49417;O96004;P17036;Q6ZNH5;P01106;O43364;Q6ZMW2;Q3ZCX4;Q8TBZ5;Q4LE28;Q5T230;Q9BS34;P41162;P0CJ79;Q6P1N0;B4DX44;O75448;Q03701;P51843;Q96MN9;Q9BWW4;Q9UHB7;Q12926;Q9NP66;Q9HC44;O75925;Q8NBF1;O43365;Q9BXX3;Q15528;Q6ZNA1;Q15699;P28702;Q9UL49;Q9NP71;Q3T8J9;O60583;P21506;P28358;Q14186;P50222;P51508;Q07666;Q92830;Q9Y330;Q9UK13;Q8N0Y2;Q92499;Q9Y5B6;Q8N8Z8;Q96BN2;Q9BT49;P18848;Q14582;Q2M1V0;Q96JL9;Q9P243;Q8IYI8;O00327;Q8ND82;Q58F21;Q9BQ70;Q9UKL3;Q15170;Q14151;P14921;Q9H1I8;Q06710;Q92794;Q9P215;P84022;Q15742;O14628;Q86Y25;Q8HWL3;P11308;Q04726;Q9H063;Q8IWS0;Q86SE9;Q8N1W2;Q96DT7;Q8IYX0;Q12968;O43513;P31275;Q8NHY6;Q8WWY6;P17542;Q96IZ0;Q9BRH9;O96019;Q9Y224;Q9HCS4;Q9Y692;Q9BYV9;Q8WUU5;Q14863;P10242;O60481;Q9UIS9;Q6ZN11;O95231;Q8IXF0;Q9C0J9;Q8NB15;Q6ECI4;Q9UNY5;Q9H175;Q8IYM9;Q8N140;Q8NDT2;Q96F24;P13984;Q8N1G0;O43829;Q9H7R5;Q8TF47;O43541;O75157;Q99990;P22736;Q5EBM4;O14948;A8MWA4;Q9Y3C7;Q6VUC0;Q15929;Q9UL36;Q9NXT0;Q5JT82;O94864;Q96D98;Q5THR3;P15976;O43670;O95125;O15266;O95096;Q9BR84;Q6P9A3;Q7RTT4;Q6ZMV8;Q969R5;Q96PE6;P53999;Q5JVG8;Q13469;O75478;Q9GZN2;Q92539;Q06546;P67809;O43189;Q96F45;Q9P0U4;Q15596;Q96JUM7;O60381;Q03468;O00255;Q9H9T3;Q02446;O75528;P78395;O60519;Q9Y4A5;P19532;P17481;Q969G2;P10914;Q6VMQ6;Q96PT4;P52746;Q8WTS6;Q96GD3;Q8N5Y2;P49640;Q15072;Q86VE0;O75529;Q99NW7;Q8N3S3;P16415;Q02556;Q6AW86;Q9H7X3;O60479;Q96N22;Q15361;Q9NQZ8;Q8IYW8;Q68EA5;O95948;Q9UDV6;Q6P2C8;Q59GR2;Q33E94;Q15022;Q9P2R6;Q9H4I2;Q03924;A6NDZ8;Q9BX82;Q6ZYL4;Q86YP4;Q06730;Q99684;Q8WVC0;Q7KZF4;Q92769;P17031;Q9Y2G9;Q8N8J6;O95251;Q8N883;Q9UK12;Q15973;Q13342;Q14192;Q6ZN32;Q9H8G1;B2RXF5;Q9BQ87;Q9UBU8;Q9NUQ3;Q5JNZ3;Q9UBG7;Q8WXI9;Q13118;Q8TBZ8;Q04725;Q9P2J8;O95780;P49848;O75164;P42704;Q6IYP3;Q3KP31;O15499;Q6ZN79;O95076;Q9Y2N7;Q9HCU9;P52744;Q9UNN4;Q8IXT2;Q13547;Q09028;O75541;Q03112;O75373;P08651;P17041;Q6STE5;Q99576;Q96E29;Q04724;Q96G23;O60284;Q9HBM6;Q6IQ32;Q9Y242;P40425;Q86VZ6;Q2M3W8;Q7RTT3;Q08ER8;Q9HCK8;Q02086;Q13761;Q5SVQ8;Q14593;O14497;Q9UN79;P51946;Q96BR6;Q13506;O43361;Q8TCN5;Q05BQ5;P63165;O00470;P28356;Q7Z4V0;Q96GN5;Q9HAP2;P47974;P09017;Q16534;Q8WVJ9;P0DI81;Q9Y250;B4DU55;Q9NZC4;O60304;Q14585;Q92784;Q9BY41;Q96N77;Q6IQ21;Q6ZS27;P52657;P50750;Q02548;O95905;O75840;Q7L1Q6;Q9H808;Q9NVM4;Q5JUK2;Q8N7Q3;P49711;Q6UUV9;Q13330;O94805;Q01954;O75618;P51815;Q6P1X5;P17544;Q9Y5B9;P09629;Q5VWX1;Q9Y6X8;A6NNF4;P51825;P84550;Q15744;Q9H7S9;Q8TAW3;Q8NA42;Q8NB12;Q96C28;Q9BXJ9;Q9H5Q4;Q96N95;B4DXR9;O75346;O14896;Q9UER7;Q13111;P37275;Q9H981;Q5HYR2;P35680;Q7L2R6;P17029;Q8NEI1;Q9NQ87;P31273;Q16649;Q99909;Q9UK58;Q96RS0;Q9H2F5;A6NIX2;Q6DD87;Q8TE02;Q16514;Q9UIF9;Q6PF04;Q8NEM1;Q86XN6;Q15475;O14627;P82970;Q53TQ3;Q9BU19;Q9Y3T9;Q9NYB0;Q96JC9;O43439;Q969E4;P10073;Q8IX07;Q99814;Q12778;Q96T23;Q12800;Q9H8M2;Q8TC21;Q9BUG6;P10243;Q9BRG1;A0JLT2;Q16576;A6NKF2;Q99551;Q9UNY4;P42224;P17035;Q8N9N5;Q7Z401;Q96NG8;Q9Y2Y4;Q9Y462;Q8WUI4;Q9HCZ1;O14686;Q9HCE3;O75582;P17021;P39687;Q8NFJ8;Q9UPP1;Q9Y5R6;Q16533;Q6ZN06;Q13495;Q9GZT3;Q9UBX2;Q01167;Q63HK3;Q13887;Q13105;Q92541;Q5H9I0;P16383;Q8N196;Q8NDW4;Q5SXM1;Q53QV2;A6NI15;P22392;Q8N8C0;Q96NI8;Q5TGS1;Q6N043;Q9UKV8;O75376;Q6Q0C0;B1APH4;P98177;Q96S

K3;Q6BEB4;Q86YH2;Q9UBD0;Q4V348;P09016;P50539;A8MV65;O94983;C9JBD0;P17030;Q9UNP9;Q9Y5  
V3;Q12962;Q9HBZ2;Q7RTT5;Q99496;Q07352;Q16385;Q9H5J0;Q9NWB6;P78317;O14979;O95718;Q8N9  
Z0;Q9Y468;Q06416;O14593;P78367;Q8WUF5;O60281;Q3ZCT1;Q05195;Q14653;Q5TYW1;O00267;Q8NC  
F5;P78411;Q9BWT1;Q8N2W9;Q9H707;Q5VTD9;Q14190;Q96EG3;Q9UBS8;Q5VV67;Q6GYQ0;Q9HCD5;Q149  
66;Q6ZRS2;Q8NB50;Q8NBZ0;P09874;Q14865;P35713;Q15910;Q96T58;Q6IE81;Q9Y6R6;Q15014;O754  
69;Q9NWH9;O94993;Q9NQ03;Q9HBE1;Q13568;Q99459;P43356;P09630;Q15935;P15407;Q9Y2G7;P277  
97;P41182;Q92994;P40337;A6NNA5;Q76KX8;Q8N5P1;Q8IYB9;Q9GZS3;P60002;Q6GRU7;Q9NRM2;A8K0  
S8;P17028;O75909;Q16633;Q8WX92;P28749;P17020;A6NDR6;O95475;Q8N344;P04198;Q92759;A6NP  
11;Q68CJ9;Q05516;Q8N371;P31267;O95619;Q9BWW7;Q96RK1;P20749;Q9H944;Q8N720;Q96MA1;Q5T6  
19;O43830;Q2KHR2;P17017;Q9UK39;Q9UM07;P61244;P55199;Q96SC8;Q92481;Q99608;Q86XU0;Q139  
52;Q6ZLN01;O15525;Q96ME7;Q96BD5;Q6ZSS3;Q6PDB4;Q15233;Q13516;Q5PRF9;Q9C0G0;Q8WVM0;Q145  
84;Q9H2C1;Q63ZY3;P10072;Q4LE39;P21675;Q9Y2T7;P11161;P35712;Q5JVS0;Q8TB69;Q6IA86;Q153  
26;Q96JF6;Q15369;O95073;Q9HCU5;Q9UKV0;Q6ZV50;Q9H7Z6;P32242;P35269;Q8N108;P17023;Q159  
37;P14317;Q9Y2D9;Q49AA0;Q15759;Q9NVC6;P32519;Q9NYV6;O75437;P55347;Q17R98;P0C7V5;Q929  
22;P42568;Q6P2D0;O95218;Q9BZK7;Q99623;O14771;Q04727;Q96SL8;A6NMT0;Q6U7Q0;B2RXH2;O754  
61;O60925;P41970;Q96JS3;P62508;Q9HB58;P10828;Q9UGL1;Q9UBR4;Q86XF7;Q15047;O60422;Q9HB  
T7;A8MTQ0;Q8NAP3;O15015;Q9NSJ1;Q8TF50;A6NLF2;P28069;P51858;Q9H9C1;O43763;Q9Y2K1;Q9BY  
N7;Q7L190;P17947;Q9Y543;Q01658;Q9UGU0;Q9UQF2;Q99929;Q9GZU2;Q9GZZ0;Q96MM3;Q99593;Q96P  
Q6;Q6ZLN30;Q9UII5;Q99549;P11474;Q5XKR4;P51504;Q10586;Q13363;Q8IW36;Q9UHV2;Q02080;Q96N  
M4;Q8N7G0;P78412;P10599;Q05215;Q9P255;Q8IYF1;Q9GZX5;Q9Y6B2;Q9UK33;P48552;A9YTQ3;Q8NG  
57;Q13490;P28370;Q86VP6;O75333;Q94992;Q9H7L9;P35232;Q96MH2;Q86X55;P61968;P40424;Q9H4  
Q4;Q96QE5;Q96ND8;A6NDX5;Q76L83;Q6P4R8;Q01196;P11532;P41212;O15226;P19838;Q9BSK1;Q9UH  
73;Q8WUY8;Q12873;Q03060;P63167;Q8N972;Q6UUUV7;P58317;Q9UHQ3;Q7RTU0;Q8NDN9;P56178;Q134  
85;Q8IXJ9;Q0D2K3;P35251;Q96KG9;P22681;P13682;Q2M3X9;Q15270;Q8WYA1;Q9P2D1;Q9Y5A6;P071  
99;Q075360;O43812;P31314;A8MTY0;Q96LX8;Q9UFB7;Q9Y232;Q7L945;Q8TBE0;O94916;P17040;P565  
45;P51522;Q9UKY1;Q9UPG8;P53567;P59923;Q15424;Q9Y651;P24928;Q9H5V7;P23193;Q96NL3;P276  
95;Q5H9L4;P54253;Q9HCL3;Q5TC79;Q7Z3K6;P0C7X5;Q02040;Q96IT1;P61457;Q9UC06;Q13029;Q9BY  
K8;Q9HAF1;Q13401;Q86UU0;Q9NWT6;A6NLW8;Q96IS3;Q8IZX4;P81877;Q9Y2X9;Q96KN3;P29083;P202  
90;O15516;Q9P1T7;Q8NHM5;Q969J2;Q16600;P18146;Q92993;Q9UFF9;Q8WUB8;Q8N782;Q9BS31;P432  
68;Q13045;Q86UZ6;Q8NI08;Q9Y2X0;Q9UH92;Q96LI6;Q14145;Q00403;Q9NQL9;Q6RFH8;Q9H9Z2;O753  
98;Q7Z353;O43318;Q8IYN0;Q99583;Q92793;O75525;P39880;Q9Y603;Q9UID6;Q92985;Q15697;P623  
24;P51531;Q8TEY5;Q9NR48;Q6ZN57;Q01844;Q6NUN9;Q8N488;Q13360;O60869;Q9UKW6;Q9Y458;Q86X  
95;P35869;Q5T6S3;Q5T7W0;P78545;O75467;Q14CW9;Q9NZL3;Q9HW3;Q9Y6X2;Q13503;Q7RTU3;Q96H  
86;Q15776;Q9Y6Q3;P51523;O00482;Q86T24;Q9H5I1;Q9UHX1;Q9HAK2;Q5VZB9;Q9Y252;O60828;Q8NE  
K5;Q14765;Q9Y2A4;Q02930;Q14588;Q15545;Q8IXH6;Q6AZW8;Q3L8U1;Q13112;Q8IY57;P56645;Q460  
N5;Q8N726;O60675;O75290;Q9ULK4;Q9HAZ2;Q01101;Q9ULV5;Q9AUL36;Q8TAU0;Q9H9S0;P17019;Q8NC  
K3;Q6IV72;Q86UP8;Q16587;Q6P3V2;Q5VWG9;Q6NT76;Q10587;Q5SXM2;Q9HCE1;Q8IZ26;Q9NYF8;O004  
01;Q9Y618;O75593;Q9Y2W1;Q9UIE0;Q13562;Q99504;Q8N988;Q8TD94;O75928;P52630;O15527;Q96G  
C6;Q01892;P35711;Q68CP9;Q9BSG1;A0AVK6;Q15654;Q9BTC8;Q9BZ11;Q49AM1;Q92966;P40763;Q6AH  
Z1;P35398;Q9BXX1;Q9UJU3;Q8NHW3;P32243;Q68DY9;Q43254;Q96JN0;Q9Y473;Q96CK0;Q969H0;O753  
86;O60543;Q86UP3;Q9UJN7;Q8NEA6;P52655;Q5EBL2;O00110;Q8TAQ2;Q3SY56;Q0D2J5;Q16670;Q9UL  
C4;Q6ZN28;Q9UBK9;Q8TAD8;P78543;Q9H204;Q9Y2H8;Q68G74;Q96RE9;Q9NPA8;Q8N3J9;Q5BXX8;Q96E  
B1;Q9Y294;P56915;Q8IVP9;Q9BSN8;Q9UMX1;Q5CZA5;Q7RTV3;O75494;Q9BXG8;Q02577;Q6P1K2;Q926  
64;Q9NYT8;Q8WXB4;Q9NS37;O95343;Q9UKN5;Q13285;P15822;A6NM28;Q8N9N2;P0CG00;Q12972;P052  
04;Q06587;Q9NVA0;Q9NVV9;Q9H160;Q02447;Q92858;P01100;Q96NK8;Q9UBB5;Q96PK6;Q9UIW0;Q9H3  
M7;Q6ZNG1;Q9UMQ3;Q6NX49;Q86UQ8;Q5TEC3;P49335;O60711;Q01664;P51948;Q9NY43;Q99676;P535  
39;A6NJJ6;Q96SR6;Q13185;Q99743;P15036;Q15544;Q9Y5K5;Q12796;Q6ZN08;O00716;P09067;Q9UI  
L8;P32780;Q9NRC8;Q8IZD2;P17509;Q9UQL6;Q13772;O15164;Q00444;O75081;O95633;Q9UHV7;Q96R  
N5;Q9UIH9;O95416;Q8N9R8;Q96PM9;O95503;O14529;Q92618;Q92785;Q96I24;Q9UC07;P0CJ86;Q149  
29;Q02833;Q01826;P55055;A8MZ59;P54198;Q43248;Q6W2J9;Q8TAU3;Q8Y2Y9;Q8TB81;Q96IK5;Q96S  
Q5;P54259;O15405;Q15650;Q6P1J9;Q6NSZ9;P18615;Q96LA8;Q8WYK2;Q71F23;A6H8Y1;Q14938;Q9NX  
R8;Q9H4Z2;Q13106;P17024;Q9BUE0;Q96PT3;Q14549;Q96T88;Q9UJL9;P31629;Q15714;O14770;Q9UJ  
W7;Q96T76;Q8N7H5;Q9NZI7;Q13352;Q7Z2F6;P51814;Q6ZR52;Q9H511;Q13901;Q32M78;Q9Y4E5;Q9P1  
Z0;Q9NVW2;P68104;Q7Z6R9;Q01543;Q9UKD1;Q6ZW49;Q6ZN55;Q96JC4;Q96JK9;Q2TB10;Q9UJW9;Q86W  
11;Q5T0F9;P15884;Q14134;P14651;Q2VY69;Q7RTU4;O14776;Q6ZN17;Q8IZL2;P18846;Q00653;Q8N1  
84;P35452;Q14839;O15062;Q8N8L2;P17482;P54252;P0CG24;Q96MX3;O00488;Q8IUM7;A8K8V0;Q6ZN  
19;Q6ZNG2;Q13127;Q96JB3;Q14241;Q9HCC6;Q6ZNG0;Q92782;Q9Y2Q1;Q8N100;Q9H7R0;Q13465;Q68D  
Y1;Q86TJ2;Q8NHV9;O75177;A6NHJ4;Q92600;P22415;O96028;Q8N228;Q9HBU1;Q9Y4A8;Q9GZV8;Q9BT  
A9;Q8NDP4;Q8IYN2;Q96IR2;O43719;Q14693;Q5BKZ1;Q14140;Q9BQA5;Q6PK81;Q9P2K3;Q9HAW0;P081  
51;Q14686;P57086;Q06455;Q9NPF5;Q92988;Q12872;Q96SF7;Q16594;Q15319;Q5VUA4;Q9UBW7;Q155  
43;Q99581;Q96GE5;P55771;Q9UJU5;Q9UQR0;Q96K58;Q03938;Q15572;Q9H2A3;Q99732;Q9NPC7;Q86T  
U7;Q92610;Q5H9L2;A6NFI3;P10589}

13736

Pathogen[Q85601] interacts with 1809 human partners: {Q5T230;Q9UQR1;Q9HCZ1;Q8N8C0;Q9Y534;Q03701;Q6R2W3;Q96RK1;Q9ULM2;Q9HCG1;P542  
59;Q9UNN4;P51946;O95619;P01106;Q9P2R6;Q3KNS6;Q92618;P18146;Q494X3;P52657;P10243;Q96I  
Z0;P17480;Q9HCE1;O75373;Q8N3X6;Q8N1G0;Q969S8;O00401;Q9ULW3;Q68CJ9;Q8N196;P08048;Q969  
E4;Q9H5I1;O95625;Q8IYN2;Q6NX45;Q6PD62;O15198;Q9UPN9;O75182;P78317;Q8NI51;Q99543;Q96M  
H2;Q8IXT2;Q9Y250;Q03989;O60225;Q9Y2X0;O02123;Q15637;Q92585;P17097;Q9NRC8;P51786;Q96C  
J1;Q15014;Q8TE85;Q15532;Q969J2;Q8N9K5;P08424;Q9NZU5;Q15542;Q9UHL9;Q32M78;P28698;Q8IZ  
C7;Q92664;P49639;P15621;O75971;P09629;Q63HK3;P61978;P0CG00;P51815;Q9UHF7;Q9Y5T5;Q96S  
65;Q13487;Q9Y3Y2;P54198;Q6ZR52;O15527;Q8N5Y2;Q9NQX6;Q15370;Q7Z5D8;Q9UKV0;Q96QR8;P081  
51;Q9H2F5;Q6PEW1;Q86W11;Q8NA42;P11831;Q9Y2T7;Q14929;Q96T76;Q4LE39;Q15853;Q8TF39;Q9HB  
T8;Q9UPG8;O14896;Q02078;Q96JK9;P17676;P15036;Q16666;Q5HYR2;P09874;O60481;Q14593;Q96D  
B2;P62633;Q9BUE0;O75360;P17040;Q6ZN11;P11473;Q2VY69;Q3MJ62;O94864;Q8N720;Q86XU0;Q064  
55;Q96SZ4;Q9UNY5;P25208;Q9H1I8;Q14586;Q96MA1;P22681;O14529;O15535;O15499;Q9NPA5;Q9UJ  
W8;P33076;Q9BT49;Q13495;Q8NBB4;Q9NQV7;Q9H8M2;Q6VUC0;Q96JB3;Q9UKL3;Q53ET0;A6NHJ4;Q96P

K6;Q9ULJ3;Q13127;P14373;O43316;Q9H707;Q2M3X9;Q9GZW5;Q8IUE1;O75528;Q96MX3;Q16236;Q6V9  
R5;Q5EBL2;C9JN71;O75928;Q53TQ3;Q13490;Q7Z340;Q9BRU2;P14316;Q6ZLN17;P17096;Q8WV37;Q96S  
R6;Q5JNZ3;Q96ND8;Q6PG37;Q96K62;Q15834;Q8N8G2;O14813;Q8WVC0;Q9Y4Z2;Q96EK4;Q96RL1;Q5JV  
S0;Q14765;Q5TYW1;A6NFI3;Q7Z591;Q8N228;Q14258;Q96017;Q07666;Q9UC07;Q96CS4;Q92754;Q025  
56;P17028;P51522;O60563;P42568;P61968;Q8N7M2;Q9P0W2;Q969W8;Q9NUA8;Q8TDD2;Q9BWX5;A6NK  
75;Q01538;Q6ZYL4;P0CB33;Q99687;Q9ULD5;P09086;P21506;Q6XYB7;Q15466;Q01892;Q8N371;Q9UP  
W6;A6NJ46;Q86X55;O15534;Q8IUR6;Q9UQ80;P50539;Q12901;Q08999;P56270;Q9H8G1;P15976;O759  
09;Q969H0;Q9BQG0;Q3SXZ3;Q96SC8;Q6UUU9;Q9BY41;Q9UL59;O94776;Q2KHR2;Q7RTV0;Q7L945;Q929  
94;O15265;Q96H20;Q9C0G0;Q16384;P19484;P50750;P17019;Q52LR7;Q96NG8;P15172;Q04724;Q5HY  
98;A6NNA5;Q96BD5;P14921;Q9ULV5;Q6P1L6;Q03052;Q8N8L2;Q6ZN57;Q96BR6;Q9ULK4;Q6ZMS7;Q96H  
Q0;Q96JM2;Q8N9R8;Q9Y2N7;P86452;Q9UUL6;Q8NB12;P13682;P08651;Q3B7T1;Q9UIF9;Q3L8U1;Q86V  
15;Q6STE5;O75151;Q96JF6;Q8TBE0;Q5PSV4;O75398;P17032;Q16656;Q9C0F0;Q6PF04;Q9UL58;P600  
02;P17036;Q6DD87;Q9HCL3;Q14CW9;Q86U70;Q06546;Q9Y2L8;Q9P2D1;P50548;O95251;Q9Y603;Q153  
29;Q8WW38;Q9UK58;P56645;Q8TAQ5;A6NIX2;Q02386;Q0V999;Q86YE8;Q9H307;Q9BYN7;Q8NAP3;Q6P1  
J9;Q14549;Q9HBT7;Q9UI95;Q5FWF6;A6NDR6;Q32MQ0;Q12857;Q16621;Q9NQR1;Q8IYN0;Q99471;Q7Z3  
98;P17020;P06400;P0CJ87;Q06330;P48378;Q969V6;Q96BV0;Q13360;Q8N7R0;Q96QT6;Q9H7S9;B4DX  
R9;Q9UIL8;O43541;P38935;O95677;P53567;Q96LX8;B1APH4;O60290;Q8TD23;Q8N8J6;Q60907;P133  
49;P39687;A8MWA4;Q96T23;Q9BR84;Q6ZNG0;Q9Y2Y9;P12980;Q12796;Q14103;P54845;Q14966;Q131  
48;Q15797;P15622;Q9Y294;P50549;Q96H40;Q969X6;Q2M3W8;Q13888;P14653;Q8N7U7;Q8N1B3;Q7Z6  
R9;Q9BZE3;Q9C086;O43248;O60315;Q8N5F7;Q7Z7C8;Q14587;Q03933;Q9HAF1;A2RRD8;Q8NDY6;Q9H0  
E3;Q8NHY6;P17027;Q9Y3Q8;Q9UM07;Q13112;Q9H9T3;A8MUV8;Q9NR11;Q03936;Q08AG5;Q9H9  
F9;Q9H116;Q2MIK9;Q99417;Q9UHV7;Q92925;Q6ZN79;Q9Y651;Q15424;P51826;Q99966;Q9NWS9;Q8N6  
80;P40337;O75030;Q7RTT3;Q9NR48;Q9BRG1;P15822;Q07352;Q9UL18;A8MVS1;Q33E94;P15407;Q8N7  
G0;P49336;Q8WYP5;Q96EK7;Q14872;Q8NDW4;Q9UKN5;P18848;Q6NSZ9;Q15654;Q5H9L4;Q14814;Q135  
06;Q9UDV6;Q13129;P19419;P40763;Q05195;Q8N3S3;Q9NWB7;O14978;P28702;Q14241;Q03112;Q49A  
N0;P28069;O60583;P17030;P32519;P14859;Q9Y468;Q9UQ92;Q9Y4A5;O60663;P52740;Q96KM6;Q6ZM  
Y9;Q8TF20;P23769;Q86TU7;P41970;Q9BUG6;Q9HC44;Q96MG7;Q15573;Q460N3;Q9Y2Y4;Q9NVM4;Q9H0  
E9;Q9NWT6;Q9NR83;O15015;Q9H609;O15516;P78545;Q86WP2;O75437;P62324;Q13106;Q9Y2X9;Q9UH  
X1;Q86WZ6;Q6NUN9;Q9UJW7;Q9Y242;Q12800;Q9BS31;Q9H3P2;B4DU55;Q8WYA1;Q9UER7;Q8IVP9;Q8IY  
H5;O14709;Q71F23;A6NE82;Q96SQ5;Q6ZNG1;Q3KP31;O75534;Q96PT3;Q09FC8;Q9H3M9;Q96IS7;Q5VW  
X1;Q86V71;Q12M93;Q15545;Q96H86;P17026;P17022;Q9H5A5;O60284;Q92610;Q9BT89;Q9ULB3;O146  
86;Q8TAW3;Q86UU0;Q16520;O95931;Q9UBU8;Q99504;Q9H0M5;P52744;Q14188;Q2M218;Q15723;Q127  
72;Q9H7Z6;P25490;Q8IZ26;Q96G25;Q6ZM55;Q86VN1;Q6IPX3;Q8N895;Q8IXJ9;Q96ES7;O43364;Q9BX  
82;Q71F56;Q96NG5;O00327;P0C7X2;P30153;Q8N5F9;Q13045;Q9Y618;O00268;Q2QGD7;O14503;Q7RT  
U4;Q8TDY2;Q8IX12;Q8NDP4;Q86XN6;P35712;Q10587;Q9UIV1;Q14588;P06733;Q6ISB3;Q9UII5;Q7Z2  
F6;Q5TB30;Q15583;Q96QE5;O43159;Q9H4T2;Q96J44;P11532;Q00059;Q8TBZ8;Q15306;Q8WX  
F1;Q14592;Q9GZV5;A6NFQ7;Q86VP6;A6NK53;Q9NQZ8;O14497;Q14591;Q9Y5B9;O96019;O00151;P188  
46;Q49AM1;Q14135;Q8N1L9;P58317;Q9NQ33;Q9C0F3;Q99814;O15392;P47974;Q8TF32;P27797;P163  
83;P27540;Q15776;A8MQ14;Q02833;O15226;Q3MIS6;Q3KQV3;O75290;P53999;Q96SE7;Q13363;B4DX  
44;D6RGH6;O75448;P26358;Q9HAW0;Q8IUE0;Q8NA19;Q9P2F9;O14646;Q9Y3M9;P17038;Q13469;Q9P2  
55;Q92831;Q9BUJ2;A6NM28;O75494;Q6PK81;O60682;Q99549;Q7RTU5;Q00978;P07199;Q6ZNO6;Q9Y3  
C7;P17031;Q96AQ7;Q8IYW8;P17014;P51948;Q9NZN8;Q96MU6;Q8N2W9;Q5T1R4;P19532;O15164;P100  
74;P78337;P18615;Q8NEP9;Q5VVH5;Q9NV72;Q49A33;Q9UJN7;Q92499;Q8WUH2;Q86SE9;Q15560;O434  
39;Q15742;Q9UFF9;Q6P1K8;A6NEJ1;Q16594;Q7KZF4;P42166;Q6NT76;Q9HAH1;Q16385;Q8WZ33;Q08A  
N1;Q9NZV7;Q99743;Q15596;O00472;Q03923;P52736;Q95983;Q99608;O95503;Q99644;Q99623;Q927  
82;P17024;O96004;P17017;Q15714;Q5VUG0;Q9Y692;O14744;Q2VWA4;P41162;O60304;Q7Z401;Q9Y2  
D9;P59923;Q8N2I2;Q00613;Q13398;Q53GI3;Q9UK11;O15525;P68036;O15405;Q86UD4;O43463;Q9NP  
71;P55055;Q04864;P20290;P17010;P49711;Q9UID6;O43345;Q9UIH9;Q8TAF7;Q15059;Q13952;Q8N1  
84;Q92600;Q9BUY5;Q8TF47;Q9UJL9;O14776;Q8IYI8;Q9NYW8;Q8WUB8;P51610;Q14145;A8MX4;Q9NW  
B6;Q9UBB9;Q02080;Q9BQI9;Q9NZ81;Q9GZS3;Q95125;Q9H9C1;Q12830;Q02878;Q9Y5Q3;P0C1Z6;Q8IZ  
X4;Q499Z4;Q13404;Q9H7R0;Q9UQF2;Q9UBG7;Q9Y6J9;Q8WX92;P10914;Q9NQG5;P08047;Q5VWG9;Q128  
88;Q969R5;Q99623;Q9H6W3;O60806;Q9HC78;Q8N9F8;Q6IQ21;P54252;Q9UH92;Q9H501;Q01954;Q952  
01;P52630;P82979;P55771;Q5VIY5;Q9UBW7;Q9UFW8;Q5H9L2;P51531;Q9H944;Q13562;P01100;Q165  
87;Q8NG57;O75155;Q9P2K3;Q9HBM6;Q15572;Q15022;Q7Z589;Q05481;Q9H869;Q14934;Q86W54;Q8N6  
I1;O15370;Q13263;Q13263;Q9H6Q4;Q68DI1;Q53H80;Q8NHW3;P52746;P41212;Q9UQB3;Q15060;Q14526;P0C7  
T5;Q5U623;Q6IQ32;O60716;Q96FV9;O75820;P22415;Q8NEA6;Q3ZCX4;Q9Y6R6;Q8TF50;P0CJ79;Q9GZ  
X5;Q16633;Q14686;Q9BQY4;Q9UBL3;O43361;Q9NW07;Q9H4I2;Q5SXM2;Q13503;P36508;Q9NP66;Q8TC  
21;P29084;Q9BWT1;Q8NBZ0;P31260;P23409;Q9UK12;P10599;Q9NX65;Q14186;P50222;Q53T94;Q8ND  
Q6;P51508;Q9Y6B2;Q8WYN3;Q92830;Q9UK13;O75444;Q04725;Q8N5F8;P40424;Q14653;Q00577;Q9BQ  
70;Q6ZNO8;Q15170;Q14151;Q9GZU2;P49716;Q92541;P12524;Q8NBF1;Q03468;Q60711;Q13352;Q9Y6  
K9;Q04726;P0CJ88;Q9P0U4;Q8IWS0;Q8N1W2;Q12968;Q15650;P17535;Q9NQX1;P51532;Q8WVY6;Q9NV  
V9;Q96JC9;O75461;Q9H808;Q6PI98;A6NGD5;Q9H981;Q96RN5;Q8WTZ3;A6NJL1;Q9BYV9;Q8NEK5;Q8N4  
W9;Q92785;Q96N38;Q6PJG2;Q8N587;Q9UIS9;Q8N344;Q8IXF0;P13984;P52742;Q02930;Q9H175;Q166  
00;Q9UMQ3;Q9UBX0;Q92681;Q8N140;Q9Y5A6;A6N3G6;Q8NDT2;Q96F24;Q9P0T4;Q9H7R5;Q99551;Q139  
01;Q9UB726;Q5JUW0;O14948;Q96JN0;P17098;Q9BSM1;Q96MN9;Q9P0L1;Q9HD15;Q14582;Q8NB42;Q9UL  
36;Q15928;Q96D98;O15266;P23511;Q96MR9;Q6P9A3;P0CJ90;Q5MCW4;P0CJ89;Q96N20;Q96JM7;Q8IU  
81;Q92759;O95402;Q8N5Z5;P0CH99;Q7Z3K6;Q9BRR0;Q9BXP5;Q16649;P32780;Q15528;Q8WTS6;Q9UM  
63;O75529;P16415;P18847;O60543;Q9H7X3;Q96N22;O95948;Q12906;Q9Y2G7;P36956;Q5TGS1;Q9UD  
V7;Q03924;A6NCD8;P78543;Q86YP4;O95416;Q9UKW6;Q9Y2A4;P35711;Q92769;A6NFD8;Q96CX3;Q8N8  
59;Q15973;Q9C005;Q0PNE2;O60765;P16220;Q9UHV2;Q99717;Q9BQ87;Q15699;Q04206;Q8WVX1;A5YK  
K6;P42226;Q9P2J8;O95780;P49848;P52738;Q16576;Q9ULM3;Q147U1;O95628;Q9HCU9;Q9NZL3;Q129  
72;Q9Y5V3;Q04727;Q9Y6Y1;Q12873;Q99502;Q14678;Q6S9J96;Q99576;Q96E29;Q96NM4;P98169;Q96G  
23;Q9H8N7;P40425;Q96T92;Q8WY36;Q08ER8;Q5SVQ8;Q9UN79;Q14192;P11142;Q9UI36;Q05BQ5;Q96N  
58;Q3C1V8;E7ETH6;P41218;Q8NFD5;Q71S5Y;Q9NXT0;P0DI81;Q17R26;Q8IYM9;P42704;P68104;O602  
48;Q7KZ85;A6NLF2;Q02577;Q6P4R8;Q9Y2V2;Q63ZY3;Q7Z3V5;P50570;Q5JVG2;Q5T5D7;Q6P3V2;Q8NH  
M5;Q8N7Q3;Q9HB58;Q96NJ6;Q13330;Q8IYX0;Q15562;P35269;O75618;Q6P1X5;Q96RK0;Q9P031;Q995

94;P22736;Q01543;Q14585;Q9NSI6;Q9Y6X8;Q0VGE8;Q9Y222;Q9Y5K5;P51825;Q15744;Q13772;Q96LW1;O14771;Q96GC6;Q86XF7;Q9BWW4;Q9BXJ9;Q6ZT77;Q96N95;P35548;O75346;O60281;O75530;Q8WXF8;P35251;Q5VZB9;Q99459;Q6ZV50;P35680;Q9H3H9;P05412;Q8IZL2;Q9Y543;P17029;Q9NPJ4;O95159;Q6ZRS2;Q9NQ87;Q9H2P0;Q9Y4A8;Q99909;Q96RS0;Q96T88;P29083;Q9ULM6;Q76L83;Q92985;A6NP11;Q8TE02;Q16514;Q15929;Q9BYE7;Q8NEM1;P28347;P82970;O00255;P35789;Q9UMS5;Q6ZNA1;P67809;Q8IX07;P18850;A6H8Y1;Q01826;Q14590;Q9UKI9;Q6U7Q0;Q8IXW5;Q9HAP2;P10244;P42771;Q9BYK8;A6NKF2;Q9UC06;P57086;O75376;Q99612;O00470;P42224;Q9H5H4;Q8N883;Q8N9N5;Q96EB1;Q6ZRF7;Q9Y462;Q01201;Q15369;Q13185;O75582;Q9UPP1;Q8NCA9;Q8N108;Q16254;P08235;Q7Z7K2;Q14865;O43711;Q6ZN32;Q9NRL2;Q53QV2;Q9UN30;A9YTV3;Q01658;P22392;P17023;Q96NI8;Q96F45;Q3KNV8;O43829;Q9H063;Q00403;P0CI00;Q8TD17;Q9UKV8;Q9GZR2;Q96SK3;Q14209;Q3SY52;Q4V348;A8MV65;O94983;Q96NJ3;C9JBD0;P11474;O43830;Q8TA94;P50613;P15923;Q86T29;Q9HBZ2;O95905;Q99496;P36402;Q8N5J4;Q13118;Q8N9Z0;Q32MZ4;O14593;P10827;Q8WUF5;P58304;Q3ZCT1;O43812;Q9UJ3;Q5HYK9;O00267;Q96A56;P22670;P32243;O14867;Q96EG3;Q15633;P48382;Q6ZW49;Q2M1V0;Q8IVC4;Q96T58;Q6IE81;Q8N693;Q02447;Q09028;P56693;O94993;O75446;O94992;P23193;Q9BTC8;Q8NE65;Q96N77;Q68EA5;Q8N5U6;Q8WUU5;Q5H9I0;P67775;Q99684;P53805;P0C7M4;Q96GN5;Q14207;O43309;Q12872;Q8TF68;Q99583;Q96RU7;Q8N5P1;P17544;Q0D2K3;A8K0S8;Q96S94;Q9NZI6;P28749;Q9HBD4;P55199;Q05516;P31249;Q6ZS27;Q9NTW7;Q7L2R6;Q5H9F3;O00482;Q9UK39;Q96IF1;P61244;P51504;Q86Y97;Q9BQA5;Q9NX70;P84022;Q9Y3T9;Q6ZN19;Q6ZN01;Q0D2J5;Q99607;Q9NPI1;Q6ZSS3;Q15233;Q7RTT5;Q5VTR2;Q9HCK8;P31271;Q9BXG8;Q5THR3;Q86VE0;Q9Y252;Q14584;P49715;Q9UIF8;Q8TF45;P10072;Q06547;Q8NEF9;O15055;Q6ZQV5;Q9Y2D1;Q8TB69;Q6IA86;Q96RE9;Q9UGP4;Q15326;Q8IV54;O43296;Q6RSH7;Q5T6S3;Q15937;P14317;Q49AA0;Q15759;Q15906;Q9NYV6;P41161;P55347;Q8WYH8;P63165;Q8N782;P0C7V5;Q9UGU0;Q6ZSB9;P37275;Q9BYH8;Q96RJ6;O95218;Q8IXH7;Q9BZK7;P56524;Q9UK10;Q8IYB9;Q86TJ5;Q5EBM4;Q8IXH6;Q92870;P31274;P62508;Q9NPC7;Q9Y2H8;O15379;O60422;Q5VTD9;Q8N187;A8MT65;Q6NZI2;Q8N9N2;Q08945;P52737;Q96AE4;Q8N8Z8;Q92750;Q9Y2P0;Q12905;Q96RE7;Q7L190;P17947;O43189;P21675;Q15910;Q96BN2;P46937;Q08050;Q6P2C8;Q6P9G9;Q9NPA8;Q8TAD8;Q9UBS8;Q8IW36;Q12962;Q9BRH9;Q06732;Q4LE28;P25440;Q92966;Q75164;Q6ZN28;O75486;P28370;P82094;P35232;Q16533;P35869;P63272;Q9GZN2;P35226;O15105;Q6ZMW2;Q16534;A6NDX5;P21127;A0JLT2;O94763;Q9BSK1;Q9UHB7;P0CG31;P52655;Q8N972;Q6UUUV7;Q7RTT6;Q9HCD5;Q13342;O75157;Q7RTU0;O94892;Q8NDN9;Q7L3S4;Q9Y5R5;Q9BW11;Q96EI5;Q92670;O15350;Q96KG9;Q99990;O00291;Q9UBX2;Q92945;Q9NRG4;Q13547;P43356;Q9H5Q4;P50221;Q99081;Q96C00;P31314;Q9BT4;A8MTY0;P49116;Q9NWA0;O75764;Q9UFP7;Q66K89;Q6ECI4;Q5T619;O94916;P14651;Q9UKY1;Q8TD26;Q9H2G4;Q86YW9;P24928;O75362;O75626;Q96NL3;Q86U86;P24863;Q96JL9;P54253;Q9HB65;Q96IT1;Q96SL8;Q9Y473;O00570;Q9P243;Q8NB50;Q14140;A6NNF4;P13056;Q8WVM0;P48552;Q5QJE6;P17025;P40426;Q6P280;Q8NCN2;P24278;Q7Z3I7;P55198;Q7Z7J5;Q13111;O43365;Q00653;Q15543;O60224;Q9NSC2;Q9NYB3;Q92993;Q86UQ0;Q96C28;O00712;Q43268;P23246;Q15652;Q96LI6;P15336;P51814;P10828;Q8N3J9;P41182;P04198;Q6NSW7;Q9P1T7;Q6RFH8;Q8IZ40;Q15047;Q8TAK5;Q143318;Q9NS37;O00422;Q92793;O75525;A8MUZ8;P39880;P57071;Q3T8J9;Q9HAJ7;Q59GR2;Q15697;P31276;Q5CZA5;Q14119;Q9UJU3;Q8WUI4;Q9Y2P7;Q8N488;Q9BQW3;O60869;P48380;Q15361;O75467;Q9HCS4;Q92800;O43593;Q7RTU3;Q9Y6Q3;Q5BKZ1;P51523;Q9NV56;O75475;O75586;Q5SXM1;Q6VMQ6;Q8N022;Q9UQR0;O60828;Q6PDB4;Q5T3J3;Q16526;Q8NB82;Q6AZW8;Q06416;O00257;Q8IY57;P19447;Q7LBC6;Q4G112;Q14527;Q99732;Q460N5;O60675;Q76KX8;Q96JJS3;Q94805;A6NN14;Q6IV72;O00167;Q6Q0C0;Q7Z5L9;Q9NXR8;Q63HK5;Q68DY9;Q9H963;Q8IX03;Q7Z7L9;P17275;A8K8V0;Q8N141;Q9Y2W1;Q9UIE0;P43355;O95163;Q9H160;Q5VUA4;Q9UBK9;Q96EZ8;Q6ZMV8;Q96I27;Q92922;Q8NCK3;Q9H7L9;Q9BS34;Q7L1Q6;Q8IYF1;Q8TBZ5;Q9BSG1;A0AVK6;Q9BXX3;O95073;Q68CP9;P19838;Q8IU2;P20823;Q12824;Q15935;Q15123;Q9UJX5;P0C7X5;P12525;B2RFX5;Q9BV97;O75175;Q9H9Z2;Q12837;Q9HTA2;Q6P1N0;Q6AW86;Q9UKL0;O60244;Q9ULC4;O14628;P0CG24;Q13485;Q8N0Y2;Q9Y5B6;Q9H204;Q96HR3;Q96PQ6;Q9NSJ1;Q03111;Q8WTR7;Q86UE3;O75925;P16989;Q9BSN8;Q9UMX1;P78395;Q6P1K2;Q8WXB4;Q06730;P78347;Q93074;Q9UHR5;Q7RTV3;Q06587;Q9H091;Q8TBC5;Q9BY31;Q14498;Q9UBD0;Q9UBB5;Q9HD42;P27695;O75478;Q8NC26;Q9H3M7;Q9NZI5;Q6NX49;P11161;Q5TEC3;Q9H4S2;Q01664;Q86Y25;Q5PRF9;Q92539;Q43167;Q9NY43;Q99676;Q9NU63;Q58F21;Q9UEG4;P53539;P17861;P31269;Q96PE6;Q01860;Q15544;Q9UNY4;Q03060;O00716;P63167;Q6ZN30;Q9BWM5;Q8IZD2;P46100;P52743;Q9H5J8;Q96K75;Q00444;Q15072;Q13105;P52747;P28324;Q8TEE9;Q9Y224;Q9NPJ6;Q13887;P20749;Q9UKT9;Q96PM9;P17035;Q8NCF5;Q96I24;P61457;Q8NF64;O43918;Q7Z353;Q96AV8;Q9ULX9;Q07687;Q8TAU3;Q9BT81;Q9NSD4;Q8HWS3;Q9NVC6;Q8WYK2;Q14938;O43513;Q15561;Q5JVG8;Q9ULJ6;Q9Y2G9;P81877;Q01844;P98182;Q99856;Q01094;Q9HC52;O14770;P23760;Q8N7H5;Q9NZI7;Q86X95;P0CJ86;P11308;P15408;O95997;Q9NYF8;A6NLW8;Q9NVW2;Q9NR55;P55197;Q9NUQ3;Q6MZP7;Q9Y5J3;Q8N7K0;Q96LA8;Q8IX15;P17039;Q9UJW9;Q5T0F9;P15884;Q6P2D0;Q8WVJ9;Q86YD1;Q8N393;Q9HCX3;Q6ZNH5;Q6P9A1;Q15796;Q14839;Q8NI08;P13010;P17482;Q86UP8;P12956;Q96LW9;P20226;P20265;Q10586;Q16670;P10073;O00321;Q719H9;O95238;Q9Y2Q1;P0CJ85;Q9P086;P05204;Q68DY1;P0C860;P49910;Q86TJ2;O75177;Q6W2J9;Q8N988;Q92748;Q9NYT6;O96028;O75081;P49750;Q9HBE1;P52741;Q96IR2;Q8N3C0;Q14693;P17021;P35227;P35638;Q12986;P98168;Q13761;Q9NPF5;Q92988;P0CJ78;Q6XD76;Q96GE5;Q9HAZ2;Q14781;Q96ST3;Q9H9D4;Q96K58;Q03938;Q93062;O75505;Q9UNS1;P17041;O60381;P10589}

Pathogen[ P14079] interacts with 1773 human partners: {Q969J2;O14776;Q9UQL6;Q96JN0;Q15637;Q15916;Q9NZ81;Q96SC8;Q3T8J9;Q9BWM5;P98168;O60225;P07199;Q8IYX0;Q8NHY6;Q9NV72;Q92664;Q14585;Q6AW86;P48552;P15622;P52738;Q96EK7;Q96C00;Q7Z5D8;Q5SXM2;Q13952;O60284;Q9UJN7;Q9UQR1;O15379;Q0D2J5;Q96CS4;Q9UPW6;Q9UK12;Q9H204;Q9NSD4;Q15560;Q8WUH1;Q96A56;O95159;Q9Y5B9;Q8N2W9;Q32MQ0;Q8N9N2;Q9HBT8;P52741;Q9HAK2;Q5THR3;Q9BW11;Q12986;Q8IZC7;Q04725;P35711;Q99623;Q9NQX1;Q3SY52;E9PGG2;Q13772;P51504;Q9HOE3;O00422;Q8N9Z0;O60244;Q8N895;Q99459;P41218;Q9NPI1;O95402;P17098;Q15014;Q8IX12;P08151;P15036;Q5JVS0;Q8N7U7;P13056;O15164;Q9Y2X0;O43513;Q8WYK2;P0CJ89;O75123;Q9HAZ2;O14867;P0CJ88;O75467;Q68DY9;P55199;O95628;P0C7M4;P10243;Q9H7R0;Q9UKV8;Q99743;Q06730;Q53GI3;O75346;P60002;Q86VN1;P16383;P62508;Q8WZ33;P33076;Q9HBT7;Q4G112;P09874;Q96JB3;Q8N1B3;P78543;Q9Y4A5;Q5MCW4;Q96RJ6;A8MTY0;P52742;Q96T23;Q8TD23;Q8IXH6;P5HYK9;Q6XYB7;O75618;Q96IR2;Q08945;Q13506;Q005BQ5;Q96RS0;O75151;Q8WTR7;Q53H80;Q9UL36;P55055;A6NEJ1;Q8N8L2;P0CG31;O60925;Q5T1R4;O00291;O95416;Q92994;P11142;Q86WP2;A8K8V0;Q10587;Q9HAJ7;Q9Y5Q3;O60381;Q9BYK8;Q9UDV6;Q9NWB6;Q8WXB4;Q15561;Q9Y2Y4;Q9BZK7;Q71F56;Q155

13737

73;Q8IZX4;P14373;Q15532;O43364;Q96LW1;Q9UC06;P35869;P57086;Q969X6;Q02078;Q9Y2G7;O951  
25;Q99814;Q7Z340;Q9UK13;Q9NYV6;Q9UIS9;Q14241;Q8NDQ6;Q06413;Q9BWX5;Q8NDP4;Q6STE5;Q9NS  
I6;Q8N196;Q99502;Q76L83;Q8IUE1;O15370;Q8N693;Q8N8G2;Q9NWB7;Q15596;Q15047;P0C7V5;Q86V  
15;P10072;Q8N141;Q9ULC4;Q92600;P52630;Q9UL18;Q96K62;Q9C005;Q9UJW7;Q96H86;P21506;Q9NQ  
V6;Q13106;Q7Z7K2;O14771;Q9Y6Q3;Q92681;Q9GZV5;Q9BT81;Q96H20;Q06546;P14859;C9JBD0;Q9Y6  
J9;Q8TF50;Q6MU06;P10073;Q7Z7L9;Q16526;Q96PT4;A8K0S8;Q9HC44;Q969H0;Q9HM2;P11532;P623  
24;Q14693;O60828;Q9UBU8;P28749;P78337;D6RGH6;Q96LA8;P13349;Q9UNY5;Q16649;Q14653;A6NK  
53;Q9UL59;Q8N587;Q8WY36;Q6ZNA1;Q9UHV2;Q5H9L4;Q8N9F8;O75437;P52747;O75928;Q52LR7;P352  
69;Q15776;Q14186;Q6ZNG9;Q13118;O75528;Q86UQ0;Q2M1V0;P49336;Q6ZNG0;Q9H869;Q96DB2;Q131  
48;P51946;P08048;Q9NRG4;P17019;Q6ZMY9;Q15853;O00321;O60481;Q3ZCX4;P68036;Q6ZT77;O155  
35;Q8IXJ9;P16594;Q9GZU2;Q9Y6X2;Q9HCG1;P17035;P23409;Q14192;Q9BQI9;Q99581;Q92830;Q9Y2  
P0;Q9H3M9;Q9H5J8;O75626;Q969E4;P52564;Q8IXH7;Q9Y2Y9;Q6P9G9;Q8TA94;O43309;Q14938;Q159  
11;Q96QR8;O75362;P17010;Q68CJ9;Q15723;Q9Y2N7;Q9Y2Q1;P35398;Q5T3J3;P0CB33;O14896;P535  
67;Q9UKD1;Q9H9C1;Q9BR84;Q14103;P67809;P47974;P68104;P53999;Q15714;Q8NDN9;Q96LT6;Q8N1  
08;P10244;Q8N782;O95503;Q9NUA8;O43439;Q8TDY2;Q9BUE0;Q96CJ1;Q9NP66;Q9NX70;Q9UFB7;Q7RT  
T3;P17022;P82979;Q92966;P11473;Q9HOM5;Q3KP31;P17041;Q9UBL3;O60290;Q8N393;P35680;O606  
82;P20265;Q8IXT2;Q6IA86;Q5TEC3;Q5T0B9;P13010;Q96ST3;Q8WUF5;O60543;Q99676;Q92782;P553  
47;P09086;Q96RK0;A8MT65;O75582;Q96JK9;Q8NCP5;Q16254;Q08AN1;A6NJG6;Q6XD76;Q8NB42;P108  
28;Q92541;Q49AM1;Q14151;Q5VVH5;Q8TF85;Q96JC9;Q58F21;Q9BYH8;Q9NVM4;Q2QGD7;P08235;Q929  
85;Q32NUN9;Q6PDB4;Q9UNY4;P17039;Q13404;Q8IYN2;Q5EBM4;Q14207;Q9UQF2;Q5T230;P0CH99;Q927  
93;Q6NMN9;P51522;Q9ULM2;Q9HC52;Q9NRL2;Q5JVG8;P12524;Q9UBB5;Q5PSV4;A6NHJ4;O959  
48;Q99549;Q16633;Q9Y5R5;Q9BXJ9;Q15528;P28370;Q9NTW7;P61457;Q49AN0;O75290;Q99607;Q9P2  
Y4;P52746;Q6ZN57;Q9Y468;Q9BTA9;Q9NVV9;Q13129;Q969S8;Q14CW9;Q63HK3;P39880;Q15583;P557  
71;Q8WUI4;Q6ZR52;Q13901;P48382;O15405;O75475;Q86U70;O15198;Q9BUJ2;Q8NEK5;Q8NSA5;Q7Z3  
K6;Q9UQR0;Q96HR3;Q12906;Q2VWA4;Q8IYB9;Q9H707;Q96SR6;Q96PM9;Q15329;Q16656;Q99576;Q995  
94;P52737;P35789;P0CJ86;P51815;Q15699;P54252;Q13330;Q86VZ6;P28347;P17096;Q14591;Q030  
60;P11474;Q92922;Q96F24;Q6ZN32;Q6ZRF7;Q8TBZ8;O95251;P48380;P51532;Q8NCA9;A8MUV8;Q9UQ  
B3;Q96NM4;O95644;P17024;Q9P255;Q14592;Q9GZX5;Q15742;Q3MJ62;Q15170;Q6P2C8;Q9NSJ1;Q86U  
86;Q96NG8;Q01538;Q9Y3C7;O14646;Q6ZN79;Q96S94;Q14865;O60675;Q8NG57;Q99684;O15392;Q926  
10;Q01826;Q96N20;O60907;Q6PEW1;Q9H3P2;Q8IXF0;P35712;Q9UID6;O95163;O75529;Q5T0F9;Q930  
62;Q9ULK4;Q86TU7;Q9UMX1;A6NE82;Q8WVJ9;Q6IPX3;O95931;Q68DI1;Q9Y250;Q13487;Q8N0Y2;Q8N7  
20;Q14966;Q8IX15;Q9NVC6;Q99966;P54198;Q9H7X3;P58304;Q5H9I0;P51531;P42704;Q96SE7;Q142  
09;Q9UKV0;Q9GZM2;Q5VIY5;O43167;Q8N726;A8MZ59;Q05516;Q4LE39;Q9HA82;P23246;Q8TAK5;O754  
46;Q9HAP2;Q8NI08;Q9Y5A6;Q9UFW8;Q8NBZ0;O96004;Q92748;P22736;Q9HD42;Q9GZR2;Q99856;Q928  
00;Q76KX8;Q02447;O43812;Q13105;O00213;P15976;Q5T5D7;P35232;Q9BWT1;A0JLT2;Q8TEE9;Q6P1  
N0;Q3MIS6;Q9BYN7;Q6ZRS2;Q9P086;Q9GZS3;Q8NC26;Q92785;Q8IZL2;Q9NR83;Q9PJT8;P53805;Q9P0  
L1;Q32MZ4;Q15059;O14497;O75157;Q8N344;Q96EB1;Q86UQ8;Q9HAF1;Q9NY43;O60281;P32519;Q131  
12;Q8N859;Q13045;Q13889;Q8NHM5;Q9UK11;Q8TAQ2;Q8N7M2;O95905;Q96K83;P19484;Q13111;Q6PG  
37;Q8N883;Q12968;Q03923;A6H8Y1;Q96NI8;Q9H2P0;Q6ZMS5;Q9NZU5;Q8IYI8;Q06732;P46937;Q5SV  
Q8;O43829;P18615;Q96MR9;Q6ZN55;Q86YP4;Q60869;O00151;Q6P2D0;A6NKF2;Q6Y2P7;Q9Y3Y2;O948  
64;P41161;Q96NL3;Q12796;Q9Y3Q8;Q96E29;Q8IUD2;O15527;Q3SXZ3;P63165;A6NGD5;Q7Z591;O607  
11;Q96SZ4;Q96RE9;A5YKK6;Q9BQA5;Q96NG5;Q9P215;Q7L3S4;O75461;P31271;Q9UBW7;P15923;Q153  
06;Q9NS37;P48443;O43830;Q96LX8;P54253;Q14498;Q9ULM3;Q06547;Q9NUQ3;Q14258;Q8N7G0;Q157  
97;P06733;Q16600;O43298;Q8TBC5;Q969V6;Q03933;Q9NWA0;Q14765;Q7RTT4;O75155;Q9H9Z2;Q96B  
N2;Q16385;Q9NW8;Q9NU63;Q6IE81;P10827;Q9N175;Q12837;Q9UHXL1;Q6PD62;Q96JM2;Q96JC4;Q6ZN  
06;Q6ISB3;P29084;Q03989;Q86TJ5;Q99608;P52744;P57071;Q8IWX8;Q15652;Q9NQQZ8;Q8NA19;Q3KQ  
V3;Q9H307;P17027;P51610;Q6EKJ0;P54845;Q92539;O15350;Q6PJG2;Q15744;P09629;O94892;Q165  
76;Q719H9;Q9UILL8;Q99612;P42568;Q16670;Q15072;O60315;Q15572;P55197;Q96S65;Q49AA0;Q8TA  
P4;P36402;Q03938;Q96MN9;Q12873;Q03111;Q8TF32;P11308;Q9BV97;Q9H5I1;O95718;P50570;Q145  
88;A6NP11;Q96FV9;Q01201;Q86V71;Q3KNS6;Q9UHB7;Q6BEB4;P55198;Q5HYR2;Q96ND8;Q3B7T1;P086  
51;Q9NYF8;Q9H808;P46100;Q9NWS9;P0CI00;Q9BRR0;P51814;A8MUZ8;Q96EI5;P28698;O94763;Q8TF  
68;Q96GE5;P28069;O75448;Q6PI98;Q96BV0;P51825;Q12772;O95073;Q9UL58;Q9UKY1;P31276;Q9H0  
E9;P0CJ90;Q9H488;Q8IXW5;Q99687;P0C7X2;Q12905;P43356;Q8TCN5;Q96JF6;Q9ULD5;O94915;Q9UC  
07;Q8NBB4;Q6W2J9;Q6NT76;Q6P1X5;P42226;Q06330;Q6V9R5;Q8N3S3;P82094;P82970;P82TAW3;Q926  
70;P50613;Q9H6W3;Q9NZC4;Q9Y2T7;Q9H981;Q9P2D1;A6NDZ8;Q8TD26;Q9NZI7;P03337;Q3C1V8;Q5H9  
F3;Q5BKZ1;O43189;Q13888;Q15929;Q00613;Q01892;Q9UKL3;O15060;Q86Y25;P17480;Q99583;Q6ZN  
19;Q8TE02;Q99543;Q8HWS3;B4DU55;Q9NZL3;Q9BXG8;Q13568;Q9UJW9;Q00059;Q7KZ85;P12956;Q9H4  
W6;Q96QT6;Q9P0W2;Q9Y3T9;Q9ULW3;Q96D98;Q9Y534;O94805;O14744;Q8N9N5;Q9Y5V3;Q03924;Q8NC  
N2;Q6NJ22;Q9BQW3;P41182;P31274;Q86UE3;Q8NAP3;Q9UL49;Q460N3;P12525;Q01543;Q8NSJ4;P100  
74;P0CJ87;Q9UPG8;Q71F23;Q96CX3;Q6MZP4;Q96AE4;Q14549;Q3ZCT1;P17097;Q8NSU6;Q86UP8;P159  
06;Q13185;Q9Y5K5;Q99496;Q6VMQ6;P58317;Q5VWX1;Q96EG3;A6NK75;Q9P2F9;Q00403;Q03936;Q9BZ  
E3;Q9UK39;Q147U1;Q86YW9;Q08ER8;O00257;O75586;Q14781;Q9UK58;Q9BX82;Q9NXT0;Q01860;O755  
30;Q8TF39;O75373;Q15543;Q6ZYL4;O75764;Q5VTD9;A6NLF2;P19532;B1APH4;Q05481;Q14145;P170  
26;Q8IX03;Q96BD5;P16989;Q02040;Q9UIH9;A6NN14;P12980;Q9UPN9;Q9HCE3;P11161;P22392;O004  
82;Q08AG5;Q8NSY2;Q9H9T3;Q8NF64;Q99732;Q9NV56;Q96K75;Q9H6Q4;Q86YE8;Q9NM972;Q969R5;Q129  
62;Q9H963;Q6DD87;Q9UER7;Q9ULH7;P17544;Q9NPF5;Q8WYP5;Q6RFH8;Q96AQ7;O95238;Q92769;Q9BX  
X3;Q96I24;O00716;Q8IY57;Q96IF1;Q6ZMV8;A8MV65;Q5SXM1;Q9H4T2;Q3SY89;P29374;Q8NCK3;O437  
11;Q9UN42;Q8TF20;Q9UHV7;Q5VTR2;Q9UPP1;P17032;Q7RTS1;O60248;Q02930;Q8NFZ5;Q9H1I8;Q9NQ  
33;Q9H2G4;Q9NW00;Q9NWT6;Q8N823;P49715;Q96G23;Q8N8J6;Q9BWW4;O60663;O14709;O15266;Q149  
34;Q96RN5;Q9NR11;Q07666;B2RXF0;Q9NZI6;A6NFQ7;Q6U7Q0;Q15759;Q8N680;Q8WTZ3;Q9Y6K9;Q6P2  
80;Q5PRF9;Q68EA5;O43345;Q7RTV0;Q7Z5L9;Q9Y473;Q9H511;O75469;P17017;P31269;P0CG40;P248  
63;P49848;P51508;Q16587;P0C7X5;Q92945;O75820;Q6ZS27;Q2M1K9;Q96JM7;P27540;Q9BQG0;C9JN  
71;Q9H4Z2;Q6ZNB6;Q9UIF9;P63272;O75525;O75534;Q12830;Q66K89;P17031;Q9UEG4;Q9P2R6;P505  
49;A6NLW8;P17029;Q9BYE7;Q96SK3;Q7L190;P22670;Q9NQR1;Q8NB12;P35251;Q9Y5J3;A6NIX2;P172  
75;P17021;P16415;Q9NYT6;Q99990;P15336;Q14593;Q92750;Q9HD15;Q6R2W3;Q8IVP9;Q16384;Q154  
24;Q96LW9;Q8NHW3;P51523;P0C1Z6;Q15697;Q8N2I2;Q9UBK9;P28702;P52743;P24278;P04198;Q9Y3

M9;Q6ZW49;Q9BY41;P17020;Q8NFD5;O14978;Q8TAD8;Q8WV37;Q9BQY4;O75175;Q9Y6R6;Q02833;Q9NY  
B0;Q96IZ0;Q8WUB8;Q9HB58;Q4V348;Q9UHR5;Q9H944;O75360;Q15370;Q9UK10;Q9P243;Q9Y2X9;P052  
04;Q8TF45;Q8NDX6;Q15788;Q86XU0;Q5TGS1;Q9UBB9;Q92759;Q9UFF9;Q9UJQ4;O75909;Q8TB69;Q133  
60;P49910;A9YTQ3;Q9HAW0;P26358;Q5VZB9;Q8N4W9;Q9HCD5;Q9UNN4;Q01664;Q86W11;Q99417;Q9HC  
K8;O00570;P15822;P51786;Q14134;Q5JVG2;Q8IX07;P31249;Q9UJW8;Q7RTT5;Q7RTT6;O95983;Q2M3  
X9;Q8TBZ5;Q15834;Q9NZI5;Q8WUY8;P56270;Q5TB30;O00110;P27695;Q8NA42;Q9P2K3;Q6ZMW2;Q9UH  
L9;Q7Z3V5;Q13351;Q99909;P78424;Q96RK1;Q9UBD0;Q96T92;Q92618;O94992;Q8NEP9;Q49A33;Q9UK  
L0;Q9BYV9;Q7Z7J5;Q96MA1;Q9H091;Q2VY69;Q96PT3;Q14586;Q96RL1;Q9Y603;Q8N140;Q96NJ3;Q8NA  
M6;Q9HC78;Q9NPN6;Q9ULX9;O43365;Q6ZN28;Q14135;P50539;Q8IVC4;Q9UI36;Q9C0F3;Q86UU0;A8MV  
S1;Q9UMQ3;P35638;P21127;Q96ES7;Q8WVY6;Q9H2F5;O43296;Q9NQ03;Q9C0F0;Q9UDV7;O14593;Q166  
21;Q92754;Q03701;P01106;Q15973;Q6SJ96;Q9BTC8;O00472;O75444;Q9UIE0;Q6P3V2;Q6P1L6;Q9UH  
92;Q86VK4;P56645;Q8NDW4;Q0VGE8;P52657;Q8NPF9;P56693;Q16236;P98169;Q16533;Q9Y692;P170  
25;Q13398;Q00444;O43541;Q00577;O95997;Q9Y3D2;Q9P0U4;Q04726;Q96RE7;Q12972;Q494X3;Q9Y4  
X4;Q12800;Q7RTU0;Q9P031;Q9BS34;Q7RTV3;Q6ZV50;Q96SL8;P42224;Q9HCU9;Q6P4R8;Q5VUA4;Q86U  
D4;Q96RU7;O00488;P17038;Q6ECI4;Q8N3J9;P10588;Q8N3X6;Q8N1G0;Q5QJE6;Q96JL9;P35226;P188  
50;Q8N0Z2;P32243;Q8WX92;Q86VE0;Q3KNV8;Q86XF7;Q7Z6R9;Q5HY98;A6NDX5;Q6P9A3;Q9UIV1;P412  
12;Q9Y2A4;P32780;O75081;Q86UZ6;P50548;Q8N5P1;Q9Y2K1;Q8N1L9;Q04743;Q05195;Q71SY5;O433  
61;Q8N488;Q07687;O14770;Q14814;Q96EK4;Q0D2K3;P81877;Q9BUY5;Q6NZI2;Q9H7R5;Q9HCX3;Q6PK  
81;Q9BS31;Q9GZ5;Q04724;P61978;Q14872;Q8TDD2;Q8IUE0;P35227;Q63ZY3;Q6ZSS3;Q14839;P207  
49;O75925;P0CJ78;Q68DY1;Q9BTT4;B2RXF5;Q9H8N7;B4DX44;P23193;Q9Y5W3;Q5TYW1;O15525;O439  
18;Q96PE6;P13984;P49750;P25440;Q8N554;Q9BSK1;Q9UN79;Q13503;Q9UII5;Q7Z401;P15407;Q2KH  
R2;Q06455;Q9BQ87;P10599;Q6RSH7;Q9UBS8;Q8N9R8;O43159;P63167;Q00978;Q2M218;Q86WZ6;Q96P  
Q6;Q8IYN0;B4DXR9;Q96IS3;Q96MX3;O75182;Q9H582;O75376;A8MXY4;P54259;O14529;A8MWA4;Q6AZ  
W8;P0C860;Q63HK5;O60583;Q7Z2F6;P78317;O75478;Q96F45;Q5T619;Q8N9K5;Q96KM6;Q92499;Q96S  
Q5;Q9HCZ1;O15265;Q9Y2H8;P17014;Q02577;A6NNA5;Q96C55;Q15928;Q8IW36;Q9P1T7;Q6ZNH5;Q145  
90;Q8WXF8;Q96AV8;Q9NPA5;Q14584;P41162;Q15562;Q8N988;Q9UKI9;Q8N371;P36508;P15884;Q96A  
W1;Q8IYF1;P78414;Q99504;Q9NR55;Q9H3M7;P78545;Q8IV54;Q9BRH9;Q03468;P78395;Q9BQ70;Q9H8  
G1;Q9NQV7;Q9NZV7;P38935;Q9HBZ2;P42166;P48378;Q9HAH1;O14948;P62633;O15015;Q5VUG0;Q7KZ  
F4;Q02386;Q96MG7;Q8IWS0;O15226;Q8IZ20;Q96N38;P0CG00;Q15910;Q68CP9;Q12872;Q9NQC7;Q137  
61;Q02556;P24928;Q8IU81;Q9H5Q4;Q03052;Q9ULM6;Q9NEA6;P30153;Q8N184;Q15369;Q9NPC7;Q96K  
58;O95201;Q9H7S9;Q9HB65;Q12824;P10589;Q5EBL2;Q99471;Q96BR6;Q6PF04;Q0PNE2;Q13469;Q930  
74;Q9BUG6;Q99081;Q9C0G0;Q499Z4;O14503;Q7L945;P17040;Q6IQ32;P98182;Q9GZV8;Q7Z353;P0DI  
81;P49116;Q8TD17;O00167;Q7L1Q6;Q13465;Q8NCF5;Q8N187;Q9UKN5;A0AVK6;Q9NPN4;Q8WYN3;Q9NZ  
N8;Q9Y2L8;O75505;O15055;Q9BT49;O95600;P05412;Q14929;Q15650;Q96N77;Q15466;Q12901;Q8WU  
U5;Q6NX45;Q86VP6;Q9Y294;P13682;Q86XN6;Q9BRG1;A6NJL1;Q9Y6B2;Q9BSG1;Q12888;Q8N1W2;Q5U6  
23;Q9HXH9;O15499;Q8IZ40;P0C7Q3;P15621;Q9H609;Q9UHJ3;P10242;Q9Y4A8;Q6P1J9;Q9UM07;Q9UJ  
U3;P56524;Q6P1K8;Q15361;O14813;Q9H7L9;Q7RTU3;Q13127;Q09028;O75030;Q52M93;P49716;Q6ZQ  
V5;Q06416;Q6ZNG1;Q9BXP5;Q96DT7;Q96IT1;Q9NRC8;P25490;Q9UM63;Q16514;P49639;O95619;Q165  
34;Q2M3W8;O75494;Q9UBX2;Q5JUW0;Q53T94;Q8WUH2;Q9H4I2;Q15233;P28360;P52740;O43313;O151  
05;Q14140;P78347;Q7Z3I7;Q96HQ0;A6NFI3;O14901;Q92988;Q8WYA1;Q9Y6X8;O00470;O002  
67;P52736;Q9UQ80;Q6P9A1;Q15935;Q14582;Q9NX65;O95780;Q9ULJ6;Q96MH2;O94776;Q9UNS1;P518  
26;P17030;Q12857;Q9H5H4;P36956;Q9ULV5;Q53TQ3;Q01094;Q13352;Q86X95;Q9Y5B6;A6NFD8;A6ND  
R6;Q14678;Q96G25;Q9Y224;P86452;Q92585;O60765;Q8N228;Q7RTU4;O75486;O00255;Q8N8C0;Q8N6  
I1;P15408;P43355;P61244;Q8N7H5;Q9NW07;O75971;Q02800;P01100;Q8NE65;Q9BRU2;P78412;Q8N7  
Q3;Q95625;O95218;Q9NP71;Q96EZ8;Q14188;Q10586;Q8IUM7;P23769;O60716;P23511;Q86Y97;Q8NE  
F9;Q96H40;P14316;P0CG24;Q01658;O43593;Q9NQG5;Q9NQX6;Q9BZE0;Q9HBE1;Q9UKW6;Q7Z589;Q9H9  
D4;Q96T76;Q14686;Q15542;Q8NDT2;Q9H063;Q5VWG9;Q5FWF6;Q9UHF7;P41970;P49711;Q15022;P0C7  
T5;Q15326;Q9Y2W1;Q9NPA8;Q96N95;Q96GN5;Q8TC21;Q9NQ92;O60304;Q96PK6;P50222;P17023;O949  
93;Q8NFX8;Q6ZN17;Q04727;O75177;Q969W8;Q86TJ2;Q86YD1;Q9Y2V2;Q8WYH8;Q16520;Q9Y462;Q9BY  
31;Q9HF9;Q9HGU0;Q8WW38;Q9HCL3;Q8TAU3;Q73275;Q8NEM1;Q07352;Q9UGP4;Q07352;Q92925;Q9BS  
M1;P19447;Q3SY56;Q9UMS5;Q8WTS6;P39687;Q9BU19;Q9H501;B7Z6K7;A8MQ14;Q9Y2G9;P17535;Q145  
87;Q6ZSB9;Q09FC8;O14628;P50221;Q9NSC2;P0CJ85;Q8N7K0;Q8N8E2;Q8NI51;Q6IV72;Q5H9L2;Q8NB  
F1;A6NM28;Q96N58;P10914;Q9H160;Q9UN30;Q9ULJ3;Q7Z398;P29083;Q96NJ6;Q13342;Q86SE9;O155  
34;Q6NSW7;Q02446;Q92993;P19419;O60224;Q8TF47;Q9Y222;Q99551;P21675;O00268;Q16666;Q8IU  
R6;Q9HBM6;P14651;Q8IZ26;Q9UIF8;Q5CZ45;Q96I27;Q9H116;Q6P1K2;Q9UKT9;Q6I2Q1;Q6NX49;Q3L8  
U1;Q96GC6;Q96T58;Q9UJL9;Q5JNZ3;Q7LBC6;Q08999;Q96JS3;Q8NDY6;Q6ZN11;Q9UBG7;P50750;P202  
90;Q5T6S3;Q8TBE0;Q8WVM0;Q6VUC0;Q15545;Q13490;O00712;Q92870;P42771;Q9Y2G1;Q8N7R0;Q8NA  
F0;Q9Y2D9;O00401;Q96KG9;Q14119;P17028;P23760;Q8TAQ5;Q8TAF7;P0CJ79;E7ETH6;Q96C28;O949  
16;Q06587;Q8N5F7;P22415;Q86T29;Q8WXI9;Q13495;P51948;Q6NSZ9;Q17R26;O94983}

13738

Pathogen[ P03383] interacts with 1333 human

partners: {Q969W8;Q96LX8;Q9UQR1;P35227;Q96MH2;Q9Y618;Q7Z7J5;O14628;O95402;Q86U86;Q9UN  
S1;Q92681;Q8IXJ9;Q06330;Q13761;O43167;Q15329;Q15723;P10244;Q9H7R0;Q02577;Q68C9;P483  
78;Q9BQ00;O60716;Q09028;Q9Y6J9;Q8WTZ3;P0C860;O15198;Q8IX15;Q99504;O75182;Q8NI51;O004  
70;Q719H9;Q5FWF6;Q12872;Q5JVG8;A6NNF4;O00213;P16989;Q92585;Q15935;Q15014;P55199;Q128  
30;Q9UHL9;Q8NBB4;P10914;O75925;Q9NYW8;Q63HK3;P14316;Q15561;Q96S65;Q8N344;O15266;Q928  
31;Q5JVS0;Q12888;Q96BR6;Q32MZ4;P11831;Q8WZ33;Q15047;Q96T76;O95625;Q9UH92;Q96SK3;Q148  
39;O75534;Q96JK9;P15036;Q0D2K3;O75582;Q6ZN08;Q8WVY6;O14497;P35712;P50549;Q9UK58;Q020  
80;Q13485;Q6P1J9;Q96SZ4;Q15369;Q9HBD4;P63272;Q9NQ92;Q9UHV2;Q9BSG1;Q14653;O75494;P202  
90;Q9UK10;Q06455;Q04864;Q96A56;A6NK75;O95163;P33076;Q8N076;O00716;Q86WP2;Q18047;Q9UPW6;Q8HW  
S3;Q9UKL3;O96019;Q9NWT6;Q9H3P2;Q9NYV6;Q9BTC8;P13010;Q9ULM3;Q14209;P29084;Q96ES7;Q9GZ  
W5;O75528;Q99607;Q9BR84;O60543;P17096;O75478;Q9BRU2;Q9UKI9;P16220;Q9NZV7;Q9H7R5;P275  
40;O00167;Q15562;Q9Y2P7;Q8N1L9;Q8NCF5;P28069;Q9Y6K9;Q49A33;Q15544;Q14678;Q8TAD8;Q6ZY  
L4;Q13469;Q9H9Z2;Q7Z591;Q9NWB7;P17544;P56270;Q8IUR6;Q9NPA8;Q12824;Q16633;P35269;P0C7  
T5;Q8TAK5;P32243;P2324;Q32MQ0;Q5H910;P51948;Q02040;Q9H4I2;O00472;Q9HBE1;Q00653;Q9UL  
18;O60765;Q08999;A8MVS1;Q9H8G1;O94805;Q9UNP9;Q8N6I1;Q9BTA9;P25440;Q6UUV9;A8MWA4;O602  
48;Q9H944;O94776;Q3T8J9;P40337;P49711;P17022;Q86V71;Q52LR7;Q15596;Q6P4R8;P15172;Q010

94;Q96GE5;Q9H5H4;Q96SL8;Q5HY98;Q3KP31;Q9NYB0;Q9H869;P14921;Q15937;P55771;Q15072;O753  
76;Q8WVJ9;Q15572;O75486;Q6NZI2;Q9ULK4;Q14526;Q9UQL6;P17029;Q07687;Q96F24;Q9Y5Q3;P0CG  
00;Q96H20;Q96RL1;Q9H981;Q9H4T2;Q15650;Q96JS3;Q5PSV4;P19484;Q16656;Q9C0F0;Q03111;Q9Y5  
R5;O95503;Q9HCL3;P01106;Q8WW38;O75437;Q86YP4;Q96CJ1;Q86U70;Q6PD62;Q06547;Q13487;O952  
51;Q96GN5;Q9UHR5;P40424;A8MXY4;A6NIX2;Q12986;P78347;Q04727;Q6NT76;Q7Z5L9;Q9UKD1;Q96N  
I8;O15527;Q9UPN9;Q99608;Q9UI95;Q13888;P49116;Q9P2R6;Q92670;Q9Y5B6;P23511;P05204;O753  
62;Q9UL49;P51815;Q9HAW0;P14859;P23193;Q9UKW6;Q8N7M2;Q86YW9;Q9BRR0;Q13360;O00570;Q9NP  
66;A8MTY0;Q9Y4A5;O60244;Q9BWW4;Q7Z3K6;Q96BD5;Q9NRG4;Q8TD23;Q05481;O60907;Q53TQ3;Q9Y2  
Y9;P55198;P48382;O75360;Q96H40;Q2M3W8;Q8N4W9;Q8N1B3;Q9C086;O43463;Q8N5F7;P17482;O602  
90;O94864;Q6ZN06;Q6ECI4;P53999;Q9NV56;Q9UMQ3;O95644;Q6P3V2;O75618;Q9H7L9;Q9NUQ3;Q4LE  
28;P18847;Q92966;Q99576;Q9UK13;Q86X55;P17861;P51508;Q8WYP5;O95218;Q8IZL2;Q01826;P226  
70;Q5H9L4;P20749;Q9BYN7;O00257;Q8N3J9;P13490;P19419;Q6ZN17;P52744;Q9BWT1;Q14686;Q6ST  
E5;P28370;B4DX44;Q96FV9;Q9UBS8;Q8NEP9;Q12972;P52655;P48380;Q9H9C1;Q15714;Q96LI6;Q5CZ  
A5;Q8TF20;P23769;P50222;P22392;Q6MZP7;Q00059;Q76KX8;Q92841;Q9H204;Q96AQ7;Q96I20;Q0PN  
E2;P37275;Q8NDQ6;Q9Y3Q8;Q9NQ87;P31276;Q96N77;Q9HC52;Q9UL58;Q9H2F5;Q9ULD5;Q9UMS5;O750  
30;Q06587;Q15542;Q6RFH8;O94983;O14709;Q15742;Q00712;D6RGH6;Q6VMQ6;P52630;P35638;Q8IX  
W5;O75461;O43365;Q9HBM6;P15923;Q3MJ62;Q9ULW3;Q5H9L2;P53805;Q16520;O95931;Q9UBU8;Q86Y  
97;O75155;Q12901;Q9C0F3;Q15532;Q9UK39;P35789;Q96G25;Q6IPX3;Q9UFF9;O14646;Q6PJG2;Q8NA  
42;O14503;Q8TDY2;Q6P9G9;P17019;Q9H5Q4;Q96QT6;P30153;Q6IQ21;Q14814;Q96N20;Q9Y2Q1;Q018  
60;Q6ISB3;P78317;Q8IZX4;Q08945;Q8WYH8;Q96BN2;Q15797;P42226;P10599;P67775;P61978;Q9BY  
E7;Q8WXF1;Q96N95;Q9P2K3;O75177;Q03923;Q96RK1;Q8N988;Q8WYN3;P18846;O43189;O15405;Q929  
93;Q86V15;Q9UQF2;Q3MIS6;Q99459;O75151;Q96SE7;Q969V6;Q86XF7;Q05516;P28698;Q9GZX5;P129  
80;Q8N693;Q8TB69;Q07352;Q86VE0;Q15306;Q5U623;P0C7X2;Q9P0L1;Q9NPJ6;P17038;Q6ZW49;Q927  
82;Q96T23;Q86TU7;Q13352;Q7RTU5;Q00978;Q13330;P61457;Q969X6;P15621;A6NK53;Q86YE8;Q8WV  
37;Q9HAH1;Q8N2W9;P51504;Q04724;Q8N587;P15408;Q9H6W3;P78337;Q5VVH5;Q6ZR52;Q96EK4;Q8TE  
85;Q15560;Q6P1K8;Q93074;Q8N5U6;P59923;P17098;Q9H175;O00321;O00267;Q9NQX1;Q15022;B4DU  
55;Q6NSZ9;Q6PI98;P0CI00;Q86UU0;Q5VUG0;Q9Y692;Q16385;P06400;O14744;O43318;P18146;Q6RS  
H7;P41162;Q9NTW7;P49750;Q13398;Q66K89;Q53GI3;Q9UK11;O15525;Q9H9F9;Q9UBB5;Q9Y2T7;Q9NP  
71;Q49AA0;Q6IQ32;Q8TAF7;Q01664;P31249;Q92870;Q15654;P21127;Q8IYI8;Q96HR3;Q14872;O751  
64;Q00403;Q9BQI9;P55347;Q9HAJ7;Q9Y2L8;O95628;P41218;P17014;Q14588;Q9HB65;P25208;Q14C  
W9;Q8N228;Q7Z3V5;Q9NQG5;Q5VWG9;Q9H0E9;Q71F23;Q16LW9;Q9Y3T9;P20226;O43159;A8MUV8;A8K8  
V0;Q96EB1;Q8TF47;Q33E94;Q9UBW7;O95201;Q8IXH6;Q9HC44;Q9HAZ2;Q6P1N0;Q5VWX1;O14770;Q6W2  
J9;Q7Z589;Q9UQR0;Q4G112;Q13495;P08651;Q9HCG1;P52657;Q53H80;P52746;Q9UQB3;Q14934;Q135  
06;Q499Z4;Q96RN5;A6NDX5;Q7L2R6;O75448;Q8N8G2;O00401;O96004;Q8WTS6;O75529;P46100;Q153  
26;P11473;O15105;Q9H6Q4;P51610;Q12796;Q9BSM1;Q5VUA4;P41161;P11474;Q16533;Q6ZNA1;Q995  
49;Q03112;P49336;O14978;O00291;Q13952;Q16594;Q01892;O15015;Q12873;Q92985;Q14186;Q6P2  
C8;Q8IYX0;P54252;Q8IXH7;Q9H3H9;O94763;Q8NB50;Q16621;P78543;P54845;Q9BQ70;Q13185;P864  
52;Q9H963;Q96MR9;P49639;Q9UHX1;P84022;P98168;B4DXR9;Q92994;Q9H160;Q04726;Q8IWS0;Q8N8  
95;Q86SE9;O75081;P52747;Q15928;P11308;Q9HDL15;Q96PK6;Q9NVV9;Q9H808;Q15361;O60563;A6NG  
D5;Q96ND8;Q9UDV6;Q8WVC0;Q13111;Q9UID6;A6NJD1;Q6ZN28;Q8NEM1;Q9NV72;Q5QJE6;Q5JN23;Q96N  
38;Q92945;Q15652;Q12857;P17010;P50613;P13984;Q9UNY5;Q32M78;Q8N9N5;Q9P031;P39687;Q995  
51;Q9BXJ9;Q9Y6B2;Q8NF64;P35548;O14948;O75157;Q96MN9;Q02447;Q9H063;Q9Y3C7;Q6VUC0;Q7RT  
T5;Q13105;P28324;Q9H1I8;Q96D98;Q8N488;Q99990;Q71F56;O95125;Q6UUV7;O14896;Q9ULV5;Q08A  
N1;P28347;P51946;O15265;P24928;Q53QV2;Q96JM7;Q14192;Q03468;Q9NPF5;P42568;Q9GZU2;Q9BQ  
A5;P17040;Q15290;Q15528;Q05195;P52742;Q13568;P17032;P0CH99;Q96N22;Q99687;Q9Y22  
94;Q9Y2G7;P17036;P24278;Q13404;Q96LW1;Q6PG37;O43345;Q9BX82;Q8N3S3;Q7KZF4;Q92769;Q52M  
93;Q76L83;P51825;Q68CP9;Q13342;Q92830;Q6ZN32;A6NHJ4;Q9C005;Q99717;O60663;Q9UGP4;P176  
76;P09874;Q04725;Q9P2J8;O95780;P49848;O00422;O60304;O60711;Q9Y2N7;Q9HCU9;P78395;Q141  
03;Q9Y5V3;Q9NYF8;Q6SJV6;O43711;Q9H501;Q6ZNG1;Q99081;Q9ULH7;Q96E29;Q9UM07;Q8NEF9;Q8N3  
X6;Q9NX47;Q9NSC2;Q15466;Q16254;A6NKF2;O43541;P60002;Q9UN79;A5YKK6;P52743;O759  
09;Q05BQ5;P63165;P15407;Q8NF99;Q9Y6X2;O60225;Q99732;P28702;P0DI81;P68104;Q9ULJ3;Q9HC  
D5;Q6IV72;P50750;Q8N5A5;Q7L190;Q99471;Q86VP6;O75971;Q12837;Q12968;Q9UFW8;Q9NZ81;Q012  
01;P35711;Q15697;Q02878;Q8N7K0;Q01543;Q86UE3;Q9NSI6;Q8NBZ0;Q68DY1;Q9Y6X8;Q9UKN5;Q8IZ  
40;P51531;Q9UNN4;P15822;O15379;O00268;O15350;Q9UIV1;C9JBD0;P11532;Q9NQ33;Q9UER7;O608  
28;Q6ZV50;Q15759;Q96RS0;Q5VVIY5;Q8TE02;Q16514;Q9UIF9;P10074;P82970;Q00613;Q9TE9;O002  
55;P10073;O75475;Q12800;P11142;Q16666;P0C1Z6;Q6U7Q0;Q7Z5D8;Q9BRG1;Q96C28;Q92600;A8MU  
Z8;Q9Y5K5;Q03936;Q07666;P82979;Q96RE7;Q8N140;Q9Y462;Q15929;Q8N0Z2;Q9H7S9;Q8NE65;Q96E  
I5;O15370;Q8N8C0;Q6P1X5;O43829;Q9UKV8;Q92759;O14776;Q9ULM6;Q12905;Q8WVM0;Q92925;Q9P0  
W2;Q96IT1;P31269;Q3ZCT1;Q99496;P36402;Q8TAQ2;Q8N5J4;Q15573;Q02833;P35232;Q8N9Z0;O145  
93;Q99543;Q9HD42;Q9UHT3;Q8N972;O43918;Q8IXL2;P41212;Q16236;O94992;Q8TF32;Q68EA5;Q151  
70;Q969H0;Q58F21;P42771;Q96JN0;Q96T58;Q99684;Q8WUF5;P31314;Q13547;Q15853;Q14207;Q5VT  
R2;P52737;Q96IR2;Q12906;Q99583;Q9UHB7;Q96RU7;A6NN14;Q9BY41;O75446;Q6ZMS7;Q9NZI6;P287  
49;Q92748;Q9UKL0;Q5SVQ8;Q16670;A6NP11;Q5H9F3;Q3L8U1;Q9H307;Q71SY5;Q9NZN8;Q8IX03;P542  
53;O75525;P10242;Q9H116;Q9Y252;Q9P086;Q96GC6;Q9HD4;O15535;O95238;Q9HCK8;Q14188;Q9H2  
G4;P62633;Q494X3;P01100;P04198;Q86XN6;Q9UC06;Q4LE39;P43268;Q8WXF8;Q2HCR2;P11161;Q9UQ  
80;O95983;Q8N0Y2;Q92750;Q92754;Q9UKV0;O43186;Q14145;P39880;Q8N108;P23760;Q9UIF8;Q5HY  
K9;Q15906;Q9NZI7;A6H8Y1;Q8N782;P0C7V5;Q9BUJ2;Q96RK0;Q5TEC3;Q15796;Q99594;P21675;Q96M  
G7;Q15059;Q9BZK7;P56524;Q92541;Q6P280;Q6ZMY9;O60925;P41970;O43309;P32519;Q00577;Q9HB  
T7;Q96NJ6;P68036;Q8NAP3;A8MT65;Q09FC8;Q6P1K2;Q96AE4;Q9Y4A8;Q9P255;Q99909;Q8IWY8;Q159  
10;Q63ZY3;Q5T230;Q9UII5;P51522;Q9H3M7;Q9NRL2;Q04206;Q7RTV3;Q10586;O95997;P49910;Q9Y2  
D9;Q8IW36;P17535;Q8WTR7;P78545;Q6NUN9;Q9NY43;Q8IY57;Q8WXI9;P82094;P51532;Q96SR6;P427  
04;Q9NWB6;Q02556;Q9Y222;Q8WUY8;A0JLT2;P53567;Q9UKT9;Q9NPI1;O14771;Q8NDT2;Q15370;P527  
36;Q7RTT6;Q9H3M9;Q15233;Q9UM63;Q13772;Q12962;O60675;Q969E4;Q96ST3;P38935;Q9Y5A6;P071  
99;P43356;Q9BTT4;Q9Y2G9;Q8TBE0;Q14258;Q6R2W3;Q9BXP5;Q9HAP2;Q8IYN0;Q14151;Q92785;P502  
21;P50548;Q8N7U7;P27695;Q99676;B1APH4;C9JN71;P57086;Q96J9C;Q9UC07;P23246;Q9HAF1;P517  
86;Q969J2;Q5TGS1;Q8N371;Q14140;Q13148;Q9UBB9;Q8TAQ5;P48552;Q9UHV7;Q15424;P55197;Q9Y2



X9;P29083;P24863;Q9P1T7;Q969R5;Q8NFD5;Q8N187;Q13045;Q92922;P15336;P10828;Q9NZI5;P16383;Q92499;Q99856;Q9NS37;P18848;Q9NVC6;Q2M1K9;P18850;O60481;Q8WUI4;P62508;Q01844;O60869;Q86X95;Q9Y534;Q9NZL3;Q95619;Q9BXG8;Q8N196;Q6IE81;Q15776;O75586;Q5SXM1;P09629;Q9Y2A4;Q02930;Q08ER8;Q15545;Q5T3J3;Q7L1Q6;Q6ZN01;Q7LBC6;Q8IUD2;Q9H5J8;Q9Y2D1;Q9UI36;Q53E T0;Q9Y2V2;P10243;Q15699;Q86W11;Q08AG5;Q5SXM2;Q2QGD7;Q9HCE1;P17275;P20265;Q9Y2W1;Q9UB K9;O75444;Q96AE8;Q9GZS3;P17480;Q14585;P51523;P06733;Q8N720;Q14135;O95073;P63167;P612 44;P19838;Q96AV8;Q96QR8;A8MV65;P35869;Q8N279;Q9ULJ6;Q8N9R8;Q8N7Q3;Q8N141;Q8TA94;P566 93;P17028;P67809;O75175;Q9UBD0;Q16534;Q15637;Q49AM1;Q9ULC4;Q9Y3Y2;P46937;Q9Y603;Q142 41;Q96PQ6;Q9NSJ1;P13056;Q01658;Q9GZV5;Q9BUY5;Q9ULX9;Q9UMX1;Q86VN1;Q6P9A1;Q6IA86;O605 83;P54198;Q9UHF7;Q8WXB4;O43439;Q15834;Q06546;Q9H5I1;Q9NWA0;Q3C1V8;Q9H091;Q92988;Q9UP P1;Q3KNV8;Q8NC26;Q86UQ8;Q5PRF9;Q13112;Q92539;Q9Y5B9;Q9NQR1;Q6V9R5;O75346;Q9BT49;Q9BY K8;Q9UNY4;Q03060;Q9Y2X0;P26358;P32780;Q8NFX5;Q8IV54;Q8NDN9;Q16384;P19532;Q8NHY6;P164 15;Q3B7T1;Q9Y6R6;P17947;Q5HYR2;Q9UN30;Q9NPJ4;Q59GR2;Q9H9T3;P18615;Q96LA8;Q9Y473;A0AV K6;Q8N7H5;O15226;Q9BUG6;P51826;P81877;Q9BUE0;P98182;P40425;Q13363;Q16576;Q6ZMV8;Q927 93;Q13901;Q8N823;Q7RTV0;Q96QE5;Q8TF39;Q02078;Q9Y224;P35226;Q99623;Q92800;Q969S8;Q9UJ W9;Q5T0F9;P14651;Q9NRC8;Q2VY69;Q8WX92;Q86YD1;P54259;P13682;Q9UIS9;Q8NI08;Q9Y468;P129 56;Q13127;Q15633;O75530;Q6ZQV5;P43355;Q96NG5;Q53T94;Q14593;Q8N726;Q9P0T4;P22415;P277 97;O96017;O95905;Q8IYN2;Q13503;P52741;Q8NB42;Q14693;Q8WUH2;Q5BKZ1;P35251;Q9H0E3;P0CB 33;Q9BQY4;O75928;Q15543;Q9Y250;Q14781;Q14498;Q03938;Q93062;Q03933;P05412;Q16526;Q8IY B9;Q7KZ85;Q13129}

13739

Pathogen[ P03410] interacts with 1780 human

partners: {Q96RL1;Q9NSD4;O60711;Q15650;Q96EG3;Q9HAW0;P84022;Q92830;Q9Y2P7;O75505;Q96L I6;Q9HCG1;Q9H3H9;Q7RTT6;Q99594;Q96NI8;O14813;A8K8V0;Q6AW86;Q9NQG5;Q5CZA5;Q71F56;Q2KH R2;P49750;P57086;Q9H0M5;Q0PNE2;Q8IXH6;Q99743;Q92831;Q00613;P20749;Q9Y5J3;Q9UKV0;Q9UH F7;Q9BSM1;P40426;Q96QT6;Q04206;O60583;Q9Y2W1;Q08945;P08048;O14771;P28069;Q9BZ11;Q9Y2 L8;Q9HC78;Q9H3M9;Q8N1W2;Q96JB3;O60224;Q6ZNG0;O14901;O00472;Q6ZNA1;O15392;P35712;Q6UU V7;P17031;P22670;Q5HY98;Q5TB30;P42771;O43309;Q9UI36;Q6ECI4;Q15714;Q9UPP1;Q96RE9;P234 09;O95619;Q6V9R5;Q5JVG2;Q9H6W3;P11831;O60281;Q8NBF1;O43439;Q9NS37;Q14588;Q8WXF8;Q6NZ I2;Q96BR6;Q9H981;Q5EBM4;O75290;B2RXF5;Q9BYN7;P0CJ87;Q92945;Q96AV8;Q5JNZ3;P23246;Q8TA U3;Q8IYN0;Q8IZX4;Q9HAJ7;P82094;P19838;Q9UHV2;Q68CJ9;P36956;Q9NYW8;P0C7V5;P52655;O754 61;P53999;P14651;Q9NRC8;Q2VY69;Q8WX92;Q86YD1;P54259;P13682;Q9UIS9;Q8NI08;Q9Y468;P129 56;Q13127;Q15633;O75530;Q6ZQV5;P43355;Q96NG5;Q53T94;Q14593;Q8N726;Q9P0T4;P22415;P277 97;O96017;O95905;Q8IYN2;Q13503;P52741;Q8NB42;Q14693;Q8WUH2;Q5BKZ1;P35251;Q9H0E3;P0CB 33;Q9BQY4;O75928;Q15543;Q9Y250;Q14781;Q14498;Q03938;Q93062;Q03933;P05412;Q16526;Q8IY B9;Q7KZ85;Q13129}



23;Q09FC8;Q06732;Q6ZN19;Q99607;P17025;Q03052;Q13045;P0CJ90;Q52M93;Q9UIV1;Q9Y3C7;Q96E  
B1;Q9UPW6;Q8NG57;Q9NWS9;O43159;Q8TAD8;P35227;P62508;Q4LE39;Q92748;Q8NEM1;P0C126;Q86W  
P2;P52657;P51523;Q8IWS0;Q14188;Q96ST3;Q8NFD5;Q6ZN55;Q9UJW9;Q6ZT77;Q7Z2F6;Q15306;Q135  
68;P50613;Q96HQ0;O75177;O15055;Q9H204;Q03933;Q96EK4;Q5VZB9;Q14258;Q96SC8;O00712;Q7LB  
C6;Q92585;Q9UKW6;Q96T58;Q8WW38;Q92541;Q01201;P25490;P01100;P18846;Q0D2K3;Q96LW1;P527  
46;Q5QJE6;Q00577;P61244;Q7RTU4;Q15424;O15226;Q70666;Q6IV72;P17036;Q96FV9;Q8TC  
21;A6NFQ7;P15408;Q9H1I8;Q53ET0;A8K0S8;Q9NNTW7;O60663;Q96G23;P51508;Q3MIS6;Q9H707;Q7Z4  
01;Q96SR6;Q5TEC3;Q9NP66;B4DXR9;Q8NEP9;Q14693;Q6VMQ6;O75486;Q8WUI4;Q5JUW0;P17544;Q5SV  
Q8;Q16670;Q9C005;Q6ZV50;Q16576;O60381;P50549;Q9GZS3;Q5EBL2;Q9H8M2;P17010;Q8N1G0;Q9GZ  
V5;Q9H0E3;Q9UQR1;P11473;Q9UQL6;Q02556;Q96MG7;P51825;Q6XD76;Q9H2F5;Q96QE5;Q9HBZ2;Q9GZ  
V8;Q9BW11;Q9Y603;Q15654;Q13148;Q14587;Q96PE6;Q15928;Q8N7H5;Q9BRR0;A8MV65;Q05BQ5;Q8ND  
Y6;Q92925;Q6ZNG2;A6NJ46;Q8TAF7;Q969V6;Q8N8L2;Q96NG8;Q86T29;Q9ULD5;O95644;Q9BQY4;Q8NC  
F5;Q7RTU0;Q96IF1;Q02930;Q6RFH8;Q96MA1;P50750;Q96MN9;P10072;Q9Y5Q3;Q92800;P26358;P275  
40;O15535;P67809;Q9NYV6;Q99081;Q9ULC4;Q6ZN06;Q9UHB7;Q96BV0;Q14590;O75151;Q9UK10;Q9BU  
G6;Q5T0F9;O60563;Q13127;Q8WXB4;P17022;Q96GE5;Q5SXM1;O43318;O00716;Q9UKT9;O15525;P086  
51;Q6ZMS7;Q9Y2X9;Q8IZL2;Q15583;Q08AN1;P41161;P17029;Q7L3S4;Q8IVP9;A6NIX2;Q92988;Q7Z7  
J5;P12956;Q9NPA8;Q8N823;Q12986;Q99990;Q8WWY6;P0DI81;Q7Z340;Q8TB69;Q5H9L4;P42166;P551  
99;Q96JK9;Q8WZ33;Q07687;Q6ZRS2;Q96H40;Q99471;P35548;Q8NEK5;Q7RTT5;Q6R2W3;Q3KQV3;Q9P0  
31;P17098;Q92793;O95905;Q14966;Q969S8;Q8TBZ5;P38935;Q8IYF1;P35251;Q719H9;Q15573;Q96J  
C9;Q5T6S3;Q8NDN9;Q9BWM5;Q6NUN9;Q8IX07;Q8IXH7;Q8TE85;Q8IY57;Q9ULK4;Q53QV2;A8MWA4;O954  
02;Q9Y2Q1;Q3KNS6;P48382;Q8WX92;P51814;Q6IQ32;P10074;Q15561;Q9Y3D2;P10244;P15036;O005  
70;Q6ZNH5;Q8IUD2;Q8IU81;Q9NQV7;P29084;Q09028;Q96BN2;Q15369;Q9BV97;Q99623;Q9P1T7;Q9UE  
R7;P17026;Q01538;A8MZ59;Q92782;Q9BS31;Q99459;Q16649;Q9HBM6;Q6EKJ0;Q9UIL8;Q92769;Q9HC  
E3;O43513;Q02386;Q8NEA6;Q9Y4A5;Q96KG9;Q9NRL2;Q9BWX5;O94805;P0CG31;Q96JM7;Q9UK12;P527  
37;Q96I27;Q7Z398;Q13342;Q9Y6B2;Q8N5A5;Q5TGS1;O60225;P17535;Q8N972;Q9Y294;Q7Z3I7;Q6ZN  
79;Q15170;Q9P2D1;Q6P9G9;Q8WYN3;Q9Y2G1;Q2VWA4;Q6PDB4;Q969H0;Q969W8;P17028;Q8N883;Q49A  
33;Q8NCK3;Q6S96;Q9UKN5;P17019;A6NLW8;Q96C00;P53805;Q8NAP3;Q9UNY5;Q03924;B2RXF0;Q165  
14;P28347;Q9HA82;Q9H9F9;P78395;Q7Z353;Q32MQ0;Q68DY9;P17030;O75534;Q9BS34;P52743;Q9P0  
L1;Q9UBS8;O75525;P17275;Q13129;O15527;Q9NQR1;Q92499;Q9NWB7;Q12772;Q969E4;Q13330;Q166  
21;Q7Z591;P49848;P52736;A6NGD5;Q9HD42;P0CI00;Q9UHJ3;P0CJ89;Q8TAK5;P25208;Q8N187;Q9BX  
X3;P62324;P581815;Q9NXR8;O95163;A6NK53;Q9BQW3;Q14872;O75362;Q9UJW8;Q96K83;P56645;Q6P1  
K2;Q6ISB3;P78317;Q8WY36;Q5HYK9;P55198;O15379;P56524;Q13111;P17014;Q12905;Q8IXJ9;C9JN  
71;Q9HCE1;P0CG24;Q68EA5;Q96SE7;Q5JVS0;Q9H5I1;Q8NA42;Q9UHX1;Q6P280;Q15797;Q71F23;Q929  
22;Q6P1X5;P17024;Q6P4R8;Q01826;P42704;Q14140;Q9H609;Q13112;Q8N7K0;Q86U70;Q5T5D7;Q9H1  
60;Q9NP71;Q14119;P43268;O75909;Q6ZS27;Q15326;P31269;Q96S65;O15534;Q95983;P19447;Q127  
96;Q9P215;P17020;Q99909;Q01658;P48380;P22415;Q8WXF1;Q13485;Q96I24;P10914;Q9BUY5;Q96I  
R2;Q9ULX9;O94864;Q99583;Q13952;P22736;Q96IZ0;Q04727;Q8IZ26;Q14186;Q9H7L9;Q96EK7;Q969  
J2;Q8NDT2;Q8TBE0;Q8N9R8;Q96MX3;Q9H7R5;O14776;Q8IYN2;Q9BY31;Q9UN42;Q9HCK8;Q8NE63;Q76L  
83;Q86VP6;P28702;Q147U1;Q9UM63;P09874;Q16526;Q8N5P1;Q5PRF9;P16220;Q15466;Q96SK3;Q158  
34;P56693;Q00403;P21506;Q9NUQ3;Q7RTV3;O96017;Q43296;Q6P1L6;P86452;Q96S94;Q9BTT4;Q9Y6  
X8;P17032;P17027;Q9H5Q4;P47974;Q9NQV6;Q3SY52;Q14585;Q9BRG1;A8MUV8;Q8NFX8;Q53H80;P469  
37;P78412;Q8N196;P20290;Q06455;Q6P1J9;O43364;Q6P2C8;Q9GZX5;Q13118;Q15699;P49910;P461  
00;Q49AN0;P35269;Q92618;Q9Y6J9;P55771;P42568;Q86XN6;Q13185;P51786;O75175;Q13469;B1AP  
H4;Q15910;P41182;Q99504;P51532;P0CG00;O15015;Q9HBT7;Q16594;Q9BQ0;Q15853;Q9NQ92;Q133  
98;Q5JV8;O75346;P13349;Q6ZRF7;Q5BKZ1;Q4LE28;P05412;Q8IUR6;Q86X95;O43541;Q96MR9;Q8N4  
88;P49336;P39880;P49639;Q3T8J9;Q9NQ33;A2RRD8;Q10586;Q12888;Q6XYB7;Q9Y3Y2;Q96F45;Q96H  
R3;Q9NW07;P49711;A6NDR6;Q9Y6R6;Q96CJ1;Q9Y222;Q8N988;Q14678;Q99576;P98168;Q5MCW4;Q9UK  
L3;Q86V71;O15105;O95625;O60828;P42226;O14628;Q7Z6R9;Q9HCU5;Q15596;Q9P086;Q8N108;P519  
48;Q8NI51;Q96JN0;Q96RU7;Q7Z7K2;A0JLT2;P51531;Q9HAP2;P24863;Q6RSH7;P28749;Q8TE02;Q8N1  
L9;Q9NSI6;Q9UKL9;Q15544;Q9H8N7;Q6VUC0;P12980;P0CJ88;O75157;Q96IT1;B4DX44;Q13901;Q9UL  
M2;Q13888;P50539;P55347;O60244;Q8IUE1;P78543;Q9Y2Y4;Q9UHV7;Q15742;Q8WV37;Q8NC26;P322  
43;Q8WVM0;P11474;Q92664;Q9Y5V3;P0CJ86;Q96RK0;P30153;A6NJL1;Q9UC07;Q9ULW3;O14593;P237  
69;Q13761;Q96EZ8;O43189;Q14586;Q9BTA9;P52630;Q3L8U1;Q9UIS9;O75081;Q8NHW3;Q9UNS1;O947  
76;Q9HCS4;P27695;Q8NCA9;Q13547;Q01664;Q9C0F0;Q9P2F9;Q96A56;Q9UJN7;Q01094;P35680;O608  
69;Q9BKR1;A6NBJ1;Q7RTV0;O00167;Q14151;P28698;Q7Z7L9;P49116;Q8NB12;P17035;A8MUD8;Q53T  
94;Q8TAQ2;P13010;O14978;Q9Y5K5;P59923;O60925;Q9BQI9;P13984;Q96IS3;A6NDZ8;Q13465;P542  
59;P10589;Q9Y2H8;Q6ZNB6;Q92966;P56270;Q02577;Q9P2J8;Q10587;Q12972;Q9Y6Y1;Q02078;Q9UI  
F9;Q5TYW1;Q15542;Q16534;A8MQ14;O15350;Q96NG5;P07199;Q9UNP9;P41970;Q2QGD7;Q6ZSS3;Q8N1  
40;Q9NZI6;Q9H9Z2;Q6ZN08;Q9BZK7;O95159;Q9H091;Q9H8G1;Q7KZF4;Q9GZ2;P05204;Q9Y2P0;Q144  
98;O43812;Q9UQB3;Q9Y462;Q6MZP7;Q3SXZ3;Q9Y250;Q86UE3;O60543;Q7RTU5;P08047;Q06587;P505  
48;Q9H9C1;Q9P255;A6NLF2;Q13487;Q12872;O60248;P55197;P17039;C9JBD0;O15265;P23760;O437  
11;Q99856;Q9UBD0;Q8N0Z2;Q8IZ40;Q00653;Q92600;Q9UBW7;Q96RE7;Q99417;Q9UJU3;Q9UFW8;Q86Y  
D1;Q494X3;Q460N5;Q8TBC5;A6NK75;Q8N9K5;Q9NYF8;O95201;A6NP11;Q16656;Q9H7S9;A8MTY0;Q8TF  
20;Q9NX65;Q5U623;Q16384;Q9NQZ8;Q68CP9;Q13404;O75626;Q9Y2X0;Q8TF32;Q9Y2X0;Q8TF32;Q9Y2X0;Q63H  
K3;Q06416;O75475;Q15937;O75478;Q6P9A3;O143829;P78347;O43463;Q6ZN17;O14744;Q23HK5;O751  
23;O95073;Q8N8J6;Q7RTT4;Q8N693;Q3ZCT1;Q8N782;Q93074;Q8IXW5;Q96LW9;Q9BQ70;Q6ZQV5;Q8TF  
47;Q9ULV5;O00422;Q9NWB6;P15407;Q12901;Q9NRC8;E9PGG2;Q9UH92;O00151;Q14584;Q8N141;Q9Y4  
A8;Q9UQF2;O00257;Q13105;Q49AA0;A5YKK6;Q6ZN57;Q03701;Q9H4W6;Q8TD26;P14316;Q96BD5;Q6ZN  
28;O75360;Q8TD23;Q9UKL0;Q9UQR0;Q15929;P17041;Q14209;Q9Y6K9;O75618;Q6STE5;Q9NZ17;Q147  
81;O75529;Q6PEW1;Q9Y2T7;P54253;Q9HD15;O15370;Q15744;Q15361;Q96MU6;Q14582;O94993;Q9H9  
44;Q9Y618;Q02080;Q92985;Q96N20;P20265;Q6DD87;A6NKF2;O60765;Q96QR8;Q86YE8;Q7RTU3;Q9UK  
58;Q8NEF9;Q12837;Q8NDP4;Q8TA94;P11308;Q9NSC2;O94983;Q8N371;Q99543;Q9NY43;Q9BR84;P352  
32;Q9UID6;Q03936;Q9BUE0;P18146;Q9NYB0;Q96K58;Q8N5U6;Q8IX15;P17021;O75164;P15622;P626  
33;P52744;P51522;P17023;O75820;Q8N895;Q5VTD9;Q12824;Q96E29;P35226;Q96H20;Q96J4;Q9H5  
01;Q9H488;Q96EI5;Q8TBZ8;Q96JS3;Q9BT81;Q14865;Q9NX70;Q63ZY3;Q96NJ3;O95416;Q05481;P163  
83;Q8N859;Q9BX82;Q9HBD4;Q6IA86;P67775;Q14145;Q7L945;Q33E94;Q92539;Q14592;P48552;Q6P9

A1;O00255;Q96JF6;Q86V15;O14867;P40424;Q96CX3;A8MXY4;Q9H2G4;P78424;Q04743;Q9H0E9;Q15796;P0C7X2;Q9UJQ4;P0C7Q3;Q15532;Q9UL36;Q5SXM2;Q14839;P08235;P15336;Q9UEG4;Q9NQX1;P1161;Q92993;Q15723;P81877;Q9NR55;O60422;Q15562;Q8N2I2;Q96PT4;Q9C086;P0CJ78;A8MVS1;Q9H511;Q8WYP5;Q8N5Y2;Q14241;P40763;Q8WUY8;P32780;Q9NU63;A6NNF4;Q68DI1;O43361;Q96AE4;Q8NDQ6;Q9Y2D9;Q9UKY1;B4DU55;Q9UN30;Q58F21;Q96SL8;Q9UMX1;Q9UGU0;P18850;Q9HCD5;Q9P2K3;Q99551;Q75971;O94992;Q4V348;O75467;O60907;Q969R5;P33076;P43356;Q9Y5A6;Q6ZN32;Q92681;Q14934;Q6ZMV8;Q12906;Q9Y5B6;P04198;Q00978;Q14591;Q8NF64;O43345;Q86UU0;Q8IXT2;Q969X6;Q9HCZ1;O75448;Q96RN5;Q6ZNG1;Q5VVH5;Q6ZW49;Q14192;Q9Y2G7;Q9BQ87;O43365;O43167;Q96D98;Q16533;P15976;Q96PM9;O14770;Q6IE81;Q6P1K8;A6NE82;Q15072;Q86UP8;Q07352;Q9NUA8;Q86TJ5;Q92759;Q9Y2A4;Q6P1N0;P52742;Q9UJW7;Q6ZR52;P17038;P0C7M4;Q06546;O60290;Q7RTT3;Q13352;Q15022;Q9GZW5;P17097;A0AVK6;Q15545;Q9NPI1;Q9HBS8;Q14135;Q5HYR2;Q7Z5D8;Q86TU7;Q9UPN9;O43593;Q8NHY6;Q9H5H4;Q7Z3V5;Q6ZNG9;Q9HC52;Q01543;Q86W11;P78337;P40337;Q92754;Q86Y25;Q499Z4;P28370;Q9HB65;Q9HBE1;Q8N393;Q13506;Q2M3X9;Q03111;O60284;Q05195;Q01892;Q96MH2;Q8N184;Q8HWS3;O75586;P14921;Q8WYA1;O75530;Q96RJ6;Q9Y473;P52747;Q96NJ6;Q9UHR5;Q8IVC4;P17480;Q9HCX3;Q04725;Q7Z589;P51504;B7Z6K7;Q9H307;Q8N9F8;O75494;P13056;Q5PSV4;O75155;Q9NRG4;Q8NBZ0;Q96NL3;Q9UBG7;Q15528;Q96DB2;Q9BXJ9;Q8IYW8;Q9BXC8;P61457;Q8IZC7;Q8N0Y2;Q16587;O15499;Q08AG5;Q9UFB7;Q8WUF5;Q15935;Q03938;Q99966;Q16385;Q6NX49;P27797;P25440;Q9BSK1;Q71SY5;Q02040;Q16559;O14529;Q92870}

Pathogen[ P14075] interacts with 1290 human partners: {Q04727;Q9H307;Q16633;Q9NQ33;P28069;P42704;Q8N196;Q96EB1;Q3L8U1;Q5VWX1;Q0D2J5;Q00059;Q9NZL3;Q9C0F3;P52630;Q5VTR2;Q86UU0;Q14781;Q494X3;Q9BY41;Q9UN30;Q6P4R8;P17480;P17029;P49336;P06733;P05204;Q68DY1;Q9NTW7;Q15059;P82979;Q5H9L2;Q8NI51;Q9Y6J9;Q96ST3;Q9NSC2;O00213;Q16576;Q92585;Q15572;A8MV65;P43355;O14646;Q9UHL9;P35869;Q3T8J9;O60663;Q8TAQ5;P63165;P51815;Q96S65;Q9GZV5;P51825;Q96QR8;Q15929;Q99607;Q8IXW5;Q6V9R5;Q3KNV8;Q7RTT5;P54253;Q9H5Q4;Q12962;Q02577;Q8TAD8;Q86U70;Q6RFH8;Q8WXF1;Q9Y5B6;P11532;P13984;Q99608;Q85X95;Q9Y5A6;Q969J2;Q9H175;Q8TSE9;Q9NPJ6;Q8N9N5;A8MTY0;Q99504;Q96GP5;Q6ZN32;Q00613;Q9GZU2;Q92681;P23246;Q92759;Q9HAP2;Q8N187;Q9H2F5;Q99990;P12956;Q14207;P50548;P11142;Q02878;Q16533;Q9BRU2;B4DXR9;P24863;Q8N141;Q13105;P55198;Q04206;Q63ZY3;P21675;Q6ZN08;P17482;Q86YD1;Q9H4I2;Q9NWB6;Q969R5;Q9Y5R5;Q15528;O15265;Q9UM63;Q7Z591;P51523;P78337;Q9H1I8;Q5TGS1;Q9HBD4;P40424;Q14526;Q969S8;P16989;P52737;P0C7X2;Q99687;O75030;Q9UBW72;Q9HAJ7;O60248;Q9UBU8;Q92966;P25440;Q96QT6;Q9UQR1;Q8NEM1;Q89999;Q99574;Q9NX70;Q8N371;P52657;Q8IXJ9;Q96JS3;Q52LR7;P68036;Q8NC26;Q13495;Q9NPI1;P05412;Q16385;Q15542;Q8N488;Q04725;P18615;Q96NJ6;P42226;Q95503;Q5BKZ1;P40425;Q12800;Q14938;P11474;Q9Y2D1;Q2M3W8;P68104;Q01543;Q9UQR0;Q9UM07;Q15759;Q9BQA5;Q14103;Q6ZN01;Q9ULM6;Q15928;P62324;O75475;Q9NYV6;Q4LE39;Q16656;Q8IY57;Q9C0F0;Q14593;P14859;O60828;P22670;Q92831;P0CI00;A6NHJ4;P11831;O60481;P52747;Q9BWW4;Q15906;Q8N1L9;Q9NPF4;P10828;Q9BXJ9;Q13506;Q8N42;P78545;Q14588;P78395;Q92782;Q8N9R8;Q86XF7;Q15697;Q8NB50;P17861;Q15014;O60765;Q8NB4;Q08945;Q15562;Q6ZNG1;Q9Y224;O00470;P27695;Q9Y2A4;Q8N140;P51532;Q6U7Q0;P28347;Q9Y3Y2;Q15532;Q9UMS5;P53567;Q9GZW5;Q12901;Q9YU94;Q8TD23;Q9UHR5;Q07666;Q96HR3;Q76L83;P252Y8;P0CB33;P52736;Q96MR9;O43541;P07199;Q15937;Q96SZ4;Q9UKN5;Q8N1B3;Q9C086;Q8N5F7;Q14686;Q0D2K3;O75582;Q9UHX1;Q01201;Q01658;O75444;Q96MH2;Q9H7R5;Q53T94;Q9H116;P17275;Q9Y4A8;Q00403;Q6ZYL4;Q7L2R6;P82094;A6NDZ8;Q13901;Q9UHJ3;P57086;Q8TE85;Q71F56;O75362;O75446;Q06546;P0C1Z6;Q6NUN9;O60563;Q9Y252;O14776;P43268;Q9P2R6;Q8WYP5;P29083;O75971;P23769;Q9NRL2;P61244;Q9UKL0;Q9NSI6;Q9UID6;P50613;Q9Y2G7;P59923;Q96T58;P41218;P19419;Q5H9F3;P41212;Q12905;Q14241;Q92600;Q6P9A1;P18847;Q8WVC0;Q01860;Q9UHP1;Q6ZW49;Q86TU7;P28698;Q9Y468;Q8N782;Q9H7R0;P38935;Q96SL8;Q9UGP4;Q14839;Q9UBD0;Q03933;Q9HC44;P48380;Q92945;P51610;P62633;Q33E94;O15527;Q9HBT7;Q15652;O15015;P35548;Q96C28;P11161;Q12837;Q15561;Q6ZQV5;P15172;Q96ND8;Q6P1X5;P17096;P56524;Q9UK11;O43918;P17036;O00422;Q01844;O14709;Q08050;Q15714;Q9H9Z2;O43186;Q5PSV4;P18146;Q9NYW8;P19484;Q9HCE1;Q9NQG5;Q96EZ8;P0C7T5;Q15047;Q16384;Q9P1T7;O60675;Q95625;Q99576;P29084;O95619;Q96R0;Q16520;Q95931;Q6ECI4;Q6IA86;Q86VE0;Q9Y2N7;P42771;Q7LBC6;P20265;P33076;Q6RSH7;Q9UH92;Q53H80;Q92922;O15226;Q86VN1;Q8NDN9;Q3MIS6;Q7KZ85;Q92870;Q9Y603;P49750;Q9P086;O94776;O75925;Q9HAH1;P10244;Q9NQR1;Q9Y2V2;P17019;Q96RK1;P35638;Q719H9;Q8TDY2;P50750;P15822;Q95218;O60583;P42568;Q92994;P31249;Q9UNP9;A8MT65;Q6ISB3;Q95997;Q9Y250;Q02080;Q9ULX9;Q93062;Q15910;Q96IT1;Q53ET0;P78347;Q92988;O43167;Q7Z7C8;Q12906;Q92800;Q99543;P39687;O75175;Q5SXM2;Q15544;Q9H091;Q8WUF5;Q8IUD2;O95159;Q9HAW0;Q02040;Q9UFW8;Q8TAF7;Q99717;O75448;O00167;Q9Y4A5;Q9UKV0;O00716;P56693;Q9H9C1;O75494;Q7RTU5;Q00978;Q8WW38;Q8IX12;P20226;Q9BT49;P15336;P04198;Q13111;Q9UHV2;Q8N2W9;Q9UL58;Q9UBB5;Q5VVH5;Q8WWY6;Q92754;Q9NZI7;Q9UI95;Q15560;Q9NZN8;Q9BRR0;P10242;Q16666;O94983;Q15796;Q96BN2;Q08AN1;Q96N95;Q9NWA0;Q9NQ87;P0CH99;Q8NHY6;Q03936;Q13148;P15923;Q6ZMV8;P15408;Q13398;Q53GI3;Q86W11;Q8N7Q3;Q9H2G4;Q9NYF8;Q14585;Q7Z3K6;Q12872;Q86YW9;Q14209;Q13952;Q9ULJ3;Q9BYE7;O43365;O75182;Q13547;Q99856;Q00570;Q05195;Q16594;P54198;O94763;P26358;Q6S9J96;Q9BQI9;Q8IYN2;Q8N0Z2;Q96IZ0;P13056;P01106;Q92750;P39880;Q8WVJ9;Q92993;Q96H20;A6H8Y1;Q8NFZ5;P53805;Q9Y618;O14497;O75290;Q5VWG9;Q5081;O95402;Q07687;O14503;Q9Y2Q1;P17040;P54252;P31269;O75376;Q92748;Q01826;Q4G112;Q92785;Q16670;Q96AQ7;Q8WV37;Q8TEE9;P17040;P27540;Q5VUG0;P55347;O75586;Q9H0E3;Q7RTV3;Q8N5A5;Q9UQB3;Q99459;C9JBD0;Q9BTT4;Q02556;Q9NUQ3;Q03468;Q9ULD5;P35711;P41162;O00257;O96004;Q96NI8;Q13568;P17098;Q96MN9;O00291;Q13485;P35232;Q94992;A8MUZ8;O00255;Q8N7H5;P09629;Q93074;O94864;Q6P1J9;Q8WTR7;Q9NPF1;Q92499;P24278;Q14186;Q6NZI2;Q86XN6;Q09028;Q10586;Q9NPF5;P15036;Q5TEC3;Q9H204;Q8IYI8;Q15853;Q8N5U6;Q9AQ70;P49116;Q12857;O95628;Q9UKL3;O96019;P46100;Q9HCL3;Q92541;Q8NBZ0;Q6IE81;Q04726;O14770;Q8IWS0;Q06587;Q5VIY5;Q9H5I1;O75478;Q96JC9;Q8N7U7;Q9BQG0;Q9NY43;Q5VUA4;Q92539;Q9ULV5;P28324;Q12986;Q8N108;Q9Y692;O00401;Q8N344;Q92670;Q9H5J8;Q15326;O75618;Q14CW9;Q8TA94;Q9Y3C7;Q9NQX1;Q9NZV7;P32519;Q4LE28;O14948;Q8NEF9;Q14653;A6NGD5;Q9UPW6;Q06455;Q96D98;Q15370;Q8NCF5;Q06547;Q01664;Q13490;O95983;Q53TQ3;O14744;P54845;Q9UHB7;Q9HAF1;P23193;Q58F21;Q96JM7;Q05481;Q96LA8;Q96RE7;Q9UHV7;Q9UNY5;O75528;Q12830;P52746;Q8N4W9;Q9P0L1;Q99909;Q9BUY5;Q8N228;Q9Y6B2;Q5HYR2;P50221;Q32M78;Q13469;O96017;Q96N22;Q15650;Q96PK6;Q9Y2T7;Q6W2

13740

J9;Q13889;O15350;P52742;Q16254;Q9UL49;Q8N7M2;Q99684;Q9UBK9;Q6PI98;Q8N693;Q9BYN7;Q8N3  
J9;Q92769;Q9HCG1;Q01892;Q86U86;P0C860;P48378;Q9C005;Q9H8G1;Q9BUJ2;Q6ZN17;O75525;Q9H9  
63;P78543;Q9Y5B9;Q99623;Q9Y5Q3;O95780;Q15834;P49848;Q15424;Q68CP9;Q8NDQ6;Q86X55;Q6IP  
X3;P35712;Q9HCU9;Q13185;Q9UBB9;Q6MZP7;Q3B7T1;Q15637;Q9Y2D9;P86452;P55771;Q6VMQ6;Q96E  
29;Q6PD62;Q49AM1;Q9H9D4;Q9UIS9;P51504;Q7Z5L9;Q9H944;P52744;O60543;Q9HCK8;Q9UPN9;Q9UN  
79;O15370;O00472;Q5JVS0;Q99732;P24928;Q8NAP3;Q05BQ3;Q9UHF7;P0DI81;O43189;Q8N6  
I1;Q9ULM3;P27797;O43318;Q15723;P51531;Q9BTA9;Q9H808;Q14934;Q6UUUV9;Q15573;Q8IYX0;Q9UK  
T9;P0CG00;P35269;Q9NPA8;O15198;P11473;Q99594;Q86VP6;O60244;Q9Y6X8;Q96CJ1;Q9NZ81;O759  
28;Q9HC52;Q9ULW3;Q92925;Q9H6W3;Q6IV72;Q8N587;Q8N895;Q96IR2;P48382;P53999;Q8WXF8;P352  
51;Q9UK39;P52655;Q15306;Q96GN5;Q969X6;O15405;P17947;Q9UIF9;Q9UKD1;Q96RS0;A6NIX2;Q8TB  
E0;P11308;Q8TE02;Q16514;O95251;Q6R2W3;Q5QJE6;P82970;Q8TAQ2;O14628;Q14151;P67809;Q8IX  
15;Q8WUY8;O60907;O60290;Q9BR84;Q99417;Q8NB42;Q8IYB9;Q9NWT6;A0JLT2;P21127;Q9P031;Q995  
51;Q9H063;Q6PJG2;Q3ZCT1;Q15545;Q96BD5;P23511;P61457;Q9H3M7;Q7L1Q6;P55197;P78317;P188  
48;O75360;O43711;Q9UMQ3;Q99549;A6NKF2;Q96JK9;Q969V6;Q01094;Q6ZN79;Q9UKV8;O14978;P283  
70;Q14258;Q13487;P08651;P61978;O15105;P14921;Q9GZS3;Q99496;P36402;Q9Y2L8;P06400;Q073  
52;A8MWA4;Q8N9Z0;O14593;Q9BSG1;Q9NWB7;Q6IQ32;Q15935;Q96AV8;Q15654;Q03112;Q02078;Q156  
33;Q9NP66;P52743;Q8N988;Q6ZN28;A8MUV8;A8MVS1;Q8IXH6;P17028;Q12824;P14316;P50549;O148  
96;Q15742;P43356;Q06330;Q15233;Q9Y2G9;Q9UIF8;P67775;Q5H9L4;O94805;O95073;P30153;P519  
46;Q3C1V8;Q9UQ80;Q969E4;Q96RU7;Q9NV56;Q9NZI6;P28749;P32780;O95163;P55199;O15379;Q9UK  
10;Q66K89;Q68CJ9;Q6ZMS7;P98168;Q8NF99;Q9ULK4;P01100;A8K8V0;P17010;Q86Y97;Q14134;O002  
68;Q8NDT2;Q02447;Q9UNN4;O15525;Q9Y222;Q5PRF8;Q9Y534;Q86YE8;Q96BR6;Q5HY98;P20290;Q9Y2  
X9;P15621;Q9UFF9;Q9H9T3;Q6ZV50;Q9UK58;A6NE82;Q9Y3T9;Q6P2C8;Q49AA0;O43159;Q13342;Q7L1  
90;Q9NZI5;P98182;P0C7V5;Q13330;Q9BXG8;Q5T230;P12980;P49711;Q96LW9;Q9BZK7;Q96H40;Q96T  
23;Q00577;Q32MQ0;O00712;Q96N20;Q8WZ33;Q92793;Q96LI6;P28702;P15884;O60925;Q9NV66;Q9UN  
S1;Q9UKW6;Q92841;Q9UI36;Q13772;O43463;Q6UUUV7;Q16526;Q8TF47;Q13404;P16383;Q96PQ6;Q156  
99;P46937;Q6P9G9;Q13127;Q9UBS8;Q8IW36;P35226;Q9Y294;Q96H42;P13134;Q32M24;Q3MJ  
62;Q9BRG1;Q9Y2P7;Q96RN5;P48552;Q9UDV6;O75486;Q13503;Q8TF39;O43439;P31276;Q05516;Q150  
22;O60711;Q9NRC8;Q8WUH2;Q15466;P19838;Q9H9F9;Q7Z7J5;Q9UQL6;P60002;Q03060;Q04724;Q53Q  
V2;Q6ZN06;Q96F24;Q96GC6;P10074;Q7RTT6;Q9HCD5;Q9Y3Q8;Q8NFD5;Q12888;Q13129;Q96EI5;Q09F  
C8;Q9UL18;Q9H981;P54259;Q14678;P56270;Q99502;P35789;O15266;Q00653;O60304;Q96N38;P162  
20;Q15361;P17022;Q7RTT3;Q7KZF4;Q6P1K2;Q9Y6K9;Q969W8;Q9BXP5;Q49A33;Q13363;Q9UKT9;Q9HB  
65;Q9H3P2;Q9Y473;Q9ULJ6;Q8TB69;Q96LW1;P13010;Q03923;P41970;Q8WVM0;Q15329;O75529;P818  
77;O95125;P22415;Q86WP2;Q92985;P84022;Q86V71;Q8N3X6;Q8NI08;Q9H3H9;Q9UER7;P15407;Q133  
52;Q16621;Q9H7S9;P23760;O43309;Q02833;Q12972;Q99583;O75534;Q8N3S3;Q8N720;P17676;P372  
75;Q8WUI4;Q16236;Q13360;O60869;Q8WYH8;Q8IXH7;Q9H501;Q96JN0;Q8WTZ3;A6NKS3;Q7Z589;Q86U  
Q8;Q2M1K9;Q6STF5;Q71SY5;O60716;Q13112;Q8IZL2;Q5T3J3;Q9UK13;P10914;Q96G25;Q96NG5;Q96F  
V9;Q9UIV1;Q9UQ88;O75155;P40337;O75909;P17544;Q2KHR2;Q96ES7;Q99081;Q9UII5;O00267;Q9Y5  
V3;Q2QGD7;Q9Y2W1;Q9H160;Q6ZMY9;P17535;Q9BX82;Q14188;Q969H0;B4DX44;Q8N859;Q92830;Q9GZ  
X5;Q86V15;Q15369;D6RGH6;O43513;Q5FWF6;P49910;Q96N77;Q12873;O75151;A5YKK6;O60225;Q96E  
K4;Q9BSM1;Q96AE4;Q9ULC4;P32243;Q8NOY2;Q8WXI9;Q63HK3;Q8WYN3;Q8IUR6;Q14814;Q03111;Q9BW  
T1;Q6P1N0;Q9UMX1;Q96RL1;Q9NRG4;Q71F23;Q99471;Q6P1K8;Q8WXB4;Q9NS37;Q9UQF2;Q12796;Q9Y6  
X2;O75461;Q9NVV9;P63167;Q96QE5;P63272;Q12968;Q8NE65;Q15170;Q9UBW7;P19532;Q6NT76;Q96M  
G7;Q14872;Q68EA5;Q7Z5D8;Q15776;Q14192;A0AVK6;Q9HD15;Q8HWS3;O75437;Q9BYK8;Q96A56;Q9NQ  
92;Q9Y462;Q02930;P10073;Q5JVG8;P62508;O43829;Q9BTC8;Q8NEP9;Q5U623;P22392;Q9P2K3;Q08A  
G5;P50222;Q9P0W2;Q8IYW8;Q0PNE2;Q8IZ40;Q13JN7;Q14145;Q9H7L9;Q8NF64;Q95644;Q9BQY2;O952  
01;Q76KX8;Q9Y2Y9;Q8N8G2;Q8N726;P51826;P09874;Q9Y2X0;Q8N823;Q8N972;Q14498;P35227;Q96T  
76;Q13045;O75346;Q6VUC0;O75164;Q15596;P20749;A6NP11;Q8N7K0;O95905;Q9UJW9;Q5T0F9;Q9BU  
E0;Q6P280;B1APH4;Q86YP4;Q8TF32;P18846;Q9Y5K5;Q9ULH7;Q14135;O75157;P51948;Q8WTS6;O755  
30;Q9Y6R6;Q04864;Q15072;O75177;O00321;Q8TAK5;P18850;Q8IX03;Q5H9I0;Q9NYB0;Q8WX92;Q8IZ  
X4;Q3KP31;O14771;P10243;Q9BUG6;Q15543;Q9HBE1;P52741;Q14693;Q14140;Q9UC07;Q13761;Q9H8  
69;P10599;Q9HBM6;Q16534;Q03938;Q7RTV0;Q13888;P08047}

13741

Pathogen[ P0C206] interacts with 1939 human  
partners: {Q9UID6;P27695;Q02386;Q9UBW7;Q9BUJ2;Q99990;Q8HWS3;Q8N9K5;Q8TE85;Q5VUA4;Q76L  
83;Q9UNS1;Q9NUA8;O43829;Q8N720;Q13112;P06733;O00488;P28698;Q6NUN9;Q15072;Q6PJG2;Q9UN  
P9;Q9BRG1;P46937;Q9Y468;Q15723;Q13887;Q02833;P84022;Q9BUE0;Q3T8J9;Q9Y224;O75486;Q8IX  
H6;Q9HCU9;Q9NQX1;Q3KNS6;Q86W11;Q9UFF9;Q9Y2X9;Q12872;Q96JL9;O60716;P53567;A8K8V0;Q5PR  
F9;Q07687;P10588;Q96RS0;Q9UK12;Q8N371;O43541;P24863;P62324;Q9Y232;Q6P9A3;Q8NG57;Q8WU  
F5;P0CJ87;B1APH4;Q86VZ6;Q9P031;Q53T94;P67809;Q9NQ87;Q14188;Q86V15;Q969W8;Q8IX15;Q163  
85;O14628;P10914;Q92769;Q8WYP5;Q92539;P08048;P60002;Q9BZE0;Q6IPX3;P78424;Q9H5H4;Q9P0  
U4;Q9GZW5;Q16649;Q8IXW5;O43309;Q9C005;Q8N140;Q03060;O95201;Q96JM7;O94915;Q9BSN8;Q8TC  
21;Q9Y3M9;Q9UN30;A6NDR6;O75530;Q8N988;P98168;Q96SE7;P0CB33;Q8IUR6;O75528;Q14587;P538  
05;Q8IXH7;Q96JC4;Q7Z353;Q15270;Q05195;P16383;Q9HCK8;Q15329;Q8N9N2;O60481;O43159;Q141  
03;P13010;Q8N187;Q00444;P49336;Q96BV0;P0CJ90;Q9NQV6;Q32MQ0;Q49AM1;Q9Y2D1;Q63HK3;Q7Z3  
I7;Q9UHL9;Q96NI8;Q15466;Q9UJN7;Q96G23;Q6PD62;Q96N22;A8MXY4;Q9BUY5;Q8N9N5;Q13568;Q96M  
M3;P3398;P23193;Q92830;Q96RK0;Q14588;O00167;Q96HR3;Q7Z398;Q06546;Q96ST3;Q9HB65;Q8WW  
Y6;P39687;Q9NPJ4;Q03924;Q15545;Q8NA19;Q8NEF9;Q9H2F5;O43711;Q9BUG6;P17026;Q96S65;P312  
69;P31314;Q96IR2;Q7RTU3;Q16514;Q7Z2F6;Q6IV72;Q6VMQ6;P55198;P38935;Q5JNZ3;P06401;Q037  
01;Q06455;Q9GZU2;Q5T5D7;O95251;O14867;Q12796;Q8N883;Q96CS4;P27797;Q7Z3K6;O60393;Q015  
38;Q9NPF5;Q06330;Q13469;Q9NMF5;Q8TD26;Q9NPF1;Q7Z7J5;P40425;Q9NYT6;Q9NS18;Q9UH92;Q155  
43;Q9UBU8;Q9Y6Q3;P98182;Q99504;Q9NUQ3;Q8N3X6;Q8NB50;Q9UJQ4;Q9HAZ2;Q12905;Q9HC52;Q8N9  
F8;Q96IZ0;Q13127;Q9NZI5;O95780;P13682;P49848;Q9Y6K9;Q9UPN9;Q9Y5Q3;Q8IYN0;P14921;Q054  
81;Q15911;Q8N228;Q9NY43;Q3SY56;Q9NSI6;Q0VGE8;P51532;Q06416;Q9NPI1;O00291;P35251;Q6PF  
04;Q8NCN2;Q9HAW0;Q9Y4A8;Q86UU0;Q9Y242;Q08AG5;Q9ULM3;Q9NR55;B4DU55;Q9NVW2;Q6NX49;Q9UC  
06;Q8TAK5;O75123;Q02078;Q147U1;Q14586;O15266;Q9P086;Q96PE6;A6NNA5;Q13263;Q8N726;Q153  
61;Q9UII5;P50750;Q5TGS1;Q94864;Q8N6I1;P52741;Q9Y2N7;P43356;Q9H981;Q5VUG0;A6NGD5;B7Z6  
K7;O96017;Q9H4I2;Q8WUU5;P15407;P20226;P12525;P11161;Q8IYX0;Q9UBB5;O43365;P17031;Q86V

K4;Q04743;Q15544;Q9H511;A2RRD8;P16220;Q9NW07;Q9Y5T5;P17275;Q9Y5R6;O14948;O95633;P09067;Q9UN79;P10074;P30153;Q92681;Q9UK13;Q5T3J3;P35869;O15527;Q96SL8;P17544;O75030;Q9UMX1;Q96DT7;Q9UGU0;P0C7X5;Q8TAD8;O75925;P09874;Q15744;Q6ZW49;P20290;Q9UDV7;P22392;P25490;O43313;O75290;P15622;P68036;Q8N9Z0;Q9NSD4;Q02446;Q86UP8;Q8N8Z8;P08651;O75444;Q9HBE1;Q9UJL9;P18850;Q9UHV2;Q14966;Q96F45;P49910;Q8NCF5;Q9UNY4;Q9P243;Q92664;Q6ZSB9;O60225;Q9BRU2;P78395;Q8N7R0;O60907;Q8WYH8;Q96N95;Q8TB69;Q9BT49;O43812;Q14258;Q6W2J9;Q49A0;P41212;Q9HGP4;Q9H9T3;Q7L190;Q9NSC2;Q96I27;P48382;Q9UC07;Q05066;Q9NR11;O75582;Q9Y2Y9;Q15697;O14744;Q5CZA5;P78414;Q15233;Q96AV8;Q01860;Q7Z7K2;Q9Y4Z2;P51531;Q9H091;A6NE82;Q96IF1;P41182;P17024;Q05516;Q6V9R5;Q9NZN8;P52743;P54821;Q9UIV1;Q9H869;P49639;Q9H7R0;Q9BS31;Q99583;P05204;P14317;Q2VWA4;Q96K75;Q9UQR0;Q9NQZ8;P52657;Q9NR83;Q7L3S4;Q9NX0;Q9UKL3;Q6XD76;O14529;O95983;Q00613;Q00470;P35226;Q13111;Q9UKL0;Q9UBX2;Q96DB2;Q9UHR5;Q9NRG4;Q86X55;A6H8Y1;Q02548;P52737;O75469;Q6ZN32;P63167;P59923;Q8WXB4;Q9UK33;Q15170;Q8IYI8;O75081;Q9Y2V2;Q96JK9;Q9P2F9;Q8WXI9;P29374;Q9Y2Q1;P52655;Q96QR8;O00255;Q9UL58;O95997;Q9Y2D9;Q9BU19;Q8WTR7;Q13045;Q04726;Q9UHB7;Q99623;P61978;Q03933;Q99717;Q9UMQ3;P17019;Q5VIY5;Q6ZRF7;Q9NPA5;Q6STE5;P05412;O95600;Q05BQ5;Q9P2D1;Q5T1R4;Q8IYH5;O15534;Q8IYF1;Q9UKV0;Q14678;Q8WW38;P46100;O43463;Q8N8E2;O43670;A6NHJ4;Q8N2W9;Q86XF7;O94892;Q9H4T2;O00268;P78411;Q9Y5V3;Q460N5;A6NIX2;Q9UPP1;Q86T29;Q9C0J9;P19419;Q6PI98;Q9NWB6;P50221;Q9UM63;Q6ZS27;Q9Y2P0;Q96MH2;P54198;Q9UL49;Q96SK3;Q8WYK2;O75177;Q96MX3;Q8NFJ8;A6NP11;Q3MIS6;Q9UL59;Q96LA8;Q6IA86;P10242;Q8N1G0;O75764;Q8NI51;Q9H307;Q9Y462;P14651;Q92988;Q8N196;Q0D2K3;O15499;Q6ZMY9;Q9ULJ6;Q15637;P10073;Q03468;Q8NFZ5;Q8WZ33;Q52LR7;O15265;Q68EA5;P23409;Q96JF6;Q7RTT3;Q3SY52;Q9HCX3;A6NFD8;O43318;Q8N680;Q86VNL;O75175;O75586;Q9UBC0;O60828;Q15654;Q16666;P15336;Q9HC44;P12980;Q6PDB4;Q86UD4;Q6ECI4;P0CJ86;Q9UJW8;Q9NQG5;P26358;Q969H0;Q12901;Q969J2;Q86TU7;P52738;Q8N7G0;O75157;Q9UIH9;Q9UFW8;Q7KZF4;Q92541;Q04727;Q92800;Q15572;P55055;P17027;P51508;P57086;Q92670;Q9UEF7;Q8N7M2;O60765;Q7LBC6;Q6ZRS2;Q6P2C8;Q9P215;Q5SXM1;O75618;Q9Y3C7;P43268;Q96T23;Q96MG7;Q9HCG1;Q75467;Q9BS34;Q96C00;Q92922;Q02878;Q15306;Q8IUD2;P15621;O75626;Q9Y5B9;P42717;A6NLF2;Q9UKV8;Q9P2K3;Q8N7K0;Q13342;Q9ULJ3;P51522;P17535;Q99909;Q9NRL2;Q13547;P43355;Q8N0Y2;Q8TAF7;Q01844;Q14186;P13056;P17023;Q96KM6;P49715;Q6ZN30;Q9C0F0;Q03936;Q9BQ87;O94776;P31268;P36956;Q13398;P17483;Q14140;P10072;P29373;Q9HCS4;O15164;O75494;P19484;C9JN71;Q9UM07;Q7RTV3;Q14591;Q96T92;P12524;C9JBD0;P41970;Q9NQX0;Q86VE0;O75437;Q04725;Q9Y3Q8;Q12968;Q96693;Q14590;O95905;Q92993;Q8N8Z0;E7ETH6;Q96S94;Q6R2W3;D6RGH6;Q12824;P18846;P48380;P0CJ89;Q68DY1;Q96QE5;O14770;Q86YP4;P55771;Q2VY69;O15525;P54845;Q9Y6J9;Q8NE65;Q07666;Q6ZM06;Q9UNN4;O00716;Q6ZNB6;Q13330;P15976;Q02040;Q01201;A6NNF4;Q86UE3;O75529;Q92925;P0C7T5;P49116;P67775;P41218;Q5HYR2;Q15532;Q9UQF2;Q5EBM4;Q9HB58;Q9HD15;O14686;P22736;Q15910;Q86YW9;Q15014;Q8WY36;Q86U86;P29084;A8MQ14;Q9NZI7;Q460N3;Q9UHV7;P19532;Q10587;Q8NSU6;Q96KG9;P78317;Q99471;Q8WVM0;P81877;Q15699;O00321;Q15796;A8MUZ8;Q9UBB9;Q96A56;O95238;Q8TAQ2;P54252;Q15326;Q13487;Q5TYW1;Q9Y603;Q8WV37;Q96H40;Q9Y2G7;Q9NXR8;Q92831;Q96IS3;Q9BRH9;Q9BQA5;Q3MJ62;Q86UQ8;Q5BKZ1;Q8IV54;P33076;O15226;Q9NX65;Q8WVY9;Q5VTR2;Q9H160;Q14241;O00482;Q8WZT3;Q95125;Q96HZ4;Q9Y6X8;Q8N3J9;P52740;Q14781;Q9P2Y4;Q9H808;Q6P2D0;Q8IZX4;Q14938;O00422;Q9UHX1;Q16254;Q96K62;Q96E29;Q96R7;O60284;Q99551;O95628;Q76KX8;Q9Y6X2;Q86TJ5;P40424;Q14145;B4DXR9;Q13495;P28749;P13984;Q969G2;P0CJ85;O15405;P11308;Q9P2R6;Q7Z340;Q96NM4;Q9BWM5;Q9UJU3;Q9Y5K5;Q03111;A6NDZ8;Q96SQ5;P18146;P62633;Q9NZL3;Q96MA1;O75360;O75971;Q8NEA6;Q8NEK5;Q6VUC0;O75475;O75534;P17025;O96004;Q8N2I2;P19447;Q9BYE0;Q9HBT7;Q92793;Q3KQV3;Q5JVG2;Q16587;Q7Z6R9;P14653;P17861;Q96EZ8;Q2KHR2;Q8NJL1;P54259;Q8N1B3;P10589;Q9BT81;Q92754;Q06730;Q9BZE3;Q9C086;Q9XG65;Q9NX70;A8MTY0;Q32M78;P0CH99;P0C7Q3;O43513;Q6NSZ9;Q9BWX5;O75346;O95163;Q63HK5;Q12857;Q9NFC7;A8MV65;Q6P280;Q6P1K8;Q8IZC7;Q9H0E3;Q08999;Q14135;Q9H5J8;Q8N393;Q8N895;Q96N58;P32529;Q6P1L6;P17022;Q9BSG1;Q9Y5B6;Q6ZMW2;O75151;Q6ZN17;Q9H8M2;O60248;Q15853;Q9HCE1;P17029;Q8NDX6;Q9NQV7;Q14839;Q9HBT8;Q15742;O43918;Q6ZN28;Q6ZMV8;Q6ZN57;P23246;Q9H7S9;P57071;Q02556;Q12837;P14652;O60304;Q03989;A6NEJ1;Q5JUW0;Q9HCC1;O14593;Q92782;Q9UK11;Q96JB3;Q05215;O00570;O95073;Q5SXM2;Q9BYK8;Q16670;A8MZ59;Q9GZN2;Q92785;P23511;Q9HCD5;Q15916;O00213;Q32MZ4;Q8IZ40;O15105;Q8NDW4;Q9NWS9;O00327;O14646;Q6P1K2;Q9NQ03;Q9BYV9;Q9H9Z2;Q9BYE7;Q96LX8;Q9UIE0;Q92610;Q13952;O95718;P78337;O14497;P51825;Q9H609;P0C7V5;Q9P2J8;O96019;Q6UUV9;Q96N20;Q6ZNG2;Q92784;P17021;O43248;O60682;P49640;Q14209;P41162;O43345;P0C1Z6;Q86TJ2;Q92750;Q8NF99;Q9UK58;Q8N823;Q5VZB9;Q02080;P78347;Q49A33;P82970;Q3KNV8;Q12888;Q16656;P19838;Q8IWS0;Q7Z591;P0C860;Q6U7Q0;Q99743;Q9H4S2;Q16633;O43298;Q8NI08;P36508;Q16526;Q8IXT2;Q969V6;O60925;Q96PQ6;Q99581;Q14919;Q86SE9;Q99612;P35269;O15516;Q9NZ81;Q9NYF8;A6NK53;Q6AW86;Q86X95;P10828;P22415;Q96FV9;Q6ZT77;P62508;P10244;Q6P1N0;Q15650;P35711;Q8TA94;Q9ULV5;P40426;Q13888;Q96N77;Q9NSJ1;A6NKF2;O75446;Q03112;Q9NW6;P53999;Q96RN5;P09086;O00712;O43361;Q8TF20;Q9P0W2;Q99081;P56645;Q8N7H5;P17035;Q9H1I8;Q8NF64;Q5JVS0;P22681;O95402;Q5QJE6;P50613;Q9BQG0;Q68G74;Q86Y97;Q9UIS9;Q9HA82;P17010;Q9Y4A5;Q6RSH7;Q6XYB7;Q9GZS3;Q9NVM4;P16989;Q8IXJ9;A6NPF7;Q8N344;Q8NAF0;Q15560;Q9H3M9;P42166;Q86UQ0;Q8NHY6;Q8IWS3;P50549;Q9UNY5;O95619;Q9Y543;Q9ULW3;Q9BWT1;Q49924;P32243;Q969X6;Q9UKN5;P17676;P78413;Q86WP2;O94993;Q15973;Q8NC26;Q52M93;O43296;Q9BXX8;Q86WZ6;Q96H20;A6NJ46;O94992;Q8TF47;O14813;Q8IZL2;P35232;Q8IZ20;Q9C0F3;Q9NR48;O15379;O0010;Q96CJ1;Q9BXX3;P52742;P08047;Q9UEG4;Q9NP66;P17482;P24278;Q14CW9;P18615;A6NFI3;Q9BW4;Q9Y5J3;Q96JN0;P13349;Q9NZV7;Q8N972;Q9UK10;Q12986;P29083;P51610;Q8N488;A6NJG6;Q96MN9;Q96BR9;Q8WXF8;Q8N141;Q9UHF7;Q7RTU5;Q9HAP2;Q15906;Q9H944;Q9H582;Q14593;Q9H175;Q92985;Q9NWB7;Q7RTU4;Q5TEC3;Q6RFH8;Q6IQ32;Q53QV2;Q5H9F3;Q9UBS8;Q9WXF1;Q8WU14;Q01658;Q08ER8;Q9NPJ6;Q99543;P17032;Q9UHJ3;P35680;Q7RTU0;Q96T88;P49711;P35548;Q8TD23;Q9HC78;Q6NZI2;P01100;Q8N7U7;Q9H2C1;Q04206;Q06587;Q4LE39;P16415;P86452;Q5VVH5;O75505;Q9Y5R5;O95931;Q9NQ1;Q5HY98;Q9UPW6;Q9Y2L8;Q7Z589;P17017;Q9UIF8;Q9Y3D2;Q9H6W3;Q9UKI9;Q7KZ81;P0CJ88;Q9P0L1;P52744;P15923;Q8TF50;Q96PK6;Q01094;Q3ZCT1;Q9UIF9;Q0PNE2;Q14686;Q9UQR5;Q9H4Z2;Q6M2P7;Q8WUY8;O96028;O00151;A0AVK6;Q96CX3;P15884;Q9BR84;Q9Y692;Q96F24;Q8WTS6;Q9H963;P20823;O94916;O95416;P50539;P28347;P17020;P53539;Q96NL3;Q8N9R8;Q8NCA9;Q3SY89;Q9NS37;P17039;Q8TBC5;Q02447;Q8TF32;Q06547;Q15834;Q8N693;Q5T230;Q3C1V8;Q6ZSS3;Q927

59;P35789;Q8WVC0;P28324;Q03052;Q8TDY2;Q9Y2W1;Q8N554;P04198;Q5H9L2;Q9H8N7;P17030;Q5H9L4;Q14582;Q13352;Q96IT1;Q9HCL3;O14771;Q6PEW1;Q8N7Q3;Q8IVC4;Q68DY9;P0CJ79;Q7RTV0;Q9Y4X4;Q15370;A6NK75;P78545;P17947;Q96HQ0;Q02930;Q13901;Q92870;Q16534;Q8N8M5;P17028;Q9NQ92;Q5VWG9;Q99608;Q96GC6;Q9NQ33;P51523;Q7L2R6;Q8NHW3;Q96AQ7;A6NLW8;O00401;Q8N8J6;Q04864;Q8N1L9;O43167;P58317;A5YKK6;Q6P9G9;P49750;Q9HAF1;Q9Y222;Q8NBF1;Q96NJ3;O60281;Q6ZQV5;Q96ES7;Q9BZK7;Q9H5I1;Q15562;O75376;P42568;Q96MU6;Q9BYN7;Q9H165;Q7Z3V5;Q8WUH2;Q92841;Q9Y6R6;Q9GZX5;Q8N782;Q6ZNG1;O00267;Q16533;P51826;Q15424;Q9BQY4;Q86XU0;O60381;Q06732;Q9BSM1;Q6ZR52;O75478;Q9NRC8;Q9H2G4;P15036;O15392;Q5MCW4;Q14872;O14896;Q5FWF6;P40763;P22670;Q15573;Q9UDV6;Q15937;Q6P9A1;Q13485;Q86UZ6;Q9H3P2;Q9BTA9;Q9BZI1;Q8TAQ5;P25208;Q9Y5A6;Q9H707;P61244;Q8IYW8;Q9NRJ4;P0C7M4;Q15633;Q8N5J4;Q13129;Q8TF45;P23760;Q92600;Q71SY5;Q9BXP5;Q9BTT4;P25440;O15535;Q9BYH8;Q8TF39;O14776;Q9BSK1;Q8WYA1;Q15022;Q5HYK9;Q8TBE0;Q9H116;Q2M1K9;P28370;O14709;Q13148;Q8N5F7;Q14527;Q96T58;Q15652;O60869;Q9H7L9;P32780;Q04724;Q99459;Q99684;Q9ULD5;Q15542;Q8N8L2;Q92966;P61457;O75373;Q8N587;Q96N38;Q14934;Q9BY31;Q96T76;O75909;Q8N4W9;O00472;P17096;Q96MR9;Q33E94;O15370;A6NM28;Q13562;E9PGG2;Q16384;Q14592;Q8TE02;P23769;Q9Y6B2;Q9NYB0;Q86V71;Q03923;Q96RK1;Q9Y2P7;P11831;Q08050;O60244;Q00978;Q8IX12;Q7L1Q6;Q0D2J5;Q59GR2;Q5THR3;Q63ZY3;Q7Z7L9;Q96JC9;O60315;Q6P1X5;Q8IZ26;Q16520;Q6IE81;Q8NA42;Q15797;Q13422;Q01664;Q99966;Q09FC8;Q8NDQ6;Q5TB30;Q86W54;Q8N859;Q9Y294;Q9NZI6;Q9H9F9;Q6NSW7;Q99502;P51786;Q15928;O95218;P20749;Q9ULK4;P18847;Q8IX07;Q9BX82;Q86Y25;Q9UL36;Q4G112;Q96BR6;Q6S7J96;Q13889;Q719H9;Q53ET0;Q9BR20;Q9H5Q4;Q9UBL3;Q8WUHL;P07199;A6NDX5;Q9UK39;Q96JS3;Q8N3S3;P49716;P42226;Q7Z5D8;Q96C28;Q8IY57;Q6ISB3;Q9BQW3;Q9UKW6;Q96D98;Q9H3M7;Q96W11;Q96NJ6;P0C7X2;O75362;Q86YD1;P98169;Q00653;Q6IQ21;Q9HCE3;P28702;Q99676;Q15596;P37275;Q969R5;Q99417;Q8WX92;Q8IYM9;Q8WUB8;Q15059;Q16576;P35712;Q13185;Q16236;Q4V348;Q9UKD1;P0CG31;P20265;O15055;P31271;Q15350;Q9H7X3;P10243;Q16621;Q6PK81;Q9UPG8;Q01826;Q6ZN11;P48378;Q99687;Q9NQX6;Q13465;Q9NRZ9;Q9HBM6;O75164;Q5H9I0;Q96LW9;O14901;P27540;Q14863;Q8NB12;Q2QGD7;Q5PSV4;Q8NEM1;Q6ZN79;Q9Y2G9;P17097;Q9NVC6;P15172;P17040;Q96E15;Q9H204;Q3SXX3;Q14151;P42704;O95625;Q13772;Q9HBD4;Q96EB1;Q92994;Q8NDP4;Q2M3X9;Q9UKT9;Q5VTD9;P52747;Q9H9S0;Q53GI3;Q86U70;Q9H0M5;Q9HD42;O43364;Q14192;Q9H501;Q09028;Q9H6Q4;Q96BN2;O75448;P21127;Q14134;Q9C0G0;Q5EBL2;Q14814;P31274;Q14765;Q9NWA0;Q9HAJ7;Q9UBR4;P51814;O60663;Q7Z7C8;P11474;Q8NFD5;Q8NDN9;Q9UN42;P51815;P21506;A8MT65;Q12962;Q9ULC4;Q96H86;P01106;Q71F56;P24928;Q9UBK9;Q6ZYL4;Q96AE4;Q07352;Q8TBZ8;Q9UQ80;Q9NYW8;Q15047;P52746;Q96LL6;Q9ULM2;Q3CX4;Q8HF21;P55199;Q99594;O75398;P0CG24;Q8TAP4;Q92945;Q12972;B2RFX5;Q9BQI9;Q9NZC4;Q96QT6;Q8NBB4;Q14584;Q6DD87;Q96RL1;Q99814;Q9BY41;P39880;Q8IUM7;Q13503;O15198;Q96SC8;Q14585;Q96K83;P84550;P09629;Q9P0T4;O15015;P63165;O95644;P11532;Q14549;Q17R26;Q14865;Q8N184;Q9H2P0;Q9NV56;P56524;O60583;P61968;O43439;Q13404;Q14526;Q7RTT5;Q9NV72;Q96GE5;Q9Y2X0;P28356;Q9UFB7;O00257;O60543;P28069;P14373;A9YTQ3;Q6AZW8;Q13106;P10599;Q9Y473;Q96NX45;Q93062;Q13363;Q8NCP5;Q6ZNH5;Q5T619;Q9GZV8;Q96SZ4;Q9GZR2;Q8TF68;Q08AN1;Q86XN6;Q96I24;O75525;Q02577;P20719;Q8TCN5;P08151;Q13118;Q8TAU0;Q15929;Q8IU81;P48552;Q49AN0;Q5JVG8;Q6ZN55;Q9NTW7;Q6ZNG0;P17038;Q00403;A6NN14;Q8TEE9;O60675;P15822;Q8NB42;Q15776;Q66K89;O60711;Q96PT4;Q8NCK3;Q6ZND1;Q6PG37;Q00059;Q13105;P41161;A0JLT2;P0CG00;A8K0S8;Q9Y252;P31249;P42224;Q969S8;Q9H4W6;P52736;A8MVS1;P50548;Q6VB84;Q9UBX0;Q99576;Q92499;Q5BXX8;Q9BXJ9;Q99549;O60563;Q14693;O43593;Q96K58;Q53H80;B4DX44;Q96G25;Q96RE9;P12956;P55197;Q494X3;Q9HAK2;Q7RTT6;O43189;Q96PM9;Q14119;P17014;Q9NU63;Q9Y2T7;Q9NZU5;Q92618;Q14498;Q8NEP9;Q96ME7;O95159;Q9ULM6;Q9UI36;Q8TAU3;Q9UQB3;Q9NPA8;Q9Y6Y1;Q86VP6;O94983;Q71F23;Q8IYB9;Q8N0Z2;Q6ZNA1;Q6ZNT7;O75461;Q15935;Q7L9B5;P09016;Q10892;P78412;Q15369;Q15788;Q08945;Q15759;Q9NYV6;O75820;Q96SR6;Q8TDD2;Q6UUV7;Q2M218;Q93074;Q9Y3T9;P36402;Q14929;Q8TD17;Q9H9C1;P18848;P11142;Q0VG99;Q9NRM2;Q96EK4;Q99732;Q6P4R8;Q969E4;Q8IUE0;Q8N5A5;Q96RE7;O60422;Q96EK7;Q96ND8;Q9UBD0;Q96GN5;Q9Y3Y2;Q7Z401;Q12830;Q9UBG7;Q15714;Q96LW1;O60806;O43763;Q8N5Y2;Q9Y618;Q6EKJ0;Q9UIL8;Q5U623;Q6P3V2;P68104;P14316;Q5T6S3;Q15528;Q01543;Q6P1J9;Q9Y250;Q2M1V0;P15408;Q12906;Q99607;P11473;Q9Y534;P17480;Q8NAP3;Q13761;Q9P1T7;Q9P255;Q8TAW3;Q9UJW9;Q5VWX1;Q12772;Q5T0F9;Q9H3H9;Q8WYN3;P47974;Q96RJ6;Q9Y2A4;P52630;O14978;Q9H8G1;A8MWA4;Q7Z5L9;Q6ZN08;Q12800;Q9BV97;Q6Q0C0;Q8IVP9;P08235;Q9H0E9;P0CJ78;O43316;A8MUV8;O95677;P51504;Q99856;Q9UI95;P58304;Q9BQ70;P35638;Q9NP62;P50570;Q99496;O94805;Q3B7T1;Q8N108;Q3KP31;O60224;Q6ZMS7;Q96EG3;Q15561;Q5SVQ8;Q9ULH7;P17098;P82094;Q14207;Q8N3C0;Q6ZM01;Q8IX03;O75182;Q9UJW7;P31260;P0CI00;Q5T0B9;Q16600;P17041;Q9HCK0;Q96NG5;Q92585;Q8N8G2;O94763;Q9NVV9;Q96JM2;Q92748;Q8IZD2;Q12873;O60290;P10827;Q9HBZ2;Q96NG8;Q9H7Z6;Q9UIG0;P21675;Q53TQ3;Q96BD5;P14859;P56177;Q4LE28;P51946;Q8IUE1;Q10586;Q7RTT4;P0DI81;Q9ULX9;P63272;Q68CJ9;P40337;Q15583;Q9UKY1;Q9UL18;P17036;Q68CP9;Q9BTC8;O95503;P51948;Q8TBZ5;P48443;Q8N1W2;Q01954;Q13506;Q9Y2H8;Q9H063;P31276;Q9Y2K1;P78543;Q13360;P54253;Q8NDT2;O15060;P35227;Q16594;Q14653;Q2M3W8;Q86YE8;Q96PT3;Q3L8U1;Q9Y2B4;Q9H7R5;P06400;Q9H9D4;Q8IXF0;Q6ZN19;Q13490;Q8NDY6;Q00577;Q03938;P55347;Q9H2A3;Q8N8C0;O43830;Q9UQL6;Q9HAH1;Q6ZV50;Q9Y651;O75155;Q95948;P50222;P56270}

13742

Pathogen[ P03363] interacts with 1915 human partners: {A2RRD8;Q719H9;Q8IZX4;Q86TJ5;Q49AA0;Q86X95;Q6IE81;Q92886;Q16236;Q9NQX1;Q16587;P22681;Q9NPF5;P56179;Q5TGS1;Q15654;Q7RTS1;Q96S94;Q13112;Q5JUW0;Q86VE0;O15370;Q86XU0;Q8TAK6;Q15911;Q9Y5A6;Q9H160;Q9P0L1;Q14653;Q8NB42;Q86U70;A8MQ14;Q9UNN4;Q53QV2;Q9NR55;Q5VTD9;O75123;Q15699;P51858;Q9C0F3;P52630;O95619;P12956;Q9UBC0;Q8NHY6;Q5T0B9;Q96QT6;P13682;Q6S7J96;O75820;Q3KNS6;Q8TEE9;Q9UFW8;O15266;Q99684;Q96RS0;Q06547;P31273;O43812;Q03923;Q2M2Q4;Q15233;Q8IUM7;Q15528;Q6P9A3;Q9UKD1;Q8NCK3;Q06455;Q13490;Q6ZMY9;P17535;P35789;O14901;O75373;Q9Y252;Q5SVQ8;Q6PN17;P98168;Q9GZN2;Q9H8N7;P18848;Q9UIW0;Q8N8G2;Q9ULW3;O14744;O94915;Q15834;P08048;O75461;Q8IXJ9;Q96JC9;Q13105;A6NKF2;P35453;Q96JM7;O75081;Q8NFW5;Q8N9N2;P0C7T5;P17027;P49716;P0CH99;Q3L8U1;Q5VUA4;Q9NSD4;Q03989;Q8N9F8;Q96RE7;Q86V71;Q6IQ21;Q9BXP5;Q16649;Q6VMQ6;Q14765;Q12830;Q8N5U6;Q8N5Y2;Q99592;Q8N1G0;P10828;Q9H963;Q9UJQ4;Q99909;Q969J2;Q9Y4Z2;Q9Y5B6;Q8N988;Q07666;Q8N9HF7;P29374;Q6P1K2;Q8N2I2;Q9UHL9;Q96LW1;P28698;Q53ET0;Q8IZC7;O60543;Q92985;Q8NE65;Q96AQ7;Q96N22;Q9NQZ8;O95948;Q6DD87;Q9GZS3;Q9NWH9;Q59GR2;P19622;P23246;Q99623;P29083;P29084;Q8TAQ5;Q96T

58;Q92766;Q03924;Q6ZNA1;Q6ZYL4;P47902;Q96S65;P35711;Q13487;Q9NZR4;Q96I24;Q96RJ6;P541  
98;Q14929;Q8NDY6;Q9UH92;P78415;Q9Y5K5;Q6XYB7;O15527;P0CJ87;Q9NQX6;Q86YD1;P0CJ88;Q153  
70;Q9BYU1;P09067;P12525;P55771;Q7Z340;Q14938;B4DU55;Q9H091;Q8N859;Q92925;Q15466;O753  
60;Q9Y5J3;O14978;Q6ZNO6;Q4LE28;P63167;Q86W11;Q8NA42;Q14865;Q13503;Q9NZL3;P31274;Q141  
45;Q9Y2D9;Q8NAP3;P17021;P17010;Q8IVP9;O43296;O14529;Q04206;Q15853;O14771;Q7Z591;O957  
80;O14896;P27540;Q86VK4;P49848;A6NK75;P17676;P52738;Q9NUA8;Q6NSZ9;Q12901;O60481;P181  
46;Q5JUK2;Q13360;P49116;O00712;Q9H981;O95628;Q9HCU9;P0CJ86;Q6ECI4;Q9UBX2;Q12972;Q9H9  
C1;Q6P2D0;O75764;Q8NEK5;Q02386;Q13148;Q96JS3;Q96JC4;O60315;Q6P1K8;Q12872;Q8WZ33;Q6ST  
E5;Q02930;Q9UHB7;Q5PRF9;O60224;Q8NG57;Q99576;Q969X6;P98169;P13984;Q9P2J8;Q86UP3;Q9Y4  
68;Q9H175;P35227;Q7Z353;O60563;Q96T92;P0CG31;Q99676;Q3ZCT1;P21127;Q6V9R5;Q96HR3;Q996  
26;Q9H8M2;Q14582;Q9NRL2;P53567;P48382;Q9COA1;Q14526;A6NHJ4;Q9UMS5;Q8N7R0;Q58F21;Q9UN  
79;Q96MX3;Q9NZU5;Q9BYV9;Q8IU81;P14373;Q13516;Q14781;Q9H707;P56177;Q2KHR2;Q3C1V8;Q96N  
G8;Q9NVV9;Q9UMX1;P36402;Q9UC06;P78424;Q96SE7;P12524;Q96IZ0;Q71SY5;Q86YP4;P54259;Q9BR  
R0;Q8IUE1;P78412;Q99543;P0DI81;P08151;Q7L3S4;Q9H5I1;P55199;Q9H7S9;Q96K62;P86452;Q9BY  
41;P53539;Q99746;Q96JF6;Q14590;Q969E4;Q9Y2V2;Q92539;Q7L190;O94992;Q86UE3;Q9BRU2;Q8WX  
92;P17098;Q6IA86;P24863;Q9H869;Q08AN1;P31267;Q15928;Q14863;Q8WV37;Q7Z398;O43365;Q68E  
A5;O15015;Q9UKN5;Q96SR6;P62633;Q9ULM2;Q02447;P08651;Q96ND8;Q8N3J9;Q8N187;Q9ULJ3;Q150  
22;Q06546;Q15562;Q63ZY3;A8MTQ0;Q13952;P50539;Q6PG37;O75618;Q0VG99;Q96LA8;O43167;Q6ZR  
52;Q09028;P13010;Q02556;Q92831;Q03933;Q8WYP5;Q8WVC0;Q96EK4;Q96RL1;O60422;Q9UKW6;Q96L  
I6;Q15291;P62508;P14651;Q15744;Q5EBL2;P0CG00;Q9HC52;Q96NJ6;Q03112;Q13888;Q9UEG4;O606  
63;Q9NS37;Q00213;Q14258;Q9HAH1;Q9H7L9;Q9UFG2;P41218;Q8N7U7;Q15014;Q9BWW7;Q8NX49;P188  
47;Q99929;Q9Y2P0;Q9HD15;Q15170;Q5U623;O75346;O60281;Q9HBT8;Q10586;Q6ZV50;O43763;Q131  
11;P37275;A5YKK6;Q06330;P32780;Q969W8;Q8TDD2;Q8TAQ2;Q8IYF1;P0CJ89;Q3KNV8;Q8NDW4;Q9Y4  
A8;Q92759;P28356;Q6MZP7;P23760;Q6ZRS2;Q9BU19;Q9NQ87;P09086;Q9H2P0;Q9NX65;P17947;Q7RT  
V3;Q8N720;O15379;Q9H2F5;Q01892;P78413;Q9GZR2;O95600;Q96LX8;P51532;Q99856;Q16514;P170  
24;Q15929;P20719;Q6ZQV5;Q7RTS3;P28347;Q8TE02;P31271;Q0D2K3;P06733;Q9P243;Q494X3;P829  
70;O75909;Q9BQG0;Q3SXZ3;Q969S8;Q9BZK7;Q9NYB0;Q8NHW3;Q9NX70;Q86SE9;O43439;P04198;Q96M  
R9;P18850;Q9H2W2;P51946;Q8NCP5;Q13045;Q6IPX3;Q5HYK9;Q5T1R4;Q9UL59;P25490;Q6EKJ0;Q018  
26;P53805;Q8IYH5;O95201;Q96HZ4;Q9UKI9;Q9P215;O60765;Q5T5D7;P17481;Q16384;Q9Y6X8;Q8ND  
Q6;Q9HCL3;Q7RTV0;Q9UBL3;P50570;Q8N140;Q5VUG0;O14497;Q52LR7;O75376;Q96GN5;Q8TCN5;O609  
07;Q9N883;Q8N9N5;Q16520;Q01543;Q7Z589;P42704;Q6PJJG2;Q9Y462;E7ETH6;Q9HGD5;Q15910;P156  
21;Q8NBB4;Q6P9A1;Q15545;O60902;P17030;Q9UC07;Q99607;Q8N8C0;Q9C0J9;O95905;Q13568;Q9H3  
M7;Q08AG5;Q9Y3Y2;P78317;Q0D2J5;Q15776;Q9Y294;Q16254;P11474;P56545;P16220;A6NGD5;Q9Y2  
L8;Q96HQ0;P35251;Q96MU6;Q9Y2D1;P78414;Q68DI1;Q5JVJG2;Q5SXM1;Q8N196;Q9UDV7;O94864;A8MT  
Y0;Q3KP31;Q9H307;P17031;Q13342;Q8WWY7;Q8N680;P78543;Q96JK9;Q5JT82;O43316;Q9Y6K9;Q8NC  
N2;Q13901;Q16621;Q9H063;P58304;Q3B7T1;Q99612;Q9P0U4;Q8N141;Q02080;Q86V15;Q9UKV8;Q6ZN  
55;Q5VTR2;Q8N488;Q8IV54;Q9NW07;Q66K89;Q8IVW6;Q4LE39;P24928;Q96QR8;O75437;P19419;Q9C0  
F0;O94983;Q76KX8;Q9UQL6;Q04726;O75475;Q9NQ33;Q96SC8;P14921;P54252;O75164;Q9UER7;P355  
48;Q9HBZ2;Q99496;Q460N3;Q9UPN9;P0C7Q3;O00268;Q15532;P50548;Q96IS3;Q8N9Z0;O14593;Q9Y4  
67;Q9Y603;O75530;Q6NUN9;Q9UK11;P78395;Q8WUF5;Q9HB65;O43318;Q3KQV3;Q15105;Q96PQ6;Q153  
06;Q8N782;A6NDZ8;Q5TYW1;O00267;Q9Y2A4;Q8IYW8;P78411;Q99417;Q96JN0;Q156GC6;Q9NT76;Q157  
97;Q7RTT5;O95073;Q9UM63;Q969V6;P32243;Q9HCK0;Q9NPC7;O15047;Q9Y2K1;O14867;O14948;O604  
79;Q96EG3;Q6ZMV8;Q9NPP4;P36508;Q6BBE4;Q7Z3K6;O95231;O60381;Q9Y2H8;Q04724;P51522;Q155  
96;O43309;Q14839;Q8N693;P16415;Q9HCZ1;Q9HCS4;P43268;Q9NSJ1;Q9BX82;Q9UJW7;P14588;P553  
47;P17028;Q43248;Q8NEA6;E9PGG2;Q8IZ26;Q9N20;Q9Y2X9;Q9UBK9;Q49AM2;Q15369;P15826;P496  
39;Q5H9I0;Q9HC44;Q14686;P59923;Q99471;Q8IXW5;Q96MM3;P17041;Q9NWS9;Q9Y5R6;P06400;Q9HA  
P2;P40337;P57086;P48378;Q9HCX3;Q15633;Q86YE8;Q96H20;Q13185;Q96BV0;Q9BUG6;Q3SY89;Q156  
52;Q96FV9;P17483;P01106;Q6ZNH5;Q9Y4X4;Q8N1L9;P0CG24;Q8NT51;Q9UQ80;Q96I27;Q9NZN8;Q96E  
29;Q14593;Q9H4S2;Q99743;P17019;A6H8Y1;Q7Z7K2;B4DXR9;A8K0S8;Q04727;O00409;Q7KZF4;Q129  
86;Q9H5H4;Q9P031;Q8WYK2;P28749;Q9UNY5;A6NDR6;Q9GZW5;O43189;P0CJ90;BLAPH4;Q9HAF1;Q9UN  
Y4;P35869;P17275;P42226;P13349;Q96PK6;Q8IXH7;P17509;P31249;Q9C005;P39687;P49711;Q96R  
K1;Q9NTW7;Q7L1Q6;Q7L2R6;P18615;P56645;Q8N0Z2;Q8TBC5;P54845;Q9BYE0;Q9UK39;Q96IF1;P526  
57;Q9NZV7;Q9UK10;P61244;O00488;Q8NCA9;O00321;P07199;Q86VZ6;P46100;Q7KZ85;Q9UN30;P146  
53;P50221;P10588;Q8N1B3;Q13127;Q96PT4;P35269;Q8IY57;Q9BZE3;Q9Y2Y9;Q9C086;P11473;Q166  
66;A6NNF4;P40425;Q96BD5;Q9C0G0;Q13495;Q99608;Q6ZN11;O96017;P0C7X5;P17029;Q9Y3Q8;Q128  
00;Q9NWB7;Q9UM07;Q96BR6;Q6P1L6;Q5BKZ1;A6NK53;Q6IV72;P51786;Q8TF45;P10072;Q12962;O751  
57;Q9Y6X2;Q03936;Q9H9F9;Q9NQ03;Q5VV67;O43524;P15923;Q96RE9;Q9UGP4;Q6ZN19;P15336;Q153  
26;Q8NDN9;Q9UD57;Q2M1K9;Q96T23;P17023;Q86T29;Q9UK58;Q9BSN8;P20749;Q6RSH7;Q9ULM6;Q004  
03;Q8NAF0;Q96DT7;Q15937;O15499;Q15424;Q9Y2G9;Q8NEF9;Q8TE85;Q9P1T7;O75446;P32519;P158  
22;Q14140;Q07352;P48552;Q9UBU8;P0C7V5;Q8WYF36;O43593;A8MUZ8;Q2M1V0;Q05066;Q96N28;Q9NV  
M4;Q8N7G0;Q2VY69;Q8WXI9;P61457;Q96JM2;A6NEJ1;Q99549;O43830;Q9BTC8;O75529;O95218;C9JN  
71;Q08050;Q96LW9;P13378;Q8IYB9;P0CJ85;P11831;Q6ZNG9;Q8WYN3;P29373;O15226;Q8TF39;Q9BS  
31;Q13129;Q9HCK8;Q8N972;Q96MA1;P46937;Q96A56;Q14872;Q8N3S3;Q16576;P56693;P28702;O609  
25;Q9BPY8;Q9NWA0;Q9BYN7;P20264;P28069;Q96N58;Q9UI36;O60583;O96019;Q9H4T2;Q49AN0;P148  
59;P28358;Q9BUE0;Q14119;Q53T94;Q6ZNG2;Q8N393;P31655;Q00444;P56915;Q12906;Q9NS16;Q8N5  
P1;P52737;Q00653;Q15544;Q96T76;Q96AE4;P11308;Q96IR2;Q9UPG8;Q9BSM1;Q8N8Z8;A8MZ59;Q8TF  
20;Q03111;Q92841;Q9ULD5;Q9NRG4;Q8IX15;O95238;P81877;Q9GZU2;Q9GZZ0;O75030;Q96KN3;Q9Y5  
B9;P08235;Q86VN1;Q9GZT3;Q92945;Q96BN2;P51504;P17480;Q9Y250;Q9NZ81;Q6P1J9;P21506;Q6ZN  
32;Q14241;Q8N5F7;P24278;Q9HBT7;Q8IW36;Q9UHV2;Q8IYN3;Q14814;Q6NJT0;Q9NZC4;Q6VB  
84;P78545;Q9P255;Q13506;Q08999;Q9BRG1;Q86WP2;Q9NYV6;Q14549;Q32MQ0;P17039;P62324;Q8IX  
T2;Q6PF04;Q8TAF7;Q96H40;Q9H2G4;Q92830;Q5VIY5;Q9UDV6;Q5JNZ3;Q9NZI6;Q86WZ6;Q9BQ87;Q96C  
28;P17032;P17096;Q9H808;Q8NB12;O14979;Q8IZ20;Q9BXX1;Q96NM4;Q9H609;Q9UJU3;P14316;Q96E  
K7;Q14527;P32242;Q9H3P2;Q9UHR5;P18846;Q01094;Q96QE5;Q8WYA1;Q9UIF9;Q3T8J9;P35226;Q9Y5  
R5;O75444;A6NDX5;Q9NXT0;Q9UKV0;Q9NVC6;P27797;P14652;O14709;O75505;Q6NX45;Q9NP08;Q5JV  
S0;P11532;O00327;O43186;Q9H4Z2;A6NE82;P51814;O94763;O75534;Q71F56;Q9BSK1;Q9UIF8;O155  
25;Q15637;P31260;Q9HCE1;Q5VWX1;Q14134;Q9NQG5;Q16670;P52736;O75155;A6NMT0;Q96ST3;Q9HB

D4;P0C1Z6;Q99732;Q5CZA5;Q8N7M2;Q7Z7C8;Q5T230;Q06416;O43541;Q9Y6Q3;Q7RTU0;Q96EB1;P17022;Q14966;Q8N5A5;Q9NPI1;P17036;Q9BW11;Q9ULH7;Q63HK3;Q92870;P17861;Q4G112;Q14919;Q5VVH5;Q9Y3M9;Q96RN5;O95931;Q86UP8;Q9Y2N7;Q9BQA5;Q99504;Q9UHV7;P52744;Q96KG9;Q9UNS1;Q96SK3;Q8IZ40;Q2M218;A0JLT2;O75586;P20265;Q15796;Q95983;Q15723;P31268;Q6XD76;Q15270;Q9UKL3;Q8N108;P84022;A0AVK6;Q01167;Q96C00;P31314;Q8N5J4;O15265;Q7Z6R9;Q6U7Q0;Q96PE6;Q16656;Q41161;Q88955;Q92782;P49750;O95163;Q68CJ9;Q5T619;O94916;Q9NZI7;Q9BRH9;Q9HCC6;Q8IVC4;Q7RTT3;Q9UKY1;Q8NI08;P10244;Q8TF68;Q9NZI5;Q6ZN57;O96004;Q9H2Z4;P26358;Q9Y618;Q8IXF0;Q92499;P49336;Q9UI95;Q00056;Q9H9Z2;Q96N77;P35638;Q86U86;Q15542;Q15742;Q969H0;Q12796;Q94805;Q8TDY2;P10914;Q6ZNG0;Q86XN6;Q9Y2G7;Q6ZN08;P54253;Q9UHX1;Q92826;Q02040;Q96IT1;Q92618;Q6ISB3;Q9BYK8;O00470;Q9NPA8;Q05925;Q15583;Q9NYF8;Q06732;P35398;Q9BQW3;Q9H0M5;Q075925;P0C860;Q86UU0;Q14209;Q92600;Q5QUJ6;Q5XKR4;Q00059;Q92664;Q8NEP9;P17025;Q9BWT1;Q7Z3I7;P50549;Q92966;Q33E94;Q9H582;Q9UK13;P55198;Q14592;P15407;Q96CX3;Q9UP56;P51508;P22415;Q8N184;P20290;A6NFQ7;P54821;Q96NK8;Q6ZSB9;Q8N7K0;A9YTQ3;P0CB33;Q96EZ8;Q9Y3T9;Q9BUY5;Q9H7R0;Q14591;Q6UUV9;Q6NZI2;Q12905;Q13547;Q86UQ0;P23759;Q14584;Q9BS34;Q8N8L2;Q92750;Q96SL8;A8MUV8;Q9HB31;P19838;Q76L83;Q99814;Q71F23;Q6NSW7;Q6ZMW2;Q93074;O43345;Q6RFH8;A8MV65;Q9UBS8;Q8TAK5;Q96SZ4;Q86UQ8;Q02833;P09016;Q9Y692;P53999;Q00422;Q92793;Q86Y25;Q16633;B4DX44;P57071;O75971;P82979;Q6ZNG1;Q01954;Q15697;P31276;Q16533;D6RGH6;P14317;Q6ZN79;O95125;O75448;Q6ZN28;Q8N823;Q7RTT4;Q6ZSS3;Q8NC26;P50222;O60869;Q92748;Q13469;Q15361;P21675;Q9NR48;Q14585;O14646;P33076;Q14CW9;P52740;Q92988;Q14103;Q8IWI9;P51523;O60208;Q9BWX5;P23193;Q14587;Q01201;Q0PNE2;P56270;Q9NPA5;P35712;Q99990;Q9NV56;Q01844;Q060393;Q96NG5;Q8N9R8;Q9UQR0;Q06082;O43711;Q9HBM6;Q9Y651;Q7RTU5;Q00978;Q9P2K3;P10242;Q9UL18;P20226;Q5THR3;Q9UHJ3;Q92681;Q96F24;Q16526;Q8WUI4;P49910;Q6AZW8;Q3B8N5;P52655;Q5TB30;P17014;Q96GE5;Q9Y2Y4;Q04725;Q7RTU4;Q5H9L2;O75362;Q92670;Q8WVM0;Q9UL58;Q13485;O75175;Q8NA19;Q460N5;Q9BT4;Q15072;Q8N726;O95076;O95402;P10074;Q96RK0;Q9UBW7;Q12968;Q05195;Q9ULV5;P17482;P52951;P49335;Q9UIV1;Q8TD23;O60806;Q9Y6R6;P23409;Q03468;Q9Y4A5;P63272;Q9UJN7;Q8WUH2;P50750;O00167;P78367;Q08945;O00570;Q14186;P98182;P31269;Q8IX12;Q6ZS27;Q63HK5;Q6ZN01;Q9Y5V3;Q5HY98;P12980;O60225;A8K8V0;P19484;Q9UQR1;Q2QG D7;Q99687;Q8IXN0;O00401;Q8TD26;P84550;Q92541;Q8TB69;Q16385;Q96JL9;Q9C056;O43159;Q8TAD8;Q9NYT6;P17020;O43463;Q14188;Q9NPJ6;Q3MIS6;Q9BR84;P15884;P41162;O75398;Q8TF47;O95644;A6NP11;Q7Z5H3;Q3SY52;A6NIX2;P25440;Q96T88;Q5BXX8;O43361;A6NLW8;Q8IUR6;Q9H7X3;Q9BSG1;Q9PFC8;Q9UK12;Q9BQY4;Q15714;P52523;Q15973;Q6ZBI1;Q96QS3;P61978;Q86XF7;Q8IUEO;P05412;Q96MN9;Q6IQ32;P17017;Q2VWA4;Q96K58;P40424;Q96AV8;Q96G23;Q9BT49;Q9H116;O60304;Q8TAU3;O15055;Q7Z401;C9JBD0;Q04741;A2RU54;Q00613;Q13398;Q9UKT9;Q53GI3;O75386;Q15405;Q96CJ1;Q5SXM2;Q7Z2F6;O60675;Q86VP6;Q86UD4;Q14934;Q12873;B2RXXF5;Q9HAJ7;P42568;P28370;Q147U1;P0C7M4;Q9NR11;Q99581;P58317;Q04864;P19532;Q9NUQ3;Q9H511;Q15059;Q6P1N0;Q6AW86;Q9UCLK0;Q8IYX0;O60244;Q9ULC4;Q9NQJR1;Q5VZB9;Q9ULJ6;P47974;Q96P280;Q8NDP4;Q8HJF8;O95997;O75486;Q7L945;Q9H204;Q9NVW2;Q5EBM4;Q9Y6B2;Q9NQ92;O14776;Q9Y224;Q5T3J3;Q9H0E3;Q9BW4;O43918;P09629;Q8TC21;A8MXY4;P16989;Q8NB50;Q9BQI9;Q9UFP9;Q52M93;Q15573;Q8N9K5;Q9Y543;P55197;P40426;Q96N95;P09874;P35452;Q13330;Q8WXB4;Q96SQ7;Q9NP71;Q9NRJ4;O95343;Q02548;Q8IYA7;P52741;P41970;Q8WTR7;Q14207;Q9HCG1;Q96MG7;Q13363;Q9Y2Q1;Q8WW38;Q9Y534;Q06587;Q9P086;Q499Z4;Q13404;Q9BY31;Q8NFD5;Q96NJ3;Q14498;O95416;Q8NFZ5;Q75478;P16383;Q68DY9;Q02878;P52743;Q8TAW3;Q9UBG7;O43364;Q9ULK4;Q03828;P08047;Q53TQ3;O60248;Q96ES7;Q6ZW49;Q8WTZ3;Q9UMQ3;Q5TEC3;A8MVS1;O00472;Q96PT3;Q99081;Q9HC78;Q9NY43;Q8TAU0;P82094;Q2M3X9;P15622;Q86YW9;Q9H501;Q8IX03;O60290;Q15560;Q6W2J9;Q8IWS0;Q9ULM3;P48380;O75626;O00716;Q03701;P0C7X2;Q13761;P52742;Q6ZRF7;Q9Y6Y1;Q9H9D4;Q6P3V2;Q2M3W8;Q5MCW4;Q7Z7J5;Q15935;Q96E15;Q8WXF1;A6NFI3;O43298;Q9BWM5;O43829;Q8N1W2;Q01658;O60284;P51531;O95475;P30153;Q8N8J6;Q8N587;Q92922;P43355;Q8WTS6;Q9NQV6;Q15543;Q9UL36;P17544;Q9P2R6;Q00577;Q6UUV7;Q8IYI8;P09630;Q96D98;P17040;O94892;Q0VGE8;Q9HCE3;O60828;Q15572;Q96BR9;Q8N2W9;Q99811;Q05481;Q9P0W2;P0CJ78;O15060;Q86W54;Q8N6I1;Q96PM9;Q7Z5L9;Q68CP9;O95503;O95625;Q92800;P05204;Q8NHV9;Q16534;Q9P2F9;Q9H118;P41212;Q96K75;Q9UQB3;P09017;Q9UJ5;Q9H9T3;O15522;Q5FWF6;Q8NF64;P39880;Q53H80;Q9H9S0;Q9ULX9;Q07687;Q9UIH9;Q6P2C8;Q9BT81;Q9NYW8;A6NJG6;Q8HWS3;O95251;Q99459;Q13352;P78337;P51815;P15172;Q9UID6;Q96MH2;Q96CS4;Q3MJ62;Q05516;Q12837;A6NJL1;O43513;Q9BUJ2;O15534;Q8WXF8;Q3ZCX4;Q8TB25;Q15561;A8MT65;P50219;Q13106;Q9GZX5;A6NLF2;Q99717;Q8TF50;Q96G25;P17038;P0CJ79;Q5H9L4;Q6P9G9;O60716;P25208;P43356;Q6R2W3;Q8IUD2;Q9UPW6;O00257;Q15047;Q12857;Q96NI8;Q8TF32;Q9BXX3;Q6ZMS7;Q9BYH8;Q9Y2T7;Q9P0T4;Q9UBD0;Q8N7H5;Q9NRC8;P60002;Q8N653;O75525;Q9H4I2;Q9BTA9;Q9H3H9;Q9NWB6;P51825;Q12926;Q9NP66;Q32M78;Q9BV97;Q86Y97;P67775;P10589;Q6P1X5;P15408;O15198;Q8NBZ0;Q8TBE0;Q96NL3;Q9Y473;P13056;Q8WYH8;Q99594;Q14678;Q8NCF5;Q17R26;Q5VWG9;Q5PSV4;Q8NEM1;Q5HYR2;Q15329;Q9H0E9;Q9UL49;Q99583;Q3KNW1;Q9NPC8;P78347;Q9UJW9;Q9Y5Q3;Q5T0F9;Q01664;Q8IXH6;Q8WVJ9;P52746;O75182;A6NNA5;Q05215;Q9BYE7;Q8IZL2;P15036;Q9UII5;P42166;Q9BZ80;Q92993;P38935;Q9Y6J9;Q01860;Q9P2Y4;Q9BXJ9;P31275;O14813;Q08ER8;Q12824;Q8N3X6;P42771;Q03060;Q4V348;Q9UJL9;Q14627;Q86X55;Q9BQ70;Q49A33;Q9NV72;Q96N38;Q9BXG8;O00291;Q06730;Q9UIE0;Q14151;Q03052;Q9H8G1;Q9H944;Q99551;O60711;Q02446;Q9UJW8;P68104;Q5H9F3;O14628;Q8NBF1;Q6P4R8;A6NN14;O14503;Q9UNP9;O14686;Q10587;O75528;P11142;Q9HBU1;Q13465;A6NJ46;Q68DY1;Q12888;Q15906;Q92585;P10243;P22670;Q86TJ2;Q7Z3V5;Q9Y222;O75177;Q9Y2Q3;Q8TBZ8;O75494;Q15650;P10073;Q8NF99;Q14135;O75290;Q9HD42;Q7Z5D8;Q04743;P51610;P67809;O94776;Q9NR83;O15535;Q6ZT77;A8MWA4;O43719;Q8N3C0;O75467;P52747;O75928;P68036;Q6PD62;P28324;Q8N344;Q13118;Q96SQ5;P23511;P17035;Q8WU5;Q8N0Y2;Q8N4W9;A6NM28;Q92785;Q9UBB5;Q02577;Q92754;Q7RTU3;A6NFD8;Q9UIS9;Q16594;Q15319;Q6VUC0;Q6PK81;Q13401;Q9H5Q4;Q9H5J8;Q6P198;Q9UFB7;Q9HAZ2;P01100;Q96H86;Q8TA94;Q5JVG8;Q9UBX0;Q03938;Q7RTT6;Q16600;Q9H2A3;P49640;Q14192;Q6QHK4;P11161;Q8NDT2;Q9Y2P7;O00482;Q9H7R5;Q02078;Q9Y3C7}

- 13743 [Cluster 1250]GO:0070424+P biological\_process [name] regulation of nucleotide-binding oligomerization domain containing signaling pathway [def] "Any process that modulates the frequency, rate, or extent of a nucleotide-binding oligomerization domain containing (NOD) pathway." [GOC
- 13744 Pathogen[ Q2Q067] interacts with 1 human partners:{Q13490}



13745 Pathogen[ P0C214] interacts with 2 human partners: {Q13490;P98170}  
13746 Pathogen[ P03346] interacts with 3 human partners: {Q13489;P98170;Q13490}  
13747 Pathogen[ Q85601] interacts with 2 human partners: {Q13490;P98170}  
13748 Pathogen[ P14079] interacts with 1 human partners: {Q13490}  
13749 Pathogen[ P03383] interacts with 1 human partners: {Q13490}  
13750 Pathogen[ P03410] interacts with 1 human partners: {Q13490}  
13751 Pathogen[ P14075] interacts with 1 human partners: {Q13490}  
13752 Pathogen[ P0C206] interacts with 3 human partners: {P98170;Q13489;Q13490}  
13753 Pathogen[ P03363] interacts with 3 human partners: {Q13490;Q13489;P98170}  
13754 [Cluster 1251]GO:0046415+P biological\_process [name] urate metabolic process [def]  
"The chemical reactions and pathways involving urate, the anion of uric acid,  
2,6,8-trioxypurine, the end product of purine metabolism in certain mammals and the main  
excretory product in uricotelic animals." [ISBN  
13755 Pathogen[ Q2Q067] interacts with 1 human partners: {Q14397}  
13756 Pathogen[ P0C214] interacts with 2 human partners: {Q14397;Q5VZK9}  
13757 Pathogen[ P03346] interacts with 2 human partners: {Q14397;Q5VZK9}  
13758 Pathogen[ Q85601] interacts with 2 human partners: {Q5VZK9;Q14397}  
13759 Pathogen[ P14079] interacts with 1 human partners: {Q14397}  
13760 Pathogen[ P03383] interacts with 1 human partners: {Q14397}  
13761 Pathogen[ P03410] interacts with 2 human partners: {Q14397;Q5VZK9}  
13762 Pathogen[ P14075] interacts with 1 human partners: {Q14397}  
13763 Pathogen[ P0C206] interacts with 2 human partners: {Q5VZK9;Q14397}  
13764 Pathogen[ P03363] interacts with 2 human partners: {Q14397;Q5VZK9}  
13765 [Cluster 1252]GO:0034138+P biological\_process [name] toll-like receptor 3 signaling  
pathway [def] "Any series of molecular signals generated as a consequence of binding to  
toll-like receptor 3." [GOC  
13766 Pathogen[ Q2Q067] interacts with 29 human  
partners: {P01100;Q8IUC6;Q92985;Q15653;Q04206;Q9NYJ8;Q8N5C8;O75582;Q14653;Q9Y6K9;Q131  
14;P19419;P19838;P15336;Q8N5C8;P25963;P0CG47;O14920;P45984;Q00653;P0CG48;O43318;P629  
87;O15111;Q15759;Q16829;Q02078;Q15750;P62979}  
13767 Pathogen[ P0C214] interacts with 33 human  
partners: {Q00653;O15111;Q9Y6K9;P19838;P15336;Q8IUC6;Q14164;P01100;P19419;Q04206;Q156  
53;O43318;Q02078;Q8N5C8;Q92985;P0CG48;P25963;Q16829;Q14653;O75582;P62987;Q15750;P054  
12;Q8N5C8;Q13114;Q15759;P0CG47;P45984;P16220;P62979;O14920;Q9NYJ8;P18846}  
13768 Pathogen[ P03346] interacts with 34 human  
partners: {Q9Y6K9;P05412;P45984;Q02078;O15111;P16220;P15336;P62987;P25963;Q8N5C8;Q156  
53;P19419;P0CG48;Q04206;Q13114;Q8N5C8;Q9NYJ8;O75582;Q15750;Q14653;Q16829;P62979;Q8IU  
C6;Q15759;P0CG47;P45985;P19838;O14920;O43318;Q92985;P01100;Q14164;P18846;Q00653}  
13769 Pathogen[ Q85601] interacts with 33 human  
partners: {Q02078;Q15750;Q9NYJ8;Q8IUC6;O15111;P19419;Q16829;P18846;P0CG48;Q15653;Q131  
14;Q8N5C8;P01100;Q14653;Q14164;Q9Y6K9;Q8N5C8;P16220;O14920;Q04206;P05412;Q92985;O755  
82;P62979;Q15759;P0CG47;P45984;P62987;Q00653;P15336;O43318;P19838;P25963}  
13770 Pathogen[ P14079] interacts with 33 human  
partners: {Q8N5C8;Q02078;P0CG48;Q06413;O43187;P53779;Q14653;P52564;O75582;Q16829;Q8IU  
C6;Q92985;Q14164;Q15750;P62979;P62987;P45984;P45983;Q16644;Q8N5C8;Q15759;Q9Y6K9;P459  
85;P15336;Q9Y6Y9;Q13164;P05412;P0CG47;Q9Y239;P01100;P19419;Q13114;Q15653}  
13771 Pathogen[ P03383] interacts with 31 human  
partners: {O75582;Q14653;P16220;Q9Y6K9;P62987;Q8IUC6;Q00653;O14920;O15111;P19419;P188  
46;Q15653;O43318;Q8N5C8;Q92985;Q15759;P25963;P01100;P62979;P0CG47;Q04206;P45984;P0CG  
48;P15336;Q9NYJ8;P19838;Q13114;Q8N5C8;Q02078;Q15750;P05412}  
13772 Pathogen[ P03410] interacts with 36 human  
partners: {Q04206;P19838;P0CG48;O14920;Q9Y239;Q8N5C8;P19419;O15111;Q15750;O75582;Q146  
53;O43187;Q15653;P62979;P01100;P18846;O43318;Q16829;P45985;Q9NYJ8;Q8N5C8;P16220;P054  
12;Q9Y6Y9;P45984;P62987;P53779;Q02078;Q8IUC6;Q00653;Q9Y6K9;P25963;Q92985;P15336;P0CG  
47;Q13114}  
13773 Pathogen[ P14075] interacts with 31 human  
partners: {O15111;Q04206;Q15750;P05412;Q15759;O75582;P19419;P15336;Q15653;P25963;Q8NF  
Z5;Q8N5C8;O14920;P0CG48;P62979;Q14653;O43318;P62987;Q13114;Q02078;Q8IUC6;P01100;P0CG  
47;P19838;Q00653;P16220;Q9Y6K9;Q92985;P18846;P45984;Q9NYJ8}  
13774 Pathogen[ P0C206] interacts with 34 human  
partners: {P0CG48;O14920;Q9Y6K9;Q13114;Q02078;P16220;Q8N5C8;O75582;P45984;P05412;P259  
63;P19419;Q8N5C8;O43318;P15336;Q15653;P18846;Q16829;P19838;Q14164;Q92985;P01100;Q042  
06;O15111;P62979;Q9NYJ8;P45985;P0CG47;Q8IUC6;Q00653;Q15750;P62987;Q15759;Q14653}  
13775 Pathogen[ P03363] interacts with 25 human  
partners: {Q14653;Q92985;O14920;Q04206;P25963;O15111;Q9NYJ8;P16220;Q9Y6K9;P19419;O433  
18;Q15750;P15336;Q15653;Q16829;Q00653;P18846;P62987;P19838;Q13114;P05412;Q8N5C8;Q8N5  
C8;P01100;Q02078}  
13776 [Cluster 1253]GO:0045040+P biological\_process [name] protein import into mitochondrial  
outer membrane [def] "The process comprising the insertion of proteins from outside the  
organelle into the mitochondrial outer membrane, mediated by large outer membrane  
translocase complexes." [GOC  
13777 Pathogen[ Q2Q067] interacts with 1 human partners: {P07900}  
13778 Pathogen[ P0C214] interacts with 2 human partners: {P34932;Q9Y512}  
13779 Pathogen[ P03346] interacts with 4 human partners: {P07900;Q9NS69;Q9Y512;P34932}  
13780 Pathogen[ Q85601] interacts with 3 human partners: {Q9Y512;P07900;P34932}  
13781 Pathogen[ P14079] interacts with 3 human partners: {Q9NS69;P07900;Q9Y512}



13782 Pathogen[ P03383] interacts with 1 human partners:{P07900}  
13783 Pathogen[ P03410] interacts with 3 human partners:{Q9Y512;Q9NS69;P07900}  
13784 Pathogen[ P14075] interacts with 3 human partners:{P07900;Q9Y512;Q9NS69}  
13785 Pathogen[ P0C206] interacts with 4 human partners:{P34932;Q9Y512;Q9NS69;P07900}  
13786 Pathogen[ P03363] interacts with 4 human partners:{P07900;P34932;Q9Y512;Q9NS69}  
13787 [Cluster 1254]GO:0035359+P biological\_process [name] negative regulation of peroxisome proliferator activated receptor signaling pathway [def] "Any process that stops, prevents, or reduces the frequency, rate or extent of the peroxisome proliferator activated receptor signaling pathway." [GOC  
13788 Pathogen[ Q2Q067] interacts with 1 human partners:{Q8IXJ9}  
13789 Pathogen[ P0C214] interacts with 1 human partners:{Q8IXJ9}  
13790 Pathogen[ P03346] interacts with 1 human partners:{Q8IXJ9}  
13791 Pathogen[ Q85601] interacts with 1 human partners:{Q8IXJ9}  
13792 Pathogen[ P14079] interacts with 1 human partners:{Q8IXJ9}  
13793 Pathogen[ P03383] interacts with 1 human partners:{Q8IXJ9}  
13794 Pathogen[ P03410] interacts with 1 human partners:{Q8IXJ9}  
13795 Pathogen[ P14075] interacts with 1 human partners:{Q8IXJ9}  
13796 Pathogen[ P0C206] interacts with 1 human partners:{Q8IXJ9}  
13797 Pathogen[ P03363] interacts with 1 human partners:{Q8IXJ9}  
13798 [Cluster 1255]GO:0016540+P biological\_process [name] protein autoprocessing [def] "Processing which a protein carries out itself. This involves actions such as the autolytic removal of residues to generate the mature form of the protein." [GOC  
13799 Pathogen[ Q2Q067] interacts with 1 human partners:{P09874}  
13800 Pathogen[ P0C214] interacts with 1 human partners:{P09874}  
13801 Pathogen[ P03346] interacts with 1 human partners:{P09874}  
13802 Pathogen[ Q85601] interacts with 1 human partners:{P09874}  
13803 Pathogen[ P14079] interacts with 1 human partners:{P09874}  
13804 Pathogen[ P03383] interacts with 1 human partners:{P09874}  
13805 Pathogen[ P03410] interacts with 1 human partners:{P09874}  
13806 Pathogen[ P14075] interacts with 1 human partners:{P09874}  
13807 Pathogen[ P0C206] interacts with 1 human partners:{P09874}  
13808 Pathogen[ P03363] interacts with 1 human partners:{P09874}  
13809 [Cluster 1256]GO:0048541+P biological\_process [name] Peyer's patch development [def] "The process whose specific outcome is the progression of Peyer's patches over time, from their formation to the mature structure. Peyer's patches are typically found as nodules associated with gut epithelium with distinct internal structures including B- and T-zones for the activation of lymphocytes." [GOC  
13810 Pathogen[ Q2Q067] interacts with 1 human partners:{P15923}  
13811 Pathogen[ P0C214] interacts with 1 human partners:{P15923}  
13812 Pathogen[ P03346] interacts with 2 human partners:{P15923;Q8TAU0}  
13813 Pathogen[ Q85601] interacts with 1 human partners:{P15923}  
13814 Pathogen[ P14079] interacts with 1 human partners:{P15923}  
13815 Pathogen[ P03383] interacts with 1 human partners:{P15923}  
13816 Pathogen[ P03410] interacts with 1 human partners:{P15923}  
13817 Pathogen[ P14075] interacts with 1 human partners:{P15923}  
13818 Pathogen[ P0C206] interacts with 3 human partners:{P15923;Q13422;Q8TAU0}  
13819 Pathogen[ P03363] interacts with 2 human partners:{P15923;Q8TAU0}  
13820 [Cluster 1257]GO:0006928+P biological\_process [name] cellular component movement [def] "The directed, self-propelled movement of a cellular component without the involvement of an external agent such as a transporter or a pore." [GOC  
13821 Pathogen[ Q2Q067] interacts with 13 human partners:{O15511;P40763;Q8IZP0;O00401;P04792;Q92558;P23528;P10599;P63000;P35579;P08670;Q92556;O75969}  
13822 Pathogen[ P0C214] interacts with 19 human partners:{P60709;P63000;Q8IZP0;O14645;P36952;P04792;P52565;O75830;O75969;Q92556;P08670;Q92558;P10599;O15144;P40763;O00401;P63261;P18054;O15511}  
13823 Pathogen[ P03346] interacts with 23 human partners:{O15511;O15144;O75969;P35579;Q8IZP0;P60709;P18054;P52565;Q9NRF2;P26038;Q9Y664;Q92558;O15145;P08670;P10599;O14645;P23528;O00401;P40763;Q92556;P63000;Q9P2A4;P04792}  
13824 Pathogen[ Q85601] interacts with 18 human partners:{O00401;O15511;Q92558;P08670;O75969;P35579;P36952;P40763;P63000;P52565;P60709;P10599;P63261;P04792;O14645;P23528;Q8IZP0;O15144}  
13825 Pathogen[ P14079] interacts with 28 human partners:{P04083;P52565;P35579;P63261;Q9Y664;Q5JQC9;O75781;Q92558;Q9NP84;P47756;Q92556;P26038;Q8IZP0;O15145;O15511;P23528;P61158;Q9P2A4;P60709;O14645;Q05682;P10599;P08670;P49023;P04792;O75969;O15144;O00401}  
13826 Pathogen[ P03383] interacts with 11 human partners:{P08670;O15511;P36952;P63000;P04792;P10599;Q92558;O00401;P35579;P23528;O75969}  
13827 Pathogen[ P03410] interacts with 29 human partners:{O15511;O75781;P10599;P47756;P63000;Q05682;Q92558;Q5JQC9;O15145;O00401;O75969;P35579;P04792;Q9P2A4;P33241;Q92556;P26038;P36952;Q8IZP0;P08670;P63261;O15144;P23528;Q9NP84;Q9Y664;O14645;P52565;P40763;P60709}  
13828 Pathogen[ P14075] interacts with 10 human partners:{P04792;O15511;P23528;O75969;O00401;P35579;P08670;P63000;Q92558;P10599}

13829 Pathogen[ P0C206] interacts with 22 human partners: {O14645;O15511;P60709;Q92556;P47756;Q5JQC9;P52565;P04792;O15145;P36952;P63000;Q8IZP0;P63261;O75969;Q92558;P35579;O00401;P40763;O15144;P08670;P10599;P23528}

13830 Pathogen[ P03363] interacts with 21 human partners: {Q8IZP0;P52565;P60709;P35579;Q92558;P63000;P36952;O15144;O14645;P08670;Q92556;O15143;P23528;O75969;O00401;P63261;Q9Y664;P04792;O15145;O15511;Q9P2A4}

13831 [Cluster 1258]GO:0060020+P biological\_process [name] Bergmann glial cell differentiation [def] "The process in which neuroepithelial cells of the neural tube give rise to Brgmann glial cells, specialized bipotential progenitors cells of the cerebellum. Differentiation includes the processes involved in commitment of a cell to a specific fate." [GOC

13832 Pathogen[ Q2Q067] interacts with 2 human partners: {P14136;P08670}

13833 Pathogen[ P0C214] interacts with 2 human partners: {P14136;P08670}

13834 Pathogen[ P03346] interacts with 2 human partners: {P14136;P08670}

13835 Pathogen[ Q85601] interacts with 2 human partners: {P08670;P14136}

13836 Pathogen[ P14079] interacts with 2 human partners: {P14136;P08670}

13837 Pathogen[ P03383] interacts with 2 human partners: {P08670;P14136}

13838 Pathogen[ P03410] interacts with 2 human partners: {P08670;P14136}

13839 Pathogen[ P14075] interacts with 2 human partners: {P14136;P08670}

13840 Pathogen[ P0C206] interacts with 2 human partners: {P14136;P08670}

13841 Pathogen[ P03363] interacts with 2 human partners: {P08670;P14136}

13842 [Cluster 1259]GO:0043687+P biological\_process [name] post-translational protein modification [def] "The process of covalently altering one or more amino acids in a protein after the protein has been completely translated and released from the ribosome." [GOC

13843 Pathogen[ Q2Q067] interacts with 16 human partners: {P55735;P34949;P63241;O95394;P27797;Q9BU89;Q16222;P53992;O95486;O94855;P49366;O95487;Q9GZV4;Q15436;Q14442;Q9H1Y0}

13844 Pathogen[ P0C214] interacts with 19 human partners: {P55735;Q9BU89;P53992;Q9GZV4;Q16222;P63241;Q15436;P49366;O95487;P49257;Q8NB77;Q9H1Y0;P27797;P34949;O95394;O15305;Q96EK6;O95486;O94855}

13845 Pathogen[ P03346] interacts with 18 human partners: {P55735;Q9GZV4;P49257;Q16222;P63241;O94855;Q15436;P49366;O95486;P27797;Q9HC U5;O95394;P34949;Q9BU89;Q9H1Y0;O95487;Q14442;P53992}

13846 Pathogen[ Q85601] interacts with 16 human partners: {P34949;Q9GZV4;O95487;P27797;P63241;Q15436;Q16222;P49257;Q9H1Y0;P55735;Q96E K6;O95486;O95394;O94855;Q9BU89;P53992}

13847 Pathogen[ P14079] interacts with 43 human partners: {Q5SRI9;O43292;P49257;Q8N307;Q16222;Q14442;O15305;O95487;Q96S52;P39656;P57054;O94855;Q9BT22;Q9BRB3;P53992;P04844;Q9Y2B2;O94777;Q969N2;Q9H1Y0;Q9NYU1;Q9P2X0;O95394;Q9BU89;Q9NYU2;P34949;Q8NBJ7;Q8NBK3;P61803;Q9H490;P63241;Q8TAX7;P55735;P15941;Q96A A3;Q96EK6;O95486;Q8TBF5;Q9GZV4;Q5SSG8;Q9UBM8;P46977;P49366}

13848 Pathogen[ P03383] interacts with 14 human partners: {P34949;P55735;O95487;Q9GZV4;O95486;P63241;Q9H1Y0;Q15436;P49366;O94855;O95394;P53992;Q9BU89;P27797}

13849 Pathogen[ P03410] interacts with 40 human partners: {Q9BU89;Q9H1Y0;Q8NBJ7;Q5SSG8;P49257;O94855;P53992;P15941;Q9Y2B2;Q16222;Q8N307;P34949;O94777;Q96EK6;Q8TAX7;Q14442;Q96S52;Q5SRI9;Q15436;Q96DR8;Q9NYU1;P49366;O95486;Q9BRB3;Q9BT22;P04844;Q9HCU5;O15305;Q969N2;P63241;Q9GZV4;P55735;P39656;Q9H490;O95394;P61803;Q9P2X0;O95487;Q9NYU2;P27797}

13850 Pathogen[ P14075] interacts with 19 human partners: {O94777;Q5SRI9;Q14442;Q9H1Y0;P34949;Q9GZV4;P63241;P53992;P55735;P49366;Q9BU89;Q8TAX7;O95487;P27797;Q15436;O95394;O94855;Q96EK6;O95486}

13851 Pathogen[ P0C206] interacts with 24 human partners: {Q8NBJ7;Q5SRI9;Q9GZV4;P27797;Q16222;O94855;P39656;O95394;Q14442;P55735;O94777;P34949;P49366;O95486;Q9H1Y0;P49257;O95487;Q9Y2B2;Q96EK6;P63241;P53992;Q9BU89;Q8TAX7;Q15436}

13852 Pathogen[ P03363] interacts with 12 human partners: {Q9GZV4;Q16222;Q15436;P49366;O95486;P27797;P63241;P53992;O95487;P55735;O94855;Q9H1Y0}

13853 [Cluster 1260]GO:0008589+P biological\_process [name] regulation of smoothened signaling pathway [def] "Any process that modulates the frequency, rate or extent of smoothened signaling." [GOC

13854 Pathogen[ Q2Q067] interacts with 2 human partners: {P08151;Q92793}

13855 Pathogen[ P0C214] interacts with 3 human partners: {P32243;Q92793;P08151}

13856 Pathogen[ P03346] interacts with 5 human partners: {Q68CZ1;Q9BT04;Q92793;P32243;P08151}

13857 Pathogen[ Q85601] interacts with 4 human partners: {P08151;P32243;Q92793;Q9BT04}

13858 Pathogen[ P14079] interacts with 7 human partners: {P08151;Q92793;Q68CZ1;P54826;Q4AC94;P32243;Q9BT04}

13859 Pathogen[ P03383] interacts with 3 human partners: {P32243;Q9BT04;Q92793}

13860 Pathogen[ P03410] interacts with 6 human partners: {Q4AC94;Q9BT04;Q92793;P54826;P32243;Q68CZ1}

13861 Pathogen[ P14075] interacts with 4 human partners: {Q9BT04;Q92793;P32243;P54826}

13862 Pathogen[ P0C206] interacts with 5 human partners: {Q9BT04;Q92793;P32243;P08151;P54826}

13863 Pathogen[ P03363] interacts with 4 human partners:{P08151;P32243;Q9BT04;Q92793}  
13864 [Cluster 1261]GO:0016446+P biological\_process [name] somatic hypermutation of immunoglobulin genes [def] "Mutations occurring somatically that result in amino acid changes in the rearranged V regions of immunoglobulins." [GOC  
13865 Pathogen[ Q2Q067] interacts with 4 human partners:{P54278;Q9UQ84;Q9NP87;P13051}  
13866 Pathogen[ P0C214] interacts with 6 human partners:{A8MQ11;Q9UQ84;P54278;Q9NP87;P40692;P13051}  
13867 Pathogen[ P03346] interacts with 4 human partners:{P13051;Q9UQ84;P54278;Q9NP87}  
13868 Pathogen[ Q85601] interacts with 7 human partners:{Q9UQ84;P13051;A8MQ11;Q9UGP5;P54278;Q9NP87;P40692}  
13869 Pathogen[ P14079] interacts with 9 human partners:{Q9UGP5;P40692;P54278;A8MQ11;O95744;Q9NP87;P52701;Q9UQ84;P13051}  
13870 Pathogen[ P03383] interacts with 2 human partners:{P54278;P13051}  
13871 Pathogen[ P03410] interacts with 9 human partners:{P40692;Q9UGP5;P52701;O95744;A8MQ11;P54278;P13051;Q9NP87;Q9UQ84}  
13872 Pathogen[ P14075] interacts with 2 human partners:{P13051;P54278}  
13873 Pathogen[ P0C206] interacts with 8 human partners:{P54278;Q9UQ84;P52701;P40692;A8MQ11;Q9UGP5;Q9NP87;P13051}  
13874 Pathogen[ P03363] interacts with 3 human partners:{P13051;P54278;Q9NP87}  
13875 [Cluster 1262]GO:0031325+P biological\_process [name] positive regulation of cellular metabolic process [def] "Any process that activates or increases the frequency, rate or extent of the chemical reactions and pathways by which individual cells transform chemical substances." [GOC  
13876 Pathogen[ Q2Q067] interacts with 1 human partners:{Q9NP71}  
13877 Pathogen[ P0C214] interacts with 3 human partners:{P53396;Q9UH92;Q9NP71}  
13878 Pathogen[ P03346] interacts with 2 human partners:{Q9NP71;Q9UH92}  
13879 Pathogen[ Q85601] interacts with 2 human partners:{Q9NP71;Q9UH92}  
13880 Pathogen[ P14079] interacts with 2 human partners:{Q9UH92;Q9NP71}  
13881 Pathogen[ P03383] interacts with 2 human partners:{Q9UH92;Q9NP71}  
13882 Pathogen[ P03410] interacts with 2 human partners:{Q9NP71;Q9UH92}  
13883 Pathogen[ P14075] interacts with 2 human partners:{Q9UH92;Q9NP71}  
13884 Pathogen[ P0C206] interacts with 2 human partners:{Q9NP71;Q9UH92}  
13885 Pathogen[ P03363] interacts with 2 human partners:{Q9UH92;Q9NP71}  
13886 [Cluster 1263]GO:0031111+P biological\_process [name] negative regulation of microtubule polymerization or depolymerization [def] "Any process that stops, prevents, or reduces the frequency, rate or extent of microtubule polymerization or depolymerization." [GOC  
13887 Pathogen[ Q2Q067] interacts with 1 human partners:{Q7Z460}  
13888 Pathogen[ P0C214] interacts with 1 human partners:{Q7Z460}  
13889 Pathogen[ P03346] interacts with 1 human partners:{Q7Z460}  
13890 Pathogen[ Q85601] interacts with 1 human partners:{Q7Z460}  
13891 Pathogen[ P14079] interacts with 1 human partners:{Q7Z460}  
13892 Pathogen[ P03383] interacts with 1 human partners:{Q7Z460}  
13893 Pathogen[ P03410] interacts with 1 human partners:{Q7Z460}  
13894 Pathogen[ P14075] interacts with 1 human partners:{Q7Z460}  
13895 Pathogen[ P0C206] interacts with 1 human partners:{Q7Z460}  
13896 Pathogen[ P03363] interacts with 1 human partners:{Q7Z460}  
13897 [Cluster 1264]GO:0045006+P biological\_process [name] DNA deamination [def] "The removal of an amino group from a nucleotide base in DNA. An example is the deamination of cytosine to produce uracil." [GOC  
13898 Pathogen[ Q2Q067] interacts with 3 human partners:{Q9NQT4;Q9NPD3;Q5RKV6}  
13899 Pathogen[ P0C214] interacts with 3 human partners:{Q5RKV6;Q9NPD3;Q9NQT4}  
13900 Pathogen[ P03346] interacts with 4 human partners:{Q5RKV6;Q9NQT5;Q9NQT4;Q9NPD3}  
13901 Pathogen[ Q85601] interacts with 3 human partners:{Q5RKV6;Q9NPD3;Q9NQT4}  
13902 Pathogen[ P14079] interacts with 3 human partners:{Q9NQT4;Q9NPD3;Q5RKV6}  
13903 Pathogen[ P03383] interacts with 3 human partners:{Q9NPD3;Q9NQT4;Q5RKV6}  
13904 Pathogen[ P03410] interacts with 3 human partners:{Q5RKV6;Q9NQT4;Q9NPD3}  
13905 Pathogen[ P14075] interacts with 3 human partners:{Q9NPD3;Q9NQT4;Q5RKV6}  
13906 Pathogen[ P0C206] interacts with 3 human partners:{Q9NPD3;Q5RKV6;Q9NQT4}  
13907 Pathogen[ P03363] interacts with 4 human partners:{Q9NQT4;Q5RKV6;Q9NPD3;Q9NQT5}  
13908 [Cluster 1265]GO:0009954+P biological\_process [name] proximal/distal pattern formation [def] "The regionalization process in which specific areas of cell differentiation are determined along a proximal/distal axis. The proximal/distal axis is defined by a line that runs from main body (proximal end) of an organism outward (distal end)." [GOC  
13909 Pathogen[ Q2Q067] interacts with 7 human partners:{P08151;P28356;O43248;Q07687;P40425;P40424;P31260}  
13910 Pathogen[ P0C214] interacts with 5 human partners:{P40424;O43248;Q07687;P40425;P08151}  
13911 Pathogen[ P03346] interacts with 10 human partners:{P31260;Q05925;P31270;P56177;P28358;P40425;P28356;P40424;O43248;P08151}  
13912 Pathogen[ Q85601] interacts with 6 human partners:{P08151;O43248;P31260;P40424;P40425;Q07687}  
13913 Pathogen[ P14079] interacts with 2 human partners:{P08151;Q07687}  
13914 Pathogen[ P03383] interacts with 3 human partners:{Q07687;P40424;P40425}  
13915 Pathogen[ P03410] interacts with 2 human partners:{Q07687;P40424}  
13916 Pathogen[ P14075] interacts with 3 human partners:{P40424;P40425;Q07687}

13917 Pathogen[ P0C206] interacts with 8 human partners:{Q07687;P40425;P40424;O43248;P28356;P08151;P31260;P56177}

13918 Pathogen[ P03363] interacts with 10 human partners:{P56177;P08151;P28356;O43248;P40425;P28358;P31260;Q05925;P40424;Q07687}

13919 [Cluster 1266]GO:0031848+P biological\_process [name] protection from non-homologous end joining at telomere [def] "A process that prevents non-homologous end joining at telomere, thereby ensuring that telomeres do not fuse." [GOC

13920 Pathogen[ Q2Q067] interacts with 4 human partners:{Q9NYB0;Q15554;Q96AP0;Q9H816}

13921 Pathogen[ P0C214] interacts with 3 human partners:{Q9H816;Q15554;Q9NYB0}

13922 Pathogen[ P03346] interacts with 4 human partners:{Q96AP0;Q15554;Q9NYB0;Q9H816}

13923 Pathogen[ Q85601] interacts with 3 human partners:{Q15554;Q9NYB0;Q9H816}

13924 Pathogen[ P14079] interacts with 4 human partners:{Q9NYB0;Q15554;Q9H816;Q96AP0}

13925 Pathogen[ P03383] interacts with 3 human partners:{Q9NYB0;Q15554;Q9H816}

13926 Pathogen[ P03410] interacts with 4 human partners:{Q9H816;Q15554;Q96AP0;Q9NYB0}

13927 Pathogen[ P14075] interacts with 4 human partners:{Q15554;Q96AP0;Q9H816;Q9NYB0}

13928 Pathogen[ P0C206] interacts with 4 human partners:{Q96AP0;Q15554;Q9H816;Q9NYB0}

13929 Pathogen[ P03363] interacts with 4 human partners:{Q9H816;Q15554;Q9NYB0;Q96AP0}

13930 [Cluster 1267]GO:0021510+P biological\_process [name] spinal cord development [def] "The process whose specific outcome is the progression of the spinal cord over time, from its formation to the mature structure. The spinal cord primarily conducts sensory and motor nerve impulses between the brain and the peripheral nervous tissues." [GO\_REF

13931 Pathogen[ Q2Q067] interacts with 2 human partners:{O15370;O95817}

13932 Pathogen[ P0C214] interacts with 2 human partners:{O95817;O15370}

13933 Pathogen[ P03346] interacts with 3 human partners:{Q06945;O15370;O95817}

13934 Pathogen[ Q85601] interacts with 2 human partners:{O15370;O95817}

13935 Pathogen[ P14079] interacts with 3 human partners:{O15370;O95817;P24588}

13936 Pathogen[ P03383] interacts with 1 human partners:{O15370}

13937 Pathogen[ P03410] interacts with 3 human partners:{O95817;O15370;P24588}

13938 Pathogen[ P14075] interacts with 1 human partners:{O15370}

13939 Pathogen[ P0C206] interacts with 2 human partners:{O15370;O95817}

13940 Pathogen[ P03363] interacts with 2 human partners:{O15370;O95817}

13941 [Cluster 1268]GO:0032515+P biological\_process [name] negative regulation of phosphoprotein phosphatase activity [def] "Any process that stops or reduces the activity of a phosphoprotein phosphatase." [GOC

13942 Pathogen[ Q2Q067] interacts with 2 human partners:{Q6NUP7;Q15257}

13943 Pathogen[ P0C214] interacts with 2 human partners:{Q15257;Q6NUP7}

13944 Pathogen[ P03346] interacts with 2 human partners:{Q15257;Q6NUP7}

13945 Pathogen[ Q85601] interacts with 2 human partners:{Q6NUP7;Q15257}

13946 Pathogen[ P14079] interacts with 1 human partners:{Q6NUP7}

13947 Pathogen[ P03383] interacts with 2 human partners:{Q6NUP7;Q15257}

13948 Pathogen[ P03410] interacts with 2 human partners:{Q15257;Q6NUP7}

13949 Pathogen[ P14075] interacts with 2 human partners:{Q15257;Q6NUP7}

13950 Pathogen[ P0C206] interacts with 2 human partners:{Q6NUP7;Q15257}

13951 Pathogen[ P03363] interacts with 2 human partners:{Q15257;Q6NUP7}

13952 [Cluster 1269]GO:000447+P biological\_process [name] endonucleolytic cleavage in ITS1 to separate SSU-rRNA from 5.8S rRNA and LSU-rRNA from tricistronic rRNA transcript (SSU-rRNA, 5.8S rRNA, LSU-rRNA) [def] "Endonucleolytic cleavage between the SSU-rRNA and the 5.8S rRNA of an rRNA molecule originally produced as a tricistronic rRNA transcript that contained the Small SubUnit (SSU) rRNA, the 5.8S rRNA, and the Large SubUnit (LSU) rRNA, in that order, from 5' to 3' along the primary transcript." [GOC

13953 Pathogen[ Q2Q067] interacts with 4 human partners:{P08865;P78316;P63220;O75691}

13954 Pathogen[ P0C214] interacts with 4 human partners:{O75691;P63220;P08865;P78316}

13955 Pathogen[ P03346] interacts with 4 human partners:{O75691;P08865;P78316;P63220}

13956 Pathogen[ Q85601] interacts with 4 human partners:{O75691;P63220;P08865;P78316}

13957 Pathogen[ P14079] interacts with 4 human partners:{O75691;P63220;P78316;P08865}

13958 Pathogen[ P03383] interacts with 4 human partners:{O75691;P08865;P78316;P63220}

13959 Pathogen[ P03410] interacts with 4 human partners:{P78316;P63220;P08865;O75691}

13960 Pathogen[ P14075] interacts with 4 human partners:{P63220;P08865;P78316;O75691}

13961 Pathogen[ P0C206] interacts with 4 human partners:{P08865;P78316;O75691;P63220}

13962 Pathogen[ P03363] interacts with 4 human partners:{P08865;O75691;P63220;P78316}

13963 [Cluster 1270]GO:0009792+P biological\_process [name] embryo development ending in birth or egg hatching [def] "The process whose specific outcome is the progression of an embryo over time, from zygote formation until the end of the embryonic life stage. The end of the embryonic life stage is organism-specific and may be somewhat arbitrary\_ for mammals it is usually considered to be birth, for insects the hatching of the first instar larva from the eggshell." [GOC

13964 Pathogen[ Q2Q067] interacts with 1 human partners:{Q13625}

13965 Pathogen[ P0C214] interacts with 1 human partners:{Q13625}

13966 Pathogen[ P03346] interacts with 2 human partners:{P49640;Q13625}

13967 Pathogen[ Q85601] interacts with 1 human partners:{Q13625}

13968 Pathogen[ P14079] interacts with 1 human partners:{Q13625}

13969 Pathogen[ P03383] interacts with 1 human partners:{Q13625}

13970 Pathogen[ P03410] interacts with 1 human partners:{Q13625}

13971 Pathogen[ P14075] interacts with 1 human partners:{Q13625}

13972 Pathogen[ P0C206] interacts with 2 human partners:{Q13625;P49640}

13973 Pathogen[ P03363] interacts with 2 human partners:{Q13625;P49640}

13974 [Cluster 1271]GO:0043046+P biological\_process [name] DNA methylation involved in gamete generation [def] "The covalent transfer of a methyl group to C-5 of cytosine that contributes to the establishment of DNA methylation patterns in the gamete." [GOC

13975 Pathogen[ Q2Q067] interacts with 3 human partners:{Q9NVM4;Q9Y6K1;Q8NI51}

13976 Pathogen[ P0C214] interacts with 3 human partners:{Q8NI51;Q9NVM4;Q9Y6K1}

13977 Pathogen[ P03346] interacts with 4 human partners:{Q8NI51;Q9Y6K1;Q9NVM4;Q9NRD5}

13978 Pathogen[ Q85601] interacts with 3 human partners:{Q8NI51;Q9NVM4;Q9Y6K1}

13979 Pathogen[ P14079] interacts with 4 human partners:{Q9Y6K1;Q9NVM4;Q96JY0;Q8NI51}

13980 Pathogen[ P03383] interacts with 2 human partners:{Q8NI51;Q9Y6K1}

13981 Pathogen[ P03410] interacts with 4 human partners:{Q9NVM4;Q9NRD5;Q8NI51;Q9Y6K1}

13982 Pathogen[ P14075] interacts with 2 human partners:{Q8NI51;Q9Y6K1}

13983 Pathogen[ P0C206] interacts with 4 human partners:{Q9Y6K1;Q8NI51;Q9NVM4;Q9NRD5}

13984 Pathogen[ P03363] interacts with 5 human partners:{Q7Z3Z4;Q9Y6K1;Q8NI51;Q9NVM4;Q96JY0}

13985 [Cluster 1272]GO:0060285+P biological\_process [name] ciliary cell motility [def] "Cell motility due to the motion of one or more cilia." [GOC

13986 Pathogen[ Q2Q067] interacts with 2 human partners:{P48380;Q9NVR5}

13987 Pathogen[ P0C214] interacts with 2 human partners:{Q9NVR5;P48380}

13988 Pathogen[ P03346] interacts with 2 human partners:{Q9NVR5;P48380}

13989 Pathogen[ Q85601] interacts with 2 human partners:{Q9NVR5;P48380}

13990 Pathogen[ P14079] interacts with 3 human partners:{Q9NVR5;P48380;Q9UFE4}

13991 Pathogen[ P03383] interacts with 2 human partners:{P48380;Q9NVR5}

13992 Pathogen[ P03410] interacts with 3 human partners:{Q9UFE4;Q9NVR5;P48380}

13993 Pathogen[ P14075] interacts with 2 human partners:{P48380;Q9NVR5}

13994 Pathogen[ P0C206] interacts with 3 human partners:{P48380;Q9NVR5;Q9UFE4}

13995 Pathogen[ P03363] interacts with 2 human partners:{Q9NVR5;P48380}

13996 [Cluster 1273]GO:0032496+P biological\_process [name] response to lipopolysaccharide [def] "Any process that results in a change in state or activity of an organism (in terms of movement, secretion, enzyme production, gene expression, etc.) as a result of a lipopolysaccharide stimulus\_lipopolysaccharide is a major component of the cell wall of gram-negative bacteria." [GOC

13997 Pathogen[ Q2Q067] interacts with 17 human partners:{P01100;Q8IUC6;Q16656;P30793;Q00613;Q04206;P17676;Q53H80;Q14790;A6NDB9;Q99966;Q14653;P29474;Q96FA3;P25963;P15923;P42224}

13998 Pathogen[ P0C214] interacts with 18 human partners:{P29474;Q00613;Q8IUC6;Q16656;P01100;Q96FA3;Q04206;Q53H80;P42224;P17676;Q99966;P30793;P15923;P25963;Q14653;P05412;O15524;Q14790}

13999 Pathogen[ P03346] interacts with 18 human partners:{P05412;O15524;Q99966;P17676;P29474;Q16656;Q00613;P25963;P15923;Q04206;Q53H80;Q96FA3;A6NDB9;P42224;Q14653;Q8IUC6;Q14790;P01100}

14000 Pathogen[ Q85601] interacts with 17 human partners:{P17676;Q8IUC6;Q16656;Q14790;Q99966;Q00613;Q96FA3;P30793;P01100;Q53H80;Q14653;Q04206;P05412;P42224;P15923;P29474;P25963}

14001 Pathogen[ P14079] interacts with 22 human partners:{Q53H80;Q16873;Q14653;Q8IUC6;Q16656;Q99966;P15923;P30793;Q96FA3;A6NDB9;Q00613;Q14790;Q16644;P11686;A6NK06;P10620;P42224;P29459;Q9Y6Y9;P05412;P01100;Q99836}

14002 Pathogen[ P03383] interacts with 14 human partners:{Q14653;P29474;A6NDB9;Q8IUC6;Q16656;P15923;Q53H80;P17676;Q00613;P25963;P01100;Q96FA3;Q04206;P05412}

14003 Pathogen[ P03410] interacts with 21 human partners:{Q00613;Q04206;P17676;Q96FA3;Q14653;P30793;P15923;P01100;P29474;P11686;Q16873;Q53H80;P05412;A6NK06;Q9Y6Y9;Q8IUC6;Q16656;P25963;A6NDB9;P29459;Q99966}

14004 Pathogen[ P14075] interacts with 15 human partners:{P29474;Q00613;Q04206;P05412;Q16656;Q53H80;P15923;P25963;Q14653;Q96FA3;Q8IUC6;P01100;A6NDB9;P17676;P30793}

14005 Pathogen[ P0C206] interacts with 20 human partners:{A6NDB9;Q00613;P05412;P25963;O15524;P30793;A6NK06;Q16656;P17676;P01100;Q04206;P15923;Q14790;Q8IUC6;P29474;Q99966;Q96FA3;P42224;Q53H80;Q14653}

14006 Pathogen[ P03363] interacts with 15 human partners:{Q14653;P29474;Q13151;Q04206;P17676;O15524;P25963;P15923;Q96FA3;Q16656;P05412;Q00613;Q53H80;A6NDB9;P01100}

14007 [Cluster 1274]GO:0042262+P biological\_process [name] DNA protection [def] "Any process in which DNA is protected from damage by, for example, oxidative stress." [GOC

14008 Pathogen[ Q2Q067] interacts with 1 human partners:{P36639}

14009 Pathogen[ P0C214] interacts with 1 human partners:{P36639}

14010 Pathogen[ P03346] interacts with 2 human partners:{Q9NS18;P36639}

14011 Pathogen[ Q85601] interacts with 1 human partners:{P36639}

14012 Pathogen[ P14079] interacts with 1 human partners:{P36639}

14013 Pathogen[ P03383] interacts with 1 human partners:{P36639}

14014 Pathogen[ P03410] interacts with 1 human partners:{P36639}

14015 Pathogen[ P14075] interacts with 1 human partners:{P36639}

14016 Pathogen[ P0C206] interacts with 2 human partners:{Q9NS18;P36639}

14017 Pathogen[ P03363] interacts with 1 human partners:{P36639}

14018 [Cluster 1275]GO:0033365+P biological\_process [name] protein localization to organelle [def] "A process in which a protein is transported to, or maintained in, a location within an organelle." [GOC

14019 Pathogen[ Q2Q067] interacts with 4 human partners:{P83436;O00541;Q96QF0;Q96JB2}  
14020 Pathogen[ POC214] interacts with 5 human partners:{O00541;P83436;Q96G01;Q96JB2;Q96QF0}  
14021 Pathogen[ P03346] interacts with 7 human partners:{Q96G01;Q96JB2;O00541;Q8N157;P83436;O14617;Q96QF0}  
14022 Pathogen[ Q85601] interacts with 5 human partners:{O00541;Q96JB2;P83436;Q96G01;Q96QF0}  
14023 Pathogen[ P14079] interacts with 7 human partners:{P83436;Q8N157;Q96QF0;Q96G01;O00541;Q96JB2;O14617}  
14024 Pathogen[ P03383] interacts with 4 human partners:{Q96QF0;P83436;O00541;Q96JB2}  
14025 Pathogen[ P03410] interacts with 7 human partners:{Q96JB2;O14617;Q8N157;Q96G01;Q96QF0;O00541;P83436}  
14026 Pathogen[ P14075] interacts with 4 human partners:{Q96JB2;O00541;Q96QF0;P83436}  
14027 Pathogen[ POC206] interacts with 8 human partners:{P83436;Q96JB2;P50461;Q96QF0;Q8N157;O00541;O14617;Q96G01}  
14028 Pathogen[ P03363] interacts with 5 human partners:{P83436;Q8N157;O00541;Q96QF0;Q96JB2}  
14029 [Cluster 1276]GO:0048520+P biological\_process [name] positive regulation of behavior [def] "Any process that activates or increases the frequency, rate or extent of behavior, the specific actions or reactions of an organism in response to external or internal stimuli." [GOC  
14030 Pathogen[ Q2Q067] interacts with 1 human partners:{P49116}  
14031 Pathogen[ POC214] interacts with 1 human partners:{P49116}  
14032 Pathogen[ P03346] interacts with 1 human partners:{P49116}  
14033 Pathogen[ Q85601] interacts with 1 human partners:{P49116}  
14034 Pathogen[ P14079] interacts with 1 human partners:{P49116}  
14035 Pathogen[ P03383] interacts with 1 human partners:{P49116}  
14036 Pathogen[ P03410] interacts with 1 human partners:{P49116}  
14037 Pathogen[ P14075] interacts with 1 human partners:{P49116}  
14038 Pathogen[ POC206] interacts with 1 human partners:{P49116}  
14039 Pathogen[ P03363] interacts with 1 human partners:{P49116}  
14040 [Cluster 1277]GO:0042953+P biological\_process [name] lipoprotein transport [def] "The directed movement of any conjugated, water-soluble protein in which the nonprotein group consists of a lipid or lipids, into, out of or within a cell, or between cells, by means of some agent such as a transporter or pore." [GOC  
14041 Pathogen[ Q2Q067] interacts with 2 human partners:{Q13432;A6NIH7}  
14042 Pathogen[ POC214] interacts with 2 human partners:{A6NIH7;Q13432}  
14043 Pathogen[ P03346] interacts with 2 human partners:{Q13432;A6NIH7}  
14044 Pathogen[ Q85601] interacts with 2 human partners:{A6NIH7;Q13432}  
14045 Pathogen[ P14079] interacts with 3 human partners:{P41238;A6NIH7;Q13432}  
14046 Pathogen[ P03383] interacts with 2 human partners:{Q13432;A6NIH7}  
14047 Pathogen[ P03410] interacts with 4 human partners:{P41238;P55157;A6NIH7;Q13432}  
14048 Pathogen[ P14075] interacts with 2 human partners:{A6NIH7;Q13432}  
14049 Pathogen[ POC206] interacts with 3 human partners:{Q13432;A6NIH7;P41238}  
14050 Pathogen[ P03363] interacts with 2 human partners:{Q13432;A6NIH7}  
14051 [Cluster 1278]GO:0000236+P biological\_process [name] mitotic prometaphase [def] "A cell cycle process comprising the steps by which a cell progresses through prometaphase, the stage following prophase in mitosis (in higher eukaryotes) during which the nuclear envelope is disrupted and breaks into membrane vesicles, and the spindle microtubules enter the nuclear region. Kinetochores mature on each centromere and attach to some of the spindle microtubules. Kinetochore microtubules begin the process of aligning chromosomes in one plane halfway between the poles." [GOC  
14052 Pathogen[ Q2Q067] interacts with 67 human partners:{P49454;Q96EE3;Q96H22;P52948;Q71F23;Q14008;Q12769;Q9Y266;P49792;Q13352;Q7Z460;P55735;Q61PU0;Q6P1K2;Q9HBM1;Q8WYP5;A8MVW5;Q9H3R5;Q5FBB7;P49450;Q13257;Q8N2Z9;Q03188;Q9NXR1;Q53HL2;O43684;Q8NBT2;Q9P258;Q8NFH4;P14635;Q9NQS7;O43264;O14980;Q92674;Q9BW27;Q96BT3;Q9BZD4;Q9NSP4;Q12834;P36873;P50748;Q9H410;Q8NFH3;O60216;O00139;O75122;Q8NG31;Q9Y6D9;P57740;Q96BD8;Q9H900;Q96IY1;Q8WUM0;Q14683;Q8WVM7;Q9BU64;P42677;O95229;O14777;Q562F6;Q9BPU9;Q8N3U4;Q15691;Q9H081;Q8WVK7;O15392;Q96EA4}  
14053 Pathogen[ POC214] interacts with 68 human partners:{Q9H081;O43684;P55735;Q13257;Q96BT3;Q14008;Q53HL2;O43264;Q96EA4;P57740;Q8WYP5;P50748;A8MVW5;O95229;Q96EE3;P49792;Q61PU0;P14635;Q8NBT2;O00139;Q15691;Q6P1K2;P46060;Q562F6;Q9Y266;P49450;Q8N2Z9;Q03188;O75122;Q92674;O14980;Q9BW27;Q96BD8;Q9HBM1;Q9BP09;Q9P258;Q12834;Q13352;Q8NFH3;Q9H410;O15392;Q9H3R5;P42677;Q14683;Q8N3U4;Q8WVM7;Q8NG31;Q7Z460;P36873;Q9H900;Q5FBB7;Q9NQS7;Q9NSP4;Q71F23;Q8NFH4;Q8N0S6;Q9NXR1;Q96IY1;P49454;O60216;Q9BZD4;Q8WUM0;Q9Y6D9;P52948;Q9BU64;Q12769;Q8WVK7;O14777}  
14054 Pathogen[ P03346] interacts with 72 human partners:{Q9Y6D9;Q8N2Z9;P55735;Q5FBB7;Q8NFH4;Q8WUM0;O95229;Q7L2Z9;Q12769;O15392;O43684;Q96EE3;Q8N3U4;Q9BPU9;Q92674;O00139;P57740;Q15691;Q8WYP5;A8MVW5;O43264;Q9NXR1;Q53HL2;Q96IY1;Q9P258;Q8NFH3;Q12834;Q9Y266;O14777;Q9BW27;O14980;Q96EA4;P14635;P46060;Q14683;P36873;Q14008;Q9NQS7;Q562F6;Q9H081;Q8NBT2;Q9HBM1;Q9H410;P30622;O75122;Q9BU64;Q8WVM7;Q03188;P42677;P50748;P49450;Q7Z460;Q61PU0;Q8NG31;Q8N0S6;Q9H3R5;Q9NSP4;Q96H22;Q6P1K2;O60216;Q96BD8;Q9BZD4;Q96BT3;Q71F23;Q13352;Q8WVK7;Q13257;P49454;Q9H900;P49792;P52948}  
14055 Pathogen[ Q85601] interacts with 67 human partners:{Q8NBT2;P49454;O95229;Q8NFH4;Q8NFH3;Q03188;Q9H900;Q14008;P46060;Q96EE3;Q9NQ

- S7;Q12769;Q9H081;Q9P258;Q96BT3;P57740;Q8WYP5;A8MVW5;P30622;Q8WUM0;Q71F23;O43264;Q53HL2;Q8NG31;O15392;Q9H3R5;Q96EA4;O60216;Q8WVM7;Q12834;Q13257;Q92674;O75122;Q9Y266;Q9BW27;Q13352;Q562F6;P14635;Q9BU64;Q14683;Q9BZD4;P36873;Q15691;Q96BD8;Q9Y6D9;P55735;P52948;P49450;Q8N2Z9;Q9H410;O14980;Q8N3U4;P42677;P50748;Q8WVK7;Q96IY1;Q9BPU9;Q7Z460;P49792;Q9NXR1;Q6P1K2;Q9GZM8;O14777;O43684;O00139;Q9HBM1;Q5FBB7}
- 14056 Pathogen[ P14079] interacts with 69 human  
partners: {Q15691;Q96IY1;Q03188;Q9BW27;Q7Z460;Q96BT3;Q9HBM1;Q8N0S6;P36873;P57740;O95229;Q8NBT2;Q9BZD4;O15392;O60216;Q9Y266;P46060;Q8NG31;A8MVW5;Q6IPU0;Q9H900;Q5FBB7;Q9H410;Q8N3U4;Q9NSP4;Q99661;Q71F23;Q8WUM0;P14635;Q8WYP5;O00139;Q8N2Z9;Q13257;Q96EA4;Q562F6;Q8WVK7;P49450;Q96H22;Q8NFH3;Q96EE3;Q9BPU9;Q9P258;O43264;Q9H3R5;Q9GZM8;Q53HL2;P42677;Q8NFH4;Q9NQS7;Q92674;P55735;Q9UQE7;P49454;Q9BU64;Q9NXR1;P50748;Q12769;Q96BD8;O75122;Q14683;Q13352;Q7L2Z9;O14777;O43684;P30622;Q6P1K2;P52948;Q9H081;Q14008}
- 14057 Pathogen[ P03383] interacts with 60 human  
partners: {Q14683;Q96EE3;Q13257;Q8WUM0;Q9NQS7;Q03188;P49454;P49792;Q8N2Z9;Q8NFH4;Q7Z460;Q6IPU0;Q96BD8;Q8NBT2;Q8N3U4;Q14008;Q9H900;Q15691;P55735;O43264;Q5FBB7;P52948;Q9P258;P57740;Q8WYP5;A8MVW5;P42677;Q96H22;Q13352;Q96EA4;O60216;P14635;Q96BT3;Q12769;P36873;Q71F23;Q12834;Q53HL2;O95229;Q9BW27;Q9BU64;O14980;O43684;Q9BZD4;Q8WVK7;Q562F6;Q9HBM1;Q9Y266;Q9H410;Q9H081;Q96IY1;Q8NG31;Q6P1K2;O14777;Q92674;Q9H3R5;Q8NFH3;Q9Y6D9;P50748;Q8WVM7}
- 14058 Pathogen[ P03410] interacts with 72 human  
partners: {Q03188;Q7Z460;O15392;Q9BW27;Q9NSP4;Q9H3R5;Q8N0S6;O43684;Q96H22;P30622;O00139;Q9NXR1;Q9H410;Q8NG31;Q9GZM8;Q53HL2;Q8NFH4;Q6IPU0;Q9UQE7;Q96BT3;P52948;Q14008;P50748;Q562F6;Q92674;O60216;O43264;P49454;Q96EA4;Q96IY1;P14635;Q15691;Q9BPU9;Q6P1K2;Q71F23;Q14683;Q9BZD4;Q8WVK7;P36873;Q9HBM1;A8MVW5;Q96EE3;Q8N3U4;Q12834;Q8NBT2;P49450;Q5FBP7;Q8WUM0;Q8WVM7;Q9H900;Q9Y266;O95229;Q9H081;Q96BD8;P57740;P55735;Q12769;Q9P258;Q8WYP5;O75122;Q8NFH3;Q13352;P46060;Q7L2Z9;O14980;O14777;P49792;Q9BU64;Q8N2Z9;Q13257;Q9NQ S7;P42677}
- 14059 Pathogen[ P14075] interacts with 62 human  
partners: {Q6IPU0;P42677;Q9Y266;Q14683;Q9Y6D9;Q9H081;Q562F6;Q9NQS7;Q8WVM7;P14635;Q92674;Q8WVK7;P57740;Q8WYP5;A8MVW5;Q7Z460;P49792;Q96IY1;Q13257;Q96H22;O43684;Q96BD8;O14777;P55735;P36873;O95229;Q8N2Z9;Q9H3R5;O14980;Q9BW27;Q9BU64;Q96EA4;O00139;Q9P258;Q15691;Q96EE3;Q96BT3;Q9BPU9;Q5FBB7;Q9H410;Q8NFH3;Q9H900;Q53HL2;P50748;Q12769;Q9HBM1;Q6P1K2;Q13352;Q14008;Q8WUM0;O43264;Q03188;Q8NG31;P49454;Q71F23;Q8NFH4;O60216;Q8NBT2;Q9BZD4;Q12834;P52948;Q8N3U4}
- 14060 Pathogen[ P0C206] interacts with 71 human  
partners: {Q9BPU9;Q96EE3;Q9HBM1;O60216;Q8WYP5;Q6IPU0;Q9NSP4;Q14008;Q9H900;Q9Y6D9;Q7L2Z9;Q15691;Q9H081;O14777;Q8N0S6;Q9BZD4;P55735;Q9H410;P57740;P49454;P30622;Q13257;Q9BU64;Q9GZM8;O75122;Q92674;Q8WUM0;P46060;Q6P1K2;P49792;Q8NBT2;A8MVW5;Q96BD8;Q9H3R5;Q9UQE7;P49450;Q14683;Q96IY1;Q96BT3;Q13352;Q5FBB7;Q53HL2;O15392;O00139;Q9P258;Q96H22;Q8NFH4;Q562F6;Q8N3U4;Q9NXR1;Q96EA4;Q8N2Z9;Q12769;P14635;O43684;Q7Z460;Q9NQS7;Q8NFH3;P36873;P50748;Q71F23;O43264;Q8WVM7;Q8NG31;Q9Y266;Q12834;Q8WVK7;Q9BW27;Q03188;P42677;O95229}
- 14061 Pathogen[ P03363] interacts with 62 human  
partners: {Q96EA4;Q9BZD4;P46060;P49454;Q96IY1;Q6P1K2;P42677;Q9Y6D9;Q9H081;P36873;Q92674;Q8NFH4;O95229;Q96BD8;Q8WYP5;Q8NFH3;Q9Y266;O14980;Q12769;Q15691;O43264;Q8NBT2;Q8N2Z9;Q9P258;Q53HL2;Q8WVK7;Q9H410;P50748;Q5FBB7;Q9H900;Q8WUM0;A8MVW5;P30622;O43684;P49450;Q9NQS7;Q9BPU9;Q9NSP4;Q8WVM7;Q9HBM1;Q7Z460;P49792;Q03188;Q8NG31;Q13257;Q71F23;P57740;Q96BT3;Q9H3R5;P52948;Q8N3U4;O14777;Q12834;Q14008;Q562F6;Q9NXR1;O00139;Q13352;P55735;Q14683;Q9BW27;O60216}
- 14062 [Cluster 1279]GO:0048589+P biological\_process [name] developmental growth [def] "The increase in size or mass of an entire organism, a part of an organism or a cell, where the increase in size or mass has the specific outcome of the progression of the organism over time from one condition to another." [GOC
- 14063 Pathogen[ Q2Q067] interacts with 7 human  
partners: {Q13485;P11831;P56693;P84022;Q15796;P04818;Q8IZT6}
- 14064 Pathogen[ P0C214] interacts with 7 human  
partners: {P04818;P56693;P84022;P11831;Q13485;Q15796;Q8IZT6}
- 14065 Pathogen[ P03346] interacts with 8 human  
partners: {P11831;P31270;Q8NFW5;Q15796;P56693;P84022;Q8IZT6;Q13485}
- 14066 Pathogen[ Q85601] interacts with 6 human  
partners: {P11831;Q8IZT6;P56693;P84022;Q13485;Q15796}
- 14067 Pathogen[ P14079] interacts with 6 human  
partners: {P01215;P54826;Q8TCU4;P56693;P04818;Q8IZT6}
- 14068 Pathogen[ P03383] interacts with 6 human  
partners: {P11831;Q13485;P84022;Q15796;P01215;P56693}
- 14069 Pathogen[ P03410] interacts with 10 human  
partners: {P84022;P11831;Q8TCU4;P01215;Q8IZT6;P04818;Q13485;P56693;P54826;Q15796}
- 14070 Pathogen[ P14075] interacts with 7 human  
partners: {P11831;P56693;Q15796;Q13485;P84022;P01215;P54826}
- 14071 Pathogen[ P0C206] interacts with 10 human  
partners: {P84022;Q8TCU4;Q8IZT6;P56693;Q15796;P01215;Q13485;P04818;P11831;P54826}
- 14072 Pathogen[ P03363] interacts with 7 human  
partners: {Q8NFW5;P11831;P56693;Q15796;P84022;Q13485;Q8IZT6}
- 14073 [Cluster 1280]GO:0009605+P biological\_process [name] response to external stimulus [def] "Any process that results in a change in state or activity of a cell or an organism (in terms of movement, secretion, enzyme production, gene expression, etc.) as

a result of an external stimulus." [GOC

14074 Pathogen[ Q2Q067] interacts with 2 human partners:{075582;Q03112}

14075 Pathogen[ P0C214] interacts with 2 human partners:{Q03112;075582}

14076 Pathogen[ P03346] interacts with 2 human partners:{Q03112;075582}

14077 Pathogen[ Q85601] interacts with 2 human partners:{Q03112;075582}

14078 Pathogen[ P14079] interacts with 1 human partners:{075582}

14079 Pathogen[ P03383] interacts with 2 human partners:{075582;Q03112}

14080 Pathogen[ P03410] interacts with 2 human partners:{Q03112;075582}

14081 Pathogen[ P14075] interacts with 2 human partners:{075582;Q03112}

14082 Pathogen[ P0C206] interacts with 2 human partners:{075582;Q03112}

14083 Pathogen[ P03363] interacts with 1 human partners:{Q03112}

14084 [Cluster 1281]GO:0031023+P biological\_process [name] microtubule organizing center organization [def] "A process that is carried out at the cellular level which results in the assembly, arrangement of constituent parts, or disassembly of a microtubule organizing center, a structure from which microtubules grow." [GOC

14085 Pathogen[ Q2Q067] interacts with 4 human partners:{Q7Z460;Q9NXR1;Q8IWJ2;075122}

14086 Pathogen[ P0C214] interacts with 4 human partners:{Q8IWJ2;075122;Q7Z460;Q9NXR1}

14087 Pathogen[ P03346] interacts with 4 human partners:{Q9NXR1;075122;Q7Z460;Q8IWJ2}

14088 Pathogen[ Q85601] interacts with 4 human partners:{Q8IWJ2;075122;Q7Z460;Q9NXR1}

14089 Pathogen[ P14079] interacts with 4 human partners:{Q7Z460;Q8IWJ2;Q9NXR1;075122}

14090 Pathogen[ P03383] interacts with 2 human partners:{Q8IWJ2;Q7Z460}

14091 Pathogen[ P03410] interacts with 4 human partners:{Q7Z460;Q9NXR1;075122;Q8IWJ2}

14092 Pathogen[ P14075] interacts with 2 human partners:{Q7Z460;Q8IWJ2}

14093 Pathogen[ P0C206] interacts with 4 human partners:{075122;Q9NXR1;Q7Z460;Q8IWJ2}

14094 Pathogen[ P03363] interacts with 3 human partners:{Q7Z460;Q8IWJ2;Q9NXR1}

14095 [Cluster 1282]GO:0045596+P biological\_process [name] negative regulation of cell differentiation [def] "Any process that stops, prevents, or reduces the frequency, rate or extent of cell differentiation." [GOC

14096 Pathogen[ Q2Q067] interacts with 11 human partners:{P41182;Q15022;O95521;Q5VWM6;Q5VWM5;Q5SWL7;P78395;P12757;O60810;O60809;Q00534}

14097 Pathogen[ P0C214] interacts with 17 human partners:{Q15022;Q5TYX0;P12757;Q5SWL7;A6NGN4;P78395;O60813;O60810;Q5VWM6;Q5VTA0;Q00534;P41182;Q5VWM5;Q5SWL8;O95521;Q5VXH4;Q5VWM1}

14098 Pathogen[ P03346] interacts with 17 human partners:{Q9NPC8;P12757;Q5VWM5;Q9BPY8;O60810;O60809;P51843;Q5VTA0;P78395;Q15022;P41182;Q00534;Q5SWL8;O95521;Q5VWM1;Q5VWM6;Q5SWL7}

14099 Pathogen[ Q85601] interacts with 17 human partners:{Q5VTA0;O60813;O60810;P12757;Q5SWL7;Q5VXH4;Q15022;Q5TYX0;Q00534;P41182;Q5VWM5;Q5SWL8;Q5VWM1;Q5VWM6;P78395;A6NGN4;Q5VT98}

14100 Pathogen[ P14079] interacts with 27 human partners:{O60811;A3QJZ6;Q5VXH5;Q5SWL7;Q5VWM3;Q5VT98;A6NGN4;Q5TYX0;P41182;Q5VWM6;A6NMV5;O95521;Q5VWM5;O95522;Q5VTA0;O60809;Q5VWM4;Q5SWL8;O60813;P78395;P12757;A6NMC2;Q5VXH4;Q5VWM1;O60810;Q15022;Q5TYW8}

14101 Pathogen[ P03383] interacts with 13 human partners:{Q5TYX0;O60809;O60810;Q00534;Q15022;Q5SWL7;P78395;O60813;Q5VXH4;Q5VWM6;P12757;Q5VWM5;O95521}

14102 Pathogen[ P03410] interacts with 28 human partners:{Q5VWM4;Q5SWL7;Q5VXH5;Q5SWL8;Q00534;A6NGN4;Q5TYW8;O60811;Q5VWM1;O60813;O60809;A3QJZ6;Q5VWM6;O95521;Q5VWM5;O60810;P78395;Q5VT98;P12757;Q5VXH4;P41182;A6NMC2;O95522;A6NMV5;Q5VTA0;Q5TYX0;Q5VWM3;Q15022}

14103 Pathogen[ P14075] interacts with 15 human partners:{Q5VWM1;Q5SWL7;O60809;P78395;Q5VXH4;O60813;Q00534;O95521;P12757;Q5VWM5;Q5TYX0;Q15022;O60810;Q5VWM6;Q5VTA0}

14104 Pathogen[ P0C206] interacts with 23 human partners:{A3QJZ6;Q5VXH4;P78395;P41182;Q5VWM5;O60813;Q5VWM3;A6NGN4;Q5TYX0;Q5TYW8;A6NMV5;Q5VTA0;Q5SWL7;P12757;Q5VT98;Q15022;O95521;Q5VWM1;O60810;O60809;Q5VWM6;Q5SWL8;Q00534}

14105 Pathogen[ P03363] interacts with 16 human partners:{O60809;Q15022;P12757;P78395;P19883;O60813;Q00534;Q9BPY8;Q5SWL7;Q5VWM6;Q5VXH4;O60810;O95521;Q5VWM5;Q9NPC8;Q5TYX0}

14106 [Cluster 1283]GO:0034162+P biological\_process [name] toll-like receptor 9 signaling pathway [def] "Any series of molecular signals generated as a consequence of binding to toll-like receptor 9." [GOC

14107 Pathogen[ Q2Q067] interacts with 1 human partners:{Q8NFX5}

14108 Pathogen[ P0C214] interacts with 1 human partners:{Q8NFX5}

14109 Pathogen[ P03346] interacts with 1 human partners:{Q8NFX5}

14110 Pathogen[ Q85601] interacts with 1 human partners:{Q8NFX5}

14111 Pathogen[ P14079] interacts with 1 human partners:{Q8NFX5}

14112 Pathogen[ P03383] interacts with 1 human partners:{Q8NFX5}

14113 Pathogen[ P03410] interacts with 1 human partners:{Q8NFX5}

14114 Pathogen[ P14075] interacts with 1 human partners:{Q8NFX5}

14115 Pathogen[ P0C206] interacts with 1 human partners:{Q8NFX5}

14116 Pathogen[ P03363] interacts with 1 human partners:{Q8NFX5}

14117 [Cluster 1284]GO:0007129+P biological\_process [name] synapsis [def] "The cell cycle process in which the side by side pairing and physical juxtaposition of homologous



chromosomes is created at the metaphase plate." [GOC

14118 Pathogen[ Q2Q067] interacts with 2 human partners:{P49959;Q9BXW9}

14119 Pathogen[ POC214] interacts with 3 human partners:{P49959;Q9BXT5;Q9BXW9}

14120 Pathogen[ P03346] interacts with 3 human partners:{Q9BXT5;P49959;Q9BXW9}

14121 Pathogen[ Q85601] interacts with 3 human partners:{Q9BXT5;Q9BXW9;P49959}

14122 Pathogen[ P14079] interacts with 4 human partners:{Q9BXT5;Q9BXW9;Q7Z7C7;Q96JY0}

14123 Pathogen[ P03383] interacts with 1 human partners:{Q9BXW9}

14124 Pathogen[ P03410] interacts with 4 human partners:{P49959;Q9BXW9;Q9BXT5;Q7Z7C7}

14125 Pathogen[ P14075] interacts with 3 human partners:{Q9BXT5;Q9BXW9;Q7Z7C7}

14126 Pathogen[ POC206] interacts with 4 human partners:{P49959;Q9BXT5;Q7Z7C7;Q9BXW9}

14127 Pathogen[ P03363] interacts with 3 human partners:{Q9BXW9;Q96JY0;Q9BXT5}

14128 [Cluster 1285]GO:0000578+P biological\_process [name] embryonic axis specification  
[def] "The establishment, maintenance and elaboration of a pattern along a line or a point in an embryo." [GOC

14129 Pathogen[ Q2Q067] interacts with 2 human partners:{Q99966;Q15468}

14130 Pathogen[ POC214] interacts with 2 human partners:{Q99966;Q15468}

14131 Pathogen[ P03346] interacts with 2 human partners:{Q99966;Q15468}

14132 Pathogen[ Q85601] interacts with 1 human partners:{Q99966}

14133 Pathogen[ P14079] interacts with 2 human partners:{Q99966;Q15468}

14134 Pathogen[ P03383] interacts with 1 human partners:{Q15468}

14135 Pathogen[ P03410] interacts with 2 human partners:{Q15468;Q99966}

14136 Pathogen[ P14075] interacts with 1 human partners:{Q15468}

14137 Pathogen[ POC206] interacts with 2 human partners:{Q15468;Q99966}

14138 Pathogen[ P03363] interacts with 1 human partners:{Q15468}

14139 [Cluster 1286]GO:0016052+P biological\_process [name] carbohydrate catabolic process  
[def] "The chemical reactions and pathways resulting in the breakdown of carbohydrates, any of a group of organic compounds based of the general formula C<sub>x</sub>(H<sub>2</sub>O)<sub>y</sub>." [ISBN

14140 Pathogen[ Q2Q067] interacts with 2 human partners:{Q96G03;Q6PCE3}

14141 Pathogen[ POC214] interacts with 2 human partners:{Q6PCE3;Q96G03}

14142 Pathogen[ P03346] interacts with 2 human partners:{Q6PCE3;Q96G03}

14143 Pathogen[ Q85601] interacts with 2 human partners:{Q6PCE3;Q96G03}

14144 Pathogen[ P14079] interacts with 3 human partners:{Q6PCE3;P17050;Q96G03}

14145 Pathogen[ P03383] interacts with 2 human partners:{Q96G03;Q6PCE3}

14146 Pathogen[ P03410] interacts with 2 human partners:{Q6PCE3;Q96G03}

14147 Pathogen[ P14075] interacts with 2 human partners:{Q96G03;Q6PCE3}

14148 Pathogen[ POC206] interacts with 2 human partners:{Q96G03;Q6PCE3}

14149 Pathogen[ P03363] interacts with 2 human partners:{Q6PCE3;Q96G03}

14150 [Cluster 1287]GO:0045786+P biological\_process [name] negative regulation of cell cycle  
[def] "Any process that stops, prevents or reduces the rate or extent of progression through the cell cycle." [GOC

14151 Pathogen[ Q2Q067] interacts with 21 human partners:{Q9H0C8;Q96KQ4;P06400;P14921;Q7Z6K1;Q13625;Q13547;O15379;O60356;Q92769;O00255;O75496;P49848;Q53EL6;Q9UKN5;Q13761;P42771;Q13105;Q9H2G4;O60477;Q00534}

14152 Pathogen[ POC214] interacts with 22 human partners:{Q9UKN5;Q13761;Q13547;P14921;Q13625;O75496;Q53EL6;O60477;Q00534;Q92769;P49848;O60356;P42574;P42771;Q96KQ4;O15379;Q9H2G4;Q9H0C8;Q7Z6K1;Q13105;P06400;O00255}

14153 Pathogen[ P03346] interacts with 23 human partners:{Q9H0C8;O15379;Q96KQ4;P06400;Q96FS4;Q9H2G4;Q7Z6K1;P42574;P42771;P14921;O00255;O60477;Q92769;P49848;Q13547;Q13761;Q13625;Q13105;O60356;Q00534;Q9UKN5;Q53EL6;O75496}

14154 Pathogen[ Q85601] interacts with 20 human partners:{O75496;P14921;Q9H0C8;P06400;Q9UKN5;Q96KQ4;Q92769;P49848;O00255;Q13625;P42771;Q53EL6;O15379;Q7Z6K1;O60356;Q13547;Q9H2G4;Q00534;Q13105;Q13761}

14155 Pathogen[ P14079] interacts with 17 human partners:{O15379;Q7Z6K1;Q13105;Q13625;O60477;Q92769;Q9H2G4;P49848;Q9H0C8;Q13761;O60356;Q9UKN5;Q96KQ4;O00255;O75496;Q53EL6;P42771}

14156 Pathogen[ P03383] interacts with 21 human partners:{Q13761;Q53EL6;Q7Z6K1;Q9H0C8;P14921;Q96KQ4;Q00534;Q13625;P06400;Q13105;Q92769;P49848;Q9UKN5;O15379;O00255;P42771;Q13547;Q9H2G4;O60477;O75496;O60356}

14157 Pathogen[ P03410] interacts with 21 human partners:{P42771;Q00534;P06400;Q96KQ4;Q9H0C8;Q92769;Q9UKN5;P49848;O15379;O60356;Q53EL6;Q13761;Q13547;O75496;Q13105;Q7Z6K1;O60477;Q13625;O00255;Q9H2G4;P14921}

14158 Pathogen[ P14075] interacts with 21 human partners:{Q13105;Q96KQ4;Q9UKN5;Q00534;P42771;Q9H2G4;Q13547;Q9H0C8;O00255;Q7Z6K1;Q92769;P49848;Q53EL6;O60356;P14921;P06400;Q13625;O60477;O15379;O75496;Q13761}

14159 Pathogen[ POC206] interacts with 22 human partners:{Q92769;O75496;P49848;P14921;Q13625;O60477;O00255;P42771;Q13547;Q96KQ4;O60356;Q9UKN5;O15379;P42574;Q53EL6;Q9H2G4;Q7Z6K1;Q13105;Q13761;Q00534;P06400;Q9H0C8}

14160 Pathogen[ P03363] interacts with 20 human partners:{Q13105;O60356;P49848;Q9UKN5;O15379;Q13625;Q7Z6K1;Q53EL6;P14921;Q96KQ4;P06400;Q00534;Q9H2G4;Q9H0C8;O60477;Q13547;O75496;Q13761;P42771;Q96FS4}

14161 [Cluster 1288]GO:2000798+P biological\_process [name] negative regulation of amniotic stem cell differentiation [def] "Any process that stops, prevents or reduces the frequency, rate or extent of amniotic stem cell differentiation." [GOC

14162 Pathogen[ Q2Q067] interacts with 1 human partners:{Q13127}

14163 Pathogen[ POC214] interacts with 1 human partners:{Q13127}

14164 Pathogen[ P03346] interacts with 1 human partners:{Q13127}  
14165 Pathogen[ Q85601] interacts with 1 human partners:{Q13127}  
14166 Pathogen[ P14079] interacts with 1 human partners:{Q13127}  
14167 Pathogen[ P03383] interacts with 1 human partners:{Q13127}  
14168 Pathogen[ P03410] interacts with 1 human partners:{Q13127}  
14169 Pathogen[ P14075] interacts with 1 human partners:{Q13127}  
14170 Pathogen[ P0C206] interacts with 1 human partners:{Q13127}  
14171 Pathogen[ P03363] interacts with 1 human partners:{Q13127}  
14172 [Cluster 1289]GO:0046788+P biological\_process [name] egress of virus within host cell [def] "The process of moving the (often) incomplete virion to the cell surface in order to be released from the cell. Egress can involve travel through the endoplasmic reticulum or cytoplasm and will often include final maturation stages of the virion, but it occurs entirely within the cell." [GOC  
14173 Pathogen[ Q2Q067] interacts with 9 human partners:{Q99816;A5D8V6;Q9UK41;Q9H9H4;P0CG47;P0CG48;P62987;Q8NEZ2;P62979}  
14174 Pathogen[ P0C214] interacts with 10 human partners:{Q9UK41;O60551;P0CG48;Q8NEZ2;P62987;Q99816;P0CG47;A5D8V6;Q9H9H4;P62979}  
14175 Pathogen[ P03346] interacts with 10 human partners:{Q86XT2;A5D8V6;P62987;P0CG48;Q8NEZ2;Q99816;Q9UK41;Q9H9H4;P62979;P0CG47}  
14176 Pathogen[ Q85601] interacts with 10 human partners:{Q99816;Q9H9H4;P0CG48;O60551;Q9UK41;P62979;P0CG47;P62987;Q8NEZ2;A5D8V6}  
14177 Pathogen[ P14079] interacts with 10 human partners:{Q9H9H4;P0CG48;Q86XT2;P62979;P62987;A5D8V6;O60551;Q8NEZ2;Q99816;P0CG47}  
14178 Pathogen[ P03383] interacts with 8 human partners:{P62987;Q8NEZ2;Q99816;Q9UK41;Q9H9H4;P62979;P0CG47;P0CG48}  
14179 Pathogen[ P03410] interacts with 10 human partners:{P0CG48;Q86XT2;Q9H9H4;O60551;P62979;A5D8V6;Q99816;Q8NEZ2;P62987;P0CG47}  
14180 Pathogen[ P14075] interacts with 8 human partners:{Q9UK41;Q8NEZ2;Q9H9H4;P0CG48;P62979;P62987;P0CG47;Q99816}  
14181 Pathogen[ P0C206] interacts with 11 human partners:{P0CG48;Q8NEZ2;Q99816;Q9UK41;Q9H9H4;A5D8V6;Q86XT2;P62979;P0CG47;O60551;P62987}  
14182 Pathogen[ P03363] interacts with 6 human partners:{Q9UK41;P62987;Q8NEZ2;Q99816;Q9H9H4;A5D8V6}  
14183 [Cluster 1290]GO:0006168+P biological\_process [name] adenine salvage [def] "Any process that generates adenine, 6-aminopurine, from derivatives of it without de novo synthesis." [GOC  
14184 Pathogen[ Q2Q067] interacts with 1 human partners:{P07741}  
14185 Pathogen[ P0C214] interacts with 1 human partners:{P07741}  
14186 Pathogen[ P03346] interacts with 1 human partners:{P07741}  
14187 Pathogen[ Q85601] interacts with 1 human partners:{P07741}  
14188 Pathogen[ P14079] interacts with 1 human partners:{P07741}  
14189 Pathogen[ P03383] interacts with 1 human partners:{P07741}  
14190 Pathogen[ P03410] interacts with 1 human partners:{P07741}  
14191 Pathogen[ P14075] interacts with 1 human partners:{P07741}  
14192 Pathogen[ P0C206] interacts with 1 human partners:{P07741}  
14193 Pathogen[ P03363] interacts with 1 human partners:{P07741}  
14194 [Cluster 1291]GO:0090084+P biological\_process [name] negative regulation of inclusion body assembly [def] "Any process that decreases the rate, frequency, or extent of inclusion body assembly. Inclusion body assembly is the aggregation, arrangement and bonding together of a set of components to form an inclusion body." [GOC  
14195 Pathogen[ Q2Q067] interacts with 2 human partners:{P08107;Q9NZJ4}  
14196 Pathogen[ P0C214] interacts with 2 human partners:{Q9NZJ4;P08107}  
14197 Pathogen[ P03346] interacts with 3 human partners:{P08107;P25686;Q9NZJ4}  
14198 Pathogen[ Q85601] interacts with 2 human partners:{P08107;Q9NZJ4}  
14199 Pathogen[ P14079] interacts with 2 human partners:{Q9NZJ4;P08107}  
14200 Pathogen[ P03383] interacts with 1 human partners:{P08107}  
14201 Pathogen[ P03410] interacts with 3 human partners:{P25686;Q9NZJ4;P08107}  
14202 Pathogen[ P14075] interacts with 1 human partners:{P08107}  
14203 Pathogen[ P0C206] interacts with 2 human partners:{Q9NZJ4;P08107}  
14204 Pathogen[ P03363] interacts with 2 human partners:{Q9NZJ4;P08107}  
14205 [Cluster 1292]GO:0045116+P biological\_process [name] protein neddylation [def] "Covalent attachment of the ubiquitin-like protein NEDD8 (RUB1) to another protein." [PMID  
14206 Pathogen[ Q2Q067] interacts with 2 human partners:{Q9UBF6;P62877}  
14207 Pathogen[ P0C214] interacts with 4 human partners:{P62877;Q969M7;P61081;Q9UBF6}  
14208 Pathogen[ P03346] interacts with 2 human partners:{P62877;Q9UBF6}  
14209 Pathogen[ Q85601] interacts with 3 human partners:{P62877;Q9UBF6;Q969M7}  
14210 Pathogen[ P14079] interacts with 3 human partners:{Q9UBF6;P62877;Q969M7}  
14211 Pathogen[ P03383] interacts with 2 human partners:{Q9UBF6;P62877}  
14212 Pathogen[ P03410] interacts with 3 human partners:{Q9UBF6;P62877;Q969M7}  
14213 Pathogen[ P14075] interacts with 2 human partners:{Q9UBF6;P62877}  
14214 Pathogen[ P0C206] interacts with 3 human partners:{P62877;Q969M7;Q9UBF6}  
14215 Pathogen[ P03363] interacts with 4 human partners:{P61081;Q9UBF6;P62877;Q969M7}  
14216 [Cluster 1293]GO:0046134+P biological\_process [name] pyrimidine nucleoside biosynthetic process [def] "The chemical reactions and pathways resulting in the

formation of one of a family of organic molecules consisting of a pyrimidine base covalently bonded to a sugar ribose (a ribonucleoside) or deoxyribose (a deoxyribonucleoside)." [GOC

14217 Pathogen[ Q2Q067] interacts with 3 human partners:{P33316;P04818;P11172}

14218 Pathogen[ P0C214] interacts with 3 human partners:{P04818;P33316;P11172}

14219 Pathogen[ P03346] interacts with 2 human partners:{P11172;P33316}

14220 Pathogen[ Q85601] interacts with 2 human partners:{P11172;P33316}

14221 Pathogen[ P14079] interacts with 3 human partners:{P11172;P33316;P04818}

14222 Pathogen[ P03383] interacts with 2 human partners:{P33316;P11172}

14223 Pathogen[ P03410] interacts with 3 human partners:{P11172;P33316;P04818}

14224 Pathogen[ P14075] interacts with 2 human partners:{P11172;P33316}

14225 Pathogen[ P0C206] interacts with 3 human partners:{P33316;P11172;P04818}

14226 Pathogen[ P03363] interacts with 2 human partners:{P33316;P11172}

14227 [Cluster 1294]GO:0030194+P biological\_process [name] positive regulation of blood coagulation [def] "Any process that activates or increases the frequency, rate or extent of blood coagulation." [GOC

14228 Pathogen[ Q2Q067] interacts with 1 human partners:{Q16236}

14229 Pathogen[ P0C214] interacts with 2 human partners:{P05121;Q16236}

14230 Pathogen[ P03346] interacts with 1 human partners:{Q16236}

14231 Pathogen[ Q85601] interacts with 2 human partners:{Q16236;P05121}

14232 Pathogen[ P14079] interacts with 1 human partners:{Q16236}

14233 Pathogen[ P03383] interacts with 1 human partners:{Q16236}

14234 Pathogen[ P03410] interacts with 2 human partners:{P05121;Q16236}

14235 Pathogen[ P14075] interacts with 1 human partners:{Q16236}

14236 Pathogen[ P0C206] interacts with 2 human partners:{P05121;Q16236}

14237 Pathogen[ P03363] interacts with 1 human partners:{Q16236}

14238 [Cluster 1295]GO:0043589+P biological\_process [name] skin morphogenesis [def] "The process in which the anatomical structures of the skin are generated and organized. The skin is the external membranous integument of an animal. In vertebrates the skin generally consists of two layers, an outer nonsensitive and nonvascular epidermis (cuticle or skarfskin) composed of cells which are constantly growing and multiplying in the deeper, and being thrown off in the superficial layers, as well as an inner, sensitive and vascular dermis (cutis, corium or true skin) composed mostly of connective tissue." [GOC

14239 Pathogen[ Q2Q067] interacts with 2 human partners:{P11831;Q9UJM3}

14240 Pathogen[ P0C214] interacts with 2 human partners:{P11831;Q9UJM3}

14241 Pathogen[ P03346] interacts with 2 human partners:{P11831;Q9UJM3}

14242 Pathogen[ Q85601] interacts with 2 human partners:{P11831;Q9UJM3}

14243 Pathogen[ P14079] interacts with 1 human partners:{Q9UJM3}

14244 Pathogen[ P03383] interacts with 2 human partners:{P11831;Q9UJM3}

14245 Pathogen[ P03410] interacts with 3 human partners:{P11831;Q15517;Q9UJM3}

14246 Pathogen[ P14075] interacts with 2 human partners:{P11831;Q9UJM3}

14247 Pathogen[ P0C206] interacts with 2 human partners:{P11831;Q9UJM3}

14248 Pathogen[ P03363] interacts with 2 human partners:{P11831;Q9UJM3}

14249 [Cluster 1296]GO:0032402+P biological\_process [name] melanosome transport [def] "The directed movement of melanosomes into, out of or within a cell, or between cells, by means of some agent such as a transporter or pore." [GOC

14250 Pathogen[ Q2Q067] interacts with 3 human partners:{Q9UL45;Q6QNY0;Q8TDH9}

14251 Pathogen[ P0C214] interacts with 3 human partners:{Q8TDH9;Q6QNY0;Q9UL45}

14252 Pathogen[ P03346] interacts with 3 human partners:{Q6QNY0;Q9UL45;Q8TDH9}

14253 Pathogen[ Q85601] interacts with 2 human partners:{Q6QNY0;Q8TDH9}

14254 Pathogen[ P14079] interacts with 5 human partners:{Q6QNY0;Q8N3I7;Q8IWZ6;Q9UL45;Q8TDH9}

14255 Pathogen[ P03383] interacts with 2 human partners:{Q6QNY0;Q8TDH9}

14256 Pathogen[ P03410] interacts with 5 human partners:{Q6QNY0;Q9UL45;Q8N3I7;Q8IWZ6;Q8TDH9}

14257 Pathogen[ P14075] interacts with 2 human partners:{Q6QNY0;Q8TDH9}

14258 Pathogen[ P0C206] interacts with 4 human partners:{Q9UL45;Q8TDH9;Q8N3I7;Q6QNY0}

14259 Pathogen[ P03363] interacts with 2 human partners:{Q8TDH9;Q6QNY0}

14260 [Cluster 1297]GO:0043923+P biological\_process [name] positive regulation by host of viral transcription [def] "Any process is which a host organism activates or increases the frequency, rate or extent of viral transcription, the synthesis of either RNA on a template of DNA or DNA on a template of RNA." [GOC

14261 Pathogen[ Q2Q067] interacts with 6 human partners:{Q01664;P08047;Q15544;P51532;Q9UID6;Q12824}

14262 Pathogen[ P0C214] interacts with 7 human partners:{Q9UID6;Q12824;Q15544;P05412;Q01664;P08047;P51532}

14263 Pathogen[ P03346] interacts with 7 human partners:{P05412;P51532;Q12824;P08047;Q9UID6;Q01664;Q15544}

14264 Pathogen[ Q85601] interacts with 7 human partners:{Q9UID6;P08047;P51532;P05412;Q12824;Q01664;Q15544}

14265 Pathogen[ P14079] interacts with 5 human partners:{P51532;Q9UID6;Q01664;Q12824;P05412}

14266 Pathogen[ P03383] interacts with 7 human partners:{P08047;Q15544;Q12824;Q01664;Q9UID6;P51532;P05412}

14267 Pathogen[ P03410] interacts with 7 human

14268 partners:{P51532;P05412;Q15544;Q01664;P08047;Q9UID6;Q12824}  
Pathogen[ P14075] interacts with 7 human

14269 partners:{P05412;P51532;Q9UID6;Q15544;Q01664;Q12824;P08047}  
Pathogen[ POC206] interacts with 7 human

14270 partners:{Q9UID6;P51532;Q15544;P05412;Q12824;P08047;Q01664}  
Pathogen[ P03363] interacts with 7 human

14271 partners:{P51532;Q15544;P05412;P08047;Q9UID6;Q01664;Q12824}  
[Cluster 1298]GO:0048840+P biological\_process [name] otolith development [def] "The process whose specific outcome is the progression of the otolith over time, from its formation to the mature structure." [GOC

14272 Pathogen[ Q2Q067] interacts with 1 human partners:{Q9H1Y0}  
14273 Pathogen[ POC214] interacts with 1 human partners:{Q9H1Y0}  
14274 Pathogen[ P03346] interacts with 1 human partners:{Q9H1Y0}  
14275 Pathogen[ Q85601] interacts with 1 human partners:{Q9H1Y0}  
14276 Pathogen[ P14079] interacts with 1 human partners:{Q9H1Y0}  
14277 Pathogen[ P03383] interacts with 1 human partners:{Q9H1Y0}  
14278 Pathogen[ P03410] interacts with 1 human partners:{Q9H1Y0}  
14279 Pathogen[ P14075] interacts with 1 human partners:{Q9H1Y0}  
14280 Pathogen[ POC206] interacts with 1 human partners:{Q9H1Y0}  
14281 Pathogen[ P03363] interacts with 1 human partners:{Q9H1Y0}

14282 [Cluster 1299]GO:0043254+P biological\_process [name] regulation of protein complex assembly [def] "Any process that modulates the frequency, rate or extent of protein complex assembly." [GOC

14283 Pathogen[ Q2Q067] interacts with 2 human partners:{P51610;Q8NCD3}  
14284 Pathogen[ POC214] interacts with 2 human partners:{P51610;Q8NCD3}  
14285 Pathogen[ P03346] interacts with 2 human partners:{P51610;Q8NCD3}  
14286 Pathogen[ Q85601] interacts with 2 human partners:{P51610;Q8NCD3}  
14287 Pathogen[ P14079] interacts with 2 human partners:{P51610;Q8NCD3}  
14288 Pathogen[ P03383] interacts with 2 human partners:{P51610;Q8NCD3}  
14289 Pathogen[ P03410] interacts with 2 human partners:{P51610;Q8NCD3}  
14290 Pathogen[ P14075] interacts with 2 human partners:{P51610;Q8NCD3}  
14291 Pathogen[ POC206] interacts with 2 human partners:{Q8NCD3;P51610}  
14292 Pathogen[ P03363] interacts with 2 human partners:{Q8NCD3;P51610}

14293 [Cluster 1300]GO:0003181+P biological\_process [name] atrioventricular valve morphogenesis [def] "The process in which the structure of the atrioventricular valve is generated and organized." [GOC

14294 Pathogen[ Q2Q067] interacts with 2 human partners:{Q9NQ87;Q8IX07}  
14295 Pathogen[ POC214] interacts with 2 human partners:{Q8IX07;Q9NQ87}  
14296 Pathogen[ P03346] interacts with 3 human partners:{Q9NQ87;Q8IX07;Q99593}  
14297 Pathogen[ Q85601] interacts with 2 human partners:{Q9NQ87;Q8IX07}  
14298 Pathogen[ P14079] interacts with 2 human partners:{Q8IX07;Q9NQ87}  
14299 Pathogen[ P03383] interacts with 1 human partners:{Q9NQ87}  
14300 Pathogen[ P03410] interacts with 2 human partners:{Q9NQ87;Q8IX07}  
14301 Pathogen[ P14075] interacts with 1 human partners:{Q9NQ87}  
14302 Pathogen[ POC206] interacts with 2 human partners:{Q9NQ87;Q8IX07}  
14303 Pathogen[ P03363] interacts with 1 human partners:{Q9NQ87}

14304 [Cluster 1301]GO:0070389+P biological\_process [name] chaperone cofactor-dependent protein refolding [def] "The process of assisting in the restoration of the biological activity of an unfolded or misfolded protein, which is dependent on additional protein cofactors. This process occurs over one or several cycles of nucleotide hydrolysis-dependent binding and release." [GOC

14305 Pathogen[ Q2Q067] interacts with 5 human  
partners:{P50502;Q99933;Q99615;Q15185;P25685}

14306 Pathogen[ POC214] interacts with 5 human  
partners:{Q99615;Q99933;Q15185;P50502;P25685}

14307 Pathogen[ P03346] interacts with 5 human  
partners:{Q99615;P25685;P50502;Q15185;Q99933}

14308 Pathogen[ Q85601] interacts with 5 human  
partners:{P25685;Q99933;Q99615;Q15185;P50502}

14309 Pathogen[ P14079] interacts with 5 human  
partners:{P25685;Q99933;Q15185;Q99615;P50502}

14310 Pathogen[ P03383] interacts with 4 human partners:{P50502;Q99615;Q15185;Q99933}  
14311 Pathogen[ P03410] interacts with 5 human  
partners:{Q99933;P50502;P25685;Q99615;Q15185}

14312 Pathogen[ P14075] interacts with 4 human partners:{Q99933;Q99615;Q15185;P50502}  
14313 Pathogen[ POC206] interacts with 5 human  
partners:{Q99933;Q99615;Q15185;P50502;P25685}

14314 Pathogen[ P03363] interacts with 5 human  
partners:{Q99615;P50502;Q15185;P25685;Q99933}

14315 [Cluster 1302]GO:0048008+P biological\_process [name] platelet-derived growth factor receptor signaling pathway [def] "The series of molecular signals generated as a consequence of a platelet-derived growth factor receptor binding to one of its physiological ligands." [GOC

14316 Pathogen[ Q2Q067] interacts with 5 human  
partners:{Q96S65;O14786;P56945;Q14865;Q9H3M7}

14317 Pathogen[ POC214] interacts with 5 human

14318 partners:{Q96S65;O14786;Q14865;P56945;Q9H3M7}  
Pathogen[ P03346] interacts with 6 human

14319 partners:{Q96S65;P56945;Q14865;Q9HB21;Q9H3M7;O14786}  
Pathogen[ Q85601] interacts with 6 human

14320 partners:{Q96S65;O14786;P56945;Q9HB21;Q14865;Q9H3M7}  
Pathogen[ P14079] interacts with 4 human partners:{Q14865;Q96S65;Q9HB21;Q9H3M7}

14321 Pathogen[ P03383] interacts with 3 human partners:{P56945;Q96S65;Q9H3M7}

14322 Pathogen[ P03410] interacts with 6 human  
partners:{O14786;Q9H3M7;Q9HB21;Q96S65;P56945;Q14865}

14323 Pathogen[ P14075] interacts with 3 human partners:{Q96S65;Q9H3M7;P56945}

14324 Pathogen[ P0C206] interacts with 6 human  
partners:{Q96S65;O14786;Q9HB21;Q9H3M7;P56945;Q14865}

14325 Pathogen[ P03363] interacts with 6 human  
partners:{Q96S65;Q14865;O14786;Q9H3M7;Q13480;P56945}

14326 [Cluster 1303]GO:0045792+P biological\_process [name] negative regulation of cell size  
[def] "Any process that reduces cell size." [GOC  
14327 Pathogen[ Q2Q067] interacts with 2 human partners:{P31749;Q96B36}  
14328 Pathogen[ P0C214] interacts with 2 human partners:{Q96B36;P31749}  
14329 Pathogen[ P03346] interacts with 3 human partners:{Q96B36;P31749;Q8TB45}  
14330 Pathogen[ Q85601] interacts with 2 human partners:{P31749;Q96B36}  
14331 Pathogen[ P14079] interacts with 2 human partners:{Q8TB45;Q96B36}  
14332 Pathogen[ P03383] interacts with 2 human partners:{P31749;Q96B36}  
14333 Pathogen[ P03410] interacts with 3 human partners:{P31749;Q96B36;Q8TB45}  
14334 Pathogen[ P14075] interacts with 2 human partners:{Q96B36;P31749}  
14335 Pathogen[ P0C206] interacts with 2 human partners:{P31749;Q96B36}  
14336 Pathogen[ P03363] interacts with 3 human partners:{Q96B36;Q8TB45;P31749}

14337 [Cluster 1304]GO:0000077+P biological\_process [name] DNA damage checkpoint [def] "A  
cell cycle checkpoint that regulates progression through the cell cycle in response to  
DNA damage. A DNA damage checkpoint may blocks cell cycle progression (in G1, G2 or  
metaphase) or slow the rate at which S phase proceeds." [GOC  
14338 Pathogen[ Q2Q067] interacts with 19 human  
partners:{Q9NVH2;O75663;Q99638;Q01094;O14757;Q13156;Q9BSD3;O60934;O96017;Q8WXE1;Q96M  
T8;Q6WBX8;O75943;Q9BVW5;Q9BQA5;Q9NRD1;Q9HAW4;O60671;O60921}

14339 Pathogen[ P0C214] interacts with 18 human  
partners:{Q9NVH2;O75663;Q13156;Q8WXE1;Q9BVW5;Q96MT8;Q6WBX8;Q9NRD1;Q9HAW4;O60921;Q010  
94;O96017;O75943;Q9BSD3;O60671;Q9BQA5;O14757;Q99638}

14340 Pathogen[ P03346] interacts with 21 human  
partners:{O60921;O96017;Q9BSD3;Q6WBX8;Q13156;O14757;Q99638;O00409;Q01094;O75943;Q9NV  
H2;Q9HAW4;O75663;Q8WXE1;Q9NRD1;O60934;O60671;O15516;Q9BVW5;Q96MT8;Q9BQA5}

14341 Pathogen[ Q85601] interacts with 18 human  
partners:{O96017;Q8WXE1;O15516;O14757;O75943;Q9HAW4;Q96MT8;O60921;O75663;Q9BQA5;O606  
71;Q13156;Q6WBX8;Q99638;Q01094;Q9BVW5;O60934;Q9NRD1}

14342 Pathogen[ P14079] interacts with 16 human  
partners:{O60671;O75663;Q6WBX8;Q8WXE1;Q9NVH2;O60934;Q9BSD3;Q9BQA5;Q13156;Q9HAW4;O759  
43;Q99638;Q9NRD1;Q01094;O60921;Q9BVW5}

14343 Pathogen[ P03383] interacts with 17 human  
partners:{O14757;O60671;Q9BVW5;Q8WXE1;Q01094;Q96MT8;O75663;O60921;Q6WBX8;Q9HAW4;Q9BQ  
A5;Q99638;Q9BSD3;Q13156;Q9NRD1;Q9NVH2;O96017}

14344 Pathogen[ P03410] interacts with 18 human  
partners:{O75663;Q9NRD1;O75943;Q9BSD3;Q9BQA5;Q9BVW5;Q6WBX8;Q8WXE1;Q9HAW4;Q99638;Q131  
56;O96017;O14757;O60671;O60921;Q9NVH2;Q01094;O60934}

14345 Pathogen[ P14075] interacts with 17 human  
partners:{Q96MT8;Q8WXE1;Q9BQA5;O60671;Q9BVW5;Q99638;Q13156;Q9HAW4;O96017;Q9NVH2;O756  
63;Q01094;O60921;Q9NRD1;Q9BSD3;Q6WBX8;O14757}

14346 Pathogen[ P0C206] interacts with 20 human  
partners:{Q8WXE1;O96017;Q13156;O60934;Q6WBX8;Q9NVH2;Q9BQA5;O75943;Q99638;Q9NRD1;O756  
63;O15516;Q9BVW5;Q01094;O60921;O60671;Q96MT8;Q9HAW4;Q9BX63;Q9BSD3}

14347 Pathogen[ P03363] interacts with 20 human  
partners:{Q9BSD3;Q9BX63;Q9HAW4;Q96MT8;O60671;O00409;O96017;O75663;Q13156;Q9BVW5;Q010  
94;Q9BQA5;Q6WBX8;Q9NVH2;Q99638;O60921;O75943;Q9NRD1;Q8WXE1;O14757}

14348 [Cluster 1305]GO:0034508+P biological\_process [name] centromere complex assembly  
[def] "The aggregation, arrangement and bonding together of proteins and centromeric DNA  
molecules to form a centromeric protein-DNA complex. Includes the formation of the  
chromatin structures which form a platform for the kinetochore, and assembly of the  
kinetochore onto this specialized chromatin. In fission yeast and higher eukaryotes this  
process also includes the formation of heterochromatin at the outer repeat (pericentric)  
regions of the centromere." [GOC  
14349 Pathogen[ Q2Q067] interacts with 1 human partners:{Q7Z7K6}  
14350 Pathogen[ P0C214] interacts with 1 human partners:{Q7Z7K6}  
14351 Pathogen[ P03346] interacts with 1 human partners:{Q7Z7K6}  
14352 Pathogen[ Q85601] interacts with 1 human partners:{Q7Z7K6}  
14353 Pathogen[ P14079] interacts with 1 human partners:{Q7Z7K6}  
14354 Pathogen[ P03383] interacts with 1 human partners:{Q7Z7K6}  
14355 Pathogen[ P03410] interacts with 1 human partners:{Q7Z7K6}  
14356 Pathogen[ P14075] interacts with 1 human partners:{Q7Z7K6}  
14357 Pathogen[ P0C206] interacts with 1 human partners:{Q7Z7K6}

14358 Pathogen[ P03363] interacts with 1 human partners:{Q7Z7K6}

14359 [Cluster 1306]GO:0015669+P biological\_process [name] gas transport [def] "The directed movement of substances that are gaseous in normal living conditions into, out of or within a cell, or between cells, by means of some agent such as a transporter or pore." [GOC

14360 Pathogen[ Q2Q067] interacts with 1 human partners:{P39019}

14361 Pathogen[ P0C214] interacts with 1 human partners:{P39019}

14362 Pathogen[ P03346] interacts with 1 human partners:{P39019}

14363 Pathogen[ Q85601] interacts with 1 human partners:{P39019}

14364 Pathogen[ P14079] interacts with 1 human partners:{P39019}

14365 Pathogen[ P03383] interacts with 1 human partners:{P39019}

14366 Pathogen[ P03410] interacts with 1 human partners:{P39019}

14367 Pathogen[ P14075] interacts with 1 human partners:{P39019}

14368 Pathogen[ P0C206] interacts with 1 human partners:{P39019}

14369 Pathogen[ P03363] interacts with 1 human partners:{P39019}

14370 [Cluster 1307]GO:000296+P biological\_process [name] spermine transport [def] "The directed movement of spermine, N,N-bis(3-aminopropyl)-1,4-diaminobutane, a polyamine formed by the transfer of a propylamine group from decarboxylated S-adenosylmethionine to spermidine, into, out of or within a cell, or between cells, by means of some agent such as a transporter or pore." [GOC

14371 Pathogen[ Q2Q067] interacts with 1 human partners:{Q15545}

14372 Pathogen[ P0C214] interacts with 1 human partners:{Q15545}

14373 Pathogen[ P03346] interacts with 1 human partners:{Q15545}

14374 Pathogen[ Q85601] interacts with 1 human partners:{Q15545}

14375 Pathogen[ P14079] interacts with 1 human partners:{Q15545}

14376 Pathogen[ P03383] interacts with 1 human partners:{Q15545}

14377 Pathogen[ P03410] interacts with 1 human partners:{Q15545}

14378 Pathogen[ P14075] interacts with 1 human partners:{Q15545}

14379 Pathogen[ P0C206] interacts with 1 human partners:{Q15545}

14380 Pathogen[ P03363] interacts with 1 human partners:{Q15545}

14381 [Cluster 1308]GO:0010890+P biological\_process [name]positive regulation of sequestering of triglyceride [def] "Any process that increases the rate, frequency or extent of sequestering of triglyceride. Triglyceride sequestration is the process of binding or confining any triester of glycerol such that it is separated from other components of a biological system." [GOC

14382 Pathogen[ Q2Q067] interacts with 1 human partners:{O60543}

14383 Pathogen[ P0C214] interacts with 1 human partners:{O60543}

14384 Pathogen[ P03346] interacts with 1 human partners:{O60543}

14385 Pathogen[ Q85601] interacts with 1 human partners:{O60543}

14386 Pathogen[ P14079] interacts with 3 human partners:{Q8N6M3;O60543;A5D6W6}

14387 Pathogen[ P03383] interacts with 1 human partners:{O60543}

14388 Pathogen[ P03410] interacts with 3 human partners:{A5D6W6;Q8N6M3;O60543}

14389 Pathogen[ P14075] interacts with 2 human partners:{O60543;Q8N6M3}

14390 Pathogen[ P0C206] interacts with 3 human partners:{A5D6W6;Q8N6M3;O60543}

14391 Pathogen[ P03363] interacts with 1 human partners:{O60543}

14392 [Cluster 1309]GO:0051402+P biological\_process [name] neuron apoptosis [def] "The process of apoptosis in neurons, the basic cellular unit of nervous tissue. Each neuron consists of a body, an axon, and dendrites. Their purpose is to receive, conduct, and transmit impulses in the nervous system." [MeSH

14393 Pathogen[ Q2Q067] interacts with 9 human partners:{P55957;P06400;P54259;P04406;P61244;Q12983;Q9C000;O95831;Q96A26}

14394 Pathogen[ P0C214] interacts with 9 human partners:{P61244;P55957;P42574;Q12983;O14727;P04406;P06400;P54259;Q9C000}

14395 Pathogen[ P03346] interacts with 14 human partners:{P04406;P06400;P55957;Q96A26;P42574;Q12983;Q6ZPB5;Q8IUQ4;O95831;P61244;O14727;P54259;Q9C000;Q15319}

14396 Pathogen[ Q85601] interacts with 7 human partners:{P54259;O95831;P06400;P55957;P61244;Q12983;P04406}

14397 Pathogen[ P14079] interacts with 11 human partners:{Q6ZPB5;Q9C000;Q969N2;O95831;Q12983;Q96A26;P54259;P61244;P49917;P55957;P04406}

14398 Pathogen[ P03383] interacts with 9 human partners:{P55957;O95831;Q96A26;Q12983;P06400;Q6ZPB5;P04406;P61244;P54259}

14399 Pathogen[ P03410] interacts with 11 human partners:{Q12983;Q9C000;P06400;P61244;P55957;Q96A26;O95831;P04406;Q6ZPB5;Q969N2;P54259}

14400 Pathogen[ P14075] interacts with 9 human partners:{Q12983;P55957;Q96A26;P61244;P04406;O95831;P06400;Q6ZPB5;P54259}

14401 Pathogen[ P0C206] interacts with 13 human partners:{Q9C000;Q8IUQ4;Q96A26;P54259;Q12983;P49917;O95831;P04406;P42574;P61244;Q6ZPB5;P55957;P06400}

14402 Pathogen[ P03363] interacts with 9 human partners:{P55957;Q9C000;P54259;P06400;P61244;P04406;Q6ZPB5;O95831;Q15319}

14403 [Cluster 1310]GO:0042723+P biological\_process [name] thiamine-containing compound metabolic process [def] "The chemical reactions and pathways involving thiamine (vitamin B1), and compounds derived from it." [CHEBI

14404 Pathogen[ Q2Q067] interacts with 1 human partners:{Q9BU02}

14405 Pathogen[ POC214] interacts with 1 human partners:{Q9BU02}

14406 Pathogen[ P03346] interacts with 1 human partners:{Q9BU02}

14407 Pathogen[ Q85601] interacts with 1 human partners:{Q9BU02}

14408 Pathogen[ P14079] interacts with 1 human partners:{Q9BU02}

14409 Pathogen[ P03383] interacts with 1 human partners:{Q9BU02}

14410 Pathogen[ P03410] interacts with 1 human partners:{Q9BU02}

14411 Pathogen[ P14075] interacts with 1 human partners:{Q9BU02}

14412 Pathogen[ POC206] interacts with 1 human partners:{Q9BU02}

14413 Pathogen[ P03363] interacts with 1 human partners:{Q9BU02}

14414 [Cluster 1311]GO:0043392+P biological\_process [name] negative regulation of DNA binding [def] "Any process that stops or reduces the frequency, rate or extent of DNA binding. DNA binding is any process in which a gene product interacts selectively with DNA (deoxyribonucleic acid)." [GOC

14415 Pathogen[ Q2Q067] interacts with 13 human partners:{Q16666;Q01664;O00712;P41134;P63165;Q99750;Q9NSA3;Q8WVJ9;Q96T23;P25963;O95271;Q5JVS0;P23497}

14416 Pathogen[ POC214] interacts with 14 human partners:{Q5JVS0;Q16666;Q99750;Q9NSA3;O00712;P41134;P63165;P25963;P23497;P05412;Q8WVJ9;Q96T23;O95271;Q01664}

14417 Pathogen[ P03346] interacts with 15 human partners:{P05412;Q16666;P25963;O00712;Q96JM2;Q9NSA3;P41134;P63165;Q8WVJ9;Q99750;Q96T23;Q5JVS0;O95271;P23497;Q01664}

14418 Pathogen[ Q85601] interacts with 15 human partners:{Q16666;P41134;Q5JVS0;Q96JM2;Q96T23;Q99750;P05412;P63165;O00712;O95271;Q9NSA3;Q01664;P51955;Q8WVJ9;P25963}

14419 Pathogen[ P14079] interacts with 15 human partners:{Q5JVS0;Q96T23;O95271;Q8WVJ9;P63165;Q96JM2;P23497;P51955;Q01664;P41134;P05412;P28360;Q16666;Q99750;O00712}

14420 Pathogen[ P03383] interacts with 13 human partners:{Q5JVS0;Q8WVJ9;O00712;Q96T23;Q01664;Q9NSA3;P63165;Q16666;P25963;P23497;Q99750;O95271;P05412}

14421 Pathogen[ P03410] interacts with 14 human partners:{Q16666;Q96T23;Q8WVJ9;Q9NSA3;P63165;Q96JM2;P41134;O00712;O95271;Q5JVS0;P05412;Q01664;P25963;Q99750}

14422 Pathogen[ P14075] interacts with 13 human partners:{P63165;P23497;P05412;Q16666;P25963;Q8WVJ9;Q01664;Q9NSA3;Q5JVS0;Q99750;Q96T23;O00712;O95271}

14423 Pathogen[ POC206] interacts with 15 human partners:{O95271;Q9NSA3;P51955;P05412;P25963;Q16666;Q96T23;Q8WVJ9;P41134;O00712;Q5JVS0;Q01664;P63165;Q99750;Q96JM2}

14424 Pathogen[ P03363] interacts with 15 human partners:{O00712;P25963;Q99750;P23497;Q16666;Q96T23;Q96JM2;Q9NSA3;P63165;Q5JVS0;P41134;O95271;P05412;Q01664;Q8WVJ9}

14425 [Cluster 1312]GO:0060164+P biological\_process [name] regulation of timing of neuron differentiation [def] "The process controlling the activation and/or rate at which a relatively unspecialized cell acquires features of a neuron." [GOC

14426 Pathogen[ Q2Q067] interacts with 2 human partners:{Q5TGS1;P35711}

14427 Pathogen[ POC214] interacts with 2 human partners:{P35711;Q5TGS1}

14428 Pathogen[ P03346] interacts with 2 human partners:{Q5TGS1;P35711}

14429 Pathogen[ Q85601] interacts with 2 human partners:{Q5TGS1;P35711}

14430 Pathogen[ P14079] interacts with 2 human partners:{P35711;Q5TGS1}

14431 Pathogen[ P03383] interacts with 2 human partners:{P35711;Q5TGS1}

14432 Pathogen[ P03410] interacts with 1 human partners:{Q5TGS1}

14433 Pathogen[ P14075] interacts with 2 human partners:{Q5TGS1;P35711}

14434 Pathogen[ POC206] interacts with 2 human partners:{Q5TGS1;P35711}

14435 Pathogen[ P03363] interacts with 2 human partners:{Q5TGS1;P35711}

14436 [Cluster 1313]GO:0045132+P biological\_process [name] meiotic chromosome segregation [def] "The process in which genetic material, in the form of chromosomes, is organized into specific structures and then physically separated and apportioned to two or more sets during M phase of the meiotic cell cycle." [GOC

14437 Pathogen[ Q2Q067] interacts with 1 human partners:{Q5FBB7}

14438 Pathogen[ POC214] interacts with 2 human partners:{Q5FBB7;P40692}

14439 Pathogen[ P03346] interacts with 1 human partners:{Q5FBB7}

14440 Pathogen[ Q85601] interacts with 2 human partners:{P40692;Q5FBB7}

14441 Pathogen[ P14079] interacts with 2 human partners:{P40692;Q5FBB7}

14442 Pathogen[ P03383] interacts with 1 human partners:{Q5FBB7}

14443 Pathogen[ P03410] interacts with 2 human partners:{P40692;Q5FBB7}

14444 Pathogen[ P14075] interacts with 1 human partners:{Q5FBB7}

14445 Pathogen[ POC206] interacts with 2 human partners:{P40692;Q5FBB7}

14446 Pathogen[ P03363] interacts with 1 human partners:{Q5FBB7}

14447 [Cluster 1314]GO:0021979+P biological\_process [name] hypothalamus cell differentiation [def] "The differentiation of cells that will contribute to the structure and function of the hypothalamus." [GO\_REF

14448 Pathogen[ Q2Q067] interacts with 2 human partners:{P20265;O75360}

14449 Pathogen[ POC214] interacts with 2 human partners:{P20265;O75360}

14450 Pathogen[ P03346] interacts with 3 human partners:{P20265;Q5XKR4;O75360}  
14451 Pathogen[ Q85601] interacts with 2 human partners:{O75360;P20265}  
14452 Pathogen[ P14079] interacts with 2 human partners:{P20265;O75360}  
14453 Pathogen[ P03383] interacts with 2 human partners:{O75360;P20265}  
14454 Pathogen[ P03410] interacts with 2 human partners:{O75360;P20265}  
14455 Pathogen[ P14075] interacts with 2 human partners:{P20265;O75360}  
14456 Pathogen[ P0C206] interacts with 2 human partners:{O75360;P20265}  
14457 Pathogen[ P03363] interacts with 3 human partners:{O75360;P20265;Q5XKR4}  
14458 [Cluster 1315]GO:0010744+P biological\_process [name] positive regulation of macrophage derived foam cell differentiation [def] "Any process that increases the rate, frequency or extent of macrophage derived foam cell differentiation. Macrophage derived foam cell differentiation is the process in which a macrophage acquires the specialized features of a foam cell. A foam cell is a type of cell containing lipids in small vacuoles and typically seen in atherosclerotic lesions, as well as other conditions." [GOC  
14459 Pathogen[ Q2Q067] interacts with 2 human partners:{P19838;P45984}  
14460 Pathogen[ P0C214] interacts with 2 human partners:{P19838;P45984}  
14461 Pathogen[ P03346] interacts with 2 human partners:{P45984;P19838}  
14462 Pathogen[ Q85601] interacts with 2 human partners:{P45984;P19838}  
14463 Pathogen[ P14079] interacts with 2 human partners:{P45984;P04141}  
14464 Pathogen[ P03383] interacts with 2 human partners:{P45984;P19838}  
14465 Pathogen[ P03410] interacts with 3 human partners:{P04141;P19838;P45984}  
14466 Pathogen[ P14075] interacts with 2 human partners:{P19838;P45984}  
14467 Pathogen[ P0C206] interacts with 2 human partners:{P45984;P19838}  
14468 Pathogen[ P03363] interacts with 1 human partners:{P19838}  
14469 [Cluster 1316]GO:0051571+P biological\_process [name] positive regulation of histone H3-K4 methylation [def] "Any process that activates or increases the frequency, rate or extent of the covalent addition of a methyl group to the lysine at position 4 of histone H3." [GOC  
14470 Pathogen[ Q2Q067] interacts with 7 human partners:{Q6ZW49;Q6PD62;Q9GZS3;Q9UBC3;P26358;Q92541;P10242}  
14471 Pathogen[ P0C214] interacts with 6 human partners:{Q92541;Q6ZW49;P26358;P10242;Q6PD62;Q9GZS3}  
14472 Pathogen[ P03346] interacts with 7 human partners:{Q6PD62;Q9UBC3;P26358;P10242;Q92541;Q9GZS3;Q6ZW49}  
14473 Pathogen[ Q85601] interacts with 7 human partners:{Q6PD62;P10242;P26358;Q9GZS3;Q92541;Q6ZW49;Q9UBC3}  
14474 Pathogen[ P14079] interacts with 7 human partners:{Q92541;Q9GZS3;Q6PD62;Q9UBC3;Q6ZW49;P26358;P10242}  
14475 Pathogen[ P03383] interacts with 6 human partners:{Q6PD62;Q6ZW49;P10242;Q92541;Q9GZS3;P26358}  
14476 Pathogen[ P03410] interacts with 7 human partners:{Q6PD62;P10242;Q92541;Q9GZS3;P26358;Q9UBC3;Q6ZW49}  
14477 Pathogen[ P14075] interacts with 6 human partners:{Q6ZW49;P10242;P26358;Q92541;Q6PD62;Q9GZS3}  
14478 Pathogen[ P0C206] interacts with 7 human partners:{Q6PD62;Q6ZW49;P10242;P26358;Q92541;Q9GZS3;Q9UBC3}  
14479 Pathogen[ P03363] interacts with 7 human partners:{Q9GZS3;P26358;P10242;Q92541;Q6ZW49;Q9UBC3;Q6PD62}  
14480 [Cluster 1317]GO:0036265+P  
14481 Pathogen[ Q2Q067] interacts with 3 human partners:{Q9UBP6;O43148;P57081}  
14482 Pathogen[ P0C214] interacts with 3 human partners:{O43148;P57081;Q9UBP6}  
14483 Pathogen[ P03346] interacts with 3 human partners:{O43148;Q9UBP6;P57081}  
14484 Pathogen[ Q85601] interacts with 3 human partners:{O43148;Q9UBP6;P57081}  
14485 Pathogen[ P14079] interacts with 2 human partners:{P57081;O43148}  
14486 Pathogen[ P03383] interacts with 3 human partners:{O43148;Q9UBP6;P57081}  
14487 Pathogen[ P03410] interacts with 3 human partners:{Q9UBP6;P57081;O43148}  
14488 Pathogen[ P14075] interacts with 3 human partners:{P57081;Q9UBP6;O43148}  
14489 Pathogen[ P0C206] interacts with 3 human partners:{Q9UBP6;P57081;O43148}  
14490 Pathogen[ P03363] interacts with 3 human partners:{Q9UBP6;P57081;O43148}  
14491 [Cluster 1318]GO:0032024+P biological\_process [name] positive regulation of insulin secretion [def] "Any process that activates or increases the frequency, rate or extent of the regulated release of insulin." [GOC  
14492 Pathogen[ Q2Q067] interacts with 3 human partners:{O00233;Q8NFW9;Q15466}  
14493 Pathogen[ P0C214] interacts with 5 human partners:{Q8NFW9;Q92934;O60825;O00233;Q15466}  
14494 Pathogen[ P03346] interacts with 5 human partners:{Q06945;Q15466;P78426;O00233;Q8NFW9}  
14495 Pathogen[ Q85601] interacts with 4 human partners:{Q8NFW9;Q15466;O60825;O00233}  
14496 Pathogen[ P14079] interacts with 8 human partners:{Q16517;P20396;O00233;Q8NFW9;Q92934;Q9Y6X1;O60502;Q15466}  
14497 Pathogen[ P03383] interacts with 2 human partners:{O00233;Q15466}  
14498 Pathogen[ P03410] interacts with 8 human partners:{Q16517;O60502;O00233;Q92934;Q8NFW9;Q9Y6X1;Q15466;P20396}  
14499 Pathogen[ P14075] interacts with 2 human partners:{O00233;Q15466}  
14500 Pathogen[ P0C206] interacts with 6 human



partners:{Q15466;Q8NFW9;Q92934;O60825;P20396;O00233}

14501 Pathogen[ P03363] interacts with 2 human partners:{Q15466;Q8NFW9}

14502 [Cluster 1319]GO:0007567+P biological\_process [name] parturition [def] "The reproductive process in which the parent is separated from its offspring either by giving birth to live young or by laying eggs." [ISBN

14503 Pathogen[ Q2Q067] interacts with 1 human partners:{Q9ULX9}

14504 Pathogen[ P0C214] interacts with 1 human partners:{Q9ULX9}

14505 Pathogen[ P03346] interacts with 1 human partners:{Q9ULX9}

14506 Pathogen[ Q85601] interacts with 1 human partners:{Q9ULX9}

14507 Pathogen[ P14079] interacts with 1 human partners:{Q9ULX9}

14508 Pathogen[ P03383] interacts with 1 human partners:{Q9ULX9}

14509 Pathogen[ P03410] interacts with 1 human partners:{Q9ULX9}

14510 Pathogen[ P14075] interacts with 1 human partners:{Q9ULX9}

14511 Pathogen[ P0C206] interacts with 1 human partners:{Q9ULX9}

14512 Pathogen[ P03363] interacts with 1 human partners:{Q9ULX9}

14513 [Cluster 1320]GO:0001570+P biological\_process [name] vasculogenesis [def] "The differentiation of endothelial cells from progenitor cells during blood vessel development, and the de novo formation of blood vessels and tubes." [PMID

14514 Pathogen[ Q2Q067] interacts with 13 human partners:{Q6ZW49;Q8WW38;P46937;Q15562;Q92990;Q08050;Q99966;Q9BSQ5;Q8WUI4;Q9Y5J3;Q9HBD4;Q07352;Q14999}

14515 Pathogen[ P0C214] interacts with 14 human partners:{Q9UGM6;Q9BSQ5;P17275;Q9HBD4;Q9Y5J3;P46937;Q14999;Q6ZW49;Q07352;Q99966;Q8WW38;P19429;Q8WUI4;Q15562}

14516 Pathogen[ P03346] interacts with 18 human partners:{P31271;Q15562;P46937;Q9HBD4;Q99966;Q96PU8;Q8WW38;Q92990;P17275;Q9BYW2;Q08050;Q9Y5J3;Q8WUI4;Q07352;P35713;Q14999;Q6ZW49;Q9BSQ5}

14517 Pathogen[ Q85601] interacts with 14 human partners:{Q8WW38;Q99966;Q07352;Q15562;Q6ZW49;Q9HBD4;P31271;Q14999;P46937;Q08050;Q8WUI4;Q9BSQ5;P17275;Q9Y5J3}

14518 Pathogen[ P14079] interacts with 16 human partners:{P19429;Q8WUI4;Q99966;O60895;P46937;P31271;Q92990;Q9BSQ5;Q9Y5J3;P17275;Q6ZW49;Q9UGM6;Q15562;Q14999;Q8WW38;Q07352}

14519 Pathogen[ P03383] interacts with 11 human partners:{Q9HBD4;Q15562;Q8WW38;Q07352;Q6ZW49;Q92990;Q8WUI4;P17275;P46937;Q14999;Q9BSQ5}

14520 Pathogen[ P03410] interacts with 15 human partners:{Q9Y5J3;O60895;P19429;Q8WW38;Q8WUI4;P17275;Q92990;P46937;Q9UGM6;Q9HBD4;Q15562;Q6ZW49;Q07352;Q9BSQ5;Q99966}

14521 Pathogen[ P14075] interacts with 12 human partners:{Q92990;Q9HBD4;Q15562;P17275;Q6ZW49;Q08050;Q8WW38;Q14999;Q07352;Q9BSQ5;P46937;Q8WUI4}

14522 Pathogen[ P0C206] interacts with 18 human partners:{P46937;P17275;Q6ZW49;Q8WW38;Q9BSQ5;P19429;Q96PU8;Q9UGM6;Q14999;Q92990;Q9Y5J3;Q8WUI4;Q15562;Q08050;Q99966;P31271;Q9HBD4;Q07352}

14523 Pathogen[ P03363] interacts with 17 human partners:{Q9Y5J3;Q15562;Q92990;P31271;Q9BSQ5;Q8N302;P17275;Q96PU8;Q07352;Q08050;P46937;Q14999;Q9HBD4;Q8WUI4;Q8WW38;Q6ZW49;P19429}

14524 [Cluster 1321]GO:0002218+P biological\_process [name] activation of innate immune response [def] "Any process that initiates an innate immune response. Innate immune responses are defense responses mediated by germline encoded components that directly recognize components of potential pathogens. Examples of this process include activation of the hypersensitive response of Arabidopsis thaliana and activation of any NOD or TLR signaling pathway in vertebrate species." [GO\_REF

14525 Pathogen[ Q2Q067] interacts with 2 human partners:{Q16666;O14862}

14526 Pathogen[ P0C214] interacts with 4 human partners:{Q9NPP4;Q16666;Q86WV6;O14862}

14527 Pathogen[ P03346] interacts with 3 human partners:{Q16666;Q9NPP4;O14862}

14528 Pathogen[ Q85601] interacts with 3 human partners:{Q86WV6;Q16666;O14862}

14529 Pathogen[ P14079] interacts with 5 human partners:{Q7Z434;Q86WV6;O14862;Q16666;Q9NPP4}

14530 Pathogen[ P03383] interacts with 2 human partners:{O14862;Q16666}

14531 Pathogen[ P03410] interacts with 5 human partners:{Q16666;O14862;Q9NPP4;Q7Z434;Q86WV6}

14532 Pathogen[ P14075] interacts with 2 human partners:{Q16666;O14862}

14533 Pathogen[ P0C206] interacts with 3 human partners:{O14862;Q16666;Q86WV6}

14534 Pathogen[ P03363] interacts with 3 human partners:{Q16666;O14862;Q9NPP4}

14535 [Cluster 1322]GO:0060485+P biological\_process [name] mesenchyme development [def] "The process whose specific outcome is the progression of a mesenchymal tissue over time, from its formation to the mature structure. A mesenchymal tissue is made up of loosely packed stellate cells." [GOC

14536 Pathogen[ Q2Q067] interacts with 1 human partners:{O96004}

14537 Pathogen[ P0C214] interacts with 1 human partners:{O96004}

14538 Pathogen[ P03346] interacts with 1 human partners:{O96004}

14539 Pathogen[ Q85601] interacts with 1 human partners:{O96004}

14540 Pathogen[ P14079] interacts with 1 human partners:{O96004}

14541 Pathogen[ P03383] interacts with 1 human partners:{O96004}

14542 Pathogen[ P03410] interacts with 1 human partners:{096004}

14543 Pathogen[ P14075] interacts with 1 human partners:{096004}

14544 Pathogen[ P0C206] interacts with 1 human partners:{096004}

14545 Pathogen[ P03363] interacts with 1 human partners:{096004}

14546 [Cluster 1323]GO:0051291+P biological\_process [name] protein heterooligomerization [def] "The process of creating protein oligomers, compounds composed of a small number, usually between three and ten, of component monomers that are not all identical. Oligomers may be formed by the polymerization of a number of monomers or the depolymerization of a large protein polymer." [GOC

14547 Pathogen[ Q2Q067] interacts with 11 human partners:{P30793;P61457;O75448;Q14790;Q86UL8;O43593;P68871;Q9NVD7;P69905;P30047;Q9H0N5}

14548 Pathogen[ P0C214] interacts with 12 human partners:{Q9Y376;P62993;P61457;P69905;Q9H0N5;P30793;P68871;O43593;O75448;Q9NVD7;P30047;Q14790}

14549 Pathogen[ P03346] interacts with 13 human partners:{P62993;P69905;Q9Y376;P30047;O43593;O75448;Q86UL8;Q9NVD7;P68871;Q14790;Q9UHD8;P61457;Q9H0N5}

14550 Pathogen[ Q85601] interacts with 13 human partners:{P69905;Q9NVD7;P62993;Q9H0N5;Q14790;Q86UL8;Q9Y376;O75448;P30793;P30047;P68871;O43593;P61457}

14551 Pathogen[ P14079] interacts with 15 human partners:{P61457;P69905;P07919;P30793;O75448;Q9H0N5;P68871;Q14790;Q9Y478;Q86UL8;P62993;Q9NVD7;Q9Y376;O43593;P30047}

14552 Pathogen[ P03383] interacts with 6 human partners:{P69905;P68871;P61457;O75448;Q9H0N5;P30047}

14553 Pathogen[ P03410] interacts with 14 human partners:{P30047;P07919;P30793;P68871;Q9Y376;Q9UHD8;Q9NVD7;Q9H0N5;Q86UL8;P69905;P62993;O75448;O43593;P61457}

14554 Pathogen[ P14075] interacts with 7 human partners:{P68871;O75448;Q9H0N5;P30047;P61457;P30793;P69905}

14555 Pathogen[ P0C206] interacts with 14 human partners:{P68871;Q9NVD7;Q9Y376;P30793;P62993;P30047;P69905;Q14790;P61457;O75448;Q16181;Q9H0N5;Q86UL8;O43593}

14556 Pathogen[ P03363] interacts with 12 human partners:{P69905;P68871;Q9H0N5;Q9NVA2;O43593;P61457;Q9UHD8;Q9Y376;O75448;Q86UL8;P30047;Q9NVD7}

14557 [Cluster 1324]GO:0045110+P biological\_process [name] intermediate filament bundle assembly [def] "The formation of the bundles of intermediate filaments, known as tonofilaments. Intermediate filament-associated proteins (IFAPs) cross-link intermediate filaments with one another, forming a bundle or a network, and with other cell structures, including the plasma membrane. The organization of intermediate filaments and their supportive function in various cells types depends in large part on their linkage to other cell structures via IFAPs." [ISBN

14558 Pathogen[ Q2Q067] interacts with 3 human partners:{P12036;P02533;P07197}

14559 Pathogen[ P0C214] interacts with 3 human partners:{P02533;P12036;P07197}

14560 Pathogen[ P03346] interacts with 4 human partners:{Q13835;P07197;P12036;P02533}

14561 Pathogen[ Q85601] interacts with 3 human partners:{P02533;P12036;P07197}

14562 Pathogen[ P14079] interacts with 4 human partners:{Q13835;P12036;P02533;P07197}

14563 Pathogen[ P03383] interacts with 3 human partners:{P02533;P12036;P07197}

14564 Pathogen[ P03410] interacts with 4 human partners:{P02533;P12036;Q13835;P07197}

14565 Pathogen[ P14075] interacts with 3 human partners:{P12036;P07197;P02533}

14566 Pathogen[ P0C206] interacts with 4 human partners:{P12036;Q13835;P02533;P07197}

14567 Pathogen[ P03363] interacts with 4 human partners:{P02533;Q13835;P07197;P12036}

14568 [Cluster 1325]GO:0016577+P biological\_process [name] histone demethylation [def] "The modification of histones by removal of methyl groups." [GOC

14569 Pathogen[ Q2Q067] interacts with 2 human partners:{Q8NHM5;O75164}

14570 Pathogen[ P0C214] interacts with 2 human partners:{O75164;Q8NHM5}

14571 Pathogen[ P03346] interacts with 2 human partners:{O75164;Q8NHM5}

14572 Pathogen[ Q85601] interacts with 2 human partners:{Q8NHM5;O75164}

14573 Pathogen[ P14079] interacts with 1 human partners:{Q8NHM5}

14574 Pathogen[ P03383] interacts with 1 human partners:{O75164}

14575 Pathogen[ P03410] interacts with 1 human partners:{O75164}

14576 Pathogen[ P14075] interacts with 1 human partners:{O75164}

14577 Pathogen[ P0C206] interacts with 2 human partners:{Q8NHM5;O75164}

14578 Pathogen[ P03363] interacts with 1 human partners:{O75164}

14579 [Cluster 1326]GO:0032481+P biological\_process [name] positive regulation of type I interferon production [def] "Any process that activates or increases the frequency, rate, or extent of type I interferon production. Type I interferons include the interferon-alpha, beta, delta, epsilon, zeta, kappa, tau, and omega gene families." [GOC

14580 Pathogen[ Q2Q067] interacts with 13 human partners:{Q8IUC6;Q15653;Q04206;Q9H171;Q7Z2W4;Q14653;P10914;Q9Y6K9;P19838;P25963;O14920;Q00653;O15111}

14581 Pathogen[ P0C214] interacts with 13 human partners:{Q00653;O15111;Q9Y6K9;P19838;Q8IUC6;Q9H171;Q04206;P10914;Q15653;Q7Z2W4;P25963}

63;Q14653;O14920}  
14582 Pathogen[ P03346] interacts with 13 human  
partners:{Q9Y6K9;O15111;P25963;Q9H171;Q15653;Q04206;P10914;Q14653;Q8IUC6;P19838;O14920;Q00653;Q7Z2W4}  
14583 Pathogen[ Q85601] interacts with 13 human  
partners:{Q8IUC6;O15111;Q7Z2W4;Q15653;P10914;Q14653;Q9Y6K9;Q9H171;O14920;Q04206;Q00653;P19838;P25963}  
14584 Pathogen[ P14079] interacts with 8 human  
partners:{Q14653;Q7Z2W4;Q8IUC6;Q9H171;Q9Y6K9;Q96C10;P10914;Q15653}  
14585 Pathogen[ P03383] interacts with 13 human  
partners:{P10914;Q14653;Q9Y6K9;Q8IUC6;Q00653;O14920;O15111;Q15653;Q9H171;P25963;Q04206;P19838;Q7Z2W4}  
14586 Pathogen[ P03410] interacts with 14 human  
partners:{Q04206;P19838;O14920;O15111;Q14653;Q15653;Q9H171;Q7Z2W4;P10914;Q96C10;Q8IUC6;Q00653;Q9Y6K9;P25963}  
14587 Pathogen[ P14075] interacts with 13 human  
partners:{O15111;Q04206;Q15653;P25963;O14920;Q14653;Q7Z2W4;Q8IUC6;P19838;Q00653;Q9Y6K9;P10914;Q9H171}  
14588 Pathogen[ P0C206] interacts with 14 human  
partners:{P10914;O14920;Q9Y6K9;P25963;Q15653;P19838;Q9H171;Q04206;O15111;Q8IUC6;Q00653;Q96C10;Q7Z2W4;Q14653}  
14589 Pathogen[ P03363] interacts with 12 human  
partners:{Q14653;O14920;Q04206;P25963;O15111;Q7Z2W4;Q9Y6K9;Q15653;Q00653;P10914;P19838;Q9H171}  
14590 [Cluster 1327]GO:0001756+P biological\_process [name] somitogenesis [def] "The formation of mesodermal clusters that are arranged segmentally along the anterior posterior axis of an embryo." [ISBN  
14591 Pathogen[ Q2Q067] interacts with 9 human  
partners:{P13349;O60315;Q8IZP0;Q86YC2;P84022;Q92830;Q5TAB7;Q0VG99;P23409}  
14592 Pathogen[ P0C214] interacts with 7 human  
partners:{Q8IZP0;P13349;P84022;Q5TAB7;Q86YC2;Q92830;O60315}  
14593 Pathogen[ P03346] interacts with 11 human  
partners:{P15863;Q0VG99;P13349;Q8IZP0;O60315;P23409;Q92830;P84022;A6NI15;Q86YC2;Q5TAB7}  
14594 Pathogen[ Q85601] interacts with 9 human  
partners:{Q0VG99;P13349;O60315;P23409;Q92830;Q86YC2;P84022;Q5TAB7;Q8IZP0}  
14595 Pathogen[ P14079] interacts with 9 human  
partners:{P13349;P23409;Q92830;Q8IZP0;Q86YC2;O60315;Q9H488;Q5TAB7;O15273}  
14596 Pathogen[ P03383] interacts with 4 human partners:{Q5TAB7;P84022;Q92830;Q86YC2}  
14597 Pathogen[ P03410] interacts with 9 human  
partners:{P84022;Q92830;P23409;Q5TAB7;O15273;P13349;Q8IZP0;Q9H488;Q86YC2}  
14598 Pathogen[ P14075] interacts with 4 human partners:{Q86YC2;Q5TAB7;P84022;Q92830}  
14599 Pathogen[ P0C206] interacts with 10 human  
partners:{P84022;Q92830;Q86YC2;P23409;Q8IZP0;P13349;Q5TAB7;O60315;Q86YT6;Q0VG99}  
14600 Pathogen[ P03363] interacts with 9 human  
partners:{Q8IZP0;O60315;Q0VG99;P13349;Q92830;P84022;Q5TAB7;P23409;Q86YC2}  
14601 [Cluster 1328]GO:0051322+P biological\_process [name] anaphase [def] "A cell cycle process comprising the steps by which a cell progresses through anaphase, the third stage of chromosome segregation in the cell cycle. Canonically, sister chromatids (or homologous chromosomes) separate and migrate towards the poles of the spindle." [GOC  
14602 Pathogen[ Q2Q067] interacts with 1 human partners:{Q13618}  
14603 Pathogen[ P0C214] interacts with 2 human partners:{Q9UJP4;Q13618}  
14604 Pathogen[ P03346] interacts with 3 human partners:{Q13618;Q9UJP4;Q9H0E7}  
14605 Pathogen[ Q85601] interacts with 3 human partners:{Q9H0E7;Q9UJP4;Q13618}  
14606 Pathogen[ P14079] interacts with 2 human partners:{Q13618;Q9UJP4}  
14607 Pathogen[ P03383] interacts with 1 human partners:{Q13618}  
14608 Pathogen[ P03410] interacts with 2 human partners:{Q13618;Q9UJP4}  
14609 Pathogen[ P14075] interacts with 1 human partners:{Q13618}  
14610 Pathogen[ P0C206] interacts with 3 human partners:{Q9H0E7;Q9UJP4;Q13618}  
14611 Pathogen[ P03363] interacts with 2 human partners:{Q13618;Q9UJP4}  
14612 [Cluster 1329]GO:0051988+P biological\_process [name] regulation of attachment of spindle microtubules to kinetochore [def] "Any process that modulates the frequency, rate or extent of the attachment of spindle microtubules to the kinetochore." [GOC  
14613 Pathogen[ Q2Q067] interacts with 3 human partners:{Q96R06;Q9Y448;P60953}  
14614 Pathogen[ P0C214] interacts with 3 human partners:{Q96R06;P60953;Q9Y448}  
14615 Pathogen[ P03346] interacts with 4 human partners:{Q96R06;P60953;Q9Y448;Q9H8V3}  
14616 Pathogen[ Q85601] interacts with 4 human partners:{Q96R06;Q9Y448;P60953;P51955}  
14617 Pathogen[ P14079] interacts with 4 human partners:{Q96R06;Q9Y448;P51955;Q9H8V3}  
14618 Pathogen[ P03383] interacts with 3 human partners:{P60953;Q96R06;Q9Y448}  
14619 Pathogen[ P03410] interacts with 4 human partners:{Q96R06;Q9Y448;P60953;Q9H8V3}  
14620 Pathogen[ P14075] interacts with 3 human partners:{P60953;Q96R06;Q9Y448}  
14621 Pathogen[ P0C206] interacts with 4 human partners:{P51955;Q9Y448;Q9H8V3;P60953}  
14622 Pathogen[ P03363] interacts with 3 human partners:{Q96R06;Q9Y448;P60953}  
14623 [Cluster 1330]GO:0097039+P biological\_process [name] protein linear polyubiquitination [def] "A protein ubiquitination process in which a linear polymer of ubiquitin, formed by the amino-terminal methionine (M1) of one ubiquitin molecule and by the

carboxy-terminal glycine (G76) of the next, is added to a protein." [GOC

14624 Pathogen[ Q2Q067] interacts with 1 human partners:{Q9H0F6}

14625 Pathogen[ P0C214] interacts with 1 human partners:{Q9H0F6}

14626 Pathogen[ P03346] interacts with 3 human partners:{Q9BYM8;Q9H0F6;Q96EP0}

14627 Pathogen[ Q85601] interacts with 1 human partners:{Q9H0F6}

14628 Pathogen[ P14079] interacts with 3 human partners:{Q96EP0;Q9BYM8;Q9H0F6}

14629 Pathogen[ P03383] interacts with 1 human partners:{Q9H0F6}

14630 Pathogen[ P03410] interacts with 1 human partners:{Q9H0F6}

14631 Pathogen[ P14075] interacts with 1 human partners:{Q9H0F6}

14632 Pathogen[ P0C206] interacts with 3 human partners:{Q96EP0;Q9H0F6;Q9BYM8}

14633 Pathogen[ P03363] interacts with 2 human partners:{Q96EP0;Q9H0F6}

14634 [Cluster 1331]GO:0050942+P biological\_process [name] positive regulation of pigment cell differentiation [def] "Any process that activates or increases the frequency, rate or extent of pigment cell differentiation." [GOC

14635 Pathogen[ Q2Q067] interacts with 2 human partners:{Q9UL45;Q8TDH9}

14636 Pathogen[ P0C214] interacts with 2 human partners:{Q8TDH9;Q9UL45}

14637 Pathogen[ P03346] interacts with 2 human partners:{Q9UL45;Q8TDH9}

14638 Pathogen[ Q85601] interacts with 1 human partners:{Q8TDH9}

14639 Pathogen[ P14079] interacts with 2 human partners:{Q9UL45;Q8TDH9}

14640 Pathogen[ P03383] interacts with 1 human partners:{Q8TDH9}

14641 Pathogen[ P03410] interacts with 2 human partners:{Q9UL45;Q8TDH9}

14642 Pathogen[ P14075] interacts with 1 human partners:{Q8TDH9}

14643 Pathogen[ P0C206] interacts with 2 human partners:{Q9UL45;Q8TDH9}

14644 Pathogen[ P03363] interacts with 1 human partners:{Q8TDH9}

14645 [Cluster 1332]GO:0006525+P biological\_process [name] arginine metabolic process [def] "The chemical reactions and pathways involving arginine, 2-amino-5-(carbamimidamido)pentanoic acid." [CHEBI

14646 Pathogen[ Q2Q067] interacts with 1 human partners:{O95865}

14647 Pathogen[ P0C214] interacts with 1 human partners:{O95865}

14648 Pathogen[ P03346] interacts with 1 human partners:{O95865}

14649 Pathogen[ Q85601] interacts with 1 human partners:{O95865}

14650 Pathogen[ P14079] interacts with 1 human partners:{O95865}

14651 Pathogen[ P03383] interacts with 1 human partners:{O95865}

14652 Pathogen[ P03410] interacts with 1 human partners:{O95865}

14653 Pathogen[ P14075] interacts with 1 human partners:{O95865}

14654 Pathogen[ P0C206] interacts with 1 human partners:{O95865}

14655 Pathogen[ P03363] interacts with 1 human partners:{O95865}

14656 [Cluster 1333]GO:0043984+P biological\_process [name] histone H4-K16 acetylation [def] "The modification of histone H4 by the addition of an acetyl group to a lysine residue at position 16 of the histone." [GOC

14657 Pathogen[ Q2Q067] interacts with 8 human partners:{Q6IE81;Q9HAF1;Q96EZ8;Q9UNL4;P51610;Q8N5Y2;Q7Z3B3;Q68DK7}

14658 Pathogen[ P0C214] interacts with 7 human partners:{P51610;Q9UNL4;Q9HAF1;O95251;Q6IE81;Q96EZ8;Q68DK7}

14659 Pathogen[ P03346] interacts with 10 human partners:{Q9UNL4;Q96EZ8;P51610;Q7Z3B3;Q8N5Y2;O95251;Q68DK7;Q6IE81;Q9H7Z6;Q9HAF1}

14660 Pathogen[ Q85601] interacts with 9 human partners:{Q8N5Y2;O95251;Q9HAF1;Q9H7Z6;Q9UNL4;P51610;Q68DK7;Q6IE81;Q96EZ8}

14661 Pathogen[ P14079] interacts with 12 human partners:{Q68DK7;O95251;Q9UNL4;Q9HAF1;Q6IE81;P51610;Q8N5Y2;Q7Z3B3;Q9HCI7;Q9P2N6;Q96EZ8;Q9H9L4}

14662 Pathogen[ P03383] interacts with 7 human partners:{O95251;Q9UNL4;P51610;Q68DK7;Q9HAF1;Q6IE81;Q96EZ8}

14663 Pathogen[ P03410] interacts with 11 human partners:{Q9P2N6;P51610;O95251;Q9UNL4;Q9HCI7;Q9H9L4;Q96EZ8;Q8N5Y2;Q7Z3B3;Q6IE81;Q68DK7}

14664 Pathogen[ P14075] interacts with 8 human partners:{P51610;Q7Z3B3;Q96EZ8;Q6IE81;Q9HAF1;O95251;Q9UNL4;Q68DK7}

14665 Pathogen[ P0C206] interacts with 13 human partners:{O95251;Q68DK7;Q9H9L4;Q96EZ8;P51610;Q9HCI7;Q9HAF1;Q6IE81;Q9P2N6;Q7Z3B3;Q8N5Y2;Q9UNL4;Q9H7Z6}

14666 Pathogen[ P03363] interacts with 9 human partners:{Q6IE81;Q68DK7;Q8N5Y2;Q9HAF1;Q9UNL4;Q7Z3B3;Q96EZ8;O95251;P51610}

14667 [Cluster 1334]GO:0035914+P biological\_process [name] skeletal muscle cell differentiation [def] "The process in which a relatively unspecialized cell acquires specialized features of a skeletal muscle cell, a somatic cell located in skeletal muscle." [CL

14668 Pathogen[ Q2Q067] interacts with 5 human partners:{P50402;O00512;Q86UU0;O60356;P15172}

14669 Pathogen[ P0C214] interacts with 5 human partners:{P15172;P50402;O60356;Q86UU0;O00512}

14670 Pathogen[ P03346] interacts with 5 human partners:{P15172;O00512;P50402;O60356;Q86UU0}

14671 Pathogen[ Q85601] interacts with 5 human partners:{P15172;Q86UU0;O00512;P50402;O60356}

14672 Pathogen[ P14079] interacts with 5 human

14673 partners:{O00512;Q8NC56;Q86UU0;O60356;P50402}  
Pathogen[ P03383] interacts with 5 human

14674 partners:{P15172;Q86UU0;O00512;P50402;O60356}  
Pathogen[ P03410] interacts with 5 human

14675 partners:{O00512;O60356;P50402;Q8NC56;Q86UU0}  
Pathogen[ P14075] interacts with 5 human

14676 partners:{Q86UU0;O00512;P15172;P50402;O60356}  
Pathogen[ P0C206] interacts with 6 human

14677 partners:{P50402;O00512;Q86UU0;Q8NC56;O60356;P15172}  
Pathogen[ P03363] interacts with 5 human

14678 partners:{O60356;O00512;Q86UU0;P50402;P15172}  
[Cluster 1335]GO:0006369+P biological\_process [name] termination of RNA polymerase II transcription [def] "The process in which the synthesis of an RNA molecule by RNA polymerase II using a DNA template is completed." [GOC

14679 Pathogen[ Q2Q067] interacts with 38 human  
partners:{P83369;P33240;Q86U42;P61326;Q01130;P62318;Q8N684;Q8WTR7;Q07955;Q9BZI7;Q16629;Q10570;Q12996;P62304;P84103;Q8IYB3;Q05048;O94913;Q86V81;P56270;Q05519;P26368;P14678;Q9Y5S9;Q01081;Q9P2I0;Q13243;O43809;Q09161;Q9UNY4;P52298;Q9UKF6;Q14493;O60508;P62306;P62308;Q969L4;P51003}

14680 Pathogen[ P0C214] interacts with 39 human  
partners:{Q12996;Q9BZI7;P26368;P83369;Q09161;P56270;O94913;Q9UKF6;P84103;Q86V81;Q9Y5S9;P51003;O60508;P14678;P62306;Q969L4;Q05048;Q10570;P62308;Q8N684;Q07955;P52298;Q14493;Q8IYB3;O43809;P61326;Q9UNY4;Q13243;Q9P2I0;Q05519;P62318;Q01081;P33240;Q15287;P62304;Q8WTR7;Q86U42;Q16629;Q01130}

14681 Pathogen[ P03346] interacts with 42 human  
partners:{Q9Y5S9;Q9BZI7;Q86U42;Q09161;Q08170;Q8IYB3;P56270;P62304;Q9UKF6;Q8N684;Q13242;Q8WTR7;Q13247;P52298;Q16629;Q07955;Q05048;Q14493;P62318;Q86V81;O60508;P51003;P83369;P62306;O94913;P26368;Q01081;P61326;Q9UNY4;O43809;P84103;Q15287;Q05519;Q01130;P14678;Q9P2I0;Q13243;Q969L4;P62308;Q10570;Q12996;P33240}

14682 Pathogen[ Q85601] interacts with 38 human  
partners:{Q9BZI7;Q8IYB3;P56270;Q13243;Q05048;P62304;Q01130;Q8N684;P61326;Q15287;O94913;Q969L4;Q86V81;Q16629;Q07955;Q09161;P14678;P62306;O60508;P62318;Q10570;Q9P2I0;Q01081;Q05519;P83369;P84103;P62308;P52298;P26368;P51003;Q86U42;Q8WTR7;Q9UKF6;Q9UNY4;Q14493;P33240;O43809;Q9Y5S9}

14683 Pathogen[ P14079] interacts with 38 human  
partners:{O43809;Q15287;Q8WTR7;O60508;Q9UKF6;Q10570;Q9UNY4;P52298;Q13243;Q9Y5S9;P33240;P26368;O94913;Q05048;P83369;P62306;P14678;Q8IYB3;Q16629;P61326;Q9BZI7;Q05519;Q8N684;Q86V81;Q86U42;P62308;P56270;P62304;Q07955;Q969L4;Q01081;Q14493;P51003;Q12996;P62318;Q09161;P84103;Q9P2I0}

14684 Pathogen[ P03383] interacts with 37 human  
partners:{Q07955;Q15287;Q05048;P51003;Q969L4;P56270;P62318;Q9Y5S9;Q10570;P62304;P61326;P26368;Q13243;Q86V81;Q9UKF6;Q09161;Q16629;Q8N684;O94913;Q8IYB3;P33240;P84103;Q01130;Q14493;P14678;Q01081;O43809;P52298;Q05519;Q8WTR7;Q9P2I0;P62308;P83369;Q86U42;Q9UNY4;P62306;Q9BZI7}

14685 Pathogen[ P03410] interacts with 39 human  
partners:{Q01081;Q9UNY4;P26368;Q10570;P61326;P62304;O60508;Q12996;Q8WTR7;Q05048;Q16629;P62306;Q15287;Q9Y5S9;Q14493;P62308;P14678;Q9BZI7;P51003;O43809;Q05519;O94913;Q07955;P52298;Q9P2I0;P83369;P33240;Q86V81;Q8IYB3;Q01130;Q969L4;Q9UKF6;P56270;Q8N684;Q09161;P84103;Q86U42;Q13243;P62318}

14686 Pathogen[ P14075] interacts with 37 human  
partners:{P51003;P62304;Q05519;Q09161;O43809;Q9P2I0;Q86V81;Q13243;Q9UNY4;P61326;Q14493;Q01130;P62306;P62308;Q8WTR7;P62318;P83369;P33240;Q05048;Q15287;P26368;Q01081;Q8IYB3;P14678;Q9Y5S9;P56270;P84103;Q8N684;Q9UKF6;Q86U42;Q16629;Q10570;Q969L4;O94913;Q07955;P52298;Q9BZI7}

14687 Pathogen[ P0C206] interacts with 39 human  
partners:{Q15287;P33240;Q9UKF6;P14678;O60508;Q9BZI7;Q07955;P26368;P52298;P61326;Q01081;Q09161;Q9UNY4;O94913;P62304;Q05519;Q8IYB3;Q8WTR7;Q8N684;Q13243;Q16629;Q86U42;P51003;O43809;Q9P2I0;P83369;Q05048;P62318;Q12996;P62306;P84103;P62308;Q01130;Q14493;Q9Y5S9;Q86V81;Q969L4;Q10570;P56270}

14688 Pathogen[ P03363] interacts with 43 human  
partners:{Q9P2I0;Q10570;Q08170;Q05048;Q16629;P62318;P62304;Q01130;Q86U42;Q92620;O94913;Q9UNY4;P61326;P62306;Q05519;P83369;Q15287;Q8N684;Q13242;Q8IYB3;O43809;P26368;P51003;Q13243;Q86V81;P52298;P56270;Q07955;Q01081;Q9BZI7;Q969L4;Q13247;P62308;Q8WTR7;Q9UKF6;P84103;Q14493;P14678;P33240;Q9Y5S9;Q12996;O60508;Q09161}

14689 [Cluster 1336]GO:0032864+P biological\_process [name] activation of Cdc42 GTPase activity [def] "Any process that initiates the activity of the inactive GTPase Cdc42 through the replacement of GDP by GTP." [GOC

14690 Pathogen[ Q2Q067] interacts with 1 human partners:{O14907}

14691 Pathogen[ P0C214] interacts with 1 human partners:{O14907}

14692 Pathogen[ P03346] interacts with 2 human partners:{O14907;Q5VV41}

14693 Pathogen[ Q85601] interacts with 2 human partners:{O14907;Q9GZM8}

14694 Pathogen[ P14079] interacts with 3 human partners:{O14907;Q9GZM8;Q5VV41}

14695 Pathogen[ P03383] interacts with 1 human partners:{O14907}

14696 Pathogen[ P03410] interacts with 3 human partners:{Q9GZM8;Q5VV41;O14907}

14697 Pathogen[ P14075] interacts with 1 human partners:{O14907}

14698 Pathogen[ P0C206] interacts with 2 human partners:{Q9GZM8;O14907}

14699 Pathogen[ P03363] interacts with 2 human partners:{O14907;Q5VV41}  
14700 [Cluster 1337]GO:0072321+P biological\_process [name] chaperone-mediated protein transport [def] "The directed movement of proteins into, out of or within a cell, or between cells, mediated by chaperone molecules that bind to the transported proteins." [GOC  
14701 Pathogen[ Q2Q067] interacts with 4 human partners:{O60220;P62072;Q9Y5J7;P40855}  
14702 Pathogen[ P0C214] interacts with 5 human partners:{P40855;O60220;P62072;Q9Y5J9;Q9Y5J7}  
14703 Pathogen[ P03346] interacts with 4 human partners:{Q9Y5J7;O60220;P62072;P40855}  
14704 Pathogen[ Q85601] interacts with 5 human partners:{P62072;Q9Y5J9;O60220;Q9Y5J7;P40855}  
14705 Pathogen[ P14079] interacts with 6 human partners:{P40855;P62072;Q9Y5J7;O60220;Q9Y5J9;Q9Y5L4}  
14706 Pathogen[ P03383] interacts with 5 human partners:{Q9Y5J7;P62072;O60220;Q9Y5J9;P40855}  
14707 Pathogen[ P03410] interacts with 6 human partners:{Q9Y5L4;P62072;Q9Y5J7;P40855;Q9Y5J9;O60220}  
14708 Pathogen[ P14075] interacts with 5 human partners:{Q9Y5J9;P62072;P40855;O60220;Q9Y5J7}  
14709 Pathogen[ P0C206] interacts with 6 human partners:{Q9Y5L4;O60220;Q9Y5J9;Q9Y5J7;P40855;P62072}  
14710 Pathogen[ P03363] interacts with 2 human partners:{Q9Y5J7;P40855}  
14711 [Cluster 1338]GO:0035083+P biological\_process [name] cilium axoneme assembly [def] "The assembly of a the bundle of microtubules and associated proteins that forms the core of cilia in eukaryotic cells and is responsible for their movements." [GOC  
14712 Pathogen[ Q2Q067] interacts with 2 human partners:{Q5TD94;O75665}  
14713 Pathogen[ P0C214] interacts with 2 human partners:{O75665;Q5TD94}  
14714 Pathogen[ P03346] interacts with 2 human partners:{Q5TD94;O75665}  
14715 Pathogen[ Q85601] interacts with 2 human partners:{Q5TD94;O75665}  
14716 Pathogen[ P14079] interacts with 4 human partners:{Q9H1X1;O95922;Q5TD94;O75665}  
14717 Pathogen[ P03383] interacts with 2 human partners:{Q5TD94;O75665}  
14718 Pathogen[ P03410] interacts with 4 human partners:{O75665;Q5TD94;Q9H1X1;O95922}  
14719 Pathogen[ P14075] interacts with 2 human partners:{Q5TD94;O75665}  
14720 Pathogen[ P0C206] interacts with 4 human partners:{Q5TD94;O95922;Q9H1X1;O75665}  
14721 Pathogen[ P03363] interacts with 4 human partners:{Q9H1X1;O95922;Q5TD94;O75665}  
14722 [Cluster 1339]GO:0001824+P biological\_process [name] blastocyst development [def] "The process whose specific outcome is the progression of the blastocyst over time, from its formation to the mature structure. The mammalian blastocyst is a hollow ball of cells containing two cell types, the inner cell mass and the trophectoderm." [GOC  
14723 Pathogen[ Q2Q067] interacts with 10 human partners:{O96004;P78545;Q8N5J4;O00321;Q13503;P20823;Q12824;Q01860;P49321;Q9HCS7}  
14724 Pathogen[ P0C214] interacts with 10 human partners:{Q9HCS7;Q12824;O00321;Q8N5J4;P49321;O96004;P78545;Q13503;Q01860;P17980}  
14725 Pathogen[ P03346] interacts with 11 human partners:{Q99626;O00321;Q12824;Q8N5J4;P20823;Q9HCS7;P49321;Q01860;O96004;P78545;Q13503}  
14726 Pathogen[ Q85601] interacts with 10 human partners:{Q9HCS7;P78545;O96004;P49321;Q13503;Q8N5J4;P20823;Q12824;Q01860;O00321}  
14727 Pathogen[ P14079] interacts with 13 human partners:{O00321;O96004;Q9HCS7;Q8N5J4;Q01860;Q86X24;P61803;Q13503;P78545;P49321;Q12824;P43686;P17980}  
14728 Pathogen[ P03383] interacts with 9 human partners:{Q12824;Q9HCS7;Q01860;P49321;O00321;O96004;Q8N5J4;P78545;Q13503}  
14729 Pathogen[ P03410] interacts with 11 human partners:{P49321;Q8N5J4;O96004;Q01860;Q13503;P78545;O00321;Q9HCS7;Q12824;P61803;P17980}  
14730 Pathogen[ P14075] interacts with 9 human partners:{P49321;Q8N5J4;P78545;Q01860;O96004;Q12824;Q9HCS7;Q13503;O00321}  
14731 Pathogen[ P0C206] interacts with 10 human partners:{Q01860;Q12824;P49321;O00321;O96004;P20823;P78545;Q8N5J4;Q13503;Q9HCS7}  
14732 Pathogen[ P03363] interacts with 10 human partners:{Q13503;P49321;Q99626;Q9HCS7;O00321;P78545;Q8N5J4;O96004;Q01860;Q12824}  
14733 [Cluster 1340]GO:0007221+P biological\_process [name] positive regulation of transcription of Notch receptor target [def] "The activation of transcription of specific genes as a result of Notch signaling, mediated by the Notch intracellular domain." [PMID  
14734 Pathogen[ Q2Q067] interacts with 2 human partners:{Q96T37;Q06330}  
14735 Pathogen[ P0C214] interacts with 2 human partners:{Q06330;Q96T37}  
14736 Pathogen[ P03346] interacts with 2 human partners:{Q06330;Q96T37}  
14737 Pathogen[ Q85601] interacts with 2 human partners:{Q06330;Q96T37}  
14738 Pathogen[ P14079] interacts with 2 human partners:{Q96T37;Q06330}  
14739 Pathogen[ P03383] interacts with 1 human partners:{Q06330}  
14740 Pathogen[ P03410] interacts with 2 human partners:{Q06330;Q96T37}  
14741 Pathogen[ P14075] interacts with 1 human partners:{Q06330}  
14742 Pathogen[ P0C206] interacts with 2 human partners:{Q96T37;Q06330}  
14743 Pathogen[ P03363] interacts with 2 human partners:{Q06330;Q96T37}

14744 [Cluster 1341]GO:0042551+P biological\_process [name] neuron maturation [def] "A developmental process, independent of morphogenetic (shape) change, that is required for a neuron to attain its fully functional state." [GOC  
14745 Pathogen[ Q2Q067] interacts with 2 human partners:{P06400;P49918}  
14746 Pathogen[ P0C214] interacts with 2 human partners:{P49918;P06400}  
14747 Pathogen[ P03346] interacts with 5 human  
partners:{Q9NZR4;P06400;P49918;P78411;Q99581}  
14748 Pathogen[ Q85601] interacts with 2 human partners:{P06400;P49918}  
14749 Pathogen[ P14079] interacts with 3 human partners:{Q99581;P49918;O75503}  
14750 Pathogen[ P03383] interacts with 2 human partners:{P06400;P49918}  
14751 Pathogen[ P03410] interacts with 3 human partners:{P06400;O75503;P49918}  
14752 Pathogen[ P14075] interacts with 2 human partners:{P49918;P06400}  
14753 Pathogen[ P0C206] interacts with 4 human partners:{P78411;Q99581;P06400;P49918}  
14754 Pathogen[ P03363] interacts with 5 human  
partners:{P49918;Q9NZR4;P78411;P06400;Q99581}  
14755 [Cluster 1342]GO:0006968+P biological\_process [name] cellular defense response [def] "A defense response that is mediated by cells." [GOC  
14756 Pathogen[ Q2Q067] interacts with 8 human  
partners:{Q04206;Q14119;O95999;P41218;Q14457;Q9UEU5;P15407;Q9UQR1}  
14757 Pathogen[ P0C214] interacts with 7 human  
partners:{Q14457;P15407;Q14119;P41218;Q04206;O95999;Q9UQR1}  
14758 Pathogen[ P03346] interacts with 8 human  
partners:{Q9UQR1;Q04206;Q14457;Q9UEU5;O95999;P41218;Q14119;P15407}  
14759 Pathogen[ Q85601] interacts with 7 human  
partners:{Q9UQR1;Q14457;P15407;Q04206;P41218;O95999;Q14119}  
14760 Pathogen[ P14079] interacts with 11 human  
partners:{Q9UQR1;P41218;O95999;Q13065;P15407;Q9Y6Y9;Q14457;Q6PIZ9;Q9UEU5;O75459;Q141  
19}  
14761 Pathogen[ P03383] interacts with 7 human  
partners:{Q9UQR1;Q14457;Q9UEU5;P41218;P15407;O95999;Q04206}  
14762 Pathogen[ P03410] interacts with 13 human  
partners:{Q04206;Q6PIZ9;P41218;Q9UEU5;Q14457;P33241;Q13065;Q9UQR1;O95999;Q14119;Q9Y6  
Y9;P15407;O75459}  
14763 Pathogen[ P14075] interacts with 7 human  
partners:{Q14457;Q04206;Q9UQR1;Q9UEU5;P41218;O95999;P15407}  
14764 Pathogen[ P0C206] interacts with 9 human  
partners:{Q9UEU5;P15407;O95999;Q14457;P41218;O75459;Q04206;Q9UQR1;Q14119}  
14765 Pathogen[ P03363] interacts with 7 human  
partners:{Q04206;Q14457;P41218;Q9UEU5;Q14119;P15407;Q9UQR1}  
14766 [Cluster 1343]GO:0043278+P biological\_process [name] response to morphine [def] "Any process that results in a change in state or activity of a cell or an organism (in terms of movement, secretion, enzyme production, gene expression, etc.) as a result of a morphine stimulus. Morphine is an opioid alkaloid, isolated from opium, with a complex ring structure." [CHEBI  
14767 Pathogen[ Q2Q067] interacts with 4 human partners:{P63151;Q04206;P53041;Q15121}  
14768 Pathogen[ P0C214] interacts with 4 human partners:{Q04206;Q15121;P63151;P53041}  
14769 Pathogen[ P03346] interacts with 4 human partners:{Q04206;Q15121;P53041;P63151}  
14770 Pathogen[ Q85601] interacts with 4 human partners:{P63151;Q15121;Q04206;P53041}  
14771 Pathogen[ P14079] interacts with 4 human partners:{P53041;Q9UHF0;P63151;Q15121}  
14772 Pathogen[ P03383] interacts with 3 human partners:{Q15121;P53041;Q04206}  
14773 Pathogen[ P03410] interacts with 5 human  
partners:{Q04206;Q15121;P63151;Q9UHF0;P53041}  
14774 Pathogen[ P14075] interacts with 3 human partners:{Q04206;P53041;Q15121}  
14775 Pathogen[ P0C206] interacts with 4 human partners:{Q15121;P53041;P63151;Q04206}  
14776 Pathogen[ P03363] interacts with 4 human partners:{Q04206;P53041;Q15121;P63151}  
14777 [Cluster 1344]GO:0033197+P biological\_process [name] response to vitamin E [def] "Any process that results in a change in state or activity of a cell or an organism (in terms of movement, secretion, enzyme production, gene expression, etc.) as a result of a vitamin E stimulus." [GOC  
14778 Pathogen[ Q2Q067] interacts with 2 human partners:{P24385;P24864}  
14779 Pathogen[ P0C214] interacts with 2 human partners:{P24385;P24864}  
14780 Pathogen[ P03346] interacts with 2 human partners:{P24385;P24864}  
14781 Pathogen[ Q85601] interacts with 2 human partners:{P24385;P24864}  
14782 Pathogen[ P14079] interacts with 1 human partners:{P24864}  
14783 Pathogen[ P03383] interacts with 2 human partners:{P24385;P24864}  
14784 Pathogen[ P03410] interacts with 2 human partners:{P24385;P24864}  
14785 Pathogen[ P14075] interacts with 2 human partners:{P24385;P24864}  
14786 Pathogen[ P0C206] interacts with 2 human partners:{P24864;P24385}  
14787 Pathogen[ P03363] interacts with 2 human partners:{P24864;P24385}  
14788 [Cluster 1345]GO:0007626+P biological\_process [name] locomotory behavior [def] "The specific movement from place to place of an organism in response to external or internal stimuli. Locomotion of a whole organism in a manner dependent upon some combination of that organism's internal state and external conditions." [GOC  
14789 Pathogen[ Q2Q067] interacts with 3 human partners:{Q92562;Q96RL7;Q3C1V8}  
14790 Pathogen[ P0C214] interacts with 6 human  
partners:{P05937;Q9UM54;Q92562;Q8IXF0;Q96RL7;Q3C1V8}

14791 Pathogen[ P03346] interacts with 11 human partners: {Q3C1V8;O75364;O43815;Q99767;Q92562;P05937;P17542;Q8IXF0;Q96RL7;Q9P2D1;P51513}

14792 Pathogen[ Q85601] interacts with 8 human partners: {Q9P2D1;O43815;Q96RL7;Q99767;Q92562;Q8IXF0;Q3C1V8;Q9UM54}

14793 Pathogen[ P14079] interacts with 10 human partners: {A7XYQ1;P05937;Q92562;O43815;Q8IXF0;Q9UM54;Q9P2D1;Q3C1V8;Q96RL7;Q99767}

14794 Pathogen[ P03383] interacts with 2 human partners: {Q96RL7;Q3C1V8}

14795 Pathogen[ P03410] interacts with 10 human partners: {Q92562;Q96RL7;Q8IXF0;Q3C1V8;Q99767;A7XYQ1;Q9UM54;Q9P2D1;P05937;O43815}

14796 Pathogen[ P14075] interacts with 2 human partners: {Q96RL7;Q3C1V8}

14797 Pathogen[ P0C206] interacts with 9 human partners: {Q9UM54;Q92562;O43815;Q9P2D1;Q99767;Q3C1V8;A7XYQ1;Q96RL7;Q8IXF0}

14798 Pathogen[ P03363] interacts with 7 human partners: {Q3C1V8;O43815;Q8IXF0;Q96RL7;P51513;Q99767;P05937}

14799 [Cluster 1346]GO:0043620+P biological\_process [name] regulation of DNA-dependent transcription in response to stress [def] "Modulation of the frequency, rate or extent of transcription from a DNA template as a result of a stimulus indicating the organism is under stress. The stress is usually, but not necessarily, exogenous (e.g. temperature, humidity, ionizing radiation)." [GOC

14800 Pathogen[ Q2Q067] interacts with 2 human partners: {P35638;Q9NYF8}

14801 Pathogen[ P0C214] interacts with 2 human partners: {P35638;Q9NYF8}

14802 Pathogen[ P03346] interacts with 2 human partners: {P35638;Q9NYF8}

14803 Pathogen[ Q85601] interacts with 2 human partners: {Q9NYF8;P35638}

14804 Pathogen[ P14079] interacts with 2 human partners: {Q9NYF8;P35638}

14805 Pathogen[ P03383] interacts with 2 human partners: {P35638;Q9NYF8}

14806 Pathogen[ P03410] interacts with 2 human partners: {P35638;Q9NYF8}

14807 Pathogen[ P14075] interacts with 2 human partners: {P35638;Q9NYF8}

14808 Pathogen[ P0C206] interacts with 2 human partners: {Q9NYF8;P35638}

14809 Pathogen[ P03363] interacts with 2 human partners: {P35638;Q9NYF8}

14810 [Cluster 1347]GO:0006405+P biological\_process [name] RNA export from nucleus [def] "The directed movement of RNA from the nucleus to the cytoplasm." [GOC

14811 Pathogen[ Q2Q067] interacts with 3 human partners: {P62826;Q9UBU9;Q9UUK6}

14812 Pathogen[ P0C214] interacts with 3 human partners: {Q9UUK6;P62826;Q9UBU9}

14813 Pathogen[ P03346] interacts with 4 human partners: {P09651;P62826;Q9UBU9;Q9UUK6}

14814 Pathogen[ Q85601] interacts with 3 human partners: {Q9UBU9;P62826;Q9UUK6}

14815 Pathogen[ P14079] interacts with 3 human partners: {Q9UBU9;Q9UUK6;P62826}

14816 Pathogen[ P03383] interacts with 3 human partners: {Q9UBU9;P62826;Q9UUK6}

14817 Pathogen[ P03410] interacts with 3 human partners: {P62826;Q9UBU9;Q9UUK6}

14818 Pathogen[ P14075] interacts with 3 human partners: {P62826;Q9UBU9;Q9UUK6}

14819 Pathogen[ P0C206] interacts with 3 human partners: {Q9UUK6;P62826;Q9UBU9}

14820 Pathogen[ P03363] interacts with 4 human partners: {P09651;Q9UBU9;Q9UUK6;P62826}

14821 [Cluster 1348]GO:0007062+P biological\_process [name] sister chromatid cohesion [def] "The cell cycle process in which the sister chromatids of a replicated chromosome are joined along the entire length of the chromosome." [GOC

14822 Pathogen[ Q2Q067] interacts with 7 human partners: {P49959;O95347;O43502;Q969H0;Q14683;Q8N3U4;Q9BTE3}

14823 Pathogen[ P0C214] interacts with 7 human partners: {P49959;O95347;Q9BTE3;O43502;Q969H0;Q14683;Q8N3U4}

14824 Pathogen[ P03346] interacts with 8 human partners: {Q5XG87;Q8N3U4;O43502;O95347;Q14683;P49959;Q969H0;Q9BTE3}

14825 Pathogen[ Q85601] interacts with 8 human partners: {O43502;Q9BTE3;O95347;Q969H0;P49959;Q5XG87;Q14683;Q8N3U4}

14826 Pathogen[ P14079] interacts with 9 human partners: {Q969H0;Q5XG87;Q9BTE3;Q8N3U4;O95347;O43502;Q96FC9;Q9UQE7;Q14683}

14827 Pathogen[ P03383] interacts with 5 human partners: {Q14683;Q8N3U4;Q9BTE3;O95347;Q969H0}

14828 Pathogen[ P03410] interacts with 10 human partners: {P49959;Q9UQE7;Q9BTE3;O95347;O43502;Q969H0;Q14683;Q5XG87;Q8N3U4;Q96FC9}

14829 Pathogen[ P14075] interacts with 5 human partners: {Q14683;O95347;Q9BTE3;Q969H0;Q8N3U4}

14830 Pathogen[ P0C206] interacts with 10 human partners: {O43502;Q5XG87;Q9BTE3;P49959;Q969H0;Q9UQE7;O95347;Q14683;Q8N3U4;Q9NTJ3}

14831 Pathogen[ P03363] interacts with 6 human partners: {Q9BTE3;O95347;Q969H0;Q8N3U4;Q14683;O43502}

14832 [Cluster 1349]GO:0019827+P biological\_process [name] stem cell maintenance [def] "The process in which an organism retains a population of stem cells, preventing the commitment of all stem cell progeny to a differentiated cell fate." [GOC

14833 Pathogen[ Q2Q067] interacts with 13 human partners: {Q8WVC0;Q6PD62;Q6P1J9;Q5UIP0;Q7Z7J5;Q92754;Q8N5F7;Q5TAX3;P56279;Q92541;Q9H9Z2;Q8N7H5;Q9HBD4}

14834 Pathogen[ P0C214] interacts with 14 human partners: {Q5UIP0;Q8N5F7;Q9HBD4;Q9NW07;Q92541;Q7Z7J5;Q92754;Q6P1J9;Q8N7H5;Q9H9Z2;Q8WVC0;Q6PD62;P56279;Q5TAX3}

14835 Pathogen[ P03346] interacts with 15 human partners: {Q6PD62;P56279;Q9HBD4;Q9NW07;Q7Z7J5;Q8N5F7;Q92754;Q5TAX3;Q8WVC0;Q92541;Q5UI



14836 Pathogen[ Q85601] interacts with 14 human  
partners: {Q6PD62;Q8WVC0;Q92754;Q6P1J9;P56279;Q8N5F7;Q9NW07;Q92541;Q5TAX3;Q5UIP0;Q9HBD4;Q7Z7J5;Q9H9Z2;Q8N7H5}

14837 Pathogen[ P14079] interacts with 15 human  
partners: {Q92541;Q9H9Z2;Q6PD62;Q95718;Q5TAX3;Q8WVC0;Q7Z7J5;Q92754;P56279;Q6P1J9;Q5UIP0;Q8N7H5;Q9NW07;P13693;Q8N5F7}

14838 Pathogen[ P03383] interacts with 13 human  
partners: {Q7Z7J5;Q6P1J9;Q9HBD4;Q9H9Z2;Q5UIP0;Q6PD62;Q8N5F7;Q5TAX3;Q8WVC0;Q92754;Q92541;P56279;Q8N7H5}

14839 Pathogen[ P03410] interacts with 14 human  
partners: {P56279;Q8WVC0;Q6PD62;Q5TAX3;Q92541;Q8N7H5;Q7Z7J5;P13693;Q6P1J9;Q9NW07;Q9H9Z2;Q5UIP0;Q9HBD4;Q92754}

14840 Pathogen[ P14075] interacts with 13 human  
partners: {Q9HBD4;Q8N5F7;Q8WVC0;Q9H9Z2;Q5TAX3;Q92754;P56279;Q8N7H5;Q6P1J9;Q92541;Q6PD62;Q7Z7J5;Q5UIP0}

14841 Pathogen[ P0C206] interacts with 15 human  
partners: {Q6PD62;Q7Z7J5;Q5UIP0;Q9NW07;Q92541;Q92754;Q9H9Z2;Q95718;Q8N7H5;Q8WVC0;Q5TAX3;Q8N5F7;Q9HBD4;P56279;Q6P1J9}

14842 Pathogen[ P03363] interacts with 14 human  
partners: {Q8WVC0;P56279;Q9NW07;Q6P1J9;Q8N5F7;Q9HBD4;Q5UIP0;Q9H9Z2;Q5TAX3;Q92541;Q7Z7J5;Q8N7H5;Q6PD62;Q92754}

14843 [Cluster 1350]GO:0000083+P biological\_process [name] regulation of transcription involved in G1/S phase of mitotic cell cycle [def] "Any process that regulates transcription such that the target genes are transcribed as part of the G1/S phase of the mitotic cell cycle." [GOC

14844 Pathogen[ Q2Q067] interacts with 17 human  
partners: {O75461;P06400;Q99741;Q9H211;Q99684;Q13415;P12004;O14867;P31350;P24864;O75419;Q16254;P78396;Q9UKT4;P04818;Q9BQA5;Q14207}

14845 Pathogen[ P0C214] interacts with 17 human  
partners: {Q16254;P04818;Q14207;P31350;O75461;P00374;O14867;P78396;Q9H211;O75419;P24864;Q99684;Q9BQA5;P06400;Q9UKT4;Q99741;Q13415}

14846 Pathogen[ P03346] interacts with 16 human  
partners: {P12004;P78396;Q14207;P06400;P24864;Q16254;O14867;P31350;Q99684;Q13415;Q9UKT4;O75461;O75419;Q99741;Q9H211;Q9BQA5}

14847 Pathogen[ Q85601] interacts with 16 human  
partners: {P06400;Q9UKT4;Q13415;P31350;O75461;P78396;Q16254;O14867;Q99684;Q14207;Q9BQA5;P12004;O75419;Q99741;Q9H211;P24864}

14848 Pathogen[ P14079] interacts with 17 human  
partners: {P00374;O14867;O75419;Q9UKT4;Q13415;P78396;P24864;Q16254;Q14207;Q9H211;Q99684;P31350;Q9BQA5;O75461;Q99741;P12004;P04818}

14849 Pathogen[ P03383] interacts with 13 human  
partners: {O75461;Q9UKT4;P06400;P31350;P78396;Q9BQA5;Q16254;Q99684;Q14207;O75419;P24864;Q9H211;Q99741}

14850 Pathogen[ P03410] interacts with 18 human  
partners: {Q9UKT4;O75461;P31350;O75419;Q9BQA5;P00374;Q14207;Q16254;Q9H211;P06400;Q99684;P78396;P04818;O14867;P24864;P12004;Q13415;Q99741}

14851 Pathogen[ P14075] interacts with 13 human  
partners: {Q9H211;Q14207;P31350;Q9BQA5;Q9UKT4;O75419;P78396;Q16254;Q99684;P06400;Q99741;O75461;P24864}

14852 Pathogen[ P0C206] interacts with 17 human  
partners: {O14867;O75419;Q99741;Q9BQA5;Q16254;Q9UKT4;Q9H211;P04818;Q99684;P78396;Q13415;O75461;P24864;Q14207;P31350;P12004;P06400}

14853 Pathogen[ P03363] interacts with 14 human  
partners: {Q99684;O75461;P24864;Q16254;O14867;P06400;Q13415;Q99741;P78396;Q9H211;Q9BQA5;Q9UKT4;Q14207;O75419}

14854 [Cluster 1351]GO:0043401+P biological\_process [name] steroid hormone mediated signaling pathway [def] "A series of molecular signals mediated by a steroid hormone binding to a receptor." [PMID

14855 Pathogen[ Q2Q067] interacts with 13 human  
partners: {P10827;P10589;P13056;P62508;P10828;P49116;P11473;P28702;P55055;Q15466;P08235;P11474;P22736}

14856 Pathogen[ P0C214] interacts with 6 human  
partners: {P11474;P13056;P49116;P10828;P62508;Q15466}

14857 Pathogen[ P03346] interacts with 22 human  
partners: {P10827;P11473;P06401;P08235;P48443;P49116;Q15466;P13056;P10588;P51843;P28702;P22736;Q95718;O75469;P62508;P10828;P11474;O00482;P35398;Q13285;P55055;P10589}

14858 Pathogen[ Q85601] interacts with 14 human  
partners: {P11473;Q15466;P28702;P55055;P22736;P08235;P11474;P10827;O00482;P62508;P49116;P13056;P10828;P10589}

14859 Pathogen[ P14079] interacts with 19 human  
partners: {P13056;P62508;P55055;P35398;P11473;P10828;P08235;P11474;P22736;P48443;P10827;Q95718;O00482;O75469;P28702;P10588;P10589;P49116;Q15466}

14860 Pathogen[ P03383] interacts with 8 human  
partners: {P49116;P11473;P11474;Q15466;P28702;P10828;P62508;P13056}

14861 Pathogen[ P03410] interacts with 11 human

partners:{P10828;P62508;P11473;P22736;P28702;Q15466;P11474;P49116;P10589;P08235;P13056}

14862 Pathogen[ P14075] interacts with 8 human

partners:{P11474;P10828;P13056;P49116;P11473;P28702;Q15466;P62508}

14863 Pathogen[ P0C206] interacts with 20 human

partners:{P10588;Q15466;P35398;P06401;O75469;P55055;P13056;P49116;P22736;O00482;P10589;O95718;P10828;P62508;P28702;P11474;P11473;P08235;P10827;P48443}

14864 Pathogen[ P03363] interacts with 13 human

partners:{P10828;Q15466;P49116;P62508;P11474;P10588;P11473;P28702;P08235;P35398;P10589;P13056;O00482}

14865 [Cluster 1352]GO:0030334+P biological\_process [name] regulation of cell migration [def] "Any process that modulates the frequency, rate or extent of cell migration." [GOC

14866 Pathogen[ Q2Q067] interacts with 8 human

partners:{P02545;P31749;Q9BYG5;Q96IF1;P62328;Q13233;P63000;P61586}

14867 Pathogen[ P0C214] interacts with 8 human

partners:{P63000;P61586;Q13233;P07093;Q9BYG5;P02545;P31749;P62328}

14868 Pathogen[ P03346] interacts with 12 human

partners:{Q96IF1;P02545;P31749;Q9BYG5;Q5JSH3;Q9NVR7;Q13233;P62328;Q9C0H9;P63000;Q9P2A4;P61586}

14869 Pathogen[ Q85601] interacts with 10 human

partners:{P02545;P31749;Q5JSH3;Q9BYG5;P63000;P61586;Q96IF1;P62328;Q13233;P07093}

14870 Pathogen[ P14079] interacts with 10 human

partners:{P31751;Q9BYG5;Q9NVR7;Q9C0H9;Q96IF1;Q5JSH3;P62328;Q9P2A4;P61586;P02545}

14871 Pathogen[ P03383] interacts with 8 human

partners:{P02545;Q13233;P31749;P62328;P63000;P61586;Q9BYG5;Q9C0H9}

14872 Pathogen[ P03410] interacts with 12 human

partners:{Q5JSH3;P62328;P63000;P31749;Q9P2A4;Q13233;Q96IF1;Q9NVR7;P61586;P02545;Q9C0H9;Q9BYG5}

14873 Pathogen[ P14075] interacts with 8 human

partners:{P62328;P31749;P02545;P61586;P63000;Q9BYG5;Q9C0H9;Q13233}

14874 Pathogen[ P0C206] interacts with 11 human

partners:{P31749;Q96IF1;P62328;Q9BYG5;Q9NVR7;Q13233;P61586;P63000;Q9C0H9;P02545;Q5JSH3}

14875 Pathogen[ P03363] interacts with 11 human

partners:{P02545;P62328;P63000;Q96IF1;Q13480;P31749;Q9NVR7;Q9BYG5;Q13233;Q9P2A4;Q9C0H9}

14876 [Cluster 1353]GO:0010469+P biological\_process [name] regulation of receptor activity [def] "Any process that modulates the frequency, rate or extent of receptor activity. Receptor activity is when a molecule combines with an extracellular or intracellular messenger to initiate a change in cell activity." [GOC

14877 Pathogen[ Q2Q067] interacts with 3 human partners:{P67775;P63279;Q15173}

14878 Pathogen[ P0C214] interacts with 4 human partners:{P63279;P05121;Q15173;P67775}

14879 Pathogen[ P03346] interacts with 3 human partners:{P63279;P67775;Q15173}

14880 Pathogen[ Q85601] interacts with 4 human partners:{Q15173;P63279;P05121;P67775}

14881 Pathogen[ P14079] interacts with 2 human partners:{P63279;Q15173}

14882 Pathogen[ P03383] interacts with 3 human partners:{Q15173;P67775;P63279}

14883 Pathogen[ P03410] interacts with 4 human partners:{P05121;Q15173;P63279;P67775}

14884 Pathogen[ P14075] interacts with 3 human partners:{P63279;Q15173;P67775}

14885 Pathogen[ P0C206] interacts with 3 human partners:{Q15173;P67775;P05121}

14886 Pathogen[ P03363] interacts with 3 human partners:{Q15173;P63279;P67775}

14887 [Cluster 1354]GO:0006461+P biological\_process [name] protein complex assembly [def] "The aggregation, arrangement and bonding together of a set of components to form a protein complex." [GOC

14888 Pathogen[ Q2Q067] interacts with 52 human

partners:{P30153;Q9Y3C7;Q99747;Q9BYG5;O43447;O43516;P30793;Q01664;Q13111;Q5TC12;Q13077;Q12933;Q9BWW4;O60356;O00401;O14910;Q92558;Q00597;P14635;O75381;O95163;O60711;Q13112;O43264;P78352;P51948;Q15370;Q96S59;P50748;O75496;Q9BSJ2;Q02410;P07814;Q8TEQ6;O00505;Q15599;O75030;P61244;Q9Y697;P42768;P40121;P17096;Q92793;Q9UGJ1;Q92845;Q9Y375;P30047;Q00987;Q9UQR1;O15360;P14868;Q8NFBH8}

14889 Pathogen[ P0C214] interacts with 54 human

partners:{P55822;Q9BWW4;O14910;P32243;Q00597;P61244;Q9BSJ2;Q99747;O43264;P30153;Q00987;Q13112;P40121;P07814;O75496;Q15599;Q13111;P50748;Q92793;Q9Y375;P17096;O75381;P14635;Q15370;O75030;P14868;Q9UGJ1;P78352;Q9Y3C7;O43516;P30793;P51948;Q9Y697;Q8TEQ6;Q96S59;Q12933;O60356;O60711;O15360;Q5TC12;O00505;Q92845;Q92558;O43447;Q9BYG5;Q02410;O00401;Q8NFBH8;P30047;P42768;Q9UQR1;Q9BYG3;Q01664;O95163}

14890 Pathogen[ P03346] interacts with 60 human

partners:{Q13077;Q15370;Q9UQR1;O43447;Q8NFBH8;O43516;P42768;P78352;P07814;O15360;Q9BW T7;O43264;O95163;Q9NZW5;O00505;Q9Y697;Q9Y5K6;O75030;P17096;Q02410;Q00987;Q8TEW0;P30047;P30153;Q5TC12;Q9BWW4;Q15599;Q9Y3C7;Q96S59;P14635;P55822;Q9BYG5;P40121;Q92558;Q9UGJ1;Q13111;Q8TEQ6;Q9Y375;P14868;Q9BYG3;Q13492;P61244;P50748;O15151;Q00597;O60356;Q9BSJ2;Q92845;Q92793;Q13112;O00401;P32243;O60711;Q01664;P51948;Q15393;O14910;Q99747;O75496}

14891 Pathogen[ Q85601] interacts with 56 human

partners:{Q9UQR1;O00401;O75496;Q15370;P17096;P14868;O14910;Q92558;Q9Y5K6;O15151;Q9BYG5;Q13112;P07814;O75030;Q9Y697;O43264;P30153;Q9Y3C7;P51948;Q00597;P30793;P30047;Q5TC12;O43516;Q9BSJ2;O60711;Q9Y375;Q8TEQ6;Q96S59;Q9UGJ1;P14635;Q12933;P40121;P42768;Q8NF

- 14892 H8;Q9BWW4;P55822;P78352;P32243;O15360;P61244;P50748;O43447;Q92845;Q13077;O60356;Q02410;Q13111;Q92793;O00505;O75381;O95163;Q00987;Q01664;Q15599;Q99747}  
Pathogen[ P14079] interacts with 64 human partners: {O43292;Q9UQR1;Q13492;O43516;O43447;P09327;Q8TEQ6;Q9Y375;Q9BYG5;Q92558;Q92793;Q02410;Q9UGJ1;P17096;Q00597;Q9Y3C7;O95163;Q15070;P14868;Q13112;Q13111;Q99747;Q5TC12;O60711;P30793;Q13077;P40121;P55822;Q00987;Q8TEW0;P14635;Q9BWW4;Q8NMFH8;Q15599;Q9Y697;Q15370;Q01664;O43264;Q9BSJ2;O00505;P32243;Q9Y5K6;Q12933;Q9BYG3;O75381;Q16625;O60356;P30153;Q92845;P50748;Q96S59;O75030;O15151;Q9UPY6;P61244;O15273;Q9NZW5;O15360;O75496;P07814;P30047;P42768;O00401;P51948}
- 14893 Pathogen[ P03383] interacts with 47 human partners: {Q9UQR1;Q5TC12;Q8NMFH8;Q9BSJ2;O95163;P17096;P14868;P32243;P51948;O43264;Q9BWW4;O75030;P30153;O00505;P14635;Q92558;Q9Y697;Q01664;O43447;O43516;O00401;Q99747;Q13111;Q9Y3C7;Q8TEQ6;Q96S59;Q12933;Q9BYG5;O60711;O75381;P42768;P07814;Q9Y375;Q00597;O15360;Q15370;Q02410;Q92845;P61244;P30047;P78352;Q13112;O14910;Q92793;O75496;P50748;O60356}
- 14894 Pathogen[ P03410] interacts with 66 human partners: {O60711;P30047;Q5TC12;O14910;Q9UPY6;O00505;P55822;O15151;Q9BWW4;Q13077;Q96S59;O43516;Q15393;Q8NMFH8;O75030;Q8TEQ6;Q92558;Q9NZW5;Q92845;O00401;P50748;P17096;P42768;Q15370;O75381;Q9Y697;P14868;P30793;Q9Y3C7;Q02410;P61244;O15273;O43264;Q9Y5K6;Q9UQR1;Q15599;Q13492;Q92793;P14635;Q00597;O95163;Q9BYG3;Q13111;Q13112;O60356;Q12933;Q9Y375;Q9BSJ2;O15360;Q16625;P51948;P32243;P30153;Q01664;O75496;Q8TEW0;P07814;Q00987;Q15070;Q9BWT7;P78352;P40121;O43447;Q99747;Q9UGJ1;Q9BYG5}
- 14895 Pathogen[ P14075] interacts with 50 human partners: {Q8TEQ6;Q02410;Q9Y375;O15360;O75030;Q9UQR1;Q9BWW4;Q92845;P14635;P61244;P42768;P17096;Q99747;Q15070;Q13111;O75381;O00505;O43516;P55822;O00401;Q9Y3C7;Q96S59;Q15370;Q01664;Q12933;O14910;P30047;P14868;O60356;Q5TC12;P30153;Q95163;O43447;Q92793;P50748;P78352;O60711;Q9BYG5;Q92558;P30793;O43264;O75496;Q00597;Q13112;Q9BSJ2;P32243;Q8NMFH8;P07814;P51948;Q9Y697}
- 14896 Pathogen[ P0C206] interacts with 60 human partners: {Q13112;P07814;P78352;O15360;Q13077;Q9BYG3;O75496;Q92845;P30153;O43516;P40121;O75030;O75381;Q13111;Q8TEQ6;Q9Y697;O00505;Q9BYG5;Q9Y3C7;Q12933;P30793;Q9UGJ1;Q92793;O95163;P30047;O60356;Q8NMFH8;Q8TEW0;Q15599;O15151;Q15070;P32243;Q9BWW4;Q9UQR1;Q9BWT7;Q92558;Q15370;O00401;Q9Y375;O14910;P61244;O43447;P17096;Q99747;Q01664;Q9Y5K6;Q00597;P14635;Q96S59;Q00987;P42768;O60711;Q5TC12;P50748;O43264;Q9BSJ2;P14868;P55822;P51948;Q02410}
- 14897 Pathogen[ P03363] interacts with 56 human partners: {Q13112;Q92845;Q15370;O15360;O60356;Q00597;Q9UPY6;Q9Y375;P14868;Q15393;Q13111;Q9NZW5;O14910;O00505;P78352;Q12933;O43264;P42768;O15151;P50748;P32243;Q92558;Q9Y697;Q8NMFH8;O43447;P61244;O75030;Q13077;P17096;Q9BWT7;Q02410;O75381;O95163;Q5TC12;Q9BYG5;Q92793;Q9BYG3;O75496;Q9UQR1;O00401;O15599;Q9UGJ1;O43516;Q8TEQ6;Q9BWW4;P30047;Q96S59;P07814;P30153;P40121;Q9Y5K6;Q01664;Q99747;Q9BSJ2;O60711;Q9Y3C7}
- 14898 [Cluster 1355]GO:0032008+P biological\_process [name] positive regulation of TOR signaling cascade [def] "Any process that activates or increases the frequency, rate or extent of signaling via the TOR signaling pathway." [GOC
- 14899 Pathogen[ Q2Q067] interacts with 4 human partners: {Q9BVC4;Q9H4A6;O43504;Q6R327}
- 14900 Pathogen[ P0C214] interacts with 4 human partners: {Q9BVC4;Q9H4A6;Q6R327;O43504}
- 14901 Pathogen[ P03346] interacts with 4 human partners: {Q9BVC4;Q9H4A6;O43504;Q6R327}
- 14902 Pathogen[ Q85601] interacts with 2 human partners: {Q9BVC4;Q9H4A6}
- 14903 Pathogen[ P14079] interacts with 8 human partners: {Q6R327;Q9Y2Q5;Q9UHA4;Q9BVC4;Q0VGL1;Q6IAA8;O43504;Q9H4A6}
- 14904 Pathogen[ P03383] interacts with 2 human partners: {Q9H4A6;O43504}
- 14905 Pathogen[ P03410] interacts with 8 human partners: {Q9Y2Q5;O43504;Q9BVC4;Q9H4A6;Q9UHA4;Q6R327;Q6IAA8;Q0VGL1}
- 14906 Pathogen[ P14075] interacts with 3 human partners: {Q6R327;O43504;Q9H4A6}
- 14907 Pathogen[ P0C206] interacts with 5 human partners: {Q9H4A6;Q9UHA4;O43504;Q6R327;Q9BVC4}
- 14908 Pathogen[ P03363] interacts with 4 human partners: {Q9BVC4;Q9H4A6;O43504;Q6R327}
- 14909 [Cluster 1356]GO:0007269+P biological\_process [name] neurotransmitter secretion [def] "The regulated release of neurotransmitter into the synaptic cleft. A neurotransmitter is any of a group of substances that are released on excitation from the axon terminal of a presynaptic neuron of the central or peripheral nervous system and travel across the synaptic cleft to either excite or inhibit the target cell. Among the many substances that have the properties of a neurotransmitter are acetylcholine, noradrenaline, adrenaline, dopamine, glycine, gamma-aminobutyrate, glutamic acid, substance P, enkephalins, endorphins and serotonin." [CHEBI
- 14910 Pathogen[ Q2Q067] interacts with 8 human partners: {O75145;O95295;O14910;P63010;P11142;Q9UI32;O94925;Q9NUP9}
- 14911 Pathogen[ P0C214] interacts with 7 human partners: {O14910;O95295;Q9UI32;P63010;O75145;O94925;P11142}
- 14912 Pathogen[ P03346] interacts with 9 human partners: {P63010;O95295;P11142;Q9UI32;Q9NUP9;Q9HAP6;O94925;O75145;O14910}
- 14913 Pathogen[ Q85601] interacts with 8 human partners: {O75145;O94925;Q9NUP9;O14910;O95295;P11142;P63010;Q9UI32}
- 14914 Pathogen[ P14079] interacts with 9 human partners: {O14810;P11142;Q9NUP9;O94925;O75145;Q9HAP6;P63010;Q9UI32;O95295}
- 14915 Pathogen[ P03383] interacts with 6 human

14916 partners:{O94925;O95295;P63010;P11142;O75145;O14910}  
Pathogen[ P03410] interacts with 10 human

14917 partners:{O14910;O14810;P11142;Q9NUP9;O94925;Q9HAP6;O95295;O75145;P63010;Q9UI32}  
Pathogen[ P14075] interacts with 6 human

14918 partners:{P11142;O95295;O14910;O75145;P63010;O94925}  
Pathogen[ P0C206] interacts with 8 human

14919 partners:{P63010;Q9NUP9;O75145;O14910;O95295;Q9UI32;O94925;P11142}  
Pathogen[ P03363] interacts with 8 human

14920 partners:{O14910;O94925;O75145;P63010;O95295;Q9UI32;Q9NUP9;P11142}  
[Cluster 1357]GO:0051168+P biological\_process [name] nuclear export [def] "The directed movement of substances out of the nucleus." [GOC

14921 Pathogen[ Q2Q067] interacts with 4 human partners:{O60524;Q9UDY8;Q96K30;P54253}  
14922 Pathogen[ P0C214] interacts with 5 human  
partners:{P54253;Q9UDY8;O60524;Q9H089;Q96K30}

14923 Pathogen[ P03346] interacts with 5 human  
partners:{P09651;Q9UDY8;Q96K30;P54253;O60524}

14924 Pathogen[ Q85601] interacts with 5 human  
partners:{Q9UDY8;Q9H089;P54253;O60524;Q96K30}

14925 Pathogen[ P14079] interacts with 4 human partners:{Q96K30;O60524;P54253;Q9H089}  
14926 Pathogen[ P03383] interacts with 3 human partners:{Q96K30;P54253;O60524}  
14927 Pathogen[ P03410] interacts with 4 human partners:{Q96K30;O60524;Q9H089;P54253}  
14928 Pathogen[ P14075] interacts with 3 human partners:{P54253;Q96K30;O60524}  
14929 Pathogen[ P0C206] interacts with 5 human  
partners:{Q9UDY8;Q96K30;O60524;Q9H089;P54253}

14930 Pathogen[ P03363] interacts with 4 human partners:{P09651;Q96K30;P54253;O60524}

14931 [Cluster 1358]GO:0045603+P biological\_process [name] positive regulation of endothelial cell differentiation [def] "Any process that activates or increases the frequency, rate or extent of endothelial cell differentiation." [GOC

14932 Pathogen[ Q2Q067] interacts with 2 human partners:{P62324;O00321}  
14933 Pathogen[ P0C214] interacts with 3 human partners:{O00321;P62324;P18054}  
14934 Pathogen[ P03346] interacts with 3 human partners:{P18054;O00321;P62324}  
14935 Pathogen[ Q85601] interacts with 2 human partners:{P62324;O00321}  
14936 Pathogen[ P14079] interacts with 2 human partners:{P62324;O00321}  
14937 Pathogen[ P03383] interacts with 2 human partners:{P62324;O00321}  
14938 Pathogen[ P03410] interacts with 2 human partners:{O00321;P62324}  
14939 Pathogen[ P14075] interacts with 2 human partners:{P62324;O00321}  
14940 Pathogen[ P0C206] interacts with 2 human partners:{P62324;O00321}  
14941 Pathogen[ P03363] interacts with 2 human partners:{O00321;P62324}

14942 [Cluster 1359]GO:0042791+P biological\_process [name] 5S class rRNA transcription from RNA polymerase III type 1 promoter [def] "The synthesis of 5S ribosomal RNA (rRNA), or an equivalent rRNA, from a DNA template by RNA polymerase III (Pol III), originating at a type 1 RNA polymerase III promoter." [GOC

14943 Pathogen[ Q2Q067] interacts with 4 human partners:{Q9Y5Q8;Q9UKN8;Q12789;Q969F1}  
14944 Pathogen[ P0C214] interacts with 4 human partners:{Q9Y5Q8;Q9UKN8;Q12789;Q969F1}  
14945 Pathogen[ P03346] interacts with 6 human  
partners:{Q9Y5Q8;Q9UKN8;Q8WUA4;Q9Y5Q9;Q969F1;Q12789}

14946 Pathogen[ Q85601] interacts with 4 human partners:{Q9UKN8;Q9Y5Q8;Q12789;Q969F1}  
14947 Pathogen[ P14079] interacts with 6 human  
partners:{Q9UKN8;Q9Y5Q9;Q969F1;Q9Y5Q8;Q12789;Q8WUA4}

14948 Pathogen[ P03383] interacts with 4 human partners:{Q9UKN8;Q969F1;Q9Y5Q8;Q12789}  
14949 Pathogen[ P03410] interacts with 6 human  
partners:{Q9Y5Q9;Q969F1;Q9Y5Q8;Q12789;Q8WUA4;Q9UKN8}

14950 Pathogen[ P14075] interacts with 4 human partners:{Q969F1;Q12789;Q9Y5Q8;Q9UKN8}  
14951 Pathogen[ P0C206] interacts with 6 human  
partners:{Q969F1;Q8WUA4;Q9Y5Q9;Q9Y5Q8;Q9UKN8;Q12789}

14952 Pathogen[ P03363] interacts with 6 human  
partners:{Q969F1;Q8WUA4;Q9Y5Q9;Q12789;Q9UKN8;Q9Y5Q8}

14953 [Cluster 1360]GO:0008652+P biological\_process [name] cellular amino acid biosynthetic process [def] "The chemical reactions and pathways resulting in the formation of amino acids, organic acids containing one or more amino substituents." [ISBN

14954 Pathogen[ Q2Q067] interacts with 6 human  
partners:{Q96GX9;Q9BV57;Q9BV20;Q9UI32;O94925;P32929}

14955 Pathogen[ P0C214] interacts with 16 human  
partners:{Q9Y617;P00480;Q9BV57;Q96GX9;Q9UI32;P32929;O15382;Q9UHY7;P54687;O94925;P04424;P35520;Q8N159;P11586;Q9BV20;Q16773}

14956 Pathogen[ P03346] interacts with 8 human  
partners:{Q9UBK8;Q9BV20;Q9BV57;Q9UI32;P32929;Q9UHY7;O94925;Q96GX9}

14957 Pathogen[ Q85601] interacts with 9 human  
partners:{O94925;P00480;Q96GX9;Q9BV57;Q9UHY7;Q9BV20;Q9UI32;O15382;P32929}

14958 Pathogen[ P14079] interacts with 11 human  
partners:{Q8N159;Q9Y617;Q9BV20;O94925;Q96GX9;P32929;Q9UI32;P00480;P04424;O15382;Q9BV57}

14959 Pathogen[ P03383] interacts with 5 human  
partners:{O94925;Q9BV57;Q96GX9;Q8N159;Q9BV20}

14960 Pathogen[ P03410] interacts with 11 human  
partners:{Q8N159;P32929;P04424;Q9Y617;O94925;Q9BV20;P00480;O15382;Q96GX9;Q9UI32;Q9BV

57}

14961 Pathogen[ P14075] interacts with 5 human  
partners: {Q96GX9;Q9BV57;Q9BV20;Q8N159;O94925}

14962 Pathogen[ POC206] interacts with 10 human  
partners: {Q9BV20;O15382;Q8N159;Q9UHY7;P32929;Q9BV57;Q9UI32;Q96GX9;O94925;P00480}

14963 Pathogen[ P03363] interacts with 5 human  
partners: {O94925;Q9BV57;Q9UI32;Q9BV20;Q96GX9}

14964 [Cluster 1361]GO:0030049+P biological\_process [name] muscle filament sliding [def] "The sliding of actin thin filaments and myosin thick filaments past each other in muscle contraction. This involves a process of interaction of myosin located on a thick filament with actin located on a thin filament. During this process ATP is split and forces are generated." [GOC

14965 Pathogen[ Q2Q067] interacts with 7 human  
partners: {Q9UKX2;P60660;P11532;P48788;P12883;P08670;P17661}

14966 Pathogen[ POC214] interacts with 14 human  
partners: {P48788;P68133;Q9UKX2;P11055;P14649;P60660;P11532;P13535;P08670;P19429;P12883;P13533;Q9Y623;P17661}

14967 Pathogen[ P03346] interacts with 10 human  
partners: {P60660;P28289;P14649;P17661;P63316;P08670;Q9UKX2;P11532;P10916;P48788}

14968 Pathogen[ Q85601] interacts with 13 human  
partners: {P68133;P17661;P13533;P08670;P14649;P11532;Q9UKX2;P48788;P11055;P12883;P13535;P60660;Q9Y623}

14969 Pathogen[ P14079] interacts with 17 human  
partners: {P13805;P19429;P11532;P07951;P10916;P19237;Q9UKX2;P14649;P68032;P28289;P60660;P48788;P12883;P08670;P17661;O15273;P68133}

14970 Pathogen[ P03383] interacts with 6 human  
partners: {P08670;P17661;Q9UKX2;P11532;P48788;P12883}

14971 Pathogen[ P03410] interacts with 18 human  
partners: {Q9UKX2;P10916;P17661;P19429;P11532;P28289;O15273;P07951;P12883;P68133;P48788;P08670;P14649;P63316;P13533;P13805;P60660;P13535}

14972 Pathogen[ P14075] interacts with 5 human  
partners: {P11532;Q9UKX2;P17661;P08670;P48788}

14973 Pathogen[ POC206] interacts with 14 human  
partners: {P17661;P13533;Q9Y623;P19429;P60660;P11055;P14649;P68133;P12883;Q9UKX2;P08670;P11532;P48788;P13535}

14974 Pathogen[ P03363] interacts with 11 human  
partners: {P14649;Q9UKX2;P68133;P48788;P11532;P08670;P17661;P28289;P60660;P19429;P10916}

14975 [Cluster 1362]GO:0008283+P biological\_process [name] cell proliferation [def] "The multiplication or reproduction of cells, resulting in the expansion of a cell population." [GOC

14976 Pathogen[ Q2Q067] interacts with 113 human  
partners: {P49454;Q13118;Q9H2G9;P31749;Q93034;O14744;Q9BVP2;A0AVK6;O75474;Q9Y266;Q15398;Q9UQ80;Q5VTD9;Q9GZL7;Q14160;Q9UMX3;P49959;Q01094;P40763;P62750;Q9Y3E1;Q16666;P46937;Q13485;P08779;P61024;Q15326;Q96T88;P37275;O75081;Q9HD15;O75896;Q9UKY7;Q05195;P14373;P17483;P14316;P56945;Q9UJT9;Q9UNH5;P40222;O95359;O00541;P11308;Q8NEU8;P30304;Q9UKW6;Q14765;Q06830;Q12972;Q14137;P12004;Q99966;Q9Y3A5;P30307;P20073;Q14186;P51948;Q13561;Q07666;O60934;O60832;P12755;Q9UKZ1;P56277;Q8N3C0;P55060;Q15468;P50750;O43598;Q13616;Q96Q83;P50613;A6NCL1;Q15742;Q92830;Q9NTI5;Q9BRX2;P10599;Q9ULW0;O75312;Q9H4A6;Q13309;Q15819;P61201;P33552;Q9UKN5;O75410;Q8N9Z9;Q9UI43;P46013;P47974;P47928;Q96PU4;Q5T2W1;Q92793;P68036;P13010;P49321;P42677;Q9UKG1;Q16576;P30260;Q9BZG8;Q13042;Q15691;Q66K89;Q01534;Q6RFH8;Q9UI36;Q9NYV6;Q9BXP5;Q9Y242}

14977 Pathogen[ POC214] interacts with 117 human  
partners: {Q9UKW6;Q9Y3E1;Q15742;Q9UKN5;A6NCL1;Q05195;P11308;P30307;A0AVK6;Q9H4A6;O75896;P55060;P23919;P49959;P56945;P13010;Q92934;P50750;Q9HD15;P50613;Q13309;Q14765;O00541;Q9BRX2;Q92793;P61024;Q9GZL7;P46937;P61201;Q96PU4;P37275;Q16666;Q93034;Q15691;Q9UKG1;Q9Y266;Q96T88;P55789;Q5VTD9;P08779;Q01534;Q06830;O95359;Q5T2W1;Q8N3C0;P50747;O75312;Q99966;Q01094;Q15819;P35580;Q14186;P21127;Q16881;P47928;P51948;Q07666;O95071;P56277;Q6RFH8;Q14137;Q15398;Q13485;Q8NEU8;Q16658;Q9Y242;Q9ULW0;Q15468;Q9UMX3;Q9H2G9;P49321;Q9UI43;Q16576;O43598;Q9NYV6;Q9UNH5;Q13616;P12755;Q14160;Q9UI36;Q8N9Z9;P54687;O60832;O75410;P42677;O75474;Q92830;P10599;Q9UKZ1;Q9UKY7;P46013;P40763;Q12972;Q9BZG8;Q9UQ80;P14373;P62750;P30260;P49454;Q9Y3A5;Q15326;P40222;Q96Q83;P20073;Q9NTI5;P30304;P33552;Q13561;Q9UJT9;Q66K89;P14316;O75081;P31749;Q9BXP5;P47974;Q9BVP2;Q13042}

14978 Pathogen[ P03346] interacts with 135 human  
partners: {Q9NPC8;P12004;P15863;P46937;Q01534;Q16666;Q9H2G9;Q99966;Q5T2W1;Q9UKY7;P68036;P14373;P08779;Q13616;O43598;P20073;O00541;Q9UJT9;Q9UQ80;P21127;Q9UKZ1;O75312;O75410;P07992;Q15691;Q9H4A6;P14316;Q9HD15;Q96FS4;Q9GZL7;P30304;O95359;O75474;O14744;P13010;Q9NQ69;P52951;O60832;P61024;P55060;P17483;P49321;Q01094;Q66K89;O75896;Q93034;P78426;Q8N3C0;Q9BXP5;Q15555;Q9Y266;Q14186;Q07666;Q92830;Q15742;P11308;Q9ULW0;Q9C0J9;Q8N960;P56945;Q15398;Q8NEU8;P31749;Q8N9Z9;Q13042;Q13309;Q13118;P51587;Q9Y242;P42566;O60447;P47974;Q9NZC4;P50750;P33552;A6NCL1;Q9NTI5;P37275;Q16576;Q12929;P49959;Q05195;Q5VTD9;Q96Q83;Q9Y3E1;O60934;Q06830;Q9BNF2;P61201;P42677;P62750;O15151;Q15326;Q9NYV6;Q9UKG1;P51858;Q14137;P10599;Q16658;P56178;Q13485;Q96PU4;P46013;Q14160;Q9UMX3;Q9BZG8;Q6RFH8;Q92793;Q9UKW6;Q9Y6Q3;Q14765;O95071;Q9UI36;Q9H9S0;P30260;P40222;Q9UI43;A0AVK6;P40763;Q15468;Q9BRX2;Q9UKN5;Q12972;P51948;P56277;O75081;Q96T88;Q9UNH5;P30307;P49454;Q9BVP2;Q9Y3A5;P47928;Q13561;Q15819}

- 14979 Pathogen[ Q85601] interacts with 119 human  
partners: {P49454;O43598;Q16666;Q13309;P14373;P31749;O00541;P14316;Q5T2W1;Q14765;Q07666;P08779;Q15398;Q9UQ80;P50750;O15151;Q9UKZ1;O75312;Q8NEU8;Q99966;Q9UKN5;P40763;Q05195;P61201;Q01534;Q9Y242;Q96PU4;Q9Y3A5;Q13616;Q9Y3E1;P47974;P49959;P30304;Q9UMX3;P51948;P61024;Q9ULW0;Q15742;P49321;O14744;Q9NTI5;P68036;O75474;P12755;P56277;Q9UNH5;Q9Y266;Q10599;Q14186;Q92830;Q15555;P30307;Q9Y6Q3;P61201;Q01534;Q8NEU8;P40222;Q14186;Q13118;P68036;O95359;Q13309;A6NCL1;Q92830;O75312;Q9Y6A5;O75896;P47974;Q16658;P13010;Q15819;O60832;Q92793;Q9BWF2;Q9UKZ1;Q9GZL7;P42566;Q15742;O43598;P51587;Q99966;Q9Y266;P56278;Q9ULW0;Q9Y3A5;P46937;O60934;Q14765;P30304;Q16576;P11308;Q8N960;Q9NTI5;Q15078;P33552;Q9H2G9;Q9Y3E1;P50613;Q9NZC4;O14744;Q99661;P23919;O15172;Q5VTD9;Q6RFH8;Q9NX09;P56277;Q92934;P62750;Q07666;Q13042;Q15555;Q93034;Q66K89;P55060;Q9HD15;Q15468;P55789;Q13561;Q9UMX3;Q9UI36;P21127;Q5T2W1;Q12972;Q9BZG8;Q5W0Q7;O75081;Q05195;P42677;Q96AZ6;P30260;P20073;Q9UKY7;P10599;O75410;O00541;P49454;Q14137;P12004;P49321;Q8N9Z9;Q9UJT9;Q9UKN5;A0AVK6;Q13616;Q9BXP5;O75474;Q9UQ80;Q96Q83;O15151;Q9H4A6;Q01094;P14316;Q9UKW6;Q15326;P47928;P07992;P37275;Q9UNH5;P49917;Q16666;P50750;P46013;Q15398;O15503;P61024;P51948}
- 14980 Pathogen[ P14079] interacts with 129 human  
partners: {Q15691;Q9BQ08;Q12929;Q9BRX2;P15502;Q13442;P12755;P14373;Q9UKG1;Q9BVP2;Q9NYV6;P08779;Q9UI43;P30307;Q9Y6Q3;P61201;Q01534;Q8NEU8;P40222;Q14186;Q13118;P68036;O95359;Q13309;A6NCL1;Q92830;O75312;Q9Y6A5;O75896;P47974;Q16658;P13010;Q15819;O60832;Q92793;Q9BWF2;Q9UKZ1;Q9GZL7;P42566;Q15742;O43598;P51587;Q99966;Q9Y266;P56278;Q9ULW0;Q9Y3A5;P46937;O60934;Q14765;P30304;Q16576;P11308;Q8N960;Q9NTI5;Q15078;P33552;Q9H2G9;Q9Y3E1;P50613;Q9NZC4;O14744;Q99661;P23919;O15172;Q5VTD9;Q6RFH8;Q9NX09;P56277;Q92934;P62750;Q07666;Q13042;Q15555;Q93034;Q66K89;P55060;Q9HD15;Q15468;P55789;Q13561;Q9UMX3;Q9UI36;P21127;Q5T2W1;Q12972;Q9BZG8;Q5W0Q7;O75081;Q05195;P42677;Q96AZ6;P30260;P20073;Q9UKY7;P10599;O75410;O00541;P49454;Q14137;P12004;P49321;Q8N9Z9;Q9UJT9;Q9UKN5;A0AVK6;Q13616;Q9BXP5;O75474;Q9UQ80;Q96Q83;O15151;Q9H4A6;Q01094;P14316;Q9UKW6;Q15326;P47928;P07992;P37275;Q9UNH5;P49917;Q16666;P50750;P46013;Q15398;O15503;P61024;P51948}
- 14981 Pathogen[ P03383] interacts with 94 human  
partners: {P30307;Q13616;P49454;P56945;P14316;P61024;Q13485;Q9NYV6;P13010;Q14160;Q15691;P56277;P51948;O75896;P62750;Q01094;Q5T2W1;O00541;Q9UKW6;P31749;Q93034;O75410;Q8NEU8;P46013;Q12972;P30304;P61201;O75474;Q9UMX3;P42677;P37275;Q96PU4;Q6RFH8;Q15742;Q15468;Q9H2G9;O43598;Q9BRX2;P10599;Q9UI43;P49321;Q13042;O14744;Q66K89;P21127;P33552;P08779;Q15326;Q14186;P55060;O75081;P11308;Q9HD15;P50613;Q15819;Q05195;Q92830;Q9UNH5;P50750;Q9UKN5;P40222;Q16666;Q07666;Q9UKY7;Q9Y266;Q9Y3A5;Q9H4A6;P35580;Q9UQ80;P68036;Q13309;Q9GZL7;Q9UKZ1;Q9BXP5;Q01534;Q9ULW0;Q96Q83;Q13561;P47928;Q9NTI5;Q9UI36;P30260;Q8N9Z9;Q14137;P20073;P46937;Q9BVP2;O60832;O75312;A0AVK6;P15502;Q16576;Q92793;Q9BZG8}
- 14982 Pathogen[ P03410] interacts with 132 human  
partners: {Q92830;P49321;Q9UI36;P49959;Q8N960;Q9H2G9;P10599;Q16666;O95359;O15172;Q16658;Q8N3C0;P37275;Q13561;O15151;Q5T2W1;P12755;Q15398;Q66K89;P07992;Q9BXP5;P55060;Q9Y6Q3;P46013;Q9UQ80;O75474;Q15468;Q01534;Q14765;P31749;Q92934;O60832;Q9Y6A5;Q96Q83;Q14137;Q9UNH5;P68036;Q9GZL7;Q14160;Q9H4A6;P50613;P56278;Q15819;Q9UKW6;Q07666;P23919;P62750;Q16576;Q9BWF2;P49454;P08779;Q6RFH8;P50750;Q9NYV6;Q92793;P33552;P15502;Q15555;Q15691;Q13042;Q8N9Z9;Q13309;Q9UKN5;P30304;Q9UKZ1;Q9BXP5;P51587;Q9BZG8;Q9BRX2;Q9UI36;P47928;Q13485;Q14186;O60447;P47974;P46937;Q13118;O75410;Q9UKY7;P30260;P61201;P51948;Q9Y3E1;Q15742;P35580;Q9BVP2;Q13616;P20073;Q9UI43;Q9ULW0;O75081;P56945;Q01094;Q9BZG8;O00541;P13010;P61024;Q12972;Q8NEU8;Q9Y266;P56277;O14744;P14316;P40222;Q9HD15;Q9UJT9;P11308;P55789;Q5VTD9;O15503;Q9Y3A5;P12004;P40763;Q9NX09;P42566;Q93034;O75896;P30307;Q12929;Q9UKG1;O75312;Q06830;Q13442;O60934;O43598;A6NCL1;A0AVK6;Q05195;Q9BQ08;P42677;Q99966}
- 14983 Pathogen[ P14075] interacts with 95 human  
partners: {P49321;Q16576;Q15819;Q9H2G9;Q6RFH8;P42677;Q9Y266;Q13042;P68036;Q93034;Q9UMX3;P61024;Q9NYV6;Q14160;O75410;Q9UKZ1;Q96Q83;P40222;Q07666;O43598;Q9UKN5;P50613;Q9GZL7;Q9BRX2;P61201;Q13561;O00541;Q96PU4;Q13442;O75312;P50750;P47928;Q9BZG8;Q8NEU8;P62750;Q16666;P20073;Q05195;Q9UI43;O75081;Q13485;Q14186;Q9ULW0;P31749;Q15326;O14744;P08779;Q15691;O75474;P11308;Q13309;P21127;Q01534;Q01094;P15502;P30304;P55789;O60832;P14316;Q15742;Q5T2W1;Q9UQ80;O75896;Q66K89;Q9UKY7;Q92793;Q9UKW6;Q9UI36;Q14137;Q15468;P46937;Q9BXP5;P56277;P13010;Q12972;P37275;Q13616;P30260;Q9NTI5;P49454;Q92830;Q9UNH5;P46013;Q9H4A6;P30307;Q8N9Z9;P55060;A0AVK6;Q9HD15;P33552;P56945;Q9BVP2;P51948;P10599;Q9Y3A5}
- 14984 Pathogen[ P0C206] interacts with 136 human  
partners: {O43598;P46937;Q9UJT9;Q9Y3E1;Q15468;Q9UKG1;Q96Q83;Q05195;O95359;P13010;O15172;Q9H4A6;Q92830;P08779;P61024;Q9UI43;P55789;P31749;P49959;Q9Y6Q3;P56278;Q9Y242;P50750;P30307;O75474;Q13309;Q14137;Q9BVP2;Q8NEU8;P68036;Q9ULW0;P15502;O14744;P51587;A6NCL1;P62750;Q9GZL7;O60934;Q15691;Q9UMX3;O75081;P46013;Q9C0J9;P56277;Q16666;P61201;Q14186;P17483;P49454;P49321;O75896;Q07666;Q13616;Q9HD15;Q15326;P30260;Q5T2W1;P11308;P07992;P12755;Q92793;Q01534;Q92934;Q15742;O75410;O60447;O15151;P49917;Q9UNH5;P50613;Q16658;Q9UKN5;Q8N9Z9;Q9Y6A5;Q6RFH8;Q14160;Q96T88;Q01094;A0AVK6;P40222;Q15819;Q9BZG8;O60832;P40763;Q13485;Q9UKZ1;Q9NTI5;Q9BXP5;O00541;Q13561;P55060;Q9H2G9;P33552;P30304;P42566;Q99966;Q9UKW6;Q9Y3A5;P37275;Q16576;Q5VTD9;Q9BWF2;P56945;Q9H9S0;P21127;Q14765;Q15555;Q9UQ80;Q93034;Q12972;Q9NZC4;P14373;P10599;Q13118;Q66K89;Q06830;Q13042;P47928;Q15398;P35580;Q9UI36;P20073;Q9NYV6;O95071;O75312;Q9BRX2;Q9Y266;P14316;Q8N960;P47974;Q9UKY7;Q96PU4;Q8N3C0;P42677;P51948;P12004}
- 14985 Pathogen[ P03363] interacts with 118 human  
partners: {O60832;O75410;Q5VTD9;P51858;O14744;Q9Y3E1;Q8N9Z9;P08779;Q13309;O75081;Q13042;Q9BXP5;P49454;Q14765;P62750;Q07666;P42677;Q9BWF2;Q9GZL7;Q9UNH5;O75474;Q15468;Q12972;P49321;P21127;P14373;Q9UJT9;P33552;Q9UKN5;P61201;P13010;Q9UKW6;Q13561;Q9HD15;P37275;Q9Y266;Q15691;Q14160;Q9ULW0;O60447;Q15398;Q9Y3A5;Q9C0J9;Q66K89;O15151;Q9UKZ1;O75312;Q9H4A6;P30260;P17483;Q9UQ80;P40222;P20073;Q16666;P30304;Q8NEU8;Q15326;Q96Q83;P46937;Q16576;Q9UI36;Q13616;P11308;Q9NZC4;Q9NYV6;Q13480;P31749;Q92830;P14316;Q01094;P610

24;Q9Y6Q3;A0AVK6;A6NCL1;P47928;Q12929;Q15742;Q14137;O95071;Q6RFH8;Q92793;Q9H2G9;Q01534;P56945;Q13485;Q05195;P52951;P50750;Q14186;Q96T88;Q9BVP2;Q9NTI5;Q9BRX2;O95359;P47974;Q9UKY7;Q93034;Q9BZG8;P46013;P55060;Q96PU4;P30307;Q9UI43;Q9H9S0;Q16658;O00541;Q5T2W1;O43598;Q9UMX3;Q9NPC8;Q9UKG1;Q96FS4;Q15555;Q8N3C0;P68036;Q13118;Q8N960;Q15819}

14986 [Cluster 1363]GO:0051658+P biological\_process [name] maintenance of nucleus location [def] "Any process in which the nucleus is maintained in a specific location within a cell and prevented from moving elsewhere." [GOC

14987 Pathogen[ Q2Q067] interacts with 1 human partners:{Q9ULV3}

14988 Pathogen[ P0C214] interacts with 1 human partners:{Q9ULV3}

14989 Pathogen[ P03346] interacts with 1 human partners:{Q9ULV3}

14990 Pathogen[ Q85601] interacts with 1 human partners:{Q9ULV3}

14991 Pathogen[ P14079] interacts with 1 human partners:{Q9ULV3}

14992 Pathogen[ P03383] interacts with 1 human partners:{Q9ULV3}

14993 Pathogen[ P03410] interacts with 1 human partners:{Q9ULV3}

14994 Pathogen[ P14075] interacts with 1 human partners:{Q9ULV3}

14995 Pathogen[ P0C206] interacts with 1 human partners:{Q9ULV3}

14996 Pathogen[ P03363] interacts with 1 human partners:{Q9ULV3}

14997 [Cluster 1364]GO:2001238+P biological\_process [name] positive regulation of extrinsic apoptotic signaling pathway [def] "Any process that activates or increases the frequency, rate or extent of extrinsic apoptotic signaling pathway." [GOC

14998 Pathogen[ Q2Q067] interacts with 4 human partners:{P55957;Q8WXF8;Q12933;Q13158}

14999 Pathogen[ P0C214] interacts with 4 human partners:{Q8WXF8;Q13158;P55957;Q12933}

15000 Pathogen[ P03346] interacts with 3 human partners:{Q13158;Q8WXF8;P55957}

15001 Pathogen[ Q85601] interacts with 5 human partners:{Q13158;Q12933;Q9NQC7;P55957;Q8WXF8}

15002 Pathogen[ P14079] interacts with 6 human partners:{Q9NP84;Q12933;Q13158;Q8WXF8;Q9NQC7;P55957}

15003 Pathogen[ P03383] interacts with 4 human partners:{P55957;Q13158;Q12933;Q8WXF8}

15004 Pathogen[ P03410] interacts with 5 human partners:{Q8WXF8;P55957;Q13158;Q12933;Q9NP84}

15005 Pathogen[ P14075] interacts with 4 human partners:{P55957;Q12933;Q13158;Q8WXF8}

15006 Pathogen[ P0C206] interacts with 5 human partners:{Q9NQC7;Q13158;Q12933;Q8WXF8;P55957}

15007 Pathogen[ P03363] interacts with 4 human partners:{P55957;Q12933;Q13158;Q8WXF8}

15008 [Cluster 1365]GO:0048873+P biological\_process [name] homeostasis of number of cells within a tissue [def] "Any biological process involved in the maintenance of the steady-state number of cells within a population of cells in a tissue." [GOC

15009 Pathogen[ Q2Q067] interacts with 4 human partners:{P27694;P07954;P23769;Q9P1Q0}

15010 Pathogen[ P0C214] interacts with 6 human partners:{P07954;P23769;Q9BXT5;Q9P1Q0;Q6Y7W6;P27694}

15011 Pathogen[ P03346] interacts with 7 human partners:{O75995;Q9BXT5;P27694;P23769;Q9P1Q0;P07954;Q9GZV8}

15012 Pathogen[ Q85601] interacts with 6 human partners:{Q9BXT5;P23769;Q6Y7W6;P27694;P07954;Q9P1Q0}

15013 Pathogen[ P14079] interacts with 9 human partners:{P07954;Q9BXT5;Q6Y7W6;Q9P1Q0;P35611;P13232;P27694;Q9GZV8;P23769}

15014 Pathogen[ P03383] interacts with 3 human partners:{P27694;P23769;Q9P1Q0}

15015 Pathogen[ P03410] interacts with 9 human partners:{Q9GZV8;P07954;Q9BXT5;Q9P1Q0;P23769;Q6Y7W6;P27694;P35611;P13232}

15016 Pathogen[ P14075] interacts with 4 human partners:{P23769;Q9BXT5;P27694;Q9P1Q0}

15017 Pathogen[ P0C206] interacts with 7 human partners:{Q9BXT5;Q9P1Q0;Q6Y7W6;P23769;P27694;Q9GZV8;P07954}

15018 Pathogen[ P03363] interacts with 3 human partners:{P27694;Q9P1Q0;Q9BXT5}

15019 [Cluster 1366]GO:0032312+P biological\_process [name] regulation of ARF GTPase activity [def] "Any process that modulates the activity of the GTPase ARF." [GOC

15020 Pathogen[ Q2Q067] interacts with 1 human partners:{P52594}

15021 Pathogen[ P0C214] interacts with 1 human partners:{P52594}

15022 Pathogen[ P03346] interacts with 1 human partners:{P52594}

15023 Pathogen[ Q85601] interacts with 4 human partners:{Q9NP61;P52594;Q8N6H7;Q8N6T3}

15024 Pathogen[ P14079] interacts with 1 human partners:{P52594}

15025 Pathogen[ P03383] interacts with 1 human partners:{P52594}

15026 Pathogen[ P03410] interacts with 2 human partners:{P52594;Q9NP61}

15027 Pathogen[ P14075] interacts with 1 human partners:{P52594}

15028 Pathogen[ P0C206] interacts with 4 human partners:{O95081;Q8N6T3;Q9NP61;Q8N6H7}

15029 Pathogen[ P03363] interacts with 1 human partners:{P52594}

15030 [Cluster 1367]GO:000060+P biological\_process [name] protein import into nucleus, translocation [def] "A protein transport process that contributes to protein import into the nucleus, and that results in the vectorial transfer of a cargo-carrier protein complex through the nuclear pore complex from the cytoplasmic side to the nucleoplasmic side of the nuclear envelope." [GOC

15031 Pathogen[ Q2Q067] interacts with 10 human partners:{Q14974;P31749;P41182;P20749;Q86XR8;Q92973;Q14181;Q8N0Z2;P25963;Q14397}

15032 Pathogen[ P0C214] interacts with 10 human partners:{Q8N0Z2;Q86XR8;P20749;P25963;P41182;Q14397;Q92973;Q14974;P31749;Q14181}

15033 Pathogen[ P03346] interacts with 11 human partners:{Q8N0Z2;Q86XR8;P25963;O00327;Q92973;P31749;Q14181;P41182;Q14397;P20749;Q149

74}  
15034 Pathogen[ Q85601] interacts with 11 human  
partners:{P31749;O00327;Q14974;Q86XR8;Q92973;Q14181;Q14397;P41182;Q8N0Z2;P20749;P25963}

15035 Pathogen[ P14079] interacts with 9 human  
partners:{P60468;P41182;Q14974;Q92973;Q14181;Q8N0Z2;P20749;Q14397;Q86XR8}

15036 Pathogen[ P03383] interacts with 9 human  
partners:{Q86XR8;Q14181;P31749;P20749;Q14397;Q92973;P25963;Q8N0Z2;Q14974}

15037 Pathogen[ P03410] interacts with 10 human  
partners:{Q14397;P20749;Q14974;P60468;Q14181;P31749;Q92973;P41182;Q8N0Z2;P25963}

15038 Pathogen[ P14075] interacts with 9 human  
partners:{Q92973;P25963;Q8N0Z2;P31749;Q86XR8;Q14397;Q14974;Q14181;P20749}

15039 Pathogen[ P0C206] interacts with 11 human  
partners:{Q86XR8;P31749;P41182;Q14974;P25963;Q92973;O00327;Q14181;P20749;Q14397;Q8N0Z2}

15040 Pathogen[ P03363] interacts with 10 human  
partners:{Q92973;Q14397;P25963;Q14181;Q8N0Z2;P20749;P31749;O00327;Q14974;Q86XR8}

15041 [Cluster 1368]GO:0002448+P biological\_process [name] mast cell mediated immunity  
[def] "Any process involved in the carrying out of an immune response by a mast cell."  
[GO\_REF

15042 Pathogen[ Q2Q067] interacts with 1 human partners:{P50453}

15043 Pathogen[ P0C214] interacts with 1 human partners:{P50453}

15044 Pathogen[ P03346] interacts with 1 human partners:{P50453}

15045 Pathogen[ Q85601] interacts with 1 human partners:{P50453}

15046 Pathogen[ P14079] interacts with 1 human partners:{P50453}

15047 Pathogen[ P03383] interacts with 1 human partners:{P50453}

15048 Pathogen[ P03410] interacts with 1 human partners:{P50453}

15049 Pathogen[ P14075] interacts with 1 human partners:{P50453}

15050 Pathogen[ P0C206] interacts with 1 human partners:{P50453}

15051 Pathogen[ P03363] interacts with 1 human partners:{P50453}

15052 [Cluster 1369]GO:0007005+P biological\_process [name]mitochondrion organization  
[def] "A process that is carried out at the cellular level which results in the assembly, arrangement of constituent parts, or disassembly of a mitochondrion\_ includes mitochondrial morphogenesis and distribution, and replication of the mitochondrial genome as well as synthesis of new mitochondrial components." [GOC

15053 Pathogen[ Q2Q067] interacts with 11 human  
partners:{Q16656;Q99497;Q9H0F6;P29474;Q53G26;Q6P444;P02489;O15287;Q99814;Q96EY1;P49715}

15054 Pathogen[ P0C214] interacts with 12 human  
partners:{P29474;O15287;P02489;Q16656;Q9H0F6;Q99497;Q8WV60;Q9BUK6;Q53G26;Q6P444;Q99814;Q96EY1}

15055 Pathogen[ P03346] interacts with 15 human  
partners:{Q6P444;P29474;Q16656;P02489;Q9BUK6;P17152;Q96C03;Q9H0F6;P49715;O15287;Q99814;Q53G26;Q99497;P50542;Q96EY1}

15056 Pathogen[ Q85601] interacts with 12 human  
partners:{Q99497;P02489;Q16656;Q53G26;Q8WV60;Q99814;Q9H0F6;P29474;P49715;Q9BUK6;O15287;Q96EY1}

15057 Pathogen[ P14079] interacts with 16 human  
partners:{P17152;Q99814;Q12887;Q6P444;Q16656;Q9BUK6;Q99497;Q9UPW5;P02489;Q8WV60;P50542;P49715;Q9H0F6;Q96C03;Q96EY1;Q15390}

15058 Pathogen[ P03383] interacts with 9 human  
partners:{P29474;Q9H0F6;Q16656;O15287;P17152;Q96C03;Q96EY1;Q53G26;Q6P444}

15059 Pathogen[ P03410] interacts with 18 human  
partners:{Q99497;Q53G26;Q9UPW5;Q15390;Q99814;Q8WV60;Q6P444;Q9BUK6;P29474;P02489;O15287;P50542;Q16656;P17152;Q96C03;Q12887;Q96EY1;Q9H0F6}

15060 Pathogen[ P14075] interacts with 10 human  
partners:{P29474;Q16656;Q96C03;Q6P444;Q53G26;Q15390;P17152;O15287;Q9H0F6;Q96EY1}

15061 Pathogen[ P0C206] interacts with 18 human  
partners:{Q8WV60;Q53G26;Q9BUK6;P49715;Q99497;Q6P444;P50542;Q16656;O15287;P17152;P29474;Q9H0F6;Q99814;Q9UPW5;Q15390;P02489;Q96EY1;Q96C03}

15062 Pathogen[ P03363] interacts with 9 human  
partners:{P29474;O15287;Q53G26;Q96C03;Q16656;Q99814;Q9H0F6;P02489;Q96EY1}

15063 [Cluster 1370]GO:0051496+P biological\_process [name] positive regulation of stress fiber assembly [def] "Any process that activates or increases the frequency, rate or extent of the assembly of a stress fiber, a bundle of microfilaments and other proteins found in fibroblasts." [GOC

15064 Pathogen[ Q2Q067] interacts with 10 human  
partners:{Q9H4X1;Q9Y613;P07737;Q8WY54;P84022;P08697;O60504;P49593;P61586;O95429}

15065 Pathogen[ P0C214] interacts with 9 human  
partners:{P08697;Q9H4X1;P61586;P84022;Q9Y613;O95429;Q8WY54;P49593;O60504}

15066 Pathogen[ P03346] interacts with 9 human  
partners:{Q9H4X1;Q8WY54;Q9Y613;P49593;P84022;O60504;P07737;O95429;P61586}

15067 Pathogen[ Q85601] interacts with 10 human  
partners:{Q9H4X1;Q9Y613;P49593;P08697;P07737;P61586;P84022;Q8WY54;O60504;O95429}

15068 Pathogen[ P14079] interacts with 7 human  
partners:{P49593;O95429;P07737;O60504;Q9Y613;Q8WY54;P61586}



15069 Pathogen[ P03383] interacts with 9 human partners:{Q9H4X1;P08697;P07737;Q9Y613;P84022;P61586;Q8WY54;O60504;O95429}

15070 Pathogen[ P03410] interacts with 10 human partners:{P84022;Q9H4X1;Q8WY54;P61586;P08697;O95429;Q9Y613;O60504;P49593;P07737}

15071 Pathogen[ P14075] interacts with 9 human partners:{Q9H4X1;Q9Y613;P07737;P08697;P61586;Q8WY54;O60504;P84022;O95429}

15072 Pathogen[ P0C206] interacts with 10 human partners:{P84022;Q9H4X1;O60504;Q8WY54;P61586;P49593;O95429;Q9Y613;P07737;P08697}

15073 Pathogen[ P03363] interacts with 6 human partners:{Q9H4X1;Q9Y613;P84022;O95429;P07737;Q8WY54}

15074 [Cluster 1371]GO:0010975+P biological\_process [name] regulation of neuron projection development [def] "Any process that modulates the rate, frequency or extent of neuron projection development. Neuron projection development is the process whose specific outcome is the progression of a neuron projection over time, from its formation to the mature structure. A neuron projection is any process extending from a neural cell, such as axons or dendrites (collectively called neurites)." [GOC

15075 Pathogen[ Q2Q067] interacts with 2 human partners:{P31749;Q9NRI5}

15076 Pathogen[ P0C214] interacts with 3 human partners:{Q9NRI5;P62166;P31749}

15077 Pathogen[ P03346] interacts with 3 human partners:{Q9NRI5;P31749;P62166}

15078 Pathogen[ Q85601] interacts with 4 human partners:{P31749;Q9NRI5;P62166;Q9GZM8}

15079 Pathogen[ P14079] interacts with 3 human partners:{Q9NRI5;P62166;Q9GZM8}

15080 Pathogen[ P03383] interacts with 2 human partners:{Q9NRI5;P31749}

15081 Pathogen[ P03410] interacts with 4 human partners:{Q9GZM8;P31749;Q9NRI5;P62166}

15082 Pathogen[ P14075] interacts with 2 human partners:{Q9NRI5;P31749}

15083 Pathogen[ P0C206] interacts with 4 human partners:{P31749;P62166;Q9GZM8;Q9NRI5}

15084 Pathogen[ P03363] interacts with 2 human partners:{P31749;Q9NRI5}

15085 [Cluster 1372]GO:0090103+P biological\_process [name] cochlea morphogenesis [def] "The process in which the cochlea is generated and organized." [GOC

15086 Pathogen[ Q2Q067] interacts with 5 human partners:{Q99502;O14641;P49639;Q8TE85;P63000}

15087 Pathogen[ P0C214] interacts with 5 human partners:{P63000;P49639;Q8TE85;O14641;Q99502}

15088 Pathogen[ P03346] interacts with 7 human partners:{P49639;Q99502;Q8TE85;O14641;Q15475;P49335;P63000}

15089 Pathogen[ Q85601] interacts with 5 human partners:{Q8TE85;P49639;P63000;O14641;Q99502}

15090 Pathogen[ P14079] interacts with 4 human partners:{Q99502;O14641;Q8TE85;P49639}

15091 Pathogen[ P03383] interacts with 4 human partners:{P63000;Q8TE85;P49639;O14641}

15092 Pathogen[ P03410] interacts with 5 human partners:{P63000;Q99502;Q8TE85;P49639;O14641}

15093 Pathogen[ P14075] interacts with 4 human partners:{Q8TE85;O14641;P63000;Q99502}

15094 Pathogen[ P0C206] interacts with 4 human partners:{Q8TE85;P49639;P63000;Q99502}

15095 Pathogen[ P03363] interacts with 5 human partners:{P49639;P63000;Q8TE85;P49335;O14641}

15096 [Cluster 1373]GO:0006400+P biological\_process [name] tRNA modification [def] "The covalent alteration of one or more nucleotides within a tRNA molecule to produce a tRNA molecule with a sequence that differs from that coded genetically." [GOC

15097 Pathogen[ Q2Q067] interacts with 4 human partners:{Q9UBP6;P57081;Q9H974;Q9BXR0}

15098 Pathogen[ P0C214] interacts with 5 human partners:{Q9BXR0;P57081;P49588;Q9UBP6;Q9H974}

15099 Pathogen[ P03346] interacts with 4 human partners:{Q9UBP6;Q9BXR0;Q9H974;P57081}

15100 Pathogen[ Q85601] interacts with 4 human partners:{Q9BXR0;Q9UBP6;Q9H974;P57081}

15101 Pathogen[ P14079] interacts with 6 human partners:{P57081;Q9BXR0;Q9NWX6;Q96SZ6;P49588;Q9H974}

15102 Pathogen[ P03383] interacts with 4 human partners:{Q9H974;Q9UBP6;P57081;Q9BXR0}

15103 Pathogen[ P03410] interacts with 5 human partners:{Q9H974;Q9UBP6;P49588;P57081;Q9NWX6}

15104 Pathogen[ P14075] interacts with 4 human partners:{Q9H974;Q9BXR0;P57081;Q9UBP6}

15105 Pathogen[ P0C206] interacts with 4 human partners:{Q9UBP6;Q9H974;P57081;Q9BXR0}

15106 Pathogen[ P03363] interacts with 5 human partners:{Q9BXR0;Q9UBP6;Q9H974;P57081;P05455}

15107 [Cluster 1374]GO:0048488+P biological\_process [name] synaptic vesicle endocytosis [def] "An endocytosis process that results in the invagination of the axonal plasma membrane to create a membrane-bounded vesicle. This process takes up excess membrane that would otherwise accumulate at the presynaptic terminal due to fusion of vesicle membranes during neurotransmitter release. The vesicles created may subsequently be used for neurotransmitter storage and release." [GOC

15108 Pathogen[ Q2Q067] interacts with 3 human partners:{Q14160;P63010;Q99962}

15109 Pathogen[ P0C214] interacts with 3 human partners:{Q99962;P63010;Q14160}

15110 Pathogen[ P03346] interacts with 3 human partners:{P63010;Q99962;Q14160}

15111 Pathogen[ Q85601] interacts with 3 human partners:{Q99962;Q14160;P63010}

15112 Pathogen[ P14079] interacts with 2 human partners:{P63010;Q99962}

15113 Pathogen[ P03383] interacts with 2 human partners:{Q14160;P63010}

15114 Pathogen[ P03410] interacts with 3 human partners:{Q14160;P63010;Q99962}

15115 Pathogen[ P14075] interacts with 2 human partners:{Q14160;P63010}

15116 Pathogen[ P0C206] interacts with 3 human partners:{P63010;Q99962;Q14160}

15117 Pathogen[ P03363] interacts with 3 human partners:{Q99962;Q14160;P63010}

15118 [Cluster 1375]GO:0042110+P biological\_process [name] T cell activation [def] "The change in morphology and behavior of a mature or immature T cell resulting from exposure to a mitogen, cytokine, chemokine, cellular ligand, or an antigen for which it is specific." [GOC

15119 Pathogen[ Q2Q067] interacts with 9 human partners:{Q08209;Q96JZ2;O43639;Q12959;Q15306;P84022;P16333;P42768;Q01826}

15120 Pathogen[ POC214] interacts with 10 human partners:{P84022;O43639;Q96JZ2;Q08209;P10809;Q12959;P16333;Q01826;P42768;Q15306}

15121 Pathogen[ P03346] interacts with 10 human partners:{O43639;Q9H6Q3;P42768;Q15306;P16333;P84022;Q96JZ2;Q08209;Q01826;Q12959}

15122 Pathogen[ Q85601] interacts with 10 human partners:{P16333;Q15306;O43639;Q08209;Q9H6Q3;P42768;Q01826;P84022;Q96JZ2;Q12959}

15123 Pathogen[ P14079] interacts with 11 human partners:{P39656;P16298;Q01826;Q15306;P16333;Q96JZ2;Q9H6Q3;O43639;O43561;Q08209;P42768}

15124 Pathogen[ P03383] interacts with 5 human partners:{Q01826;Q15306;P84022;P42768;P16333}

15125 Pathogen[ P03410] interacts with 12 human partners:{P84022;Q08209;Q12959;O43639;O43561;P42768;P16333;Q15306;Q01826;Q96JZ2;P39656;Q9H6Q3}

15126 Pathogen[ P14075] interacts with 5 human partners:{P42768;Q01826;P16333;Q15306;P84022}

15127 Pathogen[ POC206] interacts with 11 human partners:{P84022;Q9H6Q3;P39656;Q15306;Q96JZ2;P16333;Q01826;Q08209;P42768;O43639;Q12959}

15128 Pathogen[ P03363] interacts with 9 human partners:{Q12959;Q96JZ2;Q01826;Q9H6Q3;P42768;Q15306;O43639;P16333;P84022}

15129 [Cluster 1376]GO:0060330+P biological\_process [name] regulation of response to interferon-gamma [def] "Any process that modulates the rate, frequency or extent of a response to interferon-gamma. Response to interferon gamma is a change in state or activity of a cell or an organism (in terms of movement, secretion, enzyme production, gene expression, etc.) as a result of an interferon-gamma stimulus." [GOC

15130 Pathogen[ Q2Q067] interacts with 1 human partners:{Q8IXQ6}

15131 Pathogen[ POC214] interacts with 1 human partners:{Q8IXQ6}

15132 Pathogen[ P03346] interacts with 1 human partners:{Q8IXQ6}

15133 Pathogen[ Q85601] interacts with 1 human partners:{Q8IXQ6}

15134 Pathogen[ P14079] interacts with 1 human partners:{Q8IXQ6}

15135 Pathogen[ P03383] interacts with 1 human partners:{Q8IXQ6}

15136 Pathogen[ P03410] interacts with 1 human partners:{Q8IXQ6}

15137 Pathogen[ P14075] interacts with 1 human partners:{Q8IXQ6}

15138 Pathogen[ POC206] interacts with 1 human partners:{Q8IXQ6}

15139 Pathogen[ P03363] interacts with 1 human partners:{Q8IXQ6}

15140 [Cluster 1377]GO:0090136+P biological\_process [name] epithelial cell-cell adhesion [def] "The attachment of an epithelial cell to another epithelial cell via adhesion molecules." [GOC

15141 Pathogen[ Q2Q067] interacts with 3 human partners:{Q9P1Y5;P11831;P60953}

15142 Pathogen[ POC214] interacts with 3 human partners:{Q9P1Y5;P11831;P60953}

15143 Pathogen[ P03346] interacts with 4 human partners:{P11831;P60953;Q9P1Y5;Q6IQ23}

15144 Pathogen[ Q85601] interacts with 4 human partners:{P11831;Q9P1Y5;Q6IQ23;P60953}

15145 Pathogen[ P14079] interacts with 2 human partners:{Q6IQ23;Q9P1Y5}

15146 Pathogen[ P03383] interacts with 3 human partners:{P11831;P60953;Q9P1Y5}

15147 Pathogen[ P03410] interacts with 4 human partners:{P11831;Q9P1Y5;P60953;Q6IQ23}

15148 Pathogen[ P14075] interacts with 3 human partners:{P60953;P11831;Q9P1Y5}

15149 Pathogen[ POC206] interacts with 4 human partners:{Q9P1Y5;P60953;P11831;Q6IQ23}

15150 Pathogen[ P03363] interacts with 4 human partners:{P11831;Q9P1Y5;P60953;Q6IQ23}

15151 [Cluster 1378]GO:0072661+P biological\_process [name] protein targeting to plasma membrane [def] "The process of directing proteins towards the plasma membrane\_ usually uses signals contained within the protein." [GOC

15152 Pathogen[ Q2Q067] interacts with 3 human partners:{Q01082;Q6VY07;Q86VP3}

15153 Pathogen[ POC214] interacts with 4 human partners:{P16157;Q86VP3;Q01082;Q6VY07}

15154 Pathogen[ P03346] interacts with 6 human partners:{P16157;Q01082;Q969F2;Q6VY07;Q86VP3;Q15363}

15155 Pathogen[ Q85601] interacts with 4 human partners:{P16157;Q01082;Q6VY07;Q86VP3}

15156 Pathogen[ P14079] interacts with 6 human partners:{Q6VY07;Q01082;O75781;P16157;Q15363;Q86VP3}

15157 Pathogen[ P03383] interacts with 2 human partners:{Q6VY07;Q86VP3}

15158 Pathogen[ P03410] interacts with 7 human partners:{O75781;Q969F2;Q86VP3;P16157;Q15363;Q01082;Q6VY07}

15159 Pathogen[ P14075] interacts with 2 human partners:{Q86VP3;Q6VY07}

15160 Pathogen[ POC206] interacts with 6 human partners:{Q01082;Q969F2;P16157;Q6VY07;Q86VP3;Q15363}

15161 Pathogen[ P03363] interacts with 3 human partners:{P16157;Q01082;Q6VY07}

15162 [Cluster 1379]GO:0030910+P biological\_process [name] olfactory placode formation [def] "The formation of a thickening of the neural ectoderm in the head region of the vertebrate embryo which develops into the olfactory region of the nasal cavity." [GOC

15163 Pathogen[ Q2Q067] interacts with 1 human partners:{P14859}  
15164 Pathogen[ P0C214] interacts with 1 human partners:{P14859}  
15165 Pathogen[ P03346] interacts with 1 human partners:{P14859}  
15166 Pathogen[ Q85601] interacts with 1 human partners:{P14859}  
15167 Pathogen[ P14079] interacts with 1 human partners:{P14859}  
15168 Pathogen[ P03383] interacts with 1 human partners:{P14859}  
15169 Pathogen[ P03410] interacts with 1 human partners:{P14859}  
15170 Pathogen[ P14075] interacts with 1 human partners:{P14859}  
15171 Pathogen[ P0C206] interacts with 1 human partners:{P14859}  
15172 Pathogen[ P03363] interacts with 1 human partners:{P14859}  
15173 [Cluster 1380]GO:0031133+P biological\_process [name] regulation of axon diameter  
[def] "Any process that modulates the rate, direction or extent of axon growth such that  
the correct diameter is attained and maintained." [GOC  
15174 Pathogen[ Q2Q067] interacts with 1 human partners:{P07197}  
15175 Pathogen[ P0C214] interacts with 1 human partners:{P07197}  
15176 Pathogen[ P03346] interacts with 1 human partners:{P07197}  
15177 Pathogen[ Q85601] interacts with 1 human partners:{P07197}  
15178 Pathogen[ P14079] interacts with 1 human partners:{P07197}  
15179 Pathogen[ P03383] interacts with 1 human partners:{P07197}  
15180 Pathogen[ P03410] interacts with 1 human partners:{P07197}  
15181 Pathogen[ P14075] interacts with 1 human partners:{P07197}  
15182 Pathogen[ P0C206] interacts with 1 human partners:{P07197}  
15183 Pathogen[ P03363] interacts with 1 human partners:{P07197}  
15184 [Cluster 1381]GO:0021987+P biological\_process [name] cerebral cortex development  
[def] "The progression of the cerebral cortex over time from its initial formation until  
its mature state. The cerebral cortex is the outer layered region of the telencephalon."  
[GO\_REF  
15185 Pathogen[ Q2Q067] interacts with 7 human  
partners:{P62258;A6NKD9;Q9NXR1;Q92754;O95359;O75410;Q04743}  
15186 Pathogen[ P0C214] interacts with 5 human  
partners:{O95359;Q92754;O75410;A6NKD9;Q9NXR1}  
15187 Pathogen[ P03346] interacts with 11 human  
partners:{A6NKD9;O43379;O75410;P62258;O95359;Q04743;Q92858;Q9NXR1;Q04741;Q92754;Q8N9  
60}  
15188 Pathogen[ Q85601] interacts with 7 human  
partners:{Q92754;P62258;A6NKD9;O43379;Q9NXR1;O75410;O95359}  
15189 Pathogen[ P14079] interacts with 10 human  
partners:{O95359;Q9Y6A5;A6NKD9;O43379;Q8N960;Q92754;P62258;Q04743;O75410;Q9NXR1}  
15190 Pathogen[ P03383] interacts with 4 human partners:{A6NKD9;O75410;Q92754;P62258}  
15191 Pathogen[ P03410] interacts with 10 human  
partners:{P62258;Q8N960;O95359;A6NKD9;Q9NXR1;Q9Y6A5;O43379;O75410;Q04743;Q92754}  
15192 Pathogen[ P14075] interacts with 4 human partners:{O75410;Q92754;A6NKD9;P62258}  
15193 Pathogen[ P0C206] interacts with 10 human  
partners:{A6NKD9;O95359;Q04743;Q92754;O75410;O43379;P62258;Q9Y6A5;Q9NXR1;Q8N960}  
15194 Pathogen[ P03363] interacts with 10 human  
partners:{O75410;P62258;A6NKD9;O43379;Q04741;O95359;Q9NXR1;Q04743;Q92754;Q8N960}  
15195 [Cluster 1382]GO:0045494+P biological\_process [name] photoreceptor cell maintenance  
[def] "Any process preventing the degeneration of the photoreceptor, a specialized cell  
type that is sensitive to light." [CL  
15196 Pathogen[ Q2Q067] interacts with 4 human partners:{Q9Y6N9;Q03468;Q15051;Q495M9}  
15197 Pathogen[ P0C214] interacts with 4 human partners:{Q15051;Q495M9;Q9Y6N9;Q03468}  
15198 Pathogen[ P03346] interacts with 5 human  
partners:{Q9Y6N9;Q15051;Q03468;Q8IWN7;Q495M9}  
15199 Pathogen[ Q85601] interacts with 4 human partners:{Q03468;Q9Y6N9;Q15051;Q495M9}  
15200 Pathogen[ P14079] interacts with 7 human  
partners:{Q8N960;Q8IWN7;P56715;Q9Y6N9;Q15051;Q495M9;Q03468}  
15201 Pathogen[ P03383] interacts with 2 human partners:{Q15051;Q03468}  
15202 Pathogen[ P03410] interacts with 8 human  
partners:{Q8N960;Q495M9;Q03468;Q9Y6N9;Q15051;Q9UBY8;Q8IWN7;P56715}  
15203 Pathogen[ P14075] interacts with 2 human partners:{Q15051;Q03468}  
15204 Pathogen[ P0C206] interacts with 7 human  
partners:{P56715;Q9Y6N9;Q03468;Q8IWN7;Q495M9;Q8N960;Q15051}  
15205 Pathogen[ P03363] interacts with 7 human  
partners:{Q9Y6N9;Q15051;P56715;Q495M9;Q03468;Q8IWN7;Q8N960}  
15206 [Cluster 1383]GO:0045063+P biological\_process [name] T-helper 1 cell differentiation  
[def] "The process in which a relatively unspecialized T cell acquires the specialized  
features of a T-helper 1 (Th1) cell. A Th1 cell is a CD4-positive, alpha-beta T cell  
that has the phenotype T-bet-positive and produces interferon-gamma." [CL  
15207 Pathogen[ Q2Q067] interacts with 1 human partners:{Q01201}  
15208 Pathogen[ P0C214] interacts with 1 human partners:{Q01201}  
15209 Pathogen[ P03346] interacts with 1 human partners:{Q01201}  
15210 Pathogen[ Q85601] interacts with 1 human partners:{Q01201}  
15211 Pathogen[ P14079] interacts with 1 human partners:{Q01201}  
15212 Pathogen[ P03383] interacts with 1 human partners:{Q01201}  
15213 Pathogen[ P03410] interacts with 1 human partners:{Q01201}  
15214 Pathogen[ P14075] interacts with 1 human partners:{Q01201}

15215 Pathogen[ P0C206] interacts with 1 human partners:{Q01201}

15216 Pathogen[ P03363] interacts with 1 human partners:{Q01201}

15217 [Cluster 1384]GO:0046080+P biological\_process [name] dUTP metabolic process [def] "The chemical reactions and pathways involving dUTP, deoxyuridine (5'-)triphosphate." [GOC]

15218 Pathogen[ Q2Q067] interacts with 1 human partners:{P33316}

15219 Pathogen[ P0C214] interacts with 1 human partners:{P33316}

15220 Pathogen[ P03346] interacts with 1 human partners:{P33316}

15221 Pathogen[ Q85601] interacts with 1 human partners:{P33316}

15222 Pathogen[ P14079] interacts with 1 human partners:{P33316}

15223 Pathogen[ P03383] interacts with 1 human partners:{P33316}

15224 Pathogen[ P03410] interacts with 1 human partners:{P33316}

15225 Pathogen[ P14075] interacts with 1 human partners:{P33316}

15226 Pathogen[ P0C206] interacts with 1 human partners:{P33316}

15227 Pathogen[ P03363] interacts with 1 human partners:{P33316}

15228 [Cluster 1385]GO:0000462+P biological\_process [name] maturation of SSU-rRNA from tricistronic rRNA transcript (SSU-rRNA, 5.8S rRNA, LSU-rRNA) [def] "Any process involved in the maturation of a precursor Small SubUnit (SSU) ribosomal RNA (rRNA) molecule into a mature SSU-rRNA molecule from the pre-rRNA molecule originally produced as a tricistronic rRNA transcript that contains the Small Subunit (SSU) rRNA, 5.8S rRNA, and the Large Subunit (LSU) in that order from 5' to 3' along the primary transcript." [GOC]

15229 Pathogen[ Q2Q067] interacts with 3 human partners:{P62241;P78316;P62847}

15230 Pathogen[ P0C214] interacts with 3 human partners:{P62847;P78316;P62241}

15231 Pathogen[ P03346] interacts with 3 human partners:{P78316;P62847;P62241}

15232 Pathogen[ Q85601] interacts with 3 human partners:{P62241;P62847;P78316}

15233 Pathogen[ P14079] interacts with 3 human partners:{P62847;P62241;P78316}

15234 Pathogen[ P03383] interacts with 3 human partners:{P78316;P62241;P62847}

15235 Pathogen[ P03410] interacts with 3 human partners:{P62241;P78316;P62847}

15236 Pathogen[ P14075] interacts with 3 human partners:{P78316;P62847;P62241}

15237 Pathogen[ P0C206] interacts with 3 human partners:{P62241;P78316;P62847}

15238 Pathogen[ P03363] interacts with 3 human partners:{P62847;P62241;P78316}

15239 [Cluster 1386]GO:0010837+P biological\_process [name] regulation of keratinocyte proliferation [def] "Any process that modulates the rate, frequency or extent of keratinocyte proliferation. Keratinocyte proliferation is the multiplication or reproduction of keratinocytes, resulting in the expansion of a cell population." [GOC]

15240 Pathogen[ Q2Q067] interacts with 1 human partners:{P46937}

15241 Pathogen[ P0C214] interacts with 1 human partners:{P46937}

15242 Pathogen[ P03346] interacts with 1 human partners:{P46937}

15243 Pathogen[ Q85601] interacts with 1 human partners:{P46937}

15244 Pathogen[ P14079] interacts with 1 human partners:{P46937}

15245 Pathogen[ P03383] interacts with 1 human partners:{P46937}

15246 Pathogen[ P03410] interacts with 1 human partners:{P46937}

15247 Pathogen[ P14075] interacts with 1 human partners:{P46937}

15248 Pathogen[ P0C206] interacts with 1 human partners:{P46937}

15249 Pathogen[ P03363] interacts with 1 human partners:{P46937}

15250 [Cluster 1387]GO:0021794+P biological\_process [name] thalamus development [def] "The process in which the thalamus changes over time, from its initial formation to its mature state." [GO\_REF]

15251 Pathogen[ Q2Q067] interacts with 1 human partners:{075376}

15252 Pathogen[ P0C214] interacts with 1 human partners:{075376}

15253 Pathogen[ P03346] interacts with 2 human partners:{Q16559;075376}

15254 Pathogen[ Q85601] interacts with 1 human partners:{075376}

15255 Pathogen[ P14079] interacts with 2 human partners:{014949;075376}

15256 Pathogen[ P03383] interacts with 1 human partners:{075376}

15257 Pathogen[ P03410] interacts with 3 human partners:{075376;014949;Q16559}

15258 Pathogen[ P14075] interacts with 1 human partners:{075376}

15259 Pathogen[ P0C206] interacts with 1 human partners:{075376}

15260 Pathogen[ P03363] interacts with 1 human partners:{075376}

15261 [Cluster 1388]GO:0006144+P biological\_process [name] purine base metabolic process [def] "The chemical reactions and pathways involving purine bases, one of the two classes of nitrogen-containing ring compounds found in DNA and RNA, which include adenine and guanine." [GOC]

15262 Pathogen[ Q2Q067] interacts with 1 human partners:{P07741}

15263 Pathogen[ P0C214] interacts with 7 human partners:{Q96P26;P49902;P07741;Q8TCD5;Q9Y2T3;P31939;P30566}

15264 Pathogen[ P03346] interacts with 1 human partners:{P07741}

15265 Pathogen[ Q85601] interacts with 1 human partners:{P07741}

15266 Pathogen[ P14079] interacts with 10 human partners:{P22234;Q96P26;Q8TCD5;P31939;Q9Y2T3;P49902;P49915;Q9BXI3;O15067;P07741}

15267 Pathogen[ P03383] interacts with 1 human partners:{P07741}

15268 Pathogen[ P03410] interacts with 11 human partners:{Q96P26;P49915;P07741;P22234;Q9Y2T3;Q9BXI3;P30566;O15067;P31939;Q8TCD5;P49902}

15269 Pathogen[ P14075] interacts with 2 human partners:{P49902;P07741}

15270 Pathogen[ P0C206] interacts with 4 human partners:{P49902;P31939;Q8TCD5;P07741}

15271 Pathogen[ P03363] interacts with 1 human partners:{P07741}

15272 [Cluster 1389]GO:0006301+P biological\_process [name] postreplication repair [def] "The conversion of DNA-damage induced single-stranded gaps into large molecular weight DNA after replication. Includes pathways that remove replication-blocking lesions in conjunction with DNA replication." [GOC

15273 Pathogen[ Q2Q067] interacts with 4 human partners:{Q9Y253;P63146;P61088;P49459}

15274 Pathogen[ P0C214] interacts with 4 human partners:{P49459;Q9Y253;P63146;P61088}

15275 Pathogen[ P03346] interacts with 5 human partners:{Q9Y253;P49459;P61088;P63146;Q9C0J8}

15276 Pathogen[ Q85601] interacts with 4 human partners:{P63146;P49459;P61088;Q9Y253}

15277 Pathogen[ P14079] interacts with 3 human partners:{P49459;Q9Y253;P63146}

15278 Pathogen[ P03383] interacts with 4 human partners:{Q9Y253;P61088;P49459;P63146}

15279 Pathogen[ P03410] interacts with 4 human partners:{P49459;P61088;Q9Y253;P63146}

15280 Pathogen[ P14075] interacts with 4 human partners:{P61088;P49459;Q9Y253;P63146}

15281 Pathogen[ P0C206] interacts with 4 human partners:{Q9Y253;P61088;P49459;P63146}

15282 Pathogen[ P03363] interacts with 4 human partners:{P49459;Q9Y253;P63146;P61088}

15283 [Cluster 1390]GO:0031401+P biological\_process [name] positive regulation of protein modification process [def] "Any process that activates or increases the frequency, rate or extent of the covalent alteration of one or more amino acid residues within a protein." [GOC

15284 Pathogen[ Q2Q067] interacts with 1 human partners:{O60356}

15285 Pathogen[ P0C214] interacts with 1 human partners:{O60356}

15286 Pathogen[ P03346] interacts with 1 human partners:{O60356}

15287 Pathogen[ Q85601] interacts with 1 human partners:{O60356}

15288 Pathogen[ P14079] interacts with 2 human partners:{Q9H0Y0;O60356}

15289 Pathogen[ P03383] interacts with 1 human partners:{O60356}

15290 Pathogen[ P03410] interacts with 2 human partners:{Q9H0Y0;O60356}

15291 Pathogen[ P14075] interacts with 1 human partners:{O60356}

15292 Pathogen[ P0C206] interacts with 1 human partners:{O60356}

15293 Pathogen[ P03363] interacts with 1 human partners:{O60356}

15294 [Cluster 1391]GO:0043148+P biological\_process [name] mitotic spindle stabilization [def] "The cell cycle process in which spindle integrity is maintained during M phase of mitosis." [GOC

15295 Pathogen[ Q2Q067] interacts with 2 human partners:{P14635;Q9Y3A5}

15296 Pathogen[ P0C214] interacts with 2 human partners:{P14635;Q9Y3A5}

15297 Pathogen[ P03346] interacts with 2 human partners:{P14635;Q9Y3A5}

15298 Pathogen[ Q85601] interacts with 2 human partners:{Q9Y3A5;P14635}

15299 Pathogen[ P14079] interacts with 2 human partners:{Q9Y3A5;P14635}

15300 Pathogen[ P03383] interacts with 2 human partners:{P14635;Q9Y3A5}

15301 Pathogen[ P03410] interacts with 2 human partners:{P14635;Q9Y3A5}

15302 Pathogen[ P14075] interacts with 2 human partners:{P14635;Q9Y3A5}

15303 Pathogen[ P0C206] interacts with 2 human partners:{Q9Y3A5;P14635}

15304 Pathogen[ P03363] interacts with 1 human partners:{Q9Y3A5}

15305 [Cluster 1392]GO:0048565+P biological\_process [name] digestive tract development [def] "The process whose specific outcome is the progression of the digestive tract over time, from its formation to the mature structure. The digestive tract is the anatomical structure through which food passes and is processed." [GOC

15306 Pathogen[ Q2Q067] interacts with 2 human partners:{P06400;P14635}

15307 Pathogen[ P0C214] interacts with 2 human partners:{P14635;P06400}

15308 Pathogen[ P03346] interacts with 5 human partners:{Q9H2W2;P06400;Q95096;P14635;Q8TAU0}

15309 Pathogen[ Q85601] interacts with 2 human partners:{P06400;P14635}

15310 Pathogen[ P14079] interacts with 1 human partners:{P14635}

15311 Pathogen[ P03383] interacts with 2 human partners:{P14635;P06400}

15312 Pathogen[ P03410] interacts with 2 human partners:{P06400;P14635}

15313 Pathogen[ P14075] interacts with 2 human partners:{P14635;P06400}

15314 Pathogen[ P0C206] interacts with 3 human partners:{P14635;Q8TAU0;P06400}

15315 Pathogen[ P03363] interacts with 3 human partners:{Q9H2W2;P06400;Q8TAU0}

15316 [Cluster 1393]GO:0051012+P biological\_process [name] microtubule sliding [def] "The movement of one microtubule along another microtubule." [PMID

15317 Pathogen[ Q2Q067] interacts with 1 human partners:{P27816}

15318 Pathogen[ P0C214] interacts with 1 human partners:{P27816}

15319 Pathogen[ P03346] interacts with 1 human partners:{P27816}

15320 Pathogen[ Q85601] interacts with 1 human partners:{P27816}

15321 Pathogen[ P14079] interacts with 1 human partners:{P27816}

15322 Pathogen[ P03383] interacts with 1 human partners:{P27816}

15323 Pathogen[ P03410] interacts with 1 human partners:{P27816}

15324 Pathogen[ P14075] interacts with 1 human partners:{P27816}

15325 Pathogen[ P0C206] interacts with 1 human partners:{P27816}

15326 Pathogen[ P03363] interacts with 1 human partners:{P27816}

15327 [Cluster 1394]GO:0009755+P biological\_process [name] hormone-mediated signaling pathway [def] "A series of molecular signals mediated by the detection of a hormone." [GOC

15328 Pathogen[ Q2Q067] interacts with 2 human partners:{P10827;P37198}

15329 Pathogen[ P0C214] interacts with 1 human partners:{P37198}

15330 Pathogen[ P03346] interacts with 2 human partners:{P10827;P37198}

15331 Pathogen[ Q85601] interacts with 1 human partners:{P10827}

15332 Pathogen[ P14079] interacts with 3 human partners:{P20396;P10827;P37198}

15333 Pathogen[ P03383] interacts with 1 human partners:{P37198}

15334 Pathogen[ P03410] interacts with 1 human partners:{P20396}

15335 Pathogen[ P14075] interacts with 1 human partners:{P37198}

15336 Pathogen[ P0C206] interacts with 2 human partners:{P20396;P10827}

15337 Pathogen[ P03363] interacts with 1 human partners:{P37198}

15338 [Cluster 1395]GO:0010038+P biological\_process [name] response to metal ion [def] "Any process that results in a change in state or activity of a cell or an organism (in terms of movement, secretion, enzyme production, gene expression, etc.) as a result of a metal ion stimulus." [GOC

15339 Pathogen[ Q2Q067] interacts with 7 human partners:{P55212;Q96PU5;Q14872;P80297;Q92597;O60888;P08397}

15340 Pathogen[ P0C214] interacts with 8 human partners:{Q14872;P55212;O60888;P80297;P08397;Q92597;P22830;Q96PU5}

15341 Pathogen[ P03346] interacts with 6 human partners:{Q96PU5;O60888;Q14872;P55212;P80297;Q92597}

15342 Pathogen[ Q85601] interacts with 8 human partners:{O60888;Q14872;Q96PU5;P80297;Q9Y4I5;P08397;Q92597;P55212}

15343 Pathogen[ P14079] interacts with 8 human partners:{P80297;Q92597;Q9Y4I5;P55212;P08397;O60888;P22830;Q14872}

15344 Pathogen[ P03383] interacts with 6 human partners:{P55212;P80297;Q92597;Q14872;P08397;O60888}

15345 Pathogen[ P03410] interacts with 8 human partners:{P08397;P80297;Q9Y4I5;Q14872;P22830;Q92597;P55212;O60888}

15346 Pathogen[ P14075] interacts with 6 human partners:{O60888;P80297;P55212;P08397;Q92597;Q14872}

15347 Pathogen[ P0C206] interacts with 9 human partners:{Q92597;Q96PU5;Q9Y4I5;P55212;O60888;P22830;Q14872;P08397;P80297}

15348 Pathogen[ P03363] interacts with 6 human partners:{P80297;O60888;Q92597;P55212;Q14872;Q96PU5}

15349 [Cluster 1396]GO:0007565+P biological\_process [name] female pregnancy [def] "The set of physiological processes that allow an embryo or foetus to develop within the body of a female animal. It covers the time from fertilization of a female ovum by a male spermatozoon until birth." [ISBN

15350 Pathogen[ Q2Q067] interacts with 7 human partners:{P01100;P14921;Q9NZI6;Q99594;P10914;Q13895;P15407}

15351 Pathogen[ P0C214] interacts with 9 human partners:{P14921;P15407;P01100;P17275;P10914;Q9Y6I3;Q99594;Q9NZI6;Q13895}

15352 Pathogen[ P03346] interacts with 9 human partners:{Q13895;Q99594;P17275;Q9NZI6;P14921;P10914;P15407;Q9Y6I3;P01100}

15353 Pathogen[ Q85601] interacts with 9 human partners:{P14921;P15407;P10914;P01100;Q99594;Q9NZI6;Q9Y6I3;Q13895;P17275}

15354 Pathogen[ P14079] interacts with 10 human partners:{Q9UHF0;Q9Y6I3;P01225;Q99594;Q9NZI6;P17275;P15407;Q13895;P01100;P10914}

15355 Pathogen[ P03383] interacts with 8 human partners:{P10914;P14921;Q13895;P15407;Q9NZI6;P01100;Q99594;P17275}

15356 Pathogen[ P03410] interacts with 10 human partners:{Q99594;Q9Y6I3;Q13895;P01100;P17275;Q9UHF0;P10914;Q9NZI6;P15407;P14921}

15357 Pathogen[ P14075] interacts with 8 human partners:{P17275;Q99594;P14921;Q9NZI6;P01100;P15407;P10914;Q13895}

15358 Pathogen[ P0C206] interacts with 9 human partners:{P10914;P14921;P15407;P17275;Q13895;P01100;Q9Y6I3;Q9NZI6;Q99594}

15359 Pathogen[ P03363] interacts with 8 human partners:{P14921;P17275;Q13895;Q9NZI6;P10914;P15407;Q99594;P01100}

15360 [Cluster 1397]GO:0006306+P biological\_process [name] DNA methylation [def] "The covalent transfer of a methyl group to either N-6 of adenine or C-5 or N-4 of cytosine." [GOC

15361 Pathogen[ Q2Q067] interacts with 13 human partners:{Q6VMQ6;P01100;Q8IZD2;Q9NPF5;Q9Y6K1;Q86YP4;Q9UJW3;Q9UBC3;P26358;P46100;Q9UIF9;P16455;P49711}

15362 Pathogen[ P0C214] interacts with 12 human partners:{Q6VMQ6;P01100;Q9Y6K1;Q9UIF9;P46100;P26358;Q86YP4;P16455;P49711;Q9NPF5;Q8IZD2;Q9UJW3}

15363 Pathogen[ P03346] interacts with 14 human partners:{Q9NRZ9;Q9Y6K1;P46100;Q9UBC3;P26358;Q6VMQ6;Q86YP4;P49711;Q9UIF9;O14717;P01100;Q8IZD2;Q9UJW3;Q9NPF5}

15364 Pathogen[ Q85601] interacts with 13 human partners:{Q9UIF9;Q9UJW3;P16455;P26358;P49711;P01100;Q86YP4;Q9Y6K1;Q6VMQ6;Q8IZD2;P46100;Q9UBC3;Q9NPF5}

15365 Pathogen[ P14079] interacts with 13 human partners:{Q9Y6K1;P16455;Q86YP4;P46100;Q6VMQ6;Q9UBC3;Q9UJW3;Q9NPF5;Q9UIF9;P26358;Q9Y5R4;P01100;P49711}

15366 Pathogen[ P03383] interacts with 10 human partners:{P49711;Q86YP4;Q9UJW3;Q6VMQ6;P46100;Q9Y6K1;Q9NPF5;Q9UIF9;P01100;P26358}

15367 Pathogen[ P03410] interacts with 13 human

15368 partners:{Q9NPF5;Q86YP4;P01100;Q6VMQ6;P26358;P16455;P46100;P49711;Q9UBC3;Q9UIF9;Q9UJW3;Q9Y6K1;Q9Y5R4} Pathogen[ P14075] interacts with 10 human

15369 partners:{Q9Y6K1;Q9UJW3;P26358;Q9NPF5;P46100;Q6VMQ6;Q9UIF9;P01100;P49711;Q86YP4} Pathogen[ P0C206] interacts with 14 human

15370 partners:{Q6VMQ6;Q9Y6K1;Q9NPF5;P46100;P26358;Q86YP4;P49711;P01100;Q9UIF9;Q9NRZ9;Q9UBC3;P16455;Q9UJW3;Q8IZD2} Pathogen[ P03363] interacts with 13 human

15371 partners:{Q9NPF5;Q6VMQ6;Q86YP4;Q9Y5R4;Q9Y6K1;Q14717;P49711;P46100;Q9UIF9;P26358;Q9UJW3;Q9UBC3;P01100} [Cluster 1398]GO:0070141+P biological\_process [name] response to UV-A [def] "Any process that results in a change in state or activity of a cell or an organism (in terms of movement, secretion, enzyme production, gene expression, etc.) as a result of a UV-A radiation stimulus. UV-A radiation (UV-A light) spans the wavelengths 400 to 500 nm." [GOC

15372 Pathogen[ Q2Q067] interacts with 3 human partners:{P31749;P24385;P02489}

15373 Pathogen[ P0C214] interacts with 3 human partners:{P02489;P24385;P31749}

15374 Pathogen[ P03346] interacts with 3 human partners:{P24385;P02489;P31749}

15375 Pathogen[ Q85601] interacts with 3 human partners:{P02489;P31749;P24385}

15376 Pathogen[ P14079] interacts with 1 human partners:{P02489}

15377 Pathogen[ P03383] interacts with 2 human partners:{P31749;P24385}

15378 Pathogen[ P03410] interacts with 3 human partners:{P31749;P24385;P02489}

15379 Pathogen[ P14075] interacts with 2 human partners:{P31749;P24385}

15380 Pathogen[ P0C206] interacts with 3 human partners:{P31749;P02489;P24385}

15381 Pathogen[ P03363] interacts with 3 human partners:{P31749;P24385;P02489}

15382 [Cluster 1399]GO:0010923+P biological\_process [name] negative regulation of phosphatase activity [def] "Any process that decreases the rate or frequency of phosphatase activity. Phosphatases catalyze the hydrolysis of phosphoric monoesters, releasing inorganic phosphate." [GOC

15383 Pathogen[ Q2Q067] interacts with 18 human partners:{Q9H175;Q9UJT2;Q14684;Q9NPG3;O95400;Q5T8A7;Q9P1Y5;O00566;Q9HCH5;A8K8P3;Q8WYN3;Q9H788;Q8TEP8;P55199;Q92796;Q8NG31;O94763;Q7Z699}

15384 Pathogen[ P0C214] interacts with 20 human partners:{Q9H788;Q9H175;Q7Z699;Q8WYN3;O95400;Q92796;Q9P1Y5;A8K8P3;Q9HCH5;Q8TEP8;Q9UJT2;P55199;Q5T8A7;Q8NG31;Q96LQ0;Q14684;O00566;O94763;Q9BYG3;Q9NPG3}

15385 Pathogen[ P03346] interacts with 26 human partners:{Q9NPG3;O95400;Q9H788;O94763;Q8WYN3;Q9HCH5;Q9P1Y5;O00566;Q8TEP8;Q92796;Q9H175;Q9UJT2;Q9NW75;Q9H4Z3;Q14684;Q9BYG3;P55199;Q15700;Q86WC6;Q5T8A7;Q8NG31;Q7Z699;A8K8P3;Q14C87;Q8TEC5;Q9HBF4}

15386 Pathogen[ Q85601] interacts with 19 human partners:{Q9NPG3;Q14684;Q9HBF4;Q9P1Y5;Q9HCH5;Q8NG31;Q8TEP8;Q8WYN3;Q9H175;Q9H788;O00566;Q92796;Q5T8A7;P55199;O95400;O94763;Q7Z699;A8K8P3;Q9UJT2}

15387 Pathogen[ P14079] interacts with 29 human partners:{Q14C87;P55199;Q8TEP8;Q15700;Q6GV28;Q9HCH5;Q5T8A7;Q8NG31;A8K8P3;Q9H175;Q8TAP8;O94763;O95400;Q7Z699;O00566;Q9NPG3;Q6ZMY3;Q86WC6;Q14684;Q9H4Z3;Q6PJW8;Q9BYG3;Q9P1Y5;Q92796;Q8WYN3;Q9HBF4;Q9UJT2;Q9H788;Q96LQ0}

15388 Pathogen[ P03383] interacts with 18 human partners:{P55199;O95400;Q9HCH5;Q8WYN3;Q9H175;Q14684;A8K8P3;Q8TEP8;Q14C87;O94763;Q9P1Y5;Q9UJT2;Q9H788;Q9NPG3;Q5T8A7;Q8NG31;Q92796;O00566}

15389 Pathogen[ P03410] interacts with 29 human partners:{Q9UJT2;Q9HCH5;O94763;Q14C87;Q8TEP8;Q14684;Q7Z699;Q96LQ0;Q8NG31;Q9P1Y5;Q9H175;Q9NPG3;Q86WC6;Q15700;P55199;Q8WYN3;Q5T8A7;Q9BYG3;Q92796;Q6PJW8;Q8TAP8;Q9H788;Q9H4Z3;O95400;Q6GV28;Q9HBF4;Q6ZMY3;A8K8P3;O00566}

15390 Pathogen[ P14075] interacts with 20 human partners:{O00566;Q9H788;Q9H175;Q5T8A7;Q14C87;A8K8P3;Q9HCH5;O95400;O94763;Q8TEP8;Q14684;Q96LQ0;Q92796;P55199;Q8NG31;Q8TAP8;Q8WYN3;Q9P1Y5;Q9UJT2;Q9NPG3}

15391 Pathogen[ P0C206] interacts with 29 human partners:{Q6ZMY3;Q9BYG3;Q15700;Q86WC6;A8K8P3;Q9P1Y5;Q8TEP8;Q9UJT2;Q9NPG3;Q6PJW8;Q9H788;O95400;Q5T8A7;Q96LQ0;Q9H175;Q9H4Z3;P55199;Q92796;Q8TAP8;Q9HCH5;Q8NG31;Q14C87;Q9HBF4;Q7Z699;Q8WYN3;Q99640;O94763;O00566;Q14684}

15392 Pathogen[ P03363] interacts with 25 human partners:{Q5T8P6;A8K8P3;Q9H175;O95400;P55199;Q9NPG3;Q14C87;Q15700;Q9NW75;Q86WC6;Q8TEP8;Q14684;Q8WYN3;Q7Z699;Q9P1Y5;O94763;Q9H788;O00566;Q8NG31;Q9BYG3;Q5T8A7;Q8TEC5;Q9HCH5;Q92796;Q9UJT2}

15393 [Cluster 1400]GO:000018+P biological\_process [name] regulation of DNA recombination [def] "Any process that modulates the frequency, rate or extent of DNA recombination, a DNA metabolic process in which a new genotype is formed by reassortment of genes resulting in gene combinations different from those that were present in the parents." [GOC

15394 Pathogen[ Q2Q067] interacts with 3 human partners:{Q9H4L7;P52292;P52294}

15395 Pathogen[ P0C214] interacts with 3 human partners:{Q9H4L7;P52294;P52292}

15396 Pathogen[ P03346] interacts with 3 human partners:{P52292;P52294;Q9H4L7}

15397 Pathogen[ Q85601] interacts with 3 human partners:{Q9H4L7;P52292;P52294}

15398 Pathogen[ P14079] interacts with 3 human partners:{Q9H4L7;P52294;P52292}

15399 Pathogen[ P03383] interacts with 2 human partners:{P52292;P52294}

15400 Pathogen[ P03410] interacts with 3 human partners:{Q9H4L7;P52294;P52292}

15401 Pathogen[ P14075] interacts with 2 human partners:{P52292;P52294}  
15402 Pathogen[ POC206] interacts with 3 human partners:{Q9H4L7;P52294;P52292}  
15403 Pathogen[ P03363] interacts with 3 human partners:{Q9H4L7;P52292;P52294}  
15404 [Cluster 1401]GO:0060564+P biological\_process [name] negative regulation of mitotic anaphase-promoting complex activity [def] "Any process that decreases the rate frequency or extent of anaphase-promoting complex activity regulating the mitotic cell cycle." [GOC  
15405 Pathogen[ Q2Q067] interacts with 2 human partners:{Q13257;Q9UI95}  
15406 Pathogen[ POC214] interacts with 2 human partners:{Q13257;Q9UI95}  
15407 Pathogen[ P03346] interacts with 3 human partners:{Q9UI95;Q9H0E7;Q13257}  
15408 Pathogen[ Q85601] interacts with 3 human partners:{Q9H0E7;Q9UI95;Q13257}  
15409 Pathogen[ P14079] interacts with 1 human partners:{Q13257}  
15410 Pathogen[ P03383] interacts with 2 human partners:{Q13257;Q9UI95}  
15411 Pathogen[ P03410] interacts with 2 human partners:{Q9UI95;Q13257}  
15412 Pathogen[ P14075] interacts with 2 human partners:{Q13257;Q9UI95}  
15413 Pathogen[ POC206] interacts with 3 human partners:{Q13257;Q9H0E7;Q9UI95}  
15414 Pathogen[ P03363] interacts with 2 human partners:{Q9UI95;Q13257}  
15415 [Cluster 1402]GO:0043537+P biological\_process [name] negative regulation of blood vessel endothelial cell migration [def] "Any process that stops, prevents, or reduces the frequency, rate or extent of the migration of the endothelial cells of blood vessels." [GOC  
15416 Pathogen[ Q2Q067] interacts with 2 human partners:{Q9H4X1;P67870}  
15417 Pathogen[ POC214] interacts with 2 human partners:{Q9H4X1;P67870}  
15418 Pathogen[ P03346] interacts with 2 human partners:{Q9H4X1;P67870}  
15419 Pathogen[ Q85601] interacts with 2 human partners:{Q9H4X1;P67870}  
15420 Pathogen[ P14079] interacts with 1 human partners:{P67870}  
15421 Pathogen[ P03383] interacts with 2 human partners:{Q9H4X1;P67870}  
15422 Pathogen[ P03410] interacts with 2 human partners:{Q9H4X1;P67870}  
15423 Pathogen[ P14075] interacts with 2 human partners:{Q9H4X1;P67870}  
15424 Pathogen[ POC206] interacts with 2 human partners:{Q9H4X1;P67870}  
15425 Pathogen[ P03363] interacts with 2 human partners:{Q9H4X1;P67870}  
15426 [Cluster 1403]GO:0001541+P biological\_process [name] ovarian follicle development [def] "The process whose specific outcome is the progression of the ovarian follicle over time, from its formation to the mature structure." [GOC  
15427 Pathogen[ Q2Q067] interacts with 8 human partners:{P49770;P30279;Q9UI10;O00268;P35869;Q13144;Q05086;O15287}  
15428 Pathogen[ POC214] interacts with 8 human partners:{Q05086;O00268;O15287;Q9UI10;P35869;P49770;Q13144;P30279}  
15429 Pathogen[ P03346] interacts with 11 human partners:{P30279;P58012;O60393;O00268;O15287;Q5JUK2;P49770;Q05086;P35869;Q13144;Q9UI10}  
15430 Pathogen[ Q85601] interacts with 8 human partners:{O00268;Q13144;P49770;P30279;O15287;P35869;Q05086;Q9UI10}  
15431 Pathogen[ P14079] interacts with 6 human partners:{P35869;Q9UI10;P01225;Q7Z7C7;Q13144;O00268}  
15432 Pathogen[ P03383] interacts with 7 human partners:{Q9UI10;P30279;Q13144;O15287;O00268;P49770;P35869}  
15433 Pathogen[ P03410] interacts with 7 human partners:{P30279;O00268;P49770;O15287;Q7Z7C7;Q9UI10;Q13144}  
15434 Pathogen[ P14075] interacts with 8 human partners:{P35869;P30279;Q9UI10;P49770;O15287;O00268;Q13144;Q7Z7C7}  
15435 Pathogen[ POC206] interacts with 10 human partners:{O60393;P35869;P30279;Q05086;O00268;Q13144;Q7Z7C7;P49770;O15287;Q9UI10}  
15436 Pathogen[ P03363] interacts with 10 human partners:{O15287;Q5JUK2;P30279;Q9UI10;O00268;Q05086;P35869;P49770;O60393;Q13144}  
15437 [Cluster 1404]GO:0031016+P biological\_process [name] pancreas development [def] "The process whose specific outcome is the progression of the pancreas over time, from its formation to the mature structure. The pancreas is an endoderm derived structure that produces precursors of digestive enzymes and blood glucose regulating enzymes." [GOC  
15438 Pathogen[ Q2Q067] interacts with 3 human partners:{O95948;Q15796;O14770}  
15439 Pathogen[ POC214] interacts with 3 human partners:{Q15796;O14770;O95948}  
15440 Pathogen[ P03346] interacts with 9 human partners:{P50219;Q9Y283;Q7RTS3;Q15796;Q9UBC0;P78426;O95948;P78367;O14770}  
15441 Pathogen[ Q85601] interacts with 4 human partners:{Q9Y283;O95948;O14770;Q15796}  
15442 Pathogen[ P14079] interacts with 3 human partners:{O95948;O14770;Q9Y283}  
15443 Pathogen[ P03383] interacts with 2 human partners:{O14770;Q15796}  
15444 Pathogen[ P03410] interacts with 4 human partners:{O95948;Q9Y283;Q15796;O14770}  
15445 Pathogen[ P14075] interacts with 2 human partners:{Q15796;O14770}  
15446 Pathogen[ POC206] interacts with 5 human partners:{Q9UBC0;O14770;Q15796;Q9Y283;O95948}  
15447 Pathogen[ P03363] interacts with 7 human partners:{Q9UBC0;O95948;Q7RTS3;Q15796;Q9Y283;P78367;P50219}  
15448 [Cluster 1405]GO:0090305+P biological\_process [name] nucleic acid phosphodiester bond hydrolysis [def] "The nucleic acid metabolic process in which the phosphodiester bonds between nucleotides are cleaved by hydrolysis." [GOC  
15449 Pathogen[ Q2Q067] interacts with 44 human



- partners: {Q8TCS8; Q96SD1; Q15631; Q5D1E8; Q99638; Q96LI5; Q8IZH2; Q8NCE0; P49959; Q7KZF4; Q9Y2L1; Q9NRR4; O60930; O95551; Q504Q3; P27695; Q9GZR2; Q12972; Q9BSV6; A4GXA9; P52758; Q86US8; Q9NUW8; P54278; Q9UQ84; Q8TF46; Q9BRX2; P39748; Q92499; Q9H816; Q9H9L3; Q9H9J2; Q96NY9; Q96MB7; Q9BQ65; Q96AY2; Q9BQ52; Q93075; O95453; O75792; A2A288; Q8IYD8; O60671; Q9ULM6}
- 15450 Pathogen[ P0C214] interacts with 52 human  
partners: {O95551; Q8N1G1; P27695; Q9H9J2; Q9BQ65; O95453; P49959; Q9H816; Q9Y2L1; Q504Q3; Q96SD1; Q9BRX2; Q96NY9; Q7KZF4; O75792; Q8TF46; Q9BSV6; Q8IZH2; Q96MB7; Q9ULM6; A2A288; Q86US8; Q96AY2; Q9BQ52; Q6P1N9; Q8TCS8; Q9H9L3; O60930; Q9NRR4; Q8IV48; A4GXA9; Q17R31; Q8WTP8; Q93075; O60671; Q92499; Q15631; Q9C0D7; Q9GZR2; P39748; Q9UQ84; Q12972; Q8IYB7; Q9NUW8; P52758; P54278; Q96LI5; Q99638; Q5D1E8; Q8IYD8; Q8NCE0; Q9Y3B8}
- 15451 Pathogen[ P03346] interacts with 50 human  
partners: {Q504Q3; Q9ULM6; A2A288; O95551; Q96SD1; Q9GZR2; Q8IX06; Q86US8; Q9H9L3; P52758; O60930; Q9NUW8; Q96AY2; Q99638; Q8IYB7; Q8IZH2; Q96NY9; O95453; Q9BQ65; Q92499; Q15631; Q7KZF4; Q8TCS8; Q9Y2L1; Q5D1E8; Q17R31; P49959; Q9UQ84; P54278; Q9NRR4; Q8IYD8; O60671; P24855; P27695; Q13283; P39748; Q9H816; Q9BRX2; Q9UBZ4; Q9BQ52; Q93075; Q12972; Q96LI5; Q9BSV6; A4GXA9; Q8TF46; Q96MB7; Q8NCE0; Q9H9J2; O75792}
- 15452 Pathogen[ Q85601] interacts with 47 human  
partners: {Q9UBZ4; Q9BQ52; Q8IYD8; Q9UQ84; P52758; Q17R31; A4GXA9; Q9NRR4; Q96AY2; O75792; P49959; Q92499; Q7KZF4; Q9BSV6; Q504Q3; Q9Y2L1; Q8IYB7; Q8IZH2; Q96NY9; Q96LI5; A2A288; Q96MB7; Q96SD1; O95453; Q12972; Q8TCS8; Q9ULM6; Q9NUW8; Q9GZR2; Q9H9L3; Q86US8; Q9C0D7; O60671; P54278; O60930; P39748; Q9H9J2; Q9H816; Q9BRX2; Q93075; P27695; Q8TF46; Q99638; O95551; Q15631; Q5D1E8; Q8NCE0}
- 15453 Pathogen[ P14079] interacts with 62 human  
partners: {O60671; Q6P1N9; P52758; Q8IV48; Q9BRX2; Q9Y3B8; Q5D1E8; Q96NY9; Q8IYD8; Q9UBZ4; O75792; Q9BSV6; Q96LI5; P54278; P49184; O94919; Q86US8; Q9GZR2; Q9BQ65; Q8TF46; Q8NCE0; O00115; O95453; Q96AY2; Q9BQ50; A4GXA9; Q96MB7; Q8N1G1; Q15631; Q8IYB7; Q8IZH2; Q9H9L3; Q8N8Q3; Q9H9L3; Q9NRR4; P24855; P27695; Q9BQ52; Q9Y2L1; Q93075; O95551; Q9NSU2; Q12972; Q9H9J2; Q8WZ79; Q96SD1; Q5HYM0; Q92499; Q99638; Q7KZF4; Q9ULM6; A2A288; O60930; Q504Q3; Q17R31; Q9H816; Q9UQ84; Q8TCS8; P39748; Q9C0D7; Q8WTP8}
- 15454 Pathogen[ P03383] interacts with 35 human  
partners: {Q9NRR4; Q9Y2L1; O60671; P54278; Q93075; O75792; Q96MB7; A4GXA9; Q9BQ65; Q12972; Q5D1E8; Q8NCE0; Q8TCS8; Q9BRX2; Q15631; A2A288; Q9BQ52; P52758; Q9BSV6; Q9H816; Q86US8; Q7KZF4; Q96AY2; Q9H9L3; Q9ULM6; Q99638; Q9NUW8; Q9H9J2; O60930; P27695; O95551; Q92499; O95453; Q96LI5; Q96NY9}
- 15455 Pathogen[ P03410] interacts with 64 human  
partners: {Q96LI5; P49959; Q9Y2L1; Q17R31; Q8WTP8; Q9GZR2; Q9Y3B8; Q8TCS8; P49184; Q96AY2; Q9H816; Q8IV48; Q96MB7; Q8IYD8; Q9BQ50; A4GXA9; Q9C0D7; Q9ULM6; Q6P1N9; O75792; Q8TF46; Q8NHP7; Q9BQ52; Q5HYM0; A2A288; Q93075; P39748; Q9NSU2; Q96SD1; Q9BSV6; Q9H9J2; Q9NRR4; O60930; Q9H9L3; Q8IYH2; Q9UBZ4; O95551; O95453; Q99638; Q92499; Q9BRX2; Q5D1E8; Q2TB18; Q96NY9; Q8IX06; Q9NUW8; Q8N1G1; O60671; Q8IYB7; Q86US8; P63135; P27695; Q12972; Q15631; Q7KZF4; O00115; P52758; P54278; Q9UQ84; Q9BQ65; Q8NCE0; Q504Q3; P24855; Q9H9L3}
- 15456 Pathogen[ P14075] interacts with 35 human  
partners: {O95453; Q9BSV6; Q9ULM6; P27695; Q9BRX2; O60930; O60671; Q93075; Q9H9J2; Q96LI5; Q9Y2L1; Q99638; Q92499; Q96MB7; Q15631; Q86US8; Q8NCE0; Q9BQ65; Q9BQ52; Q96NY9; Q9H816; Q9NRR4; Q5D1E8; Q9H9L3; O75792; Q8TCS8; Q96AY2; P54278; Q7KZF4; P52758; Q12972; Q9NUW8; A4GXA9; A2A288; O95551}
- 15457 Pathogen[ P0C206] interacts with 57 human  
partners: {P27695; P54278; Q504Q3; Q96AY2; Q17RS7; Q9H9L3; O95453; P49959; Q9BSV6; Q9UQ84; Q9NSU2; Q8IZH2; Q8TCS8; Q17R31; Q8IV48; Q9BQ65; Q96LI5; Q9C0D7; Q8IYD8; Q9H9L3; A2A288; Q9NUW8; Q7KZF4; Q15631; Q96SD1; Q9UBZ4; Q96MB7; Q9H816; P24855; Q8N1G1; A4GXA9; Q99638; O60930; Q96NY9; Q93075; Q86US8; Q9Y3B8; O75792; Q5D1E8; O95551; Q6P1N9; Q9NRR4; Q9Y2L1; Q5HYM0; O60671; Q9H9J2; Q12972; Q8NCE0; P39748; Q9GZR2; Q8IYB7; P52758; Q92499; Q9BQ52; Q9ULM6; Q8TF46; Q9BRX2}
- 15458 Pathogen[ P03363] interacts with 44 human  
partners: {Q504Q3; Q9H816; Q9BQ50; P52758; O95453; Q12972; Q9BSV6; A2A288; Q93075; Q86US8; Q13283; Q9GZR2; O60671; Q15631; Q9H9J2; Q96MB7; Q7KZF4; O75792; Q9ULM6; Q8IYB7; P54278; Q8N1G1; P07998; Q8IYD8; Q9H9L3; Q9NUW8; Q9Y2L1; Q92499; Q96AY2; Q9NRR4; Q96LI5; Q9BQ65; Q8IX06; Q99638; O95551; Q9BRX2; Q5D1E8; O60930; P24855; A4GXA9; Q96NY9; Q8TF46; Q8NCE0; Q8IZH2}
- 15459 [Cluster 1406]GO:0043039+P biological\_process [name] tRNA aminoacylation [def] "The chemical reactions and pathways by which the various amino acids become bonded to their corresponding tRNAs. The most common route for synthesis of aminoacyl tRNA is by the formation of an ester bond between the 3'-hydroxyl group of the most 3' adenosine of the tRNA, usually catalyzed by the cognate aminoacyl-tRNA ligase. A given aminoacyl-tRNA ligase aminoacylates all species of an isoaccepting group of tRNA molecules." [GOC
- 15460 Pathogen[ Q2Q067] interacts with 5 human  
partners: {O95363; Q9Y285; P07814; Q6PI48; Q9BW92}
- 15461 Pathogen[ P0C214] interacts with 13 human  
partners: {O95363; P07814; Q9Y285; Q5JTP6; Q9BTE6; Q5JPH6; P26639; A2RTX5; P49588; P47897; Q9BW92; Q6PI48; Q9Y2Z4}
- 15462 Pathogen[ P03346] interacts with 3 human partners: {P07814; Q9Y285; Q6PI48}
- 15463 Pathogen[ Q85601] interacts with 8 human  
partners: {P26639; P07814; Q9BW92; Q9Y285; A2RTX5; O95363; P47897; Q6PI48}
- 15464 Pathogen[ P14079] interacts with 12 human  
partners: {Q9Y285; P26639; Q9BTE6; Q9BW92; P47897; O95363; A2RTX5; Q5JPH6; Q9Y2Z4; P49588; Q6PI48; P07814}
- 15465 Pathogen[ P03383] interacts with 9 human  
partners: {Q9Y285; Q5JPH6; Q9BTE6; A2RTX5; Q9Y2Z4; O95363; P07814; Q6PI48; Q9BW92}

15466 Pathogen[ P03410] interacts with 12 human partners: {Q9Y285;Q9BTE6;Q9BW92;P49588;P47897;P26639;Q5JPH6;Q9Y2Z4;P07814;A2RTX5;O9563;Q6PI48}

15467 Pathogen[ P14075] interacts with 10 human partners: {Q9Y2Z4;O95363;Q9Y285;Q9BTE6;A2RTX5;Q9BW92;P26639;Q6PI48;Q5JPH6;P07814}

15468 Pathogen[ P0C206] interacts with 11 human partners: {O95363;P07814;Q9Y2Z4;Q6PI48;A2RTX5;Q5JPH6;Q9Y285;Q9BTE6;Q9BW92;P26639;P47897}

15469 Pathogen[ P03363] interacts with 10 human partners: {Q9Y2Z4;A2RTX5;P47897;Q5JPH6;Q9BTE6;Q6PI48;O95363;Q9BW92;Q9Y285;P07814}

15470 [Cluster 1407]GO:0051438+P biological\_process [name] regulation of ubiquitin-protein ligase activity [def] "Any process that modulates the frequency, rate or extent of ubiquitin ligase activity, the catalysis of the reaction

15471 Pathogen[ Q2Q067] interacts with 1 human partners: {Q9UK73}

15472 Pathogen[ P0C214] interacts with 1 human partners: {Q9UK73}

15473 Pathogen[ P03346] interacts with 1 human partners: {Q9UK73}

15474 Pathogen[ Q85601] interacts with 1 human partners: {Q9UK73}

15475 Pathogen[ P14079] interacts with 1 human partners: {Q9UK73}

15476 Pathogen[ P03383] interacts with 1 human partners: {Q9UK73}

15477 Pathogen[ P03410] interacts with 1 human partners: {Q9UK73}

15478 Pathogen[ P14075] interacts with 1 human partners: {Q9UK73}

15479 Pathogen[ P0C206] interacts with 1 human partners: {Q9UK73}

15480 Pathogen[ P03363] interacts with 1 human partners: {Q9UK73}

15481 [Cluster 1408]GO:0030282+P biological\_process [name] bone mineralization [def] "The deposition of calcium phosphate in bone tissue." [GOC

15482 Pathogen[ Q2Q067] interacts with 2 human partners: {Q13118;Q9Y3A5}

15483 Pathogen[ P0C214] interacts with 3 human partners: {Q9NUA8;Q9H469;Q9Y3A5}

15484 Pathogen[ P03346] interacts with 4 human partners: {Q9H469;Q9NUA8;Q13118;Q9Y3A5}

15485 Pathogen[ Q85601] interacts with 4 human partners: {Q9NUA8;Q9Y3A5;Q9H469;Q13118}

15486 Pathogen[ P14079] interacts with 4 human partners: {Q13118;Q9NUA8;Q9Y3A5;Q9UNW1}

15487 Pathogen[ P03383] interacts with 1 human partners: {Q9Y3A5}

15488 Pathogen[ P03410] interacts with 6 human partners: {Q9H469;Q13118;Q9UNW1;Q9NRM1;Q9Y3A5;Q9NUA8}

15489 Pathogen[ P14075] interacts with 1 human partners: {Q9Y3A5}

15490 Pathogen[ P0C206] interacts with 4 human partners: {Q9NUA8;Q9Y3A5;Q13118;Q9H469}

15491 Pathogen[ P03363] interacts with 4 human partners: {Q9NUA8;Q9Y3A5;Q9H469;Q13118}

15492 [Cluster 1409]GO:0006926+P biological\_process [name] virus-infected cell apoptosis [def] "The process of apoptosis in cells infected with a virus." [GOC

15493 Pathogen[ Q2Q067] interacts with 1 human partners: {Q13794}

15494 Pathogen[ P0C214] interacts with 1 human partners: {Q13794}

15495 Pathogen[ P03346] interacts with 1 human partners: {Q13794}

15496 Pathogen[ Q85601] interacts with 1 human partners: {Q13794}

15497 Pathogen[ P14079] interacts with 1 human partners: {Q13794}

15498 Pathogen[ P03383] interacts with 1 human partners: {Q13794}

15499 Pathogen[ P03410] interacts with 1 human partners: {Q13794}

15500 Pathogen[ P14075] interacts with 1 human partners: {Q13794}

15501 Pathogen[ P0C206] interacts with 1 human partners: {Q13794}

15502 Pathogen[ P03363] interacts with 1 human partners: {Q13794}

15503 [Cluster 1410]GO:0006479+P biological\_process [name] protein methylation [def] "The addition of a methyl group to a protein amino acid. A methyl group is derived from methane by the removal of a hydrogen atom." [GOC

15504 Pathogen[ Q2Q067] interacts with 13 human partners: {O14744;Q9NVM4;Q96LA8;Q9Y5N5;P55345;P22061;Q9NR22;Q99873;P62324;P62495;Q9H5I1;Q86X55;P78543}

15505 Pathogen[ P0C214] interacts with 14 human partners: {Q9H5I1;P78543;Q9NVM4;Q99873;P55345;P15170;P22061;P62495;Q9Y5N5;P62324;Q8IXQ9;Q86X55;Q9NR22;Q96LA8}

15506 Pathogen[ P03346] interacts with 14 human partners: {P22061;Q99873;Q8IXQ9;Q9Y5N5;O14744;P62495;P55345;Q9NR22;Q9NVM4;Q86X55;P62324;Q9H5I1;P78543;Q96LA8}

15507 Pathogen[ Q85601] interacts with 15 human partners: {Q9H5I1;Q9NR22;Q86X55;P62495;Q9NVM4;P62324;Q9Y5N5;O14744;P15170;Q99873;P78543;P22061;Q8IXQ9;Q96LA8;P55345}

15508 Pathogen[ P14079] interacts with 14 human partners: {P78543;Q9NR22;P62324;Q96LA8;Q9Y5N5;Q99873;Q9NVM4;P62495;O60678;Q9H5I1;P55345;O14744;Q8IXQ9;Q9Y5R4}

15509 Pathogen[ P03383] interacts with 12 human partners: {P62324;Q86X55;O14744;P78543;Q99873;Q9NR22;P62495;Q9Y5N5;P22061;Q8IXQ9;Q9H5I1;Q96LA8}

15510 Pathogen[ P03410] interacts with 17 human partners: {Q96LA8;Q9NVM4;Q86X55;Q9NR22;Q8IXQ9;P15170;P62495;P62324;Q9H5I1;P78543;O14744;Q9Y5N5;P22061;O95568;Q9Y5R4;Q99873;P55345}

15511 Pathogen[ P14075] interacts with 12 human partners: {P62495;P62324;Q9NR22;Q9H5I1;Q8IXQ9;O14744;Q96LA8;Q99873;P78543;Q9Y5N5;Q86X55;P22061}

15512 Pathogen[ P0C206] interacts with 15 human

partners:{P62324;P22061;Q99873;O14744;Q86X55;Q96LA8;P62495;Q9NVM4;Q9H5I1;Q9Y5N5;Q9NR22;O60678;P55345;Q8IXQ9;P78543}

15513 Pathogen[ P03363] interacts with 15 human partners:{O14744;Q9H5I1;Q96LA8;O95568;Q9Y5R4;P78543;Q8IXQ9;P62495;Q9NVM4;Q9NR22;P62324;Q9Y5N5;Q6P2P2;Q86X55;Q99873}

15514 [Cluster 1411]GO:0048678+P biological\_process [name] response to axon injury [def] "Any process that results in a change in state or activity of a cell or an organism (in terms of movement, secretion, enzyme production, gene expression, etc.) as a result of an axon injury stimulus." [GOC

15515 Pathogen[ Q2Q067] interacts with 1 human partners:{P61244}

15516 Pathogen[ P0C214] interacts with 1 human partners:{P61244}

15517 Pathogen[ P03346] interacts with 1 human partners:{P61244}

15518 Pathogen[ Q85601] interacts with 1 human partners:{P61244}

15519 Pathogen[ P14079] interacts with 2 human partners:{Q16873;P61244}

15520 Pathogen[ P03383] interacts with 1 human partners:{P61244}

15521 Pathogen[ P03410] interacts with 2 human partners:{P61244;Q16873}

15522 Pathogen[ P14075] interacts with 1 human partners:{P61244}

15523 Pathogen[ P0C206] interacts with 1 human partners:{P61244}

15524 Pathogen[ P03363] interacts with 1 human partners:{P61244}

15525 [Cluster 1412]GO:0008050+P biological\_process [name] female courtship behavior [def] "The actions or reactions of a female, for the purpose of attracting a sexual partner." [GOC

15526 Pathogen[ Q2Q067] interacts with 2 human partners:{P10827;P10828}

15527 Pathogen[ P0C214] interacts with 1 human partners:{P10828}

15528 Pathogen[ P03346] interacts with 2 human partners:{P10827;P10828}

15529 Pathogen[ Q85601] interacts with 2 human partners:{P10827;P10828}

15530 Pathogen[ P14079] interacts with 2 human partners:{P10828;P10827}

15531 Pathogen[ P03383] interacts with 1 human partners:{P10828}

15532 Pathogen[ P03410] interacts with 1 human partners:{P10828}

15533 Pathogen[ P14075] interacts with 1 human partners:{P10828}

15534 Pathogen[ P0C206] interacts with 2 human partners:{P10828;P10827}

15535 Pathogen[ P03363] interacts with 1 human partners:{P10828}

15536 [Cluster 1413]GO:0060070+P biological\_process [name] canonical Wnt receptor signaling pathway [def] "The series of molecular signals initiated by binding of a Wnt protein to a frizzled family receptor on the surface of the target cell, followed by propagation of the signal via beta-catenin, and ending with a change in transcription of target genes. In this pathway, the activated receptor signals via downstream effectors that result in the inhibition of beta-catenin phosphorylation, thereby preventing degradation of beta-catenin. Stabilized beta-catenin can then accumulate and travel to the nucleus to trigger changes in transcription of target genes." [GOC

15537 Pathogen[ Q2Q067] interacts with 14 human partners:{P24385;O00512;P01106;P36402;Q86UU0;P17482;P63146;O14641;O60907;Q9NRI5;O75360;Q9BZK7;P60953;Q9HCK8}

15538 Pathogen[ P0C214] interacts with 15 human partners:{Q9NRI5;O60907;P60953;P17482;P24385;O14641;Q9HCK8;Q86UU0;O75360;O00512;P36402;Q9BZK7;P13533;P01106;P63146}

15539 Pathogen[ P03346] interacts with 16 human partners:{Q06945;Q9NRI5;P24385;O60907;P36402;P60953;P01106;Q9HCS4;O14641;P63146;O00512;Q9HCK8;Q9BZK7;O75360;Q86UU0;P17482}

15540 Pathogen[ Q85601] interacts with 16 human partners:{P01106;O75360;P24385;P63146;P13533;O60907;Q86UU0;O14641;O00512;P36402;Q9HCK8;Q9BZK7;P60953;Q9NRI5;Q9HCS4;P17482}

15541 Pathogen[ P14079] interacts with 11 human partners:{Q9BZK7;O14641;O60907;Q9NRI5;P36402;O00512;O75360;Q9HCK8;Q86UU0;P01106;P63146}

15542 Pathogen[ P03383] interacts with 14 human partners:{P01106;Q9NRI5;O60907;O75360;P17482;P60953;P24385;Q86UU0;O14641;O00512;P36402;Q9HCK8;Q9BZK7;P63146}

15543 Pathogen[ P03410] interacts with 16 human partners:{O00512;P17482;P01106;P36402;P24385;P63146;Q9HCK8;P60953;Q9NRI5;Q9HCS4;Q9BZK7;P13533;O75360;O60907;Q86UU0;O14641}

15544 Pathogen[ P14075] interacts with 14 human partners:{P60953;Q86UU0;P17482;O00512;P01106;Q9NRI5;O14641;Q9HCK8;O60907;O75360;P36402;Q9BZK7;P24385;P63146}

15545 Pathogen[ P0C206] interacts with 15 human partners:{Q9HCK8;O00512;Q86UU0;P13533;O60907;Q9HCS4;O75360;P17482;Q9NRI5;Q9BZK7;P60953;P01106;P36402;P63146;P24385}

15546 Pathogen[ P03363] interacts with 15 human partners:{O75360;P36402;Q9BZK7;O60907;P63146;Q9HCS4;P01106;Q9HCK8;O00512;Q86UU0;P24385;P17482;Q9NRI5;O14641;P60953}

15547 [Cluster 1414]GO:0042752+P biological\_process [name] regulation of circadian rhythm [def] "Any process that modulates the frequency, rate or extent of a circadian rhythm. A circadian rhythm is a biological process in an organism that recurs with a regularity of approximately 24 hours." [GOC

15548 Pathogen[ Q2Q067] interacts with 3 human partners:{Q9UKT7;Q03060;Q16526}

15549 Pathogen[ P0C214] interacts with 5 human

15550 partners:{Q9UKT7;Q49AN0;Q03060;Q16526;P16220}  
Pathogen[ P03346] interacts with 5 human

15551 partners:{Q9UKT7;P16220;Q49AN0;Q16526;Q03060}  
Pathogen[ Q85601] interacts with 5 human

15552 partners:{Q49AN0;Q9UKT7;P16220;Q16526;Q03060}  
Pathogen[ P14079] interacts with 4 human partners:{Q16526;Q49AN0;Q03060;Q9UKT7}

15553 Pathogen[ P03383] interacts with 4 human partners:{P16220;Q9UKT7;Q03060;Q16526}

15554 Pathogen[ P03410] interacts with 5 human  
partners:{Q9UKT7;Q03060;Q16526;P16220;Q49AN0}

15555 Pathogen[ P14075] interacts with 4 human partners:{Q9UKT7;Q16526;Q03060;P16220}

15556 Pathogen[ P0C206] interacts with 5 human  
partners:{Q03060;P16220;Q9UKT7;Q16526;Q49AN0}

15557 Pathogen[ P03363] interacts with 5 human  
partners:{P16220;Q49AN0;Q16526;Q9UKT7;Q03060}

15558 [Cluster 1415]GO:0000413+P biological\_process [name] protein peptidyl-prolyl  
isomerization [def] "The modification of a protein by cis-trans isomerization of a  
proline residue." [GOC

15559 Pathogen[ Q2Q067] interacts with 12 human  
partners:{Q9UNP9;Q13356;Q9H2H8;P49792;Q13427;O43447;Q9Y237;Q15257;Q13526;Q08752;P232  
84;P62937}

15560 Pathogen[ P0C214] interacts with 21 human  
partners:{Q9Y536;Q6UX04;A2BFH1;Q13526;P30405;Q13427;P49792;P23284;Q15257;P30414;Q9H2  
H8;Q9Y237;P45877;Q9Y3C6;F5H284;Q13356;Q96BP3;O43447;Q08752;Q8IXY8;Q9UNP9}

15561 Pathogen[ P03346] interacts with 17 human  
partners:{Q9H2H8;O43447;Q9Y3C6;Q6UX04;P62937;Q15257;Q96BP3;Q13526;Q13427;Q9Y237;Q087  
52;Q9UNP9;Q13356;Q9Y536;A2BFH1;P49792;P23284}

15562 Pathogen[ Q85601] interacts with 21 human  
partners:{F5H284;P30405;Q6UX04;A2BFH1;Q9H2H8;Q96BP3;Q13427;Q08752;Q13526;P23284;Q9Y3  
C6;Q13356;P30414;O43447;P49792;Q8IXY8;Q15257;Q9Y536;P62937;Q9Y237;P45877}

15563 Pathogen[ P14079] interacts with 16 human  
partners:{O43447;Q8IXY8;Q08752;Q9Y237;P62937;Q13427;F5H284;Q13356;P45877;Q9H2H8;A2BF  
H1;P23284;Q6UX04;Q13526;Q9Y536;Q96BP3}

15564 Pathogen[ P03383] interacts with 12 human  
partners:{P49792;Q13356;Q9UNP9;Q15257;Q96BP3;Q9H2H8;P62937;Q08752;O43447;Q13427;P232  
84;Q13526}

15565 Pathogen[ P03410] interacts with 22 human  
partners:{Q08752;Q13526;Q9Y536;Q96BP3;Q15257;Q13356;Q9H2H8;P62937;P45877;Q6UX04;Q9Y3  
C6;P23284;Q9UNP9;F5H284;Q8IXY8;P30414;Q13427;Q9Y237;O43447;P30405;A2BFH1;P49792}

15566 Pathogen[ P14075] interacts with 10 human  
partners:{Q15257;Q08752;P23284;P49792;Q9UNP9;Q13526;O43447;P62937;Q13427;Q9H2H8}

15567 Pathogen[ P0C206] interacts with 21 human  
partners:{Q9Y536;Q9UNP9;Q13526;Q08752;Q96BP3;A2BFH1;F5H284;P49792;Q9Y3C6;Q13427;P232  
84;Q13356;O43447;Q9Y237;P45877;Q9H2H8;P30405;P62937;Q15257;Q8IXY8;Q6UX04}

15568 Pathogen[ P03363] interacts with 17 human  
partners:{P23284;Q13427;P62937;A2BFH1;Q6UX04;Q13356;Q96BP3;Q9Y3C6;Q08752;Q13526;O434  
47;P49792;Q9Y237;Q15257;Q9Y536;Q9H2H8;Q9UNP9}

15569 [Cluster 1416]GO:0021696+P biological\_process [name] cerebellar cortex morphogenesis  
[def] "The process in which the anatomical structure of the cranial nerves are generated  
and organized. The cerebellar cortex is a thin mantle of gray matter that covers the  
surface of each cerebral hemisphere. It has a characteristic morphology with  
convolutions (gyri) and crevices (sulci) that have specific functions. Six layers of  
nerve cells and the nerve pathways that connect them comprise the cerebellar cortex.  
Together, these regions are responsible for the processes of conscious thought,  
perception, emotion and memory as well as advanced motor function." [GO\_REF

15570 Pathogen[ Q2Q067] interacts with 3 human partners:{Q33E94;P08151;Q95613}

15571 Pathogen[ P0C214] interacts with 3 human partners:{P08151;Q95613;Q33E94}

15572 Pathogen[ P03346] interacts with 3 human partners:{Q33E94;Q95613;P08151}

15573 Pathogen[ Q85601] interacts with 3 human partners:{P08151;Q33E94;Q95613}

15574 Pathogen[ P14079] interacts with 2 human partners:{P08151;Q95613}

15575 Pathogen[ P03383] interacts with 2 human partners:{Q33E94;Q95613}

15576 Pathogen[ P03410] interacts with 2 human partners:{Q95613;Q33E94}

15577 Pathogen[ P14075] interacts with 2 human partners:{Q33E94;Q95613}

15578 Pathogen[ P0C206] interacts with 3 human partners:{Q95613;Q33E94;P08151}

15579 Pathogen[ P03363] interacts with 3 human partners:{P08151;Q95613;Q33E94}

15580 [Cluster 1417]GO:0044030+P biological\_process [name] regulation of DNA methylation  
[def] "Any process that modulates the frequency, rate or extent of the covalent transfer  
of a methyl group to either N-6 of adenine or C-5 or N-4 of cytosine." [GOC

15581 Pathogen[ Q2Q067] interacts with 1 human partners:{Q99549}

15582 Pathogen[ P0C214] interacts with 1 human partners:{Q99549}

15583 Pathogen[ P03346] interacts with 1 human partners:{Q99549}

15584 Pathogen[ Q85601] interacts with 1 human partners:{Q99549}

15585 Pathogen[ P14079] interacts with 1 human partners:{Q99549}

15586 Pathogen[ P03383] interacts with 1 human partners:{Q99549}

15587 Pathogen[ P03410] interacts with 1 human partners:{Q99549}

15588 Pathogen[ P14075] interacts with 1 human partners:{Q99549}

15589 Pathogen[ P0C206] interacts with 1 human partners:{Q99549}

15590 Pathogen[ P03363] interacts with 1 human partners:{Q99549}  
15591 [Cluster 1418]GO:0050999+P biological\_process [name] regulation of nitric-oxide synthase activity [def] "Any process that modulates the activity of the enzyme nitric-oxide synthase." [GOC  
15592 Pathogen[ Q2Q067] interacts with 8 human partners:{P31749;P30793;P07900;O00401;P29474;Q03393;P30047;Q9Y314}  
15593 Pathogen[ P0C214] interacts with 11 human partners:{P29474;O75608;P35270;P00374;Q03393;P30793;Q8IVI9;O00401;P30047;P31749;Q9Y314}  
15594 Pathogen[ P03346] interacts with 10 human partners:{O75608;P07900;P29474;Q8IVI9;Q03393;P30047;P31749;O75052;O00401;Q9Y314}  
15595 Pathogen[ Q85601] interacts with 8 human partners:{O00401;P31749;P30793;P30047;Q8IVI9;P07900;P29474;Q9Y314}  
15596 Pathogen[ P14079] interacts with 9 human partners:{P00374;Q9Y314;O75608;P30793;Q8IVI9;P07900;Q03393;P30047;O00401}  
15597 Pathogen[ P03383] interacts with 6 human partners:{P29474;P31749;P07900;O00401;P30047;Q9Y314}  
15598 Pathogen[ P03410] interacts with 12 human partners:{P30047;P00374;Q8IVI9;O00401;P31749;P07900;P30793;P29474;O75608;O75052;Q9Y314;Q03393}  
15599 Pathogen[ P14075] interacts with 7 human partners:{P29474;P07900;P31749;O00401;P30047;P30793;Q9Y314}  
15600 Pathogen[ P0C206] interacts with 10 human partners:{P31749;O75608;P30793;P30047;P07900;O00401;P29474;Q03393;Q8IVI9;Q9Y314}  
15601 Pathogen[ P03363] interacts with 7 human partners:{P29474;P07900;Q8IVI9;P31749;O00401;P30047;Q9Y314}  
15602 [Cluster 1419]GO:0015986+P biological\_process [name] ATP synthesis coupled proton transport [def] "The transport of protons across a membrane to generate an electrochemical gradient (proton-motive force) that powers ATP synthesis." [ISBN  
15603 Pathogen[ Q2Q067] interacts with 2 human partners:{Q9Y2B5;P24539}  
15604 Pathogen[ P0C214] interacts with 3 human partners:{Q9Y2B5;P36542;P24539}  
15605 Pathogen[ P03346] interacts with 2 human partners:{P24539;Q9Y2B5}  
15606 Pathogen[ Q85601] interacts with 2 human partners:{P24539;Q9Y2B5}  
15607 Pathogen[ P14079] interacts with 10 human partners:{P36542;P25705;P56385;Q5VTU8;Q7Z4Y8;P03928;Q9Y2B5;O75964;P56381;P24539}  
15608 Pathogen[ P03383] interacts with 2 human partners:{Q9Y2B5;P24539}  
15609 Pathogen[ P03410] interacts with 11 human partners:{P36542;P25705;Q9Y2B5;P56385;P56381;Q5VTU8;P03928;P24539;O75964;P18859;Q7Z4Y8}  
15610 Pathogen[ P14075] interacts with 3 human partners:{P24539;P56385;Q9Y2B5}  
15611 Pathogen[ P0C206] interacts with 5 human partners:{P36542;Q9Y2B5;P24539;P56381;P56385}  
15612 Pathogen[ P03363] interacts with 1 human partners:{Q9Y2B5}  
15613 [Cluster 1420]GO:2000346+P biological\_process [name] negative regulation of hepatocyte proliferation [def] "Any process that stops, prevents or reduces the frequency, rate or extent of hepatocyte proliferation." [GOC  
15614 Pathogen[ Q2Q067] interacts with 1 human partners:{Q969H0}  
15615 Pathogen[ P0C214] interacts with 1 human partners:{Q969H0}  
15616 Pathogen[ P03346] interacts with 1 human partners:{Q969H0}  
15617 Pathogen[ Q85601] interacts with 1 human partners:{Q969H0}  
15618 Pathogen[ P14079] interacts with 1 human partners:{Q969H0}  
15619 Pathogen[ P03383] interacts with 1 human partners:{Q969H0}  
15620 Pathogen[ P03410] interacts with 1 human partners:{Q969H0}  
15621 Pathogen[ P14075] interacts with 1 human partners:{Q969H0}  
15622 Pathogen[ P0C206] interacts with 1 human partners:{Q969H0}  
15623 Pathogen[ P03363] interacts with 1 human partners:{Q969H0}  
15624 [Cluster 1421]GO:0061084+P biological\_process [name] negative regulation of protein refolding [def] "Any process that decreases the rate, frequency, or extent of protein refolding. Protein refolding is the process carried out by a cell that restores the biological activity of an unfolded or misfolded protein, using helper proteins such as chaperones." [GOC  
15625 Pathogen[ Q2Q067] interacts with 1 human partners:{P50502}  
15626 Pathogen[ P0C214] interacts with 1 human partners:{P50502}  
15627 Pathogen[ P03346] interacts with 1 human partners:{P50502}  
15628 Pathogen[ Q85601] interacts with 1 human partners:{P50502}  
15629 Pathogen[ P14079] interacts with 2 human partners:{Q9UL15;P50502}  
15630 Pathogen[ P03383] interacts with 1 human partners:{P50502}  
15631 Pathogen[ P03410] interacts with 2 human partners:{P50502;Q9UL15}  
15632 Pathogen[ P14075] interacts with 1 human partners:{P50502}  
15633 Pathogen[ P0C206] interacts with 1 human partners:{P50502}  
15634 Pathogen[ P03363] interacts with 1 human partners:{P50502}  
15635 [Cluster 1422]GO:0051574+P biological\_process [name] positive regulation of histone H3-K9 methylation [def] "Any process that activates or increases the frequency, rate or extent of the covalent addition of a methyl group to the lysine at position 9 of histone H3." [GOC  
15636 Pathogen[ Q2Q067] interacts with 2 human partners:{Q5VTD9;P10242}

15637 Pathogen[ P0C214] interacts with 2 human partners:{Q5VTD9;P10242}  
15638 Pathogen[ P03346] interacts with 2 human partners:{P10242;Q5VTD9}  
15639 Pathogen[ Q85601] interacts with 2 human partners:{P10242;Q5VTD9}  
15640 Pathogen[ P14079] interacts with 2 human partners:{Q5VTD9;P10242}  
15641 Pathogen[ P03383] interacts with 1 human partners:{P10242}  
15642 Pathogen[ P03410] interacts with 2 human partners:{P10242;Q5VTD9}  
15643 Pathogen[ P14075] interacts with 1 human partners:{P10242}  
15644 Pathogen[ P0C206] interacts with 2 human partners:{P10242;Q5VTD9}  
15645 Pathogen[ P03363] interacts with 2 human partners:{Q5VTD9;P10242}  
15646 [Cluster 1423]GO:0090104+P biological\_process [name] pancreatic E cell differentiation  
[def] "The process in which relatively unspecialized cells acquire specialized  
structural and functional features of a pancreatic E cell. A pancreatic E cell is a cell  
in the pancreas that secretes ghrelin." [GOC  
15647 Pathogen[ Q2Q067] interacts with 1 human partners:{Q8HWS3}  
15648 Pathogen[ P0C214] interacts with 1 human partners:{Q8HWS3}  
15649 Pathogen[ P03346] interacts with 1 human partners:{Q8HWS3}  
15650 Pathogen[ Q85601] interacts with 1 human partners:{Q8HWS3}  
15651 Pathogen[ P14079] interacts with 1 human partners:{Q8HWS3}  
15652 Pathogen[ P03383] interacts with 1 human partners:{Q8HWS3}  
15653 Pathogen[ P03410] interacts with 1 human partners:{Q8HWS3}  
15654 Pathogen[ P14075] interacts with 1 human partners:{Q8HWS3}  
15655 Pathogen[ P0C206] interacts with 1 human partners:{Q8HWS3}  
15656 Pathogen[ P03363] interacts with 1 human partners:{Q8HWS3}  
15657 [Cluster 1424]GO:0055086+P biological\_process [name] nucleobase-containing small  
molecule metabolic process [def] "The cellular chemical reactions and pathways  
involving a nucleobase-containing small molecule  
15658 Pathogen[ Q2Q067] interacts with 9 human  
partners:{P22392;P35754;P07741;P33316;P31350;Q7LG56;P10599;P04818;P11172}  
15659 Pathogen[ P0C214] interacts with 23 human  
partners:{Q96P26;P35754;O95045;P04818;P31350;P23919;P49902;P07741;P33316;P11172;Q8TC  
D5;Q16881;Q16831;Q9NRF8;P23921;P10599;P22392;P17812;Q7LG56;Q9Y2T3;P31939;P30566;Q9H0  
P0}  
15660 Pathogen[ P03346] interacts with 8 human  
partners:{P31350;Q7LG56;P22392;P35754;P10599;P11172;P07741;P33316}  
15661 Pathogen[ Q85601] interacts with 10 human  
partners:{P11172;P33316;P31350;P10599;Q7LG56;O95045;P22392;P07741;P35754;Q9H0P0}  
15662 Pathogen[ P14079] interacts with 24 human  
partners:{Q9H0P0;P22234;Q96P26;Q8TCD5;P17812;P31939;Q16831;P11172;P31350;Q9Y2T3;P333  
16;Q7LG56;Q9NRF8;P23919;P35754;P22392;O95045;P49902;P49915;Q9BXI3;P10599;O15067;P048  
18;P07741}  
15663 Pathogen[ P03383] interacts with 6 human  
partners:{P22392;P10599;P31350;P07741;P33316;P11172}  
15664 Pathogen[ P03410] interacts with 25 human  
partners:{O95045;Q96P26;P10599;P31350;P35754;P49915;P07741;Q9NRF8;P17812;Q16831;P111  
72;P23919;P22234;Q9Y2T3;P33316;Q9BXI3;P04818;P30566;O15067;P31939;Q8TCD5;Q9H0P0;P239  
21;Q7LG56;P49902}  
15665 Pathogen[ P14075] interacts with 8 human  
partners:{P31350;P49902;P11172;O95045;P33316;P07741;P22392;P10599}  
15666 Pathogen[ P0C206] interacts with 15 human  
partners:{P33316;Q16831;P22392;Q7LG56;P35754;P49902;P31939;O95045;P11172;Q8TCD5;Q9H0  
P0;P04818;P07741;P10599;P31350}  
15667 Pathogen[ P03363] interacts with 4 human partners:{P33316;P07741;P11172;P35754}  
15668 [Cluster 1425]GO:0031665+P biological\_process [name] negative regulation of  
lipopolysaccharide-mediated signaling pathway [def] "Any process that stops, prevents,  
or reduces the frequency, rate or extent of signaling in response to detection of  
lipopolysaccharide." [GOC  
15669 Pathogen[ Q2Q067] interacts with 2 human partners:{Q8WUQ7;Q9UBC1}  
15670 Pathogen[ P0C214] interacts with 1 human partners:{Q9UBC1}  
15671 Pathogen[ P03346] interacts with 3 human partners:{O75626;Q9UBC1;Q8WUQ7}  
15672 Pathogen[ Q85601] interacts with 2 human partners:{O75626;Q9UBC1}  
15673 Pathogen[ P14079] interacts with 3 human partners:{O75626;Q9UBC1;Q8WUQ7}  
15674 Pathogen[ P03383] interacts with 2 human partners:{Q9UBC1;Q8WUQ7}  
15675 Pathogen[ P03410] interacts with 3 human partners:{Q8WUQ7;Q9UBC1;O75626}  
15676 Pathogen[ P14075] interacts with 2 human partners:{Q9UBC1;Q8WUQ7}  
15677 Pathogen[ P0C206] interacts with 3 human partners:{Q9UBC1;O75626;Q8WUQ7}  
15678 Pathogen[ P03363] interacts with 3 human partners:{Q8WUQ7;O75626;Q9UBC1}  
15679 [Cluster 1426]GO:0048706+P biological\_process [name] embryonic skeletal system  
development [def] "The process, occurring during the embryonic phase, whose specific  
outcome is the progression of the skeleton over time, from its formation to the mature  
structure." [GOC  
15680 Pathogen[ Q2Q067] interacts with 13 human  
partners:{O43365;P09067;P31274;P28356;Q02447;P17482;P08047;P35227;Q00444;P20719;P352  
26;Q07687;P40424}  
15681 Pathogen[ P0C214] interacts with 8 human  
partners:{P40424;P35226;O43365;P35227;P17482;Q07687;Q02447;P08047}  
15682 Pathogen[ P03346] interacts with 20 human

15683 partners: {P35226;P35227;P56177;P23759;P31274;P20719;P08047;O43365;P28356;P78367;P09630;P31267;Q9GZZ0;P40424;O75398;Q02447;P09067;P17509;Q00444;P17482}  
Pathogen[ Q85601] interacts with 11 human  
partners: {O75398;P08047;P40424;Q02447;P31274;P35226;O43365;Q00444;Q07687;P17482;P35227}

15684 Pathogen[ P14079] interacts with 9 human  
partners: {Q02447;P54826;P31274;O43365;Q00444;P35226;Q07687;P35227;Q5T5P2}

15685 Pathogen[ P03383] interacts with 8 human  
partners: {P35227;P08047;Q07687;P40424;P17482;O43365;Q02447;P35226}

15686 Pathogen[ P03410] interacts with 11 human  
partners: {P17482;P31274;Q02447;P35227;Q07687;P54826;P08047;P35226;P40424;O43365;Q5T5P2}

15687 Pathogen[ P14075] interacts with 9 human  
partners: {P17482;P40424;O43365;Q07687;Q02447;P35226;P54826;P35227;P08047}

15688 Pathogen[ P0C206] interacts with 17 human  
partners: {Q07687;Q00444;O43365;P09067;P35226;P40424;P08047;P17482;Q02447;Q5T5P2;P31274;O75398;P28356;P20719;P54826;P56177;P35227}

15689 Pathogen[ P03363] interacts with 22 human  
partners: {Q5T5P2;P09067;P31274;P35227;P56177;P31267;O43365;Q02447;P28356;P20719;P17509;Q00444;Q9GZZ0;P35226;P23759;P17482;P78367;O75398;P40424;P08047;P09630;Q07687}

15690 [Cluster 1427]GO:0007155+P biological\_process [name] cell adhesion [def] "The attachment of a cell, either to another cell or to an underlying substrate such as the extracellular matrix, via cell adhesion molecules." [GOC

15691 Pathogen[ Q2Q067] interacts with 31 human  
partners: {P22392;O14786;Q86WQ0;Q13352;Q92797;Q12815;Q14511;P56945;Q9H307;Q9NY61;Q9Y2D8;Q99569;O60711;Q96IF1;Q9UQB3;Q96F07;Q15654;Q12904;P08865;Q02410;Q9NVD7;O60504;Q13895;Q93052;P63000;P35579;Q99689;Q12816;P61586;Q14129;O60716}

15692 Pathogen[ P0C214] interacts with 29 human  
partners: {P63000;O14786;Q12904;Q12815;P56945;O60716;Q9Y2D8;Q92797;P61586;Q96F07;Q9H307;Q12816;P08865;Q14129;Q9NY61;Q9UQB3;Q15124;Q13352;Q99689;Q15654;O60711;Q14511;Q13895;Q02410;O60504;Q9NVD7;P22392;Q7L5Y9;Q86WQ0}

15693 Pathogen[ P03346] interacts with 43 human  
partners: {Q96AC1;Q99828;Q13895;Q14511;Q96RT1;Q99569;O60716;Q13449;Q96F07;P35579;Q12815;Q9Y2D8;Q99689;Q9H307;O75970;Q13835;Q96IF1;Q14129;Q86WQ0;Q15942;O00192;P55196;Q02410;Q12816;Q9UQB3;Q12904;P08865;P56945;Q9Y4G6;Q9UI47;Q9NY61;P22392;Q9NVD7;Q92797;A6NDV4;O60504;Q93052;Q15654;O60711;P63000;O14786;Q13352;P61586}

15694 Pathogen[ Q85601] interacts with 34 human  
partners: {Q99569;Q9NVD7;Q96RT1;Q96F07;Q9NY61;Q9H307;P35579;Q15654;Q7L5Y9;Q93052;P63000;Q12815;O14786;Q9UQB3;O60716;Q86WQ0;O60711;Q13352;P56945;Q15124;Q9Y2D8;Q15942;Q12816;P22392;Q99689;P61586;Q92797;Q96IF1;Q02410;O60504;Q13895;Q14129;Q14511;P08865}

15695 Pathogen[ P14079] interacts with 50 human  
partners: {P35579;Q14242;Q96KR4;Q12815;Q9P266;A6NDV4;Q14210;Q9NY61;Q9NP84;Q08722;Q9UI47;Q93052;Q02410;Q86WQ0;Q13835;Q9UQB3;Q12816;O60504;Q7L5Y9;Q15124;Q14129;Q99828;O60711;Q9Y4G6;Q9H307;Q92797;Q96RT1;Q96GC9;Q99689;P22392;Q9UEE9;Q96IF1;Q99569;Q96AC1;P61586;Q43294;Q92982;Q96F07;Q9UKB5;P08865;P49023;Q13895;Q12904;Q9Y2D8;Q96FX8;Q9NVD7;Q13352;O60716;O75970;Q15942}

15696 Pathogen[ P03383] interacts with 26 human  
partners: {O60716;Q9NY61;P56945;Q12904;Q14129;Q12815;Q99689;P22392;Q92797;P63000;Q13352;Q15654;Q13895;Q9UQB3;Q86WQ0;P61586;Q12816;P08865;Q96F07;Q14511;O60711;Q9H307;O60504;Q02410;P35579;Q9Y2D8}

15697 Pathogen[ P03410] interacts with 52 human  
partners: {O60711;O14786;Q14129;Q96RT1;Q96GC9;P63000;Q14242;Q12815;Q14210;O60716;Q9NY61;O43294;P35579;Q15124;Q86WQ0;Q9UEE9;A6NDV4;Q13835;Q13895;Q02410;Q12904;Q15654;P08865;Q96IF1;O75970;Q93052;Q99828;Q96KR4;Q14511;Q96FX8;Q92797;P61586;Q15942;Q08722;Q9NZ67;Q9P266;Q9Y4G6;O60504;P56945;Q9UI47;Q9UQB3;Q9NVD7;Q12816;Q96F07;Q9NP84;Q13449;Q7L5Y9;Q15517;Q13352;Q9H307;Q99569;Q99689}

15698 Pathogen[ P14075] interacts with 30 human  
partners: {Q9H307;Q92797;Q96F07;Q14511;Q9P266;Q14129;Q02410;Q96FX8;P08865;Q12815;Q12816;Q9NY61;Q9Y2D8;Q7L5Y9;Q9UQB3;Q12904;P35579;P61586;Q15654;P63000;Q9UEE9;O60711;O60504;Q13352;O60716;Q86WQ0;P22392;P56945;Q99689;Q13895}

15699 Pathogen[ P0C206] interacts with 45 human  
partners: {O60716;Q96RT1;Q99828;Q96F07;O60504;Q12815;Q96KR4;P22392;Q96FX8;Q9NVD7;Q96IF1;P08865;Q9UEE9;Q9P266;Q9H307;Q15654;Q13895;Q9UI47;Q9Y2D8;Q15124;O14786;A6NDV4;P61586;Q99689;Q92797;Q7L5Y9;P63000;Q13835;P55196;Q99569;Q15942;Q12816;Q13352;P35579;O43294;Q86WQ0;Q14129;P56945;O60711;Q9NY61;Q9UQB3;Q93052;Q14511;Q12904;Q02410}

15700 Pathogen[ P03363] interacts with 37 human  
partners: {Q15654;Q96RT1;P08865;Q13835;Q9UI47;P35579;O14786;Q86WQ0;Q9H307;Q9Y2D8;Q96F07;Q8N302;Q99828;Q99569;O75970;P63000;Q93052;Q9Y4G6;Q92797;Q96IF1;Q13895;Q9NY61;Q14511;Q02410;Q14129;P56945;Q96AC1;Q9NVD7;O00192;Q9UQB3;Q13352;O60716;Q15942;O60711;Q12815;Q99689;Q12816}

15701 [Cluster 1428]GO:0050796+P biological\_process [name] regulation of insulin secretion [def] "Any process that modulates the frequency, rate or extent of the regulated release of insulin." [GOC

15702 Pathogen[ Q2Q067] interacts with 7 human  
partners: {Q13562;P48380;Q8HWS3;P36956;P29966;P11166;P20823}

15703 Pathogen[ P0C214] interacts with 5 human

15704 partners:{P29966;P11166;P11168;P48380;Q8HWS3}  
Pathogen[ P03346] interacts with 8 human

15705 partners:{P36956;P48380;P20823;Q8HWS3;P11166;P29966;Q92481;Q13562}  
Pathogen[ Q85601] interacts with 8 human

15706 partners:{P11168;Q13562;P11166;P36956;P29966;P48380;P20823;Q8HWS3}  
Pathogen[ P14079] interacts with 7 human

15707 partners:{P24588;P16298;P48380;P11166;Q8HWS3;P29966;P36956}  
Pathogen[ P03383] interacts with 4 human partners:{Q8HWS3;P48380;P11168;P29966}

15708 partners:{P36956;P11166;P05141;P11168;P48380;P29966;P24588;Q8HWS3}  
Pathogen[ P03410] interacts with 8 human

15709 partners:{P48380;P29966;P11168;Q8HWS3}  
Pathogen[ P14075] interacts with 4 human partners:{P48380;P29966;P11168;Q8HWS3}

15710 partners:{Q8HWS3;P36956;P48380;P11166;P11168;P20823;Q13562;P29966}  
Pathogen[ P0C206] interacts with 8 human

15711 Pathogen[ P03363] interacts with 4 human partners:{P29966;P48380;Q8HWS3;P11166}

15712 [Cluster 1429]GO:0009435+P biological\_process [name] NAD biosynthetic process [def] "The chemical reactions and pathways resulting in the formation of nicotinamide adenine dinucleotide, a coenzyme present in most living cells and derived from the B vitamin nicotinic acid\_biosynthesis may be of either the oxidized form, NAD, or the reduced form, NADH." [GOC  
15713 Pathogen[ Q2Q067] interacts with 3 human partners:{Q6XQN6;Q9HAN9;Q16719}

15714 Pathogen[ P0C214] interacts with 7 human  
partners:{Q96T66;Q9HAN9;Q6XQN6;Q9BZQ4;Q15274;P43490;Q16719}

15715 Pathogen[ P03346] interacts with 3 human partners:{Q9HAN9;Q6XQN6;Q16719}

15716 Pathogen[ Q85601] interacts with 3 human partners:{Q16719;Q9HAN9;Q6XQN6}

15717 Pathogen[ P14079] interacts with 7 human  
partners:{P43490;Q16719;Q9BZQ4;Q6XQN6;Q9HAN9;Q6IA69;Q15274}

15718 Pathogen[ P03383] interacts with 2 human partners:{Q16719;Q9HAN9}

15719 Pathogen[ P03410] interacts with 7 human  
partners:{Q15274;Q16719;Q6XQN6;P43490;Q9HAN9;Q6IA69;Q9BZQ4}

15720 Pathogen[ P14075] interacts with 3 human partners:{Q16719;Q9HAN9;Q6XQN6}

15721 Pathogen[ P0C206] interacts with 6 human  
partners:{Q6XQN6;P43490;Q16719;Q9BZQ4;Q9HAN9;Q15274}

15722 Pathogen[ P03363] interacts with 2 human partners:{Q6XQN6;Q9HAN9}

15723 [Cluster 1430]GO:2000791+P biological\_process [name] negative regulation of mesenchymal cell proliferation involved in lung development [def] "Any process that stops, prevents or reduces the frequency, rate or extent of mesenchymal cell proliferation involved in lung development." [PMID  
15724 Pathogen[ Q2Q067] interacts with 1 human partners:{000712}

15725 Pathogen[ P0C214] interacts with 1 human partners:{000712}

15726 Pathogen[ P03346] interacts with 1 human partners:{000712}

15727 Pathogen[ Q85601] interacts with 1 human partners:{000712}

15728 Pathogen[ P14079] interacts with 1 human partners:{000712}

15729 Pathogen[ P03383] interacts with 1 human partners:{000712}

15730 Pathogen[ P03410] interacts with 1 human partners:{000712}

15731 Pathogen[ P14075] interacts with 1 human partners:{000712}

15732 Pathogen[ P0C206] interacts with 1 human partners:{000712}

15733 Pathogen[ P03363] interacts with 1 human partners:{000712}

15734 [Cluster 1431]GO:0090073+P biological\_process [name] positive regulation of protein homodimerization activity [def] "Any process that increases the frequency, rate or extent of protein homodimerization, interacting selectively with an identical protein to form a homodimer." [GOC  
15735 Pathogen[ Q2Q067] interacts with 2 human partners:{Q12933;Q96SW2}

15736 Pathogen[ P0C214] interacts with 2 human partners:{Q12933;Q96SW2}

15737 Pathogen[ P03346] interacts with 2 human partners:{Q96SW2;Q9BUZ4}

15738 Pathogen[ Q85601] interacts with 2 human partners:{Q96SW2;Q12933}

15739 Pathogen[ P14079] interacts with 4 human partners:{Q06413;Q9BUZ4;Q12933;Q96SW2}

15740 Pathogen[ P03383] interacts with 2 human partners:{Q96SW2;Q12933}

15741 Pathogen[ P03410] interacts with 2 human partners:{Q96SW2;Q12933}

15742 Pathogen[ P14075] interacts with 2 human partners:{Q96SW2;Q12933}

15743 Pathogen[ P0C206] interacts with 3 human partners:{Q12933;Q9BUZ4;Q96SW2}

15744 Pathogen[ P03363] interacts with 3 human partners:{Q12933;Q96SW2;Q9BUZ4}

15745 [Cluster 1432]GO:0010033+P biological\_process [name] response to organic substance [def] "Any process that results in a change in state or activity of a cell or an organism (in terms of movement, secretion, enzyme production, gene expression, etc.) as a result of an organic substance stimulus." [GOC  
15746 Pathogen[ Q2Q067] interacts with 14 human  
partners:{P30153;P24385;P07737;O00267;P40763;P18887;Q04206;P67775;P27797;P55212;P08697;P25815;P38936;P78543}

15747 Pathogen[ P0C214] interacts with 17 human  
partners:{P50440;P08697;P30153;P78543;O00267;P55212;Q04206;P24385;P38936;P14618;P18887;P67775;P25815;P05412;P27797;P40763;P16220}

15748 Pathogen[ P03346] interacts with 17 human  
partners:{P05412;P24385;P16220;P25815;Q9NS18;Q04206;P67775;P55212;P30153;P51843;O00267;P27797;P18887;P07737;P38936;P40763;P78543}

15749 Pathogen[ Q85601] interacts with 17 human  
partners:{P24385;P18887;P40763;P30153;P27797;P08697;P07737;P14618;P78543;P16220;Q042



15750 Pathogen[ P14079] interacts with 13 human partners: {P78543;P07737;P55212;P25815;P08758;P38936;P18887;P11686;Q13510;P30153;P05412;P50440;O00267}

15751 Pathogen[ P03383] interacts with 14 human partners: {P25815;P55212;P16220;P08697;P24385;P30153;P67775;P07737;O00267;P78543;Q04206;P18887;P27797;P05412}

15752 Pathogen[ P03410] interacts with 19 human partners: {Q04206;P18887;O00267;P25815;P24385;Q13510;P38936;P11686;P08697;P16220;P05412;P78543;P30153;P67775;P55212;P50440;P40763;P07737;P27797}

15753 Pathogen[ P14075] interacts with 16 human partners: {Q04206;P05412;P55212;Q13510;P07737;P78543;P27797;P08697;P67775;P30153;P16220;P24385;P25815;O00267;P50440;P18887}

15754 Pathogen[ P0C206] interacts with 19 human partners: {P27797;Q9NS18;P16220;P30153;P05412;P55212;P67775;P25815;P50440;Q04206;P38936;O00267;P40763;P07737;P18887;P14618;P08697;P78543;P24385}

15755 Pathogen[ P03363] interacts with 13 human partners: {P18887;Q04206;P16220;P78543;O00267;P25815;P55212;P27797;P24385;P05412;P30153;P67775;P07737}

15756 [Cluster 1433]GO:0009267+P biological\_process [name] cellular response to starvation [def] "Any process that results in a change in state or activity of a cell (in terms of movement, secretion, enzyme production, gene expression, etc.) as a result of deprivation of nourishment." [GOC

15757 Pathogen[ Q2Q067] interacts with 4 human partners: {P36956;P15172;P61244;Q8NEZ5}

15758 Pathogen[ P0C214] interacts with 3 human partners: {P61244;P15172;Q8NDV7}

15759 Pathogen[ P03346] interacts with 5 human partners: {P36956;Q8NEZ5;P15172;Q12778;P61244}

15760 Pathogen[ Q85601] interacts with 4 human partners: {P15172;P36956;P61244;Q8NEZ5}

15761 Pathogen[ P14079] interacts with 4 human partners: {Q8NEZ5;P36956;P61244;Q8NDV7}

15762 Pathogen[ P03383] interacts with 3 human partners: {P15172;Q8NEZ5;P61244}

15763 Pathogen[ P03410] interacts with 4 human partners: {P36956;Q8NDV7;P61244;Q8NEZ5}

15764 Pathogen[ P14075] interacts with 3 human partners: {P61244;P15172;Q8NEZ5}

15765 Pathogen[ P0C206] interacts with 5 human partners: {P36956;Q8NDV7;P61244;P15172;Q8NEZ5}

15766 Pathogen[ P03363] interacts with 4 human partners: {Q8NEZ5;Q8NDV7;P61244;P15172}

15767 [Cluster 1434]GO:0043517+P biological\_process [name] positive regulation of DNA damage response, signal transduction by p53 class mediator [def] "Any process that activates, maintains or increases the rate of the cascade of processes induced by the cell cycle regulator phosphoprotein p53, or an equivalent protein, in response to the detection of DNA damage." [GOC

15768 Pathogen[ Q2Q067] interacts with 6 human partners: {Q14526;Q13794;Q8N726;Q15327;O43324;Q7Z699}

15769 Pathogen[ P0C214] interacts with 6 human partners: {Q14526;Q15327;Q7Z699;Q8N726;Q13794;O43324}

15770 Pathogen[ P03346] interacts with 6 human partners: {Q15327;Q14526;O43324;Q7Z699;Q8N726;Q13794}

15771 Pathogen[ Q85601] interacts with 6 human partners: {O43324;Q14526;Q8N726;Q15327;Q7Z699;Q13794}

15772 Pathogen[ P14079] interacts with 6 human partners: {Q8N726;Q7Z699;Q13794;Q15327;P28360;O43324}

15773 Pathogen[ P03383] interacts with 5 human partners: {Q14526;O43324;Q15327;Q13794;Q8N726}

15774 Pathogen[ P03410] interacts with 6 human partners: {Q14526;Q7Z699;Q8N726;Q13794;Q15327;O43324}

15775 Pathogen[ P14075] interacts with 5 human partners: {Q14526;Q15327;Q13794;O43324;Q8N726}

15776 Pathogen[ P0C206] interacts with 6 human partners: {O43324;Q8N726;Q15327;Q14526;Q7Z699;Q13794}

15777 Pathogen[ P03363] interacts with 6 human partners: {Q14526;Q13794;Q15327;Q7Z699;Q8N726;O43324}

15778 [Cluster 1435]GO:0019363+P biological\_process [name] pyridine nucleotide biosynthetic process [def] "The chemical reactions and pathways resulting in the formation of a pyridine nucleotide, a nucleotide characterized by a pyridine derivative as a nitrogen base." [GOC

15779 Pathogen[ Q2Q067] interacts with 3 human partners: {Q6XQN6;Q9HAN9;Q16719}

15780 Pathogen[ P0C214] interacts with 7 human partners: {Q96T66;Q9HAN9;Q6XQN6;Q9BZQ4;Q15274;P43490;Q16719}

15781 Pathogen[ P03346] interacts with 3 human partners: {Q9HAN9;Q6XQN6;Q16719}

15782 Pathogen[ Q85601] interacts with 3 human partners: {Q16719;Q9HAN9;Q6XQN6}

15783 Pathogen[ P14079] interacts with 6 human partners: {P43490;Q16719;Q9BZQ4;Q6XQN6;Q9HAN9;Q15274}

15784 Pathogen[ P03383] interacts with 2 human partners: {Q16719;Q9HAN9}

15785 Pathogen[ P03410] interacts with 6 human partners: {Q15274;Q16719;Q6XQN6;P43490;Q9HAN9;Q9BZQ4}

15786 Pathogen[ P14075] interacts with 3 human partners: {Q16719;Q9HAN9;Q6XQN6}

15787 Pathogen[ P0C206] interacts with 6 human

partners:{Q6XQN6;P43490;Q16719;Q9BZQ4;Q9HAN9;Q15274}

15788 Pathogen[ P03363] interacts with 2 human partners:{Q6XQN6;Q9HAN9}

15789 [Cluster 1436]GO:0035414+P biological\_process [name] negative regulation of catenin import into nucleus [def] "Any process that decreases the rate, frequency or extent of the directed movement of a catenin protein from the cytoplasm into the nucleus." [GOC

15790 Pathogen[ Q2Q067] interacts with 3 human partners:{P50402;Q9GZV5;O95996}

15791 Pathogen[ P0C214] interacts with 2 human partners:{Q9GZV5;P50402}

15792 Pathogen[ P03346] interacts with 3 human partners:{Q9GZV5;O95996;P50402}

15793 Pathogen[ Q85601] interacts with 3 human partners:{Q9GZV5;P50402;O95996}

15794 Pathogen[ P14079] interacts with 4 human partners:{Q9GZV5;Q96B18;O95996;P50402}

15795 Pathogen[ P03383] interacts with 2 human partners:{P50402;Q9GZV5}

15796 Pathogen[ P03410] interacts with 4 human partners:{Q96B18;Q9GZV5;O95996;P50402}

15797 Pathogen[ P14075] interacts with 2 human partners:{Q9GZV5;P50402}

15798 Pathogen[ P0C206] interacts with 4 human partners:{P50402;O95996;Q96B18;Q9GZV5}

15799 Pathogen[ P03363] interacts with 3 human partners:{O95996;Q9GZV5;P50402}

15800 [Cluster 1437]GO:0071257+P biological\_process [name] cellular response to electrical stimulus [def] "Any process that results in a change in state or activity of a cell (in terms of movement, secretion, enzyme production, gene expression, etc.) as a result of an electrical stimulus." [GOC

15801 Pathogen[ Q2Q067] interacts with 1 human partners:{Q13127}

15802 Pathogen[ P0C214] interacts with 2 human partners:{Q9UM54;Q13127}

15803 Pathogen[ P03346] interacts with 1 human partners:{Q13127}

15804 Pathogen[ Q85601] interacts with 2 human partners:{Q13127;Q9UM54}

15805 Pathogen[ P14079] interacts with 3 human partners:{O75781;Q9UM54;Q13127}

15806 Pathogen[ P03383] interacts with 1 human partners:{Q13127}

15807 Pathogen[ P03410] interacts with 3 human partners:{O75781;Q9UM54;Q13127}

15808 Pathogen[ P14075] interacts with 1 human partners:{Q13127}

15809 Pathogen[ P0C206] interacts with 2 human partners:{Q9UM54;Q13127}

15810 Pathogen[ P03363] interacts with 1 human partners:{Q13127}

15811 [Cluster 1438]GO:0010907+P biological\_process [name] positive regulation of glucose metabolic process [def] "Any process that increases the rate, frequency or extent of glucose metabolism. Glucose metabolic processes are the chemical reactions and pathways involving glucose, the aldohexose gluco-hexose." [GOC

15812 Pathogen[ Q2Q067] interacts with 2 human partners:{P31749;Q13794}

15813 Pathogen[ P0C214] interacts with 2 human partners:{Q13794;P31749}

15814 Pathogen[ P03346] interacts with 2 human partners:{P31749;Q13794}

15815 Pathogen[ Q85601] interacts with 2 human partners:{P31749;Q13794}

15816 Pathogen[ P14079] interacts with 2 human partners:{P31751;Q13794}

15817 Pathogen[ P03383] interacts with 2 human partners:{P31749;Q13794}

15818 Pathogen[ P03410] interacts with 2 human partners:{P31749;Q13794}

15819 Pathogen[ P14075] interacts with 2 human partners:{P31749;Q13794}

15820 Pathogen[ P0C206] interacts with 2 human partners:{P31749;Q13794}

15821 Pathogen[ P03363] interacts with 2 human partners:{Q13794;P31749}

15822 [Cluster 1439]GO:0001955+P biological\_process [name] blood vessel maturation [def] "A developmental process, independent of morphogenetic (shape) change, that is required for a blood vessel to attain its fully functional state." [GOC

15823 Pathogen[ Q2Q067] interacts with 1 human partners:{P12980}

15824 Pathogen[ P0C214] interacts with 1 human partners:{P12980}

15825 Pathogen[ P03346] interacts with 1 human partners:{P12980}

15826 Pathogen[ Q85601] interacts with 1 human partners:{P12980}

15827 Pathogen[ P14079] interacts with 1 human partners:{P12980}

15828 Pathogen[ P03383] interacts with 1 human partners:{P12980}

15829 Pathogen[ P03410] interacts with 1 human partners:{P12980}

15830 Pathogen[ P14075] interacts with 1 human partners:{P12980}

15831 Pathogen[ P0C206] interacts with 1 human partners:{P12980}

15832 Pathogen[ P03363] interacts with 1 human partners:{P12980}

15833 [Cluster 1440]GO:0048536+P biological\_process [name] spleen development [def] "The process whose specific outcome is the progression of the spleen over time, from its formation to the mature structure. The spleen is a large vascular lymphatic organ composed of white and red pulp, involved both in hemopoietic and immune system functions." [GOC

15834 Pathogen[ Q2Q067] interacts with 6 human partners:{P20749;P17483;Q96T37;P31314;Q00653;P40424}

15835 Pathogen[ P0C214] interacts with 6 human partners:{P40424;Q00653;P31314;Q5JVF3;P20749;Q96T37}

15836 Pathogen[ P03346] interacts with 12 human partners:{P17483;Q9UBC0;P16452;O43680;P78367;P20749;P40424;P31314;Q8TAU0;Q96T37;Q00653;Q9HBU1}

15837 Pathogen[ Q85601] interacts with 5 human partners:{P40424;Q96T37;P31314;Q00653;P20749}

15838 Pathogen[ P14079] interacts with 4 human partners:{P16452;Q96T37;Q5JVF3;P20749}

15839 Pathogen[ P03383] interacts with 4 human partners:{Q00653;P40424;P20749;P31314}

15840 Pathogen[ P03410] interacts with 7 human partners:{P20749;Q96T37;P16452;P31314;Q5JVF3;Q00653;P40424}

15841 Pathogen[ P14075] interacts with 4 human partners:{P40424;P31314;Q00653;P20749}

15842 Pathogen[ P0C206] interacts with 10 human

- 15843 partners:{Q96T37;P31314;Q9UBC0;P17483;Q5JVF3;P40424;P16452;P20749;Q00653;Q8TAU0}  
Pathogen[ P03363] interacts with 11 human  
partners:{Q9UBC0;P17483;P20749;Q00653;P31314;Q96T37;P78367;P40424;P16452;Q8TAU0;Q9HB  
U1}
- 15844 [Cluster 1441]GO:0000075+P biological\_process [name] cell cycle checkpoint [def] "A  
cell cycle regulatory process that controls cell cycle progression by monitoring the  
timing and integrity of specific cell cycle events. A cell cycle checkpoint encompasses  
detection of an event or biological quality, signal transduction, and effector processes  
that delay or stop cell cycle progression in response to a defect." [GOC
- 15845 Pathogen[ Q2Q067] interacts with 101 human  
partners:{Q8NHY2;Q99460;O75832;P48556;P40306;P55036;Q99638;Q16589;P06400;O00231;O002  
33;Q9UJX3;Q9UJX5;P27694;P49959;P51665;Q99741;P28072;Q99708;O00762;A5LHX3;P35244;Q132  
57;Q9UBU7;O14757;Q13200;P25787;Q06323;O43684;Q13415;Q16531;Q9NYG5;P30304;Q9H1A4;P519  
65;P28065;O14818;P14635;Q9UJX2;P30307;Q9UM13;Q14997;P60900;Q9UL46;P61289;O96017;Q9UB  
D5;P15927;Q12834;P51668;P28062;O95067;Q9UNM6;Q8WXE1;P25788;O75419;Q92530;P25786;Q8NH  
Z8;P38936;O96020;Q16401;Q6WBX8;O00232;O75943;Q7L590;Q9H816;Q9UJX4;O43913;P28074;P257  
89;Q9Y6D9;P0CG47;Q9Y5N6;Q13416;P20618;P42771;P0CG48;P25205;P28070;Q01831;P28066;Q146  
83;Q99436;P24941;Q8TAA3;Q9UJX6;P62987;O43242;P30260;P49721;P46527;P49720;O15287;Q130  
42;Q9HAW4;Q00987;O60671;Q9BTA9;O60921;P62979}
- 15846 Pathogen[ P0C214] interacts with 104 human  
partners:{Q9UJX6;Q14997;P51665;O43684;O15287;Q13257;P25789;P55036;P30307;P28062;A5LH  
X3;P49959;O00762;Q9H816;P28065;Q8WXE1;O43913;Q7L590;Q00987;O14818;O43242;Q9UJX5;Q997  
08;P46527;P48556;Q8NHY2;P40306;P14635;Q6WBX8;Q9UBU7;Q13200;Q9UJX2;Q9HAW4;P38936;O002  
32;Q9Y5N6;P51965;P25205;O60921;Q99460;P28066;O75832;Q14566;Q9H1A4;O96017;P49720;P280  
74;P0CG48;Q9UL46;Q8NHZ8;Q12834;O95067;P15927;P25788;P24941;Q9UNM6;O00231;P42771;P352  
44;Q06323;P25786;P28072;O75943;Q8TAA3;P62987;O60671;Q14683;O75419;Q99436;Q9UJX4;Q018  
31;P0CG47;P25787;Q13416;Q9UJX3;P27694;Q9BTA9;P35998;P60900;O00233;P51668;O14757;Q996  
38;P62979;P30260;P30304;Q92530;Q9NYG5;Q16531;Q15008;Q9UBD5;Q9UM13;P28070;P06400;Q9Y6  
D9;P20618;P49721;Q99741;Q16401;O96020;P17980;Q13415;Q13042;Q16589}
- 15847 Pathogen[ P03346] interacts with 108 human  
partners:{O60921;Q9Y6D9;P25787;P28070;Q16589;P25789;P55036;O96017;O43684;Q99460;Q9UL  
46;P62987;P27694;P28072;P06400;P25788;Q9Y5N6;P28074;P49721;Q8NHY2;O96020;Q9UBD5;P352  
44;O14818;Q6WBX8;Q99708;P35250;Q99436;P24941;P30304;Q16531;P0CG48;Q16401;A5LHX3;O147  
57;Q9UBU7;Q9UM13;P28062;Q9NYG5;Q99638;P20618;P42771;O95067;O00232;P51668;Q00987;Q128  
34;O75943;P25789;O00233;Q9UJX6;Q14566;P25205;Q9HAW4;P14635;O15287;Q13042;P51965;Q9UJ  
X5;Q01831;P49720;P28065;Q14683;O00762;Q9UJX2;Q8WXE1;P60900;P33992;P25786;O00231;Q134  
15;P15927;Q9UJX3;P35249;Q8NHZ8;P61289;P49959;Q9H1A4;P62979;P28066;Q9UNM6;P33991;Q9UJ  
X4;Q8TAA3;P0CG47;Q13416;Q14997;Q13200;P48556;O60671;P51665;P38936;Q06323;P30260;O754  
19;Q9H816;P46527;P40937;Q99741;Q7L590;Q92530;O43929;O43242;O43913;P40306;Q13257;P303  
07;Q9BTA9}
- 15848 Pathogen[ Q85601] interacts with 100 human  
partners:{Q9UJX2;P28066;Q9UNM6;P60900;O43913;P55036;Q7L590;Q9UJX6;Q01831;O96017;P257  
87;Q8WXE1;P61289;Q16531;P06400;P25788;P35244;Q8NHZ8;Q99708;O75832;Q13415;Q9H1A4;Q9Y5  
N6;Q16589;Q9BTA9;Q9UBU7;Q9UBD5;P49959;P0CG48;P30304;P51668;P27694;Q12834;Q13257;O147  
57;O75943;P25789;O00233;Q14566;O96020;P20618;P30307;P25205;P40306;P14635;P15927;Q9HA  
W4;Q13042;Q9UJX5;P51965;P49720;Q14683;Q9UM13;P28062;P49721;Q9Y6D9;Q9NYG5;O60921;P257  
86;P42771;O00762;P28072;Q9UJX3;Q13200;P28065;P62979;Q99436;P28070;Q9UJX4;Q8TAA3;Q9UL  
46;Q99460;O00231;O60671;P0CG47;Q13416;O15287;Q6WBX8;P48556;P28074;Q92530;P38936;P629  
87;P33992;O95067;A5LHX3;P19447;Q06323;P30260;O75419;Q9H816;Q00987;Q99741;O14818;Q8NH  
Y2;P24941;O43684;Q99638;Q16401;P46527}
- 15849 Pathogen[ P14079] interacts with 101 human  
partners:{O60671;P28065;Q99436;P62333;Q13416;P48556;P51965;Q7L590;P0CG48;O75419;P303  
07;Q14566;Q13415;Q9Y5N6;P40937;P40306;Q9UJX3;P55036;P28074;Q6WBX8;O00232;Q9BTA9;Q9H1  
A4;Q9UJX6;Q16531;O43913;Q8WXE1;P49720;O00487;P25787;O75832;O95067;A5LHX3;P62979;O002  
33;P35998;P61289;P30304;P51665;P20618;Q00987;Q9NYG5;Q8TAA3;Q99741;Q9HAW4;P352  
50;Q14997;P51668;P14635;Q8NHZ8;O75943;P28062;P60900;Q9UBD5;Q99708;P38936;Q9UM13;Q130  
42;Q9UNM6;Q13257;Q99460;O14818;P49721;Q92530;O43929;Q9UJX6;P33992;P15927;P30260;Q063  
23;P27694;P62191;Q99638;P46527;Q16589;O00762;Q15008;P43686;Q01831;O43242;P25788;O002  
31;P28066;Q9UL46;O96020;P35244;Q14683;P0CG47;Q9H816;P25205;Q16401;Q9UJX4;O60921;P179  
80;O43684;P28072;P19447;Q9UBU7;P42771;Q8NHY2}
- 15850 Pathogen[ P03383] interacts with 90 human  
partners:{Q14683;Q13257;P30307;Q8NHZ8;Q9UBD5;O14757;O60671;P55036;P62987;Q9NYG5;Q9BT  
A9;P51965;Q9UJX6;P25789;Q8WXE1;P60900;Q7L590;P27694;P40306;O00233;P25205;P30304;O007  
62;P49721;Q06323;Q14997;Q9H1A4;P20618;Q13042;Q01831;P14635;P06400;O60921;O43913;Q6WB  
X8;Q12834;O75832;Q9H816;P15927;Q9UM13;Q9Y5N6;P46527;Q9HAW4;O15287;Q43684;P24941;Q9UL  
46;Q9UNM6;O95067;P35244;P25786;Q99460;O96020;P28072;Q13200;P28065;P42771;P28066;Q997  
08;O75419;Q99638;Q9UJX4;Q16401;P62979;O00231;P0CG47;Q13416;Q9UJX5;P0CG48;P28074;Q925  
30;P49720;Q16531;Q8TAA3;P61289;Q9UJX2;Q8NHY2;P28062;P30260;P48556;O14818;Q9UJX3;Q994  
36;P28070;P51668;Q99741;P25787;O96017;Q9Y6D9;P25788}
- 15851 Pathogen[ P03410] interacts with 107 human  
partners:{Q8NHY2;P42771;P28070;P49959;P46527;Q16589;P35244;P25205;P55036;O43929;P0CG  
48;Q99708;O43684;Q9H816;O75943;Q9H1A4;P25786;Q13416;Q15008;Q16401;P60900;O75419;O960  
20;Q14997;P35998;P51965;Q99460;Q9UJX4;Q9NYG5;O00233;Q9UM13;Q6WBX8;Q8WXE1;O00232;Q8NH  
Z8;O95067;Q8TAA3;Q9HAW4;P48556;P49721;P06400;A5LHX3;P62979;Q99436;Q01831;P33992;P403  
06;Q06323;Q13200;P25787;P14635;P38936;Q13042;O15287;P30304;P24941;Q99638;Q9UBU7;P280  
62;P51665;P19447;Q14683;O14818;O96017;O14757;O60671;P51668;Q9UJX5;O60921;Q16531;Q7L5

90;O00231;Q9UNM6;Q12834;P30260;P25789;P49720;Q9UJX3;Q9BTA9;P62987;O00762;P27694;P28072;Q00987;P15927;P35250;Q9Y5N6;P25788;O43913;P40937;Q14566;P28066;Q9UBD5;P28065;O43242;P30307;Q9UJX6;P0CG47;P17980;O75832;P20618;Q9UL46;P28074;P61289;Q13257;Q13415;Q99741}

15852 Pathogen[ P14075] interacts with 89 human partners: {P55036;P25788;Q13042;P28066;O95067;P24941;Q14683;Q9Y6D9;Q8WXE1;Q06323;O75832;Q8TAA3;P60900;P14635;O00233;Q01831;Q9UL46;Q9Y5N6;P49720;Q9UBD5;O75419;P51965;Q13257;P42771;O60671;O43684;Q13200;P48556;Q16401;P15927;O96020;P28070;Q9UJX2;P49721;O00231;P46527;Q9UJX6;Q8NHZ8;Q92530;Q99638;Q9HAW4;P35244;P0CG48;P62979;O00762;P28062;P28074;Q9UJX5;O96017;P25205;P28065;Q9BTA9;Q9H816;P25786;Q16531;O14818;P62987;P28072;Q8NHY2;P30304;P06400;O15287;O43913;P27694;Q14997;O60921;Q9UJX4;P0CG47;P25787;Q13416;Q99741;P20618;Q9H1A4;Q9UNM6;Q9UM13;P30260;P61289;Q7L590;Q9UJX3;P40306;P51668;Q9NYG5;Q99708;Q99436;P30307;Q6WBX8;O14757;Q12834;P25789}

15853 Pathogen[ P0C206] interacts with 103 human partners: {P61289;Q8WXE1;Q99436;P28062;Q9UNM6;P0CG48;O75832;P40306;P49959;P28065;Q14997;Q9UJX3;P55036;Q99708;P30307;O96017;P25786;Q9Y6D9;P25788;O75419;P25205;P25787;Q9UJX5;O43913;Q9UJX2;Q06323;P49720;O00232;Q6WBX8;P60900;Q9UBD5;P42771;Q16531;Q13416;Q9H816;Q16589;O43242;Q99741;Q13257;O96020;P30260;A5LHX3;O75943;P19447;Q99638;P25789;P30291;P51965;Q9H1A4;Q9NYG5;Q9UJX4;O15287;Q8NHY2;P20618;Q9UBU7;Q13200;Q8TAA3;P28070;Q14683;Q99460;Q01831;P62979;Q9Y5N6;P46527;P28066;P38936;O60921;O00762;O14818;Q9BTA9;Q9UJX6;P0CG47;P28072;P30304;O60671;Q13415;P28074;P27694;P28074;Q92530;P15927;P49721;P14635;O43684;P62987;Q00987;P35244;Q9UM13;Q9UL46;Q13042;Q9HAW4;P24941;P51668;Q14566;O00233;P48556;Q16401;Q12834;Q8NHZ8;P33992;O00231;P06400;Q7L590}

15854 Pathogen[ P03363] interacts with 59 human partners: {Q9UJX2;Q9H816;Q9NYG5;Q13042;P51965;O15287;P27694;Q9HAW4;Q16589;Q9Y6D9;O00762;Q92530;Q01831;P25205;Q16531;O60671;Q8NHZ8;Q9UJX3;P61289;P24941;P35244;Q9UJX5;P15927;P30260;P06400;Q9UJX6;P33992;Q9UJX4;O96017;P30304;Q99708;Q13416;O43684;O95067;O96020;Q13415;Q99741;Q9H1A4;P62987;Q13257;Q6WBX8;P51668;Q99638;Q9UM13;O60921;Q7L590;Q12834;Q8NHY2;Q9UBD5;P30307;O75943;Q9Y5N6;Q9BTA9;Q14683;P42771;O75419;Q8WXE1;O14757;O43913}

15855 [Cluster 1442]GO:0032816+P biological\_process [name]positive regulation of natural killer cell activation [def] "Any process that activates or increases the frequency, rate or extent of natural killer cell activation." [GOC

15856 Pathogen[ Q2Q067] interacts with 2 human partners: {Q9UL45;Q6QNY0}

15857 Pathogen[ P0C214] interacts with 3 human partners: {Q99698;Q6QNY0;Q9UL45}

15858 Pathogen[ P03346] interacts with 3 human partners: {Q99698;Q6QNY0;Q9UL45}

15859 Pathogen[ Q85601] interacts with 2 human partners: {Q6QNY0;Q99698}

15860 Pathogen[ P14079] interacts with 5 human partners: {Q6QNY0;Q92902;Q9UL45;P29459;Q99698}

15861 Pathogen[ P03383] interacts with 1 human partners: {Q6QNY0}

15862 Pathogen[ P03410] interacts with 5 human partners: {Q92902;Q6QNY0;Q9UL45;Q99698;P29459}

15863 Pathogen[ P14075] interacts with 1 human partners: {Q6QNY0}

15864 Pathogen[ P0C206] interacts with 3 human partners: {Q9UL45;Q99698;Q6QNY0}

15865 Pathogen[ P03363] interacts with 3 human partners: {Q92902;Q99698;Q6QNY0}

15866 [Cluster 1443]GO:0051383+P biological\_process [name]kinetochore organization [def] "A process that is carried out at the cellular level which results in the assembly, arrangement of constituent parts, or disassembly of the kinetochore, a multisubunit complex that is located at the centromeric region of DNA and provides an attachment point for the spindle microtubules." [GOC

15867 Pathogen[ Q2Q067] interacts with 1 human partners: {Q9H3R5}

15868 Pathogen[ P0C214] interacts with 1 human partners: {Q9H3R5}

15869 Pathogen[ P03346] interacts with 1 human partners: {Q9H3R5}

15870 Pathogen[ Q85601] interacts with 1 human partners: {Q9H3R5}

15871 Pathogen[ P14079] interacts with 1 human partners: {Q9H3R5}

15872 Pathogen[ P03383] interacts with 1 human partners: {Q9H3R5}

15873 Pathogen[ P03410] interacts with 1 human partners: {Q9H3R5}

15874 Pathogen[ P14075] interacts with 1 human partners: {Q9H3R5}

15875 Pathogen[ P0C206] interacts with 1 human partners: {Q9H3R5}

15876 Pathogen[ P03363] interacts with 1 human partners: {Q9H3R5}

15877 [Cluster 1444]GO:0042994+P biological\_process [name]cytoplasmic sequestering of transcription factor [def] "The selective interaction of a transcription factor with specific molecules in the cytoplasm, thereby inhibiting its translocation into the nucleus." [GOC

15878 Pathogen[ Q2Q067] interacts with 7 human partners: {P10827;Q99750;Q96HA7;Q14145;Q9UBC1;P25963;Q9UMX1}

15879 Pathogen[ P0C214] interacts with 6 human partners: {Q14145;Q99750;P25963;Q96HA7;Q9UMX1;Q9UBC1}

15880 Pathogen[ P03346] interacts with 9 human partners: {P10827;Q96HA7;P25963;O00221;Q99750;Q9UBC1;P50539;Q14145;Q9UMX1}

15881 Pathogen[ Q85601] interacts with 8 human partners: {Q96HA7;P50539;Q14145;Q99750;P10827;Q9UMX1;Q9UBC1;P25963}

15882 Pathogen[ P14079] interacts with 9 human partners: {Q9Y6A5;Q9UMX1;Q9UBC1;P10827;Q96HA7;Q14145;O00221;P50539;Q99750}

15883 Pathogen[ P03383] interacts with 6 human partners: {Q9UBC1;P25963;Q14145;Q99750;Q96HA7;Q9UMX1}

15884 Pathogen[ P03410] interacts with 9 human partners:{Q9Y6A5;Q9UBC1;P50539;P25963;Q14145;Q9UMX1;Q96HA7;Q99750;O00221}

15885 Pathogen[ P14075] interacts with 6 human partners:{P25963;Q96HA7;Q9UBC1;Q99750;Q9UMX1;Q14145}

15886 Pathogen[ P0C206] interacts with 10 human partners:{Q96HA7;O00221;Q9UBC1;Q9UMX1;P25963;Q14145;Q9Y6A5;P50539;Q99750;P10827}

15887 Pathogen[ P03363] interacts with 8 human partners:{Q14145;O00221;Q9UMX1;P50539;P25963;Q99750;Q96HA7;Q9UBC1}

15888 [Cluster 1445]GO:0042325+P biological\_process [name] regulation of phosphorylation [def] "Any process that modulates the frequency, rate or extent of addition of phosphate groups into a molecule." [GOC

15889 Pathogen[ Q2Q067] interacts with 5 human partners:{Q8IXJ6;Q99728;Q96C90;P25063;O75943}

15890 Pathogen[ P0C214] interacts with 5 human partners:{Q99728;Q96C90;P25063;O75943;Q8IXJ6}

15891 Pathogen[ P03346] interacts with 7 human partners:{Q99728;Q8IXJ6;Q9NXH3;Q96C90;O75943;Q96A00;P25063}

15892 Pathogen[ Q85601] interacts with 4 human partners:{Q99728;O75943;Q8IXJ6;Q96C90}

15893 Pathogen[ P14079] interacts with 7 human partners:{Q9NXH3;O75943;Q96A00;P25063;Q8IXJ6;Q8TAE6;Q96C90}

15894 Pathogen[ P03383] interacts with 2 human partners:{Q96C90;P25063}

15895 Pathogen[ P03410] interacts with 7 human partners:{Q8IXJ6;O75943;Q9NXH3;Q96A00;Q8TAE6;P25063;Q96C90}

15896 Pathogen[ P14075] interacts with 5 human partners:{Q96C90;Q96A00;Q8TAE6;Q9NXH3;P25063}

15897 Pathogen[ P0C206] interacts with 8 human partners:{Q9NXH3;Q96C90;Q8TAE6;O75943;P25063;Q99728;Q8IXJ6;Q96A00}

15898 Pathogen[ P03363] interacts with 5 human partners:{Q9NXH3;Q96C90;Q99728;Q96A00;O75943}

15899 [Cluster 1446]GO:0010466+P biological\_process [name] negative regulation of peptidase activity [def] "Any process that stops or reduces the rate of peptidase activity, the hydrolysis of peptide bonds within proteins." [GOC

15900 Pathogen[ Q2Q067] interacts with 9 human partners:{P01009;P08697;P50453;Q9NR09;P48595;P20810;P50452;O15392;P35237}

15901 Pathogen[ P0C214] interacts with 29 human partners:{P08697;P35237;Q9UK55;P01011;P29622;P48594;Q86WD7;P05121;P29508;P20810;O75830;P98170;O75635;A8MV23;P05546;P07093;P01008;P30740;Q96P63;P50453;O15392;P05120;Q99574;Q9NR09;Q9UIV8;Q96P15;P50452;Q96CA5;P48595}

15902 Pathogen[ P03346] interacts with 15 human partners:{P50452;O15392;P35237;P98170;O75635;P04080;P50453;Q96P63;Q9NR09;P01009;Q9H12;Q96P15;Q96CA5;P20810;P48595}

15903 Pathogen[ Q85601] interacts with 20 human partners:{P50452;Q96P15;P01011;P98170;O15392;P35237;P08697;P01009;P05121;P50453;P05120;P01008;Q9NR09;P48595;P30740;O75635;P07093;Q96CA5;P29508;Q96P63}

15904 Pathogen[ P14079] interacts with 9 human partners:{P35237;P50452;P04080;O15392;P20810;Q9NR09;P03973;P50453;P48595}

15905 Pathogen[ P03383] interacts with 12 human partners:{P08697;P30740;P01009;P01008;P48595;P20810;P50453;Q96P63;P35237;Q9NR09;P50452;O75635}

15906 Pathogen[ P03410] interacts with 18 human partners:{O15392;P05121;Q8IUB3;Q9H1F0;Q96P63;P50452;Q9NR09;Q96P15;P08697;P50453;P01009;P20810;Q99935;P35237;O75635;P30740;P48595;P01011}

15907 Pathogen[ P14075] interacts with 8 human partners:{P20810;P01009;P48595;P08697;P50452;P50453;Q9NR09;P35237}

15908 Pathogen[ P0C206] interacts with 18 human partners:{P50452;P01008;P98170;P35237;P01009;P50453;Q9NR09;Q96P15;O75635;P20810;O15392;P05121;Q96CA5;P48595;Q96P63;P01011;P30740;P08697}

15909 Pathogen[ P03363] interacts with 12 human partners:{P20810;P35237;P50452;P50453;Q96P63;Q9H112;Q9NR09;O75635;P98170;Q96P15;Q96CA5;P48595}

15910 [Cluster 1447]GO:0033152+P biological\_process [name] immunoglobulin V(D)J recombination [def] "The process in which immunoglobulin gene segments are recombined within a single locus utilizing the conserved heptamer and nonamer recombination signal sequences (RSS). For immunoglobulin heavy chains V, D, and J gene segments are joined, and for immunoglobulin light chains V and J gene segments are joined." [GOC

15911 Pathogen[ Q2Q067] interacts with 2 human partners:{Q13426;P15923}

15912 Pathogen[ P0C214] interacts with 2 human partners:{Q13426;P15923}

15913 Pathogen[ P03346] interacts with 2 human partners:{Q13426;P15923}

15914 Pathogen[ Q85601] interacts with 2 human partners:{Q13426;P15923}

15915 Pathogen[ P14079] interacts with 3 human partners:{P15923;Q13426;P49917}

15916 Pathogen[ P03383] interacts with 2 human partners:{P15923;Q13426}

15917 Pathogen[ P03410] interacts with 2 human partners:{P15923;Q13426}

15918 Pathogen[ P14075] interacts with 2 human partners:{P15923;Q13426}

15919 Pathogen[ P0C206] interacts with 3 human partners:{P49917;Q13426;P15923}

15920 Pathogen[ P03363] interacts with 2 human partners:{P15923;Q13426}

15921 [Cluster 1448]GO:0048484+P biological\_process [name] enteric nervous system

development [def] "The process whose specific outcome is the progression of the enteric nervous system over time, from its formation to the mature structure. The enteric nervous system is composed of two ganglionated neural plexuses in the gut wall which form one of the three major divisions of the autonomic nervous system. The enteric nervous system innervates the gastrointestinal tract, the pancreas, and the gall bladder. It contains sensory neurons, interneurons, and motor neurons. Thus the circuitry can autonomously sense the tension and the chemical environment in the gut and regulate blood vessel tone, motility, secretions, and fluid transport. The system is itself governed by the central nervous system and receives both parasympathetic and sympathetic innervation." [FMA]

15922 Pathogen[ Q2Q067] interacts with 1 human partners:{P56693}

15923 Pathogen[ P0C214] interacts with 1 human partners:{P56693}

15924 Pathogen[ P03346] interacts with 4 human partners:{Q14774;P56693;O43763;Q9UJU5}

15925 Pathogen[ Q85601] interacts with 1 human partners:{P56693}

15926 Pathogen[ P14079] interacts with 2 human partners:{Q8IZ21;P56693}

15927 Pathogen[ P03383] interacts with 1 human partners:{P56693}

15928 Pathogen[ P03410] interacts with 2 human partners:{Q8IZ21;P56693}

15929 Pathogen[ P14075] interacts with 1 human partners:{P56693}

15930 Pathogen[ P0C206] interacts with 2 human partners:{P56693;O43763}

15931 Pathogen[ P03363] interacts with 3 human partners:{O43763;P56693;Q9UJU5}

15932 [Cluster 1449]GO:0097101+P biological\_process [name] blood vessel endothelial cell fate specification [def] "The process involved in the specification of identity of a blood vessel endothelial cell. Once specification has taken place, a cell will be committed to differentiate down a specific pathway if left in its normal environment. A blood vessel endothelial cell is an endothelial cell of the vascular tree, which includes blood vessels and lymphatic vessels." [CL]

15933 Pathogen[ Q2Q067] interacts with 1 human partners:{Q06330}

15934 Pathogen[ P0C214] interacts with 1 human partners:{Q06330}

15935 Pathogen[ P03346] interacts with 1 human partners:{Q06330}

15936 Pathogen[ Q85601] interacts with 1 human partners:{Q06330}

15937 Pathogen[ P14079] interacts with 1 human partners:{Q06330}

15938 Pathogen[ P03383] interacts with 1 human partners:{Q06330}

15939 Pathogen[ P03410] interacts with 1 human partners:{Q06330}

15940 Pathogen[ P14075] interacts with 1 human partners:{Q06330}

15941 Pathogen[ P0C206] interacts with 1 human partners:{Q06330}

15942 Pathogen[ P03363] interacts with 1 human partners:{Q06330}

15943 [Cluster 1450]GO:0046670+P biological\_process [name] positive regulation of retinal cell programmed cell death [def] "Any process that activates or increases the frequency, rate or extent of programmed cell death that occurs in the retina." [GOC]

15944 Pathogen[ Q2Q067] interacts with 1 human partners:{P55212}

15945 Pathogen[ P0C214] interacts with 1 human partners:{P55212}

15946 Pathogen[ P03346] interacts with 1 human partners:{P55212}

15947 Pathogen[ Q85601] interacts with 1 human partners:{P55212}

15948 Pathogen[ P14079] interacts with 1 human partners:{P55212}

15949 Pathogen[ P03383] interacts with 1 human partners:{P55212}

15950 Pathogen[ P03410] interacts with 1 human partners:{P55212}

15951 Pathogen[ P14075] interacts with 1 human partners:{P55212}

15952 Pathogen[ P0C206] interacts with 1 human partners:{P55212}

15953 Pathogen[ P03363] interacts with 1 human partners:{P55212}

15954 [Cluster 1451]GO:0016571+P biological\_process [name] histone methylation [def] "The modification of histones by addition of methyl groups." [GOC]

15955 Pathogen[ Q2Q067] interacts with 14 human partners:{Q9NVM4;Q96LA8;Q15910;P55345;Q15022;Q9NR22;Q99873;O00255;Q86Y97;Q8NI51;O75530;Q01826;Q8TEK3;Q86X55}

15956 Pathogen[ P0C214] interacts with 14 human partners:{Q8NI51;Q15022;O75530;Q9NVM4;Q99873;Q15910;P55345;Q86Y97;Q01826;Q86X55;O00255;Q9NR22;Q96LA8;Q8TEK3}

15957 Pathogen[ P03346] interacts with 14 human partners:{Q8NI51;Q99873;Q86Y97;O75530;Q8TEK3;O00255;Q15022;P55345;Q9NR22;Q9NVM4;Q15910;Q86X55;Q01826;Q96LA8}

15958 Pathogen[ Q85601] interacts with 14 human partners:{Q8NI51;Q9NR22;Q86X55;Q9NVM4;Q15022;Q99873;O75530;O00255;Q01826;Q8TEK3;Q86Y97;Q15910;Q96LA8;P55345}

15959 Pathogen[ P14079] interacts with 13 human partners:{Q9NR22;Q96LA8;Q99873;Q9NVM4;Q01826;P55345;O75530;Q8TEK3;Q15910;O00255;Q86Y97;Q15022;Q8NI51}

15960 Pathogen[ P03383] interacts with 12 human partners:{Q8NI51;Q86X55;Q01826;Q86Y97;Q15022;Q99873;Q9NR22;O00255;Q15910;Q8TEK3;Q96LA8;O75530}

15961 Pathogen[ P03410] interacts with 14 human partners:{Q96LA8;Q86Y97;Q8TEK3;Q9NVM4;Q86X55;Q9NR22;Q01826;Q15910;Q8NI51;O00255;Q15022;Q99873;P55345;O75530}

15962 Pathogen[ P14075] interacts with 12 human partners:{Q8NI51;Q9NR22;Q15910;Q01826;O00255;Q96LA8;Q99873;Q86X55;Q8TEK3;Q86Y97;Q15022;O75530}

15963 Pathogen[ P0C206] interacts with 14 human

partners:{075530;Q99873;Q86X55;O00255;Q96LA8;Q8NI51;Q15910;Q86Y97;Q9NVM4;Q9NR22;Q15022;Q8TEK3;Q01826;P55345}

15964 Pathogen[ P03363] interacts with 12 human  
partners:{Q15022;Q96LA8;Q01826;Q15910;Q8TEK3;075530;Q8NI51;Q9NVM4;Q9NR22;Q86Y97;Q86X55;Q99873}

15965 [Cluster 1452]GO:0071456+P biological\_process [name] cellular response to hypoxia [def] "Any process that results in a change in state or activity of a cell (in terms of movement, secretion, enzyme production, gene expression, etc.) as a result of a stimulus indicating lowered oxygen tension. Hypoxia, defined as a decline in O2 levels below normoxic levels of 20.8 - 20.95%, results in metabolic adaptation at both the cellular and organismal level." [GOC

15966 Pathogen[ Q2Q067] interacts with 30 human  
partners:{P27540;P02545;Q9H4X1;Q01094;P62837;Q9BXH1;Q13794;P61077;P14635;P40337;Q15370;P51668;Q9Y2N7;Q9NWT6;Q15369;Q96KS0;Q9H6Z9;P0CG47;Q12983;P0CG48;Q9GZT9;Q92793;P62987;Q92597;Q99814;Q00987;Q96A26;Q13617;P62877;P62979}

15967 Pathogen[ P0C214] interacts with 30 human  
partners:{Q13617;Q9H4X1;Q92934;Q00987;Q92793;Q96KS0;P14635;Q15370;P62877;P61077;Q13794;Q9BXH1;Q01094;Q9Y2N7;Q92597;Q9H6Z9;Q8TDB4;P0CG48;Q15369;P40337;Q9GZT9;P62987;Q12983;P0CG47;Q99814;P27540;P02545;P51668;P62979;Q9NWT6}

15968 Pathogen[ P03346] interacts with 33 human  
partners:{Q15370;Q9H4X1;P07148;P62987;P0CG48;Q96A26;P27540;Q12983;Q01094;P51668;P02545;P61077;Q8TDB4;Q00987;P62877;Q92597;P14635;Q9Y2N7;Q9GZT9;P62837;Q99814;P62979;P40337;O15151;Q15369;P0CG47;Q96KS0;Q9NWT6;Q92793;Q9BXH1;Q9H6Z9;Q13794;Q13617}

15969 Pathogen[ Q85601] interacts with 31 human  
partners:{Q15370;Q9H4X1;Q9H6Z9;P02545;Q9BXH1;Q9Y2N7;O15151;P62877;P40337;Q8TDB4;Q9NWT6;Q99814;P27540;P0CG48;P51668;P61077;Q9GZT9;P14635;Q96KS0;Q15369;P62979;P62837;P0CG47;Q12983;Q92597;P62987;Q92793;Q00987;Q01094;Q13794;Q13617}

15970 Pathogen[ P14079] interacts with 32 human  
partners:{Q9GZT9;Q99814;P0CG48;Q9Y2N7;Q92793;P62979;Q92597;P61077;P62877;Q9BXH1;P62987;Q00987;P40337;P51668;P14635;Q92934;Q9NWT6;P27540;Q9H6Z9;Q15370;Q13794;Q12983;Q96A26;Q8TDB4;Q13617;P62837;P02545;P0CG47;O15151;Q01094;Q96KS0}

15971 Pathogen[ P03383] interacts with 28 human  
partners:{P02545;Q9H4X1;Q15369;Q9NWT6;P27540;P62987;P40337;Q01094;Q8TDB4;Q96A26;Q92597;Q96KS0;P14635;Q12983;P61077;Q9Y2N7;Q9H6Z9;P62837;Q13617;P62979;P0CG47;P62877;Q15370;P0CG48;Q13794;Q9BXH1;Q92793;P51668}

15972 Pathogen[ P03410] interacts with 33 human  
partners:{Q9H4X1;P0CG48;Q12983;Q9NWT6;O15151;Q96KS0;Q9H6Z9;Q99814;Q9BXH1;Q9Y2N7;Q92934;Q15370;Q13794;P62979;Q9GZT9;P27540;Q92793;Q15369;P14635;Q96A26;P02545;P62877;P51668;P62987;Q01094;Q92597;Q13617;Q00987;Q8TDB4;P0CG47;P40337;P61077;P62837}

15973 Pathogen[ P14075] interacts with 29 human  
partners:{Q9H4X1;Q12983;Q96KS0;Q9GZT9;Q96A26;P62837;P14635;Q9Y2N7;P61077;P27540;P02545;P0CG48;P62979;Q15370;Q9BXH1;P62987;Q9NWT6;Q01094;Q13794;Q8TDB4;P0CG47;Q92793;Q92597;P40337;P51668;Q13617;Q15369;P62877;Q9H6Z9}

15974 Pathogen[ P0C206] interacts with 33 human  
partners:{Q92597;P0CG48;P62877;Q9H4X1;Q9Y2N7;Q96KS0;Q9GZT9;P62837;Q9BXH1;Q96A26;Q92793;Q92934;Q12983;O15151;Q13617;Q9NWT6;Q01094;P62979;Q15370;P0CG47;P02545;Q9H6Z9;P27540;P61077;P14635;Q99814;P62987;Q00987;Q15369;P51668;P40337;Q13794;Q8TDB4}

15975 Pathogen[ P03363] interacts with 21 human  
partners:{Q15370;Q9H4X1;P27540;P02545;Q13794;Q9H6Z9;Q92597;Q13617;O15151;Q15369;P40337;P62877;Q01094;Q9Y2N7;P62987;Q99814;Q92793;P51668;P61077;P62837;Q9BXH1}

15976 [Cluster 1453]GO:000098+P biological\_process [name] sulfur amino acid catabolic process [def] "The chemical reactions and pathways resulting in the breakdown of amino acids containing sulfur, comprising cysteine, methionine and selenocysteine." [GOC

15977 Pathogen[ Q2Q067] interacts with 3 human partners:{Q9UBX3;P32929;O95571}

15978 Pathogen[ P0C214] interacts with 4 human partners:{P32929;O95571;Q9UBX3;Q16762}

15979 Pathogen[ P03346] interacts with 3 human partners:{Q9UBX3;P32929;O95571}

15980 Pathogen[ Q85601] interacts with 3 human partners:{Q9UBX3;O95571;P32929}

15981 Pathogen[ P14079] interacts with 4 human partners:{O95571;P32929;Q16762;Q16878}

15982 Pathogen[ P03383] interacts with 1 human partners:{O95571}

15983 Pathogen[ P03410] interacts with 4 human partners:{P32929;Q9UBX3;O95571;Q16762}

15984 Pathogen[ P14075] interacts with 1 human partners:{O95571}

15985 Pathogen[ P0C206] interacts with 4 human partners:{Q9UBX3;P32929;Q16762;O95571}

15986 Pathogen[ P03363] interacts with 1 human partners:{O95571}

15987 [Cluster 1454]GO:0031076+P biological\_process [name] embryonic camera-type eye development [def] "The process occurring during the embryonic phase whose specific outcome is the progression of the eye over time, from its formation to the mature structure." [GOC

15988 Pathogen[ Q2Q067] interacts with 1 human partners:{Q8WUF5}

15989 Pathogen[ P0C214] interacts with 1 human partners:{Q8WUF5}

15990 Pathogen[ P03346] interacts with 1 human partners:{Q8WUF5}

15991 Pathogen[ Q85601] interacts with 1 human partners:{Q8WUF5}

15992 Pathogen[ P14079] interacts with 2 human partners:{Q8WUF5;P48681}

15993 Pathogen[ P03383] interacts with 1 human partners:{Q8WUF5}

15994 Pathogen[ P03410] interacts with 1 human partners:{Q8WUF5}

15995 Pathogen[ P14075] interacts with 1 human partners:{Q8WUF5}

15996 Pathogen[ P0C206] interacts with 1 human partners:{Q8WUF5}

15997 Pathogen[ P03363] interacts with 1 human partners:{Q8WUF5}

15998 [Cluster 1455]GO:0007288+P biological\_process [name] sperm axoneme assembly [def] "The assembly and organization of the sperm flagellar axoneme, the bundle of microtubules and associated proteins that forms the core of the eukaryotic sperm flagellum, and is responsible for movement." [GOC

15999 Pathogen[ Q2Q067] interacts with 1 human partners:{P63146}

16000 Pathogen[ P0C214] interacts with 1 human partners:{P63146}

16001 Pathogen[ P03346] interacts with 1 human partners:{P63146}

16002 Pathogen[ Q85601] interacts with 1 human partners:{P63146}

16003 Pathogen[ P14079] interacts with 1 human partners:{P63146}

16004 Pathogen[ P03383] interacts with 1 human partners:{P63146}

16005 Pathogen[ P03410] interacts with 1 human partners:{P63146}

16006 Pathogen[ P14075] interacts with 1 human partners:{P63146}

16007 Pathogen[ P0C206] interacts with 1 human partners:{P63146}

16008 Pathogen[ P03363] interacts with 1 human partners:{P63146}

16009 [Cluster 1456]GO:0008542+P biological\_process [name] visual learning [def] "Any process in an organism in which a change in behavior of an individual occurs in response to repeated exposure to a visual cue." [GOC

16010 Pathogen[ Q2Q067] interacts with 1 human partners:{000213}

16011 Pathogen[ P0C214] interacts with 1 human partners:{000213}

16012 Pathogen[ P03346] interacts with 1 human partners:{000213}

16013 Pathogen[ Q85601] interacts with 1 human partners:{000213}

16014 Pathogen[ P14079] interacts with 1 human partners:{000213}

16015 Pathogen[ P03383] interacts with 1 human partners:{000213}

16016 Pathogen[ P03410] interacts with 1 human partners:{000213}

16017 Pathogen[ P14075] interacts with 1 human partners:{000213}

16018 Pathogen[ P0C206] interacts with 1 human partners:{000213}

16019 Pathogen[ P03363] interacts with 1 human partners:{000213}

16020 [Cluster 1457]GO:0001763+P biological\_process [name] morphogenesis of a branching structure [def] "The process in which the anatomical structures of branches are generated and organized. A branch is a division or offshoot from a main stem. Examples in animals would include blood vessels, nerves, lymphatics and other endothelial or epithelial tubes." [ISBN

16021 Pathogen[ Q2Q067] interacts with 1 human partners:{Q9UQB3}

16022 Pathogen[ P0C214] interacts with 1 human partners:{Q9UQB3}

16023 Pathogen[ P03346] interacts with 3 human partners:{Q9BYW2;Q9UQB3;O43680}

16024 Pathogen[ Q85601] interacts with 1 human partners:{Q9UQB3}

16025 Pathogen[ P14079] interacts with 1 human partners:{Q9UQB3}

16026 Pathogen[ P03383] interacts with 1 human partners:{Q9UQB3}

16027 Pathogen[ P03410] interacts with 1 human partners:{Q9UQB3}

16028 Pathogen[ P14075] interacts with 1 human partners:{Q9UQB3}

16029 Pathogen[ P0C206] interacts with 1 human partners:{Q9UQB3}

16030 Pathogen[ P03363] interacts with 1 human partners:{Q9UQB3}

16031 [Cluster 1458]GO:0030838+P biological\_process [name] positive regulation of actin filament polymerization [def] "Any process that activates or increases the frequency, rate or extent of actin polymerization." [GOC

16032 Pathogen[ Q2Q067] interacts with 9 human partners:{P35080;O43639;Q12959;Q9BVC4;Q13233;P16333;P63000;Q6R327;O95429}

16033 Pathogen[ P0C214] interacts with 12 human partners:{P35080;P63000;Q9BVC4;P62993;O43639;Q13233;Q6R327;O14613;O95429;Q12959;P16333;O15144}

16034 Pathogen[ P03346] interacts with 12 human partners:{O43639;O15144;Q9BVC4;P62993;O14613;P16333;P35080;Q13233;O95429;Q6R327;P63000;Q12959}

16035 Pathogen[ Q85601] interacts with 11 human partners:{P62993;P16333;P35080;P63000;O43639;Q9BVC4;O14613;Q12959;Q13233;O95429;O15144}

16036 Pathogen[ P14079] interacts with 11 human partners:{Q6R327;O14613;O95429;P35080;Q9BVC4;Q6NZY7;P61158;P16333;P62993;O43639;O15144}

16037 Pathogen[ P03383] interacts with 5 human partners:{P35080;Q13233;P63000;P16333;O95429}

16038 Pathogen[ P03410] interacts with 13 human partners:{P35080;P63000;Q12959;O43639;P16333;Q9BVC4;Q13233;Q6NZY7;O95429;O14613;Q6R327;O15144;P62993}

16039 Pathogen[ P14075] interacts with 7 human partners:{P16333;Q6R327;O14613;P63000;P35080;Q13233;O95429}

16040 Pathogen[ P0C206] interacts with 12 human partners:{O14613;Q13233;P62993;Q6R327;P63000;P35080;O95429;O15144;P16333;O43639;Q12959;Q9BVC4}

16041 Pathogen[ P03363] interacts with 11 human partners:{Q12959;Q9BVC4;P35080;O43639;P63000;O15144;P16333;O14613;O95429;Q13233;Q6R327}

16042 [Cluster 1459]GO:0001547+P biological\_process [name] antral ovarian follicle growth [def] "Increase in size of antral follicles due to cell proliferation and/or growth of the antral cavity." [http



16043 Pathogen[ Q2Q067] interacts with 2 human partners:{O43524;P24864}  
16044 Pathogen[ P0C214] interacts with 1 human partners:{P24864}  
16045 Pathogen[ P03346] interacts with 2 human partners:{P24864;O43524}  
16046 Pathogen[ Q85601] interacts with 1 human partners:{P24864}  
16047 Pathogen[ P14079] interacts with 1 human partners:{P24864}  
16048 Pathogen[ P03383] interacts with 1 human partners:{P24864}  
16049 Pathogen[ P03410] interacts with 1 human partners:{P24864}  
16050 Pathogen[ P14075] interacts with 1 human partners:{P24864}  
16051 Pathogen[ P0C206] interacts with 1 human partners:{P24864}  
16052 Pathogen[ P03363] interacts with 2 human partners:{P24864;O43524}  
16053 [Cluster 1460]GO:0035265+P biological\_process [name] organ growth [def] "The increase in size or mass of an organ. Organs are commonly observed as visibly distinct structures, but may also exist as loosely associated clusters of cells that function together as to perform a specific function." [GOC  
16054 Pathogen[ Q2Q067] interacts with 1 human partners:{Q15796}  
16055 Pathogen[ P0C214] interacts with 2 human partners:{Q15796;Q9NPC3}  
16056 Pathogen[ P03346] interacts with 2 human partners:{Q15796;Q9NPC3}  
16057 Pathogen[ Q85601] interacts with 2 human partners:{Q9NPC3;Q15796}  
16058 Pathogen[ P14079] interacts with 1 human partners:{Q9NPC3}  
16059 Pathogen[ P03383] interacts with 1 human partners:{Q15796}  
16060 Pathogen[ P03410] interacts with 2 human partners:{Q9NPC3;Q15796}  
16061 Pathogen[ P14075] interacts with 1 human partners:{Q15796}  
16062 Pathogen[ P0C206] interacts with 2 human partners:{Q9NPC3;Q15796}  
16063 Pathogen[ P03363] interacts with 2 human partners:{Q9NPC3;Q15796}  
16064 [Cluster 1461]GO:0031576+P biological\_process [name] G2/M transition checkpoint [def] "A cell cycle checkpoint that blocks entry into M phase." [GOC  
16065 Pathogen[ Q2Q067] interacts with 5 human partners:{Q7Z2Z1;Q96AH0;Q9BQ15;O60934;Q68E01}  
16066 Pathogen[ P0C214] interacts with 4 human partners:{Q96AH0;Q68E01;Q7Z2Z1;Q9BQ15}  
16067 Pathogen[ P03346] interacts with 5 human partners:{Q7Z2Z1;Q96AH0;Q68E01;Q9BQ15;O60934}  
16068 Pathogen[ Q85601] interacts with 5 human partners:{Q7Z2Z1;Q96AH0;Q68E01;Q9BQ15;O60934}  
16069 Pathogen[ P14079] interacts with 5 human partners:{Q9BQ15;O60934;Q96AH0;Q68E01;Q7Z2Z1}  
16070 Pathogen[ P03383] interacts with 4 human partners:{Q68E01;Q7Z2Z1;Q9BQ15;Q96AH0}  
16071 Pathogen[ P03410] interacts with 5 human partners:{Q9BQ15;Q96AH0;Q7Z2Z1;Q68E01;O60934}  
16072 Pathogen[ P14075] interacts with 4 human partners:{Q7Z2Z1;Q68E01;Q9BQ15;Q96AH0}  
16073 Pathogen[ P0C206] interacts with 5 human partners:{Q68E01;Q9BQ15;O60934;Q7Z2Z1;Q96AH0}  
16074 Pathogen[ P03363] interacts with 4 human partners:{Q7Z2Z1;Q96AH0;Q9BQ15;Q68E01}  
16075 [Cluster 1462]GO:0045577+P biological\_process [name] regulation of B cell differentiation [def] "Any process that modulates the frequency, rate or extent of B cell differentiation." [GOC  
16076 Pathogen[ Q2Q067] interacts with 1 human partners:{Q9UKT9}  
16077 Pathogen[ P0C214] interacts with 1 human partners:{Q9UKT9}  
16078 Pathogen[ P03346] interacts with 1 human partners:{Q9UKT9}  
16079 Pathogen[ Q85601] interacts with 1 human partners:{Q9UKT9}  
16080 Pathogen[ P14079] interacts with 2 human partners:{Q9BXL7;Q9UKT9}  
16081 Pathogen[ P03383] interacts with 1 human partners:{Q9UKT9}  
16082 Pathogen[ P03410] interacts with 2 human partners:{Q9UKT9;Q9BXL7}  
16083 Pathogen[ P14075] interacts with 1 human partners:{Q9UKT9}  
16084 Pathogen[ P0C206] interacts with 1 human partners:{Q9UKT9}  
16085 Pathogen[ P03363] interacts with 1 human partners:{Q9UKT9}  
16086 [Cluster 1463]GO:0023019+P biological\_process [name] signal transduction involved in regulation of gene expression [def] "Any process that modulates the frequency, rate or extent of gene expression as a consequence of a process in which a signal is released and/or conveyed from one location to another." [GOC  
16087 Pathogen[ Q2Q067] interacts with 3 human partners:{Q13562;P35548;Q0VG99}  
16088 Pathogen[ P0C214] interacts with 1 human partners:{P35548}  
16089 Pathogen[ P03346] interacts with 4 human partners:{P35548;Q0VG99;Q13562;P56915}  
16090 Pathogen[ Q85601] interacts with 3 human partners:{Q0VG99;Q13562;P35548}  
16091 Pathogen[ P14079] interacts with 1 human partners:{P28360}  
16092 Pathogen[ P03383] interacts with 1 human partners:{P35548}  
16093 Pathogen[ P03410] interacts with 1 human partners:{P35548}  
16094 Pathogen[ P14075] interacts with 1 human partners:{P35548}  
16095 Pathogen[ P0C206] interacts with 3 human partners:{P35548;Q13562;Q0VG99}  
16096 Pathogen[ P03363] interacts with 3 human partners:{Q0VG99;P35548;P56915}  
16097 [Cluster 1464]GO:0051310+P biological\_process [name] metaphase plate congression [def] "The alignment of chromosomes at the metaphase plate, a plane halfway between the poles of the spindle." [GOC  
16098 Pathogen[ Q2Q067] interacts with 2 human partners:{P49454;Q8N0Z3}  
16099 Pathogen[ P0C214] interacts with 2 human partners:{Q8N0Z3;P49454}  
16100 Pathogen[ P03346] interacts with 2 human partners:{Q8N0Z3;P49454}  
16101 Pathogen[ Q85601] interacts with 2 human partners:{P49454;Q8N0Z3}

16102 Pathogen[ P14079] interacts with 2 human partners:{Q8N0Z3;P49454}  
16103 Pathogen[ P03383] interacts with 2 human partners:{P49454;Q8N0Z3}  
16104 Pathogen[ P03410] interacts with 2 human partners:{P49454;Q8N0Z3}  
16105 Pathogen[ P14075] interacts with 2 human partners:{P49454;Q8N0Z3}  
16106 Pathogen[ P0C206] interacts with 2 human partners:{P49454;Q8N0Z3}  
16107 Pathogen[ P03363] interacts with 2 human partners:{P49454;Q8N0Z3}  
16108 [Cluster 1465]GO:0006596+P biological\_process [name] polyamine biosynthetic process  
[def] "The chemical reactions and pathways resulting in the formation of polyamines, any  
organic compound containing two or more amino groups." [ISBN  
16109 Pathogen[ Q2Q067] interacts with 1 human partners:{P21673}  
16110 Pathogen[ P0C214] interacts with 3 human partners:{P54368;Q9NWM0;P21673}  
16111 Pathogen[ P03346] interacts with 1 human partners:{P21673}  
16112 Pathogen[ Q85601] interacts with 1 human partners:{P21673}  
16113 Pathogen[ P14079] interacts with 3 human partners:{P17707;P54368;P21673}  
16114 Pathogen[ P03383] interacts with 1 human partners:{P21673}  
16115 Pathogen[ P03410] interacts with 3 human partners:{P21673;P54368;P17707}  
16116 Pathogen[ P14075] interacts with 1 human partners:{P21673}  
16117 Pathogen[ P0C206] interacts with 2 human partners:{P21673;P54368}  
16118 Pathogen[ P03363] interacts with 1 human partners:{P21673}  
16119 [Cluster 1466]GO:0008637+P biological\_process [name] apoptotic mitochondrial changes  
[def] "The morphological and physiological alterations undergone by mitochondria during  
apoptosis." [GOC  
16120 Pathogen[ Q2Q067] interacts with 7 human  
partners:{P51398;P31749;P55957;P09913;Q8N726;P84022;Q13233}  
16121 Pathogen[ P0C214] interacts with 8 human  
partners:{P09913;P30405;P84022;P55957;Q8N726;Q13233;P51398;P31749}  
16122 Pathogen[ P03346] interacts with 7 human  
partners:{P55957;P51398;P84022;P31749;Q13233;P09913;Q8N726}  
16123 Pathogen[ Q85601] interacts with 8 human  
partners:{P30405;P09913;P31749;P51398;Q8N726;P55957;P84022;Q13233}  
16124 Pathogen[ P14079] interacts with 4 human partners:{Q8N726;P09913;P51398;P55957}  
16125 Pathogen[ P03383] interacts with 7 human  
partners:{P51398;Q13233;P31749;P55957;P09913;P84022;Q8N726}  
16126 Pathogen[ P03410] interacts with 8 human  
partners:{P84022;Q8N726;P31749;Q13233;P55957;P09913;P30405;P51398}  
16127 Pathogen[ P14075] interacts with 7 human  
partners:{P55957;P09913;P51398;P31749;P84022;Q13233;Q8N726}  
16128 Pathogen[ P0C206] interacts with 8 human  
partners:{P84022;P31749;Q8N726;Q13233;P51398;P09913;P30405;P55957}  
16129 Pathogen[ P03363] interacts with 7 human  
partners:{P55957;P09913;P31749;P84022;Q8N726;P51398;Q13233}  
16130 [Cluster 1467]GO:0032774+P biological\_process [name] RNA biosynthetic process [def]  
"The chemical reactions and pathways resulting in the formation of RNA, ribonucleic  
acid, one of the two main type of nucleic acid, consisting of a long, unbranched  
macromolecule formed from ribonucleotides joined in 3',5'-phosphodiester linkage.  
Includes polymerization of ribonucleotide monomers." [GOC  
16131 Pathogen[ Q2Q067] interacts with 1 human partners:{Q9BWH6}  
16132 Pathogen[ P0C214] interacts with 1 human partners:{Q9BWH6}  
16133 Pathogen[ P03346] interacts with 2 human partners:{P0CAP2;Q9BWH6}  
16134 Pathogen[ Q85601] interacts with 1 human partners:{Q9BWH6}  
16135 Pathogen[ P14079] interacts with 2 human partners:{Q9BWH6;P0CAP2}  
16136 Pathogen[ P03383] interacts with 2 human partners:{P0CAP2;Q9BWH6}  
16137 Pathogen[ P03410] interacts with 2 human partners:{Q9BWH6;P0CAP2}  
16138 Pathogen[ P14075] interacts with 2 human partners:{Q9BWH6;P0CAP2}  
16139 Pathogen[ P0C206] interacts with 2 human partners:{Q9BWH6;P0CAP2}  
16140 Pathogen[ P03363] interacts with 2 human partners:{Q9BWH6;P0CAP2}  
16141 [Cluster 1468]GO:0032495+P biological\_process [name] response to muramyl dipeptide  
[def] "Any process that results in a change in state or activity of an organism (in  
terms of movement, secretion, enzyme production, gene expression, etc.) as a result of a  
muramyl dipeptide stimulus. Muramyl dipeptide is derived from peptidoglycan." [GOC  
16142 Pathogen[ Q2Q067] interacts with 3 human partners:{Q04206;P25963;Q9C000}  
16143 Pathogen[ P0C214] interacts with 3 human partners:{Q04206;P25963;Q9C000}  
16144 Pathogen[ P03346] interacts with 3 human partners:{P25963;Q04206;Q9C000}  
16145 Pathogen[ Q85601] interacts with 2 human partners:{Q04206;P25963}  
16146 Pathogen[ P14079] interacts with 1 human partners:{Q9C000}  
16147 Pathogen[ P03383] interacts with 2 human partners:{P25963;Q04206}  
16148 Pathogen[ P03410] interacts with 3 human partners:{Q04206;Q9C000;P25963}  
16149 Pathogen[ P14075] interacts with 2 human partners:{Q04206;P25963}  
16150 Pathogen[ P0C206] interacts with 3 human partners:{Q9C000;P25963;Q04206}  
16151 Pathogen[ P03363] interacts with 3 human partners:{Q04206;Q9C000;P25963}  
16152 [Cluster 1469]GO:0001880+P biological\_process [name] Mullerian duct regression  
[def] "The process in which the Mullerian ducts, primordia of the oviducts, uterus and  
upper vagina, undergo regression in male embryos." [GOC  
16153 Pathogen[ Q2Q067] interacts with 2 human partners:{O15198;Q99717}  
16154 Pathogen[ P0C214] interacts with 2 human partners:{O15198;Q99717}  
16155 Pathogen[ P03346] interacts with 2 human partners:{Q99717;O15198}

16156 Pathogen[ Q85601] interacts with 2 human partners:{O15198;Q99717}  
16157 Pathogen[ P14079] interacts with 1 human partners:{O15198}  
16158 Pathogen[ P03383] interacts with 2 human partners:{O15198;Q99717}  
16159 Pathogen[ P03410] interacts with 2 human partners:{Q99717;O15198}  
16160 Pathogen[ P14075] interacts with 2 human partners:{Q99717;O15198}  
16161 Pathogen[ P0C206] interacts with 2 human partners:{Q99717;O15198}  
16162 Pathogen[ P03363] interacts with 2 human partners:{Q99717;O15198}  
16163 [Cluster 1470]GO:0035666+P biological\_process [name] TRIF-dependent toll-like receptor signaling pathway [def] "Any series of molecular signals generated as a consequence of binding to a toll-like receptor where the TRIF adaptor mediates transduction of the signal. Toll-like receptors directly bind pattern motifs from a variety of microbial sources to initiate innate immune response." [GOC  
16164 Pathogen[ Q2Q067] interacts with 28 human partners:{P01100;Q8IUC6;Q92985;Q15653;Q04206;Q9NYJ8;Q8N5C8;O75582;Q14653;Q9Y6K9;Q13114;P19419;P19838;P15336;P25963;P0CG47;O14920;P45984;Q00653;P0CG48;O43318;P62987;O15111;Q15759;Q16829;Q02078;Q15750;P62979}  
16165 Pathogen[ P0C214] interacts with 32 human partners:{Q00653;O15111;Q9Y6K9;P19838;P15336;Q8IUC6;Q14164;P01100;P19419;Q04206;Q15653;O43318;Q02078;Q8N5C8;Q92985;P0CG48;P25963;Q16829;Q14653;O75582;P62987;Q15750;P05412;Q13114;Q15759;P0CG47;P45984;P16220;P62979;O14920;Q9NYJ8;P18846}  
16166 Pathogen[ P03346] interacts with 33 human partners:{Q9Y6K9;P05412;P45984;Q02078;O15111;P16220;P15336;P62987;P25963;Q15653;P19419;P0CG48;Q04206;Q13114;Q8N5C8;Q9NYJ8;O75582;Q15750;Q14653;Q16829;P62979;Q8IUC6;Q15759;P0CG47;P45985;P19838;O14920;O43318;Q92985;P01100;Q14164;P18846;Q00653}  
16167 Pathogen[ Q85601] interacts with 32 human partners:{Q02078;Q15750;Q9NYJ8;Q8IUC6;O15111;P19419;Q16829;P18846;P0CG48;Q15653;Q13114;Q8N5C8;P01100;Q14653;Q14164;Q9Y6K9;P16220;O14920;Q04206;P05412;Q92985;O75582;P62979;Q15759;P0CG47;P45984;P62987;Q00653;P15336;O43318;P19838;P25963}  
16168 Pathogen[ P14079] interacts with 32 human partners:{Q8N5C8;Q02078;P0CG48;Q06413;O43187;P53779;Q14653;P52564;O75582;Q16829;Q8IUC6;Q92985;Q14164;Q15750;P62979;P62987;P45984;P45983;Q16644;Q15759;Q9Y6K9;P45985;P15336;Q9Y6Y9;Q13164;P05412;P0CG47;Q9Y239;P01100;P19419;Q13114;Q15653}  
16169 Pathogen[ P03383] interacts with 30 human partners:{O75582;Q14653;P16220;Q9Y6K9;P62987;Q8IUC6;Q00653;O14920;O15111;P19419;P18846;Q15653;O43318;Q8N5C8;Q92985;Q15759;P25963;P01100;P62979;P0CG47;Q04206;P45984;P0CG48;P15336;Q9NYJ8;P19838;Q13114;Q02078;Q15750;P05412}  
16170 Pathogen[ P03410] interacts with 35 human partners:{Q04206;P19838;P0CG48;O14920;Q9Y239;P19419;O15111;Q15750;O75582;Q14653;O43187;Q15653;P62979;P01100;P18846;O43318;Q16829;P45985;Q9NYJ8;Q8N5C8;P16220;P05412;Q9Y6Y9;P45984;P62987;P53779;Q02078;Q8IUC6;Q00653;Q9Y6K9;P25963;Q92985;P15336;P0CG47;Q13114}  
16171 Pathogen[ P14075] interacts with 30 human partners:{O15111;Q04206;Q15750;P05412;Q15759;O75582;P19419;P15336;Q15653;P25963;Q8N5C8;O14920;P0CG48;P62979;Q14653;O43318;P62987;Q13114;Q02078;Q8IUC6;P01100;P0CG47;P19838;Q00653;P16220;Q9Y6K9;Q92985;P18846;P45984;Q9NYJ8}  
16172 Pathogen[ P0C206] interacts with 33 human partners:{P0CG48;O14920;Q9Y6K9;Q13114;Q02078;P16220;Q8N5C8;O75582;P45984;P05412;P25963;P19419;O43318;P15336;Q15653;P18846;Q16829;P19838;Q14164;Q92985;P01100;Q04206;O15111;P62979;Q9NYJ8;P45985;P0CG47;Q8IUC6;Q00653;Q15750;P62987;Q15759;Q14653}  
16173 Pathogen[ P03363] interacts with 24 human partners:{Q14653;Q92985;O14920;Q04206;P25963;O15111;Q9NYJ8;P16220;Q9Y6K9;P19419;O43318;Q15750;P15336;Q15653;Q16829;Q00653;P18846;P62987;P19838;Q13114;P05412;Q8N5C8;P01100;Q02078}  
16174 [Cluster 1471]GO:0008625+P biological\_process [name] induction of apoptosis via death domain receptors [def] "Any process that directly activates any of the steps required for cell death by apoptosis as a result of a death receptor binding to one of its physiological ligands." [GOC  
16175 Pathogen[ Q2Q067] interacts with 9 human partners:{Q9NR28;P55957;Q8WXF8;Q00994;Q9UER7;Q13158;O75618;P78560;Q9UKL3}  
16176 Pathogen[ P0C214] interacts with 10 human partners:{Q8WXF8;O75618;Q13158;Q00994;P55957;Q9UKL3;Q9UER7;P42574;P78560;Q9NR28}  
16177 Pathogen[ P03346] interacts with 10 human partners:{Q13158;Q9NR28;Q8WXF8;P55957;P42574;Q00994;P78560;Q9UKL3;O75618;Q9UER7}  
16178 Pathogen[ Q85601] interacts with 9 human partners:{Q9UKL3;Q13158;Q9UER7;Q9NR28;O75618;P55957;Q8WXF8;Q00994;P78560}  
16179 Pathogen[ P14079] interacts with 8 human partners:{O75618;Q00994;Q9UKL3;Q9UER7;Q9NR28;Q13158;Q8WXF8;P55957}  
16180 Pathogen[ P03383] interacts with 9 human partners:{Q9UKL3;O75618;P55957;Q13158;P78560;Q00994;Q9UER7;Q8WXF8;Q9NR28}  
16181 Pathogen[ P03410] interacts with 9 human partners:{Q8WXF8;P78560;Q9NR28;P55957;Q13158;Q00994;Q9UER7;Q9UKL3;O75618}  
16182 Pathogen[ P14075] interacts with 9 human partners:{P78560;P55957;Q00994;Q9NR28;Q9UKL3;O75618;Q13158;Q8WXF8;Q9UER7}  
16183 Pathogen[ P0C206] interacts with 10 human partners:{Q9NR28;Q9UKL3;P78560;Q9UER7;O75618;Q13158;Q00994;Q8WXF8;P42574;P55957}  
16184 Pathogen[ P03363] interacts with 9 human

16185 partners:{P55957;O75618;Q9UER7;Q13158;Q9NR28;Q9UKL3;Q00994;P78560;Q8WXF8}  
[Cluster 1472]GO:0042326+P biological\_process [name] negative regulation of phosphorylation [def] "Any process that stops, prevents or decreases the rate of addition of phosphate groups to a molecule." [GOC

16186 Pathogen[ Q2Q067] interacts with 10 human  
partners: {P42773;Q86XL3;P63167;O15265;P38936;P42771;Q9H875;P46527;P49918;P42772}

16187 Pathogen[ P0C214] interacts with 10 human  
partners: {Q9H875;P46527;P38936;P49918;Q86XL3;P42771;P42773;O15265;P42772;P63167}

16188 Pathogen[ P03346] interacts with 13 human  
partners: {O15265;P55273;Q13489;Q13322;P42772;P49918;P42771;Q9H875;P42773;P63167;P38936;Q86XL3;P46527}

16189 Pathogen[ Q85601] interacts with 11 human  
partners: {P55273;O15265;P42772;Q86XL3;Q9H875;P42771;P42773;P49918;P38936;P63167;P46527}

16190 Pathogen[ P14079] interacts with 10 human  
partners: {Q86XL3;P49918;P55273;P38936;Q9H875;P63167;O15265;P46527;P42773;P42771}

16191 Pathogen[ P03383] interacts with 7 human  
partners: {P42772;O15265;P46527;P42771;P49918;P63167;Q9H875}

16192 Pathogen[ P03410] interacts with 11 human  
partners: {Q9H875;P42771;P46527;P42772;P55273;P63167;P38936;O15265;P49918;P42773;Q86XL3}

16193 Pathogen[ P14075] interacts with 7 human  
partners: {O15265;P42771;P46527;P49918;P42772;P63167;Q9H875}

16194 Pathogen[ P0C206] interacts with 12 human  
partners: {Q86XL3;P63167;O15265;P42771;P42772;P42773;P55273;P46527;P38936;Q13489;Q9H875;P49918}

16195 Pathogen[ P03363] interacts with 9 human  
partners: {P49918;Q9H875;P63167;P42772;Q13489;O15265;P42773;Q86XL3;P42771}

16196 [Cluster 1473]GO:0090086+P biological\_process [name] negative regulation of protein deubiquitination [def] "Any process that decreases the frequency, rate or extent of protein deubiquitination. Protein deubiquitination is the removal of one or more ubiquitin groups from a protein." [GOC

16197 Pathogen[ Q2Q067] interacts with 1 human partners: {P19474}

16198 Pathogen[ P0C214] interacts with 1 human partners: {P19474}

16199 Pathogen[ P03346] interacts with 2 human partners: {P25686;P19474}

16200 Pathogen[ Q85601] interacts with 1 human partners: {P19474}

16201 Pathogen[ P14079] interacts with 1 human partners: {P19474}

16202 Pathogen[ P03383] interacts with 1 human partners: {P19474}

16203 Pathogen[ P03410] interacts with 1 human partners: {P25686}

16204 Pathogen[ P14075] interacts with 1 human partners: {P19474}

16205 Pathogen[ P0C206] interacts with 1 human partners: {P19474}

16206 Pathogen[ P03363] interacts with 1 human partners: {P19474}

16207 [Cluster 1474]GO:0018105+P biological\_process [name] peptidyl-serine phosphorylation [def] "The phosphorylation of peptidyl-serine to form peptidyl-O-phospho-L-serine." [RESID

16208 Pathogen[ Q2Q067] interacts with 5 human  
partners: {P31749;Q13233;O95271;P21675;Q9HAW4}

16209 Pathogen[ P0C214] interacts with 5 human  
partners: {P21675;Q9HAW4;Q13233;O95271;P31749}

16210 Pathogen[ P03346] interacts with 6 human  
partners: {Q14149;Q9HAW4;P31749;Q13233;P21675;O95271}

16211 Pathogen[ Q85601] interacts with 6 human  
partners: {P31749;Q14149;Q9HAW4;P21675;Q13233;O95271}

16212 Pathogen[ P14079] interacts with 9 human  
partners: {O95271;Q15078;Q14149;P45983;Q9HAW4;Q16644;Q5H9T9;Q13164;P21675}

16213 Pathogen[ P03383] interacts with 5 human  
partners: {Q13233;P31749;Q9HAW4;P21675;O95271}

16214 Pathogen[ P03410] interacts with 7 human  
partners: {P21675;Q14149;P31749;Q9HAW4;Q13233;O95271;Q5H9T9}

16215 Pathogen[ P14075] interacts with 5 human  
partners: {P21675;Q9HAW4;P31749;O95271;Q13233}

16216 Pathogen[ P0C206] interacts with 7 human  
partners: {O95271;P31749;Q13233;Q5H9T9;Q14149;Q9HAW4;P21675}

16217 Pathogen[ P03363] interacts with 5 human  
partners: {Q9HAW4;P31749;O95271;P21675;Q13233}

16218 [Cluster 1475]GO:2000811+P biological\_process [name] negative regulation of anoikis [def] "Any process that stops, prevents or reduces the frequency, rate or extent of anoikis." [GOC

16219 Pathogen[ Q2Q067] interacts with 2 human partners: {Q9Y3E5;Q04724}

16220 Pathogen[ P0C214] interacts with 2 human partners: {Q04724;Q9Y3E5}

16221 Pathogen[ P03346] interacts with 3 human partners: {Q9Y3E5;Q04724;Q07820}

16222 Pathogen[ Q85601] interacts with 2 human partners: {Q04724;Q9Y3E5}

16223 Pathogen[ P14079] interacts with 2 human partners: {Q9Y3E5;Q04724}

16224 Pathogen[ P03383] interacts with 2 human partners: {Q04724;Q9Y3E5}

16225 Pathogen[ P03410] interacts with 2 human partners: {Q04724;Q9Y3E5}

16226 Pathogen[ P14075] interacts with 2 human partners: {Q9Y3E5;Q04724}

16227 Pathogen[ P0C206] interacts with 2 human partners:{Q04724;Q9Y3E5}  
16228 Pathogen[ P03363] interacts with 3 human partners:{Q04724;Q07820;Q9Y3E5}  
16229 [Cluster 1476]GO:0019985+P biological\_process [name] translesion synthesis [def] "The replication of damaged DNA by synthesis across a lesion in the template strand\_ a specialized DNA polymerase or replication complex inserts a defined nucleotide across from the lesion which allows DNA synthesis to continue beyond the lesion. This process can be mutagenic depending on the damaged nucleotide and the inserted nucleotide." [GOC  
16230 Pathogen[ Q2Q067] interacts with 5 human partners:{Q9NZJ0;P12004;Q15004;Q9H040;Q6NZ36}  
16231 Pathogen[ P0C214] interacts with 4 human partners:{Q9H040;Q6NZ36;Q9NZJ0;Q15004}  
16232 Pathogen[ P03346] interacts with 5 human partners:{Q9NZJ0;P12004;Q15004;Q6NZ36;Q9H040}  
16233 Pathogen[ Q85601] interacts with 5 human partners:{Q15004;Q9H040;Q6NZ36;Q9NZJ0;P12004}  
16234 Pathogen[ P14079] interacts with 6 human partners:{Q5QGS0;Q9H040;Q6NZ36;Q9NZJ0;P12004;Q15004}  
16235 Pathogen[ P03383] interacts with 3 human partners:{Q9NZJ0;Q15004;Q9H040}  
16236 Pathogen[ P03410] interacts with 6 human partners:{Q5QGS0;Q9H040;Q15004;Q6NZ36;P12004;Q9NZJ0}  
16237 Pathogen[ P14075] interacts with 3 human partners:{Q9H040;Q9NZJ0;Q15004}  
16238 Pathogen[ P0C206] interacts with 5 human partners:{Q6NZ36;Q9NZJ0;Q9H040;Q15004;P12004}  
16239 Pathogen[ P03363] interacts with 4 human partners:{Q6NZ36;Q15004;Q9H040;Q9NZJ0}  
16240 [Cluster 1477]GO:2000016+P biological\_process [name] negative regulation of determination of dorsal identity [def] "Any process that stops, prevents, or reduces the frequency, rate or extent of determination of dorsal identity." [GOC  
16241 Pathogen[ Q2Q067] interacts with 1 human partners:{P35638}  
16242 Pathogen[ P0C214] interacts with 1 human partners:{P35638}  
16243 Pathogen[ P03346] interacts with 1 human partners:{P35638}  
16244 Pathogen[ Q85601] interacts with 1 human partners:{P35638}  
16245 Pathogen[ P14079] interacts with 1 human partners:{P35638}  
16246 Pathogen[ P03383] interacts with 1 human partners:{P35638}  
16247 Pathogen[ P03410] interacts with 1 human partners:{P35638}  
16248 Pathogen[ P14075] interacts with 1 human partners:{P35638}  
16249 Pathogen[ P0C206] interacts with 1 human partners:{P35638}  
16250 Pathogen[ P03363] interacts with 1 human partners:{P35638}  
16251 [Cluster 1478]GO:0031532+P biological\_process [name] actin cytoskeleton reorganization [def] "A process that is carried out at the cellular level which results in dynamic structural changes to the arrangement of constituent parts of cytoskeletal structures comprising actin filaments and their associated proteins." [GOC  
16252 Pathogen[ Q2Q067] interacts with 4 human partners:{Q96EV8;P35579;Q6R327;Q14693}  
16253 Pathogen[ P0C214] interacts with 3 human partners:{Q6R327;Q96EV8;Q14693}  
16254 Pathogen[ P03346] interacts with 6 human partners:{P35579;Q96EV8;Q12929;Q6R327;Q9NP85;Q14693}  
16255 Pathogen[ Q85601] interacts with 3 human partners:{P35579;Q96EV8;Q14693}  
16256 Pathogen[ P14079] interacts with 6 human partners:{Q6R327;Q12929;P35579;Q14693;Q9NP85;Q96EV8}  
16257 Pathogen[ P03383] interacts with 3 human partners:{Q96EV8;P35579;Q14693}  
16258 Pathogen[ P03410] interacts with 6 human partners:{P35579;Q9NP85;Q14693;Q6R327;Q96EV8;Q12929}  
16259 Pathogen[ P14075] interacts with 4 human partners:{Q6R327;P35579;Q96EV8;Q14693}  
16260 Pathogen[ P0C206] interacts with 5 human partners:{Q6R327;Q96EV8;P35579;Q14693;Q9NP85}  
16261 Pathogen[ P03363] interacts with 3 human partners:{P35579;Q12929;Q6R327}  
16262 [Cluster 1479]GO:0045333+P biological\_process [name] cellular respiration [def] "The enzymatic release of energy from organic compounds (especially carbohydrates and fats) which either requires oxygen (aerobic respiration) or does not (anaerobic respiration)." [ISBN  
16263 Pathogen[ Q2Q067] interacts with 3 human partners:{Q14934;P99999;Q12968}  
16264 Pathogen[ P0C214] interacts with 5 human partners:{Q969Z0;P28331;Q12968;P99999;Q14934}  
16265 Pathogen[ P03346] interacts with 3 human partners:{Q14934;P99999;Q12968}  
16266 Pathogen[ Q85601] interacts with 4 human partners:{P99999;Q969Z0;Q14934;Q12968}  
16267 Pathogen[ P14079] interacts with 11 human partners:{O43181;Q9NYY8;Q12887;Q12968;Q53R41;Q7L8L6;Q14CZ7;Q14934;Q969Z0;Q96KJ9;P99999}  
16268 Pathogen[ P03383] interacts with 4 human partners:{Q969Z0;Q14934;Q12968;P99999}  
16269 Pathogen[ P03410] interacts with 11 human partners:{Q96KJ9;Q7L8L6;Q53R41;Q9NYY8;Q12968;P99999;O43181;Q14CZ7;Q12887;Q969Z0;Q14934}  
16270 Pathogen[ P14075] interacts with 4 human partners:{Q969Z0;P99999;Q14934;Q12968}  
16271 Pathogen[ P0C206] interacts with 6 human partners:{P99999;Q12968;Q969Z0;Q14934;Q9NYY8;Q7L8L6}  
16272 Pathogen[ P03363] interacts with 3 human partners:{P99999;Q12968;Q14934}  
16273 [Cluster 1480]GO:0045732+P biological\_process [name] positive regulation of protein catabolic process [def] "Any process that activates or increases the frequency, rate

or extent of the chemical reactions and pathways resulting in the breakdown of a protein by the destruction of the native, active configuration, with or without the hydrolysis of peptide bonds." [GOC

16274 Pathogen[ Q2Q067] interacts with 10 human  
partners: {Q96J02;Q9Y4P1;Q96DX5;Q9NYF0;Q99728;Q96KS0;Q9UM11;Q13620;Q8IUR6;P46527}

16275 Pathogen[ P0C214] interacts with 11 human  
partners: {Q96J02;Q99728;Q13620;Q9Y4P1;Q96KS0;P46527;Q96DX5;Q8IUR6;Q9UM11;Q9NYF0;P55072}

16276 Pathogen[ P03346] interacts with 14 human  
partners: {Q13596;Q96J02;Q9Y4P1;Q9UM11;Q99728;Q8IUR6;Q969G9;P55072;Q13620;Q96DX5;Q06190;Q9NYF0;Q96KS0;P46527}

16277 Pathogen[ Q85601] interacts with 11 human  
partners: {Q13596;Q96J02;Q8IUR6;Q9Y4P1;Q9NYF0;Q99728;Q96DX5;Q96KS0;Q9UM11;Q13620;P46527}

16278 Pathogen[ P14079] interacts with 12 human  
partners: {Q13620;Q9Y4P1;Q9UM11;P46695;Q96DX5;Q96J02;Q13596;Q06190;P46527;Q96KS0;Q8IUR6;Q9NYF0}

16279 Pathogen[ P03383] interacts with 8 human  
partners: {Q8IUR6;Q9Y4P1;Q96DX5;Q96KS0;P46527;Q9UM11;Q9NYF0;Q13620}

16280 Pathogen[ P03410] interacts with 12 human  
partners: {P46527;Q13596;Q96KS0;Q9Y4P1;Q13620;Q96DX5;Q06190;Q9UM11;Q969G9;Q9NYF0;Q8IUR6;P46695}

16281 Pathogen[ P14075] interacts with 8 human  
partners: {Q96KS0;Q9UM11;Q9Y4P1;Q13620;P46527;Q96DX5;Q9NYF0;Q8IUR6}

16282 Pathogen[ P0C206] interacts with 14 human  
partners: {Q06190;Q8IUR6;Q96DX5;Q96KS0;Q9Y4P1;Q96J02;Q13596;Q13620;Q99728;P46527;Q9UM11;P55072;Q9NYF0;Q969G9}

16283 Pathogen[ P03363] interacts with 10 human  
partners: {Q06190;Q969G9;Q9NYF0;Q9UM11;Q13620;Q8IUR6;Q96DX5;Q13596;Q9Y4P1;Q99728}

16284 [Cluster 1481]GO:0036261+P

16285 Pathogen[ Q2Q067] interacts with 1 human partners: {Q96RS0}

16286 Pathogen[ P0C214] interacts with 1 human partners: {Q96RS0}

16287 Pathogen[ P03346] interacts with 1 human partners: {Q96RS0}

16288 Pathogen[ Q85601] interacts with 1 human partners: {Q96RS0}

16289 Pathogen[ P14079] interacts with 1 human partners: {Q96RS0}

16290 Pathogen[ P03383] interacts with 1 human partners: {Q96RS0}

16291 Pathogen[ P03410] interacts with 1 human partners: {Q96RS0}

16292 Pathogen[ P14075] interacts with 1 human partners: {Q96RS0}

16293 Pathogen[ P0C206] interacts with 1 human partners: {Q96RS0}

16294 Pathogen[ P03363] interacts with 1 human partners: {Q96RS0}

16295 [Cluster 1482]GO:0006183+P biological\_process [name] GTP biosynthetic process [def] "The chemical reactions and pathways resulting in the formation of GTP, guanosine triphosphate." [ISBN

16296 Pathogen[ Q2Q067] interacts with 1 human partners: {P22392}

16297 Pathogen[ P0C214] interacts with 1 human partners: {P22392}

16298 Pathogen[ P03346] interacts with 1 human partners: {P22392}

16299 Pathogen[ Q85601] interacts with 1 human partners: {P22392}

16300 Pathogen[ P14079] interacts with 2 human partners: {P22392;Q86XW9}

16301 Pathogen[ P03383] interacts with 1 human partners: {P22392}

16302 Pathogen[ P03410] interacts with 1 human partners: {Q86XW9}

16303 Pathogen[ P14075] interacts with 1 human partners: {P22392}

16304 Pathogen[ P0C206] interacts with 2 human partners: {P22392;Q86XW9}

16305 Pathogen[ P03363] interacts with 1 human partners: {Q86XW9}

16306 [Cluster 1483]GO:0051716+P biological\_process [name] cellular response to stimulus [def] "Any process that results in a change in state or activity of a cell (in terms of movement, secretion, enzyme production, gene expression, etc.) as a result of a stimulus. The process begins with detection of the stimulus by a cell and ends with a change in state or activity of the cell." [GOC

16307 Pathogen[ Q2Q067] interacts with 5 human  
partners: {P49770;Q9UI10;Q14232;Q9NR50;Q13144}

16308 Pathogen[ P0C214] interacts with 5 human  
partners: {Q9UI10;P49770;Q14232;Q9NR50;Q13144}

16309 Pathogen[ P03346] interacts with 5 human  
partners: {Q14232;P49770;Q13144;Q9NR50;Q9UI10}

16310 Pathogen[ Q85601] interacts with 5 human  
partners: {Q9NR50;Q13144;P49770;Q14232;Q9UI10}

16311 Pathogen[ P14079] interacts with 4 human partners: {Q9UI10;Q13144;Q9NR50;Q14232}

16312 Pathogen[ P03383] interacts with 5 human  
partners: {Q9UI10;Q13144;Q9NR50;P49770;Q14232}

16313 Pathogen[ P03410] interacts with 5 human  
partners: {Q9NR50;Q14232;P49770;Q9UI10;Q13144}

16314 Pathogen[ P14075] interacts with 5 human  
partners: {Q9UI10;Q14232;P49770;Q9NR50;Q13144}

16315 Pathogen[ P0C206] interacts with 5 human  
partners: {Q14232;Q9NR50;Q13144;P49770;Q9UI10}

16316 Pathogen[ P03363] interacts with 4 human partners: {Q9UI10;Q9NR50;P49770;Q13144}

16317 [Cluster 1484]GO:0050885+P biological\_process [name] neuromuscular process controlling balance [def] "Any process that an organism uses to control its balance, the orientation of the organism (or the head of the organism) in relation to the source of gravity. In humans and animals, balance is perceived through visual cues, the labyrinth system of the inner ears and information from skin pressure receptors and muscle and joint receptors." [GOC

16318 Pathogen[ Q2Q067] interacts with 4 human partners:{Q12837;P78352;Q9Y6N9;O60934}

16319 Pathogen[ POC214] interacts with 6 human partners:{Q9Y6N9;P78352;P35580;Q12837;P49588;Q6Y7W6}

16320 Pathogen[ P03346] interacts with 5 human partners:{Q9Y6N9;P78352;Q12837;O60934;Q15319}

16321 Pathogen[ Q85601] interacts with 6 human partners:{Q6Y7W6;Q9Y6N9;P78352;P35580;Q12837;O60934}

16322 Pathogen[ P14079] interacts with 6 human partners:{O14773;Q6Y7W6;O60934;Q12837;Q9Y6N9;P49588}

16323 Pathogen[ P03383] interacts with 3 human partners:{Q12837;P35580;P78352}

16324 Pathogen[ P03410] interacts with 8 human partners:{P49588;Q9Y6N9;P35580;Q6Y7W6;Q9UBY8;Q12837;P78352;O60934}

16325 Pathogen[ P14075] interacts with 2 human partners:{Q12837;P78352}

16326 Pathogen[ POC206] interacts with 6 human partners:{P78352;Q9Y6N9;O60934;Q6Y7W6;Q12837;P35580}

16327 Pathogen[ P03363] interacts with 5 human partners:{Q9Y6N9;P78352;Q9C056;Q12837;Q15319}

16328 [Cluster 1485]GO:0007127+P biological\_process [name] meiosis I [def] "A cell cycle process comprising the steps by which a cell progresses through the first phase of meiosis, in which cells divide and homologous chromosomes are paired and segregated from each other, producing two daughter cells." [GOC

16329 Pathogen[ Q2Q067] interacts with 3 human partners:{Q14674;Q9UNM6;P33552}

16330 Pathogen[ POC214] interacts with 3 human partners:{Q9UNM6;P33552;Q14674}

16331 Pathogen[ P03346] interacts with 3 human partners:{P33552;Q9UNM6;Q14674}

16332 Pathogen[ Q85601] interacts with 3 human partners:{Q9UNM6;Q14674;P33552}

16333 Pathogen[ P14079] interacts with 3 human partners:{Q14674;P33552;Q9UNM6}

16334 Pathogen[ P03383] interacts with 3 human partners:{P33552;Q14674;Q9UNM6}

16335 Pathogen[ P03410] interacts with 3 human partners:{Q14674;P33552;Q9UNM6}

16336 Pathogen[ P14075] interacts with 3 human partners:{Q14674;Q9UNM6;P33552}

16337 Pathogen[ POC206] interacts with 3 human partners:{Q9UNM6;P33552;Q14674}

16338 Pathogen[ P03363] interacts with 2 human partners:{P33552;Q14674}

16339 [Cluster 1486]GO:0044257+P biological\_process [name] cellular protein catabolic process [def] "The chemical reactions and pathways resulting in the breakdown of a protein by individual cells." [GOC

16340 Pathogen[ Q2Q067] interacts with 4 human partners:{O43255;Q9UBF1;O96017;P43356}

16341 Pathogen[ POC214] interacts with 5 human partners:{O96017;Q9UBF1;P43356;O95155;O43255}

16342 Pathogen[ P03346] interacts with 5 human partners:{O96017;O95155;Q9UBF1;O43255;P43356}

16343 Pathogen[ Q85601] interacts with 5 human partners:{O96017;O95155;Q9UBF1;P43356;O43255}

16344 Pathogen[ P14079] interacts with 2 human partners:{P43356;Q9UBF1}

16345 Pathogen[ P03383] interacts with 4 human partners:{O43255;Q9UBF1;P43356;O96017}

16346 Pathogen[ P03410] interacts with 4 human partners:{Q9UBF1;O96017;Q9UBY8;P43356}

16347 Pathogen[ P14075] interacts with 4 human partners:{Q9UBF1;O43255;O96017;P43356}

16348 Pathogen[ POC206] interacts with 5 human partners:{O43255;P43356;O96017;O95155;Q9UBF1}

16349 Pathogen[ P03363] interacts with 5 human partners:{O95155;Q9UBF1;O96017;O43255;P43356}

16350 [Cluster 1487]GO:0033132+P biological\_process [name] negative regulation of glucokinase activity [def] "Any process that stops, prevents, or reduces the frequency, rate or extent of glucokinase activity, the catalysis of the transfer of a phosphate group, usually from ATP, to a glucose molecule." [GOC

16351 Pathogen[ Q2Q067] interacts with 1 human partners:{Q14397}

16352 Pathogen[ POC214] interacts with 1 human partners:{Q14397}

16353 Pathogen[ P03346] interacts with 1 human partners:{Q14397}

16354 Pathogen[ Q85601] interacts with 1 human partners:{Q14397}

16355 Pathogen[ P14079] interacts with 1 human partners:{Q14397}

16356 Pathogen[ P03383] interacts with 1 human partners:{Q14397}

16357 Pathogen[ P03410] interacts with 1 human partners:{Q14397}

16358 Pathogen[ P14075] interacts with 1 human partners:{Q14397}

16359 Pathogen[ POC206] interacts with 1 human partners:{Q14397}

16360 Pathogen[ P03363] interacts with 1 human partners:{Q14397}

16361 [Cluster 1488]GO:0002230+P biological\_process [name] positive regulation of defense response to virus by host [def] "Any host process that results in the promotion of antiviral immune response mechanisms, thereby limiting viral replication." [GOC

16362 Pathogen[ Q2Q067] interacts with 2 human partners:{O14862;Q9HC16}

16363 Pathogen[ POC214] interacts with 3 human partners:{Q9HC16;Q86WV6;O14862}

16364 Pathogen[ P03346] interacts with 1 human partners:{O14862}

16365 Pathogen[ Q85601] interacts with 3 human partners:{Q86WV6;Q9HC16;O14862}

16366 Pathogen[ P14079] interacts with 4 human partners:{Q9HC16;Q7Z434;Q86WV6;O14862}  
16367 Pathogen[ P03383] interacts with 1 human partners:{O14862}  
16368 Pathogen[ P03410] interacts with 4 human partners:{O14862;Q7Z434;Q9HC16;Q86WV6}  
16369 Pathogen[ P14075] interacts with 1 human partners:{O14862}  
16370 Pathogen[ P0C206] interacts with 3 human partners:{O14862;Q86WV6;Q9HC16}  
16371 Pathogen[ P03363] interacts with 1 human partners:{O14862}  
16372 [Cluster 1489]GO:0008054+P biological\_process [name] cyclin catabolic process [def] "The chemical reactions and pathways resulting in the breakdown of cyclins, proteins whose levels in a cell varies markedly during the cell cycle, and which play key roles in regulating cell cycle phase transitions." [GOC  
16373 Pathogen[ Q2Q067] interacts with 3 human partners:{O00762;Q13618;Q9UJX6}  
16374 Pathogen[ P0C214] interacts with 4 human partners:{Q9UJX6;O00762;Q13618;Q5XUX0}  
16375 Pathogen[ P03346] interacts with 4 human partners:{Q13618;Q9UJX6;O00762;Q5XUX0}  
16376 Pathogen[ Q85601] interacts with 3 human partners:{Q9UJX6;O00762;Q13618}  
16377 Pathogen[ P14079] interacts with 4 human partners:{Q5XUX0;Q13618;Q9UJX6;O00762}  
16378 Pathogen[ P03383] interacts with 4 human partners:{Q9UJX6;O00762;Q13618;Q5XUX0}  
16379 Pathogen[ P03410] interacts with 4 human partners:{Q5XUX0;Q13618;O00762;Q9UJX6}  
16380 Pathogen[ P14075] interacts with 4 human partners:{Q13618;Q9UJX6;O00762;Q5XUX0}  
16381 Pathogen[ P0C206] interacts with 4 human partners:{Q13618;O00762;Q9UJX6;Q5XUX0}  
16382 Pathogen[ P03363] interacts with 4 human partners:{O00762;Q13618;Q9UJX6;Q5XUX0}  
16383 [Cluster 1490]GO:0021571+P biological\_process [name] rhombomere 5 development [def] "The process whose specific outcome is the progression of rhombomere 5 over time, from its formation to the mature structure. Rhombomeres are transverse segments of the developing rhombencephalon. Rhombomeres are lineage restricted, express different genes from one another, and adopt different developmental fates. Rhombomeres are numbered in anterior to posterior order." [GO\_REF  
16384 Pathogen[ Q2Q067] interacts with 3 human partners:{Q9Y5Q3;P49639;P14653}  
16385 Pathogen[ P0C214] interacts with 3 human partners:{P49639;Q9Y5Q3;P14653}  
16386 Pathogen[ P03346] interacts with 3 human partners:{P49639;Q9Y5Q3;P14653}  
16387 Pathogen[ Q85601] interacts with 3 human partners:{P49639;P14653;Q9Y5Q3}  
16388 Pathogen[ P14079] interacts with 2 human partners:{Q9Y5Q3;P49639}  
16389 Pathogen[ P03383] interacts with 2 human partners:{Q9Y5Q3;P49639}  
16390 Pathogen[ P03410] interacts with 2 human partners:{Q9Y5Q3;P49639}  
16391 Pathogen[ P14075] interacts with 1 human partners:{Q9Y5Q3}  
16392 Pathogen[ P0C206] interacts with 3 human partners:{Q9Y5Q3;P49639;P14653}  
16393 Pathogen[ P03363] interacts with 3 human partners:{P49639;P14653;Q9Y5Q3}  
16394 [Cluster 1491]GO:0030851+P biological\_process [name] granulocyte differentiation [def] "The process in which a myeloid precursor cell acquires the specialized features of a granulocyte. Granulocytes are a class of leukocytes characterized by the presence of granules in their cytoplasm. These cells are active in allergic immune reactions such as arthritic inflammation and rashes. This class includes basophils, eosinophils and neutrophils." [GOC  
16395 Pathogen[ Q2Q067] interacts with 5 human partners:{O75081;Q02447;Q8N5F7;Q8IX07;P17947}  
16396 Pathogen[ P0C214] interacts with 5 human partners:{Q8N5F7;P17947;Q8IX07;Q02447;O75081}  
16397 Pathogen[ P03346] interacts with 5 human partners:{Q8N5F7;Q8IX07;P17947;Q02447;O75081}  
16398 Pathogen[ Q85601] interacts with 5 human partners:{Q8N5F7;Q8IX07;Q02447;P17947;O75081}  
16399 Pathogen[ P14079] interacts with 4 human partners:{Q02447;Q8IX07;O75081;Q8N5F7}  
16400 Pathogen[ P03383] interacts with 4 human partners:{Q8N5F7;O75081;Q02447;P17947}  
16401 Pathogen[ P03410] interacts with 4 human partners:{Q02447;P17947;Q8IX07;O75081}  
16402 Pathogen[ P14075] interacts with 4 human partners:{Q8N5F7;O75081;P17947;Q02447}  
16403 Pathogen[ P0C206] interacts with 5 human partners:{O75081;Q02447;P17947;Q8N5F7;Q8IX07}  
16404 Pathogen[ P03363] interacts with 4 human partners:{O75081;Q02447;P17947;Q8N5F7}  
16405 [Cluster 1492]GO:0045650+P biological\_process [name] negative regulation of macrophage differentiation [def] "Any process that stops, prevents, or reduces the frequency, rate or extent of macrophage differentiation." [GOC  
16406 Pathogen[ Q2Q067] interacts with 2 human partners:{Q13769;P23769}  
16407 Pathogen[ P0C214] interacts with 2 human partners:{Q13769;P23769}  
16408 Pathogen[ P03346] interacts with 2 human partners:{P23769;Q13769}  
16409 Pathogen[ Q85601] interacts with 2 human partners:{Q13769;P23769}  
16410 Pathogen[ P14079] interacts with 2 human partners:{Q13769;P23769}  
16411 Pathogen[ P03383] interacts with 2 human partners:{Q13769;P23769}  
16412 Pathogen[ P03410] interacts with 2 human partners:{Q13769;P23769}  
16413 Pathogen[ P14075] interacts with 2 human partners:{Q13769;P23769}  
16414 Pathogen[ P0C206] interacts with 2 human partners:{Q13769;P23769}  
16415 Pathogen[ P03363] interacts with 1 human partners:{Q13769}  
16416 [Cluster 1493]GO:0018026+P biological\_process [name] peptidyl-lysine monomethylation [def] "The methylation of peptidyl-lysine to form peptidyl-N6-methyl-L-lysine." [RESID  
16417 Pathogen[ Q2Q067] interacts with 4 human partners:{Q8TBK2;Q9NRG4;Q86TU7;Q8WTS6}  
16418 Pathogen[ P0C214] interacts with 5 human partners:{Q86TU7;Q8WTS6;Q9NQR1;Q9NRG4;Q8TBK2}  
16419 Pathogen[ P03346] interacts with 5 human



16420 partners:{Q9NQR1;Q8TBK2;Q9NRG4;Q8WTS6;Q86TU7}  
Pathogen[ Q85601] interacts with 5 human

16421 partners:{Q8TBK2;Q9NQR1;Q86TU7;Q8WTS6;Q9NRG4}  
Pathogen[ P14079] interacts with 5 human

16422 partners:{Q9NRG4;Q86TU7;Q9NQR1;Q8TBK2;Q8WTS6}  
Pathogen[ P03383] interacts with 5 human

16423 partners:{Q9NRG4;Q86TU7;Q8WTS6;Q8TBK2;Q9NQR1}  
Pathogen[ P03410] interacts with 5 human

16424 partners:{Q8WTS6;Q8TBK2;Q9NQR1;Q86TU7;Q9NRG4}  
Pathogen[ P14075] interacts with 5 human

16425 partners:{Q86TU7;Q9NQR1;Q8TBK2;Q9NRG4;Q8WTS6}  
Pathogen[ P0C206] interacts with 5 human

16426 partners:{Q9NRG4;Q86TU7;Q9NQR1;Q8WTS6;Q8TBK2}  
Pathogen[ P03363] interacts with 4 human

16427 [Cluster 1494]GO:0000002+P biological\_process [name] mitochondrial genome maintenance  
[def] "The maintenance of the structure and integrity of the mitochondrial genome\_ includes replication and segregation of the mitochondrial chromosome." [GOC

16428 Pathogen[ Q2Q067] interacts with 1 human partners:{Q02078}

16429 Pathogen[ P0C214] interacts with 1 human partners:{Q02078}

16430 Pathogen[ P03346] interacts with 1 human partners:{Q02078}

16431 Pathogen[ Q85601] interacts with 1 human partners:{Q02078}

16432 Pathogen[ P14079] interacts with 1 human partners:{Q02078}

16433 Pathogen[ P03383] interacts with 1 human partners:{Q02078}

16434 Pathogen[ P03410] interacts with 1 human partners:{Q02078}

16435 Pathogen[ P14075] interacts with 1 human partners:{Q02078}

16436 Pathogen[ P0C206] interacts with 1 human partners:{Q02078}

16437 Pathogen[ P03363] interacts with 1 human partners:{Q02078}

16438 [Cluster 1495]GO:0034587+P biological\_process [name] piRNA metabolic process [def]  
"The chemical reactions and pathways involving piRNAs, Piwi-associated RNAs, a class of 24- to 30-nucleotide RNA derived from repeat or complex DNA sequence elements and processed by a Dicer-independent mechanism." [GOC

16439 Pathogen[ Q2Q067] interacts with 1 human partners:{Q5T8I9}

16440 Pathogen[ P0C214] interacts with 1 human partners:{Q5T8I9}

16441 Pathogen[ P03346] interacts with 2 human partners:{Q5T8I9;Q96J94}

16442 Pathogen[ Q85601] interacts with 1 human partners:{Q5T8I9}

16443 Pathogen[ P14079] interacts with 1 human partners:{Q96JY0}

16444 Pathogen[ P03383] interacts with 1 human partners:{Q5T8I9}

16445 Pathogen[ P03410] interacts with 1 human partners:{Q5T8I9}

16446 Pathogen[ P14075] interacts with 1 human partners:{Q5T8I9}

16447 Pathogen[ P0C206] interacts with 1 human partners:{Q5T8I9}

16448 Pathogen[ P03363] interacts with 4 human partners:{Q7Z3Z4;Q5T8I9;Q96JY0;Q96J94}

16449 [Cluster 1496]GO:0032781+P biological\_process [name] positive regulation of ATPase activity [def] "Any process that activates or increases the rate of ATP hydrolysis by an ATPase." [GOC

16450 Pathogen[ Q2Q067] interacts with 4 human partners:{O95433;P05062;P60520;O75190}

16451 Pathogen[ P0C214] interacts with 4 human partners:{P60520;O75190;P05062;O95433}

16452 Pathogen[ P03346] interacts with 5 human  
partners:{O75190;P60520;O95433;Q96KC8;P05062}

16453 Pathogen[ Q85601] interacts with 4 human partners:{O75190;O95433;P05062;P60520}

16454 Pathogen[ P14079] interacts with 5 human  
partners:{O95433;O75190;P60520;Q15493;Q719I0}

16455 Pathogen[ P03383] interacts with 2 human partners:{O95433;O75190}

16456 Pathogen[ P03410] interacts with 6 human  
partners:{Q719I0;P60520;P05062;O75190;O95433;Q15493}

16457 Pathogen[ P14075] interacts with 2 human partners:{O95433;O75190}

16458 Pathogen[ P0C206] interacts with 5 human  
partners:{P05062;Q15493;P60520;Q719I0;O75190}

16459 Pathogen[ P03363] interacts with 3 human partners:{O75190;P60520;O95433}

16460 [Cluster 1497]GO:0060004+P biological\_process [name] reflex [def] "An automatic response to a stimulus beginning with a nerve impulse from a receptor and ending with the action of an effector such as a gland or a muscle. Signaling never reaches a level of consciousness." [GOC

16461 Pathogen[ Q2Q067] interacts with 1 human partners:{Q01826}

16462 Pathogen[ P0C214] interacts with 1 human partners:{Q01826}

16463 Pathogen[ P03346] interacts with 1 human partners:{Q01826}

16464 Pathogen[ Q85601] interacts with 1 human partners:{Q01826}

16465 Pathogen[ P14079] interacts with 1 human partners:{Q01826}

16466 Pathogen[ P03383] interacts with 1 human partners:{Q01826}

16467 Pathogen[ P03410] interacts with 1 human partners:{Q01826}

16468 Pathogen[ P14075] interacts with 1 human partners:{Q01826}

16469 Pathogen[ P0C206] interacts with 1 human partners:{Q01826}

16470 Pathogen[ P03363] interacts with 1 human partners:{Q01826}

16471 [Cluster 1498]GO:0043982+P biological\_process [name] histone H4-K8 acetylation  
[def] "The modification of histone H4 by the addition of an acetyl group to a lysine residue at position 8 of the histone." [GOC

16472 Pathogen[ Q2Q067] interacts with 6 human

16473 partners:{Q6IE81;Q9HAF1;Q96EZ8;Q9UNL4;P51610;Q7Z3B3}  
Pathogen[ POC214] interacts with 6 human

16474 partners:{P51610;Q9UNL4;Q9HAF1;O95251;Q6IE81;Q96EZ8}  
Pathogen[ P03346] interacts with 8 human

16475 partners:{Q9UNL4;Q96EZ8;P51610;Q7Z3B3;O95251;Q6IE81;Q9H7Z6;Q9HAF1}  
Pathogen[ Q85601] interacts with 7 human

16476 partners:{O95251;Q9HAF1;Q9H7Z6;Q9UNL4;P51610;Q6IE81;Q96EZ8}  
Pathogen[ P14079] interacts with 9 human

16477 partners:{O95251;Q9UNL4;Q9HAF1;Q6IE81;P51610;Q7Z3B3;Q9P2N6;Q96EZ8;Q9H9L4}  
Pathogen[ P03383] interacts with 6 human

16478 partners:{O95251;Q9UNL4;P51610;Q9HAF1;Q6IE81;Q96EZ8}  
Pathogen[ P03410] interacts with 8 human

16479 partners:{Q9P2N6;P51610;O95251;Q9UNL4;Q9H9L4;Q96EZ8;Q7Z3B3;Q6IE81}  
Pathogen[ P14075] interacts with 7 human

16480 partners:{P51610;Q7Z3B3;Q96EZ8;Q6IE81;Q9HAF1;O95251;Q9UNL4}  
Pathogen[ POC206] interacts with 10 human

16481 partners:{O95251;Q9H9L4;Q96EZ8;P51610;Q9HAF1;Q6IE81;Q9P2N6;Q7Z3B3;Q9UNL4;Q9H7Z6}  
Pathogen[ P03363] interacts with 7 human

16482 partners:{Q6IE81;Q9HAF1;Q9UNL4;Q7Z3B3;Q96EZ8;O95251;P51610}  
[Cluster 1499]GO:0000466+P biological\_process [name] maturation of 5.8S rRNA from tricistronic rRNA transcript (SSU-rRNA, 5.8S rRNA, LSU-rRNA) [def] "Any process involved in the maturation of an rRNA molecule originally produced as part of a tricistronic rRNA transcript that contained the Small SubUnit (SSU) rRNA, the 5.8S rRNA, and the Large SubUnit (LSU) rRNA, in that order, from 5' to 3' along the primary transcript." [GOC

16483 Pathogen[ Q2Q067] interacts with 2 human partners:{Q9GZL7;O00541}  
16484 Pathogen[ POC214] interacts with 2 human partners:{O00541;Q9GZL7}  
16485 Pathogen[ P03346] interacts with 2 human partners:{O00541;Q9GZL7}  
16486 Pathogen[ Q85601] interacts with 2 human partners:{O00541;Q9GZL7}  
16487 Pathogen[ P14079] interacts with 2 human partners:{Q9GZL7;O00541}  
16488 Pathogen[ P03383] interacts with 2 human partners:{O00541;Q9GZL7}  
16489 Pathogen[ P03410] interacts with 2 human partners:{Q9GZL7;O00541}  
16490 Pathogen[ P14075] interacts with 2 human partners:{Q9GZL7;O00541}  
16491 Pathogen[ POC206] interacts with 2 human partners:{Q9GZL7;O00541}  
16492 Pathogen[ P03363] interacts with 2 human partners:{Q9GZL7;O00541}

16493 [Cluster 1500]GO:0051894+P biological\_process [name] positive regulation of focal adhesion assembly [def] "Any process that activates or increases the frequency, rate or extent of focal adhesion assembly, the establishment and maturation of focal adhesions." [GOC

16494 Pathogen[ Q2Q067] interacts with 2 human partners:{P84022;P49593}  
16495 Pathogen[ POC214] interacts with 2 human partners:{P84022;P49593}  
16496 Pathogen[ P03346] interacts with 2 human partners:{P49593;P84022}  
16497 Pathogen[ Q85601] interacts with 2 human partners:{P49593;P84022}  
16498 Pathogen[ P14079] interacts with 1 human partners:{P49593}  
16499 Pathogen[ P03383] interacts with 1 human partners:{P84022}  
16500 Pathogen[ P03410] interacts with 2 human partners:{P84022;P49593}  
16501 Pathogen[ P14075] interacts with 1 human partners:{P84022}  
16502 Pathogen[ POC206] interacts with 2 human partners:{P84022;P49593}  
16503 Pathogen[ P03363] interacts with 1 human partners:{P84022}

16504 [Cluster 1501]GO:0070869+P biological\_process [name] heterochromatin assembly involved in chromatin silencing [def] "Any process that results in the assembly of chromatin into heterochromatin and contributes to chromatin silencing." [GOC

16505 Pathogen[ Q2Q067] interacts with 1 human partners:{Q9UIF9}  
16506 Pathogen[ POC214] interacts with 1 human partners:{Q9UIF9}  
16507 Pathogen[ P03346] interacts with 1 human partners:{Q9UIF9}  
16508 Pathogen[ Q85601] interacts with 1 human partners:{Q9UIF9}  
16509 Pathogen[ P14079] interacts with 1 human partners:{Q9UIF9}  
16510 Pathogen[ P03383] interacts with 1 human partners:{Q9UIF9}  
16511 Pathogen[ P03410] interacts with 1 human partners:{Q9UIF9}  
16512 Pathogen[ P14075] interacts with 1 human partners:{Q9UIF9}  
16513 Pathogen[ POC206] interacts with 1 human partners:{Q9UIF9}  
16514 Pathogen[ P03363] interacts with 1 human partners:{Q9UIF9}

16515 [Cluster 1502]GO:0007411+P biological\_process [name] axon guidance [def] "The chemotaxis process that directs the migration of an axon growth cone to a specific target site in response to a combination of attractive and repulsive cues." [ISBN

16516 Pathogen[ Q2Q067] interacts with 44 human  
partners:{P04156;Q01082;O00213;O94973;Q12837;O14786;O95782;Q7Z460;O14639;Q9UI56;P60660;O43255;O43639;P08238;P50549;P07900;Q6H8Q1;O00401;P63010;P23528;P31948;Q96CW1;Q12959;P78352;O75582;P67870;Q00610;Q96S59;Q92796;P25063;Q9UHY8;P16333;O75122;Q99962;P31946;Q13761;P60953;Q6ZVN8;P63000;P35579;Q99689;P09496;P61586;Q14194}

16517 Pathogen[ POC214] interacts with 52 human  
partners:{Q96CW1;Q9UI08;O00213;Q13761;P60709;P32243;P63000;O14786;P16157;P62993;Q92796;P61586;P60660;O14639;P60953;A0MZ66;Q14194;P31948;Q99962;O43639;Q01082;P78352;P63010;Q9UHY8;O75122;P35580;Q12837;O14531;Q96S59;Q99689;P25063;Q12959;O75582;P16333;O94973;Q6ZVN8;P04156;Q7Z460;Q7Z406;Q9UI56;O00401;P09496;O95782;Q6H8Q1;P50549;P67870;P16220;P31946;P53680;P63261;O43255;P35749}

- 16518 Pathogen[ P03346] interacts with 64 human partners: {O00213;P02549;Q6ZVN8;P60660;P07900;P16220;O14639;P63010;O43639;P11277;P35579;P78352;P53680;P50549;Q12837;Q99689;Q99962;P60709;Q92858;O43255;O95782;P52951;P31948;P60953;P62993;Q96QS3;Q9UI08;Q6H8Q1;P09496;P16157;Q92796;Q13813;Q16650;P16333;Q01082;Q9UHY8;Q96S59;O14531;Q96CW1;Q13761;O75840;Q8IUQ4;O75582;O94929;O75122;P31946;P04156;Q9UI56;P56178;P25063;Q7Z460;P67870;P23528;Q14194;O00401;O94973;P32243;P08238;P63000;Q00610;O14786;P61586;Q12959;Q9H2A3}
- 16519 Pathogen[ Q85601] interacts with 52 human partners: {O00401;O14639;O00213;Q9UHY8;P31946;P16157;Q00610;P62993;P09496;Q14194;Q96CW1;P35579;P50549;P16333;Q99962;P63000;P31948;Q01082;O43639;Q6H8Q1;O14786;P60709;O75122;Q96S59;Q7Z406;P63261;P16220;P08238;P35749;P78352;P53680;O75582;Q92796;Q99689;P61586;P07900;P32243;O94973;Q12959;P60953;P04156;Q7Z460;P35580;P63010;P67870;P23528;P17677;O43255;P60660;Q12837;O95782;Q13761}
- 16520 Pathogen[ P14079] interacts with 57 human partners: {Q96CW1;Q9UHY8;P35579;P31948;P63261;P17677;Q00610;Q01518;Q7Z460;Q6ZVN8;Q01082;O75582;P04156;Q9UI56;O14639;A0MZ66;P40123;O94929;O00213;P16157;Q12837;P50552;Q15078;P54826;O95782;Q99689;P23528;P31946;P08238;P16333;P50549;P25063;P60660;P61586;P07900;P60709;Q14194;P63010;P11277;Q6H8Q1;O94973;P32243;P62993;O43639;P67870;Q13761;Q92796;Q96S59;Q13813;O75122;P02549;P53680;Q96B86;P09496;Q99962;O00401;Q9UI08}
- 16521 Pathogen[ P03383] interacts with 37 human partners: {Q13761;Q96CW1;O00213;Q7Z460;Q75582;P50549;Q00610;P16220;P32243;O14639;P04156;P31946;P31948;Q99689;P60953;P25063;P63000;P07900;O00401;Q6ZVN8;Q96S59;P61586;P63010;Q12837;O95782;O43255;P35580;Q9UI56;P67870;Q9UHY8;P35579;Q92796;P23528;P16333;O94973;P08238;P78352}
- 16522 Pathogen[ P03410] interacts with 64 human partners: {Q00610;O14786;P09496;Q7Z460;Q9UI56;O95782;Q96CW1;Q9UI08;P53680;Q96B86;P63000;P08238;Q96S59;P16157;Q12959;O43639;O75582;Q6H8Q1;O00401;O14639;P35579;O00213;O94929;P07900;P16333;P02549;A0MZ66;P50549;P40123;O14531;P50552;Q6ZVN8;P61586;P25063;Q92796;P04156;P16220;P31948;P54826;P63010;P60953;P35580;P32243;Q13761;P17677;Q99962;P63261;Q01082;Q14194;Q01518;P23528;Q12837;P67870;Q9UHY8;P60660;P78352;Q13813;P62993;O75122;O94973;P11277;P60709;P31946;Q99689}
- 16523 Pathogen[ P14075] interacts with 38 human partners: {P60953;O00213;P09496;O94973;Q96CW1;O75582;Q7Z460;Q12837;P04156;P08238;O43255;P23528;P16333;P07900;O00401;Q6ZVN8;Q96S59;P67870;O95782;P35579;Q92796;O14639;P61586;P50549;P63000;P63010;Q9UHY8;P78352;P16220;P31946;P31948;P32243;P54826;Q9UI56;Q00610;P25063;Q13761;Q99689}
- 16524 Pathogen[ P0C206] interacts with 63 human partners: {P53680;P63010;Q01082;P60709;P78352;O94973;P17677;O43255;P04156;P16220;O75582;Q8IUQ4;P60660;Q00610;Q9UHY8;O14531;Q99962;Q9UI08;P62993;P09496;O14786;O94929;P61586;P31946;Q99689;O75122;Q12837;O00213;P16157;P25063;P08238;P63000;P50549;P32243;Q9UI56;P07900;P63261;Q96CW1;Q6ZVN8;P67870;P35749;P35579;O00401;A0MZ66;P60953;O95782;P16333;Q14194;P11277;O14639;Q96B86;Q92796;Q96S59;Q7Z460;P54826;P31948;P35580;P23528;O43639;Q12959;Q13761;Q6H8Q1;Q9H2A3}
- 16525 Pathogen[ P03363] interacts with 53 human partners: {Q12959;Q99962;P11277;P07900;Q2VIQ3;P02549;P60709;P16157;Q14194;P35579;O14786;O00213;Q01082;P78352;P31946;P16220;Q00610;P04156;P32243;O43639;P63000;O94973;Q9UHY8;Q9UI08;P16333;Q6H8Q1;P63010;Q7Z460;P31948;Q6ZVN8;P23528;P50549;Q9UI56;O95782;O14531;P52951;O00401;P63261;P60660;Q96QS3;P67870;Q96S59;Q92796;Q13761;O43255;Q13813;Q12837;P60953;P08238;O14639;Q96CW1;Q99689;Q9H2A3}
- 16526 [Cluster 1503]GO:0072001+P biological\_process [name] renal system development [def] "The process whose specific outcome is the progression of the renal system over time, from its formation to the mature structure. The renal system maintains fluid balance and contributes to electrolyte balance, acid/base balance, and disposal of nitrogenous waste products. In humans, the renal system comprises a pair of kidneys, a pair of ureters, urinary bladder, urethra, sphincter muscle and associated blood vessels." [GOC
- 16527 Pathogen[ Q2Q067] interacts with 2 human partners: {Q04743;Q03112}
- 16528 Pathogen[ P0C214] interacts with 1 human partners: {Q03112}
- 16529 Pathogen[ P03346] interacts with 3 human partners: {Q04743;Q03112;Q15475}
- 16530 Pathogen[ Q85601] interacts with 1 human partners: {Q03112}
- 16531 Pathogen[ P14079] interacts with 1 human partners: {Q04743}
- 16532 Pathogen[ P03383] interacts with 1 human partners: {Q03112}
- 16533 Pathogen[ P03410] interacts with 2 human partners: {Q03112;Q04743}
- 16534 Pathogen[ P14075] interacts with 1 human partners: {Q03112}
- 16535 Pathogen[ P0C206] interacts with 2 human partners: {Q04743;Q03112}
- 16536 Pathogen[ P03363] interacts with 2 human partners: {Q03112;Q04743}
- 16537 [Cluster 1504]GO:0045471+P biological\_process [name] response to ethanol [def] "Any process that results in a change in state or activity of a cell or an organism (in terms of movement, secretion, enzyme production, gene expression, etc.) as a result of an ethanol stimulus." [GOC
- 16538 Pathogen[ Q2Q067] interacts with 14 human partners: {P24385;P40763;P30279;Q14790;P06746;P06396;P24864;P29474;Q6RSH7;O15527;P27986;P16455;P06132;P14672}
- 16539 Pathogen[ P0C214] interacts with 16 human partners: {P06132;P29474;P06746;P06396;P24385;Q9Y3R4;P16455;P24864;P30279;P40763;O15527;P22830;P14672;P27986;Q6RSH7;Q14790}
- 16540 Pathogen[ P03346] interacts with 13 human

16541 partners: {Q6RSH7;P24385;P30279;P29474;P24864;P06132;Q14790;P06396;O15527;P14672;P40763;P06746;P27986}  
Pathogen[ Q85601] interacts with 14 human  
partners: {O15527;P24385;P06396;P16455;Q14790;P40763;P27986;P30279;P06132;P29474;Q6RSH7;P06746;P14672;P24864}

16542 Pathogen[ P14079] interacts with 14 human  
partners: {P41238;P24864;P20396;P14672;P16455;O15527;P68032;P06132;Q14790;P22830;Q9Y3R4;P06746;Q6RSH7;Q16878}

16543 Pathogen[ P03383] interacts with 11 human  
partners: {P27986;P06746;P29474;O15527;P24385;Q6RSH7;P30279;P06132;P24864;P14672;P06396}

16544 Pathogen[ P03410] interacts with 17 human  
partners: {P27986;P30279;P06396;P41238;P06746;P06132;P24385;P29474;O15527;P22830;P16455;Q6RSH7;Q9Y3R4;P24864;P40763;Q9BRK5;P20396}

16545 Pathogen[ P14075] interacts with 11 human  
partners: {P29474;P06132;P30279;O15527;P06746;Q6RSH7;P27986;P06396;P24385;P14672;P24864}

16546 Pathogen[ P0C206] interacts with 18 human  
partners: {P06396;O15527;P30279;P06746;P27986;Q9Y3R4;Q6RSH7;Q14790;P22830;P40763;P29474;P14672;P41238;P20396;P24864;P16455;P06132;P24385}

16547 Pathogen[ P03363] interacts with 11 human  
partners: {P29474;O15527;P24864;P30279;P06132;P06396;Q6RSH7;P06746;P24385;P14672;P27986}

16548 [Cluster 1505]GO:0035562+P biological\_process [name] negative regulation of chromatin binding [def] "Any process that stops or reduces the frequency, rate or extent of chromatin binding. Chromatin binding is the selective interaction with chromatin, the network of fibers of DNA, protein, and sometimes RNA, that make up the chromosomes of the eukaryotic nucleus during interphase." [GOC  
16549 Pathogen[ Q2Q067] interacts with 2 human partners: {Q7Z5K2;Q13569}  
16550 Pathogen[ P0C214] interacts with 2 human partners: {Q7Z5K2;Q13569}  
16551 Pathogen[ P03346] interacts with 2 human partners: {Q7Z5K2;Q13569}  
16552 Pathogen[ Q85601] interacts with 2 human partners: {Q7Z5K2;Q13569}  
16553 Pathogen[ P14079] interacts with 2 human partners: {Q13569;Q7Z5K2}  
16554 Pathogen[ P03383] interacts with 2 human partners: {Q13569;Q7Z5K2}  
16555 Pathogen[ P03410] interacts with 2 human partners: {Q7Z5K2;Q13569}  
16556 Pathogen[ P14075] interacts with 2 human partners: {Q7Z5K2;Q13569}  
16557 Pathogen[ P0C206] interacts with 2 human partners: {Q7Z5K2;Q13569}  
16558 Pathogen[ P03363] interacts with 2 human partners: {Q13569;Q7Z5K2}

16559 [Cluster 1506]GO:0090150+P biological\_process [name] establishment of protein localization in membrane [def] "The directed movement of a protein to a specific location in a membrane." [GOC  
16560 Pathogen[ Q2Q067] interacts with 1 human partners: {P55957}  
16561 Pathogen[ P0C214] interacts with 1 human partners: {P55957}  
16562 Pathogen[ P03346] interacts with 1 human partners: {P55957}  
16563 Pathogen[ Q85601] interacts with 1 human partners: {P55957}  
16564 Pathogen[ P14079] interacts with 1 human partners: {P55957}  
16565 Pathogen[ P03383] interacts with 1 human partners: {P55957}  
16566 Pathogen[ P03410] interacts with 1 human partners: {P55957}  
16567 Pathogen[ P14075] interacts with 1 human partners: {P55957}  
16568 Pathogen[ P0C206] interacts with 1 human partners: {P55957}  
16569 Pathogen[ P03363] interacts with 1 human partners: {P55957}

16570 [Cluster 1507]GO:0031575+P biological\_process [name] mitotic cell cycle G1/S transition checkpoint [def] "A cell cycle checkpoint that blocks entry into S phase of the mitotic cell cycle." [GOC  
16571 Pathogen[ Q2Q067] interacts with 5 human  
partners: {P06400;Q12959;O60934;P42772;O60921}  
16572 Pathogen[ P0C214] interacts with 4 human partners: {O60921;Q12959;P06400;P42772}  
16573 Pathogen[ P03346] interacts with 5 human  
partners: {O60921;P06400;P42772;O60934;Q12959}  
16574 Pathogen[ Q85601] interacts with 5 human  
partners: {P06400;P42772;O60921;Q12959;O60934}  
16575 Pathogen[ P14079] interacts with 2 human partners: {O60934;O60921}  
16576 Pathogen[ P03383] interacts with 3 human partners: {P06400;O60921;P42772}  
16577 Pathogen[ P03410] interacts with 5 human  
partners: {P42772;Q12959;P06400;O60921;O60934}  
16578 Pathogen[ P14075] interacts with 3 human partners: {P06400;O60921;P42772}  
16579 Pathogen[ P0C206] interacts with 5 human  
partners: {O60934;P42772;O60921;Q12959;P06400}

16580 Pathogen[ P03363] interacts with 4 human partners: {Q12959;P06400;P42772;O60921}

16581 [Cluster 1508]GO:0032968+P biological\_process [name] positive regulation of transcription elongation from RNA polymerase II promoter [def] "Any process that activates or increases the frequency, rate or extent of transcription elongation, the extension of an RNA molecule after transcription initiation and promoter clearance by the addition of ribonucleotides, catalyzed by RNA polymerase II." [GOC  
16582 Pathogen[ Q2Q067] interacts with 9 human  
partners: {Q8WVC0;O00267;Q6PD62;Q6P1J9;Q9GZS3;Q92541;Q56P03;O60885;Q8N7H5}

16583 Pathogen[ P0C214] interacts with 9 human partners:{Q00267;Q92541;Q6P1J9;Q8N7H5;Q56P03;Q8WVC0;O60885;Q6PD62;Q9GZS3}

16584 Pathogen[ P03346] interacts with 9 human partners:{Q6PD62;Q56P03;Q8WVC0;Q92541;O00267;Q9GZS3;O60885;Q6P1J9;Q8N7H5}

16585 Pathogen[ Q85601] interacts with 9 human partners:{Q6PD62;Q56P03;Q8WVC0;Q6P1J9;Q9GZS3;Q92541;O00267;O60885;Q8N7H5}

16586 Pathogen[ P14079] interacts with 9 human partners:{Q56P03;Q92541;Q9GZS3;Q6PD62;Q8WVC0;O60885;Q6P1J9;O00267;Q8N7H5}

16587 Pathogen[ P03383] interacts with 9 human partners:{Q6P1J9;Q56P03;Q6PD62;O00267;Q8WVC0;O60885;Q92541;Q9GZS3;Q8N7H5}

16588 Pathogen[ P03410] interacts with 9 human partners:{Q8WVC0;O60885;Q6PD62;O00267;Q92541;Q9GZS3;Q8N7H5;Q6P1J9;Q56P03}

16589 Pathogen[ P14075] interacts with 9 human partners:{Q56P03;Q8WVC0;Q8N7H5;Q6P1J9;Q92541;Q6PD62;Q9GZS3;O60885;O00267}

16590 Pathogen[ P0C206] interacts with 9 human partners:{Q6PD62;Q56P03;Q92541;Q8N7H5;Q9GZS3;O60885;Q8WVC0;O00267;Q6P1J9}

16591 Pathogen[ P03363] interacts with 9 human partners:{Q9GZS3;Q8WVC0;Q56P03;O00267;O60885;Q6P1J9;Q92541;Q8N7H5;Q6PD62}

16592 [Cluster 1509]GO:0048714+P biological\_process [name] positive regulation of oligodendrocyte differentiation [def] "Any process that activates or increases the frequency, rate or extent of oligodendrocyte differentiation." [GOC

16593 Pathogen[ Q2Q067] interacts with 3 human partners:{O15350;Q92769;Q96MN9}

16594 Pathogen[ P0C214] interacts with 3 human partners:{O15350;Q96MN9;Q92769}

16595 Pathogen[ P03346] interacts with 6 human partners:{O15350;P45381;Q96MN9;Q95096;Q92769;Q13516}

16596 Pathogen[ Q85601] interacts with 3 human partners:{Q96MN9;Q92769;O15350}

16597 Pathogen[ P14079] interacts with 4 human partners:{O15350;Q96MN9;Q92769;P45381}

16598 Pathogen[ P03383] interacts with 3 human partners:{Q96MN9;Q92769;O15350}

16599 Pathogen[ P03410] interacts with 4 human partners:{P45381;Q96MN9;Q92769;O15350}

16600 Pathogen[ P14075] interacts with 3 human partners:{Q96MN9;O15350;Q92769}

16601 Pathogen[ P0C206] interacts with 4 human partners:{Q92769;Q96MN9;P45381;O15350}

16602 Pathogen[ P03363] interacts with 2 human partners:{Q13516;Q96MN9}

16603 [Cluster 1510]GO:0097178+P biological\_process [name] ruffle assembly [def] "The aggregation, arrangement and bonding together of a set of components to form a ruffle, a projection at the leading edge of a crawling cell\_ the protrusions are supported by a microfilament meshwork. The formation of ruffles (also called membrane ruffling) is thought to be controlled by a group of enzymes known as Rho GTPases, specifically RhoA, Rac1 and cdc42." [GOC

16604 Pathogen[ Q2Q067] interacts with 2 human partners:{P63000;O95429}

16605 Pathogen[ P0C214] interacts with 2 human partners:{P63000;O95429}

16606 Pathogen[ P03346] interacts with 2 human partners:{O95429;P63000}

16607 Pathogen[ Q85601] interacts with 2 human partners:{P63000;O95429}

16608 Pathogen[ P14079] interacts with 1 human partners:{O95429}

16609 Pathogen[ P03383] interacts with 2 human partners:{P63000;O95429}

16610 Pathogen[ P03410] interacts with 2 human partners:{P63000;O95429}

16611 Pathogen[ P14075] interacts with 2 human partners:{P63000;O95429}

16612 Pathogen[ P0C206] interacts with 2 human partners:{P63000;O95429}

16613 Pathogen[ P03363] interacts with 2 human partners:{P63000;O95429}

16614 [Cluster 1511]GO:0031536+P biological\_process [name] positive regulation of exit from mitosis [def] "Any process that activates or increases the rate of progression from anaphase/telophase (high mitotic CDK activity) to G1 (low mitotic CDK activity)." [GOC

16615 Pathogen[ Q2Q067] interacts with 2 human partners:{O00762;O15392}

16616 Pathogen[ P0C214] interacts with 2 human partners:{O00762;O15392}

16617 Pathogen[ P03346] interacts with 3 human partners:{O15392;Q92886;O00762}

16618 Pathogen[ Q85601] interacts with 2 human partners:{O15392;O00762}

16619 Pathogen[ P14079] interacts with 2 human partners:{O15392;O00762}

16620 Pathogen[ P03383] interacts with 1 human partners:{O00762}

16621 Pathogen[ P03410] interacts with 2 human partners:{O15392;O00762}

16622 Pathogen[ P14075] interacts with 1 human partners:{O00762}

16623 Pathogen[ P0C206] interacts with 2 human partners:{O00762;O15392}

16624 Pathogen[ P03363] interacts with 2 human partners:{Q92886;O00762}

16625 [Cluster 1512]GO:0007158+P biological\_process [name] neuron cell-cell adhesion [def] "The attachment of a neuron to another cell via adhesion molecules." [GOC

16626 Pathogen[ Q2Q067] interacts with 1 human partners:{Q9UQB3}

16627 Pathogen[ P0C214] interacts with 1 human partners:{Q9UQB3}

16628 Pathogen[ P03346] interacts with 1 human partners:{Q9UQB3}

16629 Pathogen[ Q85601] interacts with 1 human partners:{Q9UQB3}

16630 Pathogen[ P14079] interacts with 2 human partners:{Q9UQB3;Q15078}

16631 Pathogen[ P03383] interacts with 1 human partners:{Q9UQB3}

16632 Pathogen[ P03410] interacts with 2 human partners:{Q9NZG7;Q9UQB3}

16633 Pathogen[ P14075] interacts with 1 human partners:{Q9UQB3}

16634 Pathogen[ P0C206] interacts with 1 human partners:{Q9UQB3}

16635 Pathogen[ P03363] interacts with 1 human partners:{Q9UQB3}

16636 [Cluster 1513]GO:0046907+P biological\_process [name] intracellular transport [def] "The directed movement of substances within a cell." [GOC

16637 Pathogen[ Q2Q067] interacts with 6 human

16638 partners:{P49792;Q92624;Q9UKX7;Q9H6Z4;P43487;O75901}  
Pathogen[ P0C214] interacts with 6 human

16639 partners:{Q92624;P43487;P49792;Q9UKX7;O75901;Q9H6Z4}  
Pathogen[ P03346] interacts with 8 human

16640 partners:{O75901;Q9UKX7;P43487;Q99666;O14715;Q9H6Z4;Q92624;P49792}  
Pathogen[ Q85601] interacts with 6 human

16641 partners:{P43487;Q9H6Z4;Q92624;Q9UKX7;O75901;P49792}  
Pathogen[ P14079] interacts with 6 human

16642 partners:{O14715;Q92624;Q9UKX7;Q9H6Z4;Q9NZJ9;O75901}  
Pathogen[ P03383] interacts with 6 human

16643 partners:{P49792;O75901;P43487;Q9H6Z4;Q9UKX7;Q92624}  
Pathogen[ P03410] interacts with 9 human

16644 partners:{Q9UKX7;Q99666;Q9NZJ9;Q92624;O14715;P43487;O75901;Q9H6Z4;P49792}  
Pathogen[ P14075] interacts with 6 human

16645 partners:{Q9H6Z4;P43487;P49792;Q9UKX7;O75901;Q92624}  
Pathogen[ P0C206] interacts with 7 human

16646 partners:{Q92624;P49792;Q9UKX7;P43487;Q9H6Z4;O75901;O14715}  
Pathogen[ P03363] interacts with 7 human

16647 partners:{Q9UKX7;O75901;P43487;P49792;Q92624;Q9H6Z4;Q99666}  
[Cluster 1514]GO:0035088+P biological\_process [name] establishment or maintenance of apical/basal cell polarity [def] "Any cellular process that results in the specification, formation or maintenance polarization of a cell's architecture along its apical/basal axis so that the apical and basal regions of the cell have different membrane, extracellular matrix and sub-membrane cellular components." [GOC

16648 Pathogen[ Q2Q067] interacts with 3 human partners:{Q99502;A6NGQ2;P60953}  
16649 Pathogen[ P0C214] interacts with 2 human partners:{P60953;Q99502}  
16650 Pathogen[ P03346] interacts with 3 human partners:{P60953;Q99502;A6NGQ2}  
16651 Pathogen[ Q85601] interacts with 2 human partners:{Q99502;P60953}  
16652 Pathogen[ P14079] interacts with 2 human partners:{Q99502;A6NGQ2}  
16653 Pathogen[ P03383] interacts with 2 human partners:{P60953;A6NGQ2}  
16654 Pathogen[ P03410] interacts with 3 human partners:{A6NGQ2;Q99502;P60953}  
16655 Pathogen[ P14075] interacts with 3 human partners:{P60953;A6NGQ2;Q99502}  
16656 Pathogen[ P0C206] interacts with 3 human partners:{A6NGQ2;P60953;Q99502}  
16657 Pathogen[ P03363] interacts with 2 human partners:{A6NGQ2;P60953}

16658 [Cluster 1515]GO:0072383+P biological\_process [name] plus-end-directed vesicle transport along microtubule [def] "The directed movement of a vesicle towards the plus end of a microtubule, mediated by motor proteins. This process begins with the attachment of a vesicle to a microtubule, and ends when the vesicle reaches its final destination." [GOC

16659 Pathogen[ Q2Q067] interacts with 2 human partners:{Q9H1H9;Q92845}  
16660 Pathogen[ P0C214] interacts with 1 human partners:{Q92845}  
16661 Pathogen[ P03346] interacts with 2 human partners:{Q9H1H9;Q92845}  
16662 Pathogen[ Q85601] interacts with 2 human partners:{Q9H1H9;Q92845}  
16663 Pathogen[ P14079] interacts with 3 human partners:{O15066;Q9H1H9;Q92845}  
16664 Pathogen[ P03383] interacts with 2 human partners:{Q9H1H9;Q92845}  
16665 Pathogen[ P03410] interacts with 2 human partners:{Q9H1H9;Q92845}  
16666 Pathogen[ P14075] interacts with 2 human partners:{Q9H1H9;Q92845}  
16667 Pathogen[ P0C206] interacts with 2 human partners:{Q92845;Q9H1H9}  
16668 Pathogen[ P03363] interacts with 3 human partners:{Q92845;O15066;Q9H1H9}

16669 [Cluster 1516]GO:0010564+P biological\_process [name] regulation of cell cycle process [def] "Any process that modulates a cellular process that is involved in the progression of biochemical and morphological phases and events that occur in a cell during successive cell replication or nuclear replication events." [GOC

16670 Pathogen[ Q2Q067] interacts with 3 human partners:{Q9NQG5;Q9NUQ3;Q66K89}  
16671 Pathogen[ P0C214] interacts with 3 human partners:{Q9NUQ3;Q9NQG5;Q66K89}  
16672 Pathogen[ P03346] interacts with 3 human partners:{Q9NQG5;Q66K89;Q9NUQ3}  
16673 Pathogen[ Q85601] interacts with 3 human partners:{Q9NQG5;Q66K89;Q9NUQ3}  
16674 Pathogen[ P14079] interacts with 3 human partners:{Q9NUQ3;Q66K89;Q9NQG5}  
16675 Pathogen[ P03383] interacts with 3 human partners:{Q9NUQ3;Q66K89;Q9NQG5}  
16676 Pathogen[ P03410] interacts with 3 human partners:{Q9NQG5;Q66K89;Q9NUQ3}  
16677 Pathogen[ P14075] interacts with 3 human partners:{Q9NQG5;Q9NUQ3;Q66K89}  
16678 Pathogen[ P0C206] interacts with 3 human partners:{Q9NUQ3;Q9NQG5;Q66K89}  
16679 Pathogen[ P03363] interacts with 3 human partners:{Q66K89;Q9NQG5;Q9NUQ3}

16680 [Cluster 1517]GO:0044324+P biological\_process [name] regulation of transcription involved in anterior/posterior axis specification [def] "Any process that modulates the frequency, rate or extent of transcription that contributes to the specification of the anterior/posterior axis." [GOC

16681 Pathogen[ Q2Q067] interacts with 1 human partners:{P35638}  
16682 Pathogen[ P0C214] interacts with 1 human partners:{P35638}  
16683 Pathogen[ P03346] interacts with 1 human partners:{P35638}  
16684 Pathogen[ Q85601] interacts with 1 human partners:{P35638}  
16685 Pathogen[ P14079] interacts with 1 human partners:{P35638}  
16686 Pathogen[ P03383] interacts with 1 human partners:{P35638}  
16687 Pathogen[ P03410] interacts with 1 human partners:{P35638}  
16688 Pathogen[ P14075] interacts with 1 human partners:{P35638}  
16689 Pathogen[ P0C206] interacts with 1 human partners:{P35638}

16690 Pathogen[ P03363] interacts with 1 human partners:{P35638}

16691 [Cluster 1518]GO:0001678+P biological\_process [name] cellular glucose homeostasis  
[def] "A cellular homeostatic process involved in the maintenance of an internal steady state of glucose within a cell or between a cell and its external environment." [GOC

16692 Pathogen[ Q2Q067] interacts with 1 human partners:{Q14397}

16693 Pathogen[ P0C214] interacts with 1 human partners:{Q14397}

16694 Pathogen[ P03346] interacts with 2 human partners:{Q12778;Q14397}

16695 Pathogen[ Q85601] interacts with 1 human partners:{Q14397}

16696 Pathogen[ P14079] interacts with 1 human partners:{Q14397}

16697 Pathogen[ P03383] interacts with 1 human partners:{Q14397}

16698 Pathogen[ P03410] interacts with 1 human partners:{Q14397}

16699 Pathogen[ P14075] interacts with 1 human partners:{Q14397}

16700 Pathogen[ P0C206] interacts with 1 human partners:{Q14397}

16701 Pathogen[ P03363] interacts with 1 human partners:{Q14397}

16702 [Cluster 1519]GO:0043549+P biological\_process [name] regulation of kinase activity  
[def] "Any process that modulates the frequency, rate or extent of kinase activity, the catalysis of the transfer of a phosphate group, usually from ATP, to a substrate molecule." [GOC

16703 Pathogen[ Q2Q067] interacts with 1 human partners:{Q86WI3}

16704 Pathogen[ P0C214] interacts with 1 human partners:{Q86WI3}

16705 Pathogen[ P03346] interacts with 1 human partners:{Q86WI3}

16706 Pathogen[ Q85601] interacts with 1 human partners:{Q86WI3}

16707 Pathogen[ P14079] interacts with 1 human partners:{Q86WI3}

16708 Pathogen[ P03383] interacts with 1 human partners:{Q86WI3}

16709 Pathogen[ P03410] interacts with 1 human partners:{Q86WI3}

16710 Pathogen[ P14075] interacts with 1 human partners:{Q86WI3}

16711 Pathogen[ P0C206] interacts with 1 human partners:{Q86WI3}

16712 Pathogen[ P03363] interacts with 1 human partners:{Q86WI3}

16713 [Cluster 1520]GO:0045454+P biological\_process [name] cell redox homeostasis [def]  
"Any process that maintains the redox environment of a cell or compartment within a cell." [GOC

16714 Pathogen[ Q2Q067] interacts with 10 human  
partners:{P35754;P35638;P27695;O14530;P10599;Q96KS0;Q9NNW7;O95831;Q9BQE4;Q9H299}

16715 Pathogen[ P0C214] interacts with 15 human  
partners:{P35754;P27695;Q96KS0;Q9NNW7;O14530;Q9H299;Q16881;P59797;Q9BRT3;P09622;P10599;Q9BQE4;P35638;P13667;Q96NN9}

16716 Pathogen[ P03346] interacts with 16 human  
partners:{P35638;Q9NS18;O43396;P13667;O14530;Q9BRT3;P63302;Q9H299;O76003;O00522;O95831;Q96KS0;P35754;P10599;P27695;Q9NNW7}

16717 Pathogen[ Q85601] interacts with 11 human  
partners:{O14530;O95831;P10599;O76003;Q96KS0;P35754;P59797;Q9H299;P27695;Q9BQE4;P35638}

16718 Pathogen[ P14079] interacts with 17 human  
partners:{Q9BQE4;Q9H299;O95831;P35754;Q9NNW7;P63302;Q86XW9;Q8IZQ5;O14530;Q9BRT3;P59797;P27695;P35638;O76003;P10599;Q96KS0;O00522}

16719 Pathogen[ P03383] interacts with 8 human  
partners:{O95831;P35638;P10599;Q96KS0;O14530;Q9BQE4;P27695;P59797}

16720 Pathogen[ P03410] interacts with 18 human  
partners:{Q9BRT3;P63302;P10599;P35638;P59797;P35754;O76003;Q96KS0;P13667;O14530;Q9BQE4;Q9H299;O95831;O00522;P27695;Q8IZQ5;Q86XW9;Q9NNW7}

16721 Pathogen[ P14075] interacts with 9 human  
partners:{Q9BQE4;O14530;Q96KS0;P27695;P35638;P63302;P59797;O95831;P10599}

16722 Pathogen[ P0C206] interacts with 18 human  
partners:{P27695;Q9H299;Q9NS18;O14530;Q96KS0;P35754;Q9NNW7;Q86XW9;Q9BQE4;O95831;O76003;P63302;P59797;P10599;P13667;P35638;Q9BRT3;O00522}

16723 Pathogen[ P03363] interacts with 12 human  
partners:{Q9H299;P59797;Q9NNW7;O76003;P35754;O00522;P35638;Q86XW9;O43396;O14530;P63302;O95831}

16724 [Cluster 1521]GO:0009968+P biological\_process [name] negative regulation of signal  
transduction [def] "Any process that stops, prevents, or reduces the frequency, rate or extent of signal transduction." [GOC

16725 Pathogen[ Q2Q067] interacts with 5 human  
partners:{Q8N9R8;P41220;O14508;O14512;Q6MZT1}

16726 Pathogen[ P0C214] interacts with 7 human  
partners:{P41220;Q8N9R8;Q6MZT1;O14508;Q96D03;O14512;O15524}

16727 Pathogen[ P03346] interacts with 9 human  
partners:{Q9NWT1;O15524;Q96D03;O75159;Q6MZT1;O14508;P41220;O14512;Q8N9R8}

16728 Pathogen[ Q85601] interacts with 6 human  
partners:{Q8N9R8;P41220;Q96D03;O14508;Q6MZT1;O14512}

16729 Pathogen[ P14079] interacts with 7 human  
partners:{Q96D03;P41220;Q9NX09;Q6MZT1;O14508;O14512;Q8N9R8}

16730 Pathogen[ P03383] interacts with 4 human partners:{P41220;Q6MZT1;O14512;Q8N9R8}

16731 Pathogen[ P03410] interacts with 7 human  
partners:{Q6MZT1;P41220;Q96D03;O14508;Q8N9R8;O14512;Q9NX09}

16732 Pathogen[ P14075] interacts with 4 human partners:{Q8N9R8;P41220;Q6MZT1;O14512}

16733 Pathogen[ P0C206] interacts with 7 human

16734 partners:{Q6MZT1;Q96D03;O15524;O14508;Q8N9R8;P41220;O14512}  
Pathogen[ P03363] interacts with 9 human  
partners:{O75159;O15524;Q7Z569;Q96D03;P41220;Q8N9R8;O14508;O14512;Q6MZT1}

16735 [Cluster 1522]GO:0048477+P biological\_process [name] oogenesis [def] "The complete process of formation and maturation of an ovum or female gamete from a primordial female germ cell. Examples of this process are found in *Mus musculus* and *Drosophila melanogaster*." [GOC  
16736 Pathogen[ Q2Q067] interacts with 3 human partners:{O14686;Q9Y2T7;Q8IZT6}  
16737 Pathogen[ P0C214] interacts with 3 human partners:{Q9Y2T7;P40692;Q8IZT6}  
16738 Pathogen[ P03346] interacts with 7 human  
partners:{Q6QHK4;O60393;P07992;Q5JUK2;O14686;Q9Y2T7;Q8IZT6}  
16739 Pathogen[ Q85601] interacts with 4 human partners:{Q9Y2T7;O14686;Q8IZT6;P40692}  
16740 Pathogen[ P14079] interacts with 5 human  
partners:{P40692;Q9Y2T7;Q86X24;Q8IZT6;P07992}  
16741 Pathogen[ P03383] interacts with 1 human partners:{Q9Y2T7}  
16742 Pathogen[ P03410] interacts with 4 human partners:{P40692;P07992;Q8IZT6;Q9Y2T7}  
16743 Pathogen[ P14075] interacts with 1 human partners:{Q9Y2T7}  
16744 Pathogen[ P0C206] interacts with 6 human  
partners:{O60393;P40692;Q8IZT6;O14686;P07992;Q9Y2T7}  
16745 Pathogen[ P03363] interacts with 6 human  
partners:{Q5JUK2;O60393;Q9Y2T7;Q8IZT6;O14686;Q6QHK4}

16746 [Cluster 1523]GO:0090303+P biological\_process [name] positive regulation of wound healing [def] "Any process that increases the rate, frequency, or extent of the series of events that restore integrity to a damaged tissue, following an injury." [GOC  
16747 Pathogen[ Q2Q067] interacts with 2 human partners:{Q9Y6D6;Q14678}  
16748 Pathogen[ P0C214] interacts with 2 human partners:{Q14678;Q9Y6D6}  
16749 Pathogen[ P03346] interacts with 2 human partners:{Q14678;Q9Y6D6}  
16750 Pathogen[ Q85601] interacts with 2 human partners:{Q14678;Q9Y6D6}  
16751 Pathogen[ P14079] interacts with 2 human partners:{Q9Y6D6;Q14678}  
16752 Pathogen[ P03383] interacts with 2 human partners:{Q14678;Q9Y6D6}  
16753 Pathogen[ P03410] interacts with 2 human partners:{Q9Y6D6;Q14678}  
16754 Pathogen[ P14075] interacts with 2 human partners:{Q9Y6D6;Q14678}  
16755 Pathogen[ P0C206] interacts with 2 human partners:{Q9Y6D6;Q14678}  
16756 Pathogen[ P03363] interacts with 2 human partners:{Q9Y6D6;Q14678}

16757 [Cluster 1524]GO:0045931+P biological\_process [name] positive regulation of mitotic cell cycle [def] "Any process that activates or increases the rate or extent of progression through the mitotic cell cycle." [GOC  
16758 Pathogen[ Q2Q067] interacts with 7 human  
partners:{P54274;P14635;Q13541;P30305;P06730;Q00987;O15392}  
16759 Pathogen[ P0C214] interacts with 7 human  
partners:{Q00987;P14635;P30305;O15392;P06730;P54274;Q13541}  
16760 Pathogen[ P03346] interacts with 10 human  
partners:{P06730;O15392;Q13541;P54274;Q00987;P30305;P17542;P14635;P51587;O75604}  
16761 Pathogen[ Q85601] interacts with 8 human  
partners:{P06730;O15392;Q13541;P30305;P14635;Q00987;P51587;P54274}  
16762 Pathogen[ P14079] interacts with 8 human  
partners:{P54274;P06730;O15392;P51587;Q13541;Q00987;P14635;P30305}  
16763 Pathogen[ P03383] interacts with 4 human partners:{P14635;P06730;Q13541;P54274}  
16764 Pathogen[ P03410] interacts with 8 human  
partners:{O15392;P54274;P06730;Q13541;P14635;P51587;Q00987;P30305}  
16765 Pathogen[ P14075] interacts with 4 human partners:{P14635;P06730;P54274;Q13541}  
16766 Pathogen[ P0C206] interacts with 9 human  
partners:{Q13541;P51587;O75604;P30305;P06730;P54274;O15392;P14635;Q00987}  
16767 Pathogen[ P03363] interacts with 4 human partners:{O75604;P54274;Q13541;P06730}

16768 [Cluster 1525]GO:0043393+P biological\_process [name] regulation of protein binding [def] "Any process that modulates the frequency, rate or extent of protein binding." [GOC  
16769 Pathogen[ Q2Q067] interacts with 6 human  
partners:{P56524;Q9NVM4;Q9NR22;Q9UQL6;Q9H0C5;Q6STE5}  
16770 Pathogen[ P0C214] interacts with 6 human  
partners:{Q9NVM4;P56524;Q6STE5;Q9UQL6;Q9NR22;Q9H0C5}  
16771 Pathogen[ P03346] interacts with 6 human  
partners:{P56524;Q6STE5;Q9NR22;Q9NVM4;Q9UQL6;Q9H0C5}  
16772 Pathogen[ Q85601] interacts with 6 human  
partners:{Q9NR22;Q9UQL6;Q6STE5;Q9NVM4;Q9H0C5;P56524}  
16773 Pathogen[ P14079] interacts with 6 human  
partners:{Q9UQL6;Q9NR22;Q6STE5;Q9NVM4;P56524;Q9H0C5}  
16774 Pathogen[ P03383] interacts with 5 human  
partners:{Q9UQL6;Q9H0C5;Q6STE5;Q9NR22;P56524}  
16775 Pathogen[ P03410] interacts with 6 human  
partners:{Q9NVM4;Q9NR22;Q9UQL6;P56524;Q9H0C5;Q6STE5}  
16776 Pathogen[ P14075] interacts with 5 human  
partners:{Q9NR22;P56524;Q9H0C5;Q9UQL6;Q6STE5}  
16777 Pathogen[ P0C206] interacts with 6 human  
partners:{Q6STE5;Q9NVM4;Q9NR22;Q9H0C5;P56524;Q9UQL6}  
16778 Pathogen[ P03363] interacts with 5 human



partners:{Q6STE5;Q9H0C5;Q9UQL6;Q9NVM4;Q9NR22}

16779 [Cluster 1526]GO:0051443+P biological\_process [name] positive regulation of ubiquitin-protein ligase activity [def] "Any process that activates, maintains or increases the rate of ubiquitin ligase activity, the catalysis of the reaction

16780 Pathogen[ Q2Q067] interacts with 7 human partners:{Q9NS56;Q9UBF1;P61088;P35226;Q96RU7;Q13526;P43356}

16781 Pathogen[ P0C214] interacts with 7 human partners:{P35226;Q9NS56;Q13526;Q9UBF1;P43356;Q96RU7;P61088}

16782 Pathogen[ P03346] interacts with 7 human partners:{P35226;Q9UBF1;Q13526;P61088;Q9NS56;P43356;Q96RU7}

16783 Pathogen[ Q85601] interacts with 7 human partners:{Q9NS56;Q13526;Q9UBF1;Q96RU7;P35226;P43356;P61088}

16784 Pathogen[ P14079] interacts with 6 human partners:{P43356;Q9UBF1;Q9NS56;Q96RU7;P35226;Q13526}

16785 Pathogen[ P03383] interacts with 6 human partners:{P61088;Q9UBF1;Q96RU7;P43356;Q13526;P35226}

16786 Pathogen[ P03410] interacts with 6 human partners:{Q13526;Q9UBF1;P61088;Q96RU7;P35226;P43356}

16787 Pathogen[ P14075] interacts with 6 human partners:{Q9UBF1;P61088;Q13526;P43356;Q96RU7;P35226}

16788 Pathogen[ P0C206] interacts with 7 human partners:{Q9NS56;Q13526;P43356;P35226;Q96RU7;P61088;Q9UBF1}

16789 Pathogen[ P03363] interacts with 5 human partners:{Q9UBF1;Q13526;P61088;P35226;P43356}

16790 [Cluster 1527]GO:0032287+P biological\_process [name] peripheral nervous system myelin maintenance [def] "The process in which the structure and material content of mature peripheral nervous system myelin is kept in a functional state." [GOC

16791 Pathogen[ Q2Q067] interacts with 2 human partners:{P31749;Q92597}

16792 Pathogen[ P0C214] interacts with 2 human partners:{Q92597;P31749}

16793 Pathogen[ P03346] interacts with 3 human partners:{Q8N3R9;Q92597;P31749}

16794 Pathogen[ Q85601] interacts with 2 human partners:{P31749;Q92597}

16795 Pathogen[ P14079] interacts with 3 human partners:{P31751;Q92597;Q8N3R9}

16796 Pathogen[ P03383] interacts with 2 human partners:{P31749;Q92597}

16797 Pathogen[ P03410] interacts with 3 human partners:{P31749;Q92597;Q8N3R9}

16798 Pathogen[ P14075] interacts with 2 human partners:{P31749;Q92597}

16799 Pathogen[ P0C206] interacts with 3 human partners:{Q92597;P31749;Q8N3R9}

16800 Pathogen[ P03363] interacts with 3 human partners:{Q92597;P31749;Q8N3R9}

16801 [Cluster 1528]GO:0043111+P biological\_process [name] replication fork arrest [def] "Any process that stops, prevents, or reduces the frequency, rate or extent of DNA replication by impeding the progress of the DNA replication fork." [GOC

16802 Pathogen[ Q2Q067] interacts with 1 human partners:{P50750}

16803 Pathogen[ P0C214] interacts with 1 human partners:{P50750}

16804 Pathogen[ P03346] interacts with 1 human partners:{P50750}

16805 Pathogen[ Q85601] interacts with 1 human partners:{P50750}

16806 Pathogen[ P14079] interacts with 1 human partners:{P50750}

16807 Pathogen[ P03383] interacts with 1 human partners:{P50750}

16808 Pathogen[ P03410] interacts with 1 human partners:{P50750}

16809 Pathogen[ P14075] interacts with 1 human partners:{P50750}

16810 Pathogen[ P0C206] interacts with 1 human partners:{P50750}

16811 Pathogen[ P03363] interacts with 1 human partners:{P50750}

16812 [Cluster 1529]GO:0006937+P biological\_process [name] regulation of muscle contraction [def] "Any process that modulates the frequency, rate or extent of muscle contraction." [GOC

16813 Pathogen[ Q2Q067] interacts with 1 human partners:{P08133}

16814 Pathogen[ P0C214] interacts with 2 human partners:{P08133;P19429}

16815 Pathogen[ P03346] interacts with 2 human partners:{P08133;P63316}

16816 Pathogen[ Q85601] interacts with 1 human partners:{P08133}

16817 Pathogen[ P14079] interacts with 2 human partners:{P19429;P19237}

16818 Pathogen[ P03383] interacts with 1 human partners:{P08133}

16819 Pathogen[ P03410] interacts with 3 human partners:{P19429;P08133;P63316}

16820 Pathogen[ P14075] interacts with 1 human partners:{P08133}

16821 Pathogen[ P0C206] interacts with 2 human partners:{P19429;P08133}

16822 Pathogen[ P03363] interacts with 2 human partners:{P08133;P19429}

16823 [Cluster 1530]GO:0065004+P biological\_process [name] protein-DNA complex assembly [def] "The aggregation, arrangement and bonding together of proteins and DNA molecules to form a protein-DNA complex." [GOC

16824 Pathogen[ Q2Q067] interacts with 2 human partners:{P15884;O15370}

16825 Pathogen[ P0C214] interacts with 2 human partners:{P15884;O15370}

16826 Pathogen[ P03346] interacts with 2 human partners:{O15370;P15884}

16827 Pathogen[ Q85601] interacts with 2 human partners:{O15370;P15884}

16828 Pathogen[ P14079] interacts with 2 human partners:{O15370;P15884}

16829 Pathogen[ P03383] interacts with 1 human partners:{O15370}

16830 Pathogen[ P03410] interacts with 2 human partners:{P15884;O15370}

16831 Pathogen[ P14075] interacts with 2 human partners:{O15370;P15884}

16832 Pathogen[ P0C206] interacts with 2 human partners:{P15884;O15370}

16833 Pathogen[ P03363] interacts with 2 human partners:{O15370;P15884}

16834 [Cluster 1531]GO:0035412+P biological\_process [name] regulation of catenin import into nucleus [def] "Any process that modulates the rate, frequency or extent of the directed movement of a catenin protein from the cytoplasm into the nucleus." [GOC

16835 Pathogen[ Q2Q067] interacts with 1 human partners:{Q9NYF0}

16836 Pathogen[ P0C214] interacts with 1 human partners:{Q9NYF0}

16837 Pathogen[ P03346] interacts with 1 human partners:{Q9NYF0}

16838 Pathogen[ Q85601] interacts with 1 human partners:{Q9NYF0}

16839 Pathogen[ P14079] interacts with 1 human partners:{Q9NYF0}

16840 Pathogen[ P03383] interacts with 1 human partners:{Q9NYF0}

16841 Pathogen[ P03410] interacts with 1 human partners:{Q9NYF0}

16842 Pathogen[ P14075] interacts with 1 human partners:{Q9NYF0}

16843 Pathogen[ P0C206] interacts with 1 human partners:{Q9NYF0}

16844 Pathogen[ P03363] interacts with 1 human partners:{Q9NYF0}

16845 [Cluster 1532]GO:0071364+P biological\_process [name] cellular response to epidermal growth factor stimulus [def] "Any process that results in a change in state or activity of a cell (in terms of movement, secretion, enzyme production, gene expression, etc.) as a result of an epidermal growth factor stimulus." [GOC

16846 Pathogen[ Q2Q067] interacts with 2 human partners:{P31749;O95429}

16847 Pathogen[ P0C214] interacts with 2 human partners:{O95429;P31749}

16848 Pathogen[ P03346] interacts with 2 human partners:{P31749;O95429}

16849 Pathogen[ Q85601] interacts with 2 human partners:{P31749;O95429}

16850 Pathogen[ P14079] interacts with 2 human partners:{P09327;O95429}

16851 Pathogen[ P03383] interacts with 2 human partners:{P31749;O95429}

16852 Pathogen[ P03410] interacts with 2 human partners:{P31749;O95429}

16853 Pathogen[ P14075] interacts with 2 human partners:{P31749;O95429}

16854 Pathogen[ P0C206] interacts with 2 human partners:{P31749;O95429}

16855 Pathogen[ P03363] interacts with 2 human partners:{P31749;O95429}

16856 [Cluster 1533]GO:0014031+P biological\_process [name] mesenchymal cell development [def] "The process aimed at the progression of a mesenchymal cell over time, from initial commitment of the cell to its specific fate, to the fully functional differentiated cell." [GOC

16857 Pathogen[ Q2Q067] interacts with 2 human partners:{Q9NQ87;Q15699}

16858 Pathogen[ P0C214] interacts with 2 human partners:{Q9NQ87;Q15699}

16859 Pathogen[ P03346] interacts with 2 human partners:{Q15699;Q9NQ87}

16860 Pathogen[ Q85601] interacts with 2 human partners:{Q15699;Q9NQ87}

16861 Pathogen[ P14079] interacts with 2 human partners:{Q15699;Q9NQ87}

16862 Pathogen[ P03383] interacts with 2 human partners:{Q9NQ87;Q15699}

16863 Pathogen[ P03410] interacts with 2 human partners:{Q9NQ87;Q15699}

16864 Pathogen[ P14075] interacts with 2 human partners:{Q9NQ87;Q15699}

16865 Pathogen[ P0C206] interacts with 2 human partners:{Q9NQ87;Q15699}

16866 Pathogen[ P03363] interacts with 2 human partners:{Q15699;Q9NQ87}

16867 [Cluster 1534]GO:0000216+P biological\_process [name] M/G1 transition of mitotic cell cycle [def] "Progression from M phase to G1 phase of the mitotic cell cycle." [GOC

16868 Pathogen[ Q2Q067] interacts with 59 human partners:{Q99460;O75832;P48556;P40306;P55036;O00231;O00233;P27694;P51665;Q99741;P28072;Q9H211;A5LHX3;P35244;Q9UBU7;Q13200;P25787;Q06323;Q13415;Q13156;P28065;O14818;Q14181;Q14997;P60900;Q9UL46;P61289;Q9UBD5;P15927;P28062;O75496;P56282;Q9UNM6;P25788;O75419;Q92530;P25786;Q16401;O00232;Q7L590;O43913;P28074;P25789;P0CG47;Q9Y5N6;Q13416;P20618;P0CG48;P25205;P28070;P28066;Q99436;P24941;Q8TAA3;P62987;O43242;P49721;P49720;P62979}

16869 Pathogen[ P0C214] interacts with 62 human partners:{Q14997;P51665;P25789;P55036;Q13156;P28062;A5LHX3;P28065;O43913;Q7L590;O14818;O75496;O43242;P48556;P40306;Q9UBU7;Q13200;O00232;Q9Y5N6;P25205;Q99460;P28066;O75832;Q14566;P49720;P28074;P0CG48;Q9UL46;P15927;P25788;P24941;Q9UNM6;O00231;P35244;Q06323;P25786;Q9H211;P28072;Q8TAA3;P62987;O75419;Q99436;P0CG47;P25787;Q13416;P27694;P35998;P60900;O00233;P62979;P56282;Q92530;Q15008;Q9UBD5;P28070;P20618;P49721;Q99741;Q16401;P17980;Q13415;Q14181}

16870 Pathogen[ P03346] interacts with 63 human partners:{P25787;P28070;P25789;P55036;Q99460;Q9UL46;P62987;P27694;P28072;P25788;Q9Y5N6;P28074;P49721;Q9UBD5;P35244;O14818;Q99436;P24941;Q13156;P56282;P0CG48;Q16401;A5LHX3;Q9UBU7;P28062;P20618;O00232;O75832;O00233;Q14566;P25205;P49720;P28065;P60900;P33992;P25786;O00231;Q13415;P15927;P61289;Q14181;P62979;P28066;Q9UNM6;P33991;Q8TAA3;P0CG47;Q13416;Q14997;Q13200;P48556;P51665;Q06323;O75419;Q99741;Q7L590;Q92530;Q9H211;O43929;O43242;O43913;P40306;O75496}

16871 Pathogen[ Q85601] interacts with 57 human partners:{P28066;Q9UNM6;P60900;O75496;O43913;P55036;Q7L590;P25787;P61289;P56282;P25788;P35244;O75832;Q13415;Q9Y5N6;Q9UBU7;Q9UBD5;P0CG48;P27694;P25789;O00233;Q14566;P20618;P25205;P40306;P15927;P49720;P28062;P49721;P25786;P28072;Q13200;P28065;Q14181;P62979;Q99436;P28070;Q8TAA3;Q9UL46;Q99460;O00231;P0CG47;Q13416;Q13156;P48556;P28074;Q92530;P62987;P33992;A5LHX3;Q06323;O75419;Q99741;Q9H211;O14818;P24941;Q16401}

16872 Pathogen[ P14079] interacts with 65 human partners:{P28065;Q99436;P62333;Q13416;P48556;Q7L590;P0CG48;O75419;Q14566;Q13415;Q9Y5N6;P40306;P55036;P28074;O00232;O43913;Q9H211;P49720;O00487;P25787;O75832;A5LHX3;P62979;O00233;P35998;Q13156;P61289;P62987;P51665;P20618;P20618;Q99741;Q14997;P28062;P60900;Q9UBD5;Q9UNM6;P56282;Q99460;O14818;P49721;Q92530;P49642;Q14181;O43929;P33992;P15927;Q06323;P27694;P62191;Q15008;P43686;O43242;P25788;O00231;P28066;Q9UL46;P35244;P0CG

16873 Pathogen[ P03383] interacts with 53 human partners: {Q9UBD5;P55036;P62987;P25789;P60900;Q7L590;Q14181;P27694;P40306;O00233;P25205;P49721;Q06323;Q14997;P20618;O43913;P56282;O75832;P15927;Q9Y5N6;P24941;Q9UL46;Q9UNM6;P35244;P25786;Q99460;P28072;Q13200;P28065;P28066;O75419;Q16401;P62979;O00231;P0CG47;Q13416;P0CG48;P28074;Q92530;P49720;Q8TAA3;P61289;Q13156;P28062;P48556;O14818;Q99436;Q9H211;P28070;O75496;Q99741;P25787;P25788}

16874 Pathogen[ P03410] interacts with 65 human partners: {P28070;P35244;P25205;P55036;O43929;P0CG48;Q14181;P25786;Q13416;Q15008;Q16401;P60900;O75419;Q14997;P35998;Q99460;O00233;O00232;Q8TAA3;P48556;P49721;Q9H211;P56282;A5LHX3;P62979;Q99436;P33992;P40306;Q06323;Q13200;P25787;P24941;Q9UBU7;P28062;P51665;Q13156;O14818;Q7L590;O00231;Q9UNM6;P25789;P49720;P62987;O75496;P27694;P28072;P15927;Q9Y5N6;P25788;O43913;Q14566;P28066;Q9UBD5;P28065;O43242;P0CG47;P17980;O75832;P20618;P49642;Q9UL46;P28074;P61289;Q13415;Q99741}

16875 Pathogen[ P14075] interacts with 52 human partners: {P55036;P25788;Q9H211;P28066;P24941;Q06323;O75832;Q8TAA3;P60900;O00233;Q9UL46;Q9Y5N6;P49720;Q9UBD5;O75419;Q13200;P48556;Q16401;P15927;P28070;P49721;O00231;Q92530;Q13156;P35244;P0CG48;P62979;P28062;P28074;P25205;P28065;P25786;O14818;P62987;P28072;O43913;P27694;Q14997;P0CG47;P25787;Q13416;Q99741;P20618;P56282;Q9UNM6;O75496;Q14181;P61289;Q7L590;P40306;Q99436;P25789}

16876 Pathogen[ P0C206] interacts with 61 human partners: {P61289;Q99436;P28062;Q9UNM6;P0CG48;O75832;P40306;O75496;P28065;Q14997;P55036;P25786;P25788;O75419;Q13156;P25205;P25787;O43913;Q06323;P49720;O00232;P60900;Q9UBD5;Q13416;P49642;O43242;Q99741;A5LHX3;P25789;P20618;Q14181;Q9UBU7;Q13200;Q8TAA3;P28070;Q99460;Q9H211;P62979;Q9Y5N6;P28066;O14818;P0CG47;P28072;P56282;Q13415;P28074;P27694;Q92530;P15927;P49721;P62987;P35244;Q9UL46;P24941;Q14566;O00233;P48556;Q16401;P3392;O00231;Q7L590}

16877 Pathogen[ P03363] interacts with 21 human partners: {P27694;Q92530;P25205;P61289;P24941;Q14181;P35244;P15927;P33992;Q13416;Q13415;Q13156;Q99741;Q9H211;P62987;O75496;Q7L590;Q9UBD5;Q9Y5N6;O75419;O43913}

16878 [Cluster 1535]GO:0033137+P biological\_process [name]negative regulation of peptidyl-serine phosphorylation [def] "Any process that stops, prevents, or reduces the frequency, rate or extent of the phosphorylation of peptidyl-serine." [GOC

16879 Pathogen[ Q2Q067] interacts with 3 human partners: {O15105;Q9NP71;P49593}

16880 Pathogen[ P0C214] interacts with 3 human partners: {O15105;Q9NP71;P49593}

16881 Pathogen[ P03346] interacts with 3 human partners: {O15105;P49593;Q9NP71}

16882 Pathogen[ Q85601] interacts with 3 human partners: {P49593;Q9NP71;O15105}

16883 Pathogen[ P14079] interacts with 4 human partners: {P49593;Q9NX09;O15105;Q9NP71}

16884 Pathogen[ P03383] interacts with 2 human partners: {Q9NP71;O15105}

16885 Pathogen[ P03410] interacts with 4 human partners: {Q9NP71;O15105;P49593;Q9NX09}

16886 Pathogen[ P14075] interacts with 2 human partners: {Q9NP71;O15105}

16887 Pathogen[ P0C206] interacts with 3 human partners: {Q9NP71;P49593;O15105}

16888 Pathogen[ P03363] interacts with 2 human partners: {O15105;Q9NP71}

16889 [Cluster 1536]GO:0007183+P biological\_process [name] SMAD protein complex assembly [def] "The aggregation, arrangement and bonding together of a set of components to form a protein complex that contains SMAD proteins." [GOC

16890 Pathogen[ Q2Q067] interacts with 5 human partners: {Q13485;P84022;Q15796;Q8N6I1;Q15797}

16891 Pathogen[ P0C214] interacts with 5 human partners: {P84022;Q8N6I1;Q13485;Q15796;Q15797}

16892 Pathogen[ P03346] interacts with 6 human partners: {O95405;Q15797;Q15796;P84022;Q8N6I1;Q13485}

16893 Pathogen[ Q85601] interacts with 5 human partners: {Q15797;Q8N6I1;P84022;Q13485;Q15796}

16894 Pathogen[ P14079] interacts with 3 human partners: {O95405;Q15797;Q8N6I1}

16895 Pathogen[ P03383] interacts with 5 human partners: {Q13485;Q8N6I1;Q15797;P84022;Q15796}

16896 Pathogen[ P03410] interacts with 6 human partners: {P84022;O95405;Q8N6I1;Q15797;Q13485;Q15796}

16897 Pathogen[ P14075] interacts with 4 human partners: {Q15796;Q13485;Q8N6I1;P84022}

16898 Pathogen[ P0C206] interacts with 6 human partners: {P84022;Q8N6I1;Q15796;O95405;Q13485;Q15797}

16899 Pathogen[ P03363] interacts with 6 human partners: {Q15797;O95405;Q15796;P84022;Q13485;Q8N6I1}

16900 [Cluster 1537]GO:0008334+P biological\_process [name] histone mRNA metabolic process [def] "The chemical reactions and pathways involving an mRNA encoding a histone." [GOC

16901 Pathogen[ Q2Q067] interacts with 11 human partners: {P83369;P62318;Q8WTR7;P62304;P14678;Q09161;P52298;Q14493;P62306;P62308;Q969L4}

16902 Pathogen[ P0C214] interacts with 11 human partners: {P83369;Q09161;P14678;P62306;Q969L4;P62308;P52298;Q14493;P62318;P62304;Q8WTR7}

16903 Pathogen[ P03346] interacts with 11 human partners: {Q09161;P62304;Q8WTR7;P52298;Q14493;P62318;P83369;P62306;P14678;Q969L4;P62308}

16904 Pathogen[ Q85601] interacts with 11 human

partners:{P62304;Q969L4;Q09161;P14678;P62306;P62318;P83369;P62308;P52298;Q8WTR7;Q14493}  
 16905 Pathogen[ P14079] interacts with 11 human  
 partners:{Q8WTR7;P52298;P83369;P62306;P14678;P62308;P62304;Q969L4;Q14493;P62318;Q09161}  
 16906 Pathogen[ P03383] interacts with 11 human  
 partners:{Q969L4;P62318;P62304;Q09161;Q14493;P14678;P52298;Q8WTR7;P62308;P83369;P62306}  
 16907 Pathogen[ P03410] interacts with 11 human  
 partners:{P62304;Q8WTR7;P62306;Q14493;P62308;P14678;P52298;P83369;Q969L4;Q09161;P62318}  
 16908 Pathogen[ P14075] interacts with 11 human  
 partners:{P62304;Q09161;Q14493;P62306;P62308;Q8WTR7;P62318;P83369;P14678;Q969L4;P52298}  
 16909 Pathogen[ P0C206] interacts with 11 human  
 partners:{P14678;P52298;Q09161;P62304;Q8WTR7;P83369;P62318;P62306;P62308;Q14493;Q969L4}  
 16910 Pathogen[ P03363] interacts with 12 human  
 partners:{P62318;P62304;P62306;P83369;P52298;Q969L4;P05455;P62308;Q8WTR7;Q14493;P14678;Q09161}  
 16911 [Cluster 1538]GO:2000402+P biological\_process [name] negative regulation of lymphocyte migration [def] "Any process that stops, prevents or reduces the frequency, rate or extent of lymphocyte migration." [GOC  
 16912 Pathogen[ Q2Q067] interacts with 1 human partners:{Q8N6F7}  
 16913 Pathogen[ P0C214] interacts with 1 human partners:{Q8N6F7}  
 16914 Pathogen[ P03346] interacts with 1 human partners:{Q8N6F7}  
 16915 Pathogen[ Q85601] interacts with 1 human partners:{Q8N6F7}  
 16916 Pathogen[ P14079] interacts with 1 human partners:{Q8N6F7}  
 16917 Pathogen[ P03383] interacts with 1 human partners:{Q8N6F7}  
 16918 Pathogen[ P03410] interacts with 1 human partners:{Q8N6F7}  
 16919 Pathogen[ P14075] interacts with 1 human partners:{Q8N6F7}  
 16920 Pathogen[ P0C206] interacts with 1 human partners:{Q8N6F7}  
 16921 Pathogen[ P03363] interacts with 1 human partners:{Q8N6F7}  
 16922 [Cluster 1539]GO:0034968+P biological\_process [name] histone lysine methylation [def] "The modification of a histone by addition of a methyl group to a lysine residue." [GOC  
 16923 Pathogen[ Q2Q067] interacts with 8 human  
 partners:{O43463;Q9NR48;Q15047;O00255;Q8TEK3;Q9H5I1;O96028;Q8WTS6}  
 16924 Pathogen[ P0C214] interacts with 10 human  
 partners:{Q9H5I1;Q15047;O43463;Q9NR48;Q8WTS6;Q9NQR1;O00255;Q9NQV7;Q8TEK3;O96028}  
 16925 Pathogen[ P03346] interacts with 12 human  
 partners:{Q9NQV7;Q9NQR1;Q8TEK3;Q9BYW2;O43463;O00255;Q8WTS6;Q15047;Q13029;Q9NR48;Q9H5I1;O96028}  
 16926 Pathogen[ Q85601] interacts with 10 human  
 partners:{Q9H5I1;Q9NQV7;Q9NQR1;Q9NR48;O43463;Q8WTS6;O00255;Q8TEK3;Q15047;O96028}  
 16927 Pathogen[ P14079] interacts with 7 human  
 partners:{Q15047;Q9H5I1;Q8TEK3;Q9NQR1;Q9NQV7;O00255;Q8WTS6}  
 16928 Pathogen[ P03383] interacts with 7 human  
 partners:{Q15047;O43463;Q8WTS6;O00255;Q8TEK3;Q9H5I1;Q9NQR1}  
 16929 Pathogen[ P03410] interacts with 8 human  
 partners:{Q15047;Q8TEK3;Q8WTS6;Q9NQV7;Q9NQR1;Q9H5I1;O43463;O00255}  
 16930 Pathogen[ P14075] interacts with 7 human  
 partners:{Q15047;Q9NQR1;O00255;Q9H5I1;Q8TEK3;O43463;Q8WTS6}  
 16931 Pathogen[ P0C206] interacts with 12 human  
 partners:{O00255;Q9H7B4;O43463;Q9NQX0;Q9NQV7;Q9NR48;Q9NQR1;O96028;Q8WTS6;Q9H5I1;Q8TEK3;Q15047}  
 16932 Pathogen[ P03363] interacts with 9 human  
 partners:{Q9H5I1;Q8TEK3;O15047;Q9NR48;O96028;O43463;Q9NQR1;Q8WTS6;Q15047}  
 16933 [Cluster 1540]GO:0042730+P biological\_process [name] fibrinolysis [def] "An ongoing process that solubilizes fibrin, chiefly by the proteolytic action of plasmin, resulting in the removal of small blood clots." [GOC  
 16934 Pathogen[ Q2Q067] interacts with 2 human partners:{P04264;P08697}  
 16935 Pathogen[ P0C214] interacts with 4 human partners:{P08697;P04264;P05121;P05120}  
 16936 Pathogen[ P03346] interacts with 1 human partners:{P04264}  
 16937 Pathogen[ Q85601] interacts with 4 human partners:{P08697;P04264;P05121;P05120}  
 16938 Pathogen[ P14079] interacts with 1 human partners:{P04264}  
 16939 Pathogen[ P03383] interacts with 2 human partners:{P08697;P04264}  
 16940 Pathogen[ P03410] interacts with 3 human partners:{P05121;P04264;P08697}  
 16941 Pathogen[ P14075] interacts with 2 human partners:{P04264;P08697}  
 16942 Pathogen[ P0C206] interacts with 3 human partners:{P04264;P05121;P08697}  
 16943 Pathogen[ P03363] interacts with 1 human partners:{P04264}  
 16944 [Cluster 1541]GO:0035329+P biological\_process [name] hippo signaling cascade [def] "The series of molecular signals mediated by the serine/threonine kinase Hippo or one of its orthologs. In Drosophila, Hippo in complex with the scaffold protein Salvador (Sav), phosphorylates and activates Warts (Wts), which in turn phosphorylates and inactivates the Yorkie (Yki) transcriptional activator. The core fly components hippo, sav, wts and

mats are conserved in mammals as STK4/3 (MST1/2), SAV1/WW45, LATS1/2 and MOB1." [PMID

16945 Pathogen[ Q2Q067] interacts with 18 human  
partners:{075161;Q8IY63;Q7L9L4;P62258;P46937;Q15562;Q99594;Q15561;Q8IX03;Q07157;Q9H8S9;O14641;P28347;Q9GZV5;Q9UDY2;Q9Y2J4;P31946;Q9H4B6}

16946 Pathogen[ P0C214] interacts with 18 human  
partners:{Q8IX03;075161;Q9Y2J4;Q9H8S9;P46937;Q9GZV5;P28347;Q7L9L4;Q15561;Q9H4B6;O14641;P42574;Q99594;Q9UDY2;Q8IY63;Q15562;P31946;Q07157}

16947 Pathogen[ P03346] interacts with 19 human  
partners:{Q15562;P46937;Q9UDY2;P28347;Q99594;Q9GZV5;P62258;Q8IX03;P42574;Q7L9L4;Q15561;Q8IY63;O75161;O14641;Q07157;Q9H8S9;Q9Y2J4;P31946;Q9H4B6}

16948 Pathogen[ Q85601] interacts with 18 human  
partners:{075161;P31946;Q8IY63;Q9H8S9;Q9UDY2;Q9GZV5;O14641;P62258;Q15562;Q99594;P28347;Q9Y2J4;Q07157;P46937;Q7L9L4;Q8IX03;Q9H4B6;Q15561}

16949 Pathogen[ P14079] interacts with 18 human  
partners:{075161;Q9H8S9;Q15561;Q9GZV5;Q9UDY2;O14641;Q07157;Q99594;P28347;Q9Y2J4;P46937;Q7L9L4;Q8IX03;P31946;Q9H4B6;P62258;Q15562;Q8IY63}

16950 Pathogen[ P03383] interacts with 18 human  
partners:{Q15561;Q9H8S9;Q15562;P31946;Q07157;Q7L9L4;Q9Y2J4;O14641;P28347;Q8IY63;Q8IX03;Q99594;O75161;P46937;P62258;Q9GZV5;Q9H4B6;Q9UDY2}

16951 Pathogen[ P03410] interacts with 18 human  
partners:{Q99594;P62258;Q9Y2J4;Q8IX03;Q9H8S9;Q7L9L4;O75161;Q9GZV5;Q9UDY2;Q15561;P28347;Q07157;P46937;Q9H4B6;Q8IY63;Q15562;P31946;O14641}

16952 Pathogen[ P14075] interacts with 18 human  
partners:{Q9GZV5;Q07157;Q15562;P28347;Q15561;Q8IY63;Q9H8S9;Q9Y2J4;Q9H4B6;O14641;O75161;Q99594;Q9UDY2;P46937;P31946;Q7L9L4;P62258;Q8IX03}

16953 Pathogen[ P0C206] interacts with 18 human  
partners:{P46937;O75161;Q8IY63;Q9UDY2;P31946;Q9GZV5;Q9H8S9;P62258;Q9H4B6;P28347;Q9Y2J4;P42574;Q15562;Q07157;Q7L9L4;Q99594;Q15561;Q8IX03}

16954 Pathogen[ P03363] interacts with 18 human  
partners:{P62258;O75161;Q15562;P28347;P31946;Q8IY63;Q07157;Q9Y2J4;P46937;Q9GZV5;Q9UDY2;Q7L9L4;Q9H4B6;Q9H8S9;Q8IX03;O14641;Q15561;Q99594}

16955 [Cluster 1542]GO:0040018+P biological\_process [name] positive regulation of multicellular organism growth [def] "Any process that activates or increases the frequency, rate or extent of growth of an organism to reach its usual body size." [GOC

16956 Pathogen[ Q2Q067] interacts with 3 human partners:{Q00613;P20265;P28069}

16957 Pathogen[ P0C214] interacts with 4 human partners:{Q00613;P20265;P28069;P16220}

16958 Pathogen[ P03346] interacts with 7 human  
partners:{P16220;Q00613;P20265;Q92879;P28069;P50542;Q9P2D1}

16959 Pathogen[ Q85601] interacts with 5 human  
partners:{Q9P2D1;P28069;Q00613;P16220;P20265}

16960 Pathogen[ P14079] interacts with 5 human  
partners:{P20265;P28069;Q9P2D1;Q00613;P50542}

16961 Pathogen[ P03383] interacts with 4 human partners:{P16220;P28069;Q00613;P20265}

16962 Pathogen[ P03410] interacts with 6 human  
partners:{Q00613;P28069;Q9P2D1;P16220;P50542;P20265}

16963 Pathogen[ P14075] interacts with 4 human partners:{P28069;Q00613;P20265;P16220}

16964 Pathogen[ P0C206] interacts with 7 human  
partners:{P16220;Q00613;Q9P2D1;P50542;Q13422;P20265;P28069}

16965 Pathogen[ P03363] interacts with 5 human  
partners:{Q92879;P16220;P28069;P20265;Q00613}

16966 [Cluster 1543]GO:0043043+P biological\_process [name] peptide biosynthetic process [def] "The chemical reactions and pathways resulting in the formation of peptides, compounds of 2 or more (but usually less than 100) amino acids where the alpha carboxyl group of one is bound to the alpha amino group of another. This may include the translation of a precursor protein and its subsequent processing into a functional peptide." [CHEBI

16967 Pathogen[ Q2Q067] interacts with 4 human partners:{P82933;Q9BYN8;P11532;P82673}

16968 Pathogen[ P0C214] interacts with 4 human partners:{P11532;Q9BYN8;P82673;P82933}

16969 Pathogen[ P03346] interacts with 4 human partners:{P82933;P11532;Q9BYN8;P82673}

16970 Pathogen[ Q85601] interacts with 3 human partners:{P82933;P11532;Q9BYN8}

16971 Pathogen[ P14079] interacts with 4 human partners:{P11532;P82933;Q9BYN8;P82673}

16972 Pathogen[ P03383] interacts with 3 human partners:{P82933;Q9BYN8;P11532}

16973 Pathogen[ P03410] interacts with 4 human partners:{P11532;Q9BYN8;P82673;P82933}

16974 Pathogen[ P14075] interacts with 3 human partners:{P11532;Q9BYN8;P82933}

16975 Pathogen[ P0C206] interacts with 4 human partners:{P82673;Q9BYN8;P82933;P11532}

16976 Pathogen[ P03363] interacts with 3 human partners:{P11532;P82933;Q9BYN8}

16977 [Cluster 1544]GO:0006357+P biological\_process [name] regulation of transcription from RNA polymerase II promoter [def] "Any process that modulates the frequency, rate or extent of transcription from an RNA polymerase II promoter." [GOC

16978 Pathogen[ Q2Q067] interacts with 190 human  
partners:{O60806;Q9BUE0;Q13573;Q9UKI9;Q9NZI7;P25490;Q33E94;P01100;P46108;Q9Y6X8;Q9H2G9;Q9Y5Q3;Q10587;P10827;P04198;Q9Y5V3;Q92922;P07737;O60296;Q9BUP3;Q99081;Q9Y2D1;Q6XD76;O00267;Q9H9T3;Q9NPP6;Q8WYA1;P40763;P14921;P36402;P46937;O95402;Q13485;Q9BQA1;Q16656;Q9Y2Y9;P10828;O96019;Q8N3X6;P51531;Q9NPG3;Q99708;P13349;Q15059;P37275;Q32MZ4;Q9NZI6;Q9H944;Q14119;Q9BTT4;Q93074;Q15528;P39880;P18850;Q99594;O94983;O75486;P36956;Q14192;Q15633;O75586;Q92754;Q6ZRS2;Q9NPI1;P54198;O60244;O94993;Q15560;Q9P086;P08047;Q018

92;P20265;P15172;P48552;Q15561;Q7KZ85;Q9ULK4;Q00444;Q15723;O95163;Q9Y5Z7;Q7RTV3;P539  
99;Q96G25;Q9ULW3;Q99966;P52747;P55347;Q14186;Q12800;P56693;P51948;Q969G3;O75528;Q929  
25;P25440;O15499;O14497;Q9UHV7;Q9NWA0;Q99732;P51532;A0JLT2;Q6P2C8;P15408;Q12873;Q9NV  
C6;Q8WVJ9;Q15327;Q96H20;Q92830;P35869;Q96GM5;P82970;Q16621;Q6IA86;P55055;O60765;Q153  
69;O60216;Q9NSI6;Q96JN0;Q9Y6J9;Q86VE0;P49639;Q13503;Q86YW9;O15370;Q9NQ33;Q8IZX4;O948  
05;P20823;P23193;Q12968;P52630;O60248;Q14839;Q9UPV9;P15336;Q9Y2X0;Q15545;Q14872;Q9NZ  
N8;P22415;Q9UKT9;O14646;Q04724;Q8TE85;Q12824;O43513;Q9NY43;P47928;O75764;Q5T230;Q8N6  
93;Q8TAQ2;P18848;P63272;Q15853;Q96RN5;Q14241;Q6STE5;P42226;Q13952;P15923;O60422;P154  
07;O75376;P61586;P42224;O94763;Q8TDD2;Q15797;P23409;Q06547;Q9Y651;Q9GZU7;O00422;Q065  
46;Q9H0E9;P53567;P49715;Q9Y242;Q6ZN01;Q96EB1;P17947;Q8N9B5;Q10586;Q71F56;Q9UBS8}

16979 Pathogen[ P0C214] interacts with 187 human  
partners: {P53567;P18850;P54198;Q14527;Q9NZN8;Q15327;Q15059;P32243;O75486;P49639;Q9Y5  
Z7;P35869;Q9Y5V3;Q13573;O75528;Q13952;Q06546;Q9Y6J9;O95633;P55347;O75764;Q12824;Q148  
72;Q96JN0;P14921;Q9UPV9;O14497;O75586;P15336;Q9P086;Q06547;P48552;Q16656;Q12873;P154  
07;Q99081;O00267;Q8N693;Q7KZ85;Q9Y2X0;P42226;P13349;Q14119;Q5T230;Q16621;P01100;Q930  
74;P17275;Q12800;P56693;P15408;Q9BUE0;P61586;P53999;P46937;Q99708;Q6ZRS2;Q9NWA0;P151  
72;P17947;Q9Y2Y9;Q9NVC6;Q6STE5;Q9Y5Q3;P42224;P37275;Q9UKI9;O60296;Q32MZ4;Q9NSI6;Q047  
24;Q9BTT4;Q15545;O60244;Q9GZU7;Q8TAQ2;Q15560;Q6IA86;Q10587;Q10586;Q9H944;Q9NZI7;P202  
65;Q15561;Q15633;Q92922;Q99966;Q8TE85;Q12968;Q86VE0;P18848;Q96RN5;P17535;Q99732;Q927  
54;Q969G3;Q15528;Q9BUP3;Q14186;P47928;A0JLT2;O60765;P15923;Q71F56;P51948;O43513;P254  
40;O00422;Q13485;Q15369;Q86YW9;Q9Y242;P63272;Q8N3X6;Q9H2G9;Q9UBS8;Q92925;O75376;Q6ZN  
01;O60264;Q14192;P41223;Q99594;Q9Y6X8;Q01892;Q9Y2D1;Q8WYA1;P82970;Q8IZX4;Q6P2C8;Q9H0  
E9;P36402;P52747;Q9UHV7;Q6XD76;Q9H9T3;P39880;O60806;Q9UKT9;P36508;Q8N9B5;Q8WVJ9;Q9NZ  
I6;Q9NPI1;Q15853;Q92830;Q9ULW3;P40763;Q96H20;P22415;O14646;P10828;Q7RTV3;P23193;Q135  
03;Q15797;Q9Y651;O94763;P46108;Q96G25;Q9ULK4;O15370;P51531;P52630;O94805;Q96EB1;O154  
99;O95163;Q9NQ33;O60216;Q96GM5;O95402;O60248;O96019;Q9NPI6;P08047;Q14839;Q9NY43;Q33E  
94;P04198;Q8TDD2;P51532;O94993;Q15723;O94983;Q14241;Q9NPG3}

16980 Pathogen[ P03346] interacts with 234 human  
partners: {Q15723;Q99081;P85037;Q9NPG3;Q13886;Q9Y6J9;Q7KZ85;P49639;Q16621;P46937;P502  
19;P10827;O95402;Q9H2G9;Q99966;Q9NPI6;P36508;Q8N9B5;Q96GM5;O60765;Q8N8B7;O60248;Q9Y4  
X4;O15370;P36402;Q9ULW3;O75586;P15336;P36956;Q16656;Q9BQA1;P52747;Q06547;Q9Y5Z7;Q9UK  
T9;Q99594;Q9BUP3;Q8N3X6;P51532;P13349;Q15797;Q96HZ4;Q9UKI9;Q99626;O94763;P17275;Q32M  
Z4;Q9NZI6;Q14872;Q99708;Q9NSI6;Q14527;Q8N693;P25490;Q15633;O75486;Q92925;P15923;P151  
72;P56693;P15408;P17535;Q86YW9;Q15327;Q71F56;Q93074;Q9NPI1;P23409;O95163;O60806;Q928  
86;O60244;P42226;O60296;Q9Y5Q3;Q12824;Q9NQ33;Q9Y2D1;Q9BTT4;Q15560;O14646;P20823;P254  
40;P63272;Q8TE85;O75764;Q6XD76;P49715;Q92754;Q9UBC0;Q15059;Q96H20;P78426;Q9P086;P080  
47;Q9H0E9;Q15853;O00422;P20265;Q8TDD2;P18850;Q9NZN8;Q14119;Q96G25;Q15561;Q5T230;Q8NB  
F1;Q15528;Q14186;Q92830;P18848;P14921;Q12968;O43513;P17542;O96019;Q9HCS4;Q9GZU7;Q5JT  
82;P41223;P53999;Q06546;Q9H9T3;Q02446;O75528;O95863;Q86VE0;Q6P2C8;Q33E94;Q9UPV9;Q141  
92;O15499;O60264;Q6STE5;Q04724;Q9Y242;Q02086;O14497;Q8WVJ9;O75840;Q94805;Q01954;Q9Y6  
X8;P37275;P82970;Q12778;Q12800;A0JLT2;P42224;P35659;Q01167;O75376;O94983;Q9Y5V3;P461  
08;O00267;Q9UBS8;Q6ZRS2;O94993;P09630;P15407;P04198;Q9H944;Q13952;Q6ZN01;Q969G3;Q6IA  
86;Q15369;P32242;Q9NVC6;P55347;Q92922;P10828;O60422;P17947;Q99929;Q10586;P48552;O753  
33;Q12873;Q13485;Q8WYA1;P07737;P53567;Q9Y651;P23193;Q7Z5J4;Q8IZX4;Q96KN3;O15516;Q9Y2  
X0;Q13573;O75398;P39880;P51531;P35869;Q13503;Q15545;Q9ULK4;Q10587;O75593;Q13395;P526  
30;Q01892;P40763;Q9BXX1;P32243;Q96JN0;Q8TAQ2;Q96EB1;Q7RTV3;Q13285;Q9NWA0;O60216;P011  
00;P51948;Q9NY43;Q00444;O95633;Q9UHV7;Q96RN5;P55055;P54198;Q9Y2Y9;Q9BUE0;Q9NZI7;Q148  
39;Q14241;P47928;P22415;O43719;P61586;Q15319;Q99732}

16981 Pathogen[ Q85601] interacts with 201 human  
partners: {Q5T230;Q8N3X6;Q9ULW3;Q9Y2X0;Q8TE85;P49639;P54198;Q9BQA1;Q15853;Q9BUE0;O154  
99;O75528;Q92754;Q8TDD2;Q01892;Q96H20;P15172;Q04724;P14921;Q9ULK4;Q9NPG3;Q6STE5;O753  
98;Q16656;Q06546;Q9GZU7;Q16621;P53567;P13349;Q9Y2Y9;Q15797;Q9H9T3;Q13573;Q9UHV7;Q929  
25;Q9Y651;Q99966;Q33E94;P15407;Q14872;Q99708;P18848;P40763;Q14241;Q9H0E9;O15516;Q9Y2  
42;Q12800;Q8WYA1;Q15545;Q15723;P25490;Q96G25;Q71F56;Q10587;P46108;O14497;O96019;Q9NQ  
33;P53999;O14646;Q9UPV9;P51948;Q9NZN8;O60216;Q15560;P55055;Q15059;Q13952;Q9Y5Q3;Q8IZ  
X4;Q9Y6J9;P08047;O60806;P07737;Q01954;P52630;P51531;Q9H944;P01100;O15370;Q96GM5;P224  
15;Q13503;P36508;P23409;O60296;Q14186;Q92830;Q8NBF1;Q12968;P17535;P51532;Q96RN5;Q969  
G3;Q96JN0;O95402;Q15528;P36956;O60765;P42226;Q9Y5V3;Q12873;Q14192;O60248;Q7KZ85;Q995  
94;Q9NSI6;Q9Y6X8;Q6ZRS2;Q15327;P82970;P18850;Q9UKI9;O75376;P42224;Q96EB1;Q15369;P615  
86;O94983;P15923;P36402;Q32MZ4;P10827;O00267;P32243;Q15633;Q8N693;P56693;O94993;P231  
93;Q9NZI6;Q6ZN01;Q9NPI1;Q9H2G9;Q86VE0;P49715;Q06547;Q9Y2D1;Q6IA86;Q9Y5Z7;P55347;P372  
75;O60422;P17947;P46937;Q6P2C8;Q9UBS8;P25440;O75486;P35869;P63272;A0JLT2;O94763;Q990  
81;Q9BTT4;Q9NWA0;O75764;Q86YW9;P48552;P15336;P10828;P04198;O00422;P39880;Q14119;Q9HC  
S4;O60264;O75586;Q14527;Q99732;O94805;P17275;O95163;Q92922;P20823;Q12824;Q8TAQ2;O602  
44;Q13485;Q8N9B5;Q9BUP3;Q93074;Q7RTV3;Q9NY43;Q00444;P52747;Q9NPI6;Q9UKT9;Q9NVC6;O435  
13;Q15561;Q9NZI7;P15408;Q8WVJ9;Q14839;P20265;Q10586;P47928;Q9P086;Q6XD76}

16982 Pathogen[ P14079] interacts with 184 human  
partners: {Q96JN0;P48552;Q13952;Q15560;O00422;O60244;Q9NPI1;O95402;Q8N8B7;Q9Y2X0;O435  
13;P55055;Q10587;Q9Y5Q3;Q15561;Q71F56;Q8IZX4;P35869;Q14241;Q6STE5;Q9NSI6;O15370;Q8N6  
93;P52630;Q96H20;Q06546;Q9Y6J9;P13349;P52747;Q14186;O75528;Q15853;P23409;Q14192;Q928  
30;Q9Y2Y9;Q15723;P53567;P53999;Q9BUE0;Q8N9B5;P41223;P20265;Q6IA86;P55347;Q6XD76;P108  
28;Q8TE85;Q5T230;Q15528;P39880;Q16656;Q99594;Q92922;P51532;Q6P2C8;O14646;O95163;Q9UL  
K4;Q8WVJ9;O60216;Q9NVC6;P07737;Q99966;P54198;P51531;Q13573;A0JLT2;Q6ZRS2;Q9P086;Q32M  
Z4;Q15059;O14497;Q96EB1;Q9NY43;Q8TAQ2;Q12968;P46937;P15923;Q10587;Q9NWA0;P108  
27;P36402;Q12873;Q9BUP3;O94763;Q9H0E9;Q9H2G9;P42226;P82970;Q9NZI7;Q9Y5Z7;Q01892;Q7KZ  
85;Q9ULW3;O94805;Q9Y5V3;Q86YW9;O75586;Q04760;O75764;Q9H9T3;Q99732;Q9UHV7;Q9BQA1;O602

- 48;Q9NQ33;Q99708;P49715;Q96RN5;Q9NZI6;Q9NPG3;P63272;P17275;P15336;Q96GM5;P04198;P61586;Q9H944;O60264;Q9NPJ6;Q15327;Q16621;Q92754;P56693;Q00444;Q9Y4X4;Q12800;Q7RTV3;P42224;Q8N3X6;P18850;P32243;O60296;Q86VE0;Q04724;Q14872;Q8TDD2;Q14839;Q9BTT4;P35659;P23193;P25440;Q13503;P15407;Q9UBS8;O75376;Q9UKI9;P36508;Q13395;Q15369;Q12824;Q93074;Q99081;Q9NZN8;O15499;P25490;P49639;Q8WYA1;Q9Y6X8;O00267;P36956;Q96G25;O60765;O75486;P15408;P01100;Q10586;O94993;P47928;P37275;Q92925;P46108;P17535;Q8NBF1;Q2446;Q9UKT9;Q15545;Q9GZU7;Q14119;P22415;P51948;O94983}
- 16983 Pathogen[ P03383] interacts with 165 human partners: {O95402;Q13573;Q15723;Q9Y6J9;Q15561;Q32MZ4;Q9BQA1;Q14839;Q14497;Q13485;Q15369;P63272;O95163;P08047;O96019;O75528;Q9UKI9;Q12824;P32243;P51948;O60765;O94805;P25440;O60248;Q9H944;P15172;P14921;O75376;Q8WVJ9;O75486;Q9ULK4;Q9Y5Q3;Q96H20;Q16656;Q06547;P23193;Q86YW9;O60244;Q9Y2Y9;P53999;Q6STE5;Q9UBS8;P37275;O94983;P52630;P15923;Q9ULW3;Q9H2G9;Q96G25;O14646;Q8IZX4;Q15797;P42226;Q8N693;Q86VE0;Q9NPJ6;Q04724;P15408;O60216;Q8TE85;Q15560;Q93074;P07737;O00267;Q14872;P55347;Q9H0E9;Q96EB1;Q33E94;Q96RN5;Q96GM5;Q13952;Q01892;Q12873;O60296;Q14186;Q6P2C8;O94763;Q16621;P49639;P52747;Q969G3;Q71F56;P61586;Q14192;Q9GZU7;Q15528;Q92830;Q9UPV9;O00422;Q9Y5V3;Q99081;Q8N3X6;P15407;Q99732;Q12968;Q9NSI6;Q9Y6X8;P51531;Q9NQ33;P82970;Q12800;Q9NPG3;O15370;Q92925;P36402;Q8TAQ2;Q96JN0;Q15853;Q9NZI6;Q9NZN8;Q99708;Q9P086;Q15327;P01100;P04198;Q92754;P39880;Q9NZI7;Q99594;Q15059;Q9BUP3;Q5T230;Q8N9B5;Q7RTV3;Q10586;P17535;Q9NY43;P51532;A0JLT2;P53567;Q9UKT9;Q9NPI1;Q9BTT4;P48552;Q9UHV7;Q92922;P15336;P10828;P47928;P18848;Q9NVC6;P18850;Q15586;Q15545;Q6ZN01;Q9Y2D1;P17275;P20265;P35869;P56693;P46937;Q14241;Q6IA86;P54198;Q06546;Q9NWA0;Q9Y2X0;P17947;Q9H9T3;Q9BUE0;Q15633;P22415;Q13503;Q7KZ85}
- 16984 Pathogen[ P03410] interacts with 192 human partners: {Q92830;Q99594;Q71F56;P23409;Q8NBF1;Q8IZX4;P36956;P53999;O94763;Q9NZN8;Q9H2G9;Q12873;Q6ZN01;Q9Y2Y9;Q99708;P54198;Q15633;P37275;P36508;Q8WVJ9;Q96G25;P82970;Q8N3X6;Q5T230;Q8TDD2;O60806;O00267;P17947;P63272;Q12968;Q96GM5;O14497;Q96019;P18848;P36402;Q13503;Q9Y2D1;O75528;Q7KZ85;P53567;Q86YW9;O14646;Q9NVC6;Q9GZU7;Q12800;Q9NPJ6;Q99732;Q04724;Q9NWA0;Q9BQA1;Q86VE0;P10828;O75764;Q32MZ4;Q9H9T3;O75376;Q06547;Q15059;Q15327;P23193;P15923;Q96EB1;Q9NPG3;O60216;P25490;P01100;Q15560;P15408;O75486;P35659;Q6XD76;Q92925;Q9Y5Q3;Q99081;Q9UKT9;Q6ZRS2;Q8TE85;Q9ULK4;P41223;O95402;Q15561;Q969G3;Q15369;O43513;O94805;P17535;Q9UPV9;P61586;Q13395;Q9UBS8;P17275;Q16621;Q15527;O95163;Q14872;Q15797;Q92922;Q14119;P47928;P22415;Q13485;Q13952;Q14186;Q9BUP3;P56693;Q7RTV3;Q9BT4;Q9Y6X8;P46937;Q6P2C8;Q9Y6J9;P51532;Q15853;P13349;O60296;P39880;P49639;Q9NQ33;Q8N8B7;Q10586;P42226;Q9P086;P51948;Q96JN0;A0JLT2;P51531;Q9NSI6;Q9UKI9;P55347;O60244;Q9UH7;P32243;Q9Y5V3;Q9ULW3;P46108;P52630;Q8N9B5;Q9HCS4;Q8TAQ2;Q10587;Q9NZI6;P08047;O60248;Q16656;Q9Y2X0;Q8N693;Q93074;O00422;P15407;Q6STE5;Q9NZI7;O15370;O94993;Q9H944;P20265;O60765;O60264;O94983;Q04760;Q9NY43;Q9BUE0;Q12824;Q96H20;Q6IA86;Q33E94;P48552;Q9H0E9;Q14839;P15336;Q15723;O60422;Q14241;P40763;P07737;P18850;P04198;Q96RN5;Q14192;Q06546;Q15545;Q9NPI1;Q92754;Q13573;Q01892;O75586;P14921;Q8WYA1;P52747;Q15528;O15499;Q99966;P25440}
- 16985 Pathogen[ P14075] interacts with 163 human partners: {Q9NQ33;Q96EB1;P52630;Q15059;Q9Y6J9;O14646;P35869;Q9BUP3;Q9H2G9;P35659;Q9NPJ6;Q15528;Q13573;Q96GM5;O60248;P25440;Q9NPI1;P42226;Q12800;Q9Y2D1;Q6ZN01;Q16656;Q9BQA1;P52747;P10828;O60765;P51532;P53567;P17275;Q8TE85;Q71F56;Q06546;Q9NSI6;Q14241;Q14839;Q33E94;Q15561;P15172;Q15327;O00422;Q6IA86;Q86VE0;P20265;Q92922;Q7KZ85;Q9P086;P47928;O60296;P56693;P15336;P04198;Q92754;Q9NZI7;Q15560;Q9NZN8;O94983;Q9NWA0;P15923;P15408;Q86YW9;Q13952;P54198;O94763;P39880;Q8WVJ9;Q96H20;O14497;O95402;Q9UPV9;P07737;O75376;P55347;O75586;Q7RTV3;Q9BTT4;Q13485;Q93074;Q14186;Q10586;Q15853;Q96019;Q9NY43;Q06547;P23193;Q9UHV7;O75528;Q8N693;Q01892;Q9Y5Q3;Q9H944;O15370;Q99732;Q15723;P51531;Q9UKT9;Q99594;O60244;Q9Y6X8;Q9ULW3;Q92925;P53999;P17947;P82970;Q8TAQ2;A0JLT2;Q15545;P18848;P61586;P14921;P36402;Q15633;Q12824;O94805;Q9NZI6;O95163;Q9ULK4;P01100;Q9GZU7;Q9H9T3;Q6P2C8;Q5T230;Q9NVC6;P46937;Q9UBS8;Q32MZ4;Q96RN5;P48552;O75486;Q13503;Q04724;Q9UKI9;P22415;Q8N3X6;P15407;Q16621;P37275;Q96JN0;Q6STE5;Q96G25;Q99081;O00267;Q9Y5V3;P17535;Q92830;Q15369;Q99708;O43513;Q12873;P32243;Q8N9B5;O60216;P63272;Q12968;Q14872;Q14192;Q9Y2Y9;Q9Y2X0;Q9BUE0;P51948;P18850;Q8IZX4;Q9NPG3;P08047}
- 16986 Pathogen[ P0C206] interacts with 212 human partners: {Q8TE85;P46937;Q15723;Q9BUE0;O75486;P53567;O60216;O75528;Q00444;Q9Y2D1;P23193;Q92830;Q06546;Q15545;Q8N3X6;Q9BUP3;Q9Y5Q3;P14921;Q9NY43;Q9NSI6;P51532;Q9NPI1;Q9BQA1;Q9Y242;Q9GZU7;Q99708;Q9P086;P15407;P17275;O95633;P35869;P25490;Q02446;P18850;Q9H9T3;Q9Y2Y9;P51531;Q9NZN8;P49639;Q15327;Q6XD76;Q6STE5;Q9Y5V3;P54198;Q6IA86;O75764;O15499;P23409;Q9Y5Z7;O75586;Q9UBC0;P15336;P55055;O60765;Q6ZRS2;Q6P2C8;Q92922;P17535;Q14186;P49715;P36956;Q9HCS4;Q7RTV3;Q04760;Q86VE0;Q12968;P56693;Q12824;Q9Y6J9;Q92925;Q86YW9;Q9NZI7;Q9UHV7;Q10587;P41223;Q8TAQ2;Q8WVJ9;Q14241;Q9UPV9;Q96HZ4;Q9Y6X8;Q8IZX4;O00422;Q8N9B5;Q92754;O43513;O95163;O60248;Q15853;Q14839;Q9NPG3;Q32MZ4;O14646;Q13952;O14497;O96019;Q8N8B7;P82970;Q16656;P36508;O15516;Q7Z5J4;P10828;P22415;P53999;Q96RN5;Q99081;O95402;Q15560;Q13573;Q9ULW3;P32243;O94993;Q96H20;P08047;Q96JN0;P13349;Q9H944;Q9UBS8;Q9NPJ6;P01100;Q9UKI9;Q7KZ85;P15923;O60296;P20823;Q06547;Q8N693;Q5T230;P04198;Q9Y4X4;P17947;Q9NQ33;Q8NBF1;O75376;O00267;Q14872;P40763;Q13485;Q15633;Q9BTT4;P25440;Q8WYA1;Q14527;Q04724;Q33E94;O15370;Q9H2G9;Q60244;Q15797;Q99966;Q9NSI6;Q9ULK4;P42226;P35659;P37275;Q15059;P20265;Q96GM5;Q16621;Q9NVC6;P15172;Q969G3;Q96EB1;Q9UKT9;P52747;Q14192;Q9NWA0;Q71F56;P46108;Q99594;O75398;P39880;Q13503;Q9Y2X0;P07737;P48552;A0JLT2;P42224;P47928;Q96G25;Q14119;O94983;Q01892;Q15369;Q8TDD2;Q93074;P36402;P18848;Q99732;O60422;O60806;Q15528;P15408;P52630;Q12800;Q9BX63;Q9H0E9;O94805;Q15561;Q6ZN01;O94763;Q12873;P10827;Q10586;O60264;P63272;P51948;Q01954;P55347;Q9Y651}
- 16987 Pathogen[ P03363] interacts with 209 human partners: {Q8IZX4;Q92886;Q86VE0;O15370;P52630;Q9UBC0;Q06547;Q32MZ4;Q9BX63;Q15528;P175

35;P18848;Q9ULW3;P10828;Q9BUP3;Q9UPV9;P54198;P41223;Q92925;Q13503;Q15853;O75764;Q6ST  
E5;Q99626;P53567;P36402;Q6IA86;Q06546;Q13952;O60422;Q99929;Q10586;P37275;Q8TDD2;Q8TA  
Q2;Q6ZRS2;P17947;Q7RTV3;Q01892;P51532;P82970;Q8N8B7;P04198;P18850;P25490;Q96HZ4;Q9UK  
I9;O60765;Q9Y6X8;Q14497;O75376;Q15545;P35659;Q9Y2D1;Q9NPG3;Q5JT82;Q16621;O94983;Q9NQ  
33;P14921;O00267;Q96JN0;Q15797;P32243;P36508;Q04724;Q14839;Q8N693;Q9HCS4;P55347;Q153  
69;Q49639;Q15327;Q15633;Q96H20;Q9Y4X4;Q9NZN8;P35869;P17275;P42226;P13349;Q7KZ85;O602  
96;Q9Y2Y9;O60264;Q12800;Q9BQA1;P15923;P15336;O15499;Q8TE85;P48552;Q9Y5Z7;Q99708;P469  
37;Q14872;P56693;Q9NWA0;O96019;Q9BUE0;Q14119;Q00444;Q9NSI6;Q96KN3;Q14241;Q92830;Q9NZ  
I6;Q9BXX1;Q14527;P32242;Q8WYA1;Q9NV6;Q969G3;O94763;Q71F56;Q99732;Q13395;Q5T230;Q96E  
B1;Q9NPI1;Q96RN5;Q9UHV7;A0JLT2;O75586;P20265;Q15723;Q6XD76;Q01167;Q16656;O95163;Q9NZ  
I7;P47928;O94805;Q13573;Q33E94;P46108;P15407;P22415;Q93074;Q9UBS8;P53999;O00422;Q019  
54;O14646;P23193;Q9H2G9;Q9Y651;Q13485;Q9BTT4;O95402;Q12968;O60806;P23409;P63272;Q141  
86;Q6ZN01;Q9Y5V3;Q9NPF6;O75398;P25440;O94993;Q9UKT9;Q12873;Q15059;O60244;O75486;Q9GZ  
U7;Q9P086;Q96GM5;Q9ULK4;P08047;O60248;Q99081;Q9NY43;Q86YW9;Q15560;P51531;Q92922;P096  
30;Q9H9T3;P39880;Q6P2C8;P15172;O43513;Q15561;P50219;Q96G25;P15408;Q99594;Q9H0E9;Q9Y5  
Q3;Q8N9B5;Q8WVJ9;Q9Y6J9;Q12824;Q8N3X6;Q9H944;Q02446;Q8NBF1;Q10587;O75528;P07737;O437  
19;P52747;O60216;Q92754;Q15319;P01100;Q14192}

16988 [Cluster 1545]GO:0007052+P biological\_process [name] mitotic spindle organization  
[def] "A process that is carried out at the cellular level which results in the  
assembly, arrangement of constituent parts, or disassembly of the microtubule spindle  
during a mitotic cell cycle." [GOC

16989 Pathogen[ Q2Q067] interacts with 11 human  
partners:{Q9UH99;P18754;P62826;Q14204;Q9HBM1;Q13561;O00139;O95271;Q14683;O14777;P278  
16}

16990 Pathogen[ POC214] interacts with 11 human  
partners:{Q14204;O00139;P27816;Q9UH99;Q9HBM1;P62826;Q14683;O95271;P18754;Q13561;O147  
77}

16991 Pathogen[ P03346] interacts with 11 human  
partners:{O00139;Q9UH99;P18754;Q14204;P62826;O14777;Q14683;Q9HBM1;P27816;O95271;Q135  
61}

16992 Pathogen[ Q85601] interacts with 11 human  
partners:{P27816;P62826;Q14204;Q9UH99;Q14683;P18754;O95271;O14777;O00139;Q9HBM1;Q135  
61}

16993 Pathogen[ P14079] interacts with 13 human  
partners:{Q9HBM1;O95271;Q14204;O15066;O00139;Q13561;Q9UQE7;P62826;Q9UH99;Q14683;P187  
54;O14777;P27816}

16994 Pathogen[ P03383] interacts with 9 human  
partners:{Q14683;Q9UH99;P62826;P27816;P18754;Q9HBM1;Q13561;O14777;O95271}

16995 Pathogen[ P03410] interacts with 12 human  
partners:{Q14204;Q13561;P27816;O00139;Q9UQE7;Q9UH99;P62826;O95271;Q14683;Q9HBM1;P187  
54;O14777}

16996 Pathogen[ P14075] interacts with 10 human  
partners:{Q14683;Q13561;O14777;O00139;P62826;Q9UH99;P18754;Q9HBM1;O95271;P27816}

16997 Pathogen[ POC206] interacts with 12 human  
partners:{O95271;Q9HBM1;P18754;Q9UH99;O14777;P62826;P27816;Q14204;Q9UQE7;Q14683;O001  
39;Q13561}

16998 Pathogen[ P03363] interacts with 12 human  
partners:{Q13561;Q14204;P27816;Q9HBM1;O95271;O15066;O14777;O00139;P18754;P62826;Q146  
83;Q9UH99}

16999 [Cluster 1546]GO:0043331+P biological\_process [name] response to dsRNA [def] "Any  
process that results in a change in state or activity of a cell or an organism (in terms  
of movement, secretion, enzyme production, gene expression, etc.) as a result of a  
double-stranded RNA stimulus." [GOC

17000 Pathogen[ Q2Q067] interacts with 2 human partners:{Q13794;Q96FA3}

17001 Pathogen[ POC214] interacts with 2 human partners:{Q96FA3;Q13794}

17002 Pathogen[ P03346] interacts with 2 human partners:{Q96FA3;Q13794}

17003 Pathogen[ Q85601] interacts with 2 human partners:{Q96FA3;Q13794}

17004 Pathogen[ P14079] interacts with 2 human partners:{Q96FA3;Q13794}

17005 Pathogen[ P03383] interacts with 2 human partners:{Q96FA3;Q13794}

17006 Pathogen[ P03410] interacts with 2 human partners:{Q96FA3;Q13794}

17007 Pathogen[ P14075] interacts with 2 human partners:{Q96FA3;Q13794}

17008 Pathogen[ POC206] interacts with 2 human partners:{Q96FA3;Q13794}

17009 Pathogen[ P03363] interacts with 2 human partners:{Q13794;Q96FA3}

17010 [Cluster 1547]GO:0070294+P biological\_process [name] renal sodium ion absorption  
[def] "A renal system process in which sodium ions are taken up from the collecting  
ducts and proximal and distal loops of the nephron." [GOC

17011 Pathogen[ Q2Q067] interacts with 1 human partners:{Q9UH77}

17012 Pathogen[ POC214] interacts with 1 human partners:{Q9UH77}

17013 Pathogen[ P03346] interacts with 1 human partners:{Q9UH77}

17014 Pathogen[ Q85601] interacts with 1 human partners:{Q9UH77}

17015 Pathogen[ P14079] interacts with 1 human partners:{Q9UH77}

17016 Pathogen[ P03383] interacts with 1 human partners:{Q9UH77}

17017 Pathogen[ P03410] interacts with 1 human partners:{Q9UH77}

17018 Pathogen[ P14075] interacts with 1 human partners:{Q9UH77}

17019 Pathogen[ POC206] interacts with 1 human partners:{Q9UH77}

17020 Pathogen[ P03363] interacts with 1 human partners:{Q9UH77}



17021 [Cluster 1548]GO:0030098+P biological\_process [name] lymphocyte differentiation  
[def] "The process in which a relatively unspecialized precursor cell acquires specialized features of a lymphocyte. A lymphocyte is a leukocyte commonly found in the blood and lymph that has the characteristics of a large nucleus, a neutral staining cytoplasm, and prominent heterochromatin." [CL  
17022 Pathogen[ Q2Q067] interacts with 3 human partners:{Q13951;P15923;P17947}  
17023 Pathogen[ P0C214] interacts with 3 human partners:{P17947;P15923;Q13951}  
17024 Pathogen[ P03346] interacts with 3 human partners:{P15923;Q13951;P17947}  
17025 Pathogen[ Q85601] interacts with 3 human partners:{Q13951;P15923;P17947}  
17026 Pathogen[ P14079] interacts with 3 human partners:{Q14210;P15923;Q13951}  
17027 Pathogen[ P03383] interacts with 3 human partners:{P15923;Q13951;P17947}  
17028 Pathogen[ P03410] interacts with 4 human partners:{P17947;Q14210;P15923;Q13951}  
17029 Pathogen[ P14075] interacts with 3 human partners:{Q13951;P15923;P17947}  
17030 Pathogen[ P0C206] interacts with 3 human partners:{Q13951;P15923;P17947}  
17031 Pathogen[ P03363] interacts with 3 human partners:{P17947;P15923;Q13951}  
17032 [Cluster 1549]GO:0014002+P biological\_process [name] astrocyte development [def]  
"The process aimed at the progression of an astrocyte over time, from initial commitment of the cell to a specific fate, to the fully functional differentiated cell. An astrocyte is the most abundant type of glial cell. Astrocytes provide support for neurons and regulate the environment in which they function." [GOC  
17033 Pathogen[ Q2Q067] interacts with 5 human  
partners:{P14136;P20265;Q13144;P08670;Q00534}  
17034 Pathogen[ P0C214] interacts with 5 human  
partners:{P14136;P20265;Q00534;Q13144;P08670}  
17035 Pathogen[ P03346] interacts with 5 human  
partners:{P14136;P20265;P08670;Q00534;Q13144}  
17036 Pathogen[ Q85601] interacts with 5 human  
partners:{P08670;P14136;Q13144;Q00534;P20265}  
17037 Pathogen[ P14079] interacts with 4 human partners:{P20265;Q13144;P14136;P08670}  
17038 Pathogen[ P03383] interacts with 5 human  
partners:{P08670;P14136;Q00534;Q13144;P20265}  
17039 Pathogen[ P03410] interacts with 5 human  
partners:{Q00534;P08670;P14136;P20265;Q13144}  
17040 Pathogen[ P14075] interacts with 5 human  
partners:{Q00534;P20265;P14136;P08670;Q13144}  
17041 Pathogen[ P0C206] interacts with 5 human  
partners:{Q13144;P14136;P20265;P08670;Q00534}  
17042 Pathogen[ P03363] interacts with 5 human  
partners:{Q00534;P08670;P20265;P14136;Q13144}  
17043 [Cluster 1550]GO:0031334+P biological\_process [name] positive regulation of protein  
complex assembly [def] "Any process that activates or increases the frequency, rate  
or extent of protein complex assembly." [GOC  
17044 Pathogen[ Q2Q067] interacts with 5 human  
partners:{P63165;Q96IF1;Q15173;O94811;Q9UNN5}  
17045 Pathogen[ P0C214] interacts with 6 human  
partners:{O94811;Q15173;O14613;P63165;Q9UNN5;P55072}  
17046 Pathogen[ P03346] interacts with 9 human  
partners:{Q96IF1;O14613;P55072;P17542;Q9UNN5;P63165;Q5T2T1;O94811;Q15173}  
17047 Pathogen[ Q85601] interacts with 6 human  
partners:{Q15173;Q9UNN5;O94811;O14613;Q96IF1;P63165}  
17048 Pathogen[ P14079] interacts with 7 human  
partners:{O14613;Q15173;Q5T2T1;P63165;Q9UNN5;Q96IF1;O94811}  
17049 Pathogen[ P03383] interacts with 4 human partners:{Q15173;O94811;Q9UNN5;P63165}  
17050 Pathogen[ P03410] interacts with 7 human  
partners:{Q9UNN5;P63165;Q15173;O94811;Q96IF1;Q5T2T1;O14613}  
17051 Pathogen[ P14075] interacts with 5 human  
partners:{P63165;O94811;Q9UNN5;Q15173;O14613}  
17052 Pathogen[ P0C206] interacts with 8 human  
partners:{Q9UNN5;Q96IF1;O94811;O14613;Q15173;Q5T2T1;P55072;P63165}  
17053 Pathogen[ P03363] interacts with 7 human  
partners:{Q9UNN5;O94811;Q5T2T1;Q96IF1;P63165;O14613;Q15173}  
17054 [Cluster 1551]GO:0042102+P biological\_process [name] positive regulation of T cell  
proliferation [def] "Any process that activates or increases the rate or extent of T  
cell proliferation." [GOC  
17055 Pathogen[ Q2Q067] interacts with 4 human partners:{O43639;P16333;Q53G26;Q96EY1}  
17056 Pathogen[ P0C214] interacts with 4 human partners:{O43639;Q53G26;P16333;Q96EY1}  
17057 Pathogen[ P03346] interacts with 6 human  
partners:{O75995;P02549;O43639;P16333;Q53G26;Q96EY1}  
17058 Pathogen[ Q85601] interacts with 4 human partners:{Q53G26;P16333;O43639;Q96EY1}  
17059 Pathogen[ P14079] interacts with 6 human  
partners:{Q9BXL7;P16333;O43639;P29459;P02549;Q96EY1}  
17060 Pathogen[ P03383] interacts with 3 human partners:{P16333;Q96EY1;Q53G26}  
17061 Pathogen[ P03410] interacts with 7 human  
partners:{Q53G26;O43639;P16333;P02549;Q9BXL7;Q96EY1;P29459}  
17062 Pathogen[ P14075] interacts with 3 human partners:{Q53G26;P16333;Q96EY1}  
17063 Pathogen[ P0C206] interacts with 4 human partners:{Q53G26;P16333;Q96EY1;O43639}

17064 Pathogen[ P03363] interacts with 5 human partners:{P02549;O43639;Q53G26;P16333;Q96EY1}

17065 [Cluster 1552]GO:0071280+P biological\_process [name] cellular response to copper ion [def] "Any process that results in a change in state or activity of a cell (in terms of movement, secretion, enzyme production, gene expression, etc.) as a result of a copper ion stimulus." [GOC

17066 Pathogen[ Q2Q067] interacts with 1 human partners:{P13640}

17067 Pathogen[ P0C214] interacts with 1 human partners:{P13640}

17068 Pathogen[ P03346] interacts with 1 human partners:{P13640}

17069 Pathogen[ Q85601] interacts with 1 human partners:{P13640}

17070 Pathogen[ P14079] interacts with 1 human partners:{P13640}

17071 Pathogen[ P03383] interacts with 1 human partners:{P13640}

17072 Pathogen[ P03410] interacts with 1 human partners:{P13640}

17073 Pathogen[ P14075] interacts with 1 human partners:{P13640}

17074 Pathogen[ P0C206] interacts with 1 human partners:{P13640}

17075 Pathogen[ P03363] interacts with 1 human partners:{P13640}

17076 [Cluster 1553]GO:0071560+P biological\_process [name] cellular response to transforming growth factor beta stimulus [def] "Any process that results in a change in state or activity of a cell (in terms of movement, secretion, enzyme production, gene expression, etc.) as a result of a transforming growth factor beta stimulus." [GOC

17077 Pathogen[ Q2Q067] interacts with 5 human partners:{P35712;Q9NZC7;P29474;Q15327;P35711}

17078 Pathogen[ P0C214] interacts with 5 human partners:{P29474;Q15327;P35711;Q9NZC7;P35712}

17079 Pathogen[ P03346] interacts with 6 human partners:{P29474;Q15327;Q9NZC7;P48059;P35712;P35711}

17080 Pathogen[ Q85601] interacts with 6 human partners:{Q9NZC7;P35712;P35711;Q15327;P48059;P29474}

17081 Pathogen[ P14079] interacts with 7 human partners:{P35711;Q06413;P35712;Q9NZC7;Q15327;Q13164;P48059}

17082 Pathogen[ P03383] interacts with 4 human partners:{P35712;P29474;P35711;Q15327}

17083 Pathogen[ P03410] interacts with 5 human partners:{P35712;Q9NZC7;Q15327;P29474;P48059}

17084 Pathogen[ P14075] interacts with 4 human partners:{P29474;Q15327;P35711;P35712}

17085 Pathogen[ P0C206] interacts with 6 human partners:{Q15327;P35711;P48059;P29474;Q9NZC7;P35712}

17086 Pathogen[ P03363] interacts with 4 human partners:{P29474;P35711;Q15327;P35712}

17087 [Cluster 1554]GO:0001207+P

17088 Pathogen[ Q2Q067] interacts with 1 human partners:{Q58F21}

17089 Pathogen[ P0C214] interacts with 1 human partners:{Q58F21}

17090 Pathogen[ P03346] interacts with 1 human partners:{Q58F21}

17091 Pathogen[ Q85601] interacts with 1 human partners:{Q58F21}

17092 Pathogen[ P14079] interacts with 1 human partners:{Q58F21}

17093 Pathogen[ P03383] interacts with 1 human partners:{Q58F21}

17094 Pathogen[ P03410] interacts with 1 human partners:{Q58F21}

17095 Pathogen[ P14075] interacts with 1 human partners:{Q58F21}

17096 Pathogen[ P0C206] interacts with 1 human partners:{Q58F21}

17097 Pathogen[ P03363] interacts with 1 human partners:{Q58F21}

17098 [Cluster 1555]GO:0018364+P biological\_process [name] peptidyl-glutamine methylation [def] "The addition of a methyl group to a glutamine residue in a protein." [GOC

17099 Pathogen[ Q2Q067] interacts with 1 human partners:{Q9UI30}

17100 Pathogen[ P0C214] interacts with 1 human partners:{Q9UI30}

17101 Pathogen[ P03346] interacts with 1 human partners:{Q9UI30}

17102 Pathogen[ Q85601] interacts with 1 human partners:{Q9UI30}

17103 Pathogen[ P14079] interacts with 1 human partners:{Q9UI30}

17104 Pathogen[ P03383] interacts with 1 human partners:{Q9UI30}

17105 Pathogen[ P03410] interacts with 1 human partners:{Q9UI30}

17106 Pathogen[ P14075] interacts with 1 human partners:{Q9UI30}

17107 Pathogen[ P0C206] interacts with 1 human partners:{Q9UI30}

17108 Pathogen[ P03363] interacts with 1 human partners:{Q9UI30}

17109 [Cluster 1556]GO:0015966+P biological\_process [name] diadenosine tetraphosphate biosynthetic process [def] "The chemical reactions and pathways resulting in the formation of diadenosine tetraphosphate, a derivative of the nucleoside adenosine with four phosphate groups attached." [GOC

17110 Pathogen[ Q2Q067] interacts with 2 human partners:{Q15046;P41250}

17111 Pathogen[ P0C214] interacts with 2 human partners:{P41250;Q15046}

17112 Pathogen[ P03346] interacts with 1 human partners:{P41250}

17113 Pathogen[ Q85601] interacts with 2 human partners:{Q15046;P41250}

17114 Pathogen[ P14079] interacts with 2 human partners:{Q15046;P41250}

17115 Pathogen[ P03383] interacts with 2 human partners:{Q15046;P41250}

17116 Pathogen[ P03410] interacts with 2 human partners:{P41250;Q15046}

17117 Pathogen[ P14075] interacts with 2 human partners:{P41250;Q15046}

17118 Pathogen[ P0C206] interacts with 2 human partners:{P41250;Q15046}

17119 Pathogen[ P03363] interacts with 1 human partners:{P41250}

17120 [Cluster 1557]GO:0016242+P biological\_process [name] negative regulation of macroautophagy [def] "Any process that stops, prevents, or reduces the frequency, rate

or extent of macroautophagy." [GOC

17121 Pathogen[ Q2Q067] interacts with 1 human partners:{Q9Y250}

17122 Pathogen[ P0C214] interacts with 1 human partners:{Q9Y250}

17123 Pathogen[ P03346] interacts with 1 human partners:{Q9Y250}

17124 Pathogen[ Q85601] interacts with 1 human partners:{Q9Y250}

17125 Pathogen[ P14079] interacts with 1 human partners:{Q9Y250}

17126 Pathogen[ P03383] interacts with 1 human partners:{Q9Y250}

17127 Pathogen[ P03410] interacts with 1 human partners:{Q9Y250}

17128 Pathogen[ P14075] interacts with 1 human partners:{Q9Y250}

17129 Pathogen[ P0C206] interacts with 1 human partners:{Q9Y250}

17130 Pathogen[ P03363] interacts with 1 human partners:{Q9Y250}

17131 [Cluster 1558]GO:0001782+P biological\_process [name] B cell homeostasis [def] "The process of regulating the proliferation and elimination of B cells such that the total number of B cells within a whole or part of an organism is stable over time in the absence of an outside stimulus." [GOC

17132 Pathogen[ Q2Q067] interacts with 2 human partners:{Q9Y6K9;O14920}

17133 Pathogen[ P0C214] interacts with 3 human partners:{Q9Y6K9;P42574;O14920}

17134 Pathogen[ P03346] interacts with 3 human partners:{Q9Y6K9;P42574;O14920}

17135 Pathogen[ Q85601] interacts with 2 human partners:{Q9Y6K9;O14920}

17136 Pathogen[ P14079] interacts with 3 human partners:{Q06413;Q9Y6K9;O14836}

17137 Pathogen[ P03383] interacts with 2 human partners:{Q9Y6K9;O14920}

17138 Pathogen[ P03410] interacts with 3 human partners:{O14920;O14836;Q9Y6K9}

17139 Pathogen[ P14075] interacts with 2 human partners:{O14920;Q9Y6K9}

17140 Pathogen[ P0C206] interacts with 3 human partners:{O14920;Q9Y6K9;P42574}

17141 Pathogen[ P03363] interacts with 2 human partners:{O14920;Q9Y6K9}

17142 [Cluster 1559]GO:0007356+P biological\_process [name] thorax and anterior abdomen determination [def] "Specification of the central (trunk) regions of the embryo by the gap genes\_ exemplified in insects by the actions of the Kruppel gene product." [http

17143 Pathogen[ Q2Q067] interacts with 1 human partners:{P80723}

17144 Pathogen[ P0C214] interacts with 1 human partners:{P80723}

17145 Pathogen[ P03346] interacts with 1 human partners:{P80723}

17146 Pathogen[ Q85601] interacts with 1 human partners:{P80723}

17147 Pathogen[ P14079] interacts with 1 human partners:{P80723}

17148 Pathogen[ P03383] interacts with 1 human partners:{P80723}

17149 Pathogen[ P03410] interacts with 1 human partners:{P80723}

17150 Pathogen[ P14075] interacts with 1 human partners:{P80723}

17151 Pathogen[ P0C206] interacts with 1 human partners:{P80723}

17152 Pathogen[ P03363] interacts with 1 human partners:{P80723}

17153 [Cluster 1560]GO:0045368+P biological\_process [name] positive regulation of interleukin-13 biosynthetic process [def] "Any process that activates or increases the frequency, rate or extent of the chemical reactions and pathways resulting in the formation of interleukin-13." [GOC

17154 Pathogen[ Q2Q067] interacts with 1 human partners:{Q15306}

17155 Pathogen[ P0C214] interacts with 1 human partners:{Q15306}

17156 Pathogen[ P03346] interacts with 1 human partners:{Q15306}

17157 Pathogen[ Q85601] interacts with 1 human partners:{Q15306}

17158 Pathogen[ P14079] interacts with 1 human partners:{Q15306}

17159 Pathogen[ P03383] interacts with 1 human partners:{Q15306}

17160 Pathogen[ P03410] interacts with 1 human partners:{Q15306}

17161 Pathogen[ P14075] interacts with 1 human partners:{Q15306}

17162 Pathogen[ P0C206] interacts with 1 human partners:{Q15306}

17163 Pathogen[ P03363] interacts with 1 human partners:{Q15306}

17164 [Cluster 1561]GO:0001841+P biological\_process [name] neural tube formation [def] "The formation of a tube from the flat layer of ectodermal cells known as the neural plate. This will give rise to the central nervous system." [GOC

17165 Pathogen[ Q2Q067] interacts with 2 human partners:{Q14790;O43318}

17166 Pathogen[ P0C214] interacts with 3 human partners:{Q99807;O43318;Q14790}

17167 Pathogen[ P03346] interacts with 3 human partners:{Q06945;Q14790;O43318}

17168 Pathogen[ Q85601] interacts with 2 human partners:{Q14790;O43318}

17169 Pathogen[ P14079] interacts with 3 human partners:{Q99807;Q14790;Q9Y366}

17170 Pathogen[ P03383] interacts with 1 human partners:{O43318}

17171 Pathogen[ P03410] interacts with 3 human partners:{Q9Y366;O43318;Q99807}

17172 Pathogen[ P14075] interacts with 1 human partners:{O43318}

17173 Pathogen[ P0C206] interacts with 4 human partners:{O43318;Q99807;Q14790;Q86YT6}

17174 Pathogen[ P03363] interacts with 1 human partners:{O43318}

17175 [Cluster 1562]GO:0045088+P biological\_process [name] regulation of innate immune response [def] "Any process that modulates the frequency, rate or extent of the innate immune response, the organism's first line of defense against infection." [GOC

17176 Pathogen[ Q2Q067] interacts with 3 human partners:{P10914;Q13490;Q8IUD6}

17177 Pathogen[ P0C214] interacts with 5 human partners:{Q13490;Q8IUD6;P10914;Q9Y3Z3;P98170}

17178 Pathogen[ P03346] interacts with 7 human partners:{Q9Y3Z3;Q13489;Q8IUD6;P98170;P10914;Q13490;Q9Y2R2}

17179 Pathogen[ Q85601] interacts with 4 human partners:{Q13490;P98170;Q8IUD6;P10914}

17180 Pathogen[ P14079] interacts with 5 human partners:{Q9Y3Z3;Q96C10;Q8IUD6;P10914;Q13490}

17181 Pathogen[ P03383] interacts with 2 human partners:{P10914;Q13490}  
17182 Pathogen[ P03410] interacts with 4 human partners:{Q13490;P10914;Q96C10;Q9Y3Z3}  
17183 Pathogen[ P14075] interacts with 2 human partners:{Q13490;P10914}  
17184 Pathogen[ P0C206] interacts with 7 human  
partners:{P10914;P98170;Q8IUD6;Q9Y2R2;Q13489;Q96C10;Q13490}  
17185 Pathogen[ P03363] interacts with 7 human  
partners:{Q13490;Q9Y2R2;Q13489;P98170;P10914;Q9Y3Z3;Q8IUD6}  
17186 [Cluster 1563]GO:0001654+P biological\_process [name] eye development [def] "The  
process whose specific outcome is the progression of the eye over time, from its  
formation to the mature structure. The eye is the organ of sight." [GOC  
17187 Pathogen[ Q2Q067] interacts with 4 human partners:{Q9ULV5;Q6QNY0;O14770;P07315}  
17188 Pathogen[ P0C214] interacts with 5 human  
partners:{P07315;P11844;Q6QNY0;Q9ULV5;O14770}  
17189 Pathogen[ P03346] interacts with 7 human  
partners:{Q86Z02;Q6QNY0;P07316;P07315;Q9ULV5;O95343;O14770}  
17190 Pathogen[ Q85601] interacts with 5 human  
partners:{Q6QNY0;P07315;Q9ULV5;P11844;O14770}  
17191 Pathogen[ P14079] interacts with 6 human  
partners:{P07316;Q6QNY0;P11844;O14770;P07315;Q9ULV5}  
17192 Pathogen[ P03383] interacts with 5 human  
partners:{Q6QNY0;P11844;O14770;Q9ULV5;P07315}  
17193 Pathogen[ P03410] interacts with 6 human  
partners:{P07315;Q6QNY0;P11844;P07316;Q9ULV5;O14770}  
17194 Pathogen[ P14075] interacts with 5 human  
partners:{P11844;O14770;Q9ULV5;Q6QNY0;P07315}  
17195 Pathogen[ P0C206] interacts with 6 human  
partners:{O14770;P07315;Q9ULV5;P11844;P07316;Q6QNY0}  
17196 Pathogen[ P03363] interacts with 6 human  
partners:{P07316;P11844;Q9ULV5;P07315;O95343;Q6QNY0}  
17197 [Cluster 1564]GO:0001830+P biological\_process [name] trophodermal cell fate  
commitment [def] "The cell fate commitment of precursor cells that will become  
trophoderm cells." [GOC  
17198 Pathogen[ Q2Q067] interacts with 1 human partners:{Q15561}  
17199 Pathogen[ P0C214] interacts with 1 human partners:{Q15561}  
17200 Pathogen[ P03346] interacts with 1 human partners:{Q15561}  
17201 Pathogen[ Q85601] interacts with 1 human partners:{Q15561}  
17202 Pathogen[ P14079] interacts with 1 human partners:{Q15561}  
17203 Pathogen[ P03383] interacts with 1 human partners:{Q15561}  
17204 Pathogen[ P03410] interacts with 1 human partners:{Q15561}  
17205 Pathogen[ P14075] interacts with 1 human partners:{Q15561}  
17206 Pathogen[ P0C206] interacts with 1 human partners:{Q15561}  
17207 Pathogen[ P03363] interacts with 1 human partners:{Q15561}  
17208 [Cluster 1565]GO:0006120+P biological\_process [name] mitochondrial electron transport,  
NADH to ubiquinone [def] "The transfer of electrons from NADH to ubiquinone that occurs  
during oxidative phosphorylation, mediated by the multisubunit enzyme known as complex  
I." [ISBN  
17209 Pathogen[ Q2Q067] interacts with 10 human  
partners:{O43920;P56181;O75489;O96000;O95178;O43678;O75251;O75306;E9PQ53;Q9Y375}  
17210 Pathogen[ P0C214] interacts with 20 human  
partners:{Q16795;O75306;O43678;P56556;P28331;O43920;O95299;P17568;Q9Y375;Q16718;O145  
61;O95298;P09622;O96000;E9PQ53;O95182;O75489;O75251;P56181;O95178}  
17211 Pathogen[ P03346] interacts with 10 human  
partners:{P56181;O75489;O43678;O95178;O43920;Q9Y375;E9PQ53;O75251;O96000;O75306}  
17212 Pathogen[ Q85601] interacts with 7 human  
partners:{O75306;O43678;P56181;O96000;Q9Y375;O43920;E9PQ53}  
17213 Pathogen[ P14079] interacts with 31 human  
partners:{P56181;O43674;O43677;O43181;O95169;P56556;Q9Y375;O95139;O96000;O95167;O753  
06;P17568;O95182;O43676;O43678;P51970;O95178;O75251;O14561;O95299;E9PQ53;O75489;P039  
23;Q16718;P03897;O43920;O15239;O00483;P03901;P03886;O95298}  
17214 Pathogen[ P03383] interacts with 10 human  
partners:{O75251;O96000;O43678;O43920;O75489;O75306;O95178;Q9Y375;E9PQ53;P56181}  
17215 Pathogen[ P03410] interacts with 34 human  
partners:{O95168;O43674;P56556;P17568;O95178;O75380;O43678;O75251;O95299;P51970;O439  
20;O96000;O95167;O15239;Q9Y6M9;P03886;O00483;O95298;O75438;E9PQ53;P56181;O14561;O754  
89;Q9Y375;P03897;O43677;O95169;O43181;Q16718;O75306;O43676;P03901;P03923;O95182}  
17216 Pathogen[ P14075] interacts with 16 human  
partners:{O43674;P56181;Q9Y375;O96000;O95182;O43677;O43920;O75306;O14561;O95298;O436  
78;O75251;E9PQ53;O75489;O95178;O43676}  
17217 Pathogen[ P0C206] interacts with 17 human  
partners:{P56181;O75251;O43920;O75306;O95182;O95298;O14561;O00483;P17568;O95178;Q9Y3  
75;O43678;O75489;E9PQ53;O96000;O43674;P56556}  
17218 Pathogen[ P03363] interacts with 3 human partners:{Q9Y375;O96000;P56181}  
17219 [Cluster 1566]GO:0040016+P biological\_process [name] embryonic cleavage [def] "The  
first few specialized divisions of an activated animal egg." [GOC  
17220 Pathogen[ Q2Q067] interacts with 4 human partners:{P11387;Q9NY61;P11388;Q13618}  
17221 Pathogen[ P0C214] interacts with 4 human partners:{Q13618;Q9NY61;P11388;P11387}

17222 Pathogen[ P03346] interacts with 5 human partners:{P11388;Q13618;Q6W0C5;Q9NY61;P11387}

17223 Pathogen[ Q85601] interacts with 4 human partners:{Q9NY61;P11387;P11388;Q13618}

17224 Pathogen[ P14079] interacts with 4 human partners:{P11388;Q9NY61;Q13618;Q6W0C5}

17225 Pathogen[ P03383] interacts with 3 human partners:{Q9NY61;P11387;Q13618}

17226 Pathogen[ P03410] interacts with 5 human partners:{Q9NY61;Q13618;P11387;P11388;Q6W0C5}

17227 Pathogen[ P14075] interacts with 3 human partners:{P11387;Q13618;Q9NY61}

17228 Pathogen[ P0C206] interacts with 5 human partners:{Q13618;P11388;Q6W0C5;P11387;Q9NY61}

17229 Pathogen[ P03363] interacts with 4 human partners:{P11387;Q13618;Q9NY61;Q6W0C5}

17230 [Cluster 1567]GO:0010955+P biological\_process [name] negative regulation of protein processing [def] "Any process that decreases the rate, frequency or extent of protein maturation by peptide bond cleavage." [GOC

17231 Pathogen[ Q2Q067] interacts with 1 human partners:{Q9BUX1}

17232 Pathogen[ P0C214] interacts with 2 human partners:{Q9BUX1;P07093}

17233 Pathogen[ P03346] interacts with 1 human partners:{Q9BUX1}

17234 Pathogen[ Q85601] interacts with 2 human partners:{Q9BUX1;P07093}

17235 Pathogen[ P14079] interacts with 3 human partners:{P54826;Q92896;Q9BUX1}

17236 Pathogen[ P03383] interacts with 1 human partners:{Q9BUX1}

17237 Pathogen[ P03410] interacts with 3 human partners:{Q9BUX1;Q92896;P54826}

17238 Pathogen[ P14075] interacts with 2 human partners:{Q9BUX1;P54826}

17239 Pathogen[ P0C206] interacts with 2 human partners:{Q9BUX1;P54826}

17240 Pathogen[ P03363] interacts with 1 human partners:{Q9BUX1}

17241 [Cluster 1568]GO:0048278+P biological\_process [name] vesicle docking [def] "The initial attachment of a transport vesicle membrane to the target membrane, mediated by proteins protruding from the membrane of the vesicle and the target membrane. Docking requires only that the two membranes come close enough for these proteins to interact and adhere." [GOC

17242 Pathogen[ Q2Q067] interacts with 1 human partners:{000471}

17243 Pathogen[ P0C214] interacts with 1 human partners:{000471}

17244 Pathogen[ P03346] interacts with 1 human partners:{000471}

17245 Pathogen[ Q85601] interacts with 1 human partners:{000471}

17246 Pathogen[ P14079] interacts with 1 human partners:{000471}

17247 Pathogen[ P03383] interacts with 1 human partners:{000471}

17248 Pathogen[ P03410] interacts with 1 human partners:{000471}

17249 Pathogen[ P14075] interacts with 1 human partners:{000471}

17250 Pathogen[ P0C206] interacts with 1 human partners:{000471}

17251 Pathogen[ P03363] interacts with 1 human partners:{000471}

17252 [Cluster 1569]GO:0048625+P biological\_process [name] myoblast cell fate commitment [def] "The process in which the developmental fate of a cell becomes restricted such that it will develop into a myoblast cell. A myoblast is a mononucleate cell type that, by fusion with other myoblasts, gives rise to the myotubes that eventually develop into skeletal muscle fibers." [CL

17253 Pathogen[ Q2Q067] interacts with 2 human partners:{P78337;Q99814}

17254 Pathogen[ P0C214] interacts with 2 human partners:{P78337;Q99814}

17255 Pathogen[ P03346] interacts with 2 human partners:{P78337;Q99814}

17256 Pathogen[ Q85601] interacts with 2 human partners:{Q99814;P78337}

17257 Pathogen[ P14079] interacts with 2 human partners:{Q99814;P78337}

17258 Pathogen[ P03383] interacts with 1 human partners:{P78337}

17259 Pathogen[ P03410] interacts with 2 human partners:{Q99814;P78337}

17260 Pathogen[ P14075] interacts with 1 human partners:{P78337}

17261 Pathogen[ P0C206] interacts with 2 human partners:{P78337;Q99814}

17262 Pathogen[ P03363] interacts with 2 human partners:{Q99814;P78337}

17263 [Cluster 1570]GO:0006006+P biological\_process [name] glucose metabolic process [def] "The chemical reactions and pathways involving glucose, the aldohexose gluco-hexose. D-glucose is dextrorotatory and is sometimes known as dextrose\_ it is an important source of energy for living organisms and is found free as well as combined in homo- and hetero-oligosaccharides and polysaccharides." [ISBN

17264 Pathogen[ Q2Q067] interacts with 29 human partners:{P31749;P13929;P05062;P02511;Q8N5D0;P35573;P60174;P36871;Q16851;Q96G03;P46976;P09972;P54840;Q12904;P09467;P18669;P13807;P04406;P40925;P15259;P06744;P22415;O14556;P40926;P27986;Q9UBX3;Q03060;P06733;Q6PCE3}

17265 Pathogen[ P0C214] interacts with 40 human partners:{Q04446;P11413;Q12904;P35558;Q8N5D0;P15259;P02511;P40926;O14556;P35573;P46976;P05062;Q6PCE3;Q9UBX3;O60825;P13929;Q96G03;P09467;P36871;Q15124;P14618;P09104;Q16851;O15488;Q93100;P06733;P09972;Q16822;Q03060;P54840;P16118;P60174;P22415;P27986;P46020;O00757;P13807;P04406;P00558;P31749}

17266 Pathogen[ P03346] interacts with 32 human partners:{P09972;P13807;P04406;P13929;Q9UBX3;P60174;P09467;P35573;P46976;P36871;Q01469;Q9UBC0;P06733;Q6PCE3;P18669;Q12904;P02511;O14556;Q8N5D0;Q16851;P31749;P40926;Q92481;Q96G03;P54840;P15259;P06744;Q03060;P05062;P40925;P27986;P22415}

17267 Pathogen[ Q85601] interacts with 34 human partners:{P60174;P13807;P31749;Q9UBX3;P18669;O60825;P06733;O00757;P06744;P05062;P16118;P15259;P27986;P22415;Q16851;P46976;P35573;O14556;P14618;Q15124;P13929;P36871;P02511;P09972;P09467;Q04446;P40925;P54840;Q6PCE3;P04406;Q03060;Q8N5D0;Q96G03;P40926}

- 17268 Pathogen[ P14079] interacts with 29 human partners: {P31751;P15259;Q8N5D0;Q16851;P02511;P13807;Q03060;P09972;Q93100;P06744;Q15124;P06733;P46976;Q9Y6X1;P35573;Q6PCE3;P13929;P18669;Q96G03;Q12904;P09467;Q01469;P40925;P54840;P36871;P46020;O15488;P04406;P22415}
- 17269 Pathogen[ P03383] interacts with 25 human partners: {P27986;Q96G03;Q12904;P40926;P31749;P18669;P02511;P13807;P09467;P09972;P40925;P35573;Q6PCE3;Q16822;Q16851;P06744;P46976;O14556;P04406;P54840;P06733;Q03060;Q8N5D0;P15259;P22415}
- 17270 Pathogen[ P03410] interacts with 38 human partners: {P46976;Q16822;P27986;O14556;P06744;Q6PCE3;Q16851;P36871;P54840;P16118;P46020;Q04446;P06733;P35573;P31749;Q15124;Q03060;P05062;P09467;Q9UBX3;Q00757;Q12904;Q93100;Q9Y6X1;P09972;P02511;P22415;P13807;P15259;Q8N5D0;P04406;P18669;O15488;Q96G03;P13929;P40926;Q01469;P40925}
- 17271 Pathogen[ P14075] interacts with 27 human partners: {P06733;P40925;P06744;Q8N5D0;Q16822;Q93100;P18669;Q96G03;P40926;P46976;P54840;Q6PCE3;P16118;P31749;P04406;Q12904;P27986;P35573;P02511;P09972;P15259;Q03060;P13807;P22415;P09467;Q16851;O14556}
- 17272 Pathogen[ P0C206] interacts with 41 human partners: {P06733;Q16851;Q03060;P05062;P31749;Q93100;P46976;P60174;Q96G03;Q04446;P09467;Q9UBC0;Q16822;Q9UBX3;P27986;P13807;Q15124;Q6PCE3;P46020;P54840;P06744;P22415;O14556;P40925;Q00757;P04406;P40926;Q06825;P09972;P16118;Q8N5D0;P02511;Q01469;P13929;P18669;Q12904;P14618;P36871;P15259;O15488;P35573}
- 17273 Pathogen[ P03363] interacts with 22 human partners: {Q9UBC0;P13807;P06744;P18669;Q16851;Q8N5D0;P40925;P06733;Q01469;P09972;P31749;P04406;P54840;P22415;Q6PCE3;O14556;P35573;P46976;P27986;P15259;Q03060;Q96G03}
- 17274 [Cluster 1571]GO:000086+P biological\_process [name] G2/M transition of mitotic cell cycle [def] "Progression from G2 phase to M phase of the mitotic cell cycle." [GOC
- 17275 Pathogen[ Q2Q067] interacts with 84 human partners: {P30153;Q14008;Q96RT8;Q9P209;Q14980;Q9UJX5;O95684;P62258;Q7Z460;O43805;Q14204;Q75935;Q7Z7A1;P54274;P61981;Q8NHV4;P63167;Q86XR8;Q9UJT9;P07900;Q9HC77;Q9UPV0;O14757;Q9NVX0;Q9NXR1;A8K8P3;Q96SN8;P30304;Q5BJF6;Q5JTW2;P14635;Q8TEP8;Q08050;Q14203;P24522;P30307;Q9UM13;Q9BYV8;O43768;Q8NHQ1;P51948;Q13561;Q66GS9;Q07666;Q9Y6N9;O96017;O43303;Q96RT7;Q6P1X5;O95067;Q9BSJ2;Q96MT8;Q15078;P50613;P78396;P56211;Q99996;Q16890;P38936;P20248;P50570;O75665;O94986;Q13309;P23258;Q9UJX4;Q8N371;P41208;Q86SQ7;Q13409;Q9UGJ1;O95613;P30305;P24941;Q8ND76;Q15691;Q15154;O15392;P42772;Q9BV73;P51946;Q96CW5;O15297;Q8TAP6}
- 17276 Pathogen[ P0C214] interacts with 83 human partners: {O43768;O15078;Q8N371;Q8ND76;P20248;P51946;O75935;O43805;P30307;Q9BSJ2;Q15154;P24522;Q14008;O94986;O95684;P30153;Q14203;Q9P209;Q8NHQ1;P50613;Q13309;Q96SN8;A8K8P3;O94921;Q9Y6N9;Q9UJX5;Q8NHV4;Q7Z7A1;Q9BYV8;P23258;Q9HC77;Q96MT8;Q14204;P14635;Q96CW5;Q15691;P38936;Q16890;Q96RT7;Q9UGJ1;Q14980;Q8TEP8;Q9UPV0;O43303;P56211;P51948;O96017;Q66GS9;Q07666;Q86XR8;P78396;O95067;P24941;P30305;Q8TAP6;Q6P1X5;Q96RT8;P41208;O75665;O15392;O15297;Q9UJX4;Q7Z460;Q9BV73;P61981;Q9H469;Q5BJF6;Q86SQ7;P50570;O95613;Q99996;Q13409;O14757;Q9NXR1;Q9NVX0;P30304;Q13561;Q9UJT9;Q9UM13;P42772;P54274;P63167}
- 17277 Pathogen[ P03346] interacts with 87 human partners: {Q9Y6N9;Q7Z7A1;Q8ND76;P78396;P50570;Q9H469;P07900;O96017;Q86XR8;Q5JTW2;O15392;O95684;P23258;Q96RT8;Q9UJT9;Q15154;O75935;Q15691;P54274;P62258;Q8NHV4;P24941;P30304;P42772;Q9HC77;O14757;Q9NXR1;Q9P209;Q9UM13;Q08050;Q14204;Q14203;Q96CW5;O95067;P56211;O43805;P30305;Q14980;Q8TEP8;O43768;P30153;P41208;Q07666;Q16890;Q9NVX0;Q66GS9;O75665;P14635;Q86SQ7;O94986;Q13309;Q9UJX5;Q96SN8;Q14008;P51946;Q9UGJ1;O15297;P20248;Q6P1X5;Q8TAP6;Q5BJF6;P61981;Q9BYV8;Q8N371;Q9UJX4;Q9Y2I6;Q99996;Q13409;Q8NHQ1;P63167;Q9BSJ2;Q7Z460;O94921;P38936;O95613;O15078;Q96RT7;A8K8P3;P51948;P30307;O43303;P24522;Q9UPV0;Q96MT8;Q13561;O00444;Q9BV73}
- 17278 Pathogen[ Q85601] interacts with 89 human partners: {Q8NHQ1;P51946;Q16890;P61163;P61981;Q13409;Q13309;O94986;O96017;Q07666;Q15154;Q8N371;O95684;Q14008;Q96RT8;Q96SN8;O75935;Q9NVX0;Q8NHV4;Q8ND76;P42772;Q9HC77;Q14204;Q9P209;P30153;P24522;O15078;O15392;P30304;Q5BJF6;Q9Y2I6;Q14203;Q96CW5;P51948;O43303;P56211;Q5JTW2;Q8TEP8;P23258;O14757;P30305;Q9UPV0;Q86XR8;Q9BSJ2;Q66GS9;P30307;Q86SQ7;O75665;O43768;Q9UGJ1;P14635;Q9UJX5;Q9BV73;P62258;Q9H469;Q9UM13;Q9Y6N9;Q15691;Q96MT8;Q9UJT9;P50570;O15297;Q6P1X5;P20248;Q9BYV8;Q7Z7A1;P78396;O94921;P50613;P07900;Q14980;Q9UJX4;Q8TAP6;Q99996;Q08050;Q7Z460;P38936;O95613;O95067;Q9NXR1;A8K8P3;P24941;P63167;P51955;O43805;P54274;Q96RT7;Q13561;P41208}
- 17279 Pathogen[ P14079] interacts with 84 human partners: {Q15691;Q14980;P54274;Q16890;P30307;Q99996;Q8TEP8;O43768;Q7Z460;P51946;O15297;O95684;Q9P209;Q13309;P78396;O94986;Q9UGJ1;Q9UJX5;Q9NVX0;Q14204;Q5JTW2;Q66GS9;O15392;O95067;Q9BV73;Q8ND76;A8K8P3;Q8TAP6;P56211;P30304;P50570;Q6P1X5;P50613;P61981;Q5BJF6;P14635;P51955;Q8NHV4;Q07666;P38936;Q9UM13;Q96RT8;P48681;P23258;P24522;Q96RT7;P07900;Q13409;Q13561;Q8TCU4;Q9BSJ2;P62258;O43303;P61163;Q86SQ7;P41208;P20248;Q9Y6N9;O95613;P63167;O15078;Q96FC9;Q8N371;P30305;Q8NHQ1;O75665;P30153;Q15154;Q9UJT9;Q86XR8;Q9NXR1;Q9Y2I6;O75935;Q9HC77;Q96SN8;Q9UJX4;Q9BYV8;Q14203;O43805;Q7Z7A1;Q96CW5;Q9UPV0;Q14008;P51948}
- 17280 Pathogen[ P03383] interacts with 69 human partners: {Q7Z7A1;P30307;Q86XR8;O14757;Q7Z460;Q9BSJ2;O94986;Q14008;Q15691;P51948;O95684;Q9NVX0;Q14203;Q96SN8;Q96CW5;O43303;P41208;Q8NHV4;P30304;Q9BV73;P24522;Q9HC77;P30153;O15297;P07900;P14635;Q96MT8;P78396;A8K8P3;Q8TEP8;Q66GS9;Q86SQ7;P50613;P42772;Q9UM

- 13;P51946;O43768;O15078;P24941;Q15154;O95067;Q9BYV8;O75935;Q07666;Q8ND76;Q6P1X5;O94921;Q5BJF6;Q14980;Q9UJX4;Q9UPV0;Q8TAP6;P61981;Q9P209;Q9UJX5;Q13309;Q99996;Q8N371;O95613;Q13561;P56211;P63167;O75665;P62258;Q16890;P20248;P54274;Q8NHQ1;O96017}
- 17281 Pathogen[ P03410] interacts with 85 human partners: {O95684;P62258;O75665;Q7Z460;Q14204;O15392;Q9H469;Q13409;Q8TEP8;Q13561;Q9Y2I6;O43303;Q66GS9;P42772;Q9NXR1;Q9HC77;Q99996;Q15154;P54274;Q7Z7A1;Q9UJX4;P24522;Q14008;Q96SN8;P51946;Q9UM13;O95067;Q8TCU4;P63167;Q9P209;P50570;P07900;Q9BYV8;P50613;P61163;Q07666;P78396;P61981;O43805;Q8NHV4;O94986;Q14980;O15297;Q8TAP6;P14635;P38936;Q15691;Q13309;P30304;P24941;Q9Y6N9;Q9NVX0;Q6P1X5;O15078;O96017;Q86SQ7;O14757;Q9UJX5;Q5BJF6;O75935;Q9BSJ2;P20248;O43768;P51948;P30153;Q96RT8;P23258;Q16890;Q9UPV0;Q96FC9;Q96CW5;P30305;Q9UJT9;Q96RT7;Q8N371;O95613;P41208;P56211;Q9BV73;Q8ND76;P30307;Q9UGJ1;Q5JTW2;A8K8P3;Q14203}
- 17282 Pathogen[ P14075] interacts with 70 human partners: {Q96MT8;O15297;O43303;Q9BYV8;O95067;P24941;O95684;Q8N371;Q07666;P14635;Q86SQ7;P50613;Q8NHV4;Q7Z460;Q13561;Q6P1X5;A8K8P3;Q08050;Q9HC77;Q96SN8;Q8NHQ1;P61981;Q8TEP8;P78396;Q9UPV0;P07900;P54274;Q66GS9;Q99996;O15078;Q5BJF6;O43768;O75935;Q9UJX5;Q86XR8;O96017;Q16890;Q15691;Q9BV73;P20248;Q8TAP6;Q13309;P30304;O94986;P41208;P30153;P51946;Q15154;Q9UJX4;P24522;P42772;Q9NVX0;Q8ND76;O75665;P56211;O95613;Q9P209;Q14203;Q14008;Q9UM13;Q14980;O94921;Q9BSJ2;P30307;Q7Z7A1;P63167;O14757;Q96CW5;P51948;P62258}
- 17283 Pathogen[ P0C206] interacts with 91 human partners: {Q5JTW2;Q9UJT9;Q8N371;Q86XR8;O94986;Q96SN8;Q9HC77;Q86SQ7;Q14008;P24522;Q5BJF6;O95684;P30307;O96017;Q13309;P30153;Q96RT7;P51955;Q9Y6N9;Q9UJX5;P56211;Q8TCU4;Q96CW5;P63167;Q15691;Q16890;O00444;P20248;A8K8P3;Q9UPV0;P42772;P30305;Q99996;Q07666;Q13409;Q9UGJ1;Q8TEP8;Q9NVX0;P61163;P30291;Q8TAP6;P54274;Q14204;Q9UJX4;P50613;O95613;P62258;P07900;P61981;O15078;Q66GS9;O43768;Q9BYV8;P38936;Q9BV73;Q8NHV4;O15392;P23258;O75665;Q13561;Q08050;P30304;Q6P1X5;Q7Z7A1;P78396;P41208;O95067;Q9NXR1;Q8ND76;Q9P209;P14635;Q14980;O43805;Q9UM13;Q96MT8;Q7Z460;Q14203;O75935;Q15154;O15297;Q9H469;Q8NHQ1;P24941;Q9BSJ2;O94921;P50570;Q99640;P51946;P51948;Q9Y2I6;O43303}
- 17284 Pathogen[ P03363] interacts with 80 human partners: {Q5BJF6;Q9Y6N9;Q9Y2I6;Q13309;P62258;Q07666;Q7Z7A1;A8K8P3;P07900;P63167;Q9HC77;Q9BYV8;Q99996;Q96MT8;O15078;Q9UJT9;Q8NHV4;O43805;Q66GS9;P20248;Q13561;O43303;Q14980;Q15691;O95684;P51946;Q8NHQ1;P50570;O95613;O94986;Q8ND76;Q14204;Q8TAP6;P24941;Q9UJX5;P41208;Q9P209;Q8TEP8;Q9UJX4;O96017;P30304;Q5JTW2;P61163;Q08050;O95067;P42772;P54274;Q96RT8;Q9NVX0;P78396;O75935;Q7Z460;O43768;P24522;Q13409;Q9UPV0;Q9UM13;Q96RT7;Q16890;P61981;Q9UGJ1;P56211;Q86XR8;Q14008;O15297;Q9NXR1;P23258;P30153;P30307;Q86SQ7;Q15154;Q6P1X5;Q14203;Q9BSJ2;Q9BV73;Q9H469;O75665;Q96CW5;Q96SN8;O14757}
- 17285 [Cluster 1572]GO:0046622+P biological\_process [name] positive regulation of organ growth [def] "Any process that activates or increases the frequency, rate or extent of growth of an organ of an organism." [GOC]
- 17286 Pathogen[ Q2Q067] interacts with 3 human partners: {P55895;P46937;P16989}
- 17287 Pathogen[ P0C214] interacts with 3 human partners: {P16989;P46937;P55895}
- 17288 Pathogen[ P03346] interacts with 6 human partners: {O75995;P46937;Q14774;P55895;Q96QS3;P16989}
- 17289 Pathogen[ Q85601] interacts with 3 human partners: {P46937;P16989;P55895}
- 17290 Pathogen[ P14079] interacts with 4 human partners: {P46937;P16989;Q9Y6X1;P13232}
- 17291 Pathogen[ P03383] interacts with 3 human partners: {P16989;P55895;P46937}
- 17292 Pathogen[ P03410] interacts with 5 human partners: {P16989;P55895;Q9Y6X1;P46937;P13232}
- 17293 Pathogen[ P14075] interacts with 3 human partners: {P16989;P46937;P55895}
- 17294 Pathogen[ P0C206] interacts with 3 human partners: {P46937;P16989;P55895}
- 17295 Pathogen[ P03363] interacts with 4 human partners: {P46937;Q96QS3;P55895;P16989}
- 17296 [Cluster 1573]GO:0006099+P biological\_process [name] tricarboxylic acid cycle [def] "A nearly universal metabolic pathway in which the acetyl group of acetyl coenzyme A is effectively oxidized to two CO2 and four pairs of electrons are transferred to coenzymes. The acetyl group combines with oxaloacetate to form citrate, which undergoes successive transformations to isocitrate, 2-oxoglutarate, succinyl-CoA, succinate, fumarate, malate, and oxaloacetate again, thus completing the cycle. In eukaryotes the tricarboxylic acid is confined to the mitochondria. See also glyoxylate cycle." [ISBN
- 17297 Pathogen[ Q2Q067] interacts with 8 human partners: {Q9ULD0;P31040;P07954;P40925;P21912;Q9P2R7;P21399;P40926}
- 17298 Pathogen[ P0C214] interacts with 20 human partners: {O75874;Q99643;P11177;O75390;Q5I0G3;P07954;P48735;P40926;Q99798;Q9P2R7;P50213;O43837;Q9ULD0;P09622;O14521;Q96I99;P21912;P21399;P36957;P51553}
- 17299 Pathogen[ P03346] interacts with 8 human partners: {O75390;P31040;Q9ULD0;P21912;P40926;P40925;P07954;P21399}
- 17300 Pathogen[ Q85601] interacts with 8 human partners: {P21399;P21912;Q9P2R7;P07954;P31040;P40925;Q9ULD0;P40926}
- 17301 Pathogen[ P14079] interacts with 8 human partners: {P07954;P21399;Q9P2R7;P31040;O14521;P40925;Q9ULD0;P21912}
- 17302 Pathogen[ P03383] interacts with 5 human partners: {P40926;P31040;Q9P2R7;P40925;Q9ULD0}
- 17303 Pathogen[ P03410] interacts with 11 human partners: {Q9P2R7;Q9ULD0;P21399;P07954;P31040;P21912;Q99643;P40926;O14521;P40925;O75390}
- 17304 Pathogen[ P14075] interacts with 5 human partners: {P40925;P40926;P31040;Q9ULD0;Q9P2R7}

17305 Pathogen[ P0C206] interacts with 12 human partners:{P50213;Q9ULD0;O14521;Q9P2R7;P40925;P40926;P31040;O75390;Q99798;P07954;P21912;P21399}

17306 Pathogen[ P03363] interacts with 3 human partners:{P31040;P40925;Q9ULD0}

17307 [Cluster 1574]GO:0000416+P biological\_process [name] positive regulation of histone H3-K36 methylation [def] "Any process that activates or increases the frequency, rate or extent of the covalent addition of a methyl group to the lysine at position 36 of histone H3." [GOC

17308 Pathogen[ Q2Q067] interacts with 1 human partners:{Q6ZW49}

17309 Pathogen[ P0C214] interacts with 1 human partners:{Q6ZW49}

17310 Pathogen[ P03346] interacts with 1 human partners:{Q6ZW49}

17311 Pathogen[ Q85601] interacts with 1 human partners:{Q6ZW49}

17312 Pathogen[ P14079] interacts with 1 human partners:{Q6ZW49}

17313 Pathogen[ P03383] interacts with 1 human partners:{Q6ZW49}

17314 Pathogen[ P03410] interacts with 1 human partners:{Q6ZW49}

17315 Pathogen[ P14075] interacts with 1 human partners:{Q6ZW49}

17316 Pathogen[ P0C206] interacts with 1 human partners:{Q6ZW49}

17317 Pathogen[ P03363] interacts with 1 human partners:{Q6ZW49}

17318 [Cluster 1575]GO:0031087+P biological\_process [name] deadenylation-independent decapping of nuclear-transcribed mRNA [def] "Cleavage of the 5'-cap of a nuclear-transcribed mRNA that is independent of poly(A) tail shortening." [GOC

17319 Pathogen[ Q2Q067] interacts with 1 human partners:{Q9NPJ4}

17320 Pathogen[ P0C214] interacts with 1 human partners:{Q9NPJ4}

17321 Pathogen[ P03346] interacts with 1 human partners:{Q9NPJ4}

17322 Pathogen[ Q85601] interacts with 1 human partners:{Q9NPJ4}

17323 Pathogen[ P14079] interacts with 1 human partners:{Q9NPJ4}

17324 Pathogen[ P03383] interacts with 1 human partners:{Q9NPJ4}

17325 Pathogen[ P03410] interacts with 1 human partners:{Q9NPJ4}

17326 Pathogen[ P14075] interacts with 1 human partners:{Q9NPJ4}

17327 Pathogen[ P0C206] interacts with 1 human partners:{Q9NPJ4}

17328 Pathogen[ P03363] interacts with 1 human partners:{Q9NPJ4}

17329 [Cluster 1576]GO:0031664+P biological\_process [name] regulation of lipopolysaccharide-mediated signaling pathway [def] "Any process that modulates the frequency, rate or extent of signaling in response to detection of lipopolysaccharide." [GOC

17330 Pathogen[ Q2Q067] interacts with 1 human partners:{Q5TAX3}

17331 Pathogen[ P0C214] interacts with 1 human partners:{Q5TAX3}

17332 Pathogen[ P03346] interacts with 1 human partners:{Q5TAX3}

17333 Pathogen[ Q85601] interacts with 1 human partners:{Q5TAX3}

17334 Pathogen[ P14079] interacts with 1 human partners:{Q5TAX3}

17335 Pathogen[ P03383] interacts with 1 human partners:{Q5TAX3}

17336 Pathogen[ P03410] interacts with 1 human partners:{Q5TAX3}

17337 Pathogen[ P14075] interacts with 1 human partners:{Q5TAX3}

17338 Pathogen[ P0C206] interacts with 1 human partners:{Q5TAX3}

17339 Pathogen[ P03363] interacts with 1 human partners:{Q5TAX3}

17340 [Cluster 1577]GO:0032915+P biological\_process [name] positive regulation of transforming growth factor beta2 production [def] "Any process that activates or increases the frequency, rate, or extent of production of transforming growth factor-beta2." [GOC

17341 Pathogen[ Q2Q067] interacts with 1 human partners:{P15336}

17342 Pathogen[ P0C214] interacts with 1 human partners:{P15336}

17343 Pathogen[ P03346] interacts with 1 human partners:{P15336}

17344 Pathogen[ Q85601] interacts with 1 human partners:{P15336}

17345 Pathogen[ P14079] interacts with 1 human partners:{P15336}

17346 Pathogen[ P03383] interacts with 1 human partners:{P15336}

17347 Pathogen[ P03410] interacts with 1 human partners:{P15336}

17348 Pathogen[ P14075] interacts with 1 human partners:{P15336}

17349 Pathogen[ P0C206] interacts with 1 human partners:{P15336}

17350 Pathogen[ P03363] interacts with 1 human partners:{P15336}

17351 [Cluster 1578]GO:0060136+P biological\_process [name] embryonic process involved in female pregnancy [def] "A reproductive process occurring in the embryo or fetus that allows the embryo or fetus to develop within the mother." [GOC

17352 Pathogen[ Q2Q067] interacts with 3 human partners:{Q00613;Q02447;P08047}

17353 Pathogen[ P0C214] interacts with 4 human partners:{Q00613;P17275;Q02447;P08047}

17354 Pathogen[ P03346] interacts with 4 human partners:{Q00613;P17275;P08047;Q02447}

17355 Pathogen[ Q85601] interacts with 4 human partners:{Q00613;P08047;Q02447;P17275}

17356 Pathogen[ P14079] interacts with 3 human partners:{Q02447;Q00613;P17275}

17357 Pathogen[ P03383] interacts with 4 human partners:{P08047;Q02447;Q00613;P17275}

17358 Pathogen[ P03410] interacts with 4 human partners:{Q00613;Q02447;P17275;P08047}

17359 Pathogen[ P14075] interacts with 4 human partners:{Q00613;P17275;Q02447;P08047}

17360 Pathogen[ P0C206] interacts with 4 human partners:{P17275;Q00613;P08047;Q02447}

17361 Pathogen[ P03363] interacts with 4 human partners:{Q02447;P17275;Q00613;P08047}

17362 [Cluster 1579]GO:0007507+P biological\_process [name] heart development [def] "The process whose specific outcome is the progression of the heart over time, from its formation to the mature structure. The heart is a hollow, muscular organ, which, by contracting rhythmically, keeps up the circulation of the blood." [GOC



- 17363 Pathogen[ Q2Q067] interacts with 34 human  
partners: {O14786;P49959;Q9UKV0;Q8WW38;O96004;Q13625;Q9NYJ8;Q96FH0;P41134;Q8TDY2;Q14934;Q14790;P11831;P12004;Q9UQL6;O94992;Q6W2J9;Q9HB71;Q9BQ70;O14641;O95644;P13807;Q8IX07;Q15796;Q9NNW7;Q12968;Q86U86;Q14686;Q7Z6M4;Q9NSC2;Q9HBD4;Q14188;Q8NB12;Q02078}
- 17364 Pathogen[ P0C214] interacts with 38 human  
partners: {O14786;P49959;Q13625;Q9HBD4;Q9NNW7;Q6W2J9;P11831;Q96FH0;Q8TDY2;Q14686;Q8WV60;Q7Z6M4;Q02078;Q12968;Q9BQ70;P41134;O14641;Q9UKV0;Q8WW38;P42574;P19429;Q15796;Q9NSC2;Q8IX07;Q14934;O94992;Q86U86;O96004;O95644;P55210;Q8NB12;Q14061;P13807;Q9HB71;Q14188;Q9UQL6;Q9NYJ8;Q14790}
- 17365 Pathogen[ P03346] interacts with 48 human  
partners: {Q06945;P12004;Q02078;Q9HBD4;P13807;Q9H2W2;Q02535;Q8WW38;P11831;P48443;Q14188;Q9UJQ4;Q9NSC2;P78413;Q15796;Q96FH0;Q8TDY2;P42574;Q86U86;O60902;O95644;Q14934;O96004;Q9BQ70;Q9HB71;Q12968;Q14863;O14641;Q9NYJ8;P41134;Q8NB12;P46109;Q8IX07;Q13625;P49959;P35713;Q7Z6M4;Q9UKV0;Q14790;Q99593;O94992;P55210;P10916;Q9UQL6;Q6W2J9;O14786;Q14686;Q9NNW7}
- 17366 Pathogen[ Q85601] interacts with 36 human  
partners: {Q9UKV0;P11831;Q02078;P13807;P41134;Q7Z6M4;Q9NYJ8;Q9UQL6;Q8NB12;Q8WW38;Q96FH0;Q14790;Q8WV60;Q14188;Q8TDY2;P49959;O95644;O14786;O96004;Q14934;Q14686;Q9BQ70;Q12968;O14641;Q8IX07;Q13625;Q14061;O94992;Q9HBD4;P12004;Q86U86;Q9NSC2;Q9HB71;P55210;Q15796;Q6W2J9}
- 17367 Pathogen[ P14079] interacts with 43 human  
partners: {Q9UQL6;Q02078;Q06413;P19429;Q8TDY2;O14641;P13807;P46109;P16298;O95644;Q86U86;Q9UKV0;O96004;P10916;O60895;Q12968;Q13625;P48443;Q96FH0;Q14061;Q9H488;Q6W2J9;Q9HB71;Q8WV60;Q9NNW7;Q14790;O75425;P55210;Q14934;Q8NB12;Q9UJQ4;Q8IX07;O94992;Q7Z6M4;P41134;Q9BQ70;P12004;P02144;P28360;Q14188;Q14686;Q8WW38;Q9NSC2}
- 17368 Pathogen[ P03383] interacts with 26 human  
partners: {Q86U86;P11831;Q9HBD4;Q9UQL6;Q8WW38;Q96FH0;O95644;Q14686;P13807;Q8TDY2;Q13625;Q6W2J9;Q14934;O96004;Q9BQ70;Q9HB71;O14641;Q9NSC2;Q12968;O94992;Q14188;Q7Z6M4;Q9UKV0;Q15796;Q9NYJ8;Q02078}
- 17369 Pathogen[ P03410] interacts with 45 human  
partners: {O14786;Q9UKV0;P49959;P11831;Q9HB71;P02144;Q14061;Q6W2J9;P10916;O96004;O60895;Q12968;P19429;Q86U86;Q8WV60;Q14686;Q8TDY2;P41134;Q14188;Q8WW38;Q9UQL6;O95644;Q8IX07;Q9NYJ8;P13807;Q96FH0;Q8NB12;Q02078;Q9BQ70;Q9NSC2;O75425;Q9H488;Q9HBD4;Q13625;Q15796;Q9UJQ4;P12004;O94992;P46109;Q14934;P55210;Q7Z6M4;O14641;Q16635;Q9NNW7}
- 17370 Pathogen[ P14075] interacts with 27 human  
partners: {Q9NSC2;Q9HBD4;P11831;Q14686;Q8TDY2;Q9UKV0;Q8WW38;Q15796;O96004;O94992;Q9BQ70;O14641;Q6W2J9;Q86U86;Q14934;Q96FH0;Q13625;Q02078;Q9UQL6;P13807;Q14061;Q14188;Q12968;Q9HB71;O95644;Q7Z6M4;Q9NYJ8}
- 17371 Pathogen[ P0C206] interacts with 44 human  
partners: {Q14188;Q9HB71;Q7Z6M4;Q8WV60;P49959;Q9UJQ4;Q02078;Q6W2J9;Q9NSC2;Q13625;Q9UKV0;Q8WW38;P19429;Q12968;Q86U86;Q15796;Q9NNW7;P13807;O14786;O96004;P41134;P78413;O94992;Q14686;Q96FH0;Q8TDY2;Q14790;Q9NYJ8;P42574;Q14934;P11831;Q8IX07;Q14863;Q8NB12;Q9HBD4;O95644;P55210;Q86YT6;Q14061;Q9BQ70;O75425;P48443;P12004;Q9UQL6}
- 17372 Pathogen[ P03363] interacts with 38 human  
partners: {Q9UJQ4;P13807;Q9HB71;O14786;O94992;Q14863;Q9NNW7;P78413;Q9NYJ8;Q9H2W2;Q13625;O60902;Q9UQL6;P46109;Q14686;Q96FH0;P11831;Q13480;Q8NB12;Q9UKV0;Q9HBD4;P41134;Q15796;O96004;Q86U86;Q8TDY2;Q12968;Q14188;O95644;Q14934;P55210;Q8WW38;Q6W2J9;O14641;P19429;Q9BQ70;P10916;Q02078}
- 17373 [Cluster 1580]GO:0007265+P biological\_process [name] Ras protein signal transduction [def] "A series of molecular signals within the cell that are mediated by a member of the Ras superfamily of proteins switching to a GTP-bound active state." [GOC
- 17374 Pathogen[ Q2Q067] interacts with 11 human  
partners: {P06400;Q92529;P38936;P20248;O14593;P31946;P42771;Q9NS23;O75791;P24941;Q15759}
- 17375 Pathogen[ P0C214] interacts with 13 human  
partners: {P20248;P62993;Q9NS23;Q92529;P38936;P24941;P42771;O14593;Q15759;O75791;P31946;Q99704;P06400}
- 17376 Pathogen[ P03346] interacts with 19 human  
partners: {Q13588;Q969H4;P06400;P24941;P62993;P42771;Q92766;P20248;P46109;Q99704;O14593;Q9UQ13;P31946;Q15759;P38936;Q13283;Q92529;Q9NS23;O75791}
- 17377 Pathogen[ Q85601] interacts with 12 human  
partners: {P31946;P62993;P06400;Q9NS23;P20248;Q92529;P42771;O14593;Q15759;P38936;P24941;O75791}
- 17378 Pathogen[ P14079] interacts with 15 human  
partners: {Q9NS23;Q99704;P46109;O75791;Q16644;P31946;P38936;Q15759;O14593;Q969H4;P20248;P62993;O43561;Q92529;P42771}
- 17379 Pathogen[ P03383] interacts with 8 human  
partners: {O75791;P31946;P06400;P24941;Q15759;O14593;P42771;P20248}
- 17380 Pathogen[ P03410] interacts with 15 human  
partners: {P42771;Q92529;O43561;Q9NS23;P06400;Q969H4;P38936;P24941;Q99704;P20248;O14593;P62993;P46109;P31946;O75791}
- 17381 Pathogen[ P14075] interacts with 8 human  
partners: {P24941;Q15759;O75791;P42771;P20248;P06400;O14593;P31946}
- 17382 Pathogen[ P0C206] interacts with 14 human  
partners: {P20248;P42771;O75791;P62993;P31946;O14593;P38936;Q99704;Q92529;Q9NS23;Q969H4;P24941;Q15759;P06400}

17383 Pathogen[ P03363] interacts with 17 human partners: {Q92766;Q99704;P20248;Q7Z569;Q13283;P31946;P46109;O14593;P24941;O75791;P06400;Q92529;Q969H4;Q13588;Q9NS23;Q9UQ13;P42771}

17384 [Cluster 1581]GO:1900131+P

17385 Pathogen[ Q2Q067] interacts with 1 human partners: {P40855}

17386 Pathogen[ P0C214] interacts with 1 human partners: {P40855}

17387 Pathogen[ P03346] interacts with 1 human partners: {P40855}

17388 Pathogen[ Q85601] interacts with 1 human partners: {P40855}

17389 Pathogen[ P14079] interacts with 1 human partners: {P40855}

17390 Pathogen[ P03383] interacts with 1 human partners: {P40855}

17391 Pathogen[ P03410] interacts with 1 human partners: {P40855}

17392 Pathogen[ P14075] interacts with 1 human partners: {P40855}

17393 Pathogen[ P0C206] interacts with 1 human partners: {P40855}

17394 Pathogen[ P03363] interacts with 1 human partners: {P40855}

17395 [Cluster 1582]GO:0010607+P biological\_process [name] negative regulation of cytoplasmic mRNA processing body assembly [def] "Any process that decreases the rate, frequency, or extent of the aggregation, arrangement and bonding together of proteins and RNA molecules to form a cytoplasmic mRNA processing body." [GOC

17396 Pathogen[ Q2Q067] interacts with 1 human partners: {C9JE40}

17397 Pathogen[ P0C214] interacts with 1 human partners: {C9JE40}

17398 Pathogen[ P03346] interacts with 1 human partners: {C9JE40}

17399 Pathogen[ Q85601] interacts with 1 human partners: {C9JE40}

17400 Pathogen[ P14079] interacts with 1 human partners: {C9JE40}

17401 Pathogen[ P03383] interacts with 1 human partners: {C9JE40}

17402 Pathogen[ P03410] interacts with 1 human partners: {C9JE40}

17403 Pathogen[ P14075] interacts with 1 human partners: {C9JE40}

17404 Pathogen[ P0C206] interacts with 1 human partners: {C9JE40}

17405 Pathogen[ P03363] interacts with 1 human partners: {C9JE40}

17406 [Cluster 1583]GO:0002437+P biological\_process [name] inflammatory response to antigenic stimulus [def] "An inflammatory response to an antigenic stimulus, which can be include any number of T cell or B cell epitopes." [GOC

17407 Pathogen[ Q2Q067] interacts with 1 human partners: {Q8ND90}

17408 Pathogen[ P0C214] interacts with 1 human partners: {Q8ND90}

17409 Pathogen[ P03346] interacts with 1 human partners: {Q8ND90}

17410 Pathogen[ Q85601] interacts with 1 human partners: {Q8ND90}

17411 Pathogen[ P14079] interacts with 1 human partners: {Q8ND90}

17412 Pathogen[ P03383] interacts with 1 human partners: {Q8ND90}

17413 Pathogen[ P03410] interacts with 1 human partners: {Q8ND90}

17414 Pathogen[ P14075] interacts with 1 human partners: {Q8ND90}

17415 Pathogen[ P0C206] interacts with 1 human partners: {Q8ND90}

17416 Pathogen[ P03363] interacts with 1 human partners: {Q8ND90}

17417 [Cluster 1584]GO:0000430+P biological\_process [name] regulation of transcription from RNA polymerase II promoter by glucose [def] "Any process involving glucose that modulates the frequency, rate or extent of transcription from an RNA polymerase II promoter." [GOC

17418 Pathogen[ Q2Q067] interacts with 2 human partners: {P22415;Q15853}

17419 Pathogen[ P0C214] interacts with 2 human partners: {Q15853;P22415}

17420 Pathogen[ P03346] interacts with 2 human partners: {Q15853;P22415}

17421 Pathogen[ Q85601] interacts with 2 human partners: {Q15853;P22415}

17422 Pathogen[ P14079] interacts with 2 human partners: {Q15853;P22415}

17423 Pathogen[ P03383] interacts with 2 human partners: {Q15853;P22415}

17424 Pathogen[ P03410] interacts with 2 human partners: {P22415;Q15853}

17425 Pathogen[ P14075] interacts with 2 human partners: {Q15853;P22415}

17426 Pathogen[ P0C206] interacts with 2 human partners: {Q15853;P22415}

17427 Pathogen[ P03363] interacts with 2 human partners: {Q15853;P22415}

17428 [Cluster 1585]GO:0044314+P biological\_process [name] protein K27-linked ubiquitination [def] "A protein ubiquitination process in which a polymer of ubiquitin, formed by linkages between lysine residues at position 27 of the ubiquitin monomers, is added to a protein." [PMID

17429 Pathogen[ Q2Q067] interacts with 3 human partners: {Q9Y2X8;Q9NPD8;Q9Y252}

17430 Pathogen[ P0C214] interacts with 4 human partners: {Q16763;Q9Y2X8;Q9Y252;Q9NPD8}

17431 Pathogen[ P03346] interacts with 3 human partners: {Q9Y2X8;Q9NPD8;Q9Y252}

17432 Pathogen[ Q85601] interacts with 4 human partners: {Q16763;Q9Y2X8;Q9NPD8;Q9Y252}

17433 Pathogen[ P14079] interacts with 2 human partners: {Q9NPD8;Q9Y2X8}

17434 Pathogen[ P03383] interacts with 3 human partners: {Q9Y2X8;Q9Y252;Q9NPD8}

17435 Pathogen[ P03410] interacts with 2 human partners: {Q9Y2X8;Q9NPD8}

17436 Pathogen[ P14075] interacts with 3 human partners: {Q9Y252;Q9Y2X8;Q9NPD8}

17437 Pathogen[ P0C206] interacts with 4 human partners: {Q16763;Q9Y2X8;Q9NPD8;Q9Y252}

17438 Pathogen[ P03363] interacts with 3 human partners: {Q9Y252;Q9NPD8;Q9Y2X8}

17439 [Cluster 1586]GO:1900107+P

17440 Pathogen[ Q2Q067] interacts with 1 human partners: {Q9NYF0}

17441 Pathogen[ P0C214] interacts with 1 human partners: {Q9NYF0}

17442 Pathogen[ P03346] interacts with 1 human partners: {Q9NYF0}

17443 Pathogen[ Q85601] interacts with 1 human partners: {Q9NYF0}

17444 Pathogen[ P14079] interacts with 1 human partners: {Q9NYF0}

17445 Pathogen[ P03383] interacts with 1 human partners: {Q9NYF0}

17446 Pathogen[ P03410] interacts with 1 human partners:{Q9NYF0}  
17447 Pathogen[ P14075] interacts with 1 human partners:{Q9NYF0}  
17448 Pathogen[ P0C206] interacts with 1 human partners:{Q9NYF0}  
17449 Pathogen[ P03363] interacts with 1 human partners:{Q9NYF0}  
17450 [Cluster 1587]GO:0035519+P biological\_process [name] protein K29-linked ubiquitination [def] "A protein ubiquitination process in which a polymer of ubiquitin, formed by linkages between lysine residues at position 29 of the ubiquitin monomers, is added to a protein. K29-linked ubiquitination targets the substrate protein for degradation." [PMID  
17451 Pathogen[ Q2Q067] interacts with 3 human partners:{Q96J02;Q9Y2X8;Q9NPD8}  
17452 Pathogen[ P0C214] interacts with 4 human partners:{Q96J02;Q16763;Q9Y2X8;Q9NPD8}  
17453 Pathogen[ P03346] interacts with 3 human partners:{Q96J02;Q9Y2X8;Q9NPD8}  
17454 Pathogen[ Q85601] interacts with 4 human partners:{Q96J02;Q16763;Q9Y2X8;Q9NPD8}  
17455 Pathogen[ P14079] interacts with 3 human partners:{Q9NPD8;Q96J02;Q9Y2X8}  
17456 Pathogen[ P03383] interacts with 2 human partners:{Q9Y2X8;Q9NPD8}  
17457 Pathogen[ P03410] interacts with 2 human partners:{Q9Y2X8;Q9NPD8}  
17458 Pathogen[ P14075] interacts with 2 human partners:{Q9Y2X8;Q9NPD8}  
17459 Pathogen[ P0C206] interacts with 4 human partners:{Q16763;Q9Y2X8;Q9NPD8;Q96J02}  
17460 Pathogen[ P03363] interacts with 2 human partners:{Q9NPD8;Q9Y2X8}  
17461 [Cluster 1588]GO:0000715+P biological\_process [name] nucleotide-excision repair, DNA damage recognition [def] "The identification of lesions in DNA, such as pyrimidine-dimers, intrastrand cross-links, and bulky adducts. The wide range of substrate specificity suggests the repair complex recognizes distortions in the DNA helix." [GOC  
17462 Pathogen[ Q2Q067] interacts with 2 human partners:{P54727;Q01831}  
17463 Pathogen[ P0C214] interacts with 2 human partners:{P54727;Q01831}  
17464 Pathogen[ P03346] interacts with 2 human partners:{Q01831;P54727}  
17465 Pathogen[ Q85601] interacts with 2 human partners:{Q01831;P54727}  
17466 Pathogen[ P14079] interacts with 2 human partners:{Q01831;P54727}  
17467 Pathogen[ P03383] interacts with 2 human partners:{Q01831;P54727}  
17468 Pathogen[ P03410] interacts with 2 human partners:{Q01831;P54727}  
17469 Pathogen[ P14075] interacts with 2 human partners:{Q01831;P54727}  
17470 Pathogen[ P0C206] interacts with 2 human partners:{Q01831;P54727}  
17471 Pathogen[ P03363] interacts with 2 human partners:{P54727;Q01831}  
17472 [Cluster 1589]GO:0010035+P biological\_process [name] response to inorganic substance [def] "Any process that results in a change in state or activity of a cell or an organism (in terms of movement, secretion, enzyme production, gene expression, etc.) as a result of an inorganic substance stimulus." [GOC  
17473 Pathogen[ Q2Q067] interacts with 4 human partners:{Q9H2P0;Q04206;P49356;P15259}  
17474 Pathogen[ P0C214] interacts with 6 human partners:{P15259;Q04206;P49356;P36551;Q05639;Q9H2P0}  
17475 Pathogen[ P03346] interacts with 4 human partners:{Q9H2P0;Q04206;P49356;P15259}  
17476 Pathogen[ Q85601] interacts with 5 human partners:{P15259;Q04206;Q9H2P0;P49356;Q05639}  
17477 Pathogen[ P14079] interacts with 5 human partners:{P15259;Q16873;Q9H2P0;P49356;P36551}  
17478 Pathogen[ P03383] interacts with 2 human partners:{Q04206;P15259}  
17479 Pathogen[ P03410] interacts with 5 human partners:{Q04206;P49356;P36551;Q16873;P15259}  
17480 Pathogen[ P14075] interacts with 2 human partners:{Q04206;P15259}  
17481 Pathogen[ P0C206] interacts with 5 human partners:{P36551;Q04206;Q9H2P0;P49356;P15259}  
17482 Pathogen[ P03363] interacts with 3 human partners:{Q04206;Q9H2P0;P15259}  
17483 [Cluster 1590]GO:0043631+P biological\_process [name] RNA polyadenylation [def] "The enzymatic addition of a sequence of adenylyl residues at the 3' end of an RNA molecule." [GOC  
17484 Pathogen[ Q2Q067] interacts with 2 human partners:{Q8TCS8;P51003}  
17485 Pathogen[ P0C214] interacts with 2 human partners:{P51003;Q8TCS8}  
17486 Pathogen[ P03346] interacts with 2 human partners:{P51003;Q8TCS8}  
17487 Pathogen[ Q85601] interacts with 2 human partners:{Q8TCS8;P51003}  
17488 Pathogen[ P14079] interacts with 2 human partners:{P51003;Q8TCS8}  
17489 Pathogen[ P03383] interacts with 2 human partners:{P51003;Q8TCS8}  
17490 Pathogen[ P03410] interacts with 2 human partners:{Q8TCS8;P51003}  
17491 Pathogen[ P14075] interacts with 2 human partners:{P51003;Q8TCS8}  
17492 Pathogen[ P0C206] interacts with 2 human partners:{Q8TCS8;P51003}  
17493 Pathogen[ P03363] interacts with 1 human partners:{P51003}  
17494 [Cluster 1591]GO:0007154+P biological\_process [name] cell communication [def] "Any process that mediates interactions between a cell and its surroundings. Encompasses interactions such as signaling or attachment between one cell and another cell, between a cell and an extracellular matrix, or between a cell and any other aspect of its environment." [GOC  
17495 Pathogen[ Q2Q067] interacts with 3 human partners:{Q7Z614;Q96L92;O43482}  
17496 Pathogen[ P0C214] interacts with 3 human partners:{Q7Z614;O43482;Q96L92}  
17497 Pathogen[ P03346] interacts with 16 human partners:{Q13596;Q15036;Q92543;O75335;Q9UMY4;O43482;Q7Z614;Q9NRS6;O60493;Q96L92;Q9UNH7;Q9Y5X2;O95219;O60749;Q5TCZ1;Q8WV41}  
17498 Pathogen[ Q85601] interacts with 6 human

17499 partners:{Q13596;Q15036;Q7Z614;Q96L92;Q9UNH7;O43482}  
 Pathogen[ P14079] interacts with 20 human  
 partners:{Q9UNH7;Q15036;Q8WV41;O43482;Q9C0B9;O60493;Q8N9S9;Q9NRS6;Q96L92;Q9H3E2;Q8WY  
 Q9;Q9Y5X2;O60749;O75335;Q13596;Q7Z614;Q92543;Q9UMY4;Q5TCZ1;Q9NSN8}

17500 Pathogen[ P03383] interacts with 3 human partners:{Q7Z614;Q96L92;O43482}

17501 Pathogen[ P03410] interacts with 20 human  
 partners:{Q8WV41;O75335;Q7Z614;Q96L92;Q13596;Q9H3E2;O60749;Q9UMY4;Q95219;Q9UNH7;Q9C0  
 B9;O43482;Q15036;Q8N9S9;Q9NRS6;Q8WYQ9;Q5TCZ1;Q92543;O60493;Q9Y5X2}

17502 Pathogen[ P14075] interacts with 3 human partners:{Q7Z614;O43482;Q96L92}

17503 Pathogen[ P0C206] interacts with 15 human  
 partners:{Q96L92;Q8N9S9;Q9UNH7;Q9NRS6;Q9C0B9;O60493;Q13596;Q5TCZ1;Q15036;Q8WV41;O607  
 49;Q9H3E2;O43482;Q7Z614;O75335}

17504 Pathogen[ P03363] interacts with 15 human  
 partners:{O75335;Q9UNH7;Q92543;Q96L92;Q95219;Q9UMY4;O60493;O60749;Q8WV41;Q5TCZ1;Q5VW  
 J9;Q7Z614;Q13596;O43482;Q9NSN8}

17505 [Cluster 1592]GO:0003151+P biological\_process [name] outflow tract morphogenesis  
 [def] "The process in which the anatomical structures of the outflow tract are generated  
 and organized. The outflow tract is the portion of the heart through which blood flows  
 into the arteries." [GOC

17506 Pathogen[ Q2Q067] interacts with 7 human  
 partners:{Q99502;Q9NQ87;P35548;O14641;Q06330;Q8IX07;P15336}

17507 Pathogen[ P0C214] interacts with 8 human  
 partners:{P15336;Q06330;O14641;Q8IX07;P05412;Q9NQ87;P35548;Q99502}

17508 Pathogen[ P03346] interacts with 11 human  
 partners:{Q06330;P05412;P15336;P35548;Q99502;O14641;Q9NQ87;Q15475;Q8IX07;P35713;O755  
 93}

17509 Pathogen[ Q85601] interacts with 8 human  
 partners:{Q06330;O14641;Q99502;P35548;P05412;Q9NQ87;Q8IX07;P15336}

17510 Pathogen[ P14079] interacts with 8 human  
 partners:{Q06413;Q99502;O14641;Q06330;P15336;Q8IX07;Q9NQ87;P05412}

17511 Pathogen[ P03383] interacts with 6 human  
 partners:{Q06330;Q9NQ87;P35548;O14641;P15336;P05412}

17512 Pathogen[ P03410] interacts with 8 human  
 partners:{Q06330;Q99502;Q9NQ87;P35548;Q8IX07;P05412;P15336;O14641}

17513 Pathogen[ P14075] interacts with 7 human  
 partners:{P05412;P35548;P15336;Q9NQ87;O14641;Q06330;Q99502}

17514 Pathogen[ P0C206] interacts with 7 human  
 partners:{Q9NQ87;Q06330;P05412;P15336;P35548;Q99502;Q8IX07}

17515 Pathogen[ P03363] interacts with 6 human  
 partners:{Q06330;Q9NQ87;P35548;P15336;P05412;O14641}

17516 [Cluster 1593]GO:0018401+P biological\_process [name] peptidyl-proline hydroxylation to  
 4-hydroxy-L-proline [def] "The modification of peptidyl-proline to form  
 4-hydroxy-L-proline\_ catalyzed by procollagen-proline,2-oxoglutarate-4-dioxygenase."  
 [RESID

17517 Pathogen[ Q2Q067] interacts with 3 human partners:{Q96KS0;Q9H6Z9;Q9GZT9}

17518 Pathogen[ P0C214] interacts with 3 human partners:{Q96KS0;Q9H6Z9;Q9GZT9}

17519 Pathogen[ P03346] interacts with 3 human partners:{Q9GZT9;Q96KS0;Q9H6Z9}

17520 Pathogen[ Q85601] interacts with 3 human partners:{Q9H6Z9;Q9GZT9;Q96KS0}

17521 Pathogen[ P14079] interacts with 3 human partners:{Q9GZT9;Q9H6Z9;Q96KS0}

17522 Pathogen[ P03383] interacts with 2 human partners:{Q96KS0;Q9H6Z9}

17523 Pathogen[ P03410] interacts with 3 human partners:{Q96KS0;Q9H6Z9;Q9GZT9}

17524 Pathogen[ P14075] interacts with 3 human partners:{Q96KS0;Q9GZT9;Q9H6Z9}

17525 Pathogen[ P0C206] interacts with 3 human partners:{Q96KS0;Q9GZT9;Q9H6Z9}

17526 Pathogen[ P03363] interacts with 1 human partners:{Q9H6Z9}

17527 [Cluster 1594]GO:0017145+P biological\_process [name] stem cell division [def] "The  
 self-renewing division of a stem cell. A stem cell is an undifferentiated cell, in the  
 embryo or adult, that can undergo unlimited division and give rise to one or several  
 different cell types." [GOC

17528 Pathogen[ Q2Q067] interacts with 2 human partners:{Q9GZV5;Q13618}

17529 Pathogen[ P0C214] interacts with 2 human partners:{Q9GZV5;Q13618}

17530 Pathogen[ P03346] interacts with 2 human partners:{Q9GZV5;Q13618}

17531 Pathogen[ Q85601] interacts with 2 human partners:{Q9GZV5;Q13618}

17532 Pathogen[ P14079] interacts with 2 human partners:{Q9GZV5;Q13618}

17533 Pathogen[ P03383] interacts with 2 human partners:{Q13618;Q9GZV5}

17534 Pathogen[ P03410] interacts with 2 human partners:{Q9GZV5;Q13618}

17535 Pathogen[ P14075] interacts with 2 human partners:{Q9GZV5;Q13618}

17536 Pathogen[ P0C206] interacts with 2 human partners:{Q9GZV5;Q13618}

17537 Pathogen[ P03363] interacts with 2 human partners:{Q13618;Q9GZV5}

17538 [Cluster 1595]GO:0006999+P biological\_process [name] nuclear pore organization  
 [def] "A process that is carried out at the cellular level which results in the  
 assembly, arrangement of constituent parts, or disassembly of the nuclear pore." [GOC

17539 Pathogen[ Q2Q067] interacts with 3 human partners:{Q96EE3;P52948;Q8WUM0}

17540 Pathogen[ P0C214] interacts with 3 human partners:{Q96EE3;Q8WUM0;P52948}

17541 Pathogen[ P03346] interacts with 3 human partners:{Q8WUM0;Q96EE3;P52948}

17542 Pathogen[ Q85601] interacts with 3 human partners:{Q96EE3;Q8WUM0;P52948}

17543 Pathogen[ P14079] interacts with 3 human partners:{Q8WUM0;Q96EE3;P52948}

17544 Pathogen[ P03383] interacts with 3 human partners:{Q96EE3;Q8WUM0;P52948}

17545 Pathogen[ P03410] interacts with 3 human partners:{P52948;Q96EE3;Q8WUM0}

17546 Pathogen[ P14075] interacts with 3 human partners:{Q96EE3;Q8WUM0;P52948}

17547 Pathogen[ P0C206] interacts with 2 human partners:{Q96EE3;Q8WUM0}

17548 Pathogen[ P03363] interacts with 2 human partners:{Q8WUM0;P52948}

17549 [Cluster 1596]GO:0071347+P biological\_process [name] cellular response to interleukin-1 [def] "Any process that results in a change in state or activity of a cell (in terms of movement, secretion, enzyme production, gene expression, etc.) as a result of an interleukin-1 stimulus." [GOC

17550 Pathogen[ Q2Q067] interacts with 6 human partners:{Q8WUQ7;Q04206;P38159;P10914;Q15327;P19838}

17551 Pathogen[ P0C214] interacts with 5 human partners:{Q15327;P38159;P19838;Q04206;P10914}

17552 Pathogen[ P03346] interacts with 7 human partners:{Q9Y5W3;Q15327;Q04206;P10914;P19838;P38159;Q8WUQ7}

17553 Pathogen[ Q85601] interacts with 5 human partners:{P10914;Q04206;Q15327;P38159;P19838}

17554 Pathogen[ P14079] interacts with 5 human partners:{Q15327;Q8WUQ7;Q9Y5W3;P10914;P38159}

17555 Pathogen[ P03383] interacts with 6 human partners:{P10914;P38159;Q8WUQ7;Q15327;Q04206;P19838}

17556 Pathogen[ P03410] interacts with 6 human partners:{Q8WUQ7;Q04206;P19838;Q15327;P10914;P38159}

17557 Pathogen[ P14075] interacts with 6 human partners:{Q04206;P38159;Q15327;P19838;P10914;Q8WUQ7}

17558 Pathogen[ P0C206] interacts with 6 human partners:{P10914;Q15327;Q8WUQ7;P19838;P38159;Q04206}

17559 Pathogen[ P03363] interacts with 6 human partners:{Q04206;Q15327;Q8WUQ7;P38159;P10914;P19838}

17560 [Cluster 1597]GO:0032727+P biological\_process [name] positive regulation of interferon-alpha production [def] "Any process that activates or increases the frequency, rate, or extent of interferon-alpha production." [GOC

17561 Pathogen[ Q2Q067] interacts with 4 human partners:{Q92985;Q7Z2W4;Q14653;Q9BYX4}

17562 Pathogen[ P0C214] interacts with 5 human partners:{Q9BYX4;Q7Z2W4;Q92985;P10809;Q14653}

17563 Pathogen[ P03346] interacts with 4 human partners:{Q14653;Q9BYX4;Q92985;Q7Z2W4}

17564 Pathogen[ Q85601] interacts with 4 human partners:{Q7Z2W4;Q14653;Q9BYX4;Q92985}

17565 Pathogen[ P14079] interacts with 5 human partners:{Q9BYX4;Q14653;Q7Z2W4;Q92985;Q7Z434}

17566 Pathogen[ P03383] interacts with 3 human partners:{Q14653;Q92985;Q7Z2W4}

17567 Pathogen[ P03410] interacts with 5 human partners:{Q14653;Q9BYX4;Q7Z434;Q7Z2W4;Q92985}

17568 Pathogen[ P14075] interacts with 3 human partners:{Q14653;Q7Z2W4;Q92985}

17569 Pathogen[ P0C206] interacts with 4 human partners:{Q92985;Q9BYX4;Q7Z2W4;Q14653}

17570 Pathogen[ P03363] interacts with 4 human partners:{Q14653;Q92985;Q7Z2W4;Q9BYX4}

17571 [Cluster 1598]GO:0010830+P biological\_process [name] regulation of myotube differentiation [def] "Any process that modulates the frequency, rate or extent of myotube differentiation. Myotube differentiation is the process in which a relatively unspecialized cell acquires specialized features of a myotube cell. Myotubes are multinucleated cells that are formed when proliferating myoblasts exit the cell cycle, differentiate and fuse." [GOC

17572 Pathogen[ Q2Q067] interacts with 2 human partners:{Q9UQL6;Q8NEZ5}

17573 Pathogen[ P0C214] interacts with 1 human partners:{Q9UQL6}

17574 Pathogen[ P03346] interacts with 2 human partners:{Q8NEZ5;Q9UQL6}

17575 Pathogen[ Q85601] interacts with 2 human partners:{Q9UQL6;Q8NEZ5}

17576 Pathogen[ P14079] interacts with 2 human partners:{Q9UQL6;Q8NEZ5}

17577 Pathogen[ P03383] interacts with 2 human partners:{Q9UQL6;Q8NEZ5}

17578 Pathogen[ P03410] interacts with 2 human partners:{Q9UQL6;Q8NEZ5}

17579 Pathogen[ P14075] interacts with 2 human partners:{Q8NEZ5;Q9UQL6}

17580 Pathogen[ P0C206] interacts with 2 human partners:{Q8NEZ5;Q9UQL6}

17581 Pathogen[ P03363] interacts with 3 human partners:{Q8NEZ5;Q9UQL6;Q9BX46}

17582 [Cluster 1599]GO:0042593+P biological\_process [name] glucose homeostasis [def] "Any process involved in the maintenance of an internal steady state of glucose within an organism or cell." [GOC

17583 Pathogen[ Q2Q067] interacts with 12 human partners:{Q13562;P31749;P40763;Q8HWS3;Q9BZE9;O43524;P20823;P22415;Q9NP71;P14672;Q53ET0;P62753}

17584 Pathogen[ P0C214] interacts with 12 human partners:{P35558;Q92934;P05121;Q9BZE9;Q53ET0;P62753;Q9NP71;P40763;P22415;P14672;Q8HWS3;P31749}

17585 Pathogen[ P03346] interacts with 15 human partners:{Q06945;Q53ET0;Q7RTS1;P20823;Q9BZE9;Q9NP71;Q8HWS3;P31749;Q92481;Q13562;P14672;P40763;O43524;P62753;P22415}

17586 Pathogen[ Q85601] interacts with 12 human partners:{Q53ET0;P31749;P40763;P62753;Q9NP71;Q9BZE9;Q13562;P22415;P05121;P14672;P20823;Q8HWS3}

17587 Pathogen[ P14079] interacts with 10 human partners:{P62753;P14672;Q9BZE9;Q8HWS3;Q92934;B7ZBB8;Q7RTS1;Q8TCU4;Q9NP71;P22415}

17588 Pathogen[ P03383] interacts with 8 human partners:{Q8HWS3;P31749;P62753;Q9BZE9;Q9NP71;Q53ET0;P14672;P22415}

17589 Pathogen[ P03410] interacts with 14 human partners:{B7ZBB8;Q9BZE9;P05121;P31749;Q7RTS1;Q8TCU4;Q92934;Q9NRY6;Q53ET0;Q9NP71;P22415;P40763;P62753;Q8HWS3}

17590 Pathogen[ P14075] interacts with 8 human partners:{Q53ET0;Q9NP71;P31749;P62753;P22415;P14672;Q8HWS3;Q9BZE9}

17591 Pathogen[ P0C206] interacts with 15 human partners:{Q8HWS3;P31749;Q9NP71;Q8TCU4;Q9BZE9;Q92934;P22415;P20823;B7ZBB8;P40763;Q13562;Q53ET0;P05121;P14672;P62753}

17592 Pathogen[ P03363] interacts with 11 human partners:{Q7RTS1;Q53ET0;P62753;O43524;B7ZBB8;P31749;P22415;Q9BZE9;P14672;Q9NP71;Q8HWS3}

17593 [Cluster 1600]GO:0051258+P biological\_process [name] protein polymerization [def] "The process of creating protein polymers, compounds composed of a large number of component monomers\_ polymeric proteins may be made up of different or identical monomers. Polymerization occurs by the addition of extra monomers to an existing poly- or oligomeric protein." [GOC]

17594 Pathogen[ Q2Q067] interacts with 2 human partners:{P23258;Q9NPA3}

17595 Pathogen[ P0C214] interacts with 3 human partners:{Q9NPA3;P23258;Q9BUK6}

17596 Pathogen[ P03346] interacts with 3 human partners:{P23258;Q9BUK6;Q9NPA3}

17597 Pathogen[ Q85601] interacts with 3 human partners:{P23258;Q9NPA3;Q9BUK6}

17598 Pathogen[ P14079] interacts with 4 human partners:{Q9NPA3;Q9BUK6;P68363;P23258}

17599 Pathogen[ P03383] interacts with 1 human partners:{Q9NPA3}

17600 Pathogen[ P03410] interacts with 5 human partners:{Q9BUK6;Q9BVA1;P23258;P68363;Q9NPA3}

17601 Pathogen[ P14075] interacts with 1 human partners:{Q9NPA3}

17602 Pathogen[ P0C206] interacts with 3 human partners:{Q9NPA3;Q9BUK6;P23258}

17603 Pathogen[ P03363] interacts with 4 human partners:{P68363;Q13748;Q9NPA3;P23258}

17604 [Cluster 1601]GO:0033077+P biological\_process [name] T cell differentiation in thymus [def] "The process in which a precursor cell type acquires the specialized features of a T cell via a differentiation pathway dependent upon transit through the thymus." [GOC]

17605 Pathogen[ Q2Q067] interacts with 8 human partners:{P55895;Q8N5F7;Q13426;Q53G26;P15923;Q96EY1;Q07352;Q00534}

17606 Pathogen[ P0C214] interacts with 8 human partners:{Q8N5F7;Q07352;Q00534;P55895;Q13426;P15923;Q53G26;Q96EY1}

17607 Pathogen[ P03346] interacts with 8 human partners:{Q13426;P55895;P15923;Q8N5F7;Q53G26;Q07352;Q00534;Q96EY1}

17608 Pathogen[ Q85601] interacts with 8 human partners:{Q53G26;Q8N5F7;Q07352;Q13426;P15923;Q00534;P55895;Q96EY1}

17609 Pathogen[ P14079] interacts with 6 human partners:{P15923;Q13426;Q96EY1;Q07352;P49917;Q8N5F7}

17610 Pathogen[ P03383] interacts with 8 human partners:{Q8N5F7;P15923;Q07352;Q00534;Q13426;P55895;Q96EY1;Q53G26}

17611 Pathogen[ P03410] interacts with 7 human partners:{Q53G26;Q00534;P55895;P15923;Q13426;Q96EY1;Q07352}

17612 Pathogen[ P14075] interacts with 8 human partners:{Q8N5F7;Q00534;Q53G26;P15923;Q07352;Q13426;P55895;Q96EY1}

17613 Pathogen[ P0C206] interacts with 9 human partners:{Q53G26;P49917;Q13426;P15923;P55895;Q8N5F7;Q07352;Q96EY1;Q00534}

17614 Pathogen[ P03363] interacts with 8 human partners:{Q53G26;P15923;Q00534;Q07352;Q13426;Q8N5F7;P55895;Q96EY1}

17615 [Cluster 1602]GO:0090222+P biological\_process [name] centrosome-templated microtubule nucleation [def] "The 'de novo' formation of a microtubule, in which tubulin heterodimers form metastable oligomeric aggregates from the centrosome." [GOC]

17616 Pathogen[ Q2Q067] interacts with 1 human partners:{Q8N4C6}

17617 Pathogen[ P0C214] interacts with 1 human partners:{Q8N4C6}

17618 Pathogen[ P03346] interacts with 1 human partners:{Q8N4C6}

17619 Pathogen[ Q85601] interacts with 1 human partners:{Q8N4C6}

17620 Pathogen[ P14079] interacts with 1 human partners:{Q8N4C6}

17621 Pathogen[ P03383] interacts with 1 human partners:{Q8N4C6}

17622 Pathogen[ P03410] interacts with 1 human partners:{Q8N4C6}

17623 Pathogen[ P14075] interacts with 1 human partners:{Q8N4C6}

17624 Pathogen[ P0C206] interacts with 1 human partners:{Q8N4C6}

17625 Pathogen[ P03363] interacts with 1 human partners:{Q8N4C6}

17626 [Cluster 1603]GO:0051103+P biological\_process [name] DNA ligation involved in DNA repair [def] "The re-formation of a broken phosphodiester bond in the DNA backbone, carried out by DNA ligase, that contributes to DNA repair." [GOC]

17627 Pathogen[ Q2Q067] interacts with 1 human partners:{Q13426}

17628 Pathogen[ P0C214] interacts with 1 human partners:{Q13426}

17629 Pathogen[ P03346] interacts with 1 human partners:{Q13426}

17630 Pathogen[ Q85601] interacts with 1 human partners:{Q13426}

17631 Pathogen[ P14079] interacts with 2 human partners:{Q13426;P49917}

17632 Pathogen[ P03383] interacts with 1 human partners:{Q13426}

17633 Pathogen[ P03410] interacts with 1 human partners:{Q13426}  
17634 Pathogen[ P14075] interacts with 1 human partners:{Q13426}  
17635 Pathogen[ P0C206] interacts with 3 human partners:{P49917;Q13426;P49916}  
17636 Pathogen[ P03363] interacts with 1 human partners:{Q13426}  
17637 [Cluster 1604]GO:0042307+P biological\_process [name] positive regulation of protein import into nucleus [def] "Any process that activates or increases the frequency, rate or extent of movement of proteins from the cytoplasm into the nucleus." [GOC  
17638 Pathogen[ Q2Q067] interacts with 2 human partners:{O43745;Q9BZF9}  
17639 Pathogen[ P0C214] interacts with 2 human partners:{O43745;Q9BZF9}  
17640 Pathogen[ P03346] interacts with 3 human partners:{Q9BZF9;Q9H8V3;O43745}  
17641 Pathogen[ Q85601] interacts with 2 human partners:{Q9BZF9;O43745}  
17642 Pathogen[ P14079] interacts with 3 human partners:{O43745;Q9H8V3;Q9BZF9}  
17643 Pathogen[ P03383] interacts with 2 human partners:{Q9BZF9;O43745}  
17644 Pathogen[ P03410] interacts with 3 human partners:{Q9BZF9;O43745;Q9H8V3}  
17645 Pathogen[ P14075] interacts with 2 human partners:{O43745;Q9BZF9}  
17646 Pathogen[ P0C206] interacts with 3 human partners:{Q9H8V3;Q9BZF9;O43745}  
17647 Pathogen[ P03363] interacts with 2 human partners:{Q9BZF9;O43745}  
17648 [Cluster 1605]GO:0048715+P biological\_process [name] negative regulation of oligodendrocyte differentiation [def] "Any process that stops, prevents, or reduces the frequency, rate or extent of oligodendrocyte differentiation." [GOC  
17649 Pathogen[ Q2Q067] interacts with 2 human partners:{Q07687;P47928}  
17650 Pathogen[ P0C214] interacts with 2 human partners:{Q07687;P47928}  
17651 Pathogen[ P03346] interacts with 2 human partners:{P56177;P47928}  
17652 Pathogen[ Q85601] interacts with 2 human partners:{Q07687;P47928}  
17653 Pathogen[ P14079] interacts with 2 human partners:{Q07687;P47928}  
17654 Pathogen[ P03383] interacts with 2 human partners:{Q07687;P47928}  
17655 Pathogen[ P03410] interacts with 2 human partners:{Q07687;P47928}  
17656 Pathogen[ P14075] interacts with 2 human partners:{P47928;Q07687}  
17657 Pathogen[ P0C206] interacts with 3 human partners:{Q07687;P47928;P56177}  
17658 Pathogen[ P03363] interacts with 3 human partners:{P56177;P47928;Q07687}  
17659 [Cluster 1606]GO:0021695+P biological\_process [name] cerebellar cortex development [def] "The process whose specific outcome is the progression of the cerebellar cortex over time, from its formation to the mature structure. The cerebellar cortex is a thin mantle of gray matter that covers the surface of each cerebral hemisphere. It has a characteristic morphology with convolutions (gyri) and crevices (sulci) that have specific functions. Six layers of nerve cells and the nerve pathways that connect them comprise the cerebellar cortex. Together, these regions are responsible for the processes of conscious thought, perception, emotion and memory as well as advanced motor function." [GO\_REF  
17660 Pathogen[ Q2Q067] interacts with 1 human partners:{Q15910}  
17661 Pathogen[ P0C214] interacts with 1 human partners:{Q15910}  
17662 Pathogen[ P03346] interacts with 1 human partners:{Q15910}  
17663 Pathogen[ Q85601] interacts with 1 human partners:{Q15910}  
17664 Pathogen[ P14079] interacts with 1 human partners:{Q15910}  
17665 Pathogen[ P03383] interacts with 1 human partners:{Q15910}  
17666 Pathogen[ P03410] interacts with 1 human partners:{Q15910}  
17667 Pathogen[ P14075] interacts with 1 human partners:{Q15910}  
17668 Pathogen[ P0C206] interacts with 1 human partners:{Q15910}  
17669 Pathogen[ P03363] interacts with 1 human partners:{Q15910}  
17670 [Cluster 1607]GO:0016358+P biological\_process [name] dendrite development [def] "The process whose specific outcome is the progression of the dendrite over time, from its formation to the mature structure. A dendrite is a freely branching protoplasmic process of a nerve cell." [GOC  
17671 Pathogen[ Q2Q067] interacts with 5 human partners:{O14786;O75177;Q92769;P63000;Q9Y296}  
17672 Pathogen[ P0C214] interacts with 6 human partners:{P63000;O14786;Q9UM54;Q9Y296;Q92769;O75177}  
17673 Pathogen[ P03346] interacts with 7 human partners:{O43815;Q9Y296;Q92769;P11137;P63000;O14786;O75177}  
17674 Pathogen[ Q85601] interacts with 7 human partners:{P63000;O43815;Q9Y296;O14786;Q92769;Q9UM54;O75177}  
17675 Pathogen[ P14079] interacts with 6 human partners:{Q9Y296;O43815;Q9UM54;Q92769;P11137;O75177}  
17676 Pathogen[ P03383] interacts with 4 human partners:{P63000;Q9Y296;O75177;Q92769}  
17677 Pathogen[ P03410] interacts with 8 human partners:{O14786;P11137;P63000;O75177;Q9UM54;Q92769;O43815;Q9Y296}  
17678 Pathogen[ P14075] interacts with 4 human partners:{Q92769;P63000;Q9Y296;O75177}  
17679 Pathogen[ P0C206] interacts with 8 human partners:{Q92769;Q9UM54;Q9Y296;O43815;O75177;O14786;P11137;P63000}  
17680 Pathogen[ P03363] interacts with 6 human partners:{P11137;O14786;P63000;O43815;Q9Y296;O75177}  
17681 [Cluster 1608]GO:0010506+P biological\_process [name] regulation of autophagy [def] "Any process that modulates the frequency, rate or extent of autophagy. Autophagy is the process in which cells digest parts of their own cytoplasm." [GOC  
17682 Pathogen[ Q2Q067] interacts with 3 human partners:{Q16666;O60260;Q8TDY2}  
17683 Pathogen[ P0C214] interacts with 3 human partners:{Q16666;Q8TDY2;O60260}

17684 Pathogen[ P03346] interacts with 4 human partners:{Q16666;Q8TDY2;Q14694;O60260}

17685 Pathogen[ Q85601] interacts with 3 human partners:{Q16666;Q8TDY2;O60260}

17686 Pathogen[ P14079] interacts with 6 human partners:{O60260;Q8TDY2;Q96GC9;O94964;Q16666;P10636}

17687 Pathogen[ P03383] interacts with 3 human partners:{Q8TDY2;O60260;Q16666}

17688 Pathogen[ P03410] interacts with 6 human partners:{Q16666;Q96GC9;O94964;Q8TDY2;O60260;P10636}

17689 Pathogen[ P14075] interacts with 3 human partners:{Q8TDY2;Q16666;O60260}

17690 Pathogen[ P0C206] interacts with 5 human partners:{O94964;Q16666;P10636;O60260;Q8TDY2}

17691 Pathogen[ P03363] interacts with 2 human partners:{Q16666;Q8TDY2}

17692 [Cluster 1609]GO:0031018+P biological\_process [name] endocrine pancreas development [def] "The process whose specific outcome is the progression of the endocrine pancreas over time, from its formation to the mature structure. The endocrine pancreas is made up of islet cells that produce insulin, glucagon and somatostatin." [GOC

17693 Pathogen[ Q2Q067] interacts with 9 human partners:{Q13562;P31749;P35680;P48380;Q8HWS3;O95948;Q9Y4Z2;P20823;O60422}

17694 Pathogen[ P0C214] interacts with 6 human partners:{P11168;P10909;P48380;O95948;Q8HWS3;P31749}

17695 Pathogen[ P03346] interacts with 18 human partners:{Q06945;Q9Y4Z2;P50219;Q7RTS3;P48380;P20823;O43316;Q9UBC0;P78426;Q8HWS3;O95096;P31749;O95948;P35680;Q12778;O60422;Q01101;Q13562}

17696 Pathogen[ Q85601] interacts with 11 human partners:{P11168;O43316;P31749;Q9Y4Z2;Q13562;O95948;P35680;O60422;P48380;P20823;Q8HWS3}

17697 Pathogen[ P14079] interacts with 6 human partners:{P04083;P35680;O95948;P48380;P10909;Q8HWS3}

17698 Pathogen[ P03383] interacts with 4 human partners:{Q8HWS3;P31749;P48380;P11168}

17699 Pathogen[ P03410] interacts with 8 human partners:{P11168;P31749;O95948;P48380;P35680;O60422;Q8HWS3;P10909}

17700 Pathogen[ P14075] interacts with 4 human partners:{P48380;P31749;P11168;Q8HWS3}

17701 Pathogen[ P0C206] interacts with 13 human partners:{Q8HWS3;P31749;Q9Y4Z2;Q9UBC0;P48380;P11168;P35680;P20823;P10909;Q13562;O60422;O43316;O95948}

17702 Pathogen[ P03363] interacts with 11 human partners:{Q9UBC0;Q9Y4Z2;O95948;O60422;Q7RTS3;O43316;P31749;Q9C056;P48380;Q8HWS3;P50219}

17703 [Cluster 1610]GO:0000379+P biological\_process [name] tRNA-type intron splice site recognition and cleavage [def] "RNA processing that begins when the tertiary structure of a tRNA type intron is recognized, and ends when the endonucleolytic cleavage of the RNA at both the 5' and 3' splice sites occurs." [GOC

17704 Pathogen[ Q2Q067] interacts with 1 human partners:{Q9BSV6}

17705 Pathogen[ P0C214] interacts with 1 human partners:{Q9BSV6}

17706 Pathogen[ P03346] interacts with 1 human partners:{Q9BSV6}

17707 Pathogen[ Q85601] interacts with 1 human partners:{Q9BSV6}

17708 Pathogen[ P14079] interacts with 1 human partners:{Q9BSV6}

17709 Pathogen[ P03383] interacts with 1 human partners:{Q9BSV6}

17710 Pathogen[ P03410] interacts with 1 human partners:{Q9BSV6}

17711 Pathogen[ P14075] interacts with 1 human partners:{Q9BSV6}

17712 Pathogen[ P0C206] interacts with 1 human partners:{Q9BSV6}

17713 Pathogen[ P03363] interacts with 1 human partners:{Q9BSV6}

17714 [Cluster 1611]GO:0007266+P biological\_process [name] Rho protein signal transduction [def] "A series of molecular signals within the cell that are mediated by a member of the Rho family of proteins switching to a GTP-bound active state." [GOC

17715 Pathogen[ Q2Q067] interacts with 5 human partners:{P41182;O14907;P23528;Q00587;P61586}

17716 Pathogen[ P0C214] interacts with 5 human partners:{P61586;O14907;P52565;P41182;P98171}

17717 Pathogen[ P03346] interacts with 8 human partners:{Q969H4;P98171;Q00587;P52565;O14907;P41182;P23528;P61586}

17718 Pathogen[ Q85601] interacts with 5 human partners:{P52565;O14907;P61586;P23528;P41182}

17719 Pathogen[ P14079] interacts with 12 human partners:{P52565;Q8IZ21;P98171;O14907;Q6NZY7;P41182;P23528;P61586;Q969H4;Q00587;Q9BZX4;Q9H3Q1}

17720 Pathogen[ P03383] interacts with 4 human partners:{P61586;O14907;P23528;Q00587}

17721 Pathogen[ P03410] interacts with 12 human partners:{Q8IZ21;P98171;Q9BZX4;Q00587;Q9H3Q1;Q6NZY7;Q969H4;P61586;O14907;P41182;P23528;P52565}

17722 Pathogen[ P14075] interacts with 4 human partners:{Q00587;P23528;O14907;P61586}

17723 Pathogen[ P0C206] interacts with 8 human partners:{P41182;P52565;P61586;O14907;P98171;Q969H4;P23528;Q00587}

17724 Pathogen[ P03363] interacts with 6 human partners:{O14907;P52565;P98171;Q00587;Q969H4;P23528}

17725 [Cluster 1612]GO:0010694+P biological\_process [name] positive regulation of alkaline phosphatase activity [def] "Any process that increases the frequency, rate or extent



of alkaline phosphatase activity, the catalysis of the reaction

17726 Pathogen[ Q2Q067] interacts with 1 human partners:{P84022}

17727 Pathogen[ P0C214] interacts with 1 human partners:{P84022}

17728 Pathogen[ P03346] interacts with 1 human partners:{P84022}

17729 Pathogen[ Q85601] interacts with 1 human partners:{P84022}

17730 Pathogen[ P14079] interacts with 1 human partners:{Q06413}

17731 Pathogen[ P03383] interacts with 1 human partners:{P84022}

17732 Pathogen[ P03410] interacts with 1 human partners:{P84022}

17733 Pathogen[ P14075] interacts with 1 human partners:{P84022}

17734 Pathogen[ P0C206] interacts with 1 human partners:{P84022}

17735 Pathogen[ P03363] interacts with 1 human partners:{P84022}

17736 [Cluster 1613]GO:2001056+P biological\_process [name] positive regulation of cysteine-type endopeptidase activity [def] "Any process that activates or increases the frequency, rate or extent of cysteine-type endopeptidase activity." [GOC

17737 Pathogen[ Q2Q067] interacts with 2 human partners:{Q9BXH1;O14862}

17738 Pathogen[ P0C214] interacts with 2 human partners:{Q9BXH1;O14862}

17739 Pathogen[ P03346] interacts with 2 human partners:{Q9BXH1;O14862}

17740 Pathogen[ Q85601] interacts with 2 human partners:{Q9BXH1;O14862}

17741 Pathogen[ P14079] interacts with 3 human partners:{O15553;Q9BXH1;O14862}

17742 Pathogen[ P03383] interacts with 2 human partners:{O14862;Q9BXH1}

17743 Pathogen[ P03410] interacts with 2 human partners:{Q9BXH1;O14862}

17744 Pathogen[ P14075] interacts with 2 human partners:{O14862;Q9BXH1}

17745 Pathogen[ P0C206] interacts with 2 human partners:{O14862;Q9BXH1}

17746 Pathogen[ P03363] interacts with 2 human partners:{O14862;Q9BXH1}

17747 [Cluster 1614]GO:0003222+P biological\_process [name] ventricular trabecular myocardium morphogenesis [def] "The process in which the anatomical structures of the trabecular cardiac ventricle muscle are generated and organized." [GOC

17748 Pathogen[ Q2Q067] interacts with 2 human partners:{Q06330;Q9Y5J3}

17749 Pathogen[ P0C214] interacts with 3 human partners:{Q9Y5J3;Q06330;O95155}

17750 Pathogen[ P03346] interacts with 4 human partners:{Q06330;O95155;Q9Y5J3;O75593}

17751 Pathogen[ Q85601] interacts with 3 human partners:{Q06330;O95155;Q9Y5J3}

17752 Pathogen[ P14079] interacts with 2 human partners:{Q06330;Q9Y5J3}

17753 Pathogen[ P03383] interacts with 1 human partners:{Q06330}

17754 Pathogen[ P03410] interacts with 2 human partners:{Q9Y5J3;Q06330}

17755 Pathogen[ P14075] interacts with 1 human partners:{Q06330}

17756 Pathogen[ P0C206] interacts with 3 human partners:{Q06330;O95155;Q9Y5J3}

17757 Pathogen[ P03363] interacts with 3 human partners:{Q9Y5J3;Q06330;O95155}

17758 [Cluster 1615]GO:0048213+P biological\_process [name] Golgi vesicle prefusion complex stabilization [def] "The binding of specific proteins to the t-SNARE/v-SNARE/SNAP25 complex, by which the Golgi vesicle prefusion complex is stabilized." [GOC

17759 Pathogen[ Q2Q067] interacts with 1 human partners:{Q9H9E3}

17760 Pathogen[ P0C214] interacts with 1 human partners:{Q9H9E3}

17761 Pathogen[ P03346] interacts with 1 human partners:{Q9H9E3}

17762 Pathogen[ Q85601] interacts with 1 human partners:{Q9H9E3}

17763 Pathogen[ P14079] interacts with 1 human partners:{Q9H9E3}

17764 Pathogen[ P03383] interacts with 1 human partners:{Q9H9E3}

17765 Pathogen[ P03410] interacts with 1 human partners:{Q9H9E3}

17766 Pathogen[ P14075] interacts with 1 human partners:{Q9H9E3}

17767 Pathogen[ P0C206] interacts with 1 human partners:{Q9H9E3}

17768 Pathogen[ P03363] interacts with 1 human partners:{Q9H9E3}

17769 [Cluster 1616]GO:0042536+P biological\_process [name] negative regulation of tumor necrosis factor biosynthetic process [def] "Any process that stops, prevents, or reduces the frequency, rate or extent of the chemical reactions and pathways resulting in the formation of tumor necrosis factor, an inflammatory cytokine produced by macrophages/monocytes during acute inflammation and which is responsible for a diverse range of signaling events within cells, leading to necrosis or apoptosis." [GOC

17770 Pathogen[ Q2Q067] interacts with 1 human partners:{P20749}

17771 Pathogen[ P0C214] interacts with 1 human partners:{P20749}

17772 Pathogen[ P03346] interacts with 1 human partners:{P20749}

17773 Pathogen[ Q85601] interacts with 1 human partners:{P20749}

17774 Pathogen[ P14079] interacts with 1 human partners:{P20749}

17775 Pathogen[ P03383] interacts with 1 human partners:{P20749}

17776 Pathogen[ P03410] interacts with 1 human partners:{P20749}

17777 Pathogen[ P14075] interacts with 1 human partners:{P20749}

17778 Pathogen[ P0C206] interacts with 1 human partners:{P20749}

17779 Pathogen[ P03363] interacts with 1 human partners:{P20749}

17780 [Cluster 1617]GO:0055089+P biological\_process [name] fatty acid homeostasis [def] "Any process involved in the maintenance of an internal steady state of fatty acid within an organism or cell." [GOC

17781 Pathogen[ Q2Q067] interacts with 1 human partners:{Q9NP71}

17782 Pathogen[ P0C214] interacts with 1 human partners:{Q9NP71}

17783 Pathogen[ P03346] interacts with 1 human partners:{Q9NP71}

17784 Pathogen[ Q85601] interacts with 1 human partners:{Q9NP71}

17785 Pathogen[ P14079] interacts with 1 human partners:{Q9NP71}

17786 Pathogen[ P03383] interacts with 1 human partners:{Q9NP71}

17787 Pathogen[ P03410] interacts with 1 human partners:{Q9NP71}

17788 Pathogen[ P14075] interacts with 1 human partners:{Q9NP71}  
17789 Pathogen[ P0C206] interacts with 1 human partners:{Q9NP71}  
17790 Pathogen[ P03363] interacts with 1 human partners:{Q9NP71}  
17791 [Cluster 1618]GO:0060349+P biological\_process [name] bone morphogenesis [def] "The process in which bones are generated and organized." [GOC  
17792 Pathogen[ Q2Q067] interacts with 2 human partners:{P35548;P12755}  
17793 Pathogen[ P0C214] interacts with 2 human partners:{P12755;P35548}  
17794 Pathogen[ P03346] interacts with 5 human partners:{P47902;P15863;P35548;Q6BEB4;P56178}  
17795 Pathogen[ Q85601] interacts with 2 human partners:{P12755;P35548}  
17796 Pathogen[ P14079] interacts with 4 human partners:{P12755;Q6BEB4;Q92896;P28360}  
17797 Pathogen[ P03383] interacts with 1 human partners:{P35548}  
17798 Pathogen[ P03410] interacts with 3 human partners:{P12755;Q92896;P35548}  
17799 Pathogen[ P14075] interacts with 1 human partners:{P35548}  
17800 Pathogen[ P0C206] interacts with 2 human partners:{P12755;P35548}  
17801 Pathogen[ P03363] interacts with 3 human partners:{P47902;P35548;Q6BEB4}  
17802 [Cluster 1619]GO:0033574+P biological\_process [name] response to testosterone stimulus [def] "Any process that results in a change in state or activity of a cell or an organism (in terms of movement, secretion, enzyme production, gene expression, etc.) as a result of a testosterone stimulus." [GOC  
17803 Pathogen[ Q2Q067] interacts with 4 human partners:{P30279;P27797;P55212;P27986}  
17804 Pathogen[ P0C214] interacts with 4 human partners:{P55212;P30279;P27797;P27986}  
17805 Pathogen[ P03346] interacts with 5 human partners:{P30279;Q92826;P55212;P27797;P27986}  
17806 Pathogen[ Q85601] interacts with 4 human partners:{P27797;P27986;P30279;P55212}  
17807 Pathogen[ P14079] interacts with 3 human partners:{P60022;P55212;Q16625}  
17808 Pathogen[ P03383] interacts with 4 human partners:{P27986;P55212;P30279;P27797}  
17809 Pathogen[ P03410] interacts with 6 human partners:{P27986;P30279;P60022;Q16625;P55212;P27797}  
17810 Pathogen[ P14075] interacts with 4 human partners:{P30279;P55212;P27797;P27986}  
17811 Pathogen[ P0C206] interacts with 4 human partners:{P27797;P30279;P55212;P27986}  
17812 Pathogen[ P03363] interacts with 5 human partners:{P30279;P55212;P27797;Q92826;P27986}  
17813 [Cluster 1620]GO:0007610+P biological\_process [name] behavior [def] "The specific actions or reactions of an organism in response to external or internal stimuli. Patterned activity of a whole organism in a manner dependent upon some combination of that organism's internal state and external conditions." [GOC  
17814 Pathogen[ Q2Q067] interacts with 1 human partners:{O94925}  
17815 Pathogen[ P0C214] interacts with 3 human partners:{Q8IXF0;O95278;O94925}  
17816 Pathogen[ P03346] interacts with 6 human partners:{Q99742;Q16559;Q8IXF0;O94925;O95278;P53539}  
17817 Pathogen[ Q85601] interacts with 4 human partners:{O94925;O95278;Q8IXF0;P53539}  
17818 Pathogen[ P14079] interacts with 4 human partners:{Q7Z2T5;Q8IXF0;O94925;O96001}  
17819 Pathogen[ P03383] interacts with 1 human partners:{O94925}  
17820 Pathogen[ P03410] interacts with 4 human partners:{Q8IXF0;O94925;O96001;Q16559}  
17821 Pathogen[ P14075] interacts with 1 human partners:{O94925}  
17822 Pathogen[ P0C206] interacts with 4 human partners:{O95278;P53539;O94925;Q8IXF0}  
17823 Pathogen[ P03363] interacts with 4 human partners:{P53539;Q99742;O94925;Q8IXF0}  
17824 [Cluster 1621]GO:0007186+P biological\_process [name] G-protein coupled receptor signaling pathway [def] "Any series of molecular signals that proceeds with an activated receptor promoting the exchange of GDP for GTP on the alpha-subunit of an associated heterotrimeric G-protein complex. The GTP-bound activated alpha-G-protein then dissociates from the beta- and gamma-subunits to further transmit the signal within the cell. The pathway begins with receptor-ligand interaction, or for basal GPCR signaling the pathway begins with the receptor activating its G protein in the absence of an agonist, and ends with regulation of a downstream cellular process, e.g. transcription." [GOC  
17825 Pathogen[ Q2Q067] interacts with 8 human partners:{P31749;P56945;Q8WYR1;P62879;P81274;Q02952;Q5UE93;Q6MZT1}  
17826 Pathogen[ P0C214] interacts with 7 human partners:{P56945;P81274;Q8WYR1;Q6MZT1;Q5UE93;P62879;P31749}  
17827 Pathogen[ P03346] interacts with 12 human partners:{O14908;Q7RTS1;Q8WYR1;Q6MZT1;Q9P2Y4;P62879;P56945;P81274;P31749;Q02952;Q5UE93;O75386}  
17828 Pathogen[ Q85601] interacts with 7 human partners:{P62879;P31749;P81274;Q6MZT1;P56945;Q8WYR1;Q5UE93}  
17829 Pathogen[ P14079] interacts with 19 human partners:{Q02952;Q9NYV7;Q86W33;Q9P2Y4;Q8WYR1;O43813;O60895;P60022;O15263;Q7RTS1;Q15726;Q8WU20;Q6MZT1;Q8N729;P81274;P81277;O14908;Q5UE93;Q8NG41}  
17830 Pathogen[ P03383] interacts with 8 human partners:{P62879;P56945;P31749;Q6MZT1;P81274;Q8WYR1;Q5UE93;Q02952}  
17831 Pathogen[ P03410] interacts with 20 human partners:{Q6MZT1;Q15726;Q5UE93;Q8NG41;Q8WYR1;Q8N729;O60896;O60895;Q86W33;O14908;P31749;Q7RTS1;P60022;P81274;P56945;Q02952;Q8WU20;P81277;P62879;O15263}  
17832 Pathogen[ P14075] interacts with 8 human partners:{P81274;Q8WYR1;P62879;Q5UE93;Q6MZT1;P31749;Q02952;P56945}

17833 Pathogen[ P0C206] interacts with 12 human partners: {Q6MZT1;P31749;P81274;P62879;Q8N729;Q9P2Y4;Q8WU20;O14908;Q02952;Q5UE93;P56945;Q8WYR1}

17834 Pathogen[ P03363] interacts with 13 human partners: {Q7RTS1;P62879;O14908;Q8WYR1;Q02952;P81274;Q5UE93;P31749;P56945;O75386;Q8N729;Q6MZT1;Q9P2Y4}

17835 [Cluster 1622]GO:0042796+P biological\_process [name] snRNA transcription from RNA polymerase III promoter [def] "The synthesis of small nuclear RNA (snRNA) from a DNA template by RNA Polymerase III (Pol III), originating at a Pol III promoter." [GOC

17836 Pathogen[ Q2Q067] interacts with 1 human partners: {Q5SXM2}

17837 Pathogen[ P0C214] interacts with 1 human partners: {Q5SXM2}

17838 Pathogen[ P03346] interacts with 1 human partners: {Q5SXM2}

17839 Pathogen[ Q85601] interacts with 1 human partners: {Q5SXM2}

17840 Pathogen[ P14079] interacts with 1 human partners: {Q5SXM2}

17841 Pathogen[ P03383] interacts with 1 human partners: {Q5SXM2}

17842 Pathogen[ P03410] interacts with 1 human partners: {Q5SXM2}

17843 Pathogen[ P14075] interacts with 1 human partners: {Q5SXM2}

17844 Pathogen[ P0C206] interacts with 1 human partners: {Q5SXM2}

17845 Pathogen[ P03363] interacts with 1 human partners: {Q5SXM2}

17846 [Cluster 1623]GO:0030174+P biological\_process [name] regulation of DNA-dependent DNA replication initiation [def] "Any process that modulates the frequency, rate or extent of initiation of DNA-dependent DNA replication\_ the process in which DNA becomes competent to replicate. In eukaryotes, replication competence is established in early G1 and lost during the ensuing S phase." [GOC

17847 Pathogen[ Q2Q067] interacts with 4 human partners: {Q7Z2Z1;Q9H211;Q96S55;O60934}

17848 Pathogen[ P0C214] interacts with 3 human partners: {Q96S55;Q9H211;Q7Z2Z1}

17849 Pathogen[ P03346] interacts with 4 human partners: {Q7Z2Z1;Q96S55;O60934;Q9H211}

17850 Pathogen[ Q85601] interacts with 4 human partners: {Q7Z2Z1;Q96S55;Q9H211;O60934}

17851 Pathogen[ P14079] interacts with 4 human partners: {Q9H211;O60934;Q96S55;Q7Z2Z1}

17852 Pathogen[ P03383] interacts with 3 human partners: {Q96S55;Q7Z2Z1;Q9H211}

17853 Pathogen[ P03410] interacts with 4 human partners: {Q9H211;Q96S55;Q7Z2Z1;O60934}

17854 Pathogen[ P14075] interacts with 3 human partners: {Q9H211;Q7Z2Z1;Q96S55}

17855 Pathogen[ P0C206] interacts with 4 human partners: {O60934;Q9H211;Q96S55;Q7Z2Z1}

17856 Pathogen[ P03363] interacts with 3 human partners: {Q7Z2Z1;Q9H211;Q96S55}

17857 [Cluster 1624]GO:0031344+P biological\_process [name] regulation of cell projection organization [def] "Any process that modulates the frequency, rate or extent of a process involved in the formation, arrangement of constituent parts, or disassembly of cell projections." [GOC

17858 Pathogen[ Q2Q067] interacts with 1 human partners: {Q8TCI5}

17859 Pathogen[ P0C214] interacts with 1 human partners: {Q8TCI5}

17860 Pathogen[ P03346] interacts with 1 human partners: {Q8TCI5}

17861 Pathogen[ Q85601] interacts with 1 human partners: {Q8TCI5}

17862 Pathogen[ P14079] interacts with 1 human partners: {Q8TCI5}

17863 Pathogen[ P03383] interacts with 1 human partners: {Q8TCI5}

17864 Pathogen[ P03410] interacts with 1 human partners: {Q8TCI5}

17865 Pathogen[ P14075] interacts with 1 human partners: {Q8TCI5}

17866 Pathogen[ P0C206] interacts with 1 human partners: {Q8TCI5}

17867 Pathogen[ P03363] interacts with 1 human partners: {Q8TCI5}

17868 [Cluster 1625]GO:0051489+P biological\_process [name] regulation of filopodium assembly [def] "Any process that modulates the frequency, rate or extent of the assembly of a filopodium, a thin, stiff protrusion extended by the leading edge of a motile cell such as a crawling fibroblast or amoeba, or an axonal growth cone." [GOC

17869 Pathogen[ Q2Q067] interacts with 1 human partners: {P60953}

17870 Pathogen[ P0C214] interacts with 1 human partners: {P60953}

17871 Pathogen[ P03346] interacts with 2 human partners: {P60953;Q96T49}

17872 Pathogen[ Q85601] interacts with 2 human partners: {P60953;P17677}

17873 Pathogen[ P14079] interacts with 2 human partners: {P17677;Q96T49}

17874 Pathogen[ P03383] interacts with 1 human partners: {P60953}

17875 Pathogen[ P03410] interacts with 3 human partners: {Q96T49;P60953;P17677}

17876 Pathogen[ P14075] interacts with 1 human partners: {P60953}

17877 Pathogen[ P0C206] interacts with 3 human partners: {P17677;Q96T49;P60953}

17878 Pathogen[ P03363] interacts with 2 human partners: {Q96T49;P60953}

17879 [Cluster 1626]GO:0000072+P biological\_process [name] M phase specific microtubule process [def] "A microtubule-based process that occurs only during M phase of the cell cycle." [GOC

17880 Pathogen[ Q2Q067] interacts with 2 human partners: {P52292;P02489}

17881 Pathogen[ P0C214] interacts with 2 human partners: {P02489;P52292}

17882 Pathogen[ P03346] interacts with 2 human partners: {P02489;P52292}

17883 Pathogen[ Q85601] interacts with 2 human partners: {P02489;P52292}

17884 Pathogen[ P14079] interacts with 2 human partners: {P02489;P52292}

17885 Pathogen[ P03383] interacts with 1 human partners: {P52292}

17886 Pathogen[ P03410] interacts with 2 human partners: {P02489;P52292}

17887 Pathogen[ P14075] interacts with 1 human partners: {P52292}

17888 Pathogen[ P0C206] interacts with 2 human partners: {P02489;P52292}

17889 Pathogen[ P03363] interacts with 2 human partners: {P02489;P52292}

17890 [Cluster 1627]GO:0042633+P biological\_process [name] hair cycle [def] "The cyclical

phases of growth (anagen), regression (catagen), quiescence (telogen), and shedding (exogen) in the life of a hair\_ one of the collection or mass of filaments growing from the skin of an animal, and forming a covering for a part of the head or for any part or the whole of the body." [GOC

17891 Pathogen[ Q2Q067] interacts with 2 human partners:{Q8WUF5;Q9Y651}

17892 Pathogen[ P0C214] interacts with 2 human partners:{Q8WUF5;Q9Y651}

17893 Pathogen[ P03346] interacts with 2 human partners:{Q8WUF5;Q9Y651}

17894 Pathogen[ Q85601] interacts with 2 human partners:{Q9Y651;Q8WUF5}

17895 Pathogen[ P14079] interacts with 1 human partners:{Q8WUF5}

17896 Pathogen[ P03383] interacts with 1 human partners:{Q8WUF5}

17897 Pathogen[ P03410] interacts with 1 human partners:{Q8WUF5}

17898 Pathogen[ P14075] interacts with 1 human partners:{Q8WUF5}

17899 Pathogen[ P0C206] interacts with 2 human partners:{Q8WUF5;Q9Y651}

17900 Pathogen[ P03363] interacts with 2 human partners:{Q8WUF5;Q9Y651}

17901 [Cluster 1628]GO:0050821+P biological\_process [name] protein stabilization [def] "Any process involved in maintaining the structure and integrity of a protein and preventing it from degradation or aggregation." [GOC

17902 Pathogen[ Q2Q067] interacts with 25 human partners:{Q9NQG7;Q6NVH7;Q9BZE4;Q99747;Q99497;P83436;P51610;Q8N726;P27797;P63146;P40337;P84022;O15105;Q96JB2;P04406;Q8NFZ5;Q969H0;Q3YBR2;Q19AV6;Q9NS23;P40855;P15923;Q96EY1;Q9NZD4;Q96IU2}

17903 Pathogen[ P0C214] interacts with 29 human partners:{Q9NQG7;P51610;Q99747;Q9NS23;P46379;P40855;P84022;P83436;Q99497;Q8N726;P15923;Q9NZD4;O15105;P40337;P10809;Q6NVH7;Q969H0;Q3YBR2;Q8NFZ5;P10909;P27797;Q96IU2;Q9BZE4;P16220;Q19AV6;Q96JB2;P04406;Q96EY1;P63146}

17904 Pathogen[ P03346] interacts with 36 human partners:{Q06945;Q9NQG7;Q9NQC8;P04406;P16220;Q96JB2;Q9BZE4;Q14149;Q8NFZ5;Q9NZD4;P51610;P15923;O15105;P84022;O60519;P63146;P46379;Q3YBR2;O75604;Q19AV6;Q99497;P27797;P40337;P83436;O15151;Q96IU2;Q6NVH7;P40855;Q8N726;Q969H0;Q9NQ94;Q9NS23;Q96EY1;Q99747;Q96M02;Q86Y82}

17905 Pathogen[ Q85601] interacts with 30 human partners:{Q3YBR2;Q9NQG7;Q99497;Q96M02;P63146;Q969H0;Q9BZE4;O15151;Q19AV6;P40337;Q6NVH7;P46379;Q96JB2;P83436;P27797;Q9NS23;Q14149;P51610;Q8N726;Q8NFZ5;P16220;Q9NZD4;P15923;P84022;O15105;P04406;Q96EY1;P40855;Q99747;Q96IU2}

17906 Pathogen[ P14079] interacts with 30 human partners:{Q9NQG7;P40855;Q9NS23;P83436;Q969H0;Q96IU2;Q99497;Q8N726;P10909;Q99747;P15923;Q9NQ94;P51610;Q9BZE4;Q6NVH7;Q14149;Q96M02;P40337;Q8NFZ5;Q9NZD4;Q19AV6;Q3YBR2;Q9NQC8;Q96JB2;P28360;O15105;O15151;P63146;Q96EY1;P04406}

17907 Pathogen[ P03383] interacts with 24 human partners:{Q9NQG7;P16220;P40337;P83436;Q6NVH7;Q19AV6;Q96JB2;P15923;Q9BZE4;Q96IU2;O15105;P51610;P84022;Q99747;P04406;Q969H0;P63146;Q3YBR2;Q8NFZ5;Q96EY1;P40855;Q8N726;P27797;Q9NZD4}

17908 Pathogen[ P03410] interacts with 31 human partners:{P84022;Q96M02;Q9NQG7;Q96IU2;P51610;Q99497;Q8NFZ5;Q96JB2;O15151;Q8N726;Q14149;Q19AV6;Q9NS23;P40855;Q6NVH7;P15923;Q969H0;P63146;Q3YBR2;P16220;P04406;O15105;Q9NQC8;P83436;Q96EY1;Q99747;Q9BZE4;P40337;P10909;Q9NZD4;P27797}

17909 Pathogen[ P14075] interacts with 24 human partners:{Q9NQG7;Q96IU2;Q96JB2;P40855;P51610;Q99747;P15923;Q8NFZ5;Q3YBR2;Q19AV6;P04406;P27797;O15105;Q9BZE4;P16220;P63146;P84022;Q6NVH7;P40337;Q969H0;Q9NZD4;P83436;Q96EY1;Q8N726}

17910 Pathogen[ P0C206] interacts with 33 human partners:{Q9NQC8;P84022;Q9NQG7;Q96M02;Q19AV6;P83436;P27797;Q8N726;P16220;O75604;Q8NFZ5;Q969H0;Q96JB2;Q99497;O15105;O15151;P51610;P40855;Q14149;P15923;P04406;P10909;Q9BZE4;Q99747;Q6NVH7;Q9NS23;Q9NZD4;Q3YBR2;Q96EY1;P46379;Q96IU2;P40337;P63146}

17911 Pathogen[ P03363] interacts with 31 human partners:{P46379;Q3YBR2;Q9NQG7;Q19AV6;O75604;Q9BZE4;P16220;P83436;O15151;O15105;Q96M02;P63146;P40337;P15923;P27797;P84022;P04406;Q969H0;Q9NS23;Q9NZD4;P40855;Q8N726;Q96IU2;Q6NVH7;Q8NFZ5;Q96EY1;Q99747;Q9NQC8;Q9NQ94;P51610;Q96JB2}

17912 [Cluster 1629]GO:0000279+P biological\_process [name] M phase [def] "A cell cycle process comprising the steps by which a cell progresses through M phase, the part of the cell cycle comprising nuclear division." [GOC

17913 Pathogen[ Q2Q067] interacts with 2 human partners:{P06400;Q12906}

17914 Pathogen[ P0C214] interacts with 2 human partners:{Q12906;P06400}

17915 Pathogen[ P03346] interacts with 2 human partners:{P06400;Q12906}

17916 Pathogen[ Q85601] interacts with 2 human partners:{P06400;Q12906}

17917 Pathogen[ P14079] interacts with 1 human partners:{Q12906}

17918 Pathogen[ P03383] interacts with 2 human partners:{P06400;Q12906}

17919 Pathogen[ P03410] interacts with 2 human partners:{P06400;Q12906}

17920 Pathogen[ P14075] interacts with 2 human partners:{Q12906;P06400}

17921 Pathogen[ P0C206] interacts with 2 human partners:{Q12906;P06400}

17922 Pathogen[ P03363] interacts with 2 human partners:{P06400;Q12906}

17923 [Cluster 1630]GO:0060700+P biological\_process [name] regulation of ribonuclease activity [def] "Any process that modulates the rate, frequency, or extent of ribonuclease activity, catalysis of the hydrolysis of phosphodiester bonds in chains of RNA." [GOC

17924 Pathogen[ Q2Q067] interacts with 1 human partners:{Q9Y6K5}

17925 Pathogen[ P0C214] interacts with 1 human partners:{Q9Y6K5}

17926 Pathogen[ P03346] interacts with 1 human partners:{Q9Y6K5}

17927 Pathogen[ Q85601] interacts with 1 human partners:{Q9Y6K5}

17928 Pathogen[ P14079] interacts with 1 human partners:{Q9Y6K5}

17929 Pathogen[ P03383] interacts with 1 human partners:{Q9Y6K5}

17930 Pathogen[ P03410] interacts with 1 human partners:{Q9Y6K5}

17931 Pathogen[ P14075] interacts with 1 human partners:{Q9Y6K5}

17932 Pathogen[ P0C206] interacts with 1 human partners:{Q9Y6K5}

17933 Pathogen[ P03363] interacts with 1 human partners:{Q9Y6K5}

17934 [Cluster 1631]GO:0046928+P biological\_process [name] regulation of neurotransmitter secretion [def] "Any process that modulates the frequency, rate or extent of the regulated release of a neurotransmitter from a cell or group of cells." [GOC

17935 Pathogen[ Q2Q067] interacts with 1 human partners:{Q9Y6H5}

17936 Pathogen[ P0C214] interacts with 1 human partners:{Q9Y6H5}

17937 Pathogen[ P03346] interacts with 1 human partners:{Q9Y6H5}

17938 Pathogen[ Q85601] interacts with 1 human partners:{Q9Y6H5}

17939 Pathogen[ P14079] interacts with 4 human partners:{Q9Y6H5;O43612;Q8WVH0;Q7Z7G2}

17940 Pathogen[ P03383] interacts with 1 human partners:{Q9Y6H5}

17941 Pathogen[ P03410] interacts with 4 human partners:{Q9Y6H5;O43612;Q8WVH0;Q7Z7G2}

17942 Pathogen[ P14075] interacts with 1 human partners:{Q9Y6H5}

17943 Pathogen[ P0C206] interacts with 2 human partners:{Q7Z7G2;Q9Y6H5}

17944 Pathogen[ P03363] interacts with 1 human partners:{Q9Y6H5}

17945 [Cluster 1632]GO:0032790+P biological\_process [name] ribosome disassembly [def] "The disaggregation of a ribosome into its constituent components\_ includes the dissociation of ribosomal subunits." [GOC

17946 Pathogen[ Q2Q067] interacts with 2 human partners:{Q96E11;Q9H2K0}

17947 Pathogen[ P0C214] interacts with 2 human partners:{Q96E11;Q9H2K0}

17948 Pathogen[ P03346] interacts with 2 human partners:{Q96E11;Q9H2K0}

17949 Pathogen[ Q85601] interacts with 1 human partners:{Q96E11}

17950 Pathogen[ P14079] interacts with 3 human partners:{Q96E11;Q9H2K0;Q969S9}

17951 Pathogen[ P03383] interacts with 2 human partners:{Q9H2K0;Q96E11}

17952 Pathogen[ P03410] interacts with 3 human partners:{Q9H2K0;Q969S9;Q96E11}

17953 Pathogen[ P14075] interacts with 2 human partners:{Q96E11;Q9H2K0}

17954 Pathogen[ P0C206] interacts with 2 human partners:{Q9H2K0;Q96E11}

17955 Pathogen[ P03363] interacts with 1 human partners:{Q96E11}

17956 [Cluster 1633]GO:2000010+P biological\_process [name] positive regulation of protein localization at cell surface [def] "Any process that activates or increases the frequency, rate or extent of protein localization at cell surface." [GOC

17957 Pathogen[ Q2Q067] interacts with 1 human partners:{Q9HD47}

17958 Pathogen[ P0C214] interacts with 1 human partners:{Q9HD47}

17959 Pathogen[ P03346] interacts with 1 human partners:{Q9HD47}

17960 Pathogen[ Q85601] interacts with 1 human partners:{Q9HD47}

17961 Pathogen[ P14079] interacts with 1 human partners:{Q9HD47}

17962 Pathogen[ P03383] interacts with 1 human partners:{Q9HD47}

17963 Pathogen[ P03410] interacts with 1 human partners:{Q9HD47}

17964 Pathogen[ P14075] interacts with 1 human partners:{Q9HD47}

17965 Pathogen[ P0C206] interacts with 1 human partners:{Q9HD47}

17966 Pathogen[ P03363] interacts with 1 human partners:{Q9HD47}

17967 [Cluster 1634]GO:0034227+P biological\_process [name] tRNA thio-modification [def] "The addition a sulfur atom to a nucleotide in a tRNA molecule." [GOC

17968 Pathogen[ Q2Q067] interacts with 3 human partners:{Q7Z7A3;Q2VPK5;Q9BTM9}

17969 Pathogen[ P0C214] interacts with 4 human partners:{Q9BTM9;Q95396;Q2VPK5;Q7Z7A3}

17970 Pathogen[ P03346] interacts with 3 human partners:{Q9BTM9;Q7Z7A3;Q2VPK5}

17971 Pathogen[ Q85601] interacts with 3 human partners:{Q2VPK5;Q9BTM9;Q7Z7A3}

17972 Pathogen[ P14079] interacts with 3 human partners:{Q2VPK5;Q7Z7A3;Q9BTM9}

17973 Pathogen[ P03383] interacts with 3 human partners:{Q7Z7A3;Q9BTM9;Q2VPK5}

17974 Pathogen[ P03410] interacts with 3 human partners:{Q7Z7A3;Q2VPK5;Q9BTM9}

17975 Pathogen[ P14075] interacts with 3 human partners:{Q9BTM9;Q2VPK5;Q7Z7A3}

17976 Pathogen[ P0C206] interacts with 4 human partners:{Q2VPK5;Q95396;Q7Z7A3;Q9BTM9}

17977 Pathogen[ P03363] interacts with 3 human partners:{Q9BTM9;Q7Z7A3;Q2VPK5}

17978 [Cluster 1635]GO:0007289+P biological\_process [name] spermatid nucleus differentiation [def] "The specialization of the spermatid nucleus during the development of a spermatid into a mature male gamete competent for fertilization." [GOC

17979 Pathogen[ Q2Q067] interacts with 1 human partners:{P62380}

17980 Pathogen[ P0C214] interacts with 2 human partners:{P62380;Q9HD26}

17981 Pathogen[ P03346] interacts with 2 human partners:{P62380;Q9HD26}

17982 Pathogen[ Q85601] interacts with 2 human partners:{Q9HD26;P62380}

17983 Pathogen[ P14079] interacts with 2 human partners:{P62380;Q9HD26}

17984 Pathogen[ P03383] interacts with 1 human partners:{Q9HD26}

17985 Pathogen[ P03410] interacts with 2 human partners:{P62380;Q9HD26}

17986 Pathogen[ P14075] interacts with 1 human partners:{Q9HD26}

17987 Pathogen[ P0C206] interacts with 2 human partners:{P62380;Q9HD26}

17988 Pathogen[ P03363] interacts with 2 human partners:{P62380;Q9HD26}

17989 [Cluster 1636]GO:0006974+P biological\_process [name] response to DNA damage stimulus [def] "Any process that results in a change in state or activity of a cell (in terms of movement, secretion, enzyme production, gene expression, etc.) as a result of a stimulus

indicating damage to its DNA from environmental insults or errors during metabolism."  
[GOC

- 17990 Pathogen[ Q2Q067] interacts with 243 human partners: {Q86W56;Q9Y253;Q9Y5K5;Q9NWS1;Q2YD98;P25490;O00213;P0C1Z6;Q9Y2M0;Q9NVH2;Q6NVH7;Q96SD1;Q93009;Q9BW66;Q99502;Q6ZW49;P24385;Q16594;Q9NS56;Q7Z2Z1;Q99638;Q8IY18;Q12888;Q6PJP8;Q92889;Q9HB96;P27694;P49959;Q96LA8;Q13889;P01106;Q6NS38;Q52LR7;Q7Z589;P46937;Q9UN51;Q95997;Q8N0Z6;Q15233;P41182;Q96019;Q9BRQ6;Q95243;Q99708;P18887;Q75807;Q13111;Q92985;O00167;Q9C086;Q5UIP0;Q96T88;P20749;Q9NZJ0;Q9UIF7;Q7Z2E3;Q9UHC1;Q969S2;Q96B01;P35244;P32780;Q8N2Z9;A8MT69;Q9UPV0;Q96EZ8;Q96S55;Q9UNA4;O14757;Q9N8V8;O15350;Q92759;P35638;Q9NY61;Q96AH0;P54727;P41218;Q9H981;Q53TQ3;Q9UBZ9;Q92547;Q86YC2;Q16531;Q95551;Q13156;Q13794;Q9BQ15;Q7Z6Z7;Q9N8V1;Q00597;Q43542;Q06609;Q9H9Q4;Q9BSD3;Q8NBZ0;P11388;P54725;Q14669;P61077;Q9Y2A0;Q68DK2;P27695;Q08050;Q13112;P12004;Q43524;Q43502;P63146;P06746;P24522;Q13469;Q15004;Q1ZZU3;Q99504;P29372;Q8NB91;Q9Y6P5;A4GXA9;Q9BTP7;Q99728;Q14653;Q60934;Q96017;Q5MJ70;Q9BQ83;P15927;Q8N140;Q8N3C0;Q9NPD8;Q9Y6K9;Q2TAK8;Q9NUW8;O00255;Q7LG56;P54278;Q9UQ84;Q9NPI8;P50750;Q6P4R8;Q8WXE1;P09874;Q13426;Q96MT8;Q96Q83;P50613;Q8IWL9;P23246;P61088;Q9HB75;P46100;Q9NRY2;Q6UWZ7;O15527;Q9P278;Q03468;P38936;P12956;Q68E01;Q60216;P39748;Q9UBU8;Q96HA7;Q15014;Q76064;Q13216;Q43299;P43351;Q8TD B6;Q75943;P78549;Q9UM11;Q9H816;P23396;Q13620;Q9BVW5;Q13619;Q13569;Q14686;Q96T76;Q9UI 95;Q969H0;Q96MG7;P41208;Q96NY9;Q86XK3;Q19AV6;Q9UNE7;Q9ULG1;Q9NS23;Q0VG06;P49459;Q146 76;Q96AY2;Q9NUS5;P16455;Q86WJ1;Q01831;Q96MF7;Q6ZRQ5;Q9P287;Q14683;P21675;Q9NP87;P249 41;P13010;Q8IY92;Q9UKK3;Q9NRD1;Q9Y5B9;Q92466;Q9H040;Q9UBL3;P13051;Q60870;Q6ZYL4;O152 87;Q9ULC4;Q6P1K8;Q9HAW4;Q9UMS4;Q6PI98;Q9NXX6;Q9H9F9;Q8IYD8;O60671;O15360;Q9NXR7;Q8TC 71;Q96RL1;Q9HCS7;Q9BTA9;P62877;Q53HV7;Q13888;O60921;P28715;Q9NW38;Q9BXW9;Q8N9B5;Q6NZ 36;P78543;Q08945;Q71UM5;P23025}
- 17991 Pathogen[ P0C214] interacts with 248 human partners: {P43351;Q8IWL9;Q95551;Q96B02;Q95243;Q8IY18;Q9Y6P5;O15287;O00213;Q9H9Q4;Q9P2 78;Q13619;Q9HCS7;P27695;Q9NVH2;Q00597;Q06609;Q9H040;Q13469;P24522;Q99728;Q13620;Q131 56;Q9BQ83;Q9Y6K9;Q5UIP0;Q96S55;P49959;Q9H816;Q8WXE1;Q52LR7;Q9NXX6;P78543;Q92889;P130 10;P06746;Q9NS23;Q9H9F9;P21675;Q8N0Z6;Q53TQ3;Q14164;P50750;P23396;Q2TAK8;P50613;Q131 12;Q15014;P23025;Q5H9I0;Q9NS56;O15350;O00167;Q75807;Q9C086;Q96SD1;Q13111;Q9NUA8;Q53H V7;Q15233;Q96NY9;P46937;Q9N8V8;Q99708;Q9UBZ9;P23246;Q9BVW5;P54725;Q6NZ36;Q9NU S5;P41218;Q96AH0;Q7Z589;P49459;Q96MT8;Q9ULG1;Q86W56;Q71UM5;Q9Y2A0;Q9NRD1;Q9Y2M0;P205 85;P24385;Q14676;Q68E01;Q14686;Q9HAW4;P62877;Q9NY61;Q9UI95;Q6ZRQ5;Q6P1K8;P38936;Q165 94;Q96T88;Q9UMS4;P61077;Q6ZW49;Q13794;P0C1Z6;Q9Y5K5;Q13216;Q9BW66;Q9UPV0;Q60921;Q8N3 C0;Q8N2Z9;Q6PJP8;O43299;P28715;P98170;Q92698;Q60870;Q9HB96;Q6PI98;Q92985;Q13426;Q6NS 38;Q96017;Q43542;Q96AY2;Q95071;P18887;P46100;Q9UHC1;Q9UNA4;Q7Z2E3;Q96MF7;Q9UIF7;Q6UW Z7;Q9NZJ0;Q9UBU8;P20749;Q6P4R8;Q9NVI1;P15927;Q96MG7;Q9UN51;Q43502;P24941;Q0VG06;P425 74;Q6NVH7;P41182;P35244;O15360;Q99504;Q9Y5B9;P11388;Q93009;Q96RL1;Q9HB75;A4GXA9;Q96B 01;Q15004;Q8WTP8;Q969H0;Q14653;P54727;Q75943;Q9BSD3;P32780;P41208;P16455;Q86YC2;Q9NP I8;O60671;Q96NY9;Q14669;Q9BXW9;Q14683;Q01831;P39748;Q1ZZU3;Q9UKK3;Q13888;Q9UHC1;Q128 88;Q7Z6Z7;P78549;P29372;Q08945;Q9UQ84;Q96BT7;Q95997;Q5MJ70;P27694;Q9NUW8;Q9NXR7;Q68D K2;Q9BTA9;P54278;Q8IY92;Q9NWS1;Q92547;Q9P287;Q8TC71;Q9NP87;Q86XK3;Q9UM11;O15527;P406 92;Q13569;O14757;Q92466;Q7LG56;Q99638;Q19AV6;Q8TDB6;Q9BRQ6;Q8IYW5;Q96EZ8;Q96Q83;Q9UN E7;Q76064;Q9NPD8;Q9ULC4;Q96HA7;Q16531;Q9Y253;Q60216;Q8IYD8;P01106;Q86WJ1;Q03468;Q960 19;Q92759;Q5XUX0;Q7Z2Z1;P63146;P12956;O00255;Q9NRY2;P61088;P35638;P13051;Q96T76;Q9BQ 15;Q8NBZ0;Q9NW38;P09874;Q9H981;Q8N140;Q9BTP7;P55072;Q96LA8;Q99502}
- 17992 Pathogen[ P03346] interacts with 279 human partners: {O60921;Q12888;Q9NZJ0;Q9NS91;Q8N2Z9;Q9Y6K9;Q9Y2A0;P12004;Q9Y253;Q8NB91;O002 13;Q99828;P46937;Q93009;P28715;Q7Z5Q5;Q76064;Q95677;Q96HA7;P12956;Q9NVI1;P24385;Q7Z2 Z1;Q06609;Q96MF7;Q95551;Q96017;Q6ZRQ5;Q96SD1;P46100;Q8N9B5;Q6PCD5;Q9UM11;Q8IWL9;Q52L R7;Q5MJ70;Q9BSD3;P35638;O00167;P11388;Q43502;P27694;Q8TC71;Q95714;A8MT69;Q15291;Q997 28;Q86XK3;Q96EZ8;Q9C086;Q6P1K8;Q9UNA4;P07992;Q9H9F9;P35244;Q15004;O15360;Q9UBZ9;Q997 08;Q9ULG1;P25490;P24941;Q13426;Q9UMS4;Q43313;Q16531;Q13156;Q96AH0;P23246;Q13888;Q96M G7;Q9UKK3;Q9NUW8;P13010;Q9UN51;O14757;Q7Z589;Q2TAK8;Q71UM5;Q9BRQ6;P98170;Q0VG06;Q080 50;Q8WV22;Q96RL1;P42574;Q9UIF7;Q96AY2;Q9UBL3;P49459;Q99638;O15350;Q99502;Q96PI98;Q9UI 95;Q92698;Q68E01;Q9HCS7;Q9P278;P55072;Q9NUA8;P61077;Q95997;Q9BTP7;Q08945;P0C1Z6;Q8N3 C0;Q13620;Q13889;P41218;Q96NY9;P61088;Q75943;Q6NZ36;Q7Z333;Q9UHC1;Q8N0Z6;P01106;P628 77;Q969S2;P41208;Q60870;Q9NVH2;Q53HV7;Q9HAW4;Q9NS56;Q14676;Q14694;Q96019;Q7LG56;Q8N1 40;Q96S55;Q9NXR7;Q13469;Q03468;O00255;O15287;Q9BQ15;O15315;Q6ZYL4;P63146;Q01831;Q146 83;Q9NWS1;Q9UBU8;Q9HB75;Q9UNE7;P13051;Q9H040;P51587;P20585;Q8WXE1;P29372;P50750;Q96B 01;Q43542;Q9NY61;Q9Y5B9;Q14669;Q13111;Q9H981;Q9NRD1;Q9NUS5;Q53TQ3;Q75771;Q12778;Q19A V6;P15927;P54727;Q5H9I0;Q86YC2;Q9BW66;Q5UIP0;Q9NPD8;Q13216;P49959;Q2YD98;Q14653;Q9HB 96;Q8IYW5;Q8NBZ0;P09874;Q15014;Q9N8V8;Q96Q83;Q68DK2;P41182;Q96BT7;P78549;P43351;Q927 59;P20749;Q60934;P18887;P23396;Q15233;Q92889;Q92547;Q21675;P55211;Q00597;Q9BXW9;Q9UQ 84;Q9H9Q4;Q13619;Q96PY6;Q13569;Q86W56;Q95243;P54725;P54278;Q6NVH7;Q9NRY2;Q9HA38;Q8IY D8;Q7Z2E3;Q6P4R8;P23025;Q60671;Q6PJP8;Q96FW1;Q9BQ83;P27695;Q8TDB6;Q9NPI8;P38936;Q9Y6 P5;Q9P287;Q94782;O15516;Q9NP87;Q43299;Q92985;P39748;Q92466;Q9NW38;Q13112;Q95071;Q86W J1;Q8IY92;Q43543;Q8IY18;Q9H816;Q99504;Q6UWZ7;O15527;Q9Y2M0;Q43524;P06746;Q969H0;Q1ZZ U3;P0C2W1;Q9BVW5;Q9UBZ4;Q9ULC4;P78543;Q7Z6Z7;Q60216;P54277;Q9NS23;Q75807;A4GXA9;Q9Y5 K5;Q14164;P32780;Q5XUX0;Q96LA8;Q96T88;Q96T76;Q6ZW49;Q13794;Q96M02;P24522;Q9UPV0;Q9BT A9;Q96MT8;Q9NXX6;Q14686;Q16594}
- 17993 Pathogen[ Q85601] interacts with 263 human partners: {P43351;Q9UBZ4;P01106;O00213;Q15014;Q96M02;Q9NWS1;Q9Y2M0;Q9Y5T5;O15527;Q9HC S7;Q96T76;P09874;Q43502;O15315;Q9NS56;Q96HA7;P23025;P24385;Q53TQ3;Q7Z2Z1;Q8TDB6;Q9BT P7;P63146;Q96RL1;Q01831;Q96017;Q9NUA8;Q6ZYL4;Q93009;Q15004;Q96AH0;Q969H0;Q8IYD8;Q9UQ 84;Q8WXE1;P50750;Q52LR7;Q92547;Q9H040;P18887;Q969S2;Q6NZ36;P13051;Q9BXW9;Q8IY18;Q9NY

61;Q16531;Q9UI95;Q19AV6;O95714;Q96PY6;Q68E01;O95677;Q13888;Q9C086;P16455;Q13112;Q13216;Q9H9F9;P62877;Q9NUS5;P23396;P35244;Q99708;A4GXA9;Q13426;Q9UMS4;Q9UHJ9;Q6NVH7;Q6PCD5;Q9Y6P5;Q9NPI8;Q96MG7;O15516;Q1ZZU3;Q9UUK3;Q99728;Q9NZJ0;Q9BTA9;Q9UBU8;Q99504;Q2TAK8;Q9BRQ6;P25490;P98170;P24522;Q96AY2;O43299;O95243;Q71UM5;Q9BQ15;Q9Y5B9;O96019;Q14669;Q9UGP5;P49959;Q13469;Q9NS23;Q96B02;Q9BW66;Q9NPD8;O60216;Q92698;Q6P1K8;Q16594;Q9NY2;P61077;P27694;Q6ZRQ5;O43542;Q00597;Q96H14;P0C1Z6;Q12888;Q96NY9;Q12888;O14757;Q7Z589;O75943;P28715;Q8N0Z6;Q14686;Q9UBL3;O60870;Q9UPV0;Q8NBZ0;Q14653;Q14164;Q03468;Q9Y6K9;Q9HB96;Q6PI98;Q9H981;Q7LG56;Q8N140;O76064;P54727;Q8IY92;Q9NVI1;P15927;Q92759;Q9HAW4;P32780;P78543;Q14683;Q96SD1;P54725;Q99502;P20585;Q9UBZ9;P41218;Q53HV7;Q96MT8;Q6P4R8;A8MT69;Q96B01;O60921;Q5UIP0;Q9HA38;Q9Y5K5;Q6UWZ7;Q9NWV8;P11388;Q96T88;Q92985;Q9UBT6;O00255;Q9NUW8;Q9NW38;Q86YC2;Q8N2Z9;Q9ULG1;Q9HB75;Q13569;P50613;P49459;Q8IYW5;Q6ZW49;Q68DK2;Q5H9I0;Q8IW19;O15360;Q6NS38;Q15233;Q9UM11;O60671;Q96Q83;Q96S55;Q9UIF7;P54278;O15287;Q08945;P21675;P46937;Q08050;Q9UHC1;Q7Z6Z7;Q13156;Q7Z2E3;Q6PJP8;P06746;P12004;Q86WJ1;O15350;Q9BQ83;P38936;Q9P287;Q13620;Q13111;Q0VG06;Q9NP87;P23246;P41182;P39748;P40692;P78549;Q92466;P61088;O95071;P19447;O00167;O75807;Q9H816;Q96EZ8;Q9NXX6;Q9UNE7;Q8WV22;Q13619;Q06609;Q9ULC4;Q86XK3;Q9P278;Q8N9B5;Q9Y253;P24941;Q9UNA4;P27695;Q14676;P46100;Q9NXR7;P20749;Q99638;P51587;Q86W56;O95551;O95997;Q96LA8;Q13794;Q9H9Q4;Q9BVW5;P13010;P12956;Q96MF7;Q9NS91;Q8N3C0;P35638;P29372;Q5MJ70;O60934;P41208;Q9NRD1;Q9UN

17994

Pathogen[ P14079] interacts with 254 human

partners: {O60671;Q5XUX0;Q9Y5B9;P11388;P41218;Q15014;O15315;Q9NWS1;P20585;Q9BQ15;Q8TAT5;P09874;P78543;Q08945;Q9BRQ6;Q5MJ70;P23396;Q9ULG1;Q9UIF7;Q96B01;Q9UNA4;Q99502;Q8NB91;Q68DK2;P28715;Q9ULC4;Q96MF7;Q9NS23;Q969H0;Q9UBU8;Q96LA8;Q14653;Q96NY9;Q52LR7;Q16594;Q9C0B1;Q9UGP5;Q8IYD8;Q9NUA8;Q8N9B5;Q9UBL3;Q9H9Q4;Q9NY61;P13010;Q13620;Q92985;P40692;Q9UBZ4;Q9BTA9;Q9NPI8;Q9H040;Q9NPD8;Q16531;Q00597;Q14164;Q6UWZ7;Q8WXE1;P54278;P29372;O75807;O00487;Q92698;P51587;O60216;Q5H9I0;Q9UHC1;P23246;Q96SD1;P23246;Q9UBZ9;Q13112;Q13216;P16455;Q13889;Q9BXW9;Q13111;Q9NVH2;P46937;Q86YC2;O60934;Q9BSD3;O15527;Q99828;P78549;O60870;Q13156;Q9HCS7;P61077;Q9UUK3;Q96AH0;Q96AY2;P23025;O15350;P62877;Q7LG56;Q9BQ50;A4GXA9;Q2TAK8;Q6NVH7;P46100;Q9UHJ9;Q9NVI1;Q6PI98;Q9Y6P5;Q96M02;P50613;Q9H981;Q13888;P12956;Q9HAW4;P41182;Q9NUW8;Q9NXR7;Q9Y5K5;Q9UMS4;Q8N8Q3;O75943;Q96A7;Q8IYL4;Q9BW66;Q9UM11;Q7Z5Q5;Q99708;Q0VG06;Q96S55;P38936;Q9Y6K9;Q6NS38;Q9NWV8;O95243;Q8N2Z9;P18887;P49459;Q86WJ1;Q19AV6;P24522;P0C1Z6;Q969S2;Q6ZW49;Q92759;Q96FI4;Q13794;Q71UM5;Q92889;Q68E01;P27695;Q9Y2M0;Q1ZZU3;A8MT69;Q96RL1;Q8N140;Q9NS56;P35638;Q9HAW38;O95551;P01106;O43502;Q9NSU2;P54277;O95997;Q9NP87;Q6P4R8;Q8N0Z6;O43543;P32780;Q53HV7;P41208;P06746;P15927;Q14676;P20749;Q92547;Q9Y253;O43299;Q96SD1;P27694;Q8IY18;Q86W56;Q99638;Q9HB96;Q9UQE7;Q9NRD1;Q99504;Q03468;Q9NZJ0;Q9BTP7;Q92466;P12004;Q9Y2A0;Q9NY2;Q96MG7;Q9NUS5;Q13469;Q01831;Q15004;Q9BQ83;O00167;P52701;Q6PJP8;Q96JY0;Q13569;Q12888;Q6P1K8;Q2YD98;P25490;Q6ZRQ5;Q15233;O43313;P35244;Q5UIP0;Q06609;Q14683;Q9NW38;P54277;Q96Q83;Q9UN51;Q7Z2Z1;Q7Z2E3;Q53TQ3;O00255;Q9UBT6;P63146;Q9H816;Q96EZ8;Q9P287;O15360;Q9HB75;Q9NXX6;Q13426;Q9UX84;Q7Z589;Q96T76;Q14686;O60921;Q9H9F9;P07992;Q8TC71;Q96FW1;P19447;O43542;Q86XK3;Q13619;P13051;Q8IY92;P49917;P21675;P39748;Q9UPV0;P50750;Q9BVW5;P43351;Q8IW19;Q8WTP8}

17995

Pathogen[ P03383] interacts with 199 human

partners: {P43351;Q14683;Q9UN51;Q7Z2E3;Q99504;Q9Y253;O00213;Q9NY61;Q15014;Q12888;O14757;Q8N2Z9;Q96T76;Q06609;O60671;P06746;Q14653;Q9BVW5;O96019;Q68E01;P13010;Q9NXX6;Q9NWS1;O00167;Q68DK2;P54278;Q9Y6K9;Q6ZYL4;Q13469;Q9NZJ0;Q13216;Q5H9I0;Q9BTA9;Q5UIP0;Q8WXE1;Q52LR7;Q6P4R8;Q96RL1;Q9H981;P01106;Q6NVH7;Q9HCS7;O15527;Q9UI95;Q13888;Q19AV6;P27694;Q53HV7;Q53TQ3;Q9BXW9;Q9C086;A4GXA9;Q9UHC1;Q15004;Q9BRQ6;P41208;P20749;Q8IW19;Q14686;Q96B01;Q9H9Q4;P24522;P35638;Q6PJP8;Q9UBU8;P24385;Q08945;Q71UM5;Q6ZW49;Q9NUS5;Q96S55;O60216;Q96MF7;Q6P1K8;Q01831;Q9Y2A0;Q9P278;Q6PI98;Q96MT8;Q9H9F9;O60921;P61077;P41218;P61088;Q7Z589;P46100;P29372;Q6ZRQ5;O60870;O95243;Q16594;Q92985;Q9H816;P78543;Q9NVI1;P15927;Q7Z2Z1;Q13111;P50613;Q86W56;Q9H040;Q03468;Q9HAW4;O15287;P24941;Q13426;Q96AY2;P09874;P23025;Q9UM11;P54725;Q2TAK8;P50750;Q8NBZ0;P35244;O15350;A8MT69;O00255;P0C1Z6;Q9Y5K5;Q8N140;Q9Y2M0;Q9NRY2;P54277;Q9UBZ9;Q92759;Q13569;O43299;Q9HB96;Q9NWV8;Q969H0;Q8IY92;Q99708;Q99638;Q9UUK3;Q9UPV0;Q00597;Q86XK3;Q96PY6;P21675;Q96MG7;Q9NNUW8;P62877;Q8N9B5;O95997;O15360;Q9BQ15;P49459;Q9BW66;Q86YC2;Q15233;Q9NPD8;O43542;O75807;Q96HA7;P18887;P27695;O95551;P63146;P23246;Q16531;Q96Q83;Q9P287;Q9BSD3;Q13156;Q13794;Q9NRD1;Q92547;Q14676;Q92466;Q9NW38;P13051;Q96EZ8;Q96AH0;Q9NPI8;Q1ZZU3;Q9ULC4;P46937;Q9NVH2;Q13112;Q9Y5B9;Q2YD98;P32780;Q9NXR7;Q5XUX0;P23396;Q9BQ83;Q9BTP7;Q6UWZ7;Q96LA8;Q9UMS4;Q0VG06;P12956;Q9HB75;O96017;Q13620;Q5MJ70;Q96NY9}

17996

Pathogen[ P03410] interacts with 260 human

partners: {Q96RL1;Q96M02;P20749;Q96FW1;Q08945;P23025;P49959;P40692;Q9H981;P18887;P23246;P35244;Q9H040;Q8WTP8;Q96FI4;Q9UI95;Q9NXR7;Q96T76;Q99708;P35638;Q9HB75;P20585;Q96LA8;Q13889;Q9NRD1;Q8N3C0;Q9NVI1;Q96AY2;Q9H816;Q6PI98;Q52LR7;O75943;Q15014;Q9BQ15;Q9BSD3;Q92698;Q8IYD8;Q9NWV8;Q9BQ50;Q15233;A4GXA9;P01106;P07992;Q9Y5B9;O15315;Q99502;Q9NUS5;P41218;O96019;Q9UBT6;P21675;Q9BXW9;Q13620;Q9UQE7;Q14686;Q1ZZU3;P54277;O43542;Q8NB91;P24522;Q19AV6;Q53TQ3;Q14653;Q9UNA4;Q9BVW5;Q5H9I0;Q9P287;O60870;Q8WXE1;Q9NY61;Q9ULG1;Q9UBU8;Q9NS23;P49459;Q2TAK8;Q6ZYL4;Q9HAW4;P23396;O00213;O43299;P06746;Q92889;Q96S55;Q15004;Q13794;Q96Q83;P39748;Q6NVH7;Q9NSU2;Q9BTP7;P61088;Q96SD1;P43351;O95997;Q03468;Q9BQ83;Q9NXX6;Q5XUX0;P54725;P28715;Q8TAT5;Q6NS38;P78549;P0C1Z6;Q92466;O60216;P50613;Q01831;P25490;Q53HV7;Q96MF7;Q96MG7;O95243;Q7Z2E3;P50750;Q9ULC4;Q9UHJ9;Q7Z5Q5;Q9HCS7;Q9UGP5;Q9UBZ9;P12956;Q9UNE7;P24385;Q9UBZ4;O95551;Q99828;Q9Y6P5;P52701;Q9UM11;P38936;Q8IY92;O43502;Q969H0;O15287;Q9H9F9;Q9NPI8;Q6PJP8;P24941;Q99638;Q00597;O15527;Q9Y253;Q96AH0;P51587;Q13111;Q96NY9;Q13569;Q9P4R8;Q13112;Q2YD98;P16455;P62877;P19447;Q8IW19;P63146;Q14683;Q13156;Q9NUW8;P09874;Q8TC71;Q96017;O14757;O60671;P46937;P46100;Q9HB96;O75807;Q13469;Q6UWZ7;P41182;O60921;Q99504;Q16594;Q7Z2Z1;Q16531;Q13426;O15360;Q128

88;Q86W56;Q86WJ1;Q92547;P11388;Q13216;Q13888;P78543;Q9HA38;Q9NPD8;Q96EZ8;Q9BTA9;Q8N9B5;Q9UNS1;P27695;Q9NVH2;O00167;Q13619;Q9UMS4;Q8IY18;P13010;O43543;Q9Y5K5;Q9NWS1;Q86XK3;A8MT69;O15350;Q8N140;Q9UPV0;Q9UKK3;Q969S2;P27694;Q9BRQ6;P54278;Q8N0Z6;Q5MJ70;Q14676;P13051;P15927;Q5UIP0;Q9NP87;Q9UQ84;Q9C0B1;Q6NZ36;Q9Y2M0;Q9Y6K9;Q9NW38;Q92985;Q9Y2A0;Q96B01;O00255;P41208;Q68DK2;Q9C086;P12004;P32780;Q68E01;Q86YC2;Q96HA7;Q6ZW49;Q9P278;P29372;Q6P1K8;Q7LG56;Q9NUA8;Q92759;O60934;Q9NRY2;Q71UM5;Q9UIF7;Q0VG06;Q9UHC1;Q9H9Q4;P61077;Q66609;Q8N2Z9;Q7Z589;Q9BW66;Q8NBZ0;Q9NZJ0;P54727;Q6ZRQ5}

17997 Pathogen[ P14075] interacts with 207 human  
partners: {P43351;P13051;Q96MT8;A8MT69;Q6P4R8;Q7Z2E3;Q8NB91;O00213;Q9HB96;Q99504;P23246;Q92759;P12956;Q7Z2Z1;Q9NVI1;O15360;P21675;Q9BQ83;P24941;Q9UBZ9;Q14683;Q9UBU8;P23025;Q8WXE1;Q2TAK8;Q52LR7;Q5MJ70;Q9HB75;Q96Q83;Q15014;Q08945;P27695;Q8N140;Q68E01;Q9UM11;Q9C086;Q01831;Q9NWW8;Q86YC2;Q14686;P61088;Q6ZYL4;P0C1Z6;P49459;P50613;P41218;Q6ZW49;Q9NY61;Q9BQ15;Q9NPI8;O15527;Q53HV7;Q08050;Q96EZ8;P06746;Q13620;Q6ZRQ5;P35638;P50750;Q9UIF7;Q9Y2A0;O95997;O60671;Q9BTP7;Q13216;O00167;Q9H040;Q96FW1;Q9BW66;Q13111;Q9NXR7;P15927;Q9UI95;P61077;Q16594;P01106;Q9BVW5;Q6UWZ7;Q9NW38;Q8N2Z9;Q9NPD8;Q9Y2M0;Q03468;Q99638;O60870;O00255;Q9UPV0;Q13156;Q9H9Q4;Q9NWS1;Q68DK2;O96019;Q9HAW4;P46100;P35244;Q8NBZ0;Q19AV6;Q9Y253;Q14653;Q96HA7;Q53TQ3;Q96LA8;Q14676;Q13469;O96017;Q9UHC1;Q13889;O15350;Q6PI98;Q9UHJ9;Q2YD98;P78543;Q9Y5B9;Q9NVH2;Q96NY9;Q8IW19;Q9BTA9;P54727;O75807;Q9H816;P23396;Q16531;Q9UMS4;Q96AH0;Q13794;O43542;O15287;Q13426;P41208;P27694;Q9NXR7;Q15233;P32780;Q9Y6P5;Q8TC71;Q9BRQ6;O60921;Q9HCS7;Q9NRD1;P24522;Q96B01;P54725;Q9UNS1;O95243;P46937;Q96PY6;Q9H9F9;Q96AY2;Q12888;Q9H981;Q99502;Q5UIP0;P54278;Q9Y6K9;P24385;P63146;Q86W56;P13010;Q9P287;Q92985;Q0VG06;Q6NVH7;Q96S55;Q96MF7;Q13569;Q7Z589;Q92466;Q9NZJ0;Q00597;Q13112;Q1ZZU3;Q9BSD3;Q969H0;P29372;Q6PJP8;Q99708;Q92547;Q9ULC4;Q86XK3;Q8N9B5;Q96RL1;Q6P1K8;O60216;Q9P278;Q15004;Q9NRY2;Q9BXW9;Q8IY92;Q96MG7;O14757;Q5XUX0;Q9NUS5;Q9NUW8;Q06609;P09874;P62877;Q96T76;P20749;P18887;Q9Y5K5;A4GXA9;Q5H9I0;O43299;Q9UKK3;O95551;Q71UM5;Q13888}

17998 Pathogen[ P0C206] interacts with 289 human  
partners: {P27695;Q96HA7;Q9UNS1;Q9NUA8;O43542;Q13112;Q9Y253;P46937;Q8WXE1;O43502;Q9NPI8;Q68DK2;Q2YD98;O60216;Q9UMS4;P54278;Q9NS56;Q8N140;P62877;Q9NPD8;Q96Q83;Q96M02;Q19AV6;Q9Y2M0;P28715;P13010;P54725;Q6PCD5;Q96AY2;O15360;Q17RS7;O00167;Q8WV22;Q99828;Q68E01;Q13469;P49959;Q9UBU8;Q99504;Q9Y2A0;Q9BQ15;Q5UIP0;Q9Y6K9;Q9UQ84;P24522;Q9NSU2;Q8TC71;Q99708;P50750;Q9H981;Q8IYW5;O96017;Q9Y5T5;Q9UBT6;Q9BTP7;Q9UHJ9;O15527;P09874;Q6ZW49;Q86YC2;P25490;O43313;Q9UNA4;Q13156;P52701;P51587;Q15233;P41182;Q6NS38;O75807;Q7Z5Q5;Q6NZ36;Q13111;Q6PJP8;O60934;Q9HB96;Q8IYD8;O00255;O95997;P40692;O60870;P46100;Q6PI98;Q9NUW8;Q96LA8;Q9P278;Q03468;Q52LR7;Q96PY6;Q969H0;P06746;Q9UHC1;Q96MG7;Q9NVH2;Q9Y5B9;Q9NS91;Q9UPV0;Q96SD1;Q16531;Q7LG56;Q8N0Z6;Q9UBZ4;P98170;Q93009;Q9H816;Q9P287;Q8NBZ0;Q86XK3;P41218;Q15014;Q0VG06;Q14669;Q13216;Q8NB91;Q13620;Q9BW66;Q8N9B5;O43299;A4GXA9;Q9UGP5;Q8TDB6;O75943;Q53HV7;Q9NRY2;Q9NVI1;Q9Y5K5;P07992;P19447;Q96EZ8;Q9C086;Q6P1K8;Q99638;P23246;O00213;P54277;P43351;O96019;Q13619;Q13569;Q9NRD1;P0C1Z6;P61088;Q96NY9;Q12888;Q86W56;Q14164;P49917;Q9H9Q4;O15516;Q7Z333;Q13888;O15287;P50613;P23396;Q9BVW5;Q9UKK3;Q9UNE7;Q9ULG1;P49459;Q13426;Q14683;Q92985;Q96FW1;Q14676;Q96T88;O15315;Q9NWW8;Q92889;Q7Z589;Q8TAT5;Q01831;Q71UM5;Q14686;Q99728;Q92759;O95551;P54727;P49916;P38936;Q9UM11;Q96S55;O60921;Q9HA38;Q96MF7;P42574;Q9NP87;Q96FI4;Q9BTA9;Q9UBZ9;P55072;Q9NZJ0;Q9HB75;P32780;Q96T76;Q08050;Q969S2;Q9H9F9;Q99502;P20749;Q13889;Q9UBL3;Q86WJ1;Q6ZRQ5;P41208;O60671;O15350;Q7Z2Z1;O00597;O43543;Q6UWZ7;Q5H9I0;Q66609;P27694;P20585;P11388;P15927;Q9ULC4;P01106;Q8N2Z9;Q5XUX0;Q6ZYL4;Q8IW19;P61077;Q9Y6P5;Q92466;Q96RL1;Q7Z6Z7;Q2TAK8;Q6NVH7;Q9BXW9;P39748;P35244;Q96MT8;Q96B01;Q9NS23;Q9BQ83;Q96B02;Q92547;Q9BRQ6;Q9H040;O76064;P13051;Q8IY18;P12956;Q8IY92;Q9HAW4;Q9NY61;Q15004;Q9HCS7;P24941;Q08945;Q1ZZU3;O95071;P16455;Q7Z2E3;Q6P4R8;P29372;O95714;O95243;P23025;Q9UIF7;Q9B63;Q5MJ70;O95677;Q9UI95;P35638;Q9NXK6;P18887;Q8N3C0;Q92698;Q9BSD3;A8MT69;Q9NW38;Q9UIG0;P21675;Q53TQ3;Q96AH0;Q9NXR7;Q13794;Q9NUS5;P63146;P78543;P24385;Q16594;Q14653;P12004;Q9NWS1;P78549}

17999 Pathogen[ P03363] interacts with 247 human  
partners: {Q9BSD3;Q13112;Q92547;Q9H816;Q14653;Q9BQ50;P12956;Q9NW38;P18887;Q9BX63;Q15233;Q9NVI1;Q8TDB6;Q8IW19;P23396;Q92985;O15287;P23246;P27694;Q6ZYL4;Q9HAW4;Q9Y5K5;Q7Z333;O15527;Q19AV6;P54727;O15360;P49459;Q9NUA8;Q9H981;Q9ULG1;Q6P1K8;Q9BXW9;Q00597;Q9NXR7;Q96MT8;Q7Z2Z1;Q9BTP7;Q96LA8;Q9Y2M0;P13010;Q96RL1;Q15291;Q9HCS7;Q01831;Q13888;O00213;Q6UWZ7;P41218;Q15014;Q13794;Q13111;P32780;Q16531;Q92759;Q9UHC1;Q96AH0;Q9Y253;P25490;Q2YD98;Q96BT7;Q9UBL3;Q8N140;Q52LR7;O60671;Q7Z589;Q96FI4;Q92889;P23025;P78543;P13051;Q9Y6K9;Q8N2Z9;Q1ZZU3;Q9NUS5;Q96M02;P24941;Q8IYW5;P35244;P63146;Q99828;P41208;Q68DK2;Q5H9I0;Q14686;P15927;P01106;Q9UM11;P46100;Q9C086;O96017;Q7Z6Z7;P61088;P29372;Q9H9F9;Q6NZ36;O43524;P20749;Q13619;Q9HB75;Q9UBU8;Q96Q83;Q99708;Q08050;P20585;Q14669;Q9NY61;Q8TC71;P46937;Q13426;Q86XK3;O96019;Q8NB91;Q96T76;P62877;Q9Y5B9;Q9BQ15;Q13156;P54278;Q9NWW8;Q9BW66;Q9UKK3;Q7Z2E3;Q9BVW5;Q96JY0;P06746;Q6PCD5;Q9UNE7;P0C1Z6;Q7Z5Q5;O60870;Q15004;Q8IYD8;Q5MJ70;P54277;Q99504;Q9UNS1;Q9H040;Q9NUW8;Q9BRQ6;Q5UIP0;Q13620;P98170;Q9BQ83;P24522;Q9UI95;Q96AY2;P35638;Q969H0;Q9UIF7;Q9H9Q4;Q9Y6P5;O95243;Q9NVH2;Q96EZ8;O75807;Q9NP87;O43542;Q9Y2A0;O95071;Q8N0Z6;Q6PJP8;Q8IY92;Q96S55;P54725;Q9NS23;Q9UPV0;P24385;Q13469;Q99638;P21675;Q2TAK8;Q92466;Q13569;Q71UM5;P43351;Q9NXR7;Q9NPD8;O95714;Q03468;P50750;O00167;Q08945;O60921;O95551;Q96T88;Q86W56;O75771;Q8WV22;Q06609;Q9HB96;Q9ULC4;Q6NVH7;P61077;O95997;Q9UNA4;P09874;Q96MG7;Q99728;Q9P278;Q9UMS4;Q13216;Q9NPI8;Q53TQ3;Q6ZW49;Q68E01;Q0VG06;A4GXA9;Q14676;Q96NY9;Q5XUX0;Q86WJ1;Q9NWS1;Q9UBZ9;Q9NZJ0;O75943;Q9NS91;Q9NRD1;Q9P287;Q8IY18;Q96HA7;Q5T890;Q9BTA9;Q969S2;Q96MF7;Q8NBZ0;Q14683;Q8N9B5;Q6ZRQ5;Q53HV7;Q6P4R8;Q96FW1;Q9NRY2;Q12888;Q92698;Q96B01;Q8WXE1;A8MT69;Q86YC2;Q8N3C0;O60216;O43502;O43299;Q16594;Q6PI98;O15315;O14757}

18000 [Cluster 1637]GO:0070933+P biological\_process [name] histone H4 deacetylation [def]  
"The modification of histone H4 by the removal of one or more acetyl groups." [GOC



18001 Pathogen[ Q2Q067] interacts with 14 human partners: {P56524;Q9BY41;Q9UKV0;Q13547;O15379;Q9UKL0;Q9UQL6;Q969S8;Q96DB2;Q92769;Q13127;Q9H4L7;Q8WUI4;Q9UIF9}

18002 Pathogen[ P0C214] interacts with 14 human partners: {Q13547;Q969S8;Q96DB2;P56524;Q9H4L7;Q9UIF9;Q9UKL0;Q92769;Q9UKV0;O15379;Q13127;Q8WUI4;Q9UQL6;Q9BY41}

18003 Pathogen[ P03346] interacts with 14 human partners: {Q969S8;Q9UKL0;Q96DB2;O15379;P56524;Q92769;Q13547;Q9BY41;Q9UIF9;Q8WUI4;Q9UKV0;Q9UQL6;Q13127;Q9H4L7}

18004 Pathogen[ Q85601] interacts with 14 human partners: {Q969S8;Q9UKV0;Q96DB2;Q13127;Q9BY41;Q9UQL6;Q9UIF9;Q92769;Q9H4L7;P56524;O15379;Q13547;Q8WUI4;Q9UKL0}

18005 Pathogen[ P14079] interacts with 13 human partners: {Q9UQL6;O15379;Q96DB2;Q9H4L7;Q969S8;Q8WUI4;Q9UKV0;Q92769;Q9UIF9;Q9BY41;Q9UKL0;P56524;Q13127}

18006 Pathogen[ P03383] interacts with 12 human partners: {Q9UQL6;Q92769;O15379;Q9UIF9;Q13547;Q9BY41;Q9UKL0;Q9UKV0;P56524;Q8WUI4;Q969S8;Q13127}

18007 Pathogen[ P03410] interacts with 14 human partners: {Q9UKV0;Q9H4L7;Q9BY41;Q8WUI4;Q9UQL6;Q13127;Q969S8;Q92769;O15379;P56524;Q13547;Q9UIF9;Q9UKL0;Q96DB2}

18008 Pathogen[ P14075] interacts with 12 human partners: {Q9BY41;Q969S8;Q9UKL0;P56524;Q9UKV0;Q13547;Q92769;Q9UIF9;O15379;Q13127;Q9UQL6;Q8WUI4}

18009 Pathogen[ P0C206] interacts with 14 human partners: {Q9H4L7;Q92769;Q13127;Q9UKL0;Q96DB2;Q9UKV0;Q13547;O15379;Q8WUI4;Q9UIF9;Q9BY41;P56524;Q969S8;Q9UQL6}

18010 Pathogen[ P03363] interacts with 11 human partners: {Q9BY41;Q9H4L7;O15379;Q969S8;Q9UQL6;Q13127;Q9UIF9;Q9UKV0;Q13547;Q8WUI4;Q9UKL0}

18011 [Cluster 1638]GO:0042445+P biological\_process [name]hormone metabolic process [def] "The chemical reactions and pathways involving any hormone, naturally occurring substances secreted by specialized cells that affects the metabolism or behavior of other cells possessing functional receptors for the hormone." [CHEBI

18012 Pathogen[ Q2Q067] interacts with 1 human partners: {Q15424}

18013 Pathogen[ P0C214] interacts with 1 human partners: {Q15424}

18014 Pathogen[ P03346] interacts with 1 human partners: {Q15424}

18015 Pathogen[ Q85601] interacts with 1 human partners: {Q15424}

18016 Pathogen[ P14079] interacts with 1 human partners: {Q15424}

18017 Pathogen[ P03383] interacts with 1 human partners: {Q15424}

18018 Pathogen[ P03410] interacts with 1 human partners: {Q15424}

18019 Pathogen[ P14075] interacts with 1 human partners: {Q15424}

18020 Pathogen[ P0C206] interacts with 1 human partners: {Q15424}

18021 Pathogen[ P03363] interacts with 1 human partners: {Q15424}

18022 [Cluster 1639]GO:0007088+P biological\_process [name] regulation of mitosis [def] "Any process that modulates the frequency, rate or extent of mitosis." [GOC

18023 Pathogen[ Q2Q067] interacts with 9 human partners: {P18754;O14744;Q6PGQ7;P30307;Q96Q89;Q13526;P60953;Q13042;Q9Y468}

18024 Pathogen[ P0C214] interacts with 9 human partners: {P30307;Q13526;P60953;Q9Y468;Q96Q89;Q96GD0;P18754;Q6PGQ7;Q13042}

18025 Pathogen[ P03346] interacts with 9 human partners: {O14744;P60953;P18754;Q13526;Q13042;Q96Q89;Q9Y468;Q6PGQ7;P30307}

18026 Pathogen[ Q85601] interacts with 10 human partners: {Q9Y468;O14744;Q96Q89;P30307;Q13042;Q13526;Q6PGQ7;P60953;P18754;P51955}

18027 Pathogen[ P14079] interacts with 11 human partners: {Q14004;Q6PGQ7;P30307;Q9Y468;Q96GD0;O14744;P51955;Q96Q89;Q13042;Q13526;P18754}

18028 Pathogen[ P03383] interacts with 9 human partners: {P30307;P60953;Q13042;O14744;P18754;Q6PGQ7;Q96Q89;Q13526;Q9Y468}

18029 Pathogen[ P03410] interacts with 10 human partners: {Q96Q89;Q13526;Q9Y468;Q96GD0;Q13042;Q6PGQ7;P60953;O14744;P18754;P30307}

18030 Pathogen[ P14075] interacts with 9 human partners: {P60953;Q13042;Q9Y468;O14744;Q13526;P18754;Q96Q89;P30307;Q6PGQ7}

18031 Pathogen[ P0C206] interacts with 12 human partners: {Q9Y468;Q96Q89;Q13526;P30307;P18754;P51955;O14744;Q6PGQ7;P60953;Q96GD0;Q13042;Q99640}

18032 Pathogen[ P03363] interacts with 9 human partners: {O14744;Q13042;Q9Y468;Q6PGQ7;Q13526;Q96Q89;P18754;P30307;P60953}

18033 [Cluster 1640]GO:0022618+P biological\_process [name] ribonucleoprotein complex assembly [def] "The aggregation, arrangement and bonding together of proteins and RNA molecules to form a ribonucleoprotein complex." [GOC

18034 Pathogen[ Q2Q067] interacts with 1 human partners: {Q6PI26}

18035 Pathogen[ P0C214] interacts with 1 human partners: {Q6PI26}

18036 Pathogen[ P03346] interacts with 1 human partners: {Q6PI26}

18037 Pathogen[ Q85601] interacts with 1 human partners: {Q6PI26}

18038 Pathogen[ P14079] interacts with 1 human partners: {Q6PI26}

18039 Pathogen[ P03383] interacts with 1 human partners:{Q6PI26}  
18040 Pathogen[ P03410] interacts with 1 human partners:{Q6PI26}  
18041 Pathogen[ P14075] interacts with 1 human partners:{Q6PI26}  
18042 Pathogen[ P0C206] interacts with 1 human partners:{Q6PI26}  
18043 Pathogen[ P03363] interacts with 1 human partners:{Q6PI26}  
18044 [Cluster 1641]GO:0001890+P biological\_process [name] placenta development [def] "The process whose specific outcome is the progression of the placenta over time, from its formation to the mature structure. The placenta is an organ of metabolic interchange between fetus and mother, partly of embryonic origin and partly of maternal origin." [GOC  
18045 Pathogen[ Q2Q067] interacts with 8 human partners:{P08238;Q99966;P41002;O00321;P20823;Q86U86;Q9NR09;Q13490}  
18046 Pathogen[ P0C214] interacts with 6 human partners:{Q13490;O00321;P41002;Q99966;Q86U86;Q9NR09}  
18047 Pathogen[ P03346] interacts with 12 human partners:{Q99966;Q99626;O00321;Q86U86;P20823;P41002;O60479;O14627;Q99929;Q9NR09;Q13490;P08238}  
18048 Pathogen[ Q85601] interacts with 8 human partners:{Q13490;Q99966;P41002;P08238;Q9NR09;Q86U86;P20823;O00321}  
18049 Pathogen[ P14079] interacts with 7 human partners:{O00321;Q86U86;Q99966;Q9NR09;P08238;P41002;Q13490}  
18050 Pathogen[ P03383] interacts with 6 human partners:{Q86U86;P41002;Q13490;O00321;Q9NR09;P08238}  
18051 Pathogen[ P03410] interacts with 7 human partners:{P08238;Q86U86;Q13490;O00321;P41002;Q9NR09;Q99966}  
18052 Pathogen[ P14075] interacts with 6 human partners:{P08238;Q13490;Q86U86;Q9NR09;P41002;O00321}  
18053 Pathogen[ P0C206] interacts with 8 human partners:{Q86U86;O00321;P08238;Q9NR09;P20823;Q99966;P41002;Q13490}  
18054 Pathogen[ P03363] interacts with 10 human partners:{Q13490;Q99626;Q99929;O60479;P41002;O00321;Q9NR09;Q86U86;P08238;O14627}  
18055 [Cluster 1642]GO:0043433+P biological\_process [name] negative regulation of sequence-specific DNA binding transcription factor activity [def] "Any process that stops, prevents, or reduces the frequency, rate or extent of the activity of a transcription factor, any factor involved in the initiation or regulation of transcription." [GOC  
18056 Pathogen[ Q2Q067] interacts with 23 human partners:{P04156;P56524;P06400;O14503;O96004;Q9NVW2;P41134;P35638;P63165;O75381;O43593;Q9Y297;Q92769;O00255;O15105;Q9NSA3;Q15466;Q9GZT9;Q5VWG9;P23497;Q9UMX1;P40424;P53567}  
18057 Pathogen[ P0C214] interacts with 24 human partners:{P40424;P53567;P56524;O75381;Q9Y297;O00308;Q5VWG9;O14503;Q9NSA3;P41134;P63165;Q9NVW2;Q92769;O15105;Q9GZT9;O43593;P23497;P04156;O96004;Q9UMX1;P06400;O00255;P35638;Q15466}  
18058 Pathogen[ P03346] interacts with 27 human partners:{Q9BZE0;P35638;Q02535;P06400;Q15466;P56524;O15105;O14503;O75381;O43593;O96004;P51843;Q9NSA3;O00255;P41134;Q92769;Q9GZT9;P63165;P04156;P40424;P23497;P53567;Q5VWG9;Q9Y297;Q9UMX1;Q9NVW2;O00308}  
18059 Pathogen[ Q85601] interacts with 21 human partners:{P41134;Q15466;P06400;P53567;O14503;O96004;Q5VWG9;P40424;Q9GZT9;Q92769;O00255;P63165;P56524;P04156;O15105;O43593;O75381;Q9NSA3;Q9UMX1;Q9NVW2;P35638}  
18060 Pathogen[ P14079] interacts with 20 human partners:{Q9GZT9;O43187;P53567;P04156;Q9UMX1;O96004;P63165;P23497;Q92769;P35638;P41134;O75381;O14503;Q15466;P56524;O15105;O00255;O43593;Q9BZE0;Q5VWG9}  
18061 Pathogen[ P03383] interacts with 18 human partners:{P04156;P40424;P35638;O14503;P06400;Q5VWG9;O96004;O15105;Q9NSA3;Q92769;Q15466;O75381;P63165;O00255;P23497;P56524;P53567;Q9UMX1}  
18062 Pathogen[ P03410] interacts with 20 human partners:{P35638;Q5VWG9;O96004;Q9NSA3;P63165;P53567;O43187;P41134;O75381;P06400;Q9GZT9;Q92769;P56524;P04156;Q15466;O15105;O00255;P40424;Q9UMX1;O43593}  
18063 Pathogen[ P14075] interacts with 19 human partners:{P63165;P23497;Q9GZT9;P40424;P53567;P56524;P04156;P35638;Q5VWG9;O14503;O75381;O96004;O00255;Q92769;Q9NSA3;O15105;P06400;Q15466;Q9UMX1}  
18064 Pathogen[ P0C206] interacts with 22 human partners:{P53567;Q92769;Q9BZE0;Q15466;Q9NSA3;Q9NVW2;O00308;P04156;Q9GZT9;Q9UMX1;O75381;O00255;P40424;O96004;P41134;O15105;Q5VWG9;P63165;P56524;O43593;P35638;P06400}  
18065 Pathogen[ P03363] interacts with 20 human partners:{Q15466;P53567;Q9UMX1;O15105;P04156;P23497;P06400;O43593;Q9NSA3;P63165;O75381;P41134;O96004;P35638;O00308;P40424;Q9NVW2;Q5VWG9;Q9BZE0;O14503}  
18066 [Cluster 1643]GO:0009750+P biological\_process [name] response to fructose stimulus [def] "Any process that results in a change in state or activity of a cell or an organism (in terms of movement, secretion, enzyme production, gene expression, etc.) as a result of a fructose stimulus." [GOC  
18067 Pathogen[ Q2Q067] interacts with 3 human partners:{P05062;P27986;Q14397}  
18068 Pathogen[ P0C214] interacts with 3 human partners:{P05062;Q14397;P27986}  
18069 Pathogen[ P03346] interacts with 3 human partners:{Q14397;P05062;P27986}

18070 Pathogen[ Q85601] interacts with 3 human partners:{P05062;P27986;Q14397}  
18071 Pathogen[ P14079] interacts with 1 human partners:{Q14397}  
18072 Pathogen[ P03383] interacts with 2 human partners:{P27986;Q14397}  
18073 Pathogen[ P03410] interacts with 3 human partners:{Q14397;P27986;P05062}  
18074 Pathogen[ P14075] interacts with 2 human partners:{P27986;Q14397}  
18075 Pathogen[ P0C206] interacts with 3 human partners:{P05062;P27986;Q14397}  
18076 Pathogen[ P03363] interacts with 2 human partners:{Q14397;P27986}  
18077 [Cluster 1644]GO:0045446+P biological\_process [name] endothelial cell differentiation  
[def] "The process in which a mesodermal angioblast acquires specialized features of an  
endothelial cell, a thin flattened cell. A layer of such cells lines the inside surfaces  
of body cavities, blood vessels, and lymph vessels, making up the endothelium." [CL  
18078 Pathogen[ Q2Q067] interacts with 2 human partners:{P09067;O60869}  
18079 Pathogen[ P0C214] interacts with 1 human partners:{O60869}  
18080 Pathogen[ P03346] interacts with 2 human partners:{O60869;P09067}  
18081 Pathogen[ Q85601] interacts with 1 human partners:{O60869}  
18082 Pathogen[ P14079] interacts with 1 human partners:{O60869}  
18083 Pathogen[ P03383] interacts with 1 human partners:{O60869}  
18084 Pathogen[ P03410] interacts with 1 human partners:{O60869}  
18085 Pathogen[ P14075] interacts with 1 human partners:{O60869}  
18086 Pathogen[ P0C206] interacts with 2 human partners:{P09067;O60869}  
18087 Pathogen[ P03363] interacts with 2 human partners:{P09067;O60869}  
18088 [Cluster 1645]GO:0043410+P biological\_process [name] positive regulation of MAPKKK  
cascade [def] "Any process that activates or increases the frequency, rate or extent of  
signal transduction mediated by the MAPK cascade." [GOC  
18089 Pathogen[ Q2Q067] interacts with 6 human  
partners:{Q12982;Q8IX03;Q969S3;P60953;O60504;Q9HAT8}  
18090 Pathogen[ P0C214] interacts with 6 human  
partners:{Q8IX03;Q969S3;P60953;Q9HAT8;Q12982;O60504}  
18091 Pathogen[ P03346] interacts with 7 human  
partners:{Q969S3;Q8IX03;P60953;Q9HAT8;Q6Q0C0;O60504;Q12982}  
18092 Pathogen[ Q85601] interacts with 7 human  
partners:{Q12982;Q9HAT8;Q969S3;P60953;O60504;Q6Q0C0;Q8IX03}  
18093 Pathogen[ P14079] interacts with 7 human  
partners:{Q9HAT8;Q12982;P20809;O60504;Q8IX03;Q6IAA8;Q969S3}  
18094 Pathogen[ P03383] interacts with 5 human  
partners:{P60953;Q8IX03;O60504;Q969S3;Q9HAT8}  
18095 Pathogen[ P03410] interacts with 8 human  
partners:{Q8IX03;Q969S3;P20809;Q9HAT8;O60504;Q6IAA8;P60953;Q12982}  
18096 Pathogen[ P14075] interacts with 6 human  
partners:{P60953;Q969S3;Q9HAT8;P20809;O60504;Q8IX03}  
18097 Pathogen[ P0C206] interacts with 8 human  
partners:{Q12982;O60504;Q9HAT8;Q969S3;P20809;P60953;Q6Q0C0;Q8IX03}  
18098 Pathogen[ P03363] interacts with 6 human  
partners:{Q13480;Q9HAT8;Q8IX03;P60953;Q969S3;Q12982}  
18099 [Cluster 1646]GO:0001764+P biological\_process [name] neuron migration [def] "The  
characteristic movement of an immature neuron from germinal zones to specific positions  
where they will reside as they mature." [GOC  
18100 Pathogen[ Q2Q067] interacts with 14 human  
partners:{O00213;P62258;P10589;Q8WXU2;Q9BZE3;Q9NXR1;P11831;Q99608;O43711;Q9UPW6;Q9NR  
I5;Q8IZT6;Q9NY43;Q95613}  
18101 Pathogen[ P0C214] interacts with 12 human  
partners:{O00213;Q9NRI5;Q9BZE3;P11831;Q99608;P35580;Q8WXU2;Q9UPW6;Q95613;Q9NXR1;Q8IZ  
T6;Q9NY43}  
18102 Pathogen[ P03346] interacts with 20 human  
partners:{Q9NRI5;O00213;P50219;Q9UPW6;Q9HD90;P11831;O43711;Q9BZE3;P62258;Q92858;Q9NX  
R1;Q96QS3;Q8WXU2;Q99608;P50542;Q8IZT6;Q95613;Q9NY43;Q9H2A3;P10589}  
18103 Pathogen[ Q85601] interacts with 16 human  
partners:{O00213;P11831;Q9UPW6;Q9BZE3;Q8IZT6;Q99608;Q8WXU2;P62258;O43711;Q9NRI5;P355  
80;Q95613;Q9NXR1;Q9GZM8;Q9NY43;P10589}  
18104 Pathogen[ P14079] interacts with 18 human  
partners:{Q9UPW6;Q9NRI5;O00213;Q9NY43;Q99608;Q8WXU2;Q15078;P50542;Q9BZE3;Q9NX09;O437  
11;P62258;Q9GZM8;Q95613;P10589;Q9NXR1;Q8IZT6;P10636}  
18105 Pathogen[ P03383] interacts with 11 human  
partners:{O00213;P11831;Q9UPW6;Q9NRI5;Q99608;O43711;P35580;Q9NY43;Q95613;Q8WXU2;P622  
58}  
18106 Pathogen[ P03410] interacts with 20 human  
partners:{P62258;P11831;Q8WXU2;Q9NXR1;Q9GZM8;Q99608;Q9BZE3;O00213;Q9UPW6;Q8IZT6;Q9BV  
A1;P10636;P35580;Q9NRI5;P50542;P10589;O43711;Q9NY43;Q95613;Q9NX09}  
18107 Pathogen[ P14075] interacts with 10 human  
partners:{O00213;Q99608;P11831;Q9NRI5;Q9NY43;Q9UPW6;O43711;Q95613;Q8WXU2;P62258}  
18108 Pathogen[ P0C206] interacts with 19 human  
partners:{O43711;Q9NY43;Q8IZT6;P50542;P10636;Q9GZM8;P10589;Q9BZE3;O00213;Q95613;P622  
58;Q9UPW6;Q9NRI5;Q99608;P11831;Q9NXR1;Q8WXU2;P35580;Q9H2A3}  
18109 Pathogen[ P03363] interacts with 17 human  
partners:{P62258;O00213;Q95613;Q9BZE3;Q99608;P11831;Q8WXU2;O43711;Q9NRI5;Q96QS3;Q9NY  
43;Q9NXR1;P50219;Q9UPW6;P10589;Q8IZT6;Q9H2A3}

18110 [Cluster 1647]GO:0046328+P biological\_process [name] regulation of JNK cascade  
[def] "Any process that modulates the frequency, rate or extent of signal transduction mediated by the JNK cascade." [GOC

18111 Pathogen[ Q2Q067] interacts with 4 human partners:{Q7Z6J0;Q12933;Q92905;Q9UQF2}  
18112 Pathogen[ P0C214] interacts with 4 human partners:{Q7Z6J0;Q92905;Q12933;Q9UQF2}  
18113 Pathogen[ P03346] interacts with 3 human partners:{Q7Z6J0;Q92905;Q9UQF2}  
18114 Pathogen[ Q85601] interacts with 4 human partners:{Q9UQF2;Q7Z6J0;Q12933;Q92905}  
18115 Pathogen[ P14079] interacts with 4 human partners:{P31751;Q9UQF2;Q92905;Q12933}  
18116 Pathogen[ P03383] interacts with 3 human partners:{Q92905;Q9UQF2;Q12933}  
18117 Pathogen[ P03410] interacts with 4 human partners:{Q92905;Q7Z6J0;Q12933;Q9UQF2}  
18118 Pathogen[ P14075] interacts with 3 human partners:{Q12933;Q92905;Q9UQF2}  
18119 Pathogen[ P0C206] interacts with 4 human partners:{Q7Z6J0;Q12933;Q9UQF2;Q92905}  
18120 Pathogen[ P03363] interacts with 4 human partners:{Q9UQF2;Q12933;Q7Z6J0;Q92905}

18121 [Cluster 1648]GO:0042512+P biological\_process [name] negative regulation of tyrosine phosphorylation of Stat1 protein [def] "Any process that stops, prevents, or reduces the frequency, rate or extent of the introduction of a phosphate group to a tyrosine residue of a Stat1 protein." [GOC

18122 Pathogen[ Q2Q067] interacts with 1 human partners:{P10914}  
18123 Pathogen[ P0C214] interacts with 1 human partners:{P10914}  
18124 Pathogen[ P03346] interacts with 1 human partners:{P10914}  
18125 Pathogen[ Q85601] interacts with 1 human partners:{P10914}  
18126 Pathogen[ P14079] interacts with 1 human partners:{P10914}  
18127 Pathogen[ P03383] interacts with 1 human partners:{P10914}  
18128 Pathogen[ P03410] interacts with 1 human partners:{P10914}  
18129 Pathogen[ P14075] interacts with 1 human partners:{P10914}  
18130 Pathogen[ P0C206] interacts with 1 human partners:{P10914}  
18131 Pathogen[ P03363] interacts with 1 human partners:{P10914}

18132 [Cluster 1649]GO:0042789+P biological\_process [name] mRNA transcription from RNA polymerase II promoter [def] "The cellular synthesis of messenger RNA (mRNA) from a DNA template by RNA polymerase II, originating at an RNA polymerase II promoter." [GOC

18133 Pathogen[ Q2Q067] interacts with 5 human partners:{P27540;P35638;P11831;P25791;Q01860}  
18134 Pathogen[ P0C214] interacts with 5 human partners:{P11831;P25791;P27540;Q01860;P35638}  
18135 Pathogen[ P03346] interacts with 6 human partners:{P35638;P11831;P15173;P27540;Q01860;P25791}  
18136 Pathogen[ Q85601] interacts with 5 human partners:{P11831;P27540;P25791;Q01860;P35638}  
18137 Pathogen[ P14079] interacts with 4 human partners:{Q01860;P25791;P27540;P35638}  
18138 Pathogen[ P03383] interacts with 5 human partners:{P11831;P27540;P35638;Q01860;P25791}  
18139 Pathogen[ P03410] interacts with 5 human partners:{P11831;P35638;Q01860;P25791;P27540}  
18140 Pathogen[ P14075] interacts with 5 human partners:{P11831;Q01860;P35638;P27540;P25791}  
18141 Pathogen[ P0C206] interacts with 5 human partners:{Q01860;P25791;P11831;P27540;P35638}  
18142 Pathogen[ P03363] interacts with 5 human partners:{P27540;P25791;P11831;P35638;Q01860}

18143 [Cluster 1650]GO:0030502+P biological\_process [name] negative regulation of bone mineralization [def] "Any process that stops, prevents, or reduces the frequency, rate or extent of bone mineralization." [GOC

18144 Pathogen[ Q2Q067] interacts with 3 human partners:{P15976;Q6W2J9;Q16621}  
18145 Pathogen[ P0C214] interacts with 3 human partners:{Q16621;Q6W2J9;P10124}  
18146 Pathogen[ P03346] interacts with 3 human partners:{Q16621;P15976;Q6W2J9}  
18147 Pathogen[ Q85601] interacts with 3 human partners:{P15976;Q16621;Q6W2J9}  
18148 Pathogen[ P14079] interacts with 6 human partners:{P02808;P15976;Q6W2J9;Q9NQ76;P10124;Q16621}  
18149 Pathogen[ P03383] interacts with 3 human partners:{Q6W2J9;Q16621;P10124}  
18150 Pathogen[ P03410] interacts with 6 human partners:{P02808;Q6W2J9;P10124;Q16621;Q9NQ76;P15976}  
18151 Pathogen[ P14075] interacts with 4 human partners:{Q6W2J9;P10124;Q16621;P02808}  
18152 Pathogen[ P0C206] interacts with 5 human partners:{Q6W2J9;P15976;P02808;Q16621;P10124}  
18153 Pathogen[ P03363] interacts with 3 human partners:{P02808;Q16621;Q6W2J9}

18154 [Cluster 1651]GO:0050770+P biological\_process [name] regulation of axonogenesis [def] "Any process that modulates the frequency, rate or extent of axonogenesis, the generation of an axon, the long process of a neuron." [GOC

18155 Pathogen[ Q2Q067] interacts with 2 human partners:{P20265;P61586}  
18156 Pathogen[ P0C214] interacts with 3 human partners:{P61586;P52565;P20265}  
18157 Pathogen[ P03346] interacts with 3 human partners:{P52565;P20265;P61586}  
18158 Pathogen[ Q85601] interacts with 3 human partners:{P52565;P61586;P20265}  
18159 Pathogen[ P14079] interacts with 3 human partners:{P52565;P20265;P61586}  
18160 Pathogen[ P03383] interacts with 2 human partners:{P61586;P20265}  
18161 Pathogen[ P03410] interacts with 4 human partners:{P61586;Q9BZR6;P20265;P52565}  
18162 Pathogen[ P14075] interacts with 2 human partners:{P20265;P61586}

18163 Pathogen[ POC206] interacts with 3 human partners:{P52565;P61586;P20265}  
18164 Pathogen[ POC363] interacts with 2 human partners:{P52565;P20265}  
18165 [Cluster 1652]GO:0006891+P biological\_process [name] intra-Golgi vesicle-mediated transport [def] "The directed movement of substances within the Golgi, mediated by small transport vesicles. These either fuse with the cis-Golgi or with each other to form the membrane stacks known as the cis-Golgi reticulum (network)." [ISBN  
18166 Pathogen[ Q2Q067] interacts with 14 human partners:{Q99747;O14579;Q9UP83;O14662;Q08378;P61923;P60520;Q9UBF2;Q14746;Q96JB2;P54920;P53618;P35606;Q8WTW3}  
18167 Pathogen[ POC214] interacts with 13 human partners:{P60520;P61923;Q14746;Q99747;O14579;P53618;P35606;P54920;Q08378;Q9UBF2;Q9UP83;Q96JB2;Q8WTW3}  
18168 Pathogen[ POC346] interacts with 15 human partners:{Q14746;Q9UP83;Q96JB2;P60520;Q8WTW3;P53618;Q08378;O14579;Q9Y2V7;Q9UBF2;P54920;P61923;P35606;O14662;Q99747}  
18169 Pathogen[ Q85601] interacts with 14 human partners:{P54920;Q14746;O14579;Q9UP83;Q96JB2;P61923;Q08378;Q8WTW3;Q9UBF2;P53618;P60520;P35606;O14662;Q99747}  
18170 Pathogen[ P14079] interacts with 14 human partners:{Q14746;P61923;P35606;Q08378;Q99747;Q9Y2V7;P60520;Q8WTW3;Q9UBF2;Q9UP83;O14662;O14579;Q96JB2;P54920}  
18171 Pathogen[ POC383] interacts with 9 human partners:{Q14746;O14579;Q9UP83;P53618;P54920;Q96JB2;Q8WTW3;Q99747;Q9UBF2}  
18172 Pathogen[ POC3410] interacts with 16 human partners:{Q96JB2;Q9UP83;Q9Y2V7;P60520;P35606;Q08378;O14662;O14579;O95249;P53618;P61923;Q8WTW3;Q14746;Q99747;Q9UBF2;P54920}  
18173 Pathogen[ P14075] interacts with 9 human partners:{Q14746;Q96JB2;Q9UBF2;Q99747;P54920;Q9UP83;P53618;Q8WTW3;O14579}  
18174 Pathogen[ POC206] interacts with 15 human partners:{O14662;O14579;Q9Y2V7;P53618;P54920;Q96JB2;Q14746;Q9UP83;Q8WTW3;P35606;Q08378;P60520;Q99747;Q9UBF2;P61923}  
18175 Pathogen[ POC363] interacts with 14 human partners:{Q9UP83;P54920;O14579;P53618;P60520;P61923;Q14746;Q08378;Q8WTW3;P35606;O14662;Q9UBF2;Q99747;Q96JB2}  
18176 [Cluster 1653]GO:0035855+P biological\_process [name] megakaryocyte development [def] "The process whose specific outcome is the progression of a megakaryocyte cell over time, from its formation to the mature structure. Megakaryocyte development does not include the steps involved in committing a cell to a megakaryocyte fate. A megakaryocyte is a giant cell 50 to 100 micron in diameter, with a greatly lobulated nucleus, found in the bone marrow." [CL  
18177 Pathogen[ Q2Q067] interacts with 2 human partners:{P11831;Q8IX07}  
18178 Pathogen[ POC214] interacts with 2 human partners:{P11831;Q8IX07}  
18179 Pathogen[ POC346] interacts with 3 human partners:{P11831;P17542;Q8IX07}  
18180 Pathogen[ Q85601] interacts with 2 human partners:{P11831;Q8IX07}  
18181 Pathogen[ P14079] interacts with 1 human partners:{Q8IX07}  
18182 Pathogen[ POC383] interacts with 1 human partners:{P11831}  
18183 Pathogen[ POC3410] interacts with 2 human partners:{P11831;Q8IX07}  
18184 Pathogen[ P14075] interacts with 1 human partners:{P11831}  
18185 Pathogen[ POC206] interacts with 2 human partners:{P11831;Q8IX07}  
18186 Pathogen[ POC363] interacts with 1 human partners:{P11831}  
18187 [Cluster 1654]GO:0018293+P biological\_process [name] protein-FAD linkage [def] "The formation of a linkage between a protein amino acid and flavin-adenine dinucleotide (FAD)." [GOC  
18188 Pathogen[ Q2Q067] interacts with 1 human partners:{Q9NX18}  
18189 Pathogen[ POC214] interacts with 1 human partners:{Q9NX18}  
18190 Pathogen[ POC346] interacts with 1 human partners:{Q9NX18}  
18191 Pathogen[ Q85601] interacts with 1 human partners:{Q9NX18}  
18192 Pathogen[ P14079] interacts with 1 human partners:{Q9NX18}  
18193 Pathogen[ POC383] interacts with 1 human partners:{Q9NX18}  
18194 Pathogen[ POC3410] interacts with 1 human partners:{Q9NX18}  
18195 Pathogen[ P14075] interacts with 1 human partners:{Q9NX18}  
18196 Pathogen[ POC206] interacts with 1 human partners:{Q9NX18}  
18197 Pathogen[ POC363] interacts with 1 human partners:{Q9NX18}  
18198 [Cluster 1655]GO:0006625+P biological\_process [name] protein targeting to peroxisome [def] "The process of directing proteins towards the peroxisome, usually using signals contained within the protein." [GOC  
18199 Pathogen[ Q2Q067] interacts with 1 human partners:{P40855}  
18200 Pathogen[ POC214] interacts with 1 human partners:{P40855}  
18201 Pathogen[ POC346] interacts with 4 human partners:{P50542;P40855;O43933;Q6FIF0}  
18202 Pathogen[ Q85601] interacts with 2 human partners:{O43933;P40855}  
18203 Pathogen[ P14079] interacts with 3 human partners:{Q9Y5Y5;P40855;P50542}  
18204 Pathogen[ POC383] interacts with 1 human partners:{P40855}  
18205 Pathogen[ POC3410] interacts with 3 human partners:{Q9Y5Y5;P40855;P50542}  
18206 Pathogen[ P14075] interacts with 1 human partners:{P40855}  
18207 Pathogen[ POC206] interacts with 3 human partners:{O43933;P50542;P40855}  
18208 Pathogen[ POC363] interacts with 3 human partners:{O43933;P40855;Q6FIF0}

18209 [Cluster 1656]GO:0048872+P biological\_process [name] homeostasis of number of cells  
[def] "Any biological process involved in the maintenance of the steady-state number of  
cells within a population of cells." [GOC

18210 Pathogen[ Q2Q067] interacts with 4 human partners:{Q8IX07;Q99700;P10242;Q9NYV6}  
18211 Pathogen[ P0C214] interacts with 4 human partners:{Q99700;Q9NYV6;Q8IX07;P10242}  
18212 Pathogen[ P03346] interacts with 4 human partners:{Q99700;P10242;Q8IX07;Q9NYV6}  
18213 Pathogen[ Q85601] interacts with 4 human partners:{P10242;Q8IX07;Q9NYV6;Q99700}  
18214 Pathogen[ P14079] interacts with 4 human partners:{Q9NYV6;Q99700;Q8IX07;P10242}  
18215 Pathogen[ P03383] interacts with 3 human partners:{Q9NYV6;Q99700;P10242}  
18216 Pathogen[ P03410] interacts with 4 human partners:{Q99700;P10242;Q9NYV6;Q8IX07}  
18217 Pathogen[ P14075] interacts with 3 human partners:{Q9NYV6;P10242;Q99700}  
18218 Pathogen[ P0C206] interacts with 4 human partners:{P10242;Q99700;Q8IX07;Q9NYV6}  
18219 Pathogen[ P03363] interacts with 3 human partners:{Q9NYV6;P10242;Q99700}

18220 [Cluster 1657]GO:0021983+P biological\_process [name] pituitary gland development  
[def] "The progression of the pituitary gland over time from its initial formation until  
its mature state. The pituitary gland is an endocrine gland that secretes hormones that  
regulate many other glands." [GO\_REF

18221 Pathogen[ Q2Q067] interacts with 7 human  
partners:{O60806;P14921;P08151;P28069;P23769;P78337;Q9NSC2}  
18222 Pathogen[ P0C214] interacts with 8 human  
partners:{P78337;P14921;P23769;Q9NSC2;P28069;O60806;P08151;P16220}  
18223 Pathogen[ P03346] interacts with 11 human  
partners:{P78337;P16220;P23769;Q9NSC2;P41225;O60806;P51843;P14921;Q9UBR4;P28069;P081  
51}  
18224 Pathogen[ Q85601] interacts with 8 human  
partners:{P08151;P14921;P28069;P23769;P78337;O60806;P16220;Q9NSC2}  
18225 Pathogen[ P14079] interacts with 5 human  
partners:{P08151;P78337;P28069;P23769;Q9NSC2}  
18226 Pathogen[ P03383] interacts with 6 human  
partners:{P16220;P28069;P14921;P23769;P78337;Q9NSC2}  
18227 Pathogen[ P03410] interacts with 7 human  
partners:{P28069;O60806;P16220;P23769;Q9NSC2;P78337;P14921}  
18228 Pathogen[ P14075] interacts with 6 human  
partners:{P28069;Q9NSC2;P78337;P23769;P14921;P16220}  
18229 Pathogen[ P0C206] interacts with 9 human  
partners:{P14921;P16220;Q9NSC2;P78337;P23769;Q9UBR4;P28069;P08151;O60806}  
18230 Pathogen[ P03363] interacts with 6 human  
partners:{P08151;P16220;P14921;P28069;O60806;P78337}

18231 [Cluster 1658]GO:0048597+P biological\_process [name] post-embryonic camera-type eye  
morphogenesis [def] "The process in which the anatomical structures of the eye are  
generated and organized during post-embryonic development." [GOC

18232 Pathogen[ Q2Q067] interacts with 1 human partners:{P05114}  
18233 Pathogen[ P0C214] interacts with 1 human partners:{P05114}  
18234 Pathogen[ P03346] interacts with 1 human partners:{P05114}  
18235 Pathogen[ Q85601] interacts with 1 human partners:{P05114}  
18236 Pathogen[ P14079] interacts with 1 human partners:{P05114}  
18237 Pathogen[ P03383] interacts with 1 human partners:{P05114}  
18238 Pathogen[ P03410] interacts with 1 human partners:{P05114}  
18239 Pathogen[ P14075] interacts with 1 human partners:{P05114}  
18240 Pathogen[ P0C206] interacts with 1 human partners:{P05114}  
18241 Pathogen[ P03363] interacts with 1 human partners:{P05114}

18242 [Cluster 1659]GO:0021501+P biological\_process [name] prechordal plate formation  
[def] "The formation of the prechordal plate. The prechordal plate is a thickening of  
the endoderm at the cranial end of the primitive streak formed by the involution of  
Spemann's organizer cells. The prechordal plate and the notochord induce the formation  
of the neural plate from the overlying ectodermal cells." [GO\_REF

18243 Pathogen[ Q2Q067] interacts with 1 human partners:{Q9BWW4}  
18244 Pathogen[ P0C214] interacts with 1 human partners:{Q9BWW4}  
18245 Pathogen[ P03346] interacts with 1 human partners:{Q9BWW4}  
18246 Pathogen[ Q85601] interacts with 1 human partners:{Q9BWW4}  
18247 Pathogen[ P14079] interacts with 1 human partners:{Q9BWW4}  
18248 Pathogen[ P03383] interacts with 1 human partners:{Q9BWW4}  
18249 Pathogen[ P03410] interacts with 1 human partners:{Q9BWW4}  
18250 Pathogen[ P14075] interacts with 1 human partners:{Q9BWW4}  
18251 Pathogen[ P0C206] interacts with 1 human partners:{Q9BWW4}  
18252 Pathogen[ P03363] interacts with 1 human partners:{Q9BWW4}

18253 [Cluster 1660]GO:0007179+P biological\_process [name] transforming growth factor beta  
receptor signaling pathway [def] "The series of molecular signals generated as a  
consequence of a transforming growth factor beta receptor binding to one of its  
physiological ligands." [GOC

18254 Pathogen[ Q2Q067] interacts with 63 human  
partners:{Q9Y5K5;Q13118;P01100;Q9UPN9;Q9HAU4;Q9Y3F4;Q9NPB6;P01106;Q9P2M7;Q13485;O758  
07;P62140;Q13547;Q8WUH2;P41134;Q6ZNA4;P08047;O60563;P61077;Q99966;O14980;Q14186;P127  
55;P84022;P36873;P51668;O00255;O15105;Q9GZV5;O43541;P50750;Q13233;P09874;P62136;Q96P  
U5;Q16254;O15198;P49354;Q15329;Q9GZN2;Q15796;P28749;Q15583;Q93008;P12757;P35813;P0CG  
47;Q9Y618;Q9UNE7;P0CG48;O43318;P49336;O60583;P24863;P62987;Q14188;Q99717;O75376;P615

86;Q15797;P42772;Q15750;P62979}  
18255 Pathogen[ P0C214] interacts with 65 human  
partners: {O15198;P24863;P49354;Q16254;P35813;Q9HAU4;P62140;Q13547;P12757;P50750;O75807;P01100;P17275;P61586;P84022;Q9GZV5;P05121;O43318;Q93008;P61077;Q9Y5K5;Q9HCE7;Q99966;Q9NPB6;Q13233;Q14186;O14980;P41134;P49336;P0CG48;Q13485;O15105;O60583;Q15329;P62136;O75376;P15796;O43541;Q9Y3F4;P12755;Q6ZNA4;P62987;Q15750;O60563;P05412;P28749;Q9P2M7;P0CG47;P36873;Q99717;Q15797;P51668;P16220;P62979;Q9UNE7;Q9Y618;Q8WUH2;Q9UPN9;P01106;Q14188;P08047;O00255;P42772;Q96PU5;P09874}  
18256 Pathogen[ P03346] interacts with 68 human  
partners: {P62136;Q9UPN9;P05412;O95405;P35813;Q9HAU4;Q99966;Q96PU5;P16220;P12757;Q15329;Q93008;P62987;Q15797;Q14188;Q9GZV5;O60563;P17275;P24863;P49336;Q15583;P42772;P0CG48;Q15796;Q9NPB6;Q99717;O15105;Q16254;Q8WUH2;P51668;P61077;Q8TEW0;O15198;P08047;P01106;O60583;Q14186;P84022;O14980;P49354;O43541;Q9GZN2;O00255;Q9Y3F4;P41134;Q13118;Q9UNE7;P36873;Q13547;P50750;Q13233;Q6ZNA4;O75376;Q15750;P09874;P62979;P28749;P0CG47;Q13485;P62140;O43318;Q9Y618;O75593;P01100;O75807;Q9Y5K5;Q9P2M7;P61586}  
18257 Pathogen[ Q85601] interacts with 67 human  
partners: {P01106;O15198;Q9UPN9;P09874;Q9HAU4;P41134;Q15750;O60563;P50750;Q15329;O43541;Q15797;Q99966;P49336;O60583;P42772;P12757;Q14188;Q9Y618;Q15583;Q96PU5;Q9GZV5;P0CG48;Q8WUH2;P51668;Q93008;P61077;P12755;P08047;P01100;Q14186;P49354;P62136;P16220;Q99717;P36873;Q9Y5K5;P05412;Q9Y3F4;O00255;O75376;Q16254;Q9NPB6;P05121;P61586;Q13118;O14980;P62979;P28749;P84022;P0CG47;Q6ZNA4;Q9GZN2;O15105;Q13547;P62140;P24863;Q13233;P62987;O43318;P35813;O75807;P17275;Q9UNE7;Q13485;Q9P2M7;Q15796}  
18258 Pathogen[ P14079] interacts with 55 human  
partners: {P09874;P12755;P0CG48;Q9GZV5;P28749;Q14186;Q13118;P49336;P36873;P49354;Q16254;P01225;Q15583;O15198;Q15329;O95405;O75807;P62136;Q6ZNA4;Q99966;Q9GZN2;Q15750;Q9Y3F4;P62979;Q9HAU4;Q15797;P61077;P62987;P35813;Q8TEW0;Q9Y5K5;P51668;Q9UPN9;P24863;P17275;P62140;P61586;P01106;Q9P2M7;O43541;O75376;O60583;P41134;P12757;Q969W9;P05412;Q9NPB6;Q8WUH2;O15105;P0CG47;O00255;Q13145;P01100;Q14188;P50750}  
18259 Pathogen[ P03383] interacts with 55 human  
partners: {Q9Y618;Q15329;O15198;P62140;Q13485;P08047;P16220;P62987;Q13233;O75376;P01106;Q9UPN9;Q6ZNA4;Q15797;P35813;O43318;P61077;P36873;P62136;O15105;P49336;Q14186;P84022;O60563;P42772;P61586;O14980;Q99717;P09874;Q16254;O43541;P50750;Q9NPB6;Q9P2M7;Q9Y3F4;O00255;Q9Y5K5;Q13547;P28749;Q14188;P01100;P62979;P0CG47;Q15796;P12757;P0CG48;O75807;P24863;P17275;Q9GZV5;O60583;P51668;Q8WUH2;Q15750;P05412}  
18260 Pathogen[ P03410] interacts with 68 human  
partners: {P84022;O60583;P49354;P05121;Q6ZNA4;P0CG48;O95405;Q969W9;P35813;Q15329;P42772;P12755;P01106;Q15750;Q99717;Q16254;P62136;O15198;Q13145;P41134;Q8WUH2;Q9Y3F4;O75376;Q13233;P62979;Q14188;P01100;Q9GZV5;P50750;O60563;O43318;Q15583;Q9UNE7;P62140;P61586;P17275;Q15797;Q13485;Q14186;P09874;P16220;P12757;P36873;P51668;Q13118;O75807;P05412;O43541;P49336;O15105;P24863;P28749;P62987;Q13547;Q9Y5K5;Q8TEW0;Q9NPB6;Q9GZN2;P08047;Q9P2M7;Q9Y618;O00255;Q15796;P0CG47;Q9UPN9;O14980;P61077;Q99966}  
18261 Pathogen[ P14075] interacts with 54 human  
partners: {P49336;Q9GZV5;P35813;Q9Y3F4;P24863;Q15750;P05412;O43541;P17275;O60563;P50750;O60583;Q99717;P62140;Q15796;Q13547;P61077;P01106;P36873;Q9Y618;O75376;P62136;P12757;Q13485;O00255;Q14186;O14980;P0CG48;P62979;Q6ZNA4;Q16254;Q9UPN9;O43318;O15198;O75807;P62987;P61586;O15105;P28749;P01100;P0CG47;P42772;Q8WUH2;P16220;Q9NPB6;Q15329;P84022;Q9P2M7;Q13233;Q14188;P51668;P09874;Q9Y5K5;P08047}  
18262 Pathogen[ P0C206] interacts with 68 human  
partners: {P84022;O43541;P24863;Q14188;Q96PU5;P0CG48;Q9Y3F4;Q15329;P49336;Q9UPN9;P50750;Q9HAU4;P16220;P17275;P09874;Q93008;Q6ZNA4;O75807;O00255;Q99717;P05412;O43318;Q13547;Q14186;P42772;Q15796;P49354;Q13233;Q16254;P28749;Q9Y5K5;P12755;P61586;Q9GZV5;P41134;Q9GZN2;O15105;Q8TEW0;Q9UNE7;P12757;P08047;P01100;P62979;O95405;Q9NPB6;O75376;Q8WUH2;Q13485;P62140;P0CG47;Q15797;Q99966;P05121;Q9P2M7;P01106;P61077;Q15750;O15198;P62987;O60583;Q13118;P36873;O60563;P51668;Q9Y618;P62136;P35813;Q15583}  
18263 Pathogen[ P03363] interacts with 59 human  
partners: {Q9GZN2;Q9Y3F4;P62136;Q9Y5K5;P36873;O60563;Q9HAU4;P62140;P24863;P12757;O14980;O75376;P49354;Q16254;P16220;Q9NPB6;Q9UPN9;O43318;O15105;Q15797;P01106;P28749;P17275;Q15750;Q6ZNA4;O95405;O60583;P42772;Q96PU5;Q9GZV5;Q9UNE7;O43541;P41134;Q15796;P84022;Q9Y618;P49336;Q15583;P62987;Q13547;O75807;P51668;Q13485;Q8WUH2;P50750;Q14186;Q14188;P05412;P61077;P09874;P08047;Q99717;Q9P2M7;O15198;Q93008;Q15329;Q13233;Q13118;P01100}  
18264 [Cluster 1661]GO:2000370+P biological\_process [name] positive regulation of clathrin-mediated endocytosis [def] "Any process that activates or increases the frequency, rate or extent of clathrin-mediated endocytosis." [GOC  
18265 Pathogen[ Q2Q067] interacts with 1 human partners: {O00401}  
18266 Pathogen[ P0C214] interacts with 1 human partners: {O00401}  
18267 Pathogen[ P03346] interacts with 2 human partners: {Q6P3W7;O00401}  
18268 Pathogen[ Q85601] interacts with 1 human partners: {O00401}  
18269 Pathogen[ P14079] interacts with 1 human partners: {O00401}  
18270 Pathogen[ P03383] interacts with 1 human partners: {O00401}  
18271 Pathogen[ P03410] interacts with 1 human partners: {O00401}  
18272 Pathogen[ P14075] interacts with 1 human partners: {O00401}  
18273 Pathogen[ P0C206] interacts with 2 human partners: {Q6P3W7;O00401}  
18274 Pathogen[ P03363] interacts with 1 human partners: {O00401}  
18275 [Cluster 1662]GO:0061351+P biological\_process [name] neural precursor cell proliferation [def] "The multiplication or reproduction of neural precursor cells,

resulting in the expansion of a cell population. A neural precursor cell is either a nervous system stem cell or a nervous system progenitor cell." [GOC

18276 Pathogen[ Q2Q067] interacts with 1 human partners:{095613}

18277 Pathogen[ P0C214] interacts with 1 human partners:{095613}

18278 Pathogen[ P03346] interacts with 1 human partners:{095613}

18279 Pathogen[ Q85601] interacts with 1 human partners:{095613}

18280 Pathogen[ P14079] interacts with 1 human partners:{095613}

18281 Pathogen[ P03383] interacts with 1 human partners:{095613}

18282 Pathogen[ P03410] interacts with 1 human partners:{095613}

18283 Pathogen[ P14075] interacts with 1 human partners:{095613}

18284 Pathogen[ P0C206] interacts with 1 human partners:{095613}

18285 Pathogen[ P03363] interacts with 1 human partners:{095613}

18286 [Cluster 1663]GO:0007568+P biological\_process [name] aging [def] "The inherent decline over time, from the optimal fertility and viability of early maturity, that may precede death and may be preceded by other indications, such as sterility." [GOC

18287 Pathogen[ Q2Q067] interacts with 17 human partners:{P01100;P13929;Q04206;P36956;Q96ST3;P02511;P63241;P11388;O14508;Q9HB71;P09972;P06396;P29474;P42575;P54098;P04818;P42771}

18288 Pathogen[ P0C214] interacts with 22 human partners:{P29474;P04818;P62993;P54098;P02511;P01100;Q04206;P06396;P63241;Q9UJ68;P13929;P05543;P42771;P11388;O14508;P09972;P09622;P05412;Q96ST3;P55210;Q9HB71;P42575}

18289 Pathogen[ P03346] interacts with 20 human partners:{Q96ST3;P05412;P09972;P29474;P54098;P36956;P11388;P13929;Q12772;P42575;Q04206;P62993;P63241;P42771;O14508;Q9HB71;P02511;P55210;P06396;P01100}

18290 Pathogen[ Q85601] interacts with 20 human partners:{P62993;P06396;Q12772;P63241;O14508;P01100;P54098;P36956;P13929;P42575;Q04206;P02511;P09972;P05412;P11388;P42771;P29474;Q9HB71;P55210;Q96ST3}

18291 Pathogen[ P14079] interacts with 22 human partners:{P11388;Q96ST3;Q86W33;P02511;P00395;P09972;Q12772;Q9HB71;P55210;O60502;P63241;O14508;P13929;P62993;P42575;P54098;P05412;P36956;P04818;P01100;Q9UJ68;P42771}

18292 Pathogen[ P03383] interacts with 12 human partners:{P29474;P02511;P09972;P63241;Q9HB71;P54098;P42771;P01100;Q04206;Q96ST3;P06396;P05412}

18293 Pathogen[ P03410] interacts with 24 human partners:{Q04206;P42771;P36956;Q9HB71;Q86W33;P42575;O60502;P06396;Q96ST3;P01100;P29474;Q9UJ68;P09972;O14508;P04818;Q12772;P02511;P05412;P11388;P13929;P63241;P62993;P54098;P55210}

18294 Pathogen[ P14075] interacts with 12 human partners:{P29474;Q96ST3;P54098;Q04206;P05412;P42771;P63241;P06396;P02511;P01100;P09972;Q9HB71}

18295 Pathogen[ P0C206] interacts with 22 human partners:{Q9HB71;P06396;Q96ST3;P05412;P54098;P42771;P36956;P62993;P01100;Q04206;O14508;Q9UJ68;P04818;P29474;P63241;P09972;P42575;P11388;P02511;P55210;P13929;Q12772}

18296 Pathogen[ P03363] interacts with 13 human partners:{P29474;Q04206;Q9HB71;P09972;P54098;P06396;Q96ST3;P63241;P05412;P55210;O14508;P42771;P01100}

18297 [Cluster 1664]GO:0070885+P biological\_process [name] negative regulation of calcineurin-NFAT signaling pathway [def] "Any process that stops, prevents, or reduces the frequency, rate or extent of signaling via the calcineurin-NFAT signaling pathway." [GOC

18298 Pathogen[ Q2Q067] interacts with 1 human partners:{P04156}

18299 Pathogen[ P0C214] interacts with 1 human partners:{P04156}

18300 Pathogen[ P03346] interacts with 1 human partners:{P04156}

18301 Pathogen[ Q85601] interacts with 1 human partners:{P04156}

18302 Pathogen[ P14079] interacts with 1 human partners:{P04156}

18303 Pathogen[ P03383] interacts with 1 human partners:{P04156}

18304 Pathogen[ P03410] interacts with 1 human partners:{P04156}

18305 Pathogen[ P14075] interacts with 1 human partners:{P04156}

18306 Pathogen[ P0C206] interacts with 1 human partners:{P04156}

18307 Pathogen[ P03363] interacts with 1 human partners:{P04156}

18308 [Cluster 1665]GO:2000573+P biological\_process [name] positive regulation of DNA biosynthetic process [def] "Any process that activates or increases the frequency, rate or extent of DNA biosynthetic process." [GOC

18309 Pathogen[ Q2Q067] interacts with 2 human partners:{Q9H4X1;P01106}

18310 Pathogen[ P0C214] interacts with 2 human partners:{Q9H4X1;P01106}

18311 Pathogen[ P03346] interacts with 2 human partners:{Q9H4X1;P01106}

18312 Pathogen[ Q85601] interacts with 2 human partners:{P01106;Q9H4X1}

18313 Pathogen[ P14079] interacts with 1 human partners:{P01106}

18314 Pathogen[ P03383] interacts with 2 human partners:{Q9H4X1;P01106}

18315 Pathogen[ P03410] interacts with 2 human partners:{Q9H4X1;P01106}

18316 Pathogen[ P14075] interacts with 2 human partners:{Q9H4X1;P01106}

18317 Pathogen[ P0C206] interacts with 2 human partners:{Q9H4X1;P01106}

18318 Pathogen[ P03363] interacts with 2 human partners:{Q9H4X1;P01106}

18319 [Cluster 1666]GO:0046836+P biological\_process [name] glycolipid transport [def] "The directed movement of glycolipids, compounds containing (usually) 1-4 linked monosaccharide residues joined by a glycosyl linkage to a lipid, into, out of or within



a cell, or between cells, by means of some agent such as a transporter or pore." [GOC

18320 Pathogen[ Q2Q067] interacts with 2 human partners:{A6NH11;O95397}

18321 Pathogen[ P0C214] interacts with 2 human partners:{A6NH11;O95397}

18322 Pathogen[ P03346] interacts with 3 human partners:{O95397;Q5TA50;A6NH11}

18323 Pathogen[ Q85601] interacts with 1 human partners:{O95397}

18324 Pathogen[ P14079] interacts with 4 human partners:{A6NH11;Q5TA50;O95397;Q9NZD2}

18325 Pathogen[ P03383] interacts with 2 human partners:{A6NH11;O95397}

18326 Pathogen[ P03410] interacts with 4 human partners:{Q5TA50;A6NH11;Q9NZD2;O95397}

18327 Pathogen[ P14075] interacts with 3 human partners:{O95397;A6NH11;Q5TA50}

18328 Pathogen[ P0C206] interacts with 4 human partners:{O95397;Q9NZD2;A6NH11;Q5TA50}

18329 Pathogen[ P03363] interacts with 3 human partners:{Q5TA50;O95397;A6NH11}

18330 [Cluster 1667]GO:0065001+P biological\_process [name] specification of axis polarity [def] "The pattern specification process in which the polarity of a body or organ axis is established and maintained." [GOC

18331 Pathogen[ Q2Q067] interacts with 1 human partners:{Q6W2J9}

18332 Pathogen[ P0C214] interacts with 1 human partners:{Q6W2J9}

18333 Pathogen[ P03346] interacts with 2 human partners:{Q8N157;Q6W2J9}

18334 Pathogen[ Q85601] interacts with 1 human partners:{Q6W2J9}

18335 Pathogen[ P14079] interacts with 2 human partners:{Q8N157;Q6W2J9}

18336 Pathogen[ P03383] interacts with 1 human partners:{Q6W2J9}

18337 Pathogen[ P03410] interacts with 2 human partners:{Q6W2J9;Q8N157}

18338 Pathogen[ P14075] interacts with 1 human partners:{Q6W2J9}

18339 Pathogen[ P0C206] interacts with 2 human partners:{Q6W2J9;Q8N157}

18340 Pathogen[ P03363] interacts with 2 human partners:{Q8N157;Q6W2J9}

18341 [Cluster 1668]GO:0061178+P biological\_process [name] regulation of insulin secretion involved in cellular response to glucose stimulus [def] "Any process that modulates the frequency, rate or extent of the regulated release of insulin that contributes to the response of a cell to glucose." [GOC

18342 Pathogen[ Q2Q067] interacts with 1 human partners:{Q15651}

18343 Pathogen[ P0C214] interacts with 2 human partners:{Q15651;Q00536}

18344 Pathogen[ P03346] interacts with 2 human partners:{Q00536;Q15651}

18345 Pathogen[ Q85601] interacts with 2 human partners:{Q00536;Q15651}

18346 Pathogen[ P14079] interacts with 1 human partners:{Q15651}

18347 Pathogen[ P03383] interacts with 2 human partners:{Q00536;Q15651}

18348 Pathogen[ P03410] interacts with 1 human partners:{Q15651}

18349 Pathogen[ P14075] interacts with 1 human partners:{Q15651}

18350 Pathogen[ P0C206] interacts with 2 human partners:{Q00536;Q15651}

18351 Pathogen[ P03363] interacts with 2 human partners:{Q15651;Q00536}

18352 [Cluster 1669]GO:0009451+P biological\_process [name] RNA modification [def] "The covalent alteration of one or more nucleotides within an RNA molecule to produce an RNA molecule with a sequence that differs from that coded genetically." [GOC

18353 Pathogen[ Q2Q067] interacts with 6 human partners:{Q9Y606;O60832;Q9BZE2;O95453;Q96CM3;O95900}

18354 Pathogen[ P0C214] interacts with 9 human partners:{Q3MIT2;O95453;Q9UJJ7;Q9BZE2;O95900;O60832;Q9Y606;Q8IZ73;Q96CM3}

18355 Pathogen[ P03346] interacts with 8 human partners:{Q9Y606;O95900;Q9BZE2;O60832;O95453;Q8N0Z8;Q8WWH5;Q96CM3}

18356 Pathogen[ Q85601] interacts with 6 human partners:{Q9BZE2;Q9Y606;Q9UJJ7;O95453;Q96CM3;O60832}

18357 Pathogen[ P14079] interacts with 16 human partners:{Q5VV42;Q9BZE2;Q3MIT2;Q96CM3;Q6P087;O60832;O95453;Q8IZ73;Q96PZ0;Q8N0Z8;Q9H0K6;Q9Y606;Q96SZ6;Q9UJJ7;O95900;Q8WWH5}

18358 Pathogen[ P03383] interacts with 6 human partners:{Q9BZE2;Q9Y606;O95900;O95453;Q96CM3;O60832}

18359 Pathogen[ P03410] interacts with 13 human partners:{Q8IZ73;O60832;Q9UJJ7;Q96CM3;O95453;Q8N0Z8;Q9BZE2;Q8WWH5;Q9Y606;O95900;Q6P087;Q9H0K6;Q3MIT2}

18360 Pathogen[ P14075] interacts with 9 human partners:{O95453;Q8N0Z8;Q9Y606;Q8WWH5;O95900;Q9UJJ7;Q9BZE2;O60832;Q96CM3}

18361 Pathogen[ P0C206] interacts with 11 human partners:{Q8WWH5;O95453;Q8IZ73;Q9UJJ7;Q9BZE2;Q6P087;O95900;O60832;Q9Y606;Q8N0Z8;Q96CM3}

18362 Pathogen[ P03363] interacts with 8 human partners:{O60832;Q9BZE2;O95453;Q9Y606;O95900;Q8N0Z8;Q8WWH5;Q96CM3}

18363 [Cluster 1670]GO:0031529+P biological\_process [name] ruffle organization [def] "A process that is carried out at the cellular level which results in the assembly, arrangement of constituent parts, or disassembly of a ruffle, a projection at the leading edge of a crawling cell." [GOC

18364 Pathogen[ Q2Q067] interacts with 2 human partners:{P63000;Q14693}

18365 Pathogen[ P0C214] interacts with 3 human partners:{P63000;Q5VZK9;Q14693}

18366 Pathogen[ P03346] interacts with 4 human partners:{Q9HB21;P63000;Q5VZK9;Q14693}

18367 Pathogen[ Q85601] interacts with 4 human partners:{P63000;Q5VZK9;Q9HB21;Q14693}

18368 Pathogen[ P14079] interacts with 2 human partners:{Q14693;Q9HB21}

18369 Pathogen[ P03383] interacts with 2 human partners:{P63000;Q14693}

18370 Pathogen[ P03410] interacts with 4 human partners:{P63000;Q9HB21;Q14693;Q5VZK9}

18371 Pathogen[ P14075] interacts with 2 human partners:{P63000;Q14693}

18372 Pathogen[ POC206] interacts with 4 human partners:{P63000;Q5VZK9;Q9HB21;Q14693}  
18373 Pathogen[ POC363] interacts with 3 human partners:{Q5VZK9;P63000;Q7L576}  
18374 [Cluster 1671]GO:0030155+P biological\_process [name] regulation of cell adhesion  
[def] "Any process that modulates the frequency, rate or extent of attachment of a cell  
to another cell or to the extracellular matrix." [GOC  
18375 Pathogen[ Q2Q067] interacts with 8 human  
partners:{P30153;O14974;P62140;P67775;P11831;Q9UNN5;P06396;O60759}  
18376 Pathogen[ POC214] interacts with 9 human  
partners:{P62140;P30153;O60759;P11831;P06396;O14974;Q9UNN5;P67775;Q99574}  
18377 Pathogen[ POC346] interacts with 9 human  
partners:{Q15438;P11831;O60759;P67775;P30153;Q9UNN5;P62140;P06396;O14974}  
18378 Pathogen[ Q85601] interacts with 8 human  
partners:{P11831;P06396;O60759;P30153;Q9UNN5;P67775;O14974;P62140}  
18379 Pathogen[ P14079] interacts with 6 human  
partners:{O14974;O60759;Q9UNN5;P62140;P30153;Q15438}  
18380 Pathogen[ POC383] interacts with 6 human  
partners:{P62140;P11831;P30153;P67775;Q9UNN5;P06396}  
18381 Pathogen[ POC410] interacts with 9 human  
partners:{P11831;Q9UNN5;P06396;O60759;P62140;O14974;Q15438;P30153;P67775}  
18382 Pathogen[ P14075] interacts with 6 human  
partners:{P11831;P62140;Q9UNN5;P06396;P67775;P30153}  
18383 Pathogen[ POC206] interacts with 8 human  
partners:{Q9UNN5;P06396;O60759;P30153;P67775;O14974;P62140;P11831}  
18384 Pathogen[ POC363] interacts with 9 human  
partners:{Q9UNN5;Q15438;P62140;P06396;P11831;O14974;O60759;P30153;P67775}  
18385 [Cluster 1672]GO:0055117+P biological\_process [name] regulation of cardiac muscle  
contraction [def] "Any process that modulates the frequency, rate or extent of cardiac  
muscle contraction." [GOC  
18386 Pathogen[ Q2Q067] interacts with 1 human partners:{O15105}  
18387 Pathogen[ POC214] interacts with 1 human partners:{O15105}  
18388 Pathogen[ POC346] interacts with 1 human partners:{O15105}  
18389 Pathogen[ Q85601] interacts with 1 human partners:{O15105}  
18390 Pathogen[ P14079] interacts with 1 human partners:{O15105}  
18391 Pathogen[ POC383] interacts with 1 human partners:{O15105}  
18392 Pathogen[ POC410] interacts with 1 human partners:{O15105}  
18393 Pathogen[ P14075] interacts with 1 human partners:{O15105}  
18394 Pathogen[ POC206] interacts with 1 human partners:{O15105}  
18395 Pathogen[ POC363] interacts with 1 human partners:{O15105}  
18396 [Cluster 1673]GO:0051546+P biological\_process [name] keratinocyte migration [def]  
"The directed movement of a keratinocyte, epidermal cells which synthesize keratin, from  
one site to another." [ISBN  
18397 Pathogen[ Q2Q067] interacts with 1 human partners:{P35908}  
18398 Pathogen[ POC214] interacts with 1 human partners:{P35908}  
18399 Pathogen[ POC346] interacts with 1 human partners:{P35908}  
18400 Pathogen[ Q85601] interacts with 1 human partners:{P35908}  
18401 Pathogen[ P14079] interacts with 1 human partners:{P35908}  
18402 Pathogen[ POC383] interacts with 1 human partners:{P35908}  
18403 Pathogen[ POC410] interacts with 1 human partners:{P35908}  
18404 Pathogen[ P14075] interacts with 1 human partners:{P35908}  
18405 Pathogen[ POC206] interacts with 1 human partners:{P35908}  
18406 Pathogen[ POC363] interacts with 1 human partners:{P35908}  
18407 [Cluster 1674]GO:0030225+P biological\_process [name] macrophage differentiation  
[def] "The process in which a relatively unspecialized monocyte acquires the specialized  
features of a macrophage." [GOC  
18408 Pathogen[ Q2Q067] interacts with 6 human  
partners:{Q01892;Q14790;Q15744;P60953;P49715;P17947}  
18409 Pathogen[ POC214] interacts with 4 human partners:{P17947;P60953;Q01892;Q14790}  
18410 Pathogen[ POC346] interacts with 7 human  
partners:{P60953;P49715;Q15744;Q14790;P17947;Q8TAU0;Q01892}  
18411 Pathogen[ Q85601] interacts with 6 human  
partners:{Q01892;Q14790;Q15744;P49715;P60953;P17947}  
18412 Pathogen[ P14079] interacts with 4 human partners:{Q15744;Q01892;Q14790;P49715}  
18413 Pathogen[ POC383] interacts with 3 human partners:{P60953;Q01892;P17947}  
18414 Pathogen[ POC410] interacts with 4 human partners:{P17947;P60953;Q15744;Q01892}  
18415 Pathogen[ P14075] interacts with 3 human partners:{P60953;Q01892;P17947}  
18416 Pathogen[ POC206] interacts with 7 human  
partners:{Q15744;P49715;Q14790;P17947;P60953;Q8TAU0;Q01892}  
18417 Pathogen[ POC363] interacts with 5 human  
partners:{Q15744;P17947;Q01892;Q8TAU0;P60953}  
18418 [Cluster 1675]GO:0007032+P biological\_process [name] endosome organization [def] "A  
process that is carried out at the cellular level which results in the assembly,  
arrangement of constituent parts, or disassembly of endosomes." [GOC  
18419 Pathogen[ Q2Q067] interacts with 7 human  
partners:{O75351;O43752;Q8N612;Q6ICB4;Q9H8T0;Q86VS8;Q96ED9}  
18420 Pathogen[ POC214] interacts with 7 human  
partners:{Q6ICB4;O75351;Q96ED9;Q8N612;Q86VS8;Q9H8T0;O43752}

18421 Pathogen[ P03346] interacts with 12 human partners: {O43752;Q86VS8;Q9P253;Q8N612;Q9Y6D5;Q9H8T0;Q8N4B1;Q96ED9;Q96S99;O75351;Q6ICB4;Q9UJC3}

18422 Pathogen[ Q85601] interacts with 9 human partners: {Q96S99;Q86VS8;Q9P253;Q8N612;O43752;O75351;Q9H8T0;Q6ICB4;Q96ED9}

18423 Pathogen[ P14079] interacts with 13 human partners: {Q9UJC3;Q86VS8;Q96ED9;Q9Y6D5;Q9H8T0;Q96S99;Q6IAA8;Q8N4B1;Q9P253;Q8N612;Q6ICB4;O43752;O75351}

18424 Pathogen[ P03383] interacts with 5 human partners: {Q8N612;Q9H8T0;Q86VS8;Q96ED9;O43752}

18425 Pathogen[ P03410] interacts with 13 human partners: {Q9UJC3;Q96S99;Q8N4B1;O75351;Q9H8T0;Q86VS8;Q9P253;Q96ED9;Q9Y6D5;Q8N612;Q6ICB4;Q6IAA8;O43752}

18426 Pathogen[ P14075] interacts with 5 human partners: {Q8N612;O43752;Q9H8T0;Q86VS8;Q96ED9}

18427 Pathogen[ P0C206] interacts with 12 human partners: {O43752;Q9H8T0;Q6ICB4;Q86VS8;Q96ED9;Q9Y6D5;Q96S99;Q8N612;Q8N4B1;Q9P253;Q9UJC3;O75351}

18428 Pathogen[ P03363] interacts with 9 human partners: {Q86VS8;Q96ED9;Q6ICB4;Q8N4B1;O75351;Q9H8T0;Q8N612;O43752;Q9UJC3}

18429 [Cluster 1676]GO:0007097+P biological\_process [name] nuclear migration [def] "The directed movement of the nucleus." [GOC

18430 Pathogen[ Q2Q067] interacts with 3 human partners: {Q9UH99;Q9Y266;P60953}

18431 Pathogen[ P0C214] interacts with 4 human partners: {P60953;Q9Y266;Q9UH99;P35580}

18432 Pathogen[ P03346] interacts with 4 human partners: {Q8WXH0;Q9UH99;P60953;Q9Y266}

18433 Pathogen[ Q85601] interacts with 4 human partners: {Q9Y266;Q9UH99;P60953;P35580}

18434 Pathogen[ P14079] interacts with 3 human partners: {Q9Y266;Q8WXH0;Q9UH99}

18435 Pathogen[ P03383] interacts with 4 human partners: {P60953;Q9UH99;Q9Y266;P35580}

18436 Pathogen[ P03410] interacts with 5 human partners: {Q9UH99;P60953;P35580;Q9Y266;Q8WXH0}

18437 Pathogen[ P14075] interacts with 3 human partners: {P60953;Q9Y266;Q9UH99}

18438 Pathogen[ P0C206] interacts with 5 human partners: {Q9UH99;P60953;Q8WXH0;P35580;Q9Y266}

18439 Pathogen[ P03363] interacts with 3 human partners: {Q9Y266;P60953;Q9UH99}

18440 [Cluster 1677]GO:0070245+P biological\_process [name] positive regulation of thymocyte apoptosis [def] "Any process that activates or increases the frequency, rate or extent of thymocyte death by apoptosis." [GOC

18441 Pathogen[ Q2Q067] interacts with 2 human partners: {Q9BXH1;Q8N5P1}

18442 Pathogen[ P0C214] interacts with 1 human partners: {Q9BXH1}

18443 Pathogen[ P03346] interacts with 2 human partners: {Q8N5P1;Q9BXH1}

18444 Pathogen[ Q85601] interacts with 2 human partners: {Q9BXH1;Q8N5P1}

18445 Pathogen[ P14079] interacts with 2 human partners: {Q9BXH1;Q8N5P1}

18446 Pathogen[ P03383] interacts with 1 human partners: {Q9BXH1}

18447 Pathogen[ P03410] interacts with 2 human partners: {Q9BXH1;Q8N5P1}

18448 Pathogen[ P14075] interacts with 1 human partners: {Q9BXH1}

18449 Pathogen[ P0C206] interacts with 2 human partners: {Q9BXH1;Q8N5P1}

18450 Pathogen[ P03363] interacts with 2 human partners: {Q8N5P1;Q9BXH1}

18451 [Cluster 1678]GO:0060690+P biological\_process [name] epithelial cell differentiation involved in salivary gland development [def] "The process in which a relatively unspecialized cell acquire specialized structural and/or functional features of an epithelial cell of the salivary gland." [GOC

18452 Pathogen[ Q2Q067] interacts with 1 human partners: {O60716}

18453 Pathogen[ P0C214] interacts with 1 human partners: {O60716}

18454 Pathogen[ P03346] interacts with 1 human partners: {O60716}

18455 Pathogen[ Q85601] interacts with 1 human partners: {O60716}

18456 Pathogen[ P14079] interacts with 1 human partners: {O60716}

18457 Pathogen[ P03383] interacts with 1 human partners: {O60716}

18458 Pathogen[ P03410] interacts with 1 human partners: {O60716}

18459 Pathogen[ P14075] interacts with 1 human partners: {O60716}

18460 Pathogen[ P0C206] interacts with 1 human partners: {O60716}

18461 Pathogen[ P03363] interacts with 1 human partners: {O60716}

18462 [Cluster 1679]GO:0007051+P biological\_process [name] spindle organization [def] "A process that is carried out at the cellular level which results in the assembly, arrangement of constituent parts, or disassembly of the spindle, the array of microtubules and associated molecules that forms between opposite poles of a eukaryotic cell during DNA segregation and serves to move the duplicated chromosomes apart." [GOC

18463 Pathogen[ Q2Q067] interacts with 14 human partners: {Q14008;Q9P209;Q96R06;O00762;Q2M2Z5;Q9Y448;Q12873;Q9BV86;P33552;O95613;P43487;O95229;O14777;Q9H7T9}

18464 Pathogen[ P0C214] interacts with 14 human partners: {Q14008;O00762;Q12873;Q9P209;P43487;Q96R06;O95229;Q2M2Z5;O95613;Q9Y448;P33552;Q9H7T9;Q9BV86;O14777}

18465 Pathogen[ P03346] interacts with 15 human partners: {O95229;Q2M2Z5;Q96R06;P43487;Q9P209;O14777;O00762;Q14008;P33552;Q9Y448;Q9BV86;Q12873;O95613;O14965;Q9H7T9}

18466 Pathogen[ Q85601] interacts with 15 human

18467 partners:{Q9H7T9;O95229;Q14008;Q2M2Z5;P43487;Q9BV86;Q9P209;Q96R06;O14965;Q9Y448;Q12873;P33552;O00762;O95613;O14777}  
Pathogen[ P14079] interacts with 14 human

18468 partners:{Q2M2Z5;Q9H7T9;Q9P209;Q96R06;O95229;Q9BV86;Q9Y448;Q12873;P33552;O95613;O00762;O14965;O14777;Q14008}  
Pathogen[ P03383] interacts with 14 human

18469 partners:{Q14008;O00762;Q96R06;P33552;Q12873;Q2M2Z5;O95229;P43487;O14965;Q9P209;Q9Y448;O95613;O14777;Q9H7T9}  
Pathogen[ P03410] interacts with 15 human

18470 partners:{Q12873;Q9H7T9;Q14008;Q9P209;Q96R06;O14965;Q9Y448;P33552;P43487;O00762;Q2M2Z5;Q9BV86;O95229;O95613;O14777}  
Pathogen[ P14075] interacts with 14 human

18471 partners:{Q9H7T9;Q96R06;P43487;O14777;O95229;O00762;O14965;O95613;Q9P209;Q14008;Q12873;Q9Y448;Q2M2Z5;P33552}  
Pathogen[ P0C206] interacts with 14 human

18472 partners:{Q9H7T9;Q14008;Q9BV86;O14777;Q9Y448;Q2M2Z5;O95613;P43487;O00762;P33552;Q9P209;O14965;Q12873;O95229}  
Pathogen[ P03363] interacts with 14 human

18473 partners:{O00762;O95229;P33552;Q9BV86;Q9H7T9;O95613;Q9P209;Q96R06;P43487;Q12873;O14777;Q14008;Q9Y448;Q2M2Z5}  
[Cluster 1680]GO:0046548+P biological\_process [name] retinal rod cell development [def] "Development of a rod cell, one of the sensory cells in the eye that reacts to the presence of light. Rod cells contain the photopigment rhodopsin or porphyropsin and are responsible for vision in dim light." [ISBN

18474 Pathogen[ Q2Q067] interacts with 2 human partners:{Q9NS56;P54845}  
18475 Pathogen[ P0C214] interacts with 2 human partners:{Q9NS56;P54845}  
18476 Pathogen[ P03346] interacts with 2 human partners:{P54845;Q9NS56}  
18477 Pathogen[ Q85601] interacts with 2 human partners:{Q9NS56;P54845}  
18478 Pathogen[ P14079] interacts with 4 human partners:{P54845;P56715;Q8TCU4;Q9NS56}  
18479 Pathogen[ P03383] interacts with 1 human partners:{P54845}  
18480 Pathogen[ P03410] interacts with 3 human partners:{P54845;Q8TCU4;P56715}  
18481 Pathogen[ P14075] interacts with 1 human partners:{P54845}  
18482 Pathogen[ P0C206] interacts with 4 human partners:{Q9NS56;P56715;Q8TCU4;P54845}  
18483 Pathogen[ P03363] interacts with 2 human partners:{P56715;P54845}

18484 [Cluster 1681]GO:1901016+P  
18485 Pathogen[ Q2Q067] interacts with 2 human partners:{Q96PU5;Q13642}  
18486 Pathogen[ P0C214] interacts with 3 human partners:{O00308;Q13642;Q96PU5}  
18487 Pathogen[ P03346] interacts with 3 human partners:{Q96PU5;Q13642;O00308}  
18488 Pathogen[ Q85601] interacts with 2 human partners:{Q13642;Q96PU5}  
18489 Pathogen[ P14079] interacts with 1 human partners:{Q13642}  
18490 Pathogen[ P03383] interacts with 1 human partners:{Q13642}  
18491 Pathogen[ P03410] interacts with 1 human partners:{Q13642}  
18492 Pathogen[ P14075] interacts with 1 human partners:{Q13642}  
18493 Pathogen[ P0C206] interacts with 3 human partners:{Q96PU5;O00308;Q13642}  
18494 Pathogen[ P03363] interacts with 3 human partners:{Q96PU5;O00308;Q13642}

18495 [Cluster 1682]GO:0045008+P biological\_process [name] depyrimidination [def] "The disruption of the bond between the sugar in the backbone and the C or T base, causing the base to be removed and leaving a depyrimidinated sugar." [GOC

18496 Pathogen[ Q2Q067] interacts with 5 human  
partners:{O95243;P22674;P78549;Q13569;Q53HV7}  
18497 Pathogen[ P0C214] interacts with 5 human  
partners:{O95243;Q53HV7;P22674;P78549;Q13569}  
18498 Pathogen[ P03346] interacts with 5 human  
partners:{Q53HV7;P78549;Q13569;O95243;P22674}  
18499 Pathogen[ Q85601] interacts with 5 human  
partners:{P22674;O95243;Q53HV7;Q13569;P78549}

18500 Pathogen[ P14079] interacts with 5 human  
partners:{P78549;O95243;Q53HV7;Q13569;P22674}  
18501 Pathogen[ P03383] interacts with 4 human partners:{Q53HV7;P22674;O95243;Q13569}  
18502 Pathogen[ P03410] interacts with 5 human  
partners:{P22674;P78549;Q53HV7;O95243;Q13569}  
18503 Pathogen[ P14075] interacts with 4 human partners:{Q53HV7;P22674;O95243;Q13569}  
18504 Pathogen[ P0C206] interacts with 5 human  
partners:{Q53HV7;Q13569;O95243;P22674;P78549}  
18505 Pathogen[ P03363] interacts with 4 human partners:{O95243;Q13569;P22674;Q53HV7}

18506 [Cluster 1683]GO:0006361+P biological\_process [name] transcription initiation from RNA polymerase I promoter [def] "Any process involved in the assembly of the RNA polymerase I preinitiation complex (PIC) at an RNA polymerase I promoter region of a DNA template, resulting in the subsequent synthesis of RNA from that promoter. The initiation phase includes PIC assembly and the formation of the first few bonds in the RNA chain, including abortive initiation, which occurs when the first few nucleotides are repeatedly synthesized and then released. Promoter clearance, or release, is the transition between the initiation and elongation phases of transcription." [GOC

18507 Pathogen[ Q2Q067] interacts with 21 human  
partners:{O95602;Q15573;P52434;Q13889;P32780;Q6NZI2;Q92759;Q9H9Y6;P51948;Q92831;P50613;Q15572;P53803;Q53T94;P17480;Q15361;Q9NYV6;Q9Y2S0;Q13888;O15160;P51946}

18508 Pathogen[ P0C214] interacts with 20 human partners: {P51946;Q15573;Q9H9Y6;P53803;Q15361;P50613;Q9Y2S0;Q6NZI2;P51948;Q15572;P17480;Q9NYV6;P32780;O15160;Q92831;O95602;Q13888;P52434;Q53T94;Q92759}

18509 Pathogen[ P03346] interacts with 20 human partners: {P52434;Q15573;Q13888;P53803;Q9H9Y6;Q92831;Q6NZI2;Q53T94;Q13889;P17480;Q15361;P51946;O15160;Q92759;O95602;Q9NYV6;P51948;P32780;Q9Y2S0;Q15572}

18510 Pathogen[ Q85601] interacts with 21 human partners: {P51946;P17480;O95602;Q13888;Q15573;P53803;Q9Y2S0;Q92831;P51948;Q9H9Y6;Q15572;Q53T94;Q92759;P32780;P50613;Q9NYV6;Q6NZI2;P52434;Q15361;P19447;O15160}

18511 Pathogen[ P14079] interacts with 21 human partners: {Q9Y2S0;Q15573;Q9NYV6;P51946;P52434;Q13889;P53803;Q15572;P50613;Q13888;P17480;O15160;Q92759;P32780;Q6NZI2;O95602;Q15361;Q53T94;P19447;Q9H9Y6;P51948}

18512 Pathogen[ P03383] interacts with 18 human partners: {P53803;Q92831;O95602;Q9NYV6;P51948;Q15572;Q6NZI2;Q13888;Q9H9Y6;P52434;Q15361;P50613;P51946;Q92759;Q15573;P17480;P32780;Q53T94}

18513 Pathogen[ P03410] interacts with 22 human partners: {Q92831;Q6NZI2;Q15572;Q13889;P51946;P50613;Q9NYV6;Q15573;O95602;P53803;P19447;Q9Y2S0;P51948;O15160;Q13888;P52434;Q53T94;Q15361;P32780;Q92759;Q9H9Y6;P17480}

18514 Pathogen[ P14075] interacts with 19 human partners: {P17480;Q15572;Q92759;Q9NYV6;Q92831;Q53T94;P50613;Q6NZI2;Q13889;Q15573;Q9H9Y6;P51946;P32780;O95602;Q15361;P52434;P51948;P53803;Q13888}

18515 Pathogen[ P0C206] interacts with 22 human partners: {Q53T94;Q15361;O95602;Q15572;Q92831;P19447;P53803;Q13888;P50613;Q9Y2S0;Q6NZI2;Q92759;Q15573;P32780;Q13889;Q9H9Y6;Q9NYV6;P17480;P52434;O15160;P51946;P51948}

18516 Pathogen[ P03363] interacts with 18 human partners: {Q9H9Y6;Q92831;Q13888;P32780;Q92759;P51946;O95602;Q53T94;P17480;Q9NYV6;Q6NZI2;Q15361;Q15573;P53803;Q15572;P52434;Q9Y2S0;O15160}

18517 [Cluster 1684]GO:2000741+P biological\_process [name] positive regulation of mesenchymal stem cell differentiation [def] "Any process that activates or increases the frequency, rate or extent of mesenchymal stem cell differentiation." [GOC

18518 Pathogen[ Q2Q067] interacts with 2 human partners: {P35712;P35711}

18519 Pathogen[ P0C214] interacts with 2 human partners: {P35711;P35712}

18520 Pathogen[ P03346] interacts with 2 human partners: {P35712;P35711}

18521 Pathogen[ Q85601] interacts with 2 human partners: {P35712;P35711}

18522 Pathogen[ P14079] interacts with 2 human partners: {P35711;P35712}

18523 Pathogen[ P03383] interacts with 2 human partners: {P35712;P35711}

18524 Pathogen[ P03410] interacts with 1 human partners: {P35712}

18525 Pathogen[ P14075] interacts with 2 human partners: {P35711;P35712}

18526 Pathogen[ P0C206] interacts with 2 human partners: {P35711;P35712}

18527 Pathogen[ P03363] interacts with 2 human partners: {P35711;P35712}

18528 [Cluster 1685]GO:0031648+P biological\_process [name] protein destabilization [def] "Any process that decreases the stability of a protein, making it more vulnerable to degradative processes or aggregation." [GOC

18529 Pathogen[ Q2Q067] interacts with 8 human partners: {Q9P219;Q6P1J9;P19474;P41134;Q96AB3;Q8N726;Q9Y297;Q00987}

18530 Pathogen[ P0C214] interacts with 8 human partners: {P19474;Q00987;Q8N726;Q9Y297;P41134;Q6P1J9;Q96AB3;Q9P219}

18531 Pathogen[ P03346] interacts with 9 human partners: {Q96AB3;Q00987;Q9P219;P41134;Q8IUQ4;P19474;Q8N726;Q9Y297;Q6P1J9}

18532 Pathogen[ Q85601] interacts with 7 human partners: {P41134;Q6P1J9;Q9P219;Q8N726;Q96AB3;P19474;Q00987}

18533 Pathogen[ P14079] interacts with 7 human partners: {Q96AB3;Q8N726;Q00987;P19474;P41134;Q6P1J9;Q9P219}

18534 Pathogen[ P03383] interacts with 4 human partners: {P19474;Q6P1J9;Q96AB3;Q8N726}

18535 Pathogen[ P03410] interacts with 6 human partners: {Q9P219;Q96AB3;Q8N726;P41134;Q6P1J9;Q00987}

18536 Pathogen[ P14075] interacts with 4 human partners: {Q6P1J9;Q96AB3;P19474;Q8N726}

18537 Pathogen[ P0C206] interacts with 8 human partners: {Q8N726;Q8IUQ4;P41134;Q9P219;Q96AB3;Q00987;Q6P1J9;P19474}

18538 Pathogen[ P03363] interacts with 6 human partners: {Q96AB3;Q6P1J9;P19474;P41134;Q8N726;Q9P219}

18539 [Cluster 1686]GO:0006637+P biological\_process [name] acyl-CoA metabolic process [def] "The chemical reactions and pathways involving acyl-CoA, any derivative of coenzyme A in which the sulfhydryl group is in thiolester linkage with an acyl group." [ISBN

18540 Pathogen[ Q2Q067] interacts with 3 human partners: {O14734;Q9Y305;Q86TX2}

18541 Pathogen[ P0C214] interacts with 4 human partners: {Q9Y305;Q86TX2;O14734;Q6IB77}

18542 Pathogen[ P03346] interacts with 3 human partners: {Q86TX2;Q9Y305;O14734}

18543 Pathogen[ Q85601] interacts with 4 human partners: {Q86TX2;O14734;Q9Y305;Q6IB77}

18544 Pathogen[ P14079] interacts with 5 human partners: {P49753;Q9Y305;Q6IB77;O14734;Q86TX2}

18545 Pathogen[ P03383] interacts with 2 human partners: {Q9Y305;O14734}

18546 Pathogen[ P03410] interacts with 5 human partners: {Q9Y305;Q6IB77;O14734;Q86TX2;P49753}

18547 Pathogen[ P14075] interacts with 2 human partners: {O14734;Q9Y305}

18548 Pathogen[ P0C206] interacts with 4 human partners: {Q86TX2;Q9Y305;O14734;Q6IB77}

18549 Pathogen[ P03363] interacts with 1 human partners:{014734}

18550 [Cluster 1687]GO:0006421+P biological\_process [name] asparaginyl-tRNA aminoacylation [def] "The process of coupling asparagine to asparaginyl-tRNA, catalyzed by asparaginyl-tRNA synthetase. In tRNA aminoacylation, the amino acid is first activated by linkage to AMP and then transferred to either the 2'- or the 3'-hydroxyl group of the 3'-adenosine residue of the tRNA." [GOC

18551 Pathogen[ Q2Q067] interacts with 2 human partners:{Q96I59;O43776}

18552 Pathogen[ P0C214] interacts with 2 human partners:{Q96I59;O43776}

18553 Pathogen[ P03346] interacts with 1 human partners:{O43776}

18554 Pathogen[ Q85601] interacts with 2 human partners:{O43776;Q96I59}

18555 Pathogen[ P14079] interacts with 2 human partners:{O43776;Q96I59}

18556 Pathogen[ P03383] interacts with 2 human partners:{Q96I59;O43776}

18557 Pathogen[ P03410] interacts with 2 human partners:{O43776;Q96I59}

18558 Pathogen[ P14075] interacts with 2 human partners:{O43776;Q96I59}

18559 Pathogen[ P0C206] interacts with 2 human partners:{O43776;Q96I59}

18560 Pathogen[ P03363] interacts with 2 human partners:{Q96I59;O43776}

18561 [Cluster 1688]GO:2000095+P biological\_process [name] regulation of Wnt receptor signaling pathway, planar cell polarity pathway [def] "Any process that modulates the frequency, rate or extent of Wnt receptor signaling pathway, planar cell polarity pathway." [GOC

18562 Pathogen[ Q2Q067] interacts with 1 human partners:{Q9NYF0}

18563 Pathogen[ P0C214] interacts with 1 human partners:{Q9NYF0}

18564 Pathogen[ P03346] interacts with 1 human partners:{Q9NYF0}

18565 Pathogen[ Q85601] interacts with 1 human partners:{Q9NYF0}

18566 Pathogen[ P14079] interacts with 1 human partners:{Q9NYF0}

18567 Pathogen[ P03383] interacts with 1 human partners:{Q9NYF0}

18568 Pathogen[ P03410] interacts with 1 human partners:{Q9NYF0}

18569 Pathogen[ P14075] interacts with 1 human partners:{Q9NYF0}

18570 Pathogen[ P0C206] interacts with 1 human partners:{Q9NYF0}

18571 Pathogen[ P03363] interacts with 1 human partners:{Q9NYF0}

18572 [Cluster 1689]GO:0051645+P biological\_process [name] Golgi localization [def] "Any process in which the Golgi is transported to, and/or maintained in, a specific location within the cell." [GOC

18573 Pathogen[ Q2Q067] interacts with 1 human partners:{Q86VS8}

18574 Pathogen[ P0C214] interacts with 1 human partners:{Q86VS8}

18575 Pathogen[ P03346] interacts with 1 human partners:{Q86VS8}

18576 Pathogen[ Q85601] interacts with 1 human partners:{Q86VS8}

18577 Pathogen[ P14079] interacts with 1 human partners:{Q86VS8}

18578 Pathogen[ P03383] interacts with 1 human partners:{Q86VS8}

18579 Pathogen[ P03410] interacts with 1 human partners:{Q86VS8}

18580 Pathogen[ P14075] interacts with 1 human partners:{Q86VS8}

18581 Pathogen[ P0C206] interacts with 1 human partners:{Q86VS8}

18582 Pathogen[ P03363] interacts with 1 human partners:{Q86VS8}

18583 [Cluster 1690]GO:0007343+P biological\_process [name] egg activation [def] "The process in which the egg becomes metabolically active, initiates protein and DNA synthesis and undergoes structural changes to its cortex and/or cytoplasm." [GOC

18584 Pathogen[ Q2Q067] interacts with 1 human partners:{Q6ICG8}

18585 Pathogen[ P0C214] interacts with 1 human partners:{Q6ICG8}

18586 Pathogen[ P03346] interacts with 1 human partners:{Q6ICG8}

18587 Pathogen[ Q85601] interacts with 1 human partners:{Q6ICG8}

18588 Pathogen[ P14079] interacts with 1 human partners:{Q6ICG8}

18589 Pathogen[ P03383] interacts with 1 human partners:{Q6ICG8}

18590 Pathogen[ P03410] interacts with 1 human partners:{Q6ICG8}

18591 Pathogen[ P14075] interacts with 1 human partners:{Q6ICG8}

18592 Pathogen[ P0C206] interacts with 1 human partners:{Q6ICG8}

18593 Pathogen[ P03363] interacts with 1 human partners:{Q6ICG8}

18594 [Cluster 1691]GO:0007220+P biological\_process [name] Notch receptor processing [def] "The series of successive proteolytic cleavages of the Notch protein, which result in an active form of the receptor." [PMID

18595 Pathogen[ Q2Q067] interacts with 4 human partners:{P0CG47;P0CG48;P62987;P62979}

18596 Pathogen[ P0C214] interacts with 4 human partners:{P0CG48;P62987;P0CG47;P62979}

18597 Pathogen[ P03346] interacts with 4 human partners:{P62987;P0CG48;P62979;P0CG47}

18598 Pathogen[ Q85601] interacts with 4 human partners:{P0CG48;P62979;P0CG47;P62987}

18599 Pathogen[ P14079] interacts with 7 human partners:{P0CG48;Q92542;Q9NZ42;P62979;P62987;Q8WW43;P0CG47}

18600 Pathogen[ P03383] interacts with 4 human partners:{P62987;P62979;P0CG47;P0CG48}

18601 Pathogen[ P03410] interacts with 7 human partners:{P0CG48;P62979;Q9NZ42;P62987;Q8WW43;Q92542;P0CG47}

18602 Pathogen[ P14075] interacts with 4 human partners:{P0CG48;P62979;P62987;P0CG47}

18603 Pathogen[ P0C206] interacts with 6 human partners:{P0CG48;Q9NZ42;Q92542;P62979;P0CG47;P62987}

18604 Pathogen[ P03363] interacts with 1 human partners:{P62987}

18605 [Cluster 1692]GO:0030901+P biological\_process [name] midbrain development [def] "The process whose specific outcome is the progression of the midbrain over time, from its formation to the mature structure. The midbrain is the middle division of the three primary divisions of the developing chordate brain or the corresponding part of the

adult brain (in vertebrates, includes a ventral part containing the cerebral peduncles and a dorsal tectum containing the corpora quadrigemina and that surrounds the aqueduct of Sylvius connecting the third and fourth ventricles)." [http

18606 Pathogen[ Q2Q067] interacts with 9 human partners:{Q9Y5K5;Q33E94;O14813;Q9BZE3;Q8NHM5;O15198;Q92830;Q5TGS1;Q15797}

18607 Pathogen[ P0C214] interacts with 10 human partners:{O15198;O14813;P32243;Q9BZE3;Q9Y5K5;Q92830;Q15797;Q5TGS1;Q33E94;Q8NHM5}

18608 Pathogen[ P03346] interacts with 15 human partners:{O75364;O14813;Q05925;Q15797;Q9BZE3;Q16559;P19622;O15198;Q92830;Q33E94;Q5TGS1;P32242;Q8NHM5;P32243;Q9Y5K5}

18609 Pathogen[ Q85601] interacts with 10 human partners:{O15198;O14813;Q15797;Q9BZE3;Q33E94;Q92830;Q5TGS1;Q8NHM5;Q9Y5K5;P32243}

18610 Pathogen[ P14079] interacts with 11 human partners:{Q92830;O15198;Q8NHM5;Q15797;O14949;Q9Y5K5;Q9BZE3;Q5TGS1;P32243;O14813;P28360}

18611 Pathogen[ P03383] interacts with 7 human partners:{O15198;P32243;Q15797;Q33E94;Q92830;Q9Y5K5;Q5TGS1}

18612 Pathogen[ P03410] interacts with 11 human partners:{Q92830;O14813;Q9BZE3;O15198;Q5TGS1;Q15797;P32243;Q9Y5K5;O14949;Q33E94;Q16559}

18613 Pathogen[ P14075] interacts with 6 human partners:{Q5TGS1;Q33E94;O15198;Q92830;P32243;Q9Y5K5}

18614 Pathogen[ P0C206] interacts with 10 human partners:{Q92830;Q5TGS1;Q9Y5K5;Q9BZE3;P32243;O14813;Q8NHM5;Q33E94;Q15797;O15198}

18615 Pathogen[ P03363] interacts with 12 human partners:{Q5TGS1;P19622;Q9Y5K5;Q15797;P32243;Q9BZE3;Q92830;P32242;Q05925;Q33E94;O15198;O14813}

18616 [Cluster 1693]GO:0043330+P biological\_process [name] response to exogenous dsRNA [def] "Any process that results in a change in state or activity of a cell or an organism (in terms of movement, secretion, enzyme production, gene expression, etc.) as a result of an exogenous double-stranded RNA stimulus." [GOC

18617 Pathogen[ Q2Q067] interacts with 5 human partners:{Q8IUC6;Q14653;Q92499;P25963;P42224}

18618 Pathogen[ P0C214] interacts with 6 human partners:{Q8IUC6;P42224;P25963;Q14653;Q92499;Q9H2U1}

18619 Pathogen[ P03346] interacts with 6 human partners:{P25963;Q9H2U1;Q92499;P42224;Q14653;Q8IUC6}

18620 Pathogen[ Q85601] interacts with 6 human partners:{Q8IUC6;Q92499;Q14653;P42224;P25963;Q9H2U1}

18621 Pathogen[ P14079] interacts with 4 human partners:{Q14653;Q8IUC6;P42224;Q92499}

18622 Pathogen[ P03383] interacts with 4 human partners:{Q14653;Q8IUC6;P25963;Q92499}

18623 Pathogen[ P03410] interacts with 5 human partners:{Q14653;Q92499;Q8IUC6;P25963;Q9H2U1}

18624 Pathogen[ P14075] interacts with 4 human partners:{P25963;Q92499;Q14653;Q8IUC6}

18625 Pathogen[ P0C206] interacts with 6 human partners:{P25963;Q8IUC6;Q9H2U1;P42224;Q92499;Q14653}

18626 Pathogen[ P03363] interacts with 4 human partners:{Q14653;P25963;Q92499;Q9H2U1}

18627 [Cluster 1694]GO:0035912+P biological\_process [name] dorsal aorta morphogenesis [def] "The process in which the anatomical structures of the dorsal aorta are generated and organized. The dorsal aorta is a blood vessel in a single-pass circulatory system that carries oxygenated blood from the gills to the rest of the body. In a single-pass circulatory system blood passes once through the heart to supply the body once." [GOC

18628 Pathogen[ Q2Q067] interacts with 3 human partners:{P11831;Q06330;Q9Y5J3}

18629 Pathogen[ P0C214] interacts with 3 human partners:{Q9Y5J3;P11831;Q06330}

18630 Pathogen[ P03346] interacts with 3 human partners:{Q06330;P11831;Q9Y5J3}

18631 Pathogen[ Q85601] interacts with 3 human partners:{P11831;Q06330;Q9Y5J3}

18632 Pathogen[ P14079] interacts with 2 human partners:{Q06330;Q9Y5J3}

18633 Pathogen[ P03383] interacts with 2 human partners:{Q06330;P11831}

18634 Pathogen[ P03410] interacts with 3 human partners:{Q9Y5J3;P11831;Q06330}

18635 Pathogen[ P14075] interacts with 2 human partners:{P11831;Q06330}

18636 Pathogen[ P0C206] interacts with 3 human partners:{Q06330;Q9Y5J3;P11831}

18637 Pathogen[ P03363] interacts with 3 human partners:{Q9Y5J3;Q06330;P11831}

18638 [Cluster 1695]GO:0031936+P biological\_process [name] negative regulation of chromatin silencing [def] "Any process that stops, prevents, or reduces the frequency, rate or extent of chromatin silencing." [GOC

18639 Pathogen[ Q2Q067] interacts with 2 human partners:{P17096;Q9Y294}

18640 Pathogen[ P0C214] interacts with 2 human partners:{P17096;Q9Y294}

18641 Pathogen[ P03346] interacts with 2 human partners:{P17096;Q9Y294}

18642 Pathogen[ Q85601] interacts with 2 human partners:{P17096;Q9Y294}

18643 Pathogen[ P14079] interacts with 2 human partners:{P17096;Q9Y294}

18644 Pathogen[ P03383] interacts with 2 human partners:{P17096;Q9Y294}

18645 Pathogen[ P03410] interacts with 2 human partners:{P17096;Q9Y294}

18646 Pathogen[ P14075] interacts with 2 human partners:{P17096;Q9Y294}

18647 Pathogen[ P0C206] interacts with 2 human partners:{P17096;Q9Y294}

18648 Pathogen[ P03363] interacts with 2 human partners:{Q9Y294;P17096}

18649 [Cluster 1696]GO:0010165+P biological\_process [name] response to X-ray [def] "Any

process that results in a change in state or activity of a cell or an organism (in terms of movement, secretion, enzyme production, gene expression, etc.) as a result of X-ray radiation. An X-ray is a form of electromagnetic radiation with a wavelength in the range of 10 nanometers to 100 picometers (corresponding to frequencies in the range 30 PHz to 3 EHZ)." [GOC

18650 Pathogen[ Q2Q067] interacts with 6 human  
partners: {P24385;O15350;Q13794;Q13426;Q03468;Q13216}

18651 Pathogen[ POC214] interacts with 6 human  
partners: {O15350;P24385;Q13794;Q13216;Q13426;Q03468}

18652 Pathogen[ P03346] interacts with 10 human  
partners: {P24385;Q6P2D8;P07992;Q13426;O15350;Q03468;P51587;Q13216;O43543;Q13794}

18653 Pathogen[ Q85601] interacts with 8 human  
partners: {P24385;Q6P2D8;Q13216;Q13426;Q03468;O15350;P51587;Q13794}

18654 Pathogen[ P14079] interacts with 10 human  
partners: {P04083;P51587;Q13216;O15350;Q13794;O43543;Q03468;Q13426;P07992;P49917}

18655 Pathogen[ P03383] interacts with 6 human  
partners: {Q13216;P24385;Q03468;Q13426;O15350;Q13794}

18656 Pathogen[ P03410] interacts with 10 human  
partners: {P07992;Q13794;Q03468;Q6P2D8;P24385;P51587;Q13426;Q13216;O43543;O15350}

18657 Pathogen[ P14075] interacts with 6 human  
partners: {Q13216;Q03468;O15350;Q13794;Q13426;P24385}

18658 Pathogen[ POC206] interacts with 11 human  
partners: {P51587;Q03468;Q13216;P07992;P49917;Q13426;Q6P2D8;O15350;O43543;Q13794;P24385}

18659 Pathogen[ P03363] interacts with 6 human  
partners: {Q6P2D8;Q13794;Q13426;P24385;Q03468;Q13216}

18660 [Cluster 1697]GO:0019083+P biological\_process [name] viral transcription [def] "The mechanisms involved in viral gene transcription, especially referring to those with temporal properties unique to viral transcription." [ISBN

18661 Pathogen[ Q2Q067] interacts with 81 human  
partners: {P61313;P62701;P47914;P46779;Q02543;P26373;P62750;P62273;P15880;P40429;P46782;P35268;P22090;P46778;P62888;P32969;P62277;P62241;P62244;P05387;P62861;P42766;P05386;Q9UNX3;P30050;P18077;P62891;P61927;P39023;P62081;P61247;P61254;P62249;P62280;P83731;P62263;P60866;P62906;Q02878;P46777;P62899;P08708;P08865;Q07020;P62913;P62269;P62424;P62917;P62829;P46783;P36578;P62857;P62847;P49207;P23396;P63173;P18621;P39019;P61313;P62266;P42677;Q9Y3U8;P63220;P62841;P83881;P62987;P50914;P46776;P62854;P62753;P05388;P18124;P62851;P25398;P62910;Q92901;P46781;P27635;P61513;P62945;P62979}

18662 Pathogen[ POC214] interacts with 79 human  
partners: {P62861;P84098;P61247;P15880;P62081;P42766;P62913;P22090;Q92901;P62249;P62899;P62854;P39019;P62263;P62273;P23396;P18077;P05388;P62847;P62829;P26373;P27635;P46778;P61513;P83881;P62701;P49207;P63220;P08865;P32969;Q02543;P62266;P62277;P50914;P46779;P40429;P47914;P63173;P46783;P62280;Q9UNX3;Q9Y3U8;P30050;P62753;P62910;P62891;P62269;P46781;P61254;P62841;P62244;P62987;Q07020;P42677;P62945;P46776;P62241;P46777;P83731;P35268;P62424;P60866;P62857;P61313;P08708;P05387;P25398;P61927;P62750;P62979;P05386;P62851;P46782;P18124;P61353;P36578;P18621;P62906;Q02878}

18663 Pathogen[ P03346] interacts with 82 human  
partners: {P05387;P46779;P63173;P62917;P62249;P62913;P62861;P62277;Q02878;P62280;P39023;P62987;P61927;Q9UNX3;P62857;P46778;P49207;P62266;P61254;P62424;P62273;P83731;P60866;P62899;P35268;P62891;P08708;P46782;P61353;P62854;Q9Y3U8;P47914;P08865;P61313;P25398;P61513;P05388;P62269;Q02543;P42766;P62081;P61247;P18621;P46781;P84098;P15880;P50914;P62829;P62979;P39019;P23396;P42677;P62750;P62701;P30050;P62910;P36578;P62847;P62851;P22090;P46777;Q07020;P62263;P62841;P83881;P05386;P18077;P46776;P62241;P62753;P62945;Q92901;P32969;P26373;P18124;P40429;P27635;P46783;P62906;P62244;P62888;P63220}

18664 Pathogen[ Q85601] interacts with 82 human  
partners: {P46783;P32969;P61513;P26373;P62857;P62244;P62913;P62854;P62081;P61353;P62891;P46776;P18077;P61313;P05388;P63173;P23396;P62273;P46778;P62829;P30050;P62753;P27635;P15880;P83881;Q07020;P39019;Q9Y3U8;P62701;P62241;P62424;P83731;P62899;P62945;P62263;P62861;Q02878;P39023;P61254;P49207;P62910;P62249;P62280;P47914;P84098;P08708;P42766;P62269;P18621;P05387;Q9UNX3;P62277;P35268;P62979;P62847;P42677;P63220;P46782;P46779;P62750;P62851;P62841;P62987;P22090;P61927;P36578;P05386;P08865;P61247;P46777;P62917;Q92901;P18124;P46781;P25398;P60866;Q02543;P62906;P50914;P62266;P40429;P62888}

18665 Pathogen[ P14079] interacts with 81 human  
partners: {Q9Y3U8;P27635;P84098;P46779;P26373;P23396;P40429;P18621;P83881;Q9UNX3;P46781;P83731;P61513;P62847;P62753;P39023;P62273;P25398;P18077;P46783;P61254;P50914;P62979;P62841;P18124;P42766;P62266;P46782;P62987;P62241;P32969;P22090;P62829;P60866;P62854;Q07020;P39019;P63220;P49207;P62244;P62263;Q02543;P62424;Q92901;P62277;P62750;P62910;P63173;P46776;P08708;P36578;P62906;P47914;P62280;P62899;P61353;P62081;P62945;P46777;P42677;P30050;P15880;P62891;P62888;P08865;P61927;P62917;P46778;P62249;P05386;P35268;P62913;P05387;P61247;P62269;P62701;P61313;P62851;P05388;P62857;P62861}

18666 Pathogen[ P03383] interacts with 82 human  
partners: {P42766;P36578;P05388;P62266;P39019;P26373;P62913;P62945;P62854;P40429;P62987;P62891;P25398;P62280;Q07020;P62750;P05387;P62249;P62888;P62899;P61927;P46777;P46779;P49207;P83731;P62424;P18124;P46778;Q92901;P62753;P42677;P61247;P83881;P47914;P62917;P62273;Q9UNX3;P30050;P84098;P32969;P62277;P18077;P63173;P62081;P61313;P08865;P62851;P46782;P62269;P63220;Q02543;P62244;Q02878;P62910;P27635;P62857;P62906;P46783;Q9Y3U8;P60866;P61254;P62979;P62241;P46781;P39023;P62841;P22090;P62701;P62829;P62263;P628



18667 Pathogen[ P03410] interacts with 82 human partners: {P62861;P05386;P50914;P62861;P18621;P46776;P15880;P23396;P61513;P08708;P61353} 44;P62913;Q02878;Q92901;P15880;P46777;P46776;P62841;P30050;P05388;P46781;P18124;P62269;Q07020;P63220;P62910;P62847;P62906;P23396;P18621;P62266;P62249;P63173;P50914;P62280;P22090;P61313;P62979;P62701;P62750;P08865;Q9UNX3;P62277;P36578;P18077;P25398;P61927;P84098;P62854;P62273;P62081;P46783;Q9Y3U8;P08708;P46782;P32969;P46779;P27635;P62987;P62857;P62263;P62424;P62888;P61254;P46778;P62945;P05387;P42766;P39019;P47914;P40429;P39023;P62917;P62851;P83731;P35268;P61353;P62891;P62753;P83881;P60866;P42677}

18668 Pathogen[ P14075] interacts with 82 human partners: {P42766;P49207;P62857;P46781;P63220;P32969;P42677;P62913;P22090;Q02878;P62277;P62851;P08865;P62244;P08708;P61254;P46778;P05388;P83881;P46777;Q9Y3U8;P62249;P62081;P62750;P18621;Q02543;P18124;Q9UNX3;P25398;P63173;P30050;P62979;P83731;P84098;P61247;P62753;P46782;P62891;P62861;P18077;P46779;P62917;P39023;P50914;P62269;P62847;P62910;P62273;P40429;P23396;P62241;P15880;P62987;P62841;P36578;P62266;P61513;P61313;P27635;P62888;Q92901;P35268;P62945;P46776;P46783;P62701;P62899;P47914;P62906;P05386;P61353;P39019;P62424;P62829;P62280;Q07020;P62263;P62854;P60866;P26373;P05387;P61927}

18669 Pathogen[ P0C206] interacts with 82 human partners: {P40429;P61313;P27635;P18124;P62854;P49207;P62081;P30050;P62241;P62244;P50914;P08865;P62750;P18621;P46781;P62266;Q02543;Q07020;P83881;P46778;P62263;P62273;Q02878;P62280;P62857;P62851;P62910;P46782;P61247;P18077;P62913;P61927;P61353;P62888;P36578;P62861;P35268;P23396;P39023;P32969;P62701;P05386;P22090;P84098;P62945;P26373;P46777;P05388;P62979;P62899;P83731;P39019;Q92901;P05387;P46783;P42766;P60866;P62841;Q9UNX3;P61513;P62277;P46776;P62906;P63173;P62987;P62891;P62269;P62753;P46779;P63220;P15880;P25398;P08708;P47914;P62847;P61254;P42677;P62829;P62249;P62424;Q9Y3U8;P62917}

18670 Pathogen[ P03363] interacts with 81 human partners: {P62913;P18621;P05386;P62750;P23396;P42677;P63173;P08865;P62847;P18077;P05387;P84098;P42766;P62249;P05388;P36578;P62753;P62081;P62910;P61513;P46776;P61254;P62273;P32969;Q92901;P46778;P61927;P62891;P61353;P08708;P15880;P26373;P83881;P22090;P62861;P62841;Q9UNX3;P30050;P62829;P46782;P35268;P46781;P50914;P63220;P61313;P39019;P46779;Q02543;P46777;P62987;P25398;P83731;P62851;P62280;Q9Y3U8;P62888;P62244;P62277;P62906;P62266;P62945;P49207;P62241;P62424;P60866;P61247;P62899;P62857;Q02878;Q07020;P39023;P62854;P62917;P18124;P40429;P27635;P62263;P47914;P62701;P62269;P46783}

18671 [Cluster 1698]GO:0045665+P biological\_process [name] negative regulation of neuron differentiation [def] "Any process that stops, prevents, or reduces the frequency, rate or extent of neuron differentiation." [GOC

18672 Pathogen[ Q2Q067] interacts with 17 human partners: {O00213;Q9Y6X8;O43364;O00470;P53804;O15350;Q96SN8;P27797;O43711;O60934;Q13127;Q8IZT6;P47928;Q86Y01;Q9Y651;Q9GZU7;P40424}

18673 Pathogen[ P0C214] interacts with 14 human partners: {P40424;O00470;O00213;O15350;Q96SN8;Q9GZU7;P47928;P53804;Q9Y6X8;Q13127;P27797;Q9Y651;Q86Y01;Q8IZT6}

18674 Pathogen[ P03346] interacts with 23 human partners: {O00213;P52954;P78415;O43711;P41225;O15350;O15090;O43364;Q9GZU7;O95096;Q96SN8;O00470;Q9Y6X8;P27797;O60934;Q13516;P40424;Q8IZT6;Q9Y651;P53804;Q86Y01;Q13127;P47928}

18675 Pathogen[ Q85601] interacts with 17 human partners: {O00213;Q13127;Q9GZU7;Q96SN8;Q9Y651;O43364;P27797;Q8IZT6;P40424;Q9Y6X8;O00470;O43711;O15350;P53804;Q86Y01;P47928;O60934}

18676 Pathogen[ P14079] interacts with 14 human partners: {P53804;O43364;O00213;O60934;O15350;Q86Y01;O43711;Q13127;Q9Y6X8;O00470;Q96SN8;P47928;Q8IZT6;Q9GZU7}

18677 Pathogen[ P03383] interacts with 13 human partners: {O00470;O00213;P53804;P40424;Q96SN8;Q9GZU7;O43711;Q9Y6X8;O15350;P47928;Q86Y01;Q13127;P27797}

18678 Pathogen[ P03410] interacts with 16 human partners: {O00470;Q9GZU7;Q96SN8;O00213;Q8IZT6;Q13127;Q86Y01;P47928;Q9Y6X8;O43364;O15350;O43711;P53804;P40424;O60934;P27797}

18679 Pathogen[ P14075] interacts with 13 human partners: {P53804;O00213;P40424;O00470;P47928;Q96SN8;O15350;P27797;Q9Y6X8;O43711;Q9GZU7;Q13127;Q86Y01}

18680 Pathogen[ P0C206] interacts with 18 human partners: {Q86Y01;O43711;Q96SN8;P27797;Q13127;Q9GZU7;O00470;O60934;P53804;Q8IZT6;Q9Y6X8;P40424;O00213;O15350;O43364;P47928;Q86YT6;Q9Y651}

18681 Pathogen[ P03363] interacts with 17 human partners: {Q86Y01;P78415;Q13516;O00213;Q9Y6X8;Q13127;P27797;P47928;O00470;O43711;Q9Y651;P53804;P40424;Q9GZU7;O43364;Q8IZT6;Q96SN8}

18682 [Cluster 1699]GO:0046822+P biological\_process [name] regulation of nucleocytoplasmic transport [def] "Any process that modulates the frequency, rate or extent of the directed movement of substances between the nucleus and the cytoplasm." [GOC

18683 Pathogen[ Q2Q067] interacts with 4 human partners: {O14974;P36873;Q9NRG9;P42771}

18684 Pathogen[ P0C214] interacts with 4 human partners: {O14974;Q9NRG9;P42771;P36873}

18685 Pathogen[ P03346] interacts with 5 human partners: {Q9NRG9;P42771;Q9BWF3;P36873;O14974}

18686 Pathogen[ Q85601] interacts with 4 human partners: {Q9NRG9;P36873;P42771;O14974}

18687 Pathogen[ P14079] interacts with 4 human partners: {P36873;O14974;Q9NRG9;P42771}

18688 Pathogen[ P03383] interacts with 3 human partners:{P36873;P42771;Q9NRG9}  
18689 Pathogen[ P03410] interacts with 4 human partners:{P42771;O14974;P36873;Q9NRG9}  
18690 Pathogen[ P14075] interacts with 3 human partners:{P42771;P36873;Q9NRG9}  
18691 Pathogen[ P0C206] interacts with 4 human partners:{Q9NRG9;P42771;O14974;P36873}  
18692 Pathogen[ P03363] interacts with 5 human partners:{P36873;Q9BWF3;Q9NRG9;O14974;P42771}  
18693 [Cluster 1700]GO:0003223+P biological\_process [name] ventricular compact myocardium morphogenesis [def] "The process in which the anatomical structures of the compact cardiac ventricle muscle are generated and organized." [GOC  
18694 Pathogen[ Q2Q067] interacts with 1 human partners:{P15924}  
18695 Pathogen[ P0C214] interacts with 1 human partners:{P15924}  
18696 Pathogen[ P03346] interacts with 1 human partners:{P15924}  
18697 Pathogen[ Q85601] interacts with 1 human partners:{P15924}  
18698 Pathogen[ P14079] interacts with 1 human partners:{P15924}  
18699 Pathogen[ P03383] interacts with 1 human partners:{P15924}  
18700 Pathogen[ P03410] interacts with 1 human partners:{P15924}  
18701 Pathogen[ P14075] interacts with 1 human partners:{P15924}  
18702 Pathogen[ P0C206] interacts with 1 human partners:{P15924}  
18703 Pathogen[ P03363] interacts with 1 human partners:{P15924}  
18704 [Cluster 1701]GO:0034048+P biological\_process [name] negative regulation of protein phosphatase type 2A activity [def] "Any process that stops or reduces the activity of the enzyme protein phosphatase type 2A." [GOC  
18705 Pathogen[ Q2Q067] interacts with 1 human partners:{075663}  
18706 Pathogen[ P0C214] interacts with 1 human partners:{075663}  
18707 Pathogen[ P03346] interacts with 1 human partners:{075663}  
18708 Pathogen[ Q85601] interacts with 1 human partners:{075663}  
18709 Pathogen[ P14079] interacts with 1 human partners:{075663}  
18710 Pathogen[ P03383] interacts with 1 human partners:{075663}  
18711 Pathogen[ P03410] interacts with 1 human partners:{075663}  
18712 Pathogen[ P14075] interacts with 1 human partners:{075663}  
18713 Pathogen[ P0C206] interacts with 1 human partners:{075663}  
18714 Pathogen[ P03363] interacts with 1 human partners:{075663}  
18715 [Cluster 1702]GO:2000740+P biological\_process [name] negative regulation of mesenchymal stem cell differentiation [def] "Any process that stops, prevents or reduces the frequency, rate or extent of mesenchymal stem cell differentiation." [GOC  
18716 Pathogen[ Q2Q067] interacts with 1 human partners:{Q13127}  
18717 Pathogen[ P0C214] interacts with 1 human partners:{Q13127}  
18718 Pathogen[ P03346] interacts with 1 human partners:{Q13127}  
18719 Pathogen[ Q85601] interacts with 1 human partners:{Q13127}  
18720 Pathogen[ P14079] interacts with 1 human partners:{Q13127}  
18721 Pathogen[ P03383] interacts with 1 human partners:{Q13127}  
18722 Pathogen[ P03410] interacts with 1 human partners:{Q13127}  
18723 Pathogen[ P14075] interacts with 1 human partners:{Q13127}  
18724 Pathogen[ P0C206] interacts with 1 human partners:{Q13127}  
18725 Pathogen[ P03363] interacts with 1 human partners:{Q13127}  
18726 [Cluster 1703]GO:0045216+P biological\_process [name] cell-cell junction organization [def] "A process that is carried out at the cellular level which results in the assembly, arrangement of constituent parts, or disassembly of a cell-cell junction. A cell-cell junction is a specialized region of connection between two cells." [GOC  
18727 Pathogen[ Q2Q067] interacts with 7 human partners:{Q8NI35;Q9NPB6;Q9BYG5;P84022;P63000;Q9BYG4;O60716}  
18728 Pathogen[ P0C214] interacts with 9 human partners:{P60709;P63000;Q8NI35;O60716;P84022;Q9NPB6;Q9BYG5;P63261;Q9BYG4}  
18729 Pathogen[ P03346] interacts with 11 human partners:{O60716;P60709;Q9NPB6;P55196;Q8TEW0;Q8NI35;P84022;Q8N3R9;Q9BYG5;Q9BYG4;P63000}  
18730 Pathogen[ Q85601] interacts with 9 human partners:{Q9BYG5;P63000;P60709;O60716;Q8NI35;P63261;Q9NPB6;P84022;Q9BYG4}  
18731 Pathogen[ P14079] interacts with 14 human partners:{P63261;Q8N7P3;Q9BYG5;P56750;Q8TEW0;Q8NI35;Q9BYG4;P60709;Q96B33;Q8N3R9;Q16625;Q9NPB6;O60716;Q96A59}  
18732 Pathogen[ P03383] interacts with 6 human partners:{O60716;P63000;P84022;Q9BYG5;Q9NPB6;Q9BYG4}  
18733 Pathogen[ P03410] interacts with 16 human partners:{P84022;Q96B33;Q8N7P3;P63000;O60716;Q8NI35;Q96A59;Q16625;Q8TEW0;Q9NPB6;P63261;P56750;Q9BYG4;Q8N3R9;P60709;Q9BYG5}  
18734 Pathogen[ P14075] interacts with 6 human partners:{Q9BYG4;P63000;Q9BYG5;Q9NPB6;P84022;O60716}  
18735 Pathogen[ P0C206] interacts with 12 human partners:{P84022;O60716;P60709;Q9BYG5;Q8N3R9;Q8TEW0;P63000;P55196;P63261;Q8NI35;Q9NPB6;Q9BYG4}  
18736 Pathogen[ P03363] interacts with 10 human partners:{P60709;Q9NPB6;Q9BYG4;P63000;Q8N3R9;P84022;Q9BYG5;Q8NI35;P63261;O60716}  
18737 [Cluster 1704]GO:0034613+P biological\_process [name] cellular protein localization [def] "Any process in which a protein is transported to, and/or maintained in, a specific location at the level of a cell. Localization at the cellular level encompasses

movement within the cell, from within the cell to the cell surface, or from one location to another at the surface of a cell." [GOC

18738 Pathogen[ Q2Q067] interacts with 8 human partners:{Q99502;Q6VY07;Q96ST3;Q96IF1;O14641;Q96CV9;P60953;P47928}

18739 Pathogen[ P0C214] interacts with 7 human partners:{P60953;P47928;O14641;Q6VY07;Q96CV9;Q96ST3;Q99502}

18740 Pathogen[ P03346] interacts with 9 human partners:{Q96ST3;Q96IF1;P60953;Q99502;Q96CV9;O14641;Q8N157;Q6VY07;P47928}

18741 Pathogen[ Q85601] interacts with 8 human partners:{Q96CV9;O14641;Q6VY07;Q99502;Q96IF1;P60953;P47928;Q96ST3}

18742 Pathogen[ P14079] interacts with 12 human partners:{Q6VY07;Q99502;Q9Y2Q5;Q96ST3;O14641;Q8N157;Q9UHA4;Q96IF1;Q6IAA8;O15259;Q96CV9;P47928}

18743 Pathogen[ P03383] interacts with 6 human partners:{P60953;Q6VY07;O14641;Q96ST3;Q96CV9;P47928}

18744 Pathogen[ P03410] interacts with 13 human partners:{Q9Y2Q5;Q99502;O15259;Q96ST3;Q9UHA4;Q96IF1;Q96CV9;Q8N157;P47928;Q6IAA8;P60953;Q6VY07;O14641}

18745 Pathogen[ P14075] interacts with 7 human partners:{P60953;Q96ST3;P47928;O14641;Q96CV9;Q99502;Q6VY07}

18746 Pathogen[ P0C206] interacts with 9 human partners:{Q96ST3;Q9UHA4;Q96IF1;Q96CV9;Q6VY07;Q8N157;P60953;Q99502;P47928}

18747 Pathogen[ P03363] interacts with 9 human partners:{Q96CV9;Q6VY07;Q96IF1;Q8N157;Q96ST3;P47928;O15259;O14641;P60953}

18748 [Cluster 1705]GO:0046847+P biological\_process [name] filopodium assembly [def] "The assembly of a filopodium, a thin, stiff protrusion extended by the leading edge of a motile cell such as a crawling fibroblast or amoeba, or an axonal growth cone." [GOC

18749 Pathogen[ Q2Q067] interacts with 2 human partners:{P60953;Q9NR46}

18750 Pathogen[ P0C214] interacts with 2 human partners:{P60953;Q9NR46}

18751 Pathogen[ P03346] interacts with 3 human partners:{P60953;Q9Y371;Q9NR46}

18752 Pathogen[ Q85601] interacts with 2 human partners:{P60953;Q9NR46}

18753 Pathogen[ P14079] interacts with 2 human partners:{Q9NR46;Q9Y371}

18754 Pathogen[ P03383] interacts with 2 human partners:{P60953;Q9NR46}

18755 Pathogen[ P03410] interacts with 3 human partners:{Q9NR46;Q9Y371;P60953}

18756 Pathogen[ P14075] interacts with 2 human partners:{P60953;Q9NR46}

18757 Pathogen[ P0C206] interacts with 2 human partners:{Q9NR46;P60953}

18758 Pathogen[ P03363] interacts with 2 human partners:{Q9NR46;P60953}

18759 [Cluster 1706]GO:0071157+P biological\_process [name] negative regulation of cell cycle arrest [def] "Any process that decreases the rate, frequency, or extent of cell cycle arrest, the process in which the cell cycle is halted during one of the normal phases." [GOC

18760 Pathogen[ Q2Q067] interacts with 5 human partners:{Q01664;P50750;Q9NS23;Q9NP71;Q00987}

18761 Pathogen[ P0C214] interacts with 5 human partners:{Q9NS23;P50750;Q00987;Q9NP71;Q01664}

18762 Pathogen[ P03346] interacts with 6 human partners:{Q00987;Q9NP71;P50750;O15151;Q9NS23;Q01664}

18763 Pathogen[ Q85601] interacts with 6 human partners:{P50750;O15151;Q9NS23;Q9NP71;Q00987;Q01664}

18764 Pathogen[ P14079] interacts with 6 human partners:{Q9NS23;Q00987;Q01664;O15151;Q9NP71;P50750}

18765 Pathogen[ P03383] interacts with 3 human partners:{Q9NP71;Q01664;P50750}

18766 Pathogen[ P03410] interacts with 6 human partners:{O15151;Q9NS23;P50750;Q9NP71;Q01664;Q00987}

18767 Pathogen[ P14075] interacts with 3 human partners:{P50750;Q9NP71;Q01664}

18768 Pathogen[ P0C206] interacts with 6 human partners:{Q9NP71;P50750;O15151;Q01664;Q00987;Q9NS23}

18769 Pathogen[ P03363] interacts with 5 human partners:{O15151;Q9NS23;P50750;Q9NP71;Q01664}

18770 [Cluster 1707]GO:0014044+P biological\_process [name] Schwann cell development [def] "The process aimed at the progression of a Schwann cell over time, from initial commitment of the cell to a specific fate, to the fully functional differentiated cell. Schwann cells are found in the peripheral nervous system, where they insulate neurons and axons, and regulate the environment in which neurons function." [GOC

18771 Pathogen[ Q2Q067] interacts with 2 human partners:{Q03052;P20265}

18772 Pathogen[ P0C214] interacts with 2 human partners:{Q03052;P20265}

18773 Pathogen[ P03346] interacts with 2 human partners:{Q03052;P20265}

18774 Pathogen[ Q85601] interacts with 2 human partners:{Q03052;P20265}

18775 Pathogen[ P14079] interacts with 3 human partners:{P20265;Q14118;Q03052}

18776 Pathogen[ P03383] interacts with 1 human partners:{P20265}

18777 Pathogen[ P03410] interacts with 3 human partners:{Q03052;Q14118;P20265}

18778 Pathogen[ P14075] interacts with 1 human partners:{P20265}

18779 Pathogen[ P0C206] interacts with 2 human partners:{Q03052;P20265}

18780 Pathogen[ P03363] interacts with 2 human partners:{P20265;Q03052}

18781 [Cluster 1708]GO:0021513+P biological\_process [name] spinal cord dorsal/ventral patterning [def] "The process that regulates the coordinated growth and differentiation

that establishes the non-random dorsal-ventral spatial arrangement of the spinal cord." [GO\_REF

18782 Pathogen[ Q2Q067] interacts with 1 human partners:{Q9UMX1}

18783 Pathogen[ P0C214] interacts with 1 human partners:{Q9UMX1}

18784 Pathogen[ P03346] interacts with 1 human partners:{Q9UMX1}

18785 Pathogen[ Q85601] interacts with 1 human partners:{Q9UMX1}

18786 Pathogen[ P14079] interacts with 1 human partners:{Q9UMX1}

18787 Pathogen[ P03383] interacts with 1 human partners:{Q9UMX1}

18788 Pathogen[ P03410] interacts with 1 human partners:{Q9UMX1}

18789 Pathogen[ P14075] interacts with 1 human partners:{Q9UMX1}

18790 Pathogen[ P0C206] interacts with 1 human partners:{Q9UMX1}

18791 Pathogen[ P03363] interacts with 1 human partners:{Q9UMX1}

18792 [Cluster 1709]GO:0006631+P biological\_process [name] fatty acid metabolic process [def] "The chemical reactions and pathways involving fatty acids, aliphatic monocarboxylic acids liberated from naturally occurring fats and oils by hydrolysis." [ISBN

18793 Pathogen[ Q2Q067] interacts with 13 human partners:{Q9H5J4;P30084;Q5T1C6;P05413;Q9BW60;Q9GZR5;Q92539;Q15185;A1L3X0;Q9HB03;Q03060;Q16836;Q14693}

18794 Pathogen[ P0C214] interacts with 24 human partners:{P30084;Q75608;Q9NXXB9;Q9GZR5;P40939;P05413;Q9Y2S2;Q9HB03;Q14561;Q8TBF2;Q9NY P7;P23786;Q13011;Q92539;A1L3X0;Q14832;Q9BQK8;Q86SG2;Q03060;P42765;Q9BW60;Q5T1C6;Q15185;Q14693}

18795 Pathogen[ P03346] interacts with 14 human partners:{Q9BW60;Q75608;P05413;Q16836;Q86SG2;Q15185;P23786;Q92539;Q9H5J4;Q9HB03;P42765;Q03060;P30084;Q14693}

18796 Pathogen[ Q85601] interacts with 14 human partners:{A1L3X0;Q86SG2;P05413;Q9BW60;Q9H5J4;Q9HB03;Q15185;Q16836;Q9GZR5;Q5T1C6;Q92539;P30084;Q03060;Q14693}

18797 Pathogen[ P14079] interacts with 22 human partners:{Q9BQK8;Q14693;A1L3X0;Q03060;P30084;Q86SG2;P05413;Q75608;Q95822;Q9HB03;Q92539;Q14832;Q5T1C6;Q9Y478;Q14561;Q15185;Q8TBF2;Q9GZR5;Q9BW60;Q9H5J4;Q16836;Q8WXI4}

18798 Pathogen[ P03383] interacts with 11 human partners:{Q9BW60;Q9GZR5;Q9H5J4;Q16836;A1L3X0;Q9HB03;Q15185;Q5T1C6;Q92539;Q03060;Q14693}

18799 Pathogen[ P03410] interacts with 24 human partners:{A1L3X0;Q9BQK8;P30084;Q9GZR5;Q9H5J4;P05413;Q13011;Q03060;P23786;Q14693;P42765;Q8WXI4;Q5T1C6;Q75608;Q9BW60;Q14561;Q15185;Q14832;Q86SG2;Q16836;Q9HB03;Q92539;Q8TBF2;Q95822}

18800 Pathogen[ P14075] interacts with 13 human partners:{Q9H5J4;Q9BW60;Q9HB03;Q5T1C6;Q14561;Q15185;A1L3X0;Q92539;Q16836;Q9GZR5;Q14832;Q03060;Q14693}

18801 Pathogen[ P0C206] interacts with 21 human partners:{Q92539;Q03060;Q8WXI4;Q9HB03;Q75608;Q16836;Q15185;Q14832;Q8TBF2;P23786;Q9H5J4;P05413;Q14561;P30084;Q86SG2;Q9BQK8;Q5T1C6;Q9GZR5;Q14693;A1L3X0;Q9BW60}

18802 Pathogen[ P03363] interacts with 7 human partners:{Q16836;Q9H5J4;Q92539;P05413;Q86SG2;Q15185;Q03060}

18803 [Cluster 1710]GO:0060716+P biological\_process [name] labyrinthine layer blood vessel development [def] "The process whose specific outcome is the progression of a blood vessel of the labyrinthine layer of the placenta over time, from its formation to the mature structure. The embryonic vessels grow through the layer to come in close contact with the maternal blood supply." [GOC

18804 Pathogen[ Q2Q067] interacts with 5 human partners:{P31749;Q06330;Q14686;Q9Y5J3;Q8N693}

18805 Pathogen[ P0C214] interacts with 6 human partners:{Q8N693;P17275;Q9Y5J3;Q06330;Q14686;P31749}

18806 Pathogen[ P03346] interacts with 7 human partners:{Q06330;P17275;Q8N693;Q9Y5J3;P31749;Q8N3Y1;Q14686}

18807 Pathogen[ Q85601] interacts with 7 human partners:{P31749;Q06330;Q14686;Q8N3Y1;Q8N693;P17275;Q9Y5J3}

18808 Pathogen[ P14079] interacts with 6 human partners:{Q8N693;Q8N3Y1;Q06330;Q9Y5J3;P17275;Q14686}

18809 Pathogen[ P03383] interacts with 5 human partners:{Q06330;P31749;Q14686;Q8N693;P17275}

18810 Pathogen[ P03410] interacts with 7 human partners:{Q9Y5J3;Q06330;Q14686;P31749;P17275;Q8N3Y1;Q8N693}

18811 Pathogen[ P14075] interacts with 5 human partners:{Q14686;P17275;P31749;Q8N693;Q06330}

18812 Pathogen[ P0C206] interacts with 7 human partners:{P31749;Q06330;P17275;Q8N3Y1;Q9Y5J3;Q14686;Q8N693}

18813 Pathogen[ P03363] interacts with 7 human partners:{Q9Y5J3;Q06330;Q8N693;Q14686;P17275;P31749;Q8N3Y1}

18814 [Cluster 1711]GO:0043011+P biological\_process [name] myeloid dendritic cell differentiation [def] "The process in which a monocyte acquires the specialized features of a dendritic cell, an immunocompetent cell of the lymphoid and hemopoietic systems and skin." [CL

18815 Pathogen[ Q2Q067] interacts with 4 human partners:{Q01201;Q15306;O15205;P17947}  
18816 Pathogen[ P0C214] interacts with 4 human partners:{P17947;Q01201;O15205;Q15306}  
18817 Pathogen[ P03346] interacts with 4 human partners:{Q01201;Q15306;O15205;P17947}  
18818 Pathogen[ Q85601] interacts with 4 human partners:{Q15306;O15205;Q01201;P17947}  
18819 Pathogen[ P14079] interacts with 5 human partners:{Q9H295;Q15306;Q01201;O15205;P04141}  
18820 Pathogen[ P03383] interacts with 4 human partners:{Q15306;Q01201;O15205;P17947}  
18821 Pathogen[ P03410] interacts with 5 human partners:{P04141;O15205;P17947;Q15306;Q01201}  
18822 Pathogen[ P14075] interacts with 4 human partners:{Q01201;Q15306;P17947;O15205}  
18823 Pathogen[ P0C206] interacts with 4 human partners:{Q15306;O15205;Q01201;P17947}  
18824 Pathogen[ P03363] interacts with 4 human partners:{O15205;P17947;Q15306;Q01201}  
18825 [Cluster 1712]GO:0051100+P biological\_process [name] negative regulation of binding [def] "Any process that stops or reduces the rate or extent of binding, the selective interaction of a molecule with one or more specific sites on another molecule." [GOC  
18826 Pathogen[ Q2Q067] interacts with 1 human partners:{Q9Y2T7}  
18827 Pathogen[ P0C214] interacts with 1 human partners:{Q9Y2T7}  
18828 Pathogen[ P03346] interacts with 1 human partners:{Q9Y2T7}  
18829 Pathogen[ Q85601] interacts with 1 human partners:{Q9Y2T7}  
18830 Pathogen[ P14079] interacts with 1 human partners:{Q9Y2T7}  
18831 Pathogen[ P03383] interacts with 1 human partners:{Q9Y2T7}  
18832 Pathogen[ P03410] interacts with 1 human partners:{Q9Y2T7}  
18833 Pathogen[ P14075] interacts with 1 human partners:{Q9Y2T7}  
18834 Pathogen[ P0C206] interacts with 1 human partners:{Q9Y2T7}  
18835 Pathogen[ P03363] interacts with 1 human partners:{Q9Y2T7}  
18836 [Cluster 1713]GO:0060765+P biological\_process [name] regulation of androgen receptor signaling pathway [def] "Any process that modulates the rate, frequency, or extent of the androgen receptor signaling pathway." [GOC  
18837 Pathogen[ Q2Q067] interacts with 4 human partners:{Q99497;P55345;Q9Y252;Q9UBS8}  
18838 Pathogen[ P0C214] interacts with 4 human partners:{Q99497;P55345;Q9UBS8;Q9Y252}  
18839 Pathogen[ P03346] interacts with 4 human partners:{P55345;Q99497;Q9UBS8;Q9Y252}  
18840 Pathogen[ Q85601] interacts with 4 human partners:{Q99497;Q9Y252;Q9UBS8;P55345}  
18841 Pathogen[ P14079] interacts with 3 human partners:{Q99497;P55345;Q9UBS8}  
18842 Pathogen[ P03383] interacts with 2 human partners:{Q9UBS8;Q9Y252}  
18843 Pathogen[ P03410] interacts with 3 human partners:{Q99497;Q9UBS8;P55345}  
18844 Pathogen[ P14075] interacts with 2 human partners:{Q9Y252;Q9UBS8}  
18845 Pathogen[ P0C206] interacts with 4 human partners:{Q99497;Q9UBS8;P55345;Q9Y252}  
18846 Pathogen[ P03363] interacts with 2 human partners:{Q9Y252;Q9UBS8}  
18847 [Cluster 1714]GO:0021615+P biological\_process [name] glossopharyngeal nerve morphogenesis [def] "The process in which the anatomical structure of the glossopharyngeal nerve is generated and organized. Various sensory and motor branches of the glossopharyngeal nerve supply nerve connections to the pharynx and back of the tongue. The branchial motor component contains motor fibers that innervate muscles that elevate the pharynx and larynx, and the tympanic branch supplies parasympathetic fibers to the otic ganglion." [GO\_REF  
18848 Pathogen[ Q2Q067] interacts with 2 human partners:{O43365;P14651}  
18849 Pathogen[ P0C214] interacts with 3 human partners:{O43365;P31249;P14651}  
18850 Pathogen[ P03346] interacts with 3 human partners:{P31249;O43365;P14651}  
18851 Pathogen[ Q85601] interacts with 3 human partners:{P31249;P14651;O43365}  
18852 Pathogen[ P14079] interacts with 3 human partners:{P31249;O43365;P14651}  
18853 Pathogen[ P03383] interacts with 3 human partners:{O43365;P31249;P14651}  
18854 Pathogen[ P03410] interacts with 3 human partners:{P14651;P31249;O43365}  
18855 Pathogen[ P14075] interacts with 2 human partners:{P31249;O43365}  
18856 Pathogen[ P0C206] interacts with 3 human partners:{O43365;P14651;P31249}  
18857 Pathogen[ P03363] interacts with 3 human partners:{O43365;P14651;P31249}  
18858 [Cluster 1715]GO:0021903+P biological\_process [name] rostrocaudal neural tube patterning [def] "The process in which the neural tube is divided into specific regions along the rostrocaudal axis." [GO\_REF  
18859 Pathogen[ Q2Q067] interacts with 1 human partners:{P35226}  
18860 Pathogen[ P0C214] interacts with 1 human partners:{P35226}  
18861 Pathogen[ P03346] interacts with 1 human partners:{P35226}  
18862 Pathogen[ Q85601] interacts with 1 human partners:{P35226}  
18863 Pathogen[ P14079] interacts with 1 human partners:{P35226}  
18864 Pathogen[ P03383] interacts with 1 human partners:{P35226}  
18865 Pathogen[ P03410] interacts with 1 human partners:{P35226}  
18866 Pathogen[ P14075] interacts with 1 human partners:{P35226}  
18867 Pathogen[ P0C206] interacts with 1 human partners:{P35226}  
18868 Pathogen[ P03363] interacts with 1 human partners:{P35226}  
18869 [Cluster 1716]GO:0030099+P biological\_process [name] myeloid cell differentiation [def] "The process in which a relatively unspecialized myeloid precursor cell acquires the specialized features of any cell of the myeloid leukocyte, megakaryocyte, thrombocyte, or erythrocyte lineages." [GOC  
18870 Pathogen[ Q2Q067] interacts with 11 human partners:{Q16666;Q01196;Q05516;P15976;P09629;Q15744;O00625;Q13951;Q02556;Q14686;P49715}  
18871 Pathogen[ P0C214] interacts with 7 human

18872 partners:{Q16666;Q14686;Q02556;P09629;O00625;Q05516;Q13951}  
Pathogen[ P03346] interacts with 14 human  
partners:{Q16666;P49715;Q92794;P17542;P15976;Q02556;Q13951;P09629;Q15744;Q05516;Q9H7Z6;Q01196;O00625;Q14686}

18873 Pathogen[ Q85601] interacts with 11 human  
partners:{P09629;Q16666;Q02556;P15976;Q13951;Q9H7Z6;Q14686;Q15744;Q05516;P49715;O00625}

18874 Pathogen[ P14079] interacts with 11 human  
partners:{O00625;Q05516;P15976;Q15744;P09629;Q6N021;P49715;Q02556;Q13951;Q14686;Q16666}

18875 Pathogen[ P03383] interacts with 7 human  
partners:{Q14686;Q05516;Q13951;O00625;Q16666;Q02556;P09629}

18876 Pathogen[ P03410] interacts with 9 human  
partners:{Q16666;P09629;Q14686;Q6N021;Q02556;O00625;Q13951;Q15744;P15976}

18877 Pathogen[ P14075] interacts with 7 human  
partners:{Q13951;Q14686;O00625;Q16666;Q02556;P09629;Q05516}

18878 Pathogen[ P0C206] interacts with 11 human  
partners:{Q15744;Q05516;Q13951;Q16666;O00625;P49715;P15976;Q02556;Q14686;P09629;Q9H7Z6}

18879 Pathogen[ P03363] interacts with 8 human  
partners:{Q02556;Q15744;Q14686;Q16666;Q13951;O00625;P09629;Q05516}

18880 [Cluster 1717]GO:0043523+P biological\_process [name] regulation of neuron apoptosis [def] "Any process that modulates the occurrence or rate of cell death by apoptosis in neurons." [GOC

18881 Pathogen[ Q2Q067] interacts with 5 human  
partners:{Q99497;Q96B36;O15350;Q96KS0;Q9H6Z9}

18882 Pathogen[ P0C214] interacts with 5 human  
partners:{O15350;Q96KS0;Q99497;Q9H6Z9;Q96B36}

18883 Pathogen[ P03346] interacts with 6 human  
partners:{O15350;Q96B36;Q9C040;Q99497;Q96KS0;Q9H6Z9}

18884 Pathogen[ Q85601] interacts with 5 human  
partners:{Q99497;Q9H6Z9;Q96B36;Q96KS0;O15350}

18885 Pathogen[ P14079] interacts with 5 human  
partners:{Q99497;O15350;Q9H6Z9;Q96B36;Q96KS0}

18886 Pathogen[ P03383] interacts with 4 human partners:{Q96B36;Q96KS0;Q9H6Z9;O15350}

18887 Pathogen[ P03410] interacts with 5 human  
partners:{Q99497;Q96KS0;Q9H6Z9;Q96B36;O15350}

18888 Pathogen[ P14075] interacts with 4 human partners:{Q96KS0;Q96B36;O15350;Q9H6Z9}

18889 Pathogen[ P0C206] interacts with 5 human  
partners:{Q96KS0;Q96B36;Q99497;Q9H6Z9;O15350}

18890 Pathogen[ P03363] interacts with 3 human partners:{Q96B36;Q9H6Z9;Q9C040}

18891 [Cluster 1718]GO:0042059+P biological\_process [name] negative regulation of epidermal growth factor receptor signaling pathway [def] "Any process that stops, prevents, or reduces the frequency, rate or extent of epidermal growth factor receptor signaling pathway activity." [GOC

18892 Pathogen[ Q2Q067] interacts with 20 human  
partners:{Q92783;O94973;O95782;Q96B97;P63010;O75886;Q96CW1;Q9UJM3;Q9HCC9;Q00610;P37198;Q99962;P0CG47;P0CG48;P60953;O14964;P62987;P09496;P22681;P62979}

18893 Pathogen[ P0C214] interacts with 22 human  
partners:{P22681;Q96CW1;P62993;Q9UJM3;O14964;P60953;O75886;Q9Y6I3;Q99962;P63010;P37198;Q9HCC9;P0CG48;P62987;O94973;P0CG47;P09496;O95782;Q92783;P62979;P53680;Q96B97}

18894 Pathogen[ P03346] interacts with 24 human  
partners:{Q96B97;P63010;P62987;P53680;Q99962;P0CG48;O75886;O95782;P60953;P62993;P37198;P09496;Q96CW1;P42566;P62979;P0CG47;Q92783;O14964;P22681;Q9Y6I3;O94973;Q00610;Q9HC9;Q9UJM3}

18895 Pathogen[ Q85601] interacts with 22 human  
partners:{P22681;Q00610;P62993;P09496;Q96CW1;Q99962;P0CG48;O75886;Q9HCC9;Q96B97;P53680;Q92783;O14964;P62979;O94973;P0CG47;Q9UJM3;P60953;Q9Y6I3;P63010;P62987;O95782}

18896 Pathogen[ P14079] interacts with 22 human  
partners:{O75886;Q96CW1;P0CG48;Q00610;O43597;Q9UJM3;Q9Y6I3;P42566;Q92783;Q9HCC9;Q96B97;P62979;P62987;O95782;P37198;P63010;O94973;P62993;P0CG47;P53680;P09496;Q99962}

18897 Pathogen[ P03383] interacts with 16 human  
partners:{Q96CW1;Q00610;P62987;Q9UJM3;P60953;O75886;P63010;O95782;Q92783;P62979;P0CG47;P0CG48;P37198;O94973;O14964;Q9HCC9}

18898 Pathogen[ P03410] interacts with 22 human  
partners:{Q00610;P09496;O95782;Q96CW1;P0CG48;P53680;O43597;Q9Y6I3;Q92783;P62979;Q9HC9;P63010;P60953;P62987;Q96B97;Q99962;P62993;P42566;O94973;P0CG47;Q9UJM3;O75886}

18899 Pathogen[ P14075] interacts with 17 human  
partners:{P60953;P09496;O94973;Q96CW1;O75886;Q92783;Q9HCC9;P0CG48;P62979;O14964;Q9UJM3;O95782;P37198;P62987;P63010;P0CG47;Q00610}

18900 Pathogen[ P0C206] interacts with 24 human  
partners:{O14964;P53680;P63010;P0CG48;O94973;Q9HCC9;Q96B97;Q00610;Q99962;Q92783;P62993;P09496;P22681;Q96CW1;P62979;Q9Y6I3;O43597;P60953;O95782;P0CG47;Q9UJM3;P42566;P62987;O75886}

18901 Pathogen[ P03363] interacts with 16 human  
partners:{P22681;Q9HCC9;Q99962;O75886;Q92783;Q96B97;Q00610;O94973;P63010;P62987;O149

64;O95782;Q9UJM3;P37198;P60953;Q96CW1}

18902 [Cluster 1719]GO:0009159+P biological\_process [name] deoxyribonucleoside monophosphate catabolic process [def] "The chemical reactions and pathways resulting in the breakdown of a deoxyribonucleoside monophosphate, a compound consisting of a nucleobase linked to a deoxyribose sugar esterified with phosphate on the sugar." [GOC

18903 Pathogen[ Q2Q067] interacts with 1 human partners:{O43598}

18904 Pathogen[ P0C214] interacts with 1 human partners:{O43598}

18905 Pathogen[ P03346] interacts with 1 human partners:{O43598}

18906 Pathogen[ Q85601] interacts with 1 human partners:{O43598}

18907 Pathogen[ P14079] interacts with 1 human partners:{O43598}

18908 Pathogen[ P03383] interacts with 1 human partners:{O43598}

18909 Pathogen[ P03410] interacts with 1 human partners:{O43598}

18910 Pathogen[ P14075] interacts with 1 human partners:{O43598}

18911 Pathogen[ P0C206] interacts with 1 human partners:{O43598}

18912 Pathogen[ P03363] interacts with 1 human partners:{O43598}

18913 [Cluster 1720]GO:0048705+P biological\_process [name] skeletal system morphogenesis [def] "The process in which the anatomical structures of the skeleton are generated and organized." [GOC

18914 Pathogen[ Q2Q067] interacts with 5 human partners:{Q96S65;P17483;Q9NZC7;Q14865;P14652}

18915 Pathogen[ P0C214] interacts with 3 human partners:{Q96S65;Q14865;Q9NZC7}

18916 Pathogen[ P03346] interacts with 12 human partners:{Q96S65;P14652;P13378;P17483;P17481;Q9NZC7;O75569;P31273;Q15475;P78367;Q14865;Q9HB21}

18917 Pathogen[ Q85601] interacts with 4 human partners:{Q9NZC7;Q96S65;Q9HB21;Q14865}

18918 Pathogen[ P14079] interacts with 6 human partners:{P35475;Q14865;O75569;Q96S65;Q9NZC7;Q9HB21}

18919 Pathogen[ P03383] interacts with 1 human partners:{Q96S65}

18920 Pathogen[ P03410] interacts with 5 human partners:{Q9NZC7;Q9HB21;O75569;Q96S65;Q14865}

18921 Pathogen[ P14075] interacts with 1 human partners:{Q96S65}

18922 Pathogen[ P0C206] interacts with 6 human partners:{Q96S65;P17483;P14652;Q9HB21;Q9NZC7;Q14865}

18923 Pathogen[ P03363] interacts with 9 human partners:{P31273;Q96S65;Q14865;P17481;P17483;P13378;P14652;P78367;O75569}

18924 [Cluster 1721]GO:0031274+P biological\_process [name] positive regulation of pseudopodium assembly [def] "Any process that activates or increases the frequency, rate or extent of the assembly of pseudopodia." [GOC

18925 Pathogen[ Q2Q067] interacts with 2 human partners:{Q00587;P60953}

18926 Pathogen[ P0C214] interacts with 2 human partners:{P60953;O14613}

18927 Pathogen[ P03346] interacts with 3 human partners:{Q00587;P60953;O14613}

18928 Pathogen[ Q85601] interacts with 2 human partners:{O14613;P60953}

18929 Pathogen[ P14079] interacts with 4 human partners:{O14613;Q6NZY7;Q00587;Q9H3Q1}

18930 Pathogen[ P03383] interacts with 2 human partners:{P60953;Q00587}

18931 Pathogen[ P03410] interacts with 5 human partners:{Q00587;Q9H3Q1;Q6NZY7;O14613;P60953}

18932 Pathogen[ P14075] interacts with 3 human partners:{P60953;Q00587;O14613}

18933 Pathogen[ P0C206] interacts with 3 human partners:{O14613;P60953;Q00587}

18934 Pathogen[ P03363] interacts with 3 human partners:{Q00587;O14613;P60953}

18935 [Cluster 1722]GO:0045905+P biological\_process [name] positive regulation of translational termination [def] "Any process that activates or increases the frequency, rate or extent of translational termination." [GOC

18936 Pathogen[ Q2Q067] interacts with 3 human partners:{P63241;Q6IS14;Q9GZV4}

18937 Pathogen[ P0C214] interacts with 3 human partners:{Q6IS14;Q9GZV4;P63241}

18938 Pathogen[ P03346] interacts with 3 human partners:{Q9GZV4;P63241;Q6IS14}

18939 Pathogen[ Q85601] interacts with 3 human partners:{Q9GZV4;P63241;Q6IS14}

18940 Pathogen[ P14079] interacts with 3 human partners:{Q6IS14;P63241;Q9GZV4}

18941 Pathogen[ P03383] interacts with 2 human partners:{Q9GZV4;P63241}

18942 Pathogen[ P03410] interacts with 3 human partners:{P63241;Q9GZV4;Q6IS14}

18943 Pathogen[ P14075] interacts with 2 human partners:{Q9GZV4;P63241}

18944 Pathogen[ P0C206] interacts with 3 human partners:{Q9GZV4;Q6IS14;P63241}

18945 Pathogen[ P03363] interacts with 3 human partners:{Q9GZV4;P63241;Q6IS14}

18946 [Cluster 1723]GO:0007028+P biological\_process [name] cytoplasm organization [def] "A process that is carried out at the cellular level which results in the assembly, arrangement of constituent parts, or disassembly of the cytoplasm. The cytoplasm is all of the contents of a cell excluding the plasma membrane and nucleus, but including other subcellular structures." [GOC

18947 Pathogen[ Q2Q067] interacts with 2 human partners:{Q9NZI6;Q9NYV6}

18948 Pathogen[ P0C214] interacts with 2 human partners:{Q9NYV6;Q9NZI6}

18949 Pathogen[ P03346] interacts with 2 human partners:{Q9NZI6;Q9NYV6}

18950 Pathogen[ Q85601] interacts with 2 human partners:{Q9NZI6;Q9NYV6}

18951 Pathogen[ P14079] interacts with 2 human partners:{Q9NYV6;Q9NZI6}

18952 Pathogen[ P03383] interacts with 2 human partners:{Q9NYV6;Q9NZI6}

18953 Pathogen[ P03410] interacts with 3 human partners:{Q9NYV6;Q9NZI6;P33176}

18954 Pathogen[ P14075] interacts with 2 human partners:{Q9NYV6;Q9NZI6}

18955 Pathogen[ P0C206] interacts with 2 human partners:{Q9NZI6;Q9NYV6}

18956 Pathogen[ P03363] interacts with 3 human partners:{P33176;Q9NYV6;Q9NZI6}  
18957 [Cluster 1724]GO:0061180+P biological\_process [name] mammary gland epithelium development [def] "The process whose specific outcome is the progression of the mammary gland epithelium over time, from its formation to the mature structure. The mammary gland is a large compound sebaceous gland that in female mammals is modified to secrete milk." [GOC  
18958 Pathogen[ Q2Q067] interacts with 1 human partners:{P35548}  
18959 Pathogen[ P0C214] interacts with 1 human partners:{P35548}  
18960 Pathogen[ P03346] interacts with 1 human partners:{P35548}  
18961 Pathogen[ Q85601] interacts with 1 human partners:{P35548}  
18962 Pathogen[ P14079] interacts with 1 human partners:{P28360}  
18963 Pathogen[ P03383] interacts with 1 human partners:{P35548}  
18964 Pathogen[ P03410] interacts with 1 human partners:{P35548}  
18965 Pathogen[ P14075] interacts with 1 human partners:{P35548}  
18966 Pathogen[ P0C206] interacts with 1 human partners:{P35548}  
18967 Pathogen[ P03363] interacts with 1 human partners:{P35548}  
18968 [Cluster 1725]GO:0090051+P biological\_process [name] negative regulation of cell migration involved in sprouting angiogenesis [def] "Any process that decreases the frequency, rate or extent of cell migration involved in sprouting angiogenesis. Cell migration involved in sprouting angiogenesis is the orderly movement of endothelial cells into the extracellular matrix in order to form new blood vessels contributing to the process of sprouting angiogenesis." [GOC  
18969 Pathogen[ Q2Q067] interacts with 1 human partners:{Q9UQL6}  
18970 Pathogen[ P0C214] interacts with 1 human partners:{Q9UQL6}  
18971 Pathogen[ P03346] interacts with 1 human partners:{Q9UQL6}  
18972 Pathogen[ Q85601] interacts with 1 human partners:{Q9UQL6}  
18973 Pathogen[ P14079] interacts with 1 human partners:{Q9UQL6}  
18974 Pathogen[ P03383] interacts with 1 human partners:{Q9UQL6}  
18975 Pathogen[ P03410] interacts with 1 human partners:{Q9UQL6}  
18976 Pathogen[ P14075] interacts with 1 human partners:{Q9UQL6}  
18977 Pathogen[ P0C206] interacts with 1 human partners:{Q9UQL6}  
18978 Pathogen[ P03363] interacts with 1 human partners:{Q9UQL6}  
18979 [Cluster 1726]GO:0043524+P biological\_process [name] negative regulation of neuron apoptosis [def] "Any process that stops, prevents, or reduces the frequency, rate or extent of cell death by apoptosis in neurons." [GOC  
18980 Pathogen[ Q2Q067] interacts with 14 human partners:{Q9H2P0;Q99497;O60260;Q9BZE3;Q01105;O15350;Q8NHM5;O15405;Q99966;Q16143;Q13426;Q15819;P06744;P61586}  
18981 Pathogen[ P0C214] interacts with 15 human partners:{O15350;Q9BZE3;P61586;Q99497;Q01105;Q99966;Q15819;Q13426;P49588;P05412;Q16143;O60260;O15405;Q9H2P0;Q8NHM5}  
18982 Pathogen[ P03346] interacts with 19 human partners:{P05412;Q99966;Q9H2P0;Q9BZE3;Q01105;Q9UIU6;Q13426;P56177;O15350;Q15475;Q16143;Q99497;O60260;P06744;Q8NHM5;O43543;O15405;P61586;Q15819}  
18983 Pathogen[ Q85601] interacts with 15 human partners:{Q99497;Q9BZE3;Q01105;Q99966;Q13426;P06744;O15405;Q8NHM5;P05412;Q9H2P0;P61586;O60260;O15350;Q16143;Q15819}  
18984 Pathogen[ P14079] interacts with 19 human partners:{O60260;Q01105;Q06413;Q15819;O15405;Q99497;Q99966;Q16143;P06744;Q8NHM5;Q9H2P0;O15350;Q9BZE3;P61586;O43543;P05412;P49588;Q13426;P49917}  
18985 Pathogen[ P03383] interacts with 9 human partners:{Q01105;O15405;P06744;O60260;P61586;Q15819;Q13426;O15350;P05412}  
18986 Pathogen[ P03410] interacts with 15 human partners:{P06744;Q99497;P49588;O15405;Q9BZE3;Q16143;Q01105;O60260;Q15819;P61586;Q13426;P05412;O43543;O15350;Q99966}  
18987 Pathogen[ P14075] interacts with 9 human partners:{Q15819;P06744;P05412;Q01105;O15350;O15405;P61586;Q13426;O60260}  
18988 Pathogen[ P0C206] interacts with 18 human partners:{P05412;Q99497;O15405;P61586;Q9BZE3;P06744;P49917;Q13426;O60260;Q16143;Q8NHM5;Q15819;Q99966;O15350;O43543;Q9H2P0;Q01105;P56177}  
18989 Pathogen[ P03363] interacts with 10 human partners:{P06744;P56177;Q9H2P0;Q9BZE3;Q13426;P05412;O15405;Q01105;Q16143;Q15819}  
18990 [Cluster 1727]GO:0018126+P biological\_process [name] protein hydroxylation [def] "The addition of a hydroxy group to a protein amino acid." [GOC  
18991 Pathogen[ Q2Q067] interacts with 1 human partners:{Q9H6Z9}  
18992 Pathogen[ P0C214] interacts with 1 human partners:{Q9H6Z9}  
18993 Pathogen[ P03346] interacts with 1 human partners:{Q9H6Z9}  
18994 Pathogen[ Q85601] interacts with 1 human partners:{Q9H6Z9}  
18995 Pathogen[ P14079] interacts with 1 human partners:{Q9H6Z9}  
18996 Pathogen[ P03383] interacts with 1 human partners:{Q9H6Z9}  
18997 Pathogen[ P03410] interacts with 1 human partners:{Q9H6Z9}  
18998 Pathogen[ P14075] interacts with 1 human partners:{Q9H6Z9}  
18999 Pathogen[ P0C206] interacts with 1 human partners:{Q9H6Z9}  
19000 Pathogen[ P03363] interacts with 1 human partners:{Q9H6Z9}  
19001 [Cluster 1728]GO:0010467+P biological\_process [name] gene expression [def] "The process in which a gene's sequence is converted into a mature gene product or products



(proteins or RNA). This includes the production of an RNA transcript as well as any processing to produce a mature RNA product or an mRNA (for protein-coding genes) and the translation of that mRNA into protein. Some protein processing events may be included when they are required to form an active form of a product from an inactive precursor form." [GOC

19002 Pathogen[ Q2Q067] interacts with 519 human partners: {O95363;P23588;Q92900;P05198;Q13573;P61313;P30153;O95602;P83369;Q15573;P33240;Q99460;P52434;Q92750;P83876;Q99613;P62701;Q92585;O00411;O75832;Q86U42;P48556;O15234;Q9H2U2;P49458;P47914;P23381;Q8IU60;P07910;P31749;P40306;P62312;Q8IZL2;Q9Y333;P46779;O14744;Q9UPN9;Q9HAW0;Q9Y3C7;Q9NQT4;P55036;Q9UPR3;P10827;P20226;Q96HR3;Q9HAU4;P55769;Q16594;O00303;P49591;P63104;P39687;P55265;P24278;O60841;Q86WQ0;Q13487;Q92664;Q96L15;P52272;O00267;Q02543;P61326;Q9NPJ6;O00231;Q8IZH2;P14866;P26373;O00233;P29692;Q15459;Q9H5Q4;Q9UBQ5;P62750;Q8IZD4;Q13889;P01106;P47813;P63151;P46937;Q16533;P62273;P67809;O95402;Q13485;Q9Y285;P10589;P51665;Q9Y2L1;P55795;Q01130;P13056;Q9NPI6;P62318;P62826;P62508;Q9BQA1;A5YKK6;Q9HCK5;P10828;Q15562;P15880;P40429;Q9H074;Q06265;P28072;P09132;Q96F86;Q8N684;P46782;Q9Y5Q8;O95400;P35268;O43390;Q9NRR4;Q13435;Q01105;P24534;P19388;Q5SXM2;Q96DI7;P52435;O43172;P49116;P22090;Q15046;Q99551;P49770;Q15181;P46778;Q9H944;Q9UK45;Q96C86;Q13868;Q9NSD9;P26641;Q8WTR7;Q13547;P38919;Q9BTT4;Q14103;A5LHX3;Q93074;Q9UBU9;P62888;P32780;Q99594;P32969;A6H8Y1;P62277;P18615;A6NFD8;Q9UKN8;Q6NZI2;Q15633;P30876;P19387;P62241;O75586;Q15542;Q13200;P61218;P62244;P05387;Q92759;O75448;Q92945;P25787;Q14152;P62861;P08107;Q060244;P52657;Q6ZNA4;Q8IXL2;P62476;Q06323;P67775;P04792;O75971;P05386;Q5T160;O75175;Q9Y3B2;Q07955;Q9BWJ5;Q9NPD3;Q86TB9;P08047;P11473;Q9BZ17;Q16629;Q9H9Y6;Q92973;Q14240;O60563;Q9UNX3;Q504Q3;Q8WYQ5;P30050;O94906;P28702;O43148;Q96I59;P54105;Q15561;P31943;O43776;P28065;Q12962;O14818;Q15629;P61077;P26196;Q10570;Q12996;P18077;P62891;Q9ULK4;P62314;P08621;Q13541;P11142;P61978;Q9HAU5;P29084;Q00059;Q96G25;P61927;Q5RKV6;Q9BUI4;P39023;Q92994;P38159;P52747;P62487;Q9UHI6;P62081;P61247;P62304;O14980;P55199;Q9UHB9;Q9UIV1;P84103;P61254;Q9UI10;P62249;Q8IYB3;Q05048;Q14186;O94913;P62280;Q14997;P83731;Q96F24;Q86V81;Q8IWZ8;P51948;Q92831;P60900;Q9UL46;P61289;P62263;Q86US8;Q15370;P12755;P84022;Q9UKZ1;P60866;P62906;P41252;Q15024;O95628;P51668;Q9H0W8;Q14232;P28347;Q02878;P46777;Q05519;P26368;P28062;Q12904;O00255;P62899;O15105;Q96G330;Q6P2Q9;P14859;Q9NRS0;Q15543;Q9UHV7;Q9GZV5;P49848;P08708;P50750;Q9UNM6;P08865;Q9Y5B0;Q07020;Q15544;Q9H9G7;P62913;P25788;Q8WXD5;Q08211;O00268;P09874;P62269;P60228;Q6P2C8;P08579;Q96PU5;Q16254;P52597;Q92530;P50613;P07814;Q9NVC6;P14678;Q9Y5S9;P62424;Q15329;P25786;Q9UFF9;Q01081;P62917;O75533;Q9GZN2;Q96RS0;Q8TEQ6;P62829;Q16514;O15116;P46783;Q8IYD1;Q9P2I0;P57678;P13984;P62495;P55055;Q13243;P09661;Q15796;P36578;Q9NVU0;Q15369;Q9UKV8;Q9C0C2;P62857;Q15366;Q16401;P62875;Q9HAV4;P24928;O43809;O00232;Q15029;P62847;Q15466;O75822;O15318;P28749;P09012;P49207;Q15583;P23193;Q13144;Q13155;P23396;Q09161;P28074;P54136;P25789;Q15572;Q93008;Q92540;Q9Y2X0;Q8IXH7;P12757;P35813;Q9BUJ2;Q9H3P2;P0CG47;P20042;Q7RTV0;P08235;P63173;Q12789;P18621;Q9NZN8;P31946;P52298;P52655;Q9Y618;P20618;P35269;Q15427;P11474;O43513;Q6PI48;P29083;P28316;Q92600;P49336;Q9HA77;O60583;P24863;Q9UKF6;P28070;P39019;Q14493;Q92793;Q9BW92;P28066;P41250;Q9UL18;Q14683;P61353;P63272;O15371;Q04637;P21675;P53803;Q99436;Q96RN5;Q8TAA3;Q14241;P62266;P42677;Q9Y3U8;O60508;P62306;P63220;Q9H840;P62841;Q9Y5B9;P83881;P62987;P26651;Q53T94;O43242;O6730;Q14188;P49589;O95453;P49721;Q71SY5;Q9Y535;P49720;P35637;P22626;P50914;P46776;O75376;Q8ND04;Q16637;P11940;P35658;Q9Y250;P05423;P62854;P17480;O43324;P62308;Q9P2J5;P62753;O14893;Q96JK9;P05388;O14802;Q12874;P60842;P22736;P18124;P62851;Q00839;Q9ULM6;P25398;Q15056;Q15361;Q15759;Q9NYV6;Q9H1D9;Q9Y4Z0;P62910;Q92901;Q9Y2S0;P68104;P46781;Q9H814;P14868;P62310;P27635;Q07352;O75821;Q13888;Q96B26;Q969L4;P42772;O15372;O15160;Q13347;P61513;Q15428;Q92966;P51946;Q8WX92;Q00403;O95149;Q08945;Q9Y4Y9;P62945;Q9H1J1;Q6P2E9;P51003;P62979}

19003 Pathogen[ P0C214] interacts with 531 human partners: {P62861;P41250;Q12996;Q9BZI7;P84098;O00268;Q14997;P61247;P51665;P60228;Q16637;P62312;Q92585;P51946;P24863;Q8WX92;O15234;Q9NZN8;O15116;P26368;A6H8Y1;P62316;Q16254;P49589;O00411;P25789;P35813;P83369;Q09161;Q9NSE4;Q96C86;P26196;Q8IX12;P15880;P55036;P62081;P42766;Q12904;Q9UI10;Q7L3T8;P62913;Q9HAU4;P22090;Q9Y533;Q13573;O43172;P11474;Q9UGM6;O60841;Q71SY5;P35637;O94913;Q92901;Q9Y5Q8;P28062;P62249;Q6P2E9;P62899;O95453;A5LHX3;Q13547;P38159;Q9UKF6;P12757;P62854;P30876;P28065;P39019;P62263;P60842;P49770;Q92664;P30153;Q15573;Q9H9Y6;Q96I59;O75586;Q9BUI4;P52657;Q8IZL2;Q9NP81;P21675;P53803;P84103;Q15361;P12081;Q9NPI6;Q9NVU0;Q86V81;Q96F24;P23381;Q9Y5S9;P51003;P62273;P52655;O60508;O95628;P35269;P50750;P62599;P23396;Q92900;P18077;O00267;P50613;P05388;O95400;Q9H814;O15372;Q9Y2L1;Q9Y2X0;P29084;P49590;P07814;P62847;P23588;O14818;P14678;Q9C0C2;Q9Y285;P62829;Q504Q3;P41252;Q15029;P26373;P62306;Q969L4;Q14152;Q93074;P52435;P55265;P17275;Q5J TZ9;Q92750;P27635;P57678;O43242;Q9Y3B2;P47813;P46778;Q92793;P67809;Q99613;P46937;Q05048;Q6P2Q9;P04792;P84022;Q9UKN8;Q9BWJ5;Q8IWZ8;Q9H1D9;Q15428;P16533;Q9GZV5;O75821;Q00403;Q96HR3;P61513;Q9NVC6;P29692;Q12962;P83881;Q15056;Q02386;P48556;Q9Y2S0;P28347;Q6NZI2;P61218;Q9HAV4;Q5SXM2;P40306;P62701;P49207;Q06330;P11940;Q15370;Q14232;P63220;Q10570;Q5RKV6;P26641;Q92540;P08865;Q9BTT4;P05121;Q8WXD5;P32969;Q5JPH6;Q02543;Q13200;O43776;P62266;Q9HAU5;O95149;O60244;Q15031;P62308;Q9Y4Z0;Q9UK45;P14868;O43148;P08579;O43390;Q16594;O00232;Q15366;P05423;Q8N684;P49591;Q12789;P24278;Q01105;Q15542;P62277;O94906;Q9UIV1;Q93008;Q9Y4Y9;P50914;P61077;Q9UPQ9;Q07955;P18615;Q9Y250;Q9H944;Q8IZH2;Q15561;P46779;Q07352;P55795;Q00059;Q15633;Q9Y3C7;Q9Y333;Q99460;P52298;P13056;P52272;P28066;O00303;O75832;Q92966;P62487;Q96RN5;P40429;Q9ULM6;P62314;P41091;Q86US8;P07910;Q14493;Q8IYB3;P47914;O43809;Q14186;P63173;P13639;P49116;O14980;Q9NPD3;P08621;Q13487;P56192;P46783;P51948;Q14103;P62180;P49720;P49336;P28074;P26639;Q9NRS0;P55769;P62280;P61326;A5YKK6;Q8TEQ6;Q9UNX3;P0CG48;Q9UL46;P38919;O43513;Q9Y3U8;Q92994;Q9H074;P30050;Q13485;P62753;P62910;Q8ND04;Q13144;P62891;Q15369;P35658;Q15572;O151

05;P55199;O60583;Q13243;Q14240;P63151;Q9UPR3;Q15427;P63272;Q15544;P83876;Q9P2I0;P49848;Q15329;P54577;P52597;P25788;Q9HG97;P62495;Q05519;Q7RTV0;P17480;P62269;O75376;Q9UNM6;P67775;Q86TB9;Q9BUJ2;Q15459;O00231;Q15796;Q9UHI6;O15318;P62318;Q8NDV7;Q99594;Q9NR4;Q9Y5B9;Q06323;P46781;Q13868;P25786;Q01081;Q96JK9;O75533;Q96RS0;Q96DI7;O43324;Q9NYV6;P33240;Q16514;Q9HA77;Q9NW08;Q8IYD1;P49588;P12755;Q96GW9;Q8IU60;P62875;P13984;P20226;P61254;Q12874;P28072;Q6P2C8;Q6ZNA4;P32780;Q9UKV8;P62841;Q8TAA3;Q9H840;Q15287;P24928;P62244;P52747;P26651;Q9UHV7;P62987;P62826;Q04637;P31943;O60563;P62304;Q07020;P42677;P62945;O15160;O75822;P28749;P09012;Q14683;Q92831;Q9Y535;O75448;P46776;P05198;Q8WTR7;Q99436;O95602;Q15629;Q15759;P0CG47;P25787;P62241;P46777;O14893;P55884;Q9Y5B0;P24534;Q13888;P83731;P09661;Q9UKZ1;Q92973;Q9UFF9;P35268;Q9HCK5;Q5T160;P47897;Q9UHB9;Q9BW92;Q87424;P52434;Q08945;Q8IXH7;Q6PI48;Q08211;P60866;P62857;O75971;Q92600;Q9HAW0;Q13435;Q00839;P49458;P35998;P60900;Q53T94;P61313;Q15181;P08708;Q9H3P2;Q92945;P20042;Q9HCJ0;P19387;P05387;P25398;P22626;P10828;P23193;O00233;P19388;Q9H0W8;Q9UBQ5;Q15543;P51668;Q9NSD9;P26640;Q96LI5;Q15046;Q15562;P61927;Q96G25;P31946;P62750;Q9ULK4;P62979;P05386;Q06265;P09132;P08107;P62851;Q86U42;P06730;Q5ST30;Q9Y618;P62508;Q9UPN9;Q15365;P46782;Q75175;Q8WYQ5;P39687;Q92530;P14859;Q15008;P18124;Q9NQ4;Q86WQ0;P01106;O95402;Q96F86;Q99551;Q9UL18;O14802;Q14188;Q9NPJ6;P28070;Q92759;P08047;Q96B26;O00255;Q16629;P42772;P31749;P61353;P14866;P36578;Q13155;P20618;P29083;Q15466;Q96PU5;Q9UBU9;Q9Y2Z4;P09874;P49721;Q16401;O15371;P18621;Q13541;Q9H5Q4;Q01130;P17980;Q13347;P62906;Q8IZD4;P1142;Q02878;Q9P2J5;Q14241;Q9H1J1}

19004

Pathogen[ P03346] interacts with 545 human

partners: {P08107;Q9UPR3;Q9NVU0;Q06330;Q9Y5S9;P54105;O95400;Q9BZI7;P25787;Q9UPN9;P23381;Q15427;P05387;P51991;Q92585;P46779;Q12874;Q15542;Q5RKV6;Q9H2U2;Q86U42;O15234;P61978;P28070;Q15562;P46937;Q13487;Q13263;Q15370;Q504Q3;Q9ULM6;O43172;Q02386;Q09161;P10827;P35813;P11473;P63173;P25789;P55036;P06730;P62917;Q8IX12;P62249;P62913;Q9HAU4;Q15366;P52434;Q9HAV4;O95402;Q9NPJ6;P62861;Q08170;Q8IYB3;Q9NPI6;P62277;Q02878;P41091;O95149;Q96PU5;Q9Y5Q8;Q8IXH7;A6NFD8;P47813;P09651;Q99460;Q86US8;P06401;Q7RTV0;P55265;Q9UV1;Q9UBQ5;P12757;Q96C86;O75175;O75586;P14866;Q9UL46;P62280;P39023;Q9H9A5;Q9BQA1;P52747;P08235;P62304;P83876;Q15329;Q9UKF6;Q93008;P28347;P62987;P61927;Q9UNX3;P28072;Q99594;Q71SY5;P48443;Q9UKZ1;P62857;P25788;P28074;Q14188;Q9GZV5;Q00059;P49721;Q13541;O60563;Q9Y4Y9;P81105;Q13347;P08579;P07814;O60841;Q9HG97;P55795;P12725;O95628;P49116;Q15466;P24863;O14818;Q9UL18;P05423;P24278;P49336;P46778;P49207;Q96HR3;Q15583;Q99436;Q15633;O75971;Q15629;Q15573;P14859;Q9H814;Q13888;P42772;P0CG48;P62266;Q8WXD5;Q15796;O14744;Q9H3P2;Q16401;A5LHX3;P26641;Q93074;P53803;P61254;Q9H9Y6;P38919;P62495;P07910;Q8N684;P13056;P61218;P11142;O00268;Q15056;O60244;P28062;P08621;P11940;Q13242;P29692;Q8WTR7;P31943;P10588;Q00839;Q13247;Q86WQ0;Q9BTT4;P62424;P62273;P67775;O43776;P55884;Q92831;O15105;P26599;Q9BUJ2;P83731;Q8ND04;P60866;Q92945;Q16254;P49458;P29084;Q08211;Q96B26;P20618;P62899;P63272;P35658;P52298;O00232;Q14152;O43390;Q16629;O75821;P60842;P22626;Q9Y3B2;Q6NZI2;O94906;P51668;A5YKK6;Q9BUQ8;Q9Y333;P35268;Q07955;P41252;Q92750;P61077;P09132;Q08945;P62826;Q53T94;P62891;P08047;P08708;Q13889;P20226;Q8IZH2;Q05048;Q15024;P17480;O00303;Q9NZN8;Q16637;O95453;P52756;P30153;Q96G25;Q15561;Q14103;O75832;Q9Y5B0;P46782;P41250;O15318;Q9UKN8;P61353;O00233;P62487;P01106;Q8IU60;Q13155;O75448;P51843;P62854;P19388;Q14493;Q9Y3U8;P28702;P35637;Q9HCK5;O60583;Q14186;P62318;Q86TB9;P47914;P84022;O43148;Q12904;Q86V81;O43513;O14980;Q14232;Q9Y285;O60508;Q92973;P08865;Q96F24;P13984;P22736;Q9Y3C7;P51003;P60228;Q9GZN2;O75643;P31749;P61313;P67809;Q9H074;P25398;O00255;P83369;Q86U44;Q9Y4Z0;Q15361;Q9P2J5;Q6P2C8;Q13435;P49720;P28065;Q14683;P52435;Q9H1D9;P49848;Q8WUA4;Q13547;P61513;O43324;Q6P2E9;P62306;P05388;P51946;O15160;Q9UI6;P62269;P60900;Q9Y250;P52657;P50750;O94913;Q9Y535;Q02543;P42766;P62081;Q9Y2L1;Q9Y5B9;P26368;Q9H5Q4;P55769;P25786;P61247;Q01081;O00231;O75533;Q14240;P54136;P36954;P49770;Q96RS0;Q8TFQ6;Q16514;P18621;Q8IYD1;O00411;Q9Y5Q9;P46781;P61326;Q99551;P63955;P39687;Q16533;P84098;Q9NQ4;Q6ZNA4;P15880;O15116;Q15459;Q9UKV8;O75376;P14868;Q9BWJ5;Q92540;Q12962;Q9BUI4;Q07352;P61289;P50914;O95718;Q9C0C2;O00267;P49589;P09874;O75469;P62829;P62979;P28066;Q9UNM6;Q92994;O43809;Q6P2Q9;Q99613;P24534;Q96DI7;O75822;Q8WX92;P28749;P39019;P09012;P84103;Q92759;P23588;Q9H944;Q8IWX8;P62314;P55199;P23396;O95602;P52272;P42677;Q15287;P62750;P31946;P62701;Q8TAA3;P21675;Q05519;P30050;P30876;P63104;Q15369;P35269;Q15759;Q15181;Q9NVC6;Q01130;Q9NYV6;P14678;P62910;P0CG47;P36578;Q9UBU9;Q12789;P62508;P10828;P26196;Q9NRR4;Q99593;P11474;P62847;Q14997;P57678;Q9UHB9;Q13200;P48556;Q9P2I0;P62851;Q6PI48;Q9H0W8;Q13485;P22090;Q04637;O14893;P24928;P23193;P51665;Q8IZD4;P46777;Q06265;P29083;Q9UFF9;O15371;Q9Y2X0;Q13573;Q00403;Q13243;Q07020;Q92793;P62263;P38159;P62841;Q9UPQ9;P83881;Q969L4;O00482;Q15029;P62316;Q06323;Q9ULK4;P26651;P05386;Q5SXM2;Q92900;Q9Y618;P18077;Q13144;P20042;Q92966;P35398;P46776;P62241;P52655;Q92530;P52597;Q9NR50;Q9NQ94;Q92664;Q13285;Q9NQ4;P62308;P62312;P62753;Q15372;P51948;Q10570;Q9NPD3;Q96F86;Q96LI5;O43242;Q12996;Q15544;O14802;P62945;P32780;P62310;Q9UK45;Q9UV7;Q96RN5;Q15393;P04792;P09661;P55055;Q15365;P18615;Q92901;P32969;A6H8Y1;P26373;P33240;Q9UI10;P18124;P40306;P40429;Q9Y2S0;P62875;Q13868;P27635;P19387;P68104;Q96JK9;P46783;Q8IZL2;Q14241;P62906;Q9H840;Q15428;Q92600;P63151;P62244;Q8WYQ5;Q9HAW0;Q16594;P62888;Q15543;Q9H1J1;P63220;Q15572;P05198;P10589}

19005

Pathogen[ Q85601] interacts with 515 human

partners: {P51946;P46783;P32969;P01106;P52657;P28066;P17480;Q9BZI7;Q9UNM6;Q9UPN9;P61513;P60900;Q9Y250;Q9Y2X0;Q92585;Q15542;Q92664;Q5RKV6;O75971;P26373;O15234;P61978;P62857;Q13487;P36954;Q15370;Q6P2E9;P62244;Q9BQA1;P63104;Q96JK9;P09874;P54136;O43324;Q9NSD9;P62913;P11473;O95602;P08107;P55036;Q9HAU4;P31946;Q9NPD3;Q9HAV4;O43148;P62854;P31749;P62081;P26639;O43390;Q8IYB3;Q9NPI6;P14868;P61353;O95149;P62891;P46776;Q9H1D9;O60563;P47813;Q15466;P18077;P25787;P63133;P41091;Q7RTV0;Q99613;Q92994;P05388;Q13243;P50750;Q9UBQ5;Q9HCK5;P63151;Q9ULK4;P62495;Q15629;P49589;Q05048;P61289;P06730;P62304;Q15329;Q01130;Q02386;Q9H0W8;Q14240;Q92540;Q9UBU9;Q06330;Q9UKZ1;P63173;P25788;Q9P2J5;P235

88;P39687;Q14103;Q9Y535;Q13888;O15116;Q13155;Q01105;Q9BUI4;P07814;Q8N684;Q13573;Q9Y2  
Y1;Q9UHV7;Q15459;P23396;P62273;Q07352;Q9UL18;P49336;P46778;P62829;Q75832;P30050;P287  
02;Q14241;O60583;P62753;P14859;Q13868;P42772;P27635;Q15573;P61326;P22626;P62826;Q152  
87;Q9H3P2;P12757;Q04637;P23381;P15880;P53803;Q14188;P83881;Q96G25;Q07020;Q9NRR4;Q9Y2  
S0;P30153;P61218;Q9Y618;O00268;O94913;P39019;Q8IX12;P26641;Q9UIV1;P08621;Q15583;Q969  
L4;Q9Y3U8;Q96PU5;Q00059;Q9NR50;Q9GVZ5;Q9Y5B9;P62701;P62241;P62424;Q15046;P0CG48;O754  
48;Q9HAW0;Q86V81;O43776;Q92831;O00303;Q9BUJ2;P83731;P55795;Q9Y3C7;P51948;Q9NZN8;P186  
15;P62899;Q9BW92;P20042;Q9UFF9;Q13144;Q16594;P62945;P05423;Q16629;Q9Y285;Q9UK45;O147  
44;Q08211;P62316;Q94906;P51668;Q07955;P49770;P55055;Q93008;P55769;Q92600;Q9NVU0;P245  
34;P61077;Q504Q3;P62263;P12755;Q13541;Q9Y2L1;P62861;Q02878;Q09161;Q9HA77;Q8WX92;P080  
47;Q96DI7;Q8IZH2;Q86TB9;Q9UKN8;Q9HY96;P39023;P38919;P61254;Q96C86;Q9H944;P26651;P146  
78;O15371;Q15572;P25789;Q13263;P41250;O00233;P62487;Q86WQ0;Q8WYQ5;Q5SXM2;P19388;Q5T1  
60;P29084;P49207;P60228;P35637;P11940;Q14186;Q53T94;Q9Y5Q8;P20618;P62910;Q96LI5;Q9H8  
14;P62310;Q9H9G7;Q96RN5;P62249;P62280;Q13435;P62314;P13984;Q96F24;Q99551;P62306;Q9HA  
U5;P47914;O60508;Q8TEQ6;P84098;P40306;P08708;Q92759;O95402;Q9H2U2;P32780;Q92973;Q9Y4  
Z0;Q9NQT4;Q9Y5B0;A6NFD8;P49720;Q14683;P52435;Q9Y3B2;A5YKK6;P49848;Q95628;O95453;P623  
18;P42766;Q15029;P52597;P28062;P11142;Q9UHI6;P49721;P62269;Q71SY5;P68104;Q10570;P623  
12;Q9P2I0;Q15562;P35269;Q99594;P22736;P54105;Q15024;P25786;Q01081;Q8IZD4;Q8IZL2;Q96R  
S0;P29083;Q9ULM6;Q16514;Q05519;P28347;O00255;P67809;P18621;Q8IYD1;A6H8Y1;Q8ND04;P053  
87;O75376;Q15369;P83369;P28072;Q16254;P08235;Q96I59;Q9UNX3;P60842;Q00403;Q9UKV8;Q132  
00;P62277;Q9H074;P11474;P50613;P10827;Q9C0C2;P28065;O00267;P35268;Q15633;P231  
93;O14980;P67775;Q06265;P62979;P55265;Q13347;Q99436;P62847;O75822;P28070;P28749;P841  
03;Q9NW08;P55199;P35658;P26196;Q95363;O00482;Q14152;Q86US8;P05198;P84022;P42677;Q954  
00;P63220;Q8TAA3;P14866;Q9UL46;Q6P2Q9;Q99460;O00231;Q15759;Q9NYV6;P0CG47;P83876;Q8IX  
H7;Q9UPR3;Q6ZNA4;Q12789;P62508;Q6NZI2;Q00839;Q08945;Q92750;P21675;P46782;P46937;Q6P2  
C8;Q12962;P19387;P47897;Q92966;P04792;Q9UHB9;Q16533;P63272;P48556;Q9GZN2;O15105;Q6PI  
48;P46779;P52655;P62750;P62851;Q92945;O14893;Q13547;Q9H5Q4;Q9BTT4;P49116;P62841;P249  
28;P28074;Q96F86;O15372;P62308;P24863;P52298;Q92530;P30876;P62987;P38159;P13056;P524  
34;P24278;P22090;Q15543;P26368;P10828;Q9Y333;P41252;Q92793;Q15365;A5LHX3;Q15181;P510  
03;Q9UPQ9;Q15361;P61927;O75586;P29692;P36578;P19447;P35813;Q06323;Q15160;P05386;Q929  
00;P17275;O00411;Q86U42;Q16637;P31943;O75175;O43172;P08865;O60244;Q13485;P61247;Q96H  
R3;O14818;Q8WTR7;Q93074;Q14232;Q9UKF6;O75821;Q15544;O14802;P09132;Q14493;Q96B26;P467  
77;P52747;O15318;Q9NPJ6;P09661;P62917;Q16401;Q9NVC6;Q92901;O43513;P33240;Q15561;Q153  
66;Q9UI10;P18124;P46781;P62875;P25398;P60866;Q12874;O43809;Q9Y5S9;Q15796;Q02543;P202  
26;Q9BWJ5;P62906;P50914;Q8WXD5;Q9H840;P62266;Q8IU60;P40429;P62888;Q9H1J1;Q9Y4Y9;P105  
89}

19006

Pathogen[ P14079] interacts with 545 human

partners: {Q15629;Q9Y2S0;O43809;Q9Y3U8;P27635;Q92664;Q5SXM2;P84098;P46779;P28065;Q994  
36;Q9Y5B9;P62875;O60244;Q9Y333;Q9Y285;O95402;Q01105;Q8IX12;P20042;P62333;P13056;Q9Y2  
X0;O43513;P23381;P55199;O95628;P26639;Q9UKV8;P26373;P57678;P62508;P09874;Q15287;P485  
56;Q08945;P09132;Q96RS0;Q8WTR7;P60842;P12755;Q9Y3B2;P55055;P23396;Q96GW9;Q9P2T5;Q929  
94;Q8IZD4;Q15056;P11142;Q15561;P41238;Q15573;P60468;Q8TEQ6;Q9NYV6;Q14241;P0CG48;P404  
29;Q7L3T8;Q92600;Q9UL18;O00303;O94906;Q9BW92;Q9H9G7;Q9GVZ5;P14859;O75821;O60508;P356  
37;P28749;P06730;P19387;P52747;Q9Y5B0;P35269;Q14186;Q9UI10;P54136;P49336;P51946;P186  
21;Q16594;O14893;P47813;P83881;Q8IXH7;P35398;Q9UKF6;Q9UKN8;Q15031;Q14103;P678  
09;P68104;Q8IU60;Q5T160;P62487;Q9NW08;Q9UNX3;P46781;Q92966;P11473;P83731;P61513;O755  
33;P62847;P41091;Q15024;P40306;P39656;Q96JK9;Q16254;Q9UK45;P10828;P62753;P08235;Q105  
70;P52434;P52298;P55036;P35658;Q9NPI6;Q92793;P28074;P26641;P39023;Q9H1J1;O00232;Q128  
74;P62273;Q86WQ0;Q5ST30;Q13243;Q9HCK5;Q15583;Q9Y5S9;P25398;Q9UKZ1;Q9BUJ2;Q96HR3;O155  
14;P62495;Q15329;Q9NP81;P33240;Q99594;P28347;Q96TB9;P47897;P30876;Q96LI5;P11474;Q96F  
24;O95363;P49591;P61218;P43307;P26368;Q6P2C8;Q92540;Q9Y3C7;P83876;Q9H3P2;P18077;P497  
20;Q9ULK4;O00487;Q9NQT4;Q9Y250;Q13487;P25787;Q6ZNA4;Q9NVC6;Q13868;O75832;Q9GZN2;P148  
66;P14868;P46783;Q86US8;P07910;Q9UBU9;Q9NPD3;P22736;Q13573;P05198;Q9H840;P61254;P509  
14;Q8IZL2;Q9Y5Q9;Q96C86;O94913;A5LHX3;O15116;P40484;Q9H074;P62312;Q15029;Q13889;P538  
03;A6H8Y1;P62979;P46937;P18615;O00233;Q6P2Q9;Q6P2E9;P62841;P18124;Q9UHI6;Q14240;P359  
98;A5YKK6;Q9HAU4;P48443;P62314;P42766;Q15427;P61077;Q08211;P10827;P61289;O95453;P631  
51;P29084;P62266;Q05048;Q9NQ94;O95149;P29692;O15371;P46782;Q00839;P62987;Q15572;Q9HA  
77;Q13144;O95718;P62241;P83369;P51665;Q15459;Q13541;Q8IYD1;P20618;P23588;P32969;P631  
04;P22090;P62306;Q86U44;O43776;Q5JPH6;P62829;P35813;O75448;P14678;Q8TAA3;O95400;P608  
66;Q8IYB3;Q06330;O43148;Q16629;P50613;Q9H2U2;P62854;Q9NR50;Q13888;Q07020;P39019;P174  
80;P26599;P55795;Q00059;Q9C0C2;Q9BWJ5;O14744;P63220;P61326;Q8IZH2;Q16637;Q14997;P492  
07;P19388;P49589;P62244;P51668;Q00403;O75586;Q15046;Q15543;P28062;P60900;Q9UPN9;O004  
82;P24534;P62263;Q12962;Q02543;P62424;P55265;Q92901;P62277;Q9HCJ0;O75822;Q9BZI7;P119  
40;P62750;P62910;Q9UHV7;Q9BQA1;P63173;Q9Y4Z0;P26196;P31946;Q9BUI4;P49458;Q8ND04;Q96R  
N5;P05423;Q05519;Q5RKV6;P41252;Q15759;P46776;Q7RTV0;O75469;Q96F86;P08107;P24863;P086  
21;P49848;Q92945;Q8N684;Q9UNM6;O15160;P52435;P08708;P63272;Q92973;Q99613;P41250;P172  
75;Q86V81;Q9NRR4;Q92750;Q86U42;Q99460;Q9Y5Q8;Q96I59;P36578;P28702;P24278;P62308;P266  
40;O75175;Q9H944;Q15370;Q92759;Q9UFF9;P09012;P13639;Q9HAW0;P56192;O14818;Q9NSD9;Q153  
66;P49721;P62304;Q15428;P60059;Q9Y2Y1;P62906;Q13969;Q9HAU5;Q9Y2L1;Q9NPJ6;Q92530;P62316;P479  
14;P62280;P62310;Q07955;P01106;Q15181;Q969L4;P62899;P52657;Q9Y2Z4;Q16533;Q15365;O004  
11;P10588;Q8WX92;P61353;P62081;P62945;Q9UIV1;P32780;Q71SY5;P46777;P42677;P30050;Q6NZ  
I2;O60841;P61978;Q12789;P31943;Q9BT43;P15880;Q01081;Q9BTT4;P23193;P13984;Q14493;Q063  
23;P62891;Q9NVU0;P62191;Q9UGM6;Q8WYQ5;Q9H9A5;O75376;Q92900;O60583;Q96B26;P62888;P088  
65;Q9NSE4;Q13155;Q15562;Q9UPR3;P55769;P12757;P61927;P52597;O43390;P62917;Q02386;Q9HA  
V4;Q95602;Q15008;P24928;Q9H5Q4;Q9ULM6;P30153;Q15369;P46778;P62249;P43686;P10589;Q129  
04;Q93074;P51003;Q13347;O43242;P62826;P25788;Q12996;P49116;P09661;O14802;Q9NZN8;O002

31;P05386;O15318;P28066;P49588;P35268;Q14232;Q15466;Q9UL46;P04792;P62913;Q15361;Q6PI48;O43172;Q16514;P05387;P52756;Q9UBQ5;Q9H1D9;P61247;Q53T94;O15105;P54105;Q14683;O00267;P62318;P0CG47;P62269;Q9Y4Y9;P62701;P36954;Q9UHB9;Q504Q3;A6NFD8;Q96G25;Q92585;O00255;O75971;Q06265;P51571;P61313;O15234;Q14188;Q14152;Q16401;Q8WXD5;Q15542;P17980;P07814;Q8WUA4;O43324;P62851;Q07352;P28072;P19447;Q9Y535;P39687;Q09161;P05388;Q04637;P22626;P84103;P29083;Q8IWZ8;Q99551;P21675;Q9UPQ9;O00268;P38159;Q8NDV7;Q9H9Y6;Q9P2I0;O15372;P50750;P62857;P55884;P62861;P51948;Q9H814}

19007 Pathogen[ P03383] interacts with 490 human partners: {P08107;Q9Y618;Q14683;O95402;Q13573;Q06330;P42766;Q15329;P53803;Q9NRR4;P36578;Q9UKN8;Q06265;P05388;P62266;Q9Y285;Q9UBU9;Q92585;P39019;Q07955;P55199;P26373;O15234;Q15561;Q9Y2L1;P09661;Q92831;Q15287;Q8ND04;Q9BQA1;Q96JK9;P62913;Q05048;P62945;Q95602;Q01105;P55036;Q13485;Q9H2U2;Q12904;Q15369;P63272;Q15366;P08047;P51003;Q9P2J5;Q9H3P2;Q9NYV6;O43148;P62854;P29084;Q969L4;P40429;Q15562;P14868;O43390;Q15544;P62987;P62891;P25398;P35269;P83876;P51948;Q9H840;Q9UL18;Q15459;P62280;P62318;Q07020;Q8IUU6;P49458;Q9H944;P62312;P25789;P62750;P54105;P22626;P60900;P14866;O15371;P05387;Q15029;P62249;O75376;Q15572;Q6NZI2;Q9ULK4;Q96F24;P62888;P62899;Q9UBQ5;P31946;Q9UPQ9;P01106;O43172;P60228;Q13487;P61927;P24534;Q9H0W8;Q9UPN9;Q13888;P46777;P49116;Q9Y5S9;Q9HAW0;P14859;P23193;P46779;P49207;O60244;P31749;P55795;P62316;Q5JPH6;Q9Y535;P49589;P83731;P62424;Q9H9Y6;P40306;Q5T160;Q9UI10;O00233;Q92966;Q15031;P18124;P46778;Q8IZL2;Q92901;Q10570;P62753;P52655;P62304;Q00059;Q9NP81;Q8WYQ5;P61326;Q9UHI6;P42677;Q8WXD5;Q15542;P61247;Q6P2Q9;P38919;Q9Y4Y9;O95400;P49721;Q06323;P83881;Q96G25;Q9UFF9;Q12874;Q6ZNA4;P52434;P61218;P26368;Q13243;Q9HCK5;Q9H5Q4;P30153;P26641;P47914;Q08945;P04792;Q9C0C2;O60841;Q14997;P67775;P61978;P26196;P11940;Q14152;P31943;P62917;P62273;Q07352;Q86V81;Q9NPJ6;Q13435;Q9UNX3;P35813;P20618;O43324;P09132;Q9Y5Q8;Q9H1D9;Q93074;Q13155;Q9UKF6;O00267;P30050;Q9Y3B2;O14744;O94906;P84098;P38159;Q9NVU0;P61077;Q96HR3;Q00403;P62826;P32969;Q09161;Q95628;Q16629;P20042;P20226;Q9UPR3;Q075832;P52657;Q96RN5;Q15448;P62277;P62487;Q86WQ0;Q13144;P11473;P18077;O15105;Q8N684;O94913;P23588;P06730;P63173;Q8IYB3;P11474;Q9NR50;Q16533;P49336;Q16594;Q14186;Q6P2C8;Q15629;Q8IXH7;Q16637;P62081;P84022;Q92994;P52747;P19387;P33240;P62314;P62310;Q15361;O60563;P84103;Q92945;P50613;P13984;P39687;P42772;P23381;Q99551;P63104;Q9HAU5;Q9Y3C7;Q8TEQ6;O14893;Q92973;Q13541;P28347;P35637;P51946;P24928;P61313;O14980;P08865;Q01130;Q9HAV4;Q96I59;Q9NPD3;P62851;P62495;Q86VS8;P24278;Q9NQT4;P47813;P09874;Q9NPI6;Q14493;P49848;P46782;Q15046;Q14103;Q15466;Q16254;A5YKK6;Q9UL46;Q95149;P62269;P28702;P68104;Q9UNM6;P63220;P50750;P05198;O75971;Q02543;P62244;P14678;Q02878;Q9Y2Z4;O95363;Q9Y333;O00268;Q9UIV1;P25786;Q99460;Q01081;P07814;P15759;P49770;Q96RS0;Q16514;Q86TB9;Q00255;Q8IYD1;P11142;Q96GW9;Q92600;P28072;Q96B26;P62910;Q15365;P27635;Q9UKV8;Q92759;Q13200;Q9ULM6;Q9H074;Q15573;P28065;Q9HA77;Q8IZD4;Q8IX12;P62857;P28066;Q13547;P26651;O43809;P52298;Q99613;O75822;P28749;P09012;P35658;P62906;Q9Y4Z0;P46783;Q71SY5;Q9NZN8;Q9Y3U8;P60866;Q04637;Q9UK45;Q5RKV6;Q96C86;Q15191;P61254;Q14188;Q16401;Q05519;P62979;Q92750;O00231;P0CG47;A6H8Y1;Q9BUJ2;P62875;Q15786;Q99594;P62241;P21675;P46781;Q14232;Q13347;P52435;P39023;P55265;O43776;Q8WTR7;P57678;O15318;P55769;Q9UHB9;Q9P2I0;Q6P148;Q9UKZ1;Q9Y5B0;Q15370;P12757;P0CG48;Q12962;Q9BT4;O00411;P28074;P62841;Q96F86;P62308;Q92530;P19388;P49720;Q9UHV7;Q8TAA3;P61289;P22090;P29083;P24863;Q12789;P10828;Q92540;P41250;P62701;Q9NVV6;P62829;P62508;O15116;P83369;P30876;O75586;P29692;P62263;P28062;P62847;P35268;P41252;P54136;P05386;P50914;Q5SX M2;P17275;O95453;Q86U42;P17480;P48556;Q9NSD9;O14818;P49591;P67809;O75175;P46937;Q14241;P13056;Q9GZV5;O60583;Q92900;P62861;Q7L3T8;Q13868;Q00839;Q99436;P18621;O15372;Q9Y5B9;P08621;Q96LI5;O14802;P46776;Q9Y2X0;O75821;P32780;P52597;P15880;P23396;Q15024;P18615;P28070;P61513;Q9H9G7;Q92793;Q7RTV0;Q8WX92;P51668;Q9BWJ5;Q15633;Q9H814;Q53T94;P25787;P62306;P08708;P25788;Q9BZI7;Q15543;Q9Y250;Q9H1J1;Q9BW92;P61353;Q6P2E9;Q96DI7}

19008 Pathogen[ P03410] interacts with 556 human partners: {Q9HAW0;P84022;Q96LI5;Q99594;P83876;Q92540;Q92831;O60583;Q08945;P62861;P05386;Q8IUU6;P28070;Q9Y2L1;Q6NZI2;Q92945;Q02543;Q9UPQ9;P61247;P62241;Q9Y285;Q00839;P52655;P62829;P49207;Q15427;Q9HA77;P26373;Q9NZN8;P05121;P55036;Q96RS0;Q9BWI5;Q9Y4Y9;Q6ZNA4;Q15572;P61513;Q8WXD5;Q01081;P0CG48;Q9NR50;O14893;Q9UFF9;P26368;P68104;Q10570;Q13155;P61326;P19387;Q14103;P62304;P62899;P35813;Q9NSE4;P56192;O15234;Q8IX12;Q13889;O60508;Q15329;Q9UKV8;Q9Y5Q9;Q15633;O95628;Q9UHB9;P18615;P62244;P36954;Q9BT43;Q9H3P2;O00268;Q12996;Q15029;O60841;P62913;Q8WTR7;P61978;O75822;Q92994;P60468;Q05048;Q15543;P25786;Q16629;Q9H840;P42772;P12755;P60059;Q96G25;Q02878;Q15008;Q92901;Q92900;P22626;Q16401;P11940;P49589;Q5ST30;P01106;Q9BUJ2;Q92750;O15372;P15880;O00267;Q9Y5B9;P62306;P63272;P46777;Q06330;P46776;P62841;P54105;P30050;Q96F24;P24928;P55265;P60900;P62310;Q9UL18;P05388;Q12962;Q9BW92;P21675;Q14997;P29083;P06730;Q9ULM6;Q9UPR3;P35998;Q9NPI6;P46781;Q15393;Q99460;P18124;P49588;Q9Y5S9;Q06265;P54136;Q14493;P14859;Q9NVC6;P20042;P41238;O00233;Q9C0C2;P35637;P51946;Q5RKV6;Q16254;Q8TEQ6;Q15365;P23381;Q9NPJ6;Q00059;P24278;Q9HCJ3;Q9Y333;O00232;P62269;Q8NDV7;Q07020;Q13868;P63220;Q7L3T8;O43776;P05569;P62910;P62847;P62906;P11142;P39687;Q8TAA3;P31749;P04792;P23396;Q14232;A6NFD8;P18621;P48556;P30876;Q86WQ0;P26599;P49721;P62266;Q9BQA1;P20226;Q15366;Q15370;P62249;Q01105;P10828;Q9Y5Q8;A6H8Y1;P63151;P62308;P14678;P63173;P62316;P50914;Q9HAU5;P47897;P62280;O75376;P14868;Q9H9G7;Q9H2U2;P23193;P55265;A5LHX3;P22090;P26651;O00411;P13639;P61313;Q8WYQ5;Q9UIV1;Q9Y3C7;P62979;Q99613;P47813;P62508;P25657;Q14188;O15514;Q13541;P50613;Q9H1J1;P14866;Q14152;Q9H9A5;Q9NRR4;Q99436;O15318;P09012;P62701;Q92585;Q9Y535;P49770;Q9BZ I7;Q12904;P62750;Q9NSD9;Q9H074;Q9GZV5;P11473;P51003;Q9P2J5;P08621;P55884;P08865;P49591;O43809;P50750;P40306;P67809;Q9NYV6;Q9UNX3;Q06323;P62277;O15371;Q8IZH2;O60563;O94906;Q8IZL2;Q15583;P36578;P18077;P07910;O08579;P55199;Q96JK9;Q8IZD4;Q92793;P25398;Q15573;Q96B26;Q13200;P43307;Q05519;Q8IXH7;Q9ULK4;Q9H814;O95402;Q8WX92;Q15561;Q96F86;P25787;P61927;P84098;P29084;Q9NW08;Q15369;P62854;Q95453;Q6P2E9;O43513;Q02386;O43172;P52435;P62826;P62273;P26639;O95602;O94913;P09132;Q07955;P52597;P35658;P08107;P52298;P620

81;Q16514;P28347;Q16637;P46783;P62495;Q96I59;Q9P2I0;P31943;P17275;Q9UKZ1;P62314;P49848;Q92973;P83369;Q15056;Q15024;P33240;Q15629;P53803;Q9Y3U8;P28062;Q15428;P51665;P19447;Q14683;P41250;P09661;Q13485;Q15459;P22736;Q14186;O75533;Q9Y2S0;Q9HCK5;Q86V81;P62875;P05423;P28702;Q12789;P52272;P08708;P09874;P46782;Q15466;P32969;Q00403;O14818;P12757;Q9UBU9;Q9BTT4;Q15046;Q9H5Q4;P51668;P46937;Q6P2C8;P60842;P35269;O43324;O75175;Q8IYB3;Q00303;P83919;Q16594;Q9NQT4;P61218;P49336;P04844;Q9Y2Y1;O95400;Q96HR3;O00231;Q8ND04;Q9UNM6;Q5JPH6;O15105;P46779;Q86U58;P63104;P27635;P51948;O15160;P24863;Q9Y5B0;P28749;P25789;Q15544;P49720;Q8IYD1;Q13888;O60244;Q01130;Q9UHV7;Q969L4;Q9Y4Z0;P11474;Q92664;O75821;P30153;Q9UKF6;P52434;P62987;Q9UGM6;P41252;Q13547;Q86TB9;Q9Y2Z4;Q7RTV0;P49116;P57678;Q53T94;P24534;P13984;P62857;P26640;P10589;Q92966;Q96GW9;Q15542;Q8N684;Q13347;P62487;Q9H1D9;P62263;P41091;Q9GZM2;P62424;Q9Y250;P08047;P62888;Q13487;P61254;Q09161;P46778;Q92600;P28072;O43148;P62945;P05387;P07814;Q9NPD3;Q9NVU0;P42766;Q9Y2X0;Q6P2Q9;O14744;P26641;Q93074;O15116;P84103;P39019;P62312;P47914;A5YKK6;Q86U44;Q9NP81;Q86U42;Q9H0W8;P40429;Q04637;Q15361;P49458;Q9H944;Q9Y618;P39023;P55795;P25788;Q96C86;P39656;P29692;Q8WUA4;Q15181;Q9HAV4;Q13243;P62917;P62851;Q12874;P67775;P83731;Q9UKN8;O00255;P38159;Q15796;Q8IWX8;P60228;Q5SXM2;P08235;Q9UHI6;P19388;P28066;Q15562;P35268;Q08211;Q14241;P32780;Q504Q3;P61353;Q9UK45;O95363;Q99551;O75971;P62891;Q6PI48;P28065;Q5T160;O14802;O43242;O75448;Q96RN5;Q16533;P0CG47;Q07352;Q92759;Q9BUI4;P62753;Q9UBQ5;P23588;Q9UI10;P17980;Q9UPN9;P31946;O75832;O14980;P20618;P61077;Q13573;Q14240;O75586;Q9UL46;P28074;P61289;Q9H9Y6;P52747;P83881;P17480;Q13435;P60866;O43390;O95149;P13056;Q13144;P42677;Q9Y3B2;P05198;Q71SY5;P62318}

19009

Pathogen[ P14075] interacts with 494 human

partners: {Q9Y2Z4;Q9NVU0;Q00059;O95453;Q6P2E9;P17480;P49336;P42766;P54136;P51003;P22626;Q92585;Q15572;Q8TEQ6;Q15366;Q12789;P49207;O15234;P09132;P62857;P62304;Q9GZV5;P46781;P63220;P54105;Q05519;P32969;P14866;Q9UK45;Q9H5Q4;Q12962;Q09161;P35813;P62316;Q9H814;P62495;P55036;P25788;P42677;P13984;Q13155;P62913;Q9NPJ6;Q92900;P22090;O60841;Q92759;P11142;P20042;Q02878;Q8WXD5;Q16533;P24863;P28066;O43809;P21675;Q9P2I0;Q13573;Q14683;P41250;Q92966;P62277;P55265;P52657;P08621;O15372;P23381;Q9UPR3;P62851;Q15542;P18615;Q06323;O75832;P11474;P68104;Q15759;Q9HCK5;Q14103;Q9UML6;Q86V81;Q9NYV6;Q13243;P23588;P08865;Q9BQA1;P14859;Q92831;P52747;Q8TAA3;P10828;Q9UKZ1;Q9NPD3;P60900;Q08945;Q15562;P62444;P28347;P30876;Q96HR3;P61326;O00233;P08708;Q9H9G7;Q9NSD9;Q14493;Q9UL46;P57678;Q9Y4Z0;P26196;Q53T94;P17275;Q00403;Q15459;P49720;P61254;O60563;Q9Y5B0;P46778;P29083;O75971;P50613;P26651;Q14241;Q92600;P38159;Q92945;Q92973;Q15561;Q15428;P05388;P41252;P26641;P29084;P83881;Q99613;P19388;O95400;Q01130;P61218;P50750;O75821;O60583;Q92994;O95363;P46777;Q9H840;Q9Y250;O43172;P29692;Q9Y3U8;P04792;P31943;P62249;P39687;O75175;Q9H074;Q5SXM2;Q15544;Q9HAW0;Q13200;O75448;P48556;P19387;P06730;P62306;Q16401;Q9NPJ6;P62081;Q8IX12;P20226;Q15629;P62308;P62750;P18621;Q96LI5;Q8IU60;P35658;Q9NZN8;O43390;Q15796;Q01105;Q02543;Q9UI10;Q9HAV4;P28070;P18124;Q9UNX3;O94906;P25398;Q13547;P61077;Q16594;P49721;Q96GW9;P13056;Q9Y2L1;P01106;Q92750;P47813;A6H8Y1;Q9HA77;Q9Y618;Q9NP81;Q13868;P15029;O95402;P05198;O15371;P62312;O00231;O75376;Q16637;O75586;Q9BTT4;P12757;P62487;Q96DI7;Q92530;Q9Y285;Q13485;O00255;Q93074;Q9NQT4;Q8WTR7;P11940;P24278;Q14186;Q6NZI2;O14980;P60228;P63173;Q15365;Q00839;P49116;O95628;P30050;Q9UHI6;P31749;P0CG48;Q86U58;Q8IZD4;P62979;Q6ZNA4;Q13435;P83731;P49458;P84098;Q9Y3C7;P62318;P28062;P83369;Q15370;O15116;Q7L3T8;O00411;Q12874;P55769;P28074;O14744;Q14232;P23193;P33240;Q9UV7;P56192;P61247;P62753;P46782;P62891;P62861;Q13889;Q16254;Q12904;P28065;Q9BUJ2;Q9UPQ9;P18077;Q05048;Q9Y5B9;P49848;P46779;P62917;P39023;Q9H1D9;Q15287;Q04637;Q9H944;Q9UPN9;P50914;P24928;P62269;P62847;Q9BW92;P62910;O43776;P62273;Q86TB9;Q9Y535;Q15573;P35269;P11473;Q99594;O60244;Q6P2Q9;Q5RKV6;P40429;P26368;P23396;P62241;P52655;P25786;Q01081;P15880;Q96RS0;P62826;O14818;Q16514;P49770;P62987;P67809;Q8IYD1;P63104;Q99551;P14868;Q9HAU5;Q5T160;P28072;Q9P2J5;Q9NRR4;Q96NB26;Q96JK9;P09661;Q8IYB3;Q9UKV8;Q9BWW5;P62841;Q9Y333;P36578;Q13487;P61978;O15105;P62266;Q07352;Q9Y5Q8;O95149;Q15633;Q06330;P67775;Q9H2U2;Q9H9Y6;Q13347;P30153;P51946;Q14997;P61513;O75822;P28749;P32780;P09012;P55199;P61313;P27635;Q9ULK4;O00268;P14678;O95602;P62888;Q9UFF9;Q6P2C8;Q92901;P0CG47;P42772;P25787;P26639;Q92793;P08107;P28702;Q9NVC6;Q9Y5S9;P35268;Q96C86;P46937;Q9NL50;Q9UKN8;Q96RN5;Q9UHB9;P62945;P35637;P6P148;P46776;Q15466;Q96F24;Q9H0W8;P83876;Q9UL18;Q15024;Q15361;P31946;P84103;Q96I59;P20618;O43148;Q9H3P2;Q9UBU9;P46783;Q15329;P62701;P84022;Q13144;P62875;P49589;P62899;P52597;O43324;Q5JPH6;Q9C0C2;P47914;Q8IXH7;Q9UNM6;O14893;P62906;Q71SY5;P62314;Q8IZL2;P38919;Q15046;Q8N684;Q96G25;Q9Y4Y9;Q9UBQ5;Q9UIV1;P61289;P05386;Q9UKF6;O00267;Q86U42;P40306;Q14188;P61353;P51668;P39019;Q15369;P62424;O43513;Q99436;Q92540;Q9NSE4;Q16629;A5YKK6;P52434;Q06265;Q15031;P24534;P62829;P62280;Q86WQ0;P63272;P49591;Q9Y3B2;Q96F86;Q10570;Q13541;Q8ND04;O14802;Q07020;P62508;P62263;Q969L4;O15318;P62854;P60866;Q15181;P26373;P07814;P09874;Q9Y2X0;P05387;Q94913;Q14152;P62310;Q07955;P51948;P52298;Q8WX92;P52435;P53803;Q15543;Q8WYQ5;P25789;Q9BZI7;Q9H1J1;P61927;Q7RTV0;Q13888;P08047}

19010

Pathogen[ P0C206] interacts with 553 human

partners: {P49589;O95363;Q02386;Q9BUJ2;P61289;P46937;P41091;P09132;P84022;Q15287;P40429;Q9UFF9;P61313;Q99436;P28062;P10588;Q96RS0;P24863;Q9UNM6;Q9NSE4;Q53T94;P67809;Q14188;O43324;Q96PU5;P33240;Q13541;P0CG48;P07814;Q9H074;P62875;P83876;Q99613;Q8IXH7;Q15329;Q9UKF6;Q14103;P27635;P49336;P14678;Q9HCK5;O60508;Q15466;O75832;Q9BZI7;Q504Q3;P35398;P23193;P20042;Q15365;P18124;Q96HR3;P39687;Q07955;O95149;Q86TB9;P26368;P22298;Q16514;P55265;O95453;P06401;P31749;P62854;P40306;Q06330;Q9Y2Z4;P28065;Q14997;Q15543;Q9H840;P49848;Q9UPN9;P61326;Q01081;P49207;P26651;Q8IZH2;Q9BQA1;Q9HAW0;Q96C86;P36954;P55036;Q13263;Q15361;P50750;O95602;Q9BT43;P62081;P20226;Q09161;Q9HAU4;Q15544;P30050;P25786;P55769;P17275;P30153;P39656;Q8WXD5;Q8WUA4;P09874;P25788;Q9NPJ6;P25788;Q92664;P41252;Q6PI48;O94913;P62241;Q5RKV6;P54105;P62304;P62244;O14744;P25787;Q05519;Q8IYB3;P50914;Q13868;Q9NZN8;P08865;Q5ST30;Q08211;Q9UIV1;P62750;Q6ZNA4;Q06323;P18621;P09012;P526

57;Q96LI5;P46781;A6H8Y1;P62266;Q02543;Q14232;O75469;Q96JK9;O75533;P14866;P52655;O002  
55;Q8TEQ6;Q8WTR7;P49720;P61978;P19388;P61218;Q8N684;O00268;Q07020;Q9NW08;P83881;Q8IY  
D1;P46778;P26196;Q9UGM6;A6NFD8;O75175;O75586;P63151;P62263;Q5JPH6;Q9NP81;O00232;Q9UP  
Q9;Q13243;Q12874;Q16629;P62273;Q86U42;Q15572;P55055;Q9NPL6;P62314;Q6P2C8;P62316;O433  
90;P60900;Q9Y3C7;Q9BUI4;Q02878;Q9Y5B9;Q9HA77;Q9UKV8;Q13547;Q14186;P13056;P04792;P427  
72;P62495;P62826;P51003;P62280;P22626;O15318;P41250;P26641;O43809;P49116;P67775;Q96B  
26;P62857;P22736;P62851;P29084;Q9UHV7;O43242;Q15796;P62910;Q9H9A5;Q13487;Q8NDV7;Q929  
73;Q92831;P26640;Q14241;O00482;Q9Y4Y9;Q9NR50;Q16254;P46782;Q99551;Q9Y5Q9;O95628;A5LH  
X3;Q9HAV4;Q9P2I0;P49591;P06730;P28749;P13984;Q9Y4Z0;P61247;Q9Y535;Q9Y5Q8;P83369;P127  
55;O75971;P19447;P31946;O43776;Q92793;Q13144;P18077;P10589;Q9GZV5;O43513;P62913;P619  
27;P25789;Q9Y333;P61353;P62888;Q5SXM2;Q9GZN2;Q13435;O15105;P63104;O95718;Q8IZD4;P054  
23;Q9NVU0;P36578;P60228;P53803;P49770;Q9H814;Q92750;Q9UK45;P62861;P05198;Q9Y285;Q86U  
S8;O15514;O60841;P35269;Q8ND04;P10828;P62508;Q9Y5B0;P19387;Q13888;P38159;Q05048;Q96R  
N5;Q9NSD9;O95402;P50613;P35268;O95400;P23396;P39023;Q9H0W8;P20618;Q13573;Q9BWJ5;P127  
57;P32969;Q06265;Q8IZL2;Q13200;Q9UBU9;Q8TAA3;P08047;P24278;P18615;P52597;P62701;P280  
70;Q9Y2S0;P29083;Q9UKN8;Q14683;Q6P2E9;Q9H944;P05386;Q9NPJ6;Q6NZI2;Q96F86;P22090;P840  
98;P62945;Q99460;P26373;Q14152;P35637;Q96F24;P46777;P05388;Q9UI10;P62979;P28347;Q6P2  
Q9;Q92759;Q5T160;P62318;Q15024;Q9BW92;O15371;Q7RTV0;Q15370;O15234;O14893;P28066;P628  
99;Q12996;P08107;Q9H2U2;P47813;A5YKK6;Q9NRR4;P83731;Q9Y2L1;Q15562;O75376;P55795;O002  
67;P39019;Q92901;Q16533;P05387;O14818;P46783;Q15573;Q13485;Q9H3P2;P56192;P42766;Q9UP  
R3;Q15633;Q8IWX8;P60866;Q14240;Q9UKZ1;P52435;Q92600;Q71SY5;Q86WQ0;Q9BTT4;P62306;P624  
87;O43172;P62841;Q15366;P32780;P0CG47;Q9Y3B2;Q15542;Q9C0C2;Q92966;Q9HAU5;O60244;P280  
72;Q8IX12;Q9H9G7;Q9UNX3;P54136;Q9ULK4;P84103;P23588;Q13889;Q9H5Q4;P61513;P24534;Q929  
00;P49458;P28702;Q13155;P05121;Q8WX92;P26639;Q15629;Q9NVVC6;P28074;P62277;O94906;Q9UH  
B9;Q92994;P52747;O75448;Q15031;P46776;P11474;Q92530;Q9UHI6;Q12962;P01106;P24928;P629  
06;P62312;Q04637;Q07352;P61077;P49721;P63173;P55199;Q99594;Q92945;Q99594;P09661;P629  
87;Q9NQT4;O60583;P38919;Q9Y2X0;O75821;P41238;Q16637;Q7L3T8;P62308;P62891;P62269;Q9P2  
J5;P29692;P62753;P08621;Q13347;P46779;Q00403;Q01130;O14802;Q9UL46;Q00059;P63220;P623  
10;P60842;Q9Y2Y1;Q9H9Y6;Q92540;O60563;P15880;Q96G25;Q8WYQ5;Q00839;Q9ULM6;O43148;P253  
98;O00303;P08708;Q14493;Q01105;Q15369;Q08945;Q15759;Q9NYV6;Q9H1D9;P23381;Q93074;P516  
68;Q15459;P11940;P11142;Q8IU60;O00233;P47914;Q9Y618;P68104;P48556;Q9Y250;P11473;P174  
80;P35658;Q12789;P47897;P14868;P62847;Q16401;P31943;P61254;P08235;P52434;O15116;Q155  
61;O15372;O15160;Q96GW9;Q12904;Q92585;O75822;Q15428;Q9Y5S9;Q86V81;P10827;P21675;P148  
59;O00231;P51946;P35813;P63272;P42677;P62829;Q96I59;Q15583;Q9UL18;Q969L4;P51948;P484  
43;P15046;O00417;Q10570;Q16594;P62249;P62424;Q9H1J1;Q15029;Q15181;Q9Y3U8;P30876;Q9UB  
Q5;P62917;P57678}

19011

Pathogen[ P03363] interacts with 495 human

partners: {Q96B26;Q504Q3;P62913;Q9NQT4;Q9Y2Z4;P62314;Q96RS0;O00411;Q9Y535;Q9GZN2;O147  
44;P09132;P18621;Q9H2U2;P05386;Q13151;Q9Y4Y9;Q8WUA4;Q5RKV6;Q92973;P10828;O15371;Q9Y4  
Z0;P62750;Q15366;P23396;P42677;P63173;P08865;P29083;P29084;Q13487;Q9P2I0;Q9Y5B0;P389  
19;Q15370;Q15466;P41252;P62847;P18077;Q10570;P05387;P49848;O75643;Q9NSD9;P49116;O956  
28;P19388;O95453;P84098;P42766;Q02386;Q13435;P13984;P62249;O95400;P52597;O60563;Q9HA  
U4;Q92900;Q96HR3;P05388;Q9HAV4;O60841;Q9H9Y6;Q9UHI6;P36578;P09012;Q71SY5;Q13347;P551  
99;P62753;P62312;Q8WX92;P24863;Q92530;Q8ND04;P62081;Q08170;P62910;Q15562;Q96I59;P308  
76;Q92831;Q86WZ8;P14868;P51991;P12757;P62508;Q13888;P14866;Q05048;P61513;P49589;P467  
76;Q15024;Q15393;A5YKK6;Q06330;P32780;O14980;Q86US8;Q92759;Q9UI10;P35637;O75533;P193  
87;Q9Y3B2;P41250;P61254;Q9NVU0;P62273;Q6P2E9;Q9H9G7;Q9UHB9;P61218;Q16514;P09651;P329  
69;P28347;Q92901;P08579;Q15459;Q9H1D9;Q8IYD1;P46778;Q15056;P51946;Q9Y5Q9;P61927;Q7RT  
V0;Q9UBQ5;P31946;O75376;Q9UPR3;Q16629;Q9HCK5;P62891;P62318;Q16254;P11474;Q14152;Q96J  
K9;O95602;Q9UKV8;P61353;P47897;P24928;Q15427;Q5JPH6;P62891;P62189;O00268;P62304;O151  
05;Q01130;Q6P2Q9;O43776;O00267;Q86U44;P08708;Q9UKZ1;Q9UBU9;P15880;P11940;Q86U42;Q153  
69;O14893;Q8IZD4;Q15633;P01106;P23381;Q9NZN8;Q8NDV7;Q9NPD3;A6H8Y1;Q92620;O94913;P287  
49;O15372;P17275;P41091;Q8IXH7;P23588;P39687;P62495;P18615;P61326;Q8IWX8;Q6ZNA4;P526  
57;P62306;P05198;O15116;Q05519;P10588;P26373;P35269;P11473;P52272;P54105;Q13155;P833  
69;Q15029;Q15287;P57678;Q9BQA1;P83881;Q12962;Q8N684;P63151;P63104;Q9Y3B4;Q9ULM6;Q004  
03;Q9BWJ5;P22090;Q07352;Q9Y333;P62861;P62841;P62316;Q13242;Q9UNX3;Q9NR50;Q96F86;P541  
36;P30050;P46937;Q9H0W8;P28702;Q8IYB3;O60583;P14859;O43809;P62829;Q53T94;P38159;Q155  
44;P08107;P26368;P26641;P42772;Q9Y5B9;P08235;Q14240;P46782;Q96PU5;Q92945;P35268;P174  
80;Q9Y250;Q14241;P24278;Q12874;Q15717;Q9GZV5;P29692;P31943;O43172;P05423;Q9NYV6;P317  
49;O15318;Q9C0C2;P51003;Q9H3P2;Q6P148;Q9NVVC6;P20042;P46781;P47813;P50914;Q13243;Q96R  
N5;Q8WXD5;Q86V81;Q9UHV7;O75586;Q9HAU5;Q15796;P07910;P63220;P84022;Q9Y2L1;P61313;Q9Y6  
18;P49336;P39019;Q15542;Q13573;P52298;P26196;O43148;P35658;P08621;P55265;P46779;Q025  
43;P46777;Q9H840;Q9NRR4;Q15583;P62987;P35398;Q92600;Q00059;Q92664;Q92966;O95363;Q6NZ  
I2;Q96LI5;Q13547;Q13868;Q92750;P25398;P22626;P83876;Q93074;Q92793;O75971;Q15365;P165  
33;O75448;P26599;P62487;P51668;Q9UPQ9;P49770;Q15361;P21675;P60228;Q14103;P23193;P837  
31;P62851;P62280;P55795;Q9P2J5;Q9Y3U8;P62888;P49458;Q9UL18;P20226;Q96F24;P52655;Q134  
85;O75175;Q9BTT4;P62310;O95402;P60842;Q9NQT5;P26651;Q9UIV1;Q86TB9;P63272;Q9BW92;P507  
50;Q08945;Q14186;Q8IX12;Q07955;P49591;Q14188;P62244;P62277;Q9NPJ6;P62906;Q92540;Q010  
81;Q9Y285;Q9UK45;P62266;Q9BZI7;P61978;P62945;P49207;P62241;Q969L4;Q13247;Q154  
28;Q5SXM2;P62424;P55769;Q7L3T8;O60244;P60866;P61247;P24534;P61077;Q12789;Q8TEQ6;Q131  
44;Q9UFF9;Q15031;Q00839;Q15573;P09874;P62308;P62899;Q16637;Q8WTR7;Q9UKF6;P62857;P841  
03;Q02878;Q9ULK4;P08047;Q13541;O75821;Q9UKN8;O43390;P07814;Q07020;P39023;Q01105;Q144  
93;Q96C86;P30153;P14678;Q15543;P53803;P52435;Q15572;P62854;P09661;P62826;Q08211;P524  
34;P62917;P55884;Q6P2C8;O43513;Q9BUJ2;P33240;Q15561;Q96G25;Q15181;Q8WYQ5;P18124;P404  
29;Q5T160;P67775;P10589;P27635;P06730;P62263;P13056;Q99594;O43324;Q93008;Q15329;O951  
49;Q14683;P04792;Q9Y5Q8;Q8IZL2;P47914;Q9NPI6;P62701;Q9Y2S0;Q9Y5S9;Q9H074;Q9H814;Q8IZ

H2;Q9H944;Q99551;Q12996;P68104;P11142;Q92585;O75822;P62269;Q9NQ94;P67809;Q8IU60;Q96D  
I7;O15160;P52747;O60508;Q09161;P46783;A6NFD8;Q16594;Q99613;Q9H5Q4;Q04637;Q9HLJ1;O003  
03;O15234;O00482;P52756;Q9Y3C7}

19012 [Cluster 1729]GO:0015758+P biological\_process [name] glucose transport [def] "The  
directed movement of the hexose monosaccharide glucose into, out of or within a cell, or  
between cells, by means of some agent such as a transporter or pore." [GOC

19013 Pathogen[ Q2Q067] interacts with 34 human  
partners:{Q96EE3;P31749;P52948;Q12769;Q96HA1;P49790;P49792;O75694;P78406;P19367;Q995  
67;Q8N1F7;Q7Z3B4;Q8NFH4;P12270;P11166;Q9BW27;Q8TEM1;Q9BVL2;Q9UKX7;Q9NRG9;Q8NFH3;Q9UI  
H9;P37198;Q92621;O15504;P57740;Q8WUM0;Q9BX66;P14672;P35658;Q8NFH5;Q5SRE5;Q14397}

19014 Pathogen[ P0C214] interacts with 35 human  
partners:{Q8NFH5;Q9UIH9;Q8TEM1;P78406;P57740;Q99567;Q9BX66;Q8N1F7;O75694;Q96EE3;P497  
92;Q9UKX7;P11166;P11168;P49790;P37198;Q9BW27;Q9NRG9;P35658;P19367;Q8NFH3;Q14397;O155  
04;P12270;Q8NFH4;Q9BVL2;Q5SRE5;P14672;Q7Z3B4;Q8WUM0;P52948;Q92621;P31749;Q12769;Q96H  
A1}

19015 Pathogen[ P03346] interacts with 36 human  
partners:{Q8TEM1;Q8NFH4;Q8WUM0;P12270;Q12769;Q96EE3;Q99567;Q9UKX7;O75694;Q9NRG9;P784  
06;P57740;Q9BVL2;Q8N1F7;P19367;Q8NFH5;Q9BX66;P37198;Q8NFH3;P35658;Q01469;Q5SRE5;Q926  
21;Q9BW27;P31749;P11166;Q14397;P49790;Q96HA1;P14672;Q7Z3B4;Q9UIH9;O15504;P49792;P529  
48;Q6ZJW1}

19016 Pathogen[ Q85601] interacts with 35 human  
partners:{Q8TEM1;Q5SRE5;P11168;P31749;Q8NFH4;Q8NFH3;Q96EE3;Q12769;Q9BX66;P78406;P577  
40;Q9NRG9;Q6ZJW1;Q8WUM0;Q8N1F7;P12270;Q9UIH9;O75694;O15504;Q9BW27;P11166;Q92621;P529  
48;Q9UKX7;Q8NFH5;P35658;Q14397;Q99567;P49792;Q9BVL2;Q96HA1;P14672;Q7Z3B4;P49790;P193  
67}

19017 Pathogen[ P14079] interacts with 33 human  
partners:{Q8NFH5;Q9BW27;Q96HA1;P57740;Q8N1F7;P35658;P14672;Q92621;Q8TEM1;P11166;Q9UK  
X7;Q9BVL2;O15504;Q8WUM0;P12270;Q9UIH9;Q99567;Q8NFH3;Q96EE3;P37198;P49790;Q8NFH4;P784  
06;Q7Z3B4;Q14397;Q01469;Q12769;Q6ZJW1;Q9BX66;Q5SRE5;Q9NRG9;O75694;P52948}

19018 Pathogen[ P03383] interacts with 34 human  
partners:{Q9BVL2;Q96EE3;O15504;Q8WUM0;Q92621;P49792;Q8NFH4;P12270;P19367;P52948;P317  
49;P78406;P57740;Q8NFH5;Q8N1F7;Q8TEM1;Q12769;P11168;Q99567;Q14397;Q9BW27;Q5SRE5;P356  
58;Q96HA1;Q9NRG9;P11169;P37198;Q9UKX7;P14672;Q7Z3B4;P49790;O75694;Q8NFH3;P22732}

19019 Pathogen[ P03410] interacts with 35 human  
partners:{Q99567;Q14397;Q7Z3B4;Q9BW27;P22732;Q9UKX7;P11166;Q6ZJW1;Q8NFH4;Q5SRE5;P529  
48;O15504;P11168;Q9UIH9;O75694;P31749;P78406;Q96HA1;Q8N1F7;P49790;P12270;P35658;Q8NF  
H5;Q8TEM1;Q96EE3;Q8WUM0;Q01469;P57740;Q12769;Q9NRG9;Q8NFH3;Q9BVL2;Q9BX66;Q92621;P497  
92}

19020 Pathogen[ P14075] interacts with 34 human  
partners:{P11169;P78406;P57740;P49792;Q8N1F7;P19367;P22732;Q9UKX7;P35658;P12270;Q926  
21;Q96HA1;Q9BW27;P31749;Q8TEM1;Q96EE3;P37198;Q5SRE5;Q14397;Q8NFH3;O15504;Q99567;Q127  
69;P11168;Q9BVL2;P49790;Q8WUM0;P14672;O75694;Q9NRG9;Q7Z3B4;Q8NFH4;Q8NFH5;P52948}

19021 Pathogen[ P0C206] interacts with 35 human  
partners:{Q96EE3;Q92621;P49790;P31749;Q5SRE5;Q8NFH5;Q9NRG9;Q6ZJW1;Q7Z3B4;Q96HA1;Q9UI  
H9;P57740;P11166;P19367;Q8WUM0;P11168;P49792;Q8TEM1;Q9UKX7;O75694;Q99567;Q8NFH4;Q9BX  
66;P14672;P78406;Q14397;O15504;Q12769;Q01469;Q8NFH3;Q8N1F7;P35658;Q9BW27;Q9BVL2;P122  
70}

19022 Pathogen[ P03363] interacts with 33 human  
partners:{Q7Z3B4;Q5SRE5;P12270;Q9BX66;Q8NFH4;Q14397;Q8NFH3;Q12769;Q01469;Q9UKX7;Q9NR  
G9;Q8WUM0;Q9BVL2;Q99567;P31749;Q96HA1;P49792;P35658;Q6ZJW1;O75694;P49790;P57740;P146  
72;P78406;P52948;O15504;P37198;Q8N1F7;Q9UIH9;Q92621;Q8NFH5;P11166;Q9BW27}

19023 [Cluster 1730]GO:0090190+P biological\_process [name] positive regulation of branching  
involved in ureteric bud morphogenesis [def] "Any process that increases the rate,  
frequency or extent of branching involved in ureteric bud morphogenesis, the process in  
which the branching structure of the ureteric bud is generated and organized. The  
ureteric bud is an epithelial tube that grows out from the metanephric duct. The bud  
elongates and branches to give rise to the ureter and kidney collecting tubules." [GOC

19024 Pathogen[ Q2Q067] interacts with 2 human partners:{Q9Y5V3;P09629}

19025 Pathogen[ P0C214] interacts with 2 human partners:{Q9Y5V3;P09629}

19026 Pathogen[ P03346] interacts with 5 human  
partners:{Q9UIU6;Q06710;P09629;Q15475;Q9Y5V3}

19027 Pathogen[ Q85601] interacts with 2 human partners:{P09629;Q9Y5V3}

19028 Pathogen[ P14079] interacts with 2 human partners:{P09629;Q9Y5V3}

19029 Pathogen[ P03383] interacts with 2 human partners:{Q9Y5V3;P09629}

19030 Pathogen[ P03410] interacts with 2 human partners:{P09629;Q9Y5V3}

19031 Pathogen[ P14075] interacts with 2 human partners:{P09629;Q9Y5V3}

19032 Pathogen[ P0C206] interacts with 2 human partners:{Q9Y5V3;P09629}

19033 Pathogen[ P03363] interacts with 2 human partners:{Q9Y5V3;P09629}

19034 [Cluster 1731]GO:0007257+P biological\_process [name] activation of JUN kinase activity  
[def] "The initiation of the activity of the inactive enzyme JUN kinase by  
phosphorylation by a JUN kinase kinase (JNKK)." [GOC

19035 Pathogen[ Q2Q067] interacts with 5 human  
partners:{Q9UER7;Q99750;Q13233;Q03468;Q9P1T7}

19036 Pathogen[ P0C214] interacts with 6 human  
partners:{Q99750;Q13233;Q9UER7;Q9P1T7;Q96CA5;Q03468}

19037 Pathogen[ P03346] interacts with 6 human

19038 Pathogen[ Q85601] interacts with 6 human partners: {Q03468;Q99750;Q9UER7;Q13233;Q9P1T7;Q96CA5}

19039 Pathogen[ P14079] interacts with 4 human partners: {Q9UER7;Q9P1T7;Q03468;Q99750}

19040 Pathogen[ P03383] interacts with 5 human partners: {Q13233;Q03468;Q9UER7;Q99750;Q9P1T7}

19041 Pathogen[ P03410] interacts with 5 human partners: {Q13233;Q03468;Q9P1T7;Q9UER7;Q99750}

19042 Pathogen[ P14075] interacts with 5 human partners: {Q9P1T7;Q03468;Q99750;Q9UER7;Q13233}

19043 Pathogen[ P0C206] interacts with 6 human partners: {Q03468;Q9UER7;Q13233;Q96CA5;Q99750;Q9P1T7}

19044 Pathogen[ P03363] interacts with 7 human partners: {Q99750;Q9UER7;Q9P1T7;Q13480;Q03468;Q96CA5;Q13233}

19045 [Cluster 1732]GO:0032729+P biological\_process [name] positive regulation of interferon-gamma production [def] "Any process that activates or increases the frequency, rate, or extent of interferon-gamma production. Interferon-gamma is also known as type II interferon." [GOC

19046 Pathogen[ Q2Q067] interacts with 2 human partners: {P20749;Q02556}

19047 Pathogen[ P0C214] interacts with 3 human partners: {Q02556;P20749;P10809}

19048 Pathogen[ P03346] interacts with 3 human partners: {O75995;Q02556;P20749}

19049 Pathogen[ Q85601] interacts with 2 human partners: {Q02556;P20749}

19050 Pathogen[ P14079] interacts with 4 human partners: {Q8IU54;P20749;P29459;Q02556}

19051 Pathogen[ P03383] interacts with 2 human partners: {P20749;Q02556}

19052 Pathogen[ P03410] interacts with 3 human partners: {P20749;Q02556;P29459}

19053 Pathogen[ P14075] interacts with 2 human partners: {Q02556;P20749}

19054 Pathogen[ P0C206] interacts with 2 human partners: {Q02556;P20749}

19055 Pathogen[ P03363] interacts with 2 human partners: {Q02556;P20749}

19056 [Cluster 1733]GO:0001831+P biological\_process [name] trophectodermal cellular morphogenesis [def] "The morphogenesis of trophectoderm cells." [GOC

19057 Pathogen[ Q2Q067] interacts with 1 human partners: {Q13618}

19058 Pathogen[ P0C214] interacts with 1 human partners: {Q13618}

19059 Pathogen[ P03346] interacts with 2 human partners: {Q13618;O95718}

19060 Pathogen[ Q85601] interacts with 1 human partners: {Q13618}

19061 Pathogen[ P14079] interacts with 2 human partners: {Q13618;O95718}

19062 Pathogen[ P03383] interacts with 1 human partners: {Q13618}

19063 Pathogen[ P03410] interacts with 1 human partners: {Q13618}

19064 Pathogen[ P14075] interacts with 1 human partners: {Q13618}

19065 Pathogen[ P0C206] interacts with 2 human partners: {O95718;Q13618}

19066 Pathogen[ P03363] interacts with 1 human partners: {Q13618}

19067 [Cluster 1734]GO:0032091+P biological\_process [name] negative regulation of protein binding [def] "Any process that stops, prevents, or reduces the frequency, rate or extent of protein binding." [GOC

19068 Pathogen[ Q2Q067] interacts with 10 human partners: {Q9H2P0;P09913;Q99497;O75381;Q9NSA3;Q8IX07;P09914;Q13569;Q9HC62;Q86X55}

19069 Pathogen[ P0C214] interacts with 10 human partners: {P09914;P09913;O75381;Q99497;Q9NSA3;Q8IX07;Q9HC62;Q86X55;Q13569;Q9H2P0}

19070 Pathogen[ P03346] interacts with 10 human partners: {Q9H2P0;O75381;Q9NSA3;Q8IX07;Q99497;Q9HC62;Q13569;Q86X55;P09913;P09914}

19071 Pathogen[ Q85601] interacts with 10 human partners: {Q99497;P09913;Q86X55;Q9HC62;Q9H2P0;Q8IX07;Q13569;P09914;O75381;Q9NSA3}

19072 Pathogen[ P14079] interacts with 11 human partners: {P09914;Q99497;Q9H2P0;P09913;P45983;Q9HC62;P03973;P48681;Q8IX07;O75381;Q13569}

19073 Pathogen[ P03383] interacts with 6 human partners: {Q86X55;P09913;Q9NSA3;O75381;Q13569;Q9HC62}

19074 Pathogen[ P03410] interacts with 9 human partners: {Q99497;Q9NSA3;Q86X55;O75381;Q8IX07;Q9HC62;Q13569;P09913;P09914}

19075 Pathogen[ P14075] interacts with 6 human partners: {P09913;O75381;Q9NSA3;Q86X55;Q9HC62;Q13569}

19076 Pathogen[ P0C206] interacts with 10 human partners: {Q9NSA3;O75381;Q86X55;Q9HC62;Q99497;Q13569;P09913;Q8IX07;Q9H2P0;P09914}

19077 Pathogen[ P03363] interacts with 8 human partners: {P09914;P09913;Q9H2P0;Q9NSA3;Q9HC62;O75381;Q13569;Q86X55}

19078 [Cluster 1735]GO:0051299+P biological\_process [name] centrosome separation [def] "The process in which duplicated centrosome components move away from each other. The centriole pair within each centrosome becomes part of a separate microtubule organizing center that nucleates a radial array of microtubules called an aster. The two asters move to opposite sides of the nucleus to form the two poles of the mitotic spindle." [GOC

19079 Pathogen[ Q2Q067] interacts with 1 human partners: {Q8N137}

19080 Pathogen[ P0C214] interacts with 1 human partners: {Q8N137}

19081 Pathogen[ P03346] interacts with 1 human partners: {Q8N137}

19082 Pathogen[ Q85601] interacts with 2 human partners: {Q8N137;P51955}

19083 Pathogen[ P14079] interacts with 2 human partners: {P51955;Q8N137}

19084 Pathogen[ P03383] interacts with 1 human partners: {Q8N137}



19085 Pathogen[ P03410] interacts with 1 human partners:{Q8N137}  
19086 Pathogen[ P14075] interacts with 1 human partners:{Q8N137}  
19087 Pathogen[ P0C206] interacts with 2 human partners:{Q8N137;P51955}  
19088 Pathogen[ P03363] interacts with 1 human partners:{Q8N137}  
19089 [Cluster 1736]GO:0034551+P biological\_process [name] mitochondrial respiratory chain complex III assembly [def] "The aggregation, arrangement and bonding together of a set of components to form the cytochrome bc(1) complex (also known as ubiquinol-cytochrome c reductase), in the mitochondrial inner membrane." [GOC  
19090 Pathogen[ Q2Q067] interacts with 1 human partners:{Q6DKK2}  
19091 Pathogen[ P0C214] interacts with 1 human partners:{Q6DKK2}  
19092 Pathogen[ P03346] interacts with 1 human partners:{Q6DKK2}  
19093 Pathogen[ Q85601] interacts with 1 human partners:{Q6DKK2}  
19094 Pathogen[ P14079] interacts with 1 human partners:{Q6DKK2}  
19095 Pathogen[ P03383] interacts with 1 human partners:{Q6DKK2}  
19096 Pathogen[ P03410] interacts with 1 human partners:{Q6DKK2}  
19097 Pathogen[ P14075] interacts with 1 human partners:{Q6DKK2}  
19098 Pathogen[ P0C206] interacts with 1 human partners:{Q6DKK2}  
19099 Pathogen[ P03363] interacts with 1 human partners:{Q6DKK2}  
19100 [Cluster 1737]GO:0051259+P biological\_process [name] protein oligomerization [def] "The process of creating protein oligomers, compounds composed of a small number, usually between three and ten, of component monomers\_ protein oligomers may be composed of different or identical monomers. Oligomers may be formed by the polymerization of a number of monomers or the depolymerization of a large protein polymer." [GOC  
19101 Pathogen[ Q2Q067] interacts with 5 human partners:{Q9UDY8;O95999;P06748;P31350;Q13233}  
19102 Pathogen[ P0C214] interacts with 7 human partners:{P31350;P06748;Q9UDY8;Q13233;O95999;P23921;Q15274}  
19103 Pathogen[ P03346] interacts with 9 human partners:{Q13263;P06748;Q99784;Q9UDY8;O95999;Q9Y371;P31350;Q13233;Q14596}  
19104 Pathogen[ Q85601] interacts with 7 human partners:{Q9UDY8;Q14596;P31350;Q13263;P06748;Q13233;O95999}  
19105 Pathogen[ P14079] interacts with 7 human partners:{O95999;Q14596;P31350;Q9Y371;P06748;Q9Y239;Q15274}  
19106 Pathogen[ P03383] interacts with 4 human partners:{P06748;Q13233;P31350;O95999}  
19107 Pathogen[ P03410] interacts with 10 human partners:{Q15274;P31350;Q9Y239;P06748;Q13233;Q14596;O95999;Q15049;Q9Y371;P23921}  
19108 Pathogen[ P14075] interacts with 4 human partners:{P31350;P06748;O95999;Q13233}  
19109 Pathogen[ P0C206] interacts with 8 human partners:{Q13263;Q9UDY8;O95999;Q14596;Q13233;Q15274;P06748;P31350}  
19110 Pathogen[ P03363] interacts with 2 human partners:{P06748;Q13233}  
19111 [Cluster 1738]GO:0043001+P biological\_process [name] Golgi to plasma membrane protein transport [def] "The directed movement of proteins from the Golgi to the plasma membrane in transport vesicles that move from the trans-Golgi network to the plasma membrane." [ISBN  
19112 Pathogen[ Q2Q067] interacts with 7 human partners:{Q9BSU1;Q01082;Q9H2G9;Q9H1H9;Q96CV9;Q8IWJ2;Q13439}  
19113 Pathogen[ P0C214] interacts with 6 human partners:{Q9BSU1;Q8IWJ2;Q01082;Q9H2G9;Q96CV9;Q13439}  
19114 Pathogen[ P03346] interacts with 7 human partners:{Q13439;Q9BSU1;Q9H2G9;Q9H1H9;Q01082;Q96CV9;Q8IWJ2}  
19115 Pathogen[ Q85601] interacts with 7 human partners:{Q9BSU1;Q8IWJ2;Q96CV9;Q13439;Q9H1H9;Q01082;Q9H2G9}  
19116 Pathogen[ P14079] interacts with 8 human partners:{Q01082;Q9BSU1;Q8NFJ9;Q13439;Q9H2G9;Q9H1H9;Q8IWJ2;Q96CV9}  
19117 Pathogen[ P03383] interacts with 6 human partners:{Q9BSU1;Q8IWJ2;Q13439;Q9H2G9;Q9H1H9;Q96CV9}  
19118 Pathogen[ P03410] interacts with 8 human partners:{Q9H2G9;Q8NFJ9;Q9H1H9;Q9BSU1;Q96CV9;Q01082;Q13439;Q8IWJ2}  
19119 Pathogen[ P14075] interacts with 6 human partners:{Q9BSU1;Q9H2G9;Q9H1H9;Q8IWJ2;Q13439;Q96CV9}  
19120 Pathogen[ P0C206] interacts with 8 human partners:{Q13439;Q01082;Q9BSU1;Q96CV9;Q9H1H9;Q9H2G9;Q8NFJ9;Q8IWJ2}  
19121 Pathogen[ P03363] interacts with 8 human partners:{Q9BSU1;Q96CV9;Q13439;Q01082;Q9H2G9;Q8IWJ2;Q9H1H9;Q8NFJ9}  
19122 [Cluster 1739]GO:0006626+P biological\_process [name] protein targeting to mitochondrion [def] "The process of directing proteins towards and into the mitochondrion, usually mediated by mitochondrial proteins that recognize signals contained within the imported protein." [GOC  
19123 Pathogen[ Q2Q067] interacts with 18 human partners:{P55957;P63104;Q9HAV7;P38646;Q96B49;Q8TAA5;O00170;Q15388;Q5HYI7;Q9GZY8;O6020;Q9Y5J6;P62072;Q9Y5J7;O43615;O14925;Q9P0U1;Q7Z6M4}  
19124 Pathogen[ P0C214] interacts with 24 human partners:{O00170;Q15388;Q13505;Q9HAV7;O60220;Q9Y512;P55957;Q7Z6M4;P55789;P62072;O14925;Q8TDB4;O43615;Q9Y5J9;P38646;Q9Y5J6;Q8TAA5;Q3ZCQ8;Q9Y5J7;Q8N4Q1;Q96B49;Q9P0U1;Q5HYI7;Q9GZY8}  
19125 Pathogen[ P03346] interacts with 24 human

partners: {O14925;Q9NS69;Q8N4Q1;Q9Y3D7;O43615;P55957;Q9P0U1;Q9Y5J7;O00170;Q8TDB4;Q9HAV7;P38646;Q9Y5J6;O60220;Q9Y512;Q96B49;P62072;Q7Z6M4;P63104;Q3ZCQ8;Q15388;Q5HYI7;Q9GZY8;Q8TAA5}

19126 Pathogen[ Q85601] interacts with 21 human  
partners: {O14925;P63104;Q8TAA5;Q15388;Q7Z6M4;P62072;Q9Y5J9;Q9Y5J6;Q8TDB4;O60220;Q9Y5J7;O00170;Q9Y512;P55957;Q3ZCQ8;Q9HAV7;O43615;P38646;Q5HYI7;Q13505;Q9GZY8}

19127 Pathogen[ P14079] interacts with 32 human  
partners: {Q3ZCQ8;O43615;Q8N4H5;Q5HYI7;Q9Y3D7;P62072;Q13505;O00170;Q9P0U1;Q96B49;Q9Y5J7;O14925;Q9NS69;Q9BVV7;Q15388;P63104;O75431;Q9Y512;P55789;Q8N4Q1;Q8TDB4;Q99595;Q7Z6M4;P38646;O60220;Q9GZY8;Q96Q11;Q9Y5J9;Q9Y5L4;P55957;Q9HAV7;Q8TAA5}

19128 Pathogen[ P03383] interacts with 21 human  
partners: {Q9Y5J7;P62072;P38646;Q8TDB4;O14925;O43615;P55957;Q9HAV7;O00170;O60220;Q96B49;P63104;Q9Y5J6;Q15388;Q5HYI7;Q9P0U1;Q8TAA5;Q7Z6M4;Q9GZY8;Q9Y5J9;Q13505}

19129 Pathogen[ P03410] interacts with 32 human  
partners: {Q8N4H5;Q96Q11;Q9Y5L4;Q9Y512;P62072;Q96B49;Q15388;Q9GZY8;P38646;Q9Y5J7;Q13505;Q8TAA5;Q9NS69;P55957;O14925;Q99595;Q3ZCQ8;O00170;O43615;Q5HYI7;Q9Y3D7;P63104;Q9Y5J6;Q9Y5J9;Q9P0U1;O60220;Q9HAV7;Q8TDB4;P55789;Q8N4Q1;Q7Z6M4;O75431}

19130 Pathogen[ P14075] interacts with 24 human  
partners: {Q9P0U1;O14925;Q13505;Q9HAV7;Q9Y5J9;P55957;Q96B49;P62072;Q15388;Q8TAA5;Q9GZY8;P38646;Q5HYI7;Q9Y512;O00170;O60220;P63104;P55789;Q8TDB4;Q9Y5J7;Q9Y5J6;Q9NS69;O43615;Q7Z6M4}

19131 Pathogen[ P0C206] interacts with 29 human  
partners: {Q9Y5L4;Q9Y5J6;Q7Z6M4;P55789;Q96B49;Q9HAV7;O60220;Q9Y5J9;Q5HYI7;P38646;Q9Y512;Q8N4Q1;Q9Y5J7;O43615;P63104;Q3ZCQ8;Q9Y3D7;Q9NS69;Q9P0U1;O14925;Q8TAA5;Q13505;Q15388;P62072;Q9GZY8;O00170;Q8N4H5;P55957;Q8TDB4}

19132 Pathogen[ P03363] interacts with 15 human  
partners: {P55957;Q15388;O14925;Q3ZCQ8;P63104;O43615;P38646;Q9Y5J7;Q9P0U1;Q8TAA5;Q9Y512;Q5HYI7;Q9NS69;O00170;Q9GZY8}

19133 [Cluster 1740]GO:0060126+P biological\_process [name] somatotropin secreting cell differentiation [def] "The process in which a relatively unspecialized cell acquires specialized structural and/or functional features of a somatotropin secreting cell. A somatotropin secreting cell is an acidophilic cell of the anterior pituitary that produces growth hormone, somatotropin." [GOC  
19134 Pathogen[ Q2Q067] interacts with 2 human partners: {P28069;O75360}  
19135 Pathogen[ P0C214] interacts with 2 human partners: {P28069;O75360}  
19136 Pathogen[ P03346] interacts with 2 human partners: {P28069;O75360}  
19137 Pathogen[ Q85601] interacts with 2 human partners: {O75360;P28069}  
19138 Pathogen[ P14079] interacts with 2 human partners: {P28069;O75360}  
19139 Pathogen[ P03383] interacts with 2 human partners: {P28069;O75360}  
19140 Pathogen[ P03410] interacts with 2 human partners: {P28069;O75360}  
19141 Pathogen[ P14075] interacts with 2 human partners: {P28069;O75360}  
19142 Pathogen[ P0C206] interacts with 2 human partners: {O75360;P28069}  
19143 Pathogen[ P03363] interacts with 2 human partners: {O75360;P28069}

19144 [Cluster 1741]GO:0009611+P biological\_process [name] response to wounding [def] "Any process that results in a change in state or activity of a cell or an organism (in terms of movement, secretion, enzyme production, gene expression, etc.) as a result of a stimulus indicating damage to the organism." [GOC  
19145 Pathogen[ Q2Q067] interacts with 8 human  
partners: {O14786;P14921;P14136;Q9NVK5;Q12904;Q13243;Q01860;P63000}

19146 Pathogen[ P0C214] interacts with 11 human  
partners: {P63000;O14786;Q12904;P14921;P14136;Q13243;P42574;P07093;Q9NVK5;P10909;Q01860}

19147 Pathogen[ P03346] interacts with 11 human  
partners: {Q02535;Q9NVK5;P14136;Q92826;P42574;Q01860;P14921;Q12904;Q13243;P63000;O14786}

19148 Pathogen[ Q85601] interacts with 9 human  
partners: {Q13243;P14921;P63000;P14136;O14786;Q9NVK5;P07093;P17677;Q01860}

19149 Pathogen[ P14079] interacts with 7 human  
partners: {P17677;Q13243;P10909;P14136;Q01860;Q9NVK5;Q12904}

19150 Pathogen[ P03383] interacts with 6 human  
partners: {Q12904;P14921;P63000;P14136;Q13243;Q01860}

19151 Pathogen[ P03410] interacts with 10 human  
partners: {O14786;P63000;Q01860;Q9NVK5;Q12904;P17677;P14136;Q13243;P14921;P10909}

19152 Pathogen[ P14075] interacts with 6 human  
partners: {Q13243;Q01860;P14136;Q12904;P14921;P63000}

19153 Pathogen[ P0C206] interacts with 11 human  
partners: {P17677;P14921;Q01860;Q13243;Q9NVK5;O14786;P63000;P14136;P10909;P42574;Q12904}

19154 Pathogen[ P03363] interacts with 8 human  
partners: {O14786;Q9NVK5;P14921;P63000;Q13243;P14136;Q92826;Q01860}

19155 [Cluster 1742]GO:0008088+P biological\_process [name] axon cargo transport [def] "The directed movement of organelles or molecules along microtubules in nerve cell axons." [ISBN  
19156 Pathogen[ Q2Q067] interacts with 3 human partners: {Q02410;Q9H0B6;P07197}  
19157 Pathogen[ P0C214] interacts with 3 human partners: {Q9H0B6;Q02410;P07197}  
19158 Pathogen[ P03346] interacts with 3 human partners: {Q02410;P07197;Q9H0B6}

19159 Pathogen[ Q85601] interacts with 3 human partners:{P07197;Q02410;Q9H0B6}  
19160 Pathogen[ P14079] interacts with 4 human partners:{Q02410;P07197;Q9H0B6;P10636}  
19161 Pathogen[ P03383] interacts with 3 human partners:{Q9H0B6;P07197;Q02410}  
19162 Pathogen[ P03410] interacts with 4 human partners:{Q9H0B6;Q02410;P10636;P07197}  
19163 Pathogen[ P14075] interacts with 3 human partners:{Q02410;P07197;Q9H0B6}  
19164 Pathogen[ P0C206] interacts with 4 human partners:{P10636;Q9H0B6;P07197;Q02410}  
19165 Pathogen[ P03363] interacts with 3 human partners:{P07197;Q9H0B6;Q02410}  
19166 [Cluster 1743]GO:0002076+P biological\_process [name] osteoblast development [def]  
"The process whose specific outcome is the progression of an osteoblast over time, from  
its formation to the mature structure. Osteoblast development does not include the steps  
involved in committing a cranial neural crest cell or an osteoprogenitor cell to an  
osteoblast fate. An osteoblast is a cell that gives rise to bone." [GOC  
19167 Pathogen[ Q2Q067] interacts with 9 human  
partners:{O43364;P56524;Q9UQL6;P35548;Q9UGP4;P84022;O00255;Q9UPW6;Q9Y5J3}  
19168 Pathogen[ P0C214] interacts with 9 human  
partners:{Q9UGP4;Q9Y5J3;P84022;P56524;P17535;Q9UPW6;Q9UQL6;P35548;O00255}  
19169 Pathogen[ P03346] interacts with 10 human  
partners:{Q9UGP4;Q9UPW6;P35548;P56524;P17535;Q9Y5J3;O43364;P84022;O00255;Q9UQL6}  
19170 Pathogen[ Q85601] interacts with 10 human  
partners:{Q9UPW6;Q9UQL6;O43364;P17535;P35548;O00255;P84022;Q9UGP4;P56524;Q9Y5J3}  
19171 Pathogen[ P14079] interacts with 8 human  
partners:{Q9UQL6;Q9UPW6;O43364;Q9Y5J3;P56524;O00255;Q9UGP4;P17535}  
19172 Pathogen[ P03383] interacts with 8 human  
partners:{Q9UPW6;Q9UQL6;P84022;P35548;Q9UGP4;O00255;P56524;P17535}  
19173 Pathogen[ P03410] interacts with 10 human  
partners:{P84022;Q9Y5J3;Q9UGP4;Q9UPW6;Q9UQL6;P35548;P17535;P56524;O43364;O00255}  
19174 Pathogen[ P14075] interacts with 8 human  
partners:{Q9UGP4;P35548;P56524;O00255;Q9UPW6;Q9UQL6;P84022;P17535}  
19175 Pathogen[ P0C206] interacts with 10 human  
partners:{P84022;Q9UGP4;O00255;P17535;Q9Y5J3;P35548;Q9UPW6;O43364;P56524;Q9UQL6}  
19176 Pathogen[ P03363] interacts with 8 human  
partners:{P17535;Q9Y5J3;Q9UQL6;P35548;Q9UGP4;P84022;O43364;Q9UPW6}  
19177 [Cluster 1744]GO:0030902+P biological\_process [name] hindbrain development [def]  
"The process whose specific outcome is the progression of the hindbrain over time, from  
its formation to the mature structure. The hindbrain is the posterior of the three  
primary divisions of the developing chordate brain, or the corresponding part of the  
adult brain (in vertebrates, includes the cerebellum, pons, and medulla oblongata and  
controls the autonomic functions and equilibrium)." [http  
19178 Pathogen[ Q2Q067] interacts with 8 human  
partners:{Q13562;P35680;Q8NHM5;O15078;O15198;P49639;Q9HBD4;Q15797}  
19179 Pathogen[ P0C214] interacts with 6 human  
partners:{O15078;O15198;P49639;Q9HBD4;Q15797;Q8NHM5}  
19180 Pathogen[ P03346] interacts with 14 human  
partners:{P49639;Q9HBD4;Q7RTS3;Q05925;Q15797;P19622;P52951;O15198;Q16650;P35680;Q8N1  
57;O15078;Q8NHM5;Q13562}  
19181 Pathogen[ Q85601] interacts with 8 human  
partners:{O15198;P49639;Q15797;O15078;Q13562;Q8NHM5;P35680;Q9HBD4}  
19182 Pathogen[ P14079] interacts with 7 human  
partners:{P35680;Q8N157;O15198;Q8NHM5;Q15797;O15078;P49639}  
19183 Pathogen[ P03383] interacts with 5 human  
partners:{O15198;Q9HBD4;Q15797;P49639;O15078}  
19184 Pathogen[ P03410] interacts with 7 human  
partners:{O15198;Q8N157;Q15797;O15078;P49639;P35680;Q9HBD4}  
19185 Pathogen[ P14075] interacts with 3 human partners:{Q9HBD4;O15078;O15198}  
19186 Pathogen[ P0C206] interacts with 9 human  
partners:{P49639;P35680;O15078;Q8N157;Q8NHM5;Q13562;Q15797;Q9HBD4;O15198}  
19187 Pathogen[ P03363] interacts with 10 human  
partners:{P19622;O15078;Q7RTS3;Q15797;P49639;Q8N157;Q9HBD4;Q05925;P52951;O15198}  
19188 [Cluster 1745]GO:0035372+P biological\_process [name] protein localization to  
microtubule [def] "A process in which a protein is transported to, or maintained at, a  
microtubule." [GOC  
19189 Pathogen[ Q2Q067] interacts with 2 human partners:{Q96JM3;Q15691}  
19190 Pathogen[ P0C214] interacts with 2 human partners:{Q15691;Q96JM3}  
19191 Pathogen[ P03346] interacts with 2 human partners:{Q15691;Q96JM3}  
19192 Pathogen[ Q85601] interacts with 2 human partners:{Q96JM3;Q15691}  
19193 Pathogen[ P14079] interacts with 3 human partners:{Q15691;O60610;Q96JM3}  
19194 Pathogen[ P03383] interacts with 1 human partners:{Q15691}  
19195 Pathogen[ P03410] interacts with 3 human partners:{Q96JM3;O60610;Q15691}  
19196 Pathogen[ P14075] interacts with 1 human partners:{Q15691}  
19197 Pathogen[ P0C206] interacts with 2 human partners:{Q15691;Q96JM3}  
19198 Pathogen[ P03363] interacts with 2 human partners:{Q15691;Q96JM3}  
19199 [Cluster 1746]GO:0033683+P biological\_process [name] nucleotide-excision repair, DNA  
incision [def] "A process that results in the endonucleolytic cleavage of the damaged  
strand of DNA. The incision occurs at the junction of single-stranded DNA and  
double-stranded DNA that is formed when the DNA duplex is unwound." [GOC  
19200 Pathogen[ Q2Q067] interacts with 2 human partners:{Q9Y2M0;Q92889}

19201 Pathogen[ P0C214] interacts with 2 human partners:{Q92889;Q9Y2M0}  
19202 Pathogen[ P03346] interacts with 2 human partners:{Q92889;Q9Y2M0}  
19203 Pathogen[ Q85601] interacts with 3 human partners:{Q9Y2M0;Q92889;P19447}  
19204 Pathogen[ P14079] interacts with 3 human partners:{Q92889;Q9Y2M0;P19447}  
19205 Pathogen[ P03383] interacts with 1 human partners:{Q9Y2M0}  
19206 Pathogen[ P03410] interacts with 3 human partners:{Q92889;P19447;Q9Y2M0}  
19207 Pathogen[ P14075] interacts with 1 human partners:{Q9Y2M0}  
19208 Pathogen[ P0C206] interacts with 3 human partners:{Q9Y2M0;P19447;Q92889}  
19209 Pathogen[ P03363] interacts with 2 human partners:{Q9Y2M0;Q92889}  
19210 [Cluster 1747]GO:0060484+P biological\_process [name] lung-associated mesenchyme development [def] "The biological process whose specific outcome is the progression of a lung-associated mesenchyme from an initial condition to its mature state. This process begins with the formation of lung-associated mesenchyme and ends with the mature structure. Lung-associated mesenchyme is the tissue made up of loosely connected mesenchymal cells in the lung." [GOC  
19211 Pathogen[ Q2Q067] interacts with 2 human partners:{Q7Z7J5;P20719}  
19212 Pathogen[ P0C214] interacts with 1 human partners:{Q7Z7J5}  
19213 Pathogen[ P03346] interacts with 2 human partners:{Q7Z7J5;P20719}  
19214 Pathogen[ Q85601] interacts with 1 human partners:{Q7Z7J5}  
19215 Pathogen[ P14079] interacts with 1 human partners:{Q7Z7J5}  
19216 Pathogen[ P03383] interacts with 1 human partners:{Q7Z7J5}  
19217 Pathogen[ P03410] interacts with 1 human partners:{Q7Z7J5}  
19218 Pathogen[ P14075] interacts with 1 human partners:{Q7Z7J5}  
19219 Pathogen[ P0C206] interacts with 2 human partners:{Q7Z7J5;P20719}  
19220 Pathogen[ P03363] interacts with 2 human partners:{P20719;Q7Z7J5}  
19221 [Cluster 1748]GO:0051000+P biological\_process [name] positive regulation of nitric-oxide synthase activity [def] "Any process that activates or increases the activity of the enzyme nitric-oxide synthase." [GOC  
19222 Pathogen[ Q2Q067] interacts with 2 human partners:{P31749;P30793}  
19223 Pathogen[ P0C214] interacts with 2 human partners:{P30793;P31749}  
19224 Pathogen[ P03346] interacts with 1 human partners:{P31749}  
19225 Pathogen[ Q85601] interacts with 2 human partners:{P31749;P30793}  
19226 Pathogen[ P14079] interacts with 1 human partners:{P30793}  
19227 Pathogen[ P03383] interacts with 1 human partners:{P31749}  
19228 Pathogen[ P03410] interacts with 2 human partners:{P31749;P30793}  
19229 Pathogen[ P14075] interacts with 2 human partners:{P31749;P30793}  
19230 Pathogen[ P0C206] interacts with 2 human partners:{P31749;P30793}  
19231 Pathogen[ P03363] interacts with 1 human partners:{P31749}  
19232 [Cluster 1749]GO:0002819+P biological\_process [name] regulation of adaptive immune response [def] "Any process that modulates the frequency, rate, or extent of an adaptive immune response." [GOC  
19233 Pathogen[ Q2Q067] interacts with 2 human partners:{Q92985;P10914}  
19234 Pathogen[ P0C214] interacts with 2 human partners:{P10914;Q92985}  
19235 Pathogen[ P03346] interacts with 2 human partners:{P10914;Q92985}  
19236 Pathogen[ Q85601] interacts with 2 human partners:{P10914;Q92985}  
19237 Pathogen[ P14079] interacts with 2 human partners:{Q92985;P10914}  
19238 Pathogen[ P03383] interacts with 2 human partners:{P10914;Q92985}  
19239 Pathogen[ P03410] interacts with 2 human partners:{P10914;Q92985}  
19240 Pathogen[ P14075] interacts with 2 human partners:{Q92985;P10914}  
19241 Pathogen[ P0C206] interacts with 2 human partners:{P10914;Q92985}  
19242 Pathogen[ P03363] interacts with 2 human partners:{Q92985;P10914}  
19243 [Cluster 1750]GO:0045637+P biological\_process [name] regulation of myeloid cell differentiation [def] "Any process that modulates the frequency, rate or extent of myeloid cell differentiation." [GOC  
19244 Pathogen[ Q2Q067] interacts with 1 human partners:{Q96QR8}  
19245 Pathogen[ P0C214] interacts with 1 human partners:{Q96QR8}  
19246 Pathogen[ P03346] interacts with 2 human partners:{Q96QR8;P17542}  
19247 Pathogen[ Q85601] interacts with 1 human partners:{Q96QR8}  
19248 Pathogen[ P14079] interacts with 1 human partners:{Q96QR8}  
19249 Pathogen[ P03383] interacts with 1 human partners:{Q96QR8}  
19250 Pathogen[ P03410] interacts with 1 human partners:{Q96QR8}  
19251 Pathogen[ P14075] interacts with 1 human partners:{Q96QR8}  
19252 Pathogen[ P0C206] interacts with 1 human partners:{Q96QR8}  
19253 Pathogen[ P03363] interacts with 1 human partners:{Q96QR8}  
19254 [Cluster 1751]GO:0010917+P biological\_process [name] negative regulation of mitochondrial membrane potential [def] "Any process that stops, prevents, or reduces the frequency, rate or extent of establishment or extent of a mitochondrial membrane potential, the electric potential existing across any mitochondrial membrane arising from charges in the membrane itself and from the charges present in the media on either side of the membrane." [GOC  
19255 Pathogen[ Q2Q067] interacts with 1 human partners:{Q13794}  
19256 Pathogen[ P0C214] interacts with 1 human partners:{Q13794}  
19257 Pathogen[ P03346] interacts with 1 human partners:{Q13794}  
19258 Pathogen[ Q85601] interacts with 1 human partners:{Q13794}  
19259 Pathogen[ P14079] interacts with 1 human partners:{Q13794}  
19260 Pathogen[ P03383] interacts with 1 human partners:{Q13794}

19261 Pathogen[ P03410] interacts with 1 human partners:{Q13794}

19262 Pathogen[ P14075] interacts with 1 human partners:{Q13794}

19263 Pathogen[ P0C206] interacts with 1 human partners:{Q13794}

19264 Pathogen[ P03363] interacts with 1 human partners:{Q13794}

19265 [Cluster 1752]GO:0016044+P biological\_process [name] cellular membrane organization [def] "A process that is carried out at the cellular level which results in the assembly, arrangement of constituent parts, or disassembly of a membrane. A membrane is a double layer of lipid molecules that encloses all cells, and, in eukaryotes, many organelles\_ may be a single or double lipid bilayer\_ also includes associated proteins." [GOC]

19266 Pathogen[ Q2Q067] interacts with 60 human partners:{Q92783;P02792;Q9UL45;O75351;Q9Y6Q5;Q10567;P56377;O43747;Q9H444;O14579;P55735;Q99816;Q9NUP1;Q9BRG1;Q6QNY0;Q96EV8;P48444;Q96PC3;O75886;P11142;Q96CW1;P61923;Q00610;P61966;A5D8V6;P53992;O95486;O94855;Q9UQN3;Q9UN37;Q14677;Q96H20;Q9NZZ3;Q9BXS5;Q9UK41;P50570;P54920;Q9Y3E7;Q99962;Q9H9H4;Q96CF2;P53618;P0CG47;Q5HYK7;Q9NP79;O00161;P0CG48;O95487;O43633;O14964;P35606;Q8WUX9;Q9Y678;P62987;P09496;Q86VN1;Q15436;P78537;Q8NEZ2;P62979}

19267 Pathogen[ P0C214] interacts with 62 human partners:{Q96CW1;P02794;P61923;P55735;Q8WUX9;Q96CF2;O75351;P53992;O14579;Q9NP79;Q9H444;P53618;P35606;P48444;O14964;P78537;Q5HYK7;O75886;P54920;Q9UQN3;Q9UK41;Q99962;Q15436;Q6QNY0;Q9BY43;Q10567;O95487;Q9BRG1;P0CG48;P56377;Q14671;Q9UL45;Q96PC3;Q8NEZ2;Q96EV8;Q9Y3E7;P62987;Q99816;O43747;Q9Y6Q5;P0CG47;Q9NZZ3;P02792;Q9NUP1;P61966;P09496;Q96H20;P50570;A5D8V6;Q9UN37;Q92783;O43633;Q9H9H4;P62979;Q9Y678;Q9BXS5;O00161;O95486;Q86VN1;Q14677;O94855;P11142}

19268 Pathogen[ P03346] interacts with 66 human partners:{P02792;P61966;P55735;Q86XT2;P50570;Q14671;A5D8V6;O43747;P62987;P56377;Q99962;P0CG48;O75886;Q8NEZ2;Q9BXS5;Q9Y678;Q99816;P53618;P11142;P02794;Q86VN1;Q9UK41;O14579;P09496;Q96H20;Q6QNY0;Q96FZ7;O94855;Q96CF2;Q9NZZ3;Q10567;O00161;P48444;Q15436;Q9Y3E7;P78537;Q96EV8;O43633;Q9H444;Q96CW1;Q9H9H4;Q96PC3;P54920;P61923;Q9BRG1;Q9UL45;Q9UQN3;O95486;P62979;Q9HCU5;P0CG47;Q9BY43;Q92783;Q9NP79;Q5HYK7;O75351;O14964;O95487;Q9Y6Q5;P35606;Q14677;Q9NUP1;Q00610;P53992;Q9UN37;Q8WUX9}

19269 Pathogen[ Q85601] interacts with 64 human partners:{Q99816;P54920;Q6QNY0;Q9NP79;P48444;Q00610;P09496;Q9NUP1;Q9UQN3;Q96H20;Q5HYK7;Q96CW1;O14579;O95487;Q9BXS5;Q9BRG1;P56377;Q99962;Q9H9H4;Q86VN1;O43747;P61923;O43633;P0CG48;Q10567;O75886;Q15436;Q96FZ7;Q8WUX9;Q96CF2;Q14677;O75351;Q9UK41;Q9BY43;P78537;Q96EV8;Q9H444;Q8N6T3;Q9Y678;P11142;P50570;P55735;Q92783;Q9NZZ3;O14964;O95486;P62979;Q96PC3;P53618;P0CG47;P02792;P62987;P61966;Q9Y6Q5;O94855;P35606;Q8NEZ2;Q14671;P02794;Q9UN37;Q9Y3E7;O00161;P53992;A5D8V6}

19270 Pathogen[ P14079] interacts with 60 human partners:{Q9H9H4;O75886;Q96CW1;Q86VN1;P61923;Q96CF2;Q9Y6Q5;P61966;P11142;Q9BXS5;P0CG48;Q00610;Q96H20;Q6QNY0;O95487;Q86XT2;P35606;Q9BY43;Q14677;Q10567;Q9NP79;P56377;Q9Y678;Q92783;O94855;P53992;P62979;P62987;P50570;Q9UL45;O43633;Q8WUX9;A5D8V6;Q8NEZ2;Q5HYK7;P02794;Q96LD1;P48444;Q9UN37;Q96FZ7;O43747;O14579;Q9Y3E7;P55735;Q96EV8;Q9NUP1;O75351;Q9NZZ3;O95486;Q9H444;Q9BRG1;Q96PC3;Q14671;Q99816;P0CG47;P78537;P54920;P09496;Q9UQN3;Q99962}

19271 Pathogen[ P03383] interacts with 46 human partners:{Q96CW1;P02794;Q6QNY0;P56377;Q00610;O14579;P62987;P55735;P53618;Q8WUX9;Q9Y678;Q5HYK7;P54920;Q96H20;O95487;Q9Y3E7;Q10567;Q9NZZ3;O75886;Q8NEZ2;Q99816;O95486;P78537;Q9NUP1;Q96EV8;Q15436;Q9UK41;O43633;O43747;O94855;Q9H444;Q9H9H4;P11142;Q9BRG1;Q92783;P62979;P0CG47;Q14677;P53992;P0CG48;O00161;Q9BXS5;O14964;Q86VN1;Q9UN37;Q9UQN3}

19272 Pathogen[ P03410] interacts with 65 human partners:{Q00610;Q9NUP1;P09496;Q9Y6Q5;P78537;Q96PC3;Q96CW1;P02794;P0CG48;Q5HYK7;O43633;Q9BXS5;Q86XT2;Q9H9H4;O94855;Q9NP79;O75351;P53992;O43747;Q6QNY0;P48444;Q10567;P35606;P11142;Q92783;Q9BY43;O14579;P50570;Q86VN1;P62979;Q9UL45;A5D8V6;Q99816;Q9Y3E7;Q15436;Q8WUX9;Q8NEZ2;Q14677;Q9UQN3;Q9UN37;Q9Y678;O95486;Q9H444;Q9NZZ3;P53618;P61923;Q9BRG1;Q96FZ7;Q9HCU5;P62987;Q99962;P55735;Q14671;P02792;Q96H20;P61966;Q96CF2;O00161;P56377;Q96EV8;P0CG47;O75886;O95487;Q96LD1;P54920}

19273 Pathogen[ P14075] interacts with 47 human partners:{P78537;P11142;P09496;Q96CW1;O75886;Q9H444;Q8WUX9;Q92783;Q9NP79;P54920;Q86VN1;Q5HYK7;Q9UK41;P53992;Q8NEZ2;P55735;Q96H20;Q9Y3E7;Q9H9H4;O95487;P0CG48;P62979;O14964;P53618;Q9UQN3;P02794;Q14677;Q6QNY0;Q9NZZ3;Q9NUP1;P62987;O43747;Q15436;O00161;Q9Y678;Q96EV8;P0CG47;Q9BRG1;P56377;O94855;Q9BXS5;Q99816;O95486;Q10567;Q00610;Q9UN37;O14579}

19274 Pathogen[ P0C206] interacts with 66 human partners:{O14964;Q9BRG1;O14579;P0CG48;Q9Y678;Q8WUX9;Q9UN37;Q8NEZ2;Q9H444;P78537;Q8N6T3;Q9UL45;Q9Y6Q5;Q9Y3E7;P53618;O43747;O94855;Q10567;P54920;P02794;P61966;Q9UQN3;Q86VN1;Q00610;P55735;Q99962;Q99816;Q92783;P09496;Q9UK41;Q9H9H4;O00161;A5D8V6;Q9BXS5;Q5HYK7;O95486;Q96H20;P35606;Q96EV8;Q86XT2;O95487;Q96CW1;P62979;O43633;P48444;P02792;Q96CF2;Q14677;P0CG47;Q9BY43;Q9NP79;Q9NUP1;Q9NZZ3;P53992;Q6QNY0;Q96FZ7;P62987;O75886;O75351;Q96PC3;P11142;P50570;P56377;Q14671;P61923;Q15436}

19275 Pathogen[ P03363] interacts with 50 human partners:{Q99962;O43747;P48444;O75886;Q9H444;Q92783;Q9Y678;P78537;P50570;P54920;Q15436;Q00610;Q9NZZ3;O14579;O95486;P53618;Q96H20;Q9BXS5;P61923;O75351;Q9UN37;Q86VN1;Q9BRG1;Q14677;Q9UK41;Q9Y3E7;P62987;O14964;P35606;Q8NEZ2;Q14671;P53992;O95487;Q99816;Q9UQN3;Q5HYK7;O00161;Q9NP79;Q9H9H4;Q6QNY0;Q9NUP1;P55735;P02794;O94855;Q8WUX9;Q10567;P11142;Q96CW1;Q96CF2;A5D8V6}

19276 [Cluster 1753]GO:0007229+P biological\_process [name] integrin-mediated signaling pathway [def] "Any series of molecular signals generated as a consequence of an integrin binding to one of its physiological ligands." [GOC

19277 Pathogen[ Q2Q067] interacts with 5 human partners: {Q14511;P56945;Q9BSQ5;Q13618;P35579}

19278 Pathogen[ P0C214] interacts with 4 human partners: {P56945;Q9BSQ5;Q13618;Q14511}

19279 Pathogen[ P03346] interacts with 7 human partners: {Q14511;Q96RT1;P35579;Q13618;P56945;Q96QH2;Q9BSQ5}

19280 Pathogen[ Q85601] interacts with 6 human partners: {Q96RT1;P35579;P56945;Q13618;Q9BSQ5;Q14511}

19281 Pathogen[ P14079] interacts with 8 human partners: {P35579;Q96QH2;Q08722;Q13618;Q96RT1;Q9BSQ5;O43561;P49023}

19282 Pathogen[ P03383] interacts with 5 human partners: {P56945;Q13618;Q14511;P35579;Q9BSQ5}

19283 Pathogen[ P03410] interacts with 9 human partners: {Q96QH2;Q96RT1;O43561;P35579;Q13618;Q14511;Q08722;P56945;Q9BSQ5}

19284 Pathogen[ P14075] interacts with 5 human partners: {Q14511;Q13618;P35579;Q9BSQ5;P56945}

19285 Pathogen[ P0C206] interacts with 7 human partners: {Q96RT1;Q9BSQ5;Q13618;P35579;Q96QH2;P56945;Q14511}

19286 Pathogen[ P03363] interacts with 7 human partners: {Q96RT1;P35579;Q13618;Q9BSQ5;Q14511;Q96QH2;P56945}

19287 [Cluster 1754]GO:0023035+P biological\_process [name] CD40 signaling pathway [def] "Any series of molecular signals generated as a consequence of the receptor CD40 binding to one of its physiological ligands." [GOC

19288 Pathogen[ Q2Q067] interacts with 1 human partners: {Q8NFZ5}

19289 Pathogen[ P0C214] interacts with 1 human partners: {Q8NFZ5}

19290 Pathogen[ P03346] interacts with 2 human partners: {Q8NFZ5;Q96EP0}

19291 Pathogen[ Q85601] interacts with 1 human partners: {Q8NFZ5}

19292 Pathogen[ P14079] interacts with 2 human partners: {Q96EP0;Q8NFZ5}

19293 Pathogen[ P03383] interacts with 1 human partners: {Q8NFZ5}

19294 Pathogen[ P03410] interacts with 1 human partners: {Q8NFZ5}

19295 Pathogen[ P14075] interacts with 1 human partners: {Q8NFZ5}

19296 Pathogen[ P0C206] interacts with 2 human partners: {Q8NFZ5;Q96EP0}

19297 Pathogen[ P03363] interacts with 2 human partners: {Q96EP0;Q8NFZ5}

19298 [Cluster 1755]GO:0035556+P biological\_process [name] intracellular signal transduction [def] "The process in which a signal is passed on to downstream components within the cell, which become activated themselves to further propagate the signal and finally trigger a change in the function or state of the cell." [GOC

19299 Pathogen[ Q2Q067] interacts with 31 human partners: {P31749;O60239;P39687;Q8NI35;P62258;Q96DX5;O43734;Q8WXF8;O00273;Q92870;Q9Y2B4;Q5TB30;O14508;Q9UPX8;Q8WWW0;O14641;O15105;O95644;Q9Y2V2;Q92529;Q5TCQ9;Q15796;Q99619;Q9NS23;Q96018;P63000;O14512;Q96A44;P23297;Q13501;O76075}

19300 Pathogen[ P0C214] interacts with 32 human partners: {Q8WV28;O60239;P63000;Q8WXF8;Q8WWW0;Q9UPX8;Q8NI35;Q9NS23;Q96A44;Q5TB30;Q5TCQ9;Q9Y2V2;Q96018;Q92529;Q13501;O00273;Q96DX5;O43734;O14641;O15105;Q9H0E2;Q15796;Q99619;O14508;O95644;O14512;O15524;P39687;P23297;O76075;Q92870;P31749}

19301 Pathogen[ P03346] interacts with 57 human partners: {O60239;O15524;Q9H765;Q96NS5;Q9Y2V2;Q96A44;P23297;O43734;Q8WXF8;Q5TCQ9;O75159;Q8IWN7;P62258;Q96FS4;Q9Y6D5;Q8WXX3;Q15796;Q12802;Q5TB30;Q8WV22;Q9NRJ4;Q6XZF7;O15105;Q9NRF2;O95644;Q9H0E2;O14508;Q93045;Q92870;Q96DX5;Q8NI35;O14641;P31749;Q13938;Q9Y6I7;P46109;Q99619;Q96018;P39687;Q9Y5R6;Q8WWW0;O76075;P14317;Q8WV28;Q9H8V3;O14512;Q86T24;Q96BD6;Q92529;Q9Y2B4;Q8IWN7;Q9UPX8;Q9NS23;P63000;O00273;Q8TB45;Q13501}

19302 Pathogen[ Q85601] interacts with 31 human partners: {O60239;Q9UPX8;P31749;Q96A44;Q8WWW0;P39687;P63000;Q5TB30;Q9NS23;Q96DX5;O76075;P23297;O95644;O14508;Q8NI35;O14641;P62258;Q9Y2V2;Q92529;Q8WXF8;O00273;Q96018;Q5TCQ9;P14317;Q92870;O15105;O14512;Q8WV22;Q15796;Q99619;Q13501}

19303 Pathogen[ P14079] interacts with 55 human partners: {P59894;Q9Y4G2;O76075;Q6XZF7;Q9NS23;Q9NUJ7;O14641;P46109;Q9Y6D5;O95644;Q8WJ9;Q8IWN7;P10911;Q12802;Q6ZRR9;P56715;Q93045;O60239;O96018;Q8WV28;Q8NI35;Q9NZ72;Q9H8V3;Q5TB30;Q96DX5;P23297;P62258;Q13501;Q96A44;Q8IWN7;O14508;O14512;Q8TB45;A8MYV0;O43687;O43561;Q8WXF8;Q9Y2B4;Q9H0E2;Q92529;O15105;Q9Y239;Q8WWW0;Q9NZJ9;O43734;Q9Y2V2;Q99619;P39687;Q9BR09;O00273;Q92870;Q9UPX8;Q8WXI4;Q9GZY6;H3BQB6}

19304 Pathogen[ P03383] interacts with 21 human partners: {O96018;P23297;P31749;O43734;O95644;P63000;Q96DX5;Q92870;O15105;P39687;O00273;Q96A44;O14641;Q5TCQ9;Q13501;Q8WXF8;Q15796;O14512;Q9Y2V2;P62258;Q99619}

19305 Pathogen[ P03410] interacts with 58 human partners: {P62258;Q5TB30;Q96018;Q8WXF8;Q92529;Q8WJ9;Q9Y239;P63000;Q9Y2B4;Q9BR09;Q96DX5;O43561;Q6ZRR9;O76075;Q5TCQ9;Q8IWN7;Q8WV28;O00273;Q9NS23;Q13501;P39687;P31749;Q9Y2V2;O60239;Q8NI35;H3BQB6;Q8WXI4;Q9NZJ9;O95644;Q9GZY6;Q99619;Q8WXX3;O14508;O43734;Q96A44;Q6XZF7;Q9H0E2;Q9Y6D5;Q8WWW0;O15105;P59894;A8MYV0;P23297;Q9NZ72;Q8TB45;Q9UPX8;O43687;O14512;Q9H8V3;Q15283;Q8IWN7;Q96NS5;Q15796;P56715;P46109;Q93045;O14641;Q92870}

19306 Pathogen[ P14075] interacts with 24 human partners: {O60239;O00273;Q8IWN7;Q96018;Q99619;Q92870;Q9Y2V2;P39687;Q5TCQ9;O43734;Q15796;Q9Y2B4;Q96A44;Q96DX5;P31749;O14641;Q8WXF8;O15105;P63000;O14512;O95644;Q13501;P23297;P62258}

19307 Pathogen[ P0C206] interacts with 48 human partners: {Q9H765;Q13501;Q8WXI4;P39687;Q8WV22;P31749;P56715;Q96DX5;Q9Y5R6;P14317;O76075;Q9Y2V2;Q5TCQ9;Q99619;Q8IWN1;O43734;O15524;Q15796;H3BQB6;O15105;Q9H0E2;O96018;Q93045;P63000;P62258;Q8IWN7;Q9Y6D5;Q8WXF8;O60239;O14508;Q9NZ72;Q8WWW0;Q8NI35;Q9UPX8;Q92870;Q9H8V3;Q9NRJ4;Q9BR09;Q5TB30;Q9Y2B4;Q6XZF7;O95644;Q92529;P23297;O14512;Q9NS23;Q96A44;O00273}

19308 Pathogen[ P03363] interacts with 53 human partners: {Q96A44;O75159;P62258;O00273;Q8WXX3;P56715;Q96NS5;Q8TB45;Q9BR09;O15524;Q9Y2V2;Q9H765;Q9UPX8;Q8WV28;P46109;O15105;Q9Y5R6;P63000;Q9Y6I7;Q93045;P39687;Q92529;P10911;Q6XZF7;P31749;Q5TCQ9;O76075;Q92870;Q15796;Q99619;Q9H0E2;Q9NS23;P14317;Q8NI35;O60239;Q5TB30;Q8WWW0;O95644;Q96DX5;Q8IWN7;Q8WV22;O14508;Q9NRJ4;O14512;O14641;O43734;Q9Y2B4;Q8WXF8;O96018;Q9NWX5;Q96FS4;P23297;Q96BD6}

19309 [Cluster 1756]GO:2000323+P biological\_process [name] negative regulation of glucocorticoid receptor signaling pathway [def] "Any process that stops, prevents or reduces the frequency, rate or extent of glucocorticoid receptor signaling pathway." [GOC]

19310 Pathogen[ Q2Q067] interacts with 1 human partners: {P35232}

19311 Pathogen[ P0C214] interacts with 1 human partners: {P35232}

19312 Pathogen[ P03346] interacts with 1 human partners: {P35232}

19313 Pathogen[ Q85601] interacts with 1 human partners: {P35232}

19314 Pathogen[ P14079] interacts with 1 human partners: {P35232}

19315 Pathogen[ P03383] interacts with 1 human partners: {P35232}

19316 Pathogen[ P03410] interacts with 1 human partners: {P35232}

19317 Pathogen[ P14075] interacts with 1 human partners: {P35232}

19318 Pathogen[ P0C206] interacts with 1 human partners: {P35232}

19319 Pathogen[ P03363] interacts with 1 human partners: {P35232}

19320 [Cluster 1757]GO:0051220+P biological\_process [name] cytoplasmic sequestering of protein [def] "The selective interaction of a protein with specific molecules in the cytoplasm, thereby inhibiting its transport into other areas of the cell." [GOC]

19321 Pathogen[ Q2Q067] interacts with 1 human partners: {P31946}

19322 Pathogen[ P0C214] interacts with 1 human partners: {P31946}

19323 Pathogen[ P03346] interacts with 1 human partners: {P31946}

19324 Pathogen[ Q85601] interacts with 1 human partners: {P31946}

19325 Pathogen[ P14079] interacts with 1 human partners: {P31946}

19326 Pathogen[ P03383] interacts with 1 human partners: {P31946}

19327 Pathogen[ P03410] interacts with 1 human partners: {P31946}

19328 Pathogen[ P14075] interacts with 1 human partners: {P31946}

19329 Pathogen[ P0C206] interacts with 1 human partners: {P31946}

19330 Pathogen[ P03363] interacts with 1 human partners: {P31946}

19331 [Cluster 1758]GO:0031054+P biological\_process [name] pre-miRNA processing [def] "Any process involved in the conversion of a pre-microRNA transcript into a mature microRNA molecule." [GOC]

19332 Pathogen[ Q2Q067] interacts with 6 human partners: {Q9NRR4;Q15633;Q5TAX3;Q9H9Z2;Q9UKV8;Q6ZN17}

19333 Pathogen[ P0C214] interacts with 6 human partners: {Q6ZN17;Q15633;Q9NRR4;Q9H9Z2;Q9UKV8;Q5TAX3}

19334 Pathogen[ P03346] interacts with 6 human partners: {Q15633;Q5TAX3;Q9UKV8;Q9NRR4;Q9H9Z2;Q6ZN17}

19335 Pathogen[ Q85601] interacts with 6 human partners: {Q6ZN17;Q9NRR4;Q5TAX3;Q9UKV8;Q15633;Q9H9Z2}

19336 Pathogen[ P14079] interacts with 5 human partners: {Q9UKV8;Q9H9Z2;Q5TAX3;Q9NRR4;Q6ZN17}

19337 Pathogen[ P03383] interacts with 6 human partners: {Q9NRR4;Q9H9Z2;Q6ZN17;Q5TAX3;Q9UKV8;Q15633}

19338 Pathogen[ P03410] interacts with 6 human partners: {Q9UKV8;Q15633;Q5TAX3;Q9NRR4;Q9H9Z2;Q6ZN17}

19339 Pathogen[ P14075] interacts with 6 human partners: {Q9H9Z2;Q5TAX3;Q6ZN17;Q9NRR4;Q9UKV8;Q15633}

19340 Pathogen[ P0C206] interacts with 6 human partners: {Q9UKV8;Q6ZN17;Q9H9Z2;Q9NRR4;Q5TAX3;Q15633}

19341 Pathogen[ P03363] interacts with 6 human partners: {Q6ZN17;Q9UKV8;Q15633;Q9H9Z2;Q9NRR4;Q5TAX3}

19342 [Cluster 1759]GO:0071044+P biological\_process [name] histone mRNA catabolic process [def] "The chemical reactions and pathways resulting in the breakdown of histone messenger RNA (mRNA)." [GOC]

19343 Pathogen[ Q2Q067] interacts with 8 human partners: {Q92900;Q8IU60;Q8IZH2;Q8NDF8;Q9NPD3;Q5TAX3;O15116;Q9NVV4}

19344 Pathogen[ P0C214] interacts with 9 human partners: {O15116;Q8NDF8;Q92900;Q8IZH2;Q9NPD3;Q8IV48;Q8IU60;Q9NVV4;Q5TAX3}

19345 Pathogen[ P03346] interacts with 8 human partners: {Q8IZH2;Q8IU60;Q5TAX3;Q9NVV4;O15116;Q8NDF8;Q92900;Q9NPD3}

19346 Pathogen[ Q85601] interacts with 8 human partners: {Q9NPD3;O15116;Q8IZH2;Q5TAX3;Q8NDF8;Q9NVV4;Q92900;Q8IU60}

19347 Pathogen[ P14079] interacts with 8 human partners: {Q8IV48;Q8IU60;Q9NPD3;O15116;Q8IZH2;Q5TAX3;Q9NVV4;Q92900}

19348 Pathogen[ P03383] interacts with 7 human

19349 partners:{Q9NVV4;Q8IU60;Q8NDF8;Q5TAX3;Q9NPD3;O15116;Q92900}  
Pathogen[ P03410] interacts with 8 human

19350 partners:{Q8IU60;Q8IV48;Q92900;Q5TAX3;Q9NVV4;Q8IZH2;Q9NPD3;O15116}  
Pathogen[ P14075] interacts with 7 human

19351 partners:{Q92900;Q8NDF8;Q9NPD3;Q9NVV4;Q5TAX3;Q8IU60;O15116}  
Pathogen[ P0C206] interacts with 9 human

19352 partners:{Q8IZH2;Q9NPD3;Q8IV48;Q8NDF8;Q9NVV4;Q5TAX3;Q92900;Q8IU60;O15116}  
Pathogen[ P03363] interacts with 8 human

19353 partners:{Q9NVV4;Q92900;Q9NPD3;O15116;Q8NDF8;Q5TAX3;Q8IZH2;Q8IU60}  
[Cluster 1760]GO:0034504+P biological\_process [name] protein localization to nucleus  
[def] "A process in which a protein is transported to, or maintained in, a location  
within the nucleus." [GOC

19354 Pathogen[ Q2Q067] interacts with 10 human  
partners:{P02545;Q9NS56;Q8N9N5;Q9Y3Y4;Q8N9A8;P27797;O14980;P62913;O95476;Q00987}

19355 Pathogen[ P0C214] interacts with 10 human  
partners:{Q8N9A8;P62913;Q00987;Q9NS56;Q8N9N5;O14980;O95476;P27797;P02545;Q9Y3Y4}

19356 Pathogen[ P03346] interacts with 12 human  
partners:{P62913;Q8WXH0;Q9Y3Y4;P02545;Q00987;Q9NS56;O14980;Q8N9A8;Q15475;Q8N9N5;P277  
97;O95476}

19357 Pathogen[ Q85601] interacts with 10 human  
partners:{P62913;P02545;Q9NS56;P27797;Q8N9A8;Q8N9N5;O14980;O95476;Q00987;Q9Y3Y4}

19358 Pathogen[ P14079] interacts with 11 human  
partners:{Q8N9A8;Q00987;Q8N9N5;Q5JTV8;Q8WXH0;Q9Y3Y4;Q9NS56;O95476;P62913;P02545;P283  
60}

19359 Pathogen[ P03383] interacts with 7 human  
partners:{P02545;P62913;Q8N9N5;O14980;Q8N9A8;Q9Y3Y4;P27797}

19360 Pathogen[ P03410] interacts with 11 human  
partners:{P62913;Q8N9N5;P02545;O95476;Q9Y3Y4;Q00987;Q5JTV8;Q8N9A8;Q8WXH0;O14980;P277  
97}

19361 Pathogen[ P14075] interacts with 7 human  
partners:{P62913;Q8N9N5;Q8N9A8;Q9Y3Y4;O14980;P02545;P27797}

19362 Pathogen[ P0C206] interacts with 10 human  
partners:{Q9NS56;Q8N9N5;P27797;Q9Y3Y4;O95476;P62913;P02545;Q8WXH0;Q00987;Q8N9A8}

19363 Pathogen[ P03363] interacts with 8 human  
partners:{P62913;P02545;Q8N9A8;O14980;Q8N9N5;Q9Y3Y4;O95476;P27797}

19364 [Cluster 1761]GO:0042118+P biological\_process [name] endothelial cell activation  
[def] "The change in morphology and behavior of an endothelial cell resulting from  
exposure to a cytokine, chemokine, cellular ligand, or soluble factor." [GOC

19365 Pathogen[ Q2Q067] interacts with 2 human partners:{O14744;P31269}

19366 Pathogen[ P0C214] interacts with 1 human partners:{P31269}

19367 Pathogen[ P03346] interacts with 2 human partners:{O14744;P31269}

19368 Pathogen[ Q85601] interacts with 2 human partners:{O14744;P31269}

19369 Pathogen[ P14079] interacts with 2 human partners:{O14744;P31269}

19370 Pathogen[ P03383] interacts with 2 human partners:{O14744;P31269}

19371 Pathogen[ P03410] interacts with 2 human partners:{P31269;O14744}

19372 Pathogen[ P14075] interacts with 2 human partners:{P31269;O14744}

19373 Pathogen[ P0C206] interacts with 2 human partners:{P31269;O14744}

19374 Pathogen[ P03363] interacts with 2 human partners:{O14744;P31269}

19375 [Cluster 1762]GO:0010792+P biological\_process [name] DNA double-strand break  
processing involved in repair via single-strand annealing [def] "The 5' to 3'  
exonucleolytic resection of the DNA at the site of the break to form a 3' single-strand  
DNA overhang that results in the repair of a double strand break via single-strand  
annealing." [GOC

19376 Pathogen[ Q2Q067] interacts with 3 human partners:{Q99708;Q9BQ83;Q8IY92}

19377 Pathogen[ P0C214] interacts with 3 human partners:{Q9BQ83;Q99708;Q8IY92}

19378 Pathogen[ P03346] interacts with 3 human partners:{Q99708;Q9BQ83;Q8IY92}

19379 Pathogen[ Q85601] interacts with 3 human partners:{Q99708;Q8IY92;Q9BQ83}

19380 Pathogen[ P14079] interacts with 3 human partners:{Q99708;Q9BQ83;Q8IY92}

19381 Pathogen[ P03383] interacts with 3 human partners:{Q8IY92;Q99708;Q9BQ83}

19382 Pathogen[ P03410] interacts with 3 human partners:{Q99708;Q9BQ83;Q8IY92}

19383 Pathogen[ P14075] interacts with 3 human partners:{Q9BQ83;Q99708;Q8IY92}

19384 Pathogen[ P0C206] interacts with 3 human partners:{Q99708;Q9BQ83;Q8IY92}

19385 Pathogen[ P03363] interacts with 3 human partners:{Q99708;Q9BQ83;Q8IY92}

19386 [Cluster 1763]GO:2000111+P biological\_process [name] positive regulation of macrophage  
apoptosis [def] "Any process that activates or increases the frequency, rate or extent  
of macrophage apoptosis." [GOC

19387 Pathogen[ Q2Q067] interacts with 1 human partners:{P42771}

19388 Pathogen[ P0C214] interacts with 1 human partners:{P42771}

19389 Pathogen[ P03346] interacts with 1 human partners:{P42771}

19390 Pathogen[ Q85601] interacts with 1 human partners:{P42771}

19391 Pathogen[ P14079] interacts with 2 human partners:{Q06413;P42771}

19392 Pathogen[ P03383] interacts with 1 human partners:{P42771}

19393 Pathogen[ P03410] interacts with 1 human partners:{P42771}

19394 Pathogen[ P14075] interacts with 1 human partners:{P42771}

19395 Pathogen[ P0C206] interacts with 1 human partners:{P42771}

19396 Pathogen[ P03363] interacts with 1 human partners:{P42771}



19397 [Cluster 1764]GO:0042147+P biological\_process [name] retrograde transport, endosome to Golgi [def] "The directed movement of membrane-bounded vesicles from endosomes back to the trans-Golgi network where they are recycled for further rounds of transport." [GOC

19398 Pathogen[ Q2Q067] interacts with 9 human partners:{Q8IUD2;O43752;O14662;Q6ICB4;Q8IWIJ2;Q9Y4E1;O75436;Q96QK1;Q9P1Q0}

19399 Pathogen[ P0C214] interacts with 10 human partners:{Q6ICB4;Q8IWIJ2;Q9Y4E1;Q96QK1;Q641Q2;O43752;O75436;Q9P1Q0;Q5SNT6;Q8IUD2}

19400 Pathogen[ P03346] interacts with 14 human partners:{O43752;Q96QK1;Q8IUD2;Q13190;Q9UID3;A8K0Z3;Q8N4B1;Q9UNH7;O75436;Q9P1Q0;Q9Y4E1;Q6ICB4;O14662;Q8IWIJ2}

19401 Pathogen[ Q85601] interacts with 10 human partners:{Q96QK1;Q8IWIJ2;O43752;Q6ICB4;O75436;Q9P1Q0;Q8IUD2;Q9UNH7;O14662;Q9UID3}

19402 Pathogen[ P14079] interacts with 18 human partners:{Q96QK1;Q9UNH7;Q9Y4E1;Q9UID3;Q6VEQ5;Q9P1Q0;Q8IUD2;Q9NQA3;Q641Q2;Q8N4B1;Q8IWIJ2;O14662;Q5SRD0;Q6ICB4;A8K0Z3;O43752;O75436;Q5SNT6}

19403 Pathogen[ P03383] interacts with 7 human partners:{Q8IWIJ2;Q9Y4E1;O75436;Q9P1Q0;Q96QK1;O43752;Q8IUD2}

19404 Pathogen[ P03410] interacts with 20 human partners:{Q5SNT6;Q13190;Q8N4B1;O14662;Q96QK1;O95249;Q9UNH7;Q8IUD2;Q641Q2;Q9Y4E1;O75436;Q6VEQ5;Q6ICB4;Q5SRD0;Q9P1Q0;O43752;Q9NQA3;Q9UID3;Q8IWIJ2;A8K0Z3}

19405 Pathogen[ P14075] interacts with 8 human partners:{O43752;Q8IUD2;Q8IWIJ2;O75436;Q9P1Q0;Q641Q2;Q9Y4E1;Q96QK1}

19406 Pathogen[ P0C206] interacts with 15 human partners:{O14662;Q641Q2;Q9UNH7;O43752;Q6ICB4;Q8IUD2;Q9Y4E1;Q9P1Q0;Q6VEQ5;Q5SNT6;Q9UID3;O75436;Q8N4B1;Q96QK1;Q8IWIJ2}

19407 Pathogen[ P03363] interacts with 12 human partners:{Q9UID3;Q9UNH7;Q6ICB4;Q96QK1;O75436;Q8N4B1;Q9P1Q0;Q9Y4E1;Q8IWIJ2;O14662;O43752;Q8IUD2}

19408 [Cluster 1765]GO:0070934+P biological\_process [name] CRD-mediated mRNA stabilization [def] "An mRNA stabilization process in which one or more RNA-binding proteins associate with a sequence in the open reading frame called the coding region instability determinant (CRD)." [GOC

19409 Pathogen[ Q2Q067] interacts with 4 human partners:{P67809;O60506;Q08211;Q00839}

19410 Pathogen[ P0C214] interacts with 5 human partners:{P67809;Q9NZI8;O60506;Q08211;Q00839}

19411 Pathogen[ P03346] interacts with 5 human partners:{O60506;Q9NZI8;Q00839;Q08211;P67809}

19412 Pathogen[ Q85601] interacts with 4 human partners:{O60506;Q08211;P67809;Q00839}

19413 Pathogen[ P14079] interacts with 4 human partners:{P67809;Q08211;Q00839;O60506}

19414 Pathogen[ P03383] interacts with 2 human partners:{P67809;Q00839}

19415 Pathogen[ P03410] interacts with 4 human partners:{Q00839;P67809;O60506;Q08211}

19416 Pathogen[ P14075] interacts with 2 human partners:{Q00839;P67809}

19417 Pathogen[ P0C206] interacts with 4 human partners:{P67809;Q08211;O60506;Q00839}

19418 Pathogen[ P03363] interacts with 5 human partners:{Q9NZI8;O60506;Q00839;Q08211;P67809}

19419 [Cluster 1766]GO:0048261+P biological\_process [name] negative regulation of receptor-mediated endocytosis [def] "Any process that stops, prevents, or reduces the frequency, rate or extent of receptor mediated endocytosis, the uptake of external materials by cells, utilizing receptors to ensure specificity of transport." [GOC

19420 Pathogen[ Q2Q067] interacts with 1 human partners:{P63000}

19421 Pathogen[ P0C214] interacts with 1 human partners:{P63000}

19422 Pathogen[ P03346] interacts with 2 human partners:{Q13492;P63000}

19423 Pathogen[ Q85601] interacts with 1 human partners:{P63000}

19424 Pathogen[ P14079] interacts with 1 human partners:{Q13492}

19425 Pathogen[ P03383] interacts with 1 human partners:{P63000}

19426 Pathogen[ P03410] interacts with 2 human partners:{P63000;Q13492}

19427 Pathogen[ P14075] interacts with 1 human partners:{P63000}

19428 Pathogen[ P0C206] interacts with 1 human partners:{P63000}

19429 Pathogen[ P03363] interacts with 1 human partners:{P63000}

19430 [Cluster 1767]GO:2000772+P biological\_process [name] regulation of cellular senescence [def] "Any process that modulates the frequency, rate or extent of cellular senescence." [GOC

19431 Pathogen[ Q2Q067] interacts with 2 human partners:{Q8TCS8;Q9H160}

19432 Pathogen[ P0C214] interacts with 2 human partners:{Q9H160;Q8TCS8}

19433 Pathogen[ P03346] interacts with 2 human partners:{Q8TCS8;Q9H160}

19434 Pathogen[ Q85601] interacts with 2 human partners:{Q8TCS8;Q9H160}

19435 Pathogen[ P14079] interacts with 2 human partners:{Q8TCS8;Q9H160}

19436 Pathogen[ P03383] interacts with 2 human partners:{Q8TCS8;Q9H160}

19437 Pathogen[ P03410] interacts with 2 human partners:{Q8TCS8;Q9H160}

19438 Pathogen[ P14075] interacts with 2 human partners:{Q8TCS8;Q9H160}

19439 Pathogen[ P0C206] interacts with 2 human partners:{Q8TCS8;Q9H160}

19440 Pathogen[ P03363] interacts with 1 human partners:{Q9H160}

19441 [Cluster 1768]GO:0030100+P biological\_process [name] regulation of endocytosis [def] "Any process that modulates the frequency, rate or extent of endocytosis." [GOC

19442 Pathogen[ Q2Q067] interacts with 1 human partners:{Q8WXE9}

19443 Pathogen[ P0C214] interacts with 3 human partners:{Q9Y6Q2;Q8WXE9;P53680}

19444 Pathogen[ P03346] interacts with 7 human  
partners: {Q15036;P53680;Q96T51;Q7Z3T8;Q9Y6Q2;Q8WXE9;Q13492}

19445 Pathogen[ Q85601] interacts with 5 human  
partners: {Q15036;Q96T51;Q8WXE9;Q9Y6Q2;P53680}

19446 Pathogen[ P14079] interacts with 7 human  
partners: {Q13492;Q15036;Q96T51;Q7Z3T8;Q8WXE9;P53680;Q9Y6Q2}

19447 Pathogen[ P03383] interacts with 1 human partners: {Q8WXE9}

19448 Pathogen[ P03410] interacts with 7 human  
partners: {P53680;Q8WXE9;Q13492;Q15036;Q96T51;Q7Z3T8;Q9Y6Q2}

19449 Pathogen[ P14075] interacts with 1 human partners: {Q8WXE9}

19450 Pathogen[ P0C206] interacts with 6 human  
partners: {P53680;Q9Y6Q2;Q8WXE9;Q96T51;Q15036;Q7Z3T8}

19451 Pathogen[ P03363] interacts with 2 human partners: {Q8WXE9;Q96T51}

19452 [Cluster 1769]GO:0010804+P biological\_process [name] negative regulation of tumor  
necrosis factor-mediated signaling pathway [def] "Any process that decreases the rate  
or extent of the tumor necrosis factor-mediated signaling pathway. The tumor necrosis  
factor-mediated signaling pathway is the series of molecular signals generated as a  
consequence of tumor necrosis factor binding to a cell surface receptor." [GOC

19453 Pathogen[ Q2Q067] interacts with 1 human partners: {Q8TD23}

19454 Pathogen[ P0C214] interacts with 1 human partners: {Q8TD23}

19455 Pathogen[ P03346] interacts with 1 human partners: {Q8TD23}

19456 Pathogen[ Q85601] interacts with 1 human partners: {Q8TD23}

19457 Pathogen[ P14079] interacts with 1 human partners: {Q8TD23}

19458 Pathogen[ P03383] interacts with 1 human partners: {Q8TD23}

19459 Pathogen[ P03410] interacts with 1 human partners: {Q8TD23}

19460 Pathogen[ P14075] interacts with 1 human partners: {Q8TD23}

19461 Pathogen[ P0C206] interacts with 1 human partners: {Q8TD23}

19462 Pathogen[ P03363] interacts with 1 human partners: {Q8TD23}

19463 [Cluster 1770]GO:0006952+P biological\_process [name] defense response [def]  
"Reactions, triggered in response to the presence of a foreign body or the occurrence of  
an injury, which result in restriction of damage to the organism attacked or  
prevention/recovery from the infection caused by the attack." [GOC

19464 Pathogen[ Q2Q067] interacts with 8 human  
partners: {Q9UDY8;Q04206;Q15025;Q13342;Q15744;P42768;Q9C000;Q15773}

19465 Pathogen[ P0C214] interacts with 8 human  
partners: {Q9UDY8;Q04206;Q15025;Q15773;Q14727;Q13342;P42768;Q9C000}

19466 Pathogen[ P03346] interacts with 10 human  
partners: {Q15773;P42768;Q9UDY8;Q04206;Q13342;Q15025;Q15744;Q6MZN7;Q14727;Q9C000}

19467 Pathogen[ Q85601] interacts with 7 human  
partners: {Q15773;Q9UDY8;Q04206;P42768;Q15025;Q15744;Q13342}

19468 Pathogen[ P14079] interacts with 31 human  
partners: {Q30KQ8;Q30KQ9;P49069;Q14761;Q30KR1;A8MXU0;Q30KQ7;Q9C000;Q15025;P60022;Q157  
44;Q6MZN7;Q8N104;Q15263;A6NDD2;Q15773;Q9H1M4;Q30KQ1;Q7Z7B8;Q8IZN7;Q4QY38;Q7Z7B7;Q9Y2  
39;Q30KQ6;Q8NET1;Q8N688;P59861;Q13342;P42768;Q30KP9;P81534}

19469 Pathogen[ P03383] interacts with 5 human  
partners: {Q15773;Q13342;Q15025;P42768;Q04206}

19470 Pathogen[ P03410] interacts with 31 human  
partners: {Q30KP8;Q04206;P49069;Q30KR1;Q7Z7B7;Q30KP9;Q4QY38;P59861;Q9Y239;Q8N688;Q157  
73;Q7Z7B8;Q30KQ1;P42768;Q9C000;P60022;Q15025;Q30KQ6;P33241;Q8IZN7;Q13342;Q8N104;Q5J5  
C9;Q30KQ9;Q15744;Q14761;Q30KQ7;Q30KQ8;P81534;Q15263;Q6MZN7}

19471 Pathogen[ P14075] interacts with 6 human  
partners: {Q04206;P42768;Q15025;Q15773;Q13342;Q6MZN7}

19472 Pathogen[ P0C206] interacts with 10 human  
partners: {Q9C000;Q9UDY8;Q15744;Q6MZN7;Q13342;Q15773;Q15025;Q7Z7B7;Q04206;P42768}

19473 Pathogen[ P03363] interacts with 7 human  
partners: {Q04206;Q9C000;Q15744;P42768;Q13342;Q15773;Q15025}

19474 [Cluster 1771]GO:0034453+P biological\_process [name] microtubule anchoring [def]  
"Any process in which a microtubule is maintained in a specific location in a cell."  
[GOC

19475 Pathogen[ Q2Q067] interacts with 9 human  
partners: {Q95684;Q7Z460;Q9P1Y5;Q86XR8;Q75381;Q8IWJ2;Q96NB1;Q75122;Q15154}

19476 Pathogen[ P0C214] interacts with 10 human  
partners: {Q8IWJ2;Q15154;Q95684;Q9P1Y5;Q75381;Q75122;Q8IYX8;Q86XR8;Q7Z460;Q96NB1}

19477 Pathogen[ P03346] interacts with 10 human  
partners: {Q86XR8;Q95684;Q15154;Q9P1Y5;Q8IYX8;Q75381;Q75122;Q7Z460;Q8IWJ2;Q96NB1}

19478 Pathogen[ Q85601] interacts with 10 human  
partners: {Q8IWJ2;Q15154;Q95684;Q9P1Y5;Q75122;Q86XR8;Q7Z460;Q75381;Q96NB1;Q8IYX8}

19479 Pathogen[ P14079] interacts with 11 human  
partners: {Q7Z460;Q95684;Q14118;Q8IWJ2;Q9P1Y5;Q75381;Q15154;Q86XR8;Q75122;Q8IYX8;Q96N  
B1}

19480 Pathogen[ P03383] interacts with 8 human  
partners: {Q8IWJ2;Q86XR8;Q7Z460;Q95684;Q96NB1;Q9P1Y5;Q75381;Q15154}

19481 Pathogen[ P03410] interacts with 10 human  
partners: {Q95684;Q7Z460;Q96NB1;Q15154;Q9P1Y5;Q75381;Q8IYX8;Q14118;Q75122;Q8IWJ2}

19482 Pathogen[ P14075] interacts with 8 human  
partners: {Q95684;Q7Z460;Q75381;Q86XR8;Q96NB1;Q8IWJ2;Q15154;Q9P1Y5}

19483 Pathogen[ P0C206] interacts with 10 human partners:{Q86XR8;O95684;O75381;Q9PLY5;O75122;Q8IYX8;Q7Z460;Q15154;Q96NB1;Q8IYWJ2}

19484 Pathogen[ P03363] interacts with 9 human partners:{O95684;Q9PLY5;O75381;Q7Z460;Q96NB1;Q8IYWJ2;Q8IYX8;Q86XR8;Q15154}

19485 [Cluster 1772]GO:0050435+P biological\_process [name] beta-amyloid metabolic process [def] "The chemical reactions and pathways involving beta-amyloid, a glycoprotein associated with Alzheimer's disease, and its precursor, amyloid precursor protein (APP)." [GOC

19486 Pathogen[ Q2Q067] interacts with 1 human partners:{Q14457}

19487 Pathogen[ P0C214] interacts with 1 human partners:{Q14457}

19488 Pathogen[ P03346] interacts with 1 human partners:{Q14457}

19489 Pathogen[ Q85601] interacts with 1 human partners:{Q14457}

19490 Pathogen[ P14079] interacts with 2 human partners:{Q92542;Q14457}

19491 Pathogen[ P03383] interacts with 1 human partners:{Q14457}

19492 Pathogen[ P03410] interacts with 2 human partners:{Q14457;Q92542}

19493 Pathogen[ P14075] interacts with 1 human partners:{Q14457}

19494 Pathogen[ P0C206] interacts with 2 human partners:{Q14457;Q92542}

19495 Pathogen[ P03363] interacts with 1 human partners:{Q14457}

19496 [Cluster 1773]GO:0009408+P biological\_process [name] response to heat [def] "Any process that results in a change in state or activity of a cell or an organism (in terms of movement, secretion, enzyme production, gene expression, etc.) as a result of a heat stimulus, a temperature stimulus above the optimal temperature for that organism." [GOC

19497 Pathogen[ Q2Q067] interacts with 16 human partners:{P31749;Q00613;P49770;Q9UDY4;Q9UI10;P55212;P10914;Q14232;Q9NR50;P29474;O75475;Q53G26;Q13144;P31689;Q9UBY9;Q96EY1}

19498 Pathogen[ P0C214] interacts with 18 human partners:{P29474;Q9UDY4;Q9UI10;Q00613;P49770;P55212;P34932;Q9UBY9;P10914;Q14232;Q8WW22;Q9NR50;Q13144;Q53G26;O75475;O60884;Q96EY1;P31749}

19499 Pathogen[ P03346] interacts with 17 human partners:{P29474;Q00613;O75475;P55212;Q14232;Q9UBY9;P31749;P10914;P49770;P31689;Q53G26;P34932;Q9UDY4;Q13144;Q9NR50;Q96EY1;Q9UI10}

19500 Pathogen[ Q85601] interacts with 19 human partners:{P31749;P31689;Q53G26;Q8WW22;Q9NR50;O60884;Q13144;Q00613;P49770;P10914;Q9UBY9;Q9UDY4;P29474;P34932;P55212;O75475;Q14232;Q96EY1;Q9UI10}

19501 Pathogen[ P14079] interacts with 14 human partners:{Q9UI10;O75475;Q9UDY4;P55212;Q13144;Q9NR50;Q00613;P31689;Q14232;Q8WW22;Q9UBY9;O60884;Q96EY1;P10914}

19502 Pathogen[ P03383] interacts with 16 human partners:{P10914;P29474;P55212;P31749;Q9UI10;P31689;Q13144;Q9NR50;Q9UDY4;P49770;Q00613;O75475;Q14232;Q9UBY9;Q96EY1;Q53G26}

19503 Pathogen[ P03410] interacts with 18 human partners:{Q9UDY4;Q00613;Q9NR50;Q53G26;P31749;Q14232;P49770;P29474;P10914;O60884;P31689;O75475;Q8WW22;P55212;Q9UBY9;Q96EY1;Q9UI10;Q13144}

19504 Pathogen[ P14075] interacts with 16 human partners:{P29474;P31689;Q9UBY9;Q00613;O75475;P55212;Q53G26;Q9UI10;Q9UDY4;P31749;Q14232;P49770;Q9NR50;Q13144;P10914;Q96EY1}

19505 Pathogen[ P0C206] interacts with 19 human partners:{P10914;Q9UDY4;P31749;Q00613;Q14232;P34932;Q53G26;P55212;O60884;Q9NR50;O75475;Q13144;P49770;Q8WW22;Q9UI10;P29474;Q96EY1;P31689;Q9UBY9}

19506 Pathogen[ P03363] interacts with 15 human partners:{Q9UBY9;P29474;Q9UI10;Q9UDY4;O75475;Q53G26;P55212;Q9NR50;P34932;P31749;P10914;P49770;Q00613;Q13144;Q96EY1}

19507 [Cluster 1774]GO:0035880+P biological\_process [name] embryonic nail plate morphogenesis [def] "The process, occurring in the embryo, by which the anatomical structures of a nail plate are generated and organized. The nail plate is the hard and translucent portion of the nail, composed of keratin, and serves to protect the tips of digits." [GOC

19508 Pathogen[ Q2Q067] interacts with 1 human partners:{P35548}

19509 Pathogen[ P0C214] interacts with 1 human partners:{P35548}

19510 Pathogen[ P03346] interacts with 1 human partners:{P35548}

19511 Pathogen[ Q85601] interacts with 1 human partners:{P35548}

19512 Pathogen[ P14079] interacts with 1 human partners:{P28360}

19513 Pathogen[ P03383] interacts with 1 human partners:{P35548}

19514 Pathogen[ P03410] interacts with 1 human partners:{P35548}

19515 Pathogen[ P14075] interacts with 1 human partners:{P35548}

19516 Pathogen[ P0C206] interacts with 1 human partners:{P35548}

19517 Pathogen[ P03363] interacts with 1 human partners:{P35548}

19518 [Cluster 1775]GO:0033559+P biological\_process [name] unsaturated fatty acid metabolic process [def] "The chemical reactions and pathways involving an unsaturated fatty acid, any fatty acid containing one or more double bonds between carbon atoms." [GOC

19519 Pathogen[ Q2Q067] interacts with 1 human partners:{O14734}

19520 Pathogen[ P0C214] interacts with 3 human partners:{Q9NXB9;Q9NYP7;O14734}

19521 Pathogen[ P03346] interacts with 1 human partners:{O14734}

19522 Pathogen[ Q85601] interacts with 1 human partners:{O14734}

19523 Pathogen[ P14079] interacts with 1 human partners:{O14734}

19524 Pathogen[ P03383] interacts with 1 human partners:{O14734}

19525 Pathogen[ P03410] interacts with 1 human partners:{014734}

19526 Pathogen[ P14075] interacts with 1 human partners:{014734}

19527 Pathogen[ P0C206] interacts with 1 human partners:{014734}

19528 Pathogen[ P03363] interacts with 1 human partners:{014734}

19529 [Cluster 1776]GO:0006368+P biological\_process [name] transcription elongation from RNA polymerase II promoter [def] "The extension of an RNA molecule after transcription initiation and promoter clearance at an RNA polymerase II promoter by the addition of ribonucleotides catalyzed by RNA polymerase II." [GOC

19530 Pathogen[ Q2Q067] interacts with 61 human partners:{P52434;Q92750;Q9HB65;P20226;Q16594;O00267;Q9H9T3;Q13889;P19388;P52435;P32780;P18615;P30876;P19387;Q15542;P61218;Q92759;P52657;O60563;Q12962;Q95163;P29084;P62487;P55199;P51948;Q15370;Q15543;P49848;P50750;Q9Y5B0;Q15544;O00268;P50613;Q16514;Q6IA86;P13984;Q15369;P62875;O00472;P24928;P23193;Q16186;Q09161;Q8IXH7;Q9H3P2;P52298;P52655;P35269;P29083;O60583;P63272;P21675;P53803;Q14241;Q9Y5B9;Q13888;Q96EB1;P51946;Q8WX92;Q00403;Q08945}

19531 Pathogen[ P0C214] interacts with 60 human partners:{O00268;P51946;Q8WX92;Q09161;P30876;P52657;Q16186;P21675;P53803;P52655;P35269;P50750;O00267;P50613;P29084;P52435;Q92750;Q00403;Q12962;P61218;Q15370;Q6IA86;Q16594;Q15542;P18615;P52298;P62487;P51948;Q15369;P55199;O60583;P63272;Q15544;P49848;Q9Y5B9;Q16514;P62875;P13984;P20226;P32780;P24928;Q9H9T3;O60563;Q9Y5B0;Q13888;P52434;Q08945;Q8IXH7;O00472;Q9H3P2;Q9HB65;P19387;P23193;P19388;Q15543;Q96EB1;O95163;Q92759;P29083;Q14241}

19532 Pathogen[ P03346] interacts with 61 human partners:{Q15542;Q15370;Q09161;Q9HB65;P52434;Q8IXH7;O60563;Q13888;Q9H3P2;P53803;O95163;P61218;O00268;P29084;P63272;P52298;O00472;Q92750;Q08945;Q13889;P20226;Q9Y5B0;P62487;P19388;O60583;P13984;Q9H9T3;P52435;P49848;P51946;P52657;P50750;Q9Y5B9;P36954;Q16514;Q12962;O00267;Q8WX92;Q92759;P55199;P21675;Q6IA86;P30876;Q15369;P35269;P24928;P23193;Q16186;P29083;Q00403;P52655;Q96EB1;P51948;Q15544;P32780;P18615;P62875;P19387;Q14241;Q16594;Q15543}

19533 Pathogen[ Q85601] interacts with 62 human partners:{P51946;P52657;Q15542;P36954;Q15370;O60563;P50750;Q13888;Q9H9T3;Q14241;O60583;Q9H3P2;P53803;P61218;O00268;Q9Y5B9;P51948;P18615;Q16594;O00472;Q09161;Q8WX92;P62487;P19388;P29084;P13984;Q92759;P32780;Q9Y5B0;P52435;P49848;P35269;P29083;Q16514;Q96EB1;Q15369;Q00403;P50613;O00267;P23193;P55199;Q6IA86;Q8IXH7;Q08945;Q92750;P21675;Q12962;P19387;P63272;P52655;P24928;P52298;Q9HB65;P30876;P52434;Q15543;P19447;O95163;Q15544;Q16186;P62875;P20226}

19534 Pathogen[ P14079] interacts with 60 human partners:{Q9Y5B9;P62875;P55199;Q08945;Q14241;P19387;Q9Y5B0;P35269;P51946;Q16594;Q8IXH7;P62487;Q6IA86;P52434;P52298;O15514;P30876;P61218;Q9H3P2;O95163;Q16186;Q96EB1;Q13889;P53803;P18615;P29084;P50613;Q13888;P19388;Q00403;Q15543;Q9H9T3;Q12962;P49848;P52435;P63272;Q92750;Q15370;Q92759;O00472;P52657;Q8WX92;P32780;P23193;P13984;O60583;P24928;Q15369;Q9HB65;Q16514;O00267;P36954;Q15542;P19447;Q09161;P29083;P21675;O00268;P50750;P51948}

19535 Pathogen[ P03383] interacts with 60 human partners:{P53803;P55199;Q15369;P63272;O95163;Q9H3P2;P29084;Q15544;P35269;P51948;O00472;Q13888;P23193;P52655;Q15542;P52434;P61218;Q08945;O00267;Q00403;Q09161;Q9HB65;P20226;Q96EB1;P52657;P62487;Q16594;Q8IXH7;P19387;O60563;P50613;P13984;P51946;P24928;P49848;P50750;O00268;Q16514;Q92759;P52298;Q92750;P62875;P21675;P52435;Q9Y5B0;Q15370;Q12962;P19388;P29083;P30876;Q14241;Q6IA86;O60583;Q16186;Q9Y5B9;P32780;Q9H9T3;P18615;Q8WX92;Q15543}

19536 Pathogen[ P03410] interacts with 64 human partners:{O60583;Q08945;O00472;P52655;P19387;Q13889;P18615;P36954;Q9H3P2;O00268;Q15543;Q92750;O00267;Q9Y5B9;P63272;P24928;Q12962;P21675;P29083;P51946;P30876;P20226;Q15370;Q9H9T3;P23193;Q96EB1;P52657;O15514;P50613;P50750;O60563;P55199;Q8IXH7;Q8WX92;P29084;Q15369;P52435;P52298;Q16514;P49848;O95163;P53803;P19447;P62875;Q00403;P35269;Q16594;P61218;P51948;Q9Y5B0;Q15544;Q13888;P52434;P13984;Q15542;Q16186;P62487;Q09161;Q6IA86;P19388;Q14241;P32780;Q92759;Q9HB65}

19537 Pathogen[ P14075] interacts with 61 human partners:{Q96EB1;Q12962;Q09161;P13984;Q92759;P21675;P52657;Q15542;P18615;Q16186;Q08945;P30876;Q00403;O60563;Q9Y5B0;P29083;P50613;Q14241;P29084;Q6IA86;P19388;P61218;P50750;O60583;Q15544;P19387;P20226;Q16594;Q92750;P62487;Q15370;P23193;Q13889;Q9Y5B9;P49848;O00472;P24928;P35269;P52655;Q16514;P51946;P32780;O95163;P55199;O00268;Q9H9T3;Q9HB65;Q9H3P2;P62875;Q8IXH7;O00267;Q15369;P52434;P63272;P51948;P52298;Q8WX92;P52435;P53803;Q15543;Q13888}

19538 Pathogen[ P0C206] interacts with 64 human partners:{P62875;Q8IXH7;P23193;Q9HB65;P52298;Q16514;Q15543;P49848;Q16186;P36954;P50750;P20226;Q09161;Q15544;Q9H9T3;P52657;P52655;P19388;P61218;O00268;Q6IA86;Q9Y5B9;P29084;Q14241;P13984;P19447;O95163;P53803;Q92750;O15514;P35269;Q9Y5B0;P19387;Q13888;P50613;P18615;P29083;Q92759;Q15370;O00267;Q9H3P2;P52435;P62487;P32780;Q15542;O00472;Q13889;Q8WX92;Q96EB1;Q12962;P24928;P55199;O60583;Q00403;O60563;Q15369;Q08945;P52434;P21675;P51946;P63272;P51948;Q16594;P30876}

19539 Pathogen[ P03363] interacts with 57 human partners:{Q16186;P29083;P29084;Q9Y5B0;Q15370;P49848;P19388;P13984;O60563;P55199;Q8WX92;Q6IA86;P30876;Q13888;P32780;Q92759;P19387;P61218;Q16514;P51946;P24928;O00268;Q9HB65;O00267;Q15369;Q8IXH7;P18615;P52657;P35269;Q12962;Q00403;O60583;Q15544;Q9Y5B9;Q14241;Q9H3P2;Q96EB1;O95163;Q15542;P52298;Q92750;P62487;P21675;P23193;P20226;P52655;P632

72;P50750;Q08945;O00472;Q15543;P53803;P52435;P52434;Q9H9T3;Q09161;Q16594}

19540 [Cluster 1777]GO:0046326+P biological\_process [name] positive regulation of glucose import [def] "Any process that activates or increases the frequency, rate or extent of the import of the hexose monosaccharide glucose into a cell or organelle." [GOC

19541 Pathogen[ Q2Q067] interacts with 5 human partners:{P31749;P53675;P56211;P27986;Q9BX66}

19542 Pathogen[ P0C214] interacts with 5 human partners:{Q9BX66;P53675;P56211;P27986;P31749}

19543 Pathogen[ P03346] interacts with 6 human partners:{Q9BX66;P56211;P31749;O60519;P53675;P27986}

19544 Pathogen[ Q85601] interacts with 5 human partners:{P53675;P31749;Q9BX66;P56211;P27986}

19545 Pathogen[ P14079] interacts with 5 human partners:{P31751;P56211;O60502;P53675;Q9BX66}

19546 Pathogen[ P03383] interacts with 4 human partners:{P27986;P31749;P53675;P56211}

19547 Pathogen[ P03410] interacts with 6 human partners:{P27986;O60502;P31749;P53675;P56211;Q9BX66}

19548 Pathogen[ P14075] interacts with 4 human partners:{P53675;P31749;P27986;P56211}

19549 Pathogen[ P0C206] interacts with 5 human partners:{P53675;P31749;P56211;P27986;Q9BX66}

19550 Pathogen[ P03363] interacts with 5 human partners:{Q9BX66;P31749;P56211;P53675;P27986}

19551 [Cluster 1778]GO:0061198+P biological\_process [name] fungiform papilla formation [def] "The developmental process pertaining to the initial formation of a spongiform papilla from unspecified parts. The fungiform papilla is a mushroom-shaped papilla of the tongue." [GOC

19552 Pathogen[ Q2Q067] interacts with 2 human partners:{Q13547;Q92769}

19553 Pathogen[ P0C214] interacts with 2 human partners:{Q13547;Q92769}

19554 Pathogen[ P03346] interacts with 2 human partners:{Q92769;Q13547}

19555 Pathogen[ Q85601] interacts with 2 human partners:{Q92769;Q13547}

19556 Pathogen[ P14079] interacts with 1 human partners:{Q92769}

19557 Pathogen[ P03383] interacts with 2 human partners:{Q92769;Q13547}

19558 Pathogen[ P03410] interacts with 2 human partners:{Q92769;Q13547}

19559 Pathogen[ P14075] interacts with 2 human partners:{Q13547;Q92769}

19560 Pathogen[ P0C206] interacts with 2 human partners:{Q92769;Q13547}

19561 Pathogen[ P03363] interacts with 1 human partners:{Q13547}

19562 [Cluster 1779]GO:0006904+P biological\_process [name] vesicle docking involved in exocytosis [def] "The initial attachment of a vesicle membrane to a target membrane, mediated by proteins protruding from the membrane of the vesicle and the target membrane, that contributes to exocytosis." [GOC

19563 Pathogen[ Q2Q067] interacts with 4 human partners:{O00186;Q9HCH5;Q9H267;Q15833}

19564 Pathogen[ P0C214] interacts with 3 human partners:{Q15833;O00186;Q9HCH5}

19565 Pathogen[ P03346] interacts with 7 human partners:{Q15833;Q96A65;Q9HCH5;O00186;Q96AX1;Q9H267;Q8WU76}

19566 Pathogen[ Q85601] interacts with 5 human partners:{O00186;Q96A65;Q15833;Q9HCH5;Q9H267}

19567 Pathogen[ P14079] interacts with 9 human partners:{Q8TAG9;Q9HCH5;O00186;Q6PUV4;Q15833;Q96AX1;Q96A65;Q9Y2D4;Q9H267}

19568 Pathogen[ P03383] interacts with 2 human partners:{O00186;Q9HCH5}

19569 Pathogen[ P03410] interacts with 10 human partners:{Q9HCH5;Q9H267;Q15833;Q8WU76;Q8TAG9;Q96A65;Q6PUV4;Q9Y2D4;O00186;Q96AX1}

19570 Pathogen[ P14075] interacts with 2 human partners:{O00186;Q9HCH5}

19571 Pathogen[ P0C206] interacts with 9 human partners:{Q96A65;Q6PUV4;Q8WU76;Q96AX1;Q9HCH5;Q15833;Q9H267;Q8TAG9;O00186}

19572 Pathogen[ P03363] interacts with 6 human partners:{Q96A65;Q8WU76;Q9H267;O00186;Q9HCH5;Q15833}

19573 [Cluster 1780]GO:0010628+P biological\_process [name] positive regulation of gene expression [def] "Any process that increases the frequency, rate or extent of gene expression. Gene expression is the process in which a gene's coding sequence is converted into a mature gene product or products (proteins or RNA). This includes the production of an RNA transcript as well as any processing to produce a mature RNA product or an mRNA (for protein-coding genes) and the translation of that mRNA into protein. Some protein processing events may be included when they are required to form an active form of a product from an inactive precursor form." [GOC

19574 Pathogen[ Q2Q067] interacts with 37 human partners:{Q03052;Q99081;Q96I24;Q01094;P35680;Q96AE4;Q01201;P51610;P11473;Q9UBC3;P27797;Q99966;O15162;Q13469;P26358;O75528;O75444;Q9Y6X2;Q8NI51;O15164;Q96JE7;P55055;O00321;Q7Z2X4;P45984;Q04724;Q8TE85;P60953;P27986;Q9BQA5;P49593;P15923;P49711;Q16649;Q15797;Q00534;Q14397}

19575 Pathogen[ P0C214] interacts with 34 human partners:{O75444;Q03052;Q8NI51;Q9Y6X2;Q13469;P51610;O75528;P31249;O00321;Q99081;P60953;Q04724;Q7Z2X4;Q99966;Q8TE85;Q01094;Q00534;Q01201;P15923;O15162;P26358;Q96I24;Q14397;P49711;O15164;P27797;Q96AE4;P45984;P49593;Q9BQA5;Q15797;Q96JE7;P27986;P18054}

19576 Pathogen[ P03346] interacts with 45 human partners:{Q99081;P31249;Q8NI51;P45984;P11473;Q99966;Q01201;Q96PU8;Q03052;Q15797;P51610;Q8IYA7;P20264;P15923;P18054;O00321;P60953;Q9UBC3;Q96AE4;P26358;Q7Z2X4;O75626;Q8TE

85;P49593;Q01094;O75444;Q13469;O75528;Q96JE7;Q04724;P49711;P35680;Q16649;O75469;P27797;Q14397;Q00534;Q9Y6X2;O15164;Q96I24;P55055;P27986;Q9BQA5;Q99581;O15162}

19577 Pathogen[ Q85601] interacts with 39 human partners: {Q8NI51;Q8TE85;P11473;O75528;Q04724;Q03052;Q96JE7;P49593;Q15797;Q9Y6X2;Q99966;P27797;P26358;Q13469;Q7Z2X4;O15164;P55055;P49711;P51610;P27986;O75444;Q16649;P35680;Q01201;P15923;P31249;Q14397;Q9BQA5;P45984;P60953;Q96AE4;Q99081;O75626;O15162;Q00534;Q96I24;Q01094;O00321;Q9UBC3}

19578 Pathogen[ P14079] interacts with 45 human partners: {P31751;O15164;O15162;P55055;Q06413;P49593;Q16649;O75528;O00321;Q9Y6X2;Q99581;O75626;O43597;P11473;P35680;Q8TE85;Q99966;O60895;Q9BQA5;P15923;Q15797;P51610;Q96JE7;Q01201;P45984;P45983;Q96AE4;Q9UBC3;Q96I24;O75469;P26358;P31249;P04141;O75444;O95760;Q04724;Q99439;Q14397;Q03052;Q13469;Q99081;Q7Z2X4;Q01094;P49711;Q8NI51}

19579 Pathogen[ P03383] interacts with 28 human partners: {P27986;Q8NI51;O75528;Q13469;P49711;Q01094;O15162;P60953;P15923;Q15797;Q00534;Q04724;Q8TE85;O00321;P31249;Q14397;P11473;P51610;Q9BQA5;Q99081;Q9Y6X2;Q01201;Q96JE7;Q96AE4;P45984;O75444;P26358;P27797}

19580 Pathogen[ P03410] interacts with 42 human partners: {Q14397;P04141;P51610;P27986;O43597;Q00534;O60895;Q9BQA5;O75528;O75444;P31249;Q9Y6X2;Q04724;O00321;P15923;Q03052;O95760;Q01201;P11473;O15162;P26358;Q99081;Q8TE85;Q16649;Q7Z2X4;Q99439;Q15797;Q96I24;Q96JE7;Q13469;P49711;Q9UBC3;Q8NI51;P60953;P45984;Q01094;P35680;P49593;O75626;Q96AE4;Q99966;P27797}

19581 Pathogen[ P14075] interacts with 27 human partners: {P60953;Q8NI51;Q96JE7;Q9BQA5;O15162;Q01201;O75444;Q8TE85;P51610;Q00534;P31249;P15923;P26358;O75528;Q13469;P27797;P27986;P11473;Q01094;Q14397;P49711;Q04724;Q99081;Q96AE4;Q9Y6X2;O00321;P45984}

19582 Pathogen[ P0C206] interacts with 43 human partners: {Q8TE85;Q16649;O75528;Q7Z2X4;P27797;Q13469;O75444;P45984;O75469;Q96PU8;Q8NI51;P26358;P55055;O75626;O15164;Q01201;O00321;Q9BQA5;P27986;Q9Y6X2;P49593;Q99581;Q99081;P51610;Q96JE7;P35680;P49711;P15923;Q01094;Q03052;O43597;P60953;Q04724;O15162;Q15797;Q99966;Q14397;Q96AE4;Q9UBC3;Q96I24;P31249;P11473;Q00534}

19583 Pathogen[ P03363] interacts with 34 human partners: {Q16649;Q96I24;Q14397;Q15797;Q04724;Q8NI51;P31249;Q96PU8;P49711;O00321;P11473;Q9Y6X2;P15923;Q00534;Q8TE85;P20264;Q96AE4;Q01094;O75444;P27797;Q9BQA5;P26358;Q13469;Q01201;Q99581;Q8IYA7;Q99081;O75626;Q9UBC3;P60953;P27986;Q03052;O75528;P51610}

19584 [Cluster 1781]GO:0045655+P biological\_process [name] regulation of monocyte differentiation [def] "Any process that modulates the frequency, rate or extent of monocyte differentiation." [GOC

19585 Pathogen[ Q2Q067] interacts with 1 human partners: {Q92985}

19586 Pathogen[ P0C214] interacts with 1 human partners: {Q92985}

19587 Pathogen[ P03346] interacts with 1 human partners: {Q92985}

19588 Pathogen[ Q85601] interacts with 1 human partners: {Q92985}

19589 Pathogen[ P14079] interacts with 1 human partners: {Q92985}

19590 Pathogen[ P03383] interacts with 1 human partners: {Q92985}

19591 Pathogen[ P03410] interacts with 1 human partners: {Q92985}

19592 Pathogen[ P14075] interacts with 1 human partners: {Q92985}

19593 Pathogen[ P0C206] interacts with 1 human partners: {Q92985}

19594 Pathogen[ P03363] interacts with 1 human partners: {Q92985}

19595 [Cluster 1782]GO:0032456+P biological\_process [name] endocytic recycling [def] "The directed movement of membrane-bounded vesicles from recycling endosomes back to the plasma membrane where they are recycled for further rounds of transport." [GOC

19596 Pathogen[ Q2Q067] interacts with 1 human partners: {O75154}

19597 Pathogen[ P0C214] interacts with 1 human partners: {O75154}

19598 Pathogen[ P03346] interacts with 3 human partners: {P42566;O95219;O75154}

19599 Pathogen[ Q85601] interacts with 1 human partners: {O75154}

19600 Pathogen[ P14079] interacts with 2 human partners: {P42566;O75154}

19601 Pathogen[ P03383] interacts with 1 human partners: {O75154}

19602 Pathogen[ P03410] interacts with 3 human partners: {O75154;O95219;P42566}

19603 Pathogen[ P14075] interacts with 1 human partners: {O75154}

19604 Pathogen[ P0C206] interacts with 2 human partners: {O75154;P42566}

19605 Pathogen[ P03363] interacts with 2 human partners: {O95219;O75154}

19606 [Cluster 1783]GO:0070370+P biological\_process [name] cellular heat acclimation [def] "Any process that increases heat tolerance of a cell in response to high temperatures." [GOC

19607 Pathogen[ Q2Q067] interacts with 1 human partners: {Q16576}

19608 Pathogen[ P0C214] interacts with 1 human partners: {Q16576}

19609 Pathogen[ P03346] interacts with 1 human partners: {Q16576}

19610 Pathogen[ Q85601] interacts with 1 human partners: {Q16576}

19611 Pathogen[ P14079] interacts with 1 human partners: {Q16576}

19612 Pathogen[ P03383] interacts with 1 human partners: {Q16576}

19613 Pathogen[ P03410] interacts with 1 human partners: {Q16576}

19614 Pathogen[ P14075] interacts with 1 human partners: {Q16576}

19615 Pathogen[ P0C206] interacts with 1 human partners: {Q16576}

19616 Pathogen[ P03363] interacts with 1 human partners: {Q16576}

19617 [Cluster 1784]GO:0006646+P biological\_process [name] phosphatidylethanolamine biosynthetic process [def] "The chemical reactions and pathways resulting in the formation of phosphatidylethanolamine, any of a class of glycerophospholipids in which a

phosphatidyl group is esterified to the hydroxyl group of ethanolamine." [ISBN  
19618 Pathogen[ Q2Q067] interacts with 3 human partners:{Q9UG56;Q92539;Q14693}  
19619 Pathogen[ P0C214] interacts with 4 human partners:{Q92539;Q9BQK8;Q9UG56;Q14693}  
19620 Pathogen[ P03346] interacts with 3 human partners:{Q92539;Q9UG56;Q14693}  
19621 Pathogen[ Q85601] interacts with 3 human partners:{Q9UG56;Q92539;Q14693}  
19622 Pathogen[ P14079] interacts with 4 human partners:{Q9BQK8;Q14693;Q92539;Q9UG56}  
19623 Pathogen[ P03383] interacts with 2 human partners:{Q92539;Q14693}  
19624 Pathogen[ P03410] interacts with 4 human partners:{Q9BQK8;Q14693;Q92539;Q9UG56}  
19625 Pathogen[ P14075] interacts with 3 human partners:{Q92539;Q9UG56;Q14693}  
19626 Pathogen[ P0C206] interacts with 4 human partners:{Q92539;Q9UG56;Q9BQK8;Q14693}  
19627 Pathogen[ P03363] interacts with 1 human partners:{Q92539}  
19628 [Cluster 1785]GO:0009101+P biological\_process [name] glycoprotein biosynthetic process  
[def] "The chemical reactions and pathways resulting in the formation of glycoproteins,  
any protein that contains covalently bound glucose (i.e. monosaccharide) residues\_ the  
glycose occurs most commonly as oligosaccharide or fairly small polysaccharide but  
occasionally as monosaccharide." [GOC  
19629 Pathogen[ Q2Q067] interacts with 1 human partners:{Q15025}  
19630 Pathogen[ P0C214] interacts with 1 human partners:{Q15025}  
19631 Pathogen[ P03346] interacts with 1 human partners:{Q15025}  
19632 Pathogen[ Q85601] interacts with 1 human partners:{Q15025}  
19633 Pathogen[ P14079] interacts with 1 human partners:{Q15025}  
19634 Pathogen[ P03383] interacts with 1 human partners:{Q15025}  
19635 Pathogen[ P03410] interacts with 1 human partners:{Q15025}  
19636 Pathogen[ P14075] interacts with 1 human partners:{Q15025}  
19637 Pathogen[ P0C206] interacts with 1 human partners:{Q15025}  
19638 Pathogen[ P03363] interacts with 1 human partners:{Q15025}  
19639 [Cluster 1786]GO:0009992+P biological\_process [name] cellular water homeostasis  
[def] "Any process involved in the maintenance of an internal steady state of water  
within a cell." [GOC  
19640 Pathogen[ Q2Q067] interacts with 1 human partners:{P20073}  
19641 Pathogen[ P0C214] interacts with 1 human partners:{P20073}  
19642 Pathogen[ P03346] interacts with 1 human partners:{P20073}  
19643 Pathogen[ Q85601] interacts with 1 human partners:{P20073}  
19644 Pathogen[ P14079] interacts with 1 human partners:{P20073}  
19645 Pathogen[ P03383] interacts with 1 human partners:{P20073}  
19646 Pathogen[ P03410] interacts with 1 human partners:{P20073}  
19647 Pathogen[ P14075] interacts with 1 human partners:{P20073}  
19648 Pathogen[ P0C206] interacts with 1 human partners:{P20073}  
19649 Pathogen[ P03363] interacts with 1 human partners:{P20073}  
19650 [Cluster 1787]GO:0030218+P biological\_process [name] erythrocyte differentiation  
[def] "The process in which a myeloid precursor cell acquires specializes features of an  
erythrocyte." [GOC  
19651 Pathogen[ Q2Q067] interacts with 15 human  
partners:{Q8IZD2;P10827;P15976;Q02447;P22557;P55347;P62263;Q8IX07;O00321;Q9UKV3;P231  
93;P39019;Q99717;Q99814;P17947}  
19652 Pathogen[ P0C214] interacts with 14 human  
partners:{P55347;O00321;P39019;P62263;P17947;P22557;Q8IX07;Q02447;Q99814;Q99717;Q9UK  
V3;P23193;P22830;Q8IZD2}  
19653 Pathogen[ P03346] interacts with 18 human  
partners:{P10827;O00321;Q99717;P22557;Q13351;Q9UKV3;P17542;P15976;Q8IX07;Q99814;P390  
19;P14317;P55347;P17947;P23193;P62263;Q02447;Q8IZD2}  
19654 Pathogen[ Q85601] interacts with 15 human  
partners:{P15976;P39019;Q99814;P62263;Q9UKV3;Q99717;Q8IX07;P10827;Q02447;P23193;P143  
17;P55347;P17947;Q8IZD2;O00321}  
19655 Pathogen[ P14079] interacts with 17 human  
partners:{Q99814;O00321;Q8TAG9;P55347;P22557;Q02447;P15976;O00115;P10827;P35611;P390  
19;P62263;Q9UKV3;Q8IX07;Q13351;P22830;P23193}  
19656 Pathogen[ P03383] interacts with 9 human  
partners:{P39019;P23193;O00321;P55347;Q02447;Q9UKV3;Q99717;P62263;P17947}  
19657 Pathogen[ P03410] interacts with 17 human  
partners:{Q02447;Q99814;P17947;Q99717;O00321;P23193;P22557;Q8IX07;Q9UKV3;Q8TAG9;P228  
30;P55347;P62263;O00115;P39019;P35611;P15976}  
19658 Pathogen[ P14075] interacts with 9 human  
partners:{Q99717;Q9UKV3;P55347;P23193;P17947;Q02447;P39019;P62263;O00321}  
19659 Pathogen[ P0C206] interacts with 18 human  
partners:{P23193;P14317;Q99717;P62263;P15976;O00321;P22557;Q02447;P22830;P17947;P390  
19;Q8IX07;Q99814;Q8TAG9;Q8IZD2;Q9UKV3;P10827;P55347}  
19660 Pathogen[ P03363] interacts with 11 human  
partners:{Q9UKV3;Q02447;P17947;P55347;O00321;P39019;Q99814;P14317;P23193;Q99717;P622  
63}  
19661 [Cluster 1788]GO:0006289+P biological\_process [name] nucleotide-excision repair  
[def] "A DNA repair process in which a small region of the strand surrounding the damage  
is removed from the DNA helix as an oligonucleotide. The small gap left in the DNA helix  
is filled in by the sequential action of DNA polymerase and DNA ligase. Nucleotide  
excision repair recognizes a wide range of substrates, including damage caused by UV  
irradiation (pyrimidine dimers and 6-4 photoproducts) and chemicals (intrastrand

- cross-links and bulky adducts)." [PMID
- 19662 Pathogen[ Q2Q067] interacts with 49 human  
partners: {Q15054;P52434;Q9Y2M0;P54252;Q6PJP8;Q92889;P27694;Q13889;P19388;P52435;Q969S2;P35244;P32780;P30876;P19387;P61218;Q92759;P54727;P49005;Q16531;Q13156;Q00597;P54725;P12004;P62487;P51948;P15927;P56282;Q9HCU8;P50613;O15527;Q03468;P62875;P24928;Q13216;P23193;Q96T76;P41208;P35251;Q01831;P53803;Q8IY92;Q92466;Q6ZYL4;Q9HCS7;Q13888;P28715;P51946;P23025}
- 19663 Pathogen[ P0C214] interacts with 46 human  
partners: {P51946;Q9HCS7;Q00597;Q13156;P30876;Q92889;P53803;P50613;P23025;P52435;Q6ZYL4;P54725;P61218;P35251;Q9Y2M0;P49005;Q9HCU8;Q13216;Q6PJP8;P28715;P62487;P51948;P15927;P35244;P62875;P54727;P32780;P41208;P24928;Q01831;Q15054;Q13888;P52434;P27694;Q8IY92;P19387;P23193;P19388;O15527;Q92466;P56282;Q16531;Q03468;Q92759;P54252;Q96T76}
- 19664 Pathogen[ P03346] interacts with 54 human  
partners: {P12004;P28715;P52434;Q9HCU8;P27694;P07992;P35244;P35250;Q16531;Q13156;Q13888;P56282;P53803;P61218;P49005;Q9HCS7;Q13889;P62487;Q969S2;P41208;P19388;Q03468;Q6ZYL4;Q01831;P52435;P51587;P51946;P36954;P15927;P54727;P35249;Q13216;Q92759;Q92889;P30876;Q00597;P54725;P23025;Q6PJP8;P35251;P24928;P23193;Q92466;Q8IY92;O15527;Q9Y2M0;P40937;P51948;P32780;Q96T76;P62875;Q15054;P19387;P54252}
- 19665 Pathogen[ Q85601] interacts with 53 human  
partners: {P51946;Q9Y2M0;P36954;O15527;Q9HCS7;Q96T76;P23025;Q01831;Q6ZYL4;Q969S2;Q16531;P56282;Q13888;Q13216;P35244;P53803;P61218;Q9UGP5;P49005;P51948;Q15054;P27694;Q00597;Q96FI4;P54252;Q92889;P28715;P62487;P19388;Q03468;P54727;Q8IY92;P15927;Q92759;P32780;P52435;P54725;P35251;P50613;P23193;Q9HCU8;Q13156;P19387;Q6PJP8;P12004;P24928;P30876;P52434;Q92466;P19447;P51587;P62875;P41208}
- 19666 Pathogen[ P14079] interacts with 58 human  
partners: {P62875;Q8TAT5;P28715;P19387;P51946;Q9UGP5;P62487;P40937;P52434;Q16531;P49005;O15514;P54252;P30876;Q00597;P61218;P51587;Q9HCU8;Q13216;Q13889;P53803;O15527;Q13156;Q9HCS7;P23025;P50613;Q13888;Q15054;P35250;P19388;Q6ZYL4;P56282;P52435;P35251;Q969S2;Q92759;Q96FI4;Q92889;Q9Y2M0;P32780;P41208;P15927;P23193;P27694;Q03468;Q92466;P12004;P24928;Q01831;Q6PJP8;P35244;P54727;P36954;Q96T76;P07992;P19447;Q8IY92;P51948}
- 19667 Pathogen[ P03383] interacts with 44 human  
partners: {P53803;Q96T76;Q9HCU8;Q6ZYL4;Q13216;P51948;Q9HCS7;O15527;Q13888;P23193;P27694;P41208;Q6PJP8;P52434;P61218;P49005;Q01831;P56282;P62487;P54252;P15927;P19387;P50613;P51946;P24928;Q03468;P23025;P54725;P35244;Q9Y2M0;P54727;Q92759;Q15054;Q8IY92;Q00597;P62875;P52435;P19388;Q16531;Q13156;Q92466;P30876;P32780;P35251}
- 19668 Pathogen[ P03410] interacts with 59 human  
partners: {P23025;P35244;Q96FI4;Q96T76;P19387;Q13889;P36954;P07992;P24928;P51946;Q6ZYL4;P30876;P54252;Q92889;P56282;P23193;Q03468;P54725;P28715;Q8TAT5;Q92466;O15514;P50613;Q01831;Q9HCS7;Q9UGP5;P35251;P52435;Q8IY92;Q6PJP8;Q00597;O15527;P51587;P53803;P19447;Q13156;P62875;Q15054;P61218;Q16531;Q13216;P51948;Q13888;P52434;P62487;Q969S2;P49005;P27694;P15927;P35250;Q9Y2M0;P40937;P41208;P19388;P12004;P32780;Q92759;Q9HCU8;P54727}
- 19669 Pathogen[ P14075] interacts with 45 human  
partners: {Q92759;P23025;P30876;Q01831;Q6ZYL4;P50613;O15527;P19388;P61218;Q13216;P49005;P19387;P15927;P54252;P62487;Q9Y2M0;Q03468;Q13156;P35244;P23193;Q13889;P24928;P54727;P35251;Q16531;Q15054;P41208;P27694;P51946;P32780;Q9HCS7;P54725;Q9HCU8;P56282;P62875;Q92466;Q00597;Q6PJP8;P52434;Q8IY92;Q96T76;P51948;P52435;P53803;Q13888}
- 19670 Pathogen[ P0C206] interacts with 58 human  
partners: {P62875;Q9Y2M0;P28715;P54725;P23193;P35251;P36954;O15527;Q9HCU8;Q13156;P51587;Q6PJP8;P19388;P61218;Q03468;Q16531;P49005;P54252;Q13216;Q9UGP5;P07992;P19447;P53803;O15514;Q15054;P19387;Q13888;P50613;Q92889;Q8TAT5;Q01831;Q92759;P54727;P49916;Q96FI4;P52435;P62487;P32780;Q96T76;Q969S2;Q13889;P41208;P56282;Q00597;P27694;P15927;P24928;Q6ZYL4;Q92466;P35244;Q8IY92;Q9HCS7;P23025;P52434;P51946;P51948;P12004;P30876}
- 19671 Pathogen[ P03363] interacts with 43 human  
partners: {P27694;Q6ZYL4;O15527;P54727;P19388;Q00597;P30876;Q9Y2M0;Q9HCS7;Q01831;Q13888;P32780;Q16531;Q92759;P19387;P61218;P51946;Q96FI4;Q92889;P35251;P23025;P24928;P54252;P49005;P35244;P41208;P15927;Q9HCU8;Q96T76;Q13156;Q6PJP8;Q8IY92;P54725;P62487;P23193;Q92466;Q03468;Q15054;Q13216;P53803;P52435;P52434;Q969S2}
- 19672 [Cluster 1789]GO:0030261+P biological\_process [name] chromosome condensation [def] "The progressive compaction of dispersed interphase chromatin into threadlike chromosomes prior to mitotic or meiotic nuclear division, or during apoptosis, in eukaryotic cells." [GOC
- 19673 Pathogen[ Q2Q067] interacts with 9 human  
partners: {P42695;O95347;P11388;Q86XI2;Q15003;Q15021;Q86YI8;Q14683;Q9BPX3}
- 19674 Pathogen[ P0C214] interacts with 9 human  
partners: {Q9BPX3;Q86XI2;Q15003;P42695;O95347;P11388;Q86YI8;Q14683;Q15021}
- 19675 Pathogen[ P03346] interacts with 10 human  
partners: {P11388;O95347;Q86XI2;Q6IBW4;Q9BPX3;Q15021;Q14683;P42695;Q86YI8;Q15003}
- 19676 Pathogen[ Q85601] interacts with 9 human  
partners: {O95347;P42695;Q9BPX3;Q14683;P11388;Q86YI8;Q86XI2;Q15003;Q15021}
- 19677 Pathogen[ P14079] interacts with 10 human  
partners: {P11388;Q6IBW4;Q15003;O95347;Q86YI8;Q9BPX3;Q86XI2;Q15021;Q14683;P42695}
- 19678 Pathogen[ P03383] interacts with 7 human  
partners: {Q14683;Q86XI2;O95347;Q15003;Q86YI8;Q9BPX3;Q15021}
- 19679 Pathogen[ P03410] interacts with 11 human  
partners: {P42695;Q15003;O95347;P04553;Q14683;P11388;Q6IBW4;Q9BPX3;Q86XI2;Q15021;Q86Y



I8}

19680 Pathogen[ P14075] interacts with 7 human partners:{Q14683;Q86XI2;Q95347;Q86YI8;Q15003;Q9BPX3;Q15021}

19681 Pathogen[ P0C206] interacts with 11 human partners:{Q9BPX3;P42695;Q15021;Q15003;Q86XI2;Q95347;Q6IBW4;Q14683;Q86YI8;P11388;Q9NTJ3}

19682 Pathogen[ P03363] interacts with 7 human partners:{Q15021;Q95347;Q86XI2;Q9BPX3;P42695;Q14683;Q15003}

19683 [Cluster 1790]GO:0043928+P biological\_process [name] exonucleolytic nuclear-transcribed mRNA catabolic process involved in deadenylation-dependent decay [def] "The chemical reactions and pathways resulting in the breakdown of the transcript body of a nuclear-transcribed mRNA that occurs when the ends are not protected by the 3'-poly(A) tail." [GOC

19684 Pathogen[ Q2Q067] interacts with 25 human partners:{Q8IU60;P62312;Q9Y333;Q9NQT4;Q8IZH2;Q8IZD4;Q9Y2L1;Q9NPI6;Q06265;Q96F86;Q9UK45;Q96C86;Q13868;Q9Y3B2;Q9NPD3;Q86TB9;P26196;Q5RKV6;Q15024;O15116;Q9Y4Z0;P62310;Q96B26;Q9Y4Y9;Q6P2E9}

19685 Pathogen[ P0C214] interacts with 25 human partners:{P62312;O15116;Q96C86;P26196;Q15024;Q6P2E9;Q9NPI6;Q9Y2L1;Q9Y3B2;Q5RKV6;Q9Y4Z0;Q9UK45;Q9Y4Y9;Q8IZH2;Q9Y333;Q9NPD3;P62310;Q86TB9;Q13868;Q8IU60;Q06265;Q9NQT4;Q96F86;Q96B26;Q8IZD4}

19686 Pathogen[ P03346] interacts with 26 human partners:{Q5RKV6;Q9NPI6;Q96C86;Q9Y4Y9;Q96B26;Q9Y3B2;Q9Y333;Q8IZH2;Q15024;Q8IU60;Q86TB9;Q9Y4Z0;Q6P2E9;Q9Y2L1;Q9NQT5;O15116;P26196;Q8IZD4;Q06265;Q9NQT4;P62312;Q9NPD3;Q96F86;P62310;Q9UK45;Q13868}

19687 Pathogen[ Q85601] interacts with 25 human partners:{Q5RKV6;Q6P2E9;Q9NPD3;Q9NPI6;O15116;Q13868;Q9UK45;Q9Y2L1;Q8IZH2;Q86TB9;Q96C86;P62310;Q9Y4Z0;Q9NQT4;Q9Y3B2;P62312;Q15024;Q8IZD4;Q06265;P26196;Q96F86;Q9Y333;Q96B26;Q8IU60;Q9Y4Y9}

19688 Pathogen[ P14079] interacts with 25 human partners:{Q9Y333;Q9Y3B2;Q8IZD4;Q8IU60;Q15024;Q9UK45;Q9NPI6;Q86TB9;Q9NQT4;Q13868;Q9NPD3;Q96C86;O15116;P62312;Q6P2E9;Q8IZH2;Q9Y4Z0;P26196;Q5RKV6;Q96F86;Q9Y2L1;P62310;Q96B26;Q9Y4Y9;Q06265}

19689 Pathogen[ P03383] interacts with 24 human partners:{Q06265;Q9Y2L1;Q8IU60;P62312;Q9Y4Y9;P26196;Q9Y3B2;P62310;Q9NPD3;Q9NQT4;Q9NPI6;Q9Y333;Q86TB9;Q96B26;Q8IZD4;Q9Y4Z0;Q9UK45;Q5RKV6;Q96C86;Q96F86;O15116;Q13868;Q15024;Q6P2E9}

19690 Pathogen[ P03410] interacts with 24 human partners:{Q8IU60;Q9Y2L1;Q9Y4Y9;P62310;Q9NPI6;Q06265;Q5RKV6;Q9Y333;Q13868;Q8IZH2;Q8IZD4;Q96B26;Q96F86;Q6P2E9;Q15024;Q9NQT4;Q9Y4Z0;Q86TB9;Q9NPD3;O15116;P62312;Q96C86;Q9UK45;Q9Y3B2}

19691 Pathogen[ P14075] interacts with 24 human partners:{Q6P2E9;Q9UK45;Q9NPD3;Q9Y4Z0;P26196;Q9NPI6;Q8IU60;Q9Y2L1;Q13868;P62312;Q9NQT4;Q8IZD4;O15116;Q86TB9;Q5RKV6;Q96B26;Q9Y333;Q96C86;Q15024;Q9Y4Y9;Q06265;Q9Y3B2;Q96F86;P62310}

19692 Pathogen[ P0C206] interacts with 25 human partners:{Q86TB9;Q8IZH2;Q96C86;Q9NPD3;Q5RKV6;Q13868;P26196;Q9NPI6;Q96B26;Q9Y4Y9;Q9Y4Z0;Q9Y333;Q8IZD4;Q9UK45;Q06265;Q6P2E9;Q96F86;Q15024;Q9Y2L1;Q9Y3B2;P62312;Q9NQT4;P62310;Q8IU60;O15116}

19693 Pathogen[ P03363] interacts with 25 human partners:{Q96B26;Q9NQT4;Q9Y4Y9;Q5RKV6;Q9Y4Z0;P62312;Q15024;Q9Y3B2;Q6P2E9;Q8IZD4;Q9NPD3;O15116;Q9Y333;Q96F86;Q9Y2L1;P26196;Q13868;P62310;Q9NQT5;Q86TB9;Q9UK45;Q96C86;Q9NPI6;Q8IZH2;Q8IU60}

19694 [Cluster 1791]GO:0060598+P biological\_process [name] dichotomous subdivision of terminal units involved in mammary gland duct morphogenesis [def] "The process in which the terminal end of a mammary duct bifurcates." [GOC

19695 Pathogen[ Q2Q067] interacts with 1 human partners:{Q92754}

19696 Pathogen[ P0C214] interacts with 1 human partners:{Q92754}

19697 Pathogen[ P03346] interacts with 1 human partners:{Q92754}

19698 Pathogen[ Q85601] interacts with 1 human partners:{Q92754}

19699 Pathogen[ P14079] interacts with 1 human partners:{Q92754}

19700 Pathogen[ P03383] interacts with 1 human partners:{Q92754}

19701 Pathogen[ P03410] interacts with 1 human partners:{Q92754}

19702 Pathogen[ P14075] interacts with 1 human partners:{Q92754}

19703 Pathogen[ P0C206] interacts with 1 human partners:{Q92754}

19704 Pathogen[ P03363] interacts with 1 human partners:{Q92754}

19705 [Cluster 1792]GO:0032966+P biological\_process [name] negative regulation of collagen biosynthetic process [def] "Any process that stops, prevents, or reduces the frequency, rate or extent of the chemical reactions and pathways resulting in the formation of collagen, any of a group of fibrous proteins of very high tensile strength that form the main component of connective tissue in animals." [GOC

19706 Pathogen[ Q2Q067] interacts with 1 human partners:{P33076}

19707 Pathogen[ P0C214] interacts with 1 human partners:{P33076}

19708 Pathogen[ P03346] interacts with 1 human partners:{P33076}

19709 Pathogen[ Q85601] interacts with 1 human partners:{P33076}

19710 Pathogen[ P14079] interacts with 1 human partners:{P33076}

19711 Pathogen[ P03383] interacts with 1 human partners:{P33076}

19712 Pathogen[ P03410] interacts with 1 human partners:{P33076}

19713 Pathogen[ P14075] interacts with 1 human partners:{P33076}

19714 Pathogen[ P0C206] interacts with 1 human partners:{P33076}

19715 Pathogen[ P03363] interacts with 1 human partners:{P33076}

19716 [Cluster 1793]GO:0043619+P biological\_process [name] regulation of transcription from RNA polymerase II promoter in response to oxidative stress [def] "Modulation of the frequency, rate or extent of transcription from an RNA polymerase II promoter as a result of a stimulus indicating the organism is under oxidative stress, a state often resulting from exposure to high levels of reactive oxygen species, e.g. superoxide anions, hydrogen peroxide (H2O2), and hydroxyl radicals." [GOC

19717 Pathogen[ Q2Q067] interacts with 3 human partners:{P27540;Q96ST3;Q99814}

19718 Pathogen[ P0C214] interacts with 3 human partners:{Q99814;Q96ST3;P27540}

19719 Pathogen[ P03346] interacts with 3 human partners:{Q96ST3;P27540;Q99814}

19720 Pathogen[ Q85601] interacts with 3 human partners:{Q99814;P27540;Q96ST3}

19721 Pathogen[ P14079] interacts with 3 human partners:{Q99814;Q96ST3;P27540}

19722 Pathogen[ P03383] interacts with 2 human partners:{P27540;Q96ST3}

19723 Pathogen[ P03410] interacts with 3 human partners:{Q99814;Q96ST3;P27540}

19724 Pathogen[ P14075] interacts with 2 human partners:{Q96ST3;P27540}

19725 Pathogen[ P0C206] interacts with 3 human partners:{Q96ST3;P27540;Q99814}

19726 Pathogen[ P03363] interacts with 3 human partners:{P27540;Q96ST3;Q99814}

19727 [Cluster 1794]GO:0032206+P biological\_process [name] positive regulation of telomere maintenance [def] "Any process that activates or increases the frequency, rate or extent of a process that affects and monitors the activity of telomeric proteins and the length of telomeric DNA." [GOC

19728 Pathogen[ Q2Q067] interacts with 2 human partners:{Q15554;Q9BSI4}

19729 Pathogen[ P0C214] interacts with 2 human partners:{Q9BSI4;Q15554}

19730 Pathogen[ P03346] interacts with 2 human partners:{Q9BSI4;Q15554}

19731 Pathogen[ Q85601] interacts with 1 human partners:{Q15554}

19732 Pathogen[ P14079] interacts with 2 human partners:{Q9BSI4;Q15554}

19733 Pathogen[ P03383] interacts with 2 human partners:{Q15554;Q9BSI4}

19734 Pathogen[ P03410] interacts with 2 human partners:{Q15554;Q9BSI4}

19735 Pathogen[ P14075] interacts with 2 human partners:{Q15554;Q9BSI4}

19736 Pathogen[ P0C206] interacts with 2 human partners:{Q15554;Q9BSI4}

19737 Pathogen[ P03363] interacts with 2 human partners:{Q15554;Q9BSI4}

19738 [Cluster 1795]GO:0061014+P biological\_process [name] positive regulation of mRNA catabolic process [def] "Any process that increases the rate, frequency, or extent of a mRNA catabolic process, the chemical reactions and pathways resulting in the breakdown of RNA, ribonucleic acid, one of the two main type of nucleic acid, consisting of a long, unbranched macromolecule formed from ribonucleotides joined in 3',5'-phosphodiester linkage." [GOC

19739 Pathogen[ Q2Q067] interacts with 2 human partners:{Q8TCS8;Q7Z2W4}

19740 Pathogen[ P0C214] interacts with 2 human partners:{Q7Z2W4;Q8TCS8}

19741 Pathogen[ P03346] interacts with 2 human partners:{Q8TCS8;Q7Z2W4}

19742 Pathogen[ Q85601] interacts with 2 human partners:{Q7Z2W4;Q8TCS8}

19743 Pathogen[ P14079] interacts with 3 human partners:{Q7Z2W4;O00178;Q8TCS8}

19744 Pathogen[ P03383] interacts with 2 human partners:{Q8TCS8;Q7Z2W4}

19745 Pathogen[ P03410] interacts with 3 human partners:{Q8TCS8;Q7Z2W4;O00178}

19746 Pathogen[ P14075] interacts with 2 human partners:{Q7Z2W4;Q8TCS8}

19747 Pathogen[ P0C206] interacts with 2 human partners:{Q8TCS8;Q7Z2W4}

19748 Pathogen[ P03363] interacts with 1 human partners:{Q7Z2W4}

19749 [Cluster 1796]GO:0021892+P biological\_process [name] cerebral cortex GABAergic interneuron differentiation [def] "The process in which a relatively unspecialized cell acquires specialized features of a GABAergic interneuron residing in the cerebral cortex." [GO\_REF

19750 Pathogen[ Q2Q067] interacts with 1 human partners:{Q07687}

19751 Pathogen[ P0C214] interacts with 1 human partners:{Q07687}

19752 Pathogen[ P03346] interacts with 1 human partners:{P56177}

19753 Pathogen[ Q85601] interacts with 1 human partners:{Q07687}

19754 Pathogen[ P14079] interacts with 1 human partners:{Q07687}

19755 Pathogen[ P03383] interacts with 1 human partners:{Q07687}

19756 Pathogen[ P03410] interacts with 1 human partners:{Q07687}

19757 Pathogen[ P14075] interacts with 1 human partners:{Q07687}

19758 Pathogen[ P0C206] interacts with 2 human partners:{Q07687;P56177}

19759 Pathogen[ P03363] interacts with 2 human partners:{P56177;Q07687}

19760 [Cluster 1797]GO:0070536+P biological\_process [name] protein K63-linked deubiquitination [def] "A protein deubiquitination process in which a K63-linked ubiquitin chain, i.e. a polymer of ubiquitin formed by linkages between lysine residues at position 63 of the ubiquitin monomers, is removed from a protein." [GOC

19761 Pathogen[ Q2Q067] interacts with 1 human partners:{Q9NWW8}

19762 Pathogen[ P0C214] interacts with 1 human partners:{Q9NWW8}

19763 Pathogen[ P03346] interacts with 2 human partners:{Q9UHP3;Q9NWW8}

19764 Pathogen[ Q85601] interacts with 2 human partners:{Q9NQC7;Q9NWW8}

19765 Pathogen[ P14079] interacts with 3 human partners:{O00487;Q9NWW8;Q9NQC7}

19766 Pathogen[ P03383] interacts with 1 human partners:{Q9NWW8}

19767 Pathogen[ P03410] interacts with 1 human partners:{Q9NWW8}

19768 Pathogen[ P14075] interacts with 1 human partners:{Q9NWW8}  
19769 Pathogen[ P0C206] interacts with 3 human partners:{Q9NQC7;Q9NWW8;Q9UHP3}  
19770 Pathogen[ P03363] interacts with 2 human partners:{Q9UHP3;Q9NWW8}  
19771 [Cluster 1798]GO:0043983+P biological\_process [name] histone H4-K12 acetylation  
[def] "The modification of histone H4 by the addition of an acetyl group to a lysine  
residue at position 12 of the histone." [GOC  
19772 Pathogen[ Q2Q067] interacts with 5 human  
partners:{Q6IE81;Q9HAF1;Q9UNL4;Q92830;O60885}  
19773 Pathogen[ P0C214] interacts with 6 human  
partners:{Q9UNL4;Q9HAF1;O95251;Q6IE81;O60885;Q92830}  
19774 Pathogen[ P03346] interacts with 6 human  
partners:{Q9UNL4;Q92830;O95251;Q6IE81;O60885;Q9HAF1}  
19775 Pathogen[ Q85601] interacts with 6 human  
partners:{O95251;Q9HAF1;Q9UNL4;Q92830;Q6IE81;O60885}  
19776 Pathogen[ P14079] interacts with 6 human  
partners:{Q92830;O95251;Q9UNL4;Q9HAF1;Q6IE81;O60885}  
19777 Pathogen[ P03383] interacts with 6 human  
partners:{O95251;Q9UNL4;Q92830;O60885;Q9HAF1;Q6IE81}  
19778 Pathogen[ P03410] interacts with 5 human  
partners:{Q92830;O60885;O95251;Q9UNL4;Q6IE81}  
19779 Pathogen[ P14075] interacts with 6 human  
partners:{Q6IE81;Q9HAF1;O95251;Q9UNL4;O60885;Q92830}  
19780 Pathogen[ P0C206] interacts with 6 human  
partners:{Q92830;O95251;O60885;Q9HAF1;Q6IE81;Q9UNL4}  
19781 Pathogen[ P03363] interacts with 6 human  
partners:{Q6IE81;Q9HAF1;Q9UNL4;O60885;Q92830;O95251}  
19782 [Cluster 1799]GO:0016458+P biological\_process [name] gene silencing [def] "Any  
transcriptional or post-transcriptional process carried out at the cellular level that  
results in long-term gene inactivation." [GOC  
19783 Pathogen[ Q2Q067] interacts with 4 human partners:{Q8IXJ6;P35712;P26358;Q9HD42}  
19784 Pathogen[ P0C214] interacts with 4 human partners:{Q9HD42;P26358;Q8IXJ6;P35712}  
19785 Pathogen[ P03346] interacts with 5 human  
partners:{Q9HD42;Q8IXJ6;P26358;Q96GD3;P35712}  
19786 Pathogen[ Q85601] interacts with 4 human partners:{P35712;P26358;Q8IXJ6;Q9HD42}  
19787 Pathogen[ P14079] interacts with 4 human partners:{P35712;Q9HD42;P26358;Q8IXJ6}  
19788 Pathogen[ P03383] interacts with 3 human partners:{P35712;Q9HD42;P26358}  
19789 Pathogen[ P03410] interacts with 4 human partners:{P35712;Q8IXJ6;P26358;Q9HD42}  
19790 Pathogen[ P14075] interacts with 3 human partners:{P26358;P35712;Q9HD42}  
19791 Pathogen[ P0C206] interacts with 4 human partners:{P26358;Q8IXJ6;P35712;Q9HD42}  
19792 Pathogen[ P03363] interacts with 3 human partners:{P26358;P35712;Q9HD42}  
19793 [Cluster 1800]GO:0006936+P biological\_process [name] muscle contraction [def] "A  
process in which force is generated within muscle tissue, resulting in a change in  
muscle geometry. Force generation involves a chemo-mechanical energy conversion step  
that is carried out by the actin/myosin complex activity, which generates force through  
ATP hydrolysis." [GOC  
19794 Pathogen[ Q2Q067] interacts with 12 human  
partners:{P50402;Q86U42;Q9UKX2;P60660;Q13884;P02511;P46939;Q13045;P12883;O60504;Q9BX  
66;P17661}  
19795 Pathogen[ P0C214] interacts with 19 human  
partners:{P68133;Q9UKX2;P02511;P14649;Q9BX66;P60660;Q13884;Q13045;P13535;P50402;P469  
39;P62736;P12883;O60504;P13533;Q9Y623;Q86U42;P35749;P17661}  
19796 Pathogen[ P03346] interacts with 16 human  
partners:{Q86U42;P60660;P62736;Q13884;Q9BX66;P46939;Q13424;P14649;P17661;P02511;P504  
02;Q9UKX2;O60504;Q13045;O75506;Q9UBF9}  
19797 Pathogen[ Q85601] interacts with 19 human  
partners:{P68133;Q13884;P17661;P13533;Q9BX66;P14649;Q13045;Q9UKX2;P02511;P46939;P357  
49;P12883;P50402;O60504;P13535;Q86U42;P60660;Q9Y623;P62736}  
19798 Pathogen[ P14079] interacts with 24 human  
partners:{P07951;P02511;Q9UBF9;Q13045;O60504;Q9UKX2;Q13424;P14649;P23327;P46939;O755  
06;P68032;Q16586;Q14353;P63267;Q86U42;P60660;P12883;Q05682;P49023;P50402;P17661;Q9BX  
66;P68133}  
19799 Pathogen[ P03383] interacts with 10 human  
partners:{Q13884;P17661;P02511;P46939;Q9UKX2;P12883;P50402;O60504;Q13045;Q86U42}  
19800 Pathogen[ P03410] interacts with 25 human  
partners:{Q14353;P62736;Q9UKX2;Q9UBF9;P17661;Q05682;Q13045;P23327;Q13884;P07951;P025  
11;P46939;P12883;O75506;P68133;O60504;P50402;P14649;P13533;Q86U42;Q13424;P60660;P135  
35;Q9BX66;Q16635}  
19801 Pathogen[ P14075] interacts with 10 human  
partners:{Q13884;Q9UKX2;P17661;P50402;P23327;P46939;P02511;O60504;Q86U42;Q13045}  
19802 Pathogen[ P0C206] interacts with 21 human  
partners:{P46939;P50402;P17661;O60504;P13533;P62736;Q9Y623;Q13045;P60660;Q86U42;P146  
49;P68133;Q13884;P12883;P35749;Q9UKX2;P23327;Q9BX66;P02511;Q13424;P13535}  
19803 Pathogen[ P03363] interacts with 15 human  
partners:{P46939;Q9BX66;P14649;Q9UKX2;Q9UBF9;P62736;Q13045;P68133;O75506;Q86U42;P176  
61;Q13884;P50402;P60660;Q13424}  
19804 [Cluster 1801]GO:0050728+P biological\_process [name] negative regulation of

inflammatory response [def] "Any process that stops, prevents, or reduces the frequency, rate or extent of the inflammatory response." [GOC

19805 Pathogen[ Q2Q067] interacts with 5 human partners:{Q9H0F6;P84022;Q9BQE4;Q9BZF9;P26651}

19806 Pathogen[ P0C214] interacts with 6 human partners:{P84022;Q9H0F6;P01008;P26651;Q9BZF9;Q9BQE4}

19807 Pathogen[ P03346] interacts with 4 human partners:{Q9H0F6;P84022;Q9BZF9;P26651}

19808 Pathogen[ Q85601] interacts with 6 human partners:{Q9BZF9;Q9H0F6;P26651;P84022;P01008;Q9BQE4}

19809 Pathogen[ P14079] interacts with 7 human partners:{Q9BQE4;O15553;P46695;Q9BZF9;Q9H0F6;Q13164;P0DJI8}

19810 Pathogen[ P03383] interacts with 6 human partners:{Q9H0F6;Q9BZF9;P01008;P84022;Q9BQE4;P26651}

19811 Pathogen[ P03410] interacts with 7 human partners:{P84022;P0DJI8;P26651;Q9BQE4;Q9BZF9;P46695;Q9H0F6}

19812 Pathogen[ P14075] interacts with 5 human partners:{Q9BQE4;P26651;Q9BZF9;P84022;Q9H0F6}

19813 Pathogen[ P0C206] interacts with 6 human partners:{P84022;P01008;P26651;Q9BQE4;Q9H0F6;Q9BZF9}

19814 Pathogen[ P03363] interacts with 4 human partners:{Q9BZF9;P84022;Q9H0F6;P26651}

19815 [Cluster 1802]GO:0022027+P biological\_process [name] interkinetic nuclear migration [def] "The movement of the nucleus of the ventricular zone cell between the apical and the basal zone surfaces. Mitosis occurs when the nucleus is near the apical surface, that is, the lumen of the ventricle." [GO\_REF

19816 Pathogen[ Q2Q067] interacts with 4 human partners:{O95359;O75410;Q86VS8;Q15154}

19817 Pathogen[ P0C214] interacts with 4 human partners:{Q15154;O95359;Q86VS8;O75410}

19818 Pathogen[ P03346] interacts with 5 human partners:{Q86VS8;O75410;Q15154;O95359;Q8N960}

19819 Pathogen[ Q85601] interacts with 4 human partners:{Q15154;Q86VS8;O75410;O95359}

19820 Pathogen[ P14079] interacts with 6 human partners:{O95359;Q9Y6A5;Q86VS8;Q8N960;O75410;Q15154}

19821 Pathogen[ P03383] interacts with 3 human partners:{O75410;Q15154;Q86VS8}

19822 Pathogen[ P03410] interacts with 6 human partners:{Q8N960;O95359;Q15154;Q86VS8;Q9Y6A5;O75410}

19823 Pathogen[ P14075] interacts with 3 human partners:{O75410;Q15154;Q86VS8}

19824 Pathogen[ P0C206] interacts with 6 human partners:{O95359;Q86VS8;O75410;Q9Y6A5;Q15154;Q8N960}

19825 Pathogen[ P03363] interacts with 5 human partners:{O75410;Q86VS8;O95359;Q15154;Q8N960}

19826 [Cluster 1803]GO:0002031+P biological\_process [name] G-protein coupled receptor internalization [def] "The process that results in the uptake of a G-protein coupled receptor into an endocytic vesicle." [PMID

19827 Pathogen[ Q2Q067] interacts with 1 human partners:{Q13888}

19828 Pathogen[ P0C214] interacts with 1 human partners:{Q13888}

19829 Pathogen[ P03346] interacts with 1 human partners:{Q13888}

19830 Pathogen[ Q85601] interacts with 1 human partners:{Q13888}

19831 Pathogen[ P14079] interacts with 1 human partners:{Q13888}

19832 Pathogen[ P03383] interacts with 1 human partners:{Q13888}

19833 Pathogen[ P03410] interacts with 1 human partners:{Q13888}

19834 Pathogen[ P14075] interacts with 1 human partners:{Q13888}

19835 Pathogen[ P0C206] interacts with 1 human partners:{Q13888}

19836 Pathogen[ P03363] interacts with 1 human partners:{Q13888}

19837 [Cluster 1804]GO:0055093+P biological\_process [name] response to hyperoxia [def] "Any process that results in a change in state or activity of a cell or an organism (in terms of movement, secretion, enzyme production, gene expression, etc.) as a result of a stimulus indicating increased oxygen tension." [GOC

19838 Pathogen[ Q2Q067] interacts with 4 human partners:{P09917;P29474;P38936;Q12983}

19839 Pathogen[ P0C214] interacts with 5 human partners:{P29474;P09917;P05121;P38936;Q12983}

19840 Pathogen[ P03346] interacts with 4 human partners:{P29474;Q12983;P09917;P38936}

19841 Pathogen[ Q85601] interacts with 5 human partners:{P09917;P05121;P29474;Q12983;P38936}

19842 Pathogen[ P14079] interacts with 5 human partners:{P03928;P38936;P11686;Q12983;P09917}

19843 Pathogen[ P03383] interacts with 2 human partners:{P29474;Q12983}

19844 Pathogen[ P03410] interacts with 7 human partners:{P05121;Q12983;P29474;P38936;P11686;P03928;P09917}

19845 Pathogen[ P14075] interacts with 2 human partners:{P29474;Q12983}

19846 Pathogen[ P0C206] interacts with 5 human partners:{P09917;Q12983;P38936;P29474;P05121}

19847 Pathogen[ P03363] interacts with 1 human partners:{P29474}

19848 [Cluster 1805]GO:0016239+P biological\_process [name] positive regulation of macroautophagy [def] "Any process, such as recognition of nutrient depletion, that activates or increases the rate of macroautophagy to bring cytosolic macromolecules to the vacuole/lysosome for degradation." [GOC

19849 Pathogen[ Q2Q067] interacts with 4 human partners:{O00267;Q14457;Q9UIL1;Q9BTA9}

19850 Pathogen[ P0C214] interacts with 6 human partners:{Q14457;O00267;P68402;Q6PKG0;Q9UILL1;Q9BTA9}

19851 Pathogen[ P03346] interacts with 4 human partners:{Q9UILL1;Q14457;O00267;Q9BTA9}

19852 Pathogen[ Q85601] interacts with 4 human partners:{Q14457;Q9BTA9;O00267;Q9UILL1}

19853 Pathogen[ P14079] interacts with 5 human partners:{Q9BTA9;Q9UILL1;Q6PKG0;Q14457;O00267}

19854 Pathogen[ P03383] interacts with 4 human partners:{Q14457;Q9BTA9;O00267;Q9UILL1}

19855 Pathogen[ P03410] interacts with 5 human partners:{O00267;Q14457;Q6PKG0;Q9UILL1;Q9BTA9}

19856 Pathogen[ P14075] interacts with 4 human partners:{Q14457;Q9BTA9;Q9UILL1;O00267}

19857 Pathogen[ P0C206] interacts with 5 human partners:{Q9UILL1;Q14457;Q6PKG0;O00267;Q9BTA9}

19858 Pathogen[ P03363] interacts with 4 human partners:{Q14457;O00267;Q9UILL1;Q9BTA9}

19859 [Cluster 1806]GO:0010745+P biological\_process [name] negative regulation of macrophage derived foam cell differentiation [def] "Any process that decreases the rate, frequency or extent of macrophage derived foam cell differentiation. Macrophage derived foam cell differentiation is the process in which a macrophage acquires the specialized features of a foam cell. A foam cell is a type of cell containing lipids in small vacuoles and typically seen in atherosclerotic lesions, as well as other conditions." [GOC

19860 Pathogen[ Q2Q067] interacts with 2 human partners:{P55055;P25963}

19861 Pathogen[ P0C214] interacts with 1 human partners:{P25963}

19862 Pathogen[ P03346] interacts with 2 human partners:{P25963;P55055}

19863 Pathogen[ Q85601] interacts with 2 human partners:{P55055;P25963}

19864 Pathogen[ P14079] interacts with 1 human partners:{P55055}

19865 Pathogen[ P03383] interacts with 1 human partners:{P25963}

19866 Pathogen[ P03410] interacts with 1 human partners:{P25963}

19867 Pathogen[ P14075] interacts with 1 human partners:{P25963}

19868 Pathogen[ P0C206] interacts with 2 human partners:{P25963;P55055}

19869 Pathogen[ P03363] interacts with 1 human partners:{P25963}

19870 [Cluster 1807]GO:0010243+P biological\_process [name] response to organic nitrogen [def] "Any process that results in a change in state or activity of a cell or an organism (in terms of movement, secretion, enzyme production, gene expression, etc.) as a result of an organic nitrogen stimulus. An organic nitrogen compound is formally a compound containing at least one carbon-nitrogen bond." [CHEBI

19871 Pathogen[ Q2Q067] interacts with 13 human partners:{P24385;Q96ST3;O15350;P51959;P55212;P09972;P24864;P61244;P38936;P49721;O15205;Q15797;P78543}

19872 Pathogen[ P0C214] interacts with 14 human partners:{P61244;P78543;P55212;P51959;O15350;P40261;P24385;P38936;O15205;P09972;P24864;Q96ST3;Q15797;P49721}

19873 Pathogen[ P03346] interacts with 14 human partners:{Q96ST3;P09972;P24385;Q15797;P49721;P24864;O15350;P55212;O15205;P61244;P51959;P38936;P78543;P40261}

19874 Pathogen[ Q85601] interacts with 13 human partners:{P24385;Q15797;P51959;P78543;P09972;P49721;O15205;P61244;O15350;P38936;P55212;P24864;Q96ST3}

19875 Pathogen[ P14079] interacts with 14 human partners:{P51959;P78543;P24864;Q96ST3;P09972;Q15797;O15350;P55212;P38936;O15205;P49721;P10620;Q16878;P61244}

19876 Pathogen[ P03383] interacts with 12 human partners:{P55212;P09972;P49721;P24385;Q15797;P78543;P51959;O15350;Q96ST3;P24864;P61244;O15205}

19877 Pathogen[ P03410] interacts with 13 human partners:{O15205;P49721;Q96ST3;P61244;P24385;P09972;P38936;P51959;Q15797;P78543;O15350;P55212;P24864}

19878 Pathogen[ P14075] interacts with 11 human partners:{Q96ST3;P51959;P55212;P61244;P49721;O15350;P78543;P09972;P24385;O15205;P24864}

19879 Pathogen[ P0C206] interacts with 13 human partners:{Q96ST3;P55212;O15205;P51959;P38936;P61244;Q15797;P09972;O15350;P49721;P24864;P78543;P24385}

19880 Pathogen[ P03363] interacts with 10 human partners:{O15205;P24864;P09972;P78543;Q15797;P61244;P55212;Q96ST3;P24385;P51959}

19881 [Cluster 1808]GO:0035994+P biological\_process [name] response to muscle stretch [def] "Any process that results in a change in state or activity of a cell or an organism (in terms of movement, secretion, enzyme production, gene expression, etc.) as a result of a myofibril being extended beyond its slack length." [GOC

19882 Pathogen[ Q2Q067] interacts with 1 human partners:{Q15327}

19883 Pathogen[ P0C214] interacts with 1 human partners:{Q15327}

19884 Pathogen[ P03346] interacts with 1 human partners:{Q15327}

19885 Pathogen[ Q85601] interacts with 1 human partners:{Q15327}

19886 Pathogen[ P14079] interacts with 1 human partners:{Q15327}

19887 Pathogen[ P03383] interacts with 1 human partners:{Q15327}

19888 Pathogen[ P03410] interacts with 1 human partners:{Q15327}

19889 Pathogen[ P14075] interacts with 1 human partners:{Q15327}

19890 Pathogen[ P0C206] interacts with 1 human partners:{Q15327}  
19891 Pathogen[ P03363] interacts with 1 human partners:{Q15327}  
19892 [Cluster 1809]GO:0086069+P  
19893 Pathogen[ Q2Q067] interacts with 1 human partners:{P15924}  
19894 Pathogen[ P0C214] interacts with 1 human partners:{P15924}  
19895 Pathogen[ P03346] interacts with 1 human partners:{P15924}  
19896 Pathogen[ Q85601] interacts with 1 human partners:{P15924}  
19897 Pathogen[ P14079] interacts with 1 human partners:{P15924}  
19898 Pathogen[ P03383] interacts with 1 human partners:{P15924}  
19899 Pathogen[ P03410] interacts with 1 human partners:{P15924}  
19900 Pathogen[ P14075] interacts with 1 human partners:{P15924}  
19901 Pathogen[ P0C206] interacts with 1 human partners:{P15924}  
19902 Pathogen[ P03363] interacts with 1 human partners:{P15924}  
19903 [Cluster 1810]GO:0031113+P biological\_process [name] regulation of microtubule polymerization [def] "Any process that modulates the frequency, rate or extent of microtubule polymerization." [GOC  
19904 Pathogen[ Q2Q067] interacts with 1 human partners:{Q9P270}  
19905 Pathogen[ P0C214] interacts with 2 human partners:{Q9P270;P36404}  
19906 Pathogen[ P03346] interacts with 2 human partners:{P36404;Q9P270}  
19907 Pathogen[ Q85601] interacts with 1 human partners:{Q9P270}  
19908 Pathogen[ P14079] interacts with 2 human partners:{Q9P270;P10636}  
19909 Pathogen[ P03383] interacts with 1 human partners:{Q9P270}  
19910 Pathogen[ P03410] interacts with 2 human partners:{P10636;Q9P270}  
19911 Pathogen[ P14075] interacts with 1 human partners:{Q9P270}  
19912 Pathogen[ P0C206] interacts with 2 human partners:{P10636;Q9P270}  
19913 Pathogen[ P03363] interacts with 1 human partners:{Q9P270}  
19914 [Cluster 1811]GO:0006284+P biological\_process [name] base-excision repair [def] "In base excision repair, an altered base is removed by a DNA glycosylase enzyme, followed by excision of the resulting sugar phosphate. The small gap left in the DNA helix is filled in by the sequential action of DNA polymerase and DNA ligase." [ISBN  
19915 Pathogen[ Q2Q067] interacts with 23 human partners:{Q15054;Q96LA8;O95243;P18887;Q9UIF7;Q969S2;P49005;Q7Z6Z7;P22674;P27695;P12004;P06746;P29372;P09874;Q9HCU8;O15527;Q03468;P39748;P78549;Q13569;P17096;P13051;Q53HV7}  
19916 Pathogen[ P0C214] interacts with 21 human partners:{O95243;P27695;P06746;Q53HV7;P17096;P49005;Q9HCU8;P18887;Q9UIF7;P22674;P39748;Q15054;Q7Z6Z7;P78549;P29372;O15527;Q13569;Q03468;P13051;P09874;Q96LA8}  
19917 Pathogen[ P03346] interacts with 24 human partners:{P12004;Q9HCU8;Q9UIF7;P49005;P17096;Q969S2;Q53HV7;Q03468;P13051;P29372;P09874;P78549;P18887;Q13569;Q9UGN5;O95243;P27695;P39748;O15527;P06746;Q7Z6Z7;P22674;Q96LA8;Q15054}  
19918 Pathogen[ Q85601] interacts with 25 human partners:{P22674;O15527;P09874;P17096;P18887;Q969S2;P13051;O95243;P49005;Q15054;Q96FI4;Q03468;Q53HV7;Q13569;Q9HCU8;Q9UIF7;Q9UGN5;Q7Z6Z7;P06746;P12004;P39748;P78549;P27695;Q96LA8;P29372}  
19919 Pathogen[ P14079] interacts with 25 human partners:{Q8TAT5;P09874;Q9UIF7;Q96LA8;Q9UGN5;P49005;P17096;P29372;Q9HCU8;O15527;P78549;Q15054;O95243;P18887;Q969S2;Q96FI4;P27695;Q53HV7;P06746;Q03468;P12004;Q13569;P13051;P22674;P39748}  
19920 Pathogen[ P03383] interacts with 17 human partners:{P06746;P17096;Q9HCU8;O15527;Q53HV7;P22674;P49005;P29372;O95243;Q03468;P09874;Q15054;Q13569;P18887;P27695;P13051;Q96LA8}  
19921 Pathogen[ P03410] interacts with 25 human partners:{P18887;Q96FI4;Q96LA8;P22674;P17096;P06746;P39748;Q03468;Q8TAT5;P78549;Q53HV7;O95243;O15527;Q9UGN5;Q13569;Q15054;P09874;P27695;Q969S2;P49005;P13051;P12004;P29372;Q9UIF7;Q9HCU8}  
19922 Pathogen[ P14075] interacts with 18 human partners:{P13051;P27695;O15527;Q53HV7;P17096;P06746;Q9UIF7;P49005;Q03468;P22674;Q96LA8;Q15054;O95243;Q9HCU8;Q13569;P29372;P09874;P18887}  
19923 Pathogen[ P0C206] interacts with 27 human partners:{P27695;O15527;P09874;Q9HCU8;Q96LA8;Q03468;P06746;P49005;Q53HV7;Q13569;Q15054;Q9UGN5;Q8TAT5;P49916;Q96FI4;P17096;Q969S2;Q7Z6Z7;P39748;P13051;P29372;O95243;P22674;Q9UIF7;P18887;P12004;P78549}  
19924 Pathogen[ P03363] interacts with 21 human partners:{P18887;Q9UGN5;O15527;Q96LA8;Q96FI4;P13051;P49005;Q7Z6Z7;P29372;Q9HCU8;P17096;P06746;Q9UIF7;O95243;Q13569;Q03468;Q15054;P09874;P22674;Q969S2;Q53HV7}  
19925 [Cluster 1812]GO:0017183+P biological\_process [name] peptidyl-diphthamide biosynthetic process from peptidyl-histidine [def] "The modification of peptidyl-histidine to 2'-(3-carboxamido-3-(trimethylammonio)propyl)-L-histidine, known as diphthamide, found in translation elongation factor eEF-2." [RESID  
19926 Pathogen[ Q2Q067] interacts with 3 human partners:{Q96FX2;Q9BQC3;Q9BZG8}  
19927 Pathogen[ P0C214] interacts with 3 human partners:{Q96FX2;Q9BQC3;Q9BZG8}  
19928 Pathogen[ P03346] interacts with 3 human partners:{Q9BQC3;Q96FX2;Q9BZG8}  
19929 Pathogen[ Q85601] interacts with 3 human partners:{Q9BQC3;Q96FX2;Q9BZG8}  
19930 Pathogen[ P14079] interacts with 3 human partners:{Q96FX2;Q9BQC3;Q9BZG8}  
19931 Pathogen[ P03383] interacts with 3 human partners:{Q96FX2;Q9BQC3;Q9BZG8}

19932 Pathogen[ P03410] interacts with 3 human partners:{Q96FX2;Q9BQC3;Q9BZG8}  
19933 Pathogen[ P14075] interacts with 3 human partners:{Q9BZG8;Q9BQC3;Q96FX2}  
19934 Pathogen[ P0C206] interacts with 3 human partners:{Q9BQC3;Q9BZG8;Q96FX2}  
19935 Pathogen[ P03363] interacts with 3 human partners:{Q9BQC3;Q96FX2;Q9BZG8}  
19936 [Cluster 1813]GO:0040001+P biological\_process [name] establishment of mitotic spindle  
localization [def] "The cell cycle process in which the directed movement of the  
mitotic spindle to a specific location in the cell occurs." [GOC  
19937 Pathogen[ Q2Q067] interacts with 2 human partners:{Q14674;Q9BXS6}  
19938 Pathogen[ P0C214] interacts with 2 human partners:{Q9BXS6;Q14674}  
19939 Pathogen[ P03346] interacts with 2 human partners:{Q9BXS6;Q14674}  
19940 Pathogen[ Q85601] interacts with 2 human partners:{Q9BXS6;Q14674}  
19941 Pathogen[ P14079] interacts with 2 human partners:{Q14674;Q9BXS6}  
19942 Pathogen[ P03383] interacts with 2 human partners:{Q9BXS6;Q14674}  
19943 Pathogen[ P03410] interacts with 2 human partners:{Q9BXS6;Q14674}  
19944 Pathogen[ P14075] interacts with 2 human partners:{Q9BXS6;Q14674}  
19945 Pathogen[ P0C206] interacts with 2 human partners:{Q14674;Q9BXS6}  
19946 Pathogen[ P03363] interacts with 2 human partners:{Q9BXS6;Q14674}  
19947 [Cluster 1814]GO:0007263+P biological\_process [name] nitric oxide mediated signal  
transduction [def] "A series of molecular signals mediated by the detection of nitric  
oxide (NO)." [GOC  
19948 Pathogen[ Q2Q067] interacts with 3 human partners:{Q13562;Q8NHW3;Q95865}  
19949 Pathogen[ P0C214] interacts with 2 human partners:{Q8NHW3;Q95865}  
19950 Pathogen[ P03346] interacts with 3 human partners:{Q95865;Q13562;Q8NHW3}  
19951 Pathogen[ Q85601] interacts with 3 human partners:{Q13562;Q8NHW3;Q95865}  
19952 Pathogen[ P14079] interacts with 2 human partners:{Q8NHW3;Q95865}  
19953 Pathogen[ P03383] interacts with 1 human partners:{Q95865}  
19954 Pathogen[ P03410] interacts with 2 human partners:{Q95865;Q8NHW3}  
19955 Pathogen[ P14075] interacts with 1 human partners:{Q95865}  
19956 Pathogen[ P0C206] interacts with 3 human partners:{Q95865;Q8NHW3;Q13562}  
19957 Pathogen[ P03363] interacts with 2 human partners:{Q8NHW3;Q95865}  
19958 [Cluster 1815]GO:0045351+P biological\_process [name] type I interferon biosynthetic  
process [def] "The chemical reactions and pathways resulting in the formation of any  
type I interferon. Type I interferons include the interferon-alpha, beta, delta,  
epsilon, zeta, kappa, tau, and omega gene families." [GOC  
19959 Pathogen[ Q2Q067] interacts with 3 human partners:{Q92985;Q00978;Q14653}  
19960 Pathogen[ P0C214] interacts with 3 human partners:{Q00978;Q92985;Q14653}  
19961 Pathogen[ P03346] interacts with 3 human partners:{Q00978;Q14653;Q92985}  
19962 Pathogen[ Q85601] interacts with 3 human partners:{Q00978;Q14653;Q92985}  
19963 Pathogen[ P14079] interacts with 4 human partners:{Q14653;Q92985;Q00978;Q99836}  
19964 Pathogen[ P03383] interacts with 3 human partners:{Q14653;Q00978;Q92985}  
19965 Pathogen[ P03410] interacts with 3 human partners:{Q14653;Q92985;Q00978}  
19966 Pathogen[ P14075] interacts with 3 human partners:{Q00978;Q14653;Q92985}  
19967 Pathogen[ P0C206] interacts with 3 human partners:{Q92985;Q00978;Q14653}  
19968 Pathogen[ P03363] interacts with 3 human partners:{Q14653;Q92985;Q00978}  
19969 [Cluster 1816]GO:0044281+P biological\_process [name] small molecule metabolic process  
[def] "The chemical reactions and pathways involving small molecules, any monomeric  
molecule of small relative molecular mass." [GOC  
19970 Pathogen[ Q2Q067] interacts with 213 human  
partners:{Q9BU02;O14734;Q96EE3;Q99460;P22392;O75832;P48556;P10746;P31749;P52948;P357  
54;P40306;Q43920;Q12769;Q96NU7;P55036;P07741;Q96HA1;P07195;Q9H5J4;P49790;O00231;O002  
33;P49792;P31040;P13929;P51665;O75694;Q6XQN6;Q15596;P30793;P28072;P10515;P22033;Q9HA  
B8;P61457;P49419;P15121;P56181;P33316;P78406;P19367;Q9NRN7;P38117;O75489;O95336;P050  
62;P30084;Q9HAN9;P62140;P07954;A5LHX3;Q9NZI5;O00204;O15379;Q99567;Q8N1F7;Q14192;P079  
00;Q13200;P29966;Q96ST3;P13073;Q96GX9;P25787;P37837;Q06323;O00401;Q7Z3B4;Q8NHF4;Q63H  
M1;O75182;P22557;P35573;P21953;P13196;P12270;P60174;Q9BV57;P36871;Q96000;P28065;P111  
66;P32189;O14818;P07902;Q9BW60;O95178;Q16851;Q96G23;Q9UMX2;Q9GZR5;Q99743;Q9BYK8;Q9UG  
56;Q14997;Q9BW27;Q96G03;P31350;P60900;Q8TEM1;P46976;Q9UL46;P34896;P61289;O43678;Q8WY  
R1;P68871;Q92539;P09972;P54840;P36873;Q92562;P28062;Q9BVL2;P15559;Q7LG56;P09467;P186  
69;Q9BV20;Q16719;P29474;Q9UNM6;P25788;P62136;P13807;Q92530;O75251;Q9UKX7;O75306;Q153  
27;P04406;P25786;Q96RS0;Q9NRG9;O60907;P99999;P10599;Q8NHF3;Q9P0J0;P40925;P21912;Q147  
39;Q9P2R7;P69905;Q16401;O96007;Q3L8U1;P15259;P37198;P62879;O00232;Q92621;Q96RU7;Q9Y6  
97;A1L3X0;P28074;P25789;O15504;Q9HB03;Q14686;P57740;P06744;P04818;Q9BZK7;Q9UI32;Q9Y6  
18;P20618;O94925;O14556;P40926;P00338;P27986;Q9NP71;P28070;Q8WUM0;Q92793;P28066;Q033  
93;P14324;Q99436;Q8TAA3;P30047;Q9UBX3;P06132;O43242;Q8WWR8;Q6STE5;P49721;P14672;Q5UE  
93;P49720;P06733;P51580;P27469;P21673;P11172;Q75376;P35658;P49247;P08397;Q8NHF5;Q951  
90;P32929;Q16836;Q86X55;O43708;O95571;Q5SRE5;Q14693;P24539;Q14397;Q9Y314}  
19971 Pathogen[ P0C214] interacts with 341 human  
partners:{Q8WWR8;P27469;P50440;P06132;Q16795;Q04446;P29474;Q14997;Q9HA82;P51665;Q96P  
26;P30084;Q96T66;P35754;O75608;P49419;O75306;Q13907;Q14739;P09417;Q15327;Q9Y617;Q9BU  
02;P52209;Q9NXB9;P25789;Q05932;O75874;O43678;P55036;P11413;P29966;Q9NVH6;P22695;Q950  
45;Q99643;Q8N5C5;P04818;Q8N335;Q8NHF5;P31350;P62140;P28062;P23919;P00480;A5LHX3;Q9HA  
N9;P35558;Q8TE04;P11177;Q9HAB8;P56556;P49902;P28065;O96033;P15259;O75390;Q9BXS1;P533  
96;P07741;P33316;P28331;Q8TEM1;O43920;P12694;P42898;O14818;O60907;P07954;Q9H227;Q9BV  
57;P78406;O95299;P17568;P57740;Q95567;O15056;O43242;Q99743;Q92793;P51580;P40261;P614  
57;P29401;Q9NZI5;Q9GZR5;Q8N1F7;O75694;P12277;P11172;Q3L8U1;P48735;Q8TCD5;Q6STE5;Q96G  
X9;P69905;Q96EE3;Q16613;Q6XQN6;P48556;Q9UI32;P49792;P35270;Q9UKX7;P40306;P40939;Q132

00;Q9Y3R4;Q14686;O95396;P40926;P32189;Q9NPB8;O75330;P22557;O14556;P35573;P13196;P36542;O00232;P46976;Q16718;Q13057;Q92562;P05062;Q9HB03;P32929;O95571;P11166;P54368;O14561;Q99798;Q9BYK8;Q9P2R7;O75223;Q9UBX3;O60825;Q9NYP7;P10746;P08397;P23786;P15121;Q99460;O95298;P28066;O75832;P11168;P00374;P13929;Q03393;P30793;Q96G03;P37837;P09467;P49790;Q8IVI9;Q96AT9;P50213;Q16881;P37198;P22033;P36871;P68871;Q9BW27;Q16831;P14618;Q9Y697;P99999;P12074;Q92539;Q08AM6;A1L3X0;P249720;P28074;O43837;P21953;P43896;Q8WYR1;Q9P0J0;P09104;Q16851;O14832;P52788;Q9UL46;Q63HML;P9BQK8;Q9NWM0;O15488;O95336;Q9NRG9;P24539;Q9BZQ4;P35658;Q93100;Q9UH92;Q96G23;P25788;P62136;O15382;P19623;P19367;O75376;P30043;Q9UNM6;Q5UE93;Q8NMFH3;O00231;Q14192;O00204;Q9NRF8;P14324;Q06323;Q9UMX2;Q9NP71;O15379;P25786;P06733;Q96RS0;Q9UHY7;P13073;Q6NVY1;P38117;P62879;Q9UG56;P23921;P28072;P09972;Q14397;Q9P0J1;Q8TAA3;O96007;P09622;Q9BZ23;P54687;O96000;Q96RU7;O95182;P07327;Q99436;Q13126;O75489;Q16822;O94925;O15504;P27902;P54840;P25787;O14521;P36873;Q9BZK7;Q96I99;O14734;Q13615;Q96ST3;P23526;Q96NU7;P10599;O75251;Q9UI09;Q9BW60;O00401;O95190;Q15274;P12270;P16118;Q86X55;Q16698;P35998;P60900;P04424;P22392;P60174;P21673;Q8NMFH4;P35520;Q15596;O43708;O00233;Q9BVL2;P36551;Q9NRN7;P17812;P30047;Q7LG56;P22830;Q8N159;Q16762;P48163;P21912;P10515;Q5SRE5;P14672;Q9Y618;Q8NFF5;P27986;P43490;Q96PE7;Q92530;P46020;O00757;Q7Z3B4;Q9Y2T3;P13807;P31939;P15559;Q15008;P04406;P56181;O95178;P49247;P11586;P00558;Q9P2J9;Q8WUM0;P28070;P13804;P52948;Q92621;P31749;P20618;Q06520;P07195;P36957;P51553;Q12769;Q16719;P49721;Q16401;P30566;Q9H0P0;O75182;P17980;Q9BV20;Q14693;Q16773;Q6IB77;P21695;P16278;Q9NZL9;Q9Y314;Q96HA1}

19972

Pathogen[ P03346] interacts with 221 human

partners: {O75390;Q8TEM1;Q9BW60;P62136;O00204;P25787;Q96ST3;P09972;Q96PE7;P28070;Q06520;Q8NMFH4;O75608;Q8WUM0;Q14739;P31040;P56181;P25789;P55036;Q15788;P13807;P12270;O60907;P04406;P07900;Q9NRN7;P49247;Q12769;Q99460;Q96EE3;Q99567;P29474;P23526;Q9UL46;Q16836;Q8WYR1;O75489;Q9BV20;P07148;Q8IVI9;Q9UKX7;P13929;O15379;P28072;Q9UBX3;O75694;P25788;O95336;P28074;P27469;P49721;Q9NRG9;Q9NZL9;Q9BVS7;P78406;P57740;O43678;O95178;O14818;P51580;Q99436;Q9UMX2;Q9BVL2;Q8NCF5;Q8N1F7;Q16401;Q15327;A5LHX3;P19367;P15121;Q63HML;P10746;P23786;P60174;P28062;Q96NU7;Q9NZI5;P21673;Q8NMFH5;P15559;Q9Y697;P09467;P69905;Q92562;P22557;P35573;P37198;P20618;Q8NMFH3;P35658;P13196;Q9HAN9;O00232;O75330;P46976;P36871;Q03393;O75182;P62879;P30047;P21912;P06733;O15056;Q6XQN6;P37837;Q5SRE5;O75832;O00233;Q9P0J1;P16278;Q92621;Q9NP71;P99999;Q9BW27;P13550;P18669;P13150;P49419;Q7LG56;O14556;Q16851;P24539;Q92539;P31749;Q15596;O43920;P13073;Q9H5J4;P49720;P28065;Q14192;P36873;Q6STE5;Q96G23;P60900;P51161;P32929;P14324;P40926;P25786;O00231;Q96RS0;Q9HB03;P11166;Q9UHY7;P38117;Q16719;P06132;P22392;O75376;O96007;P61289;P00338;O43708;P29966;P28066;Q9UNM6;Q96RU7;P68871;Q14397;Q96G03;O94925;Q8TAA3;Q9BU02;P54840;P07195;O75251;O14734;Q9BZK7;P35754;P15259;P32189;Q8WWR8;P10599;Q14997;P49790;Q13200;Q86X55;P48556;P06744;Q9UG56;Q5UE93;O96000;P05062;P62140;O75306;P51665;P61457;Q9BYK8;P11172;P07741;Q96HA1;Q9UH92;Q92793;Q9P0J0;P40925;P07954;Q06323;Q3L8U1;Q9HAB8;P10515;O00401;Q9Y618;P14672;Q92530;Q7Z3B4;O43242;Q99743;P40261;Q96GX9;P40306;O95571;P27986;O95190;O15504;P30084;P49792;Q14693;Q14686;P33316;P52948;Q9Y314}

19973

Pathogen[ Q85601] interacts with 215 human

partners: {Q8TEM1;P28066;O00401;Q9UNM6;O75182;P60900;Q5SRE5;P69905;Q9NRN7;P60174;P55036;Q9P0J0;P13807;P62879;P11168;O94925;Q08AM6;P31749;P99999;P24539;Q8NMFH4;O43708;Q9UG56;Q8NMFH3;Q86X55;A1L3X0;P25787;Q96EE3;Q3L8U1;Q6STE5;P61289;Q12769;P00480;P51161;Q9UBX3;O75306;P25788;O95336;O60907;Q16719;P10746;Q9BU02;P78406;P57740;O75330;Q9NRG9;O75832;P18669;Q9Y697;P21912;P11172;O60825;Q8WUM0;Q8N1F7;P37837;Q16613;Q9Y618;P06733;P33316;O00757;P06744;P21673;O43678;Q92562;P56181;P27469;P13196;P21953;P12270;P05062;Q99743;Q15596;P32189;P31350;P49247;Q9HAN9;Q9NP71;O75694;Q96GX9;Q9BV57;Q9P2R7;P16118;P15259;P30793;O15504;P30047;P27986;Q9UH92;P07954;Q6XQN6;O14734;P25789;Q96HM1;O00233;O96000;Q14686;Q9UMX2;Q16851;P10599;P20618;Q9BW27;P46976;Q96G23;Q96G23;P11166;P35573;O14556;O95045;Q92621;P40306;P34896;P14618;O43920;P62136;Q9H5J4;P13929;P49720;P36873;P36871;Q96G23;P28062;P09972;Q14192;P49721;O95190;P52948;P14324;Q8IVI9;P25786;Q9UKX7;Q96RS0;P31040;Q15327;P22033;Q9BYK8;O75376;Q9HB03;P28072;P06132;Q8NMFH5;P22392;P15121;Q13200;O96007;P28065;P07900;Q6IB77;P07741;P29966;Q99436;P29474;O00204;Q96RU7;P28070;P09467;P35658;P68871;Q14397;Q04446;P40925;Q8TAA3;Q9UL46;Q99460;O00231;P07195;Q99567;Q9BZK7;P35754;O15379;P07902;Q9UHY7;Q16836;P08397;Q8WYR1;P23526;P48556;P54840;Q9GZR5;P62140;P28074;P49792;Q9H0P0;Q92530;P04406;Q9BVL2;Q96HA1;Q92793;A5LHX3;Q9BV20;Q9UI32;Q06323;P10515;O95571;P14672;Q5UE93;O14818;Q7Z3B4;P00338;Q9NZI5;Q13907;Q92539;P30084;P49790;O15382;Q96G03;P61457;P40926;Q16401;P49419;Q14739;Q14693;P32929;P19367;Q96ST3;Q9Y314}

19974

Pathogen[ P14079] interacts with 354 human

partners: {O94923;Q8NMFH5;P01215;Q9NY59;P56181;P22695;P28065;O15379;Q99436;P00374;P15259;O75192;P17707;P36542;Q8TE04;O43674;P48775;Q9BXS1;O75223;Q8N159;P62333;O43677;Q9BW27;Q9H0P0;Q99743;Q96HA1;Q92562;O43181;P16278;Q9BQK8;O14841;P48556;P42357;O95169;P27469;Q96RS0;P21953;P13196;O95544;P56134;Q9BYK8;Q9NPB8;Q9BZK7;P56556;P07954;Q8NFF5;Q6STE5;P13073;Q96KP4;Q15596;O43505;Q16851;Q14693;A1L3X0;O95139;P25705;P12074;P00338;Q14192;P22234;Q96P26;Q8TCD5;P17812;Q9NXE4;P31939;P36873;P57740;Q8N1F7;Q9Y617;Q96ST3;P40306;Q96NU7;Q13907;P55036;P35658;Q9Y314;P52209;Q9BV20;Q92793;P28074;O00232;P61457;P01225;P14672;Q9UMX2;P24588;P13807;O96000;O95167;Q63HML;P54802;O75306;P00395;Q16831;Q92621;P43490;P00403;Q96N76;Q8WYR1;P17568;P35475;P56385;P49247;P10606;Q8TEM1;Q93099;O60907;P49720;O00487;P09972;O95190;Q93100;P62136;P11172;Q9UDW1;P25787;P22557;P29401;P32189;O75832;Q9HA82;P14927;Q9NVH6;P30084;O43708;P06744;Q14739;P13804;Q86Y39;A5LHX3;P69905;P10746;Q95954;O95182;Q32NB8;O00233;Q9P2R7;P31350;P15559;P35998;P07919;Q9NZL9;P14324;P11166;Q8TDX5;Q9Y2T3;O75608;P06733;P30793;P33316;P21289;Q96NT5;P61289;Q9HB03;Q92539;Q7LG56;P06280;P51665;O14949;Q16613;Q9UKX7;P07195;P20618;P14854;Q9NRF8;Q9BVL2;O96007;Q8TA A3;O15504;Q9UL01;P20674;P68871;P27544;Q9UG56;Q8IVI9;O95571;O96033;P06132;P54368;P469



76;P23919;Q8WUM0;Q14997;P54803;P38117;P35754;P12270;Q9BZ23;O94925;Q14353;P03928;P28062;P60900;P22392;Q16719;P31040;Q9BZQ4;O14548;P29966;Q6XQN6;O43676;Q96G23;O43678;Q6IB77;O14832;P08397;Q99567;Q13057;Q9UNM6;P51970;O14734;Q96GX9;O95178;O75251;O14561;P62140;Q9UI09;Q99460;P35573;Q9Y697;P00156;Q13510;O95299;Q8NMFH3;Q9NRN7;P07900;O95045;Q15788;Q96EE3;O95292;P16930;P09669;P37198;O14818;P22033;Q9P0J0;Q96PE7;Q9NZI5;P49721;Q9BU02;P32929;Q9UI32;Q8NBK3;P22830;Q15327;Q92530;P49790;O95336;P49902;Q8WWR8;P10620;Q9NZ20;Q9UH92;Q9Y3R4;Q9HAN9;P00480;O75964;Q96RU7;Q6IA69;Q16762;P49915;O75489;P13929;Q96PE3;Q9BXI3;Q8NMFH4;P53602;P10515;Q99541;P78406;Q06323;P03923;P10599;P62191;Q7Z3B4;Q16878;O75182;P00915;O75376;Q16718;P19623;P03897;Q8NMCN5;O15067;P56381;P15954;P18669;Q9GZR5;O14521;O43920;Q14397;O15239;P07902;P21695;P23526;Q15008;Q96G03;P43686;Q96CD2;O43242;Q03393;P25788;P09467;O00231;P28066;Q9UL46;P04424;O15382;O75330;Q12769;Q9BW60;P36551;P40925;P50440;P99999;P54840;P24539;P21673;Q15274;P36871;O00483;P51580;Q5SRE5;P04818;Q9NRG9;Q9NP71;O75694;Q5UE93;P03901;P03886;Q16401;Q05932;Q9BV57;Q14686;P17405;P17980;O15327;P07741;Q9H5J4;P30047;Q9NVS9;P28072;P46020;O15488;Q9HAB8;P52948;P34896;Q3L8U1;O95298;Q16836;O00401;P42898;P04406;P37837;P21912}

19975 Pathogen[ P03383] interacts with 183 human

partners: {Q9Y618;Q9BVL2;Q96EE3;O15504;Q8WUM0;P13073;P27986;O75182;P62140;P62879;Q92621;P49792;Q8NMFH4;Q9UH92;Q96G03;P55036;O94925;P29474;P40926;O75251;P27469;P25789;P60900;Q15596;O75376;Q9BU02;P12270;P19367;P00338;Q9BW60;P52948;P07902;P31749;Q9GZR5;P31040;O60907;P34896;O96000;P40306;P78406;P57740;O00233;O43678;Q8NMFH5;Q9H5J4;Q86X55;O43920;Q16836;P18669;Q14686;Q6STE5;O75489;Q9P2R7;P22392;P69905;P13807;P09467;P09972;Q8N1F7;P40925;Q63HM1;P68871;P49721;Q06323;Q16613;P37837;P35573;Q14997;P10599;Q9NRN7;P49247;Q8TEM1;O14734;P07900;P61457;P20618;O75306;P31350;Q9Y697;Q9NP71;O95178;Q12769;Q9BV57;P36873;P11168;P62136;Q99567;Q16719;Q96GX9;O75832;O00401;Q14397;Q16822;Q16851;Q9HAN9;P06744;Q9BW27;P46976;P06132;O14556;P07195;Q8N159;Q14192;A1L3X0;Q9UL46;Q9HB03;O95190;Q9UNM6;P04406;P29966;P14324;O15379;P25786;Q99460;Q96RS0;P99999;P22033;P28072;Q13200;O96007;Q9BZ23;P28065;P07741;Q5SRE5;P28066;Q96RU7;P35658;Q9BV20;Q3L8U1;Q15327;Q16401;P10515;O00231;Q96HA1;Q9BZK7;Q9NRG9;P32189;Q8WWR8;P11169;P08397;Q8WYR1;Q5UE93;P54840;P33316;Q96ST3;P28074;Q92530;P49720;Q8TAA3;P61289;Q9NZI5;P37198;Q9UKX7;P01215;P11172;P28062;Q9P0J0;Q9HAB8;O95571;P14672;P06733;P48556;O14818;Q7Z3B4;P56181;P30047;P24539;Q99436;Q92539;P21673;Q9BYK8;P49790;O75694;P15259;P28070;P49419;Q92793;Q8NMFH3;P25787;P22732;Q14693;P25788;Q9Y314}

19976 Pathogen[ P03410] interacts with 369 human

partners: {P15559;O75192;Q99567;A1L3X0;P54803;Q14397;Q99743;Q9BQK8;O95168;Q92562;O43674;P46976;O95292;Q9P2R7;Q7Z3B4;P28070;Q9BW27;P53602;O95045;P30047;Q15274;Q96P26;P30084;Q16822;P27986;P56556;P55036;Q96RS0;P22732;O75330;Q96PE3;P10599;P31350;P51161;Q9BU02;Q5UE93;P17568;O14556;Q9GZR5;Q14739;Q14353;P13804;P06744;Q16851;P08397;P35754;Q8WYR1;P49915;P37837;P36871;O15327;Q8NMF5;Q8TE04;Q9UKX7;O95178;P25786;P36542;Q9NVH6;P07741;Q15008;P11166;Q16401;O75380;Q8N159;O43678;P54840;Q9NRF8;P25705;Q9H5J4;Q13057;Q8NMFH4;O75251;P17812;O14548;Q96PE7;P15954;P60900;P16118;P46020;O95299;Q14997;Q14686;P51970;P35998;O43920;Q9UI09;Q99460;Q9BYK8;Q16831;P00374;Q5SRE5;P54802;P05141;O96000;Q6IB77;P52948;Q16719;O00233;O15504;P32929;P07902;O95954;P11168;P04424;Q04446;P62136;P06733;O00232;O75182;P12694;Q8IVI9;P07919;O00401;P35573;Q86X55;P16278;Q9NZI5;P20674;O75694;Q8TAA3;O00204;P11172;P31749;P78406;P48556;P49721;O95167;O95190;Q6NVY1;P56385;P07900;P27544;P21953;P06132;P55157;Q9Y697;O75376;O15239;P01215;Q15327;Q96HA1;P30793;P19623;Q96NU7;Q6XQN6;A5LHX3;P05062;P52788;Q9Y617;Q9Y6M9;P38117;P23786;P09467;Q9UBX3;Q96ST3;P07195;Q99436;P36551;O94925;Q9BV20;O00757;Q9NXC4;Q96G23;Q14693;P23919;Q8N1F7;P13073;O14841;P22234;P43490;O43708;P56381;Q9Y2T3;P40306;P52209;Q93099;P10746;P33316;Q06323;P00480;P22695;Q93100;P22557;O95571;Q9BXI3;O14734;Q9NPB8;Q92793;Q13510;P29474;Q63HM1;Q8TDX5;Q13200;P49790;P48775;P09972;P03886;P25787;Q08AM6;O00483;P68871;P28066;P12270;O75438;Q9UDW1;P62140;Q96N76;P56181;P35658;Q9HA82;O75608;P04818;P27469;P00156;Q16762;P07954;Q9BW60;O14561;P14927;O96007;P00338;Q8NMFH5;O15382;O15379;P22830;Q96CD2;Q16613;P30566;P28062;Q8TEM1;P31040;Q9NP71;P03928;P51665;P13807;O15067;P49419;P55809;O75489;P24539;Q42898;Q86Y39;P15259;O14818;P36873;Q96EE3;P31939;P21912;Q9NRN7;O14832;P21673;Q9NZ20;Q96GX9;O75964;P04406;Q9BZ23;P99999;P23526;P18669;O00231;O15488;Q96G03;Q9UNM6;P09669;P54368;Q16836;Q9HAN9;Q15596;Q8TCD5;Q9NVS9;Q96RU7;Q99643;P25789;P49720;P03897;O43677;P13929;P40926;O96033;Q8NMCN5;O95169;Q3L8U1;Q9HB03;Q8WUM0;Q9H0P0;O43181;O14521;Q16718;Q9BZK7;O75306;Q13907;P00403;P28072;O43676;O14949;Q9UI32;O95336;Q9Y3R4;P14854;P40925;O75223;P32189;P03901;Q9UH92;Q9UL01;Q9P0J0;P03923;Q6STE5;P57740;P17707;P16930;Q9Y618;P25788;Q9Y314;Q12769;P69905;Q9HAB8;P29539;P23921;Q05932;Q9NRG9;P28066;Q9BV57;P50440;Q03393;Q6IA69;Q8NMFH3;Q9BZQ4;Q9UMX2;P13196;P62879;P10515;O60907;Q9UG56;P28065;Q9BVL2;O43242;P18859;Q14192;P49247;Q9NZZL9;P51580;P29966;Q7LG56;Q92621;P24588;P34896;P17405;P56134;P17980;Q8WWR8;O75832;P20618;O43505;P49902;P14324;P22033;O75390;P10606;P49792;Q9UL46;P28074;P61289;P12074;P21695;O95182;P61457;Q16635;Q9BXS1}

19977 Pathogen[ P14075] interacts with 212 human

partners: {O43674;P11169;Q3L8U1;P06733;Q9NVH6;P29474;P68871;Q9HAB8;Q96ST3;P40925;Q96GX9;Q9H5J4;P56181;Q16719;P55036;P25788;Q9BW60;P31350;P28066;P06132;P49902;P06744;Q06323;O96000;O75832;Q8WYR1;O95182;P11172;Q8TAA3;O43677;P60900;P34896;P62879;O00233;Q14686;Q9UL46;Q9BV57;P78406;P57740;P32189;P49720;Q8WWR8;Q16822;Q93100;P49792;Q15327;Q9BV20;Q8N1F7;P18669;Q8N159;Q9UH92;Q5UE93;O14734;Q16613;P13073;P19367;P22732;Q96G03;Q13510;Q9HB03;Q9UKX7;P40926;Q8NMCN5;Q13200;P08397;P48556;P62140;Q16401;O95045;P15559;P35658;P31040;P12270;P46976;P54840;P28070;O43920;Q13057;O75306;Q92621;O75182;P49721;O95571;P07195;O14561;P36873;Q9Y618;O00231;O75376;O95298;P62136;Q92530;A1L3X0;O43678;P07900;Q9NP71;Q96HA1;P16118;Q9BW27;P31749;P07902;P04406;Q92539;P49419;O00401;O43505;P28062;P99999;P28074;P22033;P29966;P28065;Q63HM1;Q9NVS9;Q8TEM1;Q86X55;Q8TE04;O75251;P30047;Q16836;P27986;Q96EE3;P14324;P37198;P25786;Q5SRE5;Q96RS0;O14818;O95336;O60907;P614

- 57;P35573;P28072;P51580;P10515;O96007;Q14397;P33316;Q9BZ23;P24539;Q14997;Q96RU7;Q9GZR5;O15379;Q8NFH3;O94925;P00338;Q9NZI5;O15504;P09972;P25787;Q9BZK7;P15259;Q92793;O14832;P38117;P49247;O75192;Q99567;Q9UG56;Q12769;P11168;P27469;P20618;P13807;P56385;P07741;Q9BVL2;Q9HAN9;P49790;P01215;P30793;Q8WUM0;O75489;O75330;Q9UNM6;P21673;Q6STE5;Q6XQN6;Q9BU02;P61289;P40306;P14672;P37837;O95178;Q99436;O75694;Q9NRG9;P09467;Q7Z3B4;P50440;Q9P0J0;Q8NFH4;Q16851;Q14192;Q9BYK8;Q96NU7;Q8NFH5;O14556;P22392;O43676;Q15596;Q9NRN7;O95190;Q9P2R7;P52948;Q9Y697;Q14693;P25789;P10599;Q9Y314;P69905}
- 19978 Pathogen[ POC206] interacts with 293 human partners: {P33316;P61289;P06733;Q96EE3;Q16831;Q16851;Q99436;P28062;Q96RS0;P99999;Q9UNM6;Q92621;P07195;P68871;P56181;Q92539;P05062;P10746;Q96G23;O75832;O75192;Q96PE7;P49790;Q96ST3;Q14739;P31749;P40306;Q5SRE5;Q9NP71;P28065;Q14997;Q9UH92;Q8NFH5;Q93100;Q9NRG9;Q9NZI5;P50213;O75251;P46976;P60174;Q9NZL9;Q9BV20;P62879;Q9UDW1;P55036;O43920;Q6XQN6;P25786;P25788;Q92562;P51161;P22392;Q96G03;O60907;O14521;P25787;O75306;P12074;Q7Z3B4;Q13615;Q9HB03;Q06323;Q15327;Q8TE04;O15382;Q04446;O75608;Q86X55;Q16836;Q13057;P36542;P09467;P49720;Q9Y697;P15559;Q6STE5;Q96HA1;O14832;O95182;Q9NVH6;P36551;O00232;Q16822;P00915;Q96007;P60900;P21953;P38117;Q9P2R7;Q7LG56;Q9UBX3;P35754;P49902;P43490;P57740;P31939;Q9BZ23;Q9UI09;P11166;P30793;P19367;O43242;P32189;P27986;Q96RU7;O95045;A5LHX3;P23786;Q9H5J4;Q9HAB8;P13807;O95298;P22695;Q92793;Q9UL01;Q8N159;P51580;O14561;P30047;P25789;P46020;O95292;O95954;Q8WUM0;Q9BYK8;P21673;P69905;P54840;P11168;P49792;P11172;Q8TEM1;P06744;Q9UKX7;P14324;Q9Y3R4;P30084;Q99743;O00483;Q13907;Q9BXS1;P54368;Q16719;Q9HA82;P17568;P20618;O43708;Q13200;Q15379;Q8TAA3;O14556;Q75330;P28070;P07900;O75694;Q9UHY7;O95178;O95190;P34896;P22557;P50440;P32929;P01215;Q9UG56;Q99460;Q8TCD5;Q9BQK8;Q14686;P40925;O00204;P23526;Q9HOP0;O00757;O14734;P13073;Q9BZQ4;P04406;Q6IB77;P40926;P22830;P28066;P31040;P24539;O00401;Q9NPB8;Q9BZK7;Q9BV57;O75376;P07902;O14818;P04818;Q9P0J0;Q99567;P62140;O60825;P61457;Q9HAN9;Q9UI32;Q8NFH4;Q96GX9;P29474;P28072;Q63HM1;Q95336;O43678;Q15274;Q8WWR8;O94925;O75489;P16278;P09972;O75390;P16118;Q15596;P14672;P56381;Q03393;Q5UE93;P07741;Q9GZR5;P78406;P28074;P27469;Q14397;Q14192;P49419;Q92530;O15504;P15121;P49721;Q12769;Q99798;Q16762;P13196;P10599;P49247;P08397;P07954;Q9UL46;Q16613;Q8NFH3;P21912;P36873;P22033;Q14693;Q8NCN5;Q9BU02;P00338;Q8N1F7;P10515;Q15788;O96000;P13929;P06132;O43674;P56385;O00233;O95571;Q9Y618;P37837;P48556;P35658;Q8IV19;P00480;Q16401;P56556;P29966;Q9BW27;P18669;O75182;O95396;P14618;P24136;Q9BVL2;P36871;O43505;O00231;P15259;A1L3X0;O15488;P31350;P12270;Q9NRN7;Q96NU7;Q05932;Q08AM6;P29401;Q9BW60;Q3L8U1;Q9Y314;P35573;Q8WYR1;Q9UMX2}
- 19979 Pathogen[ P03363] interacts with 127 human partners: {Q6XQN6;O14734;P62879;Q16836;Q96RS0;P29474;Q3L8U1;Q7Z3B4;P69905;P62136;P49419;Q9H5J4;P13807;P31040;Q9UH92;P07900;P06744;Q5SRE5;P51580;Q8WYR1;P12270;P18669;Q8IV19;P36873;Q16851;P33316;Q8NFH4;Q6STE5;P68871;P99999;Q92539;P62140;Q92530;Q14397;P40925;Q9HAN9;Q8NFH3;Q12769;O15379;P06733;Q9BZK7;O94925;P09972;O75376;O60907;P06132;O96007;P07741;P61289;P11172;Q9UKX7;Q15596;P51161;Q14686;Q15327;Q9Y697;Q99743;Q63HM1;P21673;O95571;P35754;Q9NRG9;Q8WUM0;P61457;Q9BVL2;Q99567;Q9P0J0;Q5UE93;P1749;Q96ST3;O15056;P37837;P04406;O00204;Q9NZI5;Q96HA1;Q9Y618;P49792;Q9NRN7;P35658;P54840;Q9BYK8;Q9BV57;O75694;P49790;P29966;Q92793;P57740;Q9UI32;Q9BV20;P27469;P10515;P13196;O00401;O95336;P14672;P78406;Q96G23;Q9UMX2;P52948;O96000;Q96GX9;Q14739;Q9NP71;O15504;P30047;Q9BU02;P37198;O14556;P35573;Q8N1F7;O43708;Q92621;Q8NFH5;Q06520;P46976;P27986;P15259;O75182;P11166;Q86X55;Q9BW27;O95190;P6181;Q96G03;Q9Y314;Q14192}
- 19980 [Cluster 1817]GO:0048839+P biological\_process [name] inner ear development [def] "The process whose specific outcome is the progression of the inner ear over time, from its formation to the mature structure." [GOC
- 19981 Pathogen[ Q2Q067] interacts with 7 human partners: {Q13562;O14910;O75444;Q15599;P49639;P46527;P49715}
- 19982 Pathogen[ POC214] interacts with 6 human partners: {O75444;O14910;P49639;Q9UM54;Q15599;P46527}
- 19983 Pathogen[ P03346] interacts with 13 human partners: {P31271;P49639;Q92858;P49715;O75444;Q15599;Q15475;Q9UBR4;Q13562;P46527;P49335;O14910;Q15319}
- 19984 Pathogen[ Q85601] interacts with 9 human partners: {P49639;O14910;Q13562;O75444;P31271;P49715;Q9UM54;Q15599;P46527}
- 19985 Pathogen[ P14079] interacts with 7 human partners: {Q9UM54;P31271;P49715;Q15599;O75444;P46527;P49639}
- 19986 Pathogen[ P03383] interacts with 4 human partners: {P49639;P46527;O75444;O14910}
- 19987 Pathogen[ P03410] interacts with 7 human partners: {P46527;O14910;O75444;Q9UM54;Q15599;Q9NRR1;P49639}
- 19988 Pathogen[ P14075] interacts with 3 human partners: {O75444;P46527;O14910}
- 19989 Pathogen[ POC206] interacts with 10 human partners: {Q9UM54;O75444;P49639;P49715;Q15599;P46527;O14910;Q13562;P31271;Q9UBR4}
- 19990 Pathogen[ P03363] interacts with 7 human partners: {O14910;P31271;P49639;O75444;P49335;Q15599;Q15319}
- 19991 [Cluster 1818]GO:0003143+P biological\_process [name] embryonic heart tube morphogenesis [def] "The process in which the anatomical structures of the embryonic heart tube are generated and organized. The embryonic heart tube is an epithelial tube that will give rise to the mature heart." [GOC
- 19992 Pathogen[ Q2Q067] interacts with 2 human partners: {P46937;Q15562}
- 19993 Pathogen[ POC214] interacts with 2 human partners: {P46937;Q15562}
- 19994 Pathogen[ P03346] interacts with 2 human partners: {Q15562;P46937}
- 19995 Pathogen[ Q85601] interacts with 2 human partners: {Q15562;P46937}
- 19996 Pathogen[ P14079] interacts with 2 human partners: {P46937;Q15562}

19997 Pathogen[ P03383] interacts with 2 human partners:{Q15562;P46937}

19998 Pathogen[ P03410] interacts with 2 human partners:{P46937;Q15562}

19999 Pathogen[ P14075] interacts with 2 human partners:{Q15562;P46937}

20000 Pathogen[ P0C206] interacts with 2 human partners:{P46937;Q15562}

20001 Pathogen[ P03363] interacts with 2 human partners:{Q15562;P46937}

20002 [Cluster 1819]GO:0007178+P biological\_process [name] transmembrane receptor protein serine/threonine kinase signaling pathway [def] "The series of molecular signals generated as a consequence of a transmembrane receptor serine/threonine kinase binding to its physiological ligand." [GOC

20003 Pathogen[ Q2Q067] interacts with 1 human partners:{075969}

20004 Pathogen[ P0C214] interacts with 1 human partners:{075969}

20005 Pathogen[ P03346] interacts with 1 human partners:{075969}

20006 Pathogen[ Q85601] interacts with 1 human partners:{075969}

20007 Pathogen[ P14079] interacts with 2 human partners:{Q5JQC9;075969}

20008 Pathogen[ P03383] interacts with 1 human partners:{075969}

20009 Pathogen[ P03410] interacts with 2 human partners:{Q5JQC9;075969}

20010 Pathogen[ P14075] interacts with 1 human partners:{075969}

20011 Pathogen[ P0C206] interacts with 2 human partners:{Q5JQC9;075969}

20012 Pathogen[ P03363] interacts with 1 human partners:{075969}

20013 [Cluster 1820]GO:0044262+P biological\_process [name] cellular carbohydrate metabolic process [def] "The chemical reactions and pathways involving carbohydrates, any of a group of organic compounds based of the general formula Cx(H2O)y, as carried out by individual cells." [GOC

20014 Pathogen[ Q2Q067] interacts with 6 human partners:{P07195;P40925;Q9BYZ2;P40926;P00338;P07864}

20015 Pathogen[ P0C214] interacts with 8 human partners:{Q8IX04;P07864;075390;P53396;Q6ZMR3;P40926;Q9BYZ2;P07195}

20016 Pathogen[ P03346] interacts with 6 human partners:{075390;P40926;P00338;P07195;P40925;Q9BYZ2}

20017 Pathogen[ Q85601] interacts with 7 human partners:{Q6ZMR3;P07864;Q9BYZ2;P40925;P07195;P00338;P40926}

20018 Pathogen[ P14079] interacts with 6 human partners:{P00338;P07195;Q6ZMR3;P07864;P40925;Q9BYZ2}

20019 Pathogen[ P03383] interacts with 7 human partners:{P40926;P00338;Q9BYZ2;P07864;P40925;P07195;Q6ZMR3}

20020 Pathogen[ P03410] interacts with 8 human partners:{Q9BYZ2;Q6ZMR3;P07195;P00338;P40926;P07864;P40925;075390}

20021 Pathogen[ P14075] interacts with 6 human partners:{P40925;P40926;P07195;P07864;P00338;Q9BYZ2}

20022 Pathogen[ P0C206] interacts with 8 human partners:{P07195;Q6ZMR3;P07864;P40925;P40926;075390;Q9BYZ2;P00338}

20023 Pathogen[ P03363] interacts with 2 human partners:{P40925;Q9BYZ2}

20024 [Cluster 1821]GO:0060442+P biological\_process [name] branching involved in prostate gland morphogenesis [def] "The process in which the branching structure of the prostate gland is generated and organized. A branch is a division or offshoot from a main stem." [GOC

20025 Pathogen[ Q2Q067] interacts with 1 human partners:{Q9UK73}

20026 Pathogen[ P0C214] interacts with 1 human partners:{Q9UK73}

20027 Pathogen[ P03346] interacts with 2 human partners:{P31271;Q9UK73}

20028 Pathogen[ Q85601] interacts with 2 human partners:{Q9UK73;P31271}

20029 Pathogen[ P14079] interacts with 2 human partners:{P31271;Q9UK73}

20030 Pathogen[ P03383] interacts with 1 human partners:{Q9UK73}

20031 Pathogen[ P03410] interacts with 1 human partners:{Q9UK73}

20032 Pathogen[ P14075] interacts with 1 human partners:{Q9UK73}

20033 Pathogen[ P0C206] interacts with 2 human partners:{Q9UK73;P31271}

20034 Pathogen[ P03363] interacts with 2 human partners:{P31271;Q9UK73}

20035 [Cluster 1822]GO:0010288+P biological\_process [name] response to lead ion [def] "Any process that results in a change in state or activity of a cell or an organism (in terms of movement, secretion, enzyme production, gene expression, etc.) as a result of a lead ion stimulus." [GOC

20036 Pathogen[ Q2Q067] interacts with 2 human partners:{P29474;P08397}

20037 Pathogen[ P0C214] interacts with 5 human partners:{P29474;P09417;P08397;P36551;P22830}

20038 Pathogen[ P03346] interacts with 2 human partners:{P29474;Q12772}

20039 Pathogen[ Q85601] interacts with 3 human partners:{Q12772;P29474;P08397}

20040 Pathogen[ P14079] interacts with 4 human partners:{Q12772;P08397;P22830;P36551}

20041 Pathogen[ P03383] interacts with 2 human partners:{P29474;P08397}

20042 Pathogen[ P03410] interacts with 5 human partners:{P08397;P36551;P29474;Q12772;P22830}

20043 Pathogen[ P14075] interacts with 2 human partners:{P29474;P08397}

20044 Pathogen[ P0C206] interacts with 5 human partners:{P36551;P22830;P29474;P08397;Q12772}

20045 Pathogen[ P03363] interacts with 1 human partners:{P29474}

20046 [Cluster 1823]GO:0034499+P biological\_process [name] late endosome to Golgi transport [def] "The directed movement of substances from late endosomes to the Golgi." [GOC

20047 Pathogen[ Q2Q067] interacts with 1 human partners:{Q8IWJ2}

20048 Pathogen[ P0C214] interacts with 1 human partners:{Q8IWJ2}  
20049 Pathogen[ P03346] interacts with 1 human partners:{Q8IWJ2}  
20050 Pathogen[ Q85601] interacts with 1 human partners:{Q8IWJ2}  
20051 Pathogen[ P14079] interacts with 1 human partners:{Q8IWJ2}  
20052 Pathogen[ P03383] interacts with 1 human partners:{Q8IWJ2}  
20053 Pathogen[ P03410] interacts with 1 human partners:{Q8IWJ2}  
20054 Pathogen[ P14075] interacts with 1 human partners:{Q8IWJ2}  
20055 Pathogen[ P0C206] interacts with 1 human partners:{Q8IWJ2}  
20056 Pathogen[ P03363] interacts with 1 human partners:{Q8IWJ2}  
20057 [Cluster 1824]GO:0045893+P biological\_process [name] positive regulation of transcription, DNA-dependent [def] "Any process that activates or increases the frequency, rate or extent of cellular DNA-dependent transcription." [GOC  
20058 Pathogen[ Q2Q067] interacts with 275 human partners:{Q13562;Q12905;Q9UPP1;P27540;Q6VMQ6;P01100;O00213;Q9GZT8;Q04864;Q16236;P62633;O75155;Q03052;P56524;Q8IZD2;Q9HBZ2;Q9BRR0;P04198;P15884;P20226;Q96HR3;P10243;Q9Y462;Q9Y5V3;Q75925;Q92922;Q9NS56;P23511;Q05066;Q9HBE1;Q99081;Q12888;Q13887;Q96RK1;P06400;Q9NPJ6;Q96I24;O00233;Q01094;Q8WW38;P40763;Q9H5Q4;Q8WYH8;P14921;P01106;Q9HAZ2;O60481;Q13485;O00287;P35680;Q9P0U4;Q9UI56;P62826;P62508;P48380;P35712;Q9Y2X9;Q01664;Q8N5U6;P51531;Q96IT1;O96004;Q92985;Q7Z6R9;Q8HWS3;P08151;Q01196;Q13772;Q14140;Q05516;P20749;Q02930;Q04206;P12980;Q13547;Q14103;P55345;Q93074;Q14814;P50549;Q95999;O75486;P36956;P41161;Q14192;Q9BWW4;Q86WV1;Q9BWX5;Q15350;P35638;Q9NY61;O75448;Q9NPI1;Q02447;Q2M1K9;Q96T58;O60244;Q6ZNA4;O14896;Q96SN8;Q86WP2;P09086;Q9Y5A6;Q8TF47;P17676;Q2QGD7;P08047;O75928;Q13129;Q8N726;P11831;P15172;Q6NT76;Q14CW9;P48552;P28069;P78545;Q8IXH6;Q15723;Q08050;O15405;Q00059;O43524;Q9Y297;Q99966;Q92994;Q13469;Q8N0Z2;Q9UHV2;P78317;Q96CJ1;P15036;Q5TA31;Q15699;P40337;P56693;P48788;Q6PGN9;P19532;Q92831;Q15306;O96017;Q14978;P84022;Q14641;P10914;P52815;O00716;O75177;O75528;Q92769;O14497;O00255;Q9UHV7;O95644;P24864;Q13127;P11161;Q12906;O00268;P51532;Q8NI51;Q9H4L7;O43918;O15078;P50613;O15198;Q9NVC6;P25208;O15164;P35869;Q9H160;Q8NHW3;P82970;Q16621;Q92993;O60907;O75030;P55055;Q9UIH9;P12956;Q15796;P20248;P50570;Q7Z7C8;Q02556;P23760;Q5VTR2;Q99543;Q99607;P37198;P19419;Q96T23;Q5BKZ1;Q8WWQ0;P19838;Q8IZX4;P43268;P20823;P23193;Q9HBT7;Q8N371;Q12968;Q9UPY8;Q9Y2X0;P35813;P25963;Q7RTV0;Q14686;Q96T76;Q04917;Q9BZK7;Q6QNY1;Q9UI95;O14920;Q14872;P22415;P19484;O95619;P17096;P35269;Q8TE85;P11474;Q9HCK8;Q969V6;Q9P1Z2;Q9NP71;Q8TAQ2;Q92793;P18848;Q9NSC2;Q9H2F5;Q15853;P24941;Q9NPA8;Q9BQA5;P35232;O60869;P28370;Q6STE5;Q13404;Q8IY57;Q9Y2W1;P23497;Q9Y252;Q13952;P15923;P10242;Q99717;P49711;Q14207;Q53QV2;P42224;P49918;P22736;Q9NYV6;Q9BTA9;P23409;Q12830;Q13105;Q86TU7;Q9H0N5;Q9P1T7;Q9UJW9;P49715;P18146;Q03112;Q15650;P17947;P32519;Q9BXJ9;Q96A56;P98168;Q9UBS8;P33076}  
20059 Pathogen[ P0C214] interacts with 269 human partners:{Q92993;Q5BKZ1;O00268;O15078;Q03052;Q9BWW4;O15198;Q8NI51;O00213;Q8N371;P20248;Q96CJ1;P32243;P35813;O75486;Q13887;Q96T58;Q02930;P48788;P35869;Q9Y5V3;Q13469;Q8N0Z2;Q14207;P11474;O75528;Q13952;Q13547;Q14872;Q13772;Q6VMQ6;Q9Y5A6;P19838;P14921;O75925;O14497;Q8TD17;Q04917;P48552;P35269;Q9UIH9;P19484;P25208;Q99081;P50613;P33076;Q9Y2X0;Q7Z6R9;Q9HBE1;P15884;Q8NHW3;Q9NS56;O60907;O15350;Q14CW9;Q03112;Q13015;Q96SN8;Q16621;P01100;Q93074;P32519;Q92793;P19419;P56693;P84022;Q12906;P17096;P15172;P17947;P56524;Q7Z7C8;Q6NT76;P11831;Q96HR3;Q04206;Q9NVC6;Q2M1K9;Q6STE5;P42224;Q13404;P10914;Q5JV F3;P98168;Q12905;Q99607;O00716;O75030;Q8N726;P55345;Q86WP2;Q9H4L7;Q9Y297;Q14686;O60244;Q9NY61;Q8TAQ2;Q9UI95;Q9H2F5;P17676;P78317;O95619;Q8N5U6;Q9HBZ2;Q53QV2;Q6PGN9;Q00059;Q9H0N5;Q92922;Q8IXF0;Q9BRR0;Q13129;Q9GZT8;Q99966;Q8TE85;P10243;Q12968;Q01094;Q14814;P18848;Q92985;P37198;Q96IT1;P15923;Q14103;P28370;O96017;Q14978;Q02556;P49918;O14641;Q9TF47;Q92994;Q8WWQ0;O95999;Q13485;Q92769;P20749;Q9HAZ2;Q8WW38;Q9H160;Q96RP1;Q9NPA8;O14896;P24941;P40337;Q9UBS8;Q7RTV0;Q9HCK8;Q2QGD7;P19532;Q15796;Q9NSC2;Q96I24;Q14192;Q86TU7;P25963;Q9BXJ9;Q9NP71;Q9P1T7;P43268;Q9NYV6;Q8IXH6;P82970;Q13127;O75155;Q15650;P28069;Q9Y252;P20226;Q9UHV2;Q8IZX4;Q5TA31;Q6ZNA4;Q9Y2X9;Q14140;O43918;P10242;Q9UHV7;P62826;Q9Y462;P62633;P23497;P05412;Q9UPY8;Q86WV1;P49711;Q02447;Q92831;O75448;P18146;O15164;Q9NPI1;P24864;Q96T23;Q15853;P52815;P09086;Q9BZK7;P11161;Q12888;P23511;Q99717;P15036;Q9UI56;Q969V6;Q04864;P40763;O96004;P27540;Q99543;Q9HBT7;P08151;Q9BTA9;Q92804;P50570;P48380;Q96A56;P78545;P50549;Q9BQA5;P22415;Q9P1Z2;P23193;Q8WYH8;O00233;O95644;Q6QNY1;P16220;O60869;P35232;P51531;Q5VTR2;Q9Y2W1;P62508;Q01664;O75177;Q15699;O14920;P01106;P35712;Q9NPJ6;Q9UPP1;Q13105;P41161;P06400;P08047;Q05516;P12956;Q8HWS3;O00255;Q12830;P12980;O15405;P35638;O00287;Q96T76;P04198;Q9UJW9;P51532;P23760;Q8IZD2;Q9H5Q4;Q8IY57;Q15723;O75928;Q16236;Q15306;O60481}  
20060 Pathogen[ P03346] interacts with 341 human partners:{Q15723;Q12888;Q99081;P85037;Q06945;Q9BZE0;Q8NI51;P05412;O00213;Q96CJ1;Q12830;Q9GZT8;Q16621;Q13263;O75364;Q8N0Z2;P09086;P35813;P50570;Q15788;P23511;P12956;Q14207;Q9BRR0;Q99966;Q9NPJ6;Q5T1R4;O60907;Q99612;P58012;Q14814;O96017;Q8WYB5;Q7RTS3;Q12905;P16220;Q2QGD7;O43918;P17676;Q7RTV0;Q03052;Q99543;P19484;P62633;Q99607;Q13129;P36956;Q05066;Q8WYH8;Q5VTR2;P35638;Q8WW38;Q9BYU1;P11831;P31270;Q9Y5W3;P06400;P25963;P51532;P70SY1;P50549;Q00059;Q12772;Q9BWX5;Q2M1K9;Q8TD17;Q7Z7C8;Q9UIU6;Q14872;Q96HR3;Q8N5U6;P19419;Q96A56;P24941;Q9NSC2;O75486;O43313;P48380;P25208;P20264;P15923;Q86WP2;P15172;Q15796;P56693;P23760;P56524;O00287;Q93074;Q9NPI1;P23409;Q04206;P33076;P24864;Q12906;O00268;P41161;O60244;Q9H4W6;P15173;Q08050;Q15306;P27540;Q969V6;Q99717;P20823;Q92831;O15350;P49918;Q04864;O75030;P37198;Q8TE85;Q9UI95;Q5TA31;O95644;Q01094;P49715;P17096;Q9UBC0;Q04917;Q13351;P62826;O15198;Q13404;P08047;P12980;O95999;Q15853;P20226;Q92766;P98168;O75155;Q16236;Q14103;O00233;Q96004;Q8WV1;P01106;O75448;Q9BWW4;O75925;Q8NB F1;Q15699;Q9NP71;P18848;P14921;Q06710;Q92794;Q9NS56;P84022;Q8HWS3;Q12968;P17542;Q14978;P10242;O60481;Q8IXF0;Q8TF47;P22736;O14641;Q13469;Q9P0U4;O00255;O75528;O60519;P195

32;O95863;P10914;Q6VMQ6;Q6QNY1;Q02556;Q96SN8;Q92769;Q14192;Q9UBG7;Q9P1Z2;Q13547;Q03112;Q6STE5;P51587;Q8WWQ0;Q9HCK8;O14497;Q6N069;Q9NZC4;P55345;O75840;Q5JUK2;P49711;P20248;Q9NY61;O95361;Q9BXJ9;Q9H5Q4;O14896;P35680;Q9H2F5;Q15475;P82970;Q12778;Q96T23;Q6PGN9;P10243;P42224;Q9Y462;Q9UPP1;Q13887;Q13105;Q6ZNA4;Q53QV2;P98177;Q13015;Q9Y5V3;Q9HBZ2;P78317;Q9UBS8;P35713;Q96T58;O75469;Q9HBE1;Q92994;P40337;Q13492;P04198;Q05516;Q8N371;O95619;Q96RK1;P20749;Q92481;Q13952;Q9H2C1;Q8IUI8;P11161;P35712;Q9H7Z6;P35269;Q9NV6;P32519;Q9NYV6;Q92922;Q9BZK7;P62508;Q9UBR4;Q9HBT7;P28069;P17947;Q99593;P11474;Q9UHV2;P48552;P28370;Q9UI56;P35232;Q01196;P19838;Q9UH73;Q8WUY8;P23497;P56178;Q13485;Q9Y5A6;P23193;O14920;Q96IT1;Q8IZX4;Q9Y2X9;O15078;Q9P1T7;P18146;Q92993;P52815;P43268;Q9Y2X0;Q92793;Q92985;P51531;O60869;P35869;P78545;Q14CW9;O00482;Q9HAK2;Q9Y252;Q02930;Q9UPY8;Q8IXH6;Q8IY57;Q8N726;Q9HAZ2;Q6NT76;O75593;Q9H0N5;Q9Y2W1;Q13562;O75928;P40763;Q99729;Q9Y297;Q8NHW3;P32243;O43524;Q8TAQ2;Q92804;Q9NPA8;Q86WV1;Q13285;Q9H160;Q02447;P01100;P48788;Q01664;P15036;O00716;Q8IZD2;Q13772;O15164;Q9UHV7;Q9UIH9;Q96I24;P55055;O15405;Q15650;Q96T76;Q7Z6R9;Q9UJW9;P15884;Q8IUM7;Q13127;Q9H4L7;O75177;P22415;Q9BTA9;Q5BKZ1;Q14140;Q9BQA5;P08151;Q14686;Q99581;Q86TU7}

20061

Pathogen[ Q85601] interacts with 285 human

partners: {Q96RK1;O95619;P01106;P18146;P10243;O15198;P78317;Q8NI51;Q99543;Q6N069;Q9Y2X0;Q14978;O00213;Q96CJ1;Q8TE85;Q6PGN9;Q9Y5T5;P52815;P08151;Q9H2F5;P11831;Q96T76;Q15853;O14896;P17676;P15036;O60481;P62633;P25208;P33076;Q13127;Q9NS56;O75528;Q16236;O75928;P17096;O96017;Q02556;Q9BWX5;P09086;Q8N371;Q9H0N5;Q7RTV0;Q92994;P19484;P15172;P14921;Q03052;Q6STE5;Q14CW9;Q9NY61;Q8WW38;Q9HBT7;Q9UI95;Q16621;P06400;Q969V6;O60907;Q96T23;P12980;Q14103;P50549;Q96SN8;Q7Z6R9;Q7Z7C8;Q2M1K9;Q9UHV7;Q99966;P40337;O75030;Q14872;P18848;Q14814;Q13129;P19419;P40763;Q03112;P28069;P32519;Q86TU7;P62826;P78545;Q86WP2;Q9Y2X9;Q9BTA9;Q15723;Q12772;Q9H7Z6;O00268;Q2QGD7;P35712;P10242;Q00059;Q15306;O15078;O14497;P27540;O75448;Q13469;Q92831;Q5T1R4;P19532;O15164;Q5TA31;Q6NT76;O95644;O96004;O15405;Q9NP71;P55055;Q04864;P49711;Q9UIH9;Q13952;Q8TF47;Q04917;Q12830;Q8IZX4;Q13404;Q9UBG7;P10914;P08047;Q12888;P51531;Q13562;P01100;O75155;Q13263;Q8NHW3;P22415;O00233;Q14686;Q86WV1;P23409;Q8NBF1;Q9P0U4;Q12968;Q15650;P51532;P48788;Q8IXF0;Q02930;Q9Y5A6;Q8N726;O14641;P23511;Q9BRR0;Q12906;P36956;Q92769;P16220;Q9UHV2;Q99717;Q15699;O14920;Q92804;Q04206;Q8WWQ0;Q14192;Q9H4L7;P50570;P35269;P22736;P20248;Q13772;Q9BW4;Q9BXJ9;P35680;P05412;Q92985;P28970;O00255;Q99612;P42224;Q9Y462;Q9UPP1;Q53QV2;Q8TD17;P11474;Q13015;P50613;P15923;Q9HBZ2;Q96A56;P32243;Q96T58;Q02447;P56693;P23193;Q8N5U6;Q14207;Q05516;O00482;Q9BQA5;P84022;Q99607;Q9NP11;Q5VTR2;Q9HCK8;Q9Y252;P49715;Q9NYV6;P41161;Q8WYH8;P49918;Q9BZK7;P56524;Q6ZNA4;Q8IXH6;P62508;Q12905;P17947;Q08050;Q9NPA8;Q9UBS8;O75486;P28370;P35232;P35869;O15350;Q13547;Q9H5Q4;Q99081;Q96IT1;Q14140;P48552;O00287;Q9NSC2;Q92993;O95999;P43268;P04198;Q9P1T7;Q92793;O60869;P48380;Q9P1Z2;Q5BKZ1;Q6VMQ6;Q8N0Z2;Q9UPY8;Q8IY57;P35813;Q9Y2W1;Q9H160;Q92922;P19838;P20823;Q8TAQ2;O60244;Q13485;Q96HR3;O75925;Q6QNY1;Q93074;P24941;P11161;Q01664;O00716;Q8IZD2;Q13105;Q9NPJ6;Q13887;P20749;P51587;Q96I24;O43918;Q8HWS3;Q9NVC6;Q01094;P23760;Q9UJW9;P15884;Q15796;P12956;P20226;O75177;P55345;Q9HBE1;P35638;P98168;P24864;Q9HAZ2;P25963}

20062

Pathogen[ P14079] interacts with 273 human

partners: {P98168;P48552;Q13952;P52815;Q13492;Q8WUH1;Q96A56;Q9HAK2;Q13772;O60244;Q9NP11;P08151;P15036;O15164;Q9Y2X0;Q9HAZ2;P10243;P62508;P33076;Q9HBT7;Q96T23;Q8IXH6;Q9UPY8;Q5TA31;P55055;Q5T1R4;Q92994;Q86WV1;Q86WP2;Q9BZK7;Q8IZX4;P35869;Q9NYV6;Q06413;Q9BW4;Q6STE5;Q9UHV2;O75928;P35269;O75528;O95999;P23409;Q14192;Q99581;Q15723;O14896;Q14103;P24864;Q96CJ1;P35680;Q9NY61;P09086;O14641;Q8TE85;Q2QGD7;Q92985;Q13404;Q92804;Q14207;Q92793;Q9BXJ9;P28370;Q99607;Q9UI56;Q9BTA9;Q13129;Q9H4L7;Q14CW9;O15405;O15198;P16298;Q96HR3;Q12906;Q15699;P17096;P11474;Q92922;P48380;P51532;O95644;O60907;Q8IXF0;P35712;Q86TU7;P51587;Q6ZNA4;Q9NVC6;Q99966;P51531;Q8N726;Q05516;Q9Y5A6;O96004;P22736;Q02447;Q13105;O00213;P35232;Q8WWQ0;O14497;P32519;P32519;Q8TAQ2;P19484;Q12830;O60869;O00233;Q04917;P41161;P49918;Q9BQA5;P15923;Q15306;Q969V6;O75155;P23497;O15350;Q99612;P50570;Q9BRR0;P35813;P28069;O75448;Q12772;Q12905;Q6NT76;P82970;P50613;Q9NZC4;Q9H0N5;P40337;Q5BKZ1;Q99543;Q8HWS3;Q9UJW9;Q00059;P12956;Q9H4W6;P55345;Q9Y5V3;Q8N5U6;Q6VMQ6;P19532;Q9UIH9;P12980;P11161;O00482;Q92769;Q96I24;O00716;Q8IY57;Q9UHV7;Q5VTR2;Q9UPY8;Q92930;P49715;Q9BWW4;Q7RTV0;O75469;Q2M1K9;P27540;Q12830;P50549;Q8NHW3;P04198;O43294;Q9Y2X9;Q15788;Q01664;P37198;Q9HCK8;Q8WUY8;Q5JVF3;Q13351;Q96RK1;P48788;Q9NS56;Q9NPJ6;O00287;Q8IUI8;P35638;Q9H2F5;Q16621;P01106;Q9H6P5;P56693;Q16236;Q9P0U4;P42224;Q6PGN9;Q8N0Z2;P32243;Q7Z6R9;Q14814;P20248;Q14872;P20749;O75925;P23193;Q9Y5W3;O43918;Q9UBS8;O15078;P78317;Q9P1T7;Q8N371;P15884;Q6N069;P78545;Q9HBZ2;P62633;Q8IUI8;Q02556;Q9H5Q4;Q03052;Q13469;Q93074;Q99081;P62826;O95361;Q8TD17;P05412;Q15650;Q12888;P10242;P56524;Q13127;O75030;Q13015;Q96IT1;O95619;O43313;Q14140;Q9P1Z2;P36956;Q6QNY1;Q01094;O75486;O00255;Q13145;P01100;Q9NP71;Q96SN8;Q8IUM7;P23511;Q9BZE0;Q9HBE1;Q96T76;Q14686;P49711;Q9Y2W1;Q9NPA8;O75177;Q8WYH8;Q9Y462;Q8WW38;Q53QV2;Q9NSC2;Q8NI51;Q8NBF1;P10914;Q9H160;Q92993;P19419;Q8TF47;O00268;Q14978;Q96T58;Q9UBG7;Q9Y2G1;P23760;P22415}

20063

Pathogen[ P03383] interacts with 244 human

partners: {Q15723;O15198;Q8NI51;Q14978;O00213;Q9NY61;Q12830;P10914;O75925;Q92831;Q12888;P11831;Q96T76;P15036;O14497;P35712;P50549;Q13485;Q9UHV2;Q04864;Q96A56;P33076;O00716;Q86WP2;P08047;Q8HWS3;Q9NYV6;O75528;Q99607;P17096;P16220;P27540;P28069;Q13469;Q9NPA8;P35269;P32243;Q9HBE1;Q9BTA9;P40337;P49711;P15172;Q01094;P14921;O75486;O00287;Q15650;P19484;O14920;P01106;Q8WW38;Q96CJ1;Q6NT76;Q9UI95;P23511;P23193;Q9BRR0;O60244;Q9BW4;O60907;Q96SN8;O95644;O00233;P20749;P19419;Q14686;Q6STE5;P28370;Q9UBS8;Q86WV1;P48380;Q00059;Q9G2T8;Q9H2F5;O75030;Q6VMQ6;P35638;P15923;O75155;Q6ZNA4;Q9H5Q4;Q14814;P78317;Q8IZX4;Q8WYH8;O75177;Q96RK1;O15405;Q92993;Q969V6;Q05516;P12980;Q15306;Q9NPJ6;Q96T23;Q86TU7;P35813;Q8TE85;Q93074;Q8N5U6;P06400;P18146;Q9N1V6;Q01664;Q96HR3;Q14872;P62826;P25208;Q14CW9;P20226;Q8TF47;Q8IXH6;Q9HAZ2;Q6PGN9;O75448;O96004;P41161;P11474;Q03112;Q13952;Q92985;Q16621;P84022;P98168;Q92994;Q9H160;P50613;Q9BXJ9;Q02447;Q13105;O146

41;O14896;Q53QV2;Q13015;Q14192;Q5TA31;Q9BQA5;O15078;P24941;Q13404;Q92769;Q99717;P17676;Q14103;Q9Y5V3;Q99081;Q9NSC2;Q12968;P51531;O00268;O15350;P82970;O00255;P25963;Q9Y462;Q8N0Z2;P48788;Q12905;Q96IT1;Q8TAQ2;P35232;O95999;Q99543;O43918;Q16236;Q96T58;Q13547;Q15853;Q14207;Q9UI56;Q5VTR2;Q12906;P10242;P23497;Q9Y252;P52815;Q9HCK8;P62633;P01100;P04198;P43268;P11161;P23760;P49918;Q15796;Q9H0N5;Q9BZK7;P56524;P32519;Q9HBT7;Q8WWQ0;Q04206;P78545;Q8IY57;P51532;Q02556;Q8WUY8;Q9NPI1;Q13772;Q9Y5A6;Q8N371;Q14140;P48552;Q9UHV7;Q9Y2X9;Q9P1T7;Q92922;P37198;P18848;Q9NVC6;Q2M1K9;O60481;P62508;O60869;O95619;Q02930;P24864;P10243;Q15699;Q2QGD7;Q9Y2W1;P19838;P35869;P56693;Q9UPP1;Q9Y2X0;Q9UY8;P19532;P17947;P20248;Q9P1Z2;Q92793;Q7RTV0;Q9UJW9;P12956;Q13127;Q8N726;P22415;O96017;Q5BKZ1;Q6QNY1;O75928;P05412;Q13129}

20064

Pathogen[ P03410] interacts with 272 human

partners: {Q15650;P84022;Q8IXH6;Q92831;P20749;Q04206;Q9Y2W1;P28069;P35712;Q9UI56;Q9UPP1;P23409;O95619;P11831;Q8NBF1;Q8IZX4;P19838;Q9UHV2;P36956;Q9UI95;Q8WYH8;O75925;Q6ZNA4;Q03112;Q8IXF0;Q96T76;P35638;O14920;Q9H4L7;Q14103;P35813;Q13772;Q96T23;Q86WV1;Q6QNY1;O00268;Q92804;Q04864;Q9HAZ2;Q92994;O14896;O96004;Q9BWW4;P19419;P82970;P17676;P23511;Q9P0U4;Q8N726;P01106;Q02447;Q13015;P17947;Q12968;O60481;O14497;Q04917;Q9BQA5;Q14686;P18848;Q8TD17;O75528;P10242;O15405;Q9NVC6;Q99717;Q14814;P78545;O00233;O75030;Q96SN8;P15884;Q14207;Q16236;Q12830;Q14978;Q9NPJ6;Q00059;Q14CW9;O15198;Q9NY61;O43918;Q13145;Q9UIH9;O75928;O43294;Q2M1K9;P17096;P52815;O00213;P50570;P19532;Q5VTR2;P10243;P20226;Q5TA31;P06400;P19484;Q9BQA5;P32519;P23193;P15923;Q99607;Q03052;P62508;Q86WP2;Q9UJW9;Q15306;P05613;O75177;Q96T58;Q8WW38;P01100;Q6VMQ6;O75486;P50549;Q02556;Q9H2T5;Q9HBZ2;Q9BRR0;Q969V6;O95644;Q02930;Q9P1Z2;P27540;Q9NYV6;Q99081;Q13127;O00716;Q9Y2X9;P41161;P12956;Q9NPA8;Q13492;Q92793;Q8TE85;Q8IY57;Q53QV2;Q6N069;P15036;Q9P1T7;O95999;Q8WWQ0;Q92769;Q9BWX5;P62826;Q9Y2G1;Q9UBS8;P24941;Q13129;Q12772;Q16621;P25208;P51587;Q14872;P78317;P56524;Q12905;Q5JVF3;Q92922;Q14140;Q9H160;Q8IUI8;Q9NP71;P43268;P48380;P22415;Q13485;Q96124;O15078;P10914;Q13952;P22736;Q9HCK8;P16220;P56693;Q96017;Q9H5Q4;Q15699;P35269;Q13469;Q9UPY8;P51532;Q9HBT7;Q15853;P48788;Q5BKZ1;P05412;P20248;Q12888;Q96HR3;P49711;Q96CJ1;P98168;Q7Z6R9;Q8NI51;P51531;P12980;Q96IT1;O60244;Q9UHV7;P32243;P11474;Q9Y5V3;Q9BTA9;Q8NHW3;Q13547;Q01664;Q96A56;Q01094;P35680;O60869;Q96RK1;Q7RTV0;O00287;Q8TAQ2;O15350;Q2QGD7;Q9H6P5;Q9BZK7;Q9Y462;P08047;P23760;Q9H0N5;Q8N0Z2;Q13404;Q9Y2X0;P49918;Q93074;Q8TF47;Q13105;Q6PGN9;Q9H4W6;Q6STE5;P25963;Q92985;Q9NSC2;Q8N371;Q99543;P35232;P18146;Q8N5U6;P62633;P48552;O00255;Q15796;P11161;Q92993;Q15723;P24864;P40763;Q8WUY8;O60907;P33076;Q9Y5A6;Q12906;P04198;O75448;Q14192;Q9NPI1;Q86TU7;P40337;P28370;Q9HBE1;Q8HWS3;P55345;P14921;O75155;O14641;Q9UBG7;Q9BXJ9;Q99966}

20065

Pathogen[ P14075] interacts with 246 human

partners: {P28069;Q00059;Q5VTR2;Q8NI51;Q9NSC2;O00213;P35869;P52815;Q99607;Q9H5Q4;P35813;Q9Y5A6;Q9GZT8;Q9NPJ6;P23497;Q9H2F5;P12956;Q14207;Q13105;Q04206;P24941;Q8WWQ0;O75030;Q8N371;Q9NPI1;P05412;Q5BKZ1;P11474;Q9BQA5;Q14103;Q9NYV6;Q8IY57;Q92831;P11831;O60481;Q9BWW4;Q9BXJ9;P78545;P51532;Q96HR3;P25208;O00233;Q14686;Q8TE85;Q9Y252;P43268;P50613;Q96T58;P19419;Q12905;Q9UPP1;Q86TU7;Q9NY61;P48380;P62633;Q9HBT7;P11161;P15172;P17096;P56524;O43918;Q08050;P18146;Q13015;P19484;Q9P1T7;O95619;P33076;Q92922;O75925;Q96RK1;P35638;Q92994;O00287;Q96IT1;Q96SN8;Q7Z7C8;Q12906;Q99543;Q99717;O75448;O00716;P56693;Q8WW38;P20226;P04198;Q9UHV2;Q9UI95;Q9BRR0;P10242;Q15796;P15923;Q13952;P25963;Q13547;Q8N0Z2;P01106;Q92993;O14497;Q9HAZ2;P27540;Q02556;O96004;Q13485;P35232;O00255;Q86WV1;Q93074;Q9NP71;P15036;O14920;Q15853;Q8N5U6;Q9UPY8;Q6ZNA4;O15078;Q14CW9;P32519;P49918;O14641;Q01664;P23193;Q9UHV7;O75528;Q12830;Q9H0N5;Q13469;O96017;Q15650;O15350;Q92769;P35712;Q6VMQ6;Q6QNY1;Q9HCK8;Q15723;P51531;Q9BTA9;P35269;Q9NPA8;O15198;O60244;Q96CJ1;O75928;P37198;P20248;Q15306;O15405;P17947;P62826;P82970;Q8TAQ2;Q8WUY8;O60907;Q9P1Z2;P23511;P78317;P18848;Q969V6;Q01094;P28370;P14921;O95999;P06400;Q03112;Q8IXH6;P50549;O14896;P98168;P01100;O00268;Q02447;Q9Y2X9;Q6PGN9;P12980;P49711;Q9BZK7;Q92927;Q9393;P15884;Q9NVC6;Q13772;Q8TF47;Q13404;Q15699;Q13127;Q9UBS8;P48552;O75486;Q05516;P19838;Q53QV2;P48788;Q12888;Q13129;P16220;Q5TA31;P22415;Q86WP2;Q92985;P84022;Q16621;P23760;P17676;Q16236;O60869;Q8WYH8;Q2M1K9;Q6STE5;P10914;O75155;P40337;Q99081;Q9Y5V3;Q2QGD7;Q9Y2W1;Q9H160;P32243;Q14814;Q12968;P19532;Q6NT76;Q14872;Q14192;Q8HWS3;Q96A56;Q9UI56;Q9Y462;Q02930;P62508;Q14978;O95644;Q8N726;Q9Y2X0;Q96T76;P20749;Q9UJW9;Q04864;O75177;Q8IZX4;P10243;Q9HBE1;Q14140;P24864;Q7RTV0;P08047}

20066

Pathogen[ P0C206] interacts with 304 human

partners: {Q8HWS3;Q8TE85;Q15723;Q13887;P84022;O75486;Q8IXH6;Q9Y2X9;Q8N371;Q9H4L7;P10914;Q92769;Q9NS56;Q9BZE0;Q9P0U4;P98168;O75528;Q9HCK8;O60481;Q14103;P23193;Q96HR3;Q9H2F5;O14920;Q96SN8;Q6VMQ6;Q13469;Q9NP71;Q9HAZ2;Q12905;Q13127;P14921;P51532;Q9NPI1;Q13263;Q8N726;O96017;P20226;P11161;P16220;Q9Y5T5;P35869;O75030;O75925;O43313;Q9HBE1;Q9UV2;O60907;Q8WYH8;Q9NSC2;Q05066;P51587;P51531;Q05516;Q6ZNA4;O75469;O00255;O95999;Q99717;Q6STE5;P05412;Q5T1R4;Q8WW38;P25963;O00268;Q9Y5V3;Q9UPP1;P19419;O75177;P10242;Q8NI51;Q9Y462;P23409;Q9UBC0;P12980;Q86TU7;Q9UIH9;P55055;Q6QNY1;P20248;P43268;Q96T23;Q92922;Q15306;Q13547;P49715;P36956;Q14140;O15164;P19484;P62826;Q9P1Z2;Q12968;P56693;Q04917;Q92993;Q6PGN9;P48380;O00716;P22736;Q9UHV7;P19532;Q8N5U6;P78317;Q15699;Q15796;Q5JVF3;Q96A56;Q8TAQ2;Q92831;Q9BQA5;Q5BKZ1;P33076;Q5VTR2;Q9H160;O00482;Q8WWQ0;Q8IZX4;Q5TA31;O15405;P18146;Q6N069;P62633;O96004;Q9HBT7;Q92793;Q7Z6R9;Q9BWX5;P32519;Q15853;O43918;Q02556;P23511;O00213;Q13952;O14497;P82970;Q12888;P19838;Q969V6;Q99581;Q99612;P35269;P22415;P62508;Q15650;Q03112;P09086;Q99081;Q9UPY8;P50613;P50549;O95619;P32243;P17676;Q86WP2;Q8TF47;Q9UI56;P35232;Q13015;Q96CJ1;P08047;Q14CW9;Q9BWW4;Q92985;Q53QV2;Q9UBS8;Q9NPJ6;Q99543;P35680;P49711;P01100;Q9H2C1;Q04206;Q86WV1;P15923;Q01094;Q14686;Q8WUY8;O95361;P15884;O15078;P20823;Q02447;Q03052;Q9Y2W1;P04198;Q96IT1;Q7RTV0;P78545;P17947;Q02930;Q8NHW3;Q04864;O43294;Q8NBF1;Q9BZK7;Q92804;P15036;Q14872;O14896;P40763;Q13485;Q9BTA9;P25208;Q9Y5A6;Q13129;P23760;Q2M1K9;P28370;Q96T58;O60869;Q96T76;P17096;Q13562;Q96RK1;P11831;Q08050;O60244;Q13422;Q01664;Q99966;P20749;Q9BRR0;Q9H5Q4;Q8WUHL;Q8IY

57;P35712;Q16236;O15350;P10243;Q16621;O00287;P27540;Q2QGD7;Q9NVC6;P15172;Q13772;Q929  
94;Q14192;O75448;Q14814;Q9UBR4;Q7Z7C8;P11474;P01106;Q9HON5;Q9NZC4;Q8IUM7;O15198;O956  
44;P55345;P56524;Q13404;Q9Y2X0;P28069;P48788;Q96I24;P08151;P48552;Q00059;Q13105;P411  
61;Q9Y252;P42224;Q9H4W6;Q9UK53;Q9BXJ9;P12956;Q9HAK2;Q9NY61;Q9NPA8;Q8N0Z2;Q6NT76;P248  
64;P24941;Q15788;Q9NYV6;Q93074;Q8TD17;P18848;Q12830;Q9UBG7;O00233;Q12906;Q99607;Q9P1  
T7;Q9UJW9;Q12772;Q9UI95;P35638;P50570;Q14207;Q8IZD2;Q9HBZ2;Q9H7Z6;P35813;Q14978;P403  
37;P52815;P06400;Q8IXF0;P49918;O75155}

20067 Pathogen[ P03363] interacts with 264 human  
partners: {Q8IZX4;Q16236;Q9Y5A6;Q9H160;P49918;Q14978;Q53QV2;Q15699;O95619;P12956;Q9UB  
C0;Q8IUM7;Q9Y252;P98168;P18848;Q13105;Q6N069;Q6VMQ6;Q12830;Q8N5U6;Q92985;Q96T58;Q927  
66;Q96I24;Q9BYU1;O14920;Q8WWQ0;Q04206;Q15853;Q14896;P27540;P17676;O60481;P18146;Q5JU  
K2;P24864;Q6STE5;Q02930;Q96HR3;Q9BRR0;Q99543;P08151;Q9H4L7;O15078;Q86WV1;P62633;Q024  
47;Q13952;Q02556;Q92831;P25963;P62508;P20248;Q03112;O00213;Q8TAQ2;P23760;P09086;P179  
47;Q9H2F5;P51532;Q7RTS3;Q9H0N5;P82970;Q9BZK7;Q8NHW3;Q9GZT8;P04198;Q5T1R4;Q7RTV0;P505  
70;O14497;O60907;Q9Y462;Q99607;P52815;P78317;P11474;P16220;Q16621;Q99612;Q9P0U4;Q5VT  
R2;P19419;Q13015;P14921;Q9HBZ2;O00268;Q15306;P24941;Q6NT76;Q969V6;P32243;P43268;Q9Y2  
X9;Q14686;P23497;P06400;P40337;P01106;Q8NI51;P35869;Q99729;P49711;Q96RK1;Q8N0Z2;P487  
88;Q6ZNA4;Q13127;P35269;Q8IY57;O96017;Q5BKZ1;O43524;P15923;Q2M1K9;Q96T23;P20749;Q8TE  
85;Q9P1T7;P32519;Q14140;P48552;Q6PGN9;Q05066;Q08050;P11831;Q9UPY8;Q9NY61;Q13129;Q9HC  
K8;Q96A56;Q14872;P56693;P20264;P28069;Q12906;Q96T76;O75030;Q9HBT7;Q9UHV2;Q14814;Q9NZ  
C4;P78545;Q86WP2;Q9NYV6;P17096;Q9P1Z2;Q01094;Q9NVC6;O75155;Q7Z7C8;Q9NP11;Q9BQA5;Q9UH  
V7;Q15796;Q15723;P84022;Q7Z6R9;P41161;O96004;Q8IXF0;Q9UI95;P35638;P10914;Q6QNY1;Q96I  
T1;Q9NPA8;O75925;Q00059;P50549;P22415;O00287;Q12905;Q13547;P19838;Q93074;Q9UBS8;Q927  
93;O75448;Q9UI56;O60869;Q13469;P33076;Q14CW9;Q14103;Q9BWX5;P23193;P35712;P10242;P202  
26;Q13485;Q8N726;Q92804;Q12968;P23409;Q5TA31;Q9Y5V3;P12980;P19484;Q2QGD7;Q9NPJ6;P158  
84;Q8TF47;Q95644;P35232;P05412;O15405;Q96CJ1;P28370;Q99581;Q04864;P19532;O60244;Q049  
17;O75486;Q9BWW4;O43918;Q9NP71;Q14207;Q8WW38;Q13404;Q9UBG7;P08047;Q99081;P48380;O007  
16;P37198;P51531;Q92922;P62826;O14641;Q9UIH9;Q8HWS3;P15172;Q05516;Q99717;P25208;Q9BT  
A9;O15198;Q8WYH8;Q9UJW9;Q01664;Q8IXH6;P15036;Q9BZE0;Q92993;Q9BXJ9;Q03052;Q8NBF1;O755  
28;Q12888;P10243;O75177;Q15650;O75928;P23511;Q96SN8;Q9H5Q4;Q9HAZ2;P01100;Q14192;P111  
61;O00482}

20068 [Cluster 1825]GO:0048659+P biological\_process [name] smooth muscle cell proliferation  
[def] "The multiplication or reproduction of smooth muscle cells, resulting in the  
expansion of a cell population." [CL

20069 Pathogen[ Q2Q067] interacts with 1 human partners: {Q5VZE5}

20070 Pathogen[ P0C214] interacts with 1 human partners: {Q5VZE5}

20071 Pathogen[ P03346] interacts with 1 human partners: {Q5VZE5}

20072 Pathogen[ Q85601] interacts with 1 human partners: {Q5VZE5}

20073 Pathogen[ P14079] interacts with 1 human partners: {Q5VZE5}

20074 Pathogen[ P03383] interacts with 1 human partners: {Q5VZE5}

20075 Pathogen[ P03410] interacts with 1 human partners: {Q5VZE5}

20076 Pathogen[ P14075] interacts with 1 human partners: {Q5VZE5}

20077 Pathogen[ P0C206] interacts with 1 human partners: {Q5VZE5}

20078 Pathogen[ P03363] interacts with 1 human partners: {Q5VZE5}

20079 [Cluster 1826]GO:0006508+P biological\_process [name] proteolysis [def] "The  
hydrolysis of proteins into smaller polypeptides and/or amino acids by cleavage of their  
peptide bonds." [GOC

20080 Pathogen[ Q2Q067] interacts with 57 human  
partners: {Q9Y5K5;P48556;P54252;P40306;Q93009;O00303;Q9Y4P1;O15519;Q6ICB0;Q14674;Q994  
97;Q9UDY8;P28072;Q12765;A5LHX3;P25787;Q92905;Q14790;Q9GZR1;P28065;O14818;Q9BQI9;Q8WX  
C3;P60896;Q9UKC9;P40337;P60900;P55212;Q86T82;P28062;P25788;P42575;P61088;P25786;O609  
07;Q9UK99;P28074;P25789;Q93008;P28838;Q9HC62;P20618;P48147;Q05086;P28070;P28066;Q96S  
W2;Q99436;Q8TAA3;Q9NRD1;P49721;P49720;Q9UMX1;Q13867;Q96HI0;O15205;Q14999}

20081 Pathogen[ P0C214] interacts with 67 human  
partners: {Q05086;P25789;Q96HI0;Q9UK99;P22695;P28062;A5LHX3;P28838;Q16740;P28065;Q9NQ  
35;P55212;O14818;O60907;Q9UDY8;Q13867;Q92560;Q9Y4P1;P48556;P40306;Q99497;Q9NRD1;Q149  
99;P48147;Q93008;Q9BQI9;Q9Y5K5;O15519;P28066;O00303;Q92905;Q6ICB0;Q96FV2;P49720;P280  
74;Q96SW2;Q8WXC3;P25788;P40337;P42574;Q93009;P25786;O15205;Q9UKC9;P28072;Q8TAA3;P096  
22;Q99436;P25787;Q12765;Q9GZR1;Q9HC62;P60900;P55210;Q9UMX1;Q15008;Q9H3M9;Q9NY33;P280  
70;P42575;P61088;P54252;P20618;P49721;Q9UKT8;Q14790;Q14674}

20082 Pathogen[ P03346] interacts with 77 human  
partners: {P25787;Q9BXU7;P63119;P28070;Q93009;Q9GZR1;P25789;Q92560;O60907;Q9Y4P1;Q6IC  
B0;Q9H3M9;Q93008;P28072;P25788;P28074;P49721;Q9UDY8;P42575;O14818;Q99436;A5LHX3;Q9UK  
T8;P28062;O95630;P42574;P20618;P55212;Q86T82;Q9BQI9;O15519;O00303;P61088;Q8WXC3;Q96S  
W2;Q9UHP3;Q14694;P10144;P51784;P49720;P28065;Q86UV5;P60900;O75604;P25786;O15205;Q9NR  
D1;Q8IUQ4;Q99497;P28066;P40337;Q92905;Q13867;Q8TAA3;P55211;Q14790;Q9HC62;Q14999;Q127  
65;P48147;P48556;P55210;Q96HI0;Q9UK99;Q96FW1;Q05086;Q6GQQ9;O94782;P60896;Q9UKC9;Q146  
74;Q9UMX1;Q9Y5K5;Q496Y0;Q9H0E7;P40306;P54252}

20083 Pathogen[ Q85601] interacts with 65 human  
partners: {P10144;P28066;P60900;Q99497;Q9Y5T5;Q9H0E7;Q93009;P25787;P25788;O60907;Q9UD  
Y8;Q14790;Q92560;Q9Y4P1;Q96SW2;P40337;Q9HC62;Q9H3M9;O00303;Q14674;P48147;Q13867;Q930  
08;Q9BQI9;P54252;Q9UKC9;P25789;P20618;Q6ICB0;P40306;P49720;Q9NQC7;P42575;Q8WXC3;P280  
62;P49721;Q92905;Q9Y5K5;P25786;O15205;P28072;P28065;O95630;Q99436;Q9NQ35;P28070;Q86T  
82;Q8TAA3;Q14999;Q12765;P48556;Q96HI0;Q9UK99;Q05086;P28074;P55212;A5LHX3;P61088;Q9UK  
T8;O14818;Q9UMX1;Q9GZR1;O15519;P55210;Q9NRD1}

20084 Pathogen[ P14079] interacts with 84 human

partners:{P28838;P22695;P28065;Q99436;Q96FV2;O14773;P48556;Q9NQ35;Q8WXC3;Q96KR4;Q96K  
P4;Q9NUQ7;Q6ICB0;O00303;Q9BQI9;Q9H3M9;O15519;Q96HI0;P40306;Q92542;P28074;Q8NDH3;P481  
47;P54252;Q99497;O60907;P49720;O00487;Q9UMX1;Q86TL0;P25787;Q9NXJ5;Q96MI9;Q9UPW5;P291  
44;A5LHX3;Q9UKC9;Q14674;Q16740;Q4J6C6;Q9Y4P1;P55212;P20618;Q8TAA3;P40337;Q9Y5K5;Q9HC  
62;Q14790;P28062;P60900;P55210;Q92560;O15205;Q0VVDG4;Q13867;Q9NY33;Q400G9;Q8NDL9;Q9UK  
99;O14818;P49721;Q92905;Q9H6P5;Q12765;Q5W0Q7;A6NFU8;Q9NRD1;Q15008;P43686;P42575;P257  
88;Q96SW2;P28066;Q9GZR1;Q9BSY9;Q8WTU0;Q9NQC7;Q5TDH0;Q9H300;P10144;Q14999;Q03154;Q96F  
W1;P28072}

20085 Pathogen[ P03383] interacts with 46 human  
partners:{P55212;P40337;P25789;P60900;O60907;P40306;Q92905;Q9Y4P1;Q96SW2;P28838;P497  
21;P20618;P48147;Q9BQI9;P61088;P54252;Q14674;Q96HI0;Q12765;Q6ICB0;Q13867;Q8WXC3;P257  
86;Q9Y5K5;P28072;P28065;P28066;Q9UKC9;Q9HC62;Q9H3M9;P28074;P49720;Q8TAA3;Q9NRD1;P280  
62;P60896;P48556;O14818;O15205;Q9UMX1;Q99436;P28070;Q9GZR1;Q14999;P25787;P25788}

20086 Pathogen[ P03410] interacts with 74 human  
partners:{Q400G9;Q96FW1;Q9H3M9;P28070;O15205;P10144;Q0VVDG4;Q9NRD1;Q99497;Q96SW2;Q9UK  
99;Q9UPW5;P25786;Q96FV2;Q8NDH3;Q15008;Q5TDH0;Q9Y4P1;P60900;Q12765;P42575;Q9NQ35;P481  
47;O15519;Q92905;Q13867;Q96HI0;Q8TAA3;P48556;P49721;P54252;Q9GZR1;P61088;A5LHX3;Q8WT  
U0;Q14674;Q99436;P28838;Q9NXJ5;P40306;P22695;Q86TL0;Q96KR4;P25787;Q9HC62;Q6ICB0;P608  
96;P28062;Q9UKC9;O14818;A6NFU8;O00303;P25789;P49720;Q8WXC3;Q9Y5K5;Q496Y0;Q9BQI9;Q925  
42;Q9H6P5;P28072;Q9NY33;P25788;Q16740;P55212;P28066;Q9UMX1;O60907;P28065;P20618;P403  
37;Q9BSY9;P28074;P55210}

20087 Pathogen[ P14075] interacts with 47 human  
partners:{P25788;P28066;Q8TAA3;P60900;P61088;P55212;P49720;Q9Y4P1;P48556;Q96FW1;P280  
70;P49721;Q9BQI9;P54252;Q6ICB0;Q96SW2;Q96HI0;Q14999;P28062;P28074;P28065;Q8WXC3;Q9HC  
62;P25786;Q9UKC9;O14818;O60907;P28072;Q13867;P60896;Q9NRD1;P25787;Q14674;Q9H3M9;P206  
18;P40337;Q92905;P40306;P28838;O15205;Q99436;Q12765;Q9UMX1;Q96FV2;Q9GZR1;Q9Y5K5;P257  
89}

20088 Pathogen[ P0C206] interacts with 88 human  
partners:{Q9NQC7;Q9UKC9;Q99436;P28062;P10144;Q9NQ35;P40306;P28065;Q9NXJ5;Q96KR4;Q9UD  
Y8;P25786;Q9Y5T5;Q9UMX1;P25788;Q93008;P29144;Q8NDL9;Q96HI0;O60907;Q9Y4P1;P25787;P481  
47;O75604;Q496Y0;P49720;Q8IUQ4;O95630;Q05086;Q9HC62;P28838;P55212;P60900;Q93009;O152  
05;Q92542;Q99497;Q6ICB0;P54252;Q9H0E7;O15519;A5LHX3;Q9Y5K5;P22695;P25789;Q13867;Q149  
99;Q9NRD1;P61088;Q9GZR1;Q96SW2;Q9BSY9;Q9H3M9;P20618;Q8TAA3;P28070;Q96FW1;Q16740;Q9NY  
33;Q14790;P28066;Q86T82;Q6GQQ9;P42574;O14818;Q12765;Q8NDH3;P28072;Q9UHP3;Q9UKT8;Q146  
74;Q86TL0;P28074;P42575;Q9UK99;P49721;Q96FV2;Q9BQI9;Q9UPW5;P55210;O00303;P60896;Q8WT  
U0;P48556;Q92560;P40337;Q8WXC3;Q92905}

20089 Pathogen[ P03363] interacts with 47 human  
partners:{O15205;P63131;P63119;Q9Y5K5;O15519;P10265;P51784;Q6GQQ9;P60896;Q9UMX1;Q9UH  
P3;O75604;O60907;P63121;P54252;P40337;Q9Y6I0;P10144;Q05086;P61088;Q13867;Q92560;P552  
12;Q14999;Q9UK99;P63124;Q9HC62;Q86T82;Q8WXC3;Q9UKT8;Q14674;Q96SW2;Q9BXU7;Q96HI0;P552  
10;Q9Y4P1;Q9BQI9;Q12765;Q9GZR1;Q9UKC9;Q9NRD1;Q6ICB0;P63129;Q93008;Q92905;Q96FW1;O003  
03}

20090 [Cluster 1827]GO:0006730+P biological\_process [name] one-carbon metabolic process  
[def] "The chemical reactions and pathways involving the transfer of one-carbon units in  
various oxidation states." [GOC

20091 Pathogen[ Q2Q067] interacts with 2 human partners:{Q14749;P34896}

20092 Pathogen[ P0C214] interacts with 10 human  
partners:{Q05932;Q86XF0;O43865;P34897;P00374;Q14749;P34896;P23526;P11586;Q9NZL9}

20093 Pathogen[ P03346] interacts with 4 human partners:{P23526;Q9NZL9;Q14749;O43865}

20094 Pathogen[ Q85601] interacts with 4 human partners:{O43865;P34896;P23526;Q14749}

20095 Pathogen[ P14079] interacts with 10 human  
partners:{Q86XF0;P00374;P34897;Q9NZL9;O43865;Q14749;P00915;P23526;Q05932;P34896}

20096 Pathogen[ P03383] interacts with 2 human partners:{P34896;Q14749}

20097 Pathogen[ P03410] interacts with 9 human  
partners:{Q14749;P00374;Q86XF0;P23526;Q05932;O43865;Q9NZL9;P34897;P34896}

20098 Pathogen[ P14075] interacts with 2 human partners:{P34896;Q14749}

20099 Pathogen[ P0C206] interacts with 8 human  
partners:{Q9NZL9;P00915;P34897;O43865;P34896;P23526;Q14749;Q05932}

20100 Pathogen[ P03363] interacts with 2 human partners:{Q14749;O43865}

20101 [Cluster 1828]GO:0080182+P biological\_process [name] histone H3-K4 trimethylation  
[def] "The modification of histone H3 by addition of three methyl groups to lysine at  
position 4 of the histone." [GOC

20102 Pathogen[ Q2Q067] interacts with 3 human partners:{Q6PD62;Q9GZS3;Q92541}

20103 Pathogen[ P0C214] interacts with 3 human partners:{Q92541;Q6PD62;Q9GZS3}

20104 Pathogen[ P03346] interacts with 3 human partners:{Q6PD62;Q92541;Q9GZS3}

20105 Pathogen[ Q85601] interacts with 3 human partners:{Q6PD62;Q9GZS3;Q92541}

20106 Pathogen[ P14079] interacts with 3 human partners:{Q92541;Q9GZS3;Q6PD62}

20107 Pathogen[ P03383] interacts with 3 human partners:{Q6PD62;Q92541;Q9GZS3}

20108 Pathogen[ P03410] interacts with 3 human partners:{Q6PD62;Q92541;Q9GZS3}

20109 Pathogen[ P14075] interacts with 3 human partners:{Q92541;Q6PD62;Q9GZS3}

20110 Pathogen[ P0C206] interacts with 3 human partners:{Q6PD62;Q92541;Q9GZS3}

20111 Pathogen[ P03363] interacts with 3 human partners:{Q9GZS3;Q92541;Q6PD62}

20112 [Cluster 1829]GO:0044205+P biological\_process [name] 'de novo' UMP biosynthetic  
process [def] "The chemical reactions and pathways resulting in the formation of UMP,  
uridine monophosphate, starting with the synthesis of (S)-dihydroorotate from  
bicarbonate\_ UMP biosynthesis may either occur via reduction by quinone, NAD(+) or



oxygen." [GOC

20113 Pathogen[ Q2Q067] interacts with 1 human partners:{P11172}

20114 Pathogen[ POC214] interacts with 1 human partners:{P11172}

20115 Pathogen[ P03346] interacts with 1 human partners:{P11172}

20116 Pathogen[ Q85601] interacts with 1 human partners:{P11172}

20117 Pathogen[ P14079] interacts with 1 human partners:{P11172}

20118 Pathogen[ P03383] interacts with 1 human partners:{P11172}

20119 Pathogen[ P03410] interacts with 1 human partners:{P11172}

20120 Pathogen[ P14075] interacts with 1 human partners:{P11172}

20121 Pathogen[ POC206] interacts with 1 human partners:{P11172}

20122 Pathogen[ P03363] interacts with 1 human partners:{P11172}

20123 [Cluster 1830]GO:0071169+P biological\_process [name] establishment of protein localization to chromatin [def] "The directed movement of a protein to a part of a chromosome that is organized into chromatin." [GOC

20124 Pathogen[ Q2Q067] interacts with 1 human partners:{Q96ES7}

20125 Pathogen[ POC214] interacts with 1 human partners:{Q96ES7}

20126 Pathogen[ P03346] interacts with 1 human partners:{Q96ES7}

20127 Pathogen[ Q85601] interacts with 1 human partners:{Q96ES7}

20128 Pathogen[ P14079] interacts with 1 human partners:{Q96ES7}

20129 Pathogen[ P03383] interacts with 1 human partners:{Q96ES7}

20130 Pathogen[ P03410] interacts with 1 human partners:{Q96ES7}

20131 Pathogen[ P14075] interacts with 1 human partners:{Q96ES7}

20132 Pathogen[ POC206] interacts with 1 human partners:{Q96ES7}

20133 Pathogen[ P03363] interacts with 1 human partners:{Q96ES7}

20134 [Cluster 1831]GO:0060173+P biological\_process [name] limb development [def] "The process whose specific outcome is the progression of a limb over time, from its formation to the mature structure. A limb is an appendage of an animal used for locomotion or grasping. Examples include legs, arms or some types of fin." [GOC

20135 Pathogen[ Q2Q067] interacts with 2 human partners:{Q9NSC2;P50222}

20136 Pathogen[ POC214] interacts with 2 human partners:{P50222;Q9NSC2}

20137 Pathogen[ P03346] interacts with 4 human partners:{Q9NSC2;Q9HBG6;P50222;Q9P2D1}

20138 Pathogen[ Q85601] interacts with 3 human partners:{Q9P2D1;P50222;Q9NSC2}

20139 Pathogen[ P14079] interacts with 3 human partners:{Q9P2D1;P50222;Q9NSC2}

20140 Pathogen[ P03383] interacts with 2 human partners:{P50222;Q9NSC2}

20141 Pathogen[ P03410] interacts with 4 human partners:{P50222;Q9P2D1;Q9HBG6;Q9NSC2}

20142 Pathogen[ P14075] interacts with 2 human partners:{Q9NSC2;P50222}

20143 Pathogen[ POC206] interacts with 3 human partners:{Q9NSC2;Q9P2D1;P50222}

20144 Pathogen[ P03363] interacts with 2 human partners:{Q9HBG6;P50222}

20145 [Cluster 1832]GO:0001953+P biological\_process [name] negative regulation of cell-matrix adhesion [def] "Any process that stops, prevents, or reduces the rate or extent of cell adhesion to the extracellular matrix." [GOC

20146 Pathogen[ Q2Q067] interacts with 4 human partners:{P31268;P41182;P42771;P27986}

20147 Pathogen[ POC214] interacts with 3 human partners:{P42771;P41182;P27986}

20148 Pathogen[ P03346] interacts with 4 human partners:{P31268;P42771;P41182;P27986}

20149 Pathogen[ Q85601] interacts with 3 human partners:{P27986;P42771;P41182}

20150 Pathogen[ P14079] interacts with 2 human partners:{P41182;P42771}

20151 Pathogen[ P03383] interacts with 2 human partners:{P27986;P42771}

20152 Pathogen[ P03410] interacts with 3 human partners:{P42771;P27986;P41182}

20153 Pathogen[ P14075] interacts with 2 human partners:{P42771;P27986}

20154 Pathogen[ POC206] interacts with 4 human partners:{P41182;P42771;P31268;P27986}

20155 Pathogen[ P03363] interacts with 3 human partners:{P31268;P27986;P42771}

20156 [Cluster 1833]GO:0045844+P biological\_process [name] positive regulation of striated muscle tissue development [def] "Any process that activates or increases the frequency, rate or extent of striated muscle development." [GOC

20157 Pathogen[ Q2Q067] interacts with 1 human partners:{Q9ULH7}

20158 Pathogen[ POC214] interacts with 1 human partners:{Q9ULH7}

20159 Pathogen[ P03346] interacts with 1 human partners:{Q9ULH7}

20160 Pathogen[ Q85601] interacts with 1 human partners:{Q9ULH7}

20161 Pathogen[ P14079] interacts with 1 human partners:{Q9ULH7}

20162 Pathogen[ P03383] interacts with 1 human partners:{Q9ULH7}

20163 Pathogen[ P03410] interacts with 1 human partners:{Q9ULH7}

20164 Pathogen[ P14075] interacts with 1 human partners:{Q9ULH7}

20165 Pathogen[ POC206] interacts with 1 human partners:{Q9ULH7}

20166 Pathogen[ P03363] interacts with 1 human partners:{Q9ULH7}

20167 [Cluster 1834]GO:0000122+P biological\_process [name] negative regulation of transcription from RNA polymerase II promoter [def] "Any process that stops, prevents, or reduces the frequency, rate or extent of transcription from an RNA polymerase II promoter." [GOC

20168 Pathogen[ Q2Q067] interacts with 287 human partners:{Q9HC78;Q14526;Q13118;P25490;Q6VMQ6;Q9Y6X8;O75832;O43364;Q12837;O14744;Q9UPN9;O75461;P56524;Q9BY41;P15884;Q9HAU4;O75925;Q9Y3F4;Q13033;Q5VTD9;O00267;P06400;Q9NPF5;Q01094;Q9UKV0;Q8WW38;P40763;P01106;O14503;Q9HAZ2;Q16666;Q9Y3T9;P67809;Q6PD62;Q13485;Q9UN51;P10589;P35680;Q12986;P13056;P31268;Q9UHF7;Q6P1J9;Q9UBB5;Q15596;P35712;P41182;P54259;P10828;Q9HC52;Q15326;P51531;Q99708;Q8TD23;Q9NQ87;Q9UJG1;Q96IT1;Q15697;O96004;Q92985;Q96T88;P37275;Q9Y6K1;Q9NVW2;O00257;O75820;Q9NZI6;P50548;Q9ULV5;Q6P1N0;Q13547;P14373;O00712;Q99684;P39880;P17483;P14316;O94776;O15379;P36956;A6NFD8;P41134;O605

35;Q14192;Q92800;O95503;P15976;O95931;Q96ST3;O15350;Q04727;Q96T58;Q8WUF5;P51610;Q96K30;P63279;Q8NSD0;O14776;Q96MH2;P38935;P11473;Q15022;O43829;Q8NHM5;Q8NF57;O95416;Q86UE4;P48552;O75446;P35227;P61077;B2RXF5;Q9BQI9;Q9UBC3;Q08050;Q9Y5Z7;Q96IF1;P27797;Q9UQL6;O43524;Q9NYF0;Q9NRG4;Q9UHI6;P23769;Q94992;O14980;P35548;Q6W2J9;Q15699;Q14938;Q9BQ70;P40337;Q99750;Q969S8;O14867;Q96BD5;P26358;Q14585;Q99576;Q14653;Q9UKY1;P62263;P17098;O75437;P12755;Q13360;P84022;Q63ZY3;Q9ULM3;Q60284;P51668;Q01658;Q8N895;Q92541;Q9UBK9;Q92769;O00255;O15105;Q06330;Q9GZV5;O75444;Q13127;Q9NSA3;P28324;Q9H116;P48382;P09874;P51532;Q6RSH7;Q96PU5;P86452;Q8WVJ9;Q9ULU4;P35226;P35869;Q9Y6B2;Q9GZN2;Q92993;O60907;P10599;P14651;Q9UPW6;Q8WUI4;Q15796;O60765;Q02556;Q99496;O14770;Q96JN0;Q9NX63;Q86VE0;Q13363;P41162;P51786;Q15466;P19838;P28749;Q15583;O75360;Q07687;Q93008;O60248;P12757;P35813;P0CG47;Q13569;O95983;Q96QT6;Q9BZK7;Q15545;Q15170;Q13416;Q13761;Q9UMQ3;P16989;O95238;Q9Y618;P43356;Q9HBM6;Q04724;Q8IUR6;Q9Y5J3;Q8N488;P0CG48;O60504;Q8N7H5;P47928;O95125;Q9NP71;Q92793;Q8WYK2;Q14582;Q5TGS1;Q9NSC2;Q01826;P63272;Q9H2F5;P35232;Q9HBD4;P62987;P26651;Q16576;O75953;P42226;Q5VWG9;Q96IZ0;P23497;Q71SY5;P10242;P06733;P78318;O75376;Q8IXJ9;Q9UMX1;Q9H3M7;Q16649;P23297;Q00987;P52737;Q14781;Q9UQR1;Q66K89;P4224;P49918;Q96EY1;O94763;Q13227;Q9UI36;P43355;Q16526;Q12830;P54821;Q02078;Q5T0F9;Q06546;P49715;P18146;Q15906;P17947;O96028;P15822;Q14693;Q8N2W9;P33076;P08651;Q9NRC8;P62979}

20169

Pathogen[ P0C214] interacts with 267 human

partners: {Q92993;O75444;Q14526;Q9Y3T9;P35226;Q13761;P35813;P35227;Q96T58;Q15697;Q9Y5Z7;Q04727;Q43829;Q9HAU4;Q15022;P35869;P16989;P51610;Q71SY5;O95238;Q06546;Q13363;O75461;Q9UHF7;Q13547;P12757;P78318;Q6VMQ6;Q96JN0;P62263;Q8NSD0;P19838;Q8WUF5;O75925;Q96IZ0;Q969S8;P48552;O75820;Q00987;O00267;Q9H3M7;P33076;P42226;P15884;Q8TD23;O60907;Q15350;Q8N2W9;Q8NF57;Q9HBD4;P23769;Q92793;P50548;Q9Y5J3;P67809;Q13033;Q96QT6;Q99708;P84022;O75437;O95125;P17947;P56524;Q9GZV5;Q6W2J9;Q9Y6K1;Q99576;Q12986;Q96BD5;Q15906;O95931;O60535;P63279;P42224;P37275;Q16666;O95503;Q06330;Q04724;Q15545;P38935;Q9UMQ3;Q15170;O00308;P51786;Q9H2F5;Q92541;Q99750;Q86UE4;Q96T88;P43355;P14651;Q5VTD9;P86452;Q93008;O14776;P61077;Q9BQI9;Q2VWA4;P48382;Q5VWG9;Q02078;O14503;Q9NSA3;P13056;Q9HC78;Q01094;O75832;O75446;Q86VE0;O14867;O00712;Q8IXJ9;Q12837;Q92985;O14980;Q07687;P47928;Q9BQ70;P41134;Q96IT1;O60765;O95416;Q96MH2;O94776;Q8N488;Q02556;O95983;Q9HBM6;P49918;P0CG48;P26358;Q6P1J9;Q9Y6B2;Q9NVW2;Q13485;Q9NX63;Q92769;O15105;P63272;Q9HAZ2;P28324;Q9UKV0;Q8WW38;O00257;Q9UNS1;P02100;P40337;Q8N7H5;Q16576;O75376;Q49AN0;Q15796;Q9NSC2;Q9UHI6;Q14192;P41182;Q9Y6X8;Q96K30;Q9NP71;P17098;O15379;P06733;Q9Y3F4;P12755;Q13127;Q13227;Q14653;Q9UI36;O75360;Q99496;P26651;P10242;P62987;Q9ULV5;P39880;P23497;Q8IUR6;O94992;P43356;Q9UMQ3;Q8WVJ9;Q14781;Q01826;Q9NZI2;P28749;P18146;P27797;Q16526;P0CG47;Q01658;Q9BZK7;Q96ST3;Q13416;P10599;Q14585;P40763;O60504;O96004;Q9UPW6;Q6P1N0;Q9ULU4;Q99684;O14770;P41162;P08651;Q9NRC8;Q9UBB5;P10828;Q15596;Q8WUI4;P51668;Q13360;Q13569;P14373;Q9UJG1;O94763;P35232;Q9NQR1;Q92800;Q8N895;P51531;P62979;Q15326;Q9UQR1;Q9UBK9;Q9NQ87;Q9Y618;Q9NRG4;Q9UPN9;Q6PD62;P15822;Q9NYF0;O60284;Q15699;Q9UMX1;P23297;Q66K89;Q5TGS1;P01106;P14316;Q60248;P35712;Q9ULM3;Q9UQL6;P06400;O75953;P35548;Q96EY1;Q9HC52;O00255;Q12830;P52737;Q63ZY3;Q15466;Q96PU5;Q9NPF5;P09874;Q5T0F9;P51532;Q96028;Q6RS H7;Q14693;Q9H116;Q9BY41;Q8NHM5}

20170

Pathogen[ P03346] interacts with 355 human

partners: {Q06330;Q14781;Q969S8;Q9BZE0;Q6PD62;Q96ST3;Q9UPN9;P54821;Q9Y467;Q12830;Q9NZU5;Q99742;Q9UHF7;Q13263;Q6RSH7;Q9Y6K1;Q02078;P38935;Q16666;P35813;P11473;P31268;P28324;Q9HBD4;Q9HAU4;P86452;O60907;Q96PU5;O75446;P14373;Q9H116;A6NFD8;Q9UPW6;O60765;Q9UQR1;Q86UE4;O60248;P43355;Q9Y4X4;P17098;O14901;P12757;Q92800;Q9NU63;P36956;P35548;Q02535;Q8WW38;Q9H6Q3;Q9Y5Z7;Q93008;P62987;O15379;Q9NQR1;Q71SY5;Q8NFW5;P23297;P06400;Q8TD23;Q9Y5Z7;P35226;Q9GZV5;Q12772;P48382;P51786;Q99626;O94763;Q12837;Q15911;P02100;Q15466;Q9UJQ4;Q9NZI2;P14316;P23769;Q99708;P25490;Q15583;O95983;P51610;Q49AN0;Q9NSC2;Q8IY A7;P50548;P20264;P0CG48;O75820;P25800;Q9HC52;Q15796;P41225;O14744;P56524;Q9UNS1;O00712;Q15906;Q96QT6;O95931;Q12986;P35227;P33076;Q8N895;P52737;O95238;O94776;P13056;P56177;Q96IF1;Q9ULM3;Q08050;P42226;Q8IUR6;Q9UBC3;P10588;P63279;Q16526;O00257;P16989;P26358;O15350;P49918;O15105;O75626;O43316;P63272;Q8NF57;P13378;P17483;Q01094;Q2VWA4;P51668;P49715;Q66K89;Q9Y5J3;O15055;P61077;O14867;Q9BQI9;Q00987;O75444;P78426;O15534;O14503;P06733;Q9HC78;Q9NRG4;Q14919;O75832;Q14526;O43680;O96004;P01106;O43364;P41162;Q6P1N0;P51843;O75925;Q8NBF1;Q15699;Q9NSA3;Q9NP71;Q14582;Q9BQ70;Q15170;P84022;Q96D77;O14980;P17542;Q96IZ0;P10242;Q9UI15;Q9C0J9;Q13227;O43829;Q8NSD0;Q9ULU4;P15976;O95125;Q13033;Q9GZN2;Q06546;P67809;Q15596;O00255;Q9Y3F4;O95863;Q6VMQ6;Q86VE0;Q02556;P41134;Q15022;Q99684;Q92769;Q14192;B2RXF5;Q13118;Q13547;P08651;Q99576;Q04724;O60284;Q9HBM6;Q86VZ6;Q13761;Q9UHI6;Q8WVJ9;Q14585;Q9BY41;Q02548;Q99750;Q96K30;Q9Y6X8;P84550;P37275;O75604;P35680;Q9NQ87;P31273;Q16649;Q9H2F5;Q15475;O14627;Q9Y3T9;Q16576;P42224;Q9Y2Y4;Q8WUI4;Q9Y5R6;Q92541;Q5TGS1;O75376;P50539;Q99496;Q8WUF5;Q14653;O00267;Q8N2W9;Q5VTD9;Q14190;P09874;Q96T58;Q9NQ03;P43356;P62979;P27797;P41182;P40337;P28749;Q92481;Q9NYF0;Q96BD5;Q13516;Q63ZY3;P35712;O15151;Q15326;Q9UKV0;O75437;P0CG47;Q13569;Q9BZK7;Q04727;O75461;Q13416;P10828;P51858;P17947;Q01658;Q99929;Q13363;P10599;Q9Y6B2;P48552;A9YTQ3;O94992;P35232;Q96MH2;O60535;P19838;O60504;P23497;Q13485;Q8IXJ9;O75360;Q9UKY1;Q9NX63;Q96IT1;Q8NHM5;P18146;Q92993;Q92793;P62263;P39880;Q92985;Q15697;P51531;Q8N488;Q13360;Q9Y458;P35869;Q15545;P56645;Q9HAZ2;P26651;Q9ULV5;Q9UI36;Q5VWG9;P61925;Q9Y618;P40763;O43524;Q96JN0;Q8NEA6;Q9UBK9;P56915;Q9UMX1;P15822;O75953;Q9UBB5;Q9UIW0;Q9H3M7;Q9UMQ3;P53539;Q9NRC8;Q9UQL6;Q96EY1;P78318;O95416;O95503;Q9UJG1;Q01826;Q6W2J9;P54259;Q6P1J9;Q8WYK2;Q14938;Q96T88;O14770;Q8N7H5;O75506;Q9NVW2;Q5T0F9;P15884;P14651;O14776;O00488;Q13127;P47928;O96028;O00308;Q14693;Q9NPF5;Q96SF7;Q9UJU5;P10589}

20171

Pathogen[ Q85601] interacts with 303 human

partners: {Q9UQR1;P54259;P01106;P18146;Q96IZ0;Q969S8;Q6PD62;Q9UPN9;Q96MH2;Q9NRC8;P51786;Q9NZU5;Q9UHF7;Q9UKV0;Q9H2F5;Q02078;Q16666;P09874;O75360;P11473;P33076;Q9HAU4;Q131

27;P14373;O43316;P14316;P41134;Q02556;Q15466;Q9UPW6;O15534;Q8IUR6;P50539;P15976;Q9BY41;O94776;Q04724;Q96BD5;Q9ULV5;P86452;Q9UQL6;P08651;O15151;Q06546;P50548;Q8WW38;P56645;Q6P1J9;Q9NQR1;P06400;Q06330;Q13360;Q96QT6;P38935;Q8TD23;O60907;Q8N5F7;Q9H116;P40337;P15822;Q99708;O75832;P40763;Q49AN0;P23769;Q9Y2Y4;Q9NYF0;O75437;P12757;Q15545;O60284;O95931;Q12772;P25490;Q8N895;Q8IXJ9;O43364;Q9Y618;O14503;P35712;P06733;Q15583;Q96P U5;P10242;Q9VZV5;P27797;Q13363;P0CG48;P26358;Q8N2W9;P23297;Q15596;P05983;O95503;Q96004;O14744;Q2VWA4;P41162;P15668;Q9NP71;Q93008;P81077;P63279;P02100;O14776;P51610;O75953;P62263;Q9BQI9;P12755;O95125;Q9ULU4;Q12830;Q5VWG9;Q9HC78;P51531;P26651;Q9HBM6;Q15022;Q13263;Q14526;O75820;Q8NEA6;P10599;Q9Y6B2;O75444;Q14653;Q9BQ70;Q15170;Q92541;Q8NB F1;P51532;O75461;Q9UMQ3;Q96JN0;P17098;Q14582;Q9H6Q3;Q16649;P36956;Q5TGS1;O95416;Q92769;A6NFD8;O60765;Q15699;P42226;O60535;Q16576;Q9ULM3;Q04727;Q99576;Q14192;Q9UHI6;Q9UI36;Q71SY5;O60248;Q63ZY3;Q8NHM5;Q99750;Q14585;Q9Y6X8;P35548;Q9Y6K1;P35680;Q9NQR87;Q96T88;Q92985;Q9Y3F4;O00255;P67809;Q01826;O75376;P42224;A9YTQ3;Q01658;O43829;Q86UE4;Q13033;Q13569;Q99496;Q13118;Q8WUF5;O00267;O14867;P48382;Q96T58;O75446;O94992;O14980;Q99684;P62979;Q9NZI6;P28749;Q9HBD4;Q96IF1;P84022;Q9Y3T9;Q86VE0;P49715;O15055;Q15326;Q9Y5Z7;Q6RSH7;Q15906;P0CG47;P49918;P37275;Q9BZK7;P56524;Q13416;O15379;Q5VTD9;P52737;P17947;Q08050;Q9NX63;P35232;P35869;P63272;Q9GZN2;P35226;O15105;O94763;O60504;O15350;Q9NR G4;Q13547;P43356;Q66K89;P14651;Q9UKY1;O75626;Q96IT1;P62987;P13056;P48552;Q9NSC2;Q92993;O00712;P10828;P41182;Q92793;P39880;Q15697;Q8WUI4;Q8N488;Q92800;Q6VMQ6;Q16526;Q96K30;O00257;P35813;P43355;Q9UBK9;Q00987;P19838;Q9NSA3;B2RFX5;Q12837;Q6P1N0;Q13485;O75925;P16989;Q9UMX1;Q9UBB5;Q9H3M7;Q9NU63;P53539;Q13227;Q8N5D0;P28324;Q6EY1;P78318;Q9UJ G1;Q07687;Q8WYK2;Q14938;Q01094;Q9HC52;O14770;Q8N7H5;Q9NVW2;Q9Y5J3;Q5T0F9;P15884;Q8WV J9;Q15796;O95238;P47928;Q9UBC3;Q6W2J9;O96028;Q14693;P35227;Q12986;Q13761;Q9NPF5;Q9HA Z2;Q14781;Q96ST3;Q9UNS1;P10589}

20172 Pathogen[ P14079] interacts with 291 human

partners: {O14776;Q9UQL6;Q96JN0;Q14585;P48552;O60284;Q9UQR1;O15379;Q9UPW6;Q8N2W9;Q12986;Q8N895;P17098;P13056;Q8WYK2;Q13416;Q9HAZ2;O14867;P25800;P33076;P09874;Q96K30;Q8TD23;P12755;O95416;P63279;Q9Y2Y4;Q9BZK7;P14373;O43364;P35869;Q02078;O95125;Q8N5D0;P0CG48;Q06413;Q15596;Q9GZV5;Q06546;Q16526;Q14693;P28749;Q16649;Q14653;P02100;O75437;Q13118;Q9NRG4;Q9Y6K1;Q8IXJ9;Q14192;Q9BQI9;O75626;Q14938;Q15911;P67809;O95503;P11473;P35680;Q96ST3;Q8WUF5;P10828;Q92541;Q92985;Q92793;Q13033;Q9HC52;Q9UBB5;Q49AN0;Q96958;P39880;Q15583;Q8WUI4;P48382;Q2VWA4;Q99576;P52737;Q15699;Q86VZ6;P51532;Q15170;Q99684;Q01826;O60907;P35712;Q5T0F9;Q9UMX1;Q8WVJ9;O95931;P51531;Q9UKV0;O75832;Q9GZN2;O75446;Q96004;Q92800;P15976;P35232;Q6P1N0;Q9Y3F4;Q8NHM5;O60504;Q9NZU5;P62979;O43829;P49918;Q9UHI6;O75461;Q9HAU4;Q9ULM3;P06733;P61077;Q9NU63;Q12837;Q6PD62;P02008;P23497;P51610;O15350;P62987;Q16576;Q00987;P08651;O94763;P35813;Q12772;O75506;Q9UKY1;P43356;Q6W2J9;P42226;Q06330;P40337;Q9Y5Z7;Q96QT6;Q9Y3T9;O14744;P41182;Q15906;Q99496;Q6VMQ6;Q9UBC3;P51668;O00257;Q14781;Q5VTD9;Q96BD5;P16989;Q9UPN9;P62263;Q9NPF5;O95238;Q92769;Q96IF1;O60248;Q99708;P49715;Q9NZI6;O75820;P63272;Q12830;Q66K89;Q9NQR1;Q9Y5J3;Q15697;Q9UBK9;Q9BY41;O75953;Q6EY1;Q075360;Q9UJG1;Q5TGS1;Q9UJQ4;Q13360;A9YTQ3;P26358;P15822;P51786;O95983;O94992;Q9HC78;P50539;Q13227;Q9UI36;Q86UE4;Q9UMQ3;Q9H2F5;Q9NQ03;P23297;P01106;Q9ULU4;Q9H6Q3;O75444;P56645;Q9Y4X4;P42224;O00488;P10588;P35226;Q86VE0;P50548;Q71SY5;Q8N488;Q07687;O14770;Q04724;P35227;Q63ZY3;O75925;B2RFX5;P10599;Q6RSH7;O75376;P54259;P41162;P15884;Q9H3M7;P41134;Q9BQ70;P38935;P12757;Q12830;Q13761;Q02556;Q8NEA6;P10589;O14503;Q15055;Q15466;Q96JY0;Q13569;Q9Y6B2;P10242;Q6P1J9;P56524;Q13127;Q96IT1;Q9NRC8;P25490;P28360;O15105;O14901;Q9Y6X8;O00267;P0CG47;Q14582;Q96MH2;O94776;O15151;Q9UN S1;P36956;Q9ULV5;Q01094;A6NFD8;P86452;O60765;O00255;P43355;Q8N7H5;Q9NP71;P23769;P14316;Q01658;Q9BEZ0;Q5VWG9;Q9UHF7;P78318;Q15022;Q15326;Q96EY1;Q04727;Q8WW38;P47928;P37275;Q9NSC2;Q8NBF1;O15534;P61925;Q92993;Q16666;Q8IUR6;Q9HBM6;P14651;Q9H116;Q99750;Q96T58;Q9NYF0;Q15545;O00712;Q8N5F7}

20173 Pathogen[ P03383] interacts with 241 human

partners: {Q9UQR1;P35227;Q96MH2;Q9Y618;Q9UNS1;Q8IXJ9;Q06330;Q13761;P16989;Q12830;O75925;P14316;P35712;Q13485;Q6P1J9;Q9HBD4;P63272;Q14653;P33076;Q9UPW6;Q9ULM3;P62987;Q8IUR6;Q9NX63;O60765;Q86UE4;O60248;O94776;P40337;Q15596;Q01094;O75376;Q8WVJ9;Q14526;Q9UQL6;Q07687;O95503;P01106;Q8WW38;O75437;Q6PD62;Q12986;Q04727;Q9UPN9;P23297;Q13360;Q96BD5;Q9NRG4;Q8TD23;O60907;P48382;O75360;Q8N5F7;Q9UMQ3;Q99576;Q01826;O00257;P23769;Q9UHI6;Q96IZ0;P37275;Q9NQR87;Q9HC52;Q9H2F5;Q9ULU4;O00712;Q6VMQ6;O75461;Q9HBM6;O95931;O14503;Q96QT6;P42226;P10599;Q92993;Q96K30;Q86VE0;Q8N2W9;P35813;Q04724;P17098;O00267;Q15022;P06400;O14744;P18146;Q6RSH7;P41162;Q66K89;Q9UBB5;Q9NP71;O60535;P61077;Q9BQI9;Q5VWG9;Q9Y3T9;Q9HAZ2;Q6P1N0;O14770;Q6W2J9;P08651;O75832;O96004;Q15326;P11473;O15105;P51610;Q9NSA3;Q92985;O94763;Q9BQ70;P86452;P84022;Q8N895;Q9Y6B2;P35548;Q9Y6K1;P28324;Q8N488;O95125;Q9ULV5;Q14192;O14980;Q9NPF5;Q92769;P09874;Q9NSC2;Q15466;Q12837;Q15697;Q9Y6X8;P51531;P15822;O15379;O15350;Q9Y3F4;O00255;Q16666;O43829;O14776;Q13569;Q9UJG1;Q96IT1;Q99496;P35232;O94992;Q15170;Q96JN0;Q96T58;Q99684;Q8WUF5;Q13547;P26651;P52737;Q9BY41;O75446;Q9NZI6;P28749;Q71SY5;Q99708;P10242;P23497;Q9H116;O95238;O95983;P62979;Q9UKV0;P39880;Q15906;Q9NYF0;P0CG47;P49918;Q99750;Q15796;Q9BZK7;P56524;Q92541;Q13416;Q63ZY3;Q9H3M7;P78318;P51532;Q02556;O60504;P12757;Q13227;P0CG48;Q96ST3;P38935;P43356;P50548;P51786;Q5TGS1;P48552;Q13033;P10828;P47928;Q8WUI4;P62263;Q15545;Q9UI36;Q15699;Q9UBK9;O75444;Q14585;P06733;P19838;P35869;P67809;P13056;Q01658;Q9GZV5;Q9UMX1;Q9UHF7;Q06546;O75953;Q9NQR1;P26358;Q96EY1;Q8N5D0;P17947;P63279;Q8N7H5;Q13363;Q16576;Q92793;Q02078;P35226;Q92800;Q969S8;Q5T0F9;P14651;Q9NRC8;P54259;P51668;Q13127;P43355;P27797;Q14693;Q14781;Q16526}

20174 Pathogen[ P03410] interacts with 290 human

partners: {P84022;Q9Y5J3;Q9UKV0;Q9UHF7;Q96QT6;Q9HC78;Q9ULU4;O14901;P35712;Q9UI36;Q8NBF1;B2RFX5;Q13227;P19838;P36956;O75461;P51610;O94763;O75925;P10599;P0CG48;Q16666;Q99708;P02008;Q14526;O95238;P35813;Q13360;Q15697;Q8WYK2;Q99496;Q9BY41;Q6W2J9;P61925;O955

03;P02100;P37275;P41162;Q5VWG9;Q8WVJ9;O60535;Q9HAZ2;P15822;O15151;O96004;Q9NSA3;Q13416;P12755;Q6PD62;Q66K89;Q9UMQ3;Q9UJG1;P01106;P16989;O00267;P17947;P63272;O95125;Q06330;P78318;Q96K30;A9YTQ3;Q14938;Q9NQ87;O75446;P14651;P10242;Q9NPF5;P15884;Q14653;O75444;P28324;Q12830;O95931;P06733;P43355;Q04724;Q9UBB5;P41134;Q9H3M7;O75437;Q8N2W9;A6NFD8;O75953;Q86VE0;P10828;Q15906;Q9Y3T9;Q9Y3F4;Q9UBK9;P06400;Q9H116;Q9ULM3;O75376;Q99684;P26651;Q26263;Q9UPW6;P35227;Q96ST3;O15055;O00712;Q96T58;Q8WW38;Q92541;P25490;Q14693;Q6VMQ6;Q8WUI4;Q16576;Q9GZV5;Q9UQR1;P11473;Q9UQL6;Q02556;Q9H2F5;Q8N7H5;Q06IF1;Q92800;P26358;P67809;Q5T0F9;Q13127;P25800;P08651;Q15583;Q12986;Q07687;P35548;P17098;Q92793;Q969S8;P38935;P48382;Q16649;Q9HBM6;Q92769;Q8NEA6;P52737;Q9Y6B2;Q5TGS1;Q15170;Q2VWA4;Q9NQ87;Q12772;Q9Y5Z7;Q86UE4;P56645;O15379;P56524;Q8IXJ9;Q13569;Q13033;Q01826;Q9NP71;Q15326;O15534;O95983;Q01658;P47928;Q13485;O75506;Q96IZ0;Q04727;O14776;P09874;Q16526;Q15466;P12757;P86452;Q9Y6X8;P51668;Q14585;Q6P1J9;O43364;Q13118;Q15699;Q49AN0;Q8N5D0;P51786;P41182;P51532;Q9NYF0;O60504;Q8IUR6;Q8N488;P39880;Q9NX63;Q99576;O15105;P42226;Q9UBC3;Q15596;Q96JN0;P51531;Q6RSH7;P28749;Q96IT1;P50539;Q9Y2Y4;P23769;Q13761;P62987;Q9UNS1;O94776;Q13547;Q01094;P35680;P23297;P63279;Q9BQI9;P54259;P10589;Q02078;O15350;Q9NZI6;P22263;Q9BZK7;Q9GZN2;P50548;O60248;Q00987;O75626;P49918;O43829;O14744;Q9BQ70;Q9ULV5;Q9NRC8;O00257;P14316;Q96BD5;O75360;Q8TD23;Q14781;Q14582;Q9Y618;Q92985;O60765;Q12837;Q9NSC2;P35232;Q9Y6K1;P18146;O75820;Q8N895;Q5VTD9;P35226;Q63ZY3;O95416;Q9HBD4;P48552;O00255;O14867;Q15796;Q9UQ4;Q9UHI6;Q92993;P40763;Q9NU63;Q9UKY1;Q9UMX1;O94992;O60907;P33076;P43356;Q99750;Q14192;Q96EY1;P15976;O14770;P0CG47;Q6P1N0;Q06546;Q15022;Q15545;Q9UPN9;O75832;O14980;P40337;P61077;O60284;Q96MH2;P13056;Q9NRG4;Q9H6Q3;Q8WUF5;P27797;Q71SY5}

20175 Pathogen[ P14075] interacts with 241 human

partners: {Q04727;O75953;Q14781;Q9BY41;P06733;Q96ST3;Q9NSC2;Q16576;P43355;P35869;Q9GZV5;P35813;Q9Y6K1;P23497;Q9H2F5;P50548;Q9Y3F4;Q63ZY3;Q9NX63;Q5TGS1;Q9HBD4;Q14526;Q969S8;P16989;P52737;O60248;Q96QT6;Q9UQR1;Q8IXJ9;Q8N488;P42226;O95503;P75832;Q14938;Q8N5D0;Q15906;P10828;Q86UE4;Q15697;O60765;P51532;Q8TD23;Q8N5F7;Q01658;O75444;Q96MH2;Q9H116;O75446;Q06546;O14776;P23769;Q96T58;P26651;Q9ULU4;P38935;P51610;P35548;Q12837;P56524;Q08050;P18146;Q99576;O95931;Q86VE0;P33076;Q6RSH7;O94776;O75925;Q9NQ87;P15822;P47928;Q96IT1;Q2800;Q8WUF5;Q9UKV0;Q8WW38;Q8N2W9;Q9UBB5;P63279;P10242;Q16666;Q15796;Q9UJG1;Q9NQ87;Q14585;Q13547;P61077;O94763;P26358;Q9BQI9;Q96IZ0;P13056;P11006;P39880;Q8WVJ9;Q92993;Q9Y618;Q5VWG9;Q07687;O14503;O75376;Q01826;Q9HAZ2;Q02556;P12757;P41162;O00257;O96004;P17098;Q13485;P35232;O94992;O00255;Q8N7H5;Q6P1J9;Q9NP71;Q9NPF5;O14980;Q9BQ70;Q92541;O14770;Q9UHI6;P0CG48;P62979;Q9ULV5;P28324;Q12986;Q15326;P49918;Q14653;Q9UPW6;O95983;O14744;Q12830;Q9Y6B2;Q6W2J9;O15350;Q9684;Q9UBK9;Q92769;Q96K30;Q9NSA3;P35712;P86452;Q6VMQ6;Q6PD62;Q9UPN9;Q9UHF7;Q9ULM3;P27797;P51531;P11473;Q9Y6X8;Q9HCS2;Q8N895;P48382;P17947;Q99750;P78318;P62987;P67809;O60907;Q15545;Q96BD5;Q9H3M7;Q13227;O75360;Q9UMQ3;Q01094;P08651;O15105;Q99496;P06400;Q02078;P14316;P43356;Q06330;Q9NZI6;P28749;O15379;Q66K89;Q9Y3T9;P0CG47;Q9BZK7;O00712;Q92793;P15884;Q9UNS1;Q13416;Q04727;Q16526;Q15699;Q13127;P35226;P48552;Q15022;Q9NRC8;Q15466;P19838;O60504;Q9UQL6;Q04724;P54259;Q13363;O95125;Q92985;P84022;P37275;Q8WUI4;Q13360;Q13569;Q96JN0;Q71SY5;P40337;O00267;Q9NYF0;P51668;Q99708;Q13033;Q8IUR6;Q6P1N0;Q9UMX1;Q9NRG4;O75461;P63272;Q15170;Q14192;O75437;O43829;P62263;Q96EY1;P09874;P35227;Q15596;Q5T0F9;P23297;O60535;Q14693;Q13761;P10599;Q9HBM6}

20176 Pathogen[ P0C206] interacts with 325 human

partners: {Q9UNS1;O43829;P06733;O00488;P84022;Q07687;P10588;Q8WUF5;Q86VZ6;P67809;Q9NQ87;Q96PU5;Q92769;P0CG48;Q9BZE0;Q16649;Q8IUR6;Q9Y3F4;Q15466;Q6PD62;O75832;Q06546;Q96ST3;Q15545;Q9H2F5;Q6VMQ6;P38935;Q9Y6K1;O14867;P27797;Q9NPF5;Q06330;Q9NP71;Q9UJG1;Q9HAZ2;Q9HCS2;Q96IZ0;Q13127;O60504;Q9UPN9;Q15911;P78318;P51532;P26651;Q9NSA3;Q9ULM3;Q9H6Q3;Q9NVW2;Q02078;Q99708;Q13263;Q5TGS1;P43356;P02100;O00308;Q9UBB5;Q9HAU4;Q9Y5F5;P35869;Q9UMX1;Q96DT7;O75925;P09874;Q93008;P25490;P08651;O75444;O60907;Q6W2J9;Q9NSC2;P48382;Q15697;O14744;P51531;Q96IF1;P41182;P54821;Q2VWA4;O95983;P35226;Q9NRG4;Q02548;O75604;P52737;P02008;Q15170;O00255;Q9UMQ3;O15534;Q9UKV0;Q8WW38;Q8N2W9;Q9C0J9;Q96MH2;Q8WYK2;P10242;P14651;Q96K30;A6NFD8;Q9Y5Z7;Q16666;P62263;P26358;Q92541;Q04727;Q92800;O60765;O75626;Q13547;P43355;P13056;Q13416;P49715;O94776;P31268;P36956;P17483;Q86VE0;O75437;Q92993;O14770;P15976;Q15699;Q15796;O95238;Q15326;P33076;Q8WVJ9;O95125;Q9Y6X8;Q14781;Q14938;Q9UJG1;O60284;P28749;P18146;P12755;O75360;Q8NEA6;O96004;Q92793;P54259;P10589;Q9GZV5;Q8N895;O60248;P41134;Q02556;Q12837;Q9GZN2;O15105;Q9NQ03;Q13569;Q9NX63;P41162;O15151;P19838;Q16526;Q14919;P10828;Q6P1N0;Q9ULV5;O75446;O00712;P56645;Q8N7H5;Q6RS87;P16989;Q8IXJ9;P12757;O94992;Q9ULU4;P35232;Q15379;Q9Y5J3;Q96JN0;Q12986;P51610;Q8N488;Q9UHF7;Q15906;Q92985;Q8WUI4;Q01658;P35680;Q96T88;P35548;Q8TD23;Q9HC78;P86452;O95931;Q9NQ87;Q9UPW6;P25800;O60535;Q01094;Q9UQR1;O96028;P15884;O95416;P62979;P50539;P53539;P28324;Q14582;Q96IT1;Q9Y4X4;P17947;Q8N8M5;Q5VWG9;Q8NBF1;Q9BZK7;O75376;O00267;Q9NRC8;P40763;Q13485;Q71SY5;O14776;Q15022;Q9H116;Q8N5F7;Q96T58;Q04724;P0CG47;Q99684;P23769;Q9Y6B2;Q08050;Q63ZY3;Q13422;Q9NZI6;P51786;O75953;P42226;Q9H3M7;Q15596;P37275;Q16576;P35712;O15055;O15350;Q01826;Q9HBM6;Q86UE4;O14901;Q9NYF0;Q9HBD4;Q5VTD9;O43364;Q14192;Q9UHI6;P01106;Q9UBK9;P61077;Q9UBC3;B2RFX5;Q9BQI9;Q96QT6;Q9BY41;P39880;Q14585;P84550;P62987;P56524;Q13033;Q14526;Q8N5D0;O00257;P14373;A9YTQ3;P23297;Q00987;P10599;Q13363;P61925;Q13118;P48552;Q49AN0;P15822;Q66K89;P42224;P47928;Q969S8;O95548;Q99576;Q96EY1;Q14693;Q13227;Q9NU63;Q9NZU5;Q9UI36;O75461;O2220;P51668;Q9Y3T9;Q12830;Q99750;Q9Y618;P14316;Q6P1J9;P11473;Q13761;Q12772;Q5T0F9;O43316;Q9BQ70;Q99496;P17098;O94763;Q96BD5;P56177;P35813;P63272;P40337;Q15583;Q9UKY1;O95503;Q13360;P35227;Q14653;Q9Y2Y4;P06400;Q9UQL6;P49918}

20177 Pathogen[ P03363] interacts with 319 human

partners: {Q9NPF5;Q5TGS1;Q86VE0;Q15911;P49918;Q14653;Q5VTD9;Q15699;P51858;O75953;Q96QT6;O75820;Q99684;P31273;O14901;Q9GZN2;Q9UIW0;O14744;O75461;Q8IXJ9;Q8NFW5;Q9Y3F4;Q166

49;Q6VMQ6;Q12830;Q99592;P10828;Q9UJQ4;Q9UHF7;Q92985;Q96T58;Q14938;Q15466;O75360;Q9Y5  
J3;P18146;Q13360;O00712;Q99576;P35227;Q9HAU4;Q99626;Q14582;Q13227;P48382;Q8N5D0;Q145  
26;O60535;Q9NZU5;P14373;Q13516;Q9UHI6;Q14781;P56177;Q9UMX1;Q96IZ0;Q71SY5;P54259;P864  
52;Q9BY41;P53539;Q99742;O94992;P17098;P08651;Q15022;Q06546;Q63ZY3;P50539;Q02556;P127  
57;P14651;Q9HC52;Q99929;Q15170;P37275;O75604;Q06330;O14980;Q9NQ87;P17947;O15379;Q9H2  
F5;Q99750;P51532;P06733;Q969S8;Q9BZK7;P25490;Q01826;O60765;Q9Y6X8;O75376;O60907;Q155  
45;Q9C0J9;Q9H3M7;Q9H6Q3;Q13033;O43316;Q96K30;Q8N488;Q66K89;O75437;Q9UQL6;Q9NYF0;P355  
48;O15151;Q99496;Q9UPN9;Q9Y6K1;P50548;Q9Y467;Q8WUF5;O15105;O00267;Q96JN0;O14867;Q047  
24;Q15596;Q86UE4;Q8NEA6;O75506;Q9UBK9;P19883;Q9Y5R6;P23497;P06400;P40337;P17483;P011  
06;Q9Y4X4;Q04727;Q12986;Q8WYK2;P28749;P35869;P42226;P56645;Q96IF1;O00488;Q86VZ6;P105  
88;Q13127;P11473;Q16666;Q96BD5;P51786;Q9NQ03;O43524;Q15326;Q6RSH7;Q96DT7;Q9ULU4;O754  
46;P15822;P48552;Q9Y5Z7;Q99708;Q08050;P13378;Q9NSA3;Q16576;Q13416;P20264;Q9UI36;Q49A  
N0;P56915;P52737;Q9NRG4;O95238;Q96PU5;Q6P1J9;Q8N5F7;Q9GZV5;Q9NZI6;P14316;Q01094;Q96J  
Y0;P35226;O75444;Q9UKV0;P27797;P61925;O94763;Q96ST3;Q9HBD4;Q14919;O95931;P78318;P411  
34;Q9UNS1;Q15796;O95983;P31268;P84022;Q8N895;Q9UKY1;P47928;O96004;P26358;Q9Y618;Q96I  
T1;Q15583;P62987;O75925;P63279;P54821;A9YTQ3;Q9Y3T9;Q13547;P19838;Q92793;Q15697;O951  
25;P51668;Q14585;P33076;O96028;P35712;Q13569;O00308;Q9HBM6;P10242;Q16526;Q8WUI4;Q9Y2  
Y4;Q13485;P26651;Q9ULV5;Q8TD23;P63272;Q9UQR1;P84550;Q92541;Q9C056;P15884;P41162;Q96T  
88;Q8IUR6;P35232;Q2VWA4;Q9H116;O15055;B2RXF5;Q6P1N0;Q9NQR1;P61077;Q9NVW2;Q9Y6B2;O147  
76;P16989;Q9BQI9;P09874;Q9NP71;Q02548;Q8IYA7;Q13363;Q8WW38;O95416;O43364;O60248;Q9UM  
Q3;Q9HC78;Q9NX63;Q6W2J9;Q9ULM3;O75626;Q13761;O43829;Q01658;O60284;P51531;P43355;Q96E  
Y1;Q8N2W9;O95503;Q92800;Q9UBC3;Q9UJU5;Q9UJG1;P39880;Q07687;Q96MH2;Q12837;O15534;P433  
56;Q9UPW6;O00257;Q8N7H5;Q9NRC8;P10589;P62263;P13056;Q5VWG9;Q93008;Q5T0F9;Q8WVJ9;Q9BZ  
E0;Q92993;P38935;O14627;Q9BQ70;P23297;Q8NBF1;O14503;Q15906;P51610;P67809;O94776;Q6PD  
62;P28324;Q13118;Q9UBB5;A6NFD8;Q9UI15;Q9HAZ2;Q14192;Q02078}

20178 [Cluster 1835]GO:0000375+P biological\_process [name] RNA splicing, via  
transesterification reactions [def] "Splicing of RNA via a series of two  
transesterification reactions." [GOC

20179 Pathogen[ Q2Q067] interacts with 19 human  
partners: {P83876;O95391;O75494;O75940;Q96DI7;O43172;O00566;Q92945;O94906;Q8IYB3;Q6P2  
Q9;O75533;O15116;O75934;Q99590;Q15427;O43395;O14893;Q12874}

20180 Pathogen[ P0C214] interacts with 19 human  
partners: {O15116;O43172;O75934;Q6P2Q9;O43395;O94906;Q8IYB3;Q15427;P83876;Q99590;O755  
33;Q96DI7;O75940;Q12874;O75494;O14893;Q92945;O00566;O95391}

20181 Pathogen[ P03346] interacts with 25 human  
partners: {Q15427;Q12874;O43172;Q08170;Q8IYB3;P83876;O95391;Q9UK59;O75940;Q92945;O949  
06;Q9BUQ8;O00566;O75934;O75533;O15116;Q99590;Q6P2Q9;Q96DI7;O14893;O75494;P62995;Q153  
93;Q9BRX9;O43395}

20182 Pathogen[ Q85601] interacts with 17 human  
partners: {Q8IYB3;O95391;O15116;O75494;O75940;O75934;O94906;Q96DI7;O00566;Q99590;O433  
95;Q6P2Q9;P83876;Q92945;O14893;O43172;Q12874}

20183 Pathogen[ P14079] interacts with 18 human  
partners: {O75934;O94906;O14893;O75533;Q12874;P83876;O15116;Q6P2Q9;Q15427;Q8IYB3;O759  
40;O00566;Q92945;O43172;O75494;O43395;O95391;Q9UK59}

20184 Pathogen[ P03383] interacts with 17 human  
partners: {O75494;P83876;O43172;Q6P2Q9;Q12874;O94906;O43395;Q8IYB3;Q92945;O14893;Q995  
90;O15116;O95391;O75934;O00566;O75940;Q96DI7}

20185 Pathogen[ P03410] interacts with 20 human  
partners: {P83876;Q92945;O75934;Q15427;O14893;Q15393;Q9UK59;O94906;O43172;O43395;O755  
33;Q8IYB3;Q99590;Q6P2Q9;O15116;O75940;Q12874;O00566;O95391;O75494}

20186 Pathogen[ P14075] interacts with 17 human  
partners: {O00566;O43395;O95391;Q92945;O43172;O75494;O94906;O75940;Q96DI7;O15116;Q128  
74;Q6P2Q9;Q8IYB3;Q99590;P83876;O75934;O14893}

20187 Pathogen[ P0C206] interacts with 19 human  
partners: {P83876;O75934;Q8IYB3;O75533;O75940;Q9UK59;Q12874;O75494;O43395;Q99590;Q6P2  
Q9;O14893;O43172;O94906;Q92945;Q96DI7;O95391;O15116;O00566}

20188 Pathogen[ P03363] interacts with 23 human  
partners: {O75940;O43395;O95391;Q08170;Q15393;O75533;Q9BRX9;Q15427;Q6P2Q9;O14893;O151  
16;Q8IYB3;Q92945;Q12874;O43172;O75934;O00566;P83876;O94906;P62995;Q99590;O75494;Q96D  
I7}

20189 [Cluster 1836]GO:0007256+P biological\_process [name] activation of JNKK activity  
[def] "The initiation of the activity of the inactive enzyme JUN kinase kinase (JNKK)  
activity in response to phosphorylation by a member of the JUN kinase kinase kinase  
(JNKKK) family, or another upstream kinase. JNKKs are involved in a signaling pathway  
that is primarily activated by cytokines and exposure to environmental stress." [GOC

20190 Pathogen[ Q2Q067] interacts with 2 human partners: {Q13233;Q03468}

20191 Pathogen[ P0C214] interacts with 2 human partners: {Q13233;Q03468}

20192 Pathogen[ P03346] interacts with 2 human partners: {Q03468;Q13233}

20193 Pathogen[ Q85601] interacts with 2 human partners: {Q03468;Q13233}

20194 Pathogen[ P14079] interacts with 1 human partners: {Q03468}

20195 Pathogen[ P03383] interacts with 2 human partners: {Q13233;Q03468}

20196 Pathogen[ P03410] interacts with 2 human partners: {Q13233;Q03468}

20197 Pathogen[ P14075] interacts with 2 human partners: {Q03468;Q13233}

20198 Pathogen[ P0C206] interacts with 2 human partners: {Q03468;Q13233}

20199 Pathogen[ P03363] interacts with 2 human partners: {Q03468;Q13233}

20200 [Cluster 1837]GO:0060706+P biological\_process [name] cell differentiation involved in

embryonic placenta development [def] "The process in which a relatively unspecialized cell acquires specialized features of the embryonic placenta." [GOC

20201 Pathogen[ Q2Q067] interacts with 1 human partners:{P08727}

20202 Pathogen[ P0C214] interacts with 1 human partners:{P08727}

20203 Pathogen[ P03346] interacts with 2 human partners:{P08727;Q9NP62}

20204 Pathogen[ Q85601] interacts with 1 human partners:{P08727}

20205 Pathogen[ P14079] interacts with 1 human partners:{P08727}

20206 Pathogen[ P03383] interacts with 1 human partners:{P08727}

20207 Pathogen[ P03410] interacts with 1 human partners:{P08727}

20208 Pathogen[ P14075] interacts with 1 human partners:{P08727}

20209 Pathogen[ P0C206] interacts with 2 human partners:{P08727;Q9NP62}

20210 Pathogen[ P03363] interacts with 1 human partners:{P08727}

20211 [Cluster 1838]GO:0010519+P biological\_process [name] negative regulation of phospholipase activity [def] "Any process that decreases the frequency, rate or extent of phospholipase activity, the hydrolysis of a phospholipid." [GOC

20212 Pathogen[ Q2Q067] interacts with 1 human partners:{P41220}

20213 Pathogen[ P0C214] interacts with 1 human partners:{P41220}

20214 Pathogen[ P03346] interacts with 1 human partners:{P41220}

20215 Pathogen[ Q85601] interacts with 1 human partners:{P41220}

20216 Pathogen[ P14079] interacts with 1 human partners:{P41220}

20217 Pathogen[ P03383] interacts with 1 human partners:{P41220}

20218 Pathogen[ P03410] interacts with 1 human partners:{P41220}

20219 Pathogen[ P14075] interacts with 1 human partners:{P41220}

20220 Pathogen[ P0C206] interacts with 1 human partners:{P41220}

20221 Pathogen[ P03363] interacts with 1 human partners:{P41220}

20222 [Cluster 1839]GO:0001944+P biological\_process [name] vasculature development [def] "The process whose specific outcome is the progression of the vasculature over time, from its formation to the mature structure. The vasculature is an interconnected tubular multi-tissue structure that contains fluid that is actively transported around the organism." [GOC

20223 Pathogen[ Q2Q067] interacts with 2 human partners:{Q969H0;P17947}

20224 Pathogen[ P0C214] interacts with 2 human partners:{P17947;Q969H0}

20225 Pathogen[ P03346] interacts with 4 human partners:{O43680;P35713;P17947;Q969H0}

20226 Pathogen[ Q85601] interacts with 2 human partners:{Q969H0;P17947}

20227 Pathogen[ P14079] interacts with 1 human partners:{Q969H0}

20228 Pathogen[ P03383] interacts with 2 human partners:{Q969H0;P17947}

20229 Pathogen[ P03410] interacts with 2 human partners:{P17947;Q969H0}

20230 Pathogen[ P14075] interacts with 2 human partners:{P17947;Q969H0}

20231 Pathogen[ P0C206] interacts with 2 human partners:{Q969H0;P17947}

20232 Pathogen[ P03363] interacts with 2 human partners:{P17947;Q969H0}

20233 [Cluster 1840]GO:0045787+P biological\_process [name] positive regulation of cell cycle [def] "Any process that activates or increases the rate or extent of progression through the cell cycle." [GOC

20234 Pathogen[ Q2Q067] interacts with 8 human partners:{P19474;P62244;P51610;P27797;P49356;P15923;P15407;Q00987}

20235 Pathogen[ P0C214] interacts with 8 human partners:{P19474;P51610;P15407;Q00987;P15923;P49356;P62244;P27797}

20236 Pathogen[ P03346] interacts with 8 human partners:{P51610;P15923;Q00987;P49356;P15407;P27797;P19474;P62244}

20237 Pathogen[ Q85601] interacts with 8 human partners:{P62244;P15407;P27797;P51610;P49356;P15923;P19474;Q00987}

20238 Pathogen[ P14079] interacts with 7 human partners:{P15923;P51610;Q00987;P62244;P19474;P49356;P15407}

20239 Pathogen[ P03383] interacts with 6 human partners:{P19474;P15923;P51610;P15407;P62244;P27797}

20240 Pathogen[ P03410] interacts with 7 human partners:{P51610;P62244;P49356;P15923;Q00987;P15407;P27797}

20241 Pathogen[ P14075] interacts with 6 human partners:{P62244;P51610;P15923;P27797;P19474;P15407}

20242 Pathogen[ P0C206] interacts with 8 human partners:{P27797;P15407;P62244;P51610;P15923;Q00987;P49356;P19474}

20243 Pathogen[ P03363] interacts with 6 human partners:{P15923;P27797;P19474;P15407;P62244;P51610}

20244 [Cluster 1841]GO:0018027+P biological\_process [name] peptidyl-lysine dimethylation [def] "The methylation of peptidyl-lysine to form peptidyl-N6,N6-dimethyl-L-lysine." [RESID

20245 Pathogen[ Q2Q067] interacts with 3 human partners:{Q9NRG4;Q86TU7;Q8WTS6}

20246 Pathogen[ P0C214] interacts with 3 human partners:{Q86TU7;Q8WTS6;Q9NRG4}

20247 Pathogen[ P03346] interacts with 3 human partners:{Q9NRG4;Q8WTS6;Q86TU7}

20248 Pathogen[ Q85601] interacts with 3 human partners:{Q86TU7;Q8WTS6;Q9NRG4}

20249 Pathogen[ P14079] interacts with 3 human partners:{Q9NRG4;Q86TU7;Q8WTS6}

20250 Pathogen[ P03383] interacts with 3 human partners:{Q9NRG4;Q86TU7;Q8WTS6}

20251 Pathogen[ P03410] interacts with 3 human partners:{Q8WTS6;Q86TU7;Q9NRG4}

20252 Pathogen[ P14075] interacts with 3 human partners:{Q86TU7;Q9NRG4;Q8WTS6}

20253 Pathogen[ P0C206] interacts with 3 human partners:{Q9NRG4;Q86TU7;Q8WTS6}

20254 Pathogen[ P03363] interacts with 2 human partners:{Q9NRG4;Q8WTS6}

- 20255 [Cluster 1842]GO:0043123+P biological\_process [name] positive regulation of I-kappaB kinase/NF-kappaB cascade [def] "Any process that activates or increases the frequency, rate or extent of an I-kappaB kinase/NF-kappaB induced cascade." [GOC
- 20256 Pathogen[ Q2Q067] interacts with 48 human  
partners: {Q04864;Q8IUC6;O15519;P29692;P21980;Q96LR2;Q9NYB0;O43734;O60260;Q9UDY8;Q9H0F6;Q13077;Q04206;Q6P1N0;Q9NYJ8;O95999;P26447;Q13158;Q14790;Q86UE4;Q7Z2W4;Q96IF1;Q14653;Q9Y6K9;Q99732;P61088;P53041;P37198;Q96FA3;P35813;Q8N108;P0CG47;O14920;Q15628;P0CG48;O43318;Q92734;P62987;Q13404;Q9HAT8;O00463;Q13490;P61586;O15111;P32929;O15205;Q8N108;P62979}
- 20257 Pathogen[ P0C214] interacts with 48 human  
partners: {P35813;O15111;Q9Y6K9;Q13490;Q15628;Q8IUC6;Q14164;Q13158;Q9UDY8;Q96FA3;P61586;Q9H0F6;Q04206;P29692;Q9HAT8;Q13404;Q92734;O43318;Q86UE4;Q7Z2W4;P32929;O15519;Q99732;O43734;P37198;P0CG48;O95999;Q8N108;O15205;P53041;Q14653;P62987;Q96LR2;P26447;Q9NYB0;Q9NV92;Q8N108;P0CG47;P21980;Q04864;O60260;Q6P1N0;O00463;P62979;O14920;Q9NYJ8;P61088;Q14790}
- 20258 Pathogen[ P03346] interacts with 55 human  
partners: {P21980;Q9Y6K9;Q13077;O00463;P35813;O15111;Q96LR2;Q92734;Q86UE4;Q13489;P62987;Q13158;Q9BYM8;Q8N108;O43734;Q9UDY8;P0CG48;Q04206;Q96IF1;P29692;Q04864;P37198;Q9H0F6;Q9NV92;Q96AX9;O15519;Q96FA3;Q13404;O95999;P61088;Q6P1N0;Q96EP0;Q9NYJ8;Q9HAT8;P32929;O15205;Q9NYB0;P53041;P26447;Q14653;Q15628;P62979;O60260;Q8IUC6;Q8N108;Q14790;P0CG47;Q13490;O14920;Q9H8V3;O43318;Q14164;Q7Z2W4;P61586;Q99732}
- 20259 Pathogen[ Q85601] interacts with 47 human  
partners: {Q92734;P26447;Q13490;Q9NYJ8;Q8IUC6;O00463;Q13158;O15111;Q9UDY8;Q14790;Q9HAT8;Q7Z2W4;P0CG48;Q9H0F6;Q04864;Q96FA3;Q13404;Q14653;Q14164;Q9Y6K9;Q8N108;O14920;Q04206;P21980;O15205;P53041;Q8N108;Q86UE4;P61586;P62979;Q15628;Q96IF1;O60260;P0CG47;Q13077;P62987;Q9NYB0;O95999;O43318;P29692;P61088;P35813;Q99732;Q6P1N0;Q96LR2;O15519;P32929}
- 20260 Pathogen[ P14079] interacts with 54 human  
partners: {Q9BXL7;O00463;O60260;Q9HAT8;P0CG48;P53041;Q14653;O95999;Q7Z2W4;Q92734;O15519;Q7LFL8;Q8N108;Q8IUC6;Q13404;Q96EP0;Q14164;P21980;Q6P1N0;P62979;Q8TCD1;P29692;P62987;Q13077;Q96FA3;Q7Z434;P35813;Q14790;Q8N114;Q99732;Q96IF1;Q8N108;O15205;Q9Y6K9;Q9BYM8;Q9NYB0;P61586;Q9H8V3;P37198;P26447;P32929;Q86UE4;Q96LR2;B7ZAQ6;Q13158;Q9H0F6;Q9Y3E0;Q9NV92;P0CG47;Q9Y239;Q15628;O43734;Q99836;Q13490}
- 20261 Pathogen[ P03383] interacts with 39 human  
partners: {Q14653;Q04864;Q9H0F6;Q9Y6K9;P62987;Q8IUC6;Q96LR2;Q86UE4;Q9NYB0;O14920;O15111;O43734;Q13490;P35813;Q13158;O43318;P61088;Q6P1N0;O60260;P61586;Q13404;Q99732;P53041;O95999;Q15628;P62979;Q8N108;P0CG47;Q96FA3;Q04206;P0CG48;P21980;P37198;P29692;Q9NYJ8;O15205;Q8N108;Q9HAT8;Q7Z2W4}
- 20262 Pathogen[ P03410] interacts with 54 human  
partners: {P26447;Q04206;P0CG48;O15205;O14920;P35813;Q9Y239;Q8N108;Q04864;B7ZAQ6;Q13077;O15111;Q96FA3;Q14653;P32929;O15519;Q13490;Q99732;Q8N114;O60260;P61088;Q9Y3E0;P62979;Q9NV92;Q7Z434;Q13158;Q96IF1;Q15628;O43318;O95999;P61586;Q9BXL7;O00463;Q9NYJ8;Q7Z2W4;Q86UE4;O43734;P53041;Q92734;Q9HAT8;Q8N108;P62987;Q8IUC6;P21980;Q13404;Q9H8V3;Q9Y6K9;Q8TCD1;P29692;Q9NYB0;Q96LR2;P0CG47;Q6P1N0;Q9H0F6}
- 20263 Pathogen[ P14075] interacts with 41 human  
partners: {P35813;O15111;Q04206;Q92734;Q86UE4;P61088;P29692;O43734;Q8N108;O14920;P0CG48;P62979;Q8N108;Q14653;Q13490;Q99732;O43318;Q9HAT8;Q13158;P37198;Q96FA3;P62987;P53041;P61586;O95999;Q15628;Q7Z2W4;Q8IUC6;Q9NV92;P0CG47;Q96LR2;Q13404;Q9Y6K9;P21980;O60260;O15205;Q6P1N0;Q9H0F6;Q04864;Q9NYB0;Q9NYJ8}
- 20264 Pathogen[ P0C206] interacts with 55 human  
partners: {Q96AX9;P0CG48;Q13077;O14920;P26447;Q9Y6K9;Q9UDY8;Q9NV92;Q96IF1;O95999;P21980;Q9HAT8;P53041;Q8N108;O43318;O43734;O15205;Q13158;O15519;P61586;Q96LR2;P61088;Q14164;Q6P1N0;Q96EP0;Q04206;P32929;O60260;O15111;P62979;Q14790;Q04864;Q9NYJ8;Q15628;Q9H8V3;O00463;Q13489;P0CG47;Q9NYB0;Q8IUC6;Q9H0F6;Q96FA3;Q86UE4;Q92734;P62987;Q13404;P29692;Q7Z2W4;Q9BYM8;Q99732;Q8N108;P35813;B7ZAQ6;Q14653;Q13490}
- 20265 Pathogen[ P03363] interacts with 39 human  
partners: {Q14653;Q13490;O15205;O14920;Q04206;O15519;P26447;Q96EP0;Q92734;O15111;Q9NYJ8;Q7Z2W4;Q9NYB0;O00463;P53041;Q9Y6K9;O43318;Q86UE4;Q13158;Q96IF1;P61088;Q96FA3;P29692;Q13077;Q13489;Q99732;Q8N108;P62987;Q15628;Q9H0F6;Q04864;Q6P1N0;Q96LR2;Q13404;Q9HAT8;Q8N108;P37198;O43734;Q96AX9}
- 20266 [Cluster 1843]GO:0006892+P biological\_process [name] post-Golgi vesicle-mediated transport [def] "The directed movement of substances from the Golgi to other parts of the cell, including organelles and the plasma membrane, mediated by small transport vesicles." [GOC
- 20267 Pathogen[ Q2Q067] interacts with 26 human  
partners: {P02792;Q9UL45;Q9Y6Q5;Q10567;O15126;P56377;O43747;Q9NUP1;Q6QNY0;Q96EV8;Q96PC3;P11142;O15127;O00471;Q00610;P61966;Q14677;Q9BXS5;P50570;P54920;Q99962;Q5HYK7;O00161;P09496;P78537;Q13367}
- 20268 Pathogen[ P0C214] interacts with 27 human  
partners: {P02794;Q13367;P78537;Q5HYK7;P54920;O15127;Q99962;Q6QNY0;Q10567;O15126;P56377;Q14677;Q9UL45;Q96PC3;Q96EV8;O43747;Q9Y6Q5;P02792;Q9NUP1;P61966;P09496;P50570;Q9BXS5;O00161;Q14677;O00471;P11142}
- 20269 Pathogen[ P03346] interacts with 28 human  
partners: {P02792;P61966;P50570;O00471;Q14677;O43747;P56377;Q99962;Q9BXS5;P11142;P02794;P09496;Q6QNY0;Q10567;O00161;P78537;Q96EV8;Q96PC3;P54920;O15126;Q9UL45;Q13367;Q5HYK7;Q9Y6Q5;Q14677;Q9NUP1;Q00610;O15127}

20270 Pathogen[ Q85601] interacts with 27 human partners: {Q13367;P54920;Q6QNY0;O15126;Q00610;P09496;Q9NUP1;O00471;Q5HYK7;Q9BXS5;P56377;Q99962;O43747;Q10567;Q14677;P78537;Q96EV8;P11142;P50570;Q96PC3;P02792;O15127;P61966;Q9Y6Q5;Q14671;P02794;O00161}

20271 Pathogen[ P14079] interacts with 25 human partners: {Q9Y6Q5;P61966;P11142;Q9BXS5;O14828;Q00610;Q6QNY0;O00471;Q14677;Q10567;P56377;P50570;Q9UL45;Q5HYK7;P02794;Q13367;O43747;Q96EV8;Q9NUP1;Q96PC3;Q14671;P78537;P54920;P09496;Q99962}

20272 Pathogen[ P03383] interacts with 19 human partners: {P02794;Q6QNY0;P56377;O15126;Q00610;Q5HYK7;P54920;Q10567;P78537;Q9NUP1;Q96EV8;O43747;O00471;P11142;O15127;Q13367;Q14677;O00161;Q9BXS5}

20273 Pathogen[ P03410] interacts with 29 human partners: {Q00610;Q9NUP1;P09496;Q9Y6Q5;P78537;Q96PC3;P02794;Q5HYK7;O14828;Q9BXS5;O43747;Q6QNY0;Q10567;P11142;P50570;Q9UL45;Q14677;O15127;Q99962;Q14671;P02792;Q13367;P61966;O15126;O00471;O00161;P56377;Q96EV8;P54920}

20274 Pathogen[ P14075] interacts with 20 human partners: {P78537;P11142;P09496;O15127;P54920;Q5HYK7;O15126;O00471;P02794;Q14677;Q6QNY0;Q9NUP1;O43747;O00161;Q96EV8;P56377;Q9BXS5;Q10567;Q00610;Q13367}

20275 Pathogen[ P0C206] interacts with 29 human partners: {O15127;O14828;P78537;Q9UL45;Q9Y6Q5;O43747;Q10567;P54920;P02794;P61966;Q00610;Q99962;P09496;O00161;Q9BXS5;Q5HYK7;Q96EV8;P02792;Q14677;Q9NUP1;Q6QNY0;O15126;Q96PC3;P11142;O00471;Q13367;P50570;P56377;Q14671}

20276 Pathogen[ P03363] interacts with 20 human partners: {Q99962;Q13367;O43747;O00471;P78537;P50570;P54920;Q00610;Q9BXS5;Q14677;O15126;Q14671;O15127;Q5HYK7;O00161;Q6QNY0;Q9NUP1;P02794;Q10567;P11142}

20277 [Cluster 1844]GO:0018149+P biological\_process [name] peptide cross-linking [def] "The formation of a covalent cross-link between or within protein chains." [GOC

20278 Pathogen[ Q2Q067] interacts with 8 human partners: {P35321;P21980;P23490;P15924;P22528;Q9UBC9;Q96PI1;P07476}

20279 Pathogen[ P0C214] interacts with 8 human partners: {P35321;P07476;P22735;P15924;P23490;P21980;Q9UBC9;Q96PI1}

20280 Pathogen[ P03346] interacts with 10 human partners: {P15924;P21980;P35321;P07476;Q9UBC9;P16452;Q96PI1;P23490;P22528;P22735}

20281 Pathogen[ Q85601] interacts with 5 human partners: {P35321;P15924;P21980;P23490;Q9UBC9}

20282 Pathogen[ P14079] interacts with 12 human partners: {P04083;P22528;P16452;P22735;P07476;P15924;P21980;P35321;P23490;Q92817;Q9UBC9;Q96PI1}

20283 Pathogen[ P03383] interacts with 8 human partners: {P23490;P15924;P35321;Q96PI1;Q9UBC9;P07476;P22528;P21980}

20284 Pathogen[ P03410] interacts with 11 human partners: {P23490;P15924;Q9UBC9;P22528;P35321;P16452;Q96PI1;P21980;Q92817;P07476;P22735}

20285 Pathogen[ P14075] interacts with 8 human partners: {Q96PI1;P35321;Q9UBC9;P23490;P22528;P21980;P07476;P15924}

20286 Pathogen[ P0C206] interacts with 10 human partners: {Q9UBC9;Q96PI1;P21980;P23490;P35321;P16452;P15924;P22735;P07476;P22528}

20287 Pathogen[ P03363] interacts with 9 human partners: {P35321;P23490;Q9UBC9;P15924;P22528;P07476;Q96PI1;P16452;Q92817}

20288 [Cluster 1845]GO:0014033+P biological\_process [name] neural crest cell differentiation [def] "The process in which a relatively unspecialized cell acquires specialized features of a neural crest cell." [GOC

20289 Pathogen[ Q2Q067] interacts with 1 human partners: {Q13485}

20290 Pathogen[ P0C214] interacts with 1 human partners: {Q13485}

20291 Pathogen[ P03346] interacts with 1 human partners: {Q13485}

20292 Pathogen[ Q85601] interacts with 1 human partners: {Q13485}

20293 Pathogen[ P14079] interacts with 1 human partners: {Q06413}

20294 Pathogen[ P03383] interacts with 1 human partners: {Q13485}

20295 Pathogen[ P03410] interacts with 1 human partners: {Q13485}

20296 Pathogen[ P14075] interacts with 1 human partners: {Q13485}

20297 Pathogen[ P0C206] interacts with 1 human partners: {Q13485}

20298 Pathogen[ P03363] interacts with 1 human partners: {Q13485}

20299 [Cluster 1846]GO:0050892+P biological\_process [name] intestinal absorption [def] "Any process in which nutrients are taken up from the contents of the intestine." [GOC

20300 Pathogen[ Q2Q067] interacts with 3 human partners: {Q92681;P21399;P48200}

20301 Pathogen[ P0C214] interacts with 3 human partners: {P48200;Q92681;P21399}

20302 Pathogen[ P03346] interacts with 4 human partners: {Q92681;P07148;P48200;P21399}

20303 Pathogen[ Q85601] interacts with 3 human partners: {P21399;P48200;Q92681}

20304 Pathogen[ P14079] interacts with 3 human partners: {Q92681;P21399;P48200}

20305 Pathogen[ P03383] interacts with 2 human partners: {Q92681;P48200}

20306 Pathogen[ P03410] interacts with 3 human partners: {P21399;P48200;Q92681}

20307 Pathogen[ P14075] interacts with 2 human partners: {Q92681;P48200}

20308 Pathogen[ P0C206] interacts with 3 human partners: {Q92681;P48200;P21399}

20309 Pathogen[ P03363] interacts with 2 human partners: {P48200;Q92681}

20310 [Cluster 1847]GO:0021572+P biological\_process [name] rhombomere 6 development [def] "The process whose specific outcome is the progression of rhombomere 6 over time, from



its formation to the mature structure. Rhombomeres are transverse segments of the developing rhombencephalon. Rhombomeres are lineage restricted, express different genes from one another, and adopt different developmental fates. Rhombomeres are numbered in anterior to posterior order." [GO\_REF

20311 Pathogen[ Q2Q067] interacts with 1 human partners:{Q9Y5Q3}

20312 Pathogen[ P0C214] interacts with 1 human partners:{Q9Y5Q3}

20313 Pathogen[ P03346] interacts with 1 human partners:{Q9Y5Q3}

20314 Pathogen[ Q85601] interacts with 1 human partners:{Q9Y5Q3}

20315 Pathogen[ P14079] interacts with 1 human partners:{Q9Y5Q3}

20316 Pathogen[ P03383] interacts with 1 human partners:{Q9Y5Q3}

20317 Pathogen[ P03410] interacts with 1 human partners:{Q9Y5Q3}

20318 Pathogen[ P14075] interacts with 1 human partners:{Q9Y5Q3}

20319 Pathogen[ P0C206] interacts with 1 human partners:{Q9Y5Q3}

20320 Pathogen[ P03363] interacts with 1 human partners:{Q9Y5Q3}

20321 [Cluster 1848]GO:0070212+P biological\_process [name] protein poly-ADP-ribosylation [def] "The transfer of multiple ADP-ribose residues from NAD to a protein amino acid, forming a poly(ADP-ribose) chain." [GOC

20322 Pathogen[ Q2Q067] interacts with 3 human partners:{P09874;Q53GL7;O95271}

20323 Pathogen[ P0C214] interacts with 3 human partners:{Q53GL7;O95271;P09874}

20324 Pathogen[ P03346] interacts with 3 human partners:{Q53GL7;P09874;O95271}

20325 Pathogen[ Q85601] interacts with 3 human partners:{P09874;O95271;Q53GL7}

20326 Pathogen[ P14079] interacts with 3 human partners:{P09874;O95271;Q53GL7}

20327 Pathogen[ P03383] interacts with 3 human partners:{P09874;Q53GL7;O95271}

20328 Pathogen[ P03410] interacts with 3 human partners:{Q53GL7;O95271;P09874}

20329 Pathogen[ P14075] interacts with 3 human partners:{O95271;P09874;Q53GL7}

20330 Pathogen[ P0C206] interacts with 3 human partners:{O95271;P09874;Q53GL7}

20331 Pathogen[ P03363] interacts with 3 human partners:{O95271;P09874;Q53GL7}

20332 [Cluster 1849]GO:0009653+P biological\_process [name] anatomical structure morphogenesis [def] "The process in which anatomical structures are generated and organized. Morphogenesis pertains to the creation of form." [GOC

20333 Pathogen[ Q2Q067] interacts with 33 human partners:{O60806;O00425;Q99502;P09067;Q15928;P53675;Q9Y6M1;P63167;O95948;Q92800;P54198;P78545;Q9UQR0;Q99504;P56693;P62906;Q00056;P31276;O15499;Q9UN79;P78337;P49639;Q9NP71;Q01860;P63000;P55327;P14653;O15111;P05783;Q9UN30;Q9NQ50;O96028;Q92764}

20334 Pathogen[ P0C214] interacts with 32 human partners:{P54198;P63000;P49639;O15111;P05783;P78337;P56693;O00425;Q15928;P53675;P14653;Q9UN79;Q99504;Q9NP71;Q9UQR0;Q9NQ50;Q9UN30;O60806;Q96G01;P55327;Q9Y6M1;P78545;O95948;Q92800;O15499;Q01860;Q92764;P31276;P63167;P62906;O96028;Q99502}

20335 Pathogen[ P03346] interacts with 53 human partners:{P31271;Q96G01;Q9NPC8;P49639;P50219;P52954;Q8N653;O15111;O95677;Q15928;P05783;P78337;Q92800;P55327;Q05925;P31270;Q9NP62;Q9Y6M1;O00425;Q00056;Q9UIU6;P56693;P31276;Q9UN30;O60806;P23759;Q99502;P14653;Q9UBC0;Q01860;Q9NP71;Q06710;Q96GD3;O95948;O15499;Q9UN79;Q9NQ50;P53675;Q8IUQ4;O75333;P63167;O75398;P78545;Q99504;Q13394;P56915;Q92764;P63000;P09067;P54198;P62906;O96028;Q9UQR0}

20336 Pathogen[ Q85601] interacts with 34 human partners:{P49639;P54198;P53675;O15499;O75398;O95677;O15111;P14653;P78545;P63000;Q99504;P78337;Q9NP71;O60806;Q9Y6M1;Q92764;P05783;Q15928;O95948;Q96G01;Q99502;Q9UN79;O00425;Q9UN30;P56693;P31271;Q9NQ50;P31276;Q92800;Q9UQR0;Q01860;P63167;P62906;O96028}

20337 Pathogen[ P14079] interacts with 30 human partners:{Q9NQ50;P55327;Q99502;P78337;Q95948;Q9UQR0;P54198;Q92800;Q13394;P31271;P31276;Q01860;Q92764;Q9Y6M1;P46695;P62906;P05783;P56693;Q96G01;Q9UN79;P63167;Q15928;Q99504;P78545;P53675;O00425;O15499;P49639;Q9NP71;Q9UN30}

20338 Pathogen[ P03383] interacts with 23 human partners:{Q99504;O15111;P31276;P63000;Q01860;P53675;P05783;P78337;Q9NP71;Q9UQR0;P49639;Q15928;Q9UN79;P62906;P78545;Q9NQ50;O00425;Q92764;P63167;P56693;P54198;Q9UN30;Q92800}

20339 Pathogen[ P03410] interacts with 32 human partners:{Q13394;P54198;P31276;Q9UN79;P63000;O60806;Q99502;Q01860;O15111;P78545;Q92764;P62906;P63167;O95948;Q15928;Q92800;Q9NP71;Q96G01;P55327;P56693;Q9NQ50;Q99504;P49639;O00425;P46695;Q9UQR0;P53675;Q9UN30;P05783;P78337;Q9Y6M1;O15499}

20340 Pathogen[ P14075] interacts with 24 human partners:{Q92764;Q9UN30;O15111;Q99504;P55327;P78337;P05783;Q9UQR0;Q15928;P78545;P53675;Q01860;Q92800;P56693;P54198;Q9NP71;Q9UN79;Q9NQ50;P63000;P31276;Q99502;O00425;P62906;P63167}

20341 Pathogen[ P0C206] interacts with 40 human partners:{Q9UN30;P53675;Q9NP71;Q99504;P09067;Q9UN79;Q01860;P49639;Q9UQR0;P63167;Q8IUQ4;Q13394;P54198;O15499;Q9UBC0;P55327;Q92800;P56693;P14653;P78337;P63000;O96028;O15111;P05783;P78545;Q99502;Q15928;P31271;Q9NQ50;P62906;O75398;Q9Y6M1;O60806;O95677;Q9NP62;Q92764;P31276;Q96G01;O00425;O95948}

20342 Pathogen[ P03363] interacts with 41 human partners:{P05783;Q9UBC0;O95948;P54198;P09067;P63167;Q9UN79;Q92764;Q15928;O15111;P31271;O00425;Q9Y6M1;Q9NQ50;P49639;P63000;Q9UN30;P14653;O15499;P56693;P56915;P78545;Q99504;Q00056;Q05925;P23759;P31276;O96028;Q9UQR0;O60806;P62906;O75398;Q9NP71;Q92800;P78337;P50219;P53675;Q8N653;Q9NPC8;P55327;Q01860}

20343 [Cluster 1850]GO:0035417+P biological\_process [name] negative regulation of mitotic prometaphase [def] "Any process that stops, prevents or reduces the rate or extent of

mitotic prometaphase, the stage following prophase in mitosis (in higher eukaryotes) during which the nuclear envelope is disrupted and breaks into membrane vesicles, and the spindle microtubules enter the nuclear region." [GOC

20344 Pathogen[ Q2Q067] interacts with 1 human partners:{O15205}

20345 Pathogen[ P0C214] interacts with 1 human partners:{O15205}

20346 Pathogen[ P03346] interacts with 1 human partners:{O15205}

20347 Pathogen[ Q85601] interacts with 1 human partners:{O15205}

20348 Pathogen[ P14079] interacts with 1 human partners:{O15205}

20349 Pathogen[ P03383] interacts with 1 human partners:{O15205}

20350 Pathogen[ P03410] interacts with 1 human partners:{O15205}

20351 Pathogen[ P14075] interacts with 1 human partners:{O15205}

20352 Pathogen[ P0C206] interacts with 1 human partners:{O15205}

20353 Pathogen[ P03363] interacts with 1 human partners:{O15205}

20354 [Cluster 1851]GO:0010039+P biological\_process [name] response to iron ion [def] "Any process that results in a change in state or activity of a cell or an organism (in terms of movement, secretion, enzyme production, gene expression, etc.) as a result of an iron ion stimulus." [GOC

20355 Pathogen[ Q2Q067] interacts with 4 human partners:{000213;P24385;P55212;P06132}

20356 Pathogen[ P0C214] interacts with 5 human partners:{P06132;000213;P55212;P24385;P36551}

20357 Pathogen[ P03346] interacts with 4 human partners:{000213;P24385;P55212;P06132}

20358 Pathogen[ Q85601] interacts with 4 human partners:{000213;P24385;P06132;P55212}

20359 Pathogen[ P14079] interacts with 4 human partners:{000213;P55212;P06132;P36551}

20360 Pathogen[ P03383] interacts with 4 human partners:{000213;P55212;P24385;P06132}

20361 Pathogen[ P03410] interacts with 5 human partners:{000213;P06132;P36551;P24385;P55212}

20362 Pathogen[ P14075] interacts with 4 human partners:{000213;P06132;P55212;P24385}

20363 Pathogen[ P0C206] interacts with 5 human partners:{P55212;P36551;000213;P06132;P24385}

20364 Pathogen[ P03363] interacts with 4 human partners:{000213;P06132;P55212;P24385}

20365 [Cluster 1852]GO:0048821+P biological\_process [name] erythrocyte development [def] "The process aimed at the progression of an erythrocyte over time, from initial commitment of the cell to a specific fate, to the fully functional differentiated cell." [GOC

20366 Pathogen[ Q2Q067] interacts with 5 human partners:{P35712;P41182;P15976;P11831;P07738}

20367 Pathogen[ P0C214] interacts with 6 human partners:{P16157;P11831;P41182;P07738;Q7L5Y9;P35712}

20368 Pathogen[ P03346] interacts with 7 human partners:{P11831;P07738;P16157;Q13351;P15976;P41182;P35712}

20369 Pathogen[ Q85601] interacts with 7 human partners:{P11831;P16157;P15976;Q7L5Y9;P35712;P41182;P07738}

20370 Pathogen[ P14079] interacts with 7 human partners:{P35712;P15976;P16157;Q7L5Y9;P07738;P41182;Q13351}

20371 Pathogen[ P03383] interacts with 3 human partners:{P11831;P35712;P07738}

20372 Pathogen[ P03410] interacts with 7 human partners:{P35712;P11831;P16157;P07738;P41182;Q7L5Y9;P15976}

20373 Pathogen[ P14075] interacts with 4 human partners:{P11831;Q7L5Y9;P35712;P07738}

20374 Pathogen[ P0C206] interacts with 7 human partners:{P41182;P15976;P16157;Q7L5Y9;P11831;P35712;P07738}

20375 Pathogen[ P03363] interacts with 3 human partners:{P16157;P11831;P35712}

20376 [Cluster 1853]GO:0045453+P biological\_process [name] bone resorption [def] "The process in which specialized cells known as osteoclasts degrade the organic and inorganic portions of bone, and endocytose and transport the degradation products." [GOC

20377 Pathogen[ Q2Q067] interacts with 3 human partners:{Q9UBB6;Q8TD23;P20823}

20378 Pathogen[ P0C214] interacts with 2 human partners:{Q9UBB6;Q8TD23}

20379 Pathogen[ P03346] interacts with 3 human partners:{Q8TD23;P20823;Q9UBB6}

20380 Pathogen[ Q85601] interacts with 2 human partners:{Q8TD23;P20823}

20381 Pathogen[ P14079] interacts with 4 human partners:{O14773;Q8TD23;Q9UBB6;P13232}

20382 Pathogen[ P03383] interacts with 2 human partners:{Q9UBB6;Q8TD23}

20383 Pathogen[ P03410] interacts with 3 human partners:{Q9UBB6;Q8TD23;P13232}

20384 Pathogen[ P14075] interacts with 2 human partners:{Q8TD23;Q9UBB6}

20385 Pathogen[ P0C206] interacts with 3 human partners:{Q8TD23;P20823;Q9UBB6}

20386 Pathogen[ P03363] interacts with 2 human partners:{Q9UBB6;Q8TD23}

20387 [Cluster 1854]GO:0043558+P biological\_process [name] regulation of translational initiation in response to stress [def] "Any process that activates or increases the frequency, rate or extent of translation initiation, as a result of a stimulus indicating the organism is under stress." [GOC

20388 Pathogen[ Q2Q067] interacts with 1 human partners:{P05198}

20389 Pathogen[ P0C214] interacts with 1 human partners:{P05198}

20390 Pathogen[ P03346] interacts with 1 human partners:{P05198}

20391 Pathogen[ Q85601] interacts with 1 human partners:{P05198}

20392 Pathogen[ P14079] interacts with 1 human partners:{P05198}

20393 Pathogen[ P03383] interacts with 1 human partners:{P05198}

20394 Pathogen[ P03410] interacts with 1 human partners:{P05198}

20395 Pathogen[ P14075] interacts with 1 human partners:{P05198}

20396 Pathogen[ P0C206] interacts with 1 human partners:{P05198}  
20397 Pathogen[ P03363] interacts with 1 human partners:{P05198}  
20398 [Cluster 1855]GO:0061077+P biological\_process [name] chaperone-mediated protein folding [def] "The process of inhibiting aggregation and assisting in the covalent and noncovalent assembly of single chain polypeptides or multisubunit complexes into the correct tertiary structure that is dependent on interaction with a chaperone." [GOC  
20399 Pathogen[ Q2Q067] interacts with 2 human partners:{P11142;P40855}  
20400 Pathogen[ P0C214] interacts with 3 human partners:{P40855;P10909;P11142}  
20401 Pathogen[ P03346] interacts with 3 human partners:{P11142;Q9UHD1;P40855}  
20402 Pathogen[ Q85601] interacts with 3 human partners:{Q9UHD1;P11142;P40855}  
20403 Pathogen[ P14079] interacts with 4 human partners:{P11142;P40855;P10909;Q9UHD1}  
20404 Pathogen[ P03383] interacts with 2 human partners:{P11142;P40855}  
20405 Pathogen[ P03410] interacts with 4 human partners:{Q9UHD1;P11142;P40855;P10909}  
20406 Pathogen[ P14075] interacts with 2 human partners:{P11142;P40855}  
20407 Pathogen[ P0C206] interacts with 4 human partners:{P40855;P10909;Q9UHD1;P11142}  
20408 Pathogen[ P03363] interacts with 3 human partners:{P40855;Q9H3U1;P11142}  
20409 [Cluster 1856]GO:0032922+P biological\_process [name] circadian regulation of gene expression [def] "Any process that modulates the frequency, rate or extent of gene expression such that an expression pattern recurs with a regularity of approximately 24 hours." [GOC  
20410 Pathogen[ Q2Q067] interacts with 3 human partners:{O14503;O15379;O75376}  
20411 Pathogen[ P0C214] interacts with 3 human partners:{O14503;O75376;O15379}  
20412 Pathogen[ P03346] interacts with 7 human partners:{O15379;O15534;O14503;O00327;Q9C0J9;O75376;O15516}  
20413 Pathogen[ Q85601] interacts with 6 human partners:{O15534;O15516;O00327;O14503;O75376;O15379}  
20414 Pathogen[ P14079] interacts with 4 human partners:{O15379;O75376;O14503;O15534}  
20415 Pathogen[ P03383] interacts with 3 human partners:{O75376;O14503;O15379}  
20416 Pathogen[ P03410] interacts with 3 human partners:{O75376;O15379;O15534}  
20417 Pathogen[ P14075] interacts with 3 human partners:{O14503;O75376;O15379}  
20418 Pathogen[ P0C206] interacts with 6 human partners:{O15534;Q9C0J9;O00327;O15516;O15379;O75376}  
20419 Pathogen[ P03363] interacts with 6 human partners:{O15379;O75376;Q9C0J9;O00327;O15534;O14503}  
20420 [Cluster 1857]GO:0045944+P biological\_process [name] positive regulation of transcription from RNA polymerase II promoter [def] "Any process that activates or increases the frequency, rate or extent of transcription from an RNA polymerase II promoter." [GOC  
20421 Pathogen[ Q2Q067] interacts with 359 human partners:{Q13562;O60806;Q9UM63;Q13573;Q9UKI9;P27540;Q33E94;P01100;O00213;Q9HB65;Q92585;Q16236;P62633;Q96S65;O43364;P31749;Q8IZL2;Q12837;Q9Y5Q3;Q03052;Q9Y613;P56524;Q10587;Q99502;Q9HBZ2;P10827;P04198;P15884;Q16594;Q92922;P07737;Q13033;P23511;Q8WVC0;Q12888;Q9H175;O00512;O00267;P06400;Q8WYA1;Q01094;Q8WW38;P40763;P14921;Q08209;P01106;Q16666;P46937;O60481;Q6PD62;Q13485;O14639;O14974;P35680;P31268;Q6P1J9;Q15596;P48380;O14813;Q9Y606;Q9Y2Y9;P35712;P10828;Q15562;Q9GZS3;P55197;Q8N5U6;P51531;Q32M00;Q9NQ87;P13349;Q9UJG1;Q6VUC0;O96004;Q92985;P08151;Q9BZE3;Q01196;O43439;Q86UU0;Q96T88;O75081;P20749;Q8NF64;Q02930;Q9HD15;P49116;Q8WWK9;Q04206;Q9ULV5;O43639;Q13547;Q9BTT4;O00712;Q93074;Q6UUUV9;Q14814;P18850;P32780;Q99594;O94983;P17483;Q76L83;O94776;P36956;O95948;Q99933;Q9BWW4;Q86WV1;P15976;Q9BWX5;O75586;O14686;P28356;Q92754;Q15025;Q8N8G2;O15350;P35638;Q9NY61;O60244;Q9Y3Y4;P52657;Q6ZNA4;Q14934;Q13158;D6RGH6;P17676;P17482;Q53H80;Q9Y4Z2;Q8WYN3;Q8NDY6;P08047;P11473;Q92905;Q9NZC7;O60563;Q13129;Q8N726;P11831;P20265;P15172;O94906;P28702;P48552;Q15561;P11388;P28069;Q15424;P78545;P54845;Q08050;Q9UHK0;P61978;Q14765;Q9UQL6;Q8TAK5;O43524;O43745;O15162;Q8N5J4;P38159;Q13469;Q8N0Z2;P55347;P78317;P23769;Q9UIV1;Q99743;P20719;P15036;Q9BYK8;Q14186;P78352;Q15699;Q15532;O75582;Q14938;P56693;Q96LB3;P25791;P19532;P51948;Q92831;Q15306;P12755;P84022;Q99856;P50221;Q6P1X5;P10914;Q92539;Q92541;Q92769;O00255;O15105;Q06330;P14859;Q9UHV7;O95644;Q9GZV5;O75444;Q9NQG5;P50750;Q9Y2N7;Q9ULH7;P11161;O15265;O43679;P51532;Q16254;P08697;O43918;P50613;Q9NVC6;Q15327;Q15329;Q8NI08;Q8NHW3;Q13951;Q92993;Q8IX07;O60907;O75030;Q9UPW6;P13984;P55055;Q9UIH9;P12956;Q15796;O75475;O00321;P16333;P78337;P23760;Q9HBH7;O14593;O14770;Q99607;P19419;Q7Z2X4;P49639;Q13503;Q15014;O15370;Q8WWQ0;P19838;Q9H4S2;P28749;P20823;P23193;O75360;Q07687;Q12968;O60248;P15336;Q8NFX5;P25963;P0CG47;O43186;Q14686;Q9BZK7;Q6QNY1;Q15545;Q14872;O95271;P22415;Q9UMQ3;P19484;O95238;P31314;Q9ULG1;P35269;Q8TE85;P11474;Q12824;Q9Y5J3;P0CG48;Q9NY43;Q9HCK8;Q8N7H5;P47928;P49336;Q969V6;Q5T230;Q9P1Z2;Q96PK6;P58304;O60583;Q6ZVN8;P24863;P27986;Q05086;Q9NP71;Q92793;Q86U70;Q01860;P18848;Q5TGS1;Q9NSC2;P63272;P21675;Q86WI3;Q9ZTF5;Q15853;Q9HBD4;P62987;Q14188;Q02577;P55771;Q9UBL3;P42226;Q9Y2W1;Q71SY5;P14653;P15923;P10242;Q99717;P78318;Q15651;Q8IXJ9;Q99814;P40425;Q92841;Q0VG99;Q96JK9;Q9UQR1;P35711;P42224;A6NKF2;P22736;Q8TDD2;Q15797;P23409;Q8NAP3;Q06547;Q13501;Q02078;Q9UPG8;Q06546;P40424;P49715;P42772;Q9Y224;Q6ZN01;P18146;Q03112;P17947;P32519;P51946;Q10586;Q14693;P78543;P33076;Q96JB5;Q3C1V8;P08651;P62979}  
20422 Pathogen[ P0C214] interacts with 340 human partners:{P40424;Q05086;Q92993;O75444;Q03052;P18850;Q9BWW4;P08697;D6RGH6;O00213;Q92585;O14813;P51946;P24863;Q96S65;Q15327;Q16254;P32243;P49639;Q02930;Q13469;Q13573;Q8N0Z2;P11474;Q71SY5;O95238;Q06546;O95633;P55347;Q15651;Q13547;P78337;Q12824;Q14872;P38159;Q8NF64;P78318;O00321;P19838;P14921;O75586;P15336;P78543;Q06547;P52657;Q8IZL2;P21675;Q9H175;O43186;P48552;P31314;Q8WYN3;P35269;P50750;Q9UIH9;Q9HD15;P19484;O00267;P506

13;Q92841;Q15014;P33076;P42226;Q9UM54;P15884;Q13158;Q8NHW3;O60907;O15350;P13349;Q99856;Q03112;Q5T230;Q14765;Q9BZE3;Q8NDY6;P01100;Q93074;Q86WI3;P17275;Q9HBD4;P32519;Q99743;P23769;Q92793;Q9Y5J3;P35711;P19419;Q9HBH7;P56693;P46937;Q13033;Q8N8G2;P84022;P15172;Q76L83;P17947;P56524;Q9GZV5;P11831;Q9Y2Y9;Q8NAP3;Q04206;Q14639;Q9NVC6;Q53H80;Q9Y5Q3;Q9UHK0;P42224;P10914;Q8NI08;Q16666;P17482;O43745;Q9ULG1;Q9UPG8;Q9UKI9;Q06330;Q99607;Q05030;Q9Y726;Q9Y613;Q8N5J4;Q9BTT4;P05121;Q7Z2X4;Q14686;Q15545;Q14938;Q60244;Q9NY61;Q9H2F5;Q92541;Q16594;P17676;O43639;Q96T88;P78317;O94906;Q9UIV1;Q10587;Q8N5U6;Q10586;Q9NZC7;Q6VUC0;O14974;Q9BYK8;Q9HBZ2;P20265;Q02078;Q13501;Q15561;P78352;Q92922;Q13129;Q8TE85;Q12968;Q01094;Q14814;Q9Y2N7;P18848;P17535;Q92754;O43439;O00712;Q8IXJ9;Q14186;Q12837;P49116;Q92985;Q07687;P47928;Q9Y224;P15923;P51948;P25791;O94776;Q92905;Q92539;P49336;Q99933;O15162;Q86U70;P0CG48;Q6P1J9;P14653;Q8WWQ0;Q13485;P55197;Q08209;Q92769;O15105;O60583;P63272;P20749;Q15329;Q8WW38;Q9NQG5;O43679;Q9HCK8;Q8N7H5;Q15025;Q6ZN01;P19532;Q15796;Q9NSC2;Q6UUV9;P25963;Q99594;Q9NP71;P11388;Q96PK6;Q6P1X5;Q96JK9;Q75475;Q8WYA1;Q8IX07;P12755;Q14934;P28069;P13984;Q15424;Q86UU0;Q6ZNA4;P32780;O75360;O00512;Q8WVC0;O43918;Q8TAK5;O75582;P10242;Q9UHV7;P62987;O14593;Q9ULV5;P16333;O60806;P62633;Q15532;O60563;P05412;Q9UMQ3;Q86WV1;Q8NFX5;P28749;Q92831;P18146;Q6ZVN8;Q02577;Q15853;P40425;P0CG47;Q99814;Q9BZK7;P11161;O15265;Q12888;P23511;Q99717;Q86WV6;P15036;Q8WVK9;Q969V6;P40763;O96004;P27540;P50221;Q9UPW6;P08151;P48380;P78545;Q9ULH7;O14770;Q9HB65;P08651;P22415;Q9UM63;Q9P1Z2;Q96LB3;P10828;P23193;Q15596;Q13503;Q15797;O95644;Q6QNY1;P16220;O95948;Q9UJG1;Q9Y3Y4;O95271;A6NKF2;Q15562;Q9Y606;O15370;P51531;P62979;P54845;Q9UQR1;Q9Y2W1;Q9NQ87;P27986;Q6PD62;Q15699;P14859;Q01860;Q5TGS1;P01106;Q3C1V8;Q75081;O60248;P35712;Q14188;Q9UQL6;P06400;P08047;P12956;Q9GZS3;O00255;Q96JB5;P42772;P31749;Q9NY43;P35638;Q33E94;P04198;Q8TDD2;P51532;P18846;P23760;Q13951;Q32MQ0;Q16236;O94983;Q14693;P55771;Q15306;O60481;Q99502}

20423 Pathogen[ P03346] interacts with 436 human

partners: {Q12888;P31271;Q06330;Q3C1V8;Q06945;Q9Y606;Q9NPC8;O15265;Q9BZE0;Q6PD62;P47902;P05412;Q9UKS7;O00213;Q92585;P49639;P61978;P15863;Q15562;P46937;Q96S65;P35453;Q9Y4Z2;Q8N0Z2;Q02078;Q16666;P10827;Q9HB65;P11473;Q86U70;P31268;Q15788;P23511;Q9HBD4;Q6ZVN8;P12956;O60907;P50221;Q9NQG5;Q8N8G2;O14813;Q7RTS1;Q99612;P58012;Q14814;P78337;Q7RTS3;Q32MQ0;Q9UPW6;P16220;Q9UQR1;Q9H2W2;O14639;O60248;O43918;P17676;Q03052;Q9UIV1;Q9Y4X4;P19484;O15370;O75586;P62633;P15336;Q9BS16;Q99607;Q05925;O43639;Q13129;P36956;P35638;Q8WW38;Q9Y613;Q8TAK5;Q06547;P11831;P11388;Q15329;Q0VG99;Q9Y5W3;P62987;Q99594;Q13158;Q71SY5;P48443;P06400;P25963;P78352;Q9HBH7;P51532;P13349;P54845;Q15797;Q14188;Q9GZV5;O60393;Q12772;Q8NFX5;Q9BZE3;Q92841;O60563;Q9BWX5;Q9UKI9;Q12837;P17275;P49116;Q9UJQ4;P24863;Q9UIU6;Q9Y3Y4;Q9P2W1;P49336;Q8WYN3;P23769;Q14872;Q9HD15;Q9ULG1;Q8N5U6;P19419;Q9H4S2;P14859;Q9NSC2;P48380;P42772;P55197;P20264;P15923;P0CG48;Q86WW2;P25800;P15172;Q15796;P56693;O75475;P23760;P56524;P17535;Q15327;P19622;O00712;Q92858;Q93074;Q99856;P23409;Q9ULH7;Q04206;P33076;Q53H80;O95238;O94776;O00321;O60806;Q92886;O60244;P15173;Q08050;P42226;Q15306;Q9Y5Q3;Q12824;O43186;P27540;Q8N5J4;Q969V6;Q9BTT4;P58304;D6RGH6;Q9UBL3;Q99717;P20823;Q92831;O15350;Q7Z2X4;O15105;Q8NDY6;Q99502;Q16254;O75030;Q9UM63;P14653;P63272;Q8TE85;Q9H165;P17483;O95644;Q01094;O94906;P49715;Q92754;Q8NFX6;Q9Y5J3;Q9UBC0;Q01860;P20719;O75444;P78426;P08047;Q15853;P20265;Q96JM2;Q8TDD2;P18850;Q16236;Q15561;Q14934;Q16650;O43680;Q15532;O96004;P01106;O43364;Q5T230;Q9BWW4;P16333;Q8NBF1;Q15699;P28702;Q9NP71;O60583;P28358;Q14186;P18848;O00327;P14921;Q06710;P84022;P25791;Q12968;P17542;Q9Y224;P10242;O60481;Q9H175;P13984;P22736;Q6VUC0;P15976;Q13033;O95096;Q13469;Q92539;Q06546;P31749;Q15596;O00255;P19532;P10914;P49640;Q6QNY1;O95948;Q33E94;Q13951;Q8WVC0;Q92769;Q86WI3;O00512;Q9NZC7;Q9UHK0;Q9Y2N7;Q9P1Z2;Q13547;Q03112;P08651;P40425;Q8WWQ0;Q9HCK8;P51946;P28356;O43679;Q15025;P52657;P50750;Q02548;Q6UUV9;Q6P1X5;Q96JB5;Q9NY61;P35680;Q9NQ87;Q9H2F5;Q15475;O43439;Q8IX07;Q99814;Q12778;A6NKF2;P42224;O14686;O75582;Q9Y5R6;Q92541;Q6ZNA4;Q5TGS1;P81177;O94983;Q96LB3;P78317;Q95718;O14593;O60281;Q8N157;O00267;O94929;P35713;Q15014;P62979;Q9GZS3;Q92905;P28749;P04198;P20749;Q92481;Q6ZN01;Q8IUI8;P21675;P11161;P35712;P35269;Q9NVC6;P32519;P55347;P0CG47;Q92922;Q9BZK7;O95271;P10828;Q9UBR4;Q8NAP3;P28069;P17947;Q99593;P11474;Q10586;P48552;Q8WVK9;P61968;P40424;Q76L83;Q01196;P19838;P56178;Q13485;Q8IXJ9;Q8WYA1;O75360;P31314;Q05086;P07737;Q9UPG8;Q15424;P23193;Q9BYK8;Q86UU0;O15516;P18146;Q92993;Q8NI08;Q13573;Q92793;Q92985;Q15651;P51531;Q8TEY5;P38159;P78545;Q13503;O00482;Q08209;Q14765;Q02930;Q15545;Q8N726;Q9ULV5;Q8TAU0;Q9H9S0;Q10587;O75593;Q9Y2W1;Q13562;P35711;P40763;O14974;P35398;Q8NHW3;P32243;O43524;Q8NEA6;P78543;Q5BKK8;Q86WV1;Q02577;O95343;Q13285;P01100;Q96PK6;Q9UMQ3;P51948;Q9NY43;Q99743;P15036;P32780;Q9UQL6;Q75081;O95633;Q9UHV7;P78318;Q9UIH9;Q9UJG1;P55055;Q9Y2Y9;Q6P1J9;Q14938;Q96T88;O14770;Q8N7H5;P27986;Q96JK9;Q99933;P15884;O43745;Q8IZL2;P18846;P17482;Q8IUM7;P47928;Q13501;P22415;Q14693;P08151;Q14686;Q16594;P55771;Q9UJU5;Q9H2A3;O15162}

20424 Pathogen[ Q85601] interacts with 371 human

partners: {Q5T230;Q9UQR1;P51946;P01106;P18146;P52657;Q6PD62;O14639;P78317;Q9NZC7;O00213;Q92585;Q15014;Q8TE85;Q15532;P49639;P61978;Q96S65;Q86WV6;P08151;Q9H2F5;P11831;Q15853;Q9UPG8;Q02078;Q96JK9;P17676;P15036;Q16666;O60481;P62633;O75360;P11473;P33076;Q6VUC0;Q96PK6;Q96LB3;P31749;Q16236;Q8N8G2;O14813;Q8WVC0;Q9Y4Z2;Q14765;Q92754;O60563;P61968;Q8TDD2;Q9BWX5;Q9UPW6;P15976;Q6UUV9;Q8WVK9;O94776;O15265;P19484;P50750;P15172;P14921;Q9ULV5;Q03052;Q9Y2N7;Q9UQL6;Q08651;Q86U70;Q9Y613;Q06546;Q9Y613;Q15329;Q8WW38;Q0VG99;Q8NAP3;Q6P1J9;Q32MQ0;Q9Y606;Q13158;P06400;Q06330;Q969V6;O60907;P13349;Q9Y2Y9;P54845;Q15797;P14653;Q9BZE3;Q8NDY6;P16333;Q13573;Q13951;Q9UHV7;Q15424;O75030;Q33E94;P49336;Q14872;P18848;Q14814;Q13129;P19419;P40763;P28702;Q03112;P28069;O60583;P32519;P14859;P23769;P42772;O15516;P78545;Q8WYA1;Q15545;Q9ULH7;O14686;Q86UU0;Q14188;Q12772;Q8IXJ9;O43364;O00327;P35712;Q10587;Q9UIV1;P10242;Q15306;Q9GZV5;P18846;Q99814;Q86WI3;P27540;P0CG48;D6RGH6;Q13469;Q92831;Q7Z2X4;P51948;P19532;P78337;O43439;Q16594;O43639;Q99743;Q15596;O95644;O96004;O94906;Q15651;Q9NP71;P55055;Q9UIH9;O43745;P12755;P086

97;Q9GZS3;Q9Y5Q3;P10914;Q9NQG5;P08047;Q12888;O60806;P27986;P07737;Q08209;P55771;P51531;Q13562;P01100;Q14934;O15370;Q53H80;Q8NHW3;P22415;Q8NEA6;Q14686;Q9UBL3;Q13503;Q86V1;P23409;Q14186;Q8WYN3;O75444;P40424;Q92541;Q8NBF1;P25791;Q12968;P17535;P51532;P13984;Q02930;Q9H175;Q9UMQ3;Q96JB5;Q8N726;Q9HD15;P23511;Q8NFB25;P32780;Q99933;Q9UM63;Q95948;P36956;Q5TGS1;P78543;P35711;Q92769;P16220;Q99717;Q15699;Q04206;P42226;O43679;Q99502;P40425;Q8WWQ0;Q3C1V8;Q71SY5;Q92905;O60248;Q02577;Q15025;Q15562;P35269;Q6P1X5;Q99594;P22736;Q9BWW4;O60281;P35680;P05412;Q8IZL2;Q9NQ87;P11388;Q9BZK7;P56524;Q6ZNA4;P17927;P78352;Q9HBH7;O00255;Q8IX07;P18850;Q9UKI9;Q9BYK8;A6NKF2;Q99612;P42224;O75582;Q16254;Q9ULG1;Q13033;P05121;O00512;O94983;P11474;P50613;P15923;Q9HBZ2;Q8N5J4;O14593;P10827;P58304;O00267;P32243;Q9UHK0;P56693;P23193;Q8N5U6;P62979;P28749;Q9HBD4;O00482;P84022;Q6ZN01;Q99607;Q9HCK8;P31271;P49715;Q06547;P55347;P0CG47;Q9BZK7;P56524;Q6ZNA4;P17947;P21675;P46937;Q08050;O14974;P63272;O15105;O15350;Q13547;P50221;P31314;Q9BTT4;P49116;Q05086;P24863;Q9HB65;O15162;P62987;P38159;P48552;Q9UM54;Q9NSC2;Q92993;O00712;P15336;P10828;P04198;Q8TAK5;Q92793;P48380;Q9P1Z2;O75475;O75586;Q8N0Z2;Q95271;P19447;P17275;Q9Y2W1;Q92922;P19838;P20823;Q12824;Q12837;O60244;Q13485;Q6QNY1;Q93074;P11161;Q9H4S2;Q92539;Q9NY43;Q9Y3Y4;Q01860;Q9Y224;P20749;P78318;Q8NFB25;Q9UJG1;O43918;Q07687;Q9NVC6;Q14938;Q15561;Q99856;Q01094;O14770;P23760;Q8N7H5;P55197;Q9Y5J3;P15884;Q15796;Q8NI08;P17482;P12956;P20265;Q10586;O00321;O95238;P47928;Q13501;O75081;Q14693;P35638;P25963}

20425 Pathogen[ P14079] interacts with 346 human

partners: {P31751;Q9UQL6;P01215;P48552;Q9UQR1;Q9UPW6;Q32MQ0;P35711;O60244;P11388;Q15014;P08151;P15036;P25800;Q99743;P33076;P78543;O15162;Q53H80;P12755;P55055;Q9ULG1;Q86V1;Q10587;Q9Y5Q3;Q9BYK8;Q15561;Q9BZK7;Q15532;O43364;Q02078;Q99814;P0CG48;Q06413;Q9BWX5;Q99502;Q76L83;O15370;Q8N8G2;Q15596;O94906;O43745;Q9GZV5;Q06546;P14859;Q14693;P28749;P78337;D6RGH6;P13349;Q6ZVN8;P35269;Q14186;P20809;P49336;P51946;Q15853;O00321;O60481;Q8IXJ9;Q16594;P23409;Q9Y2Y9;Q14938;Q9Y2N7;P35398;O95271;O43439;P11473;Q9UBL3;P35680;P20265;Q9NY61;P55347;O75582;Q96JK9;Q16254;P10828;Q92541;O43679;Q8TE85;Q92985;Q5T230;Q92793;Q13033;O95948;Q8N157;Q99607;P01225;Q13129;P55771;O14639;O75475;Q86U70;Q14974;Q15329;Q99594;Q15699;P11474;Q92922;P48380;P51532;O95644;O60907;P35712;Q6ZNA4;Q9NVC6;P07737;P58304;P51531;Q8N726;Q8TAK5;Q8NI08;O96004;P22736;Q13573;Q99856;O94929;O00213;P15976;Q8WWQ0;Q9GZS3;Q8IZL2;Q9NY43;O60281;P32519;P19484;Q12968;Q15025;P62979;P46937;A6NKF2;Q9UM54;P31271;P15923;Q15306;P48443;Q9UHK0;Q06547;Q15797;Q969V6;Q14765;P10827;Q9H175;Q12837;Q6PD62;Q96JM2;P54845;Q92539;O15350;P62987;Q99612;P55197;Q96S65;Q7Z434;Q9Y613;O95718;P08651;P28069;Q12772;Q6P1X5;P42226;Q06330;P50613;Q3C1V8;Q15651;P12956;Q8NAP3;Q8N5U6;Q9UPG8;Q8N5U6;Q9BZK7;Q075586;Q01860;O00512;P19532;Q9UIH9;P11161;O00482;Q8NFB25;Q9NY43;Q9Y3Y4;Q9Y224;P20749;P78318;Q8NFB25;Q9UJG1;O43918;Q07687;Q9NVC6;P49715;Q9BWW4;Q14934;Q99933;P24863;P25791;P16333;P27540;P63272;Q9Y5J3;P17275;P15336;Q9HD15;Q9HBH7;Q15424;Q8NHW3;P28702;P04198;Q9Y3Y4;O75360;Q9UJG1;Q15788;Q5TGS1;Q9UJQ4;Q9HCK8;Q8IX07;Q92905;Q15327;Q86UU0;Q9UMQ3;P35638;Q9H2F5;O14593;Q92754;P01106;O75444;Q13501;P25657;P56693;Q16236;Q9Y606;Q9Y4X4;P42224;P18850;Q8N0Z2;P32243;Q8WWQ9;Q9UIV1;P32780;O75081;O95760;Q71SY5;Q07687;O14770;Q14814;P61978;Q14872;Q8TDD2;Q8WWB7;P20749;Q9BTT4;P23193;Q9Y5W3;Q13158;O43918;P13984;O43639;Q13503;O60583;P78317;O15265;Q02577;Q15562;Q9UKI9;P15884;P78545;Q13164;Q96JB5;Q9HBZ2;P62633;Q8IUI8;Q9NQ87;Q03052;Q8NEA6;Q9HB65;Q12824;Q86WI3;Q13469;Q93074;P49116;Q8WYN3;P05412;Q96LB3;Q12888;P10242;Q6P1J9;Q7Z2X4;P56524;O14813;O75030;Q9UM63;P49639;P28360;O15105;Q8WYA1;O00267;P0CG47;O94776;Q9P1Z2;P36956;Q9ULV5;Q6QNY1;Q01094;Q9Y224;Q92585;O00255;Q13951;Q8N7H5;P01100;Q9NVP71;Q14188;Q10586;Q8IUM7;P23769;P23511;Q08209;Q9NQG5;Q9BZE0;Q14686;P78318;Q9Y2W1;Q96PK6;Q99836;Q8NW38;P47928;P19447;P17535;P50221;Q9NSC2;Q8NBF1;P10914;Q92993;P19419;P21675;Q16666;P38159;Q8NDY6;P50750;Q6VUC0;Q15545;O00712;P23760;P22415;P51948;O94983}

20426 Pathogen[ P03383] interacts with 305 human

partners: {Q9UQR1;Q13573;Q8IXJ9;Q06330;Q15329;Q02577;P27986;O00213;Q9NY61;Q92585;Q15014;P10914;Q15561;Q96S65;Q92831;Q12888;P11831;Q96JK9;P15036;O75582;P35712;Q13485;Q6P1J9;Q9HBD4;P63272;P33076;P08047;Q9UPW6;Q99607;Q9UKI9;P16220;P27540;Q15562;P28069;Q13469;P62987;Q12824;P35269;Q8TAK5;P32243;Q32MQ0;P51948;Q6UUUV9;Q8WWK9;O14639;O60248;O94776;Q15596;P15172;Q01094;P14921;P55771;Q9UQL6;Q07687;Q9Y5Q3;O15162;P19484;P01106;Q8WW38;Q86U70;Q6PD62;Q06547;P40424;P49116;P23511;P14859;P23193;O60244;Q9BWW4;P31749;O60907;Q9Y2Y9;O75360;P17482;Q9UMQ3;O95644;Q92905;Q8IZL2;P20749;P19419;Q14686;P08697;Q86V1;P48380;P23769;Q92841;Q9NQ87;Q9H2F5;O75030;O94983;O00712;D6RGH6;P35638;P15923;Q15532;Q6ZNA4;Q14814;Q01860;P78317;Q15797;P42226;P61978;Q96JB5;Q8WYN3;P18846;Q92993;Q969V6;Q13506;Q15651;P78337;Q8TE85;Q13158;Q93074;P07737;Q8N5U6;Q9H175;O00321;O00267;Q86U0;P06400;P18146;O94906;P38159;Q9NP71;Q14872;P55347;Q9HB65;Q9NQG5;Q33E94;O14770;P08651;P52657;Q53H80;Q14934;Q8N8G2;O96004;Q9Y613;P11473;O15105;P11474;Q03112;P49336;Q16594;Q92985;Q14186;Q9Y606;P78543;P54845;P49639;P84022;O75081;P25791;Q9HD15;Q96PK6;O60563;Q8WVC0;P50613;Q9UHK0;P13984;P42772;Q8NFB25;Q6ZVN8;Q6VUC0;Q13951;Q9ULV5;P51946;O15265;Q92769;Q76L83;Q99717;P17676;Q9Y2N7;O43679;Q9HBH7;Q9ULH7;Q9NSC2;Q16254;A6NKF2;P28702;Q15025;P50750;Q12837;Q12968;O43745;P35711;P51531;O15350;Q9UIV1;O00255;O75475;Q16666;P25963;Q8N0Z2;O15370;Q6P1X5;O00512;Q96LB3;Q9UJG1;Q8N5J4;O14593;Q13501;O43918;Q16236;P31314;Q13547;Q15853;Q99933;P28749;Q71SY5;P10242;Q86WI3;Q15327;O95238;Q9HCK8;Q14188;P62633;P01100;P04198;P11161;P62979;Q92754;O43186;P23760;P0CG47;Q15796;Q99594;P21675;Q9BZK7;P56524;Q92541;P32519;Q8NAP3;Q8WWQ0;Q5T230;Q04206;Q10586;P78318;P17535;P78545;Q9NY43;P51532;Q9UM63;P0CG48;Q9BTT4;P50221;Q5TGS1;P48552;Q9UHV7;Q15424;P55197;P24863;Q13033;Q92922;P15336;P10828;Q99856;P47928;P18848;P01215;Q9NVC6;P18850;O60481;O75586;O95271;Q02930;Q15545;Q6ZN01;Q15699;P17275;P20265;Q9Y2W1;O75444;Q9GZS3;P16333;P19838;P56693;P46937;Q9GZV5;O60583;O43439;Q06546;Q3C1V8;P78352;P78352;Q92539;Q9Y3Y4;Q9BYK8;P32780;Q8NFB25;P19532;P17947;Q8N7H5;Q9P1Z2;P40425;Q92793;Q02078;Q9Y224;Q8NI08;P12956;Q8N726;P22415;Q13503;Q14693;Q6QNY1;P05412;Q13129}

- 20427 Pathogen[ P03410] interacts with 358 human partners: {P84022;Q99594;O14813;Q9NQG5;Q99933;Q99743;Q92831;P20749;Q9Y5J3;Q04206;O60583;Q9Y2W1;P28069;P35712;P23409;P11831;O60281;Q8NBF1;O43439;P19838;P36956;P27986;P05121;Q6ZNA4;Q6ZNO1;O00512;Q03112;P0CG48;Q9Y2Y9;Q8N5J4;Q16666;P35638;O95238;Q8WVC0;Q96PK6;P17482;Q86WV1;Q15329;Q6QNY1;Q8NI08;Q8NFZ5;Q15014;P61978;O96004;Q9BWW4;P19419;P42772;P12755;Q6PD62;Q08209;P17676;P23511;Q5T230;Q15DD2;Q8N726;O60806;Q9UMQ3;Q9UJG1;P01106;Q99814;O00267;P17947;P63272;Q12968;Q06330;O60481;Q14639;Q13501;P31749;Q7RTS1;O00213;O94945;P25791;Q9ULH7;P21675;Q14686;Q14938;Q9NQ87;P18848;Q9UHK0;P50221;Q9Y2N7;Q13503;Q9BYK8;Q9Y224;P10242;O43639;P14859;O75582;Q9NVC6;Q99717;Q14814;P78545;O75030;Q9NZC7;Q8WVK9;Q9UPG8;P15884;P51946;O75444;Q16254;Q16236;D6RGH6;Q3C1V8;Q9BZE3;Q92905;O43679;Q9NY61;Q9ULG1;O43918;P20809;Q96JM2;Q14765;Q9UIH9;Q14639;Q13501;P31749;Q7RTS1;O00213;O94929;P19532;P16333;O95948;P10828;O00321;Q15651;Q9H175;P06400;Q6UUUV9;P19484;P31314;Q15025;Q06547;P01215;Q15327;P32519;P23193;P15923;Q99607;Q03052;Q9UIV1;P62979;Q9UPW6;P52657;Q14188;Q15306;P50613;O00712;Q92585;Q8WW38;Q92541;O95760;P01100;P18846;Q15424;Q7Z434;Q13158;Q14693;Q96JB5;Q9GZS3;Q9GZV5;Q9UQR1;P11473;Q9UQL6;Q9H2F5;Q9HBZ2;Q8N7H5;Q8NDY6;Q969V6;O95644;O15162;Q02930;Q9P1Z2;P50750;Q9Y5Q3;P27540;Q86WI3;Q9UM54;O60563;P25800;P08651;O94906;Q8IZL2;P12956;Q96JK9;Q07687;Q92793;Q8IX07;Q8TE85;Q15561;P15036;Q8WVQ0;Q92769;Q8NEA6;Q9BWX5;Q6ZVN8;Q5TGS1;Q7Z2X4;P17535;Q8WYN3;Q8NAP3;Q32MQ0;P08697;P17275;Q13129;Q12772;Q8TAK5;O95271;Q14872;Q9NRR1;P78317;P56524;Q9HBH7;Q8IXJ9;Q8N157;Q13033;Q15797;Q92922;Q6P1X5;Q86U70;Q8IUI8;Q9NP71;Q96S65;P19447;Q9Y613;P47928;P48380;P22415;Q13485;P10914;P22736;Q14186;Q14974;Q9HCK8;Q76L83;P28702;Q9UM63;P16220;P56693;Q9BT4;Q8WVB7;Q53H80;P46937;Q6P1J9;O43364;Q15699;P35269;P55771;Q13469;P51532;Q16594;Q15853;P13349;P05412;P49336;P49639;Q10586;Q12888;O15105;P42226;P11388;Q15596;P51948;P51531;P24863;P28749;Q9UKI9;Q9Y606;Q6VUC0;P55347;O60244;P78543;Q9UHV7;P32243;Q13951;P11474;O14593;P23769;P62987;O75081;Q8NHW3;O94776;Q13547;Q01094;P35680;P49116;P13984;Q02577;Q10587;Q02907;O15350;Q9BZK7;Q86WV6;P08047;Q9Y3Y4;O60248;P55197;O15265;P23760;Q99856;Q8N0Z2;O75475;Q93074;O43745;Q9ULV5;O75360;P25963;Q9HD15;O15370;Q92985;P20265;A6NKF2;Q12837;Q9NSC2;Q96LB3;O94983;Q9NY43;P18146;Q8N5U6;P62633;Q12824;P78352;Q9HBD4;Q33E94;Q92539;P48552;O00255;P40424;P38159;Q15796;Q9UJQ4;Q15532;P15336;P11161;Q92993;Q15562;P20763;P20773;P18850;O60907;P33076;Q14934;P04198;Q8NF64;Q86UU0;P15976;O14770;P0CG47;Q06546;Q15545;P78337;Q92754;Q9HB65;Q13573;O75586;P14921;Q8WYA1;Q71SY5}
- 20428 Pathogen[ P14075] interacts with 307 human partners: {P28069;Q86UU0;P49336;Q99933;Q9NSC2;O00213;Q92585;Q96S65;Q9GZV5;Q99607;Q02577;Q86U70;P13984;Q9H175;Q9H2F5;P12956;P24863;Q04206;P21675;P17482;O15265;Q9UM63;P78337;O00512;Q13573;Q8WVQ0;Q5TGS1;Q9HBD4;P40424;Q13951;O75030;O60248;Q9UQR1;Q8N5J4;P52657;Q8IXJ9;P05412;Q86WI3;P42226;P40425;Q14938;P11474;Q6ZNO1;O75475;P14859;Q92831;P11831;O60481;Q9BWW4;P10828;P78545;Q15014;Q15562;Q9Y224;P51532;Q15532;Q76L83;O15162;Q14686;O75582;O75444;P17275;Q8TE85;Q06546;O60563;Q9Y3Y4;P23769;P50613;P19419;Q8WVC0;Q01860;Q9NY61;P38159;P48380;P62633;Q33E94;P11161;Q12837;Q15561;P15172;Q6P1X5;Q15327;Q9Y606;P55624;O43918;Q08050;O43186;P18146;P19484;Q9NQG5;Q9Y2N7;P20265;P33076;Q53H80;Q92922;O94776;P35638;P50750;O60583;P47928;Q99717;P56693;Q96JB5;Q8WW38;P15336;P04198;Q92754;Q9Y613;P10242;Q16666;O94983;Q15796;Q9UJG1;Q9NQ87;P15923;O94906;P25963;Q13547;Q99856;Q16594;Q8N0Z2;P01106;Q92993;Q8NFZ5;O75081;Q07687;P07737;P27540;P55347;O75586;Q9BT4;P35711;O96004;P16333;Q13485;Q9UHK0;O00255;Q8N7H5;Q86WV1;Q93074;Q6P1J9;Q9NP71;Q14186;Q10586;P15036;Q15853;Q8N5U6;P49116;Q92541;O14770;P25791;P31749;P0CG48;Q9NY43;Q92539;P62979;Q9ULV5;Q6ZNA4;Q6ZVN8;P32519;Q9UPW6;Q06547;Q9HBH7;P54845;P23193;Q96LB3;Q9UHV7;P50221;Q13469;Q96PK6;O15350;Q16254;Q92769;P78543;Q9Y5Q3;Q15424;P35712;O43679;P55771;Q6QNY1;Q6PD62;Q9HCK8;O15370;Q8NAP3;Q15025;P51531;Q14934;Q6UUUV9;Q13158;P35269;P27986;P11473;Q99594;O60244;Q15306;O43745;P17947;P78318;P62987;O60907;Q9P1Z2;O86967;Q15545;P23511;P55197;P78317;P18848;O75360;Q9UMQ3;A6NKF1;Q96JK9;Q969V6;Q01094;O14639;P08651;P61978;O15105;P14921;Q9GZS3;P06400;O14593;Q03112;Q02078;Q12824;Q06330;P51946;Q3C1V8;P28749;P32780;P01100;P20809;P0CG47;P42772;Q5T230;Q9BZK7;Q32MQ0;O00712;Q92793;P28702;P15884;Q9NVC6;Q92841;P78352;Q15699;P46937;P31314;P48552;Q13503;O43439;Q8WVK9;P19838;Q9UQL6;Q12888;Q13129;Q99502;P16220;Q9UKI9;Q9HB65;Q15329;P22415;Q92985;P84022;Q8NI08;P23760;P17676;P01215;Q16236;Q1715Y5;O95271;Q8IZL2;P10914;Q9UIV1;Q92905;O00267;Q9Y2W1;P17535;Q14188;D6RGH6;Q13033;P32243;Q8WYN3;Q14814;P63272;Q12968;P19532;Q14872;Q9HD15;Q9BYK8;Q02930;Q8NF64;O95644;Q15651;Q9Y2Y9;Q13501;Q8N8G2;Q8N726;Q6VUC0;Q15596;P20749;P18846;Q9ULH7;P51948;O00321;Q8TAK5;P18850;Q14693;P08047}
- 20429 Pathogen[ P0C206] interacts with 404 human partners: {Q8TE85;O95271;Q76L83;O43679;P46937;P84022;Q9Y224;Q07687;P24863;Q9NQ87;Q14188;P10914;Q13501;Q92769;P0CG48;Q92539;Q9BZE0;Q9HCK8;Q15329;O60481;P49336;Q9UM54;P78352;Q32MQ0;Q7Z2X4;Q6PD62;P35398;P23193;Q06546;Q9HB65;Q15545;Q9H2F5;Q96S65;P31314;P31749;O60393;Q06330;Q13469;Q9NP71;P40425;Q9UJQ4;O00512;Q9Y5Q3;P14921;P78318;Q9NY43;P51532;Q86UU0;Q8TAK5;Q02078;Q8N726;P50750;Q5TGS1;Q9Y2N7;P11161;P16220;P17275;Q9Y5R6;O95633;Q86WI3;O75030;P08651;O75444;P18850;O60907;Q9NSC2;O75582;Q9Y2Y9;Q99933;Q01860;Q9Y4Z2;P51531;Q9UIV1;Q6ZNA4;P49639;Q9UHK0;Q15327;P52657;Q02548;O75081;Q96JK9;O00255;P61978;Q99717;Q9UMQ3;P05412;Q8WW38;P25963;Q05086;Q9Y3Y4;P19419;P50221;Q9UM63;Q13951;P10242;Q8NFZ5;O15265;P23409;O75586;Q9UBC0;Q16666;P15336;Q9NQG5;Q9UIH9;Q92541;P55055;Q6QNY1;Q92922;Q15306;P17535;Q13547;Q14186;P49715;O94776;P32633;P36956;P17483;P42772;P19484;Q9P1Z2;Q12968;P56693;Q92993;Q86WV6;D6RGH6;Q12824;P18846;Q13158;P48380;O14770;P55771;P54845;P15976;P49116;Q15532;Q9HD15;O14686;P22736;Q15014;Q9UHV7;P19532;Q10587;Q8N5U6;P78317;Q15699;O00321;Q15796;O95238;Q92831;P33076;O00482;P27986;Q8WVQ0;Q14938;Q16254;Q9UJG1;P40424;P28749;P13984;P18146;O94929;P62633;P12755;O75360;Q8NEA6;Q96JB5;Q6VUC0;O75475;O96004;P19447;Q92793;P14653;Q92754;Q9BZE3;Q9GZV5;Q9BWX5;P32519;O60248;O14974;Q15853;O43918;Q12837;O14593;Q9BYK8;P23511;O00213;O15105;O00327;O95718;P78337;Q15025;Q6UUUV9;P49640;Q15651;Q12888;P19838;Q99743;Q9H4S2;Q8WVB7;Q8NI08;Q969V6;Q99612;P352

69;O15516;P10828;P22415;P35711;Q9ULV5;P38159;A6NKF2;Q03112;O00712;Q8N7H5;Q8NF64;P50613;Q9GZS3;Q8IXJ9;Q13573;P32243;P17676;Q9ULG1;O14813;Q8IZL2;P08047;P17482;Q9BWW4;Q9Y5J3;P13349;Q9H175;Q92985;P35680;Q96T88;P01100;Q04206;Q9UPW6;P25800;Q86WV1;P01215;Q9UKI9;P15923;Q96PK6;Q01094;Q14686;Q9UQR1;Q6ZVN8;P15884;P20823;P62979;Q06547;Q5T230;Q3C1V8;Q8WVC0;Q03052;Q96LB3;Q9Y2W1;P04198;Q9Y4X4;P78545;Q8N157;P17947;Q02930;Q8NHW3;Q8NBF1;Q60281;Q9BZK7;Q15562;Q9H165;Q9HBH7;Q92841;O00267;P20809;Q15424;P15036;Q14872;P40763;Q13485;Q8N5J4;Q13129;P23760;P25791;Q71SY5;Q9BTT4;Q8WYA1;P32780;P10CG47;Q14934;P16333;Q33E94;O15370;Q13562;P23769;Q9Y606;P11831;Q08050;O60244;O15162;Q6P1X5;Q15797;Q13422;Q99502;P20749;Q8IXO7;Q9UBL3;P42226;Q9Y613;Q9NZC7;P28702;P05121;Q15596;P35712;Q16236;P20265;P31271;O15350;Q9UPG8;P27540;Q9NVC6;P15172;Q9HBD4;O94906;Q9H9S0;Q86U70;O43364;Q08209;O14639;Q14814;P11388;Q14765;Q9UBR4;P11474;P01106;Q99594;Q99814;Q8IUM7;Q13503;O95644;P62987;P56524;Q13033;O60583;P61968;O43439;P28356;P28069;P07737;Q02577;P20719;P08151;Q8TAU0;P48552;P42224;P47928;Q5BXX8;O60563;Q14693;Q53H80;P12956;P55197;Q9NY61;O94983;Q8NOZ2;Q15788;Q8WWW9;Q8TDD2;O43639;O43745;Q93074;P18848;Q0VGG9;O60806;Q6P1J9;Q99607;P11473;Q8NAP3;Q12772;Q8WYN3;Q99856;P58304;P35638;Q15561;Q9ULH7;Q6ZN01;Q92585;Q8N8G2;Q96JM2;P10827;Q9HBZ2;P21675;P14859;P51946;Q10586;P63272;P08697;P51948;P48443;P78543;Q16594;Q92905;P06400;Q8NDY6;P55347;Q9H2A3;Q9UQL6;O95948}

20430 Pathogen[ P03363] interacts with 365 human partners: {Q92886;Q16236;Q5TGS1;Q7RTS1;O15370;Q86U70;Q15699;P12956;Q9UBC0;Q06547;Q8IUM7;P17535;P18848;Q8N8G2;Q8IXJ9;A6NKF2;P35453;O75081;Q14765;Q8N5U6;P10828;Q9UJQ4;Q9Y4Z2;Q92985;O95948;Q9GZS3;P19622;P47902;Q96S65;P35711;Q8NDY6;P55771;Q14938;O75360;Q9Y5J3;Q13503;Q8NAP3;Q8WWW0;Q04206;Q15853;P27540;P17676;O60481;P18146;P49116;O00712;Q9ULG1;Q02930;P13984;Q9H175;O60563;Q3C1V8;Q71SY5;P08151;Q92539;P24863;Q86WV1;P62633;P08651;Q06546;Q15562;Q0VGG9;Q92831;Q8WVC0;P25963;Q03112;O00213;Q9Y606;Q15014;Q8WWW9;Q9HD15;O60281;Q10586;Q06330;P32780;Q8TDD2;P28356;P23760;Q9NQ87;P17947;Q9H2F5;P51532;Q99856;P20719;Q7RTS3;P31271;P78352;Q9BZK7;Q8NHW3;O43439;P04198;P18850;Q9H2W2;P51946;Q9UKI9;Q9UBL3;O60907;Q15545;Q99607;P78317;Q16254;P11474;P16220;Q9UHK0;Q13033;P78543;Q96JK9;P58304;Q99612;P19419;O94983;Q9UQL6;O75475;P14921;Q9HBZ2;Q9Y613;Q15532;O43679;O14593;Q9HB65;O15105;Q15306;O00267;Q15797;Q9UM63;Q969V6;P32243;Q15596;P55347;O43639;Q8NEA6;Q9Y3Y4;P49639;Q13158;Q14686;Q9Y5R6;P06400;Q15327;P17483;P01106;Q9Y4X4;Q9H4S2;Q99743;Q95086;P28749;P17275;P42226;P13349;Q96PK6;Q8N0Z2;P54845;Q6ZNA4;P52657;O00321;P14653;P50221;P35269;Q9BZE3;Q9Y2Y9;P11473;Q16666;P40425;P25791;O43524;P15923;P15336;Q13951;P20749;Q15424;Q8TE85;P32519;P48552;Q96JM2;Q08050;P11831;Q8WYN3;Q9NY61;Q13129;Q9HCK8;P46937;Q14872;P56693;P28702;P20264;P28069;O60583;P14859;P28358;P38159;Q9UPG8;Q8N157;Q22841;P42772;O95238;O75030;Q6P1J9;Q9GZV5;Q14814;P78545;Q32M00;P31749;Q9P1Z2;P18846;Q01094;Q8WYA1;P16333;Q86WI3;O75444;Q9NVC6;O00327;O43186;Q9NQG5;Q9HBD4;O00512;Q5T230;Q9ULH7;P78318;Q9Y2N7;Q9UHV7;O75586;P20265;Q15796;P31268;P84022;P31314;Q8N5J4;O15265;O95271;Q8NI08;P47928;O96004;P49336;P35638;P10914;Q13573;Q6QNY1;Q6ZVN8;Q9BYK8;Q05925;P62987;P35398;Q86UU0;Q33E94;P22415;Q6UUV9;Q13547;P19838;Q76L83;Q99814;Q93074;Q8TAK5;Q92793;Q15651;D6RGH6;O14974;Q13469;P21675;P33076;Q9BWX5;P23193;P35712;O60393;P10242;Q13485;Q9BTT4;Q8N726;Q12968;Q9ULV5;P17482;Q9UIV1;O60806;P23409;P63272;P50750;Q14186;Q6ZN01;P19484;Q9UQR1;Q92541;Q14188;P15884;Q15025;O95644;Q96T88;Q5BXX8;P61978;P05412;P40424;O94906;Q14934;P19532;O60244;O43745;Q9Y224;Q9BWW4;O43918;P55197;Q9NP71;O95343;Q02548;Q8WWW3;Q8NFZ5;O43364;P08047;O60248;Q9UMQ3;Q9NY43;Q8TAU0;P48380;P51531;Q92922;Q96JB5;Q9UJU5;Q9UJG1;Q8NF64;Q53H80;Q9H9S0;Q07687;Q96LB3;Q9UIH9;P78337;P15172;Q12837;Q15561;Q99717;Q9UPW6;Q8N7H5;Q58WW2;P27986;Q6P1X5;Q99594;Q15329;Q99933;Q9NFC8;Q9Y5Q3;Q8IZL2;P15036;Q9BZE0;Q92993;Q01860;O14813;Q12824;Q03052;Q92905;Q8NBF1;O14686;Q10587;Q12888;Q92585;P07737;O14639;O94776;Q6PD62;P23511;Q02577;Q92754;Q16594;Q6VUC0;P01100;Q9H2A3;P49640;P11161;O00482;Q02078}

20431 [Cluster 1858]GO:0070940+P biological\_process [name] dephosphorylation of RNA polymerase II C-terminal domain [def] "The process of removing a phosphate group from an amino acid residue in the C-terminal domain of RNA polymerase II. Some dephosphorylation occurs during transcription while some may occur after the enzyme is released from the template in order to prepare it for the beginning of the transcription cycle again. RNA polymerase II with little or no phosphorylation is referred to as the hypophosphorylated or II(A) form." [GOC

20432 Pathogen[ Q2Q067] interacts with 2 human partners: {Q8IXW5;Q9NQG5}

20433 Pathogen[ P0C214] interacts with 2 human partners: {Q8IXW5;Q9NQG5}

20434 Pathogen[ P03346] interacts with 2 human partners: {Q9NQG5;Q8IXW5}

20435 Pathogen[ Q85601] interacts with 2 human partners: {Q9NQG5;Q8IXW5}

20436 Pathogen[ P14079] interacts with 3 human partners: {Q8IXW5;Q96P16;Q9NQG5}

20437 Pathogen[ P03383] interacts with 2 human partners: {Q8IXW5;Q9NQG5}

20438 Pathogen[ P03410] interacts with 3 human partners: {Q9NQG5;Q96P16;Q8IXW5}

20439 Pathogen[ P14075] interacts with 2 human partners: {Q8IXW5;Q9NQG5}

20440 Pathogen[ P0C206] interacts with 2 human partners: {Q8IXW5;Q9NQG5}

20441 Pathogen[ P03363] interacts with 2 human partners: {Q8IXW5;Q9NQG5}

20442 [Cluster 1859]GO:0021569+P biological\_process [name] rhombomere 3 development [def] "The process whose specific outcome is the progression of rhombomere 3 over time, from its formation to the mature structure. Rhombomeres are transverse segments of the developing rhombencephalon. Rhombomeres are lineage restricted, express different genes from one another, and adopt different developmental fates. Rhombomeres are numbered in anterior to posterior order." [GO\_REF

20443 Pathogen[ Q2Q067] interacts with 4 human partners: {O43364;P11161;P49639;P14652}

20444 Pathogen[ P0C214] interacts with 2 human partners: {P49639;P11161}

20445 Pathogen[ P03346] interacts with 4 human partners: {P49639;P14652;O43364;P11161}

20446 Pathogen[ Q85601] interacts with 3 human partners: {P49639;O43364;P11161}

20447 Pathogen[ P14079] interacts with 3 human partners:{O43364;P11161;P49639}  
20448 Pathogen[ P03383] interacts with 2 human partners:{P49639;P11161}  
20449 Pathogen[ P03410] interacts with 3 human partners:{O43364;P49639;P11161}  
20450 Pathogen[ P14075] interacts with 1 human partners:{P11161}  
20451 Pathogen[ P0C206] interacts with 4 human partners:{P11161;P49639;P14652;O43364}  
20452 Pathogen[ P03363] interacts with 4 human partners:{P49639;P14652;O43364;P11161}  
20453 [Cluster 1860]GO:0031175+P biological\_process [name] neuron projection development  
[def] "The process whose specific outcome is the progression of a neuron projection over  
time, from its formation to the mature structure. A neuron projection is any process  
extending from a neural cell, such as axons or dendrites (collectively called  
neurites)." [GOC  
20454 Pathogen[ Q2Q067] interacts with 16 human  
partners:{Q9UL45;P06400;O95295;Q9NUP1;Q9UBB6;Q6QNY0;Q96EV8;Q8TDH9;P11831;Q9UBB4;Q998  
73;Q86WG3;Q6QNY1;Q13761;P78537;P78543}  
20455 Pathogen[ P0C214] interacts with 19 human  
partners:{Q9UBB6;Q13761;P78543;Q9UBB4;O95295;P11831;P78537;Q8TDH9;Q99873;Q6QNY0;P355  
80;Q00536;Q9UL45;Q96EV8;Q9NUP1;O95155;Q86WG3;Q6QNY1;P06400}  
20456 Pathogen[ P03346] interacts with 22 human  
partners:{Q9UBB4;Q00536;Q99873;O95155;P11831;O95295;P06400;Q7Z3G6;Q6QNY0;P78537;Q96E  
V8;Q6QNY1;Q15019;Q6ZP65;Q13761;P11137;Q9UL45;Q9UBB6;Q8TDH9;P78543;Q9NUP1;Q86WG3}  
20457 Pathogen[ Q85601] interacts with 19 human  
partners:{Q6QNY0;P11831;Q00536;Q9NUP1;Q9UBB4;O95295;P06400;O95155;Q6ZP65;P78537;Q96E  
V8;Q99873;P78543;Q86WG3;P35580;Q9GZM8;Q6QNY1;Q8TDH9;Q13761}  
20458 Pathogen[ P14079] interacts with 20 human  
partners:{P78543;Q86WG3;Q6QNY0;Q99873;Q15078;Q9UL45;Q9UBB6;Q9UBB4;Q9NZ72;Q8TDH9;O952  
95;Q6ZP65;Q7Z3G6;Q9GZM8;Q96EV8;Q9NUP1;Q13761;P11137;Q6QNY1;P78537}  
20459 Pathogen[ P03383] interacts with 17 human  
partners:{Q13761;Q6QNY0;P11831;Q9UBB6;Q9UBB4;O95295;Q8TDH9;Q86WG3;Q00536;P78537;Q9NU  
P1;P06400;Q96EV8;P78543;Q99873;P35580;Q6QNY1}  
20460 Pathogen[ P03410] interacts with 21 human  
partners:{Q9NUP1;P11831;P78537;P11137;Q6QNY1;Q9GZM8;Q6QNY0;Q86WG3;P06400;Q9UL45;O952  
95;Q9UBB6;P78543;P35580;Q13761;Q9NZ72;Q6ZP65;Q9UBB4;Q8TDH9;Q96EV8;Q99873}  
20461 Pathogen[ P14075] interacts with 15 human  
partners:{P78537;Q86WG3;P11831;O95295;Q9UBB4;Q99873;P78543;Q6QNY1;Q6QNY0;Q9NUP1;P064  
00;Q9UBB6;Q8TDH9;Q96EV8;Q13761}  
20462 Pathogen[ P0C206] interacts with 25 human  
partners:{P78537;Q9UBB4;Q9UL45;Q15019;Q99873;Q00536;Q6QNY1;Q6ZP65;Q8TDH9;O95155;Q9GZ  
M8;Q7Z3G6;P11137;Q96EV8;Q9NZ72;Q9UBB6;O95295;P11831;Q9NUP1;Q6QNY0;Q86WG3;P35580;Q137  
61;P78543;P06400}  
20463 Pathogen[ P03363] interacts with 18 human  
partners:{P11137;Q9UBB6;O95155;P78537;P78543;P06400;Q6ZP65;P11831;Q86WG3;Q9UBB4;Q6QN  
Y1;O95295;Q8TDH9;Q13761;Q00536;Q6QNY0;Q9NUP1;Q99873}  
20464 [Cluster 1861]GO:0060390+P biological\_process [name] regulation of SMAD protein import  
into nucleus [def] "Any process that modulates the rate, frequency or extent of SMAD  
protein import into the nucleus, i.e. the directed movement of a SMAD proteins from the  
cytoplasm into the nucleus. Pathway-restricted SMAD proteins and common-partner SMAD  
proteins are involved in the transforming growth factor beta receptor signaling  
pathways." [GOC  
20465 Pathogen[ Q2Q067] interacts with 1 human partners:{Q9GZV5}  
20466 Pathogen[ P0C214] interacts with 1 human partners:{Q9GZV5}  
20467 Pathogen[ P03346] interacts with 1 human partners:{Q9GZV5}  
20468 Pathogen[ Q85601] interacts with 1 human partners:{Q9GZV5}  
20469 Pathogen[ P14079] interacts with 1 human partners:{Q9GZV5}  
20470 Pathogen[ P03383] interacts with 1 human partners:{Q9GZV5}  
20471 Pathogen[ P03410] interacts with 1 human partners:{Q9GZV5}  
20472 Pathogen[ P14075] interacts with 1 human partners:{Q9GZV5}  
20473 Pathogen[ P0C206] interacts with 1 human partners:{Q9GZV5}  
20474 Pathogen[ P03363] interacts with 1 human partners:{Q9GZV5}  
20475 [Cluster 1862]GO:0006470+P biological\_process [name] protein dephosphorylation  
[def] "The process of removing one or more phosphoric residues from a protein." [GOC  
20476 Pathogen[ Q2Q067] interacts with 35 human  
partners:{P30153;Q9H008;Q9H0C8;Q99502;Q8WY54;Q08209;P63151;O14974;O00167;O00743;P621  
40;Q9UNH5;P67775;P30304;O15355;Q9BV47;O14829;Q9Y297;Q9Y5P8;Q99504;P62714;P30307;P368  
73;Q9Y5B0;P62136;P53041;O95476;P35813;O75688;P30305;P49593;O14595;Q16829;Q9GZU7;O152  
97}  
20477 Pathogen[ P0C214] interacts with 41 human  
partners:{P35813;O14595;P30307;P62140;Q9BV47;P30153;O14829;O00167;Q9Y297;Q9GZU7;O149  
74;P62714;Q08209;P63151;P62136;O95278;P67775;Q99504;P30305;Q16829;Q9UNH5;P53041;Q9P0  
J1;O95476;O15297;Q8N3J5;Q8WY54;Q3ZCQ8;P36873;Q13615;Q9Y5B0;P49593;O00743;Q96GD0;O756  
88;Q9H008;Q9Y5P8;Q9H0C8;P30304;Q9P2J9;Q99502}  
20478 Pathogen[ P03346] interacts with 44 human  
partners:{P62136;P43378;Q9NRX4;Q9H0C8;O00743;P35813;O14829;Q8WY54;O00167;P30304;Q9H3  
S7;P62714;P67775;Q99502;P49593;P30305;Q9BV47;P30153;Q9Y5P8;Q9Y5B0;Q9GZU7;P17706;Q061  
90;P36873;O15297;O75688;P53041;Q16829;O95476;Q3ZCQ8;O15355;P62140;Q08209;O95278;Q9Y2  
R2;Q99504;O14974;Q9Y297;P24666;O14595;Q9H008;Q9UNH5;P30307;P63151}  
20479 Pathogen[ Q85601] interacts with 37 human



partners:{075688;014829;P62714;P63151;Q9GZU7;Q9H0C8;P49593;Q16829;Q99504;P30153;P30304;Q9H008;Q95278;Q9BV47;Q08209;Q9UNH5;P30305;O15355;P30307;P62136;Q9Y5B0;P36873;Q99502;O15297;Q3ZCQ8;P53041;P67775;Q95476;Q8WY54;O14974;O00743;P62140;P35813;O00167;O14595;Q9Y5P8;Q8N3J5}

20480 Pathogen[ P14079] interacts with 37 human  
partners:{Q3ZCQ8;Q99502;P49593;Q9NRX4;P30307;P53041;O14990;Q9Y5B0;O15297;P36873;Q16829;P16298;Q9H008;P62136;P63151;P30304;Q96GD0;P35813;Q8WY54;O14829;P62140;Q9H0C8;Q9BV47;Q06190;Q95476;Q75688;Q99504;P30305;P30153;O00167;Q9Y5P8;O15355;Q08209;O00743;Q9UNH5;Q9GZU7}

20481 Pathogen[ P03383] interacts with 23 human  
partners:{P30307;Q99504;P62140;O00167;Q9H0C8;P30304;P62714;P30153;P67775;O15297;O14990;P35813;P36873;P62136;Q9Y5P8;Q9GZU7;Q9UNH5;P53041;O15355;Q8WY54;Q9Y5B0;O00743;Q9H008}

20482 Pathogen[ P03410] interacts with 40 human  
partners:{P62714;O15355;P35813;Q8N3J5;Q08209;Q99502;Q9GZU7;Q8WY54;P62136;P63151;Q9UNH5;Q06190;Q9H0C8;Q75688;Q9NRX4;Q96GD0;Q16829;O15297;Q3ZCQ8;P62140;P30304;O14974;P36873;P53041;O14990;Q99504;Q9H008;Q95476;Q9Y5B0;P24666;P30153;O00167;P49593;P30305;P67775;Q9BV47;P30307;O00743;O14829;Q9Y5P8}

20483 Pathogen[ P14075] interacts with 24 human  
partners:{Q9Y5P8;O15297;P35813;Q99504;Q9Y5B0;P62140;O00167;P36873;P62136;O00743;Q9H0C8;Q9H008;P53041;P30304;P62714;P67775;P30153;Q9GZU7;Q8WY54;Q99502;Q9UNH5;O15355;P30307;O14990}

20484 Pathogen[ P0C206] interacts with 45 human  
partners:{Q06190;O00167;Q99504;Q9BV47;O00743;Q9GZU7;P30307;Q8WY54;P30153;Q13615;Q9NRX4;P53041;P63151;P30305;P67775;Q9Y2R2;Q16829;Q95476;P49593;O14974;O15355;Q3ZCQ8;P24666;Q75688;Q9UNH5;Q9Y5B0;Q95278;P62714;Q9H008;P62140;P30304;Q99502;O14829;Q96GD0;Q08209;O14595;O15297;P36873;Q8N3J5;Q9Y5P8;O14990;P17706;P62136;P35813;Q9H0C8}

20485 Pathogen[ P03363] interacts with 37 human  
partners:{P17706;Q9Y5P8;P62136;O15355;Q9Y5B0;Q9H3S7;Q9UNH5;P62714;O14829;P36873;Q9Y2R2;P43378;P62140;P53041;Q06190;O00743;Q3ZCQ8;Q95476;P30304;P63151;Q16829;Q9H0C8;Q99504;Q9H008;O14974;Q12923;O00167;Q9GZU7;Q9BV47;O15297;P30153;P30307;Q75688;P24666;P67775;Q8WY54;O14595}

20486 [Cluster 1863]GO:0034976+P biological\_process [name] response to endoplasmic reticulum stress [def] "Any process that results in a change in state or activity of a cell (in terms of movement, secretion, enzyme production, gene expression, etc.) as a result of a stimulus indicating endoplasmic reticulum (ER) stress. ER stress usually results from the accumulation of unfolded or misfolded proteins in the ER lumen." [GOC

20487 Pathogen[ Q2Q067] interacts with 8 human  
partners:{Q9BZQ8;Q9BXH1;P35638;P17676;Q8TAC9;Q96RU7;Q8IUR6;P18848}

20488 Pathogen[ P0C214] interacts with 9 human  
partners:{Q8TAC9;P17676;Q9BXH1;P18848;Q9BZQ8;Q8IUR6;Q96RU7;O95155;P35638}

20489 Pathogen[ P03346] interacts with 11 human  
partners:{P17676;P35638;Q95155;Q70SY1;Q8IUR6;Q13438;P18848;Q8TAC9;Q9BZQ8;Q96RU7;Q9BXH1}

20490 Pathogen[ Q85601] interacts with 9 human  
partners:{P17676;Q9BXH1;Q8IUR6;Q8TAC9;P18848;Q95155;Q9BZQ8;Q96RU7;P35638}

20491 Pathogen[ P14079] interacts with 7 human  
partners:{Q9BXH1;Q8TAC9;P35638;Q96RU7;Q9BZQ8;Q8IUR6;Q13438}

20492 Pathogen[ P03383] interacts with 8 human  
partners:{Q8IUR6;Q8TAC9;P35638;Q9BZQ8;P17676;Q96RU7;P18848;Q9BXH1}

20493 Pathogen[ P03410] interacts with 9 human  
partners:{P35638;Q8TAC9;P17676;Q9BXH1;P18848;Q8IUR6;Q96RU7;Q9BZQ8;Q13438}

20494 Pathogen[ P14075] interacts with 8 human  
partners:{P35638;Q9BZQ8;Q9BXH1;P18848;Q96RU7;Q8TAC9;P17676;Q8IUR6}

20495 Pathogen[ P0C206] interacts with 10 human  
partners:{Q9BZQ8;Q8IUR6;Q95155;Q9BXH1;Q96RU7;P17676;Q13438;Q8TAC9;P18848;P35638}

20496 Pathogen[ P03363] interacts with 8 human  
partners:{P18848;P17676;Q9BZQ8;Q95155;P35638;Q13438;Q8IUR6;Q9BXH1}

20497 [Cluster 1864]GO:0031063+P biological\_process [name] regulation of histone deacetylation [def] "Any process that modulates the frequency, rate or extent of the removal of acetyl groups from histones." [GOC

20498 Pathogen[ Q2Q067] interacts with 1 human partners:{075376}

20499 Pathogen[ P0C214] interacts with 1 human partners:{075376}

20500 Pathogen[ P03346] interacts with 1 human partners:{075376}

20501 Pathogen[ Q85601] interacts with 1 human partners:{075376}

20502 Pathogen[ P14079] interacts with 2 human partners:{P45983;075376}

20503 Pathogen[ P03383] interacts with 1 human partners:{075376}

20504 Pathogen[ P03410] interacts with 1 human partners:{075376}

20505 Pathogen[ P14075] interacts with 1 human partners:{075376}

20506 Pathogen[ P0C206] interacts with 1 human partners:{075376}

20507 Pathogen[ P03363] interacts with 1 human partners:{075376}

20508 [Cluster 1865]GO:0042692+P biological\_process [name] muscle cell differentiation [def] "The process in which a relatively unspecialized cell acquires specialized features of a muscle cell." [CL

20509 Pathogen[ Q2Q067] interacts with 14 human  
partners:{Q12982;P35712;P13349;Q92990;O00458;Q8NF91;P15172;P60953;Q6STE5;Q9UH90;P159

23;Q15759;P23409;Q02078}  
20510 Pathogen[ POC214] interacts with 12 human  
partners:{Q9UH90;O00458;P13349;P15172;Q6STE5;P60953;Q02078;Q8NF91;P15923;Q12982;Q15759;P35712}  
20511 Pathogen[ P03346] interacts with 16 human  
partners:{Q02078;Q96PU8;O00458;Q92990;P13349;P15923;P15172;P23409;P15173;P60953;Q6STE5;Q9UH90;P35712;Q15759;Q12982;Q8NF91}  
20512 Pathogen[ Q85601] interacts with 13 human  
partners:{O00458;Q02078;P15172;Q6STE5;P13349;Q12982;P35712;P23409;P15923;Q15759;P60953;Q8NF91;Q9UH90}  
20513 Pathogen[ P14079] interacts with 14 human  
partners:{Q12982;Q02078;Q06413;Q6STE5;P13349;P23409;P52564;P35712;P15923;Q92990;Q9UH90;Q15759;O00458;Q8NF91}  
20514 Pathogen[ P03383] interacts with 9 human  
partners:{O00458;P35712;P15172;P60953;Q6STE5;P15923;Q15759;Q92990;Q02078}  
20515 Pathogen[ P03410] interacts with 11 human  
partners:{P35712;P23409;P15923;Q92990;P13349;P60953;Q12982;Q02078;Q6STE5;O00458;Q8NF91}  
20516 Pathogen[ P14075] interacts with 9 human  
partners:{P60953;Q92990;Q15759;P15172;P15923;P35712;O00458;Q02078;Q6STE5}  
20517 Pathogen[ POC206] interacts with 15 human  
partners:{Q12982;Q02078;Q6STE5;Q96PU8;Q9UH90;P23409;O00458;Q8NF91;Q92990;P13349;P15923;P60953;P35712;P15172;Q15759}  
20518 Pathogen[ P03363] interacts with 13 human  
partners:{Q8NF91;Q6STE5;Q92990;P13349;Q96PU8;P15923;Q9UH90;P35712;P23409;P15172;P60953;Q12982;Q02078}  
20519 [Cluster 1866]GO:0035330+P biological\_process [name] regulation of hippo signaling cascade [def] "Any process that modulates the frequency, rate or extent of hippo signaling." [GOC  
20520 Pathogen[ Q2Q067] interacts with 1 human partners:{Q8IX03}  
20521 Pathogen[ POC214] interacts with 1 human partners:{Q8IX03}  
20522 Pathogen[ P03346] interacts with 1 human partners:{Q8IX03}  
20523 Pathogen[ Q85601] interacts with 1 human partners:{Q8IX03}  
20524 Pathogen[ P14079] interacts with 1 human partners:{Q8IX03}  
20525 Pathogen[ P03383] interacts with 1 human partners:{Q8IX03}  
20526 Pathogen[ P03410] interacts with 1 human partners:{Q8IX03}  
20527 Pathogen[ P14075] interacts with 1 human partners:{Q8IX03}  
20528 Pathogen[ POC206] interacts with 1 human partners:{Q8IX03}  
20529 Pathogen[ P03363] interacts with 1 human partners:{Q8IX03}  
20530 [Cluster 1867]GO:0043045+P biological\_process [name] DNA methylation involved in embryo development [def] "The covalent transfer of a methyl group to C-5 of cytosine that contributes to the epigenetic regulation of embryonic gene expression." [GOC  
20531 Pathogen[ Q2Q067] interacts with 2 human partners:{Q9Y6K1;Q9UBC3}  
20532 Pathogen[ POC214] interacts with 1 human partners:{Q9Y6K1}  
20533 Pathogen[ P03346] interacts with 4 human partners:{Q9Y6K1;Q9NU63;Q9UBC3;Q9NRD5}  
20534 Pathogen[ Q85601] interacts with 3 human partners:{Q9Y6K1;Q9NU63;Q9UBC3}  
20535 Pathogen[ P14079] interacts with 3 human partners:{Q9Y6K1;Q9NU63;Q9UBC3}  
20536 Pathogen[ P03383] interacts with 1 human partners:{Q9Y6K1}  
20537 Pathogen[ P03410] interacts with 4 human partners:{Q9NRD5;Q9UBC3;Q9Y6K1;Q9NU63}  
20538 Pathogen[ P14075] interacts with 1 human partners:{Q9Y6K1}  
20539 Pathogen[ POC206] interacts with 4 human partners:{Q9Y6K1;Q9UBC3;Q9NU63;Q9NRD5}  
20540 Pathogen[ P03363] interacts with 2 human partners:{Q9Y6K1;Q9UBC3}  
20541 [Cluster 1868]GO:0051302+P biological\_process [name] regulation of cell division [def] "Any process that modulates the frequency, rate or extent of the physical partitioning and separation of a cell into daughter cells." [GOC  
20542 Pathogen[ Q2Q067] interacts with 1 human partners:{Q8TDN4}  
20543 Pathogen[ POC214] interacts with 1 human partners:{Q8TDN4}  
20544 Pathogen[ P03346] interacts with 2 human partners:{Q8TDN4;Q9BTV7}  
20545 Pathogen[ Q85601] interacts with 1 human partners:{Q8TDN4}  
20546 Pathogen[ P14079] interacts with 3 human partners:{Q9BTV7;Q8TDN4;Q86Y91}  
20547 Pathogen[ P03383] interacts with 1 human partners:{Q8TDN4}  
20548 Pathogen[ P03410] interacts with 3 human partners:{Q86Y91;Q9BTV7;Q8TDN4}  
20549 Pathogen[ P14075] interacts with 1 human partners:{Q8TDN4}  
20550 Pathogen[ POC206] interacts with 3 human partners:{Q8TDN4;Q86Y91;Q9BTV7}  
20551 Pathogen[ P03363] interacts with 1 human partners:{Q8TDN4}  
20552 [Cluster 1869]GO:0034244+P biological\_process [name] negative regulation of transcription elongation from RNA polymerase II promoter [def] "Any process that stops, prevents, or reduces the frequency, rate or extent of transcription elongation, the extension of an RNA molecule after transcription initiation and promoter clearance by the addition of ribonucleotides, catalyzed by RNA polymerase II." [GOC  
20553 Pathogen[ Q2Q067] interacts with 5 human  
partners:{Q15910;P18615;Q56P03;Q9H3P2;P63272}  
20554 Pathogen[ POC214] interacts with 5 human  
partners:{Q15910;P18615;P63272;Q56P03;Q9H3P2}  
20555 Pathogen[ P03346] interacts with 5 human  
partners:{Q56P03;Q9H3P2;P63272;Q15910;P18615}

20556 Pathogen[ Q85601] interacts with 5 human partners: {Q56P03;Q9H3P2;P18615;Q15910;P63272}

20557 Pathogen[ P14079] interacts with 5 human partners: {Q56P03;Q9H3P2;P18615;P63272;Q15910}

20558 Pathogen[ P03383] interacts with 5 human partners: {Q56P03;P63272;Q9H3P2;Q15910;P18615}

20559 Pathogen[ P03410] interacts with 5 human partners: {P18615;Q9H3P2;P63272;Q15910;Q56P03}

20560 Pathogen[ P14075] interacts with 5 human partners: {P18615;Q56P03;Q15910;Q9H3P2;P63272}

20561 Pathogen[ P0C206] interacts with 5 human partners: {Q56P03;Q15910;P18615;Q9H3P2;P63272}

20562 Pathogen[ P03363] interacts with 5 human partners: {Q56P03;Q15910;P18615;Q9H3P2;P63272}

20563 [Cluster 1870]GO:0009116+P biological\_process [name] nucleoside metabolic process [def] "The chemical reactions and pathways involving a nucleoside, a nucleobase linked to either beta-D-ribofuranose (a ribonucleoside) or 2-deoxy-beta-D-ribofuranose, (a deoxyribonucleoside), e.g. adenosine, guanosine, inosine, cytidine, uridine and deoxyadenosine, deoxyguanosine, deoxycytidine and thymidine (= deoxythymidine)." [GOC

20564 Pathogen[ Q2Q067] interacts with 2 human partners: {P07741;P11172}

20565 Pathogen[ P0C214] interacts with 5 human partners: {O95045;P07741;P11172;Q16831;Q13126}

20566 Pathogen[ P03346] interacts with 2 human partners: {P11172;P07741}

20567 Pathogen[ Q85601] interacts with 3 human partners: {P11172;O95045;P07741}

20568 Pathogen[ P14079] interacts with 5 human partners: {Q16831;P11172;O95045;Q9BXI3;P07741}

20569 Pathogen[ P03383] interacts with 2 human partners: {P07741;P11172}

20570 Pathogen[ P03410] interacts with 5 human partners: {O95045;P07741;Q16831;P11172;Q9BXI3}

20571 Pathogen[ P14075] interacts with 3 human partners: {P11172;O95045;P07741}

20572 Pathogen[ P0C206] interacts with 4 human partners: {Q16831;O95045;P11172;P07741}

20573 Pathogen[ P03363] interacts with 2 human partners: {P07741;P11172}

20574 [Cluster 1871]GO:0001935+P biological\_process [name] endothelial cell proliferation [def] "The multiplication or reproduction of endothelial cells, resulting in the expansion of a cell population. Endothelial cells are thin flattened cells which line the inside surfaces of body cavities, blood vessels, and lymph vessels, making up the endothelium." [GOC

20575 Pathogen[ Q2Q067] interacts with 2 human partners: {Q12959;Q9NVV9}

20576 Pathogen[ P0C214] interacts with 2 human partners: {Q9NVV9;Q12959}

20577 Pathogen[ P03346] interacts with 2 human partners: {Q9NVV9;Q12959}

20578 Pathogen[ Q85601] interacts with 2 human partners: {Q9NVV9;Q12959}

20579 Pathogen[ P14079] interacts with 1 human partners: {Q9NVV9}

20580 Pathogen[ P03383] interacts with 1 human partners: {Q9NVV9}

20581 Pathogen[ P03410] interacts with 2 human partners: {Q9NVV9;Q12959}

20582 Pathogen[ P14075] interacts with 1 human partners: {Q9NVV9}

20583 Pathogen[ P0C206] interacts with 2 human partners: {Q12959;Q9NVV9}

20584 Pathogen[ P03363] interacts with 2 human partners: {Q12959;Q9NVV9}

20585 [Cluster 1872]GO:0043507+P biological\_process [name] positive regulation of JUN kinase activity [def] "Any process that activates or increases the frequency, rate or extent of JUN kinase activity." [GOC

20586 Pathogen[ Q2Q067] interacts with 6 human partners: {O60315;Q12933;O14641;Q13233;Q5TCQ9;O43318}

20587 Pathogen[ P0C214] interacts with 6 human partners: {Q5TCQ9;O43318;Q13233;O14641;Q12933;O60315}

20588 Pathogen[ P03346] interacts with 5 human partners: {O60315;Q5TCQ9;O14641;Q13233;O43318}

20589 Pathogen[ Q85601] interacts with 6 human partners: {O60315;O14641;Q12933;Q5TCQ9;Q13233;O43318}

20590 Pathogen[ P14079] interacts with 3 human partners: {O14641;O60315;Q12933}

20591 Pathogen[ P03383] interacts with 5 human partners: {Q13233;O43318;O14641;Q12933;Q5TCQ9}

20592 Pathogen[ P03410] interacts with 5 human partners: {Q5TCQ9;Q13233;O43318;Q12933;O14641}

20593 Pathogen[ P14075] interacts with 5 human partners: {Q5TCQ9;O14641;Q12933;O43318;Q13233}

20594 Pathogen[ P0C206] interacts with 5 human partners: {Q5TCQ9;O43318;Q12933;Q13233;O60315}

20595 Pathogen[ P03363] interacts with 6 human partners: {O60315;Q12933;O43318;Q5TCQ9;O14641;Q13233}

20596 [Cluster 1873]GO:0010172+P biological\_process [name] embryonic body morphogenesis [def] "The process in which the anatomical structures of the embryonic soma are generated and organized." [GOC

20597 Pathogen[ Q2Q067] interacts with 2 human partners: {Q9Y2X9;Q86YP4}

20598 Pathogen[ P0C214] interacts with 2 human partners: {Q86YP4;Q9Y2X9}

20599 Pathogen[ P03346] interacts with 5 human partners: {Q9HBG6;Q9BT04;Q86YP4;Q9Y2X9;Q9Y586}

20600 Pathogen[ Q85601] interacts with 3 human partners:{Q9Y2X9;Q86YP4;Q9BT04}  
20601 Pathogen[ P14079] interacts with 4 human partners:{Q9Y586;Q86YP4;Q9Y2X9;Q9BT04}  
20602 Pathogen[ P03383] interacts with 3 human partners:{Q86YP4;Q9Y2X9;Q9BT04}  
20603 Pathogen[ P03410] interacts with 5 human partners:{Q9Y586;Q86YP4;Q9Y2X9;Q9BT04;Q9HBG6}  
20604 Pathogen[ P14075] interacts with 3 human partners:{Q9BT04;Q9Y2X9;Q86YP4}  
20605 Pathogen[ P0C206] interacts with 4 human partners:{Q9Y2X9;Q9BT04;Q86YP4;Q9Y586}  
20606 Pathogen[ P03363] interacts with 4 human partners:{Q86YP4;Q9Y2X9;Q9HBG6;Q9BT04}  
20607 [Cluster 1874]GO:0015964+P biological\_process [name] diadenosine triphosphate catabolic process [def] "The chemical reactions and pathways resulting in the breakdown of diadenosine triphosphate, a derivative of the nucleoside adenosine with three phosphate groups attached." [GOC  
20608 Pathogen[ Q2Q067] interacts with 1 human partners:{P49789}  
20609 Pathogen[ P0C214] interacts with 1 human partners:{P49789}  
20610 Pathogen[ P03346] interacts with 1 human partners:{P49789}  
20611 Pathogen[ Q85601] interacts with 1 human partners:{P49789}  
20612 Pathogen[ P14079] interacts with 1 human partners:{P49789}  
20613 Pathogen[ P03383] interacts with 1 human partners:{P49789}  
20614 Pathogen[ P03410] interacts with 1 human partners:{P49789}  
20615 Pathogen[ P14075] interacts with 1 human partners:{P49789}  
20616 Pathogen[ P0C206] interacts with 1 human partners:{P49789}  
20617 Pathogen[ P03363] interacts with 1 human partners:{P49789}  
20618 [Cluster 1875]GO:0009612+P biological\_process [name] response to mechanical stimulus [def] "Any process that results in a change in state or activity of a cell or an organism (in terms of movement, secretion, enzyme production, gene expression, etc.) as a result of a mechanical stimulus." [GOC  
20619 Pathogen[ Q2Q067] interacts with 10 human partners:{P01100;P14921;Q04206;P14635;P29474;P53805;O14770;P15407;Q9H3M7;P78543}  
20620 Pathogen[ P0C214] interacts with 13 human partners:{P29474;P68133;P14921;P78543;P15407;Q9H3M7;P01100;P17275;Q04206;P14635;P05412;O14770;P53805}  
20621 Pathogen[ P03346] interacts with 12 human partners:{P53805;P05412;P29474;P17275;Q04206;P14921;P14635;P15407;P78543;P01100;Q9H3M7;O14770}  
20622 Pathogen[ Q85601] interacts with 13 human partners:{P68133;P14921;P15407;P01100;P14635;P78543;Q04206;P05412;P53805;P29474;P17275;Q9H3M7;O14770}  
20623 Pathogen[ P14079] interacts with 10 human partners:{P78543;P53805;P14635;P17275;O14770;P15407;Q9H3M7;P05412;P01100;P68133}  
20624 Pathogen[ P03383] interacts with 12 human partners:{P29474;P14921;P53805;P14635;O14770;P78543;P15407;P01100;Q9H3M7;Q04206;P17275;P05412}  
20625 Pathogen[ P03410] interacts with 14 human partners:{Q04206;Q9H3M7;Q9BQB4;P01100;P29474;P14635;P53805;P17275;P68133;P05412;P78543;P15407;O14770;P14921}  
20626 Pathogen[ P14075] interacts with 12 human partners:{P29474;Q04206;P05412;P14635;P17275;P53805;O14770;P78543;Q9H3M7;P14921;P01100;P15407}  
20627 Pathogen[ P0C206] interacts with 13 human partners:{P53805;P14921;P15407;P17275;P05412;O14770;P68133;P01100;Q04206;P29474;Q9H3M7;P14635;P78543}  
20628 Pathogen[ P03363] interacts with 11 human partners:{P29474;Q04206;P53805;Q9H3M7;P78543;P68133;P14921;P17275;P15407;P05412;P01100}  
20629 [Cluster 1876]GO:0031572+P biological\_process [name] G2/M transition DNA damage checkpoint [def] "A cell cycle checkpoint that blocks cell cycle progression from G2 to M phase in response to DNA damage." [GOC  
20630 Pathogen[ Q2Q067] interacts with 10 human partners:{Q99708;Q9NZJ0;O14757;Q9NWX8;Q6UWZ7;Q9UM11;Q6NUQ1;Q9HAW4;Q9NXX7;Q96RL1}  
20631 Pathogen[ P0C214] interacts with 10 human partners:{Q6NUQ1;Q9NWX8;Q99708;Q9HAW4;Q6UWZ7;Q9NZJ0;Q96RL1;Q9NXX7;Q9UM11;O14757}  
20632 Pathogen[ P03346] interacts with 11 human partners:{Q9NZJ0;Q9UM11;Q99708;O14757;Q96RL1;Q6NUQ1;Q9HAW4;Q496M5;Q9NXX7;Q9NWX8;Q6UWZ7}  
20633 Pathogen[ Q85601] interacts with 11 human partners:{Q96RL1;Q6NUQ1;Q99708;Q9NZJ0;O14757;Q9HAW4;Q6UWZ7;Q9NWX8;Q9UM11;Q496M5;Q9NXX7}  
20634 Pathogen[ P14079] interacts with 9 human partners:{Q6NUQ1;Q6UWZ7;Q9HAW4;Q9NXX7;Q9UM11;Q99708;Q9NWX8;Q96RL1;Q9NZJ0}  
20635 Pathogen[ P03383] interacts with 10 human partners:{O14757;Q9NZJ0;Q96RL1;Q9HAW4;Q9UM11;Q9NWX8;Q99708;Q6NUQ1;Q9NXX7;Q6UWZ7}  
20636 Pathogen[ P03410] interacts with 10 human partners:{Q96RL1;Q9NXX7;Q99708;Q9NWX8;Q9HAW4;Q6NUQ1;Q9UM11;O14757;Q6UWZ7;Q9NZJ0}  
20637 Pathogen[ P14075] interacts with 10 human partners:{Q9UM11;Q9NWX8;Q6NUQ1;Q9NXX7;Q6UWZ7;Q9HAW4;Q9NZJ0;Q99708;Q96RL1;O14757}  
20638 Pathogen[ P0C206] interacts with 10 human

20639 partners: {Q496M5;Q99708;Q6NUQ1;Q9NWX8;Q9UM11;Q9NZJ0;Q6UWZ7;Q96RL1;Q9HAW4;Q9NXR7}  
Pathogen[ P03363] interacts with 10 human

20640 partners: {Q9HAW4;Q96RL1;Q6UWZ7;Q6NUQ1;Q9UM11;Q99708;Q9NWX8;Q9NXR7;Q9NZJ0;O14757}  
[Cluster 1877]GO:0006348+P biological\_process [name] chromatin silencing at telomere  
[def] "Repression of transcription of telomeric DNA by altering the structure of  
chromatin." [PMID

20641 Pathogen[ Q2Q067] interacts with 2 human partners: {Q8IXJ6;O14929}  
20642 Pathogen[ P0C214] interacts with 2 human partners: {O14929;Q8IXJ6}  
20643 Pathogen[ P03346] interacts with 2 human partners: {Q8IXJ6;O14929}  
20644 Pathogen[ Q85601] interacts with 2 human partners: {O14929;Q8IXJ6}  
20645 Pathogen[ P14079] interacts with 2 human partners: {O14929;Q8IXJ6}  
20646 Pathogen[ P03383] interacts with 1 human partners: {O14929}  
20647 Pathogen[ P03410] interacts with 2 human partners: {Q8IXJ6;O14929}  
20648 Pathogen[ P14075] interacts with 1 human partners: {O14929}  
20649 Pathogen[ P0C206] interacts with 2 human partners: {O14929;Q8IXJ6}  
20650 Pathogen[ P03363] interacts with 1 human partners: {O14929}

20651 [Cluster 1878]GO:0002755+P biological\_process [name] MyD88-dependent toll-like  
receptor signaling pathway [def] "Any series of molecular signals generated as a  
consequence of binding to a toll-like receptor where the MyD88 adaptor molecule mediates  
transduction of the signal. Toll-like receptors directly bind pattern motifs from a  
variety of microbial sources to initiate innate immune response." [GOC

20652 Pathogen[ Q2Q067] interacts with 30 human  
partners: {P01100;Q15653;Q04206;Q9NYJ8;Q15025;Q8N5C8;O75582;Q9Y6K9;Q13233;P61088;Q96F  
A3;P19419;P19838;P15336;P25963;P0CG47;O14920;P45984;Q00653;P0CG48;O43318;P62987;Q134  
04;Q9HAT8;O15111;Q15759;Q16829;Q02078;Q15750;P62979}

20653 Pathogen[ P0C214] interacts with 34 human  
partners: {Q00653;O15111;Q9Y6K9;P19838;P15336;P01100;Q96FA3;P19419;Q04206;Q9HAT8;Q134  
04;Q15653;O43318;Q02078;Q8N5C8;Q13233;P0CG48;Q15025;P10809;P25963;Q16829;O75582;P629  
87;Q15750;P05412;Q15759;P0CG47;P45984;P16220;P62979;O14920;Q9NYJ8;P61088;P18846}

20654 Pathogen[ P03346] interacts with 34 human  
partners: {Q9Y6K9;P05412;P45984;Q02078;O15111;P16220;P15336;P62987;P25963;Q15653;P194  
19;P0CG48;Q04206;Q96FA3;Q13404;Q8N5C8;P61088;Q9NYJ8;Q15025;Q9HAT8;Q13233;O75582;Q157  
50;Q16829;P62979;Q15759;P0CG47;P45985;P19838;O14920;O43318;P01100;P18846;Q00653}

20655 Pathogen[ Q85601] interacts with 33 human  
partners: {Q02078;Q15750;Q9NYJ8;O15111;P19419;Q9HAT8;Q16829;P18846;P0CG48;Q15653;Q96F  
A3;Q13404;Q8N5C8;P01100;Q9Y6K9;P16220;O14920;Q04206;Q15025;P05412;O75582;P62979;Q157  
59;P0CG47;P45984;Q13233;P62987;Q00653;P15336;O43318;P61088;P19838;P25963}

20656 Pathogen[ P14079] interacts with 32 human  
partners: {Q9HAT8;Q8N5C8;Q02078;P0CG48;Q06413;O43187;P53779;P52564;O75582;Q16829;Q134  
04;Q15750;Q15025;P62979;P62987;Q96FA3;P45984;P45983;Q16644;Q15759;Q9Y6K9;P45985;P153  
36;Q9Y6Y9;Q13164;P05412;P0CG47;Q9Y239;P01100;Q99836;P19419;Q15653}

20657 Pathogen[ P03383] interacts with 32 human  
partners: {O75582;P16220;Q9Y6K9;P62987;Q13233;Q00653;O14920;O15111;P19419;P18846;Q156  
53;O43318;Q8N5C8;P61088;Q13404;Q15025;Q15759;P25963;P01100;P62979;P0CG47;Q96FA3;Q042  
06;P45984;P0CG48;P15336;Q9NYJ8;P19838;Q02078;Q9HAT8;Q15750;P05412}

20658 Pathogen[ P03410] interacts with 37 human  
partners: {Q04206;P19838;P0CG48;O14920;Q9Y239;P19419;O15111;Q15750;Q96FA3;O75582;O431  
87;Q15653;Q15025;P61088;Q13233;P62979;P01100;P18846;O43318;Q16829;P45985;Q9NYJ8;Q8N5  
C8;P16220;Q9HAT8;P05412;Q9Y6Y9;P45984;P62987;P53779;Q02078;Q00653;Q13404;Q9Y6K9;P259  
63;P15336;P0CG47}

20659 Pathogen[ P14075] interacts with 32 human  
partners: {O15111;Q04206;Q15750;P05412;Q15759;O75582;P61088;P19419;P15336;Q15653;P259  
63;Q8N5C8;O14920;P0CG48;P62979;Q15025;O43318;Q9HAT8;Q96FA3;P62987;Q02078;P01100;P0CG  
47;Q13404;P19838;Q00653;P16220;Q9Y6K9;Q13233;P18846;P45984;Q9NYJ8}

20660 Pathogen[ P0C206] interacts with 34 human  
partners: {P0CG48;O14920;Q9Y6K9;Q02078;P16220;Q8N5C8;O75582;P45984;P05412;P25963;P194  
19;Q9HAT8;O43318;P15336;Q15653;P18846;Q16829;Q13233;Q15025;P61088;P19838;P01100;Q042  
06;O15111;P62979;Q9NYJ8;P45985;P0CG47;Q96FA3;Q00653;Q15750;P62987;Q13404;Q15759}

20661 Pathogen[ P03363] interacts with 27 human  
partners: {O14920;Q04206;P25963;O15111;Q9NYJ8;P16220;Q9Y6K9;P19419;O43318;Q15750;P610  
88;P15336;Q15653;Q16829;Q00653;Q96FA3;P18846;P62987;P19838;Q15025;P05412;Q13404;Q9HA  
T8;Q8N5C8;Q13233;P01100;Q02078}

20662 [Cluster 1879]GO:0007611+P biological\_process [name] learning or memory [def] "The  
acquisition and processing of information and/or the storage and retrieval of this  
information over time." [GOC

20663 Pathogen[ Q2Q067] interacts with 6 human  
partners: {P10827;P51816;P11161;Q92529;P06744;P18146}

20664 Pathogen[ P0C214] interacts with 5 human  
partners: {P05937;Q92529;P51816;P18146;P11161}

20665 Pathogen[ P03346] interacts with 8 human  
partners: {P10827;P05937;P11161;P06744;P18146;Q92529;Q68G74;P51816}

20666 Pathogen[ Q85601] interacts with 5 human  
partners: {P18146;P06744;Q92529;P10827;P11161}

20667 Pathogen[ P14079] interacts with 7 human  
partners: {P05937;Q06413;P06744;P10827;P11161;P51816;Q92529}

20668 Pathogen[ P03383] interacts with 4 human partners: {P51816;P18146;P06744;P11161}

20669 Pathogen[ P03410] interacts with 6 human partners:{Q92529;P06744;P05937;P51816;P18146;P11161}

20670 Pathogen[ P14075] interacts with 4 human partners:{P51816;P06744;P11161;P18146}

20671 Pathogen[ POC206] interacts with 7 human partners:{P11161;P51816;P18146;P06744;Q68G74;Q92529;P10827}

20672 Pathogen[ P03363] interacts with 7 human partners:{P06744;P18146;Q92529;Q9NZR1;P51816;P05937;P11161}

20673 [Cluster 1880]GO:0061036+P biological\_process [name] positive regulation of cartilage development [def] "Any process that increases the rate, frequency, or extent of cartilage development, the process whose specific outcome is the progression of the cartilage over time, from its formation to the mature structure. Cartilage is a connective tissue dominated by extracellular matrix containing collagen type II and large amounts of proteoglycan, particularly chondroitin sulfate." [GOC

20674 Pathogen[ Q2Q067] interacts with 4 human partners:{P35712;Q05516;P35711;Q15797}

20675 Pathogen[ POC214] interacts with 4 human partners:{P35711;Q15797;P35712;Q05516}

20676 Pathogen[ P03346] interacts with 4 human partners:{Q15797;Q05516;P35712;P35711}

20677 Pathogen[ Q85601] interacts with 4 human partners:{Q15797;P35712;P35711;Q05516}

20678 Pathogen[ P14079] interacts with 4 human partners:{P35711;P35712;Q05516;Q15797}

20679 Pathogen[ P03383] interacts with 4 human partners:{P35712;Q15797;Q05516;P35711}

20680 Pathogen[ P03410] interacts with 2 human partners:{P35712;Q15797}

20681 Pathogen[ P14075] interacts with 3 human partners:{P35711;P35712;Q05516}

20682 Pathogen[ POC206] interacts with 4 human partners:{Q05516;P35711;Q15797;P35712}

20683 Pathogen[ P03363] interacts with 4 human partners:{P35711;Q15797;P35712;Q05516}

20684 [Cluster 1881]GO:0019046+P biological\_process [name] reactivation of latent virus [def] "The reactivation of a virus from a latent to a lytic state." [ISBN

20685 Pathogen[ Q2Q067] interacts with 1 human partners:{P51610}

20686 Pathogen[ POC214] interacts with 1 human partners:{P51610}

20687 Pathogen[ P03346] interacts with 1 human partners:{P51610}

20688 Pathogen[ Q85601] interacts with 1 human partners:{P51610}

20689 Pathogen[ P14079] interacts with 1 human partners:{P51610}

20690 Pathogen[ P03383] interacts with 1 human partners:{P51610}

20691 Pathogen[ P03410] interacts with 1 human partners:{P51610}

20692 Pathogen[ P14075] interacts with 1 human partners:{P51610}

20693 Pathogen[ POC206] interacts with 1 human partners:{P51610}

20694 Pathogen[ P03363] interacts with 1 human partners:{P51610}

20695 [Cluster 1882]GO:0010951+P biological\_process [name] negative regulation of endopeptidase activity [def] "Any process that decreases the frequency, rate or extent of endopeptidase activity, the endohydrolysis of peptide bonds within proteins." [GOC

20696 Pathogen[ Q2Q067] interacts with 9 human partners:{Q9Y5K5;P01009;Q92530;P08697;P50453;P48595;P20810;P50452;P35237}

20697 Pathogen[ POC214] interacts with 29 human partners:{P08697;P35237;Q9UK55;P01011;P29622;P36952;P48594;Q86WD7;P05121;P29508;P20810;Q9Y5K5;O75830;O75635;A8MV23;P05543;P05546;P07093;P01008;P30740;Q96P63;P50453;P05120;Q99574;Q9UIV8;Q96P15;P50452;Q92530;P48595}

20698 Pathogen[ P03346] interacts with 12 human partners:{P50452;P35237;O75635;P04080;P50453;Q96P63;P01009;Q96P15;P20810;Q92530;Q9Y5K5;P48595}

20699 Pathogen[ Q85601] interacts with 19 human partners:{P50452;P36952;Q96P15;P01011;P35237;P08697;P01009;Q9Y5K5;P05121;P50453;P05120;P01008;P48595;P30740;O75635;Q92530;P07093;P29508;Q96P63}

20700 Pathogen[ P14079] interacts with 10 human partners:{P35237;P50452;P04080;P51606;P20810;Q9Y5K5;P03973;Q92530;P50453;P48595}

20701 Pathogen[ P03383] interacts with 14 human partners:{P36952;P08697;P30740;P01009;P01008;P48595;P20810;Q9Y5K5;P50453;Q96P63;P35237;P50452;O75635;Q92530}

20702 Pathogen[ P03410] interacts with 17 human partners:{P05121;P51606;Q96P63;P50452;Q96P15;P08697;P36952;P50453;Q9Y5K5;P01009;P20810;Q99935;P35237;O75635;P30740;P48595;P01011}

20703 Pathogen[ P14075] interacts with 9 human partners:{P20810;P01009;P48595;Q92530;P08697;P50452;P50453;P35237;Q9Y5K5}

20704 Pathogen[ POC206] interacts with 17 human partners:{P50452;P01008;P35237;P01009;P50453;P36952;Q9Y5K5;Q96P15;O75635;P20810;P05121;P48595;Q96P63;Q92530;P01011;P30740;P08697}

20705 Pathogen[ P03363] interacts with 11 human partners:{P20810;Q9Y5K5;P35237;Q92530;P50452;P50453;P36952;Q96P63;O75635;Q96P15;P48595}

20706 [Cluster 1883]GO:0045444+P biological\_process [name] fat cell differentiation [def] "The process in which a relatively unspecialized cell acquires specialized features of an adipocyte, an animal connective tissue cell specialized for the synthesis and storage of fat." [CL

20707 Pathogen[ Q2Q067] interacts with 13 human partners:{P24385;Q8WTT2;Q02930;P17676;Q9Y3M2;P28062;P11161;Q14865;Q7Z2X4;P15336;P47928;Q3SYG4;P49715}

20708 Pathogen[ POC214] interacts with 13 human partners:{Q02930;P28062;Q14865;P15336;Q8WTT2;P24385;Q7Z2X4;P17676;P47928;Q9Y3M2;Q3SYG4;P11161;O15524}

20709 Pathogen[ P03346] interacts with 17 human partners: {O15524;P24385;P17676;P15336;Q9Y3M2;Q8WTT2;P28062;Q7Z2X4;P49715;Q8TAM2;Q3SYG4;Q12778;Q14865;Q92481;P11161;Q02930;P47928}

20710 Pathogen[ Q85601] interacts with 13 human partners: {P17676;P24385;Q9Y3M2;Q8WTT2;Q7Z2X4;Q02930;P28062;Q14865;Q3SYG4;P49715;P15336;P11161;P47928}

20711 Pathogen[ P14079] interacts with 17 human partners: {P31751;P20809;Q8WTT2;Q14865;Q8IWZ6;P28062;P11161;Q02930;P49715;Q8TAM2;P15336;Q8TCU4;Q9Y3M2;Q3SYG4;Q7Z2X4;P81277;P47928}

20712 Pathogen[ P03383] interacts with 10 human partners: {Q8WTT2;P24385;P17676;Q9Y3M2;Q3SYG4;P11161;P15336;P47928;P28062;Q02930}

20713 Pathogen[ P03410] interacts with 18 human partners: {Q8WTT2;P17676;Q3SYG4;Q9Y3M2;Q8TAM2;P20809;Q8TCU4;Q02930;P24385;Q7Z2X4;P28062;P47928;Q8IWZ6;P81277;Q14865;P15336;P11161;Q9BRK5}

20714 Pathogen[ P14075] interacts with 11 human partners: {Q3SYG4;Q8WTT2;P11161;P47928;P15336;P28062;P20809;P24385;Q9Y3M2;P17676;Q02930}

20715 Pathogen[ P0C206] interacts with 16 human partners: {P28062;Q7Z2X4;P11161;Q3SYG4;Q8TAM2;Q8TCU4;Q8WTT2;P15336;P49715;O15524;P17676;Q02930;P20809;Q14865;P47928;P24385}

20716 Pathogen[ P03363] interacts with 12 human partners: {Q8WTT2;Q14865;P17676;Q8TAM2;O15524;Q02930;Q9Y3M2;P15336;Q3SYG4;P47928;P24385;P11161}

20717 [Cluster 1884]GO:0070105+P biological\_process [name] positive regulation of interleukin-6-mediated signaling pathway [def] "Any process that increases the rate, frequency or extent of the series of molecular events generated as a consequence of interleukin-6 binding to a cell surface receptor." [GOC

20718 Pathogen[ Q2Q067] interacts with 1 human partners: {Q99684}

20719 Pathogen[ P0C214] interacts with 1 human partners: {Q99684}

20720 Pathogen[ P03346] interacts with 1 human partners: {Q99684}

20721 Pathogen[ Q85601] interacts with 1 human partners: {Q99684}

20722 Pathogen[ P14079] interacts with 1 human partners: {Q99684}

20723 Pathogen[ P03383] interacts with 1 human partners: {Q99684}

20724 Pathogen[ P03410] interacts with 1 human partners: {Q99684}

20725 Pathogen[ P14075] interacts with 1 human partners: {Q99684}

20726 Pathogen[ P0C206] interacts with 1 human partners: {Q99684}

20727 Pathogen[ P03363] interacts with 1 human partners: {Q99684}

20728 [Cluster 1885]GO:0033108+P biological\_process [name] mitochondrial respiratory chain complex assembly [def] "The aggregation, arrangement and bonding together of a set of components to form a mitochondrial respiratory chain complex." [GOC

20729 Pathogen[ Q2Q067] interacts with 1 human partners: {Q00059}

20730 Pathogen[ P0C214] interacts with 2 human partners: {Q5JTZ9;Q00059}

20731 Pathogen[ P03346] interacts with 1 human partners: {Q00059}

20732 Pathogen[ Q85601] interacts with 1 human partners: {Q00059}

20733 Pathogen[ P14079] interacts with 1 human partners: {Q00059}

20734 Pathogen[ P03383] interacts with 1 human partners: {Q00059}

20735 Pathogen[ P03410] interacts with 1 human partners: {Q00059}

20736 Pathogen[ P14075] interacts with 1 human partners: {Q00059}

20737 Pathogen[ P0C206] interacts with 1 human partners: {Q00059}

20738 Pathogen[ P03363] interacts with 1 human partners: {Q00059}

20739 [Cluster 1886]GO:0072331+P biological\_process [name] signal transduction by p53 class mediator [def] "An intracellular signaling process that is induced by the cell cycle regulator phosphoprotein p53 or an equivalent protein." [GOC

20740 Pathogen[ Q2Q067] interacts with 1 human partners: {P43356}

20741 Pathogen[ P0C214] interacts with 1 human partners: {P43356}

20742 Pathogen[ P03346] interacts with 1 human partners: {P43356}

20743 Pathogen[ Q85601] interacts with 1 human partners: {P43356}

20744 Pathogen[ P14079] interacts with 1 human partners: {P43356}

20745 Pathogen[ P03383] interacts with 1 human partners: {P43356}

20746 Pathogen[ P03410] interacts with 1 human partners: {P43356}

20747 Pathogen[ P14075] interacts with 1 human partners: {P43356}

20748 Pathogen[ P0C206] interacts with 1 human partners: {P43356}

20749 Pathogen[ P03363] interacts with 1 human partners: {P43356}

20750 [Cluster 1887]GO:0007162+P biological\_process [name] negative regulation of cell adhesion [def] "Any process that stops, prevents, or reduces the frequency, rate or extent of cell adhesion." [GOC

20751 Pathogen[ Q2Q067] interacts with 1 human partners: {O60711}

20752 Pathogen[ P0C214] interacts with 3 human partners: {P52565;Q5SW24;O60711}

20753 Pathogen[ P03346] interacts with 5 human partners: {Q96FS4;P52565;Q5JRA6;Q9C0H9;O60711}

20754 Pathogen[ Q85601] interacts with 3 human partners: {P52565;O60711;Q5SW24}

20755 Pathogen[ P14079] interacts with 5 human partners: {P52565;Q5SW24;O60711;Q9C0H9;Q5JRA6}

20756 Pathogen[ P03383] interacts with 2 human partners: {O60711;Q9C0H9}

20757 Pathogen[ P03410] interacts with 5 human partners: {O60711;Q5SW24;Q9C0H9;P52565;Q5JRA6}

20758 Pathogen[ P14075] interacts with 2 human partners:{O60711;Q9C0H9}  
20759 Pathogen[ P0C206] interacts with 5 human  
partners:{P52565;Q5JRA6;Q5SW24;Q9C0H9;O60711}  
20760 Pathogen[ P03363] interacts with 4 human partners:{P52565;Q96FS4;O60711;Q9C0H9}  
20761 [Cluster 1888]GO:0050691+P biological\_process [name] regulation of defense response to  
virus by host [def] "Any host process that modulates the frequency, rate, or extent of  
the antiviral response of a host cell or organism." [GOC  
20762 Pathogen[ Q2Q067] interacts with 2 human partners:{Q7Z2W4;Q9NWF9}  
20763 Pathogen[ P0C214] interacts with 2 human partners:{Q7Z2W4;Q9NWF9}  
20764 Pathogen[ P03346] interacts with 2 human partners:{Q9NWF9;Q7Z2W4}  
20765 Pathogen[ Q85601] interacts with 2 human partners:{Q7Z2W4;Q9NWF9}  
20766 Pathogen[ P14079] interacts with 2 human partners:{Q7Z2W4;Q9NWF9}  
20767 Pathogen[ P03383] interacts with 2 human partners:{Q9NWF9;Q7Z2W4}  
20768 Pathogen[ P03410] interacts with 2 human partners:{Q9NWF9;Q7Z2W4}  
20769 Pathogen[ P14075] interacts with 2 human partners:{Q9NWF9;Q7Z2W4}  
20770 Pathogen[ P0C206] interacts with 2 human partners:{Q9NWF9;Q7Z2W4}  
20771 Pathogen[ P03363] interacts with 2 human partners:{Q9NWF9;Q7Z2W4}  
20772 [Cluster 1889]GO:0016188+P biological\_process [name] synaptic vesicle maturation  
[def] "Steps required to form an initiated synaptic vesicle into a fully formed and  
transmissible synaptic vesicle." [GOC  
20773 Pathogen[ Q2Q067] interacts with 2 human partners:{O95295;P78352}  
20774 Pathogen[ P0C214] interacts with 2 human partners:{O95295;P78352}  
20775 Pathogen[ P03346] interacts with 2 human partners:{O95295;P78352}  
20776 Pathogen[ Q85601] interacts with 2 human partners:{O95295;P78352}  
20777 Pathogen[ P14079] interacts with 1 human partners:{O95295}  
20778 Pathogen[ P03383] interacts with 2 human partners:{O95295;P78352}  
20779 Pathogen[ P03410] interacts with 2 human partners:{O95295;P78352}  
20780 Pathogen[ P14075] interacts with 2 human partners:{O95295;P78352}  
20781 Pathogen[ P0C206] interacts with 2 human partners:{P78352;O95295}  
20782 Pathogen[ P03363] interacts with 2 human partners:{P78352;O95295}  
20783 [Cluster 1890]GO:0007109+P biological\_process [name] cytokinesis, completion of  
separation [def] "The process of finishing cell separation, which results in two  
physically separated cells." [GOC  
20784 Pathogen[ Q2Q067] interacts with 1 human partners:{P50995}  
20785 Pathogen[ P0C214] interacts with 1 human partners:{P50995}  
20786 Pathogen[ P03346] interacts with 2 human partners:{P50995;Q9UBP0}  
20787 Pathogen[ Q85601] interacts with 2 human partners:{Q9UBP0;P50995}  
20788 Pathogen[ P14079] interacts with 1 human partners:{P50995}  
20789 Pathogen[ P03383] interacts with 1 human partners:{P50995}  
20790 Pathogen[ P03410] interacts with 1 human partners:{P50995}  
20791 Pathogen[ P14075] interacts with 1 human partners:{P50995}  
20792 Pathogen[ P0C206] interacts with 2 human partners:{Q9UBP0;P50995}  
20793 Pathogen[ P03363] interacts with 1 human partners:{P50995}  
20794 [Cluster 1891]GO:0030238+P biological\_process [name] male sex determination [def]  
"The specification of male sex of an individual organism." [GOC  
20795 Pathogen[ Q2Q067] interacts with 2 human partners:{Q05066;Q15637}  
20796 Pathogen[ P0C214] interacts with 1 human partners:{Q15637}  
20797 Pathogen[ P03346] interacts with 4 human partners:{Q05066;Q15637;P51843;Q9Y5R6}  
20798 Pathogen[ Q85601] interacts with 1 human partners:{Q15637}  
20799 Pathogen[ P14079] interacts with 1 human partners:{Q15637}  
20800 Pathogen[ P03383] interacts with 1 human partners:{Q15637}  
20801 Pathogen[ P03410] interacts with 1 human partners:{Q15637}  
20802 Pathogen[ P14075] interacts with 1 human partners:{Q15637}  
20803 Pathogen[ P0C206] interacts with 3 human partners:{Q9Y5R6;Q05066;Q15637}  
20804 Pathogen[ P03363] interacts with 3 human partners:{Q9Y5R6;Q05066;Q15637}  
20805 [Cluster 1892]GO:0021893+P biological\_process [name] cerebral cortex GABAergic  
interneuron fate commitment [def] "The process in which the developmental fate of a  
neuroblast becomes restricted such that it will develop into a GABAergic interneuron  
residing in the cerebral cortex." [GO\_REF  
20806 Pathogen[ Q2Q067] interacts with 1 human partners:{Q07687}  
20807 Pathogen[ P0C214] interacts with 1 human partners:{Q07687}  
20808 Pathogen[ P03346] interacts with 1 human partners:{P56177}  
20809 Pathogen[ Q85601] interacts with 1 human partners:{Q07687}  
20810 Pathogen[ P14079] interacts with 1 human partners:{Q07687}  
20811 Pathogen[ P03383] interacts with 1 human partners:{Q07687}  
20812 Pathogen[ P03410] interacts with 1 human partners:{Q07687}  
20813 Pathogen[ P14075] interacts with 1 human partners:{Q07687}  
20814 Pathogen[ P0C206] interacts with 2 human partners:{Q07687;P56177}  
20815 Pathogen[ P03363] interacts with 2 human partners:{P56177;Q07687}  
20816 [Cluster 1893]GO:0042770+P biological\_process [name] signal transduction in response  
to DNA damage [def] "A cascade of processes induced by the detection of DNA damage  
within a cell." [GOC  
20817 Pathogen[ Q2Q067] interacts with 4 human partners:{P24522;O96017;Q96MT8;Q14683}  
20818 Pathogen[ P0C214] interacts with 6 human  
partners:{P24522;P62993;Q96MT8;O96017;Q14683;Q9UHF9}  
20819 Pathogen[ P03346] interacts with 5 human



20820 partners:{O96017;P62993;Q14683;P24522;Q96MT8}  
Pathogen[ Q85601] interacts with 6 human

20821 partners:{P62993;O96017;Q9UJH9;P24522;Q14683;Q96MT8}  
Pathogen[ P14079] interacts with 4 human partners:{Q9UJH9;P24522;P62993;Q14683}

20822 Pathogen[ P03383] interacts with 4 human partners:{Q14683;P24522;Q96MT8;O96017}

20823 Pathogen[ P03410] interacts with 5 human  
partners:{P24522;Q9UJH9;Q14683;O96017;P62993}

20824 Pathogen[ P14075] interacts with 5 human  
partners:{Q96MT8;Q14683;O96017;Q9UJH9;P24522}

20825 Pathogen[ P0C206] interacts with 6 human  
partners:{P24522;O96017;Q9UJH9;P62993;Q14683;Q96MT8}

20826 Pathogen[ P03363] interacts with 4 human partners:{Q96MT8;O96017;P24522;Q14683}

20827 [Cluster 1894]GO:0090096+P biological\_process [name] positive regulation of  
metanephric cap mesenchymal cell proliferation [def] "Any process that increases the  
frequency, rate, or extent of metanephric cap mesenchymal cell proliferation.  
Metanephric cap mesenchymal cell proliferation is the multiplication or reproduction of  
metanephric cap mesenchymal cells, resulting in the expansion of the cell population. A  
metanephric cap mesenchymal cell is a mesenchymal cell that has condensed with other  
mesenchymal cells surrounding the ureteric bud tip." [GOC

20828 Pathogen[ Q2Q067] interacts with 1 human partners:{P01106}

20829 Pathogen[ P0C214] interacts with 1 human partners:{P01106}

20830 Pathogen[ P03346] interacts with 1 human partners:{P01106}

20831 Pathogen[ Q85601] interacts with 1 human partners:{P01106}

20832 Pathogen[ P14079] interacts with 1 human partners:{P01106}

20833 Pathogen[ P03383] interacts with 1 human partners:{P01106}

20834 Pathogen[ P03410] interacts with 1 human partners:{P01106}

20835 Pathogen[ P14075] interacts with 1 human partners:{P01106}

20836 Pathogen[ P0C206] interacts with 1 human partners:{P01106}

20837 Pathogen[ P03363] interacts with 1 human partners:{P01106}

20838 [Cluster 1895]GO:0045746+P biological\_process [name] negative regulation of Notch  
signaling pathway [def] "Any process that stops, prevents, or reduces the frequency,  
rate or extent of the Notch signaling pathway." [GOC

20839 Pathogen[ Q2Q067] interacts with 9 human  
partners:{Q9UI56;Q96K30;Q9BUX1;P23769;Q9NWT6;P25963;Q969H0;Q9Y5J3;P43355}

20840 Pathogen[ P0C214] interacts with 9 human  
partners:{P23769;Q9Y5J3;P43355;Q9BUX1;P25963;Q96K30;Q969H0;Q9UI56;Q9NWT6}

20841 Pathogen[ P03346] interacts with 9 human  
partners:{Q9BUX1;P43355;P25963;P23769;Q9Y5J3;Q96K30;Q9UI56;Q9NWT6;Q969H0}

20842 Pathogen[ Q85601] interacts with 8 human  
partners:{Q9BUX1;Q969H0;P23769;Q9NWT6;Q96K30;P43355;Q9Y5J3;P25963}

20843 Pathogen[ P14079] interacts with 8 human  
partners:{Q96K30;Q969H0;Q9UI56;Q9NWT6;Q9Y5J3;Q9BUX1;P43355;P23769}

20844 Pathogen[ P03383] interacts with 8 human  
partners:{Q9NWT6;Q9BUX1;P23769;Q96K30;P25963;Q969H0;Q9UI56;P43355}

20845 Pathogen[ P03410] interacts with 9 human  
partners:{Q9Y5J3;Q9UI56;Q9NWT6;Q96K30;Q9BUX1;P43355;Q969H0;P23769;P25963}

20846 Pathogen[ P14075] interacts with 8 human  
partners:{P43355;P23769;P25963;Q96K30;Q9NWT6;Q9BUX1;Q969H0;Q9UI56}

20847 Pathogen[ P0C206] interacts with 9 human  
partners:{Q9BUX1;P25963;Q96K30;Q969H0;P43355;Q9NWT6;Q9UI56;Q9Y5J3;P23769}

20848 Pathogen[ P03363] interacts with 7 human  
partners:{Q9Y5J3;P25963;Q9BUX1;Q96K30;Q969H0;Q9UI56;P43355}

20849 [Cluster 1896]GO:0009651+P biological\_process [name] response to salt stress [def]  
"Any process that results in a change in state or activity of a cell or an organism (in  
terms of movement, secretion, enzyme production, gene expression, etc.) as a result of a  
stimulus indicating an increase or decrease in the concentration of salt (particularly  
but not exclusively sodium and chloride ions) in the environment." [GOC

20850 Pathogen[ Q2Q067] interacts with 2 human partners:{P08238;P20073}

20851 Pathogen[ P0C214] interacts with 1 human partners:{P20073}

20852 Pathogen[ P03346] interacts with 2 human partners:{P20073;P08238}

20853 Pathogen[ Q85601] interacts with 2 human partners:{P08238;P20073}

20854 Pathogen[ P14079] interacts with 2 human partners:{P08238;P20073}

20855 Pathogen[ P03383] interacts with 2 human partners:{P20073;P08238}

20856 Pathogen[ P03410] interacts with 2 human partners:{P08238;P20073}

20857 Pathogen[ P14075] interacts with 2 human partners:{P08238;P20073}

20858 Pathogen[ P0C206] interacts with 2 human partners:{P08238;P20073}

20859 Pathogen[ P03363] interacts with 2 human partners:{P20073;P08238}

20860 [Cluster 1897]GO:0006423+P biological\_process [name] cysteinyl-tRNA aminoacylation  
[def] "The process of coupling cysteine to cysteinyl-tRNA, catalyzed by cysteinyl-tRNA  
synthetase. In tRNA aminoacylation, the amino acid is first activated by linkage to AMP  
and then transferred to either the 2'- or the 3'-hydroxyl group of the 3'-adenosine  
residue of the tRNA." [GOC

20861 Pathogen[ Q2Q067] interacts with 2 human partners:{Q9HA77;P49589}

20862 Pathogen[ P0C214] interacts with 2 human partners:{P49589;Q9HA77}

20863 Pathogen[ P03346] interacts with 1 human partners:{P49589}

20864 Pathogen[ Q85601] interacts with 2 human partners:{P49589;Q9HA77}

20865 Pathogen[ P14079] interacts with 2 human partners:{Q9HA77;P49589}  
20866 Pathogen[ P03383] interacts with 2 human partners:{P49589;Q9HA77}  
20867 Pathogen[ P03410] interacts with 2 human partners:{Q9HA77;P49589}  
20868 Pathogen[ P14075] interacts with 2 human partners:{Q9HA77;P49589}  
20869 Pathogen[ P0C206] interacts with 2 human partners:{P49589;Q9HA77}  
20870 Pathogen[ P03363] interacts with 1 human partners:{P49589}  
20871 [Cluster 1898]GO:0060322+P biological\_process [name] head development [def] "The biological process whose specific outcome is the progression of a head from an initial condition to its mature state. The head is the anterior-most division of the body." [GOC  
20872 Pathogen[ Q2Q067] interacts with 2 human partners:{Q9BWW4;Q86U70}  
20873 Pathogen[ P0C214] interacts with 2 human partners:{Q9BWW4;Q86U70}  
20874 Pathogen[ P03346] interacts with 4 human partners:{Q86U70;Q68CZ1;Q9BWW4;P56178}  
20875 Pathogen[ Q85601] interacts with 2 human partners:{Q86U70;Q9BWW4}  
20876 Pathogen[ P14079] interacts with 3 human partners:{Q68CZ1;Q86U70;Q9BWW4}  
20877 Pathogen[ P03383] interacts with 2 human partners:{Q86U70;Q9BWW4}  
20878 Pathogen[ P03410] interacts with 3 human partners:{Q9BWW4;Q86U70;Q68CZ1}  
20879 Pathogen[ P14075] interacts with 2 human partners:{Q86U70;Q9BWW4}  
20880 Pathogen[ P0C206] interacts with 2 human partners:{Q9BWW4;Q86U70}  
20881 Pathogen[ P03363] interacts with 3 human partners:{P56179;Q86U70;Q9BWW4}  
20882 [Cluster 1899]GO:0048539+P biological\_process [name] bone marrow development [def] "The process whose specific outcome is the progression of the bone marrow over time, from its formation to the mature structure." [GOC  
20883 Pathogen[ Q2Q067] interacts with 2 human partners:{P17483;Q9Y3A5}  
20884 Pathogen[ P0C214] interacts with 1 human partners:{Q9Y3A5}  
20885 Pathogen[ P03346] interacts with 2 human partners:{P17483;Q9Y3A5}  
20886 Pathogen[ Q85601] interacts with 1 human partners:{Q9Y3A5}  
20887 Pathogen[ P14079] interacts with 1 human partners:{Q9Y3A5}  
20888 Pathogen[ P03383] interacts with 1 human partners:{Q9Y3A5}  
20889 Pathogen[ P03410] interacts with 1 human partners:{Q9Y3A5}  
20890 Pathogen[ P14075] interacts with 1 human partners:{Q9Y3A5}  
20891 Pathogen[ P0C206] interacts with 2 human partners:{P17483;Q9Y3A5}  
20892 Pathogen[ P03363] interacts with 2 human partners:{Q9Y3A5;P17483}  
20893 [Cluster 1900]GO:2000691+P biological\_process [name] negative regulation of cardiac muscle cell myoblast differentiation [def] "Any process that stops, prevents or reduces the frequency, rate or extent of cardiac muscle cell myoblast differentiation." [GOC  
20894 Pathogen[ Q2Q067] interacts with 1 human partners:{Q96MT3}  
20895 Pathogen[ P0C214] interacts with 1 human partners:{Q96MT3}  
20896 Pathogen[ P03346] interacts with 1 human partners:{Q96MT3}  
20897 Pathogen[ Q85601] interacts with 1 human partners:{Q96MT3}  
20898 Pathogen[ P14079] interacts with 1 human partners:{Q96MT3}  
20899 Pathogen[ P03383] interacts with 1 human partners:{Q96MT3}  
20900 Pathogen[ P03410] interacts with 1 human partners:{Q96MT3}  
20901 Pathogen[ P14075] interacts with 1 human partners:{Q96MT3}  
20902 Pathogen[ P0C206] interacts with 1 human partners:{Q96MT3}  
20903 Pathogen[ P03363] interacts with 1 human partners:{Q96MT3}  
20904 [Cluster 1901]GO:0006367+P biological\_process [name] transcription initiation from RNA polymerase II promoter [def] "Any process involved in the assembly of the RNA polymerase II preinitiation complex (PIC) at an RNA polymerase II promoter region of a DNA template, resulting in the subsequent synthesis of RNA from that promoter. The initiation phase includes PIC assembly and the formation of the first few bonds in the RNA chain, including abortive initiation, which occurs when the first few nucleotides are repeatedly synthesized and then released. Promoter clearance, or release, is the transition between the initiation and elongation phases of transcription." [GOC  
20905 Pathogen[ Q2Q067] interacts with 131 human partners:{Q13573;Q9UNN4;P52434;Q92750;Q92585;Q8IZL2;Q9UPN9;Q9Y3C7;P10827;P15884;P20226;Q96HR3;Q9HAU4;Q16594;Q86WQ0;Q9NPF6;Q13889;P01106;P46937;Q95402;Q13485;P10589;P13056;P62508;P10828;Q15562;P19388;P52435;P49116;Q9H944;Q13547;Q9BTT4;Q93074;P32780;Q99594;P30876;P19387;O75586;Q15542;P61218;Q92759;O75448;O60244;P52657;Q6ZNA4;A6NLC8;P08047;P11473;O60563;P28702;Q15561;Q12962;P61077;Q9SULK4;P29084;Q96G25;P62487;Q14186;Q96F24;P51948;Q92831;P56270;P12755;P84022;Q6P1X5;O00716;P51668;P28347;O00255;O15105;Q06330;Q15543;Q9UHV7;Q9GZV5;P49848;P50750;Q15544;O00268;P09874;Q6P2C8;Q96PU5;Q16254;P50613;Q9NVC6;Q15329;Q9GZN2;Q16514;P13984;P55055;Q15796;P62875;P24928;Q15466;P28749;Q15583;Q93008;Q9Y2X0;P12757;P35813;P0CG47;P08235;Q14686;Q15545;P52655;Q9Y618;Q14209;P35269;P11474;O43513;P0CG48;P29083;P49336;O60583;P24863;Q92793;P21675;P53803;Q96RN5;P78347;P62987;Q14188;Q9Y2W1;Q71SY5;O75376;Q96JK9;P22736;Q13888;P42772;P51946;Q00403;P62979}  
20906 Pathogen[ P0C214] interacts with 125 human partners:{O00268;Q92585;P51946;P24863;Q16254;P35813;P56270;Q9HAU4;Q13573;P11474;Q71SY5;Q13547;P12757;P30876;O75586;P52657;Q8IZL2;P21675;P53803;Q96F24;P52655;P35269;P50750;P50613;Q9Y2X0;P29084;P15884;Q93074;P52435;P17275;Q92750;Q92793;P46937;P84022;Q9GZV5;Q00403;Q96HR3;Q9UNN4;Q9NVC6;Q12962;Q02386;P28347;P61218;Q06330;O00716;Q9BTT4;P05121;Q14686;Q15545;O60244;Q16594;Q15542;Q93008;P61077;Q9H944;Q15561;Q9Y3C7;P13056;P62487;Q96RN5;Q14186;P49116;P51948;P49336;P0CG48;O43513;A6NLC8;P78347;Q13485;O15105;O60583;Q15544;P49848;Q15329;O75376;Q15796;Q99594;Q6P1X5;Q96JK9;Q16514;P12755;P62875;P13984;P20226;Q6P2C8;Q6ZNA4;P32780;P24928;Q9UHV7;P62987;O60563;P28749;Q92831;O75448;P0CG

- 47;Q13888;P52434;Q5H9L4;P19387;P10828;P19388;Q15543;P51668;Q15562;Q96G25;Q9ULK4;P62979;Q9Y2W1;Q9Y618;P62508;Q9UPN9;Q14209;Q86WQ0;P01106;O95402;Q14188;Q9NPJ6;Q92759;P08047;O00255;P42772;P29083;Q15466;Q96PU5;P09874}
- 20907 Pathogen[ P03346] interacts with 144 human  
partners: {Q06330;Q9UPN9;Q92585;Q15542;Q15562;P46937;Q13263;Q02386;P10827;P35813;P11473;Q9HAU4;P52434;O95402;Q9NPJ6;Q96PU5;P56270;P06401;P12757;O75586;P08235;Q15329;Q93008;P28347;P62987;Q99594;Q71SY5;P48443;A6NLC8;Q14188;Q9GZV5;O60563;P17275;P78347;P49116;Q15466;P24863;P49336;Q96HR3;Q15583;Q13888;P42772;P0CG48;Q15796;Q93074;P53803;P13056;P61218;O00268;O60244;Q14209;P10588;Q86WQ0;Q9BTT4;Q92831;O15105;Q16254;P29084;P51668;Q92750;P61077;P08047;Q13889;P20226;Q96G25;Q15561;P62487;P01106;O75448;P51843;P19388;P28702;O60583;Q14186;P84022;O43513;Q96F24;P13984;P22736;Q9Y3C7;Q9GZN2;O00255;Q6P2C8;P52435;P49848;Q9UNN4;Q13547;P51946;P52657;P50750;Q6P1X5;P36954;Q16514;Q6ZNA4;O75376;Q12962;O95718;P09874;O75469;P62979;P28749;Q92759;Q9H944;P21675;P30876;P35269;Q9NVC6;P0CG47;P62508;P10828;Q99593;P11474;Q13485;P24928;Q5H9L4;P29083;Q9Y2X0;Q13573;Q00403;Q92793;O00482;Q15545;Q9ULK4;Q9Y618;Q9Y2W1;P35398;P52655;Q13285;P51948;Q15544;O00716;P32780;Q9UHV7;Q96RN5;P55055;P62875;P19387;Q96JK9;P15884;Q8IZL2;Q14686;Q16594;Q15543;P10589}
- 20908 Pathogen[ Q85601] interacts with 138 human  
partners: {Q9UNN4;P51946;P01106;P52657;Q9UPN9;Q9Y2X0;Q92585;Q15542;P36954;Q96JK9;P09874;P11473;Q9HAU4;O60563;Q15466;P56270;P50750;Q9ULK4;Q15329;Q02386;Q06330;Q13888;Q13573;Q9UHV7;P49336;Q5H9L4;P28702;O60583;P42772;P12757;Q15545;P53803;Q14188;Q96G25;P61218;Q9Y618;O00268;Q15583;Q96PU5;Q9GZV5;P0CG48;O75448;Q92831;Q9Y3C7;P51948;Q16594;P51668;P55055;Q93008;P61077;P12755;P08047;Q9H944;Q13263;P62487;Q86WQ0;Q14686;P19388;P29084;Q14186;Q96RN5;P13984;Q96F24;Q92759;O95402;P32780;P52435;P49848;A6NLC8;Q71SY5;Q15562;P35269;Q6P1X5;Q99594;P22736;Q8IZL2;P29083;Q16514;P28347;O00255;O75376;Q16254;P08235;Q00403;P05121;Q14209;P11474;P50613;P10827;P62979;P28749;O00482;P84022;P0CG47;Q6ZNA4;P62508;Q92750;P21675;P46937;Q6P2C8;Q12962;P19387;Q9GZN2;O15105;P52655;Q13547;Q9BTT4;P49116;P24928;P24863;P30876;P62987;P13056;P52434;Q15543;P10828;Q92793;O75586;P19447;P35813;P17275;Q9Y2W1;O60244;Q13485;Q96HR3;P78347;Q93074;Q15544;O00716;Q9NPJ6;Q9NVC6;O43513;Q15561;P62875;P15884;Q15796;P20226;P10589}
- 20909 Pathogen[ P14079] interacts with 129 human  
partners: {P62875;O60244;O95402;P13056;Q9Y2X0;O43513;P62508;P09874;P12755;P55055;Q15561;P0CG48;Q9GZV5;P28749;P19387;Q5H9L4;P35269;Q14186;P49336;P51946;Q16594;P35398;P62487;P11473;Q96JK9;Q16254;P10828;P08235;P52434;Q92793;Q86WQ0;Q15583;Q96HR3;O15514;Q15329;Q99594;P28347;P30876;P11474;Q96F24;P61218;Q6P2C8;Q9Y3C7;Q9ULK4;Q6ZNA4;Q9NVC6;Q14209;Q9GZN2;P22736;Q13573;Q8IZL2;Q13889;P53803;P62979;P46937;Q9HAU4;P48443;P61077;P10827;P29084;P62987;O95718;P35813;O75448;Q6P1X5;Q06330;P50613;Q13888;P19388;P51668;Q00403;O75586;Q15543;Q9UPN9;O00482;Q12962;O00716;Q9UHV7;Q96RN5;O75469;P24863;P49848;P52435;P17275;Q92750;P28702;Q9H944;Q92759;Q9UNN4;P56270;Q9NPJ6;P01106;P52657;P10588;P32780;Q71SY5;Q9BTT4;P13984;O75376;O60583;Q15562;P15884;P12757;Q02386;P24928;P10589;Q93008;P49116;Q15466;Q16514;O15105;P78347;P0CG47;P36954;Q96G25;Q92585;O00255;Q14188;Q14686;Q15542;Q9Y2W1;P19447;P29083;P21675;O00268;P50750;Q15545;A6NLC8;P51948}
- 20910 Pathogen[ P03383] interacts with 119 human  
partners: {Q9Y618;O95402;Q13573;Q06330;Q15329;P53803;Q92585;Q15561;Q92831;Q96JK9;Q13485;O00716;P08047;Q14209;P29084;Q15562;Q15544;P62987;P56270;P35269;P51948;Q9H944;O75376;Q9ULK4;Q96F24;P01106;P78347;Q9UPN9;Q13888;P49116;A6NLC8;O60244;Q8IZL2;Q5H9L4;Q14686;P52655;Q15542;Q96G25;Q6ZNA4;P52434;P61218;Q9NPJ6;P35813;Q93074;P61077;Q96HR3;Q00403;P20226;P52657;Q96RN5;O75448;P62487;Q86WQ0;P11473;O15105;P11474;P49336;Q16594;Q14186;Q6P2C8;P84022;P19387;O60563;P50613;P13984;P42772;Q9Y3C7;P28347;P51946;P24928;P09874;P49848;Q15466;Q16254;P28702;P50750;Q9UNN4;O00268;Q16514;O00255;Q6P1X5;Q92759;Q13547;P28749;Q71SY5;Q14188;P62979;Q92750;P0CG47;P62875;Q15796;Q99594;P21675;P52435;P12757;P0CG48;Q12962;Q9BTT4;P19388;Q9UHV7;P29083;P24863;P10828;Q9NVC6;P62508;P30876;O75586;Q15545;P17275;Q9Y2W1;P46937;P13056;Q9GZV5;O60583;Q9Y2X0;P32780;Q92793;P51668;Q15543}
- 20911 Pathogen[ P03410] interacts with 133 human  
partners: {P84022;Q99594;Q92831;O60583;Q9Y2W1;P52655;Q9UNN4;P05121;Q6ZNA4;P0CG48;P19387;P35813;Q13889;Q15329;P36954;O00268;Q15543;P42772;P12755;Q96G25;P01106;Q92750;Q06330;Q96F24;P24928;Q12962;P21675;P29083;Q14686;Q9NVC6;P15884;P51946;Q16254;Q9NPJ6;P30876;Q86WQ0;P20226;P10828;O75376;Q9Y3C7;P62979;P62508;P52657;Q14188;O15514;P50613;Q92585;Q9GZV5;P11473;P50750;O60563;O00716;Q8IZL2;Q15583;Q5H9L4;Q96JK9;Q92793;Q9ULK4;O95402;Q15561;P29084;O43513;Q02386;P52435;A6NLC8;Q16514;P28347;P17275;P49848;P53803;Q6P1X5;P19447;Q13485;P22736;Q14186;P62875;P28702;P09874;Q15466;Q00403;P12757;Q9BTT4;P51668;P46937;Q6P2C8;P35269;Q16594;P61218;P49336;Q96HR3;O15105;P51948;P24863;P28749;Q15544;Q13888;O60244;Q9UHV7;P11474;P52434;P62987;Q13547;P49116;P13984;P10589;P56270;Q15542;P62487;Q9GZN2;P08047;Q9Y2X0;P78347;Q93074;Q14209;Q14188;Q9Y618;O00255;Q15796;P08235;P19388;Q15562;P32780;O75448;Q96RN5;P0CG47;Q92759;Q15545;Q9UPN9;P61077;Q13573;O75586;P13056;Q71SY5}
- 20912 Pathogen[ P14075] interacts with 122 human  
partners: {P49336;A6NLC8;Q92585;Q9GZV5;Q12962;P35813;P13984;Q9NPJ6;Q92759;P24863;P21675;Q13573;P52657;Q15542;P11474;Q92831;P10828;Q15562;P28347;P30876;Q96HR3;Q14686;P17275;Q00403;O60563;P29083;P50613;Q15561;Q6P1X5;P29084;P19388;P61218;P50750;O60583;P78347;Q15544;O75448;P19387;O00716;P20226;Q15796;Q14209;Q13547;P61077;Q16594;P13056;P01106;Q92750;Q9Y618;O95402;O75376;O75586;Q9BTT4;P12757;P62487;Q13485;O00255;Q93074;Q14186;P49116;P0CG48;P62979;Q6ZNA4;Q9Y3C7;Q9UHV7;Q13889;Q16254;P49848;Q9H944;Q9UPN9;P24928;P35269;P11473;Q99594;O60244;P52655;Q16514;P62987;Q15545;Q96JK9;O15105;Q06330;Q5H9L4;P51946;P28749;P32780;Q9ULK4;O00268;Q9UNN4;Q6P2C8;P0CG47;P42772;Q92793;P28702;P158

84;Q9NVC6;P46937;Q96RN5;Q15466;Q96F24;P56270;Q15329;P84022;P62875;Q71SY5;Q8IZL2;Q96G25;Q9Y2W1;Q14188;P51668;O43513;P52434;Q86WQ0;P62508;P09874;Q9Y2X0;P51948;P52435;P53803;Q15543;Q13888;P08047}

20913 Pathogen[ POC206] interacts with 146 human partners: {Q02386;P46937;P84022;P10588;P24863;Q14188;Q96PU5;P0CG48;P62875;Q15329;P49336;Q15466;P35398;Q96HR3;Q15545;Q16514;P06401;Q06330;Q15543;P49848;Q9UPN9;P36954;Q13263;P50750;P20226;Q9HAU4;Q15544;P17275;P09874;Q93008;Q6ZNA4;P52657;O75469;Q96JK9;P52655;O00255;P19388;P61218;O00268;O75586;P55055;Q6P2C8;Q9Y3C7;Q13547;Q14186;P13056;P42772;Q9UNN4;O00716;P49116;P22736;P29084;Q9UHV7;Q15796;Q92831;O00482;Q16254;P28749;P13984;P12755;P19447;Q92793;P10589;Q9GZV5;O43513;Q9GZN2;O15105;O95718;P53803;Q14209;Q92750;P78347;Q15514;P35269;P10828;P62508;P19387;Q13888;Q96RN5;O95402;P50613;Q13573;P12757;Q8IZL2;P08047;P29083;Q9H944;Q9NPJ6;Q14686;P15884;Q96F24;P62979;P28347;Q92759;Q9Y2W1;Q5H9L4;Q15562;O75376;A6NLC8;Q13485;P52435;Q71SY5;Q86WQ0;Q9BTT4;P62487;P32780;P0CG47;Q15542;O60244;Q6P1X5;Q9ULK4;Q13889;P28702;P05121;Q9NVC6;O75448;P11474;Q12962;P01106;P24928;P61077;Q99594;P62987;O60583;Q9Y2X0;Q00403;O60563;Q96G25;Q93074;P51668;Q9Y618;P11473;P08235;P52434;Q15561;Q92585;P10827;P21675;P51946;P35813;Q15583;P51948;P48443;Q16594;P30876;P56270}

20914 Pathogen[ P03363] interacts with 122 human partners: {Q9UNN4;Q9GZN2;P10828;P29083;P29084;Q15466;P49848;P49116;P19388;Q02386;P13984;O60563;Q9HAU4;Q96HR3;Q71SY5;P24863;Q15562;P30876;Q92831;Q86WQ0;P12757;P62508;Q13888;Q06330;P32780;Q92759;P19387;P61218;Q16514;P28347;P51946;O75376;Q15545;Q16254;P11474;Q96JK9;P24928;Q9UPN9;O00268;O15105;Q14686;A6NLC8;P01106;P28749;P17275;Q6ZNA4;P52657;P10588;P35269;P11473;Q12962;Q00403;P46937;P28702;O60583;Q15544;P42772;P08235;Q96PU5;Q9GZV5;Q9NVC6;Q96RN5;Q9UHV7;O75586;Q15796;P84022;Q9Y618;P49336;Q15542;Q13573;Q15583;P62987;P35398;Q14209;Q13547;Q92750;Q93074;Q92793;O75448;P62487;P51668;P21675;P56270;P20226;Q96F24;P52655;Q13485;Q9BTT4;O95402;P50750;Q14186;Q14188;Q9NPJ6;P15884;O60244;P61077;P09874;Q9ULK4;P08047;O00716;Q15543;P53803;P52435;P52434;Q6P2C8;O43513;Q15561;Q96G25;Q5H9L4;P10589;Q6P1X5;P13056;Q99594;Q93008;Q15329;P78347;Q8IZL2;Q9H944;Q92585;Q16594;O00482;Q9Y3C7}

20915 [Cluster 1902]GO:0034259+P biological\_process [name] negative regulation of Rho GTPase activity [def] "Any process that stops or reduces the rate of activity of a GTPase of the Rho family." [GOC]

20916 Pathogen[ Q2Q067] interacts with 1 human partners: {Q9Y6D6}

20917 Pathogen[ POC214] interacts with 1 human partners: {Q9Y6D6}

20918 Pathogen[ P03346] interacts with 1 human partners: {Q9Y6D6}

20919 Pathogen[ Q85601] interacts with 1 human partners: {Q9Y6D6}

20920 Pathogen[ P14079] interacts with 1 human partners: {Q9Y6D6}

20921 Pathogen[ P03383] interacts with 1 human partners: {Q9Y6D6}

20922 Pathogen[ P03410] interacts with 1 human partners: {Q9Y6D6}

20923 Pathogen[ P14075] interacts with 1 human partners: {Q9Y6D6}

20924 Pathogen[ POC206] interacts with 1 human partners: {Q9Y6D6}

20925 Pathogen[ P03363] interacts with 1 human partners: {Q9Y6D6}

20926 [Cluster 1903]GO:0042590+P biological\_process [name] antigen processing and presentation of exogenous peptide antigen via MHC class I [def] "The process in which an antigen-presenting cell expresses a peptide antigen of exogenous origin on its cell surface in association with an MHC class I protein complex. The peptide antigen is typically, but not always, processed from a whole protein. Class I here refers to classical class I molecules." [GOC]

20927 Pathogen[ Q2Q067] interacts with 41 human partners: {Q99460;O75832;P48556;P40306;P55036;O00231;O00233;P51665;P28072;A5LHX3;Q13200;P25787;Q06323;P28065;O14818;P27797;Q14997;P60900;Q9UL46;P61289;P28062;Q9UNM6;P25788;Q92530;P25786;Q16401;O00232;P28074;P25789;P0CG47;P20618;P0CG48;P28070;P28066;Q99436;Q8TAA3;P62987;O43242;P49721;P49720;P62979}

20928 Pathogen[ POC214] interacts with 43 human partners: {Q14997;P51665;P25789;P55036;P28062;A5LHX3;P28065;O14818;O43242;P48556;P40306;Q13200;O00232;Q99460;P28066;O75832;P49720;P28074;P0CG48;Q9UL46;P25788;Q9UNM6;O00231;Q06323;P25786;P28072;Q8TAA3;P62987;Q99436;P27797;P0CG47;P25787;P35998;P60900;O00233;P62979;Q92530;Q15008;P28070;P20618;P49721;Q16401;P17980}

20929 Pathogen[ P03346] interacts with 41 human partners: {P25787;P28070;P25789;P55036;Q99460;Q9UL46;P62987;P28072;P25788;P28074;P49721;O14818;Q99436;P0CG48;Q16401;A5LHX3;P28062;P20618;O00232;O75832;O00233;P49720;P28065;P60900;P25786;O00231;P61289;P62979;P27797;P28066;Q9UNM6;Q8TAA3;P0CG47;Q14997;Q13200;P48556;P51665;Q06323;Q92530;O43242;P40306}

20930 Pathogen[ Q85601] interacts with 37 human partners: {P28066;Q9UNM6;P60900;P55036;P25787;P61289;P25788;O75832;P27797;P0CG48;P25789;O00233;P20618;P40306;P49720;P28062;P49721;P25786;P28072;Q13200;P28065;P62979;Q99436;P28070;Q8TAA3;Q9UL46;Q99460;O00231;P0CG47;P48556;P28074;Q92530;P62987;A5LHX3;Q06323;O14818;Q16401}

20931 Pathogen[ P14079] interacts with 46 human partners: {P28065;Q99436;P62333;P48556;P60468;P0CG48;P40306;P13498;P55036;P28074;O00232;P49720;O00487;P25787;O75832;A5LHX3;P62979;O00233;P35998;P61289;P62987;P51665;P20618;Q8TAA3;Q14997;P28062;P60900;Q9UNM6;Q99460;O14818;P49721;P60059;Q92530;Q06323;P62191;Q15008;P43686;O43242;P25788;O00231;P28066;Q9UL46;P0CG47;Q16401;P17980;P28072}

20932 Pathogen[ P03383] interacts with 37 human partners: {P55036;P62987;P25789;P60900;P40306;O00233;P49721;Q06323;Q14997;P20618;O75832;Q9UL46;Q9UNM6;P25786;Q99460;P28072;Q13200;P28065;P28066;Q16401;P62979;O00231;P0CG

47;P0CG48;P28074;Q92530;P49720;Q8TAA3;P61289;P28062;P48556;O14818;Q99436;P28070;P25787;P27797;P25788}

20933 Pathogen[ P03410] interacts with 45 human partners: {P28070;P55036;P0CG48;P60468;P25786;P60059;Q15008;Q16401;P60900;Q14997;P35998;Q99460;O00233;O00232;Q8TAA3;P48556;P49721;A5LHX3;P62979;Q99436;P40306;Q06323;Q13200;P25787;P28062;P51665;O14818;O00231;Q9UNM6;P25789;P49720;P62987;P28072;P25788;P28066;P28065;O43242;P0CG47;P17980;O75832;P20618;Q9UL46;P28074;P61289;P27797}

20934 Pathogen[ P14075] interacts with 36 human partners: {P55036;P25788;P28066;Q06323;O75832;Q8TAA3;P60900;O00233;Q9UL46;P49720;Q13200;P48556;Q16401;P28070;P49721;O00231;Q92530;P0CG48;P62979;P28062;P28074;P28065;P27797;P25786;O14818;P62987;P28072;Q14997;P0CG47;P25787;P20618;Q9UNM6;P61289;P40306;Q99436;P25789}

20935 Pathogen[ P0C206] interacts with 40 human partners: {P61289;Q99436;P28062;Q9UNM6;P0CG48;O75832;P27797;P40306;P28065;Q14997;P55036;P25786;P25788;P25787;Q06323;P49720;O00232;P60900;O43242;A5LHX3;P25789;P20618;Q13200;Q8TAA3;P28070;Q99460;P62979;P28066;O14818;P0CG47;P28072;P28074;Q92530;P49721;P62987;Q9UL46;O00233;P48556;Q16401;O00231}

20936 Pathogen[ P03363] interacts with 4 human partners: {Q92530;P61289;P27797;P62987}

20937 [Cluster 1904]GO:2000036+P biological\_process [name] regulation of stem cell maintenance [def] "Any process that modulates the frequency, rate or extent of stem cell maintenance." [GOC

20938 Pathogen[ Q2Q067] interacts with 1 human partners: {Q9H4B6}

20939 Pathogen[ P0C214] interacts with 1 human partners: {Q9H4B6}

20940 Pathogen[ P03346] interacts with 3 human partners: {P17542;Q9HCS4;Q9H4B6}

20941 Pathogen[ Q85601] interacts with 2 human partners: {Q9HCS4;Q9H4B6}

20942 Pathogen[ P14079] interacts with 1 human partners: {Q9H4B6}

20943 Pathogen[ P03383] interacts with 1 human partners: {Q9H4B6}

20944 Pathogen[ P03410] interacts with 2 human partners: {Q9HCS4;Q9H4B6}

20945 Pathogen[ P14075] interacts with 1 human partners: {Q9H4B6}

20946 Pathogen[ P0C206] interacts with 2 human partners: {Q9HCS4;Q9H4B6}

20947 Pathogen[ P03363] interacts with 2 human partners: {Q9HCS4;Q9H4B6}

20948 [Cluster 1905]GO:0030916+P biological\_process [name] otic vesicle formation [def] "The process resulting in the transition of the otic placode into the otic vesicle, a transient embryonic structure formed during development of the vertebrate inner ear." [GOC

20949 Pathogen[ Q2Q067] interacts with 1 human partners: {O15078}

20950 Pathogen[ P0C214] interacts with 1 human partners: {O15078}

20951 Pathogen[ P03346] interacts with 2 human partners: {Q9UBX0;O15078}

20952 Pathogen[ Q85601] interacts with 2 human partners: {O15078;Q9UBX0}

20953 Pathogen[ P14079] interacts with 2 human partners: {O15078;O15273}

20954 Pathogen[ P03383] interacts with 1 human partners: {O15078}

20955 Pathogen[ P03410] interacts with 2 human partners: {O15273;O15078}

20956 Pathogen[ P14075] interacts with 1 human partners: {O15078}

20957 Pathogen[ P0C206] interacts with 2 human partners: {O15078;Q9UBX0}

20958 Pathogen[ P03363] interacts with 2 human partners: {O15078;Q9UBX0}

20959 [Cluster 1906]GO:0086005+P

20960 Pathogen[ Q2Q067] interacts with 1 human partners: {P15924}

20961 Pathogen[ P0C214] interacts with 1 human partners: {P15924}

20962 Pathogen[ P03346] interacts with 1 human partners: {P15924}

20963 Pathogen[ Q85601] interacts with 1 human partners: {P15924}

20964 Pathogen[ P14079] interacts with 1 human partners: {P15924}

20965 Pathogen[ P03383] interacts with 1 human partners: {P15924}

20966 Pathogen[ P03410] interacts with 1 human partners: {P15924}

20967 Pathogen[ P14075] interacts with 1 human partners: {P15924}

20968 Pathogen[ P0C206] interacts with 1 human partners: {P15924}

20969 Pathogen[ P03363] interacts with 1 human partners: {P15924}

20970 [Cluster 1907]GO:0006449+P biological\_process [name] regulation of translational termination [def] "Any process that modulates the frequency, rate or extent of translational termination." [GOC

20971 Pathogen[ Q2Q067] interacts with 4 human partners: {Q92900;O75570;P52758;P62495}

20972 Pathogen[ P0C214] interacts with 4 human partners: {Q92900;O75570;P62495;P52758}

20973 Pathogen[ P03346] interacts with 4 human partners: {P52758;P62495;O75570;Q92900}

20974 Pathogen[ Q85601] interacts with 4 human partners: {P62495;P52758;O75570;Q92900}

20975 Pathogen[ P14079] interacts with 4 human partners: {P52758;P62495;O75570;Q92900}

20976 Pathogen[ P03383] interacts with 4 human partners: {P52758;O75570;P62495;Q92900}

20977 Pathogen[ P03410] interacts with 4 human partners: {Q92900;P62495;P52758;O75570}

20978 Pathogen[ P14075] interacts with 4 human partners: {P62495;Q92900;P52758;O75570}

20979 Pathogen[ P0C206] interacts with 4 human partners: {P62495;Q92900;O75570;P52758}

20980 Pathogen[ P03363] interacts with 4 human partners: {P52758;O75570;Q92900;P62495}

20981 [Cluster 1908]GO:0006266+P biological\_process [name] DNA ligation [def] "The re-formation of a broken phosphodiester bond in the DNA backbone, carried out by DNA ligase." [ISBN

20982 Pathogen[ Q2Q067] interacts with 5 human partners: {Q7Z2E3;P11388;Q13426;P12956;P16455}

20983 Pathogen[ P0C214] interacts with 5 human partners: {Q13426;Q7Z2E3;P11388;P16455;P12956}

20984 Pathogen[ P03346] interacts with 4 human partners:{P12956;P11388;Q13426;Q7Z2E3}  
20985 Pathogen[ Q85601] interacts with 5 human  
partners:{P16455;Q13426;P11388;Q7Z2E3;P12956}  
20986 Pathogen[ P14079] interacts with 6 human  
partners:{P11388;P16455;P12956;Q7Z2E3;Q13426;P49917}  
20987 Pathogen[ P03383] interacts with 3 human partners:{Q7Z2E3;Q13426;P12956}  
20988 Pathogen[ P03410] interacts with 5 human  
partners:{Q7Z2E3;P12956;P16455;Q13426;P11388}  
20989 Pathogen[ P14075] interacts with 3 human partners:{Q7Z2E3;P12956;Q13426}  
20990 Pathogen[ P0C206] interacts with 6 human  
partners:{P49917;Q13426;P11388;P12956;P16455;Q7Z2E3}  
20991 Pathogen[ P03363] interacts with 3 human partners:{P12956;Q13426;Q7Z2E3}  
20992 [Cluster 1909]GO:0002326+P biological\_process [name] B cell lineage commitment  
[def] "The process in which a lymphoid progenitor cell becomes committed to become any  
type of B cell." [GOC  
20993 Pathogen[ Q2Q067] interacts with 2 human partners:{P55895;P15923}  
20994 Pathogen[ P0C214] interacts with 2 human partners:{P55895;P15923}  
20995 Pathogen[ P03346] interacts with 2 human partners:{P55895;P15923}  
20996 Pathogen[ Q85601] interacts with 2 human partners:{P15923;P55895}  
20997 Pathogen[ P14079] interacts with 1 human partners:{P15923}  
20998 Pathogen[ P03383] interacts with 2 human partners:{P15923;P55895}  
20999 Pathogen[ P03410] interacts with 2 human partners:{P55895;P15923}  
21000 Pathogen[ P14075] interacts with 2 human partners:{P15923;P55895}  
21001 Pathogen[ P0C206] interacts with 2 human partners:{P15923;P55895}  
21002 Pathogen[ P03363] interacts with 2 human partners:{P15923;P55895}  
21003 [Cluster 1910]GO:0050927+P biological\_process [name] positive regulation of positive  
chemotaxis [def] "Any process that activates or increases the frequency, rate or extent  
of the directed movement of a motile cell or organism towards a higher concentration in  
a concentration gradient of a specific chemical." [GOC  
21004 Pathogen[ Q2Q067] interacts with 1 human partners:{P84022}  
21005 Pathogen[ P0C214] interacts with 1 human partners:{P84022}  
21006 Pathogen[ P03346] interacts with 1 human partners:{P84022}  
21007 Pathogen[ Q85601] interacts with 1 human partners:{P84022}  
21008 Pathogen[ P14079] interacts with 1 human partners:{P31751}  
21009 Pathogen[ P03383] interacts with 1 human partners:{P84022}  
21010 Pathogen[ P03410] interacts with 1 human partners:{P84022}  
21011 Pathogen[ P14075] interacts with 1 human partners:{P84022}  
21012 Pathogen[ P0C206] interacts with 1 human partners:{P84022}  
21013 Pathogen[ P03363] interacts with 1 human partners:{P84022}  
21014 [Cluster 1911]GO:0030879+P biological\_process [name] mammary gland development  
[def] "The process whose specific outcome is the progression of the mammary gland over  
time, from its formation to the mature structure. The mammary gland is a large compound  
sebaceous gland that in female mammals is modified to secrete milk. Its development  
starts with the formation of the mammary line and ends as the mature gland cycles  
between nursing and weaning stages." [PMID  
21015 Pathogen[ Q2Q067] interacts with 3 human partners:{P22392;P28356;P17482}  
21016 Pathogen[ P0C214] interacts with 3 human partners:{P17482;P22392;P16220}  
21017 Pathogen[ P03346] interacts with 6 human  
partners:{P16220;P06401;P51587;P28356;P22392;P17482}  
21018 Pathogen[ Q85601] interacts with 4 human partners:{P16220;P22392;P51587;P17482}  
21019 Pathogen[ P14079] interacts with 2 human partners:{P51587;P22392}  
21020 Pathogen[ P03383] interacts with 3 human partners:{P16220;P17482;P22392}  
21021 Pathogen[ P03410] interacts with 3 human partners:{P17482;P51587;P16220}  
21022 Pathogen[ P14075] interacts with 3 human partners:{P17482;P16220;P22392}  
21023 Pathogen[ P0C206] interacts with 6 human  
partners:{P06401;P16220;P22392;P51587;P17482;P28356}  
21024 Pathogen[ P03363] interacts with 3 human partners:{P28356;P16220;P17482}  
21025 [Cluster 1912]GO:0007340+P biological\_process [name] acrosome reaction [def] "The  
discharge, by sperm, of a single, anterior secretory granule following the sperm's  
attachment to the zona pellucida surrounding the oocyte. The process begins with the  
fusion of the outer acrosomal membrane with the sperm plasma membrane and ends with the  
exocytosis of the acrosomal contents into the egg." [GOC  
21026 Pathogen[ Q2Q067] interacts with 1 human partners:{075969}  
21027 Pathogen[ P0C214] interacts with 1 human partners:{075969}  
21028 Pathogen[ P03346] interacts with 1 human partners:{075969}  
21029 Pathogen[ Q85601] interacts with 1 human partners:{075969}  
21030 Pathogen[ P14079] interacts with 3 human partners:{Q6UW49;Q9BZX4;075969}  
21031 Pathogen[ P03383] interacts with 1 human partners:{075969}  
21032 Pathogen[ P03410] interacts with 3 human partners:{075969;Q6UW49;Q9BZX4}  
21033 Pathogen[ P14075] interacts with 1 human partners:{075969}  
21034 Pathogen[ P0C206] interacts with 1 human partners:{075969}  
21035 Pathogen[ P03363] interacts with 1 human partners:{075969}  
21036 [Cluster 1913]GO:0031581+P biological\_process [name] hemidesmosome assembly [def]  
"Assembly of hemidesmosomes, integrin-containing protein complexes that bind to laminin  
in the basal lamina. Hemidesmosomes form the contact between the basal surface of  
epithelial cells and the underlying basal lamina." [GOC

21037 Pathogen[ Q2Q067] interacts with 2 human partners:{P13647;P02533}  
21038 Pathogen[ POC214] interacts with 2 human partners:{P02533;P13647}  
21039 Pathogen[ P03346] interacts with 3 human partners:{Q15149;P02533;P13647}  
21040 Pathogen[ Q85601] interacts with 2 human partners:{P02533;P13647}  
21041 Pathogen[ P14079] interacts with 3 human partners:{P02533;Q15149;P13647}  
21042 Pathogen[ P03383] interacts with 2 human partners:{P02533;P13647}  
21043 Pathogen[ P03410] interacts with 3 human partners:{P02533;Q15149;P13647}  
21044 Pathogen[ P14075] interacts with 2 human partners:{P13647;P02533}  
21045 Pathogen[ POC206] interacts with 2 human partners:{P13647;P02533}  
21046 Pathogen[ P03363] interacts with 3 human partners:{P02533;P13647;Q15149}  
21047 [Cluster 1914]GO:2000378+P biological\_process [name] negative regulation of reactive oxygen species metabolic process [def] "Any process that stops, prevents or reduces the frequency, rate or extent of reactive oxygen species metabolic process." [GOC  
21048 Pathogen[ Q2Q067] interacts with 3 human partners:{P04198;Q9NY61;P02511}  
21049 Pathogen[ POC214] interacts with 3 human partners:{P02511;Q9NY61;P04198}  
21050 Pathogen[ P03346] interacts with 4 human partners:{Q13489;P02511;Q9NY61;P04198}  
21051 Pathogen[ Q85601] interacts with 3 human partners:{Q9NY61;P02511;P04198}  
21052 Pathogen[ P14079] interacts with 3 human partners:{Q9NY61;P02511;P04198}  
21053 Pathogen[ P03383] interacts with 3 human partners:{Q9NY61;P02511;P04198}  
21054 Pathogen[ P03410] interacts with 3 human partners:{Q9NY61;P02511;P04198}  
21055 Pathogen[ P14075] interacts with 3 human partners:{Q9NY61;P04198;P02511}  
21056 Pathogen[ POC206] interacts with 4 human partners:{P04198;Q13489;P02511;Q9NY61}  
21057 Pathogen[ P03363] interacts with 3 human partners:{P04198;Q9NY61;Q13489}  
21058 [Cluster 1915]GO:0001707+P biological\_process [name] mesoderm formation [def] "The process that gives rise to the mesoderm. This process pertains to the initial formation of the structure from unspecified parts." [GOC  
21059 Pathogen[ Q2Q067] interacts with 5 human partners:{O96004;P11831;P84022;Q15796;O00321}  
21060 Pathogen[ POC214] interacts with 6 human partners:{O00321;P84022;P11831;Q16881;Q15796;O96004}  
21061 Pathogen[ P03346] interacts with 7 human partners:{P11831;Q15796;O00321;O96004;P84022;O95863;O43763}  
21062 Pathogen[ Q85601] interacts with 5 human partners:{P11831;O96004;P84022;Q15796;O00321}  
21063 Pathogen[ P14079] interacts with 2 human partners:{O00321;O96004}  
21064 Pathogen[ P03383] interacts with 5 human partners:{P11831;O00321;O96004;P84022;Q15796}  
21065 Pathogen[ P03410] interacts with 5 human partners:{P84022;P11831;O96004;O00321;Q15796}  
21066 Pathogen[ P14075] interacts with 5 human partners:{P11831;Q15796;O96004;P84022;O00321}  
21067 Pathogen[ POC206] interacts with 6 human partners:{P84022;O00321;Q15796;O96004;P11831;O43763}  
21068 Pathogen[ P03363] interacts with 6 human partners:{O43763;O00321;P11831;Q15796;P84022;O96004}  
21069 [Cluster 1916]GO:0030307+P biological\_process [name] positive regulation of cell growth [def] "Any process that activates or increases the frequency, rate, extent or direction of cell growth." [GOC  
21070 Pathogen[ Q2Q067] interacts with 16 human partners:{O75832;P31749;Q16594;O95684;Q06265;Q9Y5N5;Q13868;Q9NPD3;Q04695;Q6IQ32;O43598;Q9UID6;Q9HBM6;Q9ULG1;P02489;Q76FK4}  
21071 Pathogen[ POC214] interacts with 17 human partners:{Q6IQ32;Q9UID6;O95684;P02489;Q9ULG1;Q16594;O75832;Q9NPD3;Q04695;Q9HBM6;Q9Y5N5;Q76FK4;O43598;Q13868;Q06265;P31749;P18054}  
21072 Pathogen[ P03346] interacts with 19 human partners:{O95684;O43598;P02489;Q9Y5N5;Q9ULG1;P18054;O75832;Q04695;P31749;Q9HBM6;Q6IQ32;Q06265;Q9UID6;Q8WVI7;Q9NPD3;P58546;Q13868;Q76FK4;Q16594}  
21073 Pathogen[ Q85601] interacts with 16 human partners:{P02489;O43598;Q9NPD3;P31749;O95684;O75832;Q13868;Q9Y5N5;Q16594;Q9UID6;Q9HBM6;Q6IQ32;Q04695;Q76FK4;Q9ULG1;Q06265}  
21074 Pathogen[ P14079] interacts with 17 human partners:{Q9ULG1;O95684;Q16594;Q9Y5N5;P13498;Q8WVI7;O43598;Q9UID6;Q13868;O75832;Q9NPD3;Q9GZP9;P02489;Q04695;Q6IQ32;Q06265;Q9HBM6}  
21075 Pathogen[ P03383] interacts with 13 human partners:{Q06265;O95684;P31749;Q9HBM6;O43598;Q6IQ32;O75832;Q16594;Q04695;Q9UID6;Q9NPD3;Q9Y5N5;Q13868}  
21076 Pathogen[ P03410] interacts with 18 human partners:{O95684;Q8WVI7;Q06265;Q76FK4;Q9ULG1;Q13868;P31749;Q9GZP9;Q6IQ32;Q9HBM6;P02489;Q16594;Q04695;Q9NPD3;Q9UID6;Q9Y5N5;O43598;O75832}  
21077 Pathogen[ P14075] interacts with 13 human partners:{O95684;O75832;Q9NPD3;O43598;Q9UID6;Q16594;Q13868;P31749;Q04695;Q9Y5N5;Q6IQ32;Q06265;Q9HBM6}  
21078 Pathogen[ POC206] interacts with 18 human partners:{Q9UID6;O43598;O75832;P31749;O95684;Q8WVI7;Q9NPD3;Q13868;Q06265;Q9ULG1;Q6IQ32;Q76FK4;Q9GZP9;Q9Y5N5;Q9HBM6;P02489;Q04695;Q16594}  
21079 Pathogen[ P03363] interacts with 14 human

partners:{Q9ULG1;O95684;Q9NPD3;P31749;Q13868;Q9Y5N5;Q9HBM6;Q6IQ32;P02489;Q9UID6;O43598;Q76FK4;Q04695;Q16594}

21080 [Cluster 1917]GO:0001822+P biological\_process [name] kidney development [def] "The process whose specific outcome is the progression of the kidney over time, from its formation to the mature structure. The kidney is an organ that filters the blood and/or excretes the end products of body metabolism in the form of urine." [GOC

21081 Pathogen[ Q2Q067] interacts with 9 human

partners:{Q13485;P35680;O15350;Q9Y3Y4;Q7LG56;Q14865;O60765;Q9NSC2;Q15797}

21082 Pathogen[ P0C214] interacts with 11 human

partners:{O95633;Q14865;P46379;O15350;Q8WV60;O60765;Q13485;Q9NSC2;Q15797;Q9Y3Y4;Q7LG56}

21083 Pathogen[ P03346] interacts with 21 human

partners:{Q9NPC8;Q9Y283;O60765;Q15797;Q9Y3Y4;Q68CZ1;Q9NSC2;P20264;O15350;O43680;Q06710;Q7LG56;P46379;P35680;Q15475;Q14865;Q92481;P36405;Q13485;O95633;Q9UJU5}

21084 Pathogen[ Q85601] interacts with 13 human

partners:{P36405;Q15797;Q9Y283;Q8WV60;P46379;Q7LG56;O60765;P35680;Q14865;O15350;Q9NSC2;Q13485;Q9Y3Y4}

21085 Pathogen[ P14079] interacts with 14 human

partners:{Q8NBQ7;P35680;Q68CZ1;Q14865;Q15797;O15350;Q6N021;Q7LG56;P36405;Q8WV60;Q9Y3Y4;Q9Y283;O60765;Q9NSC2}

21086 Pathogen[ P03383] interacts with 6 human

partners:{Q13485;O60765;Q15797;Q9NSC2;O15350;Q9Y3Y4}

21087 Pathogen[ P03410] interacts with 14 human

partners:{Q8WV60;P36405;Q6N021;Q9Y283;Q15797;Q13485;P35680;O15350;Q9Y3Y4;O60765;Q9NSC2;Q68CZ1;Q14865;Q7LG56}

21088 Pathogen[ P14075] interacts with 5 human

partners:{Q9NSC2;O60765;Q9Y3Y4;Q13485;O15350}

21089 Pathogen[ P0C206] interacts with 14 human

partners:{Q8WV60;O95633;Q9NSC2;Q9Y3Y4;O60765;Q7LG56;Q9Y283;P35680;Q13485;P36405;Q15797;O15350;Q14865;P46379}

21090 Pathogen[ P03363] interacts with 10 human

partners:{P46379;Q14865;O60765;Q15797;Q9Y3Y4;P20264;Q9Y283;Q13485;Q9UJU5;Q9NPC8}

21091 [Cluster 1918]GO:0033128+P biological\_process [name] negative regulation of histone phosphorylation [def] "Any process that stops, prevents, or reduces the frequency, rate or extent of the addition of one or more phosphate groups to a histone protein." [GOC

21092 Pathogen[ Q2Q067] interacts with 1 human partners:{P63146}

21093 Pathogen[ P0C214] interacts with 1 human partners:{P63146}

21094 Pathogen[ P03346] interacts with 1 human partners:{P63146}

21095 Pathogen[ Q85601] interacts with 1 human partners:{P63146}

21096 Pathogen[ P14079] interacts with 1 human partners:{P63146}

21097 Pathogen[ P03383] interacts with 1 human partners:{P63146}

21098 Pathogen[ P03410] interacts with 1 human partners:{P63146}

21099 Pathogen[ P14075] interacts with 1 human partners:{P63146}

21100 Pathogen[ P0C206] interacts with 1 human partners:{P63146}

21101 Pathogen[ P03363] interacts with 1 human partners:{P63146}

21102 [Cluster 1919]GO:0000902+P biological\_process [name] cell morphogenesis [def] "The developmental process in which the size or shape of a cell is generated and organized." [GOC

21103 Pathogen[ Q2Q067] interacts with 10 human

partners:{P40306;P35712;P41182;Q9NZI6;P11473;Q15532;P40337;Q13618;Q9HBD4;P61586}

21104 Pathogen[ P0C214] interacts with 9 human

partners:{Q9HBD4;P61586;Q13618;P40306;P40337;P41182;Q15532;Q9NZI6;P35712}

21105 Pathogen[ P03346] interacts with 15 human

partners:{P11473;Q9HBD4;Q9Y5W3;Q9NZI6;Q13618;P16452;Q15532;Q9NVR7;P41182;P40337;P35712;Q9H8V3;P40306;Q9GZV8;P61586}

21106 Pathogen[ Q85601] interacts with 10 human

partners:{Q15532;P11473;P40337;P35712;P40306;P61586;Q9NZI6;Q9HBD4;Q13618;P41182}

21107 Pathogen[ P14079] interacts with 21 human

partners:{P16452;Q15532;Q01518;P11473;P40306;Q13618;P40123;P35475;P35712;Q9NVR7;P35611;P40337;P41182;Q2M3G4;Q9NZI6;P61586;Q9H8V3;Q9Y5W3;Q9GZV8;Q96JY0;P28360}

21108 Pathogen[ P03383] interacts with 9 human

partners:{P35712;Q9HBD4;P40337;P40306;Q15532;Q13618;P11473;P61586;Q9NZI6}

21109 Pathogen[ P03410] interacts with 18 human

partners:{P35712;Q2M3G4;P16452;P11473;Q9GZV8;P40306;P40123;Q13618;Q9NVR7;P61586;P41182;Q9NZI6;Q9H8V3;Q01518;Q9HBD4;Q15532;P35611;P40337}

21110 Pathogen[ P14075] interacts with 9 human

partners:{Q9HBD4;Q13618;Q15532;P35712;P11473;P61586;Q9NZI6;P40337;P40306}

21111 Pathogen[ P0C206] interacts with 15 human

partners:{P40306;P41182;Q9NVR7;Q15532;P61586;Q13618;P16452;Q2M3G4;Q9H8V3;Q9NZI6;P35712;Q9HBD4;Q9GZV8;P11473;P40337}

21112 Pathogen[ P03363] interacts with 11 human

partners:{Q2M3G4;Q13618;Q15532;P40337;P11473;Q9NZI6;Q96JY0;Q9HBD4;Q9NVR7;P35712;P16452}

21113 [Cluster 1920]GO:2000009+P biological\_process [name] negative regulation of protein localization at cell surface [def] "Any process that stops, prevents, or reduces the frequency, rate or extent of protein localization at cell surface." [GOC



21114 Pathogen[ Q2Q067] interacts with 1 human partners:{O14907}

21115 Pathogen[ POC214] interacts with 1 human partners:{O14907}

21116 Pathogen[ P03346] interacts with 1 human partners:{O14907}

21117 Pathogen[ Q85601] interacts with 1 human partners:{O14907}

21118 Pathogen[ P14079] interacts with 1 human partners:{O14907}

21119 Pathogen[ P03383] interacts with 1 human partners:{O14907}

21120 Pathogen[ P03410] interacts with 1 human partners:{O14907}

21121 Pathogen[ P14075] interacts with 1 human partners:{O14907}

21122 Pathogen[ POC206] interacts with 1 human partners:{O14907}

21123 Pathogen[ P03363] interacts with 1 human partners:{O14907}

21124 [Cluster 1921]GO:0035606+P biological\_process [name] peptidyl-cysteine S-trans-nitrosylation [def] "Transfer of a nitric oxide (NO) group from one cysteine residue to another." [PMID

21125 Pathogen[ Q2Q067] interacts with 1 human partners:{P04406}

21126 Pathogen[ POC214] interacts with 1 human partners:{P04406}

21127 Pathogen[ P03346] interacts with 1 human partners:{P04406}

21128 Pathogen[ Q85601] interacts with 1 human partners:{P04406}

21129 Pathogen[ P14079] interacts with 1 human partners:{P04406}

21130 Pathogen[ P03383] interacts with 1 human partners:{P04406}

21131 Pathogen[ P03410] interacts with 1 human partners:{P04406}

21132 Pathogen[ P14075] interacts with 1 human partners:{P04406}

21133 Pathogen[ POC206] interacts with 1 human partners:{P04406}

21134 Pathogen[ P03363] interacts with 1 human partners:{P04406}

21135 [Cluster 1922]GO:0007040+P biological\_process [name] lysosome organization [def] "A process that is carried out at the cellular level which results in the assembly, arrangement of constituent parts, or disassembly of a lysosome. A lysosome is a cytoplasmic, membrane-bounded organelle that is found in most animal cells and that contains a variety of hydrolases." [GOC

21136 Pathogen[ Q2Q067] interacts with 7 human partners:{Q9NQG7;Q14457;Q8N612;Q9H8T0;Q9NZZ3;Q86VS8;Q96ED9}

21137 Pathogen[ POC214] interacts with 8 human partners:{Q14457;Q9NQG7;Q99698;Q96ED9;Q8N612;Q86VS8;Q9H8T0;Q9NZZ3}

21138 Pathogen[ P03346] interacts with 10 human partners:{Q9NQG7;Q99698;Q86VS8;Q9P253;Q8N612;Q14457;Q9NZZ3;Q9H8T0;Q96ED9;Q9UJC3}

21139 Pathogen[ Q85601] interacts with 9 human partners:{Q14457;Q9NQG7;Q86VS8;Q9P253;Q8N612;Q9H8T0;Q9NZZ3;Q96ED9;Q99698}

21140 Pathogen[ P14079] interacts with 16 human partners:{Q9NQG7;O14773;Q9UJC3;Q86VS8;Q96ED9;P35475;Q9H8T0;Q92902;O75503;Q6IAA8;Q9P253;Q8N612;Q9NWW5;Q9NZZ3;Q99698;Q14457}

21141 Pathogen[ P03383] interacts with 7 human partners:{Q14457;Q9NQG7;Q9NZZ3;Q8N612;Q9H8T0;Q86VS8;Q96ED9}

21142 Pathogen[ P03410] interacts with 15 human partners:{Q9NQG7;Q9UJC3;Q9NWW5;Q92902;Q14457;Q9H8T0;Q86VS8;Q9P253;O75503;Q96ED9;Q9NZZ3;Q8N612;Q6IAA8;Q99698;Q9UBY8}

21143 Pathogen[ P14075] interacts with 7 human partners:{Q14457;Q9NQG7;Q8N612;Q9H8T0;Q9NZZ3;Q86VS8;Q96ED9}

21144 Pathogen[ POC206] interacts with 10 human partners:{Q9NQG7;Q9H8T0;Q14457;Q99698;Q86VS8;Q96ED9;Q8N612;Q9P253;Q9NZZ3;Q9UJC3}

21145 Pathogen[ P03363] interacts with 10 human partners:{Q9NQG7;Q86VS8;Q96ED9;Q14457;Q9NZZ3;Q92902;Q99698;Q9H8T0;Q8N612;Q9UJC3}

21146 [Cluster 1923]GO:0010569+P biological\_process [name] regulation of double-strand break repair via homologous recombination [def] "Any process that modulates the frequency, rate or extent of the error-free repair of a double-strand break in DNA in which the broken DNA molecule is repaired using homologous sequences." [GOC

21147 Pathogen[ Q2Q067] interacts with 6 human partners:{Q9NYB0;O14757;Q8N6T7;P15927;Q9NY27;P60510}

21148 Pathogen[ POC214] interacts with 7 human partners:{Q9NY27;Q9BXT5;P60510;P15927;Q8N6T7;Q9NYB0;O14757}

21149 Pathogen[ P03346] interacts with 7 human partners:{Q9BXT5;Q9NY27;O14757;Q9NYB0;P15927;Q8N6T7;P60510}

21150 Pathogen[ Q85601] interacts with 7 human partners:{Q9BXT5;Q9NY27;O14757;P15927;Q8N6T7;P60510;Q9NYB0}

21151 Pathogen[ P14079] interacts with 6 human partners:{Q9BXT5;Q9NY27;Q8N6T7;Q9NYB0;P15927;P60510}

21152 Pathogen[ P03383] interacts with 6 human partners:{O14757;Q8N6T7;Q9NYB0;P15927;Q9NY27;P60510}

21153 Pathogen[ P03410] interacts with 7 human partners:{P60510;Q8N6T7;Q9BXT5;O14757;P15927;Q9NYB0;Q9NY27}

21154 Pathogen[ P14075] interacts with 7 human partners:{Q8N6T7;P60510;P15927;Q9NY27;Q9BXT5;O14757;Q9NYB0}

21155 Pathogen[ POC206] interacts with 6 human partners:{Q9BXT5;Q8N6T7;Q9NY27;Q9NYB0;P15927;P60510}

21156 Pathogen[ P03363] interacts with 7 human partners:{Q9NYB0;P15927;Q8N6T7;P60510;Q9NY27;Q9BXT5;O14757}

21157 [Cluster 1924]GO:0015939+P biological\_process [name] pantothenate metabolic process [def] "The chemical reactions and pathways involving pantothenate, the anion of

pantothenic acid, the amide of beta-alanine and pantoic acid. It is a B complex vitamin that is a constituent of coenzyme A and is distributed ubiquitously in foods." [GOC

21158 Pathogen[ Q2Q067] interacts with 2 human partners:{Q9HAB8;Q9NRN7}

21159 Pathogen[ POC214] interacts with 5 human partners:{Q8TE04;Q9HAB8;Q13057;Q9BZ23;Q9NRN7}

21160 Pathogen[ P03346] interacts with 2 human partners:{Q9NRN7;Q9HAB8}

21161 Pathogen[ Q85601] interacts with 1 human partners:{Q9NRN7}

21162 Pathogen[ P14079] interacts with 6 human partners:{Q8TE04;Q9BZ23;Q13057;Q9NRN7;Q96CD2;Q9HAB8}

21163 Pathogen[ P03383] interacts with 3 human partners:{Q9NRN7;Q9BZ23;Q9HAB8}

21164 Pathogen[ P03410] interacts with 6 human partners:{Q8TE04;Q13057;Q96CD2;Q9NRN7;Q9BZ23;Q9HAB8}

21165 Pathogen[ P14075] interacts with 5 human partners:{Q9HAB8;Q13057;Q8TE04;Q9BZ23;Q9NRN7}

21166 Pathogen[ POC206] interacts with 5 human partners:{Q8TE04;Q13057;Q9BZ23;Q9HAB8;Q9NRN7}

21167 Pathogen[ P03363] interacts with 1 human partners:{Q9NRN7}

21168 [Cluster 1925]GO:0006402+P biological\_process [name] mRNA catabolic process [def] "The chemical reactions and pathways resulting in the breakdown of mRNA, messenger RNA, which is responsible for carrying the coded genetic 'message', transcribed from DNA, to sites of protein assembly at the ribosomes." [ISBN

21169 Pathogen[ Q2Q067] interacts with 9 human partners:{Q8TCS8;Q9Y6X8;Q9HCK5;P08107;Q9H9G7;P13489;P26651;O95453;Q07352}

21170 Pathogen[ POC214] interacts with 9 human partners:{P13489;O95453;Q07352;Q8TCS8;Q9H9G7;Q9Y6X8;P26651;Q9HCK5;P08107}

21171 Pathogen[ P03346] interacts with 9 human partners:{P08107;P13489;Q9H9G7;O95453;Q9HCK5;Q8TCS8;Q9Y6X8;Q07352;P26651}

21172 Pathogen[ Q85601] interacts with 9 human partners:{P08107;Q9HCK5;Q07352;P26651;Q9H9G7;O95453;Q8TCS8;Q9Y6X8;P13489}

21173 Pathogen[ P14079] interacts with 8 human partners:{Q9H9G7;Q9HCK5;P13489;O95453;P08107;Q9Y6X8;Q8TCS8;Q07352}

21174 Pathogen[ P03383] interacts with 9 human partners:{P08107;Q9HCK5;Q8TCS8;Q07352;Q9Y6X8;P26651;P13489;O95453;Q9H9G7}

21175 Pathogen[ P03410] interacts with 9 human partners:{P13489;Q8TCS8;Q9H9G7;P26651;O95453;P08107;Q9HCK5;Q9Y6X8;Q07352}

21176 Pathogen[ P14075] interacts with 9 human partners:{O95453;Q9HCK5;Q9H9G7;P26651;P13489;Q9Y6X8;Q07352;Q8TCS8;P08107}

21177 Pathogen[ POC206] interacts with 9 human partners:{Q9HCK5;O95453;P26651;Q8TCS8;P13489;Q9Y6X8;P08107;Q9H9G7;Q07352}

21178 Pathogen[ P03363] interacts with 8 human partners:{O95453;Q9H9G7;Q9Y6X8;Q9HCK5;P13489;Q07352;P08107;P26651}

21179 [Cluster 1926]GO:0008361+P biological\_process [name] regulation of cell size [def] "Any process that modulates the size of a cell." [GOC

21180 Pathogen[ Q2Q067] interacts with 3 human partners:{Q8N5D0;Q16254;O43504}

21181 Pathogen[ POC214] interacts with 4 human partners:{Q16254;Q8N5D0;O43504;P16220}

21182 Pathogen[ P03346] interacts with 4 human partners:{P16220;Q16254;Q8N5D0;O43504}

21183 Pathogen[ Q85601] interacts with 3 human partners:{P16220;Q16254;Q8N5D0}

21184 Pathogen[ P14079] interacts with 4 human partners:{Q8N5D0;Q16254;Q0VGL1;O43504}

21185 Pathogen[ P03383] interacts with 4 human partners:{P16220;Q16254;O43504;Q8N5D0}

21186 Pathogen[ P03410] interacts with 6 human partners:{O43504;Q16254;P16220;Q8N5D0;Q0VGL1;Q9UBY8}

21187 Pathogen[ P14075] interacts with 4 human partners:{Q8N5D0;Q16254;O43504;P16220}

21188 Pathogen[ POC206] interacts with 4 human partners:{P16220;Q16254;O43504;Q8N5D0}

21189 Pathogen[ P03363] interacts with 4 human partners:{Q8N5D0;Q16254;P16220;O43504}

21190 [Cluster 1927]GO:0032870+P biological\_process [name] cellular response to hormone stimulus [def] "Any process that results in a change in state or activity of a cell (in terms of movement, secretion, enzyme production, gene expression, etc.) as a result of a hormone stimulus." [GOC

21191 Pathogen[ Q2Q067] interacts with 3 human partners:{P01100;P40763;O14508}

21192 Pathogen[ POC214] interacts with 4 human partners:{P01100;P17275;O14508;P40763}

21193 Pathogen[ P03346] interacts with 6 human partners:{Q15788;P48443;P17275;O14508;P40763;P01100}

21194 Pathogen[ Q85601] interacts with 4 human partners:{P40763;O14508;P01100;P17275}

21195 Pathogen[ P14079] interacts with 7 human partners:{P31751;P01215;P48443;P17275;Q15788;O14508;P01100}

21196 Pathogen[ P03383] interacts with 3 human partners:{P01100;P01215;P17275}

21197 Pathogen[ P03410] interacts with 5 human partners:{P01215;P01100;O14508;P17275;P40763}

21198 Pathogen[ P14075] interacts with 3 human partners:{P17275;P01100;P01215}

21199 Pathogen[ POC206] interacts with 7 human partners:{P17275;P01100;O14508;P01215;P40763;Q15788;P48443}

21200 Pathogen[ P03363] interacts with 3 human partners:{P17275;O14508;P01100}

21201 [Cluster 1928]GO:0031396+P biological\_process [name] regulation of protein ubiquitination [def] "Any process that modulates the frequency, rate or extent of the addition of ubiquitin groups to a protein." [GOC

21202 Pathogen[ Q2Q067] interacts with 2 human partners:{Q9UER7;Q9UMX0}

21203 Pathogen[ P0C214] interacts with 3 human partners: {Q9UER7;P68543;Q9UMX0}  
21204 Pathogen[ P03346] interacts with 3 human partners: {Q9UMX0;Q9UER7;P68543}  
21205 Pathogen[ Q85601] interacts with 2 human partners: {Q9UER7;Q9UMX0}  
21206 Pathogen[ P14079] interacts with 4 human partners: {Q9UMX0;Q9UER7;P68543;Q15011}  
21207 Pathogen[ P03383] interacts with 2 human partners: {Q9UMX0;Q9UER7}  
21208 Pathogen[ P03410] interacts with 4 human partners: {P68543;Q9UMX0;Q9UER7;Q15011}  
21209 Pathogen[ P14075] interacts with 3 human partners: {Q15011;Q9UER7;Q9UMX0}  
21210 Pathogen[ P0C206] interacts with 4 human partners: {Q9UMX0;Q9UER7;P68543;Q15011}  
21211 Pathogen[ P03363] interacts with 2 human partners: {Q9UMX0;Q9UER7}  
21212 [Cluster 1929]GO:0006606+P biological\_process [name] protein import into nucleus  
[def] "The directed movement of a protein from the cytoplasm to the nucleus." [GOC  
21213 Pathogen[ Q2Q067] interacts with 29 human  
partners: {Q14974;O60684;P55265;Q86UA6;P49792;P40763;Q08209;Q9H2T7;Q96DC7;O94829;Q53F  
T3;O60318;P53801;Q96P70;P12270;Q96QC0;O15131;Q96MT3;A9QM74;O00505;Q9P0J0;Q8WWQ0;O953  
73;O00629;P52292;Q9H3M7;P35658;P52294;O95149}  
21214 Pathogen[ P0C214] interacts with 29 human  
partners: {O94829;A9QM74;Q96P70;Q9H3M7;P55265;O60684;O60318;P49792;O95149;Q96MT3;O151  
31;Q96DC7;Q53FT3;P52294;Q9P0J0;Q8WWQ0;P35658;Q08209;Q49AN0;O00505;P40763;P52292;P122  
70;Q14974;Q9H2T7;Q86UA6;O95373;Q96QC0;O00629}  
21215 Pathogen[ P03346] interacts with 32 human  
partners: {Q9NPC8;Q96P70;O00629;P12270;Q95149;Q9H2T7;P55265;Q96DC7;Q96QC0;Q49AN0;O603  
18;O00505;P35658;Q96MT3;O95373;O15131;Q8WWQ0;A9QM74;Q86UA6;P52292;O60684;P53801;Q9P0  
J0;O94829;Q08209;P40763;O95343;Q9H3M7;P52294;Q53FT3;P49792;Q14974}  
21216 Pathogen[ Q85601] interacts with 29 human  
partners: {O00629;Q53FT3;Q9P0J0;O95149;Q96DC7;Q96P70;Q86UA6;P40763;Q49AN0;O60318;P122  
70;Q14974;O94829;Q96MT3;Q08209;O15131;O95373;Q8WWQ0;A9QM74;P55265;P35658;Q96QC0;P522  
92;Q9H2T7;P49792;O00505;O60684;Q9H3M7;P52294}  
21217 Pathogen[ P14079] interacts with 28 human  
partners: {Q96DC7;O95373;Q96QC0;Q96P70;P35658;Q49AN0;P52294;O60684;Q8WWQ0;O95149;P122  
70;Q53FT3;O94829;O60318;P55265;Q14974;Q86UA6;Q9P0J0;A9QM74;O00505;Q9H3M7;P53801;Q9H2  
T7;Q96MT3;Q08209;O00629;P52292;O15131}  
21218 Pathogen[ P03383] interacts with 26 human  
partners: {Q86UA6;P49792;O94829;P12270;Q96P70;Q96MT3;O60318;O00505;A9QM74;P52292;Q9H2  
T7;O95149;P53801;Q14974;O15131;P35658;Q96QC0;Q53FT3;Q8WWQ0;Q9H3M7;P55265;O95373;Q9P0  
J0;O00629;P52294;Q96DC7}  
21219 Pathogen[ P03410] interacts with 30 human  
partners: {Q14974;A9QM74;O00505;Q96QC0;Q08209;P52294;Q96P70;Q86UA6;Q9H3M7;Q53FT3;P552  
65;P12270;Q8WWQ0;O00629;O60684;P35658;O94829;Q49AN0;Q9H2T7;O60318;Q9P0J0;P52292;Q96M  
T3;O15131;P40763;O95373;P49792;Q96DC7;O95149;P53801}  
21220 Pathogen[ P14075] interacts with 25 human  
partners: {P52292;O15131;P53801;Q96MT3;Q53FT3;Q8WWQ0;P55265;Q96P70;Q96QC0;Q9H2T7;P497  
92;O00629;P35658;P12270;O00505;P52294;O95373;Q96DC7;Q9H3M7;O95149;O94829;A9QM74;Q86U  
A6;Q14974;Q9P0J0}  
21221 Pathogen[ P0C206] interacts with 30 human  
partners: {O15131;Q96DC7;O95149;P55265;Q96MT3;A9QM74;O00629;O60684;Q14974;O00505;Q96P  
70;O60318;O94829;Q8WWQ0;P53801;P49792;O95373;P40763;Q9H2T7;Q9P0J0;Q9H3M7;Q96QC0;Q082  
09;Q49AN0;P52294;Q9UK53;Q53FT3;P52292;P35658;P12270}  
21222 Pathogen[ P03363] interacts with 30 human  
partners: {Q53FT3;P53801;O60684;Q8WWQ0;P12270;Q96MT3;A9QM74;Q96QC0;Q9H2T7;O00505;Q96P  
70;Q9H3M7;Q96DC7;O00629;Q86UA6;Q49AN0;Q9P0J0;O60318;P49792;P35658;P55265;Q14974;O948  
29;O15131;O95373;O95343;P52292;O95149;Q9NPC8;P52294}  
21223 [Cluster 1930]GO:0071310+P biological\_process [name] cellular response to organic  
substance [def] "Any process that results in a change in state or activity of a cell  
(in terms of movement, secretion, enzyme production, gene expression, etc.) as a result  
of an organic substance stimulus." [GOC  
21224 Pathogen[ Q2Q067] interacts with 10 human  
partners: {P24385;O14757;P20265;Q14765;P27797;P11161;Q9UPW6;O14529;P22736;P18146}  
21225 Pathogen[ P0C214] interacts with 11 human  
partners: {O14529;P05937;Q14765;P24385;P20265;P42574;P18146;P27797;P11161;Q9UPW6;O147  
57}  
21226 Pathogen[ P03346] interacts with 14 human  
partners: {O75603;P24385;Q9UPW6;O14757;P42574;P05937;P20265;P22736;P11137;P27797;P111  
61;P18146;Q14765;O14529}  
21227 Pathogen[ Q85601] interacts with 10 human  
partners: {P18146;O14529;P24385;Q14765;Q9UPW6;P27797;O14757;P22736;P11161;P20265}  
21228 Pathogen[ P14079] interacts with 9 human  
partners: {Q9UPW6;P05937;P20265;P13498;P22736;Q14765;P11161;O14529;P11137}  
21229 Pathogen[ P03383] interacts with 7 human  
partners: {O14757;Q9UPW6;P24385;P18146;P11161;P20265;P27797}  
21230 Pathogen[ P03410] interacts with 12 human  
partners: {P11137;Q14765;Q9UPW6;P24385;P05937;P22736;O14757;P20265;P18146;P11161;P277  
97;O14529}  
21231 Pathogen[ P14075] interacts with 7 human  
partners: {P11161;P18146;P20265;Q9UPW6;P27797;P24385;O14757}  
21232 Pathogen[ P0C206] interacts with 11 human  
partners: {P27797;P11161;O14529;P22736;P18146;P11137;Q9UPW6;P42574;P20265;Q14765;P243

85}

21233 Pathogen[ P03363] interacts with 11 human partners:{P11137;Q14765;O14529;P18146;P27797;P20265;P24385;Q9UPW6;P05937;O14757;P11161}

21234 [Cluster 1931]GO:0048844+P biological\_process [name] artery morphogenesis [def] "The process in which the anatomical structures of arterial blood vessels are generated and organized. Arteries are blood vessels that transport blood from the heart to the body and its organs." [GOC

21235 Pathogen[ Q2Q067] interacts with 3 human partners:{O15105;P49639;P54821}

21236 Pathogen[ P0C214] interacts with 2 human partners:{P49639;O15105}

21237 Pathogen[ P03346] interacts with 6 human partners:{P31271;P54821;P49639;Q99811;O15105;Q9P2D1}

21238 Pathogen[ Q85601] interacts with 4 human partners:{P49639;Q9P2D1;P31271;O15105}

21239 Pathogen[ P14079] interacts with 4 human partners:{P31271;Q9P2D1;P49639;O15105}

21240 Pathogen[ P03383] interacts with 2 human partners:{O15105;P49639}

21241 Pathogen[ P03410] interacts with 3 human partners:{Q9P2D1;P49639;O15105}

21242 Pathogen[ P14075] interacts with 1 human partners:{O15105}

21243 Pathogen[ P0C206] interacts with 5 human partners:{P54821;P49639;Q9P2D1;O15105;P31271}

21244 Pathogen[ P03363] interacts with 5 human partners:{P31271;O15105;P49639;P54821;Q99811}

21245 [Cluster 1932]GO:0030316+P biological\_process [name] osteoclast differentiation [def] "The process in which a relatively unspecialized monocyte acquires the specialized features of an osteoclast. An osteoclast is a specialized phagocytic cell associated with the absorption and removal of the mineralized matrix of bone tissue." [CL

21246 Pathogen[ Q2Q067] interacts with 3 human partners:{O75030;O15111;P48200}

21247 Pathogen[ P0C214] interacts with 5 human partners:{O15111;P17275;O75030;P48200;Q9UQC2}

21248 Pathogen[ P03346] interacts with 5 human partners:{O15111;P17275;Q9UQC2;O75030;P48200}

21249 Pathogen[ Q85601] interacts with 5 human partners:{Q9UQC2;O15111;O75030;P48200;P17275}

21250 Pathogen[ P14079] interacts with 6 human partners:{Q9H295;P17275;P48200;Q86WC4;O75030;Q9UQC2}

21251 Pathogen[ P03383] interacts with 4 human partners:{O15111;O75030;P48200;P17275}

21252 Pathogen[ P03410] interacts with 6 human partners:{Q9UQC2;O15111;O75030;P17275;Q86WC4;P48200}

21253 Pathogen[ P14075] interacts with 4 human partners:{O15111;O75030;P17275;P48200}

21254 Pathogen[ P0C206] interacts with 6 human partners:{P17275;O75030;P48200;O15111;Q9UQC2;Q86WC4}

21255 Pathogen[ P03363] interacts with 5 human partners:{O15111;P48200;P17275;O75030;Q9UQC2}

21256 [Cluster 1933]GO:0044249+P biological\_process [name] cellular biosynthetic process [def] "The chemical reactions and pathways resulting in the formation of substances, carried out by individual cells." [GOC

21257 Pathogen[ Q2Q067] interacts with 1 human partners:{Q9BV20}

21258 Pathogen[ P0C214] interacts with 1 human partners:{Q9BV20}

21259 Pathogen[ P03346] interacts with 1 human partners:{Q9BV20}

21260 Pathogen[ Q85601] interacts with 1 human partners:{Q9BV20}

21261 Pathogen[ P14079] interacts with 1 human partners:{Q9BV20}

21262 Pathogen[ P03383] interacts with 1 human partners:{Q9BV20}

21263 Pathogen[ P03410] interacts with 1 human partners:{Q9BV20}

21264 Pathogen[ P14075] interacts with 1 human partners:{Q9BV20}

21265 Pathogen[ P0C206] interacts with 1 human partners:{Q9BV20}

21266 Pathogen[ P03363] interacts with 1 human partners:{Q9BV20}

21267 [Cluster 1934]GO:0034349+P biological\_process [name] glial cell apoptosis [def] "The process of apoptosis in glial cells." [GOC

21268 Pathogen[ Q2Q067] interacts with 1 human partners:{P55957}

21269 Pathogen[ P0C214] interacts with 1 human partners:{P55957}

21270 Pathogen[ P03346] interacts with 1 human partners:{P55957}

21271 Pathogen[ Q85601] interacts with 1 human partners:{P55957}

21272 Pathogen[ P14079] interacts with 1 human partners:{P55957}

21273 Pathogen[ P03383] interacts with 1 human partners:{P55957}

21274 Pathogen[ P03410] interacts with 1 human partners:{P55957}

21275 Pathogen[ P14075] interacts with 1 human partners:{P55957}

21276 Pathogen[ P0C206] interacts with 1 human partners:{P55957}

21277 Pathogen[ P03363] interacts with 1 human partners:{P55957}

21278 [Cluster 1935]GO:0090398+P biological\_process [name] cellular senescence [def] "A cell aging process stimulated in response to cellular stress, whereby normal cells lose the ability to divide through irreversible cell cycle arrest." [GOC

21279 Pathogen[ Q2Q067] interacts with 7 human partners:{Q8IY18;Q15554;Q8N726;P11831;P27797;P38936;Q96MF7}

21280 Pathogen[ P0C214] interacts with 7 human partners:{Q8IY18;Q15554;P11831;Q8N726;P38936;Q96MF7;P27797}

21281 Pathogen[ P03346] interacts with 7 human partners:{Q96MF7;P11831;Q15554;P27797;P38936;Q8N726;Q8IY18}

21282 Pathogen[ Q85601] interacts with 7 human partners:{P11831;Q8IY18;Q15554;P27797;Q8N726;P38936;Q96MF7}

21283 Pathogen[ P14079] interacts with 5 human partners:{Q96MF7;Q8N726;P38936;Q15554;Q8IY18}

21284 Pathogen[ P03383] interacts with 5 human partners:{P11831;Q15554;Q96MF7;Q8N726;P27797}

21285 Pathogen[ P03410] interacts with 7 human partners:{P11831;Q15554;Q8N726;Q96MF7;P38936;Q8IY18;P27797}

21286 Pathogen[ P14075] interacts with 5 human partners:{P11831;Q15554;P27797;Q96MF7;Q8N726}

21287 Pathogen[ P0C206] interacts with 7 human partners:{P27797;Q8N726;Q15554;P38936;Q96MF7;P11831;Q8IY18}

21288 Pathogen[ P03363] interacts with 6 human partners:{Q15554;P11831;P27797;Q8N726;Q8IY18;Q96MF7}

21289 [Cluster 1936]GO:0035246+P biological\_process [name] peptidyl-arginine N-methylation [def] "The addition of a methyl group onto a nitrogen atom of an arginine residue in a protein." [GOC

21290 Pathogen[ Q2Q067] interacts with 4 human partners:{O14744;P55345;Q86XK2;Q86X55}

21291 Pathogen[ P0C214] interacts with 3 human partners:{P55345;Q86XK2;Q86X55}

21292 Pathogen[ P03346] interacts with 4 human partners:{O14744;Q86XK2;P55345;Q86X55}

21293 Pathogen[ Q85601] interacts with 4 human partners:{Q86X55;Q86XK2;O14744;P55345}

21294 Pathogen[ P14079] interacts with 3 human partners:{Q86XK2;P55345;O14744}

21295 Pathogen[ P03383] interacts with 3 human partners:{Q86X55;Q86XK2;O14744}

21296 Pathogen[ P03410] interacts with 4 human partners:{Q86X55;Q86XK2;O14744;P55345}

21297 Pathogen[ P14075] interacts with 3 human partners:{O14744;Q86X55;Q86XK2}

21298 Pathogen[ P0C206] interacts with 4 human partners:{Q86XK2;O14744;Q86X55;P55345}

21299 Pathogen[ P03363] interacts with 3 human partners:{O14744;Q86XK2;Q86X55}

21300 [Cluster 1937]GO:0009743+P biological\_process [name] response to carbohydrate stimulus [def] "Any process that results in a change in state or activity of a cell or an organism (in terms of movement, secretion, enzyme production, gene expression, etc.) as a result of a carbohydrate stimulus." [GOC

21301 Pathogen[ Q2Q067] interacts with 3 human partners:{Q9H2P0;P05062;P08397}

21302 Pathogen[ P0C214] interacts with 4 human partners:{P05062;P08397;P48163;Q9H2P0}

21303 Pathogen[ P03346] interacts with 2 human partners:{Q9H2P0;P05062}

21304 Pathogen[ Q85601] interacts with 3 human partners:{P05062;Q9H2P0;P08397}

21305 Pathogen[ P14079] interacts with 3 human partners:{Q9H2P0;P61158;P08397}

21306 Pathogen[ P03383] interacts with 1 human partners:{P08397}

21307 Pathogen[ P03410] interacts with 2 human partners:{P08397;P05062}

21308 Pathogen[ P14075] interacts with 1 human partners:{P08397}

21309 Pathogen[ P0C206] interacts with 3 human partners:{P05062;Q9H2P0;P08397}

21310 Pathogen[ P03363] interacts with 1 human partners:{Q9H2P0}

21311 [Cluster 1938]GO:0002576+P biological\_process [name] platelet degranulation [def] "The regulated exocytosis of secretory granules containing preformed mediators such as histamine and serotonin by a platelet." [GOC

21312 Pathogen[ Q2Q067] interacts with 7 human partners:{P07737;P01009;P23528;P62328;P08697;Q5JVS0;P62937}

21313 Pathogen[ P0C214] interacts with 6 human partners:{P08697;Q5JVS0;P05121;P10124;P10909;P62328}

21314 Pathogen[ P03346] interacts with 6 human partners:{P62937;Q5JVS0;P62328;P01009;P07737;P23528}

21315 Pathogen[ Q85601] interacts with 8 human partners:{Q5JVS0;P08697;P07737;P01009;P05121;P62328;P23528;P62937}

21316 Pathogen[ P14079] interacts with 9 human partners:{Q5JVS0;Q01518;P07737;P10909;P62937;P23528;P62328;P10124;Q9BYX7}

21317 Pathogen[ P03383] interacts with 8 human partners:{Q5JVS0;P62328;P08697;P62937;P07737;P01009;P10124;P23528}

21318 Pathogen[ P03410] interacts with 11 human partners:{P05121;P62328;P10124;P62937;P08697;Q5JVS0;P01009;Q01518;P23528;P07737;P10909}

21319 Pathogen[ P14075] interacts with 8 human partners:{P62328;P01009;P07737;P23528;Q5JVS0;P08697;P62937;P10124}

21320 Pathogen[ P0C206] interacts with 10 human partners:{P62328;P01009;Q5JVS0;P10909;P05121;P07737;P23528;P62937;P10124;P08697}

21321 Pathogen[ P03363] interacts with 5 human partners:{P62937;P62328;Q5JVS0;P23528;P07737}

21322 [Cluster 1939]GO:0060713+P biological\_process [name] labyrinthine layer morphogenesis [def] "The process in which the labyrinthine layer of the placenta is generated and organized." [GOC

21323 Pathogen[ Q2Q067] interacts with 1 human partners:{Q8N693}

21324 Pathogen[ P0C214] interacts with 1 human partners:{Q8N693}

21325 Pathogen[ P03346] interacts with 1 human partners:{Q8N693}

21326 Pathogen[ Q85601] interacts with 1 human partners:{Q8N693}

21327 Pathogen[ P14079] interacts with 1 human partners:{Q8N693}

21328 Pathogen[ P03383] interacts with 1 human partners:{Q8N693}

21329 Pathogen[ P03410] interacts with 1 human partners:{Q8N693}

21330 Pathogen[ P14075] interacts with 1 human partners:{Q8N693}

21331 Pathogen[ P0C206] interacts with 1 human partners:{Q8N693}  
21332 Pathogen[ P03363] interacts with 1 human partners:{Q8N693}  
21333 [Cluster 1940]GO:0018394+P biological\_process [name] peptidyl-lysine acetylation  
[def] "The acetylation of peptidyl-lysine." [GOC  
21334 Pathogen[ Q2Q067] interacts with 2 human partners:{Q92831;P78537}  
21335 Pathogen[ P0C214] interacts with 2 human partners:{P78537;Q92831}  
21336 Pathogen[ P03346] interacts with 2 human partners:{Q92831;P78537}  
21337 Pathogen[ Q85601] interacts with 2 human partners:{Q92831;P78537}  
21338 Pathogen[ P14079] interacts with 1 human partners:{P78537}  
21339 Pathogen[ P03383] interacts with 2 human partners:{Q92831;P78537}  
21340 Pathogen[ P03410] interacts with 2 human partners:{Q92831;P78537}  
21341 Pathogen[ P14075] interacts with 2 human partners:{P78537;Q92831}  
21342 Pathogen[ P0C206] interacts with 2 human partners:{P78537;Q92831}  
21343 Pathogen[ P03363] interacts with 2 human partners:{Q92831;P78537}  
21344 [Cluster 1941]GO:0034612+P biological\_process [name] response to tumor necrosis factor  
[def] "Any process that results in a change in state or activity of a cell or an  
organism (in terms of movement, secretion, enzyme production, gene expression, etc.) as  
a result of a tumor necrosis factor stimulus." [GOC  
21345 Pathogen[ Q2Q067] interacts with 6 human  
partners:{Q9Y5A7;P30793;Q14790;P51826;P78318;O15205}  
21346 Pathogen[ P0C214] interacts with 7 human  
partners:{P78318;P30793;P51826;P42574;O15205;Q9Y5A7;Q14790}  
21347 Pathogen[ P03346] interacts with 6 human  
partners:{P51826;P42574;Q9Y5A7;O15205;Q14790;P78318}  
21348 Pathogen[ Q85601] interacts with 6 human  
partners:{Q14790;P51826;P30793;O15205;Q9Y5A7;P78318}  
21349 Pathogen[ P14079] interacts with 7 human  
partners:{P30793;Q14249;Q14790;O15205;P51826;Q9Y5A7;P78318}  
21350 Pathogen[ P03383] interacts with 4 human partners:{Q9Y5A7;P78318;O15205;P51826}  
21351 Pathogen[ P03410] interacts with 6 human  
partners:{O15205;P78318;P51826;Q9Y5A7;P30793;Q14249}  
21352 Pathogen[ P14075] interacts with 5 human  
partners:{Q9Y5A7;P78318;P30793;O15205;P51826}  
21353 Pathogen[ P0C206] interacts with 8 human  
partners:{P78318;O15205;P30793;Q14790;P42574;P51826;Q9Y5A7;Q14249}  
21354 Pathogen[ P03363] interacts with 4 human partners:{O15205;P51826;P78318;Q9Y5A7}  
21355 [Cluster 1942]GO:0016447+P biological\_process [name] somatic recombination of  
immunoglobulin gene segments [def] "The process in which immunoglobulin genes are  
formed through recombination of the germline genetic elements, as known as  
immunoglobulin gene segments, within a single locus." [GOC  
21356 Pathogen[ Q2Q067] interacts with 2 human partners:{P54278;P13051}  
21357 Pathogen[ P0C214] interacts with 4 human partners:{P20585;P54278;P40692;P13051}  
21358 Pathogen[ P03346] interacts with 3 human partners:{P13051;P20585;P54278}  
21359 Pathogen[ Q85601] interacts with 4 human partners:{P13051;P20585;P54278;P40692}  
21360 Pathogen[ P14079] interacts with 5 human  
partners:{P20585;P40692;P54278;P52701;P13051}  
21361 Pathogen[ P03383] interacts with 2 human partners:{P54278;P13051}  
21362 Pathogen[ P03410] interacts with 5 human  
partners:{P40692;P20585;P52701;P54278;P13051}  
21363 Pathogen[ P14075] interacts with 2 human partners:{P13051;P54278}  
21364 Pathogen[ P0C206] interacts with 5 human  
partners:{P54278;P52701;P40692;P20585;P13051}  
21365 Pathogen[ P03363] interacts with 3 human partners:{P13051;P20585;P54278}  
21366 [Cluster 1943]GO:0051156+P biological\_process [name] glucose 6-phosphate metabolic  
process [def] "The chemical reactions and pathways involving glucose 6-phosphate, a  
monophosphorylated derivative of glucose with the phosphate group attached to C-6." [GOC  
21367 Pathogen[ Q2Q067] interacts with 1 human partners:{P06744}  
21368 Pathogen[ P0C214] interacts with 1 human partners:{P11413}  
21369 Pathogen[ P03346] interacts with 1 human partners:{P06744}  
21370 Pathogen[ Q85601] interacts with 1 human partners:{P06744}  
21371 Pathogen[ P14079] interacts with 1 human partners:{P06744}  
21372 Pathogen[ P03383] interacts with 1 human partners:{P06744}  
21373 Pathogen[ P03410] interacts with 1 human partners:{P06744}  
21374 Pathogen[ P14075] interacts with 1 human partners:{P06744}  
21375 Pathogen[ P0C206] interacts with 1 human partners:{P06744}  
21376 Pathogen[ P03363] interacts with 1 human partners:{P06744}  
21377 [Cluster 1944]GO:0045103+P biological\_process [name] intermediate filament-based  
process [def] "Any cellular process that depends upon or alters the intermediate  
filament cytoskeleton, that part of the cytoskeleton comprising intermediate filaments  
and their associated proteins." [GOC  
21378 Pathogen[ Q2Q067] interacts with 3 human partners:{P14136;Q9H7C4;P08670}  
21379 Pathogen[ P0C214] interacts with 3 human partners:{Q9H7C4;P14136;P08670}  
21380 Pathogen[ P03346] interacts with 3 human partners:{P14136;P08670;Q9H7C4}  
21381 Pathogen[ Q85601] interacts with 3 human partners:{P08670;P14136;Q9H7C4}  
21382 Pathogen[ P14079] interacts with 3 human partners:{Q9H7C4;P14136;P08670}  
21383 Pathogen[ P03383] interacts with 3 human partners:{P08670;P14136;Q9H7C4}

21384 Pathogen[ P03410] interacts with 3 human partners:{Q9H7C4;P08670;P14136}

21385 Pathogen[ P14075] interacts with 3 human partners:{P14136;Q9H7C4;P08670}

21386 Pathogen[ P0C206] interacts with 3 human partners:{P14136;Q9H7C4;P08670}

21387 Pathogen[ P03363] interacts with 3 human partners:{Q9H7C4;P08670;P14136}

21388 [Cluster 1945]GO:0045741+P biological\_process [name] positive regulation of epidermal growth factor-activated receptor activity [def] "Any process that activates or increases the frequency, rate or extent of EGF-activated receptor activity." [GOC

21389 Pathogen[ Q2Q067] interacts with 1 human partners:{Q969H0}

21390 Pathogen[ P0C214] interacts with 1 human partners:{Q969H0}

21391 Pathogen[ P03346] interacts with 1 human partners:{Q969H0}

21392 Pathogen[ Q85601] interacts with 1 human partners:{Q969H0}

21393 Pathogen[ P14079] interacts with 1 human partners:{Q969H0}

21394 Pathogen[ P03383] interacts with 1 human partners:{Q969H0}

21395 Pathogen[ P03410] interacts with 1 human partners:{Q969H0}

21396 Pathogen[ P14075] interacts with 1 human partners:{Q969H0}

21397 Pathogen[ P0C206] interacts with 1 human partners:{Q969H0}

21398 Pathogen[ P03363] interacts with 1 human partners:{Q969H0}

21399 [Cluster 1946]GO:0001825+P biological\_process [name] blastocyst formation [def] "The initial formation of a blastocyst from a solid ball of cells known as a morula." [GOC

21400 Pathogen[ Q2Q067] interacts with 3 human partners:{Q15561;Q07157;P12757}

21401 Pathogen[ P0C214] interacts with 5 human partners:{Q6RFH5;P12757;Q15561;Q9NPC3;Q07157}

21402 Pathogen[ P03346] interacts with 5 human partners:{P12757;Q15561;Q07157;Q9NPC3;Q6RFH5}

21403 Pathogen[ Q85601] interacts with 5 human partners:{P12757;Q07157;Q9NPC3;Q6RFH5;Q15561}

21404 Pathogen[ P14079] interacts with 4 human partners:{Q15561;Q07157;Q9NPC3;P12757}

21405 Pathogen[ P03383] interacts with 3 human partners:{Q15561;Q07157;P12757}

21406 Pathogen[ P03410] interacts with 5 human partners:{Q9NPC3;Q6RFH5;Q15561;Q07157;P12757}

21407 Pathogen[ P14075] interacts with 3 human partners:{Q07157;Q15561;P12757}

21408 Pathogen[ P0C206] interacts with 5 human partners:{Q9NPC3;Q6RFH5;P12757;Q07157;Q15561}

21409 Pathogen[ P03363] interacts with 5 human partners:{P12757;Q9NPC3;Q07157;Q15561;Q6RFH5}

21410 [Cluster 1947]GO:0006393+P biological\_process [name] termination of mitochondrial transcription [def] "The process in which the synthesis of an RNA molecule using a mitochondrial DNA template is completed." [GOC

21411 Pathogen[ Q2Q067] interacts with 1 human partners:{Q99551}

21412 Pathogen[ P0C214] interacts with 1 human partners:{Q99551}

21413 Pathogen[ P03346] interacts with 1 human partners:{Q99551}

21414 Pathogen[ Q85601] interacts with 1 human partners:{Q99551}

21415 Pathogen[ P14079] interacts with 1 human partners:{Q99551}

21416 Pathogen[ P03383] interacts with 1 human partners:{Q99551}

21417 Pathogen[ P03410] interacts with 1 human partners:{Q99551}

21418 Pathogen[ P14075] interacts with 1 human partners:{Q99551}

21419 Pathogen[ P0C206] interacts with 1 human partners:{Q99551}

21420 Pathogen[ P03363] interacts with 1 human partners:{Q99551}

21421 [Cluster 1948]GO:0001755+P biological\_process [name] neural crest cell migration [def] "The characteristic movement of cells from the dorsal ridge of the neural tube to a variety of locations in a vertebrate embryo." [GOC

21422 Pathogen[ Q2Q067] interacts with 3 human partners:{O60315;P23528;P56693}

21423 Pathogen[ P0C214] interacts with 2 human partners:{P56693;O60315}

21424 Pathogen[ P03346] interacts with 5 human partners:{O60315;P56693;P52951;P23528;Q9UJU5}

21425 Pathogen[ Q85601] interacts with 3 human partners:{O60315;P56693;P23528}

21426 Pathogen[ P14079] interacts with 4 human partners:{Q8IZ21;O60315;P23528;P56693}

21427 Pathogen[ P03383] interacts with 2 human partners:{P23528;P56693}

21428 Pathogen[ P03410] interacts with 3 human partners:{Q8IZ21;P56693;P23528}

21429 Pathogen[ P14075] interacts with 2 human partners:{P56693;P23528}

21430 Pathogen[ P0C206] interacts with 3 human partners:{P56693;O60315;P23528}

21431 Pathogen[ P03363] interacts with 5 human partners:{O60315;P56693;P23528;P52951;Q9UJU5}

21432 [Cluster 1949]GO:0032471+P biological\_process [name] reduction of endoplasmic reticulum calcium ion concentration [def] "Any process that decreases the concentration of calcium ions in the endoplasmic reticulum." [GOC

21433 Pathogen[ Q2Q067] interacts with 1 human partners:{Q9BXH1}

21434 Pathogen[ P0C214] interacts with 1 human partners:{Q9BXH1}

21435 Pathogen[ P03346] interacts with 1 human partners:{Q9BXH1}

21436 Pathogen[ Q85601] interacts with 1 human partners:{Q9BXH1}

21437 Pathogen[ P14079] interacts with 1 human partners:{Q9BXH1}

21438 Pathogen[ P03383] interacts with 1 human partners:{Q9BXH1}

21439 Pathogen[ P03410] interacts with 1 human partners:{Q9BXH1}

21440 Pathogen[ P14075] interacts with 1 human partners:{Q9BXH1}

21441 Pathogen[ P0C206] interacts with 1 human partners:{Q9BXH1}

21442 Pathogen[ P03363] interacts with 1 human partners:{Q9BXH1}

- 21443 [Cluster 1950]GO:0046325+P biological\_process [name] negative regulation of glucose import [def] "Any process that stops, prevents, or reduces the frequency, rate or extent of the import of the hexose monosaccharide glucose into a cell or organelle." [GOC]
- 21444 Pathogen[ Q2Q067] interacts with 3 human partners: {Q7Z2X4;Q9BQE4;Q15121}
- 21445 Pathogen[ P0C214] interacts with 3 human partners: {Q15121;Q7Z2X4;Q9BQE4}
- 21446 Pathogen[ P03346] interacts with 3 human partners: {Q13322;Q7Z2X4;Q15121}
- 21447 Pathogen[ Q85601] interacts with 3 human partners: {Q15121;Q7Z2X4;Q9BQE4}
- 21448 Pathogen[ P14079] interacts with 3 human partners: {Q9BQE4;Q15121;Q7Z2X4}
- 21449 Pathogen[ P03383] interacts with 2 human partners: {Q15121;Q9BQE4}
- 21450 Pathogen[ P03410] interacts with 3 human partners: {Q15121;Q9BQE4;Q7Z2X4}
- 21451 Pathogen[ P14075] interacts with 2 human partners: {Q9BQE4;Q15121}
- 21452 Pathogen[ P0C206] interacts with 3 human partners: {Q7Z2X4;Q15121;Q9BQE4}
- 21453 Pathogen[ P03363] interacts with 1 human partners: {Q15121}
- 21454 [Cluster 1951]GO:0042127+P biological\_process [name] regulation of cell proliferation [def] "Any process that modulates the frequency, rate or extent of cell proliferation." [GOC]
- 21455 Pathogen[ Q2Q067] interacts with 43 human partners: {O60806;Q13118;O15525;Q9BVP2;P55957;Q9NS56;P36402;P46937;Q15910;Q13485;Q9UN S1;Q9UBB5;P41182;Q9UL49;O60535;Q08050;O43399;O43524;O75884;P26358;O76095;O43251;Q162 54;Q9NTI5;O75030;Q9BWT1;Q9H6Z9;Q13526;P25963;Q9NR09;P11474;Q8N6I1;P42226;P11802;P216 73;Q13490;Q9H3M7;O15360;P40424;P49715;Q03112;Q9NW38;Q10586}
- 21456 Pathogen[ P0C214] interacts with 41 human partners: {P40424;Q16254;P11474;Q13490;P46379;Q9H3M7;P42226;Q9NS56;Q03112;P11802;Q135 26;P46937;P55957;O75884;O60535;Q15910;O75030;P05121;Q8N6I1;Q10586;P98170;Q9H6Z9;Q9BW T1;P26358;Q13485;Q9UN S1;O15525;P25963;P41182;O15360;P36402;O60806;Q9NR09;P21673;Q9UB B5;O43251;Q9NTI5;Q96CA5;Q9NW38;Q9BVP2;O43399}
- 21457 Pathogen[ P03346] interacts with 54 human partners: {P46937;P35453;P36402;Q693B1;P25963;O15360;P55957;Q9UN S1;P98170;O60806;Q080 50;P42226;Q96QS3;P21673;P26358;Q13526;Q16254;O75030;P49715;P11802;Q9UL49;Q9NS56;P175 42;O75884;Q13118;Q03112;P46379;Q9NTI5;Q8N6I1;Q12778;O43251;Q9BWT1;Q15910;P41182;O155 25;Q9H2C1;Q9NR09;P11474;Q10586;Q13490;P40424;O60535;Q13485;O43399;O76095;O00482;Q9NW 38;Q8TAU0;Q96CA5;O43524;Q9UBB5;Q9H3M7;Q9H6Z9;Q9BVP2}
- 21458 Pathogen[ Q85601] interacts with 45 human partners: {Q9H6Z9;Q9NS56;Q13490;O75030;Q03112;P46379;P98170;P21673;P26358;Q9NTI5;O155 25;P11802;O60806;O43399;Q8N6I1;Q9BWT1;P40424;Q13526;P42226;O60535;P55957;Q16254;Q9NW 38;P05121;P11474;P36402;Q13118;O75884;O15360;O00482;P49715;O76095;Q15910;Q9NR09;P469 37;Q08050;P41182;Q96CA5;Q13485;Q9UBB5;Q9H3M7;Q9BVP2;Q10586;Q9UN S1;P25963}
- 21459 Pathogen[ P14079] interacts with 41 human partners: {P04083;P41238;Q9BVP2;Q13118;Q16254;O76095;Q9UBB5;P11474;Q9BWT1;P46937;P364 02;Q9NR09;Q9NTI5;P42226;P41182;Q9UL49;O00482;Q9UEE9;P49715;Q9H6Z9;P26358;P04141;Q9NS 56;Q96QR1;O15525;Q99439;Q9H3M7;O75884;Q15910;O43399;Q13526;O75030;Q9NW38;P21673;Q9UN S1;Q8N6I1;Q10586;O15360;Q99836;P55957;Q13490}
- 21460 Pathogen[ P03383] interacts with 35 human partners: {Q9UN S1;Q13485;Q8N6I1;P40424;Q9UL49;Q13490;Q9BWT1;P55957;O43399;O75030;P422 26;P11802;O15525;Q9UBB5;O60535;P11474;Q03112;O75884;Q9H6Z9;Q16254;P25963;P36402;Q159 10;Q9NR09;Q9H3M7;Q10586;O15360;O76095;Q9NW38;Q9NTI5;P46937;Q9BVP2;P21673;P26358;Q135 26}
- 21461 Pathogen[ P03410] interacts with 44 human partners: {O43399;P04141;P05121;Q96QR1;Q03112;O60535;O60806;Q9H6Z9;P36402;Q8N6I1;Q135 26;Q9BWT1;Q9UL49;P41238;O75030;Q16254;Q13490;Q9UBB5;Q9H3M7;Q9UEE9;P55957;P26358;Q9NR 09;O15525;Q99439;P11802;Q9NTI5;Q13485;P46937;Q13118;P21673;Q15910;P41182;O15360;Q105 86;P42226;Q9BVP2;P11474;Q9UN S1;O76095;Q9NW38;P25963;P40424;O75884}
- 21462 Pathogen[ P14075] interacts with 38 human partners: {P55957;O15360;P40424;O75030;P11802;P42226;P11474;O76095;Q08050;Q15910;Q9UB B5;P25963;P26358;Q9NW38;Q13485;Q96QR1;Q10586;Q13490;Q16254;Q9UL49;Q13526;Q8N6I1;Q9H3 M7;P36402;Q03112;O15525;Q9UEE9;Q9UN S1;Q9NR09;P46937;O75884;P21673;Q9NTI5;O43399;Q9BW T1;Q9BVP2;O60535;Q9H6Z9}
- 21463 Pathogen[ P0C206] interacts with 51 human partners: {Q9UN S1;P46937;Q9NS56;O15360;Q13526;Q8N6I1;Q9UBB5;Q9BVP2;O75884;O75030;P411 82;Q9UEE9;P25963;Q9UL49;P26358;P49715;P98170;O15525;Q15910;O00482;Q16254;P40424;O433 99;P21673;Q03112;Q693B1;Q9NR09;Q9BWT1;Q9H2C1;O60535;Q13485;Q9NTI5;Q08050;P42226;Q9H3 M7;Q9H6Z9;P05121;Q96CA5;P11474;P41238;Q13118;Q8TAU0;P46379;P36402;O60806;P11802;P559 57;Q9NW38;O76095;Q10586;Q13490}
- 21464 Pathogen[ P03363] interacts with 48 human partners: {P46379;O43399;Q9NW38;Q13490;P35453;P55957;O15360;O60535;P36402;P25963;Q031 12;Q10586;Q9H6Z9;Q15910;Q9H3M7;O75884;Q16254;P11474;Q13526;P42226;P21673;O43524;Q080 50;P46937;Q9NR09;O75030;O15525;Q9UN S1;P98170;P26358;Q9BWT1;O76095;Q13485;O60806;Q96C A5;Q96QS3;Q9BVP2;Q9NTI5;P40424;P11802;Q8TAU0;Q8N6I1;Q9UL49;Q693B1;O43251;Q13118;Q9UB B5;O00482}
- 21465 [Cluster 1952]GO:0045840+P biological\_process [name] positive regulation of mitosis [def] "Any process that activates or increases the frequency, rate or extent of mitosis." [GOC]
- 21466 Pathogen[ Q2Q067] interacts with 4 human partners: {Q9H4X1;P54274;Q8WWQ0;Q9BXS6}
- 21467 Pathogen[ P0C214] interacts with 4 human partners: {Q9H4X1;Q9BXS6;Q8WWQ0;P54274}
- 21468 Pathogen[ P03346] interacts with 8 human



21469 partners:{P31271;Q9BXS6;Q9H4X1;P54274;Q9NRF2;Q8WWQ0;Q9Y5R6;O14965}  
Pathogen[ Q85601] interacts with 6 human

21470 partners:{Q9H4X1;Q9BXS6;O14965;Q8WWQ0;P31271;P54274}  
Pathogen[ P14079] interacts with 5 human

21471 partners:{P54274;Q8WWQ0;P31271;Q9BXS6;O14965}  
Pathogen[ P03383] interacts with 5 human

21472 partners:{Q9H4X1;Q9BXS6;O14965;Q8WWQ0;P54274}  
Pathogen[ P03410] interacts with 5 human

21473 partners:{Q9H4X1;P54274;Q9BXS6;O14965;Q8WWQ0}  
Pathogen[ P14075] interacts with 5 human

21474 partners:{Q9H4X1;Q8WWQ0;Q9BXS6;P54274;O14965}  
Pathogen[ P0C206] interacts with 7 human

21475 partners:{Q9H4X1;Q9Y5R6;Q8WWQ0;P54274;P31271;Q9BXS6;O14965}  
Pathogen[ P03363] interacts with 6 human

21476 partners:{Q8WWQ0;Q9H4X1;P31271;Q9BXS6;Q9Y5R6;P54274}  
[Cluster 1953]GO:0009880+P biological\_process [name] embryonic pattern specification  
[def] "The process that results in the patterns of cell differentiation that will arise  
in an embryo." [GOC

21477 Pathogen[ Q2Q067] interacts with 8 human  
partners:{A6NGQ2;Q0D2K3;Q05516;P84022;Q9UPW6;Q15796;Q99717;Q15797}

21478 Pathogen[ P0C214] interacts with 7 human  
partners:{P84022;Q15796;Q99717;Q0D2K3;Q9UPW6;Q15797;Q05516}

21479 Pathogen[ P03346] interacts with 10 human  
partners:{Q9UPW6;Q15797;Q15796;Q99717;P84022;Q14190;Q05516;A8MTQ0;Q0D2K3;A6NGQ2}

21480 Pathogen[ Q85601] interacts with 7 human  
partners:{Q9UPW6;Q15797;Q99717;Q0D2K3;Q05516;P84022;Q15796}

21481 Pathogen[ P14079] interacts with 5 human  
partners:{Q9UPW6;Q05516;Q15797;A6NGQ2;Q0D2K3}

21482 Pathogen[ P03383] interacts with 8 human  
partners:{Q0D2K3;Q9UPW6;Q15797;Q05516;P84022;A6NGQ2;Q99717;Q15796}

21483 Pathogen[ P03410] interacts with 7 human  
partners:{P84022;A6NGQ2;Q99717;Q9UPW6;Q0D2K3;Q15797;Q15796}

21484 Pathogen[ P14075] interacts with 7 human  
partners:{Q0D2K3;Q99717;Q15796;Q9UPW6;A6NGQ2;Q05516;P84022}

21485 Pathogen[ P0C206] interacts with 8 human  
partners:{A6NGQ2;P84022;Q05516;Q99717;Q0D2K3;Q15796;Q9UPW6;Q15797}

21486 Pathogen[ P03363] interacts with 9 human  
partners:{A6NGQ2;A8MTQ0;Q0D2K3;Q15797;Q15796;P84022;Q05516;Q99717;Q9UPW6}

21487 [Cluster 1954]GO:0051325+P biological\_process [name] interphase [def] "A cell cycle  
process comprising the steps by which a cell progresses through interphase, the stage of  
cell cycle between successive rounds of chromosome segregation. Canonically, interphase  
is the stage of the cell cycle during which the biochemical and physiologic functions of  
the cell are performed and replication of chromatin occurs." [GOC

21488 Pathogen[ Q2Q067] interacts with 1 human partners:{P08729}

21489 Pathogen[ P0C214] interacts with 1 human partners:{P08729}

21490 Pathogen[ P03346] interacts with 1 human partners:{P08729}

21491 Pathogen[ Q85601] interacts with 1 human partners:{P08729}

21492 Pathogen[ P14079] interacts with 1 human partners:{P08729}

21493 Pathogen[ P03383] interacts with 1 human partners:{P08729}

21494 Pathogen[ P03410] interacts with 1 human partners:{P08729}

21495 Pathogen[ P14075] interacts with 1 human partners:{P08729}

21496 Pathogen[ P0C206] interacts with 1 human partners:{P08729}

21497 Pathogen[ P03363] interacts with 1 human partners:{P08729}

21498 [Cluster 1955]GO:0009725+P biological\_process [name] response to hormone stimulus  
[def] "Any process that results in a change in state or activity of a cell or an  
organism (in terms of movement, secretion, enzyme production, gene expression, etc.) as  
a result of a hormone stimulus." [GOC

21499 Pathogen[ Q2Q067] interacts with 10 human  
partners:{P31749;Q14192;P35573;P11831;Q9Y6X2;Q14686;Q96T76;Q96PK6;P08397;Q16836}

21500 Pathogen[ P0C214] interacts with 10 human  
partners:{Q9Y6X2;P11831;Q14686;P35573;P08397;Q14192;Q96PK6;P48163;P31749;Q96T76}

21501 Pathogen[ P03346] interacts with 12 human  
partners:{Q15788;Q16836;P11831;Q12772;P35573;P31749;Q14192;P14317;Q9Y6X2;Q96PK6;Q96T  
76;Q14686}

21502 Pathogen[ Q85601] interacts with 12 human  
partners:{P11831;Q96T76;Q96PK6;P31749;Q9Y6X2;Q12772;Q14686;P35573;Q14192;P14317;Q168  
36;P08397}

21503 Pathogen[ P14079] interacts with 14 human  
partners:{P04083;Q9Y6X2;Q14192;Q12772;P08397;P11686;P35573;Q15788;P03897;P02144;Q96T  
76;Q14686;Q96PK6;Q16836}

21504 Pathogen[ P03383] interacts with 10 human  
partners:{P11831;Q96T76;P31749;Q16836;Q14686;P35573;Q96PK6;Q14192;Q9Y6X2;P08397}

21505 Pathogen[ P03410] interacts with 14 human  
partners:{P11831;Q96T76;P02144;Q96PK6;P08397;Q14686;P35573;Q9Y6X2;P31749;P11686;Q127  
72;Q16836;P03897;Q14192}

21506 Pathogen[ P14075] interacts with 10 human

- 21507 partners:{P11831;Q14686;P08397;P31749;Q96PK6;Q16836;P35573;Q9Y6X2;Q14192;Q96T76}  
Pathogen[ P0C206] interacts with 13 human  
partners:{P31749;P14317;Q16836;Q9Y6X2;Q96PK6;Q14686;Q96T76;P11831;Q14192;P08397;Q15788;Q12772;P35573}
- 21508 Pathogen[ P03363] interacts with 11 human  
partners:{Q16836;O43347;Q14686;Q96PK6;Q9Y6X2;P11831;Q96T76;P31749;P14317;P35573;Q14192}
- 21509 [Cluster 1956]GO:0016032+P biological\_process [name] viral reproduction [def] "The process in which a virus reproduces. Usually, this is by infection of a host cell, replication of the viral genome, and assembly of progeny virus particles. In some cases the viral genetic material may integrate into the host genome and only subsequently, under particular circumstances, 'complete' its life cycle." [GOC
- 21510 Pathogen[ Q2Q067] interacts with 299 human  
partners:{Q14974;P61313;Q96EE3;Q99460;P52434;Q92750;P62701;O75832;P48556;O94973;Q9BUG6;P18754;P47914;P52948;P40306;Q93034;Q12769;P46779;Q9Y6Q5;P17029;P55036;Q10567;Q9BR0;Q96HA1;A6NJL1;P20226;P56377;Q9GZW5;Q16594;O43747;O60304;P49790;Q95782;Q8N0Y2;Q9NPB6;O00267;Q02543;P30419;O00231;P26373;O00233;P49792;P62750;Q13889;P10073;P62273;A6NGD5;P51665;O75694;P62826;Q99816;Q6VY07;P15880;P40429;Q8NBB4;P28072;P49910;P46782;Q96IT1;Q15697;P35268;P78406;P19388;Q8IWX7;P52435;P22090;P46778;Q9P0L1;P51815;A5LHX3;Q99684;P62888;P32780;P32969;Q6R2W3;Q9H4T2;P62277;Q99567;Q8N1F7;P18615;O14709;P30876;P19387;P62241;Q15542;O15535;Q13200;Q8TBC5;P61218;P62244;P05387;Q92759;P25787;P62861;P52657;P42766;Q06323;Q7Z3B4;Q16670;Q96N95;Q9Y5A6;P05386;P17040;Q8NFH4;P0CG00;Q96JS3;P12270;O60563;Q9UNX3;O75531;P30050;P63010;Q96PC3;O43148;Q53GI3;P28065;Q12962;O14818;P18077;P62891;Q9Y5Z7;P29084;Q96CW1;Q9Y297;P61927;P39023;Q9UL58;Q13137;P62487;P62081;P61247;O14980;P55199;P61254;P62249;Q63HK3;P62280;Q14997;P83731;Q9BW27;Q6P9G9;P51948;P60900;Q8TEM1;P17022;Q9UL46;P61289;Q96SZ4;P62263;Q15370;Q8NF99;P61966;P60866;P62906;A5D8V6;Q96GC6;Q02878;P46777;P28062;Q9BVL2;P62899;Q15543;P49848;P08708;P50750;Q9UNM6;P08865;Q9Y5B0;Q07020;Q15544;P62913;P25788;O00268;P62269;Q13426;Q92530;Q9UKX7;P50613;P62424;P25786;P62917;P59923;Q9NRG9;P62829;Q969J2;Q16514;Q9Y2L8;P46783;Q8NFH3;Q9BXS5;O14771;P13984;Q9UK41;Q3MJ62;P12956;O75475;P36578;Q15369;P62857;Q16401;P62875;P24928;P37198;O00232;Q92621;P62847;P49207;P23193;Q9H9H4;Q9HBT7;P23396;Q09161;P28074;P25789;O15504;Q8IXH7;Q6NSZ9;P28698;Q9H3P2;P0CG47;P57740;P63173;P18621;Q9UNY5;P52298;P52655;P20618;P17096;P35269;Q9GZU2;P0CG48;P29083;Q95125;O60583;P28070;P39019;Q8WUM0;P28066;P63000;Q92670;P61353;P63272;P21675;P43487;P53803;Q99436;Q8TAA3;P13010;Q14241;P62266;P42677;Q9Y3U8;P63220;P62841;Q9Y5B9;P83881;P62987;O43242;Q9NWS9;P49721;P49720;O43309;O14978;P50914;P46776;P57086;Q92556;P35658;P62854;Q9HC16;P62753;P05388;Q8NFH5;Q15776;P52294;Q86W11;P63208;P18124;P62851;P25398;P62937;P62877;Q96LW9;P62910;Q8NEZ2;Q92901;P46781;P27635;Q13888;Q5SRE5;P61513;P17028;P51946;Q8WX92;Q00403;Q08945;P62945;Q8TF39;P62979}
- 21511 Pathogen[ P0C214] interacts with 301 human  
partners:{P62861;P84098;O00268;Q14997;Q96CW1;P61247;P51665;P51946;Q8WX92;P25789;Q96LW9;P63000;Q09161;P15880;P55036;P62081;P42766;Q15697;A6NGD5;Q9Y5Z7;P62913;P22090;Q8NFH5;Q92901;P28062;P62249;Q9P0L1;Q63HK3;P62899;A5LHX3;Q6R2W3;P62854;P30876;Q9Y5A6;P28065;P39019;P62263;Q9UI12;Q8IWX7;P52657;P13010;P21675;O15535;P53803;P62273;P52655;P35269;P60750;P22396;P18077;Q8TBC5;Q9GZU2;O00267;P50613;P43487;P05388;Q8TEM1;P29084;P62847;O14818;Q8N0Y2;P62829;P26373;P78406;P52435;P57740;Q92750;Q9UNY5;P17022;P27635;Q99567;O43242;P46778;P63208;Q9UL58;P17096;O95125;Q8N1F7;O14709;P17029;O75694;Q00403;P61513;Q12962;Q96EE3;P83881;P48556;Q3MJ62;P61218;P49792;Q9UKX7;P40306;Q93034;P62701;P49207;Q15370;P63220;O14771;P08865;P32969;Q9UK41;Q02543;Q13200;P62266;Q9Y297;P62877;O60551;Q96SZ4;Q43148;Q16594;O00232;Q15542;P62277;Q53GI3;P50914;P57086;P46779;P28698;Q9NWS9;Q9BRR0;P63010;Q99460;P52298;Q10567;P28066;O75832;Q13137;Q9HC16;P62487;P40429;P47914;Q9NPB6;P49790;P63173;O14980;P37198;Q96IT1;Q13426;Q9BW27;P46783;P52294;P51948;P49720;P28074;Q8NF99;P62280;Q9UNX3;Q9GZW5;P0CG48;Q9UL46;Q9Y3U8;P56377;P30050;Q96N95;Q9NRG9;Q8TF39;P62753;P62910;P62891;Q15369;Q6VY07;P35658;Q92556;P55199;O60583;P63272;Q15544;P17028;P49848;P25788;P51815;Q15B69;Q9Y6Q5;P62913;P25788;Q9GZW5;P53680;P28074;P25786;P62917;P59923;Q9NRG9;P62829;Q969J2;Q16514;Q9Y2L8;P46783;Q8NFH3;Q9BXS5;O14771;P13984;Q9UK41;Q3MJ62;P12956;O75475;P36578;Q15369;P62857;Q16401;P62875;P24928;P37198;O00232;Q92621;P62847;P49207;P23193;Q9H9H4;Q9HBT7;P23396;Q09161;P28074;P25789;O15504;Q8IXH7;Q6NSZ9;P28698;Q9H3P2;P0CG47;P57740;P63173;P18621;Q9UNY5;P52298;P52655;P20618;P17096;P35269;Q9GZU2;P0CG48;P29083;Q95125;O60583;P28070;P39019;Q8WUM0;P28066;P63000;Q92670;P61353;P63272;P21675;P43487;P53803;Q99436;Q8TAA3;P13010;Q14241;P62266;P42677;Q9Y3U8;P63220;P62841;Q9Y5B9;P83881;P62987;O43242;Q9NWS9;P49721;P49720;O43309;O14978;P50914;P46776;P57086;Q92556;P35658;P62854;Q9HC16;P62753;P05388;Q8NFH5;Q15776;P52294;Q86W11;P63208;P18124;P62851;P25398;P62937;P62877;Q96LW9;P62910;Q8NEZ2;Q92901;P46781;P27635;Q13888;Q5SRE5;P61513;P17028;P51946;Q8WX92;Q00403;Q08945;P62945;Q8TF39;P62979}
- 21512 Pathogen[ P03346] interacts with 301 human  
partners:{Q8TEM1;Q6R2W3;Q96G01;P25787;Q9NWS9;P05387;P46779;P61966;Q15542;P28070;Q86XT2;Q15370;Q8NFH4;Q8WUM0;Q8TF39;Q09161;P49910;P63173;Q3MJ62;P25789;P55036;P62917;A6NGD5;O15535;P62249;P62913;P52434;P12270;P12956;Q9BRR0;P62861;P62277;Q02878;Q8IXH7;Q12769;Q99460;Q96EE3;Q99567;P63010;Q9UL46;O75531;A5D8V6;P62280;P39023;Q9UL58;Q9Y2L8;Q9UKX7;Q9Y5Z7;O43747;P62987;O43309;P61927;Q9UNX3;P28072;O75694;P62857;P25788;Q9GZW5;P53680;P28074;P49721;Q96SZ4;O60563;Q9NRG9;P78406;P57740;P56377;O14818;P43487;P46778;P49207;Q99436;O14978;Q13426;Q9BVL2;P62937;Q13888;Q8NF99;P0CG48;P62266;Q8NEZ2;Q9BXS5;O75475;Q9H3P2;Q8N1F7;P13010;Q16401;O14709;A5LHX3;P53803;P17022;P61254;Q8TBC5;O95782;Q99816;P28698;P61218;O00268;Q9NPB6;Q9P0L1;P28062;P18754;Q8NFH5;P62424;P62273;Q9UK41;P837

31;P60866;P29084;Q92670;P37198;P20618;P62899;Q8NFH3;P63272;P35658;P52298;O00232;Q8NB  
B4;P17096;Q53GI3;P35268;A6NJL1;Q92750;Q08945;Q93034;P62826;Q9H4T2;Q6P9G9;P62891;P087  
08;Q13889;Q96LW9;P20226;Q5SRE5;O75832;Q9Y5B0;P46782;Q13137;P61353;O00233;P62487;P628  
77;P62854;P19388;Q9Y3U8;Q92621;O60583;Q8N0Y2;Q10567;P47914;Q9BW27;O43148;O14980;P088  
65;Q9UNY5;P13984;O95125;P61313;P25398;Q8IYW8;Q99684;P49720;P28065;P52435;P49848;Q96C  
W1;P61513;Q9H9H4;P05388;P51946;Q96PC3;P62269;P60900;O60304;P52657;Q05750;Q02543;P518  
15;P624766;P26081;Q9Y5B9;Q96N95;P25786;P61247;O00231;P17029;P36954;Q16514;P10073;P186  
21;Q9BUG6;P46781;P84098;Q63HK3;P15880;P63208;Q12962;P61289;P50914;O00267;P62829;P629  
79;P28066;Q9UNM6;P17028;Q8WX92;P39019;Q92759;P55199;P23396;P42677;P62750;P62701;Q8TA  
A3;P21675;P30050;P30876;Q15369;P35269;P62910;P0CG47;P36578;O14771;Q96JS3;Q9HBT7;Q9GZ  
U2;P62847;Q14997;P49790;Q13200;P48556;P62851;P22090;Q9Y5A6;P17040;P59923;P24928;P231  
93;P51665;Q96IT1;P46777;P29083;Q969J2;Q96HA1;Q00403;Q07020;P62263;Q15697;P62841;P838  
81;Q15776;Q9Y6Q5;Q06323;P05386;P18077;Q96GC6;O94973;Q9Y297;P46776;P62241;P52655;Q925  
30;Q16670;Q6VY07;Q7Z3B4;Q92556;P0CG00;P62753;P63000;P51948;O43242;Q15544;P62945;P522  
94;P32780;Q6NSZ9;P18615;Q92901;P32969;P26373;P18124;P40306;P40429;P62875;P27635;P193  
87;Q86W11;P46783;O15504;Q14241;P62906;P49792;P62244;P57086;Q14974;Q16594;P62888;Q155  
43;P63220;P52948}

21513 Pathogen[ Q85601] interacts with 298 human

partners: {Q8TEM1;Q6R2W3;P51946;P46783;P32969;P52657;P28066;Q99816;Q9UNM6;P61513;P609  
00;Q5SRE5;Q969J2;Q15542;P28698;Q63HK3;P26373;P0CG00;P51815;P62857;P36954;Q15370;P622  
44;Q86W11;Q8TF39;P62913;P17040;Q3MJ62;P55036;P60900;Q9UNY5;O15535;Q8NBB4;O43148;P628  
54;Q9GZW5;P17096;P62081;Q8NFH4;P61353;P62891;Q8NFH3;P46776;P17028;O60563;P18077;P257  
87;Q96EE3;P61313;P05388;P50750;Q96CW1;Q9UL58;P61289;Q9Y2L8;Q12769;Q9HBT7;P63173;P257  
88;Q13888;Q9BXS5;Q9HC16;P78406;P57740;P62877;P43487;Q9NWS9;P23396;Q9NRG9;P56377;P622  
73;P46778;Q6NSZ9;P62829;O75832;P30050;O14978;Q13426;P61289;Q14241;O60583;P62753;Q9BUG6;P276  
35;P62826;Q8WUM0;Q9H3P2;Q8N1F7;O14709;P63000;P15880;P53803;P17022;P83881;Q9H9H4;Q070  
20;O43747;P61218;Q8NF99;O00268;P39019;Q9H4T2;Q9Y3U8;Q9Y5B9;P62701;P62241;P62424;Q157  
76;P0CG48;P83731;Q8IYW8;P51948;P18615;P62899;O60551;Q16594;P12270;P62945;Q10567;O603  
04;P59923;Q53GI3;O75694;P62263;P62861;O95125;Q02878;Q09161;O15504;Q14974;Q8WX92;P390  
23;P61254;P25789;Q13137;O00233;P62487;P19388;P29084;P49207;P20618;P62910;Q9GZU2;Q9BW  
27;A6NGD5;P62249;A6NJL1;P62280;Q9UK41;P13984;P63208;Q9Y5A6;P47914;Q9P0L1;P84098;Q926  
21;P40306;P08708;Q92759;Q9BRR0;P32780;Q6VY07;Q9Y5B0;P49720;P52435;P49848;P42766;Q96G  
01;P28062;P49721;P62269;P35269;P52948;O14771;Q96GC6;Q96N95;P25786;Q9UKX7;P17029;P290  
83;Q16514;P18621;P05387;P53680;P57086;Q15369;P28072;Q8NFH5;Q9UNX3;Q00403;Q9NPB6;Q132  
00;P62277;P50613;P28065;O00267;P35268;P23193;O14980;Q99684;P62979;O43309;O94973;Q994  
36;P62847;Q96PC3;P28070;P55199;P35658;P42677;P63220;Q8TAA3;Q9UL46;Q9Y5Z7;Q99460;O002  
31;P0CG47;Q99567;Q8IXH7;Q08945;Q92750;P18754;P21675;P46782;Q6P9G9;Q12962;P19387;P632  
72;P48556;P46779;P52655;P62750;Q92670;P62851;P63010;P62841;P24928;P28074;P49792;P522  
98;Q92530;Q96IT1;P30876;P62987;P52434;P61966;P22090;Q15543;Q9BVL2;Q96HA1;A5LHX3;Q156  
97;P61927;Q9Y6Q5;O75475;P30419;P36578;P19447;Q06323;Q96JS3;Q8NEZ2;P05386;Q7Z7L9;O755  
31;P08865;Q8N0Y2;P61247;O14818;Q7Z3B4;P62937;Q8TBC5;P52294;P49790;Q15544;P46777;P629  
17;Q16401;Q92901;P18124;P46781;P62875;Q93034;P25398;P60866;Q02543;P13010;P12956;Q96L  
W9;P20226;P62906;Q16670;P10073;P50914;P49910;P62266;P40429;O95782;P62888;A5D8V6}

21514 Pathogen[ P14079] interacts with 303 human

partners: {Q969J2;Q8NFH5;Q6VY07;Q9Y3U8;Q9H9H4;P27635;P84098;P46779;P28065;Q96CW1;Q994  
36;Q9Y5B9;P62875;P62333;Q9BW27;P55199;Q96HA1;P26373;Q53GI3;Q9HBT7;P48556;Q08945;Q9Y6  
Q5;P61966;P23396;Q9BXS5;P57086;O95125;Q14241;P0CG48;P40429;O14771;P10073;Q7Z7L9;Q9UN  
Y5;P19387;Q9Y5B0;P35269;Q15776;P51946;P18621;O15535;Q16594;Q9GZU2;P83881;Q8IXH7;Q6P9  
G9;O43309;P62487;Q9UNX3;P46781;P17022;P57740;P83731;Q8N1F7;P61513;P62847;P13010;P403  
06;P62753;Q86XT2;P52434;P52298;P55036;P35658;P28074;P39023;O00232;P62273;Q92556;Q105  
67;Q63HK3;P25398;O75475;O15514;P51815;P17096;P30876;P56377;Q92621;P52294;P61218;Q3MJ  
62;Q99684;Q8TEM1;Q9H3P2;P18077;P49720;O00487;P25787;Q8N0Y2;Q9HC16;O75832;P46783;Q9Y5  
A6;P61254;P50914;Q9P0L1;A5LHX3;Q13889;P53803;P62937;P62979;P18615;O00233;P62841;P181  
24;A6NGD5;P35998;Q96SZ4;P42766;Q8TBC5;P61289;P29084;P62266;Q8IYW8;P46782;P62877;P629  
87;Q16670;P62241;P51665;Q9UKX7;P20618;P32969;P22090;Q9NWS9;Q9BRR0;P28698;P62829;Q9BV  
L2;Q9UL58;Q8TAA3;P60866;Q8NBB4;O15504;O43148;Q92670;P50613;P62854;Q9Y5Z7;Q13888;Q070  
20;P39019;P12956;P63220;Q8WUM0;Q14997;P49207;P19388;P62244;Q00403;O95782;P12270;Q8TF  
39;Q15543;P28062;P60900;P62263;Q12962;Q02543;P62424;Q92901;P62277;Q9H4T2;P62750;P629  
10;P63173;O14709;P46776;P49848;Q99567;Q9UNM6;P52435;Q93034;P08708;P63272;Q14974;P170  
29;Q92750;Q6R2W3;Q99460;Q96LW9;Q15697;P36578;A5D8V6;O14978;O60551;Q8NFH3;P30419;Q153  
70;Q96EE3;Q92759;P49910;Q86W11;Q8NEZ2;P37198;O14818;P49721;P63010;P62906;Q8NAM6;Q925  
30;P49790;P47914;P62280;Q13137;P62899;P52657;Q8NF99;O94973;Q96G01;Q8N8A4;O75531;Q8WX  
92;P61353;P62081;P62945;P32780;P46777;P42677;P30050;Q9GZW5;Q8NFH4;P15880;P23193;P139  
84;P78406;Q06323;P62891;O43747;P62191;Q7Z3B4;O60583;Q9UI12;P62888;P08865;P61927;P629  
17;P0CG00;Q15008;P24928;Q15369;P46778;P62249;P43686;Q9BUG6;O43242;P62826;P25788;P170  
40;P63208;O00231;Q9Y2L8;P05386;P28066;P35268;Q9NPB6;Q9UL46;A6NJL1;P62913;Q12769;Q96P  
C3;Q99816;Q96IT1;Q16514;P05387;P61247;O00267;P0CG47;P62269;P62701;P36954;Q5SRE5;Q9NR  
G9;P61313;O75694;P53680;Q16401;Q13426;Q15542;P17980;P18754;Q96N95;O60304;P62851;P280  
72;P19447;Q09161;P05388;P29083;P49917;P21675;O00268;P52948;Q96GC6;Q96JS3;P50750;P170  
28;P62857;P62861;P51948;Q6NSZ9}

21515 Pathogen[ P03383] interacts with 284 human

partners: {Q9BVL2;Q96EE3;O15504;P42766;Q96CW1;Q8WUM0;P53803;P36578;P05388;P62266;P390  
19;P55199;Q8NBB4;P26373;Q63HK3;P56377;Q92621;P49792;Q8NFH4;P62913;P62945;P55036;Q96S  
Z4;Q15369;P63272;Q9H3P2;O43148;P13010;P62854;P29084;Q9GZW5;P17096;P40429;Q15544;P629  
87;P62891;P25398;P35269;P51948;P62280;Q07020;P25789;P62750;P17022;P60900;P05387;P622  
49;P17029;P0CG00;P62888;Q9H4T2;P62899;Q96JS3;P12270;P61927;Q13888;P46777;Q92670;P518

15;P23193;P46779;P52948;Q9BRR0;P49207;Q93034;P83731;P62424;P40306;P78406;P57740;O00233;Q10567;Q8NFH5;P18124;P46778;Q6VY07;Q92901;P62753;P52655;P62937;P42677;Q9UL58;Q8N1F7;Q15542;O14709;P63000;P61247;Q3MJ62;P49721;Q06323;Q8NEZ2;P83881;Q99816;P52434;P61218;Q6P9G9;P47914;Q08945;Q14997;Q96N95;P63208;P62917;P28698;P62273;Q8TEM1;Q9P0L1;Q9UNX3;P20618;P59923;O00267;Q6NSZ9;P30050;P84098;Q53GI3;Q12769;Q00403;P62826;P32969;Q9Y2L8;Q09161;Q6LW9;P20226;Q99567;O75832;P52657;Q13137;P62277;P62487;P18077;P63173;Q14978;Q16594;Q8IXH7;P62081;Q9BW27;P19387;O60563;A6NGD5;A6NJL1;Q9UK41;P50613;P13984;Q9UNY5;P43487;O95125;P63010;P51946;P24928;P61313;O14980;P08865;O43747;Q9GZU2;P17040;P62851;Q13426;P18754;P49848;O60304;P46782;Q9H9H4;Q9UL46;P62269;Q8NF99;Q9UNM6;P63220;P50750;Q9NPB6;Q02543;P62244;Q15697;Q02878;O00268;P25786;Q99460;O95782;Q16514;P10073;O75475;P28072;P62910;P27635;Q14974;Q92759;Q13200;Q96IT1;P28065;Q5SRE5;P62857;Q99684;P28066;P52298;P35658;P62906;Q16670;P46783;Q9Y3U8;P60866;Q96GC6;O15535;P61254;Q16401;P62979;Q8N0Y2;Q92750;O00231;Q96HA1;P0CG47;P62875;P62241;P21675;P46781;O43309;Q9NRG9;Q9HBT7;P62877;Q8IWX8;P52435;P39023;P49910;Q9Y5B0;O14771;Q15370;P0CG48;Q12962;Q9Y5A6;P28074;Q6R2W3;P62841;Q92530;P57086;P19388;P49720;Q969J2;Q8TAA3;P61289;P22090;P29083;P37198;Q9UKX7;P62701;P62829;Q15776;P30876;Q9BXS5;P62263;P28062;P62847;P35268;Q86W11;P05386;P50914;O94973;P48556;O14818;P17028;Q14241;Q7Z3B4;O60583;P62861;Q99436;P18621;P52294;Q9Y5B9;P49790;P46776;P32780;O75694;P15880;P23396;P18615;P28070;Q9BUG6;P61513;O75531;Q8TF39;Q8NFH3;Q8WX92;P12956;P25787;P08708;P25788;Q15543;P61353}

21516

Pathogen[ P03410] interacts with 312 human

partners: {Q99567;P57086;O60583;Q08945;Q14771;Q9Y6Q5;P62861;Q9Y2L8;P05386;Q7Z3B4;O43309;P28070;Q9BW27;O95782;Q02543;P61247;Q96PC3;P62241;Q96CW1;P52655;P62829;P49207;Q13137;P26373;P55036;P61513;P0CG48;Q14974;P19387;P62899;Q15697;Q13889;P17040;P18615;Q9BXS5;P62244;P36954;Q9H4T2;Q9H3P2;O00268;P53680;Q3MJ62;P62913;Q86XT2;Q9UKX7;Q15543;P25786;P20963;Q9H9H4;Q02878;Q15008;P63000;Q92901;Q96SZ4;Q16401;O60551;Q92750;P15880;O00267;Q9Y5B9;P63272;P46777;O95125;P46776;P62841;P52294;Q92670;Q8NFH4;Q92050;P24928;Q15776;P60900;O43747;P10073;P05388;Q12962;P21675;Q9GZU2;Q14997;P29083;P35998;P46781;Q99460;P18124;Q5SRE5;P05141;P52948;Q8NF99;O00233;O15504;P51946;Q8NBB4;Q10567;O00232;Q8TF39;P62269;Q07020;P63220;P62910;Q96GC6;P62847;P62906;O75694;Q8TAA3;P17096;Q96N95;Q6NSZ9;P23396;Q9UL58;P78406;O14709;P30419;P18621;P48556;P30876;P49721;P62266;P20226;Q15370;P62249;P63173;P50914;P62280;Q99684;Q96HA1;P23193;Q53GI3;O60304;A5LHX3;P22090;P61313;P62979;Q9NWS9;P52657;O15514;P50613;Q99436;P62701;Q8N1F7;P62750;Q16670;A5D8V6;Q9BR0;P08865;P50750;P40306;O15535;Q9UNX3;Q99816;Q9HC16;Q06323;Q9BUG6;P62277;O60563;P17022;P36578;P17029;P18077;P12956;Q92556;P55199;Q6R2W3;P25398;P63208;Q8NEZ2;Q13200;P49790;Q8IXH7;Q8WX92;P62937;P25787;P61927;P84098;P29084;Q15369;P62854;P12270;P52435;P62826;P62273;Q6P9G9;P17028;Q9UNY5;P35658;P52298;P62081;Q16514;P46783;Q9P0L1;P49848;A6NGD5;Q9Y5Z7;P51815;Q8NFH5;O75531;P53803;Q9Y3U8;P43487;P28062;Q8TEM1;P51665;P62877;P19447;Q9UI12;Q96G01;Q969J2;P62875;P08708;P46782;P32969;Q00403;O14818;Q96EE3;P49910;P35269;P0CG00;Q9HBT7;Q16594;P87889;P61218;Q13426;O00231;Q9UNM6;P46779;P27635;P51948;Q9Y5B0;P25789;Q15544;P63010;Q96IT1;Q13888;A6NJL1;P52434;P62987;Q8WUM0;P28698;Q7Z7L9;P13010;O14978;P59923;P13984;P62857;Q15542;Q9NPB6;P62487;P62263;P62424;P62888;P61254;Q09161;P46778;P28072;O43148;P62945;P05387;Q8TBC5;P42766;Q63HK3;O75475;Q96LW9;P18754;P39019;P47914;P40429;P57740;P39023;P25788;Q12769;Q96JS3;P62917;P62851;P83731;P61966;Q6VY07;Q9NRG9;P19388;P28066;P35268;Q14241;P32780;Q8NFH3;P61353;Q93034;P62891;Q9Y5A6;P28065;Q8BVL2;O43242;O94973;P56377;P0CG47;Q92759;Q92621;P62753;Q9GZU2;Q8N8A4;P17980;O75832;O14980;P20618;Q86W11;P49792;Q9UL46;P28074;P61289;P83881;P60866;P42677;Q8IWX8;Q8N0Y2}

21517

Pathogen[ P14075] interacts with 280 human

partners: {P17029;P42766;P49207;P51815;P62857;P46781;P63220;P32969;Q12962;Q09161;P55036;P25788;P42677;P13984;Q9Y5A6;Q969J2;P62913;P22090;Q9GZU2;Q92759;P12956;Q02878;P28066;P21675;P62277;P52657;Q96JS3;O94973;P62851;Q15542;P18615;Q06323;O75832;Q93034;Q96CW1;O75475;P08865;Q8TAA3;Q15697;P60900;Q8NBB4;Q08945;P62244;P30876;Q9GZU5;O00233;P08708;Q96SZ4;Q9UL46;P78406;P57740;Q00403;P43487;P57086;P49720;P61254;O60563;Q9Y5B0;P46778;P29083;P50613;P59923;Q14241;P28698;Q9HBT7;P49792;P17096;Q8N1F7;O14709;P05388;P29084;P83881;P19388;P61218;P50750;O60583;P46777;Q96IT1;Q9UKX7;Q9Y3U8;P62249;Q15544;Q9UK41;Q13200;P48556;P19387;Q16401;P62081;P20226;Q9UL58;P62750;P18621;P35658;Q9BRR0;P12270;Q02543;Q96N95;P28070;P18124;Q9UNX3;P25398;Q53GI3;Q86W11;Q92621;Q16594;P49721;Q8NEZ2;Q92750;P17040;O00231;Q16670;Q9H9H4;Q13137;P62487;Q92530;P63208;Q96HA1;O14980;P63173;Q9BW27;P30050;P52294;P0CG48;P62979;Q92670;P83731;P84098;A6NGD5;P28062;Q15370;P28074;P23193;Q9UNY5;P61247;Q9P0L1;P62753;P46782;P62891;P62861;Q13889;Q99684;P28065;P18077;Q9Y5B9;Q8TEM1;P49848;P46779;P62917;P39023;P50914;P24928;P62269;P62847;P62910;P62273;O95782;P0CG00;P35269;Q96EE3;P37198;P40429;P23396;P62241;P52655;P25786;Q5SRE5;P15880;P62826;O14818;Q16514;Q6R2W3;P62987;O43747;P28072;O14978;P62841;P36578;P62266;Q9Y2L8;Q13426;P17028;P51946;P63000;Q14997;P61513;P32780;P28070;P55199;P61313;Q8NF99;P27635;Q8NFH3;O00268;P63010;P62888;Q92901;P0CG47;P62937;O15504;P25787;Q96LW9;P35268;P18754;Q6P9G9;Q3MJ62;Q8TF39;P62945;Q99567;P56377;P46776;Q12769;Q96GC6;O60304;P17022;P20618;O43148;Q9BXS5;Q9H3P2;Q9NPB6;P13010;P46783;Q14974;O95125;P62701;Q9BVL2;P49790;Q99816;O43309;P62875;P62899;Q8WUM0;P47914;Q8IXH7;Q9UNM6;P62906;P61289;P05386;O00267;P40306;P61353;P39019;Q15369;P62424;Q99436;P49910;O75694;Q9NRG9;P52434;Q8N0Y2;Q63HK3;Q7Z3B4;Q8NFH4;P62829;P62280;Q10567;P63272;Q15776;Q07020;P10073;Q8NFH5;P62263;P62854;Q6VY07;P60866;Q8IWX8;P26373;P62877;P05387;P52948;P51948;P52298;O75531;Q8WX92;P52435;O14771;Q9BUG6;P53803;Q15543;P25789;P61927;Q13888}

21518

Pathogen[ P0C206] interacts with 306 human

partners: {P61289;P28698;Q96EE3;P53680;P40429;Q86W11;P61313;P63010;Q99436;P28062;Q9UNM6;Q92621;P0CG48;Q9GZU5;O43309;P62875;P62877;Q8IXH7;P13010;P27635;Q63HK3;O75832;P23193;O94973;P18124;Q8NEZ2;P49790;Q9BUG6;P52298;Q92556;Q16514;Q9GZU2;P62854;P40306;Q5SR

E5;P28065;Q14997;Q15543;Q8NFH5;Q9NRG9;P49848;Q9Y6Q5;P49207;P36954;P55036;P50750;A6NGD5;P62081;P20226;Q09161;O43747;Q15544;P30050;P25786;Q10567;P25788;P18754;P49910;P30419;Q96N95;P62241;Q15697;P62244;P25787;P50914;Q7Z3B4;P08865;P62750;Q06323;P18621;P52657;P46781;P62266;Q02543;P59923;P52655;Q9UL58;P61966;P49720;P19388;P61218;Q14974;Q9H4T2;O00268;Q96HA1;Q07020;Q13137;P83881;P46778;P10073;Q9Y5Z7;P62263;O00232;Q969J2;P62273;P57086;P20670;P60900;Q02878;Q9Y5B9;Q8N0Y2;P62282;Q99816;P62280;Q99816;P62280;Q6R2W3;P62857;P62851;P29084;O43242;P62910;Q3MJ62;Q14241;O95125;P46782;A5LHX3;P13984;P61247;Q9UK41;O75475;Q9H9H4;P19447;Q9HBT7;P18077;A6NJL1;Q6NSZ9;P62913;P61927;P25789;P17022;P61353;P17029;P62888;O60304;Q8WUM0;Q16670;Q9NWS9;O75531;P49792;P36578;P53803;Q8TEML;Q92750;Q8NF99;Q9UKX7;P62861;P49917;O15514;P35269;Q9Y5B0;P19387;Q13888;A5D8V6;Q9BXS5;Q6VY07;P50613;P35268;P23396;P39023;P63000;Q9UNY5;P20618;P32969;P43487;P63208;Q13200;Q8TA A3;P18615;P62701;P28070;P29083;Q13426;O75694;P05386;Q86XT2;P22090;Q9UI12;Q9Y2L8;P84098;P62945;Q99460;Q96CW1;Q9P0L1;P26373;P46777;P05388;P62979;Q8TBC5;Q92759;Q96IT1;O14771;Q15370;P28066;Q9NPNB6;P62899;P17028;Q96GC6;Q6P9G9;P83731;O00267;P39019;Q92901;P05387;O14818;P46783;Q9H3P2;Q9Y5A6;P42766;Q8IYW8;P60866;P52435;O15535;Q8TF39;P62487;O95782;O14709;P62841;Q99567;P32780;P0CG47;Q99684;O60551;Q15542;P17096;Q8NFH4;P28072;Q7Z7L9;Q9UNX3;Q13889;Q9BRR0;P61513;Q96JS3;Q8WX92;Q96LW9;P78406;P17040;P28074;P62277;Q53GI3;Q9HC16;P46776;P51815;Q92530;Q12962;P24928;P62906;O15504;P49721;P63173;P55199;Q12769;Q93034;Q8NBB4;P62987;O60583;P62891;P62269;Q96SZ4;P62753;P87889;P46779;Q00403;Q9UL46;Q15776;Q8NFH3;P52294;P63220;P0CG00;Q96PC3;O60563;P15880;P12956;Q8N1F7;O43148;P25398;P08708;Q15369;Q08945;P62937;O00233;P47914;P48556;P35658;P62847;O14978;Q16401;P61254;P52434;Q9BW27;Q9BVL2;P56377;P21675;O00231;P51946;P63272;P42677;P62829;P12270;P51948;Q96G01;Q16594;P62249;P62424;Q9Y3U8;P30876;P62917}

21519 Pathogen[ P03363] interacts with 250 human partners: {P62913;Q9Y5A6;Q9P0L1;P12956;Q99684;P18621;P05386;Q7Z3B4;P62750;Q969J2;P23396;P28698;P42677;P63173;P08865;P29083;P29084;P62937;Q9Y5B0;Q15370;O14978;Q86W11;P62847;P18077;Q5SRE5;O14771;P05387;P49848;P12270;Q6NSZ9;P19388;P84098;P42766;Q96JS3;Q8NFH4;P13984;P62249;O60563;P05388;O43747;P36578;Q9BRR0;P55199;P62753;Q8WX92;Q92530;P62081;P62910;P30876;P13010;P0CG00;Q13888;Q8NFH3;P61513;P46776;P32780;O14980;Q92759;Q12769;P19387;P61254;P62273;P61218;Q16514;P32969;Q92901;P46778;P51946;P61927;P62891;Q8NBB4;Q15776;A6NGD5;Q9Y2L8;Q9NPNB6;P61353;P24928;O75475;P61289;O00268;Q9UKX7;O00267;Q8IYW8;Q96GC6;P08708;O43309;P17028;P15880;Q15369;P59923;Q9NWS9;P57086;Q9BUG6;P63000;Q9BXS5;Q9UNY5;Q9GZM5;Q8IXH7;O94973;Q6VY07;P18615;Q8TBC5;P52657;P26373;P35269;P17029;P83881;Q12962;Q00403;Q9NRG9;P22090;P62861;P62841;Q9Y5Z7;Q8WUM0;Q9UNX3;Q9BVL2;Q99567;Q96LW9;Q8TF39;P30050;Q13426;O60583;Q9H4T2;P62829;Q15544;P62877;Q9GZU2;Q9Y5B9;P46782;P35268;Q14241;Q9HBT7;P17096;Q9H3P2;P43487;O14709;P46781;P50914;Q16670;Q9UK41;P17022;Q63HK3;P63010;P63220;P61313;Q96HA1;Q92556;P39019;P49792;Q15542;P52298;O43148;P35658;Q96IT1;P46779;Q02543;P46777;P62987;Q14974;Q92750;P25398;O75694;P49790;Q96SZ4;Q15697;O95125;P62487;P57740;P21675;P23193;P83731;P62851;P62280;O95782;Q9Y3U8;P62888;P20226;P49910;P52655;Q9UL58;Q8NEZ2;P63272;P50750;Q8N945;P62244;P62277;O75531;P62906;P62266;P78406;P62945;O60304;P49207;P62241;Q53GI3;P62424;Q99816;P52948;P60866;P61247;Q93034;Q96N95;P62899;P62857;O15504;Q02878;Q07020;P39023;P37198;P18754;Q15543;P53803;P52435;P17040;P62854;P62826;P52434;Q9H9H4;Q8N1F7;P62917;Q13137;Q92621;P51815;Q3MJ62;A6NJL1;Q8NFH5;Q6P9G9;Q6R2W3;P18124;P40429;P27635;P63208;P62263;P47914;P62701;Q10567;Q9BW27;P10073;Q8NF99;P62269;O15535;Q96CW1;Q09161;Q8N0Y2;P46783;Q16594;P52294;A5D8V6}

21520 [Cluster 1957]GO:0008090+P biological\_process [name] retrograde axon cargo transport [def] "The directed movement of organelles or molecules along microtubules from the cell periphery toward the cell body in nerve cell axons." [ISBN

21521 Pathogen[ Q2Q067] interacts with 1 human partners: {P07196}

21522 Pathogen[ P0C214] interacts with 2 human partners: {Q8TDB4;P07196}

21523 Pathogen[ P03346] interacts with 2 human partners: {P07196;Q8TDB4}

21524 Pathogen[ Q85601] interacts with 3 human partners: {P07196;Q8TDB4;Q9GZM8}

21525 Pathogen[ P14079] interacts with 3 human partners: {P07196;Q8TDB4;Q9GZM8}

21526 Pathogen[ P03383] interacts with 2 human partners: {Q8TDB4;P07196}

21527 Pathogen[ P03410] interacts with 3 human partners: {Q9GZM8;P07196;Q8TDB4}

21528 Pathogen[ P14075] interacts with 2 human partners: {Q8TDB4;P07196}

21529 Pathogen[ P0C206] interacts with 3 human partners: {P07196;Q9GZM8;Q8TDB4}

21530 Pathogen[ P03363] interacts with 1 human partners: {P07196}

21531 [Cluster 1958]GO:0030178+P biological\_process [name] negative regulation of Wnt receptor signaling pathway [def] "Any process that stops, prevents, or reduces the frequency, rate or extent of Wnt receptor signaling pathway activity." [GOC

21532 Pathogen[ Q2Q067] interacts with 12 human partners: {Q14526;P24385;Q93074;O14907;Q9NZC7;Q9Y3M2;Q9NYF0;Q99966;Q99750;Q9NSA3;Q04724;Q9HCK8}

21533 Pathogen[ P0C214] interacts with 12 human partners: {Q14526;Q93074;O14907;P24385;Q04724;Q99750;Q9NZC7;Q9NSA3;Q99966;Q9Y3M2;Q9HCK8;Q9NYF0}

21534 Pathogen[ P03346] interacts with 18 human partners: {Q99966;P24385;Q9H2H0;Q9Y3M2;Q13322;Q93074;Q14526;Q9NSA3;Q9NZC7;Q04724;Q9HCK8;Q99750;O14907;Q9UGU5;Q9NYF0;P56915;O95343;Q9HBU1}

21535 Pathogen[ Q85601] interacts with 12 human partners: {Q9NZC7;P24385;Q04724;Q9Y3M2;Q99966;Q9NYF0;Q14526;Q99750;O14907;Q9HCK8;Q9NSA3;Q93074}

21536 Pathogen[ P14079] interacts with 10 human partners: {Q99966;O14907;Q96B18;Q9NZC7;Q9HCK8;Q04724;Q9Y3M2;Q93074;Q99750;Q9NYF0}

21537 Pathogen[ P03383] interacts with 10 human

21538 partners:{Q14526;P24385;Q04724;Q93074;Q9NSA3;Q9Y3M2;Q9HCK8;Q9NYF0;Q99750;O14907}  
Pathogen[ P03410] interacts with 14 human  
partners:{O14960;Q14526;Q9NSA3;Q9Y3M2;Q9NZC7;Q96B18;Q04724;P24385;O14907;Q9HCK8;Q9NYF0;Q93074;Q99750;Q99966}

21539 Pathogen[ P14075] interacts with 10 human  
partners:{Q14526;Q93074;Q9NSA3;Q9HCK8;O14907;Q99750;Q04724;P24385;Q9Y3M2;Q9NYF0}

21540 Pathogen[ P0C206] interacts with 13 human  
partners:{Q9HCK8;Q9NSA3;Q9H2H0;Q96B18;O14907;Q04724;Q99966;Q9NZC7;Q9NYF0;Q14526;Q93074;Q99750;P24385}

21541 Pathogen[ P03363] interacts with 13 human  
partners:{O14907;Q14526;Q99750;Q9Y3M2;Q9NYF0;Q04724;Q9NSA3;Q9HCK8;P56915;Q93074;P24385;O95343;Q9HBU1}

21542 [Cluster 1959]GO:0016331+P biological\_process [name] morphogenesis of embryonic epithelium [def] "The process in which the anatomical structures of embryonic epithelia are generated and organized." [GOC  
21543 Pathogen[ Q2Q067] interacts with 1 human partners:{Q14160}  
21544 Pathogen[ P0C214] interacts with 1 human partners:{Q14160}  
21545 Pathogen[ P03346] interacts with 1 human partners:{Q14160}  
21546 Pathogen[ Q85601] interacts with 1 human partners:{Q14160}  
21547 Pathogen[ P14079] interacts with 1 human partners:{O43294}  
21548 Pathogen[ P03383] interacts with 1 human partners:{Q14160}  
21549 Pathogen[ P03410] interacts with 2 human partners:{O43294;Q14160}  
21550 Pathogen[ P14075] interacts with 1 human partners:{Q14160}  
21551 Pathogen[ P0C206] interacts with 2 human partners:{Q14160;O43294}  
21552 Pathogen[ P03363] interacts with 1 human partners:{Q14160}

21553 [Cluster 1960]GO:0006378+P biological\_process [name] mRNA polyadenylation [def] "The enzymatic addition of a sequence of 40-200 adenylyl residues at the 3' end of a eukaryotic mRNA primary transcript." [ISBN  
21554 Pathogen[ Q2Q067] interacts with 13 human  
partners:{P33240;Q8WVC0;Q6P1J9;Q10570;Q12996;Q16630;Q05048;O43809;Q8N7H5;Q9UKF6;Q9NVV4;P11940;P51003}  
21555 Pathogen[ P0C214] interacts with 14 human  
partners:{Q12996;Q9UKF6;P51003;O43865;Q05048;P11940;Q10570;Q16630;O43809;Q6P1J9;Q8N7H5;P33240;Q8WVC0;Q9NVV4}  
21556 Pathogen[ P03346] interacts with 14 human  
partners:{Q9UKF6;P11940;Q05048;P51003;Q8WVC0;Q9NVV4;O43809;O43865;Q10570;Q12996;Q6P1J9;P33240;Q8N7H5;Q16630}  
21557 Pathogen[ Q85601] interacts with 12 human  
partners:{Q8WVC0;Q05048;Q6P1J9;O43865;P11940;Q10570;Q9NVV4;P51003;Q9UKF6;P33240;Q8N7H5;O43809}  
21558 Pathogen[ P14079] interacts with 14 human  
partners:{O43809;Q9UKF6;Q10570;P33240;Q05048;O43865;P11940;Q8WVC0;Q9NVV4;Q16630;P51003;Q12996;Q6P1J9;Q8N7H5}  
21559 Pathogen[ P03383] interacts with 11 human  
partners:{Q9NVV4;Q05048;Q6P1J9;P51003;Q10570;P11940;Q9UKF6;P33240;Q8WVC0;O43809;Q8N7H5}  
21560 Pathogen[ P03410] interacts with 14 human  
partners:{Q10570;Q8WVC0;Q12996;Q05048;P11940;Q9NVV4;P51003;Q8N7H5;O43809;P33240;Q6P1J9;Q9UKF6;Q16630;O43865}  
21561 Pathogen[ P14075] interacts with 11 human  
partners:{P51003;O43809;Q9NVV4;Q8WVC0;Q8N7H5;Q6P1J9;P11940;P33240;Q05048;Q9UKF6;Q10570}  
21562 Pathogen[ P0C206] interacts with 14 human  
partners:{P33240;Q9UKF6;P51003;O43809;O43865;Q05048;Q8N7H5;Q16630;Q8WVC0;Q12996;Q9NVV4;P11940;Q6P1J9;Q10570}  
21563 Pathogen[ P03363] interacts with 14 human  
partners:{Q9NVV4;Q10570;Q8WVC0;Q05048;Q16630;P11940;O43809;Q6P1J9;P51003;O43865;Q9UKF6;P33240;Q8N7H5;Q12996}

21564 [Cluster 1961]GO:0007141+P biological\_process [name] male meiosis I [def] "A cell cycle process comprising the steps by which a cell progresses through male meiosis I, the first meiotic division in the male germline." [GOC  
21565 Pathogen[ Q2Q067] interacts with 5 human  
partners:{Q8I WV8;O43502;Q9H160;P78396;Q58F21}  
21566 Pathogen[ P0C214] interacts with 5 human  
partners:{Q58F21;Q8I WV8;P78396;Q9H160;O43502}  
21567 Pathogen[ P03346] interacts with 7 human  
partners:{P78396;O43502;Q58F21;Q8IZU3;P51587;Q8I WV8;Q9H160}  
21568 Pathogen[ Q85601] interacts with 6 human  
partners:{O43502;P78396;Q9H160;Q58F21;P51587;Q8I WV8}  
21569 Pathogen[ P14079] interacts with 8 human  
partners:{Q5TIA1;Q8I WV8;P78396;Q58F21;P51587;Q8IZU3;O43502;Q9H160}  
21570 Pathogen[ P03383] interacts with 4 human partners:{Q8I WV8;P78396;Q9H160;Q58F21}  
21571 Pathogen[ P03410] interacts with 8 human  
partners:{Q8I WV8;P78396;O43502;P51587;Q8IZU3;Q9H160;Q58F21;Q5TIA1}  
21572 Pathogen[ P14075] interacts with 4 human partners:{P78396;Q58F21;Q9H160;Q8I WV8}  
21573 Pathogen[ P0C206] interacts with 7 human

21574 partners:{O43502;P51587;Q8IZU3;Q9H160;Q8I WV8;P78396;Q58F21}  
Pathogen[ P03363] interacts with 6 human

21575 [Cluster 1962]GO:0007204+P biological\_process [name] elevation of cytosolic calcium ion concentration [def] "Any process that increases the concentration of calcium ions in the cytosol." [GOC]  
21576 Pathogen[ Q2Q067] interacts with 2 human partners:{P25063;P62879}  
21577 Pathogen[ P0C214] interacts with 2 human partners:{P25063;P62879}  
21578 Pathogen[ P03346] interacts with 2 human partners:{P62879;P25063}  
21579 Pathogen[ Q85601] interacts with 1 human partners:{P62879}  
21580 Pathogen[ P14079] interacts with 4 human partners:{P31358;P25063;O43612;P0DJ18}  
21581 Pathogen[ P03383] interacts with 2 human partners:{P62879;P25063}  
21582 Pathogen[ P03410] interacts with 6 human  
partners:{P0DJ18;O43612;P31358;P25063;P62879;Q9NRJ3}  
21583 Pathogen[ P14075] interacts with 2 human partners:{P62879;P25063}  
21584 Pathogen[ P0C206] interacts with 2 human partners:{P62879;P25063}  
21585 Pathogen[ P03363] interacts with 1 human partners:{P62879}  
21586 [Cluster 1963]GO:0070317+P biological\_process [name] negative regulation of G0 to G1 transition [def] "A cell cycle process that stops, prevents, or reduces the rate or extent of the transition from the G0 quiescent state to the G1 phase." [GOC]  
21587 Pathogen[ Q2Q067] interacts with 1 human partners:{Q15173}  
21588 Pathogen[ P0C214] interacts with 1 human partners:{Q15173}  
21589 Pathogen[ P03346] interacts with 1 human partners:{Q15173}  
21590 Pathogen[ Q85601] interacts with 1 human partners:{Q15173}  
21591 Pathogen[ P14079] interacts with 1 human partners:{Q15173}  
21592 Pathogen[ P03383] interacts with 1 human partners:{Q15173}  
21593 Pathogen[ P03410] interacts with 1 human partners:{Q15173}  
21594 Pathogen[ P14075] interacts with 1 human partners:{Q15173}  
21595 Pathogen[ P0C206] interacts with 1 human partners:{Q15173}  
21596 Pathogen[ P03363] interacts with 1 human partners:{Q15173}  
21597 [Cluster 1964]GO:0007250+P biological\_process [name] activation of NF-kappaB-inducing kinase activity [def] "The stimulation of the activity of NF-kappaB-inducing kinase through phosphorylation at specific residues." [GOC]  
21598 Pathogen[ Q2Q067] interacts with 4 human partners:{Q9UDY8;Q12933;Q9Y6K9;O43318}  
21599 Pathogen[ P0C214] interacts with 4 human partners:{Q9Y6K9;Q9UDY8;O43318;Q12933}  
21600 Pathogen[ P03346] interacts with 4 human partners:{Q9Y6K9;Q9UDY8;Q9BWT7;O43318}  
21601 Pathogen[ Q85601] interacts with 4 human partners:{Q9UDY8;Q9Y6K9;Q12933;O43318}  
21602 Pathogen[ P14079] interacts with 2 human partners:{Q9Y6K9;Q12933}  
21603 Pathogen[ P03383] interacts with 3 human partners:{Q9Y6K9;O43318;Q12933}  
21604 Pathogen[ P03410] interacts with 4 human partners:{O43318;Q12933;Q9Y6K9;Q9BWT7}  
21605 Pathogen[ P14075] interacts with 3 human partners:{Q12933;O43318;Q9Y6K9}  
21606 Pathogen[ P0C206] interacts with 5 human  
partners:{Q9Y6K9;Q9UDY8;O43318;Q12933;Q9BWT7}  
21607 Pathogen[ P03363] interacts with 4 human partners:{Q12933;Q9Y6K9;O43318;Q9BWT7}  
21608 [Cluster 1965]GO:0042535+P biological\_process [name] positive regulation of tumor necrosis factor biosynthetic process [def] "Any process that activates or increases the frequency, rate or extent of the chemical reactions and pathways resulting in the formation of tumor necrosis factor, an inflammatory cytokine produced by macrophages/monocytes during acute inflammation and which is responsible for a diverse range of signaling events within cells, leading to necrosis or apoptosis." [GOC]  
21609 Pathogen[ Q2Q067] interacts with 1 human partners:{P04792}  
21610 Pathogen[ P0C214] interacts with 1 human partners:{P04792}  
21611 Pathogen[ P03346] interacts with 1 human partners:{P04792}  
21612 Pathogen[ Q85601] interacts with 1 human partners:{P04792}  
21613 Pathogen[ P14079] interacts with 1 human partners:{P04792}  
21614 Pathogen[ P03383] interacts with 1 human partners:{P04792}  
21615 Pathogen[ P03410] interacts with 1 human partners:{P04792}  
21616 Pathogen[ P14075] interacts with 1 human partners:{P04792}  
21617 Pathogen[ P0C206] interacts with 1 human partners:{P04792}  
21618 Pathogen[ P03363] interacts with 1 human partners:{P04792}  
21619 [Cluster 1966]GO:0035331+P biological\_process [name] negative regulation of hippo signaling cascade [def] "Any process that stops, prevents, or reduces the frequency, rate or extent of hippo signaling." [GOC]  
21620 Pathogen[ Q2Q067] interacts with 3 human partners:{A6NIX2;Q96IF1;Q9UGP4}  
21621 Pathogen[ P0C214] interacts with 2 human partners:{Q9UGP4;A6NIX2}  
21622 Pathogen[ P03346] interacts with 3 human partners:{Q9UGP4;Q96IF1;A6NIX2}  
21623 Pathogen[ Q85601] interacts with 3 human partners:{A6NIX2;Q96IF1;Q9UGP4}  
21624 Pathogen[ P14079] interacts with 3 human partners:{Q96IF1;A6NIX2;Q9UGP4}  
21625 Pathogen[ P03383] interacts with 2 human partners:{A6NIX2;Q9UGP4}  
21626 Pathogen[ P03410] interacts with 3 human partners:{Q9UGP4;Q96IF1;A6NIX2}  
21627 Pathogen[ P14075] interacts with 2 human partners:{Q9UGP4;A6NIX2}  
21628 Pathogen[ P0C206] interacts with 3 human partners:{Q9UGP4;Q96IF1;A6NIX2}  
21629 Pathogen[ P03363] interacts with 3 human partners:{Q96IF1;Q9UGP4;A6NIX2}  
21630 [Cluster 1967]GO:0071955+P biological\_process [name] recycling endosome to Golgi transport [def] "The directed movement of substances from recycling endosomes to the Golgi." [GOC]

21631 Pathogen[ Q2Q067] interacts with 1 human partners:{Q8IWJ2}  
21632 Pathogen[ P0C214] interacts with 1 human partners:{Q8IWJ2}  
21633 Pathogen[ P03346] interacts with 1 human partners:{Q8IWJ2}  
21634 Pathogen[ Q85601] interacts with 1 human partners:{Q8IWJ2}  
21635 Pathogen[ P14079] interacts with 1 human partners:{Q8IWJ2}  
21636 Pathogen[ P03383] interacts with 1 human partners:{Q8IWJ2}  
21637 Pathogen[ P03410] interacts with 1 human partners:{Q8IWJ2}  
21638 Pathogen[ P14075] interacts with 1 human partners:{Q8IWJ2}  
21639 Pathogen[ P0C206] interacts with 1 human partners:{Q8IWJ2}  
21640 Pathogen[ P03363] interacts with 1 human partners:{Q8IWJ2}  
21641 [Cluster 1968]GO:0006335+P biological\_process [name] DNA replication-dependent nucleosome assembly [def] "The formation of nucleosomes on newly replicated DNA, coupled to strand elongation." [GOC  
21642 Pathogen[ Q2Q067] interacts with 2 human partners:{Q13111;Q13112}  
21643 Pathogen[ P0C214] interacts with 2 human partners:{Q13112;Q13111}  
21644 Pathogen[ P03346] interacts with 2 human partners:{Q13111;Q13112}  
21645 Pathogen[ Q85601] interacts with 2 human partners:{Q13112;Q13111}  
21646 Pathogen[ P14079] interacts with 2 human partners:{Q13112;Q13111}  
21647 Pathogen[ P03383] interacts with 2 human partners:{Q13111;Q13112}  
21648 Pathogen[ P03410] interacts with 2 human partners:{Q13111;Q13112}  
21649 Pathogen[ P14075] interacts with 2 human partners:{Q13111;Q13112}  
21650 Pathogen[ P0C206] interacts with 2 human partners:{Q13112;Q13111}  
21651 Pathogen[ P03363] interacts with 2 human partners:{Q13112;Q13111}  
21652 [Cluster 1969]GO:0034332+P biological\_process [name] adherens junction organization [def] "A process that is carried out at the cellular level which results in the assembly, arrangement of constituent parts, or disassembly of an adherens junction. An adherens junction is a cell junction at which the cytoplasmic face of the plasma membrane is attached to actin filaments." [GOC  
21653 Pathogen[ Q2Q067] interacts with 3 human partners:{P15924;P60953;O60716}  
21654 Pathogen[ P0C214] interacts with 5 human partners:{P60709;O60716;P15924;P60953;P63261}  
21655 Pathogen[ P03346] interacts with 6 human partners:{P15924;O60716;P60709;P60953;P55196;Q9Y6R0}  
21656 Pathogen[ Q85601] interacts with 5 human partners:{P60709;P15924;O60716;P63261;P60953}  
21657 Pathogen[ P14079] interacts with 4 human partners:{P63261;P15924;P60709;O60716}  
21658 Pathogen[ P03383] interacts with 3 human partners:{P15924;O60716;P60953}  
21659 Pathogen[ P03410] interacts with 5 human partners:{P15924;O60716;P60953;P63261;P60709}  
21660 Pathogen[ P14075] interacts with 3 human partners:{P60953;O60716;P15924}  
21661 Pathogen[ P0C206] interacts with 6 human partners:{O60716;P60709;P55196;P63261;P60953;P15924}  
21662 Pathogen[ P03363] interacts with 6 human partners:{P60709;P15924;P63261;Q9Y6R0;P60953;O60716}  
21663 [Cluster 1970]GO:0045995+P biological\_process [name] regulation of embryonic development [def] "Any process that modulates the frequency, rate or extent of embryonic development." [GOC  
21664 Pathogen[ Q2Q067] interacts with 1 human partners:{Q16236}  
21665 Pathogen[ P0C214] interacts with 1 human partners:{Q16236}  
21666 Pathogen[ P03346] interacts with 1 human partners:{Q16236}  
21667 Pathogen[ Q85601] interacts with 1 human partners:{Q16236}  
21668 Pathogen[ P14079] interacts with 2 human partners:{Q16236;Q6IQ19}  
21669 Pathogen[ P03383] interacts with 1 human partners:{Q16236}  
21670 Pathogen[ P03410] interacts with 2 human partners:{Q16236;Q6IQ19}  
21671 Pathogen[ P14075] interacts with 2 human partners:{Q6IQ19;Q16236}  
21672 Pathogen[ P0C206] interacts with 2 human partners:{Q6IQ19;Q16236}  
21673 Pathogen[ P03363] interacts with 2 human partners:{Q16236;Q6IQ19}  
21674 [Cluster 1971]GO:0010831+P biological\_process [name] positive regulation of myotube differentiation [def] "Any process that increases the frequency, rate or extent of myotube differentiation. Myotube differentiation is the process in which a relatively unspecialized cell acquires specialized features of a myotube cell. Myotubes are multinucleated cells that are formed when proliferating myoblasts exit the cell cycle, differentiate and fuse." [GOC  
21675 Pathogen[ Q2Q067] interacts with 4 human partners:{Q92585;P10827;Q8NB12;Q6ZN01}  
21676 Pathogen[ P0C214] interacts with 4 human partners:{Q92585;Q9Y3R4;Q6ZN01;Q8NB12}  
21677 Pathogen[ P03346] interacts with 4 human partners:{Q92585;P10827;Q8NB12;Q6ZN01}  
21678 Pathogen[ Q85601] interacts with 4 human partners:{Q92585;Q8NB12;P10827;Q6ZN01}  
21679 Pathogen[ P14079] interacts with 4 human partners:{P10827;Q8NB12;Q9Y3R4;Q92585}  
21680 Pathogen[ P03383] interacts with 2 human partners:{Q92585;Q6ZN01}  
21681 Pathogen[ P03410] interacts with 4 human partners:{Q6ZN01;Q92585;Q8NB12;Q9Y3R4}  
21682 Pathogen[ P14075] interacts with 2 human partners:{Q92585;Q6ZN01}  
21683 Pathogen[ P0C206] interacts with 5 human partners:{Q9Y3R4;Q8NB12;Q6ZN01;Q92585;P10827}  
21684 Pathogen[ P03363] interacts with 3 human partners:{Q8NB12;Q6ZN01;Q92585}  
21685 [Cluster 1972]GO:0007156+P biological\_process [name] homophilic cell adhesion [def] "The attachment of an adhesion molecule in one cell to an identical molecule in an



adjacent cell." [ISBN

21686 Pathogen[ Q2Q067] interacts with 1 human partners:{Q12816}

21687 Pathogen[ P0C214] interacts with 1 human partners:{Q12816}

21688 Pathogen[ P03346] interacts with 1 human partners:{Q12816}

21689 Pathogen[ Q85601] interacts with 1 human partners:{Q12816}

21690 Pathogen[ P14079] interacts with 1 human partners:{Q12816}

21691 Pathogen[ P03383] interacts with 1 human partners:{Q12816}

21692 Pathogen[ P03410] interacts with 1 human partners:{Q12816}

21693 Pathogen[ P14075] interacts with 1 human partners:{Q12816}

21694 Pathogen[ P0C206] interacts with 1 human partners:{Q12816}

21695 Pathogen[ P03363] interacts with 1 human partners:{Q12816}

21696 [Cluster 1973]GO:0042274+P biological\_process [name] ribosomal small subunit biogenesis [def] "A cellular process that results in the biosynthesis of constituent macromolecules, assembly, and arrangement of constituent parts of a small ribosomal subunit\_ includes transport to the sites of protein synthesis." [GOC

21697 Pathogen[ Q2Q067] interacts with 12 human partners:{Q92979;P62081;P62249;P08708;Q96EU6;P62857;P78316;P62847;P39019;P63220;P62841;P62753}

21698 Pathogen[ P0C214] interacts with 12 human partners:{P62081;P62249;P39019;P62847;Q96EU6;P63220;P78316;Q92979;P62753;P62841;P62857;P08708}

21699 Pathogen[ P03346] interacts with 12 human partners:{P62249;Q92979;P62857;P08708;Q96EU6;P78316;P62081;P39019;P62847;P62841;P62753;P63220}

21700 Pathogen[ Q85601] interacts with 12 human partners:{P62857;P62081;Q92979;Q96EU6;P62753;P39019;P62249;P08708;P62847;P63220;P62841;P78316}

21701 Pathogen[ P14079] interacts with 12 human partners:{Q92979;P62847;P62753;P62841;P39019;P63220;P08708;P78316;P62081;P62249;Q96EU6;P62857}

21702 Pathogen[ P03383] interacts with 12 human partners:{P39019;P62249;P62753;P62081;P78316;P63220;P62857;Q96EU6;Q92979;P62841;P62847;P08708}

21703 Pathogen[ P03410] interacts with 12 human partners:{P78316;P62841;P63220;P62847;P62249;Q92979;P62081;P08708;Q96EU6;P62857;P39019;P62753}

21704 Pathogen[ P14075] interacts with 12 human partners:{P62857;P63220;Q92979;P08708;P62249;P62081;P78316;P62753;P62847;P62841;Q96EU6;P39019}

21705 Pathogen[ P0C206] interacts with 12 human partners:{Q96EU6;P62081;P62857;P78316;Q92979;P39019;P62841;P62753;P63220;P08708;P62847;P62249}

21706 Pathogen[ P03363] interacts with 12 human partners:{Q92979;Q96EU6;P62847;P62249;P62753;P62081;P08708;P62841;P63220;P39019;P78316;P62857}

21707 [Cluster 1974]GO:0051569+P biological\_process [name] regulation of histone H3-K4 methylation [def] "Any process that modulates the frequency, rate or extent of the covalent addition of a methyl group to the lysine at position 4 of histone H3." [GOC

21708 Pathogen[ Q2Q067] interacts with 1 human partners:{Q8NI51}

21709 Pathogen[ P0C214] interacts with 1 human partners:{Q8NI51}

21710 Pathogen[ P03346] interacts with 1 human partners:{Q8NI51}

21711 Pathogen[ Q85601] interacts with 1 human partners:{Q8NI51}

21712 Pathogen[ P14079] interacts with 1 human partners:{Q8NI51}

21713 Pathogen[ P03383] interacts with 1 human partners:{Q8NI51}

21714 Pathogen[ P03410] interacts with 1 human partners:{Q8NI51}

21715 Pathogen[ P14075] interacts with 1 human partners:{Q8NI51}

21716 Pathogen[ P0C206] interacts with 1 human partners:{Q8NI51}

21717 Pathogen[ P03363] interacts with 1 human partners:{Q8NI51}

21718 [Cluster 1975]GO:0042417+P biological\_process [name] dopamine metabolic process [def] "The chemical reactions and pathways involving dopamine, a catecholamine neurotransmitter and a metabolic precursor of noradrenaline and adrenaline." [GOC

21719 Pathogen[ Q2Q067] interacts with 2 human partners:{Q9Y6H5;Q16143}

21720 Pathogen[ P0C214] interacts with 2 human partners:{Q9Y6H5;Q16143}

21721 Pathogen[ P03346] interacts with 2 human partners:{Q16143;Q9Y6H5}

21722 Pathogen[ Q85601] interacts with 2 human partners:{Q9Y6H5;Q16143}

21723 Pathogen[ P14079] interacts with 2 human partners:{Q9Y6H5;Q16143}

21724 Pathogen[ P03383] interacts with 1 human partners:{Q9Y6H5}

21725 Pathogen[ P03410] interacts with 2 human partners:{Q9Y6H5;Q16143}

21726 Pathogen[ P14075] interacts with 1 human partners:{Q9Y6H5}

21727 Pathogen[ P0C206] interacts with 2 human partners:{Q16143;Q9Y6H5}

21728 Pathogen[ P03363] interacts with 2 human partners:{Q9Y6H5;Q16143}

21729 [Cluster 1976]GO:0042542+P biological\_process [name] response to hydrogen peroxide [def] "Any process that results in a change in state or activity of a cell or an organism (in terms of movement, secretion, enzyme production, gene expression, etc.) as a result of a hydrogen peroxide (H2O2) stimulus." [GOC

21730 Pathogen[ Q2Q067] interacts with 11 human

partners:{Q99497;Q7Z2E3;Q04206;P02511;P62714;P55212;P68871;P69905;P02489;P15407;Q9H3M7}

21731 Pathogen[ P0C214] interacts with 13 human partners:{P02489;P02511;P15407;P55212;Q9H3M7;Q04206;P69905;Q99497;Q5SWA1;P62714;P68871;Q7Z2E3;P05412}

21732 Pathogen[ P03346] interacts with 14 human partners:{P05412;P02489;Q9NS18;Q04206;Q5SWA1;P62714;P69905;P55212;P02511;Q99497;P15407;P68871;Q7Z2E3;Q9H3M7}

21733 Pathogen[ Q85601] interacts with 13 human partners:{Q99497;P69905;P02489;P62714;P15407;Q5SWA1;Q04206;P02511;P05412;P68871;Q7Z2E3;P55212;Q9H3M7}

21734 Pathogen[ P14079] interacts with 13 human partners:{Q5SWA1;P02511;Q99497;P69905;P02489;P55212;P68871;P15407;P03923;Q9H3M7;P02144;P05412;Q7Z2E3}

21735 Pathogen[ P03383] interacts with 11 human partners:{Q7Z2E3;P55212;P02511;P62714;P69905;P68871;Q5SWA1;P15407;Q9H3M7;Q04206;P05412}

21736 Pathogen[ P03410] interacts with 15 human partners:{Q04206;P62714;P02144;Q99497;Q9H3M7;Q7Z2E3;P68871;P02489;P02511;Q5SWA1;P05412;P15407;P03923;P69905;P55212}

21737 Pathogen[ P14075] interacts with 11 human partners:{P68871;Q7Z2E3;Q04206;P05412;P55212;Q5SWA1;Q9H3M7;P02511;P62714;P15407;P69905}

21738 Pathogen[ P0C206] interacts with 14 human partners:{P68871;Q9NS18;P15407;P05412;P55212;Q99497;P69905;Q04206;P62714;Q5SWA1;Q9H3M7;P02511;P02489;Q7Z2E3}

21739 Pathogen[ P03363] interacts with 10 human partners:{P69905;P62714;Q04206;P68871;Q9H3M7;P55212;Q7Z2E3;P15407;P05412;P02489}

21740 [Cluster 1977]GO:0035067+P biological\_process [name] negative regulation of histone acetylation [def] "Any process that stops, prevents, or reduces the frequency, rate or extent of the addition of an acetyl group to a histone protein." [GOC

21741 Pathogen[ Q2Q067] interacts with 4 human partners:{Q9Y3T9;Q01105;Q13363;Q15545}

21742 Pathogen[ P0C214] interacts with 4 human partners:{Q9Y3T9;Q13363;Q15545;Q01105}

21743 Pathogen[ P03346] interacts with 4 human partners:{Q01105;Q9Y3T9;Q13363;Q15545}

21744 Pathogen[ Q85601] interacts with 4 human partners:{Q01105;Q15545;Q13363;Q9Y3T9}

21745 Pathogen[ P14079] interacts with 3 human partners:{Q01105;Q9Y3T9;Q15545}

21746 Pathogen[ P03383] interacts with 4 human partners:{Q01105;Q9Y3T9;Q15545;Q13363}

21747 Pathogen[ P03410] interacts with 3 human partners:{Q01105;Q9Y3T9;Q15545}

21748 Pathogen[ P14075] interacts with 4 human partners:{Q01105;Q15545;Q9Y3T9;Q13363}

21749 Pathogen[ P0C206] interacts with 4 human partners:{Q15545;Q13363;Q01105;Q9Y3T9}

21750 Pathogen[ P03363] interacts with 4 human partners:{Q15545;Q9Y3T9;Q13363;Q01105}

21751 [Cluster 1978]GO:0090382+P biological\_process [name] phagosome maturation [def] "A process that is carried out at the cellular level which results in the arrangement of constituent parts of a phagosome within a cell. Phagosome maturation begins with endocytosis and formation of the early phagosome and ends with the formation of the hybrid organelle, the phagolysosome." [GOC

21752 Pathogen[ Q2Q067] interacts with 2 human partners:{P36543;P29474}

21753 Pathogen[ P0C214] interacts with 4 human partners:{P29474;Q16864;Q9UI12;P36543}

21754 Pathogen[ P03346] interacts with 6 human partners:{P21283;P29474;Q9Y5K8;P36543;Q93050;Q16864}

21755 Pathogen[ Q85601] interacts with 3 human partners:{Q93050;P29474;P36543}

21756 Pathogen[ P14079] interacts with 10 human partners:{P36543;Q9Y5K8;P61421;P13498;Q96LB4;Q8N8Y2;Q93050;Q9UI12;Q95670;Q16864}

21757 Pathogen[ P03383] interacts with 2 human partners:{P29474;P36543}

21758 Pathogen[ P03410] interacts with 11 human partners:{Q8N8Y2;P61421;Q93050;P29474;Q9UI12;Q96LB4;Q95670;Q16864;Q9Y5K8;Q75348;P36543}

21759 Pathogen[ P14075] interacts with 2 human partners:{P29474;P36543}

21760 Pathogen[ P0C206] interacts with 6 human partners:{P36543;Q9UI12;Q9Y5K8;Q16864;P29474;Q93050}

21761 Pathogen[ P03363] interacts with 3 human partners:{P29474;P36543;Q9Y5K8}

21762 [Cluster 1979]GO:0097056+P biological\_process [name] selenocysteinyl-tRNA(Sec) biosynthetic process [def] "The chemical reactions and pathways resulting in the formation of selenocysteinyl-tRNA(Sec). This process occurs through the following steps

21763 Pathogen[ Q2Q067] interacts with 2 human partners:{P49591;Q9HD40}

21764 Pathogen[ P0C214] interacts with 3 human partners:{Q9NP81;P49591;Q9HD40}

21765 Pathogen[ P03346] interacts with 1 human partners:{Q9HD40}

21766 Pathogen[ Q85601] interacts with 1 human partners:{Q9HD40}

21767 Pathogen[ P14079] interacts with 3 human partners:{Q9NP81;P49591;Q9HD40}

21768 Pathogen[ P03383] interacts with 3 human partners:{Q9HD40;Q9NP81;P49591}

21769 Pathogen[ P03410] interacts with 3 human partners:{P49591;Q9HD40;Q9NP81}

21770 Pathogen[ P14075] interacts with 3 human partners:{Q9NP81;Q9HD40;P49591}

21771 Pathogen[ P0C206] interacts with 3 human partners:{Q9HD40;Q9NP81;P49591}

21772 Pathogen[ P03363] interacts with 2 human partners:{Q9HD40;P49591}

21773 [Cluster 1980]GO:0032214+P biological\_process [name] negative regulation of telomere maintenance via semi-conservative replication [def] "Any process that stops, prevents,

or reduces the frequency, rate or extent of the semi-conservative replication of telomeric DNA." [GOC

21774 Pathogen[ Q2Q067] interacts with 2 human partners:{Q15554;P54274}

21775 Pathogen[ P0C214] interacts with 2 human partners:{Q15554;P54274}

21776 Pathogen[ P03346] interacts with 2 human partners:{Q15554;P54274}

21777 Pathogen[ Q85601] interacts with 2 human partners:{Q15554;P54274}

21778 Pathogen[ P14079] interacts with 2 human partners:{P54274;Q15554}

21779 Pathogen[ P03383] interacts with 2 human partners:{Q15554;P54274}

21780 Pathogen[ P03410] interacts with 2 human partners:{Q15554;P54274}

21781 Pathogen[ P14075] interacts with 2 human partners:{Q15554;P54274}

21782 Pathogen[ P0C206] interacts with 2 human partners:{Q15554;P54274}

21783 Pathogen[ P03363] interacts with 2 human partners:{Q15554;P54274}

21784 [Cluster 1981]GO:0071391+P biological\_process [name] cellular response to estrogen stimulus [def] "Any process that results in a change in state or activity of a cell (in terms of movement, secretion, enzyme production, gene expression, etc.) as a result of stimulus by an estrogen, C18 steroid hormones that can stimulate the development of female sexual characteristics." [GOC

21785 Pathogen[ Q2Q067] interacts with 2 human partners:{O15164;P50453}

21786 Pathogen[ P0C214] interacts with 2 human partners:{P50453;O15164}

21787 Pathogen[ P03346] interacts with 2 human partners:{P50453;O15164}

21788 Pathogen[ Q85601] interacts with 2 human partners:{O15164;P50453}

21789 Pathogen[ P14079] interacts with 2 human partners:{O15164;P50453}

21790 Pathogen[ P03383] interacts with 1 human partners:{P50453}

21791 Pathogen[ P03410] interacts with 1 human partners:{P50453}

21792 Pathogen[ P14075] interacts with 1 human partners:{P50453}

21793 Pathogen[ P0C206] interacts with 2 human partners:{O15164;P50453}

21794 Pathogen[ P03363] interacts with 1 human partners:{P50453}

21795 [Cluster 1982]GO:0010763+P biological\_process [name] positive regulation of fibroblast migration [def] "Any process that increases the rate, frequency or extent of fibroblast cell migration. Fibroblast cell migration is accomplished by extension and retraction of a pseudopodium." [GOC

21796 Pathogen[ Q2Q067] interacts with 1 human partners:{O95429}

21797 Pathogen[ P0C214] interacts with 1 human partners:{O95429}

21798 Pathogen[ P03346] interacts with 1 human partners:{O95429}

21799 Pathogen[ Q85601] interacts with 1 human partners:{O95429}

21800 Pathogen[ P14079] interacts with 1 human partners:{O95429}

21801 Pathogen[ P03383] interacts with 1 human partners:{O95429}

21802 Pathogen[ P03410] interacts with 1 human partners:{O95429}

21803 Pathogen[ P14075] interacts with 1 human partners:{O95429}

21804 Pathogen[ P0C206] interacts with 1 human partners:{O95429}

21805 Pathogen[ P03363] interacts with 1 human partners:{O95429}

21806 [Cluster 1983]GO:0007585+P biological\_process [name] respiratory gaseous exchange [def] "The process of gaseous exchange between an organism and its environment. In plants, microorganisms, and many small animals, air or water makes direct contact with the organism's cells or tissue fluids, and the processes of diffusion supply the organism with dioxygen (O2) and remove carbon dioxide (CO2). In larger animals the efficiency of gaseous exchange is improved by specialized respiratory organs, such as lungs and gills, which are ventilated by breathing mechanisms." [ISBN

21807 Pathogen[ Q2Q067] interacts with 7 human partners:{Q9Y5Q3;P20719;Q99608;P40426;O43711;P07738;Q9UI36}

21808 Pathogen[ P0C214] interacts with 5 human partners:{Q9Y5Q3;Q99608;Q9UI36;Q9UI09;P07738}

21809 Pathogen[ P03346] interacts with 9 human partners:{P50135;P40426;O43711;P07738;Q9Y5Q3;P20719;Q9BUZ4;Q99608;Q9UI36}

21810 Pathogen[ Q85601] interacts with 6 human partners:{Q99608;Q9Y5Q3;Q9UI36;O43711;P40426;P07738}

21811 Pathogen[ P14079] interacts with 11 human partners:{P15502;Q9Y5Q3;P50135;P10606;Q99608;Q9BUZ4;P07738;O43711;Q9UI09;P11686;Q9UI36}

21812 Pathogen[ P03383] interacts with 6 human partners:{Q9Y5Q3;Q99608;P07738;O43711;Q9UI36;P15502}

21813 Pathogen[ P03410] interacts with 11 human partners:{P40426;Q9UI36;Q9UI09;Q99608;Q9Y5Q3;P15502;P07738;P11686;O43711;P50135;P10606}

21814 Pathogen[ P14075] interacts with 6 human partners:{Q99608;Q9Y5Q3;O43711;P15502;Q9UI36;P07738}

21815 Pathogen[ P0C206] interacts with 11 human partners:{O43711;Q9Y5Q3;P15502;Q9UI09;Q9BUZ4;P40426;Q99608;P20719;P07738;Q9UI36;P50135}

21816 Pathogen[ P03363] interacts with 8 human partners:{P50135;P20719;Q99608;Q9UI36;O43711;P40426;Q9BUZ4;Q9Y5Q3}

21817 [Cluster 1984]GO:0003229+P biological\_process [name] ventricular cardiac muscle tissue development [def] "The process whose specific outcome is the progression of ventricular cardiac muscle over time, from its formation to the mature structure." [GOC

21818 Pathogen[ Q2Q067] interacts with 1 human partners:{Q8WUF5}

21819 Pathogen[ P0C214] interacts with 1 human partners:{Q8WUF5}

21820 Pathogen[ P03346] interacts with 2 human partners:{Q8WUF5;Q99593}

21821 Pathogen[ Q85601] interacts with 1 human partners:{Q8WUF5}

21822 Pathogen[ P14079] interacts with 1 human partners:{Q8WUF5}

21823 Pathogen[ P03383] interacts with 1 human partners:{Q8WUF5}

21824 Pathogen[ P03410] interacts with 1 human partners:{Q8WUF5}

21825 Pathogen[ P14075] interacts with 1 human partners:{Q8WUF5}

21826 Pathogen[ P0C206] interacts with 1 human partners:{Q8WUF5}

21827 Pathogen[ P03363] interacts with 1 human partners:{Q8WUF5}

21828 [Cluster 1985]GO:0006278+P biological\_process [name] RNA-dependent DNA replication [def] "A DNA replication process that uses RNA as a template for RNA-dependent DNA polymerases (e.g. reverse transcriptase) that synthesize the new strands." [GOC

21829 Pathogen[ Q2Q067] interacts with 2 human partners:{O14746;P62937}

21830 Pathogen[ P0C214] interacts with 1 human partners:{O14746}

21831 Pathogen[ P03346] interacts with 2 human partners:{P62937;O14746}

21832 Pathogen[ Q85601] interacts with 2 human partners:{O14746;P62937}

21833 Pathogen[ P14079] interacts with 2 human partners:{O14746;P62937}

21834 Pathogen[ P03383] interacts with 2 human partners:{P62937;O14746}

21835 Pathogen[ P03410] interacts with 3 human partners:{O14746;P62937;P63135}

21836 Pathogen[ P14075] interacts with 2 human partners:{O14746;P62937}

21837 Pathogen[ P0C206] interacts with 2 human partners:{P62937;O14746}

21838 Pathogen[ P03363] interacts with 2 human partners:{P62937;O14746}

21839 [Cluster 1986]GO:0001844+P biological\_process [name] protein insertion into mitochondrial membrane involved in induction of apoptosis [def] "The process in which a protein is incorporated into a mitochondrial membrane, contributing to the induction of apoptosis." [GOC

21840 Pathogen[ Q2Q067] interacts with 1 human partners:{Q13794}

21841 Pathogen[ P0C214] interacts with 1 human partners:{Q13794}

21842 Pathogen[ P03346] interacts with 2 human partners:{Q9Y371;Q13794}

21843 Pathogen[ Q85601] interacts with 1 human partners:{Q13794}

21844 Pathogen[ P14079] interacts with 2 human partners:{Q9Y371;Q13794}

21845 Pathogen[ P03383] interacts with 1 human partners:{Q13794}

21846 Pathogen[ P03410] interacts with 2 human partners:{Q13794;Q9Y371}

21847 Pathogen[ P14075] interacts with 1 human partners:{Q13794}

21848 Pathogen[ P0C206] interacts with 1 human partners:{Q13794}

21849 Pathogen[ P03363] interacts with 1 human partners:{Q13794}

21850 [Cluster 1987]GO:0010847+P biological\_process [name] regulation of chromatin assembly [def] "Any process the modulates the frequency, rate or extent of chromatin assembly. Chromatin assembly is the assembly of DNA, histone proteins, and other associated proteins into chromatin structure, beginning with the formation of the basic unit, the nucleosome, followed by organization of the nucleosomes into higher order structures, ultimately giving rise to a complex organization of specific domains within the nucleus." [GOC

21851 Pathogen[ Q2Q067] interacts with 1 human partners:{Q53GL7}

21852 Pathogen[ P0C214] interacts with 1 human partners:{Q53GL7}

21853 Pathogen[ P03346] interacts with 1 human partners:{Q53GL7}

21854 Pathogen[ Q85601] interacts with 1 human partners:{Q53GL7}

21855 Pathogen[ P14079] interacts with 1 human partners:{Q53GL7}

21856 Pathogen[ P03383] interacts with 1 human partners:{Q53GL7}

21857 Pathogen[ P03410] interacts with 1 human partners:{Q53GL7}

21858 Pathogen[ P14075] interacts with 1 human partners:{Q53GL7}

21859 Pathogen[ P0C206] interacts with 1 human partners:{Q53GL7}

21860 Pathogen[ P03363] interacts with 1 human partners:{Q53GL7}

21861 [Cluster 1988]GO:0021549+P biological\_process [name] cerebellum development [def] "The process whose specific outcome is the progression of the cerebellum over time, from its formation to the mature structure. The cerebellum is the portion of the brain in the back of the head between the cerebrum and the pons. In mice, the cerebellum controls balance for walking and standing, modulates the force and range of movement and is involved in the learning of motor skills." [GO\_REF

21862 Pathogen[ Q2Q067] interacts with 5 human partners:{Q13562;Q15596;P49116;Q86U70;O75376}

21863 Pathogen[ P0C214] interacts with 5 human partners:{P49116;Q86U70;O75376;O60925;Q15596}

21864 Pathogen[ P03346] interacts with 10 human partners:{Q86U70;Q15788;P49116;Q68CZ1;P52951;Q15596;O75376;Q9H2C1;O60925;Q13562}

21865 Pathogen[ Q85601] interacts with 5 human partners:{Q86U70;Q15596;Q13562;O75376;P49116}

21866 Pathogen[ P14079] interacts with 9 human partners:{O60925;Q15596;Q68CZ1;Q86U70;P00395;Q15078;Q15788;O75376;P49116}

21867 Pathogen[ P03383] interacts with 5 human partners:{Q15596;O75376;Q86U70;P49116;O60925}

21868 Pathogen[ P03410] interacts with 7 human partners:{O75376;Q86U70;Q15596;P49116;O60925;Q68CZ1;Q9BRK5}

21869 Pathogen[ P14075] interacts with 5 human partners:{Q86U70;O75376;P49116;O60925;Q15596}

21870 Pathogen[ P0C206] interacts with 8 human partners:{P49116;O60925;Q9H2C1;O75376;Q13562;Q15596;Q86U70;Q15788}

- 21871 Pathogen[ P03363] interacts with 6 human partners:{Q86U70;P49116;O75376;Q15596;O60925;P52951}
- 21872 [Cluster 1989]GO:0006915+P biological\_process [name] apoptotic process [def] "A programmed cell death process which begins when a cell receives an internal (e.g. DNA damage) or external signal (e.g. an extracellular death ligand), and proceeds through a series of biochemical events (signaling pathways) which typically lead to rounding-up of the cell, retraction of pseudopodes, reduction of cellular volume (pyknosis), chromatin condensation, nuclear fragmentation (karyorrhexis), plasma membrane blebbing and fragmentation of the cell into apoptotic bodies. The process ends when the cell has died. The process is divided into a signaling pathway phase and into an execution phase, which is triggered by the former." [GOC
- 21873 Pathogen[ Q2Q067] interacts with 286 human partners:{O95411;P51398;Q96TC7;Q14974;Q9BZZ5;Q99460;Q96J02;O00213;Q6FI81;Q96FV9;O75832;P0C1Z6;P48556;Q96S65;P02545;P31749;P40306;Q8IUC6;P55036;Q9NR28;P20700;Q96KQ4;Q5D1E8;P55957;Q9Y5V3;O75340;Q9UL41;Q9NS56;O15519;Q9BUP3;Q9H175;Q96B97;O00291;Q9UHR5;Q8IVG9;P30419;O00231;Q9UMX3;O00233;Q01094;Q13352;P62258;O95257;O75940;Q8IZW8;Q16666;Q9Y3T9;Q6IE81;Q96QA5;Q12982;P09913;P51665;Q9HCN2;Q14674;Q13829;Q9BXH1;P28072;Q9UHX1;O75807;Q8WXP8;O43255;O00167;Q13077;O00273;Q05516;Q9HD15;O60543;Q8WWK9;Q9BPZ2;Q00994;Q12933;Q5T1C6;O60238;Q13625;P63167;A5LHX3;Q14814;O95999;Q99933;P41134;Q9UER7;Q9UNL4;Q13200;O15350;Q9NY61;Q96GX9;P25787;Q8IX12;Q06323;Q8WUF5;Q13158;Q8ND90;Q8WYN3;P15924;Q13794;P63241;Q14790;Q9NXC7;Q9HB09;Q8N726;Q8WUY3;Q9Y3E5;P28065;Q14818;P61077;P49756;Q8IXM3;O15304;Q96AQ7;Q9BUX1;O15405;Q8N5P1;O43524;Q99966;O15162;P24522;P62487;Q9UK73;Q96CJ1;Q8WUM4;Q07157;Q14997;O43236;P51948;Q96F07;O75618;Q6GPH4;P60900;Q9H8T0;Q9UL46;O60934;Q8WWW0;P61289;Q9BXY8;O96017;Q9UNN5;O76095;Q63ZY3;P55212;Q69YI7;P09972;O14862;P55060;Q92843;Q96IL0;P28062;O43715;Q12904;Q13114;P06396;Q5TBC7;Q9HCU9;Q9H8M7;Q53EL6;Q9UNM6;Q99732;Q9H2J4;Q96LC9;Q9UDY2;P25788;Q9UL42;Q9HD36;Q969U7;P42575;Q9BUL8;Q9NPQ2;Q13616;Q92530;P49354;P04406;Q00005;P78560;P35869;Q9HB75;P25786;Q5TCQ9;O00198;P99999;Q7Z465;Q9P0J0;Q9ULW0;O95232;O60216;O00321;Q16401;Q96BY2;P23760;Q53G26;Q92785;A1L190;Q9UKV3;O00232;Q86TG7;Q9NWF9;P19838;Q96RU7;Q9Y3E7;P78395;Q13155;Q86VP1;Q9H6Z9;P28074;P25789;Q8WV24;Q8WU39;Q8NFZ5;P25963;P0CG47;Q12983;P31946;Q9C000;Q9NR09;Q13901;Q14209;P20618;Q15628;O95817;O95831;Q9GZU2;Q8N488;P0CG48;Q8N8D1;Q9NWB7;O43318;Q9UNL4;O14737;Q8IXT1;P28070;Q9Y2G2;P28066;P63000;Q9BZR8;O95613;Q96FJ2;Q01826;Q99436;Q8TAA3;P49593;P62987;O43242;Q15121;P08670;Q9UKG1;Q14154;P49721;Q9HCM9;B2CW77;Q96IZ0;P02489;Q9Y421;Q66K74;P49720;O00463;P27469;Q13490;Q9UL40;Q9UMX0;P35900;Q92556;Q96PG8;Q9HAW4;P05783;Q96A26;Q86VP3;Q9BX26;P52294;Q8WYA6;Q9NXR7;P22736;Q96EY1;O15392;Q96JJ3;O60936;Q9H1Y0;Q8N163;Q13501;Q9BT92;Q02078;Q16548;Q15276;Q23112;O76075;Q9UKL3;Q9BXF3;Q96A56;P62979}
- 21874 Pathogen[ P0C214] interacts with 305 human partners:{Q9NWB7;O00198;P27469;Q14997;Q8N163;P51665;Q96J02;P51114;Q96FV9;O00213;Q9Y3T9;P49354;Q9H832;Q96CJ1;Q96S65;O60346;P25789;P63000;O95817;Q8IX12;P55036;Q12904;Q8WXF8;Q9NPP4;P35869;Q9Y5V3;P24522;O14681;P55060;Q8WUY3;P28062;P05783;A5LHX3;Q8WWW0;P09913;Q13490;Q00005;O00321;P28065;P19838;Q15628;A1L190;Q8WUF5;Q96IZ0;Q96BY2;P02489;Q8IUC6;Q9H175;P46379;Q9BPZ2;Q92934;Q13625;O60543;Q5TCQ9;Q9NP92;Q96LC9;Q13829;Q8WYN3;Q9HD15;Q9GZU2;P28331;P55212;Q7Z465;O75618;Q13158;Q9H0S4;Q9NS56;O14818;O15350;P15924;O00167;Q03112;O75807;Q9HB09;O43242;Q00994;P31483;Q9H2J4;Q5TBC7;Q8IXM3;Q96F07;P55957;O43715;Q9UL40;Q53EL6;Q9UNL4;Q96GX9;Q15121;P48556;Q16666;Q9BUL8;P30419;Q8N726;P78395;O75340;P06396;P20700;Q13200;Q9UL41;Q13901;Q8NEY3;Q9HAW4;P63241;Q9UKG1;Q9NY61;Q96TC7;O43318;O00232;O95232;Q86VP3;Q9Y3E5;Q9NWF9;O95257;P61077;Q9NXC7;Q13794;Q9BT92;P0C1Z6;Q02078;Q13501;O15519;Q16548;Q9BXH1;Q99460;P28066;Q9Y421;Q99966;Q9NPG2;Q01094;O75832;Q14814;P62487;O00273;Q99732;P98170;Q9UHX1;Q9BUP3;P21127;Q9UHR5;Q9H6Z9;P41134;Q9UKL3;P10124;Q8N8D1;P52294;P51948;P99999;P51398;Q9UER7;O96017;Q8IXT1;Q9UL42;Q9H8T0;P49720;P28074;Q8N488;Q99933;Q9UHD4;Q9P0J0;Q9UNN5;O15162;P0CG48;Q9UL46;Q9BUX1;Q86VP1;Q12982;O95999;Q12933;Q9H8M7;Q9HD36;Q96QA5;Q92556;Q9ULW0;P08670;Q13352;Q9UMX3;P54577;Q9HCU9;P25788;P42574;Q9BZZ5;Q9UNM6;O00231;Q69YI7;P25963;O95411;Q06323;Q9HCN2;Q96KQ4;P25786;Q9HB75;Q53G26;Q9Y2G2;Q969U7;Q13616;Q9HCM9;Q8WTP8;Q9BRT3;O75940;P28072;P09972;Q9UDY2;Q6GPH4;Q8TAA3;Q9Y3E7;P62987;Q9BXF3;Q12983;Q9H4P4;Q92843;Q6IE81;Q9B26;O15392;Q9H1Y0;Q8NFZ5;Q01826;Q96RU7;Q99436;Q13114;P10909;Q9NPC3;O60238;P0CG47;P25787;Q86TG7;Q14154;Q96FJ2;Q9NR09;P49593;Q86WV6;O95155;Q8WWK9;P78560;O14862;P30419;Q8WU39;Q8WYA6;Q9NXR7;Q9UK73;Q9UKV3;O14727;Q14974;Q96A56;Q5T1C6;P35998;P60900;O95613;Q8WV24;P02545;O00233;O00463;P55210;Q6FI81;P48454;P31946;P62979;Q9NR28;Q07157;Q96AQ7;Q5D1E8;O43255;Q96J33;O43236;P98171;Q96CA5;Q92530;Q9H3K2;Q15008;Q15304;Q14209;P04406;O60216;Q9UMX0;Q92785;O76075;P28070;Q9BXY8;O00291;Q96B97;P49756;Q96EY1;Q05516;P42575;Q8ND90;P31749;Q63ZY3;O15405;Q13155;O60936;P20618;Q66K74;P49721;Q16401;P23760;P63167;P17980;Q14790;Q9C000;Q96NN9;P35900;O14737;Q9BZR8;Q14674;Q8WUM4}
- 21875 Pathogen[ P03346] interacts with 355 human partners:{O95166;B2CW77;P15924;Q96FV9;P25787;Q96J02;O00213;Q96CJ1;Q13077;O00463;P09972;Q99828;P28070;Q96FJ2;Q96S65;O60443;O60346;Q02078;Q96B97;Q16666;Q969U7;P25789;P55036;Q00005;Q8IX12;Q9BTC0;Q99966;P04406;Q8N163;P05783;Q9UDY2;Q14814;Q96017;Q9BXF3;Q8WV24;Q9BUX1;O15392;P98171;Q99460;Q9NX02;Q13616;O14901;Q9UNL4;Q9NWF9;Q8IZW8;Q13489;Q9UL46;O14737;Q96F07;Q96LC9;O00167;O95155;Q9H305;Q9UHR5;P62987;P20700;Q02489;Q96KQ4;P28072;Q9BUP3;Q13158;Q9BX26;P21127;Q9H3K2;P25963;Q7Z465;Q9NR28;P25788;Q96IL0;P28074;P27469;P49721;Q8NFZ5;Q8WXP8;O60238;Q5TCQ9;Q8IXM3;P42575;Q9Y5M1;O14818;Q8WYN3;Q9HD15;P62258;Q99436;O15304;Q96A56;Q9NS18;P55957;Q8NXX4;Q15149;P0CG48;Q96A26;P23760;Q16401;Q9H4P4;A5LHX3;Q92858;O43255;Q66K74;Q12981;Q86TG7;Q8IVG9;Q12802;P98170;O00321;Q13835;O75940;P28062;Q9UMX0;Q14209;Q9NPG2;P42574;Q06TC7;Q9H8G2;Q8IZY5;O15350;Q00994;Q96AQ7;P63241;P20618;Q9H213;Q9BXY8;P55060;P49593;O00232;P55212;Q96JJ3;Q86Z02;Q13114;Q96BY2;O00291;Q12983;Q01094;Q13829;Q9BT92;Q9Y3E5;Q16342;P02545;Q92843;P61077;O15519;Q9UKV3;P0C1

Z6;O95999;Q13813;Q9Y371;P52756;O75832;O00233;P62487;P51398;Q9UL40;Q13155;Q9BRT3;P78560;Q9Y421;Q6ZTQ3;P99999;Q9UKL3;Q9HAW4;Q9NS56;Q12904;P49354;Q96IZ0;O95232;Q9BPZ2;Q9ULW0;Q9H8T0;P10144;Q9H175;Q9Y3E7;O43236;Q13609;Q9NPP4;Q8WYA6;Q9NQS1;Q9NXR7;O75340;Q9UNN5;P22736;P51397;P31749;P78395;P31483;Q9NWB7;P41134;Q5TBC7;P49720;P28065;Q9UPQ4;Q9HB75;Q9NZC7;Q8WU39;Q9HCU9;O95817;Q03112;P46379;P49756;Q9BZZ5;Q9HCM9;P60900;O75618;Q9NY61;Q15121;Q5D1E8;Q9UER7;Q96QA5;P25786;Q07157;O00231;O00198;Q8IUQ4;Q9Y3T9;Q12778;Q13625;Q53G26;O95411;Q9HCN2;Q6Q0C0;Q07820;Q9Y5V3;O95831;P61289;Q8WUF5;Q9BZR8;Q6IE81;Q9NWH9;Q15628;P62979;P28066;Q9UNM6;Q8WUY3;Q8N5P1;P08670;Q96RU7;Q9BUZ4;Q05516;Q8ND90;O60934;Q5VV41;Q8WWW0;Q8IUC6;O60936;Q63ZY3;O76075;P31946;Q8TAA3;Q9NP92;O15151;Q96S99;Q9NPC3;P55211;Q14790;P0CG47;Q9H0S4;P35900;Q96PG8;P45985;Q6GPH4;Q69YI7;Q9UKG1;Q9HB09;Q16548;Q9GZU2;Q9NR09;A1L190;Q9HA38;P48454;Q14997;Q13490;Q9H1Y0;Q13200;Q8NEY3;Q8WWW9;P48556;Q9HC24;P55210;P19838;P63167;P24855;Q5JPI3;P09913;Q8IXT1;P06396;P51665;Q9H8M7;Q9UMX3;O95613;Q9H8V3;P51114;Q9Y2G2;O43318;O95257;O76095;Q9P0J0;Q8N488;Q6FI81;P35869;Q96DT0;Q9UHX1;Q06323;Q12982;Q8N726;Q9UL41;P62952;Q6FIF0;Q96CA5;O43715;O43524;O60543;Q9BXH1;Q8N8D1;Q92530;Q14674;O14862;Q92556;Q9H2J4;Q9HD36;O14727;O60216;Q8WUM4;Q9BUL8;P63000;P51948;O75807;Q9UL42;Q86VP3;O43242;Q8WUZ0;Q86VP1;P52294;Q14154;Q9UHD4;Q96EY1;Q53EL6;Q92785;Q01826;Q9UK73;O15405;Q96GX9;Q9H6Z9;Q13352;P40306;Q13901;Q99933;Q13794;O00273;Q15276;P24522;Q13501;O95379;Q9C000;Q14974;Q99732;O15162}

21876

Pathogen[ Q85601] interacts with 291 human partners: {P10144;P28066;Q96IZ0;Q9UNM6;Q96J02;P60900;Q9NZC7;P20700;O00213;Q96CJ1;P49756;P02489;Q96S65;Q86WV6;Q96LC9;O43715;O60346;Q8ND90;Q02078;Q16666;P09913;P55036;Q9P0J0;Q9H6Z9;P02545;Q96S99;P31946;Q9UKL3;Q9NS56;Q9EXH1;P31749;P99999;Q86VP1;Q13490;P06396;O95831;P41134;Q9H0S4;O96017;Q9BXF3;Q8WV24;Q9BUX1;P25787;Q8WVK9;Q8IUC6;Q9HB09;Q9HD36;Q9NP92;Q96F07;O15151;P61289;Q9NY61;O00463;O95166;Q6GPH4;Q13158;P08670;Q7Z465;P25788;Q16548;Q8WWW0;P49593;Q9BUL8;Q9H8M7;Q00005;Q53G26;Q13155;Q14790;Q99966;O75832;Q14814;Q15304;Q9NWB7;Q03112;Q9UDY2;Q12982;Q9UL41;Q9UHX1;Q96BY2;Q9UER7;P63000;Q13616;Q66K74;P46379;Q9BZZ5;Q12981;O60936;Q15121;P98170;Q9UNL4;Q9Y2G2;Q8WYA6;P24522;Q8IX12;Q9NR28;Q9NWF9;O15392;Q8N8D1;P0CG48;O95155;Q9UMX3;Q14674;Q6FI81;O76075;Q96AQ7;P51948;O75940;P63241;P27469;Q9ULW0;Q9UHD4;O60216;Q9BX26;Q9BT92;Q96JJ3;Q13114;O15405;Q9Y3E5;Q96GX9;P61077;O00198;P0C1Z6;Q14974;P25789;P15924;Q96FV9;O00233;P62487;P51398;Q8NEY3;Q9H2J4;Q96KQ4;Q8WYN3;P20618;Q9GZU2;Q13352;Q14154;P49354;Q9H8T0;Q92785;Q9H8Y8;Q9H175;Q9UK73;Q9BTC0;Q13901;Q8N726;Q9UNN5;Q9BPZ2;P05783;O95232;Q9HD15;P40306;Q969U7;Q9UKV3;Q9HAW4;Q8NFX5;Q99933;P55060;Q12933;Q8IZW8;O60543;Q9UL40;Q5TBC7;P62258;P49720;P42575;Q9UPQ4;Q9H1Y0;Q9HCU9;Q9Y5V3;P28062;P09972;P49721;Q92843;Q63ZY3;O75618;P22736;Q9HA38;P55957;Q8WXP8;O00273;Q96B97;P25786;O14862;O95257;Q96IL0;Q01826;Q13625;Q5TCQ9;P28072;Q53EL6;Q13200;Q14209;Q9HB75;Q8WUF5;P28065;Q96A56;O75340;Q6IE81;P62979;Q99436;Q96RU7;Q15628;Q07157;Q8N5P1;P28070;Q05516;Q9Y3T9;Q9NPG2;Q8TAA3;Q9UL46;Q9NPC3;O76095;Q99460;O00231;P0CG47;Q8IXM3;Q8WUY3;Q12983;Q9UKG1;Q8N163;Q9H832;Q9NR09;Q8WUM4;Q86TG7;Q13077;P35869;P48556;P21127;O15350;O00291;Q96TC7;Q00994;P28074;Q92530;P04406;O15162;P62987;P35900;O95613;P55212;O95999;O43318;Q9H4P4;A5LHX3;Q8N488;P30419;Q9BZR8;Q99732;Q06323;O43255;Q13829;O00167;Q6Q0C0;O75807;Q96CA5;O60238;P19838;O14818;P48454;O14737;O95817;Q5T1C6;P78395;Q9BUP3;Q9UHR5;Q9Y3E7;P52294;Q9UL42;Q86VP3;O15519;P63167;Q9NXR7;Q96EY1;Q16401;Q01094;Q9UMX0;P23760;P78560;Q5D1E8;Q13794;O43236;P55210;P51114;Q9HCM9;O00321;Q13501;A1L190;O60934;P25963;Q69YI7}

21877

Pathogen[ P14079] interacts with 379 human partners: {P31751;A8MUM7;Q8IXM3;P28065;Q9UDX5;Q99436;Q96A56;Q9BPZ2;O00463;P48454;Q8NEY3;Q8IX12;O95166;P62333;Q9UL40;Q9Y3E5;P09327;Q9NPG2;Q12982;P35900;Q9H0S4;P48556;O75618;O76075;O15162;P27469;Q9NVQ4;Q5D1E8;O00291;Q9UKG1;P35869;Q8WV24;Q02078;Q8WU39;P0CG48;Q06413;Q13609;Q9NWB7;P49593;Q8NHX4;Q6ZTQ3;Q8N163;Q9UL42;Q16548;Q9UDY2;O95999;O00231;Q9GZU2;P52564;O15519;Q9HB09;Q8N8D1;Q95817;Q96FJ2;P62487;Q8IZW8;O15304;Q96CJ1;P49354;Q9NY61;Q8WUF5;O60543;P40306;Q9NP84;Q92542;Q13323;P98171;Q9NZ42;Q8IUC6;P15924;Q9UMX0;P55036;O76095;P28074;Q07157;Q66K74;O00232;Q96DT0;Q92556;Q8IVG9;Q13835;Q13901;O15405;Q9UL41;Q9C000;Q15276;B2CW77;P52294;Q9HC24;Q9BXX5;Q9UNL4;O15392;Q01826;P49720;O75807;O00487;P09972;Q9H8T0;P25787;Q00994;O60216;Q99966;Q14209;Q75832;Q8N726;Q05516;Q96KA5;Q96PG8;P22736;Q9H305;O00213;O60346;Q92785;P10909;A5LHX3;Q9BUL8;Q14674;Q9ULW0;Q96B97;P62979;O43715;Q96S99;Q13625;O00233;O60934;Q96JJ3;Q9H213;Q99828;O00115;Q9Y371;P35998;P02489;P61077;Q6IE81;Q9H175;Q9UHX1;P62952;P61289;Q7Z465;Q9H1Y0;Q96BJ8;Q9BUZ4;O15350;Q9BXH1;P62987;Q13077;Q9HCM9;Q96S65;P55212;P09913;Q96FV9;P51665;Q9NR09;P35611;Q6FI81;P20618;Q9BUP3;Q9Y421;P10911;Q8TAA3;Q12802;Q9H8M9;Q15149;P45983;Q9UK73;P68032;Q8IXT1;Q9NPC3;Q8IZY5;O95831;Q9UKL3;O75940;Q9BZR8;Q9Y3T9;Q9HAW4;Q9Y5V3;Q9NXR7;Q14997;Q8NC60;P49756;Q9Y287;Q14790;O95379;Q9UNN5;P28062;P60900;Q8N114;Q00005;Q96BY2;Q9NZC7;Q9NWF9;Q99732;Q9UKV3;Q9UER7;Q8ND90;Q9NX09;Q96AQ7;Q96IL0;O14737;Q86VP3;Q92934;Q15121;P31946;Q86WV6;Q8NFX5;Q8WUM4;Q969U7;P55210;Q96QA5;Q9BXY8;O75340;Q9BRT3;Q9HD36;Q9H8G2;Q99933;P45985;Q5T1C6;Q9UNM6;Q96GX9;Q9BXF3;Q14974;P55060;Q8WUY3;Q9H6Z9;Q9HD15;Q99460;P24855;Q12981;O00559;P24522;P0C1Z6;Q99445;Q9NR28;Q96IZ0;P30419;Q9UHR5;Q96GPH4;Q9H8V3;Q53GA4;O14818;Q13794;P46695;Q9P0J0;Q9BX69;O43903;O60936;Q12983;P49721;Q8TCU4;P10124;Q9UMX3;Q9NS56;Q96A26;Q92530;Q96J02;Q14154;Q9HA38;P21127;P62258;P61803;Q96F07;Q13501;P05783;O14862;Q9NP92;Q8WW43;Q9HCU9;Q96RU7;Q9BX26;P63241;Q8WVK9;P20700;Q8N523;Q8N682;Q8N488;Q14814;Q86TG7;Q8N9M5;Q9Y2G2;Q12933;Q63ZY3;Q96LC9;Q9H3K2;Q13158;Q06323;O95613;O75293;Q5JPI3;P63167;P62191;Q9BT92;O00198;Q9Y3E7;O95232;Q8WXP8;Q13155;Q13164;P41134;P78395;P51397;P08670;Q9HCN2;Q15008;Q16625;Q6UX65;Q13829;Q69YI7;P43686;P42575;Q12904;O43242;P25788;Q5JBM3;O00167;Q8WYN3;O00231;Q13616;P28066;Q9UL46;Q96KQ4;P02545;P51398;P99999;O95411;Q96FX8;Q86XT9;P52756;O60238;Q9BUX1;Q13813;Q96TC7;Q9BZZ5;O14901;P0CG47;O95257;Q9H2J4;O15151;Q8WYA6;Q9Y239;Q01094;Q13352;O60443;Q9H8M7;Q15628;Q9BZM7;Q5TBC7;Q16342;O14681;Q9BTC0;Q9HB75;Q8WWW0;Q16401;P10144;Q9NQS1;P17980;Q9Y5M1;Q96EY1;Q9UHD4;Q8WUZ0;P28072;P31483;P07305;O43236;Q13114;P55957;Q16666;Q53EL6;O00273;P40305;Q13490;P10636;Q9NP

- 21878 P4;P04406;P23760;Q96PV4;Q92843;Q5VV41;A1L190;P51948;Q8WTP8}  
Pathogen[ P03383] interacts with 259 human  
partners: {P02545;P15924;P51398;Q13616;O00213;Q9NY61;Q96LC9;O14737;Q96S65;Q8IXT1;Q53E  
L6;P55036;Q12904;Q96A56;O14862;Q96TC7;Q9UKL3;Q14209;P55212;O60543;Q9BPZ2;O00167;Q9H0  
S4;P62987;Q9NWB7;Q8IUC6;P27469;P51948;Q8WUY3;Q9H2J4;Q8WWK9;P25789;Q9BUX1;Q8N163;P086  
70;P60900;Q01094;O15162;P31946;Q9UK73;Q96FJ2;Q96CJ1;Q9UHR5;O15304;Q7Z465;P31749;O432  
36;Q00005;Q9Y3E7;P40306;O75618;O00233;Q9H8G2;Q96KQ4;Q01826;Q8NEY3;Q13490;P55957;Q96F  
V9;Q5D1E8;Q96AQ7;Q9UMX3;Q96IZ0;P09972;O95831;P24522;P63000;Q96A26;Q9BZZ5;Q86TG7;P497  
21;Q06323;O60936;Q15121;Q86VP1;Q9UNL4;Q14814;Q14997;Q8WYN3;O15405;Q9NP92;Q05516;P057  
83;Q13352;P63241;P20618;Q9H1Y0;Q9UHD4;O60216;Q13158;Q13625;Q13155;Q9H175;O00321;Q129  
83;P25963;Q9HCN2;P28072;O43255;Q14974;Q13200;Q8IXM3;O95999;Q5TCQ9;P28065;Q13501;Q8IX  
12;Q9H832;Q9Y2G2;Q8WUF5;P28066;P10124;Q99933;Q96RU7;Q15628;Q8ND90;O95232;Q16401;Q8WX  
F8;P62979;O00231;P23760;P0CG47;Q9BUL8;Q9BUP3;A1L190;Q9HB09;Q63ZY3;Q9NR09;O00198;Q8WU  
M4;P0CG48;O75807;P62952;P28074;Q92785;O14681;Q92530;Q9UL42;P51397;P49720;Q9ULW0;Q8TA  
A3;O95613;P61289;Q13794;O76095;Q6IE81;Q9BXH1;P28062;Q9P0J0;Q9BXF3;Q969U7;Q13829;Q9UL  
41;P48556;Q9NWF9;P63167;P19838;Q9Y421;P35869;Q14818;Q8N8D1;Q8WV24;Q9UL40;Q8WY  
A6;P62258;Q5T1C6;Q99436;P52294;Q13114;Q8NFX5;Q14154;Q9NQS1;Q9NXR7;Q96EY1;B2CW77;Q8IV  
G9;P28070;Q96QA5;O95257;Q13901;Q02078;Q6FI81;P35900;O75940;Q53G26;Q9UDY2;Q15276;Q8N7  
26;P25787;Q96BY2;Q9HB75;O96017;P06396;P25788;Q9BX26;Q69YI7}
- 21879 Pathogen[ P03410] interacts with 367 human  
partners: {Q9BRT3;Q99933;Q9BZZ5;P62258;Q9HC24;Q96TC7;O14901;O15392;Q9H305;P28070;Q8WU  
Z0;P49354;Q96PV4;Q8WXF8;P19838;Q9H213;Q8WTP8;Q13829;Q86XT9;P55036;Q15121;Q9UL41;Q031  
12;P0CG48;A0PJW8;P15924;Q9NXR7;Q16666;Q9Y2G2;O14681;Q9UNN5;P10144;Q14974;Q13155;Q9HB  
75;Q8IX12;Q9HCM9;O75293;Q9Y239;Q53G26;Q12983;Q8NFX5;O43903;Q96S99;Q9H159;P78560;Q9H8  
G2;O15151;Q86VP3;P25786;Q15008;P63000;Q16401;Q8N726;Q9H6Z9;P98171;P52294;Q9NR28;Q130  
77;Q16548;Q9BXH1;P60900;Q9UHD4;P55060;Q9BXF3;Q9GZU2;Q96IL0;Q9NWF9;O00198;P425  
75;P35998;P06396;Q96AQ7;Q9BUL8;Q13609;Q99460;Q53GA4;Q69YI7;O15405;P24522;Q96LC9;P101  
24;Q14814;O00233;O76075;Q9NXC7;Q8WWK9;Q5TCQ9;O14862;Q9NPC3;O15519;Q13490;Q9UPQ4;Q9UN  
L4;Q9BUX1;O00232;Q9NY61;P20700;Q7Z465;O00273;Q99732;Q96BY2;Q99445;O95379;Q13501;Q9H8  
T0;Q9HD36;Q8TAA3;Q92843;P41134;P31749;Q8N114;Q9NP92;Q9HAW4;Q8TCU4;O00213;Q92934;P304  
19;P48556;P63167;Q92785;P49721;Q9Y287;Q9BPZ2;Q9NPP4;Q9C000;O00321;Q9H175;Q13794;O002  
91;Q9Y3T9;Q13835;Q9BXY8;Q8IVG9;Q9H0S4;Q96KQ4;A5LHX3;P62979;O95817;P0C1Z6;Q8NC60;O602  
16;Q14674;Q99436;Q86VP1;Q96FV9;Q12904;P55957;Q13158;O00559;Q9NZ42;Q969U7;Q8NHX4;Q9Y5  
M1;O95166;O15162;P40306;Q00994;Q6GPH4;Q8WYA6;Q9NR09;Q15628;Q06323;Q06333;O43318;Q9UM  
X0;O43715;Q2556;Q9Y3E7;Q9UDY2;Q8IZW8;Q8WV24;P49756;O60936;Q13200;Q96828;Q9BT92;P099  
72;P63098;Q9UKV3;P25787;Q96DT0;Q9UL40;Q9UER7;O95999;P51397;Q9BX26;Q96FX8;P48454;O432  
36;P45985;P02489;Q8WYN3;Q8N163;Q5T1C6;P78395;P27469;Q07157;Q9NWB7;Q9UMX3;O00463;B2CW  
77;Q5D1E8;Q96A26;P02545;P28062;Q9UHX1;P62952;Q5VV41;Q6UX65;Q01826;Q96BJ8;Q96S65;P516  
65;Q9HCN2;Q8NEY3;P22736;Q96IZ0;Q9BUP3;Q8IXT1;Q9Y371;P31483;Q53EL6;Q9BTC0;Q12933;Q8N5  
P1;O95831;O14818;O96017;O60443;Q8WU39;Q8IXM3;Q8WWW0;O75807;Q96GX9;Q66K74;Q8N488;P044  
06;P99999;Q5TBC7;Q96CJ1;O00231;P08670;Q6FI81;Q9UNM6;Q16625;Q9UKL3;Q9UK73;O95232;P511  
14;P10636;P51948;Q96KA5;Q96RU7;Q5JPI3;Q9Y3E5;P25789;P49720;Q13901;Q86TG7;P09913;Q136  
16;Q9Y5V3;Q9HA38;O60346;Q00005;P62987;Q9ULW0;Q9NPG2;Q6ZTQ3;Q96A56;Q01094;O00167;Q129  
82;Q8WW43;P49593;Q9H8M7;O95411;Q9HB09;Q02078;Q92542;Q96B97;P35900;Q8IUC6;P63241;O153  
50;P62487;Q86WV6;Q8ND90;O60543;P46695;O00115;Q96QA5;P23760;P28072;Q96F07;O75340;O760  
95;Q9H3K2;Q9BZR8;Q9H8V3;Q9P0J0;O95257;Q14209;Q9NP84;O75618;P25963;Q9HD15;A1L190;P257  
88;Q12981;Q15149;O75940;Q96PG8;Q9BX69;O95613;Q63ZY3;Q14154;Q13625;Q8IZY5;P40305;P552  
12;Q13813;Q8WUM4;P28066;Q9NR00;P61803;Q9NX09;P05783;Q96JJ3;P28065;Q8N8D1;Q9NQS1;O432  
42;P35611;Q9Y421;Q96EY1;Q9UKG1;Q6IE81;P0CG47;Q9UL42;O60934;P24855;O60238;O14737;Q133  
52;P17980;Q9H2J4;P31946;O75832;P20618;Q13114;P61077;Q15276;Q9UL46;Q13323;P28074;P109  
09;P61289;P55210;Q9UHR5;Q8WUY3;P51398;O15304;Q8WUF5;Q99966}
- 21880 Pathogen[ P14075] interacts with 263 human  
partners: {Q9BZZ5;Q96BY2;Q96F07;P78560;Q99933;O00213;Q9UK73;P35869;Q9BUP3;Q96GX9;Q96S  
65;Q12983;O95232;P55036;P62952;P25788;O00005;Q13155;Q9UHD4;Q9H175;Q9GZU2;P55957;Q8IX  
T1;Q96FX8;O00273;P28066;Q63ZY3;Q8NEY3;O14681;Q96KQ4;Q9BUL8;P09913;Q8WU39;P05783;Q8N4  
88;Q96A26;Q06323;O75832;Q9HB75;Q9UMX3;Q9BPZ2;Q8TAA3;O43236;P49756;Q07157;P78395;O760  
95;P60900;Q7Z465;Q9H0S4;Q96PG8;Q9H1Y0;Q9UHR5;O15162;O00233;Q9UHX1;Q9UL46;Q13901;Q8WU  
M4;P55212;P0C1Z6;P49720;Q9BX26;Q9NY61;P20700;Q00994;O95257;Q96TC7;Q969U7;A1L190;B2CW  
77;Q16548;Q96QA5;Q8IVG9;Q8WUY3;Q8WUF5;O53G26;Q13200;P48556;O00167;Q16401;Q5TBC7;Q8IX  
12;Q5TCQ9;P63241;Q9NXR7;Q5T1C6;Q16666;O15304;P28070;Q96LC9;Q9Y3E5;Q14209;P259  
63;P61077;P49721;Q96IZ0;Q8ND90;Q9UKV3;Q8N163;Q8NFX5;Q8WV24;O00231;Q01826;Q92785;Q9HC  
N2;Q96AQ7;P51398;O43255;Q9Y3E7;Q9HCM9;O75940;P62487;Q92530;O00291;Q9NR28;Q9ULW0;Q9UK  
L3;Q86VP3;Q9NWF9;Q9HAW4;P52294;Q6IE81;P31749;P02545;P0CG48;P04406;P62979;Q9H8T0;Q5JP  
I3;O75618;Q9H8G2;Q8N8D1;P51397;Q9BXY8;Q86VP1;Q9UNN5;P28062;Q96FJ2;P99999;Q13490;P280  
74;Q12933;O96017;O15350;Q12904;O14862;P28065;Q9NQS1;O95831;Q9HCU9;Q9H2J4;Q9HB09;O605  
43;Q99732;Q9BXH1;Q9Y421;O60238;Q14154;O43318;Q13158;Q96CJ1;O75807;Q8WXF8;P25786;O154  
05;O14818;P62987;P06396;Q13114;P21127;P28072;Q53EL6;O14737;Q9Y5M1;Q01094;Q5D1E8;Q9BU  
X1;O95999;Q13794;Q9NWB7;Q13625;Q03112;Q02078;Q15628;P08670;P63000;Q14997;Q96RU7;Q8IU  
C6;Q9UNL4;Q9Y3T9;P24522;P0CG47;Q9UL42;P09972;P25787;Q9UDY2;Q69YI7;Q8WYA6;Q146  
74;Q9NR09;Q8WWK9;O43715;Q05516;P19838;P27469;Q9UL40;P31946;P40305;P20618;Q8WUZ0;Q8NH  
X4;P10124;P35900;Q14974;O95613;Q9NP92;Q9UER7;Q13352;P23760;O60936;Q6FI81;Q13829;Q9UN

- M6;Q9BXF3;Q13616;Q15121;Q9Y287;Q8IZY5;Q96FV9;Q9UQ88;P61289;Q9Y5V3;P40306;Q99436;Q8WY  
N3;Q14814;Q9P0J0;O60216;P63167;P55060;Q9HD15;Q96A56;O95411;Q96EY1;Q13501;Q8N726;O001  
98;P51948;Q9UMX0;P62258;Q86TG7;Q9Y2G2;Q15276;O00321;Q9H6Z9;Q9UL41;Q9H8M7;P15924;P257  
89}
- 21881 Pathogen[ P0C206] interacts with 355 human  
partners: {O75293;P61289;Q96TC7;O75340;Q9UNN5;Q9C000;Q9Y5M1;Q12982;Q9HCU9;Q969U7;Q9H0  
S4;Q99436;P28062;P10144;O60216;P99999;Q9UNM6;Q8WUF5;Q13501;Q13829;P0CG48;Q9NS56;Q9UK  
G1;P31483;P06396;O75832;Q96PG8;O00167;Q13077;P40305;Q8IXM3;Q92556;Q96S65;Q99828;Q9H4  
P4;Q96F07;Q9GZU2;P31749;P40306;Q9Y2G2;P28065;Q9NS18;Q14997;Q9H305;Q9BUP3;Q96IZ0;Q9BU  
X1;P24522;O00291;Q9NZ42;Q13114;Q6FI81;O43255;Q02078;P55036;Q8N726;Q9Y3E7;Q9NR28;O960  
17;Q9BZR8;Q9BT92;Q9BXY8;P25786;Q9Y287;Q14737;Q9HD36;P35869;O14862;P25788;Q9BZ  
Z5;Q9ULW0;Q9UK73;Q9UL41;A1L190;Q96FX8;P78395;P30419;P25787;Q99933;Q86VP1;Q15121;Q055  
16;Q8TCU4;Q13625;O75807;Q06323;Q9UMX0;Q9NR00;Q9UKL3;Q96B97;P78560;Q9UHR5;O60934;O760  
75;O95232;Q9H8T0;P63167;Q9UMX3;Q5TCQ9;O95999;Q53G26;P49720;Q14974;Q8IUQ4;O75940;P259  
63;Q9Y5V3;Q96J02;P55212;Q9NWF9;Q16342;Q8NFZ5;Q9BPZ2;O43318;Q8IZW8;Q16666;O00232;Q9UE  
R7;Q8IXT1;P60900;O75618;Q8IZY5;Q9UDY2;Q9NPC3;P98170;O95155;Q86WV6;Q13158;Q9BXH1;Q925  
42;Q13616;Q96A26;Q12933;Q96KQ4;Q9HD15;P22736;O43242;O00321;P10636;Q96A56;Q9BX26;Q009  
94;Q96LC9;Q86TG7;P49354;P24855;O15519;Q9UHX1;Q96RU7;O43236;A5LHX3;Q66K74;O15405;Q8WY  
A6;P51398;P31946;Q9Y421;Q92934;P25789;Q16548;P49593;Q9H3K2;P41134;Q9NPG2;Q92785;P511  
14;O00213;O60238;O43715;Q9UPQ4;O14681;Q12983;Q9BUZ4;Q14209;O15151;P0C1Z6;O60936;P198  
38;O60443;Q92843;Q6ZTQ3;Q96FV9;Q03112;Q9BFX3;Q9NRP9;Q9NR09;O95613;P63000;O95257;P622  
58;Q13835;P20618;P51397;O95831;Q13200;Q9H1Y0;Q8TAA3;Q96CJ1;P28070;Q8N488;Q8N8D1;Q8WX  
F8;Q9H175;Q9NWB7;Q99445;Q8N5P1;Q86VP3;Q8IVG9;P09913;Q9BTC0;Q99460;Q8ND90;Q5D1E8;O001  
98;Q01094;Q5JPI3;Q8WWW0;P62979;P05783;Q5T1C6;Q96JJ3;P04406;Q96BY2;Q14790;Q13352;P109  
09;Q9BUL8;Q13609;Q13901;P28066;Q96AQ7;Q9HCN2;Q96DT0;Q15628;Q96S99;Q9HA38;P42574;Q9H8  
V3;Q53EL6;O14818;O15392;Q7Z465;P48454;Q9NRP2;P23760;O00463;Q13489;P62487;Q9HB75;P981  
71;P45985;Q9P0J0;P0CG47;P55060;O95411;Q96GX9;Q8IUC6;Q8WUM4;Q8WU39;P28072;P15924;Q129  
81;Q8IX12;O15162;Q63ZY3;Q6IE81;P63241;Q99966;Q9UHD4;Q14674;Q07157;P02545;O95379;P099  
72;Q14154;Q9HCM9;B2CW77;Q9HC24;Q9NZC7;Q9H6Z9;Q13155;O95817;O15350;Q01826;Q9H832;O149  
01;Q96CA5;P20700;P28074;P27469;Q8NEY3;P42575;Q9Y3E5;Q9BXX5;O60346;P21127;Q14814;Q925  
30;P61077;P49721;P49756;Q96QA5;P86670;P62987;O60543;Q8WUZ0;Q9UKV3;Q9UL46;P52294;P024  
89;Q96EY1;Q8WUY3;Q6GPH4;Q9HAW4;Q9NY61;Q00005;P46379;P55210;Q9UL40;Q8WWW9;Q5TBC7;P629  
52;Q9Y3T9;Q8N163;O15304;Q99732;O00273;Q9NQS1;Q96IL0;Q9H8M7;O00233;P48556;P10124;Q8WY  
N3;O95166;Q16401;P35900;Q6Q0C0;Q69YI7;Q15276;Q9BRT3;P55957;Q12904;Q9H2J4;Q9UNL4;Q9UK  
V3;Q9HB09;O76095;O00231;Q9NXR7;Q13794;P51948;Q8WV24;Q13490}
- 21882 Pathogen[ P03363] interacts with 271 human  
partners: {Q6IE81;Q86VP1;Q9UNN5;P46379;Q9NWF9;O75940;Q9H8G2;P05783;Q9BUL8;Q16342;Q134  
90;O14901;P62952;Q9BZZ5;Q9H832;P62258;P55957;O00273;Q9UL42;O60543;Q9BUP3;Q96AQ7;Q9NW  
H9;Q13835;Q9HAW4;Q96S65;O60443;P63167;Q9NQS1;O15519;Q66K74;Q969U7;Q9HCU9;Q5VV41;O954  
11;P02545;Q9H175;Q9C000;P21127;O75340;Q96IZ0;P99999;Q9NVQ4;Q9UKV3;Q9NVP4;Q96L  
C9;Q63ZY3;O95232;O75618;Q8IXM3;P25963;Q03112;O00213;Q8WWW9;Q13794;Q9HD15;Q96B97;P207  
00;P09913;Q8WV24;P23760;Q00005;O15304;O95155;O95257;Q9H8M7;Q9NX02;Q12933;Q9ULW0;Q9H6  
Z9;Q01826;O00463;Q13625;Q9BUX1;P09972;Q14154;P31946;O95613;Q9UMX0;P49354;Q9NPC3;B2CW  
77;Q8WYA6;Q8N8D1;Q15121;Q53EL6;Q13901;Q9Y5M1;Q8N488;Q9UL41;P98171;Q8IZY5;Q96F07;Q9UL  
40;Q9UER7;O15151;P61289;Q6FI81;P78395;Q9WUF5;O43318;Q9BZR8;P49756;Q9BZP2;Q99828;Q96K  
Q4;Q13158;Q5TBC7;Q8WUY3;Q96FV9;P63000;P10144;Q07157;Q16548;Q9H0S4;P35869;O00198;Q96T  
C7;Q9HCN2;O95817;O00321;P15924;Q9UNL4;Q53G26;Q16666;Q13155;O96017;P06396;Q9NWB7;P109  
11;Q9BXF3;O43524;P35900;Q9H305;Q9HD36;Q13609;Q9HB75;P55212;Q8WYN3;Q9NY61;Q96A56;Q136  
16;Q8N5P1;Q96QA5;Q8WUM4;Q9GZU2;Q9NR09;Q15149;Q14814;Q9NR28;Q9P0J0;P31749;Q96BY2;Q130  
77;Q8NEY3;Q13489;Q9UHR5;Q01094;Q5TCQ9;O76075;P0C1Z6;Q99732;P08670;Q92843;O95379;P411  
34;Q9UKL3;Q9Y3E7;P04406;P98170;Q8N163;Q7Z465;Q9BT92;Q8IZW8;P24522;Q92556;Q9UHX1;P629  
87;Q14209;Q9H2J4;P51114;Q14974;Q8ND90;Q9H8T0;Q9Y3T9;O75807;Q9Y2G2;Q00994;Q14674;Q9UD  
Y2;Q9NRP2;P78560;P19838;Q9H4P4;O76095;P62487;O60936;Q13829;Q5JPI3;Q6FIF0;O14862;Q156  
28;P63241;Q9NXR7;Q8N726;P27469;O00167;Q8IX12;Q9Y5V3;Q07820;Q96JJ3;Q13114;O14737;Q8WW  
W0;Q9HCM9;Q96CA5;Q8IVG9;Q5D1E8;O15405;Q9Y3E5;Q96CJ1;Q8WU39;Q9H3K2;Q96GX9;P610  
77;P55210;O60333;P02489;P24855;Q8NFZ5;Q9NPP4;P31483;Q9HB09;Q9BXH1;P55060;Q9BUZ4;O432  
55;Q96EY1;Q13813;Q9UK73;O43715;Q13352;Q05516;P51398;Q8WXF8;O60238;Q6ZTQ3;O95166;Q96F  
J2;Q9UMX3;Q99933;Q12982;O43236;Q9UKG1;Q86TG7;O00291;Q15276;Q9H1Y0;Q9BX26;A1L190;Q9Y4  
21;O60216;O95831;Q92785;P52294;Q8IXT1;P52756;Q9BXY8;Q02078}
- 21883 [Cluster 1990]GO:0008406+P biological\_process [name] gonad development [def] "The  
process whose specific outcome is the progression of the gonad over time, from its  
formation to the mature structure. The gonad is an animal organ that produces gametes\_  
in some species it also produces hormones." [GOC
- 21884 Pathogen[ Q2Q067] interacts with 2 human partners: {P80723;Q9NSC2}
- 21885 Pathogen[ P0C214] interacts with 2 human partners: {Q9NSC2;P80723}
- 21886 Pathogen[ P03346] interacts with 4 human partners: {P80723;Q9NSC2;P51843;P78411}
- 21887 Pathogen[ Q85601] interacts with 2 human partners: {P80723;Q9NSC2}
- 21888 Pathogen[ P14079] interacts with 3 human partners: {P01215;P80723;Q9NSC2}
- 21889 Pathogen[ P03383] interacts with 3 human partners: {Q9NSC2;P80723;P01215}
- 21890 Pathogen[ P03410] interacts with 3 human partners: {P01215;P80723;Q9NSC2}
- 21891 Pathogen[ P14075] interacts with 3 human partners: {Q9NSC2;P80723;P01215}
- 21892 Pathogen[ P0C206] interacts with 4 human partners: {Q9NSC2;P78411;P80723;P01215}
- 21893 Pathogen[ P03363] interacts with 2 human partners: {P78411;P80723}
- 21894 [Cluster 1991]GO:0010977+P biological\_process [name] negative regulation of neuron  
projection development [def] "Any process that decreases the rate, frequency or extent  
of neuron projection development. Neuron projection development is the process whose



specific outcome is the progression of a neuron projection over time, from its formation to the mature structure. A neuron projection is any process extending from a neural cell, such as axons or dendrites (collectively called neurites)." [GOC

21895 Pathogen[ Q2Q067] interacts with 6 human partners: {Q14678;O43439;Q99684;P14136;Q92769;P08670}

21896 Pathogen[ P0C214] interacts with 6 human partners: {Q14678;P14136;O43439;Q92769;P08670;Q99684}

21897 Pathogen[ P03346] interacts with 8 human partners: {Q14678;P14136;Q9H165;Q93045;Q99684;Q92769;O43439;P08670}

21898 Pathogen[ Q85601] interacts with 6 human partners: {P08670;P14136;O43439;Q92769;Q14678;Q99684}

21899 Pathogen[ P14079] interacts with 8 human partners: {O43439;Q99684;P14136;Q9NQX7;Q93045;Q92769;P08670;Q14678}

21900 Pathogen[ P03383] interacts with 6 human partners: {Q14678;P08670;P14136;Q92769;Q99684;O43439}

21901 Pathogen[ P03410] interacts with 8 human partners: {O43439;Q99684;Q92769;Q9NQX7;P08670;Q14678;P14136;Q93045}

21902 Pathogen[ P14075] interacts with 6 human partners: {P14136;Q99684;Q92769;P08670;O43439;Q14678}

21903 Pathogen[ P0C206] interacts with 9 human partners: {Q92769;Q14678;Q93045;P14136;Q9H165;Q9NQX7;Q99684;P08670;O43439}

21904 Pathogen[ P03363] interacts with 6 human partners: {Q99684;O43439;Q93045;P08670;P14136;Q14678}

21905 [Cluster 1992]GO:0006376+P biological\_process [name] mRNA splice site selection [def] "Selection of a splice site by components of the assembling spliceosome." [GOC

21906 Pathogen[ Q2Q067] interacts with 5 human partners: {Q9NR56;O75494;Q12872;Q07955;Q13243}

21907 Pathogen[ P0C214] interacts with 5 human partners: {Q9NR56;Q07955;Q13243;Q12872;O75494}

21908 Pathogen[ P03346] interacts with 8 human partners: {Q13242;Q13247;Q07955;Q92879;Q13243;O75494;Q9NR56;Q12872}

21909 Pathogen[ Q85601] interacts with 5 human partners: {Q13243;Q9NR56;O75494;Q07955;Q12872}

21910 Pathogen[ P14079] interacts with 5 human partners: {Q13243;Q9NR56;Q07955;Q12872;O75494}

21911 Pathogen[ P03383] interacts with 5 human partners: {Q12872;Q07955;O75494;Q9NR56;Q13243}

21912 Pathogen[ P03410] interacts with 5 human partners: {Q9NR56;Q07955;Q12872;Q13243;O75494}

21913 Pathogen[ P14075] interacts with 5 human partners: {Q13243;O75494;Q12872;Q9NR56;Q07955}

21914 Pathogen[ P0C206] interacts with 5 human partners: {Q12872;Q07955;Q9NR56;Q13243;O75494}

21915 Pathogen[ P03363] interacts with 8 human partners: {Q12872;Q92879;Q9NR56;Q13242;Q13243;Q07955;Q13247;O75494}

21916 [Cluster 1993]GO:0046599+P biological\_process [name] regulation of centriole replication [def] "Any process that modulates the frequency, rate or extent of the formation of a daughter centriole of an existing centriole." [GOC

21917 Pathogen[ Q2Q067] interacts with 4 human partners: {Q8N0Z3;Q9HC77;P06748;Q8TAP6}

21918 Pathogen[ P0C214] interacts with 4 human partners: {P06748;Q9HC77;Q8TAP6;Q8N0Z3}

21919 Pathogen[ P03346] interacts with 4 human partners: {P06748;Q9HC77;Q8N0Z3;Q8TAP6}

21920 Pathogen[ Q85601] interacts with 4 human partners: {Q9HC77;P06748;Q8TAP6;Q8N0Z3}

21921 Pathogen[ P14079] interacts with 4 human partners: {Q8TAP6;Q8N0Z3;P06748;Q9HC77}

21922 Pathogen[ P03383] interacts with 4 human partners: {Q8N0Z3;P06748;Q9HC77;Q8TAP6}

21923 Pathogen[ P03410] interacts with 4 human partners: {Q9HC77;P06748;Q8N0Z3;Q8TAP6}

21924 Pathogen[ P14075] interacts with 4 human partners: {Q9HC77;Q8TAP6;P06748;Q8N0Z3}

21925 Pathogen[ P0C206] interacts with 4 human partners: {Q9HC77;Q8TAP6;Q8N0Z3;P06748}

21926 Pathogen[ P03363] interacts with 4 human partners: {Q9HC77;Q8TAP6;P06748;Q8N0Z3}

21927 [Cluster 1994]GO:0031333+P biological\_process [name] negative regulation of protein complex assembly [def] "Any process that stops, prevents, or reduces the frequency, rate or extent of protein complex assembly." [GOC

21928 Pathogen[ Q2Q067] interacts with 3 human partners: {Q13541;Q9NSA3;P60953}

21929 Pathogen[ P0C214] interacts with 3 human partners: {P60953;Q9NSA3;Q13541}

21930 Pathogen[ P03346] interacts with 4 human partners: {Q13541;P60953;Q9NSA3;P61968}

21931 Pathogen[ Q85601] interacts with 4 human partners: {P61968;Q13541;P60953;Q9NSA3}

21932 Pathogen[ P14079] interacts with 1 human partners: {Q13541}

21933 Pathogen[ P03383] interacts with 3 human partners: {P60953;Q9NSA3;Q13541}

21934 Pathogen[ P03410] interacts with 4 human partners: {Q9NSA3;Q9BQB4;Q13541;P60953}

21935 Pathogen[ P14075] interacts with 3 human partners: {P60953;Q9NSA3;Q13541}

21936 Pathogen[ P0C206] interacts with 4 human partners: {Q13541;Q9NSA3;P60953;P61968}

21937 Pathogen[ P03363] interacts with 3 human partners: {Q9NSA3;Q13541;P60953}

21938 [Cluster 1995]GO:0072663+P biological\_process [name] establishment of protein localization in a peroxisome [def] "The directed movement of a protein to a specific location in a peroxisome." [GOC

21939 Pathogen[ Q2Q067] interacts with 1 human partners: {P40855}

21940 Pathogen[ P0C214] interacts with 1 human partners: {P40855}

21941 Pathogen[ P03346] interacts with 1 human partners:{P40855}

21942 Pathogen[ Q85601] interacts with 1 human partners:{P40855}

21943 Pathogen[ P14079] interacts with 1 human partners:{P40855}

21944 Pathogen[ P03383] interacts with 1 human partners:{P40855}

21945 Pathogen[ P03410] interacts with 1 human partners:{P40855}

21946 Pathogen[ P14075] interacts with 1 human partners:{P40855}

21947 Pathogen[ P0C206] interacts with 1 human partners:{P40855}

21948 Pathogen[ P03363] interacts with 1 human partners:{P40855}

21949 [Cluster 1996]GO:0050853+P biological\_process [name] B cell receptor signaling pathway [def] "A series of molecular signals initiated by the cross-linking of an antigen receptor on a B cell." [GOC

21950 Pathogen[ Q2Q067] interacts with 3 human partners:{P56945;P41218;Q13469}

21951 Pathogen[ P0C214] interacts with 3 human partners:{Q13469;P56945;P41218}

21952 Pathogen[ P03346] interacts with 4 human partners:{P41218;P56945;Q13469;Q9HB21}

21953 Pathogen[ Q85601] interacts with 4 human partners:{Q13469;P56945;P41218;Q9HB21}

21954 Pathogen[ P14079] interacts with 5 human partners:{P41218;Q06413;Q9HB21;Q13469;Q9GZY6}

21955 Pathogen[ P03383] interacts with 3 human partners:{P56945;Q13469;P41218}

21956 Pathogen[ P03410] interacts with 5 human partners:{P41218;Q9HB21;Q9GZY6;Q13469;P56945}

21957 Pathogen[ P14075] interacts with 3 human partners:{P41218;Q13469;P56945}

21958 Pathogen[ P0C206] interacts with 4 human partners:{Q13469;P41218;Q9HB21;P56945}

21959 Pathogen[ P03363] interacts with 3 human partners:{P41218;Q13469;P56945}

21960 [Cluster 1997]GO:0060348+P biological\_process [name] bone development [def] "The process whose specific outcome is the progression of bone over time, from its formation to the mature structure. Bone is the hard skeletal connective tissue consisting of both mineral and cellular components." [GOC

21961 Pathogen[ Q2Q067] interacts with 2 human partners:{Q7RTS9;O96028}

21962 Pathogen[ P0C214] interacts with 2 human partners:{Q7RTS9;O96028}

21963 Pathogen[ P03346] interacts with 2 human partners:{Q7RTS9;O96028}

21964 Pathogen[ Q85601] interacts with 2 human partners:{Q7RTS9;O96028}

21965 Pathogen[ P14079] interacts with 1 human partners:{Q7RTS9}

21966 Pathogen[ P03383] interacts with 1 human partners:{Q7RTS9}

21967 Pathogen[ P03410] interacts with 1 human partners:{Q7RTS9}

21968 Pathogen[ P14075] interacts with 1 human partners:{Q7RTS9}

21969 Pathogen[ P0C206] interacts with 2 human partners:{Q7RTS9;O96028}

21970 Pathogen[ P03363] interacts with 2 human partners:{Q7RTS9;O96028}

21971 [Cluster 1998]GO:0032785+P biological\_process [name] negative regulation of transcription elongation, DNA-dependent [def] "Any process that stops, prevents, or reduces the frequency, rate or extent of transcription elongation, the extension of an RNA molecule after transcription initiation and promoter clearance by the addition of ribonucleotides catalyzed by a DNA-dependent RNA polymerase." [GOC

21972 Pathogen[ Q2Q067] interacts with 2 human partners:{O00267;P63272}

21973 Pathogen[ P0C214] interacts with 2 human partners:{O00267;P63272}

21974 Pathogen[ P03346] interacts with 2 human partners:{P63272;O00267}

21975 Pathogen[ Q85601] interacts with 2 human partners:{O00267;P63272}

21976 Pathogen[ P14079] interacts with 2 human partners:{P63272;O00267}

21977 Pathogen[ P03383] interacts with 2 human partners:{P63272;O00267}

21978 Pathogen[ P03410] interacts with 2 human partners:{O00267;P63272}

21979 Pathogen[ P14075] interacts with 2 human partners:{O00267;P63272}

21980 Pathogen[ P0C206] interacts with 2 human partners:{O00267;P63272}

21981 Pathogen[ P03363] interacts with 2 human partners:{O00267;P63272}

21982 [Cluster 1999]GO:0016525+P biological\_process [name] negative regulation of angiogenesis [def] "Any process that stops, prevents, or reduces the frequency, rate or extent of angiogenesis." [GOC

21983 Pathogen[ Q2Q067] interacts with 5 human partners:{Q9H4X1;Q9UI56;P20719;P78347;P42224}

21984 Pathogen[ P0C214] interacts with 4 human partners:{Q9H4X1;P42224;P78347;Q9UI56}

21985 Pathogen[ P03346] interacts with 7 human partners:{Q9H4X1;P78347;P20719;P42224;O00522;P98177;Q9UI56}

21986 Pathogen[ Q85601] interacts with 3 human partners:{Q9H4X1;P42224;P78347}

21987 Pathogen[ P14079] interacts with 4 human partners:{Q9UI56;P42224;P78347;O00522}

21988 Pathogen[ P03383] interacts with 3 human partners:{Q9H4X1;P78347;Q9UI56}

21989 Pathogen[ P03410] interacts with 4 human partners:{Q9UI56;Q9H4X1;O00522;P78347}

21990 Pathogen[ P14075] interacts with 3 human partners:{Q9H4X1;P78347;Q9UI56}

21991 Pathogen[ P0C206] interacts with 6 human partners:{Q9H4X1;P78347;Q9UI56;P20719;P42224;O00522}

21992 Pathogen[ P03363] interacts with 5 human partners:{Q9H4X1;P20719;O00522;Q9UI56;P78347}

21993 [Cluster 2000]GO:0071363+P biological\_process [name] cellular response to growth factor stimulus [def] "Any process that results in a change in state or activity of a cell (in terms of movement, secretion, enzyme production, gene expression, etc.) as a result of a growth factor stimulus." [GOC

21994 Pathogen[ Q2Q067] interacts with 10 human partners:{P50402;P31749;P07737;Q15173;P35548;Q15583;Q9UKN5;Q99689;P55771;O94763}

21995 Pathogen[ P0C214] interacts with 11 human

partners:{Q9UKN5;P23919;Q15173;P50402;Q99689;P10909;P16220;O94763;P35548;P31749;P55771}

21996 Pathogen[ P03346] interacts with 14 human partners:{P16220;P35548;O94763;Q99689;Q15583;P15173;Q496M5;P31749;P50402;P07737;P54257;Q15173;Q9UKN5;P55771}

21997 Pathogen[ Q85601] interacts with 12 human partners:{P31749;Q9UKN5;Q15583;Q15173;P07737;P55771;P16220;P35548;Q99689;P50402;O94763;Q496M5}

21998 Pathogen[ P14079] interacts with 12 human partners:{P54257;Q15173;Q15583;P55771;P07737;P10909;O94763;P23919;Q99689;Q13164;Q9UKN5;P50402}

21999 Pathogen[ P03383] interacts with 10 human partners:{P16220;P55771;Q15173;P31749;Q99689;P07737;O94763;P35548;Q9UKN5;P50402}

22000 Pathogen[ P03410] interacts with 14 human partners:{O94763;Q15173;P31749;P23919;Q15583;P35548;Q9UKN5;P16220;P55771;P50402;P54257;P07737;P10909;Q99689}

22001 Pathogen[ P14075] interacts with 10 human partners:{Q9UKN5;P35548;P50402;O94763;P07737;P31749;P55771;Q15173;P16220;Q99689}

22002 Pathogen[ P0C206] interacts with 13 human partners:{P50402;Q496M5;P31749;P16220;Q15173;P55771;Q99689;Q9UKN5;P35548;P10909;P07737;O94763;Q15583}

22003 Pathogen[ P03363] interacts with 12 human partners:{P55771;Q9UKN5;P16220;P35548;P31749;O94763;Q15583;Q15173;P54257;P50402;P07737;Q99689}

22004 [Cluster 2001]GO:0046425+P biological\_process [name] regulation of JAK-STAT cascade [def] "Any process that modulates the frequency, rate or extent of the JAK-STAT signaling pathway." [GOC

22005 Pathogen[ Q2Q067] interacts with 2 human partners:{O14508;Q8TEK3}

22006 Pathogen[ P0C214] interacts with 2 human partners:{O14508;Q8TEK3}

22007 Pathogen[ P03346] interacts with 2 human partners:{Q8TEK3;O14508}

22008 Pathogen[ Q85601] interacts with 2 human partners:{O14508;Q8TEK3}

22009 Pathogen[ P14079] interacts with 3 human partners:{Q8TEK3;Q9H490;O14508}

22010 Pathogen[ P03383] interacts with 1 human partners:{Q8TEK3}

22011 Pathogen[ P03410] interacts with 3 human partners:{Q8TEK3;O14508;Q9H490}

22012 Pathogen[ P14075] interacts with 1 human partners:{Q8TEK3}

22013 Pathogen[ P0C206] interacts with 2 human partners:{O14508;Q8TEK3}

22014 Pathogen[ P03363] interacts with 2 human partners:{Q8TEK3;O14508}

22015 [Cluster 2002]GO:0014908+P biological\_process [name] myotube differentiation involved in skeletal muscle regeneration [def] "The process in which a relatively unspecialized cell acquires specialized features of a myotube cell. Myotube differentiation starts with myoblast fusion and the appearance of specific cell markers (this is the cell development step). Then individual myotubes can fuse to form bigger myotubes and start to contract. This process occurs as part of the process of skeletal muscle regeneration. Myotubes are multinucleated cells that are formed when proliferating myoblasts exit the cell cycle, differentiate and fuse." [GOC

22016 Pathogen[ Q2Q067] interacts with 2 human partners:{O00512;P15172}

22017 Pathogen[ P0C214] interacts with 2 human partners:{P15172;O00512}

22018 Pathogen[ P03346] interacts with 2 human partners:{P15172;O00512}

22019 Pathogen[ Q85601] interacts with 2 human partners:{P15172;O00512}

22020 Pathogen[ P14079] interacts with 1 human partners:{O00512}

22021 Pathogen[ P03383] interacts with 2 human partners:{P15172;O00512}

22022 Pathogen[ P03410] interacts with 1 human partners:{O00512}

22023 Pathogen[ P14075] interacts with 2 human partners:{O00512;P15172}

22024 Pathogen[ P0C206] interacts with 2 human partners:{O00512;P15172}

22025 Pathogen[ P03363] interacts with 2 human partners:{O00512;P15172}

22026 [Cluster 2003]GO:0032201+P biological\_process [name] telomere maintenance via semi-conservative replication [def] "The process in which telomeric DNA is synthesized semi-conservatively by the conventional replication machinery and telomeric accessory factors." [GOC

22027 Pathogen[ Q2Q067] interacts with 11 human partners:{Q15054;P27694;P35244;P49005;P12004;Q14181;P15927;P56282;Q9HCU8;P39748;P35251}

22028 Pathogen[ P0C214] interacts with 10 human partners:{P35251;P49005;Q9HCU8;P15927;P35244;P39748;Q15054;P27694;P56282;Q14181}

22029 Pathogen[ P03346] interacts with 14 human partners:{P12004;Q9HCU8;P27694;P35244;P35250;P56282;P49005;P15927;P35249;Q14181;P35251;P39748;P40937;Q15054}

22030 Pathogen[ Q85601] interacts with 11 human partners:{P56282;P35244;P49005;Q15054;P27694;P15927;P35251;Q14181;Q9HCU8;P12004;P39748}

22031 Pathogen[ P14079] interacts with 14 human partners:{P40937;P49005;Q9HCU8;Q15054;P35250;P56282;P35251;P49642;Q14181;P15927;P27694;P12004;P35244;P39748}

22032 Pathogen[ P03383] interacts with 9 human partners:{Q9HCU8;Q14181;P27694;P49005;P56282;P15927;P35244;Q15054;P35251}

22033 Pathogen[ P03410] interacts with 14 human

partners:{P35244;Q14181;P39748;P56282;P35251;Q15054;P49005;P27694;P15927;P35250;P40937;P12004;P49642;Q9HCU8}

22034 Pathogen[ P14075] interacts with 9 human partners:{P49005;P15927;P35244;P35251;Q15054;P27694;Q9HCU8;P56282;Q14181}

22035 Pathogen[ POC206] interacts with 12 human partners:{P35251;Q9HCU8;P49005;P49642;Q15054;Q14181;P56282;P27694;P15927;P39748;P35244;P12004}

22036 Pathogen[ P03363] interacts with 8 human partners:{P27694;P35251;P49005;Q14181;P35244;P15927;Q9HCU8;Q15054}

22037 [Cluster 2004]GO:0016576+P biological\_process [name] histone dephosphorylation [def] "The modification of histones by removal of phosphate groups." [GOC

22038 Pathogen[ Q2Q067] interacts with 3 human partners:{Q99502;O00167;Q99504}

22039 Pathogen[ POC214] interacts with 3 human partners:{O00167;Q99504;Q99502}

22040 Pathogen[ P03346] interacts with 3 human partners:{O00167;Q99502;Q99504}

22041 Pathogen[ Q85601] interacts with 3 human partners:{Q99504;Q99502;O00167}

22042 Pathogen[ P14079] interacts with 3 human partners:{Q99502;Q99504;O00167}

22043 Pathogen[ P03383] interacts with 2 human partners:{Q99504;O00167}

22044 Pathogen[ P03410] interacts with 3 human partners:{Q99502;Q99504;O00167}

22045 Pathogen[ P14075] interacts with 3 human partners:{Q99504;O00167;Q99502}

22046 Pathogen[ POC206] interacts with 3 human partners:{O00167;Q99504;Q99502}

22047 Pathogen[ P03363] interacts with 2 human partners:{Q99504;O00167}

22048 [Cluster 2005]GO:0042273+P biological\_process [name] ribosomal large subunit biogenesis [def] "A cellular process that results in the biosynthesis of constituent macromolecules, assembly, and arrangement of constituent parts of a large ribosomal subunit\_ includes transport to the sites of protein synthesis." [GOC

22049 Pathogen[ Q2Q067] interacts with 11 human partners:{Q9GZL7;Q9NVU7;O00541;P18077;Q9Y3A5;P61254;Q96EH3;P46777;P62913;P50914;P18124}

22050 Pathogen[ POC214] interacts with 11 human partners:{P62913;P18077;O00541;Q9GZL7;P50914;Q9NVU7;P61254;P46777;Q9Y3A5;P18124;Q96EH3}

22051 Pathogen[ P03346] interacts with 11 human partners:{P62913;O00541;Q9GZL7;P61254;Q96EH3;Q9NVU7;P50914;P46777;P18077;P18124;Q9Y3A5}

22052 Pathogen[ Q85601] interacts with 10 human partners:{P62913;O00541;P18077;Q9Y3A5;P61254;Q9GZL7;P46777;P18124;P50914;Q9NVU7}

22053 Pathogen[ P14079] interacts with 11 human partners:{Q9NVU7;Q9GZL7;P18077;P61254;Q96EH3;P50914;Q9Y3A5;P18124;P46777;O00541;P62913}

22054 Pathogen[ P03383] interacts with 11 human partners:{P62913;Q96EH3;O00541;P46777;P18124;P18077;Q9Y3A5;P61254;Q9GZL7;P50914;Q9NVU7}

22055 Pathogen[ P03410] interacts with 11 human partners:{P62913;P46777;P18124;P50914;Q9GZL7;Q96EH3;P18077;Q9NVU7;O00541;P61254;Q9Y3A5}

22056 Pathogen[ P14075] interacts with 11 human partners:{P62913;Q96EH3;P61254;Q9GZL7;O00541;P46777;P18124;Q9NVU7;P18077;P50914;Q9Y3A5}

22057 Pathogen[ POC206] interacts with 11 human partners:{P18124;Q9NVU7;P50914;Q9GZL7;P18077;P62913;Q96EH3;P46777;O00541;Q9Y3A5;P61254}

22058 Pathogen[ P03363] interacts with 11 human partners:{P62913;P18077;Q9GZL7;Q9NVU7;P61254;Q9Y3A5;P50914;P46777;Q96EH3;O00541;P18124}

22059 [Cluster 2006]GO:0060336+P biological\_process [name] negative regulation of interferon-gamma-mediated signaling pathway [def] "Any process that decreases the rate, frequency or extent of the series of molecular events generated as a consequence of interferon-gamma binding to a cell surface receptor." [GOC

22060 Pathogen[ Q2Q067] interacts with 2 human partners:{P55055;Q96EY1}

22061 Pathogen[ POC214] interacts with 1 human partners:{Q96EY1}

22062 Pathogen[ P03346] interacts with 2 human partners:{Q96EY1;P55055}

22063 Pathogen[ Q85601] interacts with 2 human partners:{P55055;Q96EY1}

22064 Pathogen[ P14079] interacts with 2 human partners:{P55055;Q96EY1}

22065 Pathogen[ P03383] interacts with 1 human partners:{Q96EY1}

22066 Pathogen[ P03410] interacts with 1 human partners:{Q96EY1}

22067 Pathogen[ P14075] interacts with 1 human partners:{Q96EY1}

22068 Pathogen[ POC206] interacts with 2 human partners:{P55055;Q96EY1}

22069 Pathogen[ P03363] interacts with 1 human partners:{Q96EY1}

22070 [Cluster 2007]GO:0006446+P biological\_process [name] regulation of translational initiation [def] "Any process that modulates the frequency, rate or extent of translational initiation." [GOC

22071 Pathogen[ Q2Q067] interacts with 20 human partners:{P23588;O60841;Q9UBQ5;P49770;P04792;Q14240;Q9UI10;O43310;Q14232;P78344;P41567;P60228;Q92499;Q09161;Q9H2K0;P52298;Q9UJA5;Q04637;Q15056;O15372}

22072 Pathogen[ POC214] interacts with 22 human partners:{P60228;Q09161;Q9UI10;O60841;P49770;O60739;O15372;P23588;P04792;P78344;Q150

22073 Pathogen[ P03346] interacts with 22 human  
partners: {P41567;O60739;Q09161;Q9UBQ5;O60841;P78344;Q15056;P55884;P52298;Q92499;Q14232;P60228;Q14240;P49770;P23588;O43310;Q9UJA5;Q9H2K0;Q04637;O15372;P04792;Q9UI10}

22074 Pathogen[ Q85601] interacts with 17 human  
partners: {Q9UBQ5;Q14240;P23588;Q04637;Q92499;P49770;Q09161;P60228;P78344;P41567;P04792;Q9UJA5;O15372;P52298;O43310;Q14232;Q9UI10}

22075 Pathogen[ P14079] interacts with 23 human  
partners: {Q15056;O60739;Q9UI10;Q9H2K0;P41567;P52298;O43432;P46199;Q14240;P78344;P23588;Q9P2X3;O43310;Q9UJA5;O60841;Q92499;Q14232;P04792;Q9UBQ5;Q09161;Q04637;O15372;P55884}

22076 Pathogen[ P03383] interacts with 18 human  
partners: {Q9UBQ5;P60228;P41567;Q9UI10;P04792;O60841;Q09161;P23588;Q9H2K0;P49770;P78344;P52298;Q04637;Q14232;Q9UJA5;O43310;Q92499;O15372}

22077 Pathogen[ P03410] interacts with 25 human  
partners: {O60841;O15372;Q9H2K0;P46199;P04792;Q14232;O43432;P49770;P41567;P55884;Q9UJA5;O60739;P52298;Q92499;Q15056;O43310;Q9P2X3;Q09161;Q04637;P60228;P78344;Q9UBQ5;P23588;Q9UI10;Q14240}

22078 Pathogen[ P14075] interacts with 20 human  
partners: {Q09161;O60841;O15372;P23588;P78344;P04792;Q9P2X3;Q9UI10;Q92499;P60228;Q9H2K0;O60739;Q14232;Q04637;P49770;O43310;Q9UJA5;P41567;Q9UBQ5;P52298}

22079 Pathogen[ P0C206] interacts with 21 human  
partners: {P52298;Q09161;Q14232;P41567;P04792;P60228;P49770;O60841;O60739;Q9H2K0;Q9UI10;Q14240;Q9UJA5;P23588;P78344;Q04637;O43310;Q9P2X3;Q92499;O15372;Q9UBQ5}

22080 Pathogen[ P03363] interacts with 20 human  
partners: {O60739;O43310;O60841;Q9UI10;Q15056;Q9UBQ5;O15372;P41567;P23588;Q14240;Q92499;P52298;Q9UJA5;P49770;P60228;P78344;P55884;P04792;Q09161;Q04637}

22081 [Cluster 2008]GO:0009314+P biological\_process [name] response to radiation [def] "Any process that results in a change in state or activity of a cell or an organism (in terms of movement, secretion, enzyme production, gene expression, etc.) as a result of an electromagnetic radiation stimulus. Electromagnetic radiation is a propagating wave in space with electric and magnetic components. These components oscillate at right angles to each other and to the direction of propagation." [GOC

22082 Pathogen[ Q2Q067] interacts with 8 human  
partners: {O95243;P13646;P30304;P10599;O15527;Q14683;O15287;O15297}

22083 Pathogen[ P0C214] interacts with 10 human  
partners: {O95243;O15287;P13646;P07093;P05412;O15297;Q14683;P10599;O15527;P30304}

22084 Pathogen[ P03346] interacts with 9 human  
partners: {P13646;P05412;P30304;O15287;Q14683;O15297;O95243;P10599;O15527}

22085 Pathogen[ Q85601] interacts with 10 human  
partners: {P13646;O15527;O95243;P30304;P10599;Q14683;O15297;P05412;O15287;P07093}

22086 Pathogen[ P14079] interacts with 8 human  
partners: {O15297;P13646;O15527;P30304;O95243;P10599;P05412;Q14683}

22087 Pathogen[ P03383] interacts with 9 human  
partners: {Q14683;O15527;P30304;P10599;O15297;O95243;O15287;P13646;P05412}

22088 Pathogen[ P03410] interacts with 9 human  
partners: {P13646;P10599;O95243;O15297;O15287;P30304;O15527;Q14683;P05412}

22089 Pathogen[ P14075] interacts with 9 human  
partners: {O15297;Q14683;P05412;O15527;P13646;P30304;O15287;O95243;P10599}

22090 Pathogen[ P0C206] interacts with 9 human  
partners: {O15527;P05412;O15287;Q14683;P30304;P10599;O15297;O95243;P13646}

22091 Pathogen[ P03363] interacts with 8 human  
partners: {O15287;O15527;P30304;O95243;P05412;P13646;O15297;Q14683}

22092 [Cluster 2009]GO:0070588+P biological\_process [name] calcium ion transmembrane transport [def] "A process in which a calcium ion is transported from one side of a membrane to the other by means of some agent such as a transporter or pore." [GOC

22093 Pathogen[ Q2Q067] interacts with 1 human partners: {Q93034}

22094 Pathogen[ P0C214] interacts with 1 human partners: {Q93034}

22095 Pathogen[ P03346] interacts with 1 human partners: {Q93034}

22096 Pathogen[ Q85601] interacts with 1 human partners: {Q93034}

22097 Pathogen[ P14079] interacts with 2 human partners: {Q8NE86;Q93034}

22098 Pathogen[ P03383] interacts with 1 human partners: {Q93034}

22099 Pathogen[ P03410] interacts with 3 human partners: {Q8NE86;Q8IU99;Q93034}

22100 Pathogen[ P14075] interacts with 1 human partners: {Q93034}

22101 Pathogen[ P0C206] interacts with 2 human partners: {Q8NE86;Q93034}

22102 Pathogen[ P03363] interacts with 1 human partners: {Q93034}

22103 [Cluster 2010]GO:0051016+P biological\_process [name] barbed-end actin filament capping [def] "The binding of a protein or protein complex to the barbed (or plus) end of an actin filament, thus preventing the addition, exchange or removal of further actin subunits." [ISBN

22104 Pathogen[ Q2Q067] interacts with 2 human partners: {P06396;P40121}

22105 Pathogen[ P0C214] interacts with 2 human partners: {P40121;P06396}

22106 Pathogen[ P03346] interacts with 2 human partners: {P40121;P06396}

22107 Pathogen[ Q85601] interacts with 2 human partners: {P06396;P40121}

22108 Pathogen[ P14079] interacts with 3 human partners: {P40121;P35611;Q9H2D6}

22109 Pathogen[ P03383] interacts with 1 human partners: {P06396}

22110 Pathogen[ P03410] interacts with 4 human partners:{P06396;P40121;P35611;Q9H2D6}  
22111 Pathogen[ P14075] interacts with 1 human partners:{P06396}  
22112 Pathogen[ P0C206] interacts with 2 human partners:{P06396;P40121}  
22113 Pathogen[ P03363] interacts with 3 human partners:{Q9H2D6;P06396;P40121}  
22114 [Cluster 2011]GO:0032314+P biological\_process [name] regulation of Rac GTPase activity  
[def] "Any process that modulates the activity of a GTPase of the Rac family." [GOC  
22115 Pathogen[ Q2Q067] interacts with 3 human partners:{P63172;Q9BVC4;Q6R327}  
22116 Pathogen[ P0C214] interacts with 3 human partners:{Q9BVC4;Q6R327;P63172}  
22117 Pathogen[ P03346] interacts with 3 human partners:{Q9BVC4;P63172;Q6R327}  
22118 Pathogen[ Q85601] interacts with 2 human partners:{P63172;Q9BVC4}  
22119 Pathogen[ P14079] interacts with 4 human partners:{Q6R327;P63172;Q9BVC4;Q9NZ72}  
22120 Pathogen[ P03383] interacts with 1 human partners:{P63172}  
22121 Pathogen[ P03410] interacts with 4 human partners:{P63172;Q9BVC4;Q6R327;Q9NZ72}  
22122 Pathogen[ P14075] interacts with 2 human partners:{P63172;Q6R327}  
22123 Pathogen[ P0C206] interacts with 4 human partners:{Q6R327;Q9NZ72;P63172;Q9BVC4}  
22124 Pathogen[ P03363] interacts with 3 human partners:{Q9BVC4;P63172;Q6R327}  
22125 [Cluster 2012]GO:0043368+P biological\_process [name] positive T cell selection  
[def] "The process of sparing immature T cells which react with self-MHC protein  
complexes with low affinity levels from apoptotic death." [ISBN  
22126 Pathogen[ Q2Q067] interacts with 1 human partners:{Q8N1K5}  
22127 Pathogen[ P0C214] interacts with 1 human partners:{Q8N1K5}  
22128 Pathogen[ P03346] interacts with 1 human partners:{Q8N1K5}  
22129 Pathogen[ Q85601] interacts with 1 human partners:{Q8N1K5}  
22130 Pathogen[ P14079] interacts with 1 human partners:{Q8N1K5}  
22131 Pathogen[ P03383] interacts with 1 human partners:{Q8N1K5}  
22132 Pathogen[ P03410] interacts with 1 human partners:{Q8N1K5}  
22133 Pathogen[ P14075] interacts with 1 human partners:{Q8N1K5}  
22134 Pathogen[ P0C206] interacts with 1 human partners:{Q8N1K5}  
22135 Pathogen[ P03363] interacts with 1 human partners:{Q8N1K5}  
22136 [Cluster 2013]GO:0042632+P biological\_process [name] cholesterol homeostasis [def]  
"Any process involved in the maintenance of an internal steady state of cholesterol  
within an organism or cell." [GOC  
22137 Pathogen[ Q2Q067] interacts with 3 human partners:{Q5BJF2;P25063;O75376}  
22138 Pathogen[ P0C214] interacts with 2 human partners:{O75376;P25063}  
22139 Pathogen[ P03346] interacts with 4 human partners:{Q5BJF2;O75376;P25063;O00482}  
22140 Pathogen[ Q85601] interacts with 2 human partners:{O75376;O00482}  
22141 Pathogen[ P14079] interacts with 7 human  
partners:{Q13021;Q5BJF2;O00482;Q6IAA8;P25063;Q8TCU4;O75376}  
22142 Pathogen[ P03383] interacts with 3 human partners:{O75376;P25063;Q5BJF2}  
22143 Pathogen[ P03410] interacts with 8 human  
partners:{Q8TCU4;P55157;O75376;Q9NRY6;P25063;Q6IAA8;Q5BJF2;Q13021}  
22144 Pathogen[ P14075] interacts with 3 human partners:{O75376;Q5BJF2;P25063}  
22145 Pathogen[ P0C206] interacts with 6 human  
partners:{Q5BJF2;Q8TCU4;Q13021;O00482;P25063;O75376}  
22146 Pathogen[ P03363] interacts with 3 human partners:{O75376;Q5BJF2;O00482}  
22147 [Cluster 2014]GO:0021772+P biological\_process [name] olfactory bulb development  
[def] "The progression of the olfactory bulb over time from its initial formation until  
its mature state. The olfactory bulb coordinates neuronal signaling involved in the  
perception of smell. It receives input from the sensory neurons and outputs to the  
olfactory cortex." [GO\_REF  
22148 Pathogen[ Q2Q067] interacts with 4 human partners:{P12755;Q07687;Q9NSC2;O95613}  
22149 Pathogen[ P0C214] interacts with 4 human partners:{Q07687;Q9NSC2;P12755;O95613}  
22150 Pathogen[ P03346] interacts with 4 human partners:{Q68CZ1;Q9NSC2;Q96QS3;O95613}  
22151 Pathogen[ Q85601] interacts with 4 human partners:{P12755;O95613;Q9NSC2;Q07687}  
22152 Pathogen[ P14079] interacts with 6 human  
partners:{P12755;Q68CZ1;Q9UPW5;Q07687;O95613;Q9NSC2}  
22153 Pathogen[ P03383] interacts with 3 human partners:{Q07687;Q9NSC2;O95613}  
22154 Pathogen[ P03410] interacts with 6 human  
partners:{Q9UPW5;P12755;Q07687;Q9NSC2;Q68CZ1;O95613}  
22155 Pathogen[ P14075] interacts with 3 human partners:{Q9NSC2;Q07687;O95613}  
22156 Pathogen[ P0C206] interacts with 5 human  
partners:{Q07687;Q9NSC2;P12755;O95613;Q9UPW5}  
22157 Pathogen[ P03363] interacts with 3 human partners:{O95613;Q96QS3;Q07687}  
22158 [Cluster 2015]GO:0070527+P biological\_process [name] platelet aggregation [def] "The  
adhesion of one platelet to one or more other platelets via adhesion molecules." [GOC  
22159 Pathogen[ Q2Q067] interacts with 2 human partners:{O00186;P15976}  
22160 Pathogen[ P0C214] interacts with 1 human partners:{O00186}  
22161 Pathogen[ P03346] interacts with 2 human partners:{O00186;P15976}  
22162 Pathogen[ Q85601] interacts with 2 human partners:{O00186;P15976}  
22163 Pathogen[ P14079] interacts with 2 human partners:{P15976;O00186}  
22164 Pathogen[ P03383] interacts with 1 human partners:{O00186}  
22165 Pathogen[ P03410] interacts with 2 human partners:{O00186;P15976}  
22166 Pathogen[ P14075] interacts with 1 human partners:{O00186}  
22167 Pathogen[ P0C206] interacts with 2 human partners:{P15976;O00186}  
22168 Pathogen[ P03363] interacts with 1 human partners:{O00186}  
22169 [Cluster 2016]GO:0090002+P biological\_process [name] establishment of protein

localization in plasma membrane [def] "The directed movement of a protein to a specific location in the plasma membrane." [GOC

22170 Pathogen[ Q2Q067] interacts with 1 human partners:{Q5T2W1}

22171 Pathogen[ P0C214] interacts with 1 human partners:{Q5T2W1}

22172 Pathogen[ P03346] interacts with 1 human partners:{Q5T2W1}

22173 Pathogen[ Q85601] interacts with 1 human partners:{Q5T2W1}

22174 Pathogen[ P14079] interacts with 1 human partners:{Q5T2W1}

22175 Pathogen[ P03383] interacts with 1 human partners:{Q5T2W1}

22176 Pathogen[ P03410] interacts with 1 human partners:{Q5T2W1}

22177 Pathogen[ P14075] interacts with 1 human partners:{Q5T2W1}

22178 Pathogen[ P0C206] interacts with 1 human partners:{Q5T2W1}

22179 Pathogen[ P03363] interacts with 1 human partners:{Q5T2W1}

22180 [Cluster 2017]GO:0051344+P biological\_process [name] negative regulation of cyclic-nucleotide phosphodiesterase activity [def] "Any process that stops or reduces the rate of cyclic nucleotide phosphodiesterase activity, the catalysis of the reaction

22181 Pathogen[ Q2Q067] interacts with 1 human partners:{O00170}

22182 Pathogen[ P0C214] interacts with 1 human partners:{O00170}

22183 Pathogen[ P03346] interacts with 1 human partners:{O00170}

22184 Pathogen[ Q85601] interacts with 1 human partners:{O00170}

22185 Pathogen[ P14079] interacts with 1 human partners:{O00170}

22186 Pathogen[ P03383] interacts with 1 human partners:{O00170}

22187 Pathogen[ P03410] interacts with 1 human partners:{O00170}

22188 Pathogen[ P14075] interacts with 1 human partners:{O00170}

22189 Pathogen[ P0C206] interacts with 1 human partners:{O00170}

22190 Pathogen[ P03363] interacts with 1 human partners:{O00170}

22191 [Cluster 2018]GO:0006298+P biological\_process [name] mismatch repair [def] "A system for the correction of errors in which an incorrect base, which cannot form hydrogen bonds with the corresponding base in the parent strand, is incorporated into the daughter strand. The mismatch repair system promotes genomic fidelity by repairing base-base mismatches, insertion-deletion loops and heterologies generated during DNA replication and recombination." [ISBN

22192 Pathogen[ Q2Q067] interacts with 8 human partners:{Q15054;Q9UIF7;Q9UHC1;O15350;P12004;P54278;Q9UQ84;Q13569}

22193 Pathogen[ P0C214] interacts with 10 human partners:{A8MQ11;O15350;P20585;Q9UHC1;Q9UIF7;Q15054;Q9UQ84;P54278;P40692;Q13569}

22194 Pathogen[ P03346] interacts with 10 human partners:{P12004;Q9UIF7;O15350;Q9UHC1;P20585;Q9UQ84;Q13569;P54278;P54277;Q15054}

22195 Pathogen[ Q85601] interacts with 11 human partners:{Q9UQ84;A8MQ11;Q15054;P20585;Q13569;Q9UIF7;P54278;Q9UHC1;P12004;O15350;P40692}

22196 Pathogen[ P14079] interacts with 17 human partners:{O43196;P20585;Q9UIF7;P40692;Q68D20;P54278;Q9UHC1;O15350;A8MQ11;Q15054;O95744;Q9NSU2;P54277;P12004;P52701;Q13569;Q9UQ84}

22197 Pathogen[ P03383] interacts with 5 human partners:{P54278;Q9UHC1;O15350;Q15054;Q13569}

22198 Pathogen[ P03410] interacts with 17 human partners:{P40692;P20585;P54277;Q9NSU2;P52701;Q13569;Q15054;O95744;Q68D20;O43196;O15350;A8MQ11;P54278;Q9UQ84;P12004;Q9UIF7;Q9UHC1}

22199 Pathogen[ P14075] interacts with 6 human partners:{Q9UIF7;Q9UHC1;O15350;Q15054;P54278;Q13569}

22200 Pathogen[ P0C206] interacts with 14 human partners:{P54278;Q9UQ84;Q9NSU2;P52701;P40692;Q9UHC1;A8MQ11;P54277;Q13569;Q15054;O15350;P20585;Q9UIF7;P12004}

22201 Pathogen[ P03363] interacts with 7 human partners:{Q9UHC1;P20585;P54278;P54277;Q9UIF7;Q13569;Q15054}

22202 [Cluster 2019]GO:0003148+P biological\_process [name] outflow tract septum morphogenesis [def] "The process in which the anatomical structures of the outflow tract septum are generated and organized. The outflow tract septum is a partition in the outflow tract." [GOC

22203 Pathogen[ Q2Q067] interacts with 3 human partners:{Q8WW38;P35548;Q9NVD7}

22204 Pathogen[ P0C214] interacts with 3 human partners:{Q8WW38;Q9NVD7;P35548}

22205 Pathogen[ P03346] interacts with 3 human partners:{P35548;Q8WW38;Q9NVD7}

22206 Pathogen[ Q85601] interacts with 3 human partners:{Q9NVD7;Q8WW38;P35548}

22207 Pathogen[ P14079] interacts with 2 human partners:{Q9NVD7;Q8WW38}

22208 Pathogen[ P03383] interacts with 2 human partners:{Q8WW38;P35548}

22209 Pathogen[ P03410] interacts with 3 human partners:{Q8WW38;P35548;Q9NVD7}

22210 Pathogen[ P14075] interacts with 2 human partners:{P35548;Q8WW38}

22211 Pathogen[ P0C206] interacts with 3 human partners:{Q9NVD7;Q8WW38;P35548}

22212 Pathogen[ P03363] interacts with 3 human partners:{P35548;Q8WW38;Q9NVD7}

22213 [Cluster 2020]GO:0008154+P biological\_process [name] actin polymerization or depolymerization [def] "Assembly or disassembly of actin filaments by the addition or removal of actin monomers from a filament." [GOC

22214 Pathogen[ Q2Q067] interacts with 5 human partners:{O43516;Q8IZP0;O00401;P06396;P42768}

22215 Pathogen[ P0C214] interacts with 6 human partners:{Q9UI08;Q8IZP0;P06396;O43516;O00401;P42768}

22216 Pathogen[ P03346] interacts with 6 human partners: {O43516;P42768;Q8IZP0;Q9UI08;P06396;O00401}

22217 Pathogen[ Q85601] interacts with 5 human partners: {O00401;P06396;O43516;P42768;Q8IZP0}

22218 Pathogen[ P14079] interacts with 6 human partners: {O43516;Q8IZP0;P50552;P42768;O00401;Q9UI08}

22219 Pathogen[ P03383] interacts with 4 human partners: {O43516;O00401;P42768;P06396}

22220 Pathogen[ P03410] interacts with 7 human partners: {Q9UI08;O43516;P06396;O00401;P42768;P50552;Q8IZP0}

22221 Pathogen[ P14075] interacts with 4 human partners: {P42768;O43516;O00401;P06396}

22222 Pathogen[ P0C206] interacts with 6 human partners: {P06396;O43516;Q9UI08;Q8IZP0;O00401;P42768}

22223 Pathogen[ P03363] interacts with 6 human partners: {Q8IZP0;P42768;P06396;Q9UI08;O00401;O43516}

22224 [Cluster 2021]GO:0031589+P biological\_process [name] cell-substrate adhesion [def] "The attachment of a cell to the underlying substrate via adhesion molecules." [GOC]

22225 Pathogen[ Q2Q067] interacts with 2 human partners: {O43541;O60504}

22226 Pathogen[ P0C214] interacts with 2 human partners: {O43541;O60504}

22227 Pathogen[ P03346] interacts with 2 human partners: {O43541;O60504}

22228 Pathogen[ Q85601] interacts with 2 human partners: {O43541;O60504}

22229 Pathogen[ P14079] interacts with 2 human partners: {O60504;O43541}

22230 Pathogen[ P03383] interacts with 2 human partners: {O43541;O60504}

22231 Pathogen[ P03410] interacts with 2 human partners: {O60504;O43541}

22232 Pathogen[ P14075] interacts with 2 human partners: {O43541;O60504}

22233 Pathogen[ P0C206] interacts with 2 human partners: {O43541;O60504}

22234 Pathogen[ P03363] interacts with 1 human partners: {O43541}

22235 [Cluster 2022]GO:0032743+P biological\_process [name] positive regulation of interleukin-2 production [def] "Any process that activates or increases the frequency, rate, or extent of interleukin-2 production." [GOC]

22236 Pathogen[ Q2Q067] interacts with 3 human partners: {Q9UDY8;Q12933;O43318}

22237 Pathogen[ P0C214] interacts with 3 human partners: {Q9UDY8;O43318;Q12933}

22238 Pathogen[ P03346] interacts with 3 human partners: {O75995;Q9UDY8;O43318}

22239 Pathogen[ Q85601] interacts with 3 human partners: {Q9UDY8;Q12933;O43318}

22240 Pathogen[ P14079] interacts with 1 human partners: {Q12933}

22241 Pathogen[ P03383] interacts with 2 human partners: {O43318;Q12933}

22242 Pathogen[ P03410] interacts with 2 human partners: {O43318;Q12933}

22243 Pathogen[ P14075] interacts with 2 human partners: {Q12933;O43318}

22244 Pathogen[ P0C206] interacts with 3 human partners: {Q9UDY8;O43318;Q12933}

22245 Pathogen[ P03363] interacts with 2 human partners: {Q12933;O43318}

22246 [Cluster 2023]GO:0033628+P biological\_process [name] regulation of cell adhesion mediated by integrin [def] "Any process that modulates the frequency, rate, or extent of cell adhesion mediated by integrin." [GOC]

22247 Pathogen[ Q2Q067] interacts with 1 human partners: {O60711}

22248 Pathogen[ P0C214] interacts with 1 human partners: {O60711}

22249 Pathogen[ P03346] interacts with 1 human partners: {O60711}

22250 Pathogen[ Q85601] interacts with 1 human partners: {O60711}

22251 Pathogen[ P14079] interacts with 1 human partners: {O60711}

22252 Pathogen[ P03383] interacts with 1 human partners: {O60711}

22253 Pathogen[ P03410] interacts with 1 human partners: {O60711}

22254 Pathogen[ P14075] interacts with 1 human partners: {O60711}

22255 Pathogen[ P0C206] interacts with 1 human partners: {O60711}

22256 Pathogen[ P03363] interacts with 1 human partners: {O60711}

22257 [Cluster 2024]GO:0034421+P biological\_process [name] post-translational protein acetylation [def] "The addition of an acetyl group to one or more amino acids in a protein, occurring after the protein has been completely translated and released from the ribosome." [GOC]

22258 Pathogen[ Q2Q067] interacts with 1 human partners: {Q9BVC3}

22259 Pathogen[ P0C214] interacts with 1 human partners: {Q9BVC3}

22260 Pathogen[ P03346] interacts with 1 human partners: {Q9BVC3}

22261 Pathogen[ Q85601] interacts with 1 human partners: {Q9BVC3}

22262 Pathogen[ P14079] interacts with 1 human partners: {Q9BVC3}

22263 Pathogen[ P03383] interacts with 1 human partners: {Q9BVC3}

22264 Pathogen[ P03410] interacts with 1 human partners: {Q9BVC3}

22265 Pathogen[ P14075] interacts with 1 human partners: {Q9BVC3}

22266 Pathogen[ P0C206] interacts with 1 human partners: {Q9BVC3}

22267 Pathogen[ P03363] interacts with 1 human partners: {Q9BVC3}

22268 [Cluster 2025]GO:0001832+P biological\_process [name] blastocyst growth [def] "An increase in size of a blastocyst due to expansion of the blastocoelic cavity cell shape changes and cell proliferation." [GOC]

22269 Pathogen[ Q2Q067] interacts with 3 human partners: {Q96NB3;O60934;Q9HBD4}

22270 Pathogen[ P0C214] interacts with 2 human partners: {Q9HBD4;Q96NB3}

22271 Pathogen[ P03346] interacts with 3 human partners: {Q9HBD4;O60934;Q96NB3}

22272 Pathogen[ Q85601] interacts with 3 human partners: {Q9HBD4;Q96NB3;O60934}

22273 Pathogen[ P14079] interacts with 3 human partners: {Q96NB3;O60934;Q8N201}

22274 Pathogen[ P03383] interacts with 2 human partners: {Q9HBD4;Q96NB3}

22275 Pathogen[ P03410] interacts with 4 human partners: {Q96NB3;Q8N201;Q9HBD4;O60934}



22276 Pathogen[ P14075] interacts with 2 human partners:{Q9HBD4;Q96NB3}  
22277 Pathogen[ POC206] interacts with 4 human partners:{O60934;Q96NB3;Q9HBD4;Q8N201}  
22278 Pathogen[ P03363] interacts with 2 human partners:{Q9HBD4;Q96NB3}  
22279 [Cluster 2026]GO:0050772+P biological\_process [name] positive regulation of axonogenesis [def] "Any process that activates or increases the frequency, rate or extent of axonogenesis." [GOC  
22280 Pathogen[ Q2Q067] interacts with 2 human partners:{P12757;P61586}  
22281 Pathogen[ POC214] interacts with 3 human partners:{P12757;P61586;P52565}  
22282 Pathogen[ P03346] interacts with 3 human partners:{P12757;P52565;P61586}  
22283 Pathogen[ Q85601] interacts with 3 human partners:{P12757;P52565;P61586}  
22284 Pathogen[ P14079] interacts with 3 human partners:{P52565;P61586;P12757}  
22285 Pathogen[ P03383] interacts with 2 human partners:{P61586;P12757}  
22286 Pathogen[ P03410] interacts with 3 human partners:{P61586;P12757;P52565}  
22287 Pathogen[ P14075] interacts with 2 human partners:{P12757;P61586}  
22288 Pathogen[ POC206] interacts with 3 human partners:{P52565;P61586;P12757}  
22289 Pathogen[ P03363] interacts with 2 human partners:{P52565;P12757}  
22290 [Cluster 2027]GO:0072091+P biological\_process [name] regulation of stem cell proliferation [def] "Any process that modulates the frequency, rate or extent of stem cell proliferation. A stem cell is a cell that retains the ability to divide and proliferate throughout life to provide progenitor cells that can differentiate into specialized cells." [GOC  
22291 Pathogen[ Q2Q067] interacts with 1 human partners:{P46937}  
22292 Pathogen[ POC214] interacts with 1 human partners:{P46937}  
22293 Pathogen[ P03346] interacts with 2 human partners:{P46937;P35713}  
22294 Pathogen[ Q85601] interacts with 1 human partners:{P46937}  
22295 Pathogen[ P14079] interacts with 1 human partners:{P46937}  
22296 Pathogen[ P03383] interacts with 1 human partners:{P46937}  
22297 Pathogen[ P03410] interacts with 1 human partners:{P46937}  
22298 Pathogen[ P14075] interacts with 1 human partners:{P46937}  
22299 Pathogen[ POC206] interacts with 1 human partners:{P46937}  
22300 Pathogen[ P03363] interacts with 1 human partners:{P46937}  
22301 [Cluster 2028]GO:0061141+P biological\_process [name] lung ciliated cell differentiation [def] "The process in which a relatively unspecialized cell acquires specialized features of a lung ciliated cell. A lung ciliated cell is a specialized lung epithelial cell that contains a motile cilium for moving substances released from lung secretory cells." [GOC  
22302 Pathogen[ Q2Q067] interacts with 1 human partners:{000712}  
22303 Pathogen[ POC214] interacts with 1 human partners:{000712}  
22304 Pathogen[ P03346] interacts with 1 human partners:{000712}  
22305 Pathogen[ Q85601] interacts with 1 human partners:{000712}  
22306 Pathogen[ P14079] interacts with 1 human partners:{000712}  
22307 Pathogen[ P03383] interacts with 1 human partners:{000712}  
22308 Pathogen[ P03410] interacts with 1 human partners:{000712}  
22309 Pathogen[ P14075] interacts with 1 human partners:{000712}  
22310 Pathogen[ POC206] interacts with 1 human partners:{000712}  
22311 Pathogen[ P03363] interacts with 1 human partners:{000712}  
22312 [Cluster 2029]GO:0071356+P biological\_process [name] cellular response to tumor necrosis factor [def] "Any process that results in a change in state or activity of a cell (in terms of movement, secretion, enzyme production, gene expression, etc.) as a result of a tumor necrosis factor stimulus." [GOC  
22313 Pathogen[ Q2Q067] interacts with 6 human partners:{Q8WUQ7;Q04206;P10914;Q15327;Q7Z2X4;O95429}  
22314 Pathogen[ POC214] interacts with 5 human partners:{Q15327;Q04206;P10914;Q7Z2X4;O95429}  
22315 Pathogen[ P03346] interacts with 8 human partners:{Q9Y5W3;Q15327;Q04206;Q7Z2X4;P10914;O95429;Q6FIF0;Q8WUQ7}  
22316 Pathogen[ Q85601] interacts with 5 human partners:{Q7Z2X4;P10914;Q04206;Q15327;O95429}  
22317 Pathogen[ P14079] interacts with 9 human partners:{Q9H295;Q9NXE4;P13498;O95429;Q15327;Q8WUQ7;Q9Y5W3;Q7Z2X4;P10914}  
22318 Pathogen[ P03383] interacts with 5 human partners:{P10914;Q8WUQ7;Q15327;Q04206;O95429}  
22319 Pathogen[ P03410] interacts with 7 human partners:{Q8WUQ7;Q04206;Q15327;Q9NXE4;Q7Z2X4;O95429;P10914}  
22320 Pathogen[ P14075] interacts with 5 human partners:{Q04206;Q15327;P10914;Q8WUQ7;O95429}  
22321 Pathogen[ POC206] interacts with 6 human partners:{P10914;Q7Z2X4;Q15327;Q8WUQ7;O95429;Q04206}  
22322 Pathogen[ P03363] interacts with 6 human partners:{Q04206;Q15327;Q8WUQ7;P10914;Q6FIF0;O95429}  
22323 [Cluster 2030]GO:0042474+P biological\_process [name] middle ear morphogenesis [def] "The process in which the anatomical structures of the middle ear are generated and organized. The middle ear is the air-filled cavity within the skull of vertebrates that lies between the outer ear and the inner ear. It is linked to the pharynx (and therefore to outside air) via the Eustachian tube and in mammals contains the three ear ossicles, which transmit auditory vibrations from the outer ear (via the tympanum) to the inner

ear (via the oval window)." [GOC

22324 Pathogen[ Q2Q067] interacts with 4 human partners:{O43364;Q99502;P63173;P54821}

22325 Pathogen[ P0C214] interacts with 2 human partners:{P63173;Q99502}

22326 Pathogen[ P03346] interacts with 11 human partners:{Q9NPC8;P54821;P63173;Q99811;O95677;Q99502;O43364;O75569;Q15475;P78367;P56915}

22327 Pathogen[ Q85601] interacts with 4 human partners:{P63173;O95677;O43364;Q99502}

22328 Pathogen[ P14079] interacts with 8 human partners:{Q9Y5U4;O43364;Q99502;O75569;P54826;P63173;P28360;O15503}

22329 Pathogen[ P03383] interacts with 1 human partners:{P63173}

22330 Pathogen[ P03410] interacts with 7 human partners:{Q99502;Q9Y5U4;P63173;O75569;O43364;P54826;O15503}

22331 Pathogen[ P14075] interacts with 3 human partners:{P63173;Q99502;P54826}

22332 Pathogen[ P0C206] interacts with 6 human partners:{P54821;Q99502;O43364;P63173;P54826;O95677}

22333 Pathogen[ P03363] interacts with 8 human partners:{P63173;P56915;P54821;P78367;O43364;Q99811;Q9NPC8;O75569}

22334 [Cluster 2031]GO:0007023+P biological\_process [name] post-chaperonin tubulin folding pathway [def] "Completion of folding of alpha- and beta-tubulin\_ takes place subsequent to chaperonin-mediated partial folding\_ mediated by a complex of folding cofactors." [PMID

22335 Pathogen[ Q2Q067] interacts with 2 human partners:{Q9BTW9;O75347}

22336 Pathogen[ P0C214] interacts with 2 human partners:{O75347;Q9BTW9}

22337 Pathogen[ P03346] interacts with 1 human partners:{O75347}

22338 Pathogen[ Q85601] interacts with 2 human partners:{Q9BTW9;O75347}

22339 Pathogen[ P14079] interacts with 3 human partners:{Q9BTW9;Q15814;O75347}

22340 Pathogen[ P03383] interacts with 1 human partners:{O75347}

22341 Pathogen[ P03410] interacts with 3 human partners:{Q15814;Q9BTW9;O75347}

22342 Pathogen[ P14075] interacts with 1 human partners:{O75347}

22343 Pathogen[ P0C206] interacts with 3 human partners:{Q9BTW9;Q15814;O75347}

22344 Pathogen[ P03363] interacts with 3 human partners:{O75347;Q15814;Q9BTW9}

22345 [Cluster 2032]GO:2000195+P biological\_process [name] negative regulation of female gonad development [def] "Any process that stops, prevents, or reduces the frequency, rate or extent of female gonad development." [GOC

22346 Pathogen[ Q2Q067] interacts with 1 human partners:{Q8WW38}

22347 Pathogen[ P0C214] interacts with 1 human partners:{Q8WW38}

22348 Pathogen[ P03346] interacts with 2 human partners:{Q8WW38;Q13285}

22349 Pathogen[ Q85601] interacts with 1 human partners:{Q8WW38}

22350 Pathogen[ P14079] interacts with 1 human partners:{Q8WW38}

22351 Pathogen[ P03383] interacts with 1 human partners:{Q8WW38}

22352 Pathogen[ P03410] interacts with 1 human partners:{Q8WW38}

22353 Pathogen[ P14075] interacts with 1 human partners:{Q8WW38}

22354 Pathogen[ P0C206] interacts with 1 human partners:{Q8WW38}

22355 Pathogen[ P03363] interacts with 1 human partners:{Q8WW38}

22356 [Cluster 2033]GO:0034333+P biological\_process [name] adherens junction assembly [def] "The aggregation, arrangement and bonding together of a set of components to form an adherens junction. An adherens junction is a cell junction at which the cytoplasmic face of the plasma membrane is attached to actin filaments." [GOC

22357 Pathogen[ Q2Q067] interacts with 3 human partners:{Q9BTW9;Q9H7S9;O15105}

22358 Pathogen[ P0C214] interacts with 3 human partners:{Q9BTW9;O15105;Q9H7S9}

22359 Pathogen[ P03346] interacts with 2 human partners:{O15105;Q9H7S9}

22360 Pathogen[ Q85601] interacts with 3 human partners:{Q9H7S9;Q9BTW9;O15105}

22361 Pathogen[ P14079] interacts with 4 human partners:{Q9BTW9;O60895;Q9H7S9;O15105}

22362 Pathogen[ P03383] interacts with 2 human partners:{O15105;Q9H7S9}

22363 Pathogen[ P03410] interacts with 4 human partners:{O60895;Q9BTW9;O15105;Q9H7S9}

22364 Pathogen[ P14075] interacts with 2 human partners:{O15105;Q9H7S9}

22365 Pathogen[ P0C206] interacts with 3 human partners:{Q9BTW9;Q9H7S9;O15105}

22366 Pathogen[ P03363] interacts with 3 human partners:{Q9H7S9;O15105;Q9BTW9}

22367 [Cluster 2034]GO:0030148+P biological\_process [name] sphingolipid biosynthetic process [def] "The chemical reactions and pathways resulting in the formation of sphingolipids, any of a class of lipids containing the long-chain amine diol sphingosine or a closely related base (a sphingoid)." [GOC

22368 Pathogen[ Q2Q067] interacts with 2 human partners:{Q9BW60;Q96G23}

22369 Pathogen[ P0C214] interacts with 3 human partners:{Q9HA82;Q96G23;Q9BW60}

22370 Pathogen[ P03346] interacts with 2 human partners:{Q9BW60;Q96G23}

22371 Pathogen[ Q85601] interacts with 2 human partners:{Q9BW60;Q96G23}

22372 Pathogen[ P14079] interacts with 7 human partners:{Q9HA82;P27544;Q8NFR3;Q96G23;O95292;Q969W0;Q9BW60}

22373 Pathogen[ P03383] interacts with 1 human partners:{Q9BW60}

22374 Pathogen[ P03410] interacts with 7 human partners:{O95292;P27544;Q96G23;Q9HA82;Q9BW60;Q969W0;Q8NFR3}

22375 Pathogen[ P14075] interacts with 2 human partners:{Q9BW60;Q969W0}

22376 Pathogen[ P0C206] interacts with 6 human partners:{Q96G23;Q8NFR3;O95292;Q9HA82;Q969W0;Q9BW60}

22377 Pathogen[ P03363] interacts with 1 human partners:{Q96G23}

22378 [Cluster 2035]GO:0001558+P biological\_process [name] regulation of cell growth

[def] "Any process that modulates the frequency, rate, extent or direction of cell growth." [GOC

22379 Pathogen[ Q2Q067] interacts with 13 human partners:{Q96J02;Q9H2G9;Q95997;Q99816;P56945;Q95990;Q5BJF2;Q08050;O14508;Q96KS0;Q15014;Q9UI95;O94763}

22380 Pathogen[ P0C214] interacts with 13 human partners:{Q96J02;Q9N2T2;P56945;Q15014;Q92560;Q96KS0;Q9UI95;P21127;Q9H2G9;O14508;Q99816;Q95997;O94763}

22381 Pathogen[ P03346] interacts with 17 human partners:{Q96J02;Q92560;Q9H2G9;P21127;O94763;Q99816;Q08050;Q9UI95;Q95997;Q5BJF2;O14508;P56945;Q95990;Q9N2T2;Q2LD37;Q15014;Q96KS0}

22382 Pathogen[ Q85601] interacts with 13 human partners:{Q99816;Q96J02;Q15014;Q9UI95;Q92560;O14508;P56945;Q96KS0;Q9H2G9;Q08050;P21127;O94763;Q95997}

22383 Pathogen[ P14079] interacts with 15 human partners:{Q15014;Q95990;Q5BJF2;Q2LD37;O94763;Q9H2G9;Q92560;Q9N2T2;O00559;Q96J02;P21127;Q95997;O14508;Q99816;Q96KS0}

22384 Pathogen[ P03383] interacts with 11 human partners:{Q15014;P56945;Q9UI95;Q9H2G9;Q99816;Q96KS0;P21127;O94763;Q5BJF2;Q95997;Q95990}

22385 Pathogen[ P03410] interacts with 14 human partners:{O94763;Q9UI95;Q9H2G9;Q15014;Q95990;Q96KS0;Q95997;O00559;Q99816;O14508;Q9N2T2;Q2LD37;P56945;Q5BJF2}

22386 Pathogen[ P14075] interacts with 14 human partners:{Q9H2G9;Q96KS0;Q15014;Q2LD37;Q08050;Q95997;Q9UI95;O94763;Q95990;P21127;Q99816;Q9UQ88;P56945;Q5BJF2}

22387 Pathogen[ P0C206] interacts with 17 human partners:{Q5BJF2;Q2LD37;Q96KS0;Q9N2T2;Q95997;Q96J02;Q99816;Q15014;Q95990;O14508;Q9H2G9;Q08050;P56945;P21127;Q92560;Q9UI95;O94763}

22388 Pathogen[ P03363] interacts with 15 human partners:{Q95990;P21127;Q15014;Q2LD37;Q92560;Q08050;O94763;Q9UI95;Q9H2G9;P56945;Q5BJF2;Q99816;Q95997;O14508;Q9N2T2}

22389 [Cluster 2036]GO:0045901+P biological\_process [name] positive regulation of translational elongation [def] "Any process that activates or increases the frequency, rate or extent of translational elongation." [GOC

22390 Pathogen[ Q2Q067] interacts with 3 human partners:{P63241;Q6IS14;Q9GZV4}

22391 Pathogen[ P0C214] interacts with 3 human partners:{Q6IS14;Q9GZV4;P63241}

22392 Pathogen[ P03346] interacts with 3 human partners:{Q9GZV4;P63241;Q6IS14}

22393 Pathogen[ Q85601] interacts with 4 human partners:{Q9Y5T5;Q9GZV4;P63241;Q6IS14}

22394 Pathogen[ P14079] interacts with 3 human partners:{Q6IS14;P63241;Q9GZV4}

22395 Pathogen[ P03383] interacts with 2 human partners:{Q9GZV4;P63241}

22396 Pathogen[ P03410] interacts with 3 human partners:{P63241;Q9GZV4;Q6IS14}

22397 Pathogen[ P14075] interacts with 2 human partners:{Q9GZV4;P63241}

22398 Pathogen[ P0C206] interacts with 4 human partners:{Q9GZV4;Q6IS14;Q9Y5T5;P63241}

22399 Pathogen[ P03363] interacts with 3 human partners:{Q9GZV4;P63241;Q6IS14}

22400 [Cluster 2037]GO:0051294+P biological\_process [name] establishment of spindle orientation [def] "Any process that set the alignment of spindle relative to other cellular structures." [GOC

22401 Pathogen[ Q2Q067] interacts with 2 human partners:{Q7Z460;P27816}

22402 Pathogen[ P0C214] interacts with 2 human partners:{P27816;Q7Z460}

22403 Pathogen[ P03346] interacts with 2 human partners:{P27816;Q7Z460}

22404 Pathogen[ Q85601] interacts with 2 human partners:{P27816;Q7Z460}

22405 Pathogen[ P14079] interacts with 2 human partners:{Q7Z460;P27816}

22406 Pathogen[ P03383] interacts with 2 human partners:{Q7Z460;P27816}

22407 Pathogen[ P03410] interacts with 2 human partners:{Q7Z460;P27816}

22408 Pathogen[ P14075] interacts with 2 human partners:{Q7Z460;P27816}

22409 Pathogen[ P0C206] interacts with 2 human partners:{P27816;Q7Z460}

22410 Pathogen[ P03363] interacts with 2 human partners:{P27816;Q7Z460}

22411 [Cluster 2038]GO:0007098+P biological\_process [name] centrosome cycle [def] "The cell cycle process in which centrosome duplication and separation takes place. The centrosome cycle can operate with a considerable degree of independence from other processes of the cell cycle." [ISBN

22412 Pathogen[ Q2Q067] interacts with 3 human partners:{P06748;P24522;O15182}

22413 Pathogen[ P0C214] interacts with 2 human partners:{P24522;P06748}

22414 Pathogen[ P03346] interacts with 3 human partners:{P06748;O15182;P24522}

22415 Pathogen[ Q85601] interacts with 3 human partners:{O15182;P24522;P06748}

22416 Pathogen[ P14079] interacts with 3 human partners:{P24522;P06748;O15182}

22417 Pathogen[ P03383] interacts with 2 human partners:{P06748;P24522}

22418 Pathogen[ P03410] interacts with 3 human partners:{P24522;O15182;P06748}

22419 Pathogen[ P14075] interacts with 2 human partners:{P06748;P24522}

22420 Pathogen[ P0C206] interacts with 3 human partners:{O15182;P24522;P06748}

22421 Pathogen[ P03363] interacts with 3 human partners:{P06748;P24522;O15182}

22422 [Cluster 2039]GO:0006457+P biological\_process [name] protein folding [def] "The process of assisting in the covalent and noncovalent assembly of single chain polypeptides or multisubunit complexes into the correct tertiary structure." [GOC

22423 Pathogen[ Q2Q067] interacts with 57 human

- partners: {Q9BTW9; Q9UNP9; Q13356; Q9H2H8; Q9HAV7; O95433; P49792; Q13427; O43447; P38646; P61604; P50502; P08238; P18850; O76031; Q8IWL3; P07900; O75347; Q9Y237; P02511; Q8TAA5; Q99471; O00170; Q9UBS4; P11142; P27797; Q9UDY4; Q9UBS3; P17987; Q9NZL4; Q9NQP4; Q9UBK9; O75190; P50991; O14656; Q9UHV9; Q99615; P25685; Q9NZJ4; Q16401; Q53G26; Q15257; Q13526; Q95817; Q08752; P61758; O75953; P78371; P23284; Q13952; P31689; Q96EY1; O94763; P62937; Q9NZD4; P14625; O95429}
- 22424 Pathogen[ P0C214] interacts with 83 human  
partners: {Q9Y536; O00170; Q9NZL4; P18850; Q9UDY4; Q58FG0; P60709; O95817; P14625; Q99832; Q58FF7; Q13952; P49368; Q9HAV7; O75347; P78371; Q6UX04; A2BFH1; P02511; P48643; P61758; O75190; Q9BTW9; Q13526; P30405; P61604; Q58FG1; O14656; Q13427; P49792; P23284; Q15257; Q9UBS3; P30414; Q8WW22; Q8IWL3; Q9UBS4; Q99615; Q9H2H8; O76031; Q14696; Q9NZJ4; Q9Y237; Q99614; P45877; Q9UHV9; Q9Y3C6; Q9NZD4; P49257; F5H284; Q13356; P38646; P10809; O95429; Q53G26; Q8TAA5; Q58FF3; Q58FF6; P49588; Q96BP3; O43447; P27797; Q99471; Q58FF8; O60925; P17987; O60884; Q08752; P50991; Q8IXY8; O94763; Q5F1R6; Q9NQP4; Q14568; Q9UNP9; Q9UBK9; O95433; O75953; Q96EY1; Q16401; P50502; P11142; P25685}
- 22425 Pathogen[ P03346] interacts with 70 human  
partners: {Q5F1R6; Q99615; Q9UBS3; Q9H2H8; P07900; P25685; O43447; Q9Y3C6; O75190; P14625; P50502; Q9NZL4; Q99471; Q9UHV9; O14656; O94763; Q6UX04; Q9NZD4; P49257; P61604; Q9NQP4; P62937; P78371; Q15257; Q16401; P60709; O00170; Q96BP3; P11142; P25686; Q9H173; Q13526; Q9NZJ4; Q13427; O95433; O76031; P18850; O75347; Q9HAV7; P38646; Q9Y237; P02511; Q08752; P50991; O95817; P49368; P31689; Q53G26; Q9UNP9; Q13356; P27797; Q96KC8; Q13952; Q9UBS4; O60925; Q9Y536; Q9UDY4; O95429; P61758; Q9UBK9; Q8TAA5; P08238; O75953; Q99614; A2BFH1; Q8IWL3; Q96EY1; P49792; P23284; P17987}
- 22426 Pathogen[ Q85601] interacts with 75 human  
partners: {F5H284; P30405; Q6UX04; A2BFH1; Q9H2H8; P31689; Q8TAA5; Q9NQP4; Q96BP3; O75190; Q9UBS3; Q58FF8; Q99471; Q53G26; O95433; P61604; Q9UHV9; Q9UBS4; Q9BTW9; Q8WW22; P61758; O60884; P27797; P17987; P25685; Q13952; Q13427; O75953; P60709; Q08752; O00170; P50991; P49257; Q13526; P02511; P11142; P23284; O75347; P08238; Q9Y3C6; Q9HAV7; Q99615; O14656; P18850; Q9UDY4; Q9NZD4; Q13356; P07900; P30414; O43447; P14625; P38646; O76031; O94763; Q9NZJ4; Q58FF3; P49792; P50502; P78371; Q8IWL3; Q8IXY8; P48643; Q9NZL4; Q15257; Q9UBK9; Q9Y536; O95429; Q14568; P62937; O95817; Q9Y237; Q96EY1; Q16401; P45877; Q5F1R6}
- 22427 Pathogen[ P14079] interacts with 82 human  
partners: {Q13952; Q9BTW9; P48643; O43447; O95816; P49257; O60925; P11142; Q8IXY8; Q08752; Q9NZJ4; P30040; O95817; Q9Y237; Q9UBS3; P02511; O00170; Q14696; O95429; Q8IWL3; P50991; Q9UBS4; Q9UDY4; P78371; O95433; P68363; Q9UHV9; P50990; P62937; Q9NQP4; Q13427; O75190; P61758; F5H284; O75352; P25685; Q9NYU1; P61604; O94763; Q99614; Q9NUG6; Q15814; O14656; Q13356; P45877; Q9NYU2; Q9UL15; P08238; P17987; Q9H2H8; Q9NZD4; Q9UBK9; O75953; P07900; P60709; A2BFH1; Q7Z5B4; P18850; P14625; P38646; P31689; Q9H0V9; Q99615; O75347; Q99471; O76031; P23284; P49588; Q6UX04; Q13526; P49368; Q5F1R6; Q9Y536; Q8WW22; O60884; P50502; Q16401; Q96BP3; Q9NZL4; Q96EY1; Q9HAV7; Q8TAA5}
- 22428 Pathogen[ P03383] interacts with 52 human  
partners: {Q9UHV9; P49792; Q13356; Q9UNP9; O95433; P38646; P50502; Q15257; Q96BP3; P61604; Q9H2H8; Q9HAV7; P02511; P62937; O00170; P07900; Q08752; Q9NQP4; P31689; O75190; O43447; Q9UBS4; Q9UBS3; Q13952; O94763; Q13427; O75347; Q9UDY4; Q14696; Q99471; P14625; Q99615; Q9NZL4; P11142; Q8IWL3; Q8TAA5; P78371; Q16401; O60925; P23284; O76031; P18850; Q9UBK9; P61758; P08238; O75953; Q96EY1; O95429; Q13526; Q53G26; P27797; Q9NZD4}
- 22429 Pathogen[ P03410] interacts with 95 human  
partners: {Q9UDY4; P17987; O94763; P49368; Q99832; Q9H0V9; P48643; Q53G26; Q7Z5B4; P49257; P50502; P38646; Q16401; P08238; Q08752; O14656; P25685; Q13526; Q9Y536; P49588; Q96BP3; Q99614; P61604; Q15257; P30040; P14625; O95816; Q8TAA5; P25686; P11142; P07900; O75953; Q15814; Q9UBK9; Q9UBS3; Q5F1R6; Q99615; O95817; Q9NUG6; Q13356; Q9H2H8; O76031; Q99471; P62937; Q9NZJ4; P50990; Q9NYU1; O75190; O00170; Q9BTW9; O95429; P02511; Q58FF3; P61758; Q8IWL3; P45877; Q13952; Q9BVA1; Q9H173; Q9UL15; Q6UX04; Q9NQP4; O60884; O75347; Q9UBS4; P68363; O60925; P78371; Q9Y3C6; P31689; P23284; Q9UHV9; Q9UNP9; F5H284; Q9NZL4; O75352; Q8IXY8; Q9HAV7; P30414; Q8WW22; Q14696; O95433; Q13427; Q9Y237; O43447; P18850; Q96EY1; P30405; A2BFH1; P60709; P50991; P49792; Q9NYU2; Q9NZD4; P27797}
- 22430 Pathogen[ P14075] interacts with 50 human  
partners: {O75953; Q9UBS3; Q15257; Q9HAV7; P31689; Q08752; P11142; O75347; P23284; Q99615; P61604; Q8TAA5; P49792; Q9UNP9; O95433; P78371; Q53G26; Q16401; Q9UDY4; P08238; Q13952; P38646; O94763; Q9UHV9; O76031; P07900; O00170; Q13526; Q9UBK9; P50502; Q14696; P27797; Q9NQP4; P02511; P61758; O43447; O75190; P62937; O60925; Q13427; Q9UBS4; Q9H2H8; P14625; Q9NZD4; Q99471; Q8IWL3; Q9NZL4; Q96EY1; O95429; P18850}
- 22431 Pathogen[ P0C206] interacts with 79 human  
partners: {Q9Y536; Q9UNP9; P48643; P60709; Q9UDY4; P27797; Q13526; P18850; Q7Z5B4; Q08752; Q96BP3; Q5F1R6; Q9BTW9; Q99615; Q53G26; Q9UBS4; Q9HAV7; Q9NZJ4; P50991; P17987; O60884; Q99471; A2BFH1; P38646; Q15814; Q9UHV9; O95816; F5H284; Q13952; P49792; P50502; O60925; Q8WW22; P08238; Q9Y3C6; O95429; Q58FF3; Q13427; P07900; O14656; P49257; Q9NZL4; P23284; Q8TAA5; Q13356; O43447; Q9Y237; O75953; P49368; O95817; P61758; Q9UBS3; P25685; P45877; Q9UBK9; Q9H2H8; Q14696; Q8IWL3; O00170; O75347; Q99614; P02511; O76031; P30405; Q9NZD4; Q96EY1; P62937; P11142; Q15257; P78371; Q9NQP4; Q16401; P31689; O94763; P61604; Q8IXY8; O75190; P14625; Q6UX04}
- 22432 Pathogen[ P03363] interacts with 67 human  
partners: {O75190; P23284; O75953; Q99615; O75347; Q13427; P62937; P07900; A2BFH1; P60709; Q9NZJ4; P50502; Q9NZL4; Q9UHV9; Q13952; Q6UX04; Q13356; Q96BP3; P18850; Q9Y3C6; P68363; Q9UBS3; Q08752; Q9UDY4; Q5F1R6; Q9UBK9; Q13526; Q99471; O43447; O95817; Q53G26; P50991; Q9NZN9; Q13748; O60925; O95433; P27797; O94763; Q9UBS4; P38646; Q15814; Q9BTW9; P17987; P49792; Q8TAA5; P61758; O76031; Q8IWL3; Q9NZD4; Q9NUG6; Q9Y237; P25685; Q15257; P78371; Q9Y536; Q99614; Q9NQP4; O95429; Q96EY1; P08238; P48643; O00170; Q9H2H8; Q9UNP9; P11142; P61604; P49368}
- 22433 [Cluster 2040]GO:0051056+P biological\_process [name] regulation of small GTPase mediated signal transduction [def] "Any process that modulates the frequency, rate or

extent of small GTPase mediated signal transduction." [GOC  
22434 Pathogen[ Q2Q067] interacts with 3 human partners:{P60953;P63000;P61586}  
22435 Pathogen[ P0C214] interacts with 7 human  
partners:{P63000;P31150;P61586;P60953;P52565;Q6GYQ0;P98171}  
22436 Pathogen[ P03346] interacts with 11 human  
partners:{P98171;Q96FS4;Q12802;P60953;P52565;P31150;Q6GYQ0;Q5VV41;Q9H8V3;P63000;P615  
86}  
22437 Pathogen[ Q85601] interacts with 5 human  
partners:{P31150;P63000;P52565;P61586;P60953}  
22438 Pathogen[ P14079] interacts with 9 human  
partners:{P52565;P31150;P98171;P10911;Q12802;P61586;Q9H8V3;Q86X10;Q5VV41}  
22439 Pathogen[ P03383] interacts with 3 human partners:{P60953;P63000;P61586}  
22440 Pathogen[ P03410] interacts with 9 human  
partners:{P63000;P98171;P61586;Q5VV41;P60953;Q9H8V3;Q15283;P31150;P52565}  
22441 Pathogen[ P14075] interacts with 3 human partners:{P60953;P61586;P63000}  
22442 Pathogen[ P0C206] interacts with 7 human  
partners:{P52565;P61586;P63000;Q9H8V3;P60953;P31150;P98171}  
22443 Pathogen[ P03363] interacts with 9 human  
partners:{P52565;Q5VV41;P31150;P98171;P63000;P10911;Q7Z5H3;P60953;Q96FS4}  
22444 [Cluster 2041]GO:0050900+P biological\_process [name] leukocyte migration [def] "The  
movement of a leukocyte within or between different tissues and organs of the body."  
[GOC  
22445 Pathogen[ Q2Q067] interacts with 5 human  
partners:{Q13356;Q12904;P27986;P35579;P62937}  
22446 Pathogen[ P0C214] interacts with 4 human partners:{Q12904;P62993;Q13356;P27986}  
22447 Pathogen[ P03346] interacts with 8 human  
partners:{P35579;P62937;P62993;P26038;Q12904;Q13356;Q8TAU0;P27986}  
22448 Pathogen[ Q85601] interacts with 5 human  
partners:{P62993;P35579;P27986;Q13356;P62937}  
22449 Pathogen[ P14079] interacts with 9 human  
partners:{P35579;Q8N6Q3;Q14242;Q08722;P26038;P62937;Q13356;P62993;Q12904}  
22450 Pathogen[ P03383] interacts with 5 human  
partners:{P27986;Q12904;Q13356;P62937;P35579}  
22451 Pathogen[ P03410] interacts with 10 human  
partners:{P27986;Q8N6Q3;Q14242;P35579;Q12904;Q13356;P62937;P26038;Q08722;P62993}  
22452 Pathogen[ P14075] interacts with 4 human partners:{Q12904;P27986;P35579;P62937}  
22453 Pathogen[ P0C206] interacts with 7 human  
partners:{P27986;P62993;P35579;Q13356;Q8TAU0;P62937;Q12904}  
22454 Pathogen[ P03363] interacts with 5 human  
partners:{P62937;P35579;Q13356;Q8TAU0;P27986}  
22455 [Cluster 2042]GO:2000648+P biological\_process [name] positive regulation of stem cell  
proliferation [def] "Any process that activates or increases the frequency, rate or  
extent of stem cell proliferation." [GOC  
22456 Pathogen[ Q2Q067] interacts with 1 human partners:{Q7Z7J5}  
22457 Pathogen[ P0C214] interacts with 1 human partners:{Q7Z7J5}  
22458 Pathogen[ P03346] interacts with 1 human partners:{Q7Z7J5}  
22459 Pathogen[ Q85601] interacts with 1 human partners:{Q7Z7J5}  
22460 Pathogen[ P14079] interacts with 1 human partners:{Q7Z7J5}  
22461 Pathogen[ P03383] interacts with 1 human partners:{Q7Z7J5}  
22462 Pathogen[ P03410] interacts with 1 human partners:{Q7Z7J5}  
22463 Pathogen[ P14075] interacts with 1 human partners:{Q7Z7J5}  
22464 Pathogen[ P0C206] interacts with 1 human partners:{Q7Z7J5}  
22465 Pathogen[ P03363] interacts with 1 human partners:{Q7Z7J5}  
22466 [Cluster 2043]GO:0007623+P biological\_process [name] circadian rhythm [def] "Any  
biological process in an organism that recurs with a regularity of approximately 24  
hours." [GOC  
22467 Pathogen[ Q2Q067] interacts with 5 human  
partners:{Q8WYA1;O14503;Q9UNS1;Q16649;Q16526}  
22468 Pathogen[ P0C214] interacts with 8 human  
partners:{O60346;Q16613;O14503;Q9UNS1;Q49AN0;Q8WYA1;P05412;Q16526}  
22469 Pathogen[ P03346] interacts with 16 human  
partners:{P05412;O60346;Q49AN0;Q9UNS1;Q16526;O43316;O15055;O15534;O14503;O00327;Q9C0  
J9;Q16649;Q8WYA1;O15516;P56645;Q8N100}  
22470 Pathogen[ Q85601] interacts with 15 human  
partners:{O60346;O43316;O15534;P56645;Q49AN0;O15516;Q8WYA1;Q16613;O00327;O14503;Q166  
49;P05412;O15055;Q16526;Q9UNS1}  
22471 Pathogen[ P14079] interacts with 13 human  
partners:{Q16526;Q16649;Q49AN0;O60346;Q16613;P11686;P56645;O14503;O15055;P05412;Q8WY  
A1;Q9UNS1;O15534}  
22472 Pathogen[ P03383] interacts with 5 human  
partners:{Q9UNS1;Q16613;O14503;P05412;Q16526}  
22473 Pathogen[ P03410] interacts with 12 human  
partners:{O15055;Q16649;P11686;P56645;Q16613;O15534;Q16526;Q49AN0;P05412;O60346;Q9UN  
S1;Q8WYA1}  
22474 Pathogen[ P14075] interacts with 5 human  
partners:{P05412;Q16613;O14503;Q9UNS1;Q16526}

22475 Pathogen[ P0C206] interacts with 15 human partners:{Q9UNSL;Q16649;P05412;O15534;Q9C0J9;O00327;Q16526;O15516;P56645;Q8WYA1;O15055;O60346;Q49AN0;Q16613;O43316}

22476 Pathogen[ P03363] interacts with 13 human partners:{Q16649;Q9C0J9;O43316;P56645;Q49AN0;Q8WYA1;O00327;Q9UNSL;Q16526;P05412;O15055;O15534;O14503}

22477 [Cluster 2044]GO:0000188+P biological\_process [name] inactivation of MAPK activity [def] "Any process that terminates the activity of the active enzyme MAP kinase." [PMID

22478 Pathogen[ Q2Q067] interacts with 5 human partners:{P30153;P67775;Q13227;Q16829;Q7Z699}

22479 Pathogen[ P0C214] interacts with 5 human partners:{P30153;Q7Z699;P67775;Q16829;Q13227}

22480 Pathogen[ P03346] interacts with 7 human partners:{Q8IWW1;P67775;P30153;Q13098;Q13227;Q16829;Q7Z699}

22481 Pathogen[ Q85601] interacts with 6 human partners:{Q16829;P30153;Q13098;P67775;Q7Z699;Q13227}

22482 Pathogen[ P14079] interacts with 6 human partners:{Q16829;Q13098;Q7Z699;Q13227;Q8IWW1;P30153}

22483 Pathogen[ P03383] interacts with 3 human partners:{P30153;P67775;Q13227}

22484 Pathogen[ P03410] interacts with 7 human partners:{Q13227;Q7Z699;Q13098;Q8IWW1;Q16829;P30153;P67775}

22485 Pathogen[ P14075] interacts with 4 human partners:{Q8IWW1;Q13227;P67775;P30153}

22486 Pathogen[ P0C206] interacts with 7 human partners:{P30153;Q8IWW1;P67775;Q16829;Q13098;Q13227;Q7Z699}

22487 Pathogen[ P03363] interacts with 6 human partners:{Q13227;Q7Z699;Q16829;P30153;P67775;Q13098}

22488 [Cluster 2045]GO:0032525+P biological\_process [name] somite rostral/caudal axis specification [def] "The establishment, maintenance and elaboration of the rostro-caudal axis of a somite, prior to the morphological formation of a somite boundary." [GOC

22489 Pathogen[ Q2Q067] interacts with 3 human partners:{Q0D2K3;Q13485;Q5TAB7}

22490 Pathogen[ P0C214] interacts with 4 human partners:{P32243;Q5TAB7;Q13485;Q0D2K3}

22491 Pathogen[ P03346] interacts with 4 human partners:{Q13485;Q0D2K3;Q5TAB7;P32243}

22492 Pathogen[ Q85601] interacts with 4 human partners:{P32243;Q0D2K3;Q5TAB7;Q13485}

22493 Pathogen[ P14079] interacts with 3 human partners:{P32243;Q0D2K3;Q5TAB7}

22494 Pathogen[ P03383] interacts with 4 human partners:{Q5TAB7;Q0D2K3;Q13485;P32243}

22495 Pathogen[ P03410] interacts with 4 human partners:{Q5TAB7;Q0D2K3;Q13485;P32243}

22496 Pathogen[ P14075] interacts with 4 human partners:{Q0D2K3;Q5TAB7;Q13485;P32243}

22497 Pathogen[ P0C206] interacts with 4 human partners:{Q0D2K3;P32243;Q13485;Q5TAB7}

22498 Pathogen[ P03363] interacts with 4 human partners:{Q0D2K3;P32243;Q5TAB7;Q13485}

22499 [Cluster 2046]GO:0060699+P biological\_process [name] regulation of endoribonuclease activity [def] "Any process that modulates the rate, frequency or extent of the catalysis of the hydrolysis of ester linkages within ribonucleic acid by creating internal breaks." [GOC

22500 Pathogen[ Q2Q067] interacts with 1 human partners:{P06748}

22501 Pathogen[ P0C214] interacts with 1 human partners:{P06748}

22502 Pathogen[ P03346] interacts with 1 human partners:{P06748}

22503 Pathogen[ Q85601] interacts with 1 human partners:{P06748}

22504 Pathogen[ P14079] interacts with 1 human partners:{P06748}

22505 Pathogen[ P03383] interacts with 1 human partners:{P06748}

22506 Pathogen[ P03410] interacts with 1 human partners:{P06748}

22507 Pathogen[ P14075] interacts with 1 human partners:{P06748}

22508 Pathogen[ P0C206] interacts with 1 human partners:{P06748}

22509 Pathogen[ P03363] interacts with 1 human partners:{P06748}

22510 [Cluster 2047]GO:0016485+P biological\_process [name] protein processing [def] "Any protein maturation process achieved by the cleavage of a peptide bond or bonds within a protein. Protein maturation is the process leading to the attainment of the full functional capacity of a protein." [GOC

22511 Pathogen[ Q2Q067] interacts with 1 human partners:{P42575}

22512 Pathogen[ P0C214] interacts with 4 human partners:{P10124;P42574;P55210;P42575}

22513 Pathogen[ P03346] interacts with 3 human partners:{P42575;P42574;P55210}

22514 Pathogen[ Q85601] interacts with 2 human partners:{P42575;P55210}

22515 Pathogen[ P14079] interacts with 7 human partners:{Q92542;Q9NZ42;P55210;Q4AC94;P10124;Q8WW43;P42575}

22516 Pathogen[ P03383] interacts with 1 human partners:{P10124}

22517 Pathogen[ P03410] interacts with 7 human partners:{P42575;Q4AC94;P10124;Q9NZ42;Q8WW43;Q92542;P55210}

22518 Pathogen[ P14075] interacts with 1 human partners:{P10124}

22519 Pathogen[ P0C206] interacts with 6 human partners:{Q9NZ42;Q92542;P42574;P42575;P55210;P10124}

22520 Pathogen[ P03363] interacts with 1 human partners:{P55210}

22521 [Cluster 2048]GO:0030154+P biological\_process [name] cell differentiation [def] "The process in which relatively unspecialized cells, e.g. embryonic or regenerative cells, acquire specialized structural and/or functional features that characterize the cells, tissues, or organs of the mature organism or some other relatively stable phase of the organism's life history. Differentiation includes the processes involved in commitment

- of a cell to a specific fate and its subsequent development to the mature state." [ISBN  
22522 Pathogen[ Q2Q067] interacts with 123 human  
partners: {Q13562;P49454;Q9H4I2;Q96TC7;O43463;P27540;P25490;Q9H3C7;P02538;P31749;O14786;Q96D98;P15884;Q9NVM4;Q5D1E8;Q05066;Q5TAP6;Q9BUP3;Q8TD31;Q99081;Q14160;O00291;Q8NCR6;Q5VZB9;O95257;Q9HAZ2;O60481;Q9UI56;Q99816;P48380;Q32MQ0;P13349;Q96004;Q9UL49;Q8HW S3;P08151;P37275;O75081;Q9HD15;P49116;Q9UM82;Q9BXL5;Q8IXT2;Q14814;Q96AQ6;Q16626;Q9NX R1;Q92754;P52594;Q86YF9;Q2M1K9;O14896;Q14934;P17036;P17676;Q9Y4Z2;O00458;Q13769;Q96E K5;Q7Z6Z7;Q5BJF6;P15172;Q86VP6;Q9NZP6;Q9P2T0;P78545;P58340;Q9Y3M2;Q99966;P61247;P237 69;Q14997;Q99750;Q96M53;P56693;Q9H9C1;Q9UKY1;Q12834;P28062;Q9H091;Q96EK7;Q9ULH7;P412 12;Q8WVJ9;Q9Y6B2;O75030;Q7Z7C8;O00139;Q9HBH7;Q13363;Q86TG7;Q9UN36;P78395;Q13155;Q076 87;O60248;Q13642;Q12824;P60953;Q96PU4;Q9UJX6;O60869;Q8N6I1;Q02577;Q03060;Q13404;P159 23;Q15834;P61586;Q9H5I1;Q99814;Q16352;Q14781;Q01534;A7MD48;P23409;Q13501;Q02078;P404 24;P49715;Q03112;Q9BXJ9;Q00534}
- 22523 Pathogen[ P0C214] interacts with 125 human  
partners: {P40424;Q9UJX6;Q14997;P61247;P51114;P32243;Q9H5I1;O14786;Q96M53;Q8TD31;Q133 63;P28062;Q8NCR6;P02538;Q12824;P62993;P46379;Q13769;O00458;Q9HD15;Q99081;P15884;P133 49;Q03112;P0CW01;Q9NVM4;P23769;Q9HBH7;P56693;Q16352;P61586;Q9ULP0;P15172;Q96PU4;Q7Z7 C8;Q2M1K9;P60953;Q13404;P37275;O75030;P78395;O00139;Q9H091;Q96EK7;O43463;Q96TC7;Q96Q 05;Q99750;Q8N6I1;Q9P2T0;P0CV99;Q9H4I2;Q9H3C7;P17676;Q9NZP6;Q01534;Q5VZB9;O95257;Q020 78;Q9HCE7;Q13501;Q13642;Q99966;Q14814;Q92754;Q15834;Q00534;Q9BUP3;P49116;Q07687;P159 23;Q9Y3M2;Q96D98;Q9Y6B2;Q12834;Q9HAZ2;Q14896;P0CW00;Q9BXJ9;P07093;Q14934;Q96AQ6;Q141 60;Q5TAP6;Q99816;Q8WVJ9;Q14781;P58340;Q02577;Q03060;Q9UM82;P17036;Q99814;Q86TG7;Q7Z6 Z7;Q5BJF6;Q9UI56;Q96004;P27540;P08151;P48380;P78545;Q5H9L4;Q9ULH7;P52594;Q9H9C1;P162 20;O60869;Q9NXR1;Q86YF9;P49454;Q5D1E8;Q9UN36;Q86VP6;O75081;O60248;O00291;Q8HWS3;P317 49;Q13155;P0CV98;Q32MQ0;A6NKD2;P41212;O60481}
- 22524 Pathogen[ P03346] interacts with 212 human  
partners: {Q99081;P85037;Q14781;Q8NEA9;Q9BZE0;Q3YBM2;O75603;P02538;Q6T4R5;Q01534;Q9Y4 Z2;Q16352;Q02078;P52954;Q86UU5;Q6QHK4;Q99966;Q15834;Q9H091;Q96PU8;P58012;Q14814;Q995 98;Q7RTS3;Q32MQ0;Q01538;Q16626;P16220;Q5TAP6;Q9H2W2;O60248;P17676;Q693B1;Q8NHU6;Q050 66;Q9Y3M2;Q9HD90;O00458;Q9BUP3;Q9ULP0;Q14774;Q9UM82;Q9HBH7;P13349;Q96M53;O60393;Q96A Q6;Q96HZ4;O00139;Q99626;Q2M1K9;P49116;Q7Z7C8;P23769;Q9HD15;P25490;Q9N18;P48380;P159 23;P15172;P56693;Q9UL68;Q8NCR6;Q92858;Q99426;P23409;Q9ULH7;Q86TG7;Q9NXR1;Q99816;Q9P2 T0;Q92886;Q96J94;P56177;P28062;P15173;Q5JSS6;P60953;P62993;Q96QS3;Q12824;Q96TC7;P275 40;P58340;A6NJT0;Q02575;Q96EK7;Q13769;O75030;O43316;A2RU54;O00291;P49715;Q92754;O434 63;Q9UBC0;Q9NZP6;Q96SQ7;Q8TD31;Q12834;P78426;Q13404;A7MD48;Q86YF9;Q14934;Q86W54;Q9BW F3;Q9HB31;O96004;P17036;Q9UJX6;Q13155;P51843;Q6UW56;Q9UL49;Q06710;Q8HWS3;P17542;O604 81;Q9C0J9;Q496M5;Q96D98;O95096;P31749;P78395;O60519;Q9H4I2;Q96Q05;Q8IXT2;Q03112;Q9C0 C7;P46379;P52594;Q8WVJ9;Q02548;Q99750;Q9NVM4;Q5JUK2;Q9BXL5;Q9BXJ9;Q5D1E8;O14896;P372 75;P61247;Q8N6I1;Q8IUQ4;Q99814;Q9Y5R6;A6NI15;P98177;Q5BJF6;Q07820;Q96EK5;Q13642;Q141 90;Q92832;Q9UBR4;Q9H9C1;Q99929;Q5XKR4;Q8TBZ2;Q13363;Q9NTU4;Q14997;Q9NTU4;Q86VP6;Q9UI 56;P40424;P41212;Q03060;Q00534;Q96PU4;P56545;Q9UKY1;Q14160;Q5H9L4;Q9H8V3;P51114;Q9NQ L9;O95257;O60869;P78545;Q9Y6Q3;Q9H5I1;Q5VZB9;Q9UN36;Q9HAZ2;Q01101;Q9H9S0;Q13562;P322 43;Q9H3C7;Q9NQZ3;Q5BKX8;Q02577;Q7Z6Z7;Q13285;Q96NK8;O75081;Q96IK5;O14786;P49454;Q9UJ C3;P15884;Q9HCC6;Q13501;Q8N100;Q9UBP0;P08151;P61586;Q99581;Q9H2A3}
- 22525 Pathogen[ Q85601] interacts with 137 human  
partners: {Q9H5I1;Q99816;Q8IXT2;P49454;P02538;O00458;P08151;O14896;Q02078;P17676;O604 81;O43316;Q9UJX6;P31749;P62993;Q15834;Q9Y4Z2;Q92754;Q01538;P15172;Q9UN36;Q9Y3M2;P170 36;Q13769;Q32MQ0;Q9UBP0;P13349;Q7Z7C8;Q13155;Q2M1K9;Q99966;P0CW01;Q9H3C7;O75030;Q96E K7;Q5H9L4;Q14814;Q03112;Q01534;P23769;Q9NVM4;P78545;Q96PU4;P46379;Q9ULH7;P25490;Q136 42;Q86VP6;P0CV98;Q99814;P27540;Q13363;Q5BJF6;P52594;Q14786;Q96004;O43463;P0CW 00;Q9NZP6;Q12834;Q9H9C1;Q13404;Q9UM82;Q13562;Q14934;Q86W54;Q8N6I1;P41212;Q9H4I2;P234 09;Q9Y6B2;P40424;Q9HD15;Q96D98;Q9Y4I5;P58340;P16220;Q96Q05;P28062;O60248;Q02577;Q997 50;Q9BXJ9;Q5VZB9;O95257;Q14160;Q9HBH7;P61586;P15923;P32243;P56693;P49715;Q9P2T0;P372 75;P60953;A6NKD2;Q7Z6Z7;Q86TG7;O00291;Q96TC7;Q99081;P49116;Q9UKY1;Q96M53;Q00534;P163 52;O60869;P48380;Q496M5;Q9Y6Q3;Q9NXR1;P07093;P17677;Q7Z7L9;P0CV99;Q12824;P61247;P783 95;Q9GZM8;Q9BUP3;Q9H091;Q03060;Q96AQ6;O00139;Q07687;Q8HWS3;Q8TD31;Q86YF9;P15884;Q5D1 E8;Q8WVJ9;P51114;Q13501;O75081;Q9HAZ2;Q14781}
- 22526 Pathogen[ P14079] interacts with 155 human  
partners: {Q96EK7;Q8WYA0;Q32MQ0;Q9UGV2;P08151;Q9HAZ2;Q9H295;Q6T4R5;P27216;Q5D1E8;O002 91;P17677;Q02078;Q99814;Q06413;Q9Y6Q3;Q9UJC3;Q7Z7L9;P13349;Q01534;Q5H9L4;O60481;Q9UM 82;P23409;Q99581;O14896;Q96M53;Q9H9C1;Q8IXT2;Q9NP84;Q9NR12;Q9NVM4;Q13404;Q9BXJ9;Q9UI 56;Q8NHU6;Q03060;P48380;Q01538;Q9ULP0;Q8WVJ9;Q99966;O96004;P52594;Q9P2T0;Q9Y4F9;Q96K 83;O60869;Q14444;Q9H3C7;P15923;Q5TAP6;Q5JSS6;Q9Y4I5;Q9H5I1;O96005;Q9BUP3;Q9NTU4;Q137 69;Q9UKY1;Q86UU5;Q6PUV4;Q8HWS3;Q96D98;Q5BJF6;Q9UL49;Q14997;Q13642;Q14781;A7MD48;P280 62;Q9ULH7;A6NGB9;Q96EK5;Q96PU9;O60248;Q14093;P49715;Q14934;Q99426;Q92832;O00139;Q2M1 K9;P27540;Q86X24;Q9HD15;Q9HBH7;Q9NZP6;P35663;P61586;O43294;Q9H8V3;Q5VZB9;Q96AQ6;Q158 34;Q96Q05;Q86VD1;Q9H091;Q9H3Y8;Q92754;Q8TD31;Q13501;P56693;Q9GZM8;Q9UJX6;P32243;P412 12;O75081;Q8WWZ3;Q16626;Q07687;Q14814;Q86TG7;Q9Y3M2;P62993;O00458;O75293;Q86YF9;Q025 77;Q13155;Q2TAA8;P15884;P78545;Q13164;P78395;P49454;Q99598;Q9BXL5;Q12824;Q99081;P491 16;Q96JY0;Q86VP6;Q9NXR1;Q9Y6B2;O75030;Q99816;P25490;P61247;Q9H4I2;Q96TC7;Q9UN36;O952 57;Q8N6I1;O15259;P23769;Q9BZE0;Q3YBM2;P37275;Q8NCR6;P58340;Q99750;Q7Z5L4;Q9Y2G1;Q9GZ M5}
- 22527 Pathogen[ P03383] interacts with 108 human  
partners: {Q02577;P49454;O00458;Q86UU5;Q16352;Q9NTU4;Q96TC7;Q8HWS3;P16220;P27540;Q128 24;Q14160;P32243;Q32MQ0;Q16626;Q9H4I2;Q8N6I1;O60248;Q9UJX6;P15172;Q8WVJ9;Q07687;P583 40;Q5TAP6;Q13769;P40424;Q3YBM2;P49116;Q9UL49;P31749;O43463;Q96AQ6;P60953;Q5H9L4;P483

- 80;Q9H9C1;P23769;Q5D1E8;P37275;O75030;Q96PU4;P61247;P15923;Q86TG7;Q99816;Q14814;Q149  
97;Q9UN36;Q00534;Q8TD31;Q13155;Q9NZP6;Q9BXL5;Q12834;Q9HAZ2;Q14934;Q96004;Q03112;O002  
91;A7MD48;O75081;Q9HD15;Q9BXJ9;Q9Y6B2;Q96D98;P61586;O14896;P17036;Q13404;P17676;P783  
95;Q9HBH7;Q99081;Q9ULH7;Q86VP6;P02538;Q9Y3M2;Q5BJF6;Q13501;P41212;Q9UI56;Q9P2T0;Q96E  
K5;Q92754;Q99750;Q9BUP3;Q86YF9;P78545;Q96M53;Q01534;Q2M1K9;O60481;O60869;P28062;Q136  
42;Q9UM82;Q9H3C7;P56693;Q8NCR6;Q15834;Q9H5I1;Q9H091;P52594;Q03060;Q13363;O95257;Q020  
78;Q14781}
- 22528 Pathogen[ P03410] interacts with 152 human  
partners: {Q96AQ6;O14786;Q96TC7;Q9UI56;P23409;Q96EK5;P61247;Q03112;A0PJW8;Q9UJC3;P525  
94;Q13155;Q8TD31;Q9P2T0;O75293;A6NGB9;P37275;Q8WVJ9;Q9HAZ2;O00139;O14896;O96004;Q005  
34;Q9NXR1;P17676;O96005;Q9GZM8;Q9H4I2;Q99814;O60481;O15259;Q9Y6Q3;Q9ULH7;Q9Y4I5;Q149  
97;P41212;Q8NCR6;Q9Y3M2;Q6T4R5;Q8N6I1;Q8NHU6;Q14814;Q16352;P78545;Q9UL49;O75030;P158  
84;Q01534;Q9NVM4;Q13501;O43294;Q2M1K9;P31749;Q03060;O00291;Q14160;P15923;P02538;Q5VZ  
B9;Q5TAP6;Q92832;P25490;P17036;P49454;P58340;P27540;Q99081;Q99816;Q9NTU4;Q5H9L4;Q076  
87;Q86YF9;Q9UM82;Q01538;Q9UN36;Q9Y6B2;P35663;Q9Y2G1;P61586;P78395;Q32MQ0;P04553;Q5D1  
E8;Q96K83;Q9HBH7;Q9H5I1;P28062;Q9H3C7;Q9ULP0;Q8WYA0;P48380;Q9BUP3;Q96EK7;Q86VP6;P162  
20;Q15834;P56693;Q9BXL5;Q5BJF6;Q14093;Q13769;Q6PUV4;P13349;Q13642;Q99598;Q12834;P511  
14;Q86TG7;P60953;P32243;P23769;O75081;Q96Q05;O60869;Q7Z7L9;P49116;Q86VD1;A7MD48;Q025  
77;P17677;Q02078;Q9H091;Q9H9C1;O60248;Q3YBM2;Q13404;O43463;Q9H8V3;O95257;Q9NP84;Q147  
81;Q9HD15;Q16626;Q86UU5;Q12824;Q99426;P40424;P62993;Q9UKY1;Q14934;Q8IXT2;Q96M53;Q997  
50;Q9UJX6;Q96D98;Q5JSS6;O00458;Q9NZP6;Q92754;Q8HWS3;Q9BXJ9;Q99966}
- 22529 Pathogen[ P14075] interacts with 112 human  
partners: {P60953;Q14781;Q96AQ6;Q9BUP3;Q9NTU4;Q16352;Q02577;Q13155;Q9H4I2;P40424;O750  
30;O60248;Q8TD31;Q9BXL5;Q14160;Q9UM82;O60481;Q13769;Q9BXJ9;P78545;P78395;P23769;P412  
12;P48380;P15172;Q96PU4;P17036;Q00534;O95257;Q96TC7;Q7Z7C8;Q9H091;P56693;Q9H0C1;Q927  
54;P15923;Q9NZP6;Q13642;Q8WVJ9;O75081;Q07687;Q9HAZ2;P27540;Q9UJX6;Q86UU5;O96004;O002  
91;P49116;Q6T4R5;P31749;Q9H5I1;O00139;Q5BJF6;Q3YBM2;P28062;Q96M53;Q96D98;Q9HBH7;P612  
47;Q9Y6B2;Q9UL49;Q15834;Q8N6I1;Q14934;Q86VP6;Q9UN36;Q99750;O00458;Q01534;P61586;Q5D1  
E8;Q03112;Q02078;Q12824;O14896;Q5H9L4;Q14997;P52594;A7MD48;Q9P2T0;Q32MQ0;P15884;O434  
63;Q13404;Q03060;Q9H3C7;P16220;Q8NCR6;Q13363;Q99816;Q9Y3M2;P17676;P37275;O60869;Q2M1  
K9;Q99081;P02538;P49454;Q16626;P32243;Q14814;Q86YF9;Q9HD15;Q8HWS3;Q9UI56;Q12834;Q135  
01;Q9ULH7;Q86TG7;Q96EK5;P58340;Q5TAP6}
- 22530 Pathogen[ P0C206] interacts with 182 human  
partners: {Q8HWS3;O75293;Q96TC7;Q86VD1;P28062;Q07687;Q13501;Q9BZE0;Q9BXL5;P58340;Q030  
60;O60481;Q96M53;Q32MQ0;Q9C0C7;P31749;O60393;Q01538;P17677;Q9NS18;Q14997;Q9Y6Q3;Q9BU  
P3;Q9HAZ2;O00291;Q9UBP0;Q5BJF6;Q02078;Q9ULP0;Q8N6I1;Q9H4I2;P02538;Q13642;P16220;Q9Y5  
R6;O75030;P25490;Q9NTU4;P78395;Q86YF9;P41212;Q05066;Q9Y4Z2;Q9H091;Q8TD31;Q99598;Q025  
48;Q9Y4I5;O75081;Q8IUQ4;O43463;Q9C0J9;Q96PU8;Q9UL49;Q8NCR6;P23409;Q9UBC0;Q6UW56;P497  
15;Q99816;P56693;Q12824;P49454;P48380;Q8WYA0;P49116;O00458;Q9HD15;P0CV98;Q86TG7;Q8WV  
J9;Q96HZ4;Q14781;Q9GZM8;P62993;P40424;P50461;P61247;O14786;O96004;Q01534;Q927  
54;Q13769;O60248;Q9UM82;Q99426;P51114;A6NKD2;Q5VZB9;Q8IXT2;Q99581;Q03112;Q6093B1;Q990  
81;Q96Q05;Q9NVM4;O95257;P32243;P17676;Q9UI56;P13349;Q3YBM2;Q14160;Q96EK5;Q96AQ6;P159  
23;Q5D1E8;Q16626;P15884;Q6T4R5;Q15834;Q6PUV4;Q5H9L4;P78545;O43294;Q9H5I1;Q9H8V3;Q9HB  
H7;O14896;P60953;O00139;Q2M1K9;O60869;Q9UJX6;Q14934;Q13562;P23769;Q9Y6B2;Q7Z7L9;Q999  
66;Q86W54;A6NGB9;Q96D98;Q13155;P37275;P27540;P15172;A7MD48;Q9NXR1;Q9HS0;Q14814;Q9UB  
R4;Q7Z7C8;P35663;Q9P2T0;P0CW01;Q9NZP6;Q9UN36;Q92832;Q9UJC3;Q99814;Q96K83;Q7Z6Z7;Q86U  
U5;Q13404;Q16352;Q13363;Q02577;P08151;Q96M53;Q5BKK8;Q9BXJ9;Q9H3C7;P46379;Q86VP6;Q9H9  
C1;Q96EK7;Q99750;Q5TAP6;Q12834;O43316;P0CW00;Q9ULH7;Q96PU4;P0CV99;P56177;Q9UKY1;P170  
36;Q5JSS6;Q00534;Q9H2A3}
- 22531 Pathogen[ P03363] interacts with 186 human  
partners: {Q5BJF6;Q92886;P46379;Q96M53;Q9UBC0;Q15834;O75081;P49454;Q9Y4Z2;P02538;Q9BU  
P3;Q9H091;Q16352;Q99598;O14896;P27540;P17676;O60481;Q5JUK2;P49116;Q9H9C1;Q8NHU6;Q7Z3  
Z4;Q99626;Q14781;P56177;O14786;Q9ULP0;P08151;Q9H5I1;P58340;Q8TBZ2;Q03112;Q9BXL5;Q999  
29;Q9HD15;P37275;Q99750;Q6UW56;Q7RTS3;O95257;Q14093;Q14160;Q9HBH7;Q9H2W2;P25490;Q96H  
Z4;Q9UN36;Q9C0J9;Q13769;P56545;P16220;O43316;Q9Y3M2;P32243;Q8N302;Q9NTU4;Q9BW  
F3;Q9Y5R6;Q7L576;Q9UJX6;Q9UGV2;P13349;Q96PU8;Q96TC7;Q13155;Q3YBM2;Q7Z6Z7;Q8N9W6;P159  
23;Q2M1K9;Q9P2T0;Q00534;Q8NCR6;Q92904;Q9C0C7;Q92832;Q05066;Q9NVM4;Q5JSS6;P56693;O750  
30;Q99426;Q14814;A6NJT0;P78545;Q86UU5;Q9BX46;Q32MQ0;Q8IXT2;P31749;Q6T4R5;Q96EK7;Q96J  
Y0;Q7Z7C8;Q96AQ6;Q9Y6Q3;P17036;Q9ULH7;Q5TAP6;Q9HCC6;Q9UKY1;O96004;Q96EK5;Q5XKR4;P511  
14;Q96NK8;Q9UM82;Q9HB31;Q16626;Q99814;Q9UI56;O60869;O60393;Q8NEA9;Q01534;P23409;Q078  
20;Q9C056;O43463;P15884;Q7Z5H3;Q5BKK8;Q96QS3;P40424;Q9H3C7;Q5D1E8;A2RU54;Q13642;Q96J  
94;Q86VP6;Q14934;Q99581;Q99816;Q9NZP6;Q5VZB9;O15259;P61247;Q9Y6B2;Q9NQZ3;Q12834;Q96S  
Q7;Q02548;Q13363;Q13404;A7MD48;P52594;O60248;Q99081;Q86YF9;P48380;Q9NXR1;Q96PU4;O001  
39;Q96D98;Q86W54;Q8N6I1;P41212;Q9NR12;Q9H9S0;Q07687;Q8HWS3;P15172;P60953;Q5H9L4;Q9H4  
I2;Q8TD31;Q9UL49;Q8WVJ9;Q9BZE0;Q9BXJ9;P35663;Q12824;Q86TG7;Q03060;Q9H3U1;O00291;Q693  
B1;Q02577;Q92754;Q9HAZ2;Q9H2A3;Q6QHK4;Q9UJC3;Q02078}
- 22532 [Cluster 2049]GO:0048661+P biological\_process [name] positive regulation of smooth  
muscle cell proliferation [def] "Any process that activates or increases the rate or  
extent of smooth muscle cell proliferation." [CL
- 22533 Pathogen[ Q2Q067] interacts with 4 human partners: {P21980;P51948;P08697;P42224}
- 22534 Pathogen[ P0C214] interacts with 5 human  
partners: {P08697;P42224;P51948;P05412;P21980}
- 22535 Pathogen[ P03346] interacts with 4 human partners: {P21980;P05412;P42224;P51948}
- 22536 Pathogen[ Q85601] interacts with 5 human  
partners: {P51948;P08697;P21980;P05412;P42224}
- 22537 Pathogen[ P14079] interacts with 5 human



partners:{P21980;P42224;P05412;Q99836;P51948}

22538 Pathogen[ P03383] interacts with 4 human partners:{P51948;P08697;P21980;P05412}

22539 Pathogen[ P03410] interacts with 4 human partners:{P08697;P05412;P51948;P21980}

22540 Pathogen[ P14075] interacts with 4 human partners:{P05412;P08697;P21980;P51948}

22541 Pathogen[ P0C206] interacts with 5 human partners:{P21980;P05412;P42224;P08697;P51948}

22542 Pathogen[ P03363] interacts with 1 human partners:{P05412}

22543 [Cluster 2050]GO:0042699+P biological\_process [name] follicle-stimulating hormone signaling pathway [def] "The series of molecular signals mediated by follicle-stimulating hormone." [GOC

22544 Pathogen[ Q2Q067] interacts with 1 human partners:{Q92674}

22545 Pathogen[ P0C214] interacts with 1 human partners:{Q92674}

22546 Pathogen[ P03346] interacts with 1 human partners:{Q92674}

22547 Pathogen[ Q85601] interacts with 1 human partners:{Q92674}

22548 Pathogen[ P14079] interacts with 1 human partners:{Q92674}

22549 Pathogen[ P03383] interacts with 1 human partners:{Q92674}

22550 Pathogen[ P03410] interacts with 1 human partners:{Q92674}

22551 Pathogen[ P14075] interacts with 1 human partners:{Q92674}

22552 Pathogen[ P0C206] interacts with 1 human partners:{Q92674}

22553 Pathogen[ P03363] interacts with 1 human partners:{Q92674}

22554 [Cluster 2051]GO:0042473+P biological\_process [name] outer ear morphogenesis [def] "The process in which the anatomical structures of the outer ear are generated and organized. The outer ear is the part of the ear external to the tympanum (eardrum). It consists of a tube (the external auditory meatus) that directs sound waves on to the tympanum, and may also include the external pinna, which extends beyond the skull." [GOC

22555 Pathogen[ Q2Q067] interacts with 3 human partners:{Q99502;P49639;Q9NSC2}

22556 Pathogen[ P0C214] interacts with 3 human partners:{P49639;Q9NSC2;Q99502}

22557 Pathogen[ P03346] interacts with 4 human partners:{P49639;Q9NSC2;Q99502;O75569}

22558 Pathogen[ Q85601] interacts with 3 human partners:{P49639;Q99502;Q9NSC2}

22559 Pathogen[ P14079] interacts with 5 human partners:{Q99502;O75569;P54826;P49639;Q9NSC2}

22560 Pathogen[ P03383] interacts with 2 human partners:{P49639;Q9NSC2}

22561 Pathogen[ P03410] interacts with 5 human partners:{Q99502;O75569;P49639;P54826;Q9NSC2}

22562 Pathogen[ P14075] interacts with 3 human partners:{Q9NSC2;Q99502;P54826}

22563 Pathogen[ P0C206] interacts with 4 human partners:{Q9NSC2;P49639;Q99502;P54826}

22564 Pathogen[ P03363] interacts with 2 human partners:{P49639;O75569}

22565 [Cluster 2052]GO:0000080+P biological\_process [name] G1 phase of mitotic cell cycle [def] "G1 phase occurring as part of the mitotic cell cycle. G1 phase is the interval between the completion of DNA segregation (mitosis in a mitotic cell cycle) and the beginning of DNA synthesis. A mitotic cell cycle is one which canonically comprises four successive phases called G1, S, G2, and M and includes replication of the genome and the subsequent segregation of chromosomes into daughter cells." [GOC

22566 Pathogen[ Q2Q067] interacts with 34 human partners:{P42773;P24385;P06400;Q01094;Q08999;P61024;O75794;Q9UJX2;Q14186;P51948;O00716;Q13616;Q16254;P50613;Q15329;P38936;Q13309;P28749;P0CG47;Q14209;P42771;P0CG48;P21675;P62987;Q14188;P11802;P46527;P15923;P49918;P63208;P42772;P51946;Q00534;P62979}

22567 Pathogen[ P0C214] interacts with 35 human partners:{P51946;Q16254;Q969Z0;Q08999;P21675;P50613;Q13309;P11802;P61024;P63208;P46527;O00716;P24385;Q9UJX2;O75794;P38936;Q01094;Q00534;Q14186;P15923;P51948;P49918;P0CG48;Q15329;P42771;Q13616;P62987;P42773;P28749;P0CG47;P62979;Q14209;Q14188;P06400;P42772}

22568 Pathogen[ P03346] interacts with 35 human partners:{P55273;P24385;Q08999;Q13616;Q15329;P62987;P06400;Q14188;P42772;P15923;P0CG48;Q14209;P49918;Q16254;P61024;P42771;Q01094;P11802;Q14186;Q13309;Q9UJX2;P51946;P98177;P63208;P42773;P62979;P28749;P21675;P0CG47;Q00534;P38936;P46527;P51948;O00716;O75794}

22569 Pathogen[ Q85601] interacts with 36 human partners:{Q9UJX2;P51946;Q13309;P55273;P24385;Q08999;Q15329;P06400;P42772;Q969Z0;O75794;Q13616;Q14188;P0CG48;P51948;P61024;P11802;Q14186;P63208;P42771;Q16254;Q14209;P50613;P15923;P42773;P62979;P28749;P0CG47;P49918;P21675;P38936;P62987;Q00534;O00716;Q01094;P46527}

22570 Pathogen[ P14079] interacts with 30 human partners:{P0CG48;P28749;Q14186;P51946;Q13309;Q16254;Q15329;Q14209;P62979;P49918;P15923;P62987;P55273;P50613;O00716;P38936;Q969Z0;P46527;P42773;P63208;Q13616;O75794;P0CG47;Q01094;Q14188;P21675;Q08999;P42771;P61024;P51948}

22571 Pathogen[ P03383] interacts with 33 human partners:{Q15329;Q13616;O75794;P61024;O00716;Q14209;P62987;P51948;Q08999;Q01094;P15923;P24385;P63208;Q00534;P11802;P06400;Q969Z0;Q14186;P50613;P42772;P51946;P46527;Q16254;P42771;P28749;Q14188;P62979;P0CG47;P49918;P21675;Q13309;P0CG48;Q9UJX2}

22572 Pathogen[ P03410] interacts with 35 human partners:{P42771;P46527;O75794;P0CG48;Q15329;Q00534;P42772;P21675;P51946;Q16254;P55273;Q08999;P06400;P15923;P62979;Q14188;P50613;O00716;P24385;P63208;P38936;Q13309;P11802;Q14186;P51948;P28749;Q13616;P62987;Q01094;P61024;P49918;Q14209;Q969Z0;P42773;P0CG47}

22573 Pathogen[ P14075] interacts with 33 human

partners:{P21675;Q969Z0;Q08999;P11802;P61024;P50613;Q00534;P42771;O00716;P15923;O75794;Q14209;Q9UJX2;P46527;P63208;Q14186;P0CG48;P62979;P49918;Q16254;P62987;Q13309;Q01094;P06400;P51946;P28749;P0CG47;P42772;P24385;Q15329;Q13616;Q14188;P51948}  
 22574 Pathogen[ POC206] interacts with 36 human  
 partners:{Q14188;P0CG48;Q15329;P61024;O75794;Q13309;Q9UJX2;P42771;Q14186;P42772;Q13616;O00716;Q16254;P28749;Q08999;P42773;Q14209;P50613;P63208;P15923;Q01094;Q969Z0;P62979;P55273;P46527;P38936;P0CG47;P62987;P11802;P21675;P51946;P51948;P24385;Q00534;P06400;P49918}  
 22575 Pathogen[ POC363] interacts with 27 human  
 partners:{Q9UJX2;P49918;Q13309;O75794;P51946;Q16254;P06400;P28749;P15923;Q00534;Q13616;P42772;Q08999;Q01094;P61024;P62987;Q14209;P24385;P21675;Q14186;Q14188;P42773;P11802;O00716;P63208;Q15329;P42771}  
 22576 [Cluster 2053]GO:0060429+P biological\_process [name] epithelium development [def] "The process whose specific outcome is the progression of an epithelium over time, from its formation to the mature structure. An epithelium is a tissue that covers the internal or external surfaces of an anatomical structure." [GOC  
 22577 Pathogen[ Q2Q067] interacts with 2 human partners:{P35680;Q99456}  
 22578 Pathogen[ POC214] interacts with 1 human partners:{Q99456}  
 22579 Pathogen[ POC346] interacts with 2 human partners:{P35680;Q99456}  
 22580 Pathogen[ Q85601] interacts with 2 human partners:{P35680;Q99456}  
 22581 Pathogen[ P14079] interacts with 2 human partners:{Q99456;P35680}  
 22582 Pathogen[ POC383] interacts with 1 human partners:{Q99456}  
 22583 Pathogen[ POC3410] interacts with 2 human partners:{P35680;Q99456}  
 22584 Pathogen[ P14075] interacts with 1 human partners:{Q99456}  
 22585 Pathogen[ POC206] interacts with 2 human partners:{P35680;Q99456}  
 22586 Pathogen[ POC363] interacts with 1 human partners:{Q99456}  
 22587 [Cluster 2054]GO:0071459+P biological\_process [name] protein localization to chromosome, centromeric region [def] "Any process in which a protein is transported to, or maintained at, the centromeric region of a chromosome." [GOC  
 22588 Pathogen[ Q2Q067] interacts with 2 human partners:{P06400;P49450}  
 22589 Pathogen[ POC214] interacts with 2 human partners:{P49450;P06400}  
 22590 Pathogen[ POC346] interacts with 2 human partners:{P06400;P49450}  
 22591 Pathogen[ Q85601] interacts with 2 human partners:{P06400;P49450}  
 22592 Pathogen[ P14079] interacts with 1 human partners:{P49450}  
 22593 Pathogen[ POC383] interacts with 1 human partners:{P06400}  
 22594 Pathogen[ POC3410] interacts with 2 human partners:{P06400;P49450}  
 22595 Pathogen[ P14075] interacts with 1 human partners:{P06400}  
 22596 Pathogen[ POC206] interacts with 2 human partners:{P49450;P06400}  
 22597 Pathogen[ POC363] interacts with 2 human partners:{P06400;P49450}  
 22598 [Cluster 2055]GO:0050905+P biological\_process [name] neuromuscular process [def] "Any process pertaining to the functions of the nervous and muscular systems of an organism." [GOC  
 22599 Pathogen[ Q2Q067] interacts with 2 human partners:{P49639;Q99700}  
 22600 Pathogen[ POC214] interacts with 3 human partners:{P49639;Q99700;P49588}  
 22601 Pathogen[ POC346] interacts with 4 human partners:{P49639;P28358;Q99700;P50542}  
 22602 Pathogen[ Q85601] interacts with 2 human partners:{P49639;Q99700}  
 22603 Pathogen[ P14079] interacts with 5 human  
 partners:{Q99700;Q9UPW5;P50542;P49588;P49639}  
 22604 Pathogen[ POC383] interacts with 2 human partners:{Q99700;P49639}  
 22605 Pathogen[ POC3410] interacts with 5 human  
 partners:{Q99700;Q9UPW5;P49588;P49639;P50542}  
 22606 Pathogen[ P14075] interacts with 1 human partners:{Q99700}  
 22607 Pathogen[ POC206] interacts with 4 human partners:{P49639;P50542;Q99700;Q9UPW5}  
 22608 Pathogen[ POC363] interacts with 3 human partners:{P49639;P28358;Q99700}  
 22609 [Cluster 2056]GO:2000049+P biological\_process [name] positive regulation of cell-cell adhesion mediated by cadherin [def] "Any process that activates or increases the frequency, rate or extent of cell-cell adhesion mediated by cadherin." [GOC  
 22610 Pathogen[ Q2Q067] interacts with 1 human partners:{P08697}  
 22611 Pathogen[ POC214] interacts with 1 human partners:{P08697}  
 22612 Pathogen[ POC346] interacts with 1 human partners:{Q8IWF6}  
 22613 Pathogen[ Q85601] interacts with 1 human partners:{P08697}  
 22614 Pathogen[ P14079] interacts with 1 human partners:{Q8IWF6}  
 22615 Pathogen[ POC383] interacts with 2 human partners:{P08697;Q8IWF6}  
 22616 Pathogen[ POC3410] interacts with 2 human partners:{Q8IWF6;P08697}  
 22617 Pathogen[ P14075] interacts with 2 human partners:{P08697;Q8IWF6}  
 22618 Pathogen[ POC206] interacts with 2 human partners:{Q8IWF6;P08697}  
 22619 Pathogen[ POC363] interacts with 1 human partners:{Q8IWF6}  
 22620 [Cluster 2057]GO:0043922+P biological\_process [name] negative regulation by host of viral transcription [def] "Any process in which a host organism stops, prevents, or reduces the frequency, rate or extent of viral transcription, the synthesis of either RNA on a template of DNA or DNA on a template of RNA." [GOC  
 22621 Pathogen[ Q2Q067] interacts with 6 human  
 partners:{Q9UKI9;Q13148;Q01664;Q13547;Q13127;Q9UID6}  
 22622 Pathogen[ POC214] interacts with 7 human  
 partners:{Q9UID6;Q13547;Q9UKI9;Q13127;P05412;Q13148;Q01664}  
 22623 Pathogen[ POC346] interacts with 7 human

22624 partners:{P05412;Q13148;Q9UKI9;Q13547;Q9UID6;Q01664;Q13127}  
Pathogen[ Q85601] interacts with 7 human

22625 partners:{Q13127;Q13148;Q9UID6;P05412;Q9UKI9;Q13547;Q01664}  
Pathogen[ P14079] interacts with 6 human

22626 partners:{Q13148;Q9UID6;Q01664;Q9UKI9;P05412;Q13127}  
Pathogen[ P03383] interacts with 7 human

22627 partners:{Q9UKI9;Q01664;Q9UID6;Q13547;Q13148;Q13127;P05412}  
Pathogen[ P03410] interacts with 7 human

22628 partners:{Q13148;Q13127;P05412;Q9UKI9;Q13547;Q01664;Q9UID6}  
Pathogen[ P14075] interacts with 7 human

22629 partners:{P05412;Q9UID6;Q13148;Q13547;Q01664;Q13127;Q9UKI9}  
Pathogen[ P0C206] interacts with 7 human

22630 partners:{Q9UID6;Q13127;P05412;Q13547;Q9UKI9;Q13148;Q01664}  
Pathogen[ P03363] interacts with 7 human

22631 partners:{Q13148;Q9UKI9;Q13127;Q13547;P05412;Q9UID6;Q01664}  
[Cluster 2058]GO:0007352+P biological\_process [name] zygotic specification of dorsal/ventral axis [def] "The specification of the dorsal/ventral axis of the embryo, through the products of genes expressed in the zygote." [GOC

22632 Pathogen[ Q2Q067] interacts with 2 human partners:{O43541;Q15796}  
22633 Pathogen[ P0C214] interacts with 2 human partners:{Q15796;O43541}  
22634 Pathogen[ P03346] interacts with 3 human partners:{Q9H2H0;Q15796;O43541}  
22635 Pathogen[ Q85601] interacts with 2 human partners:{O43541;Q15796}  
22636 Pathogen[ P14079] interacts with 1 human partners:{O43541}  
22637 Pathogen[ P03383] interacts with 2 human partners:{O43541;Q15796}  
22638 Pathogen[ P03410] interacts with 2 human partners:{O43541;Q15796}  
22639 Pathogen[ P14075] interacts with 2 human partners:{O43541;Q15796}  
22640 Pathogen[ P0C206] interacts with 3 human partners:{O43541;Q9H2H0;Q15796}  
22641 Pathogen[ P03363] interacts with 2 human partners:{O43541;Q15796}

22642 [Cluster 2059]GO:0016070+P biological\_process [name] RNA metabolic process [def] "The cellular chemical reactions and pathways involving RNA, ribonucleic acid, one of the two main type of nucleic acid, consisting of a long, unbranched macromolecule formed from ribonucleotides joined in 3',5'-phosphodiester linkage." [ISBN

22643 Pathogen[ Q2Q067] interacts with 232 human  
partners:{P23588;Q92900;P61313;P30153;Q99460;P62701;O75832;P48556;O15234;P47914;Q8IU60;P31749;P40306;P62312;Q9Y333;P46779;O14744;Q9NQT4;P55036;Q9UPR3;A9UHW6;P63104;P39687;Q96LI5;Q02543;P61326;O00231;Q8IZH2;P26373;O00233;P62750;Q8IZD4;P63151;P62273;P51665;Q9Y2L1;Q9NPI6;P62318;Q9BQA1;A5YKK6;P15880;P40429;Q9H074;Q06265;P28072;Q9P0M2;Q96F86;P46782;P35268;Q01105;P22090;P46778;Q9UK45;Q96C86;Q13868;P38919;Q14103;A5LHX3;P62888;P32969;P62277;P62241;Q13200;P62244;P05387;Q92945;P25787;P62861;P08107;P42766;Q06323;P67775;P04792;P05386;O75175;Q9Y3B2;Q7L1Q6;Q9NPD3;Q86TB9;Q9BZI7;Q92973;Q14240;Q9UNX3;Q504Q3;P30050;P54105;P28065;O14818;P26196;P18077;P62891;P62314;P11142;Q9HAU5;P61927;Q5RKV6;P39023;Q9UHI6;P62081;P61247;P62304;O14980;Q9UIV1;P61254;P62249;P62280;O43310;Q14997;P83731;P60900;Q9UL46;P61289;P62263;Q86US8;Q9UKZ1;P60866;P62906;Q15024;O95628;Q9H0W8;Q02878;P46777;P28062;P62899;O43251;P78344;P08708;Q9UNM6;P08865;Q07020;P62913;P25788;Q8WDX5;P62269;Q92530;P14678;Q9Y5S9;P62424;P25786;P25786;Q96RS0;Q8TEQ6;P62829;O15116;P46783;Q8IYD1;P57678;P62495;P36578;Q9C0C2;P62857;Q16401;Q969H6;O00232;P62847;P49207;Q13144;P23396;Q09161;P28074;P25789;Q92540;Q9HCG8;P0CG47;P63173;P18621;Q9NZN8;P31946;P52298;P20618;P0CG48;P62316;Q92600;Q99700;P28070;P39019;P28066;Q5C9Z4;P61353;Q04637;Q99436;Q8TAA3;P62266;P42677;Q9Y3U8;P62306;P63220;Q9H840;P62841;P83881;P62987;P26651;O43242;P06730;O95453;P49721;O75792;P49720;P50914;P46776;Q8ND04;Q16637;P11940;P35658;P62854;P62308;P62753;O14893;P05388;P60842;P18124;P62851;Q9ULM6;P25398;Q15759;Q9Y4Z0;P62910;Q92901;P46781;Q9H814;P62310;P27635;Q07352;Q96B26;P61513;O95149;Q9Y4Y9;P62945;Q9H1J1;Q6P2E9;P62979}

22644 Pathogen[ P0C214] interacts with 230 human  
partners:{P62861;Q9BZI7;P84098;Q14997;Q6RFH5;P61247;P51665;Q16637;P62312;O15234;Q9NZN8;O15116;P62316;P25789;Q09161;Q96C86;P26196;P15880;P55036;P62081;P42766;P62913;P22090;Q15024;Q92901;P28062;P62249;Q6P2E9;P62899;O95453;A5LHX3;P62854;P28065;P39019;P62263;P60842;P30153;Q969H6;Q9NPI6;Q9Y5S9;P62273;O95628;P23396;Q92900;P18077;P05388;Q9H814;Q9Y2L1;P62847;P23588;O14818;P14678;Q9C0C2;P62829;Q504Q3;P26373;P62306;P27635;P57678;O43242;Q9Y3B2;P46778;Q9P0M2;P04792;P61513;P78344;P83881;P48556;P40306;P62701;P49207;P11940;P63220;Q5RKV6;Q92540;P08865;Q8WDX5;P32969;Q02543;Q13200;P62266;Q9HAU5;O95149;P62308;Q9Y4Z0;Q9UK45;O00232;O75792;Q01105;Q99700;P62277;Q9UIV1;Q9Y4Y9;P50914;Q8IZH2;P46779;Q07352;Q9Y333;Q99460;P52298;P28066;O75832;P40429;Q9ULM6;P62314;Q86US8;P47914;P63173;O14980;Q9NPD3;P46783;Q14103;P62310;P49720;P28074;P62280;P61326;A5YKK6;Q8TEQ6;Q9UNX3;Q9CG48;Q9UL46;P38919;Q9Y3U8;Q9H074;P30050;P62753;P62910;Q8ND04;Q13144;P62891;A9UHW6;P35658;O43310;Q14240;P63151;Q9UPR3;P25788;P62495;P62269;Q9UNM6;P67775;Q86TB9;O00231;Q9UHI6;P62318;Q06323;P46781;Q13868;Q7L1Q6;P25786;Q96RS0;Q8IYD1;Q8IU60;P61254;P28072;P62841;Q8TAA3;Q9H840;Q15287;P62244;P26651;P62987;Q04637;P62304;Q07020;P42677;P62945;P46776;Q99436;Q15759;P0CG47;P25787;P62241;P46777;Q9HCG8;O14893;P83731;Q9UKZ1;Q92973;Q9UFF9;P35268;P62424;P60866;P62857;Q92600;P35998;P60900;P61313;P08708;Q92945;P05387;P25398;O00233;Q9H0W8;Q5C9Z4;O43251;Q96LI5;P61927;P31946;P62750;P62979;P05386;Q06265;P08107;P62851;P06730;P46782;O75175;P39687;Q92530;Q15008;P18124;Q9NQT4;Q96F86;P28070;Q96B26;P31749;P61353;P36578;P20618;P49721;Q16401;P18621;P17980;P62906;Q8IZD4;P11142;Q02878;Q9H1J1}

22645 Pathogen[ P03346] interacts with 237 human  
partners:{P08107;Q9UPR3;Q9Y5S9;P54105;Q9BZI7;P25787;P05387;P46779;Q5RKV6;O15234;P280

70;Q504Q3;Q9ULM6;Q9P0M2;Q09161;P63173;P25789;P55036;P06730;P62917;P62249;P62913;P62861;Q9NPI6;P62277;Q02878;Q95149;Q99460;Q86US8;Q9UIV1;Q96C86;O75175;Q9UL46;P62280;P39023;Q9H9A5;Q9BQA1;P62304;P62987;P61927;Q9UNX3;P28072;Q9UKZ1;P62857;P25788;P28074;P49721;Q9Y4Y9;Q01105;Q95628;O14818;P46778;P49207;Q99436;Q9H814;P0CG48;P62266;Q8WXD5;Q14744;Q16401;A5LHX3;Q969H6;P78344;P61254;P38919;P62495;P11142;P28062;P11940;P62424;P62273;P67775;P83731;Q8ND04;P60866;Q92945;Q96B26;P20618;P62899;P35658;P52298;O00232;P60842;Q9Y3B2;A5YKK6;Q9Y333;P35268;P62891;P68708;Q8IZH2;Q15024;Q9NZN8;Q16637;O95453;P30153;Q14103;O75832;P46782;P61353;O00233;Q8IU60;P62854;Q9Y3U8;P62318;Q99700;Q86TB9;P47914;O14980;Q92973;P08865;A9UHW6;P31749;P61313;Q9H074;P25398;Q9Y4Z0;Q9HCG8;P49720;P28065;P61513;Q6P2E9;P62306;P05388;Q9UHI6;P62269;P60900;Q7L1Q6;Q02543;P42766;P62081;Q9Y2L1;P25786;P61247;O00231;Q14240;Q96RS0;Q8TEQ6;P18621;Q8IYD1;P46781;P61326;Q9HAU5;P39687;P84098;O43251;Q9NQT5;P15880;O15116;Q92540;Q07352;P61289;P50914;Q9C0C2;P62829;P62979;P28066;Q9UNM6;P39019;P23588;P62314;P23396;P42677;Q15287;O43310;P62750;P31946;P62701;Q8TAA3;P30050;P63104;Q15759;P14678;P62910;P0CG47;P36578;P26196;P62847;Q14997;P57678;Q6RFH5;Q13200;P48556;P62851;Q9H0W8;P22090;Q04637;O14893;P51665;Q8IZD4;P46777;Q06265;Q9UFF9;Q07020;P62263;P62841;P83881;P62316;Q06323;P26651;P05386;Q92900;P18077;Q13144;P46776;P62241;Q92530;Q9NQT4;P62308;P62312;P62753;Q9NPD3;Q96F86;Q96LI5;O43242;P62945;P62310;Q9UK45;P04792;Q92901;P32969;P26373;P18124;P40306;P40429;Q13868;P27635;P46783;P62906;Q9H840;Q5C9Z4;Q92600;P63151;P62244;O75792;P62888;Q9H1J1;P63220}

22646 Pathogen[ Q85601] interacts with 229 human

partners: {P46783;P32969;P28066;Q9BZL7;Q9UNM6;P61513;P60900;Q5RKV6;P26373;O15234;P62857;Q6P2E9;P62244;Q9BQA1;P63104;P62913;P08107;P55036;P31946;Q9NPD3;P62854;P31749;P62081;Q9NPI6;P61353;Q95149;P62891;P46776;P18077;P25787;P61313;Q5C9Z4;P05388;P63151;P62495;P61289;P06730;P62304;Q9H0W8;Q14240;Q92540;Q9UKZ1;P63173;P25788;P23588;P39687;Q14103;O15116;Q01105;P23396;P62273;Q07352;P46778;P62829;O75832;P30050;P62753;Q13868;P27635;P61326;P15287;Q969H6;Q04637;P15880;P83881;Q07020;P30153;P39019;P57592;Q9UIV1;Q9Y3U8;P62701;P62241;P62424;P0CG48;P83731;Q9NZN8;P62899;Q9UFF9;Q13144;P62945;Q9UK45;O14744;P62316;Q92600;Q504Q3;P62263;Q9Y2L1;P62861;Q02878;Q09161;Q8IZH2;Q86TB9;P39023;P38919;P61254;Q96C86;P26651;P14678;P25789;O00233;P49207;P11940;P20618;P62910;Q96LI5;Q9H814;P62310;P62249;P62280;P62314;P62306;Q9HAU5;P47914;Q8TEQ6;P84098;P40306;P08708;Q92973;Q9Y4Z0;Q9NQT4;P49720;Q9Y3B2;A5YKK6;Q95628;O95453;P62318;P42766;P28062;P11142;Q9UIV1;P49721;P62269;P62312;P54105;Q15024;P25786;Q8IZD4;Q96RS0;Q9ULM6;P18621;Q8IYD1;Q8ND04;P05387;P78344;P28072;Q9UNX3;P60842;Q13200;P62277;Q9H074;Q9C0C2;P28065;P35268;O14980;P67775;Q06265;P62979;Q99436;P62847;P28072;P35658;P26196;Q86US8;Q9P0M2;P42677;P63220;Q8TAA3;Q9UL46;Q99460;O00231;Q15759;P0CG47;Q9UPR3;P46782;P04792;Q6RFH5;P48556;P46779;A9UHW6;P62750;P62851;Q92945;O14893;P62841;P28074;Q96F86;P62308;P52298;Q92530;P62987;P22090;Q9Y333;Q9HCG8;A5LHX3;P61927;P36578;Q06323;P05386;Q92900;Q16637;O43310;Q7L1Q6;O75175;P08865;P61247;O14818;Q99700;Q96B26;P46777;P62917;Q16401;Q92901;P18124;P46781;P25398;P60866;Q9Y5S9;Q02543;P62906;P50914;Q8WXD5;Q9H840;P62266;Q8IU60;P40429;P62888;Q9H1J1;Q9Y4Y9}

22647 Pathogen[ P14079] interacts with 232 human

partners: {Q9Y3U8;P27635;P84098;P46779;P28065;Q99436;Q9Y333;Q01105;P62333;O95628;P26373;P57678;A9UHW6;Q15287;P48556;Q96RS0;P60842;Q9Y3B2;P23396;Q8IZD4;P11142;Q8TEQ6;P0CG48;P40429;Q92600;P06730;P18621;O14893;P83881;Q9H0W8;Q14103;Q8IU60;Q99700;Q9UNX3;P46781;P83731;P61513;P62847;Q15024;P40306;Q9UK45;P62753;P52298;P35658;Q9P0M2;Q9NPI6;P28074;P39023;Q9H1J1;O00232;P62273;O75792;Q9Y5S9;O43432;P25398;Q9UKZ1;P62495;Q86TB9;Q96LI5;Q92540;P18077;P49720;O00487;Q9NQT4;P25787;Q13868;O75832;P46783;Q86US8;Q9NPD3;Q9H840;P61254;P50914;Q96C86;A5LHX3;O15116;Q9H074;P62312;P62979;O00233;Q6P2E9;P62841;P18124;Q9UHI6;Q14240;P35998;A5YKK6;P62314;P42766;P61289;O95453;P63151;P62266;O95149;P46782;P62987;Q13144;P62241;P51665;Q8IYD1;P20618;P78344;P23588;P32969;P63104;P22090;P62306;P62829;P14678;Q8TAA3;P60866;P62854;Q07020;P39019;Q9C0C2;O14744;P63220;P61326;Q8IZH2;Q16637;Q14997;P49207;P62244;P28062;P60900;P62263;Q02543;P62424;Q92901;P62277;Q9BZL7;P11940;P62750;P62910;Q9BQA1;P63173;Q9Y4Z0;P26196;P31946;Q8ND04;Q5RKV6;Q15759;P46778;Q96F86;P08107;Q92945;Q9UNM6;P08708;Q92973;Q99460;P36578;O43310;P62308;O75175;Q9UFF9;O14818;P49721;P62304;Q5C9Z4;Q96B70;P62906;Q9HAU5;Q9Y2L1;Q92530;P62316;P47914;P62280;P62310;P62899;P61353;P62081;P62945;Q9UIV1;P46777;P42677;P30050;P15880;Q06323;P62891;Q9HCG8;P62191;Q9H9A5;Q92900;Q96B26;P62888;P08865;Q9UPR3;P61927;P62917;Q15008;Q9ULM6;P30153;P46778;P62249;P43686;O43242;P25788;Q7L1Q6;Q9NZN8;O00231;P05386;P28066;P35268;Q9UL46;P04792;P62913;P05387;P61247;P54105;P62318;P0CG47;P62269;Q9Y4Y9;P62701;Q504Q3;Q06265;P61313;O15234;Q16401;Q8WXD5;P17980;P62851;Q07352;P28072;P39687;Q09161;P05388;Q04637;P62857;P62861;Q9H814}

22648 Pathogen[ P03383] interacts with 223 human

partners: {P08107;P42766;P36578;Q06265;P05388;P62266;P39019;P26373;O15234;Q9Y2L1;Q15287;Q8ND04;Q9BQA1;P62913;P62945;Q01105;P55036;P62854;P40429;P62987;P62891;P25398;Q9H840;P62280;P62318;Q07020;Q8IU60;P62312;P25789;P62750;P54105;P60900;P05387;P62249;P62888;P62899;P31946;O75792;Q969H6;P61927;Q9H0W8;P46777;Q9Y5S9;P46779;P49207;P31749;P62316;A9UHW6;Q99700;P83731;P62424;P40306;O00233;P18124;P46778;Q92901;P62753;P62304;P61326;Q6P2E9;P42677;Q8WXD5;P61247;P38919;Q9Y4Y9;P49721;Q06323;P83881;Q9UFF9;P30153;P47914;P04792;Q9C0C2;Q14997;P67775;P26196;P11940;P62917;P62273;Q07352;Q9UNX3;P20618;P30050;Q9Y3B2;O14744;P84098;P32969;Q09161;O95628;Q9UPR3;O75832;P62277;Q13144;P18077;P23588;P06730;P63173;Q16637;P62081;P62314;P62310;Q92945;P39687;P63104;Q9HAU5;Q8TEQ6;O14893;Q92973;P61313;O14980;P08865;Q9NPD3;P62851;P62495;Q86US8;Q9NQT4;Q9NPI6;P46782;Q14103;A5YKK6;Q9UL46;O95149;P62269;Q9UNM6;P63220;Q02543;P62244;P14678;Q02878;Q9Y333;Q9UIV1;P25786;Q99460;Q15759;Q96RS0;Q86TB9;Q8IYD1;P11142;Q92600;P78344;P28072;Q96B26;P62910;P27635;Q13200;Q9ULM6;Q9H074;P28065;Q8IZD4;P62857;P28066;P26651;P52298;P35658;P62906;Q9Y4Z0;P46783;Q9NZN8;Q9Y3U8;P60866;Q04637;Q9UK45;Q5RKV6;Q96C86;P61254;Q16401;P629

- 79;O00231;P0CG47;P62241;P46781;P39023;P57678;Q9UKZ1;P0CG48;O43310;P28074;P62841;Q96F86;P62308;Q92530;P49720;Q8TAA3;P61289;P22090;Q92540;P62701;P62829;O15116;P62263;P28062;P62847;Q7L1Q6;P35268;P05386;P50914;O95453;P48556;O14818;O75175;Q9HCG8;Q92900;P62861;Q13868;Q99436;P18621;Q96LI5;P46776;P15880;P23396;Q15024;P28070;P61513;Q9H814;P25787;Q5C9Z4;P62306;P08708;P25788;Q9BZI7;Q9H1J1;P61353;Q6P2E9}
- 22649 Pathogen[ P03410] interacts with 237 human partners: {Q96LI5;Q99700;Q92540;P62861;P05386;Q8IU60;P28070;Q9Y2L1;Q92945;Q02543;P61247;P62241;P62829;P49207;P26373;Q9NZN8;P55036;Q9RS0;Q9Y4Y9;P61513;Q8WXD5;P0CG48;O14893;Q9UFF9;P61326;Q14103;P62304;P62899;O15234;Q95628;P62244;P62913;P25786;Q9H840;Q02878;Q15008;Q92901;Q92900;Q16401;P11940;P15880;P62306;P46777;P46776;P62841;P54105;P30050;Q15287;P60900;P62310;P05388;Q14997;P06730;Q9ULM6;Q9UPR3;P35998;Q9NPI6;P46781;Q99460;P18124;Q9Y5S9;Q06265;O00233;Q9C0C2;O75792;Q5RKV6;Q8TEQ6;Q9Y333;O00232;P62269;Q5C9Z4;Q7L1Q6;Q07020;Q13868;P63220;P62910;P62847;P62906;P11142;P39687;Q8TAA3;P31749;P04792;P23396;P18621;P48556;P49721;P62266;Q9BQA1;P62249;Q01105;P63151;P62308;P14678;P63173;P62316;P50914;Q9HAU5;P62280;O43432;A5LHX3;P22090;P26651;P61313;Q9UIV1;P62979;Q9H1J1;Q9H9A5;Q99436;P62701;Q9BZI7;P62750;Q9H074;P08865;Q6RFH5;P40306;Q9UNX3;Q06323;P62277;Q8IZH2;P36578;P18077;Q9P0M2;Q8IZD4;P25398;Q96B26;Q13200;Q9H814;Q96F86;P25787;P61927;P84098;A9UHW6;P62854;O95453;Q6P2E9;P62273;Q96B70;P35658;P08107;P52298;P62081;Q16637;P46783;P62495;Q9UKZ1;P62314;Q92973;O43310;Q15024;Q9Y3U8;P28062;P51665;P08708;P46782;P32969;O14818;P60842;O75175;P38919;Q9NQT4;O00231;Q8ND04;Q9UNM6;P46779;Q86US8;P63104;P27635;P25789;P49720;Q8IYD1;Q9Y4Z0;P30153;P62987;Q86TB9;P57678;P62857;P62263;P62424;P62888;P61254;Q09161;P46778;Q92600;P28072;P62945;P05387;Q9NPD3;P42766;O14744;O15116;P39019;P62312;P47914;Q969H6;A5YKK6;Q9H0W8;P40429;Q04637;P39023;P25788;Q96C86;P62917;P62851;P67775;P83731;Q9UHI6;P28066;P35268;Q504Q3;P61353;Q9UK45;P62891;P28065;O43242;P0CG47;Q07352;P62753;P78344;P23588;P17980;P31946;O75832;O14980;P20618;Q14240;Q9UL46;P28074;P61289;P83881;P60866;O95149;Q13144;P42677;Q9HCG8;Q9Y3B2;P62318}
- 22650 Pathogen[ P14075] interacts with 222 human partners: {O95453;Q6P2E9;P42766;Q8TEQ6;P49207;O15234;P62857;P62304;P46781;P63220;P54105;P32969;Q9UK45;Q09161;P62316;Q9H814;P62495;P55036;P25788;P42677;P62913;Q92900;P22090;P11142;Q02878;Q8WXD5;P28066;P62277;Q9UPR3;P62851;Q06323;O75832;Q15759;Q14103;Q9ULM6;P23588;P08865;Q9BQA1;Q8TAA3;Q9UKZ1;Q9NPD3;P60900;P62244;P61326;O00233;P08708;Q9UL46;P57678;Q9Y4Z0;P26196;P49720;P61254;P46778;P26651;Q92600;Q92945;Q92973;P05388;P78344;P83881;P46777;Q9H840;Q9Y3U8;P04792;P62249;P39687;O75175;Q9H074;Q13200;P48556;P06730;P62306;Q16401;Q9NPI6;P62081;P62308;P62750;P18621;Q96LI5;Q8IU60;P35658;Q9NZN8;Q01105;Q02543;P28070;P18124;Q9UNX3;P25398;Q9HCG8;P49721;Q9Y2L1;A9UHW6;Q13868;P62312;O00231;Q16637;Q92530;Q9NQT4;P11940;O14980;P63173;Q95628;P30050;Q9UHI6;P31749;P0CG48;Q86US8;Q8IZD4;P62979;P83731;P84098;P62318;P28062;O15116;P28074;O14744;P61247;P62753;P46782;P62891;P62861;P28065;P18077;P46779;P62917;P39023;Q15287;Q04637;P50914;P62269;P62847;P62910;P62273;Q86TB9;Q5RKV6;P40429;P23396;P62241;P25786;P15880;Q96RS0;O14818;P62987;Q8IYD1;P63104;Q9HAU5;Q7L1Q6;P28072;Q96B26;P62841;Q9Y333;P36578;P62266;Q07352;Q95149;P67775;P30153;Q14997;P61513;P61313;P27635;P14678;O75792;P62888;O43310;Q9UFF9;Q92901;P0CG47;P25787;Q5C9Z4;P08107;Q9Y5S9;P35268;Q96C86;P62945;P46776;Q9H0W8;Q15024;P31946;P20618;Q99700;P46783;P62701;Q13144;P62899;Q9C0C2;P47914;Q9UNM6;O14893;P62906;P62314;P38919;Q9Y4Y9;Q9UIV1;P61289;P05386;P40306;P61353;P39019;P62424;Q99436;Q92540;A5YKK6;Q06265;P60842;P62280;Q9Y3B2;Q96F86;Q8ND04;Q07020;P62263;P62854;P60866;P26373;P05387;P62310;P52298;P25789;Q969H6;Q9BZI7;Q9H1J1;P61927}
- 22651 Pathogen[ P0C206] interacts with 233 human partners: {P61289;A9UHW6;Q15287;P40429;Q9UFF9;P61313;Q99436;P28062;Q96RS0;Q9UNM6;P0CG48;Q9H074;Q14103;P27635;P14678;O75832;Q9BZI7;Q504Q3;P18124;P39687;O95149;Q86TB9;P52298;O95453;P31749;P62854;P40306;P28065;Q14997;Q9H840;P61326;P49207;P26651;Q8IZH2;Q9BQA1;Q96C86;P55036;P62081;Q09161;P30050;P25786;P30153;Q8WXD5;P25788;Q9NPD3;P62241;Q5RKV6;P54105;P62304;P62244;O14744;P25787;P50914;Q13868;Q9NZN8;P08865;Q9UIV1;P62750;Q06323;P18621;Q96LI5;P46781;P62266;Q02543;Q8TEQ6;P49720;Q07020;P83881;Q8IYD1;P46778;P26196;O75175;P63151;P62263;O00232;P62273;Q9NPI6;P62314;P62316;P60900;Q02878;P04792;P62495;P62280;P67775;Q96B26;P62857;P62851;O43242;P62910;Q9H9A5;Q92973;Q9Y4Y9;P46782;O95628;A5LHX3;P06730;Q9Y4Z0;P61247;P31946;Q13144;Q969H6;P18077;P62913;P61927;P25789;Q9Y333;P61353;P62888;P63104;Q8IZD4;P36578;Q9H814;Q9UK45;P62861;Q86US8;Q8ND04;P35268;P23396;P39023;Q9H0W8;P20618;Q6RFH5;Q99700;P32969;Q06265;Q13200;Q8TAA3;P62701;P28070;Q9P0M2;Q6P2E9;P05386;Q96F86;P22090;P84098;P62945;Q99460;O75792;P26373;P46777;P05388;P62979;P62318;Q15024;O15234;O14893;P28066;P62899;Q5C9Z4;P08107;A5YKK6;P83731;Q9Y2L1;P39019;Q92901;P05387;O14818;P46783;P42766;Q9UPR3;P60866;Q14240;Q9UKZ1;Q92600;P62306;P62841;P0CG47;Q9Y3B2;Q9C0C2;Q9HAU5;Q9HCG8;P28072;Q7L1Q6;Q9UNX3;P23588;P61513;P78344;Q92900;P28074;P62277;P46776;Q92530;Q9UHI6;P62906;P62312;Q04637;Q07352;P49721;P63173;Q92945;P62987;Q9NQT4;P38919;Q16637;P62308;P62891;P62269;P62753;P46779;Q9UL46;O43310;P63220;P62310;P60842;Q92540;P15880;Q9ULM6;P25398;P08708;Q01105;Q15759;P11940;P11142;Q8IU60;O00233;P47914;P48556;P35658;P62847;Q16401;P61254;O15116;Q9Y5S9;O00231;P42677;P62829;P62249;P62424;Q9H1J1;Q9Y3U8;P62917;P57678}
- 22652 Pathogen[ P03363] interacts with 198 human partners: {Q96B26;Q504Q3;P62913;Q9NQT4;P62314;Q96RS0;O14744;P18621;P05386;Q9Y4Y9;Q5RKV6;Q92973;Q9Y4Z0;P62750;P23396;P42677;P63173;P08865;P38919;P62847;P18077;P05387;Q5C9Z4;O95628;O95453;P84098;P42766;O43310;P62249;Q92900;P05388;Q9UHI6;P36578;P62753;P62312;Q92530;Q8ND04;P62081;P62910;A9UHW6;P61513;P46776;Q15024;A5YKK6;O14980;Q86US8;Q9Y3B2;P61254;P62273;Q6P2E9;P32969;Q92901;Q8IYD1;P17980;P61927;P31946;Q9UPR3;P62891;P62318;P61353;P61289;P62304;P08708;Q9UKZ1;P15880;P11940;O14893;Q8IZD4;Q9NZN8;Q9NPD3;P23588;P39687;Q7L1Q6;P62495;P61326;Q9P0M2;P62306;O15116;P26373;O75792;P54105;Q15287;P57678;Q9BQA1;P83881;P63151;P63104;Q9ULM6;P22090;Q07352;Q9Y333;P62861;P62841;P62316;Q9UN

X3;Q96F86;P30050;Q9H0W8;P62829;P08107;Q14240;P46782;Q92945;P35268;Q15717;P31749;Q9C0  
C2;P46781;P50914;Q8WXD5;Q9HAU5;P63220;Q9Y2L1;P61313;P39019;P52298;P26196;P35658;P467  
79;Q02543;P46777;Q9H840;P62987;Q92600;Q96LI5;Q13868;P25398;Q14103;P83731;P62851;P622  
80;Q9Y3U8;P62888;Q75175;P62310;P60842;Q9NQT5;P26651;Q9UIV1;Q86TB9;P62244;P62277;P629  
06;Q92540;Q9UK45;Q969H6;P62266;Q9BZI7;P62945;P49207;P62241;Q9HCG8;P62424;P60866;P612  
47;Q8TEQ6;Q13144;Q9UFF9;P62308;P62899;P16637;P62857;Q99700;Q02878;P78344;Q07020;P390  
23;Q01105;Q96C86;P30153;P14678;P62854;P62917;P18124;P40429;P67775;Q6RFH5;P27635;P067  
30;P62263;Q95149;P04792;P47914;Q9NPI6;P62701;Q9Y5S9;Q9H074;Q9H814;Q8IZH2;O43251;P111  
42;P62269;Q8IU60;Q09161;P46783;Q04637;Q9H1J1;O15234}

22653 [Cluster 2060]GO:0035458+P biological\_process [name] cellular response to  
interferon-beta [def] "Any process that results in a change in state or activity of a  
cell (in terms of movement, secretion, enzyme production, gene expression, etc.) as a  
result of an interferon-beta stimulus. Interferon-beta is a type I interferon." [GOC

22654 Pathogen[ Q2Q067] interacts with 2 human partners:{Q8TCS8;O14862}

22655 Pathogen[ P0C214] interacts with 3 human partners:{Q8TCS8;Q86WV6;O14862}

22656 Pathogen[ P03346] interacts with 2 human partners:{Q8TCS8;O14862}

22657 Pathogen[ Q85601] interacts with 3 human partners:{Q86WV6;Q8TCS8;O14862}

22658 Pathogen[ P14079] interacts with 4 human partners:{Q86WV6;Q9NSU2;O14862;Q8TCS8}

22659 Pathogen[ P03383] interacts with 2 human partners:{O14862;Q8TCS8}

22660 Pathogen[ P03410] interacts with 4 human partners:{Q8TCS8;O14862;Q9NSU2;Q86WV6}

22661 Pathogen[ P14075] interacts with 2 human partners:{O14862;Q8TCS8}

22662 Pathogen[ P0C206] interacts with 4 human partners:{Q9NSU2;Q8TCS8;O14862;Q86WV6}

22663 Pathogen[ P03363] interacts with 1 human partners:{O14862}

22664 [Cluster 2061]GO:0040034+P biological\_process [name] regulation of development,  
heterochronic [def] "Any process that modulates the rate, frequency or extent of the  
progression an integrated living unit

22665 Pathogen[ Q2Q067] interacts with 1 human partners:{P05114}

22666 Pathogen[ P0C214] interacts with 1 human partners:{P05114}

22667 Pathogen[ P03346] interacts with 1 human partners:{P05114}

22668 Pathogen[ Q85601] interacts with 1 human partners:{P05114}

22669 Pathogen[ P14079] interacts with 1 human partners:{P05114}

22670 Pathogen[ P03383] interacts with 1 human partners:{P05114}

22671 Pathogen[ P03410] interacts with 1 human partners:{P05114}

22672 Pathogen[ P14075] interacts with 1 human partners:{P05114}

22673 Pathogen[ P0C206] interacts with 1 human partners:{P05114}

22674 Pathogen[ P03363] interacts with 1 human partners:{P05114}

22675 [Cluster 2062]GO:0045664+P biological\_process [name] regulation of neuron  
differentiation [def] "Any process that modulates the frequency, rate or extent of  
neuron differentiation." [GOC

22676 Pathogen[ Q2Q067] interacts with 8 human  
partners:{Q99502;P54259;P61981;P30279;Q96SN8;Q04917;Q16612;Q96JB5}

22677 Pathogen[ P0C214] interacts with 8 human  
partners:{Q04917;Q96SN8;P30279;P61981;Q16612;Q96JB5;P54259;Q99502}

22678 Pathogen[ P03346] interacts with 10 human  
partners:{P30279;Q92858;Q99502;Q04917;Q96SN8;Q96JB5;Q15475;P61981;Q16612;P54259}

22679 Pathogen[ Q85601] interacts with 8 human  
partners:{P54259;Q16612;P61981;Q96SN8;Q04917;Q96JB5;Q99502;P30279}

22680 Pathogen[ P14079] interacts with 9 human  
partners:{Q99502;Q04917;Q15078;P61981;Q96SZ6;P54259;Q96JB5;Q16612;Q96SN8}

22681 Pathogen[ P03383] interacts with 6 human  
partners:{Q16612;Q96SN8;Q96JB5;P30279;P61981;P54259}

22682 Pathogen[ P03410] interacts with 8 human  
partners:{P30279;Q99502;Q04917;Q96SN8;Q16612;Q96JB5;P61981;P54259}

22683 Pathogen[ P14075] interacts with 6 human  
partners:{P30279;Q96SN8;Q96JB5;P61981;P54259;Q99502}

22684 Pathogen[ P0C206] interacts with 8 human  
partners:{Q96SN8;P30279;Q04917;Q96JB5;P54259;P61981;Q16612;Q99502}

22685 Pathogen[ P03363] interacts with 7 human  
partners:{P54259;P30279;P61981;Q04917;Q16612;Q96JB5;Q96SN8}

22686 [Cluster 2063]GO:0009452+P biological\_process [name] RNA capping [def] "The sequence  
of enzymatic reactions by which the 5' cap structure, an inverted 7-methylguanosine  
linked via a 5'-5' triphosphate bridge (m7G(5')ppp(5')X) to the first transcribed  
residue, is added to a nascent RNA polymerase II transcript." [PMID

22687 Pathogen[ Q2Q067] interacts with 1 human partners:{Q96RS0}

22688 Pathogen[ P0C214] interacts with 1 human partners:{Q96RS0}

22689 Pathogen[ P03346] interacts with 1 human partners:{Q96RS0}

22690 Pathogen[ Q85601] interacts with 1 human partners:{Q96RS0}

22691 Pathogen[ P14079] interacts with 1 human partners:{Q96RS0}

22692 Pathogen[ P03383] interacts with 1 human partners:{Q96RS0}

22693 Pathogen[ P03410] interacts with 1 human partners:{Q96RS0}

22694 Pathogen[ P14075] interacts with 1 human partners:{Q96RS0}

22695 Pathogen[ P0C206] interacts with 1 human partners:{Q96RS0}

22696 Pathogen[ P03363] interacts with 1 human partners:{Q96RS0}

22697 [Cluster 2064]GO:0032876+P biological\_process [name] negative regulation of DNA  
endoreduplication [def] "Any process that stops, prevents, or reduces the frequency,  
rate or extent of DNA endoreduplication." [GOC

22698 Pathogen[ Q2Q067] interacts with 4 human partners:{P49959;Q969H0;Q14683;Q8N3U4}  
22699 Pathogen[ POC214] interacts with 4 human partners:{P49959;Q969H0;Q14683;Q8N3U4}  
22700 Pathogen[ P03346] interacts with 4 human partners:{Q8N3U4;Q14683;P49959;Q969H0}  
22701 Pathogen[ Q85601] interacts with 4 human partners:{Q969H0;P49959;Q14683;Q8N3U4}  
22702 Pathogen[ P14079] interacts with 4 human partners:{Q969H0;Q8N3U4;Q9UQE7;Q14683}  
22703 Pathogen[ P03383] interacts with 3 human partners:{Q14683;Q8N3U4;Q969H0}  
22704 Pathogen[ P03410] interacts with 5 human partners:{P49959;Q9UQE7;Q969H0;Q14683;Q8N3U4}  
22705 Pathogen[ P14075] interacts with 3 human partners:{Q14683;Q969H0;Q8N3U4}  
22706 Pathogen[ POC206] interacts with 5 human partners:{P49959;Q969H0;Q9UQE7;Q14683;Q8N3U4}  
22707 Pathogen[ P03363] interacts with 3 human partners:{Q969H0;Q8N3U4;Q14683}  
22708 [Cluster 2065]GO:0071158+P biological\_process [name] positive regulation of cell cycle arrest [def] "Any process that increases the rate, frequency, or extent of cell cycle arrest, the process in which the cell cycle is halted during one of the normal phases." [GOC  
22709 Pathogen[ Q2Q067] interacts with 7 human partners:{Q9H4X1;O43159;Q8N726;Q9BQG0;Q15173;Q96PU4;Q71SY5}  
22710 Pathogen[ POC214] interacts with 7 human partners:{Q9H4X1;Q71SY5;O43159;Q9BQG0;Q96PU4;Q8N726;Q15173}  
22711 Pathogen[ P03346] interacts with 8 human partners:{Q9H4X1;Q9BQG0;Q71SY5;O43159;Q8IUI8;Q96PU4;Q8N726;Q15173}  
22712 Pathogen[ Q85601] interacts with 7 human partners:{Q9H4X1;Q9BQG0;Q96PU4;O43159;Q15173;Q8N726;Q71SY5}  
22713 Pathogen[ P14079] interacts with 6 human partners:{Q15173;Q8N726;Q9BQG0;Q71SY5;O43159;Q8IUI8}  
22714 Pathogen[ P03383] interacts with 7 human partners:{Q9BQG0;Q9H4X1;Q15173;Q96PU4;O43159;Q71SY5;Q8N726}  
22715 Pathogen[ P03410] interacts with 7 human partners:{Q9H4X1;Q8N726;Q15173;O43159;Q8IUI8;Q9BQG0;Q71SY5}  
22716 Pathogen[ P14075] interacts with 7 human partners:{Q9H4X1;Q96PU4;Q9BQG0;Q15173;O43159;Q71SY5;Q8N726}  
22717 Pathogen[ POC206] interacts with 7 human partners:{O43159;Q9H4X1;Q8N726;Q15173;Q9BQG0;Q71SY5;Q96PU4}  
22718 Pathogen[ P03363] interacts with 7 human partners:{Q9H4X1;Q71SY5;Q9BQG0;Q15173;Q8N726;O43159;Q96PU4}  
22719 [Cluster 2066]GO:0043536+P biological\_process [name] positive regulation of blood vessel endothelial cell migration [def] "Any process that activates or increases the frequency, rate or extent of the migration of the endothelial cells of blood vessels." [GOC  
22720 Pathogen[ Q2Q067] interacts with 2 human partners:{P31749;Q8IY63}  
22721 Pathogen[ POC214] interacts with 2 human partners:{Q8IY63;P31749}  
22722 Pathogen[ P03346] interacts with 2 human partners:{Q8IY63;P31749}  
22723 Pathogen[ Q85601] interacts with 2 human partners:{P31749;Q8IY63}  
22724 Pathogen[ P14079] interacts with 1 human partners:{Q8IY63}  
22725 Pathogen[ P03383] interacts with 2 human partners:{P31749;Q8IY63}  
22726 Pathogen[ P03410] interacts with 2 human partners:{P31749;Q8IY63}  
22727 Pathogen[ P14075] interacts with 2 human partners:{Q8IY63;P31749}  
22728 Pathogen[ POC206] interacts with 2 human partners:{P31749;Q8IY63}  
22729 Pathogen[ P03363] interacts with 2 human partners:{Q8IY63;P31749}  
22730 [Cluster 2067]GO:0006898+P biological\_process [name] receptor-mediated endocytosis [def] "An endocytosis process in which cell surface receptors ensure specificity of transport. A specific receptor on the cell surface binds tightly to the extracellular macromolecule (the ligand) that it recognizes\_ the plasma-membrane region containing the receptor-ligand complex then undergoes endocytosis, forming a transport vesicle containing the receptor-ligand complex and excluding most other plasma-membrane proteins. Receptor-mediated endocytosis generally occurs via clathrin-coated pits and vesicles." [GOC  
22731 Pathogen[ Q2Q067] interacts with 3 human partners:{P53675;Q00610;P61966}  
22732 Pathogen[ POC214] interacts with 2 human partners:{P53675;P61966}  
22733 Pathogen[ P03346] interacts with 6 human partners:{P61966;Q15036;P53675;Q13492;Q00610;O75146}  
22734 Pathogen[ Q85601] interacts with 4 human partners:{P53675;Q00610;Q15036;P61966}  
22735 Pathogen[ P14079] interacts with 8 human partners:{Q13492;Q15036;P61966;O75146;Q00610;Q01518;Q9NR12;P53675}  
22736 Pathogen[ P03383] interacts with 2 human partners:{Q00610;P53675}  
22737 Pathogen[ P03410] interacts with 7 human partners:{Q00610;O75146;Q13492;Q15036;Q01518;P53675;P61966}  
22738 Pathogen[ P14075] interacts with 2 human partners:{P53675;Q00610}  
22739 Pathogen[ POC206] interacts with 4 human partners:{P53675;P61966;Q00610;Q15036}  
22740 Pathogen[ P03363] interacts with 4 human partners:{Q00610;O75146;Q9NR12;P53675}  
22741 [Cluster 2068]GO:0051131+P biological\_process [name] chaperone-mediated protein complex assembly [def] "The aggregation, arrangement and bonding together of a set of components to form a protein complex, mediated by chaperone molecules that do not form part of the finished complex." [GOC  
22742 Pathogen[ Q2Q067] interacts with 3 human partners:{P07900;Q9P2T0;P78371}

22743 Pathogen[ P0C214] interacts with 4 human partners:{P78371;P34932;Q9P2T0;P10809}

22744 Pathogen[ P03346] interacts with 5 human partners:{P07900;Q6ZW61;P78371;Q9P2T0;P34932}

22745 Pathogen[ Q85601] interacts with 4 human partners:{P07900;Q9P2T0;P34932;P78371}

22746 Pathogen[ P14079] interacts with 4 human partners:{P78371;Q9P2T0;P07900;Q6ZW61}

22747 Pathogen[ P03383] interacts with 3 human partners:{P07900;P78371;Q9P2T0}

22748 Pathogen[ P03410] interacts with 4 human partners:{Q9P2T0;Q6ZW61;P07900;P78371}

22749 Pathogen[ P14075] interacts with 4 human partners:{Q6ZW61;P78371;P07900;Q9P2T0}

22750 Pathogen[ P0C206] interacts with 5 human partners:{Q6ZW61;P34932;P07900;Q9P2T0;P78371}

22751 Pathogen[ P03363] interacts with 5 human partners:{P07900;Q9P2T0;P34932;Q6ZW61;P78371}

22752 [Cluster 2069]GO:0010507+P biological\_process [name] negative regulation of autophagy [def] "Any process that stops, prevents, or reduces the frequency, rate or extent of autophagy. Autophagy is the process in which cells digest parts of their own cytoplasm." [GOC]

22753 Pathogen[ Q2Q067] interacts with 1 human partners:{Q9NNW5}

22754 Pathogen[ P0C214] interacts with 1 human partners:{Q9NNW5}

22755 Pathogen[ P03346] interacts with 3 human partners:{Q92622;P51397;Q9NNW5}

22756 Pathogen[ Q85601] interacts with 1 human partners:{Q9NNW5}

22757 Pathogen[ P14079] interacts with 3 human partners:{Q9NNW5;P51397;Q92622}

22758 Pathogen[ P03383] interacts with 2 human partners:{P51397;Q9NNW5}

22759 Pathogen[ P03410] interacts with 2 human partners:{P51397;Q9NNW5}

22760 Pathogen[ P14075] interacts with 2 human partners:{P51397;Q9NNW5}

22761 Pathogen[ P0C206] interacts with 3 human partners:{Q9NNW5;Q92622;P51397}

22762 Pathogen[ P03363] interacts with 2 human partners:{Q92622;Q9NNW5}

22763 [Cluster 2070]GO:0051155+P biological\_process [name] positive regulation of striated muscle cell differentiation [def] "Any process that activates or increases the frequency, rate or extent of striated muscle cell differentiation." [CL]

22764 Pathogen[ Q2Q067] interacts with 1 human partners:{Q15014}

22765 Pathogen[ P0C214] interacts with 1 human partners:{Q15014}

22766 Pathogen[ P03346] interacts with 1 human partners:{Q15014}

22767 Pathogen[ Q85601] interacts with 1 human partners:{Q15014}

22768 Pathogen[ P14079] interacts with 1 human partners:{Q15014}

22769 Pathogen[ P03383] interacts with 1 human partners:{Q15014}

22770 Pathogen[ P03410] interacts with 1 human partners:{Q15014}

22771 Pathogen[ P14075] interacts with 1 human partners:{Q15014}

22772 Pathogen[ P0C206] interacts with 1 human partners:{Q15014}

22773 Pathogen[ P03363] interacts with 1 human partners:{Q15014}

22774 [Cluster 2071]GO:0045007+P biological\_process [name] depurination [def] "The disruption of the bond between the sugar in the backbone and the A or G base, causing the base to be removed and leaving a depurinated sugar." [GOC]

22775 Pathogen[ Q2Q067] interacts with 3 human partners:{Q9UIF7;P29372;O15527}

22776 Pathogen[ P0C214] interacts with 3 human partners:{Q9UIF7;P29372;O15527}

22777 Pathogen[ P03346] interacts with 3 human partners:{Q9UIF7;P29372;O15527}

22778 Pathogen[ Q85601] interacts with 3 human partners:{O15527;Q9UIF7;P29372}

22779 Pathogen[ P14079] interacts with 3 human partners:{Q9UIF7;P29372;O15527}

22780 Pathogen[ P03383] interacts with 2 human partners:{O15527;P29372}

22781 Pathogen[ P03410] interacts with 3 human partners:{O15527;P29372;Q9UIF7}

22782 Pathogen[ P14075] interacts with 3 human partners:{O15527;Q9UIF7;P29372}

22783 Pathogen[ P0C206] interacts with 3 human partners:{O15527;P29372;Q9UIF7}

22784 Pathogen[ P03363] interacts with 3 human partners:{O15527;P29372;Q9UIF7}

22785 [Cluster 2072]GO:0090399+P biological\_process [name] replicative senescence [def] "A cellular senescence process associated with the dismantling of a cell as a response to telomere shortening and/or cellular aging." [GOC]

22786 Pathogen[ Q2Q067] interacts with 5 human partners:{O14757;O96017;O14746;P38936;P42771}

22787 Pathogen[ P0C214] interacts with 5 human partners:{O14746;P38936;O96017;P42771;O14757}

22788 Pathogen[ P03346] interacts with 5 human partners:{O96017;O14757;P42771;O14746;P38936}

22789 Pathogen[ Q85601] interacts with 5 human partners:{O96017;O14757;P42771;O14746;P38936}

22790 Pathogen[ P14079] interacts with 3 human partners:{O14746;P38936;P42771}

22791 Pathogen[ P03383] interacts with 4 human partners:{O14757;O14746;P42771;O96017}

22792 Pathogen[ P03410] interacts with 5 human partners:{P42771;O14746;P38936;O96017;O14757}

22793 Pathogen[ P14075] interacts with 4 human partners:{O14746;P42771;O96017;O14757}

22794 Pathogen[ P0C206] interacts with 4 human partners:{O96017;P42771;P38936;O14746}

22795 Pathogen[ P03363] interacts with 4 human partners:{O14746;O96017;P42771;O14757}

22796 [Cluster 2073]GO:0031146+P biological\_process [name] SCF-dependent proteasomal ubiquitin-dependent protein catabolic process [def] "The chemical reactions and pathways resulting in the breakdown of a protein or peptide by hydrolysis of its peptide bonds, initiated by the covalent attachment of ubiquitin, with ubiquitin-protein ligation catalyzed by an SCF (Skp1/Cull1/F-box protein) complex, and mediated by the proteasome." [PMID]



22797 Pathogen[ Q2Q067] interacts with 9 human  
partners:{Q9UJT9;P41002;Q13616;Q9UKT7;Q969H0;Q9NRD1;P63208;Q9UKT5;P62877}

22798 Pathogen[ POC214] interacts with 12 human  
partners:{Q9UKA1;P41002;P63208;Q9NRD1;P62877;Q9UKT7;Q13616;Q969H0;Q9H469;Q9UJT9;Q5XUX0;Q9UKT5}

22799 Pathogen[ P03346] interacts with 13 human  
partners:{Q9UKT7;Q9H469;Q13616;Q9UJT9;Q969U6;P41002;Q9UKA1;P62877;Q9UKT5;Q9NRD1;P63208;Q969H0;Q5XUX0}

22800 Pathogen[ Q85601] interacts with 11 human  
partners:{Q969H0;P62877;Q13616;P41002;Q9UKA1;Q9UKT7;P63208;Q9H469;Q9UJT9;Q9UKT5;Q9NRD1}

22801 Pathogen[ P14079] interacts with 10 human  
partners:{Q5XUX0;Q9UKT5;Q969H0;P62877;P41002;Q9UKT7;Q9NRD1;P63208;Q9UJT9;Q13616}

22802 Pathogen[ P03383] interacts with 9 human  
partners:{P41002;Q13616;P63208;Q9UKT7;Q9UKT5;Q969H0;P62877;Q9NRD1;Q5XUX0}

22803 Pathogen[ P03410] interacts with 12 human  
partners:{Q9H469;Q9UKT7;Q9NRD1;Q9UKT5;Q5XUX0;P41002;P63208;Q969H0;P62877;Q969U6;Q13616;Q9UJT9}

22804 Pathogen[ P14075] interacts with 9 human  
partners:{Q9UKT7;Q9UKT5;P63208;Q9NRD1;P41002;Q13616;Q969H0;Q5XUX0;P62877}

22805 Pathogen[ POC206] interacts with 13 human  
partners:{Q9UJT9;P62877;Q9UKA1;Q969H0;Q13616;Q9NRD1;Q9UKT7;P63208;Q5XUX0;Q9H469;Q9UKT5;P41002;Q969U6}

22806 Pathogen[ P03363] interacts with 13 human  
partners:{Q9UJT9;P41002;Q13616;P62877;Q9UKT5;Q969H0;Q9UKA1;Q969U6;Q9UKT7;Q5XUX0;Q9NRD1;P63208;Q9H469}

22807 [Cluster 2074]GO:0031860+P biological\_process [name] telomeric 3' overhang formation  
[def] "The formation of the single stranded telomeric 3' overhang, a conserved feature that ranges in length from 12 nt in budding yeast to approximately 500 nt in humans."  
[PMID

22808 Pathogen[ Q2Q067] interacts with 1 human partners:{Q9H816}

22809 Pathogen[ POC214] interacts with 1 human partners:{Q9H816}

22810 Pathogen[ P03346] interacts with 1 human partners:{Q9H816}

22811 Pathogen[ Q85601] interacts with 1 human partners:{Q9H816}

22812 Pathogen[ P14079] interacts with 1 human partners:{Q9H816}

22813 Pathogen[ P03383] interacts with 1 human partners:{Q9H816}

22814 Pathogen[ P03410] interacts with 1 human partners:{Q9H816}

22815 Pathogen[ P14075] interacts with 1 human partners:{Q9H816}

22816 Pathogen[ POC206] interacts with 1 human partners:{Q9H816}

22817 Pathogen[ P03363] interacts with 1 human partners:{Q9H816}

22818 [Cluster 2075]GO:0090007+P biological\_process [name] regulation of mitotic anaphase  
[def] "Any process that modulates the frequency, rate or extent of mitotic anaphase, a cell cycle process comprising the steps by which a cell progresses through anaphase, the stage of mitosis during which the two sets of chromosomes separate and move away from each other." [GOC

22819 Pathogen[ Q2Q067] interacts with 1 human partners:{Q99741}

22820 Pathogen[ POC214] interacts with 1 human partners:{Q99741}

22821 Pathogen[ P03346] interacts with 1 human partners:{Q99741}

22822 Pathogen[ Q85601] interacts with 1 human partners:{Q99741}

22823 Pathogen[ P14079] interacts with 1 human partners:{Q99741}

22824 Pathogen[ P03383] interacts with 1 human partners:{Q99741}

22825 Pathogen[ P03410] interacts with 1 human partners:{Q99741}

22826 Pathogen[ P14075] interacts with 1 human partners:{Q99741}

22827 Pathogen[ POC206] interacts with 1 human partners:{Q99741}

22828 Pathogen[ P03363] interacts with 1 human partners:{Q99741}

22829 [Cluster 2076]GO:0035116+P biological\_process [name] embryonic hindlimb morphogenesis  
[def] "The process, occurring in the embryo, by which the anatomical structures of the hindlimbs are generated and organized. The hindlimbs are the posterior limbs of an animal." [ISBN

22830 Pathogen[ Q2Q067] interacts with 6 human  
partners:{Q05516;P35548;P51826;P78337;Q9HBD4;Q03112}

22831 Pathogen[ POC214] interacts with 6 human  
partners:{P78337;Q03112;Q9HBD4;P51826;P35548;Q05516}

22832 Pathogen[ P03346] interacts with 9 human  
partners:{Q9HBD4;P78337;P35548;Q68CZ1;P51826;Q95076;Q03112;Q05516;Q9P2D1}

22833 Pathogen[ Q85601] interacts with 7 human  
partners:{Q9P2D1;P51826;Q03112;P78337;P35548;Q9HBD4;Q05516}

22834 Pathogen[ P14079] interacts with 6 human  
partners:{P78337;Q68CZ1;Q05516;Q9P2D1;P28360;P51826}

22835 Pathogen[ P03383] interacts with 6 human  
partners:{Q9HBD4;Q05516;P78337;Q03112;P35548;P51826}

22836 Pathogen[ P03410] interacts with 7 human  
partners:{Q03112;P51826;P35548;Q9P2D1;Q68CZ1;Q9HBD4;P78337}

22837 Pathogen[ P14075] interacts with 6 human  
partners:{P78337;Q9HBD4;P35548;Q03112;Q05516;P51826}

22838 Pathogen[ POC206] interacts with 7 human

22839 partners:{Q05516;Q9P2D1;P78337;Q03112;P35548;P51826;Q9HBD4}  
 Pathogen[ P03363] interacts with 7 human

22840 partners:{Q03112;P35548;P51826;Q9HBD4;O95076;P78337;Q05516}  
 [Cluster 2077]GO:0018153+P biological\_process [name] isopeptide cross-linking via  
 N6-(L-isoglutamyl)-L-lysine [def] "The formation of an isopeptide cross-link between  
 peptidyl-lysine and peptidyl-glutamine to produce N6-(L-isoglutamyl)-L-lysine." [RESID

22841 Pathogen[ Q2Q067] interacts with 2 human partners:{P21980;P07476}  
 22842 Pathogen[ P0C214] interacts with 2 human partners:{P07476;P21980}  
 22843 Pathogen[ P03346] interacts with 2 human partners:{P21980;P07476}  
 22844 Pathogen[ Q85601] interacts with 1 human partners:{P21980}  
 22845 Pathogen[ P14079] interacts with 2 human partners:{P07476;P21980}  
 22846 Pathogen[ P03383] interacts with 2 human partners:{P07476;P21980}  
 22847 Pathogen[ P03410] interacts with 2 human partners:{P21980;P07476}  
 22848 Pathogen[ P14075] interacts with 2 human partners:{P21980;P07476}  
 22849 Pathogen[ P0C206] interacts with 2 human partners:{P21980;P07476}  
 22850 Pathogen[ P03363] interacts with 1 human partners:{P07476}

22851 [Cluster 2078]GO:0060711+P biological\_process [name] labyrinthine layer development  
 [def] "The process in which the labyrinthine layer of the placenta progresses, from its  
 formation to its mature state." [GOC

22852 Pathogen[ Q2Q067] interacts with 3 human partners:{Q99966;Q9NR09;Q9GZT9}  
 22853 Pathogen[ P0C214] interacts with 3 human partners:{Q99966;Q9GZT9;Q9NR09}  
 22854 Pathogen[ P03346] interacts with 5 human  
 partners:{Q99966;Q99626;Q9GZT9;O14627;Q9NR09}

22855 Pathogen[ Q85601] interacts with 3 human partners:{Q99966;Q9GZT9;Q9NR09}  
 22856 Pathogen[ P14079] interacts with 3 human partners:{Q9GZT9;Q99966;Q9NR09}  
 22857 Pathogen[ P03383] interacts with 1 human partners:{Q9NR09}  
 22858 Pathogen[ P03410] interacts with 3 human partners:{Q9GZT9;Q9NR09;Q99966}  
 22859 Pathogen[ P14075] interacts with 2 human partners:{Q9GZT9;Q9NR09}  
 22860 Pathogen[ P0C206] interacts with 3 human partners:{Q9GZT9;Q9NR09;Q99966}  
 22861 Pathogen[ P03363] interacts with 4 human partners:{Q99626;Q9NR09;Q13480;O14627}

22862 [Cluster 2079]GO:0006337+P biological\_process [name] nucleosome disassembly [def]  
 "The controlled breakdown of nucleosomes, the beadlike structural units of eukaryotic  
 chromatin composed of histones and DNA." [GOC

22863 Pathogen[ Q2Q067] interacts with 14 human  
 partners:{Q92922;Q01105;Q969G3;Q92925;O14497;P51532;Q96GM5;Q16621;P17096;Q12824;Q68C  
 P9;Q8TAQ2;Q9Y5B9;Q6STE5}

22864 Pathogen[ P0C214] interacts with 14 human  
 partners:{Q12824;O14497;Q16621;P17096;Q6STE5;Q8TAQ2;Q01105;Q92922;Q969G3;Q92925;Q9Y5  
 B9;Q68CP9;Q96GM5;P51532}

22865 Pathogen[ P03346] interacts with 14 human  
 partners:{Q16621;Q96GM5;P51532;Q01105;Q92925;Q12824;P17096;Q6STE5;O14497;Q9Y5B9;Q969  
 G3;Q92922;Q68CP9;Q8TAQ2}

22866 Pathogen[ Q85601] interacts with 14 human  
 partners:{P17096;Q6STE5;Q16621;Q01105;Q92925;O14497;Q9Y5B9;Q96GM5;P51532;Q969G3;Q929  
 22;Q68CP9;Q12824;Q8TAQ2}

22867 Pathogen[ P14079] interacts with 13 human  
 partners:{Q9Y5B9;Q01105;Q6STE5;P17096;Q92922;P51532;O14497;Q8TAQ2;Q96GM5;Q16621;Q68C  
 P9;Q12824;Q92925}

22868 Pathogen[ P03383] interacts with 14 human  
 partners:{O14497;Q01105;P17096;Q12824;Q6STE5;Q96GM5;Q16621;Q969G3;Q68CP9;Q92925;Q8TA  
 Q2;P51532;Q92922;Q9Y5B9}

22869 Pathogen[ P03410] interacts with 14 human  
 partners:{Q9Y5B9;Q96GM5;O14497;P17096;Q01105;Q92925;Q969G3;Q16621;Q92922;P51532;Q8TA  
 Q2;Q68CP9;Q6STE5;Q12824}

22870 Pathogen[ P14075] interacts with 13 human  
 partners:{Q96GM5;P51532;P17096;Q92922;Q01105;O14497;Q9Y5B9;Q68CP9;Q92925;Q8TAQ2;Q128  
 24;Q16621;Q6STE5}

22871 Pathogen[ P0C206] interacts with 15 human  
 partners:{P51532;Q6STE5;Q92922;Q9Y5B9;Q12824;Q92925;Q8TAQ2;O14497;P17096;Q96GM5;Q166  
 21;Q969G3;Q01105;Q9UIG0;Q68CP9}

22872 Pathogen[ P03363] interacts with 14 human  
 partners:{Q92925;Q6STE5;Q8TAQ2;P51532;O14497;Q16621;Q9Y5B9;P17096;Q969G3;Q96GM5;Q011  
 05;Q92922;Q68CP9;Q12824}

22873 [Cluster 2080]GO:0051145+P biological\_process [name] smooth muscle cell  
 differentiation [def] "The process in which a relatively unspecialized cell acquires  
 specialized features of a smooth muscle cell\_ smooth muscle lacks transverse striations  
 in its constituent fibers and are almost always involuntary." [CL

22874 Pathogen[ Q2Q067] interacts with 3 human partners:{Q14934;Q12968;Q969V6}  
 22875 Pathogen[ P0C214] interacts with 3 human partners:{Q12968;Q14934;Q969V6}  
 22876 Pathogen[ P03346] interacts with 3 human partners:{Q969V6;Q14934;Q12968}  
 22877 Pathogen[ Q85601] interacts with 3 human partners:{Q969V6;Q14934;Q12968}  
 22878 Pathogen[ P14079] interacts with 4 human partners:{Q06413;Q12968;Q969V6;Q14934}  
 22879 Pathogen[ P03383] interacts with 3 human partners:{Q969V6;Q14934;Q12968}  
 22880 Pathogen[ P03410] interacts with 4 human partners:{Q12968;Q969V6;Q9BSN7;Q14934}  
 22881 Pathogen[ P14075] interacts with 3 human partners:{Q14934;Q969V6;Q12968}  
 22882 Pathogen[ P0C206] interacts with 3 human partners:{Q12968;Q969V6;Q14934}

22883 Pathogen[ P03363] interacts with 3 human partners:{Q969V6;Q12968;Q14934}

22884 [Cluster 2081]GO:0016477+P biological\_process [name] cell migration [def] "The orderly movement of a cell from one site to another, often during the development of a multicellular organism or multicellular structure." [GOC

22885 Pathogen[ Q2Q067] interacts with 23 human partners:{Q68CZ2;O14786;Q14160;Q96B97;Q13829;P54259;O43639;P56945;Q9ULQ0;O75400;Q8IX03;P62324;Q13469;P20719;Q9UGP4;P25063;O14713;Q13618;P16333;Q8WY41;O75360;P63000;Q8IXQ6}

22886 Pathogen[ P0C214] interacts with 26 human partners:{Q9UGP4;Q8IX03;Q8IXQ6;P63000;O14786;Q13469;P56945;Q13829;Q13618;O43639;Q68CZ2;Q9ULQ0;Q16658;Q8WZ19;P62324;P25063;Q14160;O75360;P16333;Q8WY41;Q92614;Q5VZK9;O14713;O75400;Q96B97;P54259}

22887 Pathogen[ P03346] interacts with 29 human partners:{Q96B97;Q9UGP4;Q8WZ19;O43639;Q92614;O75400;Q13618;Q96B42;Q8IX03;Q8IZE3;Q68CZ2;Q13829;P20719;P16333;P56945;Q13469;O95863;Q8IXQ6;O14713;Q8WY41;Q16658;O75360;P25063;Q14160;P62324;P63000;P54259;O14786;Q5VZK9}

22888 Pathogen[ Q85601] interacts with 25 human partners:{P54259;O75360;Q92614;Q8WZ19;O14713;Q68CZ2;P16333;O75400;P62324;P63000;Q13469;O43639;O14786;P56945;Q5VZK9;Q8IXQ6;Q96B97;Q14160;Q8WY41;Q9UGP4;Q13618;Q13829;Q8IX03;Q9GZM8;Q9ULQ0}

22889 Pathogen[ P14079] interacts with 24 human partners:{Q8IXQ6;Q8WY41;O75400;P62324;Q9ULQ0;Q92614;Q16658;Q13618;Q96B97;Q8IX03;Q68CZ2;P16333;P25063;O75360;Q9GZM8;O14713;O43639;P29459;P54259;Q13829;Q13469;Q96B42;Q13145;Q9UGP4}

22890 Pathogen[ P03383] interacts with 18 human partners:{P56945;Q13469;Q14160;P62324;O14713;Q9ULQ0;O75360;P25063;P63000;O75400;Q13618;Q8IXQ6;Q9UGP4;Q8WY41;Q8IX03;Q13829;P16333;P54259}

22891 Pathogen[ P03410] interacts with 31 human partners:{O14786;Q13829;Q16658;Q8IZE3;P63000;Q9GZM8;Q96B42;Q8IX03;Q92614;Q9UGP4;O43639;O14713;Q8WZ19;Q13145;P16333;Q14160;Q13618;O75400;Q68CZ2;P25063;Q8IXQ6;P62324;Q13469;Q9ULQ0;P56945;P54259;Q96B97;Q5VZK9;O75360;Q8WY41;P29459}

22892 Pathogen[ P14075] interacts with 18 human partners:{Q8IXQ6;P62324;Q14160;Q13618;O14713;Q9UGP4;Q9ULQ0;O75400;P16333;Q13469;O75360;Q8WY41;P63000;P54259;Q13829;P56945;Q8IX03;P25063}

22893 Pathogen[ P0C206] interacts with 29 human partners:{P62324;Q13829;Q13469;Q9UGP4;O14713;Q96B97;Q8IXQ6;Q8WY41;Q9GZM8;O14786;O75360;P54259;P25063;Q8WZ19;Q13618;P63000;Q16658;Q5VZK9;Q14160;Q92614;Q96B42;P16333;O75400;Q9ULQ0;P56945;P20719;O43639;Q68CZ2;Q8IX03}

22894 Pathogen[ P03363] interacts with 28 human partners:{O75360;Q8IXQ6;O14786;P54259;Q5VZK9;Q96B97;Q13618;P20719;Q14160;O14713;O43639;Q8WY41;P63000;O75400;Q9UGP4;P62324;P16333;Q68CZ2;Q92614;Q13469;Q13829;P56945;Q8IZE3;Q8IX03;Q8WZ19;Q16658;Q9ULQ0;Q96B42}

22895 [Cluster 2082]GO:0030512+P biological\_process [name] negative regulation of transforming growth factor beta receptor signaling pathway [def] "Any process that stops, prevents, or reduces the frequency, rate or extent of any TGF-beta receptor signaling pathway." [GOC

22896 Pathogen[ Q2Q067] interacts with 29 human partners:{Q9Y5K5;Q9HAU4;Q9Y3F4;Q9HAZ2;O75807;Q86UU0;O60543;P62140;O95948;O14980;P12755;P84022;P36873;O15105;O43541;P62136;Q96PU5;Q15796;Q86TG7;Q13526;P12757;P35813;P0CG47;Q9UNE7;P0CG48;Q8N6I1;P62987;Q03112;P62979}

22897 Pathogen[ P0C214] interacts with 31 human partners:{P35813;Q9HAU4;P62140;P12757;O60543;Q03112;O75807;Q13526;P84022;Q8N6I1;Q9Y5K5;Q2VWA4;Q9HCE7;O14980;P0CG48;O15105;Q9HAZ2;P62136;Q15796;O43541;Q9Y3F4;P12755;Q86UU0;P62987;P0CG47;Q86TG7;P36873;O95948;P62979;Q9UNE7;Q96PU5}

22898 Pathogen[ P03346] interacts with 33 human partners:{P62136;O95405;P35813;Q9HAU4;Q96PU5;P12757;P62987;P0CG48;Q15796;Q86TG7;O15105;Q13526;Q2VWA4;Q9UBC0;P84022;O14980;O43541;Q9UNH7;Q9Y3F4;O95948;Q9UNE7;P36873;Q03112;P84550;Q8N6I1;P62979;P0CG47;P62140;Q86UU0;Q9HAZ2;O60543;O75807;Q9Y5K5}

22899 Pathogen[ Q85601] interacts with 31 human partners:{Q9HAU4;O43541;Q03112;P12757;Q86UU0;Q96PU5;P0CG48;Q2VWA4;P12755;Q8N6I1;O60543;P62136;O95948;Q13526;P36873;Q9Y5K5;Q9Y3F4;O14980;P62979;P84022;P0CG47;Q86TG7;O15105;P62140;P62987;P35813;O75807;Q9UNE7;Q9UNH7;Q15796;Q9HAZ2}

22900 Pathogen[ P14079] interacts with 30 human partners:{Q9HAZ2;Q9UNH7;P12755;P0CG48;P36873;O60543;O95948;Q2VWA4;O95405;O75807;P62136;Q9Y3F4;P62979;Q9HAU4;P62987;P35813;Q9Y5K5;P62140;O43294;Q86UU0;O43541;Q86TG7;Q92896;P12757;Q969W9;Q13526;O15105;P0CG47;Q8N6I1;Q13145}

22901 Pathogen[ P03383] interacts with 24 human partners:{P62140;O60543;P62987;Q8N6I1;Q86TG7;P35813;Q86UU0;P36873;P62136;Q9HAZ2;O15105;Q03112;P84022;O14980;O43541;Q9Y3F4;Q9Y5K5;P62979;P0CG47;Q15796;P12757;P0CG48;O75807;Q13526}

22902 Pathogen[ P03410] interacts with 34 human partners:{P84022;Q03112;P0CG48;O95405;Q969W9;P35813;Q9HAZ2;P12755;Q8N6I1;Q13526;P62136;Q13145;O43294;O95948;Q9Y3F4;P62979;Q9UNH7;Q92896;Q9UNE7;P62140;Q2VWA4;P12757;P36873;O75807;O43541;O15105;Q86TG7;P62987;Q9Y5K5;O60543;Q15796;Q86UU0;P0CG47;O14980}

22903 Pathogen[ P14075] interacts with 24 human partners:{Q86UU0;P35813;Q9Y3F4;O43541;P62140;Q15796;P36873;Q9HAZ2;P62136;P12757;O149

80;POCG48;P62979;Q13526;O60543;Q8N6I1;O75807;P62987;O15105;Q03112;POCG47;P84022;Q9Y5K5;Q86TG7}

22904 Pathogen[ POC206] interacts with 34 human partners:{P84022;O43541;Q96PU5;POCG48;Q9Y3F4;Q9HAZ2;Q86UU0;Q13526;Q8N6I1;Q9UNH7;Q9HAU4;O75807;Q2VWA4;Q9UBC0;Q15796;Q86TG7;Q9Y5K5;P12755;O15105;Q03112;Q9UNE7;P12757;P62979;O95405;O43294;P62140;POCG47;P84550;P62987;O60543;P36873;P62136;P35813;O95948}

22905 Pathogen[ P03363] interacts with 29 human partners:{Q9UBC0;Q9Y3F4;O60543;P62136;O95948;Q9UNH7;Q9Y5K5;P36873;Q9HAU4;P62140;P12757;Q03112;O14980;O15105;Q13526;O95405;Q96PU5;Q9UNE7;O43541;Q15796;P84022;P62987;Q86UU0;O75807;P84550;Q2VWA4;Q8N6I1;Q86TG7;Q9HAZ2}

22906 [Cluster 2083]GO:0044092+P biological\_process [name] negative regulation of molecular function [def] "Any process that stops or reduces the rate or extent of a molecular function, an elemental biological activity occurring at the molecular level, such as catalysis or binding." [GO

22907 Pathogen[ Q2Q067] interacts with 1 human partners:{Q8WVJ9}

22908 Pathogen[ POC214] interacts with 1 human partners:{Q8WVJ9}

22909 Pathogen[ P03346] interacts with 1 human partners:{Q8WVJ9}

22910 Pathogen[ Q85601] interacts with 1 human partners:{Q8WVJ9}

22911 Pathogen[ P14079] interacts with 1 human partners:{Q8WVJ9}

22912 Pathogen[ P03383] interacts with 1 human partners:{Q8WVJ9}

22913 Pathogen[ P03410] interacts with 1 human partners:{Q8WVJ9}

22914 Pathogen[ P14075] interacts with 1 human partners:{Q8WVJ9}

22915 Pathogen[ POC206] interacts with 1 human partners:{Q8WVJ9}

22916 Pathogen[ P03363] interacts with 1 human partners:{Q8WVJ9}

22917 [Cluster 2084]GO:0007173+P biological\_process [name] epidermal growth factor receptor signaling pathway [def] "The series of molecular signals generated as a consequence of an epidermal growth factor receptor binding to one of its physiological ligands." [GOC

22918 Pathogen[ Q2Q067] interacts with 36 human partners:{Q92783;O94973;P31749;O95782;Q96B97;O43639;Q5T1C6;Q96B36;P56945;P63010;O75886;Q96CW1;O43524;O75582;Q9BPZ7;Q00610;Q9BVC4;Q92529;Q96RU7;Q99962;POCG47;P31946;POCG48;P60953;O14964;P27986;P62987;P09496;P46527;Q6R327;P22681;O15111;Q00987;P22736;Q8NFH8;P62979}

22919 Pathogen[ POC214] interacts with 39 human partners:{P22681;Q9BPZ7;Q96CW1;O60346;O15111;Q9BVC4;P56945;P62993;Q92934;Q00987;P46527;O14964;P60953;O75886;Q92529;Q9Y6I3;Q99962;O43639;P63010;Q6R327;POCG48;Q96B36;O75582;P62987;Q96RU7;O94973;POCG47;P09496;Q5T1C6;O95782;Q8NFH8;P16220;Q92783;P31946;P62979;P53680;P27986;Q96B97;P31749}

22920 Pathogen[ P03346] interacts with 47 human partners:{O60346;Q96B97;O15111;Q96RT1;P16220;P63010;O43639;Q8NFH8;P62987;Q9BVC4;P53680;O75159;Q9BPZ7;Q99962;POCG48;O75886;O95782;P60953;P62993;P09496;Q00987;Q96B36;P56945;P22736;P31749;Q96CW1;P42566;Q12778;Q12929;O75582;P98177;P62979;Q96RU7;P31946;P55211;POCG47;Q92783;O14964;P22681;Q9Y6I3;Q6R327;Q92529;P46527;O94973;O43524;Q00610;P27986}

22921 Pathogen[ Q85601] interacts with 40 human partners:{O60346;P22681;P31946;Q00610;P31749;P62993;P09496;Q96RT1;Q96CW1;O15111;Q9BPZ7;Q99962;Q96B36;POCG48;O43639;O75886;P27986;Q9BVC4;P56945;P16220;Q8NFH8;P22736;Q92529;Q96B97;P53680;O75582;Q92783;O14964;P62979;O94973;Q96RU7;POCG47;P60953;Q9Y6I3;P63010;P62987;Q00987;Q5T1C6;P46527;O95782}

22922 Pathogen[ P14079] interacts with 40 human partners:{Q6R327;O75886;Q96CW1;Q12929;P09327;POCG48;P49069;Q00610;O43597;Q9Y6I3;O75582;P42566;Q92783;P22736;O60346;Q96B97;P62979;Q9BVC4;P62987;Q00987;Q96RT1;O95782;Q92934;P31946;Q8NFH8;Q5T1C6;P63010;O94973;Q96RU7;P62993;O43639;P46527;Q96B36;P49023;Q9BPZ7;Q92529;POCG47;P53680;P09496;Q99962}

22923 Pathogen[ P03383] interacts with 26 human partners:{Q96CW1;P27986;P56945;O75582;Q8NFH8;Q00610;P16220;P62987;P31946;P31749;Q9BPZ7;O15111;P60953;O75886;Q96B36;P63010;P46527;O95782;Q92783;Q96RU7;P62979;POCG47;POCG48;O94973;O14964;Q5T1C6}

22924 Pathogen[ P03410] interacts with 44 human partners:{Q00610;P09496;P49069;O95782;P46527;Q96CW1;Q92529;P27986;POCG48;Q96RT1;P53680;O43597;Q9Y6I3;O15111;O43639;Q8NFH8;O75582;Q9BPZ7;Q92783;P31749;Q92934;Q9BVC4;P62979;Q96B36;Q5T1C6;P22736;P16220;Q6R327;Q96RU7;P63010;P60953;O60346;P62987;P56945;Q96B97;Q99962;Q00987;P62993;P42566;O94973;Q12929;POCG47;O75886;P31946}

22925 Pathogen[ P14075] interacts with 28 human partners:{P60953;O15111;P09496;O94973;Q96CW1;O75886;O75582;Q92783;Q5T1C6;P46527;Q9BPZ7;Q96B36;P31749;POCG48;P62979;O14964;Q6R327;O95782;P27986;P62987;Q96RU7;P63010;POCG47;P16220;P31946;Q8NFH8;Q00610;P56945}

22926 Pathogen[ POC206] interacts with 44 human partners:{O14964;P53680;P63010;POCG48;Q96RT1;O94973;P31749;P16220;O75582;Q96B36;Q96B97;Q00610;Q99962;Q92783;P22736;P27986;P62993;Q96RU7;P09496;P31946;Q92934;Q8NFH8;Q6R327;P22681;Q96CW1;O15111;P62979;Q5T1C6;P46527;Q9BPZ7;Q9Y6I3;O43597;P60953;O95782;POCG47;P42566;P56945;O60346;Q92529;P62987;O75886;Q00987;O43639;Q9BVC4}

22927 Pathogen[ P03363] interacts with 30 human partners:{P22681;O75159;Q9BVC4;Q96RT1;Q96B36;Q99962;O75886;Q92783;Q96B97;O15111;P31946;P16220;Q00610;O43639;Q8NFH8;O94973;Q92529;O43524;Q13480;P31749;P63010;Q12929;P62987;O14964;O95782;P56945;P60953;P27986;Q6R327;Q96CW1}

22928 [Cluster 2085]GO:0010838+P biological\_process [name] positive regulation of

keratinocyte proliferation [def] "Any process that increases the rate, frequency or extent of keratinocyte proliferation. Keratinocyte proliferation is the multiplication or reproduction of keratinocytes, resulting in the expansion of a cell population." [GOC

22929 Pathogen[ Q2Q067] interacts with 1 human partners:{Q8WVJ9}

22930 Pathogen[ P0C214] interacts with 1 human partners:{Q8WVJ9}

22931 Pathogen[ P03346] interacts with 1 human partners:{Q8WVJ9}

22932 Pathogen[ Q85601] interacts with 1 human partners:{Q8WVJ9}

22933 Pathogen[ P14079] interacts with 1 human partners:{Q8WVJ9}

22934 Pathogen[ P03383] interacts with 1 human partners:{Q8WVJ9}

22935 Pathogen[ P03410] interacts with 1 human partners:{Q8WVJ9}

22936 Pathogen[ P14075] interacts with 1 human partners:{Q8WVJ9}

22937 Pathogen[ P0C206] interacts with 1 human partners:{Q8WVJ9}

22938 Pathogen[ P03363] interacts with 1 human partners:{Q8WVJ9}

22939 [Cluster 2086]GO:0016973+P biological\_process [name] poly(A)+ mRNA export from nucleus [def] "The directed movement of poly(A)+ mRNA out of the nucleus into the cytoplasm." [GOC

22940 Pathogen[ Q2Q067] interacts with 4 human partners:{Q86U42;Q9UBU9;Q53GS7;Q9H4D5}

22941 Pathogen[ P0C214] interacts with 4 human partners:{Q53GS7;Q9H4D5;Q86U42;Q9UBU9}

22942 Pathogen[ P03346] interacts with 4 human partners:{Q86U42;Q53GS7;Q9H4D5;Q9UBU9}

22943 Pathogen[ Q85601] interacts with 4 human partners:{Q9UBU9;Q53GS7;Q9H4D5;Q86U42}

22944 Pathogen[ P14079] interacts with 4 human partners:{Q9H4D5;Q9UBU9;Q53GS7;Q86U42}

22945 Pathogen[ P03383] interacts with 4 human partners:{Q9UBU9;Q9H4D5;Q53GS7;Q86U42}

22946 Pathogen[ P03410] interacts with 4 human partners:{Q9H4D5;Q9UBU9;Q86U42;Q53GS7}

22947 Pathogen[ P14075] interacts with 4 human partners:{Q53GS7;Q9UBU9;Q9H4D5;Q86U42}

22948 Pathogen[ P0C206] interacts with 4 human partners:{Q53GS7;Q86U42;Q9H4D5;Q9UBU9}

22949 Pathogen[ P03363] interacts with 4 human partners:{Q53GS7;Q9H4D5;Q9UBU9;Q86U42}

22950 [Cluster 2087]GO:0050718+P biological\_process [name] positive regulation of interleukin-1 beta secretion [def] "Any process that activates or increases the frequency, rate or extent of the regulated release of interleukin-1 beta from a cell or group of cells." [GOC

22951 Pathogen[ Q2Q067] interacts with 4 human partners:{Q8WXC3;O14862;Q9C000;Q9Y2G2}

22952 Pathogen[ P0C214] interacts with 4 human partners:{Q8WXC3;Q9Y2G2;O14862;Q9C000}

22953 Pathogen[ P03346] interacts with 6 human partners:{Q9NX02;Q8WXC3;O95361;Q9Y2G2;O14862;Q9C000}

22954 Pathogen[ Q85601] interacts with 3 human partners:{Q9Y2G2;Q8WXC3;O14862}

22955 Pathogen[ P14079] interacts with 5 human partners:{Q8WXC3;Q9C000;O14862;Q9Y2G2;O95361}

22956 Pathogen[ P03383] interacts with 3 human partners:{O14862;Q8WXC3;Q9Y2G2}

22957 Pathogen[ P03410] interacts with 4 human partners:{Q9Y2G2;O14862;Q9C000;Q8WXC3}

22958 Pathogen[ P14075] interacts with 3 human partners:{O14862;Q8WXC3;Q9Y2G2}

22959 Pathogen[ P0C206] interacts with 5 human partners:{Q9C000;Q9Y2G2;O14862;O95361;Q8WXC3}

22960 Pathogen[ P03363] interacts with 5 human partners:{Q9C000;Q9NX02;Q8WXC3;Q9Y2G2;O14862}

22961 [Cluster 2088]GO:0000461+P biological\_process [name] endonucleolytic cleavage to generate mature 3'-end of SSU-rRNA from (SSU-rRNA, 5.8S rRNA, LSU-rRNA) [def] "Endonucleolytic cleavage at the 3'-end of the SSU-rRNA from an originally tricistronic rRNA transcript that contained the Small Subunit (SSU) rRNA, the 5.8S rRNA, and the Large Subunit (LSU) rRNA in that order from 5' to 3' along the primary transcript, to produce the mature end of the SSU-rRNA." [GOC

22962 Pathogen[ Q2Q067] interacts with 2 human partners:{P08865;P63220}

22963 Pathogen[ P0C214] interacts with 2 human partners:{P63220;P08865}

22964 Pathogen[ P03346] interacts with 2 human partners:{P08865;P63220}

22965 Pathogen[ Q85601] interacts with 2 human partners:{P63220;P08865}

22966 Pathogen[ P14079] interacts with 2 human partners:{P63220;P08865}

22967 Pathogen[ P03383] interacts with 2 human partners:{P08865;P63220}

22968 Pathogen[ P03410] interacts with 2 human partners:{P63220;P08865}

22969 Pathogen[ P14075] interacts with 2 human partners:{P63220;P08865}

22970 Pathogen[ P0C206] interacts with 2 human partners:{P08865;P63220}

22971 Pathogen[ P03363] interacts with 2 human partners:{P08865;P63220}

22972 [Cluster 2089]GO:0050768+P biological\_process [name] negative regulation of neurogenesis [def] "Any process that stops, prevents, or reduces the frequency, rate or extent of neurogenesis, the origin and formation of neurons." [GOC

22973 Pathogen[ Q2Q067] interacts with 6 human partners:{P63172;Q9Y2D1;Q13127;Q86VS8;Q15154;Q9GZU7}

22974 Pathogen[ P0C214] interacts with 6 human partners:{Q15154;Q9GZU7;Q86VS8;Q9Y2D1;Q13127;P63172}

22975 Pathogen[ P03346] interacts with 6 human partners:{Q86VS8;Q15154;Q9Y2D1;Q9GZU7;P63172;Q13127}

22976 Pathogen[ Q85601] interacts with 6 human partners:{Q13127;Q15154;Q86VS8;Q9GZU7;P63172;Q9Y2D1}

22977 Pathogen[ P14079] interacts with 5 human partners:{P63172;Q86VS8;Q15154;Q13127;Q9GZU7}

22978 Pathogen[ P03383] interacts with 6 human partners:{P63172;Q9GZU7;Q15154;Q86VS8;Q9Y2D1;Q13127}

22979 Pathogen[ P03410] interacts with 6 human

22980 partners:{Q15154;Q9Y2D1;Q9GZU7;P63172;Q86VS8;Q13127}  
Pathogen[ P14075] interacts with 6 human

22981 partners:{Q9Y2D1;P63172;Q15154;Q9GZU7;Q13127;Q86VS8}  
Pathogen[ POC206] interacts with 6 human

22982 partners:{Q9Y2D1;Q13127;Q9GZU7;Q86VS8;Q15154;P63172}  
Pathogen[ P03363] interacts with 6 human

22983 partners:{Q86VS8;Q9Y2D1;Q13127;P63172;Q9GZU7;Q15154}  
[Cluster 2090]GO:0031214+P biological\_process [name] biomineral tissue development  
[def] "Formation of hard tissues that consist mainly of inorganic compounds, and also  
contain a small amounts of organic matrices that are believed to play important roles in  
their formation." [PMID

22984 Pathogen[ Q2Q067] interacts with 1 human partners:{Q9UBB9}  
22985 Pathogen[ POC214] interacts with 3 human partners:{P10124;Q6ZRV2;Q9UBB9}  
22986 Pathogen[ P03346] interacts with 1 human partners:{Q6ZRV2}  
22987 Pathogen[ Q85601] interacts with 2 human partners:{Q9UBB9;Q6ZRV2}  
22988 Pathogen[ P14079] interacts with 9 human  
partners:{P02808;A1E959;P15515;P15516;Q6ZRV2;Q9NQ76;Q9UBB9;P10124;Q13316}  
22989 Pathogen[ P03383] interacts with 3 human partners:{P10124;Q9UBB9;Q6ZRV2}  
22990 Pathogen[ P03410] interacts with 10 human  
partners:{P02808;P10124;Q9UBB9;P15515;Q9NQ76;P15516;Q9NRM1;A1E959;Q6ZRV2;Q13316}  
22991 Pathogen[ P14075] interacts with 5 human  
partners:{P15515;Q9UBB9;P10124;Q6ZRV2;P02808}  
22992 Pathogen[ POC206] interacts with 6 human  
partners:{Q13316;Q9UBB9;P15515;P02808;Q6ZRV2;P10124}  
22993 Pathogen[ P03363] interacts with 3 human partners:{P02808;P15515;Q6ZRV2}  
22994 [Cluster 2091]GO:0048469+P biological\_process [name] cell maturation [def] "A  
developmental process, independent of morphogenetic (shape) change, that is required for  
a cell to attain its fully functional state." [GOC

22995 Pathogen[ Q2Q067] interacts with 9 human  
partners:{P48380;O75896;P09086;P23769;P56693;Q13951;Q13761;Q99814;P49715}  
22996 Pathogen[ POC214] interacts with 9 human  
partners:{Q13761;O75896;P23769;P56693;Q13515;Q99814;P09086;P48380;Q13951}  
22997 Pathogen[ P03346] interacts with 12 human  
partners:{P09086;Q7RTS1;Q13515;P23769;P48380;P56693;P49715;O75896;Q13951;Q13761;Q998  
14;P35713}  
22998 Pathogen[ Q85601] interacts with 9 human  
partners:{P09086;Q13951;P23769;Q99814;Q13515;P56693;P49715;P48380;Q13761}  
22999 Pathogen[ P14079] interacts with 11 human  
partners:{Q99814;O75896;P09086;P48380;Q7RTS1;P49715;P56693;Q13515;Q13761;Q13951;P237  
69}

23000 Pathogen[ P03383] interacts with 7 human  
partners:{Q13761;Q13515;O75896;P48380;P23769;Q13951;P56693}  
23001 Pathogen[ P03410] interacts with 9 human  
partners:{Q99814;Q13515;Q7RTS1;P48380;P56693;Q13951;P23769;Q13761;O75896}  
23002 Pathogen[ P14075] interacts with 7 human  
partners:{Q13951;P23769;P48380;Q13515;P56693;O75896;Q13761}  
23003 Pathogen[ POC206] interacts with 10 human  
partners:{Q13515;Q13951;P49715;P56693;P48380;O75896;P09086;P23769;Q99814;Q13761}  
23004 Pathogen[ P03363] interacts with 8 human  
partners:{Q7RTS1;P09086;Q13951;P56693;Q99814;P48380;Q13761;Q13515}  
23005 [Cluster 2092]GO:0009312+P biological\_process [name] oligosaccharide biosynthetic  
process [def] "The chemical reactions and pathways resulting in the formation of  
oligosaccharides, molecules with between two and (about) 20 monosaccharide residues  
connected by glycosidic linkages." [ISBN

23006 Pathogen[ Q2Q067] interacts with 1 human partners:{Q14746}  
23007 Pathogen[ POC214] interacts with 1 human partners:{Q14746}  
23008 Pathogen[ P03346] interacts with 1 human partners:{Q14746}  
23009 Pathogen[ Q85601] interacts with 1 human partners:{Q14746}  
23010 Pathogen[ P14079] interacts with 2 human partners:{Q14746;O75352}  
23011 Pathogen[ P03383] interacts with 1 human partners:{Q14746}  
23012 Pathogen[ P03410] interacts with 2 human partners:{Q14746;O75352}  
23013 Pathogen[ P14075] interacts with 1 human partners:{Q14746}  
23014 Pathogen[ POC206] interacts with 1 human partners:{Q14746}  
23015 Pathogen[ P03363] interacts with 1 human partners:{Q14746}  
23016 [Cluster 2093]GO:0051151+P biological\_process [name] negative regulation of smooth  
muscle cell differentiation [def] "Any process that stops, prevents, or reduces the  
frequency, rate or extent of smooth muscle cell differentiation." [CL

23017 Pathogen[ Q2Q067] interacts with 2 human partners:{P53805;Q9H204}  
23018 Pathogen[ POC214] interacts with 2 human partners:{Q9H204;P53805}  
23019 Pathogen[ P03346] interacts with 3 human partners:{P53805;P98177;Q9H204}  
23020 Pathogen[ Q85601] interacts with 2 human partners:{P53805;Q9H204}  
23021 Pathogen[ P14079] interacts with 2 human partners:{Q9H204;P53805}  
23022 Pathogen[ P03383] interacts with 2 human partners:{Q9H204;P53805}  
23023 Pathogen[ P03410] interacts with 2 human partners:{Q9H204;P53805}  
23024 Pathogen[ P14075] interacts with 2 human partners:{P53805;Q9H204}  
23025 Pathogen[ POC206] interacts with 3 human partners:{P53805;Q9NQX0;Q9H204}

23026 Pathogen[ P03363] interacts with 2 human partners:{P53805;Q9H204}

23027 [Cluster 2094]GO:0009048+P biological\_process [name] dosage compensation, by inactivation of X chromosome [def] "Compensating for the two-fold variation in X-chromosome

23028 Pathogen[ Q2Q067] interacts with 1 human partners:{Q92900}

23029 Pathogen[ P0C214] interacts with 1 human partners:{Q92900}

23030 Pathogen[ P03346] interacts with 1 human partners:{Q92900}

23031 Pathogen[ Q85601] interacts with 1 human partners:{Q92900}

23032 Pathogen[ P14079] interacts with 1 human partners:{Q92900}

23033 Pathogen[ P03383] interacts with 1 human partners:{Q92900}

23034 Pathogen[ P03410] interacts with 1 human partners:{Q92900}

23035 Pathogen[ P14075] interacts with 1 human partners:{Q92900}

23036 Pathogen[ P0C206] interacts with 1 human partners:{Q92900}

23037 Pathogen[ P03363] interacts with 1 human partners:{Q92900}

23038 [Cluster 2095]GO:0001569+P biological\_process [name] patterning of blood vessels [def] "The process that regulates the coordinated growth and sprouting of blood vessels giving rise to the organized vascular system." [GOC

23039 Pathogen[ Q2Q067] interacts with 5 human partners:{O14786;Q14934;P11831;Q96T37;Q12968}

23040 Pathogen[ P0C214] interacts with 5 human partners:{O14786;P11831;Q12968;Q14934;Q96T37}

23041 Pathogen[ P03346] interacts with 6 human partners:{P11831;P52951;Q14934;Q12968;Q96T37;O14786}

23042 Pathogen[ Q85601] interacts with 5 human partners:{P11831;O14786;Q14934;Q12968;Q96T37}

23043 Pathogen[ P14079] interacts with 3 human partners:{Q96T37;Q12968;Q14934}

23044 Pathogen[ P03383] interacts with 3 human partners:{P11831;Q14934;Q12968}

23045 Pathogen[ P03410] interacts with 5 human partners:{O14786;P11831;Q12968;Q96T37;Q14934}

23046 Pathogen[ P14075] interacts with 3 human partners:{P11831;Q14934;Q12968}

23047 Pathogen[ P0C206] interacts with 5 human partners:{Q96T37;Q12968;O14786;Q14934;P11831}

23048 Pathogen[ P03363] interacts with 6 human partners:{O14786;P11831;Q96T37;Q12968;P52951;Q14934}

23049 [Cluster 2096]GO:0051099+P biological\_process [name] positive regulation of binding [def] "Any process that activates or increases the rate or extent of binding, the selective interaction of a molecule with one or more specific sites on another molecule." [GOC

23050 Pathogen[ Q2Q067] interacts with 1 human partners:{Q96FX2}

23051 Pathogen[ P0C214] interacts with 1 human partners:{Q96FX2}

23052 Pathogen[ P03346] interacts with 1 human partners:{Q96FX2}

23053 Pathogen[ Q85601] interacts with 1 human partners:{Q96FX2}

23054 Pathogen[ P14079] interacts with 1 human partners:{Q96FX2}

23055 Pathogen[ P03383] interacts with 1 human partners:{Q96FX2}

23056 Pathogen[ P03410] interacts with 1 human partners:{Q96FX2}

23057 Pathogen[ P14075] interacts with 1 human partners:{Q96FX2}

23058 Pathogen[ P0C206] interacts with 1 human partners:{Q96FX2}

23059 Pathogen[ P03363] interacts with 1 human partners:{Q96FX2}

23060 [Cluster 2097]GO:0048712+P biological\_process [name] negative regulation of astrocyte differentiation [def] "Any process that stops, prevents, or reduces the frequency, rate or extent of astrocyte differentiation." [GOC

23061 Pathogen[ Q2Q067] interacts with 3 human partners:{P04198;Q9Y2D1;P47928}

23062 Pathogen[ P0C214] interacts with 3 human partners:{P47928;Q9Y2D1;P04198}

23063 Pathogen[ P03346] interacts with 3 human partners:{Q9Y2D1;P04198;P47928}

23064 Pathogen[ Q85601] interacts with 3 human partners:{Q9Y2D1;P04198;P47928}

23065 Pathogen[ P14079] interacts with 2 human partners:{P04198;P47928}

23066 Pathogen[ P03383] interacts with 3 human partners:{P04198;P47928;Q9Y2D1}

23067 Pathogen[ P03410] interacts with 3 human partners:{Q9Y2D1;P47928;P04198}

23068 Pathogen[ P14075] interacts with 3 human partners:{Q9Y2D1;P47928;P04198}

23069 Pathogen[ P0C206] interacts with 3 human partners:{Q9Y2D1;P04198;P47928}

23070 Pathogen[ P03363] interacts with 3 human partners:{P04198;Q9Y2D1;P47928}

23071 [Cluster 2098]GO:0055114+P biological\_process [name] oxidation-reduction process [def] "A metabolic process that results in the removal or addition of one or more electrons to or from a substance, with or without the concomitant removal or addition of a proton or protons." [GOC

23072 Pathogen[ Q2Q067] interacts with 56 human partners:{P02792;Q9ULD0;Q9UPP1;Q9NXW9;P09917;P07195;Q9BUP3;P31040;Q6NS38;O75151;P49419;P15121;O14618;O75489;Q9Y2Z2;P21953;Q8NHM5;Q9NZC7;Q9BV57;P27695;Q06830;Q9BU89;P31350;Q96A73;P15559;Q7LG56;O00625;P29474;Q9NWT6;O75251;Q96Q83;O75306;P04406;P10599;P40925;P21912;Q14739;Q96KS0;O75164;Q9H6W3;Q13363;Q9BYZ2;Q9NNW7;Q9H6Z9;Q8N371;Q9BPX1;O95831;O14556;P40926;Q9GZT9;P00338;Q15652;Q7LBC6;Q16836;P07864;Q9UHB4}

23073 Pathogen[ P0C214] interacts with 106 human partners:{P29474;P02794;Q9GZZ9;Q8N371;Q8IX04;P49419;O75306;Q14739;P09417;P08294;P52209;P27695;P09917;O75874;P11413;Q9NVH6;Q99643;Q8NCN5;Q8N335;Q9BU89;P31350;Q13363;P11177;P07864;Q86XF0;Q5I0G3;P28331;P12694;P42898;Q9BV57;Q96KS0;Q9NNW7;Q9BRX8;P48735;Q96A73;P35270;Q9Y2Z2;Q9HA92;O75164;P40939;O75151;Q6ZMR3;Q99807;P40926;P16083;O14556;Q9Y2

- S2;P55789;Q06830;P53701;Q9NZC7;Q8TBF2;Q9UJ68;P15121;P00374;Q9UI17;Q9BUP3;P50213;Q16881;Q9H6Z9;Q6NS38;O43837;P21953;O14832;Q9NWM0;Q9H6W3;Q86WU2;Q15652;Q9GZT9;P30043;Q9ULD0;Q9BXP1;O14618;P23921;Q9NXW9;P09622;Q9UL12;P07327;O75489;Q9UHB4;P10599;P02792;O75251;Q96BT7;O00625;Q16698;P36551;Q9BYZ2;Q7LG56;Q9Y3D2;P48163;P21912;Q96Q83;P15559;P04406;P11586;Q7LBC6;Q9UPP1;Q16798;P07195;P51553;P18054;Q96NN9;Q9NWT6;P21695;Q8NHM5}
- 23074 Pathogen[ P03346] interacts with 66 human partners: {P02792;Q96A73;P16083;Q14739;P31040;P04406;Q9UBK8;P29474;Q16836;O75489;Q9BUP3;Q7LBC6;Q9UHB4;Q9BV57;Q9BXP1;Q8NCN5;P15121;P18054;Q86WU2;Q9ULD0;P02794;Q9BYW2;Q9Y2Z2;P15559;Q9NXW9;Q15652;O75151;P21912;O14618;P09917;P31350;P49419;Q7LG56;O14556;Q9NZC7;O75164;Q9GZT9;P40926;Q9UPP1;O95831;P00338;Q96Q83;Q96BT7;Q8N371;Q06830;P07195;Q96KS0;O75251;B2RXH2;Q9UGL1;Q13363;P10599;Q9BU89;O00625;P56545;O75306;P27695;Q9NWT6;Q8NHM5;P40925;Q9H6W3;Q8IWF2;Q8TDZ2;Q9H6Z9;Q9BYZ2;Q9NNW7}
- 23075 Pathogen[ Q85601] interacts with 54 human partners: {Q9NZC7;Q96A73;Q9UHB4;Q9H6Z9;O95831;Q8N371;Q6ZMR3;P09917;O75151;O75306;Q9BXP1;P21912;Q9NWT6;Q9Y2Z2;Q13363;P21953;P31350;Q9BV57;Q9H6W3;Q9NXW9;P10599;P07864;Q7LG56;O14556;Q9GZT9;Q96KS0;Q9BYZ2;Q8NHM5;P31040;Q9UPP1;P15121;P29474;Q6NS38;P40925;Q06830;P07195;Q96Q83;P02792;Q16836;O75164;O00625;P04406;Q15652;Q7LBC6;O14618;Q9ULD0;Q9BU89;P02794;P00338;Q9BUP3;P27695;P40926;P49419;Q14739}
- 23076 Pathogen[ P14079] interacts with 101 human partners: {O00625;Q9UHB4;Q86XF0;P00374;P48775;Q9GZT9;O75151;Q99807;P21953;Q8TDZ2;P00338;Q9C0B1;Q6SZ5;Q8IVL6;Q9NXW9;P13498;P16083;P52209;Q96A73;Q9NZV6;Q6P6C2;O75306;P00395;Q9Y2Z2;Q93099;Q15070;P14927;Q5SRE7;Q9NVH6;Q9BRX8;Q14739;Q8NHM5;Q15526;P31350;P15559;P07919;Q15652;Q6N021;Q7LG56;P07195;P14854;Q9BUP3;Q9H6W3;O95831;Q6ZMR3;Q86WU2;Q9NNW7;Q9BU89;Q9NZC7;P31040;Q8IUH2;Q9UPP1;Q9NWT6;O14832;Q6NS38;Q3KRA9;O75251;Q9H6Z9;Q9UL12;P07864;Q9HA92;P55789;P27695;Q9Y471;P09917;Q8NBK3;P02794;P10620;Q96KJ9;Q9Y3D2;Q9UI17;O75489;Q8TBF2;P03923;P10599;Q16878;Q9BT30;P03897;Q8NCN5;Q8N371;P21695;P36551;P40925;O43819;Q96Q83;Q9BYZ2;O43151;P53701;Q96KS0;O14618;Q9UJ68;P03901;P03886;Q9BV57;Q9NS9;Q9ULD0;Q7LBC6;Q16836;P42898;P04406;P21912}
- 23077 Pathogen[ P03383] interacts with 42 human partners: {P02794;Q9NWT6;P29474;P40926;O75251;Q9UHB4;P00338;Q9BYZ2;P31040;P07864;Q96A73;Q16836;O75489;O95831;P40925;Q9Y2Z2;P10599;O75151;Q96KS0;Q9H6W3;O75306;P31350;Q9BV57;O75164;Q9ULD0;Q15652;O14556;P07195;Q6ZMR3;O00625;Q9H6Z9;P04406;Q9BUP3;Q9BU89;P27695;Q8N371;Q96Q83;Q7LBC6;Q9UPP1;Q13363;P49419;Q9BXP1}
- 23078 Pathogen[ P03410] interacts with 101 human partners: {P15559;Q3KRA9;Q9UPP1;Q9H6W3;Q9BYZ2;Q96KJ9;Q9BU89;P02794;P10599;P31350;O14556;Q6P6C2;Q14739;Q9NWT6;Q9BXP1;Q9ULD0;Q15652;Q9NVH6;Q96KS0;Q9UI17;Q9H6Z9;Q9Y2Z2;Q9NXW9;O75251;Q8TDZ2;P00374;Q9NZC7;P12694;P07919;Q6ZMR3;Q6N021;P21953;Q96Q83;Q6NS38;P07195;Q7LBC6;P36551;Q9GZT9;P52209;Q93099;O00625;O75151;P29474;Q9UJ68;P48775;Q9Y3D2;P03886;Q86XF0;P14927;P00338;Q9HA92;Q9UL12;P53701;P16083;P31040;P49419;Q9BUP3;O75489;P42898;O95831;P21912;O14832;P04406;Q9UHB4;O43151;Q16836;Q9NVH6;Q99643;Q9BT30;P03897;P40926;Q8NCN5;P27695;Q9Y471;O75306;P09917;P07864;P14854;P40925;Q99807;Q15070;P03901;Q9C0B1;P03923;O14618;P02792;Q8N371;P55789;O75164;P23921;Q9BRX8;Q9BV57;Q8TBF2;Q96A73;Q7LG56;Q06830;Q96SZ5;O43819;P21695;Q9NNW7;Q86WU2}
- 23079 Pathogen[ P14075] interacts with 49 human partners: {Q9NVH6;P29474;Q9BUP3;P40925;Q96KS0;Q9GZT9;P31350;Q8N371;Q96Q83;P27695;Q9BV57;Q9UPP1;Q15652;Q7LBC6;Q15070;Q9Y2Z2;P40926;Q8NCN5;O00625;P15559;Q9UHB4;P31040;O75306;P07195;Q9BU89;P04406;P49419;Q9NVH6;O95831;O75251;Q16836;P02794;Q9H6W3;P07864;Q9NWT6;P55789;Q9ULD0;Q96A73;P00338;O14832;Q9BYZ2;Q13363;O75489;Q9NXW9;O75151;O14556;O75164;Q9H6Z9;P10599}
- 23080 Pathogen[ P0C206] interacts with 78 human partners: {P27695;Q8N371;Q9NZV6;P07195;Q96Q83;P53701;P09917;Q6ZMR3;Q14739;P07864;P55789;Q9HA92;Q9BUP3;P50213;O75251;Q96KS0;Q9GZT9;O43151;Q9ULD0;P02794;O75306;Q3KRA9;Q6NS38;Q16836;P15559;Q9UPP1;O14832;Q8TBF2;Q96A73;Q9Y2Z2;Q9NXW9;Q9NVH6;P36551;Q86WU2;Q7LBC6;O00625;P21953;Q7LG56;Q9NNW7;O75151;Q9BXP1;Q15070;Q9NWT6;O95831;O14556;Q9Y3D2;Q9H6W3;Q9UJ68;P40925;Q99807;O14618;P04406;P40926;Q8NHM5;P31040;Q9BV57;P02792;Q15652;P29474;O75489;Q9NZC7;Q9H6Z9;O75164;Q9BYZ2;P49419;P15121;P10599;Q13363;Q9UHB4;P21912;Q06830;Q8TDZ2;Q9BU89;Q8NCN5;P00338;Q9BRX8;P31350;P16083}
- 23081 Pathogen[ P03363] interacts with 27 human partners: {Q16836;P29474;Q9BUP3;P49419;P31040;Q9UHB4;P40925;Q9NNW7;Q9H6Z9;Q9ULD0;Q96BT7;P56545;O75164;Q9BYZ2;Q15652;Q9BXP1;Q96Q83;P04406;Q9BV57;O00625;O14618;Q14739;Q13363;O14556;Q96A73;P02794;O95831}
- 23082 [Cluster 2099]GO:0043551+P biological\_process [name] regulation of phosphatidylinositol 3-kinase activity [def] "Any process that modulates the frequency, rate or extent of phosphatidylinositol 3-kinase activity, the catalysis of the transfer of a phosphate group, usually from ATP, to an inositol lipid at the 3' position of the inositol ring." [GOC
- 23083 Pathogen[ Q2Q067] interacts with 2 human partners: {Q8WYR1;P27986}
- 23084 Pathogen[ P0C214] interacts with 2 human partners: {Q8WYR1;P27986}
- 23085 Pathogen[ P03346] interacts with 2 human partners: {Q8WYR1;P27986}
- 23086 Pathogen[ Q85601] interacts with 2 human partners: {P27986;Q8WYR1}
- 23087 Pathogen[ P14079] interacts with 1 human partners: {Q8WYR1}
- 23088 Pathogen[ P03383] interacts with 2 human partners: {P27986;Q8WYR1}
- 23089 Pathogen[ P03410] interacts with 2 human partners: {P27986;Q8WYR1}
- 23090 Pathogen[ P14075] interacts with 2 human partners: {Q8WYR1;P27986}
- 23091 Pathogen[ P0C206] interacts with 2 human partners: {P27986;Q8WYR1}
- 23092 Pathogen[ P03363] interacts with 2 human partners: {Q8WYR1;P27986}



23093 [Cluster 2100]GO:0007405+P biological\_process [name] neuroblast proliferation [def] "The expansion of a neuroblast population by cell division. A neuroblast is any cell that will divide and give rise to a neuron." [GOC

23094 Pathogen[ Q2Q067] interacts with 2 human partners:{Q9NXR1;P47928}

23095 Pathogen[ P0C214] interacts with 2 human partners:{P47928;Q9NXR1}

23096 Pathogen[ P03346] interacts with 4 human partners:{Q9HD90;Q9NXR1;Q9Y6R0;P47928}

23097 Pathogen[ Q85601] interacts with 2 human partners:{Q9NXR1;P47928}

23098 Pathogen[ P14079] interacts with 3 human partners:{Q8WU20;Q9NXR1;P47928}

23099 Pathogen[ P03383] interacts with 1 human partners:{P47928}

23100 Pathogen[ P03410] interacts with 3 human partners:{Q9NXR1;P47928;Q8WU20}

23101 Pathogen[ P14075] interacts with 1 human partners:{P47928}

23102 Pathogen[ P0C206] interacts with 3 human partners:{Q8WU20;Q9NXR1;P47928}

23103 Pathogen[ P03363] interacts with 3 human partners:{P47928;Q9NXR1;Q9Y6R0}

23104 [Cluster 2101]GO:0032232+P biological\_process [name] negative regulation of actin filament bundle assembly [def] "Any process that stops, prevents, or reduces the frequency, rate or extent of the assembly of actin filament bundles." [GOC

23105 Pathogen[ Q2Q067] interacts with 2 human partners:{O60260;Q13233}

23106 Pathogen[ P0C214] interacts with 2 human partners:{Q13233;O60260}

23107 Pathogen[ P03346] interacts with 2 human partners:{Q13233;O60260}

23108 Pathogen[ Q85601] interacts with 2 human partners:{O60260;Q13233}

23109 Pathogen[ P14079] interacts with 1 human partners:{O60260}

23110 Pathogen[ P03383] interacts with 2 human partners:{Q13233;O60260}

23111 Pathogen[ P03410] interacts with 2 human partners:{O60260;Q13233}

23112 Pathogen[ P14075] interacts with 2 human partners:{Q13233;O60260}

23113 Pathogen[ P0C206] interacts with 2 human partners:{Q13233;O60260}

23114 Pathogen[ P03363] interacts with 1 human partners:{Q13233}

23115 [Cluster 2102]GO:0048041+P biological\_process [name] focal adhesion assembly [def] "The aggregation and bonding together of a set of components to form a focal adhesion, a complex of intracellular signaling and structural proteins that provides a structural link between the internal actin cytoskeleton and the ECM, and also function as a locus of signal transduction activity." [GOC

23116 Pathogen[ Q2Q067] interacts with 3 human partners:{Q96IF1;Q15654;Q9BX66}

23117 Pathogen[ P0C214] interacts with 2 human partners:{Q9BX66;Q15654}

23118 Pathogen[ P03346] interacts with 3 human partners:{Q96IF1;Q9BX66;Q15654}

23119 Pathogen[ Q85601] interacts with 3 human partners:{Q9BX66;Q15654;Q96IF1}

23120 Pathogen[ P14079] interacts with 3 human partners:{Q96IF1;P49023;Q9BX66}

23121 Pathogen[ P03383] interacts with 1 human partners:{Q15654}

23122 Pathogen[ P03410] interacts with 3 human partners:{Q15654;Q96IF1;Q9BX66}

23123 Pathogen[ P14075] interacts with 1 human partners:{Q15654}

23124 Pathogen[ P0C206] interacts with 3 human partners:{Q96IF1;Q15654;Q9BX66}

23125 Pathogen[ P03363] interacts with 3 human partners:{Q15654;Q9BX66;Q96IF1}

23126 [Cluster 2103]GO:0061428+P

23127 Pathogen[ Q2Q067] interacts with 2 human partners:{P40337;Q9NWT6}

23128 Pathogen[ P0C214] interacts with 2 human partners:{P40337;Q9NWT6}

23129 Pathogen[ P03346] interacts with 2 human partners:{P40337;Q9NWT6}

23130 Pathogen[ Q85601] interacts with 2 human partners:{P40337;Q9NWT6}

23131 Pathogen[ P14079] interacts with 2 human partners:{P40337;Q9NWT6}

23132 Pathogen[ P03383] interacts with 2 human partners:{Q9NWT6;P40337}

23133 Pathogen[ P03410] interacts with 2 human partners:{Q9NWT6;P40337}

23134 Pathogen[ P14075] interacts with 2 human partners:{Q9NWT6;P40337}

23135 Pathogen[ P0C206] interacts with 2 human partners:{Q9NWT6;P40337}

23136 Pathogen[ P03363] interacts with 1 human partners:{P40337}

23137 [Cluster 2104]GO:0051899+P biological\_process [name] membrane depolarization [def] "The process in which membrane potential changes in the depolarizing direction from the resting potential, usually from negative to positive. For example, the initial depolarization during the rising phase of an action potential is in the direction from the negative resting potential towards the positive membrane potential that will be the peak of the action potential." [Wikipedia

23138 Pathogen[ Q2Q067] interacts with 1 human partners:{Q99497}

23139 Pathogen[ P0C214] interacts with 2 human partners:{Q99497;P05412}

23140 Pathogen[ P03346] interacts with 2 human partners:{P05412;Q99497}

23141 Pathogen[ Q85601] interacts with 2 human partners:{Q99497;P05412}

23142 Pathogen[ P14079] interacts with 2 human partners:{Q99497;P05412}

23143 Pathogen[ P03383] interacts with 1 human partners:{P05412}

23144 Pathogen[ P03410] interacts with 2 human partners:{Q99497;P05412}

23145 Pathogen[ P14075] interacts with 1 human partners:{P05412}

23146 Pathogen[ P0C206] interacts with 2 human partners:{P05412;Q99497}

23147 Pathogen[ P03363] interacts with 1 human partners:{P05412}

23148 [Cluster 2105]GO:0019932+P biological\_process [name] second-messenger-mediated signaling [def] "A series of molecular signals in which an ion or small molecule is formed or released into the cytosol, thereby helping relay the signal within the cell." [GOC

23149 Pathogen[ Q2Q067] interacts with 2 human partners:{P30153;P67775}

23150 Pathogen[ P0C214] interacts with 2 human partners:{P30153;P67775}

23151 Pathogen[ P03346] interacts with 2 human partners:{P67775;P30153}

23152 Pathogen[ Q85601] interacts with 2 human partners:{P30153;P67775}

23153 Pathogen[ P14079] interacts with 1 human partners:{P30153}  
23154 Pathogen[ P03383] interacts with 2 human partners:{P30153;P67775}  
23155 Pathogen[ P03410] interacts with 2 human partners:{P30153;P67775}  
23156 Pathogen[ P14075] interacts with 2 human partners:{P67775;P30153}  
23157 Pathogen[ P0C206] interacts with 2 human partners:{P30153;P67775}  
23158 Pathogen[ P03363] interacts with 2 human partners:{P30153;P67775}  
23159 [Cluster 2106]GO:0070375+P biological\_process [name] BMK cascade [def] "A cascade of protein kinase activities, culminating in the phosphorylation and activation of big MAP kinase (BMK1/ERK5), which is a type of mitogen-activated protein (MAP) kinase." [GOC  
23160 Pathogen[ Q2Q067] interacts with 1 human partners:{Q02078}  
23161 Pathogen[ P0C214] interacts with 1 human partners:{Q02078}  
23162 Pathogen[ P03346] interacts with 1 human partners:{Q02078}  
23163 Pathogen[ Q85601] interacts with 1 human partners:{Q02078}  
23164 Pathogen[ P14079] interacts with 2 human partners:{Q02078;Q13164}  
23165 Pathogen[ P03383] interacts with 1 human partners:{Q02078}  
23166 Pathogen[ P03410] interacts with 1 human partners:{Q02078}  
23167 Pathogen[ P14075] interacts with 1 human partners:{Q02078}  
23168 Pathogen[ P0C206] interacts with 1 human partners:{Q02078}  
23169 Pathogen[ P03363] interacts with 1 human partners:{Q02078}  
23170 [Cluster 2107]GO:0060048+P biological\_process [name] cardiac muscle contraction [def] "Muscle contraction of cardiac muscle tissue." [GOC  
23171 Pathogen[ Q2Q067] interacts with 3 human partners:{Q8WUF5;Q07955;Q99717}  
23172 Pathogen[ P0C214] interacts with 4 human partners:{Q8WUF5;Q07955;P19429;Q99717}  
23173 Pathogen[ P03346] interacts with 4 human partners:{Q99717;Q07955;P63316;Q8WUF5}  
23174 Pathogen[ Q85601] interacts with 3 human partners:{Q07955;Q99717;Q8WUF5}  
23175 Pathogen[ P14079] interacts with 5 human partners:{P19429;Q8WUF5;P68032;Q07955;O15273}  
23176 Pathogen[ P03383] interacts with 3 human partners:{Q07955;Q99717;Q8WUF5}  
23177 Pathogen[ P03410] interacts with 7 human partners:{P19429;Q99717;O15273;Q07955;P63316;Q8WUF5;Q16635}  
23178 Pathogen[ P14075] interacts with 3 human partners:{Q8WUF5;Q99717;Q07955}  
23179 Pathogen[ P0C206] interacts with 5 human partners:{Q8WUF5;Q07955;Q99717;P19429;P50461}  
23180 Pathogen[ P03363] interacts with 4 human partners:{Q8WUF5;Q07955;P19429;Q99717}  
23181 [Cluster 2108]GO:0007569+P biological\_process [name] cell aging [def] "Progression of the cell from its inception to the end of its lifespan." [GOC  
23182 Pathogen[ Q2Q067] interacts with 7 human partners:{Q99583;P06748;Q53EL6;Q53G26;P37198;P42771;Q96EY1}  
23183 Pathogen[ P0C214] interacts with 7 human partners:{P06748;Q53EL6;P37198;P42771;Q53G26;Q99583;Q96EY1}  
23184 Pathogen[ P03346] interacts with 10 human partners:{P06748;Q14149;P37198;P42771;P51587;P48059;Q53G26;Q99583;Q96EY1;Q53EL6}  
23185 Pathogen[ Q85601] interacts with 9 human partners:{Q53G26;Q14149;P42771;P06748;Q53EL6;P48059;Q99583;Q96EY1;P51587}  
23186 Pathogen[ P14079] interacts with 9 human partners:{P51587;Q14149;Q99583;P37198;P06748;P48059;Q96EY1;Q53EL6;P42771}  
23187 Pathogen[ P03383] interacts with 7 human partners:{Q53EL6;P06748;P42771;Q99583;P37198;Q96EY1;Q53G26}  
23188 Pathogen[ P03410] interacts with 9 human partners:{P42771;Q53G26;Q14149;P06748;P51587;Q99583;Q53EL6;P48059;Q96EY1}  
23189 Pathogen[ P14075] interacts with 7 human partners:{P42771;Q53G26;P37198;P06748;Q53EL6;Q99583;Q96EY1}  
23190 Pathogen[ P0C206] interacts with 9 human partners:{P51587;Q99583;Q53G26;P42771;Q14149;P48059;Q53EL6;P06748;Q96EY1}  
23191 Pathogen[ P03363] interacts with 7 human partners:{Q53EL6;P06748;Q53G26;P37198;Q96EY1;Q99583;P42771}  
23192 [Cluster 2109]GO:0007422+P biological\_process [name] peripheral nervous system development [def] "The process whose specific outcome is the progression of the peripheral nervous system over time, from its formation to the mature structure. The peripheral nervous system is one of the two major divisions of the nervous system. Nerves in the PNS connect the central nervous system (CNS) with sensory organs, other organs, muscles, blood vessels and glands." [GOC  
23193 Pathogen[ Q2Q067] interacts with 3 human partners:{Q9Y4Z2;P56693;P11161}  
23194 Pathogen[ P0C214] interacts with 3 human partners:{P56693;Q99574;P11161}  
23195 Pathogen[ P03346] interacts with 7 human partners:{Q9Y4Z2;Q9NU63;P48443;P56693;P11161;Q99929;Q9UJU5}  
23196 Pathogen[ Q85601] interacts with 4 human partners:{Q9Y4Z2;P56693;P11161;Q9NU63}  
23197 Pathogen[ P14079] interacts with 4 human partners:{P48443;Q9NU63;P11161;P56693}  
23198 Pathogen[ P03383] interacts with 2 human partners:{P11161;P56693}  
23199 Pathogen[ P03410] interacts with 3 human partners:{P56693;P11161;Q9NU63}  
23200 Pathogen[ P14075] interacts with 2 human partners:{P11161;P56693}  
23201 Pathogen[ P0C206] interacts with 5 human partners:{P11161;Q9Y4Z2;P56693;Q9NU63;P48443}  
23202 Pathogen[ P03363] interacts with 5 human partners:{Q9Y4Z2;Q99929;P56693;Q9UJU5;P11161}  
23203 [Cluster 2110]GO:0006950+P biological\_process [name] response to stress [def] "Any

- process that results in a change in state or activity of a cell or an organism (in terms of movement, secretion, enzyme production, gene expression, etc.) as a result of a disturbance in organismal or cellular homeostasis, usually, but not necessarily, exogenous (e.g. temperature, humidity, ionizing radiation)." [GOC
- 23204 Pathogen[ Q2Q067] interacts with 56 human  
partners: {P01100;O15234;O95433;Q08209;O95257;Q6IE81;Q9BZQ8;Q99497;Q12988;O75807;Q9BQ  
S6;P15121;Q00613;Q16082;Q04206;P61604;Q9ULV5;P08238;Q9UJY1;P18850;Q99933;P07900;P067  
48;Q03933;P08107;P04792;Q9Y2A0;P31948;P11142;Q9UQL6;O43524;Q9UDY4;P24522;Q9UJM3;O755  
82;P40337;Q9ULX9;Q9BPZ7;P41567;P35869;P25685;O95232;Q96RU7;Q13144;P45984;Q8IUR6;O433  
18;P26651;O14558;O60870;Q9UBY9;Q15759;Q13501;Q9Y2A4;P14625;Q96A56}
- 23205 Pathogen[ P0C214] interacts with 67 human  
partners: {Q9BPZ7;P18850;Q9UDY4;O15234;Q58FG0;P08294;Q8N573;Q9BQS6;P14625;Q00613;P358  
69;P24522;Q58FF7;Q12988;Q9Y2A4;P06748;O75807;P01100;P34932;P61604;Q9UBY9;P04792;Q160  
82;Q9ULP0;Q9UJM3;Q58FG1;Q04206;Q99497;Q9Y2A0;Q5SWA1;P31948;O43318;O95232;Q03933;O952  
57;Q13501;P15121;O60870;Q99933;Q9BZQ8;Q13144;Q08209;P40337;Q9ULX9;P41567;Q58FF3;Q58F  
F6;O75582;P26651;Q9ULV5;Q8IUR6;Q6IE81;Q96RU7;P10909;Q15759;Q58FF8;O14558;P45984;Q96A  
56;Q14011;Q14568;P08107;Q9UJY1;O95433;Q9UQL6;P11142;P25685}
- 23206 Pathogen[ P03346] interacts with 66 human  
partners: {P08107;P41567;Q9Y2A0;O15234;P50135;P45984;Q8N573;Q16082;Q12988;P07900;P256  
85;P06748;P14625;Q00613;Q14011;Q9ULP0;Q03933;Q9BPZ7;P61604;Q96A56;P15121;Q9UJY1;Q042  
06;P11142;P31948;Q8IUR6;Q5SWA1;Q9ULX9;O95433;P18850;P51843;O60870;O95232;Q9UBY9;Q9BZ  
Q8;O75569;O75582;Q99497;Q6IE81;P40337;Q96RU7;Q9UHD1;Q15759;Q9BQS6;P45985;P34932;Q9UD  
Y4;O43318;O95257;P35869;O14558;Q08209;Q9Y2A4;P26651;Q9ULV5;Q13144;O43524;P08238;P011  
00;O75807;Q9UQL6;P04792;Q99933;P24522;Q13501;Q9UJM3}
- 23207 Pathogen[ Q85601] interacts with 60 human  
partners: {Q99497;O15234;P08107;Q9UHD1;Q8IUR6;Q9ULV5;Q9UQL6;Q58FF8;Q03933;Q9BPZ7;P403  
37;O95433;P61604;P24522;P31948;Q5SWA1;P25685;Q13144;Q00613;Q9BZQ8;Q08209;P26651;P011  
00;O60870;Q9UBY9;O95232;Q12988;Q99933;Q9Y2A4;Q04206;P11142;P08238;O95257;P18850;O755  
82;P06748;P15121;Q9UDY4;P07900;Q96A56;Q6IE81;Q96RU7;P41567;Q16082;Q15759;P45984;Q9UJ  
M3;P14625;P34932;P04792;P35869;Q58FF3;O43318;Q9BQS6;O14558;O75807;Q14568;Q9UJY1;Q9UL  
X9;Q13501}
- 23208 Pathogen[ P14079] interacts with 74 human  
partners: {Q9UQL6;Q96A56;O75324;Q8N573;Q9BQS6;P31948;P11142;P35869;Q5SWA1;O43422;P525  
64;Q9Y6A5;P41567;Q9UJM3;O75582;P50135;Q99497;Q9UDY4;Q9ULP0;O75807;Q12988;O95433;P109  
09;O75569;O60870;Q03933;P25685;Q6IE81;O14683;P61604;Q13144;P45984;P45983;P40337;Q006  
13;Q16644;Q9Y6X1;Q15759;P08238;Q99933;P08107;P45985;O14558;P24522;P07900;Q16082;Q9UJ  
Y1;Q9ULX9;P06748;Q13501;O75366;Q96RU7;P18850;P14625;Q9Y2A4;O75293;O95232;Q14011;Q150  
11;Q9Y2A0;Q9UHD1;P04792;Q9BPZ7;O95257;Q9ULV5;Q9UBY9;Q9BZQ8;P01100;O15273;Q71910;O152  
34;Q08209;P03886;Q8IUR6}
- 23209 Pathogen[ P03383] interacts with 51 human  
partners: {P08107;O15234;O75582;Q96A56;P06748;Q8IUR6;O95433;P40337;Q9UQL6;P41567;Q9BP  
Z7;Q9UJM3;P31948;P61604;Q9BQS6;P24522;P04792;Q5SWA1;P07900;Q9Y2A0;O43318;Q9BZQ8;Q131  
44;O14558;O60870;Q9ULV5;Q9UDY4;P14625;Q15759;Q00613;P11142;Q13501;P26651;Q99933;Q96R  
U7;Q16082;O95232;P01100;Q04206;P45984;Q9UJY1;Q9UBY9;O75807;P18850;Q6IE81;Q9Y2A4;P358  
69;Q9ULX9;P08238;O95257;Q03933}
- 23210 Pathogen[ P03410] interacts with 73 human  
partners: {Q9UDY4;Q99933;Q00613;Q04206;Q71910;O15234;O75293;Q99497;Q9BQS6;Q08209;P082  
38;P25685;P24522;O75582;P61604;Q9BPZ7;P14625;O60870;O75324;Q9UHD1;Q13501;P11142;P047  
92;P07900;Q9Y6A5;P06748;Q9UJY1;P26651;Q03933;P01100;O15273;O75569;Q9UQL6;P41567;O433  
18;Q9Y6X1;P03886;P45985;O14558;P08107;Q58FF3;Q16082;Q12988;Q9ULP0;Q9ULX9;Q5SWA1;O758  
07;Q14011;Q8IUR6;P31948;O95232;O43422;Q96RU7;P45984;Q96A56;Q15011;Q9BZQ8;Q9ULV5;O952  
57;O95433;Q9Y2A0;Q9BSN7;P50135;P18850;Q9UBY9;Q8N573;Q6IE81;O14683;Q9Y2A4;Q9UJM3;P403  
37;P10909;Q13144}
- 23211 Pathogen[ P14075] interacts with 52 human  
partners: {Q99933;P35869;O15234;Q9BQS6;O95232;Q9UBY9;Q00613;P11142;Q04206;Q15759;Q9Y2  
A4;O75582;P61604;P26651;Q03933;O95257;Q9Y2A0;Q9ULX9;O95433;P04792;Q5SWA1;Q16082;Q9UJ  
Y1;Q9UDY4;P08238;O60870;P07900;Q9BPZ7;Q6IE81;Q9ULV5;Q9BZQ8;Q9UJM3;O43318;O14558;O758  
07;P06748;Q96RU7;P01100;P24522;P08107;Q9UQL6;Q15011;Q13144;P41567;P40337;P14625;P319  
48;Q8IUR6;Q96A56;Q13501;P18850;P45984}
- 23212 Pathogen[ P0C206] interacts with 69 human  
partners: {O75293;Q9BZQ8;Q13501;Q8IUR6;Q12988;Q9UDY4;Q9Y2A0;P24522;P26651;Q9ULP0;O434  
22;P35869;P18850;O75582;Q99933;P45984;O75807;Q00613;O95232;P41567;P34932;Q03933;O608  
70;Q14011;O43318;P04792;Q99497;Q9BQS6;Q96A56;Q96RU7;Q13144;Q9UJY1;Q16082;Q9ULV5;P082  
38;O95257;Q58FF3;P07900;Q9Y6A5;Q15011;P01100;Q04206;P10909;O15234;P08107;Q9BPZ7;Q5SW  
A1;P45985;Q71910;Q9UJM3;Q6IE81;Q9UHD1;Q8N573;P25685;Q08209;P15121;P06748;P31948;O145  
58;Q15759;P11142;P50135;Q9Y2A4;P61604;Q9ULX9;P40337;Q9UBY9;P14625;Q9UQL6}
- 23213 Pathogen[ P03363] interacts with 53 human  
partners: {Q6IE81;Q9UBY9;Q16082;P54652;P07900;Q04206;Q9BZQ8;Q9ULP0;O95232;Q03933;P501  
35;O95257;P18850;Q12988;O14558;Q9UDY4;Q9UJY1;Q9UQL6;O43422;O43318;Q9Y2A4;P40337;P067  
48;P35869;P41567;O43524;Q96A56;P08107;P34932;Q9BQS6;O95433;O60870;P24522;P31948;Q140  
11;O75807;Q9Y2A0;P26651;Q9ULV5;P25685;Q8IUR6;Q00613;Q13144;Q9UJM3;Q9ULX9;P08238;Q999  
33;P04792;P11142;P61604;O75569;P01100;O15234}
- 23214 [Cluster 2111]GO:0035196+P biological\_process [name] production of miRNAs involved in  
gene silencing by miRNA [def] "Cleavage of stem-loop RNA precursors into microRNAs  
(miRNAs), a class of small RNAs that primarily silence genes by blocking the translation  
of mRNA transcripts into protein." [GOC

23215 Pathogen[ Q2Q067] interacts with 1 human partners:{Q8TAD8}  
23216 Pathogen[ P0C214] interacts with 1 human partners:{Q8TAD8}  
23217 Pathogen[ P03346] interacts with 1 human partners:{Q8TAD8}  
23218 Pathogen[ Q85601] interacts with 1 human partners:{Q8TAD8}  
23219 Pathogen[ P14079] interacts with 1 human partners:{Q8TAD8}  
23220 Pathogen[ P03383] interacts with 1 human partners:{Q8TAD8}  
23221 Pathogen[ P03410] interacts with 1 human partners:{Q8TAD8}  
23222 Pathogen[ P14075] interacts with 1 human partners:{Q8TAD8}  
23223 Pathogen[ P0C206] interacts with 1 human partners:{Q8TAD8}  
23224 Pathogen[ P03363] interacts with 1 human partners:{Q8TAD8}  
23225 [Cluster 2112]GO:0007030+P biological\_process [name] Golgi organization [def] "A process that is carried out at the cellular level which results in the assembly, arrangement of constituent parts, or disassembly of the Golgi apparatus." [GOC  
23226 Pathogen[ Q2Q067] interacts with 13 human partners:{Q9H2G9;Q9Y6D6;Q8IWE5;Q53FT3;Q9H8Y8;Q8NF91;Q14746;Q8TAT6;Q7RTS9;Q96CV9;P60953;Q8WTW3;Q9H9E3}  
23227 Pathogen[ P0C214] interacts with 15 human partners:{Q14746;Q9H9E3;P60953;Q8IWE5;Q53FT3;Q8TAT6;Q9H8Y8;Q8NF91;P49257;Q7RTS9;Q9H2G9;Q9BQQ3;Q96CV9;Q9Y6D6;Q8WTW3}  
23228 Pathogen[ P03346] interacts with 20 human partners:{Q14746;Q9H2G9;Q7RTS1;P49257;Q14789;Q8WTW3;P60953;Q9Y6D6;Q96CV9;Q9H9E3;Q7RTS9;Q9H8Y8;Q9BQQ3;Q8TAT6;P49755;Q8NF91;Q15363;Q9BVK6;Q53FT3;Q8IWE5}  
23229 Pathogen[ Q85601] interacts with 15 human partners:{Q14746;Q96CV9;Q53FT3;Q9BQQ3;Q8WTW3;Q8IWE5;Q9H9E3;P49257;Q7RTS9;Q9H2G9;P60953;Q9Y6D6;Q9H8Y8;Q8NF91;Q8TAT6}  
23230 Pathogen[ P14079] interacts with 20 human partners:{Q14789;Q14746;P49257;Q9BVK6;Q15363;Q9H2G9;Q9H8Y8;Q8WTW3;Q53FT3;P49755;Q7RTS1;Q9Y6D6;Q8TAT6;Q9BQQ3;Q7RTS9;O15260;Q8IWE5;Q9H9E3;Q8NF91;Q96CV9}  
23231 Pathogen[ P03383] interacts with 12 human partners:{Q14746;Q9H9E3;P60953;Q9H2G9;Q9Y6D6;Q8WTW3;Q8TAT6;Q7RTS9;Q53FT3;Q96CV9;Q9H8Y8;Q8IWE5}  
23232 Pathogen[ P03410] interacts with 20 human partners:{Q9H2G9;Q7RTS9;Q8IWE5;Q9BQQ3;P49257;Q7RTS1;Q53FT3;Q9BVK6;Q9H8Y8;Q96CV9;Q14789;Q15363;Q9Y6D6;Q8WTW3;P60953;Q14746;O15260;Q8TAT6;Q9H9E3;Q8NF91}  
23233 Pathogen[ P14075] interacts with 13 human partners:{P60953;Q8TAT6;Q14746;Q9H2G9;Q53FT3;Q9H9E3;Q9Y6D6;Q8IWE5;Q7RTS9;Q9H8Y8;Q14789;Q96CV9;Q8WTW3}  
23234 Pathogen[ P0C206] interacts with 20 human partners:{Q14789;Q9BVK6;Q7RTS9;Q8IWE5;Q9H9E3;Q9Y6D6;Q96CV9;Q9H8Y8;P49755;Q14746;Q8TAT6;Q8NF91;Q8WTW3;P49257;P60953;Q9H2G9;O15260;Q15363;Q9BQQ3;Q53FT3}  
23235 Pathogen[ P03363] interacts with 15 human partners:{Q53FT3;Q7RTS1;Q14789;Q8NF91;Q96CV9;Q7RTS9;Q9H9E3;Q8IWE5;Q14746;Q8TAT6;Q8WTW3;Q9H8Y8;Q9H2G9;Q9Y6D6;P60953}  
23236 [Cluster 2113]GO:0001938+P biological\_process [name] positive regulation of endothelial cell proliferation [def] "Any process that activates or increases the rate or extent of endothelial cell proliferation." [GOC  
23237 Pathogen[ Q2Q067] interacts with 4 human partners:{P27540;O14786;Q9HCU8;P22736}  
23238 Pathogen[ P0C214] interacts with 4 human partners:{O14786;Q9HCU8;P05412;P27540}  
23239 Pathogen[ P03346] interacts with 5 human partners:{P05412;Q9HCU8;P27540;P22736;O14786}  
23240 Pathogen[ Q85601] interacts with 5 human partners:{P27540;O14786;P22736;P05412;Q9HCU8}  
23241 Pathogen[ P14079] interacts with 6 human partners:{Q86V25;P13498;P22736;Q9HCU8;P27540;P05412}  
23242 Pathogen[ P03383] interacts with 3 human partners:{Q9HCU8;P27540;P05412}  
23243 Pathogen[ P03410] interacts with 6 human partners:{O14786;P27540;P22736;P05412;Q86V25;Q9HCU8}  
23244 Pathogen[ P14075] interacts with 3 human partners:{P05412;P27540;Q9HCU8}  
23245 Pathogen[ P0C206] interacts with 6 human partners:{Q9HCU8;P05412;P22736;O14786;P27540;Q86V25}  
23246 Pathogen[ P03363] interacts with 6 human partners:{P27540;O14786;Q8N302;Q9HCU8;Q86V25;P05412}  
23247 [Cluster 2114]GO:0060803+P biological\_process [name] BMP signaling pathway involved in mesodermal cell fate specification [def] "A series of molecular signals generated as a consequence of any member of the BMP (bone morphogenetic protein) family binding to a cell surface receptor and ultimately resulting in an cell becoming specified to adopt a mesodermal fate." [GOC  
23248 Pathogen[ Q2Q067] interacts with 1 human partners:{000321}  
23249 Pathogen[ P0C214] interacts with 1 human partners:{000321}  
23250 Pathogen[ P03346] interacts with 1 human partners:{000321}  
23251 Pathogen[ Q85601] interacts with 1 human partners:{000321}  
23252 Pathogen[ P14079] interacts with 1 human partners:{000321}  
23253 Pathogen[ P03383] interacts with 1 human partners:{000321}  
23254 Pathogen[ P03410] interacts with 1 human partners:{000321}  
23255 Pathogen[ P14075] interacts with 1 human partners:{000321}  
23256 Pathogen[ P0C206] interacts with 1 human partners:{000321}

23257 Pathogen[ P03363] interacts with 1 human partners:{000321}  
23258 [Cluster 2115]GO:0045324+P biological\_process [name] late endosome to vacuole transport [def] "The directed movement of substances from late endosomes to the vacuole. In yeast, after transport to the prevacuolar compartment, endocytic content is delivered to the late endosome and on to the vacuole. This pathway is analogous to endosome to lysosome transport." [PMID  
23259 Pathogen[ Q2Q067] interacts with 1 human partners:{Q8WUX9}  
23260 Pathogen[ P0C214] interacts with 1 human partners:{Q8WUX9}  
23261 Pathogen[ P03346] interacts with 1 human partners:{Q8WUX9}  
23262 Pathogen[ Q85601] interacts with 1 human partners:{Q8WUX9}  
23263 Pathogen[ P14079] interacts with 1 human partners:{Q8WUX9}  
23264 Pathogen[ P03383] interacts with 1 human partners:{Q8WUX9}  
23265 Pathogen[ P03410] interacts with 1 human partners:{Q8WUX9}  
23266 Pathogen[ P14075] interacts with 1 human partners:{Q8WUX9}  
23267 Pathogen[ P0C206] interacts with 1 human partners:{Q8WUX9}  
23268 Pathogen[ P03363] interacts with 1 human partners:{Q8WUX9}  
23269 [Cluster 2116]GO:0071777+P biological\_process [name] positive regulation of cell cycle cytokinesis [def] "Any process that activates or increases the frequency, rate or extent of the division of the cytoplasm of a cell, and its separation into two daughter cells, that occurs in the context of cell cycle progression." [GOC  
23270 Pathogen[ Q2Q067] interacts with 7 human partners:{Q99741;Q1MSJ5;Q99569;Q02241;P60953;P30305;P61586}  
23271 Pathogen[ P0C214] interacts with 6 human partners:{Q1MSJ5;Q02241;P61586;P60953;P30305;Q99741}  
23272 Pathogen[ P03346] interacts with 8 human partners:{Q99569;P60953;P30305;Q02241;Q9H8V3;Q99741;Q1MSJ5;P61586}  
23273 Pathogen[ Q85601] interacts with 7 human partners:{Q99569;Q02241;P30305;Q1MSJ5;P61586;P60953;Q99741}  
23274 Pathogen[ P14079] interacts with 7 human partners:{Q02241;Q1MSJ5;Q99741;Q99569;P61586;Q9H8V3;P30305}  
23275 Pathogen[ P03383] interacts with 5 human partners:{Q1MSJ5;Q02241;P60953;P61586;Q99741}  
23276 Pathogen[ P03410] interacts with 8 human partners:{P61586;P60953;Q1MSJ5;Q9H8V3;P30305;Q02241;Q99569;Q99741}  
23277 Pathogen[ P14075] interacts with 5 human partners:{P60953;Q02241;P61586;Q99741;Q1MSJ5}  
23278 Pathogen[ P0C206] interacts with 8 human partners:{P30305;Q99741;Q02241;P61586;Q99569;Q9H8V3;P60953;Q1MSJ5}  
23279 Pathogen[ P03363] interacts with 5 human partners:{Q1MSJ5;Q02241;Q99569;Q99741;P60953}  
23280 [Cluster 2117]GO:0048026+P biological\_process [name] positive regulation of nuclear mRNA splicing, via spliceosome [def] "Any process that activates or increases the rate or extent of mRNA splicing via a spliceosomal mechanism." [GOC  
23281 Pathogen[ Q2Q067] interacts with 1 human partners:{P38159}  
23282 Pathogen[ P0C214] interacts with 1 human partners:{P38159}  
23283 Pathogen[ P03346] interacts with 2 human partners:{P38159;P62995}  
23284 Pathogen[ Q85601] interacts with 1 human partners:{P38159}  
23285 Pathogen[ P14079] interacts with 1 human partners:{P38159}  
23286 Pathogen[ P03383] interacts with 1 human partners:{P38159}  
23287 Pathogen[ P03410] interacts with 1 human partners:{P38159}  
23288 Pathogen[ P14075] interacts with 1 human partners:{P38159}  
23289 Pathogen[ P0C206] interacts with 1 human partners:{P38159}  
23290 Pathogen[ P03363] interacts with 3 human partners:{P38159;Q5SZQ8;P62995}  
23291 [Cluster 2118]GO:0032755+P biological\_process [name] positive regulation of interleukin-6 production [def] "Any process that activates or increases the frequency, rate, or extent of interleukin-6 production." [GOC  
23292 Pathogen[ Q2Q067] interacts with 2 human partners:{Q8IUC6;Q53H80}  
23293 Pathogen[ P0C214] interacts with 3 human partners:{Q8IUC6;Q53H80;P10809}  
23294 Pathogen[ P03346] interacts with 2 human partners:{Q53H80;Q8IUC6}  
23295 Pathogen[ Q85601] interacts with 2 human partners:{Q8IUC6;Q53H80}  
23296 Pathogen[ P14079] interacts with 5 human partners:{Q53H80;Q8IUC6;Q95760;Q9Y239;Q99836}  
23297 Pathogen[ P03383] interacts with 2 human partners:{Q8IUC6;Q53H80}  
23298 Pathogen[ P03410] interacts with 4 human partners:{Q9Y239;Q95760;Q53H80;Q8IUC6}  
23299 Pathogen[ P14075] interacts with 2 human partners:{Q53H80;Q8IUC6}  
23300 Pathogen[ P0C206] interacts with 2 human partners:{Q8IUC6;Q53H80}  
23301 Pathogen[ P03363] interacts with 1 human partners:{Q53H80}  
23302 [Cluster 2119]GO:0009566+P biological\_process [name] fertilization [def] "The union of gametes of opposite sexes during the process of sexual reproduction to form a zygote. It involves the fusion of the gametic nuclei (karyogamy) and cytoplasm (plasmogamy)." [GOC  
23303 Pathogen[ Q2Q067] interacts with 6 human partners:{A6NGQ2;P59047;Q8IYF3;Q9NRG9;P16989;Q9BX26}  
23304 Pathogen[ P0C214] interacts with 6 human partners:{P16989;Q9BXT5;Q9NRG9;Q9BX26;Q8IYF3;P59047}  
23305 Pathogen[ P03346] interacts with 8 human

23306 partners: {P59047;Q9BXT5;Q9BX26;Q9NRG9;Q8IYF3;P16989;A6NGQ2;Q9GZV8}  
Pathogen[ Q85601] interacts with 6 human

23307 partners: {Q9BXT5;Q8IYF3;Q9NRG9;Q9BX26;P16989;P59047}  
Pathogen[ P14079] interacts with 10 human

23308 partners: {Q9BXT5;Q7Z7C7;A6NGQ2;P16989;Q9BX26;Q9GZV8;Q96JY0;Q9NRG9;P59047;Q8IYF3}  
Pathogen[ P03383] interacts with 5 human

23309 partners: {P16989;Q8IYF3;A6NGQ2;Q9NRG9;Q9BX26}  
Pathogen[ P03410] interacts with 9 human

23310 partners: {P16989;A6NGQ2;P59047;Q9GZV8;Q9BX26;Q9BXT5;Q7Z7C7;Q8IYF3;Q9NRG9}  
Pathogen[ P14075] interacts with 7 human

23311 partners: {P16989;Q9BX26;Q9BXT5;A6NGQ2;Q9NRG9;Q8IYF3;Q7Z7C7}  
Pathogen[ P0C206] interacts with 9 human

23312 partners: {A6NGQ2;Q9NRG9;Q9BXT5;Q9BX26;Q7Z7C7;P16989;P59047;Q8IYF3;Q9GZV8}  
Pathogen[ P03363] interacts with 7 human

23313 partners: {A6NGQ2;Q9NRG9;Q96JY0;P59047;P16989;Q9BXT5;Q9BX26}  
[Cluster 2120]GO:0002479+P biological\_process [name] antigen processing and presentation of exogenous peptide antigen via MHC class I, TAP-dependent [def] "The process in which an antigen-presenting cell expresses a peptide antigen of exogenous origin on its cell surface in association with an MHC class I protein complex following intracellular transport via a TAP (transporter associated with antigen processing) pathway. The peptide is typically a fragment of a larger exogenous protein which has been degraded within the cell and is dependent on TAP transport from the cytosol to ER for association with the MHC class I molecule. Class I here refers to classical class I molecules." [GOC

23314 Pathogen[ Q2Q067] interacts with 41 human  
partners: {Q99460;O75832;P48556;P40306;P55036;O00231;O00233;P51665;P28072;A5LHX3;Q13200;P25787;Q06323;P28065;O14818;P27797;Q14997;P60900;Q9UL46;P61289;P28062;Q9UNM6;P25788;Q92530;P25786;Q16401;O00232;P28074;P25789;POCG47;P20618;POCG48;P28070;P28066;Q99436;Q8TAA3;P62987;O43242;P49721;P49720;P62979}

23315 Pathogen[ P0C214] interacts with 43 human  
partners: {Q14997;P51665;P25789;P55036;P28062;A5LHX3;P28065;O14818;O43242;P48556;P40306;Q13200;O00232;Q99460;P28066;O75832;P49720;P28074;POCG48;Q9UL46;P25788;Q9UNM6;O00231;Q06323;P25786;P28072;Q8TAA3;P62987;Q99436;P27797;POCG47;P25787;P35998;P60900;O00233;P62979;Q92530;Q15008;P28070;P20618;P49721;Q16401;P17980}

23316 Pathogen[ P03346] interacts with 41 human  
partners: {P25787;P28070;P25789;P55036;Q99460;Q9UL46;P62987;P28072;P25788;P28074;P49721;O14818;Q99436;POCG48;Q16401;A5LHX3;P28062;P20618;O00232;O75832;O00233;P49720;P28065;P60900;P25786;O00231;P61289;P62979;P27797;P28066;Q9UNM6;Q8TAA3;POCG47;Q14997;Q13200;P48556;P51665;Q06323;Q92530;O43242;P40306}

23317 Pathogen[ Q85601] interacts with 37 human  
partners: {P28066;Q9UNM6;P60900;P55036;P25787;P61289;P25788;O75832;P27797;POCG48;P25789;O00233;P20618;P40306;P49720;P28062;P49721;P25786;P28072;Q13200;P28065;P62979;Q99436;P28070;Q8TAA3;Q9UL46;Q99460;O00231;POCG47;P48556;P28074;Q92530;P62987;A5LHX3;Q06323;O14818;Q16401}

23318 Pathogen[ P14079] interacts with 46 human  
partners: {P28065;Q99436;P62333;P48556;P60468;POCG48;P40306;P13498;P55036;P28074;O00232;P49720;O00487;P25787;O75832;A5LHX3;P62979;O00233;P35998;P61289;P62987;P51665;P20618;Q8TAA3;Q14997;P28062;P60900;Q9UNM6;Q99460;O14818;P49721;P60059;Q92530;Q06323;P62191;Q15008;P43686;O43242;P25788;O00231;P28066;Q9UL46;POCG47;Q16401;P17980;P28072}

23319 Pathogen[ P03383] interacts with 37 human  
partners: {P55036;P62987;P25789;P60900;P40306;O00233;P49721;Q06323;Q14997;P20618;O75832;Q9UL46;Q9UNM6;P25786;Q99460;P28072;Q13200;P28065;P28066;Q16401;P62979;O00231;POCG47;POCG48;P28074;Q92530;P49720;Q8TAA3;P61289;P28062;P48556;O14818;Q99436;P28070;P25787;P27797;P25788}

23320 Pathogen[ P03410] interacts with 45 human  
partners: {P28070;P55036;POCG48;P60468;P25786;P60059;Q15008;Q16401;P60900;Q14997;P35998;Q99460;O00233;O00232;Q8TAA3;P48556;P49721;A5LHX3;P62979;Q99436;P40306;Q06323;Q13200;P25787;P28062;P51665;O14818;O00231;Q9UNM6;P25789;P49720;P62987;P28072;P25788;P28066;P28065;O43242;POCG47;P17980;O75832;P20618;Q9UL46;P28074;P61289;P27797}

23321 Pathogen[ P14075] interacts with 36 human  
partners: {P55036;P25788;P28066;Q06323;O75832;Q8TAA3;P60900;O00233;Q9UL46;P49720;Q13200;P48556;Q16401;P28070;P49721;O00231;Q92530;POCG48;P62979;P28062;P28074;P28065;P27797;P25786;O14818;P62987;P28072;Q14997;POCG47;P25787;P20618;Q9UNM6;P61289;P40306;Q99436;P25789}

23322 Pathogen[ P0C206] interacts with 40 human  
partners: {P61289;Q99436;P28062;Q9UNM6;POCG48;O75832;P27797;P40306;P28065;Q14997;P55036;P25786;P25788;P25787;Q06323;P49720;O00232;P60900;O43242;A5LHX3;P25789;P20618;Q13200;Q8TAA3;P28070;Q99460;P62979;P28066;O14818;POCG47;P28072;P28074;Q92530;P49721;P62987;Q9UL46;O00233;P48556;Q16401;O00231}

23323 Pathogen[ P03363] interacts with 4 human partners: {Q92530;P61289;P27797;P62987}

23324 [Cluster 2121]GO:0008064+P biological\_process [name] regulation of actin polymerization or depolymerization [def] "Any process that modulates the frequency, rate or extent of the assembly or disassembly of actin filaments by the addition or removal of actin monomers from a filament." [GOC

23325 Pathogen[ Q2Q067] interacts with 2 human partners: {P35080;O14604}

23326 Pathogen[ P0C214] interacts with 2 human partners: {P35080;O14604}

23327 Pathogen[ P03346] interacts with 2 human partners: {P35080;O14604}

23328 Pathogen[ Q85601] interacts with 2 human partners: {P35080;O14604}

23329 Pathogen[ P14079] interacts with 2 human partners: {O14604;P35080}

23330 Pathogen[ P03383] interacts with 2 human partners: {P35080;O14604}

23331 Pathogen[ P03410] interacts with 2 human partners: {P35080;O14604}

23332 Pathogen[ P14075] interacts with 2 human partners: {O14604;P35080}

23333 Pathogen[ P0C206] interacts with 2 human partners: {O14604;P35080}

23334 Pathogen[ P03363] interacts with 2 human partners: {P35080;O14604}

23335 [Cluster 2122]GO:0031110+P biological\_process [name] regulation of microtubule polymerization or depolymerization [def] "Any process that modulates the frequency, rate or extent of microtubule polymerization or depolymerization by the addition or removal of tubulin heterodimers from a microtubule." [GOC

23336 Pathogen[ Q2Q067] interacts with 4 human partners: {O75122;Q8IX90;Q96BD8;Q8WVK7}

23337 Pathogen[ P0C214] interacts with 4 human partners: {O75122;Q96BD8;Q8IX90;Q8WVK7}

23338 Pathogen[ P03346] interacts with 4 human partners: {O75122;Q8IX90;Q96BD8;Q8WVK7}

23339 Pathogen[ Q85601] interacts with 4 human partners: {O75122;Q96BD8;Q8IX90;Q8WVK7}

23340 Pathogen[ P14079] interacts with 4 human partners: {Q8IX90;Q8WVK7;Q96BD8;O75122}

23341 Pathogen[ P03383] interacts with 3 human partners: {Q96BD8;Q8WVK7;Q8IX90}

23342 Pathogen[ P03410] interacts with 4 human partners: {Q8IX90;Q8WVK7;Q96BD8;O75122}

23343 Pathogen[ P14075] interacts with 3 human partners: {Q8WVK7;Q96BD8;Q8IX90}

23344 Pathogen[ P0C206] interacts with 4 human partners: {Q8IX90;O75122;Q96BD8;Q8WVK7}

23345 Pathogen[ P03363] interacts with 3 human partners: {Q96BD8;Q8WVK7;Q8IX90}

23346 [Cluster 2123]GO:0003407+P biological\_process [name] neural retina development [def] "The progression of the neural retina over time from its initial formation to the mature structure. The neural retina is the part of the retina that contains neurons and photoreceptor cells." [GOC

23347 Pathogen[ Q2Q067] interacts with 4 human partners: {O96019;P51532;P42575;Q6STE5}

23348 Pathogen[ P0C214] interacts with 4 human partners: {Q6STE5;O96019;P42575;P51532}

23349 Pathogen[ P03346] interacts with 4 human partners: {P51532;P42575;O96019;Q6STE5}

23350 Pathogen[ Q85601] interacts with 4 human partners: {Q6STE5;O96019;P51532;P42575}

23351 Pathogen[ P14079] interacts with 3 human partners: {Q6STE5;P51532;P42575}

23352 Pathogen[ P03383] interacts with 3 human partners: {O96019;Q6STE5;P51532}

23353 Pathogen[ P03410] interacts with 4 human partners: {O96019;P42575;P51532;Q6STE5}

23354 Pathogen[ P14075] interacts with 3 human partners: {P51532;O96019;Q6STE5}

23355 Pathogen[ P0C206] interacts with 4 human partners: {P51532;Q6STE5;O96019;P42575}

23356 Pathogen[ P03363] interacts with 3 human partners: {Q6STE5;P51532;O96019}

23357 [Cluster 2124]GO:0006886+P biological\_process [name] intracellular protein transport [def] "The directed movement of proteins in a cell, including the movement of proteins between specific compartments or structures within a cell, such as organelles of a eukaryotic cell." [GOC

23358 Pathogen[ Q2Q067] interacts with 98 human partners: {Q92783;Q14974;Q9UI26;O94973;Q9Y6Q5;O00410;Q99747;Q10567;P56377;O75340;Q96Q U8;O43747;O95782;O95391;Q92572;O60784;P55735;Q9H2T7;Q8WXE9;P53675;P62826;O95295;Q9H1 H9;Q9P299;Q9BRJ2;Q9UJY4;Q9UJY5;O94829;Q8IV36;O43752;O14662;P83436;Q8WUH2;P06748;Q9HC H5;P48444;O00189;Q96P70;Q92973;O95198;P63010;Q96PC3;Q9BZE9;O75886;P61923;Q8NFW9;O14980;Q15388;P53677;Q9UBF2;O14787;Q9H9C1;Q8TEX9;Q14746;Q92624;Q00610;P61966;Q154 37;P55060;P53992;O95486;O75843;Q96JB2;Q96AP0;O94855;Q02410;Q9Y2T2;Q9H0R1;Q9BXS5;Q9UI A9;Q9HAV4;P54920;O15397;O95373;P53618;O43615;Q04917;P09497;O60763;O14925;Q9P0U1;Q9UL Z2;O95487;O14964;O75558;Q9BQE4;P35606;O43592;Q9Y678;P09496;Q9P2W9;P49754;Q15436;O756 74;Q9NZ52;Q13367;P41214}

23359 Pathogen[ P0C214] interacts with 97 human partners: {O94829;Q96CW1;Q8TEX9;Q9UI26;Q8NFW9;P61923;P55735;Q14746;P49754;Q9UIA9;O147 87;Q9P299;P55060;Q96P70;Q99747;Q15388;O95198;Q92624;P53992;P59780;Q9UJY5;Q04917;O952 95;P06748;Q9UM54;Q9Y2T2;O00189;Q13367;P53618;Q8IV36;P35606;P48444;P83436;O14964;Q9HC H5;Q9HAV4;O75886;P54920;Q9Y6Q2;O75340;Q9H0R1;Q15436;O75843;Q96Q U8;Q9BZE9;P63010;Q105 67;O14925;Q92572;P53675;O14980;Q9UBF2;O95487;Q9UJY4;P53677;P56377;Q15437;O43615;O435 92;Q96PC3;Q9NZ52;O43752;Q9ULZ2;O60763;O60784;P62826;O43747;O94973;Q9Y6Q5;P09497;Q024 10;Q92973;Q8WXE9;P61966;P09496;Q14974;O95782;Q9P0U1;Q9H2T7;O75558;Q9H9C1;Q92783;O953 91;O75674;Q9BQE4;P53680;Q9Y678;Q96JB2;Q8WUH2;O95373;Q9BXS5;O95486;O15397;Q9BRJ2;Q9P2 W9;O94855;P41214}

23360 Pathogen[ P03346] interacts with 123 human partners: {Q13596;Q8TEX9;Q9UI26;O14925;Q96AP0;P61966;P55735;Q96P70;O43752;Q14746;O153 97;Q9H115;Q9HAV4;Q9P2W9;Q9Y6B7;Q9NS69;Q9H2T7;P06748;Q96JB2;Q15036;P63010;O14787;Q9P2 53;O95295;O43747;O95714;Q92572;P53680;P49754;O95391;Q9ULZ2;P56377;Q96Q U8;O43615;Q8IV 36;Q9P0U1;P59780;O75886;Q9BXS5;Q9H0R1;O00410;Q9Y678;O95782;P53618;Q9HCH5;Q9H1H9;Q131 90;Q9P299;Q9H173;O00189;P55060;Q8WUH2;P09496;O60784;Q02410;Q04917;Q9BZE9;Q9UIA9;P628 26;O94855;Q8IYJ3;Q8TDW5;Q9NRS6;O43592;Q10567;O75843;O14980;P48444;Q9Y6Q2;Q92973;Q154 36;Q8WXE9;O75340;Q9UPM8;Q9UNH7;Q15437;O95373;Q96CW1;Q9UBF2;Q96PC3;Q9UJY4;Q9Y5X2;P549 20;O95198;P53675;P61923;O60763;O95486;Q8NFW9;P83436;P09497;Q92783;Q13367;Q9BRJ2;Q9H9 C1;Q15388;O14964;O95487;O14617;O60749;Q9UJY5;P49755;O75558;O75674;Q9Y6Q5;O94829;P412 14;P35606;Q9Y2J0;O94973;Q92624;Q9NZ52;O14662;P53367;Q00610;P53992;Q15363;Q92834;P536 77;Q99747;Q86Y82;Q9Y2T2;Q14974}

23361 Pathogen[ Q85601] interacts with 109 human partners: {Q13367;Q13596;Q9UI26;O14925;P54920;Q14746;Q8NFW9;P53675;Q9ULZ2;O75843;Q9HA V4;Q9UIA9;P48444;Q00610;Q9Y2T2;P09496;Q15388;Q9UJY4;Q96CW1;O95487;Q9P253;Q96P70;O952 95;O60763;O95714;O95391;Q15036;Q9BXS5;P56377;Q9P299;Q8IV36;P62826;Q9HCH5;Q8WXE9;Q96J

B2;O43747;P61923;P83436;Q9H1H9;Q9UPM8;Q9NP61;Q92834;P49754;Q8WUH2;Q10567;Q9P2W9;O75886;Q9UJY5;Q15436;Q9BZE9;Q04917;Q9H9C1;Q14974;O94829;O43752;Q92624;Q9Y6Q2;O95373;Q15437;P55060;Q92973;Q9UBF2;Q96QU8;Q9Y678;Q8TEX9;P55735;P53680;Q9BRJ2;P06748;Q92783;O14787;O14964;O43615;O75340;O75558;O14980;O95486;O94973;Q96PC3;P53618;Q9Y6B7;P09497;P53677;O15397;Q02410;P63010;Q9H2T7;Q92572;Q9UM54;P61966;P59780;Q9Y6Q5;P41214;O94855;P35606;Q9NZ52;O43592;Q9UNH7;O14662;P53992;Q9H0R1;O60784;O00189;O95198;O00410;Q99747;Q9BQE4;O75674;O95782}

23362 Pathogen[ P14079] interacts with 126 human partners: {O95373;O75886;Q96CW1;O43615;Q14746;Q9UNH7;P61923;Q9Y6Q5;Q15036;P61966;Q6ZVM7;Q9BXS5;Q8NEV8;Q00610;Q9UJY4;Q9BQE4;P83436;Q96P70;O95487;P30040;Q9H9C1;Q9UJY5;P05408;P35606;Q8IYJ3;Q9P0U1;Q9UPM8;Q02410;Q10567;O43592;Q9BZE9;Q9BRJ2;Q92834;P56377;Q9Y2T2;Q9Y678;Q92783;Q9Y6B7;P59780;O94855;O00189;Q9HCH5;O75674;Q92624;O60895;Q9NRS6;P53992;Q99747;Q9UM54;O60784;Q04917;O14925;Q9NS69;Q96JX3;Q9H269;P33947;Q92572;Q9NZ52;Q15363;Q15388;O75843;O95198;O75558;P24390;Q9ULZ2;O95782;Q8NFW9;Q9Y5X2;O94829;O00410;P49755;Q9P299;Q8IV36;O75340;Q9UI26;Q14974;P55060;Q92973;Q9UBF2;Q9H1H9;O60749;Q9P253;P09497;P60059;P63010;O15397;P53677;O95295;P06748;O14662;Q9H115;Q13596;O94973;P48444;Q8TEX9;Q99595;Q13367;Q9H0R1;Q8WXE9;O43747;O43752;O14787;Q9UIA9;P55735;P53675;Q9HAV4;Q5SRD1;P49754;Q96JB2;O14617;P62826;O95486;Q96PC3;P41214;Q9H2T7;Q9P2W9;Q96QU8;Q8WUH2;P51571;P53680;P54920;O95391;Q96AP0;P09496;O60763;Q9Y6Q2}

23363 Pathogen[ P03383] interacts with 79 human partners: {Q96CW1;Q9UI26;Q9UJY4;P56377;Q14746;Q9UIA9;P06748;Q00610;O15397;Q92572;P55735;O94829;P53618;P83436;Q9Y678;Q9BRJ2;P54920;O95487;O95295;Q8WXE9;Q10567;Q96P70;O14925;O43615;Q8IV36;Q9H9C1;O75886;Q9BZE9;Q96JB2;O95486;Q9HCH5;P53675;P49754;O00189;P53677;Q15436;Q9H1H9;P62826;P55060;Q99747;O75558;Q9H2T7;O75843;Q9Y2T2;Q92973;Q9BQE4;P63010;O14980;O43747;Q15437;Q9HAV4;O94855;Q9UJY5;Q15388;Q9ULZ2;P41214;O95782;Q9UBF2;O14787;Q14974;Q9P0U1;O60784;Q92783;Q13367;P53992;Q96QU8;O43752;Q02410;O95373;O43592;Q9BXS5;P09497;Q92624;O94973;O14964;O95391;O00410;Q8WUH2;Q9NZ52}

23364 Pathogen[ P03410] interacts with 136 human partners: {Q00610;P09496;Q9Y6Q5;Q5SRD1;Q9HCH5;Q9UPM8;O00203;O95782;Q96PC3;Q96CW1;Q9BZE9;Q6ZVM7;Q14974;Q9BXS5;Q13190;Q15388;P53680;Q96JB2;Q9H115;O60896;Q9Y2J0;P60059;Q13596;Q96AP0;O60895;O94855;Q8TDW5;Q9NZ52;P53992;Q9H1H9;Q9P299;O75674;P55060;O43747;Q04917;Q9ULZ2;O75843;O60749;Q8IV36;Q96QU8;P48444;Q96P70;P53367;Q10567;P30040;P35606;Q92572;P33947;Q9P2W9;O14662;Q92783;Q9NS69;Q8WUH2;P06748;Q9P253;Q8TEX9;O14617;Q9BQE4;Q9UJY5;P41214;Q9Y6B7;Q02410;Q8NFW9;Q8WXE9;Q9UMX2;O95295;Q9UNH7;O14925;Q99595;Q9UM54;Q92624;Q15436;O60763;Q8NEV8;Q15437;P62826;Q96JX3;Q92973;O14787;Q9Y2T2;Q9NP61;Q9Y678;Q9BRJ2;O94829;O95198;O43615;P09497;O95486;Q15363;P05408;Q15036;O60784;Q92834;Q8IYJ3;P53618;P61923;Q9H173;Q9NRS6;P49754;Q9H0R1;P53677;O75558;P24390;P63010;Q9H2T7;Q14746;O43752;Q9P0U1;Q9H9C1;O75340;O00410;P59780;Q9UI26;P83436;P55735;P53675;Q13367;Q9HAV4;O43592;P61966;Q9UIA9;Q9H269;O94973;P56377;O15397;Q99747;Q9Y6Q2;O75886;Q9UJY4;O14980;O95391;O95373;O95487;Q9Y5X2;Q9UBF2;P54920}

23365 Pathogen[ P14075] interacts with 81 human partners: {Q9UI26;Q9P0U1;Q9BQE4;O14925;P09497;Q9BRJ2;Q9UJY4;Q02410;Q14746;Q96JB2;P09496;Q9H1H9;O94973;Q96CW1;O75558;O75886;Q96P70;O95295;Q9H2T7;O14787;O43752;O95391;P53675;Q15388;Q9Y2T2;Q9UBF2;Q8IV36;Q92973;Q92783;Q99747;Q9NZ52;P54920;Q9HCH5;O15397;Q9H9C1;Q9HAV4;Q96AP0;P53992;P55735;Q92624;O43592;O14980;O00189;O95487;O14964;P49754;Q15437;O95373;P53618;P41214;Q8WXE9;O95782;O00410;P62826;O43747;Q9UIA9;P06748;Q15436;Q92572;O94829;P63010;Q96QU8;Q9ULZ2;Q9Y678;O75843;P56377;Q8WUH2;O94855;Q9BXS5;Q14974;O95486;Q10567;P83436;P55060;Q9NS69;Q00610;Q9UJY5;Q13367;O43615;O60784;Q9BZE9}

23366 Pathogen[ P0C206] interacts with 121 human partners: {O75340;O14964;O14662;P53680;P63010;Q9Y678;Q15437;P53675;Q9Y6B7;Q9UM54;P83436;O94973;Q9Y6Q5;Q96AP0;Q92572;O43592;O60784;Q9UNH7;Q9Y6Q2;P53618;Q9P299;O43747;O94855;Q10567;P54920;Q9NRS6;Q9Y2J0;O43752;Q9H0R1;P49754;Q8NFW9;P61966;Q8WXE9;Q14974;Q96QU8;Q96P70;P49755;Q9UJY4;Q00610;O15397;Q96JB2;P55735;O94829;Q9Y2T2;Q14746;Q13596;P62826;Q04917;O75558;Q92783;Q9H1H9;Q92973;Q15036;O00410;Q9BZE9;Q9HAV4;P09496;Q5SRD1;Q9NP61;Q92624;Q9BRJ2;P59780;P53677;O14787;O43615;O60749;Q8IV36;Q9UPM8;Q9BQE4;Q9BXS5;O95486;Q9NS69;Q9NZ52;P09497;O95373;P35606;P33947;Q9UJY5;P24390;Q8TEX9;O95487;O60763;Q96CW1;Q9P0U1;P48444;O14925;Q8WUH2;Q15388;Q9H2T7;O95295;O95782;P55060;Q99747;Q9UBF2;O14617;Q9P253;O95198;Q9ULZ2;O75843;P41214;P06748;Q9UIA9;P53992;Q15363;O75886;Q9HC5;O95391;Q96PC3;O75674;O00189;Q9H9C1;Q92834;O95714;Q13367;Q9P2W9;P56377;Q9UI26;P61923;Q02410;Q15436}

23367 Pathogen[ P03363] interacts with 99 human partners: {O60763;P49754;O14787;Q92973;Q9Y2T2;Q9UNH7;Q8WXE9;Q9H9C1;Q13367;O95391;O43747;Q9HAV4;Q9UJY4;O75340;P48444;O75886;Q92783;O14980;Q8NFW9;O00410;Q9Y678;P53677;Q9H2T7;O60784;Q15388;O14925;Q9NZ52;Q96P70;P54920;O75558;Q15436;P83436;Q00610;Q9Y6B7;O95486;P53618;Q9BXS5;P06748;Q9P299;Q96AP0;O94973;P61923;O60749;Q14746;Q9P2W9;Q92572;Q9BRJ2;O43615;Q96QU8;Q8IV36;Q9ULZ2;Q9H0R1;Q02410;Q9P0U1;Q8TEX9;P63010;O75674;Q92624;O95198;Q14974;Q9BZE9;O00189;O14964;O95295;O95782;O94829;P41214;P35606;O95714;Q8WUH2;O14662;Q9UBF2;Q92834;P53992;O75843;Q9UI26;O95487;O95373;Q13596;Q04917;Q9H1H9;Q9HCH5;P55060;Q9NS69;P62826;O43592;Q9UJY5;P09497;O43752;P53675;P55735;Q99747;O94855;Q10567;Q9UIA9;O15397;Q96CW1;Q9UPM8;Q96JB2}

23368 [Cluster 2125]GO:0006839+P biological\_process [name] mitochondrial transport [def] "Transport of substances into, out of or within a mitochondrion." [GOC]

23369 Pathogen[ Q2Q067] interacts with 3 human partners: {P07900;Q96EK5;Q9UBX3}

23370 Pathogen[ P0C214] interacts with 1 human partners: {Q9UBX3}

23371 Pathogen[ P03346] interacts with 3 human partners: {P07900;Q9UBX3;Q96EK5}

23372 Pathogen[ Q85601] interacts with 2 human partners: {Q9UBX3;P07900}



23373 Pathogen[ P14079] interacts with 3 human partners:{075431;Q96EK5;P07900}  
23374 Pathogen[ P03383] interacts with 2 human partners:{P07900;Q96EK5}  
23375 Pathogen[ P03410] interacts with 4 human partners:{Q96EK5;P07900;Q9UBX3;075431}  
23376 Pathogen[ P14075] interacts with 2 human partners:{P07900;Q96EK5}  
23377 Pathogen[ P0C206] interacts with 3 human partners:{Q9UBX3;P07900;Q96EK5}  
23378 Pathogen[ P03363] interacts with 2 human partners:{P07900;Q96EK5}  
23379 [Cluster 2126]GO:0045137+P biological\_process [name] development of primary sexual characteristics [def] "The process whose specific outcome is the progression of the primary sexual characteristics over time, from their formation to the mature structures. The primary sexual characteristics are the testes in males and the ovaries in females and they develop in response to sex hormone secretion." [GOC  
23380 Pathogen[ Q2Q067] interacts with 1 human partners:{Q14781}  
23381 Pathogen[ P0C214] interacts with 1 human partners:{Q14781}  
23382 Pathogen[ P03346] interacts with 1 human partners:{Q14781}  
23383 Pathogen[ Q85601] interacts with 1 human partners:{Q14781}  
23384 Pathogen[ P14079] interacts with 1 human partners:{Q14781}  
23385 Pathogen[ P03383] interacts with 1 human partners:{Q14781}  
23386 Pathogen[ P03410] interacts with 1 human partners:{Q14781}  
23387 Pathogen[ P14075] interacts with 1 human partners:{Q14781}  
23388 Pathogen[ P0C206] interacts with 1 human partners:{Q14781}  
23389 Pathogen[ P03363] interacts with 1 human partners:{Q14781}  
23390 [Cluster 2127]GO:0009628+P biological\_process [name] response to abiotic stimulus [def] "Any process that results in a change in state or activity of a cell or an organism (in terms of movement, secretion, enzyme production, gene expression, etc.) as a result of an abiotic (non-living) stimulus." [GOC  
23391 Pathogen[ Q2Q067] interacts with 1 human partners:{Q9UNS1}  
23392 Pathogen[ P0C214] interacts with 1 human partners:{Q9UNS1}  
23393 Pathogen[ P03346] interacts with 2 human partners:{P07992;Q9UNS1}  
23394 Pathogen[ Q85601] interacts with 1 human partners:{Q9UNS1}  
23395 Pathogen[ P14079] interacts with 3 human partners:{075324;Q9UNS1;P07992}  
23396 Pathogen[ P03383] interacts with 1 human partners:{Q9UNS1}  
23397 Pathogen[ P03410] interacts with 3 human partners:{P07992;075324;Q9UNS1}  
23398 Pathogen[ P14075] interacts with 1 human partners:{Q9UNS1}  
23399 Pathogen[ P0C206] interacts with 2 human partners:{Q9UNS1;P07992}  
23400 Pathogen[ P03363] interacts with 1 human partners:{Q9UNS1}  
23401 [Cluster 2128]GO:0043516+P biological\_process [name] regulation of DNA damage response, signal transduction by p53 class mediator [def] "Any process that modulates the frequency, rate or extent of the cascade of processes induced by the cell cycle regulator phosphoprotein p53, or an equivalent protein, in response to the detection of DNA damage." [GOC  
23402 Pathogen[ Q2Q067] interacts with 1 human partners:{Q9NRG4}  
23403 Pathogen[ P0C214] interacts with 2 human partners:{Q9NQR1;Q9NRG4}  
23404 Pathogen[ P03346] interacts with 2 human partners:{Q9NQR1;Q9NRG4}  
23405 Pathogen[ Q85601] interacts with 2 human partners:{Q9NQR1;Q9NRG4}  
23406 Pathogen[ P14079] interacts with 2 human partners:{Q9NRG4;Q9NQR1}  
23407 Pathogen[ P03383] interacts with 2 human partners:{Q9NRG4;Q9NQR1}  
23408 Pathogen[ P03410] interacts with 2 human partners:{Q9NQR1;Q9NRG4}  
23409 Pathogen[ P14075] interacts with 2 human partners:{Q9NQR1;Q9NRG4}  
23410 Pathogen[ P0C206] interacts with 2 human partners:{Q9NRG4;Q9NQR1}  
23411 Pathogen[ P03363] interacts with 2 human partners:{Q9NRG4;Q9NQR1}  
23412 [Cluster 2129]GO:0035278+P biological\_process [name] negative regulation of translation involved in gene silencing by miRNA [def] "The process in which microRNAs (miRNAs) block the translation of target mRNAs into proteins. Once incorporated into a RNA-induced silencing complex (RISC), a miRNA will typically repress translation if the miRNA imperfectly base-pairs with the 3' untranslated regions of target mRNAs." [PMID  
23413 Pathogen[ Q2Q067] interacts with 4 human partners:{Q9HCK5;Q9H9G7;Q9UKV8;Q9UL18}  
23414 Pathogen[ P0C214] interacts with 5 human partners:{Q9H9G7;Q8NDV7;Q9UKV8;Q9HCK5;Q9UL18}  
23415 Pathogen[ P03346] interacts with 5 human partners:{Q9H9G7;Q9UL18;Q9BWF3;Q9HCK5;Q9UKV8}  
23416 Pathogen[ Q85601] interacts with 4 human partners:{Q9HCK5;Q9UL18;Q9H9G7;Q9UKV8}  
23417 Pathogen[ P14079] interacts with 5 human partners:{Q9UKV8;Q9UL18;Q9H9G7;Q9HCK5;Q8NDV7}  
23418 Pathogen[ P03383] interacts with 4 human partners:{Q9UL18;Q9HCK5;Q9UKV8;Q9H9G7}  
23419 Pathogen[ P03410] interacts with 5 human partners:{Q9UKV8;Q9UL18;Q8NDV7;Q9H9G7;Q9HCK5}  
23420 Pathogen[ P14075] interacts with 4 human partners:{Q9HCK5;Q9H9G7;Q9UKV8;Q9UL18}  
23421 Pathogen[ P0C206] interacts with 5 human partners:{Q9HCK5;Q9UKV8;Q8NDV7;Q9H9G7;Q9UL18}  
23422 Pathogen[ P03363] interacts with 6 human partners:{Q9H9G7;Q9HCK5;Q9UKV8;Q9BWF3;Q8NDV7;Q9UL18}  
23423 [Cluster 2130]GO:0045210+P biological\_process [name] FasL biosynthetic process [def] "The chemical reactions and pathways resulting in the formation of fas ligand (FasL or CD95L), an antigen originally found to be expressed on the cell surface of activated human T-lymphocytes and B-lymphocytes and a variety of malignant human lymphoid cell lines." [http

23424 Pathogen[ Q2Q067] interacts with 1 human partners:{Q8WV24}

23425 Pathogen[ P0C214] interacts with 1 human partners:{Q8WV24}

23426 Pathogen[ P03346] interacts with 1 human partners:{Q8WV24}

23427 Pathogen[ Q85601] interacts with 1 human partners:{Q8WV24}

23428 Pathogen[ P14079] interacts with 1 human partners:{Q8WV24}

23429 Pathogen[ P03383] interacts with 1 human partners:{Q8WV24}

23430 Pathogen[ P03410] interacts with 1 human partners:{Q8WV24}

23431 Pathogen[ P14075] interacts with 1 human partners:{Q8WV24}

23432 Pathogen[ P0C206] interacts with 1 human partners:{Q8WV24}

23433 Pathogen[ P03363] interacts with 1 human partners:{Q8WV24}

23434 [Cluster 2131]GO:0014037+P biological\_process [name] Schwann cell differentiation  
[def] "The process in which a relatively unspecialized cell acquires the specialized features of a Schwann cell. Schwann cells are found in the peripheral nervous system, where they insulate neurons and axons, and regulate the environment in which neurons function." [GOC

23435 Pathogen[ Q2Q067] interacts with 3 human partners:{P11161;Q15742;Q13506}

23436 Pathogen[ P0C214] interacts with 3 human partners:{Q15742;Q13506;P11161}

23437 Pathogen[ P03346] interacts with 3 human partners:{Q15742;Q13506;P11161}

23438 Pathogen[ Q85601] interacts with 3 human partners:{Q13506;Q15742;P11161}

23439 Pathogen[ P14079] interacts with 3 human partners:{Q13506;Q15742;P11161}

23440 Pathogen[ P03383] interacts with 3 human partners:{Q15742;Q13506;P11161}

23441 Pathogen[ P03410] interacts with 3 human partners:{Q15742;P11161;Q13506}

23442 Pathogen[ P14075] interacts with 3 human partners:{Q13506;P11161;Q15742}

23443 Pathogen[ P0C206] interacts with 3 human partners:{P11161;Q15742;Q13506}

23444 Pathogen[ P03363] interacts with 3 human partners:{Q13506;Q15742;P11161}

23445 [Cluster 2132]GO:0002525+P biological\_process [name] acute inflammatory response to non-antigenic stimulus [def] "An acute inflammatory response to non-antigenic stimuli such as heat or physical trauma." [GOC

23446 Pathogen[ Q2Q067] interacts with 1 human partners:{P55212}

23447 Pathogen[ P0C214] interacts with 1 human partners:{P55212}

23448 Pathogen[ P03346] interacts with 1 human partners:{P55212}

23449 Pathogen[ Q85601] interacts with 1 human partners:{P55212}

23450 Pathogen[ P14079] interacts with 1 human partners:{P55212}

23451 Pathogen[ P03383] interacts with 1 human partners:{P55212}

23452 Pathogen[ P03410] interacts with 1 human partners:{P55212}

23453 Pathogen[ P14075] interacts with 1 human partners:{P55212}

23454 Pathogen[ P0C206] interacts with 1 human partners:{P55212}

23455 Pathogen[ P03363] interacts with 1 human partners:{P55212}

23456 [Cluster 2133]GO:0071167+P biological\_process [name] ribonucleoprotein complex import into nucleus [def] "The directed movement of a ribonucleoprotein complex from the cytoplasm to the nucleus." [GOC

23457 Pathogen[ Q2Q067] interacts with 1 human partners:{Q96RS0}

23458 Pathogen[ P0C214] interacts with 1 human partners:{Q96RS0}

23459 Pathogen[ P03346] interacts with 1 human partners:{Q96RS0}

23460 Pathogen[ Q85601] interacts with 1 human partners:{Q96RS0}

23461 Pathogen[ P14079] interacts with 1 human partners:{Q96RS0}

23462 Pathogen[ P03383] interacts with 1 human partners:{Q96RS0}

23463 Pathogen[ P03410] interacts with 1 human partners:{Q96RS0}

23464 Pathogen[ P14075] interacts with 1 human partners:{Q96RS0}

23465 Pathogen[ P0C206] interacts with 1 human partners:{Q96RS0}

23466 Pathogen[ P03363] interacts with 1 human partners:{Q96RS0}

23467 [Cluster 2134]GO:2000660+P biological\_process [name] negative regulation of interleukin-1-mediated signaling pathway [def] "Any process that stops, prevents or reduces the frequency, rate or extent of interleukin-1-mediated signaling pathway." [GOC

23468 Pathogen[ Q2Q067] interacts with 1 human partners:{Q8TD23}

23469 Pathogen[ P0C214] interacts with 1 human partners:{Q8TD23}

23470 Pathogen[ P03346] interacts with 1 human partners:{Q8TD23}

23471 Pathogen[ Q85601] interacts with 1 human partners:{Q8TD23}

23472 Pathogen[ P14079] interacts with 1 human partners:{Q8TD23}

23473 Pathogen[ P03383] interacts with 1 human partners:{Q8TD23}

23474 Pathogen[ P03410] interacts with 1 human partners:{Q8TD23}

23475 Pathogen[ P14075] interacts with 1 human partners:{Q8TD23}

23476 Pathogen[ P0C206] interacts with 1 human partners:{Q8TD23}

23477 Pathogen[ P03363] interacts with 1 human partners:{Q8TD23}

23478 [Cluster 2135]GO:0046889+P biological\_process [name] positive regulation of lipid biosynthetic process [def] "Any process that activates or increases the frequency, rate or extent of the chemical reactions and pathways resulting in the formation of lipids." [GOC

23479 Pathogen[ Q2Q067] interacts with 3 human partners:{P31749;Q9NP71;Q9BX66}

23480 Pathogen[ P0C214] interacts with 4 human partners:{Q9BX66;Q9NP71;P16220;P31749}

23481 Pathogen[ P03346] interacts with 5 human partners:{P16220;Q9BX66;Q9NP71;P31749;O60519}

23482 Pathogen[ Q85601] interacts with 4 human partners:{P31749;Q9BX66;Q9NP71;P16220}

23483 Pathogen[ P14079] interacts with 2 human partners:{Q9BX66;Q9NP71}

23484 Pathogen[ P03383] interacts with 3 human partners:{P16220;P31749;Q9NP71}

23485 Pathogen[ P03410] interacts with 4 human partners:{P31749;Q9NP71;P16220;Q9BX66}

23486 Pathogen[ P14075] interacts with 3 human partners:{Q9NP71;P31749;P16220}  
23487 Pathogen[ POC206] interacts with 4 human partners:{P31749;Q9NP71;P16220;Q9BX66}  
23488 Pathogen[ P03363] interacts with 4 human partners:{Q9BX66;P16220;P31749;Q9NP71}  
23489 [Cluster 2136]GO:0032980+P biological\_process [name] keratinocyte activation [def] "A change in the morphology or behavior of a keratinocyte resulting from exposure to an activating factor such as a cellular or soluble ligand. Upon activation, keratinocytes become migratory and hyperproliferative, and produce growth factors and cytokines." [GOC  
23490 Pathogen[ Q2Q067] interacts with 1 human partners:{P35908}  
23491 Pathogen[ POC214] interacts with 1 human partners:{P35908}  
23492 Pathogen[ P03346] interacts with 1 human partners:{P35908}  
23493 Pathogen[ Q85601] interacts with 1 human partners:{P35908}  
23494 Pathogen[ P14079] interacts with 1 human partners:{P35908}  
23495 Pathogen[ P03383] interacts with 1 human partners:{P35908}  
23496 Pathogen[ P03410] interacts with 1 human partners:{P35908}  
23497 Pathogen[ P14075] interacts with 1 human partners:{P35908}  
23498 Pathogen[ POC206] interacts with 1 human partners:{P35908}  
23499 Pathogen[ P03363] interacts with 1 human partners:{P35908}  
23500 [Cluster 2137]GO:2000210+P biological\_process [name] positive regulation of anoikis [def] "Any process that activates or increases the frequency, rate or extent of anoikis." [GOC  
23501 Pathogen[ Q2Q067] interacts with 2 human partners:{Q9Y3E5;Q9HCU9}  
23502 Pathogen[ POC214] interacts with 2 human partners:{Q9Y3E5;Q9HCU9}  
23503 Pathogen[ P03346] interacts with 2 human partners:{Q9Y3E5;Q9HCU9}  
23504 Pathogen[ Q85601] interacts with 2 human partners:{Q9Y3E5;Q9HCU9}  
23505 Pathogen[ P14079] interacts with 2 human partners:{Q9Y3E5;Q9HCU9}  
23506 Pathogen[ P03383] interacts with 2 human partners:{Q9Y3E5;Q9HCU9}  
23507 Pathogen[ P03410] interacts with 1 human partners:{Q9Y3E5}  
23508 Pathogen[ P14075] interacts with 2 human partners:{Q9Y3E5;Q9HCU9}  
23509 Pathogen[ POC206] interacts with 2 human partners:{Q9HCU9;Q9Y3E5}  
23510 Pathogen[ P03363] interacts with 2 human partners:{Q9HCU9;Q9Y3E5}  
23511 [Cluster 2138]GO:0060231+P biological\_process [name] mesenchymal to epithelial transition [def] "A transition where a mesenchymal cell establishes apical/basolateral polarity, forms intercellular adhesive junctions, synthesizes basement membrane components and becomes an epithelial cell." [GOC  
23512 Pathogen[ Q2Q067] interacts with 2 human partners:{Q99966;P80723}  
23513 Pathogen[ POC214] interacts with 2 human partners:{Q99966;P80723}  
23514 Pathogen[ P03346] interacts with 2 human partners:{Q99966;P80723}  
23515 Pathogen[ Q85601] interacts with 2 human partners:{Q99966;P80723}  
23516 Pathogen[ P14079] interacts with 2 human partners:{Q99966;P80723}  
23517 Pathogen[ P03383] interacts with 1 human partners:{P80723}  
23518 Pathogen[ P03410] interacts with 2 human partners:{P80723;Q99966}  
23519 Pathogen[ P14075] interacts with 1 human partners:{P80723}  
23520 Pathogen[ POC206] interacts with 2 human partners:{P80723;Q99966}  
23521 Pathogen[ P03363] interacts with 1 human partners:{P80723}  
23522 [Cluster 2139]GO:0007160+P biological\_process [name] cell-matrix adhesion [def] "The binding of a cell to the extracellular matrix via adhesion molecules." [GOC  
23523 Pathogen[ Q2Q067] interacts with 7 human partners:{O75334;P11831;Q9Y5J6;O14713;P63000;Q9BX66;P61586}  
23524 Pathogen[ POC214] interacts with 8 human partners:{P63000;P31249;P61586;Q9BX66;P11831;O75334;Q9Y5J6;O14713}  
23525 Pathogen[ P03346] interacts with 10 human partners:{P31249;P11831;Q9BX66;Q9Y5J6;O14713;A6NDV4;O75334;P63000;Q13136;P61586}  
23526 Pathogen[ Q85601] interacts with 9 human partners:{P11831;O14713;Q9BX66;Q9Y5J6;P63000;P61586;O75334;P31249;Q13136}  
23527 Pathogen[ P14079] interacts with 8 human partners:{A6NDV4;Q13136;O75334;P61586;P31249;O14713;P49023;Q9BX66}  
23528 Pathogen[ P03383] interacts with 7 human partners:{P11831;O14713;P63000;P31249;Q9Y5J6;P61586;O75334}  
23529 Pathogen[ P03410] interacts with 10 human partners:{P11831;P63000;O75334;O14713;P31249;A6NDV4;Q13136;P61586;Q9Y5J6;Q9BX66}  
23530 Pathogen[ P14075] interacts with 7 human partners:{P11831;O14713;P31249;P61586;P63000;Q9Y5J6;O75334}  
23531 Pathogen[ POC206] interacts with 10 human partners:{Q9Y5J6;O75334;O14713;A6NDV4;P61586;P63000;Q9BX66;P11831;P31249;Q13136}  
23532 Pathogen[ P03363] interacts with 7 human partners:{Q9BX66;O14713;P63000;P31249;O75334;P11831;Q13136}  
23533 [Cluster 2140]GO:0060749+P biological\_process [name] mammary gland alveolus development [def] "The progression of the mammary gland alveolus over time, from its formation to its mature state. The mammary gland alveolus is a sac-like structure that is found in the mature gland." [GOC  
23534 Pathogen[ Q2Q067] interacts with 4 human partners:{P24385;P20719;Q99623;O15111}  
23535 Pathogen[ POC214] interacts with 3 human partners:{O15111;Q99623;P24385}  
23536 Pathogen[ P03346] interacts with 4 human partners:{O15111;P24385;P20719;Q99623}  
23537 Pathogen[ Q85601] interacts with 3 human partners:{P24385;O15111;Q99623}  
23538 Pathogen[ P14079] interacts with 1 human partners:{Q99623}  
23539 Pathogen[ P03383] interacts with 3 human partners:{O15111;P24385;Q99623}

23540 Pathogen[ P03410] interacts with 3 human partners:{O15111;P24385;Q99623}  
23541 Pathogen[ P14075] interacts with 3 human partners:{O15111;Q99623;P24385}  
23542 Pathogen[ P0C206] interacts with 4 human partners:{Q99623;O15111;P20719;P24385}  
23543 Pathogen[ P03363] interacts with 4 human partners:{Q99623;O15111;P20719;P24385}  
23544 [Cluster 2141]GO:0033211+P biological\_process [name] adiponectin-mediated signaling pathway [def] "A series of molecular signals generated as a consequence of adiponectin binding to a cell surface receptor." [GOC  
23545 Pathogen[ Q2Q067] interacts with 1 human partners:{P67870}  
23546 Pathogen[ P0C214] interacts with 1 human partners:{P67870}  
23547 Pathogen[ P03346] interacts with 1 human partners:{P67870}  
23548 Pathogen[ Q85601] interacts with 1 human partners:{P67870}  
23549 Pathogen[ P14079] interacts with 1 human partners:{P67870}  
23550 Pathogen[ P03383] interacts with 1 human partners:{P67870}  
23551 Pathogen[ P03410] interacts with 1 human partners:{P67870}  
23552 Pathogen[ P14075] interacts with 1 human partners:{P67870}  
23553 Pathogen[ P0C206] interacts with 1 human partners:{P67870}  
23554 Pathogen[ P03363] interacts with 1 human partners:{P67870}  
23555 [Cluster 2142]GO:0006360+P biological\_process [name] transcription from RNA polymerase I promoter [def] "The synthesis of RNA from a DNA template by RNA polymerase I (RNAP I), originating at an RNAP I promoter." [GOC  
23556 Pathogen[ Q2Q067] interacts with 21 human partners:{Q95602;Q15573;P52434;Q13889;P32780;Q6NZI2;Q92759;Q9H9Y6;P51948;Q92831;P50613;Q15572;P53803;Q53T94;P17480;Q15361;Q9NYV6;Q9Y2S0;Q13888;O15160;P51946}  
23557 Pathogen[ P0C214] interacts with 20 human partners:{P51946;Q15573;Q9H9Y6;P53803;Q15361;P50613;Q9Y2S0;Q6NZI2;P51948;Q15572;P17480;Q9NYV6;P32780;O15160;Q92831;O95602;Q13888;P52434;Q53T94;Q92759}  
23558 Pathogen[ P03346] interacts with 20 human partners:{P52434;Q15573;Q13888;P53803;Q9H9Y6;Q92831;Q6NZI2;Q53T94;Q13889;P17480;Q15361;P51946;O15160;Q92759;O95602;Q9NYV6;P51948;P32780;Q9Y2S0;Q15572}  
23559 Pathogen[ Q85601] interacts with 21 human partners:{P51946;P17480;O95602;Q13888;Q15573;P53803;Q9Y2S0;Q92831;P51948;Q9H9Y6;Q15572;Q53T94;Q92759;P32780;P50613;Q9NYV6;Q6NZI2;P52434;Q15361;P19447;O15160}  
23560 Pathogen[ P14079] interacts with 21 human partners:{Q9Y2S0;Q15573;Q9NYV6;P51946;P52434;Q13889;P53803;Q15572;P50613;Q13888;P17480;O15160;Q92759;P32780;Q6NZI2;O95602;Q15361;Q53T94;P19447;Q9H9Y6;P51948}  
23561 Pathogen[ P03383] interacts with 18 human partners:{P53803;Q92831;O95602;Q9NYV6;P51948;Q15572;Q6NZI2;Q13888;Q9H9Y6;P52434;Q15361;P50613;P51946;Q92759;Q15573;P17480;P32780;Q53T94}  
23562 Pathogen[ P03410] interacts with 22 human partners:{Q92831;Q6NZI2;Q15572;Q13889;P51946;P50613;Q9NYV6;Q15573;O95602;P53803;P19447;Q9Y2S0;P51948;O15160;Q13888;P52434;Q53T94;Q15361;P32780;Q92759;Q9H9Y6;P17480}  
23563 Pathogen[ P14075] interacts with 19 human partners:{P17480;Q15572;Q92759;Q9NYV6;Q92831;Q53T94;P50613;Q6NZI2;Q13889;Q15573;Q9H9Y6;P51946;P32780;O95602;Q15361;P52434;P51948;P53803;Q13888}  
23564 Pathogen[ P0C206] interacts with 22 human partners:{Q53T94;Q15361;O95602;Q15572;Q92831;P19447;P53803;Q13888;P50613;Q9Y2S0;Q6NZI2;Q92759;Q15573;P32780;Q13889;Q9H9Y6;Q9NYV6;P17480;P52434;O15160;P51946;P51948}  
23565 Pathogen[ P03363] interacts with 18 human partners:{Q9H9Y6;Q92831;Q13888;P32780;Q92759;P51946;O95602;Q53T94;P17480;Q9NYV6;Q6NZI2;Q15361;Q15573;P53803;Q15572;P52434;Q9Y2S0;O15160}  
23566 [Cluster 2143]GO:0019048+P biological\_process [name] virus-host interaction [def] "Interactions, directly with the host cell macromolecular machinery, to allow virus replication." [ISBN  
23567 Pathogen[ Q2Q067] interacts with 179 human partners:{Q14974;O14734;O43463;Q8TAF3;P17544;Q6VMQ6;Q96J02;O95639;Q86U42;P52948;Q71F23;P40306;Q14258;Q93034;O00410;Q93009;P20226;P63172;P49790;O15519;Q9BUP3;Q14160;P06400;Q7Z5K2;Q9Y4B6;P40763;Q96LA8;P62258;Q7KZF4;Q12986;P62826;Q99816;Q9BRP4;O95295;Q6VY07;P28072;Q15326;Q9NPG3;P08729;Q92985;Q13435;P19388;Q15046;Q04206;P11387;O60238;Q13547;P63167;O60506;Q6UUV9;Q9HB58;Q9UBU9;P49450;P06748;Q9UER7;Q15542;Q6ZRS2;Q7L5N1;Q96T58;P52657;P51610;Q14457;P63279;Q13158;Q16531;P08047;Q8NDT2;Q14790;Q92973;Q14240;O60563;O75531;P28065;P54725;O14818;Q15629;P08727;Q7KZ85;O15304;P11142;P61978;Q9UKL0;Q07021;Q12959;Q9Y297;Q9UKC9;Q8WUM4;O14980;P30307;P05787;Q9Y6Y0;Q86V81;Q92831;Q14653;Q96T37;Q9NXV2;Q9Y6K9;P28062;O75843;Q9H2J4;Q8TAE8;P25788;O00268;Q96PU5;Q13616;Q92830;Q5TCQ9;Q92993;O00505;Q9BXS5;Q6UUV7;O75475;Q15369;O75164;P09914;Q13363;Q9NWF9;P28749;Q9C035;O95373;P28074;P53618;P25789;P52630;O60885;P25963;Q13619;Q12983;Q969H0;P52292;Q9BYX4;P20618;P17096;Q12824;P29083;Q13409;O60583;O43765;P27986;Q05086;P28070;Q92793;Q01826;P14324;Q04637;P21675;Q99436;P06730;P45973;P08670;Q9UGR2;P49721;P13051;P23497;P49720;O60870;Q13765;P61586;Q53ET0;Q00987;P05783;Q9HC16;Q86VP3;P05388;Q66K89;P52294;P42224;P60842;Q86X55;Q13617;Q15056;P62937;P62877;Q9P1T7;P49715;Q9Y224;Q00403;Q9H6F5;Q14999}  
23568 Pathogen[ P0C214] interacts with 184 human partners:{Q05086;Q14457;Q92993;O00268;Q96J02;P08729;Q13619;Q13617;P25789;Q96T58;P30307;P51610;Q9Y6K9;Q13363;P28062;P05783;P09914;Q13547;Q12824;Q6VMQ6;P28065;P60842;Q6UU07;Q9UI12;P62993;P52657;P21675;Q86V81;Q5TCQ9;O95295;P06748;Q00987;P05388;Q7KZ85;Q13158;O14818;Q9C035;P53618;Q92793;P61586;Q9H2J4;Q6ZRS2;P54725;P17096;P17544;Q12986;Q00403;Q04206;Q15056;P63279;P05787;P42224;Q9BYX4;P40306;Q93034;Q9NXV2;O75164;Q14999;Q9Y2

97;P62877;O00308;O43463;Q7KZF4;Q86VP3;Q8WXG1;Q15542;Q9H0M0;O75843;Q9NWF9;P49450;O15519;Q14258;Q9HC16;O60870;P49790;Q9BUP3;Q92985;O14980;Q53ET0;Q9Y224;P52294;Q9Y6Y0;Q9UER7;Q08AM6;P49720;P28074;Q9Y4B6;Q9UKL0;Q15369;Q6VY07;O60583;Q14240;P08670;Q8TAF3;Q8TAE8;P25788;Q13765;P10809;Q6UUV9;P25963;P14324;Q93009;Q9P1T7;O75475;Q9UKC9;Q13616;P20226;Q969H0;Q12959;P28072;Q14160;Q14653;O00505;O75531;O95639;P11387;P62826;Q12983;P08727;Q04637;O60563;P23497;Q99816;Q01826;Q7Z5K2;P28749;Q92831;Q96G01;Q99436;P63172;Q15629;O60885;O60238;O60506;Q92830;O14734;Q9HB58;P45973;Q92973;P40763;P52292;Q9NWZ5;Q8NDT2;Q71F23;Q13435;Q86X55;Q14974;P35998;P19388;Q13409;P16220;Q15046;P52630;Q15326;Q86U42;P06730;P27986;O43765;O95373;Q9BRP4;Q16531;O15304;Q9BXS5;Q66K89;Q7L5N1;P28070;P06400;Q96T37;P08047;P52948;P20618;P13051;P29083;Q96PU5;Q9UBU9;P49721;P63167;Q96LA8;P17980;P11142;Q14790;Q9NPG3;Q9UGR2;Q8WUM4}

23569 Pathogen[ P03346] interacts with 193 human partners: {O75179;Q9NPG3;Q96G01;Q7KZ85;Q9Y6K9;Q96J02;O95639;P08729;Q15542;Q86U42;P61978;P28070;Q93009;P25789;P06730;P45973;Q53ET0;P05783;Q96PU5;Q14258;P16220;P09651;P08727;Q9UKL0;P06748;Q13616;Q9NWF9;O75531;Q7Z5K2;Q9UGR2;Q8TAE8;O95295;P28072;Q9BUP3;Q13158;P06400;P25963;P25788;Q9BYM8;P28074;P49721;O60563;O60238;Q5TCQ9;O14818;P62258;Q99436;O15304;P51610;Q15629;Q16531;P62937;O60506;P05787;Q9BXS5;O75475;O75970;O00410;Q14141;Q12986;Q04206;Q99816;P53618;Q9NXV2;Q07021;P11142;O00268;Q15056;Q9C035;P28062;P62993;Q14457;Q12824;P63279;O00505;Q15942;Q92831;Q8TAF3;P20618;Q9Y4B6;P60842;Q12983;P49715;P17096;Q66K89;O43463;Q93034;P62826;Q00987;O15519;P08047;P20226;P62877;O60870;P19388;O60583;Q92830;Q9BUN8;Q9Y6Y0;Q86V81;Q75843;O14980;Q9Y224;Q92973;Q8IYM9;Q8NDT2;Q86UT6;Q6VMQ6;Q13435;Q7KZF4;O95373;P49720;P28065;O75164;Q13547;P13051;P05388;P52657;Q6UUV9;P17544;P14324;Q9UER7;Q14240;P42224;P63172;Q14653;Q6ZRS2;Q96T58;Q9BYX4;O43765;P08670;P28749;P21675;O60885;Q15326;Q15369;Q14790;P49450;Q13409;Q13619;O14734;Q9UBU9;Q9H6F5;P54725;Q9HB58;P52292;Q14999;Q13363;P49790;Q86X55;P63167;Q6UUV7;P23497;Q86YS3;Q04637;Q05086;Q14160;Q9H0M0;P29083;Q9P1T7;Q92993;Q00403;Q92793;Q92985;P29914;P52630;P40763;Q9Y297;Q9UKC9;Q969H0;Q13765;Q6VY07;Q9H2J4;Q8WUM4;Q86VP3;P52294;Q7L5N1;Q96T37;Q01826;Q96LA8;Q71F23;Q9NWZ5;P40306;P27986;Q9BRP4;P30307;P11387;O00308;P61586;Q12959;Q14974;P52948;Q13617}

23570 Pathogen[ Q85601] interacts with 183 human partners: {Q14457;P52657;Q99816;O43765;Q96J02;P08729;Q15542;P61978;Q13409;O75843;Q53ET0;Q08AM6;P62993;P17096;Q14258;O60563;Q93009;Q86X55;Q969H0;Q6UUV9;P05388;Q9NPG3;Q15629;P13051;Q9UGR2;P06730;Q16531;O95295;O60506;Q14240;Q9UBU9;Q13158;P06400;P08670;P05787;P25788;Q86YS3;Q9BXS5;Q9HC16;Q14790;P62877;O15304;P40763;O60583;P62826;Q9UER7;Q71F23;Q04637;Q13616;O00268;Q9BRP4;Q96PU5;Q9NWF9;Q15046;Q13363;Q86V81;Q92831;Q7KZF4;Q9Y4B6;P63172;O43463;P63279;P51610;Q14974;P08047;P27986;P52630;Q9UKC9;Q7Z5K2;O14734;P25789;P11387;O60870;P19388;Q9H2J4;Q92830;Q14653;P20618;Q9Y6K9;Q9Y6Y0;P30307;Q13435;Q8NDT2;P05783;P40306;O95373;Q92973;Q6VY07;P62258;P49720;P16220;Q04206;P45973;Q96G01;P54725;P28062;Q13765;P11142;P49721;Q8IYM9;Q7KZ85;Q9HB58;Q15942;P52948;P14324;P9BYX4;Q6ZRS2;P29083;P49450;Q92985;Q14160;Q01826;P42224;Q15369;P06748;Q5TCQ9;P28072;P60842;Q00403;P61586;P28065;Q8TAF3;Q96T58;O14980;Q99436;Q9C035;P17544;P28070;P28749;P09914;P53618;P49715;Q12959;O60885;Q15326;O95639;P08727;Q12983;P52292;Q14999;P21675;Q8WUM4;O75164;Q96T37;Q6UUV7;Q13547;Q05086;Q66K89;P28074;Q92993;Q9P1T7;Q92793;O75475;Q6VMQ6;O00505;Q9NXV2;P19447;Q86U42;Q00987;O75531;O60238;Q12824;Q07021;Q13619;Q9UKL0;O14818;P62937;Q9BUP3;P52294;Q86VP3;O15519;Q8TAE8;P49790;P63167;Q7L5N1;Q9Y224;Q93034;O00410;Q96LA8;P20226;Q12986;P25963;Q13617}

23571 Pathogen[ P14079] interacts with 172 human partners: {Q15629;Q9BRP4;Q6VY07;O95373;P28065;Q99436;Q12986;Q14004;P60842;Q15056;P1142;Q9BXS5;P63279;Q96T37;P63172;Q9BYX4;P52630;P30307;Q969H0;P28749;Q96LA8;Q14653;P06730;Q13765;Q9C035;P09914;Q92830;O15519;O15304;P40306;Q92985;Q92793;P28074;O43432;O75475;Q16531;P17096;P52294;Q01826;P49720;Q9BU70;Q9NWZ5;O75179;Q9HC16;Q9UBU9;P08729;Q6ZRS2;Q86YS3;O95639;Q9UKC9;Q9H6F5;P62937;Q14240;P35998;Q14118;O60870;P14324;Q14258;P23497;P51610;P62877;Q7Z434;P20618;Q00987;Q9BUP3;O75843;Q9BUN8;P45973;Q7KZ85;Q71F23;Q6VMQ6;P19388;Q00403;Q14790;Q15046;P28062;Q96HD9;Q9NWF9;Q9UER7;P17544;O00410;Q86VP3;Q8WUM4;P49715;Q9Y6K9;Q9NPG3;O43765;O14734;Q93034;Q66K89;Q14974;P49450;Q86V81;Q86U42;Q9BYM8;Q9HB58;P61586;O60506;Q9Y4B6;O95292;Q9Y6Y0;O14818;Q13409;Q12983;P49721;Q9UKL0;Q9NXV2;P49790;Q96J02;O95295;P06748;P62258;O00505;P52657;P05783;Q8TAE8;Q96G01;P42224;O75531;Q13617;P61978;Q7L5N1;Q86UT6;P62993;Q13158;P63167;O60583;Q96FC9;Q9UI12;Q9P1T7;O60885;Q7KZF4;P08670;Q15369;Q12824;P62826;P25788;Q8TAF3;Q13616;Q99816;Q14457;O60238;Q7Z5K2;Q07021;Q9H2J4;Q9Y224;Q9NUN5;P08727;P52292;Q15542;Q8NDT2;Q96C10;Q14999;P17980;Q15326;P28072;P19447;Q9UGR2;P05388;Q04637;Q13619;P13051;P29083;Q92993;P21675;O00268;P52948;Q96T58;O75970;Q8WXG1;Q15942}

23572 Pathogen[ P03383] interacts with 154 human partners: {Q14457;P30307;P27986;Q13616;P05388;Q9UBU9;P08729;Q92831;Q9Y4B6;Q15369;Q14653;P08047;P06748;P17096;P16220;P08727;Q9Y6K9;P17544;Q12824;Q14160;Q9H2J4;Q6UUV9;P53618;P25789;P08670;Q8TAF3;Q9NWZ5;O95295;Q12986;O15304;P52948;P63172;Q93034;O43463;Q9BUN8;P40306;Q9BRP4;Q86X55;Q01826;Q6VY07;P62937;Q15542;Q6VMQ6;P52630;P49721;Q99816;P61978;P11387;O00505;Q92993;Q86V81;O14734;P05783;Q13435;P20618;Q13158;Q12983;P06400;Q66K89;O75164;Q00403;P62826;Q71F23;P20226;P52657;Q15326;O60870;Q6730;Q92985;Q15629;P45973;P52292;Q9Y6Y0;O60238;P05787;O60563;Q9C035;O75843;P61586;Q92973;Q6UUV7;O14980;Q7KZF4;Q92830;Q9NXV2;Q86VP3;Q15046;P54725;Q13765;P14324;O00268;Q9UER7;O75475;P11142;P25963;Q9NPG3;P28072;Q7L5N1;Q14974;Q5TCQ9;P28065;Q969H0;Q96T58;Q13547;P28749;Q9UKL0;Q9UKC9;P23497;Q04637;Q13617;O43765;O60885;P21675;Q9BUP3;P62877;Q04206;Q07021;Q8WUM4;Q8NDT2;O95373;P28074;Q14258;P19388;P49720;Q16531;P29083;Q9P1T7;Q8TAE8;Q9BXS5;P28062;P13051;Q53ET0;Q86U42;Q9NWF9;P63167;O14818;P62258;O60583;Q99436;P52294;P49790;P63279;Q96LA8;P28070;Q13363;Q92793;O75531;Q9Y224;O00410;Q14999;Q7Z5K2;P25788;Q7KZ85}

- 23573 Pathogen[ P03410] interacts with 196 human partners: {Q92830;Q9Y6G9;Q92831;P62258;Q04206;O60583;O95292;Q6UUUV7;P28070;Q96HD9;P51610;P27986;O95639;Q14974;Q96LA8;O00505;Q13409;Q9BXS5;Q9BU70;O00268;Q12983;P61978;O6085;Q86VP3;P20963;Q66K89;P52294;P05388;P21675;P29083;P06730;Q9NWF9;P35998;O75843;Q12959;Q9Y224;Q7Z5K2;Q7KZ85;P05141;P52948;Q5TCQ9;Q14653;O15519;O60870;Q9BYX4;Q14457;P63172;Q86X55;Q07021;Q9NWZ5;P05787;Q96T37;Q9Y6Y0;P11142;P17096;P45973;P63167;P49721;P20226;P06748;P06400;Q6UUUV9;O43432;Q14160;P54725;Q9NPG3;P52657;Q14258;Q99436;Q96T58;Q8WGX1;Q7Z434;Q53ET0;Q13158;Q6VMQ6;P17544;O95295;P40306;Q99816;Q9HC16;O60563;Q86YS3;O75970;Q7L5N1;Q9C035;Q12986;Q6ZRS2;Q86UT6;Q14734;Q92793;P49790;P62937;Q9NUN5;Q08AM6;Q15369;Q9P1T7;Q9UER7;P62826;Q969H0;Q9BUN8;P61586;Q15942;Q9H6F5;Q92973;Q9UGR2;Q15056;O75531;Q15629;P28062;Q71F23;Q01826;Q9UKC9;Q15326;P62877;P19447;P11387;Q9UI12;O43765;Q96G01;Q9BUP3;Q8NDT2;Q86V81;Q8TAF3;P16220;Q00403;O14818;P53618;Q9UBU9;Q15046;Q14118;P60842;Q16531;Q9NRW3;P08670;P49450;P28749;P25789;P49720;Q13616;P52630;Q96C10;Q13547;Q13619;P63279;Q15542;Q7KZF4;P08047;O60506;Q96FC9;Q9BRP4;Q13617;P28072;P13051;Q00987;O75475;O43463;O00410;P08729;Q9UKL0;Q9Y6K9;Q86U42;Q04637;P25963;Q92985;P25788;Q13765;O75164;Q12824;P52292;Q6VY07;P62993;Q9Y4B6;Q92993;Q8WUM4;P19388;P40763;P09914;Q93034;O75179;P08727;P05783;P28065;P30307;O60238;Q9HB58;P17980;Q9H2J4;O14980;P20618;P14324;O95373;Q14240;P28074;Q13435;O15304;Q9NXV2}
- 23574 Pathogen[ P14075] interacts with 155 human partners: {Q14457;P13051;P52630;P11387;P52292;P08729;Q9BUP3;Q12983;P25788;P23497;P11142;Q04206;P21675;P05783;P08727;P52657;Q15542;Q07021;Q93034;Q9NWZ5;Q86V81;Q9H6F5;O75475;Q14160;Q92831;O95295;Q9Y224;Q00403;Q8WUM4;P49720;O60563;P29083;Q9UKL0;Q96T58;P51610;Q92973;P17096;P05388;Q9P1T7;Q14734;P19388;Q7KZ85;O60583;Q53ET0;P45973;P06730;P20226;Q5TCQ9;Q15629;P63279;P63172;O15304;P28070;P25963;Q13547;P49721;Q92993;Q01826;O00505;Q9NXV2;O60870;Q8TAF3;Q14999;O14980;Q86VP3;Q9NWF9;P52294;Q9Y6Y0;Q12986;Q13435;Q15326;Q14653;P28062;P28074;Q96LA8;O95373;Q7Z5K2;P28065;Q86X55;P53618;Q9H2J4;Q6VMQ6;Q04637;Q13765;O60238;Q6UUUV9;Q13158;P27986;Q9BUN8;P14324;Q16531;O00410;P62826;Q9UKC9;O14818;Q9C035;P06748;P28072;P61586;Q14258;P61978;P06400;Q12824;P08670;P28749;Q66K89;O00268;Q8NDT2;O60885;P62937;Q92793;Q7L5N1;P54725;O43463;Q6UUUV7;O75843;P16220;P20618;Q7KZF4;Q9Y6K9;Q13363;Q9BXS5;Q9UBU9;Q14974;Q92985;P49790;Q9UER7;Q99816;Q13616;Q9BRP4;Q15046;P17544;Q86U42;P40306;Q969H0;Q92830;Q13617;Q15369;Q99436;P30307;Q71F23;P63167;Q8TAE8;Q6VY07;P62877;O75164;O43765;P52948;P62258;O75531;Q9Y4B6;P05787;P25789;Q9NPG3;P08047}
- 23575 Pathogen[ P0C206] interacts with 193 human partners: {Q8TAE8;Q9UKC9;Q9Y224;Q99436;P28062;P05787;Q96PU5;P62877;Q96T37;P54725;Q8TAF3;P45973;Q92830;P49790;Q6VMQ6;P40306;P28065;Q9BUP3;Q9Y6K9;P30307;Q9H6F5;P20226;O00308;P53618;P16220;P17544;P25788;Q07021;Q14258;Q9NXV2;P08727;P52657;Q9UKL0;Q86X55;P63167;Q5TCQ9;P49720;P61978;P19388;O60870;Q14974;O43463;P25963;Q05086;O00268;Q96J02;Q96LA8;Q9NWF9;Q7Z5K2;O00505;P08729;Q14457;Q969H0;Q7KZF4;Q86U42;Q9UER7;Q6ZRS2;Q13547;Q16531;P49715;Q93009;P62826;Q99816;Q9NWZ5;Q92993;Q12824;Q13158;Q13616;Q9HB58;Q15326;Q92973;Q92831;Q14141;P27986;O00410;O15519;Q13409;P62993;P06730;P28749;O75475;P61586;P19447;Q92793;P25789;Q9Y6Y0;O95292;Q14999;Q13435;O60238;Q9NPG3;O75531;Q6UUUV9;Q13619;Q12983;P14324;Q13617;O60506;Q9BXS5;Q6VY07;P49450;P62258;P20618;Q9UBU9;P08047;O95373;P28070;Q12986;P29083;P51610;Q92985;O60885;Q14160;Q04206;Q9UI12;Q86VP3;Q7KZ85;Q15942;Q9Y6G9;Q9BUN8;O14734;P05388;P05783;Q14790;O14818;Q9C035;P40763;Q14240;O95295;Q96T58;Q15542;P17096;Q8WUM4;P28072;O95639;Q53ET0;Q8IYM9;Q01826;O75164;Q15629;P28074;Q9BRP4;O7543;Q9HC16;Q04637;P49721;P06748;Q93034;P08670;O75179;P11387;Q9BYX4;O60583;Q96C10;Q00987;Q13363;Q9Y4B6;Q7L5N1;Q00403;Q9BYM8;Q66K89;P52294;P63172;P42224;P60842;Q8WGX1;P13051;O60563;Q9UGR2;Q86YS3;Q71F23;Q15369;P62937;O43765;Q13765;Q6UUUV7;O15304;P11142;Q12959;P52292;Q9P1T7;P52630;Q9H2J4;Q86V81;P21675;Q96G01;Q08AM6;Q8NDT2;Q15046;Q9BU70;Q14653;P09914;P06400}
- 23576 Pathogen[ P03363] interacts with 158 human partners: {Q9NWF9;Q9Y6Y0;O75179;P05783;Q14653;O14734;Q12959;P52630;P62258;Q6VMQ6;Q92973;Q53ET0;Q92985;Q9BUP3;P29083;Q96T58;P62937;Q9NWZ5;P63167;Q04206;O15519;P19388;Q13435;Q8TAF3;O60563;P05388;P11387;Q96LA8;Q92831;P25963;Q14457;P09914;Q14258;P45973;O14980;Q16531;O00410;Q6ZRS2;O15304;O00505;P09651;Q14160;Q15056;Q01826;P16220;Q9NPG3;Q9NXV2;P13051;Q9Y6K9;Q66K89;Q13617;O75475;O75164;Q9UER7;O00268;Q13765;Q9UBU9;Q86U42;Q15369;P53618;Q13158;O75970;P23497;P06400;O43765;P05787;Q9BXS5;Q7KZF4;Q12986;P06748;Q05086;P28749;Q6VY07;P52657;Q7KZ85;Q07021;O60885;Q15326;Q00403;Q13619;Q9P1T7;P08727;O60583;Q13616;Q14999;Q8WUM4;P62877;P63172;Q14240;Q96PU5;P49450;Q92830;P17096;Q8TAE8;Q7L5N1;Q5TCQ9;P08670;Q9UGR2;O60870;Q86V81;Q9H6F5;Q15542;Q969H0;Q9C035;Q9H2J4;Q14974;P63279;Q6UUUV9;Q13547;Q96T37;P49790;P08729;Q71F23;Q13409;Q92793;P54725;O95295;P21675;O00308;P20226;P60842;O43463;O75531;O60506;Q9BYX4;P61978;O75843;Q99816;O95373;P52948;Q9UKL0;Q9Y224;Q93034;Q13363;P08047;Q9H0M0;Q9UKC9;Q14141;Q9Y4B6;P17544;Q6UUUV7;P30307;Q7Z5K2;P62826;P52292;O60238;P27986;P06730;Q92993;Q12824;Q86X55;Q15942;P11142;P51610;Q04637;P52294;Q8NDT2;Q9BRP4}
- 23577 [Cluster 2144]GO:0006534+P biological\_process [name] cysteine metabolic process [def] "The chemical reactions and pathways involving cysteine, 2-amino-3-mercaptopropanoic acid." [GOC
- 23578 Pathogen[ Q2Q067] interacts with 2 human partners: {Q9Y697;P32929}
- 23579 Pathogen[ P0C214] interacts with 2 human partners: {P32929;Q9Y697}
- 23580 Pathogen[ P03346] interacts with 2 human partners: {Q9Y697;P32929}
- 23581 Pathogen[ Q85601] interacts with 2 human partners: {Q9Y697;P32929}
- 23582 Pathogen[ P14079] interacts with 3 human partners: {Q9Y697;P32929;Q16878}
- 23583 Pathogen[ P03383] interacts with 1 human partners: {Q9Y697}
- 23584 Pathogen[ P03410] interacts with 2 human partners: {P32929;Q9Y697}

23585 Pathogen[ P14075] interacts with 1 human partners:{Q9Y697}  
23586 Pathogen[ P0C206] interacts with 2 human partners:{Q9Y697;P32929}  
23587 Pathogen[ P03363] interacts with 1 human partners:{Q9Y697}  
23588 [Cluster 2145]GO:0070193+P biological\_process [name] synaptonemal complex organization  
[def] "A process that is carried out at the cellular level which results in the  
assembly, arrangement of constituent parts, or disassembly of a synaptonemal complex. A  
synaptonemal complex is a proteinaceous scaffold formed between homologous chromosomes  
during meiosis." [GOC  
23589 Pathogen[ Q2Q067] interacts with 1 human partners:{P63146}  
23590 Pathogen[ P0C214] interacts with 1 human partners:{P63146}  
23591 Pathogen[ P03346] interacts with 1 human partners:{P63146}  
23592 Pathogen[ Q85601] interacts with 1 human partners:{P63146}  
23593 Pathogen[ P14079] interacts with 1 human partners:{P63146}  
23594 Pathogen[ P03383] interacts with 1 human partners:{P63146}  
23595 Pathogen[ P03410] interacts with 1 human partners:{P63146}  
23596 Pathogen[ P14075] interacts with 1 human partners:{P63146}  
23597 Pathogen[ P0C206] interacts with 1 human partners:{P63146}  
23598 Pathogen[ P03363] interacts with 1 human partners:{P63146}  
23599 [Cluster 2146]GO:0051865+P biological\_process [name] protein autoubiquitination  
[def] "The ubiquitination by a protein of one or more of its own amino acid residues, or  
residues on an identical protein. Ubiquitination occurs on the lysine residue by  
formation of an isopeptide crosslink." [GOC  
23600 Pathogen[ Q2Q067] interacts with 18 human  
partners:{P19474;O60260;Q96T88;Q12933;P63146;P78317;Q5TA31;Q9NPD8;O95628;Q96PM5;Q9NT  
X7;Q9Y4L5;O76064;Q13216;Q9UNE7;P49459;Q96PU4;Q92466}  
23601 Pathogen[ P0C214] interacts with 18 human  
partners:{Q96PM5;P19474;O95628;Q9NNTX7;Q96PU4;P49459;Q96T88;P78317;Q13216;Q12933;Q5TA  
31;O60260;Q9Y4L5;Q92466;Q9UNE7;O76064;Q9NPD8;P63146}  
23602 Pathogen[ P03346] interacts with 19 human  
partners:{O76064;O95628;Q96PM5;Q9NNTX7;P49459;Q5TA31;O94972;P63146;Q9UNE7;Q9NPD8;Q132  
16;P78317;O60260;P19474;Q9Y4L5;Q96PU4;Q92466;O94822;Q96T88}  
23603 Pathogen[ Q85601] interacts with 18 human  
partners:{P78317;P63146;Q13216;Q96PM5;Q96PU4;Q9Y4L5;Q9NPD8;Q5TA31;O76064;Q12933;O956  
28;Q96T88;Q9NNTX7;P49459;O60260;P19474;Q92466;Q9UNE7}  
23604 Pathogen[ P14079] interacts with 11 human  
partners:{O60260;O95628;Q5TA31;Q9NPD8;Q13216;P19474;P49459;Q12933;P78317;Q92466;P631  
46}  
23605 Pathogen[ P03383] interacts with 14 human  
partners:{P19474;Q13216;Q96PU4;Q9NNTX7;P78317;O95628;O60260;Q5TA31;Q12933;Q96PM5;P494  
59;Q9NPD8;P63146;Q92466}  
23606 Pathogen[ P03410] interacts with 11 human  
partners:{O95628;P49459;Q5TA31;O60260;Q92466;Q9UNE7;P78317;P63146;Q12933;Q13216;Q9NP  
D8}  
23607 Pathogen[ P14075] interacts with 14 human  
partners:{Q96PM5;Q9NNTX7;P49459;Q96PU4;Q13216;Q9NPD8;O95628;Q12933;P19474;P78317;P631  
46;Q5TA31;Q92466;O60260}  
23608 Pathogen[ P0C206] interacts with 19 human  
partners:{Q9NPD8;Q9Y4L5;O94822;Q12933;P78317;Q13216;O95628;Q5TA31;Q9UNE7;P49459;Q96T  
88;O60260;Q96PM5;Q92466;Q9NNTX7;O76064;Q96PU4;P63146;P19474}  
23609 Pathogen[ P03363] interacts with 18 human  
partners:{O94972;P49459;O95628;Q12933;Q9NNTX7;P78317;P63146;Q9UNE7;P19474;Q96PM5;Q924  
66;Q9NPD8;Q5TA31;Q96T88;Q9Y4L5;O94822;Q13216;Q96PU4}  
23610 [Cluster 2147]GO:0045348+P biological\_process [name] positive regulation of MHC class  
II biosynthetic process [def] "Any process that activates or increases the frequency,  
rate or extent of the chemical reactions and pathways resulting in the formation of MHC  
class II." [GOC  
23611 Pathogen[ Q2Q067] interacts with 1 human partners:{P33076}  
23612 Pathogen[ P0C214] interacts with 1 human partners:{P33076}  
23613 Pathogen[ P03346] interacts with 1 human partners:{P33076}  
23614 Pathogen[ Q85601] interacts with 1 human partners:{P33076}  
23615 Pathogen[ P14079] interacts with 1 human partners:{P33076}  
23616 Pathogen[ P03383] interacts with 1 human partners:{P33076}  
23617 Pathogen[ P03410] interacts with 1 human partners:{P33076}  
23618 Pathogen[ P14075] interacts with 1 human partners:{P33076}  
23619 Pathogen[ P0C206] interacts with 1 human partners:{P33076}  
23620 Pathogen[ P03363] interacts with 1 human partners:{P33076}  
23621 [Cluster 2148]GO:0006693+P biological\_process [name] prostaglandin metabolic process  
[def] "The chemical reactions and pathways involving prostaglandins, any of a group of  
biologically active metabolites which contain a cyclopentane ring due to the formation  
of a bond between two carbons of a fatty acid. They have a wide range of biological  
activities." [ISBN  
23622 Pathogen[ Q2Q067] interacts with 1 human partners:{Q15185}  
23623 Pathogen[ P0C214] interacts with 2 human partners:{Q8TBF2;Q15185}  
23624 Pathogen[ P03346] interacts with 1 human partners:{Q15185}  
23625 Pathogen[ Q85601] interacts with 1 human partners:{Q15185}  
23626 Pathogen[ P14079] interacts with 2 human partners:{Q15185;Q8TBF2}

23627 Pathogen[ P03383] interacts with 1 human partners:{Q15185}

23628 Pathogen[ P03410] interacts with 2 human partners:{Q15185;Q8TBF2}

23629 Pathogen[ P14075] interacts with 1 human partners:{Q15185}

23630 Pathogen[ P0C206] interacts with 2 human partners:{Q15185;Q8TBF2}

23631 Pathogen[ P03363] interacts with 1 human partners:{Q15185}

23632 [Cluster 2149]GO:0006662+P biological\_process [name] glycerol ether metabolic process [def] "The chemical reactions and pathways involving glycerol ethers, any anhydride formed between two organic hydroxy compounds, one of which is glycerol." [GOC

23633 Pathogen[ Q2Q067] interacts with 1 human partners:{P10599}

23634 Pathogen[ P0C214] interacts with 2 human partners:{P10599;P13667}

23635 Pathogen[ P03346] interacts with 3 human partners:{O43396;P13667;P10599}

23636 Pathogen[ Q85601] interacts with 1 human partners:{P10599}

23637 Pathogen[ P14079] interacts with 1 human partners:{P10599}

23638 Pathogen[ P03383] interacts with 1 human partners:{P10599}

23639 Pathogen[ P03410] interacts with 2 human partners:{P10599;P13667}

23640 Pathogen[ P14075] interacts with 1 human partners:{P10599}

23641 Pathogen[ P0C206] interacts with 2 human partners:{P10599;P13667}

23642 Pathogen[ P03363] interacts with 1 human partners:{O43396}

23643 [Cluster 2150]GO:0007617+P biological\_process [name] mating behavior [def] "The behavioral interactions between organisms for the purpose of mating, or sexual reproduction resulting in the formation of zygotes." [GOC

23644 Pathogen[ Q2Q067] interacts with 1 human partners:{Q02577}

23645 Pathogen[ P0C214] interacts with 1 human partners:{Q02577}

23646 Pathogen[ P03346] interacts with 1 human partners:{Q02577}

23647 Pathogen[ Q85601] interacts with 1 human partners:{Q02577}

23648 Pathogen[ P14079] interacts with 1 human partners:{Q02577}

23649 Pathogen[ P03383] interacts with 1 human partners:{Q02577}

23650 Pathogen[ P03410] interacts with 1 human partners:{Q02577}

23651 Pathogen[ P14075] interacts with 1 human partners:{Q02577}

23652 Pathogen[ P0C206] interacts with 1 human partners:{Q02577}

23653 Pathogen[ P03363] interacts with 1 human partners:{Q02577}

23654 [Cluster 2151]GO:0090161+P biological\_process [name] Golgi ribbon formation [def] "The formation of a continuous ribbon of interconnected Golgi stacks of flat cisternae." [GOC

23655 Pathogen[ Q2Q067] interacts with 2 human partners:{Q96CV9;Q8IWJ2}

23656 Pathogen[ P0C214] interacts with 2 human partners:{Q8IWJ2;Q96CV9}

23657 Pathogen[ P03346] interacts with 2 human partners:{Q96CV9;Q8IWJ2}

23658 Pathogen[ Q85601] interacts with 2 human partners:{Q8IWJ2;Q96CV9}

23659 Pathogen[ P14079] interacts with 2 human partners:{Q8IWJ2;Q96CV9}

23660 Pathogen[ P03383] interacts with 2 human partners:{Q8IWJ2;Q96CV9}

23661 Pathogen[ P03410] interacts with 2 human partners:{Q96CV9;Q8IWJ2}

23662 Pathogen[ P14075] interacts with 2 human partners:{Q8IWJ2;Q96CV9}

23663 Pathogen[ P0C206] interacts with 2 human partners:{Q96CV9;Q8IWJ2}

23664 Pathogen[ P03363] interacts with 2 human partners:{Q96CV9;Q8IWJ2}

23665 [Cluster 2152]GO:0043434+P biological\_process [name] response to peptide hormone stimulus [def] "Any process that results in a change in state or activity of a cell or an organism (in terms of movement, secretion, enzyme production, gene expression, etc.) as a result of a peptide hormone stimulus. A peptide hormone is any of a class of peptides that are secreted into the blood stream and have endocrine functions in living animals." [PMID

23666 Pathogen[ Q2Q067] interacts with 15 human partners:{Q9Y266;P40763;P49770;P30279;P05062;P36956;P62324;Q9UI10;O14508;Q14232;Q9NR50;P29474;Q13144;P42224;P78543}

23667 Pathogen[ P0C214] interacts with 19 human partners:{P50440;P29474;Q9UI10;P49770;P78543;P17275;P42224;Q14232;Q9Y266;P05062;P11168;Q9NR50;Q13144;P05543;P62324;O14508;P30279;P40763;O15524}

23668 Pathogen[ P03346] interacts with 18 human partners:{O15524;P30279;P29474;P36956;P17275;O14508;P51843;Q9Y266;Q14232;P49770;P42224;P05062;P62324;Q13144;P40763;P78543;Q9NR50;Q9UI10}

23669 Pathogen[ Q85601] interacts with 17 human partners:{P11168;P40763;P62324;Q9NR50;Q13144;P05062;P49770;O14508;Q9Y266;P36956;P78543;P30279;P42224;P29474;P17275;Q14232;Q9UI10}

23670 Pathogen[ P14079] interacts with 15 human partners:{P04083;P78543;P62324;Q9UI10;Q9Y266;Q14118;Q13144;Q9NR50;P17275;P42224;O14508;Q14232;P50440;P81277;P36956}

23671 Pathogen[ P03383] interacts with 12 human partners:{P29474;P62324;Q9UI10;P11168;P30279;Q13144;Q9NR50;P78543;P49770;Q9Y266;Q14232;P17275}

23672 Pathogen[ P03410] interacts with 19 human partners:{P36956;Q9NR50;P30279;P11168;Q14232;P05062;P49770;P29474;O14508;P17275;P62324;Q14118;P78543;Q9Y266;P81277;P50440;P40763;Q9UI10;Q13144}

23673 Pathogen[ P14075] interacts with 13 human partners:{P29474;Q9Y266;P62324;P17275;P30279;Q9UI10;Q14232;P78543;P49770;Q9NR50;P11168;Q13144;P50440}

23674 Pathogen[ P0C206] interacts with 19 human partners:{P62324;P05062;P17275;P30279;Q14232;P36956;O15524;Q9NR50;Q13144;P11168;P497



70;P50440;O14508;Q9UI10;P40763;P29474;P42224;Q9Y266;P78543}

23675 Pathogen[ P03363] interacts with 12 human partners: {P29474;O15524;P30279;Q9Y266;Q9UI10;P78543;P17275;Q9NR50;P62324;P49770;Q13144;O14508}

23676 [Cluster 2153]GO:0006998+P biological\_process [name] nuclear envelope organization [def] "A process that is carried out at the cellular level which results in the assembly, arrangement of constituent parts, or disassembly of the nuclear envelope." [GOC

23677 Pathogen[ Q2Q067] interacts with 4 human partners: {Q9UH99;P02545;O75694;O95476}

23678 Pathogen[ P0C214] interacts with 4 human partners: {O75694;Q9UH99;O95476;P02545}

23679 Pathogen[ P03346] interacts with 6 human partners: {O75694;Q8WXH0;Q9UH99;P02545;O95476;O94901}

23680 Pathogen[ Q85601] interacts with 5 human partners: {P02545;O75694;Q9UH99;O95476;O94901}

23681 Pathogen[ P14079] interacts with 6 human partners: {O94901;Q8WXH0;O95476;Q9UH99;P02545;O75694}

23682 Pathogen[ P03383] interacts with 3 human partners: {P02545;Q9UH99;O75694}

23683 Pathogen[ P03410] interacts with 6 human partners: {Q9UH99;O75694;P02545;O95476;O94901;Q8WXH0}

23684 Pathogen[ P14075] interacts with 3 human partners: {P02545;Q9UH99;O75694}

23685 Pathogen[ P0C206] interacts with 6 human partners: {Q9UH99;O95476;O94901;O75694;P02545;Q8WXH0}

23686 Pathogen[ P03363] interacts with 5 human partners: {P02545;O95476;O75694;O94901;Q9UH99}

23687 [Cluster 2154]GO:0033205+P biological\_process [name] cell cycle cytokinesis [def] "Cytokinesis that occurs in the context of cell cycle progression and results in the division of the cytoplasm of a cell and its separation into two daughter cells." [GOC

23688 Pathogen[ Q2Q067] interacts with 2 human partners: {O76095;Q02241}

23689 Pathogen[ P0C214] interacts with 1 human partners: {Q02241}

23690 Pathogen[ P03346] interacts with 4 human partners: {P51587;Q02241;Q9H8V3;O76095}

23691 Pathogen[ Q85601] interacts with 3 human partners: {Q02241;O76095;P51587}

23692 Pathogen[ P14079] interacts with 4 human partners: {O76095;Q02241;P51587;Q9H8V3}

23693 Pathogen[ P03383] interacts with 2 human partners: {Q02241;O76095}

23694 Pathogen[ P03410] interacts with 4 human partners: {P51587;O76095;Q9H8V3;Q02241}

23695 Pathogen[ P14075] interacts with 2 human partners: {Q02241;O76095}

23696 Pathogen[ P0C206] interacts with 4 human partners: {P51587;Q02241;Q9H8V3;O76095}

23697 Pathogen[ P03363] interacts with 2 human partners: {Q02241;O76095}

23698 [Cluster 2155]GO:0000729+P biological\_process [name] DNA double-strand break processing [def] "The 5' to 3' exonucleolytic resection of the DNA at the site of the break to form a 3' single-strand DNA overhang." [PMID

23699 Pathogen[ Q2Q067] interacts with 3 human partners: {Q9H4L7;P61088;Q15819}

23700 Pathogen[ P0C214] interacts with 3 human partners: {Q9H4L7;Q15819;P61088}

23701 Pathogen[ P03346] interacts with 3 human partners: {P61088;Q9H4L7;Q15819}

23702 Pathogen[ Q85601] interacts with 3 human partners: {Q9H4L7;P61088;Q15819}

23703 Pathogen[ P14079] interacts with 2 human partners: {Q15819;Q9H4L7}

23704 Pathogen[ P03383] interacts with 2 human partners: {P61088;Q15819}

23705 Pathogen[ P03410] interacts with 3 human partners: {Q9H4L7;P61088;Q15819}

23706 Pathogen[ P14075] interacts with 2 human partners: {Q15819;P61088}

23707 Pathogen[ P0C206] interacts with 3 human partners: {Q9H4L7;P61088;Q15819}

23708 Pathogen[ P03363] interacts with 3 human partners: {Q9H4L7;P61088;Q15819}

23709 [Cluster 2156]GO:0043087+P biological\_process [name] regulation of GTPase activity [def] "Any process that modulates the rate of GTP hydrolysis by a GTPase." [GOC

23710 Pathogen[ Q2Q067] interacts with 2 human partners: {Q96IF1;Q96Q35}

23711 Pathogen[ P0C214] interacts with 1 human partners: {Q96Q35}

23712 Pathogen[ P03346] interacts with 2 human partners: {Q96Q35;Q96IF1}

23713 Pathogen[ Q85601] interacts with 2 human partners: {Q96IF1;Q96Q35}

23714 Pathogen[ P14079] interacts with 3 human partners: {Q96Q35;Q96IF1;Q15042}

23715 Pathogen[ P03383] interacts with 1 human partners: {Q96Q35}

23716 Pathogen[ P03410] interacts with 3 human partners: {Q96IF1;Q96Q35;Q15042}

23717 Pathogen[ P14075] interacts with 1 human partners: {Q96Q35}

23718 Pathogen[ P0C206] interacts with 2 human partners: {Q96IF1;Q96Q35}

23719 Pathogen[ P03363] interacts with 2 human partners: {Q96IF1;Q96Q35}

23720 [Cluster 2157]GO:0016570+P biological\_process [name] histone modification [def] "The covalent alteration of one or more amino acid residues within a histone protein." [GOC

23721 Pathogen[ Q2Q067] interacts with 1 human partners: {Q92541}

23722 Pathogen[ P0C214] interacts with 2 human partners: {Q92541;P50747}

23723 Pathogen[ P03346] interacts with 1 human partners: {Q92541}

23724 Pathogen[ Q85601] interacts with 1 human partners: {Q92541}

23725 Pathogen[ P14079] interacts with 1 human partners: {Q92541}

23726 Pathogen[ P03383] interacts with 1 human partners: {Q92541}

23727 Pathogen[ P03410] interacts with 1 human partners: {Q92541}

23728 Pathogen[ P14075] interacts with 1 human partners: {Q92541}

23729 Pathogen[ P0C206] interacts with 1 human partners: {Q92541}

23730 Pathogen[ P03363] interacts with 1 human partners: {Q92541}

23731 [Cluster 2158]GO:0000045+P biological\_process [name] autophagic vacuole assembly [def] "The formation of a double membrane-bounded structure, the autophagosome, that

occurs when a specialized membrane sac, called the isolation membrane, starts to enclose a portion of the cytoplasm." [PMID

23732 Pathogen[ Q2Q067] interacts with 13 human  
partners:{Q7Z3C6;Q9Y4P1;Q6ZNE5;Q9BSB4;Q8TDY2;Q14457;Q8IXH6;O75143;Q9Y4P8;O94817;Q676U5;Q9NT62;Q9H1Y0}

23733 Pathogen[ P0C214] interacts with 14 human  
partners:{Q14457;Q9BSB4;Q9Y4P1;Q676U5;Q8TDY2;O75143;Q6ZNE5;Q9Y4P8;O94817;Q8IXH6;Q9H1Y0;Q9NT62;Q9H492;Q7Z3C6}

23734 Pathogen[ P03346] interacts with 14 human  
partners:{Q7Z3C6;Q9Y4P1;O75143;Q9BSB4;Q8TDY2;Q9NT62;Q14457;Q6ZNE5;Q9H492;Q9H1Y0;Q8IXH6;Q676U5;O94817;Q9Y4P8}

23735 Pathogen[ Q85601] interacts with 13 human  
partners:{Q14457;Q9H492;O75143;Q9BSB4;Q9Y4P1;Q8TDY2;O94817;Q7Z3C6;Q9Y4P8;Q9H1Y0;Q676U5;Q9NT62;Q8IXH6}

23736 Pathogen[ P14079] interacts with 14 human  
partners:{Q8IXH6;Q9NT62;Q9Y4P8;Q8TDY2;Q9H492;Q7Z3C6;O75143;Q9H1Y0;Q9Y4P1;Q9BSB4;Q6ZNE5;Q676U5;O94817;Q14457}

23737 Pathogen[ P03383] interacts with 13 human  
partners:{Q14457;Q7Z3C6;O75143;Q9Y4P1;Q8TDY2;Q9NT62;Q9H1Y0;Q8IXH6;Q676U5;Q9Y4P8;O94817;Q6ZNE5;Q9BSB4}

23738 Pathogen[ P03410] interacts with 16 human  
partners:{Q8IXH6;Q674R7;Q9H1Y0;Q9Y4P1;Q9BSB4;O75143;Q14457;Q8TDY2;Q9Y4P8;O94817;Q9H492;Q676U5;Q9NT62;Q6ZNE5;Q7Z3C6;Q5MNZ9}

23739 Pathogen[ P14075] interacts with 13 human  
partners:{Q14457;Q6ZNE5;Q9BSB4;Q9NT62;O75143;Q9H1Y0;Q9Y4P1;Q676U5;Q8TDY2;Q9Y4P8;Q8IXH6;O94817;Q7Z3C6}

23740 Pathogen[ P0C206] interacts with 14 human  
partners:{Q7Z3C6;Q8IXH6;Q9BSB4;Q9Y4P1;Q9H492;Q14457;Q6ZNE5;Q9Y4P8;Q9H1Y0;Q8TDY2;Q676U5;O94817;Q9NT62;O75143}

23741 Pathogen[ P03363] interacts with 14 human  
partners:{Q9H492;Q14457;O75143;Q9NT62;Q9BSB4;Q7Z3C6;Q6ZNE5;Q8TDY2;Q9Y4P8;Q9Y4P1;Q676U5;Q8IXH6;O94817;Q9H1Y0}

23742 [Cluster 2159]GO:0006110+P biological\_process [name] regulation of glycolysis [def] "Any process that modulates the frequency, rate or extent of glycolysis." [GOC

23743 Pathogen[ Q2Q067] interacts with 2 human partners:{P18669;O95905}

23744 Pathogen[ P0C214] interacts with 1 human partners:{O95905}

23745 Pathogen[ P03346] interacts with 2 human partners:{P18669;O95905}

23746 Pathogen[ Q85601] interacts with 2 human partners:{P18669;O95905}

23747 Pathogen[ P14079] interacts with 2 human partners:{O95905;P18669}

23748 Pathogen[ P03383] interacts with 2 human partners:{P18669;O95905}

23749 Pathogen[ P03410] interacts with 2 human partners:{O95905;P18669}

23750 Pathogen[ P14075] interacts with 2 human partners:{P18669;O95905}

23751 Pathogen[ P0C206] interacts with 2 human partners:{O95905;P18669}

23752 Pathogen[ P03363] interacts with 2 human partners:{P18669;O95905}

23753 [Cluster 2160]GO:0006521+P biological\_process [name] regulation of cellular amino acid metabolic process [def] "Any process that modulates the frequency, rate or extent of the chemical reactions and pathways involving amino acids." [GOC

23754 Pathogen[ Q2Q067] interacts with 39 human  
partners:{Q99460;O75832;P48556;P40306;P55036;O00231;O00233;P51665;P28072;A5LHX3;Q13200;P25787;Q06323;P28065;O14818;Q9UMX2;Q14997;P60900;Q9UL46;P61289;P28062;P15559;Q9UNM6;P25788;Q92530;P25786;Q16401;O00232;P28074;P25789;P20618;P28070;P28066;Q99436;Q8TAA3;O43242;P49721;P49720;O95190}

23755 Pathogen[ P0C214] interacts with 42 human  
partners:{Q14997;P51665;P25789;P55036;P28062;A5LHX3;P28065;O14818;O43242;P48556;P40306;Q13200;O00232;P54368;Q99460;P28066;O75832;P49720;P28074;Q9UL46;P25788;Q9UNM6;O00231;Q06323;Q9UMX2;P25786;P28072;Q8TAA3;Q99436;P25787;O95190;P35998;P60900;O00233;Q92530;P15559;Q15008;P28070;P20618;P49721;Q16401;P17980}

23756 Pathogen[ P03346] interacts with 39 human  
partners:{P25787;P28070;P25789;P55036;Q99460;Q9UL46;P28072;P25788;P28074;P49721;O14818;Q99436;Q9UMX2;Q16401;A5LHX3;P28062;P15559;P20618;O00232;O75832;O00233;P49720;P28065;P60900;P25786;O00231;P61289;P28066;Q9UNM6;Q8TAA3;Q14997;Q13200;P48556;P51665;Q06323;Q92530;O43242;P40306;O95190}

23757 Pathogen[ Q85601] interacts with 34 human  
partners:{P28066;Q9UNM6;P60900;P55036;P25787;P61289;P25788;O75832;P25789;O00233;Q9UMX2;P20618;P40306;P49720;P28062;P49721;O95190;P25786;P28072;Q13200;P28065;Q99436;P28070;Q8TAA3;Q9UL46;Q99460;O00231;P48556;P28074;Q92530;A5LHX3;Q06323;O14818;Q16401}

23758 Pathogen[ P14079] interacts with 43 human  
partners:{P28065;Q99436;P62333;P48556;P40306;P55036;P28074;O00232;Q9UMX2;P49720;O00487;O95190;P25787;O75832;A5LHX3;O00233;P15559;P35998;P61289;P51665;P20618;Q8TAA3;P54368;Q14997;P28062;P60900;Q9UNM6;Q99460;O14818;P49721;Q92530;Q06323;P62191;Q15008;P43686;O43242;P25788;O00231;P28066;Q9UL46;Q16401;P17980;P28072}

23759 Pathogen[ P03383] interacts with 33 human  
partners:{P55036;P25789;P60900;P40306;O00233;P49721;Q06323;Q14997;P20618;O75832;Q9UL46;O95190;Q9UNM6;P25786;Q99460;P28072;Q13200;P28065;P28066;Q16401;O00231;P28074;Q92530;P49720;Q8TAA3;P61289;P28062;P48556;O14818;Q99436;P28070;P25787;P25788}

23760 Pathogen[ P03410] interacts with 42 human

partners:{P15559;P28070;P55036;P25786;Q15008;Q16401;P60900;Q14997;P35998;Q99460;O00233;O00232;Q8TAA3;P48556;P49721;O95190;A5LHX3;Q99436;P40306;Q06323;Q13200;P25787;P28062;P51665;O14818;O00231;Q9UNM6;P54368;P25789;P49720;P28072;P25788;P28066;Q9UMX2;P28065;O43242;P17980;O75832;P20618;Q9UL46;P28074;P61289}

23761 Pathogen[ P14075] interacts with 33 human partners:{P55036;P25788;P28066;Q06323;O75832;Q8TAA3;P60900;O00233;Q9UL46;P49720;Q13200;P48556;Q16401;P15559;P28070;P49721;O00231;Q92530;P28062;P28074;P28065;P25786;O14818;P28072;Q14997;P25787;P20618;Q9UNM6;P61289;P40306;Q99436;O95190;P25789}

23762 Pathogen[ P0C206] interacts with 39 human partners:{P61289;Q99436;P28062;Q9UNM6;O75832;P40306;P28065;Q14997;P55036;P25786;P25788;P25787;Q06323;P49720;P15559;O00232;P60900;O43242;A5LHX3;P25789;P54368;P20618;Q13200;Q8TAA3;P28070;O95190;Q99460;P28066;O14818;P28072;P28074;Q92530;P49721;Q9UL46;O00233;P48556;Q16401;O00231;Q9UMX2}

23763 Pathogen[ P03363] interacts with 4 human partners:{Q92530;P61289;Q9UMX2;O95190}

23764 [Cluster 2161]GO:0035617+P biological\_process [name] stress granule disassembly [def] "The disaggregation of a stress granule into its constituent protein and RNA parts." [GOC]

23765 Pathogen[ Q2Q067] interacts with 1 human partners:{Q07866}

23766 Pathogen[ P0C214] interacts with 1 human partners:{Q07866}

23767 Pathogen[ P03346] interacts with 1 human partners:{Q07866}

23768 Pathogen[ Q85601] interacts with 1 human partners:{Q07866}

23769 Pathogen[ P14079] interacts with 1 human partners:{Q07866}

23770 Pathogen[ P03383] interacts with 1 human partners:{Q07866}

23771 Pathogen[ P03410] interacts with 2 human partners:{Q07866;P33176}

23772 Pathogen[ P14075] interacts with 1 human partners:{Q07866}

23773 Pathogen[ P0C206] interacts with 1 human partners:{Q07866}

23774 Pathogen[ P03363] interacts with 2 human partners:{P33176;Q07866}

23775 [Cluster 2162]GO:0051439+P biological\_process [name] regulation of ubiquitin-protein ligase activity involved in mitotic cell cycle [def] "A cell cycle process that modulates the frequency, rate or extent of ubiquitin ligase activity that contributes to the mitotic cell cycle." [GOC]

23776 Pathogen[ Q2Q067] interacts with 64 human partners:{Q99460;O75832;P48556;P40306;P55036;O00231;O00233;Q9UJX3;Q9UJX5;P51665;P28072;O00762;A5LHX3;Q13257;Q13200;P25787;Q06323;O43684;Q9NYG5;Q9H1A4;P51965;P28065;O14818;P14635;Q9UJX2;Q9Y297;Q9UM13;Q14997;P60900;Q9UL46;P61289;Q12834;P51668;P28062;Q9UNM6;P25788;Q13616;Q92530;P25786;Q8NHZ8;Q16401;O00232;Q9UM11;Q9UJX4;P28074;P25789;Q9UKT4;P0CG47;P20618;P0CG48;P28070;P28066;Q99436;P24941;Q8TAA3;Q9UJX6;P62987;O43242;P30260;P49721;P49720;Q13042;P63208;P62979}

23777 Pathogen[ P0C214] interacts with 66 human partners:{Q9UJX6;Q14997;P51665;O43684;Q13257;P25789;P55036;P28062;A5LHX3;O00762;P28065;O14818;O43242;Q9UJX5;P63208;P48556;P40306;P14635;Q13200;Q9UJX2;Q9Y297;O00232;P51965;Q99460;P28066;O75832;Q9H1A4;P49720;P28074;P0CG48;Q9UL46;Q8NHZ8;Q12834;P25788;P24941;Q9UNM6;O00231;Q06323;P25786;Q13616;P28072;Q8TAA3;P62987;Q99436;Q9UJX4;P0CG47;P25787;Q9UJX3;P35998;P60900;O00233;Q9UM11;P51668;P62979;P30260;Q92530;Q9NYG5;Q15008;Q9UM13;P28070;Q9UKT4;P20618;P49721;Q16401;P17980;Q13042}

23778 Pathogen[ P03346] interacts with 64 human partners:{P25787;P28070;P25789;P55036;O43684;Q99460;Q9UM11;Q13616;Q9UL46;P62987;P28072;P25788;P28074;P49721;O14818;Q99436;P24941;P0CG48;Q16401;A5LHX3;Q9UM13;P28062;Q9NYG5;P20618;O00232;P51668;Q12834;O75832;O00233;Q9UJX6;P14635;Q13042;P51965;Q9UJX5;P49720;P28065;O00762;Q9UJX2;P60900;P25786;O00231;Q9UKT4;Q9UJX3;Q8NHZ8;P63208;P61289;Q9H1A4;P62979;P28066;Q9UNM6;Q9UJX4;Q8TAA3;P0CG47;Q14997;Q13200;P48556;P51665;Q06323;P30260;Q9Y297;Q92530;O43242;P40306;Q13257}

23779 Pathogen[ Q85601] interacts with 59 human partners:{Q9UJX2;P28066;Q9UNM6;P60900;P55036;Q9UJX6;P25787;P61289;P25788;Q9UKT4;Q8NHZ8;O75832;Q9H1A4;Q13616;P0CG48;P51668;Q12834;Q13257;P25789;O00233;P20618;P63208;P40306;P14635;Q13042;Q9UJX5;P51965;P49720;Q9UM13;P28062;P49721;Q9NYG5;P25786;O00762;P28072;Q9UJX3;Q13200;P28065;P62979;Q99436;P28070;Q9UJX4;Q9UM11;Q8TAA3;Q9UL46;Q99460;O00231;P0CG47;P48556;P28074;Q92530;P62987;A5LHX3;Q06323;P30260;O14818;P24941;O43684;Q16401}

23780 Pathogen[ P14079] interacts with 63 human partners:{P28065;Q99436;P62333;P48556;P51965;P0CG48;Q9UKT4;P40306;Q9UJX3;P55036;P28074;O00232;Q9H1A4;Q9UJX5;P49720;O00487;P25787;O75832;A5LHX3;P62979;O00233;P35998;P61289;P62987;P51665;P20618;Q9NYG5;Q8TAA3;Q14997;P51668;P14635;Q8NHZ8;P28062;P60900;Q9UM11;Q9UM13;Q13042;Q9UNM6;Q13257;Q99460;O14818;P49721;Q92530;Q9UJX6;P30260;Q06323;P62191;O00762;Q15008;P43686;O43242;P25788;P63208;O00231;Q13616;P28066;Q9UL46;P0CG47;Q16401;Q9UJX4;P17980;O43684;P28072}

23781 Pathogen[ P03383] interacts with 59 human partners:{Q13257;Q8NHZ8;Q13616;P55036;P62987;Q9NYG5;P51965;Q9UJX6;P25789;P60900;P40306;O00233;O00762;P49721;Q06323;Q9UKT4;Q14997;Q9H1A4;P63208;P20618;Q13042;P14635;Q12834;O75832;Q9UM13;O43684;P24941;Q9UM11;Q9UL46;Q9UNM6;P25786;Q99460;P28072;Q13200;P28065;P28066;Q9UJX4;Q16401;P62979;O00231;P0CG47;Q9UJX5;P0CG48;P28074;Q92530;P49720;Q8TAA3;P61289;Q9UJX2;P28062;P30260;P48556;O14818;Q9UJX3;Q99436;P28070;P51668;P25787;P25788}

23782 Pathogen[ P03410] interacts with 64 human partners:{Q9UKT4;P28070;P55036;P0CG48;O43684;Q9H1A4;P25786;Q15008;Q16401;P60900;Q14997;P35998;P51965;Q99460;Q9UJX4;Q9NYG5;O00233;Q9UM13;O00232;Q8NHZ8;Q8TAA3;P48556;P497

21;A5LHX3;P62979;Q99436;P40306;Q06323;P63208;Q13200;P25787;P14635;Q9UM11;Q13042;P24941;P28062;P51665;O14818;P51668;Q9UJX5;O00231;Q9UNM6;Q12834;P30260;P25789;P49720;Q13616;Q9UJX3;P62987;O00762;P28072;P25788;P28066;P28065;O43242;Q9UJX6;POCG47;P17980;O75832;P20618;Q9UL46;P28074;P61289;Q13257}

23783 Pathogen[ P14075] interacts with 58 human partners: {P55036;P25788;Q13042;P28066;P24941;Q06323;O75832;Q8TAA3;Q9UKT4;P60900;P14635;Q9UM11;O00233;Q9UL46;P49720;P51965;Q13257;O43684;Q13200;P48556;Q16401;P28070;Q9UJX2;P49721;O00231;Q9UJX6;Q8NHZ8;Q92530;P63208;POCG48;P62979;O00762;P28062;P28074;Q9UJX5;P28065;P25786;O14818;P62987;P28072;Q14997;Q9UJX4;POCG47;P25787;P20618;Q9H1A4;Q9UNM6;Q13616;Q9UM13;P30260;P61289;Q9UJX3;P40306;P51668;Q9NYG5;Q99436;Q12834;P25789}

23784 Pathogen[ POC206] interacts with 62 human partners: {P61289;Q99436;P28062;Q9UNM6;POCG48;O75832;P40306;P28065;Q14997;Q9UJX3;P55036;P25786;P25788;P25787;Q9UJX5;Q9UJX2;Q06323;P49720;O00232;P60900;Q13616;O43242;Q13257;P30260;A5LHX3;P25789;P51965;Q9UKT4;Q9H1A4;Q9NYG5;Q9UJX4;P20618;P63208;Q13200;Q8TAA3;P28070;Q99460;P62979;P28066;Q9UM11;O00762;O14818;Q9UJX6;POCG47;P28072;P28074;Q92530;P49721;P14635;O43684;P62987;Q9UM13;Q9UL46;Q13042;P24941;P51668;O00233;P48556;Q16401;Q12834;Q8NHZ8;O00231}

23785 Pathogen[ P03363] interacts with 25 human partners: {Q9UJX2;Q9NYG5;Q13042;P51965;O00762;Q92530;Q8NHZ8;Q9UJX3;P61289;P24941;Q9UJX5;P30260;P62987;Q9UM11;Q9UJX4;Q13616;O43684;Q9UKT4;Q9H1A4;P62987;Q13257;P51668;Q9UM13;Q12834;P63208}

23786 [Cluster 2163]GO:0043408+P biological\_process [name] regulation of MAPKKK cascade [def] "Any process that modulates the frequency, rate or extent of signal transduction mediated by the MAPKKK cascade." [GOC

23787 Pathogen[ Q2Q067] interacts with 2 human partners: {P41134;P25063}

23788 Pathogen[ POC214] interacts with 4 human partners: {P62993;P41134;P25063;Q9H4P4}

23789 Pathogen[ P03346] interacts with 4 human partners: {Q9H4P4;P62993;P41134;P25063}

23790 Pathogen[ Q85601] interacts with 3 human partners: {P62993;P41134;Q9H4P4}

23791 Pathogen[ P14079] interacts with 4 human partners: {O75787;P25063;P62993;P41134}

23792 Pathogen[ P03383] interacts with 1 human partners: {P25063}

23793 Pathogen[ P03410] interacts with 4 human partners: {O75787;P41134;P25063;P62993}

23794 Pathogen[ P14075] interacts with 1 human partners: {P25063}

23795 Pathogen[ POC206] interacts with 5 human partners: {Q9H4P4;O75787;P62993;P41134;P25063}

23796 Pathogen[ P03363] interacts with 2 human partners: {P41134;Q9H4P4}

23797 [Cluster 2164]GO:0001655+P biological\_process [name] urogenital system development [def] "The process whose specific outcome is the progression of the urogenital system over time, from its formation to the mature structure." [GOC

23798 Pathogen[ Q2Q067] interacts with 3 human partners: {P23769;Q96AP0;P40424}

23799 Pathogen[ POC214] interacts with 2 human partners: {P40424;P23769}

23800 Pathogen[ P03346] interacts with 5 human partners: {Q96AP0;Q9NRZ9;P23769;Q06710;P40424}

23801 Pathogen[ Q85601] interacts with 2 human partners: {P23769;P40424}

23802 Pathogen[ P14079] interacts with 2 human partners: {P23769;Q96AP0}

23803 Pathogen[ P03383] interacts with 2 human partners: {P40424;P23769}

23804 Pathogen[ P03410] interacts with 3 human partners: {Q96AP0;P23769;P40424}

23805 Pathogen[ P14075] interacts with 3 human partners: {P40424;P23769;Q96AP0}

23806 Pathogen[ POC206] interacts with 4 human partners: {Q96AP0;P40424;P23769;Q9NRZ9}

23807 Pathogen[ P03363] interacts with 2 human partners: {Q96AP0;P40424}

23808 [Cluster 2165]GO:0035986+P biological\_process [name] senescence-associated heterochromatin focus assembly [def] "The assembly of chromatin into senescence-associated heterochromatin foci (SAHF), transcriptionally-silent heterochromatin structures present in senescent cells, containing the condensed chromatin of one chromosome, and enriched for histone modifications. Formation of these chromatin structures is thought to repress expression of proliferation-promoting genes." [GOC

23809 Pathogen[ Q2Q067] interacts with 2 human partners: {P42771;P17096}

23810 Pathogen[ POC214] interacts with 2 human partners: {P17096;P42771}

23811 Pathogen[ P03346] interacts with 2 human partners: {P42771;P17096}

23812 Pathogen[ Q85601] interacts with 2 human partners: {P17096;P42771}

23813 Pathogen[ P14079] interacts with 2 human partners: {P17096;P42771}

23814 Pathogen[ P03383] interacts with 2 human partners: {P17096;P42771}

23815 Pathogen[ P03410] interacts with 2 human partners: {P42771;P17096}

23816 Pathogen[ P14075] interacts with 2 human partners: {P17096;P42771}

23817 Pathogen[ POC206] interacts with 2 human partners: {P42771;P17096}

23818 Pathogen[ P03363] interacts with 2 human partners: {P17096;P42771}

23819 [Cluster 2166]GO:0010001+P biological\_process [name] glial cell differentiation [def] "The process in which a relatively unspecialized cell acquires the specialized features of a glial cell." [GOC

23820 Pathogen[ Q2Q067] interacts with 3 human partners: {O00712;Q9UIH9;Q86Y01}

23821 Pathogen[ POC214] interacts with 3 human partners: {Q9UIH9;O00712;Q86Y01}

23822 Pathogen[ P03346] interacts with 4 human partners: {Q9HD90;O00712;Q86Y01;Q9UIH9}

23823 Pathogen[ Q85601] interacts with 4 human partners: {Q9UIH9;O00712;Q86Y01;P17677}

23824 Pathogen[ P14079] interacts with 4 human partners: {P17677;Q86Y01;Q9UIH9;O00712}

23825 Pathogen[ P03383] interacts with 2 human partners: {O00712;Q86Y01}

23826 Pathogen[ P03410] interacts with 4 human partners: {Q9UIH9;O00712;Q86Y01;P17677}

23827 Pathogen[ P14075] interacts with 2 human partners:{000712;Q86Y01}  
23828 Pathogen[ POC206] interacts with 4 human partners:{Q86Y01;P17677;Q9UIH9;000712}  
23829 Pathogen[ P03363] interacts with 3 human partners:{Q86Y01;000712;Q9UIH9}  
23830 [Cluster 2167]GO:0012501+P biological\_process [name] programmed cell death [def] "A process which begins when a cell receives an internal or external signal and activates a series of biochemical events (signaling pathway). The process ends with the death of the cell." [GOC  
23831 Pathogen[ Q2Q067] interacts with 3 human partners:{P11387;Q86YP4;Q9HBM6}  
23832 Pathogen[ POC214] interacts with 4 human partners:{P14618;Q9HBM6;Q86YP4;P11387}  
23833 Pathogen[ P03346] interacts with 4 human partners:{Q16342;Q86YP4;Q9HBM6;P11387}  
23834 Pathogen[ Q85601] interacts with 4 human partners:{Q9HBM6;P11387;P14618;Q86YP4}  
23835 Pathogen[ P14079] interacts with 4 human partners:{Q86YP4;P54826;Q16342;Q9HBM6}  
23836 Pathogen[ P03383] interacts with 3 human partners:{Q86YP4;Q9HBM6;P11387}  
23837 Pathogen[ P03410] interacts with 4 human partners:{Q86YP4;Q9HBM6;P11387;P54826}  
23838 Pathogen[ P14075] interacts with 4 human partners:{P11387;P54826;Q86YP4;Q9HBM6}  
23839 Pathogen[ POC206] interacts with 6 human partners:{Q16342;Q86YP4;Q9HBM6;P11387;P54826;P14618}  
23840 Pathogen[ P03363] interacts with 4 human partners:{Q16342;Q86YP4;P11387;Q9HBM6}  
23841 [Cluster 2168]GO:0031293+P biological\_process [name] membrane protein intracellular domain proteolysis [def] "The proteolytic cleavage of a transmembrane protein leading to the release of an intracellular domain." [PMID  
23842 Pathogen[ Q2Q067] interacts with 2 human partners:{Q04206;P19838}  
23843 Pathogen[ POC214] interacts with 2 human partners:{P19838;Q04206}  
23844 Pathogen[ P03346] interacts with 2 human partners:{Q04206;P19838}  
23845 Pathogen[ Q85601] interacts with 2 human partners:{Q04206;P19838}  
23846 Pathogen[ P14079] interacts with 3 human partners:{Q92542;Q9NZ42;Q8WW43}  
23847 Pathogen[ P03383] interacts with 2 human partners:{Q04206;P19838}  
23848 Pathogen[ P03410] interacts with 5 human partners:{Q04206;P19838;Q9NZ42;Q8WW43;Q92542}  
23849 Pathogen[ P14075] interacts with 2 human partners:{Q04206;P19838}  
23850 Pathogen[ POC206] interacts with 4 human partners:{Q9NZ42;Q92542;P19838;Q04206}  
23851 Pathogen[ P03363] interacts with 2 human partners:{Q04206;P19838}  
23852 [Cluster 2169]GO:0060707+P biological\_process [name] trophoblast giant cell differentiation [def] "The process in which a relatively unspecialized cell acquires specialized features of a trophoblast giant cell of the placenta. Trophoblast giant cells are the cell of the placenta that line the maternal decidua." [GOC  
23853 Pathogen[ Q2Q067] interacts with 2 human partners:{096004;Q99750}  
23854 Pathogen[ POC214] interacts with 2 human partners:{Q99750;096004}  
23855 Pathogen[ P03346] interacts with 4 human partners:{096004;095863;Q99750;000444}  
23856 Pathogen[ Q85601] interacts with 2 human partners:{096004;Q99750}  
23857 Pathogen[ P14079] interacts with 2 human partners:{096004;Q99750}  
23858 Pathogen[ P03383] interacts with 2 human partners:{096004;Q99750}  
23859 Pathogen[ P03410] interacts with 2 human partners:{096004;Q99750}  
23860 Pathogen[ P14075] interacts with 2 human partners:{096004;Q99750}  
23861 Pathogen[ POC206] interacts with 3 human partners:{000444;096004;Q99750}  
23862 Pathogen[ P03363] interacts with 2 human partners:{Q99750;096004}  
23863 [Cluster 2170]GO:0000056+P biological\_process [name] ribosomal small subunit export from nucleus [def] "The directed movement of a ribosomal small subunit from the nucleus into the cytoplasm." [GOC  
23864 Pathogen[ Q2Q067] interacts with 1 human partners:{P62841}  
23865 Pathogen[ POC214] interacts with 1 human partners:{P62841}  
23866 Pathogen[ P03346] interacts with 1 human partners:{P62841}  
23867 Pathogen[ Q85601] interacts with 1 human partners:{P62841}  
23868 Pathogen[ P14079] interacts with 1 human partners:{P62841}  
23869 Pathogen[ P03383] interacts with 1 human partners:{P62841}  
23870 Pathogen[ P03410] interacts with 1 human partners:{P62841}  
23871 Pathogen[ P14075] interacts with 1 human partners:{P62841}  
23872 Pathogen[ POC206] interacts with 1 human partners:{P62841}  
23873 Pathogen[ P03363] interacts with 1 human partners:{P62841}  
23874 [Cluster 2171]GO:0043000+P biological\_process [name] Golgi to plasma membrane CFTR protein transport [def] "The directed movement of Cystic Fibrosis Transmembrane conductance Regulator (CFTR) protein from the Golgi to the plasma membrane." [GOC  
23875 Pathogen[ Q2Q067] interacts with 1 human partners:{P05783}  
23876 Pathogen[ POC214] interacts with 1 human partners:{P05783}  
23877 Pathogen[ P03346] interacts with 1 human partners:{P05783}  
23878 Pathogen[ Q85601] interacts with 1 human partners:{P05783}  
23879 Pathogen[ P14079] interacts with 1 human partners:{P05783}  
23880 Pathogen[ P03383] interacts with 1 human partners:{P05783}  
23881 Pathogen[ P03410] interacts with 1 human partners:{P05783}  
23882 Pathogen[ P14075] interacts with 1 human partners:{P05783}  
23883 Pathogen[ POC206] interacts with 1 human partners:{P05783}  
23884 Pathogen[ P03363] interacts with 1 human partners:{P05783}  
23885 [Cluster 2172]GO:0001778+P biological\_process [name] plasma membrane repair [def] "The resealing of a cell plasma membrane after cellular wounding due to, for instance, mechanical stress." [GOC  
23886 Pathogen[ Q2Q067] interacts with 1 human partners:{Q9UKX2}

23887 Pathogen[ P0C214] interacts with 2 human partners:{Q9UKX2;P35580}

23888 Pathogen[ P03346] interacts with 1 human partners:{Q9UKX2}

23889 Pathogen[ Q85601] interacts with 2 human partners:{Q9UKX2;P35580}

23890 Pathogen[ P14079] interacts with 1 human partners:{Q9UKX2}

23891 Pathogen[ P03383] interacts with 2 human partners:{Q9UKX2;P35580}

23892 Pathogen[ P03410] interacts with 2 human partners:{Q9UKX2;P35580}

23893 Pathogen[ P14075] interacts with 1 human partners:{Q9UKX2}

23894 Pathogen[ P0C206] interacts with 2 human partners:{Q9UKX2;P35580}

23895 Pathogen[ P03363] interacts with 1 human partners:{Q9UKX2}

23896 [Cluster 2173]GO:0030855+P biological\_process [name] epithelial cell differentiation [def] "The process in which a relatively unspecialized cell acquires specialized features of an epithelial cell, any of the cells making up an epithelium." [GOC

23897 Pathogen[ Q2Q067] interacts with 7 human partners:{O43439;Q9Y4Z2;P12035;P78545;P13645;P19013;P02533}

23898 Pathogen[ P0C214] interacts with 6 human partners:{P12035;P02533;O43439;P78545;P19013;P13645}

23899 Pathogen[ P03346] interacts with 13 human partners:{Q9Y4Z2;Q02535;P19013;O43680;P02533;P13645;Q9NZC4;Q15475;O43439;P12035;P56178;P78545;Q9HBU1}

23900 Pathogen[ Q85601] interacts with 7 human partners:{P02533;Q9Y4Z2;P19013;P78545;O43439;P13645;P12035}

23901 Pathogen[ P14079] interacts with 7 human partners:{O43439;P02533;Q9NZC4;P13645;O43294;P78545;P12035}

23902 Pathogen[ P03383] interacts with 6 human partners:{P02533;P19013;P13645;P12035;P78545;O43439}

23903 Pathogen[ P03410] interacts with 7 human partners:{P13645;O43439;P02533;P12035;P78545;P19013;O43294}

23904 Pathogen[ P14075] interacts with 6 human partners:{P78545;P13645;P12035;O43439;P02533;P19013}

23905 Pathogen[ P0C206] interacts with 9 human partners:{Q9Y4Z2;P13645;P19013;P78545;O43294;Q9NZC4;O43439;P12035;P02533}

23906 Pathogen[ P03363] interacts with 11 human partners:{P56179;P02533;Q9Y4Z2;P13645;O43347;O43439;Q9NZC4;P78545;P12035;P19013;Q9HBU1}

23907 [Cluster 2174]GO:0010771+P biological\_process [name] negative regulation of cell morphogenesis involved in differentiation [def] "Any process that decreases the frequency, rate or extent of cell morphogenesis contributing to cell differentiation. Cell morphogenesis involved in differentiation is the change in form (cell shape and size) that occurs when relatively unspecialized cells acquire specialized structural and/or functional features that characterize the cells, tissues, or organs of the mature organism or some other relatively stable phase of the organism's life history." [GOC

23908 Pathogen[ Q2Q067] interacts with 1 human partners:{P53804}

23909 Pathogen[ P0C214] interacts with 1 human partners:{P53804}

23910 Pathogen[ P03346] interacts with 1 human partners:{P53804}

23911 Pathogen[ Q85601] interacts with 1 human partners:{P53804}

23912 Pathogen[ P14079] interacts with 1 human partners:{P53804}

23913 Pathogen[ P03383] interacts with 1 human partners:{P53804}

23914 Pathogen[ P03410] interacts with 1 human partners:{P53804}

23915 Pathogen[ P14075] interacts with 1 human partners:{P53804}

23916 Pathogen[ P0C206] interacts with 1 human partners:{P53804}

23917 Pathogen[ P03363] interacts with 1 human partners:{P53804}

23918 [Cluster 2175]GO:0051276+P biological\_process [name] chromosome organization [def] "A process that is carried out at the cellular level that results in the assembly, arrangement of constituent parts, or disassembly of chromosomes, structures composed of a very long molecule of DNA and associated proteins that carries hereditary information." [GOC

23919 Pathogen[ Q2Q067] interacts with 15 human partners:{P25490;Q96SD1;P27694;P49959;P01106;O95997;Q5EE01;O95347;Q53HL2;Q13129;Q9NZH4;Q96BT3;Q9NZH5;Q9BRX2;Q14683}

23920 Pathogen[ P0C214] interacts with 15 human partners:{Q96BT3;P49959;Q53HL2;Q96SD1;Q5EE01;Q9BRX2;O95347;Q13129;Q92698;Q9NZH5;Q14683;Q9NZH4;O95997;P27694;P01106}

23921 Pathogen[ P03346] interacts with 19 human partners:{Q9NZH4;Q96SD1;Q13129;P27694;P07992;Q5EE01;P25490;O95347;Q53HL2;Q92698;O95997;P01106;Q9NZH5;Q14683;P51587;Q01954;P49959;Q9BRX2;Q96BT3}

23922 Pathogen[ Q85601] interacts with 18 human partners:{P01106;Q9NZH4;O95347;Q96BT3;Q5EE01;Q13129;P25490;Q53HL2;P49959;Q92698;P27694;Q01954;Q9NZH5;Q14683;Q96SD1;Q9BRX2;P51587;O95997}

23923 Pathogen[ P14079] interacts with 20 human partners:{Q9BRX2;Q5EE01;Q96BT3;Q13129;Q92698;P51587;O95347;Q9BY32;P01106;O95997;Q53HL2;Q96SD1;P27694;Q9UQE7;Q9NZH4;P25490;Q14683;Q9NZH5;P07992;P49917}

23924 Pathogen[ P03383] interacts with 12 human partners:{Q14683;P01106;P27694;Q5EE01;O95347;Q9BRX2;Q96BT3;Q9NZH4;Q53HL2;Q9NZH5;O95997;Q13129}

23925 Pathogen[ P03410] interacts with 20 human partners:{P49959;Q9NZH5;Q92698;P01106;P07992;Q53HL2;Q9UQE7;Q96BT3;Q96SD1;O95997;P254

23926 Pathogen[ P14075] interacts with 12 human partners: {Q14683;Q5EE01;Q9BRX2;O95347;P01106;O95347;Q9NZH5;Q96BT3;P27694;Q53HL2;Q13129;Q9NZH4}

23927 Pathogen[ P0C206] interacts with 23 human partners: {Q9NZH5;P49959;P25490;P51587;O95997;Q96SD1;Q9BY32;P07992;Q5EE01;P49917;Q9UQ E7;O95347;Q14683;Q96BT3;Q53HL2;Q13129;Q9NZH4;P27694;P01106;Q9NTJ3;Q9BRX2;Q92698;Q01954}

23928 Pathogen[ P03363] interacts with 15 human partners: {Q9NZH5;P27694;O95347;P25490;Q53HL2;P01106;Q5EE01;Q13129;Q01954;Q96BT3;Q9BR X2;O95997;Q14683;Q92698;Q9NZH4}

23929 [Cluster 2176]GO:0032863+P biological\_process [name] activation of Rac GTPase activity [def] "Any process that initiates the activity of an inactive GTPase of the Rac family through the replacement of GDP by GTP." [GOC

23930 Pathogen[ Q2Q067] interacts with 1 human partners: {Q14160}

23931 Pathogen[ P0C214] interacts with 1 human partners: {Q14160}

23932 Pathogen[ P03346] interacts with 3 human partners: {Q5VV41;Q14160;Q9H8V3}

23933 Pathogen[ Q85601] interacts with 1 human partners: {Q14160}

23934 Pathogen[ P14079] interacts with 2 human partners: {Q9H8V3;Q5VV41}

23935 Pathogen[ P03383] interacts with 1 human partners: {Q14160}

23936 Pathogen[ P03410] interacts with 3 human partners: {Q14160;Q5VV41;Q9H8V3}

23937 Pathogen[ P14075] interacts with 1 human partners: {Q14160}

23938 Pathogen[ P0C206] interacts with 2 human partners: {Q14160;Q9H8V3}

23939 Pathogen[ P03363] interacts with 2 human partners: {Q5VV41;Q14160}

23940 [Cluster 2177]GO:0007017+P biological\_process [name] microtubule-based process [def] "Any cellular process that depends upon or alters the microtubule cytoskeleton, that part of the cytoskeleton comprising microtubules and their associated proteins." [GOC

23941 Pathogen[ Q2Q067] interacts with 7 human partners: {O75935;P63167;Q9NYZ3;Q13561;P23258;Q96FJ2;Q92845}

23942 Pathogen[ P0C214] interacts with 8 human partners: {O75935;Q99698;P23258;Q92845;Q9NYZ3;Q96FJ2;Q13561;P63167}

23943 Pathogen[ P03346] interacts with 8 human partners: {Q96FJ2;Q99698;P23258;O75935;Q9NYZ3;P63167;Q92845;Q13561}

23944 Pathogen[ Q85601] interacts with 8 human partners: {O75935;O96015;P23258;Q9NYZ3;Q92845;P63167;Q99698;Q13561}

23945 Pathogen[ P14079] interacts with 10 human partners: {Q96FJ2;Q9NYZ3;P68363;P23258;Q13561;P63167;Q92845;O96015;Q99698;O75935}

23946 Pathogen[ P03383] interacts with 6 human partners: {Q96FJ2;Q9NYZ3;O75935;Q92845;Q13561;P63167}

23947 Pathogen[ P03410] interacts with 10 human partners: {Q13561;Q92845;P63167;Q9NYZ3;Q9BVA1;O75935;P23258;P68363;Q99698;O96015}

23948 Pathogen[ P14075] interacts with 6 human partners: {Q92845;Q13561;Q96FJ2;O75935;Q9NYZ3;P63167}

23949 Pathogen[ P0C206] interacts with 8 human partners: {Q92845;P63167;Q99698;P23258;Q13561;Q9NYZ3;O75935;O96015}

23950 Pathogen[ P03363] interacts with 11 human partners: {Q92845;P63167;Q13561;Q9HC35;P68363;Q13748;Q99698;O75935;Q9NYZ3;P23258;Q96F J2}

23951 [Cluster 2178]GO:0042475+P biological\_process [name] odontogenesis of dentin-containing tooth [def] "The process whose specific outcome is the progression of a dentin-containing tooth over time, from its formation to the mature structure. A dentin-containing tooth is a hard, bony organ borne on the jaw or other bone of a vertebrate, and is composed mainly of dentin, a dense calcified substance, covered by a layer of enamel." [GOC

23952 Pathogen[ Q2Q067] interacts with 5 human partners: {O96004;Q13547;Q92769;Q07687;O15111}

23953 Pathogen[ P0C214] interacts with 5 human partners: {O15111;Q13547;Q07687;Q92769;O96004}

23954 Pathogen[ P03346] interacts with 7 human partners: {O15111;P56177;O96004;Q92769;Q13547;Q8TAU0;Q68G74}

23955 Pathogen[ Q85601] interacts with 5 human partners: {O15111;O96004;Q92769;Q13547;Q07687}

23956 Pathogen[ P14079] interacts with 6 human partners: {A1E959;O96004;Q92769;Q8WWZ3;Q07687;P28360}

23957 Pathogen[ P03383] interacts with 5 human partners: {Q07687;O15111;O96004;Q92769;Q13547}

23958 Pathogen[ P03410] interacts with 6 human partners: {O96004;O15111;Q07687;Q92769;Q13547;A1E959}

23959 Pathogen[ P14075] interacts with 5 human partners: {O15111;Q13547;Q07687;O96004;Q92769}

23960 Pathogen[ P0C206] interacts with 8 human partners: {Q07687;Q92769;Q13547;O96004;Q68G74;O15111;Q8TAU0;P56177}

23961 Pathogen[ P03363] interacts with 7 human partners: {P56177;O15111;P19883;O96004;Q13547;Q8TAU0;Q07687}

23962 [Cluster 2179]GO:0000387+P biological\_process [name] spliceosomal snRNP assembly

[def] "The aggregation, arrangement and bonding together of one or more snRNA and multiple protein components to form a ribonucleoprotein complex that is involved in formation of the spliceosome." [GOC

23963 Pathogen[ Q2Q067] interacts with 26 human  
partners: {O43290;O14744;Q9NVM4;P62318;Q9BQA1;P54105;P62314;Q9UHI6;P62304;Q8WXD5;P14678;Q96RS0;Q8TEQ6;P57678;Q09161;P52298;P62316;Q9NWZ8;P62306;Q9H840;Q16637;P62308;O14893;P09234;Q9H814;O95149}

23964 Pathogen[ P0C214] interacts with 23 human  
partners: {Q16637;P62316;Q09161;Q9H814;P14678;P62306;Q9NVM4;P57678;Q8WXD5;O95149;P62308;P52298;P62314;Q8TEQ6;Q9UHI6;P62318;Q96RS0;Q9H840;P62304;O14893;O43290;P09234;Q9NWZ8}

23965 Pathogen[ P03346] interacts with 26 human  
partners: {P54105;Q09161;O43290;O95149;Q9BQA1;P62304;Q9H814;Q8WXD5;O14744;P52298;Q16637;P62318;Q9NWZ8;P62306;Q9UHI6;Q9NVM4;Q96RS0;Q8TEQ6;P62314;P14678;P57678;O14893;P62316;P09234;P62308;Q9H840}

23966 Pathogen[ Q85601] interacts with 25 human  
partners: {P09234;Q9BQA1;O95149;P62304;Q9NVM4;O14744;P62316;Q09161;P14678;Q9H814;P62314;P62306;Q8TEQ6;P62318;Q9NWZ8;Q9UHI6;P54105;Q96RS0;O43290;O14893;P62308;P52298;Q16637;Q8WXD5;Q9H840}

23967 Pathogen[ P14079] interacts with 26 human  
partners: {P57678;Q96RS0;Q8TEQ6;O14893;Q9NVM4;P52298;Q9H840;Q9UHI6;P62314;O95149;O43290;P62306;P14678;Q9NWZ8;O14744;Q16637;Q9BQA1;P62308;P62304;P62316;P09234;P54105;P62318;Q8WXD5;Q09161;Q9H814}

23968 Pathogen[ P03383] interacts with 25 human  
partners: {Q9BQA1;Q9H840;P62318;O43290;P54105;P62316;P62304;Q9UHI6;Q8WXD5;O14744;Q09161;Q16637;P62314;Q8TEQ6;O14893;O95149;P14678;Q96RS0;P52298;P57678;P62308;Q9NWZ8;P09234;Q9H814;P62306}

23969 Pathogen[ P03410] interacts with 26 human  
partners: {Q96RS0;Q8WXD5;O14893;P62304;Q9H840;P62306;P54105;Q8TEQ6;Q9NVM4;Q9BQA1;P62308;P14678;P62316;Q9H814;P52298;Q16637;P62314;P09234;P57678;Q09161;O14744;O43290;Q9UHI6;O95149;Q9NWZ8;P62318}

23970 Pathogen[ P14075] interacts with 25 human  
partners: {Q8TEQ6;P62304;P54105;Q09161;P62316;Q9H814;Q8WXD5;Q9BQA1;P57678;P09234;Q9H840;P62306;P62308;Q16637;Q9UHI6;P62318;O14744;Q96RS0;Q9NWZ8;O95149;P14678;O14893;P62314;O43290;P52298}

23971 Pathogen[ P0C206] interacts with 26 human  
partners: {Q96RS0;P14678;O95149;P52298;Q9H840;Q9BQA1;Q09161;Q8WXD5;P54105;P62304;O14744;Q8TEQ6;P62314;P62316;O43290;Q9H814;Q9NVM4;P62318;O14893;P62306;Q9UHI6;Q16637;P62308;P09234;Q9NWZ8;P57678}

23972 Pathogen[ P03363] interacts with 26 human  
partners: {P62314;Q96RS0;O14744;Q9UHI6;Q9NWZ8;P62318;P62304;P09234;O14893;P62306;P54105;P57678;Q9BQA1;Q9NVM4;P62316;Q8WXD5;O43290;P52298;Q9H840;Q8TEQ6;P62308;Q16637;P14678;O95149;Q9H814;Q09161}

23973 [Cluster 2180]GO:0030041+P biological\_process [name] actin filament polymerization [def] "Assembly of actin filaments by the addition of actin monomers to a filament." [GOC

23974 Pathogen[ Q2Q067] interacts with 5 human  
partners: {Q92558;P06396;P59998;P42768;P63000}

23975 Pathogen[ P0C214] interacts with 5 human  
partners: {P63000;P06396;P59998;Q92558;P42768}

23976 Pathogen[ P03346] interacts with 5 human  
partners: {P42768;P59998;Q92558;P06396;P63000}

23977 Pathogen[ Q85601] interacts with 5 human  
partners: {P06396;Q92558;P63000;P59998;P42768}

23978 Pathogen[ P14079] interacts with 6 human  
partners: {P09327;Q92558;O60610;P59998;Q9UPY6;P42768}

23979 Pathogen[ P03383] interacts with 5 human  
partners: {P63000;Q92558;P59998;P42768;P06396}

23980 Pathogen[ P03410] interacts with 7 human  
partners: {Q9UPY6;O60610;P63000;P06396;Q92558;P59998;P42768}

23981 Pathogen[ P14075] interacts with 5 human  
partners: {P42768;P06396;P63000;Q92558;P59998}

23982 Pathogen[ P0C206] interacts with 5 human  
partners: {P06396;P59998;P63000;Q92558;P42768}

23983 Pathogen[ P03363] interacts with 6 human  
partners: {Q9UPY6;P42768;Q92558;P63000;P06396;P59998}

23984 [Cluster 2181]GO:0007059+P biological\_process [name] chromosome segregation [def] "The process in which genetic material, in the form of chromosomes, is organized into specific structures and then physically separated and apportioned to two or more sets. In eukaryotes, chromosome segregation begins with the alignment of chromosomes at the metaphase plate, includes chromosome separation, and ends when chromosomes have completed movement to the spindle poles." [GOC

23985 Pathogen[ Q2Q067] interacts with 48 human  
partners: {P49454;P30153;Q9Y6X3;Q96EE3;P18754;O95997;Q14674;Q96R06;Q6P1K2;Q9HBM1;Q5EE01;P11387;Q9H3R5;Q5FBB7;Q03188;Q96SN8;O43684;P63279;Q8NFH4;P11388;Q9NQS7;Q9Y448;Q96BT3;Q9BZD4;Q9BV86;Q9H410;Q8NFH3;O60216;Q9UJ98;Q8IX90;Q8NG31;Q93008;O60885;Q96T76;Q96B



23986 D8;Q9Y3D0;Q96IY1;Q86YI8;Q8WVM7;Q9BU64;O14777;Q562F6;Q8NCD3;Q8N3U4;Q9H081;Q8WVK7;P49711;O15392} Pathogen[ P0C214] interacts with 49 human partners: {Q9H081;O43684;Q96BT3;P30153;Q96SN8;Q96R06;Q5EE01;Q9UJ98;Q96EE3;P63279;Q6P1K2;Q562F6;Q93008;Q03188;Q8NCD3;Q96BD8;Q9HBM1;Q8NFH3;P11388;Q86YI8;Q9H5X1;P11387;Q9H410;O15392;Q9H3R5;P49711;Q8IX90;Q8N3U4;Q8WVM7;Q8NG31;O60885;Q5FBB7;Q9Y6X3;Q9NQS7;O95997;Q9Y3D0;Q8NFH4;Q96IY1;P49454;P18754;Q9Y448;O60216;Q9BZD4;Q9BV86;Q96T76;Q9BU64;Q8WVK7;O14777;Q14674}

23987 Pathogen[ P03346] interacts with 48 human partners: {Q5FBB7;Q8NFH4;O15392;O43684;Q96EE3;Q8N3U4;P11388;Q93008;Q96R06;Q5EE01;P18754;P63279;Q96IY1;Q8NFH3;O95997;Q8NCD3;P30153;O14777;Q9UJ98;Q96SN8;P49711;Q9NQS7;Q9Y6X3;Q562F6;Q9H081;Q9HBM1;Q9H410;Q9BU64;Q8WVM7;Q03188;Q8IX90;O60885;Q9Y448;Q9BV86;Q86YI8;Q8NG31;Q9H3R5;Q14674;Q6P1K2;O60216;Q96BD8;Q9BZD4;Q9Y3D0;Q96BT3;Q96T76;Q8WVK7;P49454;P11387}

23988 Pathogen[ Q85601] interacts with 50 human partners: {P49454;Q96T76;Q8NFH4;Q8NFH3;Q03188;Q96EE3;Q9NQS7;Q9Y3D0;Q9H081;Q96SN8;Q96BT3;Q5EE01;Q9BV86;P30153;Q8NG31;O15392;Q9H3R5;Q14674;O60216;Q8WVM7;P49711;Q93008;Q96R06;P63279;Q8NCD3;P11387;Q9Y448;Q562F6;Q9UJ98;Q9BU64;Q9BZD4;Q96BD8;P11388;Q86YI8;Q9H410;Q8IX90;Q8N3U4;O60885;Q8WVK7;Q96IY1;P18754;Q6P1K2;Q9GZM8;Q9Y6X3;O14777;O43684;Q9HBM1;Q5FBB7;P51955;O95997}

23989 Pathogen[ P14079] interacts with 50 human partners: {P11388;Q96IY1;Q03188;Q5EE01;P63279;Q8IX90;Q96BT3;Q9HBM1;Q96R06;Q9BZD4;Q9BV86;O15392;O60216;Q8NG31;Q14674;Q9Y3D0;Q9Y448;Q5FBB7;Q9H410;Q9H5X1;Q8N3U4;Q99661;P51955;Q9UJ98;Q562F6;Q8WVK7;Q8NFH3;Q96EE3;Q86YI8;Q9H3R5;Q9GZM8;O95997;Q8NFH4;Q9NQS7;Q8NCD3;Q9Y6X3;O60885;P49454;Q9BU64;P30153;Q96BD8;Q969P6;Q96SN8;Q96T76;P49711;P18754;O14777;O43684;Q6P1K2;Q9H081}

23990 Pathogen[ P03383] interacts with 44 human partners: {Q96EE3;Q9NQS7;Q03188;P49454;Q8NFH4;Q96T76;Q96BD8;Q8N3U4;P49711;Q5FBB7;Q96SN8;Q9UJ98;Q5EE01;Q9Y6X3;P30153;P11387;O60216;Q9Y3D0;Q96BT3;Q96R06;Q9BU64;Q14674;O43684;P18754;Q9BZD4;Q8WVK7;Q562F6;Q86YI8;Q9HBM1;Q9H410;Q9H081;Q8IX90;Q96IY1;Q8NCD3;O60885;Q8NG31;Q6P1K2;O95997;Q9Y448;O14777;Q9H3R5;P63279;Q8NFH3;Q8WVM7}

23991 Pathogen[ P03410] interacts with 49 human partners: {Q03188;Q8IX90;O15392;Q96T76;Q9H3R5;O43684;O60885;Q9H410;Q8NG31;Q9GZM8;Q8NFH4;Q96BT3;P05141;Q96SN8;Q9H5X1;Q562F6;Q96R06;O95997;Q8NCD3;O60216;Q14674;Q5EE01;P49454;Q96IY1;Q9Y448;Q6P1K2;P11387;Q9BZD4;Q8WVK7;Q9HBM1;Q96EE3;Q9UJ98;Q8N3U4;P49711;P11388;Q5FBB7;P30153;P63279;Q8WVM7;Q9BV86;Q9H081;P18754;Q96BD8;Q9Y3D0;Q8NFH3;O14777;Q9BU64;Q9NQS7;Q86YI8}

23992 Pathogen[ P14075] interacts with 44 human partners: {P11387;Q9H081;Q562F6;Q9NQS7;Q9Y6X3;Q8WVM7;Q96R06;Q8WVK7;Q5EE01;Q96IY1;O95997;O43684;Q96SN8;Q96BD8;P63279;O14777;Q9H3R5;Q9UJ98;Q9BU64;Q96EE3;Q96BT3;Q86YI8;Q5FBB7;Q9H410;P30153;Q8IX90;Q8NFH3;O60885;Q8NCD3;P49711;Q14674;P18754;Q9HBM1;Q6P1K2;Q03188;Q8NG31;P49454;Q8NFH4;Q9Y448;O60216;Q9BZD4;Q96T76;Q8N3U4;Q9Y3D0}

23993 Pathogen[ P0C206] interacts with 49 human partners: {Q96EE3;Q9HBM1;O60216;Q96SN8;Q9BV86;P30153;Q93008;P18754;P51955;O95997;Q9H081;O14777;Q9Y448;Q9BZD4;Q9H410;Q9UJ98;P49454;Q9BU64;Q9Y6X3;Q9GZM8;Q8IX90;Q5EE01;Q6P1K2;Q96BD8;Q9H3R5;Q9Y3D0;Q8NCD3;O60885;P49711;Q96IY1;Q96BT3;Q5FBB7;O15392;Q96T76;Q8NFH4;Q86YI8;Q562F6;Q14674;Q8N3U4;P11388;P11387;O43684;Q9NQS7;Q8NFH3;Q8WVM7;Q8NG31;Q9H5X1;Q8WVK7;Q03188}

23994 Pathogen[ P03363] interacts with 43 human partners: {Q9BZD4;Q9UJ98;P49454;Q96IY1;Q6P1K2;Q9H081;Q8NFH4;Q96BD8;P11387;Q9Y3D0;Q8NFH3;Q9BV86;Q8WVK7;Q9H410;Q8IX90;P49711;Q5FBB7;O60885;Q5EE01;Q96R06;O43684;Q96T76;Q9NQS7;Q8WVM7;Q9HBM1;Q03188;Q8NG31;Q8NCD3;P63279;Q14674;Q96BT3;Q9H3R5;Q8N3U4;O14777;O95997;Q9Y448;Q9Y6X3;Q562F6;P30153;P18754;Q93008;O60216;Q96SN8}

23995 [Cluster 2182]GO:0090162+P biological\_process [name] establishment of epithelial cell polarity [def] "The specification and formation of anisotropic intracellular organization of an epithelial cell." [GOC]

23996 Pathogen[ Q2Q067] interacts with 1 human partners: {Q8TES7}

23997 Pathogen[ P0C214] interacts with 1 human partners: {Q8TES7}

23998 Pathogen[ P03346] interacts with 3 human partners: {Q15438;Q8TEW0;Q8TES7}

23999 Pathogen[ Q85601] interacts with 1 human partners: {Q8TES7}

24000 Pathogen[ P14079] interacts with 3 human partners: {Q8TEW0;Q8TES7;Q15438}

24001 Pathogen[ P03383] interacts with 1 human partners: {Q8TES7}

24002 Pathogen[ P03410] interacts with 3 human partners: {Q15438;Q8TEW0;Q8TES7}

24003 Pathogen[ P14075] interacts with 1 human partners: {Q8TES7}

24004 Pathogen[ P0C206] interacts with 2 human partners: {Q8TEW0;Q8TES7}

24005 Pathogen[ P03363] interacts with 3 human partners: {Q15438;Q8TES7;Q9P2Q2}

24006 [Cluster 2183]GO:0046600+P biological\_process [name] negative regulation of centriole replication [def] "Any process that stops, prevents, or reduces the frequency, rate or extent of centriole replication." [GOC]

24007 Pathogen[ Q2Q067] interacts with 1 human partners: {Q96SN8}

24008 Pathogen[ P0C214] interacts with 1 human partners: {Q96SN8}

24009 Pathogen[ P03346] interacts with 1 human partners: {Q96SN8}

24010 Pathogen[ Q85601] interacts with 1 human partners: {Q96SN8}

24011 Pathogen[ P14079] interacts with 1 human partners: {Q96SN8}

24012 Pathogen[ P03383] interacts with 1 human partners: {Q96SN8}

24013 Pathogen[ P03410] interacts with 1 human partners: {Q96SN8}

24014 Pathogen[ P14075] interacts with 1 human partners:{Q96SN8}  
24015 Pathogen[ P0C206] interacts with 1 human partners:{Q96SN8}  
24016 Pathogen[ P03363] interacts with 1 human partners:{Q96SN8}  
24017 [Cluster 2184]GO:0045955+P biological\_process [name] negative regulation of calcium ion-frequency exocytosis [def] "Any process that stops, prevents, or reduces the frequency, rate or extent of calcium ion-dependent exocytosis." [GOC  
24018 Pathogen[ Q2Q067] interacts with 2 human partners:{000186;Q13127}  
24019 Pathogen[ P0C214] interacts with 2 human partners:{000186;Q13127}  
24020 Pathogen[ P03346] interacts with 2 human partners:{000186;Q13127}  
24021 Pathogen[ Q85601] interacts with 2 human partners:{000186;Q13127}  
24022 Pathogen[ P14079] interacts with 2 human partners:{000186;Q13127}  
24023 Pathogen[ P03383] interacts with 2 human partners:{000186;Q13127}  
24024 Pathogen[ P03410] interacts with 2 human partners:{Q13127;000186}  
24025 Pathogen[ P14075] interacts with 2 human partners:{000186;Q13127}  
24026 Pathogen[ P0C206] interacts with 2 human partners:{Q13127;000186}  
24027 Pathogen[ P03363] interacts with 2 human partners:{Q13127;000186}  
24028 [Cluster 2185]GO:0030836+P biological\_process [name] positive regulation of actin filament depolymerization [def] "Any process that activates or increases the frequency, rate or extent of actin depolymerization." [GOC  
24029 Pathogen[ Q2Q067] interacts with 1 human partners:{P23528}  
24030 Pathogen[ P0C214] interacts with 1 human partners:{Q96GD0}  
24031 Pathogen[ P03346] interacts with 1 human partners:{P23528}  
24032 Pathogen[ Q85601] interacts with 1 human partners:{P23528}  
24033 Pathogen[ P14079] interacts with 2 human partners:{Q96GD0;P23528}  
24034 Pathogen[ P03383] interacts with 1 human partners:{P23528}  
24035 Pathogen[ P03410] interacts with 2 human partners:{Q96GD0;P23528}  
24036 Pathogen[ P14075] interacts with 1 human partners:{P23528}  
24037 Pathogen[ P0C206] interacts with 2 human partners:{Q96GD0;P23528}  
24038 Pathogen[ P03363] interacts with 1 human partners:{P23528}  
24039 [Cluster 2186]GO:0042254+P biological\_process [name] ribosome biogenesis [def] "A cellular process that results in the biosynthesis of constituent macromolecules, assembly, and arrangement of constituent parts of ribosome subunits\_ includes transport to the sites of protein synthesis." [GOC  
24040 Pathogen[ Q2Q067] interacts with 53 human partners:{Q9H583;Q9NWK9;Q8NHW5;Q9BZE4;Q9BVP2;Q9Y324;P55769;Q5TAP6;Q9GZL7;Q9NVU7;Q9UJ K0;Q9NVN8;Q9NV31;Q9NRR4;Q2NL82;O00566;Q13601;P56537;Q96G21;Q8TDN6;Q9NY61;O75683;Q96H R8;O00541;Q9NPE3;Q9UHA3;Q92979;Q14137;Q9Y3A5;Q9Y221;Q15050;Q9H9Y2;O60832;P62269;Q998 48;P62424;Q96EU6;Q9BVJ6;O00567;Q9Y2P8;P78316;Q9H9L3;Q9UKD2;Q9NY12;Q9Y2X3;Q13895;Q9BR U9;Q8NE71;Q14331;P05388;Q8IUF8;Q9NYV6;O95478}  
24041 Pathogen[ P0C214] interacts with 56 human partners:{O75683;Q9BVJ6;Q8NHW5;Q9NWK9;Q9UJK0;Q9NV31;Q14331;Q9NPE3;O95478;P05388;Q2NL 82;O00541;Q96EU6;Q9GZL7;O00567;Q96G21;Q15050;Q9NY12;Q9NY61;P78316;Q8TDN6;Q9H089;Q9BR U9;Q9Y2P8;Q8NE71;A4D1E9;Q9Y221;P55769;Q14137;Q92979;Q9Y324;Q9UHA3;P62269;Q9NVU7;Q998 48;Q9H9L3;Q9NRR4;Q9NYV6;Q5TAP6;O60832;Q9UKD2;Q13895;Q9H9Y2;P62424;Q9NVN8;Q9BZE4;Q8IU F8;O00566;Q13601;Q9Y3A5;P56537;Q9Y2X3;Q9H583;Q9NV06;Q9BVP2;Q96HR8}  
24042 Pathogen[ P03346] interacts with 56 human partners:{Q9BVJ6;Q8NHW5;Q15050;Q13895;Q92979;Q9Y324;O00567;Q5TAP6;Q9UKD2;Q9BZE4;Q9H9 L3;O00541;Q9GZL7;P56537;Q9NWK9;Q9H583;Q96G21;O60832;P62424;O00566;Q9NV06;Q9Y2X3;Q9Y2 21;Q9Y2P8;Q9NX24;Q96EU6;Q9BRU9;Q9NV31;P05388;P78316;P62269;Q9NVU7;Q99848;Q9NY61;P557 69;O75683;Q2NL82;Q9NYV6;Q8TDN6;Q8NE71;Q14137;Q9NRR4;Q9NPE3;Q8IUF8;Q13601;Q9NY12;Q96H R8;Q9NVN8;O95478;Q9UJK0;Q9H9Y2;Q7Z7H8;Q9UHA3;Q9BVP2;Q9Y3A5;Q14331}  
24043 Pathogen[ Q85601] interacts with 55 human partners:{Q9NV31;Q8NHW5;Q9BRU9;Q9UJK0;O00541;Q9Y324;P05388;Q9BZE4;Q9NY61;Q96HR8;Q143 31;Q92979;Q96EU6;Q9H9Y2;Q9BVJ6;Q9Y3A5;Q8TDN6;P56537;Q9NRR4;Q9NWK9;Q96G21;P62424;P557 69;Q9H089;Q9UHA3;Q9Y221;Q9UKD2;Q15050;P62269;Q99848;Q9Y2P8;O00566;Q95478;Q13601;Q8NE 71;Q9H9L3;Q9NYV6;A4D1E9;Q9GZL7;Q9NV06;Q9NPE3;O00567;Q8IUF8;Q13895;Q9NY12;Q9NVN8;Q141 37;Q9H583;Q9Y2X3;O75683;Q9BVP2;O60832;Q2NL82;P78316;Q9NVU7}  
24044 Pathogen[ P14079] interacts with 59 human partners:{Q92979;Q9NV31;Q9BVP2;Q9NYV6;Q9NPE3;Q9Y2X3;Q9H4K7;Q9UHA3;Q2NL82;Q9NVU7;Q9NY 61;P56537;Q9BRU9;O60832;Q9GZL7;A4D1E9;Q15050;Q9Y3A5;Q9UJK0;Q96HR8;Q8TDN6;Q5TAP6;Q9BV J6;O00567;Q9BZE4;Q9NWK9;O00566;Q9NV06;Q8NC60;Q14692;P62424;Q9H583;Q9NY12;Q8NE71;Q9H9 L3;Q9NRR4;P78316;Q9Y324;O95478;Q99848;Q13601;Q9H9Y2;Q7Z7H8;Q14331;O00541;P55769;Q141 37;Q96G21;Q9Y2P8;Q13895;Q9UKD2;Q9Y221;P62269;O75616;O75683;P05388;Q9H089;Q96EU6;Q8NH W5}  
24045 Pathogen[ P03383] interacts with 51 human partners:{Q9NRR4;P05388;O95478;Q8NHW5;Q9NY61;Q13601;Q9Y324;Q9NYV6;Q9BVJ6;Q9Y2P8;Q9NV N8;O00567;Q5TAP6;Q9NWK9;O00541;Q8NE71;P56537;P62424;Q9BZE4;Q14331;Q9NPE3;Q15050;O756 83;Q96G21;Q8IUF8;Q13895;Q2NL82;Q9UJK0;Q9H583;Q9Y221;Q9NV31;Q9H9L3;P78316;P62269;Q998 48;Q9NY12;Q9Y3A5;Q96HR8;Q9BRU9;Q9GZL7;Q9Y2X3;P55769;Q96EU6;Q92979;Q8TDN6;Q14137;Q9BV P2;O60832;O00566;Q9NVU7;A4D1E9}  
24046 Pathogen[ P03410] interacts with 61 human partners:{Q9H4K7;Q99848;Q9NVN8;Q8NHW5;O75683;P78316;Q8NE71;Q9UJK0;Q15050;Q9NV06;P053 88;Q96G21;Q14692;Q9NY61;P62269;P55769;O60832;Q8TDN6;Q14137;Q9GZL7;Q8NC60;Q5TAP6;Q9NR R4;Q13895;Q9Y2X3;Q9BRU9;Q92979;Q9NYV6;Q9NX24;O00567;Q9H089;Q9NVU7;Q9UK D2;Q9BVP2;A4D1E9;Q9NPE3;Q9NWK9;Q9BVJ6;O00541;Q96EU6;Q96HR8;P62424;Q9Y324;Q13601;O954 78;Q9NV31;Q9H583;Q9Y2P8;Q2NL82;Q7Z7H8;Q9UHA3;P56537;Q9Y3A5;Q9Y221;Q9BZE4;Q9H9L3;O005

66;Q14331;O75616}  
24047 Pathogen[ P14075] interacts with 52 human  
partners:{O00566;Q9H583;P56537;Q92979;Q2NL82;Q9NYV6;A4D1E9;Q9GZL7;Q9NY61;Q9NVN8;O005  
41;P05388;Q13601;O00567;Q9NVU7;Q9BRU9;P78316;Q96HR8;Q9Y221;Q9Y2P8;Q9NPE3;O75683;P557  
69;Q9NV31;P62269;Q99848;Q8NE71;Q9UJK0;Q9NRR4;Q96EU6;O60832;Q9H9Y2;Q9Y324;Q96G21;Q9H9  
L3;Q9BZE4;O95478;Q14137;Q8IUF8;Q7Z7H8;Q15050;Q14331;Q9BVJ6;Q8TDN6;Q9NY12;P62424;Q9Y2  
X3;Q9BVP2;Q9NWK9;Q5TAP6;Q13895;Q9Y3A5}  
24048 Pathogen[ POC206] interacts with 58 human  
partners:{O75683;Q9NPE3;Q99848;Q9NWK9;Q8NHW5;Q13601;Q96G21;O95478;Q9Y324;Q9NVN8;Q96E  
U6;Q14137;Q9BVP2;Q9NY12;P55769;Q14692;Q9NVU7;Q8IUF8;Q9GZL7;Q9H9L3;Q7Z7H8;O00567;Q138  
95;Q15050;Q8TDN6;P78316;Q9H583;Q9Y2X3;Q9H089;Q92979;Q9NV06;P05388;Q9UJK0;Q9BRU9;P565  
37;Q9NRR4;Q9Y2P8;O60832;Q9BZE4;Q96HR8;O00541;Q8NE71;A4D1E9;Q9NV31;Q9Y3A5;Q9UKD2;Q9H9  
Y2;Q9UHA3;Q14331;P62269;Q9Y221;Q2NL82;Q9NY61;Q9NYV6;Q5TAP6;O00566;P62424;Q9BVJ6}  
24049 Pathogen[ P03363] interacts with 56 human  
partners:{O60832;Q9NX24;Q92979;Q9NVN8;Q8NHW5;Q9BVJ6;Q9BRU9;Q96EU6;Q9Y2X3;Q9GZL7;Q150  
50;O75683;P05388;Q99848;Q9Y324;Q14331;O95478;Q9H9Y2;Q9NVU7;Q9NY12;Q9Y2P8;Q9Y3A5;Q9BZ  
E4;O00567;Q9NV31;Q13601;Q8IUF8;Q9UJK0;Q13895;Q9NY61;Q9NYV6;Q9NPE3;P56537;Q9H9L3;Q5TA  
P6;Q14137;O00566;Q2NL82;Q96G21;Q9NRR4;Q7Z7H8;Q9H583;Q8NE71;Q9BVP2;P62424;P55769;Q9UK  
D2;Q9UHA3;P78316;Q9NWK9;O00541;Q9NV06;Q96HR8;P62269;Q9Y221;Q8TDN6}  
24050 [Cluster 2187]GO:0030032+P biological\_process [name] lamellipodium assembly [def]  
"Formation of a lamellipodium, a thin sheetlike extension of the surface of a migrating  
cell." [GOC  
24051 Pathogen[ Q2Q067] interacts with 5 human  
partners:{O43639;Q96IF1;Q9BW27;P16333;P63000}  
24052 Pathogen[ POC214] interacts with 5 human  
partners:{P63000;O43639;Q9BW27;P16333;Q5VZK9}  
24053 Pathogen[ P03346] interacts with 7 human  
partners:{O43639;Q96IF1;Q9NRF2;P16333;Q9BW27;P63000;Q5VZK9}  
24054 Pathogen[ Q85601] interacts with 6 human  
partners:{P16333;P63000;O43639;Q9BW27;Q5VZK9;Q96IF1}  
24055 Pathogen[ P14079] interacts with 6 human  
partners:{Q9BW27;P47756;Q96IF1;P16333;O43639;P49023}  
24056 Pathogen[ P03383] interacts with 3 human partners:{P63000;Q9BW27;P16333}  
24057 Pathogen[ P03410] interacts with 7 human  
partners:{Q9BW27;P47756;P63000;O43639;P16333;Q96IF1;Q5VZK9}  
24058 Pathogen[ P14075] interacts with 3 human partners:{P16333;Q9BW27;P63000}  
24059 Pathogen[ POC206] interacts with 7 human  
partners:{P47756;Q96IF1;P63000;Q5VZK9;P16333;O43639;Q9BW27}  
24060 Pathogen[ P03363] interacts with 7 human  
partners:{Q5VZK9;O43639;P63000;Q7L576;Q96IF1;P16333;Q9BW27}  
24061 [Cluster 2188]GO:0051782+P biological\_process [name] negative regulation of cell  
division [def] "Any process that stops, prevents, or reduces the frequency, rate or  
extent of cell division." [GOC  
24062 Pathogen[ Q2Q067] interacts with 2 human partners:{P01106;Q9H3M7}  
24063 Pathogen[ POC214] interacts with 2 human partners:{Q9H3M7;P01106}  
24064 Pathogen[ P03346] interacts with 2 human partners:{P01106;Q9H3M7}  
24065 Pathogen[ Q85601] interacts with 2 human partners:{P01106;Q9H3M7}  
24066 Pathogen[ P14079] interacts with 2 human partners:{P01106;Q9H3M7}  
24067 Pathogen[ P03383] interacts with 2 human partners:{P01106;Q9H3M7}  
24068 Pathogen[ P03410] interacts with 2 human partners:{P01106;Q9H3M7}  
24069 Pathogen[ P14075] interacts with 2 human partners:{P01106;Q9H3M7}  
24070 Pathogen[ POC206] interacts with 2 human partners:{Q9H3M7;P01106}  
24071 Pathogen[ P03363] interacts with 2 human partners:{Q9H3M7;P01106}  
24072 [Cluster 2189]GO:0060287+P biological\_process [name] epithelial cilium movement  
involved in determination of left/right asymmetry [def] "The movement of cilia of  
epithelial cells resulting in the transport of signals which determine asymmetry in an  
organism's body plan with respect to the left and right halves." [GOC  
24073 Pathogen[ Q2Q067] interacts with 2 human partners:{P48380;O75665}  
24074 Pathogen[ POC214] interacts with 2 human partners:{O75665;P48380}  
24075 Pathogen[ P03346] interacts with 2 human partners:{P48380;O75665}  
24076 Pathogen[ Q85601] interacts with 2 human partners:{O75665;P48380}  
24077 Pathogen[ P14079] interacts with 3 human partners:{P48380;Q9UFE4;O75665}  
24078 Pathogen[ P03383] interacts with 2 human partners:{P48380;O75665}  
24079 Pathogen[ P03410] interacts with 3 human partners:{O75665;Q9UFE4;P48380}  
24080 Pathogen[ P14075] interacts with 2 human partners:{P48380;O75665}  
24081 Pathogen[ POC206] interacts with 3 human partners:{P48380;Q9UFE4;O75665}  
24082 Pathogen[ P03363] interacts with 2 human partners:{P48380;O75665}  
24083 [Cluster 2190]GO:0030071+P biological\_process [name] regulation of mitotic  
metaphase/anaphase transition [def] "Any process that modulates the frequency, rate or  
extent of the onset of anaphase (chromosome movement) in the mitotic cell cycle." [GOC  
24084 Pathogen[ Q2Q067] interacts with 4 human partners:{Q9UJX5;Q9UJX2;Q9UM13;Q8NHZ8}  
24085 Pathogen[ POC214] interacts with 4 human partners:{Q9UJX5;Q9UJX2;Q8NHZ8;Q9UM13}  
24086 Pathogen[ P03346] interacts with 4 human partners:{Q9UM13;Q9UJX5;Q9UJX2;Q8NHZ8}  
24087 Pathogen[ Q85601] interacts with 4 human partners:{Q9UJX2;Q8NHZ8;Q9UJX5;Q9UM13}  
24088 Pathogen[ P14079] interacts with 3 human partners:{Q9UJX5;Q8NHZ8;Q9UM13}  
24089 Pathogen[ P03383] interacts with 4 human partners:{Q8NHZ8;Q9UM13;Q9UJX5;Q9UJX2}

24090 Pathogen[ P03410] interacts with 3 human partners:{Q9UM13;Q8NHZ8;Q9UJX5}  
24091 Pathogen[ P14075] interacts with 4 human partners:{Q9UJX2;Q8NHZ8;Q9UJX5;Q9UM13}  
24092 Pathogen[ P0C206] interacts with 4 human partners:{Q9UJX5;Q9UJX2;Q9UM13;Q8NHZ8}  
24093 Pathogen[ P03363] interacts with 4 human partners:{Q9UJX2;Q8NHZ8;Q9UJX5;Q9UM13}  
24094 [Cluster 2191]GO:0000290+P biological\_process [name] deadenylation-dependent decapping of nuclear-transcribed mRNA [def] "Cleavage of the 5'-cap of a nuclear mRNA triggered by shortening of the poly(A) tail to below a minimum functional length." [GOC  
24095 Pathogen[ Q2Q067] interacts with 2 human partners:{Q96C86;Q86TB9}  
24096 Pathogen[ P0C214] interacts with 2 human partners:{Q96C86;Q86TB9}  
24097 Pathogen[ P03346] interacts with 2 human partners:{Q96C86;Q86TB9}  
24098 Pathogen[ Q85601] interacts with 2 human partners:{Q86TB9;Q96C86}  
24099 Pathogen[ P14079] interacts with 2 human partners:{Q86TB9;Q96C86}  
24100 Pathogen[ P03383] interacts with 2 human partners:{Q86TB9;Q96C86}  
24101 Pathogen[ P03410] interacts with 2 human partners:{Q86TB9;Q96C86}  
24102 Pathogen[ P14075] interacts with 2 human partners:{Q86TB9;Q96C86}  
24103 Pathogen[ P0C206] interacts with 2 human partners:{Q86TB9;Q96C86}  
24104 Pathogen[ P03363] interacts with 2 human partners:{Q86TB9;Q96C86}  
24105 [Cluster 2192]GO:2001237+P biological\_process [name] negative regulation of extrinsic apoptotic signaling pathway [def] "Any process that stops, prevents or reduces the frequency, rate or extent of extrinsic apoptotic signaling pathway." [GOC  
24106 Pathogen[ Q2Q067] interacts with 5 human partners:{Q7Z6J0;O15519;Q99497;Q15326;O43255}  
24107 Pathogen[ P0C214] interacts with 5 human partners:{Q7Z6J0;Q99497;O15519;Q15326;O43255}  
24108 Pathogen[ P03346] interacts with 5 human partners:{Q7Z6J0;O43255;O15519;Q99497;Q15326}  
24109 Pathogen[ Q85601] interacts with 5 human partners:{Q99497;Q7Z6J0;Q15326;O43255;O15519}  
24110 Pathogen[ P14079] interacts with 3 human partners:{O15519;Q99497;Q15326}  
24111 Pathogen[ P03383] interacts with 2 human partners:{Q15326;O43255}  
24112 Pathogen[ P03410] interacts with 4 human partners:{Q99497;O15519;Q7Z6J0;Q15326}  
24113 Pathogen[ P14075] interacts with 2 human partners:{O43255;Q15326}  
24114 Pathogen[ P0C206] interacts with 5 human partners:{Q7Z6J0;O43255;Q99497;Q15326;O15519}  
24115 Pathogen[ P03363] interacts with 4 human partners:{O15519;Q15326;Q7Z6J0;O43255}  
24116 [Cluster 2193]GO:0044387+P biological\_process [name] negative regulation of protein kinase activity by regulation of protein phosphorylation [def] "The stopping, prevention, or reduction in frequency, rate or extent of protein kinase activity as a result of regulating the phosphorylation status of that protein kinase." [GOC  
24117 Pathogen[ Q2Q067] interacts with 2 human partners:{P55265;P49593}  
24118 Pathogen[ P0C214] interacts with 2 human partners:{P55265;P49593}  
24119 Pathogen[ P03346] interacts with 2 human partners:{P55265;P49593}  
24120 Pathogen[ Q85601] interacts with 2 human partners:{P49593;P55265}  
24121 Pathogen[ P14079] interacts with 2 human partners:{P49593;P55265}  
24122 Pathogen[ P03383] interacts with 1 human partners:{P55265}  
24123 Pathogen[ P03410] interacts with 2 human partners:{P55265;P49593}  
24124 Pathogen[ P14075] interacts with 1 human partners:{P55265}  
24125 Pathogen[ P0C206] interacts with 2 human partners:{P55265;P49593}  
24126 Pathogen[ P03363] interacts with 1 human partners:{P55265}  
24127 [Cluster 2194]GO:0035284+P biological\_process [name] brain segmentation [def] "Division of the brain into a series of semi-repetitive parts or segments." [GOC  
24128 Pathogen[ Q2Q067] interacts with 3 human partners:{O43364;Q9Y5Q3;P11161}  
24129 Pathogen[ P0C214] interacts with 2 human partners:{Q9Y5Q3;P11161}  
24130 Pathogen[ P03346] interacts with 3 human partners:{Q9Y5Q3;O43364;P11161}  
24131 Pathogen[ Q85601] interacts with 3 human partners:{O43364;Q9Y5Q3;P11161}  
24132 Pathogen[ P14079] interacts with 3 human partners:{Q9Y5Q3;O43364;P11161}  
24133 Pathogen[ P03383] interacts with 2 human partners:{Q9Y5Q3;P11161}  
24134 Pathogen[ P03410] interacts with 3 human partners:{Q9Y5Q3;O43364;P11161}  
24135 Pathogen[ P14075] interacts with 2 human partners:{P11161;Q9Y5Q3}  
24136 Pathogen[ P0C206] interacts with 3 human partners:{Q9Y5Q3;P11161;O43364}  
24137 Pathogen[ P03363] interacts with 3 human partners:{O43364;Q9Y5Q3;P11161}  
24138 [Cluster 2195]GO:0016480+P biological\_process [name] negative regulation of transcription from RNA polymerase III promoter [def] "Any process that stops, prevents, or reduces the frequency, rate or extent of transcription from an RNA polymerase III promoter." [GOC  
24139 Pathogen[ Q2Q067] interacts with 2 human partners:{Q9H063;Q15742}  
24140 Pathogen[ P0C214] interacts with 2 human partners:{Q15742;Q9H063}  
24141 Pathogen[ P03346] interacts with 2 human partners:{Q15742;Q9H063}  
24142 Pathogen[ Q85601] interacts with 2 human partners:{Q15742;Q9H063}  
24143 Pathogen[ P14079] interacts with 2 human partners:{Q15742;Q9H063}  
24144 Pathogen[ P03383] interacts with 2 human partners:{Q15742;Q9H063}  
24145 Pathogen[ P03410] interacts with 2 human partners:{Q9H063;Q15742}  
24146 Pathogen[ P14075] interacts with 2 human partners:{Q9H063;Q15742}  
24147 Pathogen[ P0C206] interacts with 2 human partners:{Q15742;Q9H063}  
24148 Pathogen[ P03363] interacts with 2 human partners:{Q9H063;Q15742}  
24149 [Cluster 2196]GO:0030431+P biological\_process [name] sleep [def] "Any process in

which an organism enters and maintains a periodic, readily reversible state of reduced awareness and metabolic activity. Usually accompanied by physical relaxation, the onset of sleep in humans and other mammals is marked by a change in the electrical activity of the brain." [ISBN

24150 Pathogen[ Q2Q067] interacts with 2 human partners:{P01100;P10515}

24151 Pathogen[ P0C214] interacts with 2 human partners:{P01100;P10515}

24152 Pathogen[ P03346] interacts with 2 human partners:{P10515;P01100}

24153 Pathogen[ Q85601] interacts with 2 human partners:{P01100;P10515}

24154 Pathogen[ P14079] interacts with 2 human partners:{P10515;P01100}

24155 Pathogen[ P03383] interacts with 2 human partners:{P01100;P10515}

24156 Pathogen[ P03410] interacts with 2 human partners:{P01100;P10515}

24157 Pathogen[ P14075] interacts with 2 human partners:{P10515;P01100}

24158 Pathogen[ P0C206] interacts with 2 human partners:{P01100;P10515}

24159 Pathogen[ P03363] interacts with 2 human partners:{P10515;P01100}

24160 [Cluster 2197]GO:0001866+P biological\_process [name] NK T cell proliferation [def] "The expansion of a NK T cell population by cell division." [GOC

24161 Pathogen[ Q2Q067] interacts with 1 human partners:{Q99607}

24162 Pathogen[ P0C214] interacts with 1 human partners:{Q99607}

24163 Pathogen[ P03346] interacts with 1 human partners:{Q99607}

24164 Pathogen[ Q85601] interacts with 1 human partners:{Q99607}

24165 Pathogen[ P14079] interacts with 1 human partners:{Q99607}

24166 Pathogen[ P03383] interacts with 1 human partners:{Q99607}

24167 Pathogen[ P03410] interacts with 1 human partners:{Q99607}

24168 Pathogen[ P14075] interacts with 1 human partners:{Q99607}

24169 Pathogen[ P0C206] interacts with 1 human partners:{Q99607}

24170 Pathogen[ P03363] interacts with 1 human partners:{Q99607}

24171 [Cluster 2198]GO:1901189+P

24172 Pathogen[ Q2Q067] interacts with 1 human partners:{Q06330}

24173 Pathogen[ P0C214] interacts with 1 human partners:{Q06330}

24174 Pathogen[ P03346] interacts with 1 human partners:{Q06330}

24175 Pathogen[ Q85601] interacts with 1 human partners:{Q06330}

24176 Pathogen[ P14079] interacts with 1 human partners:{Q06330}

24177 Pathogen[ P03383] interacts with 1 human partners:{Q06330}

24178 Pathogen[ P03410] interacts with 1 human partners:{Q06330}

24179 Pathogen[ P14075] interacts with 1 human partners:{Q06330}

24180 Pathogen[ P0C206] interacts with 1 human partners:{Q06330}

24181 Pathogen[ P03363] interacts with 1 human partners:{Q06330}

24182 [Cluster 2199]GO:0050790+P biological\_process [name] regulation of catalytic activity [def] "Any process that modulates the activity of an enzyme." [GOC

24183 Pathogen[ Q2Q067] interacts with 3 human partners:{Q86XL3;P51948;Q14232}

24184 Pathogen[ P0C214] interacts with 4 human partners:{Q9UI12;Q14232;P51948;Q86XL3}

24185 Pathogen[ P03346] interacts with 6 human partners:{Q14232;Q96QG7;Q15019;Q15435;Q86XL3;P51948}

24186 Pathogen[ Q85601] interacts with 4 human partners:{P51948;Q86XL3;Q14232;Q96QG7}

24187 Pathogen[ P14079] interacts with 9 human partners:{P10109;Q96QG7;Q86XL3;O00631;Q9Y478;Q9UI12;Q14558;Q14232;P51948}

24188 Pathogen[ P03383] interacts with 2 human partners:{P51948;Q14232}

24189 Pathogen[ P03410] interacts with 8 human partners:{Q96QG7;Q14232;Q14558;Q9UI12;P51948;P10109;O00631;Q86XL3}

24190 Pathogen[ P14075] interacts with 2 human partners:{Q14232;P51948}

24191 Pathogen[ P0C206] interacts with 7 human partners:{Q15435;Q15019;Q86XL3;Q14232;Q96QG7;Q9UI12;P51948}

24192 Pathogen[ P03363] interacts with 3 human partners:{Q15435;Q96QG7;Q86XL3}

24193 [Cluster 2200]GO:0030279+P biological\_process [name] negative regulation of ossification [def] "Any process that stops, prevents, or reduces the frequency, rate or extent of bone formation." [GOC

24194 Pathogen[ Q2Q067] interacts with 1 human partners:{Q06330}

24195 Pathogen[ P0C214] interacts with 2 human partners:{Q06330;Q9HCE7}

24196 Pathogen[ P03346] interacts with 1 human partners:{Q06330}

24197 Pathogen[ Q85601] interacts with 1 human partners:{Q06330}

24198 Pathogen[ P14079] interacts with 2 human partners:{Q06413;Q06330}

24199 Pathogen[ P03383] interacts with 1 human partners:{Q06330}

24200 Pathogen[ P03410] interacts with 2 human partners:{Q06330;Q9BQB4}

24201 Pathogen[ P14075] interacts with 1 human partners:{Q06330}

24202 Pathogen[ P0C206] interacts with 1 human partners:{Q06330}

24203 Pathogen[ P03363] interacts with 1 human partners:{Q06330}

24204 [Cluster 2201]GO:0031663+P biological\_process [name] lipopolysaccharide-mediated signaling pathway [def] "The series of molecular signals generated in response to detection of lipopolysaccharide. Lipopolysaccharides (LPS) are major components of the outer membrane of Gram-negative bacteria, making them prime targets for recognition by the immune system." [GOC

24205 Pathogen[ Q2Q067] interacts with 6 human partners:{Q8IUC6;Q86UE4;Q14653;P29474;P25963;P42224}

24206 Pathogen[ P0C214] interacts with 6 human partners:{P29474;Q8IUC6;P42224;Q86UE4;P25963;Q14653}

24207 Pathogen[ P03346] interacts with 6 human

24208 partners:{Q86UE4;P29474;P25963;P42224;Q14653;Q8IUC6}  
Pathogen[ Q85601] interacts with 6 human

24209 partners:{Q8IUC6;Q14653;P42224;Q86UE4;P29474;P25963}  
Pathogen[ P14079] interacts with 7 human

24210 partners:{O43187;Q14653;Q8IUC6;Q86UE4;P42224;Q9Y6Y9;Q99836}  
Pathogen[ P03383] interacts with 5 human

24211 partners:{Q14653;P29474;Q8IUC6;Q86UE4;P25963}  
Pathogen[ P03410] interacts with 7 human

24212 partners:{Q14653;O43187;P29474;Q86UE4;Q9Y6Y9;Q8IUC6;P25963}  
Pathogen[ P14075] interacts with 5 human

24213 partners:{P29474;Q86UE4;P25963;Q14653;Q8IUC6}  
Pathogen[ P0C206] interacts with 6 human

24214 partners:{P25963;Q8IUC6;P29474;Q86UE4;P42224;Q14653}  
Pathogen[ P03363] interacts with 4 human partners:{Q14653;P29474;P25963;Q86UE4}

24215 [Cluster 2202]GO:0006481+P biological\_process [name] C-terminal protein methylation  
[def] "The methylation of the C-terminal amino acid of a protein." [GOC

24216 Pathogen[ Q2Q067] interacts with 1 human partners:{Q9UIC8}  
24217 Pathogen[ P0C214] interacts with 1 human partners:{Q9UIC8}  
24218 Pathogen[ P03346] interacts with 1 human partners:{Q9UIC8}  
24219 Pathogen[ Q85601] interacts with 1 human partners:{Q9UIC8}  
24220 Pathogen[ P14079] interacts with 1 human partners:{Q9UIC8}  
24221 Pathogen[ P03383] interacts with 1 human partners:{Q9UIC8}  
24222 Pathogen[ P03410] interacts with 1 human partners:{Q9UIC8}  
24223 Pathogen[ P14075] interacts with 1 human partners:{Q9UIC8}  
24224 Pathogen[ P0C206] interacts with 1 human partners:{Q9UIC8}  
24225 Pathogen[ P03363] interacts with 1 human partners:{Q9UIC8}

24226 [Cluster 2203]GO:0031929+P biological\_process [name] TOR signaling cascade [def] "A  
series of molecular signals mediated by TOR (Target of rapamycin) proteins, members of  
the phosphoinositide (PI) 3-kinase related kinase (PIKK) family that act as  
serine/threonine kinases in response to nutrient availability or growth factors." [PMID

24227 Pathogen[ Q2Q067] interacts with 3 human partners:{Q13541;Q9NRI5;P62753}  
24228 Pathogen[ P0C214] interacts with 3 human partners:{Q9NRI5;P62753;Q13541}  
24229 Pathogen[ P03346] interacts with 3 human partners:{Q9NRI5;Q13541;P62753}  
24230 Pathogen[ Q85601] interacts with 3 human partners:{P62753;Q13541;Q9NRI5}  
24231 Pathogen[ P14079] interacts with 3 human partners:{P62753;Q9NRI5;Q13541}  
24232 Pathogen[ P03383] interacts with 3 human partners:{Q9NRI5;P62753;Q13541}  
24233 Pathogen[ P03410] interacts with 3 human partners:{Q13541;Q9NRI5;P62753}  
24234 Pathogen[ P14075] interacts with 3 human partners:{Q9NRI5;P62753;Q13541}  
24235 Pathogen[ P0C206] interacts with 3 human partners:{Q13541;Q9NRI5;P62753}  
24236 Pathogen[ P03363] interacts with 3 human partners:{P62753;Q9NRI5;Q13541}

24237 [Cluster 2204]GO:0006895+P biological\_process [name] Golgi to endosome transport  
[def] "The directed movement of substances from the Golgi to early sorting endosomes.  
Clathrin vesicles transport substances from the trans-Golgi to endosomes." [GOC

24238 Pathogen[ Q2Q067] interacts with 3 human partners:{O95782;Q9Y3R5;Q96RL7}  
24239 Pathogen[ P0C214] interacts with 3 human partners:{Q96RL7;O95782;Q9Y3R5}  
24240 Pathogen[ P03346] interacts with 4 human partners:{O95782;Q9Y3R5;Q7Z3U7;Q96RL7}  
24241 Pathogen[ Q85601] interacts with 3 human partners:{Q96RL7;Q9Y3R5;O95782}  
24242 Pathogen[ P14079] interacts with 3 human partners:{Q96RL7;O95782;Q9Y3R5}  
24243 Pathogen[ P03383] interacts with 3 human partners:{Q96RL7;Q9Y3R5;O95782}  
24244 Pathogen[ P03410] interacts with 3 human partners:{O95782;Q96RL7;Q7Z3U7}  
24245 Pathogen[ P14075] interacts with 3 human partners:{Q96RL7;O95782;Q9Y3R5}  
24246 Pathogen[ P0C206] interacts with 3 human partners:{Q9Y3R5;O95782;Q96RL7}  
24247 Pathogen[ P03363] interacts with 3 human partners:{Q9Y3R5;O95782;Q96RL7}

24248 [Cluster 2205]GO:0021953+P biological\_process [name] central nervous system neuron  
differentiation [def] "The process in which a relatively unspecialized cell acquires  
specialized features of a neuron whose cell body resides in the central nervous system."  
[GO\_REF

24249 Pathogen[ Q2Q067] interacts with 2 human partners:{P49639;P35711}  
24250 Pathogen[ P0C214] interacts with 2 human partners:{P49639;P35711}  
24251 Pathogen[ P03346] interacts with 3 human partners:{P49639;P50219;P35711}  
24252 Pathogen[ Q85601] interacts with 2 human partners:{P49639;P35711}  
24253 Pathogen[ P14079] interacts with 2 human partners:{P35711;P49639}  
24254 Pathogen[ P03383] interacts with 2 human partners:{P49639;P35711}  
24255 Pathogen[ P03410] interacts with 1 human partners:{P49639}  
24256 Pathogen[ P14075] interacts with 1 human partners:{P35711}  
24257 Pathogen[ P0C206] interacts with 2 human partners:{P49639;P35711}  
24258 Pathogen[ P03363] interacts with 3 human partners:{P35711;P49639;P50219}

24259 [Cluster 2206]GO:0010952+P biological\_process [name] positive regulation of peptidase  
activity [def] "Any process that increases the frequency, rate or extent of peptidase  
activity, the hydrolysis of peptide bonds within proteins." [GOC

24260 Pathogen[ Q2Q067] interacts with 1 human partners:{O76031}  
24261 Pathogen[ P0C214] interacts with 1 human partners:{O76031}  
24262 Pathogen[ P03346] interacts with 1 human partners:{O76031}  
24263 Pathogen[ Q85601] interacts with 1 human partners:{O76031}  
24264 Pathogen[ P14079] interacts with 1 human partners:{O76031}  
24265 Pathogen[ P03383] interacts with 1 human partners:{O76031}

24266 Pathogen[ P03410] interacts with 1 human partners:{076031}  
24267 Pathogen[ P14075] interacts with 1 human partners:{076031}  
24268 Pathogen[ P0C206] interacts with 1 human partners:{076031}  
24269 Pathogen[ P03363] interacts with 1 human partners:{076031}  
24270 [Cluster 2207]GO:0048741+P biological\_process [name] skeletal muscle fiber development [def] "The process whose specific outcome is the progression of the skeletal muscle fiber over time, from its formation to the mature structure. Muscle fibers are formed by the maturation of myotubes. They can be classed as slow, intermediate/fast or fast." [GOC  
24271 Pathogen[ Q2Q067] interacts with 4 human partners:{Q08209;P15172;P12755;P53805}  
24272 Pathogen[ P0C214] interacts with 5 human partners:{P68133;P15172;Q08209;P12755;P53805}  
24273 Pathogen[ P03346] interacts with 4 human partners:{P53805;P15172;P15173;Q08209}  
24274 Pathogen[ Q85601] interacts with 5 human partners:{P68133;P15172;P12755;Q08209;P53805}  
24275 Pathogen[ P14079] interacts with 4 human partners:{P12755;P53805;Q08209;P68133}  
24276 Pathogen[ P03383] interacts with 2 human partners:{P15172;P53805}  
24277 Pathogen[ P03410] interacts with 4 human partners:{P12755;Q08209;P53805;P68133}  
24278 Pathogen[ P14075] interacts with 2 human partners:{P15172;P53805}  
24279 Pathogen[ P0C206] interacts with 5 human partners:{P53805;P12755;P68133;P15172;Q08209}  
24280 Pathogen[ P03363] interacts with 3 human partners:{P53805;P68133;P15172}  
24281 [Cluster 2208]GO:0045104+P biological\_process [name] intermediate filament cytoskeleton organization [def] "A process that is carried out at the cellular level which results in the assembly, arrangement of constituent parts, or disassembly of cytoskeletal structures comprising intermediate filaments and their associated proteins." [GOC  
24282 Pathogen[ Q2Q067] interacts with 8 human partners:{P54252;P41219;P08779;P12035;O15061;P12036;Q16352;P07197}  
24283 Pathogen[ P0C214] interacts with 9 human partners:{P12035;O15061;P41219;Q16352;Q13515;P08779;P12036;P07197;P54252}  
24284 Pathogen[ P03346] interacts with 10 human partners:{Q16352;P08779;Q96RT1;Q13515;O15061;P07197;P12036;P41219;P12035;P54252}  
24285 Pathogen[ Q85601] interacts with 10 human partners:{P08779;Q96RT1;P12036;P54252;Q13515;P12035;P41219;P07197;Q16352;O15061}  
24286 Pathogen[ P14079] interacts with 9 human partners:{P08779;P41219;P12036;P54252;Q96RT1;O15061;P07197;Q13515;P12035}  
24287 Pathogen[ P03383] interacts with 9 human partners:{Q16352;Q13515;P12036;O15061;P08779;P54252;P41219;P12035;P07197}  
24288 Pathogen[ P03410] interacts with 10 human partners:{Q96RT1;P12036;O15061;P12035;Q16352;Q13515;P54252;P41219;P08779;P07197}  
24289 Pathogen[ P14075] interacts with 9 human partners:{Q16352;Q13515;P12035;O15061;P54252;P41219;P12036;P08779;P07197}  
24290 Pathogen[ P0C206] interacts with 10 human partners:{Q96RT1;P08779;O15061;P41219;Q13515;P54252;P12036;Q16352;P12035;P07197}  
24291 Pathogen[ P03363] interacts with 10 human partners:{P08779;Q96RT1;P07197;Q16352;O15061;P54252;P41219;P12035;P12036;Q13515}  
24292 [Cluster 2209]GO:0048645+P biological\_process [name] organ formation [def] "The process pertaining to the initial formation of an organ from unspecified parts. The process begins with the specific processes that contribute to the appearance of the discrete structure, such as inductive events, and ends when the structural rudiment of the organ is recognizable, such as a condensation of mesenchymal cells into the organ rudiment. Organs are a natural part or structure in an animal or a plant, capable of performing some special action (termed its function), which is essential to the life or well-being of the whole. The heart and lungs are organs of animals, and the petal and leaf are organs of plants. In animals the organs are generally made up of several tissues, one of which usually predominates, and determines the principal function of the organ." [GOC  
24293 Pathogen[ Q2Q067] interacts with 2 human partners:{043365;P31314}  
24294 Pathogen[ P0C214] interacts with 2 human partners:{043365;P31314}  
24295 Pathogen[ P03346] interacts with 3 human partners:{043365;P78367;P31314}  
24296 Pathogen[ Q85601] interacts with 2 human partners:{P31314;043365}  
24297 Pathogen[ P14079] interacts with 1 human partners:{043365}  
24298 Pathogen[ P03383] interacts with 2 human partners:{043365;P31314}  
24299 Pathogen[ P03410] interacts with 2 human partners:{P31314;043365}  
24300 Pathogen[ P14075] interacts with 2 human partners:{043365;P31314}  
24301 Pathogen[ P0C206] interacts with 2 human partners:{P31314;043365}  
24302 Pathogen[ P03363] interacts with 3 human partners:{043365;P31314;P78367}  
24303 [Cluster 2210]GO:0035306+P biological\_process [name] positive regulation of dephosphorylation [def] "Any process that activates or increases the frequency, rate or extent of removal of phosphate groups from a molecule." [GOC  
24304 Pathogen[ Q2Q067] interacts with 1 human partners:{P78318}  
24305 Pathogen[ P0C214] interacts with 1 human partners:{P78318}  
24306 Pathogen[ P03346] interacts with 1 human partners:{P78318}  
24307 Pathogen[ Q85601] interacts with 1 human partners:{P78318}  
24308 Pathogen[ P14079] interacts with 1 human partners:{P78318}

24309 Pathogen[ P03383] interacts with 1 human partners:{P78318}

24310 Pathogen[ P03410] interacts with 1 human partners:{P78318}

24311 Pathogen[ P14075] interacts with 1 human partners:{P78318}

24312 Pathogen[ P0C206] interacts with 1 human partners:{P78318}

24313 Pathogen[ P03363] interacts with 1 human partners:{P78318}

24314 [Cluster 2211]GO:0048246+P biological\_process [name] macrophage chemotaxis [def] "The movement of a macrophage in response to an external stimulus." [GOC]

24315 Pathogen[ Q2Q067] interacts with 1 human partners:{Q9BW27}

24316 Pathogen[ P0C214] interacts with 1 human partners:{Q9BW27}

24317 Pathogen[ P03346] interacts with 1 human partners:{Q9BW27}

24318 Pathogen[ Q85601] interacts with 1 human partners:{Q9BW27}

24319 Pathogen[ P14079] interacts with 2 human partners:{Q9BW27;P0DJI8}

24320 Pathogen[ P03383] interacts with 1 human partners:{Q9BW27}

24321 Pathogen[ P03410] interacts with 2 human partners:{Q9BW27;P0DJI8}

24322 Pathogen[ P14075] interacts with 1 human partners:{Q9BW27}

24323 Pathogen[ P0C206] interacts with 1 human partners:{Q9BW27}

24324 Pathogen[ P03363] interacts with 1 human partners:{Q9BW27}

24325 [Cluster 2212]GO:000117+P biological\_process [name] regulation of transcription involved in G2/M-phase of mitotic cell cycle [def] "Any process that regulates transcription such that the target genes are transcribed as part of the G2/M phase of the mitotic cell cycle." [GOC]

24326 Pathogen[ Q2Q067] interacts with 2 human partners:{O14867;P21675}

24327 Pathogen[ P0C214] interacts with 2 human partners:{P21675;O14867}

24328 Pathogen[ P03346] interacts with 2 human partners:{O14867;P21675}

24329 Pathogen[ Q85601] interacts with 2 human partners:{O14867;P21675}

24330 Pathogen[ P14079] interacts with 2 human partners:{O14867;P21675}

24331 Pathogen[ P03383] interacts with 1 human partners:{P21675}

24332 Pathogen[ P03410] interacts with 2 human partners:{P21675;O14867}

24333 Pathogen[ P14075] interacts with 1 human partners:{P21675}

24334 Pathogen[ P0C206] interacts with 2 human partners:{O14867;P21675}

24335 Pathogen[ P03363] interacts with 2 human partners:{O14867;P21675}

24336 [Cluster 2213]GO:0045875+P biological\_process [name] negative regulation of sister chromatid cohesion [def] "Any process that stops, prevents, or reduces the frequency, rate or extent of sister chromatid cohesion." [GOC]

24337 Pathogen[ Q2Q067] interacts with 2 human partners:{Q7Z5K2;Q14674}

24338 Pathogen[ P0C214] interacts with 2 human partners:{Q7Z5K2;Q14674}

24339 Pathogen[ P03346] interacts with 2 human partners:{Q7Z5K2;Q14674}

24340 Pathogen[ Q85601] interacts with 2 human partners:{Q14674;Q7Z5K2}

24341 Pathogen[ P14079] interacts with 2 human partners:{Q14674;Q7Z5K2}

24342 Pathogen[ P03383] interacts with 2 human partners:{Q14674;Q7Z5K2}

24343 Pathogen[ P03410] interacts with 2 human partners:{Q7Z5K2;Q14674}

24344 Pathogen[ P14075] interacts with 2 human partners:{Q7Z5K2;Q14674}

24345 Pathogen[ P0C206] interacts with 2 human partners:{Q7Z5K2;Q14674}

24346 Pathogen[ P03363] interacts with 2 human partners:{Q14674;Q7Z5K2}

24347 [Cluster 2214]GO:000082+P biological\_process [name] G1/S transition of mitotic cell cycle [def] "Progression from G1 phase to S phase of the mitotic cell cycle." [GOC]

24348 Pathogen[ Q2Q067] interacts with 101 human partners:{Q9UPP1;Q99460;O75832;P48556;P18754;P40306;Q93034;P42773;P55036;P24385;P06400;O00231;O00233;P27694;Q01094;Q08209;P51665;Q99741;P28072;P61024;P49427;Q99708;Q9H211;O00743;P35244;Q9UBU7;Q13200;P25787;Q06323;Q13415;Q13156;P30304;P28065;O14818;P14635;Q13541;P12004;Q14181;Q9Y5P8;Q14186;P51948;P31350;P60900;Q9UL46;P61289;Q9UBD5;Q5MJ70;P15927;Q86T82;P28062;P56282;O95644;P24864;Q9UNM6;P25788;O75419;Q13616;Q92530;P50613;P25786;P78396;P38936;Q13618;O96020;Q16401;O00232;Q13309;Q7L590;O43913;P28074;P25789;Q9UKT4;P0CG47;Q13619;P04818;Q9Y5N6;Q13416;P20618;P42771;P0CG48;P25205;P47928;P28070;P28066;Q99436;P24941;Q9BQA5;P62987;O43242;P06730;P49721;P11802;P46527;P49720;P10242;Q96FF9;P63208;Q13617;P51946;Q00534;P62979}

24349 Pathogen[ P0C214] interacts with 107 human partners:{P51665;P51946;Q13619;Q13617;P25789;P55036;P04818;Q13156;P31350;P28062;P28065;O43913;Q7L590;P50613;Q13309;P49427;Q5H9I0;O14818;P11802;O43242;P61024;Q99708;P63208;Q86Y37;P46527;P48556;Q13618;P40306;Q93034;P14635;P24385;Q9UBU7;Q13200;P38936;O00232;Q9Y5N6;Q96FF9;P15170;P25205;Q99460;P28066;Q01094;O75832;P00374;Q14566;Q00534;Q14186;P47928;P51948;P49720;P28074;P0CG48;Q9UL46;P78396;Q08209;P15927;P25788;P24941;Q9UNM6;O00231;P42771;P35244;Q06323;P25786;Q9H211;Q13616;P28072;P10242;P62987;P42773;P54687;O75419;Q99436;P24864;P0CG47;P25787;Q13416;O00743;Q5MJ70;P27694;P35998;P60900;Q9Y5P8;Q9BQA5;O00233;O95644;P62979;P06730;P18754;P30304;P56282;Q92530;Q15008;Q9UBD5;Q9UPP1;P28070;P06400;Q9UKT4;P20618;P49721;Q99741;Q16401;Q13541;O96020;P17980;Q13415;Q14181}

24350 Pathogen[ P03346] interacts with 107 human partners:{P25787;P12004;P28070;O00743;P78396;P25789;P55036;P06730;P55273;P24385;Q99460;Q96FF9;Q13616;Q5MJ70;Q9UL46;P62987;P27694;P28072;P49427;P06400;P25788;Q9Y5N6;P28074;P49721;Q13541;O96020;Q9UBD5;P35244;O14818;Q99708;Q99436;P24941;P30304;Q13156;P56282;P0CG48;Q13618;Q16401;Q9UBU7;P24864;P28062;P18754;P61024;P20618;P42771;O00232;O95644;Q01094;Q86T82;Q93034;P11802;Q9Y5P8;O75832;O00233;Q14566;P25205;Q14186;P31350;P10242;Q16667;P14635;Q13309;P49720;P28065;P51946;P60900;P33992;P25786;O00231;Q13415;Q9UKT4;P15927;Q86Y37;Q9UPP1;Q5H9I0;P63208;P61289;Q14181;P42773;P62979;P28066;Q9UNM6;P33991;P0CG47;Q13619;Q13416;Q13200;P48556;Q00534;P51665;P38936;Q06323;Q08209;O75419;P465



- 27;Q99741;Q7L590;Q92530;Q9H211;O43929;P51948;O43242;O43913;P40306;P47928;Q9BQA5;Q13617}
- 24351 Pathogen[ Q85601] interacts with 103 human partners: {P51946;P28066;Q9UNM6;P60900;O43913;Q13309;P55036;Q7L590;P55273;P24385;P25787;P61289;P06730;P56282;P49427;P06400;P25788;Q9UKT4;P35244;Q99708;O75832;Q13415;Q9Y5N6;Q13616;P10242;Q9UBU7;Q9UBD5;P0CG48;P30304;Q86Y37;P51948;P61024;O95644;P31350;P27694;Q13541;P11802;Q08209;P25789;O00233;Q14566;O96020;Q14186;P20618;P63208;P15170;P25205;P40306;P14635;P15927;P49720;P28062;P49721;P25786;P78396;P42771;Q9UPP1;P28072;Q13200;P50613;P28065;Q14181;P42773;Q5H9I0;P62979;Q99436;P28070;Q86T82;Q9BQA5;Q9UL46;Q99460;O00231;P0CG47;Q13416;P18754;Q13156;P48556;O00743;P12004;P28074;Q92530;P38936;P62987;P33992;Q00534;Q13618;Q06323;O75419;Q99741;Q13619;Q9H211;O14818;Q96FF9;P24941;Q16401;Q01094;Q93034;Q9Y5P8;P47928;P46527;P24864;Q5MJ70;Q13617}
- 24352 Pathogen[ P14079] interacts with 106 human partners: {P28065;Q99436;P00374;P62333;Q13416;P48556;Q5MJ70;Q7L590;P0CG48;O75419;Q14566;Q9UKT4;P06730;Q14186;P51946;Q13415;Q13309;P78396;Q9Y5N6;P24864;P40306;P55036;P28074;Q13618;O00232;Q96FF9;O43913;Q9H211;O95644;P49720;O00487;P25787;Q5H9I0;O75832;P62979;O00233;P31350;P35998;Q9BQA5;Q13156;P61289;P30304;P62987;P55273;P51665;Q13541;P20618;Q99741;P50613;P14635;P28062;P60900;Q9UBD5;Q9UPP1;Q99708;P38936;Q9UNM6;P56282;Q93034;Q99460;O14818;P49721;Q92530;P49642;Q14181;O43929;Q13617;P33992;P15927;P49427;Q06323;P27694;P62191;P46527;P12004;Q15008;P42773;P43686;O43242;P25788;P63208;O00231;Q13616;P28066;Q9Y5P8;Q9UL46;O96020;Q86Y37;P10242;P35244;P0CG47;Q01094;P04818;Q08209;P25205;Q16401;P17980;P18754;O00743;P47928;P28072;Q9UBU7;Q13619;P42771;P61024;P51948}
- 24353 Pathogen[ P03383] interacts with 90 human partners: {Q13616;Q9UBD5;P55036;P61024;P62987;Q5H9I0;P51948;P25789;P60900;Q01094;Q7L590;Q14181;P49427;P27694;Q93034;P40306;O95644;O00233;P25205;P30304;P49721;Q06323;P24385;Q9UKT4;P63208;Q00534;P20618;P14635;P11802;P06400;P31350;Q13618;P78396;O43913;Q9Y5P8;P56282;O75832;P06730;Q14186;P15927;P50613;Q9Y5N6;Q13541;P51946;P46527;Q9BQA5;P24941;P18754;Q9UL46;Q9UNM6;P35244;P25786;Q99460;O96020;P28072;Q13200;P28065;P42771;P28066;Q96FF9;Q99708;P10242;O75419;Q13617;Q16401;P62979;O00231;P0CG47;Q13416;Q13309;P0CG48;P28074;Q92530;P49720;P61289;Q13156;P47928;P28062;P24864;P48556;O00743;O14818;Q99436;Q9UPP1;Q9H211;P28070;Q99741;P25787;P25788;Q5MJ70}
- 24354 Pathogen[ P03410] interacts with 111 human partners: {Q9UKT4;P42771;Q9UPP1;P28070;P46527;P35244;P25205;P55036;O43929;P31350;P0CG48;Q99708;Q14181;Q00534;P25786;Q13416;Q08209;Q15008;Q16401;P49427;P60900;O75419;O96020;Q9BQA5;P06730;P35998;Q99460;P00374;P10242;O00233;P51946;Q5H9I0;O00232;P55273;P48556;P49721;Q9H211;P06400;P56282;P62979;Q13541;P50613;Q99436;P33992;P78396;O95644;P40306;Q06323;P24385;Q13618;P63208;Q13200;P25787;P14635;P38936;Q13309;P15170;P04818;P30304;P24941;P11802;Q9UBU7;P28062;P51665;P47928;Q13156;Q14186;O14818;Q86Y37;Q7L590;O00231;Q9UNM6;P51948;P25789;P49720;Q13616;P62987;Q01094;Q13619;P61024;P27694;Q13617;P28072;Q5MJ70;Q96FF9;P15927;P18754;Q9Y5N6;P25788;O43913;Q14566;P28066;P24864;P12004;Q9UBD5;P42773;Q93034;P28065;O43242;O00743;P0CG47;P17980;O75832;P20618;P49642;Q9Y5P8;Q9UL46;P28074;P61289;Q13415;Q99741}
- 24355 Pathogen[ P14075] interacts with 89 human partners: {Q9Y5P8;P55036;P25788;Q9H211;P31350;P28066;P24941;Q5MJ70;P11802;Q06323;O75832;Q93034;Q9BQA5;P61024;Q13618;Q9UKT4;P60900;P49427;P14635;O00233;Q9UL46;Q9Y5N6;P49720;P50613;Q9UPP1;Q9UBD5;O75419;Q00534;P42771;P47928;Q13200;P48556;P06730;Q16401;P15927;O96020;P10242;P28070;P49721;Q96FF9;O00231;P46527;P78396;O00743;Q92530;P63208;Q13156;Q14186;P35244;P0CG48;P62979;P28062;P28074;P25205;P28065;P25786;O14818;P62987;Q13309;P28072;Q01094;P30304;P06400;O43913;P27694;P51946;P0CG47;P25787;Q13416;P18754;Q99741;P20618;P24385;P56282;Q9UNM6;Q13616;Q14181;P61289;Q7L590;P40306;Q13617;Q99708;Q99436;Q13541;O95644;P51948;Q5H9I0;P25789;P24864}
- 24356 Pathogen[ P0C206] interacts with 108 human partners: {P61289;Q99436;P28062;Q9UNM6;Q13541;P0CG48;Q86Y37;O75832;P61024;P40306;P28065;O00743;P55036;Q99708;Q13309;P25786;P25788;P18754;O75419;Q13156;P25205;P25787;O43913;Q06323;P49720;Q9UPP1;P10242;O00232;P60900;Q9UBD5;P42771;Q14186;Q13416;Q13616;P49642;O43242;Q99741;Q9BQA5;O96020;P49427;P06730;P25789;Q96FF9;P30291;Q9UKT4;P42773;Q13619;Q13617;P50613;Q13618;P20618;Q14181;P63208;Q9UBU7;Q13200;P28070;Q99460;Q9H211;Q01094;P62979;Q9Y5N6;P55273;P46527;P28066;P38936;Q86T82;O14818;P04818;P0CG47;P28072;P30304;P78396;P56282;Q13415;Q5H9I0;P28074;P27694;Q08209;Q92530;P15927;P49721;P14635;Q93034;O95644;P62987;P35244;Q9UL46;P47928;P24864;Q9Y5P8;P24941;Q14566;O00233;P11802;P48556;Q16401;Q5MJ70;Q99640;P33992;O00231;P51946;P31350;P51948;P24385;Q00534;P12004;P06400;Q7L590}
- 24357 Pathogen[ P03363] interacts with 58 human partners: {Q9Y5P8;Q13309;P27694;P24864;Q92530;P25205;Q13618;P51946;Q16667;O00743;Q13617;P61289;P24941;Q14181;P35244;Q5H9I0;P15927;P49427;P06400;P33992;P30304;Q00534;Q13619;Q99708;Q13416;Q13616;O96020;Q13415;Q13156;Q01094;Q99741;P61024;Q86T82;P78396;Q9H211;Q5MJ70;Q9BQA5;Q9UKT4;P47928;P62987;P24385;P10242;Q14186;O95644;Q7L590;Q93034;Q96FF9;P42773;P11802;Q13541;Q9UBD5;P18754;Q9Y5N6;P63208;P06730;P42771;O75419;O43913}
- 24358 [Cluster 2215]GO:0010501+P biological\_process [name] RNA secondary structure unwinding [def] "The process in which a secondary structure of RNA are broken or 'melted'." [PMID 24359 Pathogen[ Q2Q067] interacts with 1 human partners: {Q13838}
- 24360 Pathogen[ P0C214] interacts with 1 human partners: {Q13838}
- 24361 Pathogen[ P03346] interacts with 1 human partners: {Q13838}
- 24362 Pathogen[ Q85601] interacts with 1 human partners: {Q13838}
- 24363 Pathogen[ P14079] interacts with 1 human partners: {Q13838}
- 24364 Pathogen[ P03383] interacts with 1 human partners: {Q13838}

24365 Pathogen[ P03410] interacts with 1 human partners:{Q13838}  
24366 Pathogen[ P14075] interacts with 1 human partners:{Q13838}  
24367 Pathogen[ P0C206] interacts with 1 human partners:{Q13838}  
24368 Pathogen[ P03363] interacts with 1 human partners:{Q13838}  
24369 [Cluster 2216]GO:0048205+P biological\_process [name] COPI coating of Golgi vesicle  
[def] "The addition of COPI proteins and adaptor proteins to Golgi membranes during the  
formation of transport vesicles, forming a vesicle coat." [GOC  
24370 Pathogen[ Q2Q067] interacts with 6 human  
partners:{O14579;P48444;P61923;P53618;P35606;Q9Y678}  
24371 Pathogen[ P0C214] interacts with 6 human  
partners:{P61923;O14579;P53618;P35606;P48444;Q9Y678}  
24372 Pathogen[ P03346] interacts with 9 human  
partners:{Q9Y678;P53618;O14579;P48444;P61923;P49755;P35606;Q15363;Q9BVK6}  
24373 Pathogen[ Q85601] interacts with 7 human  
partners:{P48444;O14579;P61923;Q8N6T3;Q9Y678;P53618;P35606}  
24374 Pathogen[ P14079] interacts with 8 human  
partners:{P61923;P35606;Q9BVK6;Q9Y678;Q15363;P49755;P48444;O14579}  
24375 Pathogen[ P03383] interacts with 3 human partners:{O14579;P53618;Q9Y678}  
24376 Pathogen[ P03410] interacts with 8 human  
partners:{P48444;P35606;O14579;Q9BVK6;Q9Y678;Q15363;P53618;P61923}  
24377 Pathogen[ P14075] interacts with 3 human partners:{P53618;Q9Y678;O14579}  
24378 Pathogen[ P0C206] interacts with 10 human  
partners:{Q9BVK6;O14579;Q9Y678;Q8N6T3;P53618;P49755;P35606;P48444;Q15363;P61923}  
24379 Pathogen[ P03363] interacts with 6 human  
partners:{P48444;Q9Y678;O14579;P53618;P61923;P35606}  
24380 [Cluster 2217]GO:0030857+P biological\_process [name] negative regulation of epithelial  
cell differentiation [def] "Any process that stops, prevents, or reduces the  
frequency, rate or extent of epithelial cell differentiation." [GOC  
24381 Pathogen[ Q2Q067] interacts with 2 human partners:{P24385;P46937}  
24382 Pathogen[ P0C214] interacts with 2 human partners:{P46937;P24385}  
24383 Pathogen[ P03346] interacts with 2 human partners:{P46937;P24385}  
24384 Pathogen[ Q85601] interacts with 2 human partners:{P24385;P46937}  
24385 Pathogen[ P14079] interacts with 1 human partners:{P46937}  
24386 Pathogen[ P03383] interacts with 2 human partners:{P24385;P46937}  
24387 Pathogen[ P03410] interacts with 2 human partners:{P24385;P46937}  
24388 Pathogen[ P14075] interacts with 2 human partners:{P46937;P24385}  
24389 Pathogen[ P0C206] interacts with 2 human partners:{P46937;P24385}  
24390 Pathogen[ P03363] interacts with 2 human partners:{P46937;P24385}  
24391 [Cluster 2218]GO:0080163+P biological\_process [name] regulation of protein  
serine/threonine phosphatase activity [def] "Any process that modulates the frequency,  
rate or extent of protein serine/threonine phosphatase activity  
24392 Pathogen[ Q2Q067] interacts with 1 human partners:{Q6NUP7}  
24393 Pathogen[ P0C214] interacts with 1 human partners:{Q6NUP7}  
24394 Pathogen[ P03346] interacts with 1 human partners:{Q6NUP7}  
24395 Pathogen[ Q85601] interacts with 1 human partners:{Q6NUP7}  
24396 Pathogen[ P14079] interacts with 1 human partners:{Q6NUP7}  
24397 Pathogen[ P03383] interacts with 1 human partners:{Q6NUP7}  
24398 Pathogen[ P03410] interacts with 1 human partners:{Q6NUP7}  
24399 Pathogen[ P14075] interacts with 1 human partners:{Q6NUP7}  
24400 Pathogen[ P0C206] interacts with 1 human partners:{Q6NUP7}  
24401 Pathogen[ P03363] interacts with 1 human partners:{Q6NUP7}  
24402 [Cluster 2219]GO:0006516+P biological\_process [name] glycoprotein catabolic process  
[def] "The chemical reactions and pathways resulting in the breakdown of glycoproteins,  
any protein that contains covalently bound glucose (i.e. monosaccharide) residues\_ the  
glycose occurs most commonly as oligosaccharide or fairly small polysaccharide but  
occasionally as monosaccharide." [GOC  
24403 Pathogen[ Q2Q067] interacts with 2 human partners:{Q96IV0;Q9NRD1}  
24404 Pathogen[ P0C214] interacts with 2 human partners:{Q96IV0;Q9NRD1}  
24405 Pathogen[ P03346] interacts with 2 human partners:{Q9NRD1;Q96IV0}  
24406 Pathogen[ Q85601] interacts with 2 human partners:{Q96IV0;Q9NRD1}  
24407 Pathogen[ P14079] interacts with 3 human partners:{Q96IV0;O60502;Q9NRD1}  
24408 Pathogen[ P03383] interacts with 2 human partners:{Q9NRD1;Q96IV0}  
24409 Pathogen[ P03410] interacts with 3 human partners:{Q9NRD1;O60502;Q96IV0}  
24410 Pathogen[ P14075] interacts with 2 human partners:{Q96IV0;Q9NRD1}  
24411 Pathogen[ P0C206] interacts with 2 human partners:{Q96IV0;Q9NRD1}  
24412 Pathogen[ P03363] interacts with 2 human partners:{Q96IV0;Q9NRD1}  
24413 [Cluster 2220]GO:0046502+P biological\_process [name] uroporphyrinogen III metabolic  
process [def] "The chemical reactions and pathways involving uroporphyrinogen III, a  
precursor for synthesis of vitamin B12, chlorophyll, and heme in organisms that produce  
these compounds." [GOC  
24414 Pathogen[ Q2Q067] interacts with 1 human partners:{P06132}  
24415 Pathogen[ P0C214] interacts with 1 human partners:{P06132}  
24416 Pathogen[ P03346] interacts with 1 human partners:{P06132}  
24417 Pathogen[ Q85601] interacts with 1 human partners:{P06132}  
24418 Pathogen[ P14079] interacts with 1 human partners:{P06132}  
24419 Pathogen[ P03383] interacts with 1 human partners:{P06132}

24420 Pathogen[ P03410] interacts with 1 human partners:{P06132}  
24421 Pathogen[ P14075] interacts with 1 human partners:{P06132}  
24422 Pathogen[ P0C206] interacts with 1 human partners:{P06132}  
24423 Pathogen[ P03363] interacts with 1 human partners:{P06132}  
24424 [Cluster 2221]GO:0060828+P biological\_process [name] regulation of canonical Wnt receptor signaling pathway [def] "Any process that modulates the rate, frequency, or extent of the Wnt receptor signaling pathway through beta-catenin, the series of molecular signals initiated by binding of a Wnt protein to a frizzled family receptor on the surface of the target cell, followed by propagation of the signal via beta-catenin, and ending with a change in transcription of target genes." [GOC  
24425 Pathogen[ Q2Q067] interacts with 5 human partners:{P50402;Q5JTC6;Q9H7S9;Q8ND76;Q9BT81}  
24426 Pathogen[ P0C214] interacts with 6 human partners:{Q8ND76;O94921;Q9BT81;P50402;Q5JTC6;Q9H7S9}  
24427 Pathogen[ P03346] interacts with 6 human partners:{Q8ND76;Q9H7S9;P50402;O94921;Q9BT81;Q5JTC6}  
24428 Pathogen[ Q85601] interacts with 6 human partners:{Q9H7S9;Q8ND76;O94921;Q5JTC6;P50402;Q9BT81}  
24429 Pathogen[ P14079] interacts with 5 human partners:{Q9BT81;Q8ND76;Q9H7S9;P50402;Q5JTC6}  
24430 Pathogen[ P03383] interacts with 5 human partners:{Q5JTC6;Q8ND76;Q9H7S9;O94921;P50402}  
24431 Pathogen[ P03410] interacts with 5 human partners:{P50402;Q5JTC6;Q9H7S9;Q9BT81;Q8ND76}  
24432 Pathogen[ P14075] interacts with 5 human partners:{P50402;Q5JTC6;Q8ND76;Q9H7S9;O94921}  
24433 Pathogen[ P0C206] interacts with 6 human partners:{P50402;Q9BT81;Q9H7S9;Q8ND76;O94921;Q5JTC6}  
24434 Pathogen[ P03363] interacts with 5 human partners:{Q5JTC6;Q9H7S9;Q8ND76;P50402;Q9BT81}  
24435 [Cluster 2222]GO:2000194+P biological\_process [name] regulation of female gonad development [def] "Any process that modulates the frequency, rate or extent of female gonad development." [GOC  
24436 Pathogen[ Q2Q067] interacts with 1 human partners:{O60356}  
24437 Pathogen[ P0C214] interacts with 1 human partners:{O60356}  
24438 Pathogen[ P03346] interacts with 1 human partners:{O60356}  
24439 Pathogen[ Q85601] interacts with 1 human partners:{O60356}  
24440 Pathogen[ P14079] interacts with 1 human partners:{O60356}  
24441 Pathogen[ P03383] interacts with 1 human partners:{O60356}  
24442 Pathogen[ P03410] interacts with 1 human partners:{O60356}  
24443 Pathogen[ P14075] interacts with 1 human partners:{O60356}  
24444 Pathogen[ P0C206] interacts with 1 human partners:{O60356}  
24445 Pathogen[ P03363] interacts with 1 human partners:{O60356}  
24446 [Cluster 2223]GO:0005978+P biological\_process [name] glycogen biosynthetic process [def] "The chemical reactions and pathways resulting in the formation of glycogen, a polydisperse, highly branched glucan composed of chains of D-glucose residues." [ISBN  
24447 Pathogen[ Q2Q067] interacts with 9 human partners:{P31749;P35573;P36871;Q16851;Q96G03;P46976;P54840;P13807;Q9UQK1}  
24448 Pathogen[ P0C214] interacts with 12 human partners:{Q04446;P35573;P46976;Q96G03;P36871;Q15124;Q16851;O15488;P54840;P13807;P31749;Q9UQK1}  
24449 Pathogen[ P03346] interacts with 9 human partners:{Q9UQK1;P13807;P35573;P46976;P36871;Q16851;P31749;Q96G03;P54840}  
24450 Pathogen[ Q85601] interacts with 11 human partners:{P13807;P31749;Q9UQK1;Q16851;P46976;P35573;Q15124;P36871;Q04446;P54840;Q96G03}  
24451 Pathogen[ P14079] interacts with 11 human partners:{P31751;Q16851;P13807;Q15124;P46976;Q9UQK1;P35573;Q96G03;P54840;P36871;O15488}  
24452 Pathogen[ P03383] interacts with 8 human partners:{Q96G03;Q9UQK1;P31749;P13807;P35573;Q16851;P46976;P54840}  
24453 Pathogen[ P03410] interacts with 12 human partners:{P46976;Q16851;P36871;P54840;Q04446;P35573;P31749;Q15124;P13807;O15488;Q96G03;Q9UQK1}  
24454 Pathogen[ P14075] interacts with 8 human partners:{Q96G03;P46976;P54840;Q9UQK1;P31749;P35573;P13807;Q16851}  
24455 Pathogen[ P0C206] interacts with 12 human partners:{Q16851;P31749;P46976;Q96G03;Q9UQK1;Q04446;P13807;Q15124;P54840;P36871;O15488;P35573}  
24456 Pathogen[ P03363] interacts with 8 human partners:{P13807;Q16851;P31749;P54840;Q9UQK1;P35573;P46976;Q96G03}  
24457 [Cluster 2224]GO:2000649+P biological\_process [name] regulation of sodium ion transmembrane transporter activity [def] "Any process that modulates the frequency, rate or extent of sodium ion transmembrane transporter activity." [GOC  
24458 Pathogen[ Q2Q067] interacts with 2 human partners:{Q9HD47;Q04917}  
24459 Pathogen[ P0C214] interacts with 2 human partners:{Q04917;Q9HD47}

24460 Pathogen[ P03346] interacts with 2 human partners:{Q9HD47;Q04917}  
24461 Pathogen[ Q85601] interacts with 2 human partners:{Q9HD47;Q04917}  
24462 Pathogen[ P14079] interacts with 2 human partners:{Q04917;Q9HD47}  
24463 Pathogen[ P03383] interacts with 1 human partners:{Q9HD47}  
24464 Pathogen[ P03410] interacts with 2 human partners:{Q04917;Q9HD47}  
24465 Pathogen[ P14075] interacts with 1 human partners:{Q9HD47}  
24466 Pathogen[ P0C206] interacts with 2 human partners:{Q04917;Q9HD47}  
24467 Pathogen[ P03363] interacts with 2 human partners:{Q9HD47;Q04917}  
24468 [Cluster 2225]GO:0010718+P biological\_process [name] positive regulation of epithelial to mesenchymal transition [def] "Any process that increases the rate, frequency, or extent of epithelial to mesenchymal transition. Epithelial to mesenchymal transition is where an epithelial cell loses apical/basolateral polarity, severs intercellular adhesive junctions, degrades basement membrane components and becomes a migratory mesenchymal cell." [GOC  
24469 Pathogen[ Q2Q067] interacts with 7 human partners:{Q9H4X1;Q13485;Q86UU0;Q9H7S9;P84022;Q9GZV5;Q15796}  
24470 Pathogen[ P0C214] interacts with 7 human partners:{Q9H4X1;P84022;Q9GZV5;Q13485;Q15796;Q86UU0;Q9H7S9}  
24471 Pathogen[ P03346] interacts with 8 human partners:{Q9H4X1;Q9GZV5;Q15796;P84022;Q95863;Q9H7S9;Q13485;Q86UU0}  
24472 Pathogen[ Q85601] interacts with 7 human partners:{Q9H4X1;Q9H7S9;Q86UU0;Q9GZV5;P84022;Q13485;Q15796}  
24473 Pathogen[ P14079] interacts with 5 human partners:{Q9GZV5;O43294;Q86UU0;Q9H7S9;Q13145}  
24474 Pathogen[ P03383] interacts with 7 human partners:{Q9H4X1;Q13485;Q86UU0;P84022;Q9H7S9;Q15796;Q9GZV5}  
24475 Pathogen[ P03410] interacts with 9 human partners:{P84022;Q9H4X1;Q13145;O43294;Q9GZV5;Q13485;Q9H7S9;Q15796;Q86UU0}  
24476 Pathogen[ P14075] interacts with 7 human partners:{Q86UU0;Q9GZV5;Q9H4X1;Q15796;Q13485;P84022;Q9H7S9}  
24477 Pathogen[ P0C206] interacts with 8 human partners:{P84022;Q9H4X1;Q86UU0;Q15796;Q9GZV5;Q9H7S9;O43294;Q13485}  
24478 Pathogen[ P03363] interacts with 7 human partners:{Q9H4X1;Q9H7S9;Q9GZV5;Q15796;P84022;Q86UU0;Q13485}  
24479 [Cluster 2226]GO:0072553+P biological\_process [name] terminal button organization [def] "A process that is carried out at the cellular level which results in the assembly, arrangement of constituent parts, or disassembly of a terminal button. A terminal button is the terminal inflated portion of the axon, containing the specialized apparatus necessary to release neurotransmitters." [GOC  
24480 Pathogen[ Q2Q067] interacts with 1 human partners:{095295}  
24481 Pathogen[ P0C214] interacts with 1 human partners:{095295}  
24482 Pathogen[ P03346] interacts with 1 human partners:{095295}  
24483 Pathogen[ Q85601] interacts with 1 human partners:{095295}  
24484 Pathogen[ P14079] interacts with 1 human partners:{095295}  
24485 Pathogen[ P03383] interacts with 1 human partners:{095295}  
24486 Pathogen[ P03410] interacts with 1 human partners:{095295}  
24487 Pathogen[ P14075] interacts with 1 human partners:{095295}  
24488 Pathogen[ P0C206] interacts with 1 human partners:{095295}  
24489 Pathogen[ P03363] interacts with 1 human partners:{095295}  
24490 [Cluster 2227]GO:0051017+P biological\_process [name] actin filament bundle assembly [def] "The assembly of actin filament bundles\_ actin filaments are on the same axis but may be oriented with the same or opposite polarities and may be packed with different levels of tightness." [GOC  
24491 Pathogen[ Q2Q067] interacts with 4 human partners:{Q14511;Q9Y6N9;P60953;Q96IZ0}  
24492 Pathogen[ P0C214] interacts with 5 human partners:{Q96IZ0;Q9Y6N9;P60953;Q16658;Q14511}  
24493 Pathogen[ P03346] interacts with 7 human partners:{Q9Y6N9;Q14511;P60953;Q08495;Q96IZ0;Q12929;Q16658}  
24494 Pathogen[ Q85601] interacts with 4 human partners:{Q96IZ0;Q9Y6N9;P60953;Q14511}  
24495 Pathogen[ P14079] interacts with 8 human partners:{Q12929;Q08495;Q16658;P35611;Q2M3G4;Q96IZ0;Q9Y6N9;Q05682}  
24496 Pathogen[ P03383] interacts with 3 human partners:{P60953;Q96IZ0;Q14511}  
24497 Pathogen[ P03410] interacts with 10 human partners:{Q16658;Q2M3G4;Q05682;Q14511;Q9Y6N9;Q08495;Q96IZ0;P60953;P35611;Q12929}  
24498 Pathogen[ P14075] interacts with 3 human partners:{P60953;Q14511;Q96IZ0}  
24499 Pathogen[ P0C206] interacts with 7 human partners:{Q96IZ0;Q9Y6N9;Q16658;Q2M3G4;P60953;Q08495;Q14511}  
24500 Pathogen[ P03363] interacts with 8 human partners:{Q9Y6N9;Q2M3G4;Q96IZ0;Q08495;Q14511;Q12929;Q16658;P60953}  
24501 [Cluster 2228]GO:0034629+P biological\_process [name] cellular protein complex localization [def] "A protein complex localization process that takes place at the cellular level\_ as a result, a protein complex is transported to, or maintained in, a specific location within a cell." [GOC  
24502 Pathogen[ Q2Q067] interacts with 2 human partners:{000401;015105}  
24503 Pathogen[ P0C214] interacts with 2 human partners:{015105;000401}  
24504 Pathogen[ P03346] interacts with 2 human partners:{015105;000401}

24505 Pathogen[ Q85601] interacts with 2 human partners:{000401;015105}  
24506 Pathogen[ P14079] interacts with 2 human partners:{015105;000401}  
24507 Pathogen[ P03383] interacts with 2 human partners:{000401;015105}  
24508 Pathogen[ P03410] interacts with 2 human partners:{000401;015105}  
24509 Pathogen[ P14075] interacts with 2 human partners:{000401;015105}  
24510 Pathogen[ P0C206] interacts with 2 human partners:{015105;000401}  
24511 Pathogen[ P03363] interacts with 2 human partners:{015105;000401}  
24512 [Cluster 2229]GO:0030263+P biological\_process [name] apoptotic chromosome condensation  
[def] "The compaction of chromatin during apoptosis." [GOC  
24513 Pathogen[ Q2Q067] interacts with 3 human partners:{P11388;Q9UKV3;O76075}  
24514 Pathogen[ P0C214] interacts with 3 human partners:{P11388;Q9UKV3;O76075}  
24515 Pathogen[ P03346] interacts with 3 human partners:{P11388;Q9UKV3;O76075}  
24516 Pathogen[ Q85601] interacts with 3 human partners:{O76075;Q9UKV3;P11388}  
24517 Pathogen[ P14079] interacts with 3 human partners:{P11388;O76075;Q9UKV3}  
24518 Pathogen[ P03383] interacts with 1 human partners:{Q9UKV3}  
24519 Pathogen[ P03410] interacts with 3 human partners:{O76075;Q9UKV3;P11388}  
24520 Pathogen[ P14075] interacts with 1 human partners:{Q9UKV3}  
24521 Pathogen[ P0C206] interacts with 3 human partners:{O76075;P11388;Q9UKV3}  
24522 Pathogen[ P03363] interacts with 2 human partners:{Q9UKV3;O76075}  
24523 [Cluster 2230]GO:0000463+P biological\_process [name] maturation of LSU-rRNA from  
tricistronic rRNA transcript (SSU-rRNA, 5.8S rRNA, LSU-rRNA) [def] "Any process  
involved in the maturation of a precursor Large SubUnit (LSU) ribosomal RNA (rRNA)  
molecule into a mature LSU-rRNA molecule from the pre-rRNA molecule originally produced  
as a tricistronic rRNA transcript that contains the Small Subunit (SSU) rRNA, 5.8S rRNA,  
and Large Subunit (LSU) in that order from 5' to 3' along the primary transcript." [GOC  
24524 Pathogen[ Q2Q067] interacts with 3 human partners:{Q9GZL7;O00541;Q14137}  
24525 Pathogen[ P0C214] interacts with 3 human partners:{O00541;Q9GZL7;Q14137}  
24526 Pathogen[ P03346] interacts with 3 human partners:{O00541;Q9GZL7;Q14137}  
24527 Pathogen[ Q85601] interacts with 3 human partners:{O00541;Q9GZL7;Q14137}  
24528 Pathogen[ P14079] interacts with 3 human partners:{Q9GZL7;O00541;Q14137}  
24529 Pathogen[ P03383] interacts with 3 human partners:{O00541;Q9GZL7;Q14137}  
24530 Pathogen[ P03410] interacts with 3 human partners:{Q14137;Q9GZL7;O00541}  
24531 Pathogen[ P14075] interacts with 3 human partners:{Q9GZL7;O00541;Q14137}  
24532 Pathogen[ P0C206] interacts with 3 human partners:{Q14137;Q9GZL7;O00541}  
24533 Pathogen[ P03363] interacts with 3 human partners:{Q9GZL7;Q14137;O00541}  
24534 [Cluster 2231]GO:1901094+P  
24535 Pathogen[ Q2Q067] interacts with 1 human partners:{075381}  
24536 Pathogen[ P0C214] interacts with 1 human partners:{075381}  
24537 Pathogen[ P03346] interacts with 2 human partners:{075381;P50542}  
24538 Pathogen[ Q85601] interacts with 1 human partners:{075381}  
24539 Pathogen[ P14079] interacts with 2 human partners:{P50542;075381}  
24540 Pathogen[ P03383] interacts with 1 human partners:{075381}  
24541 Pathogen[ P03410] interacts with 2 human partners:{075381;P50542}  
24542 Pathogen[ P14075] interacts with 1 human partners:{075381}  
24543 Pathogen[ P0C206] interacts with 2 human partners:{075381;P50542}  
24544 Pathogen[ P03363] interacts with 1 human partners:{075381}  
24545 [Cluster 2232]GO:0008203+P biological\_process [name] cholesterol metabolic process  
[def] "The chemical reactions and pathways involving cholesterol, cholest-5-en-3  
beta-ol, the principal sterol of vertebrates and the precursor of many steroids,  
including bile acids and steroid hormones. It is a component of the plasma membrane  
lipid bilayer and of plasma lipoproteins and can be found in all animal tissues." [ISBN  
24546 Pathogen[ Q2Q067] interacts with 5 human  
partners:{P36956;Q15466;P20823;P14324;P49715}  
24547 Pathogen[ P0C214] interacts with 5 human  
partners:{Q13907;Q9BXS1;P14324;P22830;Q15466}  
24548 Pathogen[ P03346] interacts with 7 human  
partners:{P36956;Q12772;Q15466;P20823;P49715;Q9BXW6;P14324}  
24549 Pathogen[ Q85601] interacts with 7 human  
partners:{Q15466;Q12772;P36956;P14324;P49715;P20823;Q13907}  
24550 Pathogen[ P14079] interacts with 14 human  
partners:{Q9BXW6;Q9BXS1;Q9Y5U4;Q13907;P14324;Q0VD83;Q12772;P49715;P22830;P53602;Q9NW  
W5;Q15466;P36956;Q15503}  
24551 Pathogen[ P03383] interacts with 2 human partners:{Q15466;P14324}  
24552 Pathogen[ P03410] interacts with 14 human  
partners:{P53602;P36956;Q9NWW5;Q9Y5U4;Q12772;P22830;Q15466;Q0VD83;Q9UBY8;Q13907;O155  
03;Q9BXW6;P14324;Q9BXS1}  
24553 Pathogen[ P14075] interacts with 2 human partners:{P14324;Q15466}  
24554 Pathogen[ P0C206] interacts with 10 human  
partners:{Q15466;P49715;P36956;P14324;Q13907;Q9BXS1;P20823;P22830;Q9BXW6;Q12772}  
24555 Pathogen[ P03363] interacts with 2 human partners:{Q15466;Q9BXW6}  
24556 [Cluster 2233]GO:0010971+P biological\_process [name] positive regulation of G2/M  
transition of mitotic cell cycle [def] "Any process that increases the rate or extent  
of progression from G2 phase to M phase of the mitotic cell cycle." [GOC  
24557 Pathogen[ Q2Q067] interacts with 1 human partners:{060885}  
24558 Pathogen[ P0C214] interacts with 1 human partners:{060885}  
24559 Pathogen[ P03346] interacts with 1 human partners:{060885}

24560 Pathogen[ Q85601] interacts with 1 human partners:{060885}  
24561 Pathogen[ P14079] interacts with 1 human partners:{060885}  
24562 Pathogen[ P03383] interacts with 1 human partners:{060885}  
24563 Pathogen[ P03410] interacts with 1 human partners:{060885}  
24564 Pathogen[ P14075] interacts with 1 human partners:{060885}  
24565 Pathogen[ P0C206] interacts with 1 human partners:{060885}  
24566 Pathogen[ P03363] interacts with 1 human partners:{060885}  
24567 [Cluster 2234]GO:0035307+P biological\_process [name] positive regulation of protein dephosphorylation [def] "Any process that activates or increases the frequency, rate or extent of removal of phosphate groups from a protein." [GOC  
24568 Pathogen[ Q2Q067] interacts with 4 human partners:{Q86XL3;Q15172;Q8N9A8;Q15257}  
24569 Pathogen[ P0C214] interacts with 4 human partners:{Q8N9A8;Q15172;Q15257;Q86XL3}  
24570 Pathogen[ P03346] interacts with 4 human partners:{Q15172;Q15257;Q8N9A8;Q86XL3}  
24571 Pathogen[ Q85601] interacts with 4 human partners:{Q15172;Q86XL3;Q8N9A8;Q15257}  
24572 Pathogen[ P14079] interacts with 4 human partners:{Q15172;Q8N9A8;Q86XL3;P17405}  
24573 Pathogen[ P03383] interacts with 2 human partners:{Q15257;Q8N9A8}  
24574 Pathogen[ P03410] interacts with 5 human partners:{Q15172;Q15257;Q8N9A8;Q86XL3;P17405}  
24575 Pathogen[ P14075] interacts with 2 human partners:{Q15257;Q8N9A8}  
24576 Pathogen[ P0C206] interacts with 4 human partners:{Q86XL3;Q15172;Q15257;Q8N9A8}  
24577 Pathogen[ P03363] interacts with 4 human partners:{Q8N9A8;Q15172;Q15257;Q86XL3}  
24578 [Cluster 2235]GO:0034625+P biological\_process [name] fatty acid elongation, monounsaturated fatty acid [def] "Elongation of a fatty acid chain into which one C-C double bond has been introduced." [GOC  
24579 Pathogen[ Q2Q067] interacts with 3 human partners:{Q9H5J4;Q9BW60;Q9HB03}  
24580 Pathogen[ P0C214] interacts with 3 human partners:{Q9HB03;Q9NYP7;Q9BW60}  
24581 Pathogen[ P03346] interacts with 3 human partners:{Q9BW60;Q9H5J4;Q9HB03}  
24582 Pathogen[ Q85601] interacts with 3 human partners:{Q9BW60;Q9H5J4;Q9HB03}  
24583 Pathogen[ P14079] interacts with 3 human partners:{Q9HB03;Q9BW60;Q9H5J4}  
24584 Pathogen[ P03383] interacts with 3 human partners:{Q9BW60;Q9H5J4;Q9HB03}  
24585 Pathogen[ P03410] interacts with 3 human partners:{Q9H5J4;Q9BW60;Q9HB03}  
24586 Pathogen[ P14075] interacts with 3 human partners:{Q9H5J4;Q9BW60;Q9HB03}  
24587 Pathogen[ P0C206] interacts with 3 human partners:{Q9HB03;Q9H5J4;Q9BW60}  
24588 Pathogen[ P03363] interacts with 1 human partners:{Q9H5J4}  
24589 [Cluster 2236]GO:0090004+P biological\_process [name] positive regulation of establishment of protein localization in plasma membrane [def] "Any process that increases the frequency, rate or extent of the directed movement of a protein to a specific location in the plasma membrane." [GOC  
24590 Pathogen[ Q2Q067] interacts with 4 human partners:{P31749;Q12959;P27986;Q9BX66}  
24591 Pathogen[ P0C214] interacts with 4 human partners:{Q9BX66;Q12959;P27986;P31749}  
24592 Pathogen[ P03346] interacts with 6 human partners:{Q9BX66;P31749;Q5VV41;Q969F2;P27986;Q12959}  
24593 Pathogen[ Q85601] interacts with 4 human partners:{P31749;Q9BX66;P27986;Q12959}  
24594 Pathogen[ P14079] interacts with 2 human partners:{Q9BX66;Q5VV41}  
24595 Pathogen[ P03383] interacts with 2 human partners:{P27986;P31749}  
24596 Pathogen[ P03410] interacts with 7 human partners:{P27986;Q969F2;Q12959;P31749;Q5VV41;P33176;Q9BX66}  
24597 Pathogen[ P14075] interacts with 2 human partners:{P31749;P27986}  
24598 Pathogen[ P0C206] interacts with 5 human partners:{P31749;Q969F2;P27986;Q9BX66;Q12959}  
24599 Pathogen[ P03363] interacts with 6 human partners:{Q12959;Q9BX66;Q5VV41;P33176;P31749;P27986}  
24600 [Cluster 2237]GO:0090081+P biological\_process [name] regulation of heart induction by regulation of canonical Wnt receptor signaling pathway [def] "Any process that modulates the rate, frequency or extent of canonical Wnt receptor signaling pathway that regulates heart induction. Canonical Wnt receptor signaling pathway involved in heart induction is the series of molecular signals initiated by binding of Wnt protein to a frizzled family receptor on the surface of the target cell, followed by relaying of the signal via beta-catenin, and ending with a change in transcription of target genes." [GOC  
24601 Pathogen[ Q2Q067] interacts with 1 human partners:{Q01860}  
24602 Pathogen[ P0C214] interacts with 1 human partners:{Q01860}  
24603 Pathogen[ P03346] interacts with 1 human partners:{Q01860}  
24604 Pathogen[ Q85601] interacts with 1 human partners:{Q01860}  
24605 Pathogen[ P14079] interacts with 1 human partners:{Q01860}  
24606 Pathogen[ P03383] interacts with 1 human partners:{Q01860}  
24607 Pathogen[ P03410] interacts with 1 human partners:{Q01860}  
24608 Pathogen[ P14075] interacts with 1 human partners:{Q01860}  
24609 Pathogen[ P0C206] interacts with 1 human partners:{Q01860}  
24610 Pathogen[ P03363] interacts with 1 human partners:{Q01860}  
24611 [Cluster 2238]GO:0010040+P biological\_process [name] response to iron(II) ion [def] "Any process that results in a change in state or activity of a cell or an organism (in terms of movement, secretion, enzyme production, gene expression, etc.) as a result of an iron(II) ion stimulus." [GOC  
24612 Pathogen[ Q2Q067] interacts with 2 human partners:{P21399;P27986}  
24613 Pathogen[ P0C214] interacts with 2 human partners:{P21399;P27986}

24614 Pathogen[ P03346] interacts with 2 human partners:{P21399;P27986}  
24615 Pathogen[ Q85601] interacts with 2 human partners:{P21399;P27986}  
24616 Pathogen[ P14079] interacts with 1 human partners:{P21399}  
24617 Pathogen[ P03383] interacts with 1 human partners:{P27986}  
24618 Pathogen[ P03410] interacts with 2 human partners:{P27986;P21399}  
24619 Pathogen[ P14075] interacts with 1 human partners:{P27986}  
24620 Pathogen[ P0C206] interacts with 2 human partners:{P27986;P21399}  
24621 Pathogen[ P03363] interacts with 1 human partners:{P27986}  
24622 [Cluster 2239]GO:0071897+P biological\_process [name] DNA biosynthetic process [def] "The cellular DNA metabolic process resulting in the formation of DNA, deoxyribonucleic acid, one of the two main types of nucleic acid, consisting of a long unbranched macromolecule formed from one or two strands of linked deoxyribonucleotides, the 3'-phosphate group of each constituent deoxyribonucleotide being joined in 3',5'-phosphodiester linkage to the 5'-hydroxyl group of the deoxyribose moiety of the next one." [GOC  
24623 Pathogen[ Q2Q067] interacts with 1 human partners:{P35232}  
24624 Pathogen[ P0C214] interacts with 1 human partners:{P35232}  
24625 Pathogen[ P03346] interacts with 1 human partners:{P35232}  
24626 Pathogen[ Q85601] interacts with 1 human partners:{P35232}  
24627 Pathogen[ P14079] interacts with 1 human partners:{P35232}  
24628 Pathogen[ P03383] interacts with 1 human partners:{P35232}  
24629 Pathogen[ P03410] interacts with 1 human partners:{P35232}  
24630 Pathogen[ P14075] interacts with 1 human partners:{P35232}  
24631 Pathogen[ P0C206] interacts with 1 human partners:{P35232}  
24632 Pathogen[ P03363] interacts with 1 human partners:{P35232}  
24633 [Cluster 2240]GO:0010972+P biological\_process [name] negative regulation of G2/M transition of mitotic cell cycle [def] "Any process that decreases the rate or extent of progression from G2 phase to M phase of the mitotic cell cycle." [GOC  
24634 Pathogen[ Q2Q067] interacts with 1 human partners:{Q13642}  
24635 Pathogen[ P0C214] interacts with 1 human partners:{Q13642}  
24636 Pathogen[ P03346] interacts with 1 human partners:{Q13642}  
24637 Pathogen[ Q85601] interacts with 1 human partners:{Q13642}  
24638 Pathogen[ P14079] interacts with 1 human partners:{Q13642}  
24639 Pathogen[ P03383] interacts with 1 human partners:{Q13642}  
24640 Pathogen[ P03410] interacts with 1 human partners:{Q13642}  
24641 Pathogen[ P14075] interacts with 1 human partners:{Q13642}  
24642 Pathogen[ P0C206] interacts with 1 human partners:{Q13642}  
24643 Pathogen[ P03363] interacts with 1 human partners:{Q13642}  
24644 [Cluster 2241]GO:0006424+P biological\_process [name] glutamyl-tRNA aminoacylation [def] "The process of coupling glutamate to glutamyl-tRNA, catalyzed by glutamyl-tRNA synthetase. In tRNA aminoacylation, the amino acid is first activated by linkage to AMP and then transferred to either the 2'- or the 3'-hydroxyl group of the 3'- adenosine residue of the tRNA." [GOC  
24645 Pathogen[ Q2Q067] interacts with 1 human partners:{P07814}  
24646 Pathogen[ P0C214] interacts with 2 human partners:{P07814;Q5JPH6}  
24647 Pathogen[ P03346] interacts with 1 human partners:{P07814}  
24648 Pathogen[ Q85601] interacts with 1 human partners:{P07814}  
24649 Pathogen[ P14079] interacts with 2 human partners:{Q5JPH6;P07814}  
24650 Pathogen[ P03383] interacts with 2 human partners:{Q5JPH6;P07814}  
24651 Pathogen[ P03410] interacts with 2 human partners:{Q5JPH6;P07814}  
24652 Pathogen[ P14075] interacts with 2 human partners:{Q5JPH6;P07814}  
24653 Pathogen[ P0C206] interacts with 2 human partners:{P07814;Q5JPH6}  
24654 Pathogen[ P03363] interacts with 2 human partners:{Q5JPH6;P07814}  
24655 [Cluster 2242]GO:0016337+P biological\_process [name] cell-cell adhesion [def] "The attachment of one cell to another cell via adhesion molecules." [GOC  
24656 Pathogen[ Q2Q067] interacts with 10 human partners:{O75161;Q14160;P15924;P11831;Q12959;Q96F07;P25063;P60953;P35579;O60716}  
24657 Pathogen[ P0C214] interacts with 9 human partners:{O75161;O60716;P15924;Q96F07;P11831;P60953;P25063;Q12959;Q14160}  
24658 Pathogen[ P03346] interacts with 11 human partners:{P15924;O60716;Q96F07;P11831;P35579;P60953;O75161;Q9UI47;P25063;Q14160;Q12959}  
24659 Pathogen[ Q85601] interacts with 9 human partners:{O75161;P11831;Q96F07;P35579;P15924;O60716;Q14160;Q12959;P60953}  
24660 Pathogen[ P14079] interacts with 12 human partners:{O75161;P35579;Q9UI47;P15924;Q9HBM0;Q96GC9;P25063;O76027;Q96F07;Q9BZX4;O15259;O60716}  
24661 Pathogen[ P03383] interacts with 9 human partners:{P15924;O60716;P11831;Q14160;P60953;P25063;Q96F07;O75161;P35579}  
24662 Pathogen[ P03410] interacts with 17 human partners:{P11831;Q9HBM0;P15924;Q96GC9;O15259;Q12959;O76027;O60716;Q9BZX4;P35579;O75161;Q14160;P25063;P60953;Q9UI47;Q96F07;Q15517}  
24663 Pathogen[ P14075] interacts with 10 human partners:{P60953;Q96F07;Q14160;P11831;O75161;P35579;Q9HBM0;O60716;P25063;P15924}  
24664 Pathogen[ P0C206] interacts with 12 human partners:{O60716;Q96F07;O75161;Q9UI47;P25063;Q14160;P35579;P60953;P11831;P15924;Q9HB

M0;Q12959}

24665 Pathogen[ P03363] interacts with 11 human partners: {Q12959;O75161;Q9UI47;P35579;Q14160;Q96F07;P15924;P11831;O15259;P60953;O60716}

24666 [Cluster 2243]GO:0042035+P biological\_process [name] regulation of cytokine biosynthetic process [def] "Any process that modulates the frequency, rate or extent of the chemical reactions and pathways resulting in the formation of cytokines." [GOC

24667 Pathogen[ Q2Q067] interacts with 3 human partners: {O00425;Q9Y6M1;Q9HBT7}

24668 Pathogen[ P0C214] interacts with 4 human partners: {O00425;Q9NZI8;Q9Y6M1;Q9HBT7}

24669 Pathogen[ P03346] interacts with 4 human partners: {Q9Y6M1;O00425;Q9NZI8;Q9HBT7}

24670 Pathogen[ Q85601] interacts with 3 human partners: {Q9HBT7;Q9Y6M1;O00425}

24671 Pathogen[ P14079] interacts with 3 human partners: {Q9HBT7;Q9Y6M1;O00425}

24672 Pathogen[ P03383] interacts with 2 human partners: {Q9HBT7;O00425}

24673 Pathogen[ P03410] interacts with 3 human partners: {Q9HBT7;O00425;Q9Y6M1}

24674 Pathogen[ P14075] interacts with 2 human partners: {Q9HBT7;O00425}

24675 Pathogen[ P0C206] interacts with 3 human partners: {Q9HBT7;Q9Y6M1;O00425}

24676 Pathogen[ P03363] interacts with 4 human partners: {O00425;Q9Y6M1;Q9HBT7;Q9NZI8}

24677 [Cluster 2244]GO:0006450+P biological\_process [name] regulation of translational fidelity [def] "Any process that modulates the ability of the translational apparatus to interpret the genetic code." [GOC

24678 Pathogen[ Q2Q067] interacts with 3 human partners: {P46782;P41252;Q9P2J5}

24679 Pathogen[ P0C214] interacts with 8 human partners: {Q9NSE4;P41252;Q15031;P49588;P26640;Q5ST30;P46782;Q9P2J5}

24680 Pathogen[ P03346] interacts with 3 human partners: {P41252;P46782;Q9P2J5}

24681 Pathogen[ Q85601] interacts with 3 human partners: {Q9P2J5;P46782;P41252}

24682 Pathogen[ P14079] interacts with 9 human partners: {Q9P2J5;O43716;Q15031;Q5ST30;P46782;P41252;P26640;Q9NSE4;P49588}

24683 Pathogen[ P03383] interacts with 4 human partners: {Q9P2J5;Q15031;P46782;P41252}

24684 Pathogen[ P03410] interacts with 7 human partners: {Q9NSE4;Q5ST30;P49588;Q9P2J5;P46782;P41252;P26640}

24685 Pathogen[ P14075] interacts with 5 human partners: {P41252;P46782;Q9P2J5;Q9NSE4;Q15031}

24686 Pathogen[ P0C206] interacts with 7 human partners: {Q9NSE4;P41252;Q5ST30;P26640;P46782;Q15031;Q9P2J5}

24687 Pathogen[ P03363] interacts with 4 human partners: {P41252;P46782;Q9P2J5;Q15031}

24688 [Cluster 2245]GO:0006779+P biological\_process [name] porphyrin-containing compound biosynthetic process [def] "The chemical reactions and pathways resulting in the formation of any member of a large group of derivatives or analogs of porphyrin. Porphyrin consists of a ring of four pyrrole nuclei linked each to the next at their alpha positions through a methine group." [GOC

24689 Pathogen[ Q2Q067] interacts with 3 human partners: {P10746;P06132;P08397}

24690 Pathogen[ P0C214] interacts with 7 human partners: {P06132;P16157;Q9HA92;P10746;P08397;P36551;P22830}

24691 Pathogen[ P03346] interacts with 5 human partners: {P02549;P11277;P10746;P16157;P06132}

24692 Pathogen[ Q85601] interacts with 4 human partners: {P16157;P10746;P06132;P08397}

24693 Pathogen[ P14079] interacts with 9 human partners: {P10746;P16157;P06132;P08397;Q9HA92;P22830;P11277;P36551;P02549}

24694 Pathogen[ P03383] interacts with 2 human partners: {P06132;P08397}

24695 Pathogen[ P03410] interacts with 9 human partners: {P08397;P16157;P06132;P02549;P36551;P10746;Q9HA92;P22830;P11277}

24696 Pathogen[ P14075] interacts with 2 human partners: {P06132;P08397}

24697 Pathogen[ P0C206] interacts with 8 human partners: {P10746;Q9HA92;P36551;P16157;P22830;P11277;P08397;P06132}

24698 Pathogen[ P03363] interacts with 4 human partners: {P11277;P02549;P16157;P06132}

24699 [Cluster 2246]GO:0042790+P biological\_process [name] transcription of nuclear large rRNA transcript from RNA polymerase I promoter [def] "The synthesis of the large ribosomal RNA (rRNA) transcript which encodes several rRNAs, e.g. in mammals 28S, 18S and 5.8S, from a nuclear DNA template transcribed by RNA polymerase I." [GOC

24700 Pathogen[ Q2Q067] interacts with 1 human partners: {Q13428}

24701 Pathogen[ P0C214] interacts with 1 human partners: {Q13428}

24702 Pathogen[ P03346] interacts with 1 human partners: {Q13428}

24703 Pathogen[ Q85601] interacts with 1 human partners: {Q13428}

24704 Pathogen[ P14079] interacts with 1 human partners: {Q13428}

24705 Pathogen[ P03383] interacts with 1 human partners: {Q13428}

24706 Pathogen[ P03410] interacts with 1 human partners: {Q13428}

24707 Pathogen[ P14075] interacts with 1 human partners: {Q13428}

24708 Pathogen[ P0C206] interacts with 1 human partners: {Q13428}

24709 Pathogen[ P03363] interacts with 1 human partners: {Q13428}

24710 [Cluster 2247]GO:0001958+P biological\_process [name] endochondral ossification [def] "The formation of bone by the replacement of cartilage tissue with mineralized bone." [ISBN

24711 Pathogen[ Q2Q067] interacts with 3 human partners: {Q14814;Q15742;Q13506}

24712 Pathogen[ P0C214] interacts with 4 human partners: {Q15742;Q14814;Q13506;P35520}

24713 Pathogen[ P03346] interacts with 4 human partners: {Q14814;Q15742;Q13506;P56178}

24714 Pathogen[ Q85601] interacts with 3 human partners: {Q14814;Q13506;Q15742}



24715 Pathogen[ P14079] interacts with 4 human partners:{Q13506;Q06413;Q15742;Q14814}  
24716 Pathogen[ P03383] interacts with 3 human partners:{Q15742;Q14814;Q13506}  
24717 Pathogen[ P03410] interacts with 3 human partners:{Q14814;Q15742;Q13506}  
24718 Pathogen[ P14075] interacts with 3 human partners:{Q13506;Q15742;Q14814}  
24719 Pathogen[ P0C206] interacts with 3 human partners:{Q15742;Q14814;Q13506}  
24720 Pathogen[ P03363] interacts with 3 human partners:{Q14814;Q13506;Q15742}  
24721 [Cluster 2248]GO:0045090+P biological\_process [name] retroviral genome replication  
[def] "Any process involved in the replication of a retroviral genome. Retroviruses use  
RNA as their nucleic acid and reverse transcriptase to copy their genome into the DNA of  
the host cells chromosomes." [GOC  
24722 Pathogen[ Q2Q067] interacts with 2 human partners:{000267;Q12824}  
24723 Pathogen[ P0C214] interacts with 2 human partners:{Q12824;000267}  
24724 Pathogen[ P03346] interacts with 2 human partners:{Q12824;000267}  
24725 Pathogen[ Q85601] interacts with 2 human partners:{000267;Q12824}  
24726 Pathogen[ P14079] interacts with 2 human partners:{Q12824;000267}  
24727 Pathogen[ P03383] interacts with 2 human partners:{Q12824;000267}  
24728 Pathogen[ P03410] interacts with 2 human partners:{000267;Q12824}  
24729 Pathogen[ P14075] interacts with 2 human partners:{Q12824;000267}  
24730 Pathogen[ P0C206] interacts with 2 human partners:{Q12824;000267}  
24731 Pathogen[ P03363] interacts with 2 human partners:{000267;Q12824}  
24732 [Cluster 2249]GO:0045861+P biological\_process [name] negative regulation of  
proteolysis [def] "Any process that stops, prevents, or reduces the frequency, rate or  
extent of the hydrolysis of a peptide bond or bonds within a protein." [GOC  
24733 Pathogen[ Q2Q067] interacts with 2 human partners:{P48595;P27986}  
24734 Pathogen[ P0C214] interacts with 4 human partners:{P46379;P07093;P27986;P48595}  
24735 Pathogen[ P03346] interacts with 4 human partners:{P46379;Q96KC8;P27986;P48595}  
24736 Pathogen[ Q85601] interacts with 4 human partners:{P46379;P27986;P48595;P07093}  
24737 Pathogen[ P14079] interacts with 1 human partners:{P48595}  
24738 Pathogen[ P03383] interacts with 2 human partners:{P27986;P48595}  
24739 Pathogen[ P03410] interacts with 3 human partners:{P27986;Q9UBY8;P48595}  
24740 Pathogen[ P14075] interacts with 2 human partners:{P48595;P27986}  
24741 Pathogen[ P0C206] interacts with 3 human partners:{P27986;P48595;P46379}  
24742 Pathogen[ P03363] interacts with 3 human partners:{P46379;P48595;P27986}  
24743 [Cluster 2250]GO:0000244+P biological\_process [name] assembly of spliceosomal  
tri-snRNP [def] "The formation of a tri-snRNP complex containing U4 and U6 (or U4atac  
and U6atac) snRNAs and U5 snRNAs and associated proteins. This includes reannealing of  
U4 and U6 (or U4atac and U6atac) snRNAs released from previous rounds of splicing to  
reform the U4/U6 snRNP (or U4atac/U6atac snRNP) as well as the subsequent association of  
the U5 snRNP with the U4/U6 snRNP (or U4atac/U6atac snRNP) to form a tri-snRNP that is  
ready to reassemble into another spliceosome complex." [ISBN  
24744 Pathogen[ Q2Q067] interacts with 5 human  
partners:{075494;Q8WWY3;O95400;O94906;Q9UHI6}  
24745 Pathogen[ P0C214] interacts with 5 human  
partners:{O95400;O94906;Q9UHI6;O75494;Q8WWY3}  
24746 Pathogen[ P03346] interacts with 5 human  
partners:{O95400;O94906;Q9UHI6;Q8WWY3;O75494}  
24747 Pathogen[ Q85601] interacts with 5 human  
partners:{O75494;O94906;Q9UHI6;Q8WWY3;O95400}  
24748 Pathogen[ P14079] interacts with 5 human  
partners:{O94906;Q9UHI6;Q8WWY3;O95400;O75494}  
24749 Pathogen[ P03383] interacts with 5 human  
partners:{O75494;Q9UHI6;O95400;O94906;Q8WWY3}  
24750 Pathogen[ P03410] interacts with 5 human  
partners:{Q8WWY3;O94906;O95400;Q9UHI6;O75494}  
24751 Pathogen[ P14075] interacts with 5 human  
partners:{O95400;O75494;O94906;Q9UHI6;Q8WWY3}  
24752 Pathogen[ P0C206] interacts with 5 human  
partners:{O75494;O95400;Q8WWY3;O94906;Q9UHI6}  
24753 Pathogen[ P03363] interacts with 5 human  
partners:{O95400;Q9UHI6;Q8WWY3;O94906;O75494}  
24754 [Cluster 2251]GO:0043627+P biological\_process [name] response to estrogen stimulus  
[def] "Any process that results in a change in state or activity of a cell or an  
organism (in terms of movement, secretion, enzyme production, gene expression, etc.) as  
a result of stimulus by an estrogen, C18 steroid hormones that can stimulate the  
development of female sexual characteristics." [GOC  
24755 Pathogen[ Q2Q067] interacts with 11 human  
partners:{P24385;Q96RK1;Q8N1N5;O14686;P08727;Q99966;P25063;Q8N895;O43541;P53805;Q9UB  
L3}  
24756 Pathogen[ P0C214] interacts with 9 human  
partners:{P24385;P05121;Q99966;Q96RK1;O43541;P25063;P08727;P53805;Q8N895}  
24757 Pathogen[ P03346] interacts with 12 human  
partners:{P53805;Q99966;P24385;P08727;Q8N1N5;Q15291;Q8N895;Q9UBL3;O43541;O14686;Q96R  
K1;P25063}  
24758 Pathogen[ Q85601] interacts with 10 human  
partners:{Q96RK1;P24385;O43541;Q99966;O14686;Q8N895;Q9UBL3;P05121;P53805;P08727}  
24759 Pathogen[ P14079] interacts with 9 human

24760 partners:{Q8N895;Q9UBL3;Q99966;P53805;Q8N1N5;P25063;Q96RK1;O43541;P08727}  
Pathogen[ P03383] interacts with 8 human

24761 partners:{P08727;P25063;P53805;P24385;Q8N1N5;Q96RK1;Q8N895;O43541}  
Pathogen[ P03410] interacts with 10 human

24762 partners:{P05121;Q8N1N5;P24385;P53805;P25063;O43541;Q96RK1;Q8N895;P08727;Q99966}  
Pathogen[ P14075] interacts with 8 human

24763 partners:{P08727;O43541;Q96RK1;P53805;Q8N1N5;Q8N895;P24385;P25063}  
Pathogen[ P0C206] interacts with 12 human

24764 partners:{O43541;P53805;P08727;O14686;Q8N895;P25063;Q8N1N5;Q96RK1;Q99966;Q9UBL3;P05121;P24385}  
Pathogen[ P03363] interacts with 10 human

24765 partners:{Q15291;P53805;Q9UBL3;Q8N1N5;Q96RK1;P08727;O43541;Q8N895;P24385;O14686}  
[Cluster 2252]GO:0045404+P biological\_process [name] positive regulation of interleukin-4 biosynthetic process [def] "Any process that activates or increases the frequency, rate or extent of the chemical reactions and pathways resulting in the formation of interleukin-4." [GOC

24766 Pathogen[ Q2Q067] interacts with 1 human partners:{Q15306}  
24767 Pathogen[ P0C214] interacts with 1 human partners:{Q15306}  
24768 Pathogen[ P03346] interacts with 1 human partners:{Q15306}  
24769 Pathogen[ Q85601] interacts with 1 human partners:{Q15306}  
24770 Pathogen[ P14079] interacts with 1 human partners:{Q15306}  
24771 Pathogen[ P03383] interacts with 1 human partners:{Q15306}  
24772 Pathogen[ P03410] interacts with 1 human partners:{Q15306}  
24773 Pathogen[ P14075] interacts with 1 human partners:{Q15306}  
24774 Pathogen[ P0C206] interacts with 1 human partners:{Q15306}  
24775 Pathogen[ P03363] interacts with 1 human partners:{Q15306}

24776 [Cluster 2253]GO:2000078+P biological\_process [name] positive regulation of type B pancreatic cell development [def] "Any process that activates or increases the frequency, rate or extent of pancreatic B cell development." [GOC

24777 Pathogen[ Q2Q067] interacts with 1 human partners:{P48380}  
24778 Pathogen[ P0C214] interacts with 2 human partners:{Q92934;P48380}  
24779 Pathogen[ P03346] interacts with 2 human partners:{P48380;P78426}  
24780 Pathogen[ Q85601] interacts with 1 human partners:{P48380}  
24781 Pathogen[ P14079] interacts with 2 human partners:{P48380;Q92934}  
24782 Pathogen[ P03383] interacts with 1 human partners:{P48380}  
24783 Pathogen[ P03410] interacts with 2 human partners:{Q92934;P48380}  
24784 Pathogen[ P14075] interacts with 1 human partners:{P48380}  
24785 Pathogen[ P0C206] interacts with 2 human partners:{P48380;Q92934}  
24786 Pathogen[ P03363] interacts with 1 human partners:{P48380}

24787 [Cluster 2254]GO:0006002+P biological\_process [name] fructose 6-phosphate metabolic process [def] "The chemical reactions and pathways involving fructose 6-phosphate, also known as F6P. The D-enantiomer is an important intermediate in glycolysis, gluconeogenesis, and fructose metabolism." [ISBN

24788 Pathogen[ Q2Q067] interacts with 2 human partners:{P37837;P09467}  
24789 Pathogen[ P0C214] interacts with 2 human partners:{P37837;P09467}  
24790 Pathogen[ P03346] interacts with 2 human partners:{P09467;P37837}  
24791 Pathogen[ Q85601] interacts with 2 human partners:{P37837;P09467}  
24792 Pathogen[ P14079] interacts with 2 human partners:{P09467;P37837}  
24793 Pathogen[ P03383] interacts with 2 human partners:{P09467;P37837}  
24794 Pathogen[ P03410] interacts with 2 human partners:{P37837;P09467}  
24795 Pathogen[ P14075] interacts with 2 human partners:{P37837;P09467}  
24796 Pathogen[ P0C206] interacts with 2 human partners:{P09467;P37837}  
24797 Pathogen[ P03363] interacts with 1 human partners:{P37837}

24798 [Cluster 2255]GO:0043587+P biological\_process [name] tongue morphogenesis [def] "The process in which the anatomical structures of the tongue are generated and organized. The tongue is the movable, muscular organ on the floor of the mouth of most vertebrates, in man other mammals is the principal organ of taste, aids in the prehension of food, in swallowing, and in modifying the voice as in speech." [GOC

24799 Pathogen[ Q2Q067] interacts with 2 human partners:{P13646;P31276}  
24800 Pathogen[ P0C214] interacts with 2 human partners:{P13646;P31276}  
24801 Pathogen[ P03346] interacts with 2 human partners:{P13646;P31276}  
24802 Pathogen[ Q85601] interacts with 2 human partners:{P13646;P31276}  
24803 Pathogen[ P14079] interacts with 2 human partners:{P13646;P31276}  
24804 Pathogen[ P03383] interacts with 2 human partners:{P31276;P13646}  
24805 Pathogen[ P03410] interacts with 2 human partners:{P13646;P31276}  
24806 Pathogen[ P14075] interacts with 2 human partners:{P13646;P31276}  
24807 Pathogen[ P0C206] interacts with 2 human partners:{P13646;P31276}  
24808 Pathogen[ P03363] interacts with 2 human partners:{P31276;P13646}

24809 [Cluster 2256]GO:0031573+P biological\_process [name] intra-S DNA damage checkpoint [def] "A cell cycle checkpoint that slows DNA synthesis in response to DNA damage by the prevention of new origin firing and the stabilization of slow replication fork progression." [GOC

24810 Pathogen[ Q2Q067] interacts with 3 human partners:{Q9BVW5;Q14676;Q01831}  
24811 Pathogen[ P0C214] interacts with 3 human partners:{Q9BVW5;Q14676;Q01831}  
24812 Pathogen[ P03346] interacts with 3 human partners:{Q14676;Q01831;Q9BVW5}  
24813 Pathogen[ Q85601] interacts with 3 human partners:{Q01831;Q14676;Q9BVW5}

24814 Pathogen[ P14079] interacts with 3 human partners:{Q14676;Q01831;Q9BVW5}  
24815 Pathogen[ P03383] interacts with 3 human partners:{Q9BVW5;Q01831;Q14676}  
24816 Pathogen[ P03410] interacts with 3 human partners:{Q9BVW5;Q01831;Q14676}  
24817 Pathogen[ P14075] interacts with 3 human partners:{Q01831;Q9BVW5;Q14676}  
24818 Pathogen[ P0C206] interacts with 3 human partners:{Q9BVW5;Q14676;Q01831}  
24819 Pathogen[ P03363] interacts with 3 human partners:{Q01831;Q9BVW5;Q14676}  
24820 [Cluster 2257]GO:0045737+P biological\_process [name] positive regulation of cyclin-dependent protein kinase activity [def] "Any process that activates or increases the frequency, rate or extent of CDK activity." [GOC  
24821 Pathogen[ Q2Q067] interacts with 6 human partners:{P30281;O75832;P24385;P30279;Q5MJ70;Q8ND76}  
24822 Pathogen[ P0C214] interacts with 6 human partners:{Q8ND76;P24385;O75832;P30281;P30279;Q5MJ70}  
24823 Pathogen[ P03346] interacts with 6 human partners:{P30281;Q8ND76;P24385;P30279;Q5MJ70;O75832}  
24824 Pathogen[ Q85601] interacts with 6 human partners:{P30281;P24385;O75832;Q8ND76;P30279;Q5MJ70}  
24825 Pathogen[ P14079] interacts with 3 human partners:{Q5MJ70;O75832;Q8ND76}  
24826 Pathogen[ P03383] interacts with 6 human partners:{P24385;P30279;O75832;Q8ND76;P30281;Q5MJ70}  
24827 Pathogen[ P03410] interacts with 6 human partners:{P30279;P24385;P30281;Q5MJ70;Q8ND76;O75832}  
24828 Pathogen[ P14075] interacts with 6 human partners:{Q5MJ70;O75832;P30281;P30279;Q8ND76;P24385}  
24829 Pathogen[ P0C206] interacts with 6 human partners:{O75832;P30279;Q8ND76;Q5MJ70;P24385;P30281}  
24830 Pathogen[ P03363] interacts with 5 human partners:{P30279;Q8ND76;Q5MJ70;P24385;P30281}  
24831 [Cluster 2258]GO:0048619+P biological\_process [name] embryonic hindgut morphogenesis [def] "The process in which the anatomical structures of the hindgut are generated and organized, during the embryonic phase." [GOC  
24832 Pathogen[ Q2Q067] interacts with 2 human partners:{P36402;Q9NYF0}  
24833 Pathogen[ P0C214] interacts with 2 human partners:{P36402;Q9NYF0}  
24834 Pathogen[ P03346] interacts with 4 human partners:{P31271;P35453;P36402;Q9NYF0}  
24835 Pathogen[ Q85601] interacts with 3 human partners:{Q9NYF0;P36402;P31271}  
24836 Pathogen[ P14079] interacts with 3 human partners:{P31271;P36402;Q9NYF0}  
24837 Pathogen[ P03383] interacts with 2 human partners:{P36402;Q9NYF0}  
24838 Pathogen[ P03410] interacts with 2 human partners:{P36402;Q9NYF0}  
24839 Pathogen[ P14075] interacts with 2 human partners:{P36402;Q9NYF0}  
24840 Pathogen[ P0C206] interacts with 3 human partners:{P31271;Q9NYF0;P36402}  
24841 Pathogen[ P03363] interacts with 4 human partners:{P35453;P36402;P31271;Q9NYF0}  
24842 [Cluster 2259]GO:0071383+P biological\_process [name] cellular response to steroid hormone stimulus [def] "Any process that results in a change in state or activity of a cell (in terms of movement, secretion, enzyme production, gene expression, etc.) as a result of a steroid hormone stimulus." [GOC  
24843 Pathogen[ Q2Q067] interacts with 2 human partners:{P68036;O94763}  
24844 Pathogen[ P0C214] interacts with 2 human partners:{Q8TDB4;O94763}  
24845 Pathogen[ P03346] interacts with 3 human partners:{P68036;O94763;Q8TDB4}  
24846 Pathogen[ Q85601] interacts with 3 human partners:{Q8TDB4;P68036;O94763}  
24847 Pathogen[ P14079] interacts with 3 human partners:{P68036;O94763;Q8TDB4}  
24848 Pathogen[ P03383] interacts with 3 human partners:{Q8TDB4;O94763;P68036}  
24849 Pathogen[ P03410] interacts with 3 human partners:{O94763;P68036;Q8TDB4}  
24850 Pathogen[ P14075] interacts with 3 human partners:{P68036;O94763;Q8TDB4}  
24851 Pathogen[ P0C206] interacts with 3 human partners:{P68036;O94763;Q8TDB4}  
24852 Pathogen[ P03363] interacts with 2 human partners:{O94763;P68036}  
24853 [Cluster 2260]GO:0035094+P biological\_process [name] response to nicotine [def] "Any process that results in a change in state or activity of a cell or an organism (in terms of movement, secretion, enzyme production, gene expression, etc.) as a result of a nicotine stimulus." [CHEBI  
24854 Pathogen[ Q2Q067] interacts with 1 human partners:{Q99933}  
24855 Pathogen[ P0C214] interacts with 1 human partners:{Q99933}  
24856 Pathogen[ P03346] interacts with 2 human partners:{P78426;Q99933}  
24857 Pathogen[ Q85601] interacts with 1 human partners:{Q99933}  
24858 Pathogen[ P14079] interacts with 1 human partners:{Q99933}  
24859 Pathogen[ P03383] interacts with 1 human partners:{Q99933}  
24860 Pathogen[ P03410] interacts with 1 human partners:{Q99933}  
24861 Pathogen[ P14075] interacts with 1 human partners:{Q99933}  
24862 Pathogen[ P0C206] interacts with 1 human partners:{Q99933}  
24863 Pathogen[ P03363] interacts with 1 human partners:{Q99933}  
24864 [Cluster 2261]GO:0043488+P biological\_process [name] regulation of mRNA stability [def] "Any process that modulates the propensity of mRNA molecules to degradation. Includes processes that both stabilize and destabilize mRNAs." [GOC  
24865 Pathogen[ Q2Q067] interacts with 8 human partners:{Q14103;P27695;Q92994;Q9Y2V2;P47974;P26651;Q8NC51;Q07352}  
24866 Pathogen[ P0C214] interacts with 9 human partners:{P27695;Q9Y2V2;Q5JVF3;Q07352;Q14103;Q92994;P26651;Q8NC51;P47974}

24867 Pathogen[ P03346] interacts with 8 human partners: {Q8NC51;Q9Y2V2;Q14103;P47974;Q07352;Q92994;P27695;P26651}

24868 Pathogen[ Q85601] interacts with 8 human partners: {Q8NC51;Q92994;Q14103;Q07352;P47974;P26651;Q9Y2V2;P27695}

24869 Pathogen[ P14079] interacts with 8 human partners: {Q92994;Q14103;P47974;Q8NC51;P27695;Q5JVF3;Q9Y2V2;Q07352}

24870 Pathogen[ P03383] interacts with 7 human partners: {Q07352;Q92994;Q14103;P26651;P27695;Q9Y2V2;Q8NC51}

24871 Pathogen[ P03410] interacts with 9 human partners: {Q14103;Q92994;Q9Y2V2;P26651;Q5JVF3;P47974;P27695;Q07352;Q8NC51}

24872 Pathogen[ P14075] interacts with 7 human partners: {Q14103;P27695;P26651;Q8NC51;Q9Y2V2;Q92994;Q07352}

24873 Pathogen[ P0C206] interacts with 9 human partners: {P27695;Q14103;P26651;Q9Y2V2;Q5JVF3;Q92994;Q07352;Q8NC51;P47974}

24874 Pathogen[ P03363] interacts with 7 human partners: {Q8NC51;Q9Y2V2;Q07352;Q9BX46;Q14103;P26651;P47974}

24875 [Cluster 2262]GO:0070102+P biological\_process [name] interleukin-6-mediated signaling pathway [def] "A series of molecular events generated as a consequence of interleukin-6 binding to a cell surface receptor." [GOC]

24876 Pathogen[ Q2Q067] interacts with 2 human partners: {P40763;Q6PD62}

24877 Pathogen[ P0C214] interacts with 2 human partners: {P40763;Q6PD62}

24878 Pathogen[ P03346] interacts with 2 human partners: {Q6PD62;P40763}

24879 Pathogen[ Q85601] interacts with 2 human partners: {Q6PD62;P40763}

24880 Pathogen[ P14079] interacts with 1 human partners: {Q6PD62}

24881 Pathogen[ P03383] interacts with 1 human partners: {Q6PD62}

24882 Pathogen[ P03410] interacts with 2 human partners: {Q6PD62;P40763}

24883 Pathogen[ P14075] interacts with 1 human partners: {Q6PD62}

24884 Pathogen[ P0C206] interacts with 2 human partners: {Q6PD62;P40763}

24885 Pathogen[ P03363] interacts with 2 human partners: {Q13480;Q6PD62}

24886 [Cluster 2263]GO:0021854+P biological\_process [name] hypothalamus development [def] "The progression of the hypothalamus region of the forebrain, from its initial formation to its mature state." [GO\_REF]

24887 Pathogen[ Q2Q067] interacts with 2 human partners: {P14921;Q9H4S2}

24888 Pathogen[ P0C214] interacts with 1 human partners: {P14921}

24889 Pathogen[ P03346] interacts with 4 human partners: {Q9H4S2;P41225;P51843;P14921}

24890 Pathogen[ Q85601] interacts with 2 human partners: {P14921;Q9H4S2}

24891 Pathogen[ P14079] interacts with 2 human partners: {O14949;Q15042}

24892 Pathogen[ P03383] interacts with 1 human partners: {P14921}

24893 Pathogen[ P03410] interacts with 3 human partners: {O14949;Q15042;P14921}

24894 Pathogen[ P14075] interacts with 1 human partners: {P14921}

24895 Pathogen[ P0C206] interacts with 2 human partners: {P14921;Q9H4S2}

24896 Pathogen[ P03363] interacts with 2 human partners: {P14921;Q9H4S2}

24897 [Cluster 2264]GO:0001967+P biological\_process [name] suckling behavior [def] "Specific actions of a newborn or infant mammal that result in the derivation of nourishment from the breast." [GOC]

24898 Pathogen[ Q2Q067] interacts with 3 human partners: {A6NFD8;Q96BD5;Q9UI36}

24899 Pathogen[ P0C214] interacts with 2 human partners: {Q96BD5;Q9UI36}

24900 Pathogen[ P03346] interacts with 3 human partners: {A6NFD8;Q96BD5;Q9UI36}

24901 Pathogen[ Q85601] interacts with 3 human partners: {Q96BD5;A6NFD8;Q9UI36}

24902 Pathogen[ P14079] interacts with 3 human partners: {Q96BD5;Q9UI36;A6NFD8}

24903 Pathogen[ P03383] interacts with 2 human partners: {Q96BD5;Q9UI36}

24904 Pathogen[ P03410] interacts with 3 human partners: {Q9UI36;A6NFD8;Q96BD5}

24905 Pathogen[ P14075] interacts with 2 human partners: {Q96BD5;Q9UI36}

24906 Pathogen[ P0C206] interacts with 3 human partners: {A6NFD8;Q9UI36;Q96BD5}

24907 Pathogen[ P03363] interacts with 3 human partners: {Q96BD5;Q9UI36;A6NFD8}

24908 [Cluster 2265]GO:0008347+P biological\_process [name] glial cell migration [def] "The orderly movement of a glial cell, non-neuronal cells that provide support and nutrition, maintain homeostasis, form myelin, and participate in signal transmission in the nervous system." [GOC]

24909 Pathogen[ Q2Q067] interacts with 1 human partners: {Q99608}

24910 Pathogen[ P0C214] interacts with 1 human partners: {Q99608}

24911 Pathogen[ P03346] interacts with 1 human partners: {Q99608}

24912 Pathogen[ Q85601] interacts with 1 human partners: {Q99608}

24913 Pathogen[ P14079] interacts with 1 human partners: {Q99608}

24914 Pathogen[ P03383] interacts with 1 human partners: {Q99608}

24915 Pathogen[ P03410] interacts with 1 human partners: {Q99608}

24916 Pathogen[ P14075] interacts with 1 human partners: {Q99608}

24917 Pathogen[ P0C206] interacts with 1 human partners: {Q99608}

24918 Pathogen[ P03363] interacts with 1 human partners: {Q99608}

24919 [Cluster 2266]GO:0055082+P biological\_process [name] cellular chemical homeostasis [def] "Any biological process involved in the maintenance of an internal steady state of a chemical at the level of the cell." [GOC]

24920 Pathogen[ Q2Q067] interacts with 1 human partners: {Q8N5D0}

24921 Pathogen[ P0C214] interacts with 1 human partners: {Q8N5D0}

24922 Pathogen[ P03346] interacts with 1 human partners: {Q8N5D0}

24923 Pathogen[ Q85601] interacts with 1 human partners: {Q8N5D0}

24924 Pathogen[ P14079] interacts with 1 human partners:{Q8N5D0}  
24925 Pathogen[ P03383] interacts with 1 human partners:{Q8N5D0}  
24926 Pathogen[ P03410] interacts with 1 human partners:{Q8N5D0}  
24927 Pathogen[ P14075] interacts with 1 human partners:{Q8N5D0}  
24928 Pathogen[ P0C206] interacts with 1 human partners:{Q8N5D0}  
24929 Pathogen[ P03363] interacts with 1 human partners:{Q8N5D0}  
24930 [Cluster 2267]GO:0009786+P biological\_process [name] regulation of asymmetric cell division [def] "Any process that modulates the frequency, rate or extent of asymmetric cell division." [GOC  
24931 Pathogen[ Q2Q067] interacts with 1 human partners:{Q01860}  
24932 Pathogen[ P0C214] interacts with 1 human partners:{Q01860}  
24933 Pathogen[ P03346] interacts with 1 human partners:{Q01860}  
24934 Pathogen[ Q85601] interacts with 1 human partners:{Q01860}  
24935 Pathogen[ P14079] interacts with 1 human partners:{Q01860}  
24936 Pathogen[ P03383] interacts with 1 human partners:{Q01860}  
24937 Pathogen[ P03410] interacts with 1 human partners:{Q01860}  
24938 Pathogen[ P14075] interacts with 1 human partners:{Q01860}  
24939 Pathogen[ P0C206] interacts with 1 human partners:{Q01860}  
24940 Pathogen[ P03363] interacts with 1 human partners:{Q01860}  
24941 [Cluster 2268]GO:0031629+P biological\_process [name] synaptic vesicle fusion to presynaptic membrane [def] "Fusion of the membrane of a synaptic vesicle with its target presynaptic membrane, thereby releasing its cargo neurotransmitters into the synaptic cleft." [ISBN  
24942 Pathogen[ Q2Q067] interacts with 1 human partners:{095295}  
24943 Pathogen[ P0C214] interacts with 1 human partners:{095295}  
24944 Pathogen[ P03346] interacts with 1 human partners:{095295}  
24945 Pathogen[ Q85601] interacts with 1 human partners:{095295}  
24946 Pathogen[ P14079] interacts with 1 human partners:{095295}  
24947 Pathogen[ P03383] interacts with 1 human partners:{095295}  
24948 Pathogen[ P03410] interacts with 1 human partners:{095295}  
24949 Pathogen[ P14075] interacts with 1 human partners:{095295}  
24950 Pathogen[ P0C206] interacts with 1 human partners:{095295}  
24951 Pathogen[ P03363] interacts with 1 human partners:{095295}  
24952 [Cluster 2269]GO:0045859+P biological\_process [name] regulation of protein kinase activity [def] "Any process that modulates the frequency, rate or extent of protein kinase activity." [GOC  
24953 Pathogen[ Q2Q067] interacts with 6 human partners:{Q6NXT1;P67870;Q9UNN5;P60953;Q8ND04;Q9H2G4}  
24954 Pathogen[ P0C214] interacts with 6 human partners:{P60953;Q9UNN5;Q8ND04;Q9H2G4;Q6NXT1;P67870}  
24955 Pathogen[ P03346] interacts with 7 human partners:{Q9H2G4;P60953;Q8ND04;Q9UNN5;P67870;Q9H8V3;Q6NXT1}  
24956 Pathogen[ Q85601] interacts with 6 human partners:{Q6NXT1;Q9UNN5;Q8ND04;P60953;Q9H2G4;P67870}  
24957 Pathogen[ P14079] interacts with 6 human partners:{Q6NXT1;Q9UNN5;Q9H2G4;Q8ND04;Q9H8V3;P67870}  
24958 Pathogen[ P03383] interacts with 5 human partners:{Q8ND04;P60953;Q9UNN5;P67870;Q9H2G4}  
24959 Pathogen[ P03410] interacts with 7 human partners:{Q9UNN5;Q6NXT1;Q8ND04;P60953;Q9H8V3;P67870;Q9H2G4}  
24960 Pathogen[ P14075] interacts with 5 human partners:{P60953;Q9H2G4;Q9UNN5;P67870;Q8ND04}  
24961 Pathogen[ P0C206] interacts with 7 human partners:{Q9UNN5;Q6NXT1;Q8ND04;P67870;Q9H8V3;Q9H2G4;P60953}  
24962 Pathogen[ P03363] interacts with 6 human partners:{Q9UNN5;Q8ND04;Q6NXT1;Q9H2G4;P67870;P60953}  
24963 [Cluster 2270]GO:0003256+P biological\_process [name] regulation of transcription from RNA polymerase II promoter involved in myocardial precursor cell differentiation [def] "Any process that modulates the frequency, rate or extent of transcription from an RNA polymerase II promoter that contributes to the differentiation of a myocardial precursor cell." [GOC  
24964 Pathogen[ Q2Q067] interacts with 1 human partners:{Q06330}  
24965 Pathogen[ P0C214] interacts with 1 human partners:{Q06330}  
24966 Pathogen[ P03346] interacts with 1 human partners:{Q06330}  
24967 Pathogen[ Q85601] interacts with 1 human partners:{Q06330}  
24968 Pathogen[ P14079] interacts with 1 human partners:{Q06330}  
24969 Pathogen[ P03383] interacts with 1 human partners:{Q06330}  
24970 Pathogen[ P03410] interacts with 1 human partners:{Q06330}  
24971 Pathogen[ P14075] interacts with 1 human partners:{Q06330}  
24972 Pathogen[ P0C206] interacts with 1 human partners:{Q06330}  
24973 Pathogen[ P03363] interacts with 1 human partners:{Q06330}  
24974 [Cluster 2271]GO:0071300+P biological\_process [name] cellular response to retinoic acid [def] "Any process that results in a change in state or activity of a cell (in terms of movement, secretion, enzyme production, gene expression, etc.) as a result of a retinoic acid stimulus." [GOC  
24975 Pathogen[ Q2Q067] interacts with 7 human

24976 partners:{Q13573;Q8IZD2;P13646;P28702;Q6IQ32;P10914;P13682}  
Pathogen[ P0C214] interacts with 6 human

24977 partners:{Q6IQ32;Q13573;P13646;P10914;P13682;Q8IZD2}  
Pathogen[ P03346] interacts with 7 human

24978 partners:{P13646;P28702;P10914;Q6IQ32;P13682;Q13573;Q8IZD2}  
Pathogen[ Q85601] interacts with 7 human

24979 partners:{P13646;P13682;Q13573;P28702;P10914;Q6IQ32;Q8IZD2}  
Pathogen[ P14079] interacts with 7 human

24980 partners:{P13646;Q13573;Q7Z7C7;P28702;Q6IQ32;P13682;P10914}  
Pathogen[ P03383] interacts with 6 human

24981 partners:{Q13573;P10914;Q6IQ32;P28702;P13646;P13682}  
Pathogen[ P03410] interacts with 7 human

24982 partners:{P13646;P13682;Q6IQ32;Q7Z7C7;P10914;P28702;Q13573}  
Pathogen[ P14075] interacts with 6 human

24983 partners:{Q13573;P13646;Q6IQ32;P28702;P10914;Q7Z7C7}  
Pathogen[ P0C206] interacts with 8 human

24984 partners:{P10914;P13682;Q7Z7C7;Q13573;Q6IQ32;P28702;P13646;Q8IZD2}  
Pathogen[ P03363] interacts with 6 human

24985 partners:{P13682;P28702;P10914;Q13573;Q6IQ32;P13646}  
[Cluster 2272]GO:2001178+P biological\_process [name] positive regulation of mediator complex assembly [def] "Any process that activates or increases the frequency, rate or extent of mediator complex assembly." [GOC

24986 Pathogen[ Q2Q067] interacts with 1 human partners:{Q71SY5}  
24987 Pathogen[ P0C214] interacts with 1 human partners:{Q71SY5}  
24988 Pathogen[ P03346] interacts with 1 human partners:{Q71SY5}  
24989 Pathogen[ Q85601] interacts with 1 human partners:{Q71SY5}  
24990 Pathogen[ P14079] interacts with 1 human partners:{Q71SY5}  
24991 Pathogen[ P03383] interacts with 1 human partners:{Q71SY5}  
24992 Pathogen[ P03410] interacts with 1 human partners:{Q71SY5}  
24993 Pathogen[ P14075] interacts with 1 human partners:{Q71SY5}  
24994 Pathogen[ P0C206] interacts with 1 human partners:{Q71SY5}  
24995 Pathogen[ P03363] interacts with 1 human partners:{Q71SY5}

24996 [Cluster 2273]GO:0007638+P biological\_process [name] mechanosensory behavior [def] "Behavior that is dependent upon the sensation of a mechanical stimulus." [GOC

24997 Pathogen[ Q2Q067] interacts with 2 human partners:{Q99684;P50549}  
24998 Pathogen[ P0C214] interacts with 2 human partners:{Q99684;P50549}  
24999 Pathogen[ P03346] interacts with 2 human partners:{P50549;Q99684}  
25000 Pathogen[ Q85601] interacts with 2 human partners:{P50549;Q99684}  
25001 Pathogen[ P14079] interacts with 2 human partners:{Q99684;P50549}  
25002 Pathogen[ P03383] interacts with 2 human partners:{P50549;Q99684}  
25003 Pathogen[ P03410] interacts with 2 human partners:{Q99684;P50549}  
25004 Pathogen[ P14075] interacts with 2 human partners:{Q99684;P50549}  
25005 Pathogen[ P0C206] interacts with 2 human partners:{P50549;Q99684}  
25006 Pathogen[ P03363] interacts with 2 human partners:{Q99684;P50549}

25007 [Cluster 2274]GO:0051262+P biological\_process [name] protein tetramerization [def] "The formation of a protein tetramer, a macromolecular structure consisting of four noncovalently associated identical or nonidentical subunits." [GOC

25008 Pathogen[ Q2Q067] interacts with 6 human  
partners:{Q8N684;O15350;Q16630;P34896;O43809;Q9NTM9}

25009 Pathogen[ P0C214] interacts with 8 human  
partners:{O15350;Q8N684;Q16630;O43809;Q9NTM9;P34896;P48163;P30566}

25010 Pathogen[ P03346] interacts with 7 human  
partners:{Q9NTM9;Q86WG5;Q8N684;O15350;O43809;P50542;Q16630}

25011 Pathogen[ Q85601] interacts with 4 human partners:{Q8N684;P34896;O15350;O43809}

25012 Pathogen[ P14079] interacts with 9 human  
partners:{O43809;Q9NTM9;Q15070;O15350;P50542;Q8N684;Q16630;Q86WG5;P34896}

25013 Pathogen[ P03383] interacts with 4 human partners:{P34896;Q8N684;O15350;O43809}

25014 Pathogen[ P03410] interacts with 10 human  
partners:{Q9NTM9;O43809;P30566;P50542;Q8N684;O15350;Q15070;Q16630;P34896;Q86WG5}

25015 Pathogen[ P14075] interacts with 6 human  
partners:{O43809;P34896;Q9NTM9;Q15070;O15350;Q8N684}

25016 Pathogen[ P0C206] interacts with 8 human  
partners:{Q8N684;O43809;P50542;Q15070;Q16630;P34896;O15350;Q9NTM9}

25017 Pathogen[ P03363] interacts with 5 human  
partners:{Q16630;Q8N684;O43809;Q86WG5;Q9NTM9}

25018 [Cluster 2275]GO:0043032+P biological\_process [name] positive regulation of macrophage activation [def] "Any process that stimulates, induces or increases the rate of macrophage activation." [GOC

25019 Pathogen[ Q2Q067] interacts with 1 human partners:{Q8NFX5}  
25020 Pathogen[ P0C214] interacts with 2 human partners:{P10809;Q8NFX5}  
25021 Pathogen[ P03346] interacts with 1 human partners:{Q8NFX5}  
25022 Pathogen[ Q85601] interacts with 1 human partners:{Q8NFX5}  
25023 Pathogen[ P14079] interacts with 2 human partners:{Q8NFX5;O95760}  
25024 Pathogen[ P03383] interacts with 1 human partners:{Q8NFX5}  
25025 Pathogen[ P03410] interacts with 2 human partners:{Q8NFX5;O95760}  
25026 Pathogen[ P14075] interacts with 1 human partners:{Q8NFX5}

25027 Pathogen[ P0C206] interacts with 1 human partners:{Q8NFZ5}

25028 Pathogen[ P03363] interacts with 1 human partners:{Q8NFZ5}

25029 [Cluster 2276]GO:0003144+P biological\_process [name] embryonic heart tube formation [def] "The process that gives rise to the embryonic heart tube. This process pertains to the initial formation of a structure from unspecified parts. The embryonic heart tube is an epithelial tube that will give rise to the mature heart." [GOC

25030 Pathogen[ Q2Q067] interacts with 1 human partners:{096004}

25031 Pathogen[ P0C214] interacts with 1 human partners:{096004}

25032 Pathogen[ P03346] interacts with 1 human partners:{096004}

25033 Pathogen[ Q85601] interacts with 1 human partners:{096004}

25034 Pathogen[ P14079] interacts with 1 human partners:{096004}

25035 Pathogen[ P03383] interacts with 1 human partners:{096004}

25036 Pathogen[ P03410] interacts with 1 human partners:{096004}

25037 Pathogen[ P14075] interacts with 1 human partners:{096004}

25038 Pathogen[ P0C206] interacts with 1 human partners:{096004}

25039 Pathogen[ P03363] interacts with 1 human partners:{096004}

25040 [Cluster 2277]GO:0034122+P biological\_process [name] negative regulation of toll-like receptor signaling pathway [def] "Any process that stops, prevents, or reduces the frequency, rate, or extent of toll-like receptor signaling pathway." [GOC

25041 Pathogen[ Q2Q067] interacts with 3 human partners:{Q8WUQ7;Q15306;Q9UBC1}

25042 Pathogen[ P0C214] interacts with 2 human partners:{Q9UBC1;Q15306}

25043 Pathogen[ P03346] interacts with 3 human partners:{Q15306;Q9UBC1;Q8WUQ7}

25044 Pathogen[ Q85601] interacts with 2 human partners:{Q15306;Q9UBC1}

25045 Pathogen[ P14079] interacts with 3 human partners:{Q9UBC1;Q15306;Q8WUQ7}

25046 Pathogen[ P03383] interacts with 3 human partners:{Q9UBC1;Q15306;Q8WUQ7}

25047 Pathogen[ P03410] interacts with 3 human partners:{Q8WUQ7;Q15306;Q9UBC1}

25048 Pathogen[ P14075] interacts with 3 human partners:{Q9UBC1;Q15306;Q8WUQ7}

25049 Pathogen[ P0C206] interacts with 3 human partners:{Q9UBC1;Q15306;Q8WUQ7}

25050 Pathogen[ P03363] interacts with 3 human partners:{Q15306;Q8WUQ7;Q9UBC1}

25051 [Cluster 2278]GO:0035360+P biological\_process [name] positive regulation of peroxisome proliferator activated receptor signaling pathway [def] "Any process that activates or increases the frequency, rate or extent of the peroxisome proliferator activated receptor signaling pathway." [GOC

25052 Pathogen[ Q2Q067] interacts with 1 human partners:{Q76L83}

25053 Pathogen[ P0C214] interacts with 1 human partners:{Q76L83}

25054 Pathogen[ P03346] interacts with 1 human partners:{Q76L83}

25055 Pathogen[ Q85601] interacts with 1 human partners:{Q76L83}

25056 Pathogen[ P14079] interacts with 1 human partners:{Q76L83}

25057 Pathogen[ P03383] interacts with 1 human partners:{Q76L83}

25058 Pathogen[ P03410] interacts with 1 human partners:{Q76L83}

25059 Pathogen[ P14075] interacts with 1 human partners:{Q76L83}

25060 Pathogen[ P0C206] interacts with 1 human partners:{Q76L83}

25061 Pathogen[ P03363] interacts with 1 human partners:{Q76L83}

25062 [Cluster 2279]GO:0001942+P biological\_process [name] hair follicle development [def] "The process whose specific outcome is the progression of the hair follicle over time, from its formation to the mature structure. A hair follicle is a tube-like opening in the epidermis where the hair shaft develops and into which the sebaceous glands open." [GOC

25063 Pathogen[ Q2Q067] interacts with 8 human partners:{Q9NSB2;Q04206;Q92754;P31276;Q43679;Q9H4B6;Q86U70;Q9Y651}

25064 Pathogen[ P0C214] interacts with 9 human partners:{Q9NSB2;Q04206;Q92754;Q9H4B6;Q86U70;Q43679;P49588;Q9Y651;P31276}

25065 Pathogen[ P03346] interacts with 10 human partners:{Q86U70;P31276;Q04206;Q92754;Q9BT04;Q9NSB2;Q43679;P35713;Q9H4B6;Q9Y651}

25066 Pathogen[ Q85601] interacts with 9 human partners:{Q92754;Q86U70;Q9Y651;Q04206;Q43679;P31276;Q9BT04;Q9H4B6;Q9NSB2}

25067 Pathogen[ P14079] interacts with 9 human partners:{Q43679;Q86U70;P31276;Q9H4B6;Q92754;Q8WWZ3;P49588;Q9NSB2;Q9BT04}

25068 Pathogen[ P03383] interacts with 8 human partners:{Q9NSB2;Q86U70;P31276;Q43679;Q92754;Q04206;Q9BT04;Q9H4B6}

25069 Pathogen[ P03410] interacts with 9 human partners:{Q04206;P31276;P49588;Q43679;Q9BT04;Q86U70;Q9H4B6;Q9NSB2;Q92754}

25070 Pathogen[ P14075] interacts with 8 human partners:{Q86U70;Q04206;Q9NSB2;Q9BT04;Q92754;Q9H4B6;Q43679;P31276}

25071 Pathogen[ P0C206] interacts with 9 human partners:{Q43679;Q9NSB2;Q9BT04;Q92754;Q04206;Q9H4B6;Q86U70;P31276;Q9Y651}

25072 Pathogen[ P03363] interacts with 9 human partners:{Q86U70;Q04206;Q43679;Q9BT04;Q9NSB2;P31276;Q9H4B6;Q9Y651;Q92754}

25073 [Cluster 2280]GO:0045879+P biological\_process [name] negative regulation of smoothed signaling pathway [def] "Any process that stops, prevents, or reduces the frequency, rate or extent of smoothed signaling." [GOC

25074 Pathogen[ Q2Q067] interacts with 4 human partners:{P06400;Q9Y297;Q9NSC2;Q9UMX1}

25075 Pathogen[ P0C214] interacts with 5 human partners:{Q9Y297;Q9NSC2;P07093;Q9UMX1;P06400}

25076 Pathogen[ P03346] interacts with 7 human partners:{Q9BZE0;Q693B1;Q9BXA9;P06400;Q9NSC2;Q9Y297;Q9UMX1}

25077 Pathogen[ Q85601] interacts with 4 human partners:{P06400;Q9NSC2;P07093;Q9UMX1}  
25078 Pathogen[ P14079] interacts with 4 human partners:{Q9UMX1;P54826;Q9BZE0;Q9NSC2}  
25079 Pathogen[ P03383] interacts with 3 human partners:{P06400;Q9NSC2;Q9UMX1}  
25080 Pathogen[ P03410] interacts with 4 human partners:{P06400;P54826;Q9NSC2;Q9UMX1}  
25081 Pathogen[ P14075] interacts with 4 human partners:{Q9NSC2;P06400;Q9UMX1;P54826}  
25082 Pathogen[ POC206] interacts with 6 human partners:{Q9BZE0;Q9UMX1;Q9NSC2;Q693B1;P54826;P06400}  
25083 Pathogen[ P03363] interacts with 4 human partners:{Q9UMX1;P06400;Q9BZE0;Q693B1}  
25084 [Cluster 2281]GO:0050868+P biological\_process [name] negative regulation of T cell activation [def] "Any process that stops, prevents, or reduces the frequency, rate or extent of T cell activation." [GOC  
25085 Pathogen[ Q2Q067] interacts with 1 human partners:{Q96FA3}  
25086 Pathogen[ POC214] interacts with 1 human partners:{Q96FA3}  
25087 Pathogen[ P03346] interacts with 3 human partners:{Q8IWW1;Q96FA3;Q9Y2R2}  
25088 Pathogen[ Q85601] interacts with 1 human partners:{Q96FA3}  
25089 Pathogen[ P14079] interacts with 2 human partners:{Q96FA3;Q8IWW1}  
25090 Pathogen[ P03383] interacts with 1 human partners:{Q96FA3}  
25091 Pathogen[ P03410] interacts with 2 human partners:{Q96FA3;Q8IWW1}  
25092 Pathogen[ P14075] interacts with 2 human partners:{Q8IWW1;Q96FA3}  
25093 Pathogen[ POC206] interacts with 3 human partners:{Q8IWW1;Q9Y2R2;Q96FA3}  
25094 Pathogen[ P03363] interacts with 2 human partners:{Q9Y2R2;Q96FA3}  
25095 [Cluster 2282]GO:0020027+P biological\_process [name] hemoglobin metabolic process [def] "The chemical reactions and pathways involving hemoglobin, including its uptake and utilization." [GOC  
25096 Pathogen[ Q2Q067] interacts with 1 human partners:{Q9NZD4}  
25097 Pathogen[ POC214] interacts with 1 human partners:{Q9NZD4}  
25098 Pathogen[ P03346] interacts with 2 human partners:{Q9NZD4;P16452}  
25099 Pathogen[ Q85601] interacts with 1 human partners:{Q9NZD4}  
25100 Pathogen[ P14079] interacts with 3 human partners:{P16452;P35611;Q9NZD4}  
25101 Pathogen[ P03383] interacts with 1 human partners:{Q9NZD4}  
25102 Pathogen[ P03410] interacts with 3 human partners:{P16452;P35611;Q9NZD4}  
25103 Pathogen[ P14075] interacts with 1 human partners:{Q9NZD4}  
25104 Pathogen[ POC206] interacts with 2 human partners:{P16452;Q9NZD4}  
25105 Pathogen[ P03363] interacts with 2 human partners:{Q9NZD4;P16452}  
25106 [Cluster 2283]GO:0006972+P biological\_process [name] hyperosmotic response [def] "Any process that results in a change in state or activity of a cell or an organism (in terms of movement, secretion, enzyme production, gene expression, etc.) as a result of detection of, or exposure to, a hyperosmotic environment, i.e. an environment with a higher concentration of solutes than the organism or cell." [GOC  
25107 Pathogen[ Q2Q067] interacts with 1 human partners:{P63000}  
25108 Pathogen[ POC214] interacts with 1 human partners:{P63000}  
25109 Pathogen[ P03346] interacts with 2 human partners:{P50135;P63000}  
25110 Pathogen[ Q85601] interacts with 1 human partners:{P63000}  
25111 Pathogen[ P14079] interacts with 1 human partners:{P50135}  
25112 Pathogen[ P03383] interacts with 1 human partners:{P63000}  
25113 Pathogen[ P03410] interacts with 2 human partners:{P63000;P50135}  
25114 Pathogen[ P14075] interacts with 1 human partners:{P63000}  
25115 Pathogen[ POC206] interacts with 2 human partners:{P63000;P50135}  
25116 Pathogen[ P03363] interacts with 2 human partners:{P50135;P63000}  
25117 [Cluster 2284]GO:0060712+P biological\_process [name] spongiotrophoblast layer development [def] "The process in which the spongiotrophoblast layer of the placenta progresses from its formation to its mature state." [GOC  
25118 Pathogen[ Q2Q067] interacts with 3 human partners:{Q99966;Q9P243;Q9NR09}  
25119 Pathogen[ POC214] interacts with 3 human partners:{Q99966;Q9NR09;Q9P243}  
25120 Pathogen[ P03346] interacts with 5 human partners:{Q99966;Q9P243;Q99929;Q9NR09;Q8N3Y1}  
25121 Pathogen[ Q85601] interacts with 4 human partners:{Q99966;Q8N3Y1;Q9NR09;Q9P243}  
25122 Pathogen[ P14079] interacts with 4 human partners:{Q8N3Y1;Q99966;Q9NR09;Q9P243}  
25123 Pathogen[ P03383] interacts with 1 human partners:{Q9NR09}  
25124 Pathogen[ P03410] interacts with 4 human partners:{Q9P243;Q9NR09;Q8N3Y1;Q99966}  
25125 Pathogen[ P14075] interacts with 1 human partners:{Q9NR09}  
25126 Pathogen[ POC206] interacts with 4 human partners:{Q9P243;Q8N3Y1;Q9NR09;Q99966}  
25127 Pathogen[ P03363] interacts with 4 human partners:{Q99929;Q9P243;Q9NR09;Q8N3Y1}  
25128 [Cluster 2285]GO:0007166+P biological\_process [name] cell surface receptor linked signaling pathway [def] "A series of molecular signals initiated by activation of a receptor on the surface of a cell. The pathway begins with binding of an extracellular ligand to a cell surface receptor, or for receptors that signal in the absence of a ligand, by ligand-withdrawal or the activity of a constitutively active receptor. The pathway ends with regulation of a downstream cellular process, e.g. transcription." [GOC  
25129 Pathogen[ Q2Q067] interacts with 11 human partners:{Q99933;Q9Y6J0;Q95551;Q00978;Q99873;Q07666;P37198;Q86Y01;Q13490;P22681;Q9H0E9}  
25130 Pathogen[ POC214] interacts with 13 human partners:{P22681;Q95551;Q9UI08;Q13490;Q99873;Q00978;P37198;Q07666;Q99933;Q9H0E9;Q86Y01;Q99704;Q9Y6J0}  
25131 Pathogen[ P03346] interacts with 15 human



partners:{Q99873;O95551;Q13489;Q9UI08;Q00978;P37198;Q53HI1;Q9H0E9;Q07666;Q9Y6J0;Q99704;Q13490;P22681;Q86Y01;Q99933}

25132 Pathogen[ Q85601] interacts with 10 human partners:{P22681;Q13490;Q07666;Q9Y6J0;Q9H0E9;Q00978;Q99933;Q99873;Q86Y01;O95551}

25133 Pathogen[ P14079] interacts with 18 human partners:{P04083;P13164;Q99704;Q99873;Q9H0E9;Q86Y01;Q07666;Q99933;P37198;O14836;Q53HI1;O95551;Q00978;Q9Y6Y9;Q99836;Q9Y6J0;Q13490;Q9UI08}

25134 Pathogen[ P03383] interacts with 9 human partners:{Q13490;Q00978;Q9H0E9;Q99873;Q07666;Q99933;O95551;P37198;Q86Y01}

25135 Pathogen[ P03410] interacts with 15 human partners:{Q99933;Q9Y6J0;Q9UI08;P20963;Q13490;Q07666;Q53HI1;O95551;Q86Y01;Q99704;O14836;Q9Y6Y9;Q9H0E9;Q00978;Q99873}

25136 Pathogen[ P14075] interacts with 9 human partners:{Q99933;Q07666;Q00978;Q13490;Q99873;P37198;Q53HI1;Q86Y01;O95551}

25137 Pathogen[ P0C206] interacts with 14 human partners:{Q86Y01;Q99873;Q99933;Q9UI08;Q07666;Q9Y6J0;P22681;Q53HI1;O95551;Q13489;Q99704;Q00978;Q9H0E9;Q13490}

25138 Pathogen[ P03363] interacts with 14 human partners:{P22681;Q9Y6J0;Q86Y01;Q13490;Q07666;Q99704;Q9UI08;Q13489;Q00978;O95551;P37198;Q9H0E9;Q99933;Q99873}

25139 [Cluster 2286]GO:0009411+P biological\_process [name] response to UV [def] "Any process that results in a change in state or activity of a cell or an organism (in terms of movement, secretion, enzyme production, gene expression, etc.) as a result of an ultraviolet radiation (UV light) stimulus. Ultraviolet radiation is electromagnetic radiation with a wavelength in the range of 10 to 380 nanometers." [GOC

25140 Pathogen[ Q2Q067] interacts with 22 human partners:{Q2YD98;Q86UA6;Q92889;Q9NZJ0;Q9UBZ9;Q13794;P63146;Q15004;O00255;Q03468;P38936;Q13216;Q9BVW5;P22415;P49459;Q9BZF9;Q92466;Q9H040;Q13888;O60921;P28715;P23025}

25141 Pathogen[ P0C214] interacts with 26 human partners:{Q9H040;Q92889;P23025;Q9UBZ9;Q9BVW5;P49459;P38936;Q13794;Q13216;O60921;P28715;Q9NZJ0;P42574;Q15004;Q13888;O95155;Q9BZF9;Q9UIV8;Q14011;Q86UA6;P22415;Q92466;P55210;Q03468;P63146;O00255}

25142 Pathogen[ P03346] interacts with 31 human partners:{O60921;Q9NZJ0;Q9NS91;P28715;P55273;O95155;Q14011;Q15004;Q9UBZ9;Q13888;P42574;P49459;Q03468;O00255;P63146;Q9H040;Q86UA6;Q13216;Q2YD98;Q92889;P55211;P55210;P23025;Q9BZF9;P38936;O94782;Q92466;Q9BVW5;Q13794;Q96M02;P22415}

25143 Pathogen[ Q85601] interacts with 27 human partners:{Q96M02;P23025;P55273;P63146;Q15004;Q9H040;Q13888;Q13216;Q86UA6;Q9BZF9;Q9NZJ0;O95155;Q92889;P28715;P22415;Q03468;Q9UBZ9;O60921;O00255;P49459;P38936;Q92466;P19447;Q13794;P55210;Q9BVW5;Q9NS91}

25144 Pathogen[ P14079] interacts with 29 human partners:{P28715;Q9H040;Q9UBZ9;Q13216;P23025;P55273;Q96M02;P45983;Q13888;P55210;P38936;P49459;Q86UA6;Q13794;Q92889;Q9BZF9;Q14011;Q03468;Q9NZJ0;Q92466;Q15004;P52701;Q2YD98;O00255;P63146;O60921;P19447;Q9BVW5;P22415}

25145 Pathogen[ P03383] interacts with 19 human partners:{Q86UA6;Q9BVW5;Q9NZJ0;Q13216;Q13888;Q9BZF9;Q15004;O60921;Q9H040;Q03468;P23025;O00255;Q9UBZ9;P49459;P63146;Q13794;Q92466;Q2YD98;P22415}

25146 Pathogen[ P03410] interacts with 28 human partners:{Q96M02;P23025;Q9H040;Q9BVW5;Q86UA6;P55273;P49459;Q92889;Q15004;Q13794;Q03468;P28715;Q92466;Q9UBZ9;P52701;P38936;Q2YD98;P19447;P63146;P22415;O60921;Q14011;Q13216;Q13888;Q9BZF9;O00255;P55210;Q9NZJ0}

25147 Pathogen[ P14075] interacts with 19 human partners:{Q9UBZ9;P23025;P49459;Q13216;Q9H040;Q9BVW5;Q03468;O00255;Q2YD98;Q13794;O60921;Q9BZF9;Q86UA6;P63146;P22415;Q92466;Q9NZJ0;Q15004;Q13888}

25148 Pathogen[ P0C206] interacts with 30 human partners:{Q2YD98;Q96M02;P28715;P52701;O00255;Q14011;Q03468;Q9NS91;O95155;Q13216;P19447;P22415;Q13888;Q9BVW5;P49459;Q92889;P55273;P38936;O60921;P42574;Q9UBZ9;Q9NZJ0;Q92466;Q9BZF9;Q9H040;P55210;Q15004;P23025;Q13794;P63146}

25149 Pathogen[ P03363] interacts with 24 human partners:{P49459;Q13888;Q13794;O95155;Q2YD98;Q92889;P23025;Q96M02;P63146;Q86UA6;Q9BZF9;Q9BVW5;Q15004;Q9H040;Q14011;P22415;Q92466;Q03468;O60921;P55210;Q13216;Q9UBZ9;Q9NZJ0;Q9NS91}

25150 [Cluster 2287]GO:0072384+P biological\_process [name] organelle transport along microtubule [def] "The directed movement of an organelle along a microtubule, mediated by motor proteins. This process begins with the attachment of an organelle to a microtubule, and ends when the organelle reaches its final destination." [GOC

25151 Pathogen[ Q2Q067] interacts with 2 human partners:{P60953;Q9Y678}

25152 Pathogen[ P0C214] interacts with 2 human partners:{P60953;Q9Y678}

25153 Pathogen[ P03346] interacts with 2 human partners:{Q9Y678;P60953}

25154 Pathogen[ Q85601] interacts with 2 human partners:{Q9Y678;P60953}

25155 Pathogen[ P14079] interacts with 1 human partners:{Q9Y678}

25156 Pathogen[ P03383] interacts with 2 human partners:{Q9Y678;P60953}

25157 Pathogen[ P03410] interacts with 2 human partners:{Q9Y678;P60953}

25158 Pathogen[ P14075] interacts with 2 human partners:{P60953;Q9Y678}

25159 Pathogen[ P0C206] interacts with 2 human partners:{Q9Y678;P60953}

25160 Pathogen[ P03363] interacts with 2 human partners:{Q9Y678;P60953}

25161 [Cluster 2288]GO:0060017+P biological\_process [name] parathyroid gland development  
[def] "The process whose specific outcome is the progression of the parathyroid gland over time, from its formation to the mature structure. The parathyroid gland is an organ specialised for secretion of parathyroid hormone." [GOC  
25162 Pathogen[ Q2Q067] interacts with 1 human partners:{043365}  
25163 Pathogen[ P0C214] interacts with 1 human partners:{043365}  
25164 Pathogen[ P03346] interacts with 4 human partners:{075603;P15863;043365;P46109}  
25165 Pathogen[ Q85601] interacts with 1 human partners:{043365}  
25166 Pathogen[ P14079] interacts with 2 human partners:{P46109;043365}  
25167 Pathogen[ P03383] interacts with 1 human partners:{043365}  
25168 Pathogen[ P03410] interacts with 2 human partners:{P46109;043365}  
25169 Pathogen[ P14075] interacts with 1 human partners:{043365}  
25170 Pathogen[ P0C206] interacts with 1 human partners:{043365}  
25171 Pathogen[ P03363] interacts with 2 human partners:{043365;P46109}  
25172 [Cluster 2289]GO:0060213+P biological\_process [name] positive regulation of nuclear-transcribed mRNA poly(A) tail shortening [def] "Any process that increases the frequency, rate or extent of poly(A) tail shortening of a nuclear-transcribed mRNA. Poly(A) tail shortening is the decrease in length of the poly(A) tail of an mRNA from full length to an oligo(A) length." [GOC  
25173 Pathogen[ Q2Q067] interacts with 2 human partners:{P26651;P78543}  
25174 Pathogen[ P0C214] interacts with 2 human partners:{P78543;P26651}  
25175 Pathogen[ P03346] interacts with 2 human partners:{P26651;P78543}  
25176 Pathogen[ Q85601] interacts with 2 human partners:{P26651;P78543}  
25177 Pathogen[ P14079] interacts with 1 human partners:{P78543}  
25178 Pathogen[ P03383] interacts with 2 human partners:{P78543;P26651}  
25179 Pathogen[ P03410] interacts with 2 human partners:{P26651;P78543}  
25180 Pathogen[ P14075] interacts with 2 human partners:{P26651;P78543}  
25181 Pathogen[ P0C206] interacts with 2 human partners:{P26651;P78543}  
25182 Pathogen[ P03363] interacts with 2 human partners:{P78543;P26651}  
25183 [Cluster 2290]GO:0031397+P biological\_process [name] negative regulation of protein ubiquitination [def] "Any process that stops, prevents, or reduces the frequency, rate or extent of the addition of ubiquitin groups to a protein." [GOC  
25184 Pathogen[ Q2Q067] interacts with 7 human  
partners:{Q9BZE4;Q04323;O15105;Q9UK41;O94874;O75113;Q9H1Y0}  
25185 Pathogen[ P0C214] interacts with 7 human  
partners:{Q9UK41;O94874;O15105;Q04323;Q9H1Y0;O75113;Q9BZE4}  
25186 Pathogen[ P03346] interacts with 8 human  
partners:{Q06945;Q9BZE4;Q9UK41;O15105;Q04323;O75113;Q9H1Y0;O94874}  
25187 Pathogen[ Q85601] interacts with 7 human  
partners:{Q9BZE4;Q9UK41;Q04323;Q9H1Y0;O75113;O15105;O94874}  
25188 Pathogen[ P14079] interacts with 8 human  
partners:{O94874;Q9H1Y0;Q9BZE4;Q9UL15;Q8N300;O15105;Q04323;O75113}  
25189 Pathogen[ P03383] interacts with 7 human  
partners:{Q9BZE4;Q04323;Q9H1Y0;O15105;Q9UK41;O75113;O94874}  
25190 Pathogen[ P03410] interacts with 8 human  
partners:{Q9H1Y0;Q04323;Q9UL15;O15105;O75113;O94874;Q8N300;Q9BZE4}  
25191 Pathogen[ P14075] interacts with 7 human  
partners:{O94874;Q9H1Y0;Q9UK41;Q04323;O15105;Q9BZE4;O75113}  
25192 Pathogen[ P0C206] interacts with 8 human  
partners:{Q04323;Q9UK41;O15105;O75113;Q9H1Y0;O94874;Q9BZE4;Q8N300}  
25193 Pathogen[ P03363] interacts with 7 human  
partners:{Q04323;Q9BZE4;O15105;O75113;Q9UK41;O94874;Q9H1Y0}  
25194 [Cluster 2291]GO:0002360+P biological\_process [name] T cell lineage commitment  
[def] "The process in which a lymphoid progenitor cell becomes committed to becoming any type of T cell." [GOC  
25195 Pathogen[ Q2Q067] interacts with 1 human partners:{P55895}  
25196 Pathogen[ P0C214] interacts with 1 human partners:{P55895}  
25197 Pathogen[ P03346] interacts with 1 human partners:{P55895}  
25198 Pathogen[ Q85601] interacts with 1 human partners:{P55895}  
25199 Pathogen[ P14079] interacts with 1 human partners:{P13232}  
25200 Pathogen[ P03383] interacts with 1 human partners:{P55895}  
25201 Pathogen[ P03410] interacts with 2 human partners:{P55895;P13232}  
25202 Pathogen[ P14075] interacts with 1 human partners:{P55895}  
25203 Pathogen[ P0C206] interacts with 1 human partners:{P55895}  
25204 Pathogen[ P03363] interacts with 1 human partners:{P55895}  
25205 [Cluster 2292]GO:0009447+P biological\_process [name] putrescine catabolic process  
[def] "The chemical reactions and pathways resulting in the breakdown of putrescine, 1,4-diaminobutane\_ putrescine is the metabolic precursor of spermidine and spermine." [GOC  
25206 Pathogen[ Q2Q067] interacts with 1 human partners:{P21673}  
25207 Pathogen[ P0C214] interacts with 1 human partners:{P21673}  
25208 Pathogen[ P03346] interacts with 1 human partners:{P21673}  
25209 Pathogen[ Q85601] interacts with 1 human partners:{P21673}  
25210 Pathogen[ P14079] interacts with 1 human partners:{P21673}  
25211 Pathogen[ P03383] interacts with 1 human partners:{P21673}  
25212 Pathogen[ P03410] interacts with 1 human partners:{P21673}

25213 Pathogen[ P14075] interacts with 1 human partners:{P21673}

25214 Pathogen[ POC206] interacts with 1 human partners:{P21673}

25215 Pathogen[ P03363] interacts with 1 human partners:{P21673}

25216 [Cluster 2293]GO:0009913+P biological\_process [name] epidermal cell differentiation [def] "The process in which a relatively unspecialized cell acquires specialized features of an epidermal cell, any of the cells making up the epidermis." [GOC

25217 Pathogen[ Q2Q067] interacts with 3 human partners:{P08151;Q13547;Q92769}

25218 Pathogen[ POC214] interacts with 3 human partners:{Q13547;Q92769;P08151}

25219 Pathogen[ P03346] interacts with 3 human partners:{Q92769;Q13547;P08151}

25220 Pathogen[ Q85601] interacts with 3 human partners:{P08151;Q92769;Q13547}

25221 Pathogen[ P14079] interacts with 2 human partners:{P08151;Q92769}

25222 Pathogen[ P03383] interacts with 2 human partners:{Q92769;Q13547}

25223 Pathogen[ P03410] interacts with 2 human partners:{Q92769;Q13547}

25224 Pathogen[ P14075] interacts with 2 human partners:{Q13547;Q92769}

25225 Pathogen[ POC206] interacts with 3 human partners:{Q92769;Q13547;P08151}

25226 Pathogen[ P03363] interacts with 2 human partners:{P08151;Q13547}

25227 [Cluster 2294]GO:0055010+P biological\_process [name] ventricular cardiac muscle tissue morphogenesis [def] "The process in which the anatomical structures of cardiac ventricle muscle is generated and organized." [GOC

25228 Pathogen[ Q2Q067] interacts with 3 human partners:{O96004;O15105;P12883}

25229 Pathogen[ POC214] interacts with 6 human partners:{Q8WV60;O15105;P19429;P12883;O96004;P13533}

25230 Pathogen[ P03346] interacts with 4 human partners:{O15105;O96004;P63316;P10916}

25231 Pathogen[ Q85601] interacts with 5 human partners:{P13533;Q8WV60;O96004;P12883;O15105}

25232 Pathogen[ P14079] interacts with 7 human partners:{P19429;O96004;P10916;P19237;Q8WV60;P12883;O15105}

25233 Pathogen[ P03383] interacts with 3 human partners:{O96004;O15105;P12883}

25234 Pathogen[ P03410] interacts with 8 human partners:{P10916;O96004;P19429;Q8WV60;P12883;O15105;P63316;P13533}

25235 Pathogen[ P14075] interacts with 2 human partners:{O96004;O15105}

25236 Pathogen[ POC206] interacts with 6 human partners:{Q8WV60;P13533;P19429;O96004;O15105;P12883}

25237 Pathogen[ P03363] interacts with 4 human partners:{O15105;O96004;P19429;P10916}

25238 [Cluster 2295]GO:0040020+P biological\_process [name] regulation of meiosis [def] "Any process that modulates the frequency, rate or extent of meiosis, the process in which the nucleus of a diploid cell divides twice forming four haploid cells, one or more of which usually function as gametes." [GOC

25239 Pathogen[ Q2Q067] interacts with 4 human partners:{P27797;Q12834;Q9UM11;Q9UKT4}

25240 Pathogen[ POC214] interacts with 4 human partners:{Q12834;P27797;Q9UM11;Q9UKT4}

25241 Pathogen[ P03346] interacts with 4 human partners:{Q9UM11;Q12834;Q9UKT4;P27797}

25242 Pathogen[ Q85601] interacts with 5 human partners:{Q9UKT4;P27797;Q12834;Q9UM11;Q4G163}

25243 Pathogen[ P14079] interacts with 3 human partners:{Q9UKT4;Q9UM11;Q4G163}

25244 Pathogen[ P03383] interacts with 4 human partners:{Q9UKT4;Q12834;Q9UM11;P27797}

25245 Pathogen[ P03410] interacts with 5 human partners:{Q9UKT4;Q4G163;Q9UM11;Q12834;P27797}

25246 Pathogen[ P14075] interacts with 4 human partners:{Q9UKT4;Q9UM11;P27797;Q12834}

25247 Pathogen[ POC206] interacts with 5 human partners:{P27797;Q9UKT4;Q9UM11;Q4G163;Q12834}

25248 Pathogen[ P03363] interacts with 4 human partners:{Q9UM11;P27797;Q9UKT4;Q12834}

25249 [Cluster 2296]GO:0033138+P biological\_process [name] positive regulation of peptidyl-serine phosphorylation [def] "Any process that activates or increases the frequency, rate or extent of the phosphorylation of peptidyl-serine." [GOC

25250 Pathogen[ Q2Q067] interacts with 5 human partners:{P31749;Q8WWQ0;Q9UI95;P60953;O95429}

25251 Pathogen[ POC214] interacts with 5 human partners:{P60953;Q9UI95;Q8WWQ0;O95429;P31749}

25252 Pathogen[ P03346] interacts with 6 human partners:{P60953;Q9UI95;P31749;O60519;Q8WWQ0;O95429}

25253 Pathogen[ Q85601] interacts with 5 human partners:{P31749;Q9UI95;Q8WWQ0;P60953;O95429}

25254 Pathogen[ P14079] interacts with 5 human partners:{P31751;P20809;O43597;O95429;Q8WWQ0}

25255 Pathogen[ P03383] interacts with 5 human partners:{Q9UI95;P31749;P60953;Q8WWQ0;O95429}

25256 Pathogen[ P03410] interacts with 7 human partners:{Q9UI95;O43597;P20809;P31749;Q8WWQ0;O95429;P60953}

25257 Pathogen[ P14075] interacts with 6 human partners:{P60953;Q8WWQ0;Q9UI95;P31749;P20809;O95429}

25258 Pathogen[ POC206] interacts with 7 human partners:{P31749;Q8WWQ0;O95429;P20809;O43597;P60953;Q9UI95}

25259 Pathogen[ P03363] interacts with 5 human partners:{Q8WWQ0;P31749;Q9UI95;O95429;P60953}

25260 [Cluster 2297]GO:0007423+P biological\_process [name] sensory organ development [def] "The process whose specific outcome is the progression of sensory organs over

time, from its formation to the mature structure." [GOC

25261 Pathogen[ Q2Q067] interacts with 1 human partners:{Q9Y5Q3}

25262 Pathogen[ P0C214] interacts with 1 human partners:{Q9Y5Q3}

25263 Pathogen[ P03346] interacts with 3 human partners:{P41225;Q9Y5Q3;Q92481}

25264 Pathogen[ Q85601] interacts with 1 human partners:{Q9Y5Q3}

25265 Pathogen[ P14079] interacts with 1 human partners:{Q9Y5Q3}

25266 Pathogen[ P03383] interacts with 1 human partners:{Q9Y5Q3}

25267 Pathogen[ P03410] interacts with 1 human partners:{Q9Y5Q3}

25268 Pathogen[ P14075] interacts with 1 human partners:{Q9Y5Q3}

25269 Pathogen[ P0C206] interacts with 1 human partners:{Q9Y5Q3}

25270 Pathogen[ P03363] interacts with 1 human partners:{Q9Y5Q3}

25271 [Cluster 2298]GO:0006139+P biological\_process [name] nucleobase-containing compound metabolic process [def] "Any cellular metabolic process involving nucleobases, nucleosides, nucleotides and nucleic acids." [GOC

25272 Pathogen[ Q2Q067] interacts with 8 human partners:{Q9Y6K5;Q8IZH2;P33316;Q7KZ85;P04818;Q9Y535;P51580;Q14194}

25273 Pathogen[ P0C214] interacts with 19 human partners:{Q05932;P04818;P33316;Q7KZ85;O95299;Q9Y6K5;P51580;P29728;Q14194;Q8IZH2;Q16831;Q9Y535;Q13126;Q9HCE5;P17812;Q9Y2T3;P31939;Q9Y3B8;Q9P1U0}

25274 Pathogen[ P03346] interacts with 11 human partners:{Q9HCE5;Q7KZ85;P51580;Q8IZH2;Q86U44;Q9Y535;Q14194;P84090;Q9Y6K5;Q9P1U0;P33316}

25275 Pathogen[ Q85601] interacts with 8 human partners:{Q9P1U0;Q14194;Q9Y535;P33316;Q8IZH2;Q9Y6K5;Q7KZ85;Q9HCE5}

25276 Pathogen[ P14079] interacts with 26 human partners:{Q9Y3B8;P29728;P17812;P31939;Q16831;Q9UKK9;Q9Y2T3;P33316;Q9C093;Q9HCE5;Q86U44;Q7KZ85;Q8IZH2;Q9P1U0;Q9Y6K5;O60256;O95299;Q14194;P84090;Q8N3J2;Q96FC9;Q14558;P51580;P04818;Q05932;Q9Y535}

25277 Pathogen[ P03383] interacts with 5 human partners:{Q9Y535;Q9Y6K5;P33316;P84090;Q7KZ85}

25278 Pathogen[ P03410] interacts with 27 human partners:{Q9Y3B8;Q9HCE5;P29728;P17812;O95299;Q8N3J2;Q16831;Q7KZ85;Q9UKK9;Q8NHP7;P84090;Q9Y535;Q9Y2T3;P33316;Q8IZH2;P04818;Q14558;Q9P1U0;P31939;O60256;Q9Y6K5;Q9C093;Q96FC9;Q14194;Q86U44;Q05932;P51580}

25279 Pathogen[ P14075] interacts with 6 human partners:{Q7KZ85;Q9Y535;Q9Y6K5;P51580;P33316;P84090}

25280 Pathogen[ P0C206] interacts with 17 human partners:{P33316;Q16831;Q9P1U0;Q8IZH2;Q9Y6K5;P29728;P31939;Q9Y535;P51580;Q9Y3B8;Q7KZ85;Q9HCE5;P04818;Q14194;P84090;Q9BX63;Q05932}

25281 Pathogen[ P03363] interacts with 11 human partners:{Q9Y6K5;Q9BX63;Q9Y535;P51580;P33316;Q14194;Q86U44;Q7KZ85;Q9HCE5;Q8N3J2;Q8IZH2}

25282 [Cluster 2299]GO:0046985+P biological\_process [name] positive regulation of hemoglobin biosynthetic process [def] "Any process that activates or increases the frequency, rate or extent of the chemical reactions and pathways resulting in the formation of hemoglobin, an oxygen carrying, conjugated protein containing four heme groups and globin." [GOC

25283 Pathogen[ Q2Q067] interacts with 1 human partners:{Q86U70}

25284 Pathogen[ P0C214] interacts with 1 human partners:{Q86U70}

25285 Pathogen[ P03346] interacts with 1 human partners:{Q86U70}

25286 Pathogen[ Q85601] interacts with 1 human partners:{Q86U70}

25287 Pathogen[ P14079] interacts with 1 human partners:{Q86U70}

25288 Pathogen[ P03383] interacts with 1 human partners:{Q86U70}

25289 Pathogen[ P03410] interacts with 1 human partners:{Q86U70}

25290 Pathogen[ P14075] interacts with 1 human partners:{Q86U70}

25291 Pathogen[ P0C206] interacts with 1 human partners:{Q86U70}

25292 Pathogen[ P03363] interacts with 1 human partners:{Q86U70}

25293 [Cluster 2300]GO:0036245+P

25294 Pathogen[ Q2Q067] interacts with 2 human partners:{Q96C86;Q9UHB4}

25295 Pathogen[ P0C214] interacts with 2 human partners:{Q96C86;Q9UHB4}

25296 Pathogen[ P03346] interacts with 2 human partners:{Q96C86;Q9UHB4}

25297 Pathogen[ Q85601] interacts with 2 human partners:{Q9UHB4;Q96C86}

25298 Pathogen[ P14079] interacts with 2 human partners:{Q9UHB4;Q96C86}

25299 Pathogen[ P03383] interacts with 2 human partners:{Q9UHB4;Q96C86}

25300 Pathogen[ P03410] interacts with 2 human partners:{Q9UHB4;Q96C86}

25301 Pathogen[ P14075] interacts with 2 human partners:{Q9UHB4;Q96C86}

25302 Pathogen[ P0C206] interacts with 2 human partners:{Q96C86;Q9UHB4}

25303 Pathogen[ P03363] interacts with 2 human partners:{Q9UHB4;Q96C86}

25304 [Cluster 2301]GO:0060992+P biological\_process [name] response to fungicide [def] "Any process that results in a change in state or activity of a cell or an organism (in terms of movement, secretion, enzyme production, gene expression, etc.) as a result of a fungicide stimulus. Fungicides are chemicals used to kill fungi." [GOC

25305 Pathogen[ Q2Q067] interacts with 1 human partners:{P06132}

25306 Pathogen[ P0C214] interacts with 1 human partners:{P06132}

25307 Pathogen[ P03346] interacts with 1 human partners:{P06132}

25308 Pathogen[ Q85601] interacts with 1 human partners:{P06132}

25309 Pathogen[ P14079] interacts with 1 human partners:{P06132}

25310 Pathogen[ P03383] interacts with 1 human partners:{P06132}

25311 Pathogen[ P03410] interacts with 1 human partners:{P06132}

25312 Pathogen[ P14075] interacts with 1 human partners:{P06132}

25313 Pathogen[ P0C206] interacts with 1 human partners:{P06132}

25314 Pathogen[ P03363] interacts with 1 human partners:{P06132}

25315 [Cluster 2302]GO:0009785+P biological\_process [name] blue light signaling pathway [def] "The series of molecular signals initiated upon sensing of blue light by photoreceptor molecule, at a wavelength between 400nm and 470nm." [GOC

25316 Pathogen[ Q2Q067] interacts with 1 human partners:{Q16526}

25317 Pathogen[ P0C214] interacts with 2 human partners:{Q49AN0;Q16526}

25318 Pathogen[ P03346] interacts with 2 human partners:{Q49AN0;Q16526}

25319 Pathogen[ Q85601] interacts with 2 human partners:{Q49AN0;Q16526}

25320 Pathogen[ P14079] interacts with 2 human partners:{Q16526;Q49AN0}

25321 Pathogen[ P03383] interacts with 1 human partners:{Q16526}

25322 Pathogen[ P03410] interacts with 2 human partners:{Q16526;Q49AN0}

25323 Pathogen[ P14075] interacts with 1 human partners:{Q16526}

25324 Pathogen[ P0C206] interacts with 2 human partners:{Q16526;Q49AN0}

25325 Pathogen[ P03363] interacts with 2 human partners:{Q49AN0;Q16526}

25326 [Cluster 2303]GO:0051039+P biological\_process [name] positive regulation of transcription during meiosis [def] "Any process that activates or increases the frequency, rate or extent of transcription during meiosis." [GOC

25327 Pathogen[ Q2Q067] interacts with 1 human partners:{Q58F21}

25328 Pathogen[ P0C214] interacts with 1 human partners:{Q58F21}

25329 Pathogen[ P03346] interacts with 1 human partners:{Q58F21}

25330 Pathogen[ Q85601] interacts with 1 human partners:{Q58F21}

25331 Pathogen[ P14079] interacts with 1 human partners:{Q58F21}

25332 Pathogen[ P03383] interacts with 1 human partners:{Q58F21}

25333 Pathogen[ P03410] interacts with 1 human partners:{Q58F21}

25334 Pathogen[ P14075] interacts with 1 human partners:{Q58F21}

25335 Pathogen[ P0C206] interacts with 1 human partners:{Q58F21}

25336 Pathogen[ P03363] interacts with 1 human partners:{Q58F21}

25337 [Cluster 2304]GO:0000389+P biological\_process [name] nuclear mRNA 3'-splice site recognition [def] "Recognition of the intron 3'-splice site by components of the assembling U2- or U12-type spliceosome." [GOC

25338 Pathogen[ Q2Q067] interacts with 5 human partners:{O95391;Q15459;Q15637;Q12874;Q15428}

25339 Pathogen[ P0C214] interacts with 5 human partners:{Q15637;Q15428;Q15459;Q12874;O95391}

25340 Pathogen[ P03346] interacts with 5 human partners:{Q12874;O95391;Q15637;Q15459;Q15428}

25341 Pathogen[ Q85601] interacts with 4 human partners:{Q15637;O95391;Q15459;Q12874}

25342 Pathogen[ P14079] interacts with 5 human partners:{Q15637;Q12874;Q15459;Q15428;O95391}

25343 Pathogen[ P03383] interacts with 4 human partners:{Q15459;Q12874;Q15637;O95391}

25344 Pathogen[ P03410] interacts with 5 human partners:{Q15637;Q15428;Q15459;Q12874;O95391}

25345 Pathogen[ P14075] interacts with 5 human partners:{O95391;Q15459;Q15428;Q12874;Q15637}

25346 Pathogen[ P0C206] interacts with 5 human partners:{Q15637;Q12874;O95391;Q15459;Q15428}

25347 Pathogen[ P03363] interacts with 5 human partners:{O95391;Q15459;Q12874;Q15637;Q15428}

25348 [Cluster 2305]GO:0014902+P biological\_process [name] myotube differentiation [def] "The process in which a relatively unspecialized cell acquires specialized features of a myotube cell. Myotube differentiation starts with myoblast fusion and the appearance of specific cell markers (this is the cell development step). Then individual myotubes can fuse to form bigger myotubes and start to contract. Myotubes are multinucleated cells that are formed when proliferating myoblasts exit the cell cycle, differentiate and fuse." [GOC

25349 Pathogen[ Q2Q067] interacts with 2 human partners:{P12755;Q9UMQ3}

25350 Pathogen[ P0C214] interacts with 2 human partners:{P12755;Q9UMQ3}

25351 Pathogen[ P03346] interacts with 2 human partners:{Q9P2K5;Q9UMQ3}

25352 Pathogen[ Q85601] interacts with 3 human partners:{Q9P2K5;P12755;Q9UMQ3}

25353 Pathogen[ P14079] interacts with 3 human partners:{P12755;Q06413;Q9UMQ3}

25354 Pathogen[ P03383] interacts with 1 human partners:{Q9UMQ3}

25355 Pathogen[ P03410] interacts with 3 human partners:{P12755;Q9UMQ3;Q9P2K5}

25356 Pathogen[ P14075] interacts with 1 human partners:{Q9UMQ3}

25357 Pathogen[ P0C206] interacts with 3 human partners:{Q9UMQ3;P12755;Q9P2K5}

25358 Pathogen[ P03363] interacts with 2 human partners:{Q9P2K5;Q9UMQ3}

25359 [Cluster 2306]GO:0070059+P biological\_process [name] apoptosis in response to endoplasmic reticulum stress [def] "Apoptosis that occurs in response to a stimulus indicating endoplasmic reticulum (ER) stress. ER stress usually results from the accumulation of unfolded or misfolded proteins in the ER lumen." [GOC

25360 Pathogen[ Q2Q067] interacts with 6 human partners:{Q9BXH1;P35638;Q9BUX1;Q96RU7;O95831;P18848}

25361 Pathogen[ P0C214] interacts with 6 human partners: {P46379;Q9BXH1;P18848;Q9BUX1;Q96RU7;P35638}

25362 Pathogen[ P03346] interacts with 7 human partners: {Q9BUX1;P35638;P18848;P46379;Q95831;Q96RU7;Q9BXH1}

25363 Pathogen[ Q85601] interacts with 7 human partners: {Q9BXH1;Q95831;Q9BUX1;P18848;P46379;Q96RU7;P35638}

25364 Pathogen[ P14079] interacts with 5 human partners: {Q9BXH1;Q95831;P35638;Q96RU7;Q9BUX1}

25365 Pathogen[ P03383] interacts with 6 human partners: {Q9BUX1;Q95831;P35638;Q96RU7;P18848;Q9BXH1}

25366 Pathogen[ P03410] interacts with 6 human partners: {P35638;Q9BXH1;P18848;Q9BUX1;Q95831;Q96RU7}

25367 Pathogen[ P14075] interacts with 6 human partners: {P35638;Q95831;Q9BXH1;P18848;Q9BUX1;Q96RU7}

25368 Pathogen[ P0C206] interacts with 7 human partners: {Q9BUX1;Q9BXH1;Q96RU7;Q95831;P46379;P18848;P35638}

25369 Pathogen[ P03363] interacts with 6 human partners: {P46379;P18848;Q9BUX1;P35638;Q9BXH1;Q95831}

25370 [Cluster 2307]GO:0000209+P biological\_process [name] protein polyubiquitination [def] "Addition of multiple ubiquitin groups to a protein, forming a ubiquitin chain." [ISBN

25371 Pathogen[ Q2Q067] interacts with 82 human partners: {Q95376;Q99460;Q96J02;Q75832;P48556;P40306;P55036;Q13356;O00231;O00233;Q9H2K2;P62837;P51665;Q15386;P19474;O60260;P28072;P49427;Q9NZJ0;A5LHX3;Q13200;P25787;Q6ZNA4;Q06323;Q6VVB1;Q7Z6Z7;P51965;Q8N726;P28065;O14818;P61077;P63146;Q9Y297;Q86Y13;Q8NE65;Q14997;P60900;Q9UL46;P61289;P51668;P28062;Q96EP1;Q9UNM6;P25788;Q13233;Q92530;P25786;O60291;Q16401;Q5VTR2;Q96FA3;O00232;Q13309;Q15819;Q13216;P28074;P25789;P0CG47;Q95271;P20618;Q9UNE7;Q14139;P0CG48;P49459;P28070;P28066;P68036;Q99436;Q8TAA3;P62987;Q92466;O43242;Q9BVN2;Q13404;P49721;P49720;Q13490;Q9UMS4;Q13867;Q8NEZ5;Q9UKT5;P62979}

25372 Pathogen[ P0C214] interacts with 85 human partners: {Q14997;P51665;Q96J02;P25789;P55036;P19474;P28062;A5LHX3;Q13490;P28065;Q13309;P49427;O14818;Q13867;O43242;Q96FA3;P49459;Q13404;P48556;P40306;Q8N726;Q13200;Q9Y297;O00232;P51965;Q9UMS4;P61077;Q13216;Q9HCE7;Q99460;P28066;O75832;Q15819;Q13233;P49720;Q95071;P28074;Q14139;Q13356;P0CG48;Q9UL46;Q15386;Q95376;Q9NZJ0;P25788;Q9UNM6;O00231;Q06323;P25786;P28072;Q9H2K2;Q6ZNA4;Q8TAA3;P62987;Q9H4P4;O60291;Q99436;Q9BVN2;P0CG47;P25787;Q86Y13;Q7Z6Z7;Q95155;O60260;P35998;P60900;O00233;P51668;Q92466;Q95271;P62979;Q5VTR2;Q9UNE7;Q92530;Q8NE65;Q15008;P28070;P63146;Q6VVB1;P20618;P49721;Q96EP1;Q16401;P17980;Q9UKT5}

25373 Pathogen[ P03346] interacts with 87 human partners: {Q9NZJ0;P25787;Q96J02;P28070;P25789;P55036;P68036;Q99460;Q9UL46;Q5VTR2;Q95155;Q95376;P62987;P28072;P49427;P25788;Q8NEZ5;Q9BYM8;P28074;P49721;O14818;Q8NE65;Q99436;Q9UMS4;P0CG48;Q16401;Q9H4P4;A5LHX3;P28062;Q15386;P49459;P20618;O00232;P51668;P61077;Q96FA3;Q13404;O75832;O00233;Q14139;Q9H2K2;Q96EP0;P51965;Q13309;P63146;P49720;P28065;Q9UKT5;Q9UNE7;P60900;P25786;O00231;P62837;Q13233;Q6ZNA4;Q13356;Q13216;P61289;Q6VVB1;P62979;P28066;Q9UNM6;O60291;Q13867;O60260;Q8TAA3;P0CG47;Q95271;P19474;Q14997;Q13490;Q13200;P48556;Q9BVN2;P51665;Q92466;Q06323;Q95071;Q8N726;Q9Y297;Q92530;Q7Z6Z7;O43242;P40306;Q86Y13;Q96EP1;Q15819}

25374 Pathogen[ Q85601] interacts with 80 human partners: {Q14139;P28066;Q9UNM6;Q96J02;P60900;Q13309;P55036;Q13490;P63146;P25787;P61289;P49427;P25788;Q13216;O75832;Q9UMS4;Q9BVN2;Q9NZJ0;P0CG48;Q15386;Q95155;P51668;Q13867;P68036;P61077;Q96FA3;Q13404;P25789;O60291;O00233;Q9H2K2;P20618;Q8N726;P40306;P51965;P49720;P28062;P49721;P25786;P28072;Q13200;Q13356;P49459;P28065;Q6VVB1;Q8NE65;P62979;Q99436;P28070;Q95376;O60260;Q5VTR2;Q8TAA3;P62837;Q9UL46;Q99460;O00231;P0CG47;Q6ZNA4;Q7Z6Z7;P48556;P28074;Q92530;Q13233;P62987;Q96EP1;Q9H4P4;A5LHX3;P19474;Q92466;Q95271;Q95071;Q06323;Q9UKT5;Q9UNE7;O14818;Q16401;Q86Y13;Q8NEZ5;Q15819}

25375 Pathogen[ P14079] interacts with 78 human partners: {P28065;Q99436;O60260;P62333;Q9UKT5;P48556;P51965;P0CG48;Q9BVN2;P68036;Q13309;Q95271;Q15819;P40306;Q13404;P55036;P28074;O00232;Q96EP0;P49720;O00487;P25787;Q6ZNA4;O75832;Q8N726;P29144;A5LHX3;Q9H2K2;Q13216;P62979;O00233;P35998;P61077;P61289;P62987;Q96FA3;P51665;P20618;Q8TAA3;Q14997;P51668;Q9UMS4;Q13356;P28062;P60900;P19474;Q5VTR2;Q9UNM6;Q13867;P49459;Q99460;Q9BYM8;O14818;P49721;Q92530;Q96J02;Q14139;P49427;Q06323;Q8NEZ5;P62191;P62837;Q9NZJ0;Q92466;Q15008;P43686;O43242;P25788;O00231;P28066;Q9UL46;P0CG47;Q8NE65;P63146;Q16401;P17980;P28072;Q13490}

25376 Pathogen[ P03383] interacts with 69 human partners: {P19474;P55036;P62987;Q9NZJ0;Q13216;Q13233;Q13356;Q14139;P51965;P25789;P60900;P49427;P40306;O00233;Q13490;P49721;Q06323;Q6ZNA4;Q14997;P20618;P61077;O75832;O60260;Q15819;Q13404;Q9UKT5;Q13867;Q95376;Q9UL46;Q9UNM6;P25786;Q99460;P62837;P28072;Q8NE65;Q13200;P28065;P28066;Q5VTR2;Q16401;P62979;O00231;P0CG47;Q96FA3;P68036;Q13309;P49459;P28074;Q92530;P63146;P49720;Q8TAA3;P61289;Q96EP1;Q92466;P28062;Q95271;Q8NEZ5;P48556;O14818;Q99436;P28070;Q9UMS4;P51668;Q9BVN2;Q8N726;P25787;P25788}

25377 Pathogen[ P03410] interacts with 76 human partners: {Q9BVN2;P28070;P55036;Q6ZNA4;P0CG48;P25786;Q15008;Q16401;Q8N726;P49427;P60900;Q14997;P35998;P51965;Q96FA3;Q99460;O00233;Q13490;O00232;Q13867;P49459;Q9UKT5;Q8TAA3;P48556;P49721;Q5VTR2;O60260;P68036;Q13233;A5LHX3;P62979;Q92466;Q99436;Q15819;Q13356;P40306;Q06323;Q9UNE7;Q13200;P25787;Q13309;Q8NEZ5;Q95271;P28062;P51665;P63146;Q8NE65;O14818;P51668;O00231;Q9UNM6;Q13216;P25789;P49720;P62987;Q9UMS4;Q14139;O60291;P280

72;Q9H2K2;Q13404;P25788;P28066;P28065;O43242;Q96EP1;P0CG47;P17980;O75832;P20618;P61077;P62837;Q9UL46;P28074;P61289;Q9NZJ0}

25378 Pathogen[ P14075] interacts with 67 human partners: {Q5VTR2;Q15819;P55036;P25788;P28066;P68036;Q06323;O75832;P62837;Q8TAA3;P60900;P49427;O00233;Q9UL46;Q9BVN2;P49720;P49459;Q14139;P51965;Q13216;Q13200;P48556;Q16401;P28070;P61077;P49721;O00231;Q92530;Q9UKT5;P0CG48;P62979;Q6ZNA4;P28062;Q13490;P28074;P28065;Q96FA3;P19474;P25786;O14818;P62987;Q13309;Q8NEZ5;P28072;Q9UMS4;Q13867;Q14997;P0CG47;P25787;O95376;Q13404;P20618;P63146;Q9UNM6;Q92466;Q9NZJ0;O95271;Q13233;P61289;P40306;P51668;O60260;Q99436;Q8NE65;Q8N726;Q96EP1;P25789}

25379 Pathogen[ P0C206] interacts with 86 human partners: {O95271;P61289;Q99436;P28062;Q9UNM6;Q9UMS4;P0CG48;O60291;O75832;Q9H4P4;P40306;P28065;Q14997;P55036;Q8N726;O95376;Q13309;P25786;P25788;P29144;P68036;Q96EP1;P25787;Q6ZNA4;Q06323;P49720;Q96J02;O00232;P60900;P62837;O95155;Q8NE65;O43242;P49427;Q5VTR2;Q13216;Q13233;A5LHX3;Q15386;P25789;Q13867;P51965;Q96EP0;P20618;Q9UNE7;Q14139;Q13200;Q8TAA3;P28070;P49459;O60260;Q99460;P62979;P28066;Q15819;O14818;Q9NZJ0;P0CG47;Q13356;P28072;Q96FA3;P28074;Q92530;P61077;P49721;P49721;Q92466;Q7Z6Z7;P62987;Q13404;Q9BYM8;Q8NEZ5;Q9UL46;Q9UKT5;O95071;P51668;Q9H2K2;Q6VVB1;O00233;P48556;Q86Y13;Q16401;O00231;P63146;P19474;Q9BVN2;Q13490}

25380 Pathogen[ P03363] interacts with 46 human partners: {Q14139;O95376;Q13490;Q13309;Q96EP1;P51965;Q8NE65;P49459;O60291;Q8NEZ5;Q92530;Q96EP0;Q86Y13;Q13356;O95155;Q5VTR2;P61289;Q6VVB1;P63146;P49427;Q9H2K2;Q6ZNA4;Q7Z6Z7;Q13867;Q96FA3;Q9UKT5;Q9UNE7;P19474;O95271;P62987;O95071;Q9H4P4;Q15386;P51668;Q92466;Q9BVN2;Q8N726;P61077;Q13404;Q9UMS4;Q13216;P62837;Q9NZJ0;Q13233;P68036;Q15819}

25381 [Cluster 2308]GO:0006432+P biological\_process [name] phenylalanyl-tRNA aminoacylation [def] "The process of coupling phenylalanine to phenylalanyl-tRNA, catalyzed by phenylalanyl-tRNA synthetase. In tRNA aminoacylation, the amino acid is first activated by linkage to AMP and then transferred to either the 2'- or the 3'-hydroxyl group of the 3'-adenosine residue of the tRNA." [GOC]

25382 Pathogen[ Q2Q067] interacts with 3 human partners: {O95363;Q9Y285;Q9NSD9}

25383 Pathogen[ P0C214] interacts with 3 human partners: {O95363;Q9Y285;Q9NSD9}

25384 Pathogen[ P03346] interacts with 1 human partners: {Q9Y285}

25385 Pathogen[ Q85601] interacts with 3 human partners: {Q9NSD9;Q9Y285;O95363}

25386 Pathogen[ P14079] interacts with 4 human partners: {Q9Y285;Q9BRP7;O95363;Q9NSD9}

25387 Pathogen[ P03383] interacts with 3 human partners: {Q9Y285;O95363;Q9NSD9}

25388 Pathogen[ P03410] interacts with 4 human partners: {Q9BRP7;Q9Y285;Q9NSD9;O95363}

25389 Pathogen[ P14075] interacts with 3 human partners: {Q9NSD9;O95363;Q9Y285}

25390 Pathogen[ P0C206] interacts with 4 human partners: {O95363;Q9BRP7;Q9Y285;Q9NSD9}

25391 Pathogen[ P03363] interacts with 3 human partners: {Q9NSD9;O95363;Q9Y285}

25392 [Cluster 2309]GO:0061337+P biological\_process [name] cardiac conduction [def] "A heart process that regulates cardiac muscle contraction through signal initiation and propagation." [GOC]

25393 Pathogen[ Q2Q067] interacts with 1 human partners: {Q02078}

25394 Pathogen[ P0C214] interacts with 1 human partners: {Q02078}

25395 Pathogen[ P03346] interacts with 1 human partners: {Q02078}

25396 Pathogen[ Q85601] interacts with 1 human partners: {Q02078}

25397 Pathogen[ P14079] interacts with 1 human partners: {Q02078}

25398 Pathogen[ P03383] interacts with 1 human partners: {Q02078}

25399 Pathogen[ P03410] interacts with 1 human partners: {Q02078}

25400 Pathogen[ P14075] interacts with 1 human partners: {Q02078}

25401 Pathogen[ P0C206] interacts with 1 human partners: {Q02078}

25402 Pathogen[ P03363] interacts with 1 human partners: {Q02078}

25403 [Cluster 2310]GO:0001666+P biological\_process [name] response to hypoxia [def] "Any process that results in a change in state or activity of a cell or an organism (in terms of movement, secretion, enzyme production, gene expression, etc.) as a result of a stimulus indicating lowered oxygen tension. Hypoxia, defined as a decline in O2 levels below normoxic levels of 20.8 - 20.95%, results in metabolic adaptation at both the cellular and organismal level." [GOC]

25404 Pathogen[ Q2Q067] interacts with 34 human partners: {P27540;Q9HBZ2;Q6RW13;P14921;Q13485;Q16656;P18887;A6NIX2;P02511;P22557;P11831;Q96IF1;P63146;Q9UGP4;P84022;P25063;P09972;P29474;Q9Y2N7;Q6RSH7;O15198;O60765;Q96KS0;Q9H6Z9;Q12983;P22415;Q9GZT9;Q92793;P02489;Q9UMX0;Q99814;P08397;O60936;P14625}

25405 Pathogen[ P0C214] interacts with 38 human partners: {Q9UGP4;P29474;O15198;P08294;P14625;Q6RW13;P14921;P02489;P02511;Q16656;Q92793;Q96KS0;P84022;P11831;Q9H6Q4;P22557;Q9HBZ2;P08397;Q9Y2N7;A6NIX2;Q9H6Z9;O60765;P14618;P18887;Q13485;Q9GZT9;P25063;P09972;Q12983;Q99814;P27540;P22415;P40692;Q9UMX0;P63146;O60936;P30566;Q6RSH7}

25406 Pathogen[ P03346] interacts with 35 human partners: {P09972;Q6RSH7;Q9UGP4;O60765;P29474;P14625;Q16656;P11831;P02489;Q96IF1;Q9UMX0;P27540;P22557;Q12983;O00151;O15198;P14921;P84022;P02511;P63146;Q9Y2N7;Q9GZT9;A6NIX2;Q99814;Q9HBZ2;P18887;O60936;Q96KS0;Q99929;Q13485;P25063;Q6RW13;Q92793;Q9H6Z9;P22415}

25407 Pathogen[ Q85601] interacts with 37 human partners: {O15198;P02489;P11831;Q9H6Z9;P63146;P14921;P18887;Q9Y2N7;Q16656;A6NIX2;O60936;O00151;Q99814;P27540;Q9H6Q4;P22415;Q9GZT9;P14618;Q96KS0;O60765;P02511;P09972;Q6RW13;Q9HBZ2;P29474;Q96IF1;P84022;Q9UGP4;Q6RSH7;Q12983;P14625;P08397;Q92793;P40692;P19447;Q13485;Q9UMX0}

25408 Pathogen[ P14079] interacts with 37 human partners: {Q9GZT9;Q99814;Q9Y2N7;P20396;P02511;Q9UMX0;P40692;Q92793;O15198;Q6RW13;Q16656;P09972;P22557;O00151;P02489;Q9H6Q4;Q9NX09;Q96IF1;P08397;P27540;P18887;Q9H6Z9;A6NIX2;P25063;Q8IVP5;O60936;Q12983;P14625;Q6RSH7;Q9HBZ2;P02144;O60765;Q96KS0;P63146;Q9UGP4;P19447;P22415}

25409 Pathogen[ P03383] interacts with 29 human partners: {O15198;Q6RW13;P11831;Q13485;P29474;P27540;O60765;P14921;Q16656;A6NIX2;P02511;P25063;P09972;O60936;Q96KS0;Q12983;Q6RSH7;Q9H6Q4;P84022;Q9UGP4;Q9Y2N7;Q9UMX0;Q9H6Z9;P14625;P08397;P18887;P63146;Q92793;P22415}

25410 Pathogen[ P03410] interacts with 43 human partners: {P84022;P11831;P40692;P18887;P02144;P08397;Q12983;Q96KS0;Q9H6Z9;Q99814;Q9Y2N7;Q9UGP4;P14625;O15198;Q9H6Q4;Q9HBZ2;Q9GZT9;Q96IF1;P27540;Q9UMX0;P22557;A6NIX2;Q92793;P29474;O60936;P09972;P02489;P25063;P02511;P30566;P19447;P63146;P22415;Q13485;Q6RW13;Q6RSH7;Q16656;O00151;O60765;Q8IVP5;Q9NX09;P14921;P20396}

25411 Pathogen[ P14075] interacts with 29 human partners: {P29474;Q12983;Q96KS0;Q9GZT9;Q16656;P11831;O60765;Q9UGP4;Q9Y2N7;Q6RSH7;P08397;P27540;Q13485;O15198;A6NIX2;P14921;P02511;P09972;Q92793;P63146;P22415;P84022;Q6RW13;O60936;P14625;P18887;Q9UMX0;Q9H6Z9;P25063}

25412 Pathogen[ P0C206] interacts with 40 human partners: {P84022;P14921;Q9Y2N7;Q96KS0;Q9GZT9;Q9UGP4;Q96IF1;Q9UMX0;P40692;A6NIX2;O60765;P19447;Q92793;Q12983;O60936;Q16656;P22415;P25063;Q6RW13;Q6RSH7;P22557;O00151;Q13485;P29474;P11831;P09972;Q9H6Z9;P27540;Q9H6Q4;Q99814;O15198;P02511;P08397;P20396;P02489;P18887;P14618;Q9HBZ2;P14625;P63146}

25413 Pathogen[ P03363] interacts with 26 human partners: {P18887;P29474;P27540;Q99929;Q9H6Z9;O60765;P09972;Q9UMX0;P14921;Q9HBZ2;P63146;Q96IF1;Q9UGP4;Q6RSH7;P11831;Q9Y2N7;P84022;Q16656;P22415;Q99814;Q92793;O60936;Q13485;A6NIX2;P02489;O15198}

25414 [Cluster 2311]GO:0006290+P biological\_process [name] pyrimidine dimer repair [def] "The repair of UV-induced T-T, C-T and C-C dimers." [ISBN

25415 Pathogen[ Q2Q067] interacts with 4 human partners: {Q9Y253;P06746;Q03468;Q92466}

25416 Pathogen[ P0C214] interacts with 4 human partners: {P06746;Q92466;Q9Y253;Q03468}

25417 Pathogen[ P03346] interacts with 4 human partners: {Q9Y253;Q03468;Q92466;P06746}

25418 Pathogen[ Q85601] interacts with 4 human partners: {Q03468;P06746;Q92466;Q9Y253}

25419 Pathogen[ P14079] interacts with 4 human partners: {P06746;Q9Y253;Q03468;Q92466}

25420 Pathogen[ P03383] interacts with 4 human partners: {Q9Y253;P06746;Q03468;Q92466}

25421 Pathogen[ P03410] interacts with 4 human partners: {P06746;Q03468;Q92466;Q9Y253}

25422 Pathogen[ P14075] interacts with 4 human partners: {P06746;Q03468;Q9Y253;Q92466}

25423 Pathogen[ P0C206] interacts with 4 human partners: {Q9Y253;Q03468;P06746;Q92466}

25424 Pathogen[ P03363] interacts with 4 human partners: {Q9Y253;P06746;Q92466;Q03468}

25425 [Cluster 2312]GO:0090129+P biological\_process [name] positive regulation of synapse maturation [def] "Any process that increases the extent of synapse maturation, the process that organizes a synapse so that it attains its fully functional state." [GOC

25426 Pathogen[ Q2Q067] interacts with 2 human partners: {Q12834;Q9UJX6}

25427 Pathogen[ P0C214] interacts with 2 human partners: {Q9UJX6;Q12834}

25428 Pathogen[ P03346] interacts with 2 human partners: {Q12834;Q9UJX6}

25429 Pathogen[ Q85601] interacts with 2 human partners: {Q9UJX6;Q12834}

25430 Pathogen[ P14079] interacts with 1 human partners: {Q9UJX6}

25431 Pathogen[ P03383] interacts with 2 human partners: {Q9UJX6;Q12834}

25432 Pathogen[ P03410] interacts with 2 human partners: {Q12834;Q9UJX6}

25433 Pathogen[ P14075] interacts with 2 human partners: {Q9UJX6;Q12834}

25434 Pathogen[ P0C206] interacts with 2 human partners: {Q9UJX6;Q12834}

25435 Pathogen[ P03363] interacts with 2 human partners: {Q9UJX6;Q12834}

25436 [Cluster 2313]GO:0060509+P biological\_process [name] Type I pneumocyte differentiation [def] "The process in which a relatively unspecialized cell acquires specialized features of a Type I pneumocyte. A type I pneumocyte is a flattened cell with greatly attenuated cytoplasm and a paucity of organelles." [GOC

25437 Pathogen[ Q2Q067] interacts with 1 human partners: {O00712}

25438 Pathogen[ P0C214] interacts with 1 human partners: {O00712}

25439 Pathogen[ P03346] interacts with 1 human partners: {O00712}

25440 Pathogen[ Q85601] interacts with 1 human partners: {O00712}

25441 Pathogen[ P14079] interacts with 1 human partners: {O00712}

25442 Pathogen[ P03383] interacts with 1 human partners: {O00712}

25443 Pathogen[ P03410] interacts with 1 human partners: {O00712}

25444 Pathogen[ P14075] interacts with 1 human partners: {O00712}

25445 Pathogen[ P0C206] interacts with 1 human partners: {O00712}

25446 Pathogen[ P03363] interacts with 1 human partners: {O00712}

25447 [Cluster 2314]GO:0006914+P biological\_process [name] autophagy [def] "The process in which cells digest parts of their own cytoplasm\_ allows for both recycling of macromolecular constituents under conditions of cellular stress and remodeling the intracellular structure for cell differentiation." [ISBN

25448 Pathogen[ Q2Q067] interacts with 21 human partners: {Q7Z3C6;Q9Y4P1;Q8NEM7;Q16666;Q99497;O60260;Q9BXW4;Q6ZNE5;Q9BSB4;Q8TDY2;Q14457;Q8IXH6;P60520;O75143;Q9Y4P8;O94817;Q676U5;Q9NT62;Q9H1Y0;Q13501;Q96A56}

25449 Pathogen[ P0C214] interacts with 22 human partners: {Q14457;P60520;O14681;Q9BSB4;Q9Y4P1;Q9BXW4;Q676U5;Q16666;Q8TDY2;Q99497;Q13501;O75143;Q6ZNE5;Q9Y4P8;O94817;Q8IXH6;Q9H1Y0;O60260;Q96A56;Q9NT62;Q9H492;Q7Z3C6}



25450 Pathogen[ P03346] interacts with 30 human partners: {Q16666;Q7Z3C6;Q9Y4P1;Q92622;O75143;P60520;Q96A56;Q12981;Q9BSB4;Q8TDY2;Q9NT62;Q14457;Q9UID3;Q6ZNE5;Q8NAA4;Q14694;P51397;Q8NEM7;Q9C0C7;Q9H492;Q99497;Q969Q5;O60260;Q9BXW4;Q9H1Y0;Q8IXH6;Q676U5;O94817;Q9Y4P8;Q13501}

25451 Pathogen[ Q85601] interacts with 22 human partners: {Q14457;Q9H492;Q99497;Q16666;O75143;Q9BSB4;Q9Y4P1;Q12981;Q8TDY2;O94817;Q7Z3C6;Q9BXW4;Q9Y4P8;Q9H1Y0;Q676U5;Q96A56;O60260;Q9NT62;P60520;Q8IXH6;Q9UID3;Q13501}

25452 Pathogen[ P14079] interacts with 35 human partners: {Q96A56;O60260;Q8NEM7;Q8IXH6;Q9NT62;Q9UID3;Q9Y4P8;Q8TDY2;Q9H492;Q9H0Y0;Q99497;Q86TL0;Q7Z3C6;O75143;Q9H1Y0;Q9Y4P1;Q9BSB4;Q6ZNE5;Q9H8M9;Q96GC9;P60520;Q9HCE0;Q12981;Q8IVP5;Q13501;Q8N682;P51397;A8MW95;Q676U5;O94817;Q14457;Q92622;Q9BXW4;O14681;Q16666}

25453 Pathogen[ P03383] interacts with 19 human partners: {Q14457;Q96A56;Q7Z3C6;O75143;Q9Y4P1;Q8TDY2;Q9NT62;Q9H1Y0;Q8IXH6;O60260;Q676U5;Q16666;Q13501;Q9Y4P8;O94817;O14681;P51397;Q6ZNE5;Q9BSB4}

25454 Pathogen[ P03410] interacts with 35 human partners: {Q9H0Y0;Q8IXH6;Q674R7;Q16666;Q8NAA4;O14681;Q96GC9;Q99497;Q9H1Y0;Q9Y4P1;Q9BSB4;P60520;O75143;Q14457;Q8TDY2;Q13501;Q9HCE0;O60260;Q9Y4P8;O94817;Q86TL0;P51397;Q9H492;Q9BXW4;Q676U5;Q9NT62;Q8NEM7;Q96A56;Q6ZNE5;Q12981;Q7Z3C6;Q8IVP5;A8MW95;Q9UID3;Q5MNZ9}

25455 Pathogen[ P14075] interacts with 20 human partners: {Q14457;Q6ZNE5;O14681;Q9BSB4;Q9NT62;O75143;Q9H1Y0;Q9Y4P1;Q676U5;Q8TDY2;Q16666;Q9Y4P8;P51397;Q8IXH6;Q8NEM7;O94817;O60260;Q96A56;Q13501;Q7Z3C6}

25456 Pathogen[ P0C206] interacts with 30 human partners: {Q7Z3C6;Q8IXH6;Q9BSB4;Q13501;Q9C0C7;Q9BXW4;Q9Y4P1;Q9H492;Q14457;Q16666;Q6ZNE5;Q99497;Q96A56;Q9Y4P8;A8MW95;Q92622;O14681;P51397;Q9H1Y0;Q9HCE0;O60260;Q8TDY2;P60520;Q12981;Q9UID3;Q676U5;O94817;Q86TL0;Q9NT62;O75143}

25457 Pathogen[ P03363] interacts with 24 human partners: {Q9UID3;Q9H492;Q969Q5;Q14457;Q8NEM7;Q9BXW4;O75143;Q9NT62;P60520;Q8NAA4;Q9BSB4;Q16666;Q9C0C7;Q96A56;Q92622;Q7Z3C6;Q6ZNE5;Q8TDY2;Q9Y4P8;Q9Y4P1;Q676U5;Q8IXH6;O94817;Q9H1Y0}

25458 [Cluster 2315]GO:0051225+P biological\_process [name] spindle assembly [def] "The aggregation, arrangement and bonding together of a set of components to form the spindle, the array of microtubules and associated molecules that serves to move duplicated chromosomes apart." [GOC]

25459 Pathogen[ Q2Q067] interacts with 17 human partners: {P18754;Q7Z4H7;O94927;O15379;Q9NVX0;A6NKF1;Q99871;Q8TEP8;Q9BT25;Q9H6D7;Q96MT8;Q9UKT4;O95271;Q9ULG1;Q96CS2;O75376;Q68CZ6}

25460 Pathogen[ P0C214] interacts with 17 human partners: {O94927;Q7Z4H7;Q96MT8;Q9ULG1;Q96CS2;Q8TEP8;Q9BT25;O75376;O15379;Q99871;Q9H6D7;A6NKF1;Q68CZ6;O95271;Q9NVX0;P18754;Q9UKT4}

25461 Pathogen[ P03346] interacts with 17 human partners: {Q9BT25;Q9H6D7;Q99871;Q7Z4H7;O15379;Q9ULG1;P18754;Q8TEP8;Q9NVX0;A6NKF1;Q68CZ6;Q9UKT4;O75376;Q96CS2;O95271;O94927;Q96MT8}

25462 Pathogen[ Q85601] interacts with 18 human partners: {Q9H6D7;Q9BT25;Q99871;Q7Z4H7;Q9UKT4;Q9NVX0;A6NKF1;Q8TEP8;Q96MT8;O75376;Q9ULG1;O94927;Q96CS2;O15379;P18754;O95271;Q68CZ6;P51955}

25463 Pathogen[ P14079] interacts with 17 human partners: {O15379;Q9ULG1;Q9UKT4;Q8TEP8;O95271;Q99871;Q9NVX0;P51955;Q9H6D7;A6NKF1;O75376;Q7Z4H7;Q9BT25;Q68CZ6;P18754;O94927;Q96CS2}

25464 Pathogen[ P03383] interacts with 16 human partners: {O75376;Q9NVX0;Q7Z4H7;Q9UKT4;Q96MT8;A6NKF1;Q8TEP8;Q99871;Q96CS2;O94927;P18754;Q68CZ6;O15379;Q9BT25;Q9H6D7;O95271}

25465 Pathogen[ P03410] interacts with 16 human partners: {Q9UKT4;Q9H6D7;Q8TEP8;Q9ULG1;O75376;Q68CZ6;Q96CS2;O95271;O15379;Q9NVX0;O94927;P18754;A6NKF1;Q99871;Q9BT25;Q7Z4H7}

25466 Pathogen[ P14075] interacts with 16 human partners: {Q96MT8;Q99871;Q7Z4H7;Q9UKT4;Q68CZ6;Q9BT25;Q8TEP8;O75376;Q96CS2;O15379;A6NKF1;Q9NVX0;P18754;O94927;O95271;Q9H6D7}

25467 Pathogen[ P0C206] interacts with 18 human partners: {O95271;P18754;P51955;Q9BT25;Q8TEP8;Q9NVX0;Q9UKT4;A6NKF1;Q9ULG1;O15379;Q96CS2;Q7Z4H7;O94927;O75376;Q9H6D7;Q99871;Q96MT8;Q68CZ6}

25468 Pathogen[ P03363] interacts with 17 human partners: {A6NKF1;Q9ULG1;Q96MT8;O15379;O75376;Q9H6D7;Q9BT25;Q8TEP8;Q68CZ6;O94927;Q9NVX0;Q9UKT4;O95271;Q96CS2;Q99871;P18754;Q7Z4H7}

25469 [Cluster 2316]GO:0014707+P biological\_process [name] branchiomic skeletal muscle development [def] "The process whose specific outcome is the progression of the branchiomic skeletal muscle over time, from its formation to the mature structure. The branchiomic skeletal muscle is derived from cranial mesoderm and controls facial expression, pharyngeal and laryngeal function, operating the jaw. The muscle begins its development with the differentiation of the muscle cells and ends with the mature muscle. Branchiomic muscles of mammals correspond to the gill musculature of fish." [GOC]

25470 Pathogen[ Q2Q067] interacts with 2 human partners: {P78337;O60682}

25471 Pathogen[ P0C214] interacts with 1 human partners: {P78337}

25472 Pathogen[ P03346] interacts with 3 human partners: {P78337;O60682;O43680}

25473 Pathogen[ Q85601] interacts with 2 human partners: {O60682;P78337}

25474 Pathogen[ P14079] interacts with 2 human partners:{P78337;O60682}  
25475 Pathogen[ P03383] interacts with 1 human partners:{P78337}  
25476 Pathogen[ P03410] interacts with 2 human partners:{O60682;P78337}  
25477 Pathogen[ P14075] interacts with 1 human partners:{P78337}  
25478 Pathogen[ P0C206] interacts with 2 human partners:{P78337;O60682}  
25479 Pathogen[ P03363] interacts with 2 human partners:{O60682;P78337}  
25480 [Cluster 2317]GO:0010574+P biological\_process [name] regulation of vascular endothelial growth factor production [def] "Any process that modulates the frequency, rate, or extent of production of vascular endothelial growth factor." [GOC  
25481 Pathogen[ Q2Q067] interacts with 1 human partners:{Q9UN36}  
25482 Pathogen[ P0C214] interacts with 1 human partners:{Q9UN36}  
25483 Pathogen[ P03346] interacts with 1 human partners:{Q9UN36}  
25484 Pathogen[ Q85601] interacts with 1 human partners:{Q9UN36}  
25485 Pathogen[ P14079] interacts with 1 human partners:{Q9UN36}  
25486 Pathogen[ P03383] interacts with 1 human partners:{Q9UN36}  
25487 Pathogen[ P03410] interacts with 1 human partners:{Q9UN36}  
25488 Pathogen[ P14075] interacts with 1 human partners:{Q9UN36}  
25489 Pathogen[ P0C206] interacts with 1 human partners:{Q9UN36}  
25490 Pathogen[ P03363] interacts with 1 human partners:{Q9UN36}  
25491 [Cluster 2318]GO:0045830+P biological\_process [name] positive regulation of isotype switching [def] "Any process that activates or increases the frequency, rate or extent of isotype switching." [GOC  
25492 Pathogen[ Q2Q067] interacts with 1 human partners:{Q6ZW49}  
25493 Pathogen[ P0C214] interacts with 1 human partners:{Q6ZW49}  
25494 Pathogen[ P03346] interacts with 1 human partners:{Q6ZW49}  
25495 Pathogen[ Q85601] interacts with 1 human partners:{Q6ZW49}  
25496 Pathogen[ P14079] interacts with 1 human partners:{Q6ZW49}  
25497 Pathogen[ P03383] interacts with 1 human partners:{Q6ZW49}  
25498 Pathogen[ P03410] interacts with 1 human partners:{Q6ZW49}  
25499 Pathogen[ P14075] interacts with 1 human partners:{Q6ZW49}  
25500 Pathogen[ P0C206] interacts with 1 human partners:{Q6ZW49}  
25501 Pathogen[ P03363] interacts with 1 human partners:{Q6ZW49}  
25502 [Cluster 2319]GO:0046849+P biological\_process [name] bone remodeling [def] "The continuous turnover of bone matrix and mineral that involves first, an increase in resorption (osteoclastic activity) and later, reactive bone formation (osteoblastic activity). The process of bone remodeling takes place in the adult skeleton at discrete foci. The process ensures the mechanical integrity of the skeleton throughout life and plays an important role in calcium homeostasis. An imbalance in the regulation of bone resorption and bone formation results in many of the metabolic bone diseases, such as osteoporosis." [GOC  
25503 Pathogen[ Q2Q067] interacts with 1 human partners:{O75030}  
25504 Pathogen[ P0C214] interacts with 1 human partners:{O75030}  
25505 Pathogen[ P03346] interacts with 1 human partners:{O75030}  
25506 Pathogen[ Q85601] interacts with 1 human partners:{O75030}  
25507 Pathogen[ P14079] interacts with 1 human partners:{O75030}  
25508 Pathogen[ P03383] interacts with 1 human partners:{O75030}  
25509 Pathogen[ P03410] interacts with 1 human partners:{O75030}  
25510 Pathogen[ P14075] interacts with 1 human partners:{O75030}  
25511 Pathogen[ P0C206] interacts with 1 human partners:{O75030}  
25512 Pathogen[ P03363] interacts with 1 human partners:{O75030}  
25513 [Cluster 2320]GO:0043569+P biological\_process [name] negative regulation of insulin-like growth factor receptor signaling pathway [def] "Any process that stops, prevents, or reduces the frequency, rate or extent of insulin-like growth factor receptor signaling." [GOC  
25514 Pathogen[ Q2Q067] interacts with 1 human partners:{O15265}  
25515 Pathogen[ P0C214] interacts with 1 human partners:{O15265}  
25516 Pathogen[ P03346] interacts with 1 human partners:{O15265}  
25517 Pathogen[ Q85601] interacts with 1 human partners:{O15265}  
25518 Pathogen[ P14079] interacts with 1 human partners:{O15265}  
25519 Pathogen[ P03383] interacts with 1 human partners:{O15265}  
25520 Pathogen[ P03410] interacts with 1 human partners:{O15265}  
25521 Pathogen[ P14075] interacts with 1 human partners:{O15265}  
25522 Pathogen[ P0C206] interacts with 1 human partners:{O15265}  
25523 Pathogen[ P03363] interacts with 1 human partners:{O15265}  
25524 [Cluster 2321]GO:0006351+P biological\_process [name] transcription, DNA-dependent [def] "The cellular synthesis of RNA on a template of DNA." [GOC  
25525 Pathogen[ Q2Q067] interacts with 1586 human partners:{Q13562;Q0D2J5;Q12901;O60806;Q9HC78;Q96EI5;Q9H4I2;Q01844;Q9NZ81;Q9UM63;Q96SQ5;Q9BUE0;Q9Y473;Q9BYE7;Q14526;Q9Y5K5;Q8WV37;Q9UNN4;Q8N859;O43365;O95602;P52742;Q15573;Q9BRH9;Q9UKI9;Q8NG57;Q96N77;Q9NWB6;C9JN71;Q14151;Q12905;O43463;Q9UPP1;Q7RTT3;Q9NZI7;Q8WZ33;P27540;P17544;O75525;Q13118;P25490;Q33E94;Q6VMQ6;P52434;Q92750;Q03989;P22392;Q9UK13;P35789;Q6V9R5;Q8NA42;O00213;Q9HB65;Q9Y6X8;Q92585;Q96FV9;O43167;Q2M218;Q04864;Q9UHL9;Q9UJN7;O00411;P0C1Z6;Q16236;Q03923;Q9Y4A5;Q9UEG4;P62633;P54252;Q9BUG6;Q96S65;A6BNDX5;O43364;Q8NEM1;Q71F23;O15525;Q13185;Q9UC06;Q99583;Q6Z28;O75155;Q8IZL2;P98182;Q8IX15;Q12837;Q9H7X3;O14744;Q9UPN9;Q9Y5Q3;Q03052;O75461;P56524;Q9UK11;Q9BY41;P17029;Q12796;P52738;Q10587;A8MTY0;Q9HAW0;O75909;Q9Y3C7;A0AVK6;Q8N228;Q9UMS5;Q96D

98;Q9H7R0;Q96PE6;Q8IZD2;A6NFQ7;Q99502;Q9H3H9;Q8IZ26;P60002;Q9HBZ2;Q9BRR0;Q6ZW49;P108  
27;Q8WWY6;A6NJJ1;P15884;P20226;Q9NVM4;Q04726;Q96HR3;O43361;Q9HAU4;P10243;Q9Y462;Q994  
17;P09067;Q96NI8;Q92681;Q16594;Q9UGU0;O75925;Q92922;Q6NUN9;Q8N9R8;P39687;Q9UJL9;Q9UQ  
80;Q9NS56;O60304;Q9BRU2;P23511;P24278;Q8NEP9;Q9H063;Q8WVCO;Q05066;Q8NEF9;Q6ZQV5;Q9HB  
E1;Q06416;Q9NXR8;Q13487;Q63HK5;P0CJ88;Q99081;Q8N0Y2;Q9Y2D1;Q92664;Q5VTD9;Q15928;Q96K  
75;Q9Y3Q8;Q9UHB7;Q12888;Q9H175;Q6XD76;Q00291;Q00470;Q9UBX2;Q9UHR5;Q13887;O00267;Q96R  
K1;P06400;Q8TA94;Q6ZN32;Q9H9T3;Q9NPJ6;Q8WYA1;Q0D2K3;Q96I24;P29374;Q9NPF5;Q86YE8;Q08A  
N1;Q9C005;Q01094;P58317;Q8IYF1;Q9UKV0;Q14678;Q8WW38;Q08999;Q6ZMY9;P40763;Q9H5Q4;Q8WY  
H8;P78424;Q8N8Z8;P14921;Q5VZB9;Q6ZS27;Q9NYB0;A6NP11;Q9UL59;Q96LA8;O15226;P06454;Q8N4  
W9;Q13889;Q13352;P01106;Q9H2P0;Q13148;P10073;Q52LR7;O14503;Q9HAZ2;P36402;O43159;Q7Z5  
89;Q12872;Q16666;P46937;Q15910;Q9NR55;Q16533;O75151;Q9Y3T9;O60481;P6IE81;Q7KZF4;P678  
09;O95402;Q6PD62;Q13485;A6NGD5;Q5SXM1;Q01543;Q6IV72;A8MVS1;Q9UNS1;Q9HAJ7;P10589;Q8N2  
I2;Q6ECI4;Q9UC07;P35680;Q14549;Q9POU4;Q9H9D4;Q12986;Q9NR48;P31274;P13056;Q9C0F0;P312  
68;Q6ZT77;Q8IUE1;Q9UHF7;O43189;P62508;Q6P1J9;Q9ULD5;P51508;Q9UBB5;Q0PNE2;Q14590;A5YK  
K6;Q15596;P48380;Q8WVM0;O14813;Q9NTW7;Q16656;Q9Y2Y9;Q96NG8;P35712;Q6ZN06;Q15233;P411  
82;Q9Y2X9;P54259;Q9H5H4;P10828;Q96AE4;Q15562;Q9GZS3;Q460N3;Q96019;Q9HC52;Q01664;P551  
97;Q8NBB4;O00570;Q9GZS1;Q8N3X6;P82979;Q96H40;P49910;Q8N5U6;Q15326;Q9NZV7;Q96IS3;Q86U  
Q8;P18847;Q9UHX1;P0CJ87;P51531;Q8N9N5;Q32MQ0;P49716;P41970;Q9HAF1;Q6P2D0;Q9HCL3;Q6U7  
Q0;Q13111;Q8WXF8;A6NIX2;Q9Y5Q8;Q8TD23;Q9BW11;Q9NQ87;Q5PSV4;Q96SK3;P61457;Q96TT1;Q147  
U1;Q15697;Q96LW1;Q9NZL3;Q6VUC0;O96004;Q92985;Q6P1K2;Q15059;Q9UL49;Q7Z6R9;Q8HWS3;Q7L2  
R6;O00167;P08151;Q9BZE3;Q9C086;Q15653;P49750;Q15196;Q00613;Q99676;O75478;Q9BRG1;Q86U  
U0;Q96T88;Q13772;P19388;Q96SL8;P37275;Q8IYW8;Q14140;O75081;Q5SXM2;Q05516;Q32MZ4;P207  
49;Q8NF64;Q05481;Q02930;Q9HD15;P52435;Q9NVW2;Q8NCK3;Q460N5;Q8NDW4;O00257;O60543;O758  
20;Q9NZI6;P49116;Q7Z7J5;P10074;Q9HCD5;O60315;Q04206;Q99551;Q9P0L1;Q9H944;P12980;Q141  
19;P50548;Q9H4Z2;Q6P9A1;Q96MA1;Q16633;Q9ULV5;Q8IXT2;Q96PQ6;Q86SE9;Q8N782;Q96NL3;Q6P1  
N0;Q13547;A8MV65;Q9NP66;Q05195;Q8TAW3;Q96AV8;Q9BTT4;P63167;P51815;P14373;Q5VWZ1;Q141  
03;Q9UIS9;O00712;Q9NZI5;Q99990;Q93074;Q8TF20;Q01201;Q6UUUV9;Q9HB58;Q6ZR52;Q15528;Q996  
84;P52741;Q9UDV7;Q14814;P39880;P18850;Q8TF68;Q3KQV3;P50549;P32780;Q99594;O94983;Q8IU  
E0;Q9P255;A6H8Y1;Q8NC26;P17483;P14316;O43296;Q76L83;Q9H4T2;O15379;O75486;O15266;P369  
56;P18615;A6NFD8;O95948;O14709;P41134;Q08ER8;Q9BQ87;Q9UKN8;Q14192;Q5T5D7;Q9BWW4;Q9NQ  
X1;Q9Y5R5;Q92800;Q6NZI2;Q96EZ8;Q6ZMW2;P30876;Q99503;P19387;Q4LE39;Q9UED7;Q16520;P159  
76;O95931;Q9BWX5;Q9H307;Q5T3J3;O75586;Q8N196;Q9Y2G9;Q96JC9;Q9H0E3;Q2M3W8;Q15542;O146  
86;O15535;Q6MZP7;Q6S96;Q7RTT5;Q03933;P28356;Q92754;Q9HC44;Q96ST3;O14628;Q8TBC5;P612  
18;Q96RK0;Q8N8G2;O15350;Q6ZSS3;Q92759;Q6ZRS2;P35638;Q9NY61;Q8TDY2;O75448;Q92945;Q9UF  
W8;Q9NP11;Q8WY22;P54198;Q6ISB3;Q02447;Q99909;Q9NSD4;Q16534;Q2M1K9;Q04727;Q96T58;Q8WY  
36;O60244;Q5HYR2;Q86YP4;P52657;Q6ZNA4;O14896;Q8IX12;P41218;O00401;Q8WUF5;P17030;Q149  
34;Q9H981;Q86WP2;P17031;Q7Z340;P42704;Q86UE3;Q53TQ3;P09086;O75362;Q16670;Q96N95;Q9Y5  
A6;Q9Y3Y2;Q8TF47;O75971;O75175;P17036;Q94993;Q9ULJ3;O14776;Q8TBE0;D6RGH6;P17040;Q155  
60;P17676;Q2QGD7;P17482;Q9P086;P17010;O95625;P11308;Q53H80;P17038;Q8N5Y2;Q7L1Q6;Q9Y4  
Z2;Q9UK12;Q8WYN3;P38935;Q8NDY6;Q9NYF8;P08047;Q8TC21;P11473;Q7RTU5;Q00978;Q96C  
28;O75928;Q7RTT6;Q96RJ6;O75182;Q8NDT2;Q9ULJ6;Q15022;O43829;P16415;Q9BSM1;Q8NHM5;Q5VV  
H5;Q86Y25;Q9H9Y6;Q01892;P0CG00;Q8N5F7;Q8N3S3;P09017;Q8N184;Q96NJ6;P22670;O60563;Q8WU  
B8;O95416;Q13129;Q9H7S9;Q8N726;P11831;P20265;Q7Z3V5;P15172;P0C7T5;Q3SXZ3;Q86VP6;O432  
48;Q6NT76;Q14CW9;P28702;Q9UFB7;Q6IQ21;Q00577;P48552;Q13398;Q53GI3;Q8IU81;Q96MR9;P483  
75;Q15561;Q8NBZ0;Q96BV0;O75446;Q8IZL8;P35227;A8MT65;A6NK53;Q12962;Q9Y295;Q96TJ2;P280  
69;Q9BUY5;Q09028;O60663;P61077;Q9UKW6;Q96QC0;Q15424;P78545;B2RXF5;Q9BQI9;Q7KZ85;Q8N3  
J9;Q9Y2P0;P09629;Q9NS37;Q9BQG0;Q9Y2H8;Q9UQR0;Q96AQ7;P52743;P58340;Q96GN5;Q499Z4;P548  
45;Q8IXH6;P42568;Q15937;Q9Y4A8;Q9BXG8;Q9ULK4;Q00444;P27695;Q15723;Q15744;Q8N7G0;Q8IX  
03;Q08050;Q68EA5;P11142;O15405;P61978;Q9Y5B6;Q95163;Q9UKL0;O60711;Q14765;Q96IF1;P290  
84;Q13112;Q68DY1;Q5TB30;Q8IXW5;Q7RTV3;Q12972;Q9UQL6;Q8N5P1;Q8TAK5;Q00059;O43524;P539  
99;Q99549;Q9HCG1;O43593;Q96G25;Q9ULW3;Q6P280;Q9NRG4;Q5PRF9;Q9BUI4;Q99966;Q8TAU3;Q9UQ  
B3;Q92994;Q8N5J4;Q9UL58;P38159;Q13469;Q8N0Z2;Q5U623;P52747;Q9UHV2;Q96SR6;P0C860;P624  
87;A6NLW8;Q5THR3;P78317;Q14929;Q99504;Q5T619;Q96CJ1;P23769;P54253;Q14593;Q15929;O949  
92;P35548;P55199;Q4G112;Q9UIV1;Q8TB69;Q99743;P20719;Q5T6S3;Q15935;Q96C00;Q9BYK8;Q8IV  
P9;Q6W2J9;P51826;Q14186;Q63HK3;Q99608;P40426;Q15699;Q9UII5;Q12800;Q15532;O60828;Q8NE  
65;A8MUV8;Q9P243;Q9ULM2;Q15047;Q14938;O75529;Q9BQ70;Q96N38;A8MWA4;Q9UGP4;Q5SVQ8;Q5H9  
F3;A8MQ14;Q14498;P56693;Q92748;Q9H9C1;Q8N7R0;Q96CX3;Q8IWS0;Q969S8;O14867;Q96F24;P170  
32;P19532;Q96BD5;Q6P9G9;P26358;Q9ULX9;P51948;Q52M93;O75618;P15621;Q92831;Q92782;Q145  
85;Q9NQX6;P17022;Q9H5J8;Q07666;Q14653;Q68DI1;P51504;Q9UKY1;Q8N8C0;Q13495;Q9Y2D9;Q96S  
Z4;Q15654;Q96DB2;P56270;Q6IQ32;A2RRD8;Q15306;B4DXR9;Q9UKD1;Q6NX45;Q96017;Q15370;P170  
98;O75437;Q8NF99;P12755;O14948;Q13360;Q14978;Q9H1I8;P84022;Q63ZY3;Q99856;Q6P9A3;B1AP  
H4;Q6P1X5;P10914;Q92539;Q8N140;Q96JM7;A6NDZ8;P0C7X5;Q8IYH5;Q8TEE9;Q8N3C0;O00716;P0CJ  
89;O60284;O75177;O75528;P16383;Q9Y6K9;O95628;P0CJ90;Q96GC6;P51668;Q92925;Q76KX8;Q000  
56;A6NHJ4;Q9P2R6;Q01658;Q6NSW7;P28347;Q96ES7;Q8N895;Q96N22;Q92541;A8MXY4;Q8N141;P312  
76;P25440;Q03924;Q96LX8;Q9UBK9;Q92769;Q5JNZ3;O14497;Q03701;Q9Y2Q1;Q9H091;O00255;O151  
05;Q6PK81;Q96NG5;Q06330;P14859;Q15543;Q9UHV7;Q8IZ40;Q7Z3K6;A6NNF4;O95644;Q9GZV5;Q96E  
K7;O75444;Q13127;Q9P2J8;O95780;P49848;O43541;Q6PF04;Q9HCU9;Q9NWA0;Q9HD42;Q14135;P283  
24;Q2M1V0;Q9BR84;Q9NQG5;Q9H116;Q9H869;Q86Y97;Q9Y6X2;P50750;Q9Y2N7;Q99732;Q06E29;Q9UB  
W7;Q9ULH7;P11161;Q9NWT6;Q6P4R8;Q15544;Q9Y603;Q12906;Q9HAP2;Q9UN79;O15265;Q95BQ5;Q719  
H9;P82094;P48382;O00268;P09874;P51532;Q8NI51;A0JLT2;Q6P2C8;P15622;P0DI81;Q96K62;Q96P  
U5;Q3KP31;Q5JVG8;O43830;P0DI82;Q16254;Q68CJ9;O43918;P41212;P0CJ86;Q49A33;P50613;P154  
08;O15198;Q15742;P23246;Q12873;Q9NVC6;P86452;P25208;Q8WVJ9;Q96H20;Q92830;O15164;Q3SY  
52;Q13506;P35226;B4DX44;Q15329;P35869;Q9H160;Q8NI08;Q9UFF9;O75530;Q8N988;P59923;Q9Y6  
B2;Q96QR8;Q14865;Q9GZN2;P0CJ85;Q6RS0;Q13045;Q8TE02;Q969J2;Q16514;Q5VUA4;Q9NYT6;Q8NH  
W3;Q494X3;A6NM28;P82970;Q9Y2L8;Q8IYB9;Q16621;Q92993;Q8IX07;O60907;Q6IA86;P10599;Q32M  
78;O60225;P14651;P53041;Q03468;Q6UUUV7;O75030;O14771;Q9UPW6;Q9NQZ8;P0CH99;P61244;Q8NF

D5;Q8WUI4;Q8N823;P17041;P13984;Q8N9K5;P55055;Q9UIH9;Q9BSG1;P0CJ79;Q3MJ62;P12956;Q15796;Q8N7M2;Q9BT49;O60765;Q8NB50;O75475;Q9NVU0;Q15369;Q3ZCT1;Q02080;Q8N9N2;Q8N344;Q9UKV8;Q9NSI6;Q9NRL2;Q7Z7C8;O75164;Q5HYK9;Q9UBU8;P62875;P78337;Q02556;Q99496;Q3L8U1;P23760;Q00472;Q04725;Q8N9Z0;Q96S94;Q99543;Q14593;Q92785;Q96JN0;P24928;Q2VY69;Q9Y6J9;Q99607;Q7Z591;P37198;Q9H6W3;P19419;Q86VE0;Q96T23;Q13363;P49639;Q86X95;P51523;Q13503;Q86YW9;Q15014;Q9H7L9;Q8NFJ8;Q9H963;Q58F21;Q92499;O15370;Q969R5;Q9NYW8;P41162;Q9NX70;Q5BKZ1;Q3B726;Q9BYN7;Q96GE5;Q9NQ33;Q86UP8;P99016;Q8N720;P51786;Q9BWT1;O43812;Q15466;P19838;Q8IZX4;Q96RU7;Q9H4S2;O94805;Q14145;P78395;O60675;P28749;Q9HCZ1;Q8NB42;P43268;P20823;Q96NM4;Q15583;P23193;A6NJG6;Q9HBT7;P17861;Q8TBZ5;Q9HAH1;Q7RTU4;Q8N371;Q9Y2P7;Q6P3V2;Q12968;O75346;Q15572;Q93008;Q14588;Q6PJG2;O14529;P52630;Q9HCE1;Q9H501;Q14839;Q6ZMV8;Q9Y543;P15336;Q9Y2X0;O95073;Q14592;Q8IXH7;O94864;Q6AZW8;Q6NSZ9;P12757;P35813;Q9BUJ2;Q86V15;P28698;Q9H3P2;Q8NFZ5;Q9BYV9;Q6ZNG0;Q8N9F8;P0CG47;Q9P2K3;P0C7V5;P20290;O43186;P17021;Q86U86;Q7RTV0;P08235;Q14686;Q9UNY4;O95983;Q96T76;Q96QT6;Q9BZK7;Q9UI95;Q15545;Q9NV56;Q9UID6;Q14872;Q9UDV6;Q3KNV8;Q15170;Q12789;Q9NZN8;Q5CZA5;Q03111;Q96HQ0;Q9UKN5;Q9UNY5;P22415;P10244;Q9H707;Q9UM07;Q06455;Q13761;Q9NSJ1;Q9UKT9;Q9UMQ3;Q5JVS0;P52655;P19484;O14646;Q13901;P16989;O95238;B4DU55;Q6PG37;O60290;O75373;Q9Y618;Q14209;O95619;Q96CS4;Q49AA0;P43356;Q9HBM6;P17096;P14652;Q04724;P35269;Q8TE85;P11474;Q99623;Q8IUR6;Q86TJ5;Q12824;Q15714;O43513;Q00653;Q8IVC4;Q9Y5J3;Q8N488;P0CG48;Q9UK10;A8MUZ8;P29083;Q9NY43;Q96EK4;Q96SE7;Q9NWB7;P35251;Q9HCK8;Q7RTU0;Q8N7H5;O43318;Q7L945;Q8NDQ6;Q92600;O75764;Q13106;P49336;Q86XF7;Q5TEC3;Q9UIL8;Q9Y294;Q969V6;Q5T230;O95125;Q9P1Z2;Q96K6;Q9UIF9;P58304;O60583;Q68CP9;P24863;Q96L38;O94916;P17019;P0CG31;Q9NP71;Q9NP47;Q8N693;O60682;Q9BYH8;Q8TAQ2;P0C7X2;Q96RE7;Q92793;Q86U70;Q8WYK2;Q9Y2G7;Q14582;Q8IYX0;Q01860;Q9H204;P18848;Q5TGS1;Q9UJW7;Q9NSC2;P68036;Q92670;Q9UL18;P52736;Q01826;P63272;Q96NJ3;Q86XN6;P21675;Q9GZX5;P53803;Q9HBG1;Q9H2F5;Q49AM1;Q96MN9;Q15853;Q9NPA8;Q96RN5;Q9BQA5;P13010;Q14241;Q9NUQ3;P78347;P17025;A6NK75;Q9UBD0;Q15652;O60869;Q8N587;Q9Y5B9;Q8N7Q3;Q7Z398;Q8NB611;P62987;P13682;Q8IYI8;Q86V71;Q53T94;P52744;Q14188;A6NE82;Q02577;Q86Y01;A6NN14;Q96JL9;P55771;P28370;Q16576;P0CB33;Q6ZNH5;Q9NWS9;Q3ZCX4;Q9BX82;Q03060;Q9UBL3;Q6STE5;P42226;Q9P0T4;Q8IY57;Q5VWG9;Q5H9L2;Q5HY98;Q9Y2W1;Q9UIF8;Q96IZ0;Q15637;A6NLF2;A6NJ46;Q8NA19;Q8NEK5;Q9Y692;Q71SY5;Q6XYB7;Q9Y535;Q969X6;Q8WXI9;P14653;Q13952;P15923;P10242;Q8NB12;O43309;O14978;O60422;Q6ZN79;Q99717;P06733;Q15834;Q9H7R5;Q12857;Q9C0F3;Q8N972;Q6ZYX4;Q13568;Q3B7T1;Q13490;Q9H0M5;Q6EBN2;Q7L190;Q13765;Q9NVV4;Q8NDN9;Q6IPX3;Q9ULC4;O75376;Q6ZN08;Q8NHY6;Q8TBZ8;Q16384;Q86VN1;Q9UIE0;Q9Y468;Q9Y222;Q8IXJ9;Q68DY9;Q5VIY5;P0CG24;O75290;Q9H5I1;O95905;Q8WXF1;Q99814;Q6P1K8;Q8WXB4;P49711;P40425;Q8N5A5;Q9H3M7;Q93062;Q969E4;Q9Y250;Q16649;Q9NVV9;Q53ET0;P17480;Q92841;Q0VQ99;Q9BWM5;Q8TF32;Q16600;Q2M3X9;P52737;Q6PI98;Q6ZV50;Q96JK9;Q14781;Q9UQR1;Q8TAF7;Q8N7K0;Q9H9F9;Q14207;O14802;Q86YD1;Q15776;Q66K89;Q9P031;Q08AG5;Q153QV2;Q7LBC6;Q99459;P38711;P42224;A6NKF2;Q86W11;P51522;P22736;A6NEJ1;Q86X55;O94763;Q9UN30;O15392;Q7RTU3;Q96PM9;Q96BR6;Q8IYN2;Q96IR2;Q6RFH8;Q06587;Q9UI36;Q9ULM6;Q9Y6Y1;Q969W8;Q96RL1;Q6ZNA1;Q15361;P43355;Q96QE5;Q9HCS7;O95201;O43345;Q15759;Q9NYV6;Q9NQ92;Q8TDD2;Q9BTA9;Q15797;Q9H1D9;Q5FWF6;Q16526;Q8N393;Q9P0W2;Q8WTZ3;Q8NAP3;Q96ND8;Q96LW9;Q12830;Q3MIS6;Q9UL36;Q9BT81;Q06547;Q8TAQ5;Q13105;Q9Y2S0;Q9NV72;Q6ZNG1;Q9Y651;Q86TU7;P68104;Q8IYN0;Q96JC4;O15015;Q02078;Q9UPG8;Q9P1T7;Q9UJW9;Q9BXP5;Q5T0F9;Q96LI6;O00422;Q06546;Q9Y2A4;P21506;P40424;Q14584;Q13888;Q9Y6R6;Q9HOE9;P31269;Q86XU0;P53567;P17014;P49715;P42772;Q8N108;Q5QJE6;Q9Y224;Q6ZMS7;P17023;Q9Y242;O15160;Q8NDP4;Q6ZN01;Q9H2G4;Q96EB1;P18146;Q03112;Q15906;Q15650;P17947;P17028;Q92966;O96028;P31260;P32519;P95196;Q8WX92;P15822;Q10586;Q9UKL3;Q03936;Q00403;Q8WTS6;Q14693;Q9BXJ9;Q969F1;Q8N2W9;P78543;P17024;Q7Z401;Q7Z5L9;Q80945;Q71F56;Q96A56;A8K8V0;P98168;Q9UBS8;O60716;P33076;Q7Z3I7;Q9UK58;P51003;Q03938;Q8TF39;O60224;Q3C1V8;P08651;Q9NRC8;P62979}

25526

Pathogen[ P0C214] interacts with 1612 human

partners: {P41970;Q9NWB7;Q9Y3Q8;P40424;Q86UD4;A6NDX5;Q9UGP4;Q6ZN55;Q92993;Q5BKZ1;Q6NX49;O00470;O00268;Q9UKW6;Q92618;Q96S94;P53567;Q06732;Q8NEK5;O75444;Q9NQZ8;Q14526;Q03052;P82979;P18850;Q9BWW4;O15198;Q15742;Q9BW11;Q8NI51;P54198;Q03989;Q9HAJ7;Q9Y6X2;Q6IQ32;D6RGH6;Q96C28;Q9UHB7;Q96FV9;O00213;Q92585;Q14527;Q8N371;Q96MU6;Q9P255;Q9Y3T9;O14813;Q9UHL9;P51946;P24863;Q8WX92;Q9UKN5;Q96CJ1;Q58F21;Q96RE9;P35226;Q8NA19;Q13761;Q9NZN8;Q8IX03;Q96S65;A8MUV8;A6H8Y1;Q05195;Q15059;Q43296;Q9NS37;Q016254;Q00411;Q8TBZ8;Q96QE5;Q8IZC7;O75467;Q9HCS7;Q6ZN11;O14529;Q96LW9;Q9UID6;P20290;P11308;Q00653;P27695;Q8N228;O43365;P35813;Q6ZNA1;Q9P0T4;P35789;O75486;Q8NDQ6;Q9H5I1;Q13887;P35227;P49639;Q8IX12;Q96T58;P17032;P61244;Q14593;Q15697;A6NGD5;A8MVS1;Q9HCZ1;Q02930;Q04727;P56270;O43829;Q9HAU4;Q15022;A0AVK6;Q8WXF8;Q00613;P35869;P51508;Q13469;Q7Z398;O60663;Q8N0Z2;Q9NRL2;Q5JVS0;P16989;Q14207;P11474;O75528;A8MQ14;Q15047;Q71SY5;P52743;Q9BRU2;O95238;Q13952;Q9Y6K9;Q9BT49;Q06546;Q9Y5Q8;Q13363;Q9Y6J9;O75461;Q9P0L1;Q86YD1;P17010;O95633;Q63HK3;Q9Y2G9;Q9ULD5;A8K8V0;Q9UHF7;Q8N9N2;Q9Y4A8;O75764;O43830;Q7Z591;Q13547;Q9BS34;Q9Y2A4;Q14865;P60002;Q6PEW1;P78337;Q9HCD5;Q12824;Q14872;Q8N7Q3;Q13490;Q13772;Q86SE9;P31249;P38159;Q8IYN0;Q14929;Q8NF64;P17023;Q9BX82;P12757;O75909;Q9Y2D9;Q6VMQ6;Q14591;P30876;Q96JN0;Q9Y5A6;Q6ZN57;P51814;Q5T5D7;Q08999;P19838;Q05481;Q6UUV7;P14921;A6NHU4;Q96SQ5;Q8WUF5;Q92664;P0CB33;Q9UL59;O75925;P52744;Q6ZNH5;Q15573;Q9H9Y6;Q96IZ0;O14497;Q52LR7;Q5JVG8;Q8IWX8;Q8NC26;O75586;Q8N5A5;P15336;Q9UFW8;Q969S8;Q9BUI4;Q9P086;P78543;Q9Y473;Q06547;Q13568;P52657;Q96LW1;P13010;Q8IZL2;A6NP11;P54253;Q9H9F9;Q96I27;Q9UIL8;P21675;O15535;P53803;Q9H175;Q15361;Q96QR8;Q8TD17;Q6PG37;O43159;O60716;Q9NVU0;Q53TQ3;Q96LI6;Q9NTW7;Q8TF45;O43186;P48552;Q9BSM1;Q8NG57;Q16656;Q9C0F0;O75820;Q96F24;Q9BWM5;Q8TAQ5;P52742;Q5TB30;Q96DB2;O60543;P51003;Q14587;Q12873;Q9NPC7;P52655;O95628;Q8WYN3;P35269;P50750;Q86UE3;Q9UIH9;Q9HD15;Q8TBC5;P19484;P25208;Q99081;Q8NDP4;O00267;Q96CX3;Q96NJ3;Q8N693;P52738;P50613;Q92841;Q9H3M7;Q7KZ85;Q13112;Q15014;P33076;Q9Y2X0;Q96RK0;P29084;Q5JVG2;P0CG31;Q7Z6R9;Q96K62;O75618;Q96BR6;Q9HBE1;Q8NCA9;P42226;Q5H9I0;Q7L2R6;Q460N5;Q7RTU4;P15884;Q96EI5;Q8NHW3;Q9NS56;O75478;Q8TD23;O60907;Q9P2F9;O15350;Q8N587;Q99856;Q8TAU3;O00167;Q8N2W9;Q14119;Q14CW9;Q03112;Q9UJN7;P17019;Q9BQ87;Q8N0Y2;Q8IVP9;Q9UC

06;C9JN71;O75530;Q02080;Q5T230;Q14765;Q9BZE3;Q9C086;Q8N5F7;Q68DY1;Q8NDY6;Q16621;Q5MC  
W4;Q16384;Q99676;Q8NCK3;Q9NR55;Q14145;Q93074;P52435;O15266;P17275;Q8N823;Q9NVW4;Q927  
50;Q9UNY5;Q8NEP9;Q9HD42;Q08AN1;P17022;Q12800;O75362;Q13111;P32519;Q9NPJ4;Q9NUA8;O602  
24;Q9BQG0;Q99743;Q15233;P23769;Q5T6S3;Q92793;Q16587;P50548;Q7Z7K2;Q9Y5J3;Q969W8;Q156  
37;P35711;Q8IZL8;Q9UIF8;P19419;P56693;P67809;Q499Z4;P15408;Q9BUE0;Q96GE5;Q9Y295;P539  
99;Q8N9N5;P46937;Q9NX70;O95625;Q86XU0;P61457;Q8N8G2;Q96QT6;Q7Z5L9;Q8TF20;O431  
67;Q6P9A1;P84022;Q9H1A7;O75437;P23246;Q6ZRS2;Q6ZYL4;Q12906;Q6PK81;Q6P1L6;Q9UL58;Q9UK  
N8;P17096;Q5U623;O95125;Q9NWA0;Q9NZI5;Q5TYW1;Q9H1D9;P15172;Q6PF04;Q76L83;Q9BYH8;Q86W  
Z6;P17947;Q9P2R6;Q9H3H9;P56524;Q16533;Q9GZV5;Q9UK11;Q7Z7C8;Q6W2J9;Q86YE8;Q99623;Q9NR  
11;Q96CS4;Q9Y6Y1;O14709;P17029;Q9H501;Q6NT76;P42704;Q14678;P17544;P41218;Q12986;P118  
31;Q9Y2Y9;Q96BD5;Q00403;Q15906;Q96SR6;Q8NAP3;Q9UK13;Q96HR3;Q96ST2;Q99417;Q9UNN4;Q5H9  
F3;Q99990;P17026;Q96MN9;Q96SK3;Q04206;Q9NNW07;Q9NVC6;Q16520;O95931;Q5HY98;Q3L8U1;Q2M1  
K9;Q7Z589;Q63HK5;Q6STE5;Q12962;Q9H307;O75123;Q53H80;Q2M3W8;Q06455;Q9Y5Q3;P42224;Q023  
86;Q15973;Q3MJ62;P42568;P37275;Q68CJ9;Q9Y2S0;P28347;Q3KP31;Q6NZI2;P10914;Q8NI08;P612  
18;Q8N8C0;Q9NZ81;Q16666;Q96NM4;Q15928;P17482;Q8TDY2;Q8IXW5;Q5SXM2;Q96BN2;Q9ULJ6;O955  
03;Q86TJ2;Q9UPG8;Q96K58;Q9Y5B6;A8MT65;Q6ISB3;Q9UKI9;Q9H869;Q49AM1;Q96JC4;Q99608;Q063  
30;P98168;Q12905;P35251;Q7Z3I7;Q15910;Q15370;Q99607;Q32MZ4;O00716;Q8IZ26;O75030;Q9NS  
I6;Q8N726;P78395;Q8N9F8;P17024;Q9Y232;Q9Y2Q1;Q6ZR52;O14771;Q12901;Q96NG5;Q96N77;O751  
64;Q8N5J4;Q96SE7;O75151;Q04724;Q9H091;Q9BTT4;P05121;Q6ZMS7;Q86WP2;Q6ZLN19;Q13901;P170  
38;Q9Y468;Q9UC07;Q14686;O94864;Q15545;Q96EK7;P38935;Q494X3;Q14938;Q96MR9;Q9Y2P0;O602  
44;Q7RTU5;Q9PGZ8;Q15170;Q96K75;Q9ULI5;Q6P1K2;Q15653;Q4V348;O43463;Q9BT81;Q7KZ4;Q96S  
Z4;A6NLF2;Q9H063;Q6IV72;Q9NY61;Q8N141;Q8TBE0;P51786;Q5VVH5;Q9BY31;Q3B7T1;Q8TAQ2;Q018  
44;Q9UI95;Q15560;Q9H2F5;O43318;Q96BV0;Q6P1K8;A6NEJ1;Q5SVQ8;Q6IA86;Q92541;Q16594;Q8N8  
83;Q8N6I1;Q3SXZ3;Q9GZX5;Q9NXT0;Q9UKD1;P51523;Q9H4I2;Q147U1;Q12789;Q9HCE1;Q9BSK1;P176  
76;P24278;Q6T88;P17031;Q5PSV4;A8MV65;P43355;Q9HCX3;P78317;Q15542;Q16385;P14651;Q9UI  
V1;Q03933;Q5VTD9;O95619;Q13398;Q53GI3;Q09028;Q9HBT8;P86452;Q93008;Q99909;O14776;O432  
48;Q9UK58;Q5VZB9;P61077;O60290;Q9NUQ3;P49716;Q6ZW49;Q10587;Q8N5U6;P10244;Q8N344;P186  
15;Q9BQI9;P17030;Q10586;Q6VUC0;Q9Y250;Q03936;Q5QJE6;Q96NL3;P0C1Z6;O60828;Q8TF68;Q9H9  
44;Q9BYK8;Q9NZI7;Q9Y5K5;Q2VWA4;P48382;Q9HBZ2;P20265;Q7RTT4;Q5VWG9;Q53QV2;Q02078;Q86X  
N6;O14503;Q7RTT5;Q15561;Q969F1;P82094;Q8N3C0;O95201;Q8TC21;Q969E4;P28698;O75525;Q000  
59;Q9NWS9;Q9GZS1;Q9Y3C7;Q92922;Q8IXF0;P15622;Q6ECI4;Q9UM07;Q6ZSS3;Q9BRR0;Q6ZNN0;Q8N8  
59;Q13129;P13056;Q9UIS9;Q99966;Q9HC78;Q8TE85;Q9UQB3;P10243;Q12968;Q01094;Q14814;O754  
46;Q86VE0;Q9Y2N7;B1APH4;Q9UL36;P18848;Q92966;P62487;Q9ULJ3;Q92681;Q96RN5;Q16633;Q9UL  
M6;O14867;P17535;A6NIX2;Q13506;Q99732;Q3KNV8;Q7Z7J5;Q9Y6R6;Q49AA0;Q8N3S3;Q92754;Q158  
34;O00712;Q15528;Q8WY36;Q13045;Q9UHX1;Q7Z340;Q6ZNG1;Q8IXJ9;Q14186;Q9UIF9;Q8IYH5;Q128  
37;Q6PI98;P49116;Q01201;Q9UHR5;Q92985;P37198;Q9HAF1;P49750;Q9BQ70;A0JLT2;Q8BWT1;Q53E  
T0;P41134;Q9UKL3;Q96IT1;Q9Y224;Q13487;O60765;P15923;Q06730;Q9UJU3;Q86UQ8;Q8N184;Q71F  
56;Q9UGU0;Q86Y25;B4DXR9;Q04726;Q8IWS0;P51948;Q8WXF1;O95416;Q96MH2;O75373;Q5HYR2;Q8WT  
Z3;Q8NEF9;Q14103;Q9NVV9;P28370;Q9UER7;O96017;Q14978;Q92539;Q9Y2H8;Q15929;Q07666;Q8N4  
W9;A8MXY4;Q14151;P49336;Q96PE6;Q3ZCX4;Q68DI1;P9P0W2;O60225;Q8N488;Q9H5H4;Q02556;Q065  
87;P17861;Q8N9R8;Q00577;Q6P280;Q5VUA4;Q16600;P17014;Q6RFH8;O95983;Q8N9K5;Q99459;Q8NF  
99;Q9UJW7;Q8TBZ5;Q9HBM6;Q49A33;O14948;A5YKK6;Q99549;Q8N2I2;O75290;Q86U70;Q9Y543;Q96J  
F6;Q9BRG1;Q96D98;P0CG48;Q96RJ6;A6NDZ8;P0C7T5;Q6P9A3;Q6AW86;O43513;Q9UKL0;P26358;O438  
12;Q6ZMW2;Q9UNY4;P25440;Q8TF47;P51826;Q92994;Q6DD87;Q96JM7;O43189;Q6P1J9;P14653;Q9Y6  
B2;P51504;Q6MZP7;O00422;Q96N95;Q8TF39;Q9NVW2;P78347;Q8IZ40;Q86YP4;Q6P2D0;Q13485;Q9H6  
W3;Q9C0F3;Q9H7X3;Q96N22;A6NE82;Q15369;P55197;Q9NYT6;Q03924;Q15572;Q969X6;Q86YW9;Q5FW  
F6;P18847;Q9Y242;Q9NYW8;Q08AG5;Q9BYE7;Q92769;Q86TJ5;O15105;P55199;O60583;Q9C005;Q9H8  
G1;Q86UP8;Q9UH92;Q9UBU8;Q13352;Q8N108;P63272;Q15544;P20749;Q9HAZ2;Q8N7M2;P17028;Q9P2  
J8;O95780;P0CH99;P98169;Q8N3X6;P49848;Q15329;P28324;Q3MIS6;Q6P4R8;Q9UMS5;P16383;Q9UK  
V0;Q9HCU9;Q8WV38;O00257;Q15652;B4DU55;Q9NQG5;Q9H160;Q9NQX6;Q12872;Q66RK1;Q3B726;Q9UN  
S1;Q96E29;P51815;Q9NPA8;Q6ZS27;O14896;P51522;Q8N393;Q6ZN28;O15060;Q9BUG6;Q9Y603;Q9UB  
S8;Q15714;Q7RTV0;Q9HCK8;Q15654;Q6ZMY9;Q9UN79;Q13765;Q92925;Q8WXI9;Q05BQ5;P17480;Q8N7  
H5;Q13185;Q16576;Q2QGD7;O15226;O75376;Q49AN0;Q96N58;P0DI81;P17020;Q9ULX9;Q76KX8;Q6ZN  
01;Q9BUJ2;P19532;Q15796;Q9NSC2;Q96I24;Q969J2;Q9ULM2;Q14192;Q6UUV9;O43593;O15525;Q86V  
71;Q9Y3M9;P17027;Q86TU7;Q01543;O60381;Q96GC6;Q99594;P41182;Q9Y6X8;O60711;Q6P9G9;Q039  
23;Q9BXJ9;Q99504;Q9Y5B9;Q9NP71;Q9UQR0;Q8N972;P17098;Q6ZT77;P21506;O43541;Q7L1Q6;Q8IY  
B9;O15379;Q9UN30;P06733;Q96RL1;Q01892;Q96PK6;Q0PNE2;Q6P1X5;Q9P1T7;Q96JK9;P43268;Q9Y2  
D1;Q96RS0;Q9UBW7;O75475;Q9NYV6;Q8TE02;Q16514;O95251;Q8IXH6;Q7RTU3;Q8WYA1;P17035;P829  
70;Q8NDN9;P0C7X5;Q9NW08;Q8IX07;P48378;Q9UJL9;Q9NV56;P12755;Q6U7Q0;Q13127;Q14934;Q4LE  
39;Q8NDW4;Q9BSG1;P53041;O75155;Q15650;P62875;P28069;Q2VY69;O75346;A2RRD8;Q6ZNG0;P139  
84;P20226;P13682;Q9H2G4;Q9UHV2;Q15424;Q86W11;Q6NSZ9;A8MWA4;Q14653;Q8IZX4;Q86Y97;Q9UI  
36;Q6P2C8;Q5SXM1;Q96ND8;O75529;Q86UU0;Q6ZNA4;Q9H4T2;P32780;Q9Y4A5;Q9UKV8;P17040;Q9H0  
E9;Q6V9R5;Q8WVC0;Q9Y2X9;Q14140;P58317;Q9UDV6;Q96C00;P10074;Q15287;P24928;O43918;Q68E  
A5;Q99496;P36402;Q8TAK5;P52747;Q8IYX0;P10242;Q9UHV7;Q8N9Z0;P62987;Q6XD76;O14593;Q141  
35;Q9NV72;Q9ULV5;Q5VIY5;Q5THR3;Q8WUB8;Q9Y462;Q9UEG4;Q15935;P22670;Q9H9T3;P39880;O608  
06;Q9UBD0;P62633;Q9UKT9;P36508;Q7L945;Q15532;O43345;O60563;Q9Y294;Q8IUR6;O94992;Q6IE  
81;O15392;Q92499;P43356;P05412;Q9H8M2;Q9UMQ3;Q9Y2G7;P17041;Q8NB50;O95073;Q9NYB0;Q96H  
Q0;Q8WVJ9;Q6NX45;P49711;Q14781;Q8NFX5;Q01826;Q13106;Q02447;Q12857;Q96R7U;O15160;Q9NZ  
I6;P06454;P928749;Q8N8Z8;Q9Y535;P17021;O75448;Q719H9;P18146;Q16534;Q8TEE9;Q9HC  
44;Q96JL9;Q9H204;P0C7X2;Q8IU81;P0CG00;O15164;P58340;P15621;Q0D2J5;P0CJ78;Q9GZM3;O956  
02;Q02577;Q9NPI1;Q5PRF9;Q8N196;Q8IVC4;Q96MX3;Q14584;Q96T23;Q3SY52;Q9NQX1;Q15853;A6NK  
75;Q86U86;Q6ZNO6;Q9H1I8;Q03060;Q7Z401;P57071;Q15759;Q6IQ21;Q9P031;Q96JB3;P40425;Q6ZV  
V7;Q16526;Q04725;Q14592;P17036;O43309;P17039;Q9NX65;P0CG47;Q8TAF7;P98182;P0C7V5;Q9UD  
V7;Q99814;P09086;Q8NB42;Q460N3;Q01658;Q9P1G2;Q9BZK7;Q96H40;Q92830;Q52M93;Q6GN5;Q127  
96;Q96ST3;P0C860;P09629;Q8N8L2;A6NNF4;P10599;Q9HB58;Q96SL8;P11161;Q13888;Q6ZRF7;Q9UJ  
W8;Q6ZMV8;Q5T619;Q96AE4;O15265;Q96PQ6;Q7RTT3;Q9UFF9;Q12888;Q9NSD4;P23511;Q8NHY6;Q8WW

Y6;Q9ULW3;Q14585;Q03111;Q99717;O14978;P16415;Q6ZQV5;Q9UIE0;Q2M218;Q0D2K3;Q9NR48;P524  
34;Q08945;Q969V6;Q8IXH7;Q8N7K0;Q04864;Q9HCG1;Q9NZV7;O95905;Q8IYN2;Q5TEC3;P40763;O004  
01;Q9H9D4;A8MUZ8;Q8WZ33;Q8WVM0;Q0VGE8;O96004;Q12972;Q9H5J8;Q08ER8;O00472;Q7RTT6;Q9NW  
B6;Q7RTU0;P27540;P49910;Q9BR84;Q86V15;Q8TB69;Q99543;Q8NDT2;O75971;Q71F23;Q9H707;Q926  
00;Q96N38;Q9HBT7;Q68CP9;Q9HAW0;Q9UPW6;P08151;Q9BTA9;Q9UFB7;Q6P1N0;O94916;Q96H20;Q86X  
55;A6NM28;Q96A56;Q53T94;P78545;Q99684;Q5H9L4;Q9H3P2;P50549;Q9HCL3;Q9ULH7;Q6NU  
N9;Q9P243;P22390;P41162;Q92945;Q9BUY5;Q9HB65;Q8N3J9;Q9BQA5;P08651;A6NFI3;Q15776;P224  
15;Q9BYN7;Q8IYF1;Q9H9C1;Q9UM63;P19387;Q8N782;Q9UQ80;O14646;Q9P1Z2;Q9NRC8;Q13148;Q9UB  
B5;P10828;Q7RTV3;P23193;Q8N1W2;Q15596;Q9H7R0;Q13503;Q8WYH8;Q15797;P19388;P52736;O956  
44;Q15543;Q9Y651;Q8WUI4;P51668;P16220;Q13360;Q96NJ6;O60869;P14373;O95948;Q9P2K3;O947  
63;Q8WTS6;Q3KQV3;Q9NQ92;P17017;Q9NQR1;O14628;Q8NFD5;Q3ZCT1;Q92800;Q86Y01;Q5T3J3;Q8NA  
42;A6NKF2;Q15562;Q96H86;O60315;Q96G25;Q8N895;Q9ULK4;O15370;P51531;P62979;Q32M78;P526  
30;Q96AQ7;O94805;Q5VWX1;Q8NB12;Q6ZN32;P0CJ79;Q96NG8;P54845;Q96JC9;Q15326;Q9UQR1;Q6P3  
V2;Q8IX15;Q6ZSB9;Q9Y2W1;Q96RE7;Q92748;Q96EB1;Q969R5;Q9UBK9;Q6AZW8;Q96EZ8;Q14590;Q9NV  
V4;Q9NZL3;Q86XF7;Q9NQ87;Q9Y618;P62508;Q9NRG4;Q96EK4;Q96EG3;Q9H963;Q92782;Q01664;Q9UP  
N9;Q6PD62;O75177;Q14498;O75175;Q9NP66;Q9BS31;Q5EBL2;P39687;Q9ULC4;Q8NE65;Q5CZA5;O951  
63;P15822;Q96LX8;Q7L190;O60284;Q9NQ33;Q8WV37;Q15699;P52746;Q9H0M5;P14859;Q9NSJ1;Q9UK  
12;Q96ES7;Q96N20;Q9Y3Y2;Q9Y692;Q8WXB4;Q99583;Q86X95;Q14209;Q93062;Q9H3M9;Q9Y2P7;Q018  
60;Q9Y2L8;Q2M3X9;Q66K89;Q96NI8;Q86VP6;Q5TGS1;P01106;Q92785;Q3C1V8;O95402;O43361;O606  
75;P14316;Q99551;Q9UL18;Q8NEM1;O75081;Q03468;O14802;A6NK53;P35712;O96019;Q13495;O603  
04;Q14188;Q9H7R5;Q7LBC6;Q9NPJ6;Q9UQL6;Q9UPP1;Q73105;Q86VM1;P06400;Q92759;P35548;P080  
47;O00291;Q09FC8;Q14966;Q8IYI8;Q8TA94;Q05516;Q9HC52;Q7Z3K6;P12956;Q8HWS3;Q9GZS3;O002  
55;Q12830;Q96PM9;P12980;B4DX44;P42772;P52737;Q14839;Q8TF50;Q9BXP5;Q63ZY3;P54252;P0CG  
24;Q68DY9;O15405;A6NJL1;Q9NQV7;Q9NY43;P35638;Q5HYK9;Q9HAH1;Q14588;P29083;P31276;Q33E  
94;Q6IPX3;Q9Y5R5;Q15466;Q96T76;Q96QC0;Q96PU5;Q7Z3V5;Q8NBZ0;P0DI82;A8MTY0;Q9UK10;Q8TD  
D2;Q9H7S9;Q9NPF5;Q8TAW3;Q9UJW9;P09874;Q5JNZ3;Q5T0F9;O15015;Q6ZN79;P17025;P51532;Q9HA  
P2;Q9H981;Q15937;P18846;Q9NYF8;O94993;Q8N140;P23760;Q6SJ96;Q8IZD2;Q9P1U0;P54259;P100  
73;P52740;Q5EBM4;P63167;Q9H2P0;Q96LA8;Q9H5Q4;Q9H0E3;Q8IY57;Q86T29;Q15723;O75182;Q8NB  
B4;O94892;O00570;Q16670;Q32MQ0;Q9BXG8;O75928;Q7L3S4;O96028;Q16236;Q92670;Q9H7L9;O949  
83;P11142;P52741;Q14693;Q96IR2;Q8N988;Q9H116;P55771;Q9BY41;Q8TF32;Q8N8J6;P31269;Q153  
06;P59923;Q5H9L2;Q9NWT6;Q14241;P41212;Q96AV8;Q03938;Q4G112;O60481;Q03701;Q9Y222;Q995  
02;Q3KNS6;Q8N720;Q8NHM5;A6NN14;Q9BRH9}

Pathogen[ P03346] interacts with 2017 human  
partners: {Q96T92;Q9NVU0;Q15723;A6NK53;Q92681;Q12888;P31271;Q06330;Q99081;P85037;Q3C1  
V8;Q06945;P10244;Q6S9J6;Q3KNS6;Q14781;Q96NG5;Q5JVG2;Q96FV9;Q13886;Q969S8;O15265;Q9Y6  
Y1;P08048;Q9BEZ0;Q12901;Q05481;Q9Y6J9;P31249;Q6PD62;Q7KZ85;P0C860;O95201;Q9NWS9;Q96S  
T3;Q9UPN9;Q9Y6K9;P49716;Q7Z398;Q8NI51;Q03989;P05412;Q9UKS7;Q96N20;O00213;Q9Y467;Q925  
85;P17097;Q96CJ1;Q3KNV8;Q12830;P78424;Q9NZU5;Q15542;Q9UHL9;Q96LW1;O75603;P49639;Q166  
21;P57071;Q5T5D7;O75592;Q7Z7K2;Q9NQ92;P61978;Q99742;Q9HBT8;P15863;Q15562;Q9UHF7;P469  
37;Q96S65;Q13487;Q13263;Q9NZR4;Q96RK0;Q494X3;Q9Y3Y2;A8MXY4;P35453;Q9UOX6;Q15370;Q9UL  
M6;Q9Y4Z2;O75364;Q8N0Z2;P31260;Q9NR83;Q96QR8;P98182;Q9NRZ9;P50219;Q8TF39;P09086;Q020  
78;Q02386;P38935;Q16666;Q9NQX1;P52954;Q96ES7;P10827;Q9UMS5;Q8N4W9;Q9HB65;P35813;P499  
10;P0CJ88;P11473;Q86U70;Q3MJ62;P31268;Q8WXF1;O94892;Q15788;P28324;P23511;A6NGD5;O155  
35;Q8IX12;Q8IZM8;Q9NPA5;Q9BTC0;Q9HAU4;Q3SY89;P86452;Q9NQV7;A2RRD8;Q6P1L6;Q53ET0;P524  
34;Q6QHK4;P0CGH1;O95402;Q08AN1;O95677;Q9H8N7;Q96NJ6;O95625;P12956;Q49A33;Q142  
07;Q9BRR0;Q8IUE1;C9JN71;Q99966;Q6ZRF7;Q96C55;Q9NPJ6;Q9UGP4;Q7Z340;Q01201;Q9BRU2;Q5T1  
R4;Q8N7R0;Q9P031;Q96MR9;O60907;Q8WV37;Q9NZV7;Q8WTZ3;P18847;O94915;Q9NQG5;Q96C00;Q159  
28;Q86YD1;Q15834;Q8N8G2;Q14135;O14813;Q14678;Q9H091;Q96EK4;Q7RTS1;Q9BWM5;Q96PU5;Q145  
91;Q99612;P29374;P68036;Q9BUY5;Q9UEG4;Q7Z591;P58012;Q9Y5Q8;Q14814;P78337;O96017;Q8IX  
H7;Q936508;Q96062;Q96S94;Q9Y2P0;A6NN14;Q9NX70;Q8NCA9;O75446;P14373;O15522;Q8WYB5;Q52M  
93;Q9H116;Q7RTS3;Q12905;Q32MQ0;Q01538;Q8NAF0;Q3KNW1;A6NFD8;Q8IVW6;Q15916;Q9P2K5;Q9UL  
D5;Q9UPW6;A6NJ46;Q9C005;P16220;O15392;O60765;Q8IZC7;Q9UQR1;Q08999;P56270;P17039;Q2QG  
D7;O75362;Q9UKL0;Q9BQG0;Q9Y2P7;Q9H3M9;Q8N8B7;Q8NAP8;Q9H2W2;Q5HYK9;P06401;Q9UL59;O439  
18;Q9H0M5;P43355;Q96BA8;P17676;Q7RTV0;Q03052;Q9UIV1;O43167;Q16384;Q99543;Q9Y4X4;P194  
84;P17098;Q86V71;O15370;Q52LR7;O14901;P0C7T5;Q8NCA9;P12757;Q96NJ3;P36402;Q9ULW3;O751  
75;O75586;P62633;P15336;Q9UIF8;Q92800;Q99607;Q86Y97;O60716;Q9P0W2;Q96HQ0;Q9NU63;Q131  
29;P78415;Q2M218;P36956;P52739;O15209;Q05066;P0CJ78;Q3B8N5;Q8N141;Q8WYH8;Q7Z3V5;Q9H2  
P0;Q8IU81;Q16656;Q9C0F0;Q00613;Q6ZT77;Q9UL58;Q8NCA2;P35638;P35548;Q02535;Q8N823;Q8WW  
38;Q6ZQV5;P52747;Q9BYU1;O00167;Q9Y2L8;Q96DB2;P08235;Q8TAK5;Q06547;Q9HD90;O75530;P118  
31;P31270;Q15329;Q9UHR5;Q3KQV3;O43296;Q9NV56;Q8TAQ5;Q93008;Q6PEW1;Q9BXA9;Q86TJ5;Q0VG  
99;P28347;Q9Y5W3;Q96QC0;Q9UQ80;Q8IUE0;P62987;Q96K75;O43309;O15379;Q5FWF6;Q9ULM2;Q460  
N3;Q9NP62;Q6ZSB9;Q7Z3I7;Q9UKT9;Q9POT4;Q12857;Q99594;Q06732;Q96H40;Q9NQR1;Q8NFB5;Q71S  
Y5;Q8N3X6;Q8NFW5;P48443;Q8IXW5;P06400;P0CJ87;Q8N7M2;O75123;P48378;Q4G112;Q96I09;Q145  
90;Q9HD42;P0CH99;P40426;Q14774;Q96K62;Q9NW07;Q6V9R5;P35789;Q8NEF9;P52740;Q9NR11;Q9BY  
M8;Q8TD23;Q15291;Q08AG5;P51532;Q00577;P35226;P54845;Q969W8;Q13148;Q15797;Q70SY1;Q141  
88;Q9GZV5;O60393;P50549;Q00059;Q969X6;Q7LBC6;Q12772;Q96SZ4;Q96EZ8;Q96MU6;Q8NFX5;Q9BZ  
E3;Q92841;Q9C086;O60315;O60563;Q15653;Q8WXF8;Q9BWX5;P48382;Q03933;O60290;Q6P1K8;P170  
27;Q9Y3Q8;Q5MCW4;Q9H1A7;Q96HZ4;P51786;Q9UKI9;Q99626;O94763;Q12837;Q03936;Q16559;Q9H9  
F9;Q96JG9;Q00056;Q15911;Q2M1K9;P17275;P78347;Q32MZ4;Q86T29;A8MUV8;P20294;O95628;Q147  
U1;Q8TD17;Q14587;P52738;Q9NQV6;Q8TF45;P49116;P0CB33;Q15466;Q9UJQ4;Q8N680;Q6XYB7;P248  
63;Q7Z7C8;Q9NZI6;P14316;Q9UL18;A8MVS1;P24278;P49336;Q8WYN3;P17861;Q96KM6;Q8NEP9;P237  
69;Q14872;O43159;Q8NE65;Q9NSI6;Q5VLY5;Q9HD15;Q14527;Q96HR3;Q8N693;P25490;Q15583;Q8N5  
U6;P19419;O95983;Q9H4S2;Q96A56;Q15637;O14978;Q8NA19;O75971;Q0PNE2;Q49AN0;Q15573;P148  
59;Q9P280;Q9NSC2;Q5T0B9;O75486;O43313;P48380;Q8N393;Q14498;P25208;P50548;Q8IWL9;P232  
46;Q96I27;Q8TF20;Q13888;Q8NF99;P42772;Q92925;Q8IX15;Q6MZP7;P52741;Q9NR55;Q8TD26;P551  
97;Q9C0A1;P20264;Q8WZ33;Q86YE8;P15923;P0CG48;Q5QJE6;Q9H307;Q6ZMY9;O75820;Q86WP2;Q9HC

25527

52;P15172;Q9H2G4;Q15796;Q86WZ6;P41225;P56693;O75475;P49750;O14744;Q9BW11;P23760;Q8IZ  
20;P56524;Q6NSW7;P15408;Q9UL68;Q9H3P2;Q9UK11;P17535;P13010;Q86YW9;Q8IYH5;O43298;O147  
09;Q6NX45;Q9UN51;O00712;A6NE82;Q5PSV4;Q3SY52;Q71F56;Q15906;Q92858;Q93074;Q96QT6;Q9NP  
I1;P31276;Q5H9F3;P17026;Q99856;P53803;P17022;Q96B42;A6NPF7;Q8N5A5;Q7Z7J5;Q9ULH7;Q8TB  
C5;Q9H9Y6;Q16520;O95931;Q12986;Q5HY98;P35227;Q7Z589;Q04206;Q8IZ40;Q5T3J3;Q68DI1;P330  
76;Q9HAJ7;Q6UEB3;Q53H80;P51826;Q8TAK6;Q9H9D4;P0CJ85;Q3MIS6;Q8N9K5;Q8N895;P52737;O952  
38;Q12906;Q7L3S4;O95163;P28698;Q6ZMS7;Q9ULJ3;P13056;Q9UN30;Q6PJJ2;P81218;P11142;O002  
68;P52951;P82979;O60806;Q92886;Q8TDY2;Q96CS4;Q9P0L1;O60244;Q9BYW2;Q96IF1;Q9H4W6;Q928  
26;Q6ISB3;Q86VN1;Q63HK5;Q5TB30;Q08050;Q9BPY8;Q8IX03;Q14209;P42226;P52742;Q9UDV7;Q8IU  
R6;Q9C0D4;Q9BYE7;Q15306;Q96RL1;Q9Y5Q3;P15622;Q8NDQ6;Q9P2Y4;P23759;P10588;Q96QS3;Q9HC  
K0;Q8IVC4;Q96AE4;Q12824;Q9NQ33;P14652;Q96AV8;Q8TA94;P0CJ85;Q96CF3;Q6PG37;O43186;Q9NX65;Q165  
26;Q8TF32;O00257;Q9Y2D1;P27540;Q8N5J4;A8MQ14;Q9NP08;Q86UD4;P58340;Q96SE7;Q86U86;Q969  
V6;Q9HCG1;Q9BTT4;Q9NZI5;P58304;D6RGH6;P16989;P26358;A6NJT0;Q15560;Q9P2F9;Q8TAF7;Q9UB  
L3;Q99717;P0C7X2;O14646;Q92748;P20823;Q9H0E3;Q9Y3M9;Q96BR9;P17038;Q92831;Q9H4Q3;P254  
40;P0CJ89;Q02575;Q96RE7;A6NK75;Q9H609;O15350;Q96N38;O15105;O75626;Q9NTW7;Q9BUJ2;Q8ND  
Y6;Q99502;Q9BSM1;Q96EK7;Q9UBX0;Q92945;Q9BYE0;Q60682;Q9NRL2;Q14586;Q16254;Q7RTU5;Q009  
78;Q6PI98;P29084;Q04864;Q7RTT6;Q96AQ7;A8K010;P17014;O75030;Q13610;Q92670;P37198;Q9Y5  
R5;Q8N587;P10074;O43316;Q9UM63;Q5VVH5;Q8NB42;O60224;Q9NV72;P14653;P63272;Q86VK4;Q3SX  
Z3;Q8TE85;Q9UI95;Q8N5F7;O00570;O00409;P31269;A6NEJ1;Q96RJ6;Q15652;Q96BV0;Q9H165;Q09F  
C8;A2RU45;Q8N859;P52743;P13378;O15090;Q9HCS7;Q86Z02;P17483;Q8NBB4;O00472;O75151;Q039  
23;Q8TEE9;Q75764;O00291;Q96E15;O95644;Q8NCP5;Q8TAP4;Q6XD76;Q9UJW8;Q86V15;Q9NSD3;Q010  
94;Q9BY31;Q2VWA4;Q6NZI2;Q9NUA8;P17032;P51668;P49715;A5YKK6;Q9NPJ4;Q8N2I2;Q9ULX9;P170  
96;Q13398;Q66K89;Q53GI3;Q92754;Q8NF64;Q8N554;A6NJJ1;P17025;O43463;Q9Y5J3;O15055;P156  
21;P31274;Q9UBC0;P17010;O43345;Q6P9A1;Q15059;P59817;A8MT65;Q01860;Q92750;Q9HCC3;Q9UL  
J6;O75182;Q6EKJ0;P61077;Q96SQ7;Q96H20;O14867;Q08945;Q9H3H9;Q9NYW8;P20719;Q13351;Q9BQ  
I9;P0CG40;O15198;Q0VGE8;Q9NZ81;O75444;Q8N7K0;Q9H4T2;Q53T94;P78426;Q8NDX6;Q9NSD3;Q9P0  
86;P0C1Z6;Q499Z4;Q8N3C0;P0CJ90;Q6P9G9;O15534;P08047;Q9BQW3;Q9BXP5;Q9H582;P12980;Q138  
89;Q9H0E9;O14503;Q15853;Q96LW9;Q8TF68;P06733;P20226;Q9HC78;P41218;O00422;P20265;Q9H5  
H4;Q9NRG4;Q8N9F8;Q92766;Q9H501;Q96JM2;Q8TDD2;P98168;P18850;Q9H963;P17480;Q9UK10;Q3B7  
T1;Q9H869;P22670;Q7Z5L9;Q8WY36;Q9NZN8;Q14119;Q95600;Q8N8E2;Q96CX3;Q9UFW8;A8MUZ8;P527  
36;Q8H5J8;Q14919;Q03111;P98169;O75155;O43593;Q96G25;Q14592;Q16236;Q14592;Q14934;Q86W  
54;Q14103;Q9UQB3;Q9HB31;O60225;O15060;O60663;Q14526;Q9UKN8;Q5U623;Q16650;Q9Y222;O436  
80;Q15532;Q99417;Q96004;P62487;P17036;Q6ZNH5;P01106;O43364;Q6ZMW2;Q3ZCX4;Q8TBZ5;Q5T2  
30;Q9BS34;P41162;P0CJ79;Q6P1N0;B4DX44;O75448;Q03701;P51843;Q96MN9;Q9BWW4;Q9UHB7;P193  
88;Q9NP66;Q9HC44;O75925;Q8NBF1;O43365;Q15528;Q6ZNA1;Q15699;P28702;Q9UL49;Q9NP71;O605  
83;P21506;P28358;Q14186;P51508;Q07666;Q92830;Q9Y330;Q9UK13;Q8N0Y2;Q92499;Q9Y5B6;Q8N8  
Z8;Q96BN2;Q9BT49;P18848;Q14582;Q9GZM3;Q2M1V0;Q96JL9;Q9P243;Q8IYI8;O00327;Q8ND82;Q58F  
21;Q9BQ70;Q7Z4V5;Q9UKL3;Q15170;Q14151;P14921;Q9H1I8;Q06710;Q92794;Q9NS56;P84022;Q157  
42;O14628;Q86Y25;Q8HWS3;P11308;Q04726;Q9H063;Q8IWS0;Q86SE9;Q8N1W2;Q96DT7;Q8IYX0;Q129  
68;O43513;P31275;Q8NHY6;Q8WVY6;Q9Y295;P17542;Q96IZ0;Q14978;Q9BRH9;Q96019;Q9Y224;Q9HC  
S4;Q9Y692;Q9BYV9;Q14863;P10242;O60481;Q9UIS9;Q6ZN11;Q8IXF0;Q9C0J9;Q8NB15;Q6ECT4;Q9UN  
Y5;Q9H175;Q8IYM9;Q8N140;Q8NDT2;Q96F24;P13984;Q8N1G0;O43829;Q9H7R5;Q8TF47;O43541;Q999  
90;P22736;Q5EBM4;O14948;A8MWA4;Q9Y3C7;P51003;Q6VUC0;Q15929;Q9UL36;Q9NXT0;Q5JTB2;O948  
64;Q96D98;Q5THR3;P15976;O95125;O15266;O95096;Q9BR84;Q6P9A3;Q7RTT4;Q6ZMV8;Q969R5;Q96P  
E6;P53999;Q7YVG8;Q13469;O75478;Q9GZN2;Q95239;Q06546;P67809;O43189;Q96F45;Q9P0U4;Q155  
96;Q96JM7;O60381;Q03468;O00255;Q9H9T3;Q02446;O75528;P78395;O60519;Q9Y4A5;P19532;P174  
81;Q969G2;P10914;Q6VMQ6;P52746;Q8WTS6;Q96GD3;Q8N5Y2;Q86VE0;O75529;Q9NWB7;Q8N3S3;P164  
15;Q02556;Q6AW86;Q9H7X3;Q96N22;Q15361;Q9NQZ8;Q8IYW8;Q68EA5;O95948;Q9UDV6;Q6P2C8;P411  
34;Q33E94;Q15022;Q9P2R6;Q9H4I2;Q03924;A6NDZ8;Q9BX82;Q6ZYL4;Q86YP4;Q06730;Q99684;Q8WV  
C0;Q7KZF4;Q92769;P17031;Q9Y2G9;Q8NB87;O95251;Q8N883;Q9UK12;Q15973;Q14192;Q96684;Q9H8  
G1;B2RFX5;Q9BQ87;Q9UBU8;P52435;Q9NUQ3;Q5JNZ3;Q9UBG7;Q8WXI9;Q9H1D9;Q13118;Q8TBZ8;Q047  
25;Q9P2J8;O95780;P49848;Q8WUA4;O75164;P42704;Q6IPX3;Q3KP31;Q6ZN79;O95076;Q9Y2N7;Q9HC  
U9;P52744;Q9UNN4;Q8IXT2;Q9P1Z2;Q13547;Q09028;O75541;Q03112;O75373;P08651;P17041;Q6ST  
E5;Q96E29;Q04724;O60284;Q9HBM6;Q6IQ32;Q9Y242;P40425;Q86VZ6;Q2M3W8;Q7RTT3;Q08ER8;Q9HC  
K8;Q02086;Q13761;Q5SVQ8;Q14593;O14497;Q9UN79;P51946;O15160;Q96BR6;Q13506;O43361;Q8TC  
N5;Q05BQ5;O00470;P28356;Q7Z4V0;Q96GN5;Q9NVV4;Q9HAP2;P09017;Q16534;Q8WVJ9;P0DI81;Q9Y2  
50;B4DU55;Q9NZC4;O60304;Q14585;Q92784;Q9BY41;Q96N77;Q6IQ21;Q6ZS27;P52657;P50750;Q025  
48;O95905;O75840;Q7L1Q6;Q9Y535;Q9NVM4;Q5JUK2;Q8N7Q3;P49711;Q6UUUV9;O94805;Q01954;O756  
18;P51815;Q6P1X5;P17544;Q9NY61;Q9Y5B9;P09629;Q5VWX1;Q9Y6X8;A6NNF4;P84550;Q15744;Q9H7  
S9;Q8TAW3;Q8NA42;Q8NB12;Q96C28;Q9BXJ9;Q9H5Q4;Q96N95;B4DXR9;O75346;O14896;Q9UER7;Q131  
11;P37275;Q9H981;Q5HYR2;P35680;Q7L2R6;P17029;Q8N6I1;P36954;Q9NQ87;P31273;Q16649;Q999  
09;Q9UK58;Q96RS0;Q9H2F5;A6NIX2;Q6DD87;Q8TE02;Q16514;Q9UIF9;Q6PF04;Q8NEM1;Q86XN6;Q154  
75;O14627;P82970;Q53TQ3;Q9BU19;Q9Y3T9;Q9NYB0;Q96JC9;Q969E4;P10073;Q8IX07;Q99814;Q127  
78;Q96T23;Q12800;Q9H8M2;O00411;Q8TC21;Q9Y5Q9;Q9BVG6;P10243;Q9BRG1;A0JLT2;Q16576;P530  
41;A6NKF2;Q99551;Q9UNY4;P42224;P17035;Q8N9N5;Q7Z401;Q96NG8;Q9Y2Y4;Q9Y462;Q8WU14;Q9HC  
Z1;O14686;Q9HCE3;P17021;P39687;Q8NFJ8;Q9UPP1;Q9Y5R6;Q16533;Q6ZN06;Q13495;Q9GZT3;Q9UB  
X2;Q01167;Q63HK3;Q13887;Q13105;Q92541;Q5H9I0;P16383;Q6ZNA4;Q8N196;Q8NDW4;Q5SXM1;Q53Q  
V2;A6NI15;P22392;Q8N8C0;Q96NI8;Q5TGS1;Q6N043;Q9UKV8;O75376;Q6Q0C0;B1APH4;P98177;Q96S  
K3;Q6BEB4;Q23YH2;Q9UBD0;Q4V348;P09016;P50539;A8MVG5;O94983;P17030;Q12962;Q9HBZ2;Q7RT  
T5;Q99496;Q9BU14;Q16385;Q9B5J0;Q9NWB6;P78317;O14979;O95718;Q8N9Z0;Q9Y468;Q06416;O145  
93;P78367;Q8WUF5;O60281;Q3ZCT1;Q05195;Q14653;Q5TYW1;O00267;P78411;Q9BWT1;Q8N2W9;Q9H7  
07;Q5VTD9;Q14190;Q96EG3;Q9UBS8;Q5VV67;Q9HCD5;Q14966;Q6ZRS2;Q8NB50;Q8NBZ0;P09874;Q148  
65;P35713;Q15910;Q96T58;Q6IE81;Q9Y6R6;Q15014;O75469;Q9NWH9;O94993;Q9NQ03;Q9HBE1;Q135  
68;Q99459;P43356;P09630;Q15935;Q9Y2G7;P62979;P41182;Q92994;A6NNA5;Q76KX8;Q8N5P1;Q8IY  
B9;Q9GZS3;P60002;Q96RU7;Q9NRM2;P17028;O75909;Q16633;Q8WX92;P28749;P17020;Q8N344;Q927  
59;A6NP11;Q68CJ9;Q05516;Q8N371;P31267;O95619;Q9BWW7;Q96RK1;P20749;Q9H944;Q8N720;Q96M



A1;Q5T619;O43830;P17017;Q9UM07;P0DI82;P61244;P55199;Q92481;Q99608;Q86XU0;Q13952;Q6ZN01;O15525;Q96ME7;Q96BD5;O95602;Q6ZSS3;Q15233;Q13516;Q5PRF9;Q9C0G0;Q8WVM0;Q15287;Q14584;Q9H2C1;Q63ZY3;P10072;Q4LE39;P21675;P11161;P35712;Q5JVS0;Q8TB69;Q6IA86;P30876;Q15326;Q96JF6;Q15369;Q95073;Q9HCU5;Q9UKV0;Q6ZV50;Q9H7Z6;P35269;Q8N108;P17023;Q15937;Q9Y2D9;Q49AA0;Q15759;Q9NVC6;P32519;Q9NYV6;O75437;P0CG47;Q17R98;P0C7V5;Q92922;P42568;Q6P2D0;Q9BZK7;Q14771;Q969F1;Q04727;Q96SL8;Q12789;Q6U7Q0;B2RXH2;O75461;P41970;P62508;Q9HB58;P10828;Q9UGL1;Q9UBR4;Q86XF7;Q15047;O60422;Q9HBT7;A8MTQ0;Q8NAP3;O15015;Q9NSJ1;Q8TF50;A6NLF2;P28069;P51858;Q9H9C1;O43763;Q9Y2K1;Q9BYN7;Q7L190;P17947;Q9Y543;Q01658;Q9UGU0;Q99929;Q9GZZ0;Q96MM3;Q99593;Q96PQ6;Q6ZN30;Q9UII5;Q99549;P11474;Q5XKR4;P51504;Q10586;Q13363;Q9UHV2;Q02080;Q96NM4;Q8N7G0;P10599;Q05215;Q9P255;Q8IYF1;Q9GZX5;Q9Y6B2;Q9UK33;P48552;A9Y7Q3;Q8NG57;Q13490;P28370;Q86VP6;O75333;O94992;Q9H7L9;Q96MH2;Q86X55;P61968;P40424;Q9H4Q4;Q96QE5;Q96ND8;A6NDX5;Q76L83;Q6P4R8;Q01196;P41212;O15226;P19838;Q9BSK1;Q9UH73;Q8WUY8;Q12873;Q03060;P63167;Q8N972;Q6UU7;P58317;Q7RTU0;Q8NDN9;P56178;Q13485;Q8IXJ9;Q0D2K3;P35251;Q96KG9;P13682;Q2M3X9;Q8WYA1;Q9P2D1;Q9Y5A6;O43812;A8MTY0;Q96LX8;Q9UFB7;Q9Y232;Q7L945;Q8TBE0;O94916;P17040;P56545;P51522;Q9UKY1;Q9UPG8;P53567;P59923;Q15424;Q9Y651;P24928;Q9H5V7;P23193;Q96NL3;P27695;Q5H9L4;P54253;Q9HCL3;Q5TC79;Q7Z3K6;P0C7X5;Q96IT1;P61457;Q9UC06;Q13029;Q9BYK8;Q9HAF1;Q86UU0;Q9NWT6;A6NLW8;Q96IS3;Q8IZX4;Q9Y2X9;P29083;P20290;O15516;Q9P1T7;Q8NHM5;Q969J2;Q16600;P18146;Q92993;Q9U9F9;Q8WUB8;Q8N782;Q9BS31;P43268;Q13045;Q86UZ6;Q8NI08;Q9Y2X0;Q9UH92;Q96LI6;Q14145;Q8IZL6;Q00403;Q9NQL9;Q6RFH8;O75398;O43318;Q8IYN0;Q99583;Q92793;O75525;P39880;Q9Y603;Q9UID6;Q92985;Q15697;P51531;Q8TEY5;Q9NR48;P38159;Q6ZN57;Q01844;Q6NUN9;Q8N488;Q13360;O60869;Q9UKW6;Q9Y458;Q86X95;P35869;Q5T6S3;Q5T7W0;P78545;O75467;Q14CW9;Q9NZL3;Q9H6W3;Q9Y6X2;Q13503;Q7RTU3;Q96H86;Q15776;Q9Y6Q3;P51523;O00482;Q86T24;Q9H5I1;Q9UHX1;Q9HAK2;Q5VZB9;O60828;Q8NEK5;Q14765;Q9Y2A4;Q02930;Q86Y01;Q14588;Q15545;Q8IXH6;Q6AZW8;Q3L8U1;Q13112;Q8IY57;P56645;Q460N5;Q8N726;O60675;O75290;Q9ULK4;Q9HAZ2;Q01101;Q9ULV5;Q9UI36;Q8TAU0;Q9H9S0;P17019;Q8NCK3;Q6IV72;Q86UP8;Q16587;Q6P3V2;Q5VWG9;Q6NT76;Q10587;Q5SXM2;Q9HCE1;Q8IZ26;Q9NYF8;O00401;Q9Y618;O75593;Q9Y2W1;Q9UIE0;Q13562;Q99504;Q8N988;Q8TD94;O75928;P52630;Q96CG6;Q01892;P06454;P35711;Q68CP9;Q9BSG1;A0AVK6;Q15654;Q49AM1;Q92966;P40763;Q6AHZ1;P35398;Q9BXX1;Q9UJU3;Q8NHW3;Q68DY9;O43524;Q96JN0;Q9Y473;Q96CK0;O60543;Q86UP3;Q9UJN7;Q8NEA6;P52655;Q5EBL2;O00110;Q13765;Q8TAQ2;Q3SY56;Q0D2J5;Q16670;Q9ULC4;Q6ZN28;Q9H9K9;P78543;Q9H204;Q9Y2H8;Q68G74;Q96RE9;Q9NPA8;Q8N3J9;Q5BXX8;Q96EB1;Q9Y294;Q8IVP9;Q5CZA5;Q7RTV3;Q9BXG8;Q02577;Q6P1K2;Q92664;Q9NYT6;Q8WXB4;Q9NS37;Q9UKN5;Q13285;P15822;A6NM28;Q8N9N2;P0CG00;Q12972;Q06587;Q9NWA0;Q9NVV9;Q9H160;Q02447;Q96N58;Q96NKR8;Q9UBB5;Q96PK6;Q9UIW0;Q9H3M7;Q6ZNG1;Q9UMQ3;Q6NX49;Q86UQ8;Q5TEC3;P49335;O60711;Q01664;P51948;Q9NY43;Q99676;A6NJG6;Q96SR6;Q13185;Q99743;Q15544;O14802;Q9Y5K5;Q12796;Q6ZN08;O00716;P90067;Q9UILL8;P32780;Q9NRC8;Q8IZD2;P17509;Q9UQL6;Q13772;O15164;Q00444;O75081;O95633;Q9UHV7;Q96RN5;Q9UIH9;O95416;Q8N9R8;Q96PM9;O95503;O14529;Q92618;Q92785;Q96I24;Q9UC07;P0CJ86;Q14929;Q01826;P55055;Q9GZS1;P54198;O43248;Q6W2J9;Q8TAU3;Q9Y2Y9;Q9BT81;Q96SQ5;P54259;O15405;Q15650;Q6P1J9;Q6NSZ9;P18615;Q96LA8;Q8WYK2;Q71F23;A6H8Y1;Q14938;Q9NXR8;Q9H4Z2;Q13106;P17024;Q9BUE0;Q14549;Q96T88;Q9UJL9;P31629;Q9UJW7;Q9BT76;Q8NL7H5;Q9NZI7;Q13352;P51814;Q6ZR52;Q9H511;Q13901;Q96ST2;Q9Y2S0;Q32M78;Q9Y4E5;P62875;Q9P1Z0;P19387;Q9NVW2;P68104;Q7Z6R9;Q01543;Q9UKD1;Q6ZW49;Q6ZN55;Q96JC4;Q96JK9;Q2TB10;Q9UW9;Q86W11;Q5TOF9;P15884;P14651;Q2VY69;Q7RTU4;O14776;Q8IZL2;P18846;Q00653;Q8N184;P35452;Q14839;O15062;Q8N8L2;P17482;P54252;P0CG24;Q96MX3;O00488;Q8IUM7;A8K8V0;Q6ZN19;Q13127;Q96JB3;Q14241;Q3B726;Q9HCC6;Q6ZNG0;Q6EMB2;P9P1U0;Q92782;Q9Y2Q1;Q8N100;Q96MN5;Q9H7R0;Q68DY1;Q86TJ2;Q8NHV9;O75177;A6NHJ4;Q92600;P22415;O96028;Q8N228;Q9HBU1;Q9Y4A8;Q9GZV8;Q9BTA9;Q8NDP4;Q8IYN2;Q96IR2;O43719;Q14693;Q5BKZ1;Q14140;Q9BQA5;Q6PK81;Q9P2K3;Q9HAW0;P08151;Q14686;Q06455;Q9NPF5;Q12872;Q96SF7;Q16594;Q5VUA4;Q9UBW7;Q15543;Q99581;Q96GE5;P55771;Q9UJU5;Q9UQR0;Q96K58;Q03938;Q15572;Q9H2A3;Q99732;Q9NPC7;Q86TU7;Q92610;Q5H9L2;A6NFI3;P10589}

25528 Pathogen[ Q85601] interacts with 1742 human partners: {Q5T230;Q9UQR1;Q9HCZ1;Q8N8C0;Q03701;Q96RK1;Q9UML2;Q9HCG1;P54259;Q9UNN4;P51946;O95619;P01106;Q9P2R6;Q3KNS6;Q92618;P18146;Q494X3;P52657;P10243;Q96IZ0;P17480;Q9HCE1;O75373;Q8N3X6;Q8N1G0;Q969S8;O00401;Q9ULW3;Q68CJ9;Q8N196;P08048;Q969E4;Q9H5I1;O95625;Q8IYN2;Q6NX45;Q6PD62;O15198;Q9UPN9;O75182;P78317;Q8NI51;Q99543;Q96MH2;Q8IXT2;Q9Y250;Q03989;O60225;Q9Y2X0;Q14978;O00213;Q15637;Q92585;P17097;Q9NRC8;P51786;Q96CJ1;Q15014;Q8TE85;Q15532;Q969J2;Q8N9K5;P78424;Q9NZU5;Q15542;Q9UHL9;Q32M78;P28698;Q8IZC7;Q92664;P49639;P15621;O75971;P09629;Q63HK3;P61978;P0CG00;P51815;Q9UHF7;Q9Y5T5;Q96S65;Q13487;P36954;Q9Y3Y2;P54198;Q6ZR52;Q8N5Y2;Q9NQX6;Q15370;Q9HCS7;Q9UKV0;Q96QR8;P08151;Q9H2F5;Q6PEW1;Q86W11;Q8NA42;P11831;Q14929;Q9NT76;Q4LE39;Q15853;Q8TF39;Q9HBT8;Q9UP68;O14896;Q02078;Q9P1U0;Q96JK9;P17676;Q16666;Q5HYR2;P09874;O60481;Q14593;Q96DB2;P62633;Q9BUE0;P17040;Q6ZN11;P11473;O95602;Q2VY69;Q3MJ62;O94864;Q8N720;Q86XU0;Q06455;Q96S49;Q9UNY5;P25208;Q9H1I8;Q14586;Q96MA1;O14529;O15535;Q9NPA5;Q9UJW8;P33076;Q9HAU4;Q9BT49;Q13495;Q8NBB4;Q9NQV7;Q9H8M2;Q6VUC0;Q96JB3;Q9UKL3;Q53ET0;A6NHJ4;Q96PK6;Q9ULJ3;Q13127;Q9NS56;P14373;O43316;Q9H707;Q2M3X9;Q8IUE1;O75528;Q96MX3;Q16236;Q6V9R5;Q5EBL2;C9JN71;O75928;Q53TQ3;Q13490;Q7Z340;Q9BRU2;P14316;P17096;Q8WV37;Q96SR6;Q5JNZ3;Q96ND8;P41134;Q6PG37;Q96K62;Q15834;Q8N8G2;O14813;Q8WVC0;Q9Y4Z2;Q96EK4;Q96RL1;Q5JVS0;Q14765;Q5TYW1;A6NFI3;Q7Z591;Q8N228;O96017;Q07666;Q9UC07;Q96CS4;Q9H1D9;Q92754;Q02556;P17028;P51522;O60563;P42568;P61968;Q8N7M2;Q9P0W2;Q969W8;Q9NUA8;Q8TDD2;Q9BWX5;A6NK75;Q01538;Q6ZYL4;P0CB33;Q9P2K5;Q9ULD5;P09086;P21506;Q6XYB7;Q15466;Q01892;Q8N371;Q9UPW6;A6NJ46;Q86X55;O15534;Q8IUR6;Q9UQ80;P50539;Q12901;Q08999;P56270;Q9H8G1;P15976;O75909;Q9BQG0;Q3SXZ3;Q6UV9;Q9BY41;Q9UL59;Q7RTV0;Q7L945;Q92994;O15265;Q96H20;Q9C0G0;Q16384;P19484;P50750;P17019;Q52LR7;Q96NG8;P15172;Q04724;Q5HY98;A6NNA5;Q96BD5;P14921;Q9ULV5;Q6P1L6;Q03052;Q8N8L2;Q6ZN57;Q96BR6;Q9ULK4;Q6ZMS7;Q96HQ0;Q96JM2;Q8N9R8;P86452;Q9Y2N7;P86452;Q9UQL6;Q8NB12;P13682;P08651;Q3B7T1;Q9UIF9;Q3L8U1;Q86V15;Q6STE5;O75151;Q96JF6;Q8TBE0;Q5PSV4;O75398;P17032;Q16656;Q9C0F0;Q6PF04;Q9UL58;P60002;P17036;Q6DD87;Q9HCL3;Q14CW9;Q86U70;Q06546;Q9Y2



L8;Q9P2D1;P50548;O95251;Q9NY61;Q9Y603;Q15329;Q8WW38;Q9UK58;P56645;Q8TAQ5;A6NIX2;Q023  
86;Q0VG99;Q86YE8;Q9H307;Q9BYN7;Q8NAP3;Q6P1J9;Q14549;Q9HBT7;Q9UI95;Q5FWF6;Q32MQ0;Q128  
57;Q16621;Q9NQR1;Q8IYN0;Q7Z398;P17020;P06400;P0CJ87;Q06330;P48378;Q969V6;Q96BV0;Q133  
60;Q8N7R0;Q96QT6;Q9H7S9;B4DXR9;Q9ULL8;O43541;P38935;O95677;P53567;Q96LX8;B1APH4;O602  
90;Q8TD23;Q8N8J6;O60907;P39687;A8MWA4;Q96T23;Q9BR84;Q6ZNG0;Q9Y2Y9;P12980;Q12796;Q141  
03;P54845;Q14966;Q9Y535;Q13148;Q15797;P15622;Q9Y294;P50549;Q96H40;Q969X6;Q2M3W8;Q138  
88;P14653;Q7Z6R9;Q9BZE3;Q9C086;O43248;O60315;Q8N5F7;Q7Z7C8;Q14587;Q03933;Q9HAF1;A2RR  
D8;Q8NDY6;Q9H0E3;Q8NHY6;P17027;Q9Y3Q8;Q9BUI4;Q9UM07;Q13112;Q9H9T3;A8MUV8;Q9NR11;Q9Y6  
X2;Q03936;Q08AG5;Q9H9F9;Q9Y2Y1;Q9H116;Q2M1K9;Q99417;Q9UHV7;Q92925;Q6ZN79;Q9Y651;Q154  
24;P51826;Q99966;Q9NWS9;Q8N680;O75030;Q7RTT3;Q9NR48;Q9BRG1;P15822;Q9UL18;A8MVS1;Q33E  
94;Q8N7G0;P49336;Q96EK7;Q14872;Q8NDW4;Q9UNK5;P18848;Q6NSZ9;Q15654;Q5H9L4;Q14814;Q135  
06;Q9UDV6;Q13129;P19419;P40763;Q05195;Q8N3S3;Q9NWB7;O14978;P28702;Q14241;Q03112;Q49A  
N0;P28069;O60583;P17030;P32519;P14859;Q9Y468;Q9NQ92;Q9Y4A5;O60663;P52740;Q96KM6;Q6ZM  
Y9;Q8TF20;P23769;Q86TU7;P41970;Q9BUG6;P42772;Q9HC44;Q15573;Q460N3;Q9Y2Y4;Q9NVMA;Q9H0  
E9;Q9NWT6;Q9NR83;O15015;Q9H609;O15516;P78545;Q86WP2;O75437;Q13106;Q9Y2X9;Q9UHX1;Q86W  
Z6;Q6NUN9;Q9UJW7;Q9Y242;Q15287;Q12800;Q9BS31;Q9H3P2;B4DU55;Q8WYA1;Q9UER7;Q8IVP9;P127  
57;Q8IYH5;O14709;Q71F23;A6NE82;Q96SQ5;Q6ZNG1;Q3KP31;Q09FC8;Q9H3M9;Q96IS3;Q5VWX1;Q86V  
71;Q52M93;Q15545;Q96H86;P17026;Q8IZL8;P53803;P17022;Q8N5A5;O60284;Q92610;Q9BTA9;Q9UL  
H7;O14686;Q8TAW3;Q86UU0;Q16520;O95931;Q9UBU8;Q99504;Q9HOM5;P52744;Q14188;Q2M218;Q157  
23;Q12772;Q8H7Z6;P25490;Q8IZ26;Q96G25;Q6ZN55;Q68VN1;Q6IPX3;Q8N895;Q8IXJ9;Q96ES7;O433  
64;Q9BX82;Q71F56;Q9Y2S0;Q96NG5;O00327;P0C7X2;P61218;Q8NFP99;Q13045;Q9Y618;O00268;Q2QG  
D7;O14503;Q7RTU4;Q8TDY2;Q8IX12;Q8NDP4;Q86XN6;P35712;Q10587;Q9UIV1;Q14588;P06733;Q6IS  
B3;Q9UII5;Q5TB30;Q15583;Q96QE5;O43159;Q9H4T2;Q96JC4;Q96PU5;P10242;Q00059;Q8TBZ8;Q153  
06;Q8WXF1;Q14592;Q9GZV5;A6NFP7;Q86VP6;A6NK53;Q9NQZ8;O14497;Q14591;Q9Y5B9;O96019;P188  
46;Q49AM1;Q14135;P58317;Q9NQ33;Q9C0F3;Q99814;O15392;Q8TF32;P16383;P27540;Q15776;A8MQ  
14;O15226;Q3MIS6;Q3KQV3;O75290;P53999;Q96SE7;Q13363;Q0C948;B4DX44;P69GH6;O75448;P263  
58;Q9HAW0;Q8IUE0;Q8NA19;Q9P2F9;O14646;Q9Y3M9;P17038;Q13469;Q9P255;Q92831;Q9BUJ2;A6NM  
28;Q6PK81;O60682;Q99549;Q7RTU5;Q00978;Q6ZN06;Q9Y3C7;P17031;Q96AQ7;Q8IYW8;Q15653;P170  
14;P51948;Q9NZN8;Q96MU6;Q8N2W9;Q5T1R4;P19532;O15164;P10074;P78337;P18615;Q8NEP9;Q5VV  
H5;Q9NV72;Q49A33;Q9UJN7;Q92499;Q86SE9;Q15560;Q15742;Q9UFF9;Q6P1K8;A6NEJ1;Q16594;Q7KZ  
F4;Q15226;Q3MIS6;Q16385;Q8WZ33;Q08AN1;Q9NZV7;Q99743;P06454;Q15596;O00472;Q03923;P527  
36;O95983;Q99608;O95503;O95644;Q8N823;Q92782;P17024;O96004;P17017;Q15714;Q9Y692;O147  
44;Q2VWA4;Q9GZS1;P41162;P51668;O60304;Q7Z401;Q9Y2D9;P59923;Q8N2I2;Q00613;Q13398;Q53G  
I3;Q9UK11;O15525;P68036;O15405;Q86UD4;O43463;Q9NP71;P55055;Q04864;P20290;P17010;P497  
11;Q93008;Q9UID6;O43345;Q9UIH9;Q8TAF7;Q15059;Q13952;Q8N184;Q92600;Q9BUY5;Q8TF47;Q9NV  
U0;P61077;Q9UJL9;O14776;Q8IYI8;Q9NW8;Q8WUB8;Q14145;A8MXY4;Q9NWB6;Q02080;Q9BQ19;P127  
55;Q9NZ81;Q9GZS3;O95125;Q9H9C1;Q12830;Q9Y5Q3;P0C1Z6;Q8IZX4;Q499Z4;Q9H7R0;Q9UBG7;Q9Y6  
J9;Q8WX92;P10914;Q9NQG5;P08047;Q5VWG9;Q12888;Q969R5;Q99623;Q9H6W3;O60806;Q9HC77;Q8N9  
F8;Q6IQ21;P54252;Q9UH92;Q9H501;Q9UKN8;Q9H9Y6;Q01954;O95201;P52630;P82979;P55771;Q5VI  
Y5;Q9UBW7;Q9UFW8;Q5H9L2;P51531;Q9H944;Q13562;Q16587;Q8NG57;O75155;Q9P2K3;Q9HBM6;Q155  
72;Q15022;Q7Z589;Q05481;Q9H869;Q14934;Q86W54;Q8N6I1;O15370;Q13263;Q68DI1;Q53H80;Q8NH  
W3;P52746;P41212;Q9UQB3;O15060;Q14526;P0C7T5;Q5U623;Q6IQ32;O60716;Q96FV9;O75820;P224  
15;P62487;Q8NEA6;Q3ZCX4;Q9Y6R6;Q8TF50;P0CJ79;Q9GZX5;Q16633;Q14686;Q9UBL3;O43361;Q9NW  
07;Q9H4I2;Q5SXM2;Q13503;P36508;P19388;Q9NP66;Q8TC21;P29084;Q9BWT1;Q8NBZ0;P31260;Q9UK  
12;P10599;Q9NX65;Q14186;Q53T94;Q8NDQ6;P51508;Q9Y5Q8;Q9Y6B2;Q8WYN3;Q9Y620;Q9UK13;O754  
44;Q04725;Q8NFPJ8;P40424;Q14653;Q00577;Q9BQ70;Q6ZN08;Q15170;Q14151;P49716;Q92541;Q8NB  
F1;Q03468;O60711;Q13352;Q9Y6K9;Q04726;P0CJ88;Q9P0U4;Q8IWS0;Q8N1W2;Q12968;Q15650;P175  
35;Q9NQX1;P51532;Q8WWY6;Q9NVV9;Q96JC9;Q9Y295;O75461;Q6P198;A6NGD5;Q9H981;Q96RN5;Q8WT  
Z3;A6NJL1;Q9BYV9;Q8NEK5;Q8N4W9;Q92785;Q96N38;Q6PJG2;Q8N587;Q9UIS9;Q8N344;Q8IXF0;P139  
84;P52742;Q02930;Q9H175;Q16600;Q9UMQ3;Q9UBX0;Q9Y2681;Q8N140;Q9Y5A6;A6NJG6;Q8NDT2;Q96F  
24;Q9P0T4;Q9BTC0;Q9H7R5;Q99551;Q13901;Q8N726;O14948;Q96JN0;P17098;Q9BSM1;Q96MN9;Q9P0  
L1;Q9HD15;Q14582;Q8NB42;Q9UL36;Q9H1A7;Q15928;Q96D98;O15266;P23511;Q96MR9;Q6P9A3;P0CJ  
90;Q3B726;Q5MWC4;P0CJ89;Q96N20;Q96JM7;Q8IU81;Q92759;O95402;Q8NFX5;P0CH99;Q7Z3K6;Q9BR  
R0;Q9BXP5;Q16649;P32780;Q15528;Q8WTS6;P58340;Q9UM63;O75529;P16415;P18847;O60543;Q9H7  
X3;Q96N22;O95948;Q12906;Q9Y2G7;P36956;Q5TGS1;Q9UDV7;Q03924;A6NDZ8;P38543;Q86Y4;O954  
16;Q9UKW6;Q9Y2A4;P35711;Q92769;A6NFD8;Q96CX3;Q8N859;Q15973;Q9C005;Q0PNE2;O60765;P162  
20;Q9UHV2;Q99717;Q9BQ87;Q15699;P52435;Q04206;Q8WXI9;A5YKK6;P42226;Q9P2J8;O95780;P498  
48;P52738;Q16576;Q147U1;O95628;Q9HCU9;Q9NZL3;Q12972;Q04727;Q9Y6Y1;Q12873;Q99502;Q146  
78;Q6SJ96;Q96E29;Q96NM4;P98169;Q9H8N7;P40425;Q96T92;Q8WY36;Q08ER8;Q5SVQ8;Q9UN79;Q137  
65;Q14192;P11142;Q9UI36;Q05BQ5;Q96N58;Q3C1V8;P41218;Q8NFD5;Q71S5Y;Q9NXT0;P0DI81;Q8IY  
M9;P42704;P68104;Q7KZ85;A6NLF2;Q02577;Q6P4R8;Q63ZY3;Q7Z3V5;Q5JVG2;Q5T5D7;Q6P3V2;Q8NH  
M5;Q8N7Q3;Q9HB58;Q96NJ6;Q8IYX0;Q15562;P35269;O75618;Q6P1X5;Q96RK0;Q9P031;Q99594;P227  
36;Q01543;Q14585;Q9NSI6;Q9Y6X8;Q0VGE8;Q9Y222;Q9Y5K5;Q15744;Q13772;Q96LW1;O14771;Q96G  
C6;Q86XF7;Q9BWW4;Q9BXJ9;Q6ZT77;Q96N95;P35548;O75346;O60281;O75530;Q8WXF8;P35251;Q5VZ  
B9;Q99459;Q6ZV50;P35680;Q9H3H9;P05412;Q8IZL2;Q9Y543;P17029;Q9NPJ4;Q6ZRS2;Q9NQ87;Q9H2  
P0;Q9Y4A8;Q99909;Q96RS0;Q96T88;P29083;Q9ULM6;Q76L83;Q92985;A6NP11;Q8TE02;Q16514;Q159  
29;Q9BYE7;Q8NEM1;P28347;P82970;O00255;P35789;Q9UMS5;Q6ZNA1;P67809;Q8IX07;P18850;A6H8  
Y1;Q01826;Q14590;Q9UKI9;Q6U7Q0;Q8IXW5;Q9HAP2;P10244;Q9BYK8;P53041;A6NKF2;Q9UC06;O753  
76;Q99612;O00470;P42224;Q9H5H4;Q8N883;Q8N9N5;Q96EB1;Q6ZRF7;Q9Y462;Q12021;Q15369;Q131  
85;Q9UPP1;Q8NCA9;Q8N108;Q16254;P08235;Q7Z7K2;Q14865;Q6ZN32;Q9NRL2;Q53QV2;Q9UN30;A9YT  
Q3;Q01658;P22392;P17023;Q96NI8;Q96F45;Q3KNV8;O43829;Q9H063;Q00403;Q8TD17;Q9UKV8;Q96S  
K3;P05121;Q14209;Q3SY52;Q4V348;A8MV65;O94983;Q96NJ3;P11474;O43830;Q8TA94;P50613;P159  
23;Q86T29;Q9HBZ2;O95905;Q99496;P36402;Q8N5J4;Q13118;Q8N9Z0;Q32MZ4;O14593;P10827;Q8WU  
F5;P58304;Q3ZCT1;O43812;Q5HYK9;O00267;Q96A56;P22670;Q96ST2;O14867;Q96EG3;P48382;Q6ZW  
49;Q2M1V0;Q8IVC4;Q96T58;Q6IE81;Q8N693;Q02447;Q09028;P56693;O94993;O75446;O94992;P231  
93;Q8NE65;Q96N77;Q68EA5;Q8N5U6;Q5H9I0;Q99684;P62979;Q96GN5;Q14207;O43309;Q12872;Q8TF

68;Q99583;Q96RU7;Q8N5P1;P17544;Q0D2K3;Q96S94;Q9NZI6;P28749;Q9NW08;P55199;Q05516;P31249;Q6ZS27;Q9NTW7;Q7L2R6;Q5H9F3;Q00482;Q96IF1;P0DI82;P61244;P51504;Q86Y97;Q9BQA5;Q9NX70;P84022;Q9Y3T9;Q6ZN19;Q6ZN01;Q0D2J5;Q99607;Q9NPI1;Q6ZSS3;Q15233;Q7RTT5;Q9HCK8;P31271;Q9BXG8;Q5THR3;Q86VE0;Q14584;P49715;Q9UIF8;Q8TF45;P10072;Q06547;Q8NEF9;O15055;Q6ZQV5;Q9Y2D1;Q8TB69;Q6IA86;Q96RE9;Q9UGP4;Q15326;Q43296;Q5T6S3;Q15937;Q49AA0;Q15759;Q15906;Q9NYV6;P0CG47;Q8WYH8;Q96QC0;Q8N782;P0C7V5;Q9UGU0;Q6ZSB9;P37275;Q9BYH8;Q9BRJ6;Q8IXH7;Q8BZK7;P56524;Q9UK10;Q8IYB9;Q86TJ5;Q5EBM4;Q6ZNA4;Q8IXH6;Q12789;P31274;P62508;Q9NPC7;Q9Y2H8;O15379;O60422;Q5VTD9;A8MT65;Q6NZI2;Q8N9N2;Q08945;P52737;Q96AE4;Q8N8Z8;Q92750;Q9Y2P0;Q12905;Q96RE7;Q7L190;P17947;O43189;P21675;Q15910;Q96BN2;P46937;Q08050;Q6P2C8;Q6P9G9;Q9NPA8;Q9UBS8;Q12962;Q9BRH9;Q06732;P25440;P19387;Q92966;Q75164;Q6ZN28;O75486;P28370;P82094;Q16533;P35869;P63272;Q9GZN2;P35226;O15105;Q6ZMW2;Q16534;A6NDX5;A0JLT2;O94763;Q9BSK1;Q9UHB7;P0CG31;P52655;Q8N972;Q6UUU7;Q7RTT6;Q9HCD5;Q7RTU0;O94892;Q8NDN9;Q7L3S4;Q9Y5R5;Q9BW11;Q96E15;Q92670;O15350;Q96KG9;Q99990;O00291;Q9UBX2;Q92945;Q9NRG4;Q13547;P43356;Q9H5Q4;Q99081;Q96C00;Q9BTT4;A8MTY0;P49116;Q9NWA0;Q75764;Q9UFB7;Q66K89;Q6ECI4;Q5T619;O94916;P14651;Q9UKY1;Q8TD26;Q9H2G4;Q86YW9;P24928;O75362;O75626;Q96NL3;Q86U86;P24863;Q96JL9;P54253;Q9HB65;Q96IT1;P30876;Q96SL8;Q9Y473;O00570;Q9P243;Q8NB50;P62987;P38159;Q14140;A6NNF4;P13056;Q8WVM0;P48552;Q5QJE6;P17025;P52434;P40426;Q6P280;Q8NKN2;P24278;Q7Z3I7;Q7Z7J5;Q13111;O43365;Q00653;Q15543;O60224;Q9NSC2;Q9NYB0;Q92993;Q96C28;O00712;P43268;P23246;Q15652;Q96LI6;P15336;P51814;P10828;Q9NVV4;Q8N3J9;P41182;Q6NSW7;Q9P1T7;Q6RFH8;Q8IZ40;Q15047;Q8TAK5;O43318;Q9NS37;O00422;Q92793;O75525;A8MUZ8;P39880;P57071;Q9HAJ7;Q15697;P31276;Q5CZA5;Q14119;Q9UJU3;Q8WUI4;Q9Y2P7;Q9N488;Q9BQW3;O60869;P48380;P51003;Q9P1Z2;Q15361;O75467;Q9HCS4;Q92800;O43593;Q7RTU3;Q9Y6Q3;Q5BKZ1;P51523;Q9NV56;O75475;O75586;Q5SXM1;Q6VMQ6;Q8N0Z2;Q9UQR0;O60828;Q86Y01;Q5T3J3;Q16526;Q8N8E2;Q6AZW8;Q06416;O00257;Q8IY57;P19447;P35813;Q7LBC6;Q4G112;Q14527;Q99732;Q460N5;O60675;Q76KX8;O94805;A6NN14;Q6IV72;O15160;O00167;Q6Q0C0;Q7Z5L9;Q9NXR8;Q63HK5;Q68DY9;Q9H963;Q8IX03;Q7Z7L9;P17275;A8K8V0;Q8N141;Q9Y2W1;Q9UIE0;O00411;P43355;O95163;Q9H160;Q5VUA4;Q9UBK9;Q96EZ8;Q6ZMV8;Q96I27;Q92922;Q8NCK3;Q9H7L9;Q9BS34;Q7L1Q6;Q8IYF1;Q8TBZ5;Q9BSG1;A0AVK6;Q95073;Q68CP9;P19838;P20823;Q12824;Q15935;O75123;Q13568;P0C7X5;B2RXF5;O75175;Q12837;Q8TAQ2;Q6P1N0;Q6AW86;Q9UKL0;O60244;Q9ULC4;O14628;P0CG24;Q13485;Q8N0Y2;Q9GZM3;Q9Y5B6;Q9H204;Q96HR3;Q96PQ6;Q9NSJ1;Q03111;Q86UE3;O75925;P16989;P78395;Q6P1K2;Q8WXB4;Q06730;P78347;Q93074;Q9UHR5;Q7RTV3;Q06587;Q9H091;Q8TBC5;Q9H31;Q14498;Q9UBD0;Q9UBB5;Q9HD42;P27695;O75478;Q8NC26;Q9H3M7;Q9NZI5;Q6NX49;P11161;Q5TEC3;Q9H4S2;Q01664;Q86Y25;Q5PRF9;Q92539;O43167;Q9NY43;Q99676;Q9NU63;Q58F21;Q9UEG4;P17861;P31269;Q96PE6;Q01860;Q15544;O14802;Q9UNY4;Q03060;O00716;P63167;Q6ZN30;Q9BWM5;Q8IZD2;P52743;Q9H5J8;Q96K75;Q00444;Q13105;P52747;P28324;Q8TEE9;Q9Y247;Q9NPJ6;Q13887;P20749;Q9UKT9;Q96PM9;P17035;Q96124;P61457;Q8NF64;O43918;Q96AV8;Q9ULX9;Q8TAU3;Q9BT81;Q9NSD4;Q8HWS3;Q9NVC6;Q8WYK2;Q14938;O43513;Q15561;Q5JVG8;Q9ULJ6;Q9Y2G9;Q01844;P98182;Q99856;Q01094;Q9HC52;P23760;Q8N7H5;Q9NZI7;Q86X95;P0CJ86;P62875;P11308;P15408;Q9NYF8;A6NLW8;Q9NVW2;Q9NR55;P55197;Q9NUQ3;Q6MZP7;Q9Y5J3;Q8N7K0;Q96LA8;Q8IX15;P17039;Q9UJW9;Q5T0F9;P15884;Q6P2D0;Q8WVJ9;Q86YD1;Q8N393;Q9HCX3;Q6ZNH5;Q6P9A1;Q15796;Q14839;Q8NI08;P13010;P17482;Q86UP8;P12956;Q96LW9;P20226;P20265;Q10586;Q16670;P10073;Q719H9;Q95238;Q9Y2Q1;P0CJ85;Q9P086;Q68DY1;P0C860;P49910;Q86TJ2;O75177;Q6W2J9;Q8N988;Q92748;Q9NYT6;O96028;O75081;P49750;Q9HBE1;P52741;Q96IR2;Q8N3C0;Q14693;P17021;P35227;P35638;Q12986;P98168;Q13761;Q9NPF5;P0CJ78;Q6XD76;Q969F1;Q96GE5;Q9HAZ2;Q14781;Q96ST3;Q9H9D4;Q96K58;Q03938;Q93062;Q9UN51;P17041;O60381;P10589}

25529

Pathogen[ P14079] interacts with 1706 human

partners: {Q969J2;O14776;Q9UQL6;Q96JN0;Q9Y2S0;Q15637;Q15916;Q9NZ81;Q9BWM5;P98168;O60225;Q8IYX0;Q8NHY6;Q9NV72;Q92664;Q14585;Q6AW86;P48552;P15622;P52738;Q96EK7;Q96C00;Q5SX60;Q13952;O60284;Q9UJN7;Q9UQR1;O15379;Q0D2J5;Q96CS4;Q9UPW6;Q9UK12;Q9H204;Q9NSD4;Q15562;Q8WUH1;Q96A56;Q9Y5B9;Q8N2W9;Q32MQ0;Q8N9N2;Q9HAK2;P52741;Q9HAK2;Q9BW11;Q12986;Q8IZC7;Q04725;P35711;Q99623;Q9NQX1;Q3SY52;Q96ST2;P62875;Q13772;P51504;Q9H0E3;O00422;Q8N9Z0;O60244;Q8N895;Q99459;P41218;Q9NPI1;O95402;P17098;Q15014;Q8IX12;P08151;Q8NB7;Q5JVS0;Q9GZM3;P13056;O15164;Q9Y2X0;O43513;Q8WYK2;P0CJ89;O75123;Q9HAZ2;O14867;P0CJ88;O75467;Q68DY9;P55199;O95628;P10243;Q9H7R0;Q9UKV8;Q99743;Q06730;Q53GI3;O75346;P6002;Q86VN1;P16383;P62508;Q8WZ33;P33076;Q9HBT7;Q4G112;P09874;Q96JB3;P38543;Q15287;Q9Y4A5;Q5MCW4;Q96RJ6;A8MTY0;P52742;Q96T23;Q8TD23;Q8IXH6;Q5HYK9;Q6XYB7;O75618;Q96IR2;Q08945;Q13506;Q05BQ5;Q96RS0;O75151;Q53H80;Q9UL36;P12755;P55055;A6NEJ1;Q8N8L2;P0CG31;Q5T1R4;O00291;O95416;Q92994;P11142;Q86WP2;A8K8V0;Q10587;Q9HAJ7;Q9Y5Q3;O60381;Q9BYK8;Q9UDV6;Q9NWB6;Q8WXB4;Q15561;Q9Y2Y4;Q9BZK7;Q71F56;Q15573;Q8IXZ4;P14373;Q15532;O43364;Q96LW1;Q9UC06;P35869;Q969X6;Q02078;Q9Y2G7;Q9Y5125;Q99814;Q7Z340;Q9UK13;Q9NYV6;Q9UI59;Q14241;Q8NDQ6;P0CG48;Q06413;Q9BWX5;Q8NDP4;Q6STE5;Q9NSI6;Q8N196;Q99502;Q76L83;Q8IUE1;O15370;Q8N693;Q8N8G2;Q9NWB7;Q15596;Q15047;P0C7V5;Q86V15;P10072;Q8N141;Q9ULC4;Q92600;P52630;Q9UL18;Q96K62;Q9C005;Q9UJW7;Q96H86;P21506;Q9NQV6;Q13106;Q7Z7K2;O14771;Q9Y6Q3;Q92681;Q9GZV5;Q9BT81;Q96H20;Q06546;P14859;P53041;Q9Y6J9;Q8TF50;Q96MU6;Q96C00;P10073;Q7Z7L9;Q16526;Q9HC44;Q9H8M2;Q14693;O60828;Q9UBU8;P28749;P78337;D6RGH6;Q96LA8;Q9UNY5;Q16649;Q14653;A6NK53;Q9UL59;Q8N587;Q8WY36;Q6ZNA1;Q13765;Q9UHV2;P19387;Q5H9L4;Q8N9F8;O75437;P52747;O75928;Q52LR7;P35269;Q15776;Q14186;Q13118;O75528;Q2M1V0;P49336;Q6ZNG0;Q9H869;Q96DB2;Q13148;P51946;P08048;Q9NRG4;P17019;Q6ZMY9;Q15853;O60481;Q3ZCX4;P68036;Q6ZT77;O15535;Q8IXJ9;Q16594;Q9Y6X2;Q9HC1;P17035;Q14192;Q9BQI9;Q99581;Q92830;Q9Y2P0;Q9H3M9;Q9H5J8;O75626;Q969E4;P52564;Q8IXH7;Q9Y2Y9;Q6P9G9;Q8TA94;O43309;Q14938;Q15911;Q96QR8;O75362;P17010;Q68CJ9;Q15723;Q9Y2N7;Q9Y2Q1;P35398;Q9UKN8;Q5T3J3;P0CB33;O14896;P53567;Q9UKD1;Q9H9C1;Q9BR84;Q14103;P67809;P68104;P53999;Q15714;Q8NDN9;Q96LI6;Q8N108;P62483;P10244;Q8N782;O95503;Q9NW08;Q9NUA8;Q8TDY2;P1BUE0;Q96CJ1;Q9NP66;Q9NX70;Q9UFB7;Q7RTT3;P17022;P82979;Q92966;P11473;Q9H0M5;Q3KCP31;P17041;Q9UBL3;O60290;Q8N393;P35680;O60682;P20265;Q8IXT2;Q6IA86;Q5TEC3;Q9NY61;Q5T0B9;P13010;Q96ST3;Q8WUF5;O60543;Q99676;Q92782;P09086;Q96RK0;A8MT65;Q96JK9;Q8NCP5;Q16254;Q08AN1;A6NJG6;Q6XD76;Q8NB42;P10828;Q925

41;Q49AM1;Q14151;Q5VVH5;Q8TE85;Q96JC9;Q58F21;Q9BYH8;Q9NVM4;Q2QGD7;P08235;P52434;Q929  
85;Q32M78;Q9UNY4;P17039;Q8IYN2;Q5EBM4;Q14207;Q5T230;P0CH99;Q92793;Q6NUN9;Q9HCE1;P515  
22;Q9ULM2;Q9HC52;Q9NRL2;Q5JVG8;Q9UBB5;Q5PSV4;A6NHJ4;O95948;Q99549;Q16633;Q9Y5R5;Q9BX  
J9;Q15528;P28370;Q9NTW7;P61457;Q49AN0;Q75290;Q99607;Q9P2Y4;P52746;Q6ZN57;Q9Y468;Q9BT  
A9;Q9NVV9;Q13129;Q969S8;Q14CW9;Q63HK3;P39880;Q15583;Q9GZS1;P55771;Q8WUI4;Q6ZR52;Q139  
01;P48382;Q15405;Q75475;Q86U70;Q15198;Q9BUJ2;Q8NEK5;Q8N5A5;Q7Z3K6;Q9UQR0;Q6HR3;Q129  
06;Q2VWA4;Q8IYB9;Q9H707;Q96SR6;Q96PM9;Q15514;Q15329;Q16656;Q99594;P52737;P35789;P0CJ  
86;P51815;Q15699;P54252;Q86VZ6;P28347;P17096;P30876;Q14591;Q03060;P11474;Q92922;Q96F  
24;Q6ZN32;Q6ZRF7;Q8TBZ8;Q95251;P48380;P51532;Q8NCA9;A8MUV8;Q9UQB3;Q96NM4;Q95644;P612  
18;P17024;Q9P255;Q14592;Q9GZX5;Q15742;Q3MJ62;Q15170;Q6P2C8;Q9NSJ1;Q86U86;Q96NG8;Q015  
38;Q9Y3C7;Q14646;Q6ZN79;Q96S94;Q14865;Q060675;Q8NG57;Q99684;Q15392;Q92610;Q01826;Q96N  
20;Q60907;Q6PEW1;Q9H3P2;Q8IXF0;P35712;Q9UID6;Q95163;Q75529;Q5T0F9;Q93062;Q9ULK4;Q86T  
U7;A6NE82;Q8WVJ9;Q6IPX3;Q95931;Q68DI1;Q9Y250;Q13487;Q8N0Y2;Q8N720;Q14966;Q6ZNA4;Q8IX  
15;Q9NVC6;Q99966;P54198;Q9H7X3;P58304;Q5H9I0;P51531;P42704;Q96SE7;Q14209;Q9UKV0;Q9GZ  
N2;Q5VIY5;Q43167;Q8N726;Q05516;Q4LE39;P23246;Q8TAK5;Q75446;Q9HAP2;Q8NI08;Q9Y5A6;Q9UF  
W8;Q8NBZ0;Q96004;Q92748;P22736;Q9HD42;Q99856;Q92800;Q76KX8;Q02447;Q43812;Q13105;Q002  
13;P15976;Q5T5D7;Q9BWT1;A0JLT2;Q8TEE9;Q6P1N0;Q3MIS6;Q9BYN7;Q6ZRS2;Q9P086;Q9GZS3;Q8NC  
26;Q92785;Q8IZL2;Q9NR83;Q9Y5Q9;Q9P2J8;Q9P0L1;Q32MZ4;Q15059;Q14497;Q8N344;Q96EB1;Q86U  
Q8;Q9HAF1;Q9NY43;Q60281;P32519;Q13112;Q8N859;Q13045;Q13889;Q8NHM5;Q9UK11;Q8TAQ2;Q8N7  
M2;P53803;Q95905;Q96K83;P19484;Q13111;Q6PG37;Q8N883;Q12968;Q03923;A6H8Y1;Q96NI8;Q9H2  
P0;Q6ZMS7;Q9N2U5;Q8IYI8;P62979;Q06732;P46937;Q8SV88;Q43829;P18615;Q66MR9;Q6KN55;Q86Y  
P4;Q60869;Q6P2D0;A6NKF2;Q9Y2P7;Q9Y3Y2;Q94864;Q96NL3;Q12796;Q9Y3Q8;Q96E29;Q3SXZ3;A6NG  
D5;Q7Z591;Q60711;Q96SZ4;Q96RE9;A5YKK6;Q9BQA5;Q96NG5;Q7L3S4;Q75461;P31271;Q9UBW7;P159  
23;Q15306;Q9NS37;Q9HAU4;P48443;Q43830;Q96LX8;P54253;Q14498;Q9HCS7;Q06547;Q9NUQ3;Q8N7  
G0;Q15797;P06733;Q16600;Q43298;Q8TBC5;Q969V6;Q03933;Q9NWA0;P61077;Q14765;Q7RTT4;Q751  
55;Q96BN2;Q16385;Q9NYW8;Q9NU63;Q61E81;P10827;Q9H175;Q12837;Q9UHX1;Q6PD62;Q96JM2;Q96J  
C4;Q6ZN06;Q6ISB3;P29084;Q03989;Q86TJ5;Q99608;P52744;P57071;Q8IYW8;Q15652;Q9NQZ8;Q8NA  
19;Q3KQV3;Q9H307;P17027;Q6EKJ0;P54845;Q92539;Q15350;Q6PJG2;Q15744;P09629;Q94892;P629  
87;Q16576;Q719H9;Q9UIL8;Q99612;P42568;Q16670;Q06315;Q9H1A7;Q15572;P55197;Q96S65;Q49A  
A0;Q8TAP4;P36402;Q03938;Q96MN9;Q12873;Q03111;Q8TF32;P11308;Q9H5I1;Q95718;Q14588;A6NP  
11;Q96FV9;Q01201;Q86V71;Q3KNS6;Q9UHB7;Q6BEB4;Q5HYR2;Q96ND8;Q3B7T1;P08651;Q9NYF8;Q9NW  
S9;Q9BRR0;P51814;A8MUZ8;Q96EI5;A8K010;P28698;Q94763;Q8TF68;Q96GE5;P35813;P28069;Q754  
48;Q6PI98;Q96BV0;Q12772;Q95073;Q9UL58;Q9UKY1;P31276;Q9H0E9;P0CJ90;Q8IXW5;P0C7X2;Q129  
05;P43356;Q8TCN5;Q96JF6;Q9ULD5;Q94915;Q9UC07;Q8NBB4;Q6W2J9;Q6NT76;Q6P1X5;P42226;Q063  
30;Q6V970;Q8N3S3;P82094;P82970;Q8TAW3;Q92670;P50613;Q9H6W3;Q9NZC4;Q9H981;Q9P2D1;A6ND  
Z8;Q8TD26;Q9NZI7;Q3C1V8;Q5H9F3;Q5BKZ1;Q43189;Q13888;Q15929;Q00613;Q01892;Q9UKL3;Q150  
60;Q86Y25;P17480;Q99583;Q6ZN19;Q8TE02;Q99543;Q8HWS3;B4DU55;Q9NZL3;Q9BXG8;Q13568;Q9UJ  
W9;Q00059;Q7KZ85;P12956;Q9H4W6;Q96QT6;Q9P0W2;Q9Y3T9;Q9ULW3;Q96D98;Q94805;Q14744;Q8N9  
N5;Q03924;Q8NCN2;Q96N22;Q9BQW3;P41182;P31274;Q86UE3;Q8NAP3;Q9UL49;Q460N3;Q01543;Q8N5  
J4;P10074;P0CJ87;Q9UPG8;Q71F23;Q96CX3;Q86Y01;Q6MZP7;Q96AE4;Q14549;Q3ZCT1;P17097;Q8N5  
U6;Q86UP8;Q9P1U0;Q15906;Q13185;Q9Y5K5;Q99496;Q6VMQ6;P19388;P58317;Q5VWX1;Q96EG3;P516  
68;A6NK75;Q9P2F9;Q00403;Q03936;Q9BZE3;Q147U1;Q86YW9;Q08ER8;Q00257;Q75586;Q14781;Q9UK  
58;Q9BX82;Q9NXT0;Q01860;Q75530;Q8TF39;Q75373;Q15543;Q6ZYL4;Q75764;Q5VTD9;A6NLF2;P195  
32;B1APH4;Q05481;Q14145;P17026;Q8IX03;Q96BD5;P16989;Q9UIH9;A6NN14;P12980;Q9UPN9;Q9HC  
E3;P11161;Q22392;Q00482;Q08AG5;Q8N572;Q9H273;Q9HF64;Q9NV56;Q99732;Q96K75;Q86Y88;Q8N9  
72;Q969R5;Q12962;Q9H963;Q6DD87;Q9UER7;Q9ULH7;P17544;Q9NPF5;Q6RFH8;Q96AQ7;Q95238;Q927  
69;Q96I24;Q00716;Q8IY57;Q96IF1;Q6ZMV8;A8MV65;Q5SXM1;Q9H4T2;Q3SY89;P29374;Q8NCK3;Q9UN  
42;Q8TF20;Q9UHV7;Q9UPP1;P17032;Q7RTS1;Q9BUI4;Q02930;Q8NPF5;Q9H1I8;Q9NQ33;Q9H2G4;Q8WV  
C0;Q9NWT6;Q8N823;P49715;Q8N8J6;Q9BWW4;Q06663;Q14709;Q15266;Q14934;Q96RN5;Q9NR11;Q076  
66;Q9NZI6;A6NFQ7;Q6U7Q0;Q15759;Q8N680;Q8WTT3;Q9Y5K9;Q8P280;Q5PRF9;Q6P280;Q96Y88;Q7RT  
V0;Q7Z5L9;Q9Y473;Q9H511;Q75469;Q969F1;P17017;P31269;P0CG40;P24863;P49848;P51508;Q165  
87;P0C7X5;Q92945;Q75820;Q6ZS27;Q2M1K9;Q15160;Q96JM7;P27540;Q9BQG0;C9JN71;Q9H4Z2;P524  
35;Q3B726;Q9UIF9;P63272;Q75525;Q12830;Q66K89;P17031;Q9UEG4;Q9P2R6;P50549;A6NWL8;P170  
29;Q9BYE7;Q96SK3;Q7L190;P22670;Q9NQR1;Q8NB12;P35251;Q9Y5J3;A6NIX2;P17275;P17021;P164  
15;Q2VNT6;Q99990;P15336;Q14593;Q92750;Q9HD15;Q9Y5Q8;Q8IVP9;Q16384;Q15424;Q96LW9;Q9NV  
V4;Q8NHW3;P51523;P0C1Z6;Q15697;Q8N2I2;Q9UBK9;P28702;P52743;P24278;Q9BYM8;Q9Y3M9;Q6ZW  
49;Q9BY41;P17020;P06454;Q8NFD5;Q14978;Q8WV37;Q75175;Q6ZMY3;Q9Y6R6;Q9NYB0;Q96IZ0;Q8WU  
B8;Q9HB58;Q4V348;Q9UHR5;Q9H944;Q15370;Q9UK10;Q9P243;Q9Y2X9;Q8TF45;Q8NDX6;Q15788;Q86X  
U0;Q5TGS1;Q92759;Q9UFF9;Q9UJQ4;Q75909;Q8TB69;Q13360;P49910;A9YTQ3;Q9HAW0;P26358;Q5VZ  
B9;Q8N4W9;Q9HCD5;Q9UNN4;Q01664;Q86W11;P37198;Q59417;Q9HCK8;Q00570;P15822;P51786;Q5JV  
G2;Q8IX07;P31249;Q9UJW8;Q7RTT5;Q7RTT6;Q95983;Q2M3X9;Q8TBZ5;Q15834;Q9NZI5;Q8WUY8;P562  
70;Q5TB30;Q00110;P27695;Q8NA42;Q9P2K3;Q6ZMW2;Q9UHL9;Q7Z3V5;Q13351;Q99909;P78424;Q96R  
K1;Q9UBD0;Q96T92;Q92618;Q94992;Q8NEP9;Q49A33;Q9UKL0;Q9Y2Y1;Q9BYV9;Q7Z7J5;Q96MA1;Q9H0  
91;Q2VY69;Q14586;Q96RL1;Q9Y603;Q8N140;Q96NJ3;Q8NAM6;Q9NS56;Q9HC78;Q9NPF6;Q9ULX9;Q433  
65;Q6ZN28;Q14135;P50539;Q8IVC4;Q9U136;Q9C0F3;Q86UU0;A8MVS1;P9UUMQ3;P35638;Q96ES7;Q8WW  
Y6;Q9H2F5;Q43296;Q9NQ03;Q9C0F0;Q9UDV7;Q14593;Q16621;Q92754;Q03701;P01106;Q15973;Q6SJ  
96;Q00472;Q75444;Q9UIE0;Q6P3V2;Q6P1L6;Q9UH92;Q86VK4;P56645;Q8NDW4;Q0VGE8;P52657;Q8NF  
99;P56693;Q16236;P98169;Q16533;Q9Y692;P17025;Q13398;Q00444;Q43541;Q00577;Q9P0U4;Q047  
26;Q96RE7;Q12972;Q494X3;Q9Y4X4;Q16800;Q7RTU0;Q9P031;Q9BS34;Q7RTV3;Q6ZV50;Q96SL8;P422  
24;Q9HCU9;Q6P4R8;Q5VUA4;Q86UD4;Q00411;Q96RU7;Q00488;P17038;Q6ECI4;Q8N3J9;P10588;Q8N3  
X6;Q8N1G0;Q5QJE6;Q96JL9;P35226;P18850;Q8N0Z2;Q8IZL8;Q8WX92;Q86VE0;Q3KNV8;Q86XF7;Q7Z6  
R9;Q5HY98;A6NDX5;Q6P9A3;Q9UIV1;P41212;Q9Y2A4;P32780;Q75081;Q86UZ6;P50548;Q8N5P1;Q9Y2  
K1;Q05195;Q71SY5;Q43361;Q8N488;Q14814;Q96EK4;Q0D2K3;Q9BUY5;Q6NZI2;Q9H7R5;Q9HCX3;Q6PK  
81;Q9BS31;Q04724;P61978;Q14872;Q8TD22;Q12789;Q8IUE0;P35227;Q6ZYZ3;Q6ZSS3;Q14839;P207  
49;Q75925;P0CJ78;Q68DY1;Q9BTT4;B2RXF5;Q9H8N7;B4DX44;P23193;Q9Y5W3;Q5TYW1;Q15525;Q439  
18;Q96PE6;P13984;P49750;P25440;Q8N554;Q9BSK1;Q9UN79;Q13503;Q9UII5;Q7Z401;Q9NVU0;Q064

55;Q9BQ87;P10599;Q9UBS8;Q8N9R8;O43159;P63167;Q00978;Q2M218;Q86WZ6;Q96PQ6;Q8IYN0;B4DX  
R9;Q96IS3;Q96MX3;O75182;Q9H582;O75376;A8MXY4;P54259;O14529;A8MWA4;Q6AZW8;P0C860;Q63H  
K5;O60583;P78317;O75478;Q96F45;Q5T619;Q8N9K5;Q96KM6;Q6EMB2;Q92499;Q96SQ5;Q9HCZ1;O152  
65;Q9Y2H8;P17014;Q02577;A6NNA5;Q96C55;Q15928;Q9P1T7;Q6ZNH5;Q14590;Q8WXF8;Q96AV8;Q9NP  
A5;Q14584;P41162;Q15562;Q8N988;Q9UKI9;Q8N371;P36508;P15884;Q96AW1;Q8IYF1;Q99504;Q9NR  
55;Q9H3M7;P78545;P41134;Q9BRH9;Q03468;P78395;Q9BQ70;Q9H8G1;Q9NQV7;Q9NZV7;P38935;Q9HB  
Z2;P12757;P48378;Q9HAH1;O14948;P62633;O15015;Q7KZF4;Q02386;Q8IWS0;O15226;Q8IZZ0;Q96N  
38;O95602;P0CG00;Q15910;Q68CP9;Q12872;Q9NQ87;Q13761;Q02556;P24928;Q8IU81;Q9H5Q4;Q030  
52;Q9UML6;Q8NEA6;Q8N184;Q15369;Q9NPC7;Q96K58;Q95201;Q7Z4V5;Q9H7S9;Q9HB65;P0DI82;Q128  
24;P10589;Q5EBL2;Q96BR6;Q6PF04;Q0PNE2;Q13469;Q93074;Q9BUG6;Q99081;P51003;Q9C0G0;Q499  
Z4;O14503;Q7L9A5;P17040;Q6IQ32;P98182;Q9GZV8;P0DI81;P49116;Q8TD17;O00167;Q7L1Q6;Q9UK  
N5;O14802;A0AVK6;Q9NPJ4;Q8WYN3;Q9NZM8;Q9Y2L8;O15055;Q9BT49;O95600;P05412;Q14929;Q156  
50;Q96N77;Q15466;Q12901;Q6NX45;Q86VP6;Q9Y294;P13682;Q86XN6;Q9BRG1;A6NJL1;Q9Y6B2;Q9BS  
G1;Q12888;Q8N1W2;Q96B42;Q5U623;Q9H3H9;Q8IZ40;P15621;Q9H609;P10242;Q9Y4A8;Q6P1J9;Q9UM  
07;Q9UJU3;P56524;Q6P1K8;Q15361;O14813;Q9H7L9;Q7RTU3;Q13127;Q09028;O75030;Q52M93;P497  
16;Q6ZQV5;Q06416;Q6ZNG1;Q9BXP5;Q96DT7;Q96IT1;Q9NRC8;P25490;Q9UM63;Q16514;P49639;O956  
19;Q16534;Q2M3W8;Q9UBX2;Q9H1D9;Q53T94;Q9H4I2;Q15233;P28360;P52740;O43313;O15105;Q141  
40;P78347;Q7Z3I7;Q96HQ0;A6NFI3;O14901;Q8NB50;Q8WYA1;Q9Y6X8;O00470;O00267;P0CG47;P527  
36;Q9UQ80;Q6P9A1;Q15935;Q14582;Q9NX65;O95780;Q9ULJ6;Q96MH2;Q9UNS1;Q9P1Z2;P36954;P518  
26;P17030;Q12857;Q9H5H4;P36956;Q9ULV5;Q53TQ3;Q01094;Q13352;Q86X95;Q9Y5B6;A6NFD8;Q146  
78;Q96G25;Q9Y224;P86452;Q92585;O60765;Q8N228;Q7RTU4;O75486;O00255;Q8N8C0;Q8N611;P154  
08;P43355;P61244;Q8N7H5;Q9NW07;O75971;Q02080;Q8NE65;Q9BRU2;Q8N7Q3;O95625;Q9NP71;Q96E  
Z8;Q14188;Q10586;Q8IUM7;P23769;O60716;P23511;Q86Y97;Q9BTC0;Q8NEF9;Q96H40;P14316;P0CG  
24;Q01658;O43593;Q9NQG5;Q9NQX6;Q9BZE0;Q9HBE1;Q9UKW6;Q7Z589;Q9H9D4;Q96T76;Q14686;Q155  
42;Q8NDT2;Q9H063;Q5VWG9;Q5FWF6;Q9UHF7;P41970;P49711;Q15022;P0C7T5;Q15326;Q9Y2W1;Q9NP  
A8;Q96N95;Q96GN5;Q8TC21;Q9NQ92;O60304;Q96PK6;P17023;O94993;Q8NFJ8;Q04727;O75177;Q969  
W8;Q86TJ2;Q8WUA4;Q86YD1;Q8WYH8;Q16520;Q9Y462;Q9BY31;Q9H9F9;Q9UGU0;Q8WW38;Q9HCL3;Q8TA  
U3;P37275;Q8NEM1;Q9UGP4;Q53QV2;Q92925;Q9BSM1;P19447;Q3SY56;Q9UMS5;Q9Y535;Q8WTS6;P396  
87;Q9BU19;Q9H501;A8MQ14;Q9Y2G9;P17535;Q14587;Q6ZSB9;Q09FC8;O14628;Q9NSC2;P0CJ85;Q8N7  
K0;Q8N8E2;Q8NI51;Q6IV72;Q5H9L2;Q8NBF1;A6NM28;Q9N58;P10914;Q9H160;Q9UN30;Q9ULJ3;Q7Z3  
98;P29083;Q96NJ6;Q86SE9;O15534;Q6NSW7;Q02446;Q92993;P19419;O60224;Q8TF47;Q9Y222;Q995  
51;P21675;O00268;Q16666;Q8IUR6;Q9HBM6;P14651;P38159;Q8IZ26;Q9UIF8;Q5CZA5;Q96I27;Q9H1  
16;Q6P1K2;Q9UKT9;P58340;Q6IQ21;Q6NX49;Q14978;Q3L8U1;Q96GC6;Q96T58;Q9UJL9;Q5JNZ3;Q9H9  
Y6;Q7LBC6;Q08999;Q8NDY6;Q6ZN11;Q9UBG7;P50750;P20290;Q5T6S3;Q8TBE0;Q8WVM0;Q6VUC0;Q155  
45;Q13490;O00712;Q9Y295;Q9Y2G1;Q8N7R0;Q8NAF0;Q9Y2D9;O00401;Q96KG9;Q14119;P17028;P237  
60;Q8TAQ5;Q87AF7;P0CJ79;Q96C28;O94916;Q06587;Q8N5F7;P22415;Q86T29;Q15653;Q8WXI9;Q134  
95;P51948;Q6NSZ9;O94983}

25530

Pathogen[ P03383] interacts with 1278 human

partners: {Q969W8;Q96LX8;Q9UQR1;P35227;Q96MH2;Q9Y618;Q7Z7J5;O14628;O95402;Q86U86;Q9UN  
S1;Q92681;Q8IXJ9;Q06330;Q13761;O43167;Q15329;Q15723;P10244;Q9NVV4;Q9H7R0;Q02577;P538  
03;Q68CJ9;P48378;Q9BQG0;O60716;Q09028;Q9Y6J9;Q8WTT3;Q9UKN8;P0C860;O15198;Q8IX15;Q995  
04;O75182;Q8NI51;O00470;Q719H9;Q5FWF6;Q12872;Q5JVG8;Q14978;A6NNF4;O00213;P16989;Q9NY  
61;Q92585;Q15935;Q15014;P55199;Q12830;Q9UHL9;Q8NBB4;P10914;O75925;Q9NYW8;Q63HK3;P143  
16;Q15561;Q96S65;Q8N344;O15266;Q92831;Q5JVS0;Q12888;Q96BR6;Q32MZ4;P11831;Q15287;Q8WZ  
33;Q15047;Q96W76;O95625;Q9UH92;Q96SK3;Q14839;Q96JK9;Q0D2K3;Q6ZN08;Q9WY6;O14497;P357  
12;P50549;O95602;Q9UK58;Q02080;Q13485;Q6P1J9;Q96SZ4;Q15369;P63272;Q9NQ92;Q9UHV2;Q9BS  
G1;Q14653;P20290;Q9UK10;Q06455;Q04864;Q96A56;A6NK75;O95163;P33076;O00716;Q86WP2;P080  
47;Q9UPW6;Q8HWS3;Q9UKL3;Q96019;Q9NWT6;P51003;Q9H3P2;Q9NYV6;P13010;Q14209;P29084;Q96E  
S7;Q75528;Q96607;Q9BR84;O60543;P17096;O75478;Q9BRU2;Q9UKI9;P16220;Q9NZV7;Q9H7R5;P275  
40;O00167;Q15562;Q9Y2P7;P28069;Q9Y6K9;Q49A33;Q15544;Q14678;Q6ZYL4;Q13469;Q7Z591;P629  
87;Q9NWB7;P17544;P56270;Q8IUR6;Q9NPA8;Q12824;Q16633;P35269;P0C7T5;Q8TAK5;Q32MQ0;Q5H9  
I0;P51948;Q9H4I2;O00472;Q9HBE1;Q00653;Q9UL18;O60765;Q08999;A8MVS1;Q9H8G1;O94805;Q8N6  
I1;Q9BTA9;P25440;Q6UUUV9;P06454;A8MWA4;Q9H944;P49711;P17022;Q86V71;Q52LR7;Q15596;Q6P4  
R8;P15172;Q01094;Q96GE5;Q9H5H4;Q96SL8;Q5HY98;Q3KP31;Q9NYB0;Q9H869;P14921;Q15937;P557  
71;O75376;Q8WVJ9;Q15572;O75486;Q6NZL2;Q9ULK4;Q14526;Q9UQL6;P17029;P58340;Q96F24;Q9Y5  
Q3;P0CG00;Q96H20;Q96RL1;Q9H981;Q9H4T2;Q15650;Q5PSV4;P19484;Q16656;Q9C0F0;Q03111;Q9Y5  
R5;O95503;Q9HCL3;P01106;Q8WW38;O75437;Q86YP4;Q96CJ1;Q86U70;Q6PD62;Q06547;Q13487;O952  
51;Q96GN5;Q9UHR5;P40424;A8MXY4;A6NIX2;Q12986;P78347;Q04727;Q6NT76;Q7Z5L9;Q9UKD1;Q96N  
I8;Q9HCS7;Q9UPN9;Q99608;Q9UI95;Q13888;P49116;Q9P2R6;Q92670;Q9Y5B6;P23511;O75362;Q9UL  
49;P51815;Q9HAW0;P14859;P23193;Q9UKW6;Q8N7M2;Q96YW9;Q9BRR0;Q13360;O00570;Q9NP66;A8MT  
Y0;Q9Y4A5;O60244;Q9BWW4;Q7Z3K6;Q96BD5;Q969F1;Q9NRG4;Q8TD23;Q05481;O60907;Q53TQ3;Q9Y2  
95;Q9Y2Y9;P48382;Q9Y535;Q96H40;Q2M3W8;Q8N4W9;Q9C086;O43463;Q8N5F7;P17482;O60290;Q948  
64;Q6ZN06;Q9H9Y6;Q6ECI4;P53999;Q9NV56;Q9UMQ3;O95644;Q6P3V2;O75618;Q9H7L9;Q9NUY3;P188  
47;Q92966;Q9UK13;Q86X55;P17861;P51508;Q8IZL2;Q01826;P22670;Q5H9L4;Q20749;Q9BYN7;O002  
57;Q8N3J9;Q13490;P19419;P52744;Q9BWT1;Q14686;Q6STE5;P28370;B4DX44;Q96FV9;Q9UBS8;Q8NE  
P9;Q12972;P52655;P48380;Q9H9C1;Q15714;Q96LI6;Q5CZA5;Q8TF20;P23769;P22392;Q6MZP7;Q000  
59;Q76KX8;Q92841;Q9H204;Q96AQ7;Q96I20;Q0PNE2;P37275;Q8NDQ6;Q9Y3Q8;Q9NQ87;P31276;Q96N  
77;Q9HC52;Q9UL58;Q9H2F5;Q9ULD5;Q9UMS5;O75030;Q06587;Q15542;Q6RFH8;O94983;O14709;Q157  
42;O00712;D6RGH6;Q6VMQ6;P52630;P35638;Q8IXW5;O75461;O43365;Q9HBM6;P15923;Q8IZL8;Q3MJ  
62;Q9ULW3;Q5H9L2;Q16520;O95931;Q9UBU8;Q86Y97;O75155;Q12901;Q9C0F3;Q15532;P35789;Q96G  
25;Q6IPX3;Q9UFF9;O14646;Q6ZNA4;P52434;Q6PJG2;P61218;Q8NA42;O14503;Q8TDY2;Q6P9G9;P170  
19;Q9H5Q4;Q96QT6;Q6IQ21;Q14814;Q96N20;Q9Y2Q1;Q01860;Q6ISB3;P78317;Q8IZX4;Q08945;Q8WY  
H1;Q96BN2;Q15797;P42226;P10599;P61978;Q9BYE7;Q8WXF1;Q96N95;Q9P2K3;O75177;Q03923;Q96R  
K8;Q8N988;Q8WYN3;P18846;O43189;O15405;Q9GZS1;Q92993;Q86V15;Q3MIS6;Q99459;O75151;Q96S  
E7;Q969V6;Q86XF7;Q05516;P28698;Q9GZX5;P12980;Q8N693;Q8TB69;Q86VE0;Q15306;Q5U623;P0C7  
X2;Q9P0L1;Q9NPJ6;P17038;Q6ZW49;Q92782;Q96T23;Q86TU7;Q13352;Q7RTU5;Q00978;P61457;Q969

X6;P15621;A6NK53;Q15653;Q86YE8;Q8WV37;Q9HAH1;Q8N2W9;P35813;P51504;Q04724;Q8N587;P15408;Q9H6W3;P78337;Q5VVH5;Q6ZR52;Q96EK4;Q9Y5Q8;Q8TE85;Q15560;Q6P1K8;Q9H1D9;Q93074;Q8N5U6;P59923;P17098;Q9H175;O00267;Q9NQX1;Q15022;B4DU55;Q6NSZ9;Q6PI98;Q86UU0;Q9Y692;Q16385;P06400;O14744;Q43318;P18146;P41162;Q9NTW7;P49750;Q13398;Q66K89;Q53GI3;Q9UK11;O15525;Q9H9F9;Q9UBB5;P38159;Q9NP71;Q49AA0;Q6IQ32;Q8TAF7;Q01664;Q9NVU0;P31249;P61077;Q15654;Q8IYI8;Q95HR3;Q14872;Q75164;Q00403;Q9BQI9;Q9HAF7;Q9Y2L8;Q95628;P41218;P17014;Q14588;Q8HB65;P25208;Q14CW9;Q8N228;Q723V5;Q9NQG5;Q5VWG9;Q9H0E9;Q71F23;Q96LW9;Q9Y3T9;P20226;Q43159;A8MUV8;A8K8V0;Q96EB1;Q8TF47;Q33E94;Q9UBW7;O95201;Q8IXH6;Q9HC44;Q9HAZ2;Q6P1N0;Q5VWX1;Q6W2J9;Q7Z589;Q9UQR0;Q4G112;Q13495;P08651;Q9HCG1;P52657;Q53H80;P52746;Q9UQB3;Q14934;Q13506;Q499Z4;Q96RN5;A6NDX5;Q7L2R6;Q75448;Q8N8G2;O00401;Q96004;Q8WTS6;P62487;Q75529;Q15326;P11473;Q15105;Q12796;Q9BSM1;Q5VUA4;P11474;Q16533;Q6ZNA1;Q99549;Q03112;P49336;O14978;O00291;Q13952;Q16594;Q01892;O15015;Q12873;Q92985;Q14186;Q6P2C8;Q8IYX0;P54252;Q8IXH7;Q9H3H9;Q94763;Q8NB50;Q16621;P78543;P54845;Q9BQ70;Q13185;P86452;Q9H963;Q96MR9;P49639;Q9UHX1;P84022;P98168;B4DXR9;Q92994;Q9H160;Q04726;Q8IWS0;Q8N895;Q86SE9;O75081;P52747;P19387;Q15928;P11308;Q9HD15;Q96PK6;Q9NVV9;Q15361;O60563;A6NGD5;Q96ND8;Q9UDV6;Q8WVC0;Q13111;Q9UID6;A6NJL1;Q6ZN28;Q8NEM1;Q9NV72;Q5QJE6;Q5JNZ3;Q96N38;Q92945;Q15652;Q12857;P17010;P50613;P13984;Q9UNY5;Q32M78;Q8N9N5;Q9P031;P39687;P42772;Q99551;Q9BXJ9;Q9Y6B2;Q8NF64;P35548;O14948;Q96MN9;Q02447;Q9H063;Q9Y3C7;Q6VUC0;Q7RTT5;Q13105;P28324;Q9H1I8;Q96D98;Q8N488;Q99990;Q71F56;Q95125;Q6UUU7;O14896;Q9ULV5;Q08AN1;P28347;P51946;O15265;P24928;Q53QV2;Q96JM7;Q14192;Q03468;Q9NPF5;P42568;Q9BQA5;P17040;O75290;Q15528;Q05195;P52742;Q13568;P17032;P0CH99;Q96N22;Q8N859;Q9Y294;Q9Y2G7;P17036;P24278;Q96LW1;Q6PG37;O43345;Q9BX82;Q8N3S3;Q7KZF4;Q92769;Q52M93;Q76L83;Q68CP9;Q92830;Q6ZNA2;A6NHJ4;Q9C005;Q99717;Q06663;Q9UGP4;P17676;P09874;Q04725;Q9P2J8;Q95780;P49848;O00422;Q06304;Q60711;Q9Y2N7;Q9HCU9;P0D182;P78395;Q14103;Q9NYF8;Q6S96;Q9H501;Q6ZNG1;Q99081;Q9ULH7;Q96E29;Q9UM07;Q8NEF9;Q8N3X6;Q99417;Q9NX70;Q9NSC2;Q15466;Q16254;A6NKF2;Q43541;P60002;Q9UN79;A5YKK6;P52743;Q13765;O75909;Q05BQ5;Q8N9F9;Q9Y6X2;Q60225;Q99732;P28702;P0DI81;P68104;Q9ULJ3;Q9HCD5;Q6IV72;P50750;Q8N5A5;Q7L190;Q86VP6;O75971;Q12837;Q12968;Q9UFW8;Q9NZ81;Q01201;P35711;Q15697;Q8N7K0;Q01543;Q86UE3;Q9NSI6;Q8NBZ0;Q68DY1;Q9Y6X8;Q9UKN5;Q8IZ40;P51531;Q9UNN4;P15822;O15379;O00268;O15350;Q9UIV1;Q9NQ33;Q9UER7;O60828;Q6ZV50;Q15759;Q96RS0;Q5VIY5;Q8TE02;Q16514;Q9UIF9;P10074;P82970;Q00613;Q8TEE9;O00255;P10073;O75475;Q12800;P11142;Q16666;P0C1Z6;Q6U7Q0;Q9BRG1;Q96C28;Q92600;P53041;A8MUZ8;Q9Y5K5;Q03936;Q07666;P82979;Q96RE7;Q8N140;Q9Y462;Q15929;Q8N0Z2;Q9H7S9;Q8NE65;Q96E15;O15370;Q8N8C0;Q6P1X5;O43829;Q9UKV8;Q92759;O14776;Q9ULM6;Q12905;Q8WVM0;Q92925;Q9P0W2;Q96IT1;P31269;Q3ZCT1;Q99496;P36402;Q8TAQ2;Q8N5J4;Q15573;Q8N9Z0;O14593;Q99543;Q9HD42;Q8N972;O43918;Q8IX12;P41212;Q16236;Q94992;Q8TF32;Q68EA5;Q15170;Q58F21;Q68JN0;Q96T58;Q99684;Q8WUF5;Q13547;Q15853;Q14207;P52737;Q96IR2;Q12906;Q99583;Q9UHB7;Q96RU7;A6NN14;Q9BY41;O75446;Q6ZMS7;Q9NZI6;P28749;Q92748;Q9UKL0;Q5SVQ8;Q16670;A6NP11;Q5H9F3;Q3L8U1;Q9H307;Q71SY5;Q9NZN8;Q8IX03;P54253;O75525;P10242;Q9H116;Q9P086;Q96GC6;Q9H9D4;O15535;Q95238;Q9HCK8;Q14188;Q9H2G4;P62633;Q494X3;Q86XN6;Q9UC06;Q4LE39;P43268;Q8WXF8;P11161;Q9UQ80;Q95983;P62979;Q8N0Y2;Q92750;Q92754;Q9UKV0;O43186;Q14145;P39880;Q8N108;P23760;Q9UIF8;Q5HYK9;Q15906;P0CG47;Q9NZI7;A6H8Y1;Q96QC0;Q8N782;P0C7V5;Q9BUJ2;P62875;Q96RK0;Q5TEC3;Q15796;Q99594;P21675;Q15059;Q9BZK7;P56524;Q92541;Q6P280;Q6ZMY9;P41970;O43309;P32519;Q00577;Q9HBT7;Q96NJ6;P68036;Q8NAP3;A8MT65;Q09FC8;Q6P1K2;Q96AE4;Q9Y4A8;Q9P255;Q99909;Q8IYW8;P52435;Q15910;Q63ZY3;Q5T230;Q9UII5;P51522;Q9H3M7;Q9NRL2;Q04206;Q7RTV3;Q10586;P99Y10;Q9Y2D9;P17535;P78545;Q6NUN9;Q9NY43;Q8IY57;Q8WXI9;P82094;P51532;Q96SR6;P42704;Q9NWB6;Q02556;Q9Y222;Q8WUY8;A0JLT2;P53567;Q9UKT9;Q9NPI1;O14771;Q8NDT2;Q15370;P52736;Q7RTT6;Q9H3M9;Q15233;Q9UM63;P12757;Q13772;P0CG48;Q12962;O60675;Q969E4;Q96ST3;P38935;Q9Y5A6;P43356;Q9BTT4;Q9Y2G9;O00411;Q8TBE0;Q9BXP5;Q9HAP2;Q8IYN0;Q14151;Q92785;P50548;P27695;Q99676;B1APH4;C9JN71;Q96JC9;Q9UC07;P23246;Q9HAF1;P51786;P19388;Q969J2;Q10586;Q9Y2D9;Q14140;Q13148;Q8TAQ5;P48552;Q9UHV7;Q15424;P55197;Q9Y2X9;P29039;P24863;Q9P1T7;Q969R5;Q8NFD5;Q13045;Q92922;Q12789;P15336;P10828;Q9NZI5;P16383;Q92499;Q99856;Q9NS37;P37198;P18848;Q9NVC6;Q2M1K9;P18850;O60481;Q8WUI4;P62508;Q01844;O60869;Q86X95;Q9NZL3;Q95619;Q9BXX8;Q8N196;Q6IE81;Q15776;P30876;O75586;Q5SXM1;P09629;Q9Y2A4;Q02930;Q08ER8;Q86Y01;Q15545;Q5T3J3;Q7LQD7;Q6ZN01;Q7LBC6;Q9H5J8;Q9Y2D1;Q9UI36;Q53ET0;P10243;Q15699;Q86W11;Q08AG5;Q5SXM2;Q2QGD6;Q9HCE1;P17275;P20265;Q9Y2W1;Q9UBK9;O75444;Q96EZ8;Q9GZS3;P17480;Q14585;P51523;P06733;Q8N720;Q14135;O95073;P63167;P61244;P19838;Q96AV8;Q96QR8;A8MV65;P35869;Q6ZN79;Q9ULJ6;Q8N9R8;Q8N7Q3;Q8N141;Q8TA94;P56693;P17028;P67809;O75175;Q9UBD0;Q16534;Q15637;Q49AM1;Q9ULC4;Q9Y3Y2;P46937;Q9Y603;Q14241;Q96PQ6;Q9NSJ1;P13056;Q01658;Q9GZV5;Q9BUY5;Q9ULX9;Q86VN1;Q6P9A1;Q6IA86;O60583;P54198;Q9UHF7;Q8WXB4;Q15834;Q06546;Q9H5I1;Q9NWA0;Q3C1V8;Q9H091;Q9UPP1;Q3KNV8;Q8NC26;Q86UQ8;Q5PRF9;Q13112;Q92539;Q9Y5B9;Q9NQR1;Q6V9R5;O75346;Q9BT49;Q9BYK8;O14802;Q9UNY4;Q03060;Q9Y2X0;P26358;P32780;Q8NPF5;Q8NDN9;Q16384;P19532;Q8NHY6;P16415;Q3B7T1;Q9Y6R6;P17947;Q5HYR2;Q9UN30;Q9NPJ4;Q9H9T3;P18615;Q96LA8;Q9Y473;A0AVK6;Q8N7H5;O15226;Q9BUG6;P51826;Q9BUE0;P98182;Q9P1Z2;P40425;Q13363;Q16576;Q6ZMV8;Q92793;Q13901;Q96ST2;Q8N823;Q7RTV0;Q96QE5;Q8TF39;Q02078;Q9Y224;P35226;Q99623;Q92800;Q969S8;Q9UJW9;Q5T0F9;P14651;Q9NRC8;Q2VY69;Q8WX92;Q86YD1;P54259;P51668;P13682;Q9UIS9;Q8NI08;Q9Y468;P12956;Q13127;O75530;Q3B726;Q6ZQV5;P43355;Q96NG5;Q53T94;Q14593;Q8N726;Q9P0T4;P22415;O96017;O95905;Q8IYN2;Q13503;P52741;Q8NB42;Q14693;Q5BKZ1;P35251;Q9H0E3;P0CB33;O75928;Q15543;Q9Y250;Q14781;Q14498;Q03938;Q03962;Q03933;P05412;Q16526;Q8IYB9;Q7KZ85;Q13129}

25531

Pathogen[ P03410] interacts with 1704 human

partners: {Q96RL1;Q9NSD4;O60711;Q15650;Q96EG3;Q9HAW0;P84022;Q92830;Q9Y2P7;Q96LI6;Q9HCG1;Q9H3H9;Q7RTT6;Q99594;Q96NI8;O14813;A8K8V0;Q6AW86;Q9NQG5;Q5CZA5;Q71F56;P49750;Q9H0M5;Q0PNE2;Q8IXH6;Q99743;Q92831;Q00613;P20749;Q9Y5J3;Q9UKV0;Q9UHF7;Q9BSM1;P40426;Q96QT6;P0DI82;Q04206;O60583;Q9Y2W1;Q08945;P08048;O14771;P28069;Q9Y2L8;Q9HC78;Q9H3M9;Q8N1W2;Q96JB3;O60224;Q6ZNG0;O14901;O00472;Q6ZNA1;O15392;P35712;Q6UUU7;P17031;P22670;Q5HY98;Q5TB30;O43309;Q9UI36;Q6ECI4;Q15714;Q9UPP1;Q96RE9;O95619;Q6V9R5;Q5JVJ2;Q9H6W3;P118

31;O60281;Q8NBF1;Q9NS37;Q14588;Q8WXF8;Q6NZI2;Q96BR6;Q9H981;Q5EBM4;O75290;B2RXF5;Q9BY  
N7;P0CJ87;Q92945;Q96AV8;Q5JNZ3;P23246;Q8TAU3;Q8IYN0;Q8IZX4;Q9HAJ7;P82094;P19838;Q9UH  
V2;Q68CJ9;P36956;Q9NYW8;P0C7V5;P52655;O75461;P53999;O94763;Q9UI95;P60002;Q9UNN4;Q9NZ  
N8;Q8WYH8;P05121;O75925;Q96GN5;Q96RS0;Q6ZNA4;Q12873;Q15572;P0C7X5;Q96ST2;Q9HAH1;O606  
Y4;Q6ZNO1;Q5T619;P10599;Q03112;Q6ZMY9;P0C648;Q96NM4;Q8IXF0;Q3SY89;A6NN14;Q32M78;Q9UN  
Y4;Q9Y2Y1;P29374;Q13106;Q8N9Z0;Q8N5J4;Q8NDW4;Q96T76;Q9NZL3;Q16666;Q9UMF9;Q9UDV7;Q145  
93;P35638;Q14526;P68104;O95238;Q9H869;Q9UK13;Q8N8E2;O00470;Q96N58;Q233W8;Q8N8Z8;Q8WV  
C0;P19387;Q14103;P16415;Q96N22;P35813;Q13772;Q96LA8;Q13360;Q8N7R0;P06454;Q8N7G0;Q156  
97;Q96T23;Q8IX12;Q13889;Q8WYK2;O75373;Q9NV56;Q96PK6;Q99496;Q9H5J8;Q95780;Q5VUA4;P0CJ  
79;Q8N7Q3;Q14929;Q9BY41;P17482;Q8TF68;P54198;P17861;Q15329;Q6W2J9;Q9UKV8;Q8N3C0;Q9Y5  
Q9;P0CH99;P17040;O95628;Q8TCN5;O95503;Q96QC0;Q96H86;P15621;P18615;Q9NPA5;O94915;P372  
75;Q15637;Q93062;Q8NI08;P36954;P13682;P41162;Q9H4T2;Q9NZ81;Q9H3P2;Q8N587;Q9UL59;Q9NP  
J4;O00268;Q8NFZ5;Q15047;Q9NWT6;Q6PI98;P36508;Q5VWG9;P58317;Q96C28;Q3KNV8;Q8IYH5;Q8N7  
M2;Q96N38;Q9BRH9;Q52LR7;Q86XF7;Q13495;Q16520;Q3MJ62;P98169;Q15014;A6NDX5;Q8WTZ3;Q96C  
S4;Q8WVJ9;P61978;P0C7T5;Q9UDV6;Q04864;Q9HAZ2;Q99676;Q92994;Q9NVV9;Q9GZM3;P15822;Q8NA  
19;Q9H7R0;P52738;Q9Y2G9;O14896;O96004;P31274;Q9HBT8;Q49AM1;Q15543;Q9BWW4;P19419;P159  
73;P52740;Q15652;Q04726;P42772;P12755;Q96G25;Q9NV72;Q6PD62;P31276;Q6IPX3;P82970;Q145  
49;Q9P2R6;Q8N3X6;Q76KX8;Q9UN79;Q5TOB9;Q66K89;P17676;P23511;Q96SZ4;Q8WUB8;Q5T230;Q9P0  
U4;P98182;Q8TDD2;Q8N228;Q8N726;Q9BYV9;O60806;Q15233;Q8N680;Q9H9D4;Q96SQ5;Q9UMQ3;O949  
16;Q9H4I2;Q96JL9;P18847;P01106;Q02447;P16989;Q9BUJ2;O95251;Q92750;Q99814;O00267;P179  
47;Q9Y5B9;P0C860;Q16600;P63272;Q12968;Q95125;Q06330;O60481;Q99502;Q9BXP5;Q99549;Q067  
30;Q92670;Q86U86;O15060;Q9BSG1;O14948;O60682;Q8N8C0;Q01860;Q8N344;Q96F24;Q6AZW8;Q6ZM  
W2;Q6P3V2;P24928;P41218;Q96B42;O14497;Q15287;Q8IX03;Q9UC06;Q8N8G2;Q9UII5;A6NFI3;Q157  
76;Q8NB50;Q9UM07;O96019;Q9UKD1;P54845;Q5T3J3;Q9C0G0;Q9Y6Q3;Q9ULH7;P10073;Q8IUE0;Q9UL  
18;A9YTQ3;Q0D2J5;Q12962;Q9BQA5;P21675;Q9BYE7;P41212;Q3ZCX4;Q03989;P09629;P29083;Q146  
86;Q14938;Q8TAW3;Q9NQ87;Q9ULM6;Q9NQX6;Q8N4W9;P18848;Q9UQ80;P36402;Q5H9L2;Q8TAQ3;Q86Y  
97;Q8N6I1;Q96AQ7;Q9H1A7;Q9Y2N7;Q13503;O15266;Q9Y2D1;O75446;Q6PJJ2;Q9UGP4;Q8TD17;Q8N3  
J9;Q3KP31;Q9BYK8;Q9Y224;Q7L190;Q96N77;Q6PG37;Q8N8C2;O75528;P14651;Q7KZ85;P10242;Q8IY  
B9;P53567;Q9UIF8;Q9NPF5;Q9BWT1;Q86YW9;Q9NR11;O15405;O14646;Q9UHL9;P35789;P14859;Q9NV  
C6;Q99717;Q8WXI9;Q12800;Q8NF99;Q14814;P78545;Q99608;Q96AW1;Q8IYX0;Q9UL49;Q8N9N5;Q7L2  
R6;Q75030;Q96K62;Q96PQ6;Q8TEE9;Q53TQ3;Q86WZ6;Q9UPG8;P15884;Q6ZN11;Q9NYT6;Q15884;Q146  
53;P51946;O75444;Q14207;Q92610;Q8NBB4;P28324;Q12857;Q5H9I0;Q8TF50;Q16254;P17017;Q8TF  
45;Q16236;D6R6G6;Q3C1V8;Q12830;Q2MLV0;Q5VIY3;Q9BZE3;Q96ND8;Q14978;Q9NPJ6;Q13490;Q8IY  
I8;Q00059;P24278;O95931;Q2M218;O60716;P06733;Q9Y543;Q6P2D0;Q9P0W2;Q9UMS5;Q4G112;O751  
82;Q8WTS6;Q14CW9;Q08ER8;O15198;Q8TF39;Q5FWF6;Q9P2K5;Q9NY61;Q9UK11;A8MT65;Q8TDY2;Q9UB  
U8;O43918;O00401;A6NHJ4;Q9ULJ3;Q9NVM4;P0CB33;Q9NXT0;Q99732;P31249;Q9BU19;Q8BSE9;Q9Y6  
X2;Q96JM2;Q9Y692;Q7L1Q6;Q14765;Q86X55;Q460N3;Q96LX8;P43355;Q9UIH9;Q86XU0;Q04724;Q2VY  
69;Q9H4Z2;Q6IQ21;Q9NZI5;Q5H9F3;Q9UBB5;Q96GC6;Q6NSW7;O75928;A8K010;Q9NPC7;P51826;O438  
30;Q9BRU2;Q9C0F3;P11142;P39687;Q2MLK9;Q9NZV7;P57071;Q6ZYL4;P41134;Q86TJ2;Q0VGE8;P170  
96;Q9H963;Q8N695;Q9UBX2;Q6NSZ9;Q6NSZ9;Q9Y2K1;Q9Y3Q8;Q969F1;Q9H3M7;Q7RTS1;Q75437;Q6ZSB9;O002  
13;Q8N3S3;Q8N2W9;Q9UL58;O14709;A6NFD8;P30876;P63167;Q03060;Q9NWA0;Q96K75;P0CJ85;Q927  
85;Q8N720;Q15653;P54252;P52741;P19532;Q8N9N2;Q9H063;Q08999;P10243;Q5THR3;Q9Y468;A6NJ  
G6;A6NNA5;P20226;P82979;Q15370;Q86YP4;O95948;Q86VE0;P10828;Q6NX45;Q9Y5Q8;A6H8Y1;Q3B7  
T1;Q9H175;Q15906;Q9UJL9;Q9NSJ1;Q6PF04;Q9BT49;O00291;Q9Y3T9;O75764;Q94892;Q03M24;Q9UB  
K9;P48378;P65400;Q5VWX1;Q9ULJ6;Q16633;Q86VN1;Q6UUV9;Q9Y3M9;A6NM28;Q9H116;Q03923;Q6PK  
81;P19484;Q9H9T3;Q9HC44;O75376;Q9P243;Q86UQ8;Q9HCL3;P49716;O00110;Q68DY1;Q06547;P680  
36;Q96ES7;Q9H7X3;Q15059;Q99684;P32519;Q9BYH8;Q9UIE0;P23193;Q53GI3;Q03468;Q8NB42;O603  
04;Q6U7Q0;P15923;O00411;Q09FC8;Q06732;Q6ZNI9;Q99607;P17025;Q03052;Q13045;P0CJ90;Q52M  
93;Q9UIV1;Q9Y3C7;P62979;Q96EB1;Q9UPW6;Q8NG57;Q9NWS9;O43159;Q9NVV4;P35227;P62508;Q4LE  
39;Q92748;Q8NEM1;P0C1Z6;Q86WP2;P52657;P51523;Q8IWS0;Q14188;Q96ST3;Q8NFD5;Q6ZNS5;O155  
14;Q9UJW9;Q6ZT77;Q9Y295;Q15306;Q13568;P50613;Q96HQ0;O75177;O15055;Q9H204;Q03933;Q96E  
K4;Q5VZB9;O00712;Q7LBC6;Q92585;Q9UKW6;Q96T58;Q8WW38;Q9Y535;Q92541;Q01201;P25490;P188  
46;Q0D2K3;Q96LW1;P52746;Q5QJE6;Q00577;P61244;Q7RTU4;Q15424;O15226;Q07666;Q15560;Q7Z4  
V5;Q6IV72;P17036;Q96FV9;Q8TC21;A6NFQ7;P15408;Q9H1I8;Q53ET0;Q9NTW7;O60663;P51508;Q3MI  
S6;Q9H707;Q7Z401;Q96SR6;Q5TEC3;Q9NP66;B4DXR9;Q8NEP9;Q14693;Q6VMQ6;Q75486;Q8WU14;P175  
44;Q5SVQ8;Q16670;Q9C005;Q6ZV50;Q16576;O60381;P50549;Q9GZS3;Q5EBL2;Q9H8M2;P17010;Q8N1  
G0;Q9GZV5;Q9H0E3;Q9UQR1;P11473;Q9UQL6;Q02556;P51003;Q6XD76;Q9H2F5;Q96QE5;Q9HBZ2;Q9GZ  
V8;Q9BW11;Q9Y603;Q15654;Q13148;Q14587;Q96PE6;Q15928;Q8N7H5;Q9BRR0;A8MV65;Q05BQ5;Q8ND  
Y6;Q92925;A6NJ46;Q8TAF7;Q969V6;Q8N8L2;Q96NG8;Q86T29;Q9ULD5;O95644;P58340;Q7RTU0;Q96I  
F1;Q02930;Q9P1Z2;Q6RFH8;Q96MA1;P50750;Q96MN9;P10072;Q9Y5Q3;Q92800;P26358;P27540;O155  
35;P67809;Q9NYV6;Q99081;Q9ULC4;Q6ZNO6;Q9UHB7;Q96BV0;Q14590;O75151;Q9UK10;Q9BUG6;Q5T0  
F9;O60563;Q13127;Q8WXB4;P17022;Q96GE5;Q5SXM1;O43318;O00716;Q9UKT9;O15525;P08651;Q9HC  
S7;Q6ZMS7;Q9Y2X9;Q8IZL2;Q15583;Q08AN1;P17029;Q7L3S4;Q8IVP9;A6NIX2;Q7Z7J5;P12956;Q9NP  
A8;Q8N823;Q12986;Q99990;Q8WY6;P0DI81;Q7Z340;Q8TB69;Q5H9L4;P55199;Q96JK9;Q8WZ33;Q6ZR  
S2;Q96H40;P35548;Q8NEK5;Q7RTT5;Q3KQV3;Q9P031;P17098;Q92793;O95905;Q14966;Q969S8;Q8TB  
Z5;P38935;Q8IYF1;P35251;Q86Y01;Q719H9;Q15573;Q96JC9;Q5T6S3;Q8NDN9;Q9BWM5;Q6NUN9;Q8IX  
07;Q8IXH7;Q8TE85;Q8IY57;Q9ULK4;Q53QV2;A8MWA4;O95402;Q9Y2Q1;Q3KNS6;P48382;Q8WX92;P518  
14;Q6IQ32;P10074;Q15561;P10244;O00570;Q6ZNH5;Q8IU81;Q9NQV7;P29084;Q09028;Q96BN2;Q9NW  
08;Q15369;Q96623;Q9P1T7;Q9UER7;P17026;Q01538;Q92782;Q9BS31;Q99459;Q16649;Q9HBM6;Q6EK  
J0;Q9UIL8;Q92769;Q9HCE3;O43513;Q02386;Q8NEA6;Q9Y4A5;Q96KG9;Q9NRL2;Q9BWX5;O94805;P0CG  
31;Q96JM7;Q9UK12;P52737;Q96I27;Q7Z398;Q9Y6B2;P52435;Q8N5A5;Q5TGS1;O60225;O95602;P175  
35;Q8N972;Q9Y294;Q7Z3I7;Q6ZN79;Q15170;Q9P2D1;Q6P9G9;Q8WYN3;Q9Y2G1;Q2VVA4;Q969W8;P170  
28;Q8N883;Q49A33;Q8NCK3;Q6SJ96;Q9UKN5;P17019;A6NLW8;Q96C00;Q8NAP3;Q9UNY5;Q03924;Q165  
14;P28347;Q9H9F9;P78395;Q32MQ0;Q68DY9;P17030;Q9BS34;P52743;Q9B0L1;Q9UBS8;O75525;P172  
75;Q13129;Q9NQR1;Q92499;Q9NWB7;Q12772;Q969E4;Q16621;Q7Z591;P49848;P52736;A6NGD5;Q9HD  
42;P0CJ89;Q8TAK5;P25208;P51815;Q9NXR8;O95163;A6NK53;Q9BQW3;Q14872;O75362;Q9UJW8;Q96K

83;P56645;Q6P1K2;Q6ISB3;P78317;Q8WY36;Q5HYK9;O15379;P56524;Q13111;P17014;Q12905;Q8IX  
J9;C9JN71;Q9HCE1;P0CG24;Q68EA5;Q96SE7;Q5JVS0;Q9H5I1;P53803;Q8NA42;Q9UHX1;Q6P280;Q157  
97;Q71F23;Q92922;Q6P1X5;P17024;Q6P4R8;Q01826;P42704;Q14140;Q9H609;Q13112;Q8N7K0;Q86U  
70;Q5T5D7;Q9H160;Q9NP71;Q14119;P43268;Q75909;Q6ZS27;Q15326;P31269;Q96S65;O15534;Q959  
83;P19447;Q12796;P17020;Q99909;Q01658;P48380;P22415;Q8WXF1;Q13485;Q96I24;P10914;Q9BU  
Y5;Q96IR2;Q9ULX9;Q94864;Q99583;Q13952;P22736;Q96IZ0;Q04727;Q8IZ26;Q14186;Q9H7L9;Q96E  
K7;Q969J2;Q9Y2S0;Q8NDT2;Q8TBE0;Q8N9R8;Q96MX3;P62875;Q9H7R5;O14776;Q9GZS1;Q8IYN2;Q9BY  
31;Q9UN42;Q9HCK8;Q8NE65;Q76L83;Q86VP6;P28702;Q12789;Q9P1U0;Q147U1;Q9UM63;P09874;Q165  
26;Q9BTC0;Q8N5P1;Q5PRF9;P16220;Q15466;Q96SK3;Q15834;P56693;Q00403;P21506;Q9NUQ3;Q7RT  
V3;P12757;Q96017;O43296;Q6P1L6;P86452;Q96S94;Q9BTT4;Q9Y6X8;P17032;P53041;P17027;Q9H5  
Q4;Q9NQV6;P51668;Q3SY52;Q14585;Q9BRG1;A8MUV8;Q8NFIJ8;Q53H80;P46937;Q8N196;P20290;Q064  
55;Q6P1J9;O43364;Q6P2C8;Q9GZX5;Q13118;Q15699;P49910;Q49AN0;P35269;Q92618;Q9Y6J9;P557  
71;P42568;Q86XN6;Q13185;P51786;O75175;Q13469;B1APH4;Q15910;P41182;Q99504;P51532;P0CG  
00;O15015;Q9HBT7;Q16594;Q9BQG0;Q15853;Q9NQ92;P61218;Q13398;Q5JVG8;Q75346;Q6ZRF7;Q136  
10;Q5BKZ1;P05412;Q8IUR6;Q86X95;O43541;Q96MR9;Q8N488;P49336;P39880;P49639;Q9NQ33;A2RR  
D8;Q9Y2Y1;Q8N8B7;Q10586;Q12888;Q6XYB7;Q9Y3Y2;Q96F45;Q96HR3;Q9NW07;P49711;Q9Y6R6;Q96C  
J1;Q9Y222;Q8N988;Q14678;P98168;Q5MCW4;Q9UKL3;Q86V71;O15105;O95625;O60828;P42226;O146  
28;Q7Z6R9;Q9HCU5;Q15596;Q9P086;Q8N108;P51948;Q8NI51;O15160;Q96JN0;Q96RU7;Q7Z7K2;A0JL  
T2;P51531;Q9HAP2;P24863;P28749;Q8TE02;Q9NSI6;Q9UKI9;Q15544;Q9H8N7;Q6VUC0;P12980;P0CJ  
88;Q96IT1;B4DX44;Q13901;Q9ULM2;Q13888;P50539;O60244;Q8IUE1;P78543;Q9Y2Y4;Q9UHV7;Q157  
42;Q8WV37;Q8NC26;Q8WVM0;P11474;Q92664;P0CJ86;Q96RK0;A6NJL1;Q9UC07;Q9ULW3;O14593;P524  
34;P23769;Q13761;Q96EZ8;O43189;Q14586;Q3B726;Q9BTA9;P52630;Q3L8U1;P62987;Q9UIS9;O750  
81;Q8NHW3;Q9UNS1;Q9HCS4;P27695;Q8NCA9;Q13547;Q01664;Q9C0F0;Q9P2F9;Q96A56;Q9UJN7;Q6ZM  
Y3;Q01094;P35680;O60869;Q96RK1;A6NEJ1;Q7RTV0;O00167;Q14151;P28698;Q7Z7L9;P49116;Q8NB  
12;P17035;A8MUZ8;Q53T94;Q8TAQ2;P13010;O14978;Q9Y5K5;P59923;Q9BQI9;P13984;Q96IS3;A6ND  
Z8;P54259;P10589;Q9Y2H8;Q92966;P56270;Q02577;Q9P2J8;Q10587;Q12972;Q9Y6Y1;Q02078;Q9UI  
F9;Q5TYW1;Q15542;Q16534;A8MQ14;O15350;Q96NG5;P41970;Q2QGD7;Q6ZSS3;Q8N140;Q9NZI6;P624  
87;Q9H1D9;Q6ZN08;Q9BZK7;Q9H091;Q9H8G1;Q7KZF4;Q9GZN2;Q9Y2P0;Q14498;O43812;Q9UQB3;Q9Y4  
62;Q6MZP7;Q3SXZ3;Q9Y250;Q86UE3;O60543;Q7RTU5;P08047;Q06587;P50548;Q9H9C1;Q9P255;A6NL  
F2;Q13487;Q12872;P55197;P17039;O15265;P23760;Q99856;Q9UBD0;Q8N0Z2;Q8IZ40;Q00653;Q926  
00;Q9UBW7;Q96RE7;Q99417;Q9UJU3;Q9UFW8;Q86YD1;Q494X3;Q460N5;Q8NBC5;A9NK75;Q8N9K5;Q9NY  
F8;O95201;A6NP11;Q16656;Q9NVU0;Q9H7S9;A8MTY0;Q8TF20;Q8IZL8;Q9NX65;Q5U623;Q16384;Q9NQ  
Z8;Q68CP9;O75626;Q9Y2X0;Q8TF32;Q86UD4;Q63HK3;Q06416;O75475;Q15937;O75478;Q6P9A3;O438  
29;P78347;O43463;O14744;Q63HK5;O75123;O95073;Q8N8J6;Q7RTT4;Q8N693;Q3ZCT1;Q8N782;Q930  
74;Q8IXW5;Q96LW9;Q9BQ70;Q6ZQV5;Q8TF47;Q9ULV5;O00422;Q9NWB6;Q12901;Q9NRC8;Q9UH92;Q145  
84;Q8N141;Q9Y4A8;O00257;Q13105;Q49AA0;A5YKK6;Q6ZN57;Q03701;Q9H4W6;Q8TD26;P14316;Q96B  
D5;Q6ZN28;Q8TD23;Q9UKL0;Q9UQR0;Q15929;P17041;Q14209;Q9Y6K9;O75618;Q6STE5;Q9NZI7;Q147  
81;O75529;Q6PEW1;P54253;Q9HD15;O15370;Q15744;Q15361;Q96MU6;Q14582;Q94993;Q9H944;Q9Y6  
F8;Q02080;Q92985;Q96N20;P20265;Q6DD87;A6NKF2;O60765;Q96QR8;Q86YE8;Q7RTU3;Q9UK58;Q8NE  
F9;Q12837;Q8NDP4;Q8TA94;P11308;Q9NSC2;Q94983;Q8N371;Q99543;Q9NY43;Q9BR84;Q9UID6;Q039  
36;Q13765;Q9BUE0;P18146;Q9NYB0;Q96K58;Q8N5U6;Q8IX15;P17021;O75164;P15622;P62633;P527  
44;P51522;P17023;O75820;Q8N895;Q8WUA4;Q5VTD9;Q12824;Q96E29;P35226;Q96H20;Q96JC4;Q9H5  
01;Q96E15;Q8TBZ8;Q9BT81;Q14865;Q9NX70;Q63ZY3;Q96NJ3;O95416;Q05481;P16383;Q8N859;Q9BX  
82;Q6IA86;Q14145;Q7L945;Q33E94;Q92539;Q14592;P48552;Q6P9A1;Q9UKN8;O00255;Q96JF6;Q86V  
15;O14867;P40424;Q96CX3;A8MXY4;Q9H2G4;P78424;P38159;Q9H0E9;Q15796;Q0C7X2;Q9UJX3;Q155  
32;Q9UL36;Q5SXM2;Q14839;P08235;P15336;Q9UEG4;Q9NQX1;P11161;Q92993;Q15723;P19388;Q9NR  
55;O60422;Q15562;Q8N2I2;Q9C086;P0CJ78;A8MVS1;Q9H511;Q8N5Y2;Q14241;P40763;Q8WUY8;P327  
80;Q9NU63;A6NNF4;Q68DI1;O43361;Q96AE4;Q8NDQ6;Q9Y2D9;Q9UKY1;B4DU55;Q9UN30;Q58F21;Q96S  
L8;Q9UGU0;P18850;Q9HCD5;Q9P2K3;Q99551;O75971;O94992;Q4V348;O75467;O60907;Q969R5;P330  
76;P43356;Q9Y5A6;Q6ZN32;Q92681;Q14934;O14802;Q6ZMV8;Q12906;Q9Y5B6;Q09078;Q14591;Q8NF  
64;O43345;Q86UU0;Q8IXT2;Q969X6;Q9HCZ1;O75448;Q96RN5;Q6ZNG1;Q5VVH5;Q6ZW49;Q14192;Q9Y2  
G7;Q9BQ87;O43365;O43167;Q96D98;Q16533;P15976;Q96PM9;Q6IE81;Q6P1K8;A6NE82;Q86UP8;P0CG  
47;Q9NUA8;Q86TJ5;Q92759;Q9Y2A4;Q6P1N0;P52742;Q9UJW7;Q9BUI4;Q6ZR52;P17038;Q06546;O602  
90;Q7RTT3;Q13352;Q6EMB2;Q15022;P17097;A0AVK6;Q15545;Q9NPI1;Q9HB58;Q14135;Q5HYR2;Q86T  
U7;Q9UPN9;O43593;Q8NHY6;Q9H5H4;Q7Z3V5;Q9HC52;Q15043;Q86W11;P78337;Q92754;Q8Y6Y25;Q499  
Z4;P28370;Q9HB65;Q9HBE1;Q8N393;Q13506;P61077;Q2M3X9;Q03111;O60284;Q05195;Q01892;Q96M  
H2;Q8N184;Q8HWS3;O75586;P14921;Q8WYA1;O75530;Q96RJ6;Q9H9Y6;Q9Y473;P52747;Q96NJ6;Q9UH  
R5;Q8IVC4;P17480;Q9HCX3;Q04725;Q7Z589;P51504;Q9H307;Q8N9F8;P13056;Q5PSV4;O75155;Q9NR  
G4;Q8NBZ0;Q96NL3;Q9UBG7;Q15528;Q96DB2;Q9BXJ9;Q8IWY8;Q9BXG8;P61457;Q8IZC7;Q8N0Y2;Q165  
87;Q08AG5;Q9UFB7;Q8WUF5;Q15935;Q03938;Q99966;Q16385;Q6NX49;P25440;Q9BSK1;Q71SY5;Q165  
59;O14529}

25532

Pathogen[ P14075] interacts with 1236 human

partners: {Q04727;Q9NVU0;Q9H307;Q16633;Q9NQ33;P28069;P42704;Q8N196;Q96EB1;Q3L8U1;Q5VW  
X1;Q0D2J5;Q00059;Q9NZL3;Q9C0F3;P52630;Q969F1;Q86UU0;Q14781;Q494X3;Q9BY41;Q9UN30;Q6P4  
R8;P17480;P17029;P49336;P06733;Q68YD1;Q9NTW7;Q15059;P82979;Q5H9L2;Q8NI51;Q9Y6J9;Q96S  
T3;P51003;Q9NSC2;O00213;Q16576;Q92585;Q15572;A8MV65;Q12789;P43355;O14646;Q9UHL9;P358  
69;O60663;Q8TAQ5;P51815;Q96S65;Q9GZV5;Q96QR8;Q15929;Q99607;Q8IXW5;Q6V9R5;Q3KNV8;Q7RT  
T5;P54253;P06454;Q9H5Q4;Q12962;P35813;Q02577;Q86U70;Q6RFH8;Q8WXF1;Q9Y5B6;P13984;Q996  
O8;Q86X95;Q9Y5A6;Q969J2;Q9H175;Q86SE9;Q9NPJ6;Q8N9N5;A8MTY0;Q99504;Q96GE5;Q6ZN32;Q006  
13;Q92681;P23246;Q92759;Q9HAP2;Q9H2F5;Q99990;P12956;Q14207;P50548;P11142;Q16533;Q9BR  
U2;B4DXR9;P24863;Q8N141;Q13105;Q04206;Q63ZY3;P21675;Q6ZN08;P17482;Q86YD1;Q9H4I2;Q9NW  
B6;Q969R5;Q9Y5R5;Q15528;O15265;Q9UM63;Q7Z591;P51523;P78337;Q9H1I8;Q9GZS1;Q5TGS1;P404  
24;Q14526;Q969S8;P16989;P52737;P0C7X2;O75030;Q9NV72;Q9HAJ7;Q9UBU8;Q92966;P25440;Q96Q  
T6;Q9UQR1;Q8NEM1;Q08999;Q8N5J4;Q9NX70;Q8N371;P52657;Q8IXJ9;Q9Y295;Q52LR7;P68036;Q8NC  
26;Q13495;Q9NPI1;P05412;Q16385;Q15542;Q8N488;Q04725;P18615;Q96NJ6;P42226;O95503;Q5BK  
Z1;P40425;Q12800;Q14938;P11474;Q9Y2D1;Q2M3W8;P68104;Q01543;Q9UQR0;Q9UM07;Q15759;Q9BQ



A5;Q14103;Q6ZN01;Q9ULM6;Q15928;O75475;Q9NYV6;Q4LE39;Q16656;Q8IY57;Q9C0F0;Q14593;P14859;O60828;P22670;Q92831;A6NHJ4;P11831;O60481;P52747;Q9BWW4;Q15906;Q9NPJ4;P10828;Q9BXJ9;Q96QC0;Q13506;Q8NA42;P78545;Q14588;P78395;Q92782;Q8N9R8;Q86XF7;Q15697;Q8NB50;P17861;Q15014;O60765;Q8NBB4;Q08945;Q15562;Q6ZNG1;Q9Y224;O00470;P27695;Q9Y2A4;Q8N140;P51532;Q6U7Q0;P28347;Q9Y3Y2;P30876;Q15532;Q9UMS5;P53567;Q12901;Q9UNY4;Q8TD23;Q9UHR5;Q0766;Q96HR3;Q76L83;P25208;P0CB33;P52736;Q96MR9;O43541;Q15937;Q96SZ4;Q9UKN5;Q9C086;Q8N5F7;Q14686;Q0D2K3;Q9UHX1;Q01201;Q01658;O75444;Q96MH2;Q9H7R5;Q953T94;Q9H116;P17275;Q9Y4A8;Q00403;Q6ZYL4;Q7L2R6;P82094;A6NDZ8;Q13901;Q8TE85;Q71F56;O75362;O75446;Q06546;P0C1Z6;Q6NUN9;O60563;O14776;P43268;Q9NVV4;Q9P2R6;P29083;O75971;P23769;Q9NRL2;P61244;Q9UKL0;Q9NSI6;Q9UID6;P50613;Q9Y2G7;P59923;Q96T58;P41218;P19419;Q5H9F3;P41212;Q12905;Q14241;Q92600;Q6P9A1;P18847;Q8WVC0;Q01860;Q9UPL1;Q6ZW49;Q86TU7;P28698;Q9NY61;Q9Y468;Q8N782;P38159;Q9H7R0;P38935;Q96SL8;Q9UGP4;Q14839;Q9UBD0;Q03933;Q9HC44;P48380;Q92945;P62633;Q33E94;Q9HBT7;Q15652;O15015;P35548;Q96C28;P11161;Q12837;Q15561;Q6ZQV5;P15172;Q96ND8;Q6P1X5;P17096;P56524;Q9UK11;O43918;P17036;O00422;Q01844;O14709;Q08050;Q15714;O43186;Q5PSV4;P18146;Q9NYW8;P19484;Q9HCE1;Q9NQG5;Q96EZ8;P0C7T5;Q15047;Q16384;Q9P1T7;O60675;Q95625;P29084;O95619;Q96RK0;Q16520;O95931;Q6ECI4;Q6IA86;Q86VE0;Q9Y2N7;Q7LBC6;P20265;P33076;Q9UH92;Q53H80;Q92922;O15226;Q86VN1;Q8NDN9;P19388;Q3MIS6;Q7KZ85;Q9Y603;P49750;Q9P086;O75925;Q9HAH1;P10244;P61218;Q9NQ1;P17019;Q96RK1;P35638;Q719H9;Q8TDY2;P50750;P15822;O60583;P42568;Q92994;P31249;A8MT65;Q6ISB3;Q9Y250;Q02080;Q9ULX9;Q93062;Q15910;Q96IT1;Q53ET0;P78347;O43167;Q7Z7C8;Q12906;Q92800;Q99543;P39687;O75175;Q5SXM2;Q15544;Q9H091;Q9UUF5;Q9HAW0;Q9UFW8;Q8TAF7;Q99717;O75448;P19387;O00167;Q9Y4A5;Q9UKV0;O00716;P56693;Q9H9C1;Q7RTU5;Q00978;Q8WW38;Q8IX12;P20226;Q9BT49;P15336;Q13111;Q9UHV2;Q15653;Q8N2W9;Q9UL58;Q9UBB5;Q5VVH5;Q8WWY6;Q92754;Q9NZI7;Q9UI95;Q15560;Q9NZN8;Q9BRR0;P10242;Q16666;O94983;Q15796;Q96BN2;Q08AN1;Q96N95;Q9NWA0;Q9NQ87;P0CH99;Q8NHY6;Q03936;Q13148;P15923;Q6ZMV8;P15408;Q13398;Q53GI3;Q86W11;Q8N7Q3;Q9H2G4;Q9NYF8;Q14585;Q073K6;Q12872;Q86YW9;Q14209;Q13952;Q9ULJ3;Q9BYE7;O43365;O75182;Q13547;P61077;Q99856;O00570;Q05195;Q16594;P54198;O94763;P26358;Q6S9J9;Q9BQI9;Q8IYN2;Q8N0Z2;Q96IZ0;P13056;P01106;Q92750;P39880;Q8WVJ9;Q92993;Q96H20;A6H8Y1;Q8NFZ5;Q9Y618;O14497;O75290;Q5VWG9;O75081;O95402;O14503;Q9Y2Q1;P17040;P54252;P31269;O75376;Q92748;Q01826;Q4G112;Q92785;Q16670;Q96AQ7;Q8WV37;Q8TEE9;Q9HAZ2;P27540;O75586;Q9H0E3;Q7RTV3;Q8N5A5;Q9UQB3;Q99459;Q9BTT4;Q02556;P12757;P02487;Q9NUQ3;Q03468;Q9ULD5;P35711;P41162;O00257;Q96004;Q96NI8;Q13568;P17098;Q96MN9;O00291;Q13485;O94992;A8MUZ8;O00255;Q8N7H5;P09629;Q93074;O94864;Q6P1J9;Q9NP71;Q92499;P24278;Q14186;Q6NZI2;Q86XN6;Q09028;Q10586;Q9NPF5;Q5TEC3;Q9H204;Q8IY18;Q15853;Q8N5U6;Q9BQ70;P49116;Q12857;O95628;Q9UKL3;Q96019;Q9HCL3;Q92541;Q8NBZ0;Q6IE81;Q04726;Q8IWS0;Q06587;Q5VIY5;Q9H5I1;Q3B726;O75478;P0CG48;Q96JC9;Q9BQG0;Q9NY43;Q5VUA4;Q92539;P62979;Q9ULV5;P28324;Q12986;Q6ZNA4;Q8N108;Q9Y692;O00401;Q8N344;Q92670;Q9H5A8;Q15326;O75618;Q14CW9;Q8TA94;Q9Y3C7;Q9NQX1;Q9NZV7;P32519;O14948;Q8NEF9;Q14653;A6NGD5;Q9UPW6;Q06455;Q96D98;Q15370;Q06547;Q01664;O00411;Q13490;O95983;Q53TQ3;Q14744;P54845;Q9UHB7;Q9HAF1;P23193;Q58F21;Q96JM7;Q05481;Q96LA8;Q96RE7;Q9UHV7;Q9UNY5;O75528;Q12830;P52746;Q8N4W9;Q9POL1;Q99909;Q9BUY5;Q8N228;Q9Y6B2;Q5HYR2;Q32M78;Q13469;Q06017;Q96N22;Q15650;Q96PK6;Q6W2J9;Q13889;O15350;P52742;Q16254;Q9UL49;Q8N7M2;Q99684;Q9UBK9;Q6PI98;Q8N693;Q9BYN7;Q8N3J9;Q92769;Q9HCG1;Q01892;Q86U86;P0C860;P48378;Q9C005;Q9H8G1;Q9BUJ2;O75525;Q9H963;P78543;Q9Y5B9;Q99623;Q9Y5Q3;O95780;Q15834;P49848;Q15424;Q68CP9;Q8NDQ6;Q86X55;Q6IPX3;P35712;Q9HCU9;Q13185;Q6MZP7;Q3B7T1;Q15637;Q9Y2D9;P86452;Q9H1D9;P55771;Q6VMQ6;Q96E29;Q6PD62;Q49AM1;Q9H9D4;P15287;Q9UIS9;P51504;Q7Z5L9;Q9H944;P152744;O60543;Q9HC8;Q9UPN9;Q9UN79;O15370;O00472;Q5JVS0;Q13765;Q99732;P24928;Q8NAP3;Q05BQ5;Q9UHF7;Q6PG37;P0DI81;O43189;Q8N6I1;Q96ST2;O43318;Q15723;P51531;Q9BTA9;Q9Y535;Q14934;Q6UUV9;Q15573;Q8IYX0;Q9UKT9;P0CG00;P35269;Q9NPA8;O15198;P11473;Q99594;Q86VP6;O60244;Q9Y6X8;Q96CJ1;Q9NZ81;O75928;Q9HC52;Q9ULW3;Q92925;P37198;Q9H6W3;Q6IV72;Q8N587;Q8N895;Q96IR2;P48382;P53999;Q8WXF8;P35251;P52655;Q15306;Q96GN5;Q969X6;O15405;P17947;Q9UIF9;Q9UKD1;Q96RS0;A6NIX2;Q8TBE0;P11308;Q8TE02;Q16514;O95251;Q5QJE6;P82970;Q8TAQ2;P62987;O14628;Q14151;P67809;Q8IX15;Q8WUY8;O60907;O60290;Q9P1Z2;Q9BR84;Q99417;Q8NB42;Q8IYB9;Q9NWT6;A0JLT2;P53041;Q9P031;Q99551;Q9H063;Q6PJG2;Q3ZCT1;Q15545;Q96BD5;P23511;P61457;Q9H3M7;Q7L1Q6;P55197;P78317;P18848;Q9UMQ3;Q99549;A6NKF2;Q96JK9;Q969V6;Q01094;Q6ZN79;Q9UKV8;O14978;P28370;Q13487;P08651;P61978;O15105;P14921;Q96ZS3;Q99496;P36402;Q96ZL8;P06400;A8MW44;Q8N9Z0;O14593;Q9BSG1;Q9NWB7;Q9Y5Q8;Q6IQ32;Q15935;Q96AV8;Q15654;Q03112;Q02078;Q9NP66;P52743;Q8N988;Q6ZN28;A8MUV8;A8MVS1;Q8IXH6;P17028;Q12824;P14316;P50549;O14896;Q15742;P43356;Q06330;Q15233;Q9Y2G9;Q9UIF8;Q5H9L4;Q9H9Y6;O94805;O95073;P51946;Q3C1V8;Q9UQ80;Q69E4;Q96RU7;Q9NV56;Q9NZI6;P28749;P32780;O95163;P55199;O15379;Q9UK10;Q66K89;Q68CJ9;Q6ZMS7;P98168;Q8NF99;Q9ULK4;A8K8V0;P17010;Q86Y97;O00268;Q8NDT2;Q02447;Q9UNN4;O15525;O95602;Q9Y222;Q5PRF9;Q86YE8;Q9HCS7;Q96BR6;Q5HY98;P20290;Q9Y2X9;P15621;Q9UFF9;Q9HT3;Q6ZV50;Q9UK58;A6NE82;Q9Y3T9;Q6P2C8;Q49AA0;O43159;Q7L190;Q9NZI5;P0CG47;P98182;P0C7V5;P42772;Q9BXG8;Q5T230;P12980;P49711;Q96LW9;Q9BZK7;Q96H40;Q96T23;Q00577;Q32MQ0;O00712;Q96N20;Q8WZ33;Q92793;Q96LI6;P28702;P15884;Q9NVC6;Q9UNS1;Q9UKW6;Q92841;Q9UI36;Q13772;O43463;Q6UUV7;Q16526;Q8TF47;P16383;Q96PQ6;Q15699;P46937;Q6P9G9;Q13127;Q9UBS8;P35226;Q9Y294;Q9H3M9;Q9HD42;Q9UKN8;Q32MZ4;Q3MJ62;Q9BRG1;Q9Y2P7;Q96RN5;P48552;Q9UDV6;O75486;Q13503;Q8TF39;P31276;Q05516;Q15022;O60711;Q9NRC8;Q15466;P19838;Q9H9F9;Q7Z7J5;Q9UQL6;P60002;Q03060;Q04724;Q53QV2;Q6ZN06;Q96F24;Q96GC6;P10074;Q7RTT6;Q9HCD5;Q9Y3Q8;Q8NFD5;Q13288;Q13129;Q96EI5;Q09FC8;Q9ULL8;Q9H981;P54259;Q14678;P56270;Q99502;P35789;O15266;Q00653;O60304;Q96N38;P16220;Q15361;P17022;Q7RTT3;Q7KZF4;Q6P1K2;Q9Y6K9;Q969W8;Q9BXP5;Q49A33;Q13363;Q9UKI9;Q9HB65;Q9H3P2;Q9Y473;Q9ULJ6;Q8TB69;Q96LW1;P13010;Q03923;P41970;Q8WVM0;Q15329;O75529;O95125;P22415;Q86WP2;Q92985;P84022;Q86V71;Q8N3X6;Q8NI08;Q9H3H9;Q9UER7;Q13352;Q8IZL8;Q16621;Q9H7S9;P23760;O43309;P62875;Q12972;Q99583;Q8N3S3;Q8N720;P17676;P37275;Q8WUI4;Q16236;Q13360;O60869;Q8WYH8;Q8IXH7;Q9H501;Q96JN0;Q8WTZ3;A6NK53;Q7Z589;Q86UQ8;Q2M1K9;Q6STE5;Q71SY5;O60716;Q13112;Q8IZL2;Q86Y01;Q5T3J3;Q9UK13;P10914;Q96G25;Q96NG5;Q96FV9;Q9UIV1;O75155;O75909;P17544;Q96ES7;Q99081;Q9UII5;O00267;Q2QG



D7;Q9Y2W1;Q9H160;Q6ZMY9;P17535;Q9BX82;Q14188;P51668;B4DX44;Q8N859;Q92830;Q9GZX5;Q86V15;Q15369;D6RGG6;O43513;Q5FWF6;P49910;Q96N77;Q12873;O75151;A5YKK6;O60225;P52434;Q96EK4;Q9BSM1;Q96AE4;Q9ULC4;Q8N0Y2;Q8WXI9;Q63HK3;Q8WYN3;Q8IUR6;Q14814;Q03111;Q9BWT1;Q6P1N0;Q96RL1;Q9NRG4;Q71F23;Q6P1K8;Q8WXB4;Q9NS37;Q12796;Q9Y6X2;O75461;Q9NVV9;P63167;Q96QE5;P63272;Q12968;Q8NE65;Q15170;Q9UBW7;P19532;Q6NT76;Q14872;Q68EA5;Q15776;Q14192;A0AVK6;Q4HD15;Q8HWS3;O75437;Q9BYK8;Q96A56;Q14802;Q9NQ2;Q9Y462;Q02930;P10073;Q5JVG8;P92508;O43829;Q8NEP9;Q5U623;P22392;Q14978;Q9P2K3;Q08AG5;Q9P0W2;Q8IWY8;Q9PNE2;Q8IZG4;C9JN71;Q14145;Q9H7L9;Q8NF64;O95644;O95201;Q76KX8;Q9Y2Y9;Q8N8G2;Q8N726;P51826;P09874;Q9Y2X0;Q8N823;Q8N972;P0DI82;Q14498;P35227;Q96T76;Q13045;O75346;Q6VUC0;O75164;Q15596;P20749;A6NP11;Q8N7K0;O95905;Q9UJW9;Q5T0F9;Q9BUE0;Q6P280;B1APH4;Q86YP4;Q8TF32;P18846;Q9Y5K5;Q9ULH7;Q14135;P51948;Q8WTS6;O75530;Q9Y6R6;Q04864;O75177;Q8TAK5;P18850;Q8IX03;Q5H9I0;Q9NYB0;Q8WX92;Q8IZX4;P58340;P52435;Q3KP31;O14771;P10243;Q9BUG6;P53803;Q15543;Q9HBE1;P52741;Q14693;Q14140;Q9UC07;Q13761;Q9H869;P10599;Q9HBM6;Q16534;Q03938;Q7RTV0;Q13888;P08047}

25533

Pathogen[ P0C206] interacts with 1853 human

partners: {Q9UID6;P27695;Q02386;Q9UBW7;Q9BUJ2;Q99990;Q8HWS3;Q8N9K5;Q8TE85;Q5VUA4;Q76L83;Q9UNS1;Q9NUA8;O43829;Q8N720;Q13112;P06733;O00488;P28698;Q6NUN9;Q6PJJ2;Q9BRG1;P46937;Q9Y468;Q15723;Q13887;P84022;Q15287;Q9BUE0;Q9Y224;O75486;Q8IXH6;Q9HCU9;Q9NQX1;Q3KNS6;Q86W11;Q9UFF9;Q9Y2X9;Q12872;Q96JL9;O60716;P53567;A8K8V0;Q5PRF9;Q86Y01;P10588;Q96RS0;Q9UK12;Q8N371;O43541;P24863;Q9Y232;Q6P9A3;Q8NG57;Q8WUF5;P0CJ87;B1APH4;Q86VZ6;Q969F1;Q9P031;Q53T94;P67809;Q9NQ87;Q14188;Q86V15;Q969W8;Q9P1U0;Q8IX15;Q16385;Q96PU5;Q14628;P10914;Q92769;P0CG48;Q92539;P08048;Q9NS56;P60002;Q9BZE0;Q6IPX3;P78424;Q9H5H4;Q9P0U4;Q16649;P58340;Q8IXW5;O43309;Q9C005;Q8N140;P62875;Q03060;O95201;Q96JM7;O94915;A8K010;Q8TC21;Q9Y3M9;P0DI82;Q9UN30;O75530;Q8N988;P98168;Q96SE7;P0CB33;Q8IUR6;O75528;Q14587;Q8IXH7;Q96JC4;Q6ZMY3;Q05195;P16383;Q9HCK8;Q15329;Q8N9N2;O60481;O43159;Q14103;P13010;Q00444;P49336;Q96BV0;P0CJ90;Q9NQV6;Q9Y295;Q32MQ0;Q49AM1;Q8Y2D1;Q63HK3;Q7Z317;Q9UHL9;Q96NI8;Q15466;Q9UJN7;Q6PD62;Q96N22;A8MX4;Q9BUY5;Q8N9N5;Q13568;Q96MM3;P35398;P23193;Q92830;Q96RK0;Q14588;O00167;Q96HR3;Q7Z398;Q06546;Q96ST3;Q9HBE5;Q8WVY6;P39687;Q9NPJ4;Q03924;Q15545;Q8NA19;Q8NEF9;Q9H2F5;Q9BUG6;P17026;Q96S65;P31269;Q96IR2;Q7RTU3;Q16514;Q9GZM3;Q6IV72;Q6VMQ6;P38935;Q5JNZ3;P06401;Q03701;Q06455;Q5T5D7;O95251;O14867;Q12796;Q8N883;Q96CS4;Q7Z3K6;O60393;Q01538;Q9NPF5;Q06330;Q13469;Q9UMS5;Q8TD26;Q9NP67;Q7Z7J5;P40425;Q9NYT6;Q9UH92;Q15543;Q9UBU8;Q9Y6Q3;P98182;Q99504;Q9NUQ3;Q8N3X6;Q8NB50;Q9UJQ4;Q9HAZ2;Q12905;Q9HC52;Q8N9F8;Q96I20;Q13127;Q9NZI5;O95780;P13682;P49848;Q9Y6K9;Q9UPN9;Q9Y5Q3;Q8IYN0;P14921;Q05481;Q15911;Q8N228;Q9NY43;Q3SY56;Q9NSI6;Q0VGE8;P51532;Q06416;Q9NP11;O00291;P35251;Q6PF04;Q8NCC2;Q9HAW0;Q9Y4A8;Q86UU0;Q9Y242;Q08AG5;Q9NR55;B4DU55;Q9NVW2;Q6NX49;Q9UC06;Q8TAK5;P36954;O75123;Q02078;Q147U1;Q14586;Q15266;Q9P086;Q96PE6;A6NNA5;Q13263;Q8N726;Q15361;Q9UII5;P50750;Q5TGS1;O94864;Q8N6I1;P52741;O95602;Q9Y2N7;P43356;Q9H981;A6NGD5;O96017;Q9H4I2;P20226;P11161;Q8IYX0;Q9UBB5;O43365;P17031;Q9HAU4;Q86VK4;Q15544;Q9H511;A2RRD8;P16220;Q9NW07;Q9Y5T5;P17275;Q9Y5R6;O14948;O95633;P09067;Q9UN79;P10074;Q92681;Q9UK13;Q5T3J3;P35869;Q96SL8;P17544;O75030;Q96DT7;Q9UGU0;P0C7X5;O75925;Q8WUA4;P09874;Q15744;Q6ZW49;P20290;Q93008;Q9UDV7;P22392;P25490;O43313;O75290;P15622;P68036;Q8N9Z0;Q9NSD4;Q02446;Q86UP8;Q8N8Z8;P08651;O75444;Q9HBE1;Q9UJL9;P18850;Q9UHV2;Q14966;Q96F45;P49910;Q9UNY4;Q9P243;Q92664;Q6ZSB9;O60225;Q9BRU2;P78395;Q8N7R0;O60907;Q8WYH8;Q96N95;Q8TB69;Q9BT49;O43812;Q6W2J9;Q49AA0;P41212;Q9UGP4;Q9H9T3;Q7L190;Q9NSC2;Q9UC07;Q05066;Q9NRR1;Q9Y2Y9;Q15697;O14744;Q5CZA5;Q15233;Q96AV8;Q01860;Q7Z7K2;Q9Y4Z2;P51531;Q9H091;A6NE82;Q96IF1;P41182;P17024;Q05516;Q6V9R5;Q9NZN8;P52743;Q9UIV1;Q9H869;Q6ZNA4;P49639;Q9H7R0;Q9BS31;Q99583;Q2VWA4;Q96K75;Q9UQR0;Q9NQZ8;P52657;Q9NR83;Q7L3S4;Q9NXT0;Q9UKL3;Q6XD76;O14529;O95983;Q00613;O00470;P35226;Q13111;Q9UKL0;Q9UBX2;Q96DB2;Q9UHR5;Q9NRG4;Q86X55;A6H8Y1;Q02548;P52737;O75469;Q6ZN32;P63167;P59923;Q8WXB4;Q9UK33;Q15170;Q8IYI8;O75081;Q96JK9;Q9P2F9;Q8WXI9;Q9P2F9;Q92541;Q04727;P52655;Q96QR8;O00255;Q9UL58;Q9Y2D9;Q9BU19;Q13045;Q04726;Q9UHB7;Q99623;P61978;Q03933;Q99717;Q9UMQ3;P17019;Q5VIY5;P19388;Q6ZRF7;Q9NPA5;Q6STE5;P61218;P05412;O95600;Q05BQ5;Q9P2D1;Q5T1R4;Q8IYH5;O15534;Q8IYF1;Q9UKV0;Q14678;Q8WW38;O43463;Q8N8E2;A6NHJ4;Q8N2W9;Q86XF7;Q94982;Q9H4T2;O00268;P78411;Q460N5;A6NIX2;Q9UPL1;Q86T29;Q9C0J9;Q9NW08;P19419;Q6PI98;Q9NWB6;Q9UM63;Q6ZS27;Q9Y2P0;Q96MH2;P54198;Q9UJ49;Q96SK3;Q8WYK2;O75177;Q96MX3;Q8N9J8;A6NP11;Q3MIS6;Q9UL59;Q96LA8;Q6IA86;P10242;Q8N1G0;O75764;Q8NI51;Q9H307;Q9Y462;P14651;Q8N196;Q0D2K3;Q6ZMY9;P53041;Q9ULJ6;Q15637;P10073;Q03468;Q8N9Z5;Q8WZ33;Q52LR7;Q15265;Q68EA5;Q96JF6;Q7RTT3;Q3SY52;Q9HCX3;A6NFD8;O43318;Q8N680;Q86VN1;O75175;O75586;Q9UBC0;O60828;Q15654;Q16666;P15336;Q9HC44;P12980;Q86UD4;Q6ECI4;P0CJ86;Q9UJW8;Q9NQG5;P26358;Q12901;Q969J2;Q86TU7;P52738;Q8N7G0;Q15653;Q9UIH9;Q9UFW8;Q7KZF4;Q92541;Q04727;Q92800;Q15572;P55055;P17027;P51508;Q92670;Q9UER7;Q8N7M2;O60765;Q7LBC6;Q6ZRS2;Q6P2C8;Q5SXM1;O75618;Q9Y3C7;P43268;Q96T23;Q9HCG1;O75467;Q9BS34;Q96C00;Q92922;Q9BUI4;Q15306;P15621;O75626;Q9Y5B9;A6NLF2;Q9UKV8;Q9P2K3;Q8N7K0;Q9ULJ3;P51522;P17535;Q99909;Q9NRL2;Q13547;P43355;Q8N0Y2;Q8TAF7;Q01844;Q14186;P13056;P17023;Q96KM6;P49715;Q6ZN30;Q9C0F0;Q03936;Q9BQ87;P31268;P36956;Q13398;P17483;Q14140;P10072;P42772;Q9HCS4;O15164;P19484;C9JN71;Q9UM07;Q7RTV3;Q14591;Q96T92;P41970;Q9NQX0;Q86VE0;O75437;Q04725;Q9Y3Q8;Q9P1Z2;Q12968;P56693;Q14590;P51003;O95905;Q92993;Q8NBZ0;Q96S94;D6RGG6;Q12824;P18846;P48380;P0CJ89;Q68DY1;Q96QE5;Q86YP4;P55771;Q2VY69;O15525;P54845;Q9Y6J9;Q8NE65;Q07666;Q6ZNO6;Q9UN4;O00716;P15976;Q01201;A6NNF4;Q86UE3;O75529;Q92925;P0C7T5;P49116;P41218;Q5HYR2;Q15532;Q5EBM4;Q9HB58;Q9HD15;O14686;P22736;Q15910;Q86YW9;Q15014;Q8WY36;Q86U86;P29084;A8MQ14;Q9NZI7;Q460N3;Q9UHV7;P19532;Q10587;Q8N5U6;Q96KG9;P78317;Q8WVM0;Q15699;Q15796;A8MUZ8;Q96A56;O95238;Q8TAQ2;P54252;Q15326;Q13487;Q5TYW1;Q9Y603;Q8WV37;Q96H40;Q9Y2G7;Q9NXR8;Q92831;Q96IS3;Q9BRH9;Q9BQA5;Q3MJ62;Q86UQ4;Q5BKZ1;Q3B726;P33076;O15226;Q9NX65;Q8WVJ9;Q9H160;Q14241;O00482;Q8WTT3;Q95125;Q96HZ4;Q96X8;Q8N3J9;P52740;Q14781;Q9P2Y4;Q6P2D0;Q8IZL8;Q8IZX4;Q14938;O00422;Q9UHX1;Q16254;Q96K62;Q96E29;Q96RU7;O60284;Q99551;Q9Y5Q9;O95628;Q76KX8;Q9Y6X2;Q86TJ5;P40424;Q14145;B4DXR9;Q13495;P28749;P13984;Q969G2;Q9Y5

35;P0CJ85;Q9Y5Q8;O15405;P11308;Q9P2R6;Q7Z340;Q96NM4;Q9BWM5;Q9UJU3;Q9Y5K5;Q03111;A6ND  
Z8;Q96SQ5;P18146;P62633;P12755;Q9NZL3;Q96MA1;O75971;Q8NEA6;Q8NEK5;Q6VUC0;O75475;P170  
25;O96004;Q8N2I2;P19447;Q9BYE0;Q9HBT7;Q92793;Q3KQV3;Q5JVG2;Q16587;Q7Z6R9;P14653;P178  
61;Q96EZ8;A6NJL1;P54259;P10589;Q9BT81;Q92754;Q06730;Q9BZE3;Q9C086;Q9GZV5;Q9NX70;A8MT  
Y0;Q32M78;P0CH99;O43513;Q6NSZ9;Q9BWX5;O75346;O95163;Q63HK5;Q12857;Q9NPC7;A8MV65;Q6P2  
80;Q6P1K8;Q8IZC7;Q9H0E3;Q08999;Q14135;Q9H5J8;Q8N393;Q8N895;Q96N58;P32519;Q1P1L6;P170  
22;Q9BSG1;Q9Y5B6;Q6ZMW2;O75151;Q9H8M2;Q15853;Q9HCE1;P17029;Q8NDX6;Q9NVQ7;Q14839;Q9HB  
T8;Q15742;O43918;Q6ZN28;Q6ZMV8;P41134;Q6ZN57;P23246;Q9H7S9;P57071;Q02556;Q12837;P146  
52;Q06304;Q03989;A6NEJ1;Q9HCZ1;O14593;Q92782;Q9UK11;Q96JB3;Q05215;O00570;O95073;Q5SX  
M2;Q9BYK8;Q16670;Q9GZN2;Q92785;P23511;Q9HCD5;Q15916;O00213;Q32MZ4;Q8IZ40;O15105;Q8ND  
W4;Q9NWS9;O00327;O14646;Q13610;Q6P1K2;Q9YV03;Q9BYV9;Q9BYE7;Q96LX8;Q9UIE0;Q92610;Q139  
52;O95718;P78337;O14497;Q9H609;Q9NVU0;P0C7V5;Q9P2J8;O96019;P53803;Q6UUV9;Q96N20;Q927  
84;P17021;O43248;O60682;Q8N8B7;Q14209;P41162;O43345;P0C1Z6;Q86TJ2;Q92750;Q8NF99;Q9UK  
58;Q8N823;Q5VZB9;Q02080;P78347;Q49A33;P82970;Q3KNV8;Q12888;Q16656;P19838;Q8IWS0;Q7Z5  
91;P0C860;Q6U7Q0;Q99743;Q9H4S2;Q16633;O43298;Q8NI08;P36508;Q16526;O15514;Q8IXT2;Q969  
V6;Q96PQ6;Q95581;Q14919;Q86SE9;Q9612;P35269;O15516;Q9NZ81;Q9NYF8;A6NK53;Q6AW86;Q86X  
95;P10828;P22415;Q96FV9;Q6ZT77;P62508;P10244;Q6P1N0;Q15650;P19387;P35711;Q8TA94;Q9UL  
V5;P40426;Q13888;Q96N77;P38159;Q9NSJ1;A6NKF2;O75446;Q03112;Q9NWT6;P53999;Q96RN5;P090  
86;O00712;O43361;Q8TF20;Q9P0W2;Q99081;P56645;Q8N7H5;P17035;Q9H1I8;Q8NF64;Q5JVS0;O954  
02;Q5QJE6;P50613;Q9BQG0;Q68G74;Q86Y97;Q9UIS9;P17010;Q9Y4A5;Q6XYB7;Q9GZS3;Q9NVM4;P169  
89;Q8IXJ9;A6NFQ7;Q8N344;Q8NAF0;Q15560;Q9H3M9;Q9HAP2;P50549;Q9UNY5;Q95619;Q9Y543;Q9UL  
W3;Q9BWT1;Q499Z4;Q969X6;Q9UKN5;P17676;Q86WP2;O94993;Q15973;P12757;Q8NC26;Q52M93;O432  
96;Q9BXG8;Q86WZ6;Q96H20;A6NJ46;O94992;Q8TF47;O14813;Q8IZL2;Q8IZ20;Q9C0F3;Q9NR48;O153  
79;O00110;Q96CJ1;P52742;P08047;Q9UEG4;Q9NP66;P17482;P24278;Q14CW9;P18615;A6NFB3;Q9BW  
W4;Q9Y5J3;Q96JN0;Q9Y2S0;Q9NZV7;Q8N972;Q9UK10;Q12986;P29083;Q8NA48;Q9UKN8;A6NJG6;Q96M  
N9;Q9P2K5;Q96BR9;Q8WXF8;Q8N141;Q9UHF7;Q7RTU5;Q9HAP2;Q15906;Q9H944;Q9H582;Q14593;Q9H1  
75;Q92985;Q9NWB7;Q7RTU4;Q5TEC3;Q6RFH8;Q6IQ32;Q53QV2;Q5H9F3;Q8N5P1;Q9UBS8;Q8WXF1;Q8WU  
I4;Q01658;Q08ER8;Q9NPJ6;Q99543;P17032;P35680;Q7RTU0;Q96T88;P49711;P35548;Q8TD23;Q9HC  
78;Q6NZI2;Q9H2C1;Q04206;Q06587;Q4LE39;P16415;P86452;Q5VVH5;Q9Y5R5;O95931;Q9NQR1;Q5HY  
98;Q9UPW6;Q9Y2L8;Q7Z589;P17017;Q9UIF8;Q9BTC0;Q9H6W3;Q9UKI9;Q7KZ85;P0CJ88;Q9P0L1;P527  
44;P15923;Q8TF50;Q96PK6;Q01094;Q3ZCT1;Q9UIF9;Q0PNE2;Q14686;Q9UQR1;Q9UJZ2;Q6MZP7;Q8WU  
Y8;O96028;A0AVK6;Q96CX3;P15884;Q9BR84;Q9Y692;Q96F24;Q8WTS6;Q9H963;P20823;O94916;O954  
16;P62979;P50539;P28347;P17020;Q96NL3;Q8N9R8;Q8NCA9;Q3SY89;Q9NS37;P17039;Q8TBC5;Q024  
47;Q8TF32;Q06547;Q15834;Q8N693;Q5T230;Q3C1V8;Q6ZSS3;Q92759;P35789;Q8WVC0;P28324;Q030  
52;Q8TDY2;Q9Y2W1;Q8N554;Q5H9L2;Q9H8N7;P17030;Q5H9L4;Q14582;Q13352;Q6IT1;Q9HCL3;O147  
71;Q6PEW1;Q96ST2;Q8N7Q3;Q8IVC4;Q6HDY9;P0CJ79;Q7RTV0;Q9Y4X4;Q15370;A6NK75;P78545;P179  
47;Q96HQ0;Q02930;Q13901;Q16534;Q8NHM5;P17028;Q9NQ92;Q5VWG9;Q99608;Q96GC6;Q9NQ33;P515  
23;Q7L2R6;Q8NHW3;Q96AQ7;A6NLW8;O00401;Q8N8J6;Q04864;O43167;P58317;A5YKK6;Q6P9G9;P497  
50;Q9HAF1;Q9Y222;Q8NBF1;Q96NJ3;O60281;Q6ZQV5;Q96ES7;Q9BZK7;Q9H5I1;Q15562;O75376;P425  
68;Q96MU6;Q9BYN7;Q9H165;Q7Z3V5;Q92841;Q9Y6R6;Q9GZX5;Q8N782;Q6ZNG1;O00267;Q16533;Q9NV  
V4;P51826;Q15424;Q86XU0;O60381;Q06732;Q9BSM1;Q6ZR52;O75478;Q9NRC8;Q9H2G4;O15392;Q5MC  
W4;Q14872;O14896;Q5FWF6;P40763;P22670;Q15573;Q9UDV6;Q15937;Q6P9A1;Q13485;Q86UZ6;Q9H3  
P2;Q9BTA9;Q8TAQ5;P25208;Q9Y5A6;Q9H707;Q96B42;P61244;Q8IWX8;Q8N5J4;Q13129;Q8TF45;P237  
60;P52435;Q92600;Q71SY5;Q9BXP5;Q9BTT4;P25440;O15535;Q9BYH8;Q8TF39;O14776;Q9BSK1;Q8WY  
A1;Q15022;Q15YK9;Q8TBE0;Q9H116;P62487;Q2M1K9;P258370;O14709;Q13148;Q8N5F7;Q14527;Q96T  
58;Q15652;O60869;Q9H7L9;P32780;Q04724;P0CG47;Q99459;Q99684;Q9ULD5;Q15542;Q8N8L2;Q929  
66;P61457;O75373;Q8N587;Q96N38;Q14934;Q9BY31;Q96T76;O75909;Q8N4W9;O00472;P17096;Q96M  
R9;Q33E94;O15370;A6NM28;Q13562;Q16384;Q14592;Q8TE02;P23769;Q9Y6B2;Q9NYB0;Q86V71;Q039  
23;Q96RK1;Q9Y2P7;P11831;Q08050;O60244;Q00978;Q8IX12;Q7L1Q6;Q0D2J5;Q5THR3;Q63Z33;Q7Z7  
L9;Q96JC9;O60315;Q6P1X5;Q8IZ26;Q16520;Q6IE81;Q8NA42;Q15797;Q13422;Q10664;Q99966;Q09F  
C8;Q8NDQ6;Q5TB30;Q86W54;Q8N859;Q9Y294;Q9NZI6;Q9H9F9;Q6NSW7;Q99502;P51786;Q15928;Q9GZ  
S1;P20749;Q9ULK4;P18847;Q8IX07;Q9BX82;Q86Y25;Q9UL36;Q4G112;Q96BR6;Q6SJ96;Q13889;Q719  
H9;Q53ET0;Q9BRR0;Q9H5Q4;Q9UBL3;Q8WUH1;A6NDX5;Q8N3S3;P49716;P42226;Q96C28;Q8IY57;Q6IS  
B3;Q9BQW3;Q9UKW6;Q96D98;Q9H3M7;Q9BW11;Q96NJ6;P0C7X2;O75362;Q86YD1;P98169;Q00653;Q6IQ  
21;Q9HCE3;P28702;P05121;Q99676;Q15596;P37275;Q969R5;Q99417;Q8IYM9;Q8WUB8;Q150  
59;Q16576;P06454;P35712;Q13185;Q16236;Q4V348;Q9UKD1;P0CG31;P20265;O15055;P31271;O153  
50;Q9H7X3;P10243;Q16621;Q6PK81;Q9UPG8;Q01826;Q6ZN11;P48378;Q9NQX6;Q9NRZ9;Q9HBM6;O751  
64;Q5H9I0;Q96LW9;O14901;P27540;Q14863;Q8NB12;Q2QGD7;Q5PSV4;Q8NEM1;Q6ZN79;Q9Y2G9;P170  
97;Q9NVC6;P15172;P17040;Q96EI5;Q9H204;Q3SXZ3;Q14151;P42704;O95625;Q13772;Q96EB1;Q96Q  
C0;Q92994;Q8NDP4;Q2M3X9;Q9UKT9;Q5VTD9;P52747;Q9H9S0;Q53GI3;Q86U70;Q9H0M5;Q9HD42;O433  
64;Q14192;Q9H501;Q09028;Q96BN2;O75448;Q9C0G0;Q5EBL2;Q14814;P31274;Q14765;Q9NWA0;Q9HA  
J7;Q9UBR4;P51814;O60663;Q7Z7C8;P11474;Q8NFD5;Q8NDN9;Q9UN42;P51815;P21506;A8MT65;Q129  
62;Q9ULC4;Q96H86;P01106;Q71F56;P24928;Q9UBK9;Q6ZYL4;Q96AE4;P61077;Q8TBZ8;Q9UQ80;Q9NY  
W8;Q15047;P52746;Q96LI6;Q9ULM2;Q3ZCX4;Q58F21;P55199;Q99594;O75398;P0CG24;Q8TAP4;Q929  
45;Q12972;B2RXF5;Q9BQI9;Q9NZC4;Q96QT6;Q8NBB4;Q14584;Q6DD87;Q96RL1;Q99814;Q9BY41;P398  
80;Q8IUM7;Q13503;O15198;Q14585;Q96K83;P84550;P09629;Q9P0T4;O15015;O95644;Q14549;P629  
87;Q14865;Q8N184;Q9H2P0;Q9NV56;P56524;O60583;P61968;Q14526;Q7RTT5;Q9NV72;Q96GE5;Q9Y2  
X0;P28356;Q9UFB7;O00257;O60543;P28069;P14373;A9YTQ3;Q6AZW8;Q13106;P10599;Q9Y473;Q6NX  
45;Q03062;Q13363;Q8NCP5;Q6ZNH5;Q5T619;Q9GZV8;Q96SQ4;Q8TF68;Q08AN1;Q86XN6;Q96I24;O755  
25;Q02577;P20719;Q8TCN5;P08151;Q13118;Q8TAU0;Q15929;Q8IU81;P48552;Q49AN0;Q5JVG8;Q6ZN  
55;Q9NTW7;Q6ZNG0;P17038;Q00403;Q9BYM8;A6NN14;Q8TEE9;O60675;O14802;P15822;Q8NB42;Q157  
76;Q66K89;O60711;Q8NCK3;Q68DI1;Q6PG37;Q00059;Q13105;A0JLT2;P0CG00;P31249;P42224;Q969  
S8;Q9H4W6;Q9Y2Y1;P52736;A8MVS1;P50548;Q9UBX0;Q9H9Y6;Q92499;Q5BXX8;Q9BXJ9;Q99549;O605  
63;Q14693;O43593;Q96K58;Q53H80;B4DX44;Q96G25;Q96RE9;P12956;P55197;Q494X3;Q9HAK2;Q7RT  
T6;Q9NY61;O43189;Q96PM9;Q14119;P17014;Q9NU63;Q9NZU5;Q92618;Q14498;Q8NEP9;Q96ME7;Q9UL  
M6;Q9UI36;Q8TAU3;Q9UQB3;Q9NPA8;Q9Y6Y1;Q86VP6;O94983;Q71F23;Q8IYB9;Q8N0Z2;Q6ZNA1;Q6NT

76;O75461;Q15935;Q7L945;Q9HCS7;P09016;Q01892;Q15369;Q15788;Q08945;Q15759;Q9NYV6;O75820;Q96SR6;Q8TDD2;Q9H1D9;Q13765;Q6UVV7;Q2M218;Q93074;P51668;Q9Y3T9;P36402;Q14929;Q8TD17;Q9H9C1;P18848;P11142;Q0VG99;Q9NRM2;Q96EK4;Q99732;Q6P4R8;Q969E4;Q8IUE0;Q8N5A5;Q96RE7;O60422;Q96EK7;Q96ND8;Q9UBD0;Q96GN5;Q9Y3Y2;Q7Z401;Q12830;Q9UBG7;Q15714;Q96LW1;O60806;Q6EMB2;O43763;Q8N5Y2;Q9Y618;Q6EKJ0;Q9U1L8;Q5U623;Q6P3V2;P68104;P14316;Q5T6S3;Q15528;Q10543;Q6P1J9;Q9Y250;Q2M1V0;P15408;Q12906;Q99607;P11473;P17480;Q8NAP3;Q13761;Q9P1T7;Q9P255;Q8TAW3;Q9UJW9;Q5VWX1;Q12772;Q5T0F9;Q12789;Q9H3H9;Q8WYN3;Q9BJR6;Q9Y2A4;P52630;O14978;Q9H8G1;A8MWA4;Q7Z5L9;Q6ZN08;Q12800;Q6Q0C0;Q8IVP9;P08235;Q9H0E9;P0CJ78;O43316;A8MUV8;O95677;P51504;Q99856;Q9UI95;P52434;P58304;Q9BQ70;P35638;Q9NP62;Q99496;O94805;Q3B7T1;Q8N108;Q3KP31;O60224;Q6ZMS7;Q96EG3;Q15561;Q5SVQ8;Q9ULH7;P17098;P82094;O15160;Q14207;Q8N3C0;Q6ZN01;Q8IX03;O75182;Q9UJW7;P31260;Q5T0B9;Q9H1A7;Q16600;P17041;Q9HCK0;Q96NG5;Q92585;Q8N8G2;O94763;Q9NVV9;Q96JM2;Q92748;Q8IZD2;Q12873;O60290;P10827;Q9HBZ2;Q96NG8;Q9H7Z6;Q9UIG0;P21675;Q53TQ3;Q96BD5;P14859;P51946;Q8IUE1;P35813;Q10586;Q7RTT4;P0DI81;Q9ULX9;P63272;Q68CJ9;Q14978;Q15583;Q9UKY1;Q9UL18;P17036;Q68CP9;O95503;P51948;Q8TBZ5;P48443;Q8N1W2;Q01954;Q13506;Q9Y2H8;Q9H063;P31276;Q9Y2K1;P78543;Q13360;P54253;Q8NDT2;O15060;P35227;O00411;Q16594;Q14653;Q2M3W8;Q86YE8;Q3L8U1;Q9Y2Y4;Q9H7R5;P06400;Q9H9D4;Q8IXF0;Q6ZN19;Q13490;Q8NDY6;Q00577;Q03938;Q9H2A3;Q8N8C0;O43830;Q9UQL6;P30876;Q9HAH1;Q6ZV50;Q9Y651;O75155;O95948;P56270}

25534

Pathogen[ P03363] interacts with 1799 human

partners: {A2RRD8;Q719H9;Q8IXZ4;Q86TJ5;Q49AA0;Q86X95;Q6IE81;Q92886;Q16236;Q9NQX1;Q16587;Q9NPF5;Q5TGS1;Q96ST2;Q15654;Q7RTS1;Q96S94;Q13112;Q86VE0;O15370;Q86XU0;Q8TAK6;Q15911;Q9Y5A6;Q9H160;Q9P0L1;Q14653;Q8NB42;Q14978;Q86U70;A8MQ14;Q9UNN4;Q53QV2;Q9NR55;Q5VTD9;O75123;Q15699;P51858;Q9C0F3;P52630;O95619;P12956;Q9UBC0;Q8NHY6;Q5T0B9;Q96QT6;P13682;Q6S9J96;O75820;Q969F1;Q3KNS6;Q8TEE9;Q86Y01;Q9UFW8;O15266;Q99684;Q96RS0;Q06547;P31273;O43812;Q03923;Q32MZ4;Q15233;Q8IUM7;Q15528;O00411;Q9Y535;Q6P9A3;Q9UKD1;Q8NCK3;Q06455;Q13490;Q6ZMY9;P17535;P35789;O14901;O75373;Q5SVQ8;P98168;Q9GZN2;Q9H8N7;P18848;Q9UIW0;Q8N8G2;Q9ULW3;O14744;O94915;Q15834;P08048;O75461;Q8IXJ9;Q96JC9;Q13105;A6NKF2;P35453;Q96JM7;O75081;Q8NFW5;Q8N9N2;P0C7T5;P17027;P49716;P0CH99;Q3L8U1;Q5VUA4;Q9NVV4;Q9NSD4;Q03989;Q8N9F8;Q96RE7;Q86V71;Q6IQ21;Q9BXP5;Q16649;Q8WUA4;Q6VMQ6;Q14765;Q12830;Q8N5U6;Q8N5Y2;Q99572;Q8N1G0;P10828;Q9H963;Q9UJQ4;Q99909;Q969J2;Q9Y4Z2;Q9Y5B6;Q8N988;Q07666;Q9UHF7;P29374;Q6P1K2;Q8N2I2;Q9UHL9;Q9ULW1;P28698;Q53ET0;Q8IZC7;O60543;Q92985;Q8NE65;Q96AQ7;Q96N22;Q9NQZ8;O95948;Q6DD87;Q9GZS3;Q9NWH9;P23246;Q99623;P29083;P29084;Q8TAQ5;Q96T58;Q92766;Q03924;Q6ZNA1;Q6ZYL4;Q96S65;P35711;Q13487;Q9NZR4;Q96I24;Q96RJ6;P54198;Q14929;Q8NDY6;Q9UH92;P78415;Q9Y5K5;Q6XYB7;P0CJ87;Q9NQX6;Q86YD1;P0CJ88;Q15370;Q9BYU1;P09067;P55771;Q7Z340;Q14938;B4DU55;Q9H091;Q8N859;Q92925;Q15466;Q9Y5J3;O14978;Q86ZN06;P63167;Q86W11;Q8NA42;Q14865;Q13503;Q9NZL3;Q6EMB2;P31274;Q14145;Q9Y2D9;Q8NAP3;P17021;Q9GZM3;P17010;Q8IVP9;O43296;O14529;Q04206;Q15853;O14771;Q7Z591;O95780;O14896;P27540;Q86VK4;P49848;A6NKF5;P17676;P52738;P06454;Q9NUA8;Q6NSZ9;Q12901;O60481;P18146;Q5JUK2;Q13360;P49116;O00712;Q9H981;O95628;Q9HCU9;P0CJ86;P19388;Q6ECI4;Q9UBX2;Q12972;Q9H9C1;Q6P2D0;O75764;Q8NEK5;Q02386;Q13148;Q96J4;O60315;Q6P1K8;Q12872;Q8WZ33;Q6STE5;Q02930;Q9UHB7;Q5PRF9;O60224;Q8NG57;Q969X6;P98169;P13984;Q9P2J8;Q86UP3;Q9Y468;Q9H175;P35227;O60563;Q9HAU4;Q96T92;P0CG31;Q99676;Q3ZCT1;Q6V9R5;Q96HR3;Q99626;Q9H8M2;Q14582;Q9NRL2;P53567;P48382;Q9C0A1;Q14526;A6NHJ4;Q9UMS5;Q8N7R0;Q58F21;Q9UN79;Q9H9Y6;Q96MX3;Q9NZU5;Q9BYV9;Q8IU81;P14373;Q13516;Q14781;Q9H707;Q3C1V8;Q96NG8;Q9NVV9;P36402;Q9UC06;P78424;Q96SE7;Q6YI20;Q71SY5;Q86YP4;P54259;Q9BRR0;Q8IUE1;Q99543;P0DI81;Q908151;Q7L3S4;Q9H5I1;P55199;Q9H7S9;Q96K62;P86452;Q9BY41;Q99742;Q96JF6;Q14590;Q969E4;Q92539;Q7L190;O94992;Q86UE3;Q9BRU2;Q8WX92;P17098;Q6IA86;P24863;Q9H869;Q08AN1;P31267;Q15928;Q14863;Q8WV37;Q7Z398;O43365;Q68EA5;O15015;Q9UKN5;Q96SR6;P62633;Q9ULM2;Q02447;P08651;Q96ND8;Q8N3J9;Q9ULJ3;Q15022;Q06546;Q15562;Q63ZY3;A8MTQ0;Q13952;P50539;Q6PG37;P58340;O75618;P30876;Q0VG99;Q6L8A8;O43167;Q6ZR52;Q09028;P13010;Q02556;Q92831;Q03933;Q8WVC0;Q96EK4;Q96RL1;O60422;Q9UKW6;Q96LI6;Q15291;P12757;Q9HCS7;P62508;P14651;Q15744;Q5EBL2;P0CG00;Q9HCK52;Q96NJ6;Q03112;Q13888;Q9UEG4;O60663;Q9NS37;O00213;Q96QC0;Q9HAH1;Q9H7L9;P41218;Q15014;Q9BWW7;Q6NX49;P18847;Q99929;Q9Y2P0;Q9HD15;Q15170;Q5U623;O75346;O60281;Q9HBT8;Q10586;Q6ZV50;O43763;Q13111;P37275;A5YKK6;Q06330;P32780;Q969W8;Q8TDD2;Q8TAQ2;Q8IYF1;P0CJ89;Q3KNV8;Q8NDW4;Q9Y4A8;Q92759;P28356;Q6MGP7;P23760;P19387;Q6ZRS2;Q9BU19;Q9NQ87;P09086;Q9H2P0;Q9NX65;P17947;Q7RTV3;Q8N720;O15379;Q9H2F5;Q01892;O95600;Q96LX8;Q9NVU0;P51532;Q99856;P61218;Q16514;P17024;Q15929;P20719;Q6ZQV5;Q7RTS3;P28347;Q8TE02;P31271;Q0D2K3;P06733;Q9P243;Q494X3;Q8IZL8;P82970;Q9H1D9;O75909;Q9BQG0;Q3SXZ3;Q969S8;Q9BZK7;Q9NYB0;Q8NHW3;Q9NX70;Q86SE9;Q8N8B7;Q96MR9;P18850;Q9H2W2;P51946;Q8NCP5;Q13045;Q6IPX3;Q5HYK9;Q5T1R4;Q9UL59;P25490;Q9Y5Q9;Q6EKJ0;Q01826;Q8IYH5;O95201;Q96HZ4;Q9UKI9;O60765;Q5T5D7;Q7Z4V5;P17481;Q16384;Q9Y6X8;Q8NDQ6;Q9HCL3;Q7RTV0;P53041;Q9UBL3;Q8N140;O14497;Q52LR7;O75376;Q96GN5;Q8TCN5;O60907;Q8N883;Q8N9N5;Q16520;Q01543;Q7Z589;P42704;Q6PJG2;Q9Y462;Q9HCD5;Q15910;P15621;Q8NBB4;Q6P9A1;Q15545;P17030;Q9UC07;Q99607;Q8N8C0;Q9C0J9;O95905;Q13568;Q9H3M7;Q08AG5;Q9Y3Y2;P78317;Q0D2J5;Q15776;Q9Y294;Q16254;P11474;P56545;P16220;A6NGD5;Q9Y2L8;Q96HQ0;P35251;Q96MU6;Q9Y2D1;Q9Y295;Q68DI1;Q5JVG2;Q5SXM1;Q8N196;Q9UDV7;O94864;A8MTY0;Q3KP31;Q9H307;P17031;Q8WWY6;Q8N680;P78543;Q96JK9;Q5JT82;O43316;Q9Y6K9;Q8N8C2;Q13901;O95602;Q16621;Q9H063;P58304;Q3B7T1;Q99612;Q9P0U4;Q8N141;Q02080;Q86V15;Q9UKV8;Q6ZN55;Q8N488;Q9NW07;Q66K89;Q8IVW6;Q4LE39;P24928;Q96QR8;O75437;P19419;Q9C0F0;O94983;Q76KX8;Q9UQL6;Q04726;O75475;Q9NQ33;P14921;P54252;O75164;Q9UER7;P35548;Q9H9BZ2;Q99496;Q46ON3;Q9UPN9;O00268;Q15532;P50548;Q96IS3;Q8N920;O14593;Q9Y467;Q9Y603;O75530;Q6NUN9;Q9UK11;P78395;Q8WUF5;Q9HB65;O43318;Q3KQV3;O15105;Q96PQ6;Q15306;Q8N782;A6NDZ8;Q5TYW1;O00267;Q9Y2A4;Q8IYW8;P78411;Q99417;Q96JN0;Q96GC6;Q6NT76;Q15797;Q7RTT5;O95073;Q9UM03;Q9GZS1;Q969V6;Q9HCK0;Q9NPC7;O15047;Q9Y2K1;O14867;O14948;Q96EG3;Q6ZMV8;Q9NPJ4;P36508;Q6BBB4;Q7Z3K6;O60381;Q9Y2H8;Q04724;P51522;Q15596;O43309;Q13765;Q14839;Q8N693;P16415;Q9HCZ1;Q9HCS4;P43268;Q9NSJ1;Q9BX82;Q9UJW7;Q14588;P17028;O43248;Q8NEA6;Q8IZ26;Q96N20;Q9Y2X9;Q9UBK9;Q49AM1;Q15369;P51826;P49639;Q5H9I0;Q9HC44;Q14686;P59923;Q8IX

W5;Q96MM3;P17041;Q9NWS9;Q9Y5R6;P06400;Q9HAP2;P48378;Q9HCX3;Q86YE8;Q96H20;Q13185;Q96B  
V0;Q9BUG6;Q3SY89;Q15652;Q96FV9;P17483;P01106;Q6ZNH5;Q9Y4X4;P0CG24;Q8NI51;Q9UQ80;Q96I  
27;Q9NZN8;Q96E29;Q14593;Q9H4S2;Q99743;P17019;A6H8Y1;Q7Z7K2;B4DXR9;Q04727;O00409;Q7KZ  
F4;Q12986;Q9H5H4;Q9P031;Q8WYK2;P28749;Q9UNY5;O43189;P0CJ90;B1APH4;Q9HAF1;Q9UNY4;P358  
69;P17275;P42226;Q96PK6;Q8IXH7;P17509;P31249;Q3B726;Q9C005;P39687;P49711;Q96RK1;Q9NT  
W7;Q7L1Q6;Q7L2R6;P18615;P56645;Q8N0Z2;Q8TBC5;P54845;Q9BYE0;Q96IF1;Q6ZNA4;P0DI82;P526  
57;Q9NZV7;Q9UK10;P61244;O00488;Q8NCA9;Q86VZ6;Q7KZ85;Q9UN30;P14653;P10588;Q13127;P352  
69;Q8IY57;Q9BZE3;Q9Y2Y9;Q9C086;P11473;Q16666;A6NNF4;P40425;Q96BD5;Q9C0G0;Q13495;Q996  
08;Q6ZN11;O96017;P0C7X5;P17029;Q9Y3Q8;Q15287;Q12800;Q9NWB7;Q9H1A7;Q9UM07;Q96BR6;Q6P1  
L6;Q5BKZ1;A6NK53;Q6IV72;P51786;Q8TF45;P10072;Q12962;Q9Y6X2;Q03936;Q9H9F9;Q9NQ03;Q5VV  
67;O43524;P15923;Q96RE9;Q9UGP4;Q6ZN19;P15336;Q15326;Q8NDN9;Q2M1K9;Q96T23;P17023;Q86T  
29;Q9UK58;P20749;Q9ULM6;Q00403;Q8NAF0;Q96DT7;Q15937;Q15424;Q9Y2G9;Q8NEF9;Q15653;Q8TE  
85;Q9P1T7;O75446;P32519;P15822;Q14140;P48552;Q9UBU8;P0C7V5;Q8WY36;O43593;A8MUZ8;Q2M1  
V0;Q05066;Q8N228;Q9NVM4;Q8N7G0;Q2VY69;Q8WXI9;P61457;Q96JM2;A6NEJ1;Q99549;O43830;O755  
29;C9JN71;Q08050;Q96LW9;P13378;Q8IYB9;P0CJ85;P11831;Q8WYN3;O15226;Q8TF39;Q9BS31;Q9NY  
61;Q13129;Q9HCK8;Q8N972;Q96MA1;P46937;Q96A56;Q14872;Q8N3S3;Q16576;P56693;P28702;Q9BP  
Y8;Q9NWA0;Q9BYN7;P20264;P28069;Q96N58;Q9UI36;O60583;O96019;Q9H4T2;Q49AN0;P14859;P283  
58;Q9BUE0;Q14119;Q53T94;Q8N393;Q00444;P38159;Q12906;Q9NSI6;Q8N5P1;P52737;Q00653;Q155  
44;Q96T76;Q96AE4;P11308;Q96IR2;Q9UPG8;Q9BSM1;Q8N8Z8;Q8TF20;Q03111;Q92841;Q9ULL5;Q9NR  
G4;P42772;Q8IX15;O95238;Q9GZZ0;O75030;Q9Y5B9;P08235;Q86VN1;Q9GZT3;Q96PU5;Q92945;Q96B  
N2;P51504;P17480;Q9Y250;Q9NZ81;Q6P1J9;P21506;Q6ZN32;Q14241;Q8N5F7;P24278;Q9HBT7;Q9UH  
V2;Q8IYN2;Q9GZV5;Q14814;A6NJT0;Q9NZC4;P78545;Q9P255;Q13506;Q08999;Q9BRG1;Q86WP2;Q9NY  
V6;Q14549;Q32MQ0;P17039;Q8IXT2;Q6PF04;Q8TAF7;Q96H40;Q9H2G4;Q92830;Q5VIY5;Q9UDV6;Q5JN  
Z3;Q9NZI6;Q86WZ6;Q9BQ87;Q96C28;P17032;P17096;Q9P1Z2;Q8NB12;O14979;Q8IZ20;Q9BXX1;Q96N  
M4;Q9H609;Q9UUJ3;P14316;Q96EK7;P51003;Q14527;Q9H3P2;Q9UHR5;P18846;Q01094;Q96QE5;Q8WY  
A1;Q9UIF9;P35226;Q9Y5R5;O75444;A6NDX5;Q9NXT0;Q9UKV0;Q9NVC6;P14652;Q14709;Q6NX45;Q9NP  
08;Q5JVS0;O00327;O43186;Q9H4Z2;A6NE82;P51814;O94763;Q71F56;Q9BSK1;Q9UIF8;O15525;Q156  
37;P31260;Q9HCE1;Q5VWX1;Q9NQG5;Q16670;P52736;O75155;Q96ST3;P0C1Z6;Q99732;Q5CZA5;Q8N7  
M2;Q7Z7C8;Q5T230;Q06416;O43541;Q9Y6Q3;Q7RTU0;Q96EB1;P17022;Q14966;Q8N5A5;Q9NPI1;P170  
36;Q9BW11;Q9ULH7;Q63HK3;P17861;Q4G112;Q14919;Q5VVH5;Q9Y3M9;Q96RN5;Q95931;A0ULP8;Q9Y2  
N7;P141134;Q9HQA5;Q99504;Q9UHV7;P52744;Q96K9;Q9UNH1;Q96SK3;Q8IZ40;Q96218;A0JLT2;O755  
86;P20265;Q15796;O95983;Q15723;P31268;Q6XD76;Q9UKL3;Q8N108;P84022;A0AVK6;Q01167;Q96C  
00;Q8N5J4;O15265;Q7Z6R9;Q6U7Q0;Q96PE6;Q16656;Q8N895;Q92782;P49750;O95163;Q68C9;Q5T6  
19;O94916;Q9NZI7;Q9BRH9;Q9HCC6;Q8IVC4;Q7RTT3;Q9UKY1;Q8NI08;P10244;Q8TF68;Q9NZI5;Q6ZN  
57;O96004;P26358;Q9Y618;Q8IXF0;Q92499;P49336;Q9UI95;Q00056;Q96N77;P35638;Q86U86;Q155  
42;Q15742;Q12796;O94805;Q8TDY2;P10914;Q6ZNG0;Q86XN6;Q9Y2G7;Q6ZN08;P54253;Q9UHX1;Q928  
26;Q96IT1;Q92618;Q6ISB3;Q9BYK8;O00470;Q9NPA8;Q15583;Q9NYF8;Q06732;P62987;P35398;Q9BQ  
W3;Q9H0M5;O75925;P0C860;Q86UU0;Q14209;Q92600;Q5QJE6;Q5XKR4;Q00059;Q92664;Q8NEP9;P170  
25;Q9BWT1;Q7Z3I7;P50549;Q92966;Q33E94;Q9H582;Q9UK13;Q14592;Q96CX3;Q9UPS6;P51508;P224  
15;Q8N184;P20290;A6NFQ7;Q96NK8;Q9ZSB9;Q9B7K0;A9YTQ3;P0CB33;Q96EZ8;Q9Y3T9;Q9BUY5;Q9H7  
R0;Q14591;Q6UUV9;Q6NZI2;Q12905;Q13547;P23759;Q14584;Q9BS34;Q8N8L2;Q92750;Q96SL8;Q9P2  
K5;A8MUV8;Q9HB31;P19838;Q76L83;Q99814;Q71F23;Q6NSW7;Q6ZMW2;Q93074;O43345;Q6RFH8;A8MV  
65;Q9UBS8;Q8TAK5;Q96SZ4;Q86UQ8;P09016;Q9Y692;P53999;O00422;Q92793;Q86Y25;Q16633;B4DX  
44;P57071;O75971;P82979;Q6ZNG1;Q01954;Q15697;P31276;Q16533;D6RGH6;Q6ZN79;O95125;O754  
48;Q6ZN28;Q8N823;Q7RTT4;P62487;Q6ZS53;Q8NC26;P51668;O60869;Q92748;Q13469;Q15361;P216  
75;Q9NR48;Q14585;O14646;P33076;Q14CW9;P52740;Q14103;Q8IWI9;P51523;Q96028;Q9BWX5;P231  
93;Q14587;Q01201;Q0PNE2;P56270;Q9NPA5;P35712;Q99990;Q9NV56;Q01844;O60393;Q96NG5;Q8N9  
R8;Q9UQR0;O60682;Q9HBM6;Q9Y651;Q7RTU5;Q00978;Q9P2K3;P10242;Q9UL18;P20226;Q5THR3;Q926  
81;Q96F24;Q16526;Q8WUI4;P49910;Q6AZW8;Q3B8N5;P52655;Q5TB30;P17014;Q96GE5;Q9Y2Y4;Q047  
25;Q7RTU4;Q5H9L2;O75362;Q92670;Q8WVM0;Q9UL58;Q13485;O75175;Q8NA19;Q460N5;Q9BTT4;Q8N7  
26;O95076;O95402;P10074;Q96RK0;Q9UBW7;Q12968;Q05195;Q9ULV5;P17482;P52951;P49335;Q9UI  
V1;Q8TD23;O60806;Q9Y6R6;Q03468;Q9Y4A5;P63272;Q9UJN7;P50750;O00167;P78367;Q08945;O005  
70;Q14186;P98182;P31269;Q8IX12;Q6ZS27;Q63HK5;Q6ZN01;Q5HY98;P12980;O60225;A8K8V0;P194  
84;Q9UQR1;Q2QD7;Q8IYN0;O00401;Q8TD26;P84550;Q92541;Q8TB69;Q16385;Q96JL9;O43159;Q9NY  
T6;P17020;Q04363;Q14188;Q9NPJ6;Q3MTS6;Q9BR84;P15884;P41162;O75398;Q8TF47;O95644;A6NP  
11;Q7Z5H3;Q3SY52;A6NIX2;P25440;Q96T88;Q5BXX8;O43361;A6NLW8;Q8IUR6;Q9H7X3;Q9BSG1;Q09F  
C8;Q9UK12;Q15714;Q15973;Q96QS3;O94993;P61978;Q86XF7;Q8IUE0;P05412;Q96MN9;Q6IQ32;P170  
17;Q2VWA4;Q96K58;P40424;Q96AV8;Q9BT49;Q9H116;O60304;Q8TAU3;O15055;Q7Z401;A2RU54;Q006  
13;Q13398;Q9UKT9;Q53GI3;O15405;Q96CJ1;Q5SXM2;O60675;Q86VP6;Q86UD4;Q14934;Q12873;B2RX  
F5;Q9HAJ7;P42568;P28370;Q147U1;Q9NR11;Q95581;P58317;Q04864;P19532;Q04864;Q9H511;Q150  
59;Q6P1N0;Q6AW86;Q9UKL0;Q8IYX0;O60244;Q9ULC4;Q9NQR1;Q5VZB9;Q9ULJ6;Q6P280;Q8NDP4;Q8NF  
J8;P61077;O75486;Q7L945;Q9H204;Q9NVW2;Q12789;Q5EBM4;Q9Y6B2;Q9NQ92;Q14776;Q9Y224;Q5T3  
J3;Q9H0E3;Q9BWW4;O43918;P09629;Q8TC21;A8MXY4;P16989;Q8NB50;Q9BQI9;Q9UFF9;Q52M93;Q155  
73;Q8N9K5;Q9Y543;P55197;P40426;Q96N95;P09874;P35452;Q8WXB4;Q96SQ7;Q9NP71;Q02548;P527  
41;P14970;Q14207;Q9HCG1;Q13363;Q9Y2Q1;Q8WW38;Q06587;Q9P086;Q499Z4;Q9BY31;Q8NFP5;Q96N  
J3;Q14498;O95416;Q8NFZ5;O75478;P16383;Q68DY9;P52743;Q8TAW3;Q9UBG7;O43364;Q9ULK4;P080  
47;Q53TQ3;Q96ES7;Q6ZW49;Q8WTZ3;Q9UMQ3;Q5TEC3;A8MVS1;O00472;Q99081;Q9HC78;Q9NY43;Q8TA  
U0;P82094;Q2M3X9;P15622;Q86YW9;Q9H501;Q8IX03;O60290;Q9UKN8;Q15560;Q6W2J9;Q8IWS0;P483  
80;Q75626;O00716;Q03701;P0C7X2;Q13761;P52742;Q6ZRF7;Q9Y6Y1;Q9H9D4;Q6P3V2;Q2M3W8;Q5MC  
W4;Q7Z7J5;Q15935;Q96EI5;Q8WXF1;A6NFI3;O43298;Q9BWM5;P37198;O43829;Q8N1W2;Q01658;O602  
84;P51531;Q8N8J6;Q8N587;Q92922;P43355;Q8WTS6;Q9NQV6;Q15543;Q9UL36;P53803;P17544;Q9P2  
R6;P52435;Q00577;Q6UUV7;Q8IYI8;P09630;Q96D98;P17040;O94892;Q0VGE8;Q9HCE3;O60828;Q155  
72;Q96BR9;Q8N2W9;Q05481;Q9P0W2;P0CJ78;O15060;Q86W54;Q8N6I1;Q96PM9;Q7Z5L9;Q68CP9;Q955  
03;Q96E25;P52434;Q92800;Q8NHV9;Q16534;Q9P2F9;Q9H1I8;P41212;Q96K75;Q9UQ3;P09017;Q9UJ  
U5;Q9H9T3;O15522;Q5FWF6;Q8NF64;P39880;Q53H80;Q9H9S0;Q9ULX9;Q9UIH9;Q6P2C8;Q9BT81;Q9NY  
W8;A6NJJ6;Q8HWS3;O95251;Q99459;Q13352;P78337;P51815;P15172;Q9UID6;Q96MH2;Q96CS4;Q3MJ

62;Q05516;Q12837;A6NJL1;O43513;Q9BUJ2;O15534;Q8WXF8;Q3ZCX4;Q8TBZ5;Q15561;A8MT65;P50219;Q13106;Q9GZX5;A6NLF2;Q99717;Q8TF50;Q96G25;P17038;P0CJ79;Q5H9L4;Q6P9G9;O60716;P25208;P43356;Q9UPW6;O00257;Q15047;Q12857;Q96NI8;Q8TF32;Q6ZMS7;Q9BYH8;Q9P0T4;Q9UBD0;Q8N7H5;Q9NRC8;P60002;O75525;Q9H4I2;Q9BTA9;Q9H3H9;Q9NWB6;Q9NP66;Q32M78;Q86Y97;P10589;Q6P1X5;P15408;O15198;Q8NBZ0;Q8TBE0;Q96NL3;Q9Y473;P13056;Q8WYH8;Q99594;Q14678;Q5VWG9;Q5PSV4;Q93008;Q8NEM1;Q5HYR2;Q15329;Q9H0E9;Q9UL49;Q99583;Q3KNW1;P78347;Q9UJW9;Q9Y5Q3;Q5T0F9;Q01664;Q8IXH6;Q8WVJ9;P52746;Q9Y5Q8;O75182;A6NNA5;Q05215;Q9BYE7;Q8IZL2;Q9UII5;Q9BZE0;Q92993;P38935;Q9Y6J9;Q96B42;Q9Y2S0;Q01860;Q9P2Y4;Q9BXJ9;P31275;O14813;Q08ER8;Q12824;Q8N3X6;Q03060;Q4V348;Q9UJL9;O14627;Q86X55;Q9BQ70;Q49A33;Q9NV72;Q96N38;Q9BXG8;O00291;Q06730;Q9UIE0;Q14151;Q03052;Q9H8G1;Q9H944;Q99551;O60711;Q02446;Q9UJW8;P68104;Q5H9F3;O14628;Q8NBF1;Q6P4R8;A6NN14;O14503;O14686;Q10587;Q96MN5;O75528;P11142;Q9HBUL;A6NJ46;Q68DY1;Q12888;Q15906;Q92585;P10243;P22670;Q86TJ2;Q7Z3V5;Q9Y222;O75177;Q8N7Q3;Q8TBZ8;Q15650;P10073;Q8NF99;Q14135;O75290;Q9HD42;P67809;Q9NR83;O15535;Q6ZT77;A8MWA4;O43719;Q8N3C0;O75467;O15160;P52747;O75928;P68036;Q6PD62;P28324;Q8N344;Q13118;Q96SQ5;P23511;P17035;Q8N0Y2;Q8N4W9;A6NM28;Q92785;Q9UBB5;Q02577;Q92754;Q7RTU3;A6NFD8;Q9UIS9;Q16594;Q6VUC0;Q6PK81;Q9H5Q4;Q9H5J8;Q6P198;Q9UFB7;Q9HAZ2;Q96H86;Q8TA94;Q5JVG8;Q9UBX0;Q03938;Q7RTT6;Q16600;Q9H2A3;Q14192;Q6QHK4;P11161;Q8NDT2;Q9Y2P7;O00482;Q9H7R5;Q02078;Q9Y3C7}

25535 [Cluster 2322]GO:0009059+P biological\_process [name] macromolecule biosynthetic process [def] "The chemical reactions and pathways resulting in the formation of a macromolecule, any molecule of high relative molecular mass, the structure of which essentially comprises the multiple repetition of units derived, actually or conceptually, from molecules of low relative molecular mass." [CHEBI

25536 Pathogen[ Q2Q067] interacts with 1 human partners:{Q9NRN7}

25537 Pathogen[ P0C214] interacts with 1 human partners:{Q9NRN7}

25538 Pathogen[ P03346] interacts with 1 human partners:{Q9NRN7}

25539 Pathogen[ Q85601] interacts with 1 human partners:{Q9NRN7}

25540 Pathogen[ P14079] interacts with 2 human partners:{O94777;Q9NRN7}

25541 Pathogen[ P03383] interacts with 1 human partners:{Q9NRN7}

25542 Pathogen[ P03410] interacts with 2 human partners:{O94777;Q9NRN7}

25543 Pathogen[ P14075] interacts with 2 human partners:{O94777;Q9NRN7}

25544 Pathogen[ P0C206] interacts with 2 human partners:{O94777;Q9NRN7}

25545 Pathogen[ P03363] interacts with 1 human partners:{Q9NRN7}

25546 [Cluster 2323]GO:0030968+P biological\_process [name] endoplasmic reticulum unfolded protein response [def] "The series of molecular signals generated as a consequence of the presence of unfolded proteins in the endoplasmic reticulum (ER) or other ER-related stress\_results in changes in the regulation of transcription and translation." [GOC

25547 Pathogen[ Q2Q067] interacts with 25 human partners:{P05198;Q16236;P02545;P24385;Q9P0U4;P18847;O75807;P18850;P35638;Q9UBS4;Q14203;P27797;Q15173;Q9UBS3;Q9BQ90;P17861;Q9BQE4;P18848;Q93075;O14595;P32929;Q13105;Q9H2G4;P14625;Q14999}

25548 Pathogen[ P0C214] interacts with 26 human partners:{P18850;P14625;O14595;Q14203;O75807;Q9UBS3;P24385;Q14999;Q9UBS4;P32929;P18848;Q15173;P17861;P18847;P49588;Q93075;Q9H2G4;P05198;P27797;P02545;Q9BQE4;Q13105;P35638;Q9BQ90;P55072;Q16236}

25549 Pathogen[ P03346] interacts with 28 human partners:{Q9UBS3;P24385;P18847;P14625;P35638;P17861;Q9H2G4;Q14203;P55072;P02545;Q9BQ90;P18850;Q16236;P18848;Q9BUN8;Q9P0U4;P32929;Q13105;P27797;Q9UBS4;Q9HCU5;Q14999;P51858;Q15173;Q93075;O14595;O75807;P05198}

25550 Pathogen[ Q85601] interacts with 26 human partners:{P02545;Q16236;P24385;Q9UBS3;P18848;Q9UBS4;Q15173;P27797;Q14203;Q9P0U4;P18847;Q9BQ90;Q8N6T3;P18850;P05198;P14625;Q14999;Q9H2G4;O75807;Q93075;O14595;P17861;Q13105;Q9BQE4;P35638;P32929}

25551 Pathogen[ P14079] interacts with 35 human partners:{O95070;O14773;Q9BQ90;Q9BQE4;P61421;Q15173;Q9UBS3;Q9UBS4;P43307;O75807;P05198;Q13105;Q96Q80;Q9GZP9;P35611;Q9BUN8;Q9H2G4;Q9Y6X1;O95292;Q969H8;O14653;P32929;Q93075;P35638;Q16236;Q9P0U4;P18850;P14625;Q96FC9;Q15011;P49588;P02545;Q14999;Q14203;O43731}

25552 Pathogen[ P03383] interacts with 23 human partners:{P02545;Q93075;Q15173;Q14203;Q9BUN8;P18847;P17861;P35638;P24385;Q9UBS4;Q9UBS3;Q13105;Q9BQE4;P05198;P14625;Q16236;Q9H2G4;O75807;P18848;P18850;Q9BQ90;Q14999;P27797}

25553 Pathogen[ P03410] interacts with 39 human partners:{O95292;P35638;P17861;Q9P0U4;P18847;P18848;P61421;Q15173;P49588;P32929;Q16236;P14625;Q96Q80;Q93075;Q9GZP9;Q9UBS3;Q9BQE4;P24385;P43307;Q9Y6X1;Q9BUN8;P02545;O75807;Q9HCU5;Q9UBS4;Q96FC9;Q15011;O14653;Q13105;O43731;Q9H2G4;P18850;P35611;Q9BQ90;O95070;Q14203;Q5MNZ9;P05198;P27797}

25554 Pathogen[ P14075] interacts with 24 human partners:{Q9BQE4;Q9UBS3;Q13105;P17861;P18847;P35638;Q93075;Q9H2G4;P05198;Q14999;P02545;P27797;Q9BUN8;O75807;Q15173;P18848;Q15011;P24385;Q14203;Q9UBS4;Q16236;P14625;P18850;Q9BQ90}

25555 Pathogen[ P0C206] interacts with 34 human partners:{Q9P0U4;Q8N6T3;P27797;O14653;P18850;O75807;Q9UBS4;O95070;Q15173;P17861;O95292;Q14999;P05198;Q93075;Q9BQE4;Q15011;P32929;Q9BUN8;Q9GZP9;Q9H2G4;P55072;O43731;Q9BQ90;P18847;P02545;Q16236;Q9UBS3;O14595;Q14203;Q13105;P18848;P35638;P14625;P24385}

25556 Pathogen[ P03363] interacts with 23 human

partners:{Q16236;P51858;P18848;Q13105;P02545;Q93075;P18847;P18850;Q9UBS3;Q9P0U4;P05198;Q9BQ90;Q14999;Q9H2G4;P27797;Q9UBS4;P17861;P35638;Q15173;O75807;P24385;Q14203;O14595}

25557 [Cluster 2324]GO:0001525+P biological\_process [name] angiogenesis [def] "Blood vessel formation when new vessels emerge from the proliferation of pre-existing blood vessels." [ISBN

25558 Pathogen[ Q2Q067] interacts with 32 human partners:{Q43365;Q9NZI7;P23381;O14786;Q5D1E8;Q9BUP3;O00470;Q13887;P31268;P41970;O96004;P41134;P04792;Q14790;P55347;Q9UII2;Q12904;Q06330;P29474;Q6RSH7;Q9BUL8;P14651;P19338;P06744;Q9Y5J3;O43318;P35579;P50222;Q5UE93;P21673;Q99814;Q9BXJ9}

25559 Pathogen[ P0C214] interacts with 31 human partners:{P41970;O00470;P29474;O43365;Q13887;O14786;Q12904;P55347;P23381;Q9Y5J3;P04792;Q9BUL8;Q06330;P05121;O43318;P14651;Q9NZI7;Q9BUP3;Q9UII2;P41134;P50222;Q5UE93;Q9BXJ9;P05412;Q99814;O96004;P21673;Q5D1E8;P19338;Q6RSH7;Q14790}

25560 Pathogen[ P03346] interacts with 38 human partners:{Q06330;P23381;P05412;Q6RSH7;P31268;P29474;Q9BUP3;P35579;Q9BYW2;Q92826;P21673;P19338;Q9Y5J3;O96004;O43365;P50222;Q9UII2;Q12904;P17542;P41134;O00470;Q9BXJ9;Q5D1E8;Q99814;Q13887;O00522;P35713;Q14790;P55347;P41970;P06744;Q5UE93;O43318;Q9BUL8;P04792;O14786;Q9NZI7;P14651}

25561 Pathogen[ Q85601] interacts with 32 human partners:{P41134;Q06330;P35579;Q9BUL8;Q14790;P41970;P23381;P06744;Q99814;P21673;P19338;O14786;O96004;P50222;Q9UII2;Q9BXJ9;P05412;O00470;P05121;P29474;Q6RSH7;P55347;P04792;P14651;O43365;O43318;Q5UE93;Q9BUP3;Q13887;Q9NZI7;Q9Y5J3;Q5D1E8}

25562 Pathogen[ P14079] interacts with 32 human partners:{P35579;P23381;Q5D1E8;Q99814;P55347;Q9NP84;Q9BXJ9;Q9UII2;O96004;O60895;P06744;Q9BUL8;Q9BUP3;Q9H488;P19338;Q06330;Q9NZI7;Q14790;Q9Y5J3;O43365;Q6RSH7;P41134;Q12904;P05412;P04792;O00470;P21673;Q5UE93;P41970;P50222;O00522;P14651}

25563 Pathogen[ P03383] interacts with 26 human partners:{Q06330;O00470;Q12904;P29474;P19338;P50222;Q5D1E8;O43365;P04792;O43318;Q6RSH7;P55347;O96004;Q9UII2;P06744;P23381;Q9BXJ9;Q9NZI7;Q9BUL8;Q9BUP3;P41970;Q5UE93;P35579;P21673;P14651;P05412}

25564 Pathogen[ P03410] interacts with 35 human partners:{O14786;Q9Y5J3;P05121;Q5UE93;O00470;P06744;O96004;O60895;Q99814;Q06330;P50222;Q9BUL8;P14651;P23381;P41134;P35579;P04792;Q12904;Q9UII2;O43318;P29474;Q5D1E8;Q9BUP3;P19338;P21673;P05412;O00522;Q6RSH7;P55347;P41970;Q9NP84;Q9NZI7;Q9H488;O43365;Q9BXJ9}

25565 Pathogen[ P14075] interacts with 25 human partners:{P29474;Q9BUP3;P19338;Q9BUL8;P06744;P23381;P05412;Q9BXJ9;O00470;Q6RSH7;Q5UE93;P04792;Q9NZI7;O43365;P55347;O96004;Q9UII2;Q12904;O43318;P35579;Q5D1E8;Q06330;P41970;P21673;P50222}

25566 Pathogen[ P0C206] interacts with 35 human partners:{Q13887;Q06330;Q9BUP3;O43365;O00470;P05412;P14651;O43318;P19338;P04792;P31268;P41970;Q9NZI7;O14786;O96004;P41134;P21673;P06744;Q6RSH7;Q9Y5J3;Q5D1E8;Q14790;Q9BUL8;P35579;P29474;P05121;Q5UE93;Q99814;Q9BXJ9;P23381;Q9UII2;O00522;Q12904;P55347;P50222}

25567 Pathogen[ P03363] interacts with 33 human partners:{Q9BUL8;P29474;Q9BUP3;P19338;Q9Y5J3;P06744;P35579;O14786;O43365;P14651;Q06330;O43318;Q8N302;P55347;P23381;P21673;Q6RSH7;Q5UE93;O00522;P41134;P31268;Q9NZI7;O96004;Q92826;O00470;Q99814;P50222;Q7Z5H3;P05412;Q5D1E8;P41970;P04792;Q9BXJ9}

25568 [Cluster 2325]GO:0001714+P biological\_process [name] endodermal cell fate specification [def] "The cell fate determination process that results in a cell becoming capable of differentiating autonomously into an endoderm cell in an environment that is neutral with respect to the developmental pathway\_ upon specification, the cell fate can be reversed." [GOC

25569 Pathogen[ Q2Q067] interacts with 2 human partners:{P35680;Q01860}

25570 Pathogen[ P0C214] interacts with 1 human partners:{Q01860}

25571 Pathogen[ P03346] interacts with 3 human partners:{Q01860;P35680;Q9H9S0}

25572 Pathogen[ Q85601] interacts with 2 human partners:{P35680;Q01860}

25573 Pathogen[ P14079] interacts with 2 human partners:{P35680;Q01860}

25574 Pathogen[ P03383] interacts with 1 human partners:{Q01860}

25575 Pathogen[ P03410] interacts with 2 human partners:{Q01860;P35680}

25576 Pathogen[ P14075] interacts with 1 human partners:{Q01860}

25577 Pathogen[ P0C206] interacts with 3 human partners:{Q01860;P35680;Q9H9S0}

25578 Pathogen[ P03363] interacts with 2 human partners:{Q9H9S0;Q01860}

25579 [Cluster 2326]GO:0031295+P biological\_process [name] T cell costimulation [def] "The process of providing, via surface-bound receptor-ligand pairs, a second, antigen-independent, signal in addition to that provided by the T cell receptor to augment T cell activation." [ISBN

25580 Pathogen[ Q2Q067] interacts with 9 human partners:{P31749;Q9BPZ7;P25063;Q9BVC4;O75791;P60953;P27986;P63000;Q6R327}

25581 Pathogen[ P0C214] interacts with 10 human partners:{Q9BPZ7;P63000;Q9BVC4;P62993;P60953;Q6R327;P25063;O75791;P27986;P31749}

25582 Pathogen[ P03346] interacts with 10 human partners:{Q9BVC4;Q9BPZ7;P60953;P62993;P31749;P25063;Q6R327;P63000;P27986;O75791}

25583 Pathogen[ Q85601] interacts with 8 human partners:{P31749;P62993;Q9BPZ7;P63000;P27986;Q9BVC4;P60953;O75791}

25584 Pathogen[ P14079] interacts with 7 human partners: {Q6R327;Q9BXL7;Q9BVC4;O75791;P25063;P62993;Q9BPZ7}

25585 Pathogen[ P03383] interacts with 7 human partners: {P27986;O75791;P31749;Q9BPZ7;P60953;P25063;P63000}

25586 Pathogen[ P03410] interacts with 12 human partners: {P27986;P20963;P63000;Q9BPZ7;P31749;Q9BVC4;Q9BXL7;P25063;Q6R327;P60953;P62993;O75791}

25587 Pathogen[ P14075] interacts with 8 human partners: {P60953;O75791;Q9BPZ7;P31749;Q6R327;P27986;P63000;P25063}

25588 Pathogen[ P0C206] interacts with 10 human partners: {P31749;O75791;P27986;P62993;Q6R327;P25063;P63000;Q9BPZ7;P60953;Q9BVC4}

25589 Pathogen[ P03363] interacts with 7 human partners: {Q9BVC4;O75791;P63000;P31749;P60953;P27986;Q6R327}

25590 [Cluster 2327]GO:0035887+P biological\_process [name] aortic smooth muscle cell differentiation [def] "The process in which a relatively unspecialized cell acquires specialized features of a smooth muscle cell surrounding the aorta." [GOC

25591 Pathogen[ Q2Q067] interacts with 2 human partners: {P51531;Q9HBD4}

25592 Pathogen[ P0C214] interacts with 2 human partners: {Q9HBD4;P51531}

25593 Pathogen[ P03346] interacts with 2 human partners: {Q9HBD4;P51531}

25594 Pathogen[ Q85601] interacts with 2 human partners: {P51531;Q9HBD4}

25595 Pathogen[ P14079] interacts with 1 human partners: {P51531}

25596 Pathogen[ P03383] interacts with 2 human partners: {Q9HBD4;P51531}

25597 Pathogen[ P03410] interacts with 2 human partners: {P51531;Q9HBD4}

25598 Pathogen[ P14075] interacts with 2 human partners: {Q9HBD4;P51531}

25599 Pathogen[ P0C206] interacts with 2 human partners: {P51531;Q9HBD4}

25600 Pathogen[ P03363] interacts with 2 human partners: {Q9HBD4;P51531}

25601 [Cluster 2328]GO:0021766+P biological\_process [name] hippocampus development [def] "The progression of the hippocampus over time from its initial formation until its mature state." [GO\_REF

25602 Pathogen[ Q2Q067] interacts with 7 human partners: {P62258;O60315;O15350;P11831;Q92769;Q07687;P47928}

25603 Pathogen[ P0C214] interacts with 6 human partners: {O15350;P11831;Q07687;P47928;Q92769;O60315}

25604 Pathogen[ P03346] interacts with 8 human partners: {P11831;O60315;P62258;P56177;O15350;Q92769;Q9H2C1;P47928}

25605 Pathogen[ Q85601] interacts with 7 human partners: {P11831;O60315;P62258;Q92769;O15350;Q07687;P47928}

25606 Pathogen[ P14079] interacts with 9 human partners: {P24588;O15350;O60315;O14949;Q15078;Q92769;P62258;Q07687;P47928}

25607 Pathogen[ P03383] interacts with 6 human partners: {P11831;Q07687;Q92769;O15350;P47928;P62258}

25608 Pathogen[ P03410] interacts with 8 human partners: {P62258;P11831;Q07687;Q92769;P47928;O15350;O14949;P24588}

25609 Pathogen[ P14075] interacts with 6 human partners: {P11831;P47928;Q07687;O15350;Q92769;P62258}

25610 Pathogen[ P0C206] interacts with 9 human partners: {Q07687;Q92769;P62258;Q9H2C1;P11831;O60315;O15350;P47928;P56177}

25611 Pathogen[ P03363] interacts with 6 human partners: {P62258;O60315;P56177;P11831;P47928;Q07687}

25612 [Cluster 2329]GO:0007072+P biological\_process [name] positive regulation of transcription on exit from mitosis [def] "Any process that increases the frequency, rate or extent of transcription as the cell leaves M phase. M phase is the part of the mitotic cell cycle during which mitosis and cytokinesis take place." [GOC

25613 Pathogen[ Q2Q067] interacts with 1 human partners: {Q9NRC8}

25614 Pathogen[ P0C214] interacts with 1 human partners: {Q9NRC8}

25615 Pathogen[ P03346] interacts with 1 human partners: {Q9NRC8}

25616 Pathogen[ Q85601] interacts with 1 human partners: {Q9NRC8}

25617 Pathogen[ P14079] interacts with 1 human partners: {Q9NRC8}

25618 Pathogen[ P03383] interacts with 1 human partners: {Q9NRC8}

25619 Pathogen[ P03410] interacts with 1 human partners: {Q9NRC8}

25620 Pathogen[ P14075] interacts with 1 human partners: {Q9NRC8}

25621 Pathogen[ P0C206] interacts with 1 human partners: {Q9NRC8}

25622 Pathogen[ P03363] interacts with 1 human partners: {Q9NRC8}

25623 [Cluster 2330]GO:0006108+P biological\_process [name] malate metabolic process [def] "The chemical reactions and pathways involving malate, the anion of hydroxybutanedioic acid, a chiral hydroxydicarboxylic acid. The (+) enantiomer is an important intermediate in metabolism as a component of both the TCA cycle and the glyoxylate cycle." [ISBN

25624 Pathogen[ Q2Q067] interacts with 3 human partners: {P07954;P40925;P40926}

25625 Pathogen[ P0C214] interacts with 5 human partners: {Q5I0G3;P07954;P40926;P48163;Q16798}

25626 Pathogen[ P03346] interacts with 3 human partners: {P40926;P40925;P07954}

25627 Pathogen[ Q85601] interacts with 3 human partners: {P07954;P40925;P40926}

25628 Pathogen[ P14079] interacts with 2 human partners: {P07954;P40925}

25629 Pathogen[ P03383] interacts with 2 human partners: {P40926;P40925}

25630 Pathogen[ P03410] interacts with 3 human partners: {P07954;P40926;P40925}

25631 Pathogen[ P14075] interacts with 2 human partners: {P40925;P40926}



25632 Pathogen[ P0C206] interacts with 3 human partners:{P40925;P40926;P07954}

25633 Pathogen[ P03363] interacts with 1 human partners:{P40925}

25634 [Cluster 2331]GO:0001933+P biological\_process [name] negative regulation of protein phosphorylation [def] "Any process that stops, prevents or reduces the rate of addition of phosphate groups to amino acids within a protein." [GOC

25635 Pathogen[ Q2Q067] interacts with 10 human partners:{P04156;Q8WUQ7;Q9BZQ8;O60260;P14635;P84022;O00255;Q9GZV5;Q7Z2X4;Q96IU2}

25636 Pathogen[ P0C214] interacts with 9 human partners:{P84022;Q9GZV5;P14635;Q7Z2X4;Q9BZQ8;P04156;Q96IU2;O60260;O00255}

25637 Pathogen[ P03346] interacts with 12 human partners:{Q9GZV5;Q9P2D0;Q7Z2X4;P84022;P14635;O00255;Q9BZQ8;O60260;Q96IU2;P04156;Q8WUQ7;Q8TDZ2}

25638 Pathogen[ Q85601] interacts with 10 human partners:{Q9P2D0;Q9GZV5;Q7Z2X4;Q9BZQ8;P14635;O00255;P84022;O60260;P04156;Q96IU2}

25639 Pathogen[ P14079] interacts with 12 human partners:{O60260;Q9GZV5;Q96IU2;Q8TDZ2;P04156;P14635;Q9P2X3;Q8WUQ7;Q7Z2X4;O00255;Q9BZQ8;Q9P2D0}

25640 Pathogen[ P03383] interacts with 9 human partners:{P04156;Q96IU2;P14635;Q9BZQ8;P84022;O60260;O00255;Q8WUQ7;Q9GZV5}

25641 Pathogen[ P03410] interacts with 13 human partners:{P84022;Q8WUQ7;Q96IU2;Q8TDZ2;O60260;Q9GZV5;P14635;Q7Z2X4;Q9P2X3;P04156;Q9BZQ8;Q9P2D0;O00255}

25642 Pathogen[ P14075] interacts with 10 human partners:{Q96IU2;Q9GZV5;P14635;P04156;Q9P2X3;O00255;Q9BZQ8;P84022;Q8WUQ7;O60260}

25643 Pathogen[ P0C206] interacts with 13 human partners:{P84022;Q9BZQ8;Q7Z2X4;P04156;O00255;Q8WUQ7;Q9GZV5;O60260;P14635;Q9P2D0;Q9P2X3;Q8TDZ2;Q96IU2}

25644 Pathogen[ P03363] interacts with 7 human partners:{Q9BZQ8;Q9P2D0;P04156;Q8WUQ7;Q9GZV5;P84022;Q96IU2}

25645 [Cluster 2332]GO:0008150+P biological\_process [name] biological\_process [def] "Any process specifically pertinent to the functioning of integrated living units

25646 Pathogen[ Q2Q067] interacts with 156 human partners:{Q9HD33;Q9Y2J2;O95671;P53370;Q9NYP9;Q14657;O15234;P98182;Q96EL2;Q9Y3S2;Q9UK11;Q9ULX6;A5PL33;P59022;Q9GZV5;Q9GZP8;Q5SRH9;P23610;Q53EQ6;P10073;Q9P2M7;O00193;Q92797;Q9ULD5;Q9PNE2;Q96BZ8;Q9P0M2;P57060;Q9UKJ3;Q15059;O60829;P49750;Q9P0W5;A6NNW6;O76013;Q9UJY1;A3KN83;Q9BZV1;Q9H322;Q9P3C0;O15453;P56555;P18615;Q9H171;Q9Y5R5;P53672;Q4LE39;Q9NSB4;Q03252;Q9BY42;Q9H5F2;Q8NBR6;Q04727;O15117;Q86V97;Q5T280;O95625;Q7RTU5;Q9NY87;Q96NJ6;Q9BZE9;O14972;O43583;Q8N3J9;Q15937;Q9H6Y2;Q9BZE7;O60287;Q9Y2Q9;Q15935;Q2TAL8;Q9H2C0;Q63HK3;Q9UII5;Q9NWX4;Q9H2W6;Q9BPZ7;Q96A73;Q9BTE7;P43358;P82650;P50221;Q9UKJ5;O60826;Q9NRL3;Q96NG5;O14530;Q9NPI8;Q9BUW7;Q9UBW7;Q9UBW7;Q99618;P57055;Q70EK8;Q9Y592;Q9NR77;Q9BVC6;Q8N0V3;Q12980;Q9Y2P8;Q9NRY5;Q9H0A9;P41162;Q9Y6Z5;O75564;Q70EK8;Q9H1B7;Q9Y4K1;Q99619;O75638;Q9H9J2;O60290;Q9H0U9;Q9UBL0;Q96GG9;Q9BQ65;Q5TEC3;Q8WVZ9;O43765;P0C7X2;Q93052;Q92670;Q5C9Z4;P82664;Q96FN9;Q8N5J2;Q9BZF9;P84101;Q96M91;P43359;O14512;Q9BYS1;Q5T7W7;Q9HCM9;Q9Y421;Q969X6;Q9BXF6;Q9Y675;Q8WVK2;Q92917;Q15651;Q9P0V3;Q6PI98;Q7Z794;Q9HCI5;P49754;O95153;Q9Y608;Q969T9;Q9NYP3;P43360;O14879;Q96B26;Q9NPC6;Q6P2E9;Q9NQR4}

25647 Pathogen[ P0C214] interacts with 188 human partners:{Q9HD33;Q9BPZ7;Q6RFH5;O95671;O15234;Q15059;Q14264;O15117;Q96EL2;P49754;Q9H9J2;Q9BQ65;O76013;P84101;Q04727;P53672;Q8WUX2;Q9H6Y2;O95153;Q63HK3;Q9ULD5;Q6P2E9;Q9H4I8;Q15651;Q53EQ6;O15194;Q9UJY1;Q9P0V3;Q9NRY5;Q96M91;O14879;P43360;O60826;Q9UKJ3;Q9Y3C0;Q9H171;P43358;Q7Z794;O60829;P53370;Q5SRH9;O14513;Q9P0M2;Q8N5J2;Q9BTE6;Q92797;O95625;Q969T9;Q9UK11;Q8NBR6;O14530;Q9NPC6;Q53S33;Q96A73;Q96NG5;Q8WVZ9;Q9Y2Q9;Q9H0A9;Q9NYP3;Q7RTU5;Q9UII5;O60287;P82664;Q9BZV1;O60290;P18615;O75564;Q9UKJ3;Q9BZE9;Q86V97;Q9BY42;Q70EK8;Q9Y421;Q9Y2P8;Q9Y6Z5;Q8WVK2;Q9NRY5;A6NNW6;Q6PI98;P49750;Q03252;P57060;Q12980;Q9NQR4;Q8IYX8;Q9H0A0;O15453;Q9GZV5;Q9NYP9;Q68D10;Q5JTY3;Q92917;Q969X6;Q6GMV2;P98169;Q9BUW7;Q9BZE7;A2RTX5;Q99618;Q14019;Q9P0W5;Q9H1B7;Q9Y608;Q3SYA9;Q0PNE2;Q99619;Q9UBW7;Q9H322;Q9BXF6;Q2M3D2;Q9NR77;Q9HCM9;A3KN83;Q9ULX6;O00193;Q4LE39;P43359;Q9Y4X0;Q9H5X1;Q9BTE7;O94903;P59022;Q9NPI8;Q15935;Q9H8M2;Q8N2G8;Q9N2M5;P0C7X2;Q9P2M7;Q9H9E1;Q9BVC6;Q9HCI5;P98182;Q9H0U9;Q9UBL0;Q5TEC3;O14972;Q9BZF9;Q9H2W6;Q9Y675;Q8WWM7;Q8N0V3;P50221;Q9NWX4;Q5H9L4;P41162;P56555;Q8N3J9;Q5T7W7;Q5T280;Q9H2C0;Q5C9Z4;Q96NJ6;O14512;P23610;Q8NB25;Q96FN9;Q9BZL1;Q9BYS1;Q14657;Q9H5F2;Q8IZ73;O43765;Q9NY87;Q8WV07;Q9UJY1;Q9H3K2;P52746;Q96N20;Q96BZ8;Q86U38;P82650;O43583;P57055;Q96B26;Q9BVG4;Q2TAL8;Q9Y5R5;Q15937;Q9Y4K1;Q9NSB4;P10073;Q8WV59;O75638;Q92670;Q9Y592;Q96GG9;Q9NRL3}

25648 Pathogen[ P03346] interacts with 249 human partners:{Q96NG5;Q9UKS7;Q96N20;Q9H7Z3;O15234;O75564;P98182;Q9BZL1;Q9P0M2;Q96EL2;Q96A73;Q9NQC8;Q9NY87;Q96NJ6;O95625;A3KN83;P50221;P57055;Q9BQE9;Q9Y3C0;Q9HCS5;Q8IVW6;Q9ULD5;Q9H0A9;Q96JP2;P23610;Q9BYG8;O60287;Q9H2Z4;Q8NFV4;Q70EK8;Q96G27;Q1KMD3;A6NNW6;Q03828;P57060;P84101;Q9H3K2;Q9GZV5;O94875;Q9H171;Q2TAL8;Q9GZP8;P49754;Q9N2M5;Q969X6;Q9BY42;Q4L180;O60290;Q5T280;O15225;Q5T7W7;Q9BPZ7;Q9Y5M1;Q96BZ8;Q9P2W1;Q96W07;P43360;Q9NSB4;Q0PNE2;O95177;Q9Y6Z2;Q9BZV1;Q969T9;P49750;P56555;Q9UK11;Q9UJY1;Q06250;O95671;Q8WW59;Q9GZL8;O00193;Q9H2C0;Q9HCK0;Q9H2W6;Q96GG9;Q9NWX4;P0C7X2;Q96BR9;O95153;Q9Y3S2;Q15847;Q7RTU5;Q6PI98;Q96B26;Q92670;Q9Y5R5;O14972;Q9UKJ5;Q9BZE7;Q8IYX8;O15194;Q9UID3;Q4V328;Q15059;Q9P565;Q9BZE9;Q9UKJ3;Q9ULX6;Q9H5F2;Q9Y592;P98169;P53370;O14530;Q9HB31;Q9HAU0;Q7Z794;Q9BQ65;Q9C0H6;Q9Y675;P41162;Q8WVK2;O43583;Q6UW56;Q9Y421;Q9Y608;P82650;Q68D10;Q9BZ29;Q14153;Q9NQR4;Q9H4I8;Q9H9E1;Q14264;Q13166;Q8WWE0;Q9Y2P8;Q9BVC5;Q9P0V3;Q15646;Q9Y4H4;P13985;P52746;Q9UBL0;Q8N5J2;Q9P0W5;O60826;Q9H322;O14879;Q8N0V3;P58107;Q9BU



- W7;Q16891;O14715;Q6P2E9;Q9BZD3;Q9HCM9;Q92784;Q9BTE7;Q9Y6I7;Q99619;Q9HD33;Q9NR77;Q9Y4  
P9;P10073;Q9H6Y2;Q9H8M2;Q9BVG4;Q9NRY5;O15453;Q53EQ6;Q8WVZ9;Q63HK3;Q2M3D2;Q9H0U9;Q9Y2  
J2;Q5SRH9;Q96M91;Q15935;Q86VF2;A5PL33;O43765;Q9BVC6;Q92797;Q03252;Q8TE68;Q4LE39;Q9Y6  
Z5;P02728;Q15937;Q9BTY7;Q15435;Q9NYP3;Q75638;Q04727;P10768;Q43763;Q9UII5;Q14019;Q6RF  
H5;Q15527;Q9BXF6;Q9BZF9;Q12980;Q15270;Q92917;Q9BXM8;Q7Z3D6;P59022;Q5H9L4;Q9NPI8;Q134  
01;Q9Y4K1;Q96002;Q10571;Q8NI36;O15117;Q15651;P82664;O14512;Q93052;Q60829;Q9BYS1;Q86X  
76;P43358;Q96FN9;Q8TAU0;Q9BZR9;Q5JTJ3;Q8WXX7;Q9NYP9;Q6FIF0;Q14C87;Q16204;O43900;Q8NB  
R6;Q3SYA9;Q8N3J9;Q14657;P53672;Q5TEC3;Q99618;P18615;Q00765;Q9H1B7;Q9NRL3;Q8N2G8;Q9P2  
M7;P43359;Q9H9J2;Q9HCI5;Q5C9Z4;O76013;Q86V97;Q9UBW7;Q9NPC6;Q9Y2Q9;Q8WU76}
- 25649 Pathogen[ Q85601] interacts with 167 human  
partners: {Q53EQ6;O14530;O95625;O43765;Q9NRL3;Q9Y608;Q63HK3;O15234;Q6P2E9;Q4LE39;Q9BZ  
L1;Q96EL2;Q96A73;Q9H8M2;Q9Y2J2;Q9NY87;Q9GZW5;O76013;Q9H5F2;P10768;Q92917;P53672;Q9NS  
B4;Q8N0V3;Q9ULD5;Q96JP2;Q5C9Z4;O14879;O95671;O95153;P57060;O15194;O60290;Q969X6;Q8N5  
J2;Q9Y6Z5;Q9H2W6;P59022;Q9BPZ7;Q9BZF9;Q5H9L4;Q9P0W5;Q9NPI8;P56555;Q969T9;Q93052;Q9Y3  
C0;Q96NG5;P0C7X2;Q03252;Q9UII5;P55145;Q5SRH9;Q9BZR9;Q9UJJ7;P49754;Q7RTU5;P18615;Q9NR  
Y5;Q9H6Y2;O14972;Q9BZV1;P41162;Q9UK11;Q15651;Q9BZE9;Q15059;P53370;Q9HAU0;Q9UBW7;Q9NP  
C6;Q9Y592;P52746;Q7Z794;Q9Y675;Q9H0A9;P43360;Q9H2C0;Q9NQR4;O15117;Q6PI98;Q5T280;Q9H1  
71;Q8WVZ9;Q9H322;Q9ULX6;Q9BXF6;Q96N20;Q4L180;Q9UKJ3;Q9UBL0;Q14657;Q8WV07;Q9NYP9;Q0PN  
E2;Q99618;Q04727;P98169;A2RTX5;Q70EK8;Q9UKJ5;Q2TAL8;Q96NJ6;Q9Y2P8;Q9Y2Q9;Q86V97;Q9NR  
77;Q9Y4K1;Q9NYK5;P82650;Q8WWM7;Q2M3D2;Q6GMV2;Q9HD33;Q92797;Q9P0M2;Q60287;Q15937;P162  
04;Q00193;O75638;Q9NZM5;P84101;Q8NBR6;O15453;A3KN83;Q6RFH5;Q60826;Q9Y5R5;Q92670;P502  
21;Q9H9E1;Q9P0V3;P57055;O94903;Q8N3J9;Q8N2G8;P82664;O14512;Q9BY42;P43358;Q9H9J2;P433  
59;Q9BTE7;O43583;Q9H0U9;Q15935;Q9C0H6;O43900;O75564;Q14264;Q5TEC3;Q9UID3;Q96B26;Q9UJ  
Y1;P98182;Q9H1B7;Q9P2M7;Q96GG9;Q96M91;Q99619;Q96FN9;Q9HCM9;Q8IYX8;P10073;Q9HCI5;P497  
50}
- 25650 Pathogen[ P14079] interacts with 321 human  
partners: {Q9Y3C0;O15255;Q5VV42;Q9H0U9;Q96M91;Q5TGZ0;O15442;O15194;Q9GZN8;Q9BZP3;O755  
56;Q9BUV8;Q9Y4P9;Q9Y2J2;Q96GG9;O76087;Q8N3T6;Q14C87;Q96FN9;Q8NEB7;P09565;Q9BZL1;Q9GZ  
U0;O15225;Q9BVC5;P57088;Q9BTD3;Q9P2X8;Q9GZL8;Q86V97;Q969X6;P02728;Q60826;Q9BTE6;Q7Z7  
94;Q86U38;Q9UID3;P10073;Q9H8M2;Q9NZM5;Q96A33;Q92917;Q5H9L4;Q24JP5;A3KN83;Q8NBR6;Q9H0  
A0;Q8N6L1;Q9UKJ5;Q9BVC6;Q15155;Q9ULX6;P43360;P82664;O15453;O60290;Q5TEC3;O00193;P563  
78;Q5T7W7;Q9BY42;Q02083;A8MXV4;Q9BUW7;P13985;Q92564;Q9P0M2;P43359;Q92545;Q9Y675;Q96I  
76;Q9H171;Q6GMV2;Q13166;Q9NSB4;Q9Y5R5;P52746;Q93052;Q9NPI8;O75564;Q96A73;P47944;Q63H  
K3;Q9BZE9;Q8N5J2;Q99932;O14715;Q9BZD3;Q9BYS1;Q70EK8;Q04118;Q14264;Q8NE00;Q12980;Q018  
04;A2RTX5;Q96N20;Q969T9;Q16891;Q4LE39;O95153;Q60287;A6NNW6;Q9NPC6;Q15059;Q15527;Q6NT  
E8;Q96CP2;Q9UK11;Q9BQ65;P81408;Q9Y6Z2;Q9NV29;Q9BZV1;Q8N0V3;Q93900;Q10571;P18615;Q9UI  
G4;Q96G27;Q86YL5;Q6P2E9;Q96NG5;Q9H0C3;Q9UBW7;Q9Y4H4;O60678;Q8IVB5;Q9NR05;Q9HCI5;Q3SY  
A9;Q03252;Q9P0V3;O94903;P58511;Q9BTE7;Q8IUG1;Q9HCM9;Q9H5X1;Q9Y6Z5;Q8NB25;Q69YN2;O145  
13;Q9BXM8;Q99618;O95671;Q9Y592;Q5SRH9;Q92797;Q9Y421;Q8IZ73;Q9UJ55;Q6PI98;P55081;Q162  
04;P0C7X2;Q9NLD3;Q9ULD5;Q9UBL0;Q9NRL3;Q9H9E1;Q92670;Q8WVZ9;Q15651;Q9BQE9;Q9Y6I8;O151  
17;Q9P0I2;Q9HAU0;Q9H790;Q8IUX1;Q9H7Z3;Q9H2C0;Q14657;O75690;Q14DG7;P30408;P57055;Q130  
66;P82650;Q9BXF6;Q5T6V5;Q9BVG4;Q9UEE9;Q9Y6Z4;Q9NQA3;Q9H2W6;Q53FP2;Q8IYQ7;O14530;Q9BY  
I3;P55808;P84101;O60829;Q9H1B7;O43765;Q9NRY5;Q96J86;O95177;Q9HC47;Q9UKJ3;Q8N2G8;Q9NY  
87;Q9NYP8;P53370;Q9Y2Q9;Q8WV07;Q9P2X3;Q9NYP3;Q8WWM7;O76013;Q15847;Q9Y4X0;O43583;Q5JT  
J3;Q14153;Q8N1D0;Q9Y5U8;Q2TAL8;Q9Y471;Q9UJY1;Q8TCU4;O96002;Q5C9Z4;Q68D10;Q9NYP9;Q9GZ  
P8;Q9P2M7;P98169;P59022;Q9P0W5;Q8WVK2;Q8N3J9;Q9NUM4;A4D263;Q9H9J2;Q9UKR5;Q9GZW5;P236  
10;Q9H3K2;P43358;O14512;Q9H0A9;P49750;P30039;Q9BZF9;Q9BTY7;Q07627;Q9UJJ7;P10163;Q5T0  
11;Q9UII5;Q9C0H6;P59020;Q4V328;Q9NZV5;Q96AN5;Q96B26;Q9H5F2;Q9HD33;Q9HBU9;P41162;Q8WX  
X7;O14972;Q9NQC8;P53672;A5PL33;Q6NVU6;Q5SRD1;Q00765;O75638;Q9Y2P8;P49754;Q9Y4K1;Q0PN  
E2;P58107;P98182;Q9H478;Q9BPZ7;Q96AQ2;P57060;Q8NFP0;P56555;Q9NYK5;Q15935;Q9NR77;Q8IY  
X8;O14879;Q53S33;Q9H6K1;O14523;P10075;O95625;O15234;Q06250;P04280;Q9NQR4;Q9Y3S2;Q9Y5  
M1;Q96EL2;Q9BZW4;Q04727;Q8IXM6;P02729;Q99619;Q9NWW4;Q9Y608;P50221;Q14019;O14524;Q2M3  
D2;Q96NJ6;Q9NPA0;Q9BYG8;Q13296;Q9NUG4;Q53EQ6;Q9H322;Q5T280;Q86TL2;P43362}
- 25651 Pathogen[ P03383] interacts with 203 human  
partners: {O14879;O76087;P43359;Q15935;Q8N5J2;Q9H7Z3;O15234;P84101;Q63HK3;Q8NBR6;Q9BZ  
E7;O95625;Q96EL2;Q9Y6Z5;Q9BYG8;A6NNW6;Q9GZW5;Q9Y2P8;Q9NSB4;Q9Y3C0;O60287;P82664;Q131  
66;Q96M91;P53370;Q15937;P02728;Q96G27;Q9Y5R5;Q9Y675;Q9GZN8;Q04727;Q92670;Q3SYA9;Q9H6  
Y2;Q9BPZ7;Q96BZ8;Q9BZL1;Q96A73;O60290;Q9H2W6;Q96GG9;Q8N0V3;Q9BQ65;O14972;Q9BZF9;Q5SR  
H9;A3KN83;Q5H9L4;Q8N3J9;O95177;Q92797;Q9NYP9;Q6PNE2;Q9BZV1;Q969T9;Q9ULD5;Q9BZE9;Q8WW  
M7;O00193;Q06250;Q9NZM5;Q96N20;Q9GZL8;O75638;Q60826;Q9NWW4;Q9Y592;P0C7X2;Q156  
51;P49754;Q15847;Q7RTU5;Q969X6;O15117;Q6PI98;Q9BXM8;P41162;Q9BTY7;Q4V328;P49750;Q9UK  
11;Q96002;Q99618;Q9UKJ3;P13985;Q9UBW7;Q9Y6Z2;O14530;P52746;P43360;Q9BTE6;Q9H0A9;Q14C  
87;Q9GZP8;Q9BVC6;Q9Y2Q9;Q9Y4K1;Q53EQ6;Q96FN9;Q8WVZ9;Q5JTJ3;Q9BQE9;Q7Z794;Q13066;Q9BX  
F6;Q9H171;P53672;P43358;Q9Y5M1;Q9H322;Q9BUW7;Q9HD33;A2RTX5;P55145;A5PL33;Q14657;Q9HC  
M9;Q9NY87;Q9P2M7;Q86V97;Q68D10;O14513;Q9NR77;Q07627;Q2TAL8;P10073;Q9BVG4;Q9NRY5;O154  
53;Q9P0W5;Q96B26;Q9H0U9;Q12980;Q9Y4H4;Q5T7W7;O60829;Q9NQR4;Q8WVK2;Q9ULX6;Q14264;Q9UK  
J5;Q9HCI5;Q4LE39;O43765;Q5T280;Q14153;Q9NRL3;A4D263;Q5TEC3;Q9NYP3;Q15059;P56555;Q9BV  
C5;Q96NJ6;Q15527;O95153;Q03252;Q9P0V3;Q9H9J2;Q9UII5;P82650;O43583;O95671;Q53S33;Q9UJ  
Y1;P50221;Q9H1B7;Q70EK8;Q8NFP0;O14512;P23610;Q9NPI8;Q9BY42;Q9BYS1;Q9NYP8;O15225;Q9BT  
E7;Q9Y4P9;Q2M3D2;Q9Y421;Q9NPI8;Q8WXX7;Q9Y608;O75564;P59022;Q92917;Q8IUG1;Q9H0A0;P570  
60;Q9UBL0;P18615;P98182;Q5T6V5;Q99619;P57055;Q96NG5;Q5C9Z4;O76013;Q8WV07;Q6P2E9;Q9H5  
F2}
- 25652 Pathogen[ P03410] interacts with 324 human  
partners: {P30039;O60287;Q2M3D2;P49750;Q0PNE2;Q9BVC5;Q9Y2Q9;Q92917;Q5SRD1;Q9HC47;Q9NZ  
M5;P47944;Q9GZP8;Q8IZ73;Q9H6K1;P10768;Q9BZE9;Q92564;O75690;Q9H0C3;Q9UBL0;Q9HD33;A4D2  
63;Q9Y6Z5;Q8NEB7;Q9BTE7;Q9Y3C0;Q9Y675;O15255;O75638;Q8WUX2;Q13296;P59022;Q3SYA9;Q9C0

H6;O15234;Q14C87;Q9BZL1;Q8WXX7;Q8N5J2;Q9NRL3;Q9HCM9;Q969T9;Q9BTE6;P18615;P41162;Q9H0  
U9;Q6PI98;Q8N6L1;P98169;Q6PJE2;Q9BVC6;Q9NPA0;P02729;O96002;Q96M91;Q9BQE9;Q99618;Q9Y4  
P9;Q02083;O76087;Q9GZL8;P98182;Q86TL2;Q96CP2;Q8NFP0;Q15527;Q9UJ55;P56378;Q92670;Q9BZ  
D3;Q4L180;Q9BUW7;Q8N7X4;Q9UII5;Q14264;Q8WV07;P10073;Q10571;Q69YN2;Q9H0A0;A3KN83;Q96A  
33;P50221;Q14019;Q14153;Q8N3J9;Q9BVG4;Q9P0V3;Q5T6V5;Q9BZP3;Q9HAU0;Q9BZE7;Q9BPZ7;P570  
55;P97060;Q9BY42;Q8WVZ9;Q53EQ6;P58107;P13985;Q9UK11;Q92545;P23610;Q5C9Z4;Q14657;Q9Y  
I3;Q9NRY5;Q9NYP9;Q9H5X1;Q15847;Q9H478;P43359;Q9P2X8;P82650;P58511;Q9BUV8;Q8TCU4;Q9NY  
P8;Q86V97;Q9UEE9;Q7Z794;O43583;Q96J86;Q96AN5;O15225;Q15651;Q12980;Q24JP5;O14530;Q9BT  
D3;Q9UJY1;Q9NYK5;Q6GMV2;Q15059;O14972;Q86X76;Q14DG7;Q8WWM7;Q5JTJ3;O00193;Q9NSB4;Q9H3  
22;Q4LE39;Q8IYX8;Q9H9J2;Q9Y4X0;Q9H171;P02812;P52746;Q9NPC6;O60826;Q8WU76;Q5TEC3;Q9UJ  
J7;Q9BZV1;P81408;P82664;Q9H8M2;Q9Y592;Q9RFH5;Q9Y5M1;Q9ULD5;Q5SRH9;Q9H790;Q9Y4H4;Q5T7  
W7;Q5H9L4;Q9Y6Z4;Q9P0M2;A5PL33;Q93052;O14715;Q9NQR4;Q96B26;Q99619;Q8WVK2;O14523;Q6P2  
E9;Q9Y608;Q68D10;Q92797;Q96G27;P43362;Q5T280;Q9BXM8;P53370;Q9Y3S2;Q9NV29;Q9NPI8;Q032  
52;O14513;Q9NWV4;Q96BZ8;Q9Y2J2;P56555;Q9UIG4;Q9P2X3;Q9BXF6;Q9ULX6;O43765;Q06250;Q9Y6  
I8;Q8N2G8;Q04727;Q9UKJ5;Q13066;P02728;Q9H1B7;A8MXV4;P84101;Q9P0W5;Q9NY87;P43365;P497  
54;P87889;Q9Y5U8;Q8N3T6;Q9H7Z3;Q00765;O76013;Q9Y334;Q9Y4K1;O95625;Q96CN7;P09565;Q9NY  
P3;O15117;Q96EL2;Q70EK8;Q7Z3D6;Q9BTY7;Q9Y6Z2;Q9BYG8;Q9BZF9;Q9HCI5;Q9H0A9;Q9Y471;P570  
88;O95671;Q8NBR6;Q99932;Q8IUG1;Q04118;Q9GZN8;Q9H2C0;Q96NG5;P10163;Q07627;Q16204;Q7RT  
U5;Q9H2W6;P43360;Q9UBW7;Q9P2M7;Q9NUG4;Q8N1D0;O15442;O14512;O15453;Q63HK3;Q9H3K2;Q159  
37;Q96AQ2;Q9NQC8;Q6NVU6;Q8NE00;Q9P0I2;P43358;Q9BQ65;O75564;O95153;P55808;O14524;Q168  
91;O60829;Q96N20;O14879;Q86YL5;Q9Y2P8;Q96JP2;Q9BYS1;A2RTX5;Q4V328;Q2TAL8;Q96GG9;Q9H5  
F2;Q8N0V3;Q8IXU6;Q9GZU0;P10075;Q13166;Q96I76;P0C7X2;A6NNW6;Q8IXM6;Q9NR77;Q9BZW4;Q8WW  
59;Q9UKJ3;Q86U38;Q9NQA3;Q9Y421;O94903;Q969X6;O95177;P04280;Q9UID3;Q96A73;Q9H9E1;O602  
90;Q9GZW5;O15194;Q8NB25;Q9H6Y2;P53672;Q96FN9;Q9NRQ5;Q9HBU9;Q53S33;Q96NJ6;O43900;Q9NZ  
V5;Q15935}

25653

Pathogen[ P14075] interacts with 250 human

partners: {Q04727;Q92797;Q9P0V3;Q6P2E9;Q92545;Q15059;O14530;P84101;O15234;O75564;Q062  
50;Q96EL2;P59022;Q99932;Q9NQR4;Q9Y2J2;Q9BVC6;Q14264;Q9NYK5;Q8WV07;Q9UKJ3;Q9H322;Q9NR  
Q5;Q9P0W5;Q9Y5R5;Q9H2C0;Q9NPC6;P0C7X2;Q8N0V3;Q9H0A9;Q9Y2Q9;Q5T6V5;P18615;Q96NJ6;Q96J  
86;Q07627;Q9BVC5;Q4LE39;Q13166;Q9BZD3;Q9NYP3;Q13296;Q96BZ8;Q99619;Q10571;Q9GZW5;Q9GZ  
P8;Q9P2X8;P47944;Q15937;Q9BY42;Q02083;Q96002;Q96Z5;P53672;O76087;Q263D2;Q14C87;Q68D  
10;Q9NSB4;Q9Y6Z4;O95177;P13985;Q96M91;Q8N6L1;Q9NPI8;Q5JTJ3;Q14153;Q9NYP8;Q969T9;Q9UK  
11;Q92917;O95625;Q9HD33;P82650;P49750;O15117;Q9Y4K1;Q53EQ6;Q96FN9;Q5SRH9;O15453;Q9BV  
G4;P04280;P02728;Q9H2W6;Q9P2X3;Q9UJY1;A8MXV4;A3KN83;Q7RTU5;Q12980;Q9H9J2;Q86TL2;Q9H6  
Y2;O94903;Q4V328;P43358;Q9H0A0;Q96AQ2;O75638;P43359;Q9BYI3;Q9H478;Q70EK8;Q86V97;Q9HC  
M9;Q9ULD5;O15225;O43583;P41162;Q15847;Q9H6K1;A5PL33;Q3SYA9;Q9BPZ7;Q5TEC3;Q9NRY5;P563  
78;Q9BTE6;Q92670;Q9Y2P8;O75556;P49754;Q96GG9;O60287;Q2TAL8;O76013;P52746;Q9NRL3;P502  
21;Q13066;Q6PI98;Q8N3J9;P82664;Q9BQ65;Q9BZP3;Q9ULX6;Q9BUW7;O14523;A2RTX5;Q9H7Z3;Q9BY  
G8;Q9Y421;O95671;Q9NYP9;Q9H5F2;Q9BTD3;Q9Y608;Q9NZM5;Q5T7W7;Q14657;A6NNW6;Q9BZL1;P570  
60;O15255;Q8NDX9;Q9UJY1;P56555;Q8IXM6;Q969X6;Q9NR77;Q9Y4P9;O60290;Q9Y3S2;P57055;Q8WV  
Z9;O15442;Q9NWV4;Q96B26;Q9UIG4;Q9Y5M1;Q9H0U9;Q9GZL8;Q8NBR6;Q15935;Q9NV29;Q5H9L4;P533  
70;O60826;Q6NVU6;O14879;Q8WWM7;Q9Y3C0;P02812;Q96A73;Q9BZE7;Q9UEE9;A4D263;Q9BXF6;P981  
82;P58511;Q5C9Z4;Q96N20;Q9BTY7;Q8IUG1;Q8N5J2;Q9BZF9;Q8NE00;Q7Z794;Q8WVK2;Q9BQE9;Q9Y6  
Z2;Q8NFP0;Q9BZV1;Q9P2M7;Q99618;O14512;P23610;O95153;Q9BYS1;Q96NG5;Q9Y592;Q9UII5;Q8WX  
X7;Q9H1B7;Q9BTE7;Q9BXM8;P43360;Q96G27;Q9UKJ5;Q9GZU0;Q63HK3;O14972;Q9UBW7;Q53S33;Q9Y4  
H4;O60829;P10073;Q9H171;Q5T280;O14513;Q9UBL0;Q0PNE2;P09565;Q15651;P81408;Q15527;Q9HC  
I5;O00193;Q9GZN8;Q03252;O43765;O75690;Q9BZE9;Q9NY87;P55808;Q6GMV2;Q9Y675;Q9Y5U8}

25654

Pathogen[ P0C206] interacts with 296 human

partners: {Q9UBW7;Q4L180;Q9NY87;Q9Y3S2;Q96A33;O60829;Q9NQC8;Q9Y5M1;Q9NPI8;Q8N0V3;Q154  
35;Q96002;Q95081;Q2M3D2;Q8NB25;Q14657;Q9GZW5;Q14019;Q9Y4H4;Q15270;Q63HK3;Q8IXM6;Q9H7  
90;P98182;O14530;A8MXV4;Q9GZL8;Q96EL2;Q9NZM5;Q07627;Q86U38;P43358;Q9UII5;P57088;Q9Y5  
U8;Q9BXF6;Q9BVC5;Q9P2X8;O14524;Q9HAU0;Q9H5F2;Q9UJ55;P57060;Q8N2G8;O75638;Q8TCU4;Q9BQ  
65;Q9BTE7;P49754;Q8NBR6;Q9C0H6;O60826;Q99619;Q9UEE9;Q8IWB7;Q6PI98;Q8NFP0;P50221;A2RT  
X5;Q9Y4K1;Q8WXX7;Q9BZP3;O00193;Q9Y6Z5;Q96A73;O14879;Q99618;Q3SYA9;P10073;Q9NYP9;Q53E  
Q6;Q6UW56;O75690;Q04727;Q92670;Q9H9E1;Q9BZE7;Q9H6Y2;P09565;Q96GG9;Q9Y6Z4;P56555;P433  
60;Q7Z794;Q13066;Q9UKJ5;O95671;Q96G27;Q9UBL0;Q9BQE9;Q16891;Q9NRY5;Q9Y592;Q5JTJ3;A6NN  
W6;P10768;Q86YL5;Q9ULX6;Q96BZ8;Q96B26;P43359;Q8IZ73;Q9H6K1;P55145;P57055;Q03252;Q8N3  
J9;Q9BZE9;Q7Z3D6;P02728;O95153;Q9UKJ3;Q5SRD1;P10075;Q9NR77;Q9Y4X0;Q9HD33;Q9UJY1;A5PL  
33;Q9Y421;Q9Y675;A4D263;P23610;Q9H8M2;Q9P0W5;Q9UJY1;Q9Y608;Q9H3K2;Q9H0A9;P43362;Q9Y3  
C0;Q9UK11;Q9NRL3;Q92797;O76013;Q9BTY7;P82664;Q96N20;Q92784;Q13166;Q8WV07;Q15651;P411  
62;Q5T280;Q5T7W7;Q9Y4P9;Q8WW59;Q2TAL8;Q13296;O76087;Q9H4I8;Q92917;Q9BZR9;Q9BUV8;O149  
72;O75564;Q12980;Q969X6;Q9BZV1;Q6RFH5;Q9H322;Q9BZL1;Q92564;P18615;Q9P0M2;Q9BVC6;O439  
00;Q96BR9;Q6P2E9;Q7RTU5;Q8WVZ9;Q9H171;Q9BTE6;Q5TEC3;P53370;Q96JP2;Q4LE39;Q8IYX8;Q9Y5  
R5;Q16204;Q9NQR4;O15225;Q0PNE2;P59022;Q9H7Z3;P30039;Q8N1D0;Q8WU76;Q5H9L4;Q02083;Q5T6  
V5;O15234;O94903;Q5C9Z4;Q9BPZ7;P49750;Q9VWZ2;Q9Y2P8;Q15937;Q9NYP8;Q10H09;O602  
87;Q9ULD5;Q9H2W6;Q14264;Q9BUW7;Q9BVG4;Q9UID3;Q9BYS1;Q8N5J2;Q96M91;P82650;Q9P0V3;Q9HC  
M9;Q9BY42;P53672;Q9Y2Q9;Q96NJ6;P0C7X2;P98169;Q9BYG8;O60678;Q15059;Q9GZN8;Q96FN9;Q9P2  
M7;O95625;Q00765;Q4V328;O15255;Q8WUX2;Q86VF2;Q15847;Q9H9J2;P84101;Q53S33;O15194;Q999  
32;P52746;Q9NSB4;O43583;Q5SRH9;Q9NYK5;O14512;Q9BZF9;Q969T9;Q8TAU0;Q6250;P17889;Q8WW  
M7;O15117;O14513;Q9P2X3;Q9H1B7;O95177;Q9Y6I8;Q9NPC6;A3KN83;Q9BXM8;Q96CP2;Q14153;Q159  
35;Q14DG7;O43765;Q9HCI5;Q8WVK2;Q14C87;Q68D10;O43763;O15442;Q9BYI3;Q9NYP3;Q9Y6Z2;Q930  
52;Q9H5X1;Q9H2C0;Q9H0A0;Q9BZD3;P13985;Q9Y2J2;Q8IUG1;Q9NWV4;Q9HCK0;Q96NG5;Q10571;O602  
90;Q6GMV2;Q86X76;P47944;Q9GZP8;Q86V97;Q15527;Q70EK8;O14715;Q01804}

25655

Pathogen[ P03363] interacts with 239 human

partners: {Q1KMD3;Q96B26;P49754;P82650;Q9Y3C0;Q9HAU0;O60829;Q9UID3;Q9H7Z3;P43360;Q9Y5  
92;O75638;Q92917;Q9NYP9;Q14264;Q9NYP3;Q9BZR9;P82664;Q96EL2;Q96GG9;P10265;Q5C9Z4;Q8WX

X7;Q8N5J2;Q8NOV3;Q9P0V3;Q969X6;P98169;A2RTX5;Q02083;Q9H8M2;Q9Y4H4;Q9NY87;Q9H5F2;Q9GZ  
P8;Q8N3J9;Q96NJ6;Q86VF2;Q14657;P53672;P02728;Q9GZL8;P23610;O43763;Q969T9;Q6UW56;Q6P2  
E9;Q96JP2;Q8TE68;P59022;Q9BYG8;Q9Y2Q9;Q53EQ6;Q9Y2P8;P10768;Q10571;Q9Y5M1;Q14C87;Q9UJ  
Y1;Q2M3D2;Q95671;Q8IVW6;Q4LE39;Q8N2G8;Q95153;Q8WU76;Q9H9J2;Q9UK11;P57060;Q9BXM8;Q9Y4  
P9;Q9HCK0;Q5VWZ2;Q9H322;Q96N20;O00193;Q9NWW4;O43765;Q9BQE9;Q04727;O14879;O94875;Q9GZ  
W5;Q9Y6I7;Q93052;Q9NR77;Q9BTE7;Q9HD33;Q92797;P18615;Q9HCS5;Q14019;Q9H0M2;P50221;Q154  
35;A4D263;Q9Y608;Q9BZF9;Q03252;O60287;P43358;Q15937;O15117;Q16204;Q9H0U9;Q06250;Q3SY  
A9;A3KN83;A6NNW6;Q9P0W5;Q4L180;Q9H4I8;P84101;Q68D10;O76013;Q9BZD3;Q9ULD5;O96002;Q9BZ  
P3;Q96BZ8;Q8WW59;Q9BTE6;O15453;O60826;Q9Y5R5;Q9H2W6;Q9BZV1;Q63HK3;Q15270;Q15847;Q9H9  
E1;Q9Y4K1;P49750;Q9Y6Z5;Q99619;O75564;Q9H2Z4;Q8NBR6;P13985;Q96PQ7;Q96I76;P57055;Q9BZ  
E9;Q9HB31;Q9BQ65;Q8WVZ9;Q9BTY7;Q99618;Q9C0H6;Q15651;Q9H1B7;O14530;Q86V97;Q7Z7M0;Q9NR  
L3;Q9BXF6;Q6FIF0;Q96M91;Q0PNE2;Q5T280;Q96NG5;Q9BUW7;Q7RTU5;Q9H171;Q9BYS1;Q92670;Q9UB  
W7;P98182;Q9UBL0;Q9HCI5;Q8WV07;Q9HCM9;O43583;P41162;Q9UKJ5;Q9H0A9;Q8IYX8;O43900;Q96G  
27;Q9H3K2;Q9BY42;Q9BZL1;Q5T7W7;Q15059;Q8WVK2;Q9Y6Z2;O14972;Q2TAL8;Q9NPI8;Q03828;Q5TE  
C3;O14512;Q9UKJ3;Q96FN9;Q8WXE0;Q8TAU0;Q9H6Y2;O60290;Q9H2C0;Q9NRY5;P0C7X2;Q15935;Q9NP  
C6;O15225;P43359;Q12980;Q96BR9;O95625;Q7Z794;Q00765;Q9Y675;Q9BVG4;Q15527;Q5H9L4;P565  
55;Q9BZE7;Q9P2M7;Q6RFH5;Q96A73;Q5SRH9;Q9BVC5;P52746;Q9ULX6;Q9UII5;Q9Y2J2;Q9NSB4;Q141  
53;Q9NQR4;P58107;Q9NQC8;A5PL33;Q9NZM5;P10073;Q9Y421;Q13166;Q13401;Q6PI98;O15234;P533  
70}

25656 [Cluster 2333]GO:0048260+P biological\_process [name] positive regulation of  
receptor-mediated endocytosis [def] "Any process that activates or increases the  
frequency, rate or extent of receptor mediated endocytosis, the uptake of external  
materials by cells, utilizing receptors to ensure specificity of transport." [GOC  
25657 Pathogen[ Q2Q067] interacts with 3 human partners:{O00291;P61978;P22681}  
25658 Pathogen[ P0C214] interacts with 5 human  
partners:{P22681;P05121;Q9BQI5;Q96G01;O00291}  
25659 Pathogen[ P03346] interacts with 5 human  
partners:{Q96G01;P61978;O00291;P22681;Q9BQI5}  
25660 Pathogen[ Q85601] interacts with 5 human  
partners:{P61978;P22681;Q96G01;P05121;O00291}  
25661 Pathogen[ P14079] interacts with 4 human partners:{O00291;Q9BQI5;Q96G01;P61978}  
25662 Pathogen[ P03383] interacts with 3 human partners:{P61978;O00291;Q9BQI5}  
25663 Pathogen[ P03410] interacts with 5 human  
partners:{P05121;P61978;O00291;Q96G01;Q9BQI5}  
25664 Pathogen[ P14075] interacts with 3 human partners:{Q9BQI5;O00291;P61978}  
25665 Pathogen[ P0C206] interacts with 6 human  
partners:{O00291;P61978;P22681;Q9BQI5;P05121;Q96G01}  
25666 Pathogen[ P03363] interacts with 4 human partners:{P22681;P61978;Q9BQI5;O00291}  
25667 [Cluster 2334]GO:0016558+P biological\_process [name] protein import into peroxisome  
matrix [def] "The import of proteins into the peroxisomal matrix. A peroxisome  
targeting signal (PTS) binds to a soluble receptor protein in the cytosol, and the  
resulting complex then binds to a receptor protein in the peroxisome membrane and is  
imported." [ISBN  
25668 Pathogen[ Q2Q067] interacts with 1 human partners:{O75381}  
25669 Pathogen[ P0C214] interacts with 1 human partners:{O75381}  
25670 Pathogen[ P03346] interacts with 3 human partners:{O75381;P50542;O43933}  
25671 Pathogen[ Q85601] interacts with 2 human partners:{O43933;O75381}  
25672 Pathogen[ P14079] interacts with 4 human partners:{Q9Y5Y5;P50542;Q7Z412;O75381}  
25673 Pathogen[ P03383] interacts with 1 human partners:{O75381}  
25674 Pathogen[ P03410] interacts with 3 human partners:{Q9Y5Y5;O75381;P50542}  
25675 Pathogen[ P14075] interacts with 1 human partners:{O75381}  
25676 Pathogen[ P0C206] interacts with 3 human partners:{O43933;O75381;P50542}  
25677 Pathogen[ P03363] interacts with 2 human partners:{O43933;O75381}  
25678 [Cluster 2335]GO:0055014+P biological\_process [name] atrial cardiac muscle cell  
development [def] "The process whose specific outcome is the progression of an atrial  
cardiac muscle cell over time, from its formation to the mature state. Cardiac muscle  
cells are striated muscle cells that are responsible for heart contraction. The atrium  
is the part of the heart that receives blood into the organ." [GOC  
25679 Pathogen[ Q2Q067] interacts with 1 human partners:{Q14192}  
25680 Pathogen[ P0C214] interacts with 1 human partners:{Q14192}  
25681 Pathogen[ P03346] interacts with 1 human partners:{Q14192}  
25682 Pathogen[ Q85601] interacts with 1 human partners:{Q14192}  
25683 Pathogen[ P14079] interacts with 1 human partners:{Q14192}  
25684 Pathogen[ P03383] interacts with 1 human partners:{Q14192}  
25685 Pathogen[ P03410] interacts with 1 human partners:{Q14192}  
25686 Pathogen[ P14075] interacts with 1 human partners:{Q14192}  
25687 Pathogen[ P0C206] interacts with 1 human partners:{Q14192}  
25688 Pathogen[ P03363] interacts with 1 human partners:{Q14192}  
25689 [Cluster 2336]GO:0030324+P biological\_process [name] lung development [def] "The  
process whose specific outcome is the progression of the lung over time, from its  
formation to the mature structure. In all air-breathing vertebrates the lungs are  
developed from the ventral wall of the oesophagus as a pouch which divides into two  
sacs. In amphibians and many reptiles the lungs retain very nearly this primitive  
sac-like character, but in the higher forms the connection with the esophagus becomes  
elongated into the windpipe and the inner walls of the sacs become more and more  
divided, until, in the mammals, the air spaces become minutely divided into tubes ending

in small air cells, in the walls of which the blood circulates in a fine network of capillaries. In mammals the lungs are more or less divided into lobes, and each lung occupies a separate cavity in the thorax." [GOC

25690 Pathogen[ Q2Q067] interacts with 18 human partners: {P04198;Q63HK5;Q8WW38;Q9UNSL1;P08151;Q53FT3;P39880;P36956;Q02447;P08047;P20719;P29474;P62136;Q15796;Q4LEZ3;Q99814;P49715;Q15750}

25691 Pathogen[ P0C214] interacts with 17 human partners: {P29474;O95633;P46379;Q4LEZ3;Q63HK5;Q53FT3;Q8WW38;Q9UNSL1;P62136;Q15796;P39880;Q15750;Q02447;Q99814;P08151;P08047;P04198}

25692 Pathogen[ P03346] interacts with 23 human partners: {P62136;O15522;P29474;P36956;Q8WW38;Q15796;Q9UNSL1;Q63HK5;P49715;P20719;P08047;Q4LEZ3;P46379;Q99814;Q15750;Q14190;P04198;Q99593;P39880;Q02447;O95633;Q53FT3;P08151}

25693 Pathogen[ Q85601] interacts with 18 human partners: {P08151;Q53FT3;Q15750;Q8WW38;P46379;Q99814;P08047;P62136;P36956;Q02447;P29474;P49715;Q4LEZ3;P04198;P39880;Q63HK5;Q15796;Q9UNSL1}

25694 Pathogen[ P14079] interacts with 16 human partners: {P08151;Q99814;O43597;P39880;P62136;Q02447;Q15750;Q53FT3;P49715;Q4LEZ3;Q13510;P04198;Q63HK5;Q9UNSL1;P36956;Q8WW38}

25695 Pathogen[ P03383] interacts with 12 human partners: {Q9UNSL1;P08047;P29474;Q8WW38;P62136;Q02447;P04198;P39880;Q15796;Q53FT3;Q4LEZ3;Q15750}

25696 Pathogen[ P03410] interacts with 17 human partners: {P36956;O43597;Q02447;Q99814;Q15750;Q4LEZ3;P62136;Q53FT3;Q8WW38;Q13510;P29474;P39880;Q9UNSL1;P08047;Q63HK5;Q15796;P04198}

25697 Pathogen[ P14075] interacts with 13 human partners: {P29474;Q53FT3;Q15750;Q13510;Q8WW38;P04198;Q15796;P39880;P62136;Q4LEZ3;Q02447;Q9UNSL1;P08047}

25698 Pathogen[ P0C206] interacts with 21 human partners: {Q9UNSL1;O95633;Q8WW38;P49715;P36956;Q15796;Q63HK5;P08047;Q02447;P04198;O43597;P29474;Q4LEZ3;Q15750;Q99814;P39880;P20719;P08151;P46379;Q53FT3;P62136}

25699 Pathogen[ P03363] interacts with 18 human partners: {Q53FT3;P46379;P29474;P62136;P08151;Q02447;P20719;P04198;Q15750;Q9UNSL1;Q15796;Q99814;Q4LEZ3;Q63HK5;Q8WW38;P08047;O15522;P39880}

25700 [Cluster 2337]GO:0060379+P biological\_process [name] cardiac muscle cell myoblast differentiation [def] "The process in which a relatively unspecialized cell acquires specialized features of a cardiac myoblast. A cardiac myoblast is a precursor cell that has been committed to a cardiac muscle cell fate but retains the ability to divide and proliferate throughout life." [GOC

25701 Pathogen[ Q2Q067] interacts with 1 human partners: {Q13127}

25702 Pathogen[ P0C214] interacts with 1 human partners: {Q13127}

25703 Pathogen[ P03346] interacts with 1 human partners: {Q13127}

25704 Pathogen[ Q85601] interacts with 1 human partners: {Q13127}

25705 Pathogen[ P14079] interacts with 1 human partners: {Q13127}

25706 Pathogen[ P03383] interacts with 1 human partners: {Q13127}

25707 Pathogen[ P03410] interacts with 1 human partners: {Q13127}

25708 Pathogen[ P14075] interacts with 1 human partners: {Q13127}

25709 Pathogen[ P0C206] interacts with 1 human partners: {Q13127}

25710 Pathogen[ P03363] interacts with 1 human partners: {Q13127}

25711 [Cluster 2338]GO:0070932+P biological\_process [name] histone H3 deacetylation [def] "The modification of histone H3 by the removal of one or more acetyl groups." [GOC

25712 Pathogen[ Q2Q067] interacts with 13 human partners: {P56524;Q9BY41;Q9UKV0;Q13547;O15379;Q9UQL6;Q969S8;Q96DB2;Q92769;P28324;Q9H4L7;Q8WUI4;Q9NRC8}

25713 Pathogen[ P0C214] interacts with 13 human partners: {Q13547;Q969S8;Q96DB2;P56524;Q9H4L7;Q92769;P28324;Q9UKV0;O15379;Q9NRC8;Q8WUI4;Q9UQL6;Q9BY41}

25714 Pathogen[ P03346] interacts with 13 human partners: {Q969S8;P28324;Q96DB2;O15379;P56524;Q92769;Q13547;Q9BY41;Q8WUI4;Q9UKV0;Q9NRC8;Q9UQL6;Q9H4L7}

25715 Pathogen[ Q85601] interacts with 13 human partners: {Q969S8;Q9NRC8;Q9UKV0;Q96DB2;Q9BY41;Q9UQL6;Q92769;Q9H4L7;P56524;O15379;Q13547;Q8WUI4;P28324}

25716 Pathogen[ P14079] interacts with 11 human partners: {Q9UQL6;O15379;Q96DB2;Q9H4L7;Q969S8;Q8WUI4;Q9UKV0;Q92769;Q9BY41;P56524;Q9NRC8}

25717 Pathogen[ P03383] interacts with 11 human partners: {Q9UQL6;P28324;Q92769;O15379;Q13547;Q9BY41;Q9UKV0;P56524;Q8WUI4;Q969S8;Q9NRC8}

25718 Pathogen[ P03410] interacts with 13 human partners: {Q9UKV0;Q9H4L7;Q9BY41;P28324;Q8WUI4;Q9UQL6;Q969S8;Q92769;O15379;P56524;Q13547;Q9NRC8;Q96DB2}

25719 Pathogen[ P14075] interacts with 11 human partners: {Q9BY41;Q969S8;P56524;Q9UKV0;Q13547;P28324;Q92769;O15379;Q9NRC8;Q9UQL6;Q8WUI4}

25720 Pathogen[ P0C206] interacts with 13 human

partners:{Q9H4L7;Q92769;Q96DB2;Q9UKV0;Q13547;O15379;Q8WUI4;P28324;Q9NRC8;Q9BY41;P565  
24;Q969S8;Q9UQL6}

25721 Pathogen[ P03363] interacts with 10 human  
partners:{Q9BY41;Q9H4L7;O15379;Q969S8;Q9UQL6;Q9UKV0;Q13547;Q8WUI4;Q9NRC8;P28324}

25722 [Cluster 2339]GO:0050810+P biological\_process [name] regulation of steroid  
biosynthetic process [def] "Any process that modulates the frequency, rate or extent  
of the chemical reactions and pathways resulting in the formation of steroids, compounds  
with a 1,2,cyclopentanoperhydrophenanthrene nucleus." [GOC

25723 Pathogen[ Q2Q067] interacts with 1 human partners:{Q15637}

25724 Pathogen[ P0C214] interacts with 1 human partners:{Q15637}

25725 Pathogen[ P03346] interacts with 2 human partners:{Q15637;Q13285}

25726 Pathogen[ Q85601] interacts with 1 human partners:{Q15637}

25727 Pathogen[ P14079] interacts with 1 human partners:{Q15637}

25728 Pathogen[ P03383] interacts with 1 human partners:{Q15637}

25729 Pathogen[ P03410] interacts with 1 human partners:{Q15637}

25730 Pathogen[ P14075] interacts with 1 human partners:{Q15637}

25731 Pathogen[ P0C206] interacts with 1 human partners:{Q15637}

25732 Pathogen[ P03363] interacts with 1 human partners:{Q15637}

25733 [Cluster 2340]GO:0042769+P biological\_process [name] DNA damage response, detection of  
DNA damage [def] "The series of events required to receive a stimulus indicating DNA  
damage has occurred and convert it to a molecular signal." [GOC

25734 Pathogen[ Q2Q067] interacts with 5 human  
partners:{P82933;P82912;Q9BYN8;P09874;P82673}

25735 Pathogen[ P0C214] interacts with 5 human  
partners:{P82912;Q9BYN8;P82673;P82933;P09874}

25736 Pathogen[ P03346] interacts with 6 human  
partners:{Q06945;P82912;P82933;P09874;Q9BYN8;P82673}

25737 Pathogen[ Q85601] interacts with 4 human partners:{P09874;P82912;P82933;Q9BYN8}

25738 Pathogen[ P14079] interacts with 5 human  
partners:{P09874;P82933;P82912;Q9BYN8;P82673}

25739 Pathogen[ P03383] interacts with 4 human partners:{P82912;P82933;Q9BYN8;P09874}

25740 Pathogen[ P03410] interacts with 5 human  
partners:{Q9BYN8;P09874;P82673;P82912;P82933}

25741 Pathogen[ P14075] interacts with 4 human partners:{P82912;Q9BYN8;P82933;P09874}

25742 Pathogen[ P0C206] interacts with 5 human  
partners:{P09874;P82673;Q9BYN8;P82933;P82912}

25743 Pathogen[ P03363] interacts with 4 human partners:{P82912;P82933;P09874;Q9BYN8}

25744 [Cluster 2341]GO:0090307+P biological\_process [name] spindle assembly involved in  
mitosis [def] "The aggregation, arrangement and bonding together of a set of components  
to form the spindle that contributes to the process of mitosis." [GOC

25745 Pathogen[ Q2Q067] interacts with 5 human  
partners:{Q8N0Z3;O96017;O75665;P10244;P61586}

25746 Pathogen[ P0C214] interacts with 5 human  
partners:{P61586;P10244;O96017;O75665;Q8N0Z3}

25747 Pathogen[ P03346] interacts with 5 human  
partners:{P10244;O96017;Q8N0Z3;O75665;P61586}

25748 Pathogen[ Q85601] interacts with 5 human  
partners:{O96017;O75665;P10244;P61586;Q8N0Z3}

25749 Pathogen[ P14079] interacts with 6 human  
partners:{P10244;Q587J8;O15066;P61586;Q8N0Z3;O75665}

25750 Pathogen[ P03383] interacts with 5 human  
partners:{P10244;Q8N0Z3;P61586;O75665;O96017}

25751 Pathogen[ P03410] interacts with 6 human  
partners:{O75665;Q8N0Z3;P10244;P61586;O96017;Q587J8}

25752 Pathogen[ P14075] interacts with 5 human  
partners:{P10244;O96017;P61586;O75665;Q8N0Z3}

25753 Pathogen[ P0C206] interacts with 5 human  
partners:{O96017;P61586;P10244;O75665;Q8N0Z3}

25754 Pathogen[ P03363] interacts with 5 human  
partners:{O96017;P10244;Q8N0Z3;O15066;O75665}

25755 [Cluster 2342]GO:0045744+P biological\_process [name] negative regulation of G-protein  
coupled receptor protein signaling pathway [def] "Any process that stops, prevents, or  
reduces the frequency, rate or extent of G-protein coupled receptor protein signaling  
pathway activity." [GOC

25756 Pathogen[ Q2Q067] interacts with 2 human partners:{P41220;O60291}

25757 Pathogen[ P0C214] interacts with 2 human partners:{P41220;O60291}

25758 Pathogen[ P03346] interacts with 3 human partners:{Q68CZ1;O60291;P41220}

25759 Pathogen[ Q85601] interacts with 2 human partners:{P41220;O60291}

25760 Pathogen[ P14079] interacts with 2 human partners:{Q68CZ1;P41220}

25761 Pathogen[ P03383] interacts with 1 human partners:{P41220}

25762 Pathogen[ P03410] interacts with 3 human partners:{P41220;O60291;Q68CZ1}

25763 Pathogen[ P14075] interacts with 1 human partners:{P41220}

25764 Pathogen[ P0C206] interacts with 2 human partners:{O60291;P41220}

25765 Pathogen[ P03363] interacts with 2 human partners:{O60291;P41220}

25766 [Cluster 2343]GO:0070936+P biological\_process [name] protein K48-linked ubiquitination  
[def] "A protein ubiquitination process in which a polymer of ubiquitin, formed by

linkages between lysine residues at position 48 of the ubiquitin monomers, is added to a protein. K48-linked ubiquitination targets the substrate protein for degradation." [GOC

25767 Pathogen[ Q2Q067] interacts with 25 human  
partners: {Q95376;Q96J02;Q9NS56;P62837;P53804;O60260;P49427;O00762;Q9Y2X8;P60604;P51965;P61077;P63146;P78317;Q5TA31;Q9NPD8;P51668;Q9NTX7;Q96FA3;O76064;Q9NWF9;P49459;Q05086;P62256;Q9Y252}

25768 Pathogen[ P0C214] interacts with 29 human  
partners: {Q05086;Q96J02;O00762;P49427;Q9NS56;Q96FA3;Q9NTX7;P49459;Q969T4;P51965;P78317;Q9NWF9;P61077;P62253;P61086;Q9Y2X8;Q95376;P53804;Q9Y252;Q5TA31;O60260;Q712K3;P62256;P51668;O76064;Q9NPD8;Q96LR5;P63146;P60604}

25769 Pathogen[ P03346] interacts with 25 human  
partners: {Q96J02;O76064;Q9NWF9;O95376;P49427;Q9NTX7;P49459;Q9Y2X8;Q5TA31;P51668;P61077;Q96FA3;Q9NS56;P60604;P51965;P63146;O00762;P62837;Q9NPD8;P78317;O60260;Q05086;P62256;P53804;Q9Y252}

25770 Pathogen[ Q85601] interacts with 29 human  
partners: {Q96J02;P78317;P62253;Q9NS56;P63146;P49427;Q9Y2X8;Q969T4;Q9NWF9;Q9NPD8;Q5TA31;P51668;Q96LR5;P61077;Q96FA3;O76064;P51965;P61086;O00762;Q9NTX7;P49459;O95376;O60260;Q9Y252;P62837;Q05086;P62256;P53804;P60604}

25771 Pathogen[ P14079] interacts with 20 human  
partners: {O60260;P53804;P51965;Q5TA31;Q9NPD8;P60604;P61077;Q96FA3;P62256;P51668;Q9NWF9;P49459;Q9NS56;Q96J02;Q9Y2X8;P49427;P78317;P62837;O00762;P63146}

25772 Pathogen[ P03383] interacts with 21 human  
partners: {P53804;P51965;P49427;Q9Y2X8;O00762;Q9NTX7;P78317;P61077;O60260;P60604;Q5TA31;O95376;P62837;Q9Y252;Q96FA3;P49459;Q9NPD8;P62256;P63146;Q9NWF9;P51668}

25773 Pathogen[ P03410] interacts with 18 human  
partners: {P49427;Q9NWF9;P51965;Q96FA3;P49459;Q5TA31;O60260;P62256;P78317;P63146;Q9Y2X8;P51668;Q9NPD8;O00762;P60604;P53804;P61077;P62837}

25774 Pathogen[ P14075] interacts with 21 human  
partners: {P53804;P60604;Q9NTX7;P62837;P49427;Q9Y252;P49459;P51965;Q9Y2X8;P61077;Q9NPD8;Q9NWF9;O00762;Q96FA3;P78317;O95376;P62256;P63146;Q5TA31;P51668;O60260}

25775 Pathogen[ P0C206] interacts with 30 human  
partners: {Q9Y2X8;Q9NS56;Q9NPD8;P62253;O95376;Q05086;Q96J02;Q9NWF9;Q96LR5;P62837;P53804;P78317;P49427;Q5TA31;Q712K3;P51965;P60604;P49459;O60260;P62256;Q969T4;O00762;Q96FA3;P61077;P61086;Q9NTX7;Q9Y252;O76064;P51668;P63146}

25776 Pathogen[ P03363] interacts with 22 human  
partners: {Q95376;Q9NWF9;Q9Y252;P51965;P60604;P49459;O00762;Q9NTX7;P78317;P63146;P49427;Q05086;Q96FA3;P62256;Q969T4;P51668;Q9NPD8;Q5TA31;P53804;P61077;Q9Y2X8;P62837}

25777 [Cluster 2344]GO:0006261+P biological\_process [name] DNA-dependent DNA replication [def] "A DNA replication process that uses parental DNA as a template for the DNA-dependent DNA polymerases that synthesize the new strands." [GOC

25778 Pathogen[ Q2Q067] interacts with 16 human  
partners: {Q15054;Q86UA6;P27694;P49005;P11388;Q00059;P06746;P15927;P56282;Q9HCU8;Q9NRL2;P54098;Q9UHN1;P35251;O14519;Q9BTE3}

25779 Pathogen[ P0C214] interacts with 16 human  
partners: {Q9NRL2;P06746;P54098;P35251;P49005;Q9HCU8;Q9BTE3;Q00059;P15927;O14519;P11388;Q15054;P27694;Q86UA6;P56282;Q9UHN1}

25780 Pathogen[ P03346] interacts with 16 human  
partners: {Q9HCU8;P54098;P11388;P27694;Q00059;P56282;Q9UHN1;P49005;Q9NRL2;P15927;Q86UA6;P35251;P06746;O14519;Q9BTE3;Q15054}

25781 Pathogen[ Q85601] interacts with 16 human  
partners: {Q9BTE3;P56282;Q86UA6;Q00059;P49005;O14519;Q15054;P27694;P54098;P15927;P35251;P11388;Q9NRL2;Q9HCU8;P06746;Q9UHN1}

25782 Pathogen[ P14079] interacts with 16 human  
partners: {O14519;P11388;Q9NRL2;P49005;Q9HCU8;Q9BTE3;Q15054;Q00059;P56282;P35251;Q86UA6;P06746;P15927;P27694;P54098;Q9UHN1}

25783 Pathogen[ P03383] interacts with 15 human  
partners: {Q86UA6;O14519;Q9UHN1;P06746;Q9HCU8;P27694;Q9BTE3;Q00059;P49005;P56282;P15927;P54098;Q15054;Q9NRL2;P35251}

25784 Pathogen[ P03410] interacts with 16 human  
partners: {Q9BTE3;Q00059;Q86UA6;P06746;P56282;P35251;Q9NRL2;Q15054;P11388;O14519;P49005;P27694;P15927;Q9UHN1;P54098;Q9HCU8}

25785 Pathogen[ P14075] interacts with 15 human  
partners: {Q00059;P54098;Q9NRL2;P06746;P49005;P15927;Q9BTE3;O14519;P35251;Q15054;P27694;Q9UHN1;Q86UA6;Q9HCU8;P56282}

25786 Pathogen[ P0C206] interacts with 15 human  
partners: {Q9BTE3;Q9UHN1;P35251;Q9HCU8;P06746;P54098;Q9NRL2;P49005;O14519;Q15054;P56282;P27694;P11388;P15927;Q00059}

25787 Pathogen[ P03363] interacts with 14 human  
partners: {P27694;Q9NRL2;Q9BTE3;P35251;P49005;P15927;P54098;Q86UA6;Q9HCU8;P06746;Q00059;Q15054;O14519;Q9UHN1}

25788 [Cluster 2345]GO:2000121+P biological\_process [name] regulation of removal of superoxide radicals [def] "Any process that modulates the frequency, rate or extent of removal of superoxide radicals." [GOC

25789 Pathogen[ Q2Q067] interacts with 1 human partners: {Q16236}

25790 Pathogen[ P0C214] interacts with 1 human partners: {Q16236}

25791 Pathogen[ P03346] interacts with 1 human partners: {Q16236}

25792 Pathogen[ Q85601] interacts with 1 human partners:{Q16236}  
25793 Pathogen[ P14079] interacts with 1 human partners:{Q16236}  
25794 Pathogen[ P03383] interacts with 1 human partners:{Q16236}  
25795 Pathogen[ P03410] interacts with 1 human partners:{Q16236}  
25796 Pathogen[ P14075] interacts with 1 human partners:{Q16236}  
25797 Pathogen[ P0C206] interacts with 1 human partners:{Q16236}  
25798 Pathogen[ P03363] interacts with 1 human partners:{Q16236}  
25799 [Cluster 2346]GO:0007267+P biological\_process [name] cell-cell signaling [def] "Any process that mediates the transfer of information from one cell to another." [GOC  
25800 Pathogen[ Q2Q067] interacts with 16 human partners:{Q13118;O14786;Q15398;Q96B97;O95886;Q9NR48;O75896;Q9P1A6;Q13123;P15976;Q92754;Q12904;Q16621;P10599;O75791;O14490}  
25801 Pathogen[ P0C214] interacts with 19 human partners:{O14490;O14786;Q12904;O75896;P62993;Q16621;Q9P1A6;O95989;Q92754;Q9Y2H0;Q15398;Q9H0E2;O95886;P10599;Q9NR48;O75791;Q13123;P43490;Q96B97}  
25802 Pathogen[ P03346] interacts with 28 human partners:{Q13588;O14490;Q16621;Q96B97;Q7RTS1;P06401;P62993;Q15942;P55196;Q9H0E2;Q92754;O75896;Q12904;Q15398;Q9Y2H0;P15976;Q13118;O95886;Q13123;Q9H2C1;Q99593;P10599;Q9NR48;Q13285;O14786;Q9P1A6;Q9HBU1;O75791}  
25803 Pathogen[ Q85601] interacts with 17 human partners:{O14490;P62993;Q92754;Q15398;P15976;Q16621;Q9NR48;O95989;Q9P1A6;O14786;P10599;Q13123;Q15942;Q96B97;Q13118;O95886;O75791}  
25804 Pathogen[ P14079] interacts with 25 human partners:{P01215;Q13118;P20809;O75896;P20396;P43490;P15976;Q96B97;Q9Y2H0;O75791;Q7RTS1;O95989;P13232;Q16621;Q92754;P62993;P10599;O95886;Q9P1A6;Q12904;Q9H0E2;O14490;Q15942;Q15398;Q13123}  
25805 Pathogen[ P03383] interacts with 13 human partners:{Q9P1A6;Q12904;O75791;O75896;O95886;O14490;P10599;Q16621;Q13123;Q92754;P01215;O95989;Q9Y2H0}  
25806 Pathogen[ P03410] interacts with 27 human partners:{Q9P1A6;O14786;P10599;Q15398;Q13445;Q9Y2H0;P20809;Q7RTS1;O14490;P01215;Q12904;P43490;Q15942;Q16621;O95989;Q9H0E2;Q13118;Q96B97;O95886;Q13123;P62993;O75896;P15976;Q92754;O75791;P13232;P20396}  
25807 Pathogen[ P14075] interacts with 14 human partners:{O75791;O95886;Q92754;Q12904;O14490;Q13123;O75896;Q9P1A6;P20809;Q9Y2H0;Q16621;P01215;O95989;P10599}  
25808 Pathogen[ P0C206] interacts with 28 human partners:{P06401;Q96B97;O95886;P43490;O75896;P15976;O75791;Q13123;P62993;O14786;Q92754;O95989;Q9Y2H0;Q9H0E2;O14490;Q9NR48;P55196;Q9H2C1;P01215;Q15942;P20809;Q16621;P10599;P20396;Q13118;Q15398;Q9P1A6;Q12904}  
25809 Pathogen[ P03363] interacts with 17 human partners:{Q7RTS1;O14786;Q96B97;Q15398;Q16621;O75791;Q13588;Q13123;Q9H0E2;Q9NR48;O95886;Q9P1A6;O14490;Q15942;Q9HBU1;Q13118;Q92754}  
25810 [Cluster 2347]GO:0045599+P biological\_process [name] negative regulation of fat cell differentiation [def] "Any process that stops, prevents, or reduces the frequency, rate or extent of adipocyte differentiation." [GOC  
25811 Pathogen[ Q2Q067] interacts with 10 human partners:{Q8WW38;P23769;P35548;Q9GZV5;Q8IX07;Q96RU7;P47928;Q8WYK2;Q15834;Q8IXJ9}  
25812 Pathogen[ P0C214] interacts with 9 human partners:{P23769;Q9GZV5;Q15834;Q8IXJ9;P47928;Q8WW38;Q8IX07;Q96RU7;P35548}  
25813 Pathogen[ P03346] interacts with 11 human partners:{Q15834;P35548;Q8WW38;Q9GZV5;P23769;Q8IX07;Q12778;Q96RU7;Q8IXJ9;Q8WYK2;P47928}  
25814 Pathogen[ Q85601] interacts with 10 human partners:{Q15834;Q8WW38;P23769;Q8IXJ9;Q9GZV5;P35548;Q8IX07;Q96RU7;Q8WYK2;P47928}  
25815 Pathogen[ P14079] interacts with 11 human partners:{Q8WYK2;Q9GZV5;Q8IXJ9;O43294;Q8IX07;Q15834;Q96RU7;P23769;Q8WW38;P47928;O15503}  
25816 Pathogen[ P03383] interacts with 8 human partners:{Q8IXJ9;Q8WW38;P23769;P35548;Q96RU7;P47928;Q9GZV5;Q15834}  
25817 Pathogen[ P03410] interacts with 12 human partners:{Q8WYK2;O43294;Q8WW38;Q9GZV5;P35548;Q8IX07;Q8IXJ9;P47928;Q15834;Q96RU7;P23769;O15503}  
25818 Pathogen[ P14075] interacts with 8 human partners:{Q9GZV5;Q8IXJ9;P23769;P35548;P47928;Q8WW38;Q15834;Q96RU7}  
25819 Pathogen[ P0C206] interacts with 11 human partners:{Q8WW38;Q8WYK2;Q96RU7;Q9GZV5;Q8IXJ9;P35548;Q15834;O43294;P23769;Q8IX07;P47928}  
25820 Pathogen[ P03363] interacts with 7 human partners:{Q15834;Q8IXJ9;P35548;Q8WYK2;Q9GZV5;P47928;Q8WW38}  
25821 [Cluster 2348]GO:0051149+P biological\_process [name] positive regulation of muscle cell differentiation [def] "Any process that activates or increases the frequency, rate or extent of muscle cell differentiation." [CL  
25822 Pathogen[ Q2Q067] interacts with 10 human partners:{Q92585;Q12982;P13349;P63241;P15172;P60953;P15923;Q15759;P23409;Q02078}  
25823 Pathogen[ P0C214] interacts with 9 human

25824 partners:{Q92585;P13349;P15172;P60953;P63241;Q02078;P15923;Q12982;Q15759}  
Pathogen[ P03346] interacts with 12 human  
partners:{Q92585;Q02078;P13349;P15923;P15172;P23409;P15173;P60953;P63241;Q9BWF3;Q15759;Q12982}

25825 Pathogen[ Q85601] interacts with 10 human  
partners:{Q92585;Q02078;P15172;P13349;Q12982;P63241;P23409;P15923;Q15759;P60953}

25826 Pathogen[ P14079] interacts with 10 human  
partners:{Q12982;Q02078;Q06413;P13349;P23409;P52564;P15923;Q15759;P63241;Q92585}

25827 Pathogen[ P03383] interacts with 7 human  
partners:{Q92585;P15172;P60953;P15923;P63241;Q15759;Q02078}

25828 Pathogen[ P03410] interacts with 8 human  
partners:{P23409;P15923;Q92585;P13349;P60953;Q12982;Q02078;P63241}

25829 Pathogen[ P14075] interacts with 7 human  
partners:{P60953;Q92585;Q15759;P15172;P63241;P15923;Q02078}

25830 Pathogen[ P0C206] interacts with 10 human  
partners:{Q12982;Q02078;P23409;P13349;P15923;P60953;P63241;P15172;Q15759;Q92585}

25831 Pathogen[ P03363] interacts with 10 human  
partners:{Q9BWF3;P13349;P15923;P63241;P23409;P15172;P60953;Q12982;Q92585;Q02078}

25832 [Cluster 2349]GO:0019255+P biological\_process [name] glucose 1-phosphate metabolic process [def] "The chemical reactions and pathways involving glucose 1-phosphate, a monophosphorylated derivative of glucose with the phosphate group attached to C-1." [GOC

25833 Pathogen[ Q2Q067] interacts with 1 human partners:{Q16851}

25834 Pathogen[ P0C214] interacts with 1 human partners:{Q16851}

25835 Pathogen[ P03346] interacts with 1 human partners:{Q16851}

25836 Pathogen[ Q85601] interacts with 1 human partners:{Q16851}

25837 Pathogen[ P14079] interacts with 1 human partners:{Q16851}

25838 Pathogen[ P03383] interacts with 1 human partners:{Q16851}

25839 Pathogen[ P03410] interacts with 1 human partners:{Q16851}

25840 Pathogen[ P14075] interacts with 1 human partners:{Q16851}

25841 Pathogen[ P0C206] interacts with 1 human partners:{Q16851}

25842 Pathogen[ P03363] interacts with 1 human partners:{Q16851}

25843 [Cluster 2350]GO:0010870+P biological\_process [name] positive regulation of receptor biosynthetic process [def] "Any process that increases the frequency or rate of receptor biosynthesis. Receptor biosynthesis is the collection of chemical reactions and pathways resulting in the formation of a receptor molecule, a macromolecule that undergoes combination with a hormone, neurotransmitter, drug or intracellular messenger to initiate a change in cell function." [GOC

25844 Pathogen[ Q2Q067] interacts with 3 human partners:{Q13547;P20719;Q92769}

25845 Pathogen[ P0C214] interacts with 2 human partners:{Q13547;Q92769}

25846 Pathogen[ P03346] interacts with 3 human partners:{P20719;Q92769;Q13547}

25847 Pathogen[ Q85601] interacts with 2 human partners:{Q92769;Q13547}

25848 Pathogen[ P14079] interacts with 1 human partners:{Q92769}

25849 Pathogen[ P03383] interacts with 2 human partners:{Q92769;Q13547}

25850 Pathogen[ P03410] interacts with 2 human partners:{Q92769;Q13547}

25851 Pathogen[ P14075] interacts with 2 human partners:{Q13547;Q92769}

25852 Pathogen[ P0C206] interacts with 3 human partners:{Q92769;Q13547;P20719}

25853 Pathogen[ P03363] interacts with 2 human partners:{P20719;Q13547}

25854 [Cluster 2351]GO:0044209+P biological\_process [name] AMP salvage [def] "The chemical reactions and pathways resulting in the formation of adenosine monophosphate (AMP) from derivatives of it (either adenine, ADP or adenosine 3',5'-bisphosphate) without de novo synthesis." [GOC

25855 Pathogen[ Q2Q067] interacts with 1 human partners:{P07741}

25856 Pathogen[ P0C214] interacts with 1 human partners:{P07741}

25857 Pathogen[ P03346] interacts with 1 human partners:{P07741}

25858 Pathogen[ Q85601] interacts with 1 human partners:{P07741}

25859 Pathogen[ P14079] interacts with 1 human partners:{P07741}

25860 Pathogen[ P03383] interacts with 1 human partners:{P07741}

25861 Pathogen[ P03410] interacts with 1 human partners:{P07741}

25862 Pathogen[ P14075] interacts with 1 human partners:{P07741}

25863 Pathogen[ P0C206] interacts with 1 human partners:{P07741}

25864 Pathogen[ P03363] interacts with 1 human partners:{P07741}

25865 [Cluster 2352]GO:0007398+P biological\_process [name] ectoderm development [def] "The process whose specific outcome is the progression of the ectoderm over time, from its formation to the mature structure. In animal embryos, the ectoderm is the outer germ layer of the embryo, formed during gastrulation." [GOC

25866 Pathogen[ Q2Q067] interacts with 6 human  
partners:{P02538;Q8N7J2;Q9UKW6;Q8TE85;P04259;Q13105}

25867 Pathogen[ P0C214] interacts with 7 human  
partners:{Q9UKW6;P02538;Q9HCE7;Q8TE85;P04259;Q8N7J2;Q13105}

25868 Pathogen[ P03346] interacts with 7 human  
partners:{P02538;Q8N7J2;Q8TE85;Q13105;P04259;Q9UKW6;Q9UIW0}

25869 Pathogen[ Q85601] interacts with 6 human  
partners:{Q8TE85;P02538;P04259;Q9UKW6;Q8N7J2;Q13105}

25870 Pathogen[ P14079] interacts with 5 human  
partners:{Q8TE85;Q13105;Q8N7J2;P04259;Q9UKW6}

25871 Pathogen[ P03383] interacts with 6 human



25872 partners:{Q9UKW6;Q8TE85;Q13105;Q8N7J2;P02538;P04259}  
Pathogen[ P03410] interacts with 6 human

25873 partners:{P02538;Q9UKW6;Q8TE85;P04259;Q8N7J2;Q13105}  
Pathogen[ P14075] interacts with 6 human

25874 partners:{Q13105;Q8TE85;Q8N7J2;P04259;Q9UKW6;P02538}  
Pathogen[ P0C206] interacts with 6 human

25875 partners:{Q8TE85;P02538;Q8N7J2;Q9UKW6;P04259;Q13105}  
Pathogen[ P03363] interacts with 7 human

25876 partners:{Q9UIW0;Q13105;P02538;Q9UKW6;Q8TE85;P04259;Q8N7J2}  
[Cluster 2353]GO:0006990+P biological\_process [name] positive regulation of transcription from RNA polymerase II promoter involved in unfolded protein response [def] "The activation of genes whose promoters contain a specific sequence elements such as the unfolded protein response element (UPRE\_ consensus CAGCGTG) or the ER stress-response element (ERSE\_ CCAAN(N)9CCACG), as a result of signaling via the unfolded protein response." [GOC

25877 Pathogen[ Q2Q067] interacts with 1 human partners:{P18850}  
25878 Pathogen[ P0C214] interacts with 1 human partners:{P18850}  
25879 Pathogen[ P03346] interacts with 1 human partners:{P18850}  
25880 Pathogen[ Q85601] interacts with 1 human partners:{P18850}  
25881 Pathogen[ P14079] interacts with 1 human partners:{P18850}  
25882 Pathogen[ P03383] interacts with 1 human partners:{P18850}  
25883 Pathogen[ P03410] interacts with 1 human partners:{P18850}  
25884 Pathogen[ P14075] interacts with 1 human partners:{P18850}  
25885 Pathogen[ P0C206] interacts with 1 human partners:{P18850}  
25886 Pathogen[ P03363] interacts with 1 human partners:{P18850}

25887 [Cluster 2354]GO:0043200+P biological\_process [name] response to amino acid stimulus [def] "Any process that results in a change in state or activity of a cell or an organism (in terms of movement, secretion, enzyme production, gene expression, etc.) as a result of an amino acid stimulus. An amino acid is a carboxylic acids containing one or more amino groups." [CHEBI

25888 Pathogen[ Q2Q067] interacts with 6 human  
partners:{Q04206;P05062;P23528;P29474;P27986;P08397}  
25889 Pathogen[ P0C214] interacts with 6 human  
partners:{P29474;Q04206;P05062;P08397;P49588;P27986}  
25890 Pathogen[ P03346] interacts with 5 human  
partners:{P29474;Q04206;P05062;P23528;P27986}  
25891 Pathogen[ Q85601] interacts with 6 human  
partners:{P05062;P27986;Q04206;P29474;P08397;P23528}  
25892 Pathogen[ P14079] interacts with 4 human partners:{P23528;P08397;Q16878;P49588}  
25893 Pathogen[ P03383] interacts with 5 human  
partners:{P27986;P29474;Q04206;P08397;P23528}  
25894 Pathogen[ P03410] interacts with 7 human  
partners:{Q04206;P27986;P08397;P49588;P05062;P29474;P23528}  
25895 Pathogen[ P14075] interacts with 5 human  
partners:{P29474;Q04206;P08397;P23528;P27986}  
25896 Pathogen[ P0C206] interacts with 6 human  
partners:{P05062;P27986;Q04206;P29474;P08397;P23528}

25897 Pathogen[ P03363] interacts with 4 human partners:{P29474;Q04206;P23528;P27986}  
25898 [Cluster 2355]GO:0001539+P biological\_process [name] ciliary or flagellar motility [def] "Cell motility due to movement of cilia or flagella." [GOC

25899 Pathogen[ Q2Q067] interacts with 1 human partners:{Q96C74}  
25900 Pathogen[ P0C214] interacts with 1 human partners:{Q96C74}  
25901 Pathogen[ P03346] interacts with 2 human partners:{Q9UIF3;Q96C74}  
25902 Pathogen[ Q85601] interacts with 1 human partners:{Q96C74}  
25903 Pathogen[ P14079] interacts with 3 human partners:{075952;Q9UIF3;Q96C74}  
25904 Pathogen[ P03383] interacts with 1 human partners:{Q96C74}  
25905 Pathogen[ P03410] interacts with 2 human partners:{Q9UIF3;075952}  
25906 Pathogen[ P14075] interacts with 1 human partners:{Q96C74}  
25907 Pathogen[ P0C206] interacts with 3 human partners:{075952;Q9UIF3;Q96C74}  
25908 Pathogen[ P03363] interacts with 2 human partners:{Q96C74;Q9UIF3}

25909 [Cluster 2356]GO:0051341+P biological\_process [name] regulation of oxidoreductase activity [def] "Any process that modulates the frequency, rate or extent of oxidoreductase activity, the catalysis of an oxidation-reduction (redox) reaction, a reversible chemical reaction in which the oxidation state of an atom or atoms within a molecule is altered. One substrate acts as a hydrogen or electron donor and becomes oxidized, while the other acts as hydrogen or electron acceptor and becomes reduced." [EC

25910 Pathogen[ Q2Q067] interacts with 1 human partners:{Q9BQ95}  
25911 Pathogen[ P0C214] interacts with 1 human partners:{Q9BQ95}  
25912 Pathogen[ P03346] interacts with 1 human partners:{Q9BQ95}  
25913 Pathogen[ Q85601] interacts with 1 human partners:{Q9BQ95}  
25914 Pathogen[ P14079] interacts with 1 human partners:{Q9BQ95}  
25915 Pathogen[ P03383] interacts with 1 human partners:{Q9BQ95}  
25916 Pathogen[ P03410] interacts with 1 human partners:{Q9BQ95}  
25917 Pathogen[ P14075] interacts with 1 human partners:{Q9BQ95}  
25918 Pathogen[ P0C206] interacts with 1 human partners:{Q9BQ95}

25919 Pathogen[ P03363] interacts with 1 human partners:{Q9BQ95}  
25920 [Cluster 2357]GO:0006805+P biological\_process [name] xenobiotic metabolic process  
[def] "The chemical reactions and pathways involving a xenobiotic compound, a compound  
foreign to living organisms. Used of chemical compounds, e.g. a xenobiotic chemical,  
such as a pesticide." [GOC  
25921 Pathogen[ Q2Q067] interacts with 6 human  
partners:{O00204;O00170;Q16851;P15559;P35869;P51580}  
25922 Pathogen[ P0C214] interacts with 14 human  
partners:{O00170;P35869;P51580;P40261;O75223;Q16851;Q9NWM0;O00204;P07327;P23526;P155  
59;Q06520;Q6IB77;Q9NZL9}  
25923 Pathogen[ P03346] interacts with 11 human  
partners:{O00204;Q06520;P23526;Q9NZL9;P51580;O00170;P15559;Q16851;O75469;P35869;P402  
61}  
25924 Pathogen[ Q85601] interacts with 6 human  
partners:{O00170;Q16851;Q6IB77;O00204;P35869;P23526}  
25925 Pathogen[ P14079] interacts with 13 human  
partners:{O75223;O14841;P35869;Q96KP4;Q16851;O00170;P15559;Q9NZL9;Q6IB77;O75469;P106  
20;P23526;P51580}  
25926 Pathogen[ P03383] interacts with 3 human partners:{O00170;Q16851;P35869}  
25927 Pathogen[ P03410] interacts with 10 human  
partners:{P15559;Q16851;Q6IB77;O00204;O14841;O00170;P23526;O75223;Q9NZL9;P51580}  
25928 Pathogen[ P14075] interacts with 5 human  
partners:{P35869;P15559;O00170;P51580;Q16851}  
25929 Pathogen[ P0C206] interacts with 10 human  
partners:{Q16851;Q9NZL9;P35869;O75469;P15559;P51580;O00204;P23526;Q6IB77;O00170}  
25930 Pathogen[ P03363] interacts with 6 human  
partners:{P51580;Q16851;P35869;O00204;O00170;Q06520}  
25931 [Cluster 2358]GO:0008286+P biological\_process [name] insulin receptor signaling  
pathway [def] "The series of molecular signals generated as a consequence of the insulin  
receptor binding to insulin." [GOC  
25932 Pathogen[ Q2Q067] interacts with 24 human  
partners:{P23588;P46108;P31749;Q92922;Q92572;P36543;Q5T1C6;P36956;P56945;Q13541;O435  
24;Q9BVC4;Q92529;Q8WWQ0;Q96RU7;P35813;P31946;P27986;Q04637;P06730;Q9BX66;Q9UKG1;P627  
53;Q13542}  
25933 Pathogen[ P0C214] interacts with 28 human  
partners:{Q16864;P35813;Q9BVC4;Q9Y376;P56945;Q9UI12;P62993;P23588;Q9BX66;P36543;Q925  
29;Q9UKG1;Q13542;Q92922;Q92572;Q8WWQ0;P62753;Q04637;Q96RU7;Q5T1C6;P46108;P31946;P067  
30;Q99704;P27986;P43490;P31749;Q13541}  
25934 Pathogen[ P03346] interacts with 35 human  
partners:{P21283;Q13542;P35813;P06730;P36956;Q9Y5K8;Q92572;Q9BVC4;Q13541;Q13322;P365  
43;Q93050;P62993;Q9BX66;Q9Y376;P56945;P17706;P31749;Q8WWQ0;Q99704;Q12778;P98177;P461  
08;Q96RU7;P23588;P31946;Q92922;Q9UKG1;Q16864;Q04637;Q92529;O43524;P62753;P27986;Q6ZW  
J1}  
25935 Pathogen[ Q85601] interacts with 27 human  
partners:{P31946;P31749;P62993;P06730;P23588;Q9BX66;P62753;Q93050;Q6ZJW1;Q04637;Q9Y3  
76;P46108;Q13541;P27986;Q9BVC4;P56945;P36956;Q8WWQ0;Q92529;Q96RU7;Q9UKG1;Q92572;P358  
13;Q92922;Q5T1C6;Q13542;P36543}  
25936 Pathogen[ P14079] interacts with 36 human  
partners:{P31751;P36543;Q9Y5K8;Q9UKG1;P06730;Q99704;P61421;P62753;Q96LB4;Q92922;P434  
90;Q8WWQ0;Q9BVC4;Q92572;Q13541;P23588;P35813;P31946;Q5T1C6;Q9Y478;Q8N8Y2;Q8WU20;Q96R  
U7;Q13542;Q93050;P62993;Q9UI12;O95670;Q92529;Q6ZJW1;Q16864;Q9BX66;P36956;Q9Y376;P461  
08;Q04637}  
25937 Pathogen[ P03383] interacts with 17 human  
partners:{P27986;P56945;Q92572;P31946;P31749;P62753;P35813;Q13542;P23588;P06730;Q135  
41;Q96RU7;Q04637;Q8WWQ0;Q92922;P36543;Q5T1C6}  
25938 Pathogen[ P03410] interacts with 38 human  
partners:{P36956;Q92529;P27986;P35813;Q8N8Y2;Q6ZJW1;P06730;P61421;Q92572;Q93050;P317  
49;Q9BVC4;Q13541;P43490;Q8WWQ0;Q9Y376;Q5T1C6;Q99704;Q92922;Q9UI12;Q96LB4;Q13542;O956  
70;Q96RU7;P46108;P56945;Q16864;Q8WU20;Q04637;Q9Y5K8;P62993;O75348;Q9UKG1;Q9BX66;P365  
43;P62753;P23588;P31946}  
25939 Pathogen[ P14075] interacts with 17 human  
partners:{P35813;Q8WWQ0;Q13542;P23588;Q92922;P06730;Q5T1C6;P31749;P62753;Q04637;P279  
86;Q92572;Q96RU7;P31946;Q13541;P56945;P36543}  
25940 Pathogen[ P0C206] interacts with 34 human  
partners:{Q13541;Q9UKG1;P36543;P31749;Q92572;Q6ZJW1;Q92922;P36956;P43490;Q9Y376;P279  
86;Q8WWQ0;P62993;Q96RU7;P06730;P31946;Q13542;Q8WU20;Q9UI12;Q5T1C6;Q99704;Q9Y5K8;Q168  
64;Q9BX66;P23588;P56945;Q04637;P46108;Q92529;P62753;P17706;Q9BVC4;Q93050;P35813}  
25941 Pathogen[ P03363] interacts with 26 human  
partners:{P17706;Q9BVC4;Q8WWQ0;Q9BX66;P36543;Q99704;P62753;P31946;P23588;Q92529;Q925  
72;O43524;Q13480;P31749;P46108;Q6ZJW1;Q9Y376;Q9Y5K8;P56945;Q13541;Q92922;P27986;P067  
30;Q9UKG1;Q13542;Q04637}  
25942 [Cluster 2359]GO:0034969+P biological\_process [name] histone arginine methylation  
[def] "The modification of a histone by addition of a methyl group to an arginine  
residue." [GOC  
25943 Pathogen[ Q2Q067] interacts with 4 human partners:{Q9NVM4;P55345;Q9NR22;Q86X55}  
25944 Pathogen[ P0C214] interacts with 4 human partners:{Q9NVM4;P55345;Q86X55;Q9NR22}

25945 Pathogen[ P03346] interacts with 4 human partners:{P55345;Q9NR22;Q9NVM4;Q86X55}

25946 Pathogen[ Q85601] interacts with 4 human partners:{Q9NR22;Q86X55;Q9NVM4;P55345}

25947 Pathogen[ P14079] interacts with 3 human partners:{Q9NR22;Q9NVM4;P55345}

25948 Pathogen[ P03383] interacts with 2 human partners:{Q86X55;Q9NR22}

25949 Pathogen[ P03410] interacts with 4 human partners:{Q9NVM4;Q86X55;Q9NR22;P55345}

25950 Pathogen[ P14075] interacts with 2 human partners:{Q9NR22;Q86X55}

25951 Pathogen[ P0C206] interacts with 4 human partners:{Q86X55;Q9NVM4;Q9NR22;P55345}

25952 Pathogen[ P03363] interacts with 3 human partners:{Q9NVM4;Q9NR22;Q86X55}

25953 [Cluster 2360]GO:0032324+P biological\_process [name] molybdopterin cofactor biosynthetic process [def] "The chemical reactions and pathways resulting in the formation of the molybdopterin cofactor (Moco), essential for the catalytic activity of some enzymes, e.g. sulfite oxidase, xanthine dehydrogenase, and aldehyde oxidase. The cofactor consists of a mononuclear molybdenum (Mo-molybdopterin) or tungsten ion (W-molybdopterin) coordinated by one or two molybdopterin ligands." [GOC

25954 Pathogen[ Q2Q067] interacts with 2 human partners:{O96007;Q9Y697}

25955 Pathogen[ P0C214] interacts with 4 human partners:{O96033;O95396;Q9Y697;O96007}

25956 Pathogen[ P03346] interacts with 2 human partners:{Q9Y697;O96007}

25957 Pathogen[ Q85601] interacts with 2 human partners:{Q9Y697;O96007}

25958 Pathogen[ P14079] interacts with 3 human partners:{O96007;O96033;Q9Y697}

25959 Pathogen[ P03383] interacts with 2 human partners:{Q9Y697;O96007}

25960 Pathogen[ P03410] interacts with 3 human partners:{Q9Y697;O96007;O96033}

25961 Pathogen[ P14075] interacts with 2 human partners:{O96007;Q9Y697}

25962 Pathogen[ P0C206] interacts with 3 human partners:{Q9Y697;O96007;O95396}

25963 Pathogen[ P03363] interacts with 2 human partners:{O96007;Q9Y697}

25964 [Cluster 2361]GO:0007091+P biological\_process [name] mitotic metaphase/anaphase transition [def] "The cell cycle process in which a cell progresses from metaphase to anaphase during mitosis, triggered by the destruction of mitotic cyclins." [PMID

25965 Pathogen[ Q2Q067] interacts with 7 human partners:{Q9UJX2;O60216;Q9UKT4;Q14683;Q8WVM7;P30260;Q8N3U4}

25966 Pathogen[ P0C214] interacts with 7 human partners:{Q9UJX2;Q14683;Q8N3U4;Q8WVM7;P30260;O60216;Q9UKT4}

25967 Pathogen[ P03346] interacts with 7 human partners:{Q8N3U4;Q14683;Q9UJX2;Q9UKT4;Q8WVM7;P30260;O60216}

25968 Pathogen[ Q85601] interacts with 7 human partners:{Q9UJX2;Q9UKT4;O60216;Q8WVM7;Q14683;Q8N3U4;P30260}

25969 Pathogen[ P14079] interacts with 6 human partners:{Q9UKT4;O60216;Q8N3U4;P30260;Q9UQE7;Q14683}

25970 Pathogen[ P03383] interacts with 7 human partners:{Q14683;Q8N3U4;Q9UKT4;O60216;Q9UJX2;P30260;Q8WVM7}

25971 Pathogen[ P03410] interacts with 7 human partners:{Q9UKT4;Q9UQE7;O60216;Q14683;Q8N3U4;P30260;Q8WVM7}

25972 Pathogen[ P14075] interacts with 7 human partners:{Q14683;Q9UKT4;Q8WVM7;Q9UJX2;P30260;O60216;Q8N3U4}

25973 Pathogen[ P0C206] interacts with 8 human partners:{O60216;Q9UJX2;P30260;Q9UKT4;Q9UQE7;Q14683;Q8N3U4;Q8WVM7}

25974 Pathogen[ P03363] interacts with 7 human partners:{Q9UJX2;P30260;Q8WVM7;Q9UKT4;Q8N3U4;Q14683;O60216}

25975 [Cluster 2362]GO:0006406+P biological\_process [name] mRNA export from nucleus [def] "The directed movement of mRNA from the nucleus to the cytoplasm." [GOC

25976 Pathogen[ Q2Q067] interacts with 46 human partners:{Q92900;Q96FV9;Q12769;Q9UPR3;P61326;O75494;Q01130;Q9H1B4;P78406;Q9UBU9;O00148;P52594;Q13838;Q07955;Q6I9Y2;Q9BRD0;Q9BZI7;Q13769;P63241;Q16629;Q10570;Q9HAU5;P84103;Q8IYB3;Q86V81;Q53GS7;Q86US8;Q05519;P26368;Q9Y5S9;Q01081;Q9P2I0;Q13243;Q8NI27;Q09161;Q92540;P57740;Q9H4D5;P52298;Q9UKF6;Q14493;Q8WUM0;O60508;P06730;P35658;Q96QD9}

25977 Pathogen[ P0C214] interacts with 48 human partners:{Q9BZI7;Q96FV9;P26368;Q09161;O00148;Q9UKF6;P84103;Q86V81;Q9Y5S9;Q13769;O60508;Q92900;P78406;P57740;Q10570;Q92540;Q9HAU5;P63241;Q07955;P52298;Q86US8;Q14493;Q8IYB3;Q9H1B4;Q53GS7;P61326;P35658;Q13243;Q9UPR3;Q9P2I0;Q05519;Q8NI27;Q01081;O75494;Q15287;Q9BRD0;Q9UMR2;P52594;Q96QD9;Q9H4D5;P06730;Q13838;Q8WUM0;Q16629;Q9UBU9;Q12769;Q6I9Y2;Q01130}

25978 Pathogen[ P03346] interacts with 52 human partners:{Q9UPR3;Q9BRD0;Q9Y5S9;Q96FV9;Q9BZI7;Q8WUM0;Q09161;P06730;Q08170;Q8IYB3;Q12769;Q86US8;Q9UKF6;Q9UMR2;P78406;P57740;Q53GS7;Q13242;Q13247;Q13769;P63241;P35658;P52298;Q16629;Q07955;Q9H1B4;Q14493;Q86V81;O60508;Q96J01;P52594;P26368;Q96QD9;Q01081;P61326;Q13838;Q9HAU5;Q92540;P84103;Q9H4D5;Q15287;Q05519;Q01130;Q9UBU9;Q9P2I0;Q13243;O00148;Q92900;O75494;Q8NI27;Q10570;Q6I9Y2}

25979 Pathogen[ Q85601] interacts with 48 human partners:{Q9BZI7;Q8IYB3;Q13243;P06730;Q13769;Q12769;Q01130;Q92540;Q9UBU9;P78406;P57740;Q53GS7;P61326;Q15287;Q8WUM0;O00148;Q9H4D5;Q9UMR2;Q86V81;O75494;P63241;P52594;Q16629;Q07955;Q9H1B4;Q09161;Q96FV9;Q9HAU5;O60508;Q13838;Q9BRD0;Q10570;Q9P2I0;Q96QD9;Q01081;Q05519;Q8NI27;P84103;P35658;Q86US8;Q9UPR3;P52298;P26368;Q92900;Q9UKF6;Q6I9Y2;Q14493;Q9Y5S9}

25980 Pathogen[ P14079] interacts with 46 human partners:{Q15287;O60508;P06730;Q9H4D5;Q9UKF6;P57740;Q10570;P52298;P35658;Q13243;Q9Y5S9;P26368;Q92540;Q8NI27;Q86US8;Q9UBU9;P52594;Q13838;Q9H1B4;Q96FV9;Q13769;Q8IYB3;Q16629;Q6I9Y2;P61326;Q8WUM0;Q53GS7;Q9BZI7;Q05519;Q86V81;O00148;Q9HAU5;Q9BRD0;Q07955;P632

25981 Pathogen[ P03383] interacts with 46 human partners: {Q9H1B4;Q8WUM0;Q9UBU9;Q07955;Q15287;Q8NI27;O75494;Q9H4D5;Q13769;Q13838;Q9Y5S9;P78406;P57740;Q96FV9;Q10570;P61326;P26368;Q13243;Q86V81;Q53GS7;P63241;Q9UKF6;Q12769;Q09161;Q16629;Q9UPR3;P06730;Q8IYB3;P84103;Q9HAU5;Q01130;Q86US8;Q14493;Q96QD9;Q01081;P52298;P35658;Q05519;Q9P2I0;Q92540;Q92900;Q9BRD0;P52594;Q6I9Y2;O00148;Q9BZI7}

25982 Pathogen[ P03410] interacts with 48 human partners: {Q92540;Q13838;Q01081;P52594;P26368;Q10570;P61326;O60508;Q16629;Q92900;Q8NI27;Q15287;P06730;Q9UPR3;Q9Y5S9;Q14493;O00148;P78406;Q9HAU5;Q9BZI7;Q96FV9;Q96QD9;Q9H4D5;Q9UMR2;Q05519;Q07955;P35658;P52298;Q9P2I0;Q86V81;Q9UBU9;Q9H1B4;Q13769;Q8IYB3;Q86US8;Q01130;Q9UKF6;Q6I9Y2;Q8WUM0;P63241;Q09161;Q9BRD0;P84103;P57740;Q12769;Q13243;O75494;Q53GS7}

25983 Pathogen[ P14075] interacts with 46 human partners: {Q05519;Q09161;Q92900;Q9P2I0;Q9UPR3;Q86V81;Q13243;Q13769;P61326;Q14493;P78406;P57740;Q53GS7;Q01130;P06730;O75494;P63241;P35658;Q8NI27;Q96QD9;Q86US8;Q6I9Y2;Q15287;P26368;Q9BRD0;Q01081;Q9HAU5;Q8IYB3;P52594;Q9Y5S9;Q12769;P84103;Q9UBU9;Q9H1B4;Q8WUM0;Q9H4D5;Q96FV9;Q9UKF6;Q13838;Q92540;Q16629;Q10570;O00148;Q07955;P52298;Q9BZI7}

25984 Pathogen[ P0C206] interacts with 47 human partners: {Q53GS7;Q15287;O00148;Q9UKF6;O60508;Q9BZI7;Q07955;P26368;P52298;P61326;Q01081;Q09161;Q8NI27;Q05519;Q8IYB3;Q13243;Q16629;O75494;P57740;Q9P2I0;P06730;Q13769;Q8WUM0;Q86US8;Q9H4D5;Q96FV9;Q13838;Q9UBU9;Q9BRD0;Q9H1B4;Q9UPR3;Q9HAU5;P63241;P84103;Q96QD9;Q92900;P78406;Q12769;Q9UMR2;Q01130;Q92540;Q14493;P35658;Q6I9Y2;Q9Y5S9;Q86V81;Q10570}

25985 Pathogen[ P03363] interacts with 53 human partners: {Q53GS7;Q9H4D5;Q96J01;Q9P2I0;Q10570;Q92900;Q08170;Q86US8;Q12769;Q9UPR3;Q16629;Q13769;Q01130;Q9UBU9;Q8NI27;Q96FV9;Q92620;P61326;Q05519;Q96QD9;Q15287;Q8WUM0;Q13242;Q8IYB3;P26368;O00148;Q13243;Q86V81;Q9HAU5;P52298;Q13838;P35658;P57740;Q6I9Y2;Q9UMR2;P63241;Q07955;Q92540;Q01081;P78406;Q9BZI7;Q13247;Q9UKF6;P84103;P52594;Q14493;P06730;Q9BRD0;Q9Y5S9;Q9H1B4;O75494;O60508;Q09161}

25986 [Cluster 2363]GO:0071222+P biological\_process [name] cellular response to lipopolysaccharide [def] "Any process that results in a change in state or activity of a cell (in terms of movement, secretion, enzyme production, gene expression, etc.) as a result of a lipopolysaccharide stimulus\_ lipopolysaccharide is a major component of the cell wall of gram-negative bacteria." [GOC

25987 Pathogen[ Q2Q067] interacts with 13 human partners: {Q8WUQ7;Q6PD62;Q6P1J9;Q04206;Q99684;Q15744;Q15327;Q9GZX7;Q02556;Q9UBC1;Q8NFZ5;Q8N7H5;Q9BQE4}

25988 Pathogen[ P0C214] interacts with 13 human partners: {Q15327;Q04206;P05121;Q02556;Q6P1J9;Q8N7H5;Q8NFZ5;Q9GZX7;Q99684;Q9BQE4;Q5EBM0;Q6PD62;Q9UBC1}

25989 Pathogen[ P03346] interacts with 11 human partners: {Q6PD62;Q8NFZ5;Q15327;Q04206;Q02556;Q99684;Q15744;Q9UBC1;Q8WUQ7;Q6P1J9;Q8N7H5}

25990 Pathogen[ Q85601] interacts with 13 human partners: {Q6PD62;Q02556;Q6P1J9;Q9GZX7;Q8NFZ5;Q04206;Q15744;Q15327;P05121;Q99684;Q8N7H5;Q9BQE4;Q9UBC1}

25991 Pathogen[ P14079] interacts with 17 human partners: {Q96KP6;Q9NRQ2;Q16873;Q06413;Q5EBM0;Q9BQE4;Q99684;Q9UBC1;Q6PD62;Q15744;Q9GZX7;Q8NFZ5;Q15327;Q8WUQ7;Q02556;Q6P1J9;Q8N7H5}

25992 Pathogen[ P03383] interacts with 12 human partners: {Q6P1J9;Q6PD62;Q9UBC1;Q9BQE4;Q99684;Q8WUQ7;Q15327;Q04206;Q02556;Q5EBM0;Q8NFZ5;Q8N7H5}

25993 Pathogen[ P03410] interacts with 19 human partners: {Q8WUQ7;Q04206;P05121;Q8NFZ5;Q6PD62;Q9NRQ2;Q99684;Q15327;Q9BQE4;Q9NRY6;Q02556;Q8N7H5;Q9UBC1;Q16873;Q96KP6;Q5EBM0;Q6P1J9;Q9GZX7;Q15744}

25994 Pathogen[ P14075] interacts with 12 human partners: {Q9BQE4;Q04206;Q15327;Q8NFZ5;Q02556;Q8N7H5;Q6P1J9;Q9UBC1;Q99684;Q6PD62;Q8WUQ7;Q5EBM0}

25995 Pathogen[ P0C206] interacts with 15 human partners: {Q6PD62;Q9UBC1;Q15744;Q15327;Q5EBM0;Q8NFZ5;Q8WUQ7;Q02556;Q9BQE4;Q9GZX7;Q8N7H5;Q04206;Q99684;P05121;Q6P1J9}

25996 Pathogen[ P03363] interacts with 11 human partners: {Q99684;Q04206;Q02556;Q15744;Q15327;Q8WUQ7;Q6P1J9;Q8NFZ5;Q9UBC1;Q8N7H5;Q6PD62}

25997 [Cluster 2364]GO:0048075+P biological\_process [name] positive regulation of eye pigmentation [def] "Any process that activates or increases the frequency, rate or extent of establishment of a pattern of pigment in the eye of an organism." [GOC

25998 Pathogen[ Q2Q067] interacts with 1 human partners: {Q9NQG7}

25999 Pathogen[ P0C214] interacts with 1 human partners: {Q9NQG7}

26000 Pathogen[ P03346] interacts with 1 human partners: {Q9NQG7}

26001 Pathogen[ Q85601] interacts with 1 human partners: {Q9NQG7}

26002 Pathogen[ P14079] interacts with 1 human partners: {Q9NQG7}

26003 Pathogen[ P03383] interacts with 1 human partners: {Q9NQG7}

26004 Pathogen[ P03410] interacts with 1 human partners: {Q9NQG7}

26005 Pathogen[ P14075] interacts with 1 human partners: {Q9NQG7}

26006 Pathogen[ P0C206] interacts with 1 human partners: {Q9NQG7}

26007 Pathogen[ P03363] interacts with 1 human partners:{Q9NQG7}

26008 [Cluster 2365]GO:0045070+P biological\_process [name] positive regulation of viral genome replication [def] "Any process that activates or increases the frequency, rate or extent of viral genome replication." [GOC

26009 Pathogen[ Q2Q067] interacts with 5 human partners:{P55265;Q15633;P11388;P54725;P09914}

26010 Pathogen[ P0C214] interacts with 5 human partners:{P09914;P55265;P54725;Q15633;P11388}

26011 Pathogen[ P03346] interacts with 6 human partners:{P55265;P11388;Q15633;P54725;O00482;P09914}

26012 Pathogen[ Q85601] interacts with 6 human partners:{P54725;P11388;Q15633;P55265;O00482;P09914}

26013 Pathogen[ P14079] interacts with 5 human partners:{P11388;P09914;O00482;P55265;O95292}

26014 Pathogen[ P03383] interacts with 3 human partners:{P54725;P55265;Q15633}

26015 Pathogen[ P03410] interacts with 6 human partners:{O95292;Q15633;P55265;P54725;P11388;P09914}

26016 Pathogen[ P14075] interacts with 3 human partners:{P55265;Q15633;P54725}

26017 Pathogen[ P0C206] interacts with 7 human partners:{P54725;P55265;O00482;O95292;Q15633;P11388;P09914}

26018 Pathogen[ P03363] interacts with 5 human partners:{P09914;Q15633;P55265;P54725;O00482}

26019 [Cluster 2366]GO:0009991+P biological\_process [name] response to extracellular stimulus [def] "Any process that results in a change in state or activity of a cell or an organism (in terms of movement, secretion, enzyme production, gene expression, etc.) as a result of an extracellular stimulus." [GOC

26020 Pathogen[ Q2Q067] interacts with 1 human partners:{P39019}

26021 Pathogen[ P0C214] interacts with 2 human partners:{P68133;P39019}

26022 Pathogen[ P03346] interacts with 1 human partners:{P39019}

26023 Pathogen[ Q85601] interacts with 2 human partners:{P68133;P39019}

26024 Pathogen[ P14079] interacts with 2 human partners:{P39019;P68133}

26025 Pathogen[ P03383] interacts with 1 human partners:{P39019}

26026 Pathogen[ P03410] interacts with 2 human partners:{P68133;P39019}

26027 Pathogen[ P14075] interacts with 1 human partners:{P39019}

26028 Pathogen[ P0C206] interacts with 2 human partners:{P68133;P39019}

26029 Pathogen[ P03363] interacts with 2 human partners:{P68133;P39019}

26030 [Cluster 2367]GO:0006412+P biological\_process [name] translation [def] "The cellular metabolic process in which a protein is formed, using the sequence of a mature mRNA molecule to specify the sequence of amino acids in a polypeptide chain. Translation is mediated by the ribosome, and begins with the formation of a ternary complex between aminoacylated initiator methionine tRNA, GTP, and initiation factor 2, which subsequently associates with the small subunit of the ribosome and an mRNA. Translation ends with the release of a polypeptide chain from the ribosome." [GOC

26031 Pathogen[ Q2Q067] interacts with 246 human partners:{O95363;Q5JNZ5;P23588;P05198;Q9HD33;Q7L2H7;P61313;Q99613;P62701;Q9HBB1;O00425;P82921;Q9BYD6;Q13084;P49458;Q9BZE1;P47914;P23381;Q9H3J6;P82933;P31749;P46779;Q96EL2;Q9BYD1;Q4U2R6;O00303;P49591;P82912;Q59GN2;O60841;P82932;Q9BY44;Q9Y3B7;Q02543;P26373;P29692;Q9Y676;O75394;Q96A35;Q9UBQ5;P62750;Q13889;P47813;P62273;Q9Y285;Q9Y2R9;Q13405;Q96GC5;Q6NVV1;P15880;P40429;P09132;Q9NWU5;P46782;Q9BRJ2;P35268;P24534;P22090;Q15046;P49770;P46778;Q9NSD9;P82663;P26641;Q9BYC8;Q9UGC7;P62888;Q9Y3D9;P32969;P62277;P56537;P62241;Q9P0M9;Q15025;O75570;P62244;P05387;Q5T653;Q9NVS2;Q14152;P62861;P42766;P05386;Q5T160;Q9Y291;Q9P0J6;P38935;Q96DP5;Q92905;P63241;Q6P1L8;Q969Q0;Q9Y262;Q14240;Q9UNX3;P30050;Q96I59;O43776;Q15629;Q8IXM3;Q9Y3D3;Q9Y2R5;P18077;P62891;Q13541;Q9BQ48;P61927;Q9Y399;P39023;P62081;P61247;Q9UHB9;P61254;Q9UI10;P62249;P62280;P83731;O15235;P62263;P60866;P62906;Q9BQC6;P41252;P52815;Q13310;Q14232;P82914;Q02878;P82914;Q02878;P46777;Q96E11;Q12904;Q7Z7F7;P62899;P78344;Q9NR50;P08708;P41567;Q96EH5;P08865;Q9NZE8;Q07020;P62913;Q9HD40;O14602;O60783;P62269;P60228;Q9NP92;Q9Y6G3;P07814;Q6IS14;P62424;P49366;P62917;P5772;P62829;P46783;Q8IYD1;O76021;Q9BYD3;P62495;P36578;Q9UKV8;P62857;Q9BYD2;Q9Y3D5;P62847;O75822;P49207;Q13144;Q13155;P23396;P54136;Q9H0U6;Q9H2K0;P20042;O60573;P63173;P18621;P82675;Q6PI48;Q9NRX2;Q86TS9;Q9HA77;Q658K8;P43897;P39019;Q9BW92;P41250;P82664;P61353;O15371;Q04637;Q96L21;Q9GZV4;P62266;P42677;Q9Y3U8;P63220;P62841;Q8NE71;P83881;P62987;P06730;P49589;Q9BZG8;P49406;Q9P015;Q13765;P50914;P46776;Q9H7H0;P11940;P82909;P62854;O43324;Q9P2J5;P09001;P62753;P05388;Q13542;Q8N983;P60842;P18124;P62851;P25398;Q15056;A6NKH3;P62910;Q92901;P68104;P46781;Q9BYC9;P14868;P27635;O75821;Q13888;O15372;Q13347;P61513;P41214;Q96T21;P62945;Q71UM5;Q9NX20;P62979}

26032 Pathogen[ P0C214] interacts with 277 human partners:{Q9HD33;P62861;P41250;Q13310;P84098;Q96A35;P61247;P60228;P49406;Q9HBB1;Q9Y399;Q13405;Q9UGC7;Q9Y3D5;Q9BYD2;P49589;Q96EL2;Q9BYD1;Q9NSE4;P15880;Q6IS14;P62081;P42766;Q12904;Q9UI10;Q7L3T8;P62913;P22090;Q95363;Q9UGM6;O60841;P82912;Q92901;P62249;Q9Y3D9;P62899;P62854;P39019;P62263;P60842;P82675;P49770;Q9Y262;P0C6E6;Q9H0U6;Q9BY44;Q96I59;Q16540;Q9NP81;P12081;P57772;Q9Y676;P23381;Q86TS9;P62273;O60739;Q9NP92;P23396;P18077;O15235;Q9GZV4;P05388;O15372;P49590;P07814;P62847;Q9BYD3;P23588;Q96GC5;O76021;Q9NX20;Q9Y285;P62829;P41252;P26373;Q14152;Q5JTZ9;Q9H7H0;P27635;P47813;P46778;Q9BTE6;Q8N5X7;P6P5R6;A6NMX2;Q99613;Q4U2R6;Q5JNZ5;Q9NWU5;O14602;Q8IXM3;Q96EH5;Q96DP5;O00425;O75821;P61513;P78344;Q7Z2W9;P29692;P83881;Q15056;O75394;Q5T653;P62701;Q71UM5;P49207;P11940;Q14232;P63220;P26641;P08865;P32969;Q5JPH6;Q02543;O43776;P62266;P38935;P09001;P632

41;Q15031;Q969Q0;P14868;Q13542;P82664;P49591;P82914;P15170;P62277;Q8N983;P50914;P49366;P46779;Q14197;Q59GN2;O00303;P40429;Q9P0J6;P41091;P47914;Q8NE71;P63173;P13639;Q13084;P56192;P46783;Q92905;P43897;Q9BQ48;P82663;P26639;Q9NR50;P82921;P62280;Q9UNX3;O75570;Q9Y3U8;Q6P1L8;P30050;P62753;P62910;Q13144;P62891;Q14240;Q8TD47;Q7L2H7;P54577;P82909;Q9NZE8;A2RTX5;P62495;Q13765;Q9Y6G3;P62269;Q15025;P41567;Q96T21;Q9H3J6;P46781;Q9Y291;Q9Y2R9;O43324;Q9HA77;Q8IYD1;P49588;A6NKH3;Q96GW9;Q9BYC9;P61254;Q9UKV8;P62841;P62244;Q9NRX2;P62987;Q7Z7F7;Q04637;Q9Y2R5;Q96E11;Q07020;P42677;P62945;Q075822;Q6NVV1;Q9P0M9;P46776;P05198;Q15629;Q9BQC6;P52815;P62241;P46777;P82932;P55884;P24534;Q13888;P83731;Q96L21;P35268;Q5T160;P47897;Q9UHB9;Q9BW92;P62424;Q6PI48;P60866;Q9BYC8;P62857;Q9H2K0;Q9HD40;P49458;P61313;P08708;Q9P015;B5ME19;P20042;Q9BZG8;P05387;P25398;Q9UBQ5;Q9NSD9;P26640;Q9BZE1;Q9Y3B7;Q15046;P61927;P62750;P62979;P05386;P09132;P62851;P06730;Q5ST30;P46782;P56537;P82933;P18124;Q05639;Q5VTE0;P31749;P61353;Q9BYD6;P36578;Q13155;Q9Y2Z4;Q9BRJ2;Q9Y3D3;O15371;P18621;Q13541;O60783;Q658K8;Q13347;P62906;O60573;Q02878;Q9P2J5;Q9NVS2;P41214}

26033 Pathogen[ P03346] interacts with 253 human

partners: {Q96A35;P41567;O60739;O76021;P23381;Q9NVS2;Q9HBB1;P05387;Q9Y399;P46779;Q9UGC7;B5ME19;Q13542;Q96EL2;P38935;Q9BYD1;P63173;Q5JNZ5;P06730;P62917;O75394;P62249;P62913;P49406;Q9P0J6;Q8N983;P62861;P82912;P62277;Q02878;P41091;P47813;P82933;Q9UBQ5;Q59GN2;Q9GZV4;P62280;P39023;P57772;Q9H3J6;P62987;P61927;Q9UNX3;P62857;O00425;Q9H0U6;Q13541;Q8IXM3;Q13347;P07814;O60841;P46778;P49207;Q8N5X7;Q15629;Q6P5R6;Q13888;P62266;Q9BYC8;P26641;P78344;P61254;Q9BQ48;P56537;O60573;P62495;Q71UM5;Q15056;Q5T653;P11940;P29692;Q96T21;P62424;P62273;O43776;P55884;Q9BYD2;P83731;P60866;P49458;P0CW22;P63241;P62899;Q969Q0;Q14152;P82909;O75821;P60842;Q9BYC9;Q6NVV1;P35268;P41252;P09132;O14602;P09001;P62891;P08708;Q13889;Q6IS14;O00303;Q8TD47;P46782;P41250;P61353;Q13155;P62854;Q9Y3D9;Q9Y3U8;O75570;P47914;Q12904;Q14232;Q9Y285;P43897;Q9Y2R5;P08865;Q96DP5;Q96L21;Q9NRX2;P60228;Q7Z7F7;O15235;P31749;P61313;P25398;Q13084;Q9P2J5;P82914;P60783;P61513;Q96E11;O43324;Q9NZE8;A6NKH3;P05388;Q9Y2R9;P62269;Q6P1L8;Q15025;Q02543;P42766;P62081;Q7L2H7;P49366;P61247;Q9BYD3;Q14240;P54136;Q9HD33;P49770;Q9NNU5;P18621;Q8IYD1;Q9Y676;P46781;Q9HD40;P82921;P84098;Q969K4;P15880;Q9UKV8;P14868;P50914;P49589;Q9Y6G3;P62829;P62979;Q9Y3D5;Q99613;P24534;Q92905;O75822;P39019;Q9BYD6;P23588;Q9Y3D3;Q9H7H0;P23396;Q9BY44;Q4U2R6;P42677;P62750;Q96EH5;P62701;Q9BQC6;P30050;P82914;P60783;P61513;Q9NE71;Q9BRJ2;Q9BZE1;P82675;P62847;Q13405;Q9UHB9;P62851;Q6PI48;Q13310;P22090;Q9H2K0;Q04637;Q92616;A6NMX2;P46777;P82663;P52815;Q9BZG8;O15371;Q07020;P62263;P82664;P62841;Q658K8;P83881;P82932;P41214;P05386;P18077;Q13144;P20042;Q7Z2W9;P46776;P62241;Q13765;Q9Y291;Q9NR50;P62753;O15372;P62945;Q92901;P32969;P26373;Q9UI10;P18124;P40429;P27635;P68104;Q9P015;Q7Z7H8;P46783;Q9Y3B7;Q9Y262;Q96GC5;P62906;Q9P0M9;P62244;Q9NX20;P62888;P0C6E6;P63220;P05198}

26034 Pathogen[ Q85601] interacts with 246 human

partners: {P46783;P32969;P61513;Q9HBB1;P26373;P62857;P52815;P62244;P09001;Q9BQC6;Q96EL2;Q9BYD1;P54136;O43324;Q9NSD9;P62913;P62854;P31749;P82912;P62081;P26639;Q6P5R6;P14868;P61353;Q96A35;P62891;P46776;P47813;P82933;P18077;P61313;P41091;Q9Y2R5;Q9Y3D5;Q99613;P49406;P05388;Q9UBQ5;Q9GZV4;P62495;Q9NP92;Q5VTE0;A6NKH3;Q9Y3B7;Q15629;P57772;P49589;Q4U2R6;P06730;Q14240;Q9HD40;P63173;P38935;Q9H0U6;Q9P2J5;Q13310;P23588;Q9NX20;Q96E11;P82921;Q13888;Q13155;P07814;P23396;P62273;Q96T21;P46778;P62829;Q8N5X7;P30050;P62753;P27635;Q9BYC9;Q04637;P82932;P23381;P15880;Q9P0M9;Q9BQ48;Q96537;P83881;Q07020;Q9BY44;P39019;Q658K8;P26641;Q5T653;Q9Y3U8;Q71UM5;Q9NR50;P62701;P62241;P82675;P62424;Q15046;O43776;Q9Y3D9;O00303;P83731;P63241;Q9BYD2;P62899;Q9BW92;P20042;Q13144;P62945;Q9Y285;P49770;Q9H7H0;P24534;P62263;Q9P015;Q13541;P62861;Q02878;Q9BYD6;Q9HA77;P39023;P61254;O15371;Q9Y2R9;P41250;Q13405;B5ME19;Q9Y3D3;Q5T160;P49207;P60228;O75570;P11940;Q96GC5;Q9Y291;P62910;Q9Y6G3;Q9NRX2;Q8N983;P82909;Q9H3J6;O15235;P62249;P62280;P15170;P47914;P84098;Q96L21;Q7Z7F7;Q13084;P08708;O75394;P42766;Q9NZE8;A2RTX5;O60573;Q13765;Q9NVS2;P62269;Q92905;P68104;Q15025;Q9Y262;Q9BZG8;Q9BYD3;Q9NNU5;Q9UGC7;P18621;Q8IYD1;Q9Y676;P05387;O00425;P78344;Q9BRJ2;Q96I59;Q9UNX3;P60842;Q9UKV8;P62277;P35268;P43897;P62979;Q7L2H7;Q13347;P62847;O75822;Q8NE71;P41567;Q9HD33;O14602;O95363;Q14152;P05198;P26641;P78344;Q96EH5;Q8IXM3;Q867S9;Q8BZE1;P46782;P47897;Q9UHB9;O60783;Q6PI48;P46779;P62750;P62851;P62841;O15372;P62987;P82663;P22090;P41252;P82664;P61927;P29692;P36578;P41214;P05386;P82914;O76021;P08865;Q9Y399;P61247;Q14232;Q05639;Q9P0J6;O75821;P09132;Q5JNZ5;P46777;P62917;Q92901;Q9UI10;P18124;P46781;Q6NVV1;P25398;P60866;Q02543;P62906;P50914;Q6IS14;P62266;P40429;Q13542;P62888;Q6P1L8}

26035 Pathogen[ P14079] interacts with 287 human

partners: {Q15629;Q9Y3U8;Q9BQC6;P27635;Q8IXM3;P52815;P84098;P46779;A6NKH3;Q7L2H7;Q9BYD6;A6NMX2;Q9Y285;Q7Z7F7;P20042;P23381;P26639;Q9UKV8;P26373;Q4U2R6;P09132;P60842;O14602;P23396;Q96GW9;Q9P2J5;Q15056;Q6NVV1;P60468;P40429;O75879;Q7L3T8;Q9BTE6;O00303;Q9BW92;O43716;Q9H0R6;Q96E11;O75821;P06730;Q13765;O60739;Q9UI10;P54136;Q9H2K0;P18621;Q658K8;P47813;Q9H0U6;P83881;Q15031;P68104;Q5T160;P41567;Q9BY44;Q9UNX3;P82664;P46781;P83731;P61513;P62847;Q6IS14;P41091;P39656;P62753;P56537;P82933;Q9BQ48;P57772;P26641;P39023;P62273;Q9Y2R9;Q9BYD2;Q5ST30;Q9BYC9;O43432;P25398;P62495;Q9BRJ2;Q9NP81;Q9H3J6;P47897;O95363;P49591;P43307;Q9Y6G3;A2RTX5;Q9NRX2;P18077;Q9Y291;O75570;P14868;Q16540;P46783;Q13310;P05198;P61254;P50914;Q7Z2W9;P46199;P04844;Q13889;Q15025;P62979;P62841;P18124;Q14240;P42766;P62266;Q9Y2R5;P29692;O15371;P46782;P62987;Q5JNZ5;O60783;Q9HA77;Q13144;P62241;Q13541;Q8IYD1;P78344;P23588;Q9Y3D3;P32969;P22090;Q9P0M9;O43776;Q5JPH6;P62829;O60573;B5ME19;P60866;P43897;Q96RP9;P62854;Q9NR50;Q13888;Q07020;P39019;Q13084;Q9BZE1;Q96T21;P63220;P49207;Q96L21;P49589;P62244;P82921;Q15046;P09001;Q96A35;P24534;P62263;Q02543;P62424;Q92901;P62277;O75822;P11940;P62750;P62910;Q86TS9;P63173;P49458;Q96GC5;P41252;P46776;Q9BYD3;P82912;O76021;Q8NE71;P08708;Q99613;Q9HBB1;P41250;Q8N5X7;Q96I59;Q92616;P36578;P26640;P0CW22;Q9BYD1;P13639;P56192;Q9NSD9;Q71UM5;Q9BYC8;Q92905;O152

35;P60059;P62906;P47914;P62280;Q6P5R6;Q969S9;Q9UGC7;Q9Y262;P62899;Q9Y2Z4;Q9NP92;Q13405;Q9BZG8;P63241;Q13542;P61353;P62081;P62945;Q9NX20;P46777;Q8N442;P42677;P30050;Q9P015;O60841;P15880;Q59GN2;O75394;Q7Z7H8;P62891;P82909;Q9UGM6;Q9H7H0;P82675;Q9NZE8;Q9HD33;P62888;P08865;Q9NSE4;Q13155;P38935;P61927;P62917;Q9Y3B7;Q9P0J6;P46778;P62249;Q12904;O00425;Q13347;Q9Y676;Q969Q0;Q14197;P05386;P49588;P35268;Q14232;P62913;Q9HD40;P41214;Q6PI48;Q8N983;Q9NVS2;P05387;Q9UBQ5;P61247;P62269;P62701;Q9UHB9;P51571;Q9GZV4;P61313;Q5T653;P82663;Q14152;Q8TD47;Q96EL2;P07814;O43324;Q96DP5;P62851;Q96P1L8;P0C6E6;P49411;P05388;Q04637;Q96EH5;O15372;Q9Y3D5;P49366;P62857;P55884;P62861;Q9Y3D9;P82914;P49406}

26036 Pathogen[ P03383] interacts with 249 human partners: {P42766;P36578;P05388;Q9HBH1;P62266;Q9Y285;P39019;P26373;Q9H3J6;Q96EL2;Q9BYD1;P62913;P62945;Q12904;Q9P2J5;P62854;P40429;P82912;Q9BYD2;P14868;Q96A35;P62987;P62891;P25398;Q9HD40;Q13084;Q658K8;P62280;P82664;Q07020;P49458;P62750;Q9BRJ2;O15371;P05387;Q9BQ48;P62249;P62888;P57772;P62899;Q9UBQ5;P60228;P61927;P24534;A6NKH3;Q8NE71;Q13888;P46777;P46779;P41567;P49207;Q9P0J6;P31749;Q9NX20;Q5JPH6;P56537;P49589;P83731;P62424;Q5T160;Q92905;P49406;Q9UI10;Q15031;P18124;P82933;P46778;Q92901;P62753;Q9BQC6;Q9NP81;Q9Y262;Q9GZV4;P42677;Q9NWU5;P61247;Q9BYC9;Q5JNZ5;P83881;P09001;P26641;Q9BYD3;P47914;Q5T653;O60841;Q9P0M9;Q71UM5;Q9Y2R9;Q96T21;P11940;Q14152;P62917;Q9NP92;P82914;Q13405;P62273;O60573;Q9UNX3;Q9BZE1;P63241;Q96L21;O43324;P09132;Q969Q0;Q13155;Q9NRX2;P30050;P84098;Q9Y6G3;O75394;Q9BY44;O14602;Q13542;P32969;Q9NVS2;P20042;P49366;P82675;P62277;Q9BTE6;O75570;Q13144;Q9BYD6;P18077;Q6P1L8;P23588;P06730;P63173;Q9Y3D9;Q9NR50;Q15629;O60783;P62081;Q9Y2R5;P23381;Q9Y3B7;Q13541;P61313;P08865;Q96I59;P82909;P82663;P62851;P62495;P47813;P46782;Q15046;Q9HD33;Q9NZE8;A2RTX5;P41214;Q9H2K0;Q13765;P62269;Q9P015;P68104;Q15025;P63220;P05198;Q02543;P62244;Q02878;Q9Y224;O95363;Q7L2H7;P07814;P49770;Q9UGC7;Q9Y3D5;Q8IYD1;Q96GW9;Q86TS9;P82921;P78344;P62910;P27635;Q9UKV8;Q8IXM3;Q9HA77;P43897;P62857;Q99613;P82932;O75822;P62906;P46783;Q9Y3U8;P60866;Q04637;P52815;P61254;P62979;Q96DP5;P62241;Q7Z7F7;P46781;Q14232;Q96EH5;Q13347;Q96E11;P39023;O43776;Q9UHB9;Q6PI48;Q13310;P38935;P62841;O00425;Q6NVV1;P22090;P41250;P62701;P62829;Q9Y676;P29692;P62263;P62847;P35268;Q4U2R6;P41252;P54136;P05386;P50914;O15235;Q9Y291;Q9NSD9;P49591;Q9Y399;P62861;Q7L3T8;P18621;O15372;P46776;Q96GC5;O75821;P15880;P23396;Q8N983;Q9Y3D3;P61513;Q59GN2;Q9BZG8;Q9BYC8;O76021;Q9H0U6;P08708;Q9BW92;P61353}

26037 Pathogen[ P03410] interacts with 292 human partners: {P62861;Q96DP5;Q96T21;P05386;Q9Y399;Q7Z7F7;Q02543;P61247;P62241;Q9Y285;P62829;P49207;Q9HA77;P26373;P82663;Q9HD33;P61513;Q9NR50;P82909;P68104;Q13155;P62899;Q9NSE4;P56192;Q9P015;Q13889;Q8NE71;P0CW22;Q9P0M9;Q9BTE6;Q9UHB9;Q9UKV8;Q9UHB9;P62244;Q9H7H0;O60841;P62913;O75822;Q16540;P60468;P60059;Q02878;Q9NX20;O75879;Q92901;P11940;P49589;Q5ST30;B5ME19;O15372;P15880;P46777;P46776;Q9HBH1;P62841;P82675;Q5JNZ5;P30050;P05388;Q9BW92;Q8N983;O15235;P06730;P46781;P18124;P49588;P54136;Q96A35;Q9H2K0;P20042;Q96RP9;P49406;P23381;P46199;Q92905;Q9BYD2;P62269;Q07020;P63220;Q7L3T8;O43776;P62910;P62847;Q59GN2;P62906;Q9P0J6;Q7L2H7;P31749;P52815;Q9NP92;P23396;Q14232;Q969S9;P18621;P62266;Q9NWU5;P62249;P63173;P50914;Q969Q0;P47897;P62280;Q96EH5;Q9BQC6;Q15025;P14868;O43432;P22090;P13639;Q9BYD6;P61313;P62979;Q99613;P47813;Q9Y3D5;Q13541;Q14152;Q9BYD3;P41214;P62701;P49770;Q12904;P62750;Q9NSD9;O60783;P82664;Q969K4;Q96E11;Q8N442;Q9P2J5;P41567;P55884;P08865;Q96L21;P49591;Q9UNX3;P62277;O15371;Q9Y676;P36578;Q9BYD1;P18077;P25398;P38935;P43307;P61927;P84098;Q4U2R6;P62854;P62273;P26639;Q9NRX2;P09132;Q9BTE6;P15170;O60739;P0C6E6;P62081;P46783;P62495;Q96I59;Q8TD47;Q6NVV1;Q15056;Q9BRJ2;P49366;Q15629;Q9UGC7;Q9Y3U8;Q13084;P41250;Q14197;Q6P1L8;Q9Y291;P08708;Q9Y2R9;P46782;P32969;Q658K8;Q9H0R6;Q15046;Q9Y6G3;O14602;Q13542;Q9BQ48;Q8IXM3;P60842;O43324;O00303;Q5T653;P82912;Q92616;P04844;Q9H3J6;Q5JPH6;P46779;P27635;Q96EL2;Q9NZE8;Q8IYD1;P57772;Q13888;O60573;O75821;Q9HD40;P62987;Q9UGM6;P41252;Q9BY44;Q9Y3D9;Q7Z2W9;O00425;P62753;P78344;Q9P5R6;Q9UBQ5;P23588;Q9UI10;Q13405;Q71UM5;P49411;Q9BZE1;Q14240;P43897;O75394;P83881;Q9H0U6;P60866;Q13144;P42677;Q9Y3D3;Q6IS14;Q96GC5;P05198;Q9Y3B7}

26038 Pathogen[ P14075] interacts with 255 human partners: {Q9Y2Z4;P42766;P54136;Q9HBH1;Q9H7H0;P49207;P09132;Q9UGC7;P62857;P52815;P46781;Q9BRJ2;P63220;O76021;P32969;Q96EL2;Q9BYD1;Q9BYD6;Q9NRX2;P62495;Q9BYD2;P42677;Q13155;P62913;P82921;P22090;O60841;Q9P0M9;P56537;P20042;Q02878;P82912;Q96L21;Q9Y3D9;P41250;P62277;O15372;Q96GC5;Q7L2H7;P23381;Q658K8;P62851;Q13542;P68104;Q59GN2;P57772;P23588;P08865;P62244;P49406;Q9BQC6;Q9Y2R5;Q9NX20;Q96E11;P08708;Q9NSD9;P61254;P46778;O75394;P38935;P05388;P41252;P26641;P78344;Q9Y3D3;Q96T21;Q9HD33;P83881;Q99613;O75821;O95363;Q5T653;P46777;Q6P1L8;P29692;Q9GZV4;Q9Y3U8;P62249;Q9BZG8;P06730;P62081;Q15629;P63241;P62750;P18621;Q969Q0;Q9Y3D5;Q02543;Q9UI10;Q9BYC9;P18124;Q9UNX3;P25398;Q9BQ48;Q96GW9;Q9BZE1;Q13084;P47813;Q9HA77;Q9NP81;P05198;O15371;P49366;P82909;Q9Y3B7;Q9Y2R9;Q13405;Q9Y676;Q9Y285;P11940;P60228;P63173;Q9NWU5;P30050;Q9H2K0;P31749;O15235;Q9BTE6;P62979;P43897;Q13310;Q9Y399;O60573;P83731;P49458;P84098;Q8N983;Q7L3T8;O60739;Q14232;Q9HD40;P56192;P61247;O60783;P62753;P46782;P62891;P62861;Q13889;Q12904;Q96A35;P18077;P82664;P46779;P62917;P39023;Q9NZE8;A2RTX5;P41214;Q04637;P50914;Q13765;Q6NVV1;P62269;P62847;Q9BW92;P62910;O43776;P62273;Q15025;Q9P015;Q86TS9;P40429;P82663;P23396;P62241;Q9Y291;P15880;Q8NE71;P49770;P62987;Q8IYD1;O14602;P14868;P82914;Q5T160;Q9P2J5;Q9UKV8;P62841;P36578;Q5JNZ5;P62266;P82932;Q9Y262;Q13347;Q13836;P61513;P27635;P62888;Q9H0U6;Q92901;Q8IXM3;P26639;P35268;Q9NR50;Q9UHB9;P62945;Q6PI48;P46776;Q96EH5;P09001;Q9BYD3;Q96I59;P46783;Q7Z7H8;Q4U2R6;P62701;Q13144;Q9NP92;Q9BYC8;P49589;P62899;O00425}

- 25;O43324;Q5JPH6;P82933;P47914;P62906;P41567;Q15046;Q7Z7F7;Q9UBQ5;P05386;Q92905;P61353;P39019;P62424;Q9NSE4;Q9BY44;Q15031;P24534;P62829;P62280;P49591;Q9P0J6;O75570;Q13541;Q07020;P62263;Q96DP5;P62854;P60866;P82675;P26373;P07814;P05387;Q9Y6G3;Q14152;A6NKH3;Q9NVS2;Q71UM5;P61927;Q13888}
- 26039 Pathogen[ P0C206] interacts with 273 human partners: {P49589;O95363;P41091;Q6P1L8;Q7L2H7;P09132;P40429;P61313;Q9NSE4;Q96A35;O43324;Q13541;P07814;Q9Y291;Q9Y3D5;Q99613;Q9Y399;Q96L21;P27635;Q9GZV4;P20042;P18124;Q6IS14;Q8IXM3;Q7Z2W9;P38935;P31749;P62854;Q9H0U6;Q9Y2Z4;Q96EL2;P49207;Q9BQ48;P62081;Q9Y3D3;Q9P015;P30050;P39656;O14602;O60783;P82914;Q9UGC7;Q13084;P41252;Q6PI48;P62241;Q4U2R6;P62244;P50914;Q9BYC8;P08865;Q5ST30;P62750;P18621;P46781;P62266;Q02543;Q14232;P41567;Q658K8;Q7Z7H8;Q9Y676;P09001;Q9HD40;Q07020;Q9P0M9;P83881;Q8IYD1;P46778;A2RTX5;Q9UGM6;P62263;Q5JPH6;Q9NP81;P62273;Q02878;Q9HA77;Q9P0J6;Q9UKV8;Q9NWU5;Q5T653;P62495;Q9NRX2;P62280;P41250;P49406;P26641;Q6P5R6;Q9H3J6;P62857;P62851;Q9Y6G3;P62910;P26640;Q9NR50;P46782;P49591;Q9NZE8;P06730;P61247;Q9HD33;O43776;Q13144;P18077;Q92616;Q9BRJ2;P62913;P61927;P61353;P62888;P49366;Q6NVV1;O75394;P82664;Q15025;P43897;P36578;P60228;P49770;Q96GC5;Q9NVS2;P62861;P05198;Q9Y285;O60841;Q13888;Q8N5X7;Q9NSD9;Q13542;Q13310;Q9BYC9;P35268;P23396;P39023;Q9Y2R9;P32969;Q13405;P82909;O76021;P62701;Q9BTE6;P05386;Q9Y3B7;Q86TS9;P22090;O60739;Q9H2K0;B5ME19;Q9BYD6;P84098;P62945;Q9BYD2;P26373;Q71UM5;Q14152;P46777;P05388;Q9UI10;P62979;P57772;A6NMX2;Q5T160;Q9BW92;O15371;P62899;P82933;P47813;P56537;P83731;Q9Y3D9;Q9BZG8;P82663;P82675;P39019;Q92901;P05387;P46783;P56192;P42766;P60866;Q9NP92;Q14240;P62841;Q8NE71;Q96E11;P63241;Q9UNX3;Q9BZE1;P54136;P23588;Q13889;Q969Q0;P61513;P24534;P78344;P49458;Q13155;P26639;A6NKH3;Q9BYD1;Q15629;Q9BY44;P62277;Q9UHB9;P0C6E6;O60573;Q15031;Q14197;P46776;Q8N983;P62906;P41214;Q9H7H0;Q04637;P63173;P82932;P62987;Q9Y2R5;O75821;Q7L3T8;P62891;P62269;Q9P2J5;P29692;P62753;O75570;Q9HBH1;Q13347;P46779;P63220;P60842;Q5JNZ5;P15880;Q9NX20;Q96EH5;P25398;O00303;P08708;Q13765;P23381;P11940;Q96DP5;Q7Z7F7;P47914;P68104;O15235;Q9BQC6;P47897;P14868;P62847;Q9Y262;P61254;P82912;O15372;Q96GW9;Q12904;O75822;Q96T21;P42677;P62829;Q96I59;P52815;O00425;Q9BYD3;Q15046;P62249;P62424;P82921;Q59GN2;Q92905;Q9Y3U8;Q9UBQ5;P62917}
- 26040 Pathogen[ P03363] interacts with 257 human partners: {P62913;Q9Y2Z4;P43897;Q9Y2R5;Q9BYD2;P09132;O60739;P18621;P05386;Q9HD40;Q9GV4;O15371;P62750;P23396;P42677;Q9Y7H0;P63173;P08865;Q96GC5;P41252;P62847;O75570;P18077;P82664;P05387;Q96EL2;Q9NSD9;Q9BY44;P84098;P42766;Q9NZE8;A2RTX5;P62249;Q9BYD1;P82921;P05388;O60841;P36578;P49406;Q13347;P62753;P62081;A6NKH3;P62910;Q96I59;Q8IXM3;P14868;Q13888;P61513;P49589;P46776;Q13405;Q9UI10;Q9BYD3;P41250;P82914;P61254;Q9P0J6;P62273;Q9UHB9;P32969;Q92901;Q8IYD1;P46778;Q15056;Q9NVS2;Q9Y3D5;P61927;O14602;Q9UBQ5;O00425;P62891;P52815;Q14152;Q6P5R6;Q59GN2;Q9UKV8;P61353;P47897;P49366;Q5JPH6;Q96A35;O43376;Q9BZE1;P08708;Q13765;P15880;P11940;Q96L21;Q7Z7F7;P23381;Q96T21;O15372;Q9H0U6;P41091;P41567;P23588;P57772;Q9HD33;P62495;P05198;Q9Y3B7;P26373;Q13155;Q4U2R6;Q9NX07;P83881;Q96EH5;O76021;Q9BRJ2;Q9NWU5;P22090;P62861;P62841;Q9UNX3;Q9NR50;O75394;P54136;P30050;P82912;Q8N5X7;P62829;P26641;P82663;Q14240;P46782;P35268;Q9NRX2;P29692;Q9BTE6;P31749;Q9Y6G3;Q6PI48;Q9BYC8;P20042;P46781;P47813;P50914;Q13310;A6NMX2;Q9P0M9;P56537;Q9Y2R9;P63220;Q7L2H7;Q9Y3D9;P61313;P39019;Q9NX20;P46779;Q5T653;Q02543;P46777;P62987;Q8N983;Q7Z7H8;O95363;O60783;P25398;Q9NP92;B5ME19;P09001;P82675;Q5JNZ5;P82933;Q9H3J6;P49770;P60228;P83731;P62851;P62280;Q9P2J5;Q71UM5;Q9Y3U8;P62888;P49458;P41214;P63241;P60842;Q969Q0;Q9BW92;Q92616;Q9Y676;P49591;P62244;P62277;P62906;Q15025;Q9Y285;Q8NE71;P62266;P62945;P49207;P62241;Q9BQC6;P62424;Q7L3T8;P60866;Q9Y262;P61247;P24534;O60573;Q13144;Q9P015;Q9BZG8;Q15031;Q9Y3D3;Q13084;P62899;P62857;Q02878;P82909;Q6IS14;Q13541;O75821;Q6NVV1;P07814;P78344;Q07020;P0C6E6;P39023;P82932;Q9BQ48;Q86TS9;P62854;Q9Y399;O15235;P62917;Q7Z2W9;P55884;Q9BYC9;P18124;P40429;Q5T160;P27635;Q96E11;P06730;P62263;O43324;P47914;Q9Y291;P38935;P62701;Q658K8;Q92905;P68104;Q8TD47;Q9BYD6;O75822;P62269;Q13542;P46783;Q99613;Q04637;O00303;Q9UGC7;Q6P1L8}
- 26041 [Cluster 2368]GO:0006493+P biological\_process [name] protein O-linked glycosylation [def] "A protein glycosylation process in which a sugar unit is added to a protein via the hydroxyl group of peptidyl-serine, peptidyl-threonine, peptidyl-hydroxylysine, or peptidyl-hydroxyproline, or via the phenol group of peptidyl-tyrosine, forming an O-glycan." [ISBN
- 26042 Pathogen[ Q2Q067] interacts with 2 human partners: {O60296;Q9UPV9}
- 26043 Pathogen[ P0C214] interacts with 2 human partners: {Q9UPV9;O60296}
- 26044 Pathogen[ P03346] interacts with 2 human partners: {O60296;Q9UPV9}
- 26045 Pathogen[ Q85601] interacts with 2 human partners: {Q9UPV9;O60296}
- 26046 Pathogen[ P14079] interacts with 4 human partners: {Q9H488;O60296;Q8NBL1;Q5NDL2}
- 26047 Pathogen[ P03383] interacts with 2 human partners: {O60296;Q9UPV9}
- 26048 Pathogen[ P03410] interacts with 3 human partners: {Q9UPV9;O60296;Q9H488}
- 26049 Pathogen[ P14075] interacts with 2 human partners: {O60296;Q9UPV9}
- 26050 Pathogen[ P0C206] interacts with 2 human partners: {Q9UPV9;O60296}
- 26051 Pathogen[ P03363] interacts with 2 human partners: {Q9UPV9;O60296}
- 26052 [Cluster 2369]GO:0042984+P biological\_process [name] regulation of amyloid precursor protein biosynthetic process [def] "Any process that modulates the frequency, rate or extent of the chemical reactions and pathways resulting in the formation of amyloid precursor protein (APP), the precursor of beta-amyloid." [GOC
- 26053 Pathogen[ Q2Q067] interacts with 1 human partners: {Q96P71}
- 26054 Pathogen[ P0C214] interacts with 1 human partners: {Q96P71}
- 26055 Pathogen[ P03346] interacts with 1 human partners: {Q96P71}
- 26056 Pathogen[ Q85601] interacts with 1 human partners: {Q96P71}
- 26057 Pathogen[ P14079] interacts with 1 human partners: {Q96P71}
- 26058 Pathogen[ P03383] interacts with 1 human partners: {Q96P71}



26059 Pathogen[ P03410] interacts with 1 human partners:{Q96P71}

26060 Pathogen[ P14075] interacts with 1 human partners:{Q96P71}

26061 Pathogen[ P0C206] interacts with 1 human partners:{Q96P71}

26062 Pathogen[ P03363] interacts with 1 human partners:{Q96P71}

26063 [Cluster 2370]GO:0060644+P biological\_process [name] mammary gland epithelial cell differentiation [def] "The process in which a relatively unspecialized epithelial cell becomes a more specialized epithelial cell of the mammary gland." [GOC

26064 Pathogen[ Q2Q067] interacts with 7 human partners:{P31749;O14896;P17676;Q9H7S9;Q9UKW6;P20719;P16455}

26065 Pathogen[ P0C214] interacts with 6 human partners:{Q9UKW6;P17676;O14896;P16455;P31749;Q9H7S9}

26066 Pathogen[ P03346] interacts with 6 human partners:{P17676;P20719;P31749;Q9H7S9;O14896;Q9UKW6}

26067 Pathogen[ Q85601] interacts with 6 human partners:{O14896;P17676;P31749;Q9H7S9;P16455;Q9UKW6}

26068 Pathogen[ P14079] interacts with 5 human partners:{P31751;O14896;P16455;Q9H7S9;Q9UKW6}

26069 Pathogen[ P03383] interacts with 5 human partners:{Q9UKW6;P31749;O14896;P17676;Q9H7S9}

26070 Pathogen[ P03410] interacts with 6 human partners:{O14896;P17676;P31749;Q9UKW6;P16455;Q9H7S9}

26071 Pathogen[ P14075] interacts with 5 human partners:{P31749;O14896;Q9UKW6;Q9H7S9;P17676}

26072 Pathogen[ P0C206] interacts with 7 human partners:{P31749;Q9H7S9;P17676;O14896;Q9UKW6;P20719;P16455}

26073 Pathogen[ P03363] interacts with 6 human partners:{O14896;P17676;Q9H7S9;Q9UKW6;P20719;P31749}

26074 [Cluster 2371]GO:0010748+P biological\_process [name] negative regulation of plasma membrane long-chain fatty acid transport [def] "Any process that decreases the rate, frequency or extent of plasma membrane long-chain fatty acid transport. Plasma membrane long-chain fatty acid transport is the directed movement of long-chain fatty acids across the plasma membrane." [GOC

26075 Pathogen[ Q2Q067] interacts with 1 human partners:{P31749}

26076 Pathogen[ P0C214] interacts with 1 human partners:{P31749}

26077 Pathogen[ P03346] interacts with 1 human partners:{P31749}

26078 Pathogen[ Q85601] interacts with 1 human partners:{P31749}

26079 Pathogen[ P14079] interacts with 1 human partners:{P31751}

26080 Pathogen[ P03383] interacts with 1 human partners:{P31749}

26081 Pathogen[ P03410] interacts with 1 human partners:{P31749}

26082 Pathogen[ P14075] interacts with 1 human partners:{P31749}

26083 Pathogen[ P0C206] interacts with 1 human partners:{P31749}

26084 Pathogen[ P03363] interacts with 1 human partners:{P31749}

26085 [Cluster 2372]GO:0030183+P biological\_process [name] B cell differentiation [def] "The process in which a precursor cell type acquires the specialized features of a B cell. A B cell is a lymphocyte of B lineage with the phenotype CD19-positive and capable of B cell mediated immunity." [GO\_REF

26086 Pathogen[ Q2Q067] interacts with 17 human partners:{Q96SD1;P56524;P55895;Q9UKV0;P41182;P12980;Q02447;Q9H9Q4;P28069;Q9UQL6;Q9GZX7;P27986;Q9NP87;P55327;P15923;P10242;P53567}

26087 Pathogen[ P0C214] interacts with 18 human partners:{P53567;Q9H9Q4;Q8WV28;Q96SD1;P56524;P55895;P15923;Q9UKV0;P41182;P28069;P10242;Q02447;P55327;Q9GZX7;Q9NP87;P27986;Q9UQL6;P12980}

26088 Pathogen[ P03346] interacts with 21 human partners:{Q99612;Q96SD1;P55327;P55895;P15923;P56524;Q9H165;Q9UBC0;P12980;P10242;P41182;Q9UKV0;Q9H9Q4;P28069;P53567;Q8WV28;Q9NP87;Q8TAU0;Q02447;Q9UQL6;P27986}

26089 Pathogen[ Q85601] interacts with 17 human partners:{Q9UKV0;Q9UQL6;P53567;P12980;P28069;Q9GZX7;P10242;P27986;Q96SD1;Q99612;P15923;Q02447;P56524;Q9NP87;P41182;P55895;Q9H9Q4}

26090 Pathogen[ P14079] interacts with 18 human partners:{Q9UQL6;P55327;P20809;P53567;Q9H9Q4;Q9UKV0;Q02447;P15923;Q99612;P28069;Q9GZX7;P41182;P12980;Q8WV28;Q9NP87;Q96SD1;P10242;P56524}

26091 Pathogen[ P03383] interacts with 12 human partners:{P27986;P28069;Q9UQL6;Q9H9Q4;P15923;P12980;Q02447;P55895;P10242;Q9UKV0;P56524;P53567}

26092 Pathogen[ P03410] interacts with 19 human partners:{Q9UKV0;P28069;P27986;Q02447;P10242;P53567;Q8WV28;P20809;P55895;Q96SD1;P15923;Q9UQL6;P56524;P55327;Q9GZX7;P41182;P12980;Q9NP87;Q9H9Q4}

26093 Pathogen[ P14075] interacts with 14 human partners:{P28069;P55327;P53567;P56524;Q9UKV0;P10242;P15923;Q9H9Q4;P27986;Q02447;P20809;P12980;Q9UQL6;P55895}

26094 Pathogen[ P0C206] interacts with 23 human partners:{P53567;P41182;Q9UKV0;P10242;Q9UBC0;P12980;P55327;Q96SD1;P27986;Q9H9Q4;Q99612;Q9GZX7;P15923;Q02447;P55895;Q9H165;Q9NP87;P20809;Q13422;P56524;P28069;Q8TAU0;Q9UQL6}

26095 Pathogen[ P03363] interacts with 17 human partners:{Q9UBC0;P53567;Q02447;Q8WV28;Q99612;Q9UQL6;P15923;P28069;Q9UKV0;Q9H9Q4;Q9NP

87;P10242;P12980;P55895;Q8TAU0;P27986;P55327}

26096 [Cluster 2373]GO:0010224+P biological\_process [name] response to UV-B [def] "Any process that results in a change in state or activity of a cell or an organism (in terms of movement, secretion, enzyme production, gene expression, etc.) as a result of a UV-B radiation stimulus. UV-B radiation (UV-B light) spans the wavelengths 290 to 320 nm." [GOC

26097 Pathogen[ Q2Q067] interacts with 5 human partners:{Q04206;P05114;Q03468;Q01831;P07476}

26098 Pathogen[ P0C214] interacts with 5 human partners:{P07476;Q04206;Q01831;P05114;Q03468}

26099 Pathogen[ P03346] interacts with 5 human partners:{P05114;Q04206;P07476;Q03468;Q01831}

26100 Pathogen[ Q85601] interacts with 4 human partners:{Q01831;Q03468;Q04206;P05114}

26101 Pathogen[ P14079] interacts with 5 human partners:{P05114;P07476;P29459;Q03468;Q01831}

26102 Pathogen[ P03383] interacts with 5 human partners:{Q01831;Q03468;P07476;P05114;Q04206}

26103 Pathogen[ P03410] interacts with 6 human partners:{Q04206;Q03468;Q01831;P05114;P29459;P07476}

26104 Pathogen[ P14075] interacts with 5 human partners:{Q04206;Q01831;Q03468;P07476;P05114}

26105 Pathogen[ P0C206] interacts with 5 human partners:{P05114;Q03468;Q04206;Q01831;P07476}

26106 Pathogen[ P03363] interacts with 5 human partners:{Q04206;Q01831;P05114;P07476;Q03468}

26107 [Cluster 2374]GO:0050729+P biological\_process [name] positive regulation of inflammatory response [def] "Any process that activates or increases the frequency, rate or extent of the inflammatory response." [GOC

26108 Pathogen[ Q2Q067] interacts with 2 human partners:{P21980;Q15025}

26109 Pathogen[ P0C214] interacts with 3 human partners:{P05121;Q15025;P21980}

26110 Pathogen[ P03346] interacts with 2 human partners:{P21980;Q15025}

26111 Pathogen[ Q85601] interacts with 3 human partners:{P21980;Q15025;P05121}

26112 Pathogen[ P14079] interacts with 4 human partners:{Q08722;P21980;Q15025;O95760}

26113 Pathogen[ P03383] interacts with 2 human partners:{Q15025;P21980}

26114 Pathogen[ P03410] interacts with 5 human partners:{P05121;Q15025;O95760;Q08722;P21980}

26115 Pathogen[ P14075] interacts with 2 human partners:{Q15025;P21980}

26116 Pathogen[ P0C206] interacts with 3 human partners:{P21980;Q15025;P05121}

26117 Pathogen[ P03363] interacts with 1 human partners:{Q15025}

26118 [Cluster 2375]GO:0030318+P biological\_process [name] melanocyte differentiation [def] "The process in which a relatively unspecialized cell acquires specialized features of a melanocyte." [GOC

26119 Pathogen[ Q2Q067] interacts with 6 human partners:{Q9NQG7;Q9UL45;Q99966;P56693;O75030;Q86YV9}

26120 Pathogen[ P0C214] interacts with 6 human partners:{Q9NQG7;P56693;Q86YV9;O75030;Q99966;Q9UL45}

26121 Pathogen[ P03346] interacts with 7 human partners:{Q9NQG7;Q86YV9;Q99966;P56693;O75030;Q9UL45;Q9UJU5}

26122 Pathogen[ Q85601] interacts with 5 human partners:{Q9NQG7;Q99966;O75030;Q86YV9;P56693}

26123 Pathogen[ P14079] interacts with 8 human partners:{Q9NQG7;Q86YV9;Q06413;Q92902;Q99966;Q9UL45;P56693;O75030}

26124 Pathogen[ P03383] interacts with 4 human partners:{Q9NQG7;O75030;Q86YV9;P56693}

26125 Pathogen[ P03410] interacts with 7 human partners:{Q9NQG7;Q92902;O75030;Q9UL45;Q86YV9;P56693;Q99966}

26126 Pathogen[ P14075] interacts with 4 human partners:{Q9NQG7;O75030;P56693;Q86YV9}

26127 Pathogen[ P0C206] interacts with 6 human partners:{Q9NQG7;Q9UL45;O75030;P56693;Q99966;Q86YV9}

26128 Pathogen[ P03363] interacts with 5 human partners:{Q9NQG7;P56693;O75030;Q92902;Q9UJU5}

26129 [Cluster 2376]GO:0042491+P biological\_process [name] auditory receptor cell differentiation [def] "The process in which a relatively unspecialized cell acquires specialized features of an auditory hair cell." [CL

26130 Pathogen[ Q2Q067] interacts with 3 human partners:{Q99684;P39880;Q9Y6N9}

26131 Pathogen[ P0C214] interacts with 4 human partners:{Q9UM54;Q9Y6N9;P39880;Q99684}

26132 Pathogen[ P03346] interacts with 5 human partners:{Q9Y6N9;Q92858;Q99684;P39880;Q15319}

26133 Pathogen[ Q85601] interacts with 4 human partners:{Q9Y6N9;Q99684;Q9UM54;P39880}

26134 Pathogen[ P14079] interacts with 4 human partners:{P39880;Q99684;Q9UM54;Q9Y6N9}

26135 Pathogen[ P03383] interacts with 2 human partners:{Q99684;P39880}

26136 Pathogen[ P03410] interacts with 4 human partners:{Q99684;Q9UM54;Q9Y6N9;P39880}

26137 Pathogen[ P14075] interacts with 2 human partners:{P39880;Q99684}

26138 Pathogen[ P0C206] interacts with 4 human partners:{Q9UM54;Q9Y6N9;Q99684;P39880}

26139 Pathogen[ P03363] interacts with 4 human partners:{Q9Y6N9;Q99684;P39880;Q15319}

26140 [Cluster 2377]GO:0061154+P biological\_process [name] endothelial tube morphogenesis [def] "The process in which the anatomical structures of a tube are generated and

organized from an endothelium. An endothelium is an epithelium that lines an anatomical structure." [GOC

26141 Pathogen[ Q2Q067] interacts with 2 human partners:{P67870;Q9BSQ5}

26142 Pathogen[ P0C214] interacts with 2 human partners:{Q9BSQ5;P67870}

26143 Pathogen[ P03346] interacts with 2 human partners:{P67870;Q9BSQ5}

26144 Pathogen[ Q85601] interacts with 2 human partners:{P67870;Q9BSQ5}

26145 Pathogen[ P14079] interacts with 2 human partners:{Q9BSQ5;P67870}

26146 Pathogen[ P03383] interacts with 2 human partners:{P67870;Q9BSQ5}

26147 Pathogen[ P03410] interacts with 2 human partners:{P67870;Q9BSQ5}

26148 Pathogen[ P14075] interacts with 2 human partners:{P67870;Q9BSQ5}

26149 Pathogen[ P0C206] interacts with 2 human partners:{Q9BSQ5;P67870}

26150 Pathogen[ P03363] interacts with 2 human partners:{Q9BSQ5;P67870}

26151 [Cluster 2378]GO:0032387+P biological\_process [name] negative regulation of intracellular transport [def] "Any process that stops, prevents, or reduces the frequency, rate or extent of the directed movement of substances within cells." [GOC

26152 Pathogen[ Q2Q067] interacts with 2 human partners:{P02511;P02489}

26153 Pathogen[ P0C214] interacts with 2 human partners:{P02489;P02511}

26154 Pathogen[ P03346] interacts with 2 human partners:{P02489;P02511}

26155 Pathogen[ Q85601] interacts with 2 human partners:{P02489;P02511}

26156 Pathogen[ P14079] interacts with 3 human partners:{P02511;P02489;P10636}

26157 Pathogen[ P03383] interacts with 1 human partners:{P02511}

26158 Pathogen[ P03410] interacts with 3 human partners:{P02489;P02511;P10636}

26159 Pathogen[ P14075] interacts with 1 human partners:{P02511}

26160 Pathogen[ P0C206] interacts with 3 human partners:{P10636;P02511;P02489}

26161 Pathogen[ P03363] interacts with 1 human partners:{P02489}

26162 [Cluster 2379]GO:0090050+P biological\_process [name] positive regulation of cell migration involved in sprouting angiogenesis [def] "Any process that increases the frequency, rate or extent of cell migration involved in sprouting angiogenesis. Cell migration involved in sprouting angiogenesis is the orderly movement of endothelial cells into the extracellular matrix in order to form new blood vessels contributing to the process of sprouting angiogenesis." [GOC

26163 Pathogen[ Q2Q067] interacts with 2 human partners:{Q9UKV0;Q8WUI4}

26164 Pathogen[ P0C214] interacts with 2 human partners:{Q9UKV0;Q8WUI4}

26165 Pathogen[ P03346] interacts with 2 human partners:{Q8WUI4;Q9UKV0}

26166 Pathogen[ Q85601] interacts with 2 human partners:{Q9UKV0;Q8WUI4}

26167 Pathogen[ P14079] interacts with 2 human partners:{Q8WUI4;Q9UKV0}

26168 Pathogen[ P03383] interacts with 2 human partners:{Q9UKV0;Q8WUI4}

26169 Pathogen[ P03410] interacts with 2 human partners:{Q9UKV0;Q8WUI4}

26170 Pathogen[ P14075] interacts with 2 human partners:{Q9UKV0;Q8WUI4}

26171 Pathogen[ P0C206] interacts with 2 human partners:{Q9UKV0;Q8WUI4}

26172 Pathogen[ P03363] interacts with 2 human partners:{Q9UKV0;Q8WUI4}

26173 [Cluster 2380]GO:0060242+P biological\_process [name] contact inhibition [def] "The cellular process in which cells stop growing or dividing in response to increased cell density." [GOC

26174 Pathogen[ Q2Q067] interacts with 1 human partners:{P46937}

26175 Pathogen[ P0C214] interacts with 1 human partners:{P46937}

26176 Pathogen[ P03346] interacts with 1 human partners:{P46937}

26177 Pathogen[ Q85601] interacts with 1 human partners:{P46937}

26178 Pathogen[ P14079] interacts with 1 human partners:{P46937}

26179 Pathogen[ P03383] interacts with 1 human partners:{P46937}

26180 Pathogen[ P03410] interacts with 1 human partners:{P46937}

26181 Pathogen[ P14075] interacts with 1 human partners:{P46937}

26182 Pathogen[ P0C206] interacts with 1 human partners:{P46937}

26183 Pathogen[ P03363] interacts with 1 human partners:{P46937}

26184 [Cluster 2381]GO:0001731+P biological\_process [name] formation of translation preinitiation complex [def] "The joining of the small ribosomal subunit, ternary complex, and mRNA." [GOC

26185 Pathogen[ Q2Q067] interacts with 1 human partners:{Q7Z2Z1}

26186 Pathogen[ P0C214] interacts with 1 human partners:{Q7Z2Z1}

26187 Pathogen[ P03346] interacts with 1 human partners:{Q7Z2Z1}

26188 Pathogen[ Q85601] interacts with 1 human partners:{Q7Z2Z1}

26189 Pathogen[ P14079] interacts with 1 human partners:{Q7Z2Z1}

26190 Pathogen[ P03383] interacts with 1 human partners:{Q7Z2Z1}

26191 Pathogen[ P03410] interacts with 1 human partners:{Q7Z2Z1}

26192 Pathogen[ P14075] interacts with 1 human partners:{Q7Z2Z1}

26193 Pathogen[ P0C206] interacts with 1 human partners:{Q7Z2Z1}

26194 Pathogen[ P03363] interacts with 1 human partners:{Q7Z2Z1}

26195 [Cluster 2382]GO:0071340+P biological\_process [name] skeletal muscle acetylcholine-gated channel clustering [def] "The accumulation of acetylcholine-gated cation channels in a narrow, central region of muscle fibers, in apposition to nerve terminals." [GOC

26196 Pathogen[ Q2Q067] interacts with 2 human partners:{Q53G26;Q96EY1}

26197 Pathogen[ P0C214] interacts with 2 human partners:{Q53G26;Q96EY1}

26198 Pathogen[ P03346] interacts with 2 human partners:{Q53G26;Q96EY1}

26199 Pathogen[ Q85601] interacts with 2 human partners:{Q53G26;Q96EY1}

26200 Pathogen[ P14079] interacts with 1 human partners:{Q96EY1}

26201 Pathogen[ P03383] interacts with 2 human partners:{Q96EY1;Q53G26}

26202 Pathogen[ P03410] interacts with 2 human partners:{Q53G26;Q96EY1}

26203 Pathogen[ P14075] interacts with 2 human partners:{Q53G26;Q96EY1}

26204 Pathogen[ P0C206] interacts with 2 human partners:{Q53G26;Q96EY1}

26205 Pathogen[ P03363] interacts with 2 human partners:{Q53G26;Q96EY1}

26206 [Cluster 2383]GO:0001974+P biological\_process [name] blood vessel remodeling [def] "The reorganization or renovation of existing blood vessels." [GOC

26207 Pathogen[ Q2Q067] interacts with 5 human partners:{O43365;P21980;P29474;Q99814;Q9H1Y0}

26208 Pathogen[ P0C214] interacts with 6 human partners:{P29474;O43365;Q9H1Y0;Q99814;P21980;P35520}

26209 Pathogen[ P03346] interacts with 5 human partners:{P21980;P29474;O43365;Q99814;Q9H1Y0}

26210 Pathogen[ Q85601] interacts with 5 human partners:{Q99814;Q9H1Y0;P21980;P29474;O43365}

26211 Pathogen[ P14079] interacts with 6 human partners:{P15502;Q99814;Q06413;P21980;Q9H1Y0;O43365}

26212 Pathogen[ P03383] interacts with 5 human partners:{P29474;O43365;Q9H1Y0;P21980;P15502}

26213 Pathogen[ P03410] interacts with 6 human partners:{Q9H1Y0;Q99814;P29474;P15502;P21980;O43365}

26214 Pathogen[ P14075] interacts with 5 human partners:{P29474;Q9H1Y0;O43365;P15502;P21980}

26215 Pathogen[ P0C206] interacts with 7 human partners:{O43365;P15502;P21980;P50461;Q9H1Y0;P29474;Q99814}

26216 Pathogen[ P03363] interacts with 4 human partners:{P29474;O43365;Q99814;Q9H1Y0}

26217 [Cluster 2384]GO:0060510+P biological\_process [name] Type II pneumocyte differentiation [def] "The process in which a relatively unspecialized cell acquires specialized features of a Type II pneumocyte. A Type II pneumocyte is a surfactant secreting cell that contains abundant cytoplasm containing numerous lipid-rich multilamellar bodies." [GOC

26218 Pathogen[ Q2Q067] interacts with 2 human partners:{O00712;Q13155}

26219 Pathogen[ P0C214] interacts with 2 human partners:{O00712;Q13155}

26220 Pathogen[ P03346] interacts with 2 human partners:{O00712;Q13155}

26221 Pathogen[ Q85601] interacts with 2 human partners:{Q13155;O00712}

26222 Pathogen[ P14079] interacts with 2 human partners:{Q13155;O00712}

26223 Pathogen[ P03383] interacts with 2 human partners:{O00712;Q13155}

26224 Pathogen[ P03410] interacts with 2 human partners:{Q13155;O00712}

26225 Pathogen[ P14075] interacts with 2 human partners:{Q13155;O00712}

26226 Pathogen[ P0C206] interacts with 2 human partners:{O00712;Q13155}

26227 Pathogen[ P03363] interacts with 2 human partners:{O00712;Q13155}

26228 [Cluster 2385]GO:0043124+P biological\_process [name] negative regulation of I-kappaB kinase/NF-kappaB cascade [def] "Any process that stops, prevents, or reduces the frequency, rate or extent of an I-kappaB kinase/NF-kappaB induced cascade." [GOC

26229 Pathogen[ Q2Q067] interacts with 8 human partners:{Q15326;Q15025;Q14790;Q96LW7;Q04724;Q9Y2G2;P42224;Q96EY1}

26230 Pathogen[ P0C214] interacts with 8 human partners:{P42224;Q04724;Q96LW7;Q15025;Q9Y2G2;Q15326;Q96EY1;Q14790}

26231 Pathogen[ P03346] interacts with 9 human partners:{Q04724;Q15025;P42224;Q96LW7;Q15326;Q14790;Q6GQQ9;Q9Y2G2;Q96EY1}

26232 Pathogen[ Q85601] interacts with 8 human partners:{Q04724;Q14790;Q9Y2G2;Q15025;P42224;Q15326;Q96LW7;Q96EY1}

26233 Pathogen[ P14079] interacts with 9 human partners:{Q96KP6;Q96LW7;Q15025;Q14790;P42224;Q9Y2G2;Q04724;Q15326;Q96EY1}

26234 Pathogen[ P03383] interacts with 6 human partners:{Q04724;Q15326;Q15025;Q9Y2G2;Q96EY1;Q96LW7}

26235 Pathogen[ P03410] interacts with 7 human partners:{Q9Y2G2;Q04724;Q15025;Q96KP6;Q15326;Q96EY1;Q96LW7}

26236 Pathogen[ P14075] interacts with 6 human partners:{Q96LW7;Q15326;Q15025;Q04724;Q96EY1;Q9Y2G2}

26237 Pathogen[ P0C206] interacts with 9 human partners:{Q9Y2G2;Q15326;Q96LW7;Q15025;Q14790;Q6GQQ9;Q04724;P42224;Q96EY1}

26238 Pathogen[ P03363] interacts with 7 human partners:{Q6GQQ9;Q96LW7;Q04724;Q15326;Q9Y2G2;Q15025;Q96EY1}

26239 [Cluster 2386]GO:0032071+P biological\_process [name] regulation of endodeoxyribonuclease activity [def] "Any process that modulates the frequency, rate or extent of endodeoxyribonuclease activity, the hydrolysis of ester linkages within deoxyribonucleic acid by creating internal breaks." [GOC

26240 Pathogen[ Q2Q067] interacts with 1 human partners:{P06748}

26241 Pathogen[ P0C214] interacts with 1 human partners:{P06748}

26242 Pathogen[ P03346] interacts with 1 human partners:{P06748}

26243 Pathogen[ Q85601] interacts with 1 human partners:{P06748}

26244 Pathogen[ P14079] interacts with 1 human partners:{P06748}

26245 Pathogen[ P03383] interacts with 1 human partners:{P06748}

26246 Pathogen[ P03410] interacts with 1 human partners:{P06748}

26247 Pathogen[ P14075] interacts with 1 human partners:{P06748}

26248 Pathogen[ P0C206] interacts with 1 human partners:{P06748}

26249 Pathogen[ P03363] interacts with 1 human partners:{P06748}

26250 [Cluster 2387]GO:0032480+P biological\_process [name] negative regulation of type I interferon production [def] "Any process that stops, prevents, or reduces the frequency, rate, or extent of type I interferon production. Type I interferons include the interferon-alpha, beta, delta, epsilon, zeta, kappa, tau, and omega gene families." [GOC]

26251 Pathogen[ Q2Q067] interacts with 19 human partners:{Q096J02;Q14258;Q9UII4;P61077;Q14653;Q14933;Q13114;Q15366;Q86VP1;Q13526;P0CG47;Q9BYX4;P0CG48;O94817;Q86WI3;P62987;Q9H1Y0;Q8IUD6;P62979}

26252 Pathogen[ P0C214] interacts with 20 human partners:{O14933;Q96J02;Q14164;Q86WI3;Q13526;Q8IUD6;Q9BYX4;Q15366;P61077;Q14258;P0CG48;Q86VP1;O94817;Q9UII4;Q14653;P62987;Q9H1Y0;Q13114;P0CG47;P62979}

26253 Pathogen[ P03346] interacts with 21 human partners:{Q96J02;Q15366;Q14258;P62987;Q8IUD6;P0CG48;Q9UII4;Q13526;Q13114;P61077;Q86UT6;Q86WI3;Q14653;P62979;Q9BYX4;P0CG47;O14933;Q9H1Y0;O94817;Q14164;Q86VP1}

26254 Pathogen[ Q85601] interacts with 20 human partners:{Q96J02;Q86VP1;O14933;Q14258;Q86WI3;P0CG48;Q8IUD6;Q13114;P61077;O94817;Q14653;Q14164;Q13526;Q9NQC7;Q9H1Y0;Q9BYX4;P62979;P0CG47;P62987;Q15366}

26255 Pathogen[ P14079] interacts with 22 human partners:{P0CG48;Q9BYX4;Q14653;Q14164;P62979;Q14258;P61077;Q9H1Y0;P62987;Q7Z434;Q15366;Q96J02;Q86UT6;O94817;Q86WI3;Q13526;P0CG47;Q9NQC7;O14933;Q96C10;Q8IUD6;Q13114}

26256 Pathogen[ P03383] interacts with 15 human partners:{Q14653;Q15366;O14933;P62987;Q86VP1;Q9H1Y0;P61077;Q86WI3;P62979;P0CG47;P0CG48;O94817;Q14258;Q13114;Q13526}

26257 Pathogen[ P03410] interacts with 19 human partners:{P0CG48;Q9H1Y0;Q13526;Q14653;Q9BYX4;Q15366;P62979;O94817;Q14258;Q86VP1;O14933;Q7Z434;Q86WI3;Q86UT6;Q96C10;P62987;P0CG47;Q13114;P61077}

26258 Pathogen[ P14075] interacts with 15 human partners:{Q15366;Q86WI3;Q9H1Y0;O14933;P61077;P0CG48;P62979;Q86VP1;Q14653;Q13526;P62987;Q13114;Q14258;O94817;P0CG47}

26259 Pathogen[ P0C206] interacts with 21 human partners:{Q9NQC7;P0CG48;Q13114;Q13526;Q86WI3;O14933;Q14258;Q86VP1;Q96J02;Q8IUD6;Q14164;Q9H1Y0;P62979;Q15366;P0CG47;O94817;P61077;P62987;Q9BYX4;Q96C10;Q14653}

26260 Pathogen[ P03363] interacts with 15 human partners:{Q86VP1;Q14653;Q15366;O14933;Q14258;Q13526;Q86WI3;P62987;Q8IUD6;Q13114;Q9BYX4;P61077;Q9UII4;O94817;Q9H1Y0}

26261 [Cluster 2388]GO:2000564+P biological\_process [name] regulation of CD8-positive, alpha-beta T cell proliferation [def] "Any process that modulates the frequency, rate or extent of CD8-positive, alpha-beta T cell proliferation." [GOC]

26262 Pathogen[ Q2Q067] interacts with 1 human partners:{P10914}

26263 Pathogen[ P0C214] interacts with 1 human partners:{P10914}

26264 Pathogen[ P03346] interacts with 1 human partners:{P10914}

26265 Pathogen[ Q85601] interacts with 1 human partners:{P10914}

26266 Pathogen[ P14079] interacts with 1 human partners:{P10914}

26267 Pathogen[ P03383] interacts with 1 human partners:{P10914}

26268 Pathogen[ P03410] interacts with 1 human partners:{P10914}

26269 Pathogen[ P14075] interacts with 1 human partners:{P10914}

26270 Pathogen[ P0C206] interacts with 1 human partners:{P10914}

26271 Pathogen[ P03363] interacts with 1 human partners:{P10914}

26272 [Cluster 2389]GO:0010159+P biological\_process [name] specification of organ position [def] "The regionalization process in which information that determines the correct position at which organ primordia are formed is generated and perceived resulting in correct positioning of the new organ." [PMID]

26273 Pathogen[ Q2Q067] interacts with 1 human partners:{O43365}

26274 Pathogen[ P0C214] interacts with 1 human partners:{O43365}

26275 Pathogen[ P03346] interacts with 2 human partners:{O43365;O75593}

26276 Pathogen[ Q85601] interacts with 1 human partners:{O43365}

26277 Pathogen[ P14079] interacts with 1 human partners:{O43365}

26278 Pathogen[ P03383] interacts with 1 human partners:{O43365}

26279 Pathogen[ P03410] interacts with 1 human partners:{O43365}

26280 Pathogen[ P14075] interacts with 1 human partners:{O43365}

26281 Pathogen[ P0C206] interacts with 1 human partners:{O43365}

26282 Pathogen[ P03363] interacts with 1 human partners:{O43365}

26283 [Cluster 2390]GO:0007621+P biological\_process [name] negative regulation of female receptivity [def] "Any process that stops, prevents or reduces the receptiveness of a female to male advances." [GOC]

26284 Pathogen[ Q2Q067] interacts with 1 human partners:{P10828}

26285 Pathogen[ P0C214] interacts with 1 human partners:{P10828}

26286 Pathogen[ P03346] interacts with 1 human partners:{P10828}

26287 Pathogen[ Q85601] interacts with 1 human partners:{P10828}

26288 Pathogen[ P14079] interacts with 1 human partners:{P10828}

26289 Pathogen[ P03383] interacts with 1 human partners:{P10828}

26290 Pathogen[ P03410] interacts with 1 human partners:{P10828}

26291 Pathogen[ P14075] interacts with 1 human partners:{P10828}

26292 Pathogen[ P0C206] interacts with 1 human partners:{P10828}

26293 Pathogen[ P03363] interacts with 1 human partners:{P10828}

26294 [Cluster 2391]GO:0071542+P biological\_process [name] dopaminergic neuron differentiation [def] "The process in which a neuroblast acquires the specialized structural and functional features of a dopaminergic neuron, a neuron that secretes dopamine." [GOC

26295 Pathogen[ Q2Q067] interacts with 2 human partners:{O14813;P63000}

26296 Pathogen[ P0C214] interacts with 2 human partners:{O14813;P63000}

26297 Pathogen[ P03346] interacts with 3 human partners:{O75364;O14813;P63000}

26298 Pathogen[ Q85601] interacts with 2 human partners:{O14813;P63000}

26299 Pathogen[ P14079] interacts with 1 human partners:{O14813}

26300 Pathogen[ P03383] interacts with 1 human partners:{P63000}

26301 Pathogen[ P03410] interacts with 2 human partners:{O14813;P63000}

26302 Pathogen[ P14075] interacts with 1 human partners:{P63000}

26303 Pathogen[ P0C206] interacts with 2 human partners:{P63000;O14813}

26304 Pathogen[ P03363] interacts with 2 human partners:{P63000;O14813}

26305 [Cluster 2392]GO:0048566+P biological\_process [name] embryonic digestive tract development [def] "The process whose specific outcome is the progression of the gut over time, from its formation to the mature structure during embryonic development. The gut is the region of the digestive tract extending from the beginning of the intestines to the anus." [GOC

26306 Pathogen[ Q2Q067] interacts with 2 human partners:{Q9NSC2;P10242}

26307 Pathogen[ P0C214] interacts with 2 human partners:{Q9NSC2;P10242}

26308 Pathogen[ P03346] interacts with 2 human partners:{Q9NSC2;P10242}

26309 Pathogen[ Q85601] interacts with 2 human partners:{P10242;Q9NSC2}

26310 Pathogen[ P14079] interacts with 2 human partners:{P10242;Q9NSC2}

26311 Pathogen[ P03383] interacts with 2 human partners:{Q9NSC2;P10242}

26312 Pathogen[ P03410] interacts with 2 human partners:{P10242;Q9NSC2}

26313 Pathogen[ P14075] interacts with 2 human partners:{Q9NSC2;P10242}

26314 Pathogen[ P0C206] interacts with 2 human partners:{Q9NSC2;P10242}

26315 Pathogen[ P03363] interacts with 1 human partners:{P10242}

26316 [Cluster 2393]GO:0048103+P biological\_process [name] somatic stem cell division [def] "The self-renewing division of a somatic stem cell, a stem cell that can give rise to cell types of the body other than those of the germ-line." [GOC

26317 Pathogen[ Q2Q067] interacts with 3 human partners:{P17483;Q8N726;P35226}

26318 Pathogen[ P0C214] interacts with 2 human partners:{P35226;Q8N726}

26319 Pathogen[ P03346] interacts with 3 human partners:{P35226;P17483;Q8N726}

26320 Pathogen[ Q85601] interacts with 2 human partners:{Q8N726;P35226}

26321 Pathogen[ P14079] interacts with 2 human partners:{Q8N726;P35226}

26322 Pathogen[ P03383] interacts with 2 human partners:{P35226;Q8N726}

26323 Pathogen[ P03410] interacts with 2 human partners:{Q8N726;P35226}

26324 Pathogen[ P14075] interacts with 2 human partners:{P35226;Q8N726}

26325 Pathogen[ P0C206] interacts with 3 human partners:{Q8N726;P35226;P17483}

26326 Pathogen[ P03363] interacts with 3 human partners:{P17483;P35226;Q8N726}

26327 [Cluster 2394]GO:0048255+P biological\_process [name] mRNA stabilization [def] "Prevention of degradation of mRNA molecules. In the absence of compensating changes in other processes, the slowing of mRNA degradation can result in an overall increase in the population of active mRNA molecules." [GOC

26328 Pathogen[ Q2Q067] interacts with 5 human partners:{Q01094;Q9H074;Q14103;Q9Y2T7;P11940}

26329 Pathogen[ P0C214] interacts with 6 human partners:{P11940;Q01094;Q9Y2T7;Q14103;Q9H074;Q14011}

26330 Pathogen[ P03346] interacts with 6 human partners:{Q14011;P11940;Q01094;Q14103;Q9H074;Q9Y2T7}

26331 Pathogen[ Q85601] interacts with 5 human partners:{Q9Y2T7;Q14103;P11940;Q9H074;Q01094}

26332 Pathogen[ P14079] interacts with 7 human partners:{P41238;Q14103;Q9H074;Q9Y2T7;P11940;Q14011;Q01094}

26333 Pathogen[ P03383] interacts with 5 human partners:{Q01094;P11940;Q9Y2T7;Q14103;Q9H074}

26334 Pathogen[ P03410] interacts with 7 human partners:{Q14103;P11940;P41238;Q9H074;Q14011;Q01094;Q9Y2T7}

26335 Pathogen[ P14075] interacts with 5 human partners:{Q14103;Q9H074;P11940;Q9Y2T7;Q01094}

26336 Pathogen[ P0C206] interacts with 7 human partners:{Q9H074;Q14103;Q14011;Q01094;P41238;Q9Y2T7;P11940}

26337 Pathogen[ P03363] interacts with 7 human partners:{P11940;Q15717;Q01094;Q14011;Q14103;Q9Y2T7;Q9H074}

26338 [Cluster 2395]GO:0035767+P biological\_process [name] endothelial cell chemotaxis [def] "The directed movement of an endothelial cell guided by a specific chemical concentration gradient. Movement may be towards a higher concentration (positive chemotaxis) or towards a lower concentration (negative chemotaxis)." [CL

26339 Pathogen[ Q2Q067] interacts with 3 human partners:{O14786;P04792;P22736}

26340 Pathogen[ P0C214] interacts with 2 human partners:{O14786;P04792}

26341 Pathogen[ P03346] interacts with 3 human partners:{P22736;P04792;O14786}

26342 Pathogen[ Q85601] interacts with 3 human partners:{O14786;P22736;P04792}

26343 Pathogen[ P14079] interacts with 2 human partners:{P22736;P04792}

26344 Pathogen[ P03383] interacts with 1 human partners:{P04792}

26345 Pathogen[ P03410] interacts with 3 human partners:{O14786;P04792;P22736}

26346 Pathogen[ P14075] interacts with 1 human partners:{P04792}

26347 Pathogen[ P0C206] interacts with 3 human partners:{P04792;P22736;O14786}

26348 Pathogen[ P03363] interacts with 2 human partners:{O14786;P04792}

26349 [Cluster 2396]GO:0019060+P biological\_process [name] intracellular transport of viral proteins in host cell [def] "The directed movement of viral proteins within the host cell." [ISBN

26350 Pathogen[ Q2Q067] interacts with 2 human partners:{P63172;P09914}

26351 Pathogen[ P0C214] interacts with 2 human partners:{P09914;P63172}

26352 Pathogen[ P03346] interacts with 3 human partners:{Q9BUN8;P63172;P09914}

26353 Pathogen[ Q85601] interacts with 2 human partners:{P63172;P09914}

26354 Pathogen[ P14079] interacts with 3 human partners:{P63172;P09914;Q9BUN8}

26355 Pathogen[ P03383] interacts with 2 human partners:{P63172;Q9BUN8}

26356 Pathogen[ P03410] interacts with 3 human partners:{P63172;Q9BUN8;P09914}

26357 Pathogen[ P14075] interacts with 2 human partners:{P63172;Q9BUN8}

26358 Pathogen[ P0C206] interacts with 3 human partners:{Q9BUN8;P63172;P09914}

26359 Pathogen[ P03363] interacts with 2 human partners:{P09914;P63172}

26360 [Cluster 2397]GO:0006900+P biological\_process [name] membrane budding [def] "The evagination of a membrane, resulting in formation of a vesicle." [GOC

26361 Pathogen[ Q2Q067] interacts with 1 human partners:{000401}

26362 Pathogen[ P0C214] interacts with 1 human partners:{000401}

26363 Pathogen[ P03346] interacts with 1 human partners:{000401}

26364 Pathogen[ Q85601] interacts with 1 human partners:{000401}

26365 Pathogen[ P14079] interacts with 1 human partners:{000401}

26366 Pathogen[ P03383] interacts with 1 human partners:{000401}

26367 Pathogen[ P03410] interacts with 1 human partners:{000401}

26368 Pathogen[ P14075] interacts with 1 human partners:{000401}

26369 Pathogen[ P0C206] interacts with 1 human partners:{000401}

26370 Pathogen[ P03363] interacts with 1 human partners:{000401}

26371 [Cluster 2398]GO:0051488+P biological\_process [name] activation of anaphase-promoting complex activity [def] "Any process that initiates the ubiquitin ligase activity of the anaphase-promoting complex." [GOC

26372 Pathogen[ Q2Q067] interacts with 3 human partners:{000762;Q12834;Q9UM11}

26373 Pathogen[ P0C214] interacts with 4 human partners:{Q16763;000762;Q12834;Q9UM11}

26374 Pathogen[ P03346] interacts with 3 human partners:{Q9UM11;Q12834;000762}

26375 Pathogen[ Q85601] interacts with 4 human partners:{Q16763;Q12834;000762;Q9UM11}

26376 Pathogen[ P14079] interacts with 2 human partners:{Q9UM11;000762}

26377 Pathogen[ P03383] interacts with 3 human partners:{000762;Q12834;Q9UM11}

26378 Pathogen[ P03410] interacts with 3 human partners:{Q9UM11;Q12834;000762}

26379 Pathogen[ P14075] interacts with 3 human partners:{Q9UM11;000762;Q12834}

26380 Pathogen[ P0C206] interacts with 4 human partners:{Q16763;Q9UM11;000762;Q12834}

26381 Pathogen[ P03363] interacts with 3 human partners:{000762;Q9UM11;Q12834}

26382 [Cluster 2399]GO:0018298+P biological\_process [name] protein-chromophore linkage [def] "The covalent or noncovalent attachment of a chromophore to a protein." [GOC

26383 Pathogen[ Q2Q067] interacts with 1 human partners:{Q16526}

26384 Pathogen[ P0C214] interacts with 2 human partners:{Q49AN0;Q16526}

26385 Pathogen[ P03346] interacts with 2 human partners:{Q49AN0;Q16526}

26386 Pathogen[ Q85601] interacts with 2 human partners:{Q49AN0;Q16526}

26387 Pathogen[ P14079] interacts with 2 human partners:{Q16526;Q49AN0}

26388 Pathogen[ P03383] interacts with 1 human partners:{Q16526}

26389 Pathogen[ P03410] interacts with 2 human partners:{Q16526;Q49AN0}

26390 Pathogen[ P14075] interacts with 1 human partners:{Q16526}

26391 Pathogen[ P0C206] interacts with 2 human partners:{Q16526;Q49AN0}

26392 Pathogen[ P03363] interacts with 2 human partners:{Q49AN0;Q16526}

26393 [Cluster 2400]GO:0007413+P biological\_process [name] axonal fasciculation [def] "The collection of axons into a bundle of rods, known as a fascicle." [GOC

26394 Pathogen[ Q2Q067] interacts with 2 human partners:{O14786;Q99608}

26395 Pathogen[ P0C214] interacts with 2 human partners:{O14786;Q99608}

26396 Pathogen[ P03346] interacts with 2 human partners:{Q99608;O14786}

26397 Pathogen[ Q85601] interacts with 2 human partners:{Q99608;O14786}

26398 Pathogen[ P14079] interacts with 2 human partners:{Q99608;Q15078}

26399 Pathogen[ P03383] interacts with 1 human partners:{Q99608}

26400 Pathogen[ P03410] interacts with 2 human partners:{O14786;Q99608}

26401 Pathogen[ P14075] interacts with 1 human partners:{Q99608}

26402 Pathogen[ P0C206] interacts with 2 human partners:{O14786;Q99608}

26403 Pathogen[ P03363] interacts with 2 human partners:{O14786;Q99608}

26404 [Cluster 2401]GO:0045838+P biological\_process [name] positive regulation of membrane potential [def] "Any process that activates or increases the frequency, rate or extent of establishment or extent of a membrane potential, the electric potential existing across any membrane arising from charges in the membrane itself and from the charges present in the media on either side of the membrane." [GOC

26405 Pathogen[ Q2Q067] interacts with 2 human partners:{Q9Y6X2;Q15599}

26406 Pathogen[ P0C214] interacts with 2 human partners:{Q9Y6X2;Q15599}

26407 Pathogen[ P03346] interacts with 2 human partners:{Q15599;Q9Y6X2}

26408 Pathogen[ Q85601] interacts with 2 human partners:{Q9Y6X2;Q15599}

26409 Pathogen[ P14079] interacts with 2 human partners:{Q9Y6X2;Q15599}  
26410 Pathogen[ P03383] interacts with 1 human partners:{Q9Y6X2}  
26411 Pathogen[ P03410] interacts with 2 human partners:{Q9Y6X2;Q15599}  
26412 Pathogen[ P14075] interacts with 1 human partners:{Q9Y6X2}  
26413 Pathogen[ P0C206] interacts with 2 human partners:{Q9Y6X2;Q15599}  
26414 Pathogen[ P03363] interacts with 2 human partners:{Q9Y6X2;Q15599}  
26415 [Cluster 2402]GO:0072075+P biological\_process [name] metanephric mesenchyme development [def] "The biological process whose specific outcome is the progression of a metanephric mesenchyme from an initial condition to its mature state. This process begins with the formation of metanephric mesenchyme and ends with the mature structure. Metanephric mesenchyme is the tissue made up of loosely connected mesenchymal cells in the metanephros." [GOC  
26416 Pathogen[ Q2Q067] interacts with 1 human partners:{P80723}  
26417 Pathogen[ P0C214] interacts with 1 human partners:{P80723}  
26418 Pathogen[ P03346] interacts with 3 human partners:{Q9UIU6;P80723;Q15475}  
26419 Pathogen[ Q85601] interacts with 1 human partners:{P80723}  
26420 Pathogen[ P14079] interacts with 1 human partners:{P80723}  
26421 Pathogen[ P03383] interacts with 1 human partners:{P80723}  
26422 Pathogen[ P03410] interacts with 1 human partners:{P80723}  
26423 Pathogen[ P14075] interacts with 1 human partners:{P80723}  
26424 Pathogen[ P0C206] interacts with 1 human partners:{P80723}  
26425 Pathogen[ P03363] interacts with 1 human partners:{P80723}  
26426 [Cluster 2403]GO:0009615+P biological\_process [name] response to virus [def] "Any process that results in a change in state or activity of a cell or an organism (in terms of movement, secretion, enzyme production, gene expression, etc.) as a result of a stimulus from a virus." [GOC  
26427 Pathogen[ Q2Q067] interacts with 34 human partners:{Q9Y6K5;P55265;Q16666;P09913;Q92985;P20749;P26641;P62244;P25787;P04792;O75531;P80217;P23528;Q9NS37;O15304;Q7Z2W4;Q9Y6Y0;P61966;Q9Y6K9;P09914;Q92499;O43504;Q9BUJ2;O14920;Q9BYX4;P17096;P35269;P13994;P06733;P15407;O15111;O94763;O14879;Q00534}  
26428 Pathogen[ P0C214] interacts with 39 human partners:{P80217;Q9NS37;O15111;Q9Y6K9;P09914;P09913;O14879;P48643;P15407;P35269;P55265;Q9Y6K5;P04792;P17096;P29728;Q16666;Q9BYX4;P26641;Q8WXG1;Q7Z2W4;Q00534;Q92985;Q9Y6Y0;P20749;Q9BUJ2;P06733;P62736;P13994;O75531;P62244;Q92499;Q9H2U1;O43504;P10909;P25787;P61966;O94763;O14920;O15304}  
26429 Pathogen[ P03346] interacts with 40 human partners:{P25787;Q9Y6K9;P61966;Q16666;O15111;P55265;O75531;P62736;O94763;O15304;P26641;Q9BUJ2;P17096;P06733;Q9H2U1;Q8TCB0;Q92499;Q9Y6Y0;Q8IYM9;Q15646;O14879;O75569;P13994;P15407;Q9BYX4;O43504;P20749;P80217;P35269;Q00534;P09913;O14920;P23528;Q92985;P09914;Q9NS37;P04792;Q9Y6K5;P62244;Q7Z2W4}  
26430 Pathogen[ Q85601] interacts with 37 human partners:{P62244;Q16666;P09913;P17096;P25787;O14879;O15111;P15407;O15304;Q7Z2W4;P26641;P06733;Q9BUJ2;Q92499;P80217;Q9Y6K9;Q9Y6Y0;Q9Y6K5;O14920;Q8IYM9;P35269;Q9BYX4;Q92985;P13994;P55265;P09914;P04792;O94763;P23528;Q00534;P61966;Q9NS37;P48643;O75531;P62736;P20749;Q9H2U1}  
26431 Pathogen[ P14079] interacts with 44 human partners:{P13164;P48643;P61966;Q06413;Q9BYX4;P29728;P09914;P35269;Q7Z2W4;P80217;O15304;Q92985;P26641;Q9BUJ2;P17096;P25787;P10909;O75569;Q9NS37;P06733;P09913;O94763;P62244;P55265;P23528;Q9Y6K9;Q9Y6K5;Q9Y6Y0;O75531;P20749;Q96AZ6;P15407;P29459;Q8TCB0;Q92499;O43504;P13994;P04792;O14879;Q96C10;Q99836;Q16666;P13693;Q8WXG1}  
26432 Pathogen[ P03383] interacts with 31 human partners:{O14879;P17096;Q9Y6K9;P35269;O14920;O15304;O15111;P20749;P26641;P04792;Q00534;P09913;Q92985;O94763;Q9Y6Y0;P80217;P15407;P62244;Q16666;P13994;Q9Y6K5;O43504;Q9BUJ2;P55265;P23528;Q92499;Q9NS37;P06733;O75531;P25787;Q7Z2W4}  
26433 Pathogen[ P03410] interacts with 46 human partners:{P20749;P13994;Q9NS37;O94763;Q16666;O14920;P62736;P48643;P62244;O43504;Q00534;P29728;Q9BUJ2;O15111;P06733;Q9BYX4;Q9Y6Y0;P17096;P04792;P55265;Q8WXG1;O75569;P25787;Q92499;Q7Z2W4;O75531;Q96AZ6;P13693;P35269;P80217;Q9Y6K5;P09913;Q96C10;Q8TCB0;P26641;P15407;P23528;Q9Y6K9;Q92985;O14879;P61966;P09914;P29459;P10909;O15304;Q9H2U1}  
26434 Pathogen[ P14075] interacts with 31 human partners:{P06733;O15111;P09913;P55265;P62244;P17096;Q00534;P26641;P80217;P04792;Q16666;O15304;O94763;P23528;Q92499;O14920;Q9Y6Y0;Q9BUJ2;P35269;Q9Y6K5;P13994;Q7Z2W4;O14879;O43504;P25787;Q9Y6K9;Q92985;P15407;Q9NS37;P20749;O75531}  
26435 Pathogen[ P0C206] interacts with 43 human partners:{Q9BUJ2;P06733;P48643;O14920;P55265;Q9Y6K9;P15407;P62736;P62244;P25787;Q9Y6K5;P61966;O14879;Q16666;P29728;P04792;P26641;P80217;O43504;Q9Y6Y0;O75531;P35269;Q8TCB0;Q92985;P09913;O15111;P13994;Q9NS37;P10909;P17096;P20749;Q8IYM9;Q9H2U1;Q9BYX4;Q96C10;Q7Z2W4;Q8WXG1;Q92499;P23528;O15304;O94763;Q00534;P09914}  
26436 Pathogen[ P03363] interacts with 38 human partners:{Q9Y6Y0;Q9Y6K5;P13994;Q92985;O14920;Q8IY21;Q9NS37;P09914;P09913;O15111;O15304;P06733;P62736;Q7Z2W4;Q9Y6K9;P80217;O14879;O43504;P35269;Q16666;Q00534;P20749;P26641;P17096;O94763;Q92499;P55265;P23528;P15407;Q8TCB0;P62244;O75531;Q9BYX4;Q9H2U1;Q9BUJ2;P48643;P04792;O75569}  
26437 [Cluster 2404]GO:0060333+P biological\_process [name] interferon-gamma-mediated signaling pathway [def] "A series of molecular events generated as a consequence of interferon-gamma binding to a cell surface receptor." [GOC



26438 Pathogen[ Q2Q067] interacts with 16 human partners: {Q9Y6K5;O75925;Q92985;P14316;O14896;Q00978;P63165;Q14653;Q15306;P10914;Q02556;P23497;Q13568;P42224;P02795;P33076}

26439 Pathogen[ P0C214] interacts with 18 human partners: {O75925;Q13568;P33076;Q9Y6K5;P29728;P42224;P10914;Q00978;Q92985;P63165;Q02556;O14896;P02795;Q14653;P23497;O15524;P14316;Q15306}

26440 Pathogen[ P03346] interacts with 19 human partners: {O15524;P14316;P33076;Q15306;Q00978;O75925;P17706;Q15646;P10914;Q02556;P63165;O14896;P42224;Q14653;Q13568;P02795;P23497;Q92985;Q9Y6K5}

26441 Pathogen[ Q85601] interacts with 15 human partners: {O14896;P33076;P14316;Q02556;Q15306;Q00978;P02795;P10914;Q14653;Q9Y6K5;Q92985;P42224;P63165;Q13568;O75925}

26442 Pathogen[ P14079] interacts with 17 human partners: {P33076;P29728;P02795;Q14653;O14896;Q92985;P63165;Q15306;P23497;Q13568;Q9Y6K5;P42224;O75925;Q00978;Q02556;P14316;P10914}

26443 Pathogen[ P03383] interacts with 15 human partners: {P10914;O75925;P14316;Q14653;P33076;Q15306;Q00978;P02795;Q92985;O14896;Q13568;P63165;Q9Y6K5;P23497;Q02556}

26444 Pathogen[ P03410] interacts with 15 human partners: {O75925;O14896;P29728;P63165;Q14653;Q15306;Q13568;Q02556;P02795;P10914;Q9Y6K5;P14316;Q92985;P33076;Q00978}

26445 Pathogen[ P14075] interacts with 15 human partners: {P63165;P23497;P33076;O75925;Q00978;Q02556;Q13568;Q14653;Q9Y6K5;Q15306;P14316;O14896;P02795;Q92985;P10914}

26446 Pathogen[ P0C206] interacts with 18 human partners: {P10914;Q13568;O75925;Q9Y6K5;P29728;Q15306;O15524;P33076;Q02556;Q92985;O14896;Q00978;P63165;P02795;P42224;P14316;P17706;Q14653}

26447 Pathogen[ P03363] interacts with 17 human partners: {P17706;Q14653;Q9Y6K5;Q92985;O14896;P02795;O15524;Q02556;Q13568;Q15306;P23497;P63165;P14316;P10914;O75925;P33076;Q00978}

26448 [Cluster 2405]GO:0000480+P biological\_process [name] endonucleolytic cleavage in 5'-ETS of tricistronic rRNA transcript (SSU-rRNA, 5.8S rRNA, LSU-rRNA) [def] "Endonucleolytic cleavage within the 5'-External Transcribed Spacer (ETS) of a tricistronic rRNA transcript that contains the Small Subunit (SSU) rRNA, the 5.8S rRNA, and the Large Subunit (LSU) rRNA in that order from 5' to 3' along the primary transcript. Endonucleolytic cleavage within the 5'-ETS of the pre-rRNA is conserved as one of the early steps of rRNA processing in all eukaryotes, but the specific position of cleavage is variable." [GOC

26449 Pathogen[ Q2Q067] interacts with 2 human partners: {P78316;O75691}

26450 Pathogen[ P0C214] interacts with 2 human partners: {O75691;P78316}

26451 Pathogen[ P03346] interacts with 2 human partners: {O75691;P78316}

26452 Pathogen[ Q85601] interacts with 2 human partners: {O75691;P78316}

26453 Pathogen[ P14079] interacts with 2 human partners: {O75691;P78316}

26454 Pathogen[ P03383] interacts with 2 human partners: {O75691;P78316}

26455 Pathogen[ P03410] interacts with 2 human partners: {P78316;O75691}

26456 Pathogen[ P14075] interacts with 2 human partners: {P78316;O75691}

26457 Pathogen[ P0C206] interacts with 2 human partners: {P78316;O75691}

26458 Pathogen[ P03363] interacts with 2 human partners: {O75691;P78316}

26459 [Cluster 2406]GO:0006390+P biological\_process [name] transcription from mitochondrial promoter [def] "The synthesis of RNA from a mitochondrial DNA template, usually by a specific mitochondrial RNA polymerase." [GOC

26460 Pathogen[ Q2Q067] interacts with 7 human partners: {O00411;Q9H5Q4;Q99551;Q00059;P52815;Q7Z6M4;Q96QE5}

26461 Pathogen[ P0C214] interacts with 7 human partners: {O00411;Q96QE5;Q7Z6M4;Q00059;P52815;Q99551;Q9H5Q4}

26462 Pathogen[ P03346] interacts with 7 human partners: {Q00059;Q9H5Q4;O00411;Q99551;Q7Z6M4;Q96QE5;P52815}

26463 Pathogen[ Q85601] interacts with 7 human partners: {P52815;Q7Z6M4;Q96QE5;Q00059;Q99551;Q9H5Q4;O00411}

26464 Pathogen[ P14079] interacts with 6 human partners: {P52815;Q00059;O00411;Q7Z6M4;Q9H5Q4;Q99551}

26465 Pathogen[ P03383] interacts with 7 human partners: {Q00059;Q9H5Q4;Q99551;P52815;Q7Z6M4;O00411;Q96QE5}

26466 Pathogen[ P03410] interacts with 7 human partners: {Q00059;P52815;O00411;Q96QE5;Q9H5Q4;Q99551;Q7Z6M4}

26467 Pathogen[ P14075] interacts with 7 human partners: {Q00059;P52815;Q9H5Q4;O00411;Q99551;Q96QE5;Q7Z6M4}

26468 Pathogen[ P0C206] interacts with 7 human partners: {Q7Z6M4;Q96QE5;Q99551;Q9H5Q4;Q00059;P52815;O00411}

26469 Pathogen[ P03363] interacts with 6 human partners: {O00411;P52815;Q96QE5;Q00059;Q99551;Q9H5Q4}

26470 [Cluster 2407]GO:0046784+P biological\_process [name] intronless viral mRNA export from host nucleus [def] "The directed movement of intronless viral mRNA from the host nucleus to the cytoplasm for translation." [PMID

26471 Pathogen[ Q2Q067] interacts with 6 human partners: {Q96FV9;Q13838;Q6I9Y2;Q13769;Q86V81;Q8NI27}

26472 Pathogen[ P0C214] interacts with 6 human partners:{Q96FV9;Q86V81;Q13769;Q8NI27;Q13838;Q6I9Y2}

26473 Pathogen[ P03346] interacts with 7 human partners:{Q96FV9;Q13769;Q86V81;Q96J01;Q13838;Q8NI27;Q6I9Y2}

26474 Pathogen[ Q85601] interacts with 6 human partners:{Q13769;Q86V81;Q96FV9;Q13838;Q8NI27;Q6I9Y2}

26475 Pathogen[ P14079] interacts with 6 human partners:{Q8NI27;Q13838;Q96FV9;Q13769;Q6I9Y2;Q86V81}

26476 Pathogen[ P03383] interacts with 6 human partners:{Q8NI27;Q13769;Q13838;Q96FV9;Q86V81;Q6I9Y2}

26477 Pathogen[ P03410] interacts with 6 human partners:{Q13838;Q8NI27;Q96FV9;Q86V81;Q13769;Q6I9Y2}

26478 Pathogen[ P14075] interacts with 6 human partners:{Q86V81;Q13769;Q8NI27;Q6I9Y2;Q96FV9;Q13838}

26479 Pathogen[ P0C206] interacts with 6 human partners:{Q8NI27;Q13769;Q96FV9;Q13838;Q6I9Y2;Q86V81}

26480 Pathogen[ P03363] interacts with 7 human partners:{Q96J01;Q13769;Q8NI27;Q96FV9;Q86V81;Q13838;Q6I9Y2}

26481 [Cluster 2408]GO:0030163+P biological\_process [name] protein catabolic process [def] "The chemical reactions and pathways resulting in the breakdown of a protein by the destruction of the native, active configuration, with or without the hydrolysis of peptide bonds." [GOC

26482 Pathogen[ Q2Q067] interacts with 13 human partners:{P31749;Q8IYW8;Q9Y3C4;Q12933;Q9Y297;Q9H4M3;Q6RSH7;Q8NI29;O15164;Q9NRD1;Q96EF6;Q00987;P62877}

26483 Pathogen[ P0C214] interacts with 18 human partners:{Q8IYW8;Q9Y3C4;Q00987;Q8NI29;Q8NG27;Q9NRD1;Q9Y297;P62877;Q6ZVX7;Q12933;O15164;P35998;Q96EF6;P31749;Q8IYW7;P17980;Q9H4M3;Q6RSH7}

26484 Pathogen[ P03346] interacts with 14 human partners:{Q6RSH7;Q00987;P62877;Q9Y3C4;Q8NI29;P31749;Q9H4M3;Q9NRD1;Q8IUQ4;Q96EF6;Q8IYW8;Q8NG27;Q9Y297;O15164}

26485 Pathogen[ Q85601] interacts with 15 human partners:{Q9H4M3;P31749;Q8IYW7;P62877;O15164;Q8NI29;Q12933;Q6ZVX7;Q6RSH7;Q96EF6;Q9Y3C4;Q00987;Q8NG27;Q8IYW8;Q9NRD1}

26486 Pathogen[ P14079] interacts with 22 human partners:{Q8NI29;P62333;O15164;Q6ZVX7;O14773;Q8IYW8;P35998;P62877;Q8IYW7;Q96EF6;Q00987;O75503;Q9NZ43;Q9Y3C4;Q9H4M3;Q12933;Q6RSH7;P62191;Q9NRD1;Q9NWW5;P43686;P17980}

26487 Pathogen[ P03383] interacts with 10 human partners:{Q8IYW8;P31749;Q8NI29;Q6RSH7;Q12933;Q9Y3C4;P62877;Q9NRD1;Q96EF6;Q9H4M3}

26488 Pathogen[ P03410] interacts with 19 human partners:{Q8IYW8;Q9H4M3;Q9NZ43;Q9NRD1;Q9NWW5;P35998;Q9Y3C4;P31749;Q8IYW7;Q6ZVX7;O75503;P62877;Q12933;Q8NI29;Q6RSH7;Q9UBY8;Q00987;Q96EF6;P17980}

26489 Pathogen[ P14075] interacts with 11 human partners:{Q9Y3C4;Q6RSH7;Q96EF6;Q6ZVX7;P31749;Q12933;Q8NI29;Q9H4M3;Q9NRD1;P62877;Q8IYW8}

26490 Pathogen[ P0C206] interacts with 16 human partners:{P62877;P31749;Q8NG27;Q9H4M3;Q8IUQ4;O15164;Q6ZVX7;Q12933;Q9NRD1;Q6RSH7;Q8IYW7;Q8IYW8;Q8NI29;Q9Y3C4;Q00987;Q96EF6}

26491 Pathogen[ P03363] interacts with 11 human partners:{Q8NI29;Q12933;Q8NG27;Q9H4M3;Q6RSH7;Q96EF6;P62877;Q9Y3C4;P31749;Q8IYW8;Q9NRD1}

26492 [Cluster 2409]GO:1900740+P

26493 Pathogen[ Q2Q067] interacts with 1 human partners:{Q9BXH1}

26494 Pathogen[ P0C214] interacts with 1 human partners:{Q9BXH1}

26495 Pathogen[ P03346] interacts with 1 human partners:{Q9BXH1}

26496 Pathogen[ Q85601] interacts with 1 human partners:{Q9BXH1}

26497 Pathogen[ P14079] interacts with 1 human partners:{Q9BXH1}

26498 Pathogen[ P03383] interacts with 1 human partners:{Q9BXH1}

26499 Pathogen[ P03410] interacts with 1 human partners:{Q9BXH1}

26500 Pathogen[ P14075] interacts with 1 human partners:{Q9BXH1}

26501 Pathogen[ P0C206] interacts with 1 human partners:{Q9BXH1}

26502 Pathogen[ P03363] interacts with 1 human partners:{Q9BXH1}

26503 [Cluster 2410]GO:0003160+P biological\_process [name] endocardium morphogenesis [def] "The process in which the anatomical structure of the endocardium is generated and organized. The endocardium is an anatomical structure comprised of an endothelium and an extracellular matrix that forms the innermost layer of tissue of the heart, and lines the heart chambers." [GOC

26504 Pathogen[ Q2Q067] interacts with 1 human partners:{Q06330}

26505 Pathogen[ P0C214] interacts with 1 human partners:{Q06330}

26506 Pathogen[ P03346] interacts with 1 human partners:{Q06330}

26507 Pathogen[ Q85601] interacts with 1 human partners:{Q06330}

26508 Pathogen[ P14079] interacts with 1 human partners:{Q06330}

26509 Pathogen[ P03383] interacts with 1 human partners:{Q06330}

26510 Pathogen[ P03410] interacts with 1 human partners:{Q06330}

26511 Pathogen[ P14075] interacts with 1 human partners:{Q06330}

26512 Pathogen[ P0C206] interacts with 1 human partners:{Q06330}

26513 Pathogen[ P03363] interacts with 1 human partners:{Q06330}

26514 [Cluster 2411]GO:0090361+P biological\_process [name] regulation of platelet-derived growth factor production [def] "Any process that modulates the rate, frequency, or extent of the appearance of any platelet-derived growth factor due to biosynthesis or secretion following a cellular stimulus, resulting in an increase in its intracellular or extracellular levels." [GOC]

26515 Pathogen[ Q2Q067] interacts with 1 human partners:{Q9UN36}

26516 Pathogen[ P0C214] interacts with 1 human partners:{Q9UN36}

26517 Pathogen[ P03346] interacts with 1 human partners:{Q9UN36}

26518 Pathogen[ Q85601] interacts with 1 human partners:{Q9UN36}

26519 Pathogen[ P14079] interacts with 1 human partners:{Q9UN36}

26520 Pathogen[ P03383] interacts with 1 human partners:{Q9UN36}

26521 Pathogen[ P03410] interacts with 1 human partners:{Q9UN36}

26522 Pathogen[ P14075] interacts with 1 human partners:{Q9UN36}

26523 Pathogen[ P0C206] interacts with 1 human partners:{Q9UN36}

26524 Pathogen[ P03363] interacts with 1 human partners:{Q9UN36}

26525 [Cluster 2412]GO:0032956+P biological\_process [name] regulation of actin cytoskeleton organization [def] "Any process that modulates the frequency, rate or extent of the formation, arrangement of constituent parts, or disassembly of cytoskeletal structures comprising actin filaments and their associated proteins." [GOC]

26526 Pathogen[ Q2Q067] interacts with 4 human partners:{P46108;Q9BVC4;Q8TE85;Q6R327}

26527 Pathogen[ P0C214] interacts with 4 human partners:{Q9BVC4;Q8TE85;Q6R327;P46108}

26528 Pathogen[ P03346] interacts with 4 human partners:{Q9BVC4;Q8TE85;P46108;Q6R327}

26529 Pathogen[ Q85601] interacts with 3 human partners:{Q8TE85;P46108;Q9BVC4}

26530 Pathogen[ P14079] interacts with 5 human partners:{Q6R327;Q8TE85;Q9BVC4;Q15078;P46108}

26531 Pathogen[ P03383] interacts with 1 human partners:{Q8TE85}

26532 Pathogen[ P03410] interacts with 4 human partners:{Q9BVC4;Q8TE85;Q6R327;P46108}

26533 Pathogen[ P14075] interacts with 2 human partners:{Q8TE85;Q6R327}

26534 Pathogen[ P0C206] interacts with 4 human partners:{Q8TE85;Q6R327;P46108;Q9BVC4}

26535 Pathogen[ P03363] interacts with 4 human partners:{Q9BVC4;Q8TE85;P46108;Q6R327}

26536 [Cluster 2413]GO:0090308+P biological\_process [name] regulation of methylation-dependent chromatin silencing [def] "Any process that modulates the rate, frequency, or extent of the repression of transcription by methylation of DNA, leading to the formation of heterochromatin." [GOC]

26537 Pathogen[ Q2Q067] interacts with 1 human partners:{Q01860}

26538 Pathogen[ P0C214] interacts with 1 human partners:{Q01860}

26539 Pathogen[ P03346] interacts with 1 human partners:{Q01860}

26540 Pathogen[ Q85601] interacts with 1 human partners:{Q01860}

26541 Pathogen[ P14079] interacts with 1 human partners:{Q01860}

26542 Pathogen[ P03383] interacts with 1 human partners:{Q01860}

26543 Pathogen[ P03410] interacts with 1 human partners:{Q01860}

26544 Pathogen[ P14075] interacts with 1 human partners:{Q01860}

26545 Pathogen[ P0C206] interacts with 1 human partners:{Q01860}

26546 Pathogen[ P03363] interacts with 1 human partners:{Q01860}

26547 [Cluster 2414]GO:0042660+P biological\_process [name] positive regulation of cell fate specification [def] "Any process that activates or enables a cell to adopt a specific fate." [GOC]

26548 Pathogen[ Q2Q067] interacts with 1 human partners:{Q99684}

26549 Pathogen[ P0C214] interacts with 1 human partners:{Q99684}

26550 Pathogen[ P03346] interacts with 1 human partners:{Q99684}

26551 Pathogen[ Q85601] interacts with 1 human partners:{Q99684}

26552 Pathogen[ P14079] interacts with 1 human partners:{Q99684}

26553 Pathogen[ P03383] interacts with 1 human partners:{Q99684}

26554 Pathogen[ P03410] interacts with 1 human partners:{Q99684}

26555 Pathogen[ P14075] interacts with 1 human partners:{Q99684}

26556 Pathogen[ P0C206] interacts with 1 human partners:{Q99684}

26557 Pathogen[ P03363] interacts with 1 human partners:{Q99684}

26558 [Cluster 2415]GO:000245+P biological\_process [name] spliceosome assembly [def] "The aggregation, arrangement and bonding together of the spliceosome, a ribonucleoprotein apparatus that catalyzes nuclear mRNA splicing via transesterification reactions." [PMID]

26559 Pathogen[ Q2Q067] interacts with 15 human partners:{P83876;Q15696;Q13838;O94906;P62314;P62304;Q8WXD5;Q92499;Q99590;P62316;Q15637;Q16637;P62308;Q9UMS4;O14893}

26560 Pathogen[ P0C214] interacts with 15 human partners:{Q16637;P62316;Q15637;Q8WXD5;P62308;O94906;Q9UMS4;P62314;Q15696;P83876;Q99590;Q92499;P62304;O14893;Q13838}

26561 Pathogen[ P03346] interacts with 17 human partners:{P62304;P83876;Q15637;Q9UMS4;Q8WXD5;O94906;Q16637;P52756;Q92499;Q13838;Q99590;P62314;Q9BZJ0;O14893;P62316;Q15696;P62308}

26562 Pathogen[ Q85601] interacts with 15 human partners:{Q15637;P62304;Q9UMS4;Q92499;P62316;O94906;P62314;Q13838;Q99590;P83876;O14893;P62308;Q15696;Q16637;Q8WXD5}

26563 Pathogen[ P14079] interacts with 15 human partners:{Q15637;O94906;O14893;P83876;Q13838;P62314;Q16637;Q9UMS4;P62308;Q15696;P62304;P62316;Q92499;P52756;Q8WXD5}

26564 Pathogen[ P03383] interacts with 14 human partners: {P83876;Q13838;P62316;P62304;Q8WXD5;O94906;Q16637;P62314;O14893;Q99590;P62308;Q92499;Q15637;Q9UMS4}

26565 Pathogen[ P03410] interacts with 15 human partners: {P83876;Q13838;Q8WXD5;O14893;P62304;Q15637;Q15696;P62308;P62316;O94906;Q16637;Q92499;P62314;Q9UMS4;Q99590}

26566 Pathogen[ P14075] interacts with 14 human partners: {P62304;P62316;Q8WXD5;P62308;O94906;Q16637;Q92499;Q15637;Q9UMS4;Q99590;P83876;O14893;P62314;Q13838}

26567 Pathogen[ P0C206] interacts with 15 human partners: {Q9UMS4;P83876;Q15696;Q8WXD5;P62304;Q15637;P62314;P62316;Q13838;Q99590;O14893;O94906;Q16637;P62308;Q92499}

26568 Pathogen[ P03363] interacts with 17 human partners: {P62314;P62304;O14893;P62316;Q15637;Q8WXD5;Q92499;Q13838;P83876;O94906;P62308;Q16637;Q9UMS4;Q99590;Q15696;Q9BZJ0;P52756}

26569 [Cluster 2416]GO:0007589+P biological\_process [name] body fluid secretion [def] "The controlled release of a fluid by a cell or group of cells in an animal." [GOC]

26570 Pathogen[ Q2Q067] interacts with 1 human partners: {Q99576}

26571 Pathogen[ P0C214] interacts with 1 human partners: {Q99576}

26572 Pathogen[ P03346] interacts with 1 human partners: {Q99576}

26573 Pathogen[ Q85601] interacts with 1 human partners: {Q99576}

26574 Pathogen[ P14079] interacts with 1 human partners: {Q99576}

26575 Pathogen[ P03383] interacts with 1 human partners: {Q99576}

26576 Pathogen[ P03410] interacts with 1 human partners: {Q99576}

26577 Pathogen[ P14075] interacts with 1 human partners: {Q99576}

26578 Pathogen[ P0C206] interacts with 1 human partners: {Q99576}

26579 Pathogen[ P03363] interacts with 1 human partners: {Q99576}

26580 [Cluster 2417]GO:0030718+P biological\_process [name] germ-line stem cell maintenance [def] "Any process involved in preventing uncommitted germ-line stem cells from differentiating as another cell type." [ISBN]

26581 Pathogen[ Q2Q067] interacts with 2 human partners: {Q92754;Q92793}

26582 Pathogen[ P0C214] interacts with 2 human partners: {Q92793;Q92754}

26583 Pathogen[ P03346] interacts with 2 human partners: {Q92754;Q92793}

26584 Pathogen[ Q85601] interacts with 2 human partners: {Q92754;Q92793}

26585 Pathogen[ P14079] interacts with 2 human partners: {Q92793;Q92754}

26586 Pathogen[ P03383] interacts with 2 human partners: {Q92754;Q92793}

26587 Pathogen[ P03410] interacts with 2 human partners: {Q92793;Q92754}

26588 Pathogen[ P14075] interacts with 2 human partners: {Q92754;Q92793}

26589 Pathogen[ P0C206] interacts with 2 human partners: {Q92793;Q92754}

26590 Pathogen[ P03363] interacts with 2 human partners: {Q92793;Q92754}

26591 [Cluster 2418]GO:0006203+P biological\_process [name] dGTP catabolic process [def] "The chemical reactions and pathways resulting in the breakdown of dGTP, guanosine triphosphate." [ISBN]

26592 Pathogen[ Q2Q067] interacts with 1 human partners: {P36639}

26593 Pathogen[ P0C214] interacts with 1 human partners: {P36639}

26594 Pathogen[ P03346] interacts with 1 human partners: {P36639}

26595 Pathogen[ Q85601] interacts with 1 human partners: {P36639}

26596 Pathogen[ P14079] interacts with 1 human partners: {P36639}

26597 Pathogen[ P03383] interacts with 1 human partners: {P36639}

26598 Pathogen[ P03410] interacts with 1 human partners: {P36639}

26599 Pathogen[ P14075] interacts with 1 human partners: {P36639}

26600 Pathogen[ P0C206] interacts with 1 human partners: {P36639}

26601 Pathogen[ P03363] interacts with 1 human partners: {P36639}

26602 [Cluster 2419]GO:0032835+P biological\_process [name] glomerulus development [def] "The progression of the glomerulus over time from its initial formation until its mature state. The glomerulus is a capillary tuft which forms a close network with the visceral epithelium (podocytes) and the mesangium to form the filtration barrier and is surrounded by Bowman's capsule in nephrons of the vertebrate kidney. The glomerulus is part of the nephron and is restricted to one body segment." [GOC]

26603 Pathogen[ Q2Q067] interacts with 2 human partners: {Q9NQ87;Q9GZV5}

26604 Pathogen[ P0C214] interacts with 2 human partners: {Q9GZV5;Q9NQ87}

26605 Pathogen[ P03346] interacts with 3 human partners: {Q9GZV5;O43680;Q9NQ87}

26606 Pathogen[ Q85601] interacts with 2 human partners: {Q9GZV5;Q9NQ87}

26607 Pathogen[ P14079] interacts with 2 human partners: {Q9GZV5;Q9NQ87}

26608 Pathogen[ P03383] interacts with 2 human partners: {Q9NQ87;Q9GZV5}

26609 Pathogen[ P03410] interacts with 2 human partners: {Q9NQ87;Q9GZV5}

26610 Pathogen[ P14075] interacts with 2 human partners: {Q9GZV5;Q9NQ87}

26611 Pathogen[ P0C206] interacts with 2 human partners: {Q9NQ87;Q9GZV5}

26612 Pathogen[ P03363] interacts with 2 human partners: {Q9NQ87;Q9GZV5}

26613 [Cluster 2420]GO:0022604+P biological\_process [name] regulation of cell morphogenesis [def] "Any process that modulates the frequency, rate or extent of cell morphogenesis. Cell morphogenesis is the developmental process in which the shape of a cell is generated and organized." [GOC]

26614 Pathogen[ Q2Q067] interacts with 8 human partners: {Q5VSL9;P52742;A6NIX2;Q86UU0;P23528;Q8WWQ0;Q5T5Y3;Q5HYK7}

26615 Pathogen[ P0C214] interacts with 8 human

26616 partners: {P52742;Q5HYK7;Q5VSL9;A6NIX2;Q8WWQ0;Q5VZL5;Q5T5Y3;Q86UU0}  
Pathogen[ P03346] interacts with 8 human

26617 partners: {Q5T5Y3;P52742;Q8WWQ0;A6NIX2;Q5VSL9;Q5HYK7;Q86UU0;P23528}  
Pathogen[ Q85601] interacts with 11 human

26618 partners: {Q14202;Q5HYK7;A6NIX2;Q95789;Q86UU0;Q5VSL9;P52742;Q8WWQ0;Q5T5Y3;P23528;Q5VZL5}  
Pathogen[ P14079] interacts with 14 human

26619 partners: {Q8N6M3;P52742;Q95789;P47756;Q8WWQ0;Q14202;P23528;A6NIX2;Q71RC2;Q86UU0;Q5HYK7;Q5T5Y3;Q5VSL9;Q5VZL5}  
Pathogen[ P03383] interacts with 8 human

26620 partners: {Q5VSL9;Q5HYK7;A6NIX2;Q86UU0;P52742;Q5T5Y3;Q8WWQ0;P23528}  
Pathogen[ P03410] interacts with 14 human

26621 partners: {Q14202;Q71RC2;Q5HYK7;P47756;Q5VSL9;Q8N6M3;Q95789;Q5T5Y3;A6NIX2;Q8WWQ0;Q5VZL5;P23528;Q86UU0;P52742}  
Pathogen[ P14075] interacts with 10 human

26622 partners: {Q86UU0;Q8WWQ0;Q5VZL5;Q5HYK7;P23528;Q5VSL9;P52742;Q5T5Y3;A6NIX2;Q8N6M3}  
Pathogen[ P0C206] interacts with 13 human

26623 partners: {Q5VZL5;P47756;Q86UU0;Q5VSL9;A6NIX2;Q5T5Y3;Q8WWQ0;Q14202;Q8N6M3;Q5HYK7;P52742;P23528;Q95789}  
Pathogen[ P03363] interacts with 9 human

26624 [Cluster 2421]GO:0034502+P biological\_process [name] protein localization to chromosome [def] "Any process in which a protein is transported to, or maintained at, a specific location on a chromosome." [GOC

26625 Pathogen[ Q2Q067] interacts with 1 human partners: {Q9BSI4}

26626 Pathogen[ P0C214] interacts with 2 human partners: {Q9BSI4;Q9BXT5}

26627 Pathogen[ P03346] interacts with 2 human partners: {Q9BSI4;Q9BXT5}

26628 Pathogen[ Q85601] interacts with 1 human partners: {Q9BXT5}

26629 Pathogen[ P14079] interacts with 2 human partners: {Q9BXT5;Q9BSI4}

26630 Pathogen[ P03383] interacts with 1 human partners: {Q9BSI4}

26631 Pathogen[ P03410] interacts with 2 human partners: {Q9BSI4;Q9BXT5}

26632 Pathogen[ P14075] interacts with 2 human partners: {Q9BSI4;Q9BXT5}

26633 Pathogen[ P0C206] interacts with 2 human partners: {Q9BSI4;Q9BXT5}

26634 Pathogen[ P03363] interacts with 2 human partners: {Q9BSI4;Q9BXT5}

26635 [Cluster 2422]GO:0033674+P biological\_process [name] positive regulation of kinase activity [def] "Any process that activates or increases the frequency, rate or extent of kinase activity, the catalysis of the transfer of a phosphate group, usually from ATP, to a substrate molecule." [GOC

26636 Pathogen[ Q2Q067] interacts with 5 human  
partners: {P49959;Q8TCI5;Q96IF1;O60934;Q969S3}

26637 Pathogen[ P0C214] interacts with 3 human partners: {Q969S3;P49959;Q8TCI5}

26638 Pathogen[ P03346] interacts with 5 human  
partners: {Q969S3;Q96IF1;P49959;O60934;Q8TCI5}

26639 Pathogen[ Q85601] interacts with 5 human  
partners: {P49959;Q8TCI5;Q969S3;Q96IF1;O60934}

26640 Pathogen[ P14079] interacts with 4 human partners: {O60934;Q96IF1;Q8TCI5;Q969S3}

26641 Pathogen[ P03383] interacts with 2 human partners: {Q8TCI5;Q969S3}

26642 Pathogen[ P03410] interacts with 5 human  
partners: {P49959;Q969S3;Q96IF1;Q8TCI5;O60934}

26643 Pathogen[ P14075] interacts with 2 human partners: {Q969S3;Q8TCI5}

26644 Pathogen[ P0C206] interacts with 5 human  
partners: {Q8TCI5;P49959;Q96IF1;O60934;Q969S3}

26645 Pathogen[ P03363] interacts with 3 human partners: {Q8TCI5;Q96IF1;Q969S3}

26646 [Cluster 2423]GO:0031124+P biological\_process [name] mRNA 3'-end processing [def] "Any process involved in forming the mature 3' end of an mRNA molecule." [GOC

26647 Pathogen[ Q2Q067] interacts with 27 human  
partners: {P33240;Q86U42;P61326;Q01130;Q8N684;Q07955;Q9BZI7;Q16629;Q10570;Q12996;P84103;Q8IYB3;Q05048;Q94913;Q86V81;Q05519;P26368;Q9Y5S9;Q01081;Q9P2I0;Q13243;O43809;Q09161;P52298;Q9UKF6;O60508;P51003}

26648 Pathogen[ P0C214] interacts with 28 human  
partners: {Q12996;Q9BZI7;P26368;Q09161;Q94913;Q9UKF6;P84103;Q86V81;Q9Y5S9;P51003;O60508;Q05048;Q10570;Q8N684;Q07955;P52298;Q8IYB3;O43809;P61326;Q13243;Q9P2I0;Q05519;Q01081;P33240;Q15287;Q86U42;Q16629;Q01130}

26649 Pathogen[ P03346] interacts with 31 human  
partners: {Q9Y5S9;Q9BZI7;Q86U42;Q09161;Q08170;Q8IYB3;Q9UKF6;Q8N684;Q13242;Q13247;P52298;Q16629;Q07955;Q05048;Q86V81;O60508;P51003;Q94913;P26368;Q01081;P61326;O43809;P84103;Q15287;Q05519;Q01130;Q9P2I0;Q13243;Q10570;Q12996;P33240}

26650 Pathogen[ Q85601] interacts with 27 human  
partners: {Q9BZI7;Q8IYB3;Q13243;Q05048;Q01130;Q8N684;P61326;Q15287;Q94913;Q86V81;Q16629;Q07955;Q09161;O60508;Q10570;Q9P2I0;Q01081;Q05519;P84103;P52298;P26368;P51003;Q86U42;Q9UKF6;P33240;O43809;Q9Y5S9}

26651 Pathogen[ P14079] interacts with 27 human  
partners: {O43809;Q15287;O60508;Q9UKF6;Q10570;P52298;Q13243;Q9Y5S9;P33240;P26368;Q94913;Q05048;Q8IYB3;Q16629;P61326;Q9BZI7;Q05519;Q8N684;Q86V81;Q86U42;Q07955;Q01081;P51003;Q12996;Q09161;P84103;Q9P2I0}

26652 Pathogen[ P03383] interacts with 26 human

partners: {Q07955;Q15287;Q05048;P51003;Q9Y5S9;Q10570;P61326;P26368;Q13243;Q86V81;Q9UKF6;Q09161;Q16629;Q8N684;Q94913;Q8IYB3;P33240;P84103;Q01130;Q01081;O43809;P52298;Q05519;Q9P2I0;Q86U42;Q9BZI7}

26653 Pathogen[ P03410] interacts with 28 human  
partners: {Q01081;P26368;Q10570;P61326;O60508;Q12996;Q05048;Q16629;Q15287;Q9Y5S9;Q9BZI7;P51003;Q43809;Q05519;Q94913;Q07955;P52298;Q9P2I0;P33240;Q86V81;Q8IYB3;Q01130;Q9UKF6;Q8N684;Q09161;P84103;Q86U42;Q13243}

26654 Pathogen[ P14075] interacts with 26 human  
partners: {P51003;Q05519;Q09161;O43809;Q9P2I0;Q86V81;Q13243;P61326;Q01130;P33240;Q05048;Q15287;P26368;Q01081;Q8IYB3;Q9Y5S9;P84103;Q8N684;Q9UKF6;Q86U42;Q16629;Q10570;Q94913;Q07955;P52298;Q9BZI7}

26655 Pathogen[ P0C206] interacts with 28 human  
partners: {Q15287;P33240;Q9UKF6;O60508;Q9BZI7;Q07955;P26368;P52298;P61326;Q01081;Q09161;Q94913;Q05519;Q8IYB3;Q8N684;Q13243;Q16629;Q86U42;P51003;O43809;Q9P2I0;Q05048;Q12996;P84103;Q01130;Q9Y5S9;Q86V81;Q10570}

26656 Pathogen[ P03363] interacts with 32 human  
partners: {Q9P2I0;Q10570;Q08170;Q05048;Q16629;Q01130;Q86U42;Q92620;Q94913;P61326;Q05519;Q15287;Q8N684;Q13242;Q8IYB3;O43809;P26368;P51003;Q13243;Q86V81;P52298;Q07955;Q01081;Q9BZI7;Q13247;Q9UKF6;P84103;P33240;Q9Y5S9;Q12996;O60508;Q09161}

26657 [Cluster 2424]GO:0045766+P biological\_process [name] positive regulation of angiogenesis [def] "Any process that activates or increases angiogenesis." [GOC]

26658 Pathogen[ Q2Q067] interacts with 7 human  
partners: {P14921;Q01196;Q86UE4;P62324;P23769;P29474;Q5UE93}

26659 Pathogen[ P0C214] interacts with 7 human  
partners: {P29474;P14921;P23769;P05121;Q86UE4;Q5UE93;P62324}

26660 Pathogen[ P03346] interacts with 8 human  
partners: {Q86UE4;P29474;P23769;Q86Z02;P14921;Q01196;Q5UE93;P62324}

26661 Pathogen[ Q85601] interacts with 7 human  
partners: {P14921;P23769;P62324;Q86UE4;P05121;P29474;Q5UE93}

26662 Pathogen[ P14079] interacts with 6 human  
partners: {Q86V25;P62324;O60895;Q86UE4;P23769;Q5UE93}

26663 Pathogen[ P03383] interacts with 6 human  
partners: {P29474;P62324;Q86UE4;P14921;P23769;Q5UE93}

26664 Pathogen[ P03410] interacts with 9 human  
partners: {P05121;Q5UE93;O60895;P29474;P62324;Q86UE4;P23769;Q86V25;P14921}

26665 Pathogen[ P14075] interacts with 6 human  
partners: {P29474;P62324;Q86UE4;P23769;Q5UE93;P14921}

26666 Pathogen[ P0C206] interacts with 8 human  
partners: {P62324;P14921;P23769;P29474;P05121;Q5UE93;Q86UE4;Q86V25}

26667 Pathogen[ P03363] interacts with 7 human  
partners: {P29474;P14921;Q8N302;Q86UE4;Q86V25;Q5UE93;P62324}

26668 [Cluster 2425]GO:0007259+P biological\_process [name] JAK-STAT cascade [def] "Any process in which STAT proteins (Signal Transducers and Activators of Transcription) and JAK (Janus Activated Kinase) proteins convey a signal to trigger a change in the activity or state of a cell. The JAK-STAT cascade begins with activation of STAT proteins by members of the JAK family of tyrosine kinases, proceeds through dimerization and subsequent nuclear translocation of STAT proteins, and ends with regulation of target gene expression by STAT proteins." [GOC]

26669 Pathogen[ Q2Q067] interacts with 8 human  
partners: {O75925;P40763;Q6PD62;Q14765;Q13287;O14508;P52630;P42224}

26670 Pathogen[ P0C214] interacts with 9 human  
partners: {O75925;Q14765;P42224;O14508;P40763;P52630;O15524;Q6PD62;Q13287}

26671 Pathogen[ P03346] interacts with 10 human  
partners: {Q6PD62;O15524;O95630;Q13287;O14508;O75925;P42224;Q14765;P52630;P40763}

26672 Pathogen[ Q85601] interacts with 9 human  
partners: {Q6PD62;Q14765;P40763;O14508;P52630;P42224;O95630;O75925;Q13287}

26673 Pathogen[ P14079] interacts with 7 human  
partners: {P52630;Q14765;Q6PD62;P42224;O14508;O75925;Q13287}

26674 Pathogen[ P03383] interacts with 4 human partners: {O75925;Q6PD62;P52630;Q13287}

26675 Pathogen[ P03410] interacts with 7 human  
partners: {O75925;Q6PD62;Q14765;Q13287;O14508;P52630;P40763}

26676 Pathogen[ P14075] interacts with 4 human partners: {P52630;Q13287;O75925;Q6PD62}

26677 Pathogen[ P0C206] interacts with 10 human  
partners: {Q6PD62;O75925;O95630;O15524;Q13287;O14508;P40763;Q14765;P42224;P52630}

26678 Pathogen[ P03363] interacts with 7 human  
partners: {P52630;Q14765;O15524;O75925;O14508;Q13287;Q6PD62}

26679 [Cluster 2426]GO:0070498+P biological\_process [name] interleukin-1-mediated signaling pathway [def] "A series of molecular signals generated as a consequence of interleukin-1 binding to a cell surface receptor." [GOC]

26680 Pathogen[ Q2Q067] interacts with 3 human partners: {O75582;Q8NFZ5;P18146}

26681 Pathogen[ P0C214] interacts with 3 human partners: {O75582;Q8NFZ5;P18146}

26682 Pathogen[ P03346] interacts with 3 human partners: {Q8NFZ5;O75582;P18146}

26683 Pathogen[ Q85601] interacts with 3 human partners: {P18146;Q8NFZ5;O75582}

26684 Pathogen[ P14079] interacts with 3 human partners: {O43187;O75582;Q8NFZ5}

26685 Pathogen[ P03383] interacts with 3 human partners: {O75582;P18146;Q8NFZ5}

26686 Pathogen[ P03410] interacts with 4 human partners: {Q8NFZ5;O75582;O43187;P18146}

26687 Pathogen[ P14075] interacts with 3 human partners:{O75582;P18146;Q8NFZ5}  
26688 Pathogen[ P0C206] interacts with 3 human partners:{O75582;Q8NFZ5;P18146}  
26689 Pathogen[ P03363] interacts with 2 human partners:{P18146;Q8NFZ5}  
26690 [Cluster 2427]GO:0046022+P biological\_process [name] positive regulation of transcription from RNA polymerase II promoter during mitosis [def] "Any process that activates or increases the frequency, rate or extent of transcription from an RNA polymerase II promoter during mitosis." [GOC  
26691 Pathogen[ Q2Q067] interacts with 1 human partners:{P15407}  
26692 Pathogen[ P0C214] interacts with 2 human partners:{P15407;P17275}  
26693 Pathogen[ P03346] interacts with 3 human partners:{P17275;Q9HCS4;P15407}  
26694 Pathogen[ Q85601] interacts with 3 human partners:{P15407;Q9HCS4;P17275}  
26695 Pathogen[ P14079] interacts with 2 human partners:{P17275;P15407}  
26696 Pathogen[ P03383] interacts with 2 human partners:{P15407;P17275}  
26697 Pathogen[ P03410] interacts with 3 human partners:{P17275;Q9HCS4;P15407}  
26698 Pathogen[ P14075] interacts with 2 human partners:{P17275;P15407}  
26699 Pathogen[ P0C206] interacts with 3 human partners:{P15407;P17275;Q9HCS4}  
26700 Pathogen[ P03363] interacts with 3 human partners:{Q9HCS4;P17275;P15407}  
26701 [Cluster 2428]GO:0007018+P biological\_process [name] microtubule-based movement [def] "A microtubule-based process that is mediated by motor proteins and results in the movement of organelles, other microtubules, or other particles along microtubules." [GOC  
26702 Pathogen[ Q2Q067] interacts with 13 human partners:{Q8TF09;Q9H1H9;Q14204;Q9NP97;Q96Q89;Q8TD16;Q9H0B6;Q02241;O00139;Q07866;Q13409;Q92845;O14576}  
26703 Pathogen[ P0C214] interacts with 12 human partners:{Q07866;Q02241;Q8TF09;Q14204;O00139;Q9H0B6;Q96Q89;Q8TD16;Q92845;O14576;Q9NP97;Q13409}  
26704 Pathogen[ P03346] interacts with 15 human partners:{Q15058;O14576;Q12840;O00139;Q9H1H9;Q14204;Q8TF09;Q96Q89;Q8TD16;Q02241;Q13409;Q92845;Q9NP97;Q9H0B6;Q07866}  
26705 Pathogen[ Q85601] interacts with 16 human partners:{Q13409;Q9NP97;Q02241;Q14204;Q9H1H9;Q96015;Q12840;Q96Q89;Q15058;O14576;Q8TD16;Q92845;Q8TF09;Q07866;O00139;Q9H0B6}  
26706 Pathogen[ P14079] interacts with 26 human partners:{Q8TF09;Q6ZMV9;Q07866;Q9NZ32;Q12840;Q02241;Q14204;Q7Z4S6;P68363;Q9NP97;O15066;Q99661;Q96Q89;Q60282;O00139;Q15058;Q9H1H9;Q13409;Q86Y91;Q5T7B8;O14576;Q92845;Q96015;Q95235;Q9H0B6;Q8TD16}  
26707 Pathogen[ P03383] interacts with 8 human partners:{Q02241;Q9H0B6;Q9H1H9;Q9NP97;Q96Q89;Q07866;Q92845;Q8TF09}  
26708 Pathogen[ P03410] interacts with 27 human partners:{Q86Y91;Q14204;Q96Q89;Q15058;Q07866;Q13409;Q9NP97;Q9H0B6;O00139;Q8TF09;Q9NZ32;Q9H1H9;Q60282;Q7Z4S6;Q92845;Q8TD16;Q12840;Q60333;O14576;Q6ZMV9;Q9BVA1;P68363;P33176;Q5T7B8;Q96015;Q02241;Q6PJI1}  
26709 Pathogen[ P14075] interacts with 9 human partners:{Q9NP97;Q9H1H9;Q02241;Q92845;Q8TF09;O00139;Q07866;Q9H0B6;Q96Q89}  
26710 Pathogen[ P0C206] interacts with 19 human partners:{Q9NP97;O14576;Q96Q89;Q92845;Q9NZ32;Q8TF09;Q9H1H9;Q02241;Q13409;Q86Y91;Q14204;Q9H0B6;Q12840;O00139;Q15058;Q9BW19;Q8TD16;Q96015;Q07866}  
26711 Pathogen[ P03363] interacts with 27 human partners:{Q92845;Q2VIQ3;P33176;P68363;Q14204;Q02241;Q7Z4S6;Q07866;Q14807;Q6ZMV9;Q60282;Q13748;Q9H0B6;Q8TF09;Q9NZ32;Q5T7B8;Q13409;O15066;Q15058;Q96Q89;Q60333;Q9H1H9;Q9NP97;O00139;Q8TD16;O14576;Q12840}  
26712 [Cluster 2429]GO:0045945+P biological\_process [name] positive regulation of transcription from RNA polymerase III promoter [def] "Any process that activates or increases the frequency, rate or extent of transcription from an RNA polymerase III promoter." [GOC  
26713 Pathogen[ Q2Q067] interacts with 2 human partners:{Q9HCK8;P49715}  
26714 Pathogen[ P0C214] interacts with 1 human partners:{Q9HCK8}  
26715 Pathogen[ P03346] interacts with 2 human partners:{P49715;Q9HCK8}  
26716 Pathogen[ Q85601] interacts with 2 human partners:{Q9HCK8;P49715}  
26717 Pathogen[ P14079] interacts with 2 human partners:{P49715;Q9HCK8}  
26718 Pathogen[ P03383] interacts with 1 human partners:{Q9HCK8}  
26719 Pathogen[ P03410] interacts with 1 human partners:{Q9HCK8}  
26720 Pathogen[ P14075] interacts with 1 human partners:{Q9HCK8}  
26721 Pathogen[ P0C206] interacts with 2 human partners:{Q9HCK8;P49715}  
26722 Pathogen[ P03363] interacts with 1 human partners:{Q9HCK8}  
26723 [Cluster 2430]GO:0003310+P biological\_process [name] pancreatic A cell differentiation [def] "The process in which relatively unspecialized cells acquire specialized structural and functional features of a pancreatic A cell. A pancreatic A cell is a cell in the pancreas that secretes glucagon." [GOC  
26724 Pathogen[ Q2Q067] interacts with 1 human partners:{Q8HWS3}  
26725 Pathogen[ P0C214] interacts with 1 human partners:{Q8HWS3}  
26726 Pathogen[ P03346] interacts with 1 human partners:{Q8HWS3}  
26727 Pathogen[ Q85601] interacts with 1 human partners:{Q8HWS3}  
26728 Pathogen[ P14079] interacts with 1 human partners:{Q8HWS3}  
26729 Pathogen[ P03383] interacts with 1 human partners:{Q8HWS3}  
26730 Pathogen[ P03410] interacts with 1 human partners:{Q8HWS3}

26731 Pathogen[ P14075] interacts with 1 human partners:{Q8HWS3}

26732 Pathogen[ P0C206] interacts with 1 human partners:{Q8HWS3}

26733 Pathogen[ P03363] interacts with 1 human partners:{Q8HWS3}

26734 [Cluster 2431]GO:0051649+P biological\_process [name] establishment of localization in cell [def] "The directed movement of a substance or cellular entity, such as a protein complex or organelle, to a specific location within, or in the membrane of, a cell." [GOC

26735 Pathogen[ Q2Q067] interacts with 1 human partners:{095229}

26736 Pathogen[ P0C214] interacts with 1 human partners:{095229}

26737 Pathogen[ P03346] interacts with 1 human partners:{095229}

26738 Pathogen[ Q85601] interacts with 1 human partners:{095229}

26739 Pathogen[ P14079] interacts with 1 human partners:{095229}

26740 Pathogen[ P03383] interacts with 1 human partners:{095229}

26741 Pathogen[ P03410] interacts with 1 human partners:{095229}

26742 Pathogen[ P14075] interacts with 1 human partners:{095229}

26743 Pathogen[ P0C206] interacts with 1 human partners:{095229}

26744 Pathogen[ P03363] interacts with 1 human partners:{095229}

26745 [Cluster 2432]GO:0010498+P biological\_process [name] proteasomal protein catabolic process [def] "The chemical reactions and pathways resulting in the breakdown of a protein or peptide by hydrolysis of its peptide bonds that is mediated by the proteasome." [GOC

26746 Pathogen[ Q2Q067] interacts with 1 human partners:{Q13794}

26747 Pathogen[ P0C214] interacts with 1 human partners:{Q13794}

26748 Pathogen[ P03346] interacts with 1 human partners:{Q13794}

26749 Pathogen[ Q85601] interacts with 1 human partners:{Q13794}

26750 Pathogen[ P14079] interacts with 1 human partners:{Q13794}

26751 Pathogen[ P03383] interacts with 1 human partners:{Q13794}

26752 Pathogen[ P03410] interacts with 1 human partners:{Q13794}

26753 Pathogen[ P14075] interacts with 1 human partners:{Q13794}

26754 Pathogen[ P0C206] interacts with 1 human partners:{Q13794}

26755 Pathogen[ P03363] interacts with 1 human partners:{Q13794}

26756 [Cluster 2433]GO:0032007+P biological\_process [name] negative regulation of TOR signaling cascade [def] "Any process that stops, prevents, or reduces the frequency, rate or extent of signaling via the TOR signaling pathway." [GOC

26757 Pathogen[ Q2Q067] interacts with 2 human partners:{Q8IYW8;Q96B36}

26758 Pathogen[ P0C214] interacts with 3 human partners:{Q8IYW8;Q96B36;Q8IYW7}

26759 Pathogen[ P03346] interacts with 3 human partners:{Q96B36;Q8IYW8;Q8TB45}

26760 Pathogen[ Q85601] interacts with 3 human partners:{Q8IYW7;Q96B36;Q8IYW8}

26761 Pathogen[ P14079] interacts with 6 human partners:{Q8IYW8;Q8IYW7;Q9NX09;Q8TB45;Q96B36;O75204}

26762 Pathogen[ P03383] interacts with 2 human partners:{Q8IYW8;Q96B36}

26763 Pathogen[ P03410] interacts with 6 human partners:{Q8IYW8;Q8IYW7;Q96B36;O75204;Q8TB45;Q9NX09}

26764 Pathogen[ P14075] interacts with 2 human partners:{Q96B36;Q8IYW8}

26765 Pathogen[ P0C206] interacts with 3 human partners:{Q96B36;Q8IYW7;Q8IYW8}

26766 Pathogen[ P03363] interacts with 3 human partners:{Q96B36;Q8TB45;Q8IYW8}

26767 [Cluster 2434]GO:0009887+P biological\_process [name] organ morphogenesis [def] "Morphogenesis of an organ. An organ is defined as a tissue or set of tissues that work together to perform a specific function or functions. Morphogenesis is the process in which anatomical structures are generated and organized. Organs are commonly observed as visibly distinct structures, but may also exist as loosely associated clusters of cells that work together to perform a specific function or functions." [GOC

26768 Pathogen[ Q2Q067] interacts with 26 human partners:{O43365;O14786;Q99502;P10827;Q04726;Q92922;Q01543;O14639;P10828;Q04206;O95948;Q86YC2;P59047;O75496;Q9Y603;Q13616;Q16254;P23760;Q04725;O75360;O43186;Q13642;Q04724;Q9BX26;Q14129;P40424}

26769 Pathogen[ P0C214] interacts with 29 human partners:{P40424;Q9UI08;Q16254;P32243;O43365;O14786;P22735;O43186;O75496;Q04206;O14639;Q04724;Q14129;P53701;Q92922;Q13642;Q04726;Q9Y603;Q01543;Q13616;O75360;Q86YC2;Q9BX26;Q04725;P10828;O95948;P59047;P23760;Q99502}

26770 Pathogen[ P03346] interacts with 44 human partners:{P31271;P59047;P47902;Q3YBM2;O75364;P10827;O14639;Q13616;Q9BX26;Q99626;P41225;P23760;Q04206;Q14129;O43186;Q9UI08;Q99502;Q16254;O43316;P78426;O43680;O43365;Q04726;Q9C0J9;Q96922;O95948;Q04725;Q04724;Q02548;P46109;Q86YC2;Q13642;O95475;Q92922;P10828;Q9UBR4;P40424;O75360;P22735;Q9Y603;P32243;O14786;Q01543;O75496}

26771 Pathogen[ Q85601] interacts with 28 human partners:{O14639;O75496;O75360;O43316;Q04724;Q9Y603;Q13616;Q13642;Q9BX26;O14786;Q04725;P40424;Q04726;O95948;Q04206;Q99502;Q01543;Q16254;Q86YC2;P10827;P32243;P31271;O43365;P10828;Q14129;Q92922;P23760;P59047}

26772 Pathogen[ P14079] interacts with 34 human partners:{Q04725;P15502;Q99502;P22735;Q16254;P10828;O95948;P46109;O14639;Q92922;Q14129;Q86YC2;P31271;P10827;Q01543;Q13642;Q14353;O94772;O75360;Q53GA4;P13232;Q9Y603;O43365;Q04726;Q9BX26;P32243;Q04724;Q13616;P53701;P59047;O75496;Q3YBM2;Q9UI08;P23760}

26773 Pathogen[ P03383] interacts with 24 human partners:{Q13616;P32243;Q14129;O14639;P40424;Q3YBM2;O75360;O43365;Q04724;Q04726;Q04725;Q16254;Q01543;O43186;P23760;Q04206;Q86YC2;Q92922;P10828;Q13642;Q9Y603;P15502;O754



96;Q9BX26}  
26774 Pathogen[ P03410] interacts with 35 human  
partners:{O14786;Q04206;Q14129;Q14353;Q9UI08;Q04726;Q99502;Q53GA4;Q16254;O14639;Q047  
24;P59047;O95948;P10828;Q9Y603;P15502;Q9BX26;P53701;Q92922;Q13642;Q13616;P32243;O754  
96;P23760;Q3YBM2;O75360;P40424;O94772;Q86YC2;P46109;O43365;Q01543;Q04725;P13232;P227  
35}  
26775 Pathogen[ P14075] interacts with 25 human  
partners:{Q14129;Q04206;P40424;Q04725;Q01543;P10828;Q86YC2;Q9BX26;O43186;Q92922;Q9Y6  
03;O43365;Q13642;Q04726;Q3YBM2;Q16254;O75360;O14639;P15502;Q04724;Q99502;P23760;Q136  
16;O75496;P32243}  
26776 Pathogen[ P0C206] interacts with 37 human  
partners:{P53701;O75496;Q13642;O43365;Q86YC2;P15502;Q02548;Q04726;Q9C0J9;Q92922;Q047  
25;Q9UI08;Q13616;Q9Y603;Q9BX26;Q16254;P40424;Q969G2;O14786;O75360;P10828;P59047;P322  
43;Q3YBM2;Q04206;P23760;Q04724;Q99502;P31271;Q14129;O14639;Q9UBR4;P22735;Q01543;O433  
16;P10827;O95948}  
26777 Pathogen[ P03363] interacts with 35 human  
partners:{P10828;O95948;P47902;O75360;Q04206;Q99626;O14786;O43365;P23760;P31271;Q015  
43;Q9C0J9;Q16254;O43316;Q04726;P46109;Q9Y603;P32243;Q04724;Q3YBM2;Q13616;Q9UI08;O431  
86;P59047;Q14129;O75496;Q04725;P40424;Q13642;Q02548;O95475;Q92922;Q9BX26;O14639;Q86Y  
C2}  
26778 [Cluster 2435]GO:0060416+P biological\_process [name] response to growth hormone  
stimulus [def] "Any process that results in a change in state or activity of a cell  
or an organism (in terms of movement, secretion, enzyme production, gene expression,  
etc.) as a result of a growth hormone stimulus. Growth hormone is a peptide hormone that  
binds to the growth hormone receptor and stimulates growth." [GOC  
26779 Pathogen[ Q2Q067] interacts with 2 human partners:{Q9HB71;P10914}  
26780 Pathogen[ P0C214] interacts with 2 human partners:{P10914;Q9HB71}  
26781 Pathogen[ P03346] interacts with 3 human partners:{Q9HB71;P10914;O95361}  
26782 Pathogen[ Q85601] interacts with 2 human partners:{P10914;Q9HB71}  
26783 Pathogen[ P14079] interacts with 3 human partners:{Q9HB71;O95361;P10914}  
26784 Pathogen[ P03383] interacts with 2 human partners:{P10914;Q9HB71}  
26785 Pathogen[ P03410] interacts with 2 human partners:{Q9HB71;P10914}  
26786 Pathogen[ P14075] interacts with 2 human partners:{P10914;Q9HB71}  
26787 Pathogen[ P0C206] interacts with 3 human partners:{P10914;Q9HB71;O95361}  
26788 Pathogen[ P03363] interacts with 2 human partners:{Q9HB71;P10914}  
26789 [Cluster 2436]GO:0007596+P biological\_process [name] blood coagulation [def] "The  
sequential process in which the multiple coagulation factors of the blood interact,  
ultimately resulting in the formation of an insoluble fibrin clot\_ it may be divided  
into three stages  
26790 Pathogen[ Q2Q067] interacts with 59 human  
partners:{Q9NQG7;Q9UL45;P46108;P31749;O15525;O00186;P63104;P07737;Q13356;Q8WW38;P010  
09;Q13547;Q6QNY0;P14316;P56945;Q96EV8;P15976;Q9BWX5;Q96ST3;P23528;Q9UKL0;Q07021;O435  
02;P23769;P62328;Q96BD5;Q9ULX9;Q8WYR1;P68871;P10914;Q13310;Q92769;P29474;P08697;Q130  
94;Q16621;Q8IX07;Q9H0B6;Q02241;O00139;Q07866;O60675;P42768;Q5JVS0;P60953;P27986;P630  
00;Q92845;P24941;Q15652;P45973;Q86YV9;Q5UE93;P10242;Q8TDN4;P61586;P62937;Q9P0W2;Q9UP  
Z3}  
26791 Pathogen[ P0C214] interacts with 71 human  
partners:{Q13310;Q9NQG7;P29474;Q07866;P08697;P60709;P63000;Q5JVS0;Q9UK55;Q13547;P569  
45;P02042;Q02241;P62993;Q99698;Q16621;P23769;P61586;O00186;Q96BD5;P60953;P10914;Q86Y  
V9;O00139;P05121;Q13094;Q6QNY0;Q9H0B6;Q8TDN4;P18545;P10124;P68871;P69892;P49257;Q9P0  
W2;Q8WYR1;Q13356;Q9UKL0;Q92769;Q8WW38;Q15652;Q9UL45;P05546;O43502;P02100;P24941;Q9UL  
X9;Q5UE93;O15525;P07093;P01008;Q96EV8;Q8IX07;Q92845;P10242;P10909;P05120;Q96ST3;P459  
73;O76083;P46108;P69891;P42768;Q5VZK9;P63261;P27986;O60675;P14316;P31749;P62328;Q9UP  
Z3}  
26792 Pathogen[ P03346] interacts with 69 human  
partners:{Q9NQG7;Q96ST3;Q86YV9;Q16621;Q99698;P45973;Q12840;Q9UKL0;P29474;Q9P0W2;Q8WY  
R1;Q8WW38;O43502;P42768;Q9BWX5;O00139;P02100;P49257;P14316;P23769;P24941;P62937;P607  
09;Q07021;P60953;P62993;Q8TDN4;Q15652;Q9NRF2;Q9ULX9;O00186;Q6QNY0;Q9Y6F6;Q9BZ29;P102  
42;P56945;P15976;P31749;Q96EV8;P10914;O15315;Q92769;Q13094;Q13547;Q8IX07;Q9UL45;Q133  
56;P46108;Q02241;P68871;O15525;Q96BD5;Q5JVS0;P63104;P62328;P01009;Q5UE93;Q13310;Q928  
45;P07737;P23528;O60675;P63000;Q9UPZ3;Q5VZK9;P27986;Q9H0B6;Q07866;P61586}  
26793 Pathogen[ Q85601] interacts with 74 human  
partners:{Q9NQG7;Q9UPZ3;O00186;Q6QNY0;P63104;O43502;O15315;P31749;P62993;P14316;Q022  
41;Q5JVS0;Q9P0W2;Q9BWX5;P15976;Q96BD5;Q8WW38;Q16621;Q13310;P02042;P23769;P63000;P102  
42;P46108;Q8TDN4;O15525;P02100;P08697;Q86YV9;P10914;P27986;Q12840;P07737;P60709;P010  
09;P69892;P56945;Q96EV8;Q5VZK9;P49257;Q92769;P63261;P45973;P42768;Q8IX07;P05121;P615  
86;Q13356;P29474;P68871;P05120;P01008;P60953;P62328;Q92845;Q8WYR1;P69891;Q13547;P235  
28;Q15652;P07093;O60675;Q07021;Q9UKL0;Q5UE93;P62937;P24941;Q07866;O00139;Q9H0B6;Q9UL  
X9;Q99698;Q13094;Q96ST3}  
26794 Pathogen[ P14079] interacts with 79 human  
partners:{Q9NQG7;Q9NRQ2;Q86YV9;Q5JVS0;O15315;P02042;P49257;Q8N6Q3;P69891;P63261;Q142  
42;Q9BWX5;Q01518;Q6QNY0;P02100;Q07866;Q96ST3;Q12840;Q08722;Q9H1K0;P47756;Q13094;Q022  
41;Q8WYR1;O60675;Q92902;P07737;Q13310;P15976;P10909;P62937;Q15652;P63104;P45973;O001  
86;O15066;P68871;P18545;Q8TDN4;P08758;Q9P0W2;Q99661;Q8NCG7;Q13356;Q96BD5;Q9UPZ3;Q927  
69;Q9UL45;P23528;O00139;P62328;P61586;P60709;Q8IX07;P10124;Q9UKL0;Q9ULX9;Q16621;O435  
02;P62993;O15525;O43561;Q96EV8;Q9Y6F6;P13928;Q92845;P10242;Q99698;Q07021;Q9H0B6;P698

26795 Pathogen[ P03383] interacts with 54 human partners: {Q9NQG7;P27986;Q6QNY0;P10914;P56945;P14316;Q5JVS0;P29474;Q02241;Q13356;Q8WW38;P31749;Q96BD5;P60953;P62328;P08697;Q00186;P62937;P23769;P63000;P68871;Q9H0B6;P07737;Q96EV8;O15525;P01009;P01008;Q16621;P45973;Q15652;P63104;P61586;P24941;Q92769;P42768;Q86YV9;Q8TDN4;Q07866;Q13094;Q9P0W2;Q13547;P10124;Q9UKL0;P10242;Q07021;Q8WYR1;Q9UPZ3;Q9UE93;O60675;Q96ST3;Q13310;Q92845;P23528;Q9ULX9}

26796 Pathogen[ P03410] interacts with 87 human partners: {Q9NQG7;O00203;Q13094;P27986;P05121;O60675;Q5UE93;Q8NCG7;Q07866;P62328;P02100;Q8WYR1;Q8N6Q3;P47756;Q9H0B6;O00139;P49257;Q15652;P63000;O15315;Q92902;Q6QNY0;Q14242;P10242;P10124;O43561;Q9NRQ2;Q9P0W2;Q92845;Q9Y6F6;Q07021;P31749;P45973;P42768;Q12840;Q96ST3;Q8WW38;Q9UL45;Q13356;O15525;P29474;Q8IX07;P62937;P68871;Q92769;Q9BWX5;Q9UPZ3;O43502;P18545;Q86YV9;P61586;P24941;P08697;Q16621;Q5JVS0;Q08722;P10914;Q9ULX9;Q9H1K0;P02042;P63104;P60953;P23769;P46108;P56945;Q13547;Q99698;P63261;Q5VZK9;P01009;P14316;Q96BD5;Q01518;Q9UKL0;P23528;O00186;P69892;P62993;Q8TDN4;P07737;Q13310;Q96EV8;P15976;P60709;Q02241;P10909;P69891}

26797 Pathogen[ P14075] interacts with 54 human partners: {P60953;Q9NQG7;P29474;P68871;Q96ST3;P24941;Q02241;Q07021;Q8WYR1;O00186;P62328;Q92845;P23769;Q9UKL0;Q9Y6F6;P42768;Q15652;O60675;Q5UE93;Q9ULX9;P45973;P01009;Q8WW38;P10242;Q13547;P07737;P23528;P31749;Q13310;O00139;Q92769;Q5JVS0;P27986;Q86YV9;Q6QNY0;P63104;P08697;Q96BD5;P61586;Q9UPZ3;P14316;Q13094;P63000;O15525;Q96EV8;P62937;P10124;Q16621;Q07866;Q9H0B6;P10914;Q8TDN4;Q9P0W2;P56945}

26798 Pathogen[ P0C206] interacts with 81 human partners: {O43502;Q9NQG7;P68871;P10914;Q92769;P60709;P45973;Q96ST3;P31749;P01008;Q9UL45;Q8TDN4;P47756;Q92845;P02100;P69892;P18545;Q9UPZ3;Q07021;P62328;Q9UKL0;Q9H1K0;Q8WW38;P10242;Q99698;Q13547;P01009;O15525;P15976;Q02241;P27986;P62993;P61586;P69891;Q9BWX5;P30291;P63104;Q9H0B6;Q9P0W2;Q5JVS0;Q13310;P63000;Q5VZK9;Q96EV8;P63261;O15315;P49257;Q9Y6F6;P10909;Q12840;P60953;O00139;Q15652;Q13356;P23769;P29474;Q8IX07;P05121;Q16621;Q5UE93;P56945;P46108;Q6QNY0;Q13094;P42768;P07737;Q86YV9;O60675;P02042;Q9BW19;P23528;P24941;P62937;P14316;P10124;Q96BD5;Q07866;Q9ULX9;O00186;P08697;Q8WYR1}

26799 Pathogen[ P03363] interacts with 60 human partners: {Q9NQG7;Q92845;P29474;P62937;Q8WYR1;Q2VIQ3;P60709;P68871;Q9UPZ3;P62328;P45973;Q5VZK9;Q13356;P42768;Q02241;Q16621;P24941;Q15652;P63000;Q07866;Q14807;Q07021;Q96BD5;P63104;Q9H0B6;Q92902;Q99698;Q5UE93;P31749;P14316;Q5JVS0;O15525;Q13310;Q96ST3;P10914;P23528;P46108;Q13547;O00186;O15066;Q9BWX5;P10242;P56945;Q8TDN4;P63261;O60675;Q9Y6F6;Q9UKL0;Q8WW38;O00139;Q9P0W2;Q9ULX9;P60953;P27986;Q6QNY0;Q12840;P07737;Q13094;O43502;O15315}

26800 [Cluster 2437]GO:0009294+P biological\_process [name] DNA mediated transformation [def] "The introduction and uptake of foreign genetic material (DNA or RNA) into a cell, and often the expression of that genetic material." [ISBN

26801 Pathogen[ Q2Q067] interacts with 1 human partners: {Q13129}

26802 Pathogen[ P0C214] interacts with 1 human partners: {Q13129}

26803 Pathogen[ P03346] interacts with 1 human partners: {Q13129}

26804 Pathogen[ Q85601] interacts with 1 human partners: {Q13129}

26805 Pathogen[ P14079] interacts with 2 human partners: {Q13129;Q9UQE7}

26806 Pathogen[ P03383] interacts with 1 human partners: {Q13129}

26807 Pathogen[ P03410] interacts with 2 human partners: {Q9UQE7;Q13129}

26808 Pathogen[ P14075] interacts with 1 human partners: {Q13129}

26809 Pathogen[ P0C206] interacts with 2 human partners: {Q9UQE7;Q13129}

26810 Pathogen[ P03363] interacts with 1 human partners: {Q13129}

26811 [Cluster 2438]GO:0043044+P biological\_process [name] ATP-dependent chromatin remodeling [def] "Dynamic structural changes to eukaryotic chromatin that require energy from the hydrolysis of ATP, ranging from local changes necessary for transcriptional regulation to global changes necessary for chromosome segregation, mediated by ATP-dependent chromatin-remodelling factors." [GOC

26812 Pathogen[ Q2Q067] interacts with 3 human partners: {Q9H4L7;Q9HCK8;P28370}

26813 Pathogen[ P0C214] interacts with 4 human partners: {Q9H4L7;P28370;Q9HCK8;O60264}

26814 Pathogen[ P03346] interacts with 4 human partners: {O60264;Q9HCK8;P28370;Q9H4L7}

26815 Pathogen[ Q85601] interacts with 4 human partners: {Q9H4L7;Q9HCK8;P28370;O60264}

26816 Pathogen[ P14079] interacts with 4 human partners: {P28370;Q9H4L7;Q9HCK8;O60264}

26817 Pathogen[ P03383] interacts with 2 human partners: {P28370;Q9HCK8}

26818 Pathogen[ P03410] interacts with 4 human partners: {Q9H4L7;Q9HCK8;O60264;P28370}

26819 Pathogen[ P14075] interacts with 2 human partners: {Q9HCK8;P28370}

26820 Pathogen[ P0C206] interacts with 5 human partners: {Q9H4L7;Q9HCK8;P28370;Q9UIG0;O60264}

26821 Pathogen[ P03363] interacts with 4 human partners: {Q9H4L7;O60264;Q9HCK8;P28370}

26822 [Cluster 2439]GO:0051170+P biological\_process [name] nuclear import [def] "The directed movement of substances into the nucleus." [GOC

26823 Pathogen[ Q2Q067] interacts with 1 human partners: {Q9BUP3}

26824 Pathogen[ P0C214] interacts with 1 human partners: {Q9BUP3}

26825 Pathogen[ P03346] interacts with 2 human partners: {P09651;Q9BUP3}

26826 Pathogen[ Q85601] interacts with 1 human partners: {Q9BUP3}

26827 Pathogen[ P14079] interacts with 1 human partners: {Q9BUP3}

26828 Pathogen[ P03383] interacts with 1 human partners: {Q9BUP3}

26829 Pathogen[ P03410] interacts with 1 human partners: {Q9BUP3}

26830 Pathogen[ P14075] interacts with 1 human partners: {Q9BUP3}

26831 Pathogen[ P0C206] interacts with 1 human partners:{Q9BUP3}  
26832 Pathogen[ P03363] interacts with 2 human partners:{Q9BUP3;P09651}  
26833 [Cluster 2440]GO:0048305+P biological\_process [name] immunoglobulin secretion [def] "The regulated release of immunoglobulins from a B cell or plasma cell, whose mechanism includes the use of alternate polyadenylation signals to favor the biosynthesis of secreted forms of immunoglobulin over membrane-bound immunoglobulin." [GOC  
26834 Pathogen[ Q2Q067] interacts with 2 human partners:{O43734;P09086}  
26835 Pathogen[ P0C214] interacts with 2 human partners:{O43734;P09086}  
26836 Pathogen[ P03346] interacts with 3 human partners:{P09086;O43734;Q8IWW1}  
26837 Pathogen[ Q85601] interacts with 1 human partners:{P09086}  
26838 Pathogen[ P14079] interacts with 3 human partners:{P09086;Q8IWW1;O43734}  
26839 Pathogen[ P03383] interacts with 1 human partners:{O43734}  
26840 Pathogen[ P03410] interacts with 2 human partners:{Q8IWW1;O43734}  
26841 Pathogen[ P14075] interacts with 2 human partners:{Q8IWW1;O43734}  
26842 Pathogen[ P0C206] interacts with 3 human partners:{Q8IWW1;O43734;P09086}  
26843 Pathogen[ P03363] interacts with 2 human partners:{P09086;O43734}  
26844 [Cluster 2441]GO:0021740+P biological\_process [name] principal sensory nucleus of trigeminal nerve development [def] "The process whose specific outcome is the progression of the pontine nucleus over time, from its formation to the mature structure." [GO\_REF  
26845 Pathogen[ Q2Q067] interacts with 1 human partners:{O00712}  
26846 Pathogen[ P0C214] interacts with 1 human partners:{O00712}  
26847 Pathogen[ P03346] interacts with 1 human partners:{O00712}  
26848 Pathogen[ Q85601] interacts with 1 human partners:{O00712}  
26849 Pathogen[ P14079] interacts with 1 human partners:{O00712}  
26850 Pathogen[ P03383] interacts with 1 human partners:{O00712}  
26851 Pathogen[ P03410] interacts with 1 human partners:{O00712}  
26852 Pathogen[ P14075] interacts with 1 human partners:{O00712}  
26853 Pathogen[ P0C206] interacts with 1 human partners:{O00712}  
26854 Pathogen[ P03363] interacts with 1 human partners:{O00712}  
26855 [Cluster 2442]GO:0033148+P biological\_process [name] positive regulation of intracellular estrogen receptor signaling pathway [def] "Any process that activates or increases the frequency, rate or extent of the activity of an intracellular estrogen receptor signaling pathway." [GOC  
26856 Pathogen[ Q2Q067] interacts with 3 human partners:{O14686;Q13309;Q92841}  
26857 Pathogen[ P0C214] interacts with 2 human partners:{Q92841;Q13309}  
26858 Pathogen[ P03346] interacts with 3 human partners:{Q92841;Q13309;O14686}  
26859 Pathogen[ Q85601] interacts with 2 human partners:{Q13309;O14686}  
26860 Pathogen[ P14079] interacts with 1 human partners:{Q13309}  
26861 Pathogen[ P03383] interacts with 2 human partners:{Q92841;Q13309}  
26862 Pathogen[ P03410] interacts with 1 human partners:{Q13309}  
26863 Pathogen[ P14075] interacts with 2 human partners:{Q13309;Q92841}  
26864 Pathogen[ P0C206] interacts with 3 human partners:{Q13309;O14686;Q92841}  
26865 Pathogen[ P03363] interacts with 3 human partners:{Q13309;Q92841;O14686}  
26866 [Cluster 2443]GO:0048167+P biological\_process [name] regulation of synaptic plasticity [def] "A process that modulates synaptic plasticity, the ability of synapses to change as circumstances require. They may alter function, such as increasing or decreasing their sensitivity, or they may increase or decrease in actual numbers." [GOC  
26867 Pathogen[ Q2Q067] interacts with 3 human partners:{P61981;Q9UQB3;Q04917}  
26868 Pathogen[ P0C214] interacts with 5 human partners:{P05937;Q04917;Q9UM54;Q9UQB3;P61981}  
26869 Pathogen[ P03346] interacts with 5 human partners:{O14908;P05937;Q04917;Q9UQB3;P61981}  
26870 Pathogen[ Q85601] interacts with 4 human partners:{P61981;Q04917;Q9UQB3;Q9UM54}  
26871 Pathogen[ P14079] interacts with 7 human partners:{P05937;P16298;Q9UQB3;Q9UM54;Q04917;P61981;O14908}  
26872 Pathogen[ P03383] interacts with 2 human partners:{Q9UQB3;P61981}  
26873 Pathogen[ P03410] interacts with 6 human partners:{Q04917;O14908;P61981;Q9UM54;P05937;Q9UQB3}  
26874 Pathogen[ P14075] interacts with 2 human partners:{P61981;Q9UQB3}  
26875 Pathogen[ P0C206] interacts with 5 human partners:{Q9UM54;Q04917;O14908;P61981;Q9UQB3}  
26876 Pathogen[ P03363] interacts with 5 human partners:{O14908;P61981;Q04917;Q9UQB3;P05937}  
26877 [Cluster 2444]GO:0035025+P biological\_process [name] positive regulation of Rho protein signal transduction [def] "Any process that activates or increases the frequency, rate or extent of Rho protein signal transduction." [GOC  
26878 Pathogen[ Q2Q067] interacts with 2 human partners:{Q8N0Z2;P63000}  
26879 Pathogen[ P0C214] interacts with 2 human partners:{P63000;Q8N0Z2}  
26880 Pathogen[ P03346] interacts with 2 human partners:{Q8N0Z2;P63000}  
26881 Pathogen[ Q85601] interacts with 2 human partners:{P63000;Q8N0Z2}  
26882 Pathogen[ P14079] interacts with 1 human partners:{Q8N0Z2}  
26883 Pathogen[ P03383] interacts with 2 human partners:{P63000;Q8N0Z2}  
26884 Pathogen[ P03410] interacts with 2 human partners:{P63000;Q8N0Z2}  
26885 Pathogen[ P14075] interacts with 2 human partners:{Q8N0Z2;P63000}  
26886 Pathogen[ P0C206] interacts with 2 human partners:{P63000;Q8N0Z2}

26887 Pathogen[ P03363] interacts with 2 human partners:{P63000;Q8N0Z2}

26888 [Cluster 2445]GO:0060337+P biological\_process [name] type I interferon-mediated signaling pathway [def] "A series of molecular events generated as a consequence of a type I interferon binding to a cell surface receptor. Type I interferons include the interferon-alpha, beta, delta, epsilon, zeta, kappa, tau, and omega gene families." [GOC

26889 Pathogen[ Q2Q067] interacts with 21 human partners:{Q9Y6K5;P55265;P09913;Q92985;P14316;O14896;Q00978;P80217;Q6GPH4;Q14653;Q15306;P10914;P28062;Q02556;P09914;P52630;P23497;Q13568;P42224;O14879;P18146}

26890 Pathogen[ P0C214] interacts with 23 human partners:{P80217;P28062;P09914;P09913;Q13568;O14879;P55265;Q9Y6K5;P29728;P42224;P10914;Q00978;Q92985;Q02556;O14896;Q14653;Q6GPH4;P23497;P18146;P52630;O15524;P14316;Q15306}

26891 Pathogen[ P03346] interacts with 23 human partners:{O15524;P55265;P14316;P28062;Q15306;Q00978;Q15646;P10914;Q02556;O14879;O14896;P42224;Q14653;Q13568;P80217;Q6GPH4;P23497;P09913;P18146;Q92985;P09914;P52630;Q9Y6K5}

26892 Pathogen[ Q85601] interacts with 20 human partners:{P18146;O14896;P09913;P14316;Q02556;O14879;Q6GPH4;Q15306;Q00978;P10914;P52630;P80217;Q14653;Q9Y6K5;P28062;Q92985;P42224;P55265;P09914;Q13568}

26893 Pathogen[ P14079] interacts with 25 human partners:{P13164;P52630;P29728;Q14653;P09914;P09912;O14896;P80217;Q92985;Q15306;P23497;P09913;Q13568;P28062;P55265;Q9Y6K5;Q6GPH4;P42224;Q96AZ6;Q00978;Q02556;O14879;P14316;P10914;P40305}

26894 Pathogen[ P03383] interacts with 18 human partners:{O14879;P10914;P14316;Q14653;P52630;Q15306;Q00978;P18146;P09913;Q92985;P80217;O14896;Q13568;Q9Y6K5;P23497;P55265;Q02556;P28062}

26895 Pathogen[ P03410] interacts with 23 human partners:{O14896;P29728;Q14653;P09912;P55265;Q15306;Q13568;Q02556;Q6GPH4;P28062;Q96AZ6;P10914;P80217;Q9Y6K5;P09913;P52630;P14316;Q92985;O14879;P18146;P40305;P09914;Q00978}

26896 Pathogen[ P14075] interacts with 19 human partners:{P52630;P23497;P09913;P55265;P18146;P80217;Q00978;Q02556;Q13568;Q14653;P28062;Q9Y6K5;Q15306;P14316;O14896;O14879;P40305;Q92985;P10914}

26897 Pathogen[ P0C206] interacts with 23 human partners:{P28062;P10914;Q13568;P40305;P55265;Q9Y6K5;O14879;P29728;Q15306;O15524;P80217;P18146;Q02556;Q92985;P09913;O14896;Q00978;P42224;Q6GPH4;P14316;P52630;Q14653;P09914}

26898 Pathogen[ P03363] interacts with 19 human partners:{Q14653;Q9Y6K5;P52630;Q92985;O14896;P18146;O15524;Q02556;P09914;P09913;Q13568;P80217;Q15306;P23497;O14879;P14316;P10914;P55265;Q00978}

26899 [Cluster 2446]GO:0033693+P biological\_process [name] neurofilament bundle assembly [def] "The assembly of neurofilaments into bundles, in which the filaments are longitudinally oriented, with numerous crossbridges between them. Neurofilament bundles may be cross-linked to each other, to membrane-bounded organelles or other cytoskeletal structures such as microtubules." [PMID

26900 Pathogen[ Q2Q067] interacts with 1 human partners:{P07196}

26901 Pathogen[ P0C214] interacts with 1 human partners:{P07196}

26902 Pathogen[ P03346] interacts with 1 human partners:{P07196}

26903 Pathogen[ Q85601] interacts with 1 human partners:{P07196}

26904 Pathogen[ P14079] interacts with 1 human partners:{P07196}

26905 Pathogen[ P03383] interacts with 1 human partners:{P07196}

26906 Pathogen[ P03410] interacts with 1 human partners:{P07196}

26907 Pathogen[ P14075] interacts with 1 human partners:{P07196}

26908 Pathogen[ P0C206] interacts with 1 human partners:{P07196}

26909 Pathogen[ P03363] interacts with 1 human partners:{P07196}

26910 [Cluster 2447]GO:2000144+P biological\_process [name] positive regulation of transcription initiation, DNA-dependent [def] "Any process that activates or increases the frequency, rate or extent of DNA-dependent transcription initiation." [GOC

26911 Pathogen[ Q2Q067] interacts with 1 human partners:{Q9NYF8}

26912 Pathogen[ P0C214] interacts with 1 human partners:{Q9NYF8}

26913 Pathogen[ P03346] interacts with 1 human partners:{Q9NYF8}

26914 Pathogen[ Q85601] interacts with 1 human partners:{Q9NYF8}

26915 Pathogen[ P14079] interacts with 1 human partners:{Q9NYF8}

26916 Pathogen[ P03383] interacts with 1 human partners:{Q9NYF8}

26917 Pathogen[ P03410] interacts with 1 human partners:{Q9NYF8}

26918 Pathogen[ P14075] interacts with 1 human partners:{Q9NYF8}

26919 Pathogen[ P0C206] interacts with 1 human partners:{Q9NYF8}

26920 Pathogen[ P03363] interacts with 1 human partners:{Q9NYF8}

26921 [Cluster 2448]GO:0045669+P biological\_process [name] positive regulation of osteoblast differentiation [def] "Any process that activates or increases the frequency, rate or extent of osteoblast differentiation." [GOC

26922 Pathogen[ Q2Q067] interacts with 10 human partners:{Q9H4I2;P17676;P35548;O00255;Q9NSA3;Q9Y5J3;P47928;Q99717;Q15797;P49715}

26923 Pathogen[ P0C214] interacts with 10 human partners:{Q9Y5J3;Q9H4I2;P17676;Q9NSA3;P17535;P47928;Q99717;Q15797;P35548;O00255}

26924 Pathogen[ P03346] interacts with 14 human partners: {P17676;P35548;Q15797;P17535;Q99717;P49715;Q9Y5J3;Q6UW56;Q9NSA3;O00255;Q9H4I2;Q92832;P56178;P47928}

26925 Pathogen[ Q85601] interacts with 11 human partners: {P17676;Q15797;Q9H4I2;P17535;Q99717;P35548;O00255;P49715;Q9NSA3;Q9Y5J3;P47928}

26926 Pathogen[ P14079] interacts with 11 human partners: {P13164;Q06413;Q9NR12;Q15797;P49715;Q92832;Q9Y5J3;Q9H4I2;O00255;P47928;P17535}

26927 Pathogen[ P03383] interacts with 9 human partners: {Q9H4I2;Q15797;Q9NSA3;P35548;Q99717;P17676;O00255;P17535;P47928}

26928 Pathogen[ P03410] interacts with 11 human partners: {Q9Y5J3;Q9NSA3;P17676;Q9H4I2;Q99717;Q92832;P35548;P17535;Q15797;P47928;O00255}

26929 Pathogen[ P14075] interacts with 8 human partners: {Q9H4I2;P35548;P47928;Q99717;O00255;Q9NSA3;P17676;P17535}

26930 Pathogen[ P0C206] interacts with 13 human partners: {Q9NSA3;Q9H4I2;O00255;Q99717;Q6UW56;P17535;P49715;P17676;Q9Y5J3;P35548;Q15797;Q92832;P47928}

26931 Pathogen[ P03363] interacts with 12 human partners: {P17535;Q9Y5J3;P17676;Q6UW56;P35548;Q15797;Q92832;Q9NSA3;P47928;Q9NR12;Q99717;Q9H4I2}

26932 [Cluster 2449]GO:0033092+P biological\_process [name] positive regulation of immature T cell proliferation in thymus [def] "Any process that activates or increases the frequency, rate or extent of immature T cell proliferation in the thymus." [GOC]

26933 Pathogen[ Q2Q067] interacts with 1 human partners: {P35226}

26934 Pathogen[ P0C214] interacts with 1 human partners: {P35226}

26935 Pathogen[ P03346] interacts with 1 human partners: {P35226}

26936 Pathogen[ Q85601] interacts with 1 human partners: {P35226}

26937 Pathogen[ P14079] interacts with 1 human partners: {P35226}

26938 Pathogen[ P03383] interacts with 1 human partners: {P35226}

26939 Pathogen[ P03410] interacts with 1 human partners: {P35226}

26940 Pathogen[ P14075] interacts with 1 human partners: {P35226}

26941 Pathogen[ P0C206] interacts with 1 human partners: {P35226}

26942 Pathogen[ P03363] interacts with 1 human partners: {P35226}

26943 [Cluster 2450]GO:2001162+P biological\_process [name] positive regulation of histone H3-K79 methylation [def] "Any process that activates or increases the frequency, rate or extent of histone H3-K79 methylation." [PMID]

26944 Pathogen[ Q2Q067] interacts with 2 human partners: {Q6PD62;Q9GZS3}

26945 Pathogen[ P0C214] interacts with 2 human partners: {Q6PD62;Q9GZS3}

26946 Pathogen[ P03346] interacts with 2 human partners: {Q6PD62;Q9GZS3}

26947 Pathogen[ Q85601] interacts with 2 human partners: {Q6PD62;Q9GZS3}

26948 Pathogen[ P14079] interacts with 2 human partners: {Q9GZS3;Q6PD62}

26949 Pathogen[ P03383] interacts with 2 human partners: {Q6PD62;Q9GZS3}

26950 Pathogen[ P03410] interacts with 2 human partners: {Q6PD62;Q9GZS3}

26951 Pathogen[ P14075] interacts with 2 human partners: {Q6PD62;Q9GZS3}

26952 Pathogen[ P0C206] interacts with 2 human partners: {Q6PD62;Q9GZS3}

26953 Pathogen[ P03363] interacts with 2 human partners: {Q9GZS3;Q6PD62}

26954 [Cluster 2451]GO:0043567+P biological\_process [name] regulation of insulin-like growth factor receptor signaling pathway [def] "Any process that modulates the frequency, rate or extent of insulin-like growth factor receptor signaling." [GOC]

26955 Pathogen[ Q2Q067] interacts with 1 human partners: {P28069}

26956 Pathogen[ P0C214] interacts with 1 human partners: {P28069}

26957 Pathogen[ P03346] interacts with 1 human partners: {P28069}

26958 Pathogen[ Q85601] interacts with 1 human partners: {P28069}

26959 Pathogen[ P14079] interacts with 1 human partners: {P28069}

26960 Pathogen[ P03383] interacts with 1 human partners: {P28069}

26961 Pathogen[ P03410] interacts with 1 human partners: {P28069}

26962 Pathogen[ P14075] interacts with 1 human partners: {P28069}

26963 Pathogen[ P0C206] interacts with 1 human partners: {P28069}

26964 Pathogen[ P03363] interacts with 1 human partners: {P28069}

26965 [Cluster 2452]GO:0042698+P biological\_process [name] ovulation cycle [def] "The type of sexual cycle seen in females, often with physiologic changes in the endometrium that recur at regular intervals during the reproductive years." [ISBN]

26966 Pathogen[ Q2Q067] interacts with 1 human partners: {Q02577}

26967 Pathogen[ P0C214] interacts with 1 human partners: {Q02577}

26968 Pathogen[ P03346] interacts with 1 human partners: {Q02577}

26969 Pathogen[ Q85601] interacts with 1 human partners: {Q02577}

26970 Pathogen[ P14079] interacts with 1 human partners: {Q02577}

26971 Pathogen[ P03383] interacts with 1 human partners: {Q02577}

26972 Pathogen[ P03410] interacts with 1 human partners: {Q02577}

26973 Pathogen[ P14075] interacts with 1 human partners: {Q02577}

26974 Pathogen[ P0C206] interacts with 1 human partners: {Q02577}

26975 Pathogen[ P03363] interacts with 1 human partners: {Q02577}

26976 [Cluster 2453]GO:0021670+P biological\_process [name] lateral ventricle development [def] "The process whose specific outcome is the progression of the lateral ventricles

over time, from the formation to the mature structure. The two lateral ventricles are a cavity in each of the cerebral hemispheres derived from the cavity of the embryonic neural tube. They are separated from each other by the septum pellucidum, and each communicates with the third ventricle by the foramen of Monro, through which also the choroid plexuses of the lateral ventricles become continuous with that of the third ventricle." [GO\_REF

26977 Pathogen[ Q2Q067] interacts with 3 human partners:{Q9Y5K5;Q8NHM5;Q00534}  
26978 Pathogen[ P0C214] interacts with 4 human partners:{Q9Y5K5;Q00534;P35580;Q8NHM5}  
26979 Pathogen[ P03346] interacts with 5 human partners:{Q68CZ1;Q00534;Q8NHM5;Q9Y6R0;Q9Y5K5}  
26980 Pathogen[ Q85601] interacts with 4 human partners:{Q8NHM5;Q9Y5K5;P35580;Q00534}  
26981 Pathogen[ P14079] interacts with 4 human partners:{Q9BVM2;Q68CZ1;Q8NHM5;Q9Y5K5}  
26982 Pathogen[ P03383] interacts with 3 human partners:{Q00534;Q9Y5K5;P35580}  
26983 Pathogen[ P03410] interacts with 5 human partners:{Q00534;P35580;Q9Y5K5;Q68CZ1;Q9BVM2}  
26984 Pathogen[ P14075] interacts with 3 human partners:{Q00534;Q9BVM2;Q9Y5K5}  
26985 Pathogen[ P0C206] interacts with 5 human partners:{Q9BVM2;Q9Y5K5;Q8NHM5;P35580;Q00534}  
26986 Pathogen[ P03363] interacts with 3 human partners:{Q9Y5K5;Q00534;Q9Y6R0}  
26987 [Cluster 2454]GO:0007080+P biological\_process [name] mitotic metaphase plate congression [def] "The cell cycle process in which chromosomes are aligned at the metaphase plate, a plane halfway between the poles of the mitotic spindle, during mitosis." [GOC  
26988 Pathogen[ Q2Q067] interacts with 9 human partners:{Q96EE3;P14635;Q9UJX2;O43264;Q6PGN9;Q15050;Q96BK5;Q96FF9;Q96EA4}  
26989 Pathogen[ P0C214] interacts with 9 human partners:{Q96BK5;O43264;Q96EA4;Q96EE3;P14635;Q15050;Q9UJX2;Q96FF9;Q6PGN9}  
26990 Pathogen[ P03346] interacts with 9 human partners:{Q15050;Q96EE3;Q96FF9;O43264;Q96EA4;P14635;Q9UJX2;Q96BK5;Q6PGN9}  
26991 Pathogen[ Q85601] interacts with 9 human partners:{Q9UJX2;Q6PGN9;Q96EE3;O43264;Q96EA4;P14635;Q96BK5;Q15050;Q96FF9}  
26992 Pathogen[ P14079] interacts with 8 human partners:{Q96FF9;Q15050;P14635;Q96EA4;Q96EE3;O43264;Q6PGN9;Q96BK5}  
26993 Pathogen[ P03383] interacts with 9 human partners:{Q96EE3;O43264;Q96BK5;Q15050;Q96EA4;P14635;Q6PGN9;Q96FF9;Q9UJX2}  
26994 Pathogen[ P03410] interacts with 8 human partners:{Q15050;O43264;Q96EA4;P14635;Q96EE3;Q96FF9;Q96BK5;Q6PGN9}  
26995 Pathogen[ P14075] interacts with 9 human partners:{P14635;Q9UJX2;Q96FF9;Q96BK5;Q96EA4;Q96EE3;Q6PGN9;Q15050;O43264}  
26996 Pathogen[ P0C206] interacts with 9 human partners:{Q96EE3;Q9UJX2;Q6PGN9;Q96BK5;Q15050;Q96FF9;Q96EA4;P14635;O43264}  
26997 Pathogen[ P03363] interacts with 7 human partners:{Q9UJX2;Q96EA4;Q15050;Q96BK5;O43264;Q6PGN9;Q96FF9}  
26998 [Cluster 2455]GO:0034124+P biological\_process [name] regulation of MyD88-dependent toll-like receptor signaling pathway [def] "Any process that modulates the frequency, rate, or extent of MyD88-dependent toll-like receptor signaling pathway." [GOC  
26999 Pathogen[ Q2Q067] interacts with 2 human partners:{Q92985;P10914}  
27000 Pathogen[ P0C214] interacts with 2 human partners:{P10914;Q92985}  
27001 Pathogen[ P03346] interacts with 2 human partners:{P10914;Q92985}  
27002 Pathogen[ Q85601] interacts with 2 human partners:{P10914;Q92985}  
27003 Pathogen[ P14079] interacts with 2 human partners:{Q92985;P10914}  
27004 Pathogen[ P03383] interacts with 2 human partners:{P10914;Q92985}  
27005 Pathogen[ P03410] interacts with 2 human partners:{P10914;Q92985}  
27006 Pathogen[ P14075] interacts with 2 human partners:{Q92985;P10914}  
27007 Pathogen[ P0C206] interacts with 2 human partners:{P10914;Q92985}  
27008 Pathogen[ P03363] interacts with 2 human partners:{Q92985;P10914}  
27009 [Cluster 2456]GO:0050859+P biological\_process [name] negative regulation of B cell receptor signaling pathway [def] "Any process that stops, prevents, or reduces the frequency, rate or extent of signaling pathways initiated by the cross-linking of an antigen receptor on a B cell." [GOC  
27010 Pathogen[ Q2Q067] interacts with 1 human partners:{O60711}  
27011 Pathogen[ P0C214] interacts with 1 human partners:{O60711}  
27012 Pathogen[ P03346] interacts with 1 human partners:{O60711}  
27013 Pathogen[ Q85601] interacts with 1 human partners:{O60711}  
27014 Pathogen[ P14079] interacts with 1 human partners:{O60711}  
27015 Pathogen[ P03383] interacts with 1 human partners:{O60711}  
27016 Pathogen[ P03410] interacts with 1 human partners:{O60711}  
27017 Pathogen[ P14075] interacts with 1 human partners:{O60711}  
27018 Pathogen[ P0C206] interacts with 1 human partners:{O60711}  
27019 Pathogen[ P03363] interacts with 1 human partners:{O60711}  
27020 [Cluster 2457]GO:0006333+P biological\_process [name] chromatin assembly or disassembly [def] "The formation or destruction of chromatin structures." [GOC  
27021 Pathogen[ Q2Q067] interacts with 5 human partners:{Q9BY41;Q9BW71;O94776;Q9Y294;Q9H5I1}  
27022 Pathogen[ P0C214] interacts with 6 human partners:{Q9H5I1;Q9BW71;O94776;O60264;Q9Y294;Q9BY41}

27023 Pathogen[ P03346] interacts with 6 human partners:{O94776;Q9BW71;O60264;Q9BY41;Q9H5I1;Q9Y294}

27024 Pathogen[ Q85601] interacts with 6 human partners:{Q9H5I1;Q9BY41;O94776;Q9BW71;Q9Y294;O60264}

27025 Pathogen[ P14079] interacts with 6 human partners:{Q9H5I1;Q9BY41;O60264;Q9BW71;Q9Y294;O94776}

27026 Pathogen[ P03383] interacts with 5 human partners:{O94776;Q9BW71;Q9Y294;Q9BY41;Q9H5I1}

27027 Pathogen[ P03410] interacts with 6 human partners:{Q9BY41;Q9Y294;Q9H5I1;Q9BW71;O94776;O60264}

27028 Pathogen[ P14075] interacts with 5 human partners:{Q9BY41;O94776;Q9H5I1;Q9Y294;Q9BW71}

27029 Pathogen[ P0C206] interacts with 7 human partners:{Q9BW71;O94776;Q9H5I1;Q9Y294;Q9BY41;Q9UIG0;O60264}

27030 Pathogen[ P03363] interacts with 6 human partners:{Q9H5I1;Q9BY41;Q9Y294;Q9BW71;O60264;O94776}

27031 [Cluster 2458]GO:0021915+P biological\_process [name] neural tube development [def] "The process whose specific outcome is the progression of the neural tube over time, from its formation to the mature structure. The mature structure of the neural tube exists when the tube has been segmented into the forebrain, midbrain, hindbrain and spinal cord regions. In addition neural crest has budded away from the epithelium." [GO\_REF

27032 Pathogen[ Q2Q067] interacts with 4 human partners:{P36402;Q15468;Q5TGS1;Q9NSC2}

27033 Pathogen[ P0C214] interacts with 5 human partners:{Q9NW07;Q15468;Q9NSC2;P36402;Q5TGS1}

27034 Pathogen[ P03346] interacts with 9 human partners:{Q9Y467;P36402;Q9NW07;Q9UJQ4;Q9NSC2;Q9C0C7;Q5TGS1;Q15468;Q96EL1}

27035 Pathogen[ Q85601] interacts with 4 human partners:{Q9NW07;Q5TGS1;P36402;Q9NSC2}

27036 Pathogen[ P14079] interacts with 8 human partners:{P36402;Q96EL1;Q4AC94;Q15468;Q5TGS1;Q9UJQ4;Q9NW07;Q9NSC2}

27037 Pathogen[ P03383] interacts with 5 human partners:{Q15468;Q96EL1;Q9NSC2;P36402;Q5TGS1}

27038 Pathogen[ P03410] interacts with 8 human partners:{P36402;Q4AC94;Q15468;Q96EL1;Q5TGS1;Q9NW07;Q9NSC2;Q9UJQ4}

27039 Pathogen[ P14075] interacts with 5 human partners:{Q9NSC2;Q5TGS1;Q96EL1;P36402;Q15468}

27040 Pathogen[ P0C206] interacts with 8 human partners:{Q15468;Q9C0C7;Q9UJQ4;Q5TGS1;Q9NW07;Q9NSC2;P36402;Q96EL1}

27041 Pathogen[ P03363] interacts with 7 human partners:{Q5TGS1;Q9UJQ4;Q15468;P36402;Q9NW07;Q9Y467;Q9C0C7}

27042 [Cluster 2459]GO:0003365+P biological\_process [name] establishment of cell polarity involved in ameboidal cell migration [def] "The specification and formation of anisotropic intracellular organization that contributes to the self-propelled directed movement of an ameboid cell." [GOC

27043 Pathogen[ Q2Q067] interacts with 1 human partners:{Q8IY63}

27044 Pathogen[ P0C214] interacts with 1 human partners:{Q8IY63}

27045 Pathogen[ P03346] interacts with 1 human partners:{Q8IY63}

27046 Pathogen[ Q85601] interacts with 1 human partners:{Q8IY63}

27047 Pathogen[ P14079] interacts with 1 human partners:{Q8IY63}

27048 Pathogen[ P03383] interacts with 1 human partners:{Q8IY63}

27049 Pathogen[ P03410] interacts with 1 human partners:{Q8IY63}

27050 Pathogen[ P14075] interacts with 1 human partners:{Q8IY63}

27051 Pathogen[ P0C206] interacts with 1 human partners:{Q8IY63}

27052 Pathogen[ P03363] interacts with 1 human partners:{Q8IY63}

27053 [Cluster 2460]GO:0034553+P biological\_process [name] mitochondrial respiratory chain complex II assembly [def] "The aggregation, arrangement and bonding together of a set of components to form respiratory chain complex II, in the mitochondrial inner membrane." [GOC

27054 Pathogen[ Q2Q067] interacts with 1 human partners:{A6NFY7}

27055 Pathogen[ P0C214] interacts with 1 human partners:{A6NFY7}

27056 Pathogen[ P03346] interacts with 1 human partners:{A6NFY7}

27057 Pathogen[ Q85601] interacts with 1 human partners:{A6NFY7}

27058 Pathogen[ P14079] interacts with 1 human partners:{A6NFY7}

27059 Pathogen[ P03383] interacts with 1 human partners:{A6NFY7}

27060 Pathogen[ P03410] interacts with 1 human partners:{A6NFY7}

27061 Pathogen[ P14075] interacts with 1 human partners:{A6NFY7}

27062 Pathogen[ P0C206] interacts with 1 human partners:{A6NFY7}

27063 Pathogen[ P03363] interacts with 1 human partners:{A6NFY7}

27064 [Cluster 2461]GO:0043297+P biological\_process [name] apical junction assembly [def] "The formation of an apical junction, a functional unit located near the cell apex at the points of contact between epithelial cells composed of the tight junction, the zonula adherens junction and the desmosomes, by the aggregation, arrangement and bonding together of its constituents." [GOC

27065 Pathogen[ Q2Q067] interacts with 2 human partners:{Q8TES7;P61586}

27066 Pathogen[ P0C214] interacts with 2 human partners:{P61586;Q8TES7}

27067 Pathogen[ P03346] interacts with 2 human partners:{Q8TES7;P61586}

27068 Pathogen[ Q85601] interacts with 2 human partners:{Q8TES7;P61586}  
27069 Pathogen[ P14079] interacts with 3 human partners:{Q8N6F1;P61586;Q8TES7}  
27070 Pathogen[ P03383] interacts with 2 human partners:{Q8TES7;P61586}  
27071 Pathogen[ P03410] interacts with 3 human partners:{Q8N6F1;P61586;Q8TES7}  
27072 Pathogen[ P14075] interacts with 2 human partners:{Q8TES7;P61586}  
27073 Pathogen[ P0C206] interacts with 2 human partners:{P61586;Q8TES7}  
27074 Pathogen[ P03363] interacts with 1 human partners:{Q8TES7}  
27075 [Cluster 2462]GO:0050658+P biological\_process [name] RNA transport [def] "The directed movement of RNA, ribonucleic acids, into, out of or within a cell, or between cells, by means of some agent such as a transporter or pore." [GOC  
27076 Pathogen[ Q2Q067] interacts with 4 human partners:{Q14008;Q9H1B4;Q99700;P22626}  
27077 Pathogen[ P0C214] interacts with 4 human partners:{Q14008;Q99700;Q9H1B4;P22626}  
27078 Pathogen[ P03346] interacts with 5 human  
partners:{P22626;Q9H1B4;Q99700;Q14008;Q9NWB1}  
27079 Pathogen[ Q85601] interacts with 4 human partners:{Q14008;P22626;Q9H1B4;Q99700}  
27080 Pathogen[ P14079] interacts with 5 human  
partners:{Q99700;Q9H1B4;Q9NWB1;P22626;Q14008}  
27081 Pathogen[ P03383] interacts with 4 human partners:{Q9H1B4;Q14008;P22626;Q99700}  
27082 Pathogen[ P03410] interacts with 5 human  
partners:{Q99700;Q9NWB1;P22626;Q14008;Q9H1B4}  
27083 Pathogen[ P14075] interacts with 4 human partners:{P22626;Q99700;Q9H1B4;Q14008}  
27084 Pathogen[ P0C206] interacts with 4 human partners:{Q14008;P22626;Q99700;Q9H1B4}  
27085 Pathogen[ P03363] interacts with 5 human  
partners:{Q9NWB1;P22626;Q14008;Q99700;Q9H1B4}  
27086 [Cluster 2463]GO:0014015+P biological\_process [name] positive regulation of  
gliogenesis [def] "Any process that activates or increases the frequency, rate or extent  
of gliogenesis, the formation of mature glia." [GOC  
27087 Pathogen[ Q2Q067] interacts with 1 human partners:{P56693}  
27088 Pathogen[ P0C214] interacts with 1 human partners:{P56693}  
27089 Pathogen[ P03346] interacts with 1 human partners:{P56693}  
27090 Pathogen[ Q85601] interacts with 1 human partners:{P56693}  
27091 Pathogen[ P14079] interacts with 1 human partners:{P56693}  
27092 Pathogen[ P03383] interacts with 1 human partners:{P56693}  
27093 Pathogen[ P03410] interacts with 1 human partners:{P56693}  
27094 Pathogen[ P14075] interacts with 1 human partners:{P56693}  
27095 Pathogen[ P0C206] interacts with 1 human partners:{P56693}  
27096 Pathogen[ P03363] interacts with 1 human partners:{P56693}  
27097 [Cluster 2464]GO:0005980+P biological\_process [name] glycogen catabolic process  
[def] "The chemical reactions and pathways resulting in the breakdown of glycogen, a  
polydisperse, highly branched glucan composed of chains of D-glucose residues." [ISBN  
27098 Pathogen[ Q2Q067] interacts with 4 human partners:{P35573;P36871;Q96G03;P46976}  
27099 Pathogen[ P0C214] interacts with 7 human  
partners:{P35573;P46976;Q96G03;P36871;O15488;Q93100;P46020}  
27100 Pathogen[ P03346] interacts with 4 human partners:{P35573;P46976;P36871;Q96G03}  
27101 Pathogen[ Q85601] interacts with 4 human partners:{P46976;P35573;P36871;Q96G03}  
27102 Pathogen[ P14079] interacts with 7 human  
partners:{Q93100;P46976;P35573;Q96G03;P36871;P46020;O15488}  
27103 Pathogen[ P03383] interacts with 3 human partners:{Q96G03;P35573;P46976}  
27104 Pathogen[ P03410] interacts with 7 human  
partners:{P46976;P36871;P46020;P35573;Q93100;O15488;Q96G03}  
27105 Pathogen[ P14075] interacts with 4 human partners:{Q93100;Q96G03;P46976;P35573}  
27106 Pathogen[ P0C206] interacts with 7 human  
partners:{Q93100;P46976;Q96G03;P46020;P36871;O15488;P35573}  
27107 Pathogen[ P03363] interacts with 3 human partners:{P35573;P46976;Q96G03}  
27108 [Cluster 2465]GO:0033144+P biological\_process [name] negative regulation of  
intracellular steroid hormone receptor signaling pathway [def] "Any process that  
stops, prevents, or reduces the frequency, rate or extent of the activity of any  
intracellular steroid hormone receptor signaling pathway." [GOC  
27109 Pathogen[ Q2Q067] interacts with 2 human partners:{P27797;P61586}  
27110 Pathogen[ P0C214] interacts with 2 human partners:{P61586;P27797}  
27111 Pathogen[ P03346] interacts with 3 human partners:{P51843;P27797;P61586}  
27112 Pathogen[ Q85601] interacts with 2 human partners:{P27797;P61586}  
27113 Pathogen[ P14079] interacts with 1 human partners:{P61586}  
27114 Pathogen[ P03383] interacts with 2 human partners:{P61586;P27797}  
27115 Pathogen[ P03410] interacts with 2 human partners:{P61586;P27797}  
27116 Pathogen[ P14075] interacts with 2 human partners:{P27797;P61586}  
27117 Pathogen[ P0C206] interacts with 2 human partners:{P27797;P61586}  
27118 Pathogen[ P03363] interacts with 1 human partners:{P27797}  
27119 [Cluster 2466]GO:0033314+P biological\_process [name] mitotic cell cycle DNA  
replication checkpoint [def] "A cell cycle checkpoint that acts during a mitotic cell  
cycle and prevents the initiation of mitosis until DNA replication is complete, thereby  
ensuring that progeny inherit a full complement of the genome." [GOC  
27120 Pathogen[ Q2Q067] interacts with 2 human partners:{Q7Z2Z1;Q9HAW4}  
27121 Pathogen[ P0C214] interacts with 2 human partners:{Q9HAW4;Q7Z2Z1}  
27122 Pathogen[ P03346] interacts with 2 human partners:{Q7Z2Z1;Q9HAW4}  
27123 Pathogen[ Q85601] interacts with 2 human partners:{Q7Z2Z1;Q9HAW4}



27124 Pathogen[ P14079] interacts with 2 human partners:{Q9HAW4;Q7Z2Z1}  
27125 Pathogen[ P03383] interacts with 2 human partners:{Q7Z2Z1;Q9HAW4}  
27126 Pathogen[ P03410] interacts with 2 human partners:{Q9HAW4;Q7Z2Z1}  
27127 Pathogen[ P14075] interacts with 2 human partners:{Q7Z2Z1;Q9HAW4}  
27128 Pathogen[ P0C206] interacts with 2 human partners:{Q7Z2Z1;Q9HAW4}  
27129 Pathogen[ P03363] interacts with 2 human partners:{Q9HAW4;Q7Z2Z1}  
27130 [Cluster 2467]GO:0006206+P biological\_process [name] pyrimidine base metabolic process  
[def] "The chemical reactions and pathways involving pyrimidine bases, 1,3-diazine,  
organic nitrogenous bases." [GOC  
27131 Pathogen[ Q2Q067] interacts with 3 human partners:{P33316;P04818;P11172}  
27132 Pathogen[ P0C214] interacts with 7 human  
partners:{Q95045;P04818;P33316;P11172;Q8TCD5;Q16831;Q9H0P0}  
27133 Pathogen[ P03346] interacts with 2 human partners:{P11172;P33316}  
27134 Pathogen[ Q85601] interacts with 4 human partners:{P11172;P33316;Q95045;Q9H0P0}  
27135 Pathogen[ P14079] interacts with 8 human  
partners:{Q9H0P0;Q8TCD5;Q16831;P11172;P33316;Q95045;Q9BXI3;P04818}  
27136 Pathogen[ P03383] interacts with 2 human partners:{P33316;P11172}  
27137 Pathogen[ P03410] interacts with 8 human  
partners:{Q95045;Q16831;P11172;P33316;Q9BXI3;P04818;Q8TCD5;Q9H0P0}  
27138 Pathogen[ P14075] interacts with 3 human partners:{P11172;Q95045;P33316}  
27139 Pathogen[ P0C206] interacts with 7 human  
partners:{P33316;Q16831;Q95045;P11172;Q8TCD5;Q9H0P0;P04818}  
27140 Pathogen[ P03363] interacts with 2 human partners:{P33316;P11172}  
27141 [Cluster 2468]GO:0032233+P biological\_process [name] positive regulation of actin  
filament bundle assembly [def] "Any process that activates or increases the  
frequency, rate or extent of the assembly of actin filament bundles." [GOC  
27142 Pathogen[ Q2Q067] interacts with 1 human partners:{Q8N3V7}  
27143 Pathogen[ P0C214] interacts with 1 human partners:{Q8N3V7}  
27144 Pathogen[ P03346] interacts with 1 human partners:{Q8N3V7}  
27145 Pathogen[ Q85601] interacts with 1 human partners:{Q8N3V7}  
27146 Pathogen[ P14079] interacts with 2 human partners:{P09327;Q8N3V7}  
27147 Pathogen[ P03383] interacts with 1 human partners:{Q8N3V7}  
27148 Pathogen[ P03410] interacts with 1 human partners:{Q8N3V7}  
27149 Pathogen[ P14075] interacts with 1 human partners:{Q8N3V7}  
27150 Pathogen[ P0C206] interacts with 1 human partners:{Q8N3V7}  
27151 Pathogen[ P03363] interacts with 1 human partners:{Q8N3V7}  
27152 [Cluster 2469]GO:0090263+P biological\_process [name] positive regulation of canonical  
Wnt receptor signaling pathway [def] "Any process that increases the rate, frequency,  
or extent of the Wnt receptor signaling pathway through beta-catenin, the series of  
molecular signals initiated by binding of a Wnt protein to a frizzled family receptor on  
the surface of the target cell, followed by propagation of the signal via beta-catenin,  
and ending with a change in transcription of target genes." [GOC  
27153 Pathogen[ Q2Q067] interacts with 10 human  
partners:{Q9H2K2;P46937;Q5JTC6;P84022;O14641;Q9NTX7;P19838;Q95271;Q8IZT6;Q96IU2}  
27154 Pathogen[ P0C214] interacts with 12 human  
partners:{P19838;P46937;P84022;Q9NTX7;P98170;Q95071;O14641;Q9H2K2;Q96IU2;Q95271;Q8IZ  
T6;Q5JTC6}  
27155 Pathogen[ P03346] interacts with 15 human  
partners:{Q06945;P46937;Q9NTX7;P98170;Q9H2K2;P84022;O14641;Q06190;Q95271;Q96IU2;P198  
38;Q8IZT6;P56178;Q95071;Q5JTC6}  
27156 Pathogen[ Q85601] interacts with 12 human  
partners:{P98170;Q8IZT6;Q9H2K2;O14641;Q9NTX7;Q5JTC6;P84022;P46937;Q95271;Q95071;P198  
38;Q96IU2}  
27157 Pathogen[ P14079] interacts with 9 human  
partners:{Q96IU2;Q95271;O14641;Q9H2K2;P46937;Q06190;Q5JTC6;Q13145;Q8IZT6}  
27158 Pathogen[ P03383] interacts with 8 human  
partners:{Q9NTX7;Q96IU2;P84022;O14641;Q5JTC6;Q95271;P19838;P46937}  
27159 Pathogen[ P03410] interacts with 11 human  
partners:{P84022;P19838;Q96IU2;Q13145;Q06190;Q8IZT6;Q95271;P46937;Q5JTC6;Q9H2K2;O146  
41}  
27160 Pathogen[ P14075] interacts with 8 human  
partners:{Q96IU2;Q9NTX7;O14641;Q5JTC6;P46937;P19838;P84022;Q95271}  
27161 Pathogen[ P0C206] interacts with 12 human  
partners:{Q95271;P46937;P84022;Q06190;Q8IZT6;P98170;P19838;Q9NTX7;Q95071;Q9H2K2;Q96I  
U2;Q5JTC6}  
27162 Pathogen[ P03363] interacts with 13 human  
partners:{Q5JTC6;Q9NTX7;Q06190;Q9H2K2;P46937;P84022;P98170;Q95271;P19838;Q95071;Q96I  
U2;O14641;Q8IZT6}  
27163 [Cluster 2470]GO:0003219+P biological\_process [name] cardiac right ventricle formation  
[def] "The developmental process pertaining to the initial formation of a right cardiac  
ventricle from unspecified parts." [GOC  
27164 Pathogen[ Q2Q067] interacts with 2 human partners:{Q96004;Q6STE5}  
27165 Pathogen[ P0C214] interacts with 2 human partners:{Q6STE5;Q96004}  
27166 Pathogen[ P03346] interacts with 2 human partners:{Q96004;Q6STE5}  
27167 Pathogen[ Q85601] interacts with 2 human partners:{Q6STE5;Q96004}  
27168 Pathogen[ P14079] interacts with 2 human partners:{Q6STE5;Q96004}

27169 Pathogen[ P03383] interacts with 2 human partners:{Q6STE5;O96004}  
27170 Pathogen[ P03410] interacts with 2 human partners:{O96004;Q6STE5}  
27171 Pathogen[ P14075] interacts with 2 human partners:{O96004;Q6STE5}  
27172 Pathogen[ P0C206] interacts with 2 human partners:{Q6STE5;O96004}  
27173 Pathogen[ P03363] interacts with 2 human partners:{Q6STE5;O96004}  
27174 [Cluster 2471]GO:0030514+P biological\_process [name] negative regulation of BMP signaling pathway [def] "Any process that stops, prevents, or reduces the frequency, rate or extent of BMP signaling pathway activity." [GOC  
27175 Pathogen[ Q2Q067] interacts with 5 human partners:{Q9UPN9;P50616;P12755;O15105;O43541}  
27176 Pathogen[ P0C214] interacts with 7 human partners:{O95633;Q9HCE7;O15105;P50616;O43541;P12755;Q9UPN9}  
27177 Pathogen[ P03346] interacts with 6 human partners:{Q9UPN9;O15105;O43541;P50616;P84550;O95633}  
27178 Pathogen[ Q85601] interacts with 5 human partners:{Q9UPN9;O43541;P12755;P50616;O15105}  
27179 Pathogen[ P14079] interacts with 5 human partners:{P12755;Q9UPN9;O43541;P50616;O15105}  
27180 Pathogen[ P03383] interacts with 4 human partners:{Q9UPN9;O15105;O43541;P50616}  
27181 Pathogen[ P03410] interacts with 6 human partners:{P12755;Q9BQB4;O43541;O15105;Q9UPN9;P50616}  
27182 Pathogen[ P14075] interacts with 4 human partners:{O43541;Q9UPN9;P50616;O15105}  
27183 Pathogen[ P0C206] interacts with 7 human partners:{O43541;Q9UPN9;O95633;P12755;O15105;P50616;P84550}  
27184 Pathogen[ P03363] interacts with 5 human partners:{Q9UPN9;O15105;P50616;O43541;P84550}  
27185 [Cluster 2472]GO:0000720+P biological\_process [name] pyrimidine dimer repair by nucleotide-excision repair [def] "The repair of UV-induced T-T, C-T, and C-C dimers by the recognition and removal of the damaged DNA strand from the DNA helix as an oligonucleotide. The small gap left in the DNA helix is filled in by the sequential action of DNA polymerase and DNA ligase." [GOC  
27186 Pathogen[ Q2Q067] interacts with 1 human partners:{P05114}  
27187 Pathogen[ P0C214] interacts with 1 human partners:{P05114}  
27188 Pathogen[ P03346] interacts with 2 human partners:{P07992;P05114}  
27189 Pathogen[ Q85601] interacts with 1 human partners:{P05114}  
27190 Pathogen[ P14079] interacts with 2 human partners:{P05114;P07992}  
27191 Pathogen[ P03383] interacts with 1 human partners:{P05114}  
27192 Pathogen[ P03410] interacts with 2 human partners:{P07992;P05114}  
27193 Pathogen[ P14075] interacts with 1 human partners:{P05114}  
27194 Pathogen[ P0C206] interacts with 2 human partners:{P05114;P07992}  
27195 Pathogen[ P03363] interacts with 1 human partners:{P05114}  
27196 [Cluster 2473]GO:0033299+P biological\_process [name] secretion of lysosomal enzymes [def] "The controlled release of lysosomal enzymes by a cell or group of cells." [GOC  
27197 Pathogen[ Q2Q067] interacts with 2 human partners:{Q9UL45;Q6QNY0}  
27198 Pathogen[ P0C214] interacts with 3 human partners:{Q99698;Q6QNY0;Q9UL45}  
27199 Pathogen[ P03346] interacts with 3 human partners:{Q99698;Q6QNY0;Q9UL45}  
27200 Pathogen[ Q85601] interacts with 2 human partners:{Q6QNY0;Q99698}  
27201 Pathogen[ P14079] interacts with 4 human partners:{Q6QNY0;Q92902;Q9UL45;Q99698}  
27202 Pathogen[ P03383] interacts with 1 human partners:{Q6QNY0}  
27203 Pathogen[ P03410] interacts with 4 human partners:{Q92902;Q6QNY0;Q9UL45;Q99698}  
27204 Pathogen[ P14075] interacts with 1 human partners:{Q6QNY0}  
27205 Pathogen[ P0C206] interacts with 3 human partners:{Q9UL45;Q99698;Q6QNY0}  
27206 Pathogen[ P03363] interacts with 3 human partners:{Q92902;Q99698;Q6QNY0}  
27207 [Cluster 2474]GO:0006978+P biological\_process [name] DNA damage response, signal transduction by p53 class mediator resulting in transcription of p21 class mediator [def] "A cascade of processes induced by the cell cycle regulator phosphoprotein p53, or an equivalent protein, resulting in the induction of the transcription of p21 (also known as WAF1, CIP1 and SDI1) or any equivalent protein, in response to the detection of DNA damage." [PMID  
27208 Pathogen[ Q2Q067] interacts with 6 human partners:{Q01664;Q9UNL4;O15350;Q08050;Q92993;P23497}  
27209 Pathogen[ P0C214] interacts with 5 human partners:{Q92993;O15350;Q9UNL4;P23497;Q01664}  
27210 Pathogen[ P03346] interacts with 7 human partners:{Q9UNL4;Q08050;O15350;P51587;P23497;Q92993;Q01664}  
27211 Pathogen[ Q85601] interacts with 6 human partners:{Q9UNL4;Q08050;O15350;Q92993;Q01664;P51587}  
27212 Pathogen[ P14079] interacts with 7 human partners:{Q9UNL4;P51587;P23497;O15350;Q01664;P15941;Q92993}  
27213 Pathogen[ P03383] interacts with 5 human partners:{Q9UNL4;Q92993;Q01664;O15350;P23497}  
27214 Pathogen[ P03410] interacts with 6 human partners:{P15941;Q9UNL4;P51587;Q01664;O15350;Q92993}  
27215 Pathogen[ P14075] interacts with 6 human partners:{P23497;Q08050;Q92993;Q01664;O15350;Q9UNL4}  
27216 Pathogen[ P0C206] interacts with 6 human

27217 partners:{P51587;Q92993;Q08050;Q01664;O15350;Q9UNL4}  
 Pathogen[ P03363] interacts with 5 human  
 partners:{P23497;Q9UNL4;Q08050;Q01664;Q92993}

27218 [Cluster 2475]GO:0048793+P biological\_process [name] pronephros development [def]  
 "The process whose specific outcome is the progression of the pronephros over time, from  
 its formation to the mature structure. In mammals, the pronephros is the first of the  
 three embryonic kidneys to be established and exists only transiently. In lower  
 vertebrates such as fish and amphibia, the pronephros is the fully functional embryonic  
 kidney and is indispensable for larval life." [GOC  
 27219 Pathogen[ Q2Q067] interacts with 2 human partners:{P35680;O15078}  
 27220 Pathogen[ P0C214] interacts with 1 human partners:{O15078}  
 27221 Pathogen[ P03346] interacts with 3 human partners:{Q06710;P35680;O15078}  
 27222 Pathogen[ Q85601] interacts with 2 human partners:{O15078;P35680}  
 27223 Pathogen[ P14079] interacts with 2 human partners:{P35680;O15078}  
 27224 Pathogen[ P03383] interacts with 1 human partners:{O15078}  
 27225 Pathogen[ P03410] interacts with 2 human partners:{O15078;P35680}  
 27226 Pathogen[ P14075] interacts with 1 human partners:{O15078}  
 27227 Pathogen[ P0C206] interacts with 2 human partners:{P35680;O15078}  
 27228 Pathogen[ P03363] interacts with 1 human partners:{O15078}

27229 [Cluster 2476]GO:0000722+P biological\_process [name] telomere maintenance via  
 recombination [def] "Any recombinational process that contributes to the maintenance  
 of proper telomeric length." [GOC  
 27230 Pathogen[ Q2Q067] interacts with 13 human  
 partners:{Q15054;Q8IY18;P27694;P35244;P49005;P12004;Q14181;P15927;P56282;Q9HCU8;P397  
 48;P35251;Q96MF7}  
 27231 Pathogen[ P0C214] interacts with 12 human  
 partners:{Q8IY18;P35251;P49005;Q9HCU8;Q96MF7;P15927;P35244;P39748;Q15054;P27694;P562  
 82;Q14181}  
 27232 Pathogen[ P03346] interacts with 16 human  
 partners:{P12004;Q9HCU8;Q96MF7;P27694;P35244;P35250;P56282;P49005;P15927;P35249;Q141  
 81;P35251;P39748;Q8IY18;P40937;Q15054}  
 27233 Pathogen[ Q85601] interacts with 13 human  
 partners:{Q8IY18;P56282;P35244;P49005;Q15054;P27694;P15927;P35251;Q14181;Q9HCU8;P120  
 04;P39748;Q96MF7}  
 27234 Pathogen[ P14079] interacts with 16 human  
 partners:{Q96MF7;P40937;P49005;Q9HCU8;Q15054;P35250;P56282;P35251;P49642;Q14181;P159  
 27;P27694;Q8IY18;P12004;P35244;P39748}  
 27235 Pathogen[ P03383] interacts with 10 human  
 partners:{Q9HCU8;Q14181;P27694;P49005;Q96MF7;P56282;P15927;P35244;Q15054;P35251}  
 27236 Pathogen[ P03410] interacts with 16 human  
 partners:{P35244;Q14181;P39748;P56282;Q96MF7;P35251;Q15054;Q8IY18;P49005;P27694;P159  
 27;P35250;P40937;P12004;P49642;Q9HCU8}  
 27237 Pathogen[ P14075] interacts with 10 human  
 partners:{P49005;P15927;P35244;P35251;Q15054;P27694;Q9HCU8;P56282;Q96MF7;Q14181}  
 27238 Pathogen[ P0C206] interacts with 14 human  
 partners:{P35251;Q9HCU8;P49005;P49642;Q15054;Q14181;Q96MF7;P56282;P27694;P15927;P397  
 48;P35244;Q8IY18;P12004}  
 27239 Pathogen[ P03363] interacts with 10 human  
 partners:{P27694;P35251;P49005;Q14181;P35244;P15927;Q9HCU8;Q15054;Q8IY18;Q96MF7}

27240 [Cluster 2477]GO:2000045+P biological\_process [name] regulation of G1/S transition of  
 mitotic cell cycle [def] "Any process that modulates the frequency, rate or extent of  
 G1/S transition of mitotic cell cycle." [GOC  
 27241 Pathogen[ Q2Q067] interacts with 4 human partners:{P55957;Q01094;Q7Z2X4;Q9ULG1}  
 27242 Pathogen[ P0C214] interacts with 4 human partners:{P55957;Q9ULG1;Q7Z2X4;Q01094}  
 27243 Pathogen[ P03346] interacts with 5 human  
 partners:{Q9ULG1;P55957;Q7Z2X4;Q01094;Q496M5}  
 27244 Pathogen[ Q85601] interacts with 5 human  
 partners:{Q7Z2X4;P55957;Q9ULG1;Q496M5;Q01094}  
 27245 Pathogen[ P14079] interacts with 4 human partners:{Q9ULG1;Q7Z2X4;Q01094;P55957}  
 27246 Pathogen[ P03383] interacts with 2 human partners:{Q01094;P55957}  
 27247 Pathogen[ P03410] interacts with 4 human partners:{Q9ULG1;P55957;Q7Z2X4;Q01094}  
 27248 Pathogen[ P14075] interacts with 2 human partners:{P55957;Q01094}  
 27249 Pathogen[ P0C206] interacts with 5 human  
 partners:{Q496M5;Q7Z2X4;Q9ULG1;Q01094;P55957}

27250 Pathogen[ P03363] interacts with 3 human partners:{P55957;Q9ULG1;Q01094}

27251 [Cluster 2478]GO:0022904+P biological\_process [name] respiratory electron transport  
 chain [def] "A process in which a series of electron carriers operate together to  
 transfer electrons from donors such as NADH and FADH2 to any of several different  
 terminal electron acceptors to generate a transmembrane electrochemical gradient." [GOC  
 27252 Pathogen[ Q2Q067] interacts with 16 human  
 partners:{O43920;P31040;P56181;P38117;O75489;P13073;O96000;Q9BQG0;O95178;O43678;O752  
 51;O75306;P99999;Q9P0J0;P21912;P24539}  
 27253 Pathogen[ P0C214] interacts with 32 human  
 partners:{Q16795;O75306;O43678;P22695;Q99643;P56556;P28331;O43920;O95299;P17568;Q9BQ  
 G0;Q99807;P36542;Q16718;O14561;O95298;P99999;P12074;Q9P0J0;P24539;P13073;P38117;O960  
 00;O95182;O75489;O14521;O75251;Q9UI09;P21912;P56181;O95178;P13804}

27254 Pathogen[ P03346] interacts with 16 human partners: {P31040;P56181;Q9BQG0;O75489;O43678;O95178;P21912;P99999;P24539;O43920;P13073;P38117;O75251;O96000;O75306;Q9P0J0}

27255 Pathogen[ Q85601] interacts with 11 human partners: {Q9P0J0;P99999;P24539;Q9BQG0;O75306;P21912;O43678;P56181;O96000;O43920;P31040}

27256 Pathogen[ P14079] interacts with 65 human partners: {P56181;P22695;P36542;O43674;O43677;O43181;O95169;Q99807;P56134;P56556;P13073;O95139;P25705;P12074;O96000;O95167;O75306;P00395;P00403;P17568;P56385;P10606;Q9UDW1;P14927;P13804;Q86Y39;O95182;P07919;O14949;P14854;P20674;P38117;P03928;P31040;O14548;O43676;O43678;P51970;Q9BQG0;O95178;O75251;O14561;Q9UI09;P00156;O95299;P09669;Q9P0J0;O75964;O75489;P03923;Q16718;P03897;P56381;P15954;O14521;O43920;O15239;P99999;O43819;P24539;O00483;P03901;P03886;O95298;P21912}

27257 Pathogen[ P03383] interacts with 14 human partners: {Q9BQG0;P13073;O75251;P31040;O96000;O43678;O43920;O75489;O75306;O95178;P99999;Q9P0J0;P56181;P24539}

27258 Pathogen[ P03410] interacts with 69 human partners: {O95168;O43674;P56556;P17568;P13804;O95178;P36542;O75380;O43678;P25705;O75251;O14548;P15954;O95299;P51970;O43920;Q9UI09;O96000;P07919;P20674;O95167;P56385;O15239;Q9Y6M9;P38117;P13073;P56381;P22695;P03886;O00483;O95298;O75438;Q9UDW1;P56181;P00156;O14561;P14927;P31040;P03928;O75489;P24539;Q86Y39;P21912;Q9BQG0;O75964;P99999;P09669;Q99643;P03897;O43677;O95169;O43181;O14521;Q16718;O75306;P00403;O43676;O14949;P14854;Q99807;P03901;Q9P0J0;P03923;P18859;P56134;P10606;O43819;P12074;O95182}

27259 Pathogen[ P14075] interacts with 22 human partners: {O43674;P56181;O96000;O95182;O43677;P13073;P31040;O43920;O75306;O14561;O95298;O43678;Q9BQG0;P99999;O75251;P24539;P38117;P56385;O75489;O95178;Q9P0J0;O43676}

27260 Pathogen[ P0C206] interacts with 32 human partners: {P99999;P56181;O75251;Q9UDW1;O43920;O14521;O75306;P12074;P36542;O95182;P38117;Q9UI09;O95298;P22695;O14561;O00483;Q9BQG0;P17568;O95178;Q99807;P13073;P31040;P24539;Q9P0J0;O43678;O75489;P56381;P21912;O96000;O43674;P56385;P56556}

27261 Pathogen[ P03363] interacts with 6 human partners: {P31040;P99999;Q9BQG0;Q9P0J0;O96000;P56181}

27262 [Cluster 2479]GO:0070207+P biological\_process [name] protein homotrimerization [def] "The formation of a protein homotrimer, a macromolecular structure consisting of three noncovalently associated identical subunits." [GOC]

27263 Pathogen[ Q2Q067] interacts with 5 human partners: {Q8TCS8;Q12933;Q9ULV5;P12755;P12757}

27264 Pathogen[ P0C214] interacts with 6 human partners: {P00480;P12757;Q12933;Q8TCS8;P12755;Q9ULV5}

27265 Pathogen[ P03346] interacts with 3 human partners: {P12757;Q8TCS8;Q9ULV5}

27266 Pathogen[ Q85601] interacts with 6 human partners: {Q9ULV5;P00480;P12757;P12755;Q12933;Q8TCS8}

27267 Pathogen[ P14079] interacts with 8 human partners: {P12755;P20292;P10620;P00480;Q12933;P12757;Q9ULV5;Q8TCS8}

27268 Pathogen[ P03383] interacts with 4 human partners: {Q8TCS8;Q9ULV5;Q12933;P12757}

27269 Pathogen[ P03410] interacts with 7 human partners: {Q8TCS8;P12755;P00480;Q12933;P12757;Q9ULV5;P20292}

27270 Pathogen[ P14075] interacts with 4 human partners: {P12757;Q9ULV5;Q12933;Q8TCS8}

27271 Pathogen[ P0C206] interacts with 7 human partners: {Q8TCS8;Q12933;P12755;Q9ULV5;P12757;P20292;P00480}

27272 Pathogen[ P03363] interacts with 3 human partners: {P12757;Q12933;Q9ULV5}

27273 [Cluster 2480]GO:0003214+P biological\_process [name] cardiac left ventricle morphogenesis [def] "The process in which the left cardiac ventricle is generated and organized." [GOC]

27274 Pathogen[ Q2Q067] interacts with 1 human partners: {Q06330}

27275 Pathogen[ P0C214] interacts with 1 human partners: {Q06330}

27276 Pathogen[ P03346] interacts with 1 human partners: {Q06330}

27277 Pathogen[ Q85601] interacts with 1 human partners: {Q06330}

27278 Pathogen[ P14079] interacts with 1 human partners: {Q06330}

27279 Pathogen[ P03383] interacts with 1 human partners: {Q06330}

27280 Pathogen[ P03410] interacts with 1 human partners: {Q06330}

27281 Pathogen[ P14075] interacts with 1 human partners: {Q06330}

27282 Pathogen[ P0C206] interacts with 1 human partners: {Q06330}

27283 Pathogen[ P03363] interacts with 1 human partners: {Q06330}

27284 [Cluster 2481]GO:0007252+P biological\_process [name] I-kappaB phosphorylation [def] "The process of introducing a phosphate group into an I-kappaB protein." [GOC]

27285 Pathogen[ Q2Q067] interacts with 5 human partners: {Q8IUD2;O95163;O14920;O43318;O15111}

27286 Pathogen[ P0C214] interacts with 6 human partners: {O15111;Q14164;O43318;Q8IUD2;O95163;O14920}

27287 Pathogen[ P03346] interacts with 6 human partners: {O15111;Q8IUD2;O95163;O14920;O43318;Q14164}

27288 Pathogen[ Q85601] interacts with 6 human partners: {O15111;Q14164;O14920;O43318;O95163;Q8IUD2}

27289 Pathogen[ P14079] interacts with 3 human partners: {Q14164;O95163;Q8IUD2}

27290 Pathogen[ P03383] interacts with 5 human

27291 partners:{O95163;O14920;O15111;O43318;Q8IUD2}  
Pathogen[ P03410] interacts with 5 human

27292 partners:{O14920;O15111;O43318;Q8IUD2;O95163}  
Pathogen[ P14075] interacts with 5 human

27293 partners:{O15111;Q8IUD2;O14920;O43318;O95163}  
Pathogen[ P0C206] interacts with 6 human

27294 partners:{O14920;O43318;Q8IUD2;O95163;Q14164;O15111}  
Pathogen[ P03363] interacts with 5 human

27295 partners:{O14920;O15111;O43318;O95163;Q8IUD2}  
[Cluster 2482]GO:0010845+P biological\_process [name] positive regulation of reciprocal meiotic recombination [def] "Any process that increases the frequency, rate or extent of recombination during meiosis. Reciprocal meiotic recombination is the cell cycle process in which double strand breaks are formed and repaired through a double Holliday junction intermediate." [GOC

27296 Pathogen[ Q2Q067] interacts with 1 human partners:{P63146}  
27297 Pathogen[ P0C214] interacts with 2 human partners:{P63146;Q9NQV7}  
27298 Pathogen[ P03346] interacts with 2 human partners:{Q9NQV7;P63146}  
27299 Pathogen[ Q85601] interacts with 2 human partners:{Q9NQV7;P63146}  
27300 Pathogen[ P14079] interacts with 2 human partners:{Q9NQV7;P63146}  
27301 Pathogen[ P03383] interacts with 1 human partners:{P63146}  
27302 Pathogen[ P03410] interacts with 2 human partners:{Q9NQV7;P63146}  
27303 Pathogen[ P14075] interacts with 1 human partners:{P63146}  
27304 Pathogen[ P0C206] interacts with 2 human partners:{Q9NQV7;P63146}  
27305 Pathogen[ P03363] interacts with 1 human partners:{P63146}

27306 [Cluster 2483]GO:0045900+P biological\_process [name] negative regulation of translational elongation [def] "Any process that stops, prevents, or reduces the frequency, rate or extent of translational elongation." [GOC

27307 Pathogen[ Q2Q067] interacts with 2 human partners:{P49458;O76064}  
27308 Pathogen[ P0C214] interacts with 3 human partners:{P49458;Q8IYW5;O76064}  
27309 Pathogen[ P03346] interacts with 3 human partners:{O76064;P49458;Q8IYW5}  
27310 Pathogen[ Q85601] interacts with 2 human partners:{O76064;Q8IYW5}  
27311 Pathogen[ P14079] interacts with 1 human partners:{P49458}  
27312 Pathogen[ P03383] interacts with 1 human partners:{P49458}  
27313 Pathogen[ P03410] interacts with 1 human partners:{P49458}  
27314 Pathogen[ P14075] interacts with 1 human partners:{P49458}  
27315 Pathogen[ P0C206] interacts with 3 human partners:{Q8IYW5;P49458;O76064}  
27316 Pathogen[ P03363] interacts with 2 human partners:{Q8IYW5;P49458}

27317 [Cluster 2484]GO:0042177+P biological\_process [name] negative regulation of protein catabolic process [def] "Any process that stops, prevents, or reduces the frequency, rate or extent of the chemical reactions and pathways resulting in the breakdown of a protein by the destruction of the native, active configuration, with or without the hydrolysis of peptide bonds." [GOC

27318 Pathogen[ Q2Q067] interacts with 6 human  
partners:{Q13485;Q8N9N5;Q04206;Q13257;P84022;Q9UI95}

27319 Pathogen[ P0C214] interacts with 8 human  
partners:{Q13257;Q8N9N5;P84022;Q04206;Q9UI95;Q13485;P07093;Q96P63}

27320 Pathogen[ P03346] interacts with 8 human  
partners:{Q04206;Q9UI95;P84022;Q8N9N5;O15151;Q96P63;Q13485;Q13257}

27321 Pathogen[ Q85601] interacts with 10 human  
partners:{O15151;Q9UI95;Q13257;Q04206;Q8N9N5;P84022;Q4G163;P07093;Q13485;Q96P63}

27322 Pathogen[ P14079] interacts with 4 human partners:{Q8N9N5;Q4G163;Q13257;O15151}  
27323 Pathogen[ P03383] interacts with 7 human  
partners:{Q13257;Q13485;Q9UI95;P84022;Q8N9N5;Q96P63;Q04206}

27324 Pathogen[ P03410] interacts with 9 human  
partners:{P84022;Q4G163;Q04206;Q9UI95;O15151;Q8N9N5;Q96P63;Q13485;Q13257}

27325 Pathogen[ P14075] interacts with 6 human  
partners:{Q8N9N5;Q04206;Q13257;Q9UI95;Q13485;P84022}

27326 Pathogen[ P0C206] interacts with 9 human  
partners:{P84022;Q8N9N5;Q13257;O15151;Q04206;Q13485;Q96P63;Q4G163;Q9UI95}

27327 Pathogen[ P03363] interacts with 8 human  
partners:{Q04206;Q8N9N5;O15151;Q96P63;P84022;Q9UI95;Q13257;Q13485}

27328 [Cluster 2485]GO:0050709+P biological\_process [name] negative regulation of protein secretion [def] "Any process that stops, prevents, or reduces the frequency, rate or extent of the controlled release of a protein from a cell or group of cells." [GOC

27329 Pathogen[ Q2Q067] interacts with 2 human partners:{Q96FX2;Q9UGK8}  
27330 Pathogen[ P0C214] interacts with 3 human partners:{Q96FX2;Q8WXG1;Q9UGK8}  
27331 Pathogen[ P03346] interacts with 2 human partners:{Q9UGK8;Q96FX2}  
27332 Pathogen[ Q85601] interacts with 2 human partners:{Q96FX2;Q9UGK8}  
27333 Pathogen[ P14079] interacts with 4 human partners:{P04083;Q96FX2;Q9UGK8;Q8WXG1}  
27334 Pathogen[ P03383] interacts with 2 human partners:{Q96FX2;Q9UGK8}  
27335 Pathogen[ P03410] interacts with 3 human partners:{Q96FX2;Q8WXG1;Q9UGK8}  
27336 Pathogen[ P14075] interacts with 2 human partners:{Q9UGK8;Q96FX2}  
27337 Pathogen[ P0C206] interacts with 3 human partners:{Q9UGK8;Q96FX2;Q8WXG1}  
27338 Pathogen[ P03363] interacts with 2 human partners:{Q9UGK8;Q96FX2}

27339 [Cluster 2486]GO:0003341+P biological\_process [name] cilium movement [def] "The directed, self-propelled movement of a cilium." [GOC

27340 Pathogen[ Q2Q067] interacts with 1 human partners:{Q5TD94}  
27341 Pathogen[ P0C214] interacts with 1 human partners:{Q5TD94}  
27342 Pathogen[ P03346] interacts with 1 human partners:{Q5TD94}  
27343 Pathogen[ Q85601] interacts with 1 human partners:{Q5TD94}  
27344 Pathogen[ P14079] interacts with 3 human partners:{Q9H1X1;Q5TD94;Q8IW40}  
27345 Pathogen[ P03383] interacts with 1 human partners:{Q5TD94}  
27346 Pathogen[ P03410] interacts with 3 human partners:{Q5TD94;Q9H1X1;Q8IW40}  
27347 Pathogen[ P14075] interacts with 1 human partners:{Q5TD94}  
27348 Pathogen[ P0C206] interacts with 3 human partners:{Q5TD94;Q9H1X1;Q8IW40}  
27349 Pathogen[ P03363] interacts with 3 human partners:{Q9H1X1;Q5TD94;Q8IW40}  
27350 [Cluster 2487]GO:0001833+P biological\_process [name] inner cell mass cell proliferation [def] "The proliferation of cells in the inner cell mass." [GOC  
27351 Pathogen[ Q2Q067] interacts with 7 human partners:{Q86YC2;Q86XI2;Q14691;Q9Y3A5;Q15047;Q7Z7C8;O60885}  
27352 Pathogen[ P0C214] interacts with 7 human partners:{Q86XI2;Q15047;Q7Z7C8;Q14691;Q86YC2;O60885;Q9Y3A5}  
27353 Pathogen[ P03346] interacts with 9 human partners:{Q14691;Q9UJQ4;Q7Z7C8;Q86XI2;P51587;Q86YC2;O60885;Q15047;Q9Y3A5}  
27354 Pathogen[ Q85601] interacts with 9 human partners:{Q7Z7C8;Q9Y3A5;Q14691;Q86YC2;O60885;Q86XI2;Q15047;Q9GZM8;P51587}  
27355 Pathogen[ P14079] interacts with 10 human partners:{Q15047;Q14691;P51587;Q9Y3A5;Q86YC2;Q8N201;Q9UJQ4;Q9GZM8;Q86XI2;O60885}  
27356 Pathogen[ P03383] interacts with 6 human partners:{Q15047;Q86XI2;Q9Y3A5;O60885;Q86YC2;Q14691}  
27357 Pathogen[ P03410] interacts with 10 human partners:{Q15047;O60885;Q9GZM8;Q8N201;P51587;Q14691;Q86XI2;Q9UJQ4;Q9Y3A5;Q86YC2}  
27358 Pathogen[ P14075] interacts with 7 human partners:{Q86YC2;Q86XI2;Q15047;Q7Z7C8;Q14691;O60885;Q9Y3A5}  
27359 Pathogen[ P0C206] interacts with 11 human partners:{Q9UJQ4;Q86YC2;P51587;Q9GZM8;Q86XI2;Q14691;O60885;Q9Y3A5;Q7Z7C8;Q15047;Q8N201}  
27360 Pathogen[ P03363] interacts with 8 human partners:{Q14691;Q9UJQ4;Q86XI2;Q9Y3A5;O60885;Q7Z7C8;Q15047;Q86YC2}  
27361 [Cluster 2488]GO:2000042+P biological\_process [name] negative regulation of double-strand break repair via homologous recombination [def] "Any process that stops, prevents, or reduces the frequency, rate or extent of double-strand break repair via homologous recombination." [GOC  
27362 Pathogen[ Q2Q067] interacts with 1 human partners:{Q9NWS1}  
27363 Pathogen[ P0C214] interacts with 1 human partners:{Q9NWS1}  
27364 Pathogen[ P03346] interacts with 1 human partners:{Q9NWS1}  
27365 Pathogen[ Q85601] interacts with 1 human partners:{Q9NWS1}  
27366 Pathogen[ P14079] interacts with 1 human partners:{Q9NWS1}  
27367 Pathogen[ P03383] interacts with 1 human partners:{Q9NWS1}  
27368 Pathogen[ P03410] interacts with 1 human partners:{Q9NWS1}  
27369 Pathogen[ P14075] interacts with 1 human partners:{Q9NWS1}  
27370 Pathogen[ P0C206] interacts with 1 human partners:{Q9NWS1}  
27371 Pathogen[ P03363] interacts with 1 human partners:{Q9NWS1}  
27372 [Cluster 2489]GO:0042518+P biological\_process [name] negative regulation of tyrosine phosphorylation of Stat3 protein [def] "Any process that stops, prevents, or reduces the frequency, rate or extent of the introduction of a phosphate group to a tyrosine residue of a Stat3 protein." [GOC  
27373 Pathogen[ Q2Q067] interacts with 2 human partners:{P30153;P67775}  
27374 Pathogen[ P0C214] interacts with 3 human partners:{P30153;P67775;O15524}  
27375 Pathogen[ P03346] interacts with 3 human partners:{O15524;P67775;P30153}  
27376 Pathogen[ Q85601] interacts with 2 human partners:{P30153;P67775}  
27377 Pathogen[ P14079] interacts with 1 human partners:{P30153}  
27378 Pathogen[ P03383] interacts with 2 human partners:{P30153;P67775}  
27379 Pathogen[ P03410] interacts with 2 human partners:{P30153;P67775}  
27380 Pathogen[ P14075] interacts with 2 human partners:{P67775;P30153}  
27381 Pathogen[ P0C206] interacts with 3 human partners:{P30153;O15524;P67775}  
27382 Pathogen[ P03363] interacts with 3 human partners:{O15524;P30153;P67775}  
27383 [Cluster 2490]GO:0022037+P biological\_process [name] metencephalon development [def] "The process whose specific outcome is the progression of the metencephalon over time, from its formation to the mature structure." [GO\_REF  
27384 Pathogen[ Q2Q067] interacts with 1 human partners:{Q92830}  
27385 Pathogen[ P0C214] interacts with 1 human partners:{Q92830}  
27386 Pathogen[ P03346] interacts with 1 human partners:{Q92830}  
27387 Pathogen[ Q85601] interacts with 1 human partners:{Q92830}  
27388 Pathogen[ P14079] interacts with 1 human partners:{Q92830}  
27389 Pathogen[ P03383] interacts with 1 human partners:{Q92830}  
27390 Pathogen[ P03410] interacts with 1 human partners:{Q92830}  
27391 Pathogen[ P14075] interacts with 1 human partners:{Q92830}  
27392 Pathogen[ P0C206] interacts with 1 human partners:{Q92830}  
27393 Pathogen[ P03363] interacts with 1 human partners:{Q92830}  
27394 [Cluster 2491]GO:0042693+P biological\_process [name] muscle cell fate commitment [def] "The process in which the cellular identity of muscle cells is acquired and

determined." [CL  
27395 Pathogen[ Q2Q067] interacts with 3 human partners:{P13349;P15172;P23409}  
27396 Pathogen[ POC214] interacts with 2 human partners:{P13349;P15172}  
27397 Pathogen[ P03346] interacts with 4 human partners:{P13349;P15172;P23409;P15173}  
27398 Pathogen[ Q85601] interacts with 3 human partners:{P15172;P13349;P23409}  
27399 Pathogen[ P14079] interacts with 2 human partners:{P13349;P23409}  
27400 Pathogen[ P03383] interacts with 1 human partners:{P15172}  
27401 Pathogen[ P03410] interacts with 2 human partners:{P23409;P13349}  
27402 Pathogen[ P14075] interacts with 1 human partners:{P15172}  
27403 Pathogen[ POC206] interacts with 3 human partners:{P23409;P13349;P15172}  
27404 Pathogen[ P03363] interacts with 3 human partners:{P13349;P23409;P15172}  
27405 [Cluster 2492]GO:0045143+P biological\_process [name] homologous chromosome segregation  
[def] "The cell cycle process in which replicated homologous chromosomes are organized  
and then physically separated and apportioned to two sets during the first division of  
the meiotic cell cycle. Each replicated chromosome, composed of two sister chromatids,  
aligns at the cell equator, paired with its homologous partner\_ this pairing off,  
referred to as synapsis, permits genetic recombination. One homolog (both sister  
chromatids) of each morphologic type goes into each of the resulting chromosome sets."  
[GOC  
27406 Pathogen[ Q2Q067] interacts with 2 human partners:{O95997;Q14674}  
27407 Pathogen[ POC214] interacts with 2 human partners:{O95997;Q14674}  
27408 Pathogen[ P03346] interacts with 2 human partners:{O95997;Q14674}  
27409 Pathogen[ Q85601] interacts with 2 human partners:{Q14674;O95997}  
27410 Pathogen[ P14079] interacts with 3 human partners:{O43196;Q14674;O95997}  
27411 Pathogen[ P03383] interacts with 2 human partners:{Q14674;O95997}  
27412 Pathogen[ P03410] interacts with 3 human partners:{O95997;Q14674;O43196}  
27413 Pathogen[ P14075] interacts with 2 human partners:{O95997;Q14674}  
27414 Pathogen[ POC206] interacts with 2 human partners:{O95997;Q14674}  
27415 Pathogen[ P03363] interacts with 2 human partners:{Q14674;O95997}  
27416 [Cluster 2493]GO:0007076+P biological\_process [name] mitotic chromosome condensation  
[def] "The cell cycle process in which chromatin structure is compacted prior to and  
during mitosis in eukaryotic cells." [GOC  
27417 Pathogen[ Q2Q067] interacts with 10 human  
partners:{P42695;O95347;O43823;Q15003;Q15021;Q9HD42;Q86YI8;Q9BXS6;Q9BPX3;Q96FF9}  
27418 Pathogen[ POC214] interacts with 10 human  
partners:{Q9BPX3;Q15003;Q9BXS6;Q9HD42;P42695;Q96FF9;O95347;O43823;Q86YI8;Q15021}  
27419 Pathogen[ P03346] interacts with 11 human  
partners:{Q9BXS6;Q5XG87;Q96FF9;Q9HD42;O95347;Q9BPX3;Q15021;P42695;Q86YI8;Q15003;O438  
23}  
27420 Pathogen[ Q85601] interacts with 11 human  
partners:{O95347;P42695;Q9BXS6;Q9BPX3;Q5XG87;Q86YI8;O43823;Q15003;Q96FF9;Q9HD42;Q150  
21}  
27421 Pathogen[ P14079] interacts with 11 human  
partners:{Q96FF9;O43823;Q5XG87;Q9HD42;Q15003;Q9BXS6;O95347;Q86YI8;Q9BPX3;Q15021;P426  
95}  
27422 Pathogen[ P03383] interacts with 8 human  
partners:{Q9BXS6;O95347;Q15003;Q86YI8;Q9HD42;Q96FF9;Q9BPX3;Q15021}  
27423 Pathogen[ P03410] interacts with 11 human  
partners:{P42695;Q15003;Q9BXS6;O95347;Q9HD42;Q5XG87;Q96FF9;Q9BPX3;O43823;Q15021;Q86Y  
I8}  
27424 Pathogen[ P14075] interacts with 9 human  
partners:{Q9BXS6;Q96FF9;O95347;Q86YI8;Q9HD42;Q15003;O43823;Q9BPX3;Q15021}  
27425 Pathogen[ POC206] interacts with 12 human  
partners:{Q9BPX3;Q5XG87;P42695;Q15021;Q96FF9;Q15003;O95347;Q86YI8;O43823;Q9HD42;Q9BX  
S6;Q9NTJ3}  
27426 Pathogen[ P03363] interacts with 8 human  
partners:{Q15021;O95347;Q9BXS6;Q9BPX3;P42695;Q96FF9;Q15003;Q9HD42}  
27427 [Cluster 2494]GO:0070076+P biological\_process [name] histone lysine demethylation  
[def] "The modification of a histone by the removal of a methyl group from a lysine  
residue." [GOC  
27428 Pathogen[ Q2Q067] interacts with 1 human partners:{P63146}  
27429 Pathogen[ POC214] interacts with 1 human partners:{P63146}  
27430 Pathogen[ P03346] interacts with 1 human partners:{P63146}  
27431 Pathogen[ Q85601] interacts with 1 human partners:{P63146}  
27432 Pathogen[ P14079] interacts with 1 human partners:{P63146}  
27433 Pathogen[ P03383] interacts with 1 human partners:{P63146}  
27434 Pathogen[ P03410] interacts with 1 human partners:{P63146}  
27435 Pathogen[ P14075] interacts with 1 human partners:{P63146}  
27436 Pathogen[ POC206] interacts with 1 human partners:{P63146}  
27437 Pathogen[ P03363] interacts with 1 human partners:{P63146}  
27438 [Cluster 2495]GO:0060317+P biological\_process [name] cardiac epithelial to mesenchymal  
transition [def] "A transition where a cardiac epithelial cell loses apical/basolateral  
polarity, severs intercellular adhesive junctions, degrades basement membrane components  
and becomes a migratory mesenchymal cell." [GOC  
27439 Pathogen[ Q2Q067] interacts with 2 human partners:{Q9NQ87;Q9Y5J3}  
27440 Pathogen[ POC214] interacts with 2 human partners:{Q9Y5J3;Q9NQ87}

27441 Pathogen[ P03346] interacts with 2 human partners:{Q9Y5J3;Q9NQ87}  
27442 Pathogen[ Q85601] interacts with 2 human partners:{Q9NQ87;Q9Y5J3}  
27443 Pathogen[ P14079] interacts with 2 human partners:{Q9Y5J3;Q9NQ87}  
27444 Pathogen[ P03383] interacts with 1 human partners:{Q9NQ87}  
27445 Pathogen[ P03410] interacts with 2 human partners:{Q9Y5J3;Q9NQ87}  
27446 Pathogen[ P14075] interacts with 1 human partners:{Q9NQ87}  
27447 Pathogen[ P0C206] interacts with 2 human partners:{Q9NQ87;Q9Y5J3}  
27448 Pathogen[ P03363] interacts with 2 human partners:{Q9Y5J3;Q9NQ87}  
27449 [Cluster 2496]GO:0090292+P biological\_process [name] nuclear matrix anchoring at nuclear membrane [def] "The process in which the nuclear matrix, the dense fibrillar network lying on the inner side of the nuclear membrane, is directly or indirectly linked to the nuclear membrane." [GOC  
27450 Pathogen[ Q2Q067] interacts with 2 human partners:{Q9UH99;Q8NF91}  
27451 Pathogen[ P0C214] interacts with 2 human partners:{Q9UH99;Q8NF91}  
27452 Pathogen[ P03346] interacts with 3 human partners:{Q9UH99;Q8NF91;O94901}  
27453 Pathogen[ Q85601] interacts with 3 human partners:{Q9UH99;Q8NF91;O94901}  
27454 Pathogen[ P14079] interacts with 3 human partners:{O94901;Q8NF91;Q9UH99}  
27455 Pathogen[ P03383] interacts with 1 human partners:{Q9UH99}  
27456 Pathogen[ P03410] interacts with 3 human partners:{Q9UH99;O94901;Q8NF91}  
27457 Pathogen[ P14075] interacts with 1 human partners:{Q9UH99}  
27458 Pathogen[ P0C206] interacts with 3 human partners:{Q9UH99;O94901;Q8NF91}  
27459 Pathogen[ P03363] interacts with 3 human partners:{Q8NF91;O94901;Q9UH99}  
27460 [Cluster 2497]GO:2000116+P biological\_process [name] regulation of cysteine-type endopeptidase activity [def] "Any process that modulates the frequency, rate or extent of cysteine-type endopeptidase activity." [GOC  
27461 Pathogen[ Q2Q067] interacts with 1 human partners:{Q13490}  
27462 Pathogen[ P0C214] interacts with 1 human partners:{Q13490}  
27463 Pathogen[ P03346] interacts with 2 human partners:{Q13489;Q13490}  
27464 Pathogen[ Q85601] interacts with 1 human partners:{Q13490}  
27465 Pathogen[ P14079] interacts with 1 human partners:{Q13490}  
27466 Pathogen[ P03383] interacts with 1 human partners:{Q13490}  
27467 Pathogen[ P03410] interacts with 1 human partners:{Q13490}  
27468 Pathogen[ P14075] interacts with 1 human partners:{Q13490}  
27469 Pathogen[ P0C206] interacts with 2 human partners:{Q13489;Q13490}  
27470 Pathogen[ P03363] interacts with 2 human partners:{Q13490;Q13489}  
27471 [Cluster 2498]GO:0030511+P biological\_process [name] positive regulation of transforming growth factor beta receptor signaling pathway [def] "Any process that activates or increases the frequency, rate or extent of TGF-beta receptor signaling pathway activity." [GOC  
27472 Pathogen[ Q2Q067] interacts with 7 human partners:{Q13485;Q6ZNA4;Q99966;O00255;Q9H160;P49918;P42772}  
27473 Pathogen[ P0C214] interacts with 7 human partners:{Q99966;P49918;Q13485;Q9H160;Q6ZNA4;O00255;P42772}  
27474 Pathogen[ P03346] interacts with 8 human partners:{O14908;Q99966;P42772;P49918;O00255;Q6ZNA4;Q13485;Q9H160}  
27475 Pathogen[ Q85601] interacts with 7 human partners:{Q99966;P42772;O00255;P49918;Q6ZNA4;Q9H160;Q13485}  
27476 Pathogen[ P14079] interacts with 7 human partners:{Q6ZNA4;Q99966;P49918;O43294;O00255;O14908;Q9H160}  
27477 Pathogen[ P03383] interacts with 6 human partners:{Q13485;Q6ZNA4;Q9H160;P42772;O00255;P49918}  
27478 Pathogen[ P03410] interacts with 9 human partners:{Q6ZNA4;P42772;O43294;O14908;Q9H160;Q13485;P49918;O00255;Q99966}  
27479 Pathogen[ P14075] interacts with 6 human partners:{Q13485;O00255;Q6ZNA4;P49918;P42772;Q9H160}  
27480 Pathogen[ P0C206] interacts with 9 human partners:{Q6ZNA4;O00255;P42772;Q9H160;O14908;O43294;Q13485;Q99966;P49918}  
27481 Pathogen[ P03363] interacts with 6 human partners:{Q9H160;P49918;O14908;Q6ZNA4;P42772;Q13485}  
27482 [Cluster 2499]GO:0006977+P biological\_process [name] DNA damage response, signal transduction by p53 class mediator resulting in cell cycle arrest [def] "A cascade of processes induced by the cell cycle regulator phosphoprotein p53, or an equivalent protein, in response to the detection of DNA damage and resulting in the stopping or reduction in rate of the cell cycle." [GOC  
27483 Pathogen[ Q2Q067] interacts with 50 human partners:{Q8NHY2;Q99460;O75832;P48556;P40306;P55036;O00231;O00233;P51665;P28072;A5LHX3;Q13200;P25787;Q06323;P28065;O14818;Q9NYZ3;Q14997;P60900;Q9UL46;P61289;P28062;O43715;Q9UNM6;P25788;P42575;Q92530;P78560;Q9HB75;P25786;P38936;Q16401;O00232;P28074;P25789;P0CG47;P20618;P0CG48;P28070;P28066;Q99436;P24941;Q8TAA3;P62987;O43242;P49721;P46527;P49720;Q00987;P62979}  
27484 Pathogen[ P0C214] interacts with 52 human partners:{Q14997;P51665;P25789;P55036;P28062;A5LHX3;P28065;Q00987;O14818;O43242;P46527;O43715;P48556;Q8NHY2;P40306;Q13200;P38936;O00232;Q99460;P28066;O75832;P49720;P28074;P0CG48;Q9UL46;P25788;P24941;Q9UNM6;O00231;Q06323;P25786;Q9HB75;P28072;Q8TAA3;P62987;Q99436;P0CG47;P25787;Q9NYZ3;P78560;P35998;P60900;O00233;P62979;Q92530;Q15008;P28070;P42575;P20618;P49721;Q16401;P17980}



27485 Pathogen[ P03346] interacts with 52 human partners: {Q06945;P25787;P28070;P25789;P55036;Q13362;Q99460;Q9UL46;P62987;P28072;P25788;P28074;P49721;Q8NH2;P42575;O14818;Q99436;P24941;P0CG48;Q16401;A5LHX3;P28062;P20618;O00232;Q00987;Q75832;O00233;P78560;P49720;P28065;Q9HB75;P60900;P25786;O00231;P61289;P62979;P28066;Q9UNM6;Q8TAA3;P0CG47;Q9NYZ3;Q14997;Q13200;P48556;P51665;P38936;Q06323;P46527;O43715;Q92530;O43242;P40306}

27486 Pathogen[ Q85601] interacts with 46 human partners: {P28066;Q9UNM6;P60900;O43715;P55036;P25787;P61289;P25788;O75832;P0CG48;P25789;O00233;P20618;P40306;P49720;P42575;P28062;P49721;P25786;Q9NYZ3;P28072;Q13200;Q9HB75;P28065;P62979;Q99436;P28070;Q8TAA3;Q9UL46;Q99460;O00231;P0CG47;P48556;P28074;Q92530;P38936;P62987;A5LHX3;Q06323;Q00987;O14818;Q8NH2;P24941;Q16401;P78560;P46527}

27487 Pathogen[ P14079] interacts with 54 human partners: {P28065;Q99436;Q13362;P62333;P48556;P0CG48;P40306;P55036;P28074;O00232;Q9NYZ3;P49720;O00487;P25787;O75832;A5LHX3;P62979;O43715;O00233;P35998;P61289;P62987;P51665;P20618;Q00987;Q8TAA3;Q14997;P28062;P60900;P38936;Q9UNM6;Q99460;Q99445;O14818;P49721;Q92530;Q06323;P62191;P46527;P15941;Q15008;P43686;P42575;O43242;P25788;O00231;P28066;Q9UL46;P0CG47;Q9HB75;Q16401;P17980;P28072;Q8NH2}

27488 Pathogen[ P03383] interacts with 43 human partners: {P55036;P62987;P25789;P60900;P40306;O00233;P49721;Q06323;Q14997;P20618;O75832;P78560;P46527;P24941;O43715;Q9UL46;Q9UNM6;P25786;Q99460;Q9NYZ3;P28072;Q13200;P28065;P28066;Q16401;P62979;O00231;P0CG47;P0CG48;P28074;Q92530;P49720;Q8TAA3;P61289;Q8NH2;P28062;P48556;O14818;Q99436;P28070;P25787;Q9HB75;P25788}

27489 Pathogen[ P03410] interacts with 55 human partners: {Q8NH2;P28070;P46527;P55036;P0CG48;Q9HB75;P78560;P25786;Q15008;Q16401;P60900;Q14997;P15941;P42575;P35998;Q99460;O00233;O00232;Q99445;Q8TAA3;P48556;P49721;Q9NYZ3;A5LHX3;P62979;Q99436;P40306;Q06323;O43715;Q13200;P25787;P38936;P24941;P28062;P51665;O14818;O00231;Q9UNM6;P25789;P49720;P62987;Q13362;P28072;Q00987;P25788;P28066;P28065;O43242;P0CG47;P17980;O75832;P20618;Q9UL46;P28074;P61289}

27490 Pathogen[ P14075] interacts with 42 human partners: {P78560;P55036;P25788;P28066;P24941;Q06323;O75832;Q9HB75;Q8TAA3;P60900;O00233;Q9UL46;P49720;Q13200;P48556;Q16401;P28070;P49721;O00231;P46527;Q92530;P0CG48;P62979;P28062;P28074;P28065;P25786;O14818;P62987;P28072;Q8NH2;Q14997;P0CG47;P25787;O43715;P20618;Q9NYZ3;Q9UNM6;P61289;P40306;Q99436;P25789}

27491 Pathogen[ P0C206] interacts with 51 human partners: {P61289;Q99436;P28062;Q9UNM6;P0CG48;O75832;P40306;P28065;Q14997;P55036;P25786;P25788;P25787;Q06323;P78560;P49720;O00232;P60900;O43242;A5LHX3;P25789;O43715;Q8NH2;P20618;Q13200;Q8TAA3;P28070;Q99445;Q99460;P62979;P46527;P28066;P38936;O14818;Q9HB75;P0CG47;P28072;Q13362;P28074;P42575;Q92530;P49721;P62987;Q9NYZ3;Q00987;Q9UL46;P24941;O00233;P48556;Q16401;O00231}

27492 Pathogen[ P03363] interacts with 10 human partners: {Q92530;Q13362;P61289;P24941;Q9HB75;Q9NYZ3;P62987;P78560;Q8NH2;O43715}

27493 [Cluster 2500]GO:0045842+P biological\_process [name] positive regulation of mitotic metaphase/anaphase transition [def] "Any process that activates or increases the frequency, rate or extent of the mitotic metaphase to anaphase transition." [GOC

27494 Pathogen[ Q2Q067] interacts with 5 human partners: {Q15398;Q8IY18;P06400;Q14674;Q96MF7}

27495 Pathogen[ P0C214] interacts with 5 human partners: {Q8IY18;Q15398;Q96MF7;P06400;Q14674}

27496 Pathogen[ P03346] interacts with 5 human partners: {Q96MF7;P06400;Q15398;Q8IY18;Q14674}

27497 Pathogen[ Q85601] interacts with 5 human partners: {Q15398;Q8IY18;P06400;Q14674;Q96MF7}

27498 Pathogen[ P14079] interacts with 4 human partners: {Q96MF7;Q14674;Q8IY18;Q15398}

27499 Pathogen[ P03383] interacts with 3 human partners: {Q96MF7;P06400;Q14674}

27500 Pathogen[ P03410] interacts with 5 human partners: {Q15398;P06400;Q14674;Q96MF7;Q8IY18}

27501 Pathogen[ P14075] interacts with 3 human partners: {P06400;Q14674;Q96MF7}

27502 Pathogen[ P0C206] interacts with 5 human partners: {Q96MF7;Q14674;Q8IY18;Q15398;P06400}

27503 Pathogen[ P03363] interacts with 5 human partners: {Q15398;P06400;Q14674;Q8IY18;Q96MF7}

27504 [Cluster 2501]GO:0008543+P biological\_process [name] fibroblast growth factor receptor signaling pathway [def] "The series of molecular signals generated as a consequence of a fibroblast growth factor receptor binding to one of its physiological ligands." [GOC

27505 Pathogen[ Q2Q067] interacts with 23 human partners: {P30153;P31749;Q5T1C6;Q96B36;Q86XR8;P67775;O43524;P62714;Q9BPZ7;Q9BVC4;Q96RU7;P0CG47;P31946;P0CG48;P27986;P62987;P46527;Q6R327;P22681;O15111;Q00987;P22736;P62979}

27506 Pathogen[ P0C214] interacts with 25 human partners: {P22681;Q9BPZ7;O60346;O15111;Q9BVC4;P30153;P62993;Q92934;Q00987;P46527;P62714;Q6R327;P0CG48;Q86XR8;Q96B36;P67775;P62987;Q96RU7;P0CG47;Q5T1C6;P16220;P31946;P62979;P27986;P31749}

27507 Pathogen[ P03346] interacts with 30 human partners: {O60346;O15111;Q86XR8;P16220;P62987;Q9BVC4;Q9BPZ7;P0CG48;P62993;P62714;P6775;Q00987;P30153;Q96B36;P22736;P31749;Q12778;P98177;P62979;Q96RU7;Q9UQ13;P31946;P55211;P0CG47;O43427;P22681;Q6R327;P46527;O43524;P27986}

27508 Pathogen[ Q85601] interacts with 24 human partners: {O60346;P22681;P31946;P31749;P62993;P62714;O15111;Q9BPZ7;P30153;Q96B36;P0CG48;P27986;Q9BVC4;Q86XR8;P16220;P22736;P67775;P62979;Q96RU7;P0CG47;P62987;Q00987;Q5T1C6;P46527}

27509 Pathogen[ P14079] interacts with 22 human partners: {O6R327;P0CG48;O43597;P22736;O60346;P62979;Q9BVC4;P62987;Q00987;O43427;Q92934;P31946;Q5T1C6;Q8WU20;Q96RU7;P62993;P46527;Q96B36;P30153;Q86XR8;Q9BPZ7;P0CG47}

27510 Pathogen[ P03383] interacts with 18 human partners: {P27986;Q86XR8;P16220;P62987;P31946;P31749;Q9BPZ7;O15111;P62714;P30153;P67775;Q96B36;P46527;Q96RU7;P62979;P0CG47;P0CG48;Q5T1C6}

27511 Pathogen[ P03410] interacts with 27 human partners: {P62714;P46527;P27986;P0CG48;O43597;O43427;O15111;Q9BPZ7;P31749;Q92934;Q9BVC4;P62979;Q96B36;Q5T1C6;P22736;P16220;Q6R327;Q96RU7;P30153;O60346;P62987;Q00987;Q8WU20;P67775;P62993;P0CG47;P31946}

27512 Pathogen[ P14075] interacts with 20 human partners: {O15111;O43427;Q5T1C6;P46527;Q9BPZ7;Q96B36;P31749;P0CG48;P62979;Q86XR8;Q6R327;P27986;P62987;P62714;P67775;P30153;Q96RU7;P0CG47;P16220;P31946}

27513 Pathogen[ P0C206] interacts with 29 human partners: {Q86XR8;P0CG48;P31749;P16220;P30153;O43427;Q96B36;P67775;P22736;P27986;P62993;Q96RU7;P31946;Q92934;Q6R327;P22681;Q8WU20;O15111;P62979;Q5T1C6;P46527;Q9BPZ7;P62714;O43597;P0CG47;O60346;P62987;Q00987;Q9BVC4}

27514 Pathogen[ P03363] interacts with 17 human partners: {P22681;Q9BVC4;Q96B36;P62714;O15111;P31946;P16220;O43524;Q13480;P31749;P62987;Q9UQ13;Q86XR8;P30153;P27986;P67775;Q6R327}

27515 [Cluster 2502]GO:0060795+P biological\_process [name] cell fate commitment involved in formation of primary germ layers [def] "The commitment of cells to specific cell fates of the endoderm, ectoderm and mesoderm as a part of gastrulation." [GOC

27516 Pathogen[ Q2Q067] interacts with 1 human partners: {Q01860}

27517 Pathogen[ P0C214] interacts with 1 human partners: {Q01860}

27518 Pathogen[ P03346] interacts with 1 human partners: {Q01860}

27519 Pathogen[ Q85601] interacts with 1 human partners: {Q01860}

27520 Pathogen[ P14079] interacts with 1 human partners: {Q01860}

27521 Pathogen[ P03383] interacts with 1 human partners: {Q01860}

27522 Pathogen[ P03410] interacts with 1 human partners: {Q01860}

27523 Pathogen[ P14075] interacts with 1 human partners: {Q01860}

27524 Pathogen[ P0C206] interacts with 1 human partners: {Q01860}

27525 Pathogen[ P03363] interacts with 1 human partners: {Q01860}

27526 [Cluster 2503]GO:0007034+P biological\_process [name] vacuolar transport [def] "The directed movement of substances into, out of or within a vacuole." [GOC

27527 Pathogen[ Q2Q067] interacts with 3 human partners: {Q4G0F5;O14972;O75436}

27528 Pathogen[ P0C214] interacts with 3 human partners: {O75436;O14972;Q4G0F5}

27529 Pathogen[ P03346] interacts with 3 human partners: {Q4G0F5;O14972;O75436}

27530 Pathogen[ Q85601] interacts with 3 human partners: {O14972;Q4G0F5;O75436}

27531 Pathogen[ P14079] interacts with 3 human partners: {Q4G0F5;O14972;O75436}

27532 Pathogen[ P03383] interacts with 2 human partners: {O14972;O75436}

27533 Pathogen[ P03410] interacts with 3 human partners: {O14972;O75436;Q4G0F5}

27534 Pathogen[ P14075] interacts with 2 human partners: {O75436;O14972}

27535 Pathogen[ P0C206] interacts with 3 human partners: {Q4G0F5;O14972;O75436}

27536 Pathogen[ P03363] interacts with 3 human partners: {O75436;O14972;Q4G0F5}

27537 [Cluster 2504]GO:000079+P biological\_process [name] regulation of cyclin-dependent protein kinase activity [def] "Any process that modulates the frequency, rate or extent of CDK activity." [GOC

27538 Pathogen[ Q2Q067] interacts with 43 human partners: {P30281;Q9BZE4;P42773;O75909;P24385;Q9UII4;Q8WWL7;Q99741;P61024;Q8N1B3;P30279;P32780;P30304;O60563;P22674;P14635;P24522;Q9UHV2;P30307;P51948;P51959;P24864;O95067;P50613;Q16543;P78396;P38936;P20248;O96020;Q96S94;P33552;P42771;O60583;P24863;Q9P287;Q9UJX6;P46527;Q8ND76;P49918;P42772;P51946;Q9UK58;Q96JB5}

27539 Pathogen[ P0C214] interacts with 43 human partners: {Q9UJX6;Q96S94;Q8ND76;P20248;P51946;P24863;Q16543;P30307;P24522;O75909;P50613;P51959;Q8N1B3;P61024;P46527;P14635;P24385;P38936;Q9UK58;P51948;P49918;P78396;P30281;O60583;Q9UII4;O95067;P42771;P22674;Q9UHV2;P32780;P42773;O60563;P24864;P30279;Q8WWL7;Q9P287;Q9BZE4;P30304;P33552;Q96JB5;P42772;Q99741;O96020}

27540 Pathogen[ P03346] interacts with 45 human partners: {P30281;Q8ND76;P78396;P55273;P24385;P30279;Q96S94;Q9BZE4;Q8N1B3;O60563;P0C7Q3;O96020;P24863;P30304;P42772;Q9UII4;P24864;P49918;P61024;P42771;O95067;Q9UJX6;O60583;Q16667;P14635;Q8WWL7;P51946;P33552;P20248;Q96JB5;Q16543;Q9UK58;P42773;O75909;Q9UHV2;P51959;P38936;Q9P287;P46527;Q99741;P51948;P22674;P32780;P30307;P24522}

27541 Pathogen[ Q85601] interacts with 43 human partners: {P51946;P30281;P22674;Q16543;Q9UJX6;P55273;P24385;O60563;O75909;Q9BZE4;Q9UK58;Q8N1B3;Q8ND76;O60583;P42772;P24522;P30304;P51948;P61024;P51959;O96020;P30307;Q96JB5;P14635;P32780;Q9UHV2;P33552;P30279;P20248;P78396;P42771;P50613;P42773;Q96S94;P49918;P24863;P38936;Q9P287;O95067;Q99741;P46527;Q8WWL7;P24864}

27542 Pathogen[ P14079] interacts with 44 human partners: {Q9H85;P51959;Q8N1B3;P30307;Q9UHV2;P51946;Q9BV87;P78396;P24864;Q96S94;O95067;Q8ND76;P49918;P30304;P55273;Q9BZE4;Q15078;P33552;Q99741;P50613;P14635;Q9UK58;P38936;P24863;P24522;O75909;Q8WWL7;Q9UJX6;P32780;P20248;Q96SZ6;O60583;P46527;Q96JB5;P427

73;Q8N7R7;O96020;P0C7Q3;Q16543;Q9P287;P22674;P42771;P61024;P51948}  
27543 Pathogen[ P03383] interacts with 39 human  
partners: {P30307;Q16543;Q9UK58;P61024;Q9UHV2;P51948;Q9UJX6;P22674;Q8N1B3;Q8WWL7;P30304;P24522;Q9BZE4;P24385;Q96JB5;P14635;P78396;P30279;P33552;O60563;P50613;P42772;P51946;P46527;P51959;O75909;O95067;O96020;Q8ND76;P42771;P49918;Q9P287;P24863;P24864;P30281;O60583;P32780;P20248;Q99741}  
27544 Pathogen[ P03410] interacts with 46 human  
partners: {O60583;P42771;Q9UHV2;P46527;P30279;Q16543;P42772;Q8N1B3;O96020;P24522;Q8WWL7;P51946;Q9P287;P55273;P22674;O95067;P50613;Q96JB5;P78396;O60563;P24385;P33552;P14635;P38936;P51959;P30304;O75909;Q96S94;P20248;P30281;P51948;P24863;P61024;P49918;Q9UK58;Q8N7R7;P0C7Q3;P24864;P32780;P42773;Q8ND76;P30307;Q9UJX6;Q9BZE4;Q99741}  
27545 Pathogen[ P14075] interacts with 39 human  
partners: {Q16543;P24863;O95067;P61024;P51959;P14635;Q8N1B3;P30281;P30279;O60563;P50613;P42771;O60583;Q96JB5;Q9UHV2;O96020;P46527;P78396;Q9UJX6;P49918;P22674;Q8WWL7;P20248;P30304;P51946;P32780;Q9BZE4;Q9UK58;P24522;P42772;Q8ND76;Q99741;P24385;Q9P287;O75909;P30307;P33552;P51948;P24864}  
27546 Pathogen[ P0C206] interacts with 45 human  
partners: {P24863;Q8WWL7;P61024;P24522;P30307;Q9UHV2;P30279;P20248;P42771;Q16543;P42772;Q9P287;Q96S94;Q99741;O96020;Q96JB5;Q8N1B3;P0C7Q3;P42773;Q9UK58;P50613;P51959;P55273;P46527;P38936;Q9BZE4;Q9UJX6;P32780;O75909;P33552;P30304;P78396;O95067;Q8ND76;P14635;O60583;O60563;P24864;P22674;Q99640;P51946;P51948;P24385;P30281;P49918}  
27547 Pathogen[ P03363] interacts with 40 human  
partners: {Q96S94;P49918;Q8WWL7;P24864;O60563;P24863;P33552;P30279;P20248;P32780;O75909;P51946;Q16667;Q8ND76;Q9BZE4;P0C7Q3;Q9UJX6;Q8N1B3;P30304;Q9UK58;Q16543;O60583;O95067;O96020;P42772;Q9UHV2;Q99741;P61024;P78396;P24522;P24385;P51959;P42773;P22674;P30307;P30281;Q96JB5;Q9P287;Q9UII4;P42771}  
27548 [Cluster 2505]GO:0009617+P biological\_process [name] response to bacterium [def] "Any process that results in a change in state or activity of a cell or an organism (in terms of movement, secretion, enzyme production, gene expression, etc.) as a result of a stimulus from a bacterium." [GOC]  
27549 Pathogen[ Q2Q067] interacts with 8 human  
partners: {Q04206;O00401;Q14653;Q02556;P19838;P42224;Q03112;O15297}  
27550 Pathogen[ P0C214] interacts with 8 human  
partners: {P19838;Q03112;Q04206;P42224;Q02556;Q14653;O15297;O00401}  
27551 Pathogen[ P03346] interacts with 8 human  
partners: {Q04206;Q02556;Q03112;O15297;P42224;Q14653;P19838;O00401}  
27552 Pathogen[ Q85601] interacts with 8 human  
partners: {O00401;Q02556;Q03112;Q14653;Q04206;O15297;P42224;P19838}  
27553 Pathogen[ P14079] interacts with 9 human  
partners: {P09327;Q14653;O15297;Q08722;P60022;Q8NEV9;P42224;Q02556;O00401}  
27554 Pathogen[ P03383] interacts with 7 human  
partners: {Q14653;O15297;O00401;Q03112;Q04206;Q02556;P19838}  
27555 Pathogen[ P03410] interacts with 10 human  
partners: {Q04206;P19838;Q03112;Q14653;O00401;P60022;Q02556;O15297;Q08722;Q8NEV9}  
27556 Pathogen[ P14075] interacts with 7 human  
partners: {O15297;Q04206;Q02556;O00401;Q14653;Q03112;P19838}  
27557 Pathogen[ P0C206] interacts with 8 human  
partners: {Q02556;P19838;Q03112;Q04206;O00401;O15297;P42224;Q14653}  
27558 Pathogen[ P03363] interacts with 7 human  
partners: {Q14653;Q04206;Q02556;Q03112;P19838;O00401;O15297}  
27559 [Cluster 2506]GO:0002244+P biological\_process [name] hemopoietic progenitor cell differentiation [def] "The process in which precursor cell type acquires the specialized features of a hemopoietic progenitor cell, a class of cell types including myeloid progenitor cells and lymphoid progenitor cells." [GOC]  
27560 Pathogen[ Q2Q067] interacts with 2 human partners: {Q9P243;Q00534}  
27561 Pathogen[ P0C214] interacts with 3 human partners: {O95633;Q00534;Q9P243}  
27562 Pathogen[ P03346] interacts with 3 human partners: {Q9P243;Q00534;O95633}  
27563 Pathogen[ Q85601] interacts with 2 human partners: {Q9P243;Q00534}  
27564 Pathogen[ P14079] interacts with 1 human partners: {Q9P243}  
27565 Pathogen[ P03383] interacts with 1 human partners: {Q00534}  
27566 Pathogen[ P03410] interacts with 2 human partners: {Q00534;Q9P243}  
27567 Pathogen[ P14075] interacts with 1 human partners: {Q00534}  
27568 Pathogen[ P0C206] interacts with 3 human partners: {O95633;Q9P243;Q00534}  
27569 Pathogen[ P03363] interacts with 3 human partners: {Q9P243;P19883;Q00534}  
27570 [Cluster 2507]GO:0001682+P biological\_process [name] tRNA 5'-leader removal [def] "Generation of the mature 5'-end of the tRNA, usually via an endonucleolytic cleavage by RNase P." [PMID]  
27571 Pathogen[ Q2Q067] interacts with 1 human partners: {Q99575}  
27572 Pathogen[ P0C214] interacts with 1 human partners: {Q99575}  
27573 Pathogen[ P03346] interacts with 1 human partners: {Q99575}  
27574 Pathogen[ Q85601] interacts with 1 human partners: {Q99575}  
27575 Pathogen[ P14079] interacts with 1 human partners: {Q99575}  
27576 Pathogen[ P03383] interacts with 1 human partners: {Q99575}  
27577 Pathogen[ P03410] interacts with 1 human partners: {Q99575}  
27578 Pathogen[ P14075] interacts with 1 human partners: {Q99575}  
27579 Pathogen[ P0C206] interacts with 1 human partners: {Q99575}

27580 Pathogen[ P03363] interacts with 1 human partners:{Q99575}  
27581 [Cluster 2508]GO:0032094+P biological\_process [name] response to food [def] "Any process that results in a change in state or activity of a cell or an organism (in terms of movement, secretion, enzyme production, gene expression, etc.) as a result of a food stimulus\_ food is anything which, when taken into the body, serves to nourish or build up the tissues or to supply body heat." [GOC  
27582 Pathogen[ Q2Q067] interacts with 2 human partners:{P31749;P36956}  
27583 Pathogen[ P0C214] interacts with 1 human partners:{P31749}  
27584 Pathogen[ P03346] interacts with 2 human partners:{P36956;P31749}  
27585 Pathogen[ Q85601] interacts with 2 human partners:{P31749;P36956}  
27586 Pathogen[ P14079] interacts with 1 human partners:{P36956}  
27587 Pathogen[ P03383] interacts with 1 human partners:{P31749}  
27588 Pathogen[ P03410] interacts with 2 human partners:{P36956;P31749}  
27589 Pathogen[ P14075] interacts with 1 human partners:{P31749}  
27590 Pathogen[ P0C206] interacts with 2 human partners:{P31749;P36956}  
27591 Pathogen[ P03363] interacts with 1 human partners:{P31749}  
27592 [Cluster 2509]GO:0035335+P biological\_process [name] peptidyl-tyrosine dephosphorylation [def] "The removal of phosphoric residues from peptidyl-O-phospho-tyrosine to form peptidyl-tyrosine." [GOC  
27593 Pathogen[ Q2Q067] interacts with 9 human partners:{Q99502;O00167;Q9UNH5;P30304;Q9BV47;Q99504;P30307;P30305;Q16829}  
27594 Pathogen[ P0C214] interacts with 12 human partners:{P30307;Q9BV47;O00167;Q95278;Q99504;P30305;Q16829;Q9UNH5;Q3ZCQ8;Q13615;P30304;Q99502}  
27595 Pathogen[ P03346] interacts with 19 human partners:{P43378;Q95677;O00167;Q8TF42;P30304;Q9H3S7;Q99502;P30305;Q9BV47;Q16667;P17706;Q16829;Q3ZCQ8;Q95278;Q9Y2R2;Q99504;P24666;Q9UNH5;P30307}  
27596 Pathogen[ Q85601] interacts with 12 human partners:{Q95677;Q16829;Q99504;P30304;Q95278;Q9BV47;Q9UNH5;P30305;P30307;Q99502;Q3ZCQ8;O00167}  
27597 Pathogen[ P14079] interacts with 10 human partners:{Q3ZCQ8;Q99502;P30307;Q16829;P30304;Q9BV47;Q99504;P30305;O00167;Q9UNH5}  
27598 Pathogen[ P03383] interacts with 5 human partners:{P30307;Q99504;O00167;P30304;Q9UNH5}  
27599 Pathogen[ P03410] interacts with 11 human partners:{Q99502;Q9UNH5;Q16829;Q3ZCQ8;P30304;Q99504;P24666;O00167;P30305;Q9BV47;P30307}  
27600 Pathogen[ P14075] interacts with 6 human partners:{Q99504;O00167;P30304;Q99502;Q9UNH5;P30307}  
27601 Pathogen[ P0C206] interacts with 16 human partners:{O00167;Q99504;Q9BV47;P30307;Q13615;P30305;Q9Y2R2;Q16829;Q3ZCQ8;P24666;Q9UNH5;Q95278;P30304;Q99502;Q95677;P17706}  
27602 Pathogen[ P03363] interacts with 16 human partners:{P17706;Q9H3S7;Q8TF42;Q9UNH5;Q9Y2R2;P43378;Q16667;Q3ZCQ8;P30304;Q16829;Q99504;Q12923;O00167;Q9BV47;P30307;P24666}  
27603 [Cluster 2510]GO:0006271+P biological\_process [name] DNA strand elongation involved in DNA replication [def] "The process in which a DNA strand is synthesized from template DNA during replication by the action of polymerases, which add nucleotides to the 3' end of the nascent DNA strand." [ISBN  
27604 Pathogen[ Q2Q067] interacts with 15 human partners:{Q15054;P27694;P35244;P49005;Q9Y248;P12004;Q14181;Q14691;P15927;Q9HCU8;O75419;P39748;P25205;P35251;Q9BRT9}  
27605 Pathogen[ P0C214] interacts with 15 human partners:{P35251;P49005;Q9HCU8;Q9Y248;P25205;Q14566;Q14691;P15927;P35244;O75419;P39748;Q15054;P27694;Q14181;Q9BRT9}  
27606 Pathogen[ P03346] interacts with 21 human partners:{P12004;Q9HCU8;P27694;Q14691;P35244;Q9BRT9;P35250;P49005;Q14566;P25205;Q9Y248;P33992;P15927;P35249;Q14181;P33991;P35251;P39748;O75419;P40937;Q15054}  
27607 Pathogen[ Q85601] interacts with 17 human partners:{P35244;Q9Y248;P49005;Q15054;P27694;Q14566;Q9BRT9;P25205;P15927;P35251;Q14691;Q14181;Q9HCU8;P12004;P33992;P39748;O75419}  
27608 Pathogen[ P14079] interacts with 20 human partners:{Q9BRT9;O75419;Q14566;P40937;P49005;Q14691;Q9HCU8;Q15054;P35250;P35251;Q9Y248;P49642;Q14181;P33992;P15927;P27694;P12004;P35244;P25205;P39748}  
27609 Pathogen[ P03383] interacts with 13 human partners:{Q9HCU8;Q14181;P27694;P25205;P49005;Q9Y248;P15927;P35244;Q9BRT9;Q15054;O75419;Q14691;P35251}  
27610 Pathogen[ P03410] interacts with 20 human partners:{P35244;P25205;Q14181;O75419;P39748;Q9BRT9;P33992;P35251;Q15054;Q9Y248;P49005;P27694;P15927;Q14691;P35250;P40937;Q14566;P12004;P49642;Q9HCU8}  
27611 Pathogen[ P14075] interacts with 13 human partners:{O75419;P49005;P15927;Q14691;Q9Y248;P35244;P25205;P35251;Q15054;Q9BRT9;P27694;Q9HCU8;Q14181}  
27612 Pathogen[ P0C206] interacts with 18 human partners:{P35251;Q9Y248;Q9HCU8;O75419;P25205;P49005;P49642;Q9BRT9;Q15054;Q14181;Q14691;P27694;P15927;P39748;P35244;Q14566;P33992;P12004}

27613 Pathogen[ P03363] interacts with 14 human partners: {Q14691;P27694;P25205;P35251;P49005;Q14181;P35244;P15927;P33992;Q9HCU8;Q15054;Q9Y248;Q9BRT9;O75419}

27614 [Cluster 2511]GO:0045750+P biological\_process [name] positive regulation of S phase of mitotic cell cycle [def] "Any process that activates or increases the frequency, rate or extent of S phase of mitotic cell cycle activity." [GOC

27615 Pathogen[ Q2Q067] interacts with 4 human partners: {Q9H4X1;O43541;Q13620;Q13619}

27616 Pathogen[ POC214] interacts with 4 human partners: {Q13619;Q9H4X1;Q13620;O43541}

27617 Pathogen[ P03346] interacts with 4 human partners: {Q9H4X1;Q13620;O43541;Q13619}

27618 Pathogen[ Q85601] interacts with 4 human partners: {Q9H4X1;O43541;Q13620;Q13619}

27619 Pathogen[ P14079] interacts with 3 human partners: {Q13620;O43541;Q13619}

27620 Pathogen[ P03383] interacts with 3 human partners: {Q9H4X1;O43541;Q13620}

27621 Pathogen[ P03410] interacts with 4 human partners: {Q9H4X1;Q13620;O43541;Q13619}

27622 Pathogen[ P14075] interacts with 3 human partners: {Q9H4X1;O43541;Q13620}

27623 Pathogen[ POC206] interacts with 4 human partners: {O43541;Q9H4X1;Q13620;Q13619}

27624 Pathogen[ P03363] interacts with 4 human partners: {Q9H4X1;Q13619;O43541;Q13620}

27625 [Cluster 2512]GO:0000395+P biological\_process [name] nuclear mRNA 5'-splice site recognition [def] "Recognition of the intron 5'-splice site by components of the assembling spliceosome." [GOC

27626 Pathogen[ Q2Q067] interacts with 2 human partners: {Q07955;O75475}

27627 Pathogen[ POC214] interacts with 2 human partners: {Q07955;O75475}

27628 Pathogen[ P03346] interacts with 2 human partners: {O75475;Q07955}

27629 Pathogen[ Q85601] interacts with 2 human partners: {Q07955;O75475}

27630 Pathogen[ P14079] interacts with 2 human partners: {O75475;Q07955}

27631 Pathogen[ P03383] interacts with 2 human partners: {Q07955;O75475}

27632 Pathogen[ P03410] interacts with 2 human partners: {Q07955;O75475}

27633 Pathogen[ P14075] interacts with 2 human partners: {O75475;Q07955}

27634 Pathogen[ POC206] interacts with 2 human partners: {Q07955;O75475}

27635 Pathogen[ P03363] interacts with 2 human partners: {O75475;Q07955}

27636 [Cluster 2513]GO:0000165+P biological\_process [name] MAPKKK cascade [def] "A series of protein phosphorylation events catalyzed by MAP kinases, by which a signal is passed on to downstream components within a cell. The MAPKKK cascade begins with phosphorylation of a MAPKK by a MAPKKK, and ends with phosphorylation of a downstream target by MAPK." [GOC

27637 Pathogen[ Q2Q067] interacts with 8 human partners: {Q12837;P01106;O00255;Q13233;P31946;O43318;Q15797;Q02078}

27638 Pathogen[ POC214] interacts with 8 human partners: {O43318;Q02078;Q13233;Q12837;Q15797;P31946;P01106;O00255}

27639 Pathogen[ P03346] interacts with 9 human partners: {Q02078;Q15797;Q12837;P01106;O00255;Q13233;P31946;P45985;O43318}

27640 Pathogen[ Q85601] interacts with 8 human partners: {P01106;Q02078;P31946;Q15797;O00255;Q13233;O43318;Q12837}

27641 Pathogen[ P14079] interacts with 9 human partners: {Q02078;Q06413;Q15797;Q12837;P31946;P45985;P01106;Q13164;O00255}

27642 Pathogen[ P03383] interacts with 8 human partners: {Q13233;P31946;P01106;Q15797;O43318;Q12837;O00255;Q02078}

27643 Pathogen[ P03410] interacts with 9 human partners: {P01106;Q13233;O43318;P45985;Q15797;Q02078;Q12837;O00255;P31946}

27644 Pathogen[ P14075] interacts with 7 human partners: {Q12837;P01106;O00255;O43318;Q02078;P31946;Q13233}

27645 Pathogen[ POC206] interacts with 9 human partners: {Q02078;O00255;O43318;Q13233;P31946;Q12837;P45985;Q15797;P01106}

27646 Pathogen[ P03363] interacts with 8 human partners: {Q7Z569;P31946;O43318;Q15797;P01106;Q12837;Q13233;Q02078}

27647 [Cluster 2514]GO:0003221+P biological\_process [name] right ventricular cardiac muscle tissue morphogenesis [def] "The process in which the anatomical structures of the right cardiac ventricle muscle are generated and organized." [GOC

27648 Pathogen[ Q2Q067] interacts with 1 human partners: {Q8WW38}

27649 Pathogen[ POC214] interacts with 1 human partners: {Q8WW38}

27650 Pathogen[ P03346] interacts with 1 human partners: {Q8WW38}

27651 Pathogen[ Q85601] interacts with 1 human partners: {Q8WW38}

27652 Pathogen[ P14079] interacts with 1 human partners: {Q8WW38}

27653 Pathogen[ P03383] interacts with 1 human partners: {Q8WW38}

27654 Pathogen[ P03410] interacts with 1 human partners: {Q8WW38}

27655 Pathogen[ P14075] interacts with 1 human partners: {Q8WW38}

27656 Pathogen[ POC206] interacts with 1 human partners: {Q8WW38}

27657 Pathogen[ P03363] interacts with 1 human partners: {Q8WW38}

27658 [Cluster 2515]GO:0006259+P biological\_process [name] DNA metabolic process [def] "Any cellular metabolic process involving deoxyribonucleic acid. This is one of the two main types of nucleic acid, consisting of a long, unbranched macromolecule formed from one, or more commonly, two, strands of linked deoxyribonucleotides." [ISBN

27659 Pathogen[ Q2Q067] interacts with 21 human partners: {Q92889;P49959;O95997;P62826;Q92547;O43542;Q06609;P11388;O43502;Q9NZH4;A4GX A9;Q9NZH5;P09874;P54098;P04053;Q96T76;P52292;Q96NY9;P46013;Q96AY2;Q8IYD8}

27660 Pathogen[ POC214] interacts with 22 human partners: {Q06609;P49959;Q92889;P54098;Q96NY9;O43542;Q96AY2;Q9NZH5;O43502;P11388;A4GX

27661 A9;P62826;P04053;Q9NZH4;P46013;O95997;P52292;Q92614;Q92547;Q8IYD8;Q96T76;P09874}  
Pathogen[ P03346] interacts with 26 human  
partners:{Q9NZH4;Q06609;P54098;P11388;O43502;Q92614;Q96AY2;O95997;P62826;Q96NY9;Q13609;Q9NZH5;O15315;O43542;O75771;P49959;P09874;Q92889;Q92547;P04053;P52292;Q8IYD8;P46013;O43543;A4GXA9;Q96T76}

27662 Pathogen[ Q85601] interacts with 23 human  
partners:{Q96T76;P09874;Q92614;O43502;O15315;Q9NZH4;Q8IYD8;Q92547;A4GXA9;P62826;Q96AY2;P49959;O43542;Q96NY9;Q92889;P54098;Q9NZH5;P11388;P04053;P52292;P46013;Q06609;O95997}

27663 Pathogen[ P14079] interacts with 27 human  
partners:{P11388;O15315;P09874;Q13609;Q96NY9;Q92614;Q8IYD8;P49184;O00115;Q96AY2;A4GXA9;Q92889;O43502;O95997;O43543;Q92547;Q8WZ79;P04053;Q9NZH4;P54098;P62826;Q06609;P52292;Q96T76;Q9NZH5;O43542;P46013}

27664 Pathogen[ P03383] interacts with 15 human  
partners:{Q96T76;Q06609;A4GXA9;P46013;P62826;Q9NZH4;P52292;P54098;Q9NZH5;Q96AY2;P09874;O95997;O43542;Q92547;Q96NY9}

27665 Pathogen[ P03410] interacts with 27 human  
partners:{P49959;Q9NZH5;Q96T76;P49184;Q96AY2;Q8IYD8;A4GXA9;O15315;P46013;Q92614;Q13609;O43542;P04053;Q92889;O95997;P62826;O43502;Q96NY9;P09874;Q92547;P11388;O43543;O00115;Q9NZH4;P52292;P54098;Q06609}

27666 Pathogen[ P14075] interacts with 15 human  
partners:{P52292;P54098;O95997;Q9NZH5;Q96NY9;P62826;O43542;Q96AY2;Q92547;P46013;Q9NZH4;Q06609;P09874;Q96T76;A4GXA9}

27667 Pathogen[ P0C206] interacts with 26 human  
partners:{O43542;O43502;Q9NZH5;Q96AY2;P49959;P09874;Q8IYD8;O95997;P46013;P54098;P62826;O94762;A4GXA9;Q96NY9;P04053;O15315;Q92889;Q13609;Q92614;Q9NZH4;Q96T76;O43543;Q06609;P11388;Q92547;P52292}

27668 Pathogen[ P03363] interacts with 24 human  
partners:{Q92547;O94762;Q9NZH5;Q92889;P54098;Q13609;P04053;Q96T76;Q8IYD8;Q96AY2;O43542;Q92614;O75771;Q06609;O95997;P09874;P46013;A4GXA9;Q96NY9;P62826;P52292;Q9NZH4;O43502;O15315}

27669 [Cluster 2516]GO:0014003+P biological\_process [name] oligodendrocyte development [def] "The process aimed at the progression of an oligodendrocyte over time, from initial commitment of the cell to a specific fate, to the fully functional differentiated cell. An oligodendrocyte is a type of glial cell involved in myelinating the axons in the central nervous system." [GOC

27670 Pathogen[ Q2Q067] interacts with 9 human  
partners:{P49770;Q9UI10;Q969S8;Q96DB2;Q14232;P06396;Q9NR50;Q13144;Q96MN9}

27671 Pathogen[ P0C214] interacts with 9 human  
partners:{Q9UI10;P49770;Q969S8;Q96DB2;Q96MN9;Q14232;P06396;Q9NR50;Q13144}

27672 Pathogen[ P03346] interacts with 10 human  
partners:{Q969S8;Q96DB2;Q96MN9;Q14232;O95096;P49770;P06396;Q13144;Q9NR50;Q9UI10}

27673 Pathogen[ Q85601] interacts with 9 human  
partners:{Q969S8;Q96DB2;P06396;Q9NR50;Q13144;P49770;Q96MN9;Q14232;Q9UI10}

27674 Pathogen[ P14079] interacts with 8 human  
partners:{Q9UI10;Q96DB2;Q969S8;Q96MN9;Q13144;Q9NR50;Q14232;Q9Y2G1}

27675 Pathogen[ P03383] interacts with 8 human  
partners:{Q9UI10;Q13144;Q9NR50;Q96MN9;P49770;Q14232;Q969S8;P06396}

27676 Pathogen[ P03410] interacts with 10 human  
partners:{Q9NR50;P06396;Q14232;P49770;Q96MN9;Q969S8;Q9Y2G1;Q9UI10;Q13144;Q96DB2}

27677 Pathogen[ P14075] interacts with 8 human  
partners:{Q969S8;Q9UI10;Q96MN9;Q14232;P49770;P06396;Q9NR50;Q13144}

27678 Pathogen[ P0C206] interacts with 9 human  
partners:{P06396;Q96DB2;Q14232;Q9NR50;Q13144;P49770;Q96MN9;Q9UI10;Q969S8}

27679 Pathogen[ P03363] interacts with 7 human  
partners:{Q9UI10;Q969S8;P06396;Q9NR50;P49770;Q96MN9;Q13144}

27680 [Cluster 2517]GO:0032388+P biological\_process [name] positive regulation of intracellular transport [def] "Any process that activates or increases the frequency, rate or extent of the directed movement of substances within cells." [GOC

27681 Pathogen[ Q2Q067] interacts with 1 human partners:{Q8IUR6}

27682 Pathogen[ P0C214] interacts with 1 human partners:{Q8IUR6}

27683 Pathogen[ P03346] interacts with 1 human partners:{Q8IUR6}

27684 Pathogen[ Q85601] interacts with 1 human partners:{Q8IUR6}

27685 Pathogen[ P14079] interacts with 1 human partners:{Q8IUR6}

27686 Pathogen[ P03383] interacts with 1 human partners:{Q8IUR6}

27687 Pathogen[ P03410] interacts with 2 human partners:{Q15049;Q8IUR6}

27688 Pathogen[ P14075] interacts with 1 human partners:{Q8IUR6}

27689 Pathogen[ P0C206] interacts with 1 human partners:{Q8IUR6}

27690 Pathogen[ P03363] interacts with 1 human partners:{Q8IUR6}

27691 [Cluster 2518]GO:0048368+P biological\_process [name] lateral mesoderm development [def] "The process whose specific outcome is the progression of the lateral mesoderm over time, from its formation to the mature structure." [GOC

27692 Pathogen[ Q2Q067] interacts with 2 human partners:{P46937;Q15562}

27693 Pathogen[ P0C214] interacts with 2 human partners:{P46937;Q15562}

27694 Pathogen[ P03346] interacts with 2 human partners:{Q15562;P46937}

27695 Pathogen[ Q85601] interacts with 2 human partners:{Q15562;P46937}

27696 Pathogen[ P14079] interacts with 2 human partners:{P46937;Q15562}  
27697 Pathogen[ P03383] interacts with 2 human partners:{Q15562;P46937}  
27698 Pathogen[ P03410] interacts with 2 human partners:{P46937;Q15562}  
27699 Pathogen[ P14075] interacts with 2 human partners:{Q15562;P46937}  
27700 Pathogen[ P0C206] interacts with 2 human partners:{P46937;Q15562}  
27701 Pathogen[ P03363] interacts with 2 human partners:{Q15562;P46937}  
27702 [Cluster 2519]GO:0030518+P biological\_process [name] intracellular steroid hormone receptor signaling pathway [def] "A series of molecular signals generated as a consequence of an intracellular steroid hormone receptor binding to one of its physiological ligands." [GOC  
27703 Pathogen[ Q2Q067] interacts with 11 human partners:{Q96HR3;Q9NPJ6;Q93074;O75448;O60244;Q9UHV7;Q9NVC6;Q9Y2X0;Q9P1Z2;Q9Y2W1;Q86X55}  
27704 Pathogen[ P0C214] interacts with 11 human partners:{Q9Y2X0;Q93074;Q96HR3;Q9NVC6;O60244;Q9UHV7;O75448;Q86X55;Q9P1Z2;Q9Y2W1;Q9NPJ6}  
27705 Pathogen[ P03346] interacts with 12 human partners:{Q9NPJ6;Q96HR3;Q93074;O60244;O75448;Q9P1Z2;Q9NVC6;Q86X55;Q9Y2X0;Q9Y2W1;Q9UHV7;Q8NHV9}  
27706 Pathogen[ Q85601] interacts with 11 human partners:{Q9Y2X0;Q86X55;Q9UHV7;O75448;Q9P1Z2;Q9Y2W1;O60244;Q96HR3;Q93074;Q9NPJ6;Q9NVC6}  
27707 Pathogen[ P14079] interacts with 10 human partners:{O60244;Q9Y2X0;Q96HR3;Q9NVC6;O75448;Q9UHV7;Q9NPJ6;Q93074;Q9P1Z2;Q9Y2W1}  
27708 Pathogen[ P03383] interacts with 11 human partners:{O60244;Q86X55;Q9NPJ6;Q93074;Q96HR3;O75448;Q9UHV7;Q9NVC6;Q9Y2W1;Q9Y2X0;Q9P1Z2}  
27709 Pathogen[ P03410] interacts with 11 human partners:{Q9Y2W1;Q9NVC6;Q9NPJ6;Q86X55;Q9P1Z2;Q96HR3;O60244;Q9UHV7;Q9Y2X0;Q93074;O75448}  
27710 Pathogen[ P14075] interacts with 11 human partners:{Q9NPJ6;Q96HR3;O75448;Q93074;Q9UHV7;Q86X55;O60244;Q9P1Z2;Q9NVC6;Q9Y2W1;Q9Y2X0}  
27711 Pathogen[ P0C206] interacts with 11 human partners:{Q96HR3;Q86X55;Q9P1Z2;Q9UHV7;Q9NPJ6;Q9Y2W1;O60244;Q9NVC6;O75448;Q9Y2X0;Q93074}  
27712 Pathogen[ P03363] interacts with 10 human partners:{Q96HR3;Q9P1Z2;Q9NVC6;Q9UHV7;Q93074;O75448;Q9NPJ6;O60244;Q8NHV9;Q86X55}  
27713 [Cluster 2520]GO:0002224+P biological\_process [name] toll-like receptor signaling pathway [def] "Any series of molecular signals generated as a consequence of binding to a toll-like receptor. Toll-like receptors directly bind pattern motifs from a variety of microbial sources to initiate innate immune response." [GO\_REF  
27714 Pathogen[ Q2Q067] interacts with 31 human partners:{P01100;Q15653;Q04206;Q9NYJ8;O95999;Q8N5C8;O75582;Q9Y6K9;Q13114;Q13233;P61088;Q96FA3;P19419;P19838;P15336;P25963;P0CG47;O14920;P45984;Q00653;P0CG48;O43318;P62987;Q13404;Q9HAT8;O15111;Q15759;Q16829;Q02078;Q15750;P62979}  
27715 Pathogen[ P0C214] interacts with 34 human partners:{Q00653;O15111;Q9Y6K9;P19838;P15336;P01100;Q96FA3;P19419;Q04206;Q9HAT8;Q13404;Q15653;O43318;Q02078;Q8N5C8;Q13233;P0CG48;O95999;P25963;Q16829;O75582;P62987;Q15750;P05412;Q13114;Q15759;P0CG47;P45984;P16220;P62979;O14920;Q9NYJ8;P61088;P18846}  
27716 Pathogen[ P03346] interacts with 35 human partners:{Q9Y6K9;P05412;P45984;Q02078;O15111;P16220;P15336;P62987;P25963;Q15653;P19419;P0CG48;Q04206;Q13114;Q96FA3;Q13404;O95999;Q8N5C8;P61088;Q9NYJ8;Q9HAT8;Q13233;O75582;Q15750;Q16829;P62979;Q15759;P0CG47;P45985;P19838;O14920;O43318;P01100;P18846;Q00653}  
27717 Pathogen[ Q85601] interacts with 34 human partners:{Q02078;Q15750;Q9NYJ8;O15111;P19419;Q9HAT8;Q16829;P18846;P0CG48;Q15653;Q13114;Q96FA3;Q13404;Q8N5C8;P01100;Q9Y6K9;P16220;O14920;Q04206;P05412;O75582;P62979;Q15759;P0CG47;P45984;Q13233;P62987;Q00653;O95999;P15336;O43318;P61088;P19838;P25963}  
27718 Pathogen[ P14079] interacts with 33 human partners:{Q9HAT8;Q8N5C8;Q02078;P0CG48;Q06413;O43187;P53779;O95999;P52564;O75582;Q16829;Q13404;Q15750;P62979;P62987;Q96FA3;P45984;P45983;Q16644;Q15759;Q9Y6K9;P45985;P15336;Q9Y6Y9;Q13164;P05412;P0CG47;Q9Y239;P01100;Q99836;P19419;Q13114;Q15653}  
27719 Pathogen[ P03383] interacts with 33 human partners:{O75582;P16220;Q9Y6K9;P62987;Q13233;Q00653;O14920;O15111;P19419;P18846;Q15653;O43318;Q8N5C8;P61088;Q13404;Q15759;P25963;O95999;P01100;P62979;P0CG47;Q96FA3;Q04206;P45984;P0CG48;P15336;Q9NYJ8;P19838;Q13114;Q02078;Q9HAT8;Q15750;P05412}  
27720 Pathogen[ P03410] interacts with 38 human partners:{Q04206;P19838;P0CG48;O14920;Q9Y239;P19419;O15111;Q15750;Q96FA3;O75582;O43187;Q15653;P61088;Q13233;P62979;P01100;P18846;O43318;Q16829;O95999;P45985;Q9NYJ8;Q8N5C8;P16220;Q9HAT8;P05412;Q9Y6Y9;P45984;P62987;P53779;Q02078;Q00653;Q13404;Q9Y6K9;P25963;P15336;P0CG47;Q13114}  
27721 Pathogen[ P14075] interacts with 33 human partners:{O15111;Q04206;Q15750;P05412;Q15759;O75582;P61088;P19419;P15336;Q15653;P25963;Q8N5C8;O14920;P0CG48;P62979;O43318;Q9HAT8;Q96FA3;P62987;Q13114;O95999;Q02078;P01100;P0CG47;Q13404;P19838;Q00653;P16220;Q9Y6K9;Q13233;P18846;P45984;Q9NYJ8}

27722 Pathogen[ P0C206] interacts with 35 human partners: {P0C248;O14920;Q9Y6K9;Q13114;Q02078;P16220;Q8N5C8;O75582;P45984;O95999;P05412;P25963;P19419;Q9HAT8;O43318;P15336;Q15653;P18846;Q16829;Q13233;P61088;P19838;P01100;Q04206;O15111;P62979;Q9NYJ8;P45985;P0CG47;Q96FA3;Q00653;Q15750;P62987;Q13404;Q15759}

27723 Pathogen[ P03363] interacts with 27 human partners: {O14920;Q04206;P25963;O15111;Q9NYJ8;P16220;Q9Y6K9;P19419;O43318;Q15750;P61088;P15336;Q15653;Q16829;Q00653;Q96FA3;P18846;P62987;P19838;Q13114;P05412;Q13404;Q9HAT8;Q8N5C8;Q13233;P01100;Q02078}

27724 [Cluster 2521]GO:0019896+P biological\_process [name] axon transport of mitochondrion [def] "The directed movement of mitochondria along microtubules in nerve cell axons." [GOC]

27725 Pathogen[ Q2Q067] interacts with 1 human partners: {P07196}

27726 Pathogen[ P0C214] interacts with 2 human partners: {Q8TDB4;P07196}

27727 Pathogen[ P03346] interacts with 2 human partners: {P07196;Q8TDB4}

27728 Pathogen[ Q85601] interacts with 2 human partners: {P07196;Q8TDB4}

27729 Pathogen[ P14079] interacts with 2 human partners: {P07196;Q8TDB4}

27730 Pathogen[ P03383] interacts with 2 human partners: {Q8TDB4;P07196}

27731 Pathogen[ P03410] interacts with 2 human partners: {P07196;Q8TDB4}

27732 Pathogen[ P14075] interacts with 2 human partners: {Q8TDB4;P07196}

27733 Pathogen[ P0C206] interacts with 2 human partners: {P07196;Q8TDB4}

27734 Pathogen[ P03363] interacts with 1 human partners: {P07196}

27735 [Cluster 2522]GO:0071539+P biological\_process [name] protein localization to centrosome [def] "A process in which a protein is transported to, or maintained at, the centrosome." [GOC]

27736 Pathogen[ Q2Q067] interacts with 2 human partners: {Q86VS8;Q15154}

27737 Pathogen[ P0C214] interacts with 2 human partners: {Q15154;Q86VS8}

27738 Pathogen[ P03346] interacts with 2 human partners: {Q86VS8;Q15154}

27739 Pathogen[ Q85601] interacts with 2 human partners: {Q15154;Q86VS8}

27740 Pathogen[ P14079] interacts with 2 human partners: {Q86VS8;Q15154}

27741 Pathogen[ P03383] interacts with 2 human partners: {Q15154;Q86VS8}

27742 Pathogen[ P03410] interacts with 2 human partners: {Q15154;Q86VS8}

27743 Pathogen[ P14075] interacts with 2 human partners: {Q15154;Q86VS8}

27744 Pathogen[ P0C206] interacts with 2 human partners: {Q86VS8;Q15154}

27745 Pathogen[ P03363] interacts with 2 human partners: {Q86VS8;Q15154}

27746 [Cluster 2523]GO:0007182+P biological\_process [name] common-partner SMAD protein phosphorylation [def] "The process of introducing a phosphate group on to a common-partner SMAD protein. A common partner SMAD protein binds to pathway-restricted SMAD proteins forming a complex that translocates to the nucleus." [GOC]

27747 Pathogen[ Q2Q067] interacts with 2 human partners: {Q01082;Q15796}

27748 Pathogen[ P0C214] interacts with 2 human partners: {Q01082;Q15796}

27749 Pathogen[ P03346] interacts with 2 human partners: {Q15796;Q01082}

27750 Pathogen[ Q85601] interacts with 2 human partners: {Q01082;Q15796}

27751 Pathogen[ P14079] interacts with 1 human partners: {Q01082}

27752 Pathogen[ P03383] interacts with 1 human partners: {Q15796}

27753 Pathogen[ P03410] interacts with 2 human partners: {Q01082;Q15796}

27754 Pathogen[ P14075] interacts with 1 human partners: {Q15796}

27755 Pathogen[ P0C206] interacts with 2 human partners: {Q01082;Q15796}

27756 Pathogen[ P03363] interacts with 2 human partners: {Q01082;Q15796}

27757 [Cluster 2524]GO:0051572+P biological\_process [name] negative regulation of histone H3-K4 methylation [def] "Any process that stops, prevents, or reduces the frequency, rate or extent of the covalent addition of a methyl group to the lysine at position 4 of histone H3." [GOC]

27758 Pathogen[ Q2Q067] interacts with 2 human partners: {Q5VTD9;Q6W2J9}

27759 Pathogen[ P0C214] interacts with 2 human partners: {Q6W2J9;Q5VTD9}

27760 Pathogen[ P03346] interacts with 2 human partners: {Q5VTD9;Q6W2J9}

27761 Pathogen[ Q85601] interacts with 2 human partners: {Q5VTD9;Q6W2J9}

27762 Pathogen[ P14079] interacts with 2 human partners: {Q6W2J9;Q5VTD9}

27763 Pathogen[ P03383] interacts with 1 human partners: {Q6W2J9}

27764 Pathogen[ P03410] interacts with 2 human partners: {Q6W2J9;Q5VTD9}

27765 Pathogen[ P14075] interacts with 1 human partners: {Q6W2J9}

27766 Pathogen[ P0C206] interacts with 2 human partners: {Q6W2J9;Q5VTD9}

27767 Pathogen[ P03363] interacts with 2 human partners: {Q5VTD9;Q6W2J9}

27768 [Cluster 2525]GO:0007169+P biological\_process [name] transmembrane receptor protein tyrosine kinase signaling pathway [def] "The series of molecular signals generated as a consequence of a transmembrane receptor tyrosine kinase binding to its physiological ligand." [GOC]

27769 Pathogen[ Q2Q067] interacts with 5 human partners: {Q8IZP0;Q92529;Q13094;Q9ULZ2;O15446}

27770 Pathogen[ P0C214] interacts with 8 human partners: {Q8WV28;Q8IZP0;O15446;Q92529;Q13094;Q9UQC2;Q9ULZ2;Q99704}

27771 Pathogen[ P03346] interacts with 10 human partners: {Q969H4;Q8IZP0;Q9ULZ2;Q9UQC2;Q13094;Q99704;Q8N157;O15446;Q8WV28;Q92529}

27772 Pathogen[ Q85601] interacts with 6 human partners: {Q9ULZ2;Q9UQC2;Q92529;O15446;Q8IZP0;Q13094}

27773 Pathogen[ P14079] interacts with 12 human



partners:{Q99704;O15446;Q8N157;Q13094;Q8IZP0;Q9ULZ2;Q8WV28;Q8WU20;Q969H4;Q92529;Q6PIZ9;Q9UQC2}  
 27774 Pathogen[ P03383] interacts with 3 human partners:{Q9ULZ2;Q13094;O15446}  
 27775 Pathogen[ P03410] interacts with 12 human partners:{Q9UQC2;Q13094;Q92529;Q6PIZ9;Q9ULZ2;Q8WV28;Q969H4;Q99704;Q8N157;Q8IZP0;O15446;Q8WU20}  
 27776 Pathogen[ P14075] interacts with 3 human partners:{Q13094;Q9ULZ2;O15446}  
 27777 Pathogen[ P0C206] interacts with 10 human partners:{Q8WU20;Q8IZP0;O15446;Q8N157;Q99704;Q9ULZ2;Q92529;Q13094;Q969H4;Q9UQC2}  
 27778 Pathogen[ P03363] interacts with 10 human partners:{Q8IZP0;Q99704;Q8WV28;O15446;Q92529;Q969H4;Q9ULZ2;Q8N157;Q13094;Q9UQC2}  
 27779 [Cluster 2526]GO:0021882+P biological\_process [name] regulation of transcription from RNA polymerase II promoter involved in forebrain neuron fate commitment [def] "Any process that modulates the frequency, rate or extent of transcription from an RNA polymerase II promoter that contributes to the commitment of a neuroblast to a neuronal fate. The neuron will reside in the forebrain." [GO\_REF  
 27780 Pathogen[ Q2Q067] interacts with 1 human partners:{Q07687}  
 27781 Pathogen[ P0C214] interacts with 1 human partners:{Q07687}  
 27782 Pathogen[ P03346] interacts with 1 human partners:{P56177}  
 27783 Pathogen[ Q85601] interacts with 1 human partners:{Q07687}  
 27784 Pathogen[ P14079] interacts with 1 human partners:{Q07687}  
 27785 Pathogen[ P03383] interacts with 1 human partners:{Q07687}  
 27786 Pathogen[ P03410] interacts with 1 human partners:{Q07687}  
 27787 Pathogen[ P14075] interacts with 1 human partners:{Q07687}  
 27788 Pathogen[ P0C206] interacts with 2 human partners:{Q07687;P56177}  
 27789 Pathogen[ P03363] interacts with 2 human partners:{P56177;Q07687}  
 27790 [Cluster 2527]GO:0055001+P biological\_process [name] muscle cell development [def] "The process whose specific outcome is the progression of a muscle cell over time, from its formation to the mature structure. Muscle cell development does not include the steps involved in committing an unspecified cell to the muscle cell fate." [CL  
 27791 Pathogen[ Q2Q067] interacts with 2 human partners:{Q14934;Q12968}  
 27792 Pathogen[ P0C214] interacts with 2 human partners:{Q12968;Q14934}  
 27793 Pathogen[ P03346] interacts with 2 human partners:{Q14934;Q12968}  
 27794 Pathogen[ Q85601] interacts with 2 human partners:{Q14934;Q12968}  
 27795 Pathogen[ P14079] interacts with 3 human partners:{Q12968;Q14934;Q96LD1}  
 27796 Pathogen[ P03383] interacts with 2 human partners:{Q14934;Q12968}  
 27797 Pathogen[ P03410] interacts with 3 human partners:{Q12968;Q14934;Q96LD1}  
 27798 Pathogen[ P14075] interacts with 2 human partners:{Q14934;Q12968}  
 27799 Pathogen[ P0C206] interacts with 2 human partners:{Q12968;Q14934}  
 27800 Pathogen[ P03363] interacts with 2 human partners:{Q12968;Q14934}  
 27801 [Cluster 2528]GO:0006475+P biological\_process [name] internal protein amino acid acetylation [def] "The addition of an acetyl group to a non-terminal amino acid in a protein." [GOC  
 27802 Pathogen[ Q2Q067] interacts with 3 human partners:{O14929;P41227;P40926}  
 27803 Pathogen[ P0C214] interacts with 5 human partners:{P35558;P41227;O14929;P40926;P04424}  
 27804 Pathogen[ P03346] interacts with 3 human partners:{P41227;P40926;O14929}  
 27805 Pathogen[ Q85601] interacts with 3 human partners:{P41227;O14929;P40926}  
 27806 Pathogen[ P14079] interacts with 3 human partners:{P41227;O14929;P04424}  
 27807 Pathogen[ P03383] interacts with 3 human partners:{P40926;P41227;O14929}  
 27808 Pathogen[ P03410] interacts with 4 human partners:{O14929;P04424;P41227;P40926}  
 27809 Pathogen[ P14075] interacts with 3 human partners:{P41227;P40926;O14929}  
 27810 Pathogen[ P0C206] interacts with 3 human partners:{P41227;O14929;P40926}  
 27811 Pathogen[ P03363] interacts with 2 human partners:{P41227;O14929}  
 27812 [Cluster 2529]GO:2000001+P biological\_process [name] regulation of DNA damage checkpoint [def] "Any process that modulates the frequency, rate or extent of a DNA damage checkpoint." [GOC  
 27813 Pathogen[ Q2Q067] interacts with 1 human partners:{Q9UK73}  
 27814 Pathogen[ P0C214] interacts with 1 human partners:{Q9UK73}  
 27815 Pathogen[ P03346] interacts with 1 human partners:{Q9UK73}  
 27816 Pathogen[ Q85601] interacts with 1 human partners:{Q9UK73}  
 27817 Pathogen[ P14079] interacts with 1 human partners:{Q9UK73}  
 27818 Pathogen[ P03383] interacts with 1 human partners:{Q9UK73}  
 27819 Pathogen[ P03410] interacts with 1 human partners:{Q9UK73}  
 27820 Pathogen[ P14075] interacts with 1 human partners:{Q9UK73}  
 27821 Pathogen[ P0C206] interacts with 1 human partners:{Q9UK73}  
 27822 Pathogen[ P03363] interacts with 1 human partners:{Q9UK73}  
 27823 [Cluster 2530]GO:0050766+P biological\_process [name] positive regulation of phagocytosis [def] "Any process that activates or increases the frequency, rate or extent of phagocytosis." [GOC  
 27824 Pathogen[ Q2Q067] interacts with 2 human partners:{P27797;P23769}  
 27825 Pathogen[ P0C214] interacts with 2 human partners:{P23769;P27797}  
 27826 Pathogen[ P03346] interacts with 2 human partners:{P23769;P27797}  
 27827 Pathogen[ Q85601] interacts with 2 human partners:{P23769;P27797}  
 27828 Pathogen[ P14079] interacts with 2 human partners:{Q08722;P23769}  
 27829 Pathogen[ P03383] interacts with 2 human partners:{P23769;P27797}

27830 Pathogen[ P03410] interacts with 3 human partners:{Q08722;P23769;P27797}  
27831 Pathogen[ P14075] interacts with 2 human partners:{P23769;P27797}  
27832 Pathogen[ P0C206] interacts with 2 human partners:{P27797;P23769}  
27833 Pathogen[ P03363] interacts with 1 human partners:{P27797}  
27834 [Cluster 2531]GO:0001568+P biological\_process [name] blood vessel development [def] "The process whose specific outcome is the progression of a blood vessel over time, from its formation to the mature structure. The blood vessel is the vasculature carrying blood." [GOC  
27835 Pathogen[ Q2Q067] interacts with 5 human  
partners:{Q86YP4;P35869;O75360;Q9Y5J3;Q8N693}  
27836 Pathogen[ P0C214] interacts with 5 human  
partners:{P35869;Q8N693;Q9Y5J3;Q86YP4;O75360}  
27837 Pathogen[ P03346] interacts with 13 human  
partners:{Q99626;Q8N693;Q9Y5J3;O60479;Q86YP4;P46109;O14627;Q12778;P35713;Q9P2D1;O753  
60;P35869;O75593}  
27838 Pathogen[ Q85601] interacts with 6 human  
partners:{O75360;Q9P2D1;Q86YP4;Q8N693;P35869;Q9Y5J3}  
27839 Pathogen[ P14079] interacts with 8 human  
partners:{P35869;Q06413;Q8N693;P46109;Q86YP4;Q9P2D1;Q9Y5J3;O75360}  
27840 Pathogen[ P03383] interacts with 4 human partners:{Q86YP4;O75360;Q8N693;P35869}  
27841 Pathogen[ P03410] interacts with 6 human  
partners:{Q9Y5J3;Q86YP4;Q9P2D1;Q8N693;O75360;P46109}  
27842 Pathogen[ P14075] interacts with 4 human partners:{P35869;Q8N693;O75360;Q86YP4}  
27843 Pathogen[ P0C206] interacts with 7 human  
partners:{P35869;Q9P2D1;Q86YP4;O75360;Q9Y5J3;Q8N693;Q86YT6}  
27844 Pathogen[ P03363] interacts with 9 human  
partners:{O75360;Q9Y5J3;Q99626;Q86YP4;P46109;O60479;Q8N693;P35869;O14627}  
27845 [Cluster 2532]GO:0045638+P biological\_process [name] negative regulation of myeloid  
cell differentiation [def] "Any process that stops, prevents, or reduces the  
frequency, rate or extent of myeloid cell differentiation." [GOC  
27846 Pathogen[ Q2Q067] interacts with 12 human  
partners:{Q8WVC0;Q6PD62;Q6P1J9;Q9GZS3;Q05516;P23769;Q96T37;Q8WVJ9;P25963;Q8N7H5;P266  
51;Q00534}  
27847 Pathogen[ P0C214] interacts with 12 human  
partners:{P23769;Q00534;Q6P1J9;Q8N7H5;P25963;Q8WVC0;P26651;Q8WVJ9;Q6PD62;Q96T37;Q055  
16;Q9GZS3}  
27848 Pathogen[ P03346] interacts with 12 human  
partners:{Q6PD62;P25963;P23769;Q8WVC0;Q8WVJ9;Q9GZS3;Q05516;Q00534;P26651;Q96T37;Q6P1  
J9;Q8N7H5}  
27849 Pathogen[ Q85601] interacts with 12 human  
partners:{Q6PD62;Q8WVC0;Q6P1J9;P23769;Q9GZS3;P26651;Q05516;Q96T37;Q00534;Q8N7H5;Q8WV  
J9;P25963}  
27850 Pathogen[ P14079] interacts with 9 human  
partners:{Q96T37;Q8WVJ9;Q05516;Q9GZS3;Q6PD62;Q8WVC0;Q6P1J9;Q8N7H5;P23769}  
27851 Pathogen[ P03383] interacts with 11 human  
partners:{Q6P1J9;Q8WVJ9;Q6PD62;P23769;Q05516;Q00534;Q8WVC0;P25963;P26651;Q9GZS3;Q8N7  
H5}  
27852 Pathogen[ P03410] interacts with 11 human  
partners:{Q8WVC0;Q8WVJ9;Q00534;Q6PD62;Q96T37;P26651;Q9GZS3;Q8N7H5;Q6P1J9;P23769;P259  
63}  
27853 Pathogen[ P14075] interacts with 11 human  
partners:{P23769;P26651;Q8WVC0;Q00534;P25963;Q8WVJ9;Q8N7H5;Q6P1J9;Q6PD62;Q9GZS3;Q055  
16}  
27854 Pathogen[ P0C206] interacts with 12 human  
partners:{Q96T37;Q6PD62;P26651;Q05516;P25963;Q8WVJ9;Q8N7H5;Q9GZS3;Q8WVC0;P23769;Q6P1  
J9;Q00534}  
27855 Pathogen[ P03363] interacts with 11 human  
partners:{Q9GZS3;Q8WVC0;P25963;Q00534;Q6P1J9;Q96T37;P26651;Q05516;Q8N7H5;Q8WVJ9;Q6PD  
62}  
27856 [Cluster 2533]GO:0051560+P biological\_process [name] mitochondrial calcium ion  
homeostasis [def] "Any process involved in the maintenance of an internal steady state  
of calcium ions within the cytoplasm of a cell or between mitochondria and their  
surroundings." [GOC  
27857 Pathogen[ Q2Q067] interacts with 1 human partners:{Q9NRI5}  
27858 Pathogen[ P0C214] interacts with 1 human partners:{Q9NRI5}  
27859 Pathogen[ P03346] interacts with 2 human partners:{Q9NRI5;Q16891}  
27860 Pathogen[ Q85601] interacts with 1 human partners:{Q9NRI5}  
27861 Pathogen[ P14079] interacts with 2 human partners:{Q16891;Q9NRI5}  
27862 Pathogen[ P03383] interacts with 1 human partners:{Q9NRI5}  
27863 Pathogen[ P03410] interacts with 2 human partners:{Q9NRI5;Q16891}  
27864 Pathogen[ P14075] interacts with 1 human partners:{Q9NRI5}  
27865 Pathogen[ P0C206] interacts with 2 human partners:{Q16891;Q9NRI5}  
27866 Pathogen[ P03363] interacts with 1 human partners:{Q9NRI5}  
27867 [Cluster 2534]GO:0030513+P biological\_process [name] positive regulation of BMP  
signaling pathway [def] "Any process that activates or increases the frequency, rate  
or extent of BMP signaling pathway activity." [GOC

27868 Pathogen[ Q2Q067] interacts with 5 human partners:{Q13485;Q2M1K9;P35548;Q06330;Q15796}

27869 Pathogen[ P0C214] interacts with 6 human partners:{Q2M1K9;Q06330;Q13485;Q15796;Q9H469;P35548}

27870 Pathogen[ P03346] interacts with 6 human partners:{Q06330;Q9H469;P35548;Q2M1K9;Q15796;Q13485}

27871 Pathogen[ Q85601] interacts with 6 human partners:{Q06330;Q2M1K9;Q9H469;P35548;Q13485;Q15796}

27872 Pathogen[ P14079] interacts with 3 human partners:{Q06330;Q2M1K9;P28360}

27873 Pathogen[ P03383] interacts with 5 human partners:{Q06330;Q13485;P35548;Q15796;Q2M1K9}

27874 Pathogen[ P03410] interacts with 6 human partners:{Q9H469;Q06330;Q2M1K9;P35548;Q13485;Q15796}

27875 Pathogen[ P14075] interacts with 5 human partners:{P35548;Q15796;Q13485;Q06330;Q2M1K9}

27876 Pathogen[ P0C206] interacts with 6 human partners:{Q06330;Q15796;P35548;Q13485;Q2M1K9;Q9H469}

27877 Pathogen[ P03363] interacts with 6 human partners:{Q06330;P35548;Q2M1K9;Q15796;Q13485;Q9H469}

27878 [Cluster 2535]GO:0030048+P biological\_process [name] actin filament-based movement [def] "Movement of organelles or other particles along actin filaments, or sliding of actin filaments past each other, mediated by motor proteins." [GOC

27879 Pathogen[ Q2Q067] interacts with 3 human partners:{O43516;P42768;P35579}

27880 Pathogen[ P0C214] interacts with 8 human partners:{Q9UM54;P11055;O43516;P35580;Q7Z406;P13533;Q9Y623;P42768}

27881 Pathogen[ P03346] interacts with 3 human partners:{O43516;P42768;P35579}

27882 Pathogen[ Q85601] interacts with 9 human partners:{P13533;P35579;O43516;Q7Z406;P42768;P11055;P35580;Q9UM54;Q9Y623}

27883 Pathogen[ P14079] interacts with 5 human partners:{O43516;P35579;Q9UM54;P68032;P42768}

27884 Pathogen[ P03383] interacts with 4 human partners:{O43516;P42768;P35580;P35579}

27885 Pathogen[ P03410] interacts with 6 human partners:{O43516;P35579;P42768;Q9UM54;P35580;P13533}

27886 Pathogen[ P14075] interacts with 3 human partners:{P42768;O43516;P35579}

27887 Pathogen[ P0C206] interacts with 8 human partners:{Q9UM54;P13533;O43516;Q9Y623;P11055;P35579;P42768;P35580}

27888 Pathogen[ P03363] interacts with 3 human partners:{P35579;P42768;O43516}

27889 [Cluster 2536]GO:0071294+P biological\_process [name] cellular response to zinc ion [def] "Any process that results in a change in state or activity of a cell (in terms of movement, secretion, enzyme production, gene expression, etc.) as a result of a zinc ion stimulus." [GOC

27890 Pathogen[ Q2Q067] interacts with 9 human partners:{P07438;Q93083;P13640;P04732;P04733;P80294;P04731;P80297;P02795}

27891 Pathogen[ P0C214] interacts with 9 human partners:{P13640;P80297;P04732;P02795;P04733;P07438;P80294;P04731;Q93083}

27892 Pathogen[ P03346] interacts with 10 human partners:{P04732;P80294;P07438;P04733;P13640;Q93083;P80297;Q8N339;P02795;P04731}

27893 Pathogen[ Q85601] interacts with 10 human partners:{P80294;P04732;Q93083;P07438;P02795;Q8N339;P80297;P04733;P04731;P13640}

27894 Pathogen[ P14079] interacts with 10 human partners:{P80297;Q93083;P02795;Q8N339;P80294;P07438;P13640;P04731;P04732;P04733}

27895 Pathogen[ P03383] interacts with 9 human partners:{P04733;P80294;Q93083;P13640;P80297;P02795;P04732;P04731;P07438}

27896 Pathogen[ P03410] interacts with 10 human partners:{P07438;P80297;P04733;Q8N339;P13640;P04731;P02795;Q93083;P80294;P04732}

27897 Pathogen[ P14075] interacts with 9 human partners:{P04733;P80297;P07438;Q93083;P13640;P80294;P02795;P04731;P04732}

27898 Pathogen[ P0C206] interacts with 10 human partners:{P07438;P13640;P04732;P04733;P80294;Q93083;P04731;Q8N339;P02795;P80297}

27899 Pathogen[ P03363] interacts with 9 human partners:{P80294;P80297;P02795;P13640;P04732;P04731;P07438;P04733;Q93083}

27900 [Cluster 2537]GO:0030010+P biological\_process [name] establishment of cell polarity [def] "The specification and formation of anisotropic intracellular organization or cell growth patterns." [GOC

27901 Pathogen[ Q2Q067] interacts with 3 human partners:{Q7L804;P23528;Q86SQ7}

27902 Pathogen[ P0C214] interacts with 2 human partners:{Q7L804;Q86SQ7}

27903 Pathogen[ P03346] interacts with 5 human partners:{Q96A65;Q7L804;Q86SQ7;Q5T2T1;P23528}

27904 Pathogen[ Q85601] interacts with 4 human partners:{Q96A65;Q7L804;Q86SQ7;P23528}

27905 Pathogen[ P14079] interacts with 5 human partners:{Q7L804;Q5T2T1;P23528;Q86SQ7;Q96A65}

27906 Pathogen[ P03383] interacts with 3 human partners:{Q7L804;Q86SQ7;P23528}

27907 Pathogen[ P03410] interacts with 5 human partners:{Q7L804;Q5T2T1;Q96A65;Q86SQ7;P23528}

27908 Pathogen[ P14075] interacts with 3 human partners:{Q86SQ7;P23528;Q7L804}

27909 Pathogen[ P0C206] interacts with 6 human

27910 partners:{Q86SQ7;Q96A65;P30291;Q5T2T1;Q7L804;P23528}  
Pathogen[ P03363] interacts with 5 human  
partners:{Q7L804;Q96A65;Q5T2T1;P23528;Q86SQ7}

27911 [Cluster 2538]GO:0006996+P biological\_process [name] organelle organization [def] "A process that is carried out at the cellular level which results in the assembly, arrangement of constituent parts, or disassembly of an organelle within a cell. An organelle is an organized structure of distinctive morphology and function. Includes the nucleus, mitochondria, plastids, vacuoles, vesicles, ribosomes and the cytoskeleton. Excludes the plasma membrane." [GOC

27912 Pathogen[ Q2Q067] interacts with 6 human  
partners:{Q9NQG7;Q969F9;Q96EV8;Q9H8Y8;Q86YV9;Q9UPZ3}

27913 Pathogen[ P0C214] interacts with 6 human  
partners:{Q9NQG7;Q969F9;Q86YV9;Q9H8Y8;Q96EV8;Q9UPZ3}

27914 Pathogen[ P03346] interacts with 6 human  
partners:{Q9NQG7;Q86YV9;Q96EV8;Q969F9;Q9H8Y8;Q9UPZ3}

27915 Pathogen[ Q85601] interacts with 6 human  
partners:{Q9NQG7;Q9UPZ3;Q86YV9;Q96EV8;Q9H8Y8;Q969F9}

27916 Pathogen[ P14079] interacts with 8 human  
partners:{Q9NQG7;Q86YV9;Q92902;Q9H8Y8;Q9UPZ3;O60282;Q969F9;Q96EV8}

27917 Pathogen[ P03383] interacts with 6 human  
partners:{Q9NQG7;Q969F9;Q96EV8;Q86YV9;Q9UPZ3;Q9H8Y8}

27918 Pathogen[ P03410] interacts with 8 human  
partners:{Q9NQG7;Q92902;O60282;Q9H8Y8;Q9UPZ3;Q86YV9;Q969F9;Q96EV8}

27919 Pathogen[ P14075] interacts with 6 human  
partners:{Q9NQG7;Q86YV9;Q9H8Y8;Q969F9;Q9UPZ3;Q96EV8}

27920 Pathogen[ P0C206] interacts with 6 human  
partners:{Q9NQG7;Q9UPZ3;Q969F9;Q9H8Y8;Q96EV8;Q86YV9}

27921 Pathogen[ P03363] interacts with 6 human  
partners:{Q9NQG7;Q9UPZ3;O60282;Q92902;Q9H8Y8;Q969F9}

27922 [Cluster 2539]GO:0045739+P biological\_process [name] positive regulation of DNA repair [def] "Any process that activates or increases the frequency, rate or extent of DNA repair." [GOC

27923 Pathogen[ Q2Q067] interacts with 15 human  
partners:{Q86W56;O00213;Q99502;Q9NWX8;P27695;Q99504;P61088;Q6UWZ7;O76064;Q15819;Q13216;P16455;Q9NWX7;Q96RL1;P53567}

27924 Pathogen[ P0C214] interacts with 16 human  
partners:{P53567;O00213;P27695;Q9NWX8;Q86W56;Q13216;Q15819;Q6UWZ7;Q99504;Q96RL1;P16455;Q9NWX7;Q8IYW5;O76064;P61088;Q99502}

27925 Pathogen[ P03346] interacts with 16 human  
partners:{O00213;Q13263;O76064;Q96RL1;Q99502;P61088;Q9NWX7;Q13216;Q8IYW5;Q9NWX8;Q86W56;P53567;P27695;Q99504;Q6UWZ7;Q15819}

27926 Pathogen[ Q85601] interacts with 17 human  
partners:{O00213;Q96RL1;P53567;P16455;Q13216;Q99504;Q13263;O76064;Q99502;Q6UWZ7;Q9NWX8;Q8IYW5;P61088;P27695;Q9NWX7;Q86W56;Q15819}

27927 Pathogen[ P14079] interacts with 13 human  
partners:{Q99502;P53567;Q15819;Q6UWZ7;O00213;Q13216;P16455;Q9NWX7;Q9NWX8;P27695;Q96RL1;Q86W56;Q99504}

27928 Pathogen[ P03383] interacts with 12 human  
partners:{Q99504;O00213;Q13216;Q96RL1;P61088;Q86W56;Q15819;Q9NWX8;P53567;P27695;Q9NWX7;Q6UWZ7}

27929 Pathogen[ P03410] interacts with 14 human  
partners:{Q96RL1;Q9NWX7;Q9NWX8;Q99502;P53567;O00213;P61088;Q15819;P16455;Q6UWZ7;Q99504;Q86W56;Q13216;P27695}

27930 Pathogen[ P14075] interacts with 13 human  
partners:{O00213;Q15819;Q99504;P27695;P53567;Q9NWX8;P61088;Q13216;Q9NWX7;Q6UWZ7;Q99502;Q86W56;Q96RL1}

27931 Pathogen[ P0C206] interacts with 17 human  
partners:{P27695;P53567;Q99504;Q13263;Q8IYW5;Q13216;O00213;P61088;Q86W56;Q9NWX8;Q15819;Q99502;Q6UWZ7;Q96RL1;O76064;P16455;Q9NWX7}

27932 Pathogen[ P03363] interacts with 12 human  
partners:{P53567;Q96RL1;O00213;Q6UWZ7;Q8IYW5;P61088;Q9NWX8;Q99504;Q9NWX7;Q86W56;Q13216;Q15819}

27933 [Cluster 2540]GO:0045046+P biological\_process [name] protein import into peroxisome membrane [def] "The targeting of proteins into the peroxisomal membrane. The process is not well understood, but both signals and mechanism differ from those involved in peroxisomal matrix protein import." [ISBN

27934 Pathogen[ Q2Q067] interacts with 1 human partners:{P40855}

27935 Pathogen[ P0C214] interacts with 1 human partners:{P40855}

27936 Pathogen[ P03346] interacts with 3 human partners:{P56589;P50542;P40855}

27937 Pathogen[ Q85601] interacts with 1 human partners:{P40855}

27938 Pathogen[ P14079] interacts with 5 human  
partners:{Q9Y5Y5;P40855;P56589;P50542;Q7Z412}

27939 Pathogen[ P03383] interacts with 1 human partners:{P40855}

27940 Pathogen[ P03410] interacts with 4 human partners:{Q9Y5Y5;P40855;P50542;P56589}

27941 Pathogen[ P14075] interacts with 1 human partners:{P40855}

27942 Pathogen[ P0C206] interacts with 3 human partners:{P56589;P50542;P40855}

27943 Pathogen[ P03363] interacts with 1 human partners:{P40855}

27944 [Cluster 2541]GO:0021660+P biological\_process [name] rhombomere 3 formation [def] "The process that gives rise to rhombomere 3. This process pertains to the initial formation of a structure from unspecified parts. Rhombomeres are transverse segments of the developing rhombencephalon. Rhombomeres are lineage restricted, express different genes from one another, and adopt different developmental fates. Rhombomeres are numbered in anterior to posterior order." [GO\_REF

27945 Pathogen[ Q2Q067] interacts with 1 human partners:{P11161}

27946 Pathogen[ P0C214] interacts with 1 human partners:{P11161}

27947 Pathogen[ P03346] interacts with 1 human partners:{P11161}

27948 Pathogen[ Q85601] interacts with 1 human partners:{P11161}

27949 Pathogen[ P14079] interacts with 1 human partners:{P11161}

27950 Pathogen[ P03383] interacts with 1 human partners:{P11161}

27951 Pathogen[ P03410] interacts with 1 human partners:{P11161}

27952 Pathogen[ P14075] interacts with 1 human partners:{P11161}

27953 Pathogen[ P0C206] interacts with 1 human partners:{P11161}

27954 Pathogen[ P03363] interacts with 1 human partners:{P11161}

27955 [Cluster 2542]GO:0048701+P biological\_process [name] embryonic cranial skeleton morphogenesis [def] "The process in which the anatomical structures of the cranial skeleton are generated and organized during the embryonic phase." [GOC

27956 Pathogen[ Q2Q067] interacts with 5 human partners:{P84022;Q8WVJ9;Q15796;Q07687;P54821}

27957 Pathogen[ P0C214] interacts with 4 human partners:{P84022;Q07687;Q15796;Q8WVJ9}

27958 Pathogen[ P03346] interacts with 11 human partners:{Q9NPC8;P54821;Q99811;Q9UIU6;Q15796;Q9BYW2;P84022;Q8WVJ9;Q15475;P78411;Q96SF7}

27959 Pathogen[ Q85601] interacts with 4 human partners:{P84022;Q07687;Q8WVJ9;Q15796}

27960 Pathogen[ P14079] interacts with 3 human partners:{Q8WVJ9;P54826;Q07687}

27961 Pathogen[ P03383] interacts with 4 human partners:{Q8WVJ9;Q07687;P84022;Q15796}

27962 Pathogen[ P03410] interacts with 5 human partners:{P84022;Q8WVJ9;Q07687;P54826;Q15796}

27963 Pathogen[ P14075] interacts with 5 human partners:{Q15796;Q8WVJ9;Q07687;P84022;P54826}

27964 Pathogen[ P0C206] interacts with 7 human partners:{P84022;Q07687;P54821;P78411;Q15796;Q8WVJ9;P54826}

27965 Pathogen[ P03363] interacts with 8 human partners:{P78411;Q15796;P84022;P54821;Q99811;Q07687;Q9NPC8;Q8WVJ9}

27966 [Cluster 2543]GO:0006941+P biological\_process [name] striated muscle contraction [def] "A process in which force is generated within striated muscle tissue, resulting in the shortening of the muscle. Force generation involves a chemo-mechanical energy conversion step that is carried out by the actin/myosin complex activity, which generates force through ATP hydrolysis. Striated muscle is a type of muscle in which the repeating units (sarcomeres) of the contractile myofibrils are arranged in registry throughout the cell, resulting in transverse or oblique striations observable at the level of the light microscope." [GOC

27967 Pathogen[ Q2Q067] interacts with 2 human partners:{P15259;Q14602}

27968 Pathogen[ P0C214] interacts with 4 human partners:{P15259;P19429;P13533;Q14602}

27969 Pathogen[ P03346] interacts with 4 human partners:{Q9UHP9;O60662;P15259;Q14602}

27970 Pathogen[ Q85601] interacts with 3 human partners:{P13533;P15259;Q14602}

27971 Pathogen[ P14079] interacts with 5 human partners:{P15259;P19429;Q9UHP9;Q14602;Q9Y4J8}

27972 Pathogen[ P03383] interacts with 2 human partners:{Q14602;P15259}

27973 Pathogen[ P03410] interacts with 6 human partners:{Q9UHP9;P19429;Q14602;P15259;P13533;Q9Y4J8}

27974 Pathogen[ P14075] interacts with 3 human partners:{Q14602;Q9UHP9;P15259}

27975 Pathogen[ P0C206] interacts with 6 human partners:{Q9UHP9;P13533;Q14602;P19429;Q9Y4J8;P15259}

27976 Pathogen[ P03363] interacts with 5 human partners:{Q9UHP9;Q14602;O60662;P19429;P15259}

27977 [Cluster 2544]GO:0033600+P biological\_process [name] negative regulation of mammary gland epithelial cell proliferation [def] "Any process that stops, prevents or reduces the rate or extent of mammary gland epithelial cell proliferation." [GOC

27978 Pathogen[ Q2Q067] interacts with 3 human partners:{P43268;P42771;Q99623}

27979 Pathogen[ P0C214] interacts with 3 human partners:{Q99623;P42771;P43268}

27980 Pathogen[ P03346] interacts with 4 human partners:{P42771;P51587;Q99623;P43268}

27981 Pathogen[ Q85601] interacts with 4 human partners:{Q99623;P42771;P43268;P51587}

27982 Pathogen[ P14079] interacts with 3 human partners:{Q99623;P51587;P42771}

27983 Pathogen[ P03383] interacts with 3 human partners:{P42771;P43268;Q99623}

27984 Pathogen[ P03410] interacts with 4 human partners:{P42771;Q99623;P51587;P43268}

27985 Pathogen[ P14075] interacts with 3 human partners:{P43268;P42771;Q99623}

27986 Pathogen[ P0C206] interacts with 4 human partners:{P51587;Q99623;P43268;P42771}

27987 Pathogen[ P03363] interacts with 3 human partners:{Q99623;P43268;P42771}

27988 [Cluster 2545]GO:0006354+P biological\_process [name] transcription elongation, DNA-dependent [def] "The extension of an RNA molecule after transcription initiation and promoter clearance at a DNA-dependent RNA polymerase promoter by the addition of ribonucleotides catalyzed by an RNA polymerase." [GOC

27989 Pathogen[ Q2Q067] interacts with 3 human partners:{Q9HB65;O00267;Q15560}  
27990 Pathogen[ P0C214] interacts with 3 human partners:{O00267;Q15560;Q9HB65}  
27991 Pathogen[ P03346] interacts with 3 human partners:{Q9HB65;Q15560;O00267}  
27992 Pathogen[ Q85601] interacts with 3 human partners:{Q15560;O00267;Q9HB65}  
27993 Pathogen[ P14079] interacts with 3 human partners:{Q15560;Q9HB65;O00267}  
27994 Pathogen[ P03383] interacts with 3 human partners:{Q15560;O00267;Q9HB65}  
27995 Pathogen[ P03410] interacts with 3 human partners:{O00267;Q15560;Q9HB65}  
27996 Pathogen[ P14075] interacts with 3 human partners:{Q15560;Q9HB65;O00267}  
27997 Pathogen[ P0C206] interacts with 3 human partners:{Q9HB65;Q15560;O00267}  
27998 Pathogen[ P03363] interacts with 3 human partners:{Q9HB65;O00267;Q15560}  
27999 [Cluster 2546]GO:0009086+P biological\_process [name] methionine biosynthetic process  
[def] "The chemical reactions and pathways resulting in the formation of methionine  
(2-amino-4-(methylthio)butanoic acid), a sulfur-containing, essential amino acid found  
in peptide linkage in proteins." [GOC  
28000 Pathogen[ Q2Q067] interacts with 3 human partners:{Q96GX9;Q9BV57;Q9BV20}  
28001 Pathogen[ P0C214] interacts with 6 human  
partners:{P42898;Q9BV57;Q96GX9;Q9UHY7;P11586;Q9BV20}  
28002 Pathogen[ P03346] interacts with 5 human  
partners:{Q9UBK8;Q9BV20;Q9BV57;Q9UHY7;Q96GX9}  
28003 Pathogen[ Q85601] interacts with 4 human partners:{Q96GX9;Q9BV57;Q9UHY7;Q9BV20}  
28004 Pathogen[ P14079] interacts with 5 human  
partners:{Q9BV20;Q96GX9;Q9H2M3;Q9BV57;P42898}  
28005 Pathogen[ P03383] interacts with 3 human partners:{Q9BV57;Q96GX9;Q9BV20}  
28006 Pathogen[ P03410] interacts with 5 human  
partners:{Q9H2M3;Q9BV20;P42898;Q96GX9;Q9BV57}  
28007 Pathogen[ P14075] interacts with 3 human partners:{Q96GX9;Q9BV57;Q9BV20}  
28008 Pathogen[ P0C206] interacts with 5 human  
partners:{Q9BV20;Q9UHY7;Q9H2M3;Q9BV57;Q96GX9}  
28009 Pathogen[ P03363] interacts with 3 human partners:{Q9BV57;Q9BV20;Q96GX9}  
28010 [Cluster 2547]GO:0030335+P biological\_process [name] positive regulation of cell  
migration [def] "Any process that activates or increases the frequency, rate or extent  
of cell migration." [GOC  
28011 Pathogen[ Q2Q067] interacts with 13 human  
partners:{Q9UH99;Q9H9T3;Q95684;P14921;Q0PNE2;Q95948;P56945;Q9H7S9;Q95163;Q15654;P840  
22;Q8TE02;P27986}  
28012 Pathogen[ P0C214] interacts with 14 human  
partners:{P56945;Q95684;P14921;P84022;Q9UH99;Q15654;Q0PNE2;Q8TE02;Q9BRT3;Q9H9T3;Q959  
48;P27986;Q95163;Q9H7S9}  
28013 Pathogen[ P03346] interacts with 17 human  
partners:{Q95684;Q8WXH0;Q0PNE2;Q9UH99;Q95163;Q9UBC0;Q9BRT3;P14921;P84022;P56945;Q9H9  
T3;Q95863;Q95948;Q9H7S9;Q8TE02;Q15654;P27986}  
28014 Pathogen[ Q85601] interacts with 13 human  
partners:{Q95684;P14921;Q9H7S9;Q9H9T3;Q15654;P27986;Q9UH99;P56945;Q95948;Q0PNE2;Q8TE  
02;P84022;Q95163}  
28015 Pathogen[ P14079] interacts with 14 human  
partners:{P31751;P01215;P09327;Q95684;Q95948;P01225;Q95163;Q8TE02;Q9H9T3;Q9BRT3;Q8WX  
H0;Q9H7S9;Q0PNE2;Q9UH99}  
28016 Pathogen[ P03383] interacts with 13 human  
partners:{P27986;P56945;Q95163;Q95684;P14921;Q9UH99;Q0PNE2;Q15654;P84022;Q8TE02;Q9H7  
S9;P01215;Q9H9T3}  
28017 Pathogen[ P03410] interacts with 16 human  
partners:{P84022;Q9BRT3;Q95684;Q0PNE2;P27986;Q9UH99;Q95948;Q9H9T3;P01215;Q15654;Q951  
63;Q8TE02;P56945;Q9H7S9;Q8WXH0;P14921}  
28018 Pathogen[ P14075] interacts with 13 human  
partners:{Q95684;P27986;Q8TE02;P14921;Q15654;Q95163;Q9H9T3;Q9UH99;P84022;Q9H7S9;P012  
15;Q0PNE2;P56945}  
28019 Pathogen[ P0C206] interacts with 17 human  
partners:{P84022;P14921;Q95684;Q9H9T3;Q9UH99;Q9UBC0;Q15654;P27986;Q95163;Q9H7S9;P012  
15;Q0PNE2;Q8TE02;Q8WXH0;P56945;Q9BRT3;Q95948}  
28020 Pathogen[ P03363] interacts with 14 human  
partners:{Q15654;Q9UBC0;Q95948;Q9H7S9;Q95684;Q8TE02;P14921;P84022;Q95163;Q0PNE2;P569  
45;Q9H9T3;P27986;Q9UH99}  
28021 [Cluster 2548]GO:0035313+P biological\_process [name] wound healing, spreading of  
epidermal cells [def] "The migration of an epidermal cell along or through a wound gap  
to reestablish a continuous epidermis." [GOC  
28022 Pathogen[ Q2Q067] interacts with 2 human partners:{Q96IF1;P35548}  
28023 Pathogen[ P0C214] interacts with 1 human partners:{P35548}  
28024 Pathogen[ P03346] interacts with 2 human partners:{P35548;Q96IF1}  
28025 Pathogen[ Q85601] interacts with 2 human partners:{P35548;Q96IF1}  
28026 Pathogen[ P14079] interacts with 1 human partners:{Q96IF1}  
28027 Pathogen[ P03383] interacts with 1 human partners:{P35548}  
28028 Pathogen[ P03410] interacts with 2 human partners:{Q96IF1;P35548}  
28029 Pathogen[ P14075] interacts with 1 human partners:{P35548}  
28030 Pathogen[ P0C206] interacts with 2 human partners:{Q96IF1;P35548}  
28031 Pathogen[ P03363] interacts with 2 human partners:{P35548;Q96IF1}  
28032 [Cluster 2549]GO:2001220+P biological\_process [name] negative regulation of G2 phase

of mitotic cell cycle [def] "Any process that stops, prevents or reduces the frequency, rate or extent of G2 phase of mitotic cell cycle." [GOC

28033 Pathogen[ Q2Q067] interacts with 1 human partners:{P01106}

28034 Pathogen[ P0C214] interacts with 1 human partners:{P01106}

28035 Pathogen[ P03346] interacts with 1 human partners:{P01106}

28036 Pathogen[ Q85601] interacts with 1 human partners:{P01106}

28037 Pathogen[ P14079] interacts with 1 human partners:{P01106}

28038 Pathogen[ P03383] interacts with 1 human partners:{P01106}

28039 Pathogen[ P03410] interacts with 1 human partners:{P01106}

28040 Pathogen[ P14075] interacts with 1 human partners:{P01106}

28041 Pathogen[ P0C206] interacts with 1 human partners:{P01106}

28042 Pathogen[ P03363] interacts with 1 human partners:{P01106}

28043 [Cluster 2550]GO:0006391+P biological\_process [name] transcription initiation from mitochondrial promoter [def] "A transcription initiation process that takes place at a promoter on the mitochondrial chromosome, and results in RNA synthesis by a mitochondrial RNA polymerase." [GOC

28044 Pathogen[ Q2Q067] interacts with 3 human partners:{O00411;Q9H5Q4;Q00059}

28045 Pathogen[ P0C214] interacts with 3 human partners:{O00411;Q00059;Q9H5Q4}

28046 Pathogen[ P03346] interacts with 3 human partners:{Q00059;Q9H5Q4;O00411}

28047 Pathogen[ Q85601] interacts with 3 human partners:{Q00059;Q9H5Q4;O00411}

28048 Pathogen[ P14079] interacts with 3 human partners:{Q00059;O00411;Q9H5Q4}

28049 Pathogen[ P03383] interacts with 3 human partners:{Q00059;Q9H5Q4;O00411}

28050 Pathogen[ P03410] interacts with 3 human partners:{Q00059;O00411;Q9H5Q4}

28051 Pathogen[ P14075] interacts with 3 human partners:{Q00059;Q9H5Q4;O00411}

28052 Pathogen[ P0C206] interacts with 3 human partners:{Q9H5Q4;Q00059;O00411}

28053 Pathogen[ P03363] interacts with 3 human partners:{O00411;Q00059;Q9H5Q4}

28054 [Cluster 2551]GO:0010256+P biological\_process [name] endomembrane system organization [def] "A process that is carried out at the cellular level which results in the assembly, arrangement of constituent parts, or disassembly of the endomembrane system." [GOC

28055 Pathogen[ Q2Q067] interacts with 1 human partners:{Q9Y6D6}

28056 Pathogen[ P0C214] interacts with 1 human partners:{Q9Y6D6}

28057 Pathogen[ P03346] interacts with 2 human partners:{Q9Y6D5;Q9Y6D6}

28058 Pathogen[ Q85601] interacts with 1 human partners:{Q9Y6D6}

28059 Pathogen[ P14079] interacts with 2 human partners:{Q9Y6D5;Q9Y6D6}

28060 Pathogen[ P03383] interacts with 1 human partners:{Q9Y6D6}

28061 Pathogen[ P03410] interacts with 2 human partners:{Q9Y6D6;Q9Y6D5}

28062 Pathogen[ P14075] interacts with 1 human partners:{Q9Y6D6}

28063 Pathogen[ P0C206] interacts with 2 human partners:{Q9Y6D6;Q9Y6D5}

28064 Pathogen[ P03363] interacts with 1 human partners:{Q9Y6D6}

28065 [Cluster 2552]GO:0007286+P biological\_process [name] spermatid development [def] "The process whose specific outcome is the progression of a spermatid over time, from its formation to the mature structure." [GOC

28066 Pathogen[ Q2Q067] interacts with 12 human partners:{Q9UHB7;Q86XR8;Q8N196;Q9NS25;O43236;Q9Y2T7;Q9H091;Q9H160;O76064;O14556;Q8IXT1;O15287}

28067 Pathogen[ P0C214] interacts with 13 human partners:{Q9UHB7;O15287;Q9H091;O14556;Q9Y2T7;Q8IXT1;Q86XR8;Q9H160;Q9NS25;Q8N196;Q9NPC3;O43236;O76064}

28068 Pathogen[ P03346] interacts with 18 human partners:{O76064;Q9H091;Q96PU8;Q86XR8;Q96J94;Q9NS25;Q92879;Q9UHB7;O43236;O14556;O15287;Q8N196;Q9Y2T7;Q9NPC3;Q96MM3;Q8IXT1;Q9H160;Q9UJC3}

28069 Pathogen[ Q85601] interacts with 12 human partners:{Q8N196;Q9Y2T7;Q9NS25;Q86XR8;O76064;O14556;Q9NPC3;O15287;Q9UHB7;Q9H160;Q9H091;O43236}

28070 Pathogen[ P14079] interacts with 14 human partners:{Q5TIA1;Q8N196;Q9UJC3;Q9UHB7;Q8IXT1;Q9NPC3;Q9Y2T7;Q96KX2;Q9NS25;Q8TCU4;Q9H091;Q86XR8;Q9H160;O43236}

28071 Pathogen[ P03383] interacts with 11 human partners:{Q8IXT1;Q86XR8;O43236;Q9NS25;Q9Y2T7;Q9H160;O14556;O15287;Q9UHB7;Q8N196;Q9H091}

28072 Pathogen[ P03410] interacts with 16 human partners:{Q96KX2;Q9UJC3;O14556;Q9NPC3;Q8TCU4;Q9UHB7;Q9NS25;O43236;O15287;P04553;Q9H160;Q8IXT1;Q8N196;Q9H091;Q9Y2T7;Q5TIA1}

28073 Pathogen[ P14075] interacts with 11 human partners:{Q8N196;Q8IXT1;O43236;Q9H091;Q9UHB7;Q86XR8;Q9Y2T7;Q9NS25;O15287;Q9H160;O14556}

28074 Pathogen[ P0C206] interacts with 17 human partners:{Q86XR8;Q96MM3;Q9NS25;Q9H091;Q8TCU4;Q9UHB7;Q96PU8;Q8N196;Q8IXT1;Q9NPC3;Q9H160;O43236;O15287;O14556;Q9UJC3;O76064;Q9Y2T7}

28075 Pathogen[ P03363] interacts with 18 human partners:{Q9H160;O15287;P54652;Q9H091;Q9UHB7;Q92879;Q9NPC3;Q8N196;Q96MM3;Q96PU8;Q96J94;Q86XR8;Q9NS25;O14556;Q9Y2T7;O43236;Q8IXT1;Q9UJC3}

28076 [Cluster 2553]GO:0009888+P biological\_process [name] tissue development [def] "The process whose specific outcome is the progression of a tissue over time, from its formation to the mature structure." [ISBN

28077 Pathogen[ Q2Q067] interacts with 3 human partners:{Q08050;O43524;O95983}  
28078 Pathogen[ P0C214] interacts with 1 human partners:{O95983}  
28079 Pathogen[ P03346] interacts with 12 human  
partners:{P85037;Q7RTS3;Q9UJQ4;O95983;Q08050;O00409;Q12778;Q01167;P98177;O43524;Q132  
85;Q9HBU1}  
28080 Pathogen[ Q85601] interacts with 2 human partners:{O95983;Q08050}  
28081 Pathogen[ P14079] interacts with 2 human partners:{Q9UJQ4;O95983}  
28082 Pathogen[ P03383] interacts with 1 human partners:{O95983}  
28083 Pathogen[ P03410] interacts with 2 human partners:{O95983;Q9UJQ4}  
28084 Pathogen[ P14075] interacts with 2 human partners:{Q08050;O95983}  
28085 Pathogen[ P0C206] interacts with 3 human partners:{Q9UJQ4;O95983;Q08050}  
28086 Pathogen[ P03363] interacts with 8 human  
partners:{Q9UJQ4;Q7RTS3;O00409;O43524;Q08050;O95983;Q01167;Q9HBU1}  
28087 [Cluster 2554]GO:0033044+P biological\_process [name] regulation of chromosome  
organization [def] "Any process that modulates the frequency, rate or extent of a  
process involved in the formation, arrangement of constituent parts, or disassembly of a  
chromosome." [GOC  
28088 Pathogen[ Q2Q067] interacts with 1 human partners:{Q7Z7K6}  
28089 Pathogen[ P0C214] interacts with 1 human partners:{Q7Z7K6}  
28090 Pathogen[ P03346] interacts with 1 human partners:{Q7Z7K6}  
28091 Pathogen[ Q85601] interacts with 1 human partners:{Q7Z7K6}  
28092 Pathogen[ P14079] interacts with 1 human partners:{Q7Z7K6}  
28093 Pathogen[ P03383] interacts with 1 human partners:{Q7Z7K6}  
28094 Pathogen[ P03410] interacts with 1 human partners:{Q7Z7K6}  
28095 Pathogen[ P14075] interacts with 1 human partners:{Q7Z7K6}  
28096 Pathogen[ P0C206] interacts with 1 human partners:{Q7Z7K6}  
28097 Pathogen[ P03363] interacts with 1 human partners:{Q7Z7K6}  
28098 [Cluster 2555]GO:0007089+P biological\_process [name] traversing start control point of  
mitotic cell cycle [def] "Passage through a cell cycle control point late in G1 phase  
of the mitotic cell cycle just before entry into S phase\_ in most organisms studied,  
including budding yeast and animal cells, passage through start normally commits the  
cell to progressing through the entire cell cycle." [GOC  
28099 Pathogen[ Q2Q067] interacts with 3 human partners:{Q99741;P30307;Q00987}  
28100 Pathogen[ P0C214] interacts with 3 human partners:{P30307;Q00987;Q99741}  
28101 Pathogen[ P03346] interacts with 3 human partners:{Q00987;Q99741;P30307}  
28102 Pathogen[ Q85601] interacts with 3 human partners:{P30307;Q00987;Q99741}  
28103 Pathogen[ P14079] interacts with 4 human partners:{Q96DY7;P30307;Q00987;Q99741}  
28104 Pathogen[ P03383] interacts with 2 human partners:{P30307;Q99741}  
28105 Pathogen[ P03410] interacts with 4 human partners:{Q96DY7;Q00987;P30307;Q99741}  
28106 Pathogen[ P14075] interacts with 3 human partners:{Q96DY7;Q99741;P30307}  
28107 Pathogen[ P0C206] interacts with 4 human partners:{P30307;Q99741;Q00987;Q96DY7}  
28108 Pathogen[ P03363] interacts with 2 human partners:{Q99741;P30307}  
28109 [Cluster 2556]GO:0035928+P biological\_process [name] rRNA import into mitochondrion  
[def] "The directed movement of rRNA, ribosomal ribonucleic acid, from the cytoplasm  
into a mitochondrion." [GOC  
28110 Pathogen[ Q2Q067] interacts with 2 human partners:{Q8TCS8;Q9H0U6}  
28111 Pathogen[ P0C214] interacts with 3 human partners:{Q9H0U6;Q8TCS8;Q16762}  
28112 Pathogen[ P03346] interacts with 2 human partners:{Q9H0U6;Q8TCS8}  
28113 Pathogen[ Q85601] interacts with 2 human partners:{Q9H0U6;Q8TCS8}  
28114 Pathogen[ P14079] interacts with 3 human partners:{Q9H0U6;Q16762;Q8TCS8}  
28115 Pathogen[ P03383] interacts with 2 human partners:{Q8TCS8;Q9H0U6}  
28116 Pathogen[ P03410] interacts with 3 human partners:{Q8TCS8;Q16762;Q9H0U6}  
28117 Pathogen[ P14075] interacts with 2 human partners:{Q8TCS8;Q9H0U6}  
28118 Pathogen[ P0C206] interacts with 3 human partners:{Q9H0U6;Q8TCS8;Q16762}  
28119 Pathogen[ P03363] interacts with 1 human partners:{Q9H0U6}  
28120 [Cluster 2557]GO:0032927+P biological\_process [name] positive regulation of activin  
receptor signaling pathway [def] "Any process that activates or increases the  
frequency, rate or extent of the activity of any activin receptor signaling pathway."  
[GOC  
28121 Pathogen[ Q2Q067] interacts with 1 human partners:{P67870}  
28122 Pathogen[ P0C214] interacts with 1 human partners:{P67870}  
28123 Pathogen[ P03346] interacts with 1 human partners:{P67870}  
28124 Pathogen[ Q85601] interacts with 1 human partners:{P67870}  
28125 Pathogen[ P14079] interacts with 1 human partners:{P67870}  
28126 Pathogen[ P03383] interacts with 1 human partners:{P67870}  
28127 Pathogen[ P03410] interacts with 1 human partners:{P67870}  
28128 Pathogen[ P14075] interacts with 1 human partners:{P67870}  
28129 Pathogen[ P0C206] interacts with 1 human partners:{P67870}  
28130 Pathogen[ P03363] interacts with 1 human partners:{P67870}  
28131 [Cluster 2558]GO:0001543+P biological\_process [name] ovarian follicle rupture [def]  
"Disruption of theca cell layer releasing follicular fluid and/or the oocyte." [http  
28132 Pathogen[ Q2Q067] interacts with 1 human partners:{P48552}  
28133 Pathogen[ P0C214] interacts with 1 human partners:{P48552}  
28134 Pathogen[ P03346] interacts with 1 human partners:{P48552}  
28135 Pathogen[ Q85601] interacts with 1 human partners:{P48552}  
28136 Pathogen[ P14079] interacts with 1 human partners:{P48552}



28137 Pathogen[ P03383] interacts with 1 human partners:{P48552}  
28138 Pathogen[ P03410] interacts with 1 human partners:{P48552}  
28139 Pathogen[ P14075] interacts with 1 human partners:{P48552}  
28140 Pathogen[ P0C206] interacts with 1 human partners:{P48552}  
28141 Pathogen[ P03363] interacts with 1 human partners:{P48552}  
28142 [Cluster 2559]GO:0021960+P biological\_process [name] anterior commissure morphogenesis  
[def] "Generation of a long process of a CNS neuron, that carries efferent (outgoing)  
action potentials from the cell body in one half of the cerebral cortex towards target  
cells in the contralateral half. This axonal process is a member of those that make up  
the anterior commissure, a small midline fiber tract that lies at the anterior end of  
the corpus callosum." [GO\_REF  
28143 Pathogen[ Q2Q067] interacts with 1 human partners:{000712}  
28144 Pathogen[ P0C214] interacts with 1 human partners:{000712}  
28145 Pathogen[ P03346] interacts with 1 human partners:{000712}  
28146 Pathogen[ Q85601] interacts with 1 human partners:{000712}  
28147 Pathogen[ P14079] interacts with 1 human partners:{000712}  
28148 Pathogen[ P03383] interacts with 1 human partners:{000712}  
28149 Pathogen[ P03410] interacts with 1 human partners:{000712}  
28150 Pathogen[ P14075] interacts with 1 human partners:{000712}  
28151 Pathogen[ P0C206] interacts with 1 human partners:{000712}  
28152 Pathogen[ P03363] interacts with 1 human partners:{000712}  
28153 [Cluster 2560]GO:0000052+P biological\_process [name] citrulline metabolic process  
[def] "The chemical reactions and pathways involving citrulline,  
N5-carbamoyl-L-ornithine, an alpha amino acid not found in proteins." [ISBN  
28154 Pathogen[ Q2Q067] interacts with 1 human partners:{095865}  
28155 Pathogen[ P0C214] interacts with 1 human partners:{095865}  
28156 Pathogen[ P03346] interacts with 1 human partners:{095865}  
28157 Pathogen[ Q85601] interacts with 1 human partners:{095865}  
28158 Pathogen[ P14079] interacts with 1 human partners:{095865}  
28159 Pathogen[ P03383] interacts with 1 human partners:{095865}  
28160 Pathogen[ P03410] interacts with 1 human partners:{095865}  
28161 Pathogen[ P14075] interacts with 1 human partners:{095865}  
28162 Pathogen[ P0C206] interacts with 1 human partners:{095865}  
28163 Pathogen[ P03363] interacts with 1 human partners:{095865}  
28164 [Cluster 2561]GO:0085032+P biological\_process [name] modulation by symbiont of host  
I-kappaB kinase/NF-kappaB cascade [def] "Any process in which an organism modulates  
the frequency, rate or extent of host NF-kappaB-mediated signal transduction pathways  
during the host defense response. The host is defined as the larger of the organisms  
involved in a symbiotic interaction." [GOC  
28165 Pathogen[ Q2Q067] interacts with 1 human partners:{Q15025}  
28166 Pathogen[ P0C214] interacts with 1 human partners:{Q15025}  
28167 Pathogen[ P03346] interacts with 1 human partners:{Q15025}  
28168 Pathogen[ Q85601] interacts with 1 human partners:{Q15025}  
28169 Pathogen[ P14079] interacts with 1 human partners:{Q15025}  
28170 Pathogen[ P03383] interacts with 1 human partners:{Q15025}  
28171 Pathogen[ P03410] interacts with 1 human partners:{Q15025}  
28172 Pathogen[ P14075] interacts with 1 human partners:{Q15025}  
28173 Pathogen[ P0C206] interacts with 1 human partners:{Q15025}  
28174 Pathogen[ P03363] interacts with 1 human partners:{Q15025}  
28175 [Cluster 2562]GO:0007399+P biological\_process [name] nervous system development  
[def] "The process whose specific outcome is the progression of nervous tissue over  
time, from its formation to its mature state." [GOC  
28176 Pathogen[ Q2Q067] interacts with 81 human  
partners:{Q13562;P01100;Q9Y3A2;P54252;P31749;Q12837;O14786;P56524;Q9NR56;O75427;P158  
84;Q92922;Q13875;P63172;Q99081;P40763;P31040;O60481;O96019;P51531;Q8WXU2;P37275;P491  
16;O60315;Q14814;Q9NXR1;Q2M1K9;Q96K30;Q9Y4Z2;Q96EK5;Q8WUB8;O95416;Q00577;Q9UBB4;Q9BU  
X1;Q14203;Q9NYF0;Q99608;P78352;Q92782;Q96DF8;Q969G3;Q15102;Q12834;O60220;O14497;Q96R  
L7;P51532;Q02410;Q15742;Q9UHY8;Q92830;Q96GM5;O75920;Q8NFD5;O00139;Q9HBH7;P49639;Q86W  
G3;P12036;Q9UN36;O94805;Q9NRI5;Q12824;P60953;O75382;Q9NY43;Q8TAQ2;Q9UJX6;Q9HBD4;Q096  
66;Q99689;Q6STE5;Q66K74;P15923;Q8TDN4;Q16352;A7MD48;Q14194;Q02078;Q14738}  
28177 Pathogen[ P0C214] interacts with 83 human  
partners:{Q9UJX6;Q15742;Q9UI08;O14786;P49639;Q12824;Q15486;Q9NRI5;O14497;Q9UBB4;Q142  
03;Q99081;Q09666;Q9NR56;P15884;O60220;P01100;Q9HBD4;Q9HBH7;Q16352;P56524;Q2M1K9;Q6ST  
E5;P60953;P37275;Q99608;O00139;Q13875;Q14194;Q8TAQ2;Q02078;Q8TDN4;P78352;Q92922;Q151  
02;Q14814;Q9UHY8;Q969G3;Q12837;P49116;P15923;O95416;O14531;Q00577;Q9BUX1;Q96DF8;Q128  
34;Q99689;O95278;Q96RL7;Q96K30;P07093;Q8WXU2;Q8WUB8;O75920;P12036;Q14738;P63172;Q024  
10;Q99440;Q92830;P40763;O14727;Q86WG3;Q9NXR1;Q8NFD5;O60315;P51531;O94805;Q92782;Q9NY  
F0;Q9UN36;Q9Y2T3;Q96GM5;O96019;P31749;P54252;Q9NY43;Q66K74;P51532;O75427;O60481;Q9Y3  
A2}  
28178 Pathogen[ P03346] interacts with 131 human  
partners:{Q99081;O75382;Q9NRI5;Q9BZE0;Q9Y3A2;P49639;Q9Y4Z2;Q96DF8;Q9UBB4;Q16352;Q020  
78;P52954;P31040;Q9HBD4;O75427;Q14814;Q01538;Q9BUX1;Q96GM5;Q693B1;Q13449;Q9HD90;O433  
79;Q8NFD5;P78352;Q9HBH7;Q99784;P51532;Q00577;O60315;Q96HZ4;O00139;Q12837;Q2M1K9;P491  
16;Q99689;Q8TD26;P20264;P15923;P56524;Q9UL68;Q92858;Q99426;Q66K74;O14682;Q9NXR1;P529  
51;Q92886;P60953;Q99767;Q96QS3;Q12824;A6NJT0;Q9UI08;Q14203;O60902;Q8TDN4;A2RU54;Q024  
10;Q96SQ7;Q12834;A7MD48;Q9UJX6;Q92830;Q09666;P12036;Q15742;O96019;Q9UHY8;O60481;O950

- 96;P31749;Q15102;O14531;O60220;Q6ZP65;Q9C0C7;Q6STE5;O14497;Q96RL7;Q13875;Q92784;Q02548;Q14738;Q8WXU2;O94805;Q96K30;P37275;Q8IUQ4;P63172;O75920;Q96EK5;Q14190;Q99608;Q9NYF0;Q13516;Q969G3;Q92832;Q92922;Q99929;Q5XKR4;P56178;Q9H8V3;Q8WUB8;O75398;P51531;Q9Y6R0;O95278;Q14194;Q9UN36;Q13562;P40763;P0C2W1;Q8TAQ2;O14727;P01100;Q96NK8;Q9NY43;Q9Y586;Q9NR56;O95416;O14786;Q86WG3;P15884;P54252;Q9HCC6;Q92782;Q8N100;Q9UBP0;Q99581;Q9H2A3}
- 28179 Pathogen[ Q85601] interacts with 92 human partners: {P49639;Q99440;Q02078;O60481;Q9UHY8;Q9UJX6;P31749;Q9Y4Z2;Q01538;Q9BUX1;Q14194;Q9UN36;Q15486;Q6STE5;Q9UBB4;O75398;Q9UBP0;P12036;O60315;Q2M1K9;Q14814;P40763;Q9NYF0;O60220;Q9Y3A2;Q66K74;Q14738;Q96RL7;O14497;Q99767;O96019;Q9NR56;Q14203;Q6ZP65;Q8TDN4;Q15742;P63172;Q99608;O14786;Q92782;Q8WXU2;O95278;Q8WUB8;Q12834;P54252;P51531;Q13562;P01100;Q96GM5;Q92830;Q00577;Q09666;P51532;Q969G3;O95416;Q8NFD5;O75427;P31040;P78352;Q9HBH7;Q99689;P15923;O75920;O75382;Q9HBD4;Q86WG3;P37275;P56524;P60953;Q9NRI5;Q02410;Q99081;P49116;Q8TD26;O43379;Q16352;Q13875;Q9NXR1;Q96K30;P07093;P17677;O94805;Q92922;Q12824;Q12837;Q8TAQ2;Q9GZM8;Q9NY43;O00139;Q96DF8;P15884;Q15102}
- 28180 Pathogen[ P14079] interacts with 103 human partners: {Q9UHY8;O14773;Q96K30;O95416;P17677;Q92686;Q02078;Q06413;Q86WG3;Q6STE5;Q8IZ21;P63172;Q14738;O75072;Q9Y3A2;O60481;Q99581;Q92830;Q92782;Q96DF8;Q66K74;Q9Y586;Q02410;P12036;P54802;P54252;Q92922;P51532;Q15742;Q01538;P51531;Q9NRI5;O14497;Q9NY43;Q8TAQ2;O43379;P15923;Q9NR56;Q496H8;Q9Y2T3;Q12837;Q99608;Q8WXU2;O60315;Q9NPD7;Q9H488;Q8TD26;Q6PUV4;Q98TDN4;O94805;Q96RL7;Q9Y287;Q13875;Q99689;A7MD48;O75427;P31040;Q9UBB4;Q96EK5;O94772;Q15102;Q99426;Q92832;P48681;O00139;Q9NZ72;Q2M1K9;Q9HBH7;Q96GM5;Q8NFD5;Q8WUB8;Q9H8V3;Q14194;Q92982;Q6ZP65;Q9GZM8;Q00577;Q9UJX6;O75366;Q14814;O75920;Q99440;O60220;Q09666;Q15486;P15884;Q12824;Q99081;P49116;Q9NXR1;P56524;P49639;Q9BUX1;Q9UN36;P01100;Q9BZE0;O75382;P17405;Q14203;P37275;Q99767;Q9NYF0;Q9UI08}
- 28181 Pathogen[ P03383] interacts with 67 human partners: {O75920;Q16352;O14497;Q9HBD4;O96019;Q12824;O94805;Q9UJX6;Q9BUX1;Q96RL7;Q9UBB4;Q9NRI5;Q99608;Q86WG3;P49116;Q13875;P12036;P31749;P31040;P63172;Q14203;Q9NR56;Q99689;P60953;Q6STE5;P37275;Q15742;P15923;Q14738;Q14814;Q9UN36;Q96K30;O60220;Q92782;Q9Y3A2;Q12834;O75427;Q96GM5;P54252;A7MD48;P49639;Q969G3;Q92830;Q9HBH7;Q99081;Q12837;P51531;Q8TDN4;Q8TAQ2;Q96EK5;P01100;Q9NYF0;P56524;Q9UHY8;Q00577;Q9NY43;P51532;Q02410;Q96DF8;Q8NFD5;Q92922;Q2M1K9;O60481;Q8WXU2;P78352;Q02078}
- 28182 Pathogen[ P03410] interacts with 108 human partners: {Q92830;O14786;Q96EK5;Q96RL7;Q8WXU2;Q9UI08;P12036;P37275;O00139;Q9NXR1;Q8WUB8;Q9NPD7;Q9GZM8;Q8IZ21;O60481;Q96GM5;Q96K30;O14497;O96019;O75382;O75427;P54802;Q14814;Q16352;Q99608;P15884;Q496H8;Q9BUX1;Q9Y586;Q86WG3;P63172;Q9NR56;Q2M1K9;P31749;Q99767;Q99440;Q9Y287;P54252;P15923;Q8NFD5;Q92832;P01100;Q02410;Q00577;Q9Y2T3;Q99081;Q15486;O14531;Q969G3;Q01538;Q92782;Q9UN36;O94805;P56524;Q9HBH7;Q92922;P31040;Q9NZG7;O43379;P51532;Q6PUV4;Q9NYF0;Q66K74;P49639;Q12834;Q09666;Q13875;P51531;Q15102;P60953;Q14738;Q15742;Q9NRI5;P49116;Q8TAQ2;O75920;A7MD48;Q9NZ72;P17677;Q02078;Q92686;Q9UBY8;O60220;Q6ZP65;Q96DF8;Q14194;Q9Y3A2;Q9H8V3;Q8TD26;Q6STE5;Q12837;Q9UBB4;Q9UHY8;Q9NY43;Q12824;Q99426;Q9H488;Q13449;O95416;P78352;Q9HBD4;O94772;Q8TDN4;P40763;Q9UJX6;P17405;Q14203;Q99689}
- 28183 Pathogen[ P14075] interacts with 70 human partners: {P60953;Q96RL7;Q09666;Q02410;Q16352;Q86WG3;Q99608;Q15102;Q9HBD4;Q96GM5;O60481;Q92782;P51532;Q12837;P56524;Q92922;P31040;P63172;P15923;Q9UBB4;Q9NRI5;O14497;P54252;Q9UJX6;Q13875;P49116;P12036;O96019;P31749;Q9NY43;O75920;O00139;Q9HBH7;Q9NR56;Q96DF8;Q96K30;P51531;Q14738;Q9UN36;O60220;Q8TAQ2;Q9BUX1;Q02078;Q12824;Q15742;O94805;P01100;A7MD48;Q9UHY8;Q00577;P15884;P78352;Q8NFD5;Q14203;Q496H8;P37275;Q2M1K9;Q6STE5;Q9Y287;Q9Y3A2;Q99081;Q8TDN4;Q9NYF0;Q92830;O75427;Q14814;Q8WXU2;Q12834;Q96EK5;Q99689}
- 28184 Pathogen[ P0C206] interacts with 113 human partners: {Q13875;Q9BZE0;O60481;P78352;Q92830;Q9C0C7;P31749;Q01538;P17677;Q8TD26;Q9UBB4;Q8TDN4;Q9BUX1;Q9NY43;P51532;Q9UBP0;Q02078;Q9Y287;Q9Y4Z2;P51531;O75382;P49639;Q02548;Q9NR56;Q6STE5;Q8IUQ4;Q09666;O60220;Q96K30;Q92922;Q9UHY8;O14531;Q6ZP65;Q12824;Q9UI08;P49116;Q9Y586;Q8TAQ2;P54252;Q96HZ4;Q9GZM8;Q14738;Q66K74;O14786;O75920;Q15742;Q99689;Q12837;Q92782;O75427;Q99426;Q99767;O14497;P12036;O96019;Q92784;Q96DF8;Q99581;Q92686;O43379;Q693B1;Q99081;Q96EK5;P01100;P15923;Q9NZ72;Q15102;P15884;Q9NRI5;O95278;O95416;Q6PUV4;Q15486;Q99440;Q99608;P31040;Q9H8V3;Q9HBH7;P40763;P60953;O00139;Q2M1K9;Q9UJX6;Q13562;Q14194;O60315;Q9NPD7;P37275;Q8WUB8;Q96GM5;Q9NYF0;Q969G3;Q9HBD4;A7MD48;Q9NXR1;Q14814;Q8NFD5;Q9UN36;Q92832;O75398;P56524;Q8WXU2;Q16352;Q14203;P63172;Q86WG3;Q9Y3A2;Q12834;O94805;Q96RL7;Q00577;Q02410;Q9H2A3}
- 28185 Pathogen[ P03363] interacts with 113 human partners: {Q92886;P56179;Q9Y4Z2;P31040;Q96DF8;Q16352;Q66K74;O60481;P49116;O60315;Q6STE5;O14682;Q14194;Q13516;O14786;O43347;Q99929;P37275;Q8TAQ2;P51532;Q14738;P78352;Q9HBH7;Q96HZ4;Q9BUX1;O14497;Q9UN36;O60902;Q96K30;P54252;Q9NYF0;Q96RU3;Q9NR56;P49639;Q7L576;Q9UJX6;Q6ZP65;O75920;Q99608;P15923;Q2M1K9;Q9C0C7;Q92832;P20264;O96019;Q86WG3;P63172;Q9UHY8;Q9UI08;Q99426;Q14814;A6NJT0;P31749;Q92830;Q969G3;Q9UBB4;Q02410;Q9NZR1;Q9HBH7;Q92782;Q9HCC6;Q15742;O94805;Q96EK5;Q8WXU2;Q5XKR4;Q96NK8;O43379;Q8IWX8;O75382;Q13875;O14531;Q8TDN4;P52951;Q96RL7;Q09666;Q8TD26;Q9NRI5;P15884;O75398;Q96QS3;A2RU54;Q99581;O75427;Q9Y3A2;Q12834;Q96SQ7;Q02548;Q8NFD5;O95416;A7MD48;Q96GM5;Q99081;Q9NY43;P12036;Q9NXR1;Q9Y6R0;O00139;P51531;Q92922;Q00577;Q12837;P60953;Q14203;Q99767;Q9BZE0;Q12824;Q693B1;Q15102;Q99689;P01100;Q9H2A3;Q02078}
- 28186 [Cluster 2563]GO:000022+P biological\_process [name] mitotic spindle elongation [def] "Lengthening of the distance between poles of the mitotic spindle." [GOC
- 28187 Pathogen[ Q2Q067] interacts with 2 human partners: {O43663;Q02241}
- 28188 Pathogen[ P0C214] interacts with 2 human partners: {Q02241;O43663}

28189 Pathogen[ P03346] interacts with 2 human partners:{Q02241;O43663}  
28190 Pathogen[ Q85601] interacts with 2 human partners:{Q02241;O43663}  
28191 Pathogen[ P14079] interacts with 2 human partners:{Q02241;O43663}  
28192 Pathogen[ P03383] interacts with 2 human partners:{Q02241;O43663}  
28193 Pathogen[ P03410] interacts with 2 human partners:{Q02241;O43663}  
28194 Pathogen[ P14075] interacts with 2 human partners:{Q02241;O43663}  
28195 Pathogen[ P0C206] interacts with 2 human partners:{Q02241;O43663}  
28196 Pathogen[ P03363] interacts with 2 human partners:{Q02241;O43663}  
28197 [Cluster 2564]GO:0071850+P biological\_process [name] mitotic cell cycle arrest  
[def] "The process in which the mitotic cell cycle is halted during one of the normal  
phases (G1, S, G2, M)." [GOC  
28198 Pathogen[ Q2Q067] interacts with 7 human  
partners:{Q8TCS8;Q9H4X1;Q86UL8;P38936;Q8IXT1;P46527;Q66K89}  
28199 Pathogen[ P0C214] interacts with 6 human  
partners:{Q9H4X1;P46527;P38936;Q8IXT1;Q8TCS8;Q66K89}  
28200 Pathogen[ P03346] interacts with 7 human  
partners:{Q9H4X1;Q66K89;Q86UL8;Q8TCS8;Q8IXT1;P38936;P46527}  
28201 Pathogen[ Q85601] interacts with 6 human  
partners:{Q9H4X1;Q86UL8;Q8TCS8;Q66K89;P38936;P46527}  
28202 Pathogen[ P14079] interacts with 6 human  
partners:{Q8IXT1;P38936;Q66K89;Q86UL8;P46527;Q8TCS8}  
28203 Pathogen[ P03383] interacts with 5 human  
partners:{Q8IXT1;Q9H4X1;Q8TCS8;Q66K89;P46527}  
28204 Pathogen[ P03410] interacts with 7 human  
partners:{P46527;Q9H4X1;Q8TCS8;Q66K89;P38936;Q8IXT1;Q86UL8}  
28205 Pathogen[ P14075] interacts with 5 human  
partners:{Q9H4X1;Q8IXT1;P46527;Q66K89;Q8TCS8}  
28206 Pathogen[ P0C206] interacts with 7 human  
partners:{Q9H4X1;Q8TCS8;Q8IXT1;P46527;P38936;Q86UL8;Q66K89}  
28207 Pathogen[ P03363] interacts with 4 human partners:{Q9H4X1;Q66K89;Q86UL8;Q8IXT1}  
28208 [Cluster 2565]GO:0032925+P biological\_process [name] regulation of activin receptor  
signaling pathway [def] "Any process that modulates the frequency, rate or extent of  
the activity of any activin receptor signaling pathway." [GOC  
28209 Pathogen[ Q2Q067] interacts with 2 human partners:{O00255;O15105}  
28210 Pathogen[ P0C214] interacts with 2 human partners:{O15105;O00255}  
28211 Pathogen[ P03346] interacts with 2 human partners:{O15105;O00255}  
28212 Pathogen[ Q85601] interacts with 2 human partners:{O00255;O15105}  
28213 Pathogen[ P14079] interacts with 2 human partners:{O15105;O00255}  
28214 Pathogen[ P03383] interacts with 2 human partners:{O15105;O00255}  
28215 Pathogen[ P03410] interacts with 2 human partners:{O15105;O00255}  
28216 Pathogen[ P14075] interacts with 2 human partners:{O00255;O15105}  
28217 Pathogen[ P0C206] interacts with 2 human partners:{O00255;O15105}  
28218 Pathogen[ P03363] interacts with 1 human partners:{O15105}  
28219 [Cluster 2566]GO:0009890+P biological\_process [name] negative regulation of  
biosynthetic process [def] "Any process that stops, prevents, or reduces the rate of  
the chemical reactions and pathways resulting in the formation of substances." [GOC  
28220 Pathogen[ Q2Q067] interacts with 1 human partners:{P30047}  
28221 Pathogen[ P0C214] interacts with 1 human partners:{P30047}  
28222 Pathogen[ P03346] interacts with 1 human partners:{P30047}  
28223 Pathogen[ Q85601] interacts with 1 human partners:{P30047}  
28224 Pathogen[ P14079] interacts with 1 human partners:{P30047}  
28225 Pathogen[ P03383] interacts with 1 human partners:{P30047}  
28226 Pathogen[ P03410] interacts with 1 human partners:{P30047}  
28227 Pathogen[ P14075] interacts with 1 human partners:{P30047}  
28228 Pathogen[ P0C206] interacts with 1 human partners:{P30047}  
28229 Pathogen[ P03363] interacts with 1 human partners:{P30047}  
28230 [Cluster 2567]GO:0014013+P biological\_process [name] regulation of gliogenesis  
[def] "Any process that modulates the frequency, rate or extent of gliogenesis, the  
formation of mature glia." [GOC  
28231 Pathogen[ Q2Q067] interacts with 1 human partners:{Q15910}  
28232 Pathogen[ P0C214] interacts with 1 human partners:{Q15910}  
28233 Pathogen[ P03346] interacts with 1 human partners:{Q15910}  
28234 Pathogen[ Q85601] interacts with 1 human partners:{Q15910}  
28235 Pathogen[ P14079] interacts with 1 human partners:{Q15910}  
28236 Pathogen[ P03383] interacts with 1 human partners:{Q15910}  
28237 Pathogen[ P03410] interacts with 1 human partners:{Q15910}  
28238 Pathogen[ P14075] interacts with 1 human partners:{Q15910}  
28239 Pathogen[ P0C206] interacts with 1 human partners:{Q15910}  
28240 Pathogen[ P03363] interacts with 1 human partners:{Q15910}  
28241 [Cluster 2568]GO:0010800+P biological\_process [name] positive regulation of  
peptidyl-threonine phosphorylation [def] "Any process that increases the frequency,  
rate or extent of peptidyl-threonine phosphorylation. Peptidyl-threonine phosphorylation  
is the phosphorylation of peptidyl-threonine to form peptidyl-O-phospho-L-threonine."  
[GOC  
28242 Pathogen[ Q2Q067] interacts with 1 human partners:{Q8WWQ0}  
28243 Pathogen[ P0C214] interacts with 1 human partners:{Q8WWQ0}

28244 Pathogen[ P03346] interacts with 1 human partners:{Q8WWQ0}  
28245 Pathogen[ Q85601] interacts with 1 human partners:{Q8WWQ0}  
28246 Pathogen[ P14079] interacts with 1 human partners:{Q8WWQ0}  
28247 Pathogen[ P03383] interacts with 1 human partners:{Q8WWQ0}  
28248 Pathogen[ P03410] interacts with 1 human partners:{Q8WWQ0}  
28249 Pathogen[ P14075] interacts with 1 human partners:{Q8WWQ0}  
28250 Pathogen[ P0C206] interacts with 1 human partners:{Q8WWQ0}  
28251 Pathogen[ P03363] interacts with 1 human partners:{Q8WWQ0}  
28252 [Cluster 2569]GO:2000327+P biological\_process [name] positive regulation of ligand-dependent nuclear receptor transcription coactivator activity [def] "Any process that activates or increases the frequency, rate or extent of ligand-dependent nuclear receptor transcription coactivator activity." [GOC  
28253 Pathogen[ Q2Q067] interacts with 2 human partners:{Q92600;Q9ULM6}  
28254 Pathogen[ P0C214] interacts with 2 human partners:{Q9ULM6;Q92600}  
28255 Pathogen[ P03346] interacts with 2 human partners:{Q9ULM6;Q92600}  
28256 Pathogen[ Q85601] interacts with 2 human partners:{Q92600;Q9ULM6}  
28257 Pathogen[ P14079] interacts with 2 human partners:{Q92600;Q9ULM6}  
28258 Pathogen[ P03383] interacts with 2 human partners:{Q92600;Q9ULM6}  
28259 Pathogen[ P03410] interacts with 2 human partners:{Q9ULM6;Q92600}  
28260 Pathogen[ P14075] interacts with 2 human partners:{Q9ULM6;Q92600}  
28261 Pathogen[ P0C206] interacts with 2 human partners:{Q92600;Q9ULM6}  
28262 Pathogen[ P03363] interacts with 2 human partners:{Q9ULM6;Q92600}  
28263 [Cluster 2570]GO:0006476+P biological\_process [name] protein deacetylation [def] "The removal of an acetyl group from a protein amino acid. An acetyl group is CH3CO-, derived from acetic [ethanoic] acid." [GOC  
28264 Pathogen[ Q2Q067] interacts with 6 human partners:{Q8IXJ6;Q13547;O15379;Q9NTG7;Q969S8;Q92769}  
28265 Pathogen[ P0C214] interacts with 6 human partners:{Q13547;Q969S8;Q9NTG7;Q92769;O15379;Q8IXJ6}  
28266 Pathogen[ P03346] interacts with 6 human partners:{Q969S8;O15379;Q8IXJ6;Q92769;Q13547;Q9NTG7}  
28267 Pathogen[ Q85601] interacts with 6 human partners:{Q969S8;Q8IXJ6;Q92769;O15379;Q13547;Q9NTG7}  
28268 Pathogen[ P14079] interacts with 5 human partners:{O15379;Q969S8;Q92769;Q8IXJ6;Q9NTG7}  
28269 Pathogen[ P03383] interacts with 5 human partners:{Q9NTG7;Q92769;O15379;Q13547;Q969S8}  
28270 Pathogen[ P03410] interacts with 6 human partners:{Q8IXJ6;Q9NTG7;Q969S8;Q92769;O15379;Q13547}  
28271 Pathogen[ P14075] interacts with 5 human partners:{Q969S8;Q13547;Q9NTG7;Q92769;O15379}  
28272 Pathogen[ P0C206] interacts with 6 human partners:{Q92769;Q13547;O15379;Q8IXJ6;Q9NTG7;Q969S8}  
28273 Pathogen[ P03363] interacts with 4 human partners:{O15379;Q969S8;Q13547;Q9NTG7}  
28274 [Cluster 2571]GO:0006370+P biological\_process [name] mRNA capping [def] "Addition of the 7-methylguanosine cap to the 5' end of a nascent messenger RNA transcript." [GOC  
28275 Pathogen[ Q2Q067] interacts with 25 human partners:{P52434;O00267;Q13889;P19388;P52435;P32780;P30876;P19387;P61218;Q92759;O43148;P62487;Q8N1G2;P51948;P50613;P13984;P62875;P24928;Q09161;P52298;P35269;P53803;Q9BTL3;Q13888;P51946}  
28276 Pathogen[ P0C214] interacts with 24 human partners:{P51946;Q09161;P30876;P53803;P35269;O00267;P50613;P52435;P61218;O43148;P52298;P62487;P51948;P62875;P13984;P32780;P24928;Q9BTL3;Q13888;Q8N1G2;P52434;P19387;P19388;Q92759}  
28277 Pathogen[ P03346] interacts with 25 human partners:{Q09161;P52434;Q9BTL3;Q13888;P53803;P61218;P52298;Q13889;P62487;P19388;O43148;P13984;P52435;P51946;P36954;Q8N1G2;O00267;Q92759;P30876;P35269;P24928;P51948;P32780;P62875;P19387}  
28278 Pathogen[ Q85601] interacts with 26 human partners:{P51946;P36954;O43148;Q8N1G2;Q13888;P53803;P61218;P51948;Q09161;P62487;P19388;P13984;Q92759;P32780;P52435;P35269;P50613;O00267;Q9BTL3;P19387;P24928;P52298;P30876;P52434;P19447;P62875}  
28279 Pathogen[ P14079] interacts with 28 human partners:{P62875;P19387;P35269;P51946;P62487;P52434;P52298;Q8N1G2;O15514;P30876;P61218;Q13889;P53803;O43148;P50613;Q13888;P19388;P52435;Q92759;Q9BTL3;P32780;P13984;P24928;O00267;P36954;P19447;Q09161;P51948}  
28280 Pathogen[ P03383] interacts with 24 human partners:{P53803;O43148;P35269;P51948;Q13888;P52434;P61218;O00267;Q09161;P62487;P19387;P50613;P13984;P51946;P24928;Q92759;P52298;P62875;P52435;Q9BTL3;P19388;P30876;P32780;Q8N1G2}  
28281 Pathogen[ P03410] interacts with 28 human partners:{P19387;Q13889;P36954;Q9BTL3;O00267;P24928;P51946;P30876;O15514;P50613;P52435;P52298;Q8N1G2;P53803;P19447;P62875;P35269;P61218;P51948;Q13888;P52434;P13984;P62487;Q09161;O43148;P19388;P32780;Q92759}  
28282 Pathogen[ P14075] interacts with 25 human partners:{Q8N1G2;Q09161;P13984;Q92759;P30876;P50613;P19388;P61218;P19387;P62487;Q138

89;P24928;P35269;Q9BTL3;P51946;P32780;O43148;P62875;O00267;P52434;P51948;P52298;P52435;P53803;Q13888}

28283 Pathogen[ POC206] interacts with 28 human partners: {P62875;P52298;P36954;Q09161;P19388;P61218;Q9BTL3;P13984;P19447;P53803;O15514;P35269;P19387;Q13888;P50613;Q92759;O00267;P52435;P62487;P32780;Q13889;P24928;O43148;Q8N1G2;P52434;P51946;P51948;P30876}

28284 Pathogen[ P03363] interacts with 21 human partners: {P19388;P13984;P30876;Q13888;P32780;Q92759;P19387;P61218;Q8N1G2;P51946;P24928;O00267;P35269;Q9BTL3;P52298;O43148;P62487;P53803;P52435;P52434;Q09161}

28285 [Cluster 2572]GO:0016584+P biological\_process [name] nucleosome positioning [def] "Ordering of successions of nucleosomes into regular arrays so that nucleosomes are positioned at defined distances from one another." [GOC

28286 Pathogen[ Q2Q067] interacts with 2 human partners: {Q96T23;P49711}

28287 Pathogen[ POC214] interacts with 3 human partners: {O60264;P49711;Q96T23}

28288 Pathogen[ P03346] interacts with 4 human partners: {O60264;P49711;Q96T23;P10412}

28289 Pathogen[ Q85601] interacts with 3 human partners: {Q96T23;P49711;O60264}

28290 Pathogen[ P14079] interacts with 4 human partners: {Q96T23;P10412;O60264;P49711}

28291 Pathogen[ P03383] interacts with 2 human partners: {P49711;Q96T23}

28292 Pathogen[ P03410] interacts with 4 human partners: {Q96T23;P10412;P49711;O60264}

28293 Pathogen[ P14075] interacts with 2 human partners: {P49711;Q96T23}

28294 Pathogen[ POC206] interacts with 4 human partners: {Q96T23;P49711;P10412;O60264}

28295 Pathogen[ P03363] interacts with 4 human partners: {P49711;O60264;Q96T23;P10412}

28296 [Cluster 2573]GO:0070544+P biological\_process [name] histone H3-K36 demethylation [def] "The modification of histone H3 by the removal of a methyl group from lysine at position 36 of the histone." [GOC

28297 Pathogen[ Q2Q067] interacts with 5 human partners: {Q9UPP1;Q8NHM5;O75164;Q9H6W3;Q8N371}

28298 Pathogen[ POC214] interacts with 5 human partners: {Q8N371;O75164;Q9H6W3;Q9UPP1;Q8NHM5}

28299 Pathogen[ P03346] interacts with 5 human partners: {O75164;Q9UPP1;Q8N371;Q8NHM5;Q9H6W3}

28300 Pathogen[ Q85601] interacts with 5 human partners: {Q8N371;Q9H6W3;Q8NHM5;Q9UPP1;O75164}

28301 Pathogen[ P14079] interacts with 4 human partners: {Q8NHM5;Q9H6W3;Q9UPP1;Q8N371}

28302 Pathogen[ P03383] interacts with 4 human partners: {Q9H6W3;O75164;Q8N371;Q9UPP1}

28303 Pathogen[ P03410] interacts with 4 human partners: {Q9UPP1;Q9H6W3;Q8N371;O75164}

28304 Pathogen[ P14075] interacts with 4 human partners: {Q8N371;Q9UPP1;Q9H6W3;O75164}

28305 Pathogen[ POC206] interacts with 5 human partners: {Q8N371;Q9UPP1;Q9H6W3;Q8NHM5;O75164}

28306 Pathogen[ P03363] interacts with 1 human partners: {O75164}

28307 [Cluster 2574]GO:1901214+P

28308 Pathogen[ Q2Q067] interacts with 1 human partners: {Q5EBL4}

28309 Pathogen[ POC214] interacts with 1 human partners: {Q5EBL4}

28310 Pathogen[ P03346] interacts with 1 human partners: {Q5EBL4}

28311 Pathogen[ Q85601] interacts with 1 human partners: {Q5EBL4}

28312 Pathogen[ P14079] interacts with 1 human partners: {Q5EBL4}

28313 Pathogen[ P03383] interacts with 1 human partners: {Q5EBL4}

28314 Pathogen[ P03410] interacts with 1 human partners: {Q5EBL4}

28315 Pathogen[ P14075] interacts with 1 human partners: {Q5EBL4}

28316 Pathogen[ POC206] interacts with 1 human partners: {Q5EBL4}

28317 Pathogen[ P03363] interacts with 1 human partners: {Q5EBL4}

28318 [Cluster 2575]GO:0008152+P biological\_process [name] metabolic process [def] "The chemical reactions and pathways, including anabolism and catabolism, by which living organisms transform chemical substances. Metabolic processes typically transform small molecules, but also include macromolecular processes such as DNA repair and replication, and protein synthesis and degradation." [GOC

28319 Pathogen[ Q2Q067] interacts with 54 human partners: {P04156;Q9ULD0;Q9H008;Q8N0Y7;P30793;P10515;P22033;P49419;P19367;Q9UIF7;P30084;Q969S2;Q8N8U2;Q9NQE9;Q96AB3;Q63HM1;Q8NFI3;P22557;P35573;P21953;P13196;Q9NZC7;P60174;Q16851;Q7Z7K6;Q9BSH5;Q16222;P54840;P09467;P18669;Q16719;O43598;P13807;P07814;O15527;P12956;Q9P2R7;P15259;Q13363;Q9Y697;P78549;P07738;P21399;Q13569;Q9BPX1;Q7Z4H3;Q8WWR8;P13051;P11172;Q14689;Q96JJ3;O43708;Q53HV7;P48200}

28320 Pathogen[ POC214] interacts with 103 human partners: {Q9BSH5;Q8WWR8;P30084;Q14527;P49419;P09417;Q9Y617;O60346;Q13363;Q8NFI3;P11177;P49902;P15259;Q7Z4H3;Q96GK7;P53396;Q16222;P12694;P07814;P42898;Q9H227;Q53HV7;P29401;Q14689;P11172;P35270;P48200;Q9Y232;Q8N819;P40939;Q9Y3R4;O95396;P22557;P51854;P35573;P13196;Q8WXG1;Q9BXD5;Q13057;Q9Y3Z3;Q9NZC7;Q99798;Q9P2R7;O60825;P50747;Q8N8U2;P30793;P09467;Q13011;Q96AT9;P22033;P14618;Q9Y697;P21953;Q16851;Q63HM1;Q6P587;Q86XE5;Q9UIF7;P9BWD1;O15382;P19367;Q96AB3;Q9ULD0;Q9BPX1;O43598;Q9UHY7;Q7Z7K6;P23921;P54687;Q9NQE9;P04156;P54840;Q96I99;Q8N0Y7;P42765;O15305;P78549;Q96BT7;O76083;Q9NWZ5;Q96GD0;P16118;Q9H008;P60174;P35520;O43708;O15527;P07738;Q13569;P21399;P10515;Q96JJ3;Q8NFF5;O00757;P13807;P31939;P11586;P12956;P13051;P36957;Q16719;P16278}

28321 Pathogen[ P03346] interacts with 63 human partners: {Q9Y3Z3;Q96AB3;O60346;P13807;P12956;O43598;Q9NQE9;P07814;Q9BPX1;Q14527;P07738;P19367;Q63HM1;Q9ULD0;Q16222;P60174;Q9UIF7;Q9Y697;P09467;P22557;P35573;P13196;Q96JJ3;Q8N8U2;Q8NFI3;P45381;Q969S2;P16278;Q53HV7;P18669;P49419;Q16851;Q8WVB3;Q8N0Y7;Q7Z4

- H3;Q9BWD1;Q9NZC7;P13051;P48200;Q7Z7K6;Q9UHY7;Q16719;O43708;Q96BT7;P78549;P54840;Q13569;P42765;P15259;P04156;Q13363;Q8WWR8;Q9Y232;P56545;P11172;P21399;P10515;O15527;Q9H008;Q9NWZ5;Q14689;P30084;Q9BSH5}
- 28322 Pathogen[ Q85601] interacts with 62 human  
partners: {Q9NZC7;O15527;O43598;P60174;O60346;P13807;Q7Z4H3;Q7Z7K6;O43708;Q14689;Q969S2;P13051;P21399;Q16719;P07814;Q9BXP1;P18669;Q9Y697;P11172;O60825;Q9BXD5;P48200;Q8N8U2;O00757;Q13363;P13196;P21953;Q96JJ3;Q9H008;Q9P2R7;P16118;Q96FI4;P15259;P30793;Q63HM1;Q16222;Q16851;P35573;P14618;Q96AB3;Q53HV7;P22033;Q9BSH5;Q13569;P09467;Q9UIF7;P04156;Q9UHY7;P54840;Q9BWD1;Q8N0Y7;P78549;P07738;Q14527;P10515;Q9ULD0;P30084;O15382;P49419;Q9NQE9;P12956;P19367}
- 28323 Pathogen[ P14079] interacts with 110 human  
partners: {P51854;Q8NBV4;P15259;Q6P587;Q8TAT5;P16278;P21953;P13196;O95544;Q9UIF7;Q8NFF5;Q96KP4;Q16222;Q96AB3;O15305;Q16851;P04066;P22234;P31939;Q9Y617;Q8N8W4;P04156;P21399;P13807;Q63HM1;P54802;Q4G0N4;P35475;O43598;Q9H008;Q9NWZ5;P11172;Q9NTJ4;P22557;P29401;O43813;P30084;O43708;O60346;O95954;Q32NB8;Q9P2R7;Q96JJ3;Q8NFI3;O15527;P78549;Q8TDX5;P30793;Q96GD0;P07738;P06280;Q69YN2;P12956;P54803;Q9Y3Z3;Q96HD9;Q9NZC7;Q32M88;Q16719;Q9BSH5;O60502;Q13057;P45381;P35573;Q9Y697;P48200;Q969S2;P16930;Q8N8U2;Q96FI4;P22033;Q14689;Q96GK7;Q2TBE0;P49902;Q8WWR8;Q9BXD5;Q9Y3R4;Q9HAC7;Q53HV7;P17050;P10515;Q7Z6Z6;P18669;Q9NS86;P49773;P09467;Q9BXW7;E5RQL4;Q13569;O15382;P54840;Q86XE5;Q6ZV70;Q96PZ2;Q8WVB3;P17405;Q03154;Q8N0Y7;P07814;Q9NQE9;P13051;Q8IYS1;Q7Z7K6;Q9ULD0;Q8WXG1;P42898;Q6P2I3;O15503;Q7Z4H3}
- 28324 Pathogen[ P03383] interacts with 36 human  
partners: {P04156;Q9NWZ5;P19367;O15527;Q53HV7;P18669;Q9P2R7;P13807;P09467;P48200;Q63HM1;P35573;O43598;Q7Z7K6;Q9Y697;Q9ULD0;Q16719;P07738;Q16851;Q96AB3;P07814;P22033;Q8N0Y7;Q13569;Q9BSH5;P10515;Q8WWR8;P54840;P11172;P13051;P15259;Q13363;P49419;P12956;Q9BXP1;Q9H008}
- 28325 Pathogen[ P03410] interacts with 114 human  
partners: {P54803;Q9P2R7;Q9NS86;Q96HD9;P30084;Q96FI4;Q2TBE0;Q4G0N4;Q96AB3;Q8NFI3;P04066;Q16851;Q9BXP1;Q9ULD0;Q8NFF5;P54840;Q96PZ2;Q13057;P16118;Q13011;Q69YN2;O60502;Q9BXW7;P54802;Q16719;Q16222;Q9NZC7;O95954;P12694;P35573;Q9BXD5;P16278;Q9NWZ5;Q14689;P45381;P11172;P21953;Q9Y697;Q6P2I3;P30793;Q9Y617;Q8TAT5;P09467;E5RQL4;Q53HV7;Q8WXG1;O00757;P42765;Q7Z7K6;P22234;O43708;Q96GD0;P22557;O75600;P12956;Q63HM1;Q8TDX5;P49773;Q9NTJ4;P21399;P07738;Q9BSH5;O15527;O15382;Q13569;Q9BYC2;P13807;P49419;P55809;P42898;Q8N0Y7;P04156;P15259;P31939;Q86XE5;Q9H008;P18669;Q96CN7;O15305;Q6ZV70;Q7Z4H3;P51854;P63135;O60346;Q9NQE9;Q8WVB3;Q8N8W4;Q8N8U2;Q969S2;P07814;Q9Y3R4;P13051;P48200;Q32M88;Q9Y3Z3;P16930;Q7Z6Z6;O15503;P23921;P13196;P10515;Q96JJ3;Q6P587;O43598;P17405;Q8WWR8;Q9UIF7;P49902;P22033;Q8NBV4;Q9NQ88;Q96GK7;Q16635}
- 28326 Pathogen[ P14075] interacts with 44 human  
partners: {P13051;Q9NQE9;Q16719;P12956;P49902;Q9NWZ5;P11172;Q86XE5;O43598;Q8WWR8;O15527;Q53HV7;P18669;P04156;P19367;Q9UIF7;P54840;Q9BXD5;Q13057;Q9BSH5;P16118;P49419;P22033;Q63HM1;Q96AB3;Q9H008;P35573;P10515;Q9ULD0;Q7Z7K6;P15259;P13807;Q13363;P48200;Q8NFI3;P30793;Q13569;P07738;P09467;Q16851;Q8N0Y7;P07814;Q9P2R7;Q9Y697}
- 28327 Pathogen[ P0C206] interacts with 88 human  
partners: {O43598;Q16851;Q9Y232;P07814;P51854;Q9NQE9;Q16222;P60174;P04156;O15527;Q9ULD0;O15382;Q13057;P09467;Q9Y697;Q8N8U2;Q7Z4H3;P21953;Q9P2R7;P49902;Q9NWZ5;P31939;P30793;P19367;Q8NFI3;P48200;P13807;Q53HV7;O95954;P54840;P11172;Q13569;Q9BXP1;Q6P587;Q9Y3R4;P30084;Q16719;Q86XE5;Q8WVB3;O43708;Q9UHY7;P22557;P45381;Q8TAT5;Q7Z7K6;O00757;Q96JJ3;Q6PIY2;Q8N0Y7;Q9BWD1;Q96FI4;Q96AB3;Q9H008;Q14527;O60825;Q9BSH5;Q63HM1;Q969S2;Q8WWR8;P16278;Q9NZC7;P16118;Q96GD0;P49419;O60346;Q14689;Q99798;P13196;Q13363;Q9NS86;P07738;Q8WXG1;Q9BXD5;P13051;P22033;P12956;Q96GK7;P10515;Q9UIF7;Q8NBV4;P21399;P18669;O95396;P14618;P15259;P29401;P35573;P78549}
- 28328 Pathogen[ P03363] interacts with 49 human  
partners: {P12956;P49419;Q7Z7K6;P13807;O15527;Q6PIY2;Q9NWZ5;Q16222;P18669;Q16851;Q96AB3;Q9ULD0;Q96BT7;Q9BWD1;Q96FI4;P56545;P13051;P48200;P11172;P04156;Q14689;Q9Y697;Q63HM1;Q7Z4H3;Q9BXP1;Q14527;Q9BSH5;Q8N0Y7;Q8NFI3;Q9UIF7;P54840;Q9H008;Q9Y3Z3;Q13569;P10515;Q9NQE9;P13196;Q96JJ3;Q8WVB3;Q13363;P07814;P35573;O43708;O43598;Q969S2;P15259;Q53HV7;Q9BXD5;Q8N8U2}
- 28329 [Cluster 2576]GO:0000910+P biological\_process [name] cytokinesis [def] "A cellular process resulting in the division of the cytoplasm of a cell and its separation into two daughter cells. Cytokinesis usually occurs after growth, replication, and segregation of cellular components." [GOC
- 28330 Pathogen[ Q2Q067] interacts with 24 human  
partners: {Q9Y266;Q9NQW6;O43663;Q14674;Q9H1H9;Q8N137;O75935;Q8WYP5;Q14457;P23528;Q68DK2;Q9NQS7;O43236;Q9UN37;Q13618;Q02241;Q53EZ4;Q9Y3E7;Q6DKK2;O75154;P35579;P18583;O15392;Q9BXF3}
- 28331 Pathogen[ P0C214] interacts with 21 human  
partners: {Q14457;O75935;Q02241;Q6DKK2;Q9UJP4;Q8WYP5;Q13618;Q9Y266;P18583;O43663;Q53EZ4;Q9Y3E7;Q9BXF3;O15392;Q9NQS7;Q68DK2;Q9UN37;O43236;O75154;Q8N137;Q14674}
- 28332 Pathogen[ P03346] interacts with 31 human  
partners: {Q9P2N7;Q9NQW6;Q9BXF3;O15392;P35579;O75935;Q8N137;Q8WYP5;Q13618;Q9NQY0;Q14141;Q9H1H9;P18583;Q14457;Q9Y266;Q9Y3E7;O43236;Q53EZ4;Q9NQS7;Q68DK2;Q02241;P36405;Q9P2J3;Q86YS3;P23528;O75154;Q9UJP4;O43663;Q14674;Q6DKK2;Q9UN37}
- 28333 Pathogen[ Q85601] interacts with 28 human  
partners: {Q53EZ4;Q14457;Q8N137;O75154;Q02241;Q9NQW6;Q9BXF3;P36405;Q9NQS7;P35579;Q86YS3;O75935;Q8WYP5;Q9H1H9;O15392;Q14674;Q9UJP4;O43663;Q9Y266;Q6DKK2;Q68DK2;Q9P2J3;P18583;P23528;Q13618;Q9UN37;Q9Y3E7;O43236}

28334 Pathogen[ P14079] interacts with 29 human partners: {Q9NQW6;P35579;Q68DK2;Q13618;Q02241;O15392;Q9Y266;Q86YS3;Q14674;P36405;O43663;Q8WYP5;P23528;Q9BXF3;Q9H1H9;Q6DKK2;Q9UN37;Q9NQS7;Q9Y3E7;Q8N137;O75154;Q9UJP4;Q9BZX4;O95235;Q14457;P18583;O75935;Q53EZ4;O43236}

28335 Pathogen[ P03383] interacts with 22 human partners: {Q14457;Q9NQS7;Q68DK2;Q02241;O43236;Q9Y3E7;Q8WYP5;Q13618;Q9H1H9;P18583;Q14674;Q6DKK2;O75935;Q9Y266;Q8N137;P35579;P23528;O43663;Q9BXF3;Q9UN37;Q53EZ4;O75154}

28336 Pathogen[ P03410] interacts with 30 human partners: {O15392;O75154;Q9H1H9;Q9BXF3;P36405;Q14457;Q9BZX4;P35579;Q8N137;Q6DKK2;Q9NQW6;Q14674;Q9NQY0;Q9P2J3;Q86YS3;Q9Y3E7;Q13618;O43236;Q9UN37;P18583;O75935;Q53EZ4;Q9Y266;Q9UJP4;P23528;Q68DK2;Q8WYP5;Q02241;O43663;Q9NQS7}

28337 Pathogen[ P14075] interacts with 22 human partners: {Q14457;Q9Y266;Q9H1H9;Q02241;O43663;Q13618;O43236;Q9NQS7;Q8WYP5;Q9Y3E7;P23528;Q68DK2;O75935;Q8N137;P35579;Q53EZ4;Q14674;O75154;Q9BXF3;P18583;Q6DKK2;Q9UN37}

28338 Pathogen[ P0C206] interacts with 31 human partners: {Q68DK2;Q9P2N7;Q8N137;Q8WYP5;Q9UN37;Q9Y3E7;P18583;O75154;Q9NQW6;Q14457;Q9H1H9;Q14141;Q02241;O43236;Q9UJP4;Q6DKK2;Q9BXF3;Q13618;Q9P2J3;O43663;P35579;O15392;Q9NQY0;P36405;Q14674;Q16181;Q9NQS7;O75935;Q86YS3;P23528;Q9Y266}

28339 Pathogen[ P03363] interacts with 29 human partners: {P35579;Q8WYP5;Q9NQW6;Q14457;Q9P2N7;Q9Y266;Q13618;Q02241;Q68DK2;Q9BXF3;Q9UN37;Q53EZ4;P18583;Q6DKK2;Q9NQS7;O75935;Q9Y3E7;P23528;Q14674;O75154;Q9P2J3;Q9UJP4;Q9NQY0;Q9H1H9;O43663;Q14141;Q99719;O43236;Q8N137}

28340 [Cluster 2577]GO:0006893+P biological\_process [name] Golgi to plasma membrane transport [def] "The directed movement of substances from the Golgi to the plasma membrane in transport vesicles that move from the trans-Golgi network to the plasma membrane, where they fuse and release their contents by exocytosis." [ISBN

28341 Pathogen[ Q2Q067] interacts with 1 human partners: {Q96QF0}

28342 Pathogen[ P0C214] interacts with 2 human partners: {Q9HD26;Q96QF0}

28343 Pathogen[ P03346] interacts with 3 human partners: {Q9Y6D5;Q9HD26;Q96QF0}

28344 Pathogen[ Q85601] interacts with 2 human partners: {Q9HD26;Q96QF0}

28345 Pathogen[ P14079] interacts with 3 human partners: {Q9Y6D5;Q9HD26;Q96QF0}

28346 Pathogen[ P03383] interacts with 2 human partners: {Q96QF0;Q9HD26}

28347 Pathogen[ P03410] interacts with 3 human partners: {Q9HD26;Q9Y6D5;Q96QF0}

28348 Pathogen[ P14075] interacts with 2 human partners: {Q9HD26;Q96QF0}

28349 Pathogen[ P0C206] interacts with 3 human partners: {Q96QF0;Q9Y6D5;Q9HD26}

28350 Pathogen[ P03363] interacts with 2 human partners: {Q9HD26;Q96QF0}

28351 [Cluster 2578]GO:0007093+P biological\_process [name] mitotic cell cycle checkpoint [def] "A cell cycle checkpoint that ensures accurate chromosome replication and segregation by preventing progression through a mitotic cell cycle until conditions are suitable for the cell to proceed to the next stage." [GOC

28352 Pathogen[ Q2Q067] interacts with 12 human partners: {Q9Y4A5;Q15013;Q7Z2Z1;Q13257;O43264;P50748;Q96EP1;Q92733;O75943;Q9Y6D9;Q9H900;O95229}

28353 Pathogen[ P0C214] interacts with 12 human partners: {Q13257;O43264;Q15013;P50748;O95229;Q92733;O75943;Q9Y4A5;Q9H900;Q7Z2Z1;Q9Y6D9;Q96EP1}

28354 Pathogen[ P03346] interacts with 12 human partners: {Q9Y6D9;O95229;Q7Z2Z1;Q15013;O43264;O75943;Q9Y4A5;Q92733;P50748;Q13257;Q96EP1;Q9H900}

28355 Pathogen[ Q85601] interacts with 12 human partners: {O95229;Q7Z2Z1;Q9H900;Q92733;Q9Y4A5;O43264;Q13257;O75943;Q15013;Q9Y6D9;P50748;Q96EP1}

28356 Pathogen[ P14079] interacts with 10 human partners: {Q9Y4A5;O95229;Q15013;Q9H900;O75943;Q13257;O43264;P50748;Q7Z2Z1;Q92733}

28357 Pathogen[ P03383] interacts with 11 human partners: {Q13257;Q9H900;Q15013;O43264;Q9Y4A5;Q92733;O95229;Q7Z2Z1;Q96EP1;Q9Y6D9;P50748}

28358 Pathogen[ P03410] interacts with 11 human partners: {O75943;Q15013;P50748;O43264;Q9Y4A5;Q7Z2Z1;Q9H900;O95229;Q92733;Q96EP1;Q13257}

28359 Pathogen[ P14075] interacts with 11 human partners: {Q7Z2Z1;Q9Y6D9;Q13257;Q9Y4A5;O95229;Q15013;Q9H900;P50748;O43264;Q92733;Q96EP1}

28360 Pathogen[ P0C206] interacts with 12 human partners: {Q9H900;Q9Y6D9;Q92733;Q96EP1;Q13257;O75943;Q9Y4A5;Q15013;Q7Z2Z1;P50748;O43264;O95229}

28361 Pathogen[ P03363] interacts with 12 human partners: {Q96EP1;Q9Y6D9;O95229;Q7Z2Z1;O43264;P50748;Q9H900;Q13257;Q15013;Q9Y4A5;Q92733;O75943}

28362 [Cluster 2579]GO:0071359+P biological\_process [name] cellular response to dsRNA [def] "Any process that results in a change in state or activity of a cell (in terms of movement, secretion, enzyme production, gene expression, etc.) as a result of a double-stranded RNA stimulus." [GOC

28363 Pathogen[ Q2Q067] interacts with 2 human partners: {Q14653;P10914}

28364 Pathogen[ P0C214] interacts with 2 human partners: {P10914;Q14653}

28365 Pathogen[ P03346] interacts with 2 human partners: {P10914;Q14653}

28366 Pathogen[ Q85601] interacts with 2 human partners:{P10914;Q14653}  
28367 Pathogen[ P14079] interacts with 2 human partners:{Q14653;P10914}  
28368 Pathogen[ P03383] interacts with 2 human partners:{P10914;Q14653}  
28369 Pathogen[ P03410] interacts with 2 human partners:{Q14653;P10914}  
28370 Pathogen[ P14075] interacts with 2 human partners:{Q14653;P10914}  
28371 Pathogen[ P0C206] interacts with 2 human partners:{P10914;Q14653}  
28372 Pathogen[ P03363] interacts with 2 human partners:{Q14653;P10914}  
28373 [Cluster 2580]GO:0033014+P biological\_process [name] tetrapyrrole biosynthetic process  
[def] "The chemical reactions and pathways leading to the formation of tetrapyrroles,  
natural pigments containing four pyrrole rings joined by one-carbon units linking  
position 2 of one pyrrole ring to position 5 of the next." [CHEBI  
28374 Pathogen[ Q2Q067] interacts with 4 human partners:{P10746;P22557;P13196;P08397}  
28375 Pathogen[ P0C214] interacts with 4 human partners:{P22557;P13196;P10746;P08397}  
28376 Pathogen[ P03346] interacts with 3 human partners:{P10746;P22557;P13196}  
28377 Pathogen[ Q85601] interacts with 3 human partners:{P10746;P13196;P08397}  
28378 Pathogen[ P14079] interacts with 4 human partners:{P13196;P22557;P10746;P08397}  
28379 Pathogen[ P03383] interacts with 1 human partners:{P08397}  
28380 Pathogen[ P03410] interacts with 4 human partners:{P08397;P10746;P22557;P13196}  
28381 Pathogen[ P14075] interacts with 1 human partners:{P08397}  
28382 Pathogen[ P0C206] interacts with 4 human partners:{P10746;P22557;P13196;P08397}  
28383 Pathogen[ P03363] interacts with 1 human partners:{P13196}  
28384 [Cluster 2581]GO:0022408+P biological\_process [name] negative regulation of cell-cell  
adhesion [def] "Any process that stops, prevents or reduces the rate or extent of  
cell adhesion to another cell." [GOC  
28385 Pathogen[ Q2Q067] interacts with 2 human partners:{Q9BZE4;P27986}  
28386 Pathogen[ P0C214] interacts with 2 human partners:{Q9BZE4;P27986}  
28387 Pathogen[ P03346] interacts with 2 human partners:{Q9BZE4;P27986}  
28388 Pathogen[ Q85601] interacts with 2 human partners:{Q9BZE4;P27986}  
28389 Pathogen[ P14079] interacts with 1 human partners:{Q9BZE4}  
28390 Pathogen[ P03383] interacts with 2 human partners:{P27986;Q9BZE4}  
28391 Pathogen[ P03410] interacts with 3 human partners:{P27986;Q8NHY0;Q9BZE4}  
28392 Pathogen[ P14075] interacts with 2 human partners:{P27986;Q9BZE4}  
28393 Pathogen[ P0C206] interacts with 2 human partners:{P27986;Q9BZE4}  
28394 Pathogen[ P03363] interacts with 2 human partners:{Q9BZE4;P27986}  
28395 [Cluster 2582]GO:0016064+P biological\_process [name] immunoglobulin mediated immune  
response [def] "An immune response mediated by immunoglobulins, whether cell-bound or  
in solution." [GO\_REF  
28396 Pathogen[ Q2Q067] interacts with 2 human partners:{Q92985;O95999}  
28397 Pathogen[ P0C214] interacts with 2 human partners:{Q92985;O95999}  
28398 Pathogen[ P03346] interacts with 2 human partners:{O95999;Q92985}  
28399 Pathogen[ Q85601] interacts with 2 human partners:{Q92985;O95999}  
28400 Pathogen[ P14079] interacts with 3 human partners:{O95999;Q92985;Q99836}  
28401 Pathogen[ P03383] interacts with 2 human partners:{Q92985;O95999}  
28402 Pathogen[ P03410] interacts with 2 human partners:{O95999;Q92985}  
28403 Pathogen[ P14075] interacts with 2 human partners:{O95999;Q92985}  
28404 Pathogen[ P0C206] interacts with 2 human partners:{O95999;Q92985}  
28405 Pathogen[ P03363] interacts with 1 human partners:{Q92985}  
28406 [Cluster 2583]GO:0051493+P biological\_process [name] regulation of cytoskeleton  
organization [def] "Any process that modulates the frequency, rate or extent of the  
formation, arrangement of constituent parts, or disassembly of cytoskeletal structures."  
[GOC  
28407 Pathogen[ Q2Q067] interacts with 2 human partners:{P63172;Q8N1N5}  
28408 Pathogen[ P0C214] interacts with 1 human partners:{P63172}  
28409 Pathogen[ P03346] interacts with 3 human partners:{O75592;Q8N1N5;P63172}  
28410 Pathogen[ Q85601] interacts with 1 human partners:{P63172}  
28411 Pathogen[ P14079] interacts with 3 human partners:{P63172;Q8N1N5;Q9NZ72}  
28412 Pathogen[ P03383] interacts with 2 human partners:{P63172;Q8N1N5}  
28413 Pathogen[ P03410] interacts with 3 human partners:{Q8N1N5;P63172;Q9NZ72}  
28414 Pathogen[ P14075] interacts with 2 human partners:{P63172;Q8N1N5}  
28415 Pathogen[ P0C206] interacts with 3 human partners:{Q9NZ72;Q8N1N5;P63172}  
28416 Pathogen[ P03363] interacts with 2 human partners:{Q8N1N5;P63172}  
28417 [Cluster 2584]GO:0035878+P biological\_process [name] nail development [def] "The  
process whose specific outcome is the progression of a nail over time, from its  
formation to the mature structure. A nail is a horn-like envelope covering the outer end  
of a finger or toe, and consists of the nail plate, the nail matrix and the nail bed  
below it, and the grooves surrounding it." [GOC  
28418 Pathogen[ Q2Q067] interacts with 1 human partners:{Q9NSB2}  
28419 Pathogen[ P0C214] interacts with 1 human partners:{Q9NSB2}  
28420 Pathogen[ P03346] interacts with 1 human partners:{Q9NSB2}  
28421 Pathogen[ Q85601] interacts with 1 human partners:{Q9NSB2}  
28422 Pathogen[ P14079] interacts with 1 human partners:{Q9NSB2}  
28423 Pathogen[ P03383] interacts with 1 human partners:{Q9NSB2}  
28424 Pathogen[ P03410] interacts with 1 human partners:{Q9NSB2}  
28425 Pathogen[ P14075] interacts with 1 human partners:{Q9NSB2}  
28426 Pathogen[ P0C206] interacts with 1 human partners:{Q9NSB2}  
28427 Pathogen[ P03363] interacts with 1 human partners:{Q9NSB2}



28428 [Cluster 2585]GO:0001836+P biological\_process [name] release of cytochrome c from mitochondria [def] "The process that results in the movement of cytochrome c from the mitochondrial intermembrane space into the cytosol, which is an early step in apoptosis and leads to caspase activation." [GOC

28429 Pathogen[ Q2Q067] interacts with 6 human partners: {P55957;Q9BXH1;O15350;Q13794;Q9GZY8;P84022}

28430 Pathogen[ P0C214] interacts with 12 human partners: {O15350;P84022;P55957;Q13794;O75223;Q9BXH1;P42574;P05412;P10909;Q3ZCQ8;P55210;Q9GZY8}

28431 Pathogen[ P03346] interacts with 10 human partners: {P05412;P55957;P42574;O15350;P84022;Q3ZCQ8;P55210;Q9BXH1;Q9GZY8;Q13794}

28432 Pathogen[ Q85601] interacts with 9 human partners: {Q9BXH1;P55957;P05412;Q3ZCQ8;P84022;O15350;Q9GZY8;Q13794;P55210}

28433 Pathogen[ P14079] interacts with 11 human partners: {Q3ZCQ8;O75223;P09912;P10909;O15350;Q9BXH1;P55210;Q13794;Q9GZY8;P05412;P55957}

28434 Pathogen[ P03383] interacts with 7 human partners: {P55957;P84022;O15350;Q13794;Q9BXH1;Q9GZY8;P05412}

28435 Pathogen[ P03410] interacts with 12 human partners: {P84022;Q9GZY8;Q9BXH1;P09912;Q13794;P55957;Q3ZCQ8;P05412;O15350;O75223;P10909;P55210}

28436 Pathogen[ P14075] interacts with 7 human partners: {P55957;P05412;Q9GZY8;O15350;Q9BXH1;Q13794;P84022}

28437 Pathogen[ P0C206] interacts with 11 human partners: {P84022;P05412;Q9BXH1;Q3ZCQ8;P10909;P42574;O15350;Q9GZY8;P55210;P55957;Q13794}

28438 Pathogen[ P03363] interacts with 8 human partners: {P55957;Q13794;Q3ZCQ8;P84022;P05412;P55210;Q9BXH1;Q9GZY8}

28439 [Cluster 2586]GO:0070206+P biological\_process [name] protein trimerization [def] "The formation of a protein trimer, a macromolecular structure consisting of three noncovalently associated identical or nonidentical subunits." [GOC

28440 Pathogen[ Q2Q067] interacts with 3 human partners: {P19474;P14373;Q9C035}

28441 Pathogen[ P0C214] interacts with 3 human partners: {P19474;Q9C035;P14373}

28442 Pathogen[ P03346] interacts with 4 human partners: {P14373;Q9C035;Q8IYM9;P19474}

28443 Pathogen[ Q85601] interacts with 4 human partners: {P14373;Q8IYM9;Q9C035;P19474}

28444 Pathogen[ P14079] interacts with 3 human partners: {P14373;Q9C035;P19474}

28445 Pathogen[ P03383] interacts with 2 human partners: {P19474;Q9C035}

28446 Pathogen[ P03410] interacts with 1 human partners: {Q9C035}

28447 Pathogen[ P14075] interacts with 2 human partners: {P19474;Q9C035}

28448 Pathogen[ P0C206] interacts with 4 human partners: {Q9C035;Q8IYM9;P14373;P19474}

28449 Pathogen[ P03363] interacts with 3 human partners: {P14373;P19474;Q9C035}

28450 [Cluster 2587]GO:0051083+P biological\_process [name] 'de novo' cotranslational protein folding [def] "The process of assisting in the correct noncovalent assembly of the ribosome-bound nascent chains of a multidomain protein whilst other parts of the protein are still being translated." [GOC

28451 Pathogen[ Q2Q067] interacts with 2 human partners: {Q0VDF9;Q99543}

28452 Pathogen[ P0C214] interacts with 2 human partners: {Q99543;Q0VDF9}

28453 Pathogen[ P03346] interacts with 2 human partners: {Q99543;Q0VDF9}

28454 Pathogen[ Q85601] interacts with 2 human partners: {Q99543;Q0VDF9}

28455 Pathogen[ P14079] interacts with 2 human partners: {Q0VDF9;Q99543}

28456 Pathogen[ P03383] interacts with 1 human partners: {Q99543}

28457 Pathogen[ P03410] interacts with 2 human partners: {Q0VDF9;Q99543}

28458 Pathogen[ P14075] interacts with 1 human partners: {Q99543}

28459 Pathogen[ P0C206] interacts with 2 human partners: {Q0VDF9;Q99543}

28460 Pathogen[ P03363] interacts with 2 human partners: {Q99543;Q0VDF9}

28461 [Cluster 2588]GO:0051693+P biological\_process [name] actin filament capping [def] "The binding of a protein or protein complex to the end of an actin filament, thus preventing the addition, exchange or removal of further actin subunits." [ISBN

28462 Pathogen[ Q2Q067] interacts with 3 human partners: {Q01082;P06396;P40121}

28463 Pathogen[ P0C214] interacts with 3 human partners: {P40121;P06396;Q01082}

28464 Pathogen[ P03346] interacts with 7 human partners: {P02549;P11277;Q08495;Q13813;Q01082;P40121;P06396}

28465 Pathogen[ Q85601] interacts with 3 human partners: {P06396;Q01082;P40121}

28466 Pathogen[ P14079] interacts with 13 human partners: {P09327;Q08495;Q01082;P47756;P40121;Q9Y6U3;O15195;Q96KX2;P11277;O75366;Q13813;P02549;P35241}

28467 Pathogen[ P03383] interacts with 1 human partners: {P06396}

28468 Pathogen[ P03410] interacts with 11 human partners: {Q96KX2;P47756;P06396;Q9Y6U3;P02549;Q08495;Q01082;P35241;P40121;Q13813;P11277}

28469 Pathogen[ P14075] interacts with 1 human partners: {P06396}

28470 Pathogen[ P0C206] interacts with 6 human partners: {Q01082;P06396;P47756;P40121;Q08495;P11277}

28471 Pathogen[ P03363] interacts with 7 human partners: {P11277;P02549;Q01082;Q08495;P06396;Q13813;P40121}

28472 [Cluster 2589]GO:0007090+P biological\_process [name] regulation of S phase of mitotic

cell cycle [def] "A cell cycle process that modulates the frequency, rate or extent of the progression through the S phase of the mitotic cell cycle." [GOC

28473 Pathogen[ Q2Q067] interacts with 6 human partners:{P18754;Q9H0C8;P06400;Q01664;Q9H211;P68036}

28474 Pathogen[ P0C214] interacts with 5 human partners:{Q9H211;Q9H0C8;P18754;Q01664;P06400}

28475 Pathogen[ P03346] interacts with 7 human partners:{Q9H0C8;P68036;P06400;P18754;P51587;Q9H211;Q01664}

28476 Pathogen[ Q85601] interacts with 7 human partners:{Q9H0C8;P06400;P68036;P18754;Q9H211;Q01664;P51587}

28477 Pathogen[ P14079] interacts with 6 human partners:{P68036;Q9H211;P51587;Q9H0C8;Q01664;P18754}

28478 Pathogen[ P03383] interacts with 6 human partners:{Q9H0C8;P06400;Q01664;P18754;P68036;Q9H211}

28479 Pathogen[ P03410] interacts with 7 human partners:{Q9H211;P06400;P68036;Q9H0C8;P51587;Q01664;P18754}

28480 Pathogen[ P14075] interacts with 6 human partners:{Q9H211;P68036;Q9H0C8;Q01664;P06400;P18754}

28481 Pathogen[ P0C206] interacts with 7 human partners:{P68036;P18754;P51587;Q9H211;Q01664;P06400;Q9H0C8}

28482 Pathogen[ P03363] interacts with 6 human partners:{P06400;Q9H0C8;Q9H211;P18754;Q01664;P68036}

28483 [Cluster 2590]GO:0016043+P biological\_process [name] cellular component organization [def] "A process that results in the assembly, arrangement of constituent parts, or disassembly of a cellular component." [GOC

28484 Pathogen[ Q2Q067] interacts with 1 human partners:{Q9Y613}

28485 Pathogen[ P0C214] interacts with 2 human partners:{Q9Y613;Q2V2M9}

28486 Pathogen[ P03346] interacts with 4 human partners:{Q9NSV4;Q9Y613;Q27J81;Q2V2M9}

28487 Pathogen[ Q85601] interacts with 2 human partners:{Q2V2M9;Q9Y613}

28488 Pathogen[ P14079] interacts with 4 human partners:{Q9Y613;O60610;Q2V2M9;Q27J81}

28489 Pathogen[ P03383] interacts with 1 human partners:{Q9Y613}

28490 Pathogen[ P03410] interacts with 4 human partners:{Q27J81;O60610;Q9Y613;Q2V2M9}

28491 Pathogen[ P14075] interacts with 1 human partners:{Q9Y613}

28492 Pathogen[ P0C206] interacts with 3 human partners:{Q2V2M9;Q27J81;Q9Y613}

28493 Pathogen[ P03363] interacts with 4 human partners:{Q9NSV4;Q9Y613;Q2V2M9;Q27J81}

28494 [Cluster 2591]GO:2000637+P biological\_process [name] positive regulation of gene silencing by miRNA [def] "Any process that activates or increases the frequency, rate or extent of gene silencing by miRNA." [GOC

28495 Pathogen[ Q2Q067] interacts with 3 human partners:{A6NIX2;Q96IF1;Q9UGP4}

28496 Pathogen[ P0C214] interacts with 2 human partners:{Q9UGP4;A6NIX2}

28497 Pathogen[ P03346] interacts with 3 human partners:{Q9UGP4;Q96IF1;A6NIX2}

28498 Pathogen[ Q85601] interacts with 3 human partners:{A6NIX2;Q96IF1;Q9UGP4}

28499 Pathogen[ P14079] interacts with 3 human partners:{Q96IF1;A6NIX2;Q9UGP4}

28500 Pathogen[ P03383] interacts with 2 human partners:{A6NIX2;Q9UGP4}

28501 Pathogen[ P03410] interacts with 3 human partners:{Q9UGP4;Q96IF1;A6NIX2}

28502 Pathogen[ P14075] interacts with 2 human partners:{Q9UGP4;A6NIX2}

28503 Pathogen[ P0C206] interacts with 3 human partners:{Q9UGP4;Q96IF1;A6NIX2}

28504 Pathogen[ P03363] interacts with 3 human partners:{Q96IF1;Q9UGP4;A6NIX2}

28505 [Cluster 2592]GO:0007595+P biological\_process [name] lactation [def] "The secretion of milk by the mammary gland." [ISBN

28506 Pathogen[ Q2Q067] interacts with 5 human partners:{P22392;P07741;P24385;Q15853;O15111}

28507 Pathogen[ P0C214] interacts with 7 human partners:{O15111;P07741;P24385;O15382;Q15853;P22392;P16220}

28508 Pathogen[ P03346] interacts with 6 human partners:{O15111;P24385;P16220;Q15853;P22392;P07741}

28509 Pathogen[ Q85601] interacts with 7 human partners:{Q15853;P24385;O15111;P16220;P22392;P07741;O15382}

28510 Pathogen[ P14079] interacts with 7 human partners:{P07498;Q15853;P00403;P22392;Q16878;O15382;P07741}

28511 Pathogen[ P03383] interacts with 6 human partners:{P16220;O15111;P22392;P24385;P07741;Q15853}

28512 Pathogen[ P03410] interacts with 8 human partners:{P07498;P07741;O15111;P24385;O15382;P16220;Q15853;P00403}

28513 Pathogen[ P14075] interacts with 6 human partners:{O15111;Q15853;P16220;P24385;P07741;P22392}

28514 Pathogen[ P0C206] interacts with 8 human partners:{P16220;P22392;O15382;Q15853;O15111;P07498;P07741;P24385}

28515 Pathogen[ P03363] interacts with 5 human partners:{Q15853;O15111;P16220;P07741;P24385}

28516 [Cluster 2593]GO:0045740+P biological\_process [name] positive regulation of DNA replication [def] "Any process that activates or increases the frequency, rate or extent of DNA replication." [GOC

28517 Pathogen[ Q2Q067] interacts with 6 human partners:{P08151;Q9H668;P27797;Q9HB71;Q2NKJ3;P60953}

28518 Pathogen[ P0C214] interacts with 8 human

28519 partners:{P60953;P05412;P27797;Q9H668;P08151;Q9HB71;P18846;Q2NKJ3}  
Pathogen[ P03346] interacts with 9 human

28520 partners:{P05412;P60953;Q86SE8;Q9HB71;Q9H668;P27797;P18846;P08151;Q2NKJ3}  
Pathogen[ Q85601] interacts with 9 human

28521 partners:{P08151;Q86SE8;Q2NKJ3;P18846;P27797;Q9H668;P05412;P60953;Q9HB71}  
Pathogen[ P14079] interacts with 6 human

28522 partners:{Q9H668;P08151;Q9HB71;P04141;P05412;Q2NKJ3}  
Pathogen[ P03383] interacts with 6 human

28523 partners:{P60953;P18846;Q9HB71;Q2NKJ3;P27797;P05412}  
Pathogen[ P03410] interacts with 9 human

28524 partners:{Q86SE8;P04141;Q9HB71;Q9H668;P18846;P05412;P60953;Q2NKJ3;P27797}  
Pathogen[ P14075] interacts with 7 human

28525 partners:{P60953;P05412;Q2NKJ3;P27797;Q9HB71;P18846;Q9H668}  
Pathogen[ POC206] interacts with 9 human

28526 partners:{Q9HB71;Q2NKJ3;P27797;P05412;Q9H668;P18846;Q86SE8;P60953;P08151}  
Pathogen[ P03363] interacts with 9 human

28527 partners:{Q9HB71;P08151;P18846;P27797;Q9H668;Q2NKJ3;P05412;Q86SE8;P60953}  
[Cluster 2594]GO:0007216+P biological\_process [name] metabotropic glutamate receptor signaling pathway [def] "The series of molecular signals generated as a consequence of glutamate binding to a cell surface receptor coupled to effectors through GTP-binding proteins." [GOC

28528 Pathogen[ Q2Q067] interacts with 1 human partners:{Q9NSC5}  
28529 Pathogen[ POC214] interacts with 1 human partners:{Q9NSC5}  
28530 Pathogen[ P03346] interacts with 1 human partners:{Q9NSC5}  
28531 Pathogen[ Q85601] interacts with 1 human partners:{Q9NSC5}  
28532 Pathogen[ P14079] interacts with 1 human partners:{Q9NSC5}  
28533 Pathogen[ P03383] interacts with 1 human partners:{Q9NSC5}  
28534 Pathogen[ P03410] interacts with 1 human partners:{Q9NSC5}  
28535 Pathogen[ P14075] interacts with 1 human partners:{Q9NSC5}  
28536 Pathogen[ POC206] interacts with 1 human partners:{Q9NSC5}  
28537 Pathogen[ P03363] interacts with 1 human partners:{Q9NSC5}

28538 [Cluster 2595]GO:0007346+P biological\_process [name] regulation of mitotic cell cycle [def] "Any process that modulates the rate or extent of progress through the mitotic cell cycle." [GOC

28539 Pathogen[ Q2Q067] interacts with 12 human  
partners:{P06400;O75794;O15379;Q9NY61;D6RGH6;P38936;Q8N720;Q9UKT4;Q13619;Q9NVM9;P51808;Q9NVV9}

28540 Pathogen[ POC214] interacts with 13 human  
partners:{D6RGH6;Q13619;P51808;Q9NVM9;O75794;Q9NY61;P38936;Q9NVV9;O15379;Q7L5Y9;P06400;Q9UKT4;Q8N720}

28541 Pathogen[ P03346] interacts with 13 human  
partners:{Q9NVM9;O15379;P06400;P51808;D6RGH6;Q9NY61;Q9UKT4;Q8N720;A6NDV4;Q13619;P38936;Q9NVV9;O75794}

28542 Pathogen[ Q85601] interacts with 14 human  
partners:{Q9NVM9;Q8N720;P51808;Q9NY61;P06400;Q9UKT4;Q7L5Y9;O75794;D6RGH6;Q9NVV9;Q9NQC7;O15379;P38936;Q13619}

28543 Pathogen[ P14079] interacts with 16 human  
partners:{O15379;Q5QGS0;Q9UKT4;D6RGH6;P51808;A6NDV4;Q9NY61;Q9NVV9;Q8N720;Q9NVM9;Q7L5Y9;P38936;Q9NS64;O75794;Q9NQC7;Q13619}

28544 Pathogen[ P03383] interacts with 10 human  
partners:{Q9NY61;O75794;P51808;Q9NVM9;D6RGH6;Q9UKT4;P06400;Q9NVV9;O15379;Q8N720}

28545 Pathogen[ P03410] interacts with 16 human  
partners:{Q9UKT4;Q5QGS0;O75794;P51808;Q9NVV9;Q9NVM9;D6RGH6;Q9NY61;Q9NS64;Q8N720;A6NDV4;P06400;P38936;O15379;Q13619;Q7L5Y9}

28546 Pathogen[ P14075] interacts with 12 human  
partners:{Q9UKT4;P51808;Q9NY61;Q9NS64;Q7L5Y9;O75794;P06400;O15379;Q8N720;Q9NVM9;D6RGH6;Q9NVV9}

28547 Pathogen[ POC206] interacts with 16 human  
partners:{Q9NQC7;Q8N720;O75794;Q9NS64;D6RGH6;A6NDV4;Q9UKT4;Q13619;Q7L5Y9;O15379;P51808;P38936;Q9NVM9;Q9NY61;Q9NVV9;P06400}

28548 Pathogen[ P03363] interacts with 11 human  
partners:{Q9NVV9;O75794;Q8N720;O15379;P06400;Q13619;Q9NY61;Q9UKT4;P51808;D6RGH6;Q9NVM9}

28549 [Cluster 2596]GO:0006094+P biological\_process [name] gluconeogenesis [def] "The formation of glucose from noncarbohydrate precursors, such as pyruvate, amino acids and glycerol." [MetaCyc

28550 Pathogen[ Q2Q067] interacts with 17 human  
partners:{P13929;P18847;P05062;P60174;P09972;P09467;P18669;P04406;P40925;P15259;P06744;O14556;P40926;P18848;Q9UBX3;P06733;Q53ET0}

28551 Pathogen[ POC214] interacts with 21 human  
partners:{P35558;P15259;P40926;O14556;P05062;Q9UBX3;P18848;P13929;P09467;Q53ET0;P09104;P18847;P06733;P09972;Q16822;P16118;P60174;O00757;P04406;P00558;P21695}

28552 Pathogen[ P03346] interacts with 18 human  
partners:{P09972;Q53ET0;P04406;P18847;P13929;Q9UBX3;P60174;P09467;P06733;P20132;P18848;P18669;O14556;P40926;P15259;P06744;P05062;P40925}

28553 Pathogen[ Q85601] interacts with 19 human

28554 partners: {P60174;Q53ET0;Q9UBX3;P18848;P18669;P06733;O00757;P06744;P05062;P16118;P15259;O14556;P18847;P13929;P09972;P09467;P40925;P04406;P40926}  
Pathogen[ P14079] interacts with 11 human  
partners: {P15259;P20132;P09972;P06744;P06733;P13929;P18669;P21695;P09467;P40925;P04406}

28555 Pathogen[ P03383] interacts with 14 human  
partners: {P40926;P18847;P18669;P09467;P09972;P40925;Q16822;P06744;O14556;P04406;P18848;Q53ET0;P06733;P15259}

28556 Pathogen[ P03410] interacts with 21 human  
partners: {Q16822;O14556;P06744;P18847;P16118;P18848;P06733;P20132;P05062;P09467;Q9UBX3;O00757;Q53ET0;P09972;P15259;P04406;P18669;P13929;P40926;P40925;P21695}

28557 Pathogen[ P14075] interacts with 15 human  
partners: {P06733;P40925;P06744;Q16822;P18847;P18669;Q53ET0;P40926;P16118;P04406;P18848;P09972;P15259;P09467;O14556}

28558 Pathogen[ P0C206] interacts with 21 human  
partners: {P06733;P05062;P60174;P09467;Q16822;Q9UBX3;P20132;P06744;O14556;P40925;O00757;P04406;P40926;P18847;Q53ET0;P09972;P16118;P13929;P18848;P18669;P15259}

28559 Pathogen[ P03363] interacts with 11 human  
partners: {P18848;Q53ET0;P06744;P18669;P40925;P18847;P06733;P09972;P04406;O14556;P15259}

28560 [Cluster 2597]GO:0019941+P biological\_process [name] modification-dependent protein catabolic process [def] "The chemical reactions and pathways resulting in the breakdown of a protein or peptide by hydrolysis of its peptide bonds, initiated by the covalent modification of the target protein." [GOC  
28561 Pathogen[ Q2Q067] interacts with 2 human partners: {O14933;Q96EP1}  
28562 Pathogen[ P0C214] interacts with 2 human partners: {O14933;Q96EP1}  
28563 Pathogen[ P03346] interacts with 2 human partners: {O14933;Q96EP1}  
28564 Pathogen[ Q85601] interacts with 2 human partners: {O14933;Q96EP1}  
28565 Pathogen[ P14079] interacts with 1 human partners: {O14933}  
28566 Pathogen[ P03383] interacts with 2 human partners: {O14933;Q96EP1}  
28567 Pathogen[ P03410] interacts with 2 human partners: {O14933;Q96EP1}  
28568 Pathogen[ P14075] interacts with 2 human partners: {O14933;Q96EP1}  
28569 Pathogen[ P0C206] interacts with 2 human partners: {O14933;Q96EP1}  
28570 Pathogen[ P03363] interacts with 2 human partners: {Q96EP1;O14933}

28571 [Cluster 2598]GO:0007622+P biological\_process [name] rhythmic behavior [def] "The specific actions or reactions of an organism that recur with measured regularity." [GOC  
28572 Pathogen[ Q2Q067] interacts with 1 human partners: {P11161}  
28573 Pathogen[ P0C214] interacts with 1 human partners: {P11161}  
28574 Pathogen[ P03346] interacts with 1 human partners: {P11161}  
28575 Pathogen[ Q85601] interacts with 1 human partners: {P11161}  
28576 Pathogen[ P14079] interacts with 1 human partners: {P11161}  
28577 Pathogen[ P03383] interacts with 1 human partners: {P11161}  
28578 Pathogen[ P03410] interacts with 1 human partners: {P11161}  
28579 Pathogen[ P14075] interacts with 1 human partners: {P11161}  
28580 Pathogen[ P0C206] interacts with 1 human partners: {P11161}  
28581 Pathogen[ P03363] interacts with 1 human partners: {P11161}

28582 [Cluster 2599]GO:0006986+P biological\_process [name] response to unfolded protein [def] "Any process that results in a change in state or activity of a cell or an organism (in terms of movement, secretion, enzyme production, gene expression, etc.) as a result of an unfolded protein stimulus." [GOC  
28583 Pathogen[ Q2Q067] interacts with 23 human  
partners: {Q12988;Q16082;P61604;P08238;P18850;P07900;P35638;P08107;P04792;Q96CS3;Q92575;Q9BUX1;P11142;Q9UDY4;O75190;O14656;Q68CJ9;P25685;Q8IUR6;Q9NRD1;O75953;P31689;Q9UBY9}

28584 Pathogen[ P0C214] interacts with 22 human  
partners: {P18850;Q9UDY4;Q12988;O75190;P34932;P61604;Q9UBY9;P04792;Q16082;O14656;Q68CJ9;Q9NRD1;Q9BUX1;P10809;Q96CS3;Q8IUR6;Q92575;P08107;O75953;P35638;P11142;P25685}

28585 Pathogen[ P03346] interacts with 29 human  
partners: {P08107;Q16082;Q12988;P07900;P25685;Q9BUX1;Q96BA8;O75190;P35638;Q96CS3;O14656;Q70SY1;P61604;P11142;P25686;Q8IUR6;P18850;Q92575;Q9BUN8;Q9UBY9;Q9NRD1;P31689;Q68CJ9;P34932;Q9UDY4;Q8TEY5;P08238;O75953;P04792}

28586 Pathogen[ Q85601] interacts with 25 human  
partners: {Q68CJ9;Q92575;P08107;P31689;Q9BUX1;Q8IUR6;O75190;Q96CS3;P61604;P55145;P25685;O75953;Q9UBY9;Q12988;P11142;P08238;O14656;P18850;Q9UDY4;P07900;Q16082;P34932;P04792;P35638;Q9NRD1}

28587 Pathogen[ P14079] interacts with 29 human  
partners: {P11142;Q9P055;Q68CJ9;Q96CS3;Q9UDY4;Q12988;Q9GZP9;O75190;P25685;P61604;Q9BUN8;O14656;P08238;P08107;O75953;P07900;O95292;Q16082;P35638;P18850;P31689;Q9NRD1;Q15011;P04792;Q9BUX1;Q92575;Q9UBY9;Q8IUR6;Q9BSE4}

28588 Pathogen[ P03383] interacts with 22 human  
partners: {P08107;Q68CJ9;Q8IUR6;Q9BUX1;Q9BUN8;P61604;P35638;P04792;P07900;P31689;O75190;Q9UDY4;Q96CS3;P55145;P11142;Q16082;Q9UBY9;Q9NRD1;P18850;P08238;O75953;Q92575}

28589 Pathogen[ P03410] interacts with 30 human  
partners: {Q9UDY4;O95292;Q68CJ9;P35638;Q9NRD1;P08238;O14656;P25685;P61604;Q9BUX1;P25686;P11142;P04792;P07900;O75953;Q9GZP9;Q9P055;Q92575;Q9BSE4;Q9BUN8;P08107;O75190;Q16082;Q12988;Q8IUR6;Q96CS3;P31689;Q15011;P18850;Q9UBY9}

28590 Pathogen[ P14075] interacts with 22 human  
partners: {O75953;Q96CS3;P31689;Q9UBY9;P11142;P61604;P35638;P04792;Q16082;Q9UDY4;P08238;P07900;Q9BUN8;Q92575;Q9BUX1;Q68CJ9;O75190;Q9NRD1;P08107;Q15011;Q8IUR6;P18850}

28591 Pathogen[ POC206] interacts with 29 human  
partners: {Q8IUR6;Q92575;Q12988;Q9UDY4;Q9BUX1;P18850;P34932;P04792;P55145;O95292;Q9NRD1;Q16082;P08238;P07900;Q15011;O14656;Q9BUN8;Q9GZP9;P08107;O75953;P25685;Q96CS3;P11142;P31689;P35638;P61604;O75190;Q68CJ9;Q9UBY9}

28592 Pathogen[ P03363] interacts with 23 human  
partners: {Q9UBY9;O75190;O75953;Q16082;P54652;P07900;Q92575;P18850;Q12988;Q9BUX1;Q9UDY4;Q96CS3;P08107;P34932;Q68CJ9;P35638;P25685;Q8IUR6;Q9NRD1;P08238;P04792;P11142;P61604}

28593 [Cluster 2600]GO:0032438+P biological\_process [name] melanosome organization [def] "A process that is carried out at the cellular level which results in the assembly, arrangement of constituent parts, or disassembly of a melanosome. A melanosome is a tissue-specific, membrane-bounded cytoplasmic organelle within which melanin pigments are synthesized and stored." [GOC

28594 Pathogen[ Q2Q067] interacts with 10 human  
partners: {Q9UL45;O95295;Q9H1H9;Q9NUP1;Q6QNY0;Q96EV8;Q8TDH9;Q9BXS5;Q6QNY1;P78537}

28595 Pathogen[ POC214] interacts with 10 human  
partners: {Q99698;O95295;P78537;Q8TDH9;Q6QNY0;Q9UL45;Q96EV8;Q9NUP1;Q6QNY1;Q9BXS5}

28596 Pathogen[ P03346] interacts with 11 human  
partners: {Q99698;O95295;Q9BXS5;Q9H1H9;Q6QNY0;P78537;Q96EV8;Q6QNY1;Q9UL45;Q8TDH9;Q9NUP1}

28597 Pathogen[ Q85601] interacts with 10 human  
partners: {Q6QNY0;Q9NUP1;O95295;Q9BXS5;Q9H1H9;P78537;Q96EV8;Q6QNY1;Q8TDH9;Q99698}

28598 Pathogen[ P14079] interacts with 11 human  
partners: {Q9BXS5;Q6QNY0;Q9UL45;Q9H1H9;Q8TDH9;O95295;Q96EV8;Q9NUP1;Q99698;Q6QNY1;P78537}

28599 Pathogen[ P03383] interacts with 9 human  
partners: {Q6QNY0;O95295;Q8TDH9;P78537;Q9NUP1;Q96EV8;Q9H1H9;Q9BXS5;Q6QNY1}

28600 Pathogen[ P03410] interacts with 12 human  
partners: {Q9NUP1;O00203;P78537;Q6QNY1;Q9BXS5;Q9H1H9;Q6QNY0;Q9UL45;O95295;Q99698;Q8TDH9;Q96EV8}

28601 Pathogen[ P14075] interacts with 9 human  
partners: {P78537;Q9H1H9;O95295;Q6QNY1;Q6QNY0;Q9NUP1;Q8TDH9;Q96EV8;Q9BXS5}

28602 Pathogen[ POC206] interacts with 11 human  
partners: {P78537;Q9UL45;Q99698;Q6QNY1;Q8TDH9;Q9H1H9;Q9BXS5;Q96EV8;O95295;Q9NUP1;Q6QNY0}

28603 Pathogen[ P03363] interacts with 9 human  
partners: {P78537;Q9BXS5;Q99698;Q6QNY1;O95295;Q8TDH9;Q9H1H9;Q6QNY0;Q9NUP1}

28604 [Cluster 2601]GO:0009399+P biological\_process [name] nitrogen fixation [def] "The process in which nitrogen is taken from its relatively inert molecular form (N2) in the atmosphere and converted into nitrogen compounds useful for other chemical processes, such as ammonia, nitrate and nitrogen dioxide." [Wikipedia

28605 Pathogen[ Q2Q067] interacts with 1 human partners: {Q9H1K1}

28606 Pathogen[ POC214] interacts with 1 human partners: {Q9H1K1}

28607 Pathogen[ P03346] interacts with 1 human partners: {Q9H1K1}

28608 Pathogen[ Q85601] interacts with 1 human partners: {Q9H1K1}

28609 Pathogen[ P14079] interacts with 1 human partners: {Q9H1K1}

28610 Pathogen[ P03383] interacts with 1 human partners: {Q9H1K1}

28611 Pathogen[ P03410] interacts with 1 human partners: {Q9H1K1}

28612 Pathogen[ P14075] interacts with 1 human partners: {Q9H1K1}

28613 Pathogen[ POC206] interacts with 1 human partners: {Q9H1K1}

28614 Pathogen[ P03363] interacts with 1 human partners: {Q9H1K1}

28615 [Cluster 2602]GO:0045176+P biological\_process [name] apical protein localization [def] "Any process in which a protein is transported to, or maintained in, apical regions of the cell." [GOC

28616 Pathogen[ Q2Q067] interacts with 1 human partners: {P54920}

28617 Pathogen[ POC214] interacts with 2 human partners: {P54920;Q9HD26}

28618 Pathogen[ P03346] interacts with 2 human partners: {Q9HD26;P54920}

28619 Pathogen[ Q85601] interacts with 2 human partners: {P54920;Q9HD26}

28620 Pathogen[ P14079] interacts with 3 human partners: {Q9HD26;P54920;P35241}

28621 Pathogen[ P03383] interacts with 2 human partners: {P54920;Q9HD26}

28622 Pathogen[ P03410] interacts with 3 human partners: {Q9HD26;P35241;P54920}

28623 Pathogen[ P14075] interacts with 2 human partners: {P54920;Q9HD26}

28624 Pathogen[ POC206] interacts with 2 human partners: {P54920;Q9HD26}

28625 Pathogen[ P03363] interacts with 2 human partners: {P54920;Q9HD26}

28626 [Cluster 2603]GO:0042985+P biological\_process [name] negative regulation of amyloid precursor protein biosynthetic process [def] "Any process that stops, prevents, or reduces the frequency, rate or extent of the chemical reactions and pathways resulting in the formation of amyloid precursor protein (APP), the precursor of beta-amyloid." [GOC

28627 Pathogen[ Q2Q067] interacts with 1 human partners: {Q9NY61}

28628 Pathogen[ POC214] interacts with 1 human partners: {Q9NY61}

28629 Pathogen[ P03346] interacts with 1 human partners: {Q9NY61}

28630 Pathogen[ Q85601] interacts with 1 human partners: {Q9NY61}

28631 Pathogen[ P14079] interacts with 2 human partners:{Q9NY61;Q9Y287}  
28632 Pathogen[ P03383] interacts with 1 human partners:{Q9NY61}  
28633 Pathogen[ P03410] interacts with 2 human partners:{Q9NY61;Q9Y287}  
28634 Pathogen[ P14075] interacts with 2 human partners:{Q9NY61;Q9Y287}  
28635 Pathogen[ P0C206] interacts with 2 human partners:{Q9Y287;Q9NY61}  
28636 Pathogen[ P03363] interacts with 1 human partners:{Q9NY61}  
28637 [Cluster 2604]GO:0051595+P biological\_process [name] response to methylglyoxal  
[def] "Any process that results in a change in state or activity of a cell or an  
organism (in terms of movement, secretion, enzyme production, gene expression, etc.) as  
a result of a methylglyoxal stimulus." [GOC  
28638 Pathogen[ Q2Q067] interacts with 1 human partners:{Q96ST3}  
28639 Pathogen[ P0C214] interacts with 1 human partners:{Q96ST3}  
28640 Pathogen[ P03346] interacts with 1 human partners:{Q96ST3}  
28641 Pathogen[ Q85601] interacts with 1 human partners:{Q96ST3}  
28642 Pathogen[ P14079] interacts with 1 human partners:{Q96ST3}  
28643 Pathogen[ P03383] interacts with 1 human partners:{Q96ST3}  
28644 Pathogen[ P03410] interacts with 1 human partners:{Q96ST3}  
28645 Pathogen[ P14075] interacts with 1 human partners:{Q96ST3}  
28646 Pathogen[ P0C206] interacts with 1 human partners:{Q96ST3}  
28647 Pathogen[ P03363] interacts with 1 human partners:{Q96ST3}  
28648 [Cluster 2605]GO:0001649+P biological\_process [name] osteoblast differentiation  
[def] "The process in which a relatively unspecialized cell acquires the specialized  
features of an osteoblast, the mesodermal cell that gives rise to bone." [CL  
28649 Pathogen[ Q2Q067] interacts with 12 human  
partners:{P31749;P08151;Q14814;Q14192;Q9NZC7;P35548;P62328;P84022;Q9GZV5;Q8WVJ9;Q139  
51;Q8TDD2}  
28650 Pathogen[ P0C214] interacts with 13 human  
partners:{P17275;P84022;Q9GZV5;Q9NZC7;Q14814;Q14192;Q8WVJ9;P08151;P35548;P31749;P623  
28;Q8TDD2;Q13951}  
28651 Pathogen[ P03346] interacts with 15 human  
partners:{Q14814;P35548;Q9GZV5;P17275;Q8TDD2;P84022;P31749;Q95863;Q13951;Q14192;Q9NZ  
C7;Q8WVJ9;P62328;P56178;P08151}  
28652 Pathogen[ Q85601] interacts with 13 human  
partners:{Q9NZC7;P08151;P31749;Q8TDD2;Q13951;Q14814;Q9GZV5;Q14192;P35548;P84022;P623  
28;P17275;Q8WVJ9}  
28653 Pathogen[ P14079] interacts with 11 human  
partners:{P08151;Q06413;Q9GZV5;Q14192;Q8WVJ9;Q9NZC7;P62328;P17275;Q14814;Q8TDD2;Q139  
51}  
28654 Pathogen[ P03383] interacts with 10 human  
partners:{Q8WVJ9;P31749;P62328;Q14814;P84022;P35548;Q13951;Q14192;P17275;Q9GZV5}  
28655 Pathogen[ P03410] interacts with 12 human  
partners:{P84022;P62328;Q8WVJ9;Q8TDD2;Q14814;Q9NZC7;P31749;Q9GZV5;P35548;P17275;Q139  
51;Q14192}  
28656 Pathogen[ P14075] interacts with 10 human  
partners:{Q9GZV5;Q13951;P62328;P17275;P35548;Q8WVJ9;P31749;P84022;Q14814;Q14192}  
28657 Pathogen[ P0C206] interacts with 13 human  
partners:{P84022;P31749;P17275;P62328;Q13951;Q8WVJ9;Q9GZV5;P35548;Q9NZC7;Q14192;Q148  
14;P08151;Q8TDD2}  
28658 Pathogen[ P03363] interacts with 12 human  
partners:{P08151;P62328;Q8TDD2;P35548;P17275;Q13951;Q9GZV5;Q14814;P31749;P84022;Q8WV  
J9;Q14192}  
28659 [Cluster 2606]GO:0070198+P biological\_process [name] protein localization to  
chromosome, telomeric region [def] "Any process in which a protein is transported to,  
or maintained at, the telomeric region of a chromosome." [GOC  
28660 Pathogen[ Q2Q067] interacts with 6 human  
partners:{Q9H2K2;Q9NYB0;Q15554;Q9BSI4;Q96AP0;O95271}  
28661 Pathogen[ P0C214] interacts with 5 human  
partners:{Q9BSI4;Q15554;Q9H2K2;Q9NYB0;O95271}  
28662 Pathogen[ P03346] interacts with 6 human  
partners:{Q9BSI4;Q96AP0;Q15554;Q9H2K2;Q9NYB0;O95271}  
28663 Pathogen[ Q85601] interacts with 4 human partners:{Q15554;Q9H2K2;Q9NYB0;O95271}  
28664 Pathogen[ P14079] interacts with 6 human  
partners:{O95271;Q9BSI4;Q9H2K2;Q9NYB0;Q15554;Q96AP0}  
28665 Pathogen[ P03383] interacts with 4 human partners:{Q9NYB0;Q15554;Q9BSI4;O95271}  
28666 Pathogen[ P03410] interacts with 6 human  
partners:{Q15554;Q96AP0;Q9BSI4;O95271;Q9H2K2;Q9NYB0}  
28667 Pathogen[ P14075] interacts with 5 human  
partners:{Q15554;Q9BSI4;Q96AP0;O95271;Q9NYB0}  
28668 Pathogen[ P0C206] interacts with 6 human  
partners:{O95271;Q96AP0;Q15554;Q9BSI4;Q9NYB0;Q9H2K2}  
28669 Pathogen[ P03363] interacts with 6 human  
partners:{Q15554;Q9NYB0;Q9BSI4;Q9H2K2;Q96AP0;O95271}  
28670 [Cluster 2607]GO:0031297+P biological\_process [name] replication fork processing  
[def] "The process in which a DNA replication fork that has stalled (due to DNA damage,  
DNA secondary structure, bound proteins, dNTP shortage, or other causes) is repaired and  
replication is restarted." [PMID

28671 Pathogen[ Q2Q067] interacts with 5 human partners: {Q8N2Z9;A8MT69;Q96HA7;Q6ZRQ5;Q8IYD8}

28672 Pathogen[ POC214] interacts with 4 human partners: {Q6ZRQ5;Q8N2Z9;Q96HA7;Q8IYD8}

28673 Pathogen[ P03346] interacts with 5 human partners: {Q8N2Z9;Q96HA7;Q6ZRQ5;A8MT69;Q8IYD8}

28674 Pathogen[ Q85601] interacts with 5 human partners: {Q96HA7;Q8IYD8;Q6ZRQ5;A8MT69;Q8N2Z9}

28675 Pathogen[ P14079] interacts with 5 human partners: {Q8IYD8;Q96HA7;Q8N2Z9;A8MT69;Q6ZRQ5}

28676 Pathogen[ P03383] interacts with 4 human partners: {Q8N2Z9;Q6ZRQ5;A8MT69;Q96HA7}

28677 Pathogen[ P03410] interacts with 5 human partners: {Q8IYD8;A8MT69;Q96HA7;Q8N2Z9;Q6ZRQ5}

28678 Pathogen[ P14075] interacts with 4 human partners: {A8MT69;Q6ZRQ5;Q8N2Z9;Q96HA7}

28679 Pathogen[ POC206] interacts with 5 human partners: {Q96HA7;Q8IYD8;Q6ZRQ5;Q8N2Z9;A8MT69}

28680 Pathogen[ P03363] interacts with 5 human partners: {Q8N2Z9;Q8IYD8;Q96HA7;Q6ZRQ5;A8MT69}

28681 [Cluster 2608]GO:0045010+P biological\_process [name] actin nucleation [def] "The initial step in the formation of an actin filament, in which actin monomers combine to form a new filament. Nucleation is slow relative to the subsequent addition of more monomers to extend the filament." [ISBN

28682 Pathogen[ Q2Q067] interacts with 1 human partners: {P59998}

28683 Pathogen[ POC214] interacts with 1 human partners: {P59998}

28684 Pathogen[ P03346] interacts with 1 human partners: {P59998}

28685 Pathogen[ Q85601] interacts with 1 human partners: {P59998}

28686 Pathogen[ P14079] interacts with 2 human partners: {Q9Y6U3;P59998}

28687 Pathogen[ P03383] interacts with 1 human partners: {P59998}

28688 Pathogen[ P03410] interacts with 2 human partners: {P59998;Q9Y6U3}

28689 Pathogen[ P14075] interacts with 1 human partners: {P59998}

28690 Pathogen[ POC206] interacts with 1 human partners: {P59998}

28691 Pathogen[ P03363] interacts with 1 human partners: {P59998}

28692 [Cluster 2609]GO:0002052+P biological\_process [name] positive regulation of neuroblast proliferation [def] "Any process that activates or increases the rate of neuroblast proliferation." [GOC

28693 Pathogen[ Q2Q067] interacts with 4 human partners: {P56693;Q9NRI5;Q8IZT6;Q6STE5}

28694 Pathogen[ POC214] interacts with 4 human partners: {Q9NRI5;P56693;Q6STE5;Q8IZT6}

28695 Pathogen[ P03346] interacts with 5 human partners: {Q9NRI5;P56693;Q6STE5;Q5XKR4;Q8IZT6}

28696 Pathogen[ Q85601] interacts with 4 human partners: {Q6STE5;Q8IZT6;P56693;Q9NRI5}

28697 Pathogen[ P14079] interacts with 4 human partners: {Q6STE5;Q9NRI5;P56693;Q8IZT6}

28698 Pathogen[ P03383] interacts with 3 human partners: {Q9NRI5;Q6STE5;P56693}

28699 Pathogen[ P03410] interacts with 4 human partners: {Q8IZT6;P56693;Q9NRI5;Q6STE5}

28700 Pathogen[ P14075] interacts with 3 human partners: {P56693;Q9NRI5;Q6STE5}

28701 Pathogen[ POC206] interacts with 4 human partners: {Q6STE5;Q8IZT6;P56693;Q9NRI5}

28702 Pathogen[ P03363] interacts with 5 human partners: {Q6STE5;P56693;Q5XKR4;Q9NRI5;Q8IZT6}

28703 [Cluster 2610]GO:0034614+P biological\_process [name] cellular response to reactive oxygen species [def] "Any process that results in a change in state or activity of a cell (in terms of movement, secretion, enzyme production, gene expression, etc.) as a result of a reactive oxygen species stimulus. Reactive oxygen species include singlet oxygen, superoxide, and oxygen free radicals." [GOC

28704 Pathogen[ Q2Q067] interacts with 2 human partners: {P01100;P07320}

28705 Pathogen[ POC214] interacts with 2 human partners: {P01100;P07320}

28706 Pathogen[ P03346] interacts with 2 human partners: {P07320;P01100}

28707 Pathogen[ Q85601] interacts with 2 human partners: {P01100;P07320}

28708 Pathogen[ P14079] interacts with 4 human partners: {P07320;P60602;P49023;P01100}

28709 Pathogen[ P03383] interacts with 2 human partners: {P01100;P07320}

28710 Pathogen[ P03410] interacts with 3 human partners: {P01100;P07320;P60602}

28711 Pathogen[ P14075] interacts with 3 human partners: {P07320;P60602;P01100}

28712 Pathogen[ POC206] interacts with 3 human partners: {P07320;P01100;P60602}

28713 Pathogen[ P03363] interacts with 2 human partners: {P07320;P01100}

28714 [Cluster 2611]GO:0045653+P biological\_process [name] negative regulation of megakaryocyte differentiation [def] "Any process that stops, prevents, or reduces the frequency, rate or extent of megakaryocyte differentiation." [GOC

28715 Pathogen[ Q2Q067] interacts with 1 human partners: {Q99873}

28716 Pathogen[ POC214] interacts with 1 human partners: {Q99873}

28717 Pathogen[ P03346] interacts with 1 human partners: {Q99873}

28718 Pathogen[ Q85601] interacts with 1 human partners: {Q99873}

28719 Pathogen[ P14079] interacts with 1 human partners: {Q99873}

28720 Pathogen[ P03383] interacts with 1 human partners: {Q99873}

28721 Pathogen[ P03410] interacts with 1 human partners: {Q99873}

28722 Pathogen[ P14075] interacts with 1 human partners: {Q99873}

28723 Pathogen[ POC206] interacts with 1 human partners: {Q99873}

28724 Pathogen[ P03363] interacts with 1 human partners: {Q99873}

28725 [Cluster 2612]GO:0042276+P biological\_process [name] error-prone translesion synthesis [def] "The conversion of DNA-damage induced single-stranded gaps into large molecular

weight DNA after replication by using a specialized DNA polymerase or replication complex to insert a defined nucleotide across the lesion. This process does not remove the replication-blocking lesions and causes an increase in the endogenous mutation level. For example, in *E. coli*, a low fidelity DNA polymerase, pol V, copies lesions that block replication fork progress. This produces mutations specifically targeted to DNA template damage sites, but it can also produce mutations at undamaged sites." [GOC

28726 Pathogen[ Q2Q067] interacts with 1 human partners:{Q9UBZ9}

28727 Pathogen[ P0C214] interacts with 1 human partners:{Q9UBZ9}

28728 Pathogen[ P03346] interacts with 1 human partners:{Q9UBZ9}

28729 Pathogen[ Q85601] interacts with 1 human partners:{Q9UBZ9}

28730 Pathogen[ P14079] interacts with 1 human partners:{Q9UBZ9}

28731 Pathogen[ P03383] interacts with 1 human partners:{Q9UBZ9}

28732 Pathogen[ P03410] interacts with 1 human partners:{Q9UBZ9}

28733 Pathogen[ P14075] interacts with 1 human partners:{Q9UBZ9}

28734 Pathogen[ P0C206] interacts with 1 human partners:{Q9UBZ9}

28735 Pathogen[ P03363] interacts with 1 human partners:{Q9UBZ9}

28736 [Cluster 2613]GO:0010216+P biological\_process [name] maintenance of DNA methylation [def] "Any process involved in maintaining the methylation state of a nucleotide sequence." [PMID

28737 Pathogen[ Q2Q067] interacts with 4 human partners:{Q93009;Q96T88;P26358;P49711}

28738 Pathogen[ P0C214] interacts with 4 human partners:{Q96T88;P26358;Q93009;P49711}

28739 Pathogen[ P03346] interacts with 5 human partners:{Q9NRZ9;Q93009;P26358;P49711;Q96T88}

28740 Pathogen[ Q85601] interacts with 4 human partners:{Q93009;P26358;P49711;Q96T88}

28741 Pathogen[ P14079] interacts with 2 human partners:{P26358;P49711}

28742 Pathogen[ P03383] interacts with 2 human partners:{P49711;P26358}

28743 Pathogen[ P03410] interacts with 2 human partners:{P26358;P49711}

28744 Pathogen[ P14075] interacts with 2 human partners:{P26358;P49711}

28745 Pathogen[ P0C206] interacts with 5 human partners:{P26358;Q93009;Q96T88;P49711;Q9NRZ9}

28746 Pathogen[ P03363] interacts with 3 human partners:{P49711;P26358;Q96T88}

28747 [Cluster 2614]GO:0018279+P biological\_process [name] protein N-linked glycosylation via asparagine [def] "The glycosylation of protein via the N4 atom of peptidyl-asparagine forming N4-glycosyl-L-asparagine\_ the most common form is N-acetylglucosaminy l asparagine\_ N-acetylgalactosaminy l asparagine and N4 glucosyl asparagine also occur. This modification typically occurs in extracellular peptides with an N-X-(ST) motif. Partial modification has been observed to occur with cysteine, rather than serine or threonine, in the third position\_ secondary structure features are important, and proline in the second or fourth positions inhibits modification." [GOC

28748 Pathogen[ Q2Q067] interacts with 11 human partners:{P55735;P34949;P60604;O95394;P27797;Q16222;P53992;O95486;O94855;O95487;Q15436}

28749 Pathogen[ P0C214] interacts with 15 human partners:{P55735;P53992;Q16222;Q15436;O95487;P49257;P27797;P34949;O95394;O15305;Q96EK6;O95486;P55072;O94855;P60604}

28750 Pathogen[ P03346] interacts with 14 human partners:{P55735;P49257;Q16222;P55072;O94855;Q15436;P60604;O95486;P27797;Q9HCU5;O95394;P34949;O95487;P53992}

28751 Pathogen[ Q85601] interacts with 13 human partners:{P34949;O95487;P27797;Q15436;Q16222;P49257;P55735;Q96EK6;O95486;O95394;O94855;P60604;P53992}

28752 Pathogen[ P14079] interacts with 26 human partners:{Q5SRI9;P49257;Q16222;O15305;O95487;P39656;P60604;O94855;Q9BT22;Q96Q80;P53992;P04844;O94777;Q9NYU1;Q9P2X0;O95394;Q9NYU2;P34949;P61803;P55735;Q9NRP0;Q96AA3;Q96EK6;O95486;Q9UBM8;P46977}

28753 Pathogen[ P03383] interacts with 10 human partners:{P34949;P55735;O95487;O95486;Q15436;P60604;O94855;O95394;P53992;P27797}

28754 Pathogen[ P03410] interacts with 25 human partners:{P49257;O94855;P53992;Q16222;P34949;O94777;Q96Q80;Q96EK6;Q5SRI9;Q15436;Q9NYU1;O95486;Q9BT22;P04844;Q9HCU5;O15305;P60604;P55735;P39656;O95394;P61803;Q9P2X0;O95487;Q9NYU2;P27797}

28755 Pathogen[ P14075] interacts with 13 human partners:{P60604;O94777;Q5SRI9;P34949;P53992;P55735;O95487;P27797;Q15436;O95394;O94855;Q96EK6;O95486}

28756 Pathogen[ P0C206] interacts with 17 human partners:{Q5SRI9;P27797;Q16222;O94855;P39656;O95394;P55735;O94777;P34949;P60604;O95486;P49257;O95487;P55072;Q96EK6;P53992;Q15436}

28757 Pathogen[ P03363] interacts with 9 human partners:{P60604;Q16222;Q15436;O95486;P27797;P53992;O95487;P55735;O94855}

28758 [Cluster 2615]GO:0031668+P biological\_process [name] cellular response to extracellular stimulus [def] "Any process that results in a change in state or activity of a cell (in terms of movement, secretion, enzyme production, gene expression, etc.) as a result of an extracellular stimulus." [GOC

28759 Pathogen[ Q2Q067] interacts with 7 human partners:{P01100;Q9H2P0;P05062;P38936;P00338;P15407;P42772}

28760 Pathogen[ P0C214] interacts with 6 human



28761 partners:{P15407;P01100;P38936;P05062;P42772;Q9H2P0}  
Pathogen[ P03346] interacts with 7 human

28762 partners:{Q9H2P0;P42772;P00338;P15407;P05062;P38936;P01100}  
Pathogen[ Q85601] interacts with 7 human

28763 partners:{P15407;P42772;P05062;P01100;Q9H2P0;P38936;P00338}  
Pathogen[ P14079] interacts with 6 human

28764 partners:{P00338;Q9H2P0;P38936;P57764;P15407;P01100}  
Pathogen[ P03383] interacts with 4 human partners:{P00338;P42772;P15407;P01100}

28765 partners:{P42772;P05062;P01100;P38936;P00338;P15407}  
Pathogen[ P03410] interacts with 6 human

28766 Pathogen[ P14075] interacts with 4 human partners:{P01100;P00338;P42772;P15407}

28767 Pathogen[ P0C206] interacts with 7 human  
partners:{P05062;P15407;P42772;P01100;P38936;Q9H2P0;P00338}

28768 Pathogen[ P03363] interacts with 4 human partners:{Q9H2P0;P42772;P15407;P01100}

28769 [Cluster 2616]GO:0010738+P biological\_process [name] regulation of protein kinase A signaling cascade [def] "Any process that modulates the rate, frequency, or extent of the protein kinase A signaling cascade. The PKA signaling cascade is the series of reactions, mediated by the intracellular serine/threonine kinase protein kinase A, which occurs as a result of a single trigger reaction or compound." [GOC

28770 Pathogen[ Q2Q067] interacts with 3 human partners:{Q9P0M2;O00170;Q13023}

28771 Pathogen[ P0C214] interacts with 3 human partners:{O00170;Q13023;Q9P0M2}

28772 Pathogen[ P03346] interacts with 4 human partners:{Q9P0M2;O00170;Q13023;Q9UKA4}

28773 Pathogen[ Q85601] interacts with 3 human partners:{O00170;Q9P0M2;Q13023}

28774 Pathogen[ P14079] interacts with 4 human partners:{Q9UKA4;Q13023;Q9P0M2;O00170}

28775 Pathogen[ P03383] interacts with 2 human partners:{Q13023;O00170}

28776 Pathogen[ P03410] interacts with 4 human partners:{Q9UKA4;Q9P0M2;O00170;Q13023}

28777 Pathogen[ P14075] interacts with 2 human partners:{O00170;Q13023}

28778 Pathogen[ P0C206] interacts with 4 human partners:{Q13023;Q9P0M2;O00170;Q9UKA4}

28779 Pathogen[ P03363] interacts with 3 human partners:{Q9P0M2;Q13023;O00170}

28780 [Cluster 2617]GO:0032348+P biological\_process [name] negative regulation of aldosterone biosynthetic process [def] "Any process that stops, prevents, or reduces the frequency, rate or extent of the chemical reactions and pathways resulting in the formation of aldosterone." [GOC

28781 Pathogen[ Q2Q067] interacts with 1 human partners:{Q13127}

28782 Pathogen[ P0C214] interacts with 1 human partners:{Q13127}

28783 Pathogen[ P03346] interacts with 1 human partners:{Q13127}

28784 Pathogen[ Q85601] interacts with 1 human partners:{Q13127}

28785 Pathogen[ P14079] interacts with 1 human partners:{Q13127}

28786 Pathogen[ P03383] interacts with 1 human partners:{Q13127}

28787 Pathogen[ P03410] interacts with 1 human partners:{Q13127}

28788 Pathogen[ P14075] interacts with 1 human partners:{Q13127}

28789 Pathogen[ P0C206] interacts with 1 human partners:{Q13127}

28790 Pathogen[ P03363] interacts with 1 human partners:{Q13127}

28791 [Cluster 2618]GO:0006344+P biological\_process [name] maintenance of chromatin silencing [def] "The maintenance of chromatin in a transcriptionally silent state such as heterochromatin." [GOC

28792 Pathogen[ Q2Q067] interacts with 2 human partners:{P63146;Q92769}

28793 Pathogen[ P0C214] interacts with 2 human partners:{Q92769;P63146}

28794 Pathogen[ P03346] interacts with 2 human partners:{P63146;Q92769}

28795 Pathogen[ Q85601] interacts with 2 human partners:{P63146;Q92769}

28796 Pathogen[ P14079] interacts with 2 human partners:{Q92769;P63146}

28797 Pathogen[ P03383] interacts with 2 human partners:{Q92769;P63146}

28798 Pathogen[ P03410] interacts with 2 human partners:{Q92769;P63146}

28799 Pathogen[ P14075] interacts with 2 human partners:{Q92769;P63146}

28800 Pathogen[ P0C206] interacts with 2 human partners:{Q92769;P63146}

28801 Pathogen[ P03363] interacts with 1 human partners:{P63146}

28802 [Cluster 2619]GO:0016579+P biological\_process [name] protein deubiquitination [def] "The removal of one or more ubiquitin groups from a protein." [GOC

28803 Pathogen[ Q2Q067] interacts with 4 human partners:{Q9Y5K5;Q8TAF3;Q93009;Q93008}

28804 Pathogen[ P0C214] interacts with 6 human  
partners:{Q92560;Q93008;Q9Y5K5;Q8TAF3;Q93009;Q9H3M9}

28805 Pathogen[ P03346] interacts with 14 human  
partners:{Q9BXU7;Q93009;Q92560;Q9H3M9;Q93008;Q95630;Q8TAF3;Q14694;P51784;O75604;Q6GQ9;O94782;Q9Y5K5;Q9H0E7}

28806 Pathogen[ Q85601] interacts with 8 human  
partners:{Q9H0E7;Q93009;Q92560;Q9H3M9;Q93008;Q9Y5K5;Q8TAF3;Q95630}

28807 Pathogen[ P14079] interacts with 4 human partners:{Q9H3M9;Q9Y5K5;Q92560;Q8TAF3}

28808 Pathogen[ P03383] interacts with 3 human partners:{Q8TAF3;Q9Y5K5;Q9H3M9}

28809 Pathogen[ P03410] interacts with 3 human partners:{Q9H3M9;Q8TAF3;Q9Y5K5}

28810 Pathogen[ P14075] interacts with 3 human partners:{Q8TAF3;Q9H3M9;Q9Y5K5}

28811 Pathogen[ P0C206] interacts with 10 human  
partners:{Q8TAF3;Q93008;O75604;Q95630;Q93009;Q9H0E7;Q9Y5K5;Q9H3M9;Q6GQ9;Q92560}

28812 Pathogen[ P03363] interacts with 8 human  
partners:{Q9Y5K5;P51784;Q8TAF3;Q6GQ9;O75604;Q92560;Q9BXU7;Q93008}

28813 [Cluster 2620]GO:0071930+P biological\_process [name] negative regulation of transcription involved in G1/S phase of mitotic cell cycle [def] "Any process that

stop, prevents or decreases transcription as part of the G1/S transition of the mitotic cell cycle." [GOC

28814 Pathogen[ Q2Q067] interacts with 2 human partners:{P06400;Q01094}

28815 Pathogen[ P0C214] interacts with 2 human partners:{Q01094;P06400}

28816 Pathogen[ P03346] interacts with 2 human partners:{P06400;Q01094}

28817 Pathogen[ Q85601] interacts with 2 human partners:{P06400;Q01094}

28818 Pathogen[ P14079] interacts with 1 human partners:{Q01094}

28819 Pathogen[ P03383] interacts with 2 human partners:{Q01094;P06400}

28820 Pathogen[ P03410] interacts with 2 human partners:{P06400;Q01094}

28821 Pathogen[ P14075] interacts with 2 human partners:{Q01094;P06400}

28822 Pathogen[ P0C206] interacts with 2 human partners:{Q01094;P06400}

28823 Pathogen[ P03363] interacts with 2 human partners:{P06400;Q01094}

28824 [Cluster 2621]GO:0033689+P biological\_process [name] negative regulation of osteoblast proliferation [def] "Any process that stops, prevents or reduces the rate or extent of osteoblast proliferation." [GOC

28825 Pathogen[ Q2Q067] interacts with 1 human partners:{P84022}

28826 Pathogen[ P0C214] interacts with 1 human partners:{P84022}

28827 Pathogen[ P03346] interacts with 3 human partners:{Q6UW56;P84022;Q92832}

28828 Pathogen[ Q85601] interacts with 1 human partners:{P84022}

28829 Pathogen[ P14079] interacts with 1 human partners:{Q92832}

28830 Pathogen[ P03383] interacts with 1 human partners:{P84022}

28831 Pathogen[ P03410] interacts with 2 human partners:{P84022;Q92832}

28832 Pathogen[ P14075] interacts with 1 human partners:{P84022}

28833 Pathogen[ P0C206] interacts with 3 human partners:{P84022;Q6UW56;Q92832}

28834 Pathogen[ P03363] interacts with 3 human partners:{Q6UW56;Q92832;P84022}

28835 [Cluster 2622]GO:0051388+P biological\_process [name] positive regulation of nerve growth factor receptor signaling pathway [def] "Any process that activates or increases the frequency, rate or extent of the activity of the nerve growth factor receptor signaling pathway." [GOC

28836 Pathogen[ Q2Q067] interacts with 1 human partners:{Q15173}

28837 Pathogen[ P0C214] interacts with 1 human partners:{Q15173}

28838 Pathogen[ P03346] interacts with 1 human partners:{Q15173}

28839 Pathogen[ Q85601] interacts with 1 human partners:{Q15173}

28840 Pathogen[ P14079] interacts with 1 human partners:{Q15173}

28841 Pathogen[ P03383] interacts with 1 human partners:{Q15173}

28842 Pathogen[ P03410] interacts with 1 human partners:{Q15173}

28843 Pathogen[ P14075] interacts with 1 human partners:{Q15173}

28844 Pathogen[ P0C206] interacts with 1 human partners:{Q15173}

28845 Pathogen[ P03363] interacts with 1 human partners:{Q15173}

28846 [Cluster 2623]GO:0015949+P biological\_process [name] nucleobase-containing small molecule interconversion [def] "The chemical reactions and pathways by which a nucleobase, nucleoside or nucleotide small molecule is synthesized from another nucleobase, nucleoside or nucleotide small molecule." [GOC

28847 Pathogen[ Q2Q067] interacts with 5 human partners:{P22392;P35754;P31350;Q7LG56;P10599}

28848 Pathogen[ P0C214] interacts with 10 human partners:{P35754;P31350;P23919;Q16881;Q9NRF8;P23921;P10599;P22392;P17812;Q7LG56}

28849 Pathogen[ P03346] interacts with 5 human partners:{P31350;Q7LG56;P22392;P35754;P10599}

28850 Pathogen[ Q85601] interacts with 5 human partners:{P31350;P10599;Q7LG56;P22392;P35754}

28851 Pathogen[ P14079] interacts with 8 human partners:{P17812;P31350;Q7LG56;Q9NRF8;P23919;P35754;P22392;P10599}

28852 Pathogen[ P03383] interacts with 3 human partners:{P22392;P10599;P31350}

28853 Pathogen[ P03410] interacts with 8 human partners:{P10599;P31350;P35754;Q9NRF8;P17812;P23919;P23921;Q7LG56}

28854 Pathogen[ P14075] interacts with 3 human partners:{P31350;P22392;P10599}

28855 Pathogen[ P0C206] interacts with 5 human partners:{P22392;Q7LG56;P35754;P10599;P31350}

28856 Pathogen[ P03363] interacts with 1 human partners:{P35754}

28857 [Cluster 2624]GO:0051984+P biological\_process [name] positive regulation of chromosome segregation [def] "Any process that activates or increases the frequency, rate or extent of chromosome segregation, the process in which genetic material, in the form of chromosomes, is organized and then physically separated and apportioned to two or more sets." [GOC

28858 Pathogen[ Q2Q067] interacts with 1 human partners:{Q99741}

28859 Pathogen[ P0C214] interacts with 1 human partners:{Q99741}

28860 Pathogen[ P03346] interacts with 1 human partners:{Q99741}

28861 Pathogen[ Q85601] interacts with 1 human partners:{Q99741}

28862 Pathogen[ P14079] interacts with 1 human partners:{Q99741}

28863 Pathogen[ P03383] interacts with 1 human partners:{Q99741}

28864 Pathogen[ P03410] interacts with 1 human partners:{Q99741}

28865 Pathogen[ P14075] interacts with 1 human partners:{Q99741}

28866 Pathogen[ P0C206] interacts with 1 human partners:{Q99741}

28867 Pathogen[ P03363] interacts with 1 human partners:{Q99741}

28868 [Cluster 2625]GO:2001274+P biological\_process [name] negative regulation of glucose

import in response to insulin stimulus [def] "Any process that stops, prevents or reduces the frequency, rate or extent of glucose import in response to insulin stimulus." [GOC

28869 Pathogen[ Q2Q067] interacts with 2 human partners:{Q7Z2X4;Q8WU39}

28870 Pathogen[ P0C214] interacts with 2 human partners:{Q7Z2X4;Q8WU39}

28871 Pathogen[ P03346] interacts with 2 human partners:{Q7Z2X4;Q8WU39}

28872 Pathogen[ Q85601] interacts with 1 human partners:{Q7Z2X4}

28873 Pathogen[ P14079] interacts with 2 human partners:{Q8WU39;Q7Z2X4}

28874 Pathogen[ P03383] interacts with 1 human partners:{Q8WU39}

28875 Pathogen[ P03410] interacts with 2 human partners:{Q7Z2X4;Q8WU39}

28876 Pathogen[ P14075] interacts with 1 human partners:{Q8WU39}

28877 Pathogen[ P0C206] interacts with 2 human partners:{Q7Z2X4;Q8WU39}

28878 Pathogen[ P03363] interacts with 1 human partners:{Q8WU39}

28879 [Cluster 2626]GO:0032210+P biological\_process [name] regulation of telomere maintenance via telomerase [def] "Any process that modulates the frequency, rate or extent of the addition of telomeric repeats by telomerase." [GOC

28880 Pathogen[ Q2Q067] interacts with 1 human partners:{095271}

28881 Pathogen[ P0C214] interacts with 1 human partners:{095271}

28882 Pathogen[ P03346] interacts with 1 human partners:{095271}

28883 Pathogen[ Q85601] interacts with 1 human partners:{095271}

28884 Pathogen[ P14079] interacts with 1 human partners:{095271}

28885 Pathogen[ P03383] interacts with 1 human partners:{095271}

28886 Pathogen[ P03410] interacts with 1 human partners:{095271}

28887 Pathogen[ P14075] interacts with 1 human partners:{095271}

28888 Pathogen[ P0C206] interacts with 1 human partners:{095271}

28889 Pathogen[ P03363] interacts with 1 human partners:{095271}

28890 [Cluster 2627]GO:0007276+P biological\_process [name] gamete generation [def] "The generation and maintenance of gametes in a multicellular organism. A gamete is a haploid reproductive cell." [GOC

28891 Pathogen[ Q2Q067] interacts with 7 human partners:{Q99865;Q9BPZ2;Q00597;Q9UQR1;Q15797;Q9NW38;Q9BXW9}

28892 Pathogen[ P0C214] interacts with 7 human partners:{Q00597;Q99865;Q9BPZ2;Q9BXW9;Q15797;Q9UQR1;Q9NW38}

28893 Pathogen[ P03346] interacts with 11 human partners:{Q86UU5;Q9Y657;Q9UQR1;Q15797;Q9BPZ2;Q5JT82;Q00597;Q9BXW9;Q9NW38;Q99865;Q8NHV9}

28894 Pathogen[ Q85601] interacts with 6 human partners:{Q9UQR1;Q9BXW9;Q15797;Q00597;Q9BPZ2;Q9NW38}

28895 Pathogen[ P14079] interacts with 12 human partners:{Q9UQR1;Q9BPZ2;Q56A73;Q5TIA1;Q5JUX0;Q00597;Q9BXW9;Q15797;Q86UU5;Q99865;Q9NW38;Q9Y657}

28896 Pathogen[ P03383] interacts with 8 human partners:{Q9UQR1;Q86UU5;Q9BPZ2;Q9BXW9;Q15797;Q00597;Q99865;Q9NW38}

28897 Pathogen[ P03410] interacts with 11 human partners:{Q9BXW9;Q5JUX0;Q9BPZ2;Q99865;Q9UQR1;Q00597;Q15797;Q9Y657;Q9NW38;Q86UU5;Q5TIA1}

28898 Pathogen[ P14075] interacts with 7 human partners:{Q99865;Q9UQR1;Q9BPZ2;Q9NW38;Q86UU5;Q00597;Q9BXW9}

28899 Pathogen[ P0C206] interacts with 9 human partners:{Q99865;Q9BPZ2;Q9UQR1;Q9Y657;Q15797;Q00597;Q86UU5;Q9BXW9;Q9NW38}

28900 Pathogen[ P03363] interacts with 12 human partners:{Q9NW38;Q9BXW9;Q00597;Q9Y657;Q5JT82;Q15797;Q9BPZ2;P19883;Q86UU5;Q9UQR1;Q8NHV9;Q99865}

28901 [Cluster 2628]GO:0006629+P biological\_process [name] lipid metabolic process [def] "The chemical reactions and pathways involving lipids, compounds soluble in an organic solvent but not, or sparingly, in an aqueous solvent. Includes fatty acids\_ neutral fats, other fatty-acid esters, and soaps\_ long-chain (fatty) alcohols and sphingolipids\_ and other long-chain bases\_ glycolipids, phospholipids and sphingolipids\_ and carotenes, polyprenols, sterols, terpenes and other isoprenoids." [GOC

28902 Pathogen[ Q2Q067] interacts with 25 human partners:{Q9H5J4;O60543;P30084;P62140;O00204;P36956;Q8N9A8;Q9BW60;Q96G23;Q9GZR5;Q9UG56;Q92748;Q92539;Q15102;P36873;P62136;Q15185;A1L3X0;Q9HB03;Q9BPX1;O95125;P14324;Q9NPA3;Q16836;Q14693}

28903 Pathogen[ P0C214] interacts with 44 human partners:{Q9HA82;P30084;O75608;Q8N9A8;Q13907;Q9NXB9;P11413;P62140;P35558;Q9BXS1;P53396;O60543;Q9NPA3;O95125;Q9GZR5;P68402;P40939;Q9NPB8;Q9HB03;O14561;Q8TBF2;Q9NYP7;P23786;Q15102;Q13011;Q92539;A1L3X0;Q9BQK8;O00154;Q9BWD1;Q96G23;P62136;Q9BPX1;O00204;P14324;Q9UG56;P10909;P36873;P42765;Q9BW60;Q92748;Q15185;Q06520;Q14693}

28904 Pathogen[ P03346] interacts with 33 human partners:{Q9BW60;P62136;O00204;Q06520;O75608;P36956;Q16836;Q12772;Q9BPX1;Q15185;P23786;Q92748;Q01469;O95125;Q92539;Q15102;Q9BWD1;Q9H5J4;P36873;Q96G23;Q8N9A8;P51161;P14324;Q9HB03;Q99829;O75131;P42765;Q9UG56;P62140;O60543;Q9NPA3;P30084;Q14693}

28905 Pathogen[ Q85601] interacts with 29 human partners:{Q9UG56;A1L3X0;P51161;Q9BPX1;Q12772;O95125;Q9BW60;O60543;P62136;Q9H5J4;P36956;P36873;Q96G23;Q8N9A8;P14324;Q9HB03;Q9NPA3;Q15185;O00204;Q16836;Q9GZR5;Q9BWD1;P62140;Q13907;Q92539;P30084;Q92748;Q15102;Q14693}

28906 Pathogen[ P14079] interacts with 67 human partners: {Q9BXS1;O94830;O14773;Q9Y5U4;Q9NPH2;Q9BQK8;Q9NPB8;Q86VE9;P41238;O95125;Q9NP A3;Q14693;A1L3X0;P25705;Q9NUJ7;P36873;O60543;Q86W33;Q8N8W4;Q02083;Q13907;Q99829;Q8N9 A8;P62136;Q9HA82;Q92748;P30084;Q8NEL9;P10909;Q32NB8;Q9NRX5;P14324;O75608;O95822;Q9HB 03;Q0VD83;Q92539;Q96JX3;Q12772;P27544;Q9UG56;Q8NFR3;Q8NCG7;Q96G23;Q15102;Q9Y478;O145 61;P62140;Q13510;Q15185;Q8TCU4;Q969W0;Q9NZ20;Q9UKR5;Q8TBF2;P53602;Q7Z6Z6;Q99487;Q9GZ R5;Q9Y234;Q01469;Q9BW60;P81277;P36956;Q9H5J4;Q16836;O15503}

28907 Pathogen[ P03383] interacts with 19 human partners: {P62140;O60543;Q9BW60;Q9GZR5;Q9H5J4;Q16836;P36873;P62136;O95125;A1L3X0;Q9HB 03;P14324;Q15185;Q92748;Q8N9A8;Q92539;Q9NPA3;Q14693;Q9BPX1}

28908 Pathogen[ P03410] interacts with 70 human partners: {A1L3X0;Q6IED9;Q9BQK8;Q9NPH2;Q86VE9;P53602;P30084;P36956;P51161;Q9GZR5;Q8NC G7;Q9BPX1;Q02083;P25705;Q86W33;Q9H5J4;O95125;Q13011;P41238;Q9Y5U4;P62136;O00204;Q8TC U4;P27544;P55157;Q99829;P23786;Q92748;Q96G23;Q14693;P42765;Q9NPB8;O00154;Q13510;Q9Y2 34;Q9NRX5;P62140;Q9HA82;O75608;Q12772;Q96JX3;Q9BW60;O14561;Q15185;O94830;P36873;Q9NZ 20;Q16836;Q15102;Q9HB03;Q969W0;Q8N8W4;Q0VD83;Q13907;O60543;Q01469;P81277;Q7Z6Z6;Q8N9 A8;O15503;Q92539;Q8TBF2;Q9UG56;Q9NPA3;O95822;P14324;Q8NEL9;Q8NFR3;P10909;Q9BXS1}

28909 Pathogen[ P14075] interacts with 24 human partners: {Q9H5J4;Q9BW60;Q15102;Q8N9A8;Q02083;Q13510;Q9HB03;P62140;O14561;Q15185;P368 73;Q92748;P62136;A1L3X0;Q92539;Q9NPA3;O60543;Q16836;P14324;Q9GZR5;Q9UG56;Q969W0;O951 25;Q14693}

28910 Pathogen[ P0C206] interacts with 48 human partners: {Q9Y234;Q9NPA3;Q92539;Q96G23;P51161;Q8TCU4;Q9HB03;O75608;Q16836;Q15185;Q8TB F2;P36956;Q8NFR3;Q99829;O95125;P23786;Q9H5J4;O14561;Q9BPX1;P14324;P30084;Q13907;Q9BX S1;Q9HA82;Q969W0;Q9UG56;Q9BQK8;Q15102;O00204;Q02083;P10909;Q9BWD1;Q9NPB8;P62140;Q9GZ R5;O94830;P41238;O60543;Q01469;P36873;Q14693;Q12772;P62136;Q92748;A1L3X0;Q9BW60;Q8NE L9;Q8N9A8}

28911 Pathogen[ P03363] interacts with 22 human partners: {Q16836;Q99829;O60543;P62136;Q9H5J4;P36873;Q8N9A8;Q02083;Q92539;P62140;Q014 69;Q9BWD1;P51161;Q9BPX1;O00204;Q15185;O95125;Q92748;Q96G23;Q9NPA3;Q06520;Q15102}

28912 [Cluster 2629]GO:0000731+P biological\_process [name] DNA synthesis involved in DNA repair [def] "Synthesis of DNA that proceeds from the broken 3' single-strand DNA end uses the homologous intact duplex as the template." [PMID

28913 Pathogen[ Q2Q067] interacts with 3 human partners: {Q9Y253;Q15054;Q96S55}

28914 Pathogen[ P0C214] interacts with 3 human partners: {Q96S55;Q15054;Q9Y253}

28915 Pathogen[ P03346] interacts with 4 human partners: {Q9Y253;P55273;Q96S55;Q15054}

28916 Pathogen[ Q85601] interacts with 4 human partners: {P55273;Q15054;Q96S55;Q9Y253}

28917 Pathogen[ P14079] interacts with 4 human partners: {P55273;Q15054;Q96S55;Q9Y253}

28918 Pathogen[ P03383] interacts with 3 human partners: {Q9Y253;Q96S55;Q15054}

28919 Pathogen[ P03410] interacts with 4 human partners: {P55273;Q96S55;Q9Y253;Q15054}

28920 Pathogen[ P14075] interacts with 3 human partners: {Q9Y253;Q15054;Q96S55}

28921 Pathogen[ P0C206] interacts with 4 human partners: {Q9Y253;Q15054;P55273;Q96S55}

28922 Pathogen[ P03363] interacts with 3 human partners: {Q9Y253;Q96S55;Q15054}

28923 [Cluster 2630]GO:0061099+P biological\_process [name] negative regulation of protein tyrosine kinase activity [def] "Any process that decreases the rate, frequency, or extent of protein tyrosine kinase activity." [GOC

28924 Pathogen[ Q2Q067] interacts with 1 human partners: {O95684}

28925 Pathogen[ P0C214] interacts with 1 human partners: {O95684}

28926 Pathogen[ P03346] interacts with 3 human partners: {O95684;Q9P2D0;Q9C0H9}

28927 Pathogen[ Q85601] interacts with 2 human partners: {O95684;Q9P2D0}

28928 Pathogen[ P14079] interacts with 3 human partners: {O95684;Q9C0H9;Q9P2D0}

28929 Pathogen[ P03383] interacts with 2 human partners: {O95684;Q9C0H9}

28930 Pathogen[ P03410] interacts with 3 human partners: {O95684;Q9C0H9;Q9P2D0}

28931 Pathogen[ P14075] interacts with 2 human partners: {O95684;Q9C0H9}

28932 Pathogen[ P0C206] interacts with 3 human partners: {O95684;Q9C0H9;Q9P2D0}

28933 Pathogen[ P03363] interacts with 3 human partners: {O95684;Q9P2D0;Q9C0H9}

28934 [Cluster 2631]GO:0006334+P biological\_process [name] nucleosome assembly [def] "The aggregation, arrangement and bonding together of a nucleosome, the beadlike structural units of eukaryotic chromatin composed of histones and DNA." [GOC

28935 Pathogen[ Q2Q067] interacts with 31 human partners: {Q9NYP9;Q8N831;Q96H22;Q71F23;Q96NT1;Q13352;Q6IPU0;Q86VY4;Q01105;Q99457;Q9H3 R5;P49450;P06748;Q9ULW6;Q09028;Q92674;O43482;P25440;Q99733;Q96T23;Q8NG31;Q9H0U9;Q9Y2 94;Q9H489;Q9BU64;Q16576;Q8NCD3;Q01534;P55209;Q6P0N0;Q9H2G4}

28936 Pathogen[ P0C214] interacts with 37 human partners: {Q6P0N0;P06748;P0CW01;Q99457;Q6IPU0;Q9H489;P0CV99;Q01105;Q09028;Q01534;P494 50;Q9UJ04;Q8NCD3;O43482;Q92674;Q8N831;Q9NYP9;P25440;Q13352;A6NFF2;Q16576;P0CW00;O602 64;Q9H2G4;Q9Y294;Q9H3R5;Q96NT1;Q8NG31;Q96T23;Q9H0U9;Q86VY4;Q71F23;Q99733;Q9ULW6;Q9BU 64;P0CV98;A6NKD2}

28937 Pathogen[ P03346] interacts with 40 human partners: {Q01534;Q7L2Z9;Q8WYB5;P06748;Q9BS16;Q92674;Q9UJ04;Q01105;Q99733;Q99457;Q9H2 G4;O43482;Q6P0N0;P25440;Q8NCD3;Q92794;Q86VY4;O60264;Q09028;Q16695;Q96T23;Q16576;Q9H0 U9;Q8N831;Q9BU64;P10412;P49450;Q6IPU0;Q9H489;Q96NT1;Q8NG31;Q9NYP9;P55209;Q9H3R5;Q9Y2 94;Q96H22;Q9ULW6;Q71F23;Q13352;A6NFF2}

28938 Pathogen[ Q85601] interacts with 37 human partners: {A6NFF2;Q99733;Q96NT1;Q9H489;Q96T23;Q9Y294;Q01105;P0CW01;Q99457;Q01534;Q71F 23;Q8NG31;P0CV98;Q9H3R5;P0CW00;Q8NCD3;Q92674;Q86VY4;Q8N831;Q13352;Q9UJ04;Q9NYP9;Q9BU

64;Q16576;P49450;P06748;Q09028;A6NKD2;P25440;Q9H2G4;O60264;P0CV99;P55209;Q9H0U9;Q6P0  
NO;O43482;Q9ULW6}

28939 Pathogen[ P14079] interacts with 38 human  
partners: {Q9H0U9;Q6P0N0;Q8N831;Q01105;Q96T23;P10412;O43482;Q01534;Q8IZA3;Q99733;Q8NG  
31;Q6IPU0;A6NFF2;Q16576;Q96NT1;Q71F23;P55209;Q9H2G4;P49450;Q96H22;O60264;Q9NYP9;P067  
48;Q9H3R5;Q9UJ04;P25440;Q8NCD3;Q92674;Q9BU64;Q86VY4;Q9Y294;Q09028;Q9H489;Q13352;Q7L2  
Z9;Q9ULW6;P07305;Q99457}

28940 Pathogen[ P03383] interacts with 30 human  
partners: {Q09028;Q01105;Q6IPU0;P06748;Q86VY4;P25440;Q96NT1;Q99457;Q9NYP9;Q96H22;Q96T  
23;Q13352;P55209;Q71F23;Q8N831;Q99733;Q9BU64;Q9H489;Q9Y294;Q9H0U9;Q9H2G4;Q8NCD3;Q8NG  
31;Q01534;Q6P0N0;Q92674;Q9H3R5;O43482;Q16576;Q9ULW6}

28941 Pathogen[ P03410] interacts with 36 human  
partners: {Q99457;Q99733;Q9H3R5;Q96T23;Q96H22;Q9H0U9;Q9UJ04;Q8NG31;Q6IPU0;Q01534;Q9NY  
P9;P10412;Q92674;Q01105;P06748;Q6P0N0;Q8NCD3;Q16576;Q8N831;Q09028;Q9H489;Q9Y294;O434  
82;Q86VY4;Q71F23;P49450;P55209;O60264;Q9H2G4;Q9ULW6;A6NFF2;Q96NT1;Q13352;Q7L2Z9;Q9BU  
64;P25440}

28942 Pathogen[ P14075] interacts with 29 human  
partners: {Q16576;Q6IPU0;P25440;Q92674;Q99457;Q96H22;Q01105;Q9H2G4;P55209;Q9H3R5;Q090  
28;Q9BU64;Q99733;Q9NYP9;Q01534;P06748;Q9H0U9;Q8N831;Q8NCD3;Q96T23;Q9Y294;Q86VY4;Q133  
52;Q8NG31;O43482;Q6P0N0;Q71F23;Q96NT1;Q9ULW6}

28943 Pathogen[ P0C206] interacts with 41 human  
partners: {Q96NT1;Q99733;Q6IPU0;A6NFF2;Q7L2Z9;Q86VY4;Q9NYP9;Q96T23;P0CV98;Q9BU64;Q015  
34;Q92674;A6NKD2;Q99457;Q9H3R5;Q9ULW6;P49450;Q8NCD3;Q13352;Q9UJ04;O43482;Q9H2G4;Q6P0  
NO;P55209;Q9H489;P25440;Q9H0U9;Q96H22;Q9Y294;Q16576;P10412;Q09028;P0CW01;Q8N831;P067  
48;Q71F23;Q01105;Q8NG31;P0CW00;P0CV99;O60264}

28944 Pathogen[ P03363] interacts with 34 human  
partners: {A6NFF2;Q8IZA3;Q6P0N0;Q9NYP9;Q92674;Q9UJ04;Q09028;Q99733;Q9Y294;Q16695;Q96N  
T1;P06748;Q9H489;O60264;Q96T23;Q9H0U9;Q99457;Q16576;P49450;Q9H2G4;P55209;Q86VY4;P104  
12;Q8NG31;Q8NCD3;Q71F23;Q01534;P25440;Q9H3R5;O43482;Q01105;Q13352;Q9ULW6;Q8N831}

28945 [Cluster 2632]GO:0035115+P biological\_process [name] embryonic forelimb morphogenesis  
[def] "The process, occurring in the embryo, by which the anatomical structures of the  
forelimb are generated and organized. The forelimbs are the front limbs of an animal."  
[ISBN

28946 Pathogen[ Q2Q067] interacts with 3 human partners: {P28356;P35548;Q03112}

28947 Pathogen[ P0C214] interacts with 3 human partners: {Q03112;Q9NW07;P35548}

28948 Pathogen[ P03346] interacts with 10 human  
partners: {P31271;P29373;Q05925;P35548;Q9NW07;Q68CZ1;O95076;Q03112;P28356;Q99593}

28949 Pathogen[ Q85601] interacts with 4 human partners: {Q03112;Q9NW07;P35548;P31271}

28950 Pathogen[ P14079] interacts with 4 human partners: {Q68CZ1;P31271;P28360;Q9NW07}

28951 Pathogen[ P03383] interacts with 2 human partners: {Q03112;P35548}

28952 Pathogen[ P03410] interacts with 4 human partners: {Q03112;P35548;Q9NW07;Q68CZ1}

28953 Pathogen[ P14075] interacts with 2 human partners: {P35548;Q03112}

28954 Pathogen[ P0C206] interacts with 6 human  
partners: {Q9NW07;P29373;Q03112;P35548;P31271;P28356}

28955 Pathogen[ P03363] interacts with 8 human  
partners: {Q03112;P28356;P31271;Q9NW07;P35548;P29373;Q05925;O95076}

28956 [Cluster 2633]GO:0046716+P biological\_process [name] muscle cell homeostasis [def]  
"The cellular homeostatic process that preserves a muscle cell in a stable functional or  
structural state." [GOC

28957 Pathogen[ Q2Q067] interacts with 2 human partners: {P11831;P11532}

28958 Pathogen[ P0C214] interacts with 2 human partners: {P11831;P11532}

28959 Pathogen[ P03346] interacts with 2 human partners: {P11831;P11532}

28960 Pathogen[ Q85601] interacts with 2 human partners: {P11831;P11532}

28961 Pathogen[ P14079] interacts with 3 human partners: {P11532;P16298;Q96LD1}

28962 Pathogen[ P03383] interacts with 2 human partners: {P11831;P11532}

28963 Pathogen[ P03410] interacts with 3 human partners: {P11831;P11532;Q96LD1}

28964 Pathogen[ P14075] interacts with 2 human partners: {P11532;P11831}

28965 Pathogen[ P0C206] interacts with 2 human partners: {P11831;P11532}

28966 Pathogen[ P03363] interacts with 2 human partners: {P11831;P11532}

28967 [Cluster 2634]GO:0034599+P biological\_process [name] cellular response to oxidative  
stress [def] "Any process that results in a change in state or activity of a cell (in  
terms of movement, secretion, enzyme production, gene expression, etc.) as a result of  
oxidative stress, a state often resulting from exposure to high levels of reactive  
oxygen species, e.g. superoxide anions, hydrogen peroxide (H2O2), and hydroxyl  
radicals." [GOC

28968 Pathogen[ Q2Q067] interacts with 7 human  
partners: {Q8TCS8;Q16236;Q99497;P41161;Q6IQ32;P16455;Q9BQE4}

28969 Pathogen[ P0C214] interacts with 9 human  
partners: {Q6IQ32;P11413;Q99497;Q99807;Q8TCS8;P16455;Q9BQE4;P41161;Q16236}

28970 Pathogen[ P03346] interacts with 6 human  
partners: {P41161;Q16236;Q8TCS8;Q6IQ32;Q12778;Q99497}

28971 Pathogen[ Q85601] interacts with 7 human  
partners: {Q99497;Q16236;P16455;Q6IQ32;Q8TCS8;P41161;Q9BQE4}

28972 Pathogen[ P14079] interacts with 8 human  
partners: {Q99807;Q9BQE4;Q99497;P16455;P41161;Q16236;Q6IQ32;Q8TCS8}

28973 Pathogen[ P03383] interacts with 5 human

28974 partners:{Q8TCS8;Q6IQ32;P41161;Q9BQE4;Q16236}  
Pathogen[ P03410] interacts with 8 human

28975 partners:{Q8TCS8;Q99497;Q16236;Q9BQE4;P41161;Q6IQ32;P16455;Q99807}  
28976 Pathogen[ P14075] interacts with 4 human partners:{Q9BQE4;Q6IQ32;Q8TCS8;Q16236}  
28977 Pathogen[ P0C206] interacts with 8 human  
28977 partners:{Q8TCS8;Q99497;Q9BQE4;Q6IQ32;Q99807;Q16236;P41161;P16455}  
28978 Pathogen[ P03363] interacts with 3 human partners:{Q16236;P41161;Q6IQ32}  
28978 [Cluster 2635]GO:0007050+P biological\_process [name] cell cycle arrest [def] "A regulatory process that halts progression through the cell cycle during one of the normal phases (G1, S, G2, M)." [GOC

28979 Pathogen[ Q2Q067] interacts with 57 human  
partners:{P04156;Q9UM63;O43290;Q9NNW5;O00213;Q93034;P42773;Q8IZD2;Q9UQ80;P06400;P01106;Q99816;O75807;O75794;Q92870;P58004;Q9UNL4;O15350;P35638;O14896;O15355;Q8N726;P58005;P58340;P27797;P24522;Q9Y5P8;Q9Y6P5;Q99728;Q92831;Q07666;O60934;P84022;P10914;O00255;P78344;Q96Q89;Q13616;P50613;P38936;Q13618;P12757;P35813;Q13619;Q3YBR2;P42771;Q9NS23;Q8IXT1;P46527;Q9GZQ3;P49918;Q13617;P42772;Q8N9B5;O60477;Q00534;Q96A56}

28980 Pathogen[ P0C214] interacts with 57 human  
partners:{Q9Y6P5;O00213;Q13619;Q13617;P35813;Q969Z0;P24522;Q99728;Q9Y376;P12757;Q9NS23;P50613;O15350;O75807;P84022;P46527;P78344;Q9UNL4;P10914;Q13618;Q93034;Q9GZQ3;Q8N726;O60477;O75794;P38936;Q00534;Q96Q89;Q8IXT1;Q07666;P49918;O14896;P42771;O60381;Q13616;Q3YBR2;P42773;Q99816;Q8N9B5;Q92831;P58340;P04156;P27797;O43290;Q96A56;Q9Y5P8;Q9NNW5;Q9UM63;Q9UQ80;P01106;P06400;O00255;Q92870;P42772;P35638;P58004;Q8IZD2}

28981 Pathogen[ P03346] interacts with 61 human  
partners:{O00213;P35813;O43290;P55273;Q8N9B5;Q13616;Q9UNL4;P12757;P35638;Q9UQ80;P06400;Q99728;Q96A56;P42772;Q13618;P78344;Q99816;P58340;Q92831;O15350;P49918;Q9UM63;P42771;Q9Y376;Q93034;Q92870;Q9Y5P8;P01106;Q07666;P84022;Q16667;O60381;O00255;O60477;P10914;Q3YBR2;O14896;Q96Q89;P98177;P42773;P27797;O60934;Q13619;P04156;O15355;Q00534;Q8IXT1;P38936;Q9Y6P5;Q8N726;P46527;Q9GZQ3;Q9NS23;O75807;Q8IZD2;P58005;P58004;P24522;Q9NNW5;O75794;Q13617}

28982 Pathogen[ Q85601] interacts with 58 human  
partners:{Q3YBR2;P01106;Q99816;O00213;O14896;P55273;Q07666;Q9UQ80;P06400;P42772;Q9Y6P5;Q969Z0;Q9NY30;P12757;Q99728;O75794;Q13616;Q9UNL4;P24522;Q9Y376;Q9GZQ3;P27797;Q92831;Q9NS23;P10914;Q9NNW5;Q96Q89;O15355;Q8N726;P58340;Q9UM63;O00255;P42771;P78344;P50613;O43290;Q96A56;P42773;P84022;P49918;Q92870;P04156;O15350;P38936;Q00534;Q13618;P35813;O75807;Q13619;Q8N9B5;Q8IZD2;Q93034;Q9Y5P8;P46527;P35638;O60934;Q13617;O60381}

28983 Pathogen[ P14079] interacts with 61 human  
partners:{Q96A56;Q96DY7;O60381;Q9NS23;Q9GZQ3;P52564;O14896;Q8N9B5;P04156;Q13618;Q9UNL4;P58005;O75807;Q8N726;O00213;O60934;P49918;O15350;O43290;P55273;O60477;P78344;P35813;Q9Y6P5;Q8IXT1;P50613;P54826;Q96Q89;Q07666;P38936;Q93034;Q9Y478;Q9NS64;P24522;Q9NY30;Q43903;Q969Z0;P35638;P01106;P58004;Q13617;Q3YBR2;Q9NNW5;P29459;P46527;P12757;P42773;Q13616;Q9Y5P8;O75794;Q99816;Q9UM63;O15355;Q9UQ80;O00255;Q9Y376;Q13619;P10914;P58340;Q92870;P42771}

28984 Pathogen[ P03383] interacts with 49 human  
partners:{Q13616;O00213;P10914;Q92831;Q8IXT1;O75794;Q96A56;O43290;P04156;P58340;P01106;Q93034;P24522;P35638;Q99816;Q9UNL4;Q9GZQ3;Q00534;P35813;P06400;Q13618;Q92870;Q969Z0;Q9Y5P8;P84022;P50613;P42772;O14896;P46527;O15350;Q96Q89;O00255;Q07666;P78344;O15355;P58004;P42771;Q13617;Q9UQ80;P49918;Q8N9B5;Q9UM63;P12757;O75807;Q3YBR2;Q9NNW5;O60477;Q8N726;P27797}

28985 Pathogen[ P03410] interacts with 65 human  
partners:{P84022;Q92831;Q96DY7;P42771;Q96Q89;P46527;O75794;O15355;P35638;P35813;O43903;O14896;Q00534;P42772;Q8N726;P01106;Q9NY30;Q9UQ80;P24522;Q9UNL4;P55273;Q9NS23;Q9NS64;O00213;P06400;P50613;Q07666;O60381;P58340;Q99816;Q13618;Q9Y6P5;P38936;Q9Y376;Q3YBR2;P10914;Q8IXT1;Q9UM63;P04156;P12757;O75807;P54826;P58005;Q13616;Q8N9B5;Q96A56;Q13619;O15350;Q13617;P49918;P58004;O43290;O60477;Q9GZQ3;O00255;Q969Z0;P42773;Q93034;O60934;P29459;P78344;Q9Y5P8;Q9NNW5;P27797;Q92870}

28986 Pathogen[ P14075] interacts with 54 human  
partners:{Q9Y5P8;O00213;P35813;Q8IXT1;Q9UM63;Q969Z0;Q93034;Q13618;Q92831;Q07666;Q96DY7;P50613;Q9NS64;Q00534;P78344;P42771;P04156;Q92870;P35638;Q9GZQ3;O75794;P58004;P01106;P46527;Q3YBR2;P12757;O00255;P58005;P49918;O15350;P27797;O75807;P06400;O14896;Q9UQ80;O60477;Q9Y6P5;Q9UNL4;P24522;P42772;P84022;Q99816;Q13616;P10914;O43290;Q9NNW5;Q13617;O15355;Q96Q89;Q8N9B5;P54826;Q96A56;Q8N726;P58340}

28987 Pathogen[ P0C206] interacts with 65 human  
partners:{P84022;P10914;P58340;P27797;O75794;Q96Q89;Q9GZQ3;P24522;Q8N726;P04156;Q9NY30;O75807;O60934;O60477;O00255;Q9NS64;Q9UM63;Q8IXT1;P42771;P42772;Q99816;P58004;Q9Y376;Q07666;Q13616;Q96A56;Q92831;Q9NNW5;Q8N9B5;O43290;O15355;P42773;O00213;Q13619;Q13617;P50613;Q13618;P12757;Q969Z0;Q99728;P55273;P46527;Q92870;P38936;O60381;O14896;P78344;O15350;P01106;Q9UQ80;Q9Y6P5;Q93034;Q9NS23;P54826;Q3YBR2;P58005;Q9Y5P8;P35638;Q9UNL4;Q8IZD2;P35813;Q00534;P06400;Q96DY7;P49918}

28988 Pathogen[ P03363] interacts with 53 human  
partners:{Q3YBR2;P49918;Q9Y5P8;Q07666;O15355;O14896;P58004;O75794;P58340;Q92831;P12757;O00213;Q9GZQ3;Q13618;Q16667;Q13617;Q8NHY3;P04156;Q9UM63;O60381;P06400;P01106;Q9UQ80;Q9UNL4;Q00534;Q13619;Q96A56;Q13616;P42772;P27797;Q92870;O60477;P84022;P24522;O43290;P35638;P10914;Q9Y6P5;O75807;Q9Y376;Q9NS23;Q8N726;Q99816;Q96Q89;P58005;Q93034;Q99728;P42773;P78344;Q8N9B5;P42771;Q9NNW5;Q8IXT1}

28989 [Cluster 2636]GO:0002361+P biological\_process [name] CD4-positive, CD25-positive, alpha-beta regulatory T cell differentiation [def] "The process in which a precursor

cell type acquires the specialized features of a CD4-positive, CD25-positive, alpha-beta regulatory T cell." [GOC

28990 Pathogen[ Q2Q067] interacts with 1 human partners:{075376}

28991 Pathogen[ P0C214] interacts with 1 human partners:{075376}

28992 Pathogen[ P03346] interacts with 1 human partners:{075376}

28993 Pathogen[ Q85601] interacts with 1 human partners:{075376}

28994 Pathogen[ P14079] interacts with 1 human partners:{075376}

28995 Pathogen[ P03383] interacts with 1 human partners:{075376}

28996 Pathogen[ P03410] interacts with 1 human partners:{075376}

28997 Pathogen[ P14075] interacts with 1 human partners:{075376}

28998 Pathogen[ P0C206] interacts with 1 human partners:{075376}

28999 Pathogen[ P03363] interacts with 1 human partners:{075376}

29000 [Cluster 2637]GO:0019432+P biological\_process [name] triglyceride biosynthetic process [def] "The chemical reactions and pathways resulting in the formation of a triglyceride, any triester of glycerol." [ISBN

29001 Pathogen[ Q2Q067] interacts with 8 human partners:{Q9H5J4;P32189;Q9BW60;Q9GZR5;Q92539;A1L3X0;Q9HB03;Q14693}

29002 Pathogen[ P0C214] interacts with 12 human partners:{Q9NXB9;Q8N335;P53396;Q9GZR5;P32189;Q9HB03;Q9NYP7;Q92539;A1L3X0;Q9BW60;Q14693;P21695}

29003 Pathogen[ P03346] interacts with 6 human partners:{Q9BW60;Q92539;Q9H5J4;Q9HB03;P32189;Q14693}

29004 Pathogen[ Q85601] interacts with 8 human partners:{A1L3X0;P32189;Q9BW60;Q9H5J4;Q9HB03;Q9GZR5;Q92539;Q14693}

29005 Pathogen[ P14079] interacts with 9 human partners:{Q14693;A1L3X0;P32189;Q9HB03;Q92539;Q9GZR5;P21695;Q9BW60;Q9H5J4}

29006 Pathogen[ P03383] interacts with 8 human partners:{Q9BW60;Q9GZR5;Q9H5J4;A1L3X0;Q9HB03;P32189;Q92539;Q14693}

29007 Pathogen[ P03410] interacts with 9 human partners:{A1L3X0;Q9GZR5;Q9H5J4;Q14693;Q9BW60;Q9HB03;P32189;Q92539;P21695}

29008 Pathogen[ P14075] interacts with 8 human partners:{Q9H5J4;Q9BW60;P32189;Q9HB03;A1L3X0;Q92539;Q9GZR5;Q14693}

29009 Pathogen[ P0C206] interacts with 8 human partners:{Q92539;Q9HB03;P32189;Q9H5J4;Q9GZR5;Q14693;A1L3X0;Q9BW60}

29010 Pathogen[ P03363] interacts with 2 human partners:{Q9H5J4;Q92539}

29011 [Cluster 2638]GO:0051246+P biological\_process [name] regulation of protein metabolic process [def] "Any process that modulates the frequency, rate or extent of the chemical reactions and pathways involving a protein." [GOC

29012 Pathogen[ Q2Q067] interacts with 3 human partners:{Q13619;Q9HC62;P60953}

29013 Pathogen[ P0C214] interacts with 3 human partners:{Q13619;P60953;Q9HC62}

29014 Pathogen[ P03346] interacts with 3 human partners:{P60953;Q9HC62;Q13619}

29015 Pathogen[ Q85601] interacts with 3 human partners:{Q9HC62;P60953;Q13619}

29016 Pathogen[ P14079] interacts with 2 human partners:{Q9HC62;Q13619}

29017 Pathogen[ P03383] interacts with 2 human partners:{P60953;Q9HC62}

29018 Pathogen[ P03410] interacts with 3 human partners:{Q9HC62;P60953;Q13619}

29019 Pathogen[ P14075] interacts with 2 human partners:{P60953;Q9HC62}

29020 Pathogen[ P0C206] interacts with 3 human partners:{Q9HC62;Q13619;P60953}

29021 Pathogen[ P03363] interacts with 3 human partners:{Q13619;Q9HC62;P60953}

29022 [Cluster 2639]GO:0051974+P biological\_process [name] negative regulation of telomerase activity [def] "Any process that stops or reduces the activity of the enzyme telomerase, which catalyzes of the reaction

29023 Pathogen[ Q2Q067] interacts with 3 human partners:{P54274;O00255;Q96BK5}

29024 Pathogen[ P0C214] interacts with 3 human partners:{Q96BK5;O00255;P54274}

29025 Pathogen[ P03346] interacts with 4 human partners:{P54274;O00255;Q9NUX5;Q96BK5}

29026 Pathogen[ Q85601] interacts with 3 human partners:{Q96BK5;O00255;P54274}

29027 Pathogen[ P14079] interacts with 4 human partners:{P54274;Q9NUX5;Q96BK5;O00255}

29028 Pathogen[ P03383] interacts with 3 human partners:{Q96BK5;O00255;P54274}

29029 Pathogen[ P03410] interacts with 4 human partners:{Q9NUX5;P54274;Q96BK5;O00255}

29030 Pathogen[ P14075] interacts with 3 human partners:{Q96BK5;O00255;P54274}

29031 Pathogen[ P0C206] interacts with 4 human partners:{O00255;Q96BK5;P54274;Q9NUX5}

29032 Pathogen[ P03363] interacts with 3 human partners:{Q96BK5;P54274;Q9NUX5}

29033 [Cluster 2640]GO:0034644+P biological\_process [name] cellular response to UV [def] "Any process that results in a change in state or activity of a cell (in terms of movement, secretion, enzyme production, gene expression, etc.) as a result of an ultraviolet radiation (UV light) stimulus. Ultraviolet radiation is electromagnetic radiation with a wavelength in the range of 10 to 380 nanometers." [GOC

29034 Pathogen[ Q2Q067] interacts with 10 human partners:{P25490;P01106;Q9Y3T9;O15350;Q14934;P30304;Q9BSD3;Q969H0;Q9ULG1;P27986}

29035 Pathogen[ P0C214] interacts with 9 human partners:{Q9Y3T9;O15350;Q9ULG1;Q14934;Q969H0;Q9BSD3;P30304;P27986;P01106}

29036 Pathogen[ P03346] interacts with 10 human partners:{Q9BSD3;Q9ULG1;P25490;P30304;O15350;Q14934;P01106;Q9Y3T9;Q969H0;P27986}

29037 Pathogen[ Q85601] interacts with 9 human partners:{P01106;Q969H0;P25490;P30304;P27986;Q14934;Q9ULG1;Q9Y3T9;O15350}

29038 Pathogen[ P14079] interacts with 9 human partners:{Q9ULG1;Q969H0;Q9BSD3;P30304;O15350;Q9Y3T9;Q14934;P01106;P25490}

29039 Pathogen[ P03383] interacts with 8 human partners:{P27986;P01106;P30304;Q9Y3T9;Q14934;O15350;Q969H0;Q9BSD3}

29040 Pathogen[ P03410] interacts with 10 human partners:{P27986;Q9BSD3;P01106;Q9ULG1;Q9Y3T9;P25490;Q969H0;P30304;O15350;Q14934}

29041 Pathogen[ P14075] interacts with 8 human partners:{P01106;O15350;Q14934;P27986;P30304;Q9Y3T9;Q9BSD3;Q969H0}

29042 Pathogen[ P0C206] interacts with 10 human partners:{P25490;Q969H0;P27986;Q9ULG1;Q14934;P30304;O15350;P01106;Q9Y3T9;Q9BSD3}

29043 Pathogen[ P03363] interacts with 9 human partners:{Q9BSD3;Q9ULG1;P25490;P01106;P30304;Q969H0;Q9Y3T9;Q14934;P27986}

29044 [Cluster 2641]GO:0030220+P biological\_process [name] platelet formation [def] "The process in which platelets bud from long processes extended by megakaryocytes." [GOC

29045 Pathogen[ Q2Q067] interacts with 4 human partners:{P15976;P11831;Q8IX07;P35579}

29046 Pathogen[ P0C214] interacts with 2 human partners:{P11831;Q8IX07}

29047 Pathogen[ P03346] interacts with 6 human partners:{P11831;P35579;P17542;P15976;Q96AX1;Q8IX07}

29048 Pathogen[ Q85601] interacts with 4 human partners:{P11831;P15976;P35579;Q8IX07}

29049 Pathogen[ P14079] interacts with 5 human partners:{P35579;Q06413;P15976;Q96AX1;Q8IX07}

29050 Pathogen[ P03383] interacts with 2 human partners:{P11831;P35579}

29051 Pathogen[ P03410] interacts with 5 human partners:{P11831;P35579;Q8IX07;P15976;Q96AX1}

29052 Pathogen[ P14075] interacts with 2 human partners:{P11831;P35579}

29053 Pathogen[ P0C206] interacts with 5 human partners:{P15976;Q96AX1;P35579;P11831;Q8IX07}

29054 Pathogen[ P03363] interacts with 2 human partners:{P35579;P11831}

29055 [Cluster 2642]GO:0070584+P biological\_process [name] mitochondrion morphogenesis [def] "The process in which the anatomical structures of a mitochondrion are generated and organized." [GOC

29056 Pathogen[ Q2Q067] interacts with 4 human partners:{Q8TCS8;Q9GZY8;Q7Z2X4;Q04837}

29057 Pathogen[ P0C214] interacts with 5 human partners:{Q7Z2X4;Q99807;Q8TCS8;Q04837;Q9GZY8}

29058 Pathogen[ P03346] interacts with 4 human partners:{Q7Z2X4;Q8TCS8;Q04837;Q9GZY8}

29059 Pathogen[ Q85601] interacts with 4 human partners:{Q7Z2X4;Q8TCS8;Q04837;Q9GZY8}

29060 Pathogen[ P14079] interacts with 5 human partners:{Q04837;Q99807;Q9GZY8;Q7Z2X4;Q8TCS8}

29061 Pathogen[ P03383] interacts with 3 human partners:{Q8TCS8;Q04837;Q9GZY8}

29062 Pathogen[ P03410] interacts with 5 human partners:{Q8TCS8;Q9GZY8;Q04837;Q7Z2X4;Q99807}

29063 Pathogen[ P14075] interacts with 3 human partners:{Q9GZY8;Q8TCS8;Q04837}

29064 Pathogen[ P0C206] interacts with 5 human partners:{Q7Z2X4;Q8TCS8;Q99807;Q04837;Q9GZY8}

29065 Pathogen[ P03363] interacts with 2 human partners:{Q04837;Q9GZY8}

29066 [Cluster 2643]GO:0007258+P biological\_process [name] JUN phosphorylation [def] "The process of introducing a phosphate group into a JUN protein." [GOC

29067 Pathogen[ Q2Q067] interacts with 2 human partners:{Q9UQF2;P45984}

29068 Pathogen[ P0C214] interacts with 2 human partners:{Q9UQF2;P45984}

29069 Pathogen[ P03346] interacts with 2 human partners:{P45984;Q9UQF2}

29070 Pathogen[ Q85601] interacts with 2 human partners:{Q9UQF2;P45984}

29071 Pathogen[ P14079] interacts with 4 human partners:{P53779;Q9UQF2;P45984;P45983}

29072 Pathogen[ P03383] interacts with 2 human partners:{Q9UQF2;P45984}

29073 Pathogen[ P03410] interacts with 3 human partners:{P45984;P53779;Q9UQF2}

29074 Pathogen[ P14075] interacts with 2 human partners:{Q9UQF2;P45984}

29075 Pathogen[ P0C206] interacts with 2 human partners:{P45984;Q9UQF2}

29076 Pathogen[ P03363] interacts with 1 human partners:{Q9UQF2}

29077 [Cluster 2644]GO:0021702+P biological\_process [name] cerebellar Purkinje cell differentiation [def] "The process in which neuroblasts acquire specialized structural and/or functional features that characterize the mature cerebellar Purkinje cell. Differentiation includes the processes involved in commitment of a neuroblast to a Purkinje cell fate. A Purkinje cell is an inhibitory GABAergic neuron found in the cerebellar cortex that projects to the deep cerebellar nuclei and brain stem." [GO\_REF

29078 Pathogen[ Q2Q067] interacts with 2 human partners:{Q99700;Q86U70}

29079 Pathogen[ P0C214] interacts with 2 human partners:{Q99700;Q86U70}

29080 Pathogen[ P03346] interacts with 4 human partners:{Q86U70;Q99700;Q9H2C1;P35398}

29081 Pathogen[ Q85601] interacts with 2 human partners:{Q86U70;Q99700}

29082 Pathogen[ P14079] interacts with 4 human partners:{P35398;Q99700;Q86U70;Q9UPW5}

29083 Pathogen[ P03383] interacts with 2 human partners:{Q86U70;Q99700}

29084 Pathogen[ P03410] interacts with 3 human partners:{Q99700;Q9UPW5;Q86U70}

29085 Pathogen[ P14075] interacts with 2 human partners:{Q86U70;Q99700}

29086 Pathogen[ P0C206] interacts with 5 human partners:{P35398;Q99700;Q9H2C1;Q86U70;Q9UPW5}

29087 Pathogen[ P03363] interacts with 3 human partners:{Q86U70;P35398;Q99700}

29088 [Cluster 2645]GO:0002011+P biological\_process [name] morphogenesis of an epithelial sheet [def] "The process in which the anatomical structures of an epithelial sheet are generated and organized. An epithelial sheet is a flat surface consisting of closely packed epithelial cells." [GOC



29089 Pathogen[ Q2Q067] interacts with 4 human partners:{P17483;P11831;P14652;O15111}

29090 Pathogen[ POC214] interacts with 2 human partners:{O15111;P11831}

29091 Pathogen[ P03346] interacts with 4 human partners:{O15111;P11831;P14652;P17483}

29092 Pathogen[ Q85601] interacts with 2 human partners:{P11831;O15111}

29093 Pathogen[ P14079] interacts with 1 human partners:{Q14118}

29094 Pathogen[ P03383] interacts with 2 human partners:{P11831;O15111}

29095 Pathogen[ P03410] interacts with 3 human partners:{P11831;O15111;Q14118}

29096 Pathogen[ P14075] interacts with 2 human partners:{O15111;P11831}

29097 Pathogen[ POC206] interacts with 4 human partners:{P17483;P14652;O15111;P11831}

29098 Pathogen[ P03363] interacts with 4 human partners:{O15111;P17483;P11831;P14652}

29099 [Cluster 2646]GO:0032332+P biological\_process [name] positive regulation of chondrocyte differentiation [def] "Any process that activates or increases the frequency, rate or extent of chondrocyte differentiation." [GOC

29100 Pathogen[ Q2Q067] interacts with 5 human partners:{P35712;Q05516;Q04206;P84022;P35711}

29101 Pathogen[ POC214] interacts with 5 human partners:{P35711;P84022;Q04206;P35712;Q05516}

29102 Pathogen[ P03346] interacts with 6 human partners:{P31270;Q04206;P84022;Q05516;P35712;P35711}

29103 Pathogen[ Q85601] interacts with 5 human partners:{P35712;P35711;Q04206;Q05516;P84022}

29104 Pathogen[ P14079] interacts with 3 human partners:{P35711;P35712;Q05516}

29105 Pathogen[ P03383] interacts with 5 human partners:{P35712;Q05516;P84022;P35711;Q04206}

29106 Pathogen[ P03410] interacts with 3 human partners:{P84022;Q04206;P35712}

29107 Pathogen[ P14075] interacts with 5 human partners:{Q04206;P35711;P35712;Q05516;P84022}

29108 Pathogen[ POC206] interacts with 5 human partners:{P84022;Q05516;P35711;Q04206;P35712}

29109 Pathogen[ P03363] interacts with 5 human partners:{P35711;Q04206;P84022;P35712;Q05516}

29110 [Cluster 2647]GO:0097067+P biological\_process [name] cellular response to thyroid hormone stimulus [def] "A change in state or activity of a cell (in terms of movement, secretion, enzyme production, gene expression, etc.) as a result of a thyroid hormone stimulus." [GOC

29111 Pathogen[ Q2Q067] interacts with 2 human partners:{P15976;P25791}

29112 Pathogen[ POC214] interacts with 1 human partners:{P25791}

29113 Pathogen[ P03346] interacts with 3 human partners:{Q13886;P25791;P15976}

29114 Pathogen[ Q85601] interacts with 2 human partners:{P15976;P25791}

29115 Pathogen[ P14079] interacts with 2 human partners:{P15976;P25791}

29116 Pathogen[ P03383] interacts with 1 human partners:{P25791}

29117 Pathogen[ P03410] interacts with 2 human partners:{P25791;P15976}

29118 Pathogen[ P14075] interacts with 1 human partners:{P25791}

29119 Pathogen[ POC206] interacts with 2 human partners:{P15976;P25791}

29120 Pathogen[ P03363] interacts with 1 human partners:{P25791}

29121 [Cluster 2648]GO:0030595+P biological\_process [name] leukocyte chemotaxis [def] "The movement of a leukocyte in response to an external stimulus." [GOC

29122 Pathogen[ Q2Q067] interacts with 2 human partners:{Q8IVG9;Q9Y3A5}

29123 Pathogen[ POC214] interacts with 2 human partners:{Q99698;Q9Y3A5}

29124 Pathogen[ P03346] interacts with 3 human partners:{Q99698;Q8IVG9;Q9Y3A5}

29125 Pathogen[ Q85601] interacts with 2 human partners:{Q9Y3A5;Q99698}

29126 Pathogen[ P14079] interacts with 3 human partners:{Q8IVG9;Q9Y3A5;Q99698}

29127 Pathogen[ P03383] interacts with 2 human partners:{Q9Y3A5;Q8IVG9}

29128 Pathogen[ P03410] interacts with 3 human partners:{Q8IVG9;Q99698;Q9Y3A5}

29129 Pathogen[ P14075] interacts with 2 human partners:{Q8IVG9;Q9Y3A5}

29130 Pathogen[ POC206] interacts with 3 human partners:{Q99698;Q8IVG9;Q9Y3A5}

29131 Pathogen[ P03363] interacts with 3 human partners:{Q9Y3A5;Q99698;Q8IVG9}

29132 [Cluster 2649]GO:0000733+P biological\_process [name] DNA strand renaturation [def] "The identification and annealing of complementary base pairs in single-strand DNA." [GOC

29133 Pathogen[ Q2Q067] interacts with 1 human partners:{P28370}

29134 Pathogen[ POC214] interacts with 2 human partners:{Q92698;P28370}

29135 Pathogen[ P03346] interacts with 3 human partners:{P46063;Q92698;P28370}

29136 Pathogen[ Q85601] interacts with 2 human partners:{Q92698;P28370}

29137 Pathogen[ P14079] interacts with 2 human partners:{P28370;Q92698}

29138 Pathogen[ P03383] interacts with 1 human partners:{P28370}

29139 Pathogen[ P03410] interacts with 2 human partners:{Q92698;P28370}

29140 Pathogen[ P14075] interacts with 1 human partners:{P28370}

29141 Pathogen[ POC206] interacts with 2 human partners:{P28370;Q92698}

29142 Pathogen[ P03363] interacts with 3 human partners:{P46063;P28370;Q92698}

29143 [Cluster 2650]GO:0007576+P biological\_process [name] nucleolar fragmentation [def] "The cell aging process that results in the nucleolus breaking down into fragments." [GOC

29144 Pathogen[ Q2Q067] interacts with 1 human partners:{O60765}

29145 Pathogen[ POC214] interacts with 1 human partners:{O60765}

29146 Pathogen[ P03346] interacts with 1 human partners:{O60765}

29147 Pathogen[ Q85601] interacts with 1 human partners:{060765}

29148 Pathogen[ P14079] interacts with 1 human partners:{060765}

29149 Pathogen[ P03383] interacts with 1 human partners:{060765}

29150 Pathogen[ P03410] interacts with 1 human partners:{060765}

29151 Pathogen[ P14075] interacts with 1 human partners:{060765}

29152 Pathogen[ P0C206] interacts with 1 human partners:{060765}

29153 Pathogen[ P03363] interacts with 1 human partners:{060765}

29154 [Cluster 2651]GO:0045725+P biological\_process [name] positive regulation of glycogen biosynthetic process [def] "Any process that activates or increases the frequency, rate or extent of the chemical reactions and pathways resulting in the formation of glycogen." [GOC

29155 Pathogen[ Q2Q067] interacts with 2 human partners:{P31749;Q9BX66}

29156 Pathogen[ P0C214] interacts with 2 human partners:{Q9BX66;P31749}

29157 Pathogen[ P03346] interacts with 2 human partners:{Q9BX66;P31749}

29158 Pathogen[ Q85601] interacts with 2 human partners:{P31749;Q9BX66}

29159 Pathogen[ P14079] interacts with 3 human partners:{P31751;B7ZBB8;Q9BX66}

29160 Pathogen[ P03383] interacts with 1 human partners:{P31749}

29161 Pathogen[ P03410] interacts with 3 human partners:{B7ZBB8;P31749;Q9BX66}

29162 Pathogen[ P14075] interacts with 1 human partners:{P31749}

29163 Pathogen[ P0C206] interacts with 3 human partners:{P31749;B7ZBB8;Q9BX66}

29164 Pathogen[ P03363] interacts with 3 human partners:{Q9BX66;B7ZBB8;P31749}

29165 [Cluster 2652]GO:0003281+P biological\_process [name] ventricular septum development [def] "The progression of the ventricular septum over time from its formation to the mature structure." [GOC

29166 Pathogen[ Q2Q067] interacts with 2 human partners:{Q86V48;Q9NSC2}

29167 Pathogen[ P0C214] interacts with 2 human partners:{Q9NSC2;Q86V48}

29168 Pathogen[ P03346] interacts with 6 human partners:{P31271;Q86V48;Q9UJQ4;Q9NSC2;Q99593;P61968}

29169 Pathogen[ Q85601] interacts with 4 human partners:{P61968;Q86V48;P31271;Q9NSC2}

29170 Pathogen[ P14079] interacts with 5 human partners:{P31271;Q9UJQ4;Q8WU20;Q86V48;Q9NSC2}

29171 Pathogen[ P03383] interacts with 2 human partners:{Q9NSC2;Q86V48}

29172 Pathogen[ P03410] interacts with 4 human partners:{Q86V48;Q8WU20;Q9NSC2;Q9UJQ4}

29173 Pathogen[ P14075] interacts with 2 human partners:{Q9NSC2;Q86V48}

29174 Pathogen[ P0C206] interacts with 6 human partners:{Q9UJQ4;Q9NSC2;Q86V48;Q8WU20;P31271;P61968}

29175 Pathogen[ P03363] interacts with 3 human partners:{Q9UJQ4;Q86V48;P31271}

29176 [Cluster 2653]GO:0070306+P biological\_process [name] lens fiber cell differentiation [def] "The process in which a relatively unspecialized cell acquires specialized features of a lens fiber cell, any of the elongated, tightly packed cells that make up the bulk of the mature lens in the camera-type eye. The cytoplasm of a lens fiber cell is devoid of most intracellular organelles including the cell nucleus, and contains primarily crystallins, a group of water-soluble proteins expressed in vary large quantities." [GOC

29177 Pathogen[ Q2Q067] interacts with 5 human partners:{P84022;O75444;Q9UM11;P12757;P07320}

29178 Pathogen[ P0C214] interacts with 5 human partners:{O75444;P12757;P84022;Q9UM11;P07320}

29179 Pathogen[ P03346] interacts with 7 human partners:{O75364;Q9UM11;P12757;Q8NHU6;P07320;O75444;P84022}

29180 Pathogen[ Q85601] interacts with 5 human partners:{P12757;O75444;P84022;Q9UM11;P07320}

29181 Pathogen[ P14079] interacts with 5 human partners:{P07320;Q8NHU6;Q9UM11;O75444;P12757}

29182 Pathogen[ P03383] interacts with 5 human partners:{P84022;Q9UM11;P12757;P07320;O75444}

29183 Pathogen[ P03410] interacts with 6 human partners:{P84022;Q8NHU6;O75444;P07320;Q9UM11;P12757}

29184 Pathogen[ P14075] interacts with 5 human partners:{P07320;Q9UM11;O75444;P12757;P84022}

29185 Pathogen[ P0C206] interacts with 5 human partners:{P84022;O75444;P07320;P12757;Q9UM11}

29186 Pathogen[ P03363] interacts with 6 human partners:{Q8NHU6;P12757;Q9UM11;P07320;O75444;P84022}

29187 [Cluster 2654]GO:0000724+P biological\_process [name] double-strand break repair via homologous recombination [def] "The error-free repair of a double-strand break in DNA in which the broken DNA molecule is repaired using homologous sequences. A strand in the broken DNA searches for a homologous region in an intact chromosome to serve as the template for DNA synthesis. The restoration of two intact DNA molecules results in the exchange, reciprocal or nonreciprocal, of genetic material between the intact DNA molecule and the broken DNA molecule." [GOC

29188 Pathogen[ Q2Q067] interacts with 35 human partners:{P25490;Q9Y2M0;Q6NVH7;Q8IY18;Q12888;Q92889;P27694;P49959;Q99708;Q96B01;P35244;Q96AH0;Q86YC2;Q9BQ15;Q06609;Q68DK2;Q1ZZU3;P60896;O60934;Q9BQ83;P15927;P61088;Q9UBU8;Q96HA7;O43299;P43351;Q86XK3;Q19AV6;Q9ULG1;Q14676;Q9NUS5;Q96MF7;Q6ZQR5;Q8IY92;O60921}

29189 Pathogen[ P0C214] interacts with 33 human partners: {P43351;Q8IY18;Q06609;Q9BQ83;P49959;Q92889;Q99708;Q9NUS5;Q96AH0;Q9ULG1;Q9Y2M0;Q14676;Q6ZRQ5;O60921;O43299;Q92698;Q96MF7;Q9UBU8;P15927;Q6NVH7;P35244;Q96B01;Q86YC2;Q1ZZU3;Q12888;P27694;Q68DK2;Q8IY92;Q86XK3;Q19AV6;Q96HA7;P61088;Q9BQ15}

29190 Pathogen[ P03346] interacts with 38 human partners: {O60921;Q12888;Q96HA7;Q06609;Q96MF7;Q6ZRQ5;P27694;Q86XK3;P35244;Q99708;Q9ULG1;P25490;Q96AH0;Q92698;P61088;Q14676;Q9BQ15;Q9UBU8;P151587;Q96B01;Q9NUS5;Q19AV6;P15927;Q86YC2;P49959;Q68DK2;P43351;O60934;Q92889;Q6NVH7;Q9BQ83;O43299;P60896;Q8IY92;O43543;Q8IY18;Q9Y2M0;Q1ZZU3}

29191 Pathogen[ Q85601] interacts with 36 human partners: {P43351;Q9Y2M0;Q96HA7;Q96AH0;Q8IY18;Q19AV6;Q9NUS5;P35244;Q99708;Q6NVH7;Q1ZZU3;Q9UBU8;P25490;O43299;Q9BQ15;P49959;Q92698;P27694;Q6ZRQ5;Q12888;Q92889;Q8IY92;P15927;Q96B01;O60921;Q86YC2;Q9ULG1;Q68DK2;Q9BQ83;P61088;Q06609;Q86XK3;Q14676;P151587;Q96MF7;O60934}

29192 Pathogen[ P14079] interacts with 36 human partners: {Q9BQ15;Q9ULG1;Q96B01;Q68DK2;Q96MF7;Q9UBU8;O00487;Q92698;P151587;Q86YC2;O60934;Q96AH0;Q6NVH7;Q96HA7;Q99708;Q19AV6;Q92889;Q9Y2M0;Q1ZZU3;O43543;P15927;Q14676;O43299;P27694;Q8IY18;Q9NUS5;Q9BQ83;Q12888;P25490;Q6ZRQ5;P35244;Q06609;O60921;Q86XK3;Q8IY92;P43351}

29193 Pathogen[ P03383] interacts with 29 human partners: {P43351;Q12888;Q06609;Q68DK2;Q6NVH7;Q19AV6;P27694;Q96B01;Q9UBU8;Q9NUS5;Q96MF7;O60921;P61088;Q6ZRQ5;P15927;P35244;Q9Y2M0;O43299;Q8IY92;Q99708;Q86XK3;Q9BQ15;Q86YC2;Q96HA7;Q14676;P60896;Q96AH0;Q1ZZU3;Q9BQ83}

29194 Pathogen[ P03410] interacts with 38 human partners: {P49959;P35244;Q99708;Q9BQ15;Q92698;Q9NUS5;Q1ZZU3;Q19AV6;Q9ULG1;Q9UBU8;O43299;Q92889;Q6NVH7;P61088;P43351;Q9BQ83;P25490;Q96MF7;Q8IY92;P60896;Q96AH0;P151587;O60921;Q12888;Q8IY18;O43543;Q86XK3;P27694;Q14676;P15927;Q9Y2M0;Q96B01;Q68DK2;Q86YC2;Q96HA7;O60934;Q06609;Q6ZRQ5}

29195 Pathogen[ P14075] interacts with 29 human partners: {P43351;Q9BQ83;Q9UBU8;Q86YC2;P61088;Q9BQ15;Q6ZRQ5;P15927;Q9Y2M0;Q68DK2;P35244;Q19AV6;Q96HA7;Q14676;Q96AH0;P27694;P60896;O60921;Q96B01;Q12888;Q6NVH7;Q96MF7;Q1ZZU3;Q99708;Q86XK3;Q8IY92;Q9NUS5;Q06609;O43299}

29196 Pathogen[ P0C206] interacts with 38 human partners: {Q96HA7;Q68DK2;Q19AV6;Q9Y2M0;P49959;Q9UBU8;Q9BQ15;Q99708;Q86YC2;P25490;P151587;O60934;Q86XK3;O43299;P43351;P61088;Q12888;Q9ULG1;Q14676;Q92889;O60921;Q96MF7;Q6ZRQ5;O43543;Q06609;P27694;P15927;Q6NVH7;P35244;Q96B01;Q9BQ83;Q8IY18;Q8IY92;Q1ZZU3;P60896;Q92698;Q96AH0;Q9NUS5}

29197 Pathogen[ P03363] interacts with 34 human partners: {P27694;Q19AV6;Q9ULG1;P60896;Q9Y2M0;Q96AH0;P25490;Q92889;Q1ZZU3;Q9NUS5;P35244;Q68DK2;P15927;P61088;Q9UBU8;Q99708;Q86XK3;Q9BQ15;Q9BQ83;Q8IY92;P43351;O60921;Q06609;Q6NVH7;Q14676;Q8IY18;Q96HA7;Q96MF7;Q6ZRQ5;Q12888;Q92698;Q96B01;Q86YC2;O43299}

29198 [Cluster 2655]GO:2000065+P biological\_process [name] negative regulation of cortisol biosynthetic process [def] "Any process that stops, prevents, or reduces the frequency, rate or extent of cortisol biosynthetic process." [GOC]

29199 Pathogen[ Q2Q067] interacts with 1 human partners: {Q13127}

29200 Pathogen[ P0C214] interacts with 1 human partners: {Q13127}

29201 Pathogen[ P03346] interacts with 1 human partners: {Q13127}

29202 Pathogen[ Q85601] interacts with 1 human partners: {Q13127}

29203 Pathogen[ P14079] interacts with 1 human partners: {Q13127}

29204 Pathogen[ P03383] interacts with 1 human partners: {Q13127}

29205 Pathogen[ P03410] interacts with 1 human partners: {Q13127}

29206 Pathogen[ P14075] interacts with 1 human partners: {Q13127}

29207 Pathogen[ P0C206] interacts with 1 human partners: {Q13127}

29208 Pathogen[ P03363] interacts with 1 human partners: {Q13127}

29209 [Cluster 2656]GO:0042921+P biological\_process [name] glucocorticoid receptor signaling pathway [def] "Any series of molecular signals generated as a consequence of a glucocorticoid binding to its receptor." [GOC]

29210 Pathogen[ Q2Q067] interacts with 5 human partners: {P27797;O14497;Q14686;Q04917;Q96PK6}

29211 Pathogen[ P0C214] interacts with 5 human partners: {O14497;Q04917;Q14686;Q96PK6;P27797}

29212 Pathogen[ P03346] interacts with 5 human partners: {Q04917;O14497;P27797;Q96PK6;Q14686}

29213 Pathogen[ Q85601] interacts with 5 human partners: {Q96PK6;O14497;P27797;Q04917;Q14686}

29214 Pathogen[ P14079] interacts with 4 human partners: {O14497;Q04917;Q14686;Q96PK6}

29215 Pathogen[ P03383] interacts with 4 human partners: {O14497;Q14686;Q96PK6;P27797}

29216 Pathogen[ P03410] interacts with 5 human partners: {Q96PK6;O14497;Q04917;Q14686;P27797}

29217 Pathogen[ P14075] interacts with 4 human partners: {Q14686;O14497;Q96PK6;P27797}

29218 Pathogen[ P0C206] interacts with 5 human partners: {P27797;Q04917;O14497;Q96PK6;Q14686}

29219 Pathogen[ P03363] interacts with 5 human partners: {O14497;Q14686;Q96PK6;P27797;Q04917}

29220 [Cluster 2657]GO:0016445+P biological\_process [name] somatic diversification of immunoglobulins [def] "The somatic process that results in the generation of sequence

diversity of immunoglobulins." [GOC

29221 Pathogen[ Q2Q067] interacts with 3 human partners:{P55895;Q9GZX7;Q8WYA6}

29222 Pathogen[ P0C214] interacts with 3 human partners:{P55895;Q9GZX7;Q8WYA6}

29223 Pathogen[ P03346] interacts with 2 human partners:{P55895;Q8WYA6}

29224 Pathogen[ Q85601] interacts with 3 human partners:{Q9GZX7;Q8WYA6;P55895}

29225 Pathogen[ P14079] interacts with 2 human partners:{Q9GZX7;Q8WYA6}

29226 Pathogen[ P03383] interacts with 2 human partners:{P55895;Q8WYA6}

29227 Pathogen[ P03410] interacts with 3 human partners:{P55895;Q8WYA6;Q9GZX7}

29228 Pathogen[ P14075] interacts with 2 human partners:{Q8WYA6;P55895}

29229 Pathogen[ P0C206] interacts with 3 human partners:{Q8WYA6;Q9GZX7;P55895}

29230 Pathogen[ P03363] interacts with 2 human partners:{Q8WYA6;P55895}

29231 [Cluster 2658]GO:0002296+P biological\_process [name] T-helper 1 cell lineage commitment [def] "The process in which a CD4-positive, alpha-beta T cell becomes committed to becoming a T-helper 1 cell, a CD4-positive, alpha-beta T cell specialized to promote immunological processes often associated with resistance to intracellular bacteria, fungi, and protozoa, and pathological conditions such as arthritis." [GOC

29232 Pathogen[ Q2Q067] interacts with 1 human partners:{P42226}

29233 Pathogen[ P0C214] interacts with 1 human partners:{P42226}

29234 Pathogen[ P03346] interacts with 1 human partners:{P42226}

29235 Pathogen[ Q85601] interacts with 1 human partners:{P42226}

29236 Pathogen[ P14079] interacts with 1 human partners:{P42226}

29237 Pathogen[ P03383] interacts with 1 human partners:{P42226}

29238 Pathogen[ P03410] interacts with 1 human partners:{P42226}

29239 Pathogen[ P14075] interacts with 1 human partners:{P42226}

29240 Pathogen[ P0C206] interacts with 1 human partners:{P42226}

29241 Pathogen[ P03363] interacts with 1 human partners:{P42226}

29242 [Cluster 2659]GO:0007021+P biological\_process [name] tubulin complex assembly [def] "The aggregation and bonding together of alpha- and beta-tubulin to form a tubulin heterodimer." [GOC

29243 Pathogen[ Q2Q067] interacts with 4 human partners:{O75347;P02511;P17987;P02489}

29244 Pathogen[ P0C214] interacts with 5 human partners:{O75347;P02489;P02511;P17987;P36404}

29245 Pathogen[ P03346] interacts with 5 human partners:{P02489;O75347;P02511;P36404;P17987}

29246 Pathogen[ Q85601] interacts with 4 human partners:{P02489;P17987;P02511;O75347}

29247 Pathogen[ P14079] interacts with 4 human partners:{P02511;P02489;P17987;O75347}

29248 Pathogen[ P03383] interacts with 2 human partners:{P02511;O75347}

29249 Pathogen[ P03410] interacts with 4 human partners:{P17987;P02489;P02511;O75347}

29250 Pathogen[ P14075] interacts with 2 human partners:{O75347;P02511}

29251 Pathogen[ P0C206] interacts with 4 human partners:{P17987;O75347;P02511;P02489}

29252 Pathogen[ P03363] interacts with 3 human partners:{O75347;P17987;P02489}

29253 [Cluster 2660]GO:0045948+P biological\_process [name] positive regulation of translational initiation [def] "Any process that activates or increases the frequency, rate or extent of translational initiation." [GOC

29254 Pathogen[ Q2Q067] interacts with 1 human partners:{Q13144}

29255 Pathogen[ P0C214] interacts with 1 human partners:{Q13144}

29256 Pathogen[ P03346] interacts with 2 human partners:{Q13144;Q9NQZ3}

29257 Pathogen[ Q85601] interacts with 1 human partners:{Q13144}

29258 Pathogen[ P14079] interacts with 1 human partners:{Q13144}

29259 Pathogen[ P03383] interacts with 1 human partners:{Q13144}

29260 Pathogen[ P03410] interacts with 1 human partners:{Q13144}

29261 Pathogen[ P14075] interacts with 1 human partners:{Q13144}

29262 Pathogen[ P0C206] interacts with 1 human partners:{Q13144}

29263 Pathogen[ P03363] interacts with 4 human partners:{Q8N9W6;Q92904;Q13144;Q9NQZ3}

29264 [Cluster 2661]GO:0006226+P biological\_process [name] dUMP biosynthetic process [def] "The chemical reactions and pathways resulting in the formation of dUMP, deoxyuridine monophosphate (2'-deoxyuridine 5'-phosphate)." [ISBN

29265 Pathogen[ Q2Q067] interacts with 1 human partners:{P33316}

29266 Pathogen[ P0C214] interacts with 1 human partners:{P33316}

29267 Pathogen[ P03346] interacts with 1 human partners:{P33316}

29268 Pathogen[ Q85601] interacts with 1 human partners:{P33316}

29269 Pathogen[ P14079] interacts with 1 human partners:{P33316}

29270 Pathogen[ P03383] interacts with 1 human partners:{P33316}

29271 Pathogen[ P03410] interacts with 1 human partners:{P33316}

29272 Pathogen[ P14075] interacts with 1 human partners:{P33316}

29273 Pathogen[ P0C206] interacts with 1 human partners:{P33316}

29274 Pathogen[ P03363] interacts with 1 human partners:{P33316}

29275 [Cluster 2662]GO:0030262+P biological\_process [name] apoptotic nuclear change [def] "A process that is carried out at the cellular level which results in the disassembly of the nucleus and contributes to apoptosis." [GOC

29276 Pathogen[ Q2Q067] interacts with 4 human partners:{Q8WXF8;Q9H0F6;Q9P0J0;Q96BY2}

29277 Pathogen[ P0C214] interacts with 4 human partners:{Q8WXF8;Q96BY2;Q9H0F6;Q9P0J0}

29278 Pathogen[ P03346] interacts with 4 human partners:{Q8WXF8;Q9H0F6;Q96BY2;Q9P0J0}

29279 Pathogen[ Q85601] interacts with 4 human partners:{Q9P0J0;Q96BY2;Q9H0F6;Q8WXF8}

29280 Pathogen[ P14079] interacts with 5 human partners:{Q96BY2;Q9P0J0;Q9H0F6;Q8WXF8;P28360}

29281 Pathogen[ P03383] interacts with 4 human partners:{Q9H0F6;Q8WXF8;Q9P0J0;Q96BY2}  
29282 Pathogen[ P03410] interacts with 4 human partners:{Q8WXF8;Q96BY2;Q9P0J0;Q9H0F6}  
29283 Pathogen[ P14075] interacts with 4 human partners:{Q96BY2;Q8WXF8;Q9P0J0;Q9H0F6}  
29284 Pathogen[ P0C206] interacts with 4 human partners:{Q8WXF8;Q96BY2;Q9P0J0;Q9H0F6}  
29285 Pathogen[ P03363] interacts with 4 human partners:{Q9P0J0;Q96BY2;Q9H0F6;Q8WXF8}  
29286 [Cluster 2663]GO:0071034+P biological\_process [name] CUT catabolic process [def]  
"The chemical reactions and pathways resulting in the breakdown of cryptic unstable  
transcripts (CUTs)." [GOC  
29287 Pathogen[ Q2Q067] interacts with 1 human partners:{Q9Y2L1}  
29288 Pathogen[ P0C214] interacts with 1 human partners:{Q9Y2L1}  
29289 Pathogen[ P03346] interacts with 2 human partners:{Q9Y2L1;Q9NQT5}  
29290 Pathogen[ Q85601] interacts with 1 human partners:{Q9Y2L1}  
29291 Pathogen[ P14079] interacts with 1 human partners:{Q9Y2L1}  
29292 Pathogen[ P03383] interacts with 1 human partners:{Q9Y2L1}  
29293 Pathogen[ P03410] interacts with 1 human partners:{Q9Y2L1}  
29294 Pathogen[ P14075] interacts with 1 human partners:{Q9Y2L1}  
29295 Pathogen[ P0C206] interacts with 1 human partners:{Q9Y2L1}  
29296 Pathogen[ P03363] interacts with 2 human partners:{Q9Y2L1;Q9NQT5}  
29297 [Cluster 2664]GO:0045824+P biological\_process [name] negative regulation of innate  
immune response [def] "Any process that stops, prevents, or reduces the frequency, rate  
or extent of the innate immune response." [GOC  
29298 Pathogen[ Q2Q067] interacts with 1 human partners:{Q16666}  
29299 Pathogen[ P0C214] interacts with 1 human partners:{Q16666}  
29300 Pathogen[ P03346] interacts with 1 human partners:{Q16666}  
29301 Pathogen[ Q85601] interacts with 1 human partners:{Q16666}  
29302 Pathogen[ P14079] interacts with 2 human partners:{Q96C10;Q16666}  
29303 Pathogen[ P03383] interacts with 1 human partners:{Q16666}  
29304 Pathogen[ P03410] interacts with 2 human partners:{Q16666;Q96C10}  
29305 Pathogen[ P14075] interacts with 1 human partners:{Q16666}  
29306 Pathogen[ P0C206] interacts with 2 human partners:{Q16666;Q96C10}  
29307 Pathogen[ P03363] interacts with 1 human partners:{Q16666}  
29308 [Cluster 2665]GO:0032205+P biological\_process [name] negative regulation of telomere  
maintenance [def] "Any process that stops, prevents, or reduces the frequency, rate or  
extent of a process that affects and monitors the activity of telomeric proteins and the  
length of telomeric DNA." [GOC  
29309 Pathogen[ Q2Q067] interacts with 4 human partners:{Q92889;Q9NYB0;Q15554;Q9BSI4}  
29310 Pathogen[ P0C214] interacts with 4 human partners:{Q92889;Q9BSI4;Q15554;Q9NYB0}  
29311 Pathogen[ P03346] interacts with 5 human  
partners:{Q9BSI4;Q15554;P07992;Q9NYB0;Q92889}  
29312 Pathogen[ Q85601] interacts with 3 human partners:{Q15554;Q92889;Q9NYB0}  
29313 Pathogen[ P14079] interacts with 5 human  
partners:{Q9BSI4;Q9NYB0;Q92889;Q15554;P07992}  
29314 Pathogen[ P03383] interacts with 3 human partners:{Q9NYB0;Q15554;Q9BSI4}  
29315 Pathogen[ P03410] interacts with 5 human  
partners:{Q15554;P07992;Q92889;Q9BSI4;Q9NYB0}  
29316 Pathogen[ P14075] interacts with 3 human partners:{Q15554;Q9BSI4;Q9NYB0}  
29317 Pathogen[ P0C206] interacts with 5 human  
partners:{Q15554;Q9BSI4;P07992;Q92889;Q9NYB0}  
29318 Pathogen[ P03363] interacts with 4 human partners:{Q15554;Q9NYB0;Q92889;Q9BSI4}  
29319 [Cluster 2666]GO:0006241+P biological\_process [name] CTP biosynthetic process [def]  
"The chemical reactions and pathways resulting in the formation of CTP, cytidine  
5'-triphosphate." [ISBN  
29320 Pathogen[ Q2Q067] interacts with 1 human partners:{P22392}  
29321 Pathogen[ P0C214] interacts with 2 human partners:{P22392;P17812}  
29322 Pathogen[ P03346] interacts with 1 human partners:{P22392}  
29323 Pathogen[ Q85601] interacts with 1 human partners:{P22392}  
29324 Pathogen[ P14079] interacts with 3 human partners:{P17812;P22392;Q86XW9}  
29325 Pathogen[ P03383] interacts with 1 human partners:{P22392}  
29326 Pathogen[ P03410] interacts with 2 human partners:{P17812;Q86XW9}  
29327 Pathogen[ P14075] interacts with 1 human partners:{P22392}  
29328 Pathogen[ P0C206] interacts with 2 human partners:{P22392;Q86XW9}  
29329 Pathogen[ P03363] interacts with 1 human partners:{Q86XW9}  
29330 [Cluster 2667]GO:0042481+P biological\_process [name] regulation of odontogenesis  
[def] "Any process that modulates the frequency, rate or extent of the formation and  
development of a tooth or teeth." [GOC  
29331 Pathogen[ Q2Q067] interacts with 1 human partners:{P55771}  
29332 Pathogen[ P0C214] interacts with 1 human partners:{P55771}  
29333 Pathogen[ P03346] interacts with 2 human partners:{Q3SY56;P55771}  
29334 Pathogen[ Q85601] interacts with 1 human partners:{P55771}  
29335 Pathogen[ P14079] interacts with 3 human partners:{P55771;P28360;Q3SY56}  
29336 Pathogen[ P03383] interacts with 1 human partners:{P55771}  
29337 Pathogen[ P03410] interacts with 1 human partners:{P55771}  
29338 Pathogen[ P14075] interacts with 1 human partners:{P55771}  
29339 Pathogen[ P0C206] interacts with 2 human partners:{Q3SY56;P55771}  
29340 Pathogen[ P03363] interacts with 1 human partners:{P55771}  
29341 [Cluster 2668]GO:0001954+P biological\_process [name] positive regulation of

cell-matrix adhesion [def] "Any process that activates or increases the rate or extent of cell adhesion to an extracellular matrix." [GOC

29342 Pathogen[ Q2Q067] interacts with 3 human partners:{Q9HB19;P46939;Q00534}

29343 Pathogen[ P0C214] interacts with 3 human partners:{Q9HB19;Q00534;P46939}

29344 Pathogen[ P03346] interacts with 3 human partners:{Q9HB19;P46939;Q00534}

29345 Pathogen[ Q85601] interacts with 3 human partners:{P46939;Q9HB19;Q00534}

29346 Pathogen[ P14079] interacts with 2 human partners:{P46939;Q9HB19}

29347 Pathogen[ P03383] interacts with 3 human partners:{Q00534;P46939;Q9HB19}

29348 Pathogen[ P03410] interacts with 3 human partners:{Q00534;P46939;Q9HB19}

29349 Pathogen[ P14075] interacts with 3 human partners:{Q00534;P46939;Q9HB19}

29350 Pathogen[ P0C206] interacts with 3 human partners:{P46939;Q9HB19;Q00534}

29351 Pathogen[ P03363] interacts with 3 human partners:{P46939;Q00534;Q9HB19}

29352 [Cluster 2669]GO:0048733+P biological\_process [name] sebaceous gland development [def] "The process whose specific outcome is the progression of the sebaceous gland over time, from its formation to the mature structure." [GOC

29353 Pathogen[ Q2Q067] interacts with 2 human partners:{Q13485;Q92754}

29354 Pathogen[ P0C214] interacts with 2 human partners:{Q92754;Q13485}

29355 Pathogen[ P03346] interacts with 2 human partners:{Q92754;Q13485}

29356 Pathogen[ Q85601] interacts with 2 human partners:{Q92754;Q13485}

29357 Pathogen[ P14079] interacts with 1 human partners:{Q92754}

29358 Pathogen[ P03383] interacts with 2 human partners:{Q13485;Q92754}

29359 Pathogen[ P03410] interacts with 2 human partners:{Q13485;Q92754}

29360 Pathogen[ P14075] interacts with 2 human partners:{Q92754;Q13485}

29361 Pathogen[ P0C206] interacts with 2 human partners:{Q92754;Q13485}

29362 Pathogen[ P03363] interacts with 2 human partners:{Q13485;Q92754}

29363 [Cluster 2670]GO:0048627+P biological\_process [name] myoblast development [def] "The process whose specific outcome is the progression of the myoblast over time, from its formation to the mature structure. A myoblast is a mononucleate cell type that, by fusion with other myoblasts, gives rise to the myotubes that eventually develop into skeletal muscle fibers." [CL

29364 Pathogen[ Q2Q067] interacts with 1 human partners:{060248}

29365 Pathogen[ P0C214] interacts with 1 human partners:{060248}

29366 Pathogen[ P03346] interacts with 1 human partners:{060248}

29367 Pathogen[ Q85601] interacts with 1 human partners:{060248}

29368 Pathogen[ P14079] interacts with 1 human partners:{060248}

29369 Pathogen[ P03383] interacts with 1 human partners:{060248}

29370 Pathogen[ P03410] interacts with 1 human partners:{060248}

29371 Pathogen[ P14075] interacts with 1 human partners:{060248}

29372 Pathogen[ P0C206] interacts with 1 human partners:{060248}

29373 Pathogen[ P03363] interacts with 1 human partners:{060248}

29374 [Cluster 2671]GO:0060536+P biological\_process [name] cartilage morphogenesis [def] "The process in which the anatomical structures of cartilage are generated and organized." [GOC

29375 Pathogen[ Q2Q067] interacts with 2 human partners:{096004;P20719}

29376 Pathogen[ P0C214] interacts with 1 human partners:{096004}

29377 Pathogen[ P03346] interacts with 3 human partners:{P20719;096004;095863}

29378 Pathogen[ Q85601] interacts with 1 human partners:{096004}

29379 Pathogen[ P14079] interacts with 2 human partners:{096004;P28360}

29380 Pathogen[ P03383] interacts with 1 human partners:{096004}

29381 Pathogen[ P03410] interacts with 1 human partners:{096004}

29382 Pathogen[ P14075] interacts with 1 human partners:{096004}

29383 Pathogen[ P0C206] interacts with 2 human partners:{096004;P20719}

29384 Pathogen[ P03363] interacts with 2 human partners:{P20719;096004}

29385 [Cluster 2672]GO:0042733+P biological\_process [name] embryonic digit morphogenesis [def] "The process, occurring in the embryo, by which the anatomical structures of the digit are generated and organized. A digit is one of the terminal divisions of an appendage, such as a finger or toe." [GOC

29386 Pathogen[ Q2Q067] interacts with 7 human partners:{P04198;Q13547;O43248;P35548;Q92769;Q92793;Q9NSC2}

29387 Pathogen[ P0C214] interacts with 7 human partners:{Q13547;Q92793;O43248;Q92769;Q9NSC2;P35548;P04198}

29388 Pathogen[ P03346] interacts with 10 human partners:{P35453;P35548;P31270;Q9NSC2;Q92769;Q13547;P04198;Q92793;O43248;P35452}

29389 Pathogen[ Q85601] interacts with 7 human partners:{O43248;Q92769;P35548;Q13547;Q9NSC2;P04198;Q92793}

29390 Pathogen[ P14079] interacts with 8 human partners:{Q92793;P54826;Q92769;Q4AC94;P04198;Q9Y366;P28360;Q9NSC2}

29391 Pathogen[ P03383] interacts with 6 human partners:{P35548;Q92769;Q9NSC2;Q13547;P04198;Q92793}

29392 Pathogen[ P03410] interacts with 9 human partners:{Q4AC94;Q9Y366;P35548;Q92793;Q92769;P54826;Q13547;Q9NSC2;P04198}

29393 Pathogen[ P14075] interacts with 7 human partners:{Q9NSC2;P35548;P04198;Q13547;Q92769;Q92793;P54826}

29394 Pathogen[ P0C206] interacts with 8 human partners:{Q92769;Q9NSC2;Q13547;Q92793;O43248;P35548;P04198;P54826}

29395 Pathogen[ P03363] interacts with 7 human

partners:{P35453;P04198;P35548;O43248;Q13547;Q92793;P35452}

29396 [Cluster 2673]GO:0072520+P biological\_process [name] seminiferous tubule development [def] "The reproductive developmental process whose specific outcome is the progression of the seminiferous tubule over time, from its formation to the mature structure. Seminiferous tubules are ducts located in the testicles, and are the specific location of meiosis, and the subsequent creation of gametes, namely spermatozoa." [GOC

29397 Pathogen[ Q2Q067] interacts with 1 human partners:{Q9H160}

29398 Pathogen[ P0C214] interacts with 1 human partners:{Q9H160}

29399 Pathogen[ P03346] interacts with 1 human partners:{Q9H160}

29400 Pathogen[ Q85601] interacts with 1 human partners:{Q9H160}

29401 Pathogen[ P14079] interacts with 1 human partners:{Q9H160}

29402 Pathogen[ P03383] interacts with 1 human partners:{Q9H160}

29403 Pathogen[ P03410] interacts with 1 human partners:{Q9H160}

29404 Pathogen[ P14075] interacts with 1 human partners:{Q9H160}

29405 Pathogen[ P0C206] interacts with 1 human partners:{Q9H160}

29406 Pathogen[ P03363] interacts with 1 human partners:{Q9H160}

29407 [Cluster 2674]GO:0006509+P biological\_process [name] membrane protein ectodomain proteolysis [def] "The proteolytic cleavage of transmembrane proteins and release of their ectodomain (extracellular domain)." [GOC

29408 Pathogen[ Q2Q067] interacts with 2 human partners:{P38159;P35579}

29409 Pathogen[ P0C214] interacts with 1 human partners:{P38159}

29410 Pathogen[ P03346] interacts with 2 human partners:{P35579;P38159}

29411 Pathogen[ Q85601] interacts with 2 human partners:{P35579;P38159}

29412 Pathogen[ P14079] interacts with 5 human partners:{P35579;Q92542;Q9NZ42;Q14118;P38159}

29413 Pathogen[ P03383] interacts with 2 human partners:{P38159;P35579}

29414 Pathogen[ P03410] interacts with 5 human partners:{P35579;Q9NZ42;Q14118;Q92542;P38159}

29415 Pathogen[ P14075] interacts with 2 human partners:{P38159;P35579}

29416 Pathogen[ P0C206] interacts with 4 human partners:{Q9NZ42;Q92542;P38159;P35579}

29417 Pathogen[ P03363] interacts with 2 human partners:{P35579;P38159}

29418 [Cluster 2675]GO:0021575+P biological\_process [name] hindbrain morphogenesis [def] "The process in which the anatomical structure of the hindbrain is generated and organized. The hindbrain is the region consisting of the medulla, pons and cerebellum. Areas of the hindbrain control motor and autonomic functions." [GO\_REF

29419 Pathogen[ Q2Q067] interacts with 1 human partners:{Q5TGS1}

29420 Pathogen[ P0C214] interacts with 1 human partners:{Q5TGS1}

29421 Pathogen[ P03346] interacts with 1 human partners:{Q5TGS1}

29422 Pathogen[ Q85601] interacts with 1 human partners:{Q5TGS1}

29423 Pathogen[ P14079] interacts with 1 human partners:{Q5TGS1}

29424 Pathogen[ P03383] interacts with 1 human partners:{Q5TGS1}

29425 Pathogen[ P03410] interacts with 1 human partners:{Q5TGS1}

29426 Pathogen[ P14075] interacts with 1 human partners:{Q5TGS1}

29427 Pathogen[ P0C206] interacts with 1 human partners:{Q5TGS1}

29428 Pathogen[ P03363] interacts with 1 human partners:{Q5TGS1}

29429 [Cluster 2676]GO:0007126+P biological\_process [name] meiosis [def] "A cell cycle process comprising the steps by which a cell progresses through the nuclear division phase of a meiotic cell cycle. A meiotic cell cycle is the specialized nuclear and cell division in which a single diploid cell undergoes two nuclear divisions following a single round of DNA replication in order to produce four daughter cells that contain half the number of chromosomes as the diploid cell. Meiotic division occurs during the formation of gametes from diploid organisms and at the beginning of haplophase in those organisms that alternate between diploid and haploid generations." [GOC

29430 Pathogen[ Q2Q067] interacts with 25 human partners:{Q5TAP6;P27694;P49959;Q8WWL7;Q99708;Q8WYR4;P67775;O43684;Q06609;O43264;O60934;Q8NEH6;Q9BQ90;Q9UQ84;Q5VUA4;A1L190;Q9UJ98;Q6PIF2;Q6ICG8;P46013;Q14683;P24941;Q562F6;Q8N3U4;Q9BX26}

29431 Pathogen[ P0C214] interacts with 26 human partners:{O43684;Q06609;P49959;O43264;A1L190;Q8NEH6;Q8WYR4;Q9UJ98;Q99708;Q6ICG8;Q562F6;Q92698;Q5VUA4;P24941;P67775;Q5TAP6;Q9BX26;Q14683;Q8N3U4;Q8N7B1;P46013;Q9UQ84;P27694;Q8WWL7;Q9NQV7;Q9BQ90}

29432 Pathogen[ P03346] interacts with 36 human partners:{Q9NQV7;Q06609;Q9BWT6;O43684;Q5TAP6;Q8N3U4;P27694;Q9BX26;Q9P2W1;Q99708;P24941;O43264;Q6ICG8;Q96J94;P67775;Q92698;Q9BQ90;Q8IZU3;Q9UJ98;Q14683;Q8WWL7;Q562F6;Q6PIF2;P49959;O60934;Q9UQ84;Q8WYR4;Q96MM3;A1L190;Q8N635;Q8N0S2;P46013;O43543;Q8N7B1;Q8NEH6;Q5VUA4}

29433 Pathogen[ Q85601] interacts with 29 human partners:{Q9NQV7;Q8N7B1;Q9UQ84;Q99708;O43264;Q6ICG8;P49959;Q92698;Q9BX26;Q8WYR4;P27694;Q562F6;Q9UJ98;Q9BQ90;Q14683;Q6PIF2;P67775;Q8N3U4;Q4G163;P46013;Q8NEH6;Q5VUA4;Q06609;P24941;O43684;P51955;A1L190;Q8WWL7;O60934}

29434 Pathogen[ P14079] interacts with 41 human partners:{O43196;Q5TIA1;Q9BQ90;Q8NEH6;Q8IZA3;Q9BWT6;Q92698;Q13472;Q7Z7C7;O60934;Q5TAP6;Q6PIF2;Q8N3U4;Q7Z4M0;P51955;Q9UJ98;Q8IZU3;Q4G163;Q99708;Q86X24;Q562F6;Q8WWL7;O43264;Q8N635;Q5VUA4;O43543;Q9BX26;Q6ICG8;P27694;Q9UQE7;Q9NQV7;Q8N7B1;Q96JY0;Q8WYR4;Q06609;Q14683;Q9Y236;Q9UQ84;O43684;A1L190;P46013}

29435 Pathogen[ P03383] interacts with 20 human

29436 partners: {Q14683;Q06609;Q8N3U4;Q5TAP6;O43264;P27694;Q9UJ98;Q8WWL7;P46013;P67775;Q5VUA4;O43684;P24941;Q562F6;Q99708;A1L190;Q9BQ90;Q6ICG8;Q8NEH6;Q9BX26}  
Pathogen[ P03410] interacts with 40 human

29437 partners: {Q4G163;P49959;Q99708;Q5VUA4;O43684;Q92698;P46013;Q9UQE7;Q8WWL7;Q6ICG8;Q562F6;Q7Z4M0;Q5TAP6;O43264;Q8NEH6;Q8WYR4;Q9BWT6;Q13472;Q9NQV7;Q9BX26;P24941;Q8IZU3;Q7Z7C7;Q14683;Q9UJ98;Q8N3U4;O43196;O43543;Q6PIF2;P27694;Q9UQ84;A1L190;P67775;Q8N635;Q9BQ90;O60934;Q5TIA1;Q8N7B1;Q06609;Q8N0S2}  
Pathogen[ P14075] interacts with 22 human

29438 partners: {P24941;Q14683;Q562F6;Q9BX26;Q6ICG8;A1L190;O43684;Q9UJ98;Q5VUA4;Q8N7B1;Q8WWL7;P27694;P67775;O43264;Q99708;P46013;Q8NEH6;Q06609;Q7Z7C7;Q8N3U4;Q9BQ90;Q5TAP6}  
Pathogen[ P0C206] interacts with 38 human

29439 partners: {Q5VUA4;Q8WWL7;Q96MM3;P49959;Q9UQ84;Q99708;Q8NEH6;Q8N635;A1L190;P51955;O60934;P46013;Q6ICG8;Q9UJ98;P67775;Q9BX26;Q8IZU3;Q9NQV7;Q7Z7C7;Q8WYR4;Q9UQE7;Q14683;Q8N0S2;Q562F6;Q9BQ90;Q8N3U4;O43543;Q06609;P27694;O43684;Q4G163;O43264;P24941;Q8N7B1;Q13472;Q5TAP6;Q92698;Q6PIF2}  
Pathogen[ P03363] interacts with 34 human

29440 partners: {Q8IZA3;Q9UJ98;Q5VUA4;Q8WWL7;P27694;Q7Z3Z4;O43264;Q8NEH6;P24941;Q96MM3;Q8N9W6;Q9BQ90;Q99708;Q8N7B1;O43684;Q6PIF2;Q96JY0;Q13472;Q5TAP6;Q6ICG8;Q8WYR4;Q8N635;Q96J94;Q06609;Q8N3U4;P46013;Q562F6;P67775;Q9BWT6;Q8IZU3;Q14683;Q9BX26;Q92698;A1L190}  
[Cluster 2677]GO:0003139+P biological\_process [name] secondary heart field specification [def] "The process that results in the delineation of a specific region of the lateral mesoderm into the area which will form the majority of the mesodermal component of the right ventricle, arterial and venous poles." [GOC

29441 Pathogen[ Q2Q067] interacts with 1 human partners: {Q6STE5}

29442 Pathogen[ P0C214] interacts with 1 human partners: {Q6STE5}

29443 Pathogen[ P03346] interacts with 2 human partners: {Q6STE5;O75593}

29444 Pathogen[ Q85601] interacts with 1 human partners: {Q6STE5}

29445 Pathogen[ P14079] interacts with 2 human partners: {Q06413;Q6STE5}

29446 Pathogen[ P03383] interacts with 1 human partners: {Q6STE5}

29447 Pathogen[ P03410] interacts with 1 human partners: {Q6STE5}

29448 Pathogen[ P14075] interacts with 1 human partners: {Q6STE5}

29449 Pathogen[ P0C206] interacts with 1 human partners: {Q6STE5}

29450 Pathogen[ P03363] interacts with 1 human partners: {Q6STE5}

29451 [Cluster 2678]GO:0006285+P biological\_process [name] base-excision repair, AP site formation [def] "The formation of an AP site, a deoxyribose sugar with a missing base, by DNA glycosylase which recognizes an altered base in DNA and catalyzes its hydrolytic removal. This sugar phosphate is the substrate recognized by the AP endonuclease, which cuts the DNA phosphodiester backbone at the 5' side of the altered site to leave a gap which is subsequently repaired." [ISBN

29452 Pathogen[ Q2Q067] interacts with 8 human partners: {O95243;Q9UIF7;P22674;P29372;O15527;P78549;Q13569;Q53HV7}

29453 Pathogen[ P0C214] interacts with 8 human partners: {O95243;Q53HV7;Q9UIF7;P22674;P78549;P29372;O15527;Q13569}

29454 Pathogen[ P03346] interacts with 8 human partners: {Q9UIF7;Q53HV7;P29372;P78549;Q13569;O95243;O15527;P22674}

29455 Pathogen[ Q85601] interacts with 8 human partners: {P22674;O15527;O95243;Q53HV7;Q13569;Q9UIF7;P78549;P29372}

29456 Pathogen[ P14079] interacts with 8 human partners: {Q9UIF7;P29372;O15527;P78549;O95243;Q53HV7;Q13569;P22674}

29457 Pathogen[ P03383] interacts with 6 human partners: {O15527;Q53HV7;P22674;P29372;O95243;Q13569}

29458 Pathogen[ P03410] interacts with 8 human partners: {P22674;P78549;Q53HV7;O95243;O15527;Q13569;P29372;Q9UIF7}

29459 Pathogen[ P14075] interacts with 7 human partners: {O15527;Q53HV7;Q9UIF7;P22674;O95243;Q13569;P29372}

29460 Pathogen[ P0C206] interacts with 8 human partners: {O15527;Q53HV7;Q13569;P29372;O95243;P22674;Q9UIF7;P78549}

29461 Pathogen[ P03363] interacts with 7 human partners: {O15527;P29372;Q9UIF7;O95243;Q13569;P22674;Q53HV7}

29462 [Cluster 2679]GO:0006970+P biological\_process [name] response to osmotic stress [def] "Any process that results in a change in state or activity of a cell or an organism (in terms of movement, secretion, enzyme production, gene expression, etc.) as a result of a stimulus indicating an increase or decrease in the concentration of solutes outside the organism or cell." [GOC

29463 Pathogen[ Q2Q067] interacts with 9 human partners: {Q93034;Q9Y3Q8;P11166;Q99576;Q14978;Q13233;P15336;Q14244;O75157}

29464 Pathogen[ P0C214] interacts with 9 human partners: {Q9Y3Q8;P15336;O75157;Q99576;Q93034;P11166;Q13233;Q14978;Q14244}

29465 Pathogen[ P03346] interacts with 9 human partners: {P15336;Q9Y3Q8;Q93034;Q14978;O75157;Q99576;Q13233;P11166;Q14244}

29466 Pathogen[ Q85601] interacts with 9 human partners: {Q14978;Q14244;Q9Y3Q8;P11166;Q99576;O75157;Q13233;P15336;Q93034}

29467 Pathogen[ P14079] interacts with 10 human partners: {P31751;P41238;Q99576;Q14244;O75157;Q9Y3Q8;P11166;Q93034;P15336;Q14978}

29468 Pathogen[ P03383] interacts with 8 human partners: {Q14244;Q14978;Q13233;Q93034;Q99576;Q9Y3Q8;O75157;P15336}



29469 Pathogen[ P03410] interacts with 10 human partners:{P11166;P41238;Q14978;Q9Y3Q8;Q13233;Q99576;O75157;P15336;Q14244;Q93034}

29470 Pathogen[ P14075] interacts with 8 human partners:{Q93034;Q99576;P15336;Q9Y3Q8;Q13233;Q14978;Q14244;O75157}

29471 Pathogen[ P0C206] interacts with 10 human partners:{P15336;O75157;Q9Y3Q8;P11166;Q13233;Q14244;Q93034;P41238;Q99576;Q14978}

29472 Pathogen[ P03363] interacts with 9 human partners:{Q14978;Q14244;Q99576;Q9Y3Q8;O75157;P15336;Q93034;Q13233;P11166}

29473 [Cluster 2680]GO:0022402+P biological\_process [name] cell cycle process [def] "A cellular process that is involved in the progression of biochemical and morphological phases and events that occur in a cell during successive cell replication or nuclear replication events." [GOC

29474 Pathogen[ Q2Q067] interacts with 2 human partners:{Q9H8E8;Q15637}

29475 Pathogen[ P0C214] interacts with 2 human partners:{Q15637;Q9H8E8}

29476 Pathogen[ P03346] interacts with 2 human partners:{Q15637;Q9H8E8}

29477 Pathogen[ Q85601] interacts with 2 human partners:{Q15637;Q9H8E8}

29478 Pathogen[ P14079] interacts with 2 human partners:{Q15637;Q9H8E8}

29479 Pathogen[ P03383] interacts with 2 human partners:{Q9H8E8;Q15637}

29480 Pathogen[ P03410] interacts with 2 human partners:{Q15637;Q9H8E8}

29481 Pathogen[ P14075] interacts with 2 human partners:{Q9H8E8;Q15637}

29482 Pathogen[ P0C206] interacts with 1 human partners:{Q15637}

29483 Pathogen[ P03363] interacts with 2 human partners:{Q9H8E8;Q15637}

29484 [Cluster 2681]GO:2000623+P biological\_process [name] negative regulation of nuclear-transcribed mRNA catabolic process, nonsense-mediated decay [def] "Any process that stops, prevents or reduces the frequency, rate or extent of nuclear-transcribed mRNA catabolic process, nonsense-mediated decay." [GOC

29485 Pathogen[ Q2Q067] interacts with 1 human partners:{P11940}

29486 Pathogen[ P0C214] interacts with 1 human partners:{P11940}

29487 Pathogen[ P03346] interacts with 1 human partners:{P11940}

29488 Pathogen[ Q85601] interacts with 1 human partners:{P11940}

29489 Pathogen[ P14079] interacts with 1 human partners:{P11940}

29490 Pathogen[ P03383] interacts with 1 human partners:{P11940}

29491 Pathogen[ P03410] interacts with 1 human partners:{P11940}

29492 Pathogen[ P14075] interacts with 1 human partners:{P11940}

29493 Pathogen[ P0C206] interacts with 1 human partners:{P11940}

29494 Pathogen[ P03363] interacts with 1 human partners:{P11940}

29495 [Cluster 2682]GO:0051101+P biological\_process [name] regulation of DNA binding [def] "Any process that modulates the frequency, rate or extent of DNA binding. DNA binding is any process in which a gene product interacts selectively with DNA (deoxyribonucleic acid)." [GOC

29496 Pathogen[ Q2Q067] interacts with 3 human partners:{P20749;P67870;Q8NCD3}

29497 Pathogen[ P0C214] interacts with 3 human partners:{Q8NCD3;P20749;P67870}

29498 Pathogen[ P03346] interacts with 3 human partners:{Q8NCD3;P20749;P67870}

29499 Pathogen[ Q85601] interacts with 3 human partners:{Q8NCD3;P67870;P20749}

29500 Pathogen[ P14079] interacts with 3 human partners:{P20749;Q8NCD3;P67870}

29501 Pathogen[ P03383] interacts with 3 human partners:{P20749;P67870;Q8NCD3}

29502 Pathogen[ P03410] interacts with 3 human partners:{P20749;Q8NCD3;P67870}

29503 Pathogen[ P14075] interacts with 3 human partners:{P67870;Q8NCD3;P20749}

29504 Pathogen[ P0C206] interacts with 3 human partners:{Q8NCD3;P67870;P20749}

29505 Pathogen[ P03363] interacts with 3 human partners:{P20749;Q8NCD3;P67870}

29506 [Cluster 2683]GO:0051085+P biological\_process [name] chaperone mediated protein folding requiring cofactor [def] "The process of assisting in the correct posttranslational noncovalent assembly of proteins, which is dependent on additional protein cofactors. This process occurs over one or several cycles of nucleotide hydrolysis-dependent binding and release." [GOC

29507 Pathogen[ Q2Q067] interacts with 3 human partners:{P11142;O14656;P25685}

29508 Pathogen[ P0C214] interacts with 3 human partners:{O14656;P11142;P25685}

29509 Pathogen[ P03346] interacts with 3 human partners:{P25685;O14656;P11142}

29510 Pathogen[ Q85601] interacts with 3 human partners:{P25685;P11142;O14656}

29511 Pathogen[ P14079] interacts with 3 human partners:{P11142;P25685;O14656}

29512 Pathogen[ P03383] interacts with 1 human partners:{P11142}

29513 Pathogen[ P03410] interacts with 3 human partners:{O14656;P25685;P11142}

29514 Pathogen[ P14075] interacts with 1 human partners:{P11142}

29515 Pathogen[ P0C206] interacts with 3 human partners:{O14656;P25685;P11142}

29516 Pathogen[ P03363] interacts with 2 human partners:{P25685;P11142}

29517 [Cluster 2684]GO:0006543+P biological\_process [name] glutamine catabolic process [def] "The chemical reactions and pathways resulting in the breakdown of glutamine, 2-amino-4-carbamoylbutanoic acid." [GOC

29518 Pathogen[ Q2Q067] interacts with 1 human partners:{O94925}

29519 Pathogen[ P0C214] interacts with 1 human partners:{O94925}

29520 Pathogen[ P03346] interacts with 1 human partners:{O94925}

29521 Pathogen[ Q85601] interacts with 1 human partners:{O94925}

29522 Pathogen[ P14079] interacts with 1 human partners:{O94925}

29523 Pathogen[ P03383] interacts with 1 human partners:{O94925}

29524 Pathogen[ P03410] interacts with 1 human partners:{O94925}

29525 Pathogen[ P14075] interacts with 1 human partners:{O94925}

29526 Pathogen[ P0C206] interacts with 1 human partners:{094925}

29527 Pathogen[ P03363] interacts with 1 human partners:{094925}

29528 [Cluster 2685]GO:0090344+P biological\_process [name] negative regulation of cell aging  
[def] "Any process that decreases the rate, frequency, or extent of cell aging. Cell aging is the progression of the cell from its inception to the end of its lifespan."  
[GOC

29529 Pathogen[ Q2Q067] interacts with 2 human partners:{Q08050;Q9UM11}

29530 Pathogen[ P0C214] interacts with 1 human partners:{Q9UM11}

29531 Pathogen[ P03346] interacts with 2 human partners:{Q9UM11;Q08050}

29532 Pathogen[ Q85601] interacts with 2 human partners:{Q9UM11;Q08050}

29533 Pathogen[ P14079] interacts with 1 human partners:{Q9UM11}

29534 Pathogen[ P03383] interacts with 1 human partners:{Q9UM11}

29535 Pathogen[ P03410] interacts with 1 human partners:{Q9UM11}

29536 Pathogen[ P14075] interacts with 2 human partners:{Q9UM11;Q08050}

29537 Pathogen[ P0C206] interacts with 2 human partners:{Q9UM11;Q08050}

29538 Pathogen[ P03363] interacts with 2 human partners:{Q9UM11;Q08050}

29539 [Cluster 2686]GO:0016553+P biological\_process [name] base conversion or substitution editing [def] "Any base modification or substitution events that result in alterations in the coding potential or structural properties of RNAs as a result of changes in the base-pairing properties of the modified ribonucleoside(s)." [PMID

29540 Pathogen[ Q2Q067] interacts with 2 human partners:{P55265;Q9HC16}

29541 Pathogen[ P0C214] interacts with 2 human partners:{P55265;Q9HC16}

29542 Pathogen[ P03346] interacts with 1 human partners:{P55265}

29543 Pathogen[ Q85601] interacts with 2 human partners:{Q9HC16;P55265}

29544 Pathogen[ P14079] interacts with 2 human partners:{Q9HC16;P55265}

29545 Pathogen[ P03383] interacts with 1 human partners:{P55265}

29546 Pathogen[ P03410] interacts with 2 human partners:{P55265;Q9HC16}

29547 Pathogen[ P14075] interacts with 1 human partners:{P55265}

29548 Pathogen[ P0C206] interacts with 2 human partners:{P55265;Q9HC16}

29549 Pathogen[ P03363] interacts with 1 human partners:{P55265}

29550 [Cluster 2687]GO:2001244+P biological\_process [name] positive regulation of intrinsic apoptotic signaling pathway [def] "Any process that activates or increases the frequency, rate or extent of intrinsic apoptotic signaling pathway." [GOC

29551 Pathogen[ Q2Q067] interacts with 4 human partners:{Q9BXH1;Q9NYF8;Q13794;O43236}

29552 Pathogen[ P0C214] interacts with 5 human partners:{Q13794;Q9BXH1;P10909;O43236;Q9NYF8}

29553 Pathogen[ P03346] interacts with 5 human partners:{O43236;Q8IUQ4;Q9NYF8;Q9BXH1;Q13794}

29554 Pathogen[ Q85601] interacts with 4 human partners:{Q9BXH1;Q9NYF8;Q13794;O43236}

29555 Pathogen[ P14079] interacts with 5 human partners:{P10909;Q9BXH1;Q9NYF8;Q13794;O43236}

29556 Pathogen[ P03383] interacts with 4 human partners:{O43236;Q9NYF8;Q13794;Q9BXH1}

29557 Pathogen[ P03410] interacts with 5 human partners:{Q9BXH1;Q13794;O43236;Q9NYF8;P10909}

29558 Pathogen[ P14075] interacts with 4 human partners:{O43236;Q9NYF8;Q9BXH1;Q13794}

29559 Pathogen[ P0C206] interacts with 6 human partners:{Q8IUQ4;Q9BXH1;O43236;Q9NYF8;P10909;Q13794}

29560 Pathogen[ P03363] interacts with 4 human partners:{Q13794;Q9NYF8;Q9BXH1;O43236}

29561 [Cluster 2688]GO:0043542+P biological\_process [name] endothelial cell migration [def] "The orderly movement of an endothelial cell into the extracellular matrix to form an endothelium." [GOC

29562 Pathogen[ Q2Q067] interacts with 4 human partners:{Q6ZW49;P29474;P25815;P42224}

29563 Pathogen[ P0C214] interacts with 4 human partners:{P29474;P42224;Q6ZW49;P25815}

29564 Pathogen[ P03346] interacts with 5 human partners:{O14908;P29474;P25815;P42224;Q6ZW49}

29565 Pathogen[ Q85601] interacts with 4 human partners:{P25815;P42224;Q6ZW49;P29474}

29566 Pathogen[ P14079] interacts with 4 human partners:{P25815;Q6ZW49;P42224;O14908}

29567 Pathogen[ P03383] interacts with 3 human partners:{P25815;P29474;Q6ZW49}

29568 Pathogen[ P03410] interacts with 4 human partners:{O14908;P25815;P29474;Q6ZW49}

29569 Pathogen[ P14075] interacts with 3 human partners:{P29474;Q6ZW49;P25815}

29570 Pathogen[ P0C206] interacts with 5 human partners:{Q6ZW49;P25815;O14908;P29474;P42224}

29571 Pathogen[ P03363] interacts with 4 human partners:{P29474;O14908;P25815;Q6ZW49}

29572 [Cluster 2689]GO:0006420+P biological\_process [name] arginyl-tRNA aminoacylation [def] "The process of coupling arginine to arginyl-tRNA, catalyzed by arginyl-tRNA synthetase. In tRNA aminoacylation, the amino acid is first activated by linkage to AMP and then transferred to either the 2'- or the 3'-hydroxyl group of the 3'-adenosine residue of the tRNA." [GOC

29573 Pathogen[ Q2Q067] interacts with 2 human partners:{Q5T160;P54136}

29574 Pathogen[ P0C214] interacts with 2 human partners:{Q5T160;Q5D0E6}

29575 Pathogen[ P03346] interacts with 1 human partners:{P54136}

29576 Pathogen[ Q85601] interacts with 3 human partners:{P54136;Q5T160;Q5D0E6}

29577 Pathogen[ P14079] interacts with 3 human partners:{P54136;Q5T160;Q5D0E6}

29578 Pathogen[ P03383] interacts with 3 human partners:{Q5D0E6;Q5T160;P54136}

29579 Pathogen[ P03410] interacts with 3 human partners:{P54136;Q5D0E6;Q5T160}

29580 Pathogen[ P14075] interacts with 3 human partners:{P54136;Q5D0E6;Q5T160}

29581 Pathogen[ P0C206] interacts with 3 human partners:{Q5D0E6;Q5T160;P54136}  
29582 Pathogen[ P03363] interacts with 2 human partners:{P54136;Q5T160}  
29583 [Cluster 2690]GO:0045663+P biological\_process [name] positive regulation of myoblast differentiation [def] "Any process that activates or increases the frequency, rate or extent of myoblast differentiation. A myoblast is a mononucleate cell type that, by fusion with other myoblasts, gives rise to the myotubes that eventually develop into skeletal muscle fibers." [CL  
29584 Pathogen[ Q2Q067] interacts with 4 human partners:{P62324;Q9NWT6;P27986;Q8NB12}  
29585 Pathogen[ P0C214] interacts with 5 human partners:{Q9Y3R4;P62324;Q8NB12;P27986;Q9NWT6}  
29586 Pathogen[ P03346] interacts with 5 human partners:{Q15911;Q8NB12;Q9NWT6;P62324;P27986}  
29587 Pathogen[ Q85601] interacts with 4 human partners:{Q8NB12;Q9NWT6;P62324;P27986}  
29588 Pathogen[ P14079] interacts with 6 human partners:{Q06413;P62324;Q15911;Q9NWT6;Q8NB12;Q9Y3R4}  
29589 Pathogen[ P03383] interacts with 3 human partners:{P27986;Q9NWT6;P62324}  
29590 Pathogen[ P03410] interacts with 5 human partners:{P27986;Q9NWT6;P62324;Q8NB12;Q9Y3R4}  
29591 Pathogen[ P14075] interacts with 3 human partners:{P62324;P27986;Q9NWT6}  
29592 Pathogen[ P0C206] interacts with 6 human partners:{P62324;Q15911;P27986;Q9Y3R4;Q9NWT6;Q8NB12}  
29593 Pathogen[ P03363] interacts with 4 human partners:{Q15911;P62324;Q8NB12;P27986}  
29594 [Cluster 2691]GO:0007064+P biological\_process [name] mitotic sister chromatid cohesion [def] "The cell cycle process in which the sister chromatids of a replicated chromosome are joined along the entire length of the chromosome, from their formation in S phase through metaphase during a mitotic cell cycle. This cohesion cycle is critical for high fidelity chromosome transmission." [GOC  
29595 Pathogen[ Q2Q067] interacts with 4 human partners:{Q7Z3K3;Q9NTI5;Q14683;Q96FF9}  
29596 Pathogen[ P0C214] interacts with 4 human partners:{Q7Z3K3;Q96FF9;Q14683;Q9NTI5}  
29597 Pathogen[ P03346] interacts with 4 human partners:{Q7Z3K3;Q96FF9;Q14683;Q9NTI5}  
29598 Pathogen[ Q85601] interacts with 4 human partners:{Q9NTI5;Q7Z3K3;Q14683;Q96FF9}  
29599 Pathogen[ P14079] interacts with 4 human partners:{Q96FF9;Q7Z3K3;Q9NTI5;Q14683}  
29600 Pathogen[ P03383] interacts with 4 human partners:{Q14683;Q7Z3K3;Q96FF9;Q9NTI5}  
29601 Pathogen[ P03410] interacts with 4 human partners:{Q9NTI5;Q14683;Q7Z3K3;Q96FF9}  
29602 Pathogen[ P14075] interacts with 4 human partners:{Q14683;Q96FF9;Q7Z3K3;Q9NTI5}  
29603 Pathogen[ P0C206] interacts with 4 human partners:{Q96FF9;Q14683;Q7Z3K3;Q9NTI5}  
29604 Pathogen[ P03363] interacts with 4 human partners:{Q7Z3K3;Q9NTI5;Q96FF9;Q14683}  
29605 [Cluster 2692]GO:0009404+P biological\_process [name] toxin metabolic process [def] "The chemical reactions and pathways involving a toxin, a poisonous compound (typically a protein) that is produced by cells or organisms and that can cause disease when introduced into the body or tissues of an organism." [GOC  
29606 Pathogen[ Q2Q067] interacts with 1 human partners:{P54259}  
29607 Pathogen[ P0C214] interacts with 2 human partners:{Q9HBK9;P54259}  
29608 Pathogen[ P03346] interacts with 2 human partners:{Q9HBK9;P54259}  
29609 Pathogen[ Q85601] interacts with 1 human partners:{P54259}  
29610 Pathogen[ P14079] interacts with 2 human partners:{Q9HBK9;P54259}  
29611 Pathogen[ P03383] interacts with 1 human partners:{P54259}  
29612 Pathogen[ P03410] interacts with 2 human partners:{Q9HBK9;P54259}  
29613 Pathogen[ P14075] interacts with 1 human partners:{P54259}  
29614 Pathogen[ P0C206] interacts with 2 human partners:{P54259;Q9HBK9}  
29615 Pathogen[ P03363] interacts with 2 human partners:{P54259;Q9HBK9}  
29616 [Cluster 2693]GO:0031047+P biological\_process [name] gene silencing by RNA [def] "Any process in which RNA molecules inactivate expression of target genes." [GOC  
29617 Pathogen[ Q2Q067] interacts with 21 human partners:{P55265;Q8TAD8;Q7KZF4;Q9HCK5;A6NIX2;Q9NRR4;Q15633;Q5TAX3;Q96IF1;Q9UGP4;Q9H9G7;Q9H9Z2;Q9UKV8;Q9HAV4;Q09161;Q9HCE1;P52298;Q5T8I9;Q9UL18;Q6ZN17;Q9BXP5}  
29618 Pathogen[ P0C214] interacts with 24 human partners:{Q9UGP4;Q6ZN17;Q09161;Q8TAD8;P55265;Q9HAV4;Q7KZF4;Q9HCE1;Q9UPQ9;Q15633;P52298;A6NIX2;Q5T8I9;Q9H9G7;Q8NDV7;Q9NRR4;Q8IV48;Q9H9Z2;Q9UKV8;Q9HCK5;Q9HCJ0;Q9UL18;Q9BXP5;Q5TAX3}  
29619 Pathogen[ P03346] interacts with 25 human partners:{Q09161;Q9HAV4;Q9UGP4;Q5T8I9;P55265;Q9H9G7;Q9UL18;Q15633;Q96J94;Q96IF1;P52298;Q9BXP5;Q9BWF3;Q9HCK5;Q5TAX3;Q7KZF4;Q75569;A6NIX2;Q9UKV8;Q9NRR4;Q9H9Z2;Q9UPQ9;Q9HCE1;Q8TAD8;Q6ZN17}  
29620 Pathogen[ Q85601] interacts with 22 human partners:{Q9HCE1;Q9HAV4;Q6ZN17;Q9HCK5;A6NIX2;Q9UL18;Q9NRR4;Q5T8I9;Q7KZF4;Q09161;Q9H9G7;Q5TAX3;Q9BXP5;Q9UKV8;Q15633;P55265;Q96IF1;Q9UGP4;Q8TAD8;P52298;Q9UPQ9;Q9H9Z2}  
29621 Pathogen[ P14079] interacts with 25 human partners:{Q8IV48;Q9UKV8;Q9UL18;Q9H9G7;P52298;Q9HCE1;Q9HCK5;Q75569;Q9H9Z2;Q5TAX3;P52298;Q9HCJ0;Q96IF1;A6NIX2;Q9NRR4;Q8TAD8;Q7KZF4;Q9HAV4;Q96JY0;Q9BXP5;Q6ZN17;Q9UGP4;Q09161;Q9UPQ9;Q8NDV7}  
29622 Pathogen[ P03383] interacts with 21 human partners:{Q9NRR4;Q8TAD8;Q9H9Z2;Q9UL18;Q9UPQ9;A6NIX2;Q6ZN17;Q5T8I9;Q9HCK5;Q09161;Q5TAX3;Q9HAV4;Q7KZF4;Q9UKV8;P52298;P55265;Q9BXP5;Q9HCE1;Q9H9G7;Q15633}  
29623 Pathogen[ P03410] interacts with 26 human partners:{Q9UPQ9;Q9UKV8;Q15633;Q8IV48;Q9BXP5;Q9UL18;Q5TAX3;Q9UGP4;Q9HCJ0;Q5T8I9;Q8ND

V7;Q9H9G7;P55265;Q8TAD8;Q9NRR4;O75569;Q96IF1;A6NIX2;P52298;Q9HCE1;Q9HCK5;Q9H9Z2;Q7KZ  
F4;Q09161;Q6ZN17;Q9HAV4}

29624 Pathogen[ P14075] interacts with 21 human  
partners: {Q09161;Q8TAD8;P55265;Q9HCK5;Q9H9G7;Q9UGP4;Q9H9Z2;Q9HCE1;Q5TAX3;Q9HAV4;Q6ZN  
17;Q9UPQ9;Q5T8I9;A6NIX2;Q9NRR4;Q9UKV8;Q15633;Q9UL18;Q7KZF4;Q9BXP5;P52298}

29625 Pathogen[ POC206] interacts with 24 human  
partners: {Q9HCK5;P52298;P55265;Q09161;Q8TAD8;Q9UGP4;Q96IF1;Q8IV48;A6NIX2;Q9UPQ9;Q7KZ  
F4;Q9UKV8;Q8NDV7;Q5T8I9;Q9HAV4;Q6ZN17;Q9HCE1;Q9H9Z2;Q9NRR4;Q5TAX3;Q15633;Q9BXP5;Q9H9  
G7;Q9UL18}

29626 Pathogen[ P03363] interacts with 28 human  
partners: {Q6ZN17;Q9BXP5;Q7Z3Z4;Q9HAV4;Q9H9G7;Q5T8I9;Q9HCK5;Q9UKV8;Q9BWF3;Q15633;Q8ND  
V7;Q7KZF4;Q96IF1;Q9UGP4;Q96JY0;Q9HCE1;Q9H9Z2;P52298;P55265;Q9NRR4;Q5TAX3;Q9UPQ9;Q9UL  
18;Q8TAD8;A6NIX2;Q96J94;O75569;Q09161}

29627 [Cluster 2694]GO:0014706+P biological\_process [name] striated muscle tissue  
development [def] "The process whose specific outcome is the progression of a striated  
muscle over time, from its formation to the mature structure. Striated muscle contain  
fibers that are divided by transverse bands into striations, and cardiac and skeletal  
muscle are types of striated muscle. Skeletal muscle myoblasts fuse to form myotubes and  
eventually multinucleated muscle fibers. The fusion of cardiac cells is very rare and  
can only form binucleate cells." [CL

29628 Pathogen[ Q2Q067] interacts with 2 human partners: {Q99502;O00167}

29629 Pathogen[ POC214] interacts with 2 human partners: {O00167;Q99502}

29630 Pathogen[ P03346] interacts with 2 human partners: {O00167;Q99502}

29631 Pathogen[ Q85601] interacts with 2 human partners: {Q99502;O00167}

29632 Pathogen[ P14079] interacts with 2 human partners: {Q99502;O00167}

29633 Pathogen[ P03383] interacts with 1 human partners: {O00167}

29634 Pathogen[ P03410] interacts with 2 human partners: {Q99502;O00167}

29635 Pathogen[ P14075] interacts with 2 human partners: {O00167;Q99502}

29636 Pathogen[ POC206] interacts with 2 human partners: {O00167;Q99502}

29637 Pathogen[ P03363] interacts with 1 human partners: {O00167}

29638 [Cluster 2695]GO:0007004+P biological\_process [name] telomere maintenance via  
telomerase [def] "The maintenance of proper telomeric length by the addition of  
telomeric repeats by telomerase." [GOC

29639 Pathogen[ Q2Q067] interacts with 9 human  
partners: {P49959;Q9NYB0;Q15554;P54274;O60832;O14746;Q96BK5;Q9C0C2;P35251}

29640 Pathogen[ POC214] interacts with 9 human  
partners: {Q96BK5;O14746;P49959;Q15554;Q9C0C2;P35251;O60832;Q9NYB0;P54274}

29641 Pathogen[ P03346] interacts with 10 human  
partners: {Q15554;P54274;O60832;O14746;Q9NUX5;Q96BK5;Q9NYB0;P49959;Q9C0C2;P35251}

29642 Pathogen[ Q85601] interacts with 9 human  
partners: {Q15554;P49959;Q96BK5;P35251;Q9C0C2;O14746;Q9NYB0;O60832;P54274}

29643 Pathogen[ P14079] interacts with 9 human  
partners: {P54274;O14746;Q9NUX5;O60832;Q9C0C2;P35251;Q9NYB0;Q15554;Q96BK5}

29644 Pathogen[ P03383] interacts with 8 human  
partners: {Q9NYB0;Q15554;Q96BK5;Q9C0C2;O14746;O60832;P54274;P35251}

29645 Pathogen[ P03410] interacts with 10 human  
partners: {P49959;Q9NUX5;Q15554;O14746;P54274;Q9C0C2;O60832;P35251;Q96BK5;Q9NYB0}

29646 Pathogen[ P14075] interacts with 8 human  
partners: {O14746;Q15554;Q96BK5;P54274;P35251;O60832;Q9C0C2;Q9NYB0}

29647 Pathogen[ POC206] interacts with 10 human  
partners: {P49959;P35251;Q15554;Q96BK5;P54274;O60832;Q9C0C2;Q9NYB0;Q9NUX5;O14746}

29648 Pathogen[ P03363] interacts with 9 human  
partners: {O60832;Q15554;Q96BK5;Q9NYB0;P35251;O14746;P54274;Q9C0C2;Q9NUX5}

29649 [Cluster 2696]GO:0019882+P biological\_process [name] antigen processing and  
presentation [def] "The process in which an antigen-presenting cell expresses antigen  
(peptide or lipid) on its cell surface in association with an MHC protein complex."  
[GO\_REF

29650 Pathogen[ Q2Q067] interacts with 3 human partners: {Q01201;P28065;P28062}

29651 Pathogen[ POC214] interacts with 3 human partners: {P28062;P28065;Q01201}

29652 Pathogen[ P03346] interacts with 4 human partners: {Q01201;P28062;P28065;O14617}

29653 Pathogen[ Q85601] interacts with 3 human partners: {P28062;Q01201;P28065}

29654 Pathogen[ P14079] interacts with 4 human partners: {P28065;Q01201;P28062;O14617}

29655 Pathogen[ P03383] interacts with 3 human partners: {Q01201;P28065;P28062}

29656 Pathogen[ P03410] interacts with 5 human  
partners: {O00203;O14617;Q01201;P28062;P28065}

29657 Pathogen[ P14075] interacts with 3 human partners: {Q01201;P28062;P28065}

29658 Pathogen[ POC206] interacts with 4 human partners: {P28062;P28065;Q01201;O14617}

29659 Pathogen[ P03363] interacts with 1 human partners: {Q01201}

29660 [Cluster 2697]GO:0030878+P biological\_process [name] thyroid gland development  
[def] "The process whose specific outcome is the progression of the thyroid gland over  
time, from its formation to the mature structure. The thyroid gland is an  
endoderm-derived gland that produces thyroid hormone." [GOC

29661 Pathogen[ Q2Q067] interacts with 5 human  
partners: {O43365;P10827;P20719;P84022;P14651}

29662 Pathogen[ POC214] interacts with 4 human partners: {O43365;P31249;P84022;P14651}

29663 Pathogen[ P03346] interacts with 8 human

29664 partners:{P31249;P10827;P20719;O43365;Q06710;P84022;Q15475;P14651}  
Pathogen[ Q85601] interacts with 5 human

29665 partners:{P10827;P31249;P84022;P14651;O43365}  
Pathogen[ P14079] interacts with 5 human

29666 partners:{P01215;P10827;P31249;O43365;P14651}  
Pathogen[ P03383] interacts with 5 human

29667 partners:{O43365;P31249;P84022;P01215;P14651}  
Pathogen[ P03410] interacts with 5 human

29668 partners:{P84022;P14651;P31249;P01215;O43365}  
Pathogen[ P14075] interacts with 4 human partners:{P31249;O43365;P84022;P01215}

29669 Pathogen[ P0C206] interacts with 7 human  
partners:{P84022;O43365;P14651;P01215;P20719;P31249;P10827}

29670 Pathogen[ P03363] interacts with 5 human  
partners:{O43365;P14651;P20719;P31249;P84022}

29671 [Cluster 2698]GO:0042476+P biological\_process [name] odontogenesis [def] "The process whose specific outcome is the progression of a tooth or teeth over time, from formation to the mature structure(s). A tooth is any hard bony, calcareous, or chitinous organ found in the mouth or pharynx of an animal and used in procuring or masticating food." [GOC

29672 Pathogen[ Q2Q067] interacts with 3 human partners:{P35548;Q6W2J9;P55771}

29673 Pathogen[ P0C214] interacts with 4 human partners:{Q6W2J9;P17026;P35548;P55771}

29674 Pathogen[ P03346] interacts with 5 human  
partners:{P35548;Q02535;P17026;Q6W2J9;P55771}

29675 Pathogen[ Q85601] interacts with 4 human partners:{P17026;P55771;P35548;Q6W2J9}

29676 Pathogen[ P14079] interacts with 5 human  
partners:{P55771;Q6W2J9;P54826;P17026;P28360}

29677 Pathogen[ P03383] interacts with 3 human partners:{P55771;Q6W2J9;P35548}

29678 Pathogen[ P03410] interacts with 6 human  
partners:{Q6W2J9;P35548;P17026;P55771;P54826;Q9NRM1}

29679 Pathogen[ P14075] interacts with 4 human partners:{P35548;Q6W2J9;P55771;P54826}

29680 Pathogen[ P0C206] interacts with 5 human  
partners:{P17026;Q6W2J9;P55771;P35548;P54826}

29681 Pathogen[ P03363] interacts with 3 human partners:{P55771;P35548;Q6W2J9}

29682 [Cluster 2699]GO:0006809+P biological\_process [name] nitric oxide biosynthetic process [def] "The chemical reactions and pathways resulting in the formation of nitric oxide, nitrogen monoxide (NO), a colorless gas only slightly soluble in water." [GOC

29683 Pathogen[ Q2Q067] interacts with 6 human  
partners:{P31749;P30793;P15559;P29474;O95865;P30047}

29684 Pathogen[ P0C214] interacts with 7 human  
partners:{P29474;P35270;P30793;O95865;P30047;P15559;P31749}

29685 Pathogen[ P03346] interacts with 6 human  
partners:{P29474;P15559;P30047;P31749;O95865;P35398}

29686 Pathogen[ Q85601] interacts with 5 human  
partners:{P31749;P30793;P30047;P29474;O95865}

29687 Pathogen[ P14079] interacts with 5 human  
partners:{P35398;P15559;P30793;P30047;O95865}

29688 Pathogen[ P03383] interacts with 4 human partners:{P29474;O95865;P31749;P30047}

29689 Pathogen[ P03410] interacts with 6 human  
partners:{P15559;P30047;O95865;P31749;P30793;P29474}

29690 Pathogen[ P14075] interacts with 6 human  
partners:{P29474;P15559;P31749;O95865;P30047;P30793}

29691 Pathogen[ P0C206] interacts with 7 human  
partners:{P35398;P31749;P15559;P30793;O95865;P30047;P29474}

29692 Pathogen[ P03363] interacts with 5 human  
partners:{P29474;P31749;P35398;O95865;P30047}

29693 [Cluster 2700]GO:0046686+P biological\_process [name] response to cadmium ion [def] "Any process that results in a change in state or activity of a cell or an organism (in terms of movement, secretion, enzyme production, gene expression, etc.) as a result of a cadmium (Cd) ion stimulus." [GOC

29694 Pathogen[ Q2Q067] interacts with 4 human partners:{P04156;P12004;Q14872;P45984}

29695 Pathogen[ P0C214] interacts with 3 human partners:{Q14872;P04156;P45984}

29696 Pathogen[ P03346] interacts with 4 human partners:{P12004;P45984;Q14872;P04156}

29697 Pathogen[ Q85601] interacts with 4 human partners:{Q14872;P45984;P04156;P12004}

29698 Pathogen[ P14079] interacts with 5 human  
partners:{P04156;P45984;P45983;Q14872;P12004}

29699 Pathogen[ P03383] interacts with 3 human partners:{P04156;Q14872;P45984}

29700 Pathogen[ P03410] interacts with 4 human partners:{Q14872;P04156;P45984;P12004}

29701 Pathogen[ P14075] interacts with 3 human partners:{P04156;Q14872;P45984}

29702 Pathogen[ P0C206] interacts with 4 human partners:{P04156;P45984;Q14872;P12004}

29703 Pathogen[ P03363] interacts with 2 human partners:{P04156;Q14872}

29704 [Cluster 2701]GO:0009791+P biological\_process [name] post-embryonic development [def] "The process whose specific outcome is the progression of the organism over time, from the completion of embryonic development to the mature structure. See embryonic development." [GOC

29705 Pathogen[ Q2Q067] interacts with 14 human  
partners:{Q96S65;P35712;P22033;A6NFD8;O15350;Q9Y3Y4;Q8WUF5;Q99608;Q14865;Q15796;Q9UK

29706 Pathogen[ P0C214] interacts with 15 human partners: {Q96S65;Q14865;Q8WUF5;O15350;Q03112;Q99608;P48200;P22033;P05543;Q15796;Q9UKV8;Q6Y7W6;Q9Y3Y4;P21399;P35712}

29707 Pathogen[ P03346] interacts with 20 human partners: {Q96S65;P50219;Q9Y283;A6NFD8;Q14149;Q16559;Q9Y3Y4;Q15796;Q04741;O15350;Q03112;P48200;Q9UKV8;Q8WUF5;Q14865;Q99608;Q9HB21;P35712;P21399;Q8TAU0}

29708 Pathogen[ Q85601] interacts with 18 human partners: {Q96S65;P21399;Q9Y283;Q03112;P48200;Q6Y7W6;P35712;Q99608;Q14149;A6NFD8;Q9HB21;P22033;Q14865;Q9UKV8;Q8WUF5;O15350;Q9Y3Y4;Q15796}

29709 Pathogen[ P14079] interacts with 19 human partners: {Q9UKV8;Q96A33;Q8WUF5;P21399;Q6Y7W6;Q14865;P35712;Q99608;O15350;Q6N021;Q96S65;Q14149;Q9Y6X1;P48200;Q9Y3Y4;P22033;Q9Y283;Q9HB21;A6NFD8}

29710 Pathogen[ P03383] interacts with 11 human partners: {Q96S65;P35712;Q99608;P48200;Q03112;O15350;P22033;Q9UKV8;Q8WUF5;Q15796;Q9Y3Y4}

29711 Pathogen[ P03410] interacts with 22 human partners: {P35712;Q03112;Q9UKV8;Q14149;Q96A33;Q99608;Q6N021;A6NFD8;Q9Y283;Q9HB21;Q9Y6X1;P21399;Q96S65;Q6Y7W6;O15350;Q9Y3Y4;P48200;Q14865;Q15796;P22033;Q8WUF5;Q16559}

29712 Pathogen[ P14075] interacts with 11 human partners: {Q96S65;Q99608;Q9Y3Y4;Q8WUF5;Q15796;P22033;O15350;P35712;Q9UKV8;Q03112;P48200}

29713 Pathogen[ P0C206] interacts with 20 human partners: {Q96A33;Q8WUF5;Q96S65;Q9Y3Y4;A6NFD8;Q9UKV8;Q15796;Q9Y283;P48200;Q6Y7W6;Q03112;Q14149;Q99608;Q9HB21;P35712;O15350;Q14865;Q8TAU0;P22033;P21399}

29714 Pathogen[ P03363] interacts with 15 human partners: {Q96S65;Q14865;Q03112;P48200;Q9UKV8;Q8WUF5;Q9Y3Y4;Q99608;Q15796;Q9Y283;P35712;Q04741;Q8TAU0;P50219;A6NFD8}

29715 [Cluster 2702]GO:0072332+P biological\_process [name] signal transduction by p53 class mediator resulting in induction of apoptosis [def] "A cascade of processes induced by the cell cycle regulator phosphoprotein p53, or an equivalent protein, that results in the induction of apoptosis." [GOC

29716 Pathogen[ Q2Q067] interacts with 5 human partners: {Q9UMX3;O43159;Q16666;Q13794;Q9BQG0}

29717 Pathogen[ P0C214] interacts with 5 human partners: {O43159;Q9BQG0;Q16666;Q13794;Q9UMX3}

29718 Pathogen[ P03346] interacts with 5 human partners: {Q16666;Q9BQG0;O43159;Q9UMX3;Q13794}

29719 Pathogen[ Q85601] interacts with 5 human partners: {Q16666;Q9BQG0;O43159;Q9UMX3;Q13794}

29720 Pathogen[ P14079] interacts with 5 human partners: {Q9BQG0;Q13794;Q9UMX3;O43159;Q16666}

29721 Pathogen[ P03383] interacts with 5 human partners: {Q9BQG0;Q9UMX3;O43159;Q16666;Q13794}

29722 Pathogen[ P03410] interacts with 5 human partners: {Q16666;Q13794;O43159;Q9UMX3;Q9BQG0}

29723 Pathogen[ P14075] interacts with 5 human partners: {Q9UMX3;Q16666;Q9BQG0;Q13794;O43159}

29724 Pathogen[ P0C206] interacts with 5 human partners: {O43159;Q9UMX3;Q16666;Q9BQG0;Q13794}

29725 Pathogen[ P03363] interacts with 5 human partners: {Q13794;Q9BQG0;Q16666;O43159;Q9UMX3}

29726 [Cluster 2703]GO:0090284+P biological\_process [name] positive regulation of protein glycosylation in Golgi [def] "Any process that increases the rate, frequency, or extent of the addition of a sugar unit to a protein amino acid in any compartment of the Golgi apparatus." [GOC

29727 Pathogen[ Q2Q067] interacts with 1 human partners: {Q9Y6D6}

29728 Pathogen[ P0C214] interacts with 1 human partners: {Q9Y6D6}

29729 Pathogen[ P03346] interacts with 1 human partners: {Q9Y6D6}

29730 Pathogen[ Q85601] interacts with 1 human partners: {Q9Y6D6}

29731 Pathogen[ P14079] interacts with 1 human partners: {Q9Y6D6}

29732 Pathogen[ P03383] interacts with 1 human partners: {Q9Y6D6}

29733 Pathogen[ P03410] interacts with 1 human partners: {Q9Y6D6}

29734 Pathogen[ P14075] interacts with 1 human partners: {Q9Y6D6}

29735 Pathogen[ P0C206] interacts with 1 human partners: {Q9Y6D6}

29736 Pathogen[ P03363] interacts with 1 human partners: {Q9Y6D6}

29737 [Cluster 2704]GO:0007031+P biological\_process [name] peroxisome organization [def] "A process that is carried out at the cellular level which results in the assembly, arrangement of constituent parts, or disassembly of a peroxisome. A peroxisome is a small, membrane-bounded organelle that uses dioxygen (O2) to oxidize organic molecules." [GOC

29738 Pathogen[ Q2Q067] interacts with 4 human partners: {O14734;O75381;Q96JE7;P40855}

29739 Pathogen[ P0C214] interacts with 4 human partners: {P40855;O75381;O14734;Q96JE7}

29740 Pathogen[ P03346] interacts with 8 human partners: {O75381;Q96JE7;O14734;P56589;P50542;P40855;O43933;O96011}

29741 Pathogen[ Q85601] interacts with 5 human

29742 partners:{Q96JE7;O14734;O43933;O75381;P40855}  
Pathogen[ P14079] interacts with 10 human

29743 partners:{Q9Y5Y5;O75192;P40855;P56589;Q96JE7;P50542;O96011;O14734;O75381;Q86UB9}  
Pathogen[ P03383] interacts with 4 human partners:{O14734;O75381;Q96JE7;P40855}

29744 Pathogen[ P03410] interacts with 10 human

29745 partners:{O75192;Q9Y5Y5;O96011;P40855;O75381;O14734;Q96JE7;P50542;P56589;Q86UB9}  
Pathogen[ P14075] interacts with 5 human

29746 partners:{Q96JE7;P40855;O14734;O75381;O75192}  
Pathogen[ P0C206] interacts with 10 human

29747 partners:{O43933;O75192;O75381;P56589;P50542;P40855;Q96JE7;O14734;O96011;Q86UB9}  
Pathogen[ P03363] interacts with 4 human partners:{O14734;O43933;O75381;P40855}

29748 [Cluster 2705]GO:0031647+P biological\_process [name] regulation of protein stability  
[def] "Any process that affects the structure and integrity of a protein by altering the  
likelihood of its degradation or aggregation." [GOC

29749 Pathogen[ Q2Q067] interacts with 10 human

29750 partners:{Q93009;Q9NXV6;Q7Z2E3;Q9Y3I1;Q8N726;Q9NYF0;P59047;Q92830;O15164;P60953}  
Pathogen[ P0C214] interacts with 10 human

29751 partners:{Q9Y3I1;P60953;Q8N726;Q7Z2E3;Q93009;Q9NXV6;O15164;Q92830;Q9NYF0;P59047}  
Pathogen[ P03346] interacts with 13 human

29752 partners:{Q06945;P59047;Q93009;O14908;P60953;Q9NXV6;Q92830;Q9NYF0;Q7Z2E3;Q8N726;Q9Y3  
I1;O14965;O15164}  
Pathogen[ Q85601] interacts with 11 human

29753 partners:{Q9Y3I1;Q93009;Q9NYF0;O15164;O14965;Q92830;Q8N726;P60953;Q7Z2E3;Q9NXV6;P590  
47}  
Pathogen[ P14079] interacts with 12 human

29754 partners:{O15164;Q92830;Q9NXV6;Q8N726;O94777;Q9P2X0;Q9Y3I1;O14965;Q7Z2E3;O14908;P590  
47;Q9NYF0}  
Pathogen[ P03383] interacts with 8 human

29755 partners:{Q7Z2E3;Q9Y3I1;P60953;Q92830;O14965;Q9NYF0;Q9NXV6;Q8N726}  
Pathogen[ P03410] interacts with 12 human

29756 partners:{Q92830;Q8N726;Q9Y3I1;O14908;P59047;O94777;Q9NXV6;O14965;Q7Z2E3;Q9NYF0;P609  
53;Q9P2X0}  
Pathogen[ P14075] interacts with 9 human

29757 partners:{P60953;Q7Z2E3;Q9NXV6;O94777;Q9Y3I1;O14965;Q9NYF0;Q92830;Q8N726}  
Pathogen[ P0C206] interacts with 13 human

29758 partners:{Q92830;Q8N726;Q9NXV6;O94777;O15164;Q93009;P59047;O14908;P60953;Q9NYF0;Q9Y3  
I1;O14965;Q7Z2E3}  
Pathogen[ P03363] interacts with 9 human

29759 partners:{O14908;Q9NYF0;Q9Y3I1;Q92830;Q7Z2E3;P59047;Q8N726;P60953;Q9NXV6}  
[Cluster 2706]GO:0008219+P biological\_process [name] cell death [def] "Any  
biological process that results in permanent cessation of all vital functions of a cell.  
A cell should be considered dead when any one of the following molecular or  
morphological criteria is met

29760 Pathogen[ Q2Q067] interacts with 60 human

29761 partners:{P02792;P54252;P20226;O00291;Q13148;P54259;Q99497;Q12988;O60260;Q96JI7;Q142  
04;Q9NZD8;O60543;Q7Z2E3;Q9UJY1;O95999;P04792;Q96LT7;P38935;Q8NF91;Q9Y3I1;Q156A1;Q9UB  
B4;Q9UHD9;Q68DK2;Q14203;P06746;P54253;Q9H2C0;Q9Y6H5;Q9UNN5;Q9NUW8;Q92562;P78344;Q96R  
L7;O15265;Q9UQN3;P15408;Q96CV9;Q00005;O00567;Q9NZJ4;Q53G26;P37198;P12036;Q96QK1;O432  
99;P54098;Q12983;Q99700;P41250;Q04637;Q9UKK3;P35637;Q9NVV4;Q16637;Q96EY1;Q8NEZ2;O604  
77;Q9UHB4}  
Pathogen[ P0C214] interacts with 70 human

29762 partners:{P41250;Q16637;Q9Y3I1;P35637;Q12988;Q00005;Q96JI7;P06746;P54253;P54098;Q9UB  
B4;Q14203;O60543;Q96QK1;P15408;P04792;O00567;P78344;Q14204;Q99497;O60477;Q9UQN3;P389  
35;Q96LT7;Q99700;Q92562;Q96C11;Q99798;O43299;Q9NZJ4;Q8NF91;P37198;Q9Y6H5;Q9NZD8;Q9UN  
N5;Q9NSK7;Q7Z2E3;O95999;Q96MP8;P10809;Q96RL7;Q8NEZ2;Q53G26;Q96CV9;P20226;Q9BZ23;Q129  
83;Q04637;P12036;P10909;Q9UHB4;Q156A1;Q9UKK3;P02792;O15265;Q6Y7W6;O60260;Q9NUW8;Q68D  
K2;Q13148;Q9H2C0;Q9H902;Q9NVV4;Q9UJY1;Q9UHD9;O00291;Q96EY1;P54252;P54259;P55072}  
Pathogen[ P03346] interacts with 68 human

29763 partners:{P02792;O15265;Q96QK1;Q9UBB4;P38935;Q12988;Q00005;Q96MP8;Q9UHD9;O00567;Q128  
40;P54098;Q13148;Q9UHB4;Q96JI7;Q96LT7;Q8NEZ2;Q9UKK3;P15408;Q9NUW8;Q156A1;Q9UJY1;P783  
44;Q9NZD8;Q9H2C0;Q14204;Q14203;Q9NZJ4;Q92562;P37198;O00291;Q12983;P55072;O95999;P202  
26;Q16637;Q9H902;P41250;Q7Z333;P35637;Q99700;P12036;Q96CV9;Q9UNN5;O60477;Q96RL7;Q9NV  
V4;Q9Y6H5;Q53G26;Q8N0X7;Q99497;Q9UQN3;Q68DK2;O60260;Q7Z2E3;Q04637;P54253;O43299;Q8NF  
91;P06746;O60543;Q9Y3I1;Q96EY1;P04792;P54259;P54252;Q9UBP0;Q92610}  
Pathogen[ Q85601] interacts with 64 human

29764 partners:{P54259;Q96QK1;Q99497;Q9Y3I1;Q96CV9;Q9UHB4;Q9UQN3;O15265;Q9UBB4;Q9UBP0;P120  
36;P38935;Q96MP8;Q13148;Q00005;Q53G26;Q96LT7;Q9UKK3;Q04637;Q92610;Q14204;Q6Y7W6;Q96R  
L7;O43299;Q14203;Q92562;Q9NSK7;Q9UHD9;Q12840;P54252;P41250;P35637;Q9H2C0;Q9UNN5;P540  
98;Q12988;O60543;Q9NUW8;Q9H902;P78344;Q8N0X7;Q96JI7;Q68DK2;O60260;Q12983;P02792;P047  
92;Q7Z2E3;P06746;O00567;O00291;Q9NZJ4;Q9Y6H5;P54253;O95999;Q9NVV4;Q8NEZ2;Q16637;Q8NF  
91;Q99700;Q96EY1;Q9UJY1;P15408;P20226}  
Pathogen[ P14079] interacts with 81 human

29765 partners:{Q96QK1;Q9UHB4;O60260;Q96JI7;O14773;Q92562;O00291;Q68DK2;P35637;Q9NZJ4;Q131  
48;O95999;Q99700;Q9NSK7;O60543;Q9NP84;Q12840;O00400;P12036;Q14204;P54252;Q9Y6H5;Q6Y7  
W6;Q99497;Q92610;Q12988;Q96C11;P10909;P54253;O94905;Q9UKK3;O60477;P78344;O00567;O755  
03;Q96LT7;Q9NUW8;Q96RL7;Q16637;Q9Y287;Q9H2C0;Q9BZ23;Q9UNN5;Q00005;Q9UBB4;P41250;Q9NV

29765 V4;Q13510;O95292;Q8NEZ2;P37198;Q12983;Q9UJY1;Q156A1;Q8N0X7;Q9NSU2;P06746;O43299;P54259;O15265;P38935;Q96MP8;Q9NWW5;P54098;Q12768;Q8NF91;P04792;Q9UHD9;Q7RTP0;Q9Y3I1;Q7Z2E3;Q9H902;P15408;Q96CV9;P17405;Q96EY1;Q14203;Q04637;Q3B7T3;Q9UQN3;P10636}  
Pathogen[ P03383] interacts with 54 human partners: {Q7Z2E3;Q9NVV4;Q9Y3I1;P06746;O60543;Q68DK2;Q96JI7;O00567;Q9NZD8;Q96RL7;Q9UBB4;Q9UHB4;P12036;Q14203;Q00005;Q99700;Q8NEZ2;P04792;Q9H2C0;P15408;Q12983;P20226;O00291;P54252;Q16637;O60260;Q9UNN5;P54098;Q9UHD9;P35637;O15265;Q156A1;P78344;O43299;O95999;Q9BZ23;P54253;Q04637;Q9UKK3;Q96QK1;Q9NUW8;Q9UJY1;P38935;Q9Y6H5;Q13148;Q96CV9;P41250;P37198;Q96EY1;O60477;Q96LT7;Q9UQN3;P54259;Q53G26}

29766 Pathogen[ P03410] interacts with 83 human partners: {Q99700;Q92562;Q14204;O95292;Q96RL7;Q9Y6H5;Q9UNN5;Q8N0X7;P12036;Q99497;Q53G26;Q12983;Q9H902;Q3B7T3;Q9NWW5;Q96C11;Q9UHD9;Q9NSK7;O00400;O94905;Q9Y3I1;P35637;Q92610;Q96QK1;P04792;O43299;P06746;Q9Y287;P54252;P20226;O00291;Q9UJY1;O60260;Q9NSU2;Q12840;Q9NVV4;P15408;Q156A1;O75503;Q13148;Q7Z2E3;Q96MP8;O00567;Q13510;P38935;Q8NEZ2;Q9UNN3;Q9NZJ4;O95999;Q16637;Q96LT7;Q96CV9;Q12988;P41250;Q9NUW8;Q9BZ23;Q9UHB4;P10636;Q96JI7;Q00005;P54259;Q6Y7W6;Q12768;Q9H2C0;Q9UBY8;Q9UKK3;O60543;O15265;Q7RTP0;Q9NP84;Q04637;P54253;P02792;Q9UBB4;O60477;Q68DK2;P54098;Q96EY1;P78344;P17405;Q14203;P10909;Q8NF91}

29767 Pathogen[ P14075] interacts with 57 human partners: {Q96RL7;Q7Z2E3;P54253;Q12983;P54098;Q00005;Q156A1;O15265;Q9Y6H5;Q9H2C0;P41250;Q9NVV4;P38935;P78344;P06746;Q13510;P04792;Q53G26;Q9UJY1;P20226;O00567;Q9UHB4;Q9NZD8;Q9Y3I1;Q13148;P15408;Q96JI7;Q9UBB4;Q8NEZ2;P54252;Q16637;O00291;P12036;Q68DK2;Q9UNN5;Q9UHD9;Q9UQN3;Q04637;O60543;Q96C11;P37198;O95999;Q9BZ23;O60477;Q96CV9;P35637;P54259;Q99700;Q14203;Q9Y287;O60260;Q96LT7;Q9NUW8;Q96EY1;O43299;Q9UKK3;Q96QK1}

29768 Pathogen[ P0C206] interacts with 78 human partners: {Q9UNN5;Q68DK2;Q8N0X7;Q12988;Q8NEZ2;P38935;Q9UBB4;Q9NSU2;O00291;Q9UBP0;P20226;Q9Y287;Q92562;Q96CV9;O60477;Q96JI7;O95999;Q53G26;O00567;Q9UQN3;Q9NUW8;Q12768;O15265;Q9NZJ4;P06746;P54098;P04792;Q9BZ23;P41250;Q99497;P10636;P54252;O43299;P54259;Q6Y7W6;Q9UJY1;O95292;Q92610;P12036;Q12983;Q14204;Q8NF91;Q7Z333;Q96LT7;Q9UKK3;Q99700;O60260;P35637;O94905;P10909;P02792;Q9NVV4;Q12840;P55072;Q13148;Q156A1;Q96MP8;Q96C11;P78344;Q04637;Q96QK1;Q99798;Q9Y3I1;O60543;Q16637;Q9UHB4;Q14203;Q96EY1;Q00005;Q7Z2E3;P15408;Q9UHD9;Q9H902;Q9H2C0;Q9Y6H5;Q96RL7;Q9NSK7;P54253}

29769 Pathogen[ P03363] interacts with 60 human partners: {Q9UNN5;Q9Y6H5;Q9NVV4;O60543;Q8NF91;Q9H902;Q7Z333;Q96CV9;Q9UHB4;Q13148;Q9NZJ4;P54259;P22314;P35637;Q00005;Q96QK1;P41250;Q12988;Q14204;O00567;Q8N0X7;Q9UJY1;P54252;Q156A1;Q96JI7;Q68DK2;P54098;Q53G26;Q9Y3I1;Q9UKK3;Q7Z2E3;P06746;Q9UBB4;O60477;Q9NUW8;O15265;P54253;Q96LT7;P20226;Q96RL7;Q8NEZ2;Q9UQN3;Q16637;Q9NZD8;Q99700;P12036;Q9H2C0;P78344;P37198;Q96EY1;P15408;Q14203;P04792;P38935;O00291;Q96MP8;Q12840;Q9UHD9;O43299;Q04637}

29770 [Cluster 2707]GO:0042117+P biological\_process [name] monocyte activation [def] "The change in morphology and behavior of a monocyte resulting from exposure to a cytokine, chemokine, cellular ligand, or soluble factor." [GOC]

29771 Pathogen[ Q2Q067] interacts with 1 human partners: {P13640}

29772 Pathogen[ P0C214] interacts with 1 human partners: {P13640}

29773 Pathogen[ P03346] interacts with 1 human partners: {P13640}

29774 Pathogen[ Q85601] interacts with 1 human partners: {P13640}

29775 Pathogen[ P14079] interacts with 1 human partners: {P13640}

29776 Pathogen[ P03383] interacts with 1 human partners: {P13640}

29777 Pathogen[ P03410] interacts with 1 human partners: {P13640}

29778 Pathogen[ P14075] interacts with 1 human partners: {P13640}

29779 Pathogen[ P0C206] interacts with 1 human partners: {P13640}

29780 Pathogen[ P03363] interacts with 1 human partners: {P13640}

29781 [Cluster 2708]GO:0035249+P biological\_process [name] synaptic transmission, glutamatergic [def] "The process of communication from a neuron to another neuron across a synapse using the neurotransmitter glutamate." [GOC]

29782 Pathogen[ Q2Q067] interacts with 2 human partners: {Q92529;P54920}

29783 Pathogen[ P0C214] interacts with 2 human partners: {P54920;Q92529}

29784 Pathogen[ P03346] interacts with 3 human partners: {Q9H115;P54920;Q92529}

29785 Pathogen[ Q85601] interacts with 2 human partners: {P54920;Q92529}

29786 Pathogen[ P14079] interacts with 3 human partners: {Q9H115;Q92529;P54920}

29787 Pathogen[ P03383] interacts with 1 human partners: {P54920}

29788 Pathogen[ P03410] interacts with 3 human partners: {Q92529;Q9H115;P54920}

29789 Pathogen[ P14075] interacts with 1 human partners: {P54920}

29790 Pathogen[ P0C206] interacts with 2 human partners: {P54920;Q92529}

29791 Pathogen[ P03363] interacts with 2 human partners: {P54920;Q92529}

29792 [Cluster 2709]GO:0043486+P biological\_process [name] histone exchange [def] "The replacement, within chromatin, of resident histones or histone subunits with alternative, sometimes variant, histones or subunits." [GOC]

29793 Pathogen[ Q2Q067] interacts with 2 human partners: {O76064;P49321}

29794 Pathogen[ P0C214] interacts with 2 human partners: {P49321;O76064}

29795 Pathogen[ P03346] interacts with 2 human partners: {O76064;P49321}

29796 Pathogen[ Q85601] interacts with 2 human partners: {P49321;O76064}

29797 Pathogen[ P14079] interacts with 1 human partners: {P49321}

29798 Pathogen[ P03383] interacts with 1 human partners: {P49321}

29799 Pathogen[ P03410] interacts with 1 human partners: {P49321}

29800 Pathogen[ P14075] interacts with 1 human partners: {P49321}



29801 Pathogen[ P0C206] interacts with 2 human partners:{P49321;O76064}

29802 Pathogen[ P03363] interacts with 1 human partners:{P49321}

29803 [Cluster 2710]GO:0035039+P biological\_process [name] male pronucleus assembly [def] "The conversion at fertilization of the inactive sperm nucleus into a male pronucleus with its chromosomes processed for the first zygotic division." [GOC

29804 Pathogen[ Q2Q067] interacts with 1 human partners:{Q6ICG8}

29805 Pathogen[ P0C214] interacts with 1 human partners:{Q6ICG8}

29806 Pathogen[ P03346] interacts with 1 human partners:{Q6ICG8}

29807 Pathogen[ Q85601] interacts with 1 human partners:{Q6ICG8}

29808 Pathogen[ P14079] interacts with 1 human partners:{Q6ICG8}

29809 Pathogen[ P03383] interacts with 1 human partners:{Q6ICG8}

29810 Pathogen[ P03410] interacts with 1 human partners:{Q6ICG8}

29811 Pathogen[ P14075] interacts with 1 human partners:{Q6ICG8}

29812 Pathogen[ P0C206] interacts with 1 human partners:{Q6ICG8}

29813 Pathogen[ P03363] interacts with 1 human partners:{Q6ICG8}

29814 [Cluster 2711]GO:0007431+P biological\_process [name] salivary gland development [def] "The process whose specific outcome is the progression of the salivary gland over time, from its formation to the mature structure. Salivary glands include any of the saliva-secreting exocrine glands of the oral cavity." [GOC

29815 Pathogen[ Q2Q067] interacts with 1 human partners:{Q9NZI6}

29816 Pathogen[ P0C214] interacts with 1 human partners:{Q9NZI6}

29817 Pathogen[ P03346] interacts with 1 human partners:{Q9NZI6}

29818 Pathogen[ Q85601] interacts with 1 human partners:{Q9NZI6}

29819 Pathogen[ P14079] interacts with 1 human partners:{Q9NZI6}

29820 Pathogen[ P03383] interacts with 1 human partners:{Q9NZI6}

29821 Pathogen[ P03410] interacts with 1 human partners:{Q9NZI6}

29822 Pathogen[ P14075] interacts with 1 human partners:{Q9NZI6}

29823 Pathogen[ P0C206] interacts with 1 human partners:{Q9NZI6}

29824 Pathogen[ P03363] interacts with 1 human partners:{Q9NZI6}

29825 [Cluster 2712]GO:0045667+P biological\_process [name] regulation of osteoblast differentiation [def] "Any process that modulates the frequency, rate or extent of osteoblast differentiation." [GOC

29826 Pathogen[ Q2Q067] interacts with 2 human partners:{Q9BXL5;P11474}

29827 Pathogen[ P0C214] interacts with 1 human partners:{P11474}

29828 Pathogen[ P03346] interacts with 3 human partners:{Q9BXL5;Q92832;P11474}

29829 Pathogen[ Q85601] interacts with 1 human partners:{P11474}

29830 Pathogen[ P14079] interacts with 3 human partners:{P11474;Q92832;Q9BXL5}

29831 Pathogen[ P03383] interacts with 2 human partners:{Q9BXL5;P11474}

29832 Pathogen[ P03410] interacts with 3 human partners:{Q92832;Q9BXL5;P11474}

29833 Pathogen[ P14075] interacts with 2 human partners:{Q9BXL5;P11474}

29834 Pathogen[ P0C206] interacts with 3 human partners:{Q9BXL5;P11474;Q92832}

29835 Pathogen[ P03363] interacts with 3 human partners:{Q9BXL5;P11474;Q92832}

29836 [Cluster 2713]GO:0031497+P biological\_process [name] chromatin assembly [def] "The assembly of DNA, histone proteins, other associated proteins, and sometimes RNA, into chromatin structure, beginning with the formation of the basic unit, the nucleosome, followed by organization of the nucleosomes into higher order structures, ultimately giving rise to a complex organization of specific domains within the nucleus." [http

29837 Pathogen[ Q2Q067] interacts with 3 human partners:{Q13111;Q09028;Q13112}

29838 Pathogen[ P0C214] interacts with 3 human partners:{Q13112;Q13111;Q09028}

29839 Pathogen[ P03346] interacts with 3 human partners:{Q09028;Q13111;Q13112}

29840 Pathogen[ Q85601] interacts with 3 human partners:{Q13112;Q09028;Q13111}

29841 Pathogen[ P14079] interacts with 3 human partners:{Q13112;Q13111;Q09028}

29842 Pathogen[ P03383] interacts with 3 human partners:{Q09028;Q13111;Q13112}

29843 Pathogen[ P03410] interacts with 3 human partners:{Q09028;Q13111;Q13112}

29844 Pathogen[ P14075] interacts with 3 human partners:{Q13111;Q09028;Q13112}

29845 Pathogen[ P0C206] interacts with 3 human partners:{Q13112;Q13111;Q09028}

29846 Pathogen[ P03363] interacts with 3 human partners:{Q13112;Q09028;Q13111}

29847 [Cluster 2714]GO:0016559+P biological\_process [name] peroxisome fission [def] "The division of a mature peroxisome within a cell to form two or more separate peroxisome compartments." [GOC

29848 Pathogen[ Q2Q067] interacts with 4 human partners:{O14734;Q9GZY8;Q96JE7;P40855}

29849 Pathogen[ P0C214] interacts with 4 human partners:{P40855;O14734;Q96JE7;Q9GZY8}

29850 Pathogen[ P03346] interacts with 5 human partners:{Q96JE7;O14734;P40855;O96011;Q9GZY8}

29851 Pathogen[ Q85601] interacts with 4 human partners:{Q96JE7;O14734;Q9GZY8;P40855}

29852 Pathogen[ P14079] interacts with 7 human partners:{O75192;Q96HA9;P40855;Q96JE7;O96011;O14734;Q9GZY8}

29853 Pathogen[ P03383] interacts with 5 human partners:{Q96HA9;O14734;Q96JE7;Q9GZY8;P40855}

29854 Pathogen[ P03410] interacts with 7 human partners:{O75192;Q9GZY8;O96011;P40855;O14734;Q96JE7;Q96HA9}

29855 Pathogen[ P14075] interacts with 6 human partners:{Q96JE7;P40855;O14734;Q9GZY8;Q96HA9;O75192}

29856 Pathogen[ P0C206] interacts with 7 human partners:{O75192;Q96HA9;P40855;Q96JE7;O14734;O96011;Q9GZY8}

29857 Pathogen[ P03363] interacts with 3 human partners:{O14734;P40855;Q9GZY8}

29858 [Cluster 2715]GO:0006287+P biological\_process [name] base-excision repair, gap-filling  
[def] "Repair of the damaged strand by the combined action of an apurinic endonuclease  
that degrades a few bases on the damaged strand and a polymerase that synthesizes a  
'patch' in the 5' to 3' direction, using the undamaged strand as a template." [ISBN

29859 Pathogen[ Q2Q067] interacts with 1 human partners:{P54098}  
29860 Pathogen[ P0C214] interacts with 1 human partners:{P54098}  
29861 Pathogen[ P03346] interacts with 1 human partners:{P54098}  
29862 Pathogen[ Q85601] interacts with 1 human partners:{P54098}  
29863 Pathogen[ P14079] interacts with 2 human partners:{Q5QGS0;P54098}  
29864 Pathogen[ P03383] interacts with 1 human partners:{P54098}  
29865 Pathogen[ P03410] interacts with 2 human partners:{Q5QGS0;P54098}  
29866 Pathogen[ P14075] interacts with 1 human partners:{P54098}  
29867 Pathogen[ P0C206] interacts with 1 human partners:{P54098}  
29868 Pathogen[ P03363] interacts with 1 human partners:{P54098}

29869 [Cluster 2716]GO:0002315+P biological\_process [name] marginal zone B cell  
differentiation [def] "The process in which a B cell in the spleen acquires the  
specialized features of a marginal zone B cell. Marginal zone B cells are localized in a  
distinct anatomical region of the spleen that represents the major antigen-filtering and  
scavenging area (by specialized macrophages resident there). It appears that they are  
preselected to express a BCR repertoire similar to B-1 B cells, biased toward bacterial  
cell wall constituents and senescent self-components (such as oxidized LDL)." [GOC

29870 Pathogen[ Q2Q067] interacts with 1 human partners:{P20749}  
29871 Pathogen[ P0C214] interacts with 1 human partners:{P20749}  
29872 Pathogen[ P03346] interacts with 1 human partners:{P20749}  
29873 Pathogen[ Q85601] interacts with 1 human partners:{P20749}  
29874 Pathogen[ P14079] interacts with 1 human partners:{P20749}  
29875 Pathogen[ P03383] interacts with 1 human partners:{P20749}  
29876 Pathogen[ P03410] interacts with 1 human partners:{P20749}  
29877 Pathogen[ P14075] interacts with 1 human partners:{P20749}  
29878 Pathogen[ P0C206] interacts with 1 human partners:{P20749}  
29879 Pathogen[ P03363] interacts with 1 human partners:{P20749}

29880 [Cluster 2717]GO:0045947+P biological\_process [name] negative regulation of  
translational initiation [def] "Any process that stops, prevents, or reduces the  
frequency, rate or extent of translational initiation." [GOC

29881 Pathogen[ Q2Q067] interacts with 9 human  
partners:{Q9ULR5;Q13541;Q9UI10;Q06787;P60228;O60516;Q9UKV8;Q9BPZ3;Q13542}  
29882 Pathogen[ P0C214] interacts with 9 human  
partners:{P60228;Q9UI10;Q06787;O60516;Q13542;Q9BPZ3;Q9UKV8;Q9ULR5;Q13541}  
29883 Pathogen[ P03346] interacts with 10 human  
partners:{Q9ULR5;Q13542;Q06787;Q9BPZ3;Q13541;Q9BWF3;P60228;Q9UKV8;O60516;Q9UI10}  
29884 Pathogen[ Q85601] interacts with 9 human  
partners:{Q06787;Q9ULR5;O60516;Q13541;P60228;Q9BPZ3;Q9UKV8;Q9UI10;Q13542}  
29885 Pathogen[ P14079] interacts with 8 human  
partners:{Q9UKV8;Q9UI10;Q13541;Q9BPZ3;Q13542;Q9ULR5;Q06787;O60516}  
29886 Pathogen[ P03383] interacts with 9 human  
partners:{P60228;Q9UI10;Q06787;Q9ULR5;Q13542;Q13541;Q9UKV8;O60516;Q9BPZ3}  
29887 Pathogen[ P03410] interacts with 9 human  
partners:{Q9UKV8;Q9BPZ3;Q9ULR5;Q13541;Q13542;Q06787;O60516;P60228;Q9UI10}  
29888 Pathogen[ P14075] interacts with 9 human  
partners:{Q13542;O60516;Q9UI10;P60228;Q06787;Q9UKV8;Q9BPZ3;Q9ULR5;Q13541}  
29889 Pathogen[ P0C206] interacts with 9 human  
partners:{Q13541;Q9ULR5;Q06787;Q9UKV8;P60228;Q13542;Q9BPZ3;Q9UI10;O60516}  
29890 Pathogen[ P03363] interacts with 10 human  
partners:{Q06787;Q9ULR5;Q9UI10;Q9UKV8;Q9BWF3;Q9BPZ3;P60228;Q13541;O60516;Q13542}

29891 [Cluster 2718]GO:0032703+P biological\_process [name] negative regulation of  
interleukin-2 production [def] "Any process that stops, prevents, or reduces the  
frequency, rate, or extent of interleukin-2 production." [GOC

29892 Pathogen[ Q2Q067] interacts with 3 human partners:{P04156;Q92993;Q8WUI4}  
29893 Pathogen[ P0C214] interacts with 3 human partners:{Q92993;P04156;Q8WUI4}  
29894 Pathogen[ P03346] interacts with 3 human partners:{Q8WUI4;P04156;Q92993}  
29895 Pathogen[ Q85601] interacts with 3 human partners:{P04156;Q92993;Q8WUI4}  
29896 Pathogen[ P14079] interacts with 3 human partners:{P04156;Q8WUI4;Q92993}  
29897 Pathogen[ P03383] interacts with 3 human partners:{P04156;Q92993;Q8WUI4}  
29898 Pathogen[ P03410] interacts with 3 human partners:{Q8WUI4;P04156;Q92993}  
29899 Pathogen[ P14075] interacts with 3 human partners:{P04156;Q92993;Q8WUI4}  
29900 Pathogen[ P0C206] interacts with 3 human partners:{P04156;Q92993;Q8WUI4}  
29901 Pathogen[ P03363] interacts with 3 human partners:{P04156;Q8WUI4;Q92993}

29902 [Cluster 2719]GO:0006527+P biological\_process [name] arginine catabolic process  
[def] "The chemical reactions and pathways resulting in the breakdown of arginine,  
2-amino-5-(carbamimidamido)pentanoic acid." [CHEBI

29903 Pathogen[ Q2Q067] interacts with 2 human partners:{P29474;O95865}  
29904 Pathogen[ P0C214] interacts with 3 human partners:{P29474;O95865;P04424}  
29905 Pathogen[ P03346] interacts with 2 human partners:{P29474;O95865}  
29906 Pathogen[ Q85601] interacts with 2 human partners:{P29474;O95865}  
29907 Pathogen[ P14079] interacts with 3 human partners:{P16930;P04424;O95865}  
29908 Pathogen[ P03383] interacts with 2 human partners:{P29474;O95865}

29909 Pathogen[ P03410] interacts with 4 human partners:{P04424;O95865;P29474;P16930}

29910 Pathogen[ P14075] interacts with 2 human partners:{P29474;O95865}

29911 Pathogen[ P0C206] interacts with 2 human partners:{O95865;P29474}

29912 Pathogen[ P03363] interacts with 2 human partners:{P29474;O95865}

29913 [Cluster 2720]GO:0044154+P biological\_process [name] histone H3-K14 acetylation [def] "The modification of histone H3 by the addition of an acetyl group to a lysine residue at position 14 of the histone." [GOC

29914 Pathogen[ Q2Q067] interacts with 3 human partners:{Q9HAF1;Q92830;O60885}

29915 Pathogen[ P0C214] interacts with 3 human partners:{Q9HAF1;O60885;Q92830}

29916 Pathogen[ P03346] interacts with 3 human partners:{Q92830;O60885;Q9HAF1}

29917 Pathogen[ Q85601] interacts with 3 human partners:{Q9HAF1;Q92830;O60885}

29918 Pathogen[ P14079] interacts with 3 human partners:{Q92830;Q9HAF1;O60885}

29919 Pathogen[ P03383] interacts with 3 human partners:{Q92830;O60885;Q9HAF1}

29920 Pathogen[ P03410] interacts with 2 human partners:{Q92830;O60885}

29921 Pathogen[ P14075] interacts with 3 human partners:{Q9HAF1;O60885;Q92830}

29922 Pathogen[ P0C206] interacts with 3 human partners:{Q92830;O60885;Q9HAF1}

29923 Pathogen[ P03363] interacts with 3 human partners:{Q9HAF1;O60885;Q92830}

29924 [Cluster 2721]GO:0000460+P biological\_process [name] maturation of 5.8S rRNA [def] "Any process involved in the maturation of a precursor 5.8S ribosomal RNA (rRNA) molecule into a mature 5.8S rRNA molecule." [GOC

29925 Pathogen[ Q2Q067] interacts with 3 human partners:{Q99547;Q9NPD3;Q13901}

29926 Pathogen[ P0C214] interacts with 3 human partners:{Q13901;Q99547;Q9NPD3}

29927 Pathogen[ P03346] interacts with 4 human partners:{P42285;Q99547;Q9NPD3;Q13901}

29928 Pathogen[ Q85601] interacts with 3 human partners:{Q9NPD3;Q99547;Q13901}

29929 Pathogen[ P14079] interacts with 3 human partners:{Q13901;Q9NPD3;Q99547}

29930 Pathogen[ P03383] interacts with 3 human partners:{Q99547;Q9NPD3;Q13901}

29931 Pathogen[ P03410] interacts with 3 human partners:{Q99547;Q13901;Q9NPD3}

29932 Pathogen[ P14075] interacts with 3 human partners:{Q9NPD3;Q13901;Q99547}

29933 Pathogen[ P0C206] interacts with 3 human partners:{Q9NPD3;Q99547;Q13901}

29934 Pathogen[ P03363] interacts with 4 human partners:{Q99547;Q13901;Q9NPD3;P42285}

29935 [Cluster 2722]GO:0031571+P biological\_process [name]mitotic cell cycle G1/S transition DNA damage checkpoint [def] "A mitotic G1/S transition checkpoint that blocks entry into S phase in response to DNA damage." [GOC

29936 Pathogen[ Q2Q067] interacts with 4 human partners:{P24385;O15350;P24941;Q71UM5}

29937 Pathogen[ P0C214] interacts with 5 human partners:{O15350;Q71UM5;P24385;P24941;Q5XUX0}

29938 Pathogen[ P03346] interacts with 6 human partners:{P24385;Q6PCD5;P24941;Q71UM5;O15350;Q5XUX0}

29939 Pathogen[ Q85601] interacts with 5 human partners:{P24385;Q6PCD5;Q71UM5;O15350;P24941}

29940 Pathogen[ P14079] interacts with 3 human partners:{Q5XUX0;O15350;Q71UM5}

29941 Pathogen[ P03383] interacts with 5 human partners:{P24385;Q71UM5;P24941;O15350;Q5XUX0}

29942 Pathogen[ P03410] interacts with 5 human partners:{Q5XUX0;P24385;P24941;O15350;Q71UM5}

29943 Pathogen[ P14075] interacts with 5 human partners:{P24941;O15350;P24385;Q5XUX0;Q71UM5}

29944 Pathogen[ P0C206] interacts with 6 human partners:{Q6PCD5;Q71UM5;O15350;Q5XUX0;P24941;P24385}

29945 Pathogen[ P03363] interacts with 5 human partners:{P24941;Q6PCD5;P24385;Q71UM5;Q5XUX0}

29946 [Cluster 2723]GO:0048339+P biological\_process [name] paraxial mesoderm development [def] "The process whose specific outcome is the progression of the paraxial mesoderm over time, from its formation to the mature structure. The paraxial mesoderm is the mesoderm located bilaterally adjacent to the notochord and neural tube." [GOC

29947 Pathogen[ Q2Q067] interacts with 3 human partners:{P46937;Q15562;Q8WUM0}

29948 Pathogen[ P0C214] interacts with 3 human partners:{P46937;Q15562;Q8WUM0}

29949 Pathogen[ P03346] interacts with 3 human partners:{Q15562;P46937;Q8WUM0}

29950 Pathogen[ Q85601] interacts with 3 human partners:{Q8WUM0;Q15562;P46937}

29951 Pathogen[ P14079] interacts with 3 human partners:{P46937;Q8WUM0;Q15562}

29952 Pathogen[ P03383] interacts with 3 human partners:{Q8WUM0;Q15562;P46937}

29953 Pathogen[ P03410] interacts with 3 human partners:{P46937;Q8WUM0;Q15562}

29954 Pathogen[ P14075] interacts with 3 human partners:{Q15562;P46937;Q8WUM0}

29955 Pathogen[ P0C206] interacts with 3 human partners:{P46937;Q8WUM0;Q15562}

29956 Pathogen[ P03363] interacts with 3 human partners:{Q15562;Q8WUM0;P46937}

29957 [Cluster 2724]GO:0030150+P biological\_process [name] protein import into mitochondrial matrix [def] "The import of proteins across the outer and inner mitochondrial membranes into the matrix. Unfolded proteins enter the mitochondrial matrix with a chaperone protein\_ the information required to target the precursor protein from the cytosol to the mitochondrial matrix is contained within its N-terminal matrix-targeting sequence. Translocation of precursors to the matrix occurs at the rare sites where the outer and inner membranes are close together." [ISBN

29958 Pathogen[ Q2Q067] interacts with 2 human partners:{Q9HAV7;Q96BW9}

29959 Pathogen[ P0C214] interacts with 2 human partners:{Q96BW9;Q9HAV7}

29960 Pathogen[ P03346] interacts with 2 human partners:{Q9HAV7;Q96BW9}

29961 Pathogen[ Q85601] interacts with 2 human partners:{Q96BW9;Q9HAV7}

29962 Pathogen[ P14079] interacts with 2 human partners:{Q96BW9;Q9HAV7}

29963 Pathogen[ P03383] interacts with 2 human partners:{Q96BW9;Q9HAV7}

29964 Pathogen[ P03410] interacts with 2 human partners:{Q96BW9;Q9HAV7}

29965 Pathogen[ P14075] interacts with 2 human partners:{Q9HAV7;Q96BW9}

29966 Pathogen[ P0C206] interacts with 2 human partners:{Q9HAV7;Q96BW9}

29967 Pathogen[ P03363] interacts with 1 human partners:{Q96BW9}

29968 [Cluster 2725]GO:0048642+P biological\_process [name] negative regulation of skeletal muscle tissue development [def] "Any process that stops, prevents, or reduces the frequency, rate or extent of skeletal muscle tissue development." [GOC

29969 Pathogen[ Q2Q067] interacts with 2 human partners:{Q99576;P16989}

29970 Pathogen[ P0C214] interacts with 2 human partners:{P16989;Q99576}

29971 Pathogen[ P03346] interacts with 3 human partners:{P16989;Q99576;O75604}

29972 Pathogen[ Q85601] interacts with 2 human partners:{Q99576;P16989}

29973 Pathogen[ P14079] interacts with 2 human partners:{Q99576;P16989}

29974 Pathogen[ P03383] interacts with 2 human partners:{P16989;Q99576}

29975 Pathogen[ P03410] interacts with 2 human partners:{P16989;Q99576}

29976 Pathogen[ P14075] interacts with 2 human partners:{P16989;Q99576}

29977 Pathogen[ P0C206] interacts with 3 human partners:{O75604;P16989;Q99576}

29978 Pathogen[ P03363] interacts with 3 human partners:{Q99576;O75604;P16989}

29979 [Cluster 2726]GO:0045347+P biological\_process [name] negative regulation of MHC class II biosynthetic process [def] "Any process that stops, prevents, or reduces the frequency, rate or extent of the chemical reactions and pathways resulting in the formation of MHC class II." [GOC

29980 Pathogen[ Q2Q067] interacts with 3 human partners:{Q12986;Q92769;P17947}

29981 Pathogen[ P0C214] interacts with 3 human partners:{P17947;Q12986;Q92769}

29982 Pathogen[ P03346] interacts with 3 human partners:{Q12986;Q92769;P17947}

29983 Pathogen[ Q85601] interacts with 3 human partners:{Q92769;P17947;Q12986}

29984 Pathogen[ P14079] interacts with 2 human partners:{Q12986;Q92769}

29985 Pathogen[ P03383] interacts with 3 human partners:{Q12986;Q92769;P17947}

29986 Pathogen[ P03410] interacts with 3 human partners:{P17947;Q12986;Q92769}

29987 Pathogen[ P14075] interacts with 3 human partners:{Q12986;Q92769;P17947}

29988 Pathogen[ P0C206] interacts with 3 human partners:{Q92769;Q12986;P17947}

29989 Pathogen[ P03363] interacts with 2 human partners:{P17947;Q12986}

29990 [Cluster 2727]GO:0033169+P biological\_process [name] histone H3-K9 demethylation [def] "The modification of histone H3 by the removal of a methyl group from lysine at position 9 of the histone." [GOC

29991 Pathogen[ Q2Q067] interacts with 3 human partners:{Q9UPP1;O75151;Q9ULV5}

29992 Pathogen[ P0C214] interacts with 3 human partners:{O75151;Q9ULV5;Q9UPP1}

29993 Pathogen[ P03346] interacts with 3 human partners:{O75151;Q9UPP1;Q9ULV5}

29994 Pathogen[ Q85601] interacts with 3 human partners:{Q9ULV5;O75151;Q9UPP1}

29995 Pathogen[ P14079] interacts with 3 human partners:{O75151;Q9UPP1;Q9ULV5}

29996 Pathogen[ P03383] interacts with 3 human partners:{O75151;Q9ULV5;Q9UPP1}

29997 Pathogen[ P03410] interacts with 3 human partners:{Q9UPP1;O75151;Q9ULV5}

29998 Pathogen[ P14075] interacts with 3 human partners:{Q9UPP1;Q9ULV5;O75151}

29999 Pathogen[ P0C206] interacts with 3 human partners:{Q9UPP1;O75151;Q9ULV5}

30000 Pathogen[ P03363] interacts with 1 human partners:{Q9ULV5}

30001 [Cluster 2728]GO:0019216+P biological\_process [name] regulation of lipid metabolic process [def] "Any process that modulates the frequency, rate or extent of the chemical reactions and pathways involving lipids." [GOC

30002 Pathogen[ Q2Q067] interacts with 1 human partners:{O60869}

30003 Pathogen[ P0C214] interacts with 2 human partners:{P01011;O60869}

30004 Pathogen[ P03346] interacts with 1 human partners:{O60869}

30005 Pathogen[ Q85601] interacts with 2 human partners:{P01011;O60869}

30006 Pathogen[ P14079] interacts with 1 human partners:{O60869}

30007 Pathogen[ P03383] interacts with 1 human partners:{O60869}

30008 Pathogen[ P03410] interacts with 2 human partners:{O60869;P01011}

30009 Pathogen[ P14075] interacts with 1 human partners:{O60869}

30010 Pathogen[ P0C206] interacts with 2 human partners:{O60869;P01011}

30011 Pathogen[ P03363] interacts with 1 human partners:{O60869}

30012 [Cluster 2729]GO:0042407+P biological\_process [name] cristae formation [def] "The assembly of cristae, the inwards folds of the inner mitochondrial membrane." [GOC

30013 Pathogen[ Q2Q067] interacts with 1 human partners:{Q9BRQ6}

30014 Pathogen[ P0C214] interacts with 2 human partners:{O95202;Q9BRQ6}

30015 Pathogen[ P03346] interacts with 2 human partners:{Q9BRQ6;O95202}

30016 Pathogen[ Q85601] interacts with 1 human partners:{Q9BRQ6}

30017 Pathogen[ P14079] interacts with 2 human partners:{Q9BRQ6;O95202}

30018 Pathogen[ P03383] interacts with 1 human partners:{Q9BRQ6}

30019 Pathogen[ P03410] interacts with 3 human partners:{Q9BRQ6;O95202;Q16635}

30020 Pathogen[ P14075] interacts with 1 human partners:{Q9BRQ6}

30021 Pathogen[ P0C206] interacts with 2 human partners:{O95202;Q9BRQ6}

30022 Pathogen[ P03363] interacts with 1 human partners:{Q9BRQ6}

30023 [Cluster 2730]GO:0046580+P biological\_process [name] negative regulation of Ras protein signal transduction [def] "Any process that stops, prevents, or reduces the frequency, rate or extent of Ras protein signal transduction." [GOC

30024 Pathogen[ Q2Q067] interacts with 3 human partners:{P62714;P09467;P37198}

30025 Pathogen[ P0C214] interacts with 3 human partners:{P62714;P09467;P37198}

30026 Pathogen[ P03346] interacts with 3 human partners:{P62714;P09467;P37198}  
30027 Pathogen[ Q85601] interacts with 2 human partners:{P62714;P09467}  
30028 Pathogen[ P14079] interacts with 3 human partners:{O43597;P37198;P09467}  
30029 Pathogen[ P03383] interacts with 3 human partners:{P62714;P09467;P37198}  
30030 Pathogen[ P03410] interacts with 4 human partners:{P62714;O43597;P09467;Q15283}  
30031 Pathogen[ P14075] interacts with 3 human partners:{P37198;P62714;P09467}  
30032 Pathogen[ P0C206] interacts with 3 human partners:{P09467;P62714;O43597}  
30033 Pathogen[ P03363] interacts with 2 human partners:{P62714;P37198}  
30034 [Cluster 2731]GO:2000382+P biological\_process [name] positive regulation of mesoderm development [def] "Any process that activates or increases the frequency, rate or extent of mesoderm development." [GOC  
30035 Pathogen[ Q2Q067] interacts with 1 human partners:{O00321}  
30036 Pathogen[ P0C214] interacts with 1 human partners:{O00321}  
30037 Pathogen[ P03346] interacts with 1 human partners:{O00321}  
30038 Pathogen[ Q85601] interacts with 1 human partners:{O00321}  
30039 Pathogen[ P14079] interacts with 1 human partners:{O00321}  
30040 Pathogen[ P03383] interacts with 1 human partners:{O00321}  
30041 Pathogen[ P03410] interacts with 1 human partners:{O00321}  
30042 Pathogen[ P14075] interacts with 1 human partners:{O00321}  
30043 Pathogen[ P0C206] interacts with 1 human partners:{O00321}  
30044 Pathogen[ P03363] interacts with 1 human partners:{O00321}  
30045 [Cluster 2732]GO:0034130+P biological\_process [name] toll-like receptor 1 signaling pathway [def] "Any series of molecular signals generated as a consequence of binding to toll-like receptor 1." [GOC  
30046 Pathogen[ Q2Q067] interacts with 29 human partners:{P01100;Q15653;Q04206;Q9NYJ8;Q8N5C8;O75582;Q9Y6K9;Q13233;P61088;Q96FA3;P19419;P19838;P15336;P25963;P0CG47;O14920;P45984;Q00653;P0CG48;O43318;P62987;Q13404;Q9HAT8;O15111;Q15759;Q16829;Q02078;Q15750;P62979}  
30047 Pathogen[ P0C214] interacts with 32 human partners:{Q00653;O15111;Q9Y6K9;P19838;P15336;P01100;Q96FA3;P19419;Q04206;Q9HAT8;Q13404;Q15653;O43318;Q02078;Q8N5C8;Q13233;P0CG48;P25963;Q16829;O75582;P62987;Q15750;P05412;Q15759;P0CG47;P45984;P16220;P62979;O14920;Q9NYJ8;P61088;P18846}  
30048 Pathogen[ P03346] interacts with 33 human partners:{Q9Y6K9;P05412;P45984;Q02078;O15111;P16220;P15336;P62987;P25963;Q15653;P19419;P0CG48;Q04206;Q96FA3;Q13404;Q8N5C8;P61088;Q9NYJ8;Q9HAT8;Q13233;O75582;Q15750;Q16829;P62979;Q15759;P0CG47;P19838;P15336;O43318;P01100;P18846;Q00653}  
30049 Pathogen[ Q85601] interacts with 32 human partners:{Q02078;Q15750;Q9NYJ8;O15111;P19419;Q9HAT8;Q16829;P18846;P0CG48;Q15653;Q96FA3;Q13404;Q8N5C8;P01100;Q9Y6K9;P16220;O14920;Q04206;P05412;O75582;P62979;Q15759;P0CG47;P45984;Q13233;P62987;Q00653;P15336;O43318;P61088;P19838;P25963}  
30050 Pathogen[ P14079] interacts with 31 human partners:{Q9HAT8;Q8N5C8;Q02078;P0CG48;Q06413;O43187;P53779;P52564;O75582;Q16829;Q13404;Q15750;P62979;P62987;Q96FA3;P45984;P45983;Q16644;Q15759;Q9Y6K9;P45985;P15336;Q9Y6Y9;Q13164;P05412;P0CG47;Q9Y239;P01100;Q99836;P19419;Q15653}  
30051 Pathogen[ P03383] interacts with 31 human partners:{O75582;P16220;Q9Y6K9;P62987;Q13233;Q00653;O14920;O15111;P19419;P18846;Q15653;O43318;Q8N5C8;P61088;Q13404;Q15759;P25963;P01100;P62979;P0CG47;Q96FA3;Q04206;P45984;P0CG48;P15336;Q9NYJ8;P19838;Q02078;Q9HAT8;Q15750;P05412}  
30052 Pathogen[ P03410] interacts with 36 human partners:{Q04206;P19838;P0CG48;O14920;Q9Y239;P19419;O15111;Q15750;Q96FA3;O75582;O43187;Q15653;P61088;Q13233;P62979;P01100;P18846;O43318;Q16829;P45985;Q9NYJ8;Q8N5C8;P16220;Q9HAT8;P05412;Q9Y6Y9;P45984;P62987;P53779;Q02078;Q00653;Q13404;Q9Y6K9;P25963;P15336;P0CG47}  
30053 Pathogen[ P14075] interacts with 31 human partners:{O15111;Q04206;Q15750;P05412;Q15759;O75582;P61088;P19419;P15336;Q15653;P25963;Q8N5C8;O14920;P0CG48;P62979;O43318;Q9HAT8;Q96FA3;P62987;Q02078;P01100;P0CG47;Q13404;P19838;Q00653;P16220;Q9Y6K9;Q13233;P18846;P45984;Q9NYJ8}  
30054 Pathogen[ P0C206] interacts with 33 human partners:{P0CG48;O14920;Q9Y6K9;Q02078;P16220;Q8N5C8;O75582;P45984;P05412;P25963;P19419;Q9HAT8;O43318;P15336;Q15653;P18846;Q16829;Q13233;P61088;P19838;P01100;Q04206;O15111;P62979;Q9NYJ8;P45985;P0CG47;Q96FA3;Q00653;Q15750;P62987;Q13404;Q15759}  
30055 Pathogen[ P03363] interacts with 26 human partners:{O14920;Q04206;P25963;O15111;Q9NYJ8;P16220;Q9Y6K9;P19419;O43318;Q15750;P61088;P15336;Q15653;Q16829;Q00653;Q96FA3;P18846;P62987;P19838;P05412;Q13404;Q9HAT8;Q8N5C8;Q13233;P01100;Q02078}  
30056 [Cluster 2733]GO:0010575+P biological\_process [name] positive regulation vascular endothelial growth factor production [def] "Any process that increases or activates the frequency, rate, or extent of production of vascular endothelial growth factor." [GOC  
30057 Pathogen[ Q2Q067] interacts with 1 human partners:{P27540}  
30058 Pathogen[ P0C214] interacts with 1 human partners:{P27540}  
30059 Pathogen[ P03346] interacts with 1 human partners:{P27540}  
30060 Pathogen[ Q85601] interacts with 1 human partners:{P27540}  
30061 Pathogen[ P14079] interacts with 1 human partners:{P27540}  
30062 Pathogen[ P03383] interacts with 1 human partners:{P27540}  
30063 Pathogen[ P03410] interacts with 1 human partners:{P27540}

30064 Pathogen[ P14075] interacts with 1 human partners:{P27540}  
30065 Pathogen[ POC206] interacts with 1 human partners:{P27540}  
30066 Pathogen[ P03363] interacts with 1 human partners:{P27540}  
30067 [Cluster 2734]GO:0006383+P biological\_process [name] transcription from RNA polymerase III promoter [def] "The synthesis of RNA from a DNA template by RNA polymerase III, originating at an RNAP III promoter." [GOC  
30068 Pathogen[ Q2Q067] interacts with 34 human partners:{P52434;Q9HAW0;P20226;Q13487;Q92664;Q16533;Q9Y5Q8;P10155;P19388;Q5SXM2;A6H8Y1;Q9UKN8;P61218;O75971;Q9BUI4;Q92994;P52747;Q9Y6Y0;Q14585;P14859;Q9NVU0;P62875;O15318;Q12789;P53803;Q9Y535;Q9Y250;P05423;O14802;Q9H1D9;Q9Y2S0;O15160;Q92966;Q969F1}  
30069 Pathogen[ POC214] interacts with 35 human partners:{A6H8Y1;Q9Y5Q8;Q92664;Q9BUI4;P53803;Q9NVU0;Q9UKN8;Q9H1D9;Q16533;Q9Y2S0;P61218;Q5SXM2;P05423;Q12789;Q9Y250;Q969F1;Q92966;Q13487;Q9Y6Y0;Q92994;O15318;Q9NW08;P62875;P20226;P52747;O15160;Q9Y535;Q14585;P52434;O75971;Q9HAW0;P19388;P14859;P10155;O14802}  
30070 Pathogen[ P03346] interacts with 36 human partners:{Q9NVU0;Q13487;P52434;Q9Y5Q8;P52747;P05423;O75971;P14859;P53803;P61218;P20226;O15318;Q9UKN8;P19388;P10155;Q9Y6Y0;Q9H1D9;Q8WUA4;O15160;Q9Y250;Q14585;Q9Y535;Q9Y5Q9;Q16533;Q9BUI4;Q92994;Q969F1;Q12789;Q5SXM2;Q92966;Q92664;O14802;A6H8Y1;Q9Y2S0;P62875;Q9HAW0}  
30071 Pathogen[ Q85601] interacts with 36 human partners:{Q9Y250;Q92664;O75971;Q13487;Q9H1D9;Q92994;Q9Y535;Q9BUI4;Q9Y2Y1;P10155;P14859;P53803;Q9Y2S0;P61218;Q9HAW0;P05423;Q9NVU0;Q9UKN8;Q5SXM2;P19388;Q9Y5Q8;Q9Y6Y0;Q14585;A6H8Y1;Q9NW08;Q12789;Q92966;Q16533;P52434;O15160;O14802;P52747;O15318;P62875;P20226;Q969F1}  
30072 Pathogen[ P14079] interacts with 38 human partners:{Q9Y2S0;Q92664;Q14585;Q5SXM2;P62875;P10155;Q92994;P14859;P52747;Q9UKN8;Q9NW08;Q92966;P52434;P61218;Q9Y250;Q13487;Q9Y5Q9;P53803;A6H8Y1;P19388;Q9BUI4;P05423;Q969F1;O15160;Q9Y5Q8;Q9Y6Y0;Q9HAW0;Q9Y2Y1;Q16533;Q12789;Q9BT43;Q9NVU0;O14802;O15318;Q9H1D9;O75971;Q8WUA4;Q9Y535}  
30073 Pathogen[ P03383] interacts with 29 human partners:{P53803;Q9UKN8;Q13487;Q9HAW0;P14859;Q969F1;Q9Y535;Q92966;P52434;P61218;Q9Y5Q8;Q9H1D9;P10155;Q9NVU0;P20226;Q16533;Q92994;P52747;Q9Y6Y0;O75971;A6H8Y1;P62875;O15318;P19388;Q12789;Q5SXM2;Q14585;O14802;Q9Y250}  
30074 Pathogen[ P03410] interacts with 39 human partners:{Q9HAW0;Q9Y5Q9;Q9BT43;Q92994;P14859;Q9Y6Y0;Q969F1;P20226;Q9Y5Q8;A6H8Y1;O15318;Q9Y535;Q9NW08;P53803;Q9Y2S0;P62875;P05423;Q12789;Q14585;P61218;Q9Y2Y1;O15160;Q92664;P52434;Q92966;Q9H1D9;Q9Y250;Q13487;Q9NVU0;Q8WUA4;Q9UKN8;Q5SXM2;P19388;O75971;O14802;Q16533;Q9BUI4;P52747;P10155}  
30075 Pathogen[ P14075] interacts with 29 human partners:{Q9NVU0;Q969F1;Q12789;Q16533;Q92966;P14859;P52747;O75971;P19388;P61218;Q92994;Q9Y250;Q5SXM2;Q9HAW0;P20226;Q14585;A6H8Y1;P10155;Q9Y6Y0;Q9H1D9;Q9Y535;Q13487;Q9Y5Q8;Q9UKN8;P62875;P52434;O14802;O15318;P53803}  
30076 Pathogen[ POC206] interacts with 39 human partners:{Q969F1;P62875;Q9HAW0;Q9BT43;P20226;Q8WUA4;Q92664;A6H8Y1;P19388;P61218;Q9NW08;Q9BUI4;O15318;Q13487;Q9Y5Q9;Q9Y535;Q9Y5Q8;O75971;Q9Y6Y0;Q5SXM2;P05423;Q9NVU0;P53803;Q9Y2S0;Q9UKN8;P10155;Q16533;Q92966;Q92994;P52747;Q14585;O14802;Q9Y2Y1;Q9H1D9;Q9Y250;Q12789;P52434;O15160;P14859}  
30077 Pathogen[ P03363] interacts with 31 human partners:{Q9Y6Y0;Q969F1;Q9Y535;Q8WUA4;Q13487;P19388;Q9NVU0;P61218;Q9H1D9;Q9Y5Q9;A6H8Y1;P10155;P14859;Q9Y250;P05423;O15318;Q92664;Q92966;O75971;Q16533;Q14585;P20226;Q5SXM2;Q12789;Q9UKN8;P53803;P52434;Q9Y5Q8;Q9Y2S0;O15160;P52747}  
30078 [Cluster 2735]GO:0050727+P biological\_process [name] regulation of inflammatory response [def] "Any process that modulates the frequency, rate or extent of the inflammatory response, the immediate defensive reaction (by vertebrate tissue) to infection or injury caused by chemical or physical agents." [GOC  
30079 Pathogen[ Q2Q067] interacts with 8 human partners:{P41182;Q99497;Q04206;Q9Y2G9;Q8TBK2;P60900;Q9C000;Q13490}  
30080 Pathogen[ POC214] interacts with 9 human partners:{Q9Y2G9;Q13490;Q04206;Q99497;P98170;P41182;P60900;Q8TBK2;Q9C000}  
30081 Pathogen[ P03346] interacts with 10 human partners:{Q13489;Q8TBK2;Q04206;P98170;Q9Y2G9;P60900;Q99497;P41182;Q13490;Q9C000}  
30082 Pathogen[ Q85601] interacts with 8 human partners:{P60900;Q99497;Q13490;Q8TBK2;P98170;Q04206;P41182;Q9Y2G9}  
30083 Pathogen[ P14079] interacts with 8 human partners:{Q9C000;Q99497;P41182;P60900;Q8TBK2;Q99836;Q9Y2G9;Q13490}  
30084 Pathogen[ P03383] interacts with 5 human partners:{P60900;Q13490;Q04206;Q9Y2G9;Q8TBK2}  
30085 Pathogen[ P03410] interacts with 8 human partners:{Q04206;Q99497;Q9Y2G9;P60900;Q13490;Q9C000;Q8TBK2;P41182}  
30086 Pathogen[ P14075] interacts with 5 human partners:{Q04206;P60900;Q8TBK2;Q13490;Q9Y2G9}  
30087 Pathogen[ POC206] interacts with 10 human partners:{Q9C000;P41182;P60900;P98170;Q99497;Q04206;Q13489;Q9Y2G9;Q8TBK2;Q13490}  
30088 Pathogen[ P03363] interacts with 7 human partners:{Q13490;Q04206;Q9C000;Q8TBK2;Q9Y2G9;Q13489;P98170}

30089 [Cluster 2736]GO:0034121+P biological\_process [name] regulation of toll-like receptor signaling pathway [def] "Any process that modulates the frequency, rate, or extent of toll-like receptor signaling pathway." [GOC

30090 Pathogen[ Q2Q067] interacts with 2 human partners:{Q99684;Q13490}

30091 Pathogen[ P0C214] interacts with 2 human partners:{Q13490;Q99684}

30092 Pathogen[ P03346] interacts with 3 human partners:{Q13489;Q99684;Q13490}

30093 Pathogen[ Q85601] interacts with 2 human partners:{Q13490;Q99684}

30094 Pathogen[ P14079] interacts with 2 human partners:{Q99684;Q13490}

30095 Pathogen[ P03383] interacts with 2 human partners:{Q13490;Q99684}

30096 Pathogen[ P03410] interacts with 2 human partners:{Q13490;Q99684}

30097 Pathogen[ P14075] interacts with 2 human partners:{Q13490;Q99684}

30098 Pathogen[ P0C206] interacts with 3 human partners:{Q13489;Q99684;Q13490}

30099 Pathogen[ P03363] interacts with 3 human partners:{Q99684;Q13490;Q13489}

30100 [Cluster 2737]GO:0030177+P biological\_process [name] positive regulation of Wnt receptor signaling pathway [def] "Any process that activates or increases the frequency, rate or extent of Wnt receptor signaling pathway activity." [GOC

30101 Pathogen[ Q2Q067] interacts with 10 human partners:{Q14678;Q6P1J9;Q9UBB5;O60315;O60535;Q9NYF0;P12755;Q9NRI5;P35813;Q9NSC2}

30102 Pathogen[ P0C214] interacts with 10 human partners:{P35813;Q9NRI5;Q14678;O60535;Q6P1J9;Q9NSC2;P12755;Q9UBB5;O60315;Q9NYF0}

30103 Pathogen[ P03346] interacts with 10 human partners:{Q06945;Q9NRI5;P35813;Q14678;O60315;Q9NSC2;Q9NYF0;O60535;Q9UBB5;Q6P1J9}

30104 Pathogen[ Q85601] interacts with 10 human partners:{Q6P1J9;O60315;Q9NYF0;P12755;O60535;Q14678;Q9NRI5;Q9NSC2;P35813;Q9UBB5}

30105 Pathogen[ P14079] interacts with 9 human partners:{P12755;Q9UBB5;Q9NRI5;O60315;P35813;Q6P1J9;Q14678;Q9NSC2;Q9NYF0}

30106 Pathogen[ P03383] interacts with 8 human partners:{Q6P1J9;Q14678;Q9NRI5;P35813;Q9UBB5;O60535;Q9NSC2;Q9NYF0}

30107 Pathogen[ P03410] interacts with 9 human partners:{P35813;O60535;P12755;Q9UBB5;Q6P1J9;Q9NYF0;Q14678;Q9NRI5;Q9NSC2}

30108 Pathogen[ P14075] interacts with 8 human partners:{Q9NSC2;P35813;Q9UBB5;Q9NRI5;Q6P1J9;Q14678;Q9NYF0;O60535}

30109 Pathogen[ P0C206] interacts with 10 human partners:{Q9UBB5;Q9NSC2;Q14678;P12755;O60535;Q9NRI5;O60315;Q9NYF0;Q6P1J9;P35813}

30110 Pathogen[ P03363] interacts with 7 human partners:{O60315;O60535;Q9NYF0;Q6P1J9;Q9NRI5;Q14678;Q9UBB5}

30111 [Cluster 2738]GO:0043122+P biological\_process [name] regulation of I-kappaB kinase/NF-kappaB cascade [def] "Any process that modulates an I-kappaB kinase/NF-kappaB induced cascade." [GOC

30112 Pathogen[ Q2Q067] interacts with 4 human partners:{P04792;Q9Y297;O14920;Q13501}

30113 Pathogen[ P0C214] interacts with 4 human partners:{P04792;Q9Y297;Q13501;O14920}

30114 Pathogen[ P03346] interacts with 5 human partners:{O14920;Q6FIF0;Q9Y297;P04792;Q13501}

30115 Pathogen[ Q85601] interacts with 3 human partners:{O14920;P04792;Q13501}

30116 Pathogen[ P14079] interacts with 2 human partners:{Q13501;P04792}

30117 Pathogen[ P03383] interacts with 3 human partners:{O14920;P04792;Q13501}

30118 Pathogen[ P03410] interacts with 3 human partners:{O14920;Q13501;P04792}

30119 Pathogen[ P14075] interacts with 3 human partners:{P04792;O14920;Q13501}

30120 Pathogen[ P0C206] interacts with 3 human partners:{Q13501;O14920;P04792}

30121 Pathogen[ P03363] interacts with 3 human partners:{O14920;Q6FIF0;P04792}

30122 [Cluster 2739]GO:0000398+P biological\_process [name] nuclear mRNA splicing, via spliceosome [def] "The joining together of exons from one or more primary transcripts of nuclear messenger RNA (mRNA) and the excision of intron sequences, via a spliceosomal mechanism, so that mRNA consisting only of the joined exons is produced." [GOC

30123 Pathogen[ Q2Q067] interacts with 129 human partners:{Q9UNP9;O43290;Q13573;P33240;P52434;P83876;Q86U42;P07910;Q9Y333;Q8WUQ7;P55769;Q9H2H8;O95391;P52272;P61326;O75494;P14866;Q15459;O43447;P67809;P55795;Q01130;P62318;Q8WWY3;Q8N684;O95400;O43390;Q13435;P19388;Q96DI7;P52435;Q15696;O43172;Q9UK45;P38919;Q14103;O60506;P30876;P19387;O00148;Q9H307;P61218;Q8IX12;Q13838;Q9ULR0;Q07955;Q9BWJ5;Q9BRD0;Q9BZI7;Q16629;O94906;P31943;Q10570;Q12996;P62314;P08621;P61978;P38159;P62487;P62304;P84103;Q8IYB3;Q05048;O94913;Q86V81;Q8IYW8;Q96DF8;Q96IZ7;Q05519;P26368;Q6P2Q9;Q6NZY4;Q9UBB9;Q8WXD5;Q08211;P08579;P52597;P14678;Q9Y5S9;Q01081;O75533;Q8TEQ6;Q9P2IO;P13984;Q13243;P09661;Q15366;P62875;P24928;O43809;O95777;Q15029;P09012;Q09161;Q9P013;Q9HCG8;Q9UQ35;Q9BUJ2;Q7RTV0;Q9BRR8;P52298;P35269;Q15427;P62316;O43395;Q9UKF6;Q14683;P53803;Q96MU7;O60508;P62306;Q9H840;Q15637;P35637;P22626;P11940;Q14331;P62308;Q9UMS4;O14893;Q99459;Q12874;Q00839;Q9HCS7;O43660;P09234;P62310;Q15428;P51003}

30124 Pathogen[ P0C214] interacts with 133 human partners:{Q12996;Q9BZI7;Q6NZY4;P26368;P62316;Q9HCS7;Q9ULR0;Q09161;Q8IX12;Q13573;Q14331;O43172;P35637;O94913;O00148;P38159;Q9UKF6;P30876;Q6UXO4;P53803;P84103;Q86V81;Q9Y5S9;P51003;O60508;P35269;P26599;O95400;P14678;Q15029;P62306;P52435;Q15637;P67809;Q05048;Q6P2Q9;Q9BWJ5;Q8IYW8;Q15428;Q9H307;P61218;O43395;P11940;Q10570;Q8WXD5;P62308;Q9UK45;P08579;O43390;Q15366;Q8N684;O94906;Q9UMS4;Q96IZ7;Q07955;Q9H2H8;P55795;Q9Y333;P52298;P52272;P62487;Q9Y3C6;P62314;P07910;Q8IYB3;O43809;Q15696;Q9BRR8;P08621;Q14103;P62310;P55769;Q99459;P61326;Q8TEQ6;P38919;Q96DF8;Q13243;Q15427;P83876;Q9P2IO;P52597;Q05519;Q7RTV0;Q9BUJ2;Q15459;P62318;Q01081;O75533;Q96DI7;P33240;P62875;Q96BP3;P13984;Q12874;O95777;O75494;Q9H840;Q15287;P24928;P31943;P62304;P09012;Q14683;O43447;Q9P013;O605

- 06;Q9HCG8;O14893;Q9BRD0;P09661;Q9UQ35;O43290;P52434;Q08211;Q13435;Q00839;P09234;Q96MU7;P19387;P22626;P19388;O95391;Q9UNP9;Q86U42;Q13838;Q15365;O43660;Q9UBB9;Q16629;P14866;Q01130;Q8WWY3}
- 30125 Pathogen[ P03346] interacts with 153 human partners: {Q9BRD0;Q9Y5S9;O95400;Q9BZI7;Q15427;P51991;Q12874;Q9BRR8;Q86U42;Q96MU7;P61978;Q9ULR0;Q96DF8;O43172;Q09161;Q8IX12;Q15366;P52434;O43290;Q9H2H8;Q08170;Q8IYB3;P09651;O43447;Q9Y3C6;Q7RTV0;P14866;P62304;P83876;Q9UKF6;O95777;O95391;P08579;P55795;Q6UX04;Q9UK59;Q15637;Q9UMS4;O60506;Q9H307;Q8WXD5;P53803;P38919;P07910;Q96BP3;Q8N684;P61218;P08621;P11940;Q13242;P31943;Q00839;Q13247;P26599;Q9BUJ2;Q08211;P52298;O43390;Q9HCS7;Q16629;P22626;O94906;Q9BUQ8;Q9Y333;Q07955;Q9P013;Q05048;P52756;Q14103;P62487;P19388;P35637;P11940;P62310;Q13435;P62318;Q86V81;O60508;P13984;P61326;P22626;Q75643;P67809;Q9HCG8;Q13435;Q14683;P52435;P62306;Q6NZY4;O94913;P26368;P55769;Q01081;O75533;P36954;Q8TEQ6;P61326;Q13838;P31942;Q15459;Q9BWI5;Q9UNP9;P42285;Q99459;Q8WWY3;O43809;Q6P2Q9;Q96DI7;Q14562;P09012;P84103;Q9UQ35;O95926;Q8IWX8;P62314;P52272;Q15287;Q05519;P30876;P35269;Q01130;P14678;Q9BZJ0;Q9P2I0;O14893;P51513;P24928;Q13573;Q13243;O00148;Q96IZ7;P38159;Q15029;P62316;Q15696;Q8WUQ7;P52597;P09234;O75494;P62308;Q10570;Q12996;P62995;P62310;Q9UK45;Q15393;P09661;Q15365;Q9BRX9;P33240;P62875;P19387;Q9H840;Q15428;Q14331;O43395}
- 30126 Pathogen[ Q85601] interacts with 124 human partners: {Q9BZI7;Q6UX04;Q15637;Q9BRR8;Q96MU7;P61978;P09234;P36954;Q9ULR0;Q9HCS7;Q9H2H8;O43390;Q8IYB3;Q96BP3;Q7RTV0;Q13243;Q05048;P62304;Q01130;Q9H307;O60506;Q14331;Q14103;O95391;Q8N684;Q13573;Q15459;Q9UMS4;P61326;P22626;Q15287;Q00148;P53803;P61218;Q94913;Q8IX12;P08621;Q9P013;Q86V81;Q9BUJ2;P55795;O75494;Q16629;Q9UK45;Q08211;P62316;O94906;Q07955;P55769;Q9UBB9;Q09161;Q96DI7;P38919;P14678;P62487;P19388;P35637;P11940;P62310;Q13435;P62314;P13984;P62306;O60508;Q8TEQ6;Q13838;Q14683;P52435;Q9BRD0;P62318;Q15029;P52597;Q6NZY4;Q9Y3C6;Q10570;Q9P2I0;P35269;Q99459;Q01081;Q9UQ35;Q05519;P67809;O43395;O43290;Q8WWY3;P84103;O95777;O95400;P14866;Q6P2Q9;Q96IZ7;P83876;Q43447;Q00839;P19387;O14893;O43660;P24928;P62308;P52298;P30876;P38159;P52434;Q15696;P26368;Q9Y333;Q9HCS7;Q15365;P51003;Q86U42;P31943;O43172;Q9UKF6;P09661;P33240;Q15366;P62875;Q96DF8;Q12874;O43809;Q9Y5S9;Q9BWI5;Q8WXD5;Q9H840}
- 30127 Pathogen[ P14079] interacts with 131 human partners: {Q15637;O43809;P62875;Q96MU7;Q99459;Q9Y333;Q8IX12;O43447;Q15287;Q8TEQ6;O94906;O60508;P35637;P19387;P35269;O14893;Q9UKF6;Q14103;P67809;P62487;O75533;Q9UK45;Q10570;P52434;P52298;Q96DF8;Q12874;Q13243;Q9Y5S9;Q9BUJ2;Q6NZY4;Q15514;P33240;P30876;P61218;Q9P013;P26368;P83876;P14866;P07910;Q13838;Q13573;Q9H840;O94913;Q15029;P53803;Q6P2Q9;P62314;Q9HCS7;Q15427;Q08211;Q05048;Q9H307;Q0839;O43290;Q8WWY3;Q15459;P62306;P14678;O95400;Q8IYB3;Q9ULR0;Q16629;P26599;P55795;Q9BWI5;P61326;P19388;O95926;Q9UMS4;Q9BZJ0;P11940;Q05519;Q7RTV0;Q9BRR8;P08621;Q9H2H8;Q8N684;Q9UQ35;P52435;Q86V81;Q86U42;Q96IZ7;Q00148;P62308;O60506;Q15696;Q9UBB9;P09012;Q15366;P62304;Q15428;P62316;Q9BRD0;P62310;Q07955;Q15365;Q8WUQ7;P61978;P31943;Q01081;P13984;Q9HCG8;O95777;Q14331;P55769;P52597;O43390;P09234;P24928;P51003;Q12996;P09661;Q6UX04;O43172;P52756;O75494;Q14683;P62318;P36954;O43395;Q96BP3;Q8WXD5;O95391;Q09161;P22626;P84103;Q8IWX8;Q9UK59;P38159;Q9P2I0}
- 30128 Pathogen[ P03383] interacts with 119 human partners: {Q14683;Q13573;P53803;Q07955;P09661;Q15287;Q05048;O75494;Q15366;P51003;O43390;P35269;P83876;Q9H840;Q15459;P62318;Q96IZ7;Q9UNP9;O43290;P22626;P14866;Q15029;O43172;Q96MU7;Q13838;Q9HCS7;Q9ULR0;Q9Y5S9;P55795;P62316;Q96BP3;Q9H2H8;Q10570;P62304;P61218;Q8WXD5;Q6P2Q9;P38919;O95400;Q12874;P52434;P61218;P26368;Q13243;Q9P013;P61978;Q14331;P11940;P31943;Q99459;Q86V81;Q13435;Q6NZY4;Q9UKF6;O94906;P38159;Q09161;O43447;Q16629;P62487;Q8N684;O43395;O94913;Q8IYB3;O95777;P19387;P33240;P62314;P62310;P84103;P13984;Q8TEQ6;O14893;P35637;P24928;Q01130;Q14103;P14678;Q9Y333;Q01081;Q9BRR8;Q15365;Q8IX12;O43809;P52298;Q8WUQ7;P09012;Q9H307;Q9UK45;Q05519;Q9BUJ2;P62875;Q8WWY3;Q9UQ35;P52435;P55769;Q9P2I0;Q96DF8;P62308;P19388;Q9UBB9;P30876;Q86U42;P67809;Q15637;Q9HCG8;P09234;Q00839;Q9BRD0;P08621;P52597;O95391;Q9UMS4;Q7RTV0;Q9BWI5;O00148;P62306;Q9BZI7;Q96DI7}
- 30129 Pathogen[ P03410] interacts with 138 human partners: {Q8WUQ7;P83876;Q13838;Q00839;Q9ULR0;Q15427;Q9BWI5;Q8WXD5;Q01081;O14893;P26368;Q10570;P61326;P19387;Q14103;P62304;Q8IX12;O60508;Q8WWY3;Q15637;P36954;Q12996;Q15029;Q15696;P61978;Q05048;Q16629;Q9H840;P22626;P11940;Q9BUJ2;P62306;P24928;Q15287;P62310;Q6NZY4;O95777;Q15393;Q9Y5S9;Q96BP3;P35637;Q8TEQ6;Q15365;Q9Y333;Q00148;P55769;P30876;P26599;Q96MU7;Q9P013;Q15366;Q9UK59;P62308;P14678;P62316;Q9UBB9;Q96IZ7;O15514;P14866;P09012;Q9BZI7;Q9UQ35;P51003;P08621;O43809;P67809;Q9H2H8;Q9HCS7;O94906;P07910;P08579;Q05519;Q99459;O43172;P52435;O94913;Q07955;P52597;P52298;Q9P2I0;P31943;P62314;O43660;P33240;P53803;O43395;Q15428;Q14683;Q09661;Q15459;O75533;Q86V81;P62875;P52272;Q9BR8;P35269;Q8IYB3;P38919;P61218;O95400;Q6UX04;P09234;Q01130;Q9UKF6;P52434;Q7RTV0;Q9UMS4;P13984;Q9Y3C6;Q8N684;Q9UNP9;P62487;O60506;Q09161;Q9BRD0;Q96DF8;Q6P2Q9;P84103;Q86U42;O43290;P55795;Q13243;Q12874;P38159;Q8IWX8;P19388;O43447;Q08211;Q9UK45;O95391;Q13573;Q13435;O43390;Q9H307;O75494;Q14331;Q9HCG8;P62318}
- 30130 Pathogen[ P14075] interacts with 118 human partners: {Q9H307;P51003;P22626;Q8TEQ6;Q15366;P62304;Q05519;P14866;Q9UK45;Q09161;P62316;P13984;Q8WXD5;O43809;Q9P2I0;Q13573;Q14683;P08621;Q14103;Q86V81;Q13243;O43395;P30876;P61326;O95391;Q15459;P09234;P38159;Q15428;Q96IZ7;P19388;O95400;Q01130;P61218;O95777;Q9UNP9;Q9H840;O43172;P31943;P19387;P62306;O75494;Q8IX12;P62308;O43390;Q9UQ35;O94906;Q9HCG8;Q9ULR0;Q15029;Q99459;P62487;Q96DI7;P11940;Q15365;Q00839;Q13435;P62318;Q12874;P55769;P33240;Q96DF8;Q6NZY4;Q9BUJ2;Q05048;Q9UBB9;Q15637;Q15287;P24928;Q96MU7;P35269;Q6P2Q9;P26368;Q9BRD0;Q01081;P67809;Q9UMS4;P09661;Q8IYB3;Q9BWI5;Q9Y333;P61978;P09012;P14678;O43447;Q9HCS7;Q9BRR8;Q9Y5S9;P35637;P83876;P84103;P62875;P52597;O14893;Q9H2



H8;Q14331;P62314;P38919;Q8N684;Q8WUQ7;O43290;Q9UKF6;Q13838;Q86U42;Q16629;P52434;Q9P013;Q10570;O00148;Q8WWY3;O94913;P62310;Q07955;P52298;P52435;P53803;Q9BZI7;Q7RTV0}

30131 Pathogen[ POC206] interacts with 133 human partners: {Q9BUJ2;Q9UNP9;Q15287;P67809;Q9UMS4;P33240;P62875;P83876;O00148;Q9UKF6;Q14103;P14678;O60508;Q9BZI7;Q15365;Q07955;P26368;P52298;Q9H840;P61326;Q01081;P36954;Q15696;Q09161;P55769;Q8WXD5;O94913;Q96BP3;P62304;Q05519;Q08211;P09012;O75533;P14866;Q8TEQ6;P61978;P19388;P61218;Q8N684;Q9H307;Q15637;Q9UK59;Q13243;Q12874;Q16629;Q86U42;P62314;P62316;O43390;O75494;P51003;P22626;O43809;Q9UBB9;Q8WUQ7;Q9P2I0;P13984;O43290;O95777;Q9Y333;Q13435;Q9UQ35;P53803;Q96DF8;Q9UK45;O15514;P35269;Q9BRR8;P19387;P38159;Q05048;O60506;O95400;Q13573;Q9BJW5;Q9Y3C6;Q13838;P52597;Q14683;Q9P013;Q9BRD0;P35637;O43395;Q96MU7;Q6P2Q9;P62318;Q6NZY4;Q7RTV0;Q14893;Q12996;Q8WWY3;P55795;Q8IWZ8;P52435;P62306;Q9ULR0;P62487;O43172;Q15366;Q99459;O43447;Q9HCG8;Q8IX12;Q96IZ7;P84103;O94906;P24928;Q9H2H8;Q14331;Q96DI7;P09661;O43660;P38919;P62308;O95391;P08621;Q01130;P62310;Q00839;Q9HCS7;Q15459;P11940;P09234;P31943;P52434;Q15428;Q9Y5S9;Q86V81;Q10570;Q15029;P30876;Q6UX04}

30132 Pathogen[ P03363] interacts with 156 human partners: {O95777;O95926;P62314;O43395;Q13151;Q13595;Q15366;Q96IZ7;Q9P2I0;P38919;Q96DF8;Q10570;O75643;P19388;Q13435;O95391;P13984;O95400;P52597;Q6NZY4;P09012;Q96MU7;Q08170;O60306;P30876;Q14331;P51991;Q9HCS7;Q6UX04;P14866;Q05048;Q15393;P35637;O75533;P19387;Q96BP3;P61218;P09651;P08579;Q15459;Q9Y3C6;Q7RTV0;Q9BRR8;Q16629;P62318;Q9H307;Q9BRX9;P24928;Q15427;P62304;Q01130;Q6P2Q9;P09234;P11940;Q86U42;Q8WWY3;Q14893;Q92620;O94913;O43447;P61326;Q8IWZ8;P62306;Q05519;P35269;P52272;Q15029;Q15287;Q8N684;Q9Y3B4;Q9BJW5;Q9Y333;Q14562;P62316;Q13242;Q8WUQ7;Q8IYB3;O43809;P38159;P26368;Q12874;P31943;O43172;Q9ULR0;P51003;O00148;Q15637;Q13243;Q8WXD5;Q86V81;P07910;P31942;O43290;Q13573;P52298;Q13838;P08621;Q9H840;P22626;P83876;Q15365;P26599;P62487;Q14103;P55795;P62310;Q9UKM9;Q8IX12;Q07955;O43660;O60506;Q01081;Q9UK45;Q9BZI7;P61978;O94906;Q9HCG8;Q13247;Q15428;P55769;Q5SZQ8;Q8TEQ6;Q00839;P62308;Q9P013;Q9UKF6;P84103;Q9UMS4;P51513;O43390;P62995;P14678;P53803;P52435;P09661;Q08211;P52434;Q99459;Q9BUJ2;P33240;Q9UQ35;Q14683;Q15696;Q9BRD0;Q9Y5S9;Q12996;Q9H2H8;Q9UNP9;Q9BZJ0;O75494;P67809;Q96DI7;O60508;Q09161;P42285;P52756}

30133 [Cluster 2740]GO:0060389+P biological\_process [name] pathway-restricted SMAD protein phosphorylation [def] "The process of introducing a phosphate group on to a pathway restricted SMAD protein. A pathway restricted SMAD protein is an effector protein that acts directly downstream of the transforming growth factor family receptor." [GOC]

30134 Pathogen[ Q2Q067] interacts with 1 human partners: {O15105}

30135 Pathogen[ POC214] interacts with 1 human partners: {O15105}

30136 Pathogen[ P03346] interacts with 1 human partners: {O15105}

30137 Pathogen[ Q85601] interacts with 1 human partners: {O15105}

30138 Pathogen[ P14079] interacts with 1 human partners: {O15105}

30139 Pathogen[ P03383] interacts with 1 human partners: {O15105}

30140 Pathogen[ P03410] interacts with 1 human partners: {O15105}

30141 Pathogen[ P14075] interacts with 1 human partners: {O15105}

30142 Pathogen[ POC206] interacts with 1 human partners: {O15105}

30143 Pathogen[ P03363] interacts with 1 human partners: {O15105}

30144 [Cluster 2741]GO:000046+P biological\_process [name] autophagic vacuole fusion [def] "The fusion of an autophagic vacuole with a vacuole (yeast) or lysosome (e.g. mammals and insects). In the case of yeast, inner membrane-bounded structures (autophagic bodies) appear in the vacuole." [PMID]

30145 Pathogen[ Q2Q067] interacts with 1 human partners: {Q9Y4P8}

30146 Pathogen[ POC214] interacts with 1 human partners: {Q9Y4P8}

30147 Pathogen[ P03346] interacts with 1 human partners: {Q9Y4P8}

30148 Pathogen[ Q85601] interacts with 1 human partners: {Q9Y4P8}

30149 Pathogen[ P14079] interacts with 1 human partners: {Q9Y4P8}

30150 Pathogen[ P03383] interacts with 1 human partners: {Q9Y4P8}

30151 Pathogen[ P03410] interacts with 1 human partners: {Q9Y4P8}

30152 Pathogen[ P14075] interacts with 1 human partners: {Q9Y4P8}

30153 Pathogen[ POC206] interacts with 1 human partners: {Q9Y4P8}

30154 Pathogen[ P03363] interacts with 1 human partners: {Q9Y4P8}

30155 [Cluster 2742]GO:0001779+P biological\_process [name] natural killer cell differentiation [def] "The process in which a relatively unspecialized cell acquires the specialized features of a natural killer cell." [GOC]

30156 Pathogen[ Q2Q067] interacts with 3 human partners: {O75896;Q02447;P15923}

30157 Pathogen[ POC214] interacts with 3 human partners: {O75896;P15923;Q02447}

30158 Pathogen[ P03346] interacts with 3 human partners: {P15923;Q02447;Q02447}

30159 Pathogen[ Q85601] interacts with 2 human partners: {P15923;Q02447}

30160 Pathogen[ P14079] interacts with 3 human partners: {O75896;Q02447;P15923}

30161 Pathogen[ P03383] interacts with 3 human partners: {O75896;P15923;Q02447}

30162 Pathogen[ P03410] interacts with 3 human partners: {Q02447;P15923;O75896}

30163 Pathogen[ P14075] interacts with 3 human partners: {P15923;O75896;Q02447}

30164 Pathogen[ POC206] interacts with 4 human partners: {O75896;P15923;Q02447;Q13422}

30165 Pathogen[ P03363] interacts with 2 human partners: {Q02447;P15923}

30166 [Cluster 2743]GO:0046015+P biological\_process [name] regulation of transcription by glucose [def] "Any process involving glucose that modulates the frequency, rate or extent or transcription." [GOC]

30167 Pathogen[ Q2Q067] interacts with 1 human partners: {O43159}

30168 Pathogen[ POC214] interacts with 1 human partners: {O43159}

30169 Pathogen[ P03346] interacts with 1 human partners:{O43159}  
30170 Pathogen[ Q85601] interacts with 1 human partners:{O43159}  
30171 Pathogen[ P14079] interacts with 1 human partners:{O43159}  
30172 Pathogen[ P03383] interacts with 1 human partners:{O43159}  
30173 Pathogen[ P03410] interacts with 1 human partners:{O43159}  
30174 Pathogen[ P14075] interacts with 1 human partners:{O43159}  
30175 Pathogen[ P0C206] interacts with 1 human partners:{O43159}  
30176 Pathogen[ P03363] interacts with 1 human partners:{O43159}  
30177 [Cluster 2744]GO:0031398+P biological\_process [name] positive regulation of protein ubiquitination [def] "Any process that activates or increases the frequency, rate or extent of the addition of ubiquitin groups to a protein." [GOC  
30178 Pathogen[ Q2Q067] interacts with 26 human partners:{O75832;Q8IUC6;Q6ZW49;Q9UDY8;Q86VY4;Q8N2Z9;O95999;A8MT69;Q6ZNA4;Q6VVB1;Q9NV11;O43236;Q96MT3;Q9NZL4;P51668;O15105;Q96PM5;Q96FA3;Q13155;Q96MG7;Q9UNE7;Q9NS23;Q9H040;Q8N668;Q96EY1;Q9UKT5}  
30179 Pathogen[ P0C214] interacts with 27 human partners:{Q9NZL4;Q96PM5;Q9H040;Q9NS23;Q8IUC6;Q9UDY8;Q96FA3;Q8N668;Q96MT3;Q6ZW49;Q9HC E7;Q8N2Z9;O75832;O95999;O15105;Q9NV11;Q96MG7;Q6ZNA4;Q9NV92;Q86VY4;P51668;Q9UNE7;O43236;Q96EY1;Q6VVB1;Q13155;Q9UKT5}  
30180 Pathogen[ P03346] interacts with 28 human partners:{Q8N2Z9;Q9NV11;Q9NZL4;Q8N668;A8MT69;Q9UDY8;Q96MG7;Q96PM5;P25686;O15105;Q9NV92;P51668;Q96FA3;O95999;Q96MT3;O75832;Q13155;O43236;Q86VY4;Q9UKT5;Q9UNE7;Q9H040;Q6ZNA4;Q6VVB1;Q8IUC6;Q9NS23;Q96EY1;Q6ZW49}  
30181 Pathogen[ Q85601] interacts with 26 human partners:{Q9H040;Q8IUC6;Q13155;Q9UDY8;O75832;Q96MG7;Q96PM5;Q9NS23;P51668;Q96FA3;Q96MT3;Q86VY4;Q9NV11;A8MT69;Q8N668;Q8N2Z9;Q6VVB1;Q6ZW49;Q6ZNA4;O15105;O95999;Q9NZL4;Q9UKT5;Q9UNE7;Q96EY1;O43236}  
30182 Pathogen[ P14079] interacts with 23 human partners:{Q9UKT5;Q9NS23;O95999;Q8IUC6;Q9H040;Q6ZNA4;O75832;Q96FA3;Q9NV11;P51668;Q8N2Z9;Q6ZW49;Q8N668;A8MT69;Q13155;Q96MG7;Q9NV92;Q86VY4;O15105;Q96MT3;Q9NZL4;Q96EY1;O43236}  
30183 Pathogen[ P03383] interacts with 22 human partners:{Q8N2Z9;Q8IUC6;Q86VY4;Q8N668;O43236;Q96MT3;Q6ZNA4;Q6ZW49;Q13155;O75832;O15105;Q9NV11;Q9H040;Q9UKT5;Q96PM5;A8MT69;Q9NZL4;O95999;Q96MG7;Q96FA3;Q96EY1;P51668}  
30184 Pathogen[ P03410] interacts with 25 human partners:{Q9H040;Q6ZNA4;Q13155;Q9NV11;Q96FA3;Q9NS23;P25686;Q9UKT5;Q9NV92;Q96MG7;Q9UNE7;O95999;O43236;Q86VY4;P51668;O15105;Q8IUC6;A8MT69;Q9NZL4;Q96MT3;Q8N668;Q6ZW49;Q96EY1;O75832;Q8N2Z9}  
30185 Pathogen[ P14075] interacts with 23 human partners:{A8MT69;Q96MT3;Q96PM5;Q13155;Q9NV11;O75832;O43236;Q6ZW49;Q9H040;Q8N668;Q8N2Z9;Q9UKT5;Q6ZNA4;Q96FA3;O15105;O95999;Q8IUC6;Q9NV92;Q86VY4;P51668;Q96MG7;Q9NZL4;Q96EY1}  
30186 Pathogen[ P0C206] interacts with 27 human partners:{O75832;Q9UDY8;Q96MT3;Q6ZW49;Q9NV92;Q6ZNA4;O95999;Q86VY4;Q96MG7;O43236;Q9NV11;O15105;Q9UNE7;Q9NZL4;Q8IUC6;Q96FA3;Q13155;Q96PM5;Q8N2Z9;Q9NS23;Q8N668;Q9H040;Q96EY1;Q9UKT5;P51668;Q6VVB1;A8MT69}  
30187 Pathogen[ P03363] interacts with 22 human partners:{Q9NV11;Q9NZL4;Q96MT3;Q8N2Z9;O15105;Q6VVB1;Q6ZNA4;Q8N668;Q13155;Q96FA3;Q9UKT5;Q86VY4;Q9UNE7;Q9H040;Q96PM5;Q9NS23;P51668;Q96MG7;Q6ZW49;Q96EY1;O43236;A8MT69}  
30188 [Cluster 2745]GO:0051292+P biological\_process [name] nuclear pore complex assembly [def] "The aggregation, arrangement and bonding together of a set of components to form a nuclear pore complex." [GOC  
30189 Pathogen[ Q2Q067] interacts with 1 human partners:{Q8WYP5}  
30190 Pathogen[ P0C214] interacts with 1 human partners:{Q8WYP5}  
30191 Pathogen[ P03346] interacts with 2 human partners:{Q8WYP5;Q9BTX1}  
30192 Pathogen[ Q85601] interacts with 1 human partners:{Q8WYP5}  
30193 Pathogen[ P14079] interacts with 2 human partners:{Q8WYP5;Q9BTX1}  
30194 Pathogen[ P03383] interacts with 2 human partners:{Q8WYP5;Q9BTX1}  
30195 Pathogen[ P03410] interacts with 2 human partners:{Q8WYP5;Q9BTX1}  
30196 Pathogen[ P14075] interacts with 2 human partners:{Q8WYP5;Q9BTX1}  
30197 Pathogen[ P0C206] interacts with 2 human partners:{Q8WYP5;Q9BTX1}  
30198 Pathogen[ P03363] interacts with 2 human partners:{Q8WYP5;Q9BTX1}  
30199 [Cluster 2746]GO:0015701+P biological\_process [name] bicarbonate transport [def] "The directed movement of bicarbonate into, out of or within a cell, or between cells, by means of some agent such as a transporter or pore." [GOC  
30200 Pathogen[ Q2Q067] interacts with 2 human partners:{P68871;P69905}  
30201 Pathogen[ P0C214] interacts with 2 human partners:{P69905;P68871}  
30202 Pathogen[ P03346] interacts with 2 human partners:{P69905;P68871}  
30203 Pathogen[ Q85601] interacts with 2 human partners:{P69905;P68871}  
30204 Pathogen[ P14079] interacts with 3 human partners:{P69905;P68871;P00915}  
30205 Pathogen[ P03383] interacts with 2 human partners:{P69905;P68871}  
30206 Pathogen[ P03410] interacts with 2 human partners:{P68871;P69905}  
30207 Pathogen[ P14075] interacts with 2 human partners:{P68871;P69905}  
30208 Pathogen[ P0C206] interacts with 3 human partners:{P68871;P00915;P69905}  
30209 Pathogen[ P03363] interacts with 2 human partners:{P69905;P68871}  
30210 [Cluster 2747]GO:0030833+P biological\_process [name] regulation of actin filament

polymerization [def] "Any process that modulates the frequency, rate or extent of the assembly of actin filaments by the addition of actin monomers to a filament." [GOC

30211 Pathogen[ Q2Q067] interacts with 1 human partners:{O15511}

30212 Pathogen[ POC214] interacts with 2 human partners:{O15144;O15511}

30213 Pathogen[ P03346] interacts with 3 human partners:{O15511;O15144;O15145}

30214 Pathogen[ Q85601] interacts with 2 human partners:{O15511;O15144}

30215 Pathogen[ P14079] interacts with 6 human partners:{P15502;Q9BPX5;O15145;O15511;P61158;O15144}

30216 Pathogen[ P03383] interacts with 2 human partners:{O15511;P15502}

30217 Pathogen[ P03410] interacts with 5 human partners:{O15511;O15145;P15502;Q9BPX5;O15144}

30218 Pathogen[ P14075] interacts with 2 human partners:{O15511;P15502}

30219 Pathogen[ POC206] interacts with 4 human partners:{O15511;P15502;O15145;O15144}

30220 Pathogen[ P03363] interacts with 5 human partners:{Q9BPX5;O15144;O15143;O15145;O15511}

30221 [Cluster 2748]GO:0060058+P biological\_process [name] positive regulation of apoptosis involved in mammary gland involution [def] "Any process that activates or increases the frequency, rate or extent of cell death by apoptosis of mammary epithelial cells during mammary gland involution." [GOC

30222 Pathogen[ Q2Q067] interacts with 1 human partners:{P42771}

30223 Pathogen[ POC214] interacts with 1 human partners:{P42771}

30224 Pathogen[ P03346] interacts with 1 human partners:{P42771}

30225 Pathogen[ Q85601] interacts with 1 human partners:{P42771}

30226 Pathogen[ P14079] interacts with 1 human partners:{P42771}

30227 Pathogen[ P03383] interacts with 1 human partners:{P42771}

30228 Pathogen[ P03410] interacts with 1 human partners:{P42771}

30229 Pathogen[ P14075] interacts with 1 human partners:{P42771}

30230 Pathogen[ POC206] interacts with 1 human partners:{P42771}

30231 Pathogen[ P03363] interacts with 1 human partners:{P42771}

30232 [Cluster 2749]GO:0071230+P biological\_process [name] cellular response to amino acid stimulus [def] "Any process that results in a change in state or activity of a cell (in terms of movement, secretion, enzyme production, gene expression, etc.) as a result of an amino acid stimulus. An amino acid is a carboxylic acids containing one or more amino groups." [CHEBI

30233 Pathogen[ Q2Q067] interacts with 5 human partners:{Q9Y6K1;P17676;Q9UBC3;P26358;O43504}

30234 Pathogen[ POC214] interacts with 5 human partners:{Q9Y6K1;P17676;P26358;O43504;O15524}

30235 Pathogen[ P03346] interacts with 6 human partners:{Q9Y6K1;O15524;P17676;Q9UBC3;P26358;O43504}

30236 Pathogen[ Q85601] interacts with 4 human partners:{P17676;P26358;Q9Y6K1;Q9UBC3}

30237 Pathogen[ P14079] interacts with 9 human partners:{Q9Y2Q5;Q9Y6K1;P13498;Q9UHA4;Q0VGL1;Q9UBC3;Q6IAA8;P26358;O43504}

30238 Pathogen[ P03383] interacts with 4 human partners:{Q9Y6K1;P17676;O43504;P26358}

30239 Pathogen[ P03410] interacts with 9 human partners:{Q9Y2Q5;O43504;P17676;Q9UHA4;P26358;Q9UBC3;Q6IAA8;Q0VGL1;Q9Y6K1}

30240 Pathogen[ P14075] interacts with 4 human partners:{Q9Y6K1;P26358;O43504;P17676}

30241 Pathogen[ POC206] interacts with 7 human partners:{Q9UHA4;Q9Y6K1;P26358;O15524;O43504;P17676;Q9UBC3}

30242 Pathogen[ P03363] interacts with 6 human partners:{P17676;O15524;Q9Y6K1;O43504;P26358;Q9UBC3}

30243 [Cluster 2750]GO:0015031+P biological\_process [name] protein transport [def] "The directed movement of proteins into, out of or within a cell, or between cells, by means of some agent such as a transporter or pore." [GOC

30244 Pathogen[ Q2Q067] interacts with 247 human partners:{Q92783;Q7Z3C6;P49454;Q14974;Q9UI26;Q4G0F5;Q96EE3;Q8IUD2;O15027;O75351;Q9H2G9;O60684;Q94973;P52948;Q7LBR1;Q12769;O00186;Q9Y6D6;Q9Y6Q5;O00410;Q99747;Q10567;Q96HA1;O15126;P56377;Q63HQ0;Q96QU8;O43747;Q9Y4P1;P49790;O95782;Q9H444;Q2VPB7;Q9NVU7;Q92572;O60784;P49792;O14579;Q7Z6B0;Q9NPJ8;P55735;Q9H2T7;O75694;P62826;Q99816;Q9H1H9;Q9P299;Q6PD74;Q96B49;Q8WV92;Q9UJY4;Q9BRG1;A8CG34;Q9UJY5;Q8WYP5;O94829;Q9UP83;O43752;O14662;Q53FT3;P83436;Q96EY5;P61970;Q99567;Q8N1F7;Q9C0E2;Q8N1B4;Q86VX9;Q13432;Q9UBQ0;Q7L804;P48444;Q9Y3R5;Q7Z3B4;O14910;O00189;Q7Z614;Q96P70;Q8NPF4;Q96N16;P63241;Q96KP1;Q92973;P12270;Q9H267;P63010;Q96PC3;Q9Y5L0;Q8N612;Q15629;O15069;Q96QF0;O75886;Q9UND3;O75381;Q96CW1;P61923;O43745;P60520;O95721;Q8N0Z2;O43264;O75396;O15127;Q8WUM4;Q96L92;O14980;O60645;Q15388;P53677;Q5HYI7;O15131;O00471;Q9UBF2;Q9BYV8;Q9BW27;O14787;Q9H9C1;Q53GS7;Q8TEM1;Q9H8T0;Q96BW9;Q8TEX9;Q14746;Q92624;P61966;A9QM74;Q5VIR6;Q15437;P55060;A5D8V6;O60220;P53992;Q9Y5J6;O95486;Q9BVL2;Q96D46;Q96RL7;O75843;Q9HD42;Q96JB2;O94855;Q02410;Q9UQN3;O15078;Q9UKX7;Q9HD47;Q6IS14;Q9UN37;Q8IWT2;Q96H20;Q9Y2T2;Q9H0R1;Q9H7P6;Q9NZ3;Q9NFH3;O00505;Q9BXS5;Q9UIA9;Q96JE7;Q9UK41;Q86VQ0;Q9NRA8;Q9HAV4;P37198;A6NF01;Q8TAC9;Q92621;P54920;P62072;Q9Y3E7;O75436;Q96QK1;Q14764;O43299;O15397;Q9P1Q0;Q13228;Q9H9H4;O95373;Q96CF2;Q9Y5J7;P53618;Q9H009;O00629;O15504;O43615;Q6NUQ1;P57740;Q9HC62;O95271;Q6ULP2;P52292;O15155;A6NIH7;Q9NP79;Q9H6Z4;O60763;Q9UKK6;O00161;Q15833;O14925;O75382;Q9P0U1;O95487;O43633;O14964;Q9NUS5;O75558;Q8WUM0;O96018;P35579;P35606;Q8WTW3;Q9GZV4;Q96NA2;P49321;Q8WUX9;O60518;Q9Y678;Q676U5;Q9UPT5;Q86VS8;Q9P2W9;Q9BXF6;Q13765;Q86VN1;Q9NT62;P35658;Q96ED9;P49754;Q8NPF5;P52294;Q15436;Q9H9E3;O75674;Q96GV9;Q8NEZ2;Q9NZ52;Q9H814;Q8IYI6;Q13367;Q5SRE5;Q15276;Q96CW6;P14625;Q9NUP9}

- 30245 Pathogen[ P0C214] interacts with 256 human partners: {P60520;Q96BW9;Q94829;Q96CW1;Q8TEX9;Q15833;Q9UI26;Q6NUQ1;O15078;Q9Y5L0;P61923;Q8IWJ2;P55735;Q8IX04;A9QM74;O14910;Q14746;P49754;P14625;Q6IS14;Q9UIA9;Q8N0Z2;O14787;Q9P299;Q8WUX9;Q8NFH5;Q96CF2;Q8N2H4;P55060;Q96P70;Q99747;Q15388;Q92624;Q13505;Q75351;P53992;O43264;Q9H9E3;P59780;Q9UJY5;Q99698;O00159;Q96ED9;Q9UPT5;Q9GZV4;Q8TEM1;Q9H814;Q96QK1;Q8TAC9;Q9UM54;O14579;Q9NP79;Q14764;Q9H444;O60220;Q9Y2T2;Q96GV9;Q96D46;P57740;O00189;Q13367;Q9HD42;Q9Y4P1;Q99567;P31150;P53618;Q8WYP5;O60684;P35606;Q9UND3;O00186;P48444;Q9BYV8;Q8N1F7;Q9NUS5;O75694;Q96NA2;Q86VX9;P83436;Q96EE3;O14964;Q676U5;Q9HAV4;Q9NPJ8;O43745;O95721;P49792;O75381;O75886;O96018;P54920;O15127;Q9UKX7;Q9UQN3;Q7Z614;Q9UK41;Q9HOR1;Q8N612;Q2VPB7;P63241;Q15436;O15131;O75843;A8CG34;Q9H089;P62072;Q7L804;Q96QU8;Q5VIR6;Q9BY43;O43299;Q9H7P6;P63010;Q10567;Q7LBR1;O14925;Q86VS8;Q92572;P49790;Q96EY5;A6NF01;O14980;P37198;Q9BW27;P52294;Q9UBF2;O95487;P49257;Q9H8T0;Q9UJY4;O15126;Q53GS7;Q9BRG1;P53677;Q9UKK6;Q96L92;P56377;Q15437;O43615;P35658;Q9Y5J9;Q9H2G9;P49321;Q9BQQ3;Q13765;Q96PC3;Q9NVU7;Q8NFH3;Q9NZ52;Q9Y5J6;Q7Z6B0;Q96RL7;Q8NEZ2;Q9BXF6;O43752;Q8N1B4;O60763;O00505;Q9Y3E7;Q9HD26;O60784;P62826;Q99816;O43747;Q9HD47;O75436;Q5VIR6;O94973;Q9NUU7;Q9P1Q0;Q9Y6Q5;Q9H009;Q9UBQ0;Q15629;O15504;Q02410;Q3ZCQ8;Q9Y5J7;Q9NZ3;Q9UP83;O75396;Q6ULP2;Q9Y6D6;Q9UHJ9;Q9UMR2;Q92973;A6NIH7;Q9HC62;Q6PD74;P61966;Q8N4Q1;P52292;P12270;O15069;Q96B49;Q96H20;Q14974;O95782;A5D8V6;O60645;Q9P0U1;Q9H2T7;Q9UN37;O75558;Q9H9C1;Q8NFH4;Q9BVL2;Q92783;Q13228;O43633;O75674;Q9H9H4;Q5HYI7;Q9Y3R5;O95271;Q63HQ0;P49454;Q96JE7;Q8IUD2;P53680;Q9Y678;P61970;Q5SRE5;Q9NT62;Q96JB2;O95373;Q9C0E2;Q8IYI6;Q96QF0;Q9H6Z4;Q7Z3B4;Q9BXS5;O00161;O15155;O15027;O60518;Q8WUM0;O95486;Q86VNL;P52948;Q92621;O15397;Q4G0F5;Q12769;O00629;Q13432;Q8WTW3;Q7Z3C6;Q9P2W9;O00471;Q96CW6;O94855;Q9NRA8;Q96N16;Q8WUM4;Q96HA1}
- 30246 Pathogen[ P03346] interacts with 322 human partners: {O95166;Q8TEM1;Q13596;Q8TEX9;Q8IYI6;O75382;Q15833;Q9UI26;O14925;Q4G0F5;P61966;P55735;Q5VIR6;Q86XT2;Q9H1M0;Q96P70;O43752;Q8N0Z2;Q96QK1;Q14746;Q8NFH4;Q99698;Q8WUM0;Q86VQ0;O00629;O15397;Q9H115;Q7Z3C6;Q5JWR5;Q9UPT5;Q9HAV4;Q9P2W9;O15027;P12270;Q9H2G9;Q9Y4P1;Q13228;Q9Y6B7;Q99598;Q9NS69;Q9UP83;O00471;Q12769;Q96A65;Q8N4Q1;Q9H2T7;Q86VS8;Q96EE3;Q99567;Q96N16;Q96JB2;Q15036;Q9GZV4;Q14764;P63010;O14787;A5D8V6;Q2VPB7;P14625;Q9P253;Q9UKX7;Q8N612;O43747;Q9Y3D7;O75694;Q9HD42;P35579;Q92572;Q96MW5;P60520;P53680;Q9C0E2;P49754;Q9UMR2;Q96GV9;Q92543;P57740;P49257;P56377;Q8WYP5;O60684;O43615;Q15629;Q9P0U1;Q9H814;Q9BVL2;Q9Y6D5;P59780;Q8WTW3;O75886;Q8IUD2;Q8NEZ2;Q9BXS5;Q8N1F7;Q96T51;Q9HOR1;O00410;Q96NA2;Q9Y5J7;Q53GS7;Q86VX9;Q9Y678;O43264;O95782;Q99816;P53618;Q9UMY4;Q9H1H9;Q86VN1;Q9NT62;Q99767;O75396;O00505;Q7Z614;Q8NFH5;Q9UK41;Q9P299;Q9UBQ0;Q9H173;O14579;O00189;P63241;P37198;P55060;Q8NFH3;P35658;P49321;Q9UID3;Q9HD47;O60784;Q53H11;Q02410;Q96H20;Q9UIA9;O00186;P62826;Q96FZ7;Q9BT04;O94855;Q7Z6B0;Q6IS14;O75381;Q5SR85;Q13432;Q9BTX1;O15069;O60518;Q96CF2;Q9NZ33;Q9NRS6;Q92621;Q9Y2V7;Q9Y3R5;Q9Y6D6;Q10567;Q6NUQ1;Q9BW27;O00161;Q8NAA4;Q9BUN8;Q9Y5J6;O75843;O14980;P48444;P20340;Q92973;Q9H8T0;Q15436;Q9Y3E7;Q7L804;Q9H9E3;O60493;Q7Z3U7;Q9UPM8;Q8TAC9;Q9NUP9;Q96L92;Q9UNH7;Q15437;O43633;Q9HD26;Q9Y587;Q96JE7;O95373;Q9H444;P31150;Q6PD74;O15131;O60220;Q96CW1;O95721;Q96AX1;Q9UBF2;Q8WV92;Q9H9H4;P42566;Q96PC3;Q96RL7;Q9NVU7;Q9UJY4;Q8N1B4;Q9Y5X2;P54920;A9QM74;Q96B49;Q9NUS5;P61923;O96018;Q9BRG1;P62072;O15126;O60763;Q9UQN3;O95486;Q9HAP6;Q9BQQ3;Q9BYV8;O75436;P83436;Q9NUU7;Q9P1Q0;Q969Q5;Q9ULV0;Q9UJ41;Q5JRA6;Q9H009;P36405;Q96ED9;Q9HCU5;Q3ZCQ8;Q9HC62;Q9BY43;Q92783;Q13367;O95217;O95219;Q9NP79;A8CG34;P52292;Q6ULP2;Q9H9C1;Q15388;Q9UND3;O75351;P50542;Q9HA38;A6NIH7;P49790;O60684;Q9Y5L0;Q9BXF6;O14964;Q5HYI7;O95487;Q9H6Z4;O14617;O60749;Q7LBR1;Q9NRA8;O15078;Q9H8V3;P61970;Q96HA1;Q9UKK6;Q9UJY5;O43299;Q15035;O43933;Q96BW9;P49755;O75558;O75674;Q9Y6Q5;O94829;Q676U5;Q63HQ0;P35606;Q9ULU8;Q9Y2J0;Q6FIF0;O94973;Q96EY5;A6NF01;O15155;Q13765;Q92624;Q7Z3B4;Q9NZ52;O14662;Q8WUM4;Q9H7P6;Q9H267;P52294;Q96D46;O60645;P53992;O14910;Q96KP1;Q15363;Q9NPJ8;P49454;Q9BVK6;Q9UJ33;P53677;Q99747;O43745;O15504;Q8IWJ2;Q9UN37;Q53FT3;Q86Y82;Q8WUX9;Q15276;Q9Y2T2;Q96CW6;O15127;P49792;Q96QF0;Q14974;P52948;Q8WU76}
- 30247 Pathogen[ Q85601] interacts with 282 human partners: {Q8TEM1;Q13367;Q13596;Q8IYI6;Q96QK1;Q9UI26;O14925;Q99816;Q63HQ0;P49454;O00186;Q8IWJ2;Q5SRE5;P54920;O15126;Q14746;O00629;Q53FT3;O75843;Q9UPT5;Q9HAV4;Q9UIA9;Q9NP79;O15027;P48444;Q9Y2T2;Q9NUP9;Q9UQN3;Q8NFH4;Q15388;O14910;Q8NFH3;Q6NUQ1;P36405;P31150;O00471;Q96A65;Q8N2H4;Q9H7P6;Q86VS8;Q7L804;Q9UJY4;Q96EE3;Q9BQQ3;Q96H20;O75396;Q9HD47;Q9GZV4;Q96CW1;Q15629;Q15833;O14579;O95487;Q9P253;A8CG34;Q96P70;Q12769;Q8TAC9;O95166;O60763;Q96JE7;P35579;Q8WV92;Q15036;Q9UP83;P62072;Q9BXS5;P57740;Q53GS7;Q9Y4P1;Q9NUS5;Q9BRG1;P56377;Q9Y5J9;Q9Y5J6;Q8WYP5;Q9HC62;Q9P299;O15155;Q9UHJ9;P62826;O60220;Q8WUM0;Q8N1F7;Q96T51;Q96T51;Q9Y5J7;Q86VX9;Q9UMR2;O43264;Q9H9H4;Q86VN1;Q96JB2;O43747;Q9NPJ8;P61923;Q96RL7;P83436;Q9H1H9;Q9UPM8;O43299;Q9NP61;P61970;O15078;Q99767;Q14764;O43633;Q7Z614;Q5VIR6;P49754;Q7LBR1;P63241;Q9UJ41;P12270;Q10567;Q9H6Z4;Q9P2W9;Q4G0F5;P49321;O75886;Q9UJY5;Q15436;Q96BW9;Q8N612;O75694;Q9H089;Q9C0E2;O43745;Q96FZ7;Q9H9C1;Q8WTW3;O15504;Q14974;Q9H267;O94829;Q7Z3C6;O43752;Q96CF2;Q96L92;Q8N6H7;O60518;O15131;Q9BW27;Q92624;Q9H814;O00159;O75351;Q9H8T0;Q9UK41;Q9H9E3;Q9UKK6;Q96D46;Q9Y678;Q92621;Q9BXF6;O95373;Q15437;P55060;Q92973;Q9UBF2;Q9HD26;P49257;Q96QU8;Q9H444;Q8N6T3;Q9Y678;O15069;Q15035;Q8TEX9;Q13765;Q8N1B4;Q9NUU7;P55735;Q13228;A9QM74;Q676U5;Q9HA38;P52948;A6NF01;Q86VQ0;Q9UKX7;Q9BYV8;Q3ZCQ8;O96018;P53680;Q92783;Q9NZ33;Q8NFH5;O14787;O14964;O43615;O75558;O14980;O95486;O94973;Q96PC3;Q7Z6B0;O75382;O75436;P35658;Q9P1Q0;Q2VPB7;P53618;Q9NT62;P60520;Q9H2G9;Q9Y6B7;Q9H009;P53677;O43933;Q99567;P14625;P52292;Q6ULP2;Q9UBQ0;O15127;A6NIH7;Q8WUM4;Q9Y6D6;Q13432;O15397;Q02410;Q9NRA8;Q5HYI7;P63010;Q9H2T7;P49792;Q13505;Q9Y3R5;Q92572;Q9UM54;P61966;P59780;Q9BVL2;Q96HA1;Q96NA2;Q9Y6Q5;Q8N0Z2;O95271;Q9BT04;O00505;O94855;O75381;P35606;Q8NEZ2;Q14662;O60684;Q96KP1;Q8IUD2;Q6PD74;Q96EY5;Q9Y5L0;Q96ED9;Q9UND3;Q7Z3B4;Q9UNH7;Q9UN37;O14662;Q9Y3E7;Q9HD42;P52294;O00161;P49790;Q9UID3;O60645;P53992;Q96N16;Q9HOR1;O60784;O95721;O00189;Q96GV9;Q99698;O00410;Q99747;Q6IS14;Q9NVU7;Q96CW6;O75674;Q96QF0;O95782;A5D8V6}

30248

Pathogen[ P14079] interacts with 349 human partners: {Q13228;Q15629;Q8NFH5;Q96QK1;Q9H9H4;Q6NUQ1;O95373;P0CG08;O75886;Q96CW1;O95070;Q3ZCQ8;O43615;O15069;P35579;O95166;Q7L804;Q9BW27;Q8N4H5;Q6ZVE7;Q14746;Q96NA2;Q96HA1;Q86VNI;Q9UNH7;Q5HYI7;Q969M3;P49257;P61923;O15027;P61970;Q96CF2;Q9Y6Q5;Q96EY5;Q15036;P61966;Q6ULP2;Q6ZVM7;Q9BXS5;P60468;Q9Y3D7;O14828;O43745;Q9NT62;Q9UJY4;Q9UJC3;Q96H20;P83436;Q9UID3;Q1HG44;P31150;P47224;Q13765;A6NIH7;Q9H009;Q96P70;Q9NVU7;O95487;Q1HG43;P982072;Q9BRL7;O95271;Q9H9C1;Q13505;Q8TAG9;Q2VVP7;Q86VS8;Q9UJY5;P57740;O60493;Q8N1F7;Q6IS14;Q86VX9;Q9NPJ8;Q86XT2;P35658;Q9H1K0;P35606;Q9BY43;Q63HQ0;Q9P0U1;Q96ED9;Q9UPM8;Q9H0Y0;Q02410;A6NF01;O00471;Q9BVK6;Q10567;A8CG34;Q9Y6D5;Q9NP79;Q9ULU8;Q96BW9;Q15276;Q9H7P6;P42566;P56377;Q92621;P52294;O60518;Q9Y2T2;Q9Y678;Q92783;Q9Y6B7;Q96B49;Q8TEML1;Q7LBR1;Q9H8T0;Q86TL0;O60684;P59780;O94855;O00189;Q9P1Q0;Q587I9;Q9HD42;O75674;O60645;Q92624;Q8N9S9;O60895;Q99442;Q96D46;Q9NRS6;P53992;Q9Y5J7;Q9UJ41;Q99747;Q9UM54;O60784;Q8IUD2;Q96L92;Q9UPT5;Q7Z3C6;Q9H3E2;O15155;Q4G0F5;O14925;Q9NS69;Q96JE7;Q9Y4P1;Q96N16;Q9H5N1;Q9H269;P33947;Q92572;Q9NZ52;Q96KP1;Q9BVV7;Q9UKX7;Q15363;Q15388;O75843;Q9BUN8;O75558;Q9UHTJ9;O75396;Q9BVL2;O75431;Q9Y2V7;Q7Z7G8;P24390;Q9H2G9;O15504;O00186;Q9HD26;Q9NUP9;O95721;Q5JWR5;Q96CW6;Q15833;P36405;P50542;Q8N609;Q96RL7;Q9WUM0;Q9HC62;P60520;O95782;P12270;Q53GS7;Q9UND3;Q8WTW3;Q53FT3;Q9Y5X2;Q9BXP6;Q96T51;O94829;Q8NC96;Q8TAC9;Q8WYP5;Q969E2;O00410;O96018;O43633;P49755;Q9P299;Q8WUM4;Q9Y6X1;Q9Y6D6;Q9UI26;Q99567;Q9NVZ3;Q8WUX9;Q5JRA6;Q14974;P55060;Q92973;Q96QF0;Q9UBF2;Q96AX1;Q9UP83;Q9H1H9;Q9NZ43;Q9UKK6;A5D8V6;Q8NFH3;O60749;Q9P253;Q96EE3;Q7Z412;Q6PD74;Q9H8V3;Q9HAP6;Q8NEZ2;P37198;Q5VIR6;O14653;Q53HI1;O43264;Q8IWD2;Q9NV70;P60059;P63010;Q15035;O15397;P49790;P53677;Q9BQQ3;Q9HA38;A9QM74;O14662;Q9H115;Q13596;O00505;Q9H6Z4;B7ZAQ6;Q8N4Q1;O94973;Q8N1B4;Q8N2H4;P48444;Q9UN37;Q8TEX9;Q7Z614;O60831;Q96FZ7;P63241;Q99595;Q8N0Z2;Q8N612;P14625;Q96MW5;Q96A65;Q8IYI6;Q13367;Q13432;Q8NFH4;Q8WV19;Q14764;Q9H0R1;O43299;O43747;O60220;Q9UBQ0;Q7Z3B4;O43752;O15078;O14579;Q9Y3E7;O14787;Q9UIA9;P55735;Q8WV92;P49454;Q92543;Q9H9E3;Q9Y3E0;Q99598;O75381;Q9H0V9;Q967U5;P49321;Q9HAV4;Q5SRD1;Q9H5J9;O75351;P49754;Q96JB2;Q9NUS5;O14617;Q9NZZ3;P59074;P62826;O75436;O95486;Q9H444;Q9BRG1;Q9Y3R5;Q12769;O95235;Q96PC3;Q99698;Q9Y2D4;Q9H2T7;Q99816;Q9P2W9;Q96QU8;Q86VQ0;Q9Y5L0;Q9Y5J9;Q9NRA8;Q5SRE5;Q9GZV4;O75694;O00629;P53680;P52292;O75382;Q9BYV8;Q9Y5L4;P54920;O15131;Q9C0E2;Q9BTX1;Q99767;Q9Y587;O60763;Q9H267;Q9H089;Q9UQN3;P52948;Q7Z6B0;Q96GV9;Q9BT04;O43731;Q9H814;Q9HD47}

30249

Pathogen[ P03383] interacts with 226 human partners: {Q96BW9;Q9BVL2;O96018;Q96EE3;O15504;Q13228;Q96CW1;Q8WUM0;Q9UI26;Q9UJY4;Q9HD47;Q7L804;Q8IWIJ2;P49454;Q9Y5J7;P56377;O15126;Q92621;Q14746;P49792;Q8NFH4;Q7Z3C6;Q9UIA9;Q9H9E3;O15397;O14579;Q92572;Q7Z6B0;Q9UP83;A6NF01;P55735;Q96QF0;O94829;P53618;Q8WUX9;P62072;P83436;Q9Y678;Q96RL7;Q8N1B4;P54920;Q96H20;O95487;O43264;P12270;Q96HD26;A8CG34;Q8TAC9;P52948;Q9H7P6;Q9Y3E7;Q9BUN8;P57740;Q9Y4P1;Q10567;Q8NFH5;Q96P70;O14925;Q8WYP5;Q9NZZ3;O43615;O00186;Q9H9C1;Q9GZV4;O75886;Q8N1F7;Q96JB2;Q9H2G9;Q86VX9;Q8NEZ2;Q99816;O95486;Q8IYI6;Q9Y6D6;Q9NT62;O00505;P49321;Q7Z614;Q8TEM1;O60220;Q9NUS5;P49754;Q53GS7;P63241;O00189;Q96KP1;Q13432;P53677;Q15436;Q96D46;Q12769;Q8N2H4;Q8N612;A9QM74;Q96B49;Q9H1H9;P62826;Q8WTW3;Q6PD74;Q99567;Q96L92;O15069;Q15629;Q9Y3R5;Q9BW27;P55060;P52292;Q99747;O75558;Q96N16;Q9H8T0;Q9UK41;Q7LBR1;Q86VQ0;Q9H2T7;O75843;O43633;Q9Y5J6;Q9Y2T2;Q92973;P63010;O14980;O43747;Q15437;Q9HAV4;O94855;O00471;O15078;Q9UJY5;Q15388;Q9BXP6;Q9H444;Q5HYI7;O75381;Q9H9H4;Q13765;O43745;Q676U5;P14625;O95782;Q9BYV8;Q9BTX1;Q86V58;Q9C0E2;Q9UBF2;Q9BRG1;Q8N0Z2;O14787;Q14974;Q96ED9;O43299;Q9HD42;Q9P0U1;O15027;O60784;Q5SRE5;O15131;Q92783;O75436;P35658;Q9P1Q0;O15127;Q9H009;Q96HA1;Q96QK1;Q9H6Z4;Q96JE7;Q13367;Q53FT3;Q6ULP2;Q9UND3;Q9HC62;P53992;Q96QU8;A6NIH7;O60645;Q8WUM4;O43752;O60518;Q9NRA8;Q02410;O95373;P35579;Q6NUQ1;O60831;P61970;P37198;Q9UKX7;O00161;Q9BXS5;O95271;Q8IUD2;Q9UBQ0;Q92624;Q9UPT5;O94973;Q9Y5L0;O00629;Q9Y5J9;O14964;Q63HQ0;Q7Z3B4;Q9BT04;Q86VNI;Q9UN37;P52294;P49790;Q14764;Q96EY5;O75694;O14910;Q9NPJ8;Q96GV9;Q96N16;Q8NFH3;O00410;Q2VVP7;Q15276;Q5VIR6;Q9UKK6;Q9H814;Q9NVU7;Q96CW6;Q9NZ52;Q13505}

30250

Pathogen[ P03410] interacts with 372 human partners: {Q8N4H5;Q99567;Q6PD74;Q9H0Y0;Q8NC96;Q9Y6Q5;Q5SRD1;P49321;Q9UPM8;Q7Z3B4;O00203;Q9BW27;O96018;Q7L804;Q9Y5L4;O95782;Q96PC3;Q96CW1;Q86VQ0;O14910;Q9H267;Q9H2G9;Q9UJC3;Q8NAA4;Q6ZVM7;Q9H1M0;O14828;Q14974;P62072;A9QM74;Q15833;Q96B49;O43633;O00505;A6NF01;Q7Z614;Q9NZ43;Q9H0V9;Q9UPT5;Q9BXS5;Q96L92;Q99442;Q9UJ41;Q9BQQ3;Q15388;P53680;Q96JB2;Q8TAC9;Q9H7P6;Q9UP83;Q9H115;Q86XT2;Q9UKX7;O60896;P60468;P49257;Q9Y2J0;Q9H9H4;P60059;Q13596;O60895;Q1HG43;O94855;Q9Y4P1;Q9NZ52;Q9NVZ3;Q9NP79;Q9NUS5;P52294;Q13445;Q8NFH4;B7ZAQ6;O75351;P53992;Q9Y2V7;Q9H1H9;Q9P299;O75674;P55060;O75382;O43747;Q9Y5J7;Q9H3E2;O75843;Q9ULV0;O60749;Q13505;O15069;Q96QU8;P60520;Q5SRE5;P48444;Q96P70;P52948;O15504;Q8N1B4;Q10567;P14625;Q969E2;P35606;Q7Z6B0;Q9NRA8;P36405;Q92572;O00159;P33947;O60645;Q9P2W9;Q9H8T0;Q9HD47;O75694;O14662;P59074;Q96CW6;Q92783;Q9BY43;Q99767;O14579;Q96QK1;P35579;O43299;Q9NS69;Q9NUP9;Q53FT3;Q1HG44;Q96N16;Q86VS8;O75381;Q86VNI;Q9P253;Q96HA1;Q9Y3E0;Q9UMY4;Q6NUQ1;Q8N2H4;Q8TEX9;Q9BYV8;O14617;Q96BW9;Q9UJY5;Q9Y587;Q9Y6B7;Q9H609;Q02410;Q9H009;Q8WU76;Q9UMZ2;O43264;Q8N1F7;A6NIH7;O95249;Q9HAP6;P49454;O95219;A5D8V6;Q9UBQ0;Q9UNH7;Q9HD26;O14925;Q99595;O95166;Q53HI1;Q99816;Q9UM54;Q9UHTJ9;Q96MW5;Q92624;Q86TL0;Q9UMR2;Q9BT04;Q9Y3E7;Q15436;Q8WUX9;Q9BVK6;Q8NEZ2;O60763;Q9Y5L0;P49790;Q9Y6X1;Q9H814;Q14764;Q9UQN3;Q8IUD2;Q9HC62;O75396;P12270;Q969M3;Q15437;Q9NUU7;P62826;O00629;Q8TAG9;O60684;Q3ZCQ8;P0CG08;Q9BUN8;P35658;Q96ED9;O15155;Q92973;Q9HD42;O14787;Q9Y2T2;Q9NP61;Q9UN37;O95271;Q96A65;Q9Y678;Q8NFH5;O94829;Q9UND3;Q15629;O43615;O95486;Q8TEM1;O15127;Q5HYI7;Q15049;Q8WV92;Q15363;Q9BXP6;Q15036;O15078;Q9Y3D7;Q676U5;Q9H444;O60784;Q9NZZ3;Q9Y6D6;Q9H089;Q9H1K0;Q8N9S9;Q9ULU8;Q9NVU7;P53618;Q9NT62;O75436;P61923;Q9Y6D5;Q96EE3;Q9H173;Q96JE7;Q9BRG1;P47224;Q8WTW3;Q8N612;Q9NRS6;P49754;Q96FZ7;Q9H0R1;Q99598;P53677;O75558;Q96T51;Q9HCU5;P24390;Q9Y5J6;Q9P1Q0;P63010;Q9NPJ8;Q9H2T7;Q4G0F5;Q96QF0;Q96D46;Q9Y5J9;P50542;Q14746;Q9HA38;Q96KP1;Q8WUM0;Q99698;Q86VX9;Q63HQ0;Q7Z7G8;Q6ULP2;O43752;P63241;A8CG34;Q96GV9;Q9P0U1;O15027;Q587I9;O60220;Q9Y2D4;Q9H9C1;O146

53;Q9NV70;Q8N0Z2;Q13228;Q96EY5;Q15035;O00410;P59780;Q9UI26;P83436;O43745;Q9H8V3;Q5VI  
R6;O43731;Q9GZV4;Q2VPB7;Q6ZVE7;P57740;P55735;Q9H5N1;O00186;O95721;Q13367;Q96NA2;O608  
31;Q13765;P31150;Q12769;Q7Z3C6;P52292;Q13432;Q9HAV4;Q96H20;P61966;Q7Z3U7;Q9UIA9;O151  
26;Q96CF2;Q8WV19;Q95562;Q8WUM4;Q9H6Z4;Q9H269;O15131;Q8WYP5;Q8NFB3;P42566;O00471;O001  
61;Q9BVL2;Q7LBR1;Q5JWR5;O94973;Q9H9E3;P56377;Q8N4Q1;O15397;Q9UID3;Q9UKK6;Q99747;Q925  
43;Q9BTX1;Q8IWI2;O60518;Q92621;Q9C0E2;Q8IYI6;Q5JRA6;O75886;Q9UJY4;O60493;O95070;O149  
80;O95373;O95487;P49792;Q15276;Q9Y5X2;Q9UBF2;Q96AX1;O75431;Q9BRL7;P61970;P54920;Q6IS  
14;Q53GS7}

30251 Pathogen[ P14075] interacts with 229 human

partners: {P49321;Q9H6Z4;Q9UI26;Q96RL7;Q9P0U1;P52292;O15131;O14925;Q13505;Q9C0E2;Q9UJ  
Y4;Q02410;Q14746;Q9H2G9;Q9BYV8;Q96JB2;Q96EY5;Q9H814;Q53FT3;Q14764;Q9Y5J9;Q96JE7;Q96B  
49;Q96D46;Q9H1H9;O60645;O15069;O96018;Q8N1B4;O94973;P62072;Q8N2H4;Q9H9E3;Q96CW1;O755  
58;O75886;O00186;Q96P70;Q96BW9;P61970;Q8N612;Q9H2T7;O14787;O43752;Q9NT62;O15127;Q7LB  
R1;Q9H444;A8CG34;Q96GV9;Q96N16;P57740;Q96KP1;Q8WUX9;Q8WUM4;Q15388;Q9Y2T2;Q8WYP5;Q9UB  
F2;Q6NUQ1;Q53GS7;Q92973;P49792;Q92783;Q9Y4P1;Q8N1F7;Q9NP79;Q99747;Q86VX9;Q9NZ52;Q9UB  
Q0;O00629;Q9NPJ8;P54920;Q86VN1;Q676U5;Q9BT04;Q96NA2;Q86VQ0;Q9UKX7;Q9HD26;Q9GZV4;O153  
97;Q7Z614;Q8IUD2;Q9UK41;O15027;Q9H9C1;Q15629;P63241;O15126;P35658;Q9Y6D6;P12270;Q9HA  
V4;A6NF01;P53992;Q9NVU7;Q92621;Q8NEZ2;Q8N0Z2;P55735;O00471;Q96H20;Q5HYI7;O75381;Q9Y3  
E7;Q92624;Q9H9H4;Q9BTX1;O00505;Q96HA1;O60831;O14980;Q9BW27;O00189;P52294;O95487;Q9H8  
T0;O15078;O14964;Q9UP83;P49754;Q15437;Q7Z6B0;O14910;O95373;Q9UHJ9;Q7L804;O60518;Q8TE  
M1;P53618;Q9NPJ8;Q9UND3;Q9HC62;Q13765;Q6IUD2;O95782;Q9BUN8;Q96EE3;Q8IWI2;P37198;O602  
20;O43745;O00410;Q5SRE5;P62826;Q9NZZ3;O43747;Q9UIA9;Q1HG44;Q9HD47;P35579;Q15436;Q925  
72;Q9Y3R5;Q13228;Q5VIR6;O94829;O75436;O00161;Q9P1Q0;Q8NFB3;P63010;Q9H009;Q96QU8;Q9Y6  
78;Q9BXF6;A9QM74;O15504;Q9H7P6;Q96QF0;Q6ULP2;O75843;Q8TAC9;Q9HD42;A6NIH7;Q9BRG1;Q995  
67;P56377;Q9Y5L0;Q9Y5J7;Q12769;Q2VPB7;Q8IYI6;Q86VS8;O94855;Q9BXS5;Q9NRA8;Q14974;Q9BV  
L2;Q53HI1;P49790;Q99816;Q8WUM0;O43264;O95271;P14625;P49454;Q13432;Q75694;O95486;Q7Z3  
B4;Q9Y5J6;Q8NFB4;Q9UKK6;Q10567;P83436;P55060;Q9NS69;Q8NFB5;Q9NUS5;Q9UJY5;Q13367;Q7Z3  
C6;O43615;O60784;Q96ED9;Q8WTW3;Q6PD74;Q9UN37;P52948;Q96L92;Q15276;O43299;Q96CW6;Q9UP  
T5;Q96QK1;O14579}

30252 Pathogen[ P0C206] interacts with 341 human

partners: {O95271;Q53GS7;Q7Z3C6;P59074;Q96EE3;O14964;Q9BRG1;O14662;O60645;P53680;P630  
10;Q92621;Q9BVK6;Q4G0F5;Q96L92;Q9NUP9;O14579;Q8WYP5;Q63HQ0;O15131;O43933;O15127;Q9Y5  
L4;Q9Y5L0;Q9Y678;Q15437;Q8WUX9;Q9Y6B7;Q9UN37;Q587I9;Q9UM54;Q9Y5J6;Q9GZV4;Q8N9S9;P834  
36;O94973;Q8NEZ2;P49790;O14828;Q6IS14;Q9H444;Q8N6T3;Q7LBR1;Q5SRE5;O75396;Q8NFB5;Q134  
32;Q9Y2V7;Q9NUU7;Q9Y6Q5;Q92572;O60784;Q9UKK6;Q9Y3E7;Q9UNH7;Q8NC96;P53618;Q9P299;O437  
47;Q9BXF6;Q9H9E3;O60518;O94855;Q9UHJ9;Q10567;O14653;P54920;Q6NUQ1;Q9NVU7;Q96B49;Q9NR  
S6;O95721;Q9Y4P1;O75381;Q9BT04;Q9Y6D6;A9QM74;O75382;Q7Z3B4;Q9Y2J0;Q13228;Q2VPB7;O437  
52;Q99598;Q9HOR1;O00629;O60684;Q9H8T0;P49754;Q9H1K0;P61966;Q14974;Q9HC62;Q96HA1;Q9UQ  
N3;O95070;Q96QU8;O00505;Q96T51;O60220;Q96KP1;Q86VQ0;Q86VN1;O60493;Q96P70;P49755;Q5JR  
A6;Q99698;Q9UJY4;O15397;Q96JB2;O60831;Q8IUD2;P55735;Q9Y5J9;O94829;Q9Y2T2;Q15035;Q147  
46;Q13596;P62826;Q99816;Q5HYI7;P57740;Q96GV9;P49454;P49321;O75558;Q9Y3R5;Q92783;Q9H1  
H9;Q969E2;P47224;Q1HG44;P50542;Q96A65;Q92973;Q15036;O00410;Q96N16;Q8N4Q1;Q9HAV4;O432  
99;Q9Y5J7;Q5SRD1;Q86VS8;Q9NP61;Q9UK41;Q9P1Q0;Q9Y587;Q92624;Q96ED9;Q9H9H4;Q9NPJ8;O001  
61;Q96D46;P59780;Q8N2H4;P53677;Q8WUM0;Q9UBQ0;O14787;O43615;Q9H7P6;Q3ZCQ8;Q96QF0;Q997  
67;P49792;O60749;Q8TEM1;Q9H814;Q1HG43;Q9UKX7;Q9HD47;Q9H089;Q9UPM8;Q9ULB8;A5D8  
V6;Q6ULP2;Q9BXS5;O15155;O96018;Q9Y3D7;O95486;Q969M3;Q8WTW3;Q5VIR6;Q9NS69;Q96H20;Q6ZV  
E7;Q9NZ52;Q53HI1;Q9Y6D5;O95373;Q9UPT5;P35606;Q9H3E2;O75694;O00159;Q7Z7G8;P33947;Q9UJ  
Y5;Q96JE7;Q86XT2;Q86VX9;P24390;P49257;Q8TEX9;O95487;O60763;Q96CW1;Q9BTX1;O15078;Q9BU  
N8;Q9P0U1;O43633;Q8WU76;Q96AX1;P48444;Q6PD74;O14925;Q9BYV8;P35579;A6NF01;O15069;Q9HA  
38;Q13505;Q9H8V3;Q15388;O14910;P60520;Q9H2T7;Q7Z614;P31150;Q8N612;Q96CF2;O95782;Q9H6  
Z4;Q9UJ41;Q99567;Q9H5N1;P55060;O43731;P36405;Q9H2G9;Q8NFB4;Q99747;A6NIH7;Q8IYI6;Q8WU  
M4;P62072;P0CG08;Q9BY43;Q9H009;P42566;Q9UID3;P63241;Q676U5;Q9UBF2;O75436;Q86TL0;Q156  
29;O14617;Q9P253;O75843;Q9HD42;Q96NA2;O15504;Q9NP79;A8CG34;Q96QK1;Q9UIA9;Q9NZZ3;Q9C0  
E2;Q12769;Q9UJC3;Q7L804;Q9UMR2;P53992;Q96FZ7;Q15363;Q9NT62;Q9NV70;O75886;Q9UND3;Q9BQ  
Q3;Q8N1B4;O75351;Q7Z6B0;Q8TAC9;Q8NFB3;P52294;Q8N6H7;O15126;Q8WV92;Q96PC3;O15027;Q158  
33;Q8N1F7;Q8N0Z2;O75674;O43264;O00189;Q13765;O43745;Q9H9C1;Q8N4H5;Q53FT3;P61970;Q9HD  
26;P52292;P35658;O95166;Q9H267;O00471;Q8IWI2;Q13367;Q9P2W9;Q96RL7;Q15276;Q8TAG9;Q9BW  
27;Q96EY5;Q5JWR5;Q9BVL2;Q96CW6;P56377;Q9UI26;Q14764;O00186;P61923;P12270;Q9NRA8;Q9NU  
S5;B7ZAQ6;P14625;Q96BW9;Q9BRL7;Q02410;Q15436}

30253 Pathogen[ P03363] interacts with 262 human

partners: {O60763;Q53FT3;Q96D46;P49754;Q86VS8;O14787;Q9UID3;P49454;Q53GS7;Q7Z3B4;Q929  
73;Q9GZV4;Q9Y2T2;O43933;Q9UNH7;Q7L804;O60645;O60684;Q96ED9;Q5SRE5;Q99598;Q9NRA8;Q86V  
Q0;P12270;Q9BYV8;Q9H9C1;Q13367;Q8NFB4;Q9UND3;P49321;Q9UP83;Q92543;O43747;Q9HAV4;Q9UJ  
Y4;P35579;P61970;P31150;P48444;O75886;Q63HQ0;Q96L92;O15078;Q8N1B4;Q969Q5;Q9Y3R5;Q132  
28;A9QM74;Q8WYP5;Q9H444;O95219;Q8IYI6;Q92783;Q8NFB3;Q9NVU7;O14980;O00471;Q12769;O004  
10;Q96QK1;Q96A65;Q9Y678;P53677;O14910;Q9H2T7;O00505;O60784;Q15388;O14925;Q9NZ52;Q9NU  
U7;O43264;O75436;Q6NUQ1;A6NF01;Q96P70;P54920;Q9H9E3;O75558;Q15436;Q9NUS5;A8CG34;P834  
36;Q8WU76;Q9NZZ3;Q9UKX7;O15069;Q9Y6B7;O14579;Q9C0E2;Q3ZCQ8;Q13765;O95486;Q9NT62;P536  
18;P60520;Q9H20;Q9UMY4;Q9BXS5;O00629;O60493;Q9HD47;Q96T51;Q9P299;O94973;P61923;Q9P1  
Q0;Q8N0Z2;Q8NAA4;O60749;Q9UJ41;Q14746;O75351;Q9P2W9;Q96BW9;Q92572;O43615;Q8WUM0;Q9BV  
L2;Q96QU8;Q99567;Q5JWR5;Q9UN37;Q6ULP2;Q5VWJ9;Q8WUM4;Q9HOR1;Q86VN1;Q99698;Q9BRG1;O957  
21;Q9H267;Q15035;Q13432;Q96KP1;Q9HC62;Q7Z3C6;Q02410;Q9Y5J7;Q9P0U1;Q9UK41;O75381;Q8TE  
X9;Q86VX9;P63010;O75674;Q9Y3E7;Q9NPJ8;Q7LBR1;O95271;Q96HA1;P49792;Q92624;P35658;Q9BT  
04;Q14974;Q9HTW3;Q9H8T0;O75694;Q9UKK6;P49790;O00189;Q9Y5L0;O14964;O00186;Q66EY5;Q7Z6  
14;O75382;P57740;Q9BXF6;Q9UBQ0;Q5VIR6;Q6FIF0;Q9UMR2;O95782;Q9BTX1;Q9H2G9;O94829;A6NI  
H7;Q8WV92;Q8IWI2;P63241;Q5HYI7;O15126;P35606;Q96RL7;Q8NEZ2;Q96GV9;O15131;O14662;Q2VP

B7;Q9H6Z4;Q96NA2;Q9UBF2;Q8N612;Q6PD74;P53992;O75843;Q9UI26;O95487;Q99816;O95373;P52948;Q13596;O15127;O43745;Q9Y4P1;Q9UQN3;O15504;Q9H7P6;Q9H1H9;Q6IS14;O00161;P55060;Q9H009;Q7Z6B0;Q9NP79;Q9NS69;Q9Y6D6;Q9NUP9;P37198;Q676U5;P62826;Q9H9H4;P52292;Q8N1F7;Q9UY5;O43752;Q96N16;Q92621;Q14764;Q8NFH5;O60518;Q96018;Q8IUD2;Q95166;P55735;Q99767;Q99747;Q9HD26;Q9H814;O94855;Q8WUX9;Q15276;Q10567;Q9BW27;Q9UIA9;Q96CW6;Q9HD42;O15397;Q9UPT5;Q96QF0;Q96CW1;Q15833;O43299;P52294;Q9UPM8;Q96CF2;Q4G0F5;A5D8V6;Q9UJC3;Q96JB2]

30254 [Cluster 2751]GO:0016045+P biological\_process [name] detection of bacterium [def] "The series of events in which a stimulus from a bacterium is received and converted into a molecular signal." [GOC

30255 Pathogen[ Q2Q067] interacts with 1 human partners:{Q86W56}

30256 Pathogen[ P0C214] interacts with 2 human partners:{Q9NPP4;Q86W56}

30257 Pathogen[ P03346] interacts with 2 human partners:{Q9NPP4;Q86W56}

30258 Pathogen[ Q85601] interacts with 1 human partners:{Q86W56}

30259 Pathogen[ P14079] interacts with 3 human partners:{Q86W56;Q9Y239;Q9NPP4}

30260 Pathogen[ P03383] interacts with 1 human partners:{Q86W56}

30261 Pathogen[ P03410] interacts with 3 human partners:{Q9Y239;Q9NPP4;Q86W56}

30262 Pathogen[ P14075] interacts with 1 human partners:{Q86W56}

30263 Pathogen[ P0C206] interacts with 1 human partners:{Q86W56}

30264 Pathogen[ P03363] interacts with 2 human partners:{Q86W56;Q9NPP4}

30265 [Cluster 2752]GO:0046718+P biological\_process [name] entry of virus into host cell [def] "The process in which a virion enters a host cell, including virion attachment and penetration." [ISBN

30266 Pathogen[ Q2Q067] interacts with 5 human partners:{Q96J02;P63172;P49790;O00505;Q9UID6}

30267 Pathogen[ P0C214] interacts with 7 human partners:{Q96J02;Q9UID6;O00308;Q9H0M0;P49790;O00505;P63172}

30268 Pathogen[ P03346] interacts with 7 human partners:{Q96J02;O00505;P63172;P49790;Q9H0M0;Q9UID6;O00308}

30269 Pathogen[ Q85601] interacts with 5 human partners:{Q96J02;P63172;Q9UID6;O00505;P49790}

30270 Pathogen[ P14079] interacts with 5 human partners:{P63172;Q9UID6;P49790;Q96J02;O00505}

30271 Pathogen[ P03383] interacts with 4 human partners:{P63172;O00505;Q9UID6;P49790}

30272 Pathogen[ P03410] interacts with 4 human partners:{O00505;P63172;P49790;Q9UID6}

30273 Pathogen[ P14075] interacts with 4 human partners:{Q9UID6;P63172;O00505;P49790}

30274 Pathogen[ P0C206] interacts with 6 human partners:{Q9UID6;P49790;O00308;Q96J02;O00505;P63172}

30275 Pathogen[ P03363] interacts with 6 human partners:{O00505;P63172;P49790;O00308;Q9H0M0;Q9UID6}

30276 [Cluster 2753]GO:0010332+P biological\_process [name] response to gamma radiation [def] "Any process that results in a change in state or activity of a cell or an organism (in terms of movement, secretion, enzyme production, gene expression, etc.) as a result of a gamma radiation stimulus. Gamma radiation is a form of electromagnetic radiation (EMR) or light emission of a specific frequency produced from sub-atomic particle interaction, such as electron-positron annihilation and radioactive decay. Gamma rays are generally characterized as EMR having the highest frequency and energy, and also the shortest wavelength, within the electromagnetic radiation spectrum." [GOC

30277 Pathogen[ Q2Q067] interacts with 8 human partners:{P01106;O15350;Q96017;P55212;O00255;Q13426;Q03468;Q9BXW9}

30278 Pathogen[ P0C214] interacts with 9 human partners:{P55212;O15350;Q8IWE4;Q13426;Q96017;Q9BXW9;P01106;Q03468;O00255}

30279 Pathogen[ P03346] interacts with 11 human partners:{Q96017;Q13426;O15350;P55212;Q8IWE4;P01106;Q03468;O00255;P51587;Q9BXW9;O43543}

30280 Pathogen[ Q85601] interacts with 10 human partners:{P01106;Q96017;Q9BXW9;Q13426;Q03468;O00255;O15350;Q8IWE4;P55212;P51587}

30281 Pathogen[ P14079] interacts with 12 human partners:{P41238;P51587;Q9BXW9;O15350;P55212;P01106;O43543;Q03468;O00255;Q13426;P49917;Q8IWE4}

30282 Pathogen[ P03383] interacts with 9 human partners:{P55212;P01106;Q9BXW9;Q8IWE4;Q03468;Q13426;O15350;O00255;Q96017}

30283 Pathogen[ P03410] interacts with 12 human partners:{Q8IWE4;P01106;Q9BXW9;P41238;Q03468;P51587;Q96017;Q13426;O43543;O15350;O00255;P55212}

30284 Pathogen[ P14075] interacts with 8 human partners:{P55212;P01106;Q03468;O00255;Q96017;O15350;Q13426;Q9BXW9}

30285 Pathogen[ P0C206] interacts with 13 human partners:{Q96017;P51587;O00255;P55212;Q03468;Q8IWE4;P49917;Q13426;O15350;O43543;P01106;P41238;Q9BXW9}

30286 Pathogen[ P03363] interacts with 6 human partners:{Q9BXW9;P01106;Q96017;P55212;Q13426;Q03468}

30287 [Cluster 2754]GO:0045084+P biological\_process [name] positive regulation of interleukin-12 biosynthetic process [def] "Any process that activates or increases the frequency, rate or extent of the chemical reactions and pathways resulting in the formation of interleukin-12." [GOC

30288 Pathogen[ Q2Q067] interacts with 3 human partners:{Q04864;Q04206;P10914}

30289 Pathogen[ P0C214] interacts with 3 human partners:{Q04206;P10914;Q04864}  
30290 Pathogen[ P03346] interacts with 3 human partners:{Q04206;Q04864;P10914}  
30291 Pathogen[ Q85601] interacts with 3 human partners:{Q04864;P10914;Q04206}  
30292 Pathogen[ P14079] interacts with 1 human partners:{P10914}  
30293 Pathogen[ P03383] interacts with 3 human partners:{P10914;Q04864;Q04206}  
30294 Pathogen[ P03410] interacts with 3 human partners:{Q04206;Q04864;P10914}  
30295 Pathogen[ P14075] interacts with 3 human partners:{Q04206;P10914;Q04864}  
30296 Pathogen[ P0C206] interacts with 3 human partners:{P10914;Q04206;Q04864}  
30297 Pathogen[ P03363] interacts with 3 human partners:{Q04206;P10914;Q04864}  
30298 [Cluster 2755]GO:0033147+P biological\_process [name] negative regulation of intracellular estrogen receptor signaling pathway [def] "Any process that stops, prevents, or reduces the frequency, rate or extent of the activity of an intracellular estrogen receptor signaling pathway." [GOC  
30299 Pathogen[ Q2Q067] interacts with 5 human partners:{Q13033;Q8N1N5;Q63ZY3;Q8N895;Q99623}  
30300 Pathogen[ P0C214] interacts with 4 human partners:{Q13033;Q99623;Q8N895;Q63ZY3}  
30301 Pathogen[ P03346] interacts with 6 human partners:{Q8N1N5;Q8N895;Q13033;Q63ZY3;Q99623;Q75593}  
30302 Pathogen[ Q85601] interacts with 4 human partners:{Q8N895;Q99623;Q63ZY3;Q13033}  
30303 Pathogen[ P14079] interacts with 5 human partners:{Q99623;Q8N895;Q13033;Q8N1N5;Q63ZY3}  
30304 Pathogen[ P03383] interacts with 5 human partners:{Q8N1N5;Q8N895;Q63ZY3;Q13033;Q99623}  
30305 Pathogen[ P03410] interacts with 5 human partners:{Q8N1N5;Q99623;Q13033;Q8N895;Q63ZY3}  
30306 Pathogen[ P14075] interacts with 5 human partners:{Q63ZY3;Q8N1N5;Q99623;Q8N895;Q13033}  
30307 Pathogen[ P0C206] interacts with 5 human partners:{Q99623;Q8N895;Q8N1N5;Q63ZY3;Q13033}  
30308 Pathogen[ P03363] interacts with 5 human partners:{Q99623;Q63ZY3;Q13033;Q8N1N5;Q8N895}  
30309 [Cluster 2756]GO:0051216+P biological\_process [name] cartilage development [def] "The process whose specific outcome is the progression of the cartilage over time, from its formation to the mature structure. Cartilage is a connective tissue dominated by extracellular matrix containing collagen type II and large amounts of proteoglycan, particularly chondroitin sulfate." [http  
30310 Pathogen[ Q2Q067] interacts with 13 human partners:{O43365;P35712;Q05516;P09017;P35548;P14651;Q9UPW6;P78337;Q07687;P04818;P11474;P35711;P54821}  
30311 Pathogen[ P0C214] interacts with 12 human partners:{O43365;P04818;P11474;P78337;P31249;P35711;P14651;Q07687;Q9UPW6;P35712;P35548;Q05516}  
30312 Pathogen[ P03346] interacts with 16 human partners:{P31249;P54821;Q99811;P78337;Q9UPW6;P35548;Q70SY1;P23759;O43365;P09017;Q05516;P35712;P11474;P35711;P14651;Q9UJU5}  
30313 Pathogen[ Q85601] interacts with 11 human partners:{Q9UPW6;P35712;P78337;P35711;P35548;P11474;Q05516;P31249;P14651;O43365;Q07687}  
30314 Pathogen[ P14079] interacts with 12 human partners:{Q9UPW6;P35711;P78337;P11474;P35712;Q05516;P57679;P31249;O43365;Q07687;P04818;P14651}  
30315 Pathogen[ P03383] interacts with 11 human partners:{P35712;Q9UPW6;Q07687;O43365;Q05516;P78337;P31249;P11474;P35548;P35711;P14651}  
30316 Pathogen[ P03410] interacts with 10 human partners:{P35712;P14651;P31249;Q9UPW6;Q07687;P35548;P04818;P11474;O43365;P78337}  
30317 Pathogen[ P14075] interacts with 10 human partners:{P78337;P11474;P35548;P31249;O43365;Q07687;P35711;Q9UPW6;P35712;Q05516}  
30318 Pathogen[ P0C206] interacts with 13 human partners:{Q07687;O43365;Q05516;P54821;P14651;P78337;P35711;P35548;Q9UPW6;P04818;P35712;P11474;P31249}  
30319 Pathogen[ P03363] interacts with 16 human partners:{P35711;O43365;P14651;P11474;P35548;P31249;P54821;P23759;P35712;Q99811;P09017;Q9UJU5;Q07687;P78337;Q05516;Q9UPW6}  
30320 [Cluster 2757]GO:0070307+P biological\_process [name] lens fiber cell development [def] "The process whose specific outcome is the progression of a lens fiber cell over time, from its formation to the mature structure. Cell development does not include the steps involved in committing a cell to a lens fiber cell fate. A lens fiber cell is any of the elongated, tightly packed cells that make up the bulk of the mature lens in a camera-type eye." [GOC  
30321 Pathogen[ Q2Q067] interacts with 1 human partners:{P08670}  
30322 Pathogen[ P0C214] interacts with 2 human partners:{Q13515;P08670}  
30323 Pathogen[ P03346] interacts with 3 human partners:{Q13515;P07316;P08670}  
30324 Pathogen[ Q85601] interacts with 2 human partners:{P08670;Q13515}  
30325 Pathogen[ P14079] interacts with 3 human partners:{P07316;Q13515;P08670}  
30326 Pathogen[ P03383] interacts with 2 human partners:{Q13515;P08670}



30327 Pathogen[ P03410] interacts with 3 human partners:{Q13515;P08670;P07316}  
30328 Pathogen[ P14075] interacts with 2 human partners:{Q13515;P08670}  
30329 Pathogen[ P0C206] interacts with 3 human partners:{Q13515;P07316;P08670}  
30330 Pathogen[ P03363] interacts with 3 human partners:{P07316;P08670;Q13515}  
30331 [Cluster 2758]GO:0035308+P biological\_process [name] negative regulation of protein  
dephosphorylation [def] "Any process the stops, prevents, or reduces the frequency,  
rate or extent of removal of phosphate groups from a protein." [GOC  
30332 Pathogen[ Q2Q067] interacts with 4 human partners:{P62258;Q15257;P31946;P78318}  
30333 Pathogen[ P0C214] interacts with 3 human partners:{P78318;Q15257;P31946}  
30334 Pathogen[ P03346] interacts with 4 human partners:{P62258;Q15257;P31946;P78318}  
30335 Pathogen[ Q85601] interacts with 4 human partners:{P31946;P62258;Q15257;P78318}  
30336 Pathogen[ P14079] interacts with 3 human partners:{P31946;P62258;P78318}  
30337 Pathogen[ P03383] interacts with 4 human partners:{P31946;Q15257;P78318;P62258}  
30338 Pathogen[ P03410] interacts with 4 human partners:{P62258;P78318;Q15257;P31946}  
30339 Pathogen[ P14075] interacts with 4 human partners:{Q15257;P78318;P31946;P62258}  
30340 Pathogen[ P0C206] interacts with 4 human partners:{P78318;P31946;P62258;Q15257}  
30341 Pathogen[ P03363] interacts with 4 human partners:{P62258;P31946;P78318;Q15257}  
30342 [Cluster 2759]GO:0031115+P biological\_process [name] negative regulation of  
microtubule polymerization [def] "Any process that stops, prevents, or reduces the  
frequency, rate or extent of microtubule polymerization." [GOC  
30343 Pathogen[ Q2Q067] interacts with 2 human partners:{Q9BTW9;Q15691}  
30344 Pathogen[ P0C214] interacts with 2 human partners:{Q9BTW9;Q15691}  
30345 Pathogen[ P03346] interacts with 2 human partners:{Q15691;Q93045}  
30346 Pathogen[ Q85601] interacts with 2 human partners:{Q9BTW9;Q15691}  
30347 Pathogen[ P14079] interacts with 3 human partners:{Q15691;Q9BTW9;Q93045}  
30348 Pathogen[ P03383] interacts with 1 human partners:{Q15691}  
30349 Pathogen[ P03410] interacts with 3 human partners:{Q15691;Q9BTW9;Q93045}  
30350 Pathogen[ P14075] interacts with 1 human partners:{Q15691}  
30351 Pathogen[ P0C206] interacts with 3 human partners:{Q9BTW9;Q15691;Q93045}  
30352 Pathogen[ P03363] interacts with 3 human partners:{Q15691;Q93045;Q9BTW9}  
30353 [Cluster 2760]GO:0019538+P biological\_process [name]protein metabolic process  
[def] "The chemical reactions and pathways involving a specific protein, rather than of  
proteins in general. Includes protein modification." [GOC  
30354 Pathogen[ Q2Q067] interacts with 2 human partners:{Q96P71;P28838}  
30355 Pathogen[ P0C214] interacts with 3 human partners:{P28838;Q9UJ68;Q96P71}  
30356 Pathogen[ P03346] interacts with 3 human partners:{Q96P71;Q96FW1;Q9Y6R0}  
30357 Pathogen[ Q85601] interacts with 1 human partners:{Q96P71}  
30358 Pathogen[ P14079] interacts with 6 human  
partners:{P28838;Q95816;Q96P71;Q8NDH3;Q9UJ68;Q96FW1}  
30359 Pathogen[ P03383] interacts with 2 human partners:{P28838;Q96P71}  
30360 Pathogen[ P03410] interacts with 6 human  
partners:{Q96FW1;Q8NDH3;Q95816;P28838;Q9UJ68;Q96P71}  
30361 Pathogen[ P14075] interacts with 3 human partners:{Q96FW1;P28838;Q96P71}  
30362 Pathogen[ P0C206] interacts with 6 human  
partners:{Q96P71;P28838;Q95816;Q96FW1;Q9UJ68;Q8NDH3}  
30363 Pathogen[ P03363] interacts with 3 human partners:{Q96P71;Q9Y6R0;Q96FW1}  
30364 [Cluster 2761]GO:0032886+P biological\_process [name] regulation of microtubule-based  
process [def] "Any process that modulates the frequency, rate or extent of any cellular  
process that depends upon or alters the microtubule cytoskeleton." [GOC  
30365 Pathogen[ Q2Q067] interacts with 4 human partners:{Q95359;Q75122;Q75410;Q9Y316}  
30366 Pathogen[ P0C214] interacts with 4 human partners:{Q9Y316;Q95359;Q75122;Q75410}  
30367 Pathogen[ P03346] interacts with 5 human  
partners:{Q75410;Q95359;Q9Y316;Q8N960;Q75122}  
30368 Pathogen[ Q85601] interacts with 4 human partners:{Q75122;Q9Y316;Q75410;Q95359}  
30369 Pathogen[ P14079] interacts with 7 human  
partners:{Q9Y316;Q95359;Q9Y6A5;Q8N960;Q60610;Q75410;Q75122}  
30370 Pathogen[ P03383] interacts with 2 human partners:{Q75410;Q9Y316}  
30371 Pathogen[ P03410] interacts with 7 human  
partners:{Q8N960;Q95359;Q60610;Q9Y316;Q9Y6A5;Q75410;Q75122}  
30372 Pathogen[ P14075] interacts with 2 human partners:{Q75410;Q9Y316}  
30373 Pathogen[ P0C206] interacts with 6 human  
partners:{Q95359;Q9Y316;Q75122;Q75410;Q9Y6A5;Q8N960}  
30374 Pathogen[ P03363] interacts with 4 human partners:{Q9Y316;Q75410;Q95359;Q8N960}  
30375 [Cluster 2762]GO:0010388+P biological\_process [name] cullin deneddylation [def] "The  
modification of cullins by removal of ubiquitin-like protein NEDD8 (RUB1)." [PMID  
30376 Pathogen[ Q2Q067] interacts with 7 human  
partners:{Q9UNS2;Q7L5N1;Q92905;Q99627;Q9UBW8;P61201;Q9BT78}  
30377 Pathogen[ P0C214] interacts with 8 human  
partners:{P61201;Q9UNS2;Q9BT78;Q92905;Q9H9Q2;Q99627;Q9UBW8;Q7L5N1}  
30378 Pathogen[ P03346] interacts with 9 human  
partners:{Q99627;Q9BT78;Q13098;Q92905;P61201;Q9H9Q2;Q9UBW8;Q9UNS2;Q7L5N1}  
30379 Pathogen[ Q85601] interacts with 9 human  
partners:{P61201;Q9UBW8;Q13098;Q92905;Q9BT78;Q9H9Q2;Q9UNS2;Q99627;Q7L5N1}  
30380 Pathogen[ P14079] interacts with 9 human  
partners:{Q99627;P61201;Q9UBW8;Q13098;Q9UNS2;Q9H9Q2;Q92905;Q9BT78;Q7L5N1}  
30381 Pathogen[ P03383] interacts with 7 human

30382 partners:{Q92905;Q9UBW8;P61201;Q9BT78;Q7L5N1;Q9UNS2;Q99627}  
Pathogen[ P03410] interacts with 9 human

30383 partners:{Q9H9Q2;Q13098;Q92905;Q99627;Q9BT78;Q7L5N1;Q9UNS2;P61201;Q9UBW8}  
Pathogen[ P14075] interacts with 7 human

30384 partners:{Q9BT78;P61201;Q9UNS2;Q7L5N1;Q92905;Q99627;Q9UBW8}  
Pathogen[ P0C206] interacts with 9 human

30385 partners:{Q9H9Q2;P61201;Q9UBW8;Q9BT78;Q99627;Q13098;Q7L5N1;Q9UNS2;Q92905}  
Pathogen[ P03363] interacts with 9 human

30386 partners:{Q9H9Q2;P61201;Q9BT78;Q99627;Q7L5N1;Q9UNS2;Q9UBW8;Q92905;Q13098}  
[Cluster 2763]GO:0043588+P biological\_process [name] skin development [def] "The process whose specific outcome is the progression of the skin over time, from its formation to the mature structure. The skin is the external membranous integument of an animal. In vertebrates the skin generally consists of two layers, an outer nonsensitive and nonvascular epidermis (cuticle or skarfskin) composed of cells which are constantly growing and multiplying in the deeper, and being thrown off in the superficial layers, as well as an inner vascular dermis (cutis, corium or true skin) composed mostly of connective tissue." [GOC

30387 Pathogen[ Q2Q067] interacts with 7 human  
partners:{Q6XD76;Q92754;O14896;P15924;P35527;Q9UMX1;Q9Y651}

30388 Pathogen[ P0C214] interacts with 9 human  
partners:{P35527;P15924;Q92754;Q5SW24;O14896;P49588;Q6XD76;Q9Y651;Q9UMX1}

30389 Pathogen[ P03346] interacts with 9 human  
partners:{P15924;P35527;Q6XD76;Q92754;Q9HCS4;O14896;Q92481;Q9Y651;Q9UMX1}

30390 Pathogen[ Q85601] interacts with 9 human  
partners:{O14896;Q92754;Q9Y651;P15924;P35527;Q9HCS4;Q9UMX1;Q5SW24;Q6XD76}

30391 Pathogen[ P14079] interacts with 8 human  
partners:{O14896;Q5SW24;Q6XD76;P15924;Q9UMX1;P35527;Q92754;P49588}

30392 Pathogen[ P03383] interacts with 5 human  
partners:{P15924;P35527;O14896;Q92754;Q9UMX1}

30393 Pathogen[ P03410] interacts with 9 human  
partners:{P15924;O14896;P49588;P35527;Q6XD76;Q5SW24;Q9HCS4;Q9UMX1;Q92754}

30394 Pathogen[ P14075] interacts with 5 human  
partners:{Q92754;O14896;P35527;Q9UMX1;P15924}

30395 Pathogen[ P0C206] interacts with 9 human  
partners:{P35527;Q9UMX1;Q6XD76;Q9HCS4;Q92754;Q5SW24;O14896;P15924;Q9Y651}

30396 Pathogen[ P03363] interacts with 8 human  
partners:{O14896;Q9UMX1;Q9HCS4;P15924;P35527;Q6XD76;Q9Y651;Q92754}

30397 [Cluster 2764]GO:0009749+P biological\_process [name] response to glucose stimulus [def] "Any process that results in a change in state or activity of a cell or an organism (in terms of movement, secretion, enzyme production, gene expression, etc.) as a result of a glucose stimulus." [GOC

30398 Pathogen[ Q2Q067] interacts with 17 human  
partners:{Q13562;P35680;P49770;P36956;Q9UI10;P55212;P54840;Q14232;Q9NR50;Q8NHW3;Q15796;Q15466;P20823;Q13144;Q9BQE4;Q9H3M7;P18146}

30399 Pathogen[ P0C214] interacts with 15 human  
partners:{Q9UI10;P49770;P55212;Q9H3M7;Q8NHW3;Q14232;O60825;P11168;Q9NR50;Q13144;Q15796;P18146;P54840;Q9BQE4;Q15466}

30400 Pathogen[ P03346] interacts with 16 human  
partners:{P36956;Q15466;Q15796;P20823;P55212;Q14232;P35680;P49770;P54840;P18146;Q13562;Q13144;Q8NHW3;Q9NR50;Q9H3M7;Q9UI10}

30401 Pathogen[ Q85601] interacts with 19 human  
partners:{P18146;P11168;Q15466;O60825;Q9NR50;Q13144;P49770;Q13562;Q8NHW3;P36956;P35680;P54840;P55212;P20823;Q14232;Q9H3M7;Q9UI10;Q15796;Q9BQE4}

30402 Pathogen[ P14079] interacts with 16 human  
partners:{Q9BQE4;Q9UI10;Q16517;P20396;P35680;P55212;Q13144;Q9NR50;P11686;Q8NHW3;Q9H3M7;Q14232;Q15466;P54840;P81277;P36956}

30403 Pathogen[ P03383] interacts with 13 human  
partners:{P55212;Q9UI10;P18146;P11168;Q13144;Q9NR50;Q9BQE4;Q15466;P49770;Q15796;Q14232;Q9H3M7;P54840}

30404 Pathogen[ P03410] interacts with 20 human  
partners:{P36956;Q9NR50;P54840;Q16517;P11168;Q9H3M7;Q14232;Q9BQE4;P49770;P11686;Q15466;Q8NHW3;P35680;P81277;P18146;Q15796;P55212;Q9UI10;Q13144;P20396}

30405 Pathogen[ P14075] interacts with 13 human  
partners:{Q9BQE4;P55212;P18146;Q15796;Q9UI10;P54840;Q14232;P49770;Q9H3M7;Q9NR50;Q15466;P11168;Q13144}

30406 Pathogen[ P0C206] interacts with 20 human  
partners:{Q15466;Q14232;P55212;P36956;Q15796;Q9NR50;P18146;Q13144;P54840;P11168;P49770;Q9BQE4;P35680;P20823;Q9UI10;Q8NHW3;O60825;Q13562;Q9H3M7;P20396}

30407 Pathogen[ P03363] interacts with 11 human  
partners:{Q15466;P18146;Q9UI10;Q8NHW3;Q9H3M7;P55212;Q9NR50;Q15796;P54840;P49770;Q13144}

30408 [Cluster 2765]GO:0048742+P biological\_process [name] regulation of skeletal muscle fiber development [def] "Any process that modulates the frequency, rate or extent of skeletal muscle fiber development. Muscle fibers are formed by the maturation of myotubes. They can be classed as slow, intermediate/fast or fast." [GOC

30409 Pathogen[ Q2Q067] interacts with 4 human partners:{P56524;Q9UKV0;Q9UQL6;Q8NEZ5}

30410 Pathogen[ P0C214] interacts with 3 human partners:{P56524;Q9UKV0;Q9UQL6}  
30411 Pathogen[ P03346] interacts with 4 human partners:{Q8NEZ5;P56524;Q9UKV0;Q9UQL6}  
30412 Pathogen[ Q85601] interacts with 4 human partners:{Q9UKV0;Q9UQL6;P56524;Q8NEZ5}  
30413 Pathogen[ P14079] interacts with 4 human partners:{Q9UQL6;Q9UKV0;Q8NEZ5;P56524}  
30414 Pathogen[ P03383] interacts with 4 human partners:{Q9UQL6;Q9UKV0;P56524;Q8NEZ5}  
30415 Pathogen[ P03410] interacts with 4 human partners:{Q9UKV0;Q9UQL6;Q8NEZ5;P56524}  
30416 Pathogen[ P14075] interacts with 4 human partners:{P56524;Q9UKV0;Q8NEZ5;Q9UQL6}  
30417 Pathogen[ P0C206] interacts with 4 human partners:{Q9UKV0;P56524;Q8NEZ5;Q9UQL6}  
30418 Pathogen[ P03363] interacts with 3 human partners:{Q8NEZ5;Q9UQL6;Q9UKV0}  
30419 [Cluster 2766]GO:0034067+P biological\_process [name] protein localization in Golgi apparatus [def] "A process in which a protein is transported to, or maintained in, a location within the Golgi apparatus." [GOC  
30420 Pathogen[ Q2Q067] interacts with 2 human partners:{P83436;Q8IWIJ2}  
30421 Pathogen[ P0C214] interacts with 2 human partners:{Q8IWIJ2;P83436}  
30422 Pathogen[ P03346] interacts with 3 human partners:{P20340;P83436;Q8IWIJ2}  
30423 Pathogen[ Q85601] interacts with 2 human partners:{Q8IWIJ2;P83436}  
30424 Pathogen[ P14079] interacts with 3 human partners:{P83436;Q9GZZ8;Q8IWIJ2}  
30425 Pathogen[ P03383] interacts with 2 human partners:{Q8IWIJ2;P83436}  
30426 Pathogen[ P03410] interacts with 3 human partners:{Q9GZZ8;P83436;Q8IWIJ2}  
30427 Pathogen[ P14075] interacts with 3 human partners:{Q8IWIJ2;Q9GZZ8;P83436}  
30428 Pathogen[ P0C206] interacts with 2 human partners:{P83436;Q8IWIJ2}  
30429 Pathogen[ P03363] interacts with 2 human partners:{P83436;Q8IWIJ2}  
30430 [Cluster 2767]GO:0000160+P biological\_process [name] two-component signal transduction system (phosphorelay) [def] "A conserved series of molecular signals found in prokaryotes and eukaryotes\_ involves autophosphorylation of a histidine kinase and the transfer of the phosphate group to an aspartate that then acts as a phospho-donor to response regulator proteins." [PMID  
30431 Pathogen[ Q2Q067] interacts with 1 human partners:{Q96T76}  
30432 Pathogen[ P0C214] interacts with 2 human partners:{Q9NXG0;Q96T76}  
30433 Pathogen[ P03346] interacts with 2 human partners:{Q9NXG0;Q96T76}  
30434 Pathogen[ Q85601] interacts with 2 human partners:{Q96T76;Q9NXG0}  
30435 Pathogen[ P14079] interacts with 2 human partners:{Q9NXG0;Q96T76}  
30436 Pathogen[ P03383] interacts with 1 human partners:{Q96T76}  
30437 Pathogen[ P03410] interacts with 2 human partners:{Q96T76;Q9NXG0}  
30438 Pathogen[ P14075] interacts with 1 human partners:{Q96T76}  
30439 Pathogen[ P0C206] interacts with 2 human partners:{Q96T76;Q9NXG0}  
30440 Pathogen[ P03363] interacts with 2 human partners:{Q9NXG0;Q96T76}  
30441 [Cluster 2768]GO:0006687+P biological\_process [name] glycosphingolipid metabolic process [def] "The chemical reactions and pathways involving glycosphingolipids, any compound with residues of sphingoid and at least one monosaccharide." [ISBN  
30442 Pathogen[ Q2Q067] interacts with 2 human partners:{Q8WWR8;Q03060}  
30443 Pathogen[ P0C214] interacts with 5 human partners:{Q8WWR8;Q9H227;Q9Y3R4;Q03060;P16278}  
30444 Pathogen[ P03346] interacts with 3 human partners:{P16278;Q8WWR8;Q03060}  
30445 Pathogen[ Q85601] interacts with 1 human partners:{Q03060}  
30446 Pathogen[ P14079] interacts with 11 human partners:{Q9NY59;P16278;Q9NXE4;Q03060;P06280;P54803;Q13510;Q8NBK3;Q8WWR8;Q9Y3R4;P17405}  
30447 Pathogen[ P03383] interacts with 2 human partners:{Q8WWR8;Q03060}  
30448 Pathogen[ P03410] interacts with 8 human partners:{P54803;P16278;Q03060;Q9NXE4;Q13510;Q9Y3R4;P17405;Q8WWR8}  
30449 Pathogen[ P14075] interacts with 3 human partners:{Q8WWR8;Q13510;Q03060}  
30450 Pathogen[ P0C206] interacts with 4 human partners:{Q03060;Q9Y3R4;Q8WWR8;P16278}  
30451 Pathogen[ P03363] interacts with 1 human partners:{Q03060}  
30452 [Cluster 2769]GO:0036109+P  
30453 Pathogen[ Q2Q067] interacts with 1 human partners:{O14734}  
30454 Pathogen[ P0C214] interacts with 3 human partners:{Q9NXB9;Q9NYP7;O14734}  
30455 Pathogen[ P03346] interacts with 1 human partners:{O14734}  
30456 Pathogen[ Q85601] interacts with 1 human partners:{O14734}  
30457 Pathogen[ P14079] interacts with 1 human partners:{O14734}  
30458 Pathogen[ P03383] interacts with 1 human partners:{O14734}  
30459 Pathogen[ P03410] interacts with 1 human partners:{O14734}  
30460 Pathogen[ P14075] interacts with 1 human partners:{O14734}  
30461 Pathogen[ P0C206] interacts with 1 human partners:{O14734}  
30462 Pathogen[ P03363] interacts with 1 human partners:{O14734}  
30463 [Cluster 2770]GO:0001776+P biological\_process [name] leukocyte homeostasis [def] "The process of regulating the proliferation and elimination of cells of the immune system such that the total number of cells of a particular cell type within a whole or part of an organism is stable over time in the absence of an outside stimulus." [GOC  
30464 Pathogen[ Q2Q067] interacts with 1 human partners:{O00255}  
30465 Pathogen[ P0C214] interacts with 1 human partners:{O00255}  
30466 Pathogen[ P03346] interacts with 2 human partners:{O00255;Q8TAU0}  
30467 Pathogen[ Q85601] interacts with 1 human partners:{O00255}  
30468 Pathogen[ P14079] interacts with 1 human partners:{O00255}  
30469 Pathogen[ P03383] interacts with 1 human partners:{O00255}  
30470 Pathogen[ P03410] interacts with 1 human partners:{O00255}

30471 Pathogen[ P14075] interacts with 1 human partners:{000255}

30472 Pathogen[ POC206] interacts with 2 human partners:{000255;Q8TAU0}

30473 Pathogen[ P03363] interacts with 1 human partners:{Q8TAU0}

30474 [Cluster 2771]GO:0006119+P biological\_process [name] oxidative phosphorylation  
[def] "The phosphorylation of ADP to ATP that accompanies the oxidation of a metabolite through the operation of the respiratory chain. Oxidation of compounds establishes a proton gradient across the membrane, providing the energy for ATP synthesis." [ISBN

30475 Pathogen[ Q2Q067] interacts with 3 human partners:{075323;Q8WYQ3;Q96QE5}

30476 Pathogen[ POC214] interacts with 5 human partners:{Q96QE5;P22695;P36542;Q8WYQ3;075323}

30477 Pathogen[ P03346] interacts with 3 human partners:{Q8WYQ3;075323;Q96QE5}

30478 Pathogen[ Q85601] interacts with 2 human partners:{Q96QE5;075323}

30479 Pathogen[ P14079] interacts with 8 human partners:{P22695;P36542;Q8WYQ3;P00395;P14927;Q15526;P07919;075323}

30480 Pathogen[ P03383] interacts with 3 human partners:{075323;Q8WYQ3;Q96QE5}

30481 Pathogen[ P03410] interacts with 7 human partners:{Q8WYQ3;P36542;P07919;Q96QE5;P22695;075323;P14927}

30482 Pathogen[ P14075] interacts with 3 human partners:{075323;Q8WYQ3;Q96QE5}

30483 Pathogen[ POC206] interacts with 5 human partners:{P36542;Q96QE5;P22695;Q8WYQ3;075323}

30484 Pathogen[ P03363] interacts with 2 human partners:{Q96QE5;075323}

30485 [Cluster 2772]GO:0006772+P biological\_process [name] thiamine metabolic process  
[def] "The chemical reactions and pathways involving thiamine (vitamin B1), a water soluble vitamin present in fresh vegetables and meats, especially liver." [GOC

30486 Pathogen[ Q2Q067] interacts with 1 human partners:{Q9BU02}

30487 Pathogen[ POC214] interacts with 2 human partners:{Q9BU02;P51854}

30488 Pathogen[ P03346] interacts with 1 human partners:{Q9BU02}

30489 Pathogen[ Q85601] interacts with 1 human partners:{Q9BU02}

30490 Pathogen[ P14079] interacts with 2 human partners:{P51854;Q9BU02}

30491 Pathogen[ P03383] interacts with 1 human partners:{Q9BU02}

30492 Pathogen[ P03410] interacts with 2 human partners:{Q9BU02;P51854}

30493 Pathogen[ P14075] interacts with 1 human partners:{Q9BU02}

30494 Pathogen[ POC206] interacts with 2 human partners:{P51854;Q9BU02}

30495 Pathogen[ P03363] interacts with 1 human partners:{Q9BU02}

30496 [Cluster 2773]GO:0051603+P biological\_process [name] proteolysis involved in cellular protein catabolic process [def] "The hydrolysis of a peptide bond or bonds within a protein as part of the chemical reactions and pathways resulting in the breakdown of a protein by individual cells." [GOC

30497 Pathogen[ Q2Q067] interacts with 21 human partners:{P40306;P28072;A5LHX3;076031;P25787;Q14790;P28065;O14818;P60900;P28062;P25788;P25786;P28074;P25789;P20618;P28070;P28066;Q99436;Q8TAA3;P49721;P49720}

30498 Pathogen[ POC214] interacts with 21 human partners:{P25789;P28062;A5LHX3;P28065;O14818;P40306;076031;P28066;P49720;P28074;P25788;P25786;P28072;Q8TAA3;Q99436;P25787;P60900;P28070;P20618;P49721;Q14790}

30499 Pathogen[ P03346] interacts with 21 human partners:{P25787;P28070;P25789;P28072;P25788;P28074;P49721;O14818;Q99436;A5LHX3;P28062;P20618;076031;P49720;P28065;P60900;P25786;P28066;Q8TAA3;Q14790;P40306}

30500 Pathogen[ Q85601] interacts with 21 human partners:{P28066;P60900;P25787;P25788;Q14790;P25789;P20618;P40306;P49720;P28062;P49721;P25786;P28072;P28065;Q99436;P28070;Q8TAA3;076031;P28074;A5LHX3;O14818}

30501 Pathogen[ P14079] interacts with 18 human partners:{P28065;Q99436;P40306;P28074;P49720;P25787;A5LHX3;P20618;Q8TAA3;Q14790;P28062;P60900;O14818;P49721;P25788;076031;P28066;P28072}

30502 Pathogen[ P03383] interacts with 19 human partners:{P25789;P60900;P40306;P49721;P20618;P25786;P28072;P28065;P28066;076031;P28074;P49720;Q8TAA3;P28062;O14818;Q99436;P28070;P25787;P25788}

30503 Pathogen[ P03410] interacts with 20 human partners:{P28070;P25786;P60900;Q8TAA3;P49721;A5LHX3;Q99436;P40306;076031;P25787;P28062;O14818;P25789;P49720;P28072;P25788;P28066;P28065;P20618;P28074}

30504 Pathogen[ P14075] interacts with 19 human partners:{P25788;P28066;Q8TAA3;P60900;P49720;P28070;P49721;076031;P28062;P28074;P28065;P25786;O14818;P28072;P25787;P20618;P40306;Q99436;P25789}

30505 Pathogen[ POC206] interacts with 21 human partners:{Q99436;P28062;P40306;P28065;P25786;P25788;P25787;P49720;P60900;A5LHX3;P25789;P20618;Q8TAA3;P28070;Q14790;P28066;O14818;P28072;P28074;P49721;076031}

30506 Pathogen[ P03363] interacts with 1 human partners:{076031}

30507 [Cluster 2774]GO:0060452+P biological\_process [name] positive regulation of cardiac muscle contraction [def] "Any process that increases the frequency, rate or extent of cardiac muscle contraction." [GOC

30508 Pathogen[ Q2Q067] interacts with 1 human partners:{P41220}

30509 Pathogen[ POC214] interacts with 1 human partners:{P41220}

30510 Pathogen[ P03346] interacts with 1 human partners:{P41220}

30511 Pathogen[ Q85601] interacts with 1 human partners:{P41220}

30512 Pathogen[ P14079] interacts with 1 human partners:{P41220}

30513 Pathogen[ P03383] interacts with 1 human partners:{P41220}

30514 Pathogen[ P03410] interacts with 1 human partners:{P41220}

30515 Pathogen[ P14075] interacts with 1 human partners:{P41220}

30516 Pathogen[ P0C206] interacts with 1 human partners:{P41220}

30517 Pathogen[ P03363] interacts with 1 human partners:{P41220}

30518 [Cluster 2775]GO:0060412+P biological\_process [name] ventricular septum morphogenesis [def] "The developmental process in which a ventricular septum is generated and organized. A ventricular septum is an anatomical structure that separates the lower chambers (ventricles) of the heart from one another." [GOC

30519 Pathogen[ Q2Q067] interacts with 8 human partners:{Q8WW38;Q9NQ87;Q96T37;O15105;Q8IX07;Q9Y5J3;Q9GZT9;Q9H4B6}

30520 Pathogen[ P0C214] interacts with 8 human partners:{Q9Y5J3;Q9H4B6;O15105;Q8WW38;Q9GZT9;Q8IX07;Q9NQ87;Q96T37}

30521 Pathogen[ P03346] interacts with 9 human partners:{Q06945;Q8WW38;O15105;Q9Y5J3;Q9GZT9;Q9NQ87;Q8IX07;Q9H4B6;Q96T37}

30522 Pathogen[ Q85601] interacts with 8 human partners:{Q8WW38;Q9GZT9;Q9NQ87;Q8IX07;O15105;Q96T37;Q9H4B6;Q9Y5J3}

30523 Pathogen[ P14079] interacts with 8 human partners:{Q9GZT9;Q96T37;Q9Y5J3;Q9H4B6;Q8IX07;Q9NQ87;O15105;Q8WW38}

30524 Pathogen[ P03383] interacts with 4 human partners:{Q8WW38;Q9NQ87;O15105;Q9H4B6}

30525 Pathogen[ P03410] interacts with 8 human partners:{Q9Y5J3;Q9NQ87;Q96T37;Q8WW38;Q9GZT9;Q8IX07;O15105;Q9H4B6}

30526 Pathogen[ P14075] interacts with 5 human partners:{Q9GZT9;Q8WW38;Q9NQ87;Q9H4B6;O15105}

30527 Pathogen[ P0C206] interacts with 8 human partners:{Q9NQ87;Q96T37;Q9GZT9;Q8WW38;O15105;Q9Y5J3;Q9H4B6;Q8IX07}

30528 Pathogen[ P03363] interacts with 6 human partners:{Q9Y5J3;Q9NQ87;O15105;Q96T37;Q9H4B6;Q8WW38}

30529 [Cluster 2776]GO:0006264+P biological\_process [name] mitochondrial DNA replication [def] "The process in which new strands of DNA are synthesized in the mitochondrion." [GOC

30530 Pathogen[ Q2Q067] interacts with 6 human partners:{O60930;Q7LG56;Q53G26;P54098;Q96EY1;Q96QE5}

30531 Pathogen[ P0C214] interacts with 6 human partners:{Q96QE5;P54098;O60930;Q53G26;Q7LG56;Q96EY1}

30532 Pathogen[ P03346] interacts with 6 human partners:{P54098;O60930;Q7LG56;Q53G26;Q96QE5;Q96EY1}

30533 Pathogen[ Q85601] interacts with 6 human partners:{Q53G26;Q96QE5;Q7LG56;P54098;O60930;Q96EY1}

30534 Pathogen[ P14079] interacts with 4 human partners:{Q7LG56;P54098;O60930;Q96EY1}

30535 Pathogen[ P03383] interacts with 5 human partners:{P54098;O60930;Q96EY1;Q96QE5;Q53G26}

30536 Pathogen[ P03410] interacts with 6 human partners:{Q53G26;O60930;Q96QE5;P54098;Q96EY1;Q7LG56}

30537 Pathogen[ P14075] interacts with 5 human partners:{P54098;O60930;Q53G26;Q96QE5;Q96EY1}

30538 Pathogen[ P0C206] interacts with 6 human partners:{Q53G26;P54098;Q7LG56;Q96QE5;O60930;Q96EY1}

30539 Pathogen[ P03363] interacts with 5 human partners:{P54098;Q53G26;Q96QE5;O60930;Q96EY1}

30540 [Cluster 2777]GO:0051321+P biological\_process [name] meiotic cell cycle [def] "Progression through the phases of the meiotic cell cycle, in which canonically a cell replicates to produce four offspring with half the chromosomal content of the progenitor cell." [GOC

30541 Pathogen[ Q2Q067] interacts with 1 human partners:{P49116}

30542 Pathogen[ P0C214] interacts with 1 human partners:{P49116}

30543 Pathogen[ P03346] interacts with 1 human partners:{P49116}

30544 Pathogen[ Q85601] interacts with 1 human partners:{P49116}

30545 Pathogen[ P14079] interacts with 2 human partners:{P61158;P49116}

30546 Pathogen[ P03383] interacts with 1 human partners:{P49116}

30547 Pathogen[ P03410] interacts with 1 human partners:{P49116}

30548 Pathogen[ P14075] interacts with 1 human partners:{P49116}

30549 Pathogen[ P0C206] interacts with 1 human partners:{P49116}

30550 Pathogen[ P03363] interacts with 1 human partners:{P49116}

30551 [Cluster 2778]GO:0071028+P biological\_process [name] nuclear mRNA surveillance [def] "The set of processes involved in identifying and degrading defective or aberrant mRNAs within the nucleus." [GOC

30552 Pathogen[ Q2Q067] interacts with 3 human partners:{Q8IZH2;Q06265;Q9NPD3}

30553 Pathogen[ P0C214] interacts with 3 human partners:{Q8IZH2;Q9NPD3;Q06265}

30554 Pathogen[ P03346] interacts with 3 human partners:{Q8IZH2;Q06265;Q9NPD3}

30555 Pathogen[ Q85601] interacts with 3 human partners:{Q9NPD3;Q8IZH2;Q06265}

30556 Pathogen[ P14079] interacts with 3 human partners:{Q9NPD3;Q8IZH2;Q06265}

30557 Pathogen[ P03383] interacts with 2 human partners:{Q06265;Q9NPD3}

30558 Pathogen[ P03410] interacts with 3 human partners:{Q06265;Q8IZH2;Q9NPD3}

30559 Pathogen[ P14075] interacts with 2 human partners:{Q9NPD3;Q06265}

30560 Pathogen[ P0C206] interacts with 3 human partners:{Q8IZH2;Q9NPD3;Q06265}

30561 Pathogen[ P03363] interacts with 2 human partners:{Q9NPD3;Q8IZH2}

30562 [Cluster 2779]GO:0008063+P biological\_process [name] Toll signaling pathway [def]

"The series of molecular signals initiated by binding of an extracellular ligand to the Toll receptor on the surface of the target cell." [GOC

30563 Pathogen[ Q2Q067] interacts with 34 human partners:{P01100;Q8IUC6;Q92985;Q15653;Q04206;Q9NYJ8;A6NDB9;Q8N5C8;O75582;Q14653;Q9Y6K9;Q13114;Q13233;P61088;Q96FA3;P19419;P19838;P15336;P25963;POCG47;O14920;P45984;Q00653;POCG48;O43318;P62987;Q13404;Q9HAT8;O15111;Q15759;Q16829;Q02078;Q15750;P62979}

30564 Pathogen[ P0C214] interacts with 37 human partners:{Q00653;O15111;Q9Y6K9;P19838;P15336;Q8IUC6;Q14164;P01100;Q96FA3;P19419;Q04206;Q9HAT8;Q13404;Q15653;O43318;Q02078;Q8N5C8;Q13233;Q92985;POCG48;P25963;Q16829;Q14653;O75582;P62987;Q15750;P05412;Q13114;Q15759;POCG47;P45984;P16220;P62979;O14920;Q9NYJ8;P61088;P18846}

30565 Pathogen[ P03346] interacts with 39 human partners:{Q9Y6K9;P05412;P45984;Q02078;O15111;P16220;P15336;P62987;P25963;Q15653;P19419;POCG48;Q04206;Q13114;Q96FA3;Q13404;Q8N5C8;A6NDB9;P61088;Q9NYJ8;Q9HAT8;Q13233;O75582;Q15750;Q14653;Q16829;P62979;Q8IUC6;Q15759;POCG47;P45985;P19838;O14920;O43318;Q92985;P01100;Q14164;P18846;Q00653}

30566 Pathogen[ Q85601] interacts with 37 human partners:{Q02078;Q15750;Q9NYJ8;Q8IUC6;O15111;P19419;Q9HAT8;Q16829;P18846;POCG48;Q15653;Q13114;Q96FA3;Q13404;Q8N5C8;P01100;Q14653;Q14164;Q9Y6K9;P16220;O14920;Q04206;P05412;Q92985;O75582;P62979;Q15759;POCG47;P45984;Q13233;P62987;Q00653;P15336;O43318;P61088;P19838;P25963}

30567 Pathogen[ P14079] interacts with 37 human partners:{Q9HAT8;Q8N5C8;Q02078;POCG48;Q06413;O43187;P53779;Q14653;P52564;O75582;Q16829;Q8IUC6;Q92985;Q13404;Q14164;Q15750;P62979;P62987;Q96FA3;A6NDB9;P45984;P45983;Q16644;Q15759;Q9Y6K9;P45985;P15336;Q9Y6Y9;Q13164;P05412;POCG47;Q9Y239;P01100;Q99836;P19419;Q13114;Q15653}

30568 Pathogen[ P03383] interacts with 36 human partners:{O75582;Q14653;P16220;A6NDB9;Q9Y6K9;P62987;Q8IUC6;Q13233;Q00653;O14920;O15111;P19419;P18846;Q15653;O43318;Q8N5C8;P61088;Q92985;Q13404;Q15759;P25963;P01100;P62979;POCG47;Q96FA3;Q04206;P45984;POCG48;P15336;Q9NYJ8;P19838;Q13114;Q02078;Q9HAT8;Q15750;P05412}

30569 Pathogen[ P03410] interacts with 41 human partners:{Q04206;P19838;POCG48;O14920;Q9Y239;P19419;O15111;Q15750;Q96FA3;O75582;Q14653;O43187;Q15653;P61088;Q13233;P62979;P01100;P18846;O43318;Q16829;P45985;Q9NYJ8;Q8N5C8;P16220;Q9HAT8;P05412;Q9Y6Y9;P45984;P62987;P53779;Q02078;Q8IUC6;Q00653;Q13404;Q9Y6K9;P25963;Q92985;P15336;A6NDB9;POCG47;Q13114}

30570 Pathogen[ P14075] interacts with 36 human partners:{O15111;Q04206;Q15750;P05412;Q15759;O75582;P61088;P19419;P15336;Q15653;P25963;Q8N5C8;O14920;POCG48;P62979;Q14653;O43318;Q9HAT8;Q96FA3;P62987;Q13114;Q02078;Q8IUC6;P01100;POCG47;Q13404;P19838;Q00653;P16220;Q9Y6K9;Q92985;A6NDB9;Q13233;P18846;P45984;Q9NYJ8}

30571 Pathogen[ P0C206] interacts with 39 human partners:{POCG48;O14920;Q9Y6K9;Q13114;Q02078;P16220;Q8N5C8;O75582;A6NDB9;P45984;P05412;P25963;P19419;Q9HAT8;O43318;P15336;Q15653;P18846;Q16829;Q13233;P61088;P19838;Q14164;Q92985;P01100;Q04206;O15111;P62979;Q9NYJ8;P45985;POCG47;Q8IUC6;Q96FA3;Q00653;Q15750;P62987;Q13404;Q15759;Q14653}

30572 Pathogen[ P03363] interacts with 30 human partners:{Q14653;Q92985;O14920;Q04206;P25963;O15111;Q9NYJ8;P16220;Q9Y6K9;P19419;O43318;Q15750;P61088;P15336;Q15653;Q16829;Q00653;Q96FA3;P18846;P62987;P19838;Q13114;P05412;Q13404;Q9HAT8;Q8N5C8;Q13233;A6NDB9;P01100;Q02078}

30573 [Cluster 2780]GO:0060087+P biological\_process [name] relaxation of vascular smooth muscle [def] "A process in which the extent of vascular smooth muscle contraction is reduced. Vascular smooth muscle relaxation is mediated via a decrease in the phosphorylation state of myosin light chain. This can be achieved by removal of calcium from the cytoplasm to the sarcoplasmic reticulum lumen through the action of Ca<sup>2+</sup> ATPases leading to a decrease myosin light chain kinase activity, and through calcium-independent pathways leading to a increase in myosin light chain phosphatase activity." [GOC

30574 Pathogen[ Q2Q067] interacts with 1 human partners:{P41220}

30575 Pathogen[ P0C214] interacts with 1 human partners:{P41220}

30576 Pathogen[ P03346] interacts with 1 human partners:{P41220}

30577 Pathogen[ Q85601] interacts with 1 human partners:{P41220}

30578 Pathogen[ P14079] interacts with 1 human partners:{P41220}

30579 Pathogen[ P03383] interacts with 1 human partners:{P41220}

30580 Pathogen[ P03410] interacts with 1 human partners:{P41220}

30581 Pathogen[ P14075] interacts with 1 human partners:{P41220}

30582 Pathogen[ P0C206] interacts with 1 human partners:{P41220}

30583 Pathogen[ P03363] interacts with 1 human partners:{P41220}

30584 [Cluster 2781]GO:0051090+P biological\_process [name] regulation of sequence-specific DNA binding transcription factor activity [def] "Any process that modulates the frequency, rate or extent of the activity of a transcription factor, any factor involved in the initiation or regulation of transcription." [GOC

30585 Pathogen[ Q2Q067] interacts with 10 human partners:{P01100;Q93009;Q9NS37;Q08050;O43524;P49848;Q9Y6J9;P15336;P45984;Q15759}

30586 Pathogen[ P0C214] interacts with 9 human partners:{Q9NS37;Q9Y6J9;P15336;P01100;P49848;Q93009;P05412;Q15759;P45984}

30587 Pathogen[ P03346] interacts with 19 human  
partners: {P85037;Q9Y6J9;P05412;P45984;Q93009;P58012;P15336;Q08050;O00409;P49848;Q12778;Q01167;P98177;Q15759;O75593;O43524;Q9NS37;P01100;Q9UJU5}

30588 Pathogen[ Q85601] interacts with 10 human  
partners: {Q93009;Q9Y6J9;P01100;P49848;P05412;Q15759;P45984;Q08050;P15336;Q9NS37}

30589 Pathogen[ P14079] interacts with 11 human  
partners: {Q9Y6J9;P53779;Q9NS37;P45984;P45983;Q15759;P49848;P15336;Q8N1H7;P05412;P01100}

30590 Pathogen[ P03383] interacts with 8 human  
partners: {Q9Y6J9;P49848;Q15759;P01100;P45984;P15336;Q9NS37;P05412}

30591 Pathogen[ P03410] interacts with 8 human  
partners: {Q9NS37;P01100;P49848;Q9Y6J9;P05412;P45984;P53779;P15336}

30592 Pathogen[ P14075] interacts with 9 human  
partners: {Q9Y6J9;P05412;Q15759;Q08050;P15336;P49848;P01100;Q9NS37;P45984}

30593 Pathogen[ P0C206] interacts with 10 human  
partners: {P49848;P45984;P05412;P15336;Q93009;Q9Y6J9;P01100;Q9NS37;Q08050;Q15759}

30594 Pathogen[ P03363] interacts with 11 human  
partners: {P49848;Q9NS37;O00409;O43524;P15336;Q08050;Q01167;P05412;Q9UJU5;Q9Y6J9;P01100}

30595 [Cluster 2782]GO:0042771+P biological\_process [name] DNA damage response, signal transduction by p53 class mediator resulting in induction of apoptosis [def] "A cascade of processes induced by the cell cycle regulator phosphoprotein p53, or an equivalent protein, in response to the detection of DNA damage and resulting in the initiation of apoptosis (programmed cell death)." [GOC

30596 Pathogen[ Q2Q067] interacts with 6 human  
partners: {Q16666;Q9BXH1;P20749;O60356;O15350;Q71UM5}

30597 Pathogen[ P0C214] interacts with 8 human  
partners: {P46379;O15350;Q16666;Q71UM5;Q9BXH1;P20749;O60356;Q8WTP8}

30598 Pathogen[ P03346] interacts with 11 human  
partners: {Q16666;Q13362;Q9H305;Q71UM5;O15350;Q86Z02;P51587;P46379;P20749;O60356;Q9BXH1}

30599 Pathogen[ Q85601] interacts with 8 human  
partners: {Q16666;Q9BXH1;P46379;Q71UM5;O60356;O15350;P20749;P51587}

30600 Pathogen[ P14079] interacts with 11 human  
partners: {Q13362;P51587;Q9H305;O15350;Q9BXH1;Q9NX09;Q71UM5;P20749;O60356;Q16666;Q8WTP8}

30601 Pathogen[ P03383] interacts with 6 human  
partners: {P20749;Q71UM5;O15350;Q16666;Q9BXH1;O60356}

30602 Pathogen[ P03410] interacts with 11 human  
partners: {P20749;Q9H305;Q8WTP8;Q16666;Q9BXH1;P51587;O60356;O15350;Q13362;Q9NX09;Q71UM5}

30603 Pathogen[ P14075] interacts with 6 human  
partners: {Q16666;O15350;Q9BXH1;O60356;P20749;Q71UM5}

30604 Pathogen[ P0C206] interacts with 10 human  
partners: {Q9H305;P51587;Q16666;Q9BXH1;O60356;Q71UM5;P20749;Q13362;O15350;P46379}

30605 Pathogen[ P03363] interacts with 8 human  
partners: {P46379;O60356;Q13362;Q16666;Q9H305;P20749;Q71UM5;Q9BXH1}

30606 [Cluster 2783]GO:0051412+P biological\_process [name] response to corticosterone stimulus [def] "Any process that results in a change in state or activity of a cell or an organism (in terms of movement, secretion, enzyme production, gene expression, etc.) as a result of a corticosterone stimulus. Corticosterone is a 21 carbon steroid hormone of the corticosteroid type, produced in the cortex of the adrenal glands. In many species, corticosterone is the principal glucocorticoid, involved in regulation of fuel metabolism, immune reactions, and stress responses." [PMID

30607 Pathogen[ Q2Q067] interacts with 5 human  
partners: {P01100;P24385;P24864;P38936;P15407}

30608 Pathogen[ P0C214] interacts with 8 human  
partners: {P15407;P01100;P17275;Q16613;P24385;P38936;P05543;P24864}

30609 Pathogen[ P03346] interacts with 6 human  
partners: {P24385;P17275;P24864;P15407;P38936;P01100}

30610 Pathogen[ Q85601] interacts with 7 human  
partners: {P24385;P15407;Q16613;P01100;P38936;P17275;P24864}

30611 Pathogen[ P14079] interacts with 7 human  
partners: {P24864;P20396;Q16613;P38936;P17275;P15407;P01100}

30612 Pathogen[ P03383] interacts with 6 human  
partners: {Q16613;P24385;P15407;P01100;P24864;P17275}

30613 Pathogen[ P03410] interacts with 8 human  
partners: {P01100;P24385;P38936;P17275;Q16613;P15407;P24864;P20396}

30614 Pathogen[ P14075] interacts with 6 human  
partners: {P17275;Q16613;P01100;P24385;P15407;P24864}

30615 Pathogen[ P0C206] interacts with 8 human  
partners: {P15407;P17275;P01100;P38936;P20396;Q16613;P24864;P24385}

30616 Pathogen[ P03363] interacts with 5 human  
partners: {P24864;P17275;P15407;P24385;P01100}

30617 [Cluster 2784]GO:0031952+P biological\_process [name] regulation of protein autophosphorylation [def] "Any process that modulates the frequency, rate or extent of

addition of the phosphorylation by a protein of one or more of its own residues." [GOC

30618 Pathogen[ Q2Q067] interacts with 2 human partners:{P67775;Q15173}

30619 Pathogen[ P0C214] interacts with 2 human partners:{Q15173;P67775}

30620 Pathogen[ P03346] interacts with 2 human partners:{P67775;Q15173}

30621 Pathogen[ Q85601] interacts with 2 human partners:{Q15173;P67775}

30622 Pathogen[ P14079] interacts with 1 human partners:{Q15173}

30623 Pathogen[ P03383] interacts with 2 human partners:{Q15173;P67775}

30624 Pathogen[ P03410] interacts with 2 human partners:{Q15173;P67775}

30625 Pathogen[ P14075] interacts with 2 human partners:{Q15173;P67775}

30626 Pathogen[ P0C206] interacts with 2 human partners:{Q15173;P67775}

30627 Pathogen[ P03363] interacts with 2 human partners:{Q15173;P67775}

30628 [Cluster 2785]GO:2000142+P biological\_process [name] regulation of transcription initiation, DNA-dependent [def] "Any process that modulates the frequency, rate or extent of DNA-dependent transcription initiation." [GOC

30629 Pathogen[ Q2Q067] interacts with 1 human partners:{Q9NYV6}

30630 Pathogen[ P0C214] interacts with 1 human partners:{Q9NYV6}

30631 Pathogen[ P03346] interacts with 1 human partners:{Q9NYV6}

30632 Pathogen[ Q85601] interacts with 1 human partners:{Q9NYV6}

30633 Pathogen[ P14079] interacts with 1 human partners:{Q9NYV6}

30634 Pathogen[ P03383] interacts with 1 human partners:{Q9NYV6}

30635 Pathogen[ P03410] interacts with 1 human partners:{Q9NYV6}

30636 Pathogen[ P14075] interacts with 1 human partners:{Q9NYV6}

30637 Pathogen[ P0C206] interacts with 1 human partners:{Q9NYV6}

30638 Pathogen[ P03363] interacts with 1 human partners:{Q9NYV6}

30639 [Cluster 2786]GO:0060133+P biological\_process [name] somatotropin secreting cell development [def] "The process whose specific outcome is the progression of a somatotropin secreting cell over time, from its formation to the mature structure. A somatotropin secreting cell is an acidophilic cell of the anterior pituitary that produces growth hormone, somatotropin." [GOC

30640 Pathogen[ Q2Q067] interacts with 1 human partners:{P28069}

30641 Pathogen[ P0C214] interacts with 1 human partners:{P28069}

30642 Pathogen[ P03346] interacts with 1 human partners:{P28069}

30643 Pathogen[ Q85601] interacts with 1 human partners:{P28069}

30644 Pathogen[ P14079] interacts with 1 human partners:{P28069}

30645 Pathogen[ P03383] interacts with 1 human partners:{P28069}

30646 Pathogen[ P03410] interacts with 1 human partners:{P28069}

30647 Pathogen[ P14075] interacts with 1 human partners:{P28069}

30648 Pathogen[ P0C206] interacts with 1 human partners:{P28069}

30649 Pathogen[ P03363] interacts with 1 human partners:{P28069}

30650 [Cluster 2787]GO:0030433+P biological\_process [name] ER-associated protein catabolic process [def] "The chemical reactions and pathways resulting in the breakdown of proteins transported from the endoplasmic reticulum and targeted to cytoplasmic proteasomes for degradation. This process acts on misfolded proteins as well as in the regulated degradation of correctly folded proteins." [GOC

30651 Pathogen[ Q2Q067] interacts with 8 human partners:{Q5VYK3;P60604;Q9UBS3;Q8TAT6;Q9BQE4;Q9NRD1;Q96DZ1;P14625}

30652 Pathogen[ P0C214] interacts with 9 human partners:{P14625;Q5VYK3;Q9UBS3;Q9NRD1;Q8TAT6;Q96DZ1;Q9BQE4;P55072;P60604}

30653 Pathogen[ P03346] interacts with 12 human partners:{Q9UBS3;P14625;Q96DZ1;P25686;Q13438;P55072;Q9BUN8;P60604;Q5VYK3;Q9NRD1;Q8TAT6;Q8IWF2}

30654 Pathogen[ Q85601] interacts with 7 human partners:{Q5VYK3;Q9UBS3;P14625;P60604;Q8TAT6;Q9BQE4;Q9NRD1}

30655 Pathogen[ P14079] interacts with 16 human partners:{P60468;Q9BQE4;Q9P055;Q9UBS3;P60604;Q96Q80;Q9GZP9;O94905;Q5VYK3;Q96DZ1;Q9BUN8;O75477;Q8TAT6;P14625;Q9NRD1;Q13438}

30656 Pathogen[ P03383] interacts with 9 human partners:{Q96DZ1;Q5VYK3;Q9BUN8;Q9UBS3;P60604;Q9BQE4;Q8TAT6;P14625;Q9NRD1}

30657 Pathogen[ P03410] interacts with 17 human partners:{Q9NRD1;P60468;O94905;P14625;Q5VYK3;P25686;Q96Q80;Q9GZP9;Q9UBS3;Q9P055;Q9BQE4;Q9BUN8;O75477;P60604;Q96DZ1;Q8TAT6;Q13438}

30658 Pathogen[ P14075] interacts with 10 human partners:{P60604;Q9BQE4;Q9UBS3;Q8TAT6;Q9BUN8;Q9NRD1;Q96DZ1;P14625;O75477;Q5VYK3}

30659 Pathogen[ P0C206] interacts with 14 human partners:{O75477;Q8TAT6;Q96DZ1;Q9NRD1;Q9BQE4;P60604;O94905;Q9BUN8;Q9GZP9;P55072;Q5VYK3;Q9UBS3;Q13438;P14625}

30660 Pathogen[ P03363] interacts with 7 human partners:{P60604;Q96DZ1;Q9UBS3;Q8TAT6;Q13438;Q9NRD1;Q5VYK3}

30661 [Cluster 2788]GO:0009306+P biological\_process [name] protein secretion [def] "The controlled release of proteins from a cell or group of cells." [GOC

30662 Pathogen[ Q2Q067] interacts with 2 human partners:{Q96P71;Q86VX9}

30663 Pathogen[ P0C214] interacts with 3 human partners:{Q86VX9;Q96P71;P13667}

30664 Pathogen[ P03346] interacts with 3 human partners:{Q96P71;Q86VX9;P13667}

30665 Pathogen[ Q85601] interacts with 3 human partners:{Q86VX9;Q9NP61;Q96P71}

30666 Pathogen[ P14079] interacts with 5 human partners:{Q96P71;P30040;Q86VX9;Q8N300;Q96S06}



30667 Pathogen[ P03383] interacts with 2 human partners:{Q86VX9;Q96P71}  
30668 Pathogen[ P03410] interacts with 7 human  
partners:{P13667;P30040;Q9NP61;Q96S06;Q86VX9;Q8N300;Q96P71}  
30669 Pathogen[ P14075] interacts with 2 human partners:{Q86VX9;Q96P71}  
30670 Pathogen[ P0C206] interacts with 6 human  
partners:{Q96P71;Q9NP61;Q86VX9;Q8N300;P13667;Q96S06}  
30671 Pathogen[ P03363] interacts with 2 human partners:{Q96P71;Q86VX9}  
30672 [Cluster 2789]GO:0033523+P biological\_process [name] histone H2B ubiquitination  
[def] "The modification of histone H2B by addition of ubiquitin groups." [GOC  
30673 Pathogen[ Q2Q067] interacts with 8 human  
partners:{Q8WVC0;Q6PD62;Q6P1J9;P51965;Q5VTR2;O76064;O75150;Q8N7H5}  
30674 Pathogen[ P0C214] interacts with 8 human  
partners:{P51965;Q6P1J9;Q8N7H5;Q8WVC0;O75150;Q5VTR2;O76064;Q6PD62}  
30675 Pathogen[ P03346] interacts with 8 human  
partners:{Q6PD62;O76064;O75150;Q5VTR2;P51965;Q8WVC0;Q6P1J9;Q8N7H5}  
30676 Pathogen[ Q85601] interacts with 8 human  
partners:{Q6PD62;Q8WVC0;Q6P1J9;O76064;P51965;O75150;Q5VTR2;Q8N7H5}  
30677 Pathogen[ P14079] interacts with 6 human  
partners:{P51965;Q6PD62;Q5VTR2;Q8WVC0;Q6P1J9;Q8N7H5}  
30678 Pathogen[ P03383] interacts with 7 human  
partners:{Q6P1J9;P51965;Q6PD62;Q8WVC0;Q5VTR2;O75150;Q8N7H5}  
30679 Pathogen[ P03410] interacts with 7 human  
partners:{Q8WVC0;Q6PD62;P51965;Q5VTR2;Q8N7H5;O75150;Q6P1J9}  
30680 Pathogen[ P14075] interacts with 7 human  
partners:{Q5VTR2;Q8WVC0;P51965;Q8N7H5;Q6P1J9;Q6PD62;O75150}  
30681 Pathogen[ P0C206] interacts with 8 human  
partners:{Q6PD62;Q5VTR2;P51965;Q8N7H5;Q8WVC0;O76064;O75150;Q6P1J9}  
30682 Pathogen[ P03363] interacts with 7 human  
partners:{P51965;Q8WVC0;Q5VTR2;O75150;Q6P1J9;Q8N7H5;Q6PD62}  
30683 [Cluster 2790]GO:0046007+P biological\_process [name] negative regulation of activated  
T cell proliferation [def] "Any process that stops, prevents or reduces the rate or  
extent of activated T cell proliferation." [GOC  
30684 Pathogen[ Q2Q067] interacts with 1 human partners:{P04156}  
30685 Pathogen[ P0C214] interacts with 2 human partners:{P42574;P04156}  
30686 Pathogen[ P03346] interacts with 2 human partners:{P42574;P04156}  
30687 Pathogen[ Q85601] interacts with 1 human partners:{P04156}  
30688 Pathogen[ P14079] interacts with 1 human partners:{P04156}  
30689 Pathogen[ P03383] interacts with 1 human partners:{P04156}  
30690 Pathogen[ P03410] interacts with 1 human partners:{P04156}  
30691 Pathogen[ P14075] interacts with 1 human partners:{P04156}  
30692 Pathogen[ P0C206] interacts with 2 human partners:{P04156;P42574}  
30693 Pathogen[ P03363] interacts with 1 human partners:{P04156}  
30694 [Cluster 2791]GO:0042113+P biological\_process [name] B cell activation [def] "The  
change in morphology and behavior of a mature or immature B cell resulting from exposure  
to a mitogen, cytokine, chemokine, cellular ligand, or an antigen for which it is  
specific." [GOC  
30695 Pathogen[ Q2Q067] interacts with 7 human  
partners:{P56524;Q9UKV0;Q9UDY8;Q9UQL6;Q9UKT9;Q02040;P78318}  
30696 Pathogen[ P0C214] interacts with 10 human  
partners:{Q8WV28;P78318;Q9UDY8;P56524;Q9UKV0;P10809;Q9UKT9;O60925;Q02040;Q9UQL6}  
30697 Pathogen[ P03346] interacts with 10 human  
partners:{Q9UKT9;Q9UDY8;Q8IWW1;P56524;Q9UKV0;O60925;Q8WV28;Q02040;Q9UQL6;P78318}  
30698 Pathogen[ Q85601] interacts with 6 human  
partners:{Q9UKV0;Q9UQL6;Q9UDY8;P56524;P78318;Q9UKT9}  
30699 Pathogen[ P14079] interacts with 11 human  
partners:{Q9UQL6;O60925;Q9UKV0;Q8N292;Q02040;Q8WV28;Q8IWW1;P56524;P78318;Q9UKT9;Q9GZ  
Y6}  
30700 Pathogen[ P03383] interacts with 7 human  
partners:{Q02040;Q9UQL6;Q9UKV0;P56524;O60925;P78318;Q9UKT9}  
30701 Pathogen[ P03410] interacts with 11 human  
partners:{Q9UKV0;P78318;Q8N292;Q8IWW1;Q8WV28;Q9UQL6;Q9UKT9;Q9GZY6;P56524;O60925;Q020  
40}  
30702 Pathogen[ P14075] interacts with 8 human  
partners:{Q8IWW1;P56524;Q02040;Q9UKV0;Q9UKT9;P78318;O60925;Q9UQL6}  
30703 Pathogen[ P0C206] interacts with 9 human  
partners:{P78318;Q9UDY8;Q8IWW1;Q9UKV0;Q02040;O60925;Q9UKT9;P56524;Q9UQL6}  
30704 Pathogen[ P03363] interacts with 7 human  
partners:{Q8WV28;Q9UQL6;O60925;Q9UKV0;P78318;Q02040;Q9UKT9}  
30705 [Cluster 2792]GO:0045109+P biological\_process [name] intermediate filament  
organization [def] "Control of the spatial distribution of intermediate filaments\_  
includes organizing filaments into meshworks, bundles, or other structures, as by  
cross-linking." [GOC  
30706 Pathogen[ Q2Q067] interacts with 9 human  
partners:{P07196;Q7Z3Z0;P14136;P15924;Q04695;P35527;O75190;P08670;P35900}  
30707 Pathogen[ P0C214] interacts with 9 human  
partners:{P35527;O75190;P15924;P14136;Q04695;P08670;Q7Z3Z0;P07196;P35900}

30708 Pathogen[ P03346] interacts with 9 human partners: {P15924;P07196;O75190;P35527;Q7Z3Z0;P14136;Q04695;P08670;P35900}

30709 Pathogen[ Q85601] interacts with 9 human partners: {O75190;P07196;P08670;P14136;P15924;Q7Z3Z0;Q04695;P35527;P35900}

30710 Pathogen[ P14079] interacts with 9 human partners: {P35900;Q7Z3Z0;P15924;O75190;P35527;Q04695;P07196;P14136;P08670}

30711 Pathogen[ P03383] interacts with 9 human partners: {P15924;P08670;Q7Z3Z0;P14136;O75190;P35527;Q04695;P07196;P35900}

30712 Pathogen[ P03410] interacts with 9 human partners: {P15924;Q7Z3Z0;P35527;P07196;O75190;Q04695;P08670;P35900;P14136}

30713 Pathogen[ P14075] interacts with 9 human partners: {Q7Z3Z0;P14136;Q04695;P08670;O75190;P07196;P35900;P35527;P15924}

30714 Pathogen[ P0C206] interacts with 9 human partners: {P07196;P35527;Q7Z3Z0;P14136;P15924;P08670;P35900;O75190;Q04695}

30715 Pathogen[ P03363] interacts with 9 human partners: {O75190;P15924;P35900;P07196;P35527;P08670;P14136;Q7Z3Z0;Q04695}

30716 [Cluster 2793]GO:0001708+P biological\_process [name] cell fate specification [def] "The process involved in the specification of cell identity. Once specification has taken place, a cell will be committed to differentiate down a specific pathway if left in its normal environment." [GOC

30717 Pathogen[ Q2Q067] interacts with 3 human partners: {Q15561;P28069;O43711}

30718 Pathogen[ P0C214] interacts with 3 human partners: {P32243;Q15561;P28069}

30719 Pathogen[ P03346] interacts with 5 human partners: {O43711;Q15561;P28069;P32243;Q9GZV8}

30720 Pathogen[ Q85601] interacts with 4 human partners: {P28069;O43711;P32243;Q15561}

30721 Pathogen[ P14079] interacts with 5 human partners: {Q15561;P28069;O43711;P32243;Q9GZV8}

30722 Pathogen[ P03383] interacts with 4 human partners: {Q15561;P28069;P32243;O43711}

30723 Pathogen[ P03410] interacts with 5 human partners: {P28069;Q9GZV8;Q15561;P32243;O43711}

30724 Pathogen[ P14075] interacts with 4 human partners: {P28069;Q15561;O43711;P32243}

30725 Pathogen[ P0C206] interacts with 5 human partners: {O43711;P32243;P28069;Q9GZV8;Q15561}

30726 Pathogen[ P03363] interacts with 4 human partners: {P32243;P28069;O43711;Q15561}

30727 [Cluster 2794]GO:0030162+P biological\_process [name] regulation of proteolysis [def] "Any process that modulates the frequency, rate or extent of the hydrolysis of a peptide bond or bonds within a protein." [GOC

30728 Pathogen[ Q2Q067] interacts with 7 human partners: {P01009;Q13114;P08697;P50453;P48595;P50452;P35237}

30729 Pathogen[ P0C214] interacts with 25 human partners: {P08697;P35237;Q9UK55;P01011;P29622;P36952;P48594;Q86WD7;P29508;O75830;O75635;A8MV23;P05543;P05546;P01008;P30740;Q96P63;P50453;Q13114;P05120;Q99574;Q9UIV8;Q96P15;P50452;P48595}

30730 Pathogen[ P03346] interacts with 9 human partners: {P50452;P35237;Q13114;O75635;P50453;Q96P63;P01009;Q96P15;P48595}

30731 Pathogen[ Q85601] interacts with 16 human partners: {P50452;P36952;Q96P15;P01011;Q13114;P35237;P08697;P01009;P50453;P05120;P01008;P48595;P30740;O75635;P29508;Q96P63}

30732 Pathogen[ P14079] interacts with 7 human partners: {P35237;P50452;Q4AC94;A4D1B5;P50453;P48595;Q13114}

30733 Pathogen[ P03383] interacts with 12 human partners: {P36952;P08697;P30740;P01009;P01008;P48595;P50453;Q96P63;P35237;P50452;O75635;Q13114}

30734 Pathogen[ P03410] interacts with 15 human partners: {A4D1B5;Q4AC94;Q96P63;P50452;Q96P15;P08697;P36952;P50453;P01009;P35237;O75635;P30740;Q13114;P48595;P01011}

30735 Pathogen[ P14075] interacts with 7 human partners: {P01009;P48595;Q13114;P08697;P50452;P50453;P35237}

30736 Pathogen[ P0C206] interacts with 15 human partners: {P50452;P01008;Q13114;P35237;P01009;P50453;P36952;A4D1B5;Q96P15;O75635;P48595;Q96P63;P01011;P30740;P08697}

30737 Pathogen[ P03363] interacts with 9 human partners: {P35237;P50452;P50453;P36952;Q96P63;O75635;Q96P15;Q13114;P48595}

30738 [Cluster 2795]GO:0060052+P biological\_process [name] neurofilament cytoskeleton organization [def] "A process that is carried out at the cellular level which results in the assembly, arrangement of constituent parts, or disassembly of cytoskeletal structures comprising neurofilaments and their associated proteins." [GOC

30739 Pathogen[ Q2Q067] interacts with 4 human partners: {P12036;Q9P1Q0;Q16352;P07197}

30740 Pathogen[ P0C214] interacts with 4 human partners: {Q16352;P12036;Q9P1Q0;P07197}

30741 Pathogen[ P03346] interacts with 4 human partners: {Q16352;P07197;P12036;Q9P1Q0}

30742 Pathogen[ Q85601] interacts with 5 human partners: {P12036;Q9P1Q0;P07197;Q16352;Q9GZM8}

30743 Pathogen[ P14079] interacts with 4 human partners: {P12036;Q9P1Q0;P07197;Q9GZM8}

30744 Pathogen[ P03383] interacts with 4 human partners: {Q16352;P12036;P07197;Q9P1Q0}

30745 Pathogen[ P03410] interacts with 6 human partners: {P12036;Q9GZM8;Q16352;Q9P1Q0;Q9UBY8;P07197}

30746 Pathogen[ P14075] interacts with 4 human partners:{Q16352;P12036;Q9P1Q0;P07197}  
30747 Pathogen[ P0C206] interacts with 5 human  
partners:{Q9GZM8;Q9P1Q0;P12036;Q16352;P07197}  
30748 Pathogen[ P03363] interacts with 4 human partners:{P07197;Q16352;Q9P1Q0;P12036}  
30749 [Cluster 2796]GO:0071425+P biological\_process [name] hemopoietic stem cell  
proliferation [def] "The expansion of a hemopoietic stem cell population by cell  
division. A hemopoietic stem cell is a stem cell from which all cells of the lymphoid  
and myeloid lineages develop." [CL  
30750 Pathogen[ Q2Q067] interacts with 4 human partners:{O95376;Q01196;Q8N5F7;Q03112}  
30751 Pathogen[ P0C214] interacts with 3 human partners:{Q03112;Q8N5F7;O95376}  
30752 Pathogen[ P03346] interacts with 4 human partners:{O95376;Q8N5F7;Q03112;Q01196}  
30753 Pathogen[ Q85601] interacts with 3 human partners:{Q8N5F7;Q03112;O95376}  
30754 Pathogen[ P14079] interacts with 1 human partners:{Q8N5F7}  
30755 Pathogen[ P03383] interacts with 3 human partners:{Q8N5F7;Q03112;O95376}  
30756 Pathogen[ P03410] interacts with 1 human partners:{Q03112}  
30757 Pathogen[ P14075] interacts with 3 human partners:{Q8N5F7;Q03112;O95376}  
30758 Pathogen[ P0C206] interacts with 3 human partners:{O95376;Q03112;Q8N5F7}  
30759 Pathogen[ P03363] interacts with 3 human partners:{O95376;Q03112;Q8N5F7}  
30760 [Cluster 2797]GO:0048514+P biological\_process [name] blood vessel morphogenesis  
[def] "The process in which the anatomical structures of blood vessels are generated and  
organized. The blood vessel is the vasculature carrying blood." [GOC  
30761 Pathogen[ Q2Q067] interacts with 4 human partners:{O00470;P41134;P08697;O00321}  
30762 Pathogen[ P0C214] interacts with 4 human partners:{O00470;P08697;O00321;P41134}  
30763 Pathogen[ P03346] interacts with 3 human partners:{O00321;P41134;O00470}  
30764 Pathogen[ Q85601] interacts with 4 human partners:{P41134;P08697;O00470;O00321}  
30765 Pathogen[ P14079] interacts with 3 human partners:{O00321;P41134;O00470}  
30766 Pathogen[ P03383] interacts with 3 human partners:{O00470;P08697;O00321}  
30767 Pathogen[ P03410] interacts with 4 human partners:{O00470;P41134;O00321;P08697}  
30768 Pathogen[ P14075] interacts with 3 human partners:{O00470;P08697;O00321}  
30769 Pathogen[ P0C206] interacts with 4 human partners:{O00470;O00321;P41134;P08697}  
30770 Pathogen[ P03363] interacts with 3 human partners:{O00321;P41134;O00470}  
30771 [Cluster 2798]GO:0008608+P biological\_process [name] attachment of spindle  
microtubules to kinetochore [def] "The process in which spindle microtubules become  
physically associated with the proteins making up the kinetochore complex." [GOC  
30772 Pathogen[ Q2Q067] interacts with 4 human partners:{Q5FBB7;O43684;Q8NG31;O14777}  
30773 Pathogen[ P0C214] interacts with 4 human partners:{O43684;Q8NG31;Q5FBB7;O14777}  
30774 Pathogen[ P03346] interacts with 4 human partners:{Q5FBB7;O43684;O14777;Q8NG31}  
30775 Pathogen[ Q85601] interacts with 4 human partners:{Q8NG31;O14777;O43684;Q5FBB7}  
30776 Pathogen[ P14079] interacts with 4 human partners:{Q8NG31;Q5FBB7;O14777;O43684}  
30777 Pathogen[ P03383] interacts with 4 human partners:{Q5FBB7;O43684;Q8NG31;O14777}  
30778 Pathogen[ P03410] interacts with 4 human partners:{O43684;Q8NG31;Q5FBB7;O14777}  
30779 Pathogen[ P14075] interacts with 4 human partners:{O43684;O14777;Q5FBB7;Q8NG31}  
30780 Pathogen[ P0C206] interacts with 4 human partners:{O14777;Q5FBB7;O43684;Q8NG31}  
30781 Pathogen[ P03363] interacts with 4 human partners:{Q5FBB7;O43684;Q8NG31;O14777}  
30782 [Cluster 2799]GO:0002088+P biological\_process [name] lens development in camera-type  
eye [def] "The process whose specific outcome is the progression of the lens over time,  
from its formation to the mature structure. The lens is a transparent structure in the  
eye through which light is focused onto the retina. An example of this process is found  
in *Mus musculus*." [GOC  
30783 Pathogen[ Q2Q067] interacts with 9 human  
partners:{P05813;Q8N196;P02511;Q12959;P55212;O75444;P07315;P07320;P02489}  
30784 Pathogen[ P0C214] interacts with 10 human  
partners:{O75444;P07315;P02489;P02511;P55212;P11844;P05813;Q12959;Q8N196;P07320}  
30785 Pathogen[ P03346] interacts with 12 human  
partners:{Q6T4R5;O75364;P07320;P02489;P55212;O75444;P07316;P02511;Q8N196;P07315;P058  
13;Q12959}  
30786 Pathogen[ Q85601] interacts with 10 human  
partners:{Q8N196;P02489;P07315;O75444;P02511;Q12959;P11844;P55212;P07320;P05813}  
30787 Pathogen[ P14079] interacts with 13 human  
partners:{P07320;P07316;Q6T4R5;P05813;Q8N196;P11844;P02511;P02489;I3L1E1;P55212;P229  
14;O75444;P07315}  
30788 Pathogen[ P03383] interacts with 8 human  
partners:{P55212;P11844;P02511;P07320;Q8N196;O75444;P05813;P07315}  
30789 Pathogen[ P03410] interacts with 14 human  
partners:{P07315;Q6T4R5;Q12959;P11844;O75444;P07320;I3L1E1;P02489;P02511;Q8N196;P058  
13;P07316;P55212;P22914}  
30790 Pathogen[ P14075] interacts with 9 human  
partners:{Q8N196;P07320;O75444;P55212;P05813;P11844;Q6T4R5;P02511;P07315}  
30791 Pathogen[ P0C206] interacts with 13 human  
partners:{O75444;I3L1E1;P55212;Q8N196;P07320;P07315;P05813;P11844;Q6T4R5;P07316;P025  
11;P02489;Q12959}  
30792 Pathogen[ P03363] interacts with 11 human  
partners:{Q12959;P07316;Q8N196;P11844;P55212;P07320;Q6T4R5;O75444;P07315;P02489;P058  
13}  
30793 [Cluster 2800]GO:2001022+P biological\_process [name] positive regulation of response  
to DNA damage stimulus [def] "Any process that activates or increases the frequency,

rate or extent of response to DNA damage stimulus." [GOC  
30794 Pathogen[ Q2Q067] interacts with 3 human partners:{P01106;Q9NYF8;Q9NXX6}  
30795 Pathogen[ POC214] interacts with 3 human partners:{Q9NXX6;P01106;Q9NYF8}  
30796 Pathogen[ P03346] interacts with 4 human partners:{Q8WV22;P01106;Q9NYF8;Q9NXX6}  
30797 Pathogen[ Q85601] interacts with 4 human partners:{P01106;Q9NXX6;Q8WV22;Q9NYF8}  
30798 Pathogen[ P14079] interacts with 3 human partners:{Q9NYF8;P01106;Q9NXX6}  
30799 Pathogen[ P03383] interacts with 3 human partners:{Q9NXX6;P01106;Q9NYF8}  
30800 Pathogen[ P03410] interacts with 3 human partners:{P01106;Q9NXX6;Q9NYF8}  
30801 Pathogen[ P14075] interacts with 3 human partners:{Q9NYF8;P01106;Q9NXX6}  
30802 Pathogen[ POC206] interacts with 4 human partners:{Q8WV22;Q9NYF8;P01106;Q9NXX6}  
30803 Pathogen[ P03363] interacts with 4 human partners:{Q9NXX6;P01106;Q9NYF8;Q8WV22}  
30804 [Cluster 2801]GO:0032435+P biological\_process [name] negative regulation of proteasomal ubiquitin-dependent protein catabolic process [def] "Any process that stops, prevents, or reduces the frequency, rate or extent of the breakdown of a protein or peptide by hydrolysis of its peptide bonds, initiated by the covalent attachment of ubiquitin, and mediated by the proteasome." [GOC  
30805 Pathogen[ Q2Q067] interacts with 5 human partners:{Q16594;P08238;Q04323;O75113;Q9BTA9}  
30806 Pathogen[ POC214] interacts with 5 human partners:{P46379;Q16594;Q04323;O75113;Q9BTA9}  
30807 Pathogen[ P03346] interacts with 7 human partners:{O14908;P46379;Q04323;O75113;P08238;Q9BTA9;Q16594}  
30808 Pathogen[ Q85601] interacts with 6 human partners:{P46379;Q9BTA9;Q16594;Q04323;P08238;O75113}  
30809 Pathogen[ P14079] interacts with 6 human partners:{Q16594;Q9BTA9;P08238;O14908;Q04323;O75113}  
30810 Pathogen[ P03383] interacts with 5 human partners:{Q9BTA9;Q04323;Q16594;O75113;P08238}  
30811 Pathogen[ P03410] interacts with 6 human partners:{P08238;O14908;Q04323;Q16594;Q9BTA9;O75113}  
30812 Pathogen[ P14075] interacts with 5 human partners:{P08238;Q04323;Q16594;Q9BTA9;O75113}  
30813 Pathogen[ POC206] interacts with 7 human partners:{Q04323;P08238;O75113;O14908;Q9BTA9;P46379;Q16594}  
30814 Pathogen[ P03363] interacts with 7 human partners:{P46379;O14908;Q04323;O75113;P08238;Q9BTA9;Q16594}  
30815 [Cluster 2802]GO:0042755+P biological\_process [name] eating behavior [def] "The specific actions or reactions of an organism relating to the intake of food, any substance (usually solid) that can be metabolized by an organism to give energy and build tissue." [GOC  
30816 Pathogen[ Q2Q067] interacts with 2 human partners:{P40763;Q3C1V8}  
30817 Pathogen[ POC214] interacts with 2 human partners:{P40763;Q3C1V8}  
30818 Pathogen[ P03346] interacts with 2 human partners:{Q3C1V8;P40763}  
30819 Pathogen[ Q85601] interacts with 2 human partners:{P40763;Q3C1V8}  
30820 Pathogen[ P14079] interacts with 4 human partners:{P20396;Q3C1V8;O43612;P81277}  
30821 Pathogen[ P03383] interacts with 1 human partners:{Q3C1V8}  
30822 Pathogen[ P03410] interacts with 5 human partners:{O43612;Q3C1V8;P81277;P40763;P20396}  
30823 Pathogen[ P14075] interacts with 1 human partners:{Q3C1V8}  
30824 Pathogen[ POC206] interacts with 3 human partners:{Q3C1V8;P40763;P20396}  
30825 Pathogen[ P03363] interacts with 1 human partners:{Q3C1V8}  
30826 [Cluster 2803]GO:0006909+P biological\_process [name] phagocytosis [def] "An endocytosis process that results in the engulfment of external particulate material by phagocytes. The particles are initially contained within phagocytic vacuoles (phagosomes), which then fuse with primary lysosomes to effect digestion of the particles." [ISBN  
30827 Pathogen[ Q2Q067] interacts with 8 human partners:{P50995;Q15744;Q8N336;P23769;Q02556;Q92556;Q9NRR3;Q96JJ3}  
30828 Pathogen[ POC214] interacts with 8 human partners:{Q9NRR3;Q9NRR8;P23769;Q8N336;Q02556;Q92556;Q96JJ3;P50995}  
30829 Pathogen[ P03346] interacts with 10 human partners:{Q9NRR3;P23769;Q8N336;Q96JJ3;Q02556;Q15744;P50995;P01858;Q70J99;Q92556}  
30830 Pathogen[ Q85601] interacts with 6 human partners:{Q02556;P50995;P23769;Q96JJ3;Q9NRR3;Q15744}  
30831 Pathogen[ P14079] interacts with 12 human partners:{Q9NRR3;P50995;Q9NRR8;Q92556;Q8N336;Q96JJ3;Q96BJ8;Q15744;Q96FG2;Q02556;P23769;P01858}  
30832 Pathogen[ P03383] interacts with 4 human partners:{P50995;P23769;Q9NRR3;Q02556}  
30833 Pathogen[ P03410] interacts with 13 human partners:{P01858;P50995;Q70J99;Q9NRR3;Q8N336;Q02556;Q96FG2;Q92556;Q96BJ8;P23769;Q15744;Q96JJ3;Q9NRR8}  
30834 Pathogen[ P14075] interacts with 7 human partners:{P23769;Q8N336;Q02556;P50995;P01858;Q9NRR3;Q9NRR8}  
30835 Pathogen[ POC206] interacts with 10 human partners:{Q92556;Q15744;Q9NRR8;P01858;P50995;Q9NRR3;Q02556;Q96JJ3;Q8N336;P23769}  
30836 Pathogen[ P03363] interacts with 8 human

30837 partners:{Q02556;Q15744;P01858;Q8N336;P50995;Q92556;Q96JJ3;Q9NRR3}  
[Cluster 2804]GO:0001503+P biological\_process [name] ossification [def] "The formation of bone or of a bony substance, or the conversion of fibrous tissue or of cartilage into bone or a bony substance." [GOC

30838 Pathogen[ Q2Q067] interacts with 10 human  
30839 partners:{P10827;P13349;Q02447;P08047;P35548;O00255;Q13951;Q5TAB7;P63173;Q99717}  
Pathogen[ P0C214] interacts with 11 human  
30840 partners:{O95633;P13349;Q8WXG1;Q5TAB7;P63173;Q02447;Q99717;P35548;P08047;O00255;Q13951}  
Pathogen[ P03346] interacts with 13 human  
30841 partners:{P10827;P63173;P35548;P13349;P15173;Q99717;P08047;O00255;Q13951;P56178;Q5TAB7;Q02447;O95633}  
Pathogen[ Q85601] interacts with 10 human  
30842 partners:{P63173;P13349;Q13951;P08047;Q99717;P35548;O00255;P10827;Q02447;Q5TAB7}  
Pathogen[ P14079] interacts with 14 human  
30843 partners:{P02808;P13164;P13349;Q9NR12;Q02447;P10827;P45983;P63173;Q13316;Q9UNW1;Q5TAB7;O00255;Q13951;Q8WXG1}  
Pathogen[ P03383] interacts with 8 human  
30844 partners:{Q5TAB7;P08047;P63173;P35548;Q02447;Q13951;Q99717;O00255}  
Pathogen[ P03410] interacts with 14 human  
30845 partners:{P02808;Q5TAB7;Q02447;Q99717;P63173;Q9BQB4;Q8WXG1;P35548;P13349;Q13951;Q9UNW1;P08047;O00255;Q13316}  
Pathogen[ P14075] interacts with 9 human  
30846 partners:{Q13951;Q5TAB7;P35548;Q99717;O00255;P63173;Q02447;P02808;P08047}  
Pathogen[ P0C206] interacts with 14 human  
30847 partners:{O95633;O00255;Q99717;Q13951;Q13316;P08047;P13349;P35548;Q02447;Q5TAB7;P02808;P63173;Q8WXG1;P10827}  
Pathogen[ P03363] interacts with 10 human  
30848 partners:{P02808;P63173;Q02447;P35548;P13349;Q13951;Q5TAB7;P08047;Q9NR12;Q99717}  
[Cluster 2805]GO:0030097+P biological\_process [name] hemopoiesis [def] "The process whose specific outcome is the progression of the myeloid and lymphoid derived organ/tissue systems of the blood and other parts of the body over time, from formation to the mature structure. The site of hemopoiesis is variable during development, but occurs primarily in bone marrow or kidney in many adult vertebrates." [GOC

30849 Pathogen[ Q2Q067] interacts with 24 human  
30850 partners:{Q6FI81;O00470;P27694;Q16666;P35712;Q01196;Q05516;P17483;Q8N5F7;O95394;Q9HCG1;P55347;Q9P243;O00255;P35226;O00321;Q9NNW7;Q9GZN7;Q8IXT1;Q9UBL3;Q9Y468;Q99814;Q9NZD4;Q00534}  
Pathogen[ P0C214] interacts with 21 human  
30851 partners:{O00470;P35226;P55347;O00321;Q8N5F7;Q9NNW7;Q16666;Q9Y468;Q00534;Q9NZD4;Q8IXT1;O95394;Q99814;Q9HCG1;Q9GZN7;P27694;Q9P243;Q6FI81;P35712;Q05516;O00255}  
Pathogen[ P03346] interacts with 31 human  
30852 partners:{Q16666;P02549;P11277;P27694;P35226;Q9NZD4;O00321;Q9HCG1;Q9UBL3;Q8N5F7;Q9H165;P17483;Q9P243;P17542;O00255;P51587;O00470;Q9GZN7;Q99814;Q9Y2Y4;Q9Y468;Q13492;Q05516;P35712;P55347;O95394;Q01196;Q00534;Q8IXT1;Q6FI81;Q9NNW7}  
Pathogen[ Q85601] interacts with 21 human  
30853 partners:{Q9HCG1;Q16666;Q8N5F7;Q9Y468;Q9Y2Y4;P35712;Q99814;Q6FI81;P27694;Q9UBL3;O00255;O00470;Q9NZD4;Q05516;P55347;O95394;P35226;Q9P243;Q00534;P51587;O00321}  
Pathogen[ P14079] interacts with 29 human  
30854 partners:{Q13492;Q14004;Q9Y2Y4;Q99814;O00321;Q9HCG1;Q9Y6A5;Q9UBL3;P55347;Q9Y468;P35712;P51587;Q05516;Q6FI81;O95394;Q8IXT1;Q9NNW7;Q9GZN7;Q9NZD4;Q9P243;P11277;P35226;P27694;Q99439;O00470;P02549;O00255;Q16666;Q8N5F7}  
Pathogen[ P03383] interacts with 18 human  
30855 partners:{O00470;Q8IXT1;P35712;Q9GZN7;P27694;Q8N5F7;Q05516;Q00534;O00321;P55347;Q9HCG1;O00255;Q16666;O95394;Q6FI81;P35226;Q9Y468;Q9NZD4}  
Pathogen[ P03410] interacts with 27 human  
30856 partners:{Q9HCG1;P35712;Q16666;O00470;Q00534;Q99814;Q9Y468;O00321;Q9Y6A5;Q9P243;P02549;Q13492;Q99439;P51587;Q8IXT1;Q6FI81;P55347;Q9Y2Y4;P27694;P35226;O00255;O95394;P11277;Q9GZN7;Q9NZD4;Q16635;Q9NNW7}  
Pathogen[ P14075] interacts with 18 human  
30857 partners:{Q8IXT1;O00470;Q8N5F7;Q9Y468;Q00534;Q16666;P55347;O00255;Q9HCG1;P35712;P27694;O95394;P35226;Q05516;Q9GZN7;Q6FI81;Q9NZD4;O00321}  
Pathogen[ P0C206] interacts with 29 human  
30858 partners:{Q9Y468;Q6FI81;Q9GZN7;Q9P243;P51587;Q05516;O00470;P35226;O00255;O95394;Q16666;Q8IXT1;Q9HCG1;P17483;O00321;Q9NNW7;Q9Y6A5;Q9H165;Q8N5F7;Q13422;Q9UBL3;P35712;P11277;P27694;Q99814;Q9NZD4;Q00534;Q9Y2Y4;P55347}  
Pathogen[ P03363] interacts with 24 human  
30859 partners:{P27694;P11277;P02549;Q9Y468;Q9NNW7;Q9P243;Q9UBL3;Q6FI81;P55347;P17483;O00321;Q16666;Q00534;Q8N5F7;P35226;O00470;Q99814;Q9NZD4;P35712;Q9Y2Y4;Q9HCG1;Q05516;Q9GZN7;Q8IXT1}  
[Cluster 2806]GO:0045585+P biological\_process [name] positive regulation of cytotoxic T cell differentiation [def] "Any process that activates or increases the frequency, rate or extent of cytotoxic T cell differentiation." [GOC

30860 Pathogen[ Q2Q067] interacts with 1 human partners:{O43290}  
30861 Pathogen[ P0C214] interacts with 1 human partners:{O43290}  
30862 Pathogen[ P03346] interacts with 1 human partners:{O43290}

30863 Pathogen[ Q85601] interacts with 1 human partners:{043290}  
30864 Pathogen[ P14079] interacts with 1 human partners:{043290}  
30865 Pathogen[ P03383] interacts with 1 human partners:{043290}  
30866 Pathogen[ P03410] interacts with 1 human partners:{043290}  
30867 Pathogen[ P14075] interacts with 1 human partners:{043290}  
30868 Pathogen[ P0C206] interacts with 1 human partners:{043290}  
30869 Pathogen[ P03363] interacts with 1 human partners:{043290}  
30870 [Cluster 2807]GO:0046831+P biological\_process [name] regulation of RNA export from nucleus [def] "Any process that modulates the frequency, rate or extent of the directed movement of RNA from the nucleus to the cytoplasm." [GOC  
30871 Pathogen[ Q2Q067] interacts with 1 human partners:{Q07666}  
30872 Pathogen[ P0C214] interacts with 1 human partners:{Q07666}  
30873 Pathogen[ P03346] interacts with 1 human partners:{Q07666}  
30874 Pathogen[ Q85601] interacts with 1 human partners:{Q07666}  
30875 Pathogen[ P14079] interacts with 2 human partners:{Q07666;Q9NZJ9}  
30876 Pathogen[ P03383] interacts with 1 human partners:{Q07666}  
30877 Pathogen[ P03410] interacts with 2 human partners:{Q07666;Q9NZJ9}  
30878 Pathogen[ P14075] interacts with 1 human partners:{Q07666}  
30879 Pathogen[ P0C206] interacts with 1 human partners:{Q07666}  
30880 Pathogen[ P03363] interacts with 1 human partners:{Q07666}  
30881 [Cluster 2808]GO:0055072+P biological\_process [name] iron ion homeostasis [def] "Any process involved in the maintenance of an internal steady state of iron ions within an organism or cell." [GOC  
30882 Pathogen[ Q2Q067] interacts with 2 human partners:{P02792;Q6ZVN8}  
30883 Pathogen[ P0C214] interacts with 4 human partners:{Q9UKA1;Q6ZVN8;P02792;P22830}  
30884 Pathogen[ P03346] interacts with 4 human partners:{P02792;Q6ZVN8;P16452;Q9UKA1}  
30885 Pathogen[ Q85601] interacts with 2 human partners:{Q9UKA1;P02792}  
30886 Pathogen[ P14079] interacts with 3 human partners:{P16452;Q6ZVN8;P22830}  
30887 Pathogen[ P03383] interacts with 1 human partners:{Q6ZVN8}  
30888 Pathogen[ P03410] interacts with 4 human partners:{P16452;Q6ZVN8;P22830;P02792}  
30889 Pathogen[ P14075] interacts with 1 human partners:{Q6ZVN8}  
30890 Pathogen[ P0C206] interacts with 5 human partners:{Q9UKA1;Q6ZVN8;P16452;P22830;P02792}  
30891 Pathogen[ P03363] interacts with 3 human partners:{Q6ZVN8;Q9UKA1;P16452}  
30892 [Cluster 2809]GO:0070861+P biological\_process [name] regulation of protein exit from endoplasmic reticulum [def] "Any process that modulates the frequency, rate or extent of the directed movement of proteins from the endoplasmic reticulum." [GOC  
30893 Pathogen[ Q2Q067] interacts with 1 human partners:{Q8IWIJ2}  
30894 Pathogen[ P0C214] interacts with 1 human partners:{Q8IWIJ2}  
30895 Pathogen[ P03346] interacts with 1 human partners:{Q8IWIJ2}  
30896 Pathogen[ Q85601] interacts with 1 human partners:{Q8IWIJ2}  
30897 Pathogen[ P14079] interacts with 1 human partners:{Q8IWIJ2}  
30898 Pathogen[ P03383] interacts with 1 human partners:{Q8IWIJ2}  
30899 Pathogen[ P03410] interacts with 1 human partners:{Q8IWIJ2}  
30900 Pathogen[ P14075] interacts with 1 human partners:{Q8IWIJ2}  
30901 Pathogen[ P0C206] interacts with 1 human partners:{Q8IWIJ2}  
30902 Pathogen[ P03363] interacts with 1 human partners:{Q8IWIJ2}  
30903 [Cluster 2810]GO:0007000+P biological\_process [name] nucleolus organization [def] "A process that is carried out at the cellular level which results in the assembly, arrangement of constituent parts, or disassembly the nucleolus." [GOC  
30904 Pathogen[ Q2Q067] interacts with 3 human partners:{O00541;Q14978;Q9NYV6}  
30905 Pathogen[ P0C214] interacts with 3 human partners:{O00541;Q14978;Q9NYV6}  
30906 Pathogen[ P03346] interacts with 3 human partners:{O00541;Q14978;Q9NYV6}  
30907 Pathogen[ Q85601] interacts with 3 human partners:{Q14978;O00541;Q9NYV6}  
30908 Pathogen[ P14079] interacts with 3 human partners:{Q9NYV6;O00541;Q14978}  
30909 Pathogen[ P03383] interacts with 3 human partners:{Q14978;Q9NYV6;O00541}  
30910 Pathogen[ P03410] interacts with 3 human partners:{Q14978;Q9NYV6;O00541}  
30911 Pathogen[ P14075] interacts with 3 human partners:{Q9NYV6;O00541;Q14978}  
30912 Pathogen[ P0C206] interacts with 3 human partners:{O00541;Q9NYV6;Q14978}  
30913 Pathogen[ P03363] interacts with 3 human partners:{Q14978;Q9NYV6;O00541}  
30914 [Cluster 2811]GO:0050896+P biological\_process [name] response to stimulus [def] "Any process that results in a change in state or activity of a cell or an organism (in terms of movement, secretion, enzyme production, gene expression, etc.) as a result of a stimulus. The process begins with detection of the stimulus and ends with a change in state or activity of the cell or organism." [GOC  
30915 Pathogen[ Q2Q067] interacts with 12 human partners:{Q96IS3;Q3B820;Q96EV8;Q13432;P54845;O43924;O43186;P58304;Q3SYG4;P07320;P02489;Q16526}  
30916 Pathogen[ P0C214] interacts with 13 human partners:{P02489;O43186;Q13515;P18545;Q3SYG4;Q49AN0;Q96EV8;Q16526;Q13956;Q3B820;P54845;P07320;Q13432}  
30917 Pathogen[ P03346] interacts with 21 human partners:{Q9NZR4;Q13515;P07320;P02489;P54845;Q49AN0;O43186;Q16526;P58304;Q96KN7;Q8N8E2;Q13432;Q96EV8;Q3SYG4;Q3B820;P78411;Q96IS3;Q8NI36;Q8IWN7;Q92834;O43924}  
30918 Pathogen[ Q85601] interacts with 15 human partners:{P02489;O43924;P54845;Q49AN0;Q96IS3;Q92834;Q13515;Q96EV8;P58304;Q3B820;Q3SY



30961 X4;Q96T23;Q9HAW0;Q15543;Q6SJ96}  
Pathogen[ P03346] interacts with 28 human  
partners:{Q6SJ96;Q9Y6J9;Q8N2Z9;Q15542;O75486;O00268;Q92750;P20226;P62380;P49848;O60264;Q9HBM6;Q16514;Q96T23;Q92541;Q12962;Q92994;P21675;Q9NYV6;Q8WUY8;Q8IZX4;Q00403;Q15545;P15884;Q9HAW0;Q14686;Q16594;Q15543}

30962 Pathogen[ Q85601] interacts with 27 human  
partners:{Q15542;Q92994;Q96T23;Q15545;O00268;Q9HAW0;Q16594;Q8IZX4;Q9Y6J9;Q9HBM6;Q14686;Q92541;P49848;Q6SJ96;Q16514;Q00403;Q8N2Z9;Q9NYV6;Q92750;P21675;Q12962;O75486;Q15543;O60264;P62380;P15884;P20226}

30963 Pathogen[ P14079] interacts with 27 human  
partners:{Q96T23;Q92994;Q8IZX4;Q9NYV6;Q9Y6J9;Q16594;Q92541;P62380;Q00403;Q15543;Q12962;P49848;Q8N2Z9;Q92750;Q9HAW0;Q8WUY8;O60264;Q6SJ96;P15884;Q16514;O75486;Q14686;Q15542;P21675;O00268;Q9HBM6;Q15545}

30964 Pathogen[ P03383] interacts with 25 human  
partners:{Q9Y6J9;Q8N2Z9;Q9NYV6;O75486;Q9HAW0;Q14686;Q15542;Q9HBM6;Q8IZX4;Q96T23;Q00403;P20226;Q16594;Q92994;P49848;Q6SJ96;O00268;Q16514;Q92750;P21675;Q92541;Q8WUY8;Q12962;Q15545;Q15543}

30965 Pathogen[ P03410] interacts with 28 human  
partners:{Q9HAW0;Q8IZX4;Q96T23;O00268;Q92994;Q15543;Q92750;Q12962;P21675;Q14686;P15884;P62380;P20226;Q92541;O75486;Q9NYV6;Q9HBM6;Q6SJ96;Q16514;P49848;Q00403;Q9Y6J9;Q16594;Q15542;O60264;Q8WUY8;Q15545;Q8N2Z9}

30966 Pathogen[ P14075] interacts with 26 human  
partners:{Q9Y6J9;Q12962;P21675;Q15542;Q9NYV6;Q14686;Q00403;Q92994;Q9HAW0;P20226;Q16594;Q6SJ96;Q92750;Q8N2Z9;Q92541;P49848;Q16514;Q8WUY8;Q15545;O00268;Q96T23;P15884;O75486;Q8IZX4;Q15543;Q9HBM6}

30967 Pathogen[ P0C206] interacts with 28 human  
partners:{O75486;Q15545;Q16514;Q15543;P49848;Q9HAW0;P20226;P62380;O00268;Q92541;Q96T23;Q9Y6J9;Q8IZX4;Q92750;Q14686;Q8WUY8;P15884;Q15542;Q6SJ96;Q9HBM6;Q92994;Q12962;Q8N2Z9;Q00403;Q9NYV6;P21675;O60264;Q16594}

30968 Pathogen[ P03363] interacts with 25 human  
partners:{Q8IZX4;Q6SJ96;P62380;P49848;Q16514;Q15545;Q8N2Z9;O00268;Q14686;O60264;Q12962;Q96T23;Q00403;Q9NYV6;Q15542;Q92750;P21675;Q9HBM6;P20226;Q92541;P15884;O75486;Q15543;Q9Y6J9;Q16594}

30969 [Cluster 2816]GO:0021555+P biological\_process [name] midbrain-hindbrain boundary morphogenesis [def] "The process in which the anatomical structure of the midbrain-hindbrain boundary is generated and organized. The midbrain-hindbrain domain of the embryonic brain is comprised of the mesencephalic vesicle and the first rhombencephalic vesicle at early somitogenesis stages. An organizing center at the boundary patterns the midbrain and hindbrain primordia of the neural plate." [GO\_REF]

30970 Pathogen[ Q2Q067] interacts with 2 human partners:{Q8NHM5;Q5TGS1}

30971 Pathogen[ P0C214] interacts with 2 human partners:{Q5TGS1;Q8NHM5}

30972 Pathogen[ P03346] interacts with 3 human partners:{P52951;Q5TGS1;Q8NHM5}

30973 Pathogen[ Q85601] interacts with 2 human partners:{Q5TGS1;Q8NHM5}

30974 Pathogen[ P14079] interacts with 2 human partners:{Q8NHM5;Q5TGS1}

30975 Pathogen[ P03383] interacts with 1 human partners:{Q5TGS1}

30976 Pathogen[ P03410] interacts with 1 human partners:{Q5TGS1}

30977 Pathogen[ P14075] interacts with 1 human partners:{Q5TGS1}

30978 Pathogen[ P0C206] interacts with 2 human partners:{Q5TGS1;Q8NHM5}

30979 Pathogen[ P03363] interacts with 2 human partners:{Q5TGS1;P52951}

30980 [Cluster 2817]GO:0001501+P biological\_process [name] skeletal system development [def] "The process whose specific outcome is the progression of the skeleton over time, from its formation to the mature structure. The skeleton is the bony framework of the body in vertebrates (endoskeleton) or the hard outer envelope of insects (exoskeleton or dermoskeleton)." [GOC]

30981 Pathogen[ Q2Q067] interacts with 21 human  
partners:{Q13118;Q92890;P56524;Q9UHF7;Q01196;Q05516;O15266;P09017;O43248;Q15561;Q06830;Q13428;P20719;P15036;P84022;Q96AP0;P0DI81;P35226;P78337;Q9UMX1;P31260}

30982 Pathogen[ P0C214] interacts with 16 human  
partners:{P35226;Q9UHF7;P78337;Q15486;O15266;P84022;P56524;O43248;Q06830;Q13428;Q15561;P0DI81;Q92890;P15036;Q9UMX1;Q05516}

30983 Pathogen[ P03346] interacts with 34 human  
partners:{P31271;Q06945;Q96AP0;P15863;Q9UHF7;P35453;P31260;P78337;Q05925;P31270;P35226;P56524;O60902;P20719;Q15561;P28358;P84022;O15266;Q13118;P09017;P0DI81;Q13428;P78367;Q05516;Q06830;Q01196;P56178;Q9P2D1;Q7Z5J4;Q9UMX1;Q92890;P15036;O43248;P35452}

30984 Pathogen[ Q85601] interacts with 20 human  
partners:{Q9UHF7;P15036;Q15486;Q9P2D1;O43248;P78337;P31260;O15266;Q13428;P0DI81;Q13118;Q05516;P84022;Q06830;P31271;P56524;P35226;Q92890;Q9UMX1;Q15561}

30985 Pathogen[ P14079] interacts with 20 human  
partners:{P15036;Q15561;P78337;Q13118;Q9UMX1;Q13428;Q05516;P57679;P31271;Q92890;Q9P2D1;Q9Y6X1;O15266;Q9NQ76;P35226;Q15486;P0DI81;P56524;Q9UHF7;Q96AP0}

30986 Pathogen[ P03383] interacts with 13 human  
partners:{Q15561;O15266;P15036;Q05516;P78337;Q13428;P84022;P0DI81;P56524;Q9UMX1;Q9UHF7;Q92890;P35226}

30987 Pathogen[ P03410] interacts with 20 human  
partners:{P84022;Q9UHF7;O14960;Q96AP0;O15266;P0DI81;Q15486;Q9Y6X1;Q15561;P15036;Q9P2D1;P56524;Q13118;Q9NQ76;Q13428;P35226;Q9UMX1;Q92890;Q06830;P78337}



30988 Pathogen[ P14075] interacts with 14 human partners: {P78337;Q15561;P56524;Q92890;Q96AP0;P15036;Q9UHF7;P0DI81;Q13428;P35226;Q05516;O15266;P84022;Q9UMX1}

30989 Pathogen[ P0C206] interacts with 23 human partners: {P84022;Q92890;Q96AP0;O15266;Q9UMX1;Q05516;P35226;Q9P2D1;P78337;O43248;Q7Z5J4;Q13428;Q9UHF7;Q15486;P15036;P31271;P56524;P20719;Q13118;Q06830;Q15561;P31260;P0DI81}

30990 Pathogen[ P03363] interacts with 26 human partners: {P56179;O15266;P35453;Q9UHF7;Q13428;Q9UMX1;P0DI81;P20719;P31271;O60902;O43248;Q92890;Q96AP0;P28358;P35226;P31260;P84022;Q05925;P78367;P35452;P09017;P78337;Q05516;Q15561;P15036;Q13118}

30991 [Cluster 2818]GO:0071353+P biological\_process [name] cellular response to interleukin-4 [def] "Any process that results in a change in state or activity of a cell (in terms of movement, secretion, enzyme production, gene expression, etc.) as a result of an interleukin-4 stimulus." [GOC

30992 Pathogen[ Q2Q067] interacts with 1 human partners: {P36402}

30993 Pathogen[ P0C214] interacts with 1 human partners: {P36402}

30994 Pathogen[ P03346] interacts with 1 human partners: {P36402}

30995 Pathogen[ Q85601] interacts with 1 human partners: {P36402}

30996 Pathogen[ P14079] interacts with 2 human partners: {Q9H295;P36402}

30997 Pathogen[ P03383] interacts with 1 human partners: {P36402}

30998 Pathogen[ P03410] interacts with 1 human partners: {P36402}

30999 Pathogen[ P14075] interacts with 1 human partners: {P36402}

31000 Pathogen[ P0C206] interacts with 1 human partners: {P36402}

31001 Pathogen[ P03363] interacts with 1 human partners: {P36402}

31002 [Cluster 2819]GO:0008593+P biological\_process [name] regulation of Notch signaling pathway [def] "Any process that modulates the frequency, rate or extent of the Notch signaling pathway." [GOC

31003 Pathogen[ Q2Q067] interacts with 1 human partners: {Q86Y01}

31004 Pathogen[ P0C214] interacts with 1 human partners: {Q86Y01}

31005 Pathogen[ P03346] interacts with 1 human partners: {Q86Y01}

31006 Pathogen[ Q85601] interacts with 1 human partners: {Q86Y01}

31007 Pathogen[ P14079] interacts with 2 human partners: {Q86Y01;Q8NBL1}

31008 Pathogen[ P03383] interacts with 1 human partners: {Q86Y01}

31009 Pathogen[ P03410] interacts with 1 human partners: {Q86Y01}

31010 Pathogen[ P14075] interacts with 1 human partners: {Q86Y01}

31011 Pathogen[ P0C206] interacts with 1 human partners: {Q86Y01}

31012 Pathogen[ P03363] interacts with 1 human partners: {Q86Y01}

31013 [Cluster 2820]GO:0032570+P biological\_process [name] response to progesterone stimulus [def] "Any process that results in a change in state or activity of a cell or an organism (in terms of movement, secretion, enzyme production, gene expression, etc.) as a result of a progesterone stimulus." [GOC

31014 Pathogen[ Q2Q067] interacts with 7 human partners: {P01100;Q04206;P36956;P24864;P27986;P15407;Q9H3M7}

31015 Pathogen[ P0C214] interacts with 8 human partners: {P15407;Q9H3M7;P01100;P17275;Q04206;P24864;O15524;P27986}

31016 Pathogen[ P03346] interacts with 10 human partners: {O15524;Q15788;P36956;P17275;Q04206;P24864;P15407;P01100;Q9H3M7;P27986}

31017 Pathogen[ Q85601] interacts with 8 human partners: {P15407;P27986;P01100;P36956;Q04206;P17275;Q9H3M7;P24864}

31018 Pathogen[ P14079] interacts with 7 human partners: {P24864;P17275;Q15788;P15407;Q9H3M7;P36956;P01100}

31019 Pathogen[ P03383] interacts with 7 human partners: {P27986;P15407;P01100;Q9H3M7;Q04206;P24864;P17275}

31020 Pathogen[ P03410] interacts with 8 human partners: {Q04206;P36956;P27986;Q9H3M7;P01100;P17275;P15407;P24864}

31021 Pathogen[ P14075] interacts with 7 human partners: {Q04206;P17275;P27986;Q9H3M7;P01100;P15407;P24864}

31022 Pathogen[ P0C206] interacts with 10 human partners: {P15407;P17275;P36956;O15524;P27986;P01100;Q04206;Q9H3M7;P24864;Q15788}

31023 Pathogen[ P03363] interacts with 8 human partners: {Q04206;P24864;O15524;Q9H3M7;P17275;P15407;P27986;P01100}

31024 [Cluster 2821]GO:0050769+P biological\_process [name] positive regulation of neurogenesis [def] "Any process that activates or increases the frequency, rate or extent of neurogenesis, the origin and formation of neurons." [GOC

31025 Pathogen[ Q2Q067] interacts with 5 human partners: {Q13573;Q96T58;Q13426;P12956;P13010}

31026 Pathogen[ P0C214] interacts with 5 human partners: {Q96T58;Q13573;P13010;Q13426;P12956}

31027 Pathogen[ P03346] interacts with 7 human partners: {P12956;Q13426;P13010;Q96T58;Q13573;Q9Y6R0;O43543}

31028 Pathogen[ Q85601] interacts with 5 human partners: {Q13573;Q13426;Q96T58;P13010;P12956}

31029 Pathogen[ P14079] interacts with 7 human partners: {P13010;Q13573;P12956;O43543;Q13426;P49917;Q96T58}

31030 Pathogen[ P03383] interacts with 5 human

31031 Pathogen[ P03410] interacts with 6 human partners:{Q13573;P13010;Q13426;Q96T58;P12956}

31032 Pathogen[ P14075] interacts with 5 human partners:{Q96T58;P12956;Q13426;P13010;O43543;Q13573}

31033 Pathogen[ P0C206] interacts with 7 human partners:{P12956;Q13573;Q96T58;Q13426;P13010}

31034 Pathogen[ P03363] interacts with 6 human partners:{P13010;P49917;Q13573;Q13426;Q96T58;O43543;P12956}

31035 [Cluster 2822]GO:0007528+P biological\_process [name] neuromuscular junction development [def] "The process whose specific outcome is the progression of the neuromuscular junction over time, from its formation to the mature structure." [GOC]

31036 Pathogen[ Q2Q067] interacts with 2 human partners:{Q53G26;Q96EY1}

31037 Pathogen[ P0C214] interacts with 2 human partners:{Q53G26;Q96EY1}

31038 Pathogen[ P03346] interacts with 3 human partners:{Q13424;Q53G26;Q96EY1}

31039 Pathogen[ Q85601] interacts with 2 human partners:{Q53G26;Q96EY1}

31040 Pathogen[ P14079] interacts with 2 human partners:{Q13424;Q96EY1}

31041 Pathogen[ P03383] interacts with 2 human partners:{Q96EY1;Q53G26}

31042 Pathogen[ P03410] interacts with 3 human partners:{Q53G26;Q13424;Q96EY1}

31043 Pathogen[ P14075] interacts with 2 human partners:{Q53G26;Q96EY1}

31044 Pathogen[ P0C206] interacts with 3 human partners:{Q53G26;Q13424;Q96EY1}

31045 Pathogen[ P03363] interacts with 3 human partners:{Q53G26;Q96EY1;Q13424}

31046 [Cluster 2823]GO:0001711+P biological\_process [name] endodermal cell fate commitment [def] "The cell differentiation process that results in commitment of a cell to become part of the endoderm." [GOC]

31047 Pathogen[ Q2Q067] interacts with 5 human partners:{Q8WVC0;Q6PD62;Q6P1J9;Q92541;Q8N7H5}

31048 Pathogen[ P0C214] interacts with 5 human partners:{Q92541;Q6P1J9;Q8N7H5;Q8WVC0;Q6PD62}

31049 Pathogen[ P03346] interacts with 5 human partners:{Q6PD62;Q8WVC0;Q92541;Q6P1J9;Q8N7H5}

31050 Pathogen[ Q85601] interacts with 5 human partners:{Q6PD62;Q8WVC0;Q6P1J9;Q92541;Q8N7H5}

31051 Pathogen[ P14079] interacts with 5 human partners:{Q92541;Q6PD62;Q8WVC0;Q6P1J9;Q8N7H5}

31052 Pathogen[ P03383] interacts with 5 human partners:{Q6P1J9;Q6PD62;Q8WVC0;Q92541;Q8N7H5}

31053 Pathogen[ P03410] interacts with 5 human partners:{Q8WVC0;Q6PD62;Q92541;Q8N7H5;Q6P1J9}

31054 Pathogen[ P14075] interacts with 5 human partners:{Q8WVC0;Q8N7H5;Q6P1J9;Q92541;Q6PD62}

31055 Pathogen[ P0C206] interacts with 5 human partners:{Q6PD62;Q92541;Q8N7H5;Q8WVC0;Q6P1J9}

31056 Pathogen[ P03363] interacts with 5 human partners:{Q8WVC0;Q6P1J9;Q92541;Q8N7H5;Q6PD62}

31057 [Cluster 2824]GO:0007584+P biological\_process [name] response to nutrient [def] "Any process that results in a change in state or activity of a cell or an organism (in terms of movement, secretion, enzyme production, gene expression, etc.) as a result of a nutrient stimulus." [GOC]

31058 Pathogen[ Q2Q067] interacts with 8 human partners:{P09917;O14929;P13073;P35573;P21953;O43768;P27986;P49715}

31059 Pathogen[ P0C214] interacts with 12 human partners:{P50440;O43768;P09917;P12694;O14929;P35573;P14618;P21953;P13073;P01008;P27986;P30566}

31060 Pathogen[ P03346] interacts with 10 human partners:{P07992;Q9NRJ4;P35573;P49715;O43768;P09917;P13073;P51587;O14929;P27986}

31061 Pathogen[ Q85601] interacts with 10 human partners:{P09917;P21953;P27986;O43768;P35573;O14929;P14618;P49715;P01008;P51587}

31062 Pathogen[ P14079] interacts with 11 human partners:{P21953;P13073;O43768;P51587;O14929;P49715;P35573;P09917;P61803;P50440;P07992}

31063 Pathogen[ P03383] interacts with 6 human partners:{P13073;P27986;P35573;P01008;O14929;O43768}

31064 Pathogen[ P03410] interacts with 13 human partners:{P27986;O14929;P07992;P12694;P35573;P21953;P13073;P51587;P30566;O43768;P09917;P50440;P61803}

31065 Pathogen[ P14075] interacts with 6 human partners:{P13073;O14929;O43768;P27986;P35573;P50440}

31066 Pathogen[ P0C206] interacts with 14 human partners:{P09917;P01008;P51587;P21953;P49715;P27986;P07992;O14929;P50440;P13073;O43768;Q9NRJ4;P14618;P35573}

31067 Pathogen[ P03363] interacts with 5 human partners:{O43768;O14929;Q9NRJ4;P35573;P27986}

31068 [Cluster 2825]GO:0016049+P biological\_process [name] cell growth [def] "The process in which a cell irreversibly increases in size over time by accretion and biosynthetic production of matter similar to that already present." [GOC]

31069 Pathogen[ Q2Q067] interacts with 3 human partners:{O60356;P51959;Q9Y2X3}

31070 Pathogen[ POC214] interacts with 5 human partners:{P68133;P51959;Q9ULP0;O60356;Q9Y2X3}

31071 Pathogen[ P03346] interacts with 7 human partners:{Q96RT1;Q9ULP0;O75159;Q9Y2X3;O60356;P51959;P58546}

31072 Pathogen[ Q85601] interacts with 5 human partners:{P68133;Q96RT1;P51959;O60356;Q9Y2X3}

31073 Pathogen[ P14079] interacts with 8 human partners:{P51959;Q9Y2X3;Q9Y2Q5;Q9ULP0;Q96RT1;Q6IAA8;O60356;P68133}

31074 Pathogen[ P03383] interacts with 3 human partners:{P51959;Q9Y2X3;O60356}

31075 Pathogen[ P03410] interacts with 8 human partners:{Q9Y2Q5;Q96RT1;Q9Y2X3;P51959;Q9ULP0;O60356;P68133;Q6IAA8}

31076 Pathogen[ P14075] interacts with 3 human partners:{P51959;O60356;Q9Y2X3}

31077 Pathogen[ POC206] interacts with 6 human partners:{Q96RT1;Q9ULP0;O60356;P68133;Q9Y2X3;P51959}

31078 Pathogen[ P03363] interacts with 7 human partners:{O75159;Q96RT1;Q9Y2X3;O60356;Q9ULP0;P68133;P51959}

31079 [Cluster 2826]GO:2000020+P biological\_process [name] positive regulation of male gonad development [def] "Any process that activates or increases the frequency, rate or extent of male gonad development." [GOC

31080 Pathogen[ Q2Q067] interacts with 2 human partners:{Q05066;Q8WW38}

31081 Pathogen[ POC214] interacts with 1 human partners:{Q8WW38}

31082 Pathogen[ P03346] interacts with 3 human partners:{Q05066;Q8WW38;Q13285}

31083 Pathogen[ Q85601] interacts with 1 human partners:{Q8WW38}

31084 Pathogen[ P14079] interacts with 1 human partners:{Q8WW38}

31085 Pathogen[ P03383] interacts with 1 human partners:{Q8WW38}

31086 Pathogen[ P03410] interacts with 1 human partners:{Q8WW38}

31087 Pathogen[ P14075] interacts with 1 human partners:{Q8WW38}

31088 Pathogen[ POC206] interacts with 2 human partners:{Q05066;Q8WW38}

31089 Pathogen[ P03363] interacts with 2 human partners:{Q05066;Q8WW38}

31090 [Cluster 2827]GO:0007389+P biological\_process [name] pattern specification process [def] "Any developmental process that results in the creation of defined areas or spaces within an organism to which cells respond and eventually are instructed to differentiate." [GOC

31091 Pathogen[ Q2Q067] interacts with 10 human partners:{O43364;Q99502;O60481;Q6ZNA4;Q08050;O43524;P20719;Q15796;Q8TE85;P14653}

31092 Pathogen[ POC214] interacts with 6 human partners:{Q8TE85;P14653;Q15796;Q6ZNA4;O60481;Q99502}

31093 Pathogen[ P03346] interacts with 27 human partners:{P85037;P47902;P15863;P35453;P58012;Q99626;Q15796;Q08050;A6NJTO;Q99502;P14653;Q8TE85;O00409;P20719;O43364;O60481;O95076;P46109;Q15475;Q12778;Q01167;Q6ZNA4;P98177;Q99593;O43524;P35452;Q9UJU5}

31094 Pathogen[ Q85601] interacts with 8 human partners:{Q8TE85;O60481;P14653;O43364;Q99502;Q6ZNA4;Q08050;Q15796}

31095 Pathogen[ P14079] interacts with 7 human partners:{O43364;Q99502;O60481;Q8TE85;P46109;Q6ZNA4;Q4AC94}

31096 Pathogen[ P03383] interacts with 4 human partners:{Q6ZNA4;Q8TE85;Q15796;O60481}

31097 Pathogen[ P03410] interacts with 8 human partners:{Q6ZNA4;O60481;Q99502;Q4AC94;Q8TE85;O43364;Q15796;P46109}

31098 Pathogen[ P14075] interacts with 6 human partners:{O60481;Q8TE85;Q08050;Q15796;Q6ZNA4;Q99502}

31099 Pathogen[ POC206] interacts with 9 human partners:{Q8TE85;O60481;Q6ZNA4;Q15796;P14653;Q08050;Q99502;O43364;P20719}

31100 Pathogen[ P03363] interacts with 20 human partners:{P35453;P47902;O60481;Q99626;P20719;P46109;P19883;O00409;Q6ZNA4;P14653;O43524;Q8TE85;Q08050;A6NJTO;Q15796;Q01167;O95076;P35452;O43364;Q9UJU5}

31101 [Cluster 2828]GO:0014067+P biological\_process [name] negative regulation of phosphatidylinositol 3-kinase cascade [def] "Any process that stops, prevents, or reduces the frequency, rate or extent of signal transduction mediated by the phosphatidylinositol 3-kinase cascade." [GOC

31102 Pathogen[ Q2Q067] interacts with 2 human partners:{Q15599;O75376}

31103 Pathogen[ POC214] interacts with 3 human partners:{Q15599;O75376;P07093}

31104 Pathogen[ P03346] interacts with 2 human partners:{Q15599;O75376}

31105 Pathogen[ Q85601] interacts with 3 human partners:{O75376;P07093;Q15599}

31106 Pathogen[ P14079] interacts with 2 human partners:{Q15599;O75376}

31107 Pathogen[ P03383] interacts with 1 human partners:{O75376}

31108 Pathogen[ P03410] interacts with 2 human partners:{O75376;Q15599}

31109 Pathogen[ P14075] interacts with 1 human partners:{O75376}

31110 Pathogen[ POC206] interacts with 2 human partners:{Q15599;O75376}

31111 Pathogen[ P03363] interacts with 2 human partners:{O75376;Q15599}

31112 [Cluster 2829]GO:0051701+P biological\_process [name] interaction with host [def] "An interaction between two organisms living together in more or less intimate association. The term host is used for the larger (macro) of the two members of a symbiosis\_ the various forms of symbiosis include parasitism, commensalism and mutualism." [GOC

31113 Pathogen[ Q2Q067] interacts with 2 human partners:{P36543;P29474}

31114 Pathogen[ P0C214] interacts with 4 human partners:{P29474;Q16864;Q9UI12;P36543}  
31115 Pathogen[ P03346] interacts with 6 human partners:{P21283;P29474;Q9Y5K8;P36543;Q93050;Q16864}  
31116 Pathogen[ Q85601] interacts with 3 human partners:{Q93050;P29474;P36543}  
31117 Pathogen[ P14079] interacts with 10 human partners:{P36543;Q9Y5K8;P61421;P13498;Q96LB4;Q8N8Y2;Q93050;Q9UI12;O95670;Q16864}  
31118 Pathogen[ P03383] interacts with 2 human partners:{P29474;P36543}  
31119 Pathogen[ P03410] interacts with 11 human partners:{Q8N8Y2;P61421;Q93050;P29474;Q9UI12;Q96LB4;O95670;Q16864;Q9Y5K8;O75348;P36543}  
31120 Pathogen[ P14075] interacts with 2 human partners:{P29474;P36543}  
31121 Pathogen[ P0C206] interacts with 6 human partners:{P36543;Q9UI12;Q9Y5K8;Q16864;P29474;Q93050}  
31122 Pathogen[ P03363] interacts with 3 human partners:{P29474;P36543;Q9Y5K8}  
31123 [Cluster 2830]GO:0045581+P biological\_process [name] negative regulation of T cell differentiation [def] "Any process that stops, prevents, or reduces the frequency, rate or extent of T cell differentiation." [GOC  
31124 Pathogen[ Q2Q067] interacts with 1 human partners:{Q86Y01}  
31125 Pathogen[ P0C214] interacts with 1 human partners:{Q86Y01}  
31126 Pathogen[ P03346] interacts with 1 human partners:{Q86Y01}  
31127 Pathogen[ Q85601] interacts with 1 human partners:{Q86Y01}  
31128 Pathogen[ P14079] interacts with 2 human partners:{Q86Y01;Q8IU54}  
31129 Pathogen[ P03383] interacts with 1 human partners:{Q86Y01}  
31130 Pathogen[ P03410] interacts with 1 human partners:{Q86Y01}  
31131 Pathogen[ P14075] interacts with 1 human partners:{Q86Y01}  
31132 Pathogen[ P0C206] interacts with 1 human partners:{Q86Y01}  
31133 Pathogen[ P03363] interacts with 1 human partners:{Q86Y01}  
31134 [Cluster 2831]GO:0001893+P biological\_process [name] maternal placenta development [def] "Maternally driven process whose specific outcome is the progression of the placenta over time, from its formation to the mature structure. The placenta is an organ of metabolic interchange between fetus and mother, partly of embryonic origin and partly of maternal origin." [GOC  
31135 Pathogen[ Q2Q067] interacts with 1 human partners:{P31749}  
31136 Pathogen[ P0C214] interacts with 1 human partners:{P31749}  
31137 Pathogen[ P03346] interacts with 4 human partners:{Q9P2F5;O75626;P31749;Q15363}  
31138 Pathogen[ Q85601] interacts with 2 human partners:{P31749;O75626}  
31139 Pathogen[ P14079] interacts with 3 human partners:{O75626;Q15363;Q9P2F5}  
31140 Pathogen[ P03383] interacts with 2 human partners:{P31749;Q9P2F5}  
31141 Pathogen[ P03410] interacts with 4 human partners:{Q9P2F5;P31749;Q15363;O75626}  
31142 Pathogen[ P14075] interacts with 2 human partners:{P31749;Q9P2F5}  
31143 Pathogen[ P0C206] interacts with 4 human partners:{P31749;O75626;Q9P2F5;Q15363}  
31144 Pathogen[ P03363] interacts with 2 human partners:{P31749;O75626}  
31145 [Cluster 2832]GO:0051480+P biological\_process [name] cytosolic calcium ion homeostasis [def] "Any process involved in the maintenance of an internal steady state of calcium ions within the cytosol of a cell or between the cytosol and its surroundings." [GOC  
31146 Pathogen[ Q2Q067] interacts with 1 human partners:{Q93034}  
31147 Pathogen[ P0C214] interacts with 1 human partners:{Q93034}  
31148 Pathogen[ P03346] interacts with 1 human partners:{Q93034}  
31149 Pathogen[ Q85601] interacts with 1 human partners:{Q93034}  
31150 Pathogen[ P14079] interacts with 1 human partners:{Q93034}  
31151 Pathogen[ P03383] interacts with 1 human partners:{Q93034}  
31152 Pathogen[ P03410] interacts with 1 human partners:{Q93034}  
31153 Pathogen[ P14075] interacts with 1 human partners:{Q93034}  
31154 Pathogen[ P0C206] interacts with 1 human partners:{Q93034}  
31155 Pathogen[ P03363] interacts with 1 human partners:{Q93034}  
31156 [Cluster 2833]GO:0003334+P biological\_process [name] keratinocyte development [def] "The process whose specific outcome is the progression of a keratinocyte over time, from its formation to the mature structure." [GOC  
31157 Pathogen[ Q2Q067] interacts with 2 human partners:{Q92754;P60953}  
31158 Pathogen[ P0C214] interacts with 2 human partners:{P60953;Q92754}  
31159 Pathogen[ P03346] interacts with 2 human partners:{P60953;Q92754}  
31160 Pathogen[ Q85601] interacts with 2 human partners:{Q92754;P60953}  
31161 Pathogen[ P14079] interacts with 1 human partners:{Q92754}  
31162 Pathogen[ P03383] interacts with 2 human partners:{P60953;Q92754}  
31163 Pathogen[ P03410] interacts with 2 human partners:{P60953;Q92754}  
31164 Pathogen[ P14075] interacts with 2 human partners:{P60953;Q92754}  
31165 Pathogen[ P0C206] interacts with 2 human partners:{Q92754;P60953}  
31166 Pathogen[ P03363] interacts with 2 human partners:{P60953;Q92754}  
31167 [Cluster 2834]GO:0006221+P biological\_process [name] pyrimidine nucleotide biosynthetic process [def] "The chemical reactions and pathways resulting in the formation of a pyrimidine nucleotide, a compound consisting of nucleoside (a pyrimidine base linked to a deoxyribose or ribose sugar) esterified with a phosphate group at either the 3' or 5'-hydroxyl group of the sugar." [GOC  
31168 Pathogen[ Q2Q067] interacts with 1 human partners:{P11172}  
31169 Pathogen[ P0C214] interacts with 4 human partners:{P11172;Q9NRF8;P17812;Q5EBM0}  
31170 Pathogen[ P03346] interacts with 1 human partners:{P11172}

31171 Pathogen[ Q85601] interacts with 1 human partners:{P11172}  
31172 Pathogen[ P14079] interacts with 4 human partners:{Q5EBM0;P17812;P11172;Q9NRF8}  
31173 Pathogen[ P03383] interacts with 2 human partners:{P11172;Q5EBM0}  
31174 Pathogen[ P03410] interacts with 4 human partners:{Q9NRF8;P17812;P11172;Q5EBM0}  
31175 Pathogen[ P14075] interacts with 2 human partners:{P11172;Q5EBM0}  
31176 Pathogen[ P0C206] interacts with 2 human partners:{Q5EBM0;P11172}  
31177 Pathogen[ P03363] interacts with 1 human partners:{P11172}  
31178 [Cluster 2835]GO:0032392+P biological\_process [name] DNA geometric change [def] "The process in which a transformation is induced in the geometry of a DNA double helix, resulting in a change in twist, writhe, or both, but with no change in linking number. Includes the unwinding of double-stranded DNA by helicases." [GOC  
31179 Pathogen[ Q2Q067] interacts with 1 human partners:{Q99551}  
31180 Pathogen[ P0C214] interacts with 1 human partners:{Q99551}  
31181 Pathogen[ P03346] interacts with 1 human partners:{Q99551}  
31182 Pathogen[ Q85601] interacts with 1 human partners:{Q99551}  
31183 Pathogen[ P14079] interacts with 1 human partners:{Q99551}  
31184 Pathogen[ P03383] interacts with 1 human partners:{Q99551}  
31185 Pathogen[ P03410] interacts with 1 human partners:{Q99551}  
31186 Pathogen[ P14075] interacts with 1 human partners:{Q99551}  
31187 Pathogen[ P0C206] interacts with 1 human partners:{Q99551}  
31188 Pathogen[ P03363] interacts with 1 human partners:{Q99551}  
31189 [Cluster 2836]GO:0046778+P biological\_process [name] modification by virus of host mRNA processing [def] "Any viral process that interferes with the processing of mRNA in the host cell." [ISBN  
31190 Pathogen[ Q2Q067] interacts with 2 human partners:{O95639;Q86U42}  
31191 Pathogen[ P0C214] interacts with 2 human partners:{O95639;Q86U42}  
31192 Pathogen[ P03346] interacts with 2 human partners:{O95639;Q86U42}  
31193 Pathogen[ Q85601] interacts with 2 human partners:{O95639;Q86U42}  
31194 Pathogen[ P14079] interacts with 2 human partners:{O95639;Q86U42}  
31195 Pathogen[ P03383] interacts with 1 human partners:{Q86U42}  
31196 Pathogen[ P03410] interacts with 2 human partners:{O95639;Q86U42}  
31197 Pathogen[ P14075] interacts with 1 human partners:{Q86U42}  
31198 Pathogen[ P0C206] interacts with 2 human partners:{Q86U42;O95639}  
31199 Pathogen[ P03363] interacts with 1 human partners:{Q86U42}  
31200 [Cluster 2837]GO:0048024+P biological\_process [name] regulation of nuclear mRNA splicing, via spliceosome [def] "Any process that modulates the frequency, rate or extent of mRNA splicing via a spliceosomal mechanism." [GOC  
31201 Pathogen[ Q2Q067] interacts with 1 human partners:{Q9HCG8}  
31202 Pathogen[ P0C214] interacts with 2 human partners:{P31483;Q9HCG8}  
31203 Pathogen[ P03346] interacts with 2 human partners:{P31483;Q9HCG8}  
31204 Pathogen[ Q85601] interacts with 1 human partners:{Q9HCG8}  
31205 Pathogen[ P14079] interacts with 2 human partners:{Q9HCG8;P31483}  
31206 Pathogen[ P03383] interacts with 1 human partners:{Q9HCG8}  
31207 Pathogen[ P03410] interacts with 2 human partners:{P31483;Q9HCG8}  
31208 Pathogen[ P14075] interacts with 1 human partners:{Q9HCG8}  
31209 Pathogen[ P0C206] interacts with 2 human partners:{P31483;Q9HCG8}  
31210 Pathogen[ P03363] interacts with 2 human partners:{Q9HCG8;P31483}  
31211 [Cluster 2838]GO:0006816+P biological\_process [name] calcium ion transport [def] "The directed movement of calcium (Ca) ions into, out of or within a cell, or between cells, by means of some agent such as a transporter or pore." [GOC  
31212 Pathogen[ Q2Q067] interacts with 6 human partners:{Q08209;Q9BSW2;P08133;P26678;O95644;P10242}  
31213 Pathogen[ P0C214] interacts with 6 human partners:{P08133;Q08209;P10242;Q9BSW2;O95644;P26678}  
31214 Pathogen[ P03346] interacts with 6 human partners:{P26678;O95644;P08133;P10242;Q9BSW2;Q08209}  
31215 Pathogen[ Q85601] interacts with 5 human partners:{P10242;O95644;Q08209;P08133;Q9BSW2}  
31216 Pathogen[ P14079] interacts with 11 human partners:{Q9BSW2;O95644;Q8NE86;O60895;O00631;P05814;Q96BY9;P26678;P10242;Q08209;P13693}  
31217 Pathogen[ P03383] interacts with 5 human partners:{O95644;Q9BSW2;P26678;P10242;P08133}  
31218 Pathogen[ P03410] interacts with 13 human partners:{O60896;Q08209;O60895;P10242;O95644;Q8NE86;P08133;Q96BY9;P26678;P13693;O00631;Q8IU99;P05814}  
31219 Pathogen[ P14075] interacts with 5 human partners:{Q9BSW2;P08133;P10242;P26678;O95644}  
31220 Pathogen[ P0C206] interacts with 7 human partners:{Q8NE86;P10242;P08133;Q08209;P26678;O95644;Q9BSW2}  
31221 Pathogen[ P03363] interacts with 4 human partners:{P08133;Q9BSW2;P10242;O95644}  
31222 [Cluster 2839]GO:0071173+P biological\_process [name] spindle assembly checkpoint [def] "A cell cycle checkpoint that delays the metaphase/anaphase transition until the spindle is correctly assembled and chromosomes are attached to the spindle." [GOC  
31223 Pathogen[ Q2Q067] interacts with 2 human partners:{O43684;Q8NG31}  
31224 Pathogen[ P0C214] interacts with 2 human partners:{O43684;Q8NG31}

31225 Pathogen[ P03346] interacts with 2 human partners:{O43684;Q8NG31}  
31226 Pathogen[ Q85601] interacts with 2 human partners:{Q8NG31;O43684}  
31227 Pathogen[ P14079] interacts with 2 human partners:{Q8NG31;O43684}  
31228 Pathogen[ P03383] interacts with 2 human partners:{O43684;Q8NG31}  
31229 Pathogen[ P03410] interacts with 2 human partners:{O43684;Q8NG31}  
31230 Pathogen[ P14075] interacts with 2 human partners:{O43684;Q8NG31}  
31231 Pathogen[ P0C206] interacts with 2 human partners:{O43684;Q8NG31}  
31232 Pathogen[ P03363] interacts with 2 human partners:{O43684;Q8NG31}  
31233 [Cluster 2840]GO:0051001+P biological\_process [name] negative regulation of nitric-oxide synthase activity [def] "Any process that stops or reduces the activity of the enzyme nitric-oxide synthase." [GOC  
31234 Pathogen[ Q2Q067] interacts with 1 human partners:{Q9Y314}  
31235 Pathogen[ P0C214] interacts with 1 human partners:{Q9Y314}  
31236 Pathogen[ P03346] interacts with 1 human partners:{Q9Y314}  
31237 Pathogen[ Q85601] interacts with 1 human partners:{Q9Y314}  
31238 Pathogen[ P14079] interacts with 2 human partners:{Q9Y314;P06280}  
31239 Pathogen[ P03383] interacts with 1 human partners:{Q9Y314}  
31240 Pathogen[ P03410] interacts with 1 human partners:{Q9Y314}  
31241 Pathogen[ P14075] interacts with 1 human partners:{Q9Y314}  
31242 Pathogen[ P0C206] interacts with 1 human partners:{Q9Y314}  
31243 Pathogen[ P03363] interacts with 1 human partners:{Q9Y314}  
31244 [Cluster 2841]GO:0046500+P biological\_process [name] S-adenosylmethionine metabolic process [def] "The chemical reactions and pathways involving S-adenosylmethionine, S-(5'-adenosyl)-L-methionine, an important intermediate in one-carbon metabolism." [GOC  
31245 Pathogen[ Q2Q067] interacts with 2 human partners:{P22061;Q14749}  
31246 Pathogen[ P0C214] interacts with 2 human partners:{P22061;Q14749}  
31247 Pathogen[ P03346] interacts with 2 human partners:{P22061;Q14749}  
31248 Pathogen[ Q85601] interacts with 2 human partners:{P22061;Q14749}  
31249 Pathogen[ P14079] interacts with 3 human partners:{Q14749;Q14353;Q16625}  
31250 Pathogen[ P03383] interacts with 2 human partners:{P22061;Q14749}  
31251 Pathogen[ P03410] interacts with 4 human partners:{Q14353;Q14749;Q16625;P22061}  
31252 Pathogen[ P14075] interacts with 2 human partners:{P22061;Q14749}  
31253 Pathogen[ P0C206] interacts with 2 human partners:{P22061;Q14749}  
31254 Pathogen[ P03363] interacts with 1 human partners:{Q14749}  
31255 [Cluster 2842]GO:0045785+P biological\_process [name] positive regulation of cell adhesion [def] "Any process that activates or increases the frequency, rate or extent of cell adhesion." [GOC  
31256 Pathogen[ Q2Q067] interacts with 3 human partners:{P21980;Q86U70;O95429}  
31257 Pathogen[ P0C214] interacts with 4 human partners:{Q86U70;O95429;P21980;P18054}  
31258 Pathogen[ P03346] interacts with 4 human partners:{P21980;Q86U70;P18054;O95429}  
31259 Pathogen[ Q85601] interacts with 3 human partners:{Q86U70;P21980;O95429}  
31260 Pathogen[ P14079] interacts with 5 human partners:{O95429;Q86U70;P21980;P29459;P0DJ18}  
31261 Pathogen[ P03383] interacts with 3 human partners:{Q86U70;P21980;O95429}  
31262 Pathogen[ P03410] interacts with 5 human partners:{P0DJ18;O95429;Q86U70;P21980;P29459}  
31263 Pathogen[ P14075] interacts with 3 human partners:{Q86U70;P21980;O95429}  
31264 Pathogen[ P0C206] interacts with 3 human partners:{P21980;O95429;Q86U70}  
31265 Pathogen[ P03363] interacts with 2 human partners:{Q86U70;O95429}  
31266 [Cluster 2843]GO:0031290+P biological\_process [name] retinal ganglion cell axon guidance [def] "The process in which the migration of an axon growth cone of a retinal ganglion cell (RGC) is directed to its target in the brain in response to a combination of attractive and repulsive cues." [GOC  
31267 Pathogen[ Q2Q067] interacts with 1 human partners:{Q12837}  
31268 Pathogen[ P0C214] interacts with 1 human partners:{Q12837}  
31269 Pathogen[ P03346] interacts with 2 human partners:{Q12837;Q15319}  
31270 Pathogen[ Q85601] interacts with 1 human partners:{Q12837}  
31271 Pathogen[ P14079] interacts with 1 human partners:{Q12837}  
31272 Pathogen[ P03383] interacts with 1 human partners:{Q12837}  
31273 Pathogen[ P03410] interacts with 1 human partners:{Q12837}  
31274 Pathogen[ P14075] interacts with 1 human partners:{Q12837}  
31275 Pathogen[ P0C206] interacts with 1 human partners:{Q12837}  
31276 Pathogen[ P03363] interacts with 2 human partners:{Q12837;Q15319}  
31277 [Cluster 2844]GO:0000059+P biological\_process [name] protein import into nucleus, docking [def] "A protein complex assembly process that contributes to protein import into the nucleus, and that results in the association of a cargo protein, a carrier protein such as an importin alpha/beta heterodimer, and a nucleoporin located at the periphery of the nuclear pore complex." [GOC  
31278 Pathogen[ Q2Q067] interacts with 2 human partners:{P52948;Q92621}  
31279 Pathogen[ P0C214] interacts with 2 human partners:{P52948;Q92621}  
31280 Pathogen[ P03346] interacts with 2 human partners:{Q92621;P52948}  
31281 Pathogen[ Q85601] interacts with 2 human partners:{Q92621;P52948}  
31282 Pathogen[ P14079] interacts with 2 human partners:{Q92621;P52948}  
31283 Pathogen[ P03383] interacts with 2 human partners:{Q92621;P52948}  
31284 Pathogen[ P03410] interacts with 2 human partners:{P52948;Q92621}  
31285 Pathogen[ P14075] interacts with 2 human partners:{Q92621;P52948}

31286 Pathogen[ P0C206] interacts with 1 human partners:{Q92621}

31287 Pathogen[ P03363] interacts with 2 human partners:{P52948;Q92621}

31288 [Cluster 2845]GO:0050798+P biological\_process [name] activated T cell proliferation [def] "The expansion of a T cell population following activation by an antigenic stimulus." [GOC

31289 Pathogen[ Q2Q067] interacts with 1 human partners:{Q01826}

31290 Pathogen[ P0C214] interacts with 1 human partners:{Q01826}

31291 Pathogen[ P03346] interacts with 1 human partners:{Q01826}

31292 Pathogen[ Q85601] interacts with 1 human partners:{Q01826}

31293 Pathogen[ P14079] interacts with 1 human partners:{Q01826}

31294 Pathogen[ P03383] interacts with 1 human partners:{Q01826}

31295 Pathogen[ P03410] interacts with 1 human partners:{Q01826}

31296 Pathogen[ P14075] interacts with 1 human partners:{Q01826}

31297 Pathogen[ P0C206] interacts with 1 human partners:{Q01826}

31298 Pathogen[ P03363] interacts with 1 human partners:{Q01826}

31299 [Cluster 2846]GO:0006515+P biological\_process [name] misfolded or incompletely synthesized protein catabolic process [def] "The chemical reactions and pathways resulting in the breakdown of misfolded or attenuated proteins." [GOC

31300 Pathogen[ Q2Q067] interacts with 2 human partners:{P54252;Q9UNE7}

31301 Pathogen[ P0C214] interacts with 3 human partners:{Q96B02;Q9UNE7;P54252}

31302 Pathogen[ P03346] interacts with 2 human partners:{Q9UNE7;P54252}

31303 Pathogen[ Q85601] interacts with 3 human partners:{Q96B02;P54252;Q9UNE7}

31304 Pathogen[ P14079] interacts with 1 human partners:{P54252}

31305 Pathogen[ P03383] interacts with 1 human partners:{P54252}

31306 Pathogen[ P03410] interacts with 2 human partners:{P54252;Q9UNE7}

31307 Pathogen[ P14075] interacts with 1 human partners:{P54252}

31308 Pathogen[ P0C206] interacts with 3 human partners:{P54252;Q9UNE7;Q96B02}

31309 Pathogen[ P03363] interacts with 2 human partners:{P54252;Q9UNE7}

31310 [Cluster 2847]GO:0071267+P biological\_process [name] L-methionine salvage [def] "Any process that generates L-methionine from derivatives of it, without de novo synthesis." [CHEBI

31311 Pathogen[ Q2Q067] interacts with 1 human partners:{Q96GX9}

31312 Pathogen[ P0C214] interacts with 1 human partners:{Q96GX9}

31313 Pathogen[ P03346] interacts with 1 human partners:{Q96GX9}

31314 Pathogen[ Q85601] interacts with 1 human partners:{Q96GX9}

31315 Pathogen[ P14079] interacts with 1 human partners:{Q96GX9}

31316 Pathogen[ P03383] interacts with 1 human partners:{Q96GX9}

31317 Pathogen[ P03410] interacts with 1 human partners:{Q96GX9}

31318 Pathogen[ P14075] interacts with 1 human partners:{Q96GX9}

31319 Pathogen[ P0C206] interacts with 1 human partners:{Q96GX9}

31320 Pathogen[ P03363] interacts with 1 human partners:{Q96GX9}

31321 [Cluster 2848]GO:0035729+P biological\_process [name] cellular response to hepatocyte growth factor stimulus [def] "Any process that results in a change in state or activity of a cell (in terms of movement, secretion, enzyme production, gene expression, etc.) as a result of a hepatocyte growth factor stimulus." [GOC

31322 Pathogen[ Q2Q067] interacts with 2 human partners:{O14786;P56945}

31323 Pathogen[ P0C214] interacts with 2 human partners:{O14786;P56945}

31324 Pathogen[ P03346] interacts with 2 human partners:{P56945;O14786}

31325 Pathogen[ Q85601] interacts with 2 human partners:{O14786;P56945}

31326 Pathogen[ P14079] interacts with 1 human partners:{P09327}

31327 Pathogen[ P03383] interacts with 1 human partners:{P56945}

31328 Pathogen[ P03410] interacts with 2 human partners:{O14786;P56945}

31329 Pathogen[ P14075] interacts with 1 human partners:{P56945}

31330 Pathogen[ P0C206] interacts with 2 human partners:{O14786;P56945}

31331 Pathogen[ P03363] interacts with 2 human partners:{O14786;P56945}

31332 [Cluster 2849]GO:0050710+P biological\_process [name] negative regulation of cytokine secretion [def] "Any process that stops, prevents, or reduces the frequency, rate or extent of the regulated release of cytokines from a cell or group of cells." [GOC

31333 Pathogen[ Q2Q067] interacts with 2 human partners:{Q9H4X1;O60543}

31334 Pathogen[ P0C214] interacts with 3 human partners:{Q9H4X1;O60543;P10124}

31335 Pathogen[ P03346] interacts with 2 human partners:{Q9H4X1;O60543}

31336 Pathogen[ Q85601] interacts with 2 human partners:{Q9H4X1;O60543}

31337 Pathogen[ P14079] interacts with 2 human partners:{O60543;P10124}

31338 Pathogen[ P03383] interacts with 3 human partners:{Q9H4X1;O60543;P10124}

31339 Pathogen[ P03410] interacts with 3 human partners:{Q9H4X1;P10124;O60543}

31340 Pathogen[ P14075] interacts with 3 human partners:{Q9H4X1;O60543;P10124}

31341 Pathogen[ P0C206] interacts with 3 human partners:{Q9H4X1;O60543;P10124}

31342 Pathogen[ P03363] interacts with 2 human partners:{O60543;Q9H4X1}

31343 [Cluster 2850]GO:0042832+P biological\_process [name] defense response to protozoan [def] "Reactions triggered in response to the presence of a protozoan that act to protect the cell or organism." [GOC

31344 Pathogen[ Q2Q067] interacts with 2 human partners:{P20749;Q02556}

31345 Pathogen[ P0C214] interacts with 3 human partners:{Q99698;Q02556;P20749}

31346 Pathogen[ P03346] interacts with 3 human partners:{Q99698;Q02556;P20749}

31347 Pathogen[ Q85601] interacts with 3 human partners:{Q02556;P20749;Q99698}

31348 Pathogen[ P14079] interacts with 4 human partners:{P20749;P29459;Q02556;Q99698}

31349 Pathogen[ P03383] interacts with 2 human partners:{P20749;Q02556}  
31350 Pathogen[ P03410] interacts with 4 human partners:{P20749;Q02556;Q99698;P29459}  
31351 Pathogen[ P14075] interacts with 2 human partners:{Q02556;P20749}  
31352 Pathogen[ P0C206] interacts with 3 human partners:{Q99698;Q02556;P20749}  
31353 Pathogen[ P03363] interacts with 3 human partners:{Q02556;P20749;Q99698}  
31354 [Cluster 2851]GO:0030330+P biological\_process [name] DNA damage response, signal transduction by p53 class mediator [def] "A cascade of processes induced by the cell cycle regulator phosphoprotein p53, or an equivalent protein, in response to the detection of DNA damage." [GOC  
31355 Pathogen[ Q2Q067] interacts with 6 human partners:{Q6ZW49;P20749;O43524;O60934;O43715;Q92597}  
31356 Pathogen[ P0C214] interacts with 5 human partners:{Q9UM54;O43715;Q6ZW49;Q92597;P20749}  
31357 Pathogen[ P03346] interacts with 7 human partners:{Q14694;Q92597;P20749;O60934;O43715;O43524;Q6ZW49}  
31358 Pathogen[ Q85601] interacts with 6 human partners:{O43715;Q6ZW49;Q92597;Q9UM54;P20749;O60934}  
31359 Pathogen[ P14079] interacts with 6 human partners:{O43715;Q9UM54;O60934;Q92597;Q6ZW49;P20749}  
31360 Pathogen[ P03383] interacts with 4 human partners:{P20749;Q6ZW49;Q92597;O43715}  
31361 Pathogen[ P03410] interacts with 6 human partners:{P20749;Q9UM54;O43715;Q92597;Q6ZW49;O60934}  
31362 Pathogen[ P14075] interacts with 4 human partners:{Q6ZW49;O43715;Q92597;P20749}  
31363 Pathogen[ P0C206] interacts with 6 human partners:{Q92597;Q9UM54;Q6ZW49;O60934;O43715;P20749}  
31364 Pathogen[ P03363] interacts with 5 human partners:{Q92597;O43524;P20749;Q6ZW49;O43715}  
31365 [Cluster 2852]GO:000288+P biological\_process [name] nuclear-transcribed mRNA catabolic process, deadenylation-dependent decay [def] "A major pathway of degradation of nuclear-transcribed mRNAs that proceeds through a series of ordered steps that includes poly(A) tail shortening and that can regulate mRNA stability." [GOC  
31366 Pathogen[ Q2Q067] interacts with 49 human partners:{P23588;Q8IU60;P62312;Q9Y333;Q9NQT4;Q96LI5;Q8IZH2;Q8IZD4;Q9Y2L1;Q9NPI6;A5YK K6;Q9H074;Q06265;Q96F86;Q9UK45;Q96C86;Q13868;P38919;O75175;Q9Y3B2;Q9NPD3;Q86TB9;Q142 40;Q504Q3;P26196;Q5RKV6;Q9UIV1;Q9UKZ1;Q15024;O95628;Q9UFF9;O15116;Q9C0C2;Q9NZN8;P479 74;Q92600;Q04637;P26651;P06730;O95453;P11940;P60842;Q9ULM6;Q9Y4Z0;P62310;Q07352;Q96B 26;Q9Y4Y9;Q6P2E9}  
31367 Pathogen[ P0C214] interacts with 49 human partners:{P62312;Q9NZN8;O15116;Q96C86;P26196;Q15024;Q6P2E9;O95453;P60842;Q9NPI6;O956 28;Q9Y2L1;P23588;Q9C0C2;Q504Q3;Q9Y3B2;P11940;Q5RKV6;Q9Y4Z0;Q9UK45;Q9UIV1;Q9Y4Y9;Q8IZ H2;Q07352;Q9Y333;Q9ULM6;Q9NPD3;P62310;A5YKK6;P38919;Q9H074;Q14240;Q86TB9;Q13868;Q8IU 60;P26651;Q04637;Q9UKZ1;Q9UFF9;Q92600;Q96LI5;Q06265;P06730;O75175;Q9NQT4;Q96F86;Q96B 26;P47974;Q8IZD4}  
31368 Pathogen[ P03346] interacts with 51 human partners:{Q5RKV6;Q504Q3;Q9ULM6;P06730;Q9NPI6;Q9UIV1;Q96C86;O75175;Q9H9A5;Q9UKZ1;Q9Y4 Y9;O95628;P38919;P11940;Q96B26;P60842;Q9Y3B2;A5YKK6;Q9Y333;Q8IZH2;Q15024;Q9NZN8;O954 53;Q8IU60;Q86TB9;Q9H074;Q9Y4Z0;Q6P2E9;P47974;Q9Y2L1;Q14240;Q9NQT5;O15116;Q07352;Q9C0 C2;P23588;P26196;Q04637;Q8IZD4;Q06265;Q9UFF9;P26651;Q9NQT4;P62312;Q9NPD3;Q96F86;Q96L I5;P62310;Q9UK45;Q13868;Q92600}  
31369 Pathogen[ Q85601] interacts with 49 human partners:{Q5RKV6;Q6P2E9;Q9NPD3;Q9NPI6;P06730;Q14240;Q9UKZ1;P23588;O15116;Q07352;Q138 68;Q04637;Q9UIV1;P47974;Q9NZN8;Q9UFF9;Q9UK45;Q92600;Q504Q3;Q9Y2L1;Q8IZH2;Q86TB9;P389 19;Q96C86;P26651;P11940;Q96LI5;P62310;Q9Y4Z0;Q9NQT4;Q9Y3B2;A5YKK6;O95628;O95453;P623 12;Q15024;Q8IZD4;Q9ULM6;P60842;Q9H074;Q9C0C2;Q06265;P26196;Q96F86;Q9Y333;O75175;Q96B 26;Q8IU60;Q9Y4Y9}  
31370 Pathogen[ P14079] interacts with 48 human partners:{Q9Y333;O95628;P60842;Q9Y3B2;Q8IZD4;Q92600;P06730;P47974;Q8IU60;Q15024;Q9UK 45;Q9NPI6;Q9UKZ1;Q86TB9;Q96LI5;Q9NQT4;Q13868;Q9NPD3;Q96C86;O15116;Q9H074;P62312;Q6P2 E9;Q14240;A5YKK6;O95453;P23588;Q9C0C2;Q8IZH2;P11940;Q9Y4Z0;P26196;Q5RKV6;Q96F86;O751 75;Q9UFF9;Q9Y2L1;P62310;Q9UIV1;Q9H9A5;Q96B26;Q9ULM6;Q9NZN8;Q9Y4Y9;Q504Q3;Q06265;Q073 52;Q04637}  
31371 Pathogen[ P03383] interacts with 44 human partners:{Q06265;Q9Y2L1;Q8IU60;P62312;P38919;Q9Y4Y9;Q9UFF9;Q9C0C2;P26196;P11940;Q073 52;Q9Y3B2;O95628;P23588;P06730;P62310;Q9NPD3;Q9NQT4;Q9NPI6;A5YKK6;Q9Y333;Q9UIV1;Q86T B9;Q92600;Q96B26;Q9ULM6;Q9H074;Q8IZD4;P26651;Q9Y4Z0;Q9NZN8;Q04637;Q9UK45;Q5RKV6;Q96C 86;Q9UKZ1;Q96F86;O15116;O95453;O75175;Q13868;Q96LI5;Q15024;Q6P2E9}  
31372 Pathogen[ P03410] interacts with 49 human partners:{Q96LI5;Q8IU60;Q9Y2L1;Q9NZN8;Q9Y4Y9;Q9UFF9;O95628;P11940;P62310;P06730;Q9UL M6;Q9NPI6;Q06265;Q9C0C2;Q5RKV6;Q9Y333;Q13868;P26651;Q9UIV1;Q9H9A5;Q9H074;Q8IZH2;Q8IZ D4;Q96B26;Q96F86;O95453;Q6P2E9;Q9UKZ1;Q15024;P47974;P60842;O75175;P38919;Q9NQT4;Q9Y4 Z0;Q86TB9;Q92600;Q9NPD3;O15116;P62312;A5YKK6;Q04637;Q96C86;Q504Q3;Q9UK45;Q07352;P235 88;Q14240;Q9Y3B2}  
31373 Pathogen[ P14075] interacts with 44 human partners:{O95453;Q6P2E9;Q9UK45;Q9ULM6;P23588;Q9UKZ1;Q9NPD3;Q9Y4Z0;P26196;P26651;Q926 00;O75175;Q9H074;P06730;Q9NPI6;Q96LI5;Q8IU60;Q9NZN8;Q9Y2L1;Q13868;P62312;Q9NQT4;P119 40;O95628;Q8IZD4;O15116;Q04637;Q86TB9;Q5RKV6;Q96B26;Q9Y333;Q07352;Q9UFF9;Q96C86;Q150



- 31374 Pathogen[ P0C206] interacts with 50 human partners: {Q9UUFF9;Q9H074;Q504Q3;Q86TB9;O95453;P26651;Q8IZH2;Q96C86;Q9NPD3;Q5RKV6;Q13868;Q9NZN8;Q9UIV1;Q96LI5;P26196;O75175;Q9NPI6;Q96B26;Q9H9A5;Q9Y4Y9;O95628;P06730;Q9Y4Z0;Q9Y333;Q8IZD4;Q9UK45;Q06265;Q6P2E9;Q96F86;Q15024;A5YKK6;Q9Y2L1;Q14240;Q9UKZ1;Q92600;Q9Y3B2;Q9C0C2;P23588;P62312;Q04637;Q07352;Q9NQT4;P38919;P62310;P60842;Q9ULM6;P11940;Q8IU60;P47974;O15116}
- 31375 Pathogen[ P03363] interacts with 49 human partners: {Q96B26;Q504Q3;Q9NQT4;Q9Y4Y9;Q5RKV6;Q9Y4Z0;P38919;O95628;O95453;P62312;Q15024;A5YKK6;Q9Y3B2;Q6P2E9;Q9UKZ1;P11940;Q8IZD4;Q9NZN8;Q9NPD3;P23588;O15116;Q9ULM6;Q07352;Q9Y333;Q96F86;Q14240;Q9C0C2;Q9Y2L1;P26196;Q92600;Q96LI5;Q13868;O75175;P62310;P60842;Q9NQT5;P26651;Q9UIV1;Q86TB9;Q9UK45;P47974;Q9UUFF9;Q96C86;P06730;Q9NPI6;Q9H074;Q8IZH2;Q8IU60;Q04637}
- 31376 [Cluster 2853]GO:0003130+P biological\_process [name] BMP signaling pathway involved in heart induction [def] "A series of molecular signals generated as a consequence of any member of the BMP (bone morphogenetic protein) family binding to a cell surface receptor that contributes to heart induction." [GOC]
- 31377 Pathogen[ Q2Q067] interacts with 1 human partners: {Q01860}
- 31378 Pathogen[ P0C214] interacts with 1 human partners: {Q01860}
- 31379 Pathogen[ P03346] interacts with 1 human partners: {Q01860}
- 31380 Pathogen[ Q85601] interacts with 1 human partners: {Q01860}
- 31381 Pathogen[ P14079] interacts with 1 human partners: {Q01860}
- 31382 Pathogen[ P03383] interacts with 1 human partners: {Q01860}
- 31383 Pathogen[ P03410] interacts with 1 human partners: {Q01860}
- 31384 Pathogen[ P14075] interacts with 1 human partners: {Q01860}
- 31385 Pathogen[ P0C206] interacts with 1 human partners: {Q01860}
- 31386 Pathogen[ P03363] interacts with 1 human partners: {Q01860}
- 31387 [Cluster 2854]GO:0046697+P biological\_process [name] decidualization [def] "The cellular and vascular changes occurring in the endometrium of the pregnant uterus just after the onset of blastocyst implantation. This process involves the proliferation and differentiation of the fibroblast-like endometrial stromal cells into large, polyploid decidual cells that eventually form the maternal component of the placenta." [ISBN]
- 31388 Pathogen[ Q2Q067] interacts with 1 human partners: {P11473}
- 31389 Pathogen[ P0C214] interacts with 1 human partners: {P17275}
- 31390 Pathogen[ P03346] interacts with 2 human partners: {P11473;P17275}
- 31391 Pathogen[ Q85601] interacts with 2 human partners: {P11473;P17275}
- 31392 Pathogen[ P14079] interacts with 2 human partners: {P11473;P17275}
- 31393 Pathogen[ P03383] interacts with 2 human partners: {P11473;P17275}
- 31394 Pathogen[ P03410] interacts with 2 human partners: {P11473;P17275}
- 31395 Pathogen[ P14075] interacts with 2 human partners: {P17275;P11473}
- 31396 Pathogen[ P0C206] interacts with 2 human partners: {P17275;P11473}
- 31397 Pathogen[ P03363] interacts with 2 human partners: {P17275;P11473}
- 31398 [Cluster 2855]GO:0007517+P biological\_process [name] muscle organ development [def] "The process whose specific outcome is the progression of the muscle over time, from its formation to the mature structure. The muscle is an organ consisting of a tissue made up of various elongated cells that are specialized to contract and thus to produce movement and mechanical work." [GOC]
- 31399 Pathogen[ Q2Q067] interacts with 21 human partners: {P49454;P50402;P02545;Q96D98;Q99081;P35712;P13349;Q14814;P50549;P02511;P15172;Q15561;P37802;P11532;P46939;Q9ULH7;Q02080;Q13642;Q8N6I1;P23409;Q02078}
- 31400 Pathogen[ P0C214] interacts with 21 human partners: {P51114;P02511;Q99081;P13349;Q02080;P11055;P15172;Q8N6I1;Q02078;P11532;Q15561;Q13642;Q14814;Q96D98;P50402;P46939;P50549;Q9ULH7;P02545;P49454;P35712}
- 31401 Pathogen[ P03346] interacts with 32 human partners: {P37802;Q99081;P85037;Q02078;P52954;Q14814;P13349;P50549;Q15911;Q8IYA7;P15172;P23409;Q9ULH7;P15173;P46939;P02545;Q15561;Q14863;Q9UI15;P02511;Q96D98;O75604;Q8N6I1;P98177;Q13642;P50402;P35712;Q02080;P11532;P51114;Q5BXX8;P49454}
- 31402 Pathogen[ Q85601] interacts with 23 human partners: {P37802;P49454;Q02078;P02545;P15172;P13349;P50549;Q14814;Q9ULH7;Q13642;P35712;P11532;Q02080;Q8N6I1;P23409;Q96D98;P02511;P46939;P11055;P50402;Q99081;Q15561;P51114}
- 31403 Pathogen[ P14079] interacts with 30 human partners: {P37802;Q15561;Q02078;Q06413;O75072;P11532;P13349;P23409;Q15911;P02511;Q16585;P35712;Q9Y4F9;P57679;P46939;Q92629;Q96D98;Q13642;Q16586;Q9ULH7;P50549;Q13326;Q14814;P49454;Q99081;P50402;P02545;P28360;Q8N6I1;Q02080}
- 31404 Pathogen[ P03383] interacts with 19 human partners: {P02545;P49454;Q15561;P35712;P50549;Q02080;Q8N6I1;P15172;P02511;Q14814;P46939;Q96D98;Q99081;Q9ULH7;P11532;P50402;P37802;Q13642;Q02078}
- 31405 Pathogen[ P03410] interacts with 24 human partners: {P35712;P23409;Q9ULH7;Q8N6I1;Q14814;P11532;Q16585;P50549;P49454;P37802;Q99081;Q15561;P02511;P46939;P02545;P13349;Q13642;P50402;P51114;Q02078;Q92629;Q13326;Q02080;Q96D98}
- 31406 Pathogen[ P14075] interacts with 19 human partners: {P11532;Q15561;P15172;Q02080;P50402;Q13642;P02545;Q96D98;P37802;P35712;P46939;Q8N6I1;P02511;Q02078;P50549;Q99081;P49454;Q14814;Q9ULH7}
- 31407 Pathogen[ P0C206] interacts with 28 human

partners:{P46939;P50402;Q15911;Q02078;Q8N6I1;Q13642;O75604;P23409;P49454;P11055;P504  
 61;P51114;Q02080;Q99081;P50549;P13349;P37802;P02545;Q96D98;P35712;Q14863;P15172;Q148  
 14;P11532;P02511;Q5BKX8;Q15561;Q9ULH7}  
 31408 Pathogen[ P03363] interacts with 28 human  
 partners:{Q15911;P46939;P49454;P02545;Q14863;O75604;P37802;Q02080;P13349;Q14814;P115  
 32;Q9ULH7;P51114;P50549;P50402;P35712;P23409;Q5BKX8;Q13642;Q8IYA7;Q99081;Q96D98;Q8N6  
 I1;P15172;Q15561;Q9H3U1;Q9UI15;Q02078}  
 31409 [Cluster 2856]GO:0070537+P biological\_process [name] histone H2A K63-linked  
 deubiquitination [def] "A protein deubiquitination process in which a K63-linked  
 ubiquitin chain, i.e. a polymer of ubiquitin formed by linkages between lysine residues  
 at position 63 of the ubiquitin monomers, is removed from a lysine residue in histone  
 H2A or the variant H2AX." [GOC  
 31410 Pathogen[ Q2Q067] interacts with 1 human partners:{Q96RL1}  
 31411 Pathogen[ P0C214] interacts with 1 human partners:{Q96RL1}  
 31412 Pathogen[ P03346] interacts with 1 human partners:{Q96RL1}  
 31413 Pathogen[ Q85601] interacts with 2 human partners:{Q9Y5T5;Q96RL1}  
 31414 Pathogen[ P14079] interacts with 1 human partners:{Q96RL1}  
 31415 Pathogen[ P03383] interacts with 1 human partners:{Q96RL1}  
 31416 Pathogen[ P03410] interacts with 1 human partners:{Q96RL1}  
 31417 Pathogen[ P14075] interacts with 1 human partners:{Q96RL1}  
 31418 Pathogen[ P0C206] interacts with 2 human partners:{Q9Y5T5;Q96RL1}  
 31419 Pathogen[ P03363] interacts with 1 human partners:{Q96RL1}  
 31420 [Cluster 2857]GO:0007096+P biological\_process [name] regulation of exit from mitosis  
 [def] "Any process involved in the progression from anaphase/telophase to G1 that is  
 associated with a conversion from high to low mitotic CDK activity." [GOC  
 31421 Pathogen[ Q2Q067] interacts with 6 human  
 partners:{Q8IXJ6;Q15013;Q9NQW6;Q9UJX2;O43264;P50748}  
 31422 Pathogen[ P0C214] interacts with 5 human  
 partners:{O43264;Q15013;P50748;Q9UJX2;Q8IXJ6}  
 31423 Pathogen[ P03346] interacts with 7 human  
 partners:{Q9NQW6;Q15013;O43264;Q8IXJ6;Q86SE8;Q9UJX2;P50748}  
 31424 Pathogen[ Q85601] interacts with 7 human  
 partners:{Q9UJX2;Q9NQW6;Q86SE8;O43264;Q15013;Q8IXJ6;P50748}  
 31425 Pathogen[ P14079] interacts with 5 human  
 partners:{Q9NQW6;Q15013;O43264;Q8IXJ6;P50748}  
 31426 Pathogen[ P03383] interacts with 4 human partners:{Q15013;O43264;Q9UJX2;P50748}  
 31427 Pathogen[ P03410] interacts with 6 human  
 partners:{Q8IXJ6;Q86SE8;Q15013;P50748;Q9NQW6;O43264}  
 31428 Pathogen[ P14075] interacts with 4 human partners:{Q9UJX2;Q15013;P50748;O43264}  
 31429 Pathogen[ P0C206] interacts with 7 human  
 partners:{Q9NQW6;Q9UJX2;Q86SE8;Q8IXJ6;Q15013;P50748;O43264}  
 31430 Pathogen[ P03363] interacts with 6 human  
 partners:{Q9UJX2;Q9NQW6;O43264;P50748;Q15013;Q86SE8}  
 31431 [Cluster 2858]GO:0046688+P biological\_process [name] response to copper ion [def]  
 "Any process that results in a change in state or activity of a cell or an organism (in  
 terms of movement, secretion, enzyme production, gene expression, etc.) as a result of a  
 copper ion stimulus." [GOC  
 31432 Pathogen[ Q2Q067] interacts with 3 human partners:{P04156;P05062;P19838}  
 31433 Pathogen[ P0C214] interacts with 5 human  
 partners:{P08294;P19838;Q16613;P05062;P04156}  
 31434 Pathogen[ P03346] interacts with 3 human partners:{P04156;P19838;P05062}  
 31435 Pathogen[ Q85601] interacts with 4 human partners:{Q16613;P05062;P04156;P19838}  
 31436 Pathogen[ P14079] interacts with 3 human partners:{P04156;P00395;Q16613}  
 31437 Pathogen[ P03383] interacts with 3 human partners:{P04156;Q16613;P19838}  
 31438 Pathogen[ P03410] interacts with 4 human partners:{P19838;P05062;Q16613;P04156}  
 31439 Pathogen[ P14075] interacts with 3 human partners:{P04156;Q16613;P19838}  
 31440 Pathogen[ P0C206] interacts with 4 human partners:{P05062;P04156;P19838;Q16613}  
 31441 Pathogen[ P03363] interacts with 2 human partners:{P04156;P19838}  
 31442 [Cluster 2859]GO:0006105+P biological\_process [name] succinate metabolic process  
 [def] "The chemical reactions and pathways involving succinate, also known as  
 butanedioate or ethane dicarboxylate, the dianion of succinic acid. Succinate is an  
 important intermediate in metabolism and a component of the TCA cycle." [ISBN  
 31443 Pathogen[ Q2Q067] interacts with 3 human partners:{P31040;P21912;Q9P2R7}  
 31444 Pathogen[ P0C214] interacts with 2 human partners:{Q9P2R7;P21912}  
 31445 Pathogen[ P03346] interacts with 2 human partners:{P31040;P21912}  
 31446 Pathogen[ Q85601] interacts with 3 human partners:{P21912;Q9P2R7;P31040}  
 31447 Pathogen[ P14079] interacts with 3 human partners:{Q9P2R7;P31040;P21912}  
 31448 Pathogen[ P03383] interacts with 2 human partners:{P31040;Q9P2R7}  
 31449 Pathogen[ P03410] interacts with 3 human partners:{Q9P2R7;P31040;P21912}  
 31450 Pathogen[ P14075] interacts with 2 human partners:{P31040;Q9P2R7}  
 31451 Pathogen[ P0C206] interacts with 3 human partners:{Q9P2R7;P31040;P21912}  
 31452 Pathogen[ P03363] interacts with 1 human partners:{P31040}  
 31453 [Cluster 2860]GO:0042981+P biological\_process [name] regulation of apoptotic process  
 [def] "Any process that modulates the occurrence or rate of cell death by apoptotic  
 process." [GOC  
 31454 Pathogen[ Q2Q067] interacts with 99 human

- partners:{P30153;Q99460;O75832;P48556;P02545;P40306;Q99583;P55036;P55957;Q9Y5V3;O15519;Q9BUP3;O00291;O00231;Q9UMX3;O00233;P36402;P51665;Q9UDY8;P28072;Q8WXF8;Q13077;P20749;Q12933;A5LHX3;O95999;P56945;Q13200;P25787;Q06323;Q13158;Q14790;P28065;O14818;P62324;P27797;Q9UK73;P35548;Q9UII2;Q8NE65;Q14997;O43236;O75618;P60900;Q9UL46;P61289;Q9BYX8;P12755;Q92843;P28062;Q13114;Q9UNM6;Q96LC9;P25788;Q9HD36;Q969U7;P42575;Q92530;Q92830;Q15164;P78560;P25786;O00198;O75030;Q16401;O00232;P28074;P25789;P12757;P0CG47;Q6QNY1;Q9UI32;Q9UKT9;Q9C000;Q9BYX4;P20618;P0CG48;Q9NWB7;P28070;Q9Y2G2;P28066;Q9BZR8;Q99436;Q8TAA3;P35232;P62987;O43242;Q15121;Q9UKG1;P49721;P49720;O00463;Q13490;P42224;O94763;O15392;O60936;Q16548;P62979}
- 31455 Pathogen[ P0C214] interacts with 108 human  
partners:{Q9NWB7;O00198;Q14997;P51665;P25789;P55036;Q8WXF8;Q9NPP4;Q9Y5V3;P28062;A5LHX3;Q13490;P12757;P56945;P28065;P30153;Q92934;Q96LC9;O75618;Q9HBF5;Q13158;O14818;Q9UDY8;O43242;P30405;P55957;Q15121;P42224;P48556;Q9UI32;Q9BYX4;P40306;O75030;Q13200;Q9UKG1;O00232;O15519;Q16548;Q99460;P28066;O75832;Q9BUP3;Q9UII2;P49720;P28074;P0CG48;Q9UL46;O95999;Q12933;Q9HD36;P20749;Q9UMX3;P25788;P42574;Q9UNM6;O00231;P62324;Q06323;P25786;Q9Y2G2;Q969U7;P12755;P28072;Q8TAA3;P36402;P62987;Q9UKT9;Q92843;O15392;O15164;Q99436;Q13114;P27797;P0CG47;P25787;Q92830;P78560;Q9UK73;O14727;P35998;P60900;P02545;O00233;Q6QNY1;P16220;O94763;P35232;O00463;P62979;O43236;Q92530;Q8NE65;Q15008;Q99583;P28070;Q9BYX8;P35548;O00291;P42575;O60936;P20618;P49721;Q16401;P55072;P17980;Q14790;Q9C000;Q9BZR8}
- 31456 Pathogen[ P03346] interacts with 116 human  
partners:{P25787;Q13077;O00463;P28070;Q969U7;P25789;P55036;P16220;O15392;Q99460;P12757;P36402;Q13489;Q9UL46;P35548;Q96LC9;P62987;Q9UKT9;P28072;Q9BUP3;Q13158;P25788;P28074;P49721;Q8WXF8;Q9UDY8;O94763;P42575;O14818;Q8NE65;Q99436;P55957;P0CG48;Q9BWT7;Q16401;A5LHX3;P28062;P42574;O75030;P20618;Q9BXY8;O00232;Q13114;O00291;P55072;P02545;Q92843;O15519;O95999;P30153;O75832;O00233;Q9UI32;P78560;Q6ZTQ3;Q9UII2;Q92830;P04080;Q06710;O43236;P56945;Q9NPP4;Q6QNY1;Q9NWB7;P49720;P28065;O95076;Q9HBF5;P60900;O75618;Q15121;P25786;O00231;O00198;P42224;Q6QOC0;Q07820;Q9Y5V3;P61289;Q9BZR8;P62979;P27797;P28066;Q9UNM6;Q9BYX4;Q9BUZ4;P20749;O60936;Q8TAA3;P55211;Q14790;P0CG47;Q9UKG1;Q16548;Q14997;Q13490;P35232;Q13200;P48556;O75052;P51665;Q9UMX3;Q9Y2G2;Q99583;P62324;Q06323;Q6FI F0;Q92530;Q9HD36;O14727;O43242;O15164;Q9UK73;P40306;Q8TB45;Q9C000}
- 31457 Pathogen[ Q85601] interacts with 97 human  
partners:{P28066;Q9UNM6;P30405;P60900;Q96LC9;P55036;P02545;Q13490;P25787;Q9HD36;P61289;O00463;Q13158;P25788;Q16548;Q9UDY8;Q14790;O75030;O75832;Q9NWB7;P62324;P12757;O60936;Q15121;P30153;Q9Y2G2;O15392;P27797;P0CG48;Q9UMX3;O15164;Q13114;O00198;P12755;P25789;O00233;Q9UII2;Q92830;P20618;Q9BXY8;Q9UK73;P56945;P40306;Q969U7;Q12933;P49720;P42575;P16220;Q9Y5V3;P28062;P49721;Q92843;O75618;P55957;P35548;Q9BYX4;Q8WXF8;P25786;P42224;P28072;Q13200;P36402;P28065;Q8NE65;P62979;Q99436;Q99583;P28070;Q8TAA3;Q9UL46;Q99460;O00231;P0CG47;Q9UKG1;Q13077;P35232;P48556;O94763;O00291;P28074;Q92530;P62987;O95999;A5LHX3;Q9UI32;Q9BZR8;Q06323;Q6QOC0;O14818;Q9BUP3;Q6QNY1;O15519;P20749;Q9UKT9;Q16401;P78560;O43236}
- 31458 Pathogen[ P14079] interacts with 115 human  
partners:{P28065;Q99436;Q9BXL7;O00463;P62333;O15164;P48556;O75618;P12755;O00291;Q9UKG1;P0CG48;Q9BYX4;Q9NWB7;Q6ZTQ3;P62324;Q16548;O95999;Q92830;O15519;P40306;Q13323;P55036;P28074;O00232;Q9UII2;P04080;Q9C000;Q9BXX5;O15392;P49720;O00487;P25787;O75832;P35232;A5LHX3;P62979;O00233;P35998;P61289;Q9BUZ4;P62987;Q13077;P36402;P51665;P20618;Q9BUP3;O94763;Q8TAA3;Q9UK73;Q9Y5U9;Q99583;Q9BZR8;Q9Y5V3;P54826;Q14997;Q14790;P28062;P60900;Q92934;Q15121;Q969U7;Q9BXY8;Q9HD36;Q9UNM6;Q99460;O14818;Q9HBF5;P46695;Q9BX69;O60936;P49721;Q9UMX3;Q9UI32;Q92530;P42224;Q8N9M5;Q9Y2G2;Q12933;P20749;Q96LC9;Q13158;Q06323;Q8TB45;P2191;O00198;Q8WXF8;P12757;Q15008;P30153;P43686;P42575;O43242;P25788;O00231;P28066;Q9UL46;P02545;O75030;P28360;P0CG47;Q9Y239;Q6QNY1;Q8NE65;Q16401;P17980;P28072;O43236;Q13114;P55957;Q9UKT9;P13693;Q13490;Q9NPP4;Q92843}
- 31459 Pathogen[ P03383] interacts with 80 human  
partners:{P02545;Q96LC9;P56945;P55036;P16220;P62987;Q9NWB7;P62324;P25789;P60900;Q9UK73;O43236;P40306;O75618;O00233;P20749;Q13490;P55957;Q9UMX3;O75030;P49721;Q06323;O60936;Q15121;P30153;Q14997;P20618;Q13158;Q9HBF5;O75832;P78560;O00291;Q9UII2;O94763;Q9BYX8;P35548;Q12933;Q92830;Q9Y5V3;Q16548;Q9UL46;Q9UNM6;P25786;Q99460;P28072;Q8NE65;Q13200;P36402;P35232;O95999;P28065;Q9Y2G2;P28066;Q99583;Q16401;Q8WXF8;P62979;O00231;P0CG47;Q9BUP3;O00198;Q9UKT9;P12757;P0CG48;P28074;Q92530;P49720;Q8TAA3;P61289;P28062;Q969U7;P48556;O14818;Q99436;Q13114;P28070;P25787;P27797;Q6QNY1;P25788}
- 31460 Pathogen[ P03410] interacts with 114 human  
partners:{Q92830;P20749;O15392;P28070;Q8WXF8;O94763;P55036;Q15121;P0CG48;Q9Y2G2;Q9Y239;Q6QNY1;P78560;P25786;P12755;Q15008;Q16401;Q13077;Q16548;P60900;Q14997;O00198;P42575;P36402;P35998;Q99460;Q96LC9;O00233;Q75030;O15519;Q13490;O00232;Q9BYX4;Q9HD36;Q8TAA3;Q92843;Q92934;P48556;P49721;Q9NPP4;Q9C000;O00291;Q9BXY8;A5LHX3;P62979;Q99436;P55957;Q13158;Q969U7;P40306;Q9UII2;Q06323;Q9UKT9;P35548;O60936;Q13200;P25787;O95999;O43236;Q9BXL7;Q9NWB7;Q9UMX3;O00463;Q9HBF5;P62324;P02545;P28062;P51665;Q99583;Q9BUP3;P13693;Q8NE65;Q12933;P16220;O14818;P12757;O00231;Q9UNM6;Q9UK73;P54826;P25789;P49720;Q9Y5V3;P30153;P62987;P56945;Q6ZTQ3;Q9Y5U9;O75052;P46695;Q8TB45;P28072;Q9UI32;Q9BZR8;O75618;P25788;P35232;Q9BX69;Q9BWT7;P28066;P28065;O43242;Q9UKG1;P30405;P0CG47;P17980;O75632;P20618;Q13114;Q9UL46;Q13323;P28074;P61289;P27797}
- 31461 Pathogen[ P14075] interacts with 80 human  
partners:{P78560;Q9UK73;Q9BUP3;P55036;P25788;P55957;P28066;O75030;Q06323;O75832;Q9UMX3;P62324;Q8TAA3;O43236;P60900;O00233;Q9UL46;P49720;P35548;Q969U7;Q16548;Q13200;P48556;Q16401;P28070;Q96LC9;O94763;P49721;O00231;P12757;Q92530;O00291;P35232;Q9UII2;P02545;P0CG48;P62979;O75618;Q9BXY8;P28062;Q13490;P28074;Q12933;P28065;Q6QNY1;P27797;Q9UK

T9;Q13158;Q8WXF8;P25786;O14818;P62987;Q13114;P28072;O95999;P36402;Q9NWB7;P30153;Q14997;P0CG47;P25787;P16220;Q9HBF5;P20618;Q99583;O60936;Q9UNM6;Q15121;P61289;Q9Y5V3;P40306;Q92830;Q99436;P54826;Q8NE65;O00198;P20749;P56945;Q9Y2G2;P25789}

31462 Pathogen[ P0C206] interacts with 112 human partners: {P61289;Q9C000;Q969U7;Q99436;P28062;Q9UNM6;P62324;P0CG48;Q9UKG1;O75832;Q92830;Q13077;P25787;P40306;Q9Y2G2;P28065;Q14997;Q9BUP3;O00291;Q13114;P55036;Q9BZR8;Q9BY8;Q9UDY8;P25786;P16220;P30153;Q9HD36;O75030;P25788;Q9UK73;P25787;Q15121;Q06323;Q99583;P78560;Q9UMX3;O95999;P49720;Q9Y5V3;O00232;Q6QNY1;P60900;O75618;O15164;Q13158;Q8NE65;Q12933;O43242;Q96LC9;O15519;O43236;A5LHX3;P12755;Q92934;P25789;Q16548;Q9BUZ4;O60936;Q92843;Q6ZTQ3;P20618;P12757;P35232;Q13200;Q8TAA3;P28070;Q8WXF8;Q9NWB7;P35548;Q99460;O00198;P62979;Q9BWT7;Q14790;P28066;P42574;O14818;O15392;P55072;O00463;Q13489;P0CG47;Q9UI32;P28072;P20749;P02545;P28074;P42575;Q9UKT9;P56945;Q9BXX5;Q92530;P49721;P62987;Q9BYX4;Q9Y5U9;P54826;Q9HBF5;P30405;Q9UL46;P42224;P36402;O00233;P48556;Q9UII2;Q16401;Q6Q0C0;P55957;O94763;O00231;Q13490}

31463 Pathogen[ P03363] interacts with 64 human partners: {Q13490;P55957;Q8NE65;Q9BUP3;Q8TB45;O15519;Q969U7;Q9HBF5;P02545;Q9C000;P36402;Q92530;Q96LC9;O75618;P12757;Q12933;O00463;P16220;Q15121;P35548;P61289;Q9BZR8;Q13158;Q16548;O00198;Q9NWB7;P20749;Q9HD36;O75030;P62324;Q92830;Q13077;Q9BWT7;Q13489;P27797;O94763;Q92843;Q6QNY1;P62987;Q9Y2G2;P78560;O60936;Q9UI32;Q6FIF0;P56945;O95076;Q9Y5V3;Q07820;Q13114;P35232;Q9BYX4;Q9UKT9;Q9NPP4;Q9BUZ4;P30153;Q9UK73;Q8WXF8;Q6ZTQ3;Q9UMX3;Q99583;O43236;Q9UKG1;O00291;Q9BXY8}

31464 [Cluster 2861]GO:0002726+P biological\_process [name] positive regulation of T cell cytokine production [def] "Any process that activates or increases the frequency, rate, or extent of T cell cytokine production." [GOC]

31465 Pathogen[ Q2Q067] interacts with 3 human partners: {Q9UDY8;Q12933;O43318}

31466 Pathogen[ P0C214] interacts with 3 human partners: {Q9UDY8;O43318;Q12933}

31467 Pathogen[ P03346] interacts with 3 human partners: {O75995;Q9UDY8;O43318}

31468 Pathogen[ Q85601] interacts with 3 human partners: {Q9UDY8;Q12933;O43318}

31469 Pathogen[ P14079] interacts with 1 human partners: {Q12933}

31470 Pathogen[ P03383] interacts with 2 human partners: {O43318;Q12933}

31471 Pathogen[ P03410] interacts with 2 human partners: {O43318;Q12933}

31472 Pathogen[ P14075] interacts with 2 human partners: {Q12933;O43318}

31473 Pathogen[ P0C206] interacts with 3 human partners: {Q9UDY8;O43318;Q12933}

31474 Pathogen[ P03363] interacts with 2 human partners: {Q12933;O43318}

31475 [Cluster 2862]GO:0048588+P biological\_process [name] developmental cell growth [def] "The growth of a cell, where growth contributes to the progression of the cell over time from one condition to another." [GOC]

31476 Pathogen[ Q2Q067] interacts with 2 human partners: {O95376;P55345}

31477 Pathogen[ P0C214] interacts with 2 human partners: {P55345;O95376}

31478 Pathogen[ P03346] interacts with 2 human partners: {O95376;P55345}

31479 Pathogen[ Q85601] interacts with 2 human partners: {O95376;P55345}

31480 Pathogen[ P14079] interacts with 1 human partners: {P55345}

31481 Pathogen[ P03383] interacts with 1 human partners: {O95376}

31482 Pathogen[ P03410] interacts with 1 human partners: {P55345}

31483 Pathogen[ P14075] interacts with 1 human partners: {O95376}

31484 Pathogen[ P0C206] interacts with 2 human partners: {O95376;P55345}

31485 Pathogen[ P03363] interacts with 1 human partners: {O95376}

31486 [Cluster 2863]GO:0042308+P biological\_process [name] negative regulation of protein import into nucleus [def] "Any process that stops, prevents, or reduces the frequency, rate or extent of the movement of proteins from the cytoplasm into the nucleus." [GOC]

31487 Pathogen[ Q2Q067] interacts with 1 human partners: {Q9P1T7}

31488 Pathogen[ P0C214] interacts with 1 human partners: {Q9P1T7}

31489 Pathogen[ P03346] interacts with 2 human partners: {Q9P1T7;P61925}

31490 Pathogen[ Q85601] interacts with 1 human partners: {Q9P1T7}

31491 Pathogen[ P14079] interacts with 2 human partners: {Q9P1T7;P61925}

31492 Pathogen[ P03383] interacts with 1 human partners: {Q9P1T7}

31493 Pathogen[ P03410] interacts with 2 human partners: {P61925;Q9P1T7}

31494 Pathogen[ P14075] interacts with 1 human partners: {Q9P1T7}

31495 Pathogen[ P0C206] interacts with 2 human partners: {P61925;Q9P1T7}

31496 Pathogen[ P03363] interacts with 2 human partners: {Q9P1T7;P61925}

31497 [Cluster 2864]GO:0097193+P biological\_process [name] intrinsic apoptotic signaling pathway [def] "A series of molecular signals in which an intracellular signal is conveyed to trigger the apoptotic death of a cell. The pathway starts with reception of an intracellular signal (e.g. DNA damage, growth factor withdrawal, endoplasmic reticulum stress, oxidative stress etc.), and ends when the execution phase of apoptosis is triggered. The intrinsic apoptotic signaling pathway is crucially regulated by permeabilization of the mitochondrial outer membrane (MOMP)." [GOC]

31498 Pathogen[ Q2Q067] interacts with 10 human partners: {O43290;Q93034;Q9NR28;P25063;Q13616;P38936;Q13618;Q13619;P49593;Q13617}

31499 Pathogen[ P0C214] interacts with 14 human partners: {Q13619;Q13617;Q92934;Q13015;Q13618;Q93034;P38936;P25063;Q13616;P10909;O43290;P49593;O14727;Q9NR28}

31500 Pathogen[ P03346] interacts with 13 human partners: {O43290;Q13616;Q9NR28;Q13618;P49593;Q93034;Q13015;Q13619;P25063;P38936;Q96DT0;O14727;Q13617}

31501 Pathogen[ Q85601] interacts with 10 human

31502 partners:{P49593;Q13616;Q9NR28;Q13015;O43290;P38936;Q13618;Q13619;Q93034;Q13617}  
Pathogen[ P14079] interacts with 15 human

31503 partners:{P49593;Q13618;Q96DT0;P10909;O43290;Q92934;P38936;Q93034;P25063;Q9NR28;Q13617;Q13616;P52701;Q13015;Q13619}

31504 Pathogen[ P03383] interacts with 8 human  
partners:{Q13616;O43290;Q93034;P25063;Q13618;Q13015;Q13617;Q9NR28}

31505 Pathogen[ P03410] interacts with 15 human  
partners:{Q13015;Q9NR28;Q92934;Q13618;P52701;Q96DT0;P38936;P25063;Q13616;Q13619;P49593;Q13617;O43290;Q93034;P10909}

31506 Pathogen[ P14075] interacts with 8 human  
partners:{Q93034;Q13618;Q13015;Q9NR28;Q13616;O43290;Q13617;P25063}

31507 Pathogen[ P0C206] interacts with 15 human  
partners:{Q9NR28;P52701;Q13616;O43290;Q92934;P49593;Q13619;Q13617;P25063;Q13618;Q13015;P10909;P38936;Q96DT0;Q93034}

31508 Pathogen[ P03363] interacts with 8 human  
partners:{Q13618;Q13617;Q13015;Q13619;Q13616;Q9NR28;O43290;Q93034}

31509 [Cluster 2865]GO:0070293+P biological\_process [name] renal absorption [def] "A renal system process in which water, ions, glucose and proteins are taken up from the collecting ducts, glomerulus and proximal and distal loops of the nephron." [GOC

31510 Pathogen[ Q2Q067] interacts with 1 human partners:{P68871}

31511 Pathogen[ P0C214] interacts with 1 human partners:{P68871}

31512 Pathogen[ P03346] interacts with 1 human partners:{P68871}

31513 Pathogen[ Q85601] interacts with 1 human partners:{P68871}

31514 Pathogen[ P14079] interacts with 1 human partners:{P68871}

31515 Pathogen[ P03383] interacts with 1 human partners:{P68871}

31516 Pathogen[ P03410] interacts with 1 human partners:{P68871}

31517 Pathogen[ P14075] interacts with 1 human partners:{P68871}

31518 Pathogen[ P0C206] interacts with 1 human partners:{P68871}

31519 Pathogen[ P03363] interacts with 1 human partners:{P68871}

31520 [Cluster 2866]GO:0007602+P biological\_process [name] phototransduction [def] "The sequence of reactions within a cell required to convert absorbed photons into a molecular signal." [GOC

31521 Pathogen[ Q2Q067] interacts with 1 human partners:{Q13432}

31522 Pathogen[ P0C214] interacts with 1 human partners:{Q13432}

31523 Pathogen[ P03346] interacts with 1 human partners:{Q13432}

31524 Pathogen[ Q85601] interacts with 1 human partners:{Q13432}

31525 Pathogen[ P14079] interacts with 1 human partners:{Q13432}

31526 Pathogen[ P03383] interacts with 1 human partners:{Q13432}

31527 Pathogen[ P03410] interacts with 1 human partners:{Q13432}

31528 Pathogen[ P14075] interacts with 1 human partners:{Q13432}

31529 Pathogen[ P0C206] interacts with 1 human partners:{Q13432}

31530 Pathogen[ P03363] interacts with 1 human partners:{Q13432}

31531 [Cluster 2867]GO:0006613+P biological\_process [name] cotranslational protein targeting to membrane [def] "The targeting of proteins to a membrane that occurs during translation. The transport of most secretory proteins, particularly those with more than 100 amino acids, into the endoplasmic reticulum lumen occurs in this manner, as does the import of some proteins into mitochondria." [ISBN

31532 Pathogen[ Q2Q067] interacts with 2 human partners:{P09132;Q15629}

31533 Pathogen[ P0C214] interacts with 2 human partners:{Q15629;P09132}

31534 Pathogen[ P03346] interacts with 3 human partners:{Q15629;P09132;Q15041}

31535 Pathogen[ Q85601] interacts with 2 human partners:{Q15629;P09132}

31536 Pathogen[ P14079] interacts with 5 human  
partners:{Q15629;P09132;Q15041;P43307;Q99442}

31537 Pathogen[ P03383] interacts with 2 human partners:{P09132;Q15629}

31538 Pathogen[ P03410] interacts with 5 human  
partners:{Q15041;Q99442;P43307;P09132;Q15629}

31539 Pathogen[ P14075] interacts with 2 human partners:{P09132;Q15629}

31540 Pathogen[ P0C206] interacts with 3 human partners:{P09132;Q15041;Q15629}

31541 Pathogen[ P03363] interacts with 2 human partners:{P09132;Q15041}

31542 [Cluster 2868]GO:2001020+P biological\_process [name] regulation of response to DNA damage stimulus [def] "Any process that modulates the frequency, rate or extent of response to DNA damage stimulus." [GOC

31543 Pathogen[ Q2Q067] interacts with 1 human partners:{Q9H160}

31544 Pathogen[ P0C214] interacts with 1 human partners:{Q9H160}

31545 Pathogen[ P03346] interacts with 1 human partners:{Q9H160}

31546 Pathogen[ Q85601] interacts with 1 human partners:{Q9H160}

31547 Pathogen[ P14079] interacts with 1 human partners:{Q9H160}

31548 Pathogen[ P03383] interacts with 1 human partners:{Q9H160}

31549 Pathogen[ P03410] interacts with 1 human partners:{Q9H160}

31550 Pathogen[ P14075] interacts with 1 human partners:{Q9H160}

31551 Pathogen[ P0C206] interacts with 1 human partners:{Q9H160}

31552 Pathogen[ P03363] interacts with 1 human partners:{Q9H160}

31553 [Cluster 2869]GO:0030308+P biological\_process [name] negative regulation of cell growth [def] "Any process that stops, prevents, or reduces the frequency, rate, extent or direction of cell growth." [GOC

31554 Pathogen[ Q2Q067] interacts with 39 human

- partners:{P30153;O00213;P42773;P06400;Q9NXV6;Q6IE81;Q13485;P41182;P51531;Q14140;O75489;Q92870;P02511;P08107;P67775;Q9Y2B4;P62324;Q96CJ1;Q6PGN9;P84022;P09467;P51532;Q9P0J0;P38936;Q99543;Q9UKN5;Q13642;P42771;P35232;Q16576;P46527;P06733;Q15834;Q12816;A2A288;P32929;Q9BT92;Q9UJW9;Q9H2G4}
- 31554 Pathogen[ POC214] interacts with 41 human  
partners:{O00213;Q9UKN5;Q96CJ1;O14681;P30153;P02511;P84022;P46527;Q12816;P38936;Q8IWE4;P32929;Q9BT92;Q6PGN9;Q13642;A2A288;Q15834;P09467;Q9P0J0;Q13485;Q16576;P67775;P42771;P62324;P41182;P07093;P06733;Q9H2G4;Q14140;P42773;Q6IE81;Q9NXV6;O75489;Q99543;P35232;P51531;P08107;P06400;Q92870;Q9UJW9;P51532}
- 31555 Pathogen[ P03346] interacts with 47 human  
partners:{P08107;P85037;O00213;Q96CJ1;A2A288;P55273;Q15834;Q99543;O75489;P06400;P51532;Q96FS4;Q9H2G4;P25686;P67775;P09467;P42771;Q8IWE4;Q9BT92;Q9NXV6;Q92870;Q12816;P06733;P30153;P84022;P02511;P32929;Q6PGN9;Q16576;P42773;Q13642;Q6IE81;P41182;Q8IUI8;P35232;Q13485;P38936;P62324;P51531;Q9P0J0;P46527;Q9Y2B4;P10916;Q9UKN5;Q9UJW9;Q96M02;Q14140}
- 31556 Pathogen[ Q85601] interacts with 41 human  
partners:{Q99543;O00213;Q96CJ1;Q96M02;Q6PGN9;P08107;Q9P0J0;P55273;Q15834;P06400;Q9UKN5;P62324;P30153;Q13642;P06733;Q9BT92;P51531;P51532;A2A288;Q16576;P02511;P42771;Q12816;P42773;Q6IE81;P67775;P09467;P84022;Q92870;P35232;Q9H2G4;P38936;Q14140;Q8IWE4;P41182;P07093;Q13485;Q9NXV6;Q9UJW9;P46527;P32929}
- 31557 Pathogen[ P14079] interacts with 48 human  
partners:{Q9UGV2;Q9H295;P62324;Q96CJ1;P02511;P51532;Q9NXV6;P51531;Q12816;O00213;P35232;P10916;Q96B18;P06733;Q6IE81;Q16576;P55273;Q96M02;Q99543;Q9UJW9;P54826;P41182;Q13642;Q9H2G4;P38936;P08107;Q9P0J0;Q15834;P13232;P32929;Q96QR1;Q6PGN9;O75489;Q9BT92;P46527;Q9Y2B4;Q8IUI8;P42773;P30153;A2A288;P09467;Q9UKN5;P28360;Q14140;O14681;Q92870;P42771;Q8IWE4}
- 31558 Pathogen[ P03383] interacts with 36 human  
partners:{P08107;O00213;Q13485;P62324;Q96CJ1;P02511;O75489;P09467;P30153;P67775;P06400;A2A288;Q8IWE4;Q92870;Q6PGN9;P84022;Q12816;P46527;Q9BT92;Q9UKN5;P51531;P35232;Q99543;P42771;Q9H2G4;P51532;O14681;Q14140;Q9NXV6;Q6IE81;Q9P0J0;Q13642;P06733;Q15834;Q16576;Q9UJW9}
- 31559 Pathogen[ P03410] interacts with 50 human  
partners:{P84022;Q96M02;P42771;P46527;Q96QR1;O14681;P10916;Q8IWE4;Q9Y2B4;P32929;P06733;Q96B18;P55273;P25686;A2A288;O00213;Q9NXV6;P06400;P09467;Q9UJW9;Q16576;Q9BT92;P38936;Q9UKN5;P08107;P62324;P02511;Q14140;Q8IUI8;Q13485;O75489;Q15834;P41182;P51532;Q13642;Q96CJ1;P54826;P51531;P30153;Q12816;Q6PGN9;Q9P0J0;Q99543;P35232;P67775;Q9H2G4;P42773;Q6IE81;P13232;Q92870}
- 31560 Pathogen[ P14075] interacts with 38 human  
partners:{P06733;O00213;Q16576;Q9NXV6;O14681;P62324;P51532;Q9UKN5;Q12816;P42771;Q92870;Q99543;Q9BT92;Q9H2G4;Q13642;P46527;Q9Y2B4;Q13485;P35232;Q96QR1;Q6IE81;Q15834;P51531;Q96CJ1;P06400;P02511;P67775;P30153;Q6PGN9;P08107;P84022;O75489;P09467;Q9P0J0;P54826;Q9UJW9;A2A288;Q14140}
- 31561 Pathogen[ POC206] interacts with 46 human  
partners:{P06733;P84022;P62324;Q96M02;P51532;Q9BT92;Q13642;P30153;P51531;P41182;P09467;Q9NXV6;A2A288;Q8IWE4;P42771;Q14140;Q6PGN9;P67775;Q96B18;P42773;O00213;O14681;Q9UKN5;P35232;Q96CJ1;Q99543;P32929;Q12816;Q15834;P55273;P46527;Q92870;P38936;P08107;Q9H2G4;Q13485;Q9P0J0;Q6IE81;O75489;Q16576;Q9Y2B4;P02511;P54826;Q9UK53;Q9UJW9;P06400}
- 31562 Pathogen[ P03363] interacts with 36 human  
partners:{Q6IE81;Q15834;A2A288;Q99543;Q9UKN5;O00213;P51532;P06733;Q96M02;P06400;Q9UGV2;Q14140;Q6PGN9;Q16576;P08107;Q9P0J0;P62324;Q9H2G4;Q92870;P84022;Q9BT92;Q13485;P35232;Q13642;Q96CJ1;P42773;P51531;P30153;Q9Y2B4;P67775;Q9NXV6;Q9UJW9;P42771;Q96FS4;P10916;Q12816}
- 31563 [Cluster 2870]GO:0048147+P biological\_process [name] negative regulation of fibroblast proliferation [def] "Any process that stops, prevents, or reduces the frequency, rate or extent of multiplication or reproduction of fibroblast cells." [GOC
- 31564 Pathogen[ Q2Q067] interacts with 9 human  
partners:{P50402;P01106;Q6P1J9;O60356;Q13794;P12755;Q53GL7;Q71SY5;Q9UI36}
- 31565 Pathogen[ POC214] interacts with 10 human  
partners:{P02794;Q71SY5;Q13794;Q53GL7;P50402;Q6P1J9;O60356;P12755;Q9UI36;P01106}
- 31566 Pathogen[ P03346] interacts with 10 human  
partners:{Q71SY5;Q14149;Q53GL7;P02794;P01106;P50402;O60356;Q9UI36;Q6P1J9;Q13794}
- 31567 Pathogen[ Q85601] interacts with 11 human  
partners:{P01106;Q6P1J9;Q14149;P12755;Q9UI36;Q71SY5;P50402;O60356;P02794;Q53GL7;Q13794}
- 31568 Pathogen[ P14079] interacts with 11 human  
partners:{P12755;Q14149;Q13794;Q9UI36;P01106;P02794;Q71SY5;Q53GL7;O60356;P50402;Q6P1J9}
- 31569 Pathogen[ P03383] interacts with 9 human  
partners:{P02794;Q6P1J9;P01106;Q53GL7;P50402;Q71SY5;Q13794;Q9UI36;O60356}
- 31570 Pathogen[ P03410] interacts with 11 human  
partners:{Q9UI36;P02794;P12755;P01106;Q53GL7;Q14149;Q13794;O60356;Q6P1J9;P50402;Q71SY5}
- 31571 Pathogen[ P14075] interacts with 9 human  
partners:{P50402;P01106;Q6P1J9;P02794;O60356;Q13794;Q9UI36;Q71SY5;Q53GL7}
- 31572 Pathogen[ POC206] interacts with 11 human  
partners:{P50402;P02794;Q53GL7;P12755;O60356;Q14149;Q71SY5;P01106;Q9UI36;Q6P1J9;Q137

94}

31573 Pathogen[ P03363] interacts with 9 human partners: {O60356;Q71SY5;Q13794;P01106;Q9UI36;Q6P1J9;P50402;P02794;Q53GL7}

31574 [Cluster 2871]GO:0032793+P biological\_process [name] positive regulation of CREB transcription factor activity [def] "Any process that activates or increases the frequency, rate or extent of activity of the transcription factor CREB." [GOC

31575 Pathogen[ Q2Q067] interacts with 4 human partners: {Q6UUUV9;O75582;Q6UUUV7;Q53ET0}

31576 Pathogen[ P0C214] interacts with 4 human partners: {Q6UUUV7;Q53ET0;Q6UUUV9;O75582}

31577 Pathogen[ P03346] interacts with 4 human partners: {Q53ET0;Q6UUUV9;O75582;Q6UUUV7}

31578 Pathogen[ Q85601] interacts with 4 human partners: {Q53ET0;Q6UUUV9;O75582;Q6UUUV7}

31579 Pathogen[ P14079] interacts with 1 human partners: {O75582}

31580 Pathogen[ P03383] interacts with 4 human partners: {O75582;Q6UUUV9;Q6UUUV7;Q53ET0}

31581 Pathogen[ P03410] interacts with 4 human partners: {Q6UUUV7;O75582;Q6UUUV9;Q53ET0}

31582 Pathogen[ P14075] interacts with 4 human partners: {O75582;Q53ET0;Q6UUUV9;Q6UUUV7}

31583 Pathogen[ P0C206] interacts with 4 human partners: {O75582;Q6UUUV9;Q53ET0;Q6UUUV7}

31584 Pathogen[ P03363] interacts with 3 human partners: {Q53ET0;Q6UUUV9;Q6UUUV7}

31585 [Cluster 2872]GO:0014070+P biological\_process [name] response to organic cyclic compound [def] "Any process that results in a change in state or activity of a cell or an organism (in terms of movement, secretion, enzyme production, gene expression, etc.) as a result of an organic cyclic compound stimulus." [CHEBI

31586 Pathogen[ Q2Q067] interacts with 22 human partners: {P01100;P24385;P40763;Q04206;P30279;P05062;Q99933;P49356;Q6P1X5;P09972;P24864;P29474;P35869;P38936;Q9HBM6;P16455;P06132;P49721;P15407;P08397;P42772;P78543}

31587 Pathogen[ P0C214] interacts with 27 human partners: {P06132;P29474;P35869;P78543;P15407;P01100;P17275;Q04206;Q16613;P24385;P38936;P05062;P08397;Q99933;Q9HBM6;P09104;P49356;Q6P1X5;P09972;P16455;P05412;P24864;P30279;P40763;P42772;P49721;P18846}

31588 Pathogen[ P03346] interacts with 24 human partners: {P05412;P09972;P24385;P30279;P29474;P48443;P49721;P17275;P42772;Q04206;P24864;P49356;Q9HBM6;Q6P1X5;P06132;P15407;P05062;P38936;P35869;P40763;P78543;P01100;Q99933;P18846}

31589 Pathogen[ Q85601] interacts with 26 human partners: {P24385;P16455;P15407;P40763;P42772;Q16613;P18846;P05062;P01100;Q9HBM6;Q99933;P78543;Q04206;P09972;P49721;P30279;Q6P1X5;P05412;P06132;P49356;P29474;P08397;P35869;P38936;P17275;P24864}

31590 Pathogen[ P14079] interacts with 24 human partners: {P04083;P78543;P35869;P24864;P20396;P09972;P16455;P48443;Q16613;Q6P1X5;P06132;P38936;Q99933;P08397;P17275;P49356;P49721;Q99541;P15407;Q16625;P05412;P01100;P03886;Q9HBM6}

31591 Pathogen[ P03383] interacts with 21 human partners: {P29474;P09972;Q9HBM6;P49721;Q16613;P24385;P18846;P30279;P78543;P06132;P42772;P15407;Q6P1X5;Q99933;P01100;Q04206;P08397;P24864;P17275;P35869;P05412}

31592 Pathogen[ P03410] interacts with 28 human partners: {Q99933;Q04206;P08397;P30279;P42772;P49356;P49721;P06132;P05062;P01100;P18846;P24385;P29474;P09972;P03886;Q9HBM6;P38936;P17275;Q16613;Q6P1X5;P16455;P05412;Q16625;P78543;P15407;P24864;P40763;P20396}

31593 Pathogen[ P14075] interacts with 21 human partners: {P29474;Q99933;P35869;Q04206;P06132;P05412;P17275;P30279;Q6P1X5;Q16613;P08397;P49721;P78543;P01100;P42772;P09972;P24385;P15407;P18846;P24864;Q9HBM6}

31594 Pathogen[ P0C206] interacts with 28 human partners: {P05062;P15407;P17275;P35869;Q99933;P30279;P05412;P42772;P18846;P01100;Q04206;P38936;P40763;P29474;Q6P1X5;P09972;Q9HBM6;P49721;P08397;P20396;Q16613;P49356;P24864;P16455;P06132;P48443;P78543;P24385}

31595 Pathogen[ P03363] interacts with 18 human partners: {P29474;Q04206;P24864;P30279;P09972;P06132;P78543;P35869;P17275;P42772;P18846;P15407;P24385;Q9HBM6;P05412;Q6P1X5;Q99933;P01100}

31596 [Cluster 2873]GO:0006955+P biological\_process [name] immune response [def] "Any immune system process that functions in the calibrated response of an organism to a potential internal or invasive threat." [GO\_REF

31597 Pathogen[ Q2Q067] interacts with 30 human partners: {Q12905;Q9Y6K5;Q99081;P14921;P36402;Q13829;Q06265;P37275;Q13123;O15117;P17676;P22670;P80217;Q95163;Q07021;P84022;Q14862;Q9Y6K9;O43541;O43918;Q13094;Q02556;P50453;P17861;P42768;O15111;Q16649;Q9Y255;P53567;P33076}

31598 Pathogen[ P0C214] interacts with 33 human partners: {P80217;P53567;P02794;O15117;O15111;Q9Y6K9;P14921;Q14164;Q13829;Q9Y255;Q99081;P33076;Q9Y6K5;P84022;P48594;P29728;P37275;Q12905;Q13094;P17676;Q9Y3Z3;Q02556;P17861;O43541;O43918;P36402;P50453;P22670;Q14862;P42768;Q06265;Q13123;Q95163}

31599 Pathogen[ P03346] interacts with 39 human partners: {Q99081;Q9Y3Z3;Q9Y6K9;O15111;Q12905;O43918;P17676;P36402;P42768;Q8IYW1;P17861;P33076;Q95163;Q07021;P02794;Q13829;Q9Y255;P22670;P14921;P84022;Q8IYM9;O43541;Q15646;Q02556;Q13094;O75569;Q02086;P37275;Q16649;Q13123;P50453;P80217;P53567;Q06265;O15117;Q8TAU0;Q14862;Q14164;Q9Y6K5}

31600 Pathogen[ Q85601] interacts with 32 human partners: {P17676;P33076;Q02556;P14921;O43541;P53567;O15111;P80217;Q14164;Q13123;Q9Y6K9;O15117;Q9Y6K5;Q16649;P42768;Q8IYM9;O14862;P36402;P50453;P22670;Q06265;P84022;P37275;Q12905;Q99081;Q13829;Q95163;P02794;Q07021;P17861;O43918;Q13094}

31601 Pathogen[ P14079] interacts with 42 human partners: {P33076;P29728;Q16649;Q9Y255;P09912;P53567;P80217;Q13094;Q14164;O95163;O75569;P60022;O00178;P36402;P02686;Q12905;O15117;O15263;Q9Y3Z3;Q9Y6K9;Q9Y6K5;P22670;P04141;P13232;P81172;P50453;P02794;O43541;O14862;Q8I WV1;O43918;P29459;O43561;Q02556;Q13829;Q99081;Q07021;Q9UBP8;Q06265;P37275;P42768;Q13123}

31602 Pathogen[ P03383] interacts with 29 human partners: {P02794;Q06265;O14862;O95163;P33076;Q9Y6K9;P14921;O15111;P17861;P22670;P37275;O15117;P84022;P80217;Q13123;P17676;Q99081;O43541;P42768;Q13094;Q12905;Q9Y6K5;P36402;P50453;O43918;Q07021;Q02556;P53567;Q13829}

31603 Pathogen[ P03410] interacts with 48 human partners: {P84022;P22670;P04141;Q13094;Q13829;P02794;P17861;P37275;P12018;P29728;P17676;O15111;P36402;Q9Y255;Q06265;P53567;O43561;P02686;O14862;Q8I WV1;O43918;Q07021;P09912;P42768;P60022;O75569;Q02556;Q99081;Q9UBP8;Q16649;O95163;Q12905;P81172;O43541;P50453;P80217;O15117;Q9Y6K5;Q13123;Q9Y6K9;Q9Y3Z3;O00178;P33076;Q9NRJ3;P29459;O15263;P14921;P13232}

31604 Pathogen[ P14075] interacts with 31 human partners: {O15111;Q8I WV1;Q07021;P22670;P17861;P53567;O43541;Q12905;P42768;O43918;P80217;P33076;O15117;Q9Y255;Q02556;O14862;P02794;Q9Y6K5;Q13123;P14921;P36402;P50453;Q13094;O95163;Q9Y6K9;P84022;P17676;P37275;Q13829;Q99081;Q06265}

31605 Pathogen[ P0C206] interacts with 36 human partners: {P84022;P53567;O43541;Q13829;Q16649;Q12905;Q9Y6K9;P14921;O14862;P02794;Q07021;Q9Y6K5;Q8I WV1;P29728;P50453;P33076;P80217;Q13123;P17861;O95163;O43918;Q02556;Q14164;Q99081;P17676;Q9Y255;Q06265;O15111;P22670;P37275;Q8I YM9;Q13094;P42768;Q8TAU0;O15117;P36402}

31606 Pathogen[ P03363] interacts with 32 human partners: {Q9Y6K5;Q16649;P17676;P53567;P36402;Q02556;P37275;O15111;P42768;Q9Y6K9;P80217;P14921;P50453;Q07021;O15117;Q13123;O43541;P17861;P84022;O95163;Q12905;Q9Y3Z3;Q13829;P33076;O14862;O43918;Q99081;Q8TAU0;P02794;Q13094;P22670;O75569}

31607 [Cluster 2874]GO:0021537+P biological\_process [name] telencephalon development [def] "The process whose specific outcome is the progression of the telencephalon over time, from its formation to the mature structure. The telencephalon is the paired anteriolateral division of the prosencephalon plus the lamina terminalis from which the olfactory lobes, cerebral cortex, and subcortical nuclei are derived." [GO\_REF

31608 Pathogen[ Q2Q067] interacts with 1 human partners: {Q92830}

31609 Pathogen[ P0C214] interacts with 2 human partners: {Q92830;O60925}

31610 Pathogen[ P03346] interacts with 4 human partners: {Q68CZ1;Q92830;O60925;O95343}

31611 Pathogen[ Q85601] interacts with 1 human partners: {Q92830}

31612 Pathogen[ P14079] interacts with 3 human partners: {O60925;Q92830;Q68CZ1}

31613 Pathogen[ P03383] interacts with 2 human partners: {Q92830;O60925}

31614 Pathogen[ P03410] interacts with 3 human partners: {Q92830;O60925;Q68CZ1}

31615 Pathogen[ P14075] interacts with 2 human partners: {O60925;Q92830}

31616 Pathogen[ P0C206] interacts with 2 human partners: {Q92830;O60925}

31617 Pathogen[ P03363] interacts with 3 human partners: {O60925;Q92830;O95343}

31618 [Cluster 2875]GO:0043353+P biological\_process [name] enucleate erythrocyte differentiation [def] "The process in which a myeloid precursor cell acquires specialized features of an erythrocyte without a nucleus. An example of this process is found in *Mus musculus*." [GOC

31619 Pathogen[ Q2Q067] interacts with 4 human partners: {P06400;Q02447;P08047;P53567}

31620 Pathogen[ P0C214] interacts with 4 human partners: {P53567;Q02447;P06400;P08047}

31621 Pathogen[ P03346] interacts with 4 human partners: {P06400;P08047;P53567;Q02447}

31622 Pathogen[ Q85601] interacts with 4 human partners: {P06400;P53567;P08047;Q02447}

31623 Pathogen[ P14079] interacts with 3 human partners: {P53567;Q02447;P02144}

31624 Pathogen[ P03383] interacts with 4 human partners: {P08047;P06400;Q02447;P53567}

31625 Pathogen[ P03410] interacts with 5 human partners: {P02144;Q02447;P53567;P06400;P08047}

31626 Pathogen[ P14075] interacts with 4 human partners: {P53567;P06400;Q02447;P08047}

31627 Pathogen[ P0C206] interacts with 4 human partners: {P53567;P08047;Q02447;P06400}

31628 Pathogen[ P03363] interacts with 4 human partners: {P53567;Q02447;P06400;P08047}

31629 [Cluster 2876]GO:0017015+P biological\_process [name] regulation of transforming growth factor beta receptor signaling pathway [def] "Any process that modulates the frequency, rate or extent of activity of any TGF-beta receptor signaling pathway." [GOC

31630 Pathogen[ Q2Q067] interacts with 10 human partners: {Q9UPN9;Q9HAU4;O00512;Q13485;Q9H7S9;P84022;O15105;Q15796;Q8N6I1;Q16612}

31631 Pathogen[ P0C214] interacts with 10 human partners: {Q9HAU4;P84022;Q8N6I1;Q13485;O15105;Q15796;O00512;Q16612;Q9UPN9;Q9H7S9}

31632 Pathogen[ P03346] interacts with 10 human partners: {Q9UPN9;Q9HAU4;Q15796;O15105;P84022;O00512;Q9H7S9;Q8N6I1;Q13485;Q16612}

31633 Pathogen[ Q85601] interacts with 10 human partners: {Q16612;Q9UPN9;Q9HAU4;Q9H7S9;Q8N6I1;O00512;P84022;O15105;Q13485;Q15796}

31634 Pathogen[ P14079] interacts with 7 human partners: {Q9HAU4;O00512;Q9UPN9;Q9H7S9;O15105;Q16612;Q8N6I1}

31635 Pathogen[ P03383] interacts with 9 human partners: {Q16612;Q13485;Q8N6I1;Q9UPN9;O15105;P84022;Q9H7S9;O00512;Q15796}

31636 Pathogen[ P03410] interacts with 9 human partners: {P84022;O00512;Q8N6I1;Q16612;Q13485;O15105;Q9H7S9;Q15796;Q9UPN9}

31637 Pathogen[ P14075] interacts with 8 human



31638 Pathogen[ POC206] interacts with 10 human partners:{O00512;Q15796;Q13485;Q9UPN9;Q8N6I1;O15105;P84022;Q9H7S9}

31639 Pathogen[ POC3363] interacts with 10 human partners:{P84022;O00512;Q9UPN9;Q8N6I1;Q9HAU4;Q15796;Q9H7S9;O15105;Q16612;Q13485}

31640 [Cluster 2877]GO:0003218+P biological\_process [name] cardiac left ventricle formation [def] "The developmental process pertaining to the initial formation of a left cardiac ventricle from unspecified parts." [GOC

31641 Pathogen[ Q2Q067] interacts with 1 human partners:{O96004}

31642 Pathogen[ POC214] interacts with 1 human partners:{O96004}

31643 Pathogen[ POC3346] interacts with 2 human partners:{O96004;Q99593}

31644 Pathogen[ Q85601] interacts with 1 human partners:{O96004}

31645 Pathogen[ P14079] interacts with 1 human partners:{O96004}

31646 Pathogen[ POC3383] interacts with 1 human partners:{O96004}

31647 Pathogen[ POC3410] interacts with 1 human partners:{O96004}

31648 Pathogen[ P14075] interacts with 1 human partners:{O96004}

31649 Pathogen[ POC206] interacts with 1 human partners:{O96004}

31650 Pathogen[ POC3363] interacts with 1 human partners:{O96004}

31651 [Cluster 2878]GO:0030900+P biological\_process [name] forebrain development [def] "The process whose specific outcome is the progression of the forebrain over time, from its formation to the mature structure. The forebrain is the anterior of the three primary divisions of the developing chordate brain or the corresponding part of the adult brain (in vertebrates, includes especially the cerebral hemispheres, the thalamus, and the hypothalamus and especially in higher vertebrates is the main control center for sensory and associative information processing, visceral functions, and voluntary motor functions)." [http

31652 Pathogen[ Q2Q067] interacts with 12 human partners:{Q33E94;Q03052;Q01094;P10589;Q9NXR1;O15350;Q8NHM5;Q15468;P46100;Q9HBD4;Q04743;Q03112}

31653 Pathogen[ POC214] interacts with 12 human partners:{Q03052;P32243;O15350;Q03112;Q9HBD4;Q01094;P46100;Q15468;O14727;Q9NXR1;Q33E94;Q8NHM5}

31654 Pathogen[ POC3346] interacts with 22 human partners:{Q9HBD4;P46100;Q03052;P41225;Q04743;Q9NXR1;Q9BYW2;Q96QS3;O15350;Q01094;Q33E94;Q03112;P32243;Q8NHM5;Q9Y6R0;Q15468;P32243;P56915;O14727;Q9UIW0;Q9H2A3;P10589}

31655 Pathogen[ Q85601] interacts with 11 human partners:{Q03052;Q33E94;Q03112;Q8NHM5;P32243;Q9HBD4;O15350;Q9NXR1;P46100;Q01094;P10589}

31656 Pathogen[ P14079] interacts with 12 human partners:{Q8NHM5;O15350;P46100;Q15468;Q8WU20;P32243;Q04743;Q03052;P10589;Q9NXR1;P28360;Q01094}

31657 Pathogen[ POC3383] interacts with 8 human partners:{Q9HBD4;P32243;Q01094;Q15468;Q33E94;P46100;Q03112;O15350}

31658 Pathogen[ POC3410] interacts with 13 human partners:{Q03112;Q9NXR1;Q15468;Q03052;P46100;P32243;Q01094;P10589;O15350;Q8WU20;Q9HBD4;Q33E94;Q04743}

31659 Pathogen[ P14075] interacts with 8 human partners:{Q9HBD4;Q33E94;P46100;O15350;Q01094;Q03112;Q15468;P32243}

31660 Pathogen[ POC206] interacts with 16 human partners:{Q15468;Q04743;P46100;P10589;Q03112;P32243;Q8WU20;Q01094;Q03052;Q8NHM5;Q33E94;Q13422;O15350;Q9HBD4;Q9NXR1;Q9H2A3}

31661 Pathogen[ POC3363] interacts with 17 human partners:{Q9UIW0;Q15468;Q03112;P32243;P46100;P56915;P32242;Q01094;Q9HBD4;Q33E94;Q96QS3;Q9NXR1;Q9Y6R0;P10589;Q03052;Q04743;Q9H2A3}

31662 [Cluster 2879]GO:0007159+P biological\_process [name] leukocyte cell-cell adhesion [def] "The attachment of a leukocyte to another cell via adhesion molecules." [GOC

31663 Pathogen[ Q2Q067] interacts with 1 human partners:{Q15025}

31664 Pathogen[ POC214] interacts with 1 human partners:{Q15025}

31665 Pathogen[ POC3346] interacts with 2 human partners:{P26038;Q15025}

31666 Pathogen[ Q85601] interacts with 1 human partners:{Q15025}

31667 Pathogen[ P14079] interacts with 2 human partners:{P26038;Q15025}

31668 Pathogen[ POC3383] interacts with 1 human partners:{Q15025}

31669 Pathogen[ POC3410] interacts with 2 human partners:{Q15025;P26038}

31670 Pathogen[ P14075] interacts with 1 human partners:{Q15025}

31671 Pathogen[ POC206] interacts with 1 human partners:{Q15025}

31672 Pathogen[ POC3363] interacts with 1 human partners:{Q15025}

31673 [Cluster 2880]GO:0019509+P biological\_process [name] L-methionine salvage from methylthioadenosine [def] "The generation of L-methionine (2-amino-4-(methylthio)butanoic acid) from methylthioadenosine." [GOC

31674 Pathogen[ Q2Q067] interacts with 6 human partners:{P49770;Q96GX9;Q9BV57;Q9UI10;Q14232;Q9BV20}

31675 Pathogen[ POC214] interacts with 8 human partners:{Q9UI10;P49770;Q9BV57;Q96GX9;Q14232;Q9UHY7;Q13126;Q9BV20}

31676 Pathogen[ POC3346] interacts with 7 human partners:{Q9BV20;Q9BV57;Q14232;P49770;Q9UHY7;Q96GX9;Q9UI10}

31677 Pathogen[ Q85601] interacts with 7 human

31678 partners:{P49770;Q96GX9;Q9BV57;Q9UHY7;Q9BV20;Q14232;Q9UI10}  
Pathogen[ P14079] interacts with 5 human

31679 partners:{Q9UI10;Q9BV20;Q96GX9;Q14232;Q9BV57}  
Pathogen[ P03383] interacts with 6 human

31680 partners:{Q9UI10;Q9BV57;Q96GX9;P49770;Q9BV20;Q14232}  
Pathogen[ P03410] interacts with 6 human

31681 partners:{Q14232;P49770;Q9BV20;Q96GX9;Q9BV57;Q9UI10}  
Pathogen[ P14075] interacts with 6 human

31682 partners:{Q96GX9;Q9BV57;Q9BV20;Q9UI10;Q14232;P49770}  
Pathogen[ P0C206] interacts with 7 human

31683 partners:{Q9BV20;Q14232;P49770;Q9UHY7;Q9UI10;Q9BV57;Q96GX9}  
Pathogen[ P03363] interacts with 5 human

31684 partners:{Q9UI10;Q9BV57;P49770;Q9BV20;Q96GX9}  
[Cluster 2881]GO:0019086+P biological\_process [name] late viral mRNA transcription  
[def] "The last group of viral genes to be transcribed during the viral life cycle\_ genes consist mainly of those encoding structural proteins." [ISBN

31685 Pathogen[ Q2Q067] interacts with 2 human partners:{P22415;Q15853}  
31686 Pathogen[ P0C214] interacts with 2 human partners:{Q15853;P22415}  
31687 Pathogen[ P03346] interacts with 2 human partners:{Q15853;P22415}  
31688 Pathogen[ Q85601] interacts with 2 human partners:{Q15853;P22415}  
31689 Pathogen[ P14079] interacts with 2 human partners:{Q15853;P22415}  
31690 Pathogen[ P03383] interacts with 2 human partners:{Q15853;P22415}  
31691 Pathogen[ P03410] interacts with 2 human partners:{P22415;Q15853}  
31692 Pathogen[ P14075] interacts with 2 human partners:{Q15853;P22415}  
31693 Pathogen[ P0C206] interacts with 2 human partners:{Q15853;P22415}  
31694 Pathogen[ P03363] interacts with 2 human partners:{Q15853;P22415}

31695 [Cluster 2882]GO:0048662+P biological\_process [name] negative regulation of smooth muscle cell proliferation [def] "Any process that stops, prevents or reduces the rate or extent of smooth muscle cell proliferation." [CL

31696 Pathogen[ Q2Q067] interacts with 5 human  
partners:{Q9NSA3;P29474;Q9UN36;P27986;Q15637}

31697 Pathogen[ P0C214] interacts with 5 human  
partners:{P29474;Q15637;Q9NSA3;P27986;Q9UN36}

31698 Pathogen[ P03346] interacts with 5 human  
partners:{P29474;Q15637;Q9NSA3;Q9UN36;P27986}

31699 Pathogen[ Q85601] interacts with 5 human  
partners:{Q15637;Q9UN36;P27986;P29474;Q9NSA3}

31700 Pathogen[ P14079] interacts with 3 human partners:{Q15637;P29459;Q9UN36}

31701 Pathogen[ P03383] interacts with 5 human  
partners:{P27986;P29474;Q9UN36;Q9NSA3;Q15637}

31702 Pathogen[ P03410] interacts with 6 human  
partners:{P27986;Q15637;Q9NSA3;P29474;Q9UN36;P29459}

31703 Pathogen[ P14075] interacts with 5 human  
partners:{P29474;Q9NSA3;Q15637;P27986;Q9UN36}

31704 Pathogen[ P0C206] interacts with 5 human  
partners:{Q9NSA3;Q15637;P27986;P29474;Q9UN36}

31705 Pathogen[ P03363] interacts with 5 human  
partners:{P29474;Q9UN36;Q9NSA3;Q15637;P27986}

31706 [Cluster 2883]GO:0030111+P biological\_process [name] regulation of Wnt receptor signaling pathway [def] "Any process that modulates the frequency, rate or extent of the activity of the Wnt receptor mediated signal transduction pathway." [GOC

31707 Pathogen[ Q2Q067] interacts with 8 human  
partners:{P30153;P35680;P67775;O14907;Q99750;P20823;Q9HC62;Q9P1T7}

31708 Pathogen[ P0C214] interacts with 6 human  
partners:{P30153;O14907;Q99750;P67775;Q9P1T7;Q9HC62}

31709 Pathogen[ P03346] interacts with 9 human  
partners:{P67775;P20823;P30153;Q9HCS4;Q99750;O14907;P35680;Q9HC62;Q9P1T7}

31710 Pathogen[ Q85601] interacts with 9 human  
partners:{Q9HC62;P30153;Q99750;O14907;P35680;P67775;Q9P1T7;Q9HCS4;P20823}

31711 Pathogen[ P14079] interacts with 7 human  
partners:{P35680;Q96Q45;O14907;Q9HC62;Q9P1T7;P30153;Q99750}

31712 Pathogen[ P03383] interacts with 6 human  
partners:{P30153;P67775;Q99750;Q9HC62;O14907;Q9P1T7}

31713 Pathogen[ P03410] interacts with 9 human  
partners:{Q96Q45;Q9HC62;Q9P1T7;O14907;P30153;Q9HCS4;P35680;P67775;Q99750}

31714 Pathogen[ P14075] interacts with 6 human  
partners:{Q9P1T7;Q9HC62;O14907;Q99750;P67775;P30153}

31715 Pathogen[ P0C206] interacts with 9 human  
partners:{P30153;Q9HC62;Q9HCS4;P67775;O14907;P35680;P20823;Q99750;Q9P1T7}

31716 Pathogen[ P03363] interacts with 7 human  
partners:{O14907;Q99750;Q9HCS4;Q9P1T7;Q9HC62;P30153;P67775}

31717 [Cluster 2884]GO:0007015+P biological\_process [name] actin filament organization [def] "A process that is carried out at the cellular level which results in the assembly, arrangement of constituent parts, or disassembly of cytoskeletal structures comprising actin filaments. Includes processes that control the spatial distribution of actin filaments, such as organizing filaments into meshworks, bundles, or other

structures, as by cross-linking." [GOC  
31718 Pathogen[ Q2Q067] interacts with 7 human  
partners:{O43639;P56945;P11831;P23528;Q12959;P16333;P02489}  
31719 Pathogen[ P0C214] interacts with 9 human  
partners:{Q9UI08;P56945;P02489;P11831;O43639;O14613;Q12959;P16333;Q5VZK9}  
31720 Pathogen[ P03346] interacts with 13 human  
partners:{P02549;O43639;P11831;P02489;Q9NQY0;O14613;Q9UI08;Q9Y664;P16333;P56945;P235  
28;Q5VZK9;Q12959}  
31721 Pathogen[ Q85601] interacts with 9 human  
partners:{P02489;P11831;P16333;O43639;P56945;Q5VZK9;O14613;Q12959;P23528}  
31722 Pathogen[ P14079] interacts with 8 human  
partners:{O14613;Q9Y664;P02489;P23528;P16333;O43639;P02549;Q9UI08}  
31723 Pathogen[ P03383] interacts with 4 human partners:{P56945;P11831;P23528;P16333}  
31724 Pathogen[ P03410] interacts with 13 human  
partners:{P11831;Q9UI08;Q12959;O43639;P16333;P02549;Q9NQY0;P02489;O14613;P56945;Q5VZ  
K9;P23528;Q9Y664}  
31725 Pathogen[ P14075] interacts with 5 human  
partners:{P11831;P23528;P16333;O14613;P56945}  
31726 Pathogen[ P0C206] interacts with 11 human  
partners:{O14613;Q9UI08;Q5VZK9;Q9NQY0;P16333;P11831;P56945;P02489;P23528;O43639;Q129  
59}  
31727 Pathogen[ P03363] interacts with 13 human  
partners:{Q12959;P02549;Q5VZK9;O43639;P11831;Q9UI08;P16333;O14613;P23528;P56945;Q9NQ  
Y0;P02489;Q9Y664}  
31728 [Cluster 2885]GO:0034454+P biological\_process [name] microtubule anchoring at  
centrosome [def] "Any process in which a microtubule is maintained in a specific  
location in a cell by attachment to a centrosome." [GOC  
31729 Pathogen[ Q2Q067] interacts with 3 human partners:{Q8N4C6;Q86VS8;Q15154}  
31730 Pathogen[ P0C214] interacts with 3 human partners:{Q15154;Q86VS8;Q8N4C6}  
31731 Pathogen[ P03346] interacts with 3 human partners:{Q86VS8;Q15154;Q8N4C6}  
31732 Pathogen[ Q85601] interacts with 3 human partners:{Q15154;Q86VS8;Q8N4C6}  
31733 Pathogen[ P14079] interacts with 3 human partners:{Q86VS8;Q8N4C6;Q15154}  
31734 Pathogen[ P03383] interacts with 3 human partners:{Q15154;Q86VS8;Q8N4C6}  
31735 Pathogen[ P03410] interacts with 3 human partners:{Q15154;Q86VS8;Q8N4C6}  
31736 Pathogen[ P14075] interacts with 3 human partners:{Q15154;Q86VS8;Q8N4C6}  
31737 Pathogen[ P0C206] interacts with 3 human partners:{Q86VS8;Q8N4C6;Q15154}  
31738 Pathogen[ P03363] interacts with 3 human partners:{Q86VS8;Q8N4C6;Q15154}  
31739 [Cluster 2886]GO:0006635+P biological\_process [name] fatty acid beta-oxidation  
[def] "A fatty acid oxidation process that results in the complete oxidation of a  
long-chain fatty acid. Fatty acid beta-oxidation begins with the addition of coenzyme A  
to a fatty acid, and occurs by successive cycles of reactions during each of which the  
fatty acid is shortened by a two-carbon fragment removed as acetyl coenzyme A\_ the cycle  
continues until only two or three carbons remain (as acetyl-CoA or propionyl-CoA  
respectively)." [GOC  
31740 Pathogen[ Q2Q067] interacts with 3 human partners:{P22033;P30084;Q16836}  
31741 Pathogen[ P0C214] interacts with 8 human  
partners:{P30084;P40939;P23786;Q13011;P22033;P42765;Q16698;Q96PE7}  
31742 Pathogen[ P03346] interacts with 6 human  
partners:{Q96PE7;Q16836;P23786;P42765;P50542;P30084}  
31743 Pathogen[ Q85601] interacts with 3 human partners:{P22033;Q16836;P30084}  
31744 Pathogen[ P14079] interacts with 5 human  
partners:{P30084;P50542;P22033;Q96PE7;Q16836}  
31745 Pathogen[ P03383] interacts with 2 human partners:{Q16836;P22033}  
31746 Pathogen[ P03410] interacts with 8 human  
partners:{P30084;Q96PE7;Q13011;P23786;P42765;Q16836;P50542;P22033}  
31747 Pathogen[ P14075] interacts with 2 human partners:{P22033;Q16836}  
31748 Pathogen[ P0C206] interacts with 6 human  
partners:{Q96PE7;Q16836;P50542;P23786;P30084;P22033}  
31749 Pathogen[ P03363] interacts with 1 human partners:{Q16836}  
31750 [Cluster 2887]GO:0002756+P biological\_process [name] MyD88-independent toll-like  
receptor signaling pathway [def] "Any series of molecular signals generated as a  
consequence of binding to a toll-like receptor not relying on the MyD88 adaptor  
molecule. Toll-like receptors directly bind pattern motifs from a variety of microbial  
sources to initiate innate immune response." [GOC  
31751 Pathogen[ Q2Q067] interacts with 27 human  
partners:{P01100;Q8IUC6;Q92985;Q15653;Q04206;Q9NYJ8;Q8N5C8;O75582;Q14653;Q9Y6K9;P194  
19;P19838;P15336;P25963;P0CG47;O14920;P45984;Q00653;P0CG48;O43318;P62987;O15111;Q157  
59;Q16829;Q02078;Q15750;P62979}  
31752 Pathogen[ P0C214] interacts with 31 human  
partners:{Q00653;O15111;Q9Y6K9;P19838;P15336;Q8IUC6;Q14164;P01100;P19419;Q04206;Q156  
53;O43318;Q02078;Q8N5C8;Q92985;P0CG48;P25963;Q16829;Q14653;O75582;P62987;Q15750;P054  
12;Q15759;P0CG47;P45984;P16220;P62979;O14920;Q9NYJ8;P18846}  
31753 Pathogen[ P03346] interacts with 32 human  
partners:{Q9Y6K9;P05412;P45984;Q02078;O15111;P16220;P15336;P62987;P25963;Q15653;P194  
19;P0CG48;Q04206;Q8N5C8;Q9NYJ8;O75582;Q15750;Q14653;Q16829;P62979;Q8IUC6;Q15759;P0CG  
47;P45985;P19838;O14920;O43318;Q92985;P01100;Q14164;P18846;Q00653}

31754 Pathogen[ Q85601] interacts with 31 human  
partners: {Q02078;Q15750;Q9NYJ8;Q8IUC6;O15111;P19419;Q16829;P18846;P0CG48;Q15653;Q8N5C8;P01100;Q14653;Q14164;Q9Y6K9;P16220;O14920;Q04206;P05412;Q92985;O75582;P62979;Q15759;P0CG47;P45984;P62987;Q00653;P15336;O43318;P19838;P25963}

31755 Pathogen[ P14079] interacts with 31 human  
partners: {Q96KP6;Q8N5C8;Q02078;P0CG48;Q06413;O43187;P53779;Q14653;P52564;O75582;Q16829;Q8IUC6;Q92985;Q14164;Q15750;P62979;P62987;P45984;P45983;Q16644;Q15759;Q9Y6K9;P45985;P15336;Q13164;P05412;P0CG47;Q9Y239;P01100;P19419;Q15653}

31756 Pathogen[ P03383] interacts with 29 human  
partners: {O75582;Q14653;P16220;Q9Y6K9;P62987;Q8IUC6;Q00653;O14920;O15111;P19419;P18846;Q15653;O43318;Q8N5C8;Q92985;Q15759;P25963;P01100;P62979;P0CG47;Q04206;P45984;P0CG48;P15336;Q9NYJ8;P19838;Q02078;Q15750;P05412}

31757 Pathogen[ P03410] interacts with 34 human  
partners: {Q04206;P19838;P0CG48;O14920;Q9Y239;P19419;O15111;Q15750;O75582;Q14653;O43187;Q15653;P62979;P01100;P18846;O43318;Q16829;P45985;Q9NYJ8;Q96KP6;Q8N5C8;P16220;P05412;P45984;P62987;P53779;Q02078;Q8IUC6;Q00653;Q9Y6K9;P25963;Q92985;P15336;P0CG47}

31758 Pathogen[ P14075] interacts with 29 human  
partners: {O15111;Q04206;Q15750;P05412;Q15759;O75582;P19419;P15336;Q15653;P25963;Q8N5C8;O14920;P0CG48;P62979;Q14653;O43318;P62987;Q02078;Q8IUC6;P01100;P0CG47;P19838;Q00653;P16220;Q9Y6K9;Q92985;P18846;P45984;Q9NYJ8}

31759 Pathogen[ P0C206] interacts with 32 human  
partners: {P0CG48;O14920;Q9Y6K9;Q02078;P16220;Q8N5C8;O75582;P45984;P05412;P25963;P19419;O43318;P15336;Q15653;P18846;Q16829;P19838;Q14164;Q92985;P01100;Q04206;O15111;P62979;Q9NYJ8;P45985;P0CG47;Q8IUC6;Q00653;Q15750;P62987;Q15759;Q14653}

31760 Pathogen[ P03363] interacts with 23 human  
partners: {Q14653;Q92985;O14920;Q04206;P25963;O15111;Q9NYJ8;P16220;Q9Y6K9;P19419;O43318;Q15750;P15336;Q15653;Q16829;Q00653;P18846;P62987;P19838;P05412;Q8N5C8;P01100;Q02078}

31761 [Cluster 2888]GO:0008089+P biological\_process [name] anterograde axon cargo transport [def] "The directed movement of organelles or molecules along microtubules from the cell body toward the cell periphery in nerve cell axons." [ISBN

31762 Pathogen[ Q2Q067] interacts with 13 human  
partners: {Q9UL45;P07196;Q92572;O95295;Q9NUP1;Q6QNY0;Q96EV8;Q8TDH9;P53677;Q9Y2T2;Q6QNY1;P78537;Q13367}

31763 Pathogen[ P0C214] interacts with 15 human  
partners: {P59780;O95295;Q9Y2T2;Q13367;P78537;Q8TDH9;Q6QNY0;Q92572;Q8TDB4;P53677;Q9UL45;Q96EV8;Q9NUP1;Q6QNY1;P07196}

31764 Pathogen[ P03346] interacts with 16 human  
partners: {P07196;O95295;Q92572;P59780;Q8TDB4;Q6QNY0;P78537;Q96EV8;Q6QNY1;Q9UL45;Q13367;O14617;Q8TDH9;Q9NUP1;P53677;Q9Y2T2}

31765 Pathogen[ Q85601] interacts with 14 human  
partners: {Q13367;Q6QNY0;Q9Y2T2;Q9NUP1;P07196;O95295;Q8TDB4;P78537;Q96EV8;P53677;Q92572;P59780;Q6QNY1;Q8TDH9}

31766 Pathogen[ P14079] interacts with 17 human  
partners: {Q6QNY0;Q9Y2T2;P59780;P07196;Q92572;O15066;Q9UL45;Q8TDH9;P53677;O95295;Q8TDB4;Q13367;Q96EV8;Q9NUP1;O14617;Q6QNY1;P78537}

31767 Pathogen[ P03383] interacts with 13 human  
partners: {Q6QNY0;Q92572;Q8TDB4;O95295;Q8TDH9;P78537;Q9NUP1;P53677;Q96EV8;Q9Y2T2;P07196;Q13367;Q6QNY1}

31768 Pathogen[ P03410] interacts with 18 human  
partners: {Q9NUP1;O00203;P78537;Q6QNY1;Q6QNY0;Q92572;O14617;P07196;Q9UL45;O95295;O60333;Q9Y2T2;P53677;P59780;Q8TDB4;Q13367;Q8TDH9;Q96EV8}

31769 Pathogen[ P14075] interacts with 12 human  
partners: {P78537;O95295;Q9Y2T2;Q6QNY1;Q6QNY0;Q9NUP1;Q92572;Q8TDB4;Q8TDH9;Q96EV8;P07196;Q13367}

31770 Pathogen[ P0C206] interacts with 16 human  
partners: {P07196;P78537;Q9UL45;Q92572;Q6QNY1;Q9Y2T2;Q8TDH9;P59780;P53677;Q96EV8;O95295;O14617;Q9NUP1;Q6QNY0;Q13367;Q8TDB4}

31771 Pathogen[ P03363] interacts with 13 human  
partners: {Q9Y2T2;Q13367;P53677;P78537;Q92572;P07196;Q6QNY1;O15066;O95295;O60333;Q8TDH9;Q6QNY0;Q9NUP1}

31772 [Cluster 2889]GO:0035552+P biological\_process [name] oxidative single-stranded DNA demethylation [def] "Removal of the methyl group from one or more nucleotides within a single-stranded DNA molecule involving the oxidation (i.e. electron loss) of one or more atoms." [GOC

31773 Pathogen[ Q2Q067] interacts with 1 human partners: {Q96Q83}

31774 Pathogen[ P0C214] interacts with 1 human partners: {Q96Q83}

31775 Pathogen[ P03346] interacts with 1 human partners: {Q96Q83}

31776 Pathogen[ Q85601] interacts with 1 human partners: {Q96Q83}

31777 Pathogen[ P14079] interacts with 2 human partners: {Q9C0B1;Q96Q83}

31778 Pathogen[ P03383] interacts with 1 human partners: {Q96Q83}

31779 Pathogen[ P03410] interacts with 2 human partners: {Q96Q83;Q9C0B1}

31780 Pathogen[ P14075] interacts with 1 human partners: {Q96Q83}

31781 Pathogen[ P0C206] interacts with 1 human partners: {Q96Q83}

31782 Pathogen[ P03363] interacts with 1 human partners: {Q96Q83}

31783 [Cluster 2890]GO:000132+P biological\_process [name] establishment of mitotic spindle

orientation [def] "A cell cycle process that sets the alignment of mitotic spindle relative to other cellular structures." [GOC

31784 Pathogen[ Q2Q067] interacts with 10 human  
partners:{Q99502;P63172;Q14980;P49450;Q9NXR1;Q96SN8;O43264;P81274;O14777;Q96EA4}

31785 Pathogen[ P0C214] interacts with 10 human  
partners:{O43264;P81274;Q96EA4;Q96SN8;P49450;Q14980;P63172;Q9NXR1;O14777;Q99502}

31786 Pathogen[ P03346] interacts with 10 human  
partners:{O43264;Q9NXR1;Q99502;Q14980;O14777;Q96EA4;P81274;Q96SN8;P63172;P49450}

31787 Pathogen[ Q85601] interacts with 10 human  
partners:{P81274;Q96SN8;O43264;Q96EA4;P63172;Q99502;P49450;Q14980;Q9NXR1;O14777}

31788 Pathogen[ P14079] interacts with 10 human  
partners:{Q14980;Q99502;P63172;Q96EA4;P49450;O43264;P81274;Q9NXR1;Q96SN8;O14777}

31789 Pathogen[ P03383] interacts with 7 human  
partners:{O43264;P63172;Q96SN8;Q96EA4;P81274;Q14980;O14777}

31790 Pathogen[ P03410] interacts with 10 human  
partners:{Q9NXR1;Q99502;Q96SN8;P63172;O43264;Q96EA4;Q14980;P81274;P49450;O14777}

31791 Pathogen[ P14075] interacts with 8 human  
partners:{P81274;Q96SN8;P63172;O14777;Q96EA4;Q99502;O43264;Q14980}

31792 Pathogen[ P0C206] interacts with 10 human  
partners:{Q96SN8;P81274;O14777;P49450;Q99502;Q9NXR1;Q96EA4;Q14980;P63172;O43264}

31793 Pathogen[ P03363] interacts with 9 human  
partners:{Q96EA4;Q14980;O43264;P81274;P63172;P49450;O14777;Q9NXR1;Q96SN8}

31794 [Cluster 2891]GO:0016197+P biological\_process [name] endosome transport [def] "The directed movement of substances into, out of or mediated by an endosome, a membrane-bounded organelle that carries materials newly ingested by endocytosis. It passes many of the materials to lysosomes for degradation." [ISBN

31795 Pathogen[ Q2Q067] interacts with 34 human  
partners:{Q92783;O75351;Q9H444;Q2VPB7;O60784;Q9C005;Q99816;Q9BRG1;O75886;A5D8V6;Q9UQ  
N3;Q9UN37;Q96H20;Q9H0R1;Q9NZZ3;Q9UK41;Q9Y3E7;O43299;Q9H9H4;Q96CF2;P42768;P0CG47;Q9NP  
79;P0CG48;O43633;O14964;Q9NUS5;Q8WUX9;P62987;Q86VN1;Q13501;Q8NEZ2;O75901;P62979}

31796 Pathogen[ P0C214] interacts with 35 human  
partners:{Q8WUX9;Q96CF2;O75351;Q9NP79;Q9H444;Q9NUS5;O14964;O75886;Q9UQN3;Q9UK41;Q9H0  
R1;Q2VPB7;Q13501;Q9BY43;O43299;Q9BRG1;P0CG48;O75901;Q9C005;Q8NEZ2;Q9Y3E7;O60784;P629  
87;Q99816;P0CG47;Q9NZZ3;Q96H20;A5D8V6;Q9UN37;Q92783;O43633;Q9H9H4;P62979;P42768;Q86V  
N1}

31797 Pathogen[ P03346] interacts with 42 human  
partners:{Q13596;Q86XT2;Q9C005;Q15036;A5D8V6;Q2VPB7;O75901;P42768;P62987;P0CG48;O758  
86;Q8NEZ2;Q9H0R1;Q99816;Q86VN1;Q9UK41;O60784;A8K0Z3;Q96H20;Q96FZ7;Q96CF2;Q9NZZ3;Q7Z3  
T8;Q9Y3E7;O43633;Q9H444;Q9H9H4;Q9NUS5;Q9BRG1;Q9UQN3;P62979;Q13492;P0CG47;Q9BY43;Q927  
83;Q9NP79;O75351;O14964;O43299;Q9UN37;Q8WUX9;Q13501}

31798 Pathogen[ Q85601] interacts with 38 human  
partners:{Q13596;Q99816;Q9NP79;Q9UQN3;Q96H20;Q15036;Q9NUS5;Q9BRG1;Q9H9H4;Q86VN1;O432  
99;O43633;P0CG48;O75886;Q96FZ7;Q8WUX9;Q96CF2;O75351;Q9UK41;Q9BY43;Q9H444;Q9C005;P427  
68;Q92783;Q9NZZ3;O14964;P62979;O75901;Q2VPB7;P0CG47;P62987;Q8NEZ2;Q9UN37;Q9Y3E7;Q9H0  
R1;O60784;Q13501;A5D8V6}

31799 Pathogen[ P14079] interacts with 44 human  
partners:{Q9H9H4;O75886;Q13492;Q86VN1;Q96CF2;Q15036;P0CG48;Q9C005;Q96H20;Q2VPB7;Q86X  
T2;Q9H1K0;Q9BY43;Q9NP79;Q6VEQ5;Q92783;Q2M389;P62979;O60784;P62987;Q9NQA3;O43633;Q8WU  
X9;A5D8V6;Q8NEZ2;Q13596;Q13501;Q9UN37;Q96FZ7;Q7Z3T8;Q9H0R1;A8K0Z3;O43299;Q9Y3E7;O753  
51;Q9NUS5;Q9NZZ3;Q9H444;Q9BRG1;Q99816;P0CG47;O75901;Q9UQN3;P42768}

31800 Pathogen[ P03383] interacts with 29 human  
partners:{P62987;Q8WUX9;Q96H20;Q9Y3E7;Q9NZZ3;O75886;Q8NEZ2;Q99816;Q9NUS5;O75901;Q9UK  
41;O43633;Q9H444;Q9C005;Q9H9H4;P42768;Q9BRG1;O43299;Q13501;O60784;Q92783;P62979;P0CG  
47;P0CG48;O14964;Q86VN1;Q9UN37;Q9UQN3;Q2VPB7}

31801 Pathogen[ P03410] interacts with 44 human  
partners:{P0CG48;O43633;Q86XT2;Q9H9H4;Q13596;Q9NP79;Q9NUS5;O75351;Q2M389;Q13501;Q927  
83;Q9BY43;O43299;P42768;Q86VN1;P62979;Q9C005;A5D8V6;Q99816;Q9Y3E7;Q13492;Q8WUX9;Q8NE  
Z2;Q9UQN3;Q9UN37;Q15036;Q9H444;O60784;Q9NZZ3;Q9H1K0;Q9BRG1;Q6VEQ5;Q96FZ7;Q9H0R1;P629  
87;O75901;Q2VPB7;Q96H20;Q96CF2;Q9NQA3;P0CG47;Q7Z3T8;O75886;A8K0Z3}

31802 Pathogen[ P14075] interacts with 29 human  
partners:{O75886;Q9H444;Q8WUX9;P42768;Q92783;Q9NP79;Q86VN1;Q9UK41;O75901;Q8NEZ2;Q96H  
20;Q9Y3E7;Q9H9H4;P0CG48;P62979;O14964;Q9C005;Q9UQN3;Q9NZZ3;P62987;P0CG47;Q9BRG1;Q2VP  
B7;Q99816;Q9NUS5;Q13501;O60784;Q9UN37;O43299}

31803 Pathogen[ P0C206] interacts with 43 human  
partners:{O14964;Q9BRG1;Q13501;P0CG48;Q9C005;Q8WUX9;Q9UN37;Q8NEZ2;Q9H444;O60784;Q9Y3  
E7;Q2VPB7;Q9H0R1;Q9H1K0;Q9UQN3;Q86VN1;Q2M389;Q13596;Q99816;Q92783;Q15036;O43299;Q9UK  
41;Q9H9H4;Q7Z3T8;Q6VEQ5;A5D8V6;Q96H20;Q86XT2;P62979;O43633;Q96CF2;P0CG47;Q9BY43;Q9NP  
79;Q9NZZ3;Q96FZ7;P62987;O75886;P42768;O75351;O75901;Q9NUS5}

31804 Pathogen[ P03363] interacts with 30 human  
partners:{O75886;Q9H444;Q92783;O60784;P42768;Q9NUS5;Q9NZZ3;Q96H20;Q9C005;O75351;Q9UN  
37;Q9H0R1;Q86VN1;Q9BRG1;O75901;Q9UK41;Q9Y3E7;P62987;O14964;Q8NEZ2;Q2VPB7;Q99816;Q135  
96;Q9UQN3;Q9NP79;Q9H9H4;Q8WUX9;O43299;Q96CF2;A5D8V6}

31805 [Cluster 2892]GO:0035522+P biological\_process [name] monoubiquitinated histone H2A  
deubiquitination [def] "The removal of the ubiquitin group from a monoubiquitinated  
histone H2A protein." [GOC

31806 Pathogen[ Q2Q067] interacts with 1 human partners:{Q8IXJ9}

31807 Pathogen[ P0C214] interacts with 2 human partners:{Q92560;Q8IXJ9}

31808 Pathogen[ P03346] interacts with 2 human partners:{Q92560;Q8IXJ9}

31809 Pathogen[ Q85601] interacts with 2 human partners:{Q92560;Q8IXJ9}

31810 Pathogen[ P14079] interacts with 2 human partners:{Q8IXJ9;Q92560}

31811 Pathogen[ P03383] interacts with 1 human partners:{Q8IXJ9}

31812 Pathogen[ P03410] interacts with 1 human partners:{Q8IXJ9}

31813 Pathogen[ P14075] interacts with 1 human partners:{Q8IXJ9}

31814 Pathogen[ P0C206] interacts with 2 human partners:{Q8IXJ9;Q92560}

31815 Pathogen[ P03363] interacts with 2 human partners:{Q8IXJ9;Q92560}

31816 [Cluster 2893]GO:0019886+P biological\_process [name] antigen processing and presentation of exogenous peptide antigen via MHC class II [def] "The process in which an antigen-presenting cell expresses a peptide antigen of exogenous origin on its cell surface in association with an MHC class II protein complex. The peptide antigen is typically, but not always, processed from a whole protein." [GOC

31817 Pathogen[ Q2Q067] interacts with 37 human partners:{O94973;Q9Y6Q5;Q10567;P56377;O43747;O95782;P55735;Q14204;Q9UJW0;O75935;P63167;P63010;Q96PC3;Q14203;Q96CW1;Q13561;Q00610;P61966;P53992;O95486;O94855;P42025;Q9BXS5;Q9H0B6;P50570;Q02241;O00139;Q07866;Q99962;Q13409;O95487;Q96FJ2;Q92845;Q96NA2;P09496;Q15436;O14576}

31818 Pathogen[ P0C214] interacts with 39 human partners:{Q96CW1;Q07866;P55735;O75935;P53992;Q9UJW0;Q02241;Q14203;Q96NA2;Q14204;O00139;Q99962;Q15436;Q9BTE1;Q9H0B6;P63010;Q10567;O95487;P56377;Q96PC3;Q92845;O43747;P42025;O94973;Q9Y6Q5;O14576;Q96FJ2;O00399;P61966;P09496;P50570;O95782;Q13409;P53680;Q13561;Q9BXS5;O95486;P63167;O94855}

31819 Pathogen[ P03346] interacts with 42 human partners:{P61966;P55735;Q96FJ2;P50570;Q9UJW0;O14576;Q12840;P63010;O43747;P53680;O75935;O00139;P56377;Q99962;Q9BXS5;Q96NA2;O95782;Q14204;Q14203;Q9BTE1;P09496;O94855;Q9BXS5;Q10567;Q15436;Q96CW1;Q96PC3;P42025;O00399;O95486;Q02241;Q13409;P63167;O95487;Q92845;Q9Y6Q5;O94973;Q00610;P53992;Q9H0B6;Q07866;Q13561}

31820 Pathogen[ Q85601] interacts with 41 human partners:{P61163;Q13409;Q9UJW0;Q00610;P09496;Q02241;Q96CW1;O95487;O75935;Q9BXS5;P56377;Q99962;Q14204;O43747;Q14203;Q10567;Q9BTE1;Q15436;Q12840;P50570;P55735;O14576;O00399;P53680;O95486;O94973;Q96PC3;Q92845;P63010;P61966;Q96NA2;Q9Y6Q5;O94855;P42025;P63167;Q07866;O00139;Q9H0B6;P53992;Q13561;O95782}

31821 Pathogen[ P14079] interacts with 44 human partners:{Q9BXS5;Q96CW1;Q96NA2;Q9Y6Q5;P61966;Q9BXS5;Q00610;O95487;Q07866;Q96FJ2;Q12840;Q10567;Q02241;Q14204;P56377;O94855;P53992;O00399;Q9UJW0;P50570;O15066;Q9BTE1;Q99661;O95782;O00139;Q13409;Q13561;P63010;O94973;P61163;O43747;P63167;P55735;P42025;O14576;O95486;Q92845;Q96PC3;Q9H0B6;O75935;P53680;Q14203;P09496;Q99962}

31822 Pathogen[ P03383] interacts with 27 human partners:{Q96CW1;P56377;Q9UJW0;Q00610;Q02241;P55735;O95487;Q96FJ2;P42025;Q14203;Q10567;Q9H0B6;O95486;Q15436;P63010;O43747;O94855;O95782;O75935;Q07866;P53992;Q92845;Q13561;Q9BXS5;O94973;P63167;Q96NA2}

31823 Pathogen[ P03410] interacts with 44 human partners:{Q00610;P09496;Q9Y6Q5;Q14204;O95782;Q96PC3;Q96CW1;Q07866;Q13409;Q9BXS5;P53680;Q13561;Q9H0B6;O00139;O94855;P53992;O43747;Q10567;Q92845;O00399;P63167;P50570;Q9UJW0;Q8TCX1;Q12840;P61163;Q15436;O14576;Q9BTE1;O95486;O75935;P63010;P42025;Q99962;P55735;Q96NA2;P61966;O94973;P56377;O43237;Q9BXS5;Q14203;O95487;Q02241}

31824 Pathogen[ P14075] interacts with 29 human partners:{P09496;Q02241;O94973;Q96CW1;Q92845;Q13561;Q96NA2;P53992;P55735;O95487;O00139;Q96FJ2;O75935;O95782;O43747;Q15436;P63010;P56377;O94855;Q9BXS5;Q14203;Q07866;Q9H0B6;Q9UJW0;O95486;Q10567;P63167;P42025;Q00610}

31825 Pathogen[ P0C206] interacts with 43 human partners:{P53680;P63010;O94973;O14576;Q9Y6Q5;Q92845;Q9BTE1;O43747;O94855;Q10567;P63167;P61966;Q00610;P55735;Q99962;O43237;Q02241;Q13409;P09496;P61163;Q14204;Q9H0B6;Q9BXS5;Q9UJW0;O95486;O95487;Q96CW1;O00399;Q12840;O00139;O95782;Q13561;Q9BXS5;Q96NA2;P53992;Q14203;O75935;Q96PC3;P42025;P50570;P56377;Q07866;Q15436}

31826 Pathogen[ P03363] interacts with 41 human partners:{Q92845;Q99962;P63167;Q2VIQ3;O43747;Q13561;Q9UJW0;O00399;P50570;Q14204;Q02241;Q15436;Q00610;O95486;Q9BXS5;Q07866;Q14807;O94973;P61163;Q9H0B6;Q9BXS5;P63010;O75935;P42025;Q13409;O15066;O95782;Q9BTE1;Q96NA2;P53992;O95487;O00139;O43237;Q96FJ2;P55735;Q14203;O94855;O14576;Q10567;Q12840;Q96CW1}

31827 [Cluster 2894]GO:0060743+P biological\_process [name] epithelial cell maturation involved in prostate gland development [def] "The developmental process, independent of morphogenetic (shape) change, that is required for an epithelial cell of the prostate gland to attain its fully functional state. An epithelial cell is a cell usually found in a two-dimensional sheet with a free surface." [GOC

31828 Pathogen[ Q2Q067] interacts with 1 human partners:{Q9UK73}

31829 Pathogen[ P0C214] interacts with 1 human partners:{Q9UK73}

31830 Pathogen[ P03346] interacts with 2 human partners:{Q92826;Q9UK73}

31831 Pathogen[ Q85601] interacts with 1 human partners:{Q9UK73}

31832 Pathogen[ P14079] interacts with 1 human partners:{Q9UK73}

31833 Pathogen[ P03383] interacts with 1 human partners:{Q9UK73}

31834 Pathogen[ P03410] interacts with 1 human partners:{Q9UK73}

31835 Pathogen[ P14075] interacts with 1 human partners:{Q9UK73}

31836 Pathogen[ P0C206] interacts with 1 human partners:{Q9UK73}

31837 Pathogen[ P03363] interacts with 2 human partners:{Q92826;Q9UK73}

31838 [Cluster 2895]GO:0002260+P biological\_process [name] lymphocyte homeostasis [def] "The process of regulating the proliferation and elimination of lymphocytes such that the total number of lymphocytes within a whole or part of an organism is stable over time in the absence of an outside stimulus." [GOC

31839 Pathogen[ Q2Q067] interacts with 1 human partners:{P12757}

31840 Pathogen[ P0C214] interacts with 1 human partners:{P12757}

31841 Pathogen[ P03346] interacts with 2 human partners:{P02549;P12757}

31842 Pathogen[ Q85601] interacts with 1 human partners:{P12757}

31843 Pathogen[ P14079] interacts with 2 human partners:{P12757;P02549}

31844 Pathogen[ P03383] interacts with 1 human partners:{P12757}

31845 Pathogen[ P03410] interacts with 2 human partners:{P02549;P12757}

31846 Pathogen[ P14075] interacts with 1 human partners:{P12757}

31847 Pathogen[ P0C206] interacts with 1 human partners:{P12757}

31848 Pathogen[ P03363] interacts with 2 human partners:{P02549;P12757}

31849 [Cluster 2896]GO:2000984+P biological\_process [name] negative regulation of ATP citrate synthase activity [def] "Any process that stops, prevents or reduces the frequency, rate or extent of ATP citrate synthase activity." [GOC

31850 Pathogen[ Q2Q067] interacts with 2 human partners:{O75323;Q8WYQ3}

31851 Pathogen[ P0C214] interacts with 2 human partners:{Q8WYQ3;O75323}

31852 Pathogen[ P03346] interacts with 3 human partners:{Q9NRX4;Q8WYQ3;O75323}

31853 Pathogen[ Q85601] interacts with 1 human partners:{O75323}

31854 Pathogen[ P14079] interacts with 3 human partners:{Q9NRX4;Q8WYQ3;O75323}

31855 Pathogen[ P03383] interacts with 2 human partners:{O75323;Q8WYQ3}

31856 Pathogen[ P03410] interacts with 3 human partners:{Q8WYQ3;Q9NRX4;O75323}

31857 Pathogen[ P14075] interacts with 2 human partners:{O75323;Q8WYQ3}

31858 Pathogen[ P0C206] interacts with 3 human partners:{Q9NRX4;Q8WYQ3;O75323}

31859 Pathogen[ P03363] interacts with 1 human partners:{O75323}

31860 [Cluster 2897]GO:0033119+P biological\_process [name] negative regulation of RNA splicing [def] "Any process that stops, prevents, or reduces the frequency, rate or extent of RNA splicing." [GOC

31861 Pathogen[ Q2Q067] interacts with 2 human partners:{P62277;P62854}

31862 Pathogen[ P0C214] interacts with 3 human partners:{P62854;P26599;P62277}

31863 Pathogen[ P03346] interacts with 3 human partners:{P62277;P26599;P62854}

31864 Pathogen[ Q85601] interacts with 2 human partners:{P62854;P62277}

31865 Pathogen[ P14079] interacts with 4 human partners:{P31751;P62854;P26599;P62277}

31866 Pathogen[ P03383] interacts with 2 human partners:{P62854;P62277}

31867 Pathogen[ P03410] interacts with 3 human partners:{P26599;P62277;P62854}

31868 Pathogen[ P14075] interacts with 2 human partners:{P62277;P62854}

31869 Pathogen[ P0C206] interacts with 2 human partners:{P62854;P62277}

31870 Pathogen[ P03363] interacts with 3 human partners:{P26599;P62277;P62854}

31871 [Cluster 2898]GO:0043649+P biological\_process [name] dicarboxylic acid catabolic process [def] "The chemical reactions and pathways resulting in the breakdown of dicarboxylic acids, any organic acid containing two carboxyl (-COOH) groups." [ISBN

31872 Pathogen[ Q2Q067] interacts with 1 human partners:{O14734}

31873 Pathogen[ P0C214] interacts with 1 human partners:{O14734}

31874 Pathogen[ P03346] interacts with 1 human partners:{O14734}

31875 Pathogen[ Q85601] interacts with 1 human partners:{O14734}

31876 Pathogen[ P14079] interacts with 1 human partners:{O14734}

31877 Pathogen[ P03383] interacts with 1 human partners:{O14734}

31878 Pathogen[ P03410] interacts with 1 human partners:{O14734}

31879 Pathogen[ P14075] interacts with 1 human partners:{O14734}

31880 Pathogen[ P0C206] interacts with 1 human partners:{O14734}

31881 Pathogen[ P03363] interacts with 1 human partners:{O14734}

31882 [Cluster 2899]GO:0032607+P biological\_process [name] interferon-alpha production [def] "The appearance of interferon-alpha due to biosynthesis or secretion following a cellular stimulus, resulting in an increase in its intracellular or extracellular levels." [GOC

31883 Pathogen[ Q2Q067] interacts with 1 human partners:{Q92985}

31884 Pathogen[ P0C214] interacts with 1 human partners:{Q92985}

31885 Pathogen[ P03346] interacts with 1 human partners:{Q92985}

31886 Pathogen[ Q85601] interacts with 1 human partners:{Q92985}

31887 Pathogen[ P14079] interacts with 1 human partners:{Q92985}

31888 Pathogen[ P03383] interacts with 1 human partners:{Q92985}

31889 Pathogen[ P03410] interacts with 1 human partners:{Q92985}

31890 Pathogen[ P14075] interacts with 1 human partners:{Q92985}

31891 Pathogen[ P0C206] interacts with 1 human partners:{Q92985}

31892 Pathogen[ P03363] interacts with 1 human partners:{Q92985}

31893 [Cluster 2900]GO:0044089+P biological\_process [name] positive regulation of cellular component biogenesis [def] "Any process that activates or increases the frequency, rate or extent of cellular component biogenesis, a process that results in the biosynthesis of constituent macromolecules, assembly, and arrangement of constituent parts of a cellular component." [GOC

31894 Pathogen[ Q2Q067] interacts with 1 human partners:{O43679}

31895 Pathogen[ P0C214] interacts with 1 human partners:{O43679}

31896 Pathogen[ P03346] interacts with 1 human partners:{O43679}

31897 Pathogen[ Q85601] interacts with 1 human partners:{043679}  
31898 Pathogen[ P14079] interacts with 1 human partners:{043679}  
31899 Pathogen[ P03383] interacts with 1 human partners:{043679}  
31900 Pathogen[ P03410] interacts with 1 human partners:{043679}  
31901 Pathogen[ P14075] interacts with 1 human partners:{043679}  
31902 Pathogen[ P0C206] interacts with 1 human partners:{043679}  
31903 Pathogen[ P03363] interacts with 1 human partners:{043679}  
31904 [Cluster 2901]GO:0016055+P biological\_process [name] Wnt receptor signaling pathway  
[def] "The series of molecular signals initiated by binding of a Wnt protein to a  
frizzled family receptor on the surface of the target cell and ending with a change in  
cell state." [GOC  
31905 Pathogen[ Q2Q067] interacts with 54 human  
partners:{Q14526;O75474;Q9P219;Q04726;P24385;Q8WVC0;Q8IY63;O00512;Q9H2K2;P36402;Q6PD  
62;Q6P1J9;Q9GZS3;Q8N7J2;Q9NPI1;Q04727;Q9Y3Y4;Q5JTC6;Q16531;Q92837;Q14907;Q9NZC7;Q9Y2  
97;Q9NYF0;P67870;O14641;P25063;Q92541;P24864;Q9NSA3;Q9NTX7;Q9Y2J4;Q53G59;O75030;Q136  
18;O00321;Q04725;Q9UN36;Q9NRI5;O95996;P35813;Q9HC62;O95271;Q04724;Q9HCK8;Q8N7H5;Q9P1  
Z2;Q86U70;Q8ND76;Q9Y608;P23508;Q9BRK4;Q8N2W9;O60716}  
31906 Pathogen[ P0C214] interacts with 58 human  
partners:{Q14526;Q8ND76;P35813;Q04727;O00321;Q9NRI5;Q9Y2J4;Q9BRK4;O60716;Q8N2W9;O949  
21;Q9NTX7;Q14907;Q13618;O75030;P24385;Q04724;Q9Y297;Q92541;Q9NZC7;Q9NSA3;Q14696;P981  
70;Q04726;Q53G59;Q86U70;O14641;Q6P1J9;Q9HCK8;Q8N7H5;O60381;Q9Y608;P25063;Q9H2K2;O005  
12;Q8WVC0;P36402;O75474;Q9NPI1;P24864;Q04725;Q8N7J2;Q9HC62;Q8IY63;P23508;Q9P1Z2;P678  
70;Q9P219;Q9Y3Y4;O95271;Q6PD62;Q9NYF0;Q9UN36;Q5JTC6;Q16531;Q92837;Q9GZS3;Q8N944}  
31907 Pathogen[ P03346] interacts with 65 human  
partners:{Q9NRI5;Q6PD62;Q8ND76;P35813;Q86U70;Q9Y283;P24385;Q9H2H0;P36402;O60716;P235  
08;Q8N7J2;Q9Y3Y4;Q16531;O75474;Q13618;Q9NPI1;O43815;Q9NTX7;P24864;P98170;O00321;O750  
30;Q969G9;Q9P219;Q9BRK4;Q14526;Q8IY63;Q9Y608;Q9NSA3;Q9H2K2;Q04726;Q9HCS4;O14641;O603  
81;Q8WVC0;O00512;Q04725;Q9NZC7;Q9P1Z2;Q04724;Q9HCK8;Q92837;Q14907;Q9UGU5;Q92541;Q9Y2  
J4;O95996;Q8N2W9;Q9GZS3;Q9NYF0;Q9HC62;Q969F2;Q04727;O95271;P25063;P67870;O94921;Q86T  
24;Q9UN36;Q9Y297;Q9UIW0;Q6P1J9;Q8N7H5;Q5JTC6}  
31908 Pathogen[ Q85601] interacts with 59 human  
partners:{Q6PD62;Q9NZC7;Q9Y608;Q92837;P24385;Q8WVC0;Q04724;Q9UN36;Q86U70;P23508;Q8IY  
63;Q16531;Q6P1J9;Q9Y283;O75030;Q9HC62;Q8ND76;Q9NYF0;O43815;P98170;Q8N2W9;O75474;Q9GZ  
S3;Q9P219;Q14526;O60716;Q04725;Q9H2K2;Q92541;Q04726;O14641;Q9NQC7;Q04727;Q9BRK4;O149  
07;O94921;Q9NTX7;Q9Y2J4;O00512;P36402;Q5JTC6;O95996;Q9NPI1;Q9HCK8;Q9NRI5;P67870;Q136  
18;Q53G59;Q9P1Z2;Q9HCS4;O95271;Q8N7J2;P35813;Q9NSA3;Q9Y3Y4;Q8N7H5;O00321;P24864;O603  
81}  
31909 Pathogen[ P14079] interacts with 57 human  
partners:{Q8N944;Q8N2W9;Q04725;Q9NPI1;O60381;O00321;O95271;P24864;O14641;Q92541;Q136  
18;Q14696;Q16531;Q86U70;O43815;Q9NRI5;Q9GZS3;Q8ND76;Q9H2K2;Q9Y2J4;Q8N7J2;O14907;Q96B  
18;Q6PD62;P36402;P35813;Q9HC62;O00512;Q9NZC7;Q8WVC0;P23508;O95996;P25063;Q9Y3Y4;O432  
94;Q9HCK8;Q92837;Q04726;Q04724;Q9Y283;P67870;Q53G59;Q6P1J9;O75030;O75474;Q5JTC6;Q9UN  
36;Q9P1Z2;Q9BRK4;Q9NQC7;Q8N7H5;O60716;Q04727;Q8IY63;Q9P219;Q9Y608;Q9NYF0}  
31910 Pathogen[ P03383] interacts with 51 human  
partners:{Q9BRK4;O60716;Q6P1J9;Q14526;Q86U70;Q6PD62;Q04727;Q9NRI5;P25063;O75474;O750  
30;Q9NTX7;P24385;Q9UN36;Q8N2W9;P35813;Q04724;O00321;Q13618;Q9NSA3;Q04726;Q8WVC0;Q9Y2  
J4;O14641;Q53G59;Q04725;Q14696;Q8N7J2;Q5JTC6;Q8ND76;O94921;O00512;Q8IY63;P36402;P678  
70;Q9HCK8;Q9NYF0;Q92541;P23508;Q9HC62;Q9NPI1;O14907;Q16531;Q92837;O95271;P24864;Q9GZ  
S3;Q9Y608;Q9Y3Y4;Q8N7H5;Q9P1Z2}  
31911 Pathogen[ P03410] interacts with 62 human  
partners:{Q53G59;Q969F2;Q9P219;O00512;Q14526;Q8WVC0;P35813;Q9NSA3;Q04726;Q6PD62;Q9Y2  
J4;P36402;O75030;Q9NZC7;O75474;O60716;Q96B18;Q04724;O43294;Q8N2W9;O00321;Q9Y283;Q9BQ  
B4;Q92541;P23508;O60381;Q9GZS3;Q8N7H5;Q9P1Z2;P24385;Q13618;Q9HC62;Q9Y608;Q9UN36;O959  
96;P25063;O95271;Q92837;Q969G9;Q86U70;O14907;Q04727;Q9HCK8;Q6P1J9;Q16531;Q9NYF0;Q5JT  
C6;Q9NRI5;Q9HCS4;O43815;Q9Y3Y4;Q8N7J2;Q9H2K2;Q14696;P67870;Q8IY63;P24864;Q8ND76;Q9NP  
I1;Q8N944;Q04725;O14641}  
31912 Pathogen[ P14075] interacts with 52 human  
partners:{Q04727;P35813;Q86U70;O00512;Q14526;O75030;Q9NPI1;Q04725;Q9NTX7;Q13618;Q9Y3  
Y4;Q8WVC0;Q53G59;Q8N2W9;Q8IY63;Q9NRI5;Q8N7H5;Q6P1J9;Q9Y2J4;Q92541;Q04726;Q8N7J2;O146  
41;Q9NSA3;Q6PD62;Q9HC62;Q9HCK8;P67870;Q14696;Q9Y608;Q92837;Q9UN36;O14907;Q16531;O754  
74;Q9P1Z2;Q9GZS3;P36402;Q5JTC6;P23508;Q9BRK4;Q8ND76;Q04724;P24385;O60716;O95271;O949  
21;Q9NYF0;Q8N944;O00321;P25063;P24864}  
31913 Pathogen[ P0C206] interacts with 65 human  
partners:{O95271;Q9NQC7;O60716;Q9HCK8;Q6PD62;O00512;Q9NPI1;Q9NSA3;Q969F2;O75474;O750  
30;O43815;Q8N944;Q8IY63;Q9H2H0;Q04726;Q8N2W9;Q9HC62;Q9Y3Y4;Q92541;Q04727;Q16531;Q9HC  
S4;P98170;Q04725;Q9P1Z2;O00321;O95996;Q9Y283;Q96B18;O14907;Q9Y608;P25063;Q8N7H5;Q136  
18;Q9GZS3;Q8N7J2;Q9P219;Q9NRI5;Q9Y2J4;P67870;Q8WVC0;O43294;O60381;Q04724;Q9NZC7;Q9NY  
F0;Q86U70;Q8ND76;Q9UN36;Q14696;Q14526;Q92837;Q9NTX7;Q53G59;P24864;P36402;Q9H2K2;Q6P1  
J9;O94921;Q969G9;P35813;Q5JTC6;P23508;P24385}  
31914 Pathogen[ P03363] interacts with 57 human  
partners:{Q86U70;Q9UIW0;O14907;Q5JTC6;Q9GZS3;O95996;O75474;P24864;Q14526;Q9BRK4;P364  
02;Q8WVC0;Q16531;Q13618;Q9UN36;Q9NTX7;Q8ND76;Q969G9;Q04726;Q9NYF0;Q8IY63;O60381;Q047  
24;Q9HCS4;Q9Y3Y4;P23508;Q9H2K2;Q04727;O00321;Q9Y2J4;Q9Y608;Q9NSA3;Q9HCK8;O75030;Q6P1  
J9;Q9P1Z2;Q9HC62;Q92837;O00512;O43815;Q9NPI1;P98170;O95271;Q53G59;Q9Y283;P24385;Q047  
25;Q92541;Q9NRI5;P67870;Q9P219;Q8N2W9;O14641;O60716;Q8N7H5;Q6PD62;Q8N7J2}  
31915 [Cluster 2902]GO:0033261+P biological\_process [name] regulation of S phase [def] "A



cell cycle process that modulates the rate or extent of the progression through the S phase of the cell cycle." [GOC

31916 Pathogen[ Q2Q067] interacts with 5 human partners:{Q9UNS1;O14757;Q9BVW5;Q14493;Q92793}

31917 Pathogen[ P0C214] interacts with 5 human partners:{Q92793;Q9BVW5;Q14493;Q9UNS1;O14757}

31918 Pathogen[ P03346] interacts with 5 human partners:{Q9UNS1;O14757;Q14493;Q92793;Q9BVW5}

31919 Pathogen[ Q85601] interacts with 5 human partners:{O14757;Q92793;Q14493;Q9BVW5;Q9UNS1}

31920 Pathogen[ P14079] interacts with 4 human partners:{Q92793;Q14493;Q9UNS1;Q9BVW5}

31921 Pathogen[ P03383] interacts with 5 human partners:{Q9UNS1;O14757;Q9BVW5;Q14493;Q92793}

31922 Pathogen[ P03410] interacts with 5 human partners:{Q14493;Q9BVW5;Q92793;O14757;Q9UNS1}

31923 Pathogen[ P14075] interacts with 5 human partners:{Q14493;Q9BVW5;Q92793;Q9UNS1;O14757}

31924 Pathogen[ P0C206] interacts with 4 human partners:{Q9UNS1;Q92793;Q9BVW5;Q14493}

31925 Pathogen[ P03363] interacts with 5 human partners:{Q9BVW5;Q9UNS1;Q92793;Q14493;O14757}

31926 [Cluster 2903]GO:0051567+P biological\_process [name] histone H3-K9 methylation [def] "The modification of histone H3 by addition of a methyl group to lysine at position 9 of the histone." [GOC

31927 Pathogen[ Q2Q067] interacts with 4 human partners:{O43463;Q9NQX1;Q9UIF9;Q9H5I1}

31928 Pathogen[ P0C214] interacts with 4 human partners:{Q9H5I1;O43463;Q9UIF9;Q9NQX1}

31929 Pathogen[ P03346] interacts with 4 human partners:{Q9NQX1;O43463;Q9UIF9;Q9H5I1}

31930 Pathogen[ Q85601] interacts with 4 human partners:{Q9H5I1;Q9UIF9;O43463;Q9NQX1}

31931 Pathogen[ P14079] interacts with 3 human partners:{Q9NQX1;Q9H5I1;Q9UIF9}

31932 Pathogen[ P03383] interacts with 4 human partners:{O43463;Q9NQX1;Q9UIF9;Q9H5I1}

31933 Pathogen[ P03410] interacts with 4 human partners:{Q9H5I1;Q9UIF9;O43463;Q9NQX1}

31934 Pathogen[ P14075] interacts with 4 human partners:{Q9H5I1;Q9NQX1;Q9UIF9;O43463}

31935 Pathogen[ P0C206] interacts with 4 human partners:{Q9NQX1;O43463;Q9UIF9;Q9H5I1}

31936 Pathogen[ P03363] interacts with 4 human partners:{Q9NQX1;Q9H5I1;Q9UIF9;O43463}

31937 [Cluster 2904]GO:0048863+P biological\_process [name] stem cell differentiation [def] "The process in which a relatively unspecialized cell acquires specialized features of a stem cell. A stem cell is a cell that retains the ability to divide and proliferate throughout life to provide progenitor cells that can differentiate into specialized cells." [CL

31938 Pathogen[ Q2Q067] interacts with 9 human partners:{O00231;P31268;Q9Y2X9;P35548;P56693;Q9H9Z2;P09016;P43268;Q9Y651}

31939 Pathogen[ P0C214] interacts with 7 human partners:{P56693;O00231;P43268;Q9H9Z2;Q9Y2X9;Q9Y651;P35548}

31940 Pathogen[ P03346] interacts with 11 human partners:{P31268;P35548;P56693;Q9HCS4;O00231;P98177;P09016;Q9Y651;Q9Y2X9;P43268;Q9H9Z2}

31941 Pathogen[ Q85601] interacts with 8 human partners:{Q9Y651;Q9Y2X9;P35548;P56693;O00231;P43268;Q9HCS4;Q9H9Z2}

31942 Pathogen[ P14079] interacts with 5 human partners:{Q9H9Z2;Q9Y2X9;P56693;O00231;P28360}

31943 Pathogen[ P03383] interacts with 6 human partners:{Q9H9Z2;P35548;P43268;O00231;Q9Y2X9;P56693}

31944 Pathogen[ P03410] interacts with 7 human partners:{Q9Y2X9;P35548;P43268;P56693;O00231;Q9HCS4;Q9H9Z2}

31945 Pathogen[ P14075] interacts with 6 human partners:{P43268;P35548;Q9H9Z2;P56693;O00231;Q9Y2X9}

31946 Pathogen[ P0C206] interacts with 10 human partners:{Q9Y2X9;P43268;P31268;Q9HCS4;P56693;Q9H9Z2;P35548;P09016;O00231;Q9Y651}

31947 Pathogen[ P03363] interacts with 9 human partners:{P35548;Q9HCS4;P43268;Q9Y2X9;P56693;P31268;Q9H9Z2;P09016;Q9Y651}

31948 [Cluster 2905]GO:0006919+P biological\_process [name] activation of caspase activity [def] "Upregulation of the activity of a caspase, any of a group of cysteine proteases involved in apoptosis." [GOC

31949 Pathogen[ Q2Q067] interacts with 29 human partners:{Q9NR28;O75340;O00291;Q9UMX3;Q9BXH1;P54274;P61604;Q00994;Q12933;Q13158;Q13794;Q14790;Q8N726;P84022;Q9HD36;Q16890;Q96BY2;P23396;Q9H6Z9;Q9C000;Q15628;O95831;Q9NWB7;Q9Y2G2;P46527;Q96A26;Q96EY1;Q9UKL3;Q71UM5}

31950 Pathogen[ P0C214] interacts with 32 human partners:{Q9NWB7;Q9NPP4;Q15628;Q96BY2;Q92934;P23396;Q13158;P61604;Q00994;P84022;P46527;Q71UM5;Q8N726;O75340;Q16890;Q13794;Q9BXH1;Q9H6Z9;Q9UKL3;Q12933;Q9HD36;Q9UMX3;P10809;Q9Y2G2;O14727;Q9NR28;O00291;Q96EY1;P54274;P55072;Q14790;Q9C000}

31951 Pathogen[ P03346] interacts with 33 human partners:{Q13158;Q9NR28;P54274;P61604;Q96A26;Q71UM5;Q00994;Q96BY2;O00291;P55072;Q16890;Q9UKL3;P84022;Q9NPP4;O75340;P51397;Q9NWB7;O95831;Q15628;P23396;P55211;Q14790;Q9UMX3;Q9Y2G2;Q8N726;P46527;Q9BXH1;Q9HD36;O14727;Q96EY1;Q9H6Z9;Q13794;Q9C000}

31952 Pathogen[ Q85601] interacts with 27 human partners:{Q16890;Q9H6Z9;Q9UKL3;Q9BXH1;O95831;Q9HD36;Q13158;Q14790;P23396;P61604;Q9NW

B7;Q96BY2;Q9Y2G2;Q71UM5;Q9NR28;Q9UMX3;Q8N726;Q12933;O75340;Q15628;P84022;O00291;Q00994;Q96EY1;P54274;Q13794;P46527}

31953 Pathogen[ P14079] interacts with 34 human partners: {P54274;Q16890;P23396;O00291;Q9NWB7;Q9C000;Q9BXX5;Q00994;Q8N726;Q9BXH1;P61604;O95831;Q9UKL3;Q14790;Q96BY2;Q92934;O75340;Q9HD36;Q9H6Z9;Q9NR28;Q13794;Q71UM5;Q9UMX3;Q96A26;Q9Y2G2;Q12933;Q13158;P46527;P51397;Q9Y239;Q15628;Q96EY1;P40305;Q9NPP4}

31954 Pathogen[ P03383] interacts with 26 human partners: {Q9UKL3;Q9NWB7;P61604;Q9UMX3;O95831;Q96A26;Q71UM5;Q13158;O00291;P84022;Q00994;P46527;Q12933;Q9H6Z9;Q9Y2G2;Q15628;P51397;Q13794;Q9BXH1;Q9NR28;Q16890;P23396;Q96EY1;P54274;Q8N726;Q96BY2}

31955 Pathogen[ P03410] interacts with 33 human partners: {P84022;P46527;Q9Y2G2;Q9Y239;Q8N726;Q9H6Z9;Q9NR28;Q9BXH1;P54274;P61604;Q96BY2;Q9HD36;P23396;Q92934;Q9NPP4;Q9C000;Q13794;O00291;Q13158;Q00994;Q15628;P51397;Q9NWB7;Q9UMX3;Q96A26;Q12933;O95831;Q9UKL3;Q16890;O75340;P40305;Q96EY1;Q71UM5}

31956 Pathogen[ P14075] interacts with 27 human partners: {Q96BY2;Q96A26;Q9UMX3;P61604;Q00994;P46527;O00291;Q9NR28;Q9UKL3;P54274;P51397;Q12933;O95831;Q16890;Q9BXH1;Q13158;P23396;Q13794;Q9NWB7;Q15628;P40305;P84022;Q96EY1;Q8N726;Q9Y2G2;Q9H6Z9;Q71UM5}

31957 Pathogen[ P0C206] interacts with 34 human partners: {O75340;Q9C000;P84022;P40305;Q9Y2G2;O00291;Q8N726;Q9NR28;Q9HD36;Q9UKL3;Q9UMX3;Q16890;Q13158;Q9BXH1;Q96A26;Q12933;Q00994;Q92934;P54274;P23396;P51397;O95831;Q9NWB7;Q71UM5;P46527;Q96BY2;Q14790;Q15628;P55072;Q9H6Z9;Q9BXX5;Q96EY1;P61604;Q13794}

31958 Pathogen[ P03363] interacts with 27 human partners: {P23396;Q9C000;O75340;Q13794;Q12933;Q9H6Z9;Q13158;Q9NWB7;Q9HD36;Q9NR28;Q96BY2;P54274;Q9UKL3;P84022;Q9Y2G2;Q00994;Q15628;Q71UM5;Q8N726;Q16890;Q9NPP4;Q9BXH1;Q96EY1;Q9UMX3;O00291;P61604;O95831}

31959 [Cluster 2906]GO:0055008+P biological\_process [name] cardiac muscle tissue morphogenesis [def] "The process in which the anatomical structures of cardiac muscle tissue are generated and organized." [GOC]

31960 Pathogen[ Q2Q067] interacts with 3 human partners: {Q15327;Q8IX07;Q9GZT9}

31961 Pathogen[ P0C214] interacts with 3 human partners: {Q15327;Q9GZT9;Q8IX07}

31962 Pathogen[ P03346] interacts with 3 human partners: {Q15327;Q9GZT9;Q8IX07}

31963 Pathogen[ Q85601] interacts with 3 human partners: {Q9GZT9;Q15327;Q8IX07}

31964 Pathogen[ P14079] interacts with 5 human partners: {Q9GZT9;P68032;Q8IX07;Q15327;O15273}

31965 Pathogen[ P03383] interacts with 1 human partners: {Q15327}

31966 Pathogen[ P03410] interacts with 4 human partners: {Q15327;O15273;Q9GZT9;Q8IX07}

31967 Pathogen[ P14075] interacts with 2 human partners: {Q9GZT9;Q15327}

31968 Pathogen[ P0C206] interacts with 3 human partners: {Q9GZT9;Q15327;Q8IX07}

31969 Pathogen[ P03363] interacts with 1 human partners: {Q15327}

31970 [Cluster 2907]GO:0042766+P biological\_process [name] nucleosome mobilization [def] "The movement of nucleosomes along a DNA fragment." [PMID]

31971 Pathogen[ Q2Q067] interacts with 1 human partners: {O14497}

31972 Pathogen[ P0C214] interacts with 1 human partners: {O14497}

31973 Pathogen[ P03346] interacts with 1 human partners: {O14497}

31974 Pathogen[ Q85601] interacts with 1 human partners: {O14497}

31975 Pathogen[ P14079] interacts with 1 human partners: {O14497}

31976 Pathogen[ P03383] interacts with 1 human partners: {O14497}

31977 Pathogen[ P03410] interacts with 1 human partners: {O14497}

31978 Pathogen[ P14075] interacts with 1 human partners: {O14497}

31979 Pathogen[ P0C206] interacts with 1 human partners: {O14497}

31980 Pathogen[ P03363] interacts with 1 human partners: {O14497}

31981 [Cluster 2908]GO:0010458+P biological\_process [name] exit from mitosis [def] "The cell cycle process where a cell leaves M phase. M phase is the part of the mitotic cell cycle during which mitosis and cytokinesis take place." [GOC]

31982 Pathogen[ Q2Q067] interacts with 4 human partners: {Q7Z460;O00762;Q66LE6;Q9Y5B0}

31983 Pathogen[ P0C214] interacts with 5 human partners: {Q16763;O00762;Q66LE6;Q7Z460;Q9Y5B0}

31984 Pathogen[ P03346] interacts with 4 human partners: {Q66LE6;Q9Y5B0;O00762;Q7Z460}

31985 Pathogen[ Q85601] interacts with 5 human partners: {Q16763;Q66LE6;Q9Y5B0;O00762;Q7Z460}

31986 Pathogen[ P14079] interacts with 4 human partners: {Q7Z460;Q9Y5B0;Q66LE6;O00762}

31987 Pathogen[ P03383] interacts with 3 human partners: {Q7Z460;O00762;Q9Y5B0}

31988 Pathogen[ P03410] interacts with 4 human partners: {Q7Z460;Q9Y5B0;O00762;Q66LE6}

31989 Pathogen[ P14075] interacts with 3 human partners: {Q9Y5B0;Q7Z460;O00762}

31990 Pathogen[ P0C206] interacts with 5 human partners: {Q16763;Q66LE6;Q9Y5B0;O00762;Q7Z460}

31991 Pathogen[ P03363] interacts with 4 human partners: {Q9Y5B0;O00762;Q66LE6;Q7Z460}

31992 [Cluster 2909]GO:0006386+P biological\_process [name] termination of RNA polymerase III transcription [def] "The process in which transcription by RNA polymerase III is terminated. Pol III has an intrinsic ability to terminate transcription upon incorporation of 4 to 6 contiguous U residues." [GOC]

31993 Pathogen[ Q2Q067] interacts with 15 human partners: {P52434;P19388;P61218;Q9BUI4;Q9NVU0;P62875;O15318;P53803;Q9Y535;Q9Y250;P05423;O14802;Q9HID9;Q9Y2S0;O15160}

31994 Pathogen[ P0C214] interacts with 16 human

31995 partners: {Q9BUI4;P53803;Q9NVU0;Q9H1D9;Q9Y2S0;P61218;P05423;Q9Y250;O15318;Q9NW08;P62875;O15160;Q9Y535;P52434;P19388;O14802}  
Pathogen[ P03346] interacts with 15 human

31996 partners: {Q9NVU0;P52434;P05423;P53803;P61218;O15318;P19388;Q9H1D9;O15160;Q9Y250;Q9Y535;Q9BUI4;O14802;Q9Y2S0;P62875}  
Pathogen[ Q85601] interacts with 17 human

31997 partners: {Q9Y250;Q9H1D9;Q9Y535;Q9BUI4;Q9Y2Y1;P53803;Q9Y2S0;P61218;P05423;Q9NVU0;P19388;Q9NW08;P52434;O15160;O14802;O15318;P62875}  
Pathogen[ P14079] interacts with 18 human

31998 partners: {Q9Y2S0;P62875;Q9NW08;P52434;P61218;Q9Y250;P53803;P19388;Q9BUI4;P05423;O15160;Q9Y2Y1;Q9BT43;Q9NVU0;O14802;O15318;Q9H1D9;Q9Y535}  
Pathogen[ P03383] interacts with 11 human

31999 partners: {P53803;Q9Y535;P52434;P61218;Q9H1D9;Q9NVU0;P62875;O15318;P19388;O14802;Q9Y250}  
Pathogen[ P03410] interacts with 18 human

32000 partners: {Q9BT43;O15318;Q9Y535;Q9NW08;P53803;Q9Y2S0;P62875;P05423;P61218;Q9Y2Y1;O15160;P52434;Q9H1D9;Q9Y250;Q9NVU0;P19388;O14802;Q9BUI4}  
Pathogen[ P14075] interacts with 11 human

32001 partners: {Q9NVU0;P19388;P61218;Q9Y250;Q9H1D9;Q9Y535;P62875;P52434;O14802;O15318;P53803}  
Pathogen[ P0C206] interacts with 18 human

32002 partners: {P62875;Q9BT43;P19388;P61218;Q9NW08;Q9BUI4;O15318;Q9Y535;P05423;Q9NVU0;P53803;Q9Y2S0;O14802;Q9Y2Y1;Q9H1D9;Q9Y250;P52434;O15160}  
Pathogen[ P03363] interacts with 12 human

32003 partners: {Q9Y535;P19388;Q9NVU0;P61218;Q9H1D9;Q9Y250;P05423;O15318;P53803;P52434;Q9Y2S0;O15160}  
[Cluster 2910]GO:0046890+P biological\_process [name] regulation of lipid biosynthetic process [def] "Any process that modulates the frequency, rate or extent of the chemical reactions and pathways resulting in the formation of lipids." [GOC

32004 Pathogen[ Q2Q067] interacts with 2 human partners: {Q92748;Q9NPA3}

32005 Pathogen[ P0C214] interacts with 2 human partners: {Q9NPA3;Q92748}

32006 Pathogen[ P03346] interacts with 2 human partners: {Q92748;Q9NPA3}

32007 Pathogen[ Q85601] interacts with 2 human partners: {Q9NPA3;Q92748}

32008 Pathogen[ P14079] interacts with 2 human partners: {Q9NPA3;Q92748}

32009 Pathogen[ P03383] interacts with 2 human partners: {Q92748;Q9NPA3}

32010 Pathogen[ P03410] interacts with 2 human partners: {Q92748;Q9NPA3}

32011 Pathogen[ P14075] interacts with 2 human partners: {Q92748;Q9NPA3}

32012 Pathogen[ P0C206] interacts with 2 human partners: {Q9NPA3;Q92748}

32013 Pathogen[ P03363] interacts with 2 human partners: {Q92748;Q9NPA3}

32014 [Cluster 2911]GO:0048545+P biological\_process [name] response to steroid hormone stimulus [def] "Any process that results in a change in state or activity of a cell or an organism (in terms of movement, secretion, enzyme production, gene expression, etc.) as a result of a steroid hormone stimulus." [GOC

32015 Pathogen[ Q2Q067] interacts with 2 human partners: {P24385;P24864}

32016 Pathogen[ P0C214] interacts with 4 human partners: {P68133;P24385;P05543;P24864}

32017 Pathogen[ P03346] interacts with 2 human partners: {P24385;P24864}

32018 Pathogen[ Q85601] interacts with 3 human partners: {P68133;P24385;P24864}

32019 Pathogen[ P14079] interacts with 3 human partners: {P24864;O60502;P68133}

32020 Pathogen[ P03383] interacts with 2 human partners: {P24385;P24864}

32021 Pathogen[ P03410] interacts with 4 human partners: {O60502;P24385;P68133;P24864}

32022 Pathogen[ P14075] interacts with 2 human partners: {P24385;P24864}

32023 Pathogen[ P0C206] interacts with 3 human partners: {P68133;P24864;P24385}

32024 Pathogen[ P03363] interacts with 3 human partners: {P24864;P68133;P24385}

32025 [Cluster 2912]GO:0003382+P biological\_process [name] epithelial cell morphogenesis [def] "The change in form that occurs when an epithelial cell progresses from its initial formation to its mature state." [GOC

32026 Pathogen[ Q2Q067] interacts with 1 human partners: {P63000}

32027 Pathogen[ P0C214] interacts with 2 human partners: {P63000;Q5SW24}

32028 Pathogen[ P03346] interacts with 1 human partners: {P63000}

32029 Pathogen[ Q85601] interacts with 2 human partners: {P63000;Q5SW24}

32030 Pathogen[ P14079] interacts with 1 human partners: {Q5SW24}

32031 Pathogen[ P03383] interacts with 1 human partners: {P63000}

32032 Pathogen[ P03410] interacts with 2 human partners: {P63000;Q5SW24}

32033 Pathogen[ P14075] interacts with 1 human partners: {P63000}

32034 Pathogen[ P0C206] interacts with 2 human partners: {Q5SW24;P63000}

32035 Pathogen[ P03363] interacts with 1 human partners: {P63000}

32036 [Cluster 2913]GO:0046827+P biological\_process [name] positive regulation of protein export from nucleus [def] "Any process that activates or increases the frequency, rate or extent of directed movement of proteins from the nucleus into the cytoplasm." [GOC

32037 Pathogen[ Q2Q067] interacts with 3 human partners: {P50402;O43516;Q9C0E2}

32038 Pathogen[ P0C214] interacts with 3 human partners: {O43516;P50402;Q9C0E2}

32039 Pathogen[ P03346] interacts with 3 human partners: {O43516;Q9C0E2;P50402}

32040 Pathogen[ Q85601] interacts with 3 human partners: {Q9C0E2;O43516;P50402}

32041 Pathogen[ P14079] interacts with 3 human partners: {O43516;P50402;Q9C0E2}

32042 Pathogen[ P03383] interacts with 3 human partners: {O43516;Q9C0E2;P50402}

32043 Pathogen[ P03410] interacts with 3 human partners: {O43516;P50402;Q9C0E2}

32044 Pathogen[ P14075] interacts with 3 human partners:{Q9C0E2;P50402;O43516}  
32045 Pathogen[ P0C206] interacts with 3 human partners:{P50402;O43516;Q9C0E2}  
32046 Pathogen[ P03363] interacts with 3 human partners:{Q9C0E2;P50402;O43516}  
32047 [Cluster 2914]GO:0006644+P biological\_process [name] phospholipid metabolic process  
[def] "The chemical reactions and pathways involving phospholipids, any lipid containing  
phosphoric acid as a mono- or diester." [ISBN  
32048 Pathogen[ Q2Q067] interacts with 9 human  
partners:{Q96G23;Q9UG56;Q8WYR1;Q92539;Q92562;P27986;Q8WWR8;Q5UE93;Q14693}  
32049 Pathogen[ P0C214] interacts with 22 human  
partners:{Q8WWR8;Q9HA82;Q8N335;Q99698;Q9H227;O15056;P40939;Q9Y3R4;Q9NPB8;Q92562;Q925  
39;Q08AM6;Q8WYR1;Q9BQK8;Q96G23;Q5UE93;Q9UG56;Q13615;P27986;Q14693;P21695;P16278}  
32050 Pathogen[ P03346] interacts with 13 human  
partners:{Q99698;Q8WYR1;Q92562;O15056;P16278;Q92539;Q96G23;Q8WWR8;Q9UG56;Q5UE93;P279  
86;Q9Y263;Q14693}  
32051 Pathogen[ Q85601] interacts with 10 human  
partners:{Q08AM6;Q9UG56;Q92562;P27986;Q96G23;Q8WYR1;Q5UE93;Q92539;Q99698;Q14693}  
32052 Pathogen[ P14079] interacts with 29 human  
partners:{Q9NY59;Q92562;P16278;Q9BQK8;Q9NPB8;Q14693;Q9NXXE4;Q8WYR1;Q9HA82;Q32NB8;Q925  
39;P06280;P27544;Q9UG56;P54803;Q96G23;Q9Y263;Q13510;O95292;Q8NBK3;Q8WWR8;Q9NZ20;Q9Y3  
R4;Q96PE3;P21695;Q99698;Q5UE93;P17405;O15327}  
32053 Pathogen[ P03383] interacts with 6 human  
partners:{P27986;Q8WWR8;Q8WYR1;Q5UE93;Q92539;Q14693}  
32054 Pathogen[ P03410] interacts with 29 human  
partners:{P54803;Q9BQK8;Q92562;O95292;P27986;Q96PE3;Q5UE93;Q8WYR1;O15327;P16278;P275  
44;Q9NXXE4;Q96G23;Q14693;Q9NPB8;Q13510;Q08AM6;Q9HA82;Q9NZ20;Q9Y263;Q99698;Q9UBY8;Q9Y3  
R4;Q92539;Q9UG56;P17405;Q8WWR8;P21695;Q16635}  
32055 Pathogen[ P14075] interacts with 8 human  
partners:{Q8WYR1;Q8WWR8;Q5UE93;Q13510;Q92539;P27986;Q9UG56;Q14693}  
32056 Pathogen[ P0C206] interacts with 18 human  
partners:{Q92539;Q96G23;Q92562;Q13615;Q99698;P27986;O95292;Q9Y3R4;Q9HA82;Q9UG56;Q9BQ  
K8;Q9NPB8;Q8WWR8;P16278;Q5UE93;Q14693;Q08AM6;Q8WYR1}  
32057 Pathogen[ P03363] interacts with 8 human  
partners:{Q9Y263;Q8WYR1;Q92539;Q99698;Q5UE93;O15056;Q96G23;P27986}  
32058 [Cluster 2915]GO:0019918+P biological\_process [name] peptidyl-arginine methylation, to  
symmetrical-dimethyl arginine [def] "The process of methylation of peptidyl-arginine  
to form peptidyl-N(omega),N'(omega)-dimethyl-L-arginine." [RESID  
32059 Pathogen[ Q2Q067] interacts with 2 human partners:{O14744;Q9NVM4}  
32060 Pathogen[ P0C214] interacts with 1 human partners:{Q9NVM4}  
32061 Pathogen[ P03346] interacts with 2 human partners:{O14744;Q9NVM4}  
32062 Pathogen[ Q85601] interacts with 2 human partners:{Q9NVM4;O14744}  
32063 Pathogen[ P14079] interacts with 2 human partners:{Q9NVM4;O14744}  
32064 Pathogen[ P03383] interacts with 1 human partners:{O14744}  
32065 Pathogen[ P03410] interacts with 2 human partners:{Q9NVM4;O14744}  
32066 Pathogen[ P14075] interacts with 1 human partners:{O14744}  
32067 Pathogen[ P0C206] interacts with 2 human partners:{O14744;Q9NVM4}  
32068 Pathogen[ P03363] interacts with 2 human partners:{O14744;Q9NVM4}  
32069 [Cluster 2916]GO:0034134+P biological\_process [name] toll-like receptor 2 signaling  
pathway [def] "Any series of molecular signals generated as a consequence of binding to  
toll-like receptor 2." [GOC  
32070 Pathogen[ Q2Q067] interacts with 30 human  
partners:{P01100;Q15653;Q04206;Q9NYJ8;Q8N5C8;O75582;Q9Y6K9;Q13233;P61088;Q96FA3;P194  
19;P19838;P15336;Q8N5C8;P25963;P0CG47;O14920;P45984;Q00653;P0CG48;O43318;P62987;Q134  
04;Q9HAT8;O15111;Q15759;Q16829;Q02078;Q15750;P62979}  
32071 Pathogen[ P0C214] interacts with 33 human  
partners:{Q00653;O15111;Q9Y6K9;P19838;P15336;P01100;Q96FA3;P19419;Q04206;Q9HAT8;Q134  
04;Q15653;O43318;Q02078;Q8N5C8;Q13233;P0CG48;P25963;Q16829;O75582;P62987;Q15750;P054  
12;Q8N5C8;Q15759;P0CG47;P45984;P16220;P62979;O14920;Q9NYJ8;P61088;P18846}  
32072 Pathogen[ P03346] interacts with 34 human  
partners:{Q9Y6K9;P05412;P45984;Q02078;O15111;P16220;P15336;P62987;P25963;Q8N5C8;Q156  
53;P19419;P0CG48;Q04206;Q96FA3;Q13404;Q8N5C8;P61088;Q9NYJ8;Q9HAT8;Q13233;O75582;Q157  
50;Q16829;P62979;Q15759;P0CG47;P45985;P19838;O14920;O43318;P01100;P18846;Q00653}  
32073 Pathogen[ Q85601] interacts with 33 human  
partners:{Q02078;Q15750;Q9NYJ8;O15111;P19419;Q9HAT8;Q16829;P18846;P0CG48;Q15653;Q96F  
A3;Q13404;Q8N5C8;P01100;Q9Y6K9;Q8N5C8;P16220;O14920;Q04206;P05412;O75582;P62979;Q157  
59;P0CG47;P45984;Q13233;P62987;Q00653;P15336;O43318;P61088;P19838;P25963}  
32074 Pathogen[ P14079] interacts with 32 human  
partners:{Q9HAT8;Q8N5C8;Q02078;P0CG48;Q06413;O43187;P53779;P52564;O75582;Q16829;Q134  
04;Q15750;P62979;P62987;Q96FA3;P45984;P45983;Q16644;Q8N5C8;Q15759;Q9Y6K9;P45985;P153  
36;Q9Y6Y9;Q13164;P05412;P0CG47;Q9Y239;P01100;Q99836;P19419;Q15653}  
32075 Pathogen[ P03383] interacts with 32 human  
partners:{O75582;P16220;Q9Y6K9;P62987;Q13233;Q00653;O14920;O15111;P19419;P18846;Q156  
53;O43318;Q8N5C8;P61088;Q13404;Q15759;P25963;P01100;P62979;P0CG47;Q96FA3;Q04206;P459  
84;P0CG48;P15336;Q9NYJ8;P19838;Q8N5C8;Q02078;Q9HAT8;Q15750;P05412}  
32076 Pathogen[ P03410] interacts with 37 human  
partners:{Q04206;P19838;P0CG48;O14920;Q9Y239;Q8N5C8;P19419;O15111;Q15750;Q96FA3;O755  
82;O43187;Q15653;P61088;Q13233;P62979;P01100;P18846;O43318;Q16829;P45985;Q9NYJ8;Q8N5

C8;P16220;Q9HAT8;P05412;Q9Y6Y9;P45984;P62987;P53779;Q02078;Q00653;Q13404;Q9Y6K9;P25963;P15336;POCG47}

32077 Pathogen[ P14075] interacts with 32 human  
partners: {O15111;Q04206;Q15750;P05412;Q15759;O75582;P61088;P19419;P15336;Q15653;P25963;Q8NFZ5;Q8N5C8;O14920;POCG48;P62979;O43318;Q9HAT8;Q96FA3;P62987;Q02078;P01100;POCG47;Q13404;P19838;Q00653;P16220;Q9Y6K9;Q13233;P18846;P45984;Q9NYJ8}

32078 Pathogen[ POC206] interacts with 34 human  
partners: {POCG48;O14920;Q9Y6K9;Q02078;P16220;Q8N5C8;O75582;P45984;P05412;P25963;P19419;Q9HAT8;Q8NFZ5;O43318;P15336;Q15653;P18846;Q16829;Q13233;P61088;P19838;P01100;Q04206;O15111;P62979;Q9NYJ8;P45985;POCG47;Q96FA3;Q00653;Q15750;P62987;Q13404;Q15759}

32079 Pathogen[ P03363] interacts with 27 human  
partners: {O14920;Q04206;P25963;O15111;Q9NYJ8;P16220;Q9Y6K9;P19419;O43318;Q15750;P61088;P15336;Q15653;Q16829;Q00653;Q96FA3;P18846;P62987;P19838;P05412;Q13404;Q9HAT8;Q8NFZ5;Q8N5C8;Q13233;P01100;Q02078}

32080 [Cluster 2917]GO:0045071+P biological\_process [name] negative regulation of viral genome replication [def] "Any process that stops, prevents, or reduces the frequency, rate or extent of viral genome replication." [GOC

32081 Pathogen[ Q2Q067] interacts with 7 human  
partners: {Q9Y6K5;Q16666;Q15025;Q7Z2W4;O15162;P09914;Q9HC16}

32082 Pathogen[ POC214] interacts with 8 human  
partners: {P09914;Q9Y6K5;Q16666;Q8WXG1;Q7Z2W4;Q9HC16;O15162;Q15025}

32083 Pathogen[ P03346] interacts with 7 human  
partners: {Q16666;Q15646;Q15025;P09914;Q9Y6K5;Q7Z2W4;O15162}

32084 Pathogen[ Q85601] interacts with 7 human  
partners: {Q16666;Q9HC16;Q7Z2W4;Q9Y6K5;Q15025;P09914;O15162}

32085 Pathogen[ P14079] interacts with 12 human  
partners: {P13164;O15162;P09914;Q7Z2W4;P31941;Q9HC16;Q15025;Q7Z434;P03973;Q9Y6K5;Q16666;Q8WXG1}

32086 Pathogen[ P03383] interacts with 5 human  
partners: {O15162;Q15025;Q16666;Q9Y6K5;Q7Z2W4}

32087 Pathogen[ P03410] interacts with 10 human  
partners: {Q16666;Q15025;Q8WXG1;Q7Z434;O15162;Q9HC16;Q7Z2W4;Q9Y6K5;P31941;P09914}

32088 Pathogen[ P14075] interacts with 5 human  
partners: {O15162;Q16666;Q15025;Q9Y6K5;Q7Z2W4}

32089 Pathogen[ POC206] interacts with 9 human  
partners: {Q9Y6K5;Q16666;Q15025;P31941;O15162;Q9HC16;Q7Z2W4;Q8WXG1;P09914}

32090 Pathogen[ P03363] interacts with 5 human  
partners: {Q9Y6K5;P09914;Q7Z2W4;Q16666;Q15025}

32091 [Cluster 2918]GO:0030890+P biological\_process [name] positive regulation of B cell proliferation [def] "Any process that activates or increases the rate or extent of B cell proliferation." [GOC

32092 Pathogen[ Q2Q067] interacts with 7 human  
partners: {Q8IUC6;P41182;Q13469;P35226;P38936;Q96FA3;P15923}

32093 Pathogen[ POC214] interacts with 7 human  
partners: {P35226;Q13469;Q8IUC6;Q96FA3;P38936;P15923;P41182}

32094 Pathogen[ P03346] interacts with 8 human  
partners: {O75995;P35226;P15923;Q96FA3;Q13469;P41182;Q8IUC6;P38936}

32095 Pathogen[ Q85601] interacts with 7 human  
partners: {Q8IUC6;Q13469;Q96FA3;P15923;P35226;P38936;P41182}

32096 Pathogen[ P14079] interacts with 10 human  
partners: {Q9BXL7;Q06413;Q8IUC6;P15923;Q96FA3;P41182;P38936;P13232;P35226;Q13469}

32097 Pathogen[ P03383] interacts with 5 human  
partners: {Q13469;Q8IUC6;P15923;Q96FA3;P35226}

32098 Pathogen[ P03410] interacts with 9 human  
partners: {Q96FA3;P15923;P38936;Q9BXL7;Q13469;P41182;Q8IUC6;P35226;P13232}

32099 Pathogen[ P14075] interacts with 5 human  
partners: {P15923;Q13469;Q96FA3;Q8IUC6;P35226}

32100 Pathogen[ POC206] interacts with 7 human  
partners: {Q13469;P41182;P35226;P15923;P38936;Q8IUC6;Q96FA3}

32101 Pathogen[ P03363] interacts with 4 human partners: {P15923;Q96FA3;P35226;Q13469}

32102 [Cluster 2919]GO:0030326+P biological\_process [name] embryonic limb morphogenesis [def] "The process, occurring in the embryo, by which the anatomical structures of the limb are generated and organized. A limb is an appendage of an animal used for locomotion or grasping." [GOC

32103 Pathogen[ Q2Q067] interacts with 11 human  
partners: {Q9NR56;Q8IVN3;P35548;Q15699;P12755;Q96AP0;P20823;P40425;P54821;P40424;P31260}

32104 Pathogen[ POC214] interacts with 7 human  
partners: {P40424;Q9NR56;P12755;Q8IVN3;P40425;Q15699;P35548}

32105 Pathogen[ P03346] interacts with 19 human  
partners: {Q96AP0;P54821;P35453;P31260;Q99811;Q05925;P35548;P31270;Q9UJQ4;P20823;POCG40;Q8IVN3;Q15699;P28358;P40425;Q99593;P40424;P56178;Q9NR56}

32106 Pathogen[ Q85601] interacts with 9 human  
partners: {Q9NR56;P12755;Q8IVN3;P31260;P40424;Q15699;P40425;P35548;P20823}

32107 Pathogen[ P14079] interacts with 9 human  
partners: {P12755;Q15699;Q9NR56;POCG40;Q8IVN3;Q4AC94;Q9UJQ4;P28360;Q96AP0}

32108 Pathogen[ P03383] interacts with 6 human partners:{P40424;Q9NR56;Q8IVN3;P35548;Q15699;P40425}

32109 Pathogen[ P03410] interacts with 9 human partners:{P12755;Q96AP0;Q4AC94;Q9NR56;P35548;Q8IVN3;Q15699;P40424;Q9UJQ4}

32110 Pathogen[ P14075] interacts with 7 human partners:{P40424;P40425;P35548;Q96AP0;Q9NR56;Q15699;Q8IVN3}

32111 Pathogen[ P0C206] interacts with 12 human partners:{P40425;Q9UJQ4;Q96AP0;P54821;Q9NR56;Q15699;P40424;P12755;Q8IVN3;P35548;P20823;P31260}

32112 Pathogen[ P03363] interacts with 15 human partners:{P56179;Q15699;P35453;Q9UJQ4;P35548;Q9NR56;Q96AP0;P40425;P28358;P31260;Q05925;P54821;P40424;Q99811;Q8IVN3}

32113 [Cluster 2920]GO:2000379+P biological\_process [name] positive regulation of reactive oxygen species metabolic process [def] "Any process that activates or increases the frequency, rate or extent of reactive oxygen species metabolic process." [GOC

32114 Pathogen[ Q2Q067] interacts with 4 human partners:{Q16236;P24522;P38936;Q7Z2X4}

32115 Pathogen[ P0C214] interacts with 5 human partners:{P24522;P62993;Q7Z2X4;P38936;Q16236}

32116 Pathogen[ P03346] interacts with 5 human partners:{P62993;Q7Z2X4;Q16236;P38936;P24522}

32117 Pathogen[ Q85601] interacts with 5 human partners:{Q16236;P62993;P24522;Q7Z2X4;P38936}

32118 Pathogen[ P14079] interacts with 7 human partners:{Q1HG43;P38936;P24522;Q16236;P62993;P60602;Q7Z2X4}

32119 Pathogen[ P03383] interacts with 2 human partners:{P24522;Q16236}

32120 Pathogen[ P03410] interacts with 7 human partners:{Q1HG43;P24522;Q16236;P38936;Q7Z2X4;P60602;P62993}

32121 Pathogen[ P14075] interacts with 3 human partners:{P60602;P24522;Q16236}

32122 Pathogen[ P0C206] interacts with 7 human partners:{Q7Z2X4;P24522;P62993;Q1HG43;P38936;Q16236;P60602}

32123 Pathogen[ P03363] interacts with 2 human partners:{Q16236;P24522}

32124 [Cluster 2921]GO:0000281+P biological\_process [name] cytokinesis after mitosis [def] "A cell cycle process that results in the division of the cytoplasm of a cell after mitosis, resulting in the separation of the original cell into two daughter cells." [GOC

32125 Pathogen[ Q2Q067] interacts with 4 human partners:{Q01082;Q8WWK9;Q9UER7;Q9BXS6}

32126 Pathogen[ P0C214] interacts with 5 human partners:{Q9BXS6;Q01082;P35580;Q9UER7;Q8WWK9}

32127 Pathogen[ P03346] interacts with 5 human partners:{Q9BXS6;O95630;Q01082;Q9UER7;Q8WWK9}

32128 Pathogen[ Q85601] interacts with 6 human partners:{Q8WWK9;Q9UER7;Q9BXS6;Q01082;O95630;P35580}

32129 Pathogen[ P14079] interacts with 4 human partners:{Q01082;Q9BXS6;Q9UER7;Q8WWK9}

32130 Pathogen[ P03383] interacts with 4 human partners:{Q8WWK9;Q9BXS6;Q9UER7;P35580}

32131 Pathogen[ P03410] interacts with 5 human partners:{Q8WWK9;Q9BXS6;Q9UER7;P35580;Q01082}

32132 Pathogen[ P14075] interacts with 3 human partners:{Q9BXS6;Q8WWK9;Q9UER7}

32133 Pathogen[ P0C206] interacts with 6 human partners:{Q01082;O95630;Q9UER7;Q9BXS6;P35580;Q8WWK9}

32134 Pathogen[ P03363] interacts with 4 human partners:{Q8WWK9;Q01082;Q9UER7;Q9BXS6}

32135 [Cluster 2922]GO:0048025+P biological\_process [name] negative regulation of nuclear mRNA splicing, via spliceosome [def] "Any process that stops, prevents or reduces the rate or extent of mRNA splicing via a spliceosomal mechanism." [GOC

32136 Pathogen[ Q2Q067] interacts with 5 human partners:{O75494;Q12872;Q16629;P38159;P26368}

32137 Pathogen[ P0C214] interacts with 6 human partners:{P26368;P38159;P26599;Q12872;O75494;Q16629}

32138 Pathogen[ P03346] interacts with 9 human partners:{Q08170;Q13242;Q13247;P26599;Q16629;P26368;P38159;O75494;Q12872}

32139 Pathogen[ Q85601] interacts with 5 human partners:{O75494;Q16629;Q12872;P38159;P26368}

32140 Pathogen[ P14079] interacts with 6 human partners:{P26368;Q16629;P26599;Q12872;O75494;P38159}

32141 Pathogen[ P03383] interacts with 5 human partners:{Q12872;O75494;P26368;P38159;Q16629}

32142 Pathogen[ P03410] interacts with 6 human partners:{P26368;Q16629;P26599;Q12872;P38159;O75494}

32143 Pathogen[ P14075] interacts with 5 human partners:{P38159;O75494;Q12872;P26368;Q16629}

32144 Pathogen[ P0C206] interacts with 5 human partners:{Q12872;P26368;Q16629;O75494;P38159}

32145 Pathogen[ P03363] interacts with 9 human partners:{Q12872;Q08170;Q16629;Q13242;P38159;P26368;P26599;Q13247;O75494}

32146 [Cluster 2923]GO:0030336+P biological\_process [name] negative regulation of cell migration [def] "Any process that stops, prevents, or reduces the frequency, rate or extent of cell migration." [GOC

32147 Pathogen[ Q2Q067] interacts with 9 human partners: {Q9BZE4;Q8N9R8;Q14678;P11831;Q86UL8;O15105;Q5VTR2;Q9UI36;Q96A56}

32148 Pathogen[ POC214] interacts with 10 human partners: {Q14678;P11831;P05121;Q8N9R8;O15105;Q9UI36;Q9H4P4;Q96A56;Q9BZE4;Q5VTR2}

32149 Pathogen[ P03346] interacts with 12 human partners: {Q14678;Q9BZE4;Q5VTR2;P11831;Q96A56;Q9H4P4;O15105;Q86UL8;Q5JRA6;Q99593;Q9UI36;Q8N9R8}

32150 Pathogen[ Q85601] interacts with 11 human partners: {P11831;Q9BZE4;Q8N9R8;Q86UL8;Q14678;Q9UI36;P05121;Q96A56;Q5VTR2;O15105;Q9H4P4}

32151 Pathogen[ P14079] interacts with 13 human partners: {Q96A56;P13164;Q9NP50;Q14118;Q9BZE4;Q5VTR2;Q5JRA6;Q9UI36;Q86UL8;Q8N9R8;Q99439;O15105;Q14678}

32152 Pathogen[ P03383] interacts with 9 human partners: {P11831;Q96A56;Q14678;Q9BZE4;O15105;Q5VTR2;Q9NP50;Q9UI36;Q8N9R8}

32153 Pathogen[ P03410] interacts with 14 human partners: {Q9UI36;P11831;P05121;Q5VTR2;Q99439;Q8N9R8;Q14118;Q14678;O15105;Q96A56;Q86UL8;Q9NP50;Q9BZE4;Q5JRA6}

32154 Pathogen[ P14075] interacts with 9 human partners: {Q5VTR2;P11831;Q8N9R8;Q9NP50;O15105;Q9BZE4;Q9UI36;Q14678;Q96A56}

32155 Pathogen[ POC206] interacts with 13 human partners: {Q9H4P4;Q14678;Q5JRA6;Q96A56;Q5VTR2;O15105;Q8N9R8;Q9BZE4;P11831;P05121;Q86UL8;Q9UI36;Q9NP50}

32156 Pathogen[ P03363] interacts with 10 human partners: {Q9BZE4;Q5VTR2;O15105;P11831;Q96A56;Q9UI36;Q9H4P4;Q8N9R8;Q86UL8;Q14678}

32157 [Cluster 2924]GO:0019433+P biological\_process [name] triglyceride catabolic process [def] "The chemical reactions and pathways resulting in the breakdown of a triglyceride, any triester of glycerol." [ISBN

32158 Pathogen[ Q2Q067] interacts with 3 human partners: {P62140;P36873;P62136}

32159 Pathogen[ POC214] interacts with 3 human partners: {P62140;P62136;P36873}

32160 Pathogen[ P03346] interacts with 3 human partners: {P62136;P36873;P62140}

32161 Pathogen[ Q85601] interacts with 3 human partners: {P62136;P36873;P62140}

32162 Pathogen[ P14079] interacts with 3 human partners: {P36873;P62136;P62140}

32163 Pathogen[ P03383] interacts with 3 human partners: {P62140;P36873;P62136}

32164 Pathogen[ P03410] interacts with 3 human partners: {P62136;P62140;P36873}

32165 Pathogen[ P14075] interacts with 3 human partners: {P62140;P36873;P62136}

32166 Pathogen[ POC206] interacts with 3 human partners: {P62140;P36873;P62136}

32167 Pathogen[ P03363] interacts with 3 human partners: {P62136;P36873;P62140}

32168 [Cluster 2925]GO:0009117+P biological\_process [name] nucleotide metabolic process [def] "The chemical reactions and pathways involving a nucleotide, a nucleoside that is esterified with (ortho)phosphate or an oligophosphate at any hydroxyl group on the glucose moiety\_ may be mono-, di- or triphosphate\_ this definition includes cyclic nucleotides (nucleoside cyclic phosphates)." [GOC

32169 Pathogen[ Q2Q067] interacts with 5 human partners: {P22392;P33316;P49789;O43598;Q9H4L7}

32170 Pathogen[ POC214] interacts with 10 human partners: {Q96P26;P49902;P49789;P33316;Q8TCD5;Q9H4L7;O43598;P22392;Q9Y3B8;Q9H0P0}

32171 Pathogen[ P03346] interacts with 6 human partners: {O43598;P49789;P22392;Q9H4L7;P33316;Q969T7}

32172 Pathogen[ Q85601] interacts with 6 human partners: {O43598;P49789;P33316;Q9H4L7;P22392;Q9H0P0}

32173 Pathogen[ P14079] interacts with 14 human partners: {Q9H0P0;Q9Y3B8;Q96P26;Q8TCD5;Q969T7;Q9H4L7;O43598;Q9UKK9;P33316;P22392;Q9BY32;P49902;Q9BXI3;P49789}

32174 Pathogen[ P03383] interacts with 4 human partners: {P49789;P22392;O43598;P33316}

32175 Pathogen[ P03410] interacts with 13 human partners: {Q96P26;Q9Y3B8;Q9H4L7;Q9UKK9;Q9BY32;P33316;Q9BXI3;P49789;Q8TCD5;Q9H0P0;O43598;P49902;Q969T7}

32176 Pathogen[ P14075] interacts with 5 human partners: {P49902;O43598;P33316;P49789;P22392}

32177 Pathogen[ POC206] interacts with 11 human partners: {P33316;O43598;Q9H4L7;P22392;P49902;Q9BY32;P49789;Q9Y3B8;Q8TCD5;Q9H0P0;Q969T7}

32178 Pathogen[ P03363] interacts with 5 human partners: {P33316;Q9H4L7;Q969T7;P49789;O43598}

32179 [Cluster 2926]GO:0006338+P biological\_process [name] chromatin remodeling [def] "Dynamic structural changes to eukaryotic chromatin occurring throughout the cell division cycle. These changes range from the local changes necessary for transcriptional regulation to global changes necessary for chromosome segregation." [GOC

32180 Pathogen[ Q2Q067] interacts with 49 human partners: {Q13185;P56524;Q92922;O00267;P06400;P01106;O96019;P51531;P11387;Q13547;Q09028;Q7KZ85;Q9UQL6;Q92831;Q969G3;Q92925;Q9P2R6;Q92769;O14497;O00255;P51532;Q9H4L7;Q92830;Q96GM5;Q9UPW6;Q9NRL2;Q9Y6J9;Q96T23;Q58F21;O94805;P20823;Q12983;Q86U86;O14646;Q9ULG1;Q12824;Q9UIF9;Q8TAQ2;Q86WJ1;Q01826;P63272;Q9HBD4;P28370;Q6STE5;P10242;Q8NB12;Q9H5I1;Q15361;Q12830}

32181 Pathogen[ POC214] interacts with 49 human

partners: {Q58F21; Q9H5I1; Q9NRL2; Q9Y6J9; Q13547; Q12824; O14497; Q15361; O00267; Q7KZ85; Q9HBD4; Q9P2R6; P56524; Q6STE5; Q9ULG1; Q9H4L7; Q8TAQ2; Q09028; Q92922; Q969G3; Q9UIF9; P28370; Q92769; P63272; Q92925; Q13185; O60264; P11387; P10242; Q12983; Q01826; Q92831; Q96T23; Q86U86; Q92830; Q9UPW6; O14646; P51531; O94805; Q8NB12; Q96GM5; P01106; Q86WJ1; O96019; Q9UQL6; P06400; O00255; Q12830; P51532}

32182 Pathogen[ P03346] interacts with 54 human partners: {Q9Y6J9; Q7KZ85; Q12830; Q9HBD4; Q96GM5; Q9UPW6; P06400; P51532; Q9ULG1; Q92925; Q8TD26; P56524; Q12824; Q86U86; O14646; P20823; Q92831; Q9NRL2; P63272; Q12983; Q13351; Q86SE8; P01106; Q92830; Q58F21; O96019; P10242; O00255; Q96GD3; Q15361; Q9P2R6; Q92769; O60264; Q13547; Q09028; Q6STE5; O14497; O94805; Q8NB12; Q9UIF9; Q96T23; O00267; Q969G3; Q92922; P28370; P51531; Q9H5I1; Q86WJ1; Q8TAQ2; Q13185; Q9UQL6; Q01826; P11387; Q9H4L7}

32183 Pathogen[ Q85601] interacts with 52 human partners: {P01106; Q9P2R6; Q9H5I1; Q9UPW6; Q9UQL6; Q8NB12; Q9UIF9; Q6STE5; P06400; Q96T23; Q86SE8; Q92925; P10242; O14497; O96019; O14646; Q92831; Q12830; Q9Y6J9; P51531; P11387; Q96GM5; Q92830; P51532; Q969G3; Q92769; Q7KZ85; Q9H4L7; O00255; Q01826; Q13185; Q9NRL2; Q9ULG1; O00267; Q09028; Q9HBD4; Q12983; P56524; P28370; P63272; Q86WJ1; Q13547; Q8TD26; Q86U86; Q15361; O60264; O94805; Q92922; P20823; Q12824; Q8TAQ2; Q58F21}

32184 Pathogen[ P14079] interacts with 46 human partners: {Q9UQL6; Q9UPW6; Q96T23; Q9ULG1; Q6STE5; Q9Y6J9; Q92830; Q9NRG0; Q58F21; Q9NRL2; P28370; Q9H4L7; Q92922; P51532; Q86U86; O14646; Q01826; P51531; O14497; Q8TAQ2; Q9H5I1; Q8TD26; Q7KZ85; O94805; Q13185; Q92769; Q9UIF9; P63272; Q12830; Q9P2R6; Q8NB12; Q86WJ1; Q96GM5; Q12983; Q13351; O60264; P01106; Q12824; P10242; P56524; Q15361; Q09028; O00267; Q969P6; O00255; Q92925}

32185 Pathogen[ P03383] interacts with 44 human partners: {Q86U86; Q09028; Q9Y6J9; Q12830; Q92831; O14497; Q9HBD4; P63272; Q9UPW6; O96019; Q12824; O94805; Q9UQL6; P01106; Q9P2R6; Q01826; Q6STE5; P28370; O14646; P11387; Q96T23; O00267; Q12983; P06400; Q96GM5; Q13185; Q15361; Q969G3; Q92769; Q92830; P51531; Q9UIF9; O00255; Q92925; Q8TAQ2; Q58F21; Q13547; P10242; P56524; Q9NRL2; P51532; Q92922; Q9H5I1; Q7KZ85}

32186 Pathogen[ P03410] interacts with 52 human partners: {Q92830; Q92831; Q86SE8; Q9H4L7; Q96T23; Q12983; Q9P2R6; P01106; O00267; P63272; Q86U86; Q96GM5; O14497; O96019; Q7KZ85; P10242; O14646; Q12830; Q9ULG1; Q9NRG0; P06400; Q9UPW6; Q9UQL6; Q92925; Q969G3; Q09028; Q92769; Q9NRL2; O94805; P56524; Q9H5I1; Q92922; Q01826; P11387; Q9Y6J9; Q13185; P51532; Q86WJ1; P51531; Q13547; Q8NB12; Q8TAQ2; Q9UIF9; Q8TD26; Q6STE5; Q15361; O60264; Q12824; Q9HBD4; O00255; Q58F21; P28370}

32187 Pathogen[ P14075] interacts with 43 human partners: {P11387; Q9Y6J9; O14646; Q12983; Q9HBD4; Q96GM5; Q92831; P51532; Q9P2R6; Q9NRL2; P56524; Q92922; Q7KZ85; P10242; Q13547; P01106; O14497; Q01826; O00255; Q09028; O96019; Q9H5I1; Q9UPW6; Q58F21; Q12830; Q92769; Q86U86; Q13185; P51531; Q92925; Q9UIF9; Q8TAQ2; P28370; P06400; Q12824; O94805; Q96T23; Q9UQL6; Q15361; Q6STE5; O00267; Q92830; P63272}

32188 Pathogen[ P0C206] interacts with 53 human partners: {Q9H4L7; Q92769; Q92830; Q8TD26; P51532; Q15361; P51531; O00255; Q6STE5; P10242; Q96T23; Q92922; Q9NRL2; Q13547; Q12824; Q9Y6J9; Q92925; Q86U86; Q8TAQ2; Q92831; Q9P2R6; O14646; O14497; O96019; Q12983; Q9ULG1; Q9UPW6; Q7KZ85; Q9UIF9; P20823; Q86SE8; Q9H5I1; O00267; P28370; Q86WJ1; Q13185; Q96GM5; Q01826; Q8NB12; Q969G3; Q9HBD4; Q09028; P01106; Q58F21; P11387; P56524; Q12830; O94805; Q9UIG0; O60264; P63272; P06400; Q9UQL6}

32189 Pathogen[ P03363] interacts with 47 human partners: {Q12830; Q92925; Q9ULG1; Q6STE5; Q9NRL2; Q58F21; Q9H5I1; P11387; Q9H4L7; Q09028; Q92831; Q8TAQ2; P51532; Q01826; O14497; Q9UQL6; O00267; P06400; Q13185; P01106; Q7KZ85; O60264; Q96T23; O96019; Q92830; Q8NB12; Q9UIF9; Q969G3; Q9HBD4; Q86U86; O94805; Q13547; Q15361; O14646; P10242; P63272; Q8TD26; P28370; Q86SE8; Q96GM5; P51531; Q92922; Q86WJ1; Q9P2R6; Q9UPW6; Q9Y6J9; Q12824}

32190 [Cluster 2927]GO:0018009+P biological\_process [name] N-terminal peptidyl-L-cysteine N-palmitoylation [def] "The covalent attachment of a palmitoyl group to a nitrogen (N) atom in an N-terminal cysteine residue to form N-palmitoyl-L-cysteine." [RESID

32191 Pathogen[ Q2Q067] interacts with 1 human partners: {Q9H9H5}

32192 Pathogen[ P0C214] interacts with 1 human partners: {Q9H9H5}

32193 Pathogen[ P03346] interacts with 1 human partners: {Q9H9H5}

32194 Pathogen[ Q85601] interacts with 1 human partners: {Q9H9H5}

32195 Pathogen[ P14079] interacts with 1 human partners: {Q9H9H5}

32196 Pathogen[ P03383] interacts with 1 human partners: {Q9H9H5}

32197 Pathogen[ P03410] interacts with 1 human partners: {Q9H9H5}

32198 Pathogen[ P14075] interacts with 1 human partners: {Q9H9H5}

32199 Pathogen[ P0C206] interacts with 1 human partners: {Q9H9H5}

32200 Pathogen[ P03363] interacts with 1 human partners: {Q9H9H5}

32201 [Cluster 2928]GO:0042311+P biological\_process [name] vasodilation [def] "An increase in the internal diameter of blood vessels, especially arterioles or capillaries, usually resulting in a decrease in blood pressure." [ISBN

32202 Pathogen[ Q2Q067] interacts with 2 human partners: {P30793; Q9H1Y0}

32203 Pathogen[ P0C214] interacts with 2 human partners: {P30793; Q9H1Y0}

32204 Pathogen[ P03346] interacts with 1 human partners: {Q9H1Y0}

32205 Pathogen[ Q85601] interacts with 2 human partners: {P30793; Q9H1Y0}

32206 Pathogen[ P14079] interacts with 2 human partners: {P30793; Q9H1Y0}

32207 Pathogen[ P03383] interacts with 1 human partners: {Q9H1Y0}

32208 Pathogen[ P03410] interacts with 2 human partners: {Q9H1Y0; P30793}

32209 Pathogen[ P14075] interacts with 2 human partners: {Q9H1Y0; P30793}

32210 Pathogen[ P0C206] interacts with 2 human partners: {P30793; Q9H1Y0}

32211 Pathogen[ P03363] interacts with 1 human partners: {Q9H1Y0}



32212 [Cluster 2929]GO:0021877+P biological\_process [name] forebrain neuron fate commitment [def] "The process in which the developmental fate of a cell becomes restricted such that it will develop into a neuron that resides in the forebrain." [GO\_REF

32213 Pathogen[ Q2Q067] interacts with 1 human partners:{Q92754}

32214 Pathogen[ P0C214] interacts with 1 human partners:{Q92754}

32215 Pathogen[ P03346] interacts with 1 human partners:{Q92754}

32216 Pathogen[ Q85601] interacts with 1 human partners:{Q92754}

32217 Pathogen[ P14079] interacts with 1 human partners:{Q92754}

32218 Pathogen[ P03383] interacts with 1 human partners:{Q92754}

32219 Pathogen[ P03410] interacts with 1 human partners:{Q92754}

32220 Pathogen[ P14075] interacts with 1 human partners:{Q92754}

32221 Pathogen[ P0C206] interacts with 1 human partners:{Q92754}

32222 Pathogen[ P03363] interacts with 1 human partners:{Q92754}

32223 [Cluster 2930]GO:0071260+P biological\_process [name] cellular response to mechanical stimulus [def] "Any process that results in a change in state or activity of a cell (in terms of movement, secretion, enzyme production, gene expression, etc.) as a result of a mechanical stimulus." [GOC

32224 Pathogen[ Q2Q067] interacts with 14 human partners:{O95999;O14757;Q13158;Q14790;P24522;P10914;Q13233;P42575;Q15327;P78560;P19838;Q12983;Q5JVS0;Q9UKL3}

32225 Pathogen[ P0C214] interacts with 15 human partners:{Q15327;Q5JVS0;P24522;P19838;Q92934;Q13158;P10914;Q13233;Q9UKL3;O95999;Q12983;P78560;O14757;P42575;Q14790}

32226 Pathogen[ P03346] interacts with 15 human partners:{Q13158;P42575;Q15327;O14757;Q12983;O95999;P78560;Q9UKL3;P10914;Q13233;Q5JVS0;Q14790;P45985;P19838;P24522}

32227 Pathogen[ Q85601] interacts with 14 human partners:{Q9UKL3;Q5JVS0;Q13158;Q14790;P24522;P10914;O14757;P42575;Q15327;Q12983;Q13233;O95999;P19838;P78560}

32228 Pathogen[ P14079] interacts with 17 human partners:{Q5JVS0;O95999;P13498;P45983;Q9UKL3;Q14790;Q92934;P45985;P11686;P24522;Q12983;Q15327;Q13158;Q99439;P42575;Q99836;P10914}

32229 Pathogen[ P03383] interacts with 12 human partners:{P10914;Q5JVS0;O14757;Q9UKL3;Q13233;P24522;Q13158;Q12983;P78560;O95999;Q15327;P19838}

32230 Pathogen[ P03410] interacts with 17 human partners:{P19838;Q12983;P78560;P42575;P24522;Q92934;Q13233;Q15327;Q13158;O95999;P45985;P11686;Q99439;Q5JVS0;P10914;O14757;Q9UKL3}

32231 Pathogen[ P14075] interacts with 12 human partners:{P78560;Q12983;Q15327;Q9UKL3;Q5JVS0;Q13158;O95999;P24522;P19838;Q13233;P10914;O14757}

32232 Pathogen[ P0C206] interacts with 15 human partners:{P10914;P24522;Q15327;Q9UKL3;P78560;O95999;Q13158;Q13233;Q92934;Q12983;P19838;Q5JVS0;Q14790;P45985;P42575}

32233 Pathogen[ P03363] interacts with 10 human partners:{Q13158;Q15327;Q5JVS0;Q9UKL3;P24522;P10914;P78560;P19838;Q13233;O14757}

32234 [Cluster 2931]GO:0010834+P biological\_process [name] telomere maintenance via telomere shortening [def] "Any process that contributes to the maintenance of proper telomeric length and structure by affecting and monitoring the activity of telomeric proteins and shortening the telomeric DNA." [GOC

32235 Pathogen[ Q2Q067] interacts with 3 human partners:{Q92889;Q15554;P54274}

32236 Pathogen[ P0C214] interacts with 3 human partners:{Q92889;Q15554;P54274}

32237 Pathogen[ P03346] interacts with 3 human partners:{Q15554;P54274;Q92889}

32238 Pathogen[ Q85601] interacts with 3 human partners:{Q15554;Q92889;P54274}

32239 Pathogen[ P14079] interacts with 3 human partners:{P54274;Q92889;Q15554}

32240 Pathogen[ P03383] interacts with 2 human partners:{Q15554;P54274}

32241 Pathogen[ P03410] interacts with 3 human partners:{Q15554;P54274;Q92889}

32242 Pathogen[ P14075] interacts with 2 human partners:{Q15554;P54274}

32243 Pathogen[ P0C206] interacts with 3 human partners:{Q15554;P54274;Q92889}

32244 Pathogen[ P03363] interacts with 3 human partners:{Q15554;Q92889;P54274}

32245 [Cluster 2932]GO:0048133+P biological\_process [name] male germ-line stem cell division [def] "The self-renewing division of a germline stem cell in the male gonad, to produce a daughter stem cell and a daughter germ cell, which will divide to form the male gametes." [GOC

32246 Pathogen[ Q2Q067] interacts with 2 human partners:{Q05516;Q9H160}

32247 Pathogen[ P0C214] interacts with 2 human partners:{Q9H160;Q05516}

32248 Pathogen[ P03346] interacts with 2 human partners:{Q05516;Q9H160}

32249 Pathogen[ Q85601] interacts with 2 human partners:{Q05516;Q9H160}

32250 Pathogen[ P14079] interacts with 2 human partners:{Q05516;Q9H160}

32251 Pathogen[ P03383] interacts with 2 human partners:{Q05516;Q9H160}

32252 Pathogen[ P03410] interacts with 1 human partners:{Q9H160}

32253 Pathogen[ P14075] interacts with 2 human partners:{Q05516;Q9H160}

32254 Pathogen[ P0C206] interacts with 2 human partners:{Q05516;Q9H160}

32255 Pathogen[ P03363] interacts with 2 human partners:{Q9H160;Q05516}

32256 [Cluster 2933]GO:0071345+P biological\_process [name] cellular response to cytokine stimulus [def] "Any process that results in a change in state or activity of a cell

(in terms of movement, secretion, enzyme production, gene expression, etc.) as a result of a cytokine stimulus." [GOC

32257 Pathogen[ Q2Q067] interacts with 3 human partners:{P50750;Q7Z2X4;P08397}

32258 Pathogen[ P0C214] interacts with 3 human partners:{P50750;Q7Z2X4;P08397}

32259 Pathogen[ P03346] interacts with 3 human partners:{Q7Z2X4;P78426;P50750}

32260 Pathogen[ Q85601] interacts with 3 human partners:{P50750;Q7Z2X4;P08397}

32261 Pathogen[ P14079] interacts with 3 human partners:{P08397;Q7Z2X4;P50750}

32262 Pathogen[ P03383] interacts with 2 human partners:{P50750;P08397}

32263 Pathogen[ P03410] interacts with 3 human partners:{P08397;P50750;Q7Z2X4}

32264 Pathogen[ P14075] interacts with 2 human partners:{P50750;P08397}

32265 Pathogen[ P0C206] interacts with 3 human partners:{Q7Z2X4;P50750;P08397}

32266 Pathogen[ P03363] interacts with 1 human partners:{P50750}

32267 [Cluster 2934]GO:0032465+P biological\_process [name] regulation of cytokinesis [def] "Any process that modulates the frequency, rate or extent of the division of the cytoplasm of a cell and its separation into two daughter cells." [GOC

32268 Pathogen[ Q2Q067] interacts with 5 human partners:{O75400;O43303;Q13526;P41208;Q9NR09}

32269 Pathogen[ P0C214] interacts with 6 human partners:{Q13526;O43303;P41208;Q9NR09;Q96GD0;O75400}

32270 Pathogen[ P03346] interacts with 6 human partners:{O75400;Q13526;P41208;P51587;Q9NR09;O43303}

32271 Pathogen[ Q85601] interacts with 6 human partners:{O75400;O43303;Q13526;Q9NR09;P51587;P41208}

32272 Pathogen[ P14079] interacts with 7 human partners:{O75400;P51587;Q96GD0;Q9NR09;O43303;P41208;Q13526}

32273 Pathogen[ P03383] interacts with 5 human partners:{O43303;P41208;O75400;Q9NR09;Q13526}

32274 Pathogen[ P03410] interacts with 7 human partners:{O43303;Q13526;Q96GD0;Q9NR09;O75400;P51587;P41208}

32275 Pathogen[ P14075] interacts with 5 human partners:{O43303;O75400;Q13526;P41208;Q9NR09}

32276 Pathogen[ P0C206] interacts with 7 human partners:{Q13526;P51587;Q9NR09;O75400;P41208;Q96GD0;O43303}

32277 Pathogen[ P03363] interacts with 5 human partners:{O43303;P41208;Q13526;O75400;Q9NR09}

32278 [Cluster 2935]GO:0010807+P biological\_process [name] regulation of synaptic vesicle priming [def] "Any process that modulates the frequency, rate or extent of synaptic vesicle priming. Synaptic vesicle priming is the formation of SNARE-containing complexes, bringing synaptic vesicle membrane and plasma membranes into close proximity and thereby facilitating membrane fusion." [GOC

32279 Pathogen[ Q2Q067] interacts with 1 human partners:{P54920}

32280 Pathogen[ P0C214] interacts with 1 human partners:{P54920}

32281 Pathogen[ P03346] interacts with 2 human partners:{Q9H115;P54920}

32282 Pathogen[ Q85601] interacts with 1 human partners:{P54920}

32283 Pathogen[ P14079] interacts with 2 human partners:{Q9H115;P54920}

32284 Pathogen[ P03383] interacts with 1 human partners:{P54920}

32285 Pathogen[ P03410] interacts with 2 human partners:{Q9H115;P54920}

32286 Pathogen[ P14075] interacts with 1 human partners:{P54920}

32287 Pathogen[ P0C206] interacts with 1 human partners:{P54920}

32288 Pathogen[ P03363] interacts with 1 human partners:{P54920}

32289 [Cluster 2936]GO:0048738+P biological\_process [name] cardiac muscle tissue development [def] "The process whose specific outcome is the progression of cardiac muscle over time, from its formation to the mature structure." [GOC

32290 Pathogen[ Q2Q067] interacts with 3 human partners:{Q8WW38;O75182;P26678}

32291 Pathogen[ P0C214] interacts with 3 human partners:{Q8WW38;P26678;O75182}

32292 Pathogen[ P03346] interacts with 3 human partners:{Q8WW38;P26678;O75182}

32293 Pathogen[ Q85601] interacts with 2 human partners:{O75182;Q8WW38}

32294 Pathogen[ P14079] interacts with 3 human partners:{O75182;P26678;Q8WW38}

32295 Pathogen[ P03383] interacts with 3 human partners:{O75182;Q8WW38;P26678}

32296 Pathogen[ P03410] interacts with 4 human partners:{O75182;Q8WW38;P26678;Q16635}

32297 Pathogen[ P14075] interacts with 3 human partners:{Q8WW38;O75182;P26678}

32298 Pathogen[ P0C206] interacts with 4 human partners:{Q8WW38;P50461;P26678;O75182}

32299 Pathogen[ P03363] interacts with 2 human partners:{Q8WW38;O75182}

32300 [Cluster 2937]GO:0010801+P biological\_process [name] negative regulation of peptidyl-threonine phosphorylation [def] "Any process that decreases the frequency, rate or extent of peptidyl-threonine phosphorylation. Peptidyl-threonine phosphorylation is the phosphorylation of peptidyl-threonine to form peptidyl-O-phospho-L-threonine." [GOC

32301 Pathogen[ Q2Q067] interacts with 2 human partners:{O15105;Q7Z699}

32302 Pathogen[ P0C214] interacts with 2 human partners:{Q7Z699;O15105}

32303 Pathogen[ P03346] interacts with 2 human partners:{O15105;Q7Z699}

32304 Pathogen[ Q85601] interacts with 2 human partners:{O15105;Q7Z699}

32305 Pathogen[ P14079] interacts with 4 human partners:{O43597;Q7Z699;Q9NX09;O15105}

32306 Pathogen[ P03383] interacts with 1 human partners:{O15105}

32307 Pathogen[ P03410] interacts with 4 human partners:{O43597;Q7Z699;O15105;Q9NX09}

32308 Pathogen[ P14075] interacts with 1 human partners:{O15105}

32309 Pathogen[ P0C206] interacts with 3 human partners:{O15105;O43597;Q7Z699}

32310 Pathogen[ P03363] interacts with 2 human partners:{O15105;Q7Z699}

32311 [Cluster 2938]GO:0019430+P biological\_process [name] removal of superoxide radicals [def] "Any process involved in removing superoxide radicals (O<sub>2</sub><sup>-</sup>) from a cell or organism, e.g. by conversion to dioxygen (O<sub>2</sub>) and hydrogen peroxide (H<sub>2</sub>O<sub>2</sub>)." [CHEBI

32312 Pathogen[ Q2Q067] interacts with 3 human partners:{O14618;Q00597;Q06830}

32313 Pathogen[ P0C214] interacts with 4 human partners:{P08294;Q00597;Q06830;O14618}

32314 Pathogen[ P03346] interacts with 3 human partners:{O14618;Q06830;Q00597}

32315 Pathogen[ Q85601] interacts with 3 human partners:{Q00597;Q06830;O14618}

32316 Pathogen[ P14079] interacts with 2 human partners:{Q00597;O14618}

32317 Pathogen[ P03383] interacts with 1 human partners:{Q00597}

32318 Pathogen[ P03410] interacts with 3 human partners:{Q00597;O14618;Q06830}

32319 Pathogen[ P14075] interacts with 1 human partners:{Q00597}

32320 Pathogen[ P0C206] interacts with 3 human partners:{O14618;Q00597;Q06830}

32321 Pathogen[ P03363] interacts with 2 human partners:{Q00597;O14618}

32322 [Cluster 2939]GO:0033342+P biological\_process [name] negative regulation of collagen binding [def] "Any process that stops, prevents, or reduces the frequency, rate or extent of collagen binding." [GOC

32323 Pathogen[ Q2Q067] interacts with 1 human partners:{Q9BZE4}

32324 Pathogen[ P0C214] interacts with 1 human partners:{Q9BZE4}

32325 Pathogen[ P03346] interacts with 1 human partners:{Q9BZE4}

32326 Pathogen[ Q85601] interacts with 1 human partners:{Q9BZE4}

32327 Pathogen[ P14079] interacts with 1 human partners:{Q9BZE4}

32328 Pathogen[ P03383] interacts with 1 human partners:{Q9BZE4}

32329 Pathogen[ P03410] interacts with 1 human partners:{Q9BZE4}

32330 Pathogen[ P14075] interacts with 1 human partners:{Q9BZE4}

32331 Pathogen[ P0C206] interacts with 1 human partners:{Q9BZE4}

32332 Pathogen[ P03363] interacts with 1 human partners:{Q9BZE4}

32333 [Cluster 2940]GO:0010255+P biological\_process [name] glucose mediated signaling pathway [def] "The process in which a change in the level of mono- and disaccharide glucose trigger the expression of genes controlling metabolic and developmental processes." [GOC

32334 Pathogen[ Q2Q067] interacts with 1 human partners:{Q9NP71}

32335 Pathogen[ P0C214] interacts with 1 human partners:{Q9NP71}

32336 Pathogen[ P03346] interacts with 1 human partners:{Q9NP71}

32337 Pathogen[ Q85601] interacts with 1 human partners:{Q9NP71}

32338 Pathogen[ P14079] interacts with 1 human partners:{Q9NP71}

32339 Pathogen[ P03383] interacts with 1 human partners:{Q9NP71}

32340 Pathogen[ P03410] interacts with 1 human partners:{Q9NP71}

32341 Pathogen[ P14075] interacts with 1 human partners:{Q9NP71}

32342 Pathogen[ P0C206] interacts with 1 human partners:{Q9NP71}

32343 Pathogen[ P03363] interacts with 1 human partners:{Q9NP71}

32344 [Cluster 2941]GO:0030490+P biological\_process [name] maturation of SSU-rRNA [def] "Any process involved in the maturation of a precursor Small SubUnit (SSU) ribosomal RNA (rRNA) molecule into a mature SSU-rRNA molecule." [GOC

32345 Pathogen[ Q2Q067] interacts with 1 human partners:{P62263}

32346 Pathogen[ P0C214] interacts with 1 human partners:{P62263}

32347 Pathogen[ P03346] interacts with 1 human partners:{P62263}

32348 Pathogen[ Q85601] interacts with 1 human partners:{P62263}

32349 Pathogen[ P14079] interacts with 1 human partners:{P62263}

32350 Pathogen[ P03383] interacts with 1 human partners:{P62263}

32351 Pathogen[ P03410] interacts with 1 human partners:{P62263}

32352 Pathogen[ P14075] interacts with 1 human partners:{P62263}

32353 Pathogen[ P0C206] interacts with 1 human partners:{P62263}

32354 Pathogen[ P03363] interacts with 1 human partners:{P62263}

32355 [Cluster 2942]GO:0060155+P biological\_process [name] platelet dense granule organization [def] "A process that is carried out at the cellular level which results in the assembly, arrangement of constituent parts, or disassembly of a platelet dense granule. A platelet dense granule is an electron-dense granule occurring in blood platelets that stores and secretes adenosine nucleotides and serotonin. They contain a highly condensed core consisting of serotonin, histamine, calcium, magnesium, ATP, ADP, pyrophosphate and membrane lysosomal proteins." [GOC

32356 Pathogen[ Q2Q067] interacts with 4 human partners:{Q6QNY0;Q96EV8;Q6QNY1;P78537}

32357 Pathogen[ P0C214] interacts with 4 human partners:{P78537;Q6QNY0;Q96EV8;Q6QNY1}

32358 Pathogen[ P03346] interacts with 4 human partners:{Q6QNY0;P78537;Q96EV8;Q6QNY1}

32359 Pathogen[ Q85601] interacts with 4 human partners:{Q6QNY0;P78537;Q96EV8;Q6QNY1}

32360 Pathogen[ P14079] interacts with 4 human partners:{Q6QNY0;Q96EV8;Q6QNY1;P78537}

32361 Pathogen[ P03383] interacts with 4 human partners:{Q6QNY0;P78537;Q96EV8;Q6QNY1}

32362 Pathogen[ P03410] interacts with 4 human partners:{P78537;Q6QNY1;Q6QNY0;Q96EV8}

32363 Pathogen[ P14075] interacts with 4 human partners:{P78537;Q6QNY1;Q6QNY0;Q96EV8}

32364 Pathogen[ P0C206] interacts with 4 human partners:{P78537;Q6QNY1;Q96EV8;Q6QNY0}

32365 Pathogen[ P03363] interacts with 3 human partners:{P78537;Q6QNY1;Q6QNY0}

32366 [Cluster 2943]GO:0003208+P biological\_process [name] cardiac ventricle morphogenesis [def] "The process in which the cardiac ventricle is generated and organized. A cardiac ventricle receives blood from a cardiac atrium and pumps it out of the heart." [GOC

32367 Pathogen[ Q2Q067] interacts with 2 human partners:{Q9NQ87;Q9Y5J3}

32368 Pathogen[ P0C214] interacts with 2 human partners:{Q9Y5J3;Q9NQ87}  
32369 Pathogen[ P03346] interacts with 2 human partners:{Q9Y5J3;Q9NQ87}  
32370 Pathogen[ Q85601] interacts with 2 human partners:{Q9NQ87;Q9Y5J3}  
32371 Pathogen[ P14079] interacts with 2 human partners:{Q9Y5J3;Q9NQ87}  
32372 Pathogen[ P03383] interacts with 1 human partners:{Q9NQ87}  
32373 Pathogen[ P03410] interacts with 2 human partners:{Q9Y5J3;Q9NQ87}  
32374 Pathogen[ P14075] interacts with 1 human partners:{Q9NQ87}  
32375 Pathogen[ P0C206] interacts with 2 human partners:{Q9NQ87;Q9Y5J3}  
32376 Pathogen[ P03363] interacts with 2 human partners:{Q9Y5J3;Q9NQ87}  
32377 [Cluster 2944]GO:0042637+P biological\_process [name] catagen [def] "The regression phase of the hair cycle during which cell proliferation ceases, the hair follicle shortens, and an anchored club hair is produced." [PMID  
32378 Pathogen[ Q2Q067] interacts with 1 human partners:{Q9UMQ3}  
32379 Pathogen[ P0C214] interacts with 1 human partners:{Q9UMQ3}  
32380 Pathogen[ P03346] interacts with 1 human partners:{Q9UMQ3}  
32381 Pathogen[ Q85601] interacts with 1 human partners:{Q9UMQ3}  
32382 Pathogen[ P14079] interacts with 1 human partners:{Q9UMQ3}  
32383 Pathogen[ P03383] interacts with 1 human partners:{Q9UMQ3}  
32384 Pathogen[ P03410] interacts with 1 human partners:{Q9UMQ3}  
32385 Pathogen[ P14075] interacts with 1 human partners:{Q9UMQ3}  
32386 Pathogen[ P0C206] interacts with 1 human partners:{Q9UMQ3}  
32387 Pathogen[ P03363] interacts with 1 human partners:{Q9UMQ3}  
32388 [Cluster 2945]GO:0009636+P biological\_process [name] response to toxin [def] "Any process that results in a change in state or activity of a cell or an organism (in terms of movement, secretion, enzyme production, gene expression, etc.) as a result of a toxin stimulus." [GOC  
32389 Pathogen[ Q2Q067] interacts with 12 human partners:{P01100;Q7Z5K2;O60356;P11831;P14635;P15559;Q03468;P38936;O14920;P16455;Q13867;P23025}  
32390 Pathogen[ P0C214] interacts with 14 human partners:{P23025;Q13867;P01100;P11831;P14635;P38936;O60356;P16455;Q7Z5K2;P40692;P15559;O14920;Q03468;Q6IB77}  
32391 Pathogen[ P03346] interacts with 13 human partners:{Q86UT5;Q7Z5K2;P11831;P15559;P14635;Q03468;Q13867;O60356;P23025;O95050;O14920;P38936;P01100}  
32392 Pathogen[ Q85601] interacts with 13 human partners:{P11831;P23025;P16455;Q13867;P01100;Q7Z5K2;Q03468;P14635;O14920;Q6IB77;O60356;P38936;P40692}  
32393 Pathogen[ P14079] interacts with 15 human partners:{Q86UT5;P40692;P16455;P15559;P23025;P02686;P14635;Q6IB77;P38936;Q13867;Q03468;O60356;Q7Z5K2;P01100;O95050}  
32394 Pathogen[ P03383] interacts with 9 human partners:{P11831;O14920;P14635;Q03468;P23025;Q13867;P01100;Q7Z5K2;O60356}  
32395 Pathogen[ P03410] interacts with 17 human partners:{P15559;Q86UT5;P23025;P11831;P40692;O14920;Q7Z5K2;Q6IB77;P02686;Q13867;O95050;Q03468;P01100;P14635;P38936;P16455;O60356}  
32396 Pathogen[ P14075] interacts with 10 human partners:{P23025;P11831;P14635;P15559;Q03468;O14920;Q7Z5K2;O60356;Q13867;P01100}  
32397 Pathogen[ P0C206] interacts with 15 human partners:{O14920;P40692;P15559;Q7Z5K2;Q03468;Q86UT5;Q13867;O60356;P01100;Q6IB77;P38936;P11831;P14635;P16455;P23025}  
32398 Pathogen[ P03363] interacts with 10 human partners:{O14920;O60356;O95050;P23025;Q13867;P11831;Q86UT5;Q03468;Q7Z5K2;P01100}  
32399 [Cluster 2946]GO:0070646+P biological\_process [name] protein modification by small protein removal [def] "A protein modification process in which one or more covalently attached groups of a small protein, such as ubiquitin or a ubiquitin-like protein, are removed from a target protein." [GOC  
32400 Pathogen[ Q2Q067] interacts with 1 human partners:{Q9GZR1}  
32401 Pathogen[ P0C214] interacts with 1 human partners:{Q9GZR1}  
32402 Pathogen[ P03346] interacts with 1 human partners:{Q9GZR1}  
32403 Pathogen[ Q85601] interacts with 1 human partners:{Q9GZR1}  
32404 Pathogen[ P14079] interacts with 1 human partners:{Q9GZR1}  
32405 Pathogen[ P03383] interacts with 1 human partners:{Q9GZR1}  
32406 Pathogen[ P03410] interacts with 1 human partners:{Q9GZR1}  
32407 Pathogen[ P14075] interacts with 1 human partners:{Q9GZR1}  
32408 Pathogen[ P0C206] interacts with 1 human partners:{Q9GZR1}  
32409 Pathogen[ P03363] interacts with 1 human partners:{Q9GZR1}  
32410 [Cluster 2947]GO:0070602+P biological\_process [name] regulation of centromeric sister chromatid cohesion [def] "Any process that modulates the frequency, rate or extent of sister chromatid cohesion in the centromeric region of a chromosome." [GOC  
32411 Pathogen[ Q2Q067] interacts with 1 human partners:{P49711}  
32412 Pathogen[ P0C214] interacts with 1 human partners:{P49711}  
32413 Pathogen[ P03346] interacts with 1 human partners:{P49711}  
32414 Pathogen[ Q85601] interacts with 1 human partners:{P49711}  
32415 Pathogen[ P14079] interacts with 1 human partners:{P49711}  
32416 Pathogen[ P03383] interacts with 1 human partners:{P49711}

32417 Pathogen[ P03410] interacts with 1 human partners:{P49711}

32418 Pathogen[ P14075] interacts with 1 human partners:{P49711}

32419 Pathogen[ P0C206] interacts with 1 human partners:{P49711}

32420 Pathogen[ P03363] interacts with 1 human partners:{P49711}

32421 [Cluster 2948]GO:0001578+P biological\_process [name] microtubule bundle formation [def] "A process that results in a parallel arrangement of microtubules." [GOC

32422 Pathogen[ Q2Q067] interacts with 5 human partners:{Q7Z460;Q96SN8;O94811;Q6PGN9;Q66K74}

32423 Pathogen[ P0C214] interacts with 5 human partners:{O94811;Q96SN8;Q6PGN9;Q7Z460;Q66K74}

32424 Pathogen[ P03346] interacts with 9 human partners:{Q66K74;Q96SN8;Q8N841;Q6PGN9;P11137;O94811;P30622;Q7Z460;Q9UBP0}

32425 Pathogen[ Q85601] interacts with 8 human partners:{Q6PGN9;Q9UBP0;Q96SN8;P30622;Q66K74;O94811;Q9BW30;Q7Z460}

32426 Pathogen[ P14079] interacts with 10 human partners:{Q7Z460;Q66K74;O94811;Q8N841;Q6PGN9;Q9BW30;P11137;O95235;Q96SN8;P30622}

32427 Pathogen[ P03383] interacts with 4 human partners:{Q7Z460;Q96SN8;O94811;Q6PGN9}

32428 Pathogen[ P03410] interacts with 9 human partners:{Q7Z460;P11137;P30622;Q96SN8;O94811;Q9BW30;Q66K74;Q6PGN9;Q8N841}

32429 Pathogen[ P14075] interacts with 4 human partners:{O94811;Q7Z460;Q96SN8;Q6PGN9}

32430 Pathogen[ P0C206] interacts with 10 human partners:{Q96SN8;Q9UBP0;O94811;Q6PGN9;P30622;Q66K74;P11137;Q8N841;Q7Z460;Q9BW30}

32431 Pathogen[ P03363] interacts with 10 human partners:{P11137;Q66K74;O94811;Q8NHY3;Q6PGN9;Q9BW30;P30622;Q7Z460;Q8N841;Q96SN8}

32432 [Cluster 2949]GO:0019043+P biological\_process [name] establishment of viral latency [def] "The process in which a virus reaches a latent state." [ISBN

32433 Pathogen[ Q2Q067] interacts with 1 human partners:{Q92985}

32434 Pathogen[ P0C214] interacts with 1 human partners:{Q92985}

32435 Pathogen[ P03346] interacts with 1 human partners:{Q92985}

32436 Pathogen[ Q85601] interacts with 1 human partners:{Q92985}

32437 Pathogen[ P14079] interacts with 1 human partners:{Q92985}

32438 Pathogen[ P03383] interacts with 1 human partners:{Q92985}

32439 Pathogen[ P03410] interacts with 1 human partners:{Q92985}

32440 Pathogen[ P14075] interacts with 1 human partners:{Q92985}

32441 Pathogen[ P0C206] interacts with 1 human partners:{Q92985}

32442 Pathogen[ P03363] interacts with 1 human partners:{Q92985}

32443 [Cluster 2950]GO:0032203+P biological\_process [name] telomere formation via telomerase [def] "The addition of telomeric repeats to a non-telomeric double-stranded DNA end by telomerase." [GOC

32444 Pathogen[ Q2Q067] interacts with 2 human partners:{O14746;Q9BUR4}

32445 Pathogen[ P0C214] interacts with 2 human partners:{O14746;Q9BUR4}

32446 Pathogen[ P03346] interacts with 3 human partners:{Q9BUR4;O14746;Q9NUX5}

32447 Pathogen[ Q85601] interacts with 2 human partners:{Q9BUR4;O14746}

32448 Pathogen[ P14079] interacts with 3 human partners:{O14746;Q9NUX5;Q9BUR4}

32449 Pathogen[ P03383] interacts with 2 human partners:{Q9BUR4;O14746}

32450 Pathogen[ P03410] interacts with 3 human partners:{Q9NUX5;O14746;Q9BUR4}

32451 Pathogen[ P14075] interacts with 2 human partners:{O14746;Q9BUR4}

32452 Pathogen[ P0C206] interacts with 3 human partners:{Q9BUR4;Q9NUX5;O14746}

32453 Pathogen[ P03363] interacts with 3 human partners:{Q9BUR4;O14746;Q9NUX5}

32454 [Cluster 2951]GO:0060421+P biological\_process [name] positive regulation of heart growth [def] "Any process that increases the rate or extent of heart growth. Heart growth is the increase in size or mass of the heart." [GOC

32455 Pathogen[ Q2Q067] interacts with 1 human partners:{P80723}

32456 Pathogen[ P0C214] interacts with 1 human partners:{P80723}

32457 Pathogen[ P03346] interacts with 1 human partners:{P80723}

32458 Pathogen[ Q85601] interacts with 1 human partners:{P80723}

32459 Pathogen[ P14079] interacts with 1 human partners:{P80723}

32460 Pathogen[ P03383] interacts with 1 human partners:{P80723}

32461 Pathogen[ P03410] interacts with 1 human partners:{P80723}

32462 Pathogen[ P14075] interacts with 1 human partners:{P80723}

32463 Pathogen[ P0C206] interacts with 1 human partners:{P80723}

32464 Pathogen[ P03363] interacts with 1 human partners:{P80723}

32465 [Cluster 2952]GO:0055005+P biological\_process [name] ventricular cardiac myofibril development [def] "The process whose specific outcome is the progression of the ventricular cardiac myofibril over time, from its formation to the mature structure. A cardiac myofibril is a myofibril specific to cardiac muscle cells." [GOC

32466 Pathogen[ Q2Q067] interacts with 1 human partners:{Q02078}

32467 Pathogen[ P0C214] interacts with 1 human partners:{Q02078}

32468 Pathogen[ P03346] interacts with 1 human partners:{Q02078}

32469 Pathogen[ Q85601] interacts with 1 human partners:{Q02078}

32470 Pathogen[ P14079] interacts with 1 human partners:{Q02078}

32471 Pathogen[ P03383] interacts with 1 human partners:{Q02078}

32472 Pathogen[ P03410] interacts with 1 human partners:{Q02078}

32473 Pathogen[ P14075] interacts with 1 human partners:{Q02078}

32474 Pathogen[ P0C206] interacts with 1 human partners:{Q02078}

32475 Pathogen[ P03363] interacts with 1 human partners:{Q02078}

32476 [Cluster 2953]GO:0016573+P biological\_process [name] histone acetylation [def] "The modification of a histone by the addition of an acetyl group." [GOC

32477 Pathogen[ Q2Q067] interacts with 19 human  
partners: {Q9Y4A5; Q9H9T3; Q15596; O14929; Q9UKN8; Q15542; Q6ZRS2; O75448; P35227; Q9H8E8; Q92831; Q92830; P35226; Q92993; Q8IZX4; O95983; Q92793; P21675; Q96EB1}

32478 Pathogen[ P0C214] interacts with 21 human  
partners: {Q92993; P35226; P35227; P21675; O14929; Q92793; Q6ZRS2; Q9UKN8; Q9Y232; Q15542; O95983; Q4LE28; Q8IZX4; Q9Y4A5; Q9H9T3; Q92831; O75448; Q92830; Q15596; Q96EB1; Q9H8E8}

32479 Pathogen[ P03346] interacts with 25 human  
partners: {Q15542; Q8WYB5; P35226; O95983; P35227; Q9H8E8; Q92831; Q9UKN8; Q4LE28; O75448; Q92830; Q92794; Q15596; Q9H9T3; Q9Y4A5; Q6ZRS2; P21675; Q9H7Z6; Q9Y232; Q8IZX4; O15516; Q92993; Q92793; Q96EB1; O14929}

32480 Pathogen[ Q85601] interacts with 22 human  
partners: {Q15542; Q9H9T3; Q9Y4A5; O15516; Q9H7Z6; O75448; Q92831; Q15596; O95983; Q8IZX4; Q9UKN8; Q92830; O14929; Q9H8E8; Q6ZRS2; Q96EB1; P21675; Q4LE28; P35226; Q92993; Q92793; P35227}

32481 Pathogen[ P14079] interacts with 19 human  
partners: {Q9Y4A5; Q8IZX4; Q15596; Q92830; Q9UKN8; Q92793; Q9H8E8; Q6ZRS2; Q96EB1; O75448; O14929; Q9H9T3; O60502; O95983; P35226; P35227; Q15542; Q92993; P21675}

32482 Pathogen[ P03383] interacts with 19 human  
partners: {P35227; Q9UKN8; Q92831; Q15596; Q9Y4A5; Q4LE28; Q15542; Q8IZX4; Q92993; Q96EB1; O75448; Q9H8E8; O14929; Q92830; O95983; P21675; Q9H9T3; Q92793; P35226}

32483 Pathogen[ P03410] interacts with 21 human  
partners: {Q92830; Q92831; Q8IZX4; O14929; P21675; O60502; Q9H9T3; Q96EB1; P35227; Q6ZRS2; Q92793; Q9Y4A5; O95983; Q4LE28; Q15596; Q9H8E8; Q15542; P35226; Q9UKN8; Q92993; O75448}

32484 Pathogen[ P14075] interacts with 19 human  
partners: {Q96EB1; P21675; Q15542; Q92831; O75448; Q9Y4A5; O14929; Q92993; Q4LE28; O95983; Q9H8E8; Q9H9T3; Q92793; P35226; Q9UKN8; Q92830; P35227; Q15596; Q8IZX4}

32485 Pathogen[ P0C206] interacts with 22 human  
partners: {Q9Y232; Q92830; Q9H9T3; O95983; P35226; Q6ZRS2; Q92993; Q92831; Q8IZX4; Q92793; O15516; Q9Y4A5; O14929; Q9UKN8; Q15542; Q15596; Q96EB1; O75448; Q9H7Z6; P21675; Q4LE28; P35227}

32486 Pathogen[ P03363] interacts with 20 human  
partners: {Q8IZX4; Q9H8E8; Q4LE28; P35227; Q92831; Q6ZRS2; Q15596; Q92830; P35226; Q96EB1; O95983; Q15542; O14929; Q92793; O75448; P21675; Q9Y4A5; Q9UKN8; Q9H9T3; Q92993}

32487 [Cluster 2954]GO:0007268+P biological\_process [name] synaptic transmission [def] "The process of communication from a neuron to a target (neuron, muscle, or secretory cell) across a synapse." [GOC

32488 Pathogen[ Q2Q067] interacts with 22 human  
partners: {O94973; P54252; O95782; P07196; O95295; Q13432; P63010; P11142; Q96CW1; Q12959; P78352; Q16143; Q92796; Q02410; Q99996; P62879; Q9UI32; O94925; Q9UPA5; O96018; Q00987; O14490}

32489 Pathogen[ P0C214] interacts with 24 human  
partners: {Q96CW1; O14490; O95295; Q00987; Q92796; Q9UM54; Q9UI32; O96018; P78352; P63010; P62879; Q12959; O94973; O94925; Q02410; Q16143; O95782; Q99996; P16220; P53680; P07196; P54252; Q13432; P11142}

32490 Pathogen[ P03346] interacts with 35 human  
partners: {O95166; O14490; O14908; P07196; Q96A65; P16220; Q12840; P63010; O95295; P78352; P53680; O95782; P11142; Q99767; Q02410; Q00987; P62879; Q92796; Q13432; Q9UI32; Q96CW1; Q16143; O96018; O94925; Q99996; Q15700; Q8TBZ2; P51513; P54257; O94973; P24666; Q9NRD5; P54252; Q9UPA5; Q12959}

32491 Pathogen[ Q85601] interacts with 29 human  
partners: {O14490; P62879; O94925; Q96A65; Q96CW1; P07196; O95295; O95166; Q99767; Q12840; P54252; P16220; P11142; Q9UPA5; P78352; O96018; P53680; Q92796; O94973; Q12959; Q99996; Q13432; Q02410; P63010; Q9UM54; Q9UI32; Q00987; Q16143; O95782}

32492 Pathogen[ P14079] interacts with 34 human  
partners: {Q96CW1; O14810; O95166; P11142; P54257; Q99996; Q15700; Q12840; Q02410; P24588; P54252; Q9UPA5; Q16143; Q9UM54; P07196; P02686; Q00987; O95782; O94925; O96018; O43612; P63010; Q9UI32; O95295; O94973; Q96A65; Q13432; P47874; Q92796; O14908; Q9Y4J8; P53680; O14490; Q99767}

32493 Pathogen[ P03383] interacts with 18 human  
partners: {O96018; Q96CW1; P62879; O94925; P16220; O95295; O14490; Q13432; P54252; P63010; P07196; O95782; P11142; Q02410; Q99996; Q92796; O94973; P78352}

32494 Pathogen[ P03410] interacts with 40 human  
partners: {O96018; O95782; Q96CW1; P53680; O43612; Q99996; Q12959; O14810; P02686; Q16143; O14908; P11142; Q99767; P54252; O14490; Q12840; O94925; Q02410; P07196; Q15700; O95295; O95166; Q9UM54; Q9NRD5; Q9UPA5; Q96A65; Q92796; P16220; P54257; P24666; P63010; Q9UI32; Q00987; Q13432; P78352; P62879; O94973; P47874; P24588; Q9Y4J8}

32495 Pathogen[ P14075] interacts with 19 human  
partners: {Q02410; P11142; O96018; O94973; Q96CW1; O95295; P62879; P54252; Q99996; O95782; O14490; Q92796; P63010; O94925; P78352; P07196; P16220; Q9UPA5; Q13432}

32496 Pathogen[ P0C206] interacts with 34 human  
partners: {P53680; P63010; Q9UM54; P78352; O94973; P07196; Q13432; P62879; P16220; Q15700; Q9UPA5; Q99996; Q96A65; P54252; Q99767; Q9Y4J8; P24666; O14490; O96018; Q96CW1; O14908; Q16143; Q12840; O95295; O95782; Q9UI32; O94925; Q92796; Q00987; Q9NRD5; P11142; Q12959; O95166; Q02410}

32497 Pathogen[ P03363] interacts with 32 human  
partners: {P62879; Q12959; O14908; Q99996; Q8TBZ2; Q96A65; P78352; O94925; P16220; P54252; Q15700; O94973; P07196; Q13432; Q02410; P63010; P54257; O95295; Q9UI32; O95782; Q9UPA5; O14490; Q92796; P51513; O96018; P24666; O95166; Q99767; Q16143; Q12840; P11142; Q96CW1}

32498 [Cluster 2955]GO:0006959+P biological\_process [name] humoral immune response [def]

"An immune response mediated through a body fluid." [GOC  
32499 Pathogen[ Q2Q067] interacts with 9 human  
partners:{P40306;O43734;Q16633;P09086;P19532;O43918;P35226;P06744;P19484}  
32500 Pathogen[ POC214] interacts with 10 human  
partners:{Q9Y5A9;P35226;Q8WV28;P19484;P40306;Q16633;O43734;P19532;O43918;P09086}  
32501 Pathogen[ P03346] interacts with 12 human  
partners:{P50219;P09086;O43918;P19484;P35226;O43734;P19532;Q02548;Q16633;P06744;Q8WV  
28;P40306}  
32502 Pathogen[ Q85601] interacts with 8 human  
partners:{P09086;P19484;P06744;P19532;Q16633;P40306;P35226;O43918}  
32503 Pathogen[ P14079] interacts with 13 human  
partners:{Q06413;P40306;P09086;Q16633;P06744;P19484;P19532;Q8WV28;P13232;P35226;O439  
18;Q9Y5A9;O43734}  
32504 Pathogen[ P03383] interacts with 8 human  
partners:{Q16633;P19484;O43734;P40306;P06744;O43918;P19532;P35226}  
32505 Pathogen[ P03410] interacts with 11 human  
partners:{P06744;Q8WV28;O43918;P19532;Q16633;P19484;P40306;O43734;Q9Y5A9;P35226;P132  
32}  
32506 Pathogen[ P14075] interacts with 8 human  
partners:{Q16633;P06744;O43918;P19484;O43734;P35226;P40306;P19532}  
32507 Pathogen[ POC206] interacts with 11 human  
partners:{P40306;P35226;Q02548;O43734;P19484;P19532;O43918;P06744;Q16633;P09086;Q9Y5  
A9}  
32508 Pathogen[ P03363] interacts with 11 human  
partners:{P06744;P09086;Q8WV28;P35226;Q16633;P19484;P19532;O43918;Q02548;O43734;P502  
19}  
32509 [Cluster 2956]GO:0006307+P biological\_process [name] DNA dealkylation involved in DNA  
repair [def] "The repair of alkylation damage, e.g. the removal of the alkyl group at  
the O6-position of guanine by O6-alkylguanine-DNA alkyltransferase (AGT)." [PMID  
32510 Pathogen[ Q2Q067] interacts with 5 human  
partners:{Q6NS38;P29372;Q8N3C0;Q96Q83;P16455}  
32511 Pathogen[ POC214] interacts with 5 human  
partners:{Q8N3C0;Q6NS38;P16455;P29372;Q96Q83}  
32512 Pathogen[ P03346] interacts with 3 human partners:{Q8N3C0;P29372;Q96Q83}  
32513 Pathogen[ Q85601] interacts with 5 human  
partners:{P16455;Q6NS38;Q96Q83;Q8N3C0;P29372}  
32514 Pathogen[ P14079] interacts with 5 human  
partners:{Q9C0B1;P29372;P16455;Q6NS38;Q96Q83}  
32515 Pathogen[ P03383] interacts with 2 human partners:{P29372;Q96Q83}  
32516 Pathogen[ P03410] interacts with 6 human  
partners:{Q8N3C0;Q96Q83;Q6NS38;P16455;Q9C0B1;P29372}  
32517 Pathogen[ P14075] interacts with 2 human partners:{Q96Q83;P29372}  
32518 Pathogen[ POC206] interacts with 5 human  
partners:{Q96Q83;Q6NS38;P16455;P29372;Q8N3C0}  
32519 Pathogen[ P03363] interacts with 3 human partners:{P29372;Q96Q83;Q8N3C0}  
32520 [Cluster 2957]GO:0060770+P biological\_process [name] negative regulation of epithelial  
cell proliferation involved in prostate gland development [def] "Any process that  
decreases the rate, frequency or extent of epithelial cell proliferation that  
contributes to the progression of the prostate gland over time." [GOC  
32521 Pathogen[ Q2Q067] interacts with 3 human partners:{Q9BQA1;Q96CJ1;P46527}  
32522 Pathogen[ POC214] interacts with 2 human partners:{Q96CJ1;P46527}  
32523 Pathogen[ P03346] interacts with 3 human partners:{Q96CJ1;Q9BQA1;P46527}  
32524 Pathogen[ Q85601] interacts with 3 human partners:{Q96CJ1;Q9BQA1;P46527}  
32525 Pathogen[ P14079] interacts with 3 human partners:{Q96CJ1;Q9BQA1;P46527}  
32526 Pathogen[ P03383] interacts with 3 human partners:{Q9BQA1;Q96CJ1;P46527}  
32527 Pathogen[ P03410] interacts with 3 human partners:{P46527;Q9BQA1;Q96CJ1}  
32528 Pathogen[ P14075] interacts with 3 human partners:{Q9BQA1;P46527;Q96CJ1}  
32529 Pathogen[ POC206] interacts with 3 human partners:{Q9BQA1;Q96CJ1;P46527}  
32530 Pathogen[ P03363] interacts with 2 human partners:{Q9BQA1;Q96CJ1}  
32531 [Cluster 2958]GO:0080154+P biological\_process [name] regulation of fertilization  
[def] "Any process that modulates the rate, frequency or extent of fertilization.  
Fertilization is the union of gametes of opposite sexes during the process of sexual  
reproduction to form a zygote. It involves the fusion of the gametic nuclei (karyogamy)  
and cytoplasm (plasmogamy)." [GOC  
32532 Pathogen[ Q2Q067] interacts with 1 human partners:{Q9NVM9}  
32533 Pathogen[ POC214] interacts with 1 human partners:{Q9NVM9}  
32534 Pathogen[ P03346] interacts with 1 human partners:{Q9NVM9}  
32535 Pathogen[ Q85601] interacts with 1 human partners:{Q9NVM9}  
32536 Pathogen[ P14079] interacts with 1 human partners:{Q9NVM9}  
32537 Pathogen[ P03383] interacts with 1 human partners:{Q9NVM9}  
32538 Pathogen[ P03410] interacts with 1 human partners:{Q9NVM9}  
32539 Pathogen[ P14075] interacts with 1 human partners:{Q9NVM9}  
32540 Pathogen[ POC206] interacts with 1 human partners:{Q9NVM9}  
32541 Pathogen[ P03363] interacts with 1 human partners:{Q9NVM9}  
32542 [Cluster 2959]GO:0051580+P biological\_process [name] regulation of neurotransmitter  
uptake [def] "Any process that modulates the frequency, rate or extent of the directed

movement of a neurotransmitter into a neuron or glial cell." [GOC  
32543 Pathogen[ Q2Q067] interacts with 1 human partners:{P14136}  
32544 Pathogen[ P0C214] interacts with 1 human partners:{P14136}  
32545 Pathogen[ P03346] interacts with 1 human partners:{P14136}  
32546 Pathogen[ Q85601] interacts with 1 human partners:{P14136}  
32547 Pathogen[ P14079] interacts with 1 human partners:{P14136}  
32548 Pathogen[ P03383] interacts with 1 human partners:{P14136}  
32549 Pathogen[ P03410] interacts with 1 human partners:{P14136}  
32550 Pathogen[ P14075] interacts with 1 human partners:{P14136}  
32551 Pathogen[ P0C206] interacts with 1 human partners:{P14136}  
32552 Pathogen[ P03363] interacts with 1 human partners:{P14136}  
32553 [Cluster 2960]GO:0000289+P biological\_process [name] nuclear-transcribed mRNA poly(A)  
tail shortening [def] "Shortening of the poly(A) tail of a nuclear-transcribed mRNA from  
full length to an oligo(A) length." [GOC  
32554 Pathogen[ Q2Q067] interacts with 22 human  
partners:{P23588;Q96LI5;A5YKK6;Q9H074;P38919;O75175;Q14240;Q504Q3;Q9UIV1;Q9UKZ1;O956  
28;Q9UFF9;Q9C0C2;Q9NZN8;Q92600;Q04637;P26651;P06730;O95453;P11940;P60842;Q9ULM6}  
32555 Pathogen[ P0C214] interacts with 23 human  
partners:{Q9NZN8;O95453;P60842;O95628;P23588;Q9C0C2;Q504Q3;P11940;Q9UIV1;Q9ULM6;A5YK  
K6;P38919;Q9H074;Q14240;P26651;Q04637;Q9UKZ1;Q9UFF9;Q92600;P40692;Q96LI5;P06730;O751  
75}  
32556 Pathogen[ P03346] interacts with 23 human  
partners:{Q504Q3;Q9ULM6;P06730;Q9UIV1;O75175;Q9H9A5;Q9UKZ1;O95628;P38919;P11940;P608  
42;A5YKK6;Q9NZN8;O95453;Q9H074;Q14240;Q9C0C2;P23588;Q04637;Q9UFF9;P26651;Q96LI5;Q926  
00}  
32557 Pathogen[ Q85601] interacts with 23 human  
partners:{P06730;Q14240;Q9UKZ1;P23588;Q04637;Q9UIV1;Q9NZN8;Q9UFF9;Q92600;Q504Q3;P389  
19;P26651;P11940;Q96LI5;A5YKK6;O95628;O95453;Q9ULM6;P60842;Q9H074;Q9C0C2;P40692;O751  
75}  
32558 Pathogen[ P14079] interacts with 22 human  
partners:{O95628;P60842;Q92600;P06730;P40692;Q9UKZ1;Q96LI5;Q9H074;Q14240;A5YKK6;O954  
53;P23588;Q9C0C2;P11940;O75175;Q9UFF9;Q9UIV1;Q9H9A5;Q9ULM6;Q9NZN8;Q504Q3;Q04637}  
32559 Pathogen[ P03383] interacts with 19 human  
partners:{P38919;Q9UFF9;Q9C0C2;P11940;O95628;P23588;P06730;A5YKK6;Q9UIV1;Q92600;Q9UL  
M6;Q9H074;P26651;Q9NZN8;Q04637;Q9UKZ1;O95453;O75175;Q96LI5}  
32560 Pathogen[ P03410] interacts with 24 human  
partners:{Q96LI5;P40692;Q9NZN8;Q9UFF9;O95628;P11940;P06730;Q9ULM6;Q9C0C2;P26651;Q9UI  
V1;Q9H9A5;Q9H074;O95453;Q9UKZ1;P60842;O75175;P38919;Q92600;A5YKK6;Q04637;Q504Q3;P235  
88;Q14240}  
32561 Pathogen[ P14075] interacts with 19 human  
partners:{O95453;Q9ULM6;P23588;Q9UKZ1;P26651;Q92600;O75175;Q9H074;P06730;Q96LI5;Q9NZ  
N8;P11940;O95628;Q04637;Q9UFF9;Q9C0C2;P38919;Q9UIV1;A5YKK6}  
32562 Pathogen[ P0C206] interacts with 24 human  
partners:{Q9UFF9;Q9H074;Q504Q3;O95453;P26651;Q9NZN8;Q9UIV1;Q96LI5;P40692;O75175;Q9H9  
A5;O95628;P06730;A5YKK6;Q14240;Q9UKZ1;Q92600;Q9C0C2;P23588;Q04637;P38919;P60842;Q9UL  
M6;P11940}  
32563 Pathogen[ P03363] interacts with 22 human  
partners:{Q504Q3;P38919;O95628;O95453;A5YKK6;Q9UKZ1;P11940;Q9NZN8;P23588;Q9ULM6;Q142  
40;Q9C0C2;Q92600;Q96LI5;O75175;P60842;P26651;Q9UIV1;Q9UFF9;P06730;Q9H074;Q04637}  
32564 [Cluster 2961]GO:0030050+P biological\_process [name] vesicle transport along actin  
filament [def] "Movement of a vesicle along an actin filament, mediated by motor  
proteins." [GOC  
32565 Pathogen[ Q2Q067] interacts with 1 human partners:{000401}  
32566 Pathogen[ P0C214] interacts with 1 human partners:{000401}  
32567 Pathogen[ P03346] interacts with 1 human partners:{000401}  
32568 Pathogen[ Q85601] interacts with 1 human partners:{000401}  
32569 Pathogen[ P14079] interacts with 1 human partners:{000401}  
32570 Pathogen[ P03383] interacts with 1 human partners:{000401}  
32571 Pathogen[ P03410] interacts with 1 human partners:{000401}  
32572 Pathogen[ P14075] interacts with 1 human partners:{000401}  
32573 Pathogen[ P0C206] interacts with 1 human partners:{000401}  
32574 Pathogen[ P03363] interacts with 1 human partners:{000401}  
32575 [Cluster 2962]GO:0046498+P biological\_process [name] S-adenosylhomocysteine metabolic  
process [def] "The chemical reactions and pathways involving S-adenosylhomocysteine\_ the  
L-enantiomer is formed from S-adenosylmethionine and is a strong inhibitor of  
S-adenosylmethionine-mediated methylation reactions. It can be cleaved to form adenosine  
and homocysteine." [ISBN  
32576 Pathogen[ Q2Q067] interacts with 4 human partners:{Q9Y6K1;P22061;Q14749;Q9UBC3}  
32577 Pathogen[ P0C214] interacts with 3 human partners:{Q9Y6K1;P22061;Q14749}  
32578 Pathogen[ P03346] interacts with 4 human partners:{Q9Y6K1;P22061;Q9UBC3;Q14749}  
32579 Pathogen[ Q85601] interacts with 4 human partners:{Q9Y6K1;P22061;Q14749;Q9UBC3}  
32580 Pathogen[ P14079] interacts with 5 human  
partners:{Q9Y6K1;Q9UBC3;Q14749;Q14353;Q16625}  
32581 Pathogen[ P03383] interacts with 3 human partners:{Q9Y6K1;P22061;Q14749}  
32582 Pathogen[ P03410] interacts with 6 human  
partners:{Q14353;Q14749;Q16625;Q9UBC3;Q9Y6K1;P22061}



32583 Pathogen[ P14075] interacts with 3 human partners:{Q9Y6K1;P22061;Q14749}  
32584 Pathogen[ POC206] interacts with 4 human partners:{Q9Y6K1;P22061;Q14749;Q9UBC3}  
32585 Pathogen[ P03363] interacts with 3 human partners:{Q9Y6K1;Q14749;Q9UBC3}  
32586 [Cluster 2963]GO:0033522+P biological\_process [name] histone H2A ubiquitination  
[def] "The modification of histone H2A by addition of one or more ubiquitin groups."  
[GOC  
32587 Pathogen[ Q2Q067] interacts with 4 human partners:{Q8IYW8;P63146;O76064;P49459}  
32588 Pathogen[ POC214] interacts with 4 human partners:{Q8IYW8;P49459;O76064;P63146}  
32589 Pathogen[ P03346] interacts with 4 human partners:{O76064;P49459;P63146;Q8IYW8}  
32590 Pathogen[ Q85601] interacts with 4 human partners:{P63146;O76064;P49459;Q8IYW8}  
32591 Pathogen[ P14079] interacts with 3 human partners:{Q8IYW8;P49459;P63146}  
32592 Pathogen[ P03383] interacts with 3 human partners:{Q8IYW8;P49459;P63146}  
32593 Pathogen[ P03410] interacts with 3 human partners:{Q8IYW8;P49459;P63146}  
32594 Pathogen[ P14075] interacts with 3 human partners:{P49459;P63146;Q8IYW8}  
32595 Pathogen[ POC206] interacts with 4 human partners:{P49459;Q8IYW8;O76064;P63146}  
32596 Pathogen[ P03363] interacts with 3 human partners:{P49459;P63146;Q8IYW8}  
32597 [Cluster 2964]GO:0007181+P biological\_process [name] transforming growth factor beta  
receptor complex assembly [def] "The aggregation, arrangement and bonding together of  
a ligand-bound type II transforming growth factor beta (TGF-beta) receptor dimer with a  
type I TGF-beta receptor dimer, following ligand binding, to form a heterotetrameric  
TGF-beta receptor complex." [GOC  
32598 Pathogen[ Q2Q067] interacts with 1 human partners:{Q8N6I1}  
32599 Pathogen[ POC214] interacts with 1 human partners:{Q8N6I1}  
32600 Pathogen[ P03346] interacts with 1 human partners:{Q8N6I1}  
32601 Pathogen[ Q85601] interacts with 1 human partners:{Q8N6I1}  
32602 Pathogen[ P14079] interacts with 1 human partners:{Q8N6I1}  
32603 Pathogen[ P03383] interacts with 1 human partners:{Q8N6I1}  
32604 Pathogen[ P03410] interacts with 1 human partners:{Q8N6I1}  
32605 Pathogen[ P14075] interacts with 1 human partners:{Q8N6I1}  
32606 Pathogen[ POC206] interacts with 1 human partners:{Q8N6I1}  
32607 Pathogen[ P03363] interacts with 1 human partners:{Q8N6I1}  
32608 [Cluster 2965]GO:0040019+P biological\_process [name] positive regulation of embryonic  
development [def] "Any process that activates or increases the frequency, rate or extent  
of embryonic development." [GOC  
32609 Pathogen[ Q2Q067] interacts with 2 human partners:{Q9UI56;P49116}  
32610 Pathogen[ POC214] interacts with 3 human partners:{P32243;P49116;Q9UI56}  
32611 Pathogen[ P03346] interacts with 3 human partners:{P49116;Q9UI56;P32243}  
32612 Pathogen[ Q85601] interacts with 2 human partners:{P32243;P49116}  
32613 Pathogen[ P14079] interacts with 3 human partners:{Q9UI56;P32243;P49116}  
32614 Pathogen[ P03383] interacts with 3 human partners:{P32243;P49116;Q9UI56}  
32615 Pathogen[ P03410] interacts with 3 human partners:{Q9UI56;P32243;P49116}  
32616 Pathogen[ P14075] interacts with 3 human partners:{P49116;P32243;Q9UI56}  
32617 Pathogen[ POC206] interacts with 3 human partners:{P49116;P32243;Q9UI56}  
32618 Pathogen[ P03363] interacts with 3 human partners:{P49116;P32243;Q9UI56}  
32619 [Cluster 2966]GO:0071894+P biological\_process [name] histone H2B conserved C-terminal  
lysine ubiquitination [def] "A histone ubiquitination process in which a ubiquitin  
monomer is added to a conserved lysine residue in the C-terminus of histone H2B. The  
conserved lysine residue is K119 in fission yeast, K123 in budding yeast, or K120 in  
mammals." [GOC  
32620 Pathogen[ Q2Q067] interacts with 1 human partners:{Q9BTA9}  
32621 Pathogen[ POC214] interacts with 1 human partners:{Q9BTA9}  
32622 Pathogen[ P03346] interacts with 1 human partners:{Q9BTA9}  
32623 Pathogen[ Q85601] interacts with 1 human partners:{Q9BTA9}  
32624 Pathogen[ P14079] interacts with 1 human partners:{Q9BTA9}  
32625 Pathogen[ P03383] interacts with 1 human partners:{Q9BTA9}  
32626 Pathogen[ P03410] interacts with 1 human partners:{Q9BTA9}  
32627 Pathogen[ P14075] interacts with 1 human partners:{Q9BTA9}  
32628 Pathogen[ POC206] interacts with 1 human partners:{Q9BTA9}  
32629 Pathogen[ P03363] interacts with 1 human partners:{Q9BTA9}  
32630 [Cluster 2967]GO:0030501+P biological\_process [name] positive regulation of bone  
mineralization [def] "Any process that activates or increases the frequency, rate or  
extent of bone mineralization." [GOC  
32631 Pathogen[ Q2Q067] interacts with 1 human partners:{P84022}  
32632 Pathogen[ POC214] interacts with 1 human partners:{P84022}  
32633 Pathogen[ P03346] interacts with 3 human partners:{Q6UW56;P84022;Q92832}  
32634 Pathogen[ Q85601] interacts with 1 human partners:{P84022}  
32635 Pathogen[ P14079] interacts with 2 human partners:{Q06413;Q92832}  
32636 Pathogen[ P03383] interacts with 1 human partners:{P84022}  
32637 Pathogen[ P03410] interacts with 2 human partners:{P84022;Q92832}  
32638 Pathogen[ P14075] interacts with 1 human partners:{P84022}  
32639 Pathogen[ POC206] interacts with 3 human partners:{P84022;Q6UW56;Q92832}  
32640 Pathogen[ P03363] interacts with 3 human partners:{Q6UW56;Q92832;P84022}  
32641 [Cluster 2968]GO:0060339+P biological\_process [name] negative regulation of type I  
interferon-mediated signaling pathway [def] "Any process that decreases the rate,  
frequency or extent of a type I interferon-mediated signaling pathway. A type I  
interferon-mediated signaling pathway is the series of molecular events generated as a

consequence of a type I interferon binding to a cell surface receptor." [GOC  
32642 Pathogen[ Q2Q067] interacts with 2 human partners:{Q8WUQ7;Q86WI3}  
32643 Pathogen[ P0C214] interacts with 1 human partners:{Q86WI3}  
32644 Pathogen[ P03346] interacts with 2 human partners:{Q86WI3;Q8WUQ7}  
32645 Pathogen[ Q85601] interacts with 1 human partners:{Q86WI3}  
32646 Pathogen[ P14079] interacts with 2 human partners:{Q8WUQ7;Q86WI3}  
32647 Pathogen[ P03383] interacts with 2 human partners:{Q8WUQ7;Q86WI3}  
32648 Pathogen[ P03410] interacts with 2 human partners:{Q8WUQ7;Q86WI3}  
32649 Pathogen[ P14075] interacts with 2 human partners:{Q86WI3;Q8WUQ7}  
32650 Pathogen[ P0C206] interacts with 2 human partners:{Q86WI3;Q8WUQ7}  
32651 Pathogen[ P03363] interacts with 2 human partners:{Q8WUQ7;Q86WI3}  
32652 [Cluster 2969]GO:0032608+P biological\_process [name] interferon-beta production  
[def] "The appearance of interferon-beta due to biosynthesis or secretion following a  
cellular stimulus, resulting in an increase in its intracellular or extracellular  
levels." [GOC  
32653 Pathogen[ Q2Q067] interacts with 1 human partners:{Q92985}  
32654 Pathogen[ P0C214] interacts with 2 human partners:{Q92985;Q86WV6}  
32655 Pathogen[ P03346] interacts with 1 human partners:{Q92985}  
32656 Pathogen[ Q85601] interacts with 2 human partners:{Q86WV6;Q92985}  
32657 Pathogen[ P14079] interacts with 2 human partners:{Q92985;Q86WV6}  
32658 Pathogen[ P03383] interacts with 1 human partners:{Q92985}  
32659 Pathogen[ P03410] interacts with 2 human partners:{Q86WV6;Q92985}  
32660 Pathogen[ P14075] interacts with 1 human partners:{Q92985}  
32661 Pathogen[ P0C206] interacts with 2 human partners:{Q86WV6;Q92985}  
32662 Pathogen[ P03363] interacts with 1 human partners:{Q92985}  
32663 [Cluster 2970]GO:0033554+P biological\_process [name] cellular response to stress  
[def] "Any process that results in a change in state or activity of a cell (in terms of  
movement, secretion, enzyme production, gene expression, etc.) as a result of a stimulus  
indicating the organism is under stress. The stress is usually, but not necessarily,  
exogenous (e.g. temperature, humidity, ionizing radiation)." [GOC  
32664 Pathogen[ Q2Q067] interacts with 25 human  
partners:{P27540;O75340;O95391;P62837;P61077;P40337;Q15370;P51668;Q9Y2N7;Q9NWT6;Q153  
69;Q96KS0;Q9H6Z9;P0CG47;P0CG48;Q9GZT9;Q8IXT1;Q92793;P62987;P35900;Q99814;Q8TC71;Q136  
17;P62877;P62979}  
32665 Pathogen[ P0C214] interacts with 24 human  
partners:{Q13617;Q92793;Q96KS0;Q15370;O75340;P62877;P61077;Q9Y2N7;Q9H6Z9;Q8IXT1;P0CG  
48;Q15369;P40337;Q9GZT9;P62987;P0CG47;Q99814;P27540;Q8TC71;P51668;O95391;P62979;P359  
00;Q9NWT6}  
32666 Pathogen[ P03346] interacts with 27 human  
partners:{Q15370;P62987;Q8TC71;O95391;P0CG48;P27540;P51668;P61077;Q9BWF3;Q6ZPB5;P628  
77;O75340;Q9Y2N7;Q9GZT9;P62837;Q99814;P62979;P40337;Q15369;P0CG47;P35900;Q96KS0;Q8IX  
T1;Q9NWT6;Q92793;Q9H6Z9;Q13617}  
32667 Pathogen[ Q85601] interacts with 23 human  
partners:{Q15370;Q9H6Z9;Q9Y2N7;O95391;P62877;P40337;Q9NWT6;Q99814;P27540;P0CG48;P516  
68;P61077;Q9GZT9;Q96KS0;Q15369;O75340;P62979;P62837;P0CG47;P62987;P35900;Q92793;Q136  
17}  
32668 Pathogen[ P14079] interacts with 26 human  
partners:{Q9GZT9;P35900;Q99814;P0CG48;Q9Y2N7;Q92793;Q6ZPB5;P62979;P61077;P62877;P629  
87;Q8IXT1;P40337;P51668;Q9NWT6;O75340;P27540;Q9H6Z9;Q15370;Q13617;P62837;Q15369;P0CG  
47;Q96KS0;Q8TC71;O95391}  
32669 Pathogen[ P03383] interacts with 23 human  
partners:{Q8IXT1;Q15369;Q9NWT6;P27540;P62987;P40337;Q96KS0;Q6ZPB5;P61077;Q9Y2N7;Q9H6  
Z9;P62837;Q13617;P62979;P0CG47;Q8TC71;P62877;Q15370;P0CG48;O95391;Q92793;P35900;P516  
68}  
32670 Pathogen[ P03410] interacts with 26 human  
partners:{P0CG48;Q9NWT6;Q96KS0;Q9H6Z9;Q99814;Q9Y2N7;Q15370;P62979;Q9GZT9;P27540;Q927  
93;Q15369;P62877;Q8IXT1;Q8TC71;P51668;P62987;Q6ZPB5;P35900;Q13617;O75340;P0CG47;O953  
91;P40337;P61077;P62837}  
32671 Pathogen[ P14075] interacts with 24 human  
partners:{Q96KS0;Q8IXT1;Q9GZT9;P62837;O95391;Q9Y2N7;P61077;P27540;P0CG48;P62979;Q153  
70;P62987;Q9NWT6;Q8TC71;Q6ZPB5;P0CG47;Q92793;P35900;P40337;P51668;Q13617;Q15369;P628  
77;Q9H6Z9}  
32672 Pathogen[ P0C206] interacts with 26 human  
partners:{O75340;P0CG48;P62877;Q8TC71;Q9Y2N7;Q96KS0;Q9GZT9;Q8IXT1;P62837;Q92793;Q136  
17;Q9NWT6;P62979;Q15370;P0CG47;Q9H6Z9;P27540;Q6ZPB5;P61077;Q99814;P62987;O95391;Q153  
69;P51668;P35900;P40337}  
32673 Pathogen[ P03363] interacts with 21 human  
partners:{Q15370;P27540;O95391;O75340;Q9H6Z9;Q13617;Q15369;Q9BWF3;P40337;P35900;Q8TC  
71;P62877;Q9Y2N7;P62987;Q99814;Q92793;Q6ZPB5;P51668;P61077;P62837;Q8IXT1}  
32674 [Cluster 2971]GO:0048593+P biological\_process [name] camera-type eye morphogenesis  
[def] "The process in which the anatomical structures of the eye are generated and  
organized. The camera-type eye is an organ of sight that receives light through an  
aperture and focuses it through a lens, projecting it on a photoreceptor field." [GOC  
32675 Pathogen[ Q2Q067] interacts with 3 human partners:{P25490;P12755;Q06587}  
32676 Pathogen[ P0C214] interacts with 2 human partners:{Q06587;P12755}  
32677 Pathogen[ P03346] interacts with 3 human partners:{P25490;Q9HBG6;Q06587}

32678 Pathogen[ Q85601] interacts with 3 human partners:{P25490;P12755;Q06587}  
32679 Pathogen[ P14079] interacts with 3 human partners:{P12755;P25490;Q06587}  
32680 Pathogen[ P03383] interacts with 1 human partners:{Q06587}  
32681 Pathogen[ P03410] interacts with 4 human partners:{P12755;P25490;Q9HBG6;Q06587}  
32682 Pathogen[ P14075] interacts with 1 human partners:{Q06587}  
32683 Pathogen[ P0C206] interacts with 3 human partners:{P25490;P12755;Q06587}  
32684 Pathogen[ P03363] interacts with 3 human partners:{P25490;Q9HBG6;Q06587}  
32685 [Cluster 2972]GO:0006656+P biological\_process [name] phosphatidylcholine biosynthetic process [def] "The chemical reactions and pathways resulting in the formation of phosphatidylcholines, any of a class of glycerophospholipids in which the phosphatidyl group is esterified to the hydroxyl group of choline." [ISBN  
32686 Pathogen[ Q2Q067] interacts with 2 human partners:{Q92539;Q14693}  
32687 Pathogen[ P0C214] interacts with 3 human partners:{Q92539;Q9BQK8;Q14693}  
32688 Pathogen[ P03346] interacts with 3 human partners:{Q01469;Q92539;Q14693}  
32689 Pathogen[ Q85601] interacts with 2 human partners:{Q92539;Q14693}  
32690 Pathogen[ P14079] interacts with 4 human partners:{Q9BQK8;Q14693;Q92539;Q01469}  
32691 Pathogen[ P03383] interacts with 2 human partners:{Q92539;Q14693}  
32692 Pathogen[ P03410] interacts with 4 human partners:{Q9BQK8;Q14693;Q01469;Q92539}  
32693 Pathogen[ P14075] interacts with 2 human partners:{Q92539;Q14693}  
32694 Pathogen[ P0C206] interacts with 4 human partners:{Q92539;Q9BQK8;Q01469;Q14693}  
32695 Pathogen[ P03363] interacts with 2 human partners:{Q92539;Q01469}  
32696 [Cluster 2973]GO:0048013+P biological\_process [name] ephrin receptor signaling pathway [def] "The series of molecular signals generated as a consequence of an ephrin receptor binding to an ephrin." [GOC  
32697 Pathogen[ Q2Q067] interacts with 2 human partners:{P46108;Q15532}  
32698 Pathogen[ P0C214] interacts with 2 human partners:{Q15532;P46108}  
32699 Pathogen[ P03346] interacts with 3 human partners:{Q15532;Q92625;P46108}  
32700 Pathogen[ Q85601] interacts with 2 human partners:{Q15532;P46108}  
32701 Pathogen[ P14079] interacts with 3 human partners:{Q15532;Q15078;P46108}  
32702 Pathogen[ P03383] interacts with 1 human partners:{Q15532}  
32703 Pathogen[ P03410] interacts with 2 human partners:{P46108;Q15532}  
32704 Pathogen[ P14075] interacts with 1 human partners:{Q15532}  
32705 Pathogen[ P0C206] interacts with 3 human partners:{Q15532;Q92625;P46108}  
32706 Pathogen[ P03363] interacts with 3 human partners:{Q15532;P46108;Q92625}  
32707 [Cluster 2974]GO:0040029+P biological\_process [name] regulation of gene expression, epigenetic [def] "Any process that modulates the frequency, rate or extent of gene expression\_ the process is mitotically or meiotically heritable, or is stably self-propagated in the cytoplasm of a resting cell, and does not entail a change in DNA sequence." [PMID  
32708 Pathogen[ Q2Q067] interacts with 2 human partners:{Q92990;P49711}  
32709 Pathogen[ P0C214] interacts with 1 human partners:{P49711}  
32710 Pathogen[ P03346] interacts with 2 human partners:{Q92990;P49711}  
32711 Pathogen[ Q85601] interacts with 1 human partners:{P49711}  
32712 Pathogen[ P14079] interacts with 2 human partners:{Q92990;P49711}  
32713 Pathogen[ P03383] interacts with 2 human partners:{P49711;Q92990}  
32714 Pathogen[ P03410] interacts with 2 human partners:{Q92990;P49711}  
32715 Pathogen[ P14075] interacts with 2 human partners:{Q92990;P49711}  
32716 Pathogen[ P0C206] interacts with 3 human partners:{Q92990;P49711;Q9UIG0}  
32717 Pathogen[ P03363] interacts with 2 human partners:{Q92990;P49711}  
32718 [Cluster 2975]GO:0010867+P biological\_process [name] positive regulation of triglyceride biosynthetic process [def] "Any process that increases the rate, frequency, or extent of triglyceride biosynthesis. Triglyceride biosynthesis is the collection of chemical reactions and pathways resulting in the formation of triglyceride, any triester of glycerol." [GOC  
32719 Pathogen[ Q2Q067] interacts with 4 human partners:{P36956;Q8N9A8;P55055;O95476}  
32720 Pathogen[ P0C214] interacts with 2 human partners:{Q8N9A8;O95476}  
32721 Pathogen[ P03346] interacts with 4 human partners:{P36956;Q8N9A8;O95476;P55055}  
32722 Pathogen[ Q85601] interacts with 4 human partners:{P55055;P36956;Q8N9A8;O95476}  
32723 Pathogen[ P14079] interacts with 4 human partners:{P55055;Q8N9A8;O95476;P36956}  
32724 Pathogen[ P03383] interacts with 1 human partners:{Q8N9A8}  
32725 Pathogen[ P03410] interacts with 3 human partners:{P36956;O95476;Q8N9A8}  
32726 Pathogen[ P14075] interacts with 1 human partners:{Q8N9A8}  
32727 Pathogen[ P0C206] interacts with 4 human partners:{P55055;P36956;O95476;Q8N9A8}  
32728 Pathogen[ P03363] interacts with 2 human partners:{Q8N9A8;O95476}  
32729 [Cluster 2976]GO:0071569+P biological\_process [name] protein ufmylation [def] "Covalent attachment of the ubiquitin-like protein UFM1 to another protein." [GOC  
32730 Pathogen[ Q2Q067] interacts with 3 human partners:{Q9Y3C8;O94874;P61960}  
32731 Pathogen[ P0C214] interacts with 3 human partners:{Q9GZZ9;O94874;P61960}  
32732 Pathogen[ P03346] interacts with 3 human partners:{P61960;Q9Y3C8;O94874}  
32733 Pathogen[ Q85601] interacts with 1 human partners:{O94874}  
32734 Pathogen[ P14079] interacts with 3 human partners:{O94874;Q9Y3C8;P61960}  
32735 Pathogen[ P03383] interacts with 3 human partners:{Q9Y3C8;O94874;P61960}  
32736 Pathogen[ P03410] interacts with 3 human partners:{Q9Y3C8;O94874;P61960}  
32737 Pathogen[ P14075] interacts with 3 human partners:{P61960;Q9Y3C8;O94874}  
32738 Pathogen[ P0C206] interacts with 3 human partners:{Q9Y3C8;O94874;P61960}  
32739 Pathogen[ P03363] interacts with 3 human partners:{Q9Y3C8;P61960;O94874}

32740 [Cluster 2977]GO:0044130+P biological\_process [name] negative regulation of growth of symbiont in host [def] "Any process in which the symbiont stops, prevents or reduces its increase in size or mass within the cells or tissues of the host organism. The host is defined as the larger of the organisms involved in the symbiotic interaction." [GOC

32741 Pathogen[ Q2Q067] interacts with 1 human partners:{Q02556}

32742 Pathogen[ P0C214] interacts with 1 human partners:{Q02556}

32743 Pathogen[ P03346] interacts with 1 human partners:{Q02556}

32744 Pathogen[ Q85601] interacts with 1 human partners:{Q02556}

32745 Pathogen[ P14079] interacts with 2 human partners:{Q02556;Q99836}

32746 Pathogen[ P03383] interacts with 1 human partners:{Q02556}

32747 Pathogen[ P03410] interacts with 1 human partners:{Q02556}

32748 Pathogen[ P14075] interacts with 1 human partners:{Q02556}

32749 Pathogen[ P0C206] interacts with 1 human partners:{Q02556}

32750 Pathogen[ P03363] interacts with 1 human partners:{Q02556}

32751 [Cluster 2978]GO:0060411+P biological\_process [name] cardiac septum morphogenesis [def] "The process in which the anatomical structure of a cardiac septum is generated and organized. A cardiac septum is a partition that separates parts of the heart." [GOC

32752 Pathogen[ Q2Q067] interacts with 2 human partners:{O96004;Q9Y5J3}

32753 Pathogen[ P0C214] interacts with 2 human partners:{Q9Y5J3;O96004}

32754 Pathogen[ P03346] interacts with 2 human partners:{Q9Y5J3;O96004}

32755 Pathogen[ Q85601] interacts with 2 human partners:{O96004;Q9Y5J3}

32756 Pathogen[ P14079] interacts with 2 human partners:{O96004;Q9Y5J3}

32757 Pathogen[ P03383] interacts with 1 human partners:{O96004}

32758 Pathogen[ P03410] interacts with 2 human partners:{Q9Y5J3;O96004}

32759 Pathogen[ P14075] interacts with 1 human partners:{O96004}

32760 Pathogen[ P0C206] interacts with 2 human partners:{O96004;Q9Y5J3}

32761 Pathogen[ P03363] interacts with 2 human partners:{Q9Y5J3;O96004}

32762 [Cluster 2979]GO:0000972+P biological\_process [name] transcription-dependent tethering of RNA polymerase II gene DNA at nuclear periphery [def] "The chromosome organization process in which the DNA sequence containing a gene transcribed by RNA polymerase II is maintained in a specific location at the nuclear periphery. In *S. cerevisiae*, this process involves cis-acting DNA sequences such as the TATA box and upstream activating sequence (UAS) elements, trans-acting transcriptional activators, and also the 3'-UTR of the transcript." [GOC

32763 Pathogen[ Q2Q067] interacts with 1 human partners:{Q86U70}

32764 Pathogen[ P0C214] interacts with 1 human partners:{Q86U70}

32765 Pathogen[ P03346] interacts with 1 human partners:{Q86U70}

32766 Pathogen[ Q85601] interacts with 1 human partners:{Q86U70}

32767 Pathogen[ P14079] interacts with 1 human partners:{Q86U70}

32768 Pathogen[ P03383] interacts with 1 human partners:{Q86U70}

32769 Pathogen[ P03410] interacts with 1 human partners:{Q86U70}

32770 Pathogen[ P14075] interacts with 1 human partners:{Q86U70}

32771 Pathogen[ P0C206] interacts with 1 human partners:{Q86U70}

32772 Pathogen[ P03363] interacts with 1 human partners:{Q86U70}

32773 [Cluster 2980]GO:0033151+P biological\_process [name] V(D)J recombination [def] "The process in which immune receptor V, D, and J, or V and J gene segments, depending on the specific receptor, are recombined within a single locus utilizing the conserved heptamer and nonamer recombination signal sequences (RSS)." [GOC

32774 Pathogen[ Q2Q067] interacts with 3 human partners:{P55895;Q13426;P12956}

32775 Pathogen[ P0C214] interacts with 3 human partners:{P55895;Q13426;P12956}

32776 Pathogen[ P03346] interacts with 3 human partners:{P12956;Q13426;P55895}

32777 Pathogen[ Q85601] interacts with 3 human partners:{Q13426;P55895;P12956}

32778 Pathogen[ P14079] interacts with 3 human partners:{P12956;Q13426;P49917}

32779 Pathogen[ P03383] interacts with 3 human partners:{Q13426;P55895;P12956}

32780 Pathogen[ P03410] interacts with 3 human partners:{P55895;P12956;Q13426}

32781 Pathogen[ P14075] interacts with 3 human partners:{P12956;Q13426;P55895}

32782 Pathogen[ P0C206] interacts with 5 human partners:{P49917;Q13426;P49916;P55895;P12956}

32783 Pathogen[ P03363] interacts with 3 human partners:{P12956;Q13426;P55895}

32784 [Cluster 2981]GO:0021778+P biological\_process [name] oligodendrocyte cell fate specification [def] "The process in which a cell becomes capable of differentiating autonomously into an oligodendrocyte in an environment that is neutral with respect to the developmental pathway. Upon specification, the cell fate can be reversed." [GO\_REF

32785 Pathogen[ Q2Q067] interacts with 1 human partners:{P35712}

32786 Pathogen[ P0C214] interacts with 1 human partners:{P35712}

32787 Pathogen[ P03346] interacts with 1 human partners:{P35712}

32788 Pathogen[ Q85601] interacts with 1 human partners:{P35712}

32789 Pathogen[ P14079] interacts with 1 human partners:{P35712}

32790 Pathogen[ P03383] interacts with 1 human partners:{P35712}

32791 Pathogen[ P03410] interacts with 1 human partners:{P35712}

32792 Pathogen[ P14075] interacts with 1 human partners:{P35712}

32793 Pathogen[ P0C206] interacts with 1 human partners:{P35712}

32794 Pathogen[ P03363] interacts with 1 human partners:{P35712}

32795 [Cluster 2982]GO:0060206+P biological\_process [name] estrous cycle phase [def] "The progression of physiological phases, occurring in the endometrium during the estrous cycle that recur at regular intervals during the reproductive years. The estrous cycle

is an ovulation cycle where the endometrium is resorbed if pregnancy does not occur." [GOC

32796 Pathogen[ Q2Q067] interacts with 2 human partners:{P14921;Q9H2P0}

32797 Pathogen[ P0C214] interacts with 2 human partners:{P14921;Q9H2P0}

32798 Pathogen[ P03346] interacts with 3 human partners:{Q15788;Q9H2P0;P14921}

32799 Pathogen[ Q85601] interacts with 2 human partners:{P14921;Q9H2P0}

32800 Pathogen[ P14079] interacts with 3 human partners:{P04083;Q9H2P0;Q15788}

32801 Pathogen[ P03383] interacts with 1 human partners:{P14921}

32802 Pathogen[ P03410] interacts with 1 human partners:{P14921}

32803 Pathogen[ P14075] interacts with 1 human partners:{P14921}

32804 Pathogen[ P0C206] interacts with 3 human partners:{P14921;Q9H2P0;Q15788}

32805 Pathogen[ P03363] interacts with 2 human partners:{Q9H2P0;P14921}

32806 [Cluster 2983]GO:0060261+P biological\_process [name] positive regulation of transcription initiation from RNA polymerase II promoter [def] "Any process that increases the rate, frequency or extent of a process involved in starting transcription from an RNA polymerase II promoter." [GOC

32807 Pathogen[ Q2Q067] interacts with 5 human partners:{Q6ZW49;P35680;P11831;P20823;P21675}

32808 Pathogen[ P0C214] interacts with 3 human partners:{P21675;P11831;Q6ZW49}

32809 Pathogen[ P03346] interacts with 5 human partners:{P11831;P20823;P35680;P21675;Q6ZW49}

32810 Pathogen[ Q85601] interacts with 5 human partners:{P11831;P35680;Q6ZW49;P21675;P20823}

32811 Pathogen[ P14079] interacts with 3 human partners:{P35680;Q6ZW49;P21675}

32812 Pathogen[ P03383] interacts with 3 human partners:{P11831;Q6ZW49;P21675}

32813 Pathogen[ P03410] interacts with 4 human partners:{P11831;P21675;P35680;Q6ZW49}

32814 Pathogen[ P14075] interacts with 3 human partners:{P21675;P11831;Q6ZW49}

32815 Pathogen[ P0C206] interacts with 5 human partners:{Q6ZW49;P35680;P20823;P11831;P21675}

32816 Pathogen[ P03363] interacts with 3 human partners:{P11831;P21675;Q6ZW49}

32817 [Cluster 2984]GO:0031022+P biological\_process [name]nuclear migration along microfilament [def] "The directed movement of the nucleus along microfilaments within the cell, mediated by motor proteins." [GOC

32818 Pathogen[ Q2Q067] interacts with 1 human partners:{Q9UH99}

32819 Pathogen[ P0C214] interacts with 1 human partners:{Q9UH99}

32820 Pathogen[ P03346] interacts with 2 human partners:{Q8WXH0;Q9UH99}

32821 Pathogen[ Q85601] interacts with 1 human partners:{Q9UH99}

32822 Pathogen[ P14079] interacts with 2 human partners:{Q8WXH0;Q9UH99}

32823 Pathogen[ P03383] interacts with 1 human partners:{Q9UH99}

32824 Pathogen[ P03410] interacts with 2 human partners:{Q9UH99;Q8WXH0}

32825 Pathogen[ P14075] interacts with 1 human partners:{Q9UH99}

32826 Pathogen[ P0C206] interacts with 2 human partners:{Q9UH99;Q8WXH0}

32827 Pathogen[ P03363] interacts with 1 human partners:{Q9UH99}

32828 [Cluster 2985]GO:0030951+P biological\_process [name] establishment or maintenance of microtubule cytoskeleton polarity [def] "Any cellular process that results in the specification, formation or maintenance of polarized microtubule-based cytoskeletal structures." [GOC

32829 Pathogen[ Q2Q067] interacts with 2 human partners:{P02545;Q14008}

32830 Pathogen[ P0C214] interacts with 2 human partners:{Q14008;P02545}

32831 Pathogen[ P03346] interacts with 2 human partners:{P02545;Q14008}

32832 Pathogen[ Q85601] interacts with 2 human partners:{P02545;Q14008}

32833 Pathogen[ P14079] interacts with 3 human partners:{Q99661;P02545;Q14008}

32834 Pathogen[ P03383] interacts with 2 human partners:{P02545;Q14008}

32835 Pathogen[ P03410] interacts with 2 human partners:{Q14008;P02545}

32836 Pathogen[ P14075] interacts with 2 human partners:{P02545;Q14008}

32837 Pathogen[ P0C206] interacts with 2 human partners:{Q14008;P02545}

32838 Pathogen[ P03363] interacts with 2 human partners:{P02545;Q14008}

32839 [Cluster 2986]GO:0001736+P biological\_process [name] establishment of planar polarity [def] "Coordinated organization of groups of cells in the plane of an epithelium, such that they all orient to similar coordinates." [GOC

32840 Pathogen[ Q2Q067] interacts with 1 human partners:{Q8TE85}

32841 Pathogen[ P0C214] interacts with 1 human partners:{Q8TE85}

32842 Pathogen[ P03346] interacts with 2 human partners:{Q8TE85;Q9BT04}

32843 Pathogen[ Q85601] interacts with 2 human partners:{Q8TE85;Q9BT04}

32844 Pathogen[ P14079] interacts with 3 human partners:{Q8TE85;Q8TCU4;Q9BT04}

32845 Pathogen[ P03383] interacts with 2 human partners:{Q8TE85;Q9BT04}

32846 Pathogen[ P03410] interacts with 3 human partners:{Q8TCU4;Q9BT04;Q8TE85}

32847 Pathogen[ P14075] interacts with 2 human partners:{Q8TE85;Q9BT04}

32848 Pathogen[ P0C206] interacts with 3 human partners:{Q8TE85;Q9BT04;Q8TCU4}

32849 Pathogen[ P03363] interacts with 2 human partners:{Q8TE85;Q9BT04}

32850 [Cluster 2987]GO:0000028+P biological\_process [name] ribosomal small subunit assembly [def] "The aggregation, arrangement and bonding together of constituent RNAs and proteins to form the small ribosomal subunit." [GOC

32851 Pathogen[ Q2Q067] interacts with 4 human partners:{P62263;P08708;P08865;P62851}

32852 Pathogen[ P0C214] interacts with 4 human partners:{P62263;P08865;P08708;P62851}

32853 Pathogen[ P03346] interacts with 4 human partners:{P08708;P08865;P62851;P62263}

32854 Pathogen[ Q85601] interacts with 4 human partners:{P62263;P08708;P62851;P08865}  
32855 Pathogen[ P14079] interacts with 5 human  
partners:{P62263;P08708;P08865;O75616;P62851}  
32856 Pathogen[ P03383] interacts with 4 human partners:{P08865;P62851;P62263;P08708}  
32857 Pathogen[ P03410] interacts with 5 human  
partners:{P08865;P08708;P62263;P62851;O75616}  
32858 Pathogen[ P14075] interacts with 4 human partners:{P62851;P08865;P08708;P62263}  
32859 Pathogen[ P0C206] interacts with 4 human partners:{P08865;P62263;P62851;P08708}  
32860 Pathogen[ P03363] interacts with 4 human partners:{P08865;P08708;P62851;P62263}  
32861 [Cluster 2988]GO:000042+P biological\_process [name] protein targeting to Golgi  
[def] "The process of directing proteins towards the Golgi\_ usually uses signals  
contained within the protein." [GOC  
32862 Pathogen[ Q2Q067] interacts with 6 human  
partners:{Q6VY07;Q96CN9;Q15643;Q96CV9;Q8IWJ2;Q13439}  
32863 Pathogen[ P0C214] interacts with 6 human  
partners:{Q8IWJ2;Q96CN9;Q6VY07;Q15643;Q96CV9;Q13439}  
32864 Pathogen[ P03346] interacts with 9 human  
partners:{Q13439;Q96CN9;Q99666;Q15643;Q96CV9;P20340;O14715;Q6VY07;Q8IWJ2}  
32865 Pathogen[ Q85601] interacts with 6 human  
partners:{Q96CN9;Q8IWJ2;Q15643;Q96CV9;Q13439;Q6VY07}  
32866 Pathogen[ P14079] interacts with 7 human  
partners:{Q6VY07;O14715;Q13439;Q8IWJ2;Q96CV9;Q96CN9;Q15643}  
32867 Pathogen[ P03383] interacts with 6 human  
partners:{Q8IWJ2;Q13439;Q6VY07;Q96CN9;Q15643;Q96CV9}  
32868 Pathogen[ P03410] interacts with 8 human  
partners:{Q99666;O14715;Q96CV9;Q15643;Q92805;Q13439;Q6VY07;Q8IWJ2}  
32869 Pathogen[ P14075] interacts with 6 human  
partners:{Q15643;Q8IWJ2;Q13439;Q96CV9;Q96CN9;Q6VY07}  
32870 Pathogen[ P0C206] interacts with 7 human  
partners:{Q13439;Q96CV9;Q6VY07;Q96CN9;Q15643;Q8IWJ2;O14715}  
32871 Pathogen[ P03363] interacts with 7 human  
partners:{Q96CV9;Q13439;Q6VY07;Q8IWJ2;Q99666;Q15643;Q96CN9}  
32872 [Cluster 2989]GO:000114+P biological\_process [name] regulation of transcription  
involved in G1 phase of mitotic cell cycle [def] "Any process that regulates  
transcription such that the target genes are transcribed as part of the G1 phase of the  
mitotic cell cycle." [GOC  
32873 Pathogen[ Q2Q067] interacts with 2 human partners:{Q5VTD9;O60885}  
32874 Pathogen[ P0C214] interacts with 2 human partners:{Q5VTD9;O60885}  
32875 Pathogen[ P03346] interacts with 2 human partners:{Q5VTD9;O60885}  
32876 Pathogen[ Q85601] interacts with 2 human partners:{O60885;Q5VTD9}  
32877 Pathogen[ P14079] interacts with 2 human partners:{Q5VTD9;O60885}  
32878 Pathogen[ P03383] interacts with 1 human partners:{O60885}  
32879 Pathogen[ P03410] interacts with 2 human partners:{O60885;Q5VTD9}  
32880 Pathogen[ P14075] interacts with 1 human partners:{O60885}  
32881 Pathogen[ P0C206] interacts with 2 human partners:{O60885;Q5VTD9}  
32882 Pathogen[ P03363] interacts with 2 human partners:{Q5VTD9;O60885}  
32883 [Cluster 2990]GO:0044255+P biological\_process [name] cellular lipid metabolic process  
[def] "The chemical reactions and pathways involving lipids, as carried out by  
individual cells." [GOC  
32884 Pathogen[ Q2Q067] interacts with 35 human  
partners:{O14734;Q9H5J4;Q15596;P22033;P30084;Q9NZI5;O15379;Q14192;Q96ST3;O75182;P131  
96;P32189;Q9BW60;Q9GZR5;Q99743;Q9BYK8;Q92539;Q15327;Q96RS0;O60907;P55055;Q3L8U1;Q96R  
U7;A1L3X0;Q9HB03;Q14686;Q9BZK7;Q9Y618;Q92793;Q6STE5;P27469;O75376;Q16836;Q86X55;Q146  
93}  
32885 Pathogen[ P0C214] interacts with 46 human  
partners:{P27469;P30084;Q15327;Q9NXB9;O75874;Q8N335;P53396;O60907;Q99743;Q92793;Q9NZ  
I5;Q9GZR5;Q3L8U1;Q6STE5;P40939;Q14686;P32189;P13196;Q9HB03;Q9BYK8;Q9NYP7;P23786;Q168  
81;P22033;Q92539;A1L3X0;O14832;O75376;Q14192;O15379;Q96RS0;Q96RU7;Q9BZK7;O14734;Q96S  
T3;Q9BW60;Q86X55;Q16698;Q15596;P48163;Q9Y618;Q96PE7;Q06520;O75182;Q14693;P21695}  
32886 Pathogen[ P03346] interacts with 38 human  
partners:{Q9BW60;Q96ST3;Q96PE7;Q06520;Q15788;O60907;Q16836;P07148;O15379;P27469;Q153  
27;P23786;Q9NZI5;P13196;O75182;Q92539;Q15596;Q9H5J4;Q14192;Q6STE5;Q96RS0;Q9HB03;O753  
76;Q96RU7;O14734;Q9BZK7;P32189;P50542;Q86X55;Q9BYK8;Q92793;Q3L8U1;Q9Y618;Q99743;P550  
55;P30084;Q14693;Q14686}  
32887 Pathogen[ Q85601] interacts with 35 human  
partners:{O75182;Q86X55;A1L3X0;Q3L8U1;Q6STE5;O60907;Q9Y618;P27469;P13196;Q99743;Q155  
96;P32189;P55055;O14734;Q14686;Q9BW60;Q9H5J4;Q14192;Q96RS0;Q15327;P22033;Q9BYK8;O753  
76;Q9HB03;Q96RU7;Q9BZK7;O15379;Q16836;Q9GZR5;Q92793;Q9NZI5;Q92539;P30084;Q14693;Q96S  
T3}  
32888 Pathogen[ P14079] interacts with 40 human  
partners:{O15379;O75192;Q99743;P27469;Q96RS0;P55055;P13196;Q9BYK8;Q9BZK7;Q6STE5;Q155  
96;Q14693;A1L3X0;Q14192;Q96ST3;Q92793;O60907;P32189;P30084;Q9HB03;Q92539;P50542;O148  
32;O14734;Q15788;P22033;Q96PE7;Q9NZI5;Q15327;Q96RU7;Q99541;O75182;O75376;Q9GZR5;P216  
95;Q9BW60;Q14686;Q9H5J4;Q3L8U1;Q16836}  
32889 Pathogen[ P03383] interacts with 31 human  
partners:{Q9Y618;O75182;P27469;Q15596;O75376;Q9BW60;Q9GZR5;O60907;Q9H5J4;Q86X55;Q168

36;Q14686;Q6STE5;O14734;Q14192;A1L3X0;Q9HB03;O15379;Q96RS0;P22033;Q96RU7;Q3L8U1;Q15327;Q9BZK7;P32189;Q96ST3;Q9NZI5;Q92539;Q9BYK8;Q92793;Q14693}

32890 Pathogen[ P03410] interacts with 41 human  
partners: {O75192;A1L3X0;Q99743;P30084;Q96RS0;Q9GZR5;Q9H5J4;Q96PE7;Q14686;Q9BYK8;O75182;Q86X55;Q9NZI5;O75376;Q15327;P23786;Q96ST3;Q14693;O14734;Q92793;P27469;Q9BW60;O15379;P55809;O14832;Q16836;Q15596;Q96RU7;P50542;Q3L8U1;Q9HB03;Q9BZK7;P32189;Q6STE5;Q9Y618;Q92539;P13196;O60907;Q14192;P22033;P21695}

32891 Pathogen[ P14075] interacts with 33 human  
partners: {Q3L8U1;Q96ST3;Q9H5J4;Q9BW60;Q14686;P32189;Q15327;O14734;Q9HB03;O75182;Q9Y618;O75376;A1L3X0;Q92539;P22033;Q86X55;Q16836;Q96RS0;O60907;Q96RU7;Q9GZR5;O15379;Q9NZI5;Q9BZK7;Q92793;O14832;O75192;P27469;Q6STE5;Q14192;Q9BYK8;Q15596;Q14693}

32892 Pathogen[ P0C206] interacts with 41 human  
partners: {Q96RS0;Q92539;O75192;Q96PE7;Q96ST3;Q9NZI5;O60907;Q9HB03;Q15327;Q86X55;Q16836;Q6STE5;O14832;P55055;P50542;P32189;Q96RU7;P23786;Q9H5J4;Q92793;Q9BYK8;P30084;Q99743;O15379;Q14686;O14734;Q9BZK7;O75376;Q15596;Q9GZR5;P27469;Q14192;P13196;P22033;Q14693;Q15788;Q9Y618;O75182;A1L3X0;Q9BW60;Q3L8U1}

32893 Pathogen[ P03363] interacts with 26 human  
partners: {O14734;Q16836;Q96RS0;Q3L8U1;Q9H5J4;Q6STE5;Q92539;O15379;Q9BZK7;O75376;O60907;Q15596;Q14686;Q15327;Q99743;Q96ST3;Q9NZI5;Q9Y618;Q9BYK8;Q92793;P27469;P13196;Q06520;O75182;Q86X55;Q14192}

32894 [Cluster 2991]GO:0045648+P biological\_process [name] positive regulation of erythrocyte differentiation [def] "Any process that activates or increases the frequency, rate or extent of erythrocyte differentiation." [GOC

32895 Pathogen[ Q2Q067] interacts with 7 human  
partners: {P27540;P14921;Q6NXT1;P15976;P08107;O43524;P23769}

32896 Pathogen[ P0C214] interacts with 5 human  
partners: {P14921;P23769;Q6NXT1;P27540;P08107}

32897 Pathogen[ P03346] interacts with 8 human  
partners: {P08107;P23769;P27540;P14921;P17542;P15976;O43524;Q6NXT1}

32898 Pathogen[ Q85601] interacts with 6 human  
partners: {P08107;P15976;P14921;P23769;Q6NXT1;P27540}

32899 Pathogen[ P14079] interacts with 5 human  
partners: {P15976;Q6NXT1;P08107;P27540;P23769}

32900 Pathogen[ P03383] interacts with 4 human partners: {P08107;P27540;P14921;P23769}

32901 Pathogen[ P03410] interacts with 6 human  
partners: {Q6NXT1;P27540;P08107;P23769;P15976;P14921}

32902 Pathogen[ P14075] interacts with 4 human partners: {P23769;P27540;P14921;P08107}

32903 Pathogen[ P0C206] interacts with 6 human  
partners: {Q6NXT1;P14921;P15976;P08107;P23769;P27540}

32904 Pathogen[ P03363] interacts with 5 human  
partners: {P27540;Q6NXT1;P14921;O43524;P08107}

32905 [Cluster 2992]GO:0042986+P biological\_process [name] positive regulation of amyloid precursor protein biosynthetic process [def] "Any process that activates or increases the frequency, rate or extent of the chemical reactions and pathways resulting in the formation of amyloid precursor protein (APP), the precursor of beta-amyloid." [GOC

32906 Pathogen[ Q2Q067] interacts with 1 human partners: {Q96IZ0}

32907 Pathogen[ P0C214] interacts with 1 human partners: {Q96IZ0}

32908 Pathogen[ P03346] interacts with 1 human partners: {Q96IZ0}

32909 Pathogen[ Q85601] interacts with 1 human partners: {Q96IZ0}

32910 Pathogen[ P14079] interacts with 1 human partners: {Q96IZ0}

32911 Pathogen[ P03383] interacts with 1 human partners: {Q96IZ0}

32912 Pathogen[ P03410] interacts with 1 human partners: {Q96IZ0}

32913 Pathogen[ P14075] interacts with 1 human partners: {Q96IZ0}

32914 Pathogen[ P0C206] interacts with 1 human partners: {Q96IZ0}

32915 Pathogen[ P03363] interacts with 1 human partners: {Q96IZ0}

32916 [Cluster 2993]GO:0070555+P biological\_process [name] response to interleukin-1 [def] "Any process that results in a change in state or activity of a cell or an organism (in terms of movement, secretion, enzyme production, gene expression, etc.) as a result of an interleukin-1 stimulus." [GOC

32917 Pathogen[ Q2Q067] interacts with 6 human  
partners: {P56524;Q16594;P14921;Q04206;Q99966;P78318}

32918 Pathogen[ P0C214] interacts with 6 human  
partners: {P78318;P14921;P56524;Q04206;Q16594;Q99966}

32919 Pathogen[ P03346] interacts with 7 human  
partners: {P50135;Q99966;P56524;Q04206;P14921;P78318;Q16594}

32920 Pathogen[ Q85601] interacts with 6 human  
partners: {P14921;Q99966;Q16594;Q04206;P56524;P78318}

32921 Pathogen[ P14079] interacts with 9 human  
partners: {P04083;O43187;Q16594;P13498;P50135;Q99966;P56524;P78318;Q99836}

32922 Pathogen[ P03383] interacts with 5 human  
partners: {P14921;Q16594;P56524;Q04206;P78318}

32923 Pathogen[ P03410] interacts with 8 human  
partners: {Q04206;P78318;O43187;P56524;Q16594;P50135;P14921;Q99966}

32924 Pathogen[ P14075] interacts with 5 human  
partners: {Q04206;P56524;Q16594;P78318;P14921}

32925 Pathogen[ P0C206] interacts with 7 human

32926 Pathogen[ P14921;P78318;Q04206;Q99966;P56524;P50135;Q16594] interacts with 5 human partners: {P14921;P78318;Q04206;Q99966;P56524;P50135;Q16594}

32927 [Cluster 2994]GO:0006121+P biological\_process [name] mitochondrial electron transport, succinate to ubiquinone [def] "The transfer of electrons from succinate to ubiquinone that occurs during oxidative phosphorylation, mediated by the multisubunit enzyme known as complex II." [ISBN Pathogen[ Q2Q067] interacts with 1 human partners: {Q9NX18}

32928 Pathogen[ POC214] interacts with 2 human partners: {Q9NX18;O14521}

32930 Pathogen[ P03346] interacts with 1 human partners: {Q9NX18}

32931 Pathogen[ Q85601] interacts with 1 human partners: {Q9NX18}

32932 Pathogen[ P14079] interacts with 2 human partners: {Q9NX18;O14521}

32933 Pathogen[ P03383] interacts with 1 human partners: {Q9NX18}

32934 Pathogen[ P03410] interacts with 2 human partners: {O14521;Q9NX18}

32935 Pathogen[ P14075] interacts with 1 human partners: {Q9NX18}

32936 Pathogen[ POC206] interacts with 2 human partners: {O14521;Q9NX18}

32937 Pathogen[ P03363] interacts with 1 human partners: {Q9NX18}

32938 [Cluster 2995]GO:0006605+P biological\_process [name] protein targeting [def] "The process of targeting specific proteins to particular membrane-bounded subcellular organelles. Usually requires an organelle specific protein sequence motif." [GOC Pathogen[ Q2Q067] interacts with 17 human partners: {Q9NQG7;Q9Y6Q5;P63104;O60296;P62258;Q9NSC5;P61981;Q7Z3B4;Q15388;P62913;Q16543;Q02952;Q9UPV9;P27348;P31946;Q13023;O75901}

32940 Pathogen[ POC214] interacts with 15 human partners: {Q9NQG7;Q16543;P62913;Q15388;Q9UPV9;P27348;Q9UM54;Q13023;O60296;Q9NSC5;O75901;Q9Y6Q5;P61981;P31946;Q7Z3B4}

32941 Pathogen[ P03346] interacts with 22 human partners: {Q95166;Q9NSC5;Q9NQG7;O14908;P62913;Q96RT1;O75901;P62258;P27348;Q13023;O60296;Q9UPV9;Q02952;Q16543;P61981;P31946;P63104;Q15388;Q9Y6Q5;Q7Z3B4;Q9NRD5;Q6ZJW1}

32942 Pathogen[ Q85601] interacts with 21 human partners: {Q9NQG7;P61981;Q16543;P63104;P62913;P31946;Q15388;Q96RT1;O95166;Q6ZJW1;Q9UPV9;O60296;P62258;P27348;Q9BVA0;O75901;Q9NSC5;Q9UM54;Q13023;Q9Y6Q5;Q7Z3B4}

32943 Pathogen[ P14079] interacts with 25 human partners: {Q9NQG7;Q02952;O95166;O43759;Q9Y6Q5;Q13023;P24588;Q9UM54;Q15388;P63104;Q96RT1;P61981;P31946;P27348;P60059;Q9NSC5;P62258;O60296;Q7Z3B4;P62913;Q16543;Q6ZJW1;Q9BVA0;O14908;O75901}

32944 Pathogen[ P03383] interacts with 16 human partners: {Q9NQG7;Q16543;P62913;P31946;Q13023;O75901;O60296;P63104;Q15388;Q9UPV9;Q9NSC5;P61981;Q7Z3B4;P62258;Q02952;P27348}

32945 Pathogen[ P03410] interacts with 27 human partners: {Q9NQG7;P62258;Q9Y6Q5;Q7Z3B4;Q96RT1;Q15388;P62913;Q16543;P60059;Q6ZJW1;O43759;P27348;O14908;Q9NSC5;O95166;P61981;Q9UM54;Q9NRD5;Q9UPV9;Q13023;O60296;P63104;O75901;Q02952;P24588;P31946;Q9BVA0}

32946 Pathogen[ P14075] interacts with 16 human partners: {Q9NQG7;Q16543;P62913;Q15388;O60296;O75901;P61981;Q9UPV9;Q02952;Q9NSC5;P63104;P27348;P31946;Q7Z3B4;P62258;Q13023}

32947 Pathogen[ POC206] interacts with 25 human partners: {Q9NQG7;Q9UM54;Q9BVA0;Q96RT1;Q9Y6Q5;Q6ZJW1;O43759;Q13023;Q7Z3B4;Q16543;P27348;Q9UPV9;P31946;P62913;P63104;Q9NSC5;P62258;O60296;O14908;P61981;Q15388;Q02952;Q9NRD5;O75901;O95166}

32948 Pathogen[ P03363] interacts with 20 human partners: {P62913;Q9NQG7;P62258;Q7Z3B4;Q96RT1;P27348;Q9UPV9;O14908;Q02952;Q15388;P31946;O60296;P63104;Q16543;Q9NSC5;O75901;Q6ZJW1;Q13023;P61981;O95166}

32949 [Cluster 2996]GO:0007140+P biological\_process [name] male meiosis [def] "A cell cycle process comprising the steps by which a cell progresses through the nuclear division phase of a meiotic cell cycle in the male germline." [GOC Pathogen[ Q2Q067] interacts with 8 human partners: {Q9UHC1;Q5MJ70;Q8IYF3;Q58F21;Q8IZX4;Q9H5I1;Q9BX26;O15360}

32950 Pathogen[ POC214] interacts with 10 human partners: {Q58F21;Q9H5I1;Q9BXT5;Q9UHC1;O15360;Q8IZX4;Q9BX26;Q5MJ70;P40692;Q8IYF3}

32951 Pathogen[ P03346] interacts with 11 human partners: {Q9BXT5;Q5MJ70;Q9BX26;O15360;Q8IYF3;Q9UHC1;Q58F21;Q9NTU4;Q8N635;Q8IZX4;Q9H5I1}

32952 Pathogen[ Q85601] interacts with 10 human partners: {Q9H5I1;Q9BXT5;Q8IYF3;Q9BX26;Q8IZX4;O15360;Q9UHC1;P40692;Q58F21;Q5MJ70}

32953 Pathogen[ P14079] interacts with 13 human partners: {Q5MJ70;Q8IZX4;Q9BXT5;Q58F21;P40692;Q9UHC1;Q9H5I1;Q9NTU4;Q8N635;Q9BX26;Q96JY0;O15360;Q8IYF3}

32954 Pathogen[ P03383] interacts with 9 human partners: {Q9NTU4;Q9UHC1;Q8IZX4;Q8IYF3;Q58F21;O15360;Q9H5I1;Q5MJ70;Q9BX26}

32955 Pathogen[ P03410] interacts with 12 human partners: {P40692;Q8IZX4;Q9NTU4;Q9BX26;Q9H5I1;Q9BXT5;O15360;Q5MJ70;Q8IYF3;Q58F21;Q8N635;Q9UHC1}

32956 Pathogen[ P14075] interacts with 10 human partners: {Q9NTU4;O15360;Q5MJ70;Q9BX26;Q9H5I1;Q58F21;Q9UHC1;Q9BXT5;Q8IYF3;Q8IZX4}

32957 Pathogen[ POC206] interacts with 12 human partners: {Q9NTU4;O15360;Q5MJ70;Q9BX26;Q9H5I1;Q58F21;Q9UHC1;Q9BXT5;Q8IYF3;Q8IZX4}



- 32959 partners: {O15360;Q8N635;Q9NTU4;P40692;Q9UHC1;Q9BXT5;Q9BX26;Q8IZX4;Q9H5I1;Q8IYF3;Q58F21;Q5MJ70}  
Pathogen[ P03363] interacts with 12 human  
partners: {Q8IZX4;P54652;O15360;Q58F21;Q9H5I1;Q9UHC1;Q9NTU4;Q96JY0;Q5MJ70;Q8N635;Q9BXT5;Q9BX26}
- 32960 [Cluster 2997]GO:0019221+P biological\_process [name] cytokine-mediated signaling pathway [def] "Any series of molecular signals generated as a consequence of a cytokine binding to a cell surface receptor." [GOC
- 32961 Pathogen[ Q2Q067] interacts with 85 human  
partners: {Q14974;Q96EE3;P52948;Q12769;Q9Y6K5;Q96HA1;O75925;Q9UII4;P55265;P49790;P49792;P40763;P09913;O75694;Q8TD23;Q92985;P78406;Q04206;P38919;P14316;Q99567;Q8N1F7;O14896;Q7Z3B4;Q8WU90;Q8NFH4;Q00978;P12270;P51965;Q14240;P80217;P63165;Q14765;O15131;Q9BW27;Q6GPH4;Q8TEM1;Q14653;Q15306;Q9Y4X5;P10914;A9QM74;O14933;P28062;Q9BVL2;P78344;Q9UKX7;P61088;Q9NRG9;Q8NFH3;O00505;Q02556;P09914;P37198;Q92621;P52630;O00629;O15504;Q13526;P0CG47;O60573;P57740;O75688;P52292;P0CG48;Q92600;Q8WUM0;Q04637;P62987;P06730;P42226;P23497;Q13568;P35658;Q8NFH5;P52294;P42224;P60842;P02795;O14879;Q5SRE5;P49715;P18146;P33076;P62979}
- 32962 Pathogen[ P0C214] interacts with 88 human  
partners: {P80217;O14933;A9QM74;Q8NFH5;P28062;P09914;P09913;P60842;O75925;Q13568;O14879;Q92934;Q8TEM1;P33076;P42226;Q8TD23;Q14765;P78406;P55265;P57740;Q9Y6K5;Q99567;Q13526;Q8N5X7;P29728;Q8N1F7;O75694;P78344;Q04206;Q96EE3;P42224;P10914;P49792;Q9UKX7;Q00978;O15131;P51965;P49790;Q92985;P37198;Q9BW27;P52294;P63165;Q02556;P0CG48;P38919;Q9NRG9;P35658;Q14240;Q9UII4;O14896;P02795;Q8NFH3;Q14653;O00505;Q6GPH4;P62987;Q04637;P23497;Q8WU90;P18146;O15504;P0CG47;P40763;P52292;P12270;Q92600;Q14974;O75688;Q8NFH4;Q9BVL2;Q9Y4X5;P62979;P52630;Q5SRE5;P06730;O15524;Q7Z3B4;P14316;Q8WUM0;P52948;Q92621;P61088;Q12769;O00629;O60573;Q15306;Q96HA1}
- 32963 Pathogen[ P03346] interacts with 92 human  
partners: {Q8TEM1;Q8NFH4;Q8WUM0;O00629;O15524;P06730;P12270;Q99612;Q12769;Q96EE3;P55265;Q99567;Q9UKX7;P62987;O75694;Q8WU90;Q8TD23;Q9NRG9;P78406;O75159;P57740;P14316;Q8N5X7;Q9BVL2;P0CG48;Q9UII4;Q8N1F7;P78344;P38919;O60573;Q04206;P33076;P28062;P42226;Q15306;O00505;Q8NFH5;Q13526;Q00978;P37198;Q8NFH3;P35658;P60842;P49715;P61088;Q5SRE5;O75925;Q92621;Q9BW27;P17706;Q15646;P10914;P51965;Q02556;O14879;O15131;P63165;A9QM74;O14896;Q14240;O75688;P42224;Q14653;Q13568;P62979;P80217;P02795;P0CG47;Q6GPH4;P52292;O14933;P49790;P23497;Q04637;P09913;P18146;Q96HA1;Q92985;Q9Y4X5;P09914;Q14765;Q9Y6R0;P52630;P40763;Q7Z3B4;P52294;Q9Y6K5;O15504;Q92600;P49792;Q14974;P52948}
- 32964 Pathogen[ Q85601] interacts with 84 human  
partners: {Q8TEM1;P18146;Q5SRE5;O14896;O00629;O75688;P09913;P33076;P14316;O14933;Q8NFH4;Q14765;Q8NFH3;Q02556;Q96EE3;O14879;P06730;Q12769;Q14240;Q6GPH4;Q8TD23;P78406;P57740;Q9NRG9;Q8N5X7;P40763;Q8WUM0;Q8N1F7;Q04637;Q15306;P0CG48;Q00978;P02795;P12270;Q92600;O75694;O15504;Q14974;P10914;P52630;P28062;P38919;Q14653;O15131;Q9BW27;Q9Y6K5;Q92621;P51965;Q13526;Q04206;P42226;P28062;O60573;A9QM74;P52948;Q9UKX7;Q92985;Q99612;P42224;P78344;Q8NFH5;P60842;P62979;P55265;Q8WU90;P35658;P09914;P49715;P0CG47;P63165;Q99567;P52292;P49792;P62987;Q9BVL2;Q96HA1;P61088;O00505;Q13568;Q7Z3B4;O75925;P52294;P49790;Q9Y4X5}
- 32965 Pathogen[ P14079] interacts with 87 human  
partners: {Q8NFH5;P13164;Q9BW27;Q96HA1;P33076;Q8TD23;P51965;P60842;P0CG48;Q92600;P52630;P29728;P02795;Q14653;P06730;P09914;P09912;O14896;P80217;P57740;Q8N1F7;Q92985;P35658;O43432;Q92621;P52294;Q8TEM1;P62979;P63165;Q14240;Q15306;Q14765;P23497;P62987;Q99612;P09913;Q9UKX7;P78344;Q9BVL2;O60573;P42226;O15504;Q8WU90;Q13568;Q8WUM0;P12270;P28062;P55265;Q92934;P49715;Q9Y6K5;Q99567;Q14974;Q8N5X7;Q96EE3;P37198;Q8NFH3;Q6GPH4;P37198;P49790;A9QM74;O00505;P42224;Q8NFH4;O75925;Q96AZ6;P78406;Q00978;Q7Z3B4;O75688;Q02556;Q12769;Q13526;P0CG47;O14879;O14933;Q5SRE5;Q9NRG9;O75694;P14316;O00629;P52292;O15131;Q99836;Q04637;P10914;P52948;P40305}
- 32966 Pathogen[ P03383] interacts with 74 human  
partners: {Q9BVL2;Q96EE3;O15504;O14879;Q8WUM0;P10914;O75925;P14316;Q92621;P49792;Q8NFH4;Q14653;P33076;O14933;P62987;P51965;P12270;P52948;Q8TD23;P78406;P57740;Q8NFH5;Q8N1F7;P52630;P38919;P42226;O00505;Q8TEM1;Q15306;O60573;Q00978;P02795;P18146;Q12769;A9QM74;P09913;Q99567;P61088;P06730;Q92985;Q9BW27;P52292;P80217;O14896;Q13568;P63165;Q92600;P78344;Q14974;Q9Y6K5;Q5SRE5;O15131;P35658;P23497;Q04637;P62979;Q96HA1;P0CG47;Q9NRG9;Q04206;P55265;Q02556;P0CG48;Q8WU90;P37198;Q9UKX7;P28062;O00629;Q7Z3B4;P52294;P49790;O75694;Q13526;Q8NFH3}
- 32967 Pathogen[ P03410] interacts with 87 human  
partners: {Q99567;Q04206;Q7Z3B4;Q9BW27;O75925;P0CG48;Q14974;A9QM74;O00505;Q9UKX7;O14896;P29728;P55265;P52294;Q8NFH4;P06730;P51965;Q13526;Q5SRE5;P52948;O15504;Q14653;Q14765;P09912;O75694;Q92934;P78406;P61088;O43432;Q96HA1;P55265;P62979;Q15306;Q13568;O14933;Q8N1F7;Q02556;O75688;Q6GPH4;P49790;P12270;O00629;P35658;Q8NFH5;P02795;P28062;Q96AZ6;Q8TEM1;Q9Y4X5;P10914;Q96EE3;P60842;P38919;P80217;P42226;Q9Y6K5;P09913;O60573;P52630;P62987;Q8WUM0;Q8N5X7;Q92600;P14316;Q8TD23;Q04637;P57740;Q92985;O14879;P18146;Q12769;P52292;P40305;Q9NRG9;O15131;P40763;Q8NFH3;P09914;P33076;Q9BVL2;Q00978;Q8WU90;P0CG47;Q92621;P78344;P49792;Q14240}
- 32968 Pathogen[ P14075] interacts with 75 human  
partners: {P52630;P52292;O15131;P63165;P23497;Q04206;P09913;P55265;Q8WU90;P42226;Q8TD23;P61088;P78406;P57740;Q92600;P49792;Q8N1F7;P51965;P18146;P78344;P80217;P33076;O00629;O75925;Q9UKX7;O14933;P06730;Q00978;P35658;P12270;Q92621;O00505;Q02556;Q13568;Q96HA1;Q9BW27;P52294;P0CG48;P62979;O60573;Q14653;P28062;Q13526;Q8TEM1;Q04637;Q96EE3;P37198;Q9Y6K5;Q15306;Q5SRE5;P62987;P14316;O14896;O14879;Q8NFH3;P02795;P0CG47;A9QM74;O155

04;Q99567;Q12769;P40305;Q14974;Q92985;Q9BVL2;P49790;Q8WUM0;P38919;P10914;O75694;Q9NRG9;Q7Z3B4;Q8NFH4;Q8NFH5;P52948}

32969 Pathogen[ POC206] interacts with 88 human partners: {Q96EE3;P28062;Q92621;P10914;P0CG48;O15131;Q8WU90;Q13568;P49790;P40305;P55265;Q5SRE5;Q8NFH5;Q9NRG9;Q13526;O75925;O14933;A9QM74;Q7Z3B4;O00629;Q9Y6K5;Q14974;Q96HA1;O14879;O00505;P29728;Q15306;P49715;O15524;Q8NFH4;P30730;P80217;P06730;P18146;Q9Y4X5;Q92934;P51965;Q02556;Q8WUM0;P49792;Q8TEML;Q9UKX7;P61088;O75688;Q99612;Q8N5X7;O75694;Q92985;Q8TD23;Q04206;P09913;P62979;O14896;P40763;Q14240;Q92600;Q99567;P0CG47;Q8NFH4;Q00978;P42226;P78344;P78406;O60573;Q14765;O15504;Q04637;Q12769;P63165;P62987;P38919;P02795;Q8NFH3;P52294;P42224;P60842;Q6GPH4;Q8N1F7;P52292;P14316;P35658;P52630;P17706;Q9BW27;Q9BVL2;P12270;Q14653;P09914}

32970 Pathogen[ P03363] interacts with 81 human partners: {P17706;Q14653;Q9Y6K5;P52630;O75159;Q14765;Q7Z3B4;P51965;Q92985;P38919;Q5SR E5;Q04206;O14896;P02795;P12270;P18146;O15524;Q8NFH4;A9QM74;O14933;Q02556;P09914;Q8NF H3;P09913;Q12769;O00505;Q13568;Q99612;P80217;Q9UKX7;Q15306;Q13526;P23497;Q8WU90;O006 29;O14879;P42226;P61088;Q9NRG9;Q8WUM0;Q9BVL2;Q99567;Q8N5X7;Q9Y4X5;P63165;Q14240;P143 16;Q96HA1;P49792;P10914;P35658;P55265;P62987;O75925;Q92600;Q14974;O75694;P49790;P577 40;P33076;Q00978;P60842;Q8TD23;O15131;P78406;P52948;O60573;O15504;P78344;Q9Y6R0;P371 98;P52292;Q8N1F7;Q92621;O75688;Q8NFH5;P06730;Q9UII4;Q9BW27;Q04637;P52294}

32971 [Cluster 2998]GO:0032648+P biological\_process [name] regulation of interferon-beta production [def] "Any process that modulates the frequency, rate, or extent of interferon-beta production." [GOC

32972 Pathogen[ Q2Q067] interacts with 2 human partners: {Q13114;Q9NWF9}

32973 Pathogen[ POC214] interacts with 2 human partners: {Q9NWF9;Q13114}

32974 Pathogen[ P03346] interacts with 2 human partners: {Q9NWF9;Q13114}

32975 Pathogen[ Q85601] interacts with 2 human partners: {Q9NWF9;Q13114}

32976 Pathogen[ P14079] interacts with 2 human partners: {Q9NWF9;Q13114}

32977 Pathogen[ P03383] interacts with 2 human partners: {Q9NWF9;Q13114}

32978 Pathogen[ P03410] interacts with 2 human partners: {Q9NWF9;Q13114}

32979 Pathogen[ P14075] interacts with 2 human partners: {Q9NWF9;Q13114}

32980 Pathogen[ POC206] interacts with 2 human partners: {Q13114;Q9NWF9}

32981 Pathogen[ P03363] interacts with 2 human partners: {Q9NWF9;Q13114}

32982 [Cluster 2999]GO:000956+P biological\_process [name] nuclear-transcribed mRNA catabolic process [def] "The chemical reactions and pathways resulting in the breakdown of nuclear-transcribed mRNAs in eukaryotic cells." [GOC

32983 Pathogen[ Q2Q067] interacts with 4 human partners: {Q8IZH2;Q06265;Q9NPD3;Q9UL18}

32984 Pathogen[ POC214] interacts with 4 human partners: {Q8IZH2;Q9NPD3;Q06265;Q9UL18}

32985 Pathogen[ P03346] interacts with 4 human partners: {Q9UL18;Q8IZH2;Q06265;Q9NPD3}

32986 Pathogen[ Q85601] interacts with 4 human partners: {Q9NPD3;Q9UL18;Q8IZH2;Q06265}

32987 Pathogen[ P14079] interacts with 4 human partners: {Q9UL18;Q9NPD3;Q8IZH2;Q06265}

32988 Pathogen[ P03383] interacts with 3 human partners: {Q06265;Q9UL18;Q9NPD3}

32989 Pathogen[ P03410] interacts with 4 human partners: {Q9UL18;Q06265;Q8IZH2;Q9NPD3}

32990 Pathogen[ P14075] interacts with 3 human partners: {Q9NPD3;Q9UL18;Q06265}

32991 Pathogen[ POC206] interacts with 4 human partners: {Q8IZH2;Q9NPD3;Q06265;Q9UL18}

32992 Pathogen[ P03363] interacts with 3 human partners: {Q9NPD3;Q9UL18;Q8IZH2}

32993 [Cluster 3000]GO:0043161+P biological\_process [name] proteasomal ubiquitin-dependent protein catabolic process [def] "The chemical reactions and pathways resulting in the breakdown of a protein or peptide by hydrolysis of its peptide bonds, initiated by the covalent attachment of ubiquitin, and mediated by the proteasome." [GOC

32994 Pathogen[ Q2Q067] interacts with 35 human partners: {Q8IXJ6;P54252;Q92890;Q9NS56;Q8WW12;Q13829;P49427;P35638;P54727;P63279;Q6VV B1;Q16531;P54725;P61077;Q04323;P63146;P78317;P62714;Q5TA31;Q9UNN5;Q8TAT6;O60907;Q136 18;Q15366;Q9UKT7;Q9NWF9;Q13216;P28074;Q9Y2M5;Q9BZK7;Q9UNE7;Q96SW2;Q9H3F6;Q13490;P628 77}

32995 Pathogen[ POC214] interacts with 42 human partners: {Q96B02;Q8WW12;Q13490;Q13829;P49427;Q9NS56;O60907;P54725;P63279;Q13618;P628 77;O00308;Q5T447;Q15366;Q9UKT7;P78317;Q9H0M0;Q9NWF9;P61077;Q13216;Q9HCE7;P62714;Q8TA T6;P28074;Q9UNN5;Q96SW2;Q9Y2M5;Q8WZ19;Q04323;Q92890;Q5TA31;P54727;Q9BZK7;Q8IXJ6;Q9H3 F6;Q9UNE7;Q16531;P63146;Q6VVB1;P54252;P35638;P55072}

32996 Pathogen[ P03346] interacts with 46 human partners: {Q9UKT7;Q15366;O60907;Q13362;Q8WZ19;Q9NWF9;P35638;P49427;Q9BYM8;P28074;Q8WW 12;Q969U6;Q16531;Q13618;Q8IXJ6;P63279;P62714;Q5TA31;P55072;Q13829;Q5T447;P61077;Q96S W2;P62877;Q9NS56;Q9UNN5;P63146;Q9UNE7;Q8IUQ4;P54727;Q13216;P78317;Q6VVB1;Q04323;Q8TA T6;Q9BZK7;P54725;Q13490;Q9H0M0;Q9H3F6;Q9Y2M5;P0C2W1;Q92890;Q9H0E7;P54252;O00308}

32997 Pathogen[ Q85601] interacts with 38 human partners: {P78317;Q9NS56;Q13490;Q9H0E7;P63146;Q8WZ19;P62714;Q16531;P49427;O60907;Q132 16;P62877;Q96SW2;Q9NWF9;Q96B02;Q5TA31;P61077;P63279;P54252;Q9UKT7;Q9UNN5;P54727;Q043 23;Q8WW12;Q8IXJ6;P54725;Q6VVB1;Q9BZK7;Q92890;Q9Y2M5;P28074;Q13618;Q9H3F6;Q13829;Q9UN E7;Q8TAT6;Q15366;P35638}

32998 Pathogen[ P14079] interacts with 33 human partners: {Q13362;Q5TA31;P63279;Q9BZK7;P28074;Q13618;Q16531;P54252;O60907;Q13216;P610 77;Q92890;P62877;Q8WW12;Q9UNN5;Q9NWF9;Q9BYM8;Q8TAT6;Q9Y2M5;Q15366;Q9NS56;P35638;Q8IX J6;P49427;P78317;Q9UKT7;Q13829;Q96SW2;P54727;P63146;Q9H3F6;Q04323;Q13490}

32999 Pathogen[ P03383] interacts with 31 human partners: {Q15366;Q13216;P49427;O60907;Q96SW2;Q13490;P62714;P35638;Q04323;P78317;Q9UK T7;Q8WW12;Q13618;P61077;P54252;Q9UNN5;Q5TA31;Q8TAT6;P54725;P54727;Q9BZK7;P62877;Q9Y2

33000 M5;P28074;P63146;Q16531;Q9H3F6;Q13829;Q9NWF9;Q92890;P63279}  
Pathogen[ P03410] interacts with 36 human  
partners:{P62714;Q8IXJ6;Q9UKT7;Q13829;Q9UNN5;P35638;Q96SW2;P49427;Q9NWF9;Q13490;Q8WZ  
19;P54252;Q15366;Q5TA31;Q04323;P54725;Q9UNE7;Q9H3F6;Q13618;P78317;P62877;P63146;Q165  
31;Q8WW12;Q13216;Q969U6;P63279;Q9BZK7;Q13362;O60907;Q8TAT6;Q92890;Q9Y2M5;P61077;P280  
74;P54727}

33001 Pathogen[ P14075] interacts with 31 human  
partners:{Q15366;Q8TAT6;Q13618;P49427;Q9UKT7;Q8WW12;P35638;Q92890;Q13216;P63279;Q043  
23;P61077;P54252;Q96SW2;Q9NWF9;Q9UNN5;Q13490;P28074;P54727;Q16531;O60907;P78317;P627  
14;Q9BZK7;P54725;P63146;Q5TA31;Q9H3F6;Q9Y2M5;Q13829;P62877}

33002 Pathogen[ P0C206] interacts with 43 human  
partners:{Q9UNN5;Q13829;Q9NS56;P62877;P54725;Q92890;Q8WW12;O00308;Q04323;O60907;Q8IU  
Q4;Q9NWF9;Q16531;Q8TAT6;P78317;P54252;Q9H0E7;P49427;Q13216;Q5TA31;Q9UKT7;Q96SW2;Q8WZ  
19;Q13618;Q9UNE7;P54727;P62714;Q9BZK7;Q9H3F6;P55072;Q8IXJ6;Q15366;Q13362;P28074;Q9Y2  
M5;P61077;Q9BYM8;Q96B02;Q6VVB1;Q969U6;P35638;P63146;Q13490}

33003 Pathogen[ P03363] interacts with 38 human  
partners:{Q9UNN5;Q9NWF9;Q13490;Q15366;Q04323;P54727;P62714;Q13362;Q8WW12;Q16531;Q136  
18;Q9BZK7;O60907;P78317;P54252;Q6VVB1;P63146;P49427;Q92890;Q8TAT6;P62877;Q9Y2M5;Q9UN  
E7;P35638;P63279;Q9H3F6;Q96SW2;P54725;Q13829;O00308;Q5TA31;P61077;Q13216;Q969U6;Q9H0  
M0;Q9UKT7;Q8WZ17;Q5T447}

33004 [Cluster 3001]GO:0050715+P biological\_process [name] positive regulation of cytokine  
secretion [def] "Any process that activates or increases the frequency, rate or extent  
of the regulated release of cytokines from a cell or group of cells." [GOC

33005 Pathogen[ Q2Q067] interacts with 4 human partners:{Q9H4X1;Q92990;Q14653;Q8TAC9}  
33006 Pathogen[ P0C214] interacts with 3 human partners:{Q9H4X1;Q8TAC9;Q14653}  
33007 Pathogen[ P03346] interacts with 4 human partners:{Q9H4X1;Q92990;Q8TAC9;Q14653}  
33008 Pathogen[ Q85601] interacts with 3 human partners:{Q9H4X1;Q8TAC9;Q14653}  
33009 Pathogen[ P14079] interacts with 4 human partners:{Q14653;Q92990;Q8TAC9;P0DJ18}  
33010 Pathogen[ P03383] interacts with 4 human partners:{Q9H4X1;Q14653;Q8TAC9;Q92990}  
33011 Pathogen[ P03410] interacts with 5 human  
partners:{Q9H4X1;P0DJ18;Q8TAC9;Q14653;Q92990}

33012 Pathogen[ P14075] interacts with 4 human partners:{Q92990;Q9H4X1;Q14653;Q8TAC9}  
33013 Pathogen[ P0C206] interacts with 4 human partners:{Q9H4X1;Q92990;Q8TAC9;Q14653}  
33014 Pathogen[ P03363] interacts with 3 human partners:{Q14653;Q9H4X1;Q92990}

33015 [Cluster 3002]GO:0032298+P biological\_process [name] positive regulation of  
DNA-dependent DNA replication initiation [def] "Any process that activates or  
increases the frequency, rate or extent of initiation of DNA-dependent DNA replication."  
[GOC

33016 Pathogen[ Q2Q067] interacts with 2 human partners:{Q9ULV3;P24941}  
33017 Pathogen[ P0C214] interacts with 2 human partners:{P24941;Q9ULV3}  
33018 Pathogen[ P03346] interacts with 2 human partners:{P24941;Q9ULV3}  
33019 Pathogen[ Q85601] interacts with 2 human partners:{P24941;Q9ULV3}  
33020 Pathogen[ P14079] interacts with 1 human partners:{Q9ULV3}  
33021 Pathogen[ P03383] interacts with 2 human partners:{P24941;Q9ULV3}  
33022 Pathogen[ P03410] interacts with 2 human partners:{P24941;Q9ULV3}  
33023 Pathogen[ P14075] interacts with 2 human partners:{P24941;Q9ULV3}  
33024 Pathogen[ P0C206] interacts with 2 human partners:{Q9ULV3;P24941}  
33025 Pathogen[ P03363] interacts with 2 human partners:{P24941;Q9ULV3}

33026 [Cluster 3003]GO:2001141+P biological\_process [name] regulation of RNA biosynthetic  
process [def] "Any process that modulates the frequency, rate or extent of RNA  
biosynthetic process." [GOC

33027 Pathogen[ Q2Q067] interacts with 1 human partners:{P78337}  
33028 Pathogen[ P0C214] interacts with 1 human partners:{P78337}  
33029 Pathogen[ P03346] interacts with 3 human partners:{Q15788;P78337;Q9UBR4}  
33030 Pathogen[ Q85601] interacts with 1 human partners:{P78337}  
33031 Pathogen[ P14079] interacts with 2 human partners:{P78337;Q15788}  
33032 Pathogen[ P03383] interacts with 1 human partners:{P78337}  
33033 Pathogen[ P03410] interacts with 1 human partners:{P78337}  
33034 Pathogen[ P14075] interacts with 1 human partners:{P78337}  
33035 Pathogen[ P0C206] interacts with 3 human partners:{P78337;Q9UBR4;Q15788}  
33036 Pathogen[ P03363] interacts with 1 human partners:{P78337}

33037 [Cluster 3004]GO:0061371+P biological\_process [name] determination of heart left/right  
asymmetry [def] "Determination of the asymmetric location of the heart with respect to  
the left and right halves of the organism." [GOC

33038 Pathogen[ Q2Q067] interacts with 1 human partners:{O96004}  
33039 Pathogen[ P0C214] interacts with 1 human partners:{O96004}  
33040 Pathogen[ P03346] interacts with 1 human partners:{O96004}  
33041 Pathogen[ Q85601] interacts with 1 human partners:{O96004}  
33042 Pathogen[ P14079] interacts with 1 human partners:{O96004}  
33043 Pathogen[ P03383] interacts with 1 human partners:{O96004}  
33044 Pathogen[ P03410] interacts with 1 human partners:{O96004}  
33045 Pathogen[ P14075] interacts with 1 human partners:{O96004}  
33046 Pathogen[ P0C206] interacts with 1 human partners:{O96004}  
33047 Pathogen[ P03363] interacts with 1 human partners:{O96004}

33048 [Cluster 3005]GO:0035176+P biological\_process [name] social behavior [def] "Behavior  
that occurs predominantly, or only, in individuals that are part of a group." [PMID

33049 Pathogen[ Q2Q067] interacts with 3 human partners:{P20073;P78352;Q96RL7}  
33050 Pathogen[ POC214] interacts with 4 human partners:{P78352;Q8IXF0;Q96RL7;P20073}  
33051 Pathogen[ P03346] interacts with 4 human partners:{P20073;P78352;Q8IXF0;Q96RL7}  
33052 Pathogen[ Q85601] interacts with 4 human partners:{Q96RL7;Q8IXF0;P78352;P20073}  
33053 Pathogen[ P14079] interacts with 4 human partners:{P16298;Q8IXF0;Q96RL7;P20073}  
33054 Pathogen[ P03383] interacts with 3 human partners:{Q96RL7;P20073;P78352}  
33055 Pathogen[ P03410] interacts with 5 human partners:{Q96RL7;Q8IXF0;P20073;Q9UBY8;P78352}  
33056 Pathogen[ P14075] interacts with 3 human partners:{Q96RL7;P20073;P78352}  
33057 Pathogen[ POC206] interacts with 4 human partners:{P78352;P20073;Q96RL7;Q8IXF0}  
33058 Pathogen[ P03363] interacts with 4 human partners:{P78352;P20073;Q8IXF0;Q96RL7}  
33059 [Cluster 3006]GO:0006342+P biological\_process [name] chromatin silencing [def] "Repression of transcription by altering the structure of chromatin, e.g. by conversion of large regions of DNA into an inaccessible state often called heterochromatin." [GOC  
33060 Pathogen[ Q2Q067] interacts with 5 human partners:{Q8IXJ6;Q8IYW8;Q9Y6E7;O14686;Q9UQL6}  
33061 Pathogen[ POC214] interacts with 4 human partners:{Q8IYW8;Q8IXJ6;Q9Y6E7;Q9UQL6}  
33062 Pathogen[ P03346] interacts with 6 human partners:{Q9NRZ9;Q8IXJ6;Q9Y6E7;O14686;Q8IYW8;Q9UQL6}  
33063 Pathogen[ Q85601] interacts with 5 human partners:{Q9UQL6;O14686;Q9Y6E7;Q8IXJ6;Q8IYW8}  
33064 Pathogen[ P14079] interacts with 3 human partners:{Q9UQL6;Q8IYW8;Q8IXJ6}  
33065 Pathogen[ P03383] interacts with 3 human partners:{Q9UQL6;Q8IYW8;Q9Y6E7}  
33066 Pathogen[ P03410] interacts with 3 human partners:{Q8IYW8;Q8IXJ6;Q9UQL6}  
33067 Pathogen[ P14075] interacts with 3 human partners:{Q9Y6E7;Q9UQL6;Q8IYW8}  
33068 Pathogen[ POC206] interacts with 6 human partners:{O14686;Q8IYW8;Q8IXJ6;Q9NRZ9;Q9Y6E7;Q9UQL6}  
33069 Pathogen[ P03363] interacts with 4 human partners:{Q9Y6E7;Q9UQL6;Q8IYW8;O14686}  
33070 [Cluster 3007]GO:0034088+P biological\_process [name] maintenance of mitotic sister chromatid cohesion [def] "The process in which the association between sister chromatids of a replicated chromosome is maintained as chromosomes condense, attach to the spindle in a bipolar orientation, and congress to the metaphase plate during a mitotic cell cycle." [GOC  
33071 Pathogen[ Q2Q067] interacts with 3 human partners:{Q9Y6X3;P06400;Q9BVC3}  
33072 Pathogen[ POC214] interacts with 3 human partners:{Q9BVC3;Q9Y6X3;P06400}  
33073 Pathogen[ P03346] interacts with 3 human partners:{P06400;Q9Y6X3;Q9BVC3}  
33074 Pathogen[ Q85601] interacts with 3 human partners:{P06400;Q9BVC3;Q9Y6X3}  
33075 Pathogen[ P14079] interacts with 2 human partners:{Q9BVC3;Q9Y6X3}  
33076 Pathogen[ P03383] interacts with 3 human partners:{Q9Y6X3;P06400;Q9BVC3}  
33077 Pathogen[ P03410] interacts with 2 human partners:{P06400;Q9BVC3}  
33078 Pathogen[ P14075] interacts with 3 human partners:{Q9Y6X3;Q9BVC3;P06400}  
33079 Pathogen[ POC206] interacts with 3 human partners:{Q9Y6X3;Q9BVC3;P06400}  
33080 Pathogen[ P03363] interacts with 3 human partners:{Q9BVC3;P06400;Q9Y6X3}  
33081 [Cluster 3008]GO:0035518+P biological\_process [name] histone H2A monoubiquitination [def] "The modification of histone H2A by addition of a single ubiquitin group. Steady-state modification of histone H2A occurs at lysine 119 (H2A-K119) in metazoans, and at the equivalent residue in other organisms." [PMID  
33082 Pathogen[ Q2Q067] interacts with 7 human partners:{Q9BSM1;Q8NHM5;Q6W2J9;Q99496;Q8N488;P63208;Q06587}  
33083 Pathogen[ POC214] interacts with 8 human partners:{Q9BSM1;P63208;Q6W2J9;Q8N488;Q06587;Q99496;Q8IYW5;Q8NHM5}  
33084 Pathogen[ P03346] interacts with 8 human partners:{Q9BSM1;P63208;Q99496;Q8IYW5;Q8NHM5;Q8N488;Q06587;Q6W2J9}  
33085 Pathogen[ Q85601] interacts with 8 human partners:{P63208;Q9BSM1;Q8NHM5;Q99496;Q8IYW5;Q8N488;Q06587;Q6W2J9}  
33086 Pathogen[ P14079] interacts with 7 human partners:{Q8NHM5;Q6W2J9;Q99496;Q8N488;P63208;Q9BSM1;Q06587}  
33087 Pathogen[ P03383] interacts with 6 human partners:{Q06587;P63208;Q6W2J9;Q9BSM1;Q8N488;Q99496}  
33088 Pathogen[ P03410] interacts with 6 human partners:{Q9BSM1;Q99496;Q6W2J9;P63208;Q8N488;Q06587}  
33089 Pathogen[ P14075] interacts with 6 human partners:{Q8N488;P63208;Q06587;Q6W2J9;Q99496;Q9BSM1}  
33090 Pathogen[ POC206] interacts with 8 human partners:{Q8IYW5;Q6W2J9;P63208;Q8N488;Q06587;Q8NHM5;Q9BSM1;Q99496}  
33091 Pathogen[ P03363] interacts with 7 human partners:{Q8N488;Q99496;Q8IYW5;Q9BSM1;Q06587;Q6W2J9;P63208}  
33092 [Cluster 3009]GO:0008202+P biological\_process [name] steroid metabolic process [def] "The chemical reactions and pathways involving steroids, compounds with a 1,2,cyclopentanoperhydrophenanthrene nucleus." [ISBN  
33093 Pathogen[ Q2Q067] interacts with 6 human partners:{P15121;O00204;P36956;Q9NZC7;Q9BXP1;P14324}  
33094 Pathogen[ POC214] interacts with 8 human partners:{Q13907;Q9BXS1;Q9NZC7;P15121;Q9BXP1;O00204;P14324;Q06520}  
33095 Pathogen[ P03346] interacts with 9 human partners:{O00204;Q06520;P36956;Q12772;Q9BXP1;P15121;Q9NZC7;P14324;O75469}

33096 Pathogen[ Q85601] interacts with 8 human partners:{Q9NZC7;Q9BPX1;Q12772;P36956;P14324;P15121;O00204;Q13907}

33097 Pathogen[ P14079] interacts with 12 human partners:{Q9BXS1;Q9Y5U4;Q13907;P14324;Q0VD83;Q12772;Q9NZC7;O75469;Q9UKR5;P53602;P36956;O15503}

33098 Pathogen[ P03383] interacts with 2 human partners:{P14324;Q9BPX1}

33099 Pathogen[ P03410] interacts with 12 human partners:{P53602;P36956;Q9BPX1;Q9NZC7;Q9Y5U4;O00204;Q12772;Q0VD83;Q13907;O15503;P14324;Q9BXS1}

33100 Pathogen[ P14075] interacts with 1 human partners:{P14324}

33101 Pathogen[ P0C206] interacts with 10 human partners:{O75469;P36956;Q9BPX1;P14324;Q13907;Q9BXS1;O00204;Q9NZC7;P15121;Q12772}

33102 Pathogen[ P03363] interacts with 3 human partners:{Q9BPX1;O00204;Q06520}

33103 [Cluster 3010]GO:0048478+P biological\_process [name] replication fork protection [def] "Any process that prevents the collapse of stalled replication forks." [GOC

33104 Pathogen[ Q2Q067] interacts with 1 human partners:{Q9BVW5}

33105 Pathogen[ P0C214] interacts with 1 human partners:{Q9BVW5}

33106 Pathogen[ P03346] interacts with 2 human partners:{P51587;Q9BVW5}

33107 Pathogen[ Q85601] interacts with 2 human partners:{P51587;Q9BVW5}

33108 Pathogen[ P14079] interacts with 2 human partners:{P51587;Q9BVW5}

33109 Pathogen[ P03383] interacts with 1 human partners:{Q9BVW5}

33110 Pathogen[ P03410] interacts with 2 human partners:{Q9BVW5;P51587}

33111 Pathogen[ P14075] interacts with 1 human partners:{Q9BVW5}

33112 Pathogen[ P0C206] interacts with 2 human partners:{P51587;Q9BVW5}

33113 Pathogen[ P03363] interacts with 1 human partners:{Q9BVW5}

33114 [Cluster 3011]GO:0007601+P biological\_process [name] visual perception [def] "The series of events required for an organism to receive a visual stimulus, convert it to a molecular signal, and recognize and characterize the signal. Visual stimuli are detected in the form of photons and are processed to form an image." [GOC

33115 Pathogen[ Q2Q067] interacts with 18 human partners:{P78424;O14639;Q96IS3;P05813;Q99456;Q3B820;Q13432;P54845;Q99504;O43924;O15265;O43186;P07315;P58304;Q3SYG4;P07320;P02489;Q99814}

33116 Pathogen[ P0C214] interacts with 19 human partners:{P07315;P02489;O43186;P11844;Q13515;O14639;P05813;P18545;P26998;Q3SYG4;Q99504;Q99456;Q99814;Q13956;O15265;Q3B820;P54845;P07320;Q13432}

33117 Pathogen[ P03346] interacts with 33 human partners:{O15265;P78424;Q9NZR4;O95677;O14639;Q13515;P07320;P02489;P54845;O43186;P58304;Q96KN7;Q8N8E2;Q13432;P07316;Q3SYG4;P53611;Q99814;Q3B820;P78411;O95475;P07315;P05813;Q99456;Q96IS3;Q8NI36;Q99504;Q8IWN7;O95343;Q9UIW0;Q92834;O43924;Q15319}

33118 Pathogen[ Q85601] interacts with 22 human partners:{O14639;P78424;P02489;P07315;O43924;O15265;O95677;P54845;Q96IS3;Q99504;Q99814;Q92834;Q13515;P58304;Q3B820;Q3SYG4;P11844;Q13432;Q99456;Q8N8E2;P07320;P05813}

33119 Pathogen[ P14079] interacts with 46 human partners:{P07320;P07316;P05813;Q99814;P11844;Q99456;Q9Y5M6;O43924;P26998;Q9P0W8;O14639;Q92834;Q8N8E2;Q92902;P58304;Q8N3I7;P02489;P54845;Q8IWN7;Q8IWN7;P53673;O75503;P56715;P18545;Q8N6F1;Q13956;P53674;Q7Z3Z2;Q00LT1;P78424;Q16378;Q13432;Q3B820;Q96IS3;O15265;Q99504;Q13515;A6NGG8;Q9NWW5;P07315;Q3SYG4;Q13371;Q9H6K4;Q96KN7;Q8N8E2;P43320}

33120 Pathogen[ P03383] interacts with 14 human partners:{Q99504;Q13515;P11844;O14639;Q99456;Q13432;P54845;O15265;Q3SYG4;O43186;Q3B820;P07320;P05813;P07315}

33121 Pathogen[ P03410] interacts with 45 human partners:{Q3B820;P43320;Q8N8E2;P07315;Q8N8E2;P26998;Q9H6K4;Q9NWW5;Q99814;Q3SYG4;P54845;Q92902;P11844;Q96KN7;Q13515;Q13956;O14639;Q8N6F1;Q7Z3Z2;P07320;O75503;P53674;P02489;P18545;A6NGG8;Q13371;Q8N3I7;Q16378;Q92834;O43924;Q99504;P05813;P53611;Q96IS3;Q00LT1;Q99456;Q9UBY8;P07316;O15265;Q8IWN7;Q9Y5M6;Q13432;Q8IWN7;P78424;P56715}

33122 Pathogen[ P14075] interacts with 18 human partners:{P53673;Q3SYG4;Q99504;P07320;O15265;P05813;O43186;Q13515;P11844;Q9Y5M6;Q9H6K4;P54845;Q99456;O14639;P26998;P07315;Q13432;Q3B820}

33123 Pathogen[ P0C206] interacts with 37 human partners:{P78424;P56715;Q99504;Q13432;P18545;Q3SYG4;Q13515;Q9Y5M6;Q8N8E2;P78411;O15265;P53673;P07320;P54845;Q8N3I7;Q96IS3;P07315;Q9H6K4;Q96KN7;P05813;P11844;Q8IWN7;P26998;Q13956;A6NGG8;Q3B820;P07316;Q8N8E2;O14639;Q99814;O43924;P02489;P53611;Q92834;Q99456;O95677;P58304}

33124 Pathogen[ P03363] interacts with 35 human partners:{Q9UIW0;P36575;Q9NZR4;P56715;Q3B820;P78424;P07316;O43924;Q99456;P58304;Q96IS3;P78411;P11844;P54845;Q9NZN9;P07320;Q3SYG4;Q92902;Q13432;O43186;Q99504;O15265;Q99814;P07315;Q92834;Q8IWN7;P02489;O95343;Q8N8E2;O95475;O14639;Q13515;Q96KN7;Q15319;P05813}

33125 [Cluster 3012]GO:0003184+P biological\_process [name] pulmonary valve morphogenesis [def] "The process in which the structure of the pulmonary valve is generated and organized." [GOC

33126 Pathogen[ Q2Q067] interacts with 2 human partners:{Q9NQ87;Q9Y5J3}

33127 Pathogen[ P0C214] interacts with 2 human partners:{Q9Y5J3;Q9NQ87}

33128 Pathogen[ P03346] interacts with 2 human partners:{Q9Y5J3;Q9NQ87}

33129 Pathogen[ Q85601] interacts with 2 human partners:{Q9NQ87;Q9Y5J3}

33130 Pathogen[ P14079] interacts with 2 human partners:{Q9Y5J3;Q9NQ87}

33131 Pathogen[ P03383] interacts with 1 human partners:{Q9NQ87}  
33132 Pathogen[ P03410] interacts with 2 human partners:{Q9Y5J3;Q9NQ87}  
33133 Pathogen[ P14075] interacts with 1 human partners:{Q9NQ87}  
33134 Pathogen[ P0C206] interacts with 2 human partners:{Q9NQ87;Q9Y5J3}  
33135 Pathogen[ P03363] interacts with 2 human partners:{Q9Y5J3;Q9NQ87}  
33136 [Cluster 3013]GO:0001829+P biological\_process [name] trophoctodermal cell differentiation [def] "The process in which a relatively unspecialized cell acquires the specialized features of a trophoctoderm cell." [GOC  
33137 Pathogen[ Q2Q067] interacts with 5 human partners:{O96004;Q92754;Q02447;P08047;P11831}  
33138 Pathogen[ P0C214] interacts with 6 human partners:{P17275;P11831;Q92754;Q02447;O96004;P08047}  
33139 Pathogen[ P03346] interacts with 9 human partners:{P11831;Q99626;P17275;Q9BPY8;Q92754;P08047;O96004;Q02447;Q9UJU5}  
33140 Pathogen[ Q85601] interacts with 6 human partners:{P11831;Q92754;O96004;P08047;Q02447;P17275}  
33141 Pathogen[ P14079] interacts with 4 human partners:{O96004;Q02447;P17275;Q92754}  
33142 Pathogen[ P03383] interacts with 6 human partners:{P11831;P08047;O96004;Q02447;Q92754;P17275}  
33143 Pathogen[ P03410] interacts with 6 human partners:{P11831;O96004;Q02447;P17275;P08047;Q92754}  
33144 Pathogen[ P14075] interacts with 6 human partners:{P11831;P17275;Q92754;O96004;Q02447;P08047}  
33145 Pathogen[ P0C206] interacts with 6 human partners:{P17275;O96004;Q92754;P08047;Q02447;P11831}  
33146 Pathogen[ P03363] interacts with 9 human partners:{Q99626;Q02447;P17275;P11831;Q9BPY8;O96004;P08047;Q9UJU5;Q92754}  
33147 [Cluster 3014]GO:0046545+P biological\_process [name] development of primary female sexual characteristics [def] "The process whose specific outcome is the progression of the primary female sexual characteristics over time, from their formation to the mature structure. The primary female sexual characteristics are the ovaries, and they develop in response to sex hormone secretion." [GOC  
33148 Pathogen[ Q2Q067] interacts with 1 human partners:{Q9UI36}  
33149 Pathogen[ P0C214] interacts with 1 human partners:{Q9UI36}  
33150 Pathogen[ P03346] interacts with 1 human partners:{Q9UI36}  
33151 Pathogen[ Q85601] interacts with 1 human partners:{Q9UI36}  
33152 Pathogen[ P14079] interacts with 1 human partners:{Q9UI36}  
33153 Pathogen[ P03383] interacts with 1 human partners:{Q9UI36}  
33154 Pathogen[ P03410] interacts with 1 human partners:{Q9UI36}  
33155 Pathogen[ P14075] interacts with 1 human partners:{Q9UI36}  
33156 Pathogen[ P0C206] interacts with 1 human partners:{Q9UI36}  
33157 Pathogen[ P03363] interacts with 1 human partners:{Q9UI36}  
33158 [Cluster 3015]GO:0007420+P biological\_process [name] brain development [def] "The process whose specific outcome is the progression of the brain over time, from its formation to the mature structure. Brain development begins with patterning events in the neural tube and ends with the mature structure that is the center of thought and emotion. The brain is responsible for the coordination and control of bodily activities and the interpretation of information from the senses (sight, hearing, smell, etc.)." [GOC  
33159 Pathogen[ Q2Q067] interacts with 29 human partners:{Q9UPP1;P55957;Q9UMX3;P36402;Q9H0F6;Q96SN8;Q99966;Q15699;O43236;P51816;P51959;Q15102;O00255;P11161;P42575;P35226;P54920;Q07687;Q14686;Q8IZT6;O95817;P47928;Q05086;Q04743;P28370;Q66K74;Q9NNX9;Q12830;Q96JB5}  
33160 Pathogen[ P0C214] interacts with 35 human partners:{Q05086;P35226;O95817;P46379;P51959;Q96SN8;O15056;P55957;P12277;Q9H0F6;P54920;P68402;Q9NNX9;Q14686;Q15102;Q99966;P35580;Q07687;P47928;P28370;Q9UMX3;P51816;P36402;P11161;O14727;Q14061;O43236;Q8IZT6;Q15699;Q9UPP1;P42575;O00255;Q12830;Q96JB5;Q66K74}  
33161 Pathogen[ P03346] interacts with 47 human partners:{Q12830;P50135;Q99966;P36402;Q8NFW5;P35226;P42575;Q68CZ1;P55957;Q04743;Q92858;Q66K74;Q04741;Q9UBX0;Q9H0F6;A2RU54;O15056;Q16650;Q15699;Q9HCS4;Q14863;O43236;O95096;Q15102;O00255;Q96SN8;O95817;P51587;P46379;P54920;Q96JB5;Q9UPP1;P11161;P28370;Q8IZT6;Q9NNX9;Q05086;P51959;Q9UMX3;P54257;Q9NQZ2;Q9Y2J0;O14727;O95343;P51816;P47928;Q14686}  
33162 Pathogen[ Q85601] interacts with 33 human partners:{P54920;Q96SN8;Q99966;Q66K74;P46379;Q9UMX3;Q9H0F6;P51959;Q8IZT6;Q12830;Q14686;Q9UBX0;Q96JB5;P42575;Q15699;P55957;O00255;Q9UPP1;Q14061;P36402;P28370;P35226;Q9NNX9;P35580;Q05086;Q9HCS4;O95817;P11161;P51587;Q07687;O43236;P47928;Q15102}  
33163 Pathogen[ P14079] interacts with 45 human partners:{P51959;O43181;P54257;Q24JP5;P61421;Q16517;O95817;P50135;Q66K74;P28370;Q68CZ1;Q15699;P51587;Q99966;P36402;Q15078;Q9NNX9;Q14061;O75503;P11161;Q9NX09;Q9UPP1;Q15102;Q9NQZ2;P48681;Q12830;Q4AC94;Q15042;Q9UMX3;P35226;Q04743;Q07687;Q96SZ6;Q9H0F6;Q96JB5;P51816;P42575;O00255;Q96SN8;Q14686;P54920;P47928;Q8IZT6;O43236;P55957}  
33164 Pathogen[ P03383] interacts with 22 human partners:{Q12830;Q9H0F6;P54920;Q07687;O43236;Q96SN8;Q14686;P28370;P55957;Q9UMX3;Q96JB5;P51816;Q9NNX9;P51959;O00255;P36402;P35580;P11161;P47928;Q15699;Q9UPP1;P35226}

33165 Pathogen[ P03410] interacts with 45 human partners: {Q9UPP1;Q9NNX9;Q14061;Q9Y2J0;Q16517;Q9NQZ2;Q14686;P42575;P36402;P61421;Q4AC94;Q96SN8;Q12830;Q24JP5;Q95817;P55957;Q8IZT6;Q96JB5;O75503;Q07687;O43236;P51959;Q9UMX3;P51587;P47928;Q15699;Q66K74;P54257;Q15102;P35580;Q9HCS4;Q43181;P51816;Q68CZ1;P35226;O00255;Q04743;P11161;Q9NX09;P50135;Q15042;P28370;Q9H0F6;P54920;Q99966}

33166 Pathogen[ P14075] interacts with 23 human partners: {P55957;Q15102;P51816;Q9UMX3;O43236;P51959;Q14686;Q9UPP1;P11161;P54920;P47928;Q96SN8;Q9NNX9;Q96JB5;Q07687;O00255;Q12830;P28370;P36402;Q15699;P35226;Q14061;Q9H0F6}

33167 Pathogen[ P0C206] interacts with 39 human partners: {Q07687;Q96SN8;P11161;Q04743;P54920;P51587;Q9Y2J0;P35226;Q9UMX3;O00255;Q05086;Q9UPP1;P51816;Q8IZT6;Q9HCS4;Q15699;O43236;Q66K74;Q96JB5;P51959;Q15102;Q14686;P28370;Q99966;Q9H0F6;O95817;Q14863;P42575;Q9NQZ2;P47928;Q9UBX0;P35580;P46379;Q14061;P36402;P50135;Q12830;Q9NNX9;P55957}

33168 Pathogen[ P03363] interacts with 36 human partners: {P46379;Q15699;Q8NFW5;P55957;Q12830;Q66K74;P36402;Q14863;P50135;P54920;Q9HCS4;Q14686;Q05086;O95817;Q9NNX9;P35226;O15056;P47928;P54257;Q9H0F6;P51959;P51816;Q04741;A2RU54;P28370;O95343;Q96JB5;Q07687;Q8IZT6;Q9UMX3;O43236;Q15102;Q04743;Q96SN8;Q9UBX0;P11161}

33169 [Cluster 3016]GO:0072368+P biological\_process [name] regulation of lipid transport by negative regulation of transcription from RNA polymerase II promoter [def] "Any process that modulates the frequency, rate or extent of lipid transport by stopping, preventing, or reducing the frequency, rate or extent of transcription from an RNA polymerase II promoter." [GOC

33170 Pathogen[ Q2Q067] interacts with 1 human partners: {075376}

33171 Pathogen[ P0C214] interacts with 1 human partners: {075376}

33172 Pathogen[ P03346] interacts with 2 human partners: {Q12772;075376}

33173 Pathogen[ Q85601] interacts with 2 human partners: {Q12772;075376}

33174 Pathogen[ P14079] interacts with 2 human partners: {Q12772;075376}

33175 Pathogen[ P03383] interacts with 1 human partners: {075376}

33176 Pathogen[ P03410] interacts with 2 human partners: {075376;Q12772}

33177 Pathogen[ P14075] interacts with 1 human partners: {075376}

33178 Pathogen[ P0C206] interacts with 2 human partners: {075376;Q12772}

33179 Pathogen[ P03363] interacts with 1 human partners: {075376}

33180 [Cluster 3017]GO:0051096+P biological\_process [name] positive regulation of helicase activity [def] "Any process that activates or increases the activity of a helicase." [GOC

33181 Pathogen[ Q2Q067] interacts with 1 human partners: {Q04837}

33182 Pathogen[ P0C214] interacts with 2 human partners: {P20585;Q04837}

33183 Pathogen[ P03346] interacts with 3 human partners: {P20585;Q9NUX5;Q04837}

33184 Pathogen[ Q85601] interacts with 2 human partners: {P20585;Q04837}

33185 Pathogen[ P14079] interacts with 4 human partners: {Q04837;P20585;Q9NUX5;P52701}

33186 Pathogen[ P03383] interacts with 1 human partners: {Q04837}

33187 Pathogen[ P03410] interacts with 4 human partners: {Q9NUX5;P20585;Q04837;P52701}

33188 Pathogen[ P14075] interacts with 1 human partners: {Q04837}

33189 Pathogen[ P0C206] interacts with 4 human partners: {P52701;Q04837;P20585;Q9NUX5}

33190 Pathogen[ P03363] interacts with 3 human partners: {P20585;Q9NUX5;Q04837}

33191 [Cluster 3018]GO:0042267+P biological\_process [name] natural killer cell mediated cytotoxicity [def] "The directed killing of a target cell by a natural killer cell through the release of granules containing cytotoxic mediators or through the engagement of death receptors." [GOC

33192 Pathogen[ Q2Q067] interacts with 2 human partners: {Q06830;P53567}

33193 Pathogen[ P0C214] interacts with 3 human partners: {P53567;Q99698;Q06830}

33194 Pathogen[ P03346] interacts with 3 human partners: {Q99698;Q06830;P53567}

33195 Pathogen[ Q85601] interacts with 3 human partners: {P53567;Q06830;Q99698}

33196 Pathogen[ P14079] interacts with 2 human partners: {P53567;Q99698}

33197 Pathogen[ P03383] interacts with 1 human partners: {P53567}

33198 Pathogen[ P03410] interacts with 3 human partners: {P53567;Q99698;Q06830}

33199 Pathogen[ P14075] interacts with 1 human partners: {P53567}

33200 Pathogen[ P0C206] interacts with 3 human partners: {P53567;Q99698;Q06830}

33201 Pathogen[ P03363] interacts with 2 human partners: {P53567;Q99698}

33202 [Cluster 3019]GO:0048596+P biological\_process [name] embryonic camera-type eye morphogenesis [def] "The process in which the anatomical structures of the eye are generated and organized during embryonic development." [GOC

33203 Pathogen[ Q2Q067] interacts with 4 human partners: {Q02447;P08047;Q8NHM5;P02489}

33204 Pathogen[ P0C214] interacts with 4 human partners: {P02489;Q02447;P08047;Q8NHM5}

33205 Pathogen[ P03346] interacts with 5 human partners: {P02489;Q86Z02;P08047;Q8NHM5;Q02447}

33206 Pathogen[ Q85601] interacts with 4 human partners: {P02489;P08047;Q8NHM5;Q02447}

33207 Pathogen[ P14079] interacts with 3 human partners: {Q02447;Q8NHM5;P02489}

33208 Pathogen[ P03383] interacts with 2 human partners: {P08047;Q02447}

33209 Pathogen[ P03410] interacts with 3 human partners: {Q02447;P02489;P08047}

33210 Pathogen[ P14075] interacts with 2 human partners: {Q02447;P08047}

33211 Pathogen[ P0C206] interacts with 4 human partners: {P08047;Q02447;Q8NHM5;P02489}

33212 Pathogen[ P03363] interacts with 3 human partners: {Q02447;P02489;P08047}

33213 [Cluster 3020]GO:0034509+P biological\_process [name] centromeric core chromatin

assembly [def] "The assembly of chromatin into the specialized structure characteristic of the centromeric core region, defined by the presence of the variant histone CENP-A." [GOC

33214 Pathogen[ Q2Q067] interacts with 2 human partners:{Q5EE01;Q8NCD3}

33215 Pathogen[ POC214] interacts with 2 human partners:{Q5EE01;Q8NCD3}

33216 Pathogen[ P03346] interacts with 2 human partners:{Q5EE01;Q8NCD3}

33217 Pathogen[ Q85601] interacts with 2 human partners:{Q5EE01;Q8NCD3}

33218 Pathogen[ P14079] interacts with 2 human partners:{Q5EE01;Q8NCD3}

33219 Pathogen[ P03383] interacts with 2 human partners:{Q5EE01;Q8NCD3}

33220 Pathogen[ P03410] interacts with 2 human partners:{Q8NCD3;Q5EE01}

33221 Pathogen[ P14075] interacts with 2 human partners:{Q5EE01;Q8NCD3}

33222 Pathogen[ POC206] interacts with 2 human partners:{Q5EE01;Q8NCD3}

33223 Pathogen[ P03363] interacts with 2 human partners:{Q5EE01;Q8NCD3}

33224 [Cluster 3021]GO:0090200+P biological\_process [name] positive regulation of release of cytochrome c from mitochondria [def] "Any process that increases the rate, frequency or extent of release of cytochrome c from mitochondria, the process in which cytochrome c is enabled to move from the mitochondrial intermembrane space into the cytosol, which is an early step in apoptosis and leads to caspase activation." [GOC

33225 Pathogen[ Q2Q067] interacts with 9 human partners:{P55957;Q9BXH1;Q13794;Q9GZY8;Q96IL0;Q96LC9;O00198;Q12983;Q96A26}

33226 Pathogen[ POC214] interacts with 10 human partners:{O00198;Q92934;Q96LC9;Q13015;P55957;Q96IL0;Q13794;Q9BXH1;Q12983;Q9GZY8}

33227 Pathogen[ P03346] interacts with 10 human partners:{Q96LC9;Q96IL0;P55957;Q96A26;Q12983;O00198;Q13015;Q9BXH1;Q9GZY8;Q13794}

33228 Pathogen[ Q85601] interacts with 9 human partners:{Q96LC9;Q9BXH1;O00198;P55957;Q96IL0;Q13015;Q12983;Q9GZY8;Q13794}

33229 Pathogen[ P14079] interacts with 12 human partners:{Q13323;Q9BXH1;Q96IL0;Q92934;Q13794;Q12983;Q96A26;Q96LC9;O00198;Q9GZY8;Q13015;P55957}

33230 Pathogen[ P03383] interacts with 9 human partners:{Q96LC9;P55957;Q96A26;Q12983;Q13015;O00198;Q13794;Q9BXH1;Q9GZY8}

33231 Pathogen[ P03410] interacts with 12 human partners:{Q12983;Q9GZY8;Q13015;Q9BXH1;Q96IL0;O00198;Q96LC9;Q92934;Q13794;P55957;Q96A26;Q13323}

33232 Pathogen[ P14075] interacts with 9 human partners:{Q12983;P55957;Q96A26;Q13015;Q9GZY8;Q96LC9;Q9BXH1;Q13794;O00198}

33233 Pathogen[ POC206] interacts with 11 human partners:{Q9BXH1;Q96A26;Q96LC9;Q92934;Q12983;Q13015;O00198;Q9GZY8;Q96IL0;P55957;Q13794}

33234 Pathogen[ P03363] interacts with 7 human partners:{P55957;Q96LC9;Q13794;Q13015;O00198;Q9BXH1;Q9GZY8}

33235 [Cluster 3022]GO:0060965+P biological\_process [name] negative regulation of gene silencing by miRNA [def] "Any process that decreases the rate, frequency, or extent of the downregulation of gene expression through the action of microRNAs (miRNAs), endogenous 21-24 nucleotide small RNAs processed from stem-loop RNA precursors (pre-miRNAs). Once incorporated into a RNA-induced silencing complex (RISC), miRNAs can downregulate gene expression by either of two posttranscriptional mechanisms

33236 Pathogen[ Q2Q067] interacts with 1 human partners:{Q01860}

33237 Pathogen[ POC214] interacts with 1 human partners:{Q01860}

33238 Pathogen[ P03346] interacts with 1 human partners:{Q01860}

33239 Pathogen[ Q85601] interacts with 1 human partners:{Q01860}

33240 Pathogen[ P14079] interacts with 1 human partners:{Q01860}

33241 Pathogen[ P03383] interacts with 1 human partners:{Q01860}

33242 Pathogen[ P03410] interacts with 1 human partners:{Q01860}

33243 Pathogen[ P14075] interacts with 1 human partners:{Q01860}

33244 Pathogen[ POC206] interacts with 1 human partners:{Q01860}

33245 Pathogen[ P03363] interacts with 1 human partners:{Q01860}

33246 [Cluster 3023]GO:0008544+P biological\_process [name] epidermis development [def] "The process whose specific outcome is the progression of the epidermis over time, from its formation to the mature structure. The epidermis is the outer epithelial layer of a plant or animal, it may be a single layer that produces an extracellular material (e.g. the cuticle of arthropods) or a complex stratified squamous epithelium, as in the case of many vertebrate species." [GOC

33247 Pathogen[ Q2Q067] interacts with 31 human partners:{P19012;Q9UKI9;P35908;P35321;Q03052;Q15323;P08779;Q32MQ0;P78385;Q9H0F6;P13646;Q14532;P15924;P20265;P78545;P22528;P04264;Q04695;P35527;Q9UBC9;P22531;P78386;P13645;P42768;P13647;P42771;Q8TE85;Q01826;P02533;P26371;O76011}

33248 Pathogen[ POC214] interacts with 30 human partners:{Q03052;O76011;Q14532;P35321;P35527;P04264;P13646;P02533;P15924;Q9H0F6;Q9UKI9;P35908;P08779;P78386;P20265;Q8TE85;Q04695;P78385;P22531;P42771;P19012;Q15323;Q01826;P13647;P78545;P42768;Q9UBC9;P26371;Q32MQ0;P13645}

33249 Pathogen[ P03346] interacts with 42 human partners:{P13646;P15924;P19012;P35321;P35325;P29373;Q32MQ0;P08779;Q03052;Q15323;O14633;P35527;Q95171;P42768;P35326;Q9UKI9;Q92826;Q9BYE4;Q14532;P78386;Q9H0F6;P42771;Q8TE85;Q9UBC9;Q01469;P20265;P35908;Q04695;Q96RM1;P02533;P22531;P13645;Q01954;P22532;O76011;P26371;P13647;P22528;P78545;P04264;P78385;Q01826}



33250 Pathogen[ Q85601] interacts with 31 human partners: {P13646;Q8TE85;P35321;P78386;P02533;P08779;Q03052;Q32MQ0;P78545;Q9H0F6;Q01954;P15924;Q04695;P04264;P22531;P42768;P19012;P13645;Q01826;Q9UKI9;P42771;Q15323;P78385;O76011;P13647;Q14532;P35527;P35908;O95171;Q9UBC9;P20265}

33251 Pathogen[ P14079] interacts with 40 human partners: {Q32MQ0;P22528;P22531;P35326;P08779;P35908;Q14532;P20265;O76011;Q8TE85;P15924;Q9BYE4;Q01826;P13646;P26371;Q15323;P35527;Q96RM1;Q04695;P02533;O14633;P78385;P13645;P35321;P35325;P78386;O95171;Q92817;Q9UBC9;P22532;Q9H0F6;Q5T750;Q9UKI9;P78545;P04264;Q03052;Q01469;P13647;P42768;P42771}

33252 Pathogen[ P03383] interacts with 35 human partners: {P15924;Q9BYE4;P35321;P02533;Q9H0F6;Q9UKI9;Q32MQ0;P26371;Q01826;P13645;O76011;Q8TE85;P78386;P35527;Q9UBC9;P08779;Q96RM1;Q04695;P22531;P42768;P22532;P04264;P22528;P42771;Q15323;P35908;O14633;P13647;P78545;P78385;P13646;P19012;P20265;Q14532;P35325}

33253 Pathogen[ P03410] interacts with 41 human partners: {P78385;P13645;P42771;P13646;P02533;P15924;O76011;Q15323;P22531;Q9UBC9;P35325;P04264;P22528;Q9BYE4;P78545;P35527;Q5T750;P35321;P42768;Q03052;O95171;P08779;Q8TE85;P35908;Q32MQ0;O14633;Q14532;Q01826;P78386;Q96RM1;Q04695;Q9UKI9;P26371;P22532;P35326;Q01469;P20265;P13647;Q92817;Q15517;Q9H0F6}

33254 Pathogen[ P14075] interacts with 36 human partners: {P35321;P22532;Q9UBC9;P35325;P78545;Q8TE85;Q5T750;P42768;P42771;P20265;P19012;P13645;P78385;Q01826;Q15323;Q04695;P35908;Q96RM1;Q14532;P26371;P08779;P22531;P04264;P13646;P22528;P78386;Q32MQ0;Q9BYE4;P13647;Q9UKI9;O76011;O14633;P35527;P02533;Q9H0F6;P15924}

33255 Pathogen[ P0C206] interacts with 42 human partners: {Q8TE85;Q9BYE4;Q32MQ0;P08779;P35527;P78385;Q9UBC9;P35325;P22531;P04264;P13645;Q96RM1;P19012;P42771;P78386;P29373;P35326;O14633;Q14532;P13647;P35321;O76011;Q9UKI9;Q03052;P78545;P26371;P15924;Q9H0F6;P22532;P20265;Q01826;P42768;Q01469;Q15323;Q5T750;P02533;P13646;O95171;P35908;Q04695;Q01954;P22528}

33256 Pathogen[ P03363] interacts with 43 human partners: {P78385;P02533;P08779;P22531;P13645;P22532;P35321;Q9BYE4;Q01826;Q9UBC9;Q9UKI9;Q01469;P42768;O76011;Q15323;P35326;P15924;P35908;Q96RM1;Q8TE85;P29373;P35325;P13647;Q14532;P78545;Q13480;Q32MQ0;P35527;P22528;O14633;P20265;O95171;Q92826;Q01954;Q9H0F6;P78386;P13646;P04264;P26371;Q92817;P42771;Q03052;Q04695}

33257 [Cluster 3024]GO:0006555+P biological\_process [name] methionine metabolic process [def] "The chemical reactions and pathways involving methionine (2-amino-4-(methylthio)butanoic acid), a sulfur-containing, essential amino acid found in peptide linkage in proteins." [GOC]

33258 Pathogen[ Q2Q067] interacts with 1 human partners: {Q14749}

33259 Pathogen[ P0C214] interacts with 4 human partners: {P42898;Q9UJ68;Q14749;P52788}

33260 Pathogen[ P03346] interacts with 2 human partners: {Q9UBK8;Q14749}

33261 Pathogen[ Q85601] interacts with 1 human partners: {Q14749}

33262 Pathogen[ P14079] interacts with 3 human partners: {Q14749;Q9UJ68;P42898}

33263 Pathogen[ P03383] interacts with 1 human partners: {Q14749}

33264 Pathogen[ P03410] interacts with 4 human partners: {Q14749;P52788;Q9UJ68;P42898}

33265 Pathogen[ P14075] interacts with 1 human partners: {Q14749}

33266 Pathogen[ P0C206] interacts with 2 human partners: {Q9UJ68;Q14749}

33267 Pathogen[ P03363] interacts with 1 human partners: {Q14749}

33268 [Cluster 3025]GO:0006403+P biological\_process [name] RNA localization [def] "A process in which RNA is transported to, or maintained in, a specific location." [GOC]

33269 Pathogen[ Q2Q067] interacts with 2 human partners: {P25490;O94906}

33270 Pathogen[ P0C214] interacts with 2 human partners: {Q9NZI8;O94906}

33271 Pathogen[ P03346] interacts with 3 human partners: {P25490;Q9NZI8;O94906}

33272 Pathogen[ Q85601] interacts with 2 human partners: {P25490;O94906}

33273 Pathogen[ P14079] interacts with 2 human partners: {O94906;P25490}

33274 Pathogen[ P03383] interacts with 1 human partners: {O94906}

33275 Pathogen[ P03410] interacts with 2 human partners: {P25490;O94906}

33276 Pathogen[ P14075] interacts with 1 human partners: {O94906}

33277 Pathogen[ P0C206] interacts with 2 human partners: {P25490;O94906}

33278 Pathogen[ P03363] interacts with 3 human partners: {P25490;Q9NZI8;O94906}

33279 [Cluster 3026]GO:0010669+P biological\_process [name] epithelial structure maintenance [def] "A tissue homeostatic process required for the maintenance of epithelial structure." [GOC]

33280 Pathogen[ Q2Q067] interacts with 3 human partners: {P11831;O43679;Q86U70}

33281 Pathogen[ P0C214] interacts with 3 human partners: {P11831;Q86U70;O43679}

33282 Pathogen[ P03346] interacts with 3 human partners: {Q86U70;P11831;O43679}

33283 Pathogen[ Q85601] interacts with 3 human partners: {P11831;Q86U70;O43679}

33284 Pathogen[ P14079] interacts with 2 human partners: {O43679;Q86U70}

33285 Pathogen[ P03383] interacts with 3 human partners: {P11831;Q86U70;O43679}

33286 Pathogen[ P03410] interacts with 3 human partners: {P11831;O43679;Q86U70}

33287 Pathogen[ P14075] interacts with 3 human partners: {Q86U70;P11831;O43679}

33288 Pathogen[ P0C206] interacts with 3 human partners: {O43679;P11831;Q86U70}

33289 Pathogen[ P03363] interacts with 3 human partners: {Q86U70;O43679;P11831}

33290 [Cluster 3027]GO:0045656+P biological\_process [name] negative regulation of monocyte differentiation [def] "Any process that stops, prevents, or reduces the frequency, rate or extent of monocyte differentiation." [GOC]

33291 Pathogen[ Q2Q067] interacts with 2 human partners:{P01106;P31268}  
33292 Pathogen[ P0C214] interacts with 1 human partners:{P01106}  
33293 Pathogen[ P03346] interacts with 2 human partners:{P31268;P01106}  
33294 Pathogen[ Q85601] interacts with 1 human partners:{P01106}  
33295 Pathogen[ P14079] interacts with 1 human partners:{P01106}  
33296 Pathogen[ P03383] interacts with 1 human partners:{P01106}  
33297 Pathogen[ P03410] interacts with 1 human partners:{P01106}  
33298 Pathogen[ P14075] interacts with 1 human partners:{P01106}  
33299 Pathogen[ P0C206] interacts with 2 human partners:{P31268;P01106}  
33300 Pathogen[ P03363] interacts with 2 human partners:{P01106;P31268}  
33301 [Cluster 3028]GO:0048172+P biological\_process [name] regulation of short-term neuronal synaptic plasticity [def] "A process that modulates short-term neuronal synaptic plasticity, the ability of neuronal synapses to change in the short-term as circumstances require. Short-term neuronal synaptic plasticity generally involves increasing or decreasing synaptic sensitivity." [GOC  
33302 Pathogen[ Q2Q067] interacts with 1 human partners:{075145}  
33303 Pathogen[ P0C214] interacts with 1 human partners:{075145}  
33304 Pathogen[ P03346] interacts with 1 human partners:{075145}  
33305 Pathogen[ Q85601] interacts with 1 human partners:{075145}  
33306 Pathogen[ P14079] interacts with 3 human partners:{043759;B4DS77;075145}  
33307 Pathogen[ P03383] interacts with 1 human partners:{075145}  
33308 Pathogen[ P03410] interacts with 3 human partners:{043759;075145;B4DS77}  
33309 Pathogen[ P14075] interacts with 1 human partners:{075145}  
33310 Pathogen[ P0C206] interacts with 2 human partners:{075145;043759}  
33311 Pathogen[ P03363] interacts with 1 human partners:{075145}  
33312 [Cluster 3029]GO:0060021+P biological\_process [name] palate development [def] "The biological process whose specific outcome is the progression of the palate from an initial condition to its mature state. This process begins with the formation of the structure and ends with the mature structure. The palate is the partition that separates the nasal and oral cavities." [GOC  
33313 Pathogen[ Q2Q067] interacts with 14 human partners:{Q96S65;Q9HAZ2;Q13485;P63165;Q6W2J9;Q15699;P12755;O00255;Q14865;Q9UPW6;Q15796;O60682;P50222;P54821}  
33314 Pathogen[ P0C214] interacts with 12 human partners:{Q96S65;Q14865;Q6W2J9;P63165;Q13485;Q9HAZ2;P50222;Q15796;P12755;Q9UPW6;Q15699;O00255}  
33315 Pathogen[ P03346] interacts with 18 human partners:{P54821;Q96S65;Q9UPW6;Q15796;O60682;O43680;Q15699;P50222;O00255;O95863;P63165;Q14865;Q9HB21;P56178;Q13485;Q9P2D1;Q9HAZ2;Q6W2J9}  
33316 Pathogen[ Q85601] interacts with 15 human partners:{Q96S65;Q9UPW6;Q9P2D1;O60682;P12755;P50222;Q15699;Q9HB21;O00255;Q14865;P63165;Q13485;Q15796;Q6W2J9;Q9HAZ2}  
33317 Pathogen[ P14079] interacts with 17 human partners:{Q9UPW6;Q9HAZ2;Q9Y5U4;P12755;O60682;Q15699;Q14865;P63165;Q96S65;Q6W2J9;Q9P2D1;P54826;Q9HB21;P28360;O00255;P50222;O15503}  
33318 Pathogen[ P03383] interacts with 10 human partners:{Q96S65;Q13485;Q9UPW6;P50222;Q9HAZ2;Q6W2J9;P63165;O00255;Q15796;Q15699}  
33319 Pathogen[ P03410] interacts with 18 human partners:{Q6W2J9;Q9HAZ2;P12755;P63165;O60682;P50222;Q9Y5U4;Q9HB21;Q9UPW6;Q9P2D1;Q96S65;Q13485;Q15699;P54826;Q14865;O15503;O00255;Q15796}  
33320 Pathogen[ P14075] interacts with 11 human partners:{P63165;Q96S65;Q15796;Q9HAZ2;Q13485;O00255;Q9UPW6;Q6W2J9;Q15699;P54826;P50222}  
33321 Pathogen[ P0C206] interacts with 17 human partners:{Q96S65;Q9HAZ2;Q6W2J9;P54821;O00255;Q9P2D1;Q15699;Q15796;P12755;O60682;Q9UPW6;Q13485;Q9HB21;P63165;Q14865;P54826;P50222}  
33322 Pathogen[ P03363] interacts with 13 human partners:{P56179;Q15699;Q96S65;Q14865;P63165;Q15796;P54821;P50222;O60682;Q13485;Q6W2J9;Q9UPW6;Q9HAZ2}  
33323 [Cluster 3030]GO:0006166+P biological\_process [name] purine ribonucleoside salvage [def] "Any process which produces a purine nucleoside from derivatives of it, without de novo synthesis." [GOC  
33324 Pathogen[ Q2Q067] interacts with 1 human partners:{P07741}  
33325 Pathogen[ P0C214] interacts with 2 human partners:{P07741;Q13126}  
33326 Pathogen[ P03346] interacts with 1 human partners:{P07741}  
33327 Pathogen[ Q85601] interacts with 1 human partners:{P07741}  
33328 Pathogen[ P14079] interacts with 1 human partners:{P07741}  
33329 Pathogen[ P03383] interacts with 1 human partners:{P07741}  
33330 Pathogen[ P03410] interacts with 1 human partners:{P07741}  
33331 Pathogen[ P14075] interacts with 1 human partners:{P07741}  
33332 Pathogen[ P0C206] interacts with 1 human partners:{P07741}  
33333 Pathogen[ P03363] interacts with 1 human partners:{P07741}  
33334 [Cluster 3031]GO:0043101+P biological\_process [name] purine-containing compound salvage [def] "Any process that generates a purine-containing compound, any nucleobase, nucleoside, nucleotide or nucleic acid that contains a purine base, from derivatives of them without de novo synthesis." [CHEBI

33335 Pathogen[ Q2Q067] interacts with 1 human partners:{P07741}

33336 Pathogen[ P0C214] interacts with 1 human partners:{P07741}

33337 Pathogen[ P03346] interacts with 1 human partners:{P07741}

33338 Pathogen[ Q85601] interacts with 1 human partners:{P07741}

33339 Pathogen[ P14079] interacts with 1 human partners:{P07741}

33340 Pathogen[ P03383] interacts with 1 human partners:{P07741}

33341 Pathogen[ P03410] interacts with 1 human partners:{P07741}

33342 Pathogen[ P14075] interacts with 1 human partners:{P07741}

33343 Pathogen[ P0C206] interacts with 1 human partners:{P07741}

33344 Pathogen[ P03363] interacts with 1 human partners:{P07741}

33345 [Cluster 3032]GO:0018216+P biological\_process [name] peptidyl-arginine methylation [def] "The addition of a methyl group to an arginine residue in a protein." [GOC

33346 Pathogen[ Q2Q067] interacts with 4 human partners:{O14744;Q9NVM4;Q9NR22;Q99873}

33347 Pathogen[ P0C214] interacts with 3 human partners:{Q9NVM4;Q99873;Q9NR22}

33348 Pathogen[ P03346] interacts with 4 human partners:{Q99873;O14744;Q9NR22;Q9NVM4}

33349 Pathogen[ Q85601] interacts with 4 human partners:{Q9NR22;Q9NVM4;O14744;Q99873}

33350 Pathogen[ P14079] interacts with 4 human partners:{Q9NR22;Q99873;Q9NVM4;O14744}

33351 Pathogen[ P03383] interacts with 3 human partners:{O14744;Q99873;Q9NR22}

33352 Pathogen[ P03410] interacts with 4 human partners:{Q9NVM4;Q9NR22;O14744;Q99873}

33353 Pathogen[ P14075] interacts with 3 human partners:{Q9NR22;O14744;Q99873}

33354 Pathogen[ P0C206] interacts with 4 human partners:{Q99873;O14744;Q9NVM4;Q9NR22}

33355 Pathogen[ P03363] interacts with 4 human partners:{O14744;Q9NVM4;Q9NR22;Q99873}

33356 [Cluster 3033]GO:0042493+P biological\_process [name] response to drug [def] "Any process that results in a change in state or activity of a cell or an organism (in terms of movement, secretion, enzyme production, gene expression, etc.) as a result of a drug stimulus. A drug is a substance used in the diagnosis, treatment or prevention of a disease." [GOC

33357 Pathogen[ Q2Q067] interacts with 58 human partners:{Q13562;P49454;P01100;P22392;P24385;P63104;P40763;P01106;P13929;Q99497;P09132;P18887;P54274;Q04206;P11387;P05062;Q6QNY0;O15379;P36956;Q99933;P05413;P11388;P14635;Q9UBC3;P27797;P63146;Q13469;Q96L92;O14980;Q9UHB9;Q15532;O60934;P24864;P54278;P29474;O15527;P38936;Q14764;Q15583;P17861;P04818;O14920;P27986;P16455;Q01831;Q9UKK3;Q04743;P11802;P15923;P15407;P27815;Q9H3M7;Q13867;P08397;Q16836;Q15797;Q9H633;Q9H1Y0}

33358 Pathogen[ P0C214] interacts with 68 human partners:{P29474;Q9H633;Q13469;P04818;O14681;P00480;Q99698;P15407;P27815;Q9H3M7;Q9UM54;Q14764;Q13867;P01100;Q95299;P17275;P11802;P40261;Q04206;Q99497;P14635;P40939;P05413;P24385;Q99807;P38936;P05062;Q6QNY0;P08397;P13929;Q92698;O14980;P15923;P17861;Q99933;P09104;P18887;Q96L92;P05543;P11388;O15379;P16455;P11387;Q15532;P05412;Q9H1Y0;P24864;Q01831;P27797;Q9UKK3;Q9UHB9;P40763;P54278;P22392;Q15797;O15527;P40692;P16220;P17812;P22830;P49454;P09132;O15524;P27986;O14920;P01106;P63146;P54274}

33359 Pathogen[ P03346] interacts with 67 human partners:{P05412;Q99698;O15524;P24385;Q5XG87;P16220;P29474;P05413;Q14764;P36956;Q16836;Q9H633;P11388;P13929;O15379;Q15797;Q12772;P17275;P54274;P17861;Q15583;P15923;Q9UKK3;Q04743;Q04206;P24864;Q04741;Q9UBC3;O43316;Q92698;P09132;Q6QNY0;P78426;P11802;Q15532;P01106;O14980;Q96L92;Q13469;P14635;P63146;Q01831;P27815;P22392;Q99497;P15407;P27797;Q13867;O60934;P18887;P63104;P54278;Q9UHB9;Q9H1Y0;P05062;O14920;P38936;Q13562;O15527;P40763;P01100;Q9H3M7;P40261;P27986;P49454;Q99933;P11387}

33360 Pathogen[ Q85601] interacts with 67 human partners:{P01106;Q99497;P49454;Q6QNY0;Q15532;O15527;P63104;O43316;P24385;P63146;Q01831;P05413;P18887;P00480;Q15797;P16455;P15407;P40763;P27815;Q9UKK3;Q12772;Q15583;Q14764;P27797;Q13469;Q92698;P05062;Q13867;P11802;P27986;Q13562;P01100;Q96L92;P11387;Q5XG87;P14635;Q99933;P36956;P13929;P16220;Q9H1Y0;O14920;Q04206;P05412;P11388;P22392;P15923;O14980;P29474;P54278;O15379;Q16836;P08397;Q9UHB9;P38936;Q9UM54;P40692;Q9H633;P17275;Q9H3M7;P17861;P09132;P54274;Q99698;Q9UBC3;P24864;O60934}

33361 Pathogen[ P14079] interacts with 73 human partners:{P04083;O15379;P54274;P11388;Q9Y5P2;P09132;Q99807;Q16873;P41238;Q15532;Q6QNY0;P17812;P24864;P13498;P40692;Q15583;Q5XG87;Q99497;P54278;Q92698;P16455;Q9UM54;O60934;O15527;Q96L92;P15923;P05413;Q15797;Q9UKK3;Q9H1Y0;P63104;Q12772;P68032;Q9UBC3;P14635;P22392;P38936;Q99933;P08397;P48681;Q13867;P18887;P17275;Q95299;Q9H633;P22830;P01106;P61803;P10620;P00480;Q04743;P13929;P53602;P27815;Q14764;Q99541;P15407;Q9H3M7;P49454;Q13469;Q01831;P05412;Q9UEY8;Q99698;Q9UHB9;P36956;P04818;P01100;P63146;O14681;P03886;P17405;Q16836}

33362 Pathogen[ P03383] interacts with 46 human partners:{P27986;Q6QNY0;P49454;P29474;P16220;P54278;Q13469;O14920;P01106;Q9H633;O15527;P17861;Q16836;P22392;P15923;Q15532;P24385;Q15797;P11387;Q9H1Y0;P09132;Q01831;P14635;P11802;Q96L92;P63104;O14980;Q13867;P15407;O15379;Q99933;Q9UKK3;P01100;Q9H3M7;Q04206;P08397;Q9UHB9;P18887;O14681;P63146;P24864;P17275;Q14764;P54274;P27797;P05412}

33363 Pathogen[ P03410] interacts with 79 human partners:{Q99933;Q04206;P53602;P40692;P18887;P36956;P27986;O14681;O14920;P17861;Q9UEY8;Q99497;Q9UHB9;P08397;Q96L92;Q9H1Y0;Q92698;P01106;P17812;P05413;P54274;Q95299;Q6QNY0;P41238;Q13867;Q9H3M7;P15923;P05062;Q01831;P01100;P49454;Q9UM54;P00480;Q15583;P24385;P29474;Q14764;P03886;P14635;P38936;P09132;P04818;P17275;O15527;Q12772;P11802;Q16873;O15379;P22830;Q15797;P16455;P63146;P11387;P16220;Q5XG87;Q9Y5P2;Q13469;P05412;Q16836;P11388;P63104;Q9UBC3;P13929;Q99698;Q9UKK3;P54278;Q99807;P15407;Q9H633;Q04743;Q15532;P24864;P61803;P40763;P27815;O60934;P17405;O14980;P27797}

33364 Pathogen[ P14075] interacts with 45 human

partners:{P11387;P29474;Q99933;P09132;Q14764;Q04206;O14681;P05412;P11802;P17861;Q15532;Q9H1Y0;P14635;Q01831;P17275;O15527;P08397;P15923;P01106;O14980;O14920;P54274;Q13469;P27797;Q16836;P27986;Q6QNY0;P63104;Q9H3M7;Q13867;O15379;P01100;Q9H633;Q9UHB9;P16220;P54278;P24385;P63146;P15407;P49454;P22392;P18887;Q96L92;Q9UKK3;P24864}

33365 Pathogen[ P0C206] interacts with 73 human  
partners:{P09132;Q96L92;P54278;Q5XG87;P05062;Q9UM54;O14920;P27797;Q13469;P15407;Q04743;P16220;P17275;O15527;P22392;Q99933;O60934;Q16836;P40692;P05412;Q99698;P36956;O15524;P49454;Q99497;Q15532;P27986;P17861;P05413;Q13867;P54274;P63104;O14681;P27815;Q9UKK3;O15379;Q9H1Y0;P01100;Q04206;Q01831;P15923;Q99807;P22830;P38936;P40763;P04818;Q13562;P29474;Q15797;Q9H3M7;Q9UHB9;P11388;P01106;Q9UBC3;P14635;Q6QNY0;P11387;P41238;P08397;P24864;P13929;P16455;Q9H633;P11802;Q12772;P00480;O43316;P18887;Q92698;Q14764;Q15583;P63146;P24385}

33366 Pathogen[ P03363] interacts with 52 human  
partners:{Q16836;P18887;P09132;P29474;P49454;O15527;O14920;Q04206;P24864;O15524;Q96L92;P11387;Q01831;O14980;O15379;Q9UHB9;Q9H3M7;P16220;O43316;Q15532;Q15797;P63146;P01106;P27815;P17275;Q9H633;P15923;P63104;Q13867;Q99698;P54278;Q9UKK3;P54274;P27797;P17861;P05413;Q15583;P15407;P24385;Q13469;P05412;Q04741;P11802;Q9UBC3;Q14764;P27986;Q6QNY0;Q99933;Q9H1Y0;Q92698;Q04743;P01100}

33367 [Cluster 3034]GO:0008015+P biological\_process [name] blood circulation [def] "The flow of blood through the body of an animal, enabling the transport of nutrients to the tissues and the removal of waste products." [GOC]

33368 Pathogen[ Q2Q067] interacts with 10 human  
partners:{Q01543;P54105;P26678;P11171;Q16254;Q16621;P53805;P14652;P50222;P42224}

33369 Pathogen[ P0C214] interacts with 9 human  
partners:{Q16254;P42898;Q16621;P42224;P50222;Q01543;P53805;P26678;P11171}

33370 Pathogen[ P03346] interacts with 11 human  
partners:{P53805;P54105;Q16621;P26678;P14652;Q16254;P50222;P11171;P42224;Q9P2D1;Q01543}

33371 Pathogen[ Q85601] interacts with 9 human  
partners:{Q9P2D1;Q16621;P11171;P50222;Q01543;P54105;P42224;Q16254;P53805}

33372 Pathogen[ P14079] interacts with 12 human  
partners:{P15502;P11171;Q16254;P53805;Q9P2D1;Q01543;Q16621;P42224;P26678;P54105;P50222;P42898}

33373 Pathogen[ P03383] interacts with 8 human  
partners:{P54105;P50222;P53805;Q16621;Q16254;Q01543;P26678;P15502}

33374 Pathogen[ P03410] interacts with 11 human  
partners:{P54105;P50222;Q16254;P11171;P15502;Q9P2D1;P53805;Q16621;P26678;P42898;Q01543}

33375 Pathogen[ P14075] interacts with 9 human  
partners:{P54105;Q01543;P53805;P26678;Q16254;P15502;Q16621;P50222;P11171}

33376 Pathogen[ P0C206] interacts with 12 human  
partners:{P53805;P15502;P54105;Q9P2D1;Q16254;P14652;Q16621;P26678;P42224;Q01543;P11171;P50222}

33377 Pathogen[ P03363] interacts with 8 human  
partners:{P53805;Q01543;Q16254;Q16621;P54105;P14652;P11171;P50222}

33378 [Cluster 3035]GO:0006429+P biological\_process [name] leucyl-tRNA aminoacylation [def] "The process of coupling leucine to leucyl-tRNA, catalyzed by leucyl-tRNA synthetase. In tRNA aminoacylation, the amino acid is first activated by linkage to AMP and then transferred to either the 2'- or the 3'-hydroxyl group of the 3'-adenosine residue of the tRNA." [GOC]

33379 Pathogen[ Q2Q067] interacts with 1 human partners:{Q9P2J5}

33380 Pathogen[ P0C214] interacts with 2 human partners:{Q15031;Q9P2J5}

33381 Pathogen[ P03346] interacts with 1 human partners:{Q9P2J5}

33382 Pathogen[ Q85601] interacts with 1 human partners:{Q9P2J5}

33383 Pathogen[ P14079] interacts with 2 human partners:{Q9P2J5;Q15031}

33384 Pathogen[ P03383] interacts with 2 human partners:{Q9P2J5;Q15031}

33385 Pathogen[ P03410] interacts with 1 human partners:{Q9P2J5}

33386 Pathogen[ P14075] interacts with 2 human partners:{Q9P2J5;Q15031}

33387 Pathogen[ P0C206] interacts with 2 human partners:{Q15031;Q9P2J5}

33388 Pathogen[ P03363] interacts with 2 human partners:{Q9P2J5;Q15031}

33389 [Cluster 3036]GO:0045618+P biological\_process [name] positive regulation of keratinocyte differentiation [def] "Any process that activates or increases the frequency, rate or extent of keratinocyte differentiation." [GOC]

33390 Pathogen[ Q2Q067] interacts with 2 human partners:{P22392;P11473}

33391 Pathogen[ P0C214] interacts with 1 human partners:{P22392}

33392 Pathogen[ P03346] interacts with 3 human partners:{P11473;O95361;P22392}

33393 Pathogen[ Q85601] interacts with 2 human partners:{P11473;P22392}

33394 Pathogen[ P14079] interacts with 3 human partners:{P11473;P22392;O95361}

33395 Pathogen[ P03383] interacts with 2 human partners:{P22392;P11473}

33396 Pathogen[ P03410] interacts with 1 human partners:{P11473}

33397 Pathogen[ P14075] interacts with 2 human partners:{P11473;P22392}

33398 Pathogen[ P0C206] interacts with 3 human partners:{P22392;O95361;P11473}

33399 Pathogen[ P03363] interacts with 1 human partners:{P11473}

33400 [Cluster 3037]GO:0007283+P biological\_process [name] spermatogenesis [def] "The process of formation of spermatozoa, including spermatocytogenesis and spermiogenesis." [GOC]

- 33401 Pathogen[ Q2Q067] interacts with 75 human  
partners: {O75525;P25490;Q9H3C7;Q9HB65;P02545;P20226;Q99417;Q9HBE1;Q5TAP6;Q8NCR6;P41220;Q01094;Q9NS26;Q8IUV8;Q95997;Q8IXK0;P41182;Q9UL49;P08151;Q00613;Q9Y6K1;P49116;Q9UM82;P30279;P14373;Q16626;Q03933;P54727;P52594;Q86YF9;Q8ND90;Q94993;Q9H320;Q8NHM5;Q5BJF6;Q9UJW3;Q9NZP6;P14635;Q9P2T0;P62324;P27797;O43502;P63146;Q9UMX2;Q14997;Q96M53;Q9BZW7;Q9H9C1;Q99728;Q9Y2T7;O75618;P35527;Q15102;Q92843;P25440;Q9H091;Q96EH5;Q9HD36;P62380;Q9H160;P78396;P15259;A1L190;Q58F21;P41208;P16989;Q8IZT6;Q96L21;Q9GZV4;P13682;Q03060;P31689;O14599;Q01534;P31260}
- 33402 Pathogen[ P0C214] interacts with 86 human  
partners: {Q14997;Q58F21;Q8IUV8;P41220;Q00613;Q96M53;P16989;Q99728;P35527;O95633;Q8NCR6;Q8IXK0;A1L190;P15259;P46379;P62380;Q9GZV4;O75618;Q9HBE1;P0CW01;Q96EH5;Q9Y6K1;Q99417;P14635;Q9Y232;P68402;O14599;Q9H091;Q8NEY3;Q9BXT5;Q9P2T0;P0CV99;Q9H3C7;P55789;Q03933;Q9NZP6;Q01534;O75525;Q15102;Q01094;Q9Y2T7;P49116;Q00536;Q96KC9;P78396;P25440;Q9HD36;Q9H160;O43502;P0CW00;Q9BZW7;P62324;P41182;Q9UMX2;P20226;P13682;P54727;P41208;Q5TAP6;Q92843;P30279;P27797;Q03060;Q9UM82;Q96L21;Q5BJF6;Q9NS26;O95997;P08151;Q5H9L4;Q9H320;P52594;Q9HB65;P02545;Q9H9C1;P40692;P14373;Q86YF9;Q8IZT6;P63146;Q8ND90;P0CV98;O94993;Q9UJW3;A6NKD2;Q8NHM5}
- 33403 Pathogen[ P03346] interacts with 112 human  
partners: {Q8NEA9;Q9NS91;Q9NS26;Q01534;P31260;Q9BXT5;P78396;Q14320;Q00536;Q9Y6K1;Q9HB65;Q86UU5;P30279;Q9H091;Q99598;P14373;Q16626;Q5TAP6;Q9GZV4;Q8NHU6;P35527;Q00613;O43502;Q95714;Q9UM82;Q99728;Q96M53;Q12772;Q03933;P07992;P49116;P25490;Q9UMX2;Q8NHX4;Q8NCR6;Q9P2T0;Q96J94;Q5JSS6;P16989;P25440;Q01094;P02545;Q9NZP6;Q92843;O95997;P20226;Q86YF9;Q86W54;Q99417;P51843;P41208;Q9UL49;Q58F21;A6NDE4;Q96L21;Q15102;P14635;Q96GD3;P62380;P63146;P51587;P46379;P52594;O14599;Q02548;Q5JUK2;O75618;Q8N0X2;Q8IUQ4;P31689;P54727;Q5BJF6;O94993;Q9HBE1;P27797;P41182;Q8ND90;Q9HB21;Q96EH5;Q9Y2T7;Q8IUV8;Q9H9C1;P15259;A1L190;Q8TBZ2;Q9NTU4;Q14997;Q8NEY3;O75031;Q03060;Q8IZT6;P13682;Q9Y232;Q5H9L4;Q8IXK0;Q9C0J8;Q8NHM5;P41220;O75525;P62324;Q8TEY5;Q9BZW7;Q9H3C7;Q9H320;Q9NQZ3;Q9HD36;Q9H160;O95633;Q96IK5;Q9UJC3;Q9UJW3;P08151}
- 33404 Pathogen[ Q85601] interacts with 90 human  
partners: {Q8IXK0;P08151;Q9Y2T7;Q00536;Q8ND90;Q9BXT5;O43502;P02545;P14373;P31689;P63146;Q9GZV4;Q9H320;Q9HD36;P13682;O14599;Q9UJW3;P41220;O95714;Q03933;Q99417;P0CW01;Q9H3C7;Q5H9L4;Q01534;P62324;Q99728;P46379;Q12772;P25490;P0CV98;P27797;Q5BJF6;P52594;Q86VD1;Q8IZT6;Q00613;P0CW00;Q9NZP6;P15259;Q9H9C1;Q9UM82;Q86W54;Q8NEY3;Q9UMX2;P31260;Q96L21;P54727;Q9Y4I5;P14635;Q9NS26;Q92843;Q9HB21;Q8NHM5;O75618;P30279;Q9Y6K1;P78396;O94993;Q96EH5;Q9P2T0;A6NKD2;P25440;P35527;P49116;Q96M53;Q9HB65;P41182;O75525;P40692;Q7Z7L9;Q9H160;Q9P2V9;P62380;P16989;Q9H091;Q58F21;Q03060;P51587;Q01094;O95997;Q86YF9;P20226;Q8IUV8;A1L190;Q15102;Q9NS91;Q9HBE1;P41208;Q9BZW7}
- 33405 Pathogen[ P14079] interacts with 113 human  
partners: {O75031;Q8WYA0;P15259;Q9H320;Q8NEY3;Q9UGV2;P08151;O75618;P14373;Q9BXT5;Q8NHX4;Q9UJC3;Q7Z7L9;P62324;Q01534;Q5H9L4;Q8IUV8;Q9UM82;Q9Y6K1;P78396;Q96M53;Q9H9C1;Q58F21;Q13323;Q8N0X2;P40692;P01225;Q9POW8;Q9UMX2;O43432;Q8NHU6;Q03060;Q14320;P51587;P52594;Q9P2T0;Q8NHM5;P41220;Q7Z7C7;P35527;P62380;Q9H3C7;Q03933;Q5TAP6;Q86UN6;Q5JSS6;Q9Y4I5;Q12772;Q9NTU4;Q86UU5;Q9Y2T7;Q00613;P41182;Q5BJF6;Q9UL49;Q14997;Q96L21;P14635;Q14353;P16989;Q9UJW3;Q8ND90;A6NGB9;Q96PU9;Q14093;Q15102;Q9HD36;Q86X24;O75525;Q8IXK0;Q9NZP6;P35663;Q99417;P55789;Q9NS26;Q86VD1;Q9H091;O43502;O95997;P41208;Q16626;P25440;P31689;Q86YF9;Q9HB21;Q2TAA8;Q99598;Q9HB65;P49116;Q96JY0;Q9BZX4;P13682;Q96KC9;P02545;P25490;P54727;Q01094;O15259;Q9GZV4;P63146;O14599;Q9HBE1;O94993;Q8IZT6;P07992;Q8NCR6;Q9H160;Q96EH5;Q7Z5L4;Q9BSE4;Q92843;A1L190;Q9BZW7}
- 33406 Pathogen[ P03383] interacts with 65 human  
partners: {P02545;P16989;Q86UU5;Q9NTU4;P62324;Q16626;Q9HBE1;P25440;Q01094;Q5TAP6;P41220;Q9UJW3;Q8IUV8;P49116;Q9UL49;O75618;P41208;Q8NEY3;Q5H9L4;Q9H9C1;Q9GZV4;Q9BZW7;Q9NS26;Q00536;Q14997;Q96L21;P31689;P14635;P78396;Q9Y2T7;Q9NZP6;P30279;Q9HB65;P20226;P35527;Q8NHX4;Q9H160;Q9Y6K1;Q99417;Q00613;P54727;Q5BJF6;Q58F21;Q9P2T0;Q8ND90;O75525;Q86YF9;A1L190;Q96EH5;O95997;Q9H320;Q96M53;P63146;Q01534;Q9UM82;Q9H3C7;Q8NCR6;O14599;Q9H091;P52594;Q03060;P15259;P13682;P27797;Q03933}
- 33407 Pathogen[ P03410] interacts with 107 human  
partners: {Q8IUV8;Q00613;P40692;Q8IXK0;Q96KC9;Q9UJC3;P52594;Q14353;Q9P2T0;O14599;A6NGB9;P30279;P13682;P16989;P07992;O15259;P41220;Q9Y4I5;Q14997;O75031;Q8NCR6;Q8N0X2;Q8NHU6;P35527;Q9UL49;Q01534;P62380;Q9BZX4;Q9HD36;Q92843;Q86UN6;Q03060;P20226;Q96EH5;Q9HB21;O43432;O95997;Q03933;Q5TAP6;P25490;Q8IZT6;Q9BSE4;Q8NHX4;P78396;Q96L21;Q9NTU4;Q5H9L4;Q86YF9;Q9UM82;P14635;O43502;P35663;Q9NPE6;O75525;Q12772;P62324;P04553;P51587;P02545;Q9H3C7;Q9BXT5;Q9H160;Q8WYA0;Q7Z7C7;P63146;Q8NEY3;P15259;Q14320;Q5BJF6;Q14093;P41182;Q99598;Q9BZW7;Q15102;Q01094;Q7Z7L9;P49116;Q86VD1;P31689;Q9H091;Q8ND90;Q9H9C1;Q99417;Q9UJW3;Q9GZV4;O75618;Q9Y2T7;O94993;A1L190;Q16626;Q9H320;Q86UU5;Q9Y6K1;P55789;P41208;Q9UMX2;Q58F21;Q96M53;Q5JSS6;Q9NZP6;Q9NS26;Q9HB65;Q9HBE1;Q13323;P27797;P25440;P54727}
- 33408 Pathogen[ P14075] interacts with 70 human  
partners: {Q9NTU4;P31689;Q9Y6K1;Q00613;Q15102;Q8NEY3;Q96L21;P16989;P25440;P62324;Q9UM82;P14635;P30279;Q03933;Q9UJW3;Q14320;A1L190;P41220;O95997;Q9GZV4;Q9H091;Q9H9C1;P20226;Q9NZP6;Q8ND90;P78396;Q86UU5;P49116;P02545;Q96KC9;O75618;Q5BJF6;Q96M53;Q58F21;Q9Y2T7;Q9UL49;O75525;Q9BXT5;Q9H320;P27797;P54727;Q99417;Q01534;Q01094;P55789;P41208;Q5H9L4;Q9NS26;Q14997;P52594;Q9P2T0;P15259;Q03060;Q9H3C7;Q96EH5;Q9BZW7;Q8NCR6;P63146;Q8NHX4;Q9HB65;O14599;Q9H160;Q16626;P35527;Q86YF9;Q7Z7C7;Q8IUV8;O75031;Q9HBE1;Q5TAP6}
- 33409 Pathogen[ P0C206] interacts with 115 human  
partners: {Q86VD1;O43502;Q14320;P62324;Q9Y232;Q96KC9;Q03060;Q96L21;Q9GZV4;Q9HB65;P35527;P55789;Q9Y6K1;P27797;Q14997;P13682;Q5BJF6;P20226;O95633;Q9HD36;P25490;Q9HBE1;Q9NT

U4;A1L190;Q86YF9;P51587;Q9H091;P41182;P62380;Q99598;P30279;Q00613;Q02548;Q9Y4I5;Q00536;O95997;P40692;Q03933;Q8IUQ4;Q9UL49;Q8NCR6;Q9H320;O75618;Q9NS91;Q8IZT6;Q9BXT5;Q9BZW7;Q8WYA0;P49116;P0CV98;Q9H160;P07992;Q01534;O14599;Q9UM82;A6NKD2;Q7Z7C7;Q92843;P16989;O94993;Q8ND90;Q01094;Q16626;Q15102;Q99728;P54727;Q5H9L4;P49916;Q8NHM5;Q86UN6;Q8IYW8;P25440;Q9HB21;Q7Z7L9;Q9NS26;Q86W54;P02545;Q8IXK0;P78396;A6NGB9;P41208;Q99417;Q8NEY3;O75031;P35663;Q9P2T0;P0CW01;Q9NZP6;Q58F21;P14635;Q9UJC3;Q86UU5;P14373;P41220;O75525;P08151;Q8NHX4;Q96M53;Q9H3C7;Q9Y2T7;P46379;Q96EH5;Q9H9C1;O95714;Q12772;Q5TAP6;P31689;P0CW00;P31260;Q9UJW3;P0CV99;P15259;Q5JSS6;P63146;Q9UMX2}

33410 Pathogen[ P03363] interacts with 103 human partners: {Q5BJF6;P46379;Q9H160;Q96M53;P13682;Q9GZV4;Q8N0X2;P62380;Q9H091;P54727;Q99598;Q5JUK2;P49116;Q9H9C1;Q8NHU6;P02545;Q7Z3Z4;Q58F21;P14373;P08151;O75618;Q8TBZ2;P30279;Q03933;Q14093;P25490;Q9Y6K1;Q9HB65;Q8IXK0;Q99417;P63146;P41208;Q9NTU4;Q96L21;Q9NS26;Q9UGV2;Q8N9W6;Q96EH5;Q9H320;O14599;Q9P2T0;Q9HD36;Q8NCR6;O75031;Q92904;Q5JSS6;Q86U05;P62324;Q8NEY3;Q01094;Q96JY0;P35527;P27797;P31260;P78396;Q92843;Q14320;Q5TAP6;Q8ND90;Q9UM82;Q16626;Q86UN6;P41220;Q8NEA9;Q01534;P20226;O95714;P25440;O94993;Q9H3C7;Q00613;Q9UMX2;Q96J94;Q9BZW7;Q9UJW3;Q5SZQ8;Q9NZP6;A6NDE4;O15259;Q8IYW8;O95997;Q9NQZ3;P16989;Q02548;Q99728;Q9BXT5;P52594;Q86YF9;Q86W54;Q9NS91;Q5H9L4;Q9Y2T7;O75525;Q00536;P15259;Q8IZT6;Q9UL49;P35663;Q03060;A1L190;Q15102;O43502;Q9UJC3}

33411 [Cluster 3038]GO:0060235+P biological\_process [name] lens induction in camera-type eye [def] "Signaling at short range between the head ectoderm and the optic vesicle that results in the head ectoderm forming a lens." [GOC]

33412 Pathogen[ Q2Q067] interacts with 1 human partners: {P14859}

33413 Pathogen[ P0C214] interacts with 1 human partners: {P14859}

33414 Pathogen[ P03346] interacts with 3 human partners: {P14859;Q86Z02;O95343}

33415 Pathogen[ Q85601] interacts with 1 human partners: {P14859}

33416 Pathogen[ P14079] interacts with 1 human partners: {P14859}

33417 Pathogen[ P03383] interacts with 1 human partners: {P14859}

33418 Pathogen[ P03410] interacts with 1 human partners: {P14859}

33419 Pathogen[ P14075] interacts with 1 human partners: {P14859}

33420 Pathogen[ P0C206] interacts with 1 human partners: {P14859}

33421 Pathogen[ P03363] interacts with 2 human partners: {P14859;O95343}

33422 [Cluster 3039]GO:0045717+P biological\_process [name] negative regulation of fatty acid biosynthetic process [def] "Any process that stops, prevents, or reduces the frequency, rate or extent of the chemical reactions and pathways resulting in the formation of fatty acids." [GOC]

33423 Pathogen[ Q2Q067] interacts with 2 human partners: {Q8N5D0;Q96RU7}

33424 Pathogen[ P0C214] interacts with 2 human partners: {Q8N5D0;Q96RU7}

33425 Pathogen[ P03346] interacts with 2 human partners: {Q8N5D0;Q96RU7}

33426 Pathogen[ Q85601] interacts with 2 human partners: {Q96RU7;Q8N5D0}

33427 Pathogen[ P14079] interacts with 4 human partners: {Q9Y5U4;Q8N5D0;Q96RU7;O15503}

33428 Pathogen[ P03383] interacts with 2 human partners: {Q96RU7;Q8N5D0}

33429 Pathogen[ P03410] interacts with 4 human partners: {Q9Y5U4;Q8N5D0;Q96RU7;O15503}

33430 Pathogen[ P14075] interacts with 2 human partners: {Q8N5D0;Q96RU7}

33431 Pathogen[ P0C206] interacts with 2 human partners: {Q96RU7;Q8N5D0}

33432 Pathogen[ P03363] interacts with 1 human partners: {Q8N5D0}

33433 [Cluster 3040]GO:0032436+P biological\_process [name] positive regulation of proteasomal ubiquitin-dependent protein catabolic process [def] "Any process that activates or increases the frequency, rate or extent of the breakdown of a protein or peptide by hydrolysis of its peptide bonds, initiated by the covalent attachment of ubiquitin, and mediated by the proteasome." [GOC]

33434 Pathogen[ Q2Q067] interacts with 14 human partners: {O75832;P31749;Q9Y5A7;P63165;Q96MT3;Q9NZL4;O15105;Q96PM5;P61956;Q15819;Q9UNE7;P21675;Q00987;Q8NEZ5}

33435 Pathogen[ P0C214] interacts with 15 human partners: {Q9NZL4;Q96PM5;P61956;P21675;Q00987;Q96MT3;O75832;Q15819;P63165;O15105;P10909;Q9Y5A7;Q9UNE7;P31749;P55072}

33436 Pathogen[ P03346] interacts with 18 human partners: {Q9NZL4;P61956;Q8NEZ5;O75159;Q96PM5;P25686;O15105;P55072;Q00987;Q96MT3;O75832;Q9Y5A7;P31749;Q9UNE7;P63165;P21675;Q969F2;Q15819}

33437 Pathogen[ Q85601] interacts with 14 human partners: {P31749;O75832;P61956;Q96PM5;Q96MT3;P63165;P21675;O15105;Q9Y5A7;Q9NZL4;Q00987;Q9UNE7;Q8NEZ5;Q15819}

33438 Pathogen[ P14079] interacts with 12 human partners: {Q15819;O75832;P10909;P63165;P61956;Q00987;Q8NEZ5;O15105;Q9Y5A7;Q96MT3;Q9NZL4;P21675}

33439 Pathogen[ P03383] interacts with 12 human partners: {P61956;P31749;Q96MT3;O75832;Q9Y5A7;O15105;Q15819;P63165;Q96PM5;Q9NZL4;P21675;Q8NEZ5}

33440 Pathogen[ P03410] interacts with 16 human partners: {Q969F2;P63165;P21675;P25686;P31749;Q9Y5A7;Q15819;Q9UNE7;Q8NEZ5;O15105;Q9NZL4;Q00987;Q96MT3;P61956;O75832;P10909}

33441 Pathogen[ P14075] interacts with 12 human partners: {Q15819;P63165;Q96MT3;Q96PM5;P21675;O75832;P31749;Q9Y5A7;P61956;Q8NEZ5;O15105;Q9NZL4}

33442 Pathogen[ P0C206] interacts with 17 human partners: {O75832;P31749;Q969F2;Q96MT3;P61956;O15105;Q9UNE7;Q9NZL4;P10909;Q15819;P55072}

72;Q96PM5;P63165;Q00987;Q8NEZ5;Q9Y5A7;P21675}

33443 Pathogen[ P03363] interacts with 13 human partners:{075159;Q9NZL4;Q8NEZ5;Q96MT3;O15105;P63165;P31749;Q9UNE7;Q96PM5;P21675;P61956;Q9Y5A7;Q15819}

33444 [Cluster 3041]GO:0050767+P biological\_process [name] regulation of neurogenesis [def] "Any process that modulates the frequency, rate or extent of neurogenesis, the origin and formation of neurons." [GOC

33445 Pathogen[ Q2Q067] interacts with 3 human partners:{Q15910;P14651;Q5TGS1}

33446 Pathogen[ P0C214] interacts with 3 human partners:{Q15910;P14651;Q5TGS1}

33447 Pathogen[ P03346] interacts with 3 human partners:{Q5TGS1;Q15910;P14651}

33448 Pathogen[ Q85601] interacts with 3 human partners:{Q5TGS1;Q15910;P14651}

33449 Pathogen[ P14079] interacts with 3 human partners:{Q5TGS1;Q15910;P14651}

33450 Pathogen[ P03383] interacts with 3 human partners:{Q15910;Q5TGS1;P14651}

33451 Pathogen[ P03410] interacts with 3 human partners:{P14651;Q5TGS1;Q15910}

33452 Pathogen[ P14075] interacts with 2 human partners:{Q5TGS1;Q15910}

33453 Pathogen[ P0C206] interacts with 3 human partners:{Q5TGS1;P14651;Q15910}

33454 Pathogen[ P03363] interacts with 3 human partners:{Q5TGS1;P14651;Q15910}

33455 [Cluster 3042]GO:0032479+P biological\_process [name] regulation of type I interferon production [def] "Any process that modulates the frequency, rate, or extent of interferon type I production. Type I interferons include the interferon-alpha, beta, delta, epsilon, zeta, kappa, tau, and omega gene families." [GOC

33456 Pathogen[ Q2Q067] interacts with 1 human partners:{Q92985}

33457 Pathogen[ P0C214] interacts with 1 human partners:{Q92985}

33458 Pathogen[ P03346] interacts with 1 human partners:{Q92985}

33459 Pathogen[ Q85601] interacts with 1 human partners:{Q92985}

33460 Pathogen[ P14079] interacts with 1 human partners:{Q92985}

33461 Pathogen[ P03383] interacts with 1 human partners:{Q92985}

33462 Pathogen[ P03410] interacts with 1 human partners:{Q92985}

33463 Pathogen[ P14075] interacts with 1 human partners:{Q92985}

33464 Pathogen[ P0C206] interacts with 1 human partners:{Q92985}

33465 Pathogen[ P03363] interacts with 1 human partners:{Q92985}

33466 [Cluster 3043]GO:0032760+P biological\_process [name] positive regulation of tumor necrosis factor production [def] "Any process that activates or increases the frequency, rate, or extent of tumor necrosis factor production." [GOC

33467 Pathogen[ Q2Q067] interacts with 2 human partners:{Q8IUC6;Q13158}

33468 Pathogen[ P0C214] interacts with 2 human partners:{Q8IUC6;Q13158}

33469 Pathogen[ P03346] interacts with 4 human partners:{075995;Q13158;Q9Y6D5;Q8IUC6}

33470 Pathogen[ Q85601] interacts with 2 human partners:{Q8IUC6;Q13158}

33471 Pathogen[ P14079] interacts with 6 human partners:{Q8IUC6;Q9Y6D5;Q7Z434;Q13158;Q9Y239;Q99836}

33472 Pathogen[ P03383] interacts with 2 human partners:{Q8IUC6;Q13158}

33473 Pathogen[ P03410] interacts with 5 human partners:{Q9Y239;Q7Z434;Q13158;Q9Y6D5;Q8IUC6}

33474 Pathogen[ P14075] interacts with 2 human partners:{Q13158;Q8IUC6}

33475 Pathogen[ P0C206] interacts with 3 human partners:{Q13158;Q9Y6D5;Q8IUC6}

33476 Pathogen[ P03363] interacts with 1 human partners:{Q13158}

33477

```
1 [Section 8] molecular functions that the HTLV viruses may interfere with
2
3
4 [Cluster 1]GO:0046332+F molecular_function [name] SMAD binding [def] "Interacting
selectively and non-covalently with a SMAD signaling protein." [GOC
5 Pathogen[ Q2Q067] interacts with 18 human
partners:{Q9HAU4;Q9HAZ2;Q13485;O60315;Q8WUH2;P50616;Q6ZNA4;Q00577;Q86UL8;P12755;P8402
2;Q96QR8;Q15796;P12757;Q9UNE7;Q92793;Q8N6I1;Q02078}
6 Pathogen[ P0C214] interacts with 18 human
partners:{Q9HAU4;P12757;Q96QR8;Q92793;P84022;Q8N6I1;Q2VWA4;Q02078;Q00577;Q13485;Q9HAZ
2;P50616;Q15796;P12755;Q6ZNA4;O60315;Q9UNE7;Q8WUH2}
7 Pathogen[ P03346] interacts with 20 human
partners:{Q96QR8;Q02078;Q9HAU4;P12757;Q00577;O60315;Q15796;Q8WUH2;Q2VWA4;P84022;Q86UL
8;Q9UNE7;P50616;P84550;Q8N6I1;Q6ZNA4;Q13485;Q92793;Q9HAZ2;O75593}
8 Pathogen[ Q85601] interacts with 19 human
partners:{Q96QR8;Q02078;Q9HAU4;O60315;Q86UL8;P12757;Q8WUH2;Q2VWA4;P12755;Q8N6I1;Q0057
7;P50616;P84022;Q6ZNA4;Q92793;Q9UNE7;Q13485;Q15796;Q9HAZ2}
9 Pathogen[ P14079] interacts with 15 human
partners:{Q9HAZ2;P12755;Q02078;Q96QR8;Q92793;Q2VWA4;Q6ZNA4;Q9HAU4;O60315;Q00577;Q86UL
8;P12757;P50616;Q8WUH2;Q8N6I1}
10 Pathogen[ P03383] interacts with 13 human
partners:{Q13485;Q8N6I1;Q6ZNA4;Q9HAZ2;P84022;P50616;Q15796;Q00577;P12757;Q96QR8;Q9279
3;Q02078;Q8WUH2}
11 Pathogen[ P03410] interacts with 17 human
partners:{P84022;Q6ZNA4;Q9HAZ2;P12755;Q8N6I1;Q8WUH2;Q00577;Q9UNE7;Q92793;Q2VWA4;Q1348
5;P12757;Q02078;Q86UL8;Q96QR8;Q15796;P50616}
12 Pathogen[ P14075] interacts with 13 human
partners:{Q96QR8;Q15796;Q9HAZ2;P12757;Q13485;Q6ZNA4;P50616;Q8N6I1;Q02078;Q00577;Q9279
3;Q8WUH2;P84022}
13 Pathogen[ P0C206] interacts with 20 human
partners:{P84022;Q9HAZ2;Q02078;Q8N6I1;Q9HAU4;Q6ZNA4;Q2VWA4;Q96QR8;Q15796;P12755;Q9279
3;Q9UNE7;P12757;P50616;Q8WUH2;Q13485;O60315;P84550;Q86UL8;Q00577}
14 Pathogen[ P03363] interacts with 19 human
partners:{O60315;Q9HAU4;P12757;Q96QR8;P50616;Q6ZNA4;Q9UNE7;Q15796;P84022;Q92793;Q1348
5;Q8WUH2;P84550;Q86UL8;Q2VWA4;Q00577;Q8N6I1;Q9HAZ2;Q02078}
15 [Cluster 2]GO:0016747+F molecular_function [name] transferase activity, transferring
acyl groups other than amino-acyl groups [def] "Catalysis of the transfer of an acyl
group, other than amino-acyl, from one compound (donor) to another (acceptor)." [GOC
16 Pathogen[ Q2Q067] interacts with 2 human partners:{Q9H5J4;Q92993}
17 Pathogen[ P0C214] interacts with 5 human
partners:{Q92993;Q9NXB9;Q9BWD1;O95251;P42765}
18 Pathogen[ P03346] interacts with 8 human
partners:{Q8WYB5;Q92794;Q9BWD1;Q9H5J4;O95251;Q9H7Z6;P42765;Q92993}
19 Pathogen[ Q85601] interacts with 5 human
partners:{O95251;Q9H7Z6;Q9H5J4;Q9BWD1;Q92993}
20 Pathogen[ P14079] interacts with 3 human partners:{O95251;Q9H5J4;Q92993}
21 Pathogen[ P03383] interacts with 3 human partners:{O95251;Q9H5J4;Q92993}
22 Pathogen[ P03410] interacts with 5 human
partners:{Q6IED9;O95251;Q9H5J4;P42765;Q92993}
23 Pathogen[ P14075] interacts with 3 human partners:{Q9H5J4;Q92993;O95251}
24 Pathogen[ P0C206] interacts with 5 human
partners:{O95251;Q92993;Q9H5J4;Q9BWD1;Q9H7Z6}
25 Pathogen[ P03363] interacts with 4 human partners:{Q9H5J4;Q9BWD1;O95251;Q92993}
26 [Cluster 3]GO:0017048+F molecular_function [name] Rho GTPase binding [def]
"Interacting selectively and non-covalently with Rho protein, any member of the Rho
subfamily of the Ras superfamily of monomeric GTPases. Proteins in the Rho subfamily are
involved in relaying signals from cell-surface receptors to the actin cytoskeleton."
[ISBN
27 Pathogen[ Q2Q067] interacts with 2 human partners:{P07737;Q9NPB6}
28 Pathogen[ P0C214] interacts with 1 human partners:{Q9NPB6}
29 Pathogen[ P03346] interacts with 7 human
partners:{Q9NSV4;Q27J81;Q9NPB6;Q9BZ29;Q5VV41;P07737;Q9H8V3}
30 Pathogen[ Q85601] interacts with 2 human partners:{P07737;Q9NPB6}
31 Pathogen[ P14079] interacts with 7 human
partners:{P07737;O15066;O60610;Q9H8V3;Q9NPB6;Q27J81;Q5VV41}
32 Pathogen[ P03383] interacts with 2 human partners:{P07737;Q9NPB6}
33 Pathogen[ P03410] interacts with 6 human
partners:{Q27J81;O60610;Q5VV41;Q9NPB6;Q9H8V3;P07737}
34 Pathogen[ P14075] interacts with 2 human partners:{P07737;Q9NPB6}
35 Pathogen[ P0C206] interacts with 4 human partners:{Q27J81;Q9NPB6;Q9H8V3;P07737}
36 Pathogen[ P03363] interacts with 6 human
partners:{Q5VV41;Q9NPB6;Q9NSV4;O15066;Q27J81;P07737}
37 [Cluster 4]GO:0008124+F molecular_function [name] 4-alpha-hydroxytetrahydrobiopterin
dehydratase activity [def] "Catalysis of the reaction
38 Pathogen[ Q2Q067] interacts with 2 human partners:{P61457;Q9H0N5}
39 Pathogen[ P0C214] interacts with 2 human partners:{P61457;Q9H0N5}
```



```

40 Pathogen[ P03346] interacts with 2 human partners:{P61457;Q9H0N5}
41 Pathogen[ Q85601] interacts with 2 human partners:{Q9H0N5;P61457}
42 Pathogen[ P14079] interacts with 2 human partners:{P61457;Q9H0N5}
43 Pathogen[ P03383] interacts with 2 human partners:{P61457;Q9H0N5}
44 Pathogen[ P03410] interacts with 2 human partners:{Q9H0N5;P61457}
45 Pathogen[ P14075] interacts with 2 human partners:{Q9H0N5;P61457}
46 Pathogen[ P0C206] interacts with 2 human partners:{P61457;Q9H0N5}
47 Pathogen[ P03363] interacts with 2 human partners:{Q9H0N5;P61457}
48 [Cluster 5]GO:0004601+F molecular_function [name] peroxidase activity [def] "Catalysis
of the reaction
49 Pathogen[ Q2Q067] interacts with 5 human
partners:{Q9BRA2;Q99497;Q06830;P68871;P69905}
50 Pathogen[ P0C214] interacts with 5 human
partners:{Q9BRA2;P69905;Q99497;Q06830;P68871}
51 Pathogen[ P03346] interacts with 5 human
partners:{Q9BRA2;P69905;Q99497;P68871;Q06830}
52 Pathogen[ Q85601] interacts with 5 human
partners:{Q99497;P69905;Q9BRA2;P68871;Q06830}
53 Pathogen[ P14079] interacts with 5 human
partners:{Q8WWM9;Q99497;P69905;P68871;Q9BRA2}
54 Pathogen[ P03383] interacts with 3 human partners:{Q9BRA2;P69905;P68871}
55 Pathogen[ P03410] interacts with 6 human
partners:{Q99497;Q9BRA2;Q8WWM9;P68871;P69905;Q06830}
56 Pathogen[ P14075] interacts with 3 human partners:{P68871;Q9BRA2;P69905}
57 Pathogen[ P0C206] interacts with 6 human
partners:{P68871;Q99497;P69905;Q9BRA2;Q06830;Q8WWM9}
58 Pathogen[ P03363] interacts with 3 human partners:{P69905;P68871;Q9BRA2}
59 [Cluster 6]GO:0005096+F molecular_function [name] GTPase activator activity [def]
"Increases the activity of a GTPase, an enzyme that catalyzes the hydrolysis of GTP."
[GOC
60 Pathogen[ Q2Q067] interacts with 8 human
partners:{Q9BTW9;P41220;Q12982;Q9Y2B5;Q5TB30;Q8N336;P43487;Q15276}
61 Pathogen[ P0C214] interacts with 12 human
partners:{Q9Y2B5;P41220;Q5TB30;P43487;Q9BTW9;P31150;P46060;P52565;Q8N336;Q12982;Q6GYQ
0;P98171}
62 Pathogen[ P03346] interacts with 14 human
partners:{P98171;P43487;Q8N336;Q96FS4;Q5TB30;P52565;P46060;P31150;Q6GYQ0;Q9H8V3;P4122
0;Q12982;Q15276;Q9Y2B5}
63 Pathogen[ Q85601] interacts with 12 human
partners:{P31150;P46060;P41220;P43487;Q12982;Q9BTW9;Q5TB30;Q9NP61;P52565;Q8N6H7;Q9Y2B
5;Q8N6T3}
64 Pathogen[ P14079] interacts with 16 human
partners:{P52565;Q9BTW9;Q12982;P31150;P98171;Q8N336;Q15276;P46060;P41220;Q9H5N1;Q9Y2B
5;Q9H8V3;Q5TB30;Q96FG2;Q15042;Q86X10}
65 Pathogen[ P03383] interacts with 4 human partners:{P41220;Q9Y2B5;P43487;Q15276}
66 Pathogen[ P03410] interacts with 18 human
partners:{Q5TB30;P98171;P41220;Q9Y2B5;Q8N336;Q96FG2;Q9BTW9;Q9NP61;P43487;Q12982;Q9H8V
3;Q15283;Q9H5N1;P31150;P52565;Q15042;P46060;Q15276}
67 Pathogen[ P14075] interacts with 5 human
partners:{P43487;Q8N336;P41220;Q9Y2B5;Q15276}
68 Pathogen[ P0C206] interacts with 17 human
partners:{Q12982;Q8N6T3;Q9BTW9;P52565;Q9Y2B5;Q9NP61;P46060;P43487;Q9H8V3;P31150;P9817
1;Q9H5N1;Q8N336;Q5TB30;P41220;Q8N6H7;Q15276}
69 Pathogen[ P03363] interacts with 15 human
partners:{Q9Y2B5;P46060;P52565;P31150;P98171;Q8N336;P43487;Q9BTW9;P41220;Q5TB30;Q96NW
4;Q7Z5H3;Q12982;Q96FS4;Q15276}
70 [Cluster 7]GO:0004652+F molecular_function [name] polynucleotide adenylyltransferase
activity [def] "Catalysis of the template-independent extension of the 3'- end of an
RNA or DNA strand by addition of one adenosine molecule at a time. Cannot initiate a
chain 'de novo'. The primer, depending on the source of the enzyme, may be an RNA or DNA
fragment, or oligo(A) bearing a 3'-OH terminal group." [EC
71 Pathogen[ Q2Q067] interacts with 2 human partners:{Q9NVV4;P51003}
72 Pathogen[ P0C214] interacts with 2 human partners:{P51003;Q9NVV4}
73 Pathogen[ P03346] interacts with 2 human partners:{P51003;Q9NVV4}
74 Pathogen[ Q85601] interacts with 2 human partners:{Q9NVV4;P51003}
75 Pathogen[ P14079] interacts with 2 human partners:{Q9NVV4;P51003}
76 Pathogen[ P03383] interacts with 2 human partners:{Q9NVV4;P51003}
77 Pathogen[ P03410] interacts with 2 human partners:{Q9NVV4;P51003}
78 Pathogen[ P14075] interacts with 2 human partners:{P51003;Q9NVV4}
79 Pathogen[ P0C206] interacts with 2 human partners:{P51003;Q9NVV4}
80 Pathogen[ P03363] interacts with 2 human partners:{Q9NVV4;P51003}
81 [Cluster 8]GO:0050220+F molecular_function [name] prostaglandin-E synthase activity
[def] "Catalysis of the reaction
82 Pathogen[ Q2Q067] interacts with 1 human partners:{Q15185}
83 Pathogen[ P0C214] interacts with 1 human partners:{Q15185}
84 Pathogen[ P03346] interacts with 1 human partners:{Q15185}

```

```

85 Pathogen[ Q85601] interacts with 1 human partners:{Q15185}
86 Pathogen[ P14079] interacts with 1 human partners:{Q15185}
87 Pathogen[ P03383] interacts with 1 human partners:{Q15185}
88 Pathogen[ P03410] interacts with 1 human partners:{Q15185}
89 Pathogen[ P14075] interacts with 1 human partners:{Q15185}
90 Pathogen[ P0C206] interacts with 1 human partners:{Q15185}
91 Pathogen[ P03363] interacts with 1 human partners:{Q15185}
92 [Cluster 9]GO:0031492+F molecular_function [name] nucleosomal DNA binding [def]
"Interacting selectively and non-covalently with the DNA portion of a nucleosome." [GOC]
93 Pathogen[ Q2Q067] interacts with 6 human
partners:{P05204;P18754;P05114;P82970;Q15651;O00479}
94 Pathogen[ P0C214] interacts with 6 human
partners:{Q15651;P05204;O00479;P82970;P05114;P18754}
95 Pathogen[ P03346] interacts with 6 human
partners:{O00479;P05114;P18754;P82970;Q15651;P05204}
96 Pathogen[ Q85601] interacts with 6 human
partners:{Q15651;P82970;O00479;P18754;P05114;P05204}
97 Pathogen[ P14079] interacts with 6 human
partners:{P05114;P82970;Q15651;P05204;O00479;P18754}
98 Pathogen[ P03383] interacts with 6 human
partners:{P05204;Q15651;P18754;O00479;P82970;P05114}
99 Pathogen[ P03410] interacts with 6 human
partners:{P82970;Q15651;O00479;P05204;P18754;P05114}
100 Pathogen[ P14075] interacts with 6 human
partners:{P05204;P82970;P18754;O00479;Q15651;P05114}
101 Pathogen[ P0C206] interacts with 6 human
partners:{P05114;P18754;P05204;Q15651;P82970;O00479}
102 Pathogen[ P03363] interacts with 6 human
partners:{P82970;O00479;P05114;Q15651;P18754;P05204}
103 [Cluster 10]GO:0008969+F molecular_function [name] phosphohistidine phosphatase
activity [def] "Catalysis of the reaction
104 Pathogen[ Q2Q067] interacts with 1 human partners:{Q9H008}
105 Pathogen[ P0C214] interacts with 1 human partners:{Q9H008}
106 Pathogen[ P03346] interacts with 2 human partners:{Q9NRX4;Q9H008}
107 Pathogen[ Q85601] interacts with 1 human partners:{Q9H008}
108 Pathogen[ P14079] interacts with 3 human partners:{Q9NRX4;Q9H008;Q9UNW1}
109 Pathogen[ P03383] interacts with 1 human partners:{Q9H008}
110 Pathogen[ P03410] interacts with 3 human partners:{Q9NRX4;Q9H008;Q9UNW1}
111 Pathogen[ P14075] interacts with 1 human partners:{Q9H008}
112 Pathogen[ P0C206] interacts with 2 human partners:{Q9NRX4;Q9H008}
113 Pathogen[ P03363] interacts with 1 human partners:{Q9H008}
114 [Cluster 11]GO:0030492+F molecular_function [name] hemoglobin binding [def]
"Interacting selectively and non-covalently with hemoglobin, an oxygen carrying,
conjugated protein containing four heme groups and globin." [CHEBI]
115 Pathogen[ Q2Q067] interacts with 2 human partners:{P68871;Q9NZD4}
116 Pathogen[ P0C214] interacts with 2 human partners:{P68871;Q9NZD4}
117 Pathogen[ P03346] interacts with 2 human partners:{Q9NZD4;P68871}
118 Pathogen[ Q85601] interacts with 2 human partners:{Q9NZD4;P68871}
119 Pathogen[ P14079] interacts with 2 human partners:{P68871;Q9NZD4}
120 Pathogen[ P03383] interacts with 2 human partners:{P68871;Q9NZD4}
121 Pathogen[ P03410] interacts with 2 human partners:{P68871;Q9NZD4}
122 Pathogen[ P14075] interacts with 2 human partners:{P68871;Q9NZD4}
123 Pathogen[ P0C206] interacts with 2 human partners:{P68871;Q9NZD4}
124 Pathogen[ P03363] interacts with 2 human partners:{P68871;Q9NZD4}
125 [Cluster 12]GO:0050998+F molecular_function [name] nitric-oxide synthase binding
[def] "Interacting selectively and non-covalently with the enzyme nitric-oxide synthase."
[GOC]
126 Pathogen[ Q2Q067] interacts with 1 human partners:{P11532}
127 Pathogen[ P0C214] interacts with 2 human partners:{P60709;P11532}
128 Pathogen[ P03346] interacts with 3 human partners:{P60709;P11532;O75052}
129 Pathogen[ Q85601] interacts with 2 human partners:{P11532;P60709}
130 Pathogen[ P14079] interacts with 2 human partners:{P11532;P60709}
131 Pathogen[ P03383] interacts with 1 human partners:{P11532}
132 Pathogen[ P03410] interacts with 3 human partners:{P11532;O75052;P60709}
133 Pathogen[ P14075] interacts with 1 human partners:{P11532}
134 Pathogen[ P0C206] interacts with 2 human partners:{P60709;P11532}
135 Pathogen[ P03363] interacts with 2 human partners:{P60709;P11532}
136 [Cluster 13]GO:0070034+F molecular_function [name] telomeric RNA binding [def]
"Interacting selectively and non-covalently with the telomerase RNA template or to RNA
complementary to it." [GOC]
137 Pathogen[ Q2Q067] interacts with 2 human partners:{O14746;Q96BK5}
138 Pathogen[ P0C214] interacts with 2 human partners:{Q96BK5;O14746}
139 Pathogen[ P03346] interacts with 2 human partners:{O14746;Q96BK5}
140 Pathogen[ Q85601] interacts with 2 human partners:{Q96BK5;O14746}
141 Pathogen[ P14079] interacts with 2 human partners:{O14746;Q96BK5}
142 Pathogen[ P03383] interacts with 2 human partners:{Q96BK5;O14746}

```

143 Pathogen[ P03410] interacts with 2 human partners:{O14746;Q96BK5}  
144 Pathogen[ P14075] interacts with 2 human partners:{O14746;Q96BK5}  
145 Pathogen[ P0C206] interacts with 2 human partners:{Q96BK5;O14746}  
146 Pathogen[ P03363] interacts with 2 human partners:{Q96BK5;O14746}  
147 [Cluster 14]GO:0071207+F molecular\_function [name] histone pre-mRNA stem-loop binding  
[def] "Interacting selectively and non-covalently with a conserved stem-loop structure  
found in histone pre-mRNAs." [PMID  
148 Pathogen[ Q2Q067] interacts with 1 human partners:{Q14493}  
149 Pathogen[ P0C214] interacts with 2 human partners:{Q14493;Q8IV48}  
150 Pathogen[ P03346] interacts with 1 human partners:{Q14493}  
151 Pathogen[ Q85601] interacts with 1 human partners:{Q14493}  
152 Pathogen[ P14079] interacts with 2 human partners:{Q8IV48;Q14493}  
153 Pathogen[ P03383] interacts with 1 human partners:{Q14493}  
154 Pathogen[ P03410] interacts with 2 human partners:{Q8IV48;Q14493}  
155 Pathogen[ P14075] interacts with 1 human partners:{Q14493}  
156 Pathogen[ P0C206] interacts with 2 human partners:{Q8IV48;Q14493}  
157 Pathogen[ P03363] interacts with 1 human partners:{Q14493}  
158 [Cluster 15]GO:0043021+F molecular\_function [name] ribonucleoprotein complex binding  
[def] "Interacting selectively and non-covalently with any complex of RNA and protein."  
[GOC  
159 Pathogen[ Q2Q067] interacts with 11 human  
partners:{Q96J02;O14744;Q9NVM4;O43447;Q8WWY3;O95400;O94906;Q9Y2T7;P62136;Q9BYX4;Q8IUD  
6}  
160 Pathogen[ P0C214] interacts with 11 human  
partners:{Q96J02;O95400;Q9NVM4;Q8IUD6;Q9BYX4;O94906;Q9Y2T7;P62136;O43447;Q3ZCQ8;Q8WWY  
3}  
161 Pathogen[ P03346] interacts with 12 human  
partners:{P62136;O95400;Q96J02;O43447;Q8IUD6;O14744;O94906;Q9NVM4;Q8WWY3;Q9BYX4;Q9Y2T  
7;Q3ZCQ8}  
162 Pathogen[ Q85601] interacts with 12 human  
partners:{Q96J02;Q9Y2T7;Q9NVM4;Q8IUD6;O14744;O94906;P62136;Q9BYX4;Q3ZCQ8;Q8WWY3;O9540  
0;O43447}  
163 Pathogen[ P14079] interacts with 12 human  
partners:{Q3ZCQ8;O43447;Q9BYX4;O94906;Q9NVM4;P62136;Q8WWY3;O95400;Q9Y2T7;O14744;Q96J0  
2;Q8IUD6}  
164 Pathogen[ P03383] interacts with 7 human  
partners:{O95400;O14744;O94906;Q9Y2T7;O43447;P62136;Q8WWY3}  
165 Pathogen[ P03410] interacts with 10 human  
partners:{Q8WWY3;P62136;Q9BYX4;Q9NVM4;O94906;Q3ZCQ8;O95400;O14744;Q9Y2T7;O43447}  
166 Pathogen[ P14075] interacts with 7 human  
partners:{O95400;O94906;P62136;O14744;Q9Y2T7;O43447;Q8WWY3}  
167 Pathogen[ P0C206] interacts with 12 human  
partners:{O14744;Q96J02;Q8IUD6;Q3ZCQ8;Q9NVM4;O95400;Q8WWY3;O43447;O94906;Q9BYX4;Q9Y2T  
7;P62136}  
168 Pathogen[ P03363] interacts with 11 human  
partners:{O14744;P62136;O95400;Q3ZCQ8;Q8WWY3;O43447;Q9NVM4;Q8IUD6;Q9BYX4;O94906;Q9Y2T  
7}  
169 [Cluster 16]GO:0008013+F molecular\_function [name] beta-catenin binding [def]  
"Interacting selectively and non-covalently with the beta subunit of the catenin  
complex." [GOC  
170 Pathogen[ Q2Q067] interacts with 24 human  
partners:{O00512;Q14678;P36402;Q86UU0;Q93074;Q5JTC6;O14907;Q9Y3M2;Q9Y297;Q9NYF0;P8402  
2;O15105;Q9NSA3;O60907;Q15599;Q86YW9;O75360;O95996;Q9BZK7;Q9HCK8;Q9P1Z2;Q9NSC2;Q9UMX1  
;Q86X55}  
171 Pathogen[ P0C214] interacts with 24 human  
partners:{O60907;Q15599;Q93074;P84022;O14907;Q14678;Q9Y297;Q9NSA3;Q9Y3M2;Q86YW9;O1510  
5;Q5SW24;Q9HCK8;Q9NSC2;Q86UU0;O75360;O00512;P36402;Q9BZK7;Q86X55;Q9P1Z2;Q9NYF0;Q5JTC6  
;Q9UMX1}  
172 Pathogen[ P03346] interacts with 25 human  
partners:{O60907;Q14678;P36402;Q9Y3M2;Q9NSC2;Q86YW9;Q93074;O15105;Q9NSA3;P84022;Q9HCS  
4;Q15599;O00512;Q9P1Z2;Q9HCK8;O14907;O95996;Q9NYF0;Q9BZK7;Q86X55;O75360;Q86UU0;Q9Y297  
;Q9UMX1;Q5JTC6}  
173 Pathogen[ Q85601] interacts with 25 human  
partners:{O75360;Q86X55;Q9Y3M2;O60907;Q9NYF0;Q86UU0;Q14678;O14907;O00512;P36402;Q5JTC  
6;O95996;P84022;Q9HCK8;Q9BZK7;O15105;Q86YW9;Q9NSC2;Q9P1Z2;Q9HCS4;Q9NSA3;Q9UMX1;Q93074  
;Q15599;Q5SW24}  
174 Pathogen[ P14079] interacts with 23 human  
partners:{Q9BZK7;Q5SW24;O60907;Q9UMX1;O14907;P36402;Q86YW9;O00512;Q15599;O95996;O7536  
0;Q9HCK8;Q86UU0;Q9Y3M2;P49023;Q93074;O15105;Q5JTC6;Q9P1Z2;Q14678;Q8WZA0;Q9NSC2;Q9NYF0  
}  
175 Pathogen[ P03383] interacts with 21 human  
partners:{Q14678;Q86YW9;O60907;O75360;Q86X55;Q93074;Q86UU0;O15105;Q9NSA3;P84022;Q9NSC  
2;Q5JTC6;Q9Y3M2;O00512;P36402;Q9HCK8;Q9NYF0;Q9BZK7;O14907;Q9UMX1;Q9P1Z2}  
176 Pathogen[ P03410] interacts with 26 human  
partners:{P84022;O00512;Q9NSA3;P36402;Q9Y3M2;Q86YW9;Q8WZA0;Q86X55;Q9P1Z2;Q15599;O9599  
6;Q5SW24;O14907;Q9HCK8;Q9NYF0;Q5JTC6;Q14678;O15105;Q9HCS4;Q9BZK7;Q93074;O75360;Q9NSC2

```
;Q9UMX1;O60907;Q86UU0}
177 Pathogen[ P14075] interacts with 21 human
partners:{Q86UU0;Q9NSC2;O00512;Q86YW9;Q93074;Q9NSA3;Q86X55;Q9HCK8;O14907;O60907;Q9P1Z
2;O75360;O15105;P36402;Q5JTC6;Q9BZK7;Q14678;P84022;Q9Y3M2;Q9NYF0;Q9UMX1}
178 Pathogen[ P0C206] interacts with 24 human
partners:{P84022;Q9HCK8;O00512;Q9NSA3;Q86UU0;Q9UMX1;O60907;Q9NSC2;Q86X55;Q14678;Q9HCS
4;Q9P1Z2;Q86YW9;O95996;O75360;Q5SW24;O14907;O15105;Q15599;Q9BZK7;Q9NYF0;Q93074;P36402
;Q5JTC6}
179 Pathogen[ P03363] interacts with 23 human
partners:{O14907;Q5JTC6;O75360;O95996;Q9UMX1;P36402;Q9BZK7;O60907;Q9Y3M2;Q9NYF0;O1510
5;Q9HCS4;Q9NSA3;Q9HCK8;Q9P1Z2;O00512;P84022;Q86UU0;Q93074;Q15599;Q86YW9;Q14678;Q86X55
}
180 [Cluster 17]GO:0004134+F molecular_function [name] 4-alpha-glucanotransferase
activity [def] "Catalysis of the transfer of a segment of a (1->4)-alpha-D-glucan to a
new 4-position in an acceptor, which may be glucose or (1->4)-alpha-D-glucan." [EC
181 Pathogen[ Q2Q067] interacts with 1 human partners:{P35573}
182 Pathogen[ P0C214] interacts with 1 human partners:{P35573}
183 Pathogen[ P03346] interacts with 1 human partners:{P35573}
184 Pathogen[ Q85601] interacts with 1 human partners:{P35573}
185 Pathogen[ P14079] interacts with 1 human partners:{P35573}
186 Pathogen[ P03383] interacts with 1 human partners:{P35573}
187 Pathogen[ P03410] interacts with 1 human partners:{P35573}
188 Pathogen[ P14075] interacts with 1 human partners:{P35573}
189 Pathogen[ P0C206] interacts with 1 human partners:{P35573}
190 Pathogen[ P03363] interacts with 1 human partners:{P35573}
191 [Cluster 18]GO:0005102+F molecular_function [name] receptor binding [def]
"Interacting selectively and non-covalently with one or more specific sites on a receptor
molecule, a macromolecule that undergoes combination with a hormone, neurotransmitter,
drug or intracellular messenger to initiate a change in cell function." [GOC
192 Pathogen[ Q2Q067] interacts with 27 human
partners:{O14734;P07737;Q9Y3F4;O60296;Q8IVG9;Q15596;Q96SL8;Q12933;O15117;P48552;P1114
2;O75381;P78352;O43768;P67870;Q96PM5;O15164;P56211;Q15599;Q99996;P16333;Q15257;P27986
;Q14244;Q6STE5;Q13023;O60716}
193 Pathogen[ P0C214] interacts with 30 human
partners:{O43768;O15117;O75874;Q96PM5;O60716;P48552;Q13023;Q15599;Q6STE5;O75381;Q1525
7;O60296;P05121;P78352;Q13011;P56211;Q14244;Q12933;P07093;Q9Y3F4;P16333;O15164;O14734
;Q96SL8;Q99996;Q15596;P67870;P27986;P55072;P11142}
194 Pathogen[ P03346] interacts with 33 human
partners:{O14908;P06401;Q15036;O60716;P78352;Q15257;Q96PM5;Q8IVG9;P11142;Q13023;O6029
6;P56211;P55072;Q6P3W7;P26038;O43768;O75381;P16333;Q15599;Q15596;Q9Y3F4;Q6STE5;Q99996
;Q14244;O14734;Q96SL8;P48552;P07737;P67870;O15117;O15164;Q9NRD5;P27986}
195 Pathogen[ Q85601] interacts with 29 human
partners:{Q6STE5;Q14244;Q15036;P16333;Q96PM5;O15164;Q15596;P56211;P27986;P07737;O1473
4;O60716;O60296;O15117;O43768;Q12933;P11142;Q9Y3F4;P78352;P05121;Q99996;P67870;Q96SL8
;P48552;Q13023;O75381;P07093;Q15257;Q15599}
196 Pathogen[ P14079] interacts with 40 human
partners:{P04083;P48552;O15164;P49753;Q15036;Q14242;P11142;Q6STE5;Q15596;Q99996;O4376
8;Q9UHF0;Q9BT09;Q13023;A8MXV4;Q8IVG9;P26038;P07737;Q14244;Q9Y3F4;Q8NEV9;P56211;O95822
;P06280;O15117;O60610;Q15599;P16333;O14734;Q9UJZ1;Q8IU54;Q96SL8;O60296;Q12933;Q92896;
P67870;O75381;O14908;O60716;Q99836}
197 Pathogen[ P03383] interacts with 25 human
partners:{Q14244;O60716;P27986;Q15596;Q96SL8;Q15257;Q13023;Q6STE5;O14734;P07737;O1511
7;O60296;O43768;Q12933;O75381;Q96PM5;Q9Y3F4;P11142;P67870;Q99996;P48552;P56211;P16333
;P78352;Q8IVG9}
198 Pathogen[ P03410] interacts with 44 human
partners:{P27986;P05121;O60610;Q99996;Q13445;Q13011;Q9BT09;Q14242;Q15257;O60716;O1490
8;P11142;P16333;Q9Y3F4;O75381;Q8IVG9;Q92896;Q15599;O14734;Q9NRD5;P26038;Q9NRR1;Q9UHF0
;Q15036;Q8NEV9;Q13023;Q12933;A8MXV4;Q9UJZ1;O60296;O43768;Q15596;O15117;P49753;Q6STE5;
P67870;P78352;P48552;Q14244;P56211;P07737;Q96SL8;O95822;Q5MZN9}
199 Pathogen[ P14075] interacts with 26 human
partners:{Q15257;Q96PM5;P11142;Q9Y3F4;Q96SL8;O14734;O15117;O60296;Q8IVG9;A8MXV4;P0773
7;O75381;P16333;Q99996;O43768;Q12933;P67870;P27986;P78352;P48552;P56211;Q6STE5;O60716
;Q15596;Q14244;Q13023}
200 Pathogen[ P0C206] interacts with 36 human
partners:{O60716;Q9UJZ1;Q9Y3F4;P78352;P06401;A8MXV4;Q96SL8;Q13023;O75381;P56211;Q6STE
5;O15164;Q99996;Q12933;Q15036;Q6P3W7;P27986;Q14244;Q15599;Q8IVG9;O60296;O14908;O14734
;P67870;O43768;P55072;P16333;P05121;Q15596;Q96PM5;P07737;P48552;O15117;Q9NRD5;P11142;
Q15257}
201 Pathogen[ P03363] interacts with 27 human
partners:{O14734;Q9Y3F4;Q14244;O14908;Q6STE5;Q99996;P78352;Q12933;Q15596;O60296;O1511
7;P48552;P16333;O75381;O43768;Q96PM5;Q96SL8;Q13023;Q15257;Q15599;P56211;Q8IVG9;P67870
;O60716;P27986;P11142;P07737}
202 [Cluster 19]GO:0001205+F
203 Pathogen[ Q2Q067] interacts with 2 human partners:{O95644;P17947}
204 Pathogen[ P0C214] interacts with 2 human partners:{P17947;O95644}
205 Pathogen[ P03346] interacts with 3 human partners:{Q9H2W2;O95644;P17947}
```

206 Pathogen[ Q85601] interacts with 2 human partners:{095644;P17947}  
207 Pathogen[ P14079] interacts with 1 human partners:{095644}  
208 Pathogen[ P03383] interacts with 2 human partners:{095644;P17947}  
209 Pathogen[ P03410] interacts with 2 human partners:{P17947;095644}  
210 Pathogen[ P14075] interacts with 2 human partners:{P17947;095644}  
211 Pathogen[ P0C206] interacts with 2 human partners:{P17947;095644}  
212 Pathogen[ P03363] interacts with 3 human partners:{P17947;Q9H2W2;095644}  
213 [Cluster 20]GO:0004536+F molecular\_function [name] deoxyribonuclease activity [def]  
"Catalysis of the hydrolysis of ester linkages within deoxyribonucleic acid." [GOC  
214 Pathogen[ Q2Q067] interacts with 3 human partners:{000273;Q66K74;076075}  
215 Pathogen[ P0C214] interacts with 3 human partners:{000273;076075;Q66K74}  
216 Pathogen[ P03346] interacts with 5 human  
partners:{Q66K74;Q13609;076075;P24855;000273}  
217 Pathogen[ Q85601] interacts with 3 human partners:{Q66K74;076075;000273}  
218 Pathogen[ P14079] interacts with 6 human  
partners:{076075;Q13609;Q66K74;P49184;P24855;000273}  
219 Pathogen[ P03383] interacts with 1 human partners:{000273}  
220 Pathogen[ P03410] interacts with 6 human  
partners:{P49184;Q13609;076075;000273;Q66K74;P24855}  
221 Pathogen[ P14075] interacts with 1 human partners:{000273}  
222 Pathogen[ P0C206] interacts with 5 human  
partners:{076075;P24855;Q66K74;Q13609;000273}  
223 Pathogen[ P03363] interacts with 5 human  
partners:{000273;Q66K74;Q13609;076075;P24855}  
224 [Cluster 21]GO:0003712+F molecular\_function [name] transcription cofactor activity  
[def] "Interacting selectively and non-covalently with a regulatory transcription factor  
and also with the basal transcription machinery in order to modulate transcription.  
Cofactors generally do not bind DNA, but rather mediate protein-protein interactions  
between regulatory transcription factors and the basal transcription machinery." [GOC  
225 Pathogen[ Q2Q067] interacts with 33 human  
partners:{Q9Y4A5;Q96HR3;Q9NPJ6;Q9H5Q4;Q7KZF4;075478;Q16633;Q05195;Q93074;075448;06024  
4;P48552;000170;P62324;060711;Q13287;Q92831;Q14653;Q9UHV7;P28324;000625;P82094;043679  
;Q9NVC6;P61244;014593;Q92499;Q9Y2X0;Q9P1Z2;Q92793;Q86U70;Q14188;Q9Y2W1}  
226 Pathogen[ P0C214] interacts with 35 human  
partners:{000170;Q05195;P61244;P48552;Q9Y2X0;075478;Q93074;Q92793;Q96HR3;Q9NVC6;06024  
4;Q7KZF4;P82094;Q16633;Q86U70;P28324;043679;P62324;060711;Q4LE28;Q14653;Q9Y4A5;Q9UHV7  
;014593;Q92499;Q92831;075448;000625;Q9P1Z2;P16220;Q9Y2W1;Q13287;Q14188;Q9NPJ6;Q9H5Q4}  
227 Pathogen[ P03346] interacts with 36 human  
partners:{Q86U70;P28324;Q9NPJ6;P16220;Q14188;Q96HZ4;P82094;Q96HR3;Q93074;000170;06024  
4;Q92831;Q13287;Q4LE28;075448;Q92499;075478;Q9Y4A5;Q7KZF4;Q9P1Z2;043679;Q9H5Q4;014593  
;Q05195;Q14653;Q16633;P61244;Q9NVC6;P48552;000625;Q9Y2X0;Q92793;P62324;Q9Y2W1;060711;  
Q9UHV7}  
228 Pathogen[ Q85601] interacts with 35 human  
partners:{Q9Y2X0;Q86U70;Q9UHV7;Q05195;Q9Y4A5;P62324;Q14188;075448;Q92831;Q92499;Q7KZF  
4;000170;Q16633;Q14653;060711;P16220;043679;014593;P61244;Q4LE28;P82094;000625;Q9H5Q4  
;P48552;Q92793;Q9P1Z2;Q9Y2W1;060244;Q96HR3;Q93074;075478;P28324;Q9NPJ6;Q9NVC6;Q13287}  
229 Pathogen[ P14079] interacts with 32 human  
partners:{000625;P48552;060244;Q9Y2X0;Q9Y4A5;P62324;Q14653;043679;Q92793;000170;Q1663  
3;Q86U70;Q96HR3;Q9NVC6;060711;075448;P82094;Q9UHV7;Q9NPJ6;014593;Q05195;075478;Q92499  
;P15941;Q7KZF4;Q9H5Q4;Q93074;Q9P1Z2;Q13287;P61244;Q14188;Q9Y2W1}  
230 Pathogen[ P03383] interacts with 35 human  
partners:{Q92831;Q14653;075478;P16220;Q16633;P62324;Q86U70;Q9Y4A5;060244;Q4LE28;00017  
0;Q9H5Q4;Q9NPJ6;Q93074;Q96HR3;Q13287;075448;P28324;Q05195;Q7KZF4;000625;060711;043679  
;014593;Q14188;P82094;P48552;Q9UHV7;Q92499;Q9NVC6;Q9Y2W1;P61244;Q9Y2X0;Q9P1Z2;Q92793}  
231 Pathogen[ P03410] interacts with 36 human  
partners:{060711;Q92831;Q9Y2W1;P82094;P15941;Q9NVC6;Q14653;P28324;Q9NPJ6;043679;Q1663  
3;Q14188;P61244;Q9P1Z2;000625;Q92793;Q13287;Q9Y4A5;000170;Q92499;P62324;Q86U70;P16220  
;Q9H5Q4;Q4LE28;Q96HR3;060244;Q9UHV7;014593;Q7KZF4;Q9Y2X0;075478;Q93074;P48552;075448;  
Q05195}  
232 Pathogen[ P14075] interacts with 35 human  
partners:{Q16633;Q9H5Q4;Q86U70;Q9NPJ6;P62324;Q92831;Q96HR3;P82094;P61244;Q13287;00062  
5;075448;Q9Y4A5;Q05195;Q93074;Q92499;075478;P28324;Q4LE28;000170;Q14653;Q9UHV7;043679  
;060244;Q9P1Z2;014593;Q92793;Q9NVC6;P48552;060711;P16220;Q7KZF4;Q9Y2W1;Q14188;Q9Y2X0}  
233 Pathogen[ P0C206] interacts with 36 human  
partners:{043679;P62324;Q14188;Q05195;Q96HR3;P16220;Q7KZF4;000625;Q9P1Z2;Q13287;Q9UHV  
7;Q92831;Q96HZ4;Q92793;014593;Q16633;Q9Y4A5;Q9NPJ6;P28324;Q9Y2W1;075478;P61244;060244  
;Q9H5Q4;Q9NVC6;Q86U70;075448;000170;Q9Y2X0;P48552;060711;Q92499;Q93074;P82094;Q4LE28;  
Q14653}  
234 Pathogen[ P03363] interacts with 34 human  
partners:{Q14653;Q86U70;Q4LE28;Q96HR3;Q92831;Q96HZ4;P16220;043679;014593;Q7KZF4;P6124  
4;P48552;P62324;Q9P1Z2;Q9NVC6;Q9UHV7;Q92499;Q93074;Q92793;Q16633;075448;Q05195;Q9Y4A5  
;000625;Q14188;Q9NPJ6;060244;075478;P82094;Q13287;000170;060711;P28324;Q9H5Q4}  
235 [Cluster 22]GO:0071837+F molecular\_function [name] HMG box domain binding [def]  
"Interacting selectively and non-covalently with an HMG box domain, a protein domain that  
consists of three helices in an irregular array. HMG-box domains are found in one or more  
copies in HMG-box proteins, which form a large, diverse family involved in the regulation

of DNA-dependent processes such as transcription, replication, and strand repair, all of which require the bending and unwinding of chromatin." [GOC

236 Pathogen[ Q2Q067] interacts with 6 human partners:{O43365;P08047;P09017;P50221;Q5T230;P54821}

237 Pathogen[ P0C214] interacts with 4 human partners:{O43365;Q5T230;P50221;P08047}

238 Pathogen[ P03346] interacts with 9 human partners:{P54821;P50221;P20264;P08047;Q5T230;O43365;P09017;Q13516;P56178}

239 Pathogen[ Q85601] interacts with 4 human partners:{Q5T230;P08047;P50221;O43365}

240 Pathogen[ P14079] interacts with 3 human partners:{Q5T230;O43365;P50221}

241 Pathogen[ P03383] interacts with 4 human partners:{P08047;O43365;Q5T230;P50221}

242 Pathogen[ P03410] interacts with 4 human partners:{Q5T230;P50221;P08047;O43365}

243 Pathogen[ P14075] interacts with 4 human partners:{O43365;P50221;Q5T230;P08047}

244 Pathogen[ P0C206] interacts with 5 human partners:{O43365;P54821;P50221;P08047;Q5T230}

245 Pathogen[ P03363] interacts with 8 human partners:{Q13516;O43365;P50221;P20264;Q5T230;P54821;P08047;P09017}

246 [Cluster 23]GO:0044548+F

247 Pathogen[ Q2Q067] interacts with 3 human partners:{P50995;P31949;P23297}

248 Pathogen[ P0C214] interacts with 3 human partners:{P31949;P50995;P23297}

249 Pathogen[ P03346] interacts with 4 human partners:{P23297;P06703;P50995;P31949}

250 Pathogen[ Q85601] interacts with 3 human partners:{P50995;P23297;P31949}

251 Pathogen[ P14079] interacts with 4 human partners:{P50995;P31949;P23297;P06703}

252 Pathogen[ P03383] interacts with 2 human partners:{P50995;P23297}

253 Pathogen[ P03410] interacts with 4 human partners:{P50995;P31949;P06703;P23297}

254 Pathogen[ P14075] interacts with 2 human partners:{P50995;P23297}

255 Pathogen[ P0C206] interacts with 4 human partners:{P31949;P50995;P06703;P23297}

256 Pathogen[ P03363] interacts with 3 human partners:{P31949;P50995;P23297}

257 [Cluster 24]GO:0015036+F molecular\_function [name] disulfide oxidoreductase activity [def] "Catalysis of the reaction

258 Pathogen[ Q2Q067] interacts with 1 human partners:{P38432}

259 Pathogen[ P0C214] interacts with 1 human partners:{P38432}

260 Pathogen[ P03346] interacts with 2 human partners:{O43396;P38432}

261 Pathogen[ Q85601] interacts with 1 human partners:{P38432}

262 Pathogen[ P14079] interacts with 1 human partners:{P38432}

263 Pathogen[ P03383] interacts with 1 human partners:{P38432}

264 Pathogen[ P03410] interacts with 1 human partners:{P38432}

265 Pathogen[ P14075] interacts with 1 human partners:{P38432}

266 Pathogen[ P0C206] interacts with 1 human partners:{P38432}

267 Pathogen[ P03363] interacts with 2 human partners:{O43396;P38432}

268 [Cluster 25]GO:0003779+F molecular\_function [name] actin binding [def] "Interacting selectively and non-covalently with monomeric or multimeric forms of actin, including actin filaments." [GOC

269 Pathogen[ Q2Q067] interacts with 68 human partners:{O15511;Q9Y2J2;Q01082;P50402;Q9Y613;P07737;Q8WX93;Q14315;Q9NQW6;O00291;P35080;Q9P2M7;Q8IZW8;Q9UKX2;O75167;O14639;Q8N3V7;P63313;O43516;O14604;Q8N6F7;Q13884;Q6H8Q1;P29966;O00401;Q8NF91;Q92558;O95198;P60673;Q8TF74;P23528;Q9HBL0;Q8N0Z2;P0CG35;P11532;Q8NFW9;P62328;P11171;P48788;P46939;Q9C0D0;P0CG34;P06396;Q9BR76;Q9NVD7;Q13045;Q9UMS6;Q86TC9;P12883;P59998;P42768;P40121;Q9Y2M5;Q04917;Q8TCJ0;Q9ULG1;Q13425;Q969V6;Q9H204;P35579;P49006;Q9BX66;Q9BVN2;Q96IZ0;Q9UH77;Q9Y281;Q9NPC6;Q8N9B5}

270 Pathogen[ P0C214] interacts with 81 human partners:{P35080;Q8NFW9;Q9UI08;P49006;A7E2Y1;P48788;P29966;Q8N0Z2;Q8N6F7;Q9UKX2;O95198;Q96IZ0;O00159;Q04917;Q9Y2K3;Q9Y281;P40121;Q9UMS4;P11055;P63313;Q9UMS6;Q9BX66;Q9NPC6;O14639;Q9ULG1;Q9Y613;P06396;Q13884;P0CG35;Q01082;Q14315;P11532;O43516;Q13045;P0CG34;P35580;Q8NF91;Q8TF74;Q13425;O14604;P13535;Q86TC9;P50402;P46939;Q9Y2M5;Q16658;Q14019;P19429;P12882;P59998;Q96KR7;O75167;P12883;Q9C0D0;Q92558;Q8N9B5;Q9HBL0;Q9H204;Q9P2M7;Q9BVN2;Q2V2M9;P60673;Q7Z406;O15144;Q969V6;O00401;P13533;Q9Y623;Q6H8Q1;Q9NVD7;Q8N3V7;P42768;Q8TCJ0;Q7L5Y9;Q9UH77;P35749;O00291;P11171;P62328;Q9BR76;O15511}

271 Pathogen[ P03346] interacts with 109 human partners:{Q13425;Q86TC9;Q8N3V7;Q8N0Z2;Q96KR7;Q9Y281;P02549;O14908;Q8WX93;Q9NSV4;Q14315;Q9NQW6;Q9BQE9;Q8N9B5;Q9UH77;O14639;Q8IZW8;O15511;Q9P253;O15144;O43516;Q9Y613;P11277;P42768;P35579;Q8N6F7;Q9UMS6;Q13884;P0CG34;Q8WXH0;Q9ULG1;Q27J81;Q15149;O14682;Q9BR76;Q08495;Q969V6;P28289;Q9UI08;Q9BX66;O00291;Q6H8Q1;P46939;P26038;Q96AX9;A8K0Z3;Q04917;Q2V2M9;Q9Y664;Q13813;O75167;Q13424;Q6NYC8;Q9C0H6;Q01082;Q8TCJ0;P59998;Q14847;P11171;O76041;Q96IZ0;P60673;P35080;P40121;Q9Y4G6;O43491;Q92558;Q9HBL0;O15145;O95198;O14604;Q9Y2J2;Q9C0D0;Q6ZMZ3;O94929;P50402;P29966;Q8NFW9;Q9NVD7;Q08AE8;Q9ULV0;Q8TF74;P63313;P49006;P62328;Q14019;Q9UKX2;Q16658;P11532;Q9BVN2;P24855;P0CG35;P07737;P06396;P23528;Q13045;Q9Y2M5;P28290;O00401;Q8NF91;Q9H204;P48788;Q8TDZ2;Q9P2M7;Q9UJC3;O75146;Q9Y573;Q9UBF9;Q9NPC6}

272 Pathogen[ Q85601] interacts with 84 human partners:{Q96IZ0;O00401;Q86TC9;O14639;O15511;Q8WX93;Q8NFW9;Q9Y2J2;Q9NVD7;P06396;Q9NQW6;Q13884;Q92558;P13533;Q2V2M9;Q9P253;Q9Y613;Q969V6;P35579;Q9BX66;P35080;Q8TF74;Q9UMS6;Q7L5Y9;Q9BVN2;Q13045;P11532;P11171;P49006;Q01082;P0CG34;Q6H8Q1;Q9BR76;Q04917;P59998;P07737;Q9NPC6;O75167;O43516;Q9UKX2;Q9Y2K3;P48788;O00159;Q8N6F7;P12882;Q8IZW8;Q7Z406;P40121;P42768;Q8N3V7;P46939;P11055;Q13425;P35749;Q9Y281;P60673;Q9ULG1;P12883;Q14315;Q9C0D0;P29966;P50402;P62328;Q9Y2M5;P35580;P0CG35;O00291;Q9UMS4;P23528;P13535;Q9HBL0;Q8N0Z2;Q9UH77;Q8NF91;Q8TCJ0;Q9C0H6;Q9H204;Q8N9B5;Q9Y623;O14604;O15144;Q9P2M7;O95198;P633

- 13}
- 273 Pathogen[ P14079] interacts with 146 human partners: {Q9H204;O43516;Q9NQW6;Q9Y2J2;P35579;O95425;P09327;Q9ULG1;O00291;Q08495;Q9Y664;O75146;A6NL28;P19429;Q9C0D0;Q8IZ21;Q9UJC3;P0CG34;P11532;Q01518;O15553;P11171;Q8TDZ2;Q9BVN2;Q8WVL2;P07951;A4UGR9;Q01082;Q8IZW8;Q16658;Q8N9B5;Q92558;P47756;Q8WX93;P49006;O14604;P24588;O14639;P26038;P40123;Q6VEQ5;Q9BPX5;P07737;Q8TCJ0;Q9UBF9;O94929;Q9NPC6;P35080;P19237;Q13045;Q7L5Y9;Q8TF74;Q9UKX2;Q14847;Q9UM54;Q04917;P60673;Q14118;Q13424;Q9Y4G6;Q969V6;P50552;Q9H269;P46939;P40121;Q9Y613;O75167;P35611;O95198;O15145;Q9HBL0;Q86TC9;Q15149;O15511;Q08AE8;Q9BQE9;Q9NQW6;Q8N205;Q96KR7;Q14315;Q9H2D6;Q8NFW9;Q9Y6U3;Q2M3G4;A6NGB9;Q9NQA3;P23528;P29966;O60610;P28289;Q53SF7;Q7Z4L9;P61158;Q702N8;P62328;O15195;P24855;Q96KX2;Q8N3V7;Q8WXH0;Q96IZ0;Q6ZMZ3;Q9P253;Q9Y2M5;O76041;Q9BR76;P48788;Q9Y281;Q8TF30;P11277;Q6H8Q1;P12883;Q9P2M7;O75366;P0CG35;Q9UH77;Q8N0Z2;Q05682;Q8N6F7;A8K0Z3;Q9C0H6;P28290;Q99439;P59998;Q2V2M9;P50402;Q8NF91;Q9UEY8;Q9BX66;Q13813;P02549;Q9UPY6;Q9NVD7;Q9Y573;P63313;O14908;Q8NHR9;O15144;P35241;Q14019;Q27J81;P42768;O00401;Q9UI08;Q9NSN8;Q9UMS6}
- 274 Pathogen[ P03383] interacts with 49 human partners: {O75167;Q8TF74;Q9Y281;P35080;Q13884;O14639;O15511;Q9UMS6;P62328;Q9H204;P49006;Q96IZ0;P63313;Q969V6;P07737;P46939;Q92558;O43516;O00401;Q9Y613;O00291;P59998;Q9BQE9;Q9UKX2;Q8N6F7;Q9UH77;Q9P2M7;P0CG35;Q8TCJ0;P29966;P42768;P11532;Q8N0Z2;P48788;P12883;P50402;P35580;Q8N9B5;Q9Y2M5;P35579;Q8N3V7;P23528;Q13045;Q9NPC6;O14604;Q13425;Q9BVN2;P06396;P0CG34}
- 275 Pathogen[ P03410] interacts with 152 human partners: {O15511;Q9BVN2;Q9UH77;Q53SF7;Q8NHR9;Q9Y573;Q96KX2;Q6NYC8;Q9UMS6;Q9UJC3;Q27J81;Q9C0H6;Q9UPY6;Q9UI08;A6NL28;Q9UKX2;Q16658;Q9UEY8;P62328;A6NGB9;P35080;Q2M3G4;Q9UBF9;P47756;Q8N3V7;O60610;Q9BQE9;P49006;Q8IZ21;Q702N8;P19429;Q6ZMZ3;Q08AE8;Q8TCJ0;Q8TDZ2;Q04917;O76041;O43516;P0CG35;P06396;Q05682;P0CG34;Q9ULV0;Q9C0D0;Q14019;Q8N6F7;Q7Z4L9;P11532;O75167;Q92558;Q9ULG1;Q13425;P28289;O15145;Q6H8Q1;O00401;O00159;O14639;P59998;O14908;P35579;P42768;O94929;O00291;Q9Y6U3;Q9P253;Q9H987;Q13045;Q9NQW6;Q8TF30;P02549;O75146;P33241;Q9H204;Q8NFW9;Q9NPC6;Q13884;Q969V6;P11171;P40123;Q9UM54;O95425;P60673;Q8IZW8;Q8N205;P50552;Q14315;Q96KR7;P07951;P12882;P26038;O43491;Q99439;Q9NYL9;Q9BPX5;O14604;Q9Y2J2;O95198;P46939;Q14847;Q9HBL0;Q08495;Q9Y613;P12883;Q96IZ0;Q9BR76;Q14118;Q9Y4G6;Q6VEQ5;Q2V2M9;P48788;Q9Y281;Q8WVL2;P50402;P35580;P28290;A4UGR9;Q8N9B5;Q9NVD7;P13533;Q01082;Q8N0Z2;O15144;Q9P2M7;P35241;Q01518;P23528;Q13424;Q15149;Q9Y664;P40121;P13535;Q13813;Q9H269;P63313;P07737;Q7L5Y9;Q8WXH0;Q9NQA3;P35611;Q8WX93;P11277;Q9H2D6;P29966;Q86TC9;Q8TF74;Q9BX66;P24588;P24855;Q9Y2M5;A8K0Z3;Q8NF91}
- 276 Pathogen[ P14075] interacts with 52 human partners: {P0CG34;P11532;Q9Y2J2;Q8N3V7;Q9NPC6;P49006;Q13884;Q9UKX2;P62328;Q9BVN2;Q13425;P42768;Q7L5Y9;Q9Y613;P63313;P50402;O15511;Q8N0Z2;Q96IZ0;P07737;P23528;O43516;O00291;Q9H204;O00401;O14604;P29966;P46939;Q8TCJ0;Q6NYC8;Q8TF74;P06396;Q9UH77;P35579;P0CG35;Q969V6;O14639;P35080;P48788;Q92558;Q9BQE9;Q9UMS6;P59998;Q9P2M7;Q9Y2M5;P28290;Q8N9B5;Q9Y281;P11171;Q8N6F7;Q13045;O75167}
- 277 Pathogen[ P0C206] interacts with 113 human partners: {Q8TF30;O14604;O15511;P0CG35;P0CG34;Q96AX9;Q9HBL0;P46939;Q01082;Q14019;P50402;Q9UM54;P06396;Q86TC9;Q96IZ0;P60673;P47756;O00291;P13533;Q8N3V7;O43516;P40121;Q9Y623;Q9BR76;Q9NVD7;Q14315;Q9NQW6;P62328;Q2V2M9;Q8NFW9;Q9C0H6;Q13045;Q9UMS6;P19429;P59998;Q8WX93;Q8IZW8;Q27J81;Q9BQE9;Q04917;Q9UI08;O15145;P11055;Q8TCJ0;Q9C0D0;P24855;Q8N9B5;Q8N6F7;O94929;O76041;Q6ZMZ3;Q13884;Q6VEQ5;Q8NF91;Q969V6;P12883;Q8TF74;Q7L5Y9;Q16658;P35080;Q9ULG1;Q13425;O00159;P28290;P49006;P12882;O43491;O14908;Q92558;P35749;Q2M3G4;P35579;O00401;Q9UKX2;Q8N205;O15144;Q9BX66;Q8WXH0;Q08495;A6NGB9;Q9Y613;Q8WVL2;P11277;Q9P253;O95198;P63313;Q9P2M7;Q9H204;O14639;Q6NYC8;Q9Y2M5;Q9UJC3;P11532;P48788;P42768;P07737;Q13424;Q9NPC6;Q8TDZ2;P35580;P23528;P13535;O75167;Q8N0Z2;Q9UH77;Q96KR7;Q9Y2J2;Q08AE8;P29966;Q6H8Q1;P11171;Q9Y281;Q9BVN2}
- 278 Pathogen[ P03363] interacts with 117 human partners: {Q8N6F7;Q08AE8;Q86TC9;Q8N3V7;Q9H2D6;P46939;Q8NF91;P11277;O14908;Q2M3G4;Q6ZMZ3;Q9H987;A6NL28;Q9ULG1;Q9BX66;P02549;O14682;Q9UPY6;P35080;P0CG35;P35579;Q96IZ0;P60673;Q9NQW6;Q9BR76;P62328;Q9UKX2;P63313;Q8NFW9;Q9UBF9;Q01082;Q14847;Q13045;Q8NHR9;Q9BPX5;P42768;Q9C0D0;Q9NSV4;Q9Y613;Q969V6;Q92558;Q9BQE9;Q7L576;Q9Y4G6;Q08495;Q8N0Z2;P48788;Q13425;Q14019;P06396;O15144;P59998;Q15149;Q9UI08;Q9Y2M5;P11532;Q6H8Q1;Q9NZR1;P28290;P11171;Q8IZW8;Q2V2M9;Q96PQ7;O15143;O75167;P0CG34;O95198;P23528;Q8WX93;Q13884;P29966;P50402;Q9C0H6;P28289;Q9HBL0;O43491;Q9BVN2;O00401;Q9UH77;Q8TCJ0;Q9UMS6;Q9NYL9;O43516;Q27J81;Q04917;Q9H204;O75146;Q9Y664;P24855;O76041;Q9NVD7;Q96KR7;O14604;Q9NPC6;P49006;Q6NYC8;P19429;Q13813;Q16658;Q8WVL2;P40121;Q8TF74;Q9P2M7;Q8N9B5;Q9NSN8;Q9Y2J2;Q14315;O00291;O15145;Q9Y573;P07737;O14639;O15511;Q96AX9;Q13424;Q9Y281;Q9UJC3}
- 279 [Cluster 26]GO:0009000+F molecular\_function [name] translation repressor activity, nucleic acid binding [def] "Antagonizes the ribosome-mediated translation of mRNA into a polypeptide via direct binding to nucleic acid." [GOC
- 280 Pathogen[ Q2Q067] interacts with 3 human partners: {Q9ULR5;Q00577;Q96QR8}
- 281 Pathogen[ P0C214] interacts with 3 human partners: {Q96QR8;Q00577;Q9ULR5}
- 282 Pathogen[ P03346] interacts with 4 human partners: {Q9ULR5;Q96QR8;Q00577;Q92879}
- 283 Pathogen[ Q85601] interacts with 3 human partners: {Q96QR8;Q9ULR5;Q00577}
- 284 Pathogen[ P14079] interacts with 3 human partners: {Q96QR8;Q00577;Q9ULR5}
- 285 Pathogen[ P03383] interacts with 3 human partners: {Q9ULR5;Q00577;Q96QR8}
- 286 Pathogen[ P03410] interacts with 3 human partners: {Q9ULR5;Q00577;Q96QR8}
- 287 Pathogen[ P14075] interacts with 3 human partners: {Q96QR8;Q00577;Q9ULR5}
- 288 Pathogen[ P0C206] interacts with 3 human partners: {Q9ULR5;Q96QR8;Q00577}
- 289 Pathogen[ P03363] interacts with 4 human partners: {Q9ULR5;Q92879;Q96QR8;Q00577}

- 290 [Cluster 27]GO:0003700+F molecular\_function [name] sequence-specific DNA binding transcription factor activity [def] "Interacting selectively and non-covalently with a specific DNA sequence in order to modulate transcription. The transcription factor may or may not also interact selectively with a protein or macromolecular complex." [GOC
- 291 Pathogen[ Q2Q067] interacts with 593 human partners:{Q13562;Q12901;O60806;Q9H4I2;Q9Y473;Q9BYE7;Q14526;O43365;P52742;Q9UKI9;Q9NZI7;P27540;P17544;Q13118;P25490;Q92750;P01100;P22392;P35789;Q9Y6X8;Q92988;Q8N187;Q9H2G9;Q04864;Q9UHL9;Q16236;Q03923;P62633;Q9BUG6;Q96S65;O43364;O15525;Q9UC06;Q14258;Q99583;Q8IX15;Q12837;Q9Y5Q3;Q03052;O75461;P17029;P52738;Q10587;A0AVK6;Q9UMS5;A6NFQ7;Q7Z353;Q9HBZ2;Q9BRR0;P10827;A6NJL1;P04198;P15884;P20226;P09067;Q9GZW5;Q13033;Q9UJL9;Q9UQ80;O60304;P23511;P24278;Q05066;Q06416;Q13487;Q63HK5;P0CJ88;Q99081;Q8N0Y2;Q9Y2D1;Q9Y3Q8;Q9UHB7;Q9H175;O00470;Q9UBX2;Q13887;P06400;Q6ZN32;Q8WYA1;P29374;P51825;Q01094;P40763;P78424;P14921;Q13889;P01106;Q9H2P0;Q13148;P10073;O14503;P36402;Q9NR55;O60481;P67809;Q13485;A6NGD5;Q01543;O00287;P10589;Q9UC07;P35680;Q14549;Q12986;P31274;Q95997;P13056;P31268;Q8IUE1;Q9UHF7;O43189;P62508;P51508;P48380;O14813;P35712;P41182;Q9Y2X9;P10828;Q96AE4;Q15562;P55197;Q8NBB4;O00570;P49910;Q96IS3;P18847;P0CJ87;Q9NPG3;P49716;P41970;Q9NQ87;Q96IT1;Q15697;Q6VUC0;O96004;Q92985;Q9UL49;Q7Z6R9;Q9BZE3;Q01196;Q00613;O43439;O75478;Q96T88;P37275;Q8IWY8;O75081;Q5SXM2;P20749;Q05481;Q02930;O75820;Q9NZI6;P49116;P10074;O60315;Q04206;Q8WYP5;Q9P0L1;P50548;Q9ULV5;Q13547;Q9NP66;Q05195;Q96AV8;Q9BXX3;P51815;Q9UIS9;O00712;Q01201;P52741;Q14814;P39880;P18850;P50549;Q99594;Q8IUE0;P17483;P14316;Q6R2W3;O94776;Q9H4T2;O15266;P36956;A6NFD8;O95948;O14709;P41134;P41161;P0C7M4;Q7Z5D8;Q9Y5R5;Q16520;P15976;Q9BWX5;Q8N196;Q15542;O15535;Q6S9J9;Q03933;P28356;Q92754;Q96ST3;Q8TBC5;O15350;Q92759;P35638;Q9NY61;P54198;Q16534;Q96T58;Q8N1L9;Q86YP4;O14896;P51610;Q14934;Q86WP2;P09086;O75362;Q16670;Q96N95;Q9Y5A6;O75971;P17036;P17040;P17676;Q2QGD7;P17482;P1308;Q8N5Y2;Q9Y4Z2;Q8WYN3;E9PGG2;P08047;P11473;Q00978;Q13342;Q01892;P0CG00;Q96JS3;P09017;P11831;P20265;P15172;O43248;Q6NT76;P28702;Q00577;Q53GI3;Q96PT3;Q15561;Q14134;P35227;Q12962;P28069;O60663;Q9UKW6;P78545;Q7KZ85;P09629;Q9NS37;Q9UQR0;P52743;P54845;Q9Y4A8;Q00444;Q15723;Q15744;Q9GZR2;Q8N7G0;Q08050;Q9Y5B6;Q14765;Q7RTV3;Q8N5F1;Q00059;O43524;Q96G23;O43593;Q99966;Q8N5J4;Q9UL58;Q13469;P78412;P55347;A6NLW8;P78317;Q14929;P23769;P35548;Q4G112;Q9UIV1;Q99743;P20719;P51036;Q14186;Q63HK3;P40426;Q59GR2;Q15699;Q12800;A8MZ59;Q14938;O75529;Q9BQ70;Q9BTC8;P56693;Q8N7R0;O14867;P17032;P19532;Q6P9G9;Q9ULX9;O43711;P17022;Q99576;Q14653;P51504;Q9UKY1;O75505;Q96SZ4;Q6IQ32;Q15306;Q8NF99;O14948;Q14978;P84022;P78414;Q99856;P50221;P10914;Q13330;O00716;P0CJ89;O60284;O75528;Q8WUUS;P16383;P0CJ90;Q96GC6;Q00056;Q9P2R6;Q6NSW7;P28347;P31276;O15499;Q03924;Q92764;Q2M105;Q06330;P14859;Q15543;Q8IZ40;O95644;O75444;Q13127;P49848;O43541;P12525;P28324;Q2M1V0;Q9Y2N7;P11161;Q9Y603;Q9UN79;P48382;A6NDR6;O00268;O43830;Q16254;Q68CJ9;P41212;P0CJ86;P15408;O15198;P25208;Q8WVJ9;Q15329;P35869;Q9UFF9;P59923;Q9BQY4;Q96QR8;Q9GZN2;P0CJ85;Q969J2;Q16514;Q8NHW3;Q13951;Q9Y2L8;Q16621;P14651;P53805;O75030;O14771;Q9UPW6;Q9NQZ8;P61244;P55055;Q9UIH9;Q3MJ62;Q15796;O60765;Q02080;O00321;P78337;Q02556;P12524;P23760;Q95218;O14593;O14770;Q96JN0;Q99607;P19419;Q86VE0;Q13363;P49639;Q8N7U7;Q86X95;Q99687;P41162;P09016;P51786;O43812;Q15466;P19838;Q9H4S2;A8K0S8;O60675;P43268;P20823;Q15583;O75360;A6NJG6;Q9HBT7;P17861;Q07687;Q9Y2P7;Q12968;O14529;P52630;O60248;P15336;Q6NSZ9;P28698;Q9BYV9;O43186;Q7RTV0;P08235;Q15545;Q9UID6;Q14872;Q969H0;Q15170;Q9UNY5;P22415;P10244;Q6VB84;Q06455;Q13761;Q9UKT9;Q9UMQ3;P19484;P16989;O95238;P31314;Q14209;O95619;P42771;P17096;P14652;P11474;Q8IUR6;Q9GZU2;Q15714;Q00653;Q9Y5J3;Q9NY43;P47974;Q13106;O95125;P58304;O94916;Q9NP71;Q8N693;O60682;Q92793;Q8WYK2;Q01860;P18848;Q9NSC2;Q92670;P52736;Q01826;P63272;Q15853;Q9BQA5;P78347;Q9UBD0;O60869;P13682;Q04743;Q53T94;P52744;Q14188;P50222;Q9NWS9;Q8IV54;Q03060;P42226;Q96PT4;A6NJ46;Q8NA19;Q9Y692;Q6XYB7;Q8WXI9;P14653;Q13952;P15923;P10242;O43309;O14978;O60422;Q99717;P06733;P15407;Q12857;Q13568;O75376;P57086;Q9UK39;Q9Y468;Q9Y222;P22681;Q99814;P49711;P40425;Q8NSA5;Q9Y250;Q16649;Q0V699;Q9UQR1;Q14207;Q15776;Q66K89;P35711;P42224;Q86W11;P51522;P22736;Q9UN30;Q6RFH8;Q9UI36;Q15797;P23409;Q9P0W2;O75157;Q8NAP3;Q96LW9;Q9UL36;Q9BT81;Q06547;Q13105;Q9Y651;P54821;Q02078;Q9UPG8;Q96LI6;Q06546;Q07352;P40424;Q13888;Q9HOE9;P31269;P53567;P49715;P17023;Q9Y242;P18146;Q03112;P17947;P17028;P31260;P32519;Q10586;Q03936;P98168;Q03938;Q8TF39;Q3C1V8;P08651}
- 292 Pathogen[ P0C214] interacts with 519 human partners:{P41970;P22681;Q9Y3Q8;P40424;O00470;O00268;Q9UKW6;P53567;Q06732;O75444;Q9NQZ8;Q9HA82;Q14526;Q03052;P18850;O15198;P54198;Q6IQ32;Q9UHB7;O14813;Q9UHL9;Q8NA19;Q13761;Q96S65;Q05195;Q9NS37;Q16254;O14529;Q96LW9;Q9UID6;P11308;Q00653;P32243;O43365;P35789;Q13887;P35227;P49639;Q96T58;P17032;P61244;Q15697;A6NGD5;Q02930;A0AVK6;Q00613;P35869;P51508;Q13469;O60663;P16989;Q14207;P51610;P11474;O75528;Q13330;P52743;O95238;Q13952;Q8IV54;Q06546;Q13363;O75461;Q9P0L1;Q63HK3;P55347;Q9UHF7;Q9Y4A8;O43830;Q13547;P78337;Q14872;P31249;Q14929;P17023;Q6R2W3;O00321;Q96JN0;Q9Y5A6;P51814;P19838;Q05481;P14921;P52744;Q7Z5D8;Q8IWY8;Q8N5A5;P15336;Q9Y473;Q06547;Q13568;O15535;Q9H175;Q96QR8;Q96LI6;O43186;O75820;P31314;P52742;Q14587;P15407;Q9NPG3;P51825;Q8WYN3;Q9UIH9;Q8TBC5;P19484;P25208;Q99081;Q9GZU2;Q8N693;P52738;Q7KZ85;Q7Z6R9;P42226;Q5H9I0;P15884;Q8NHW3;O75478;O15350;Q99856;Q03112;Q8N0Y2;Q9UC06;O75157;Q02080;Q14765;Q9BZE3;Q16621;P01100;Q9NR55;O15266;P17275;Q92750;Q9UNY5;P17022;Q12800;O75362;P32519;Q8WYP5;Q99743;P23769;Q92793;P50548;Q9Y5J3;P35711;P19419;P56693;P67809;P15408;Q13033;P84022;Q9UL58;P17096;O95125;P15172;P17947;Q9P2R6;O14709;P17029;Q6NT76;Q99576;P17544;Q12986;P11831;Q8NAP3;Q04206;Q16520;Q63HK5;Q12962;Q06455;Q9Y5Q3;P42224;Q02386;Q3MJ62;P37275;Q68CJ9;P28347;P10914;P17482;Q5SXM2;Q9UPG8;Q9Y5B6;Q9UKI9;Q06330;P98168;Q99607;O00716;O75030;O14771;Q12901;Q8N5J4;Q86WP2;Q9Y468;Q9UC07;Q15545;Q14938;Q00978;Q15170;Q9BT81;Q96SZ4;Q9NY61;P51786;Q9H4I2;P17676;P24278;Q96T88;P78317;Q15542;P14651;Q9UIV1;Q03933;O95619;Q53GI3;Q8N7U7;O43248;P49716;Q10587;P10244;Q10586;Q6VUC0;Q9Y250;Q03936;Q9NZI7;P57086;Q9UK39;P48382;P20265;Q02078;O14503;Q15561;Q07352;P28698;Q00059;Q9NWS9;Q14258;Q9BRR0;P13056;Q9UIS9;Q99966;Q12968;Q01094;Q14814;Q86VE0;Q9Y2N7;Q9UL36;P18848;O14867;P17535;Q92754;O43439;O00712;Q141



86;Q12837;P49116;Q01201;Q92985;Q07687;Q9BQ70;P41134;Q96IT1;Q13487;O60765;P15923;Q06730;O94776;Q14978;Q9P0W2;Q02556;P17861;Q00577;Q6RFH8;Q8N9F9;O14948;Q9GZW5;O43812;O43189;P14653;P51504;Q96N95;Q8TF39;P78347;Q8IZ40;Q86YP4;Q13485;P55197;Q03924;P18847;Q9Y242;Q9BYE7;Q92769;O15105;Q9UH92;P63272;P20749;P17028;P49848;Q15329;P50222;P28324;Q9UMS5;P16383;Q96G23;Q9H2G9;P51815;O14896;P51522;Q9BUG6;Q9Y603;Q15714;Q7RTV0;Q9UN79;Q8WXI9;Q2QGD7;O75376;Q9ULX9;P19532;Q15796;P42771;Q9NSC2;Q969J2;P41223;O43593;Q15525;Q01543;Q96GC6;Q99687;Q95994;P41182;Q9Y6X8;Q6P9G9;Q03923;Q9NP71;Q9UQR0;Q9BQY4;O43541;Q9UN30;P06733;Q01892;P43268;Q9Y2D1;Q16514;O95251;Q8WYA1;Q9UJL9;Q13127;Q14934;P28069;P20226;Q969H0;Q96JS3;P13682;Q9BTC8;Q86W11;Q6NSZ9;Q14653;Q9UI36;O75529;Q9H4T2;O75360;P17040;Q9H0E9;Q9Y2X9;P10074;P36402;P10242;O14593;Q9ULV5;P39880;O60806;Q9UBD0;P62633;Q9UKT9;Q8IUR6;P05412;Q9UMQ3;Q8WVJ9;P49711;Q01826;Q13106;Q12857;Q9NZI6;P18146;Q16534;Q8N187;P0CG00;Q8N196;Q15853;Q03060;Q9GZR2;P40425;P17036;O43309;Q99814;P09086;Q96ST3;O60925;P09629;Q59GR2;P11161;Q13888;Q96AE4;Q9UFF9;P23511;Q99717;O14978;P15036;Q04864;P40763;O96004;O95218;P27540;P49910;O95997;P50221;O75971;Q9HBT7;Q9UPW6;O94916;P48380;Q53T94;P78545;P50549;O14770;Q92988;P22392;P41162;Q13342;Q9BQA5;P08651;Q15776;P22415;Q9UQ80;Q13148;P10828;Q7RTV3;Q15797;P52736;O95644;Q15543;Q9Y651;P16220;O60869;O95948;P53805;Q15562;O60315;Q9Y3D2;P52630;Q6ZN32;P54845;Q9UQR1;Q8IX15;O15499;Q9NQ87;P62508;Q9NP66;Q5EBL2;O60284;Q15699;P14859;Q9Y692;Q99583;Q86X95;Q14209;Q9Y2P7;Q01860;Q9Y2L8;Q66K89;P01106;Q3C1V8;O60675;P14316;O75081;O60248;P35712;O60304;Q14188;Q13105;P41161;P06400;Q92759;P35548;P08047;Q8N1L9;A6NJL1;Q9NY43;P35638;P31276;O00287;Q9Y5R5;Q15466;P04198;P47974;P18846;P23760;Q6SJ96;P10073;P52740;Q13951;Q9H2P0;Q15723;Q8NBB4;O00570;Q16670;Q16236;Q92670;P52741;P31269;Q15306;P59923;Q9NPG3;P41212;Q96AV8;Q03938;Q4G112;O60481;Q9Y222}

Pathogen[ P03346] interacts with 798 human partners: {Q15723;Q6R2W3;P31271;Q06330;Q99081;P85037;Q9NPG3;Q3C1V8;Q06945;P10244;Q68SJ96;P53805;Q9NPC8;Q13886;Q12901;Q05481;Q8N7U7;P31249;Q7KZ85;Q9NWS9;Q96ST3;P49716;P54821;P47902;P05412;Q9Y467;P78424;Q15542;Q9UHL9;P49639;Q16621;Q99742;Q15562;Q9UHF7;Q96S65;Q13487;Q13263;Q9NZR4;P35453;Q9Y4Z2;O75364;P31260;Q9NR83;Q96QR8;P12524;P50219;Q8TF39;P09086;Q02078;Q02386;P52954;P10827;Q9UMS5;E9PGG2;P49910;P0CJ88;P11473;Q3MJ62;P31268;P28324;P23511;Q8N653;A6NGD5;O15535;Q99811;Q99687;Q14207;Q9H2G9;Q9BRR0;Q8IUE1;Q99966;Q01201;Q8N7R0;Q9UD57;P50221;P18847;Q8N1L9;O14813;Q99612;P29374;P58012;Q14258;Q14814;P78337;O15522;Q01578;Q3KNW1;A6NFD8;Q9GZR2;Q9UPW6;A6NJ46;P16220;O60765;Q9UQR1;Q2QGD7;O75362;Q9Y2P7;Q9H2W2;O60248;P06401;Q96BA8;P17676;Q7RTV0;Q9H2Z4;Q03052;Q9UIV1;P78414;Q9Y4X4;P19484;O14901;P36402;P62633;P15336;Q99607;Q9BQY4;Q9P0W2;Q05925;P78415;P36956;P52739;Q05066;Q8N187;Q9H2P0;Q03828;Q00613;Q9UL58;P35638;P35548;Q02535;Q9BYU1;Q9Y2L8;P08235;Q06547;P11831;Q15329;Q0VG99;P28347;Q9Y5W3;Q9UQ80;Q8IUE0;O43309;Q9NP62;Q9UKT9;Q12857;Q99594;Q06732;Q7Z5D8;Q8NFW5;P48443;P06400;P0CJ87;Q4G112;P40426;Q14774;P35789;Q9GZW5;P52740;Q9BYM8;O43711;Q00577;P54845;Q13148;Q15797;Q70SY1;Q14188;O60393;P50549;Q00059;Q12772;Q96SZ4;Q9BZE3;O60315;Q9BWX5;P48382;Q03933;Q9Y3Q8;Q96HZ4;P51786;Q9UKI9;Q99626;Q12837;Q03936;Q00056;Q15911;P17275;P78347;Q14587;P52738;P49116;Q15466;Q6XYB7;Q9NZI6;Q9UIU6;P14316;P24278;Q8WYN3;P17861;Q8WYP5;P23769;Q14872;Q8N693;P25490;P0C7M4;Q15583;P19419;Q9H4S2;O14978;Q8NA19;O75971;P51610;O75505;P14859;Q9NSC2;P48380;Q8IYA7;P25208;P50548;Q8IWI9;Q13888;Q8NF99;Q8IX15;P52741;Q9NR55;P55197;Q9C0A1;P20264;P15923;Q6VB84;P78413;O75820;Q86WP2;P15172;Q15796;P56693;P23760;Q6NSW7;P15408;Q9UL68;P17535;O14709;P19622;O00712;Q04743;O00287;Q92858;P31276;Q99856;P17022;P23409;A6NFQ7;Q8N5A5;Q8TBC5;Q16520;Q12986;P35227;Q04206;Q8IZ40;Q8IV54;P0CJ85;O95238;O94776;P28698;P13056;Q9NQ69;O00321;Q9UN30;O00268;P52951;O60806;Q92886;P41161;P56177;Q9P0L1;Q92826;Q04741;Q63HK5;P15173;Q08050;Q9BPY8;Q14209;P12525;P42226;P52742;Q8IUR6;Q9BYE7;Q15306;Q9Y5Q3;Q9P2Y4;P23759;P10588;Q96QS3;Q96AE4;P14652;Q96AV8;O43186;Q9NRJ4;Q9Y2D1;P27540;Q8N5J4;Q9NP08;P58304;P16989;A6NJT0;Q99717;P20823;P0CJ89;O15350;O15105;O75626;Q9UBX0;O60682;Q16254;Q00097;Q04864;O60902;O75030;Q92670;Q9Y5R5;P10074;O43316;P14653;P42771;P63272;O00570;O00409;P31269;A2RU54;P52743;P13378;P17483;Q8NBB4;Q03923;O95644;Q01094;P17032;P49715;Q9ULX9;P17096;Q66K89;Q53GI3;Q92754;A6NJL1;Q9Y5J3;P31274;Q9UBC0;Q01860;Q92750;O95997;O14867;P20719;Q13351;O15198;O75444;Q9H4T2;Q53T94;P78426;P0CJ90;Q6P9G9;P08047;Q13889;Q9H0E9;O14503;Q15853;Q96LW9;P06733;P20226;P20265;P98168;P18850;P52736;Q14919;O43593;Q16236;Q15561;Q14934;Q9H31;O60663;Q14526;Q16650;Q9Y222;O96004;P17036;P01106;O43364;P41162;P51843;Q9UHB7;Q9NP66;O43365;Q9BXX3;Q15699;P28702;Q9UL49;Q9NP71;P28358;Q14186;P50222;P51508;Q8NOY2;Q9Y5B6;P18848;Q2M1V0;O00327;Q9BQ70;Q15170;P14921;Q06710;P84022;P11308;Q12968;P31275;P17542;Q14978;Q9HCS4;Q9Y692;Q9BYV9;Q8WUU5;Q14863;P10242;O60481;Q9UIS9;O95231;Q9C0J9;Q9UNY5;Q9H175;Q8IYM9;O43541;O75157;P22736;O14948;Q6VUC0;Q9UL36;Q5JT82;P41223;P15976;O43367;O95125;O15266;Q13033;O95056;Q13469;O75478;Q9GZN2;Q06546;P67809;O43189;Q02446;O75528;O60519;P19532;P17481;Q969G2;P10914;Q96PT4;Q96GD3;Q8N5Y2;P49640;Q86VE0;O75529;Q02556;O60479;Q9NQZ8;Q8IWX8;O95948;P41134;Q59GR2;Q9P2R6;Q9H4I2;Q03924;Q13951;Q86YP4;Q06730;Q92769;O95251;Q13342;Q6ZN32;Q9UBG7;Q8WXI9;Q13118;P49848;O15499;O95076;Q9Y2N7;P52744;Q13547;Q03112;P08651;Q99576;Q96G23;O60284;Q6IQ32;Q9Y242;P40425;Q13761;Q9UN79;O00470;P28356;P47974;P09017;Q16534;Q8WVJ9;Q9Y250;Q9NZC4;O60304;Q02548;Q175840;Q5JUN2;P49711;Q13330;Q01954;P51815;P17544;Q9NY61;P09629;Q9Y6X8;P51825;Q15744;Q96N95;O14896;P37275;P35680;P17029;Q9NQ87;P31273;Q16649;Q16514;Q15475;O14627;O43439;P10073;Q99814;Q12778;Q12800;Q9BUG6;P42224;Q9Y5R6;Q9UBX2;Q01167;Q63HK3;Q13887;Q13105;Q5H9I0;P16383;Q8N196;P22392;O75376;P98177;Q9UBD0;P09016;Q12962;Q9HBZ3;Q07352;P78317;O95718;Q9Y468;Q06416;O14593;P78367;Q05195;Q14653;P78411;Q14190;P35713;Q96T58;O75469;Q13568;P09630;P15407;P41182;A6NNA5;Q8N5P1;Q9NRM2;A8K0S8;P17028;A6NDR6;O95475;P04198;Q92759;Q68CJ9;P31267;O95619;Q9BWW7;P20749;O43830;Q9UK39;P61244;Q92481;Q13952;O15525;Q13516;Q9H2C1;P11161;P35712;P32242;P17023;P14317;P32519;P55347;O95218;O14771;A6NMT0;O75461;O60925;P41970;Q96JS3;P62508;P10828;Q9UGL1;Q9UBR4;O60422;Q9BHT7;A8MTQ0;Q28069;O43763;P17947;Q9929;Q9GZU2;Q9GZZ0;Q96MM3;Q99593;P11474;Q5XKR4;P51504;Q10586;Q13363;Q02080;Q8N7G0;P78412;Q05215;O75333;P61968;P40424;Q01196;P41212;P19838;Q9UH73;Q03060;P56178;Q13485;P22681;P

293

294

13682;Q15270;Q8WYA1;Q9Y5A6;O75360;O43812;P31314;O94916;P17040;P51522;Q9UKY1;Q9UPG8;P53567;P59923;Q9Y651;Q96IT1;Q9UC06;Q13029;A6NLW8;Q96IS3;Q9Y2X9;Q96KN3;O15516;Q969J2;P18146;Q9UFF9;P43268;Q9UH92;Q96LI6;Q6RFH8;Q7Z353;Q99583;Q92793;P39880;Q9Y603;Q9UID6;Q92985;Q15697;Q8TEY5;O60869;Q9UKW6;Q9Y458;Q86X95;P35869;P78545;Q15776;Q9Y6Q3;O00482;Q14765;Q02930;Q15545;O60675;Q9ULV5;Q9UI36;Q8TAU0;Q9H9S0;Q6NT76;Q10587;Q5SXM2;O75593;Q13562;P52630;Q96GC6;Q01892;P35711;A0AVK6;Q9BTC8;Q9BZ11;P40763;P35398;Q95729;Q9BXX1;Q8NHW3;P32243;O43524;Q96JN0;Q9Y473;Q969H0;Q86UP3;Q8NEA6;Q5EBL2;Q16670;Q68G74;P56915;Q7RTV3;Q9NS37;O95343;Q13285;P0CG00;P01100;Q9UIW0;Q9UMQ3;P49335;Q9NY43;P53539;A6NJJ6;Q99743;P15036;O00716;P09067;P17509;Q00444;O75081;Q9UIH9;O14529;Q9UC07;P0CJ86;Q14929;Q01826;P55055;A8MZ59;P54198;O43248;Q9BT81;Q6NSZ9;Q8WYK2;Q14938;Q13106;Q96PT3;Q14549;Q96T88;Q9UJL9;Q15714;O14770;Q9NZI7;P51814;Q7Z6R9;Q01543;Q86W11;P15884;Q14134;P14651;P18846;Q00653;P35452;P17482;Q6ZNG2;Q13127;Q13465;Q8NHV9;P22415;Q9HBU1;Q9Y4A8;Q9BQA5;P57086;Q06455;Q92988;Q96SF7;Q15319;Q15543;Q99581;Q9UJU5;Q9UQR0;Q03938;Q9NPC7;P10589}

Pathogen[ Q85601] interacts with 609 human

partners: {Q9UQR1;Q6R2W3;O95619;P01106;Q9P2R6;P18146;Q68CJ9;Q8N196;O15198;P78317;Q9Y250;Q14978;P51786;Q969J2;P78424;Q15542;Q9UHL9;P28698;P49639;O75971;P09629;Q63HK3;P0CG00;P51815;Q9UHF7;Q96S65;Q13487;P54198;Q8N5Y2;Q7Z5D8;Q96QR8;Q86W11;P11831;Q14929;Q15853;Q8TF39;Q9UPG8;O14896;Q02078;P17676;P15036;O60481;P62633;O75360;P17040;P11473;Q3MJ62;Q06455;Q96SZ4;Q9UNY5;P25208;P22681;O14529;O15535;O15499;Q8NBB4;Q6VUC0;Q13127;O43316;Q9GZW5;Q8IUE1;Q05528;Q16236;Q5EBL2;P14316;P17096;P41134;O14813;Q9Y4Z2;Q14765;Q14258;Q9UC07;Q92754;Q02556;P17028;P51522;P61968;Q9P0W2;Q9BWX5;Q01538;Q99687;P09086;Q6XYB7;Q15466;Q01892;Q9UPW6;A6NJ46;Q8IUR6;Q9UQ80;Q12901;P15976;Q969H0;O94776;Q7RTV0;P19484;P15172;A6NNA5;P14921;Q9ULV5;Q03052;Q9Y2N7;Q9NPG3;P13682;P08651;P17032;Q9UL58;P17036;Q06546;Q9Y2L8;P50548;O95251;Q9NY61;Q9Y603;Q15329;Q02386;Q0VG99;Q8NAP3;Q14549;Q9HBT7;A6NDR6;Q12857;Q16621;P06400;P0CJ87;Q06330;Q8N7R0;O43541;P53567;P54845;Q13148;Q15797;P50549;Q13888;P14653;Q8N7U7;Q7Z6R9;Q9BZE3;O43248;O60315;Q14587;Q03933;Q9Y3Q8;Q03936;Q13951;Q9Y651;Q99966;Q9NWS9;O75030;Q07352;P15407;Q8N7G0;Q8WYP5;Q14872;P18848;Q6NSZ9;Q14814;P19419;P40763;Q05195;O14978;P28702;Q03112;P28069;P32519;P14859;Q9Y468;O60663;P52740;P23769;P41970;Q9BUG6;Q9H0E9;Q9NR83;O15516;P78545;Q86WP2;Q13106;Q9Y2X9;Q9Y242;Q12800;Q8WYA1;O14709;Q96PT3;Q96IS3;Q15545;P17022;Q8N5A5;O60284;Q16520;P52744;Q14188;Q15723;Q12772;P25490;O43364;O00327;Q8NF99;O00268;Q2QGD7;O14503;P35712;Q10587;Q9UIV1;P06733;Q15583;Q9H4T2;P10242;Q00059;Q15306;A6NFQ7;Q9NQZ8;P18846;Q8N1L9;Q99814;P47974;P16383;P27540;Q15776;Q13363;Q8IUE0;Q8NA19;Q13469;O60682;Q00978;Q8IWI8;P19532;P10074;P78337;O43439;Q9UFF9;Q6NT76;Q99743;Q03923;P52736;O95644;O96004;Q15714;Q9Y692;P41162;O60304;P59923;Q00613;Q53GI3;O15525;Q9NP71;P55055;Q04864;P49711;Q9UID6;Q9UIH9;Q13952;Q9UJL9;P51610;Q02080;O95125;Q9Y5Q3;Q9UBG7;P10914;P08047;O60806;Q9UH92;Q01954;P52630;Q13562;P01100;Q05481;Q14934;Q13263;Q8NHW3;P41212;Q14526;Q6IQ32;O75820;P22415;Q8NEA6;Q9BQY4;Q9H4I2;Q5SXM2;Q9NP66;P31260;P23409;Q14186;P50222;Q53T94;P51508;Q8WYN3;O75444;P40424;Q14653;Q00577;Q9BQ70;Q15170;Q9GZU2;P49716;P12524;P0CJ88;Q12968;P17535;O75461;A6NGD5;A6NJJ1;Q9BYV9;Q9UIS9;P52742;Q02300;Q9H175;Q9UMQ3;Q9UBX0;Q9Y5A6;A6NJJ6;O14948;Q96JN0;P9P0L1;Q9UL36;O15266;P23511;P0CJ90;P0CJ89;Q92759;Q9BRR0;Q16649;O75529;P18847;O95948;P36956;Q03924;Q86YP4;Q9UKW6;P35711;Q92769;A6NFD8;O60765;P16220;Q99717;Q15699;Q04206;Q8WXI9;P42226;P49848;P52738;Q6S9J6;Q99576;Q96G23;P40425;Q9UN79;Q9UI36;Q3C1V8;Q8IYM9;O60248;Q7KZ85;Q13330;Q15562;Q99594;P22736;Q01543;Q9Y6X8;Q9Y222;P51825;Q15744;O14771;Q96GC6;Q96N95;P35548;P35680;P05412;P17029;Q9NQ87;Q9H2P0;Q9Y4A8;Q96T88;Q92985;Q16514;Q9BYE7;P28347;P35789;Q9UMS5;P67809;P18850;Q01826;Q9UKI9;P10244;P42771;Q9UC06;P57086;O75376;Q99612;O00470;P42224;Q01201;Q16254;P08235;O43711;Q6ZN32;Q9UN30;P22392;P17023;Q9GZR2;Q13033;Q14209;P11474;O43830;P15923;Q9HBZ2;P36402;Q8N5J4;Q13118;O14593;P10827;P58304;O43812;P32243;O14867;P48382;Q2M1V0;Q96T58;Q8N693;P56693;Q9BTC8;Q8WUUS;Q5H9I0;P53805;P0C7M4;Q14207;O43309;Q99583;Q8N5P1;P17544;A8K0S8;Q9NZI6;P31249;O00482;Q9UK39;P61244;P51504;Q9BQA5;P84022;Q99607;Q9H2G9;P31271;Q86VE0;P49715;Q06547;Q9Y2D1;Q8IV54;P14317;P41161;P55347;P37275;O95218;P31274;P62508;Q9NPC7;O60422;Q8N187;Q96AE4;Q92750;P17947;O43189;Q08050;Q6P9G9;Q12962;Q06732;P35869;P63272;Q9GZN2;O15105;Q16534;Q9UHB7;Q13342;O75157;Q9Y5R5;Q92670;O15350;Q9UBX2;Q13547;P50221;Q99081;P31314;P49116;Q66K89;O94916;P14651;Q9UKY1;O75362;O75626;Q96IT1;Q9Y473;O00570;P13056;P40426;P42718;O00287;O43365;Q00653;Q15543;Q9NSC2;O00712;P43268;Q96LI6;P15336;P51814;P10828;P41182;P04198;Q6NSW7;Q6RFH8;Q8IZ40;Q9NS37;Q92793;P39880;Q59GR2;Q15697;P31276;Q9Y2P7;O60869;P48380;Q9HCS4;O43593;Q9Y6Q3;Q9UQR0;Q06416;Q4G112;O60675;Q96JS3;Q63HK5;Q7Z7L9;P17275;A0AVK6;Q9BXX3;P19838;P20823;Q13568;P12525;Q12837;Q13485;Q8N0Y2;Q9Y5B6;P16989;Q06730;P78347;Q7RTV3;Q8TBC5;Q9UBD0;O75478;P11161;Q9H4S2;Q9NY43;P53539;P17861;P31269;Q01860;Q03060;O00716;P52743;Q00444;Q13105;P28324;Q13887;P20749;Q9UKT9;Q7Z353;Q96AV8;Q9ULX9;Q07687;Q9BT81;Q8WYK2;Q14938;Q15561;Q99856;Q01094;O14770;P23760;Q9NZI7;Q86X95;P0CJ86;P11308;P15408;O95997;A6NLW8;Q9NR55;P55197;Q9Y5J3;Q8IX15;P15884;Q8WVJ9;Q15796;P17482;Q96LW9;P20226;P20265;Q10586;Q16670;P10073;O00321;O95238;P0CJ85;P49910;O75081;P52741;P35227;P35638;Q12986;P98168;Q13761;Q92988;Q96ST3;Q03938;O75505;P10589}

Pathogen[ P14079] interacts with 578 human

partners: {Q969J2;Q96JN0;P98168;P52738;Q7Z5D8;Q5SXM2;Q13952;O60284;Q9UQR1;Q9UPW6;P52741;Q12986;P35711;E9PGG2;P51504;P15036;Q8N7U7;P13056;Q8WYK2;P0CJ89;O14867;P0CJ88;P0C7M4;Q99743;Q06732;Q53GI3;P16383;P62508;Q9HBT7;Q4G112;P52742;Q6XYB7;P55055;O60925;Q86WP2;Q10587;Q9Y5Q3;Q15561;O43364;Q9UC06;P35869;P57086;Q02078;O95125;Q99814;Q9UIS9;Q06413;Q9BWX5;Q8N196;Q8IUE1;Q8N693;P52630;Q13106;O14771;Q9Y6Q3;Q9BT81;Q06546;P14859;P10073;Q7Z7L9;Q96PT4;A8K0S8;Q969H0;P78337;Q9UNY5;Q16649;Q14653;Q15776;Q14186;Q13118;O75528;Q2M1V0;Q13148;Q15853;O00321;O60481;O15535;Q9GZU2;P23409;Q99581;O75626;Q6P9G9;O43309;Q14938;Q15911;Q96QR8;O75362;Q68CJ9;Q15723;Q9Y2N7;P35398;O14896;P53567;P67809;P47974;Q15714;Q96LI6;P10244;O43439;Q9NP66;P17022;P11473;P41223;P35680;O60682;P20265;Q9NY61;Q96ST3;P55347;P09086;Q16254;A6NJJ6;P10828;Q2QGD7;P08235;Q92985;Q14207;Q92793;Q13033;

295

P51522;P12524;O95948;Q9Y5R5;Q99607;Q9P2Y4;Q9Y468;Q63HK3;P39880;Q15583;P48382;O15198;Q8N5A5;Q9UQR0;Q15329;Q99576;Q99594;P35789;P0CJ86;P51815;Q15699;Q13330;P28347;P17096;Q03060;P11474;Q6ZN32;O95251;P48380;O95644;Q3MJ62;Q15170;Q01538;O60675;Q01826;P35712;Q9UID6;O75529;Q8WVJ9;Q9Y250;Q13487;Q8N0Y2;Q8IX15;Q99966;P54198;P58304;Q5H9I0;Q14209;Q9GZ N2;A8MZ59;Q9HA82;Q9Y5A6;O96004;P22736;Q9GZR2;Q99856;O43812;Q13105;P15976;Q9NR83;P5380 5;Q9P0L1;O75157;Q9NY43;P32519;Q13889;P19484;Q12968;Q03923;Q9H2P0;Q06732;Q86Y34;O60869 ;Q9Y2P7;P41161;Q9Y3Q8;A6NGD5;Q96SZ4;Q9BQA5;O75461;P31271;P15923;Q15306;Q9NS37;P48443; O43830;Q06547;Q14258;Q8N7G0;Q15797;P06733;Q8TBC5;Q03933;Q14765;P10827;Q9H175;Q12837;P 52744;Q8IWY8;Q9NQZ8;Q8NA19;P51610;P54845;O15350;Q15744;P09629;Q99612;Q16670;O60315;P5 1597;Q96S65;P36402;Q03938;P11308;O95718;Q01201;Q9UHB7;P08651;Q9NWS9;Q9BRR0;P51814;P28 698;P28069;P51825;Q12772;Q9UL58;Q9UKY1;P31276;Q9H0E9;P0CJ90;Q99687;Q9UC07;Q8NBB4;Q9H2 G9;Q6NT76;P42226;Q06330;Q92670;Q9NZC4;Q9NZI7;Q3C1V8;O43189;Q13888;Q00613;Q01892;Q9958 3;Q13568;Q00059;Q7KZ85;Q9P0W2;Q03924;P41182;P31274;Q8NAP3;Q9UL49;P12525;Q01543;Q8N5J4 ;P10074;P0CJ87;Q9UPG8;Q96AE4;Q14549;Q03936;Q9BZE3;Q9UK39;Q01860;Q8TF39;Q15543;P19532; Q05481;P16989;Q9UIH9;P11161;P22392;Q00482;Q8N5Y2;Q12962;P17544;Q8WYP5;Q6RFH8;O95238;Q 92769;Q9BXX3;O00716;Q9H4T2;P29374;O43711;P17032;O60248;Q02930;P49715;Q96G23;O60663;O1 4709;O15266;Q14934;B2RXF0;Q9NZI6;A6NFQ7;Q7RTV0;Q9Y473;O75469;Q9NPG3;P31269;P49848;P51 508;O75820;P27540;Q6ZNB6;P63272;Q66K89;Q9P2R6;P50549;A6NLW8;P17029;Q9BYE7;Q9Y5J3;P172 75;P15336;Q92750;Q6R2W3;Q96LW9;Q8NHW3;Q15697;P28702;P52743;P24278;P04198;Q9BYM8;O1497 8;Q9BQY4;O75360;Q9Y2X9;Q92759;Q9UFF9;P49910;Q86W11;O00570;P51786;Q14134;P31249;Q9UHL9 ;Q13351;P78424;Q9UBD0;Q9BYV9;Q96PT3;Q9Y603;Q8NAM6;Q9ULX9;O43365;O00287;Q9UI36;Q9UMQ3; P35638;O14593;Q16621;Q92754;P01106;Q6S9J6;Q9BTC8;O75444;Q9UH92;Q8NF99;P56693;Q16236;Q 9Y692;Q00444;O43541;Q00577;O95997;Q9Y3D2;Q9Y4X4;Q12800;Q7RTV3;P42224;P10588;P18850;P3 2243;Q86VE0;Q7Z6R9;Q9UIV1;P41212;O75081;P50548;Q8N5P1;Q8N1L9;Q04743;Q05195;Q07687;O14 770;Q14814;Q9GZW5;Q14872;Q8IUE0;P35227;Q8WVB7;P20749;Q9Y5W3;O15525;Q9UN79;P15407;Q064 55;Q00978;Q96IS3;O75376;O14529;Q63HK5;P78317;O75478;A6NNAS;Q96AV8;P41162;Q15562;Q9UKI 9;P15884;P78414;Q9NR55;P78545;Q8IV54;P41134;Q9BQ70;Q9HBB2;O14948;P62633;Q02386;P0CG00 ;Q9NQ87;Q13761;Q02556;Q03052;Q8NEA6;Q9NPC7;P10589;Q5EBL2;Q13469;Q9BUG6;Q99081;O14503; P17040;Q6IQ32;Q7Z353;P49116;Q13465;Q8N187;A0AVK6;Q8WYN3;Q9Y2L8;O75505;P05412;Q14929;Q 15466;Q12901;Q8WUU5;P13682;A6NJL1;O15499;Q8IZ40;P10242;Q9Y4A8;O14813;Q13127;O75030;P4 9716;Q06416;Q96IT1;P25490;Q16514;P49639;O95619;Q16534;Q9UBX2;Q53T94;Q9H4I2;P28360;P52 740;O15105;P78347;O14901;Q92988;Q8WYA1;Q9Y6X8;O00470;P52736;Q9UQ80;O94776;Q12857;P369 56;Q9ULV5;Q01094;Q86X95;Q9Y5B6;A6NFD8;A6NDR6;O60765;P15408;P61244;Q13951;O75971;Q0208 0;P01100;P78412;O95218;Q9NP71;Q14188;Q10586;P23769;P23511;P14316;O43593;Q9UKW6;Q15542 ;Q9UHF7;P41970;P49711;Q96N95;O60304;P50222;P17023;Q16520;P37275;Q07352;Q9UMS5;P17535; Q14587;P50221;Q9NSC2;P0CJ85;P10914;Q9UN30;Q13342;Q6NSW7;Q02446;P19419;Q9Y222;O00268;Q 8IUR6;P14651;Q9UKT9;Q14978;Q96GC6;Q96T58;Q9UJL9;Q96JS3;Q9UBG7;Q6VUC0;Q15545;O00712;P4 2771;Q9Y2G1;Q8N7R0;P17028;P23760;O94916;P22415;Q8WXI9;Q6NSZ9}

296

Pathogen: {P03383} interacts with 452 human

partners: {Q9UQR1;P35227;Q06330;Q13761;Q15329;Q15723;P10244;Q68CJ9;O15198;Q8IX15;O0047 0;Q14978;P16989;Q9NY61;Q9UHL9;Q8NBB4;P10914;Q63HK3;P14316;Q15561;Q96S65;O15266;P11831 ;Q9UH92;P15036;P35712;P50549;Q02080;Q13485;Q96SZ4;P63272;Q14653;Q06455;Q04864;O00716; Q86WP2;P08047;Q9UPW6;Q9BTC8;Q14209;Q9GZW5;O75528;Q99607;P17096;O75478;Q9UKI9;P16220;P 27540;Q15562;Q9Y2P7;Q8N1L9;P28069;Q13469;P17544;Q8IUR6;P32243;Q9H9I0;Q9H4I2;Q00653;O6 0765;O60248;O94776;P49711;P17022;P15172;Q01194;P14921;O75376;Q8WVJ9;Q14526;P17029;Q0 687;Q9Y5Q3;P0CG00;Q9H4T2;O00287;Q96JS3;P19484;Q9Y5R5;P01106;Q86YP4;Q06547;Q13487;O952 51;P40424;Q12986;P78347;Q6NT76;Q13888;P49116;Q9P2R6;Q92670;Q9Y5B6;P23511;O75362;Q9UL4 9;P51815;P14859;Q9UKW6;Q9BRR0;O00570;Q9NP66;Q05481;P48382;O75360;P17482;Q9UMQ3;O95644 ;P18847;Q99576;P17861;P51508;Q8WYP5;O95218;Q01826;P20749;P19419;P52744;P48380;Q15714; Q96LL6;P23769;P50222;P22392;Q00059;P37275;Q10928;Q9NQ87;P31276;Q9UL58;Q9UMS5;O75030;Q 15542;Q6RFH8;O14709;O00712;P52630;P35638;O75461;O43365;P15923;Q3MJ62;Q9H2G9;P53805;Q1 6520;Q12901;Q9UK39;P35789;Q9UFF9;O14503;Q6P9G9;Q14814;Q01860;P78317;Q15797;P42226;Q9B YE7;Q96N95;Q03923;Q8WYN3;P18846;O43189;P28698;Q8N693;Q07352;Q86VE0;Q15306;Q9P0L1;Q009 78;Q13330;P51504;P15408;P78337;P59923;Q9H175;O00321;Q6NSZ9;Q9Y692;P06400;P18146;P4116 2;Q66K89;Q53G13;O15525;Q9NP71;Q6IQ32;P31249;Q14872;P55347;Q9Y2L8;P25208;Q9H0E9;Q96LW9 ;P20226;O14770;Q9UQR0;Q4G112;P08651;Q14934;O96004;O75529;P11473;O15105;P51610;P41161; P11474;Q03112;O14978;Q13952;Q01892;Q92985;Q14186;Q16621;P54845;Q9BQ70;P49639;P84022;P 98168;O75081;P11308;A6NGD5;Q9UID6;A6NJL1;Q12857;Q9UNY5;P35548;O14948;O75157;Q6VUC0;Q1 3105;P28324;O95125;Q13951;O14896;Q9ULV5;P28347;Q9GZU2;Q9BQA5;P17040;Q05195;P52742;Q13 568;P17032;Q99687;P17036;P24278;Q92769;P51825;Q13342;Q6ZN32;Q99717;O60663;P17676;P498 48;O60304;Q9Y2N7;Q6S9J6;O43711;Q99081;Q9NSC2;Q15466;Q16254;O43541;Q9UN79;P52743;P1540 7;Q8NF99;P28702;Q8N5A5;O75971;Q12837;Q12968;Q01201;P35711;Q15697;Q01543;Q9Y6X8;Q8IZ40 ;O00268;O15350;Q9UIV1;Q16514;P10074;Q00613;P10073;Q12800;Q7Z5D8;Q03936;Q9NPG3;Q92759; Q9P0W2;Q96IT1;P31269;P36402;Q8N5J4;O14593;P41212;Q16236;Q15170;Q969H0;P42771;Q96JN0;Q 96T58;P31314;Q13547;Q15853;Q14207;Q99583;Q9UHB7;Q9NZI6;Q16670;P10242;Q96GC6;O15535;O9 5238;Q14188;P62633;P01100;P04198;Q9UC06;P43268;P11161;Q9UQ80;Q8N0Y2;Q92750;Q92754;O43 186;P39880;P23760;Q9NZI7;Q15796;Q99594;O60925;P41970;O43309;P32519;Q00577;Q9HBT7;Q8NA P3;Q96AE4;Q9Y4A8;Q8IWY8;P51522;Q04206;Q7RTV3;Q10586;O95997;P49910;P17535;P78545;Q9NY4 3;Q8WXI9;Q02556;Q9Y222;P53567;Q9UKT9;O14771;P52736;Q12962;O60675;Q06ST3;Q9Y5A6;Q14258 ;Q6R2W3;P50221;P50548;Q8N7U7;P57086;Q9UC07;P51786;Q969J2;Q13148;P55197;Q9Y2X9;Q8N187; Q13033;P15336;P10828;P16383;Q99856;Q9NS37;P18848;P18850;O60481;P62508;O60869;Q86X95;O 95619;Q8N196;Q15776;P09629;Q02930;Q15545;Q9Y2D1;Q9UI36;Q15699;Q86W11;Q5SXM2;Q2QGD7;P1 7275;Q20265;O75444;P06733;P61244;P19838;Q96AV8;Q96QR8;P35869;P56693;P17028;P67809;Q9U BD0;Q16534;Q9Y603;P13056;Q9ULX9;P54198;Q9UHF7;O43439;Q06546;Q3C1V8;Q92988;Q03060;Q8IV 54;P19532;P17947;Q9UN30;Q59GR2;Q9Y473;A0AVK6;Q9BUG6;P40425;Q13363;Q92793;Q7RTV0;Q8TF3 9;Q02078;P14651;P13682;Q9UIS9;Q9Y468;Q13127;Q53T94;P22415;P52741;Q9BQY4;Q15543;Q9Y250

297 ;Q03938;Q03933;P05412;Q7KZ85}  
Pathogen[ P03410] interacts with 584 human  
partners: {P84022;Q9Y2P7;O75505;Q96LI6;Q99594;O14813;P57086;Q99743;Q00613;P20749;Q9Y5J  
3;Q9UHF7;P40426;Q04206;O14771;P28069;Q9BZI1;Q9Y2L8;O14901;P35712;P42771;O43309;Q9UI36  
;Q15714;P23409;O95619;P11831;O43439;Q9NS37;P0CJ87;Q96AV8;P19838;Q68CJ9;P36956;O75461;  
P51610;Q96PT3;Q9H2G9;O60675;Q03112;Q9UK39;O95218;P29374;Q13106;Q8N5J4;Q9UFF9;P35638;Q  
14526;Q9GZR2;O95238;Q59GR2;O00470;Q8TV54;Q8N7R0;Q8N7G0;Q15697;Q13889;Q8WYK2;Q14929;P1  
7482;P54198;P17861;Q15329;P17040;P37275;P13682;P41162;Q9H4T2;O00268;Q16520;Q3MJ62;Q8W  
VJ9;Q04864;Q8NA19;P52738;O14896;O96004;P31274;Q15543;P19419;P52740;P31276;Q14549;Q9P2  
R6;Q9UN79;Q66K89;P17676;P23511;Q96SZ4;Q9BYV9;O60806;Q9UMQ3;O94916;Q9H4I2;P18847;P0110  
6;P16989;O95251;Q92750;Q99814;P17947;P63272;Q12968;O95125;Q06330;O60481;Q06730;Q92670  
;O14948;O60682;Q01860;Q9UC06;Q15776;P54845;Q9Y6Q3;P10073;Q8IUE0;Q12962;Q9BQA5;Q9GZU2;  
Q9BYE7;P41212;P09629;Q14938;Q9NQ87;P18848;Q9UQ80;P36402;P50222;P50221;Q9Y2N7;O15266;Q  
9Y2D1;Q8WUU5;O75528;P14651;Q7KZ85;P10242;P53567;Q9UHL9;P35789;P14859;Q99717;Q8WXI9;Q1  
2800;Q8NF99;Q14814;P78545;Q9UL49;O75030;Q9UPG8;P15884;Q14653;O75444;Q14207;Q8NBB4;P28  
324;Q12857;Q5H9I0;Q16254;Q16236;Q3C1V8;Q2M1V0;Q9BZE3;Q14978;Q9BTC8;Q00059;P24278;P067  
33;Q9P0W2;Q9UMS5;Q4G112;O15198;Q8TF39;Q9NY61;P31249;Q9Y692;Q14765;Q9UIH9;Q96GC6;P1252  
5;Q6NSW7;Q9NPC7;O43830;P78414;P41134;P17096;Q96N95;Q9UBX2;Q6NSZ9;Q9Y3Q8;Q99687;Q9UL58  
;O14709;A6NFD8;Q03060;P0CJ85;P52741;P19532;Q9Y468;A6NJG6;A6NNA5;P20226;Q86YP4;O95948;  
Q86VE0;P10828;O00321;Q9H175;Q9UJL9;P06400;Q03923;P19484;O75376;P31314;P49716;Q06547;O  
95997;P32519;Q8N7U7;Q53GI3;O60304;P15923;Q06732;Q99607;Q03052;P0CJ90;Q9UIV1;Q9UPW6;Q9  
NPG3;Q9NWS9;P35227;P62508;Q86WP2;Q14188;Q96ST3;Q15306;Q13568;Q03933;Q14258;O00712;Q9U  
KW6;Q96T58;Q01201;P25490;P01100;P18846;Q00577;P61244;P17036;A6NFQ7;P15408;A8K0S8;O606  
63;Q96G23;P51508;Q9NP66;P17544;Q16670;P50549;Q5EBL2;Q9UQR1;P11473;Q02556;P51825;Q9HBZ  
2;Q9Y603;Q13148;Q14587;Q9BRR0;Q6ZNG2;A6NJ46;O95644;Q9BQY4;Q02930;Q6RFH8;Q9Y5Q3;P27540  
;O15535;P67809;Q99081;Q9UHB7;Q9BUG6;Q13127;P17022;O00716;Q9UKT9;O15525;P08651;Q9Y2X9;  
Q15583;P41161;P17029;Q92988;Q12986;Q07687;P35548;Q6R2W3;Q92793;P41223;P48382;P51814;Q  
6IQ32;P10074;Q15561;Q9Y3D2;P10244;P15036;O00570;Q01538;A8MZ59;Q16649;Q92769;Q02386;Q8  
NEA6;Q9BWX5;Q13342;Q8N5A5;P17535;Q15170;Q6P9G9;Q8WYN3;Q9Y2G1;Q969H0;P17028;Q6SJJ96;A6N  
LW8;P53805;Q8NAP3;Q9UNY5;Q03924;B2RXF0;Q16514;P28347;Q9HA82;Q7Z357;P52743;Q9P0L1;P172  
75;Q12772;Q13330;Q16621;P49848;P52736;A6NGD5;P0CJ89;P25208;Q8N187;P25208;Q9BXX3;P51815;Q1487  
2;O75362;P78317;Q13033;Q15797;Q01826;Q9NP71;P43268;P31269;Q96S65;P48380;P22415;Q13485  
;P10914;Q9ULX9;Q99583;Q13952;P22736;Q14186;Q969J2;P28702;Q8N5P1;P16220;Q15466;P56693;  
Q7RTV3;Q9Y6X8;P17032;Q8WWB7;P47974;P78412;Q8N196;Q06455;O43364;Q13118;Q15699;P49910;P  
51786;Q13469;P41182;P0CG00;Q9HBT7;Q15853;P05412;Q8IUR6;Q86X95;O43541;P39880;P49639;P1  
0586;Q6XYB7;P49711;A6NDR6;Q9Y222;Q99576;P98168;O15105;P42226;Q7Z6R9;Q96JN0;Q8N1L9;Q9U  
KI9;Q6VUC0;P0CJ88;O75157;Q96IT1;Q13888;P55347;Q8IUE1;P32243;Q13951;P11474;P0CJ86;A6NJ  
L1;Q9UC07;O14593;P23769;Q13761;O43189;P52630;Q9UIS9;O75081;Q8NHW3;O94776;Q9HCS4;Q1354  
7;Q01094;P35680;O60869;Q7RTV0;P28698;Q0277L9;P49116;O00287;Q53T94;O14978;P59923;O60925  
;Q96IS3;Q13465;P10589;Q6ZNB6;Q10587;Q07Z8;Q15542;Q16534;O15350;P41970;Q2QGD7;Q9NZI6;  
Q9GZN2;O43812;Q9Y250;P08047;P50548;Q13487;O60248;P55197;P23760;O43711;Q99856;Q9UBD0;Q  
8IZ40;Q00653;Q8TBC5;Q9NQZ8;O75626;P12524;Q63HK3;Q06416;O75478;P78347;Q63HK5;Q8N693;Q9  
6LW9;Q9BQ70;Q9ULV5;P15407;Q12901;E9PGG2;Q9UH92;Q9Y4A8;Q13105;P14316;O75360;Q9UQR0;Q14  
209;Q9NIZ7;Q05529;Q15744;Q02080;Q92985;P20265;O60765;Q96QR8;Q12837;P11308;Q9NSC2;Q9NY  
43;Q9UID6;Q03936;P18146;Q8IX15;P62633;P52744;P51522;P17023;O75820;Q96FS3;Q9BT81;Q0548  
1;P16383;O14867;P40424;P78424;Q04743;Q9H0E9;Q15796;Q9UL36;Q5SXM2;P08235;P15336;P11161  
;Q15723;Q9NR55;O60422;Q15562;Q96PT4;Q8WYP5;Q8N5Y2;P40763;Q96AE4;Q9UKY1;Q9UN30;P18850;  
O75971;Q9Y5A6;Q6ZNS2;Q14934;Q9Y5B6;P04198;Q00978;O43365;P15976;O14770;Q07352;Q92759;P  
52742;P0C7M4;Q06546;Q9GZW5;A0AVK6;Q15545;Q7Z5D8;O43593;Q01543;Q86W11;P78337;Q92754;O6  
0284;Q05195;Q01892;P14921;Q8WYA1;Q9Y473;P51504;P13056;Q9UBG7;Q8IYW8;Q9N0Y2;O15499;Q03  
938;Q99966;O14529}

298 Pathogen[ P14075] interacts with 439 human  
partners: {P28069;Q8N196;Q00059;P52630;Q9UN30;P17029;P06733;Q96ST3;Q9NSC2;Q9UHL9;P3586  
9;O60663;P51815;Q96S65;P51825;Q96QR8;Q99607;Q12962;Q9H2G9;Q6RFH8;Q9Y5B6;Q86X95;Q9Y5A6  
;Q969J2;Q9H175;Q6ZN32;Q00613;Q9GZU2;Q92759;Q8N187;Q14207;P50548;Q13105;Q04206;P17482;  
Q9H4I2;Q9Y5R5;P78337;P40424;Q14526;Q13951;P16989;Q99687;O75030;O60248;Q9UQR1;Q8N5J4;Q  
96JS3;P05412;Q15542;P42226;P40425;Q12800;Q14938;P11474;Q9Y2D1;Q01543;Q9UQR0;Q9BQA5;P1  
4859;P11831;O60481;Q8N1L9;P10828;P78545;Q15697;P17861;O60765;Q8NBB4;Q15562;O00470;P28  
347;Q9UMS5;P53567;Q9GZW5;Q12901;P25208;P52736;O43541;Q96SZ4;Q01201;O75444;Q53T94;P172  
75;Q9Y4A8;P57086;O75362;Q06546;P43268;Q9P2R6;Q8WYP5;O75971;P23769;P61244;Q9UID6;P5992  
3;Q96T58;P19419;P41212;P18847;Q01860;P28698;Q9NY61;Q9Y468;Q9UBD0;Q03933;P48380;P51610  
;P62633;Q9HBT7;P35548;P11161;Q12837;Q15561;P15172;P17096;P17036;O14709;Q08050;Q15714;  
O43186;P18146;P19484;O60675;Q99576;O95619;Q16520;Q86VE0;Q9Y2N7;P42771;P20265;Q9UH92;Q  
7KZ85;Q9Y603;O94776;P10244;P35638;O95218;P31249;O00287;O95997;Q9Y250;Q02080;Q9ULX9;Q9  
6IT1;P78347;Q92988;Q5SXM2;Q99717;O00716;P56693;Q00978;P20226;P15336;P04198;Q9UL58;Q92  
754;Q9NIZ7;Q9BRR0;P10242;Q15796;Q96N95;Q9NQ87;Q03936;Q13148;P15923;P15408;Q53GI3;Q86W  
11;Q14209;Q13952;Q9BYE7;O43365;Q13547;Q99856;O00570;Q05195;P54198;Q6SJJ96;P13056;P0110  
6;Q92750;P39880;Q8WVJ9;P53805;O75081;Q07687;O14503;P17040;P31269;O75376;Q01826;P046112  
;Q16670;P27540;P55347;Q7RTV3;Q8N5A5;Q02556;P35711;P41162;O96004;Q13568;Q13485;Q09629;  
Q9NP71;P24278;Q14186;Q10586;P15036;Q15853;Q9BQ70;P49116;Q12857;O14770;O75478;Q8N7U7;Q  
9NY43;Q9ULV5;P28324;Q12986;Q9Y692;Q92670;P32519;O14948;Q14653;A6NGD5;Q9UPW6;Q06455;Q0  
6547;P54845;Q9UHB7;Q05481;Q9UNY5;O75528;Q9P0L1;P50221;Q13469;Q13889;O15350;P52742;Q16  
254;Q9UL49;Q8N693;Q92769;Q01892;Q9Y5Q3;P49848;P35712;Q9UIS9;P51504;P52744;Q9UN79;Q8NA  
P3;Q9UHF7;O43189;Q15723;Q14934;Q9UKT9;P0CG00;O15198;P11473;Q99594;Q9Y6X8;P48382;Q9UK3  
9;Q15306;P17947;P11308;Q16514;O95251;Q6R2W3;P67809;Q8IX15;Q15545;P23511;P55197;P78317  
;P18848;O75360;O43711;Q9UMQ3;Q01094;O14978;Q14258;Q13487;P08651;O15105;P14921;P36402;

Q9Y2L8;P06400;Q07352;O14593;Q6IQ32;Q96AV8;Q03112;Q02078;Q9NP66;P52743;P17028;P14316;P50549;O14896;Q06330;Q3C1V8;Q9UQ80;Q9NZI6;Q66K89;Q68CJ9;P98168;Q8N9F9;P01100;Q14134;O0268;O15525;Q9Y222;Q9Y2X9;Q9UFF9;Q13342;Q13330;P49711;Q96LW9;Q00577;O00712;Q92793;Q96LI6;P28702;P15884;O60925;Q9UKW6;Q9UI36;P16383;Q15699;Q6P9G9;Q13127;P31314;Q3MJ62;Q9Y2P7;Q8TF39;P43439;P31276;Q15466;P19838;Q03060;Q96GC6;P10074;Q9Y3Q8;P35789;O15266;Q00653;O60304;P17022;Q13363;Q9UKI9;Q9Y473;Q03923;P41970;Q15329;O75529;O95125;P22415;Q86WP2;Q92985;P84022;P15407;Q16621;P23760;O43309;Q99583;P17676;P37275;Q16236;O60869;Q96JN0;P10914;Q9UIV1;P17544;Q99081;Q2QGD7;P17535;Q14188;Q969H0;P49910;Q13033;Q96AE4;P32243;Q8N0Y2;Q8WXI9;Q63HK3;Q8WYN3;Q8IUR6;Q14814;Q9NS37;O75461;P63272;Q12968;Q15170;P19532;Q6NT76;Q14872;Q7Z5D8;Q15776;A0AVK6;Q02930;P10073;P62508;Q9BTC8;P22392;Q14978;P50222;Q9P0W2;Q8IWX8;Q8IZ40;O95644;Q9BQY4;P35227;Q6VUC0;P20749;Q86YP4;P18846;O75157;Q04864;O00321;P18850;Q5H9I0;O14771;Q9BUG6;Q15543;P52741;Q9UC07;Q13761;Q16534;Q03938;Q9NPG3;Q7RTV0;Q13888;P08047}

299 Pathogen[ P0C206] interacts with 678 human partners: {Q9UID6;Q02386;P06733;P28698;Q9Y468;Q15723;Q13887;P84022;Q86W11;Q9UFF9;Q9Y2X9;P53567;Q07687;P10588;O43541;P0CJ87;Q53T94;P67809;Q9NQ87;Q14188;Q8IX15;P10914;Q92769;Q8WYP5;P78424;Q9GZW5;Q16649;O43309;Q03060;Q9UN30;A6NDR6;P98168;Q8IUR6;O75528;Q14587;P53805;Q7Z353;Q15270;Q05195;P16383;Q15329;O60481;Q8N187;Q00444;P0CJ90;Q9Y2D1;Q63HK3;Q9UHL9;Q15466;Q96G23;Q13568;Q96MM3;P35398;Q06546;Q96ST3;Q03924;Q15545;Q8NA19;O43711;Q9BUG6;Q96S65;P31269;P31314;Q16514;P06401;Q06455;Q9GZU2;O95251;O14867;O60393;Q01538;Q06330;Q13469;Q9UMS5;Q9NP71;P40425;Q9UH92;Q15543;Q9Y6Q3;Q13127;P13682;P49848;Q9Y5Q3;P14921;Q05481;Q15911;Q9NY43;Q06416;Q9Y4A8;Q9Y242;Q9NR55;Q9UC06;Q02078;O15266;A6NNA5;Q13263;P52741;Q9Y2N7;A6NGD5;Q9H4I2;Q8WUU5;P15407;P20226;P12525;P11161;O43365;Q04743;P16220;P17275;Q9Y5R6;O14948;P09067;Q9UN79;P10074;P35869;P17544;O75030;Q15744;P22392;P25490;Q02446;P08651;O75444;Q9UJL9;P18850;P49910;Q8N7R0;Q96N95;O43812;Q14258;P41212;Q9NSC2;P48382;Q9UC07;Q05066;Q15697;P78414;Q96AV8;Q01860;Q9Y4Z2;P41182;P52743;P54821;Q9UIV1;P49639;Q99583;P14317;Q9UQR0;Q9NQZ8;Q9NR83;O14529;Q00613;O00470;Q9UBX2;Q02548;O75469;Q6ZN32;P59923;Q15170;O75081;Q8WXI9;P29374;Q96QR8;Q9UL58;O95997;Q9UHB7;Q03933;Q99717;Q9UMQ3;P05412;O43670;Q9H4T2;O00268;P78411;Q9C0J9;P19419;P50221;Q13951;P54198;Q9UL49;Q8WYK2;P10242;P14651;Q92988;Q8N196;O15499;P10073;P23409;A6NFD8;Q9UBC0;P15336;P0CJ86;Q969H0;Q12901;Q969J2;P52738;Q8N7G0;O75157;Q9UIH9;P55055;P51508;P57086;Q92670;O60765;P43268;Q15306;O75626;P42771;Q13342;P51522;P17535;Q13547;Q8N0Y2;Q14186;P13056;P17023;P49715;Q03936;Q94776;P31268;P36956;P17483;Q9HCS4;P19484;Q7RTV3;P12524;P41970;Q86VE0;Q9Y3Q8;Q12968;P56693;Q6R2W3;P18846;P48380;P0CJ89;O14770;Q86YP4;O15525;P54845;O00716;Q6ZNB6;Q13330;P15976;Q01201;O75529;P49116;P22736;Q9NZI6;P19532;Q10587;P41223;P78317;Q15699;O00321;Q15796;O95238;Q13487;Q9Y603;Q96IS3;Q9BQA5;Q3MJ62;Q8IV54;Q8WVJ9;O00482;O95125;Q96HZ4;Q9Y6X8;P52740;Q9P2Y4;Q14938;Q16254;O60284;P40424;Q969G2;P0CJ85;P11308;Q9P2R6;P18146;P62633;O75360;O75971;Q8NEA6;Q6VUC0;O96004;Q9HBT7;Q92793;Q7Z6R9;P14653;P17861;A6NJL1;P10589;Q9BT81;Q92754;Q06730;Q9BZE3;Q6NSZ9;Q9BWX5;Q63HK5;Q12857;Q9NPC7;P32519;P17022;Q9Y5B6;O60248;Q15853;P17029;P41134;Q02556;Q12837;P14652;O60304;O14593;Q05215;O00570;Q5SXM2;Q16670;A8MZ59;Q9GZN2;P23511;Q9NPG3;Q8IZ40;O15105;Q9NWS9;O00327;Q9BYV9;Q9BYE7;Q13952;O95718;P78337;P51825;Q6ZNG2;O43248;O60682;P49640;Q14209;P41162;Q92750;Q8NF99;Q02080;P78347;P19838;Q99743;Q9H4S2;Q8WWTB7;O60925;Q99581;Q14919;Q99612;O15516;Q86X95;P10828;P22415;P62508;P10244;P35711;Q9ULV5;P40426;Q13888;Q03112;P09086;O00712;Q9P0W2;Q99081;P22681;Q68G74;Q9UIS9;Q9HA82;Q6XYB7;P16989;A6NFB7;P50549;Q9UNY5;O95619;P32243;P17676;P78413;Q86WP2;A6NJ46;O14813;Q9BXX3;P52742;P08047;Q9NP66;P17482;P24278;Q9Y5J3;Q96JN0;Q12986;P51610;A6NJG6;Q9UHF7;Q9H175;Q92985;Q6RFH8;Q6IQ32;Q8N5P1;P17032;P35680;Q96T88;P49711;P35548;P01100;Q8N7U7;Q9H2C1;Q04206;O75505;Q9Y5R5;Q9UPW6;Q9Y2L8;Q9Y3D2;Q9UKI9;Q7K285;P0CJ88;Q9P0L1;P52744;P15923;Q01094;Q9UQR1;A0AVK6;P15884;Q9Y692;P20823;O94916;P28347;P53539;Q9NS37;Q8TBC5;Q06547;Q8N693;Q3C1V8;Q92759;P35789;P28324;Q03052;P04198;Q96IT1;O14771;Q7RTV0;Q9Y4X4;P78545;P17947;Q02930;Q16534;P17028;Q96GC6;Q8NHW3;A6NLW8;Q04864;Q8N1L9;Q6P9G9;Q9Y222;Q15562;O75376;Q9BQY4;Q06732;O75478;P15036;Q14872;O14896;P40763;Q13485;Q9BZI1;P25208;Q9Y5A6;P61244;Q8IWX8;Q9NRJ4;P0C7M4;Q8N5J4;P23760;O15535;Q8TF39;Q8WYA1;O14709;Q13148;Q96T58;O60869;Q15542;Q14934;P17096;Q13562;E9PGG2;P23769;Q9H2G9;Q03923;Q9Y2P7;P11831;Q08050;Q00978;Q59GR2;Q7Z7L9;O60315;Q16520;Q15797;Q13422;Q99666;Q9NZI6;Q6NSW7;P51786;O95218;P20749;P18847;Q9UL36;Q4G112;Q6S9J6;Q13889;Q9BRR0;Q9UK39;Q96JS3;P49716;P42226;Q7Z5D8;Q9UKW6;O75362;Q00653;P28702;P37275;Q8IYM9;P35712;Q16236;P20265;P31271;O15350;Q16621;Q9UPG8;Q01826;Q99687;Q13465;Q5H9I0;Q96LW9;O00287;O14901;P27540;Q14863;Q2QGD7;P15172;P17040;Q9UKT9;Q9H9S0;Q53GI3;O43364;Q14134;Q5EBL2;Q14814;P31274;Q14765;Q9UBR4;P51814;O60663;P11474;P51815;Q12962;P01106;Q96AE4;Q07352;Q9UQ80;Q96LI6;Q99594;Q9NZC4;Q8NBB4;Q99814;P39880;O15198;P09629;O95644;Q14549;Q9H2P0;Q13033;P61968;O43439;Q14526;P28356;P28069;Q13106;Q9Y473;Q13363;Q96SZ4;Q9GZR2;P20719;Q13118;Q8TAU0;Q9BYM8;O60675;Q15776;Q66K89;Q96PT4;Q00059;Q13105;P41161;P0CG00;A8K0S8;P31249;P42224;P52736;P05048;Q6VB84;Q9UBX0;Q99576;O43593;P55197;Q9NY61;O43189;Q9UI36;Q6NT76;O75461;P09216;Q01892;P78412;Q075820;P36402;Q14929;P18848;Q0V9G9;Q9NRM2;Q8IUE0;Q8N5A5;O60422;Q9UBD0;Q9UBG7;Q15714;O60806;O43763;Q8N5Y2;P14316;Q01543;Q9Y250;Q2M1V0;P15408;Q99607;P11473;Q8NAP3;Q13761;Q12772;Q8WYN3;P47974;P52630;O14978;Q12800;P08235;Q9H0E9;O43316;P51504;Q99856;P08304;Q9BQ70;P35638;Q9NP62;Q15561;Q14207;P31260;P10827;Q9HBZ2;P14859;P56177;Q8IUE1;Q10586;Q9ULX9;P63272;Q68CJ9;Q14978;Q15583;Q9UKY1;P17036;Q9BTC8;P48443;Q01954;P31276;P35227;Q14653;Q96PT3;P06400;Q00577;Q03938;P55347;O43830;Q9Y651;O95948;P50222}

300 Pathogen[ P03363] interacts with 716 human partners: {Q86X95;Q92886;Q16236;P22681;P56179;Q86VE0;Q15911;Q9Y5A6;Q9P0L1;Q14653;Q14978;Q9NR55;Q15699;P52630;O95619;Q9UBC0;P13682;Q6S9J6;O75820;O15266;Q06547;P31273;O43812;Q03923;Q06455;P17535;P35789;O14901;P98168;Q9GZN2;P18848;Q9UIW0;O75461;Q13105;P35453;O75081;Q8NFW5;P49716;Q16649;Q14765;Q8N5Y2;Q99592;P10828;Q969J2;Q9Y4Z2;Q9Y5B6;Q9UHF7;P29374;Q9UHL9;P28698;Q92985;Q9NQZ8;O95948;Q59GR2;P19622;Q96T58;Q03924;P47902;Q96S65;P3

5711;Q13487;Q9NZR4;P54198;Q14929;Q9UH92;P78415;Q6XYB7;P0CJ87;P0CJ88;Q9BYU1;P09067;P12525;Q14938;P41223;Q15466;O75360;Q9Y5J3;O14978;Q86W11;P31274;Q8NAP3;O14529;Q04206;Q15853;O14771;O14896;P27540;P49848;P17676;P52738;Q6NSZ9;Q12901;O60481;P18146;Q5JUK2;P49116;O00712;P0CJ86;Q9UBX2;Q02386;Q13148;Q96JS3;O60315;Q02930;Q9UHB7;Q99576;Q86UP3;Q9Y468;Q9H175;P35227;Q7Z353;Q99626;P53567;P48382;Q9C0A1;Q14526;Q9UMS5;Q8N7R0;Q9UN79;Q9BYV9;Q13516;P56177;Q3C1V8;P36402;Q9UC06;P78424;P12524;Q86YP4;Q9BRR0;Q8IUE1;P78412;P53539;Q99742;P31267;Q14863;O43365;P62633;P08651;Q8N187;Q06546;Q15562;A8MTQ0;Q13952;Q0VG99;Q02556;Q03933;Q8WYP5;O60422;Q9UKW6;Q96LI6;P62508;P14651;Q15744;Q5EBL2;P0CG00;Q03112;Q13888;O60663;Q9NS37;Q14258;Q8N7U7;Q9BWW7;P18847;Q99929;Q15170;Q10586;O43763;P37275;Q06330;P0CJ89;Q9Y4A8;Q92759;P28356;P23760;Q9NQ87;P09086;Q9H2P0;P17947;Q7RTV3;Q01892;P78413;Q9GZR2;Q99856;Q16514;P20719;P28347;P31271;P06733;Q8NHW3;O43439;P04198;P18850;Q9H2W2;P25490;Q01826;P53805;Q96HZ4;Q9UKI9;O60765;P17481;Q9Y6X8;Q7RTV0;O75376;Q16520;Q01543;Q8NBB4;Q15545;O60902;Q9UC07;Q99607;Q9C0J9;Q13568;P78317;Q15776;Q16254;P11474;P16220;A6NGD5;Q9Y2L8;Q9Y2D1;P78414;Q8N196;Q9NPG3;Q13033;Q13342;Q5JT82;O43316;Q16621;P58304;Q99612;Q02080;Q8IV54;Q66K89;Q96QR8;P19419;P14921;P35548;Q9HBZ2;O00268;P50548;Q96IS3;O14593;Q9Y467;Q9Y603;O15105;Q15306;Q8IWX8;P78411;Q96JN0;Q96GC6;Q6NT76;Q15797;P32243;Q9NFC7;O14867;O14948;O60479;O95231;P51522;O43309;Q8N693;Q9HCS4;P43268;P55347;P17028;O43248;Q8NEA6;E9PGG2;Q9Y2X9;P49639;Q5H9I0;P59923;Q96MM3;Q9NWS9;Q9Y5R6;P06400;P57086;Q9BUG6;P17483;P01106;Q9Y4X4;Q8N1L9;Q9UQ80;Q9H4S2;Q99743;A8K0S8;O00409;Q12986;Q8WYK2;Q9UNY5;A6NDR6;Q9GZW5;O43189;P0CJ90;P35869;P17275;P42226;P17509;P31249;Q99729;P49711;Q8TBC5;P54845;Q9UK39;P61244;O00321;Q7KZ85;Q9UN30;P14653;P50221;P10588;Q13127;Q96PT4;Q9BZE3;P11473;P40425;P17029;Q9Y3Q8;Q12800;P51786;Q12962;O75157;Q03936;O43524;P15923;P15336;Q9UD57;Q13951;P17023;P20749;O15499;P32519;Q07352;O43593;Q2M1V0;Q05066;Q8N7G0;Q8WXI9;O43830;Q9BTC8;O75529;O95218;Q08050;Q96LW9;P13378;P0CJ85;P11831;Q8WYN3;Q8TF39;Q9NY61;Q14872;P56693;P28702;O60925;Q9BYP8;P20264;P28069;Q9UI36;Q9H4T2;P14859;P28358;Q53T94;Q6ZNG2;Q00444;P56915;Q8N5P1;Q00653;Q96AE4;P11308;Q9UPG8;A8MZ59;Q8IX15;O95238;Q9GZU2;Q9GZU0;O75030;Q96KN3;P08235;P51504;Q9Y250;Q6ZN32;P24278;Q9HBT7;Q14814;A6NJT0;Q9NZC4;Q6VB84;P78545;Q86WP2;Q14549;Q9NZI6;P17032;P17096;Q9BXX1;P14316;P32242;P18846;Q01094;Q8WYA1;Q9Y5R5;O75444;P14652;O14709;O75505;Q9NP08;O00327;O43186;P51814;O15525;P31260;Q14134;Q16670;P52736;A6NMT0;Q96ST3;Q06416;O43541;Q9Y6Q3;P17022;Q8N5A5;P17036;Q63HK3;P17861;Q4G112;Q14919;Q9Y2N7;P41134;Q9BQA5;P52744;Q8IZ40;P20265;Q15796;Q15723;P31268;Q15270;P84022;A0AVK6;Q01167;P31314;Q8N5J4;Q7Z6R9;P41161;Q68CJ9;O94916;Q9NZI7;Q9UKY1;P10244;O96004;Q9HZ24;Q00056;P35638;Q15542;Q969H0;P10914;Q92826;Q96IT1;O00470;Q05925;Q15583;Q06732;P35398;Q14209;Q5XKR4;Q00059;P50549;P15407;P51508;P22415;O00287;A6NFQ7;P54821;Q13547;P23759;Q92750;Q9HB31;P19838;Q99814;Q6NSW7;Q6RFH8;Q96SZ4;P09016;Q9Y692;Q92793;O75971;P1954;Q15697;P31276;P14317;O95125;P50222;O60869;Q13469;P52740;Q92988;Q8IWI9;Q9BWX5;Q14587;Q01201;P35712;Q9H2G9;O60393;Q9UQR0;O60682;O43711;Q9Y651;Q00978;P10242;P20226;P49910;O75362;Q92670;Q9UL58;Q13485;Q8NA19;O95076;P10074;Q12968;Q05195;Q9ULV5;P17482;P52951;P49335;Q9UIV1;O60806;P23409;P63272;P78367;O00570;Q14186;P31269;Q63HK5;P19484;Q9UQR1;Q2QGD7;Q99687;Q9C056;Q14188;P15884;P41162;O95644;Q96T88;A6NLW8;Q8IUR6;Q9BQY4;Q15714;Q9BZ11;Q96QS3;Q8IUE0;P05412;Q6IQ32;P40424;Q96AV8;Q96G23;O60304;Q04741;A2RU54;Q00613;Q9UKT9;Q53GI3;Q5SXM2;O60675;Q14934;P0C7M4;Q99581;Q04864;P19532;P47974;O95997;P09629;P16989;Q9UFF9;P55197;P40426;Q96N95;P35452;Q13330;Q9NP71;Q9NRF4;O95343;Q02548;Q8IYA7;P52741;P41970;Q14207;Q13363;O75478;P16383;P52743;Q9UBG7;O43364;Q03828;P08047;O60248;Q9UMQ3;Q96PT3;Q99081;Q9NY43;Q8TAU0;P48380;O75626;O00716;Q13761;P52742;O60284;O95475;Q15543;Q9UL36;P17544;Q9P2R6;Q00577;P09630;P17040;Q99811;Q05481;Q9P0W2;Q8NHV9;Q16534;P41212;P09017;Q9UJU5;O15522;P39880;Q9H9S0;Q9ULX9;Q07687;Q9UIH9;Q9BT81;A6NJG6;O95251;P78337;P51815;P15172;Q9UID6;Q3MJ62;Q12837;A6NJL1;Q15561;P50219;Q13106;Q99717;Q6P9G9;P25208;Q6R2W3;Q9UPW6;Q12857;Q9BXX3;Q9UBD0;Q8N653;Q9H4I2;P151825;Q9NP66;P10589;P15408;O15198;Q9Y473;P13056;Q99594;Q15329;Q9H0E9;Q9UL49;Q99583;Q3KNW1;Q9NPC8;P78347;Q9Y5Q3;Q8WVJ9;A6NNA5;Q05215;Q9BYE7;P15036;Q01860;Q9P2Y4;P31275;O14813;P42771;Q03060;Q9UJL9;O14627;Q9BQ70;Q06730;Q03052;Q02446;O14503;Q10587;O75528;Q9HBU1;Q13465;A6NJ46;Q9Y222;P10073;Q8NF99;Q7Z5D8;Q04743;P51610;P67809;O94776;Q9NR83;O15535;P28324;Q13118;P23511;Q8WUU5;Q8N0Y2;Q92754;A6NFD8;Q9UIS9;Q15319;Q6VUC0;P01100;Q9UBX0;Q03938;P49640;P11161;Q9Y2P7;O00482;Q02078}

- 301 [Cluster 28]GO:0031418+F molecular\_function [name] L-ascorbic acid binding [def]  
"Interacting selectively and non-covalently with L-ascorbic acid,  
(2R)-2-[(1S)-1,2-dihydroxyethyl]-4-hydroxy-5-oxo-2,5-dihydrofuran-3-olate\_ L-ascorbic  
acid is vitamin C and has co-factor and anti-oxidant activities in many species." [CHEBI
- 302 Pathogen[ Q2Q067] interacts with 4 human partners:{Q96Q83;Q96KS0;Q9H6Z9;Q9GZT9}
- 303 Pathogen[ P0C214] interacts with 6 human  
partners:{Q9NVH6;Q96KS0;Q9H6Z9;O14832;Q9GZT9;Q96Q83}
- 304 Pathogen[ P03346] interacts with 4 human partners:{Q9GZT9;Q96Q83;Q96KS0;Q9H6Z9}
- 305 Pathogen[ Q85601] interacts with 4 human partners:{Q9H6Z9;Q9GZT9;Q96KS0;Q96Q83}
- 306 Pathogen[ P14079] interacts with 7 human  
partners:{Q9GZT9;Q8IVL6;Q9NVH6;O14832;Q9H6Z9;Q96Q83;Q96KS0}
- 307 Pathogen[ P03383] interacts with 3 human partners:{Q96KS0;Q9H6Z9;Q96Q83}
- 308 Pathogen[ P03410] interacts with 6 human  
partners:{Q9NVH6;Q96KS0;Q9H6Z9;Q96Q83;Q9GZT9;O14832}
- 309 Pathogen[ P14075] interacts with 6 human  
partners:{Q9NVH6;Q96KS0;Q9GZT9;Q96Q83;O14832;Q9H6Z9}
- 310 Pathogen[ P0C206] interacts with 6 human  
partners:{Q96Q83;Q96KS0;Q9GZT9;O14832;Q9NVH6;Q9H6Z9}
- 311 Pathogen[ P03363] interacts with 2 human partners:{Q9H6Z9;Q96Q83}
- 312 [Cluster 29]GO:0008092+F molecular\_function [name] cytoskeletal protein binding [def]  
"Interacting selectively and non-covalently with any protein component of any

cytoskeleton (actin, microtubule, or intermediate filament cytoskeleton)." [GOC

313 Pathogen[ Q2Q067] interacts with 15 human  
partners:{Q9Y2J2;Q14315;P05062;Q8IZP0;P02511;P05413;Q9NZQ3;Q12959;P11171;P09972;Q86TC9;Q96FJ2;Q9BX66;Q9NUP9;P17661}

314 Pathogen[ P0C214] interacts with 13 human  
partners:{Q8IZP0;P02511;Q9BX66;P05413;P05062;Q14315;Q86TC9;Q12959;P09972;Q9NZQ3;Q96FJ2;P11171;P17661}

315 Pathogen[ P03346] interacts with 22 human  
partners:{Q86TC9;P09972;Q96FJ2;Q14315;O75112;Q9HCS5;P05413;Q9UKS6;Q8IZP0;Q9H329;Q9BX66;P26038;P11171;O76041;P17661;P02511;Q9NUP9;Q9NZQ3;O43491;Q9Y2J2;P05062;Q12959}

316 Pathogen[ Q85601] interacts with 15 human  
partners:{Q86TC9;Q9Y2J2;Q9NUP9;O75112;P05413;P17661;Q9BX66;P11171;Q9NZQ3;P05062;P02511;P09972;Q14315;Q12959;Q8IZP0}

317 Pathogen[ P14079] interacts with 18 human  
partners:{O75112;Q9Y2J2;P11171;Q96FJ2;Q9UKS6;P02511;P26038;P09972;Q8IZP0;P05413;Q86TC9;Q9NUP9;Q14315;Q9NZQ3;O76041;P17661;Q9BX66;P35241}

318 Pathogen[ P03383] interacts with 5 human  
partners:{P17661;Q96FJ2;P02511;P09972;Q9NZQ3}

319 Pathogen[ P03410] interacts with 21 human  
partners:{P17661;Q9H329;P05413;O76041;Q12959;Q9NZQ3;Q9NUP9;P05062;P11171;P09972;Q14315;Q9UKS6;P26038;O43491;Q9Y2J2;P02511;Q8IZP0;O75112;P35241;Q86TC9;Q9BX66}

320 Pathogen[ P14075] interacts with 7 human  
partners:{Q9NZQ3;Q9Y2J2;P17661;Q96FJ2;P02511;P09972;P11171}

321 Pathogen[ P0C206] interacts with 18 human  
partners:{Q9NUP9;P05062;P17661;Q86TC9;Q14315;P05413;O76041;Q8IZP0;O75112;O43491;Q9BX66;P09972;P02511;Q12959;Q9Y2J2;Q9UKS6;Q9NZQ3;P11171}

322 Pathogen[ P03363] interacts with 19 human  
partners:{Q12959;Q86TC9;Q8IZP0;Q9BX66;O75112;P09972;Q9HCS5;P17661;P11171;P05413;Q9UKS6;O43491;Q9NZQ3;O76041;Q9NUP9;Q9H329;Q96FJ2;Q9Y2J2;Q14315}

323 [Cluster 30]GO:0004386+F molecular\_function [name] helicase activity [def]  
"Catalysis of the reaction

324 Pathogen[ Q2Q067] interacts with 37 human  
partners:{Q92900;P51531;P38919;O00148;Q6ZRS2;Q13838;P38935;Q14240;P26196;Q9UHI6;Q9BYK8;Q8N3C0;Q08211;P51532;Q9H4L7;Q12873;P46100;Q03468;P13984;P12956;Q3L8U1;Q92499;Q9HCE1;Q14839;Q9UNY4;O14646;Q9BYX4;Q9ULG1;P25205;Q9HCK8;Q86WJ1;P13010;Q9HBD4;P28370;Q92841;Q8IYD8;P60842}

325 Pathogen[ P0C214] interacts with 47 human  
partners:{Q14527;P26196;O00148;P60842;P13010;Q12873;Q92900;Q92841;Q9H0S4;Q9HBD4;Q6ZRS2;Q3L8U1;Q7L2E3;Q9ULG1;Q9BYX4;Q9H4L7;P38935;Q9HCE1;P25205;Q9BYK8;Q8N3C0;Q14566;Q92698;P28370;P46100;P38919;Q9UNY4;Q9NVP1;Q14240;Q9HCK8;O60264;Q9UHI6;P13984;Q92499;Q14240;Q9NUU7;Q9UMR2;Q08211;O14646;P51531;Q13838;Q8IYD8;Q86WJ1;Q03468;P12956;Q14839;P51532}

326 Pathogen[ P03346] interacts with 60 human  
partners:{P46063;Q9NRZ9;P38935;Q9HBD4;P12956;P46100;P51532;Q9UMR2;Q92841;Q14527;Q9ULG1;Q8TD26;P13010;P38919;Q7L2E3;Q9NVP1;O14646;Q08211;Q92698;P60842;Q9BUQ8;Q8N3C0;Q9H2U1;Q7333;Q14566;P25205;Q92499;P13984;Q14240;Q9HCK8;O60264;Q9UHI6;P13984;Q92499;Q14240;Q13838;Q9UNY4;Q6ZRS2;P42285;Q9BYX4;Q14562;P33991;Q9NUU7;Q9H0S4;P26196;Q8IYD8;P28370;Q12873;Q9P2D1;Q9BYK8;O00148;Q13283;P51531;Q3L8U1;Q86WJ1;Q9HCE1;Q92900;Q86XP3;Q14839;Q9H4L7}

327 Pathogen[ Q85601] interacts with 50 human  
partners:{Q9HCE1;Q9H0S4;Q8IYD8;Q3L8U1;Q9P2D1;Q14240;P38935;O00148;Q9UMR2;Q7L2E3;O14646;Q92499;Q92698;Q08211;P38919;P51531;Q14566;Q03468;P51532;P13984;P25205;Q13838;Q9NVP1;Q12873;Q9UHI6;Q9H4L7;Q9NUU7;Q9BYX4;Q6ZRS2;Q9BYK8;P60842;Q9ULG1;Q9HBD4;P26196;Q9HCK8;P28370;Q86WJ1;Q8TD26;P33992;O60264;P19447;Q14527;Q92900;Q9UNY4;P46100;Q14839;P13010;P12956;Q8N3C0;Q9H2U1}

328 Pathogen[ P14079] interacts with 45 human  
partners:{Q9H0S4;P60842;Q9ULG1;Q9BYK8;Q9BYX4;Q14566;Q8IYD8;P13010;Q9UNY4;Q9HCE1;P28370;Q7L2E3;Q9H4L7;P51532;O14646;Q92698;P51531;Q13838;Q6ZRS2;Q9UHI6;Q14240;Q08211;Q12873;P46100;Q9P2D1;Q8TD26;P12956;P26196;Q86WJ1;O00148;Q9HCK8;O60264;P33992;Q14839;P13984;Q92900;Q92499;Q96FC9;Q03468;P38935;Q9NVP1;P25205;Q96C10;P19447;Q3L8U1}

329 Pathogen[ P03383] interacts with 28 human  
partners:{Q14839;Q9HBD4;P13010;Q9H0S4;Q13838;P25205;P28370;Q92841;Q9UHI6;P38919;O14646;P26196;P46100;Q12873;P13984;Q03468;P51531;Q3L8U1;Q9HCK8;P51532;P38935;Q92499;Q9HCE1;Q92900;Q9BYK8;Q9UNY4;P12956;O00148}

330 Pathogen[ P03410] interacts with 50 human  
partners:{Q13838;P25205;Q12873;Q9UNY4;Q9H4L7;Q8N3C0;Q92698;Q8IYD8;Q92900;Q9NVP1;Q9BYK8;O14646;Q9BYX4;Q9ULG1;O00148;Q9H0S4;Q03468;P33992;Q9UMR2;P12956;Q6ZRS2;P38935;Q9NUU7;Q9P2D1;Q92499;Q9HCE1;P19447;Q7L2E3;Q9HCK8;P46100;P60842;P51532;P38919;Q86WJ1;P51531;Q3L8U1;Q96C10;P13010;P13984;Q96FC9;Q8TD26;O60264;Q9HBD4;Q14566;Q14839;Q9UHI6;Q08211;P28370;Q14240;Q9H2U1}

331 Pathogen[ P14075] interacts with 28 human  
partners:{Q3L8U1;O14646;P13984;Q92900;P12956;Q9HBD4;P51532;Q9H0S4;Q9UNY4;P26196;P38935;Q14839;Q9HCE1;Q03468;Q92499;P46100;Q9UHI6;P25205;Q9HCK8;P51531;P28370;Q92841;P13010;P38919;Q13838;Q12873;Q9BYK8;O00148}

332 Pathogen[ P0C206] interacts with 56 human  
partners:{Q9H0S4;Q9H4L7;O00148;Q9HCK8;P13010;P38935;Q8TD26;Q9NUU7;P51532;Q9UNY4;P25205;P51531;Q08211;Q8IYD8;Q9P2D1;P46100;P26196;Q03468;Q6ZRS2;O94762;P13984;P19447;Q9HCE1



;Q14839;Q9BYK8;O14646;Q7Z333;Q13838;Q9ULG1;Q9NVP1;Q92841;Q14240;P28370;Q14527;Q86WJ1;Q92900;Q9H2U1;Q9NRZ9;Q9HBD4;Q9UHI6;Q9UMR2;Q9BYX4;P38919;Q96C10;P60842;Q92499;P12956;Q14566;Q7L2E3;Q9BX63;Q8N3C0;Q92698;P33992;Q12873;O60264;Q3L8U1}

333 Pathogen[ P03363] interacts with 62 human partners: {P12956;O94762;Q9BX63;Q3L8U1;Q7Z333;P38919;O75643;Q8IY21;Q9ULG1;P13984;Q92900;Q9UHI6;Q9H4L7;P13010;P25205;Q13283;Q6ZRS2;P51532;Q9NUU7;Q14839;Q92620;Q9H0S4;Q9UNY4;P33992;P46100;O60264;Q14562;Q9HCK8;Q9NUL7;Q92841;Q14240;P46063;Q14527;O00148;Q9HCE1;Q9HBD4;Q8IYD8;Q92499;P26196;Q13838;Q9BYK8;O14646;Q9UMR2;P60842;Q86XP3;Q03468;Q8TD26;Q9BYX4;Q12873;P28370;Q7L2E3;Q9NVP1;Q9H2U1;P51531;Q86WJ1;Q08211;Q9H6S0;Q5T890;P38935;Q92698;Q8N3C0;P42285}

334 [Cluster 31]GO:0016929+F molecular\_function [name] SUMO-specific protease activity [def] "Catalysis of the hydrolysis of SUMO, a small ubiquitin-related modifier, from previously sumoylated substrates." [GOC

335 Pathogen[ Q2Q067] interacts with 2 human partners: {Q9GZR1;Q9HC62}

336 Pathogen[ P0C214] interacts with 2 human partners: {Q9GZR1;Q9HC62}

337 Pathogen[ P03346] interacts with 2 human partners: {Q9GZR1;Q9HC62}

338 Pathogen[ Q85601] interacts with 2 human partners: {Q9HC62;Q9GZR1}

339 Pathogen[ P14079] interacts with 2 human partners: {Q9HC62;Q9GZR1}

340 Pathogen[ P03383] interacts with 2 human partners: {Q9HC62;Q9GZR1}

341 Pathogen[ P03410] interacts with 2 human partners: {Q9GZR1;Q9HC62}

342 Pathogen[ P14075] interacts with 2 human partners: {Q9HC62;Q9GZR1}

343 Pathogen[ P0C206] interacts with 2 human partners: {Q9HC62;Q9GZR1}

344 Pathogen[ P03363] interacts with 2 human partners: {Q9HC62;Q9GZR1}

345 [Cluster 32]GO:0050152+F molecular\_function [name] omega-amidase activity [def] "Catalysis of the reaction

346 Pathogen[ Q2Q067] interacts with 1 human partners: {Q9NQR4}

347 Pathogen[ P0C214] interacts with 1 human partners: {Q9NQR4}

348 Pathogen[ P03346] interacts with 1 human partners: {Q9NQR4}

349 Pathogen[ Q85601] interacts with 1 human partners: {Q9NQR4}

350 Pathogen[ P14079] interacts with 1 human partners: {Q9NQR4}

351 Pathogen[ P03383] interacts with 1 human partners: {Q9NQR4}

352 Pathogen[ P03410] interacts with 1 human partners: {Q9NQR4}

353 Pathogen[ P14075] interacts with 1 human partners: {Q9NQR4}

354 Pathogen[ P0C206] interacts with 1 human partners: {Q9NQR4}

355 Pathogen[ P03363] interacts with 1 human partners: {Q9NQR4}

356 [Cluster 33]GO:0047933+F molecular\_function [name] glucose-1,6-bisphosphate synthase activity [def] "Catalysis of the reaction

357 Pathogen[ Q2Q067] interacts with 1 human partners: {Q6PCE3}

358 Pathogen[ P0C214] interacts with 1 human partners: {Q6PCE3}

359 Pathogen[ P03346] interacts with 1 human partners: {Q6PCE3}

360 Pathogen[ Q85601] interacts with 1 human partners: {Q6PCE3}

361 Pathogen[ P14079] interacts with 1 human partners: {Q6PCE3}

362 Pathogen[ P03383] interacts with 1 human partners: {Q6PCE3}

363 Pathogen[ P03410] interacts with 1 human partners: {Q6PCE3}

364 Pathogen[ P14075] interacts with 1 human partners: {Q6PCE3}

365 Pathogen[ P0C206] interacts with 1 human partners: {Q6PCE3}

366 Pathogen[ P03363] interacts with 1 human partners: {Q6PCE3}

367 [Cluster 34]GO:0042802+F molecular\_function [name] identical protein binding [def] "Interacting selectively and non-covalently with an identical protein or proteins." [GOC

368 Pathogen[ Q2Q067] interacts with 127 human partners: {P04156;P02792;Q9NWK9;O60232;Q9UL45;Q9UH99;O15234;P07910;P31749;Q13185;A0AVK6;Q9HAU4;P07195;P63172;Q9P209;P07196;Q8IY63;O43663;Q9C005;Q7Z6B0;P38432;Q13485;Q9H9D4;Q9NPI6;Q15233;P18847;Q96F86;O43805;Q9H0F6;P61457;O96004;Q96T88;Q9P0W5;Q05516;Q04206;P50502;P05062;Q12933;O60238;Q96AV8;Q9UJY1;Q9BSB4;Q86XR8;Q14192;P07900;Q9NXR1;O15350;Q96GX9;Q9NQ48;P51610;P26447;Q13158;P17036;D6RGH6;Q14790;Q6BDS2;P20265;Q9NR22;Q06609;Q9UBB4;Q9NP97;P11166;O14818;Q9UHK0;Q06830;P12004;Q9Y3M2;P54253;P56693;Q14653;P67870;P34896;O14641;Q8N140;O14862;Q9H0W8;Q9BV20;Q13233;O43918;Q8IWIJ2;O75530;Q9Y2J4;Q7Z465;P53041;Q16890;Q96007;Q9H7L9;Q13309;P81274;Q99962;Q9C035;P42768;P25963;Q12983;Q9UDV6;Q9NS73;Q96H12;Q06455;Q15628;Q9NS23;Q9UHN1;P60953;Q92734;Q03393;P08670;Q9HCM9;P42226;Q86VS8;P23497;Q66K74;P51808;Q9NVV4;Q86WH2;P57086;Q9Y468;P83916;P23297;Q96ED9;Q00987;Q9UMS4;Q8N668;Q15154;O15392;Q15797;O60936;Q13501;Q9Y224}

369 Pathogen[ P0C214] interacts with 139 human partners: {D6RGH6;Q8IWIJ2;O15234;Q9NWK9;P38432;O43805;Q06609;Q9HAU4;A0AVK6;Q9NPP4;Q15154;Q99832;P51610;Q15628;Q9BSB4;Q9Y2J4;P62993;Q6BDS2;Q9NS23;P54253;Q9NPI6;Q96ED9;Q9UBB4;P81274;Q9P209;Q00987;Q13309;Q7Z465;P42226;Q13158;O14818;O15350;Q9C035;P83916;O75530;Q15233;P56693;P61457;P34897;Q9H0F6;Q04206;Q96GX9;Q06455;Q9UHK0;P60953;O60232;Q92734;Q8N668;P51808;Q9Y468;Q99962;Q16890;Q96T88;P05062;Q9UMS4;Q06830;P11166;Q9UH99;P57086;P20265;Q13501;Q86WH2;Q03393;Q14566;Q86VS8;P07910;Q13233;Q96AT9;Q9Y224;P49257;Q8IYX8;P34896;Q9Y3M2;O14641;Q86XR8;Q12933;Q13485;P18847;Q9C005;P08670;O43663;Q9L485;Q8WZ19;Q13185;Q9P0W5;Q14192;Q7Z6B0;P25963;Q9NS73;Q9HCM9;P53041;Q14653;O96007;Q9UDV6;O43918;Q12983;P23497;P26447;O15392;P04156;P63172;Q9NQ48;O60238;P17036;P02792;Q9NP97;O14862;Q8IY63;Q9H9D4;O96004;P16118;O14727;Q96H12;Q15797;Q9H0W8;P67870;P36551;Q9NXR1;P42768;P63261;Q9NVV4;Q9UJY1;P23297;Q96F86;P07196;Q05516;P31749;Q9NR22;O60936;P07195;Q66K74;P50502;Q8N140;P55072;Q9BV20;Q9H7L9;Q9UHN1;Q14790;Q96AV8}

370 Pathogen[ P03346] interacts with 142 human partners: {P02792;P12004;O15234;Q9UBB4;P07196;Q9HAU4;Q06609;P18847;P07900;Q9NPI6;Q8WZ1



- 9;Q86XR8;Q9C005;O15392;Q86VS8;Q92734;O43918;Q9Y3M2;P50502;Q9BV20;O75530;P42768;Q13158;Q8N668;P23297;P25963;Q7Z465;Q15797;Q15154;O60238;P51808;P49257;Q99962;O14818;P51610;Q9UMS4;Q9UH99;P56693;Q9UJY1;Q66K74;Q04206;P07910;Q9BSB4;Q9H9D4;Q9NXR1;Q9P209;O60232;Q9NWK9;Q9UHN1;Q9C035;P60953;P42226;P62993;Q96AV8;D6RGH6;O15350;Q9H0F6;Q12983;P55072;Q8IYX8;Q03393;O43805;Q00987;P20265;Q7Z6B0;Q9Y371;Q8IY63;O96004;P17036;Q14566;Q16890;Q9Y224;Q8N140;Q9NPP4;O14641;P81274;P31749;Q13309;Q8N5Z5;Q9UDV6;Q9P0W5;Q14192;Q9UHK0;Q8N5I3;Q9NVV4;Q9HCM9;Q9NS73;Q9NR22;O75604;P53041;Q13233;P11166;P63172;Q9NQ48;Q9Y2J4;Q9UL45;O96007;P26447;Q9Y468;Q14653;Q15628;P08670;Q05516;Q06830;Q96H12;Q15233;O60936;Q96ED9;Q14790;P07195;P04156;P83916;Q9H7L9;Q9H0W8;P23497;Q13485;Q9UI14;P05062;P38432;P67870;P54253;P61457;Q6BDS2;Q9BZR9;O43663;Q86WH2;A0AVK6;O14862;O14727;Q9NS23;P53367;Q96F86;Q9NP97;Q13185;Q9NRD5;Q96GX9;Q96T88;Q9UJC3;Q8IYW2;Q13501;P57086;Q06455}
- 371 Pathogen[ Q85601] interacts with 130 human  
partners: {Q16890;Q8IYW2;Q92734;O15234;Q13309;Q06455;P83916;Q9HAU4;P26447;Q9NP97;P31749;P62993;Q9NPI6;Q8WZ19;Q9NR22;Q15154;P51808;Q9BSB4;Q86VS8;Q9UBB4;Q9Y3M2;P17036;Q8IY63;P07196;Q9H0W8;Q13158;P08670;Q7Z465;P81274;Q15797;Q14790;Q99962;Q9P0W5;Q9UDV6;Q9UMS4;Q9Y468;Q66K74;O60936;Q9P209;O60232;Q9NWK9;Q9BZR9;O15392;D6RGH6;Q9NS23;P23297;Q9H0F6;P05062;P63172;O96004;Q96GX9;P16118;P51610;O43663;Q9NS73;Q14566;Q86XR8;Q9UH99;Q14653;P38432;Q8N140;P11166;O14641;P34896;Q12933;P18847;P49257;Q9C005;P63261;Q04206;P42768;P42226;Q14192;O75530;O14862;Q96T88;Q8N668;P53041;P57086;Q13185;Q9NQ48;Q9Y2J4;O96007;P07900;Q9UHK0;P56693;Q9C035;Q7Z6B0;Q15628;Q05516;Q06830;Q15233;P07195;Q12983;P60953;P02792;P04156;P12004;O15350;Q96F86;P67870;P54253;Q13233;P50502;Q9NVV4;Q9BV20;Q9NXR1;Q86WH2;Q00987;Q9H7L9;O60238;A0AVK6;Q96ED9;Q06609;Q13485;Q9UHN1;O14818;Q9Y224;Q9UJY1;P61457;O43918;Q96AV8;O43805;P20265;Q9HCM9;Q8IYX8;Q13501;Q96H12;Q9H9D4;P25963}
- 372 Pathogen[ P14079] interacts with 146 human  
partners: {P09327;P49257;Q9NQ48;Q16890;Q9NR22;P63261;Q8N7P3;Q9UDV6;P57086;P63172;Q9C005;Q14566;Q9UJC3;Q9NS23;P53041;D6RGH6;Q14653;P51808;Q9C035;Q9P209;Q13309;Q92734;Q14192;P22234;Q9H0W8;P56750;Q86VS8;P20265;Q96L14;O14641;P04156;Q9NPI6;Q9BV20;Q96ED9;Q66K74;P61457;Q9Y468;O15392;Q6ZUJ8;Q05516;P07910;Q9UI14;O96004;Q969X0;Q9Y2J4;Q96H12;Q8N5I3;P34897;Q9Y371;Q9HAU4;Q9UHK0;P54253;P11166;Q15797;Q7Z465;P23497;P51610;O15350;O00501;P07196;Q9HCM9;Q9BSB4;Q86WH2;Q9NP97;P07195;Q00987;Q96007;Q9NWK9;P42226;P8N6F1;O43663;Q13185;Q9UMS4;Q14790;O75530;Q96HD9;Q9UL45;Q9UBB4;Q96F86;Q96GX9;Q9NVV4;P07900;Q96B33;O14818;P26447;O60936;Q12983;Q9UJY1;Q8IYW2;Q8N668;Q9NWX6;Q8N140;P23297;Q5T0D9;P10620;Q13501;P56693;O14862;Q9P0W5;Q12933;Q9Y3M2;P62993;Q13158;O43918;P38432;Q06455;Q9H0F6;P67870;Q96AV8;Q9H8K7;Q8N5Z5;P12004;P81274;P08670;Q03393;Q15154;A0AVK6;P83916;Q86XR8;Q9NXR1;P36551;Q9UH99;Q9H7L9;Q6BDS2;Q9UHN1;O60238;Q15233;Q06609;Q9Y239;Q8IYX8;Q9Y224;Q15628;O15234;P50502;O60232;Q9H9D4;Q99836;Q8IY63;O43805;Q9NS73;P34896;P43320;P42768;Q7Z6B0;Q99962;Q9NPP4}
- 373 Pathogen[ P03383] interacts with 107 human  
partners: {Q9NVV4;Q9UHN1;Q8IYW2;O15234;Q86XR8;Q06609;Q13485;Q14653;Q06455;O14862;Q9H0F6;P51808;Q7Z6B0;Q13233;P08670;P04156;Q96H12;Q9UBB4;P50502;Q9NWK9;Q9H0W8;Q8N668;P23297;Q7Z465;P31749;P34896;P63172;Q9H7L9;P18847;P60953;Q9NS73;Q9UH99;Q86WH2;D6RGH6;O60936;O60232;Q15797;P42226;Q05516;P07900;P61457;Q13158;P38432;Q12983;P83916;Q96GX9;O96004;P51610;Q13185;P81274;O60238;Q9UDV6;Q9C035;Q9Y2J4;Q9UHK0;P07195;O14641;Q14192;Q12933;Q9NR22;P17036;Q9NP97;Q9C005;Q9NPI6;Q9HCM9;Q15154;Q9NQ48;P42768;O15350;P07196;Q86VS8;Q9Y3M2;P25963;P53041;Q9P0W5;Q8N140;Q96ED9;O96007;Q8IY63;Q13501;O43918;Q15628;Q9BV20;P54253;P67870;P23497;Q9H9D4;Q9P209;Q13309;Q04206;Q9UJY1;Q15233;Q96F86;P57086;O43663;P20265;Q96AV8;P56693;O14818;Q16890;A0AVK6;Q9UMS4;Q9Y224;Q9Y468;O75530;Q6BDS2;Q9BSB4}
- 374 Pathogen[ P03410] interacts with 160 human  
partners: {P26447;P57086;Q04206;O15392;Q96HD9;Q96AV8;P43320;P51610;Q9UJC3;Q96B33;P51808;Q99832;O15234;Q9HCM9;Q9Y239;Q12983;Q8N7P3;Q9NP97;Q9UDV6;P49257;P50502;O96004;P20963;Q9NXR1;P11166;Q9Y2J4;Q15233;Q9H9D4;P18847;Q15154;Q9BSB4;P16118;Q9UHK0;Q9Y3M2;Q9NPI6;Q9UH99;Q9NS73;Q9Y224;O14862;Q14653;P53367;D6RGH6;O00501;Q8WZ19;Q7Z6B0;P63172;Q7Z465;O43918;Q9NS23;Q13501;P31749;Q8N6F1;Q9P209;P42768;P07900;Q9Y468;Q9NPP4;Q86VS8;Q969X0;Q9UJY1;Q96H12;Q13233;P05062;Q9NVV4;Q8IYX8;P56747;Q9NR22;P07195;P36551;Q9BV20;P17036;P07196;P38432;Q9UL45;Q13158;Q9C005;P22234;O43805;Q15628;Q9C035;P07910;O60936;Q9NRD5;Q96F86;Q13309;Q6ZUJ8;Q9NPE6;Q96ED9;O96007;Q15797;O60232;Q13485;Q9H8K7;Q9H7L9;Q9Y371;P04156;Q12933;P56693;O14818;P53041;Q92734;Q9P0W5;Q06455;P81274;Q13185;Q86WH2;Q96GX9;Q66K74;Q8N5I3;P08670;P42226;P60953;Q6BDS2;Q9NWK9;P23297;Q9UMS4;Q5T0D9;P83916;Q16890;O15350;Q8N5Z5;Q8N140;Q99962;Q9NQ48;P63261;Q00987;P56750;Q9H0W8;Q8IU99;P25963;P54253;P20265;P02792;Q96L14;P67870;Q9UBB4;Q14566;Q8IY63;P62993;Q9UHN1;P12004;Q03393;Q9NWX6;Q9UI14;Q8N668;Q9BRK5;Q14192;O95471;Q06830;P34897;Q8IYW2;P34896;O60238;A0AVK6;Q06609;O43663;O75530;Q9H0F6;O14641;P61457}
- 375 Pathogen[ P14075] interacts with 110 human  
partners: {P60953;Q96GX9;O15234;P54253;Q9NP97;Q12983;P23497;Q04206;Q9P0W5;Q96H12;P81274;Q9BSB4;O43663;P42226;Q92734;Q9NR22;P34896;Q7Z465;Q9Y224;Q8N140;P38432;P51808;P57086;Q9NVV4;P18847;Q9Y468;P42768;P51610;Q9BV20;O43918;P17036;P20265;P04156;O60232;Q9UJY1;P56693;Q9NPI6;Q8N668;Q5T0D9;P63172;Q9UBB4;Q8IY63;P25963;P07195;Q9HCM9;O96004;Q13485;Q9UHK0;P07900;Q9Y2J4;P16118;P31749;Q14653;Q06455;O14641;Q7Z6B0;Q12933;Q86XR8;O15350;O14862;Q9C005;Q13185;Q9H9D4;P50502;Q86WH2;Q16890;P67870;O60238;Q13158;Q8IYW2;O14818;Q13309;Q9C035;P53041;P61457;Q9UMS4;O96007;P83916;Q96AV8;Q15628;Q15233;P08670;Q15154;Q9UHN1;Q9UH99;Q9UDV6;Q05516;Q9H8K7;P07196;Q9H0W8;Q9NQ48;Q86VS8;Q9P209;Q9Y3M2;O60936;Q13233;Q6BDS2;D6RGH6;Q9NS73;Q9H0F6;Q96F86;Q14192;A0AVK6;Q9H7L9;Q06609;Q13501;Q96ED9;P23297;O75530;Q9NWK9}
- 376 Pathogen[ P0C206] interacts with 141 human  
partners: {Q9Y468;Q9Y224;Q9BSB4;Q86XR8;P07195;Q9UMS4;Q86WH2;Q13501;Q9NWK9;Q9C005;Q8N140;P05062;O75530;Q9UHN1;P07196;P26447;Q06455;P31749;Q9NP97;Q9UBB4;Q9UL45;P81274;Q9BV20}

;Q13309;P04156;Q9HAU4;O14862;Q15233;Q96AV8;Q05516;Q8IY63;Q9UHK0;Q9UH99;O75604;P25963;P53041;Q16890;P36551;P57086;Q9NPI6;Q96007;P34897;Q99962;P56693;D6RGH6;Q13158;Q12933;P11166;Q13233;Q9UI14;P62993;Q6BDS2;Q66K74;Q86VS8;Q96ED9;O96004;Q9P0W5;Q9UJY1;O43918;Q5TOD9;O60238;Q12983;O60936;P50502;Q8WZ19;P83916;Q9BZR9;Q9H0W8;P07900;P51808;P51610;P63261;P34896;Q96T88;Q96F86;Q04206;Q8IYX8;P49257;A0AVK6;Q9Y2J4;P67870;O43663;Q14790;O15234;Q15628;P20792;Q9NVV4;O14818;Q96H12;O15392;Q7Z465;Q9C035;Q9UDV6;Q13485;Q96L14;P55072;P60953;Q9NR22;Q9H7L9;Q9NQ48;P61457;Q96GX9;Q15797;Q9H0F6;P18847;Q9HCM9;P42226;P16118;Q13185;P20265;O15350;Q03393;Q06609;Q9NXR1;Q14192;Q92734;Q9P209;Q9H8K7;Q9UJC3;P08670;P23297;Q00987;O43805;P42768;Q9NS23;Q7Z6B0;Q8N668;Q15154;P63172;Q06830;Q9NRD5;Q14566;P38432;O60232;Q9NS73;Q8IYW2;P17036;P54253;Q14653;P12004;Q9H9D4}

377 Pathogen[ P03363] interacts with 122 human partners: {Q14653;Q86VS8;Q15233;Q06455;Q96H12;Q13309;Q9NVV4;Q8N5Z5;Q99962;Q9BZR9;P07900;Q96ED9;Q04206;Q66K74;P26447;P83916;Q9Y468;Q9HAU4;P50502;O43805;P25963;O60232;Q92734;Q9H7L9;P18847;O75604;Q12933;P53041;Q8N140;Q6BDS2;Q9UHK0;P42768;O96007;Q9UJY1;Q9Y3M2;Q96RU3;Q8IY63;O75530;Q15797;P04156;Q9P209;Q13158;P23497;P57086;Q13185;P42226;Q9C005;P81274;Q8N668;Q9BSB4;Q9Y2J4;P07196;Q92904;P61457;Q96F86;Q9P0W5;P56693;Q9H0W8;P63172;Q9NR22;P31749;Q9UDV6;Q9UBB4;P08670;P17036;P20265;P07910;Q9NQ48;A0AVK6;Q7Z465;O96004;Q9C035;P54253;P51808;Q9NS23;D6RGH6;O60936;O14862;Q15628;Q9BV20;Q8IYW2;Q13485;Q9H0F6;Q16890;Q86WH2;P63261;Q9HCM9;Q96T88;Q8IYX8;Q96AV8;P67870;Q06609;Q86XR8;Q96GX9;Q9UHN1;Q9Y224;O43918;Q9UMS4;Q9NPP4;Q9NP97;O43663;Q7Z6B0;Q8WZ19;Q9NXR1;Q9H9D4;Q9NWK9;O14641;Q9NS73;Q05516;P60953;O60238;Q15154;Q13233;Q9NPI6;P11166;P38432;P23297;P51610;Q9UH99;O15234;Q14192;Q9UJC3}

378 [Cluster 35]GO:0003886+F molecular\_function [name] DNA (cytosine-5-)-methyltransferase activity [def] "Catalysis of the reaction

379 Pathogen[ Q2Q067] interacts with 3 human partners: {Q9Y6K1;Q9UBC3;P26358}

380 Pathogen[ P0C214] interacts with 2 human partners: {Q9Y6K1;P26358}

381 Pathogen[ P03346] interacts with 4 human partners: {Q9Y6K1;Q9UBC3;P26358;O14717}

382 Pathogen[ Q85601] interacts with 3 human partners: {P26358;Q9Y6K1;Q9UBC3}

383 Pathogen[ P14079] interacts with 3 human partners: {Q9Y6K1;Q9UBC3;P26358}

384 Pathogen[ P03383] interacts with 2 human partners: {Q9Y6K1;P26358}

385 Pathogen[ P03410] interacts with 3 human partners: {P26358;Q9UBC3;Q9Y6K1}

386 Pathogen[ P14075] interacts with 2 human partners: {Q9Y6K1;P26358}

387 Pathogen[ P0C206] interacts with 3 human partners: {Q9Y6K1;P26358;Q9UBC3}

388 Pathogen[ P03363] interacts with 4 human partners: {Q9Y6K1;O14717;P26358;Q9UBC3}

389 [Cluster 36]GO:0046538+F molecular\_function [name] 2,3-bisphosphoglycerate-dependent phosphoglycerate mutase activity [def] "Catalysis of the reaction

390 Pathogen[ Q2Q067] interacts with 1 human partners: {P15259}

391 Pathogen[ P0C214] interacts with 1 human partners: {P15259}

392 Pathogen[ P03346] interacts with 1 human partners: {P15259}

393 Pathogen[ Q85601] interacts with 1 human partners: {P15259}

394 Pathogen[ P14079] interacts with 1 human partners: {P15259}

395 Pathogen[ P03383] interacts with 1 human partners: {P15259}

396 Pathogen[ P03410] interacts with 1 human partners: {P15259}

397 Pathogen[ P14075] interacts with 1 human partners: {P15259}

398 Pathogen[ P0C206] interacts with 1 human partners: {P15259}

399 Pathogen[ P03363] interacts with 1 human partners: {P15259}

400 [Cluster 37]GO:0004407+F molecular\_function [name] histone deacetylase activity [def] "Catalysis of the reaction

401 Pathogen[ Q2Q067] interacts with 12 human partners: {P56524;Q9BY41;Q9UKV0;Q13547;O94776;O15379;Q9UQL6;Q969S8;Q96DB2;Q92769;Q8WUI4;Q9NSC2}

402 Pathogen[ P0C214] interacts with 12 human partners: {Q13547;Q969S8;Q96DB2;P56524;O94776;Q92769;Q9UKV0;Q9NSC2;O15379;Q8WUI4;Q9UQL6;Q9BY41}

403 Pathogen[ P03346] interacts with 12 human partners: {Q969S8;Q96DB2;O15379;Q9NSC2;P56524;O94776;Q92769;Q13547;Q9BY41;Q8WUI4;Q9UKV0;Q9UQL6}

404 Pathogen[ Q85601] interacts with 12 human partners: {Q969S8;Q9UKV0;Q96DB2;Q9BY41;O94776;Q9UQL6;Q92769;P56524;O15379;Q13547;Q9NSC2;Q8WUI4}

405 Pathogen[ P14079] interacts with 11 human partners: {Q9UQL6;O15379;Q96DB2;Q969S8;Q8WUI4;Q9UKV0;Q92769;Q9BY41;P56524;O94776;Q9NSC2}

406 Pathogen[ P03383] interacts with 11 human partners: {O94776;Q9UQL6;Q92769;Q9NSC2;O15379;Q13547;Q9BY41;Q9UKV0;P56524;Q8WUI4;Q969S8}

407 Pathogen[ P03410] interacts with 12 human partners: {Q9UKV0;Q9BY41;Q8WUI4;Q9UQL6;Q969S8;Q92769;O15379;P56524;O94776;Q13547;Q9NSC2;Q96DB2}

408 Pathogen[ P14075] interacts with 11 human partners: {Q9BY41;Q9NSC2;Q969S8;P56524;O94776;Q9UKV0;Q13547;Q92769;O15379;Q9UQL6;Q8WUI4}

409 Pathogen[ P0C206] interacts with 12 human partners: {Q92769;Q9NSC2;Q96DB2;Q9UKV0;Q13547;O94776;O15379;Q8WUI4;Q9BY41;P56524;Q969S8;Q9UQL6}

410 Pathogen[ P03363] interacts with 8 human

411 partners:{Q9BY41;O15379;Q969S8;Q9UQL6;Q9UKV0;Q13547;Q8WUI4;O94776}  
[Cluster 38]GO:0019900+F molecular\_function [name] kinase binding [def]  
"Interacting selectively and non-covalently with a kinase, any enzyme that catalyzes the  
transfer of a phosphate group." [GOC  
412 Pathogen[ Q2Q067] interacts with 18 human  
partners:{P06400;Q7L9L4;Q99741;O60260;O95999;Q15172;Q96N16;P11166;P62324;Q9UJM3;Q9972  
8;Q15654;Q86VP1;Q15628;Q9UNE7;Q8TBN0;P23497;Q9UMX0}  
413 Pathogen[ P0C214] interacts with 24 human  
partners:{Q99728;Q9Y376;Q15628;Q8TBN0;Q15172;Q9UJM3;A0MZ66;Q7L9L4;P11166;O60825;Q86VP  
1;O95999;Q9H0E2;Q15654;P62324;P23497;Q5VZ66;O60260;P16118;Q9UNE7;Q9UMX0;P06400;Q99741  
;Q96N16}  
414 Pathogen[ P03346] interacts with 25 human  
partners:{Q15172;Q8TBN0;Q96N16;P06400;Q99728;Q9UMX0;Q7L9L4;Q9Y376;Q9H0E2;O95999;Q9Y3P  
8;Q96AA8;O95863;Q9UNE7;P11166;Q15628;O60260;Q5VZ66;P23497;P62324;Q9Y2R2;Q15654;Q99741  
;Q86VP1;Q9UJM3}  
415 Pathogen[ Q85601] interacts with 21 human  
partners:{Q86VP1;P06400;Q15654;O60825;P62324;Q99728;Q15172;Q9Y376;P16118;P11166;Q96AA  
8;Q8TBN0;Q15628;O60260;Q9UJM3;Q7L9L4;O95999;Q99741;Q9UNE7;Q96N16;Q9UMX0}  
416 Pathogen[ P14079] interacts with 20 human  
partners:{O60260;P62324;O95999;Q9UJM3;Q9UMX0;Q15172;P24588;Q8TBN0;A0MZ66;Q5VZ66;P1116  
6;P23497;Q96N16;Q99741;Q7L9L4;Q96AA8;Q9H0E2;Q15628;Q9Y376;Q9Y3P8}  
417 Pathogen[ P03383] interacts with 15 human  
partners:{P62324;Q9UJM3;Q86VP1;P06400;Q15654;Q7L9L4;Q96N16;O60260;Q9UMX0;O95999;Q1562  
8;P23497;Q8TBN0;Q99741;Q9Y3P8}  
418 Pathogen[ P03410] interacts with 24 human  
partners:{P11166;P16118;Q15172;Q7L9L4;Q96N16;P06400;O60260;A0MZ66;Q86VP1;Q15654;Q1562  
8;Q9UMX0;Q9UNE7;Q9Y3P8;Q96AA8;Q5VZ66;O95999;Q9Y376;P62324;Q9H0E2;Q8TBN0;Q9UJM3;P24588  
;Q99741}  
419 Pathogen[ P14075] interacts with 17 human  
partners:{P23497;P62324;Q96N16;Q96AA8;P16118;Q86VP1;Q9UJM3;Q9Y3P8;O95999;P06400;Q1565  
4;Q15628;Q99741;Q7L9L4;O60260;Q8TBN0;Q9UMX0}  
420 Pathogen[ P0C206] interacts with 26 human  
partners:{P62324;Q86VP1;Q9UMX0;Q15172;O95999;Q96AA8;Q15654;Q9Y376;P11166;Q9Y2R2;Q9974  
1;Q96N16;Q8TBN0;Q9H0E2;Q9Y3P8;Q9UNE7;O60260;Q99728;Q15628;A0MZ66;O60825;Q9UJM3;P16118  
;Q7L9L4;Q5VZ66;P06400}  
421 Pathogen[ P03363] interacts with 21 human  
partners:{Q15654;Q86VP1;Q9Y3P8;Q9Y2R2;Q9UMX0;P23497;P06400;P62324;Q99741;Q9UNE7;Q9H0E  
2;Q9Y376;Q7L9L4;Q15628;Q15172;Q9UJM3;Q99728;Q96N16;Q8TBN0;P11166;Q96AA8}  
422 [Cluster 39]GO:0009881+F molecular\_function [name] photoreceptor activity [def]  
"The function of absorbing and responding to incidental electromagnetic radiation,  
particularly visible light. The response may involve a change in conformation." [GOC  
423 Pathogen[ Q2Q067] interacts with 1 human partners:{Q16526}  
424 Pathogen[ P0C214] interacts with 2 human partners:{Q49AN0;Q16526}  
425 Pathogen[ P03346] interacts with 2 human partners:{Q49AN0;Q16526}  
426 Pathogen[ Q85601] interacts with 2 human partners:{Q49AN0;Q16526}  
427 Pathogen[ P14079] interacts with 2 human partners:{Q16526;Q49AN0}  
428 Pathogen[ P03383] interacts with 1 human partners:{Q16526}  
429 Pathogen[ P03410] interacts with 2 human partners:{Q16526;Q49AN0}  
430 Pathogen[ P14075] interacts with 1 human partners:{Q16526}  
431 Pathogen[ P0C206] interacts with 2 human partners:{Q16526;Q49AN0}  
432 Pathogen[ P03363] interacts with 2 human partners:{Q49AN0;Q16526}  
433 [Cluster 40]GO:0019809+F molecular\_function [name] spermidine binding [def]  
"Interacting selectively and non-covalently with spermidine,  
N-(3-aminopropyl)-1,4-diaminobutane." [GOC  
434 Pathogen[ Q2Q067] interacts with 1 human partners:{P21673}  
435 Pathogen[ P0C214] interacts with 1 human partners:{P21673}  
436 Pathogen[ P03346] interacts with 1 human partners:{P21673}  
437 Pathogen[ Q85601] interacts with 1 human partners:{P21673}  
438 Pathogen[ P14079] interacts with 1 human partners:{P21673}  
439 Pathogen[ P03383] interacts with 1 human partners:{P21673}  
440 Pathogen[ P03410] interacts with 1 human partners:{P21673}  
441 Pathogen[ P14075] interacts with 1 human partners:{P21673}  
442 Pathogen[ P0C206] interacts with 1 human partners:{P21673}  
443 Pathogen[ P03363] interacts with 1 human partners:{P21673}  
444 [Cluster 41]GO:0046966+F molecular\_function [name] thyroid hormone receptor binding  
[def] "Interacting selectively and non-covalently with a thyroid hormone receptor." [GOC  
445 Pathogen[ Q2Q067] interacts with 23 human  
partners:{Q96HR3;Q9NPJ6;P55345;Q93074;O75448;O60244;P28702;Q14669;O43593;Q15654;Q9UHV  
7;Q15544;Q9NVC6;P37198;Q15466;Q9Y2X0;Q14686;Q15545;Q15652;Q9Y2W1;O75376;Q15651;Q00403  
}  
446 Pathogen[ P0C214] interacts with 22 human  
partners:{Q15651;Q9Y2X0;Q93074;Q00403;Q96HR3;Q9NVC6;P55345;Q14686;Q15545;O60244;P3719  
8;Q15544;Q15652;Q15654;O75376;O43593;Q9UHV7;Q14669;O75448;Q9Y2W1;Q9NPJ6;Q15466}  
447 Pathogen[ P03346] interacts with 25 human  
partners:{Q9NPJ6;Q15466;Q9P2W1;Q96HR3;Q93074;O60244;P37198;Q15652;O43593;O75448;P2870  
2;Q15646;P55345;Q14669;O75376;Q9NVC6;Q9Y2X0;Q00403;Q15651;Q15545;Q9Y2W1;Q15654;Q15544

```

;Q9UHV7;Q14686}
448 Pathogen[ Q85601] interacts with 22 human
partners:{Q9Y2X0;Q15466;Q9UHV7;Q15654;P28702;Q15545;Q14669;O75448;Q15651;Q14686;O7537
6;Q00403;Q15652;O43593;Q9Y2W1;O60244;Q96HR3;Q93074;Q15544;Q9NPJ6;Q9NVC6;P55345}
449 Pathogen[ P14079] interacts with 20 human
partners:{Q06244;Q9Y2X0;Q96HR3;Q9NVC6;Q15652;O75448;Q15651;P55345;Q00403;Q9UHV7;P2870
2;P37198;Q9NPJ6;O75376;Q93074;Q15466;O43593;Q14686;Q9Y2W1;Q15545}
450 Pathogen[ P03383] interacts with 20 human
partners:{Q15544;O75376;O60244;Q14686;Q9NPJ6;Q15651;Q93074;Q15654;Q96HR3;Q00403;O7544
8;Q15652;Q15466;P28702;Q9UHV7;P37198;Q9NVC6;Q15545;Q9Y2W1;Q9Y2X0}
451 Pathogen[ P03410] interacts with 21 human
partners:{Q9Y2W1;Q15652;Q14686;Q9NVC6;Q9NPJ6;Q15651;O75376;Q15654;P28702;Q15466;Q0040
3;Q96HR3;Q15544;O60244;Q9UHV7;Q9Y2X0;Q93074;O75448;Q15545;O43593;P55345}
452 Pathogen[ P14075] interacts with 20 human
partners:{Q9NPJ6;Q96HR3;Q14686;Q00403;Q15652;Q15544;O75448;O75376;Q93074;Q9UHV7;O6024
4;P37198;Q15545;Q15654;P28702;Q9NVC6;Q15466;Q9Y2W1;Q15651;Q9Y2X0}
453 Pathogen[ P0C206] interacts with 22 human
partners:{Q15466;Q96HR3;Q15545;Q15544;Q15654;Q9UHV7;Q14669;Q15651;Q9NPJ6;Q14686;Q9Y2W
1;O75376;Q15652;O60244;P28702;Q9NVC6;O75448;P55345;Q9Y2X0;Q00403;O43593;Q93074}
454 Pathogen[ P03363] interacts with 20 human
partners:{Q15654;Q15466;Q96HR3;O75376;Q15545;Q14686;Q15652;Q00403;O43593;Q14669;P2870
2;Q15544;Q9NVC6;Q9UHV7;Q93074;Q15651;O75448;Q9NPJ6;O60244;P37198}
455 [Cluster 42]GO:0032549+F molecular_function [name] ribonucleoside binding [def]
"Interacting selectively and non-covalently with a ribonucleoside, a compound consisting
of a purine or pyrimidine nitrogenous base linked to ribose." [GOC
456 Pathogen[ Q2Q067] interacts with 3 human partners:{P30876;Q9H9Y6;O14802}
457 Pathogen[ P0C214] interacts with 4 human partners:{P30876;Q9H9Y6;Q9NW08;O14802}
458 Pathogen[ P03346] interacts with 3 human partners:{Q9H9Y6;P30876;O14802}
459 Pathogen[ Q85601] interacts with 4 human partners:{Q9H9Y6;Q9NW08;P30876;O14802}
460 Pathogen[ P14079] interacts with 4 human partners:{Q9NW08;P30876;O14802;Q9H9Y6}
461 Pathogen[ P03383] interacts with 3 human partners:{Q9H9Y6;P30876;O14802}
462 Pathogen[ P03410] interacts with 4 human partners:{P30876;Q9NW08;O14802;Q9H9Y6}
463 Pathogen[ P14075] interacts with 3 human partners:{P30876;Q9H9Y6;O14802}
464 Pathogen[ P0C206] interacts with 4 human partners:{Q9NW08;O14802;Q9H9Y6;P30876}
465 Pathogen[ P03363] interacts with 2 human partners:{Q9H9Y6;P30876}
466 [Cluster 43]GO:0004634+F molecular_function [name] phosphopyruvate hydratase activity
[def] "Catalysis of the reaction
467 Pathogen[ Q2Q067] interacts with 3 human partners:{P13929;A6NNW6;P06733}
468 Pathogen[ P0C214] interacts with 4 human partners:{P13929;A6NNW6;P09104;P06733}
469 Pathogen[ P03346] interacts with 3 human partners:{A6NNW6;P13929;P06733}
470 Pathogen[ Q85601] interacts with 2 human partners:{P06733;P13929}
471 Pathogen[ P14079] interacts with 3 human partners:{A6NNW6;P06733;P13929}
472 Pathogen[ P03383] interacts with 2 human partners:{A6NNW6;P06733}
473 Pathogen[ P03410] interacts with 3 human partners:{P06733;P13929;A6NNW6}
474 Pathogen[ P14075] interacts with 2 human partners:{P06733;A6NNW6}
475 Pathogen[ P0C206] interacts with 3 human partners:{P06733;A6NNW6;P13929}
476 Pathogen[ P03363] interacts with 2 human partners:{P06733;A6NNW6}
477 [Cluster 44]GO:0051787+F molecular_function [name] misfolded protein binding [def]
"Interacting selectively and non-covalently with a misfolded protein." [GOC
478 Pathogen[ Q2Q067] interacts with 2 human partners:{Q9UBS3;Q9UNE7}
479 Pathogen[ P0C214] interacts with 3 human partners:{Q9UBS3;P10909;Q9UNE7}
480 Pathogen[ P03346] interacts with 2 human partners:{Q9UBS3;Q9UNE7}
481 Pathogen[ Q85601] interacts with 2 human partners:{Q9UBS3;Q9UNE7}
482 Pathogen[ P14079] interacts with 2 human partners:{Q9UBS3;P10909}
483 Pathogen[ P03383] interacts with 1 human partners:{Q9UBS3}
484 Pathogen[ P03410] interacts with 3 human partners:{Q9UBS3;Q9UNE7;P10909}
485 Pathogen[ P14075] interacts with 1 human partners:{Q9UBS3}
486 Pathogen[ P0C206] interacts with 3 human partners:{Q9UNE7;P10909;Q9UBS3}
487 Pathogen[ P03363] interacts with 2 human partners:{Q9UBS3;Q9UNE7}
488 [Cluster 45]GO:0035241+F molecular_function [name] protein-arginine omega-N
monomethyltransferase activity [def] "Catalysis of the addition of a methyl group to
either of the unmethylated terminal nitrogen atoms (also called omega nitrogen) in
peptidyl-arginine to form an omega-N-G-monomethylated arginine residue." [PMID
489 Pathogen[ Q2Q067] interacts with 3 human partners:{Q9NVM4;Q96LA8;Q9NR22}
490 Pathogen[ P0C214] interacts with 3 human partners:{Q9NVM4;Q9NR22;Q96LA8}
491 Pathogen[ P03346] interacts with 3 human partners:{Q9NR22;Q9NVM4;Q96LA8}
492 Pathogen[ Q85601] interacts with 3 human partners:{Q9NR22;Q9NVM4;Q96LA8}
493 Pathogen[ P14079] interacts with 3 human partners:{Q9NR22;Q96LA8;Q9NVM4}
494 Pathogen[ P03383] interacts with 2 human partners:{Q9NR22;Q96LA8}
495 Pathogen[ P03410] interacts with 3 human partners:{Q96LA8;Q9NVM4;Q9NR22}
496 Pathogen[ P14075] interacts with 2 human partners:{Q9NR22;Q96LA8}
497 Pathogen[ P0C206] interacts with 3 human partners:{Q96LA8;Q9NVM4;Q9NR22}
498 Pathogen[ P03363] interacts with 3 human partners:{Q96LA8;Q9NVM4;Q9NR22}
499 [Cluster 46]GO:0004528+F molecular_function [name] phosphodiesterase I activity [def]
"Catalysis of the sequential hydrolytic removal of 5'-nucleotides from the 3'-hydroxy
termini of 3'-hydroxy-terminated oligonucleotides." [EC

```

```

500 Pathogen[ Q2Q067] interacts with 2 human partners:{Q9Y2M0;P27695}
501 Pathogen[ P0C214] interacts with 2 human partners:{P27695;Q9Y2M0}
502 Pathogen[ P03346] interacts with 2 human partners:{P27695;Q9Y2M0}
503 Pathogen[ Q85601] interacts with 2 human partners:{Q9Y2M0;P27695}
504 Pathogen[ P14079] interacts with 2 human partners:{P27695;Q9Y2M0}
505 Pathogen[ P03383] interacts with 2 human partners:{Q9Y2M0;P27695}
506 Pathogen[ P03410] interacts with 2 human partners:{P27695;Q9Y2M0}
507 Pathogen[ P14075] interacts with 2 human partners:{P27695;Q9Y2M0}
508 Pathogen[ P0C206] interacts with 2 human partners:{P27695;Q9Y2M0}
509 Pathogen[ P03363] interacts with 1 human partners:{Q9Y2M0}
510 [Cluster 47]GO:0003904+F molecular_function [name] deoxyribodipyrimidine photo-lyase
activity [def] "Catalysis of the reaction
511 Pathogen[ Q2Q067] interacts with 1 human partners:{Q16526}
512 Pathogen[ P0C214] interacts with 2 human partners:{Q49AN0;Q16526}
513 Pathogen[ P03346] interacts with 2 human partners:{Q49AN0;Q16526}
514 Pathogen[ Q85601] interacts with 2 human partners:{Q49AN0;Q16526}
515 Pathogen[ P14079] interacts with 2 human partners:{Q16526;Q49AN0}
516 Pathogen[ P03383] interacts with 1 human partners:{Q16526}
517 Pathogen[ P03410] interacts with 2 human partners:{Q16526;Q49AN0}
518 Pathogen[ P14075] interacts with 1 human partners:{Q16526}
519 Pathogen[ P0C206] interacts with 2 human partners:{Q16526;Q49AN0}
520 Pathogen[ P03363] interacts with 2 human partners:{Q49AN0;Q16526}
521 [Cluster 48]GO:0016702+F molecular_function [name] oxidoreductase activity, acting on
single donors with incorporation of molecular oxygen, incorporation of two atoms of
oxygen [def] "Catalysis of an oxidation-reduction (redox) reaction in which hydrogen or
electrons are transferred from one donor, and two oxygen atoms is incorporated into a
donor." [GOC
522 Pathogen[ Q2Q067] interacts with 18 human
partners:{Q9UPP1;Q9NXW9;P09917;Q6NS38;O75151;Q8NHM5;Q9BV57;O00625;Q9NWT6;Q96Q83;Q96KS
0;O75164;Q9H6W3;Q9H6Z9;Q8N371;Q9GZT9;Q15652;Q7LBC6}
523 Pathogen[ P0C214] interacts with 21 human
partners:{Q8N371;P09917;Q9NVH6;Q9BV57;Q96KS0;O75164;O75151;Q9H6Z9;Q6NS38;O14832;Q9H6W
3;Q15652;Q9GZT9;Q9NXW9;O00625;Q96Q83;Q7LBC6;Q9UPP1;P18054;Q9NWT6;Q8NHM5}
524 Pathogen[ P03346] interacts with 20 human
partners:{Q7LBC6;Q9BV57;P18054;Q9NXW9;Q15652;O75151;P09917;O75164;Q9GZT9;Q9UPP1;Q96Q8
3;Q8N371;Q96KS0;B2RXH2;Q9UGL1;O00625;Q9NWT6;Q8NHM5;Q9H6W3;Q9H6Z9}
525 Pathogen[ Q85601] interacts with 18 human
partners:{Q9H6Z9;Q8N371;P09917;O75151;Q9NWT6;Q9BV57;Q9H6W3;Q9NXW9;Q9GZT9;Q96KS0;Q8NHM
5;Q9UPP1;Q6NS38;Q96Q83;O75164;O00625;Q15652;Q7LBC6}
526 Pathogen[ P14079] interacts with 31 human
partners:{O00625;P48775;Q9GZT9;O75151;Q9C0B1;Q96SZ5;Q8IVL6;Q9NXW9;Q6P6C2;Q93099;Q5SRE
7;Q9NVH6;Q8NHM5;Q15652;Q6N021;Q9H6W3;Q9UPP1;Q9NWT6;O14832;Q6NS38;Q3KRA9;Q9H6Z9;P09917
;Q16878;Q9BT30;Q8N371;Q96Q83;O43151;Q96KS0;Q9BV57;Q7LBC6}
527 Pathogen[ P03383] interacts with 13 human
partners:{Q9NWT6;O75151;Q96KS0;Q9H6W3;Q9BV57;O75164;Q15652;O00625;Q9H6Z9;Q8N371;Q96Q8
3;Q7LBC6;Q9UPP1}
528 Pathogen[ P03410] interacts with 28 human
partners:{Q3KRA9;Q9UPP1;Q9H6W3;Q6P6C2;Q9NWT6;Q15652;Q9NVH6;Q96KS0;Q9H6Z9;Q9NXW9;Q6N02
1;Q96Q83;Q6NS38;Q7LBC6;Q9GZT9;Q93099;O00625;O75151;P48775;O14832;O43151;Q9BT30;P09917
;Q9C0B1;Q8N371;O75164;Q9BV57;Q96SZ5}
529 Pathogen[ P14075] interacts with 17 human
partners:{Q9NVH6;Q96KS0;Q9GZT9;Q8N371;Q96Q83;Q9BV57;Q9UPP1;Q15652;Q7LBC6;O00625;Q9H6W
3;Q9NWT6;O14832;Q9NXW9;O75151;O75164;Q9H6Z9}
530 Pathogen[ P0C206] interacts with 22 human
partners:{Q8N371;Q96Q83;P09917;Q96KS0;Q9GZT9;O43151;Q3KRA9;Q6NS38;Q9UPP1;O14832;Q9NXW
9;Q9NVH6;Q7LBC6;O00625;O75151;Q9NWT6;Q9H6W3;Q8NHM5;Q9BV57;Q15652;Q9H6Z9;O75164}
531 Pathogen[ P03363] interacts with 6 human
partners:{Q9H6Z9;O75164;Q15652;Q96Q83;Q9BV57;O00625}
532 [Cluster 49]GO:0022857+F molecular_function [name] transmembrane transporter activity
[def] "Enables the transfer of a substance from one side of a membrane to the other."
[GOC
533 Pathogen[ Q2Q067] interacts with 3 human partners:{P11166;P14672;P24539}
534 Pathogen[ P0C214] interacts with 5 human
partners:{P36542;P11166;P11168;P24539;P14672}
535 Pathogen[ P03346] interacts with 3 human partners:{P24539;P11166;P14672}
536 Pathogen[ Q85601] interacts with 4 human partners:{P11168;P24539;P11166;P14672}
537 Pathogen[ P14079] interacts with 10 human
partners:{P36542;P56134;P25705;P14672;P56385;P11166;P03928;O75964;P56381;P24539}
538 Pathogen[ P03383] interacts with 5 human
partners:{P11168;P11169;P14672;P24539;P22732}
539 Pathogen[ P03410] interacts with 12 human
partners:{P22732;P36542;P11166;P25705;P11168;P56385;P56381;P03928;P24539;O75964;P1885
9;P56134}
540 Pathogen[ P14075] interacts with 6 human
partners:{P11169;P22732;P24539;P11168;P56385;P14672}
541 Pathogen[ P0C206] interacts with 7 human

```

```
partners:{P36542;P11166;P11168;P24539;P14672;P56381;P56385}
542 Pathogen[ P03363] interacts with 2 human partners:{P14672;P11166}
543 [Cluster 50]GO:0033300+F molecular_function [name] dehydroascorbic acid transporter
activity [def] "Enables the directed movement of dehydroascorbate,
5-(1,2-dihydroxyethyl)furan-2,3,4(5H)-trione, into, out of or within a cell, or between
cells, by means of some agent such as a transporter or pore." [CHEBI
544 Pathogen[ Q2Q067] interacts with 1 human partners:{P11166}
545 Pathogen[ P0C214] interacts with 2 human partners:{P11166;P11168}
546 Pathogen[ P03346] interacts with 1 human partners:{P11166}
547 Pathogen[ Q85601] interacts with 2 human partners:{P11168;P11166}
548 Pathogen[ P14079] interacts with 1 human partners:{P11166}
549 Pathogen[ P03383] interacts with 1 human partners:{P11168}
550 Pathogen[ P03410] interacts with 2 human partners:{P11166;P11168}
551 Pathogen[ P14075] interacts with 1 human partners:{P11168}
552 Pathogen[ P0C206] interacts with 2 human partners:{P11166;P11168}
553 Pathogen[ P03363] interacts with 1 human partners:{P11166}
554 [Cluster 51]GO:0042974+F molecular_function [name] retinoic acid receptor binding
[def] "Interacting selectively and non-covalently with the retinoic acid receptor, a
ligand-regulated transcription factor belonging to the nuclear receptor superfamily."
[GOC
555 Pathogen[ Q2Q067] interacts with 16 human
partners:{P55345;Q5T3J3;P28702;P48552;O95521;Q5VWM6;Q5VWM5;Q5SWL7;Q15466;P78395;P1709
6;Q71SY5;O60810;O60809;O75376;Q8IXJ9}
556 Pathogen[ P0C214] interacts with 21 human
partners:{Q71SY5;Q5TYX0;Q5SWL7;P48552;A6NGN4;P17096;P78395;O60813;P55345;O60810;Q5VWM
6;Q5VTA0;Q8IXJ9;O75376;Q5VWM5;Q5T3J3;Q5SWL8;O95521;Q5VXH4;Q5VWM1;Q15466}
557 Pathogen[ P03346] interacts with 19 human
partners:{Q5VWM5;Q71SY5;Q15466;Q5T3J3;O60810;P17096;O60809;P28702;Q5VTA0;P78395;P5534
5;O75376;P48552;Q8IXJ9;Q5SWL8;O95521;Q5VWM1;Q5VWM6;Q5SWL7}
558 Pathogen[ Q85601] interacts with 22 human
partners:{P17096;Q15466;Q5VTA0;O60813;P28702;O60810;Q8IXJ9;Q5SWL7;Q5VXH4;Q71SY5;O7537
6;Q5TYX0;P48552;Q5VWM5;Q5T3J3;Q5SWL8;Q5VWM1;Q5VWM6;P78395;A6NGN4;Q5VT98;P55345}
559 Pathogen[ P14079] interacts with 33 human
partners:{P48552;O60811;A3QJZ6;Q8IXJ9;Q5VXH5;Q5T3J3;P17096;Q5SWL7;Q5VWM3;Q5VT98;A6NGN
4;Q5TYX0;P55345;Q5VWM6;A6NMV5;O95521;Q5VWM5;O95522;Q5VTA0;O60809;P28702;Q5VWM4;Q5SWL8
;Q71SY5;O60813;O75376;P78395;A6NMC2;Q5VXH4;Q15466;Q5VWM1;O60810;Q5TYW8}
560 Pathogen[ P03383] interacts with 18 human
partners:{Q8IXJ9;Q5TYX0;O60809;P17096;O75376;O60810;Q5SWL7;P78395;Q15466;P28702;O6081
3;Q5VXH4;Q71SY5;Q5VWM6;P48552;Q5VWM5;Q5T3J3;O95521}
561 Pathogen[ P03410] interacts with 33 human
partners:{Q5VWM4;Q5SWL7;Q5VXH5;Q5SWL8;A6NGN4;Q5TYW8;O60811;Q5T3J3;Q5VWM1;O60813;P1709
6;O60809;O75376;A3QJZ6;Q5VWM6;O95521;Q5VWM5;O60810;P78395;Q8IXJ9;Q5VT98;P28702;Q15466
;Q5VXH4;A6NMC2;O95522;A6NMV5;Q5VTA0;P48552;Q5TYX0;Q5VWM3;P55345;Q71SY5}
562 Pathogen[ P14075] interacts with 20 human
partners:{Q5VWM1;Q5SWL7;Q8IXJ9;O60809;P78395;Q5VXH4;P17096;O60813;O95521;O75376;Q5VWM
5;Q5TYX0;P28702;P48552;Q15466;O60810;Q5VWM6;Q71SY5;Q5T3J3;Q5VTA0}
563 Pathogen[ P0C206] interacts with 28 human
partners:{Q15466;A3QJZ6;Q5T3J3;Q5VXH4;P78395;Q5VWM5;O60813;Q5VWM3;A6NGN4;Q5TYX0;Q5TYW
8;A6NMV5;Q5VTA0;Q8IXJ9;Q5SWL7;Q5VT98;O75376;Q71SY5;P17096;O95521;P28702;Q5VWM1;O60810
;O60809;Q5VWM6;P55345;P48552;Q5SWL8}
564 Pathogen[ P03363] interacts with 18 human
partners:{Q8IXJ9;O60809;Q15466;Q71SY5;O75376;P78395;O60813;P48552;P28702;P17096;Q5SWL
7;Q5VWM6;Q5VXH4;O60810;Q5T3J3;O95521;Q5VWM5;Q5TYX0}
565 [Cluster 52]GO:0008534+F molecular_function [name] oxidized purine base lesion DNA
N-glycosylase activity [def] "Catalysis of the removal of oxidized purine bases by
cleaving the N-C1' glycosidic bond between the oxidized purine and the deoxyribose sugar.
The reaction involves the formation of a covalent enzyme-substrate intermediate. Release
of the enzyme and free base by a beta-elimination or a beta, gamma-elimination mechanism
results in the cleavage of the DNA backbone 3' of the apurinic (AP) site." [GOC
566 Pathogen[ Q2Q067] interacts with 1 human partners:{O15527}
567 Pathogen[ P0C214] interacts with 1 human partners:{O15527}
568 Pathogen[ P03346] interacts with 1 human partners:{O15527}
569 Pathogen[ Q85601] interacts with 1 human partners:{O15527}
570 Pathogen[ P14079] interacts with 1 human partners:{O15527}
571 Pathogen[ P03383] interacts with 1 human partners:{O15527}
572 Pathogen[ P03410] interacts with 1 human partners:{O15527}
573 Pathogen[ P14075] interacts with 1 human partners:{O15527}
574 Pathogen[ P0C206] interacts with 1 human partners:{O15527}
575 Pathogen[ P03363] interacts with 1 human partners:{O15527}
576 [Cluster 53]GO:0003696+F molecular_function [name] satellite DNA binding [def]
"Interacting selectively and non-covalently with satellite DNA, the many tandem repeats
(identical or related) of a short basic repeating unit_ many have a base composition or
other property different from the genome average that allows them to be separated from
the bulk (main band) genomic DNA." [GOC
577 Pathogen[ Q2Q067] interacts with 4 human partners:{Q9UBB5;O95243;Q9UHC1;P07199}
578 Pathogen[ P0C214] interacts with 4 human partners:{O95243;P07199;Q9UHC1;Q9UBB5}
```

579 Pathogen[ P03346] interacts with 4 human partners: {Q9UHC1;O95243;P07199;Q9UBB5}  
580 Pathogen[ Q85601] interacts with 4 human partners: {O95243;P07199;Q9UHC1;Q9UBB5}  
581 Pathogen[ P14079] interacts with 4 human partners: {P07199;Q9UBB5;Q9UHC1;O95243}  
582 Pathogen[ P03383] interacts with 4 human partners: {Q9UHC1;Q9UBB5;O95243;P07199}  
583 Pathogen[ P03410] interacts with 4 human partners: {Q9UBB5;O95243;P07199;Q9UHC1}  
584 Pathogen[ P14075] interacts with 4 human partners: {P07199;Q9UBB5;Q9UHC1;O95243}  
585 Pathogen[ P0C206] interacts with 4 human partners: {Q9UBB5;Q9UHC1;P07199;O95243}  
586 Pathogen[ P03363] interacts with 4 human partners: {Q9UHC1;P07199;O95243;Q9UBB5}  
587 [Cluster 54]GO:0070644+F molecular\_function [name] vitamin D response element binding  
[def] "Interacting selectively and non-covalently with the vitamin D response element  
(VDRE), a short sequence with dyad symmetry found in the promoters of some of the  
cellular immediate-early genes, regulated by serum." [GOC  
588 Pathogen[ Q2Q067] interacts with 2 human partners: {P11473;P15923}  
589 Pathogen[ P0C214] interacts with 1 human partners: {P15923}  
590 Pathogen[ P03346] interacts with 2 human partners: {P11473;P15923}  
591 Pathogen[ Q85601] interacts with 2 human partners: {P11473;P15923}  
592 Pathogen[ P14079] interacts with 2 human partners: {P11473;P15923}  
593 Pathogen[ P03383] interacts with 2 human partners: {P15923;P11473}  
594 Pathogen[ P03410] interacts with 2 human partners: {P15923;P11473}  
595 Pathogen[ P14075] interacts with 2 human partners: {P15923;P11473}  
596 Pathogen[ P0C206] interacts with 2 human partners: {P15923;P11473}  
597 Pathogen[ P03363] interacts with 2 human partners: {P11473;P15923}  
598 [Cluster 55]GO:0003963+F molecular\_function [name] RNA-3'-phosphate cyclase activity  
[def] "Catalysis of the reaction  
599 Pathogen[ Q2Q067] interacts with 1 human partners: {Q9Y2P8}  
600 Pathogen[ P0C214] interacts with 2 human partners: {Q9Y2P8;O00442}  
601 Pathogen[ P03346] interacts with 1 human partners: {Q9Y2P8}  
602 Pathogen[ Q85601] interacts with 1 human partners: {Q9Y2P8}  
603 Pathogen[ P14079] interacts with 2 human partners: {O00442;Q9Y2P8}  
604 Pathogen[ P03383] interacts with 1 human partners: {Q9Y2P8}  
605 Pathogen[ P03410] interacts with 2 human partners: {O00442;Q9Y2P8}  
606 Pathogen[ P14075] interacts with 1 human partners: {Q9Y2P8}  
607 Pathogen[ P0C206] interacts with 1 human partners: {Q9Y2P8}  
608 Pathogen[ P03363] interacts with 1 human partners: {Q9Y2P8}  
609 [Cluster 56]GO:0004865+F molecular\_function [name] protein serine/threonine  
phosphatase inhibitor activity [def] "Stops, prevents or reduces the activity of a  
serine/threonine protein phosphatase, an enzyme that catalyzes the reaction  
610 Pathogen[ Q2Q067] interacts with 3 human partners: {P41236;Q13522;Q12972}  
611 Pathogen[ P0C214] interacts with 3 human partners: {P41236;Q13522;Q12972}  
612 Pathogen[ P03346] interacts with 3 human partners: {Q13522;P41236;Q12972}  
613 Pathogen[ Q85601] interacts with 2 human partners: {Q12972;P41236}  
614 Pathogen[ P14079] interacts with 5 human  
partners: {Q13522;P41236;Q12972;Q8TAE6;O96001}  
615 Pathogen[ P03383] interacts with 3 human partners: {Q12972;Q13522;P41236}  
616 Pathogen[ P03410] interacts with 5 human  
partners: {P41236;Q13522;Q8TAE6;Q12972;O96001}  
617 Pathogen[ P14075] interacts with 4 human partners: {Q13522;P41236;Q8TAE6;Q12972}  
618 Pathogen[ P0C206] interacts with 4 human partners: {P41236;Q8TAE6;Q13522;Q12972}  
619 Pathogen[ P03363] interacts with 3 human partners: {Q12972;P41236;Q13522}  
620 [Cluster 57]GO:0008233+F molecular\_function [name] peptidase activity [def]  
"Catalysis of the hydrolysis of a peptide bond. A peptide bond is a covalent bond formed  
when the carbon atom from the carboxyl group of one amino acid shares electrons with the  
nitrogen atom from the amino group of a second amino acid." [GOC  
621 Pathogen[ Q2Q067] interacts with 41 human  
partners: {Q9Y5K5;P54252;P40306;Q93009;O00303;Q9Y4P1;Q6ICB0;Q14674;Q99497;Q9UDY8;P2807  
2;A5LHX3;P25787;Q92905;Q14790;Q9GZR1;P28065;O14818;P60896;P60900;P55212;Q86T82;P28062  
;P25788;P42575;P25786;P28074;P25789;Q93008;P28838;Q9HC62;P20618;P48147;P28070;P28066;  
Q99436;Q8TAA3;P49721;P49720;Q13867;Q96HI0}  
622 Pathogen[ P0C214] interacts with 45 human  
partners: {P25789;Q96HI0;P28062;A5LHX3;P28838;Q16740;P28065;P55212;O14818;Q9UDY8;Q1386  
7;Q92560;Q9Y4P1;P40306;Q99497;P48147;Q93008;Q9Y5K5;P28066;O00303;Q92905;Q6ICB0;P49720  
;P28074;P25788;P42574;Q93009;P25786;P28072;Q8TAA3;Q99436;P25787;Q9GZR1;Q9HC62;P60900;  
P55210;Q9H3M9;Q9NY33;P28070;P42575;P54252;P20618;P49721;Q14790;Q14674}  
623 Pathogen[ P03346] interacts with 58 human  
partners: {P25787;Q9BXU7;P63119;P28070;Q93009;Q9GZR1;P25789;Q92560;Q9Y4P1;Q6ICB0;Q9H3M  
9;Q93008;P28072;P25788;P28074;P49721;Q9UDY8;P42575;O14818;Q99436;A5LHX3;P28062;O95630  
;P42574;P20618;P55212;Q86T82;O00303;Q9UHP3;Q14694;P10144;P51784;P49720;P28065;Q86UV5;  
P60900;O75604;P25786;Q99497;P28066;Q92905;Q13867;Q8TAA3;P55211;Q14790;Q9HC62;P48147;P  
55210;Q96HI0;Q96FW1;Q6GQQ9;O94782;P60896;Q14674;Q9Y5K5;Q9H0E7;P40306;P54252}  
624 Pathogen[ Q85601] interacts with 47 human  
partners: {P10144;P28066;P60900;Q99497;Q9Y5T5;Q9H0E7;Q93009;P25787;P25788;Q9UDY8;Q1479  
0;Q92560;Q9Y4P1;Q9HC62;Q9H3M9;O00303;Q14674;P48147;Q13867;Q93008;P54252;P25789;P20618  
;Q6ICB0;P40306;P49720;Q9NQC7;P42575;P28062;P49721;Q92905;Q9Y5K5;P25786;P28072;P28065;  
O95630;Q99436;P28070;Q86T82;Q8TAA3;Q96HI0;P28074;P55212;A5LHX3;O14818;Q9GZR1;P55210}  
625 Pathogen[ P14079] interacts with 62 human  
partners: {P28838;P28065;Q99436;O14773;Q96KR4;Q96KP4;Q9NUQ7;Q6ICB0;O00303;Q9H3M9;Q96HI

0;P40306;Q92542;P28074;Q8NDH3;P48147;P54252;Q99497;P49720;O00487;Q86TL0;P25787;Q9NXJ5;Q96MI9;Q9UPW5;P29144;A5LHX3;Q14674;Q16740;Q4J6C6;Q9Y4P1;P55212;P20618;Q8TAA3;Q9Y5K5;Q9HC62;Q14790;P28062;P60900;P55210;Q92560;Q13867;Q9NY33;Q400G9;Q8NDL9;O14818;P49721;Q92905;Q9H6P5;Q8WW43;Q5W0Q7;A6NFU8;P42575;P25788;P28066;Q9GZR1;Q9BSY9;Q9NQC7;Q9H300;P10144;Q96FW1;P28072}

626 Pathogen[ P03383] interacts with 33 human  
partners: {P55212;P25789;P60900;P40306;Q92905;Q9Y4P1;P28838;P49721;P20618;P48147;P54252;Q14674;Q96HI0;Q6ICB0;Q13867;P25786;Q9Y5K5;P28072;P28065;P28066;Q9HC62;Q9H3M9;P28074;P49720;Q8TAA3;P28062;P60896;O14818;Q99436;P28070;Q9GZR1;P25787;P25788}

627 Pathogen[ P03410] interacts with 53 human  
partners: {Q400G9;Q96FW1;Q9H3M9;P28070;P10144;Q99497;Q9UPW5;P25786;Q8NDH3;Q9Y4P1;P60900;P42575;P48147;Q92905;Q13867;Q96HI0;Q8TAA3;P49721;P54252;Q9GZR1;A5LHX3;Q14674;Q99436;P28838;Q9NXJ5;P40306;Q86TL0;Q96KR4;P25787;Q9HC62;Q6ICB0;P60896;P28062;O14818;A6NFU8;O00303;P25789;P49720;Q8WW43;Q9Y5K5;Q92542;Q9H6P5;P28072;Q9NY33;P25788;Q16740;P55212;P28066;P28065;P20618;Q9BSY9;P28074;P55210}

628 Pathogen[ P14075] interacts with 33 human  
partners: {P25788;P28066;Q8TAA3;P60900;P55212;P49720;Q9Y4P1;Q96FW1;P28070;P49721;P54252;Q6ICB0;Q96HI0;P28062;P28074;P28065;Q9HC62;P25786;O14818;P28072;Q13867;P60896;P25787;Q14674;Q9H3M9;P20618;Q92905;P40306;P28838;Q99436;Q9GZR1;Q9Y5K5;P25789}

629 Pathogen[ P0C206] interacts with 65 human  
partners: {Q9NQC7;Q99436;P28062;P10144;P40306;P28065;Q9NXJ5;Q96KR4;Q9UDY8;P25786;Q9Y5T5;P25788;Q93008;P29144;Q8NDL9;Q96HI0;Q9Y4P1;P25787;P48147;O75604;P49720;O95630;Q9HC62;P28838;P55212;P60900;Q93009;Q92542;Q99497;Q6ICB0;P54252;Q9H0E7;A5LHX3;Q9Y5K5;P25789;Q13867;Q9GZR1;Q9BSY9;Q9H3M9;P20618;Q8TAA3;P28070;Q96FW1;Q16740;Q9NY33;Q14790;P28066;Q86T82;Q6GQQ9;P42574;O14818;Q8NDH3;P28072;Q9UHP3;Q14674;Q86TL0;P28074;P42575;P49721;Q9UPW5;P55210;O00303;P60896;Q92560;Q92905}

630 Pathogen[ P03363] interacts with 31 human  
partners: {P63131;P63119;Q9Y5K5;P10265;P51784;Q6GQQ9;P60896;Q9UHP3;O75604;P63121;P54252;Q9Y6I0;P10144;Q13867;Q92560;P55212;P63124;Q9HC62;Q86T82;Q14674;Q9BXU7;Q96HI0;P55210;Q9Y4P1;Q9GZR1;Q6ICB0;P63129;Q93008;Q92905;Q96FW1;O00303}

631 [Cluster 58]GO:0070403+F molecular\_function [name] NAD+ binding [def] "Interacting selectively and non-covalently with the oxidized form, NAD, of nicotinamide adenine dinucleotide, a coenzyme involved in many redox and biosynthetic reactions." [GOC

632 Pathogen[ Q2Q067] interacts with 6 human  
partners: {Q8IXJ6;Q9Y6E7;Q9NTG7;Q8N6T7;Q16836;Q9NRC8}

633 Pathogen[ P0C214] interacts with 6 human  
partners: {Q9Y2S2;Q9NTG7;Q8N6T7;Q8IXJ6;Q9NRC8;Q9Y6E7}

634 Pathogen[ P03346] interacts with 6 human  
partners: {Q16836;Q8IXJ6;Q9Y6E7;Q8N6T7;Q9NTG7;Q9NRC8}

635 Pathogen[ Q85601] interacts with 6 human  
partners: {Q9NRC8;Q9Y6E7;Q8IXJ6;Q8N6T7;Q16836;Q9NTG7}

636 Pathogen[ P14079] interacts with 5 human  
partners: {Q8N6T7;Q8IXJ6;Q9NRC8;Q9NTG7;Q16836}

637 Pathogen[ P03383] interacts with 5 human  
partners: {Q8N6T7;Q16836;Q9NTG7;Q9Y6E7;Q9NRC8}

638 Pathogen[ P03410] interacts with 5 human  
partners: {Q8IXJ6;Q9NTG7;Q8N6T7;Q16836;Q9NRC8}

639 Pathogen[ P14075] interacts with 5 human  
partners: {Q8N6T7;Q9Y6E7;Q9NTG7;Q16836;Q9NRC8}

640 Pathogen[ P0C206] interacts with 6 human  
partners: {Q16836;Q8N6T7;Q9NRC8;Q8IXJ6;Q9NTG7;Q9Y6E7}

641 Pathogen[ P03363] interacts with 5 human  
partners: {Q9Y6E7;Q16836;Q8N6T7;Q9NTG7;Q9NRC8}

642 [Cluster 59]GO:0008080+F molecular\_function [name] N-acetyltransferase activity [def] "Catalysis of the transfer of an acetyl group to a nitrogen atom on the acceptor molecule." [GOC

643 Pathogen[ Q2Q067] interacts with 11 human  
partners: {Q9H9T3;Q93015;Q9GZZ1;Q9BSU3;Q9H8E8;Q92831;Q969G3;P41227;Q92830;P21673;Q9BXJ9}

644 Pathogen[ P0C214] interacts with 15 human  
partners: {P41227;Q93015;Q9BSU3;Q16613;Q9GZZ1;Q969G3;Q9H0A0;Q9BXJ9;Q9H9T3;Q92831;Q92830;P21673;Q96EK6;Q8N159;Q9H8E8}

645 Pathogen[ P03346] interacts with 12 human  
partners: {Q9BSU3;Q93015;Q9H8E8;P21673;Q92831;Q92830;P41227;Q9H9T3;Q9BXJ9;Q969G3;Q8WUY8;Q9GZZ1}

646 Pathogen[ Q85601] interacts with 13 human  
partners: {Q9GZZ1;Q93015;Q9H9T3;Q16613;P21673;Q92831;Q92830;P41227;Q969G3;Q9H8E8;Q9BXJ9;Q96EK6;Q9BSU3}

647 Pathogen[ P14079] interacts with 17 human  
partners: {Q8N159;P41227;Q86UY6;Q9H0A0;Q92830;Q9BXJ9;Q9H8E8;Q9BTE0;Q16613;Q9BSU3;Q9H9T3;Q9GZZ1;Q8N8M0;Q93015;Q8WUY8;Q96EK6;P21673}

648 Pathogen[ P03383] interacts with 15 human  
partners: {Q92831;Q9GZZ1;Q93015;P41227;Q16613;Q9BSU3;Q969G3;Q9BXJ9;Q8N159;Q9H8E8;Q92830;Q8WUY8;Q9H0A0;P21673;Q9H9T3}

649 Pathogen[ P03410] interacts with 19 human  
partners: {Q92830;Q92831;Q9BSU3;Q9GZZ1;Q93015;Q8N159;Q9H0A0;Q96EK6;Q9H9T3;P41227;Q969G3



3;Q86UY6;Q8N8M0;Q16613;P21673;Q9H8E8;Q8WUY8;Q9BTE0;Q9BXJ9}  
650 Pathogen[ P14075] interacts with 15 human  
partners:{P41227;Q92831;Q93015;Q9BXJ9;Q9BSU3;Q8N159;Q16613;Q9H0A0;Q9H8E8;Q8WUY8;Q9H9T  
3;Q9GZZ1;P21673;Q96EK6;Q92830}  
651 Pathogen[ P0C206] interacts with 15 human  
partners:{Q92830;Q9GZZ1;Q9H9T3;P41227;Q92831;Q8N159;P21673;Q93015;Q8WUY8;Q96EK6;Q9BSU  
3;Q969G3;Q16613;Q9BXJ9;Q9H0A0}  
652 Pathogen[ P03363] interacts with 11 human  
partners:{P41227;Q9H8E8;Q92831;P21673;Q93015;Q9BSU3;Q92830;Q969G3;Q9GZZ1;Q9H9T3;Q9BXJ  
9}  
653 [Cluster 60]GO:000309+F molecular\_function [name] nicotinamide-nucleotide  
adenyltransferase activity [def] "Catalysis of the reaction  
654 Pathogen[ Q2Q067] interacts with 1 human partners:{Q9HAN9}  
655 Pathogen[ P0C214] interacts with 3 human partners:{Q96T66;Q9HAN9;Q9BZQ4}  
656 Pathogen[ P03346] interacts with 1 human partners:{Q9HAN9}  
657 Pathogen[ Q85601] interacts with 1 human partners:{Q9HAN9}  
658 Pathogen[ P14079] interacts with 2 human partners:{Q9BZQ4;Q9HAN9}  
659 Pathogen[ P03383] interacts with 1 human partners:{Q9HAN9}  
660 Pathogen[ P03410] interacts with 2 human partners:{Q9HAN9;Q9BZQ4}  
661 Pathogen[ P14075] interacts with 1 human partners:{Q9HAN9}  
662 Pathogen[ P0C206] interacts with 2 human partners:{Q9BZQ4;Q9HAN9}  
663 Pathogen[ P03363] interacts with 1 human partners:{Q9HAN9}  
664 [Cluster 61]GO:0003677+F molecular\_function [name] DNA binding [def] "Any molecular  
function by which a gene product interacts selectively with DNA (deoxyribonucleic acid)."  
[GOC  
665 Pathogen[ Q2Q067] interacts with 1331 human  
partners:{Q13562;Q0D2J5;Q12901;P05204;O60806;Q9HC78;Q09FC8;Q9Y253;Q9H4I2;Q9UM63;Q9290  
0;Q96SQ5;Q9Y473;Q9BYE7;Q14526;Q9NWS1;Q9UNN4;Q8N859;O43365;O95602;P52742;Q15573;Q9BRH9  
;Q9UKI9;Q8NG57;Q96N77;Q14151;Q12905;Q9NZI7;P27540;P17544;Q13118;P25490;Q33E94;Q92750;  
P01100;Q03989;P22392;Q9UK13;P35789;Q6V9R5;Q8NA42;Q9Y6X8;Q92988;Q9H2G9;Q96FV9;O43167;Q  
2M218;Q04864;P81877;Q9UHL9;Q9UJN7;O00411;Q96MW7;P0C1Z6;Q16236;Q03923;Q9Y2S7;Q9Y2M0;Q9  
UEG4;P62633;Q9BUG6;P18754;Q96S65;A6NDX5;O43364;Q8NEM1;O15525;Q6NVH7;Q9UC06;Q99583;Q2K  
HR2;Q8IX15;Q9NRF9;Q12837;Q9H7X3;Q9UPN9;Q9Y5Q3;Q03052;O75461;P56524;Q9UK11;P17029;P527  
38;Q9ULX6;Q10587;A8MTY0;A0AVK6;Q15631;Q8N228;Q9UMS5;Q9H7R0;Q96PE6;A6NFQ7;Q8IZ26;Q7Z35  
3;Q9HBZ2;Q9BRRO;P10827;A6NJL1;P04198;P15884;P20226;O43361;A9UHW6;P10243;Q9Y462;P09067  
;Q96NI8;Q16594;Q9UGU0;O75925;Q92922;Q6NUN9;P55895;Q9UJL9;Q9UQ80;Q9NS56;O60304;P55265;  
P23511;P24278;P49790;Q8NEP9;Q96E14;Q05066;Q6ZQV5;Q9HBE1;Q06416;Q63HK5;P0CJ88;Q99081;Q  
8NOY2;Q9Y2D1;Q92664;Q5VTD9;Q15928;Q96K75;Q12888;Q9H175;Q6XD76;O00470;Q9UBX2;Q92889;Q1  
3887;P06400;Q8TA94;Q6ZN32;Q9H9T3;O75534;Q8WYA1;Q8IZH2;Q96I24;P29374;P42167;Q86YE8;P27  
694;Q08AN1;P49959;Q01094;P58317;Q8IYF1;Q8WV38;Q08999;Q6ZMY9;P40763;P78424;Q8N8Z8;P149  
21;Q5VZB9;Q6ZS27;Q9NYB0;A6NP11;Q9UL59;O15226;Q8N4W9;Q53EQ6;P01106;Q9H2P0;Q13148;P1007  
3;O14503;Q9HAZ2;P36402;Q16666;Q15910;Q9NR55;Q16533;O60481;P67809;O95402;Q13485;Q5SXM1  
;Q01543;O00287;Q6IV72;A8MVS1;Q9HAJ7;P10589;Q8N2I2;Q7Z6K1;Q6ECI4;Q9UC07;P35680;Q14549;  
Q9P0U4;Q9H9D4;Q12986;Q9NR48;P31274;P13056;Q8IXK0;P31268;Q6ZT77;Q8IUE1;Q9UHF7;Q99816;P  
62508;Q9ULD5;P51508;Q9UBB5;Q14590;P48380;Q8WVM0;O14813;Q9NTW7;Q9Y606;Q16656;Q9Y2Y9;Q9  
6NG8;P35712;Q6ZN06;Q15233;P41182;Q9Y2X9;P19474;Q15554;Q9H5H4;P10828;Q96AE4;Q15562;Q9H  
074;Q01664;P55197;Q8NBB4;O00570;Q9GZS1;Q8N3X6;P82979;Q96H40;P49910;Q8N5U6;Q15326;Q9NZ  
V7;Q96IS3;O95243;P18847;Q9UHX1;P0CJ87;P51531;Q9NPG3;Q99708;Q8N9N5;P49716;P41970;Q6P2D  
0;Q9HCL3;Q9ZU7Q;Q8WXF8;Q9Y5Q8;Q8TD23;Q9BW11;Q9NQ87;P13349;Q96SK3;Q96IT1;Q147U1;Q15697  
;Q96LW1;Q9NZL3;Q6VUC0;Q96004;Q92985;Q9UL49;Q7Z6R9;Q96AV8;Q8HWS3;Q7L2R6;P08151;Q9BZ3;Q96006;  
Q01196;Q00613;Q9H211;Q99676;O75478;Q01105;Q96T88;P19388;P37275;Q8IYW8;Q5SXM2;Q05516;Q  
32MZ4;P20749;Q05481;Q5EE01;Q02930;Q9HD15;P54274;Q9Y6K1;P52435;Q8NCK3;Q8NDW4;Q8NDF8;Q9  
BSI4;O75820;Q9NZI6;P49116;P10074;Q7Z2E3;O60315;Q04206;Q99551;P11387;Q8WYP5;Q9P0L1;P12  
980;Q14119;P50548;Q9H4Z2;Q6P9A1;Q96MA1;Q16633;Q9ULV5;Q8IXT2;Q96PQ6;Q8N782;Q969S2;Q96N  
L3;Q96B01;Q4W5G0;Q8WTR7;Q6P1N0;Q9NPF6;Q05195;Q8TAW3;Q96AV8;Q9BXX3;P51815;P14373;Q1410  
3;Q9UIS9;O00712;Q9NZI5;Q8TF20;Q01201;Q9HB58;Q6ZR52;Q99684;P52741;Q9UDV7;P49450;Q14814  
;P39880;P18850;Q8TF68;Q3KQV3;P50549;Q99594;Q8N2Z9;O94983;Q8IUE0;Q9P255;A6H8Y1;Q8NC26;  
P17483;P14316;A8MT69;O43296;O94776;Q9H4T2;O15379;O15266;P36956;A6NFD8;O95948;O14709;P  
41161;Q08ER8;P0C7M4;O60535;Q9UKN8;Q5T5D7;Q9BWW4;Q9H171;P57723;Q9NQX1;Q7Z5D8;Q03188;Q9  
Y5R5;P05114;Q690318;Q96S55;Q6ZMW2;Q9UNA4;P30876;P19387;Q4LE39;Q16520;P15976;Q9BWX5;Q9H  
307;O75586;Q8N196;Q2M3W8;Q15542;O14686;O15535;Q6MZP7;Q6S96;Q4VC44;Q03933;P28356;Q927  
54;O94842;Q9HC44;Q96ST3;O14628;Q8TBC5;P61218;Q96RK0;Q9Y237;O15350;Q6ZSS3;Q6ZRS2;P3563  
8;Q96AH0;Q92945;Q9UFW8;Q96ST2;Q6ISB3;Q02447;P52594;Q9NSD4;Q16534;Q2M1K9;Q96T58;Q8WY36  
;Q8N1L9;Q96S8;O14896;Q9Y534;P41218;O75683;P17030;Q14934;Q86WP2;P17031;Q7Z340;P42704;  
Q86UE3;P09086;Q9H668;O75362;Q96N95;Q9Y5A6;Q9UB29;Q92547;Q8TF47;Q86YC2;P17036;P49005;O  
94993;Q9ULJ3;Q13415;Q8TBE0;P17040;Q15560;P17676;Q16531;P17482;P17010;O95625;P11308;P1  
7038;Q8N5Y2;Q9Y4Z2;Q9UK12;Q8WYN3;P38935;Q8NDY6;E9PGG2;Q9NYF8;P08047;Q8TC21;P11473;Q7R  
TU5;Q00978;Q96C28;O75928;Q96RJ6;Q13342;O43829;P16415;Q8NHM5;Q86Y25;Q9BQ15;Q9H9Y6;Q018  
92;Q8N3S3;Q7Z6Z7;P09017;Q8N184;Q96N66;P22670;O60563;O95416;Q9NV11;O43542;Q13129;Q8N72  
6;P11831;P20265;O75531;Q7Z3V5;P15172;Q06609;P0C7T5;Q3SXZ3;O43248;Q6NT76;P57721;Q9H9Q4  
;P28702;Q9UFB7;Q6IQ21;Q00577;Q13398;Q53GI3;Q96PT3;Q96MR9;P48378;Q15561;Q96BV0;O75446;  
P11388;P35227;A8MT65;A6NK53;Q86TJ2;P28069;Q9BUY5;O60663;Q9UKW6;Q96QC0;Q15424;P78545;B  
2RXF5;Q9N3J9;Q9Y2P0;P09629;Q9NS37;Q9BQG0;Q9Y2H8;Q9UQR0;P52743;P58340;Q499Z4;P54845;Q1  
5937;Q9Y4A8;Q9BXG8;Q00444;Q6ZVD7;P27695;Q15723;Q9UBC3;Q15744;Q8N7G0;Q08050;Q9UHK0;Q6  
EA5;O15405;P61978;O43823;Q9Y5B6;O95163;Q9UKL0;Q14765;Q9HAU5;P29084;Q68DY1;Q7RTV3;Q129  
72;P27797;P12004;Q00059;O43524;Q14181;P53999;Q96G23;Q9HCG1;O43502;O43593;Q9ULW3;P0674

6;Q6P280;Q9BUI4;O95159;Q8TAU3;Q8N5J4;Q9UL58;Q13469;P52747;P78412;Q96SR6;P55347;Q9UHI6  
;A6NLW8;P78317;Q14929;Q5T619;P23769;P29372;P54253;Q14593;Q15929;P35548;Q4G112;Q8TB69;  
Q99743;P20719;Q15072;Q15935;P15036;Q96C00;Q9BYK8;Q8IYB3;Q8IVP9;P51826;Q14186;Q63HK3;Q  
99608;P40426;O75717;Q59GR2;Q15699;Q9UII5;Q12800;A8MZ59;O60828;Q8NE65;A8MUV8;Q96KR1;Q9  
P243;Q9ULM2;Q15047;Q14938;Q9BQ70;O43310;Q96N38;A8MWA4;Q5SVQ8;Q9BTC8;A8MQ14;P56693;A4G  
XA9;Q96BT3;Q8N7R8;Q96CX3;Q9BTP7;O14867;P25791;P17032;P19532;Q96BD5;Q6P9G9;P26358;Q9UL  
X9;Q9Y2T7;O75610;P15621;Q14585;O43711;Q9NQX6;P17022;Q9H5J8;Q07666;Q14653;Q68DI1;P5150  
4;Q9UKY1;O75505;Q8N8C0;Q9Y2D9;Q96SZ4;P56270;Q6IQ32;A2RRD8;Q15306;B4DXR9;Q9UKD1;Q6NX45  
;Q86US8;P17098;O75437;Q8NFP9;O14948;Q13360;Q9UBD5;Q14978;P84022;Q969G3;P78414;Q99856;  
Q6P9A3;P50221;B1APH4;P10914;P15927;P007X5;Q8IYH5;Q13330;O00716;P0CJ89;O60284;O14862;P  
16383;P0CJ90;Q96GC6;Q96RY5;Q76KX8;Q00056;A6NHJ4;Q9P2R6;Q01658;Q6NSW7;P28347;Q8N895;Q9  
6N22;Q92541;A8MX4;Q8N141;P31276;Q02878;Q9BVC3;O15499;Q03924;Q96LX8;Q5JNZ3;O14497;Q03  
701;Q9Y2Q1;O00255;Q6PK81;Q96NG5;P78344;Q06330;P14859;Q15543;Q8IZ40;Q7Z3K6;P56282;A6NN  
F4;O95644;O75444;Q13127;Q9P2J8;O95780;P54278;P49848;Q9UQ84;Q6PF04;P12525;Q9Y2V2;P2832  
4;Q2M1V0;Q9BR84;Q9H116;P50750;Q9Y2N7;Q96E29;Q9UBB9;P11161;Q6P4R8;Q15544;Q9Y603;Q12906  
;Q96AP0;Q9HAP2;Q9UN79;P82094;Q08211;P48382;A6NDR6;O00268;P09874;P51532;Q8NI51;Q13426;  
P15622;Q9H4L7;Q96K62;Q7Z3K3;Q3KP31;Q5JVG8;O43830;Q16254;P62380;Q68CJ9;O43918;P41212;P  
0CJ86;Q49A33;P15408;O14746;P23246;Q12873;P86452;P25208;Q8WVJ9;Q15327;O15164;Q3SY52;B4  
DX44;Q15329;P35869;Q9H160;Q9NTI5;Q8N988;P59923;Q9BQY4;Q96QR8;Q14865;Q9GZN2;P0CJ85;Q96  
9J2;Q16514;Q9NYT6;Q8NA31;Q8NHW3;Q13951;Q494X3;A6NM28;P82970;Q9Y2L8;Q8IYB9;P46100;Q166  
21;Q8IX07;Q6IA86;Q32M78;Q9H9Z2;P14651;P53805;Q03468;O75030;O14771;Q9UPW6;Q9NQZ8;P0CH9  
9;P61244;Q8NFD5;Q8N823;P17041;P13984;Q8N9K5;P55055;Q9UIH9;Q9BSG1;P0CJ79;Q3MJ62;P12956  
;Q15796;Q8N7M2;Q9BT49;O60765;O95232;O75475;Q14739;Q3ZCT1;Q02080;Q8N344;P39748;O00321;  
Q15366;Q5HYK9;P62875;P78337;Q02556;Q3L8U1;P12524;P23760;Q8N9Z0;Q99543;O14593;O14770;Q  
96JN0;P24928;Q2VY69;Q9Y6J9;Q99607;P19338;Q7Z591;P19419;Q86VE0;Q8WTV1;P49639;Q8N7U7;P5  
1523;Q9H963;Q92499;O15370;Q99687;P41162;Q86TG7;Q5BKZ1;Q9BYN7;Q96GE5;Q9NQZ8;P0CH9  
016;Q2NKJ3;Q8N720;P51786;O43812;Q15466;P19838;Q8IZX4;O75564;Q9H4S2;Q02833;A8K0S8;P433  
51;O60675;Q9HCZ1;Q8NB42;P43268;P20823;Q96NM4;P78549;Q15583;P23193;P54098;O75360;A6NJG  
6;Q9HBT7;P17861;Q07687;Q8TBZ5;Q9HAH1;Q7RTU4;Q9Y2P7;Q09161;Q12968;O75346;Q15572;Q14588  
;Q6PJG2;O14529;P52630;O60248;Q14839;Q6ZMV8;Q9Y543;P15336;O60885;Q14592;Q9HCG8;Q6AZW8;  
Q6NSZ9;P12757;Q86V15;P28698;Q9BYV9;Q6ZNG0;Q8N9F8;Q9H503;Q9P2K3;P04053;P0C7V5;O43186;P  
17021;Q86U86;Q7RTV0;P08235;Q9UNY4;O95983;Q9BZK7;Q9Y5N6;Q9UID6;Q14872;Q9UDV6;Q12789;Q5  
CZA5;Q03111;Q9Y3C5;Q96HQ0;Q9UKN5;Q9UNY5;P22415;P10244;Q9H707;Q6VB84;Q06455;Q13761;Q9N  
SJ1;Q9UKT9;Q9UMQ3;P52655;P19484;O14646;Q13901;Q96NY9;P16989;O95238;B4DU55;Q6PG37;P313  
14;O75373;Q9BYX4;Q9Y618;Q14209;O95619;Q05BW5;Q96CS4;Q49AA0;P17096;P14652;Q95831;Q9ULG  
1;P35269;Q8TE85;P11474;Q86TJ5;Q0VG06;Q00653;Q8IVC4;Q9UHN1;Q9Y5J3;Q8N488;Q9UK10;P42166  
;A8MUZ8;P25205;Q9NY43;Q96EK4;Q96SE7;Q9NWB7;P35251;Q9HCK8;P47974;Q7RTU0;Q7L945;Q8NDQ6;  
O75764;Q13106;Q86XF7;Q5TEC3;Q96AY2;Q96PU4;O95125;Q9UIF9;P58304;Q68CP9;O14737;O94916;P  
17019;Q9BXS6;P0CG31;Q9NPF71;P16455;Q8N693;O60682;Q8TAQ2;Q86WJ1;Q01831;P0C7X2;Q92793;Q8  
6U70;Q8WYK2;Q9Y2G7;Q14582;Q8IYX0;Q01860;P18848;Q5TGS1;Q9UJW7;Q9NSC2;Q92670;Q5C9Z4;P52  
736;Q01826;Q96NJ3;Q86XN6;Q04637;P21675;O14519;Q9GZX5;Q9NP87;P53803;Q9H8G1;Q96MN9;Q158  
53;Q9BQA5;P13010;Q14241;P78347;P17025;Q9UKK3;P42677;A6NK75;Q9UBD0;P62841;O60869;Q9HBD  
4;Q8N587;Q8N7Q3;Q7Z398;Q92466;P13682;Q8IYI8;P26651;Q86V71;Q04743;Q53T94;Q8TEK3;P52744  
;Q14188;Q02577;A6NN14;Q96JL9;P55771;P28370;P50222;P0CB33;Q6ZNH5;Q9H040;Q9NWS9;P3ZCX4;  
Q9BX82;Q03060;Q9UBL3;P42226;Q9P0T4;B2CW77;Q96PT4;Q5HY98;Q04837;Q6B0B8;Q9UIF8;P23497;A  
6NLF2;A6NJ46;Q8NEK5;Q9Y692;Q6XYB7;Q9Y535;Q66K74;Q9Y252;P14653;Q13952;P15923;P10242;Q8  
NB12;O43309;O14978;O60422;P35637;Q6ZN79;P06733;P15407;Q8NCD3;Q9H7R5;Q12857;Q9C0F3;O60  
870;Q8N972;Q6ZYL4;Q13568;Q9H0M5;Q13765;Q9BWH6;P18583;O75376;Q6ZN08;Q8NHY6;Q8TBZ8;Q9UI  
E0;Q86WV5;Q15651;Q9Y222;Q68DY9;Q5VIY5;P0CG24;O75290;Q3T8J9;Q99814;Q8WXB4;P49711;P4042  
5;Q8N5A5;Q9Y250;Q16649;P05423;Q9NVV9;P17480;Q8HAW4;Q9UMS4;Q0VG99;Q9BWM5;Q8TF32;Q16600  
;Q2M3X9;P52737;Q6ZV50;Q9BX26;Q14781;Q9UQR1;Q8TAF7;Q8N7K0;O14802;Q15776;Q66K89;Q8IYD8;  
Q08AG5;Q99459;P35711;P42224;O75132;A6NKF2;Q86W11;P51522;P22736;Q6ZN17;O00479;Q9UN30;Q  
7RTU3;P18124;Q96PM9;Q96BR6;Q00839;Q96IR2;Q8RFH8;Q9UI36;Q9Y6Y1;Q969W8;Q6ZNA1;Q15361;O9  
5201;Q43345;Q8TDD2;Q9H1D9;Q5FWF6;Q16526;Q8N393;P23409;Q9P0W2;P07199;Q8WTV3;Q8NAP3;Q96  
ND8;Q96LW9;Q3MLS6;Q9UL36;Q9BT81;Q8TAQ5;Q13105;Q9Y2S0;Q9NV72;Q6ZNG1;Q9NV71;Q8IYN0;P548  
21;Q53HV7;Q96JC4;O15015;Q02078;Q9UPG8;Q96DN6;Q9BXP5;Q96LI6;Q06546;Q9Y2A4;Q07352;Q6P0N  
0;P21506;P40424;Q14584;Q9Y6R6;Q8NG50;P31269;Q86XU0;P53567;Q96IU2;P17014;P49715;Q8N108  
;Q6ZMS7;P17023;O15160;Q8NDP4;P18146;P28715;Q03112;Q15906;P17947;P17028;Q92966;Q96028;  
P31260;Q076075;P32519;P15822;Q10586;Q9UKL3;Q03936;Q00403;Q969F1;Q8N2W9;P17024;Q7Z401;Q  
08945;A8K8V0;P33076;Q7Z317;P23025;Q03938;Q8TF39;Q3C1V8;P08651}

666

Pathogen[ P0C214] interacts with 1336 human

partners: {P41970;Q9NWB7;P43351;P40424;Q86UD4;A6NDX5;Q6ZN55;Q5BKZ1;Q02833;Q6NX49;O0047  
0;Q05683;O00268;Q9UKW6;Q92618;P53567;Q06732;Q8NEK5;O75444;O95243;Q9NQZ8;Q9HA82;Q14526  
;O73052;P82979;P18850;Q9BWW4;Q9BW11;Q8NI51;Q03989;Q9HAJ7;Q6IQ32;Q7Z3K3;Q96C28;Q96FV9;  
Q05BW5;Q14527;Q96MU6;Q9P255;Q6B0B8;Q9H9Q4;O14813;Q9UHL9;Q9UKN5;Q96RE9;Q13761;Q14739;Q  
96S65;Q15327;A8MUV8;A6H8Y1;Q05195;O43296;Q6ZN17;Q9NS37;Q16254;O00411;Q8TBZ8;Q8IZC7;O7  
5467;Q6ZN11;O14529;Q96LW9;Q9UID6;P11308;Q00653;P27695;P32243;Q8N228;O43365;Q6ZNA1;Q09  
161;Q9P0T4;P35789;Q8NDQ6;Q13887;P35227;P49639;Q96T58;P17032;P61244;Q06609;Q9H040;Q145  
93;Q15697;A8MVS1;Q9HCZ1;P19474;Q02930;Q6P0N0;P56270;Q9Y2S7;O43829;A0AVK6;Q8WXF8;Q0061  
3;P35869;P51508;Q13469;Q7Z398;O60663;P42166;P16989;P11474;A8MQ14;Q15047;Q13330;O14746  
;Q96BT3;P52743;P35637;O95238;Q13952;Q9Y5L5;Q9BT49;Q06546;Q9Y5Q8;Q4VC44;Q9Y6J9;O75461;  
Q9P0L1;P17010;Q63HK3;Q9ULD5;P55347;A8K8V0;Q9UHF7;Q9Y4A8;O75764;Q15651;O43830;Q96S55;Q  
7Z591;Q9BS34;Q9Y2A4;Q14865;P78337;P49959;Q14872;Q53EQ6;Q8IXK0;Q8N7Q3;P31249;Q8IYN0;Q1  
4929;Q96KR1;P17023;Q9BX82;P12757;Q9Y2D9;O00321;Q14591;P30876;Q96JN0;Q9Y5A6;Q6ZN57;Q8N  
DF8;P51814;Q5T5D7;Q08999;P19838;Q05481;P14921;A6NHJ4;O94842;Q96SQ5;P57721;Q92664;P0CB  
33;Q9UL59;O75925;P52744;Q6ZNH5;Q15573;Q9H9Y6;O14497;Q7Z5D8;Q5JVG8;Q8IYW8;Q8NC26;O7558

6;Q8N5A5;P15336;Q9UFW8;Q9BUI4;Q9Y473;Q13568;Q92889;Q96LW1;P13010;P06746;A6NP11;P54253;P54098;Q96I27;P21675;O15535;P53803;Q9H175;Q15361;Q96QR8;Q8TD17;Q6PG37;Q96LI6;Q9NTW7;Q8TF45;Q9BSI4;O43186;Q8NG57;P62380;Q16656;O75820;Q9BWM5;Q8TAQ5;P31314;P52742;P01011;Q14587;Q12873;P15407;Q9NPC7;P52655;Q8WYN3;P35269;Q15554;P50750;Q86UE3;Q9UIH9;Q92900;Q9HD15;Q8TBC5;P19484;P25208;Q99081;Q8NDP4;Q96CX3;Q96NJ3;Q8N693;P52738;Q3T8J9;Q9H171;P33076;Q96RK0;P29084;Q5JVG2;P0CG31;P23025;Q7Z6R9;Q96K62;O75618;Q96BR6;Q9HBE1;Q8NCA9;P42226;Q5H9I0;Q7L2R6;Q7RTU4;P15884;Q8NHW3;Q9NS56;O75478;Q8TD23;Q9P2F9;O15350;P13349;Q8N587;Q99856;Q8TAU3;Q8N2W9;Q14119;Q03112;Q9UJN7;P17019;Q9BWH6;Q8N0Y2;Q8IVP9;Q9UC06;Q02080;Q9Y2V2;Q14765;Q9BZE3;Q68DY1;Q8NDY6;Q16621;Q5MCW4;P01100;Q9BXS6;Q99676;Q8NCK3;Q9NR55;P52435;P05204;P55265;O15266;P17275;Q8N823;Q92750;Q9UNY5;Q5EE01;Q8NEP9;Q08AN1;P17022;Q12800;Q9HBD4;Q6NT04;O75362;P32519;Q9NUA8;Q9BQ0;Q53HV7;Q8WYP5;Q99743;Q15233;P23769;Q92793;Q16587;P50548;Q7Z7K2;Q9Y5J3;Q969W8;Q96NY9;P35711;Q9UIF8;P19419;P56693;P67809;Q499Z4;P15408;Q96GE5;P53999;Q8N9N5;O95625;Q86XU0;Q99708;Q8TF20;Q9UBZ9;O43167;Q6P9A1;P81877;P84022;Q9H1A7;O75437;P23246;Q6ZRS2;Q6ZYL4;Q12906;Q6PK81;Q6P1L6;Q9UL58;Q9UKN8;P17096;Q95125;Q9NZI5;Q5TYW1;Q9H1D9;P15172;Q6PF04;Q86WZ6;P17947;Q9P2R6;P56524;Q96PU4;Q16533;Q9UK11;Q86YE8;Q9NR11;Q96CS4;Q9Y6Y1;Q9Y6K1;O14709;P17029;Q6NT76;P42704;P17544;P41218;Q12986;P11831;Q9Y2Y9;Q96BD5;Q00403;Q15906;Q96SR6;Q8NAP3;Q9UK13;Q96ST2;P78344;O60318;Q9UNN4;P17026;Q96MN9;Q96SK3;Q04206;Q96AH0;Q9NW07;Q16520;Q5HY98;Q3L8U1;Q2M1K9;Q63HK5;Q9H307;O75123;O60535;Q2M3W8;Q06455;Q9Y5Q3;Q9UHK0;P42224;Q02386;Q15973;Q3MJ62;P37275;Q68CJ9;Q9Y2S0;P28347;Q3KP31;P10914;P61218;Q8N8C0;Q16666;Q96NM4;Q15928;P17482;Q5SXM2;Q9ULG1;Q86TJ2;Q9UPG8;Q96K58;Q9BYX4;Q9Y5B6;A8MT65;Q9Y3C5;Q6ISB3;Q9UKI9;Q96J4;Q965C4;Q06330;Q12905;P35251;Q7Z3I7;Q15910;Q99607;Q32MZ4;O00716;Q8IZ26;O75030;Q8N726;Q8N9F8;Q9Y2M0;P17024;Q9Y2Q1;Q6ZR52;P20585;O14771;Q96DN6;Q12901;Q96NG5;Q96N77;Q8N5J4;Q96SE7;P49005;Q6ZMS7;Q86WP2;Q9H4L7;Q6ZNI9;P07199;Q13901;P17038;Q9UC07;Q9HAU5;P38935;Q9HAW4;Q494X3;Q14938;Q96MR9;Q9Y2P0;Q7RTU5;Q00978;Q96K75;O96006;Q9UII5;Q4V348;Q9BT81;Q96SZ4;A6NLF2;Q6IV72;Q8N141;Q8TBE0;P51786;Q9BY31;Q8TAQ2;Q15560;Q96BV0;Q5SVQ8;Q6IA86;Q92541;Q16594;Q8N883;Q9Y5N6;Q15366;O95232;Q3SXZ3;Q9GZX5;P05423;Q9NXT0;Q9UKD1;P51523;Q9H4I2;Q147U1;Q12789;Q9BSK1;P17676;P24278;Q96T88;P17031;Q01105;Q9HCX3;P78317;Q15542;P14651;Q9H503;Q03933;Q5VTD9;O95619;Q13398;P25205;Q53GI3;Q9HBT8;P86452;Q8N7U7;O43248;Q8NA31;Q5VZB9;Q9UMS4;P49716;Q8WTV1;Q10587;Q8N5U6;P10244;Q8N344;P49450;P17030;Q10586;Q9Y534;Q6VUC0;Q9Y250;O75564;Q03937;Q96NL3;P0C1Z6;O60828;Q8TF68;Q9BYX6;Q9Y3C5;Q9NZI7;P48382;Q9HBZ2;P20265;Q02078;Q86XN6;O14503;Q8IZH2;Q15561;Q969F1;P82094;Q07352;Q8N2Z9;O95201;Q8TC21;P28698;Q00059;Q9NWS9;Q9GZS1;Q03188;Q92922;Q8IXF0;P15622;Q6ECI4;Q6ZSS3;Q9BRR0;Q6ZNO8;Q8N859;Q13129;P13056;Q9UIS9;Q9HC78;Q9Y237;Q8TE85;P28715;P10243;Q12968;Q01094;Q14814;O75446;Q8NCD3;Q86VE0;Q9Y2N7;B1APH4;Q9UL36;P18848;Q92966;Q9ULJ3;Q16633;Q86WV5;O14867;Q14566;P17535;O00479;Q86US8;Q8IYB3;Q9Y6R6;Q49AA0;Q8N3S3;Q92754;Q92698;Q969G3;O60870;O00712;Q8WY36;Q9UHX1;Q9Y2T7;P49790;Q7Z340;Q6ZNG1;P18583;Q14186;Q9UIF9;Q8IYH5;Q12837;P55895;P49116;Q01201;Q92985;Q07687;Q9BQ70;Q9UKL3;Q96IT1;O60765;Q13426;P15923;Q06730;Q9UJU3;Q8N184;Q9UGU0;Q86Y25;Q6DXR9;P25791;O75132;O95416;O75373;Q8WYZ3;Q14103;Q9NVV9;P28370;O94776;Q14978;O43542;Q96AY2;Q9Y2H6;Q15929;Q07666;Q8N4W9;A8MXY4;Q14151;Q96PE6;Q3CX4;Q68DI1;Q9P0W2;Q8N488;Q9H5A4;Q02556;P17861;Q00577;Q6P280;Q16600;P17014;Q6RFH8;O95983;Q8N9K5;Q99459;Q8NF99;Q9UJW7;Q8TBZ5;Q49A33;O14948;Q8N2I2;O75290;Q86U70;Q9Y543;Q96JF6;P46100;Q96RJ6;P0C7T5;Q6P9A3;Q6AW86;Q9UNA4;Q9UKL0;P26358;O43812;Q6ZMW2;Q9UNY4;Q8TF47;P51826;Q9H074;Q6DD87;P14653;P51504;Q6MZP7;Q7Z2E3;Q96N95;Q8TF39;Q9BTP6;P78347;Q8IZ40;Q6P2D0;Q13485;Q0C0F3;Q4W5G0;Q9H7X3;Q96N22;A9UHW6;P55197;Q9NYT6;Q03924;Q15572;Q5FWF6;O43310;P18847;Q08AG5;Q9BYE7;Q86TJ5;Q9H8G1;Q86UP8;Q9UH92;Q8N108;Q15544;P20749;Q9HAZ2;Q8N7M2;P17028;Q9P2J8;O95780;P0CH99;Q8N3X6;P49848;Q15329;P50222;P28324;Q3MIS6;Q6P4R8;Q9UMS5;P16383;Q8WW38;Q96G23;Q9NVI1;B4DU55;P15927;Q9H160;Q9H2G9;Q9NQX6;O43502;Q96E29;P51815;Q6ZS27;O14896;P51522;Q8N393;O43823;O15060;Q9BUG6;Q9Y603;O14519;Q7RTV0;Q9HCK8;Q0VG06;Q6ZMY9;Q9UN79;Q13765;P17480;Q9BVC3;O15226;O75376;Q49AN0;Q96N58;P17020;Q9ULX9;Q76KX8;O60264;P19532;Q15796;Q6NVH7;Q9NSC2;Q96I24;Q9UHI6;Q969J2;Q9ULM2;O75717;O43593;O15525;Q86V71;Q9Y3M9;P17027;Q86UQ0;Q01543;O60381;Q96GC6;Q99687;Q99594;P41182;Q9Y6X8;Q6P9G9;Q03923;Q5VZL5;Q9NP71;Q9UQR0;Q8N972;P11388;Q9BQY4;P17098;Q6ZT77;P21506;Q8IYB9;O15379;Q9UN30;P06733;Q01892;A4GXA9;P43268;Q96B01;Q9Y2D1;O75475;Q9NRF9;Q16514;Q9H211;Q7RTU3;Q8WYA1;P17035;P82970;P0C7X5;Q9NW08;Q8IX07;Q9ULX6;P48378;Q9UJL9;Q9H9Z2;Q6U7Q0;Q13127;Q14934;Q4LE39;Q8NDW4;Q9BSG1;P62875;P28069;Q2VY69;Q9Y252;O75346;A2RRD8;Q6ZNG0;P13984;Q15072;P20226;P13682;Q9BTC8;Q15424;Q86W11;Q6NSZ9;A8MWA4;O75534;Q14653;Q8IZX4;Q9UI36;Q5SXM1;O75531;Q96ND8;Q9H4T2;O75360;P17040;P16455;Q6V9R5;P62841;Q9Y2X9;P11387;P58317;Q9UDV6;Q96C00;P10074;P24928;Q86YC2;O43918;Q68EA5;P36402;P52747;Q8IYX0;P26651;P10242;Q8N9Z0;Q6XD76;O14593;Q9NV72;Q9ULV5;Q5VIY5;Q9Y462;Q9UEG4;Q15935;P22670;Q9H9T3;P39880;O60806;Q9UBD0;P62633;Q9UKT9;P36508;Q7L945;Q04637;O43345;O60563;P23497;Q9BX26;Q99816;Q92499;P05412;Q9UMQ3;Q9Y2G7;P17041;Q9NYB0;Q96HQ0;Q8WVJ9;Q6NX45;P49711;Q14781;Q01826;Q13106;Q02447;Q12857;P42677;O15160;Q9NZI6;Q8N8Z8;Q9Y535;P17021;P18146;Q16534;Q9HC44;Q15631;Q96JL9;P0C7X2;Q8WTR7;O15164;P58340;P15621;Q0D2J5;P0CJ78;Q9GZM3;O95602;Q02577;Q8N196;Q8IVC4;Q96MX3;Q01831;Q14584;Q35Y52;Q9NQX1;P27797;Q15853;A6NK75;Q86U86;Q6ZNM0;O94952;Q03060;Q7Z401;P57071;O60885;Q6IQ21;Q96JB3;P40425;Q6ZV50;Q16526;Q14592;P17036;O43309;P39748;P17039;Q9NX65;P04053;Q8TAF7;P0C7V5;Q9UDV7;Q99814;P09086;Q86TG7;Q96IU2;Q8NB42;Q9UKK3;Q01658;Q6PJG2;Q9BZK7;Q9HCG8;Q96H40;Q96ST3;P09629;Q8N8L2;A6NNF4;Q9H8B5;Q759R2;P11161;Q6ZRF7;Q9UJW8;Q8IXM2;Q6ZMV8;Q5T619;Q96AE4;Q96PQ6;Q12888;Q9NSD4;P23511;Q7Z6R7;Q8NHX6;Q9ULW3;Q14585;P78549;Q03111;O14978;P15036;P16415;Q6ZQV5;Q9UIE0;Q2M218;Q9NR48;P29372;Q08945;O14862;Q8N7K0;Q04864;Q9HCG1;Q08211;Q9NZV7;Q5TEC3;P40763;Q9H9D4;A8MUZ8;Q9UQ84;Q8WVM0;Q0VGE8;O96004;Q12972;Q9H668;Q9H5J8;Q08ER8;Q7RTU0;P27540;P49910;Q9BR84;Q86V15;Q8TB69;P50221;P27694;Q99543;Q9H707;Q96N38;Q9HBT7;Q68CP9;Q9UPW6;P08151;Q92804;Q9UFB7;Q6P1N0;Q92614;O94916;Q00839;P54278;A6NM28;P48380;Q53T94;P78545;Q99684;P50549;Q9HCL3;O14770;Q6NUN9;Q9NWS1;Q9P243;Q92988;P22392;P52594;P41162;Q92945;Q13342;Q92547;Q9BUY5;Q8N3J9;Q9BQA5;P08651;A6NFI3;Q15776;P22415;Q9BYN7;Q8IYF1;Q9UM63;P19387;Q8N782;Q9NP87;Q9UQ80;O14646;Q13148;Q9UBB5;P108

28;Q7RTV3;P23193;Q8N1W2;Q9H7R0;P19388;P52736;O95644;Q15543;Q9Y651;Q5C9Z4;P16220;Q13360;Q96NJ6;O60869;P14373;O95948;Q9P2K3;Q3KQV3;P17017;Q92466;O14628;P53805;P05114;Q8NFD5;Q3ZCT1;Q8NA42;A6NKF2;Q15562;Q9Y606;Q96H86;O60315;Q8N895;O15370;P51531;Q32M78;P52630;Q7Z6K1;Q8NB12;Q6ZN32;P0CJ79;Q96NG8;P54845;Q04837;Q15326;Q9UQR1;Q8IX15;Q6ZSB9;O15499;Q6AZW8;Q14590;P19338;Q9NZL3;P18754;Q9NTI5;Q98XF7;Q9NQ87;Q9Y618;P62508;Q96EK4;Q96EG3;Q9H963;Q01664;P56282;Q9UPN9;Q15365;Q9NP66;Q1B531;Q5EBL2;Q8NE65;Q5CZA5;O95163;P15822;Q96LX8;O60284;Q8NG50;Q9NQ33;Q15699;P52746;Q9H0M5;P14859;Q9NSJ1;Q9UK12;Q96E14;Q96N20;Q16531;Q9Y692;Q8WXB4;Q99583;Q9Y253;P18124;Q14209;Q9Y2P7;Q01860;Q9Y2L8;Q2M3X9;Q66K89;Q96NI8;Q9UBD5;Q5TGS1;Q8IYD8;P01106;Q96RY5;Q3C1V8;O95402;O43361;O60675;P14316;Q86WJ1;Q99551;Q8NEM1;Q2KHR2;O76075;O60248;Q03468;O14802;A6NK53;P35712;O60304;Q14188;Q9H7R5;Q13105;P41161;Q9UBB9;P06400;P35548;P08047;Q9QFC8;Q14966;Q8IYI8;Q8TA94;Q05516;Q7Z3K6;P12956;Q8HWS3;O00255;Q96PM9;P12980;B4DX44;P52737;Q14839;Q8TF50;Q9BXP5;Q8N1L9;P0CG24;Q68DY9;O15405;A6NJL1;Q9NY43;P35638;Q5HYK9;Q9HAH1;Q14588;P31276;O00287;Q33E94;Q9Y5R5;Q15466;Q96QC0;P04198;Q9BQ15;Q7Z3V5;P80303;Q66K74;A8MTY0;Q9UK10;P54274;Q8TDD2;Q8TAW3;P09874;Q5JNZ3;O15015;Q6ZN79;P17025;P51532;P47974;Q9HAP2;Q15937;P18846;Q9NYF8;O94993;P23760;Q6SJ96;P10073;Q9BTP7;P52740;Q5EBM4;Q13951;Q9H2P0;Q86T29;Q15723;Q8NBB4;O94892;O00570;Q13415;Q14181;Q9BXG8;O75928;Q8TEK3;Q7L3S4;O96028;Q16236;Q92670;O94983;P52741;Q96IR2;Q9UHN1;Q8N988;Q9H116;P55771;Q2NKJ3;Q02878;Q8TF32;Q8N8J6;P31269;Q15306;P59923;Q14241;Q9NPG3;O14737;Q96MW7;P41212;Q96AV8;Q03938;Q4G112;O60481;Q03701;Q9Y222;Q3KNS6;Q8N720;Q8NHM5;A6NN14;Q9BRH9}

667

Pathogen[ P03346] interacts with 1822 human

partners: {Q86UQ0;Q96T92;Q15723;A6NK53;Q12888;P31271;Q06330;B2CW77;Q99081;Q9BSI4;Q7Z3K3;P85037;Q9NPG3;Q3C1V8;Q06945;Q9Y606;P10244;Q6SJ96;Q3KNS6;P53805;Q14781;Q96NG5;Q5JVG2;Q9NPC8;Q96FV9;Q13886;Q9Y6Y1;P08048;Q9BZE0;Q9NS91;Q12901;Q05481;Q9Y6J9;Q96AP0;Q8N7U7;P31249;Q8N2Z9;O95201;Q9NWS9;Q96ST3;Q9UPN9;P12004;P49716;P54821;Q7Z398;Q8NI51;Q9Y253;Q03989;P47902;P05412;Q9UKS7;Q96N20;Q9Y467;P17097;P78424;Q15542;Q9UHL9;Q96LW1;O75603;P49639;Q16621;P46063;P57071;Q5T5D7;Q4VC44;Q7Z7K2;P61978;Q99742;Q9HBT8;P15863;Q15562;Q9UHF7;Q96S65;Q13263;Q9NZR4;Q96RK0;Q494X3;A8MX4;Q9BXS6;P35453;Q9NQX6;Q9P267;Q9Y4Z2;O75364;P31260;Q9NR83;Q96QR8;P12524;O75564;Q9NRZ9;P50219;Q8TF39;Q9Y6K1;P09086;Q02078;O95159;Q02386;P38935;Q7L9B9;Q16666;Q9NQX1;P52954;Q14739;Q09161;P10827;Q9UMS5;Q8N4W9;P29PGG2;P49910;P0CJ88;P11473;Q86U70;Q3MJ62;P31268;P28715;Q7Z5Q5;O94892;Q15788;P28324;P152511;Q9HBD4;O15535;Q8IZM8;Q9NPA5;Q9Y657;Q3SY89;P86452;Q15366;Q99811;A2RRD8;Q6P1L6;Q6QHK4;P0CG31;Q9HAH1;Q99687;O95402;Q08AN1;Q9H8N7;Q96NJ6;O95625;P12956;Q49A33;Q9H2G9;Q9BRR0;Q8IUE1;P9NV11;Q6ZRF7;Q96C55;Q7Z340;Q01201;Q5T1R4;Q8N7R0;Q96MR9;Q9NZV7;Q8WTZ3;Q9UD57;P50221;P80303;O96006;Q06609;P18847;Q96C00;Q8N1L9;Q15928;Q5XG87;Q8IYB3;O14813;Q96EK4;Q7RTS1;Q02878;Q9BWM5;Q14591;Q99612;P29374;Q9BUY5;Q9UEG4;Q7Z591;P58012;Q9Y588;Q14814;P78337;Q99598;P36508;Q9Y2P0;A6NN14;Q8NCA9;O75446;Q8IXM2;P14373;O15522;Q8WYB5;Q9H116;Q7RTS3;Q12905;Q01538;Q9BWT6;Q8NAF0;Q3KKNW1;A6NFD8;Q8IYW6;Q15916;Q9P2K5;Q9UULD5;Q96KR1;P46100;Q9UPW6;A6NJ46;P16220;O60765;Q8IZC7;Q9UQR1;Q08999;P56270;P17039;O75362;Q9UKL0;O00479;B2RD01;Q9BQG0;Q9Y2P7;Q8N8B7;Q8NAP8;Q9H2W2;Q86US8;O60248;Q5HYK9;P06401;Q9UL59;O43918;Q9H0M5;Q96BA8;P17676;Q7RTV0;P55265;Q9HZ24;Q03052;O43167;P78414;Q99543;Q9Y4X4;P19484;P17098;Q86V71;O15370;O14901;Q9H2H0;P0C7T5;Q8NC26;P12757;Q96NJ3;P36402;Q9ULW3;O75586;P62633;P15336;Q9UIF8;Q99607;Q9BQY4;Q9P0W2;P54098;Q96HQ0;Q05925;Q9NU63;O75531;Q86WV5;O14737;Q13129;Q9Y2V2;P78415;Q2M218;P36956;P52739;O15209;Q05066;P0CJ78;Q3B8N5;Q8N141;Q96DN6;Q7Z3V5;Q9H2P0;Q03828;Q16656;Q00613;Q6ZT77;Q9UL58;Q8NCN2;P35638;P35548;Q8N548;Q8N38;Q6ZQV5;P52747;Q9BYU1;Q9Y2L8;P08235;Q9HD90;P11831;P11388;P31270;Q15329;Q3KQV3;O43296;O43502;Q8TAQ5;Q9BXA9;Q86TJ5;Q0VG99;P28347;Q9Y5W3;Q15554;Q96QC0;Q9UQ80;Q8IUE0;Q96K75;O43309;O15379;Q5FWF6;Q9UML2;P27694;Q9NPF2;Q6ZSB9;Q7Z3I7;Q9UKT9;Q9H503;Q9P0T4;Q12857;Q99594;Q06732;Q96H40;Q8NFD5;Q9BX26;Q7Z5D8;Q8N3X6;Q8NFW5;P48443;P06400;P0CJ87;Q8N7M2;O75123;P48378;Q9Y3C5;Q4G112;Q96IQ9;O75717;Q14590;P0CH99;P40426;Q14774;P0CB47;Q96K62;Q9NW07;Q6V9R5;P35789;Q9Y5N6;P52740;Q9NR11;Q9BYM8;A8MT69;Q8TD23;Q9H171;Q08AG5;P51532;P13349;O43711;Q00577;P54845;Q969W8;Q13148;Q92614;Q70SY1;Q14188;O60393;P50549;Q00059;Q12772;Q96SZ4;Q96MU6;Q9BZE3;O60315;O60563;Q8WXF8;Q9BWX5;P48382;Q03933;P17027;Q5MCW4;Q01105;Q9H1A7;Q9UNA4;Q96HZ4;P51786;Q9UKI9;Q99626;P07992;Q12837;Q03936;Q16559;Q9BJG9;Q00056;Q15911;Q2M1K9;P17275;P78347;Q32MZ4;Q86T29;A8MUV8;P82094;Q147U1;Q5EE01;Q9UBD5;Q8TD17;P54274;Q14587;P52738;Q9NQV6;Q8TF45;P49116;P0CB33;Q15466;Q9UJQ4;Q8N680;Q6XYB7;Q9NZI6;Q9UIU6;P14316;P05423;A8MVS1;P24278;Q9P2W1;Q8WYN3;P17861;Q8WYP5;Q96KM6;Q8NEP9;P23769;Q14872;Q9UBZ9;Q99708;Q8NE65;Q5VIY5;Q9HD15;Q14527;P35250;Q9ULG1;Q8N693;P25490;P0C7M4;Q15583;Q8N5U6;P19419;O95983;Q9H4S2;Q5H9K5;O14978;Q13426;Q9Y483;Q9UMS4;Q49AN0;O75505;Q15573;P55895;P14859;Q6P280;Q9NSC2;Q5T0B9;P48380;Q8IYA7;Q8N393;Q16531;P25208;P50548;Q8IWI9;Q96AH0;P23246;Q96I27;Q8TF20;Q8NF99;Q8IX15;Q6MZP7;P52741;Q9NR55;Q8TD26;P56282;P55197;Q9C0A1;P20264;Q86YE8;P15923;Q8TEK3;Q9H307;Q6ZMY9;Q6VB84;P78413;O75820;Q86WP2;P15172;Q15796;Q9UKK3;Q86WZ6;P41225;P56693;O75475;Q9BW11;P23760;Q8IZ20;P56524;Q6NSW7;P15408;Q9UL68;Q9UK11;P17535;P13010;Q8IYH5;O43298;Q15327;O14709;P19622;Q6NX45;O00712;P05114;Q3SY52;Q04743;O75534;Q15906;O00287;Q92858;P78344;O60318;P31276;P17026;Q99856;P53803;P17022;P23409;Q96B42;Q66K74;A6NPF7;Q8N5A5;Q8TBC5;Q9H9Y6;Q16520;Q12986;Q5HY98;P35227;Q86TG7;Q04206;Q8IZ40;Q68DI1;P33076;Q9HAJ7;Q86UE3;P51826;Q8TAK6;Q9H9D4;P0CJ85;Q99816;Q0VG06;Q3MIS6;Q8N9K5;Q8N895;P52737;O95238;Q12906;Q7L3S4;O95163;O94776;P28698;Q6ZMS7;Q9ULJ3;P13056;Q9NQ69;O00321;Q9UN30;Q6PJG2;P61218;O00268;P52951;P82979;O60806;Q92886;P41161;P15822;P5833;Q9UHN1;P56177;Q96CS4;Q9P0L1;Q9BYW2;Q9H4W6;Q92826;Q04741;Q6ISB3;Q63HK5;P15173;Q08050;Q9BYP8;Q14209;P12525;P42226;P52742;Q9UDV7;P18754;Q9C0D4;Q9BYE7;Q15306;Q8WTR7;Q9Y5Q3;P15622;Q8NDQ6;Q9UBC3;Q7Z6K1;Q9P2Y4;P23759;P10588;Q96QS3;Q9HCK0;Q8IVC4;Q00839;Q96AE4;Q9NQ33;P14652;Q96AV8;Q8TA94;Q9C0F3;Q6PG37;O43186;Q9NX65;Q16526;Q8TF32;Q9Y2D1;P27540;Q8N5J4;A8MQ14;Q9NP08;Q86UD4;P58340;Q96SE7;Q86U86;Q96AY2;Q9HCG1;P49005;Q9NZI5;P58304;Q6P0N0;P16989;P26358;A6NJT0;Q15560;P19338;Q9P2F9;Q8TAF7;Q9UBL3;P0C7X2;O14646;P20823;Q9Y3M9;Q96BR9;P17038;Q9H4Q3;P0CJ89;Q02575;A6NK75;Q9H609;O15350;Q96N38;O75626;Q9NTW7;Q6N

T04;Q8NDY6;Q9UBX0;Q9Y534;Q92945;Q9BYE0;O60682;Q14586;Q16254;Q7RTU5;Q00978;P29084;Q04864;Q08211;P17014;O60902;O75030;Q92670;Q9Y5R5;Q8N587;P10074;O43316;Q9UM63;Q8NB42;Q9NV72;P14653;Q86VK4;Q3SXZ3;Q9NR33;Q8TE85;Q92698;O00570;O00409;P31269;O94842;Q96RJ6;Q96BV0;Q09FC8;A2RU54;Q8N859;P52743;P13378;O15090;P17483;Q8NBB4;P42166;Q03923;Q9NRF9;O75764;O95644;Q8NCP5;Q6XD76;Q9UJW8;Q86V15;Q01094;Q9BY31;Q9NUA8;P17032;P49715;Q8N2I2;Q9ULX9;P17096;Q13398;Q66K89;Q53GI3;Q92754;Q8N554;Q9BWG4;A6NJL1;P17025;Q9Y5J3;P15621;P31274;Q9UBC0;P17010;Q16342;O43345;Q6P9A1;P59817;A8MT65;Q01860;Q92750;Q9HCX3;Q6EKJ0;Q96SQ7;Q9BTP7;O14867;Q08945;P20719;Q13351;P0CG40;Q0VGE8;O75444;Q8N7K0;Q9H4T2;Q53T94;Q8NCD3;P78426;Q9NSD4;P0C1Z6;Q9ULX6;Q499Z4;P0CJ90;Q6P9G9;P08047;Q9BQW3;Q9BXP5;Q9H582;P12980;O14503;Q15853;Q96LW9;Q8TF68;P06733;P20226;Q9HC78;Q8IZH2;P41218;P20265;Q9H5H4;Q8N9F8;Q92766;Q96JM2;Q8TDD2;P18850;Q9H963;P17480;Q9UK10;P22670;Q8WY36;Q14119;O95600;Q96NY9;Q8N8E2;Q96CX3;Q9UFW8;A8MUZ8;P52736;Q9H5J8;P52756;Q14919;Q03111;O43593;Q14592;Q16236;Q15561;Q14934;Q86W54;Q14103;Q9HB31;O15060;O60663;Q14526;Q9UKN8;Q16650;Q9Y222;Q7Z333;O43680;O96004;P17036;Q6ZNH5;P01106;O43364;Q6ZMW2;Q3ZCX4;Q8TBZ5;Q9BS34;P41162;Q14566;P0CJ79;Q6P1N0;B4DX44;Q03701;P51843;Q96MN9;Q9BWW4;P25205;Q969S2;O60870;P19388;Q9NP66;Q9HC44;O75925;Q8NBF1;O43365;Q9BXX3;Q6ZNA1;Q15699;P28702;P35637;Q9UL49;Q9NP71;Q3T8J9;P21506;P28358;Q14186;P50222;P51508;Q07666;Q9Y330;Q9UK13;Q8N0Y2;Q92499;Q9Y5B6;Q8N8Z8;Q9BT49;P18848;Q14582;Q9GZM3;Q2M1V0;Q96JL9;Q53HV7;Q9P243;Q8IYI8;O00327;Q8ND82;Q9BQ70;Q7Z4V5;Q9UKL3;Q14151;P14921;Q9HAW4;Q06710;Q92794;Q9NS56;Q9P215;P84022;O14628;Q86Y25;Q8HWS3;P11308;Q8N1W2;P25791;Q96DT7;Q8IYX0;Q12968;P31275;Q8NHY6;P17542;Q14978;O95232;Q9BRH9;Q9HCS4;Q9Y692;Q9BYV9;Q14863;P10242;O60481;Q9ULS9;Q6ZN11;Q9Y237;O95231;Q8IXF0;Q9C0J9;Q8NB15;Q6ECT4;Q9UNY5;Q9H175;A9UHW6;P13984;Q8N1G0;O43829;Q13609;Q9H7R5;Q8TF47;Q96S55;P22736;Q5EBM4;O14948;Q9Y2S7;A8MWA4;Q6VUC0;Q15929;Q9UL36;Q9NXT0;Q5JT82;P15976;O43670;O95125;O15266;O95096;Q9BR84;Q6P9A3;Q6ZMV8;Q96PE6;P53999;Q5JVG8;Q15646;Q13469;O75478;Q9GZN2;Q15631;Q06546;P67809;Q9H074;Q9POU4;O60381;Q03468;O00255;Q9H9T3;Q02446;Q8IZU3;O60519;P19532;P17481;O95863;Q969G2;P10914;Q96PT4;P52746;Q96GD3;Q8N5Y2;P49640;Q9BQ15;Q15072;Q86VE0;Q9UJW8;O15315;Q9HCG8;Q9NWB7;Q8N3S3;P16415;Q02556;Q4W5G0;Q6AW86;Q9H7X3;O60479;Q96N22;Q15361;Q9NQZ8;Q8LWY8;Q68EA5;O95948;Q9UDV6;P62380;Q59GR2;Q33E94;Q9P2R6;Q9H4I2;Q03924;Q13951;Q9BX82;Q6ZYL4;Q06730;Q99684;Q01831;P17031;Q8N8J6;Q8N883;Q9UK12;Q15973;Q13342;Q6ZNC3;Q9H8G1;B2RXF5;Q9NWS1;P52435;Q5JNZ3;Q8NA31;Q9UBG7;Q9H1D9;Q13118;Q8TBZ8;Q9P2J8;O95780;P49848;Q8WAA4;P42704;Q9UHK0;Q3KP31;O15499;Q6ZM79;O95076;Q9Y217;P52744;Q9UNN4;Q8IXT2;O60264;O75541;Q9H668;Q03112;O75373;P08651;P17041;Q9H040;P51587;Q96E29;Q96G23;P20585;O60284;Q6IQ32;P40425;P52594;Q2M3W8;Q08ER8;Q9HC88;Q02086;Q13761;Q5SVQ8;Q14593;O14497;Q9UN79;O15160;Q96BR6;O14746;Q9UHI6;O43361;Q8TCN5;O00470;P28356;Q7Z4V0;Q9NWX5;Q9HAP2;P47974;P09017;P29372;Q16534;Q8WVJ9;Q9Y250;B4DU55;Q9NZC4;O60304;Q14585;Q96N77;Q10Z21;Q6ZS27;P50750;Q02548;O75840;Q9Y535;Q96B01;Q5JUK2;Q8N7Q3;P49711;Q13330;Q01954;O75618;P51815;O43542;P17544;P09629;P33992;Q8NG50;Q9Y6X8;O95361;A6NNF4;Q15744;Q8TAW3;Q8NA42;Q8NB12;Q96C28;Q96N95;B4DXR9;Q9NTI5;O75346;O14896;P37275;O75683;P35680;Q7L2R6;P17029;Q13415;P36954;Q9NQ87;Q13273;Q16649;Q96E14;Q6DD87;Q9BWH6;Q16514;Q9UIF9;Q6PF04;Q8NEM1;Q86XN6;Q9UGU5;Q15475;O14627;P82970;Q9BU19;Q9NYB0;P10073;Q8IX07;O75771;Q99814;Q12778;Q16695;Q12800;O00411;Q8TC21;Q9Y5Q9;Q6TAR4;Q9BUG6;P10243;O14717;A6NKF2;Q99551;Q9UNY4;P15927;P42224;P17035;Q8N9N5;Q9HAU5;Q7Z401;Q96NG8;Q53EQ6;Q9Y2Y4;Q9Y462;Q9HCZ1;O14686;Q9HCE3;P17021;Q9Y5R6;Q16533;P35659;Q6ZNO6;Q9UBX2;Q01167;Q63HK3;Q13887;Q13105;Q92541;Q5H9T0;P16383;Q8N196;Q8NDW4;Q5SXM1;A6NI15;P22392;Q8N8C0;Q96NI8;Q86YC2;Q5TGS1;Q6N043;O75376;B1APH4;P98177;Q96S3;Q6BEB4;Q86YH2;P35249;Q9UBD0;Q4V348;P09016;P50539;Q4983;P17030;O95831;Q9HBZ2;Q9BUI4;Q07352;Q8NFC6;Q9H5J0;P78317;O14979;P49959;O95718;Q8N9Z0;Q06416;O14593;P78367;O60281;P0CG13;Q3ZCT1;Q05195;Q14653;Q5TYW1;P78411;Q8N2W9;Q14181;Q9H707;Q5VTD9;Q14190;Q9EGE3;Q14966;Q6ZRS2;P09874;Q14865;P35713;Q15910;Q96T58;Q9Y6R6;O75132;O75469;O94993;Q9NQ03;Q9HBE1;P78364;Q13568;Q99459;P09630;Q15935;P15407;Q9Y2G7;P27797;P41182;P0CB48;A6NNA5;Q9BYX4;Q96RY5;Q76KX8;Q8IYB9;Q9NRM2;Q8NDF8;P33991;Q03188;Q9BUZ4;P78549;A8K0S8;P17028;Q16633;P43351;Q96KC8;P17020;A6NDR6;P10412;O95475;Q8N344;P04198;A6NP11;Q68CJ9;Q05516;P31267;O95619;Q9BWW7;P20749;Q8N720;Q96MA1;Q5T619;O43830;Q2KHR2;P17017;P61244;Q96SC8;Q92481;Q99608;Q86XU0;Q13952;O15525;Q96ME7;Q96BD5;O95602;Q6ZSS3;Q9UJ41;Q15233;Q9ULL5;Q13516;Q6ZVD7;Q9C0G0;Q92889;Q8WVM0;P42677;Q92547;Q14584;Q9H2C1;Q969G3;O43310;O76075;P10072;Q4LE39;P21675;Q9Y2T7;P11161;P35712;O94952;Q8TB69;Q6IA86;O60885;P30876;Q15326;Q96JF6;Q9HCU5;Q6ZV50;P32242;P35269;Q8N108;P17023;Q15937;P14317;Q9Y2D9;Q49AA0;P32519;P49450;O75437;P55347;Q17R98;P04053;P0C7V5;Q9UQ84;Q9H9Q4;Q92922;Q6P2D0;Q9BZK7;O14771;Q9UGN5;Q969F1;Q12789;O95243;A6NMT0;Q6U7Q0;Q96IU2;O75461;P54278;P41970;P62508;P19474;Q9HB58;P10828;Q9UGL1;Q9UBR4;Q6NVH7;Q86XF7;Q15047;O60422;Q9HBT7;A8MTQ0;Q8NAP3;O15015;Q9NSJ1;Q8TF50;A6NLF2;P28069;P51858;O43763;Q9Y2K1;Q9BYN7;P17947;Q9Y543;Q01658;Q9UGU0;Q99929;Q05BW5;Q9GZ0;Q96MM3;Q99593;Q96PQ6;Q9UII5;Q96MW7;P11474;Q5XKR4;P51504;Q10586;Q02080;Q96NM4;Q8N7G0;P78412;Q8IYD8;Q05215;Q9P255;Q8IYF1;Q9GZX5;Q9UK33;A9YTQ3;Q8NG57;P49790;P28370;O75333;Q7Z2E3;P40424;Q9H4Q4;Q96ND8;Q9BVC3;A6NDX5;Q6P4R8;O60535;Q01196;P23025;P41212;O15226;P19838;Q9BSK1;Q9UH73;Q8WUY8;Q12873;Q03060;Q8N972;P58317;Q7RTU0;P23497;P56178;Q13485;P35251;Q96PU4;Q96KH9;P13682;Q2M3X9;Q04637;Q15270;Q8WYA1;Q9P2D1;Q9Y5A6;P07199;O75360;O43812;P31314;A8MTY0;Q96LX8;Q9UFB7;Q7L945;Q8TBE0;O94916;P17040;P51522;Q9UKY1;Q9UPG8;P53567;P59923;Q15424;Q9Y651;P24928;Q9H5V7;P23193;Q96N13;P27695;P54253;Q9HCL3;Q5TCT9;Q7Z3K6;P0C7X5;Q96IT1;Q9UC06;Q13029;Q9BYK8;Q8IXK0;A6NLW8;Q96IS3;Q8IZX4;P81877;Q9Y2X9;Q6GQ09;Q96KN3;O15516;Q8NHHM5;Q96J29;Q16600;P18146;Q8N782;Q9BS31;Q9NB87;P43268;Q9UH92;Q96LI6;Q00403;Q9NQL9;Q6RFH8;Q9H9Z2;O75398;Q7Z353;Q8IYN0;Q99583;Q92793;P39880;Q9Y603;Q9UID6;Q92985;Q15651;Q13283;P39748;Q15697;P51531;Q8TEY5;Q9NR48;Q6ZN57;Q6NUN9;Q8N488;Q13360;P62841;O60869;Q9UKW6;Q9Y458;P35869;Q5T7W0;P78545;O75467;Q9NZL3;Q7RTU3;Q96H86;Q15776;Q9Y6Q3;Q92466;P51523;O00482;Q86T24;Q9UHX1;Q9HAK2;Q8WTV1;Q5VZB9;Q9Y252;O60828;Q8NEK5;Q14765;Q9Y2A4;Q02930;Q14588;Q6AZW8;Q3L8U1;Q86WJ1;Q86W26;O60675;O75290;Q9HAZ2;Q01101;P26651;Q9ULV5;Q9UI36;Q8TAU0;Q9H9S0;O43543;P17019;Q8NCK3;Q6IV72;P29558;Q86UP8;Q16587;Q6NT76;Q10587;Q5SXM2;Q8IZ26;Q92900;Q04837;Q9NYF8;Q9Y618;O75593;Q9UIE0;Q1

3562;Q8N988;Q8TD94;O75928;P52630;Q96GC6;Q01892;Q6FIF0;P35711;Q68CP9;Q9BSG1;A0AVK6;Q9Y2M0;Q9BTC8;Q9BZ11;Q92966;P40763;Q6AHZ1;P35398;Q9Y4A0;Q9BXX1;Q9UJU3;Q8NHW3;P32243;P40937;Q68DY9;O43524;Q96JN0;P06746;Q9Y473;Q96CK0;Q86UP3;Q9UJN7;Q8NEA6;P52655;Q5EBL2;Q13765;Q8TAQ2;Q3SY56;O14519;Q0D2J5;Q9UBZ4;Q9H211;O14862;Q9Y2H8;Q68G74;Q96RE9;Q92804;Q8N3J9;P56915;Q8IVP9;Q5CZA5;Q7RTV3;Q9BXX8;Q02577;O43929;Q92664;Q7Z6Z7;Q9NYT6;Q8WXB4;Q9NS37;O95343;Q9UKN5;Q13285;P15822;A6NM28;P42167;Q12972;P05204;Q9NNV9;Q17RP2;Q9H160;Q02447;Q96N58;P01100;Q96NK8;Q9UBB5;Q9UIW0;P54277;Q6ZNG1;Q9UMQ3;Q6NX49;Q5TEC3;P49335;Q01664;O43823;Q9NY43;Q99676;P53539;A6NJG6;Q96SR6;A4GXA9;Q99743;P15036;Q15544;O14802;Q6ZN08;O00716;P09067;P57723;P17509;O15164;Q00444;Q9Y6X0;Q9UIH9;O95416;Q96PM9;Q96BT3;O14529;Q92618;Q96I24;Q9UC07;P0CJ86;Q14929;Q02833;Q01826;P55055;A8MZ59;Q9GZS1;Q15365;O43248;Q8TAU3;Q9Y2Y9;Q9BT81;Q96SQ5;O15405;Q6NSZ9;Q8WYK2;A6H8Y1;Q14938;Q9H4Z2;Q13106;P17024;Q96PT3;Q14549;Q96T88;Q9UJL9;P31629;O14770;Q9UJW7;Q9NZI7;P51814;P18124;Q6ZR52;Q13901;Q96ST2;Q9Y2S0;Q32M78;Q9Y4E5;P62875;Q9P1Z0;P19387;Q7Z6R9;Q01543;Q9UKD1;Q6ZN55;Q96JC4;Q2TB10;Q86W11;P15884;P14651;Q2VY69;Q7RTU4;Q6ZM17;O94900;P18846;Q00653;Q8N184;P35452;Q14839;O15062;Q8N8L2;P17482;P0CG24;Q96MX3;O00488;Q8IUM7;A8K8V0;Q6ZN19;Q6ZNG2;Q13127;Q96JB3;Q14241;Q9HCC6;Q6ZNG0;Q9Y2Q1;P11387;Q8N100;Q96MN5;Q9H7R0;Q9H4L7;Q68DY1;Q86TJ2;Q8NHV9;A6NHJ4;Q5C9Z4;Q9H8Y1;P22415;O96028;Q8N228;Q9HBU1;Q9Y4A8;Q9GZV8;Q8IY51;Q8NDP4;Q96IR2;Q5BKZ1;Q9BQA5;Q6PK81;Q9P2K3;P08151;Q6B0B8;Q06455;Q92988;Q96SF7;Q16594;Q15319;Q15543;Q99581;Q96GE5;P55771;Q9UJU5;P57721;Q9UQR0;Q96K58;Q03938;Q15572;Q9H2A3;Q9NPC7;Q92610;Q2NKJ3;A6NFI3;P10589}

668

Pathogen[Q85601] interacts with 1486 human

partners: {P43351;Q53EQ6;Q9UQR1;Q9HCZ1;Q8N8C0;Q9Y534;Q03701;Q9ULM2;Q9HCG1;Q9UBZ4;Q9UNN4;O95619;Q8IXK0;P01106;Q9P2R6;Q3KNS6;Q92618;P18146;Q494X3;P10243;P17480;O75373;Q8N3X6;Q8N1G0;Q9ULW3;Q68CJ9;Q8N196;P08048;O95625;Q99816;Q6NX45;Q9UPN9;P78317;Q8NI51;Q99543;Q8IXT2;Q9Y250;Q03989;Q14978;P17097;P51786;Q8TE85;Q969J2;Q8N9K5;P78424;Q15542;Q9UHL9;Q32M78;P28698;Q8IZC7;Q92664;P49639;P15621;Q9NWS1;P09629;Q63HK3;Q4VC44;P61978;P51815;Q9Y2M0;Q9UHF7;Q96S65;P36954;Q6ZR52;Q8N5Y2;Q9NQX6;Q7Z5D8;Q96QR8;P08151;Q86W11;Q8NA42;P11831;Q9Y2T7;Q14929;Q4LE39;Q15853;Q8TF39;Q9HBT8;Q9UPG8;O14896;Q02078;P17676;P15036;Q16666;P09874;O60481;Q14593;P62633;O75360;P17040;Q6ZN11;P11473;O95602;Q2VY69;Q3MJ62;Q8N720;Q86XU0;Q92614;Q06455;Q96SZ4;Q9UNY5;P25208;Q14586;Q96MA1;O14529;O15535;O43502;O15499;Q9NPA5;O15315;Q9UJW8;P33076;Q9BT49;Q8NBB4;Q6VUC0;Q96JB3;Q9UKL3;A6NHJ4;Q9UJL3;Q13127;Q9NS56;P14373;O43316;Q9H707;Q2M3X9;Q8IUE1;P23025;Q96MX3;Q16236;Q6V9R5;Q5EBL2;O75928;Q7Z340;P14316;Q9BTP7;Q6ZM17;P17096;Q96SR6;Q5JNZ3;Q96ND8;O95831;Q6PG37;Q96K62;Q8IYB3;O14813;Q9Y4Z2;Q96EK4;Q14765;Q01831;Q5TYW1;A6NFI3;Q9Y2S7;Q7Z591;Q8N228;Q07666;Q9UC07;Q03188;Q96CS4;Q9H1D9;Q92754;Q02556;P17028;P51522;O60563;Q8N7M2;Q9P0W2;Q969W8;Q9NUA8;Q8TD2;Q9BWX5;A6NKJ5;Q01538;Q6ZYL4;P0CB33;Q99687;Q9P2K5;Q9ULD5;P09086;P21506;Q6XYB7;Q15466;Q01892;Q9UPW6;A6NJ46;Q96AH0;Q9UQ80;P50539;Q12901;Q08999;P56270;Q9H8G1;P15976;Q9BQG0;Q3SXZ3;Q8IYD8;Q96SC8;Q9BWH6;Q9UL59;O94776;Q5C9Z4;Q2KHR2;Q9UQ84;Q7RTV0;Q7L945;Q9C0G0;P19484;P50750;P17019;Q96NG8;Q14202;P15172;Q92547;Q9H040;Q5HY98;A6NNA5;Q96BD5;P14921;Q6B0B8;Q969S2;Q9ULV5;Q6P1L6;Q03052;Q8N8L2;Q6ZN75;Q96BR6;Q6ZMS7;Q96HQ0;Q96JM2;Q9Y2N7;Q86WV5;Q9NPG3;P86452;Q8NB12;P13682;P08651;Q9UIF9;Q3L8U1;Q86V15;Q96JF6;Q8TBE0;O75398;P17032;Q16656;Q6PF04;Q9UL58;P17036;Q6DD87;Q9HCL3;Q86U70;Q06546;Q9Y2L8;Q9P2D1;P50548;Q9Y603;Q15329;Q8WW38;Q16531;Q8TAQ5;Q02386;Q0VGG9;Q86YE8;Q9H307;Q15554;Q9BYN7;Q8NAP3;Q14549;Q9HBT7;Q5FWF6;P56282;A6NDR6;Q9Y606;Q12857;Q16621;Q8IYNO;Q7Z398;P17020;P06400;P0CJ87;Q06330;P48378;Q9Y3C5;Q96BV0;Q13360;Q8N7R0;B4DXR9;Q9H5L6;P38935;P53567;Q96LX8;BLAPH4;Q8TD23;Q8N8J6;P13349;A8MWA4;Q9BR84;Q6ZNG0;Q9Y2Y9;P12980;Q14103;P54845;Q14966;Q9Y535;Q13148;P15622;P50549;Q96H40;Q2M3W8;P14653;Q8N7U7;Q7Z6R9;Q9BZE3;O43248;O60315;Q96BT3;P16455;Q14587;Q03933;A2RRD8;Q8NDY6;Q8NHY6;P17027;Q01105;Q9BUI4;Q9H9T3;A8MUV8;Q9NR11;Q03936;Q08AG5;Q9Y2Y1;Q9H116;Q13951;Q2M1K9;Q5EE01;Q6ZN79;Q9Y651;Q15424;P51826;Q9NWS9;Q8N680;O75030;Q9NR48;P15822;Q07352;A8MV51;Q33E94;P15407;Q8N7G0;Q8WYP5;Q14872;Q8NDW4;Q9UKN5;Q99708;P18848;Q6NSZ9;A4GXA9;Q14814;Q9UDV6;Q13129;P19419;P40763;Q05195;Q8N3S3;Q9NWB7;O14978;Q13426;P28702;Q14241;Q03112;Q9UMS4;Q49AN0;P28069;P17030;P32519;P14859;O60663;P52740;Q96KM6;Q6ZMY9;Q8TF20;P23769;Q6NVH7;P41970;Q9BUG6;Q9HC44;Q13415;Q15573;Q9Y2Y4;Q9Y5N6;Q95789;Q9NR83;O15015;Q9H609;O15516;P78545;Q86WP2;O75437;Q13106;Q9Y2X9;Q9UHX1;Q9UKK3;Q86WZ6;Q6NUN9;Q9UJW7;Q12800;Q96PU4;Q9BS31;B4DU55;Q8WXA1;Q8IWP9;P12757;Q8IYH5;O14709;Q96SQ5;Q6ZNG1;Q3KP31;O75534;Q96PT3;Q09FC8;Q96IS3;Q04637;Q86V71;P01011;O60318;Q96H86;P17026;P53803;P17022;Q66K74;P80303;Q8N5A5;O60284;Q92610;O14686;Q8TAW3;Q96KR1;Q16520;Q2NKJ3;Q9H0M5;P52744;Q14188;Q2M218;Q15723;Q12772;P25490;Q8IZ26;Q6ZN55;Q8N895;O43364;Q9BX82;Q9Y2S0;Q96NG5;O00327;Q9BXS6;P0C7X2;P61218;Q8NF99;Q9Y618;O00268;Q96AY2;O14503;Q7RTU4;Q8NDP4;Q86XN6;P35712;Q10587;Q14588;P06733;Q6ISB3;Q9UII5;Q15583;Q9H4T2;Q96JCA;O95243;P10242;Q00059;Q9BQ15;Q8TBZ8;Q15306;Q14592;A6NFQ7;A6NK53;Q9NQZ8;O14497;Q14591;P18846;Q9UBD5;Q8N1L9;P58317;Q9NQ33;Q9UGP5;Q9C0F3;Q99814;P47974;Q8TF32;P27797;P16383;P49959;P27540;Q15776;A8MQ14;Q02833;O15226;Q3MIS6;Q3KQV3;O75290;P53999;Q96SE7;B4DX44;P49005;P26358;Q8IUE0;P19338;Q9P2F9;O14646;Q9Y3M9;P17038;Q13469;Q9P255;O14519;A6NM28;Q6PK81;O60682;Q7RTU5;Q00978;P07199;Q6ZN06;O76075;P17031;Q8IYW8;P17014;Q96MU6;Q8N2W9;Q5T1R4;P19532;O15164;P10074;P78337;Q8NEP9;P52594;Q9NV72;Q49A33;Q9UJN7;Q92499;Q15560;Q92698;Q9U41;Q16594;Q9BX26;P42166;Q6NT76;Q9HAH1;Q08AN1;Q9NZV7;P05423;Q99743;Q03923;P52736;O95983;Q99608;Q95644;Q8N823;P17024;O96004;P17017;Q9Y692;Q9NTI5;Q08211;Q9GZS1;P41162;O60304;Q9Y2401;Q9Y2D9;P59923;Q8N2I2;Q00613;Q13398;Q53GI3;Q9UK11;O15525;O15405;Q86UD4;Q15651;Q9NP71;P55055;Q04864;P17010;P49711;Q9UID6;O43345;Q9UIH9;Q8TAF7;Q13952;Q8N184;Q9BUY5;Q8TF47;Q9UJL9;P27694;Q8IYI8;O43542;Q96FI4;A8MXY4;Q9UBB9;Q02080;O95125;Q8NCD3;Q02878;Q9Y5Q3;Q09161;P0C1Z6;Q8IZX4;Q499Z4;Q9H7R0;Q9UBG7;Q9Y6J9;P10914;P08047;Q12888;Q9NRF9;O60806;Q9HC78;Q8IZH2;Q8N9F8;Q6IQ21;Q9UH92;Q9UKN8;Q9H9Y6;Q01954;O95201;P52630;P82979;P55771;Q5VIY5;Q96NY9;Q92889;Q9UFW8;P51531;P26651;Q13562;P01100;Q16587;Q8NG57;Q92K3;Q15572;Q05481;Q05BW5;Q14934;Q86W54;O15370;Q13263;P28715;Q8NG50;P11387;Q68DI1;Q8NHW3;P52746;P41212;O15060;Q14526;P0C7T5;Q6IQ32;Q96FV9;O75820;P22415;Q9P267;Q8NEA6;Q3ZCX4;Q9Y

6R6;Q8TF50;Q14566;P0CJ79;Q9GZX5;Q16633;Q9BQY4;Q9UBL3;O43361;Q9NW07;Q9H4I2;Q5SXM2;O60870;P36508;P19388;Q9NP66;Q8TC21;Q9BVC3;P29084;P31260;Q7Z3K3;P23409;P35637;Q9UK12;Q9NX65;Q14186;P50222;Q53T94;Q8NDQ6;P51508;Q9Y5Q8;Q8WYN3;Q9UK13;O75444;P40424;Q14653;Q00577;Q9BQ70;Q6ZNO8;Q14151;P49716;Q92541;P12524;Q8NBF1;Q03468;P0CJ88;Q9P0U4;Q8N1W2;P25791;Q12968;P17535;Q9NVX1;P51532;Q9NVV9;Q8NA31;O75461;Q8WYZ3;A6NJL1;Q9BYV9;Q8NEK5;Q8N4W9;Q5XG87;Q9NM38;Q6PJG2;Q8N587;Q9UIS9;Q8NA34;Q8IXF0;Q9H171;P13984;P52742;Q02930;Q9H175;Q16600;Q9UMQ3;Q9UBX0;Q9Y5A6;A6NJJG6;P78364;Q9P0T4;Q9H7R5;Q99551;Q969G3;Q13901;Q9HAU5;Q8N726;O14948;Q96JN0;P17098;Q96MN9;O95232;Q9P0L1;Q9HD15;Q14582;Q8NB42;P54098;Q9UL36;Q9H1A7;P25205;Q15928;O15266;P23511;Q9ULX6;Q9NVI1;Q96MR9;Q6P9A3;P0CJ90;Q5MWC4;P0CJ89;P15927;Q96N20;Q9HAW4;O95402;P0CH99;Q7Z3K6;Q9BRR0;Q9BXP5;Q16649;P58340;Q9UM63;P16415;P18847;Q4W5G0;Q9H7X3;Q96N22;O95948;Q12906;Q9Y2G7;P36956;Q5TGS1;Q9UDV7;Q03924;O95416;Q9UKW6;Q9Y2A4;P35711;A6NFD8;Q96CX3;Q8N859;Q15973;O60765;P16220;Q15699;P52435;Q92804;Q04206;P42226;Q9P2J8;O95780;P49848;P52738;O60535;Q147U1;Q8IXM2;Q9NZL3;Q12972;Q9Y6Y1;Q9H668;Q12873;Q6SJJ96;Q96E29;Q96NM4;Q96G23;P20585;Q9H8N7;P40425;Q96T92;Q8WY36;Q08ER8;Q9UBZ9;Q5S VQ8;Q9UN79;Q13765;Q9UHI6;Q9UI36;Q96N58;Q3C1V8;P41218;Q8NFD5;Q9NXT0;Q53HV7;P42704;O60248;A6NLF2;Q02577;Q6P4R8;Q9Y2V2;Q9H4L7;Q7Z3V5;A8MT69;Q5JVG2;Q5T5D7;Q96B01;Q8NHM5;Q8N7Q3;Q9HB58;Q96NJ6;Q13330;Q8IYX0;Q15562;P35269;O75618;Q96RK0;Q99594;P22736;Q01543;Q14585;Q9Y6X8;Q0VGE8;Q9Y222;Q15744;Q96LW1;O14771;Q96GC6;Q86XF7;Q9BWW4;Q6ZT77;Q96N95;P35548;O75346;Q9BYX4;O60281;Q8WXF8;P35251;Q9Y6K1;Q5VZB9;Q99459;Q6ZV50;P35680;O14862;P05412;Q9Y543;P17029;Q95159;Q6ZRS2;Q9NQ87;Q9H2P0;Q9Y4A8;P11388;Q96T88;P49450;Q92985;A6NP11;Q15327;Q16514;Q15929;Q9BYE7;Q8NEM1;P28347;Q9UBT6;P82970;O00255;P35789;Q9UMS5;Q6ZNA1;P67809;Q8IX07;P18850;A6H8Y1;Q01826;Q6TAR4;Q14590;Q9UKI9;Q6U7Q0;Q9HAP2;P10244;Q9BYK8;A6NKF2;Q9UC06;O75376;Q99612;O00470;P42224;Q9H5H4;Q8N883;Q8N9N5;Q6ZRF7;Q9Y462;Q01201;P78344;Q8NCA9;Q8N108;Q16254;P08235;Q7Z7K2;Q14865;O43711;Q6Z32;O75717;Q9UN30;A9YTQ3;Q01658;P22392;P17023;Q96NI8;Q86YC2;O43829;Q00403;Q8TD17;Q8N2Z9;Q96SK3;Q9ULG1;Q14209;Q03SY52;Q4V348;O94983;Q96NJ3;Q9H074;P11474;O43830;Q8TA94;O00479;P15923;Q86T29;Q9HBZ2;P36402;Q8N5J4;Q13118;Q8N9Z0;Q32MZ4;O14593;P10827;P58304;Q3ZCT1;O43812;Q5HYK9;P22670;Q14181;Q96ST2;P32243;O14867;Q96EG3;P48382;Q2MLV0;Q8IVC4;Q9UHK0;Q96T58;Q8N693;Q02447;O75132;P56693;O94993;O75446;P23193;Q9BTC8;Q8NE65;Q96N77;Q68EA5;Q8N5U6;Q5H9I0;Q99684;P53805;P0C7M4;P55265;Q6ZRY5;O43309;Q8TEK3;Q8TF68;Q99583;Q8NDF8;P17544;A8K0S8;Q9NZI6;Q9HBD4;Q9NW08;Q05516;P31249;Q6ZS27;Q9NTW7;Q7L2R6;O00482;Q86U56;P61244;P51504;Q9BQA5;P84022;Q6Z32;Q0D2J5;Q99607;Q6ZSS3;Q15233;P42677;Q9HCK8;Q9H2G9;P31271;Q9BXG8;Q86VE0;Q9Y252;Q14584;P49715;Q9UIF8;Q8TF45;P10072;Q6ZQV5;Q9Y2D1;Q8TB69;Q6IA86;Q96RE9;O60885;Q15326;O14746;O43296;Q96DN6;Q15937;P14317;Q49AA0;Q15906;P41161;P55347;P04053;Q96QC0;Q8N782;P0C7V5;Q9UGU0;Q6ZSB9;P37275;Q96RJ6;Q96S55;Q9BZK7;P56524;Q9UK10;Q8IYB9;Q86TJ5;Q5EBM4;Q12789;P54278;P31274;P62508;Q9NPC7;Q9Y2H8;O15379;O60422;Q5VTD9;A8MT65;Q00839;Q08945;P18583;P52737;Q9UGN5;Q96AE4;Q8N8Z8;Q92750;Q7Z6K1;Q9Y2P0;Q12905;P18754;P17947;P21675;Q15910;Q96MW7;Q08050;Q6P9G9;Q7Z6Z7;Q9BRH9;Q06732;P19387;Q92966;Q86TG7;P28370;Q7Z2E3;P82094;Q16533;P35869;Q9GZN2;Q6ZMU2;Q16534;A6NNDX5;P06746;P12004;Q9BSK1;Q86WJ1;P0C6G31;P52655;Q8NA92;Q8N972;Q13342;Q7RTU0;O94892;A9UHW6;Q7L3S4;Q9Y5R5;Q9BW11;O43823;Q92670;O96006;O15350;Q96KG9;Q9UBX2;Q92945;P50221;Q99081;Q96C00;P31314;A8MTY0;P49116;O75764;Q9UFB7;Q66K89;Q6ECI4;Q5T619;O94916;P14651;Q9UKY1;Q8TD26;P62841;P24928;O75362;O75626;Q96NL3;Q86U86;Q96JL9;P54253;Q96IT1;P30876;Q9Y473;O00570;Q9P243;A6NMF4;P13056;P33992;Q8WVM0;P17025;P40426;Q6P280;Q8N2C2;P24278;Q7Z3I7;O00287;O43365;Q00653;Q15543;Q0VQ06;Q9NSC2;Q9NYB9;Q86UQ0;Q96C28;O00712;Q9NP87;P43268;P23246;O94952;Q96LL6;P15336;P51814;P10328;Q8N3J9;P41182;P04198;Q6NSW7;Q6RFH8;Q8IZ40;Q15047;Q9NS37;Q92793;Q9HCG8;A8MUZ8;P39880;P05114;P57071;Q15365;Q3T8J9;Q9HAJ7;P39748;Q59GR2;Q15697;P31276;P19474;Q5CZA5;Q14119;Q9UJU3;Q9Y2P7;Q8N488;Q9BQW3;O60869;P48380;Q15361;O75467;Q9HCS4;O60264;O43593;Q7RTU3;Q9Y6Q3;P78549;Q5BKZ1;Q92466;P51523;P57721;O75475;O75586;Q5SXM1;Q9UQR0;O60828;Q16526;Q8N8E2;Q6AZW8;Q06416;P19447;Q4G112;Q14527;O60675;Q76KX8;A6NN14;Q6IV72;O15160;Q63HK5;Q68DY9;Q9H963;Q92900;Q7Z7L9;P17275;Q04837;A8K8V0;Q8N141;Q9UIE0;O00411;O95163;Q9H160;O43310;Q6ZMV8;Q96I27;Q92922;O75531;Q8NCK3;Q9BS34;O94842;Q8IYF1;Q8TBZ5;Q9BSG1;A0AVK6;Q9BXX3;Q68CP9;P19838;P20823;Q15935;O75123;Q13568;P0C7X5;P12525;B2RXF5;Q8NFC6;Q9H9Z2;Q12837;Q8TAQ2;Q6P0N0;Q06609;Q6P1N0;Q6AW86;Q9UKL0;Q9H211;O14628;P0CG24;Q13485;Q8N0Y2;P62380;Q9GZM3;Q9Y5B6;Q96PQ6;Q9UHN1;Q9NSJ1;Q03111;Q8WTR7;Q06633;O75925;O14737;Q96E14;P16989;Q8WXB4;O75564;Q06730;P78347;O75683;Q7RTV3;Q9Y237;Q9Y253;Q8TBC5;Q9BY31;Q9UNA4;Q9UBD0;Q9UBB5;P27695;O75478;Q8NC26;Q9NZI5;Q6NX49;P11161;Q5TEC3;Q9H4S2;Q01664;Q86Y25;O43167;Q9NY43;Q99676;Q9NU63;Q9UEG4;P53539;P17861;P31269;Q96PE6;P49790;Q01860;Q15544;O14802;Q9UNY4;Q03060;O00716;Q9BWM5;Q8WTV1;P46100;P52743;Q9H5J8;Q96K75;Q00444;Q15072;P55895;Q13105;P52747;P28324;Q13887;P20749;Q9UKT9;Q96PM9;P17035;P51587;Q96I24;O43918;Q15631;Q7Z353;Q96AV8;Q9ULX9;Q07687;Q8TAU3;Q9BT81;Q9NSD4;Q8HWS3;Q8WYK2;Q14938;Q15561;Q5JVG8;P81877;Q15366;Q99856;Q01094;Q14770;P23760;Q9NZI7;P18124;P0CJ86;P62875;P11308;P15408;Q9NYF8;A6NWL8;P54274;Q9NR55;P55197;Q6MZP7;Q9Y5J3;Q8N7K0;Q8IX15;P17039;Q14739;P15884;Q9P2D0;Q8WVJ9;Q9H9Q4;Q8N393;Q9HCX3;Q6ZNH5;Q96IU2;Q6P9A1;Q15796;Q14839;P13010;P17482;Q9H503;Q86UP8;P12956;Q96LW9;P20226;P20265;Q10586;P10073;Q5VZL5;O00321;O95238;Q9Y2Q1;P0CJ85;Q9UBC3;P05204;Q68DY1;P49910;Q86TJ2;Q8N988;Q9NYT6;O96028;Q9NS91;Q9HBE1;P52741;Q96IR2;P17021;P35227;P35638;P29372;Q12986;Q13761;Q92988;P0CJ78;Q6XD76;Q969F1;Q96GE5;Q9HAZ2;Q14781;Q96ST3;Q9H9D4;Q96K58;Q03938;O75505;P17041;O60381;P10589}

669

Pathogen[ P14079] interacts with 1527 human

pathogen: {Q969J2;Q96JN0;Q9Y2S0;Q15916;Q96SC8;Q3T8J9;Q9BWM5;P07199;Q8IYX0;Q8NHY6;Q9NV72;Q92664;Q14585;Q6AW86;P15622;P52738;Q96C00;Q7Z5D8;Q5SXM2;Q13952;O60284;Q9UJN7;Q9UQR1;O15379;Q0D2J5;Q96CS4;Q8NA92;Q9UPW6;Q9UK12;Q6P0N0;Q04837;Q9NSD4;Q15560;O95159;Q8N2W9;Q9HBT8;P52741;Q9HAK2;Q9BW11;Q12986;O14519;Q8IZC7;P35711;Q9H668;Q9NVX1;P54274;Q3SY52;E9PGG2;Q96ST2;P62875;P51504;Q8N9Z0;O43196;P11388;Q8N895;Q99459;P41218;O95402;P17098;Q01105;P08151;Q8N8B7;P15036;Q03188;Q9GZM3;Q8N7U7;P13056;O15164;Q8WYK2;P0CJ89;O75123;O15315;O14746;Q9HAZ2;O14867;P0CJ88;O75467;Q68DY9;Q9NWS1;P20585;P0C7M4;P10243;Q9H7R0;Q997



43;Q06730;Q9BQ15;Q53GI3;O75346;P16383;P62508;P33076;Q9HBT7;P05114;Q8TAT5;A9UHW6;Q4G11  
2;P09874;Q96JB3;Q5MCW4;Q96RJ6;A8MTY0;P52742;Q8TD23;Q5HYK9;Q6XYB7;O75618;Q96IR2;O76075  
;Q08945;P57723;Q8WTR7;Q9UL36;P55055;Q8N8L2;P0CG31;Q5T1R4;Q9ULG1;O95416;Q5EE01;Q86WP2;  
P10412;A8K8V0;Q10587;Q9HAJ7;Q9Y5Q3;O60381;Q9BYK8;Q9UDV6;Q8WXB4;Q15561;Q9Y2Y4;Q9BZK7;Q  
15573;Q8IZX4;P14373;O43364;Q96LW1;Q9UC06;P35869;Q02078;Q9Y2G7;O95125;Q99814;Q7Z340;Q9  
3713;Q9UIS5;Q14241;Q8NDQ6;Q96B01;Q06413;Q9BWX5;Q13609;Q8NDP4;Q9UNA4;Q8N196;Q8IUE1;O15  
370;Q8N693;Q9BYX4;Q9NWB7;Q15047;P0C7V5;Q86V15;P10072;Q8N141;P28715;P52630;Q96K62;Q9UJ  
W7;Q14566;Q96H86;P21506;Q9NQV6;Q13106;Q7Z7K2;O14771;Q9Y6Q3;Q9NUX5;Q9BT81;Q06546;P1485  
9;Q49AG3;Q9Y6J9;Q8TF50;Q96MU6;Q96QC0;P10073;Q7Z7L9;Q16526;P35637;Q96PT4;A8K0S8;Q9HC44  
;Q6NT04;O60828;P78337;Q6ZVD7;O43422;P13349;Q9UNY5;Q16649;Q14653;A6NK53;Q9UL59;Q96NY9;  
Q8N587;Q8WY36;Q6ZNA1;Q86WV5;Q13765;P19387;Q96BT3;Q8N9F8;O75437;P52747;O75928;P35269;P  
57721;Q15776;Q14186;Q13118;Q96IU2;Q86UQ0;Q2M1V0;Q6ZNG0;Q13148;P08048;P17019;Q6ZMY9;Q1  
5853;O00321;O60481;Q13415;Q3ZCX4;Q9Y6K1;Q6ZT77;O15535;Q16594;Q8IZA3;Q9HCG1;P17035;P23  
409;Q99581;Q9Y2P0;Q9H5J8;Q9BWH6;O75626;Q9Y2Y9;Q6P9G9;Q8TA94;O43309;Q14938;Q92614;Q159  
11;Q96QR8;O75362;P17010;Q68CJ9;Q15723;Q9UGP5;Q9Y2N7;B2RD01;Q9Y2Q1;P35398;Q9UKN8;P0CB3  
3;O14896;P53567;Q9UKD1;Q9Y5N6;Q9BR84;Q14103;P67809;Q7LFL8;Q8IYD8;Q9UGN5;P47974;P53999  
;Q96LI6;Q8N108;P10244;Q9Y237;Q8N782;Q9NW08;Q9NUA8;Q9ULX6;Q7Z6K1;O95789;Q9NP66;Q9UFB7;  
P17022;P82979;Q92966;P11473;Q9H0M5;Q3KP31;P17041;Q9UBL3;Q9H9Q4;Q8N393;P35680;O60682;P  
20265;P40937;Q8IXT2;Q6IA86;Q5TEC3;Q5T0B9;P13010;Q96ST3;Q99676;Q9NRG0;P55347;P09086;Q9  
6RKO;A8MT65;Q8NCP5;Q16254;Q08AN1;A6NJG6;Q6XD76;Q8NB42;P10828;Q92541;Q14151;Q8TE85;Q9B  
SI4;P08235;Q92985;Q32M78;Q9UNY4;P17039;Q5EBM4;Q92804;Q9UBZ4;P0CH99;Q92793;Q6NUN9;P515  
22;Q9ULM2;Q5JVG8;P12524;Q9UBB5;Q9H171;A6NHJ4;O95948;Q16633;Q9Y5R5;Q66K74;Q9BWT6;P2837  
0;Q9NTW7;Q49AN0;O75290;Q99607;O43823;Q9P2Y4;P52746;Q6ZN57;Q9NVV9;O75564;Q13129;Q9H4L7  
;Q63HK3;P39880;Q15583;Q9H040;Q9GZS1;Q7Z3K3;P55771;Q6ZR52;Q13901;O43432;P48382;O15405;  
O75475;Q16531;Q8NG50;P49005;Q86U70;Q8NEK5;Q8N5A5;Q7Z3K6;Q9UQ0;Q12906;Q8IYB9;Q9H707;Q  
96SR6;Q96PM9;Q15329;Q16656;Q99594;P52737;P35789;P0CJ86;P51815;Q15699;Q13330;P28347;P1  
7096;P30876;Q14591;B2CW77;Q03060;P11474;Q92922;Q6ZN32;Q6ZRF7;Q8TBZ8;P48380;P51532;Q9H  
211;Q5XG87;Q8NCA9;A8MUV8;Q96NM4;O95644;P61218;P17024;Q9P255;Q14592;Q9GZX5;Q3MJ62;P542  
78;Q9H5L6;Q9NSJ1;Q86U86;Q96NG8;Q01538;O14646;Q6ZN79;Q14865;O60675;Q9BTP6;Q8NG57;P2937  
2;Q99684;Q92610;Q01826;Q96N20;Q8IXF0;P35712;Q9UID6;O95163;Q8WVJ9;Q68DI1;Q9Y250;Q16298  
;P51587;Q8N0Y2;Q8N720;Q14966;Q8IX15;P49184;Q9HT3;P58304;Q5H9I0;P51531;P42704;Q96SE7;  
Q14209;Q9GZN2;Q5VIY5;O43167;Q8N726;A8MZ59;Q05516;Q4LE39;Q9HA82;P23246;O75446;Q86US8;Q  
9HAP2;Q9Y5A6;Q9UFW8;O96004;P22736;P52594;Q99856;Q76KX8;Q9BWE0;Q02447;O43812;Q13105;Q9  
H503;P15976;Q5T5D7;Q6P1N0;Q3MIS6;Q9BYN7;Q6ZRS2;Q9Y5L5;Q8NC26;Q9NR83;Q9Y5Q9;Q9P2J8;P53  
805;Q14739;Q9P0L1;Q32MZ4;O14497;Q9UBZ9;Q9BWM4;Q8N344;Q4VC44;Q9H074;Q9Y43;O60281;P325  
19;Q8N859;P16455;Q8NHM5;Q9UK11;Q8TAQ2;Q8N7M2;P53803;Q96K83;Q13472;P19484;Q6PG37;Q8N88  
3;Q12968;Q03923;Q9UJ41;A6H8Y1;Q96NI8;Q9H2P0;Q6ZMS7;Q8IYI8;Q06732;Q5SVQ8;O43829;Q86YC2  
;Q96MR9;Q6ZN55;O60869;Q6P2D0;A6NKF2;Q9Y2P7;P41161;Q96NL3;P62841;Q96E29;P18124;Q3SXZ3;  
P62380;Q9UHI6;O00115;Q7Z591;Q96SZ4;Q96RE9;P78549;Q9BQA5;Q8WY91;Q96NG5;Q8NA31;P9P215;Q  
7L3S4;O75461;P31271;P15923;Q15306;Q9NS37;P48443;Q9UHK0;O60870;O43830;Q96LX8;P54253;Q8  
N7G0;P06733;P16600;O43298;Q8TBC5;Q03933;Q08211;Q14765;Q9H9Z2;Q9NU63;P10827;Q9H175;Q12  
837;Q9UHX1;Q9UKK3;Q96AH0;Q96JM2;Q96JC4;Q6ZN06;Q6ISB3;Q96AY2;P23025;P29084;Q03989;P234  
97;Q86TJ5;Q99608;P52744;P57071;Q8IWX8;Q9NQZ8;Q3KQV3;Q9H307;P17027;Q6EKJ0;P54845;Q9BUZ  
4;O15350;Q00839;Q6PJG2;Q15744;P09629;O94892;Q99612;Q9BXS6;Q15072;O60315;Q9H1A7;Q15572  
;P55197;Q96S65;Q49AA0;P36402;Q03938;Q96MN9;Q12873;Q03111;Q8TF32;P11308;O95178;Q14588;  
A6NP11;Q7L9B9;Q96FV9;A4GXA9;Q01201;Q86V71;Q3KNS6;P78344;Q9NTI5;Q6BEB4;Q96RY5;Q96ND8;Q  
6NVH7;P08651;Q9NYF8;P46100;Q9NWS9;Q9BRR0;P51814;Q9NVI1;A8MUZ8;P28698;Q8TF68;Q96GE5;P2  
8069;Q96BV0;Q12772;Q9UL58;Q9UKY1;P31276;P0CJ90;Q99687;P0C7X2;Q8IYB3;Q12905;Q8TCN5;Q96  
JF6;Q9ULD5;Q9UC07;Q8NBB4;Q9H2G9;Q6NT76;P19338;P42226;Q06330;Q6V9R5;Q9ULL5;P80303;Q8N3  
S3;P82094;P82970;Q8TAW3;Q92670;Q9NZC4;Q9Y2T7;Q9P2D1;Q8TD26;Q9NZI7;Q3C1V8;Q15631;Q5BKZ  
1;O95831;Q15651;Q15929;P78364;Q00613;Q01892;Q9UKL3;O15060;Q86Y25;Q14202;P17480;Q99583  
;Q6ZN19;Q99543;Q5VV52;Q8HWS3;B4DU55;Q96MW7;Q9NZL3;Q9BXG8;Q13568;Q00059;P12956;Q9H4W6;  
Q9P0W2;Q9ULW3;Q9HAW4;Q9Y534;Q8N9N5;Q03924;Q8N8N2;Q96N22;Q9BQW3;P41182;P31274;Q86UE3;Q  
8NAP3;Q9UL49;P12525;Q01543;P35250;Q8N5J4;Q8IZH2;P10074;P0CJ87;Q9UPG8;Q96CX3;Q6MZP7;Q9  
H790;Q96AE4;Q14549;Q9NRF9;Q3ZCT1;P17097;Q8N5U6;Q86UP8;Q15906;P19388;P58317;Q96EG3;Q9U  
BC3;A6NK75;Q9P2F9;Q00403;Q9UMS4;Q03936;Q9BZE3;Q147U1;Q08ER8;O75586;Q14781;Q9BX82;Q9NX  
T0;Q01860;Q8TF39;O75373;Q15543;Q6ZYL4;O75764;Q5VTD9;A6NLF2;P19532;B1APH4;Q05481;P4216  
7;P17026;Q96BD5;P16989;Q9UIH9;A6NN14;P12980;Q9UPN9;Q9HCE3;P11161;P22392;O00482;Q9Y2S7  
;Q08AG5;Q8N5Y2;Q9H9T3;Q96K75;O60318;Q86YE8;Q8N972;Q9H963;Q6DD87;P19474;P55265;P17544;  
Q8WYP5;Q6RFH8;O95238;Q9UBD5;Q9BXX3;Q96I24;Q9P220;O00716;Q6ZMV8;Q5SXM1;O14737;Q9H4T2;Q  
3SY89;P29374;Q8NCK3;O43711;Q8IZU3;Q7Z5Q5;Q8TF20;P17032;Q7RTS1;O60248;Q9BUI4;Q02930;Q8  
TEK3;Q9NQ33;Q99708;Q8N823;P49715;Q96G23;Q8N8J6;Q9BWW4;O60663;O14709;O15266;Q14934;Q9N  
R11;Q0QV06;Q07666;P05423;Q9NZI6;A6NFQ7;Q96S55;Q6U7Q0;Q8N680;Q8WZT3;Q6P280;Q68EA5;O433  
45;Q7RTV0;Q9Y473;O75469;Q969F1;P17017;Q9NPG3;P31269;P0CG40;P25791;P49848;P51508;Q1658  
7;P0C7X5;Q92945;O75820;Q6ZS27;Q2M1K9;O15160;O95243;P56282;P27540;Q9BQ00;Q9H4Z2;P52435  
;Q9UIF9;O75534;Q66K89;Q8N2Z9;P17031;Q9UEG4;Q9H8Y1;Q9P2R6;P50549;A6NLW8;P17029;Q9BYE7;  
Q96SK3;P22670;Q8NB12;P35251;Q9Y5J3;Q9BVC3;P17275;P17021;P16415;Q9NYT6;P49450;Q86WJ1;P  
15336;Q14593;Q92750;Q9HD15;Q96NC0;Q8IXK0;Q9Y5Q8;Q8IVP9;Q8NFC6;Q15424;Q96LW9;Q8NHW3;P5  
1523;P0C1Z6;Q15697;Q8N2I2;P28702;Q969S2;P2743;P24278;P04198;O43310;Q9BYM8;Q9Y3M9;P17  
020;Q8NFD5;O14978;Q9BQY4;Q9Y4A0;Q9Y6R6;Q02833;Q9NYB0;Q9HB58;Q4V348;O75360;Q9UK10;Q9P2  
43;Q9Y2X9;P05204;Q8TF45;Q15788;Q86XU0;Q5TGS1;Q9UBB9;Q9UJQ4;Q8TB69;Q13360;P49910;A9YTQ  
3;P26358;Q5VZB9;Q8N4W9;Q9UNN4;Q01664;Q86W11;Q2M6F14;Q9HCK8;O00570;P15822;P51786;Q92889  
;Q5JVG2;Q8IXX0;P31249;Q9UJW8;Q15366;O95983;Q2M3X9;Q8TBZ5;Q9Y693;Q9NZI5;Q8WY98;P56270;  
P27695;Q8NA42;Q9P2K3;Q6ZMW2;Q9UHL9;Q7Z3V5;Q13351;P78424;Q9UBD0;Q5C9Q4;Q96T92;Q96218;Q  
8NEP9;Q17RP2;Q49A33;Q9UKL0;Q9Y2Y1;Q9BYV9;Q9H8U3;Q96MA1;Q9Y2M0;Q9HAU5;Q2VY69;A8MT69;Q9  
6PT3;Q14586;Q9Y603;Q96NJ3;Q8NAM6;Q9NS56;O60264;Q9HC78;Q9ULX9;Q15327;O43365;P49790;O00



287;P50539;Q8IVC4;Q9UI36;Q9C0F3;Q8WTV1;A8MVS1;Q9UMQ3;P35638;Q9Y6X0;O43296;Q9NQ03;Q9UDV7;O14593;Q16621;Q92754;Q03701;P01106;Q15973;Q6S9J96;Q9BTC8;O43502;O75444;Q14181;Q9UIE0;Q9H0W7;P54277;Q6P1L6;Q9UH92;O43929;Q86VK4;Q8NDW4;Q0VGE8;Q8NF99;P56693;Q16236;Q16533;Q9Y692;P17025;Q13398;O94952;Q00444;Q15365;Q00577;Q9P0U4;O14862;Q9Y606;Q12972;Q494X3;Q9NP87;Q9Y4X4;Q12800;Q7RTU0;Q9BS34;Q7RTV3;Q6ZV50;P42224;Q6P4R8;Q86UD4;Q00411;O75531;P33992;O00488;P17038;Q6ECI4;Q8N3J9;O43543;P10588;Q8N3X6;Q8N1G0;Q9BX26;P18850;P32243;Q86VE0;P86XF7;Q15554;Q7Z6R9;Q5HY98;A6NNDX5;Q6P9A3;P41212;Q9Y2A4;P50548;Q53HV7;Q9Y2K1;Q8N1L9;Q04743;Q05195;O43361;Q96DN6;Q8N488;Q07687;P42677;O14770;Q14814;Q96EK4;P81877;Q9BUY5;Q86TG7;Q9H7R5;Q9HCX3;Q6PK81;Q9BS31;P61978;Q14872;P06746;Q8TDD2;Q12789;Q8IUE0;P35227;P15927;Q6ZSS3;Q14839;P20749;Q075925;P0CJ78;Q9Y5R4;Q68DY1;Q92547;Q9Y253;B2RXF5;P35659;Q9H8N7;B4DX44;P23193;Q9Y5W3;Q5TYW1;O15525;O43918;Q96PE6;P13984;Q8N554;Q9BSK1;Q9UN79;Q9UII5;Q7Z401;P15407;Q2KHR2;Q06455;Q9HCG8;Q8IXM2;Q8NCD3;P27694;Q96KR1;Q00978;Q2M218;Q86WZ6;Q96PQ6;Q8IYNO;B4DXR9;Q96IS3;Q96MX3;Q9H582;O75376;A8MXY4;O14529;Q92900;A8MWA4;Q6AZW8;Q63HK5;P78317;O75478;Q5T619;Q8N9K5;Q96KM6;Q92499;Q96SQ5;P04053;Q96FC9;Q9HCZ1;O95232;Q9Y2H8;P17014;Q02577;A6NNA5;Q96C55;Q15928;Q6ZNH5;Q14590;Q8WXF8;Q96AV8;Q9NPA5;Q14584;P41162;Q15562;O75132;Q8N988;Q9UKI9;P36508;P15884;Q8IYF1;P78414;Q9NR55;P78545;O60885;Q9BRH9;Q03468;Q9BQ70;Q9BTP7;Q9H8G1;Q92466;Q9NZV7;P38935;Q9HBZ2;P12004;Q9Y3C5;P12757;P42166;P48378;Q9HAH1;O14948;P62633;O15015;Q02386;Q99598;O15226;Q8IZ20;Q96N38;O95602;Q15910;Q68CP9;Q9NQ87;Q13761;Q02556;P24928;Q03052;Q8NEA6;Q8N184;Q9NPC7;Q96K58;O95201;Q7Z4V5;P10589;Q5EBL2;Q96BR6;Q6PF04;Q13469;Q9BUG6;Q99081;Q9C0G0;P54098;Q01831;Q6B0B8;Q499Z4;O14503;Q7L945;P17040;O95361;Q6IQ32;Q9GZV8;Q7Z353;P49116;Q8TD17;Q9UKN5;O14802;A0AVK6;Q8WYN3;Q9Y2L8;O00479;O75505;P52701;Q9BT49;O95600;P05412;Q14929;Q96N77;Q15466;Q12901;Q96JY0;Q6NX45;P13682;Q86XN6;A6NJL1;Q9BSG1;Q12888;Q8N1W2;Q96B42;O15499;Q8IZ40;P15621;Q9H609;P10242;Q9Y4A8;Q9UJU3;P56524;Q15361;O14813;Q7RTU3;Q9UHN1;Q13127;O75030;P49716;Q6ZQV5;Q06416;Q6ZNG1;Q9BXP5;Q99816;Q96DT7;Q96IT1;P25490;Q9UM63;Q16514;P49639;O95619;P52756;Q16534;Q2M3W8;Q9UBX2;Q9H1D9;Q53T94;Q9H4I2;Q15233;P28360;P52740;P78347;Q7Z3I7;Q96E14;Q96HQ0;A6NFI3;Q06609;O14901;Q92988;Q8WYA1;Q9Y6X8;O00470;P52736;Q9UQ80;Q6P9A1;Q15935;Q14582;Q9NX65;O95780;O94776;Q2NKK3;P18583;P36954;P51826;O96006;Q7Z2E3;P17030;Q12857;Q9H5H4;P36956;Q9ULV5;Q01094;Q9Y5B6;A6NFD8;Q969P6;A6NDR6;P86452;O60765;Q8N228;Q7RTU4;O00255;Q8N8C0;P15408;P61244;Q13951;Q9NW07;Q02080;P01100;Q8NE65;Q9P267;P10075;Q9UBT6;P78412;Q8N7Q3;O95625;O75683;Q9NP71;Q16342;Q14188;Q10586;Q8IUM7;P23769;O75717;P23511;Q96H40;P14316;P0CG24;Q01658;O43593;P25205;Q9NR33;Q9NQX6;Q9BZE0;Q13426;Q4W5G0;Q9HBB1;Q9UKW6;Q9UQ84;Q9H9D4;Q15542;Q5FWF6;Q9UHF7;Q96C10;P41970;P49711;O94842;P0C7T5;Q15326;P18754;Q96N95;Q8TC21;O60304;P50222;P17023;O94993;Q6ZNI7;Q969W8;Q86TJ2;Q8WUA4;Q9Y2V2;Q16520;Q9Y462;Q9BY31;Q9UGU0;Q8IY51;Q8WW38;Q9HCL3;Q8TAU3;P07992;P37275;Q8NEM1;Q07352;P19447;Q3SY56;Q9UMS5;Q9Y535;O43542;Q9Y657;Q9BU19;Q96AP0;Q09161;A8MQ14;P17535;Q14587;Q6ZSB9;Q04637;Q09FC8;O14628;P50221;Q9NSC2;P0CJ85;Q8N7K0;Q8N8E2;Q8NI51;P07305;Q6IV72;Q8NBF1;A6NM28;Q96N58;P10914;Q9H160;Q9UN30;Q9ULJ3;Q7Z398;Q96NJ6;Q13342;Q6NSW7;Q02446;Q4G0Z9;P19419;Q8TF47;P49917;Q9Y222;Q99551;P21675;O00268;Q16666;P39748;P14651;P52TG3;Q8IZ26;Q9UIF8;Q5CZA5;Q96I27;Q9H116;Q9UKT9;P58340;Q6IQ21;Q6NX49;Q14978;Q3L8U1;P0C7I3;Q96GC6;Q96T58;Q9UJL9;Q5JNZ3;Q9H9Y6;Q80999;Q5VZL5;Q9UJV8;Q8NDY6;Q6ZNI1;Q9UBG7;P50750;Q53EQ6;Q8TBE0;Q8WVM0;Q6VUC0;O00712;Q9Y2G1;Q8N7R0;Q8NAF0;Q9Y2D9;Q96KG9;Q14119;P17028;P23760;Q8TAQ5;Q8TAF7;P0CJ79;Q96C28;O94916;P22415;P43351;Q86T29;Q6NSZ9;O94983}

670

Pathogen { P03383 } interacts with 993 human

partners: [ Q969W8; Q96LX8; P43351; Q9UQR1; P35227; Q9Y618; O14628; O95402; Q86U86; Q7Z2E3; Q06330; O14519; Q13761; O43167; Q15329; Q15723; P10244; Q9H7R0; Q02577; P53803; Q68CJ9; P48378; Q9BQG0; Q9Y6J9; Q8WTZ3; Q9UKN8; Q8IX15; Q03188; Q8NI51; O00470; Q9Y253; Q9UHN1; Q5FWF6; Q5JVG8; Q14978; A6NNF4; P16989; Q15935; Q9UHL9; Q8NBB4; P19474; P10914; O75925; O14737; Q63HK3; P14316; Q15561; Q96S65; Q8N344; O15266; Q9Y2S7; Q9UBD5; Q12888; Q96BR6; Q32MZ4; P11831; Q8N2Z9; Q15047; Q06609; O95625; Q9UH92; Q96SK3; Q14839; O75534; Q8NFC6; P15036; Q6ZN08; O14497; P35712; P50549; O95602; Q01105; P06746; Q02080; Q13485; Q96SZ4; Q9HBD4; Q9BSG1; Q14653; Q9UK10; Q06455; Q04864; O14862; A6NK75; O95163; P33076; O00716; Q86WP2; Q15366; P08047; Q9UPW6; Q8HWS3; Q9UKL3; Q9BTC8; P13010; Q14209; P29084; Q99607; Q9BR84; P17096; O75478; Q9UKI9; Q9Y5L5; P16220; Q9NZV7; Q9H7R5; P27540; Q9NWS1; Q15562; Q9Y2P7; Q8N1L9; Q7Z6K1; P28069; P54278; Q49A33; Q15544; Q6ZYL4; Q13469; Q9H9Z2; Q7Z591; Q9NWB7; P17544; P56270; Q16633; P35269; P0C7T5; P32243; Q5H9I0; P19338; Q9H4I2; Q9HBE1; Q00653; O60765; Q8WTV1; Q08999; A8MVS1; Q9H8G1; A8MWA4; O60248; O94776; Q3T8J9; P49711; P17022; Q86V71; Q6P4R8; P15172; Q01094; Q96GE5; Q9H5H4; Q5HY98; Q3KCP31; Q9NYB0; P14921; Q15937; P55771; Q15072; O75376; Q8WVJ9; Q15572; Q14526; P17029; Q07687; P58340; Q9Y5Q3; Q9H4T2; O00287; P19484; Q16656; Q03111; Q9Y5R5; Q9HCL3; P01106; Q8WW38; O75437; Q86U70; P40424; A8MXY4; Q12986; P78347; Q6NT76; Q6NVH7; Q15554; Q9UKD1; Q96NI8; Q9UPN9; Q99608; Q14181; O96006; P49116; Q9P2R6; P49116; Q9Y5B6; P23511; P05204; O75362; Q9UL49; P51815; P14859; P23193; Q9UKW6; Q8N7M2; Q9BRR0; Q13360; O00570; Q9NP66; P27694; A8MTY0; Q9BWW4; Q7Z3K6; Q96BD5; Q969F1; Q53HV7; Q8TD23; Q05481; Q9Y2Y9; Q9BXS6; P48382; O75360; Q9UHW6; Q9Y535; Q96H40; Q2M3W8; Q8N4W9; P17482; Q6ZNO6; Q9H9Y6; A4GXA9; Q6ECI4; P53999; Q9UMQ3; O95644; O75618; Q5EE01; P18847; Q92966; P25205; P18124; Q9UK13; P17861; P51508; Q8WYP5; Q01826; P22670; P20749; Q9BYN7; Q8N3J9; P19419; Q6ZN17; P52744; P28370; B4DX44; Q96FV9; Q8NEP9; Q12972; P52655; Q96B01; Q9H9Q4; P48380; Q96LI6; Q5CZA5; Q8TF20; P23769; P50222; P22392; Q9H503; Q6MZP7; Q00059; Q76KX8; Q9UHI6; P42677; P37275; Q8NDQ6; Q9NQ87; P31276; Q96N77; O95831; Q9UL58; Q9ULD5; Q9UMS5; O75030; Q96PU4; Q15542; Q6RFH8; O94983; O14709; O00712; P52630; P35638; O75461; O43365; O60318; P15923; Q3MJ62; Q9ULW3; Q9H2G9; P53805; Q96KR1; Q16520; Q86TG7; Q12901; Q9C0F3; Q8NDF8; P35789; Q99816; O14646; Q8NA31; Q6PJJG2; P61218; Q8NA42; O14503; Q6P9G9; P17019; Q6IQ21; Q14814; Q96N20; Q9Y2Q1; Q01860; Q6ISB3; P78317; Q8IZX4; Q08945; Q96IU2; P42226; P61978; Q9BYE7; Q96N95; P11387; Q9P2K3; Q03923; Q8N988; Q8WYN3; P18846; O15405; Q9GZS1; Q86V15; Q3MIS6; Q99459; Q96SE7; P49005; Q86XF7; Q05516; P28698; Q9GZX5; P12980; Q8N693; Q8TB69; Q07352; Q86VE0; Q15306; P0C7X2; Q9P0L1; Q15651; P17038; Q96S55; Q7RTU5; Q00978; Q13330; P15621; A6NK53; Q15631; Q86YE8; Q9HAC1; Q8N2W9; P51504; Q8N587; P15408; P78337; Q6ZR52; Q96EK4; Q9Y5Q8; Q8TE85; Q15560; O75683; Q9H1D9; Q8N5U6; P59923; P17098; Q9H175; Q01831; O00321; Q9NQX1; B4DU55; Q6NSZ9; Q9Y692; P06400; P18146; P41162; Q

9NTW7;Q13398;Q66K89;Q53GI3;Q9UK11;O15525;Q96BT3;Q9UBB5;Q9Y2T7;Q9NP71;Q49AA0;Q6IQ32;Q8  
TAF7;O60535;Q01664;P31249;Q8IYI8;Q14872;Q00403;P55347;Q9HAJ7;Q9Y2L8;Q09161;P41218;P17  
014;Q14588;P25208;Q8N228;Q7Z3V5;Q96LW9;P20226;A8MUV8;A8K8V0;Q8TF47;Q33E94;Q6ZVD7;O952  
01;Q9HC44;Q9HAZ2;Q6P1N0;O14770;P56282;Q9UQR0;Q4G112;P08651;Q9HCG1;P52746;Q14934;Q499Z  
4;A6NDX5;Q7L2R6;Q96004;P46100;Q15326;P29372;P11473;O60870;Q8IYB3;P41161;P11474;Q16533  
;Q6ZNA1;Q03112;O14978;O95243;Q13952;Q16594;Q01892;Q15015;Q12873;Q92985;Q14186;Q95606;  
Q8IYN0;Q16621;Q9NVI1;P54845;P15927;Q9BQ70;P86452;Q9H963;Q96MR9;P49639;Q9UHX1;P84022;B  
4DXR9;Q9H160;Q8N895;P25791;P52747;P19387;Q15928;P11308;Q9HD15;Q9NVV9;Q15361;P18583;O6  
0563;Q96ND8;Q9UDV6;Q53EQ6;Q9UID6;A6NJL1;Q8NEM1;Q9NV72;Q5JN23;Q96N38;Q92945;Q12857;P17  
010;Q9UHK0;P13984;Q9UNY5;Q32M78;Q8N9N5;Q99551;Q969G3;Q9HAU5;P35548;O14948;Q96MN9;Q024  
47;Q6VUC0;P54098;Q9Y6K1;Q13105;P28324;Q8N488;Q9H040;O95125;Q13951;O14896;Q9Y5N6;Q9ULV  
5;Q08AN1;P28347;P35637;P24928;Q03468;Q9HAW4;Q9BQA5;P17040;O75290;Q05195;P52742;Q13568  
;P17032;P0CH99;Q96N22;Q99687;Q8N859;Q13426;Q86US8;Q9Y2G7;P17036;P24278;P18754;Q96LW1;  
Q6PG37;O43345;Q9BX82;Q8N3S3;Q9H171;Q96AY2;Q68C9P;Q13342;Q6ZN32;A6NHJ4;O60663;P17676;P  
09874;P23025;Q9P2J8;O95780;P49848;O60304;Q9Y2N7;Q9BSI4;Q14103;Q7Z3K3;Q9NYF8;Q6SJ96;O4  
3711;Q6ZNG1;Q99081;Q96E29;Q8N3X6;Q9NSC2;Q15466;Q16254;A6NKF2;Q9UN79;P52743;Q13765;O14  
746;P15407;Q8NF99;P57721;P28702;Q9ULJ3;Q6IV72;P50750;Q8N5A5;Q12837;Q12968;Q9UFW8;Q012  
01;P35711;Q15697;Q02878;Q8N7K0;Q01543;Q86UE3;Q68DY1;Q9Y6X8;Q9UKN5;Q8IZ40;P51531;Q9UNN  
4;P15822;O15379;O00268;O15350;Q9NQ33;O60828;Q6ZV50;O00479;P55895;A8MT69;O94842;Q96DN6  
;Q5VIY5;Q16514;Q9UIF9;P10074;P82970;Q00613;O00255;P10073;O75475;Q12800;Q16666;P0C1Z6;  
Q6U7Q0;Q7Z5D8;Q96C28;A8MUZ8;Q03936;Q9NPG3;Q07666;P82979;P78344;Q9Y2M0;Q9Y462;Q15929;Q  
8NE65;Q9UBZ9;O15370;Q8N8C0;Q15365;O43829;Q12905;Q8WVM0;Q9H074;Q9P0W2;Q96IT1;P31269;Q3  
ZCT1;P36402;Q8TAQ2;Q8N5J4;Q15573;Q02833;Q96E14;Q8N9Z0;O14593;Q99543;Q8N972;O43918;P41  
212;Q16236;Q8TF32;Q68EA5;Q96JN0;Q96T58;Q99684;P31314;P26651;Q15853;Q9ULX6;P52737;Q96I  
R2;Q12906;Q99583;A6NN14;O75446;Q6ZMS7;Q9NZI6;Q9UKL0;Q5SVQ8;A6NP11;Q3L8U1;Q9H307;P5425  
3;Q99708;O95232;P10242;P23497;Q9H116;Q9Y252;Q04637;Q96GC6;Q15327;Q96GD4;O15535;Q9UKK3  
;O95238;Q9HCK8;Q14188;P62633;Q494X3;P01100;P04198;Q86XN6;Q9UC06;Q4LE39;P43268;Q8WXF8;  
Q8NCD3;Q2KHR2;P11161;Q9UQ80;O95983;P05114;Q8N0Y2;O60885;Q92750;Q92754;O43186;P39880;Q  
8N108;P23760;Q9UIF8;Q5HYK9;Q15906;Q9NZI7;A6H8Y1;Q96QC0;Q8N782;P0C7V5;P62875;Q96RK0;Q5  
TEC3;Q15796;Q99594;P21675;Q9BZK7;P56524;Q92541;Q6P280;Q6ZMY9;P41970;Q64309;P32519;Q  
577;Q9HBT7;Q96NJ6;Q8NAP3;A8MT65;Q09FC8;Q96AE4;Q9Y4A8;Q9P255;Q8IYW8;P52435;Q15910;Q9UI  
I5;P51522;Q04206;Q7RTV3;Q10586;P49910;P55265;Q9Y2D9;P17535;Q8WTR7;Q9BQ15;P78545;Q6NUN  
9;Q9NY43;P82094;P51532;Q96SR6;P42704;Q02556;Q9Y222;Q8WUY8;P53567;Q9UKT9;O14771;Q86YC2  
;P52736;Q96RY5;Q15233;Q9UM63;P12757;O60675;O43310;Q96ST3;O43542;P38935;Q9Y5A6;P07199;  
O00411;Q8TBE0;Q9BXP5;Q9HAP2;Q8IYN0;Q14151;P62841;P50221;P50548;Q8N7U7;P27695;Q99676;B  
1APH4;Q9UC07;P23246;P51786;P19388;Q969J2;Q5TGS1;Q16531;Q13148;Q9UBB9;Q8TAQ5;Q15424;P5  
5197;Q9Y2X9;Q6P0N0;Q8NFD5;O75132;O94952;Q92922;Q8TEK3;Q12789;P15336;P10828;Q9NZI5;P16  
383;Q92499;Q99856;Q9NS37;P18848;Q2M1K9;P18850;O60481;P62508;Q92547;O60869;Q9Y534;Q9NZ  
L3;O95619;Q9BXG8;Q8N196;Q15776;Q92466;P30876;O75586;Q5SXM1;P09629;Q9Y2A4;Q02930;Q08ER  
8;Q9NTI5;Q9H5D1;Q9UI36;Q9Y2V2;P10243;Q15699;Q86W11;Q86WV5;Q08AG5;Q5SXM2;P17275  
;Q04837;P20265;O75444;P17480;Q14585;P51523;Q96AH0;P06733;Q8N720;P61244;P19838;Q96AV8;  
Q96QR8;P35869;Q6ZN79;Q8N7Q3;Q8N141;Q8TA94;P56693;P17028;Q9BVC3;P67809;Q9UBD0;Q16534;Q  
9HCC8;Q9Y603;Q14241;Q96PQ6;Q9NSJ1;P13056;Q01658;Q9BUY5;Q9ULX9;Q6P9A1;Q6IA86;Q9UHF7;Q8  
WXB4;O75564;Q92900;Q06546;Q3C1V8;Q00839;Q92988;Q8NC26;P52594;Q2NKKJ3;Q6V9R5;O75346;Q9B  
T49;Q9BYK8;P9790;O14802;Q9UNY4;Q03060;P26358;Q9H211;P19532;B2CW77;Q8NHY6;P16415;Q9Y6  
R6;Q4VC44;P17947;Q9BTP7;Q9UN30;Q59GR2;Q9H9T3;Q9Y473;A0AVK6;O15226;Q9BUG6;P51826;P8187  
7;P40425;Q9UMS4;Q6ZMV8;Q92793;Q13901;Q96ST2;Q8N823;O75531;Q7RTV0;Q8TF39;P54274;Q02078  
;Q0VG06;P14651;Q2VY69;Q9BWH6;P13682;Q9UIS9;P12956;Q13127;Q6ZQV5;Q96NG5;Q53T94;Q14593;  
Q8N726;Q9P0T4;Q5C9Z4;P22415;P27797;P52741;Q8NB42;Q5BKZ1;P35251;P0CB33;Q9BQY4;Q9BX26;O  
75928;Q15543;Q9Y250;Q96N9Y;Q14781;Q03938;Q03933;P05412;Q16526;Q8IYB9;Q13129}

671 Pathogen[ P03410] interacts with 1521 human  
partners: {Q9NSD4;Q96EG3;P84022;Q9Y2P7;Q14202;Q03188;O75505;Q9BWH6;Q96LI6;Q9HCG1;Q9959  
4;Q96NI8;O14813;A8K8V0;Q6AW86;Q5CZA5;Q2KHR2;Q9HOM5;Q99743;Q00613;P20749;Q9Y5J3;Q9BWE0  
;Q9UHF7;P40426;Q4206;Q08945;P08048;Q14771;P28069;Q9BZI1;Q9Y2L8;Q9HC78;Q8N1W2;Q96JB3;  
Q6ZNG0;O14901;Q6ZNA1;P35712;P17031;P22670;Q5HY98;P23025;O43309;Q9UI36;Q6ECI4;P49959;Q  
96RE9;P23409;O95619;Q6V9R5;Q5JVG2;P11831;O60281;Q8NBF1;Q9NS37;Q14588;Q8WXF8;Q96BR6;Q9  
Y2S7;Q5EBM4;O75290;B2RXF5;Q9BYN7;P0CJ87;Q92945;Q96AV8;Q5JN23;P23246;Q8TAU3;Q8IYN0;Q8I  
ZX4;Q9HAJ7;P82094;P19838;Q68CJ9;P36956;Q96IU2;P0C7V5;Q00839;P52655;O75461;P53999;P252  
05;Q9NUX5;Q9H040;Q96FI4;Q9UNN4;Q96PT3;O75925;Q8IXK0;O43929;Q9H2G9;Q12873;Q15572;P0C7X  
5;Q96ST2;Q9HAH1;O60675;Q5T619;Q03112;Q6ZMY9;Q96NM4;Q9H8Y1;Q8IXF0;Q3SY89;A6NN14;Q32M78  
;Q9UNY4;Q9Y2Y9;P29374;Q13106;Q8N9Z0;Q8N5J4;Q8NDW4;Q9NZL3;Q16666;Q8WY91;Q99708;Q9UDV7;  
Q14593;P52594;P35638;Q14526;O95238;Q59GR2;Q02833;Q9UK13;Q8N8E2;O00470;Q96N58;Q2M3W8;Q  
8N8Z8;Q9H4L7;O75683;P19387;Q14103;Q96006;P20585;P16415;Q96N22;Q13360;Q8N7R0;Q8N7G0;P8  
0303;Q14739;Q15697;P49184;Q8WYK2;O75373;Q9H5J8;O95780;P0CJ79;Q8N7Q3;Q14929;P17482;Q8TF  
F68;Q05BW5;Q9Y534;P17861;Q15329;Q9Y509;P0CH99;P17040;Q8TCN5;Q96QC0;Q16886;P15621;Q9NP  
A5;P37275;P36954;Q9NVI1;P13682;P41162;Q9H4T2;Q8N587;Q9UL59;O00268;Q96AY2;Q15047;P3650  
8;P58317;Q9UJ41;Q96C28;Q8IYH5;Q8N7M2;Q96N38;Q9BRH9;Q86XF7;Q16520;Q3MJ62;A6NDX5;Q8WTT3  
;Q8WTR7;Q96CS4;Q8WVJ9;Q92804;P61978;P0C7T5;O60535;Q9UDV6;Q04864;Q9HAZ2;Q99676;Q9BQ15;  
Q9NVV9;O60885;Q9GZM3;P15822;Q9H7R0;P52738;Q14181;O14896;O96004;P31274;Q9HBT8;Q92698;Q  
15543;Q9BWW4;P19419;Q15973;P52740;Q8IYD8;Q15554;Q9NV72;P31276;Q02878;P82970;Q14549;Q9  
P2R6;Q8N3X6;Q76KX8;Q9UN79;Q5T0B9;Q66K89;P17676;P23511;Q96SZ4;Q92900;Q96AP0;Q9P0U4;Q8T  
DD2;Q8N228;Q8N726;Q9BYV9;O60806;Q15233;Q8N680;Q9H9D4;Q96SQ5;A4GXA9;Q9UMQ3;O94916;Q9H4  
I2;Q96JL9;P18847;P01106;Q02447;P16989;Q92750;P07992;Q99814;P17947;Q16600;Q12968;O9512  
5;Q06330;O15315;O60481;O14746;Q9BXP5;Q06730;P62841;Q04837;Q92670;Q96H86;O15060;Q9BSG1  
;O14948;Q17RP2;O60682;Q8N8C0;Q01860;Q8N344;Q6AZW8;Q6ZMW2;P24928;P41218;Q96B42;O14497;  
Q9UC06;Q9UII5;A6NFI3;Q15776;P54274;Q9UKD1;P54845;Q9C0G0;P25791;Q9Y6Q3;P10073;Q8IUE0;A

9YTQ3;Q0D2J5;Q9BQA5;Q9UBT6;Q9BTP6;P21675;Q9BYE7;P41212;Q3ZCX4;Q03989;P09629;Q14938;Q8TAW3;Q9NQ87;Q9NQX6;Q8N4W9;Q96BT3;P18848;Q9UQ80;P36402;Q92614;Q9UHK0;Q96KR1;P50222;Q8TAQ5;Q9H1A7;P54277;P50221;Q9Y2N7;O15266;Q9Y2D1;Q13609;O75446;Q6PJJ2;P18124;O43542;Q8TD17;Q8N3J9;Q3KP31;Q9BYK8;Q96N77;Q6PG37;Q8NCN2;P14651;P04053;P10242;Q8IYB9;P53567;Q9UIF8;Q9NR11;O15405;O14646;Q9UHL9;P35789;P14859;Q12800;Q8NF99;Q14814;P57723;P78545;Q99608;Q8IYX0;Q9UL49;Q8N9N5;Q7L2R6;O76075;O75030;Q96K62;Q96PQ6;P35637;Q86WZ6;Q9UPG8;P15884;O14862;Q6ZNL1;Q9H8U3;Q9NYT6;Q9UJV8;Q14653;O75444;Q92610;Q8NBB4;Q8TEK3;P28324;Q9UNAA4;Q12857;Q5H9I0;Q8TF50;Q16254;P17017;Q8TF45;Q15365;Q16236;Q3C1V8;Q2M1V0;Q5VIY5;Q9BZE3;Q96ND8;Q14978;Q9BTC8;O60870;Q8IYI8;Q00059;P24278;Q53EQ6;Q2M218;P06733;Q9Y543;Q6P2D0;Q9P0W2;Q9UMS5;Q4G112;Q9BYX4;Q08ER8;Q8TF39;Q5FWF6;Q9P2K5;Q9UK11;Q9ULG1;A8MT65;Q6ZVD7;Q8NG50;Q43918;A6NHJ4;Q9ULJ3;Q5C9Z4;P0CB33;Q9NXT0;P31249;Q9BWG4;Q9BU19;Q6JMT2;Q9Y692;Q14765;Q96LX8;P57721;Q9UIH9;Q86XU0;P62380;Q2VY69;Q9H4Z2;Q6IQ21;Q9NZI5;Q9UBB5;Q96GC6;P12525;Q6NSW7;O75928;Q9NPC7;P51826;Q86UQ0;O43830;Q9C0F3;Q4G0Z9;Q2M1K9;Q9NZV7;P78414;P57071;Q6ZYL4;Q86TJ2;Q0VGE8;P17096;Q9H963;Q96N95;Q9UBX2;Q6NSZ9;Q9Y2K1;Q9HAW4;Q969F1;Q7RTS1;P10412;Q075437;Q66DN6;Q6ZSB9;Q8N3S3;P55895;Q99687;Q8N2W9;Q9UL58;P06746;O14709;Q9H668;A6NFD8;P30876;Q03060;Q96K75;Q9Y2V2;P0CJ85;Q8N720;P52741;Q92889;P19532;Q08999;P10243;A6NJG6;A6NNA5;Q9H211;Q96S55;P20226;P82979;Q15366;Q01105;O95948;Q86VE0;P10828;Q6NX45;Q9Y5Q8;O00321;A6H8Y1;Q15651;Q9NRG0;Q9H175;Q15906;Q9UJL9;Q9NSJ1;Q6PF04;Q9BT49;O75764;O94892;Q032M4;Q9HAU5;Q9UBB9;P39748;P48378;P06400;Q16633;Q6NVH7;Q9BSI4;Q9Y3M9;A6NM28;Q9H116;Q03923;Q6PK81;P19484;Q9H9T3;P56282;Q9HC44;O75376;Q9P243;Q9ULL5;P31314;Q9HCL3;P49716;Q68DY1;Q9H7X3;Q9BTP7;O43432;Q99684;P43351;Q15327;P32519;Q8N7U7;Q9UIE0;P23193;Q53GI3;Q03468;Q8NB42;P55265;O60304;Q6U7Q0;P15923;P26651;O00411;Q09FC8;Q06732;Q6ZN19;Q99607;Q4VC44;P17025;Q03052;P0CJ90;Q9BXS6;Q9UPW6;P28715;Q8TAT5;Q8NG57;Q9NPG3;Q9NWS9;P78549;P35227;P62508;Q4LE39;Q8NEM1;Q6P0N0;P0C1Z6;Q86WP2;Q8NCD3;Q92466;P51523;Q14188;Q96ST3;Q8NFD5;Q9H171;Q6ZN55;Q6ZT77;Q15306;Q13568;Q96HQ0;Q03933;Q96EK4;Q5VZB9;Q5H9K5;Q96SC8;O00712;Q01831;Q9UKW6;Q96T58;Q8WW38;Q9Y535;Q92541;Q01201;P25490;P01100;P18846;Q96LW1;Q53HV7;P52746;Q00577;P61244;Q7RTU4;Q15424;O15226;Q07666;Q15560;Q7Z4V5;Q5EE01;Q6IV72;P17036;Q96FV9;Q8TC21;A6NFQ7;P15408;A8K0S8;Q9NTW7;O60663;Q96G23;P51508;Q3MIS6;Q9H707;P33992;Q7Z401;Q96SR6;Q5TEC3;Q9NPF6;B4DXR9;Q8NEP9;P17544;Q5SVQ8;P35659;Q9H074;Q6ZV50;O60381;P50549;Q15E18;P17010;Q8N1G0;Q9UQR1;P11473;Q02556;Q6XD76;Q9HBZ2;Q9GVZ8;Q9P2Z0;Q9BW11;Q9Y603;Q934BL;Q14507;Q96PE6;Q15928;Q9BRR0;O95243;Q8NDY6;Q6ZNG2;A6NJ46;Q8TAF7;Q8N8L2;Q96NG8;Q86T29;Q7Z2E3;Q9ULD5;O95644;Q9BQY4;P58340;Q7RTU0;Q02930;Q6RFH8;Q96MA1;P50750;O95789;Q96MN9;P10072;Q9Y5Q3;P26358;P27540;O15535;P67809;Q86WV5;Q99081;Q99816;Q9H790;Q6ZN06;Q96BV0;Q14590;Q9UK10;Q9BUG6;Q8IZH2;O60563;Q13127;Q8WXB4;P17022;Q96GE5;Q5SXM1;O00716;Q9UKT9;O15525;Q7Z5Q5;P08651;Q6ZMS7;Q9Y2X9;Q15583;Q08AN1;Q9UGP5;P41161;P17029;Q7L3S4;Q8IYV9;Q9UBZ9;Q92988;P12956;Q8N823;Q12986;Q7Z340;Q9UBZ4;Q8TB69;P42166;Q07628;Q6ZRS2;Q96H40;P35548;Q8NEK5;Q3KQV3;Q9BWT6;P17098;Q92793;Q14966;Q13472;Q6B0B8;Q8TBZ5;P38935;Q8IYF1;P35251;Q15573;Q9BWM5;P49790;Q6NUM9;Q8IX07;Q8TE85;A8MWA4;O95402;Q9Y2Q1;Q3KNS6;P48382;P51814;Q6IQ32;P10074;Q15561;P10244;P52701;P15036;O00570;Q969G3;Q6ZNH5;P29084;A9UHW6;Q9NW08;P17026;Q01538;A8MW59;Q8IXM2;Q9BX26;Q9BS31;Q99459;Q8NEF6;Q16649;Q6EKJ0;Q9HCE3;Q02386;Q8NEA6;Q96KG9;Q9BWX5;P0CG31;Q9UK12;P52737;P0CG13;Q96I27;Q7Z398;Q13342;P52435;Q8N5A5;Q5TGS1;O95602;P17535;Q8N972;Q49AG3;Q4W5G0;O43502;O94842;Q7Z3I7;Q6ZN79;Q9P2D1;Q6P9C9;Q8WYN3;Q9Y2G1;Q969W8;P17028;Q8N883;Q49A33;Q8NCK3;Q6SJT96;Q9UKN5;P17019;A6NLW8;Q96C00;P53805;Q8NAP3;Q9UNY5;Q03924;O75132;Q9Y3C5;Q16514;P28347;Q9HA82;Q7Z353;Q6ZDY9;P17030;O75534;Q9B334;P52743;Q9P0L1;P17275;Q13129;Q92499;Q9NWB7;Q12772;Q13330;Q16621;Q9Y253;Q7Z591;P49848;P52736;B2CW77;Q6NT04;P0CJ89;P25208;Q9BXX3;Q96AH0;Q9UGN5;P51815;P04553;O95163;A6NK53;Q9BQW3;P51587;Q14872;O75362;Q9UJW8;Q96K83;Q9H5L6;Q6ISB3;P78317;Q8WY36;Q5HYK9;O75531;O43310;Q5VZL5;O15379;P56524;P17014;Q6TAR4;Q12905;P0CG24;Q8IZU3;Q68EA5;Q96SE7;Q96NY9;Q9NTI5;P53803;Q8NA42;Q9UHX1;Q6P280;Q92922;P17024;Q6P4R8;Q01826;P42704;Q9H609;Q9Y6X0;Q8N7K0;Q86U70;Q5T5D7;Q9H160;Q9NP17;Q14119;P43268;Q6ZS27;Q15326;P31269;Q96S65;P16455;O95983;P19447;Q9P215;P11387;P17020;P42167;Q01658;P48380;P22415;Q9ULX6;Q13485;Q96I24;P10914;Q9BUY5;Q96IR2;Q9ULX9;Q99583;Q13952;P22736;Q8IZ26;Q14186;Q969J2;Q9Y2S0;Q8TBE0;Q96MX3;P62875;Q9H7R5;P05423;Q9GZS1;Q9BY31;Q9HCK8;Q9BVC3;Q8NE65;P28702;Q12789;P19338;Q9NRF9;Q147U1;Q9UM63;P09874;Q16526;P16220;Q15466;Q96SK3;P56693;Q00403;P21506;O95831;Q7RTV3;P12757;O43296;Q6P1L6;P18583;P86452;Q5XG87;Q9Y6X8;P17032;P17027;P47974;Q9NQV6;Q3SY52;Q14585;A8MUV8;P78412;Q8N196;Q06455;O43364;Q9GZX5;Q13118;Q15699;P49910;P46100;Q49AN0;P35269;Q92618;Q9Y6J9;P55771;Q86XN6;Q5VV52;P51786;Q13469;B1APH4;Q15910;P41182;Q8IYB3;P51532;O15015;Q9HBT7;Q16594;Q9BQG0;Q15853;P61218;Q13398;Q5JVG8;Q16531;O75346;P13349;Q6ZRF7;Q9NR33;Q5BKZ1;Q66K74;Q13426;Q15TG3;P05412;Q96MR9;Q8N488;Q99598;P39880;P49639;Q3T8J9;Q9NQ33;A2RRD8;Q9Y2Y1;Q8N8B7;Q10586;Q12888;Q6XYB7;O43196;Q9NW07;P49711;A6NDR6;Q9Y6R6;Q9Y222;Q8N988;Q86WJ1;Q8NA92;Q5MCW4;Q9UKL3;Q86V71;O95232;Q92547;O95625;O60828;O43422;P42226;Q86US8;O14628;Q7Z6R9;Q9HCU5;P11388;Q9UBC3;Q8N108;Q8NI51;O15160;Q96JN0;Q7Z7K2;P51531;Q9HAP2;P49450;Q8N1L9;Q9UKI9;Q15544;Q9H8N7;Q9Y606;Q6VUC0;P12980;P0CJ88;Q96IT1;B4DX44;Q13901;Q9ULM2;P50539;O60318;Q86TG7;P55347;Q8IUE1;O00479;Q9Y2Y4;Q8NC26;P32243;Q13951;Q8WVM0;P11474;Q92664;P0CJ86;Q96RK0;A6NJL1;Q9UC07;Q9UL73;O14593;P23769;Q13761;P63135;Q14586;P52630;Q3L8U1;Q96C10;Q9UIS9;Q8NHW3;O94776;Q9HCS4;P27695;Q8NCA9;Q01664;Q9P2F9;Q9UJN7;Q01094;O75717;P35680;O60869;Q7RTV0;Q14151;P28698;Q7Z7L9;P49116;B2RD01;Q8NB12;P17035;A8MUZ8;O00287;Q53T94;Q9UMS4;Q8TAQ2;P13010;O14978;O43543;P59923;P13984;Q96IS3;P10589;Q9NWS1;Q9Y2H8;Q92966;P56270;Q02577;Q9P2J8;Q10587;Q12972;Q9Y6Y1;Q02078;Q9UIF9;Q5TYW1;Q15542;A8MT69;Q16534;A8MQ14;O15350;Q96NG5;Q7Z3K3;P07199;P41970;Q6ZSS3;Q9NZI6;Q9H1D9;Q9H9Z2;Q96E14;Q6ZN08;Q9BZK7;O95159;Q15631;O14519;Q9H8G1;Q9GZN2;P05204;Q9Y2P0;Q9UKK3;Q969S2;O43812;Q9Y462;Q6MZP7;Q3SXZ3;Q9Y250;Q86UE3;Q7RTU5;P08047;P49005;P27694;P50548;O00115;Q96FC9;Q9P255;A6NLF2;Q09161;O60248;P55197;P17039;P23760;Q9Y657;O43711;Q99856;Q9UBD0;Q8IZ40;Q00653;P54278;Q9UJU3;Q9UFW8;Q494X3;Q8TBC5;A6NK75;Q8N9K5;Q9NYF8;O95201;A6NP11;Q16656;Q9P267;A8MTY0;Q8TF20;Q9NX65;Q9NQZ8;P15927;Q68CP9;O75626;Q9Y5L5;Q8TF32;Q86UD4;P12524;Q63HK3;Q06416;O75475;Q15937;O75478;Q6P9A3;O43829;P78347;

Q6ZN17;Q96RY5;Q9Y4A0;Q63HK5;O75123;Q8N8J6;Q8N693;Q3ZCT1;P35250;Q8N782;Q96LW9;Q9BQ70;Q6ZQV5;Q8TF47;P18754;Q9ULV5;P15407;Q12901;E9PGG2;Q9UH92;Q14584;Q8N141;Q9Y4A8;Q9NF87;Q13105;Q9UQ84;Q49AA0;Q6ZN57;Q03701;Q9H4W6;Q8TD26;P14316;Q96BD5;O75360;Q8TD23;Q9Y2M0;Q9U KL0;Q9UQR0;Q15929;P17041;Q14209;Q9Y693;O75564;O75618;Q9NZL7;Q9Y5N6;Q04637;Q14781;Q9Y2 T7;P54265;Q9HD15;O15370;Q15744;Q15361;Q96MU6;Q14582;Q94993;Q9Y618;Q02080;Q92985;Q96N2 0;P20265;Q6DD87;A6NKF2;O60765;Q96QR8;Q86YE8;Q7RTU3;Q7Z6K1;O94952;O60264;Q12837;Q8NDP4 ;Q8TA94;Q8IY51;P11308;Q9NSC2;O94983;Q99543;Q9NY43;Q2NKK3;Q9BR84;Q9UID6;Q9Y6K1;Q03936; Q13765;P18146;Q9NYB0;Q96K58;Q8N5U6;Q8IX15;P17021;P15622;P62633;P52744;P51522;P17023;O 75820;Q8N895;Q8WUA4;Q5VTD9;Q96E29;P40937;Q96JC4;Q8TBZ8;Q9BT81;Q14865;Q96NJ3;Q95416;Q0 5481;Q96B01;P16383;Q8N859;Q9BX82;Q9HBD4;Q6IA86;Q14566;Q7L945;Q33E94;Q14592;Q96MW7;Q6P 9A1;Q9UKN8;O00255;P78364;Q96JF6;Q86V15;O43823;O14867;P40424;Q96CX3;A8MXY4;P78424;Q047 43;Q15796;P10075;P0C7X2;Q9UJQ4;Q9UL36;Q9Y237;Q5SXM2;Q14839;P08235;Q9UHN1;P15336;Q9UEG 4;Q9NQX1;P11161;Q9UHI6;Q15723;P19388;P81877;Q9NR55;O60422;Q15562;Q8N2I2;Q96PT4;Q08211 ;P0CJ78;P12004;A8MVS1;Q8WYP5;Q8N5Y2;Q14241;P40763;Q8WUY8;Q9NU63;A6NNF4;Q68DI1;Q9UBD5; P54098;O43361;Q96AE4;Q8NDQ6;Q9Y2D9;Q9UKY1;B4DU55;Q9UN30;Q86YC2;Q9UGU0;P18850;Q9P2K3;Q 99551;Q4V348;O75467;P33076;Q9Y5A6;Q6ZN32;Q14934;O14802;Q6ZMV8;Q12906;Q9Y5B6;P04198;Q0 0978;Q14591;O43345;Q8IXT2;Q9HCZ1;Q6ZNG1;Q9Y5R4;Q9Y2G7;O43365;O43167;Q16533;P15976;P05 114;Q96PM9;P29372;O14770;Q15072;Q86UP8;Q07352;Q9NUA8;Q86TJ5;Q9Y2A4;Q6P1N0;P52742;Q9UJ W7;Q7L9B9;Q9BUI4;Q6ZR52;P17038;P0C7M4;Q06546;O14737;P78344;P17097;A0AVK6;Q9HB58;Q8NA3 1;Q7Z5D8;Q9UPN9;O43593;Q8NHY6;Q9H5H4;Q0VG06;Q7Z3V5;Q01543;Q86W11;P78337;Q92754;Q9H9Q4 ;Q86Y25;Q499Z4;P28370;Q9HBE1;Q8N393;Q2M3X9;Q03111;O60284;Q05195;Q06609;Q01892;Q8N184; Q8HWS3;O75586;P14921;Q8WYA1;Q8N2Z9;Q96RJ6;Q9H9Y6;Q9Y473;P52747;Q96NJ6;Q9H503;Q8IVC4;P 17480;Q9HCX3;P01011;P51504;Q9H307;Q8N9F8;P13056;Q96NL3;Q13415;Q9UBG7;P42677;Q9HCG8;Q8 IWY8;Q9BXG8;Q8IZC7;Q8N0Y2;Q16587;O15499;Q08AG5;Q9UFB7;Q8WTV1;Q9H0W7;Q15935;Q03938;Q6N X49;P27797;Q9BSK1;Q16559;O14529}

672

Pathogen[ P14075] interacts with 954 human

partners: {P43351;Q9H307;Q16633;Q9NQ33;P28069;P42704;Q8N196;Q3L8U1;Q0D2J5;Q00059;Q9NZL 3;Q9C0F3;P52630;Q969F1;Q14781;Q494X3;A8MT69;P11387;Q9UN30;Q6P4R8;P17480;P17029;P06733 ;P05204;Q68DY1;Q9NTW7;P82979;Q7Z2E3;Q8NI51;Q9Y6J9;Q96ST3;Q9NSC2;Q15572;Q15366;Q12789; Q96IU2;O14646;Q9UHL9;P35869;Q3T8J9;O60663;Q8TAQ5;P51815;Q96S65;Q96QR8;Q15929;Q9607;Q 6V9R5;O75564;P54253;Q96E14;Q9H2G9;Q9O161;Q02577;O95232;Q86U70;Q6RFH8;Q9Y5B6;P54098;P4 2677;P13984;Q99608;Q9Y5A6;P19338;Q9Y6K1;Q969J2;Q9H175;P35659;Q9H211;Q8N9N5;Q92900;A8M TY0;Q96GE5;Q6ZN32;Q00613;P23497;P23246;Q9HAP2;Q9ULL5;P12956;P50548;Q9BWH6;Q9NV11;Q028 78;Q16533;B4DXR9;Q8N141;Q13105;Q04206;P21675;Q6ZN08;P17482;Q9H4I2;Q9Y5R5;Q9UM63;Q9Y2S 7;Q7Z591;P51523;P78337;Q9GZS1;Q5TGS1;Q9HBD4;P40424;Q14526;Q9UBZ9;Q13951;P16989;P52737 ;P0C7X2;Q99687;O75030;Q9NV72;Q96UQR1;Q9HAJ7;O60248;Q92966;P55265;Q9UQR1;Q8NEM1;Q08999; Q8N5J4;O14746;P23025;Q8NC26;P05412;Q15542;Q8N488;Q96NJ6;P42226;Q5BKZ1;P40425;Q12800;Q 14938;P11474;Q9Y2D1;Q2M3W8;Q01543;Q9UQR0;Q8NDF8;Q9BQA5;Q14103;Q15928;O75475;Q4LE39;Q1 6656;Q14593;P14859;O60828;P22670;A6NHJ4;P11831;O60481;P52747;Q9BWW4;Q15554;Q15906;Q8N 1L9;P10828;Q96QC0;Q9BSI4;Q8NA42;P78545;Q14588;Q86XF7;Q15697;P17861;O60765;Q8NBB4;Q089 45;Q15562;Q6ZNG1;O00470;P27695;Q9Y2A4;P15532;Q6U7Q0;P28347;P30876;Q9UMS5;P53567;Q1290 1;Q9UNY4;Q8TD23;Q07666;P25208;P0CB33;P52736;Q96MR9;P07199;Q15937;Q96SZ4;Q9UKN5;Q01831 ;Q86YC2;Q2NKK3;Q9UHX1;Q01201;Q01658;O75444;Q9H7R5;Q53T94;Q9H116;P17275;Q9Y5N6;Q9Y4A8; Q00403;Q6ZYL4;Q7L2R6;P82094;Q13901;Q5EE01;Q8TE85;O75362;O75446;Q06546;P0C1Z6;Q6NUN9;O 60563;Q9Y252;P43268;Q9P2R6;Q8WYP5;P23769;P61244;Q9UKL0;Q9UID6;Q9Y2G7;P59923;Q96T58;P4 1218;Q9BX26;P19419;P41212;P26651;Q12905;Q14241;Q6P9A1;P18847;Q01860;Q9UBD5;P28698;Q8N 782;Q9BQ15;Q9H7R0;P38935;Q14839;Q9UBD0;Q03933;Q9HC44;P48380;Q92945;P62633;Q33E94;Q9HB T7;O15015;P35548;Q96C28;P11161;Q12837;Q15561;Q6ZQV5;Q53HV7;P15172;Q96ND8;P17096;Q1532 7;Q9Y606;P56524;Q96PU4;Q9UK11;O43918;P17036;O14709;Q08050;Q9H9Z2;O43186;P18146;P19484 ;P78344;P0C7T5;Q15047;O60675;O95625;P06746;P29084;O95619;Q96RK0;Q16520;Q6ECI4;Q6IA86; Q86VE0;Q9Y2N7;P20265;P33076;Q9UH92;Q92922;O15226;P19388;Q3MIS6;Q9Y603;O94776;B2CW77;O 75925;Q5VZL5;Q9BXS6;Q9HAH1;P10244;P61218;Q9Y2V2;P17019;P35638;P50750;P15822;Q53EQ6;P3 1249;A8MT65;Q6TSB3;O00287;Q9Y250;Q02080;Q9ULX9;Q15910;Q96IT1;Q9BTP7;P78347;Q92988;O43 167;Q12906;Q99543;Q9H074;Q5SXM2;Q15544;P49005;O95159;Q9UFW8;Q8TAF7;P19387;O00716;P566 93;Q9H040;Q7RTU5;Q00978;Q8WV38;P20226;Q9BT49;P15336;P04198;Q8N2W9;Q9UL58;Q9UBB5;Q9275 4;Q9NZI7;P15927;Q15560;Q9BRR0;P10242;Q16666;O94983;Q15796;Q01105;Q08AN1;Q96N95;Q9NQ87 ;P0CH99;Q8NHY6;Q03936;Q13148;P15923;Q6ZMV8;P18124;Q96AP0;P15408;Q9HCG8;Q13398;Q53GI3; Q86W11;Q8N7Q3;Q9NYF8;Q14585;Q7Z3K6;Q14209;Q13952;Q9ULJ3;Q9BYE7;O43365;Q99856;O00570;Q 05195;Q16594;P26358;Q6S96;Q8NA31;P13056;P01106;Q92750;P39880;Q8WVJ9;A9UHW6;A6H8Y1;P5 3805;Q9Y618;O14497;O75290;O95402;Q07687;O14503;O75132;Q9Y2Q1;P17040;P31269;O75376;Q01 826;Q4G112;Q9HAZ2;P27540;P55347;O75586;Q7RTV3;Q8N5A5;Q99459;Q8N2Z9;Q02556;P12757;Q9Y2 M0;Q03468;Q9ULD5;P35711;P41162;O96004;Q96NI8;Q13568;P17098;Q96MN9;Q13485;Q9UHK0;A8MUZ 8;Q60870;O00255;P09629;Q9BVC3;Q8WTR7;Q9NP71;Q92499;P24278;Q14186;Q86XN6;Q10586;P15036 ;Q5TEC3;Q15365;Q00839;Q8IYI8;Q15853;Q9H9Q4;Q8N5U6;Q9BQ70;P49116;Q9NWS1;Q12857;Q9UKL3; Q9HAW4;P46100;P54274;Q9HCL3;Q92541;Q6ZVD7;O14770;Q9UHI6;P25791;Q5VIY5;P57721;O75478;Q 15631;Q8N7U7;Q86US8;Q9BQGO;Q9NY43;Q9ULV5;P28324;Q12986;Q8N108;Q9Y692;Q9Y253;Q8N344;Q9 2670;Q9H5J8;Q15326;O75618;Q8TA94;Q9NQX1;Q9NZV7;P32519;O14948;Q14653;Q9UPW6;Q06455;Q01 664;Q7Z6K1;O00411;O75683;O95983;P54845;P23193;Q05481;Q9UNY5;P52746;Q8N4W9;Q9P0L1;Q9BU Y5;O14519;Q8N228;P50221;Q32M78;Q13469;Q96N22;Q9Y2T7;O15350;P52742;Q16254;Q9UL49;Q8N7M 2;Q99684;Q8N693;Q9BYN7;Q8N3J9;Q9HCG1;Q01892;Q86U86;O14862;P25205;P48378;Q9H8G1;Q6ZN17 ;Q96RY5;Q9H963;Q9Y5Q3;O95780;P49848;Q15424;Q68CP9;Q8NDQ6;P35712;O95831;Q9UBB9;Q6MZP7; Q9ULX6;Q9Y2D9;P86452;Q9H1D9;P55771;Q96E29;Q9H9D4;Q96NY9;Q04637;Q9UIS9;P51504;P52744;Q 9HCK8;Q9UPN9;Q9UN79;O15370;Q13765;P24928;Q8NAP3;Q86WV5;Q9UHF7;Q6PG37;Q96ST2;P27797;Q1 5723;P51531;Q9Y535;Q14934;Q15573;Q8IYX0;Q9UKT9;P35269;P11473;Q99594;Q9Y6X8;O75929;Q9U LW3;Q6IV72;Q8N587;Q8N895;Q96IR2;P48382;P53999;P19474;Q8WVX8;P35251;P52655;Q15306;Q165 31;O15405;P17947;Q9UIF9;Q9UKD1;Q8TBE0;P11308;Q16514;Q96BT3;P82970;Q8TAQ2;O14628;Q1415

1;P67809;Q8IX15;Q8WUY8;Q9BR84;Q8NB42;Q8IYB9;Q99551;Q9Y5L5;Q9HAU5;Q6PJG2;Q3ZCT1;Q96BD5  
;P23511;P55197;P78317;P18848;O75360;O43711;Q9UMQ3;A6NKF2;O14737;Q9UMS4;Q8IYB3;Q01094;  
Q6ZN79;O14978;P28370;P62841;Q96AH0;P08651;P61978;P14921;P36402;Q9Y2L8;P06400;Q07352;O  
43542;A8MWA4;Q8N9Z0;O14593;Q9BSG1;Q9NWB7;Q9Y5Q8;Q6IQ32;Q15935;Q96AV8;Q03112;Q02078;Q1  
3426;Q9NP66;P52743;Q8N988;A8MUV8;A8MVS1;P17028;P27694;P14316;P50549;O14896;Q06330;Q15  
233;Q9UIF8;Q8Y9Y6;Q3C1V8;Q9UQ80;P52594;Q9NZI6;O95163;O15379;Q9UK10;Q06689;Q68CJ9;Q6ZM  
S7;Q8NF99;Q8TEK3;P01100;A8K8V0;P17010;O00268;Q02447;Q9UNN4;O15525;Q95602;Q9Y222;Q6B0B  
8;Q9Y534;O43310;Q86YE8;O94952;Q96BR6;Q9UHN1;Q5HY98;O60885;Q9Y2X9;P15621;Q9H9T3;Q6ZV50  
;Q49AA0;Q13342;Q9NZI5;P0C7V5;Q13330;Q96B01;Q9BXG8;Q8NCD3;P12980;P49711;Q96LW9;Q9BZK7;  
Q96H40;Q00577;Q5C9Z4;O00712;Q96N20;Q92793;Q96LI6;P28702;P15884;Q9UKW6;Q9UI36;Q16526;Q  
8TF47;P18754;P16383;Q96PQ6;Q15699;O95243;Q6P9G9;Q13127;P31314;Q9UKN8;Q32MZ4;Q3MX62;Q9  
Y2P7;Q9UDV6;Q8TF39;P31276;Q05516;P35637;Q15466;P19838;Q96AY2;Q03060;Q6ZN06;Q96GC6;P10  
074;Q8NFD5;Q12888;Q13129;Q09FC8;Q8NFC6;P56270;P35789;O15266;Q00653;O60304;Q96N38;P162  
20;Q15361;P17022;P54278;Q969W8;Q9BXP5;Q49A33;Q9UKI9;Q9Y473;Q8TB69;Q96LW1;P13010;Q0392  
3;P41970;Q8WVM0;Q15329;P81877;O95125;P56282;P22415;Q86WP2;Q92985;Q0VG06;P84022;Q86V71  
;Q6NVH7;Q8N3X6;P49790;Q99816;Q96DN6;P15407;Q16621;Q96S55;P23760;O43309;P62875;Q02833;  
Q12972;Q99583;O00479;O75534;Q8N3S3;Q8N720;P17676;P37275;Q16236;Q13360;O60869;Q96JN0;Q  
8WTZ3;A6NK53;Q92466;Q2M1K9;O94842;O43823;Q9UK13;P10914;Q14181;Q96NG5;Q96FV9;P17544;Q2  
KHR2;Q03188;Q7Z3K3;Q99081;Q9UII5;Q04837;Q9H160;Q6ZMY9;Q9NTI5;P55895;P17535;Q9BX82;Q14  
188;B4DX44;Q8N859;P29372;Q9GZX5;Q6P0N0;Q86V15;Q99708;Q5FWF6;P49910;Q96N77;P42167;Q925  
47;Q12873;Q96EK4;Q96AE4;P32243;Q8N0Y2;Q63HK3;Q8WYN3;Q14814;Q03111;Q0P120;Q8WXB4;Q9NS3  
7;Q8WTV1;O75461;Q9NVV9;Q12968;Q8NE65;P19532;Q6NT76;Q14872;Q68EA5;Q7Z5D8;P18583;Q15776  
;A0AVK6;Q9HD15;Q8HWS3;O75437;Q9BYK8;O14802;Q9Y462;Q02930;P10073;Q5JVG8;P62508;O43829;  
Q9H171;Q9BTC8;Q8NEP9;P22392;Q14978;O96006;Q9P2K3;Q08AG5;P50222;Q9P0W2;Q8IYW8;Q8TZ40;O  
95644;Q9BQY4;Q15651;O95201;Q76KX8;Q9Y2Y9;Q06609;Q8N726;P51826;P09874;Q8N823;Q8N972;P3  
5227;O75346;Q6VUC0;P20749;A6NP11;Q9H8Y1;Q4VC44;Q8N7K0;Q6P280;B1APH4;O60535;Q8TF32;P18  
846;Q9H503;Q86TG7;Q9Y6R6;Q04864;Q15072;A4GXA9;O00321;P18850;Q5H9I0;O75531;Q9UKK3;Q9NY  
B0;Q8IZX4;P58340;P52435;Q3KP31;O14771;P10243;Q9BUG6;Q9H668;P53803;Q15543;Q9HBE1;P5274  
1;Q9UC07;Q13761;P05114;Q16534;Q03938;Q9NPG3;Q7RTV0;P08047}

Pathogen[ P0C206] interacts with 1640 human  
partners: {Q9UID6;P27695;Q02386;Q8HWS3;Q8N9K5;Q8TE85;Q9NUA8;O43829;Q8N720;O43542;P0673  
3;O00488;P28698;Q6NUN9;A9UHW6;Q15072;Q6PJG2;Q9Y253;Q15723;O43502;Q13887;Q02833;P84022  
;Q3T8J9;Q9BWH6;Q9NQX1;Q3KNS6;Q86W11;Q9Y2X9;Q96JL9;P53567;A8K8V0;Q07687;P10588;Q9UK12;  
Q75683;Q6P9A3;Q8NG57;Q49AG3;P0CJ87;B1APH4;Q969F1;Q53T94;P67809;Q9NQ87;Q14188;Q86V15;Q  
969W8;Q9UJV8;Q9UMS4;Q9H4L7;Q8IX15;O14628;P10914;P54278;Q8WYP5;P08048;Q9NS56;Q9BZE0;P7  
8424;Q9H074;Q9H5H4;Q9P0U4;Q16649;P58340;O43309;Q9H8Y1;P62875;Q03060;Q5XG87;O95201;Q8T  
C21;Q9Y3M9;Q9UN30;A6NDR6;Q8N988;Q96SE7;P0CB33;Q14587;P53805;Q96JC4;Q2NKJ3;Q7Z353;Q152  
70;Q9BTP6;Q05195;P16383;Q9HCK8;Q15329;O60481;Q9Y2M0;P28715;Q14103;P13010;Q00444;Q96BV  
0;P0CJ90;Q9NQV6;Q9Y2D1;Q63HK3;Q7Z3I7;Q9UHL9;Q96NI8;Q15466;Q9UJN7;Q96G23;Q96N22;A8MXY4  
;Q6AY2;Q9BUY5;Q96RY5;Q8N9N5;Q13568;Q96MM3;P35398;P23193;Q17RS7;O94842;Q96RK0;Q15365;  
Q14588;Q9UHN1;P18124;Q7Z398;Q06546;P49790;Q96ST3;Q03924;O43711;Q14739;Q9BUG6;P17026;Q  
8NA31;Q96S65;P31269;P31314;Q96IR2;Q7RTU3;Q16514;Q9H790;Q9GZM3;Q6IV72;P55265;P38935;Q5  
JNZ3;P06401;Q5VZL5;Q03701;Q06455;Q5T5D7;Q9Y6K1;O14867;Q8N883;Q96CS4;P27797;Q7Z3K6;O60  
393;Q01538;Q06330;Q13469;Q9UMS5;Q8TD26;Q9NP71;P49959;P40425;Q9NYT6;Q9UH92;Q15543;Q9Y6  
Q3;Q8N3X6;Q9NRF9;Q9UJQ4;Q9HAZ2;Q9BQ15;Q12905;Q8N9F8;Q13127;Q9NZI5;Q95780;P13682;P4984  
8;Q9UPN9;Q9Y5Q3;Q8IYN0;P14921;Q05481;Q9UQ84;Q15911;Q8N228;Q9NY43;Q96AP0;Q3SY56;Q0VGE8  
;P51532;P26651;Q8IZH2;Q06416;P35251;Q6PF04;Q8NKN2;Q9Y4A8;Q08AG5;Q9NR55;B4DU55;Q6NX49;  
Q9UC06;P36954;O75123;Q02078;Q147U1;Q14586;O15266;Q99708;Q96PE6;A6NNA5;Q13263;Q8N726;Q  
15361;Q9UII5;P50750;Q5TGS1;P52741;O95602;Q9Y2N7;Q9H4I2;P15407;P78364;P20226;P12525;P1  
1161;Q8IYX0;Q9UBB5;O43365;P17031;Q09161;Q86VK4;Q04743;Q15544;P05114;P18583;A2RRD8;P16  
220;Q9NW07;P17275;Q9Y5R6;O14948;P09067;Q9UN79;P10074;Q9NR33;O14737;Q9UBT6;Q9UK13;Q9BT  
P7;O43422;P35869;O14862;P17544;O75030;Q96DT7;Q9UGU0;P0C7X5;O75925;Q8WUA4;P09874;Q1574  
4;Q86YC2;Q9UDV7;P22392;P25490;Q8IY51;O75290;P15622;Q9Y5L5;Q8N9Z0;Q9NSD4;Q02446;Q86UP8  
;Q8N8Z8;P08651;Q9UNA4;O75444;Q9HBE1;Q9UJL9;P18754;P18850;Q14966;P49910;Q9UNY4;Q9P243;  
Q92664;Q6ZSB9;Q8N7R0;Q96N95;Q8TB69;Q9BT49;O43812;Q49AA0;P41212;Q9H9T3;Q9NSC2;Q96127;P  
48382;P25205;P52701;Q9UC07;Q05066;Q9NR11;Q9Y2Y9;Q15697;Q5CZA5;P51587;P78414;Q15233;Q8  
IYB3;Q96AV8;Q01860;Q7Z7K2;Q9Y4Z2;P51531;P41182;P17024;Q05516;Q6V9R5;P52743;P54821;Q08  
211;Q86WV5;P49639;Q15554;Q9H7R0;Q9BS31;O75717;Q99583;P05204;P14317;P62380;Q9UHK0;Q96K  
75;Q9UQR0;Q9NQZ8;Q15327;Q9NR83;Q7L3S4;Q7Z5Q5;Q9NXT0;Q9UKL3;Q99598;Q6XD76;O14529;O9598  
3;Q00613;O00470;Q9UKL0;Q9UBX2;O76075;A6H8Y1;Q02548;P52737;O95232;O75469;Q6ZN32;P59923  
;Q8WXB4;Q9UK33;Q8IYI8;Q9Y2V2;Q9P2F9;P29374;Q9Y2Q1;P52655;Q96QR8;Q8IYD8;O00255;Q9UL58;  
Q9Y2D9;Q9BU19;Q8WTR7;Q9H2H0;P61978;Q03933;Q9UMQ3;P17019;Q5VIY5;P19388;Q6ZRF7;O60870;Q  
9NPA5;P61218;P05412;O95600;Q9P2D1;Q5T1R4;Q8IYH5;Q8IYF1;Q8WW38;P46100;Q8N8E2;Q9H5L6;O4  
3670;A6NHJ4;Q8N2W9;Q86XF7;O94892;Q9H4T2;O00268;P78411;Q86T29;Q9C0J9;Q9NM08;P19419;P50  
221;Q9UM63;P80303;Q6ZS27;Q9Y2P0;Q13951;Q9UL49;Q6ZVD7;Q96SK3;Q8WYK2;Q96MX3;A6NP11;Q3MI  
S6;Q9UL59;Q6IA86;P10242;Q8N1G0;O75764;Q8NI51;Q9H307;Q9Y462;P14651;Q92988;Q8N196;Q1634  
2;O15499;Q6ZMY9;P10073;Q03468;Q68EA5;P23409;Q96JF6;Q3SY52;Q9HCX3;A6NFD8;Q8N680;O75586  
;Q9UBC0;O60828;Q16666;P15336;P19338;Q9HC44;P12980;Q86UD4;Q6ECI4;Q53EQ6;P0CJ86;Q9UJW8;  
P26358;Q12901;Q969J2;P06746;P52738;Q8N7G0;Q9UIH9;Q9UFW8;Q92541;Q15572;Q15631;P55055;P  
17027;P54098;P51508;Q92670;Q8N7M2;O60765;Q6ZRS2;Q9P215;Q5SXM1;O75618;P43268;Q9UBD5;Q9  
HCG1;O75467;Q9BS34;Q96C00;Q92922;Q9BUI4;Q02878;O60318;Q15306;P15621;O75626;Q9NS91;A6N  
LF2;Q9P2K3;Q8N7K0;Q13342;Q9ULJ3;P51522;P17535;Q8NOY2;Q8TAF7;Q14186;P13056;Q16531;Q9BS  
I4;P17023;Q9P267;Q96KM6;P49715;Q03936;O94776;Q9ULL5;Q9UBZ4;P31268;P36956;Q13398;P1748  
3;P10072;Q9HCS4;Q9H503;O15164;Q9H668;P19484;O94952;Q7RTV3;Q14591;Q96T92;P12524;Q99816  
;P41970;Q86VE0;O75437;Q12968;P56693;Q14590;P18846;P48380;P49005;P0CJ89;Q68DY1;O14770;  
P55771;Q2VY69;O15525;P54845;Q9Y6J9;Q8NE65;Q07666;Q6ZN06;Q9UNN4;O00716;Q13330;P15976;Q

673

01201;A6NNF4;Q86UE3;P0C7T5;P49116;Q9ULX6;P41218;Q5EBM4;Q9HB58;Q9HD15;O14686;P22736;Q15910;Q8WY36;Q86U86;P29084;A8MQ14;Q9NZI7;P19532;Q10587;Q8N5U6;Q96KG9;P78317;Q8WVM0;P81877;Q15699;O00321;Q15796;A8MUZ8;Q9UBB9;O95238;Q8TAQ2;Q15326;Q5TYW1;Q96E14;Q9Y603;Q96H40;Q9BX26;Q8IZU3;Q9Y2G7;Q96IS3;Q9BRH9;Q9BQA5;Q86TG7;Q3MJ62;Q8NA92;Q5BKZ1;Q0VGO6;P33076;Q15226;Q9NX65;Q8WVJ9;Q9H160;Q14241;O00482;Q8WTV3;O95125;Q96HZ4;Q9Y6X8;Q8N3J9;P52740;Q14781;Q9P2Y4;Q6P2D0;Q8IZX4;Q14938;Q9UHX1;Q16254;Q96K62;Q96E29;O60284;Q99551;Q9Y5Q9;Q76KX8;Q86TJ5;P40424;B4DXR9;P13984;Q969G2;A4GXAN;Q66K74;Q9Y535;P0CJ85;Q9Y5Q8;O15405;P11308;Q9P2R6;Q7Z340;Q96NM4;Q9UGP5;P57721;Q9BWM5;P10075;Q9UJU3;Q53HV7;Q9NVI1;Q03111;Q96SQ5;P18146;P07992;P62633;Q9NZL3;Q96MA1;O75360;Q8NEA6;Q8NEK5;Q6VUC0;O75475;O75534;P17025;Q96004;Q8NJ2I;P19447;Q9BYE0;Q9HBT7;Q92793;Q3KQV3;Q5JVG2;Q16587;Q7Z6R9;P14653;P17861;Q2KHR2;A6NJL1;P10589;Q9BT81;Q92754;Q96730;Q9BZE3;A8MTY0;Q32M78;P0CH99;Q6NSZ9;Q9BWX5;O75346;O95163;Q63HK5;Q12857;Q9NPC7;Q6P280;Q8TZC7;Q08999;Q9H5J8;Q8N393;Q8N895;Q96N58;P32519;O14519;Q6P1L6;P17022;Q9BSG1;Q9Y5B6;Q6ZMW2;Q6ZN17;O60248;Q15853;P17029;Q14839;Q9HBT8;O43918;Q6ZMV8;Q6ZN57;P23246;P57071;Q02556;Q12837;P14652;O60304;Q03989;Q9HCZ1;O14593;Q9UK11;Q96JB3;Q05215;O00570;Q5SXM2;Q9BYK8;A8MZ59;Q9GZN2;Q8WTV1;P23511;Q5EE01;P54274;Q15916;Q5H9K5;Q9NPG3;Q32MZ4;Q8IZ40;Q1Z40;P54277;Q8NDW4;Q9NWS9;O75531;O00327;O14646;Q9NQ03;Q9BYV9;Q9H9Z2;Q9BYE7;P43351;Q96LX8;Q9UIE0;Q92610;Q13952;O95718;P78337;O14497;Q9H609;P05423;P0C7V5;Q9P2J8;P53803;Q96N20;Q6ZNG2;P17021;O43248;O60682;Q9BUZ4;P49640;Q8N8B7;Q14202;Q14209;Q15651;P41162;O43345;P0C1Z6;Q86TJ2;Q92750;Q8N9F9;Q8N823;Q5VZB9;Q02080;P78347;Q49A33;Q82970;Q96NY9;Q12888;Q16656;P19838;Q7Z591;Q86US8;Q6U7Q0;Q99743;Q9H4S2;Q16633;O43298;P49917;P36508;Q16526;Q8IXT2;Q96P06;Q99581;Q14919;Q9H9Q4;Q99612;P35269;O15516;Q9NYF8;A6NK53;Q6AW86;P10828;P22415;Q96FV9;Q6ZT77;P62508;P10244;Q6P1N0;P19387;P35711;Q8TA94;Q9ULV5;P40426;P04053;Q7Z333;Q96N77;Q9NSJ1;A6NKF2;O75446;Q03112;P53999;P09086;O00712;Q9UGN5;O43361;Q8TF20;Q9P0W2;Q99081;P17035;O95402;Q9BQG0;Q68G74;Q9UIS9;P49450;Q9HA82;P17010;Q6XYB7;O75564;P16989;A6NFQ7;Q8N344;Q8NAF0;Q15560;P42166;Q86UQ0;Q7L9B9;Q8NHY6;P05049;Q9UKK3;Q9UNY5;O95619;Q9Y543;Q9ULW3;Q499Z4;P32243;Q9UNK5;P17676;P78413;Q86WP2;O94993;Q15973;P12757;Q8NC26;O95831;Q9ULG1;O43296;Q14181;Q9BXX8;Q86WZ6;A6NJ46;Q8TF47;O14813;Q8IZ20;Q9C0F3;Q05BW5;Q9NR48;O15379;Q9BXX3;P52742;P08047;Q9UEG4;Q9NP66;P17482;P24278;A6NFI3;Q9BWW4;Q8NCD3;Q9Y5J3;Q96JN0;P13349;Q9Y2S0;Q9NZV7;Q8N972;Q9UK10;Q12986;Q8NA88;Q13426;Q9UKN8;A6NJG6;Q96MN9;Q9P2K5;Q96BR9;Q8WXF8;Q8N141;Q9UHF7;Q7RTU5;Q9HAP2;Q15906;Q9H582;Q9H171;Q96K71;Q14593;Q9H175;Q92985;Q9NWB7;Q7RTU4;Q5TEC3;Q6RFH8;Q6IQ32;O60885;Q01658;Q08ER8;Q99543;P17032;P35680;Q7RTU0;Q96T88;O15315;P49711;P35548;Q8TD23;Q9HC78;P01100;Q8N7U7;Q9H2C1;Q04206;Q4LE39;P16415;P86452;O75505;Q9Y5R5;Q5HY98;Q9UPW6;Q92889;Q9Y2L8;Q8TAT5;P17017;Q9UIF8;Q9UKI9;Q01831;P0CJ88;O60535;Q9P0L1;P52744;P15923;Q9H211;Q8TF50;Q01094;Q3ZCT1;Q9UIF9;Q96BT3;Q9UQR1;P35637;Q9H4Z2;Q6MZP7;Q8WUY8;O96028;Q7ZK3;A0AVK6;O95361;Q96CX3;P15884;Q9BR84;Q9Y692;O96006;Q9H963;P20823;O94916;O95416;P50539;P28347;Q8NDF8;P17020;P53539;Q96NL3;Q8NCA9;Q3SY89;Q9NS37;P17039;Q8TBC5;Q02447;Q8TF32;Q9Y5N6;Q9Y6X0;Q8N693;Q3C1V8;Q6ZSS3;P35789;P28324;Q03052;Q8N554;P04198;Q9H8N7;P17030;Q14582;Q96IT1;Q9HCL3;O14771;Q96ST2;Q8N7Q3;Q8IVC4;Q68DY9;P0CJ79;Q9RTV0;Q9Y4X4;A6NK75;P78545;Q6PIY2;P49916;Q13609;P17947;Q96HQ0;Q02930;Q13901;Q16534;Q8NH5;P17028;Q96S55;Q99608;Q96GC6;Q9NQ33;P51523;Q7L2R6;Q8NHW3;Q5C9Z4;A6NLW8;Q8N8J6;Q04864;Q8N1L9;O43167;Q4VC44;P58317;Q6P9G9;P55895;Q9Y222;Q8NBF1;Q6GQQ9;Q96NJ3;Q92614;O60281;Q6ZQV5;Q9BZK7;Q15562;O75376;Q96MU6;Q9BYN7;Q7Z3V5;Q9Y6R6;Q9GZX5;Q8N782;Q6ZNG1;Q9NP87;Q16533;P51826;Q92804;Q15424;Q9BQY4;Q86XU0;O60381;Q06732;Q6ZR52;O75478;Q96FI4;P15036;Q5MCW4;Q14872;O14896;Q6P0N0;Q5FWF6;P40763;P22670;Q15573;Q9UDV6;Q15937;Q6P9A1;P13485;Q9BZ11;Q8TAQ5;P25208;Q9UBZ9;Q9Y5A6;Q9H707;Q96B42;P61244;Q8IYW8;P0C7M4;Q8N5J4;Q13129;Q8TF45;P23760;Q9NTI5;P25791;Q9Y657;P52435;Q9BXP5;O15535;Q8TF39;Q9BSK1;Q8WYA1;Q5HYK9;Q8TBE0;Q9H116;Q2M1K9;P28370;O14709;Q13148;Q14527;Q96T58;P62841;O60869;Q9UJ41;Q15366;Q99459;Q99684;Q9ULD5;Q15542;Q8N8L2;Q92966;O75373;Q8N587;Q9HAU5;Q96N38;Q14934;Q9BY31;Q8N4W9;P17096;Q96MR9;Q33E94;O15370;A6NM28;Q9HCG8;Q13562;E9PGG2;Q14592;P23769;Q8IXM2;Q9H2G9;Q9NYB0;Q86V71;Q03923;Q9Y2P7;Q8TEK3;Q9Y606;P11831;Q9BWG4;Q08050;Q00978;Q0D2J5;Q59GR2;Q7Z7L9;O60315;Q8IZ26;Q16520;Q8NA42;Q969S2;Q13422;Q01664;Q9Y237;Q09FC8;Q8NDQ6;Q86W54;Q8N859;Q9NZI6;Q6NSW7;P51786;Q15928;Q9GZS1;P20749;O43823;P18847;Q8IX07;Q9BX82;Q86Y25;Q9UL36;Q4G112;Q96BR6;Q6S9J96;Q9BRR0;Q9UBL3;Q86WJ1;Q8IXK0;P70199;A6NDX5;Q8N3S3;P49716;P42226;Q7Z5D8;B2CW77;Q96C28;Q6ISB3;Q9BQW3;Q9UKW6;P78344;P35659;Q92900;Q9BW11;Q04837;Q96NJ6;P0C7X2;O75362;Q00653;Q6IQ21;Q9HCE3;P28702;Q99676;Q8NFC6;P37275;P35712;Q16236;Q4V348;Q9UKD1;P56282;P0CG31;P20265;P31271;O15350;Q9H7X3;P10243;Q16621;Q6PK81;Q13415;Q9UPG8;Q01826;Q6ZN11;P48378;Q99687;Q9NQX6;O43543;Q9NRZ9;Q5H9I0;Q96LW9;P0CG13;O00287;O14901;P27540;Q14863;Q8NB12;Q8NEM1;Q6ZN79;P17097;P15172;Q06609;P17040;Q3SXZ3;Q14151;P42704;Q969G3;O95625;P10412;Q9HBD4;Q96QC0;P8NDP4;Q2M3X9;P27694;P20585;Q9UKT9;Q5VTD9;P52747;Q9H9S0;Q53GI3;Q86U70;Q9H0M5;O43364;Q9C0G0;Q5EBL2;Q14814;P31274;P11388;Q14765;Q9HAJ7;Q9UBR4;P51814;O60663;P11474;Q8NFD5;Q9NUX5;P51815;P21506;A8MT65;Q9UH16;P15927;Q96H86;P01106;P24928;Q8N2Z9;Q6ZYL4;Q9P2Z0;Q96AE4;Q04637;Q07352;Q8TBZ8;Q9UQ80;Q15047;P52746;Q96LI6;Q9ULM2;Q3ZCX4;Q9UBC3;Q99594;O75398;P0CG24;Q92945;Q12972;B2RXF5;P01011;Q9NZC4;Q8NBB4;Q14584;Q92466;Q6DD87;Q99814;P39880;Q8IUM7;Q96SC8;Q14585;Q96K83;P09629;Q9P0T4;Q7Z6Z7;O15015;O95644;Q9BXS6;Q6B0B8;P11387;Q9Y483;B2RD01;Q14549;Q14865;Q8N184;Q9H2P0;P56524;P42167;Q9BYX4;Q14526;Q9NV72;Q96GB5;P28356;Q7Z6K1;Q9UFB7;Q96C10;P28069;Q6NVH7;P14373;A9YTQ3;Q6AZW8;Q13106;Q9Y473;Q6NX45;P39748;Q8NCP5;Q6ZNH5;Q5T619;Q9ZV8;Q96SZ4;Q8TF68;Q08AN1;Q68XN6;Q9VI24;Q02577;P20719;Q96B01;Q8TCN5;P08151;Q13118;Q8TAU0;Q15929;Q49AN0;Q5JV82;Q6ZN55;Q95VV52;Q9NTW7;Q6ZNG0;P17038;Q00403;Q9BYM8;A6NN14;O60675;O14802;P15822;Q8NB42;Q15776;Q66K89;O43310;Q96PT4;Q8NCK3;Q92547;Q68DI1;Q6PG37;Q00059;Q13105;P41161;A8K0S8;Q9Y252;P31249;P42244;Q9H4W6;Q9Y2Y1;P52736;Q9H040;A8MVS1;P50548;Q6VB84;Q9UBX0;Q96MW7;Q9H9Y6;Q92499;O60563;O43593;Q96K58;O00479;B4DX44;Q96RE9;P12956;P55197;Q494X3;Q9HAW4;Q9HAK2;Q96PM9;Q14119;P17014;Q9NU63;Q00839;Q9Y2T7;Q92618;Q8NEP9;Q96ME7;O95159;Q9UI36;Q8TAU3;Q9Y6Y1;O94983;Q8IYB9;Q6ZNA1;Q6NT76;Q6NT04;O75461;Q15935;Q7L945;Q01105;P09016;Q01892;P78412;Q15788;Q08945;O75820;Q96SR6;Q8TDD2;Q9H1D9;Q13765;P16455;Q7Z2E3;Q2M218;P36402;Q14929;Q8TD17;

Q14566;P18848;Q0VG99;Q9NRM2;Q96EK4;Q6P4R8;Q8IUE0;Q8N5A5;O60422;Q96ND8;Q9UBD0;Q7Z401;Q9UBG7;Q96IU2;Q96LW1;O60806;O43763;P29372;Q8N5Y2;Q9Y618;Q6EJK0;O95789;Q8WY91;Q13472;P14316;O95243;Q01543;Q9Y250;Q2M1V0;P15408;Q12906;Q9BVC3;Q99607;P11473;Q9Y534;P17480;Q96DN6;Q8NAP3;Q13761;Q9P255;Q8TAW3;Q12772;Q12789;P23025;Q8WYN3;P47974;Q96RJ6;Q9Y2A4;P52630;O14978;Q9H8G1;Q6TAR4;A8MWA4;Q6ZN08;Q12800;Q9Y3C5;Q9BX63;Q8IVP9;P08235;P0CJ78;O43316;Q8NG50;Q4W5G0;A8MUV8;P51504;Q99856;P58304;Q9BQ70;P35638;Q9NP62;Q8N108;Q3KP31;Q6Z337;Q96EG3;Q15561;Q5SVQ8;P17098;P82094;O15160;Q96PU4;Q92698;A8MT69;P33992;Q9UJW7;P31260;Q03188;Q5T0B9;Q9H1A7;Q16600;P17041;Q9HCK0;Q96NG5;Q9NVV9;Q9Y2S7;Q96JM2;Q12873;P10827;Q9HBZ2;O14746;Q96NG8;P21675;Q96BD5;P14859;P56177;Q8IUE1;Q96AH0;Q10586;O60264;Q9ULX9;Q68CJ9;P42677;Q14978;Q15583;Q9UKY1;P17036;Q68CP9;Q9BTC8;Q8TBZ5;P48443;Q8N1W2;Q01954;Q9Y2H8;P31276;Q9Y2K1;Q13360;P54253;P19474;O15060;P35227;O00411;Q16594;Q14653;Q2M3W8;Q86YE8;Q96PT3;Q3L8U1;Q9Y2Y4;Q9H7R5;P12004;P06400;Q9H9D4;Q8IXF0;Q6ZN19;Q8NDY6;Q00577;Q03938;P55347;Q9H2A3;Q8N8C0;O43830;Q9NWS1;P30876;P78549;O75132;Q9HAH1;Q6ZV50;Q9Y651;O95948;P50222;P56270}

674

Pathogen[ P03363] interacts with 1648 human

partners: {A2RRD8;Q8IZX4;Q86TJ5;Q49AA0;Q92886;Q16236;Q9NQX1;Q16587;P56179;Q5TGS1;Q96ST2;Q7RTS1;Q86VE0;O15370;Q92547;O75717;Q8IXM2;Q86XU0;Q8TAK6;Q15911;Q9Y5A6;Q9H160;Q9P0L1;Q14653;Q8NB42;Q14978;Q86U70;A8MQ14;Q9UNN4;Q9NR55;Q5VTD9;O75123;Q15699;P51858;Q9C0F3;P52630;O95619;P12956;Q9UBC0;Q8NHY6;Q5T0B9;P13682;Q6S9J6;O75820;Q969F1;Q3KNS6;Q9UFW8;O15266;Q99684;Q16342;P31273;O43812;Q03923;Q23MZ4;Q9BX63;Q15233;Q8IUM7;O00411;Q9NVI1;Q9Y535;Q6P9A3;Q9UKD1;Q8NCK3;Q06455;Q6ZMY9;P17535;P35789;O14901;O75373;Q9Y252;Q5SVQ2;Q6ZNI17;Q9GZN2;Q9H8N7;P18848;Q9UIW0;Q9ULW3;P08048;O75461;Q13105;A6NKF2;P35453;Q8IZA3;Q8NFW5;P0C7T5;P17027;P49716;P0CH99;Q3L8U1;Q9NSD4;Q03989;Q8N9F8;Q86V71;Q6IQ21;Q9BXP5;Q16649;Q8WUA4;Q14765;Q8N5U6;Q6P0N0;Q8N5Y2;Q99592;Q8N1G0;P10828;Q9H963;Q9UJQ4;Q15366;Q969J2;Q9Y4Z2;Q9Y5B6;Q8N988;Q4W5G0;Q07666;Q9UHF7;P29374;Q8N2I2;Q9UHL9;Q96LW1;P28698;Q8IZC7;Q92985;P42677;Q8NE65;P19338;Q96N22;Q9NQZ8;P62380;O95948;Q6DD87;Q59GR2;P19622;P23246;P29084;Q8TAQ5;Q96T58;P27694;Q8WTV1;Q92766;Q03924;Q6ZNA1;Q9UGN5;Q6ZYL4;Q9HAW4;P47902;Q96S65;P35711;Q9NZR4;Q96I24;Q96RJ6;Q14929;Q8NDY6;Q9UH92;P78415;Q7Z333;Q6XYB7;Q6PIY2;P0CJ87;Q9NQX6;P0CJ88;Q9BYU1;P09067;P12525;P55771;Q7Z340;Q14938;B4DU55;Q8N859;Q15466;O75360;Q9Y5J3;O14978;Q9Y6X0;Q6ZN06;Q86W11;Q8NA42;Q14865;Q9NZL3;P31274;Q9Y2D9;Q8NAP3;P17021;Q9GZM3;P17010;Q8IVP9;O43296;Q8NA92;O14529;Q04206;Q15853;O14771;Q99598;Q7Z591;O95780;O14896;P27540;Q66K74;Q86VK4;P49848;A6NK75;P17676;P52738;O75683;Q9NUA8;Q6NSZ9;Q5C9Z4;Q12901;O60481;P18146;Q5JUK2;Q13360;P49116;O00712;Q9ULG1;Q8NG50;P0CJ86;P19388;Q2VIQ3;Q6ECI4;Q9UBX2;Q12972;Q6P2D0;O75764;Q8NEK5;Q02386;Q13148;Q96JC4;O60315;Q02930;Q8NG57;P13984;O43310;Q9P2J8;Q86UP3;Q9UJV8;Q9H175;Q6NT04;P35227;Q7Z353;O60563;Q96T92;P0CG31;Q99676;Q3ZCT1;P29200;Q6V9R5;Q99626;Q6GQQ9;Q14582;P35567;P48382;Q9C0A1;Q14526;A6NHG4;Q9UMS5;Q8N7R0;O60535;Q9UN79;Q9H9Y6;Q96MX3;Q9BYV9;P14373;Q13516;Q9UHI6;Q15554;Q14781;Q9H707;P56177;Q2KHR2;Q3C1V8;Q96NG8;Q9NVV9;P36402;Q9UC06;P78424;Q96SE7;Q9Y3C5;P12524;P0CB48;Q9BRR0;Q8IUE1;P78412;Q99543;P08151;Q7L3S4;P0CB47;Q96K62;P86452;P11387;P53539;Q99742;Q96JF6;Q14590;Q9Y2V2;Q9H4L7;Q86UE3;P17098;Q9BTP7;Q6IA86;Q08AN1;P31267;Q15928;Q14863;Q7Z398;O43365;Q68EA5;O15015;Q9UKN5;Q96SR6;P62633;Q9ULM2;Q02447;P08651;Q96ND8;Q8N3J9;Q9ULJ3;Q06546;Q15562;A8MTQ0;Q13952;P50539;O95232;Q6PG37;P58340;O75618;P30876;Q0VG99;A9UHW6;Q9Y2M0;O43167;Q6ZRS2;P13010;Q02556;Q03933;Q8WYP5;Q96EK4;O60422;Q9UKW6;Q96L16;P12757;P62508;P14651;Q15744;Q5EBL2;Q01831;Q96NJ6;P25205;Q03112;Q9UEG4;O60663;Q9NS37;Q96QC0;Q9HAH1;Q96RY5;P41218;Q8N7U7;Q9Y606;Q9BWW7;Q6NX49;P18847;Q99929;Q9Y2F0;Q9HD15;O75346;O60281;Q9HBT8;Q10586;Q9NRF9;Q6ZV50;O75132;O43763;P37275;Q06330;Q969W8;Q8TDD2;Q86US8;Q8TAQ2;Q8IYF1;P0CJ89;Q16531;Q7L9B9;Q9Y5R4;Q8NDW4;Q9Y4A8;P35637;P28356;Q6MZP7;P23760;P19387;Q13283;Q6ZRS2;Q9BU19;Q9NQ87;P42167;P09086;Q9H2P0;Q9NX65;P17947;Q7RTV3;Q8N720;O15379;Q01892;P78413;O95600;Q96LX8;P51532;Q99856;Q96AH0;P61218;Q16514;P17024;Q15929;P20719;Q6ZQV5;Q7RTS3;Q9BWG4;P28347;P31271;P06733;Q9P243;Q994X3;P82970;Q9H1D9;Q9BQG0;Q3SXZ3;Q9BZK7;Q9NYB0;Q8NHW3;Q9Y253;Q8N8B7;P04198;Q96MR9;P18850;Q9H2W2;Q8NCP5;Q5HYK9;Q5T1R4;Q9UL59;P25490;Q9Y5Q9;Q6EJK0;Q01826;P53805;Q8IYH5;O95201;Q96HZ4;Q9UKI9;Q9P215;O60765;Q5T5D7;Q7Z4V5;P17481;Q9Y6X8;Q8NDQ6;Q9HCL3;Q7RTV0;Q9UBL3;O14497;O75376;Q8TCN5;P29558;P57723;Q8N883;Q8N9N5;Q16520;Q53EQ6;Q01543;P42704;Q6PJG2;Q9Y462;Q15910;P15621;Q9NBB4;Q6P9A1;Q7Z6K1;O60902;Q96FI4;P17030;Q92889;Q9UC07;Q99607;Q8N8C0;Q9C0J9;Q13568;P35659;Q9Y657;Q08AG5;P78317;Q0D2J5;Q15776;Q16254;P11474;P16220;B2CW77;Q9Y2L8;Q96HQ0;Q9UHK0;P35251;Q96MU6;Q9Y2D1;P78414;Q68DI1;P23025;Q5JVG2;Q5SXM1;Q8N196;Q86WV5;Q9NPG3;Q9UDV7;A8MTY0;Q3KP31;Q9H307;P17031;Q13342;Q8N680;Q5JT82;O43316;Q8N8C2;Q13901;O95602;Q16621;P58304;Q99612;Q9P0U4;Q8N141;Q02080;Q86V15;Q8N2Z9;Q6ZN55;Q8N488;Q9NW07;Q66K89;Q8IVW6;Q4LE39;P24928;Q96QR8;Q15631;O75437;P19419;O94983;Q76KX8;O75475;Q9NQ33;Q96SC8;P14921;P35548;Q9HBZ2;Q8TEK3;Q9UPN9;O43422;O00268;Q9BVC3;Q9Y6K1;P50548;Q96IS3;Q8N9Z0;O14593;Q9BXS6;Q9Y467;Q9Y603;Q6NUN9;Q9UK11;P49005;Q3KQV3;Q8IXK0;Q96PQ6;Q15306;Q8N782;Q5TYW1;O14746;Q9Y2A4;Q8IYW8;P78411;Q96JN0;Q96GC6;Q9ULL5;Q6MNT76;Q9UM63;Q9GZS1;Q14181;P32243;Q9HCK0;Q9NPC7;Q9Y2K1;O14867;O14948;O60479;Q96EG3;Q6ZMV8;P36508;Q6BEB4;Q7Z3K6;O95231;O60381;Q9Y2H8;Q9BSI4;P51522;O43309;Q13765;Q14839;Q8N693;P16415;Q9HCL1;Q9HCS4;P43268;Q9NSJ1;Q9BX82;Q9UJW7;Q14588;P55347;P17028;O43248;Q8NEA6;E9PGG2;Q8IZ26;Q96N20;Q9Y2X9;P51826;P49639;Q5H9I0;Q9HC44;P59923;Q16695;P15927;Q96MM3;P17041;Q9NWS9;Q9Y5R6;P23497;P06400;Q9HAP2;Q15327;P48378;Q9HCX3;Q86YE8;Q96BV0;Q9BEG6;Q3SY89;Q96FV9;P17483;P01106;Q6ZNH5;Q9Y4X4;Q8N1L9;P0CG24;Q8NI51;Q9UQ80;Q96I27;O14717;Q96E29;Q14593;Q9H4S2;Q99743;P17019;A6H8Y1;Q7Z7K2;B4DXR9;A8K0S8;Q14807;O00409;Q12986;Q9H5H4;Q8WYK2;Q9UNY5;Q8NFC6;A6NDR6;P0CJ90;B1APH4;Q9UNY4;P35869;P17275;P42226;Q96AP0;P13349;P17509;P31249;P49711;Q9NTW7;Q7L2R6;O94900;P54098;Q8TBC5;P54845;Q9BYE0;Q9NZV7;Q9UK10;P61244;O00488;Q8NCA9;O00321;P07199;P33992;P46100;Q9UN30;P14653;P50221;P10588;Q13127;Q96PT4;P35269;Q9BZE3;Q9Y2Y9;P11473;Q16666;Q9UJ41;A6NNF4;P40425;Q6ZVD7;Q96BD5;Q9C010;Q99608;Q6ZN11;Q7Z6Z7;P0C7X5;P17029;O60264;Q12800;Q9NWB7;P25791;Q9H1A7;Q96BR6;Q9P2Z0;Q6P1L6;Q5BKZ1;A6NK53;Q6IV72;P51786;Q8TF45;P10072;P29372;Q03936;Q9NQ03;O43524;P15923;Q96RE9;Q6ZN19;P15336;O60885;Q15326;Q9UD57;Q1



3951;Q2M1K9;P17023;Q86T29;P20749;Q5EE01;Q00403;Q8NAF0;Q96DT7;Q13609;Q15937;O15499;Q15424;Q8TE85;O75446;P32519;P15822;Q07352;P04053;P0C7V5;Q8WY36;O43593;A8MUZ8;Q2MLV0;Q05066;Q8N228;Q8N7G0;Q2VY69;P62841;O94952;Q96JM2;Q99708;O43830;Q9BTC8;Q08050;Q96LW9;P13378;Q8LYB9;P20585;P0CJ85;P11831;Q8WYN3;O15226;Q8TF39;Q9BS31;Q13129;Q9HCK8;Q8N972;Q96MA1;Q14872;Q48N3S3;P56693;Q13426;P28702;Q9BPY8;Q8IYB3;Q9BYN7;P20264;P28069;Q96N58;Q195I36;Q9H4T2;Q9AN0;P14859;P28358;Q14119;Q5T94;Q6ZNG2;Q8N393;Q00444;P56915;Q12906;P18583;P52737;Q00653;Q15544;Q96AE4;P11308;Q96IR2;Q9UPG8;Q8N8Z8;A8MZ59;Q8TF20;Q03111;Q9ULD5;Q8IX15;O95238;P81877;Q13415;Q9GZZ0;O75030;Q96KN3;P08235;Q17RP2;P46063;Q92945;P51504;P17480;Q9Y250;Q9BQ15;P21506;Q6ZLN3;Q14241;P24278;Q9HBT7;Q14814;A6NJT0;Q9NZC4;P54278;P49450;Q6VB84;P78545;Q9P255;Q08999;Q86WP2;P05423;Q14549;P0CG13;P17039;Q8IXT2;Q6PF04;Q8TAF7;Q96H40;Q5VIY5;Q9UDV6;Q9UKK3;Q5JN33;Q9NZI6;Q86WZ6;Q7Z2E3;Q96C28;Q96E14;P17032;P17096;Q8NB12;O14979;P54274;Q8IZ20;Q9BXX1;Q96NM4;Q9H609;Q9UJU3;P14316;Q14527;P32242;P18846;Q01094;Q8WYA1;Q9UIF9;Q96JY0;Q3T8J9;Q9Y5R5;Q8NDF8;O75444;A6NDX5;Q9NXT0;P06746;P27797;P14652;O14709;O75505;Q6NXX5;Q9NP08;Q13472;Q8IY51;Q969G3;O00327;O43186;Q9H4Z2;Q9H668;Q9BWH6;P51814;O75534;Q9BSK1;Q9UIF8;O15525;P31260;P19474;P52736;A6NMT0;Q96ST3;Q9HBD4;O60318;O76075;P0C1Z6;Q7Z5Q5;Q5CZA5;Q8N7M2;Q06416;Q9Y6Q3;Q7RTU0;P17022;O60870;Q6B0B8;Q14966;Q8N5A5;P17036;Q9BW11;Q63HK3;P17861;Q4G112;Q14919;Q9H211;Q9Y3M9;Q8IYD8;Q86UP8;O96006;P54277;Q9Y2N7;Q9BQA5;P52744;Q96KG9;Q96SK3;Q8IZ40;Q2M218;O75586;P10412;P20265;Q9H040;Q9HAU5;Q15796;O95983;Q15723;P31268;Q6XD76;Q15270;Q9UKL3;Q8N108;P57721;P84022;A0AVK6;Q01167;Q96C00;P31314;Q8N5J4;Q7Z6R9;Q6U7Q0;Q96PE6;Q16656;P41161;Q8N895;O95163;Q68CJ9;Q5T619;O94916;Q9NZI7;Q9BRH9;Q9HCC6;Q8IYV4;Q9UKY1;O75564;P10244;Q8TF68;Q9NZI5;Q6ZM57;O96004;Q9H2Z4;P26358;Q9Y618;Q8IXF0;Q92499;Q00056;Q96AY2;Q9H9Z2;Q96N77;P35638;Q86U86;Q15542;P10914;Q6ZNG0;Q86XN6;Q9Y2G7;Q6ZN08;P54253;Q9UHX1;Q92826;Q96IT1;Q92618;O00479;Q6ISB3;Q9BYK8;Q03188;P55265;O00470;Q05925;Q15583;Q9H9Q4;Q9NYF8;Q06732;P35398;Q9BQW3;Q9H0M5;O75925;Q14209;O95243;Q5XKR4;Q8NCD3;Q00059;Q92664;Q8NEP9;P17025;Q7Z3I7;P50549;Q92966;Q33E94;Q9H582;Q9UK13;Q14592;P15407;Q96CX3;P51508;P22415;Q8N184;Q9H503;O00287;A6NFQ7;P54821;Q96NK8;Q6ZSB9;Q8N7K0;A9YTQ3;P0CB33;Q9BUY5;Q9H7R0;Q14591;Q12905;Q86UQ0;P23759;Q14584;Q9BS34;Q8N8L2;Q9NP87;Q4G0Z9;Q92750;Q9P2K5;O43542;Q9NXX5;P49790;A8MUV8;Q9HB31;P19838;Q7Z3K3;Q99814;Q6NSW7;Q6ZMW2;O43345;Q6RFH8;Q96S55;Q96SZ4;Q02833;P09016;Q9Y692;P53999;Q92793;Q86Y25;P05114;Q16633;B4DX44;P57071;P82979;Q15365;Q15651;Q6ZNG1;Q01954;Q15697;P31276;Q16533;P14317;Q6ZM79;O95125;Q8N823;Q6ZSS3;Q8NC26;P50222;Q96E14;O60869;Q13469;Q15361;P21675;Q9NR48;Q14585;O14646;P33076;P52740;Q92988;Q14103;Q8IWI9;P51523;O96028;Q6PFF0;Q9BWX5;P23193;Q14587;Q01201;P56270;O14862;Q92466;Q9NPA5;P35712;Q9H2G9;O60393;Q96NG5;Q9UQR0;O60682;O43711;Q96BT3;Q9Y651;Q7RTU5;Q00978;Q9P2K3;P10242;P20226;Q16526;Q9H171;P49910;Q6AAZ8;Q3B8N5;P52655;P17014;Q96GE5;Q9Y2Y4;Q9Y237;Q7RTU4;O75362;Q12670;Q8WV0;Q9UL58;P43351;Q13485;Q15072;Q8N726;O95076;O95402;P10074;Q96RK0;Q92804;Q2NJK3;Q12968;Q05195;P26651;Q9ULV5;P17482;P52951;P49335;Q8TD23;O60806;Q9Y6R6;P23409;Q03468;Q9UJN7;P50750;P78367;Q08945;O00570;Q14186;P31269;Q6ZS27;Q63HK5;Q5HY98;P12980;Q04837;A8K8V0;P19484;Q9UQR1;Q99687;Q8IYN0;Q8TD26;Q92541;Q8TB69;Q9H8Y1;Q96JL9;Q9C056;Q9NYT6;O14737;P17020;Q14188;O75531;Q3MIS6;Q9Y483;Q9BR84;P15884;P41162;O75398;Q8TF47;Q9A842;O95644;A6NP11;Q3SY52;Q96T88;O43361;A6NLW8;Q9H7X3;Q9BSG1;Q9P267;Q9QFC8;Q9UK12;Q9BQY4;Q15973;Q9BYX4;Q9BZI1;Q96QS3;O94993;P61978;Q86XF7;Q8IUE0;P05412;Q96MN9;Q6IQ32;P17017;Q9NTI5;Q96K58;P40424;Q96AV8;Q96G23;Q9BT49;Q9H116;O60304;Q8TAU3;Q7Z401;Q9HCG8;Q04741;A2RU54;Q5H9K5;Q00613;Q13398;Q9UKT9;Q53GI3;O15405;Q5SXM2;O60675;O75771;Q86UD4;Q14934;Q12873;B2RXF5;Q9HAJ7;P28370;Q147U1;P0C7M4;Q9NR11;Q99581;P58317;Q04864;P19532;Q9NQC6;Q86DY9;Q02874;O14519;Q6P1N0;Q6AW86;Q9UKL0;Q8IYX0;Q5VZB9;Q96IU2;P47974;Q6P280;Q8NDP4;Q14739;Q6NVH7;Q7L945;Q12789;Q5EBM4;Q9UHN1;Q4VC44;Q9BWW4;O43918;Q96DN6;Q9UNA4;P09629;Q8TC21;A8MXY4;P55895;P16989;Q00839;Q15573;Q8N9K5;Q9Y543;P55197;P40426;Q96N95;P09874;P35452;Q13330;Q8WXB4;Q96SQ7;Q9NP71;O95343;Q02548;Q8IYA7;P52741;P41970;Q9NR33;Q8WTR7;Q9HCG1;Q9Y2Q1;Q8WW38;Q9Y534;Q499Z4;Q9BY31;Q9UMS4;Q8NFD5;Q96NJ3;O95416;O75478;P16383;Q68DY9;Q02874;P52743;Q8TAW3;Q9UBG7;O43364;Q03828;P08047;P52594;O60248;Q8WZT3;Q9UMQ3;Q5TEC3;A8MVS1;Q96PT3;Q99081;Q9HC78;Q9NY43;Q8TAU0;P82094;Q2M3X9;P15622;Q0VGO6;A4GXA9;Q9UKN8;Q15560;P78344;Q9BUZ4;Q9BTP6;P48380;Q96KR1;O75626;O00716;Q03701;P0C7X2;Q13761;P52742;Q6ZRF7;Q9Y6Y1;Q9H9D4;Q2M3W8;Q5MCW4;Q15935;Q96PU4;Q96NY9;A6NFI3;O43298;Q01105;Q9BWM5;O43829;Q8N1W2;Q01658;Q9UBD5;O60284;P51531;O95475;Q8N8J6;Q8N8J7;P18754;Q92922;Q9NQV6;Q86WJ1;Q9NWS1;Q15543;Q9UL36;P53803;P17544;Q9P2R6;P52435;Q9UBZ9;Q00577;Q8IYI8;P09630;P17040;O94892;Q0VGE8;Q9HCE3;O60828;Q15572;Q96BR9;Q8N2W9;Q99811;Q05481;Q9P0W2;P0CJ78;O15060;Q86W54;Q96PM9;Q68CP9;Q08211;O95625;P05204;Q8NHV9;Q9NS91;Q9UBC3;Q16534;Q9P2F9;P41212;Q96K75;P09017;Q9UJU5;Q9H9T3;O15522;Q5FWF6;P39880;Q9H9S0;Q9ULX9;Q07687;Q9UIH9;Q9BT81;A6NJG6;Q8HWS3;Q99459;P78337;P51815;P15172;Q9UID6;Q96CS4;Q3MJ62;Q05516;Q12837;A6NJL1;Q8WXF8;Q3ZCX4;Q8TBZ5;Q15561;A8MT65;P50219;Q13106;Q9GZX5;A6NLF2;Q9Y5N6;Q8TF50;P17038;P0CJ79;Q6P9G9;P25208;Q9UPW6;Q5T890;Q15047;Q12857;Q96NI8;Q8TF32;Q9BXX3;Q6ZMS7;Q9Y2T7;Q9P0T4;Q9UBD0;P18124;Q9H4I2;Q969S2;Q9NP66;Q32M78;P10589;P15408;Q9BWT6;Q8TBE0;Q96NL3;Q9Y473;P13056;Q99594;Q8IZU3;Q8NEM1;Q15329;Q9UL49;Q99583;Q3KNW1;Q9NPTC8;P78347;Q9Y5Q3;Q01664;Q8WVJ9;P52746;Q9ULX6;Q9Y5Q8;A6NNA5;Q05215;Q9BYE7;Q9Y2S7;P15036;Q9UII5;P42166;Q9BZE0;P38935;Q9Y6J9;Q96B42;Q9Y2S0;Q01860;Q9H074;Q9P2Y4;P31275;O14813;Q08ER8;Q8N3X6;Q53HV7;Q86TG7;Q03060;Q4V348;Q9UJL9;Q9Y5L5;O14627;Q8IZH2;Q9BQ70;Q49A33;Q9NV72;Q96N38;Q9BXG8;Q06730;Q9UIE0;Q14151;Q03052;Q9H8G1;Q99551;Q02446;Q9UJW8;Q9BX26;O14628;Q8NBF1;Q6P4R8;A6NN14;O14503;O14686;Q10587;Q96MN5;Q9HBUL1;A6NJ46;Q68DY1;Q12888;Q15906;P10243;Q92698;Q49AG3;P22670;Q86TJ2;Q96B01;Q7Z3V5;Q9Y222;Q8N7Q3;A8MT69;O95789;Q8TBZ8;P10073;Q8NFP9;O75290;Q7Z5D8;Q04743;B2RD01;P67809;Q8NA31;O94776;Q9NR83;Q86YC2;O15535;Q6ZT77;A8MWA4;O75467;O15160;P52747;O75928;P28324;Q8N344;Q13118;Q96SQ5;P23511;P17035;Q09161;O43502;Q96MW7;O95831;Q8NOY2;Q6TAR4;Q05BW5;Q8N4W9;A6NM28;Q9UBB5;Q02577;Q92754;Q7RTU3;A6NFD8;Q9UIS9;Q16594;Q15319;Q6VUC0;Q6PK81;Q04637;Q9H5J8;Q9UFB7;Q9HAZ2;O15315;P01100;Q96H86;Q8TA94;Q5JVG8;Q9UBX0;Q03938;Q16600;Q9H2A3;P49640;Q6QHK4;P11161;Q9Y2P7;O00482;P52756;Q9H7R5;Q02078}

675 [Cluster 62]GO:0033558+F molecular\_function [name] protein deacetylase activity [def]



"Catalysis of the hydrolysis of an acetyl group or groups from a protein substrate." [GOC  
676 Pathogen[ Q2Q067] interacts with 7 human  
partners:{Q8IXJ6;P56524;Q9UKV0;Q13547;O15379;Q969S8;Q92769}  
677 Pathogen[ P0C214] interacts with 7 human  
partners:{Q13547;Q969S8;P56524;Q92769;Q9UKV0;O15379;Q8IXJ6}  
678 Pathogen[ P03346] interacts with 7 human  
partners:{Q969S8;O15379;P56524;Q8IXJ6;Q92769;Q13547;Q9UKV0}  
679 Pathogen[ Q85601] interacts with 7 human  
partners:{Q969S8;Q9UKV0;Q8IXJ6;Q92769;P56524;O15379;Q13547}  
680 Pathogen[ P14079] interacts with 6 human  
partners:{O15379;Q969S8;Q9UKV0;Q92769;Q8IXJ6;P56524}  
681 Pathogen[ P03383] interacts with 6 human  
partners:{Q92769;O15379;Q13547;Q9UKV0;P56524;Q969S8}  
682 Pathogen[ P03410] interacts with 7 human  
partners:{Q9UKV0;Q8IXJ6;Q969S8;Q92769;O15379;P56524;Q13547}  
683 Pathogen[ P14075] interacts with 6 human  
partners:{Q969S8;P56524;Q9UKV0;Q13547;Q92769;O15379}  
684 Pathogen[ P0C206] interacts with 7 human  
partners:{Q92769;Q9UKV0;Q13547;O15379;Q8IXJ6;P56524;Q969S8}  
685 Pathogen[ P03363] interacts with 4 human partners:{O15379;Q969S8;Q9UKV0;Q13547}  
686 [Cluster 63]GO:0042826+F molecular\_function [name] histone deacetylase binding [def]  
"Interacting selectively and non-covalently with the enzyme histone deacetylase." [GOC  
687 Pathogen[ Q2Q067] interacts with 41 human  
partners:{Q14526;Q8IXJ6;P56524;Q99638;Q9UKV0;P62258;P13056;Q01664;Q13547;Q14814;O9498  
3;O15379;Q8N5D0;P08047;Q6BDS2;P48552;P11388;Q09028;O43593;Q6W2J9;Q969S8;Q92831;Q9H091  
;O75496;Q15327;Q92830;Q02080;O14593;O43809;Q9H7L9;P31946;P22415;P52292;Q9Y618;P43356;  
P35232;P45973;O75376;P43355;Q02078;Q14693}  
688 Pathogen[ P0C214] interacts with 41 human  
partners:{Q14526;Q15327;Q13547;Q8N5D0;Q6BDS2;Q969S8;P48552;Q02080;O75496;P56524;Q6W2J  
9;Q9H091;P43355;Q09028;Q02078;P13056;Q14814;O43809;Q9UKV0;O75376;O43593;P11388;O15379  
;O14593;P43356;Q92831;Q9H9E1;Q92830;Q8IXJ6;P45973;P52292;P22415;P35232;Q99638;P31946;  
Q9Y618;Q01664;P08047;Q9H7L9;O94983;Q14693}  
689 Pathogen[ P03346] interacts with 48 human  
partners:{Q969S8;Q02078;P45973;Q9H091;Q14814;P43355;P11388;O15379;P62258;P56524;Q1532  
7;P13056;Q8IXJ6;Q92831;Q99638;O75626;P08047;O43593;Q14526;O43680;Q92830;Q9H9E1;P17542  
;Q9C0J9;Q8N5D0;Q13547;Q09028;Q02086;O75376;O94983;O14593;P43356;O43809;P31946;Q9UKV0;  
P52292;Q02080;P48552;Q9H7L9;P35232;Q6BDS2;Q9Y618;Q01664;Q6W2J9;Q96M02;O75496;P22415;Q  
14693}  
690 Pathogen[ Q85601] interacts with 43 human  
partners:{Q969S8;Q96M02;O75496;Q9UKV0;Q02078;P31946;Q14814;Q9Y618;Q92831;Q02080;P0804  
7;Q14526;P22415;Q92830;Q8IXJ6;P62258;P45973;P11388;Q15327;O75376;O94983;O14593;Q09028  
;P56524;O15379;P52292;P35232;Q13547;P43356;Q9H9E1;O75626;P13056;P48552;O43593;P43355;  
Q9H7L9;Q9H091;Q01664;Q8N5D0;Q99638;O43809;Q6W2J9;Q14693}  
691 Pathogen[ P14079] interacts with 40 human  
partners:{O43809;P48552;O15379;P11388;P13056;Q02078;Q8N5D0;Q14693;Q92830;O75626;Q969S  
8;Q9UKV0;P35232;P43356;Q6W2J9;P45973;Q96M02;Q9H9E1;P45983;P31946;Q01664;Q9H091;Q15327  
;O14593;P62258;Q8IXJ6;Q14814;O75376;Q99638;P56524;Q9H7L9;Q6BDS2;Q09028;P43355;Q02080;  
O43593;P52292;O75496;P22415;O94983}  
692 Pathogen[ P03383] interacts with 38 human  
partners:{Q9Y618;Q09028;Q92831;Q02080;P08047;O75376;Q14526;P31946;Q9H7L9;O94983;Q1481  
4;Q01664;Q6W2J9;P45973;P52292;Q92830;O15379;P35232;O14593;Q13547;O43809;Q15327;Q99638  
;Q9UKV0;P56524;P43356;P48552;P62258;P13056;Q9H091;Q8N5D0;Q02078;Q969S8;O75496;P43355;  
P22415;Q6BDS2;Q14693}  
693 Pathogen[ P03410] interacts with 44 human  
partners:{Q92830;Q96M02;Q92831;Q9UKV0;P62258;Q8IXJ6;Q14526;Q6W2J9;Q14814;P43355;P4597  
3;O75376;Q15327;Q14693;O43809;Q969S8;Q09028;Q99638;O15379;P56524;P22415;Q9H7L9;Q8N5D0  
;P11388;O14593;Q6BDS2;Q13547;Q01664;O75496;Q02078;Q9H091;P08047;O75626;Q9Y618;Q02080;  
O94983;P35232;P52292;P48552;P43356;Q9H9E1;O43593;P31946;P13056}  
694 Pathogen[ P14075] interacts with 38 human  
partners:{P52292;P43355;O43809;Q14526;Q969S8;Q92831;Q8N5D0;Q15327;P56524;Q02080;Q9H09  
1;P45973;Q9UKV0;O94983;Q13547;P13056;Q9Y618;O75376;P35232;Q99638;Q09028;Q01664;Q6W2J9  
;O14593;Q02078;P43356;O15379;P48552;P31946;P22415;O75496;Q6BDS2;Q92830;Q14814;Q9H7L9;  
P62258;Q14693;P08047}  
695 Pathogen[ P0C206] interacts with 45 human  
partners:{Q96M02;P45973;Q92830;O75496;Q02078;P43356;Q6W2J9;Q9H091;Q15327;Q9UKV0;Q9C0J  
9;Q9H9E1;O75626;Q13547;P43355;P13056;O43809;Q92831;Q6BDS2;P31946;Q99638;O14593;Q02080  
;P22415;P62258;P35232;O15379;P08047;O75376;Q8IXJ6;Q9H7L9;Q01664;Q09028;Q14814;P11388;  
P56524;Q14526;Q8N5D0;P48552;Q969S8;Q14693;O43593;O94983;P52292;Q9Y618}  
696 Pathogen[ P03363] interacts with 41 human  
partners:{P62258;Q9H091;Q8N5D0;Q14526;Q09028;Q92831;Q9H7L9;P45973;O15379;Q969S8;P3194  
6;O75376;Q6BDS2;Q9C0J9;Q02080;O94983;O14593;Q96M02;Q15327;P48552;O43593;O43809;Q14814  
;Q92830;Q9UKV0;Q9H9E1;Q9Y618;P22415;Q13547;Q99638;O75496;P35232;P08047;Q6W2J9;O75626;  
P43355;P52292;P43356;P13056;Q01664;Q02078}  
697 [Cluster 64]GO:0045502+F molecular\_function [name] dynein binding [def]  
"Interacting selectively and non-covalently with dynein, the multisubunit protein complex  
that is associated with microtubules." [GOC

698 Pathogen[ Q2Q067] interacts with 1 human partners:{P49454}  
699 Pathogen[ P0C214] interacts with 3 human partners:{Q96G01;O00399;P49454}  
700 Pathogen[ P03346] interacts with 4 human partners:{Q96G01;O43313;O00399;P49454}  
701 Pathogen[ Q85601] interacts with 4 human partners:{P49454;Q96G01;O00399;Q9BVA0}  
702 Pathogen[ P14079] interacts with 7 human  
partners:{O00399;Q7Z4L9;Q96G01;Q9UQE7;P49454;O43313;Q9BVA0}  
703 Pathogen[ P03383] interacts with 1 human partners:{P49454}  
704 Pathogen[ P03410] interacts with 6 human  
partners:{Q9UQE7;Q7Z4L9;O00399;P49454;Q96G01;Q9BVA0}  
705 Pathogen[ P14075] interacts with 1 human partners:{P49454}  
706 Pathogen[ P0C206] interacts with 6 human  
partners:{Q9BVA0;O43313;P49454;Q9UQE7;O00399;Q96G01}  
707 Pathogen[ P03363] interacts with 2 human partners:{P49454;O00399}  
708 [Cluster 65]GO:0004505+F molecular\_function [name] phenylalanine 4-monooxygenase  
activity [def] "Catalysis of the reaction  
709 Pathogen[ Q2Q067] interacts with 2 human partners:{P61457;Q9H0N5}  
710 Pathogen[ P0C214] interacts with 2 human partners:{P61457;Q9H0N5}  
711 Pathogen[ P03346] interacts with 2 human partners:{P61457;Q9H0N5}  
712 Pathogen[ Q85601] interacts with 2 human partners:{Q9H0N5;P61457}  
713 Pathogen[ P14079] interacts with 2 human partners:{P61457;Q9H0N5}  
714 Pathogen[ P03383] interacts with 2 human partners:{P61457;Q9H0N5}  
715 Pathogen[ P03410] interacts with 2 human partners:{Q9H0N5;P61457}  
716 Pathogen[ P14075] interacts with 2 human partners:{Q9H0N5;P61457}  
717 Pathogen[ P0C206] interacts with 2 human partners:{P61457;Q9H0N5}  
718 Pathogen[ P03363] interacts with 2 human partners:{Q9H0N5;P61457}  
719 [Cluster 66]GO:0005178+F molecular\_function [name] integrin binding [def]  
"Interacting selectively and non-covalently with an integrin." [GOC  
720 Pathogen[ Q2Q067] interacts with 3 human partners:{P14136;P27797;P11532}  
721 Pathogen[ P0C214] interacts with 3 human partners:{P14136;P11532;P27797}  
722 Pathogen[ P03346] interacts with 4 human partners:{Q96RT1;P14136;P27797;P11532}  
723 Pathogen[ Q85601] interacts with 4 human partners:{Q96RT1;P14136;P11532;P27797}  
724 Pathogen[ P14079] interacts with 4 human partners:{P11532;Q96RT1;P14136;Q13316}  
725 Pathogen[ P03383] interacts with 3 human partners:{P14136;P11532;P27797}  
726 Pathogen[ P03410] interacts with 5 human  
partners:{Q96RT1;P11532;P14136;Q13316;P27797}  
727 Pathogen[ P14075] interacts with 3 human partners:{P11532;P14136;P27797}  
728 Pathogen[ P0C206] interacts with 5 human  
partners:{Q96RT1;P27797;Q13316;P14136;P11532}  
729 Pathogen[ P03363] interacts with 4 human partners:{Q96RT1;P27797;P11532;P14136}  
730 [Cluster 67]GO:0008134+F molecular\_function [name] transcription factor binding [def]  
"Interacting selectively and non-covalently with a transcription factor, any protein  
required to initiate or regulate transcription." [ISBN  
731 Pathogen[ Q2Q067] interacts with 136 human  
partners:{Q13562;P49454;P27540;P17544;Q8IXJ6;O00213;Q9GZT8;O75832;Q9Y5Q3;P56524;Q9300  
9;Q9BY41;P10827;P20226;P63104;Q05066;Q9NPB6;P06400;Q01094;Q9UKV0;Q8WW38;P40763;P14921  
;P01106;Q16666;Q14690;P31268;Q9NQ87;O96004;Q01196;P20749;Q04206;Q92870;Q13547;O94983;  
O95999;O15379;Q14192;Q9UER7;O75586;Q96ST3;O15350;P35638;Q9NPI1;P52657;Q8WUF5;P63279;P  
17676;P38935;P08047;Q8N726;P11831;P15172;Q00577;Q9Y295;P28069;O00170;P63165;Q9BQG0;Q0  
8050;Q9UQL6;O43524;P78317;P23769;Q6W2J9;Q14186;P40337;Q99750;P26358;Q92831;Q96MT3;P67  
870;O60934;Q96DB2;Q15306;Q14978;P84022;Q01658;O94888;Q92769;O43251;Q13127;Q719H9;P098  
74;P0DI81;Q16254;Q15742;Q96H20;Q13506;Q15329;P35869;Q96QR8;Q16514;Q8IX07;O60907;Q1579  
6;Q96JN0;Q13363;Q15466;P28749;Q14839;Q9Y543;P25963;Q15545;P52655;Q14209;P45984;P17096  
;Q04724;P35269;Q9Y5J3;O60504;Q9NP71;Q92793;Q01860;Q5TGS1;P21675;Q9HBD4;Q8TEK3;Q14188;  
Q6STE5;P23497;Q71SY5;P15923;Q12857;Q9UMX1;Q99814;Q14689;P40425;Q96EY1;Q12830;Q9P1T7;P  
40424;P53567;P49715;Q00403}  
732 Pathogen[ P0C214] interacts with 133 human  
partners:{P40424;O00170;P53567;Q15742;O00213;Q16254;P35869;Q71SY5;Q13363;Q13547;Q96JN  
0;P14921;Q8WUF5;O75586;P52657;P21675;Q96QR8;O94888;Q96DB2;P52655;P35269;O60907;O15350  
;Q9HBD4;Q9BQG0;P23769;Q92793;Q9Y5J3;Q9Y295;P84022;P17096;Q14689;P15172;P56524;Q6W2J9;  
P17544;P11831;Q00403;Q04206;Q6STE5;P63279;Q9Y5Q3;Q16666;Q8N726;Q04724;Q9Y6I3;Q15545;P  
38935;O00308;Q99750;Q96MT3;P17676;P78317;Q9GZT8;Q01094;O75832;Q13506;Q9NPB6;Q14186;P1  
5923;Q9UER7;Q14978;P63165;Q00577;Q9Y543;P26358;O95999;Q92769;Q9UH92;Q5SW24;P20749;Q15  
329;Q9UKV0;Q8WW38;P40337;P0DI81;Q15796;Q14192;P25963;Q9NP71;Q93009;O15379;Q9P1T7;Q146  
90;Q16514;Q8IX07;Q13127;P28069;P20226;P23497;P05412;Q12857;P28749;Q92831;Q719H9;Q9NPI  
1;P40425;Q99814;Q01658;Q8IXJ6;Q96ST3;P45984;Q86WV6;P40763;O60504;O96004;P27540;Q96H20  
;P67870;P16220;O43251;P49454;Q9NQ87;Q9UMX1;Q14209;Q01860;Q5TGS1;P01106;Q14188;Q9UQL6;  
P06400;P08047;Q96EY1;Q12830;Q92870;Q14839;P35638;Q15466;P09874;Q8TEK3;O94983;Q9BY41;Q  
15306}  
733 Pathogen[ P03346] interacts with 164 human  
partners:{P85037;Q96ST3;P05412;O00213;Q12830;Q9GZT8;Q96QR8;P45984;Q93009;P38935;Q1666  
6;P10827;P31268;Q9HBD4;Q6QHK4;O60907;P58012;Q8WYB5;P16220;Q9BQG0;P17676;O75586;Q05066  
;P35638;Q02535;Q8WW38;O94888;Q96DB2;P11831;Q15329;O15379;Q9NP62;Q12857;Q71SY5;P06400;  
P25963;Q00577;Q14188;Q96HZ4;Q15466;P23769;P15923;Q8TEK3;P15172;Q15796;P56524;Q9NPI1;Q  
04206;O00170;Q8IXJ6;Q9NPB6;Q08050;Q14209;Q15306;Q9Y5Q3;P63279;P27540;P26358;Q92831;O1  
5350;Q9BYE0;Q16254;O00409;Q01094;P49715;P17096;Q9Y5J3;Q01860;Q96H20;P08047;Q92870;O95  
999;P20226;Q96MT3;Q14919;O75832;O96004;P01106;P51843;Q9NP71;Q14186;P14921;Q92794;P840

- 22;Q15742;Q9Y295;Q14978;O95096;Q92769;Q14192;Q13547;Q6STE5;Q04724;P40425;Q13506;P63165;P0DI81;Q9BY41;P52657;Q99750;P17544;Q9UER7;Q9NQ87;Q16514;Q8IX07;Q99814;Q12778;O43251;Q01167;Q5TGS1;P98177;O94983;P78317;O95718;Q8WUF5;P09874;P40337;P28749;P20749;O60934;P21675;P63104;Q9UKV0;Q9H7Z6;P35269;P28069;Q9Y543;Q01658;Q99593;Q13363;P61968;P40424;Q01196;O60504;P23497;P53567;P67870;Q9Y6I3;Q9P1T7;Q9UH92;Q00403;Q92793;P35869;Q15545;Q8N726;Q07554;Q13562;P40763;O43524;Q96JN0;P52655;Q14690;Q9UMX1;P53539;Q9UQL6;Q96EY1;Q6W2J9;P49454;Q14839;Q13127;Q14689;Q9HCC6;O00308;Q9UJU5}
- 734 Pathogen[ Q85601] interacts with 139 human partners: {P01106;P52657;P78317;P49454;Q14978;O00213;Q86WV6;Q9UKV0;Q96QR8;P11831;P63104;P17676;Q16666;P09874;Q96DB2;Q13127;P17096;Q14689;P61968;Q93009;Q15466;Q9BQG0;Q9BY41;Q96H20;P15172;Q04724;P14921;Q9UQL6;Q6STE5;Q15329;Q8WW38;Q12857;P06400;P38935;P53567;O60907;P40337;O75832;Q13506;P40763;P28069;P23769;Q9UER7;Q15545;Q14188;Q9H7Z6;Q15306;Q99814;P27540;Q13363;P26358;O94888;Q92831;Q14690;Q15742;O96004;Q9NP71;P63279;Q12830;Q9Y5Q3;P08047;Q9UH92;Q96MT3;Q13562;O00170;Q14186;P40424;Q00577;Q9Y295;Q8N726;Q96JN0;Q8IXJ6;Q5TGS1;Q92769;P16220;Q04206;P40425;Q14192;Q71SY5;P0DI81;Q99750;P35269;P05412;Q9Y543;Q9NQ87;Q16514;Q8IX07;Q16254;Q01658;Q00403;Q9NPB6;Q14209;O94983;P15923;P10827;Q8WUF5;Q8TEK3;P17544;P28749;Q9HBD4;P84022;Q9NPI1;P49715;P63165;P45984;P56524;Q92870;O15379;P21675;Q08050;P35869;O60504;P52655;O15350;Q9Y6I3;Q13547;P67870;O95999;Q9P1T7;Q92793;O75586;P19447;Q9UMX1;P53539;Q01860;Q96EY1;P20749;Q01094;Q9Y5J3;Q15796;Q14839;P20226;Q719H9;Q6W2J9;P35638;Q5SW24;O60934;Q96ST3;P25963}
- 735 Pathogen[ P14079] interacts with 118 human partners: {Q9UQL6;Q96JN0;O15379;Q9NPI1;Q9Y5U4;P09874;Q13506;Q9Y5Q3;P63279;P35869;Q99814;Q6STE5;O94888;Q96H20;P28749;P35269;Q14186;Q96DB2;O95999;Q14192;Q96QR8;P53567;Q5SW24;Q9Y6I3;Q96ST3;Q8WUF5;Q16254;Q02083;Q92793;O00170;Q15329;P17096;Q15742;O60907;Q9UMX1;Q14209;Q9UKV0;Q719H9;O95718;P35611;P45984;P63104;P28069;Q6W2J9;P40337;Q00403;O75586;Q01860;Q9UER7;P17544;Q92769;Q86WV6;Q8TEK3;P49715;P27540;Q9BQG0;Q12830;Q9Y5J3;Q9BY41;Q5TGS1;P26358;Q8IX07;Q14689;P35638;P01106;Q9UH92;P52657;Q00577;Q8IXJ6;Q71SY5;Q04724;Q14839;P20749;P78317;P67870;Q9P1T7;P49454;P38935;Q9NQ87;P0DI81;P05412;Q15466;Q9NPB6;P56524;Q13127;Q16514;Q12857;Q01094;Q96MT3;Q9NP71;Q14188;P23769;Q01658;Q96EY1;Q8WW38;P19447;Q14690;P21675;Q16666;P13693;Q14978;Q99750;Q15545;Q92870;Q9Y295;O94983}
- 736 Pathogen[ P03383] interacts with 120 human partners: {Q15329;Q9BQG0;Q719H9;Q14978;O00213;P49454;Q12830;Q92831;P11831;Q9UH92;Q14839;Q9HBD4;P08047;Q14209;P17096;P16220;P27540;P28069;P17544;P35269;P40337;P15172;Q01094;P14921;Q9UQL6;Q9Y5Q3;Q96H20;P01106;Q8WW38;P40424;O60907;Q9Y295;P20749;Q6STE5;P52655;P23769;Q9GZT8;Q96MT3;Q9NQ87;O94983;Q15742;P35638;P15923;O00170;Q01860;P78317;O94888;Q15306;Q14690;Q04724;P06400;Q9NP71;Q92870;Q00403;P20226;Q6W2J9;O75832;P52657;Q13506;O96004;Q14186;P84022;Q12857;P63104;Q14192;Q92769;P17676;P09874;Q15466;Q16254;P63165;P0DI81;Q9NPB6;O15379;O15350;Q9UER7;Q16514;Q16666;P25963;O95999;Q96JN0;Q8WUF5;Q13547;Q9BY41;P28749;Q71SY5;P67870;P23497;Q14188;Q9UKV0;Q99750;Q15796;P21675;P56524;Q00577;Q04206;P45984;P53567;O60504;Q9NPI1;Q96ST3;P38935;Q5TGS1;Q9P1T7;Q8TEK3;O75586;Q15545;Q96QR8;P35869;Q01658;Q9UMX1;P26358;Q96EY1;P63279;P40425;Q13363;Q92793;Q13127;Q8N726;P05412}
- 737 Pathogen[ P03410] interacts with 132 human partners: {P84022;Q92831;P20749;Q9Y5J3;Q9UKV0;Q04206;P28069;Q8IXJ6;P11831;P52655;Q16666;P35638;Q9BY41;Q15329;Q6W2J9;O96004;Q02083;P17676;Q9Y6I3;Q8N726;P01106;P63165;Q99814;Q01860;P21675;Q9NQ87;P53567;Q8TEK3;Q12857;Q16254;Q9Y5U4;Q12830;Q14978;Q9Y543;Q04724;Q14689;P17096;O00213;P20226;P06400;Q9BQB4;P15923;P52657;Q14188;Q96ST3;Q9Y295;Q15306;Q8WW38;Q00577;P17544;P49454;Q9UQL6;Q9Y5Q3;P26358;P27540;Q13127;P0DI81;Q92793;P38935;Q719H9;Q8IX07;Q9P1T7;Q9UER7;O95999;Q92769;Q5TGS1;Q16514;O00170;Q5SW24;P78317;O15379;P56524;Q9NP71;P19447;Q01658;Q14186;P13693;P09874;P16220;Q15466;Q00403;P35269;Q9BQG0;O60504;P05412;P63104;Q96JN0;P28749;Q15742;P45984;P23769;Q13547;Q01094;P63279;Q9NPB6;O15350;Q86WV6;P08047;Q9UH92;Q14209;Q6STE5;P25963;Q96QR8;P67870;O94983;Q96H20;Q96MT3;Q9HBD4;P40424;Q15796;Q14839;P40763;Q9UMX1;O60907;P35611;Q99750;Q14192;Q96EY1;O60934;Q15545;Q9NPI1;O94888;O75832;P40337;Q13506;O75586;P14921;Q14690;Q96DB2;Q8WUF5;Q71SY5;Q92870}
- 738 Pathogen[ P14075] interacts with 122 human partners: {P28069;Q9BY41;Q96ST3;O00213;P35869;P63165;Q96QR8;Q96MT3;Q14690;Q9GZT8;P23497;Q04206;P21675;Q5TGS1;Q9HBD4;P40424;P52657;Q9Y295;Q9NPI1;P05412;P40425;O75832;Q92831;P11831;Q13506;P53567;Q02083;Q01658;O94888;Q00403;P23769;Q01860;P38935;Q14839;P15172;P17096;P56524;Q08050;Q9P1T7;Q9UH92;Q92870;P35638;Q719H9;Q8WUF5;Q9UKV0;Q8WW38;P20226;P63279;Q16666;O94983;Q15796;Q9NQ87;P15923;Q14209;P25963;Q13547;P26358;P01106;Q96H20;P27540;O75586;O96004;Q9NP71;Q14186;Q12857;Q9BQG0;O00170;Q12830;Q6W2J9;O15350;Q16254;Q92769;Q9Y5Q3;P67870;P0DI81;P35269;P52655;Q15306;Q99750;Q16514;O60907;P63104;Q15545;P78317;Q01094;P14921;O95999;P06400;Q15742;P28749;O15379;Q8TEK3;Q00577;Q92793;Q13127;Q15466;O60504;Q9UQL6;Q04724;P16220;Q13363;Q9NPB6;Q15329;P84022;Q9UER7;P17676;Q96JN0;Q6STE5;Q71SY5;P40337;P17544;Q14188;P49454;Q9UMX1;Q14192;Q14978;Q96EY1;Q8N726;P09874;P20749;P45984;P08047}
- 739 Pathogen[ P0C206] interacts with 147 human partners: {P84022;P53567;Q8WUF5;Q9NQ87;Q14188;Q92769;Q15329;Q9Y295;Q15466;O75832;Q96ST3;Q15545;Q16514;P38935;Q9NP71;P40425;Q9UH92;Q13127;O60504;Q9Y5Q3;P14921;Q9NPI1;Q8N726;Q5TGS1;P20226;O00308;Q96MT3;P16220;P35869;P17544;Q9UMX1;P09874;Q14690;O60907;Q6W2J9;Q05066;P45984;Q01860;P52657;Q96DB2;O60934;P52655;Q96QR8;O95999;Q6STE5;P05412;Q9UKV0;Q8WW38;P25963;O75586;Q16666;P26358;Q9UER7;Q15306;Q13547;Q14186;P49715;P31268;Q93009;O94888;Q86WV6;P49454;P78317;Q15796;Q92831;Q96HZ4;Q16254;P40424;P28749;O96004;P19447;Q9BYE0;Q92793;Q12857;Q5SW24;Q14839;Q15742;O00213;P63104;O95718;Q14209;Q14919;P35269;Q9BQG0;Q9Y543;P17676;Q96H20;O15379;P08047;Q9Y5J3;Q96JN0;Q01658;Q04206;P15923;Q01094;P53539;P67870;Q02083;Q92870;Q9NPB6;Q9Y6I3;P40763;Q71SY5;Q8IXJ6;Q04724;P17096;Q13562;P23769}

;Q8TEK3;P11831;Q08050;P20749;Q8IX07;Q719H9;O15350;P27540;P15172;Q9HBD4;Q14192;P01106;O00170;Q99814;Q9BY41;Q14689;P63165;P56524;P61968;P28069;Q13363;Q00403;Q96EY1;O94983;Q12830;Q99750;Q9P1T7;P35638;Q9NP62;P10827;Q9H7Z6;P21675;P0DI81;Q14978;P40337;Q13506;P06400;Q00577;Q9UQL6}

740 Pathogen[ P03363] interacts with 132 human partners: {Q719H9;Q5TGS1;Q14978;P49454;Q12830;Q9UH92;Q15466;Q9Y5J3;Q04206;P27540;P17676;Q6STE5;Q02083;P53567;Q9UMX1;Q71SY5;P0DI81;Q9BY41;P53539;Q96MT3;Q92831;P25963;O00213;Q9NQ87;O15379;Q99750;O94888;Q16514;Q9BQG0;Q9GZT8;Q96HZ4;O60907;Q15545;P78317;Q16254;P16220;Q9Y295;Q9NPB6;Q96QR8;O94983;Q9UQL6;P14921;Q9UER7;Q8TEK3;Q8WUF5;Q15306;Q96JN0;Q04724;Q14839;P23497;P06400;P40337;Q14689;Q96H20;P01106;O00409;P28749;P35869;Q9BYE0;P52657;Q13127;P35269;Q16666;P40425;O43524;P15923;P63104;Q14690;P20749;Q00403;Q9P1T7;Q05066;Q08050;P11831;P28069;P63165;Q13506;P17096;Q01094;Q9UKV0;Q96ST3;Q9HBD4;Q9NPI1;Q92870;Q14919;O75586;Q15796;P31268;P84022;Q01167;Q9HCC6;O96004;P26358;P35638;Q15742;Q14209;P63279;Q13547;Q99814;Q92793;P21675;O00308;P20226;P52655;Q8N726;Q14186;Q14188;P05412;P40424;P67870;Q9Y543;P09874;Q9NP71;Q13363;Q8WW38;P08047;Q6W2J9;Q01658;P17544;Q00577;Q96EY1;Q9UJU5;P15172;Q00170;Q12857;Q15329;Q9Y5Q3;P38935;Q01860;O43251;Q14192;Q6QHK4}

741 [Cluster 68]GO:0043422+F molecular\_function [name] protein kinase B binding [def] "Interacting selectively and non-covalently with protein kinase B, an intracellular kinase that is important in regulating glucose metabolism." [GOC

742 Pathogen[ Q2Q067] interacts with 2 human partners: {O95999;Q9UKG1}

743 Pathogen[ P0C214] interacts with 2 human partners: {Q9UKG1;O95999}

744 Pathogen[ P03346] interacts with 2 human partners: {O95999;Q9UKG1}

745 Pathogen[ Q85601] interacts with 2 human partners: {Q9UKG1;O95999}

746 Pathogen[ P14079] interacts with 2 human partners: {Q9UKG1;O95999}

747 Pathogen[ P03383] interacts with 1 human partners: {O95999}

748 Pathogen[ P03410] interacts with 2 human partners: {O95999;Q9UKG1}

749 Pathogen[ P14075] interacts with 1 human partners: {O95999}

750 Pathogen[ P0C206] interacts with 2 human partners: {Q9UKG1;O95999}

751 Pathogen[ P03363] interacts with 1 human partners: {Q9UKG1}

752 [Cluster 69]GO:0071889+F molecular\_function [name] 14-3-3 protein binding [def] "Interacting selectively and non-covalently with a 14-3-3 protein. A 14-3-3 protein is any of a large family of approximately 30kDa acidic proteins which exist primarily as homo- and heterodimers within all eukaryotic cells, and have been implicated in the modulation of distinct biological processes by binding to specific phosphorylated sites on diverse target proteins, thereby forcing conformational changes or influencing interactions between their targets and other molecules. Each 14-3-3 protein sequence can be roughly divided into three sections

753 Pathogen[ Q2Q067] interacts with 4 human partners: {O14974;Q9UMS6;Q8WUI4;P26651}

754 Pathogen[ P0C214] interacts with 4 human partners: {Q9UMS6;O14974;P26651;Q8WUI4}

755 Pathogen[ P03346] interacts with 4 human partners: {Q9UMS6;Q8WUI4;P26651;O14974}

756 Pathogen[ Q85601] interacts with 4 human partners: {Q9UMS6;P26651;O14974;Q8WUI4}

757 Pathogen[ P14079] interacts with 4 human partners: {Q8WUI4;O14974;Q9NX09;Q9UMS6}

758 Pathogen[ P03383] interacts with 3 human partners: {Q9UMS6;P26651;Q8WUI4}

759 Pathogen[ P03410] interacts with 5 human partners: {Q9UMS6;P26651;Q8WUI4;O14974;Q9NX09}

760 Pathogen[ P14075] interacts with 3 human partners: {P26651;Q9UMS6;Q8WUI4}

761 Pathogen[ P0C206] interacts with 4 human partners: {P26651;Q9UMS6;O14974;Q8WUI4}

762 Pathogen[ P03363] interacts with 4 human partners: {O14974;Q8WUI4;P26651;Q9UMS6}

763 [Cluster 70]GO:0004402+F molecular\_function [name] histone acetyltransferase activity [def] "Catalysis of the reaction

764 Pathogen[ Q2Q067] interacts with 30 human partners: {Q16594;Q9NXR8;Q9H9T3;Q15596;O75478;O14929;O75486;Q9UKN8;Q9H0E3;Q15542;Q6ZRS2;O75448;Q12962;O75529;Q9H8E8;Q92831;O75528;Q92830;Q16514;Q92993;Q9NRL2;Q9Y6J9;Q8IZX4;O94864;Q92793;P21675;Q9H2F5;O60869;Q96BN2;Q96EB1}

765 Pathogen[ P0C214] interacts with 32 human partners: {Q92993;O75486;Q9NRL2;O75528;Q9Y6J9;P21675;O75478;O14929;Q92793;Q6ZRS2;Q9UKN8;Q12962;Q96BN2;Q9Y232;O94864;Q9H2F5;Q16594;Q15542;Q16514;Q95251;Q4LE28;Q8IZX4;O75529;Q9H9T3;Q92831;O75448;Q92830;Q15596;O60869;Q96EB1;Q9H8E8;Q9H0E3}

766 Pathogen[ P03346] interacts with 39 human partners: {Q9Y6J9;Q15542;Q15788;Q8WYB5;O75486;Q9H8E8;Q9H0E3;Q92831;Q9NRL2;Q9UKN8;Q4LE28;O75448;Q92830;Q96BN2;Q92794;O94864;O75478;Q15596;Q9H9T3;O75528;O75529;O95251;P51587;Q9H2F5;Q16514;Q12962;Q6ZRS2;P21675;Q9H7Z6;Q9Y232;Q8IZX4;O15516;Q92993;Q92793;O60869;Q96EB1;Q9NXR8;O14929;Q16594}

767 Pathogen[ Q85601] interacts with 35 human partners: {Q15542;Q9H2F5;O94864;O75528;O95251;Q9H0E3;Q9H9T3;O15516;Q9H7Z6;O75448;Q92831;Q16594;Q15596;Q8IZX4;Q9Y6J9;Q9UKN8;Q92830;O14929;O75529;Q9H8E8;Q6ZRS2;Q16514;Q96EB1;Q9NRL2;P21675;Q96BN2;Q12962;Q4LE28;O75486;Q92993;Q92793;O60869;Q9NXR8;O75478;P51587}

768 Pathogen[ P14079] interacts with 32 human partners: {Q9H0E3;Q8IZX4;Q15596;Q9Y6J9;O75528;Q16594;Q92830;Q9UKN8;Q92793;Q9NRL2;Q9H8E8;O95251;O75529;P51587;Q6ZRS2;Q96EB1;O60869;O94864;Q96BN2;O75448;O14929;Q9H9T3;Q12962;O60502;Q15788;Q9H2F5;O75478;Q16514;O75486;Q15542;Q92993;P21675}

769 Pathogen[ P03383] interacts with 30 human partners: {Q9Y6J9;Q9UKN8;Q92831;O75478;Q15596;O75486;O95251;O94864;Q4LE28;Q9H2F5;Q15542;Q8IZX4;Q96BN2;Q92993;Q96EB1;O75448;O75529;Q16594;Q9H8E8;O14929;Q92830;Q16514;P21675;Q9NRL2;Q12962;O60869;Q9H9T3;Q92793;Q9H0E3}

770 Pathogen[ P03410] interacts with 34 human

771 partners:{Q92830;Q92831;Q8IZX4;O14929;O95251;Q12962;P21675;O60502;O75528;Q9H9T3;Q96EB1;O75486;Q9H0E3;Q9H2F5;Q6ZRS2;Q92793;Q96BN2;Q9NRL2;Q16514;Q9NXR8;P51587;O94864;Q9Y6J9;Q16594;Q4LE28;Q15596;O60869;Q9H8E8;Q15542;O75478;O75529;Q9UKN8;Q92993;O75448}  
Pathogen[ P14075] interacts with 30 human

772 partners:{Q96EB1;Q9Y6J9;Q12962;Q9H2F5;P21675;Q15542;Q92831;Q9NRL2;O75448;O14929;Q96BN2;Q16594;Q92993;Q9H0E3;O94864;O75478;Q4LE28;O75528;Q9H8E8;Q16514;O95251;Q9H9T3;Q92793;Q9UKN8;O75486;O75529;O60869;Q92830;Q15596;Q8IZX4}  
Pathogen[ P0C206] interacts with 36 human

773 partners:{O75486;Q9Y232;O75528;Q92830;Q9H2F5;Q16514;O95251;O94864;Q9H9T3;P51587;Q6ZRS2;Q9NRL2;Q92993;Q9Y6J9;O75529;Q9NXR8;Q92831;Q8IZX4;Q92793;Q9H0E3;O15516;O14929;Q9UKN8;O75478;O60869;Q15542;Q15596;Q96EB1;Q96BN2;O75448;Q12962;Q15788;Q9H7Z6;P21675;Q4LE28;Q16594}  
Pathogen[ P03363] interacts with 31 human

774 partners:{Q8IZX4;Q9H8E8;Q4LE28;Q9NRL2;Q92831;Q6ZRS2;Q9H2F5;Q16514;O94864;Q15596;Q12962;O75529;Q96BN2;Q92830;Q96EB1;Q15542;O14929;Q92793;O75448;O60869;P21675;O75486;Q9H0E3;O75478;Q9UKN8;Q9H9T3;O95251;Q92993;Q9Y6J9;O75528;Q16594}  
[Cluster 71]GO:0019215+F molecular\_function [name] intermediate filament binding [def] "Interacting selectively and non-covalently with an intermediate filament, a distinct elongated structure, characteristically 10 nm in diameter, that occurs in the cytoplasm of higher eukaryotic cells. Intermediate filaments form a fibrous system, composed of chemically heterogeneous subunits and involved in mechanically integrating the various components of the cytoplasmic space." [ISBN

775 Pathogen[ Q2Q067] interacts with 1 human partners:{O15061}  
776 Pathogen[ P0C214] interacts with 1 human partners:{O15061}  
777 Pathogen[ P03346] interacts with 2 human partners:{O15061;Q13835}  
778 Pathogen[ Q85601] interacts with 1 human partners:{O15061}  
779 Pathogen[ P14079] interacts with 3 human partners:{Q13835;O15061;P48681}  
780 Pathogen[ P03383] interacts with 1 human partners:{O15061}  
781 Pathogen[ P03410] interacts with 2 human partners:{O15061;Q13835}  
782 Pathogen[ P14075] interacts with 1 human partners:{O15061}  
783 Pathogen[ P0C206] interacts with 2 human partners:{O15061;Q13835}  
784 Pathogen[ P03363] interacts with 2 human partners:{Q13835;O15061}

785 [Cluster 72]GO:0004532+F molecular\_function [name] exoribonuclease activity [def] "Catalysis of the sequential cleavage of mononucleotides from a free 5' or 3' terminus of an RNA molecule." [GOC

786 Pathogen[ Q2Q067] interacts with 8 human partners:{Q9NQT4;Q06265;Q13868;Q9Y3B2;Q9NPD3;Q5RKV6;Q15024;Q96B26}  
787 Pathogen[ P0C214] interacts with 8 human partners:{Q15024;Q9Y3B2;Q5RKV6;Q9NPD3;Q13868;Q06265;Q9NQT4;Q96B26}  
788 Pathogen[ P03346] interacts with 9 human partners:{Q5RKV6;Q96B26;Q9Y3B2;Q15024;Q9NQT5;Q06265;Q9NQT4;Q9NPD3;Q13868}  
789 Pathogen[ Q85601] interacts with 8 human partners:{Q5RKV6;Q9NPD3;Q13868;Q9NQT4;Q9Y3B2;Q15024;Q06265;Q96B26}  
790 Pathogen[ P14079] interacts with 8 human partners:{Q9Y3B2;Q15024;Q9NQT4;Q13868;Q9NPD3;Q5RKV6;Q96B26;Q06265}  
791 Pathogen[ P03383] interacts with 8 human partners:{Q06265;Q9Y3B2;Q9NPD3;Q9NQT4;Q96B26;Q5RKV6;Q13868;Q15024}  
792 Pathogen[ P03410] interacts with 8 human partners:{Q06265;Q5RKV6;Q13868;Q96B26;Q15024;Q9NQT4;Q9NPD3;Q9Y3B2}  
793 Pathogen[ P14075] interacts with 8 human partners:{Q9NPD3;Q13868;Q9NQT4;Q5RKV6;Q96B26;Q15024;Q06265;Q9Y3B2}  
794 Pathogen[ P0C206] interacts with 8 human partners:{Q9NPD3;Q5RKV6;Q13868;Q96B26;Q06265;Q15024;Q9Y3B2;Q9NQT4}  
795 Pathogen[ P03363] interacts with 8 human partners:{Q96B26;Q9NQT4;Q5RKV6;Q15024;Q9Y3B2;Q9NPD3;Q13868;Q9NQT5}

796 [Cluster 73]GO:0045296+F molecular\_function [name] cadherin binding [def] "Interacting selectively and non-covalently with cadherin, a type I membrane protein involved in cell adhesion." [GOC

797 Pathogen[ Q2Q067] interacts with 2 human partners:{Q92597;O60716}  
798 Pathogen[ P0C214] interacts with 2 human partners:{O60716;Q92597}  
799 Pathogen[ P03346] interacts with 3 human partners:{O60716;Q92597;Q9UI47}  
800 Pathogen[ Q85601] interacts with 2 human partners:{O60716;Q92597}  
801 Pathogen[ P14079] interacts with 5 human partners:{Q9UI47;P24588;Q92597;Q15078;O60716}  
802 Pathogen[ P03383] interacts with 2 human partners:{O60716;Q92597}  
803 Pathogen[ P03410] interacts with 4 human partners:{O60716;Q9UI47;Q92597;P24588}  
804 Pathogen[ P14075] interacts with 2 human partners:{Q92597;O60716}  
805 Pathogen[ P0C206] interacts with 3 human partners:{Q92597;O60716;Q9UI47}  
806 Pathogen[ P03363] interacts with 3 human partners:{Q9UI47;Q92597;O60716}

807 [Cluster 74]GO:0033677+F molecular\_function [name] DNA/RNA helicase activity [def] "Catalysis of the reaction

808 Pathogen[ Q2Q067] interacts with 1 human partners:{Q92499}  
809 Pathogen[ P0C214] interacts with 1 human partners:{Q92499}  
810 Pathogen[ P03346] interacts with 1 human partners:{Q92499}  
811 Pathogen[ Q85601] interacts with 1 human partners:{Q92499}  
812 Pathogen[ P14079] interacts with 1 human partners:{Q92499}

813 Pathogen[ P03383] interacts with 1 human partners:{Q92499}  
814 Pathogen[ P03410] interacts with 1 human partners:{Q92499}  
815 Pathogen[ P14075] interacts with 1 human partners:{Q92499}  
816 Pathogen[ P0C206] interacts with 1 human partners:{Q92499}  
817 Pathogen[ P03363] interacts with 1 human partners:{Q92499}  
818 [Cluster 75]GO:0035091+F molecular\_function [name] phosphatidylinositol binding [def]  
"Interacting selectively and non-covalently with any inositol-containing  
glycerophospholipid, i.e. phosphatidylinositol (PtdIns) and its phosphorylated  
derivatives." [GOC  
819 Pathogen[ Q2Q067] interacts with 6 human  
partners:{P55895;O00291;Q7Z614;Q96L92;Q9H160;Q96QT6}  
820 Pathogen[ P0C214] interacts with 6 human  
partners:{Q96QT6;Q7Z614;P55895;Q96L92;Q9H160;O00291}  
821 Pathogen[ P03346] interacts with 20 human  
partners:{Q13596;Q15036;Q92543;P55895;Q96QT6;Q86WG5;Q9UMY4;Q7Z614;O00291;Q9NRS6;O6049  
3;Q96L92;Q9UNH7;Q9Y5X2;O95219;O60749;Q5TCZ1;Q9H160;O75146;Q8WV41}  
822 Pathogen[ Q85601] interacts with 9 human  
partners:{Q13596;Q96QT6;Q15036;Q7Z614;Q96L92;O00291;Q9H160;Q9UNH7;P55895}  
823 Pathogen[ P14079] interacts with 22 human  
partners:{Q9UNH7;Q15036;O00291;O75146;Q8WV41;Q9C0B9;O60493;Q8N9S9;Q9NRS6;Q96L92;Q9H3E  
2;Q96QT6;Q8WYQ9;Q9Y5X2;O60749;Q13596;Q7Z614;Q86WG5;Q92543;Q9UMY4;Q5TCZ1;Q9H160}  
824 Pathogen[ P03383] interacts with 6 human  
partners:{Q96QT6;Q7Z614;Q96L92;O00291;Q9H160;P55895}  
825 Pathogen[ P03410] interacts with 25 human  
partners:{Q8WV41;Q96QT6;Q7Z614;Q96L92;Q13596;Q0JRZ9;Q9H3E2;O60749;P55895;O00291;Q9UMY  
4;O75146;O95219;Q9UNH7;Q9C0B9;Q9H160;Q15036;Q8N9S9;Q9NRS6;Q8WYQ9;Q5TCZ1;Q92543;O60493  
;Q9Y5X2;Q86WG5}  
826 Pathogen[ P14075] interacts with 6 human  
partners:{Q96QT6;Q7Z614;O00291;Q9H160;P55895;Q96L92}  
827 Pathogen[ P0C206] interacts with 17 human  
partners:{Q96L92;Q8N9S9;O00291;Q9UNH7;Q9NRS6;Q9C0B9;O60493;Q13596;Q5TCZ1;Q9H160;Q1503  
6;Q8WV41;O60749;Q9H3E2;P55895;Q7Z614;Q96QT6}  
828 Pathogen[ P03363] interacts with 19 human  
partners:{Q9H160;Q96QT6;Q9UNH7;Q92543;Q96L92;O95219;Q9UMY4;O60493;O60749;Q8WV41;Q5TCZ  
1;Q8IYM1;Q5VWJ9;Q86WG5;Q7Z614;Q13596;O75146;P55895;O00291}  
829 [Cluster 76]GO:0043167+F molecular\_function [name] ion binding [def] "Interacting  
selectively and non-covalently with ions, charged atoms or groups of atoms." [GOC  
830 Pathogen[ Q2Q067] interacts with 1 human partners:{Q96GX9}  
831 Pathogen[ P0C214] interacts with 1 human partners:{Q96GX9}  
832 Pathogen[ P03346] interacts with 1 human partners:{Q96GX9}  
833 Pathogen[ Q85601] interacts with 1 human partners:{Q96GX9}  
834 Pathogen[ P14079] interacts with 1 human partners:{Q96GX9}  
835 Pathogen[ P03383] interacts with 1 human partners:{Q96GX9}  
836 Pathogen[ P03410] interacts with 1 human partners:{Q96GX9}  
837 Pathogen[ P14075] interacts with 1 human partners:{Q96GX9}  
838 Pathogen[ P0C206] interacts with 1 human partners:{Q96GX9}  
839 Pathogen[ P03363] interacts with 1 human partners:{Q96GX9}  
840 [Cluster 77]GO:0000171+F molecular\_function [name] ribonuclease MRP activity [def]  
"Catalysis of the site-specific cleavage of RNA by a catalytic RNA-mediated mechanism\_  
substrates include the A3 site in the ITS1 of pre-rRNA." [PMID  
841 Pathogen[ Q2Q067] interacts with 1 human partners:{Q99575}  
842 Pathogen[ P0C214] interacts with 1 human partners:{Q99575}  
843 Pathogen[ P03346] interacts with 1 human partners:{Q99575}  
844 Pathogen[ Q85601] interacts with 1 human partners:{Q99575}  
845 Pathogen[ P14079] interacts with 1 human partners:{Q99575}  
846 Pathogen[ P03383] interacts with 1 human partners:{Q99575}  
847 Pathogen[ P03410] interacts with 1 human partners:{Q99575}  
848 Pathogen[ P14075] interacts with 1 human partners:{Q99575}  
849 Pathogen[ P0C206] interacts with 1 human partners:{Q99575}  
850 Pathogen[ P03363] interacts with 1 human partners:{Q99575}  
851 [Cluster 78]GO:0036004+F molecular\_function [name] GAF domain binding [def]  
"Interacting selectively and non-covalently with the GAF domain of a protein." [GOC  
852 Pathogen[ Q2Q067] interacts with 1 human partners:{O00170}  
853 Pathogen[ P0C214] interacts with 1 human partners:{O00170}  
854 Pathogen[ P03346] interacts with 1 human partners:{O00170}  
855 Pathogen[ Q85601] interacts with 1 human partners:{O00170}  
856 Pathogen[ P14079] interacts with 1 human partners:{O00170}  
857 Pathogen[ P03383] interacts with 1 human partners:{O00170}  
858 Pathogen[ P03410] interacts with 1 human partners:{O00170}  
859 Pathogen[ P14075] interacts with 1 human partners:{O00170}  
860 Pathogen[ P0C206] interacts with 1 human partners:{O00170}  
861 Pathogen[ P03363] interacts with 1 human partners:{O00170}  
862 [Cluster 79]GO:0005542+F molecular\_function [name] folic acid binding [def]  
"Interacting selectively and non-covalently with folic acid, pteroylglutamic acid. Folic  
acid is widely distributed as a member of the vitamin B complex and is essential for the  
synthesis of purine and pyrimidines." [GOC

863 Pathogen[ Q2Q067] interacts with 2 human partners:{Q14749;P04818}  
864 Pathogen[ P0C214] interacts with 3 human partners:{P04818;Q9UI17;Q14749}  
865 Pathogen[ P03346] interacts with 1 human partners:{Q14749}  
866 Pathogen[ Q85601] interacts with 1 human partners:{Q14749}  
867 Pathogen[ P14079] interacts with 7 human  
partners:{Q53S99;O95954;Q96NT5;Q14749;Q9UI17;E5RQL4;P04818}  
868 Pathogen[ P03383] interacts with 1 human partners:{Q14749}  
869 Pathogen[ P03410] interacts with 5 human  
partners:{Q14749;Q9UI17;O95954;E5RQL4;P04818}  
870 Pathogen[ P14075] interacts with 1 human partners:{Q14749}  
871 Pathogen[ P0C206] interacts with 3 human partners:{O95954;P04818;Q14749}  
872 Pathogen[ P03363] interacts with 1 human partners:{Q14749}  
873 [Cluster 80]GO:0019899+F molecular\_function [name] enzyme binding [def]  
"Interacting selectively and non-covalently with any enzyme." [GOC  
874 Pathogen[ Q2Q067] interacts with 84 human  
partners:{Q9H2G9;O15234;P31749;Q13185;Q8IZD2;P24385;O75925;Q99638;O60296;O00267;P0640  
0;Q9H2K2;Q08209;P62258;P62318;P10828;O96004;O14618;O00257;Q04206;Q12933;Q13547;O95999  
;O15379;Q9UER7;P63279;Q9NZC7;P15172;P11388;Q9UJW3;Q12962;P62324;P06746;O15162;P40337;  
Q969S8;Q96S59;Q12834;P26368;Q92769;Q7RTS9;Q9Y6X2;O43679;P42575;Q8TF46;Q5VU43;P50570;Q  
9C0C2;Q15366;Q9UKV3;Q9UQK1;Q96RU7;Q9Y383;Q7L592;Q9BUJ2;P25963;Q14686;Q04917;P31946;P2  
2415;Q9C000;P17096;Q9UNE7;O96018;Q9BQE4;Q86U70;P68036;P30047;P9BQA5;P30047;Q9UKK3;P45  
973;Q96IZ0;O60888;Q9NT62;P83916;Q00987;Q13023;P42224;Q8WYA6;O15392;Q8N163;P31269;O760  
75}  
875 Pathogen[ P0C214] interacts with 91 human  
partners:{Q8N163;Q9Y6X2;O15234;P26368;P63000;Q13547;P16157;O75925;Q96IZ0;Q969S8;P0674  
6;Q04917;Q00987;O00267;Q9C0C2;P83916;Q13023;O60888;P17096;P15172;Q04206;Q12962;P63279  
;P42224;O96018;O60296;P20585;P24385;Q14686;Q15366;Q7L592;Q8TF46;Q9NZC7;P50747;O95685;  
Q5VU43;Q9UER7;O15162;Q86U70;Q96S59;O95999;Q12933;Q08209;Q92769;Q12834;Q7RTS9;O00257;Q  
9H2G9;O43679;P40337;Q14019;Q13185;Q9BUJ2;P62324;P62318;P25963;P11388;O15379;O14618;Q9  
6P3;Q9H2K2;O15392;Q96RU7;Q9UKK3;P45973;O95155;O96004;Q8WYA6;Q9UKV3;P50570;Q9BQA5;P22  
415;P10828;P35520;Q9BQE4;P30047;Q99638;P31946;Q9Y383;Q9NT62;Q9UNE7;Q96CA5;O76075;P064  
00;P42575;P31749;Q9UQK1;Q8IZD2;Q9UJW3;Q9C000;P31269}  
876 Pathogen[ P03346] interacts with 103 human  
partners:{Q969S8;Q9UQK1;O15234;Q86U70;Q86UR1;P50570;Q15788;P45973;Q15366;Q9H2G9;P2438  
5;Q8N163;P68036;O15392;O60888;P59103;P06401;O95155;P11388;O95685;O15379;P06400;P25963  
;Q15911;P42575;P62258;P15172;Q9UKK3;Q04206;Q9Y383;Q13023;O60296;Q9NT62;P63279;O00257;  
Q99638;Q9BUJ2;P31269;P16157;P17096;Q04917;Q00987;Q12834;Q86SE8;Q9UKV3;P30047;O95999;O  
14618;O96004;O75925;P62318;Q9H2K2;P17542;Q96IZ0;Q8WYA6;Q96S59;P31749;Q92769;Q7RTS9;Q9  
NCZ7;Q9UNE7;Q13547;P20585;O43679;P26368;Q9UER7;Q7L592;O96018;P42224;P98177;Q12962;Q9C  
0C2;O00267;Q13023;Q96RU7;O76075;P31946;O15151;Q96P63;Q9H7Z6;P10828;Q14019;P50542;P839  
16;P62324;Q9Y6X2;Q08209;Q5VU43;Q96CA5;P40937;P06746;Q13285;P63000;Q13185;Q8IZD2;Q8TF4  
6;Q9NRD5;Q9UJW3;P22415;Q9BQA5;Q9C000;Q14686;O15162}  
877 Pathogen[ Q85601] interacts with 90 human  
partners:{Q96IZ0;Q969S8;Q9NZC7;O15234;P83916;P31946;P16157;P31749;P24385;P17096;Q9Y38  
3;O60888;P15172;O15151;Q86U70;Q9UJW3;P06400;Q9UQK1;Q9Y6X2;Q86SE8;P40337;P62324;Q9UKK3  
;Q9UER7;P63000;Q9H7Z6;Q8WYA6;O15392;O95155;Q9BUJ2;O76075;O96004;P68036;Q04917;P63279;  
Q12834;P30047;Q08209;P22415;Q14686;O60296;Q9H2K2;Q96S59;Q9UKV3;Q12933;P62258;Q92769;P  
42575;Q04206;P45973;Q7RTS9;P62318;O43679;P20585;P50570;P11388;O96018;P42224;Q13185;Q9  
C0C2;O00267;Q96RU7;Q9BQA5;Q9NT62;Q9H2G9;Q5VU43;Q8N163;O15379;Q12962;P06746;Q13547;O15  
162;O95999;P26368;P10828;Q13023;O00257;O14618;Q00987;Q96CA5;Q9UNE7;O75925;P31269;Q8IZ  
D2;Q8TF46;Q99638;Q15366;Q96P63;Q9BQE4;P25963}  
878 Pathogen[ P14079] interacts with 93 human  
partners:{O15379;Q9NRQ2;P11388;P20585;O76075;O15162;P63279;Q9NT62;Q9BQE4;Q8N163;Q7L59  
2;P62324;Q9Y2D5;O95999;P68036;Q9Y6X2;Q15911;P20292;P23434;P10109;P59103;P40937;Q13023  
;P10828;O43679;Q969S8;Q86U70;Q9BUJ2;P16298;Q9C000;P17096;P26368;O15392;O96004;Q9Y383;  
Q9H2K2;P16157;Q04917;Q8TF46;Q9BQA5;Q9UKK3;P50570;Q00987;Q9H2G9;P45973;P40337;Q9C0C2;O  
75952;P50542;Q13185;O00257;O95685;Q9UJW3;Q9NZC7;Q9UKV3;Q12962;Q9UER7;Q92769;O96018;P3  
1946;P03973;P31269;O60888;Q9UQK1;Q96IZ0;Q15788;O95292;Q15366;P62258;Q7RTS9;P42224;Q96  
RU7;O60296;Q12933;P06746;O75925;Q99638;P42575;P83916;Q96S59;O00267;P62318;O15151;Q8WY  
A6;O14618;O15234;Q08209;Q14686;P30047;Q14019;Q5VU43;P10636;P22415}  
879 Pathogen[ P03383] interacts with 69 human  
partners:{O96018;O75925;O15234;P06746;Q15366;P17096;Q9UQK1;P62324;P62318;P40337;Q8N16  
3;P15172;O15162;P31946;Q86U70;Q7L592;Q9UJW3;P31749;Q13023;O00257;Q14686;Q96IZ0;P63000  
;Q9H2G9;P24385;P26368;Q9C0C2;Q9NT62;O00267;P06400;P83916;Q5VU43;Q12834;O96004;O60296;  
Q13185;P45973;Q96S59;Q9BQE4;Q9UKV3;Q9BQA5;Q12933;Q9Y383;Q92769;Q7RTS9;O43679;Q9Y6X2;O  
15379;Q9UER7;P25963;P31269;O95999;Q13547;Q96RU7;Q99638;Q9UKK3;Q96P63;Q9BUJ2;P68036;Q0  
4206;Q12962;P10828;Q8WYA6;P62258;P30047;P63279;Q969S8;P22415;O60888}  
880 Pathogen[ P03410] interacts with 101 human  
partners:{Q7L592;P62258;Q04206;O95292;O15392;Q86SE8;O96018;P30047;O75925;Q9H2G9;Q7RTS  
9;Q9Y2D5;P26368;P20585;O15234;O15151;O96004;Q08209;P63000;Q9BUJ2;O00267;Q96S59;Q04917  
;Q12962;Q9BQA5;P16157;Q14686;P42575;Q14019;Q9C0C2;O76075;Q9NZC7;Q96P63;Q9NRQ2;Q8TF46;  
O43679;Q9Y6X2;O95685;P31749;P17096;P06746;P45973;P50570;Q15366;P10828;Q9C000;P06400;P  
68036;Q9BQE4;O75952;O15162;Q8WYA6;Q9UNE7;P24385;Q969S8;Q9NRD5;Q9UKV3;Q9UER7;O95999;Q9  
2769;Q8N163;Q99638;Q86UR1;P62324;O15379;Q5VU43;P23434;Q86U70;P31269;P22415;Q96IZ0;Q13  
023;Q12933;Q9NT62;Q13185;O60296;Q12834;P10636;P11388;Q96RU7;P50542;Q13547;P63279;P839  
16;Q9Y383;Q9UKK3;P10109;Q00987;Q9UJW3;Q9H2K2;O00257;P25963;O14618;P40937;P20292;O6088

8;P59103;P31946;P40337;Q9UQK1;P62318}

881 Pathogen[ P14075] interacts with 70 human partners:{Q9BQE4;Q15366;O15234;Q7L592;Q12962;Q9H2G9;Q86U70;Q04206;Q969S8;O96018;O60888;P68036;Q9BQA5;P62324;Q5VU43;P10828;Q9NT62;O15162;Q14686;P15172;P17096;Q9UJW3;P06746;O75925;O60296;P45973;P63279;P25963;Q13547;Q9UQK1;Q96IZ0;Q9UKV3;Q8N163;P31269;O00257;O96004;Q99638;P31749;P62318;Q96S59;Q12933;Q92769;Q9BUJ2;Q7RTS9;Q13185;O43679;P30047;P26368;O95999;P06400;P83916;P63000;Q96RU7;O15379;Q9Y383;Q8WYA6;P31946;P24385;O95685;P22415;Q9UER7;Q9C0C2;P59103;P40337;O00267;Q9Y6X2;Q12834;P62258;Q9UUK3;Q13023}

882 Pathogen[ P0C206] interacts with 105 human partners:{Q9BUJ2;O43679;Q9C000;P62324;Q92769;Q14019;O75952;P45973;P26368;P31269;P06401;P31749;Q96IZ0;Q7RTS9;Q15911;Q9Y2D5;O75925;P68036;Q13023;Q9UQK1;O76075;O95999;P25963;Q9Y383;P06746;Q9UER7;Q13547;Q04917;O95155;Q12933;P50542;P10636;Q9BQA5;Q96RU7;Q9Y6X2;Q8WYA6;O96004;P31946;Q99638;P30047;O95292;P16157;O15151;P10828;Q9BQE4;P22415;O96018;P83916;P63000;P62258;Q9UUK3;Q9UNE7;O15379;O60888;Q04206;Q14686;O60296;O14618;P62318;O15234;Q5VU43;Q86SE8;O00267;O15392;P23434;Q15366;Q9C0C2;P17096;Q9H2G9;O15162;P20292;Q9NZC7;Q13185;Q96CA5;P15172;Q96P63;P20585;P42575;Q86U70;Q08209;P11388;Q12962;P59103;Q9NT62;O00257;Q96S59;Q00987;O95685;P42224;Q969S8;Q9NRD5;Q8TF46;Q15788;Q8N163;Q9H2K2;Q12834;P50570;Q7L592;Q9UJW3;Q8IZD2;Q9UKV3;Q9H7Z6;P40337;P24385;P06400}

883 Pathogen[ P03363] interacts with 81 human partners:{P15911;Q86U70;O60888;P62258;P10828;Q15366;Q04206;Q7RTS9;Q9Y383;Q86UR1;P83916;Q9C000;P16157;Q96IZ0;Q9UKV3;P25963;P45973;O15379;Q7L592;O95155;Q969S8;Q12933;P50570;P31946;P62318;Q8WYA6;Q9UER7;O15151;Q5VU43;O43679;O00267;Q9NT62;Q14686;P06400;P40337;Q13185;P63000;Q9H2K2;Q14019;O60296;Q96P63;Q12962;Q9Y6X2;P20585;P26368;P62324;P31749;Q9UUK3;P17096;Q9C0C2;P06746;Q9UNE7;O76075;Q9BQA5;Q8N163;O96004;O75925;P22415;P63279;Q13547;P24385;Q99638;Q9UQK1;Q13023;Q9H2G9;P31269;Q96CA5;O14618;Q9UJW3;Q04917;Q12834;Q86SE8;P30047;Q96S59;Q8TF46;P15172;Q9BUJ2;O96018;O00257;P68036;O15234}

884 [Cluster 81]GO:0030617+F molecular\_function [name] transforming growth factor beta receptor, inhibitory cytoplasmic mediator activity [def] "A TGF-beta cytoplasmic mediator that inhibits the signaling function of common-partner and pathway-specific mediators." [PMID

885 Pathogen[ Q2Q067] interacts with 2 human partners:{O15105;O43541}

886 Pathogen[ P0C214] interacts with 2 human partners:{O15105;O43541}

887 Pathogen[ P03346] interacts with 2 human partners:{O15105;O43541}

888 Pathogen[ Q85601] interacts with 2 human partners:{O43541;O15105}

889 Pathogen[ P14079] interacts with 2 human partners:{O43541;O15105}

890 Pathogen[ P03383] interacts with 2 human partners:{O15105;O43541}

891 Pathogen[ P03410] interacts with 2 human partners:{O43541;O15105}

892 Pathogen[ P14075] interacts with 2 human partners:{O43541;O15105}

893 Pathogen[ P0C206] interacts with 2 human partners:{O43541;O15105}

894 Pathogen[ P03363] interacts with 2 human partners:{O15105;O43541}

895 [Cluster 82]GO:0008201+F molecular\_function [name] heparin binding [def] "Interacting selectively and non-covalently with heparin, any member of a group of glycosaminoglycans found mainly as an intracellular component of mast cells and which consist predominantly of alternating alpha-(1->4)-linked D-galactose and N-acetyl-D-glucosamine-6-sulfate residues." [GOC

896 Pathogen[ Q2Q067] interacts with 4 human partners:{P47914;O14786;P35268;Q15072}

897 Pathogen[ P0C214] interacts with 8 human partners:{P08294;O14786;P47914;P05546;P07093;P01008;Q15072;P35268}

898 Pathogen[ P03346] interacts with 6 human partners:{P35268;Q9Y215;P47914;Q15072;P51858;O14786}

899 Pathogen[ Q85601] interacts with 6 human partners:{O14786;P47914;P35268;P01008;P07093;Q15072}

900 Pathogen[ P14079] interacts with 5 human partners:{Q15072;O95866;P47914;P35268;Q8TAT2}

901 Pathogen[ P03383] interacts with 4 human partners:{Q15072;P47914;P01008;P35268}

902 Pathogen[ P03410] interacts with 8 human partners:{O14786;Q9BQB4;O95866;Q8TAT2;P47914;P35268;Q9Y215;Q15072}

903 Pathogen[ P14075] interacts with 3 human partners:{P35268;P47914;Q15072}

904 Pathogen[ P0C206] interacts with 5 human partners:{Q15072;P01008;O14786;P35268;P47914}

905 Pathogen[ P03363] interacts with 6 human partners:{P51858;O14786;P35268;Q9Y215;Q15072;P47914}

906 [Cluster 83]GO:0070410+F molecular\_function [name] co-SMAD binding [def] "Interacting selectively and non-covalently with a common mediator SMAD signaling protein." [GOC

907 Pathogen[ Q2Q067] interacts with 8 human partners:{Q9UPN9;Q99966;P84022;O43541;Q15796;Q15583;Q93008;Q15797}

908 Pathogen[ P0C214] interacts with 7 human partners:{P84022;Q93008;Q99966;Q15796;O43541;Q15797;Q9UPN9}

909 Pathogen[ P03346] interacts with 9 human partners:{Q9UPN9;Q99966;Q93008;Q15797;Q15583;Q15796;P84022;O43541;O75593}

910 Pathogen[ Q85601] interacts with 8 human partners:{Q9UPN9;O43541;Q15797;Q99966;Q15583;Q93008;P84022;Q15796}

911 Pathogen[ P14079] interacts with 5 human partners:{Q15583;Q99966;Q15797;Q9UPN9;O43541}

912 Pathogen[ P03383] interacts with 5 human



913 partners:{Q9UPN9;Q15797;P84022;O43541;Q15796}  
Pathogen[ P03410] interacts with 7 human

914 partners:{P84022;Q15583;Q15797;O43541;Q15796;Q9UPN9;Q99966}  
Pathogen[ P14075] interacts with 4 human partners:{O43541;Q15796;Q9UPN9;P84022}

915 Pathogen[ P0C206] interacts with 8 human

916 partners:{P84022;O43541;Q9UPN9;Q93008;Q15796;Q15797;Q99966;Q15583}  
Pathogen[ P03363] interacts with 7 human  
partners:{Q9UPN9;Q15797;O43541;Q15796;P84022;Q15583;Q93008}

917 [Cluster 84]GO:0004722+F molecular\_function [name] protein serine/threonine  
phosphatase activity [def] "Catalysis of the reaction

918 Pathogen[ Q2Q067] interacts with 22 human  
partners:{P30153;Q9H0C8;Q8WY54;Q08209;P63151;O00743;P62140;O15355;O14829;Q9Y5P8;P6271  
4;P36873;P62136;P99999;P53041;Q9UQK1;O95476;P35813;O75688;P49593;P60510;O15297}

919 Pathogen[ P0C214] interacts with 30 human  
partners:{O60346;P35813;P62140;P30153;O14829;Q5SWA1;P60510;P62714;O95685;P99999;Q0820  
9;P63151;P62136;O95278;P53041;Q9P0J1;O95476;O15297;Q8N3J5;Q8WY54;Q3ZCQ8;P36873;Q13615  
;P49593;O00743;O75688;Q9Y5P8;Q9H0C8;Q9P2J9;Q9UQK1}

920 Pathogen[ P03346] interacts with 28 human  
partners:{P62136;Q9UQK1;Q9H0C8;O00743;O60346;P35813;O14829;Q8WY54;O95685;Q5SWA1;P6271  
4;P49593;P30153;Q9Y5P8;P99999;Q16667;P36873;O15297;O75688;P53041;O95476;Q3ZCQ8;O15355  
;P62140;Q08209;O95278;P60510;P63151}

921 Pathogen[ Q85601] interacts with 27 human  
partners:{O60346;O75688;P99999;O14829;P62714;P63151;Q9H0C8;Q9UQK1;P49593;P30153;Q5SWA  
1;O95278;Q08209;O15355;P62136;P36873;O15297;Q3ZCQ8;P53041;O95476;Q8WY54;P60510;O00743  
;P62140;P35813;Q9Y5P8;Q8N3J5}

922 Pathogen[ P14079] interacts with 26 human  
partners:{Q3ZCQ8;P49593;P53041;Q5SWA1;O15297;P36873;P16298;P62136;O60346;P63151;P3581  
3;Q8WY54;O95685;O14829;P62140;Q9UQK1;Q9H0C8;P60510;O95476;O75688;P30153;Q9Y5P8;P99999  
;O15355;Q08209;O00743}

923 Pathogen[ P03383] interacts with 17 human  
partners:{P62140;Q9UQK1;Q9H0C8;P62714;P30153;Q5SWA1;O15297;P35813;P36873;P62136;Q9Y5P  
8;P99999;P53041;O15355;Q8WY54;O00743;P60510}

924 Pathogen[ P03410] interacts with 27 human  
partners:{P62714;O15355;P35813;Q8N3J5;Q08209;P60510;Q8WY54;P62136;O95685;P63151;Q9H0C  
8;O75688;O15297;Q3ZCQ8;P62140;Q5SWA1;P36873;P53041;P99999;O95476;P30153;O60346;P49593  
;O00743;O14829;Q9Y5P8;Q9UQK1}

925 Pathogen[ P14075] interacts with 18 human  
partners:{Q9Y5P8;O15297;P35813;P60510;Q5SWA1;P62140;Q9UQK1;P36873;P62136;O00743;Q9H0C  
8;P99999;P53041;P62714;P30153;Q8WY54;O95685;O15355}

926 Pathogen[ P0C206] interacts with 29 human  
partners:{P99999;O00743;Q8WY54;P30153;Q13615;Q9UQK1;P53041;P63151;O95476;P49593;O1535  
5;Q3ZCQ8;O75688;O95278;P62714;Q5SWA1;P62140;O14829;O60346;Q08209;P60510;O95685;O15297  
;P36873;Q8N3J5;Q9Y5P8;P62136;P35813;Q9H0C8}

927 Pathogen[ P03363] interacts with 21 human  
partners:{Q9Y5P8;P62136;O15355;P62714;O14829;P36873;P99999;P62140;P53041;Q16667;O0074  
3;Q3ZCQ8;O95476;P63151;Q9H0C8;P60510;Q9UQK1;O15297;P30153;O75688;Q8WY54}

928 [Cluster 85]GO:0030971+F molecular\_function [name] receptor tyrosine kinase binding  
[def] "Interacting selectively and non-covalently with a receptor that possesses protein  
tyrosine kinase activity." [GOC

929 Pathogen[ Q2Q067] interacts with 8 human  
partners:{P61981;P12004;Q8N1I0;Q53G26;P27986;Q96EY1;Q96JJ3;Q13501}

930 Pathogen[ P0C214] interacts with 7 human  
partners:{Q13501;Q53G26;P61981;Q8N1I0;Q96JJ3;P27986;Q96EY1}

931 Pathogen[ P03346] interacts with 10 human  
partners:{P12004;O75159;Q96JJ3;Q53G26;P61981;Q5VV41;Q8N1I0;Q96EY1;P27986;Q13501}

932 Pathogen[ Q85601] interacts with 8 human  
partners:{P61981;Q53G26;Q96JJ3;P27986;P12004;Q8N1I0;Q96EY1;Q13501}

933 Pathogen[ P14079] interacts with 8 human  
partners:{Q96JJ3;P61981;P08758;Q13501;P12004;Q8N1I0;Q96EY1;Q5VV41}

934 Pathogen[ P03383] interacts with 5 human  
partners:{P27986;Q13501;P61981;Q96EY1;Q53G26}

935 Pathogen[ P03410] interacts with 9 human  
partners:{P27986;Q53G26;Q13501;P61981;Q5VV41;Q8N1I0;P12004;Q96JJ3;Q96EY1}

936 Pathogen[ P14075] interacts with 5 human  
partners:{Q53G26;P61981;P27986;Q96EY1;Q13501}

937 Pathogen[ P0C206] interacts with 8 human  
partners:{Q13501;Q53G26;P27986;P61981;Q96JJ3;Q8N1I0;Q96EY1;P12004}

938 Pathogen[ P03363] interacts with 8 human  
partners:{O75159;Q5VV41;Q53G26;Q8N1I0;P61981;Q96JJ3;Q96EY1;P27986}

939 [Cluster 86]GO:0008140+F molecular\_function [name] cAMP response element binding  
protein binding [def] "Interacting selectively and non-covalently with the cAMP response  
element binding protein." [GOC

940 Pathogen[ Q2Q067] interacts with 5 human  
partners:{Q6UUUV9;Q6UUUV7;P15336;Q03060;Q53ET0}

941 Pathogen[ P0C214] interacts with 5 human  
partners:{Q6UUUV7;P15336;Q53ET0;Q6UUUV9;Q03060}

- 942 Pathogen[ P03346] interacts with 5 human partners:{Q53ET0;P15336;Q6UUUV9;Q03060;Q6UUUV7}
- 943 Pathogen[ Q85601] interacts with 5 human partners:{Q53ET0;Q6UUUV9;Q6UUUV7;P15336;Q03060}
- 944 Pathogen[ P14079] interacts with 2 human partners:{Q03060;P15336}
- 945 Pathogen[ P03383] interacts with 5 human partners:{Q6UUUV9;Q6UUUV7;P15336;Q53ET0;Q03060}
- 946 Pathogen[ P03410] interacts with 5 human partners:{Q6UUUV7;Q03060;Q6UUUV9;Q53ET0;P15336}
- 947 Pathogen[ P14075] interacts with 5 human partners:{Q53ET0;P15336;Q6UUUV9;Q6UUUV7;Q03060}
- 948 Pathogen[ P0C206] interacts with 5 human partners:{Q03060;P15336;Q6UUUV9;Q53ET0;Q6UUUV7}
- 949 Pathogen[ P03363] interacts with 5 human partners:{Q53ET0;P15336;Q6UUUV9;Q6UUUV7;Q03060}
- 950 [Cluster 87]GO:0008022+F molecular\_function [name] protein C-terminus binding [def] "Interacting selectively and non-covalently with a protein C-terminus, the end of any peptide chain at which the l-carboxy function of a constituent amino acid is not attached in peptide linkage to another amino-acid residue." [ISBN
- 951 Pathogen[ Q2Q067] interacts with 66 human partners:{P49454;O75351;Q93009;P15884;A9UHW6;O95782;P07196;Q92889;P49959;Q13352;P38432;Q9NSC5;Q15554;Q9P0M2;Q93074;O95999;P67775;P63279;Q92547;P08047;O14907;Q9BSM1;Q06609;P11388;P31948;Q12959;Q99966;P54253;P62714;P78352;Q66GS9;Q92796;Q12834;Q15543;Q9Y6X2;Q13426;P50613;Q96CV9;Q9UN37;O60907;O00505;Q15599;Q03468;P12956;P19338;Q13363;O75360;P35813;Q6QNY1;P31946;O95619;O75382;P46013;Q14676;Q99700;Q9P1Z2;P27986;P13010;P08670;P11940;Q15691;Q14207;Q9UBY9;Q9NPA3;Q9BV73;P33076}
- 952 Pathogen[ P0C214] interacts with 68 human partners:{Q9Y6X2;P35813;P38432;Q06609;Q14207;Q13363;P49959;O75351;Q92889;P13010;P54253;O00159;Q9BSM1;Q15554;P50613;Q92796;P33076;P15884;O60907;Q15599;Q9NPA3;Q93074;Q9P0M2;Q9UBY9;O14907;P63279;P11940;Q9NSC5;Q14676;Q15691;P31948;Q99700;O95619;P62714;P78352;Q99966;Q13426;Q66GS9;O95999;A9UHW6;Q12834;P08670;Q13352;P67775;P11388;Q93009;Q96CV9;Q12959;O00505;O75360;Q9HD26;Q96JB3;Q9BV73;P46013;O95782;Q9UN37;Q92547;Q9P1Z2;Q15543;Q6QNY1;P31946;P49454;P19338;P27986;Q03468;P07196;P08047;P12956}
- 953 Pathogen[ P03346] interacts with 84 human partners:{Q9NSC5;O75382;Q86UT5;Q93009;Q9P0M2;P35813;Q9NQC8;P07196;P12956;Q14207;Q99966;O60907;Q06609;Q15036;P11388;Q15554;P78352;Q12772;P07992;Q15691;Q13426;O75970;P13010;Q93074;P33076;O95782;P31948;P11940;P63279;O00505;P62714;P67775;P19338;Q9BSM1;Q9UBX0;O00409;P55196;Q5EBL8;Q12834;P08047;O95999;Q92796;Q99700;Q14676;Q96CV9;Q66GS9;A9UHW6;Q8N960;Q15599;Q9UBY9;Q03468;Q6QNY1;Q9HD26;Q9P1Z2;O14907;Q8IUQ4;P49959;P08670;O95619;Q92889;Q92547;P31946;O75351;P50542;Q13363;P46013;O75360;Q9UI14;P38432;P54253;O43933;Q9Y6X2;Q9NRD5;Q13352;P27986;P49454;Q9NPA3;P15884;Q9UN37;Q96JB3;Q12959;Q9NWB1;Q15543;Q9BV73}
- 954 Pathogen[ Q85601] interacts with 75 human partners:{O95619;P49454;Q96CV9;O75360;P33076;P31946;Q96JB3;Q93009;Q92547;P62714;P07196;Q15554;P08670;O60907;Q15036;Q9Y6X2;Q99966;Q13426;Q12772;P31948;P49959;Q13363;P19338;P63279;Q96FI4;Q12834;P08047;P27986;Q92889;P11940;P38432;Q03468;Q13352;Q66GS9;O00159;O75351;Q9UBX0;Q9UBY9;Q9BSM1;Q9BV73;Q9HD26;Q15691;O14907;P11388;P78352;Q9NPA3;Q92796;P50613;P67775;Q14207;O75382;Q9P0M2;Q12959;O43933;Q9NSC5;A9UHW6;P46013;P54253;Q15543;O95999;Q9P1Z2;O00505;P19447;P35813;Q06609;Q9UN37;Q6QNY1;Q93074;Q99700;Q14676;P15884;Q15599;P13010;P12956;O95782}
- 955 Pathogen[ P14079] interacts with 77 human partners:{Q15691;Q9Y5Y5;P11388;P33076;A9UHW6;Q96JB3;P31948;Q15036;P63279;Q9NPA3;O95999;Q9Y6X2;Q99700;P13010;Q86UT5;Q9P0M2;Q14207;Q66GS9;O60907;Q99966;Q9UI14;Q9BV73;O14907;P54253;P07196;Q8N960;P35813;Q12772;P19338;Q9HD26;P50613;P12956;P50542;O95782;Q15543;P11940;O75915;P31946;Q15599;Q9Y520;O75360;Q7Z412;Q96FI4;Q92889;Q9NSC5;O00505;Q9UN37;Q15554;Q9Y366;Q14676;Q92547;P38432;P15884;Q03468;P49454;Q9NQC8;P08670;O75351;Q9NWB1;Q93074;Q92796;O95619;Q06609;Q9P1Z2;Q6QNY1;Q13352;Q9UBY9;O75382;Q96CV9;Q13426;P07992;Q9BSM1;P19447;P49917;O75970;Q9NSN8;P46013}
- 956 Pathogen[ P03383] interacts with 56 human partners:{P27986;P49454;Q06609;P33076;P08047;P13010;Q15691;P19338;P08670;P31946;Q9HD26;Q15554;O60907;O75360;A9UHW6;Q99700;P31948;P46013;Q9BV73;P62714;P67775;P11940;O00505;Q13352;P35813;Q93074;P38432;Q12834;Q9BSM1;Q66GS9;P50613;Q03468;Q13426;Q9Y6X2;P07196;O95782;O95999;Q14207;Q9NSC5;P54253;O14907;Q9UBY9;Q92796;Q96CV9;Q92547;Q14676;O95619;Q9UN37;P78352;Q9NPA3;P63279;Q9P1Z2;Q13363;P12956;Q6QNY1;Q15543}
- 957 Pathogen[ P03410] interacts with 84 human partners:{Q99700;Q9BSM1;P62714;Q96JB3;Q86UT5;P49959;O95619;O95782;Q8N960;Q96FI4;P27986;P35813;O00505;Q6QNY1;Q9NWB1;Q15543;Q66GS9;Q15554;P11940;P07992;O75351;O75382;P46013;Q12959;P15884;Q14207;Q9Y5Y5;O00159;Q9Y6X2;Q92889;Q9NSC5;Q9Y366;Q03468;P50613;P07196;P38432;P49454;Q9HD26;Q9P1Z2;Q15599;O75970;P12956;Q9P0M2;Q9NRD5;A9UHW6;O95999;Q15691;O75915;Q12772;Q9UN37;Q9Y520;Q96CV9;Q92796;P19447;O14907;Q15036;P19338;Q13426;P31948;P08670;Q12834;Q92547;P11388;P50542;P13010;P63279;P08047;Q14676;Q9NQC8;Q93074;O75360;P54253;P78352;P67775;Q9UBY9;Q9UI14;O60907;Q9BV73;P33076;Q9NPA3;Q13352;P31946;Q06609;Q99966}
- 958 Pathogen[ P14075] interacts with 57 human partners:{P54253;P35813;P19338;Q9UBY9;P12956;Q14207;Q15554;P38432;P50613;O95619;P33076;Q9HD26;P63279;A9UHW6;O00505;Q03468;Q93074;P11940;Q66GS9;Q14676;Q9NPA3;Q9NSC5;Q6QNY1

;Q15691;Q9BV73;O95782;P27986;O14907;O60907;Q9P1Z2;O75360;Q92796;O95999;Q13426;P62714;P67775;P08670;P15884;P78352;Q96CV9;P07196;P31946;Q99700;Q13363;P13010;Q13352;P31948;P49454;Q92547;Q9BSM1;P46013;Q9Y6X2;Q12834;Q06609;Q9UN37;Q15543;P08047}

959 Pathogen[ P0C206] interacts with 85 human partners: {A9UHW6;Q9NQC8;Q9NPA3;O43933;Q9UN37;P13010;P78352;P07196;Q9Y520;P49959;Q15543;O60907;Q96CV9;Q96CV9;Q15554;Q15691;O95999;Q8IUQ4;P46013;O00505;Q03468;P19338;Q6QNY1;Q93009;Q9P1Z2;P49454;P67775;P50542;P33076;Q15036;P27986;Q9UII4;Q9Y6X2;P07992;O75360;P19447;P31946;Q86UT5;O14907;Q96JB3;Q15599;P49917;P50613;Q9NSC5;O95619;Q99700;P08047;Q9POM2;Q13426;P55196;O00159;Q14676;Q92889;P15884;Q66GS9;Q13352;P62714;Q9BV73;Q9BSM1;Q96FI4;O95782;Q99966;Q06609;P11388;Q92796;P08670;Q13363;O75351;P31948;Q92547;Q9UBX0;P12956;Q9NRD5;Q93074;P11940;Q12959;Q9HD26;P38432;Q12772;Q8N960;Q12834;Q14207;P35813;Q9UBY9;P54253}

960 Pathogen[ P03363] interacts with 71 human partners: {Q9UBV9;Q92547;Q12959;O95619;P12956;O14907;P49454;P19338;O43933;O75360;P62714;Q96CV9;Q15554;A9UHW6;P13010;Q66GS9;O00505;Q15691;P78352;P31946;O60907;Q96FI4;Q92889;P11940;O75970;O00409;Q9POM2;O75351;Q9Y6X2;P07196;Q9NSC5;Q9UN37;Q13426;Q9BSM1;Q9P1Z2;P08670;Q9NWB1;P31948;Q86UT5;Q6QNY1;P54253;P63279;Q93074;O75382;Q9UBE0;P33076;O95782;Q03468;Q15599;P15884;Q06609;Q12834;Q14207;Q13363;Q99700;P08047;Q92796;P46013;Q14676;Q9NPA3;Q15543;Q13352;P27986;P67775;Q9HD26;Q9NSN8;Q9BV73;P38432;Q9NQC8;Q9UBX0;Q8N960}

961 [Cluster 88]GO:0019888+F molecular\_function [name] protein phosphatase regulator activity [def] "Modulates the activity of a protein phosphatase, an enzyme which catalyzes of the removal of a phosphate group from a protein substrate molecule." [GOC

962 Pathogen[ Q2Q067] interacts with 1 human partners: {Q6NUP7}

963 Pathogen[ P0C214] interacts with 1 human partners: {Q6NUP7}

964 Pathogen[ P03346] interacts with 2 human partners: {Q6NUP7;Q9UQ13}

965 Pathogen[ Q85601] interacts with 1 human partners: {Q6NUP7}

966 Pathogen[ P14079] interacts with 1 human partners: {Q6NUP7}

967 Pathogen[ P03383] interacts with 1 human partners: {Q6NUP7}

968 Pathogen[ P03410] interacts with 1 human partners: {Q6NUP7}

969 Pathogen[ P14075] interacts with 1 human partners: {Q6NUP7}

970 Pathogen[ P0C206] interacts with 1 human partners: {Q6NUP7}

971 Pathogen[ P03363] interacts with 2 human partners: {Q9UQ13;Q6NUP7}

972 [Cluster 89]GO:0042296+F molecular\_function [name] ISG15 ligase activity [def] "Catalysis of the covalent attachment of the ubiquitin-like protein ISG15 to other proteins." [GOC

973 Pathogen[ Q2Q067] interacts with 3 human partners: {Q9UII4;P51965;O14933}

974 Pathogen[ P0C214] interacts with 4 human partners: {O14933;P51965;Q9UII4;Q96LR5}

975 Pathogen[ P03346] interacts with 3 human partners: {Q9UII4;P51965;O14933}

976 Pathogen[ Q85601] interacts with 3 human partners: {O14933;Q96LR5;P51965}

977 Pathogen[ P14079] interacts with 2 human partners: {P51965;O14933}

978 Pathogen[ P03383] interacts with 2 human partners: {O14933;P51965}

979 Pathogen[ P03410] interacts with 2 human partners: {P51965;O14933}

980 Pathogen[ P14075] interacts with 2 human partners: {P51965;O14933}

981 Pathogen[ P0C206] interacts with 3 human partners: {O14933;Q96LR5;P51965}

982 Pathogen[ P03363] interacts with 3 human partners: {P51965;O14933;Q9UII4}

983 [Cluster 90]GO:0035257+F molecular\_function [name] nuclear hormone receptor binding [def] "Interacting selectively and non-covalently with a nuclear hormone receptor, a ligand-dependent receptor found in the nucleus of the cell." [GOC

984 Pathogen[ Q2Q067] interacts with 6 human partners: {Q13573;Q15596;O95359;P48552;Q8NI08;Q6STE5}

985 Pathogen[ P0C214] interacts with 6 human partners: {Q13573;P48552;Q6STE5;Q8NI08;O95359;Q15596}

986 Pathogen[ P03346] interacts with 7 human partners: {Q15788;O95359;Q15596;Q6STE5;P48552;Q8NI08;Q13573}

987 Pathogen[ Q85601] interacts with 6 human partners: {Q6STE5;Q13573;Q15596;P48552;Q8NI08;O95359}

988 Pathogen[ P14079] interacts with 7 human partners: {P48552;Q6STE5;Q15596;O95359;Q8NI08;Q13573;Q15788}

989 Pathogen[ P03383] interacts with 5 human partners: {Q13573;Q15596;Q6STE5;P48552;Q8NI08}

990 Pathogen[ P03410] interacts with 6 human partners: {O95359;Q8NI08;Q15596;Q6STE5;P48552;Q13573}

991 Pathogen[ P14075] interacts with 5 human partners: {Q13573;P48552;Q8NI08;Q6STE5;Q15596}

992 Pathogen[ P0C206] interacts with 7 human partners: {O95359;Q6STE5;Q8NI08;Q13573;Q15596;P48552;Q15788}

993 Pathogen[ P03363] interacts with 6 human partners: {Q6STE5;Q15596;P48552;Q8NI08;Q13573;O95359}

994 [Cluster 91]GO:0017108+F molecular\_function [name] 5'-flap endonuclease activity [def] "Catalysis of the cleavage of a 5' flap structure in DNA, but not other DNA structures\_ processes the 5' ends of Okazaki fragments in lagging strand DNA synthesis." [PMID

995 Pathogen[ Q2Q067] interacts with 4 human partners: {Q9Y2M0;Q9BQ83;P39748;Q8IY92}

996 Pathogen[ P0C214] interacts with 4 human partners: {Q9BQ83;Q9Y2M0;P39748;Q8IY92}

997 Pathogen[ P03346] interacts with 4 human partners: {Q9BQ83;P39748;Q8IY92;Q9Y2M0}

998 Pathogen[ Q85601] interacts with 4 human partners: {Q9Y2M0;Q8IY92;Q9BQ83;P39748}

```

999 Pathogen[ P14079] interacts with 4 human partners:{Q9Y2M0;Q9BQ83;Q8IY92;P39748}
1000 Pathogen[ P03383] interacts with 3 human partners:{Q9Y2M0;Q8IY92;Q9BQ83}
1001 Pathogen[ P03410] interacts with 4 human partners:{P39748;Q9BQ83;Q8IY92;Q9Y2M0}
1002 Pathogen[ P14075] interacts with 3 human partners:{Q9BQ83;Q9Y2M0;Q8IY92}
1003 Pathogen[ P0C206] interacts with 4 human partners:{Q9Y2M0;P39748;Q9BQ83;Q8IY92}
1004 Pathogen[ P03363] interacts with 3 human partners:{Q9Y2M0;Q9BQ83;Q8IY92}
1005 [Cluster 92]GO:0019003+F molecular_function [name] GDP binding [def] "Interacting
selectively and non-covalently with GDP, guanosine 5'-diphosphate." [GOC
1006 Pathogen[ Q2Q067] interacts with 1 human partners:{Q14232}
1007 Pathogen[ P0C214] interacts with 3 human partners:{P35558;Q14232;P36404}
1008 Pathogen[ P03346] interacts with 3 human partners:{Q14232;P36404;P36405}
1009 Pathogen[ Q85601] interacts with 2 human partners:{P36405;Q14232}
1010 Pathogen[ P14079] interacts with 2 human partners:{P36405;Q14232}
1011 Pathogen[ P03383] interacts with 1 human partners:{Q14232}
1012 Pathogen[ P03410] interacts with 2 human partners:{P36405;Q14232}
1013 Pathogen[ P14075] interacts with 1 human partners:{Q14232}
1014 Pathogen[ P0C206] interacts with 2 human partners:{Q14232;P36405}
1015 Pathogen[ P03363] interacts with 1 human partners:{Q8IYML}
1016 [Cluster 93]GO:0032129+F molecular_function [name] histone deacetylase activity
(H3-K9 specific) [def] "Catalysis of the reaction
1017 Pathogen[ Q2Q067] interacts with 10 human
partners:{P56524;Q9BY41;Q9UKV0;Q13547;O15379;Q9UQL6;Q969S8;Q96DB2;Q92769;Q8WUI4}
1018 Pathogen[ P0C214] interacts with 10 human
partners:{Q13547;Q969S8;Q96DB2;P56524;Q92769;Q9UKV0;O15379;Q8WUI4;Q9UQL6;Q9BY41}
1019 Pathogen[ P03346] interacts with 10 human
partners:{Q969S8;Q96DB2;O15379;P56524;Q92769;Q13547;Q9BY41;Q8WUI4;Q9UKV0;Q9UQL6}
1020 Pathogen[ Q85601] interacts with 10 human
partners:{Q969S8;Q9UKV0;Q96DB2;Q9BY41;Q9UQL6;Q92769;P56524;O15379;Q13547;Q8WUI4}
1021 Pathogen[ P14079] interacts with 9 human
partners:{Q9UQL6;O15379;Q96DB2;Q969S8;Q8WUI4;Q9UKV0;Q92769;Q9BY41;P56524}
1022 Pathogen[ P03383] interacts with 9 human
partners:{Q9UQL6;Q92769;O15379;Q13547;Q9BY41;Q9UKV0;P56524;Q8WUI4;Q969S8}
1023 Pathogen[ P03410] interacts with 10 human
partners:{Q9UKV0;Q9BY41;Q8WUI4;Q9UQL6;Q969S8;Q92769;O15379;P56524;Q13547;Q96DB2}
1024 Pathogen[ P14075] interacts with 9 human
partners:{Q9BY41;Q969S8;P56524;Q9UKV0;Q13547;Q92769;O15379;Q9UQL6;Q8WUI4}
1025 Pathogen[ P0C206] interacts with 10 human
partners:{Q92769;Q96DB2;Q9UKV0;Q13547;O15379;Q8WUI4;Q9BY41;P56524;Q969S8;Q9UQL6}
1026 Pathogen[ P03363] interacts with 7 human
partners:{Q9BY41;O15379;Q969S8;Q9UQL6;Q9UKV0;Q13547;Q8WUI4}
1027 [Cluster 94]GO:0002161+F molecular_function [name] aminoacyl-tRNA editing activity
[def] "The hydrolysis of an incorrectly aminoacylated tRNA." [GOC
1028 Pathogen[ Q2Q067] interacts with 2 human partners:{P41252;Q9P2J5}
1029 Pathogen[ P0C214] interacts with 7 human
partners:{Q9NSE4;P41252;Q15031;P49588;P26640;Q5ST30;Q9P2J5}
1030 Pathogen[ P03346] interacts with 2 human partners:{P41252;Q9P2J5}
1031 Pathogen[ Q85601] interacts with 2 human partners:{Q9P2J5;P41252}
1032 Pathogen[ P14079] interacts with 7 human
partners:{Q9P2J5;Q15031;Q5ST30;P41252;P26640;Q9NSE4;P49588}
1033 Pathogen[ P03383] interacts with 3 human partners:{Q9P2J5;Q15031;P41252}
1034 Pathogen[ P03410] interacts with 6 human
partners:{Q9NSE4;Q5ST30;P49588;Q9P2J5;P41252;P26640}
1035 Pathogen[ P14075] interacts with 4 human partners:{P41252;Q9P2J5;Q9NSE4;Q15031}
1036 Pathogen[ P0C206] interacts with 6 human
partners:{Q9NSE4;P41252;Q5ST30;P26640;Q15031;Q9P2J5}
1037 Pathogen[ P03363] interacts with 3 human partners:{P41252;Q9P2J5;Q15031}
1038 [Cluster 95]GO:0016462+F molecular_function [name] pyrophosphatase activity [def]
"Catalysis of the hydrolysis of a pyrophosphate bond between two phosphate groups,
leaving one phosphate on each of the two fragments." [EC
1039 Pathogen[ Q2Q067] interacts with 3 human partners:{Q15181;Q8WUY3;Q86TP1}
1040 Pathogen[ P0C214] interacts with 3 human partners:{Q8WUY3;Q86TP1;Q15181}
1041 Pathogen[ P03346] interacts with 3 human partners:{Q8WUY3;Q15181;Q86TP1}
1042 Pathogen[ Q85601] interacts with 3 human partners:{Q86TP1;Q8WUY3;Q15181}
1043 Pathogen[ P14079] interacts with 5 human
partners:{Q86TP1;Q9H773;Q8WUY3;Q15181;P49915}
1044 Pathogen[ P03383] interacts with 3 human partners:{Q8WUY3;Q15181;Q86TP1}
1045 Pathogen[ P03410] interacts with 5 human
partners:{P49915;Q9H773;Q86TP1;Q15181;Q8WUY3}
1046 Pathogen[ P14075] interacts with 3 human partners:{Q8WUY3;Q15181;Q86TP1}
1047 Pathogen[ P0C206] interacts with 3 human partners:{Q86TP1;Q8WUY3;Q15181}
1048 Pathogen[ P03363] interacts with 3 human partners:{Q8WUY3;Q15181;Q86TP1}
1049 [Cluster 96]GO:0050811+F molecular_function [name] GABA receptor binding [def]
"Interacting selectively and non-covalently with the gamma-aminobutyric acid (GABA,
4-aminobutyrate) receptor." [GOC
1050 Pathogen[ Q2Q067] interacts with 4 human partners:{O60296;Q96N16;P60520;Q9UPV9}
1051 Pathogen[ P0C214] interacts with 4 human partners:{P60520;Q9UPV9;O60296;Q96N16}

```

1052 Pathogen[ P03346] interacts with 7 human  
partners:{O95166;Q96N16;P60520;Q9Y6D5;O60296;Q9H0R8;Q9UPV9}

1053 Pathogen[ Q85601] interacts with 6 human  
partners:{O95166;Q9H0R8;Q9UPV9;O60296;P60520;Q96N16}

1054 Pathogen[ P14079] interacts with 7 human  
partners:{O95166;P24588;Q9Y6D5;Q96N16;P60520;Q9H0R8;O60296}

1055 Pathogen[ P03383] interacts with 3 human partners:{O60296;Q96N16;Q9UPV9}

1056 Pathogen[ P03410] interacts with 8 human  
partners:{P60520;Q96N16;O95166;Q9H0R8;Q9UPV9;Q9Y6D5;O60296;P24588}

1057 Pathogen[ P14075] interacts with 3 human partners:{Q96N16;O60296;Q9UPV9}

1058 Pathogen[ P0C206] interacts with 7 human  
partners:{Q9UPV9;Q96N16;Q9Y6D5;O60296;P60520;Q9H0R8;O95166}

1059 Pathogen[ P03363] interacts with 6 human  
partners:{Q9UPV9;P60520;O60296;Q9H0R8;Q96N16;O95166}

1060 [Cluster 97]GO:0004817+F molecular\_function [name] cysteine-tRNA ligase activity  
[def] "Catalysis of the reaction

1061 Pathogen[ Q2Q067] interacts with 2 human partners:{Q9HA77;P49589}

1062 Pathogen[ P0C214] interacts with 2 human partners:{P49589;Q9HA77}

1063 Pathogen[ P03346] interacts with 1 human partners:{P49589}

1064 Pathogen[ Q85601] interacts with 2 human partners:{P49589;Q9HA77}

1065 Pathogen[ P14079] interacts with 2 human partners:{Q9HA77;P49589}

1066 Pathogen[ P03383] interacts with 2 human partners:{P49589;Q9HA77}

1067 Pathogen[ P03410] interacts with 2 human partners:{Q9HA77;P49589}

1068 Pathogen[ P14075] interacts with 2 human partners:{Q9HA77;P49589}

1069 Pathogen[ P0C206] interacts with 2 human partners:{P49589;Q9HA77}

1070 Pathogen[ P03363] interacts with 1 human partners:{P49589}

1071 [Cluster 98]GO:0042578+F molecular\_function [name] phosphoric ester hydrolase  
activity [def] "Catalysis of the reaction

1072 Pathogen[ Q2Q067] interacts with 2 human partners:{Q92562;P09467}

1073 Pathogen[ P0C214] interacts with 4 human partners:{O15056;Q92562;P09467;O00757}

1074 Pathogen[ P03346] interacts with 3 human partners:{P09467;Q92562;O15056}

1075 Pathogen[ Q85601] interacts with 3 human partners:{O00757;Q92562;P09467}

1076 Pathogen[ P14079] interacts with 2 human partners:{Q92562;P09467}

1077 Pathogen[ P03383] interacts with 1 human partners:{P09467}

1078 Pathogen[ P03410] interacts with 3 human partners:{Q92562;P09467;O00757}

1079 Pathogen[ P14075] interacts with 1 human partners:{P09467}

1080 Pathogen[ P0C206] interacts with 3 human partners:{Q92562;P09467;O00757}

1081 Pathogen[ P03363] interacts with 1 human partners:{O15056}

1082 [Cluster 99]GO:0000149+F molecular\_function [name] SNARE binding [def]  
"Interacting selectively and non-covalently with a SNARE (soluble  
N-ethylmaleimide-sensitive factor attached protein receptor) protein." [PMID

1083 Pathogen[ Q2Q067] interacts with 3 human partners:{O95295;P60520;P54920}

1084 Pathogen[ P0C214] interacts with 3 human partners:{P60520;O95295;P54920}

1085 Pathogen[ P03346] interacts with 3 human partners:{O95295;P60520;P54920}

1086 Pathogen[ Q85601] interacts with 3 human partners:{P54920;O95295;P60520}

1087 Pathogen[ P14079] interacts with 7 human  
partners:{O14810;Q6PUV4;P60520;O95295;Q8WVH0;Q7Z7G2;P54920}

1088 Pathogen[ P03383] interacts with 2 human partners:{P54920;O95295}

1089 Pathogen[ P03410] interacts with 7 human  
partners:{P60520;O14810;Q8WVH0;O95295;Q7Z7G2;Q6PUV4;P54920}

1090 Pathogen[ P14075] interacts with 2 human partners:{O95295;P54920}

1091 Pathogen[ P0C206] interacts with 5 human  
partners:{P54920;Q7Z7G2;Q6PUV4;P60520;O95295}

1092 Pathogen[ P03363] interacts with 3 human partners:{P54920;P60520;O95295}

1093 [Cluster 100]GO:0033882+F molecular\_function [name] choloyl-CoA hydrolase activity  
[def] "Catalysis of the reaction

1094 Pathogen[ Q2Q067] interacts with 1 human partners:{O14734}

1095 Pathogen[ P0C214] interacts with 1 human partners:{O14734}

1096 Pathogen[ P03346] interacts with 1 human partners:{O14734}

1097 Pathogen[ Q85601] interacts with 1 human partners:{O14734}

1098 Pathogen[ P14079] interacts with 1 human partners:{O14734}

1099 Pathogen[ P03383] interacts with 1 human partners:{O14734}

1100 Pathogen[ P03410] interacts with 1 human partners:{O14734}

1101 Pathogen[ P14075] interacts with 1 human partners:{O14734}

1102 Pathogen[ P0C206] interacts with 1 human partners:{O14734}

1103 Pathogen[ P03363] interacts with 1 human partners:{O14734}

1104 [Cluster 101]GO:0004520+F molecular\_function [name] endodeoxyribonuclease activity  
[def] "Catalysis of the hydrolysis of ester linkages within deoxyribonucleic acid by  
creating internal breaks." [GOC

1105 Pathogen[ Q2Q067] interacts with 6 human  
partners:{Q92889;P49959;O95243;P27695;Q8IW19;P28715}

1106 Pathogen[ P0C214] interacts with 6 human  
partners:{Q8IW19;O95243;P27695;P49959;Q92889;P28715}

1107 Pathogen[ P03346] interacts with 7 human  
partners:{P28715;Q8IW19;Q13609;P49959;Q92889;O95243;P27695}

1108 Pathogen[ Q85601] interacts with 6 human

1109 partners:{O95243;P49959;Q92889;P28715;Q8IW19;P27695}  
 Pathogen[ P14079] interacts with 8 human

1110 partners:{Q13609;P28715;O00115;O95243;Q92889;P27695;Q8WZ79;Q8IW19}  
 Pathogen[ P03383] interacts with 3 human partners:{Q8IW19;O95243;P27695}

1111 partners:{P49959;Q13609;Q92889;P28715;O95243;Q8IW19;P27695;O00115}  
 Pathogen[ P14075] interacts with 3 human partners:{P27695;Q8IW19;O95243}

1112 Pathogen[ P0C206] interacts with 7 human  
 partners:{P27695;P28715;P49959;Q92889;Q13609;Q8IW19;O95243}

1114 Pathogen[ P03363] interacts with 4 human partners:{Q8IW19;Q92889;Q13609;O95243}

1115 [Cluster 102]GO:0000146+F molecular\_function [name] microfilament motor activity [def]  
 "Catalysis of movement along a microfilament, coupled to the hydrolysis of a nucleoside triphosphate (usually ATP)." [GOC

1116 Pathogen[ Q2Q067] interacts with 3 human partners:{Q9UKX2;P12883;P35579}

1117 Pathogen[ P0C214] interacts with 7 human  
 partners:{Q9UKX2;P11055;P35580;P12883;Q7Z406;P13533;Q9Y623}

1118 Pathogen[ P03346] interacts with 3 human partners:{P35579;Q9ULV0;Q9UKX2}

1119 Pathogen[ Q85601] interacts with 8 human  
 partners:{P13533;P35579;Q9UKX2;Q7Z406;P11055;P12883;P35580;Q9Y623}

1120 Pathogen[ P14079] interacts with 3 human partners:{P35579;Q9UKX2;P12883}

1121 Pathogen[ P03383] interacts with 4 human partners:{Q9UKX2;P12883;P35580;P35579}

1122 Pathogen[ P03410] interacts with 6 human  
 partners:{Q9UKX2;Q9ULV0;P35579;P12883;P35580;P13533}

1123 Pathogen[ P14075] interacts with 2 human partners:{Q9UKX2;P35579}

1124 Pathogen[ P0C206] interacts with 7 human  
 partners:{P13533;Q9Y623;P11055;P12883;P35579;Q9UKX2;P35580}

1125 Pathogen[ P03363] interacts with 2 human partners:{P35579;Q9UKX2}

1126 [Cluster 103]GO:0071208+F molecular\_function [name] histone pre-mRNA DCP binding [def]  
 "Interacting selectively and non-covalently with the downstream cleavage product (DCP) generated by histone pre-mRNA 3'-end processing." [PMID

1127 Pathogen[ Q2Q067] interacts with 4 human partners:{P62318;P14678;Q14493;Q969L4}

1128 Pathogen[ P0C214] interacts with 4 human partners:{P14678;Q969L4;Q14493;P62318}

1129 Pathogen[ P03346] interacts with 4 human partners:{Q14493;P62318;P14678;Q969L4}

1130 Pathogen[ Q85601] interacts with 4 human partners:{Q969L4;P14678;P62318;Q14493}

1131 Pathogen[ P14079] interacts with 4 human partners:{P14678;Q969L4;Q14493;P62318}

1132 Pathogen[ P03383] interacts with 4 human partners:{Q969L4;P62318;Q14493;P14678}

1133 Pathogen[ P03410] interacts with 4 human partners:{Q14493;P14678;Q969L4;P62318}

1134 Pathogen[ P14075] interacts with 4 human partners:{Q14493;P62318;P14678;Q969L4}

1135 Pathogen[ P0C206] interacts with 4 human partners:{P14678;P62318;Q14493;Q969L4}

1136 Pathogen[ P03363] interacts with 4 human partners:{P62318;Q969L4;Q14493;P14678}

1137 [Cluster 104]GO:0003948+F molecular\_function [name]  
 N4-(beta-N-acetylglucosaminyl)-L-asparaginase activity [def] "Catalysis of the reaction

1138 Pathogen[ Q2Q067] interacts with 1 human partners:{Q7L266}

1139 Pathogen[ P0C214] interacts with 1 human partners:{Q7L266}

1140 Pathogen[ P03346] interacts with 1 human partners:{Q7L266}

1141 Pathogen[ Q85601] interacts with 1 human partners:{Q7L266}

1142 Pathogen[ P14079] interacts with 2 human partners:{P20933;Q7L266}

1143 Pathogen[ P03383] interacts with 1 human partners:{Q7L266}

1144 Pathogen[ P03410] interacts with 2 human partners:{Q7L266;P20933}

1145 Pathogen[ P14075] interacts with 1 human partners:{Q7L266}

1146 Pathogen[ P0C206] interacts with 1 human partners:{Q7L266}

1147 Pathogen[ P03363] interacts with 1 human partners:{Q7L266}

1148 [Cluster 105]GO:0008413+F molecular\_function [name] 8-oxo-7,8-dihydroguanosine triphosphate pyrophosphatase activity [def] "Catalysis of the reaction

1149 Pathogen[ Q2Q067] interacts with 1 human partners:{P36639}

1150 Pathogen[ P0C214] interacts with 1 human partners:{P36639}

1151 Pathogen[ P03346] interacts with 1 human partners:{P36639}

1152 Pathogen[ Q85601] interacts with 1 human partners:{P36639}

1153 Pathogen[ P14079] interacts with 1 human partners:{P36639}

1154 Pathogen[ P03383] interacts with 1 human partners:{P36639}

1155 Pathogen[ P03410] interacts with 1 human partners:{P36639}

1156 Pathogen[ P14075] interacts with 1 human partners:{P36639}

1157 Pathogen[ P0C206] interacts with 1 human partners:{P36639}

1158 Pathogen[ P03363] interacts with 1 human partners:{P36639}

1159 [Cluster 106]GO:0003954+F molecular\_function [name] NADH dehydrogenase activity [def]  
 "Catalysis of the reaction

1160 Pathogen[ Q2Q067] interacts with 4 human partners:{O75489;O75251;O75306;Q9P0J0}

1161 Pathogen[ P0C214] interacts with 8 human  
 partners:{Q16795;O75306;P28331;P17568;Q9P0J0;O75489;O75251;Q9UI09}

1162 Pathogen[ P03346] interacts with 4 human partners:{O75489;O75251;O75306;Q9P0J0}

1163 Pathogen[ Q85601] interacts with 2 human partners:{Q9P0J0;O75306}

1164 Pathogen[ P14079] interacts with 7 human  
 partners:{O95169;O75306;P17568;O75251;Q9UI09;Q9P0J0;O75489}

1165 Pathogen[ P03383] interacts with 4 human partners:{O75251;O75489;O75306;Q9P0J0}

1166 Pathogen[ P03410] interacts with 8 human  
 partners:{P17568;O75251;Q9UI09;O75438;O75489;O95169;O75306;Q9P0J0}

1167 Pathogen[ P14075] interacts with 4 human partners:{075306;075251;075489;Q9P0J0}  
1168 Pathogen[ P0C206] interacts with 6 human  
partners:{075251;075306;Q9UI09;P17568;Q9P0J0;075489}  
1169 Pathogen[ P03363] interacts with 1 human partners:{Q9P0J0}  
1170 [Cluster 107]GO:0022891+F molecular\_function [name] substrate-specific transmembrane  
transporter activity [def] "Enables the transfer of a specific substance or group of  
related substances from one side of a membrane to the other." [GOC  
1171 Pathogen[ Q2Q067] interacts with 2 human partners:{P11166;P14672}  
1172 Pathogen[ P0C214] interacts with 3 human partners:{P11166;P11168;P14672}  
1173 Pathogen[ P03346] interacts with 2 human partners:{P11166;P14672}  
1174 Pathogen[ Q85601] interacts with 3 human partners:{P11168;P11166;P14672}  
1175 Pathogen[ P14079] interacts with 2 human partners:{P14672;P11166}  
1176 Pathogen[ P03383] interacts with 4 human partners:{P11168;P11169;P14672;P22732}  
1177 Pathogen[ P03410] interacts with 3 human partners:{P22732;P11166;P11168}  
1178 Pathogen[ P14075] interacts with 4 human partners:{P11169;P22732;P11168;P14672}  
1179 Pathogen[ P0C206] interacts with 3 human partners:{P11166;P11168;P14672}  
1180 Pathogen[ P03363] interacts with 2 human partners:{P14672;P11166}  
1181 [Cluster 108]GO:0051373+F molecular\_function [name] FATZ binding [def] "Interacting  
selectively and non-covalently with a family of FATZ proteins, filamin-, actinin-, and  
telethonin-binding proteins of the Z-disc of striated muscle. FATZ proteins are located  
in the Z-disc of the sarcomere and are involved in a complex network of interactions with  
other Z-band components." [PMID  
1182 Pathogen[ Q2Q067] interacts with 1 human partners:{Q9NP98}  
1183 Pathogen[ P0C214] interacts with 1 human partners:{Q9NP98}  
1184 Pathogen[ P03346] interacts with 1 human partners:{Q9NP98}  
1185 Pathogen[ Q85601] interacts with 1 human partners:{Q9NP98}  
1186 Pathogen[ P14079] interacts with 2 human partners:{Q9NP98;O15273}  
1187 Pathogen[ P03383] interacts with 1 human partners:{Q9NP98}  
1188 Pathogen[ P03410] interacts with 2 human partners:{Q9NP98;O15273}  
1189 Pathogen[ P14075] interacts with 1 human partners:{Q9NP98}  
1190 Pathogen[ P0C206] interacts with 1 human partners:{Q9NP98}  
1191 Pathogen[ P03363] interacts with 1 human partners:{Q9NP98}  
1192 [Cluster 109]GO:0030976+F molecular\_function [name] thiamine pyrophosphate binding  
[def] "Interacting selectively and non-covalently with thiamine pyrophosphate, the  
diphosphoric ester of thiamine. Acts as a coenzyme of several (de)carboxylases,  
transketolases, and alpha-oxoacid dehydrogenases." [CHEBI  
1193 Pathogen[ Q2Q067] interacts with 1 human partners:{Q9ULD0}  
1194 Pathogen[ P0C214] interacts with 2 human partners:{P29401;Q9ULD0}  
1195 Pathogen[ P03346] interacts with 1 human partners:{Q9ULD0}  
1196 Pathogen[ Q85601] interacts with 1 human partners:{Q9ULD0}  
1197 Pathogen[ P14079] interacts with 2 human partners:{P29401;Q9ULD0}  
1198 Pathogen[ P03383] interacts with 1 human partners:{Q9ULD0}  
1199 Pathogen[ P03410] interacts with 1 human partners:{Q9ULD0}  
1200 Pathogen[ P14075] interacts with 1 human partners:{Q9ULD0}  
1201 Pathogen[ P0C206] interacts with 2 human partners:{Q9ULD0;P29401}  
1202 Pathogen[ P03363] interacts with 1 human partners:{Q9ULD0}  
1203 [Cluster 110]GO:0044183+F molecular\_function [name] protein binding involved in  
protein folding [def] "Interacting selectively and non-covalently with any protein or  
protein complex (a complex of two or more proteins that may include other nonprotein  
molecules) that contributes to the process of protein folding." [GOC  
1204 Pathogen[ Q2Q067] interacts with 3 human partners:{P08107;P27797;Q16401}  
1205 Pathogen[ P0C214] interacts with 3 human partners:{P27797;P08107;Q16401}  
1206 Pathogen[ P03346] interacts with 3 human partners:{P08107;Q16401;P27797}  
1207 Pathogen[ Q85601] interacts with 3 human partners:{P08107;P27797;Q16401}  
1208 Pathogen[ P14079] interacts with 3 human partners:{P08107;Q7Z5B4;Q16401}  
1209 Pathogen[ P03383] interacts with 3 human partners:{P08107;Q16401;P27797}  
1210 Pathogen[ P03410] interacts with 4 human partners:{Q7Z5B4;Q16401;P08107;P27797}  
1211 Pathogen[ P14075] interacts with 3 human partners:{Q16401;P27797;P08107}  
1212 Pathogen[ P0C206] interacts with 4 human partners:{P27797;Q7Z5B4;P08107;Q16401}  
1213 Pathogen[ P03363] interacts with 2 human partners:{P08107;P27797}  
1214 [Cluster 111]GO:0005484+F molecular\_function [name] SNAP receptor activity [def]  
"Acting as a marker to identify a membrane and interacting selectively with one or more  
SNAREs on another membrane to mediate membrane fusion." [GOC  
1215 Pathogen[ Q2Q067] interacts with 5 human  
partners:{O43752;O14662;O95721;O75558;Q9P2W9}  
1216 Pathogen[ P0C214] interacts with 4 human partners:{O95721;O43752;O75558;Q9P2W9}  
1217 Pathogen[ P03346] interacts with 7 human  
partners:{O43752;Q9P2W9;Q13190;O95721;O75558;O14662;Q86Y82}  
1218 Pathogen[ Q85601] interacts with 5 human  
partners:{Q9P2W9;O43752;O75558;O14662;O95721}  
1219 Pathogen[ P14079] interacts with 5 human  
partners:{O75558;O95721;O14662;O43752;Q9P2W9}  
1220 Pathogen[ P03383] interacts with 2 human partners:{O75558;O43752}  
1221 Pathogen[ P03410] interacts with 7 human  
partners:{Q13190;Q9P2W9;O14662;O95249;O75558;O43752;O95721}  
1222 Pathogen[ P14075] interacts with 2 human partners:{O75558;O43752}

1223 Pathogen[ P0C206] interacts with 5 human partners:{O14662;O95721;O43752;O75558;Q9P2W9}

1224 Pathogen[ P03363] interacts with 5 human partners:{O75558;Q9P2W9;O95721;O14662;O43752}

1225 [Cluster 112]GO:0036310+F

1226 Pathogen[ Q2Q067] interacts with 1 human partners:{P28370}

1227 Pathogen[ P0C214] interacts with 2 human partners:{Q92698;P28370}

1228 Pathogen[ P03346] interacts with 2 human partners:{Q92698;P28370}

1229 Pathogen[ Q85601] interacts with 2 human partners:{Q92698;P28370}

1230 Pathogen[ P14079] interacts with 2 human partners:{P28370;Q92698}

1231 Pathogen[ P03383] interacts with 1 human partners:{P28370}

1232 Pathogen[ P03410] interacts with 2 human partners:{Q92698;P28370}

1233 Pathogen[ P14075] interacts with 1 human partners:{P28370}

1234 Pathogen[ P0C206] interacts with 2 human partners:{P28370;Q92698}

1235 Pathogen[ P03363] interacts with 2 human partners:{P28370;Q92698}

1236 [Cluster 113]GO:0004647+F molecular\_function [name] phosphoserine phosphatase activity [def] "Catalysis of the reaction

1237 Pathogen[ Q2Q067] interacts with 1 human partners:{Q9UBQ0}

1238 Pathogen[ P0C214] interacts with 2 human partners:{Q9UBQ0;Q96GD0}

1239 Pathogen[ P03346] interacts with 1 human partners:{Q9UBQ0}

1240 Pathogen[ Q85601] interacts with 1 human partners:{Q9UBQ0}

1241 Pathogen[ P14079] interacts with 3 human partners:{Q96GD0;O15172;Q9UBQ0}

1242 Pathogen[ P03383] interacts with 1 human partners:{Q9UBQ0}

1243 Pathogen[ P03410] interacts with 3 human partners:{O15172;Q9UBQ0;Q96GD0}

1244 Pathogen[ P14075] interacts with 1 human partners:{Q9UBQ0}

1245 Pathogen[ P0C206] interacts with 3 human partners:{O15172;Q9UBQ0;Q96GD0}

1246 Pathogen[ P03363] interacts with 1 human partners:{Q9UBQ0}

1247 [Cluster 114]GO:0035259+F molecular\_function [name] glucocorticoid receptor binding [def] "Interacting selectively and non-covalently with a glucocorticoid receptor." [GOC

1248 Pathogen[ Q2Q067] interacts with 5 human partners:{P40763;P17676;P48552;P15036;Q04917}

1249 Pathogen[ P0C214] interacts with 5 human partners:{Q04917;P48552;P17676;P15036;P40763}

1250 Pathogen[ P03346] interacts with 6 human partners:{P17676;Q9P2W1;Q04917;P48552;P40763;P15036}

1251 Pathogen[ Q85601] interacts with 5 human partners:{P17676;P15036;P40763;Q04917;P48552}

1252 Pathogen[ P14079] interacts with 3 human partners:{P48552;P15036;Q04917}

1253 Pathogen[ P03383] interacts with 3 human partners:{P15036;P17676;P48552}

1254 Pathogen[ P03410] interacts with 5 human partners:{P17676;Q04917;P15036;P48552;P40763}

1255 Pathogen[ P14075] interacts with 3 human partners:{P15036;P48552;P17676}

1256 Pathogen[ P0C206] interacts with 5 human partners:{Q04917;P17676;P15036;P40763;P48552}

1257 Pathogen[ P03363] interacts with 4 human partners:{P17676;P48552;Q04917;P15036}

1258 [Cluster 115]GO:0005087+F molecular\_function [name] Ran guanyl-nucleotide exchange factor activity [def] "Stimulates the exchange of guanyl nucleotides associated with a GTPase of the Ran family. Under normal cellular physiological conditions, the concentration of GTP is higher than that of GDP, favoring the replacement of GDP by GTP in association with the GTPase." [GOC

1259 Pathogen[ Q2Q067] interacts with 3 human partners:{P18754;Q6VN20;Q9UGK8}

1260 Pathogen[ P0C214] interacts with 3 human partners:{Q9UGK8;Q6VN20;P18754}

1261 Pathogen[ P03346] interacts with 3 human partners:{P18754;Q6VN20;Q9UGK8}

1262 Pathogen[ Q85601] interacts with 3 human partners:{Q6VN20;P18754;Q9UGK8}

1263 Pathogen[ P14079] interacts with 3 human partners:{Q6VN20;Q9UGK8;P18754}

1264 Pathogen[ P03383] interacts with 2 human partners:{P18754;Q9UGK8}

1265 Pathogen[ P03410] interacts with 3 human partners:{Q6VN20;Q9UGK8;P18754}

1266 Pathogen[ P14075] interacts with 2 human partners:{P18754;Q9UGK8}

1267 Pathogen[ P0C206] interacts with 3 human partners:{P18754;Q9UGK8;Q6VN20}

1268 Pathogen[ P03363] interacts with 3 human partners:{Q9UGK8;Q6VN20;P18754}

1269 [Cluster 116]GO:0042169+F molecular\_function [name] SH2 domain binding [def] "Interacting selectively and non-covalently with a SH2 domain (Src homology 2) of a protein, a protein domain of about 100 amino-acid residues and belonging to the alpha + beta domain class." [GOC

1270 Pathogen[ Q2Q067] interacts with 6 human partners:{P46108;Q6PD62;Q5VWX1;Q86WV1;P37198;Q13501}

1271 Pathogen[ P0C214] interacts with 6 human partners:{Q13501;P37198;Q86WV1;P46108;Q5VWX1;Q6PD62}

1272 Pathogen[ P03346] interacts with 8 human partners:{Q6PD62;Q8I WV1;P37198;Q9Y3P8;Q5VWX1;P46108;Q86WV1;Q13501}

1273 Pathogen[ Q85601] interacts with 5 human partners:{Q6PD62;Q5VWX1;P46108;Q86WV1;Q13501}

1274 Pathogen[ P14079] interacts with 12 human partners:{Q86WV1;Q8NEM2;Q14118;Q6PD62;Q5VWX1;P37198;Q13501;Q8I WV1;O43761;P46108;Q9Y3P8;Q9GZY6}

1275 Pathogen[ P03383] interacts with 6 human



1276 partners:{Q6PD62;Q86WV1;Q5VWX1;Q13501;P37198;Q9Y3P8}  
Pathogen[ P03410] interacts with 11 human  
partners:{Q86WV1;Q6PD62;Q8IWW1;Q13501;Q5VWX1;O43761;Q9Y3P8;Q9GZY6;Q14118;Q8NEM2;P46108}

1277 Pathogen[ P14075] interacts with 8 human  
partners:{Q5VWX1;Q8IWW1;Q86WV1;Q6PD62;P37198;Q9Y3P8;Q8NEM2;Q13501}

1278 Pathogen[ P0C206] interacts with 8 human  
partners:{Q13501;Q6PD62;Q8IWW1;Q9Y3P8;Q86WV1;Q8NEM2;P46108;Q5VWX1}

1279 Pathogen[ P03363] interacts with 6 human  
partners:{Q9Y3P8;Q86WV1;Q5VWX1;P46108;P37198;Q6PD62}

1280 [Cluster 117]GO:0070064+F molecular\_function [name] proline-rich region binding [def] "Interacting selectively and non-covalently with a proline-rich region, i.e. a region that contains a high proportion of proline residues, in a protein." [GOC  
1281 Pathogen[ Q2Q067] interacts with 4 human partners:{O00213;P07737;P46937;Q5HYK7}  
1282 Pathogen[ P0C214] interacts with 3 human partners:{O00213;P46937;Q5HYK7}  
1283 Pathogen[ P03346] interacts with 6 human  
partners:{O00213;P46937;O75554;Q5HYK7;Q9UI14;P07737}

1284 Pathogen[ Q85601] interacts with 5 human  
partners:{O00213;Q5HYK7;P07737;Q9NQC7;P46937}

1285 Pathogen[ P14079] interacts with 6 human  
partners:{P07737;Q9UI14;O00213;P46937;Q5HYK7;Q9NQC7}

1286 Pathogen[ P03383] interacts with 4 human partners:{O00213;Q5HYK7;P07737;P46937}

1287 Pathogen[ P03410] interacts with 5 human  
partners:{Q5HYK7;O00213;P46937;P07737;Q9UI14}

1288 Pathogen[ P14075] interacts with 4 human partners:{O00213;Q5HYK7;P07737;P46937}

1289 Pathogen[ P0C206] interacts with 6 human  
partners:{Q9NQC7;P46937;Q9UI14;O00213;Q5HYK7;P07737}

1290 Pathogen[ P03363] interacts with 4 human partners:{O00213;P46937;Q5HYK7;P07737}

1291 [Cluster 118]GO:0008430+F molecular\_function [name] selenium binding [def] "Interacting selectively and non-covalently with selenium (Se)." [GOC  
1292 Pathogen[ Q2Q067] interacts with 2 human partners:{Q13228;Q9BQE4}  
1293 Pathogen[ P0C214] interacts with 5 human  
partners:{P59797;Q9BRT3;Q13228;Q9BQE4;O60613}

1294 Pathogen[ P03346] interacts with 4 human partners:{Q13228;Q9BRT3;P63302;Q9Y2J0}

1295 Pathogen[ Q85601] interacts with 4 human partners:{O60613;Q13228;P59797;Q9BQE4}

1296 Pathogen[ P14079] interacts with 7 human  
partners:{Q13228;Q9BQE4;O60613;P63302;Q8IZQ5;Q9BRT3;P59797}

1297 Pathogen[ P03383] interacts with 4 human partners:{Q13228;O60613;Q9BQE4;P59797}

1298 Pathogen[ P03410] interacts with 8 human  
partners:{Q9BRT3;P63302;O60613;P59797;Q9Y2J0;Q9BQE4;Q8IZQ5;Q13228}

1299 Pathogen[ P14075] interacts with 5 human  
partners:{Q9BQE4;P63302;P59797;O60613;Q13228}

1300 Pathogen[ P0C206] interacts with 7 human  
partners:{Q9Y2J0;Q13228;O60613;Q9BQE4;P63302;P59797;Q9BRT3}

1301 Pathogen[ P03363] interacts with 3 human partners:{P59797;Q13228;P63302}

1302 [Cluster 119]GO:0000976+F molecular\_function [name] transcription regulatory region sequence-specific DNA binding [def] "Interacting selectively and non-covalently with a specific sequence of DNA that is part of a regulatory region that controls transcription of that section of the DNA. The transcribed region might be described as a gene, cistron, or operon." [GOC  
1303 Pathogen[ Q2Q067] interacts with 24 human  
partners:{Q92988;P0CJ88;Q9UBX2;P0CJ87;O15266;Q9NQX1;P15976;Q96PT3;A6NLW8;P0CJ89;P0CJ90;P0CJ86;P0CJ85;O15370;O43812;P19838;O75360;Q07687;Q9UMQ3;Q04743;Q96PT4;A6NJ46;Q6RFH8;P18146}

1304 Pathogen[ P0C214] interacts with 11 human  
partners:{P19838;O15266;Q07687;Q6RFH8;O43812;O75360;Q9UMQ3;P18146;Q9NQX1;Q92988;O15370}

1305 Pathogen[ P03346] interacts with 44 human  
partners:{Q06945;P47902;Q9NQX1;P52954;P0CJ88;A6NJ46;O15370;P0CJ87;Q14774;Q99626;Q04743;P0CJ85;P56177;P0CJ89;O60902;P78426;P0CJ90;P17542;P15976;O15266;P17481;Q96PT4;O60479;P31273;O14627;Q9UBX2;A6NMT0;Q5XKR4;P19838;P56178;O75360;O43812;A6NLW8;P18146;Q6RFH8;Q9UIW0;Q9UMQ3;P0CJ86;Q96PT3;Q6ZNG2;Q8NHV9;Q9HBU1;Q92988;Q96SF7}

1306 Pathogen[ Q85601] interacts with 22 human  
partners:{P18146;O75360;A6NJ46;P15976;P0CJ87;Q96PT3;O15370;P0CJ88;Q9NQX1;Q9UMQ3;O15266;P0CJ90;P0CJ89;O43812;Q9UBX2;Q6RFH8;P19838;Q07687;P0CJ86;A6NLW8;P0CJ85;Q92988}

1307 Pathogen[ P14079] interacts with 21 human  
partners:{Q9NQX1;P0CJ89;P0CJ88;O15370;Q96PT4;P0CJ86;O43812;P15976;P0CJ90;P0CJ87;Q6RFH8;O15266;A6NLW8;O75360;Q96PT3;Q9UMQ3;Q04743;Q07687;Q9UBX2;Q92988;P0CJ85}

1308 Pathogen[ P03383] interacts with 10 human  
partners:{O15266;Q07687;O75360;Q9UMQ3;Q6RFH8;Q9NQX1;P18146;O15370;P19838;Q92988}

1309 Pathogen[ P03410] interacts with 25 human  
partners:{P0CJ87;P19838;Q96PT3;Q9UMQ3;O15266;Q9UBX2;P0CJ85;P0CJ90;Q6ZNG2;A6NJ46;Q6RFH8;Q92988;Q07687;A6NLW8;P0CJ89;P0CJ88;P0CJ86;O43812;O75360;O15370;P18146;Q04743;Q9NQX1;Q96PT4;P15976}

1310 Pathogen[ P14075] interacts with 10 human  
partners:{Q6RFH8;P18146;Q92988;Q07687;Q9NQX1;O15370;O75360;Q9UMQ3;P19838;O15266}

1311 Pathogen[ P0C206] interacts with 26 human partners:{Q9NQX1;Q07687;P0CJ87;P0CJ90;O15266;Q04743;O43812;Q9UBX2;Q9UMQ3;Q92988;P0CJ86;P0CJ89;P15976;P0CJ85;P18146;O75360;Q6ZNG2;P19838;A6NJ46;Q6RFH8;P0CJ88;A6NLW8;O15370;Q96PT4;P56177;Q96PT3}

1312 Pathogen[ P03363] interacts with 39 human partners:{Q9NQX1;P56179;O15370;O15266;P31273;O43812;Q9UIW0;P47902;P0CJ87;P0CJ88;O75360;P18146;P0CJ86;Q9UBX2;Q99626;P56177;P0CJ89;P17481;O60902;O60479;P0CJ90;Q96PT4;P0CJ85;Q6ZNG2;A6NMT0;Q5XKR4;P19838;Q6RFH8;Q92988;Q9C056;A6NLW8;Q9UMQ3;Q96PT3;Q8NHV9;Q07687;O14627;Q9HBUI;A6NJ46;Q04743}

1313 [Cluster 120]GO:0004523+F molecular\_function [name] ribonuclease H activity [def] "Catalysis of the endonucleolytic cleavage of RNA in RNA-DNA hybrids to 5'-phosphomonoesters." [EC

1314 Pathogen[ Q2Q067] interacts with 5 human partners:{O60930;P27695;Q9UQ84;P39748;O75792}

1315 Pathogen[ P0C214] interacts with 5 human partners:{P27695;O75792;O60930;P39748;Q9UQ84}

1316 Pathogen[ P03346] interacts with 5 human partners:{O60930;Q9UQ84;P27695;P39748;O75792}

1317 Pathogen[ Q85601] interacts with 5 human partners:{Q9UQ84;O75792;O60930;P39748;P27695}

1318 Pathogen[ P14079] interacts with 5 human partners:{O75792;P27695;O60930;Q9UQ84;P39748}

1319 Pathogen[ P03383] interacts with 3 human partners:{O75792;O60930;P27695}

1320 Pathogen[ P03410] interacts with 6 human partners:{O75792;P39748;O60930;P63135;P27695;Q9UQ84}

1321 Pathogen[ P14075] interacts with 3 human partners:{P27695;O60930;O75792}

1322 Pathogen[ P0C206] interacts with 5 human partners:{P27695;Q9UQ84;O60930;O75792;P39748}

1323 Pathogen[ P03363] interacts with 2 human partners:{O75792;O60930}

1324 [Cluster 121]GO:0070412+F molecular\_function [name] R-SMAD binding [def] "Interacting selectively and non-covalently with a receptor-regulated SMAD signaling protein." [GOC

1325 Pathogen[ Q2Q067] interacts with 11 human partners:{P01100;Q9H4X1;Q9UPN9;Q13485;P84022;O00255;O43541;Q15327;Q15796;P35813;Q9H6Z4}

1326 Pathogen[ P0C214] interacts with 13 human partners:{Q15327;Q9H4X1;P35813;P01100;P84022;Q9HCE7;Q13485;Q15796;O43541;P05412;Q9UPN9;Q9H6Z4;O00255}

1327 Pathogen[ P03346] interacts with 13 human partners:{Q9UPN9;P05412;Q9H4X1;P35813;Q15796;Q15327;P84022;O43541;O00255;Q13485;Q9H6Z4;O75593;P01100}

1328 Pathogen[ Q85601] interacts with 12 human partners:{Q9UPN9;Q9H4X1;O43541;Q9H6Z4;P01100;P05412;Q15327;O00255;P84022;P35813;Q13485;Q15796}

1329 Pathogen[ P14079] interacts with 8 human partners:{P35813;Q9UPN9;Q15327;Q9H6Z4;O43541;P05412;O00255;P01100}

1330 Pathogen[ P03383] interacts with 12 human partners:{Q9H4X1;Q13485;Q9UPN9;P35813;P84022;O43541;O00255;Q15327;P01100;Q9H6Z4;Q15796;P05412}

1331 Pathogen[ P03410] interacts with 12 human partners:{P84022;Q9H4X1;P35813;Q15327;P01100;Q13485;P05412;O43541;O00255;Q15796;Q9H6Z4;Q9UPN9}

1332 Pathogen[ P14075] interacts with 12 human partners:{Q9H6Z4;Q9H4X1;P35813;P05412;O43541;Q15327;Q15796;Q13485;O00255;Q9UPN9;P01100;P84022}

1333 Pathogen[ P0C206] interacts with 12 human partners:{P84022;O43541;Q9H4X1;Q9UPN9;Q15327;O00255;P05412;Q15796;P01100;Q13485;Q9H6Z4;P35813}

1334 Pathogen[ P03363] interacts with 10 human partners:{Q9H4X1;Q9UPN9;Q15327;O43541;Q15796;P84022;Q13485;Q9H6Z4;P05412;P01100}

1335 [Cluster 122]GO:0030145+F molecular\_function [name] manganese ion binding [def] "Interacting selectively and non-covalently with manganese (Mn) ions." [GOC

1336 Pathogen[ Q2Q067] interacts with 11 human partners:{Q8IU60;P49959;O95551;O14829;Q86TP1;P39748;P28838;P35813;O75688;Q9NVV4;P51003}

1337 Pathogen[ P0C214] interacts with 15 human partners:{O95551;Q13907;P35813;P49959;P35558;P28838;O14829;P51003;Q8N819;Q86TP1;Q8IU60;P39748;O75688;P48163;Q9NVV4}

1338 Pathogen[ P03346] interacts with 10 human partners:{P35813;O14829;O95551;Q8IU60;P51003;Q9NVV4;O75688;P49959;P39748;Q86TP1}

1339 Pathogen[ Q85601] interacts with 11 human partners:{O75688;O14829;P49959;Q86TP1;Q9NVV4;P39748;P51003;P35813;Q13907;O95551;Q8IU60}

1340 Pathogen[ P14079] interacts with 12 human partners:{P28838;Q8IU60;Q13907;Q8NDH3;Q86TP1;P35813;O14829;Q9NVV4;O95551;O75688;P51003;P39748}

1341 Pathogen[ P03383] interacts with 7 human  
partners:{Q9NVV4;P51003;Q8IU60;P28838;P35813;Q86TP1;O95551}

1342 Pathogen[ P03410] interacts with 13 human  
partners:{Q8IU60;P49959;P35813;Q8NDH3;Q86TP1;P39748;Q9NVV4;P28838;P51003;O75688;O95551;Q13907;O14829}

1343 Pathogen[ P14075] interacts with 7 human  
partners:{P51003;P35813;Q9NVV4;Q8IU60;P28838;O95551;Q86TP1}

1344 Pathogen[ P0C206] interacts with 13 human  
partners:{Q86TP1;P49959;P28838;P51003;O75688;Q13907;O95551;Q9NVV4;Q8NDH3;O14829;P39748;Q8IU60;P35813}

1345 Pathogen[ P03363] interacts with 7 human  
partners:{Q9NVV4;O14829;P51003;O95551;O75688;Q86TP1;Q8IU60}

1346 [Cluster 123]GO:0016746+F molecular\_function [name] transferase activity, transferring acyl groups [def] "Catalysis of the transfer of an acyl group from one compound (donor) to another (acceptor)." [GOC

1347 Pathogen[ Q2Q067] interacts with 16 human  
partners:{Q9H9T3;P30419;P21980;Q93015;P10515;O14929;Q9UKN8;Q8WU03;P22557;P13196;Q9GZZ1;Q9BSU3;Q92831;P41227;Q92993;P21673}

1348 Pathogen[ P0C214] interacts with 34 human  
partners:{Q92993;O95260;P41227;P22735;Q93015;O14929;Q9UKN8;Q9BSU3;Q16613;Q9GZZ1;Q9Y232;O60551;P22557;P13196;O75223;P23786;Q9H0A0;Q9BWD1;Q8WU03;O95251;Q5SZD4;Q9H9T3;Q92831;P21980;P42765;Q969I3;A6NK58;P30419;P21673;Q96EK6;Q8N159;P10515;P36957;Q6IB77}

1349 Pathogen[ P03346] interacts with 29 human  
partners:{P21980;Q15788;Q8WYB5;Q9BSU3;Q93015;O95260;Q8WU03;P23786;P21673;Q92831;P22557;P13196;Q9UKN8;Q92794;P41227;Q9H9T3;Q9BWD1;O95251;Q9H7Z6;P42765;Q5SZD4;Q8WUY8;Q9Y232;Q9GZZ1;O15516;Q92993;P22735;P10515;O14929}

1350 Pathogen[ Q85601] interacts with 26 human  
partners:{Q5SZD4;Q9GZZ1;Q93015;O95251;Q9H9T3;O15516;Q8WU03;Q9H7Z6;Q16613;P21673;Q92831;O60551;P13196;Q9UKN8;P41227;O14929;O95260;P21980;Q96EK6;Q6IB77;Q9BSU3;Q9BWD1;Q92993;P30419;P10515;Q969I3}

1351 Pathogen[ P14079] interacts with 35 human  
partners:{O75223;Q8N159;P41227;Q86UY6;P13196;P22735;Q9H0A0;Q9UKN8;Q9BVM4;O95251;P21980;P22557;Q5SZD4;Q969I3;Q9BTE0;Q16613;Q9BSU3;O14929;Q9H9T3;Q9GZZ1;Q6IB77;O60502;Q8N8M0;O60551;P30419;Q15788;Q93015;Q8WUY8;P10515;Q96EK6;Q9Y234;O95260;P21673;A6NK58;Q92993}

1352 Pathogen[ P03383] interacts with 20 human  
partners:{Q9UKN8;Q92831;Q9GZZ1;Q93015;O95251;P41227;Q16613;Q92993;Q9BSU3;Q8N159;O14929;P10515;Q8WU03;Q8WUY8;P21980;Q9H0A0;P21673;Q969I3;Q9H9T3;Q5SZD4}

1353 Pathogen[ P03410] interacts with 41 human  
partners:{Q6IED9;Q92831;Q9BSU3;Q9GZZ1;Q93015;O14929;Q8N159;O60551;O95251;Q9H0A0;O60502;Q6IB77;P30419;O95260;Q96EK6;Q5SZD4;Q969I3;Q9H9T3;P23786;A6NK58;P42765;P22557;O75600;P41227;Q9Y234;Q86UY6;Q8N8M0;Q16613;P21673;P21980;Q9BVM4;O75223;Q8WU03;Q9UKN8;Q92993;Q8WUY8;Q9BTE0;P13196;P10515;P22735;Q16635}

1354 Pathogen[ P14075] interacts with 22 human  
partners:{Q5SZD4;P41227;Q92831;Q93015;Q9BSU3;Q8N159;Q16613;O14929;Q9H0A0;Q8WU03;Q92993;Q9BVM4;O95251;Q8WUY8;P10515;Q9H9T3;Q9UKN8;Q969I3;Q9GZZ1;P21980;P21673;Q96EK6}

1355 Pathogen[ P0C206] interacts with 37 human  
partners:{Q9Y234;Q9Y232;Q9GZZ1;O95251;O95260;Q9BVM4;P30419;Q9H9T3;P41227;P21980;Q92993;Q969I3;Q92831;P23786;Q8N159;P21673;Q93015;O15516;O14929;Q9UKN8;P22557;Q8WUY8;Q6IB77;Q9BWD1;Q8WU03;Q96EK6;O60551;Q9BSU3;P13196;A6NK58;Q16613;Q5SZD4;P10515;Q15788;P22735;Q9H0A0;Q9H7Z6}

1356 Pathogen[ P03363] interacts with 15 human  
partners:{P41227;Q92831;Q9BWD1;O95260;P21673;Q93015;Q9BSU3;O14929;P10515;Q9GZZ1;P13196;Q9UKN8;Q9H9T3;O95251;Q92993}

1357 [Cluster 124]GO:0000175+F molecular\_function [name] 3'-5'-exoribonuclease activity [def] "Catalysis of the sequential cleavage of mononucleotides from a free 3' terminus of an RNA molecule." [GOC

1358 Pathogen[ Q2Q067] interacts with 8 human  
partners:{Q8TCS8;Q9NQT4;Q9Y2L1;Q06265;Q13868;Q9NPD3;Q15024;Q8TF46}

1359 Pathogen[ P0C214] interacts with 8 human  
partners:{Q15024;Q9Y2L1;Q8TF46;Q9NPD3;Q8TCS8;Q13868;Q06265;Q9NQT4}

1360 Pathogen[ P03346] interacts with 9 human  
partners:{Q15024;Q8TCS8;Q9Y2L1;Q9NQT5;Q06265;Q9NQT4;Q9NPD3;Q8TF46;Q13868}

1361 Pathogen[ Q85601] interacts with 8 human  
partners:{Q9NPD3;Q13868;Q9Y2L1;Q9NQT4;Q8TCS8;Q15024;Q06265;Q8TF46}

1362 Pathogen[ P14079] interacts with 9 human  
partners:{Q15024;Q9NQT4;Q13868;Q9NPD3;Q8TF46;Q9Y2L1;Q96AZ6;Q06265;Q8TCS8}

1363 Pathogen[ P03383] interacts with 7 human  
partners:{Q06265;Q9Y2L1;Q8TCS8;Q9NPD3;Q9NQT4;Q13868;Q15024}

1364 Pathogen[ P03410] interacts with 9 human  
partners:{Q9Y2L1;Q8TCS8;Q06265;Q8TF46;Q13868;Q15024;Q96AZ6;Q9NQT4;Q9NPD3}

1365 Pathogen[ P14075] interacts with 7 human  
partners:{Q9NPD3;Q9Y2L1;Q13868;Q9NQT4;Q8TCS8;Q15024;Q06265}

1366 Pathogen[ P0C206] interacts with 8 human  
partners:{Q8TCS8;Q9NPD3;Q13868;Q06265;Q15024;Q9Y2L1;Q9NQT4;Q8TF46}

1367 Pathogen[ P03363] interacts with 7 human  
partners:{Q9NQT4;Q15024;Q9NPD3;Q9Y2L1;Q13868;Q9NQT5;Q8TF46}

1368 [Cluster 125]GO:0016433+F molecular\_function [name] rRNA (adenine) methyltransferase activity [def] "Catalysis of the transfer of a methyl group from S-adenosyl-L-methionine to an adenine residue in an rRNA molecule." [GOC

1369 Pathogen[ Q2Q067] interacts with 2 human partners:{Q8WVM0;Q9UNQ2}

1370 Pathogen[ P0C214] interacts with 2 human partners:{Q9UNQ2;Q8WVM0}

1371 Pathogen[ P03346] interacts with 2 human partners:{Q9UNQ2;Q8WVM0}

1372 Pathogen[ Q85601] interacts with 2 human partners:{Q8WVM0;Q9UNQ2}

1373 Pathogen[ P14079] interacts with 2 human partners:{Q9UNQ2;Q8WVM0}

1374 Pathogen[ P03383] interacts with 2 human partners:{Q9UNQ2;Q8WVM0}

1375 Pathogen[ P03410] interacts with 2 human partners:{Q9UNQ2;Q8WVM0}

1376 Pathogen[ P14075] interacts with 2 human partners:{Q9UNQ2;Q8WVM0}

1377 Pathogen[ P0C206] interacts with 2 human partners:{Q8WVM0;Q9UNQ2}

1378 Pathogen[ P03363] interacts with 2 human partners:{Q9UNQ2;Q8WVM0}

1379 [Cluster 126]GO:0019788+F molecular\_function [name] NEDD8 ligase activity [def] "Catalysis of ATP-dependent isopeptide bond formation between the carboxy-terminal residues of the small ubiquitin-related modifier NEDD8 and a substrate lysine residue." [GOC

1380 Pathogen[ Q2Q067] interacts with 2 human partners:{Q9UBF6;P62877}

1381 Pathogen[ P0C214] interacts with 4 human partners:{P62877;Q969M7;P61081;Q9UBF6}

1382 Pathogen[ P03346] interacts with 2 human partners:{P62877;Q9UBF6}

1383 Pathogen[ Q85601] interacts with 3 human partners:{P62877;Q9UBF6;Q969M7}

1384 Pathogen[ P14079] interacts with 3 human partners:{Q9UBF6;P62877;Q969M7}

1385 Pathogen[ P03383] interacts with 2 human partners:{Q9UBF6;P62877}

1386 Pathogen[ P03410] interacts with 3 human partners:{Q9UBF6;P62877;Q969M7}

1387 Pathogen[ P14075] interacts with 2 human partners:{Q9UBF6;P62877}

1388 Pathogen[ P0C206] interacts with 3 human partners:{P62877;Q969M7;Q9UBF6}

1389 Pathogen[ P03363] interacts with 4 human partners:{P61081;Q9UBF6;P62877;Q969M7}

1390 [Cluster 127]GO:0051018+F molecular\_function [name] protein kinase A binding [def] "Interacting selectively and non-covalently with any subunit of protein kinase A." [GOC

1391 Pathogen[ Q2Q067] interacts with 8 human partners:{Q9P0M2;Q9NYF0;Q8NFW9;Q2M3C7;Q02952;Q02040;Q13023;O75969}

1392 Pathogen[ P0C214] interacts with 8 human partners:{Q8NFW9;Q13023;Q9P0M2;O75969;Q2M3C7;Q5SW24;Q02040;Q9NYF0}

1393 Pathogen[ P03346] interacts with 9 human partners:{Q9P0M2;O75969;Q13023;Q2M3C7;Q9UKA4;Q02952;Q8NFW9;Q9NYF0;Q02040}

1394 Pathogen[ Q85601] interacts with 7 human partners:{Q8NFW9;O75969;Q9NYF0;Q2M3C7;Q9P0M2;Q13023;Q5SW24}

1395 Pathogen[ P14079] interacts with 14 human partners:{Q02952;Q9UKA4;Q5JQC9;Q5SW24;Q13023;Q9P0M2;P24588;Q96B18;Q8NFW9;Q02040;O43687;Q2M3C7;O75969;Q9NYF0}

1396 Pathogen[ P03383] interacts with 6 human partners:{Q02040;Q13023;Q2M3C7;Q9NYF0;Q02952;O75969}

1397 Pathogen[ P03410] interacts with 14 human partners:{Q9UKA4;Q5JQC9;Q96B18;O75969;Q8NFW9;Q9P0M2;Q2M3C7;Q5SW24;Q13023;Q9NYF0;O43687;Q02952;P24588;Q02040}

1398 Pathogen[ P14075] interacts with 6 human partners:{Q02040;O75969;Q2M3C7;Q02952;Q9NYF0;Q13023}

1399 Pathogen[ P0C206] interacts with 12 human partners:{Q5JQC9;Q13023;Q8NFW9;Q02040;Q96B18;Q5SW24;Q9P0M2;O75969;Q02952;Q9NYF0;Q2M3C7;Q9UKA4}

1400 Pathogen[ P03363] interacts with 8 human partners:{Q02952;Q8NFW9;Q9NYF0;Q9P0M2;Q02040;Q13023;O75969;Q2M3C7}

1401 [Cluster 128]GO:0017075+F molecular\_function [name] syntaxin-1 binding [def] "Interacting selectively and non-covalently with the SNAP receptor syntaxin-1." [GOC

1402 Pathogen[ Q2Q067] interacts with 4 human partners:{O00186;O75150;Q15833;Q9NX95}

1403 Pathogen[ P0C214] interacts with 4 human partners:{Q15833;O00186;Q9NX95;O75150}

1404 Pathogen[ P03346] interacts with 4 human partners:{Q15833;O75150;Q9NX95;O00186}

1405 Pathogen[ Q85601] interacts with 4 human partners:{O00186;Q15833;O75150;Q9NX95}

1406 Pathogen[ P14079] interacts with 5 human partners:{O14810;Q9NX95;O00186;Q6PUV4;Q15833}

1407 Pathogen[ P03383] interacts with 3 human partners:{O00186;Q9NX95;O75150}

1408 Pathogen[ P03410] interacts with 6 human partners:{Q15833;O14810;O75150;Q6PUV4;O00186;Q9NX95}

1409 Pathogen[ P14075] interacts with 3 human partners:{O00186;O75150;Q9NX95}

1410 Pathogen[ P0C206] interacts with 5 human partners:{Q9NX95;Q6PUV4;Q15833;O75150;O00186}

1411 Pathogen[ P03363] interacts with 4 human partners:{O75150;O00186;Q15833;Q9NX95}

1412 [Cluster 129]GO:0003743+F molecular\_function [name] translation initiation factor activity [def] "Functions in the initiation of ribosome-mediated translation of mRNA into a polypeptide." [ISBN

1413 Pathogen[ Q2Q067] interacts with 39 human partners:{P23588;P05198;Q7L2H7;Q99613;O00303;O60841;Q9BY44;Q9UBQ5;P47813;P49770;P56537;Q14152;Q92905;Q9Y262;Q14240;O43583;Q9UI10;Q14232;P78344;Q9NR50;P41567;O14602;P60228;Q9UKV8;O75822;Q13144;Q9H2K0;P20042;O60573;Q9UJA5;O15371;Q04637;P06730;P60842;Q15056;O75821;O15372;Q13347;P41214}

1414 Pathogen[ P0C214] interacts with 46 human

partners:{P60228;Q9UI10;O60841;P60842;P49770;Q9Y262;Q9BY44;O60739;O15372;P23588;Q14152;P47813;Q8N5X7;A6NMX2;Q99613;O14602;O75821;P78344;Q15056;Q14232;Q8N9N8;O00303;P41091;Q92905;Q9NR50;Q13144;Q14240;Q7L2H7;P41567;Q9UKV8;Q04637;O75822;P05198;P55884;Q9UJA5;Q9H2K0;B5ME19;P20042;Q9UBQ5;P06730;P56537;O43583;O15371;Q13347;O60573;P41214}

1415 Pathogen[ P03346] interacts with 46 human partners:{P41567;O60739;B5ME19;P06730;P41091;P47813;Q9UBQ5;Q13347;O60841;Q8N5X7;P78344;P56537;O60573;Q15056;P55884;Q14152;O75821;P60842;O14602;O00303;O43583;Q14232;P60228;Q7L2H7;Q14240;P49770;Q9UKV8;Q8N9N8;Q99613;Q92905;O75822;P23588;Q9BY44;Q9UJA5;Q9H2K0;Q04637;A6NMX2;O15371;P41214;Q13144;P20042;Q9NR50;O15372;Q9UI10;Q9Y262;P05198}

1416 Pathogen[ Q85601] interacts with 39 human partners:{P47813;P41091;Q99613;Q9UBQ5;P06730;Q14240;P23588;Q8N5X7;Q04637;P56537;Q9BY44;Q9NR50;O00303;P20042;Q13144;P49770;O15371;B5ME19;P60228;O60573;Q92905;Q9Y262;P78344;P60842;Q9UKV8;Q7L2H7;Q13347;O75822;P41567;O14602;Q14152;P05198;Q9UJA5;O15372;P41214;O43583;Q14232;O75821;Q9UI10}

1417 Pathogen[ P14079] interacts with 46 human partners:{Q8N9N8;Q7L2H7;A6NMX2;P20042;Q9UKV8;P60842;O14602;Q15056;O00303;O75821;P06730;O60739;Q9UI10;Q9H2K0;P47813;P41567;Q9BY44;P41091;P56537;O43432;P05198;P46199;Q14240;O15371;Q13144;P78344;P23588;O60573;B5ME19;Q9NR50;O75822;Q99613;Q8N5X7;O43583;Q9UJA5;Q92905;Q9Y262;O60841;Q13347;Q14232;P41214;Q9UBQ5;Q14152;Q04637;O15372;P55884}

1418 Pathogen[ P03383] interacts with 35 human partners:{O15371;Q9UBQ5;P60228;P41567;P56537;Q92905;Q9UI10;Q9Y262;O60841;Q14152;O60573;Q9BY44;O14602;P20042;Q13144;P23588;P06730;Q9NR50;P47813;P41214;Q9H2K0;P05198;Q7L2H7;P49770;P78344;Q9UKV8;Q99613;O75822;Q04637;Q14232;Q13347;O43583;Q9UJA5;O15372;O75821}

1419 Pathogen[ P03410] interacts with 48 human partners:{Q9NR50;Q9UKV8;O60841;O75822;B5ME19;O15372;P06730;Q9H2K0;P20042;P46199;Q92905;Q7L2H7;Q14232;O43583;O43432;Q99613;P47813;Q14152;P41214;P49770;P41567;P55884;O15371;Q9UJA5;O60739;Q15056;O14602;P60842;O00303;O60573;O75821;Q9BY44;Q8N5X7;Q8N9N8;Q13347;P41091;Q04637;Q9Y262;A6NMX2;P56537;P60228;P78344;Q9UBQ5;P23588;Q9UI10;Q14240;Q13144;P05198}

1420 Pathogen[ P14075] interacts with 36 human partners:{O60841;P56537;P20042;O15372;Q7L2H7;P23588;P78344;Q99613;O75821;P06730;Q9UI10;P47813;P05198;O15371;O43583;P60228;Q9H2K0;O60573;O60739;Q14232;P41214;Q04637;P49770;O14602;Q9UKV8;Q9Y262;Q13347;O75822;Q9NR50;Q9UJA5;Q13144;P41567;Q9UBQ5;Q92905;Q9BY44;Q14152}

1421 Pathogen[ P0C206] interacts with 44 human partners:{P41091;Q7L2H7;Q99613;P20042;O14602;Q14232;P41567;Q9UKV8;Q8N9N8;Q9NR50;P06730;Q13144;P60228;P49770;P05198;O60841;Q8N5X7;O60739;Q9H2K0;B5ME19;Q14152;Q9UI10;A6NMX2;O15371;P47813;P56537;Q14240;Q9UJA5;P23588;P78344;Q9BY44;O60573;P41214;Q04637;O43583;O75821;Q13347;P60842;O00303;Q9Y262;O15372;O75822;Q92905;Q9UBQ5}

1422 Pathogen[ P03363] interacts with 44 human partners:{O60739;O15371;Q9BY44;O60841;Q13347;Q9UI10;Q15056;O14602;Q9UBQ5;Q14152;Q9UKV8;O15372;P41091;P41567;P23588;P05198;Q9NR50;Q8N5X7;Q14240;P20042;P47813;A6NMX2;P56537;Q7L2H7;B5ME19;Q9UJA5;P49770;P60228;P41214;P60842;O43583;Q9Y262;O60573;Q13144;O75821;P78344;P55884;P06730;Q92905;O75822;Q8N9N8;Q99613;Q04637;O00303}

1423 [Cluster 130]GO:0019211+F molecular\_function [name] phosphatase activator activity [def] "Increases the activity of a phosphatase, an enzyme which catalyzes of the removal of a phosphate group from a substrate molecule." [GOC

1424 Pathogen[ Q2Q067] interacts with 2 human partners:{Q15257;P35269}

1425 Pathogen[ P0C214] interacts with 2 human partners:{P35269;Q15257}

1426 Pathogen[ P03346] interacts with 2 human partners:{Q15257;P35269}

1427 Pathogen[ Q85601] interacts with 2 human partners:{P35269;Q15257}

1428 Pathogen[ P14079] interacts with 2 human partners:{P35269;Q8WU20}

1429 Pathogen[ P03383] interacts with 2 human partners:{P35269;Q15257}

1430 Pathogen[ P03410] interacts with 3 human partners:{Q15257;P35269;Q8WU20}

1431 Pathogen[ P14075] interacts with 2 human partners:{Q15257;P35269}

1432 Pathogen[ P0C206] interacts with 3 human partners:{P35269;Q8WU20;Q15257}

1433 Pathogen[ P03363] interacts with 2 human partners:{P35269;Q15257}

1434 [Cluster 131]GO:0008017+F molecular\_function [name] microtubule binding [def] "Interacting selectively and non-covalently with microtubules, filaments composed of tubulin monomers." [GOC

1435 Pathogen[ Q2Q067] interacts with 49 human partners:{P04156;Q12798;Q9UH99;Q9P219;Q96RT8;Q7Z460;P08151;P78406;P54274;Q969S2;Q9P1Y5;Q86XR8;Q9NXR1;P02511;Q96SN8;P42704;Q08AD1;Q96N16;O75381;P06746;P60520;Q9Y3A5;O94811;Q6PGN9;Q9H9H5;Q96RT7;Q9UBK9;Q5JR59;P49354;P04406;O15527;P50570;Q02241;Q9UPY8;Q5T5Y3;O95998;Q96BD8;P41208;O15182;Q9BXS6;Q86VS8;Q92597;Q66K74;Q15691;Q8WVK7;Q96ED9;P49754;O15392;O14576}

1436 Pathogen[ P0C214] interacts with 50 human partners:{P60520;P49354;P49754;Q08AD1;Q02241;P06746;Q96ED9;P02511;O94811;Q9P1Y5;Q96SN8;Q9BXS6;P78406;P42704;O75381;Q15691;Q96RT7;Q5JR59;Q9UH99;Q6PGN9;Q92597;Q86VS8;Q12798;Q96BD8;Q8IYX8;Q9H9H5;Q86XR8;Q5T5Y3;Q96RT8;P41208;Q9BQI5;O15392;Q9UPY8;P04156;O14576;Q5VZ66;Q7Z460;P08151;P50570;O15527;Q9P219;Q9NXR1;Q9Y3A5;Q9UBK9;Q9H902;P04406;Q66K74;P54274;Q8WVK7;Q96N16}

1437 Pathogen[ P03346] interacts with 63 human partners:{O95166;Q5T5Y3;Q9BXS6;P50570;O14576;P04406;Q86XR8;O15392;Q86VS8;Q96N16;Q5JR59;Q96RT8;P60520;P49754;P78406;Q15691;P54274;Q08AD1;Q9UH99;Q66K74;Q9NXR1;Q9P1Y5;Q8IYX8;O75381;Q9P219;Q9H902;Q15555;Q969S2;P41208;P49354;Q96AA8;P02511;Q9H9H5;Q92597;Q96SN8;

- 1438 Pathogen[ Q85601] interacts with 60 human  
partners: {Q6PGN9;O15527;P08151;Q02241;P36405;Q86VS8;Q969S2;O15182;Q96RT8;O95166;Q9UBP0;Q12798;Q96SN8;P78406;P30622;Q9P1Y5;Q9Y3A5;Q66K74;Q9BXS6;O15392;P49754;Q9P219;Q08AD1;Q86XR8;Q9UH99;P49354;Q15555;Q6P597;Q9H9H5;O94811;Q96AA8;P02511;Q15691;P42704;Q96BD8;P50570;Q5T5Y3;O14576;Q9H902;Q9BVA0;O95996;P60520;Q5JR59;Q8WVK7;P04156;P06746;Q7Z460;Q92597;P04406;Q9NXR1;Q9UPY8;O75381;Q9UBK9;Q96ED9;Q9GZM8;Q96N16;P54274;Q8IYX8;Q96RT7;P41208}
- 1439 Pathogen[ P14079] interacts with 66 human  
partners: {Q15691;P54274;P08151;O95166;Q9UPY8;Q08AD1;Q9UJC3;Q7Z460;Q86VS8;P49354;P02511;P04156;Q96ED9;Q66K74;Q02241;Q99932;Q5VZ66;O15392;P42704;Q9Y3A5;Q92597;O15527;Q9H9H5;Q9BXS6;Q96N16;P50570;P56715;P36405;P60520;Q96RT8;Q9BQI5;O95996;Q12798;Q15555;Q96AA8;Q8WVK7;O94811;Q9UBK9;Q969S2;Q96RT7;Q9GZM8;Q5T5Y3;Q96JE9;Q6PGN9;P41208;P06746;P78406;Q9P1Y5;O75381;O15182;Q5JR59;P49754;O14576;Q86XR8;Q9NXR1;Q9UH99;Q96BD8;Q9BVA0;Q8IYX8;Q9H902;Q96SN8;Q9P219;Q6P597;P30622;P10636;P04406}
- 1440 Pathogen[ P03383] interacts with 36 human  
partners: {Q86XR8;Q5JR59;Q7Z460;P06746;Q96BD8;Q02241;Q15691;P04156;O15527;Q9BXS6;Q96SN8;P78406;O94811;P41208;P02511;Q9UH99;Q12798;P49754;Q92597;Q6PGN9;Q96N16;Q9H9H5;Q9P1Y5;O75381;Q9BQI5;P04406;Q8WVK7;Q86VS8;Q96ED9;Q9Y3A5;Q5T5Y3;Q08AD1;P42704;Q9UBK9;Q9UPY8;P54274}
- 1441 Pathogen[ P03410] interacts with 66 human  
partners: {Q7Z460;O15392;P49354;Q5JR59;Q9P219;Q9UJC3;Q08AD1;P30622;Q9H902;Q9NXR1;Q9GZM8;A6NC98;P54274;Q9P1Y5;Q9UH99;P60520;Q96SN8;O94811;P36405;O15182;P78406;P06746;Q12798;P50570;Q96N16;Q86VS8;Q9UBK9;O75381;Q96JE9;Q9BXS6;Q6P597;Q8IYX8;O95166;Q5T5Y3;O14576;Q9H9H5;Q96AA8;Q5VZ66;Q15555;Q15691;O95996;Q96ED9;O15527;P02511;P42704;Q8WVK7;P04156;Q9UPY8;P49754;Q66K74;P04406;Q9BQI5;P10636;Q96RT8;Q99932;Q969S2;P33176;Q92597;Q6PGN9;Q96BD8;Q96RT7;Q9Y3A5;P41208;P56715;Q9BVA0;Q02241}
- 1442 Pathogen[ P14075] interacts with 39 human  
partners: {Q9BQI5;P42704;O94811;Q99932;Q02241;Q96N16;Q8WVK7;P78406;Q96JE9;Q7Z460;O15527;P06746;P04156;Q9BXS6;Q96SN8;Q12798;Q96BD8;Q5JR59;O75381;Q96AA8;P54274;Q9UPY8;P04406;Q9H9H5;P49754;Q86XR8;Q9UBK9;Q15691;Q5T5Y3;P02511;P41208;Q6PGN9;Q9UH99;Q92597;Q86VS8;Q9P1Y5;Q96ED9;Q08AD1;Q9Y3A5}
- 1443 Pathogen[ P0C206] interacts with 66 human  
partners: {Q92597;O15182;Q86XR8;Q9BVA0;Q96SN8;P56715;O14576;Q9UBP0;P04156;O15527;Q96RT7;Q08AD1;O75381;Q9UH99;Q96JE9;P49754;Q15691;O94811;Q5T5Y3;Q96AA8;P06746;Q6P597;Q5JR59;Q6PGN9;P30622;O95996;P10636;P49354;Q02241;Q9GZM8;Q96N16;Q66K74;Q86VS8;Q96ED9;Q9P1Y5;P54274;Q96BD8;Q9UPY8;Q8IYX8;Q9P219;P04406;Q9BQI5;O15392;P60520;P36405;Q969S2;Q9Y3A5;P41208;P78406;P42704;Q9NXR1;Q9UBK9;Q15555;Q99932;Q12798;Q9UJC3;Q9BXS6;P02511;Q7Z460;P08151;Q5VZ66;Q9H902;O95166;Q8WVK7;P50570;Q9H9H5}
- 1444 Pathogen[ P03363] interacts with 61 human  
partners: {P49754;Q86VS8;Q9UDT6;Q9H902;O15527;P56715;Q96ED9;O95996;Q66K74;P33176;O94811;P08151;Q96BD8;Q15691;Q92597;P50570;P42704;Q9Y3A5;P49354;Q02241;A6NC98;Q8WVK7;Q9BXS6;Q8NHY3;P04156;P41208;Q9UBK9;P60520;Q5JR59;Q6PGN9;P30622;Q9UPY8;Q12798;Q9P1Y5;P54274;P06746;Q96RT8;O75381;P04406;Q7Z460;O15182;Q96RT7;Q8IYX8;P78406;Q86XR8;Q9NXR1;Q9BQI5;Q9P219;Q96N16;Q969S2;O95166;O14576;Q15555;Q96JE9;Q9UH99;Q96AA8;Q96SN8;Q08AD1;Q9H9H5;Q5T5Y3;Q9UJC3}
- 1445 [Cluster 132]GO:0016616+F molecular\_function [name] oxidoreductase activity, acting on the CH-OH group of donors, NAD or NADP as acceptor [def] "Catalysis of an oxidation-reduction (redox) reaction in which a CH-OH group acts as a hydrogen or electron donor and reduces NAD+ or NADP." [GOC
- 1446 Pathogen[ Q2Q067] interacts with 8 human  
partners: {P07195;P40925;Q13363;Q9BYZ2;P40926;P00338;Q16836;P07864}
- 1447 Pathogen[ P0C214] interacts with 22 human  
partners: {Q9GZZ9;Q8IX04;P52209;O75874;Q8N335;Q13363;P07864;Q5I0G3;P48735;P40939;Q6ZMR3;P40926;Q9Y2S2;Q8TBF2;P50213;O43837;Q9BYZ2;P48163;Q16798;P07195;P51553;P21695}
- 1448 Pathogen[ P03346] interacts with 8 human  
partners: {Q16836;P40926;P00338;P07195;Q13363;P56545;P40925;Q9BYZ2}
- 1449 Pathogen[ Q85601] interacts with 9 human  
partners: {Q6ZMR3;Q13363;P07864;Q9BYZ2;P40925;P07195;Q16836;P00338;P40926}
- 1450 Pathogen[ P14079] interacts with 10 human  
partners: {P00338;P52209;P07195;Q6ZMR3;P07864;Q8TBF2;P21695;P40925;Q9BYZ2;Q16836}
- 1451 Pathogen[ P03383] interacts with 9 human  
partners: {P40926;P00338;Q9BYZ2;P07864;Q16836;P40925;P07195;Q6ZMR3;Q13363}
- 1452 Pathogen[ P03410] interacts with 11 human  
partners: {Q9BYZ2;Q6ZMR3;P07195;P52209;P00338;Q16836;P40926;P07864;P40925;Q8TBF2;P21695}
- 1453 Pathogen[ P14075] interacts with 8 human  
partners: {P40925;P40926;P07195;Q16836;P07864;P00338;Q9BYZ2;Q13363}
- 1454 Pathogen[ P0C206] interacts with 11 human  
partners: {P07195;Q6ZMR3;P07864;P50213;Q16836;Q8TBF2;P40925;P40926;Q9BYZ2;Q13363;P00338}
- 1455 Pathogen[ P03363] interacts with 5 human  
partners: {Q16836;P40925;P56545;Q9BYZ2;Q13363}
- 1456 [Cluster 133]GO:0004828+F molecular\_function [name] serine-tRNA ligase activity [def]

```

"Catalysis of the reaction
1457 Pathogen[ Q2Q067] interacts with 2 human partners:{P49591;P12270}
1458 Pathogen[ P0C214] interacts with 3 human partners:{Q9NP81;P49591;P12270}
1459 Pathogen[ P03346] interacts with 1 human partners:{P12270}
1460 Pathogen[ Q85601] interacts with 1 human partners:{P12270}
1461 Pathogen[ P14079] interacts with 3 human partners:{Q9NP81;P49591;P12270}
1462 Pathogen[ P03383] interacts with 3 human partners:{P12270;Q9NP81;P49591}
1463 Pathogen[ P03410] interacts with 3 human partners:{P49591;P12270;Q9NP81}
1464 Pathogen[ P14075] interacts with 3 human partners:{P12270;Q9NP81;P49591}
1465 Pathogen[ P0C206] interacts with 3 human partners:{Q9NP81;P49591;P12270}
1466 Pathogen[ P03363] interacts with 2 human partners:{P12270;P49591}
1467 [Cluster 134]GO:0004853+F molecular_function [name] uroporphyrinogen decarboxylase
activity [def] "Catalysis of the reaction
1468 Pathogen[ Q2Q067] interacts with 1 human partners:{P06132}
1469 Pathogen[ P0C214] interacts with 1 human partners:{P06132}
1470 Pathogen[ P03346] interacts with 1 human partners:{P06132}
1471 Pathogen[ Q85601] interacts with 1 human partners:{P06132}
1472 Pathogen[ P14079] interacts with 1 human partners:{P06132}
1473 Pathogen[ P03383] interacts with 1 human partners:{P06132}
1474 Pathogen[ P03410] interacts with 1 human partners:{P06132}
1475 Pathogen[ P14075] interacts with 1 human partners:{P06132}
1476 Pathogen[ P0C206] interacts with 1 human partners:{P06132}
1477 Pathogen[ P03363] interacts with 1 human partners:{P06132}
1478 [Cluster 135]GO:0003956+F molecular_function [name] NAD(P)+-protein-arginine
ADP-ribosyltransferase activity [def] "Catalysis of the reaction
1479 Pathogen[ Q2Q067] interacts with 1 human partners:{Q8N6T7}
1480 Pathogen[ P0C214] interacts with 1 human partners:{Q8N6T7}
1481 Pathogen[ P03346] interacts with 1 human partners:{Q8N6T7}
1482 Pathogen[ Q85601] interacts with 1 human partners:{Q8N6T7}
1483 Pathogen[ P14079] interacts with 1 human partners:{Q8N6T7}
1484 Pathogen[ P03383] interacts with 1 human partners:{Q8N6T7}
1485 Pathogen[ P03410] interacts with 1 human partners:{Q8N6T7}
1486 Pathogen[ P14075] interacts with 1 human partners:{Q8N6T7}
1487 Pathogen[ P0C206] interacts with 1 human partners:{Q8N6T7}
1488 Pathogen[ P03363] interacts with 1 human partners:{Q8N6T7}
1489 [Cluster 136]GO:0050827+F molecular_function [name] toxin receptor binding [def]
"Interacting selectively and non-covalently with a toxin receptor, a receptor for
substances that cause injury to living organisms." [GOC
1490 Pathogen[ Q2Q067] interacts with 1 human partners:{P54259}
1491 Pathogen[ P0C214] interacts with 1 human partners:{P54259}
1492 Pathogen[ P03346] interacts with 1 human partners:{P54259}
1493 Pathogen[ Q85601] interacts with 1 human partners:{P54259}
1494 Pathogen[ P14079] interacts with 1 human partners:{P54259}
1495 Pathogen[ P03383] interacts with 1 human partners:{P54259}
1496 Pathogen[ P03410] interacts with 1 human partners:{P54259}
1497 Pathogen[ P14075] interacts with 1 human partners:{P54259}
1498 Pathogen[ P0C206] interacts with 1 human partners:{P54259}
1499 Pathogen[ P03363] interacts with 1 human partners:{P54259}
1500 [Cluster 137]GO:0002162+F molecular_function [name] dystroglycan binding [def]
"Interacting selectively and non-covalently with dystroglycan. Dystroglycan is
glycoprotein found in non-muscle tissues as well as in muscle tissues, often in
association with dystrophin. The native dystroglycan cleaved into two non-covalently
associated subunits, alpha (N-terminal) and beta (C-terminal)." [GOC
1501 Pathogen[ Q2Q067] interacts with 1 human partners:{P11532}
1502 Pathogen[ P0C214] interacts with 1 human partners:{P11532}
1503 Pathogen[ P03346] interacts with 2 human partners:{P11137;P11532}
1504 Pathogen[ Q85601] interacts with 1 human partners:{P11532}
1505 Pathogen[ P14079] interacts with 3 human partners:{P11532;Q8TD06;P11137}
1506 Pathogen[ P03383] interacts with 1 human partners:{P11532}
1507 Pathogen[ P03410] interacts with 4 human partners:{P11137;P11532;O95994;Q8TD06}
1508 Pathogen[ P14075] interacts with 1 human partners:{P11532}
1509 Pathogen[ P0C206] interacts with 3 human partners:{Q8TD06;P11137;P11532}
1510 Pathogen[ P03363] interacts with 3 human partners:{P11137;Q8TD06;P11532}
1511 [Cluster 138]GO:0005246+F molecular_function [name] calcium channel regulator activity
[def] "Modulates the activity of a calcium channel." [GOC
1512 Pathogen[ Q2Q067] interacts with 2 human partners:{P26678;P62879}
1513 Pathogen[ P0C214] interacts with 2 human partners:{P62879;P26678}
1514 Pathogen[ P03346] interacts with 2 human partners:{P26678;P62879}
1515 Pathogen[ Q85601] interacts with 1 human partners:{P62879}
1516 Pathogen[ P14079] interacts with 1 human partners:{P26678}
1517 Pathogen[ P03383] interacts with 2 human partners:{P62879;P26678}
1518 Pathogen[ P03410] interacts with 2 human partners:{P26678;P62879}
1519 Pathogen[ P14075] interacts with 2 human partners:{P62879;P26678}
1520 Pathogen[ P0C206] interacts with 2 human partners:{P62879;P26678}
1521 Pathogen[ P03363] interacts with 1 human partners:{P62879}
1522 [Cluster 139]GO:0005133+F molecular_function [name] interferon-gamma receptor binding

```

```
[def] "Interacting selectively and non-covalently with the interferon-gamma receptor."
[GOC
1523 Pathogen[ Q2Q067] interacts with 1 human partners:{Q96EY1}
1524 Pathogen[ P0C214] interacts with 1 human partners:{Q96EY1}
1525 Pathogen[ P03346] interacts with 1 human partners:{Q96EY1}
1526 Pathogen[ Q85601] interacts with 1 human partners:{Q96EY1}
1527 Pathogen[ P14079] interacts with 1 human partners:{Q96EY1}
1528 Pathogen[ P03383] interacts with 1 human partners:{Q96EY1}
1529 Pathogen[ P03410] interacts with 1 human partners:{Q96EY1}
1530 Pathogen[ P14075] interacts with 1 human partners:{Q96EY1}
1531 Pathogen[ P0C206] interacts with 1 human partners:{Q96EY1}
1532 Pathogen[ P03363] interacts with 1 human partners:{Q96EY1}
1533 [Cluster 140]GO:0070491+F molecular_function [name] repressing transcription factor
binding [def] "Interacting selectively and non-covalently with a transcription repressor,
any protein whose activity is required to prevent or downregulate transcription." [GOC
1534 Pathogen[ Q2Q067] interacts with 21 human
partners:{P56524;P20226;Q9UKV0;P01106;Q9Y3T9;Q01196;Q04206;Q9NQX1;Q04727;Q9H7S9;Q9UQL
6;P12755;O75496;P25208;Q9ULU4;Q92993;Q8WUI4;Q13363;P43356;P45973;P15923}
1535 Pathogen[ P0C214] interacts with 20 human
partners:{Q92993;Q9Y3T9;Q04727;Q13363;P25208;O75496;P56524;Q04206;P15923;Q9UKV0;P1275
5;P20226;P43356;Q9NQX1;P45973;Q9ULU4;Q8WUI4;P01106;Q9UQL6;Q9H7S9}
1536 Pathogen[ P03346] interacts with 20 human
partners:{Q9NQX1;P45973;P25208;P15923;P56524;Q04206;P20226;P01106;Q9ULU4;Q9H7S9;Q9Y3T
9;Q8WUI4;P43356;Q9UKV0;Q04727;Q13363;Q01196;Q92993;Q9UQL6;O75496}
1537 Pathogen[ Q85601] interacts with 20 human
partners:{P01106;O75496;Q9UKV0;P25208;Q9UQL6;Q9H7S9;Q13363;P12755;Q9ULU4;Q9NQX1;Q0420
6;P45973;Q04727;P15923;Q9Y3T9;P56524;P43356;Q92993;Q8WUI4;P20226}
1538 Pathogen[ P14079] interacts with 16 human
partners:{Q9UQL6;Q9NQX1;P12755;Q8WUI4;Q9UKV0;P15923;P43356;P45973;Q9Y3T9;P01106;Q9ULU
4;Q9H7S9;P56524;O75496;Q04727;Q92993}
1539 Pathogen[ P03383] interacts with 19 human
partners:{Q9UQL6;P01106;Q04727;Q9ULU4;P15923;Q92993;Q9NQX1;P25208;Q9Y3T9;P20226;P4597
3;Q9H7S9;Q9UKV0;P56524;Q04206;P43356;Q8WUI4;Q13363;O75496}
1540 Pathogen[ P03410] interacts with 19 human
partners:{Q9UKV0;Q04206;Q9ULU4;P12755;P01106;P45973;P20226;Q9Y3T9;P15923;Q8WUI4;Q9UQL
6;P25208;P56524;Q04727;O75496;Q9H7S9;Q9NQX1;Q92993;P43356}
1541 Pathogen[ P14075] interacts with 19 human
partners:{Q04727;Q04206;P25208;Q9ULU4;P56524;P45973;Q9UKV0;P20226;P15923;P01106;Q9299
3;Q9NQX1;P43356;Q9Y3T9;Q9UQL6;Q13363;Q9H7S9;Q8WUI4;O75496}
1542 Pathogen[ P0C206] interacts with 20 human
partners:{Q9NQX1;P45973;O75496;P43356;P20226;Q9UKV0;Q04727;Q92993;P12755;Q9H7S9;Q9ULU
4;Q8WUI4;Q04206;P15923;P25208;P01106;P56524;Q13363;Q9Y3T9;Q9UQL6}
1543 Pathogen[ P03363] interacts with 18 human
partners:{Q9NQX1;Q04206;Q9H7S9;P45973;Q9UQL6;P01106;Q04727;P15923;Q9ULU4;Q9UKV0;Q9Y3T
9;O75496;P20226;Q8WUI4;Q13363;P25208;P43356;Q92993}
1544 [Cluster 141]GO:0016853+F molecular_function [name] isomerase activity [def]
"Catalysis of the geometric or structural changes within one molecule. Isomerase is the
systematic name for any enzyme of EC class 5." [ISBN
1545 Pathogen[ Q2Q067] interacts with 34 human
partners:{Q9UNP9;Q13356;Q9H2H8;P49792;Q13427;Q8N0Y7;O43447;Q9Y606;P22033;P11387;P3494
9;Q9Y237;O95394;P60174;P36871;P11388;Q96G03;O60832;P18669;Q9BV20;Q15185;P15259;Q15257
;P07738;Q13526;P06744;Q9BZE2;Q08752;P23284;P49247;Q6PCE3;P62937;O43708;O95900}
1546 Pathogen[ P0C214] interacts with 49 human
partners:{Q9Y536;Q3MIT2;Q13907;P15259;Q6UX04;Q9BXS1;A2BFH1;Q13526;P30405;Q13427;P4979
2;P23284;Q15257;P30414;Q6PCE3;Q9H2H8;Q9Y237;P45877;Q9Y3C6;Q96G03;Q13011;Q96AT9;P22033
;P36871;F5H284;Q9BZE2;Q13356;O95900;P11388;Q96BP3;P11387;O60832;O43447;P34949;O95394;
Q8N0Y7;O15305;Q08752;P60174;O43708;Q8IXY8;P07738;Q9Y606;Q9UNP9;Q15185;Q96PE7;P49247;Q
9BV20;P13667}
1547 Pathogen[ P03346] interacts with 42 human
partners:{Q9Y606;Q96PE7;Q9H2H8;P49247;O43447;Q9Y3C6;Q9BV20;P11388;O95900;Q6UX04;Q9BZE
2;P62937;Q15257;Q15185;P07738;Q96BP3;P60174;O60832;Q13526;P13667;P36871;Q13427;Q6PCE3
;P18669;Q9Y237;Q08752;Q8N0Y7;Q8N0Z8;Q9UNP9;Q13356;O43708;Q8WWH5;Q96G03;O95394;P34949;
P15259;P06744;Q9Y536;A2BFH1;P11387;P49792;P23284}
1548 Pathogen[ Q85601] interacts with 43 human
partners:{F5H284;P30405;Q6UX04;P60174;P34949;A2BFH1;Q9H2H8;O43708;Q9BZE2;Q96BP3;Q9Y60
6;P18669;P06744;P49247;Q13427;P15259;Q08752;P11387;Q13526;P36871;P23284;Q9Y3C6;P11388
;P22033;Q13356;P30414;Q15185;O95394;O43447;Q6PCE3;P49792;Q8N0Y7;Q8IXY8;Q9BV20;P07738;
Q15257;Q9Y536;P62937;Q9Y237;Q13907;O60832;Q96G03;P45877}
1549 Pathogen[ P14079] interacts with 55 human
partners:{O94923;P15259;A2VDF0;P11388;Q9BXS1;O43447;Q9NPH2;Q9BZE2;O15305;Q8IXY8;Q0875
2;Q3MIT2;Q9Y237;Q13907;O60832;Q9BV20;P49247;Q96C23;P51606;O43708;P06744;Q13472;P62937
;Q13427;F5H284;P07738;O95394;Q96PZ0;Q9UL01;Q13356;P45877;Q8N0Z8;Q9H2H8;P34949;Q15185;
P22033;Q96PE7;A2BFH1;Q9H0K6;Q6PCE3;Q9Y606;P30039;P18669;Q96G03;P23284;Q6UX04;Q13526;Q
9Y536;P36871;Q969P6;O95900;Q96BP3;Q8N0Y7;Q5T013;Q8WWH5}
1550 Pathogen[ P03383] interacts with 30 human
partners:{P34949;P49792;Q96G03;Q13356;Q9UNP9;Q15257;Q96BP3;P18669;Q9H2H8;P62937;P1138
```



7;P49247;Q08752;Q9BZE2;Q6PCE3;O43447;P07738;Q9Y606;P06744;Q13427;Q15185;P22033;Q8N0Y7;Q9BV20;O95394;P23284;O95900;O60832;P15259;Q13526}

1551 Pathogen[ P03410] interacts with 61 human partners:{P30039;Q9NPH2;A2VDF0;P51606;P06744;Q6PCE3;P36871;Q08752;Q96PE7;Q13011;Q13526;Q9Y536;P13667;Q96BP3;Q15257;P34949;O60832;Q9BV20;O43708;Q13356;Q9H2H8;Q13472;P62937;P07738;Q8N0Z8;P45877;P11387;Q5T013;Q15185;Q8N0Y7;P15259;Q96C23;Q9BZE2;Q8WWH5;Q6UX04;P18669;Q96G03;P11388;O15305;Q9Y606;Q9Y3C6;P23284;Q9UNP9;F5H284;Q13907;O95900;Q8IXY8;P30414;Q9H0K6;Q9UL01;Q13427;O95394;Q9Y237;O43447;Q3MIT2;P49247;P30405;A2BFH1;P22033;P49792;Q9BXS1}

1552 Pathogen[ P14075] interacts with 30 human partners:{Q8N0Z8;P11387;Q15257;Q08752;P06744;P23284;P34949;P49792;Q9Y606;Q9BV20;P18669;Q9UNP9;Q96G03;Q8WWH5;Q6PCE3;Q15185;O95900;P22033;Q13526;Q9BZE2;O60832;O43447;O95394;P62937;P15259;P49247;Q13427;P07738;Q9H2H8;Q8N0Y7}

1553 Pathogen[ P0C206] interacts with 54 human partners:{Q9Y536;Q9UNP9;Q8WWH5;Q96PE7;P60174;Q9BV20;Q13526;Q96G03;Q08752;Q96BP3;O95394;Q15185;P34949;A2BFH1;Q9UL01;F5H284;Q6PCE3;Q9BZE2;P49792;P06744;Q13907;Q9BXS1;Q9Y3C6;O43708;Q13427;Q96C23;P30039;P23284;Q8N0Y7;O95900;O60832;Q13356;O43447;Q9Y606;Q9Y237;P45877;P11388;Q9H2H8;P11387;P49247;Q8N0Z8;P07738;P30405;P22033;P62937;A2VDF0;Q13472;Q15257;P13667;P18669;Q8IXY8;P36871;P15259;Q6UX04}

1554 Pathogen[ P03363] interacts with 34 human partners:{O60832;P23284;Q9BZE2;Q13427;P62937;P06744;A2BFH1;P18669;P11387;Q6UX04;Q9Y606;Q13356;Q96BP3;Q9Y3C6;Q08752;O95900;Q13526;O43447;Q13472;Q8N0Y7;P49792;Q15185;Q9BV20;Q9Y237;Q15257;Q8N0Z8;Q9Y536;Q8WWH5;Q6PCE3;O43708;P15259;Q9H2H8;Q9UNP9;Q96G03}

1555 [Cluster 142]GO:0015450+F molecular\_function [name] P-P-bond-hydrolysis-driven protein transmembrane transporter activity [def] "Primary active carrier-mediated transport of a protein across a membrane, driven by the hydrolysis of the diphosphate bond of inorganic pyrophosphate, ATP, or another nucleoside triphosphate. The transport protein may or may not be transiently phosphorylated, but the substrate is not phosphorylated." [GOC

1556 Pathogen[ Q2Q067] interacts with 5 human partners:{Q9BRJ2;Q15388;O43615;O14925;Q9P0U1}

1557 Pathogen[ P0C214] interacts with 5 human partners:{Q15388;O14925;O43615;Q9P0U1;Q9BRJ2}

1558 Pathogen[ P03346] interacts with 5 human partners:{O14925;O43615;Q9P0U1;Q9BRJ2;Q15388}

1559 Pathogen[ Q85601] interacts with 4 human partners:{O14925;Q15388;Q9BRJ2;O43615}

1560 Pathogen[ P14079] interacts with 8 human partners:{O43615;Q9P0U1;Q9BRJ2;O14925;Q15388;P60059;Q99595;Q5SRD1}

1561 Pathogen[ P03383] interacts with 5 human partners:{Q9BRJ2;O14925;O43615;Q15388;Q9P0U1}

1562 Pathogen[ P03410] interacts with 8 human partners:{Q5SRD1;Q15388;P60059;O14925;Q99595;Q9BRJ2;O43615;Q9P0U1}

1563 Pathogen[ P14075] interacts with 5 human partners:{Q9P0U1;O14925;Q9BRJ2;Q15388;O43615}

1564 Pathogen[ P0C206] interacts with 6 human partners:{Q5SRD1;Q9BRJ2;O43615;Q9P0U1;O14925;Q15388}

1565 Pathogen[ P03363] interacts with 5 human partners:{Q15388;O14925;Q9BRJ2;O43615;Q9P0U1}

1566 [Cluster 143]GO:0000150+F molecular\_function [name] recombinase activity [def] "Catalysis of the identification and base-pairing of homologous sequences between single-stranded DNA and double-stranded DNA." [GOC

1567 Pathogen[ Q2Q067] interacts with 1 human partners:{Q06330}

1568 Pathogen[ P0C214] interacts with 1 human partners:{Q06330}

1569 Pathogen[ P03346] interacts with 1 human partners:{Q06330}

1570 Pathogen[ Q85601] interacts with 1 human partners:{Q06330}

1571 Pathogen[ P14079] interacts with 1 human partners:{Q06330}

1572 Pathogen[ P03383] interacts with 1 human partners:{Q06330}

1573 Pathogen[ P03410] interacts with 1 human partners:{Q06330}

1574 Pathogen[ P14075] interacts with 1 human partners:{Q06330}

1575 Pathogen[ P0C206] interacts with 1 human partners:{Q06330}

1576 Pathogen[ P03363] interacts with 1 human partners:{Q06330}

1577 [Cluster 144]GO:0017124+F molecular\_function [name] SH3 domain binding [def] "Interacting selectively and non-covalently with a SH3 domain (Src homology 3) of a protein, small protein modules containing approximately 50 amino acid residues found in a great variety of intracellular or membrane-associated proteins." [GOC

1578 Pathogen[ Q2Q067] interacts with 28 human partners:{Q9P2Y5;O75525;O60239;Q99638;Q96B97;O95997;Q13625;Q5VWX1;Q8TF68;Q96EY5;P56945;Q9NZQ3;O15162;Q9NZH4;Q07666;Q9UPX8;Q8N1I0;Q9NZH5;Q86TC9;Q9UJC5;O14512;Q86Y01;Q92556;P22681;O75368;Q9NR46;O75674;Q96JJ3}

1579 Pathogen[ P0C214] interacts with 32 human partners:{P22681;P55822;Q9UI08;O60239;Q9UPX8;P56945;Q13625;O15056;Q8TF68;Q9NR46;O75525;Q96EY5;Q07666;O15162;Q86TC9;Q9NZH5;Q92556;Q9P2Y5;Q9BQI5;Q8N1I0;Q9NZQ3;Q9NZH4;O95997;O14512;O75674;Q86Y01;Q99638;Q5VWX1;Q96JJ3;O75368;Q96B97;Q9UJC5}

1580 Pathogen[ P03346] interacts with 45 human partners:{Q86TC9;O60239;Q96B97;Q86UR1;Q8IZD9;Q9NZH4;Q96PU8;Q99638;Q9UI08;Q9Y5K6;Q96JJ3;O95997;Q8TF68;Q9Y371;O15056;Q07666;P56945;Q9NZH5;P55822;Q9NZQ3;P42566;Q5VWX1;Q13625;P78314;P14317;P22681;Q96D71;O75525;O14512;O75674;Q9P2Y5;Q86Y01;Q9Y2R2;Q9BQI5;Q8N1I0;

1581 Q96EY5;Q16204;P24666;Q9UPX8;Q9NR46;Q92556;O75368;Q8TDZ2;Q9UJC5;O15162}  
Pathogen[ Q85601] interacts with 30 human  
partners:{Q86TC9;O60239;Q9UPX8;P22681;Q9NZH4;Q07666;Q9Y5K6;Q9P2Y5;Q5VWX1;Q9NZQ3;Q96JJ3;P56945;Q9NZH5;Q96B97;P55822;Q13625;Q8TF68;P14317;Q16204;O15162;O75525;O14512;Q86Y01;Q9UJC5;Q8N1I0;Q96EY5;Q9NR46;Q99638;O95997;O75674}

1582 Pathogen[ P14079] interacts with 42 human  
partners:{Q9NRQ2;Q9NR46;O15162;Q96EY5;Q8TDZ2;O75368;P13498;Q92556;P42566;O43813;O75674;Q8IZD9;Q96B97;Q13625;Q96JJ3;Q9Y371;Q96BJ8;P50552;P55822;Q8TF68;Q16204;Q86TC9;O75952;O60239;Q86Y01;Q5VWX1;Q9NZQ3;Q07666;Q9BQI5;O75525;O95997;Q9Y5K6;O14512;Q99638;Q9NZH4;Q8N1I0;Q9UJC5;Q9P2Y5;Q9NZH5;P10636;Q9UI08;Q9UPX8}

1583 Pathogen[ P03383] interacts with 19 human  
partners:{P56945;O15162;Q13625;Q5VWX1;Q9NZH4;Q9NZQ3;Q9NZH5;Q9BQI5;Q07666;O75525;Q9P2Y5;Q99638;O95997;Q9NR46;O14512;Q86Y01;Q9UJC5;O75368;Q96EY5}

1584 Pathogen[ P03410] interacts with 45 human  
partners:{Q9NZH5;Q9UI08;Q8TF68;Q9P2Y5;P55822;Q9NR46;Q8IZD9;Q8TDZ2;O75674;Q9NRQ2;Q9NZQ3;O60239;O75368;Q5VWX1;O95997;Q07666;Q9NRY6;Q9Y5K6;O75952;O15162;Q92556;Q86Y01;P50552;O75525;Q99638;Q86UR1;Q96D71;Q96BJ8;Q9Y371;Q9BQI5;P10636;P24666;Q9UJC5;P56945;Q96B97;Q16204;Q9UPX8;O14512;Q96EY5;Q9NZH4;Q13625;Q8N1I0;P42566;Q96JJ3;Q86TC9}

1585 Pathogen[ P14075] interacts with 21 human  
partners:{Q9BQI5;Q5VWX1;Q9P2Y5;Q9NZQ3;O60239;Q96EY5;Q9NR46;Q07666;O15162;O95997;Q99638;P55822;Q9NZH5;O75525;Q13625;O14512;Q86Y01;O75368;Q9NZH4;P56945;Q9UJC5}

1586 Pathogen[ P0C206] interacts with 42 human  
partners:{Q86Y01;Q9NZH5;Q9NR46;O75952;Q8IZD9;Q92556;Q9P2Y5;Q86TC9;Q13625;P14317;Q96B97;O95997;Q96PU8;Q9UI08;Q07666;Q9Y2R2;P10636;Q99638;P24666;P22681;O60239;Q16204;Q96JJ3;Q9UPX8;Q9BQI5;Q9NZH4;O15162;O75368;P42566;Q8N1I0;Q9Y5K6;P56945;Q8TF68;O14512;O75525;Q8TDZ2;O75674;Q5VWX1;Q96EY5;Q9UJC5;Q9NZQ3;P55822}

1587 Pathogen[ P03363] interacts with 39 human  
partners:{P22681;Q86Y01;Q86TC9;Q9NZH5;Q07666;O75368;Q9P2Y5;Q86UR1;Q9Y2R2;Q9UPX8;Q96B97;Q9NR46;Q13625;Q9UJC5;Q96PU8;P78314;Q16204;Q9UI08;Q8N1I0;Q8IZD9;Q5VWX1;O15056;O75674;Q8TF68;Q92556;Q96EY5;P14317;Q99638;O60239;P56945;Q9NZQ3;Q96JJ3;O95997;O14512;Q9BQI5;P24666;O75525;Q9Y5K6;Q9NZH4}

1588 [Cluster 145]GO:0010484+F molecular\_function [name] H3 histone acetyltransferase  
activity [def] "Catalysis of the reaction

1589 Pathogen[ Q2Q067] interacts with 1 human partners:{Q92830}

1590 Pathogen[ P0C214] interacts with 1 human partners:{Q92830}

1591 Pathogen[ P03346] interacts with 2 human partners:{Q92830;P51587}

1592 Pathogen[ Q85601] interacts with 2 human partners:{Q92830;P51587}

1593 Pathogen[ P14079] interacts with 2 human partners:{Q92830;P51587}

1594 Pathogen[ P03383] interacts with 1 human partners:{Q92830}

1595 Pathogen[ P03410] interacts with 2 human partners:{Q92830;P51587}

1596 Pathogen[ P14075] interacts with 1 human partners:{Q92830}

1597 Pathogen[ P0C206] interacts with 2 human partners:{Q92830;P51587}

1598 Pathogen[ P03363] interacts with 1 human partners:{Q92830}

1599 [Cluster 146]GO:0051219+F molecular\_function [name] phosphoprotein binding [def]  
"Interacting selectively and non-covalently with a phosphorylated protein." [GOC

1600 Pathogen[ Q2Q067] interacts with 8 human  
partners:{P06400;P62258;O00257;Q7Z2E3;Q99933;O15405;P31946;P27986}

1601 Pathogen[ P0C214] interacts with 8 human  
partners:{P62993;Q99933;Q7Z2E3;O00257;P31946;P27986;P06400;O15405}

1602 Pathogen[ P03346] interacts with 9 human  
partners:{P06400;P62258;P62993;O00257;P31946;Q7Z2E3;O15405;P27986;Q99933}

1603 Pathogen[ Q85601] interacts with 9 human  
partners:{P31946;P62993;P06400;O15405;P27986;Q99933;P62258;Q7Z2E3;O00257}

1604 Pathogen[ P14079] interacts with 7 human  
partners:{O15405;O00257;P31946;Q99933;P62258;P62993;Q7Z2E3}

1605 Pathogen[ P03383] interacts with 8 human  
partners:{Q7Z2E3;P27986;P31946;O00257;O15405;P06400;Q99933;P62258}

1606 Pathogen[ P03410] interacts with 9 human  
partners:{Q99933;P62258;P27986;O15405;P06400;Q7Z2E3;O00257;P62993;P31946}

1607 Pathogen[ P14075] interacts with 8 human  
partners:{Q7Z2E3;Q99933;O00257;P27986;O15405;P06400;P31946;P62258}

1608 Pathogen[ P0C206] interacts with 9 human  
partners:{Q99933;P27986;P62993;O15405;P31946;P62258;O00257;Q7Z2E3;P06400}

1609 Pathogen[ P03363] interacts with 9 human  
partners:{P62258;P36575;P31946;P06400;Q7Z2E3;O15405;O00257;P27986;Q99933}

1610 [Cluster 147]GO:0004843+F molecular\_function [name] ubiquitin-specific protease  
activity [def] "Catalysis of the hydrolysis of various forms of polymeric ubiquitin  
sequences." [ISBN

1611 Pathogen[ Q2Q067] interacts with 6 human  
partners:{Q9Y5K5;P54252;Q92890;Q93009;Q15025;Q86T82}

1612 Pathogen[ P0C214] interacts with 7 human  
partners:{Q92560;Q9Y5K5;Q15025;Q93009;Q92890;Q9H3M9;P54252}

1613 Pathogen[ P03346] interacts with 15 human  
partners:{Q93009;Q92560;Q9H3M9;O95630;Q86T82;Q9UHP3;Q14694;P51784;Q15025;Q96FW1;O94782;Q92890;Q9Y5K5;Q9H0E7;P54252}

1614 Pathogen[ Q85601] interacts with 12 human

partners:{Q9Y5T5;Q9H0E7;Q93009;Q92560;Q9H3M9;P54252;Q9NQC7;Q15025;Q9Y5K5;O95630;Q86T82;Q92890}

1615 Pathogen[ P14079] interacts with 8 human

partners:{Q9H3M9;P54252;Q15025;Q92890;Q9Y5K5;Q92560;Q9NQC7;Q96FW1}

1616 Pathogen[ P03383] interacts with 5 human

partners:{P54252;Q15025;Q9Y5K5;Q9H3M9;Q92890}

1617 Pathogen[ P03410] interacts with 6 human

partners:{Q96FW1;Q9H3M9;P54252;Q15025;Q9Y5K5;Q92890}

1618 Pathogen[ P14075] interacts with 6 human

partners:{Q92890;Q96FW1;P54252;Q15025;Q9H3M9;Q9Y5K5}

1619 Pathogen[ P0C206] interacts with 14 human

partners:{Q9NQC7;Q92890;Q9Y5T5;O95630;Q93009;P54252;Q9H0E7;Q9Y5K5;Q15025;Q9H3M9;Q96FW1;Q86T82;Q9UHP3;Q92560}

1620 Pathogen[ P03363] interacts with 9 human

partners:{Q9Y5K5;P51784;Q9UHP3;P54252;Q92890;Q92560;Q86T82;Q15025;Q96FW1}

1621 [Cluster 148]GO:0046974+F molecular\_function [name] histone methyltransferase activity (H3-K9 specific) [def] "Catalysis of the reaction

1622 Pathogen[ Q2Q067] interacts with 2 human partners:{O43463;Q9H5I1}

1623 Pathogen[ P0C214] interacts with 2 human partners:{Q9H5I1;O43463}

1624 Pathogen[ P03346] interacts with 2 human partners:{O43463;Q9H5I1}

1625 Pathogen[ Q85601] interacts with 2 human partners:{Q9H5I1;O43463}

1626 Pathogen[ P14079] interacts with 1 human partners:{Q9H5I1}

1627 Pathogen[ P03383] interacts with 2 human partners:{O43463;Q9H5I1}

1628 Pathogen[ P03410] interacts with 2 human partners:{Q9H5I1;O43463}

1629 Pathogen[ P14075] interacts with 2 human partners:{Q9H5I1;O43463}

1630 Pathogen[ P0C206] interacts with 2 human partners:{O43463;Q9H5I1}

1631 Pathogen[ P03363] interacts with 2 human partners:{Q9H5I1;O43463}

1632 [Cluster 149]GO:0019904+F molecular\_function [name] protein domain specific binding [def] "Interacting selectively and non-covalently with a specific domain of a protein." [GOC

1633 Pathogen[ Q2Q067] interacts with 78 human

partners:{Q14974;P46108;Q16236;Q7LBR1;Q13185;P10827;P63104;Q9H7N4;P52272;P21980;P62258;O14503;O95886;Q9NSC5;Q9UBB5;P54259;Q9P0M2;Q8N137;P61981;P50502;Q93074;Q9P1A6;Q9HC77;Q9NY61;Q9Y6J0;P09086;O95359;Q9Y2D8;P58340;Q08050;O14980;Q07157;Q14186;Q05084;P67870;P51959;P12755;Q9UNN5;Q14978;Q92796;O14641;O75528;Q9Y6K9;Q9HD42;P42575;Q16254;Q9UQN3;P41212;Q9UN37;Q8WVJ9;O60907;P16333;Q13363;Q15466;P12757;Q04917;Q9HC62;P27348;P31946;O75410;Q9C000;P11474;P80723;Q9NRX2;O43633;O14964;P27986;Q14188;P23497;P14653;Q9UMX0;Q99459;Q92665;P49715;Q9NUP9;O14490;O60716;P23025}

1634 Pathogen[ P0C214] interacts with 77 human

partners:{O14490;Q16254;P11474;O75528;Q9Y6K9;Q13363;P12757;P62993;O60716;Q04917;P27348;Q92796;P23025;P51959;O60907;Q9Y2D8;Q93074;Q9HD42;Q9P0M2;Q9HC77;O14964;Q9P1A6;Q9NSC5;Q9UQN3;Q9NY61;Q8NDH6;O95359;O14503;Q92665;P52272;Q7LBR1;Q14186;O14980;Q14978;Q99459;Q9UNN5;O14641;Q9Y2H0;P14653;Q13185;O95886;P19429;P12755;Q9NRX2;P16333;P23497;Q8WVJ9;O75410;P58340;P61981;P09086;P21980;Q9HC62;P80723;Q14974;Q05084;Q9UN37;Q9UBB5;P67870;O43633;P46108;P31946;Q07157;Q9H7N4;P27986;Q9UMX0;Q14188;P42575;Q15466;Q9Y6J0;P50502;P54259;P55072;Q16236;Q9C000;P41212;Q8N137}

1635 Pathogen[ P03346] interacts with 91 human

partners:{Q9NSC5;P21980;Q9Y6K9;O14490;Q9P0M2;P09086;P10827;O60907;P12757;O60716;P50502;Q02535;Q9HD42;Q9Y2D8;Q14188;O75410;Q8N137;P07992;Q15466;P42575;P62258;P80723;O95359;Q9HC77;Q93074;O43815;P27348;Q08050;Q9UMX0;P62993;P58340;Q16254;Q05084;P14653;P55072;P49715;Q04917;O14503;Q92796;Q16236;P51843;P16333;Q14186;O14980;Q14978;P20340;Q8N3R9;Q9UNN5;Q9Y2H0;Q9NRX2;Q9NUP9;O14641;O75528;O43633;Q9Y6J0;Q8WVJ9;Q5T2T1;Q9NY61;O95886;Q07157;P46108;Q9UQN3;Q99459;Q9HAP6;P61981;P52272;P31946;P63104;Q9HC62;P11474;Q13363;P23025;O14964;P41212;P23497;P51959;P67870;Q7LBR1;Q9H7N4;O75593;Q9UBB5;P53367;Q13185;Q9NRD5;P54259;P27986;Q9P1A6;Q9UN37;Q92665;Q9C000;Q14974}

1636 Pathogen[ Q85601] interacts with 77 human

partners:{P54259;O14490;P61981;Q14978;Q8N137;P63104;P31946;O75528;P23025;Q16236;P62993;Q9NUP9;Q9UQN3;P09086;Q15466;Q9NY61;O60907;P14653;Q92665;Q9Y6J0;P16333;Q9HC62;Q9P1A6;P12757;Q9HC77;O43815;Q14188;O14503;P46108;O43633;Q13363;Q7LBR1;P51959;P80723;Q04917;P12755;Q14974;P27986;P41212;O60716;Q14186;Q9Y6K9;Q9NRX2;Q9UNN5;O14641;P58340;Q9Y2D8;P62258;P42575;P27348;P21980;Q99459;Q13185;Q16254;Q9H7N4;Q92796;P11474;O14964;P10827;O14980;Q07157;Q9P0M2;P49715;Q9NSC5;Q08050;P67870;P50502;O95886;Q9UN37;Q93074;Q9UBB5;Q9HD42;O75410;Q05084;Q9UMX0;Q8WVJ9;O95359}

1637 Pathogen[ P14079] interacts with 86 human

partners:{Q8NDH6;P51959;Q99459;P12755;Q05084;P19429;Q14186;O75528;O95359;Q9Y6A5;Q9NY61;P09086;Q16254;O14641;Q9UMX0;Q9P0M2;Q07157;Q9UBB5;Q5T2T1;P24588;Q9C000;P11474;O43815;P21980;O60907;Q9NRX2;Q7LBR1;Q8WVJ9;Q9HD42;Q96K83;Q04917;Q96BJ3;P10827;P23025;P23497;Q9Y2H0;P63104;Q9NUP9;P61981;O75952;Q13185;Q9HC62;Q9H7N4;Q9UNN5;O43633;P31946;P49715;Q9Y6K9;Q9NZ72;P16333;Q14974;Q92665;P27348;Q9HAP6;Q9NSC5;P62258;Q8N3R9;Q16236;Q9UN37;P41212;P62993;O75410;P54259;P67870;O95886;Q8N137;P12757;Q9P1A6;P80723;P42575;Q93074;O14503;Q92796;Q15466;Q9Y2D8;Q9HC77;Q14188;O60716;P50502;P07992;O14490;P46108;Q9UQN3;P58340;Q14978;Q9Y6J0}

1638 Pathogen[ P03383] interacts with 65 human

partners:{O60716;P27986;Q14978;Q9NY61;Q9P1A6;O75528;Q9Y6K9;Q8WVJ9;P58340;P50502;P31946;O60907;O75410;O95886;Q9HC77;O14490;O14503;Q99459;Q9H7N4;Q92665;Q93074;Q9NRX2;Q9UBB5;Q07157;Q05084;P11474;Q14186;Q13185;Q7LBR1;P63104;Q9UNN5;O43633;O14641;O14980;P51959;

1639 P23025;Q9UMX0;Q15466;Q16254;Q14974;Q9HD42;P41212;Q16236;Q9NSC5;P67870;P23497;Q14188;P61981;Q9HC62;Q8N137;P80723;P12757;P21980;Q92796;Q96BJ3;Q9Y2D8;P16333;O14964;P62258;Q9UN37;Q9Y2H0;Q13363;Q9UQN3;P54259;P27348}  
 Pathogen[ P03410] interacts with 85 human  
 partners: {Q9P1A6;P62258;P23025;P27986;Q9Y6J0;Q9UNN5;O95359;Q14974;O43633;Q8WVJ9;P50502;P12755;Q9HC77;P07992;P19429;Q04917;P41212;P42575;O75528;P27348;Q16254;P53367;Q16236;Q14978;Q92665;O60716;Q9Y2H0;Q9NY61;Q9UBB5;Q8NDH6;Q9NUP9;P16333;Q8N137;Q9C000;Q9NSC5;Q9Y6A5;O14490;Q14188;Q05084;Q96BJ3;Q9HAP6;Q9H7N4;P58340;O75952;P61981;Q5T2T1;Q9UMX0;Q9POM2;Q9NRD5;Q9UQN3;Q9HC62;Q99459;Q9NRX2;P51959;Q07157;Q9HD42;Q9UN37;Q96K83;Q92796;Q14186;P52272;Q15466;P12757;O75410;Q13185;P63104;P11474;P46108;P54259;Q9NZ72;O95886;O43815;P80723;P21980;Q93074;Q9Y6K9;P67870;P62993;O60907;Q7LBR1;P24588;Q8N3R9;P31946;O14980;O14641}

1640 Pathogen[ P14075] interacts with 65 human  
 partners: {Q9NRX2;P23497;P23025;P11474;O75410;Q07157;P51959;Q7LBR1;P80723;P41212;Q9NY61;O95886;Q9Y2D8;Q08050;Q9HC77;Q9H7N4;Q9UBB5;P61981;Q8WVJ9;O14503;Q99459;Q96BJ3;P12757;P16333;Q93074;Q14186;O14980;O14964;Q9UNN5;O14641;O75528;Q16254;Q92665;Q13185;Q9NSC5;Q9UQN3;Q9HC62;P50502;P67870;P27986;Q8N137;O14490;O60907;P63104;Q92796;P27348;Q05084;Q9P1A6;Q9HD42;Q15466;P54259;Q9Y2H0;P31946;Q9Y6K9;Q13363;Q14974;P21980;Q16236;O60716;Q14188;Q14978;Q9UN37;Q9UMX0;P62258;P58340}

1641 Pathogen[ P0C206] interacts with 88 human  
 partners: {Q9UNN5;Q9C000;O14964;O60716;Q8N137;Q14188;Q9NUP9;P58340;O75528;O75952;Q9UN37;O95359;Q15466;Q7LBR1;Q9HC77;Q9Y6K9;Q9UBB5;O43815;O60907;P41212;Q9UMX0;Q9H7N4;Q92665;P21980;Q14974;Q9HC62;P19429;Q9UQN3;O95886;Q14186;P49715;Q9NRX2;Q04917;P27348;Q8WVJ9;P27986;P62993;Q16254;Q9Y2D8;P07992;P12755;P31946;P14653;P54259;O75410;Q8N3R9;Q9Y2H0;P63104;P50502;Q5T2T1;O14490;Q9Y6J0;P09086;Q9NSC5;P62258;P12757;P51959;P80723;Q9POM2;Q9Y6A5;Q96BJ3;Q9NZ72;P61981;P67870;O43633;P55072;Q99459;P16333;Q08050;Q07157;Q8NDH6;Q13185;Q16236;P42575;Q9HD42;P11474;P46108;Q92796;Q96K83;Q13363;Q9NY61;Q9NRD5;Q93074;P23025;Q05084;Q9P1A6;P10827;Q14978}

1642 Pathogen[ P03363] interacts with 78 human  
 partners: {Q16236;Q9UNN5;O75410;Q14978;Q9Y6J0;P62258;P27348;P36575;Q15466;Q9HC77;Q9C000;P50502;P54259;P58340;P12757;O14980;P09086;P31946;O60907;Q9UMX0;Q16254;P11474;P23025;Q9Y6K9;Q9Y2D8;Q5T2T1;P23497;Q13185;Q07157;Q9POM2;P14653;P52272;P63104;Q08050;Q9NSC5;Q9NY61;Q9UN37;Q9H7N4;Q9NRX2;Q9UPN6;P16333;Q9HC62;O43815;Q8N3R9;Q05084;Q7LBR1;Q14974;P46108;O14964;Q93074;Q92665;P51959;Q14186;P61981;Q14188;P80723;O95359;O95886;P67870;Q04917;Q9P1A6;Q9UQN3;O14490;Q13363;Q92796;Q9NUP9;O14641;P41212;P19429;Q99459;O60716;P27986;Q8WVJ9;O14503;O75528;Q9HD42;Q9UBB5;Q8N137}

1643 [Cluster 150]GO:0001618+F molecular\_function [name] viral receptor activity [def]  
 "Combining with a virus component and mediating entry of the virus into the cell." [GOC]

1644 Pathogen[ Q2Q067] interacts with 1 human partners: {O15304}

1645 Pathogen[ P0C214] interacts with 1 human partners: {O15304}

1646 Pathogen[ P03346] interacts with 1 human partners: {O15304}

1647 Pathogen[ Q85601] interacts with 1 human partners: {O15304}

1648 Pathogen[ P14079] interacts with 1 human partners: {O15304}

1649 Pathogen[ P03383] interacts with 1 human partners: {O15304}

1650 Pathogen[ P03410] interacts with 1 human partners: {O15304}

1651 Pathogen[ P14075] interacts with 1 human partners: {O15304}

1652 Pathogen[ P0C206] interacts with 1 human partners: {O15304}

1653 Pathogen[ P03363] interacts with 1 human partners: {O15304}

1654 [Cluster 151]GO:0003810+F molecular\_function [name] protein-glutamine  
 gamma-glutamyltransferase activity [def] "Catalysis of the reaction

1655 Pathogen[ Q2Q067] interacts with 1 human partners: {P21980}

1656 Pathogen[ P0C214] interacts with 2 human partners: {P22735;P21980}

1657 Pathogen[ P03346] interacts with 3 human partners: {P21980;P16452;P22735}

1658 Pathogen[ Q85601] interacts with 1 human partners: {P21980}

1659 Pathogen[ P14079] interacts with 3 human partners: {P16452;P22735;P21980}

1660 Pathogen[ P03383] interacts with 1 human partners: {P21980}

1661 Pathogen[ P03410] interacts with 3 human partners: {P16452;P21980;P22735}

1662 Pathogen[ P14075] interacts with 1 human partners: {P21980}

1663 Pathogen[ P0C206] interacts with 3 human partners: {P21980;P16452;P22735}

1664 Pathogen[ P03363] interacts with 1 human partners: {P16452}

1665 [Cluster 152]GO:0004872+F molecular\_function [name] receptor activity [def]  
 "Combining with an extracellular or intracellular messenger to initiate a change in cell activity." [GOC]

1666 Pathogen[ Q2Q067] interacts with 18 human  
 partners: {Q93034;Q96HR3;Q9NPJ6;P13056;P49116;Q93074;O75448;O60244;Q9Y5L0;Q15629;P04264;Q9UHV7;Q9NVC6;Q9Y2X0;Q9BQE4;Q9Y2W1;P23508;P41214}

1667 Pathogen[ P0C214] interacts with 20 human  
 partners: {Q9Y5L0;Q9NZT2;P04264;Q9Y2X0;Q93074;Q96HR3;Q9NVC6;Q93034;O60244;P13056;P49116;Q08AM6;Q9UHV7;O75448;Q15629;P23508;Q9BQE4;Q9Y2W1;Q9NPJ6;P41214}

1668 Pathogen[ P03346] interacts with 19 human  
 partners: {Q9NPJ6;P23508;P49116;Q96HR3;Q15629;Q93074;P13056;O60244;Q93034;O75448;Q9BUN8;Q9NZT2;Q9NVC6;Q9Y5L0;Q9Y2X0;P04264;P41214;Q9Y2W1;Q9UHV7}

1669 Pathogen[ Q85601] interacts with 19 human  
 partners: {Q9Y2X0;Q08AM6;Q15629;P23508;Q9UHV7;O75448;P04264;P49116;P13056;P41214;Q9Y2W1;Q9Y5L0;O60244;Q96HR3;Q93074;Q9NPJ6;Q9NVC6;Q93034;Q9BQE4}

1670 Pathogen[ P14079] interacts with 24 human

partners:{Q5TC84;Q15629;O60244;P13056;Q9Y2X0;Q9BQE4;Q96HR3;Q9NVC6;Q99442;Q9BUN8;O75448;Q9UHV7;O75787;P23508;Q93034;Q9NZT2;O14836;Q9NPJ6;P04264;Q93074;P49116;P41214;Q9Y5L0;Q9Y2W1}

1671 Pathogen[ P03383] interacts with 19 human partners:{P49116;O60244;Q93034;Q9BUN8;Q9NPJ6;Q93074;Q96HR3;O75448;Q15629;Q9BQE4;P41214;P04264;P23508;Q9UHV7;Q9NVC6;Q9Y2W1;Q9Y5L0;P13056;Q9Y2X0}

1672 Pathogen[ P03410] interacts with 27 human partners:{Q9Y2W1;Q99442;O75787;O60896;P04264;Q9NVC6;Q9NPJ6;Q9BQE4;P41214;P23508;Q9Y5L0;Q08AM6;Q9BUN8;O14836;Q15629;Q9NZT2;Q96HR3;O60244;Q9UHV7;Q9BZR6;P49116;Q9Y2X0;Q93074;Q93034;O75448;Q5TC84;P13056}

1673 Pathogen[ P14075] interacts with 19 human partners:{Q9BQE4;Q9NPJ6;Q93034;Q96HR3;O75448;Q15629;P13056;Q93074;P49116;Q9UHV7;P04264;P41214;Q9BUN8;O60244;P23508;Q9NVC6;Q9Y5L0;Q9Y2W1;Q9Y2X0}

1674 Pathogen[ P0C206] interacts with 23 human partners:{Q9Y5L0;Q96HR3;Q9NZT2;Q5TC84;O75787;P04264;P13056;P49116;Q9UHV7;Q9BQE4;Q9NPJ6;Q9BUN8;Q9Y2W1;O60244;Q15629;Q9NVC6;O75448;P41214;Q93034;Q9Y2X0;Q93074;P23508;Q08AM6}

1675 Pathogen[ P03363] interacts with 15 human partners:{P49116;Q96HR3;P23508;Q9NVC6;Q9UHV7;Q9Y5L0;Q93074;O75448;P41214;Q9NPJ6;O60244;Q93034;Q9NZT2;P04264;P13056}

1676 [Cluster 153]GO:0008603+F molecular\_function [name] cAMP-dependent protein kinase regulator activity [def] "Modulation of the activity of the enzyme cAMP-dependent protein kinase." [GOC]

1677 Pathogen[ Q2Q067] interacts with 1 human partners:{Q96C74}

1678 Pathogen[ P0C214] interacts with 1 human partners:{Q96C74}

1679 Pathogen[ P03346] interacts with 1 human partners:{Q96C74}

1680 Pathogen[ Q85601] interacts with 1 human partners:{Q96C74}

1681 Pathogen[ P14079] interacts with 5 human partners:{Q49A92;O75952;A6NNX1;Q9BZX4;Q96C74}

1682 Pathogen[ P03383] interacts with 1 human partners:{Q96C74}

1683 Pathogen[ P03410] interacts with 5 human partners:{A6NNX1;Q9BZX4;O75952;Q9HAT0;Q49A92}

1684 Pathogen[ P14075] interacts with 1 human partners:{Q96C74}

1685 Pathogen[ P0C206] interacts with 2 human partners:{O75952;Q96C74}

1686 Pathogen[ P03363] interacts with 1 human partners:{Q96C74}

1687 [Cluster 154]GO:0004515+F molecular\_function [name] nicotinate-nucleotide adenyltransferase activity [def] "Catalysis of the reaction

1688 Pathogen[ Q2Q067] interacts with 1 human partners:{Q9HAN9}

1689 Pathogen[ P0C214] interacts with 3 human partners:{Q96T66;Q9HAN9;Q9BZQ4}

1690 Pathogen[ P03346] interacts with 1 human partners:{Q9HAN9}

1691 Pathogen[ Q85601] interacts with 1 human partners:{Q9HAN9}

1692 Pathogen[ P14079] interacts with 2 human partners:{Q9BZQ4;Q9HAN9}

1693 Pathogen[ P03383] interacts with 1 human partners:{Q9HAN9}

1694 Pathogen[ P03410] interacts with 2 human partners:{Q9HAN9;Q9BZQ4}

1695 Pathogen[ P14075] interacts with 1 human partners:{Q9HAN9}

1696 Pathogen[ P0C206] interacts with 2 human partners:{Q9BZQ4;Q9HAN9}

1697 Pathogen[ P03363] interacts with 1 human partners:{Q9HAN9}

1698 [Cluster 155]GO:0016896+F molecular\_function [name] exoribonuclease activity, producing 5'-phosphomonoesters [def] "Catalysis of the hydrolysis of ester linkages within ribonucleic acids by removing nucleotide residues from the 3' or 5' end to yield 5' phosphomonoesters." [GOC]

1699 Pathogen[ Q2Q067] interacts with 1 human partners:{Q8IU60}

1700 Pathogen[ P0C214] interacts with 1 human partners:{Q8IU60}

1701 Pathogen[ P03346] interacts with 1 human partners:{Q8IU60}

1702 Pathogen[ Q85601] interacts with 1 human partners:{Q8IU60}

1703 Pathogen[ P14079] interacts with 1 human partners:{Q8IU60}

1704 Pathogen[ P03383] interacts with 1 human partners:{Q8IU60}

1705 Pathogen[ P03410] interacts with 1 human partners:{Q8IU60}

1706 Pathogen[ P14075] interacts with 1 human partners:{Q8IU60}

1707 Pathogen[ P0C206] interacts with 1 human partners:{Q8IU60}

1708 Pathogen[ P03363] interacts with 1 human partners:{Q8IU60}

1709 [Cluster 156]GO:0046969+F molecular\_function [name] NAD-dependent histone deacetylase activity (H3-K9 specific) [def] "Catalysis of the reaction

1710 Pathogen[ Q2Q067] interacts with 11 human partners:{P56524;Q9BY41;Q9UKV0;Q13547;O15379;Q8N6T7;Q9UQL6;Q969S8;Q96DB2;Q92769;Q8WUI4}

1711 Pathogen[ P0C214] interacts with 11 human partners:{Q13547;Q969S8;Q96DB2;P56524;Q92769;Q9UKV0;O15379;Q8N6T7;Q8WUI4;Q9UQL6;Q9BY41}

1712 Pathogen[ P03346] interacts with 11 human partners:{Q969S8;Q96DB2;O15379;P56524;Q92769;Q13547;Q9BY41;Q8WUI4;Q8N6T7;Q9UKV0;Q9UQL6}

1713 Pathogen[ Q85601] interacts with 11 human partners:{Q969S8;Q9UKV0;Q96DB2;Q9BY41;Q9UQL6;Q92769;Q8N6T7;P56524;O15379;Q13547;Q8WUI4}

1714 Pathogen[ P14079] interacts with 10 human

1715 partners:{Q9UQL6;O15379;Q96DB2;Q969S8;Q8WUI4;Q9UKV0;Q92769;Q8N6T7;Q9BY41;P56524}  
Pathogen[ P03383] interacts with 10 human

1716 partners:{Q8N6T7;Q9UQL6;Q92769;O15379;Q13547;Q9BY41;Q9UKV0;P56524;Q8WUI4;Q969S8}  
Pathogen[ P03410] interacts with 11 human

1717 partners:{Q9UKV0;Q9BY41;Q8N6T7;Q8WUI4;Q9UQL6;Q969S8;Q92769;O15379;P56524;Q13547;Q96DB2}  
Pathogen[ P14075] interacts with 10 human

1718 partners:{Q9BY41;Q8N6T7;Q969S8;P56524;Q9UKV0;Q13547;Q92769;O15379;Q9UQL6;Q8WUI4}  
Pathogen[ P0C206] interacts with 11 human

1719 partners:{Q92769;Q96DB2;Q9UKV0;Q13547;Q8N6T7;O15379;Q8WUI4;Q9BY41;P56524;Q969S8;Q9UQL6}  
Pathogen[ P03363] interacts with 8 human

1720 [Cluster 157]GO:0030506+F molecular\_function [name] ankyrin binding [def]  
"Interacting selectively and non-covalently with ankyrin, a 200 kDa cytoskeletal protein that attaches other cytoskeletal proteins to integral membrane proteins." [GOC

1721 Pathogen[ Q2Q067] interacts with 3 human partners:{Q01082;Q14315;Q9C0C2}  
1722 Pathogen[ P0C214] interacts with 3 human partners:{Q9C0C2;Q01082;Q14315}  
1723 Pathogen[ P03346] interacts with 5 human partners:{Q14315;P11277;Q15149;Q01082;Q9C0C2}  
1724 Pathogen[ Q85601] interacts with 3 human partners:{Q01082;Q14315;Q9C0C2}  
1725 Pathogen[ P14079] interacts with 5 human partners:{Q01082;Q15149;Q9C0C2;Q14315;P11277}  
1726 Pathogen[ P03383] interacts with 1 human partners:{Q9C0C2}  
1727 Pathogen[ P03410] interacts with 5 human partners:{Q9C0C2;Q14315;Q01082;Q15149;P11277}  
1728 Pathogen[ P14075] interacts with 1 human partners:{Q9C0C2}  
1729 Pathogen[ P0C206] interacts with 4 human partners:{Q01082;Q14315;Q9C0C2;P11277}  
1730 Pathogen[ P03363] interacts with 5 human partners:{P11277;Q01082;Q15149;Q9C0C2;Q14315}

1731 [Cluster 158]GO:0050313+F molecular\_function [name] sulfur dioxygenase activity [def]  
"Catalysis of the reaction

1732 Pathogen[ Q2Q067] interacts with 1 human partners:{O95571}  
1733 Pathogen[ P0C214] interacts with 1 human partners:{O95571}  
1734 Pathogen[ P03346] interacts with 1 human partners:{O95571}  
1735 Pathogen[ Q85601] interacts with 1 human partners:{O95571}  
1736 Pathogen[ P14079] interacts with 1 human partners:{O95571}  
1737 Pathogen[ P03383] interacts with 1 human partners:{O95571}  
1738 Pathogen[ P03410] interacts with 1 human partners:{O95571}  
1739 Pathogen[ P14075] interacts with 1 human partners:{O95571}  
1740 Pathogen[ P0C206] interacts with 1 human partners:{O95571}  
1741 Pathogen[ P03363] interacts with 1 human partners:{O95571}

1742 [Cluster 159]GO:0005092+F molecular\_function [name] GDP-dissociation inhibitor activity [def]  
"Prevents the dissociation of GDP from a GTPase, thereby preventing GTP from binding." [GOC

1743 Pathogen[ Q2Q067] interacts with 2 human partners:{P81274;P43487}  
1744 Pathogen[ P0C214] interacts with 3 human partners:{P81274;P43487;P31150}  
1745 Pathogen[ P03346] interacts with 3 human partners:{P43487;P81274;P31150}  
1746 Pathogen[ Q85601] interacts with 3 human partners:{P31150;P81274;P43487}  
1747 Pathogen[ P14079] interacts with 2 human partners:{P31150;P81274}  
1748 Pathogen[ P03383] interacts with 2 human partners:{P81274;P43487}  
1749 Pathogen[ P03410] interacts with 3 human partners:{P43487;P81274;P31150}  
1750 Pathogen[ P14075] interacts with 2 human partners:{P81274;P43487}  
1751 Pathogen[ P0C206] interacts with 3 human partners:{P81274;P43487;P31150}  
1752 Pathogen[ P03363] interacts with 3 human partners:{P31150;P81274;P43487}

1753 [Cluster 160]GO:0008200+F molecular\_function [name] ion channel inhibitor activity [def]  
"Stops, prevents, or reduces the activity of an ion channel." [GOC

1754 Pathogen[ Q2Q067] interacts with 2 human partners:{Q92681;O43768}  
1755 Pathogen[ P0C214] interacts with 2 human partners:{O43768;Q92681}  
1756 Pathogen[ P03346] interacts with 3 human partners:{Q92681;Q86UT5;O43768}  
1757 Pathogen[ Q85601] interacts with 2 human partners:{O43768;Q92681}  
1758 Pathogen[ P14079] interacts with 4 human partners:{Q92681;O43768;Q86UT5;Q5JPF3}  
1759 Pathogen[ P03383] interacts with 2 human partners:{Q92681;O43768}  
1760 Pathogen[ P03410] interacts with 4 human partners:{Q86UT5;Q5JPF3;O43768;Q92681}  
1761 Pathogen[ P14075] interacts with 2 human partners:{Q92681;O43768}  
1762 Pathogen[ P0C206] interacts with 3 human partners:{Q92681;Q86UT5;O43768}  
1763 Pathogen[ P03363] interacts with 3 human partners:{O43768;Q86UT5;Q92681}

1764 [Cluster 161]GO:0031493+F molecular\_function [name] nucleosomal histone binding [def]  
"Interacting selectively and non-covalently with a histone that is assembled into a nucleosome." [GOC

1765 Pathogen[ Q2Q067] interacts with 2 human partners:{Q96T88;Q9Y468}  
1766 Pathogen[ P0C214] interacts with 2 human partners:{Q9Y468;Q96T88}  
1767 Pathogen[ P03346] interacts with 2 human partners:{Q9Y468;Q96T88}  
1768 Pathogen[ Q85601] interacts with 2 human partners:{Q9Y468;Q96T88}  
1769 Pathogen[ P14079] interacts with 1 human partners:{Q9Y468}  
1770 Pathogen[ P03383] interacts with 1 human partners:{Q9Y468}

1771 Pathogen[ P03410] interacts with 1 human partners:{Q9Y468}  
1772 Pathogen[ P14075] interacts with 1 human partners:{Q9Y468}  
1773 Pathogen[ P0C206] interacts with 2 human partners:{Q9Y468;Q96T88}  
1774 Pathogen[ P03363] interacts with 2 human partners:{Q9Y468;Q96T88}  
1775 [Cluster 162]GO:0016866+F molecular\_function [name] intramolecular transferase activity [def] "Catalysis of the transfer of a functional group from one position to another within a single molecule." [GOC  
1776 Pathogen[ Q2Q067] interacts with 2 human partners:{P22033;P06744}  
1777 Pathogen[ P0C214] interacts with 1 human partners:{P22033}  
1778 Pathogen[ P03346] interacts with 1 human partners:{P06744}  
1779 Pathogen[ Q85601] interacts with 2 human partners:{P06744;P22033}  
1780 Pathogen[ P14079] interacts with 2 human partners:{P06744;P22033}  
1781 Pathogen[ P03383] interacts with 2 human partners:{P06744;P22033}  
1782 Pathogen[ P03410] interacts with 2 human partners:{P06744;P22033}  
1783 Pathogen[ P14075] interacts with 2 human partners:{P06744;P22033}  
1784 Pathogen[ P0C206] interacts with 2 human partners:{P06744;P22033}  
1785 Pathogen[ P03363] interacts with 1 human partners:{P06744}  
1786 [Cluster 163]GO:0001730+F molecular\_function [name] 2'-5'-oligoadenylate synthetase activity [def] "Catalysis of the reaction  
1787 Pathogen[ Q2Q067] interacts with 1 human partners:{Q9Y6K5}  
1788 Pathogen[ P0C214] interacts with 2 human partners:{Q9Y6K5;P29728}  
1789 Pathogen[ P03346] interacts with 2 human partners:{Q15646;Q9Y6K5}  
1790 Pathogen[ Q85601] interacts with 1 human partners:{Q9Y6K5}  
1791 Pathogen[ P14079] interacts with 2 human partners:{P29728;Q9Y6K5}  
1792 Pathogen[ P03383] interacts with 1 human partners:{Q9Y6K5}  
1793 Pathogen[ P03410] interacts with 2 human partners:{P29728;Q9Y6K5}  
1794 Pathogen[ P14075] interacts with 1 human partners:{Q9Y6K5}  
1795 Pathogen[ P0C206] interacts with 2 human partners:{Q9Y6K5;P29728}  
1796 Pathogen[ P03363] interacts with 1 human partners:{Q9Y6K5}  
1797 [Cluster 164]GO:0020037+F molecular\_function [name] heme binding [def] "Interacting selectively and non-covalently with heme, any compound of iron complexed in a porphyrin (tetrapyrrole) ring." [CHEBI  
1798 Pathogen[ Q2Q067] interacts with 5 human partners:{O14867;P68871;P29474;P99999;P69905}  
1799 Pathogen[ P0C214] interacts with 14 human partners:{P29474;Q99643;P02042;P69905;Q9NPG2;O14867;P68871;P69892;P99999;P02100;O14521;P35520;P69891;P22830}  
1800 Pathogen[ P03346] interacts with 8 human partners:{P29474;O95714;P02100;Q9NPG2;P69905;O14867;P99999;P68871}  
1801 Pathogen[ Q85601] interacts with 11 human partners:{P69905;P99999;O95714;P02042;P02100;P69892;O14867;P29474;P68871;Q9NPG2;P69891}  
1802 Pathogen[ P14079] interacts with 21 human partners:{Q8WWM9;P48775;P02042;O14867;Q9NPG2;P69891;P02100;P13498;P00395;P00403;P09105;P69905;P02008;P68871;O00264;P22830;Q6B0K9;O14521;P02144;P99999;P69892}  
1803 Pathogen[ P03383] interacts with 4 human partners:{P29474;P69905;P68871;P99999}  
1804 Pathogen[ P03410] interacts with 21 human partners:{Q6B0K9;P02008;P02144;P02100;P09105;Q8WWM9;P29474;P48775;P68871;O00264;P22830;P99999;P02042;Q99643;Q9NPG2;O14521;P00403;P69892;P69905;O14867;P69891}  
1805 Pathogen[ P14075] interacts with 4 human partners:{P29474;P68871;P99999;P69905}  
1806 Pathogen[ P0C206] interacts with 18 human partners:{P99999;P68871;Q6B0K9;O14867;P02100;P69892;O14521;P02008;P69891;Q9NPG2;P69905;O00264;P09105;P22830;P29474;P02042;O95714;Q8WWM9}  
1807 Pathogen[ P03363] interacts with 6 human partners:{P29474;P69905;P68871;P99999;O14867;O95714}  
1808 [Cluster 165]GO:0003913+F molecular\_function [name] DNA photolyase activity [def] "Catalysis of the repair of a photoproduct resulting from ultraviolet irradiation of two adjacent pyrimidine residues in DNA." [GOC  
1809 Pathogen[ Q2Q067] interacts with 1 human partners:{Q16526}  
1810 Pathogen[ P0C214] interacts with 2 human partners:{Q49AN0;Q16526}  
1811 Pathogen[ P03346] interacts with 2 human partners:{Q49AN0;Q16526}  
1812 Pathogen[ Q85601] interacts with 2 human partners:{Q49AN0;Q16526}  
1813 Pathogen[ P14079] interacts with 2 human partners:{Q16526;Q49AN0}  
1814 Pathogen[ P03383] interacts with 1 human partners:{Q16526}  
1815 Pathogen[ P03410] interacts with 2 human partners:{Q16526;Q49AN0}  
1816 Pathogen[ P14075] interacts with 1 human partners:{Q16526}  
1817 Pathogen[ P0C206] interacts with 2 human partners:{Q16526;Q49AN0}  
1818 Pathogen[ P03363] interacts with 2 human partners:{Q49AN0;Q16526}  
1819 [Cluster 166]GO:0005085+F molecular\_function [name] guanyl-nucleotide exchange factor activity [def] "Stimulates the exchange of guanyl nucleotides associated with a GTPase. Under normal cellular physiological conditions, the concentration of GTP is higher than that of GDP, favoring the replacement of GDP by GTP in association with the GTPase." [GOC  
1820 Pathogen[ Q2Q067] interacts with 14 human partners:{P18754;Q9Y6D6;Q9Y2L1;P49770;Q96QF0;Q9UI10;Q8N1I0;Q14232;Q9NR50;Q9HD47;Q9UGK8;O43504;Q13144;Q8TBN0}

1821 Pathogen[ P0C214] interacts with 15 human partners:{Q9UI10;P49770;Q9Y2L1;Q8TBN0;Q14232;Q9NR50;Q13144;Q9HD47;O43504;Q8N1I0;Q9Y6D6;Q9UGK8;P18754;Q96QF0;Q9NVN3}

1822 Pathogen[ P03346] interacts with 28 human partners:{Q6P3S1;Q15438;Q8IZD9;Q8TBN0;O95714;Q9Y6D5;Q8IV53;Q12802;P18754;Q6XZF7;Q9HD47;Q9Y6D6;Q9NR50;Q14232;Q9Y2L1;P49770;Q6DN90;O43504;Q5VV41;Q9NVN3;Q9UGK8;Q9H8V3;Q13144;Q8N1I0;Q9NR50;Q9UI10;Q92834;Q96QF0}

1823 Pathogen[ Q85601] interacts with 15 human partners:{Q9HD47;O95714;Q9NR50;Q92834;Q13144;P49770;Q9Y2L1;Q8TBN0;P18754;Q9UGK8;Q9Y6D6;Q8N1I0;Q14232;Q9UI10;Q96QF0}

1824 Pathogen[ P14079] interacts with 31 human partners:{Q6P3S1;Q6XZF7;P47224;Q9Y2Q5;Q9UGK8;Q9UI10;Q9Y6D5;Q8TBN0;Q92834;Q8IZD9;Q9UHA4;Q0VGL1;Q13144;P10911;Q12802;Q9NR50;Q8IV53;Q9Y6D6;Q6IAA8;Q96QF0;Q9H8V3;Q9Y2L1;O43504;Q6DN90;Q14232;Q8N1I0;Q9NVN3;Q15438;P18754;Q5VV41;Q9HD47}

1825 Pathogen[ P03383] interacts with 13 human partners:{Q9HD47;Q9Y2L1;Q96QF0;Q9UI10;Q9Y6D6;Q13144;Q9NR50;P18754;P49770;O43504;Q14232;Q9UGK8;Q8TBN0}

1826 Pathogen[ P03410] interacts with 29 human partners:{Q9Y2Q5;Q9Y2L1;Q9NR50;O43504;Q8IZD9;Q9HD47;Q14232;Q9NVN3;Q9UHA4;P49770;Q9UGK8;Q5VV41;Q6XZF7;Q92834;Q9Y6D6;Q9Y6D5;Q6P3S1;P47224;Q15438;Q8TBN0;Q6IAA8;Q96QF0;Q0VGL1;P18754;Q9H8V3;Q8N1I0;Q8IV53;Q9UI10;Q13144}

1827 Pathogen[ P14075] interacts with 13 human partners:{Q9Y6D6;Q9UI10;Q9Y2L1;Q14232;P49770;Q9HD47;O43504;Q96QF0;P18754;Q9UGK8;Q9NR50;Q13144;Q8TBN0}

1828 Pathogen[ P0C206] interacts with 25 human partners:{Q8IZD9;Q9UHA4;P18754;Q9Y6D6;Q14232;Q9UGK8;P47224;Q9NR50;O43504;Q13144;Q96QF0;P49770;Q8TBN0;Q9HD47;Q9Y6D5;Q9UI10;Q9Y2L1;Q9H8V3;Q8N1I0;Q8IV53;Q6XZF7;Q9NVN3;Q92834;O95714;Q6P3S1}

1829 Pathogen[ P03363] interacts with 24 human partners:{Q9UGK8;Q15438;Q5VV41;Q9UI10;Q9HD47;O43504;P10911;Q9NR50;Q6XZF7;Q8N1I0;Q8IZD9;Q9Y2L1;P49770;O95714;Q6P3S1;Q96NW4;Q92834;Q6DN90;Q13144;Q9Y6D6;P18754;Q8TBN0;Q8IV53;Q96QF0}

1830 [Cluster 167]GO:0035034+F molecular\_function [name] histone acetyltransferase regulator activity [def] "Modulates the activity of histone acetyltransferase." [GOC

1831 Pathogen[ Q2Q067] interacts with 1 human partners:{Q9Y6B2}

1832 Pathogen[ P0C214] interacts with 1 human partners:{Q9Y6B2}

1833 Pathogen[ P03346] interacts with 1 human partners:{Q9Y6B2}

1834 Pathogen[ Q85601] interacts with 1 human partners:{Q9Y6B2}

1835 Pathogen[ P14079] interacts with 1 human partners:{Q9Y6B2}

1836 Pathogen[ P03383] interacts with 1 human partners:{Q9Y6B2}

1837 Pathogen[ P03410] interacts with 1 human partners:{Q9Y6B2}

1838 Pathogen[ P14075] interacts with 1 human partners:{Q9Y6B2}

1839 Pathogen[ P0C206] interacts with 1 human partners:{Q9Y6B2}

1840 Pathogen[ P03363] interacts with 1 human partners:{Q9Y6B2}

1841 [Cluster 168]GO:0008757+F molecular\_function [name] S-adenosylmethionine-dependent methyltransferase activity [def] "Catalysis of the transfer of a methyl group from S-adenosyl-L-methionine to a substrate." [GOC

1842 Pathogen[ Q2Q067] interacts with 9 human partners:{O43463;Q9NVM4;O43159;P46087;P22061;Q14749;Q9UIC8;Q9NR22;P51580}

1843 Pathogen[ P0C214] interacts with 9 human partners:{P46087;O43159;Q9NVM4;P51580;O43463;P22061;Q14749;Q9UIC8;Q9NR22}

1844 Pathogen[ P03346] interacts with 9 human partners:{P22061;P51580;O43159;Q9UIC8;Q14749;O43463;P46087;Q9NR22;Q9NVM4}

1845 Pathogen[ Q85601] interacts with 8 human partners:{P46087;Q9NR22;Q9NVM4;O43159;O43463;P22061;Q9UIC8;Q14749}

1846 Pathogen[ P14079] interacts with 10 human partners:{Q9NR22;Q7L2J0;Q9NVM4;Q9UIC8;Q14749;Q14353;P46087;O43159;Q16625;P51580}

1847 Pathogen[ P03383] interacts with 7 human partners:{O43463;O43159;Q9NR22;P22061;P46087;Q9UIC8;Q14749}

1848 Pathogen[ P03410] interacts with 12 human partners:{Q14353;Q14749;Q9NVM4;O43159;Q9NR22;Q16625;Q9UIC8;P46087;Q7L2J0;O43463;P22061;P51580}

1849 Pathogen[ P14075] interacts with 8 human partners:{Q9NR22;P46087;P51580;P22061;O43159;O43463;Q14749;Q9UIC8}

1850 Pathogen[ P0C206] interacts with 10 human partners:{O43159;Q9UIC8;P22061;O43463;P51580;Q9NVM4;Q9NR22;P46087;Q14749;Q7L2J0}

1851 Pathogen[ P03363] interacts with 8 human partners:{P46087;P51580;Q9NVM4;Q9NR22;Q14749;Q9UIC8;O43159;O43463}

1852 [Cluster 169]GO:0034739+F molecular\_function [name] histone deacetylase activity (H3-K16 specific) [def] "Catalysis of the reaction

1853 Pathogen[ Q2Q067] interacts with 10 human partners:{P56524;Q9BY41;Q9UKV0;Q13547;O15379;Q9UQL6;Q969S8;Q96DB2;Q92769;Q8WUI4}

1854 Pathogen[ P0C214] interacts with 10 human partners:{Q13547;Q969S8;Q96DB2;P56524;Q92769;Q9UKV0;O15379;Q8WUI4;Q9UQL6;Q9BY41}

1855 Pathogen[ P03346] interacts with 10 human partners:{Q969S8;Q96DB2;O15379;P56524;Q92769;Q13547;Q9BY41;Q8WUI4;Q9UKV0;Q9UQL6}



1856 Pathogen[ Q85601] interacts with 10 human  
partners:{Q969S8;Q9UKV0;Q96DB2;Q9BY41;Q9UQL6;Q92769;P56524;O15379;Q13547;Q8WUI4}

1857 Pathogen[ P14079] interacts with 9 human  
partners:{Q9UQL6;O15379;Q96DB2;Q969S8;Q8WUI4;Q9UKV0;Q92769;Q9BY41;P56524}

1858 Pathogen[ P03383] interacts with 9 human  
partners:{Q9UQL6;Q92769;O15379;Q13547;Q9BY41;Q9UKV0;P56524;Q8WUI4;Q969S8}

1859 Pathogen[ P03410] interacts with 10 human  
partners:{Q9UKV0;Q9BY41;Q8WUI4;Q9UQL6;Q969S8;Q92769;O15379;P56524;Q13547;Q96DB2}

1860 Pathogen[ P14075] interacts with 9 human  
partners:{Q9BY41;Q969S8;P56524;Q9UKV0;Q13547;Q92769;O15379;Q9UQL6;Q8WUI4}

1861 Pathogen[ P0C206] interacts with 10 human  
partners:{Q92769;Q96DB2;Q9UKV0;Q13547;O15379;Q8WUI4;Q9BY41;P56524;Q969S8;Q9UQL6}

1862 Pathogen[ P03363] interacts with 7 human  
partners:{Q9BY41;O15379;Q969S8;Q9UQL6;Q9UKV0;Q13547;Q8WUI4}

1863 [Cluster 170]GO:0004814+F molecular\_function [name] arginine-tRNA ligase activity  
[def] "Catalysis of the reaction

1864 Pathogen[ Q2Q067] interacts with 2 human partners:{Q5T160;P54136}

1865 Pathogen[ P0C214] interacts with 2 human partners:{Q5T160;Q5D0E6}

1866 Pathogen[ P03346] interacts with 1 human partners:{P54136}

1867 Pathogen[ Q85601] interacts with 3 human partners:{P54136;Q5T160;Q5D0E6}

1868 Pathogen[ P14079] interacts with 3 human partners:{P54136;Q5T160;Q5D0E6}

1869 Pathogen[ P03383] interacts with 3 human partners:{Q5D0E6;Q5T160;P54136}

1870 Pathogen[ P03410] interacts with 3 human partners:{P54136;Q5D0E6;Q5T160}

1871 Pathogen[ P14075] interacts with 3 human partners:{P54136;Q5D0E6;Q5T160}

1872 Pathogen[ P0C206] interacts with 3 human partners:{Q5D0E6;Q5T160;P54136}

1873 Pathogen[ P03363] interacts with 2 human partners:{P54136;Q5T160}

1874 [Cluster 171]GO:0005507+F molecular\_function [name] copper ion binding [def]  
"Interacting selectively and non-covalently with copper (Cu) ions." [GOC

1875 Pathogen[ Q2Q067] interacts with 12 human  
partners:{P04156;P07438;Q9H2P0;Q93083;O14618;P04732;P04733;Q9UBF6;P04731;Q9NTM9;Q9H7H0;Q8N668}

1876 Pathogen[ P0C214] interacts with 14 human  
partners:{P08294;Q9H7H0;Q8N668;Q9NTM9;P04732;P04733;O14618;P04156;P07438;P04731;Q93083;Q14061;Q9UBF6;Q9H2P0}

1877 Pathogen[ P03346] interacts with 13 human  
partners:{Q3KNW1;Q9H2P0;Q8N668;Q9NTM9;P04732;O14618;P07438;P04733;Q93083;Q9H7H0;P04156;P04731;Q9UBF6}

1878 Pathogen[ Q85601] interacts with 12 human  
partners:{P04732;Q93083;P07438;Q9H7H0;Q9UBF6;P04733;Q9H2P0;Q8N668;Q14061;P04156;P04731;O14618}

1879 Pathogen[ P14079] interacts with 19 human  
partners:{Q93083;Q9UBF6;P04156;P47944;Q9UKY0;P00403;Q9NTM9;P07438;Q9H2P0;Q14061;O75880;Q8N668;P04731;Q9H7H0;P04732;P04733;O00244;O43819;O14618}

1880 Pathogen[ P03383] interacts with 9 human  
partners:{P04733;Q93083;P04156;Q8N668;Q9UBF6;P04732;Q9H7H0;P04731;P07438}

1881 Pathogen[ P03410] interacts with 17 human  
partners:{P47944;Q14061;Q9H7H0;P07438;P04733;Q9NTM9;Q9UBF6;P04731;Q9UKY0;Q93083;P04156;P00403;O14618;P04732;O75880;Q8N668;O43819}

1882 Pathogen[ P14075] interacts with 12 human  
partners:{Q9H7H0;P04733;P47944;Q9NTM9;P04156;Q8N668;P07438;Q93083;P04731;P04732;Q14061;Q9UBF6}

1883 Pathogen[ P0C206] interacts with 15 human  
partners:{P07438;P04156;P04732;P04733;Q9UBF6;Q93083;P04731;O14618;Q9UKY0;Q9H7H0;Q9H2P0;Q8N668;Q14061;Q9NTM9;P47944}

1884 Pathogen[ P03363] interacts with 13 human  
partners:{Q9H7H0;Q9H2P0;Q9UBF6;P04732;P04156;Q8N668;P04731;P07438;O14618;P04733;Q93083;Q9NTM9;Q3KNW1}

1885 [Cluster 172]GO:0052821+F molecular\_function [name] DNA-7-methyladenine glycosylase activity [def] "Catalysis of the reaction

1886 Pathogen[ Q2Q067] interacts with 1 human partners:{P29372}

1887 Pathogen[ P0C214] interacts with 1 human partners:{P29372}

1888 Pathogen[ P03346] interacts with 1 human partners:{P29372}

1889 Pathogen[ Q85601] interacts with 1 human partners:{P29372}

1890 Pathogen[ P14079] interacts with 1 human partners:{P29372}

1891 Pathogen[ P03383] interacts with 1 human partners:{P29372}

1892 Pathogen[ P03410] interacts with 1 human partners:{P29372}

1893 Pathogen[ P14075] interacts with 1 human partners:{P29372}

1894 Pathogen[ P0C206] interacts with 1 human partners:{P29372}

1895 Pathogen[ P03363] interacts with 1 human partners:{P29372}

1896 [Cluster 173]GO:0005544+F molecular\_function [name] calcium-dependent phospholipid binding [def] "Interacting selectively and non-covalently with phospholipids, a class of lipids containing phosphoric acid as a mono- or diester, in the presence of calcium." [GOC

1897 Pathogen[ Q2Q067] interacts with 3 human partners:{P50995;P08133;P20073}

1898 Pathogen[ P0C214] interacts with 3 human partners:{P08133;P20073;P50995}

1899 Pathogen[ P03346] interacts with 6 human

```

1900     partners:{P20073;Q9UJ72;P08133;Q99829;O75131;P50995}
1901     Pathogen[ Q85601] interacts with 3 human partners:{P50995;P20073;P08133}
1902     Pathogen[ P14079] interacts with 10 human
1903     partners:{P04083;P27216;P50995;Q99829;Q5T2P8;P08758;P09525;O76027;P20073;P13928}
1904     Pathogen[ P03383] interacts with 3 human partners:{P50995;P20073;P08133}
1905     Pathogen[ P03410] interacts with 6 human
1906     partners:{P50995;O76027;Q99829;Q9UJ72;P08133;P20073}
1907     Pathogen[ P14075] interacts with 3 human partners:{P08133;P20073;P50995}
1908     Pathogen[ P0C206] interacts with 5 human
1909     partners:{P50995;Q99829;P08133;Q9UJ72;P20073}
1910     Pathogen[ P03363] interacts with 4 human partners:{Q99829;P20073;P50995;P08133}
1911 [Cluster 174]GO:0015459+F     molecular_function [name] potassium channel regulator
1912 activity [def] "Modulates the activity of a potassium channel." [GOC
1913     Pathogen[ Q2Q067] interacts with 3 human partners:{Q12959;Q9Y6X2;P56211}
1914     Pathogen[ P0C214] interacts with 3 human partners:{Q9Y6X2;P56211;Q12959}
1915     Pathogen[ P03346] interacts with 3 human partners:{P56211;Q9Y6X2;Q12959}
1916     Pathogen[ Q85601] interacts with 3 human partners:{Q9Y6X2;P56211;Q12959}
1917     Pathogen[ P14079] interacts with 2 human partners:{Q9Y6X2;P56211}
1918     Pathogen[ P03383] interacts with 2 human partners:{Q9Y6X2;P56211}
1919     Pathogen[ P03410] interacts with 3 human partners:{Q12959;Q9Y6X2;P56211}
1920     Pathogen[ P14075] interacts with 2 human partners:{P56211;Q9Y6X2}
1921     Pathogen[ P0C206] interacts with 3 human partners:{P56211;Q9Y6X2;Q12959}
1922     Pathogen[ P03363] interacts with 3 human partners:{Q12959;Q9Y6X2;P56211}
1923 [Cluster 175]GO:0051287+F     molecular_function [name] NAD binding [def] "Interacting
1924 selectively and non-covalently with nicotinamide adenine dinucleotide, a coenzyme
1925 involved in many redox and biosynthetic reactions_ binding may be to either the oxidized
1926 form, NAD+, or the reduced form, NADH." [GOC
1927     Pathogen[ Q2Q067] interacts with 8 human
1928     partners:{Q8IXJ6;P07195;Q9NTG7;P09874;O75306;P04406;Q13363;O14556}
1929     Pathogen[ P0C214] interacts with 19 human
1930     partners:{O75306;O75874;Q8N335;Q13363;P48735;P40939;O14556;P50213;O43837;Q9NTG7;P0962
1931     2;Q8IXJ6;P48163;P04406;Q16798;P07195;P51553;P09874;P21695}
1932     Pathogen[ P03346] interacts with 9 human
1933     partners:{P04406;Q8IXJ6;O14556;P09874;P07195;Q13363;P56545;O75306;Q9NTG7}
1934     Pathogen[ Q85601] interacts with 8 human
1935     partners:{P09874;O75306;Q13363;O14556;Q8IXJ6;P07195;P04406;Q9NTG7}
1936     Pathogen[ P14079] interacts with 7 human
1937     partners:{P09874;O75306;P07195;Q8IXJ6;P21695;Q9NTG7;P04406}
1938     Pathogen[ P03383] interacts with 7 human
1939     partners:{O75306;Q9NTG7;O14556;P07195;P09874;P04406;Q13363}
1940     Pathogen[ P03410] interacts with 8 human
1941     partners:{Q8IXJ6;Q9NTG7;O14556;P07195;P09874;P04406;O75306;P21695}
1942     Pathogen[ P14075] interacts with 7 human
1943     partners:{O75306;P07195;P04406;Q9NTG7;Q13363;O14556;P09874}
1944     Pathogen[ P0C206] interacts with 9 human
1945     partners:{P07195;P50213;P09874;O75306;O14556;P04406;Q8IXJ6;Q13363;Q9NTG7}
1946     Pathogen[ P03363] interacts with 6 human
1947     partners:{P56545;P04406;Q9NTG7;P09874;Q13363;O14556}
1948 [Cluster 176]GO:0003905+F     molecular_function [name] alkylbase DNA N-glycosylase
1949 activity [def] "Catalysis of the reaction
1950     Pathogen[ Q2Q067] interacts with 1 human partners:{P29372}
1951     Pathogen[ P0C214] interacts with 1 human partners:{P29372}
1952     Pathogen[ P03346] interacts with 1 human partners:{P29372}
1953     Pathogen[ Q85601] interacts with 1 human partners:{P29372}
1954     Pathogen[ P14079] interacts with 1 human partners:{P29372}
1955     Pathogen[ P03383] interacts with 1 human partners:{P29372}
1956     Pathogen[ P03410] interacts with 1 human partners:{P29372}
1957     Pathogen[ P14075] interacts with 1 human partners:{P29372}
1958     Pathogen[ P0C206] interacts with 1 human partners:{P29372}
1959     Pathogen[ P03363] interacts with 1 human partners:{P29372}
1960 [Cluster 177]GO:0048029+F     molecular_function [name] monosaccharide binding [def]
1961 "Interacting selectively and non-covalently with any monosaccharide. Monosaccharides are
1962 the simplest carbohydrates_ they are polyhydroxy aldehydes H[CH(OH)]nC(=O)H or
1963 polyhydroxy ketones H[CHOH]nC(=O)[CHOH]mH with three or more carbon atoms. They form the
1964 constitutional repeating units of oligo- and polysaccharides." [CHEBI
1965     Pathogen[ Q2Q067] interacts with 5 human
1966     partners:{O95336;P37837;P09467;P06744;P49247}
1967     Pathogen[ P0C214] interacts with 6 human
1968     partners:{P29401;P37837;P09467;O95336;Q96EK6;P49247}
1969     Pathogen[ P03346] interacts with 5 human
1970     partners:{P49247;O95336;P09467;P37837;P06744}
1971     Pathogen[ Q85601] interacts with 6 human
1972     partners:{O95336;P37837;P06744;P49247;Q96EK6;P09467}
1973     Pathogen[ P14079] interacts with 8 human
1974     partners:{A2VDF0;P49247;P29401;P06744;O95336;Q96EK6;P09467;P37837}
1975     Pathogen[ P03383] interacts with 4 human partners:{P09467;P37837;P49247;P06744}

```

1947 Pathogen[ P03410] interacts with 7 human partners:{A2VDF0;P06744;P37837;Q96EK6;P09467;O95336;P49247}

1948 Pathogen[ P14075] interacts with 6 human partners:{P06744;O95336;P49247;Q96EK6;P37837;P09467}

1949 Pathogen[ P0C206] interacts with 8 human partners:{P09467;P06744;Q96EK6;O95336;P49247;A2VDF0;P37837;P29401}

1950 Pathogen[ P03363] interacts with 3 human partners:{P06744;P37837;O95336}

1951 [Cluster 178]GO:0046975+F molecular\_function [name] histone methyltransferase activity (H3-K36 specific) [def] "Catalysis of the reaction

1952 Pathogen[ Q2Q067] interacts with 2 human partners:{Q9NRG4;Q86TU7}

1953 Pathogen[ P0C214] interacts with 2 human partners:{Q86TU7;Q9NRG4}

1954 Pathogen[ P03346] interacts with 2 human partners:{Q9NRG4;Q86TU7}

1955 Pathogen[ Q85601] interacts with 2 human partners:{Q86TU7;Q9NRG4}

1956 Pathogen[ P14079] interacts with 2 human partners:{Q9NRG4;Q86TU7}

1957 Pathogen[ P03383] interacts with 2 human partners:{Q9NRG4;Q86TU7}

1958 Pathogen[ P03410] interacts with 2 human partners:{Q86TU7;Q9NRG4}

1959 Pathogen[ P14075] interacts with 2 human partners:{Q86TU7;Q9NRG4}

1960 Pathogen[ P0C206] interacts with 2 human partners:{Q9NRG4;Q86TU7}

1961 Pathogen[ P03363] interacts with 1 human partners:{Q9NRG4}

1962 [Cluster 179]GO:0016429+F molecular\_function [name] tRNA (adenine-N1-)-methyltransferase activity [def] "Catalysis of the reaction

1963 Pathogen[ Q2Q067] interacts with 2 human partners:{Q96FX7;Q9BVS5}

1964 Pathogen[ P0C214] interacts with 2 human partners:{Q96FX7;Q9BVS5}

1965 Pathogen[ P03346] interacts with 2 human partners:{Q96FX7;Q9BVS5}

1966 Pathogen[ Q85601] interacts with 2 human partners:{Q9BVS5;Q96FX7}

1967 Pathogen[ P14079] interacts with 2 human partners:{Q9BVS5;Q96FX7}

1968 Pathogen[ P03383] interacts with 2 human partners:{Q9BVS5;Q96FX7}

1969 Pathogen[ P03410] interacts with 2 human partners:{Q96FX7;Q9BVS5}

1970 Pathogen[ P14075] interacts with 2 human partners:{Q9BVS5;Q96FX7}

1971 Pathogen[ P0C206] interacts with 2 human partners:{Q96FX7;Q9BVS5}

1972 Pathogen[ P03363] interacts with 2 human partners:{Q96FX7;Q9BVS5}

1973 [Cluster 180]GO:0017125+F molecular\_function [name] deoxycytidyl transferase activity [def] "Catalysis of the insertion of a dCMP residue opposite a template abasic site in DNA." [PMID

1974 Pathogen[ Q2Q067] interacts with 1 human partners:{Q9UBZ9}

1975 Pathogen[ P0C214] interacts with 1 human partners:{Q9UBZ9}

1976 Pathogen[ P03346] interacts with 1 human partners:{Q9UBZ9}

1977 Pathogen[ Q85601] interacts with 1 human partners:{Q9UBZ9}

1978 Pathogen[ P14079] interacts with 1 human partners:{Q9UBZ9}

1979 Pathogen[ P03383] interacts with 1 human partners:{Q9UBZ9}

1980 Pathogen[ P03410] interacts with 1 human partners:{Q9UBZ9}

1981 Pathogen[ P14075] interacts with 1 human partners:{Q9UBZ9}

1982 Pathogen[ P0C206] interacts with 1 human partners:{Q9UBZ9}

1983 Pathogen[ P03363] interacts with 1 human partners:{Q9UBZ9}

1984 [Cluster 181]GO:0008798+F molecular\_function [name] beta-aspartyl-peptidase activity [def] "Catalysis of the cleavage of a beta-linked aspartic residue from the N-terminus of a polypeptide." [EC

1985 Pathogen[ Q2Q067] interacts with 1 human partners:{Q7L266}

1986 Pathogen[ P0C214] interacts with 1 human partners:{Q7L266}

1987 Pathogen[ P03346] interacts with 1 human partners:{Q7L266}

1988 Pathogen[ Q85601] interacts with 1 human partners:{Q7L266}

1989 Pathogen[ P14079] interacts with 1 human partners:{Q7L266}

1990 Pathogen[ P03383] interacts with 1 human partners:{Q7L266}

1991 Pathogen[ P03410] interacts with 1 human partners:{Q7L266}

1992 Pathogen[ P14075] interacts with 1 human partners:{Q7L266}

1993 Pathogen[ P0C206] interacts with 1 human partners:{Q7L266}

1994 Pathogen[ P03363] interacts with 1 human partners:{Q7L266}

1995 [Cluster 182]GO:0016149+F molecular\_function [name] translation release factor activity, codon specific [def] "A translation release factor that is specific for one or more particular termination codons\_ acts at the ribosomal A-site and require polypeptidyl-tRNA at the P-site." [ISBN

1996 Pathogen[ Q2Q067] interacts with 3 human partners:{Q9UGC7;O75570;P62495}

1997 Pathogen[ P0C214] interacts with 3 human partners:{Q9UGC7;O75570;P62495}

1998 Pathogen[ P03346] interacts with 3 human partners:{Q9UGC7;P62495;O75570}

1999 Pathogen[ Q85601] interacts with 3 human partners:{P62495;O75570;Q9UGC7}

2000 Pathogen[ P14079] interacts with 3 human partners:{P62495;O75570;Q9UGC7}

2001 Pathogen[ P03383] interacts with 3 human partners:{O75570;P62495;Q9UGC7}

2002 Pathogen[ P03410] interacts with 3 human partners:{P62495;Q9UGC7;O75570}

2003 Pathogen[ P14075] interacts with 3 human partners:{Q9UGC7;P62495;O75570}

2004 Pathogen[ P0C206] interacts with 3 human partners:{Q9UGC7;P62495;O75570}

2005 Pathogen[ P03363] interacts with 3 human partners:{O75570;P62495;Q9UGC7}

2006 [Cluster 183]GO:0030372+F molecular\_function [name] high molecular weight B cell growth factor receptor binding [def] "Interacting selectively and non-covalently with the high molecular weight B cell growth factor receptor." [GOC

2007 Pathogen[ Q2Q067] interacts with 1 human partners:{P40222}

2008 Pathogen[ P0C214] interacts with 1 human partners:{P40222}

2009 Pathogen[ P03346] interacts with 1 human partners:{P40222}  
2010 Pathogen[ Q85601] interacts with 1 human partners:{P40222}  
2011 Pathogen[ P14079] interacts with 1 human partners:{P40222}  
2012 Pathogen[ P03383] interacts with 1 human partners:{P40222}  
2013 Pathogen[ P03410] interacts with 1 human partners:{P40222}  
2014 Pathogen[ P14075] interacts with 1 human partners:{P40222}  
2015 Pathogen[ P0C206] interacts with 1 human partners:{P40222}  
2016 Pathogen[ P03363] interacts with 1 human partners:{P40222}  
2017 [Cluster 184]GO:0051539+F molecular\_function [name] 4 iron, 4 sulfur cluster binding  
[def] "Interacting selectively and non-covalently with a 4 iron, 4 sulfur (4Fe-4S)  
cluster\_ this cluster consists of four iron atoms, with the inorganic sulfur atoms found  
between the irons and acting as bridging ligands." [GOC  
2018 Pathogen[ Q2Q067] interacts with 8 human  
partners:{Q9UIF7;Q9UMS0;O75251;O75306;P21912;P78549;P21399;P48200}  
2019 Pathogen[ P0C214] interacts with 14 human  
partners:{O75306;P28331;Q9HA92;P48200;Q9H6Q4;Q8WXG1;Q99798;Q9UMS0;Q9UIF7;O75251;P7854  
9;P21912;P21399;Q9Y5Y2}  
2020 Pathogen[ P03346] interacts with 9 human  
partners:{Q9UMS0;Q9UIF7;P21912;P48200;Q9Y5Y2;P78549;O75251;O75306;P21399}  
2021 Pathogen[ Q85601] interacts with 9 human  
partners:{P21399;O75306;P21912;P48200;Q9UMS0;Q9H6Q4;Q9UIF7;Q9Y5Y2;P78549}  
2022 Pathogen[ P14079] interacts with 15 human  
partners:{Q5VV42;Q9UIF7;P21399;O75306;P78549;Q9UMS0;Q9H6Q4;O75251;P48200;Q9Y5Y2;Q9HA9  
2;Q96SZ6;Q96FC9;Q8WXG1;P21912}  
2023 Pathogen[ P03383] interacts with 5 human  
partners:{O75251;P48200;O75306;Q9H6Q4;Q9UMS0}  
2024 Pathogen[ P03410] interacts with 13 human  
partners:{O75251;Q9Y5Y2;Q9H6Q4;P78549;Q8WXG1;P21399;Q9UMS0;Q9HA92;P21912;O75306;Q96FC  
9;P48200;Q9UIF7}  
2025 Pathogen[ P14075] interacts with 5 human  
partners:{Q9UMS0;Q9UIF7;O75306;O75251;P48200}  
2026 Pathogen[ P0C206] interacts with 14 human  
partners:{Q9HA92;O75251;O75306;Q9Y5Y2;P48200;Q9H6Q4;Q99798;P21912;Q8WXG1;Q9UMS0;Q9UIF  
7;Q9BX63;P21399;P78549}  
2027 Pathogen[ P03363] interacts with 5 human  
partners:{Q9BX63;Q9UMS0;P48200;Q9UIF7;Q9Y5Y2}  
2028 [Cluster 185]GO:0008177+F molecular\_function [name] succinate dehydrogenase  
(ubiquinone) activity [def] "Catalysis of the reaction  
2029 Pathogen[ Q2Q067] interacts with 2 human partners:{P31040;P21912}  
2030 Pathogen[ P0C214] interacts with 1 human partners:{P21912}  
2031 Pathogen[ P03346] interacts with 2 human partners:{P31040;P21912}  
2032 Pathogen[ Q85601] interacts with 2 human partners:{P21912;P31040}  
2033 Pathogen[ P14079] interacts with 2 human partners:{P31040;P21912}  
2034 Pathogen[ P03383] interacts with 1 human partners:{P31040}  
2035 Pathogen[ P03410] interacts with 2 human partners:{P31040;P21912}  
2036 Pathogen[ P14075] interacts with 1 human partners:{P31040}  
2037 Pathogen[ P0C206] interacts with 2 human partners:{P31040;P21912}  
2038 Pathogen[ P03363] interacts with 1 human partners:{P31040}  
2039 [Cluster 186]GO:0035033+F molecular\_function [name] histone deacetylase regulator  
activity [def] "Modulates the activity of histone deacetylase." [GOC  
2040 Pathogen[ Q2Q067] interacts with 1 human partners:{O75376}  
2041 Pathogen[ P0C214] interacts with 1 human partners:{O75376}  
2042 Pathogen[ P03346] interacts with 1 human partners:{O75376}  
2043 Pathogen[ Q85601] interacts with 1 human partners:{O75376}  
2044 Pathogen[ P14079] interacts with 2 human partners:{P45983;O75376}  
2045 Pathogen[ P03383] interacts with 1 human partners:{O75376}  
2046 Pathogen[ P03410] interacts with 1 human partners:{O75376}  
2047 Pathogen[ P14075] interacts with 1 human partners:{O75376}  
2048 Pathogen[ P0C206] interacts with 1 human partners:{O75376}  
2049 Pathogen[ P03363] interacts with 1 human partners:{O75376}  
2050 [Cluster 187]GO:0097372+F  
2051 Pathogen[ Q2Q067] interacts with 11 human  
partners:{P56524;Q9BY41;Q9UKV0;Q13547;O15379;Q9UQL6;Q969S8;Q96DB2;Q92769;Q8WUI4;Q9NRC  
8}  
2052 Pathogen[ P0C214] interacts with 11 human  
partners:{Q13547;Q969S8;Q96DB2;P56524;Q92769;Q9UKV0;O15379;Q9NRC8;Q8WUI4;Q9UQL6;Q9BY4  
1}  
2053 Pathogen[ P03346] interacts with 11 human  
partners:{Q969S8;Q96DB2;O15379;P56524;Q92769;Q13547;Q9BY41;Q8WUI4;Q9UKV0;Q9NRC8;Q9UQL  
6}  
2054 Pathogen[ Q85601] interacts with 11 human  
partners:{Q969S8;Q9NRC8;Q9UKV0;Q96DB2;Q9BY41;Q9UQL6;Q92769;P56524;O15379;Q13547;Q8WUI  
4}  
2055 Pathogen[ P14079] interacts with 10 human  
partners:{Q9UQL6;O15379;Q96DB2;Q969S8;Q8WUI4;Q9UKV0;Q92769;Q9BY41;P56524;Q9NRC8}  
2056 Pathogen[ P03383] interacts with 10 human

2057 partners:{Q9UQL6;Q92769;O15379;Q13547;Q9BY41;Q9UKV0;P56524;Q8WUI4;Q969S8;Q9NRC8}  
Pathogen[ P03410] interacts with 11 human

2058 partners:{Q9UKV0;Q9BY41;Q8WUI4;Q9UQL6;Q969S8;Q92769;O15379;P56524;Q13547;Q9NRC8;Q96DB2}  
Pathogen[ P14075] interacts with 10 human

2059 partners:{Q9BY41;Q969S8;P56524;Q9UKV0;Q13547;Q92769;O15379;Q9NRC8;Q9UQL6;Q8WUI4}  
Pathogen[ P0C206] interacts with 11 human

2060 partners:{Q92769;Q96DB2;Q9UKV0;Q13547;O15379;Q8WUI4;Q9NRC8;Q9BY41;P56524;Q969S8;Q9UQL6}  
Pathogen[ P03363] interacts with 8 human

2061 partners:{Q9BY41;O15379;Q969S8;Q9UQL6;Q9UKV0;Q13547;Q8WUI4;Q9NRC8}  
[Cluster 188]GO:0004708+F molecular\_function [name] MAP kinase kinase activity [def] "Catalysis of the concomitant phosphorylation of threonine (T) and tyrosine (Y) residues in a Thr-Glu-Tyr (TEY) thiolester sequence in MAP kinases. It is a dual-specificity mitogen-activated protein kinase and requires activation by the serine/threonine kinase, MAP kinase kinase." [ISBN

2062 Pathogen[ Q2Q067] interacts with 1 human partners:{043318}  
2063 Pathogen[ P0C214] interacts with 1 human partners:{043318}  
2064 Pathogen[ P03346] interacts with 1 human partners:{043318}  
2065 Pathogen[ Q85601] interacts with 1 human partners:{043318}  
2066 Pathogen[ P14079] interacts with 3 human partners:{P53779;P52564;Q16644}  
2067 Pathogen[ P03383] interacts with 1 human partners:{043318}  
2068 Pathogen[ P03410] interacts with 2 human partners:{043318;P53779}  
2069 Pathogen[ P14075] interacts with 1 human partners:{043318}  
2070 Pathogen[ P0C206] interacts with 1 human partners:{043318}  
2071 Pathogen[ P03363] interacts with 1 human partners:{043318}

2072 [Cluster 189]GO:0001047+F molecular\_function [name] core promoter binding [def] "Interacting selectively and non-covalently with the regulatory region composed of the transcription start site and binding sites for the basal transcription machinery. Binding may occur as a sequence specific interaction or as an interaction observed only once a factor has been recruited to the DNA by other factors." [GOC

2073 Pathogen[ Q2Q067] interacts with 13 human  
partners:{P06400;Q01094;Q15910;Q9Y2X9;Q13547;Q15424;P38159;O00716;Q13127;P28324;Q14872;Q14209;P17947}

2074 Pathogen[ P0C214] interacts with 13 human  
partners:{Q13547;Q14872;P38159;P17947;Q15910;O00716;Q01094;P28324;Q13127;Q15424;Q9Y2X9;Q14209;P06400}

2075 Pathogen[ P03346] interacts with 13 human  
partners:{P28324;P06400;Q14872;Q14209;Q01094;Q13547;Q15910;P17947;Q15424;Q9Y2X9;P38159;O00716;Q13127}

2076 Pathogen[ Q85601] interacts with 13 human  
partners:{Q13127;P06400;Q15424;Q14872;Q9Y2X9;Q14209;P17947;Q15910;Q13547;P38159;O00716;P28324;Q01094}

2077 Pathogen[ P14079] interacts with 9 human  
partners:{Q14209;O00716;Q15424;Q9Y2X9;Q14872;Q15910;Q13127;Q01094;P38159}

2078 Pathogen[ P03383] interacts with 13 human  
partners:{O00716;Q14209;Q01094;P06400;P38159;Q14872;P28324;Q13547;Q15910;Q15424;Q9Y2X9;P17947;Q13127}

2079 Pathogen[ P03410] interacts with 13 human  
partners:{P17947;P28324;P06400;Q15424;Q13127;O00716;Q9Y2X9;Q14872;Q15910;Q13547;Q01094;Q14209;P38159}

2080 Pathogen[ P14075] interacts with 13 human  
partners:{P38159;Q15910;O00716;Q14209;Q13547;P28324;Q15424;P17947;Q01094;P06400;Q9Y2X9;Q13127;Q14872}

2081 Pathogen[ P0C206] interacts with 13 human  
partners:{Q9Y2X9;Q13127;Q13547;O00716;Q15910;Q14209;P38159;Q01094;P28324;P17947;Q15424;Q14872;P06400}

2082 Pathogen[ P03363] interacts with 13 human  
partners:{P17947;Q15910;Q9Y2X9;P06400;Q13127;Q15424;Q14872;P38159;Q01094;Q14209;Q13547;O00716;P28324}

2083 [Cluster 190]GO:0047134+F molecular\_function [name] protein-disulfide reductase activity [def] "Catalysis of the reaction

2084 Pathogen[ Q2Q067] interacts with 1 human partners:{Q9BRA2}  
2085 Pathogen[ P0C214] interacts with 1 human partners:{Q9BRA2}  
2086 Pathogen[ P03346] interacts with 1 human partners:{Q9BRA2}  
2087 Pathogen[ Q85601] interacts with 1 human partners:{Q9BRA2}  
2088 Pathogen[ P14079] interacts with 1 human partners:{Q9BRA2}  
2089 Pathogen[ P03383] interacts with 1 human partners:{Q9BRA2}  
2090 Pathogen[ P03410] interacts with 1 human partners:{Q9BRA2}  
2091 Pathogen[ P14075] interacts with 1 human partners:{Q9BRA2}  
2092 Pathogen[ P0C206] interacts with 1 human partners:{Q9BRA2}  
2093 Pathogen[ P03363] interacts with 1 human partners:{Q9BRA2}

2094 [Cluster 191]GO:0008186+F molecular\_function [name] RNA-dependent ATPase activity [def] "Catalysis of the reaction

2095 Pathogen[ Q2Q067] interacts with 3 human partners:{Q13838;P38935;Q92841}  
2096 Pathogen[ P0C214] interacts with 3 human partners:{Q92841;P38935;Q13838}

2097 Pathogen[ P03346] interacts with 3 human partners:{P38935;Q92841;Q13838}

2098 Pathogen[ Q85601] interacts with 2 human partners:{P38935;Q13838}

2099 Pathogen[ P14079] interacts with 2 human partners:{Q13838;P38935}

2100 Pathogen[ P03383] interacts with 3 human partners:{Q13838;Q92841;P38935}

2101 Pathogen[ P03410] interacts with 2 human partners:{Q13838;P38935}

2102 Pathogen[ P14075] interacts with 3 human partners:{P38935;Q92841;Q13838}

2103 Pathogen[ P0C206] interacts with 3 human partners:{P38935;Q13838;Q92841}

2104 Pathogen[ P03363] interacts with 3 human partners:{Q92841;Q13838;P38935}

2105 [Cluster 192]GO:0019787+F molecular\_function [name] small conjugating protein ligase activity [def] "Catalysis of ATP-dependent isopeptide bond formation between the carboxy-terminal residues of a small conjugating protein such as ubiquitin or a ubiquitin-like protein, and a substrate lysine residue. This function may be performed alone or in conjunction with an E3, ubiquitin-like protein ligase." [GOC

2106 Pathogen[ Q2Q067] interacts with 6 human partners:{Q9H8T0;Q9Y4X5;O14933;P11441;Q9NT62;Q9UBS8}

2107 Pathogen[ P0C214] interacts with 6 human partners:{O14933;Q9H8T0;Q9UBS8;P11441;Q9Y4X5;Q9NT62}

2108 Pathogen[ P03346] interacts with 6 human partners:{Q9NT62;Q9H8T0;P11441;Q9UBS8;O14933;Q9Y4X5}

2109 Pathogen[ Q85601] interacts with 6 human partners:{O14933;Q9H8T0;Q9NT62;Q9UBS8;P11441;Q9Y4X5}

2110 Pathogen[ P14079] interacts with 5 human partners:{Q9NT62;Q9H8T0;Q9UBS8;O14933;P11441}

2111 Pathogen[ P03383] interacts with 5 human partners:{O14933;Q9UBS8;Q9NT62;Q9H8T0;P11441}

2112 Pathogen[ P03410] interacts with 6 human partners:{Q9H8T0;O14933;Q9UBS8;Q9Y4X5;Q9NT62;P11441}

2113 Pathogen[ P14075] interacts with 5 human partners:{Q9NT62;O14933;Q9H8T0;P11441;Q9UBS8}

2114 Pathogen[ P0C206] interacts with 6 human partners:{O14933;Q9H8T0;P11441;Q9Y4X5;Q9UBS8;Q9NT62}

2115 Pathogen[ P03363] interacts with 6 human partners:{P11441;O14933;Q9NT62;Q9Y4X5;Q9H8T0;Q9UBS8}

2116 [Cluster 193]GO:0046972+F molecular\_function [name] histone acetyltransferase activity (H4-K16 specific) [def] "Catalysis of the reaction

2117 Pathogen[ Q2Q067] interacts with 3 human partners:{Q96EZ8;P51610;Q7Z3B3}

2118 Pathogen[ P0C214] interacts with 2 human partners:{P51610;Q96EZ8}

2119 Pathogen[ P03346] interacts with 4 human partners:{Q96EZ8;P51610;Q7Z3B3;Q9H7Z6}

2120 Pathogen[ Q85601] interacts with 3 human partners:{Q9H7Z6;P51610;Q96EZ8}

2121 Pathogen[ P14079] interacts with 5 human partners:{P51610;Q7Z3B3;Q9P2N6;Q96EZ8;Q9H9L4}

2122 Pathogen[ P03383] interacts with 2 human partners:{P51610;Q96EZ8}

2123 Pathogen[ P03410] interacts with 5 human partners:{Q9P2N6;P51610;Q9H9L4;Q96EZ8;Q7Z3B3}

2124 Pathogen[ P14075] interacts with 3 human partners:{P51610;Q7Z3B3;Q96EZ8}

2125 Pathogen[ P0C206] interacts with 6 human partners:{Q9H9L4;Q96EZ8;P51610;Q9P2N6;Q7Z3B3;Q9H7Z6}

2126 Pathogen[ P03363] interacts with 3 human partners:{Q7Z3B3;Q96EZ8;P51610}

2127 [Cluster 194]GO:0008157+F molecular\_function [name] protein phosphatase 1 binding [def] "Interacting selectively and non-covalently with the enzyme protein phosphatase 1." [GOC

2128 Pathogen[ Q2Q067] interacts with 1 human partners:{Q96QC0}

2129 Pathogen[ P0C214] interacts with 1 human partners:{Q96QC0}

2130 Pathogen[ P03346] interacts with 3 human partners:{Q96QC0;Q9UKA4;Q8TEC5}

2131 Pathogen[ Q85601] interacts with 1 human partners:{Q96QC0}

2132 Pathogen[ P14079] interacts with 3 human partners:{Q9UKA4;Q8IZ21;Q96QC0}

2133 Pathogen[ P03383] interacts with 1 human partners:{Q96QC0}

2134 Pathogen[ P03410] interacts with 3 human partners:{Q96QC0;Q9UKA4;Q8IZ21}

2135 Pathogen[ P14075] interacts with 1 human partners:{Q96QC0}

2136 Pathogen[ P0C206] interacts with 2 human partners:{Q96QC0;Q9UKA4}

2137 Pathogen[ P03363] interacts with 2 human partners:{Q96QC0;Q8TEC5}

2138 [Cluster 195]GO:0016403+F molecular\_function [name] dimethylargininase activity [def] "Catalysis of the reaction

2139 Pathogen[ Q2Q067] interacts with 1 human partners:{095865}

2140 Pathogen[ P0C214] interacts with 1 human partners:{095865}

2141 Pathogen[ P03346] interacts with 1 human partners:{095865}

2142 Pathogen[ Q85601] interacts with 1 human partners:{095865}

2143 Pathogen[ P14079] interacts with 1 human partners:{095865}

2144 Pathogen[ P03383] interacts with 1 human partners:{095865}

2145 Pathogen[ P03410] interacts with 1 human partners:{095865}

2146 Pathogen[ P14075] interacts with 1 human partners:{095865}

2147 Pathogen[ P0C206] interacts with 1 human partners:{095865}

2148 Pathogen[ P03363] interacts with 1 human partners:{095865}

2149 [Cluster 196]GO:0000982+F molecular\_function [name] RNA polymerase II core promoter proximal region sequence-specific DNA binding transcription factor activity [def] "Interacting selectively and non-covalently with a sequence of DNA that is in cis with

and relatively close to a core promoter for RNA polymerase II (RNAP II) in order to modulate transcription by RNAP II." [GOC

2150 Pathogen[ Q2Q067] interacts with 4 human partners:{Q8WYA1;Q92985;Q06330;P18146}

2151 Pathogen[ P0C214] interacts with 4 human partners:{Q06330;Q92985;Q8WYA1;P18146}

2152 Pathogen[ P03346] interacts with 7 human partners:{Q06330;O00327;Q9UBG7;Q8WYA1;O15516;P18146;Q92985}

2153 Pathogen[ Q85601] interacts with 7 human partners:{P18146;Q06330;O15516;Q8WYA1;O00327;Q9UBG7;Q92985}

2154 Pathogen[ P14079] interacts with 5 human partners:{Q92985;Q06330;P28360;Q8WYA1;Q9UBG7}

2155 Pathogen[ P03383] interacts with 3 human partners:{Q06330;P18146;Q92985}

2156 Pathogen[ P03410] interacts with 5 human partners:{Q06330;Q92985;P18146;Q8WYA1;Q9UBG7}

2157 Pathogen[ P14075] interacts with 3 human partners:{P18146;Q06330;Q92985}

2158 Pathogen[ P0C206] interacts with 7 human partners:{Q06330;P18146;O00327;O15516;Q92985;Q8WYA1;Q9UBG7}

2159 Pathogen[ P03363] interacts with 6 human partners:{Q92985;P18146;Q06330;Q8WYA1;O00327;Q9UBG7}

2160 [Cluster 197]GO:0001103+F molecular\_function [name] RNA polymerase II repressing transcription factor binding [def] "Interacting selectively and non-covalently with an RNA polymerase II transcription repressing factor, a protein involved in negative regulation of transcription." [GOC

2161 Pathogen[ Q2Q067] interacts with 8 human partners:{P20226;Q9NPF5;Q99708;Q96ST3;P52657;O14776;P08047;Q06330}

2162 Pathogen[ P0C214] interacts with 8 human partners:{P52657;Q99708;Q06330;O14776;P20226;Q96ST3;P08047;Q9NPF5}

2163 Pathogen[ P03346] interacts with 8 human partners:{Q06330;Q96ST3;Q99708;P08047;P20226;P52657;O14776;Q9NPF5}

2164 Pathogen[ Q85601] interacts with 8 human partners:{P52657;Q06330;Q99708;O14776;P08047;P20226;Q9NPF5;Q96ST3}

2165 Pathogen[ P14079] interacts with 6 human partners:{O14776;Q96ST3;Q06330;Q9NPF5;Q99708;P52657}

2166 Pathogen[ P03383] interacts with 8 human partners:{Q06330;P08047;P20226;P52657;Q9NPF5;O14776;Q99708;Q96ST3}

2167 Pathogen[ P03410] interacts with 8 human partners:{Q99708;Q06330;Q9NPF5;P20226;P52657;Q96ST3;O14776;P08047}

2168 Pathogen[ P14075] interacts with 8 human partners:{Q96ST3;P52657;O14776;P20226;Q9NPF5;Q06330;Q99708;P08047}

2169 Pathogen[ P0C206] interacts with 8 human partners:{Q96ST3;Q9NPF5;Q06330;Q99708;P20226;P52657;P08047;O14776}

2170 Pathogen[ P03363] interacts with 8 human partners:{Q9NPF5;Q06330;P52657;Q99708;Q96ST3;P20226;O14776;P08047}

2171 [Cluster 198]GO:0003914+F molecular\_function [name] DNA (6-4) photolyase activity [def] "Catalysis of the reaction

2172 Pathogen[ Q2Q067] interacts with 1 human partners:{Q16526}

2173 Pathogen[ P0C214] interacts with 2 human partners:{Q49AN0;Q16526}

2174 Pathogen[ P03346] interacts with 2 human partners:{Q49AN0;Q16526}

2175 Pathogen[ Q85601] interacts with 2 human partners:{Q49AN0;Q16526}

2176 Pathogen[ P14079] interacts with 2 human partners:{Q16526;Q49AN0}

2177 Pathogen[ P03383] interacts with 1 human partners:{Q16526}

2178 Pathogen[ P03410] interacts with 2 human partners:{Q16526;Q49AN0}

2179 Pathogen[ P14075] interacts with 1 human partners:{Q16526}

2180 Pathogen[ P0C206] interacts with 2 human partners:{Q16526;Q49AN0}

2181 Pathogen[ P03363] interacts with 2 human partners:{Q49AN0;Q16526}

2182 [Cluster 199]GO:0016881+F molecular\_function [name] acid-amino acid ligase activity [def] "Catalysis of the ligation of an acid to an amino acid via a carbon-nitrogen bond, with the concomitant hydrolysis of the diphosphate bond in ATP or a similar triphosphate." [GOC

2183 Pathogen[ Q2Q067] interacts with 32 human partners:{Q96J02;Q14258;Q9HAU4;Q5JXB2;Q9UII4;P62837;Q15386;O60260;P49427;O00762;Q9Y2X8;P60604;P63279;Q7Z6Z7;P51965;Q14669;P61077;P63146;Q9H8T0;Q9NPD8;O14933;P51668;Q96PU5;P61088;O76064;Q15819;Q9NR09;P49459;Q05086;P62256;P68036;Q13404}

2184 Pathogen[ P0C214] interacts with 46 human partners:{Q05086;O14933;Q96B02;Q96J02;Q9H832;Q16763;Q9HAU4;O00762;P49427;Q5JXB2;P63279;P49459;Q13404;Q969T4;O00308;Q5T447;P51965;Q9H0M0;P61077;Q9HCE7;Q14258;P62253;Q15819;P61086;Q9H8T0;O95071;Q9Y2X8;Q15386;Q9UII4;Q9H4P4;Q14669;Q969M7;Q9NR09;Q7Z6Z7;O60260;Q712K3;P62256;P51668;O76064;Q9NPD8;P61081;Q96LR5;P63146;P61088;Q96PU5;P60604}

2185 Pathogen[ P03346] interacts with 39 human partners:{Q96J02;O76064;Q9HAU4;Q96PU5;P68036;Q14258;O95714;P49427;Q9UII4;Q9H4P4;P63279;Q15386;P49459;Q9Y2X8;P51668;Q5T447;P61077;Q13404;P61088;Q9H8T0;P60604;P51965;P63146;O00762;Q14669;P62837;Q9NPD8;O60260;O14933;Q9NR09;Q9ULT8;Q5JXB2;Q05086;P62256;Q9H0M0;O95071;Q7Z6Z7;O00308;Q15819}

2186 Pathogen[ Q85601] interacts with 42 human partners:{Q96J02;P62253;Q9HAU4;Q16763;P63146;O14933;Q14258;O95714;P49427;Q9Y2X8;Q96PU5;Q969T4;Q14669;Q15386;Q96B02;Q9NPD8;P51668;Q96LR5;P68036;P61077;P63279;Q13404;Q9H8T0;O76064;P51965;P61086;O00762;P49459;O60260;P62837;Q9H832;Q9NR09;Q7Z6Z7;Q969M7;Q5JXB2;

2187 Pathogen[ P14079] interacts with 26 human partners: {O60260;P51965;P63279;P68036;Q5JXB2;Q15819;Q13404;Q8IWF7;Q9NPD8;P60604;Q9H8T0;Q9HAU4;Q14258;P61077;Q9NR09;P62256;P51668;Q969M7;P49459;Q96J02;Q9Y2X8;P49427;P62837;O00762;O14933;P63146}

2188 Pathogen[ P03383] interacts with 24 human partners: {O14933;P51965;Q5JXB2;P49427;Q9Y2X8;O00762;P61077;P61088;Q9H8T0;O60260;P60604;Q15819;Q13404;P62837;Q9H832;P68036;Q9NR09;P49459;Q9NPD8;Q14258;P62256;P63146;P63279;P51668}

2189 Pathogen[ P03410] interacts with 25 human partners: {P49427;P51965;P49459;Q9H8T0;O60260;P68036;P61088;Q14258;Q15819;O14933;Q5JXB2;Q9NR09;P62256;P63146;Q9Y2X8;P51668;Q9NPD8;O00762;P63279;Q969M7;P60604;Q13404;Q8IWF7;P61077;P62837}

2190 Pathogen[ P14075] interacts with 22 human partners: {P60604;Q15819;P68036;P62837;P49427;P61088;P49459;P51965;O14933;Q9Y2X8;P63279;P61077;Q9NPD8;O00762;Q9H8T0;Q14258;Q13404;Q9NR09;P62256;P63146;P51668;O60260}

2191 Pathogen[ P0C206] interacts with 44 human partners: {Q16763;Q9Y2X8;Q96PU5;Q9NPD8;P62253;Q9H4P4;O00308;Q9HAU4;Q5JXB2;P68036;O14933;Q969M7;Q14258;Q9H8T0;Q05086;Q96J02;Q96LR5;P62837;P49427;Q14669;Q15386;Q712K3;P51965;P61088;P60604;Q9NR09;P49459;O60260;P62256;Q15819;Q969T4;O00762;Q9H832;P61077;Q7Z6Z7;Q13404;P61086;Q96B02;O76064;O95071;P51668;O95714;Q8IWF7;P63146}

2192 Pathogen[ P03363] interacts with 41 human partners: {Q9H832;P51965;P60604;P49459;O00762;Q9HAU4;O14933;P61081;Q14258;Q9ULT8;P63146;P49427;Q5JXB2;Q05086;Q7Z6Z7;P61088;Q14669;Q9NR09;Q96PU5;P62256;Q969T4;Q9H8T0;P63279;O95071;Q9H4P4;Q15386;P51668;O00308;Q9NPD8;O95714;Q969M7;P61077;Q13404;Q9Y2X8;P62837;Q9H0M0;Q9UII4;Q7Z7E8;Q5T447;P68036;Q15819}

2193 [Cluster 200]GO:0010521+F molecular\_function [name] telomerase inhibitor activity [def] "Stops, prevents or reduces the activity of a telomerase. Telomerase catalyzes the reaction

2194 Pathogen[ Q2Q067] interacts with 2 human partners: {P54274;Q96BK5}

2195 Pathogen[ P0C214] interacts with 2 human partners: {Q96BK5;P54274}

2196 Pathogen[ P03346] interacts with 3 human partners: {P54274;Q9NUX5;Q96BK5}

2197 Pathogen[ Q85601] interacts with 2 human partners: {Q96BK5;P54274}

2198 Pathogen[ P14079] interacts with 3 human partners: {P54274;Q9NUX5;Q96BK5}

2199 Pathogen[ P03383] interacts with 2 human partners: {Q96BK5;P54274}

2200 Pathogen[ P03410] interacts with 3 human partners: {Q9NUX5;P54274;Q96BK5}

2201 Pathogen[ P14075] interacts with 2 human partners: {Q96BK5;P54274}

2202 Pathogen[ P0C206] interacts with 3 human partners: {Q96BK5;P54274;Q9NUX5}

2203 Pathogen[ P03363] interacts with 3 human partners: {Q96BK5;P54274;Q9NUX5}

2204 [Cluster 201]GO:0017056+F molecular\_function [name] structural constituent of nuclear pore [def] "The action of a molecule that contributes to the structural integrity of the nuclear pore complex." [GOC

2205 Pathogen[ Q2Q067] interacts with 3 human partners: {P52948;O75694;P37198}

2206 Pathogen[ P0C214] interacts with 3 human partners: {O75694;P37198;P52948}

2207 Pathogen[ P03346] interacts with 5 human partners: {Q9H1M0;O75694;P37198;Q9BTX1;P52948}

2208 Pathogen[ Q85601] interacts with 2 human partners: {O75694;P52948}

2209 Pathogen[ P14079] interacts with 4 human partners: {P37198;O75694;Q9BTX1;P52948}

2210 Pathogen[ P03383] interacts with 4 human partners: {P52948;Q9BTX1;P37198;O75694}

2211 Pathogen[ P03410] interacts with 4 human partners: {Q9H1M0;P52948;O75694;Q9BTX1}

2212 Pathogen[ P14075] interacts with 4 human partners: {Q9BTX1;P37198;O75694;P52948}

2213 Pathogen[ P0C206] interacts with 2 human partners: {O75694;Q9BTX1}

2214 Pathogen[ P03363] interacts with 4 human partners: {O75694;Q9BTX1;P52948;P37198}

2215 [Cluster 202]GO:0061133+F molecular\_function [name] endopeptidase activator activity [def] "Increases the activity of an endopeptidase, any enzyme that hydrolyzes nonterminal peptide bonds in polypeptides." [GOC

2216 Pathogen[ Q2Q067] interacts with 2 human partners: {P61289;Q16186}

2217 Pathogen[ P0C214] interacts with 1 human partners: {Q16186}

2218 Pathogen[ P03346] interacts with 2 human partners: {P61289;Q16186}

2219 Pathogen[ Q85601] interacts with 2 human partners: {P61289;Q16186}

2220 Pathogen[ P14079] interacts with 3 human partners: {O00487;Q16186;P61289}

2221 Pathogen[ P03383] interacts with 2 human partners: {P61289;Q16186}

2222 Pathogen[ P03410] interacts with 2 human partners: {Q16186;P61289}

2223 Pathogen[ P14075] interacts with 2 human partners: {Q16186;P61289}

2224 Pathogen[ P0C206] interacts with 2 human partners: {P61289;Q16186}

2225 Pathogen[ P03363] interacts with 2 human partners: {Q16186;P61289}

2226 [Cluster 203]GO:0097100+F molecular\_function [name] supercoiled DNA binding [def] "Interacting selectively and non-covalently with supercoiled DNA. During replication and transcription, template DNA is negatively supercoiled in the receding downstream DNA and positively supercoiled in the approaching downstream DNA." [GOC

2227 Pathogen[ Q2Q067] interacts with 1 human partners: {O75475}

2228 Pathogen[ P0C214] interacts with 1 human partners: {O75475}

2229 Pathogen[ P03346] interacts with 1 human partners: {O75475}

2230 Pathogen[ Q85601] interacts with 1 human partners: {O75475}

2231 Pathogen[ P14079] interacts with 1 human partners: {O75475}

2232 Pathogen[ P03383] interacts with 1 human partners: {O75475}



2233 Pathogen[ P03410] interacts with 1 human partners:{075475}

2234 Pathogen[ P14075] interacts with 1 human partners:{075475}

2235 Pathogen[ P0C206] interacts with 1 human partners:{075475}

2236 Pathogen[ P03363] interacts with 1 human partners:{075475}

2237 [Cluster 204]GO:0008650+F molecular\_function [name] rRNA  
(uridine-2'-O-)-methyltransferase activity [def] "Catalysis of the reaction

2238 Pathogen[ Q2Q067] interacts with 1 human partners:{Q9UI43}

2239 Pathogen[ P0C214] interacts with 1 human partners:{Q9UI43}

2240 Pathogen[ P03346] interacts with 1 human partners:{Q9UI43}

2241 Pathogen[ Q85601] interacts with 1 human partners:{Q9UI43}

2242 Pathogen[ P14079] interacts with 1 human partners:{Q9UI43}

2243 Pathogen[ P03383] interacts with 1 human partners:{Q9UI43}

2244 Pathogen[ P03410] interacts with 1 human partners:{Q9UI43}

2245 Pathogen[ P14075] interacts with 1 human partners:{Q9UI43}

2246 Pathogen[ P0C206] interacts with 1 human partners:{Q9UI43}

2247 Pathogen[ P03363] interacts with 1 human partners:{Q9UI43}

2248 [Cluster 205]GO:0019789+F molecular\_function [name] SUMO ligase activity [def]  
"Catalysis of ATP-dependent isopeptide bond formation between the carboxy-terminal  
glycine residues of the small ubiquitin-related modifier SUMO and a substrate lysine  
residue, leading to the formation of predominately monosumoylated proteins with modified  
function." [GOC

2249 Pathogen[ Q2Q067] interacts with 9 human  
partners:{075925;Q9NS56;P63279;O75928;P63165;P55854;Q9Y6X2;Q96MF7;Q8N2W9}

2250 Pathogen[ P0C214] interacts with 9 human  
partners:{Q9Y6X2;O75925;Q9NS56;Q8N2W9;P63279;P55854;P63165;Q96MF7;O75928}

2251 Pathogen[ P03346] interacts with 9 human  
partners:{Q96MF7;P55854;P63279;O75925;Q9NS56;P63165;Q8N2W9;Q9Y6X2;O75928}

2252 Pathogen[ Q85601] interacts with 9 human  
partners:{Q9NS56;O75928;Q9Y6X2;Q8N2W9;P63279;P55854;P63165;O75925;Q96MF7}

2253 Pathogen[ P14079] interacts with 9 human  
partners:{Q8N2W9;P63279;Q96MF7;O75928;Q9Y6X2;P63165;P55854;Q9NS56;O75925}

2254 Pathogen[ P03383] interacts with 8 human  
partners:{O75925;Q8N2W9;Q96MF7;P55854;P63165;Q9Y6X2;P63279;O75928}

2255 Pathogen[ P03410] interacts with 8 human  
partners:{P55854;O75925;P63165;Q9Y6X2;O75928;Q8N2W9;Q96MF7;P63279}

2256 Pathogen[ P14075] interacts with 8 human  
partners:{P63165;O75925;Q8N2W9;P63279;P55854;O75928;Q96MF7;Q9Y6X2}

2257 Pathogen[ P0C206] interacts with 7 human  
partners:{Q9NS56;O75925;Q8N2W9;Q9Y6X2;P55854;Q96MF7;P63165}

2258 Pathogen[ P03363] interacts with 8 human  
partners:{Q9Y6X2;P63165;O75925;P63279;Q8N2W9;Q96MF7;P55854;O75928}

2259 [Cluster 206]GO:0004003+F molecular\_function [name] ATP-dependent DNA helicase  
activity [def] "Catalysis of the reaction

2260 Pathogen[ Q2Q067] interacts with 9 human  
partners:{P49959;O60934;Q08211;Q12873;P12956;Q14839;O14646;Q86WJ1;P13010}

2261 Pathogen[ P0C214] interacts with 9 human  
partners:{P49959;P13010;Q12873;Q14566;Q08211;O14646;Q86WJ1;P12956;Q14839}

2262 Pathogen[ P03346] interacts with 13 human  
partners:{P46063;P12956;P13010;O14646;Q08211;Q14566;P49959;P33991;O60934;Q12873;Q1328  
3;Q86WJ1;Q14839}

2263 Pathogen[ Q85601] interacts with 11 human  
partners:{P49959;O14646;Q08211;Q14566;Q12873;Q86WJ1;P19447;Q14839;P13010;P12956;O6093  
4}

2264 Pathogen[ P14079] interacts with 11 human  
partners:{Q14566;P13010;O14646;O60934;Q08211;Q12873;P12956;Q86WJ1;Q14839;Q96FC9;P1944  
7}

2265 Pathogen[ P03383] interacts with 5 human  
partners:{Q14839;P13010;O14646;Q12873;P12956}

2266 Pathogen[ P03410] interacts with 12 human  
partners:{P49959;Q12873;O14646;P12956;P19447;Q86WJ1;P13010;Q96FC9;Q14566;Q14839;Q0821  
1;O60934}

2267 Pathogen[ P14075] interacts with 5 human  
partners:{O14646;P12956;Q14839;P13010;Q12873}

2268 Pathogen[ P0C206] interacts with 12 human  
partners:{P13010;P49959;Q08211;O60934;P19447;Q14839;O14646;Q86WJ1;P12956;Q14566;Q9BX6  
3;Q12873}

2269 Pathogen[ P03363] interacts with 10 human  
partners:{P12956;Q9BX63;P13010;Q13283;Q14839;P46063;O14646;Q12873;Q86WJ1;Q08211}

2270 [Cluster 207]GO:0032184+F molecular\_function [name] SUMO polymer binding [def]  
"Interacting selectively and non-covalently with a polymer of the small ubiquitin-like  
protein SUMO." [GOC

2271 Pathogen[ Q2Q067] interacts with 1 human partners:{P78317}

2272 Pathogen[ P0C214] interacts with 1 human partners:{P78317}

2273 Pathogen[ P03346] interacts with 1 human partners:{P78317}

2274 Pathogen[ Q85601] interacts with 1 human partners:{P78317}

2275 Pathogen[ P14079] interacts with 1 human partners:{P78317}

2276 Pathogen[ P03383] interacts with 1 human partners:{P78317}  
2277 Pathogen[ P03410] interacts with 1 human partners:{P78317}  
2278 Pathogen[ P14075] interacts with 1 human partners:{P78317}  
2279 Pathogen[ P0C206] interacts with 1 human partners:{P78317}  
2280 Pathogen[ P03363] interacts with 1 human partners:{P78317}  
2281 [Cluster 208]GO:0016783+F molecular\_function [name] sulfurtransferase activity [def]  
"Catalysis of the transfer of sulfur atoms from one compound (donor) to another  
(acceptor)." [GOC  
2282 Pathogen[ Q2Q067] interacts with 1 human partners:{Q9BTM9}  
2283 Pathogen[ P0C214] interacts with 2 human partners:{Q9BTM9;O95396}  
2284 Pathogen[ P03346] interacts with 1 human partners:{Q9BTM9}  
2285 Pathogen[ Q85601] interacts with 1 human partners:{Q9BTM9}  
2286 Pathogen[ P14079] interacts with 2 human partners:{O75648;Q9BTM9}  
2287 Pathogen[ P03383] interacts with 1 human partners:{Q9BTM9}  
2288 Pathogen[ P03410] interacts with 2 human partners:{O75648;Q9BTM9}  
2289 Pathogen[ P14075] interacts with 2 human partners:{Q9BTM9;O75648}  
2290 Pathogen[ P0C206] interacts with 2 human partners:{O95396;Q9BTM9}  
2291 Pathogen[ P03363] interacts with 1 human partners:{Q9BTM9}  
2292 [Cluster 209]GO:0004719+F molecular\_function [name] protein-L-isoaspartate  
(D-aspartate) O-methyltransferase activity [def] "Catalysis of the reaction  
2293 Pathogen[ Q2Q067] interacts with 1 human partners:{P22061}  
2294 Pathogen[ P0C214] interacts with 1 human partners:{P22061}  
2295 Pathogen[ P03346] interacts with 3 human partners:{P22061;Q96MG8;Q9NV79}  
2296 Pathogen[ Q85601] interacts with 1 human partners:{P22061}  
2297 Pathogen[ P14079] interacts with 2 human partners:{Q96MG8;Q9NV79}  
2298 Pathogen[ P03383] interacts with 1 human partners:{P22061}  
2299 Pathogen[ P03410] interacts with 3 human partners:{Q9NV79;Q96MG8;P22061}  
2300 Pathogen[ P14075] interacts with 1 human partners:{P22061}  
2301 Pathogen[ P0C206] interacts with 3 human partners:{P22061;Q9NV79;Q96MG8}  
2302 Pathogen[ P03363] interacts with 2 human partners:{Q96MG8;Q9NV79}  
2303 [Cluster 210]GO:0019776+F molecular\_function [name] Atg8 ligase activity [def]  
"Catalysis of the covalent attachment of the ubiquitin-like protein Atg8 to substrate  
molecules\_phosphatidylethanolamine is a known substrate." [GOC  
2304 Pathogen[ Q2Q067] interacts with 1 human partners:{Q9NT62}  
2305 Pathogen[ P0C214] interacts with 1 human partners:{Q9NT62}  
2306 Pathogen[ P03346] interacts with 1 human partners:{Q9NT62}  
2307 Pathogen[ Q85601] interacts with 1 human partners:{Q9NT62}  
2308 Pathogen[ P14079] interacts with 1 human partners:{Q9NT62}  
2309 Pathogen[ P03383] interacts with 1 human partners:{Q9NT62}  
2310 Pathogen[ P03410] interacts with 1 human partners:{Q9NT62}  
2311 Pathogen[ P14075] interacts with 1 human partners:{Q9NT62}  
2312 Pathogen[ P0C206] interacts with 1 human partners:{Q9NT62}  
2313 Pathogen[ P03363] interacts with 1 human partners:{Q9NT62}  
2314 [Cluster 211]GO:0051536+F molecular\_function [name] iron-sulfur cluster binding [def]  
"Interacting selectively and non-covalently with an iron-sulfur cluster, a combination of  
iron and sulfur atoms." [GOC  
2315 Pathogen[ Q2Q067] interacts with 11 human  
partners:{Q9H9T3;Q9UIF7;Q9UMS0;O75251;O75306;P21912;P78549;P23396;P21399;P48200;Q9H1K  
1}  
2316 Pathogen[ P0C214] interacts with 19 human  
partners:{O75306;P23396;P28331;Q9HA92;P48200;Q9H6Q4;Q8WXG1;Q99798;Q9H1K1;Q9UMS0;Q9UIF  
7;Q9H9T3;O75251;P78549;P22830;P21912;P21399;Q9Y5Y2;Q96NN9}  
2317 Pathogen[ P03346] interacts with 14 human  
partners:{Q9NS18;Q9H1K1;Q9UMS0;Q9UIF7;P21912;Q9H9T3;O76003;P48200;Q9Y5Y2;P78549;P2339  
6;O75251;O75306;P21399}  
2318 Pathogen[ Q85601] interacts with 13 human  
partners:{P21399;O75306;Q9H9T3;P23396;P21912;P48200;Q9UMS0;Q9H6Q4;O76003;Q9UIF7;Q9Y5Y  
2;Q9H1K1;P78549}  
2319 Pathogen[ P14079] interacts with 25 human  
partners:{Q5VV42;Q6P4F2;P23396;Q9UIF7;P10109;Q9NZ45;P21399;Q9H1K1;O75306;Q86U28;Q9BUE  
6;P78549;Q9UMS0;Q9H9T3;Q9H6Q4;O75251;P48200;Q9Y5Y2;Q9HA92;P22830;O76003;Q96SZ6;Q96FC9  
;Q8WXG1;P21912}  
2320 Pathogen[ P03383] interacts with 8 human  
partners:{O75251;Q9H1K1;P48200;O75306;Q9H6Q4;Q9UMS0;P23396;Q9H9T3}  
2321 Pathogen[ P03410] interacts with 23 human  
partners:{O76003;O75251;P23396;Q6P4F2;Q9Y5Y2;Q9H9T3;Q9H6Q4;P78549;Q9H1K1;Q8WXG1;P2139  
9;Q9UMS0;Q9HA92;P22830;P21912;O75306;Q96FC9;P10109;Q86U28;P48200;Q9NZ45;Q9UIF7;Q9BUE6  
}  
2322 Pathogen[ P14075] interacts with 8 human  
partners:{Q9UMS0;Q9UIF7;O75306;O75251;P23396;Q9H9T3;P48200;Q9H1K1}  
2323 Pathogen[ P0C206] interacts with 22 human  
partners:{Q9H1K1;Q9HA92;Q9NS18;O75251;Q9H9T3;O75306;Q86U28;Q9Y5Y2;P48200;P23396;P2283  
0;O76003;Q9H6Q4;Q99798;P21912;Q8WXG1;Q9UMS0;Q9UIF7;Q9BX63;P21399;Q9BUE6;P78549}  
2324 Pathogen[ P03363] interacts with 9 human  
partners:{Q9BX63;P23396;Q9UMS0;O76003;P48200;Q9UIF7;Q9H1K1;Q9Y5Y2;Q9H9T3}  
2325 [Cluster 212]GO:0016491+F molecular\_function [name] oxidoreductase activity [def]

- "Catalysis of an oxidation-reduction (redox) reaction, a reversible chemical reaction in which the oxidation state of an atom or atoms within a molecule is altered. One substrate acts as a hydrogen or electron donor and becomes oxidized, while the other acts as hydrogen or electron acceptor and becomes reduced." [GOC
- 2326 Pathogen[ Q2Q067] interacts with 52 human partners: {P02792;Q9ULD0;Q9UPP1;Q9NXW9;P09917;P07195;Q9BUP3;P31040;Q6NS38;O75151;P49419;P15121;O75489;P21953;Q8NHM5;Q9NZC7;Q9BV57;P27695;Q06830;Q9BU89;P31350;Q96A73;P15559;Q7LG56;O00625;P29474;Q9NWT6;O75251;Q96Q83;O75306;P04406;P40925;P21912;Q96KS0;O75164;Q9H6W3;Q13363;Q9BYZ2;Q9NNW7;Q9H6Z9;Q8N371;Q9BPX1;O95831;O14556;P40926;Q9GZT9;P00338;Q15652;Q7LBC6;Q16836;P07864;Q9UHB4}
- 2327 Pathogen[ P0C214] interacts with 99 human partners: {P29474;P02794;Q8N371;Q8IX04;P49419;O75306;P09417;P08294;P52209;P27695;P09917;O75874;P11413;Q9NVH6;Q8NCN5;Q8N335;Q9BU89;P31350;Q13363;P11177;P07864;Q86XF0;Q5I0G3;P28331;P12694;P42898;Q9BV57;Q96KS0;Q9NNW7;P48735;Q96A73;P35270;Q9HA92;O75164;P40939;O75151;Q6ZMR3;Q99807;P40926;P16083;O14556;Q9Y2S2;P55789;Q06830;Q9NZC7;Q8TBF2;Q9UJ68;P15121;P00374;Q9UI17;Q9BUP3;P50213;Q16881;Q9H6Z9;Q6NS38;O43837;P21953;O14832;Q9NWM0;Q9H6W3;Q86WU2;Q15652;Q9GZT9;P30043;Q9ULD0;Q9BPX1;P23921;Q9NXW9;P09622;Q9UL12;P07327;O75489;Q9UHB4;P02792;O75251;Q96BT7;O00625;Q16698;P36551;Q9BYZ2;Q7LG56;Q9Y3D2;P48163;P21912;Q96Q83;P15559;P04406;P11586;Q7LBC6;Q9UPP1;P13804;Q16798;P07195;P51553;P18054;Q96NN9;Q9NWT6;P21695;Q8NHM5}
- 2328 Pathogen[ P03346] interacts with 62 human partners: {P02792;Q96A73;P16083;P31040;P04406;Q9UBK8;P29474;Q16836;O75489;Q9BUP3;Q7LBC6;Q9UHB4;Q9BV57;Q9BPX1;Q8NCN5;P15121;P18054;Q86WU2;Q9ULD0;P02794;Q9BYW2;P15559;Q9NXW9;Q15652;O75151;P21912;P09917;P31350;P49419;Q7LG56;O14556;Q9NZC7;O75164;Q9GZT9;P40926;Q9UPP1;O95831;P00338;Q96Q83;Q96BT7;Q8N371;Q06830;P07195;Q96KS0;O75251;B2RXH2;Q9UGL1;Q13363;Q9BU89;O00625;P56545;O75306;P27695;Q9NWT6;Q8NHM5;P40925;Q9H6W3;Q8IWF2;Q8TDZ2;Q9H6Z9;Q9BYZ2;Q9NNW7}
- 2329 Pathogen[ Q85601] interacts with 50 human partners: {Q9NZC7;Q96A73;Q9UHB4;Q9H6Z9;O95831;Q8N371;Q6ZMR3;P09917;O75151;O75306;Q9BPX1;P21912;Q9NWT6;Q13363;P21953;P31350;Q9BV57;Q9H6W3;Q9NXW9;P07864;Q7LG56;O14556;Q9GZT9;Q96KS0;Q9BYZ2;Q8NHM5;P31040;Q9UPP1;P15121;P29474;Q6NS38;P40925;Q06830;P07195;Q96Q83;P02792;Q16836;O75164;O00625;P04406;Q15652;Q7LBC6;Q9ULD0;Q9BU89;P02794;P00338;Q9BUP3;P27695;P40926;P49419}
- 2330 Pathogen[ P14079] interacts with 90 human partners: {O00625;Q9UHB4;Q86XF0;P00374;P48775;Q9GZT9;O75151;Q99807;P21953;Q8TDZ2;P00338;Q9C0B1;Q96SZ5;Q8IVL6;Q9NXW9;P13498;P16083;P52209;Q96A73;Q9NZV6;Q6P6C2;O75306;P00395;P00403;Q93099;Q5SRE7;Q9NVH6;P13804;Q8NHM5;P31350;P15559;Q15652;Q6N021;Q7LG56;P07195;Q9BUP3;Q9H6W3;O95831;Q6ZMR3;Q86WU2;Q9NNW7;Q9BU89;Q9NZC7;P31040;Q8IUH2;Q9UPP1;Q9NWT6;O14832;Q6NS38;Q3KRA9;O75251;Q9H6Z9;Q9UL12;P00156;P07864;Q9HA92;P55789;P27695;Q9Y471;P09917;Q8NBK3;P02794;Q9Y3D2;Q9UI17;O75489;Q8TBF2;P03923;Q16878;Q9BT30;P03897;Q8NCN5;Q8N371;P21695;P36551;P40925;Q96Q83;Q9BYZ2;O43151;Q96KS0;Q9UJ68;P03901;P03886;Q9BV57;Q9NVS9;Q9ULD0;Q7LBC6;Q16836;P42898;P04406;P21912}
- 2331 Pathogen[ P03383] interacts with 40 human partners: {P02794;Q9NWT6;P29474;P40926;O75251;Q9UHB4;P00338;Q9BYZ2;P31040;P07864;Q96A73;Q16836;O75489;O95831;P40925;O75151;Q96KS0;Q9H6W3;O75306;P31350;Q9BV57;O75164;Q9ULD0;Q15652;O14556;P07195;Q6ZMR3;O00625;Q9H6Z9;P04406;Q9BUP3;Q9BU89;P27695;Q8N371;Q96Q83;Q7LBC6;Q9UPP1;Q13363;P49419;Q9BPX1}
- 2332 Pathogen[ P03410] interacts with 91 human partners: {P15559;Q3KRA9;Q9UPP1;Q9H6W3;Q9BYZ2;Q9BU89;P02794;P31350;O14556;Q6P6C2;P13804;Q9NWT6;Q9BPX1;Q9ULD0;Q15652;Q9NVH6;Q96KS0;Q9UI17;Q9H6Z9;Q9NXW9;O75251;Q8TDZ2;P00374;Q9NZC7;P12694;Q6ZMR3;Q6N021;P21953;Q96Q83;Q6NS38;P07195;Q7LBC6;P36551;Q9GZT9;P52209;Q93099;O00625;O75151;P29474;Q9UJ68;P48775;Q9Y3D2;P03886;P00156;Q86XF0;P00338;Q9HA92;Q9UL12;P16083;P31040;P49419;Q9BUP3;O75489;P42898;O95831;P21912;O14832;P04406;Q9UHB4;O43151;Q16836;Q9NVS9;Q9BT30;P03897;P40926;Q8NCN5;P27695;Q9Y471;O75306;P09917;P00403;P07864;P40925;Q99807;P03901;Q9C0B1;P03923;P02792;Q8N371;P55789;O75164;P23921;Q9BV57;Q8TBF2;Q96A73;Q7LG56;Q06830;Q96SZ5;P21695;Q9NNW7;Q86WU2}
- 2333 Pathogen[ P14075] interacts with 46 human partners: {Q9NVH6;P29474;Q9BUP3;P40925;Q96KS0;Q9GZT9;P31350;Q8N371;Q96Q83;P27695;Q9BV57;Q9UPP1;Q15652;Q7LBC6;P40926;Q8NCN5;O00625;P15559;Q9UHB4;P31040;O75306;P07195;Q9BU89;P04406;P49419;Q9NVS9;O95831;O75251;Q16836;P02794;Q9H6W3;P07864;Q9NWT6;P55789;Q9ULD0;Q96A73;P00338;O14832;Q9BYZ2;Q13363;O75489;Q9NXW9;O75151;O14556;O75164;Q9H6Z9}
- 2334 Pathogen[ P0C206] interacts with 71 human partners: {P27695;Q8N371;Q9NZV6;P07195;Q96Q83;P09917;Q6ZMR3;P07864;P55789;Q9HA92;Q9BUP3;P50213;O75251;Q96KS0;Q9GZT9;O43151;Q9ULD0;P02794;O75306;Q3KRA9;Q6NS38;Q16836;P15559;Q9UPP1;O14832;Q8TBF2;Q96A73;Q9NXW9;Q9NVH6;P36551;Q86WU2;Q7LBC6;O00625;P21953;Q7LG56;Q9NNW7;O75151;Q9BPX1;Q9NWT6;O95831;O14556;Q9Y3D2;Q9H6W3;Q9UJ68;P40925;Q99807;P04406;P40926;Q8NHM5;P31040;Q9BV57;P02792;Q15652;P29474;O75489;Q9NZC7;Q9H6Z9;O75164;Q9BYZ2;P49419;P15121;Q13363;Q9UHB4;P21912;Q06830;Q8TDZ2;Q9BU89;Q8NCN5;P00338;P31350;P16083}
- 2335 Pathogen[ P03363] interacts with 25 human partners: {Q16836;P29474;Q9BUP3;P49419;P31040;Q9UHB4;P40925;Q9NNW7;Q9H6Z9;Q9ULD0;Q96BT7;P56545;O75164;Q9BYZ2;Q15652;Q9BPX1;Q96Q83;P04406;Q9BV57;O00625;Q13363;O14556;Q96A73;P02794;O95831}
- 2336 [Cluster 213]GO:0004004+F molecular\_function [name] ATP-dependent RNA helicase activity [def] "Catalysis of the reaction
- 2337 Pathogen[ Q2Q067] interacts with 5 human partners: {Q92900;P38919;Q13838;Q9UHI6;Q08211}

2338 Pathogen[ P0C214] interacts with 6 human partners:{Q92900;P38919;Q9NVP1;Q9UHI6;Q08211;Q13838}

2339 Pathogen[ P03346] interacts with 9 human partners:{P38919;Q9NVP1;Q08211;Q9BUQ8;Q9UHI6;Q13838;Q14562;Q13283;Q92900}

2340 Pathogen[ Q85601] interacts with 6 human partners:{Q08211;P38919;Q13838;Q9NVP1;Q9UHI6;Q92900}

2341 Pathogen[ P14079] interacts with 5 human partners:{Q13838;Q9UHI6;Q08211;Q92900;Q9NVP1}

2342 Pathogen[ P03383] interacts with 4 human partners:{Q13838;Q9UHI6;P38919;Q92900}

2343 Pathogen[ P03410] interacts with 6 human partners:{Q13838;Q92900;Q9NVP1;P38919;Q9UHI6;Q08211}

2344 Pathogen[ P14075] interacts with 4 human partners:{Q92900;Q9UHI6;P38919;Q13838}

2345 Pathogen[ P0C206] interacts with 6 human partners:{Q08211;Q13838;Q9NVP1;Q92900;Q9UHI6;P38919}

2346 Pathogen[ P03363] interacts with 8 human partners:{P38919;Q92900;Q9UHI6;Q13283;Q14562;Q13838;Q9NVP1;Q08211}

2347 [Cluster 214]GO:0043522+F molecular\_function [name] leucine zipper domain binding [def] "Interacting selectively and non-covalently with a leucine zipper domain, a protein secondary structure exhibiting a periodic repetition of leucine residues at every seventh position over a distance covering eight helical turns." [GOC

2348 Pathogen[ Q2Q067] interacts with 7 human partners:{Q8IUD2;Q6P1K2;Q9NY61;P54845;O43186;Q969V6;Q96IZ0}

2349 Pathogen[ P0C214] interacts with 7 human partners:{Q96IZ0;O43186;Q6P1K2;Q9NY61;Q969V6;Q8IUD2;P54845}

2350 Pathogen[ P03346] interacts with 7 human partners:{P54845;Q8IUD2;O43186;Q969V6;Q96IZ0;Q9NY61;Q6P1K2}

2351 Pathogen[ Q85601] interacts with 6 human partners:{Q96IZ0;Q9NY61;Q969V6;P54845;Q8IUD2;Q6P1K2}

2352 Pathogen[ P14079] interacts with 6 human partners:{Q9NY61;Q8IUD2;Q969V6;P54845;Q96IZ0;Q6P1K2}

2353 Pathogen[ P03383] interacts with 7 human partners:{Q9NY61;Q96IZ0;Q969V6;P54845;O43186;Q6P1K2;Q8IUD2}

2354 Pathogen[ P03410] interacts with 6 human partners:{P54845;Q9NY61;Q969V6;Q8IUD2;Q6P1K2;Q96IZ0}

2355 Pathogen[ P14075] interacts with 7 human partners:{Q9NY61;O43186;Q8IUD2;Q96IZ0;P54845;Q969V6;Q6P1K2}

2356 Pathogen[ P0C206] interacts with 6 human partners:{Q96IZ0;Q8IUD2;P54845;Q6P1K2;Q969V6;Q9NY61}

2357 Pathogen[ P03363] interacts with 7 human partners:{Q6P1K2;Q96IZ0;Q969V6;P54845;Q9NY61;O43186;Q8IUD2}

2358 [Cluster 215]GO:0004082+F molecular\_function [name] bisphosphoglycerate mutase activity [def] "Catalysis of the reaction

2359 Pathogen[ Q2Q067] interacts with 4 human partners:{Q8N0Y7;P18669;P15259;P07738}

2360 Pathogen[ P0C214] interacts with 3 human partners:{P15259;Q8N0Y7;P07738}

2361 Pathogen[ P03346] interacts with 4 human partners:{P07738;P18669;Q8N0Y7;P15259}

2362 Pathogen[ Q85601] interacts with 4 human partners:{P18669;P15259;Q8N0Y7;P07738}

2363 Pathogen[ P14079] interacts with 4 human partners:{P15259;P07738;P18669;Q8N0Y7}

2364 Pathogen[ P03383] interacts with 4 human partners:{P18669;P07738;Q8N0Y7;P15259}

2365 Pathogen[ P03410] interacts with 4 human partners:{P07738;Q8N0Y7;P15259;P18669}

2366 Pathogen[ P14075] interacts with 4 human partners:{P18669;P15259;P07738;Q8N0Y7}

2367 Pathogen[ P0C206] interacts with 4 human partners:{Q8N0Y7;P07738;P18669;P15259}

2368 Pathogen[ P03363] interacts with 3 human partners:{P18669;Q8N0Y7;P15259}

2369 [Cluster 216]GO:0016868+F molecular\_function [name] intramolecular transferase activity, phosphotransferases [def] "Catalysis of the transfer of a phosphate group from one position to another within a single molecule." [GOC

2370 Pathogen[ Q2Q067] interacts with 8 human partners:{Q8N0Y7;O95394;P36871;Q96G03;P18669;P15259;P07738;Q6PCE3}

2371 Pathogen[ P0C214] interacts with 8 human partners:{P15259;Q6PCE3;Q96G03;P36871;Q15124;O95394;Q8N0Y7;P07738}

2372 Pathogen[ P03346] interacts with 8 human partners:{P07738;P36871;Q6PCE3;P18669;Q8N0Y7;Q96G03;O95394;P15259}

2373 Pathogen[ Q85601] interacts with 9 human partners:{P18669;P15259;Q15124;P36871;O95394;Q6PCE3;Q8N0Y7;P07738;Q96G03}

2374 Pathogen[ P14079] interacts with 9 human partners:{P15259;Q15124;P07738;O95394;Q6PCE3;P18669;Q96G03;P36871;Q8N0Y7}

2375 Pathogen[ P03383] interacts with 7 human partners:{Q96G03;P18669;Q6PCE3;P07738;Q8N0Y7;O95394;P15259}

2376 Pathogen[ P03410] interacts with 9 human partners:{Q6PCE3;P36871;Q15124;P07738;Q8N0Y7;P15259;P18669;Q96G03;O95394}

2377 Pathogen[ P14075] interacts with 7 human partners:{P18669;Q96G03;Q6PCE3;O95394;P15259;P07738;Q8N0Y7}

2378 Pathogen[ P0C206] interacts with 9 human partners:{Q96G03;O95394;Q15124;Q6PCE3;Q8N0Y7;P07738;P18669;P36871;P15259}

2379 Pathogen[ P03363] interacts with 5 human partners:{P18669;Q8N0Y7;Q6PCE3;P15259;Q96G03}

2380 [Cluster 217]GO:0005123+F molecular\_function [name] death receptor binding [def]

"Interacting selectively and non-covalently with any member of the death receptor (DR) family. The DR family falls within the tumor necrosis factor receptor superfamily and is characterized by a cytoplasmic region of ~80 residues termed the death domain (DD)." [GOC

2381 Pathogen[ Q2Q067] interacts with 7 human  
partners: {P55957;Q00994;Q13158;Q9UK73;Q9HB75;Q9UKN5;Q9UKL3}

2382 Pathogen[ P0C214] interacts with 7 human  
partners: {Q9UKN5;Q13158;Q00994;P55957;Q9UKL3;Q9HB75;Q9UK73}

2383 Pathogen[ P03346] interacts with 7 human  
partners: {Q13158;P55957;Q00994;Q9UKL3;Q9HB75;Q9UKN5;Q9UK73}

2384 Pathogen[ Q85601] interacts with 7 human  
partners: {Q9UKL3;Q13158;Q9UKN5;Q9UK73;P55957;Q9HB75;Q00994}

2385 Pathogen[ P14079] interacts with 8 human  
partners: {Q00994;Q9UK73;Q9UKL3;Q13158;Q9UKN5;Q9HB75;Q99836;P55957}

2386 Pathogen[ P03383] interacts with 7 human  
partners: {Q9UKL3;Q9UK73;P55957;Q13158;Q00994;Q9UKN5;Q9HB75}

2387 Pathogen[ P03410] interacts with 7 human  
partners: {Q9HB75;P55957;Q13158;Q00994;Q9UKN5;Q9UKL3;Q9UK73}

2388 Pathogen[ P14075] interacts with 7 human  
partners: {Q9UK73;P55957;Q9HB75;Q9UKN5;Q00994;Q9UKL3;Q13158}

2389 Pathogen[ P0C206] interacts with 7 human  
partners: {Q9UK73;Q9UKL3;Q13158;Q00994;Q9UKN5;Q9HB75;P55957}

2390 Pathogen[ P03363] interacts with 7 human  
partners: {P55957;Q9UKN5;Q13158;Q9HB75;Q9UKL3;Q00994;Q9UK73}

2391 [Cluster 218]GO:0032183+F molecular\_function [name] SUMO binding [def] "Interacting selectively and non-covalently with the small ubiquitin-like protein SUMO." [GOC

2392 Pathogen[ Q2Q067] interacts with 2 human partners: {000257;Q13569}

2393 Pathogen[ P0C214] interacts with 2 human partners: {000257;Q13569}

2394 Pathogen[ P03346] interacts with 4 human partners: {095714;000257;Q9UHP3;Q13569}

2395 Pathogen[ Q85601] interacts with 3 human partners: {095714;Q13569;000257}

2396 Pathogen[ P14079] interacts with 3 human partners: {000257;Q5W0Q7;Q13569}

2397 Pathogen[ P03383] interacts with 2 human partners: {000257;Q13569}

2398 Pathogen[ P03410] interacts with 2 human partners: {Q13569;000257}

2399 Pathogen[ P14075] interacts with 2 human partners: {000257;Q13569}

2400 Pathogen[ P0C206] interacts with 4 human partners: {Q13569;Q9UHP3;000257;095714}

2401 Pathogen[ P03363] interacts with 4 human partners: {Q9UHP3;Q13569;095714;000257}

2402 [Cluster 219]GO:0003730+F molecular\_function [name] mRNA 3'-UTR binding [def] "Interacting selectively and non-covalently with the 3' untranslated region of an mRNA molecule." [GOC

2403 Pathogen[ Q2Q067] interacts with 10 human  
partners: {000425;Q13148;Q9Y6M1;Q10570;Q9Y2T7;Q9Y2V2;P16989;095453;Q8NC51;Q96T21}

2404 Pathogen[ P0C214] interacts with 14 human  
partners: {P51114;P16989;095453;Q9Y2V2;000425;Q10570;Q9NZI8;Q9Y2T7;Q96T21;Q15287;Q9Y6M1;Q8NC51;Q14011;Q13148}

2405 Pathogen[ P03346] interacts with 16 human  
partners: {Q8NC51;Q9Y2V2;Q14011;Q9Y6M1;000425;Q13148;Q9NZI8;Q96T21;P16989;095453;Q9BWF3;Q12926;Q15287;Q9Y2T7;P51114;Q10570}

2406 Pathogen[ Q85601] interacts with 12 human  
partners: {Q9Y2T7;Q8NC51;Q13148;Q96T21;Q15287;Q9Y6M1;095453;Q10570;Q9Y2V2;000425;P16989;P51114}

2407 Pathogen[ P14079] interacts with 12 human  
partners: {Q15287;Q13148;Q10570;095453;Q9Y2T7;Q96T21;P16989;Q8NC51;Q9Y6M1;Q14011;000425;Q9Y2V2}

2408 Pathogen[ P03383] interacts with 10 human  
partners: {P16989;Q15287;Q10570;Q96T21;Q9Y2T7;000425;Q13148;Q9Y2V2;095453;Q8NC51}

2409 Pathogen[ P03410] interacts with 13 human  
partners: {Q96T21;Q10570;P16989;Q15287;Q9Y2V2;Q13148;095453;Q14011;P51114;000425;Q9Y2T7;Q8NC51;Q9Y6M1}

2410 Pathogen[ P14075] interacts with 10 human  
partners: {095453;P16989;Q8NC51;Q96T21;Q9Y2V2;Q13148;Q9Y2T7;Q15287;000425;Q10570}

2411 Pathogen[ P0C206] interacts with 13 human  
partners: {Q15287;095453;Q9Y2V2;Q14011;P51114;P16989;Q13148;Q9Y6M1;Q9Y2T7;Q8NC51;Q96T21;000425;Q10570}

2412 Pathogen[ P03363] interacts with 18 human  
partners: {Q10570;Q8NC51;095453;Q13148;Q9Y2V2;000425;Q9Y6M1;Q9BWF3;Q96T21;Q15287;Q92904;Q9NZI8;Q9BX46;Q14011;P51114;P16989;Q9Y2T7;Q12926}

2413 [Cluster 220]GO:0004550+F molecular\_function [name] nucleoside diphosphate kinase activity [def] "Catalysis of the reaction

2414 Pathogen[ Q2Q067] interacts with 1 human partners: {P22392}

2415 Pathogen[ P0C214] interacts with 1 human partners: {P22392}

2416 Pathogen[ P03346] interacts with 1 human partners: {P22392}

2417 Pathogen[ Q85601] interacts with 1 human partners: {P22392}

2418 Pathogen[ P14079] interacts with 2 human partners: {P22392;Q86XW9}

2419 Pathogen[ P03383] interacts with 1 human partners: {P22392}

2420 Pathogen[ P03410] interacts with 1 human partners: {Q86XW9}

2421 Pathogen[ P14075] interacts with 1 human partners: {P22392}

2422 Pathogen[ P0C206] interacts with 2 human partners: {P22392;Q86XW9}

2423 Pathogen[ P03363] interacts with 1 human partners:{Q86XW9}

2424 [Cluster 221]GO:0030337+F molecular\_function [name] DNA polymerase processivity factor activity [def] "An enzyme regulator activity that increases the processivity of polymerization by DNA polymerase, by allowing the polymerase to move rapidly along DNA while remaining topologically bound to it." [GOC

2425 Pathogen[ Q2Q067] interacts with 2 human partners:{P12004;Q96QE5}

2426 Pathogen[ P0C214] interacts with 1 human partners:{Q96QE5}

2427 Pathogen[ P03346] interacts with 2 human partners:{P12004;Q96QE5}

2428 Pathogen[ Q85601] interacts with 2 human partners:{Q96QE5;P12004}

2429 Pathogen[ P14079] interacts with 1 human partners:{P12004}

2430 Pathogen[ P03383] interacts with 1 human partners:{Q96QE5}

2431 Pathogen[ P03410] interacts with 2 human partners:{Q96QE5;P12004}

2432 Pathogen[ P14075] interacts with 1 human partners:{Q96QE5}

2433 Pathogen[ P0C206] interacts with 2 human partners:{Q96QE5;P12004}

2434 Pathogen[ P03363] interacts with 1 human partners:{Q96QE5}

2435 [Cluster 222]GO:0004812+F molecular\_function [name] aminoacyl-tRNA ligase activity [def] "Catalysis of the formation of aminoacyl-tRNA from ATP, amino acid, and tRNA with the release of diphosphate and AMP." [ISBN

2436 Pathogen[ Q2Q067] interacts with 19 human partners:{O95363;P23381;P49591;Q9Y285;Q15046;Q9NSD9;Q5T160;Q96I59;O43776;P41252;P07814;P54136;Q6PI48;Q9HA77;Q9BW92;P41250;P49589;Q9P2J5;P14868}

2437 Pathogen[ P0C214] interacts with 38 human partners:{P41250;P49589;Q9NSE4;Q7L3T8;O95363;Q9UGM6;Q96I59;Q9NP81;P12081;P23381;P49590;P07814;Q9Y285;P41252;Q5JPH6;O43776;Q15031;P14868;P49591;P56192;P26639;P54577;A2RTX5;Q9HA77;P49588;Q96GW9;Q5T160;P47897;Q9BW92;Q6PI48;Q5D0E6;Q9NSD9;P26640;Q15046;Q5ST30;Q9Y2Z4;Q9P2J5}

2438 Pathogen[ P03346] interacts with 11 human partners:{P23381;P07814;O43776;P41252;P41250;Q9Y285;Q9P2J5;P54136;P14868;P49589;Q6PI48}

2439 Pathogen[ Q85601] interacts with 22 human partners:{P54136;Q9NSD9;P26639;P14868;P49589;Q9P2J5;P07814;P23381;Q15046;O43776;Q9BW92;Q9Y285;Q9HA77;P41250;Q5T160;Q5D0E6;A2RTX5;Q96I59;O95363;P47897;Q6PI48;P41252}

2440 Pathogen[ P14079] interacts with 35 human partners:{Q9Y285;P23381;P26639;Q96GW9;Q9P2J5;Q7L3T8;Q9BW92;P54136;Q15031;Q5T160;Q5ST30;Q9NP81;P47897;O95363;P49591;A2RTX5;P14868;Q9HA77;O43776;Q5JPH6;P49589;Q15046;P41252;P41250;Q96I59;P26640;P56192;Q9NSD9;Q9Y2Z4;Q9UGM6;Q9NSE4;Q5D0E6;P49588;Q6PI48;P07814}

2441 Pathogen[ P03383] interacts with 27 human partners:{Q9Y285;Q9P2J5;P14868;Q5D0E6;Q5JPH6;P49589;Q5T160;Q15031;Q9NP81;P23381;Q96I59;Q15046;A2RTX5;Q9Y2Z4;O95363;P07814;Q96GW9;Q9HA77;O43776;Q6PI48;P41250;P41252;P54136;Q9NSD9;P49591;Q7L3T8;Q9BW92}

2442 Pathogen[ P03410] interacts with 34 human partners:{Q9Y285;Q9HA77;Q9NSE4;P56192;P49589;Q5ST30;Q9BW92;P49588;P54136;P23381;Q7L3T8;O43776;P47897;P14868;Q5D0E6;Q9NSD9;Q9P2J5;P49591;P26639;Q96I59;P41250;Q15046;Q5JPH6;Q9UGM6;P41252;Q9Y2Z4;P26640;Q96GW9;P07814;Q9NP81;A2RTX5;O95363;Q6PI48;Q5T160}

2443 Pathogen[ P14075] interacts with 30 human partners:{Q9Y2Z4;P54136;P41250;Q5D0E6;P23381;Q9NSD9;P41252;O95363;Q96GW9;Q9HA77;Q9NP81;Q9Y285;Q7L3T8;P56192;A2RTX5;Q9BW92;O43776;P14868;Q5T160;Q9P2J5;P26639;Q6PI48;Q96I59;P49589;Q5JPH6;Q15046;Q9NSE4;Q15031;P49591;P07814}

2444 Pathogen[ P0C206] interacts with 34 human partners:{P49589;O95363;Q9NSE4;P07814;Q9Y2Z4;P41252;Q6PI48;Q5ST30;A2RTX5;Q9UGM6;Q5JPH6;Q9NP81;Q9HA77;P41250;P26640;P49591;O43776;Q9Y285;Q9NSD9;Q5D0E6;Q5T160;Q9BW92;P56192;P54136;P26639;Q15031;Q7L3T8;Q9P2J5;P23381;P47897;P14868;Q96GW9;Q96I59;Q15046}

2445 Pathogen[ P03363] interacts with 23 human partners:{Q9Y2Z4;P41252;Q9NSD9;A2RTX5;Q96I59;P14868;P49589;P41250;P47897;Q5JPH6;O43776;P23381;P54136;Q6PI48;O95363;Q9P2J5;Q9BW92;P49591;Q9Y285;Q7L3T8;Q15031;P07814;Q5T160}

2446 [Cluster 223]GO:0008409+F molecular\_function [name] 5'-3' exonuclease activity [def] "Catalysis of the hydrolysis of ester linkages within nucleic acids by removing nucleotide residues from the 5' end." [GOC

2447 Pathogen[ Q2Q067] interacts with 7 human partners:{Q9Y2M0;Q96SD1;Q8IZH2;Q9UQ84;P39748;Q9H816;Q9UKF6}

2448 Pathogen[ P0C214] interacts with 7 human partners:{Q9H816;Q9UKF6;Q96SD1;Q9Y2M0;Q8IZH2;P39748;Q9UQ84}

2449 Pathogen[ P03346] interacts with 7 human partners:{Q96SD1;Q9UKF6;Q8IZH2;Q9UQ84;P39748;Q9H816;Q9Y2M0}

2450 Pathogen[ Q85601] interacts with 7 human partners:{Q9Y2M0;Q9UQ84;Q8IZH2;Q96SD1;P39748;Q9H816;Q9UKF6}

2451 Pathogen[ P14079] interacts with 7 human partners:{Q9UKF6;Q8IZH2;Q9Y2M0;Q96SD1;Q9H816;Q9UQ84;P39748}

2452 Pathogen[ P03383] interacts with 3 human partners:{Q9UKF6;Q9H816;Q9Y2M0}

2453 Pathogen[ P03410] interacts with 7 human partners:{Q9H816;P39748;Q96SD1;Q8IZH2;Q9UKF6;Q9UQ84;Q9Y2M0}

2454 Pathogen[ P14075] interacts with 3 human partners:{Q9Y2M0;Q9H816;Q9UKF6}

2455 Pathogen[ P0C206] interacts with 7 human partners:{Q9UKF6;Q9Y2M0;Q9UQ84;Q8IZH2;Q96SD1;Q9H816;P39748}

2456 Pathogen[ P03363] interacts with 4 human partners:{Q9H816;Q9Y2M0;Q9UKF6;Q8IZH2}

2457 [Cluster 224]GO:0019209+F molecular\_function [name] kinase activator activity [def]  
 "Increases the activity of a kinase, an enzyme which catalyzes of the transfer of a phosphate group, usually from ATP, to a substrate molecule." [GOC

2458 Pathogen[ Q2Q067] interacts with 4 human partners:{Q7L9L4;Q9UDY8;O95999;Q15750}  
 2459 Pathogen[ P0C214] interacts with 4 human partners:{Q9UDY8;Q7L9L4;O95999;Q15750}  
 2460 Pathogen[ P03346] interacts with 4 human partners:{Q9UDY8;Q7L9L4;O95999;Q15750}  
 2461 Pathogen[ Q85601] interacts with 4 human partners:{Q15750;Q9UDY8;Q7L9L4;O95999}  
 2462 Pathogen[ P14079] interacts with 3 human partners:{O95999;Q15750;Q7L9L4}  
 2463 Pathogen[ P03383] interacts with 3 human partners:{Q7L9L4;O95999;Q15750}  
 2464 Pathogen[ P03410] interacts with 3 human partners:{Q15750;Q7L9L4;O95999}  
 2465 Pathogen[ P14075] interacts with 3 human partners:{Q15750;O95999;Q7L9L4}  
 2466 Pathogen[ P0C206] interacts with 4 human partners:{Q9UDY8;O95999;Q7L9L4;Q15750}  
 2467 Pathogen[ P03363] interacts with 2 human partners:{Q15750;Q7L9L4}

2468 [Cluster 225]GO:0004385+F molecular\_function [name] guanylate kinase activity [def]  
 "Catalysis of the reaction

2469 Pathogen[ Q2Q067] interacts with 4 human partners:{Q12959;Q92796;Q9UDY2;Q5TCQ9}  
 2470 Pathogen[ P0C214] interacts with 4 human partners:{Q5TCQ9;Q92796;Q12959;Q9UDY2}  
 2471 Pathogen[ P03346] interacts with 5 human partners:{Q9UDY2;Q5TCQ9;Q92796;Q15700;Q12959}  
 2472 Pathogen[ Q85601] interacts with 4 human partners:{Q9UDY2;Q5TCQ9;Q92796;Q12959}  
 2473 Pathogen[ P14079] interacts with 4 human partners:{Q9BXL7;Q9UDY2;Q15700;Q92796}  
 2474 Pathogen[ P03383] interacts with 3 human partners:{Q5TCQ9;Q92796;Q9UDY2}  
 2475 Pathogen[ P03410] interacts with 6 human partners:{Q12959;Q5TCQ9;Q15700;Q9UDY2;Q9BXL7;Q92796}  
 2476 Pathogen[ P14075] interacts with 3 human partners:{Q5TCQ9;Q92796;Q9UDY2}  
 2477 Pathogen[ P0C206] interacts with 5 human partners:{Q15700;Q5TCQ9;Q9UDY2;Q92796;Q12959}  
 2478 Pathogen[ P03363] interacts with 5 human partners:{Q12959;Q15700;Q5TCQ9;Q9UDY2;Q92796}

2479 [Cluster 226]GO:0003857+F molecular\_function [name] 3-hydroxyacyl-CoA dehydrogenase activity [def] "Catalysis of the reaction

2480 Pathogen[ Q2Q067] interacts with 1 human partners:{Q16836}  
 2481 Pathogen[ P0C214] interacts with 2 human partners:{P40939;Q9Y2S2}  
 2482 Pathogen[ P03346] interacts with 1 human partners:{Q16836}  
 2483 Pathogen[ Q85601] interacts with 1 human partners:{Q16836}  
 2484 Pathogen[ P14079] interacts with 1 human partners:{Q16836}  
 2485 Pathogen[ P03383] interacts with 1 human partners:{Q16836}  
 2486 Pathogen[ P03410] interacts with 1 human partners:{Q16836}  
 2487 Pathogen[ P14075] interacts with 1 human partners:{Q16836}  
 2488 Pathogen[ P0C206] interacts with 1 human partners:{Q16836}  
 2489 Pathogen[ P03363] interacts with 1 human partners:{Q16836}

2490 [Cluster 227]GO:0043325+F molecular\_function [name] phosphatidylinositol-3,4-bisphosphate binding [def] "Interacting selectively and non-covalently with phosphatidylinositol-3,4-bisphosphate, a derivative of phosphatidylinositol in which the inositol ring is phosphorylated at the 3' and 4' positions." [GOC

2491 Pathogen[ Q2Q067] interacts with 3 human partners:{Q86VW0;P31749;P55895}  
 2492 Pathogen[ P0C214] interacts with 4 human partners:{Q86VW0;P55895;Q9UQC2;P31749}  
 2493 Pathogen[ P03346] interacts with 6 human partners:{P55895;Q9UQC2;Q86VW0;P31749;Q9HB21;Q9HBF4}  
 2494 Pathogen[ Q85601] interacts with 6 human partners:{P31749;Q9UQC2;Q9HBF4;Q9HB21;P55895;Q86VW0}  
 2495 Pathogen[ P14079] interacts with 4 human partners:{Q9HB21;Q86VW0;Q9HBF4;Q9UQC2}  
 2496 Pathogen[ P03383] interacts with 2 human partners:{P31749;P55895}  
 2497 Pathogen[ P03410] interacts with 6 human partners:{Q9UQC2;P31749;P55895;Q9HB21;Q9HBF4;Q86VW0}  
 2498 Pathogen[ P14075] interacts with 2 human partners:{P31749;P55895}  
 2499 Pathogen[ P0C206] interacts with 6 human partners:{P31749;Q86VW0;P55895;Q9HB21;Q9UQC2;Q9HBF4}

2500 Pathogen[ P03363] interacts with 4 human partners:{P31749;P55895;Q86VW0;Q9UQC2}

2501 [Cluster 228]GO:0004830+F molecular\_function [name] tryptophan-tRNA ligase activity [def] "Catalysis of the reaction

2502 Pathogen[ Q2Q067] interacts with 1 human partners:{P23381}  
 2503 Pathogen[ P0C214] interacts with 2 human partners:{Q9UGM6;P23381}  
 2504 Pathogen[ P03346] interacts with 1 human partners:{P23381}  
 2505 Pathogen[ Q85601] interacts with 1 human partners:{P23381}  
 2506 Pathogen[ P14079] interacts with 2 human partners:{P23381;Q9UGM6}  
 2507 Pathogen[ P03383] interacts with 1 human partners:{P23381}  
 2508 Pathogen[ P03410] interacts with 2 human partners:{P23381;Q9UGM6}  
 2509 Pathogen[ P14075] interacts with 1 human partners:{P23381}  
 2510 Pathogen[ P0C206] interacts with 2 human partners:{Q9UGM6;P23381}  
 2511 Pathogen[ P03363] interacts with 1 human partners:{P23381}

2512 [Cluster 229]GO:0008170+F molecular\_function [name] N-methyltransferase activity [def]  
 "Catalysis of the transfer of a methyl group to the nitrogen atom of an acceptor molecule." [GOC

2513 Pathogen[ Q2Q067] interacts with 1 human partners:{Q99873}

2514 Pathogen[ P0C214] interacts with 1 human partners:{Q99873}  
2515 Pathogen[ P03346] interacts with 2 human partners:{P50135;Q99873}  
2516 Pathogen[ Q85601] interacts with 1 human partners:{Q99873}  
2517 Pathogen[ P14079] interacts with 3 human partners:{Q99873;P50135;Q9Y5R4}  
2518 Pathogen[ P03383] interacts with 1 human partners:{Q99873}  
2519 Pathogen[ P03410] interacts with 3 human partners:{P50135;Q9Y5R4;Q99873}  
2520 Pathogen[ P14075] interacts with 1 human partners:{Q99873}  
2521 Pathogen[ P0C206] interacts with 2 human partners:{Q99873;P50135}  
2522 Pathogen[ P03363] interacts with 3 human partners:{Q9Y5R4;P50135;Q99873}  
2523 [Cluster 230]GO:0004518+F molecular\_function [name] nuclease activity [def]  
"Catalysis of the hydrolysis of ester linkages within nucleic acids." [ISBN  
2524 Pathogen[ Q2Q067] interacts with 53 human  
partners:{Q8TCS8;Q9Y2M0;Q96SD1;Q15631;Q5D1E8;Q99638;Q96LI5;Q92889;Q8IZH2;Q8NCE0;P4995  
9;Q7KZF4;Q9Y2L1;Q99708;Q9NRR4;O60930;Q9H777;O95551;Q504Q3;P27695;Q9GZR2;Q12972;Q9BSV6  
;A4GXA9;P52758;Q86US8;Q9BQ83;Q9NUW8;P54278;Q9UQ84;Q8TF46;Q9BRX2;Q9UKV8;P39748;Q92499;  
Q9H816;Q9H9L3;Q9H9J2;Q96NY9;Q96MB7;Q9BQ65;Q96AY2;Q9UKF6;Q9BQ52;Q93075;O95453;O75792;A  
2A288;Q8IYD8;O60671;Q9ULM6;P28715;O76075}  
2525 Pathogen[ P0C214] interacts with 61 human  
partners:{O95551;Q8N1G1;P27695;Q9H9J2;Q9BQ65;Q9BQ83;O95453;P49959;Q9H816;Q9UKF6;Q9288  
9;Q9Y2L1;Q504Q3;Q96SD1;Q9BRX2;Q96NY9;Q99708;Q9H777;Q9Y2M0;Q7KZF4;O75792;Q8TF46;Q9BSV6  
;Q8IZH2;P28715;Q96MB7;Q9ULM6;A2A288;Q86US8;Q96AY2;Q9BQ52;Q6P1N9;Q8TCS8;Q9H9L3;O60930;  
Q9NRR4;Q8IV48;A4GXA9;Q17R31;Q8WTP8;Q93075;Q9UKV8;O60671;Q92499;Q15631;Q9C0D7;Q9GZR2;P  
39748;Q9UQ84;Q12972;Q8IYB7;Q9NUW8;P52758;P54278;Q96LI5;Q99638;Q5D1E8;Q8IYD8;O76075;Q8  
NCE0;Q9Y3B8}  
2526 Pathogen[ P03346] interacts with 61 human  
partners:{Q504Q3;Q9ULM6;P28715;A2A288;O95551;Q96SD1;Q9GZR2;Q8IX06;Q86US8;Q9H9L3;P5275  
8;Q9UKF6;O60930;P07992;Q99708;Q9NUW8;Q96AY2;Q99638;Q8IYB7;Q8IZH2;Q96NY9;O95453;Q9BQ65  
;Q92499;Q13609;Q15631;Q7KZF4;Q8TCS8;Q9Y2L1;Q5D1E8;Q9H777;Q9UKV8;Q17R31;P49959;Q92889;  
O76075;Q9UQ84;P54278;Q9NRR4;Q8IYD8;O60671;P24855;Q9BQ83;P27695;Q13283;P39748;Q9H816;Q  
9Y2M0;Q9BRX2;Q9UBZ4;Q9BQ52;Q93075;Q12972;Q96LI5;Q9BSV6;A4GXA9;Q8TF46;Q96MB7;Q8NCE0;Q9  
H9J2;O75792}  
2527 Pathogen[ Q85601] interacts with 56 human  
partners:{Q9UBZ4;Q9BQ52;Q9Y2M0;Q8IYD8;Q9UQ84;P52758;Q17R31;Q99708;A4GXA9;Q9NRR4;Q96AY  
2;O75792;P49959;O76075;Q92499;Q7KZF4;Q9BSV6;Q504Q3;Q9H777;Q9Y2L1;Q8IYB7;Q8IZH2;Q96NY9  
;Q92889;P28715;Q96LI5;A2A288;Q96MB7;Q96SD1;O95453;Q12972;Q8TCS8;Q9ULM6;Q9NUW8;Q9UKV8;  
Q9GZR2;Q9H9L3;Q86US8;Q9C0D7;O60671;P54278;Q9BQ83;O60930;P39748;Q9H9J2;Q9H816;Q9BRX2;Q  
93075;P27695;Q9UKF6;Q8TF46;Q99638;O95551;Q15631;Q5D1E8;Q8NCE0}  
2528 Pathogen[ P14079] interacts with 75 human  
partners:{O60671;Q6P1N9;P52758;Q8IV48;Q9BRX2;Q9UKV8;Q9Y3B8;O76075;Q5D1E8;Q13609;P2871  
5;Q96NY9;Q9UKF6;Q8IYD8;Q9UBZ4;O75792;Q9H777;Q9BSV6;Q96LI5;P54278;P49184;O94919;Q86US8  
;Q9GZR2;Q9BQ65;Q8TF46;Q8NCE0;O00115;O95453;Q96AY2;Q14249;Q9BQ50;A4GXA9;Q96MB7;Q8N1G1;  
Q15631;Q8IYB7;Q8IZH2;Q9NUW8;Q9H790;Q8N8Q3;Q99708;Q9H9L3;Q9NRR4;P24855;Q92889;P27695;Q  
9BQ52;Q9Y2M0;Q9Y2L1;Q93075;O95551;Q9NSU2;Q12972;Q9H9J2;Q8WZ79;Q96AZ6;Q96SD1;Q5HYM0;Q9  
2499;Q99638;Q7KZF4;Q9ULM6;A2A288;Q9BQ83;O60930;Q504Q3;Q17R31;Q9H816;Q9UQ84;P07992;Q8T  
CS8;P39748;Q9C0D7;Q8WTP8}  
2529 Pathogen[ P03383] interacts with 41 human  
partners:{Q9NRR4;Q9Y2L1;O60671;P54278;Q9H777;Q93075;O75792;Q96MB7;A4GXA9;Q9BQ65;Q1297  
2;Q5D1E8;Q8NCE0;Q8TCS8;Q9BRX2;Q15631;Q9UKF6;A2A288;Q9BQ52;P52758;Q9BSV6;Q9H816;Q86US8  
;Q7KZF4;Q96AY2;Q9H9L3;Q9Y2M0;Q9UKV8;Q9ULM6;Q99708;Q99638;Q9NUW8;Q9H9J2;O60930;P27695;  
O95551;Q92499;O95453;Q96LI5;Q9BQ83;Q96NY9}  
2530 Pathogen[ P03410] interacts with 77 human  
partners:{Q96LI5;P49959;Q9Y2L1;Q17R31;Q8WTP8;Q99708;Q9GZR2;Q9Y3B8;Q8TCS8;P49184;Q9UKV  
8;Q96AY2;Q9H816;Q8IV48;Q96MB7;Q8IYD8;Q9BQ50;A4GXA9;Q9C0D7;P07992;Q9ULM6;Q13609;Q6P1N9  
;O76075;O75792;Q8TF46;Q8NHP7;Q9BQ52;Q5HYM0;A2A288;Q92889;Q93075;P39748;Q9NSU2;Q96SD1;  
Q9BQ83;P28715;Q9BSV6;Q9H9J2;Q9NRR4;O60930;Q9H790;Q8IZH2;Q9UBZ4;O95551;O95453;Q99638;Q  
92499;Q9BRX2;Q5D1E8;Q2TB18;Q96NY9;Q96AZ6;Q8IX06;Q9NUW8;Q8N1G1;Q9H777;O60671;Q8IYB7;Q8  
6US8;Q9UKF6;P63135;P27695;Q12972;Q15631;Q7KZF4;O00115;P52758;P54278;Q9UQ84;Q9Y2M0;Q9B  
Q65;Q8NCE0;Q504Q3;P24855;Q9H9L3;Q14249}  
2531 Pathogen[ P14075] interacts with 41 human  
partners:{O95453;Q9BSV6;Q9BQ83;Q9ULM6;P27695;Q9BRX2;O60930;O60671;Q93075;Q9H9J2;Q96LI  
5;Q9Y2L1;Q9Y2M0;Q99638;Q9H777;Q92499;Q96MB7;Q15631;Q86US8;Q8NCE0;Q9BQ65;Q9BQ52;Q96NY9  
;Q9H816;Q9NRR4;Q9UKV8;Q5D1E8;Q9H9L3;O75792;Q8TCS8;Q96AY2;P54278;Q7KZF4;P52758;Q12972;  
Q9UKF6;Q99708;Q9NUW8;A4GXA9;A2A288;O95551}  
2532 Pathogen[ P0C206] interacts with 69 human  
partners:{P27695;P54278;Q9UKF6;Q9Y2M0;P28715;Q504Q3;Q96AY2;Q17RS7;Q9H790;O95453;P4995  
9;Q9BSV6;Q9UQ84;Q9NSU2;Q8IZH2;Q8TCS8;Q99708;Q17R31;Q8IV48;Q9BQ65;Q96LI5;O76075;Q9C0D7  
;Q8IYD8;Q9H9L3;A2A288;Q9NUW8;Q7KZF4;Q15631;Q9UKV8;Q96SD1;Q9UBZ4;Q96MB7;Q9H816;P24855;  
Q8N1G1;A4GXA9;P07992;Q99638;O60930;Q96NY9;Q93075;Q86US8;Q92889;Q9Y3B8;O75792;Q5D1E8;O  
95551;Q6P1N9;Q13609;Q9NRR4;Q9Y2L1;Q5HYM0;O60671;Q9H777;Q9H9J2;Q12972;Q8NCE0;P39748;Q9  
GZR2;Q9BQ83;Q8IYB7;P52758;Q92499;Q9BQ52;Q9ULM6;Q8TF46;Q14249;Q9BRX2}  
2533 Pathogen[ P03363] interacts with 52 human  
partners:{Q504Q3;Q9H816;Q9BQ50;P52758;O95453;Q12972;Q9BSV6;A2A288;Q93075;Q9Y2M0;Q86US  
8;Q13283;Q9GZR2;O60671;Q92889;Q9UKV8;Q15631;Q9H9J2;Q96MB7;Q7KZF4;O75792;Q9ULM6;Q13609;  
Q99708;Q8IYB7;P54278;Q8N1G1;O76075;P07998;Q8IYD8;Q9H9L3;Q9NUW8;Q9Y2L1;Q9BQ83;Q92499;  
Q96AY2;Q9NRR4;Q96LI5;Q9BQ65;Q8IX06;Q99638;O95551;Q9BRX2;Q5D1E8;O60930;Q9UKF6;P24855;A  
4GXA9;Q96NY9;Q8TF46;Q8NCE0;Q8IZH2}



2534 [Cluster 231]GO:0070363+F molecular\_function [name] mitochondrial light strand promoter sense binding [def] "Interacting selectively and non-covalently with the sense strand of the light strand promoter, a promoter located on the light, or cytosine-rich, strand of mitochondrial DNA." [GOC

2535 Pathogen[ Q2Q067] interacts with 1 human partners:{Q00059}

2536 Pathogen[ P0C214] interacts with 1 human partners:{Q00059}

2537 Pathogen[ P03346] interacts with 1 human partners:{Q00059}

2538 Pathogen[ Q85601] interacts with 1 human partners:{Q00059}

2539 Pathogen[ P14079] interacts with 1 human partners:{Q00059}

2540 Pathogen[ P03383] interacts with 1 human partners:{Q00059}

2541 Pathogen[ P03410] interacts with 1 human partners:{Q00059}

2542 Pathogen[ P14075] interacts with 1 human partners:{Q00059}

2543 Pathogen[ P0C206] interacts with 1 human partners:{Q00059}

2544 Pathogen[ P03363] interacts with 1 human partners:{Q00059}

2545 [Cluster 232]GO:0004588+F molecular\_function [name] orotate phosphoribosyltransferase activity [def] "Catalysis of the reaction

2546 Pathogen[ Q2Q067] interacts with 1 human partners:{P11172}

2547 Pathogen[ P0C214] interacts with 1 human partners:{P11172}

2548 Pathogen[ P03346] interacts with 1 human partners:{P11172}

2549 Pathogen[ Q85601] interacts with 1 human partners:{P11172}

2550 Pathogen[ P14079] interacts with 1 human partners:{P11172}

2551 Pathogen[ P03383] interacts with 1 human partners:{P11172}

2552 Pathogen[ P03410] interacts with 1 human partners:{P11172}

2553 Pathogen[ P14075] interacts with 1 human partners:{P11172}

2554 Pathogen[ P0C206] interacts with 1 human partners:{P11172}

2555 Pathogen[ P03363] interacts with 1 human partners:{P11172}

2556 [Cluster 233]GO:0004801+F molecular\_function [name] sedoheptulose-7-phosphate [def] "Catalysis of the reaction

2557 Pathogen[ Q2Q067] interacts with 1 human partners:{P37837}

2558 Pathogen[ P0C214] interacts with 1 human partners:{P37837}

2559 Pathogen[ P03346] interacts with 1 human partners:{P37837}

2560 Pathogen[ Q85601] interacts with 1 human partners:{P37837}

2561 Pathogen[ P14079] interacts with 1 human partners:{P37837}

2562 Pathogen[ P03383] interacts with 1 human partners:{P37837}

2563 Pathogen[ P03410] interacts with 1 human partners:{P37837}

2564 Pathogen[ P14075] interacts with 1 human partners:{P37837}

2565 Pathogen[ P0C206] interacts with 1 human partners:{P37837}

2566 Pathogen[ P03363] interacts with 1 human partners:{P37837}

2567 [Cluster 234]GO:0047485+F molecular\_function [name] protein N-terminus binding [def] "Interacting selectively and non-covalently with a protein N-terminus, the end of any peptide chain at which the 2-amino (or 2-imino) function of a constituent amino acid is not attached in peptide linkage to another amino-acid residue." [ISBN

2568 Pathogen[ Q2Q067] interacts with 44 human partners:{Q9Y6X3;O43463;P35754;Q92922;Q92889;Q13889;Q9UJW0;Q7Z2E3;Q04206;Q9UER7;P08107;P63241;Q96KP1;O75381;O00471;P51948;O60934;Q969G3;P15927;O00255;Q9Y6X2;Q15544;P09874;P51532;P60228;Q9BUL8;Q16621;Q03468;Q9BT49;Q9UBU8;Q9UQ35;Q9BZK7;P27348;Q9Y618;Q9NS23;P40855;O00165;P63220;O95229;Q13490;Q13023;Q14207;Q13888;P28715}

2569 Pathogen[ P0C214] interacts with 41 human partners:{P60228;Q9Y6X2;P35754;Q14207;Q9BT49;Q13490;Q9UJW0;Q92889;Q9NS23;P27348;P40855;Q13023;Q16621;O95229;Q04206;O75381;Q9BUL8;P63220;O43463;P63241;Q92922;P28715;Q969G3;P51948;Q9UER7;O00165;Q7Z2E3;Q9UBU8;Q15544;P15927;Q9BZK7;Q13888;Q9Y6X3;Q9UQ35;P08107;Q9Y618;Q03468;O00255;P09874;P51532;O00471}

2570 Pathogen[ P03346] interacts with 52 human partners:{P08107;Q16621;P28715;Q15788;Q9UJW0;O95229;Q14207;O00471;Q96A65;Q8NHU6;Q9H6Q3;P51532;Q13888;P27348;Q04206;Q13023;Q13190;Q9UBX0;P63241;O43463;Q96FZ7;Q13889;O75381;Q9BT49;P60228;Q03468;O00255;Q9UBU8;Q9UER7;Q9Y6X3;P15927;P09874;Q9UQ35;O00165;O60934;Q92889;Q969G3;Q92922;Q9BZK7;P35754;P50542;Q13490;Q7Z2E3;P40855;Q9Y6X2;Q9Y618;Q9BUL8;Q9NS23;P51948;Q15544;Q96KP1;P63220}

2571 Pathogen[ Q85601] interacts with 48 human partners:{P09874;P08107;Q9UJW0;Q9BT49;O95229;Q13490;O00471;Q96A65;O00165;Q16621;Q9BUL8;Q13888;Q9Y6X2;Q9UER7;Q9UBU8;Q9Y618;Q9NS23;P51948;P63241;O43463;Q96FZ7;Q92889;P28715;P60228;Q03468;P51532;Q9UBX0;Q969G3;Q9H6Q3;P15927;Q04206;P27348;Q9UQ35;O00255;Q14207;P63220;Q9BZK7;P35754;Q7Z2E3;Q13023;P19447;O75381;Q92922;Q96KP1;Q9Y6X3;Q15544;P40855;O60934}

2572 Pathogen[ P14079] interacts with 48 human partners:{P09874;Q9BZK7;P40855;P28715;Q9NS23;Q9UBU8;Q9Y6X2;P20292;Q13023;O95229;Q14207;O00165;O00471;Q8NHU6;Q92922;P51532;Q9BUL8;Q13889;O60934;Q9UJW0;Q96KP1;Q13888;P50542;P63220;P35754;Q9UER7;P08107;Q9UQ35;P27348;Q9GZ8;Q15788;Q92889;Q16621;Q9H6Q3;Q96FZ7;P63241;Q96A65;P15927;Q9Y6X3;Q03468;O75381;Q9BT49;Q7Z2E3;O00255;O43761;P19447;Q13490;P51948}

2573 Pathogen[ P03383] interacts with 38 human partners:{P08107;Q9Y618;Q7Z2E3;Q9UJW0;Q15544;P51948;P60228;Q13888;Q13023;O43463;Q13490;Q9UBU8;Q9Y6X3;O00165;P63241;Q96KP1;Q16621;P15927;O95229;Q969G3;Q03468;O00471;P09874;O75381;Q9Y6X2;P63220;Q9UER7;O00255;Q14207;Q9BZK7;Q9BUL8;Q9UQ35;Q04206;P51532;Q92922;Q9BT49;P40855;P27348}

2574 Pathogen[ P03410] interacts with 53 human

partners:{Q04206;Q13889;P35754;Q13190;Q9GZZ8;Q9BUL8;Q8NHU6;O00165;P27348;Q14207;Q13490;Q9UBU8;Q9Y6X2;Q9NS23;P63220;P40855;Q92889;Q9UJW0;Q9BT49;O75381;Q03468;P28715;O43761;Q9UQ35;Q7Z2E3;Q969G3;Q9UER7;P08107;Q16621;Q96A65;Q92922;P19447;Q13023;P09874;P51532;Q96FZ7;P51948;Q15544;Q13888;P50542;Q96KP1;P63241;Q9BZK7;O95229;P15927;O43463;Q9Y618;P20292;O00255;P60228;O00471;O60934;Q9H6Q3}

2575 Pathogen[ P14075] interacts with 39 human partners:{Q7Z2E3;P63220;Q14207;Q04206;Q9BUL8;Q9UBU8;Q9Y6X3;P51532;P40855;Q96KP1;Q92922;Q15544;Q9BT49;P63241;P15927;Q9UQ35;O00471;Q9Y618;O95229;O75381;Q03468;O00255;P60228;Q13490;Q13889;P27348;Q9BZK7;P08107;O43463;Q9GZZ8;Q9UER7;Q16621;Q9UJW0;O00165;Q9Y6X2;P09874;P51948;Q13023;Q13888}

2576 Pathogen[ P0C206] interacts with 52 human partners:{P28715;Q9UBU8;P51532;Q9H6Q3;Q15544;P09874;Q13023;Q9BT49;O75381;O60934;O00255;O43463;Q03468;Q96KP1;Q9UER7;Q92922;P35754;P27348;P50542;Q96A65;Q9Y6X3;Q9Y6X2;P19447;Q9UQ35;P60228;Q13888;Q9UJW0;O00165;P40855;Q04206;Q92889;Q9BUL8;P08107;Q9BZK7;P63241;Q13889;P20292;Q16621;Q969G3;P15927;Q96FZ7;Q9NS23;P63220;Q9UBX0;Q15788;Q7Z2E3;Q9Y618;O00471;Q14207;P51948;O95229;Q13490}

2577 Pathogen[ P03363] interacts with 43 human partners:{Q9BUL8;Q13490;P27348;Q04206;Q8NHU6;O95229;Q13888;O00471;Q96A65;P51532;Q9UJW0;Q9BZK7;Q92889;Q9H6Q3;Q16621;Q9UER7;P15927;P35754;Q9Y6X2;Q9UBU8;Q15544;P08107;Q7Z2E3;Q96KP1;Q969G3;O75381;P63220;Q9Y618;Q9NS23;P40855;P60228;Q13023;P63241;Q03468;O43463;Q9BT49;O00165;P09874;Q14207;Q9Y6X3;Q92922;Q9UQ35;Q9UBX0}

2578 [Cluster 235]GO:0050700+F molecular\_function [name] CARD domain binding [def] "Interacting selectively and non-covalently with a CARD (N-terminal caspase recruitment) domain, a protein-protein interaction domain that belongs to the death domain-fold superfamily. These protein molecule families are similar in structure with each consisting of six or seven anti-parallel alpha-helices that form highly specific homophilic interactions between signaling partners. CARD exists in the N-terminal prodomains of several caspases and in apoptosis-regulatory proteins and mediates the assembly of CARD-containing proteins that participate in activation or suppression of CARD carrying members of the caspase family." [PMID

2579 Pathogen[ Q2Q067] interacts with 1 human partners:{Q96LW7}

2580 Pathogen[ P0C214] interacts with 1 human partners:{Q96LW7}

2581 Pathogen[ P03346] interacts with 1 human partners:{Q96LW7}

2582 Pathogen[ Q85601] interacts with 1 human partners:{Q96LW7}

2583 Pathogen[ P14079] interacts with 4 human partners:{Q9BXL7;Q96LW7;Q7Z434;Q9Y239}

2584 Pathogen[ P03383] interacts with 1 human partners:{Q96LW7}

2585 Pathogen[ P03410] interacts with 4 human partners:{Q9Y239;Q7Z434;Q9BXL7;Q96LW7}

2586 Pathogen[ P14075] interacts with 1 human partners:{Q96LW7}

2587 Pathogen[ P0C206] interacts with 1 human partners:{Q96LW7}

2588 Pathogen[ P03363] interacts with 1 human partners:{Q96LW7}

2589 [Cluster 236]GO:0016799+F molecular\_function [name] hydrolase activity, hydrolyzing N-glycosyl compounds [def] "Catalysis of the hydrolysis of any N-glycosyl bond." [GOC

2590 Pathogen[ Q2Q067] interacts with 3 human partners:{Q969S2;Q13569;P13051}

2591 Pathogen[ P0C214] interacts with 2 human partners:{Q13569;P13051}

2592 Pathogen[ P03346] interacts with 3 human partners:{Q969S2;P13051;Q13569}

2593 Pathogen[ Q85601] interacts with 4 human partners:{Q969S2;P13051;Q96FI4;Q13569}

2594 Pathogen[ P14079] interacts with 5 human partners:{Q8TAT5;Q969S2;Q96FI4;Q13569;P13051}

2595 Pathogen[ P03383] interacts with 2 human partners:{Q13569;P13051}

2596 Pathogen[ P03410] interacts with 5 human partners:{Q96FI4;Q8TAT5;Q13569;Q969S2;P13051}

2597 Pathogen[ P14075] interacts with 2 human partners:{P13051;Q13569}

2598 Pathogen[ P0C206] interacts with 5 human partners:{Q13569;Q8TAT5;Q96FI4;Q969S2;P13051}

2599 Pathogen[ P03363] interacts with 4 human partners:{Q96FI4;P13051;Q13569;Q969S2}

2600 [Cluster 237]GO:0030621+F molecular\_function [name] U4 snRNA binding [def] "Interacting selectively and non-covalently with the U4 small nuclear RNA (U4 snRNA)." [GOC

2601 Pathogen[ Q2Q067] interacts with 1 human partners:{Q13838}

2602 Pathogen[ P0C214] interacts with 1 human partners:{Q13838}

2603 Pathogen[ P03346] interacts with 1 human partners:{Q13838}

2604 Pathogen[ Q85601] interacts with 1 human partners:{Q13838}

2605 Pathogen[ P14079] interacts with 1 human partners:{Q13838}

2606 Pathogen[ P03383] interacts with 1 human partners:{Q13838}

2607 Pathogen[ P03410] interacts with 1 human partners:{Q13838}

2608 Pathogen[ P14075] interacts with 1 human partners:{Q13838}

2609 Pathogen[ P0C206] interacts with 1 human partners:{Q13838}

2610 Pathogen[ P03363] interacts with 1 human partners:{Q13838}

2611 [Cluster 238]GO:0005525+F molecular\_function [name] GTP binding [def] "Interacting selectively and non-covalently with GTP, guanosine triphosphate." [GOC

2612 Pathogen[ Q2Q067] interacts with 29 human partners:{Q9BZE4;Q9BVP2;O60841;P21980;Q9NVN8;Q9H2T7;P62826;P30793;P49770;P08238;Q9Y295;O43236;Q8N1I0;Q14978;Q14232;P57772;Q8IYD1;Q8TCY9;Q9ULW0;P50570;Q15029;P23258;P60953;P63000;Q8N4C6;Q9Y5B9;P61586;Q9NNTK5;P68104}

2613 Pathogen[ P0C214] interacts with 38 human partners:{P63000;O60841;P35558;P49770;P57772;Q15029;P61586;Q9Y295;P23258;P60953;Q1423

2;P15170;Q9H089;P41091;P30793;P13639;A4D1E9;Q14978;Q8TCY9;Q9ULW0;Q9Y5B9;Q8IYD1;P62826;Q16822;Q8N1I0;P21980;Q96199;Q9NVN8;P50570;Q9H2T7;Q9BZE4;Q8N4C6;O43236;Q9NTK5;Q05639;Q5VTE0;Q9BVP2;P36404}

2614 Pathogen[ P03346] interacts with 42 human partners: {P21980;P50570;Q8IZD9;P41091;Q9H2T7;Q9BZE4;Q8TCY9;P23258;P57772;Q8WYJ6;O60841;Q14141;P60953;P62826;Q9BZ29;Q9Y295;Q14232;Q14978;P20340;Q9ULW0;Q9NTK5;O43236;Q92599;Q15019;Q9Y5B9;P36404;P49770;Q8IYD1;Q3YEC7;Q969Q5;P36405;Q9UHD8;Q8N4C6;Q15029;Q8N1I0;Q9NVN8;Q6ZU15;P08238;P63000;P68104;Q9BVP2;P61586}

2615 Pathogen[ Q85601] interacts with 36 human partners: {Q14978;Q9NTK5;P36405;P41091;Q9BZE4;Q5VTE0;P57772;P62826;P63000;Q9Y5B9;Q9ULW0;P49770;Q9H089;P30793;P23258;Q9Y295;P15170;Q15029;P21980;P08238;P68104;P50570;Q8IYD1;P61586;Q8WYJ6;P60953;A4D1E9;Q9H2T7;Q8N4C6;P19447;Q8N1I0;Q9NVN8;Q14232;Q05639;Q9BVP2;O43236}

2616 Pathogen[ P14079] interacts with 50 human partners: {Q9Y5B9;P55039;Q9BVP2;Q9H4K7;Q8N3Z3;P68104;P05408;P41091;P57772;P21980;A4D1E9;Q8IZD9;P68363;P46199;Q9ULW0;Q15029;P30793;O00178;P50570;Q8IYD1;Q9BZE4;Q96RP9;P36405;Q8WYJ6;Q8NC60;Q14692;Q8N4C6;P08238;P23258;P61586;P13639;Q9NWX6;Q969S9;Q9NTK5;Q8N442;O60841;Q9NS86;H0YL14;P62826;Q14232;Q9H2T7;Q8N1I0;O75616;P19447;P49411;O43236;Q8TCY9;Q9H089;Q14978;Q9Y295}

2617 Pathogen[ P03383] interacts with 27 human partners: {Q14978;Q9NVN8;Q15029;P57772;Q9NTK5;O43236;Q9Y295;P60953;P63000;Q9BZE4;O60841;P62826;Q16822;Q9H2T7;P61586;P68104;P49770;Q8IYD1;Q8TCY9;Q14232;P21980;Q9ULW0;Q8N4C6;P08238;Q9BVP2;Q9Y5B9;A4D1E9}

2618 Pathogen[ P03410] interacts with 58 human partners: {Q9H4K7;Q9NVN8;Q9NS86;Q16822;P68104;Q15029;O60841;P63000;Q8IZD9;P08238;Q9Y5B9;Q14692;Q9NTK5;Q96RP9;Q8TCY9;Q14978;P46199;P36405;Q14232;Q969S9;P50570;P30793;P13639;Q6ZU15;Q8NC60;Q9Y295;P49770;Q8N442;H0YL14;O43236;P62826;P15170;P61586;P19447;P05408;Q9H089;Q8WYJ6;Q9BVA1;Q8N4C6;Q9UHD8;Q8IYD1;P57772;Q9H2T7;P60953;Q9BVP2;A4D1E9;P23258;Q9ULW0;P68363;P41091;P21980;O00178;Q8N1I0;Q9NWX6;Q9BZE4;Q8N3Z3;P49411;O75616}

2619 Pathogen[ P14075] interacts with 29 human partners: {P60953;O60841;Q9Y295;P68104;P57772;O43236;Q9H2T7;A4D1E9;Q16822;Q9NVN8;P08238;Q15029;Q9ULW0;Q9NTK5;Q14232;Q9Y5B9;P62826;P49770;Q8IYD1;P61586;H0YL14;P63000;Q9BZE4;P21980;Q8N4C6;P30793;Q8TCY9;Q14978;Q9BVP2}

2620 Pathogen[ P0C206] interacts with 44 human partners: {P41091;Q9Y295;Q8IZD9;Q9NVN8;Q15019;Q9BVP2;Q14692;Q9ULW0;Q14232;P21980;Q8IYD1;Q16822;Q9Y5B9;P62826;P30793;Q14141;O43236;P61586;P19447;Q8TCY9;Q6ZU15;P49770;Q8WYJ6;Q9H089;O60841;P08238;P63000;P57772;Q9H2T7;P60953;P23258;Q9NTK5;Q9BZE4;P36405;A4D1E9;Q8N1I0;Q16181;H0YL14;Q9NS86;Q8N4C6;P68104;P50570;Q14978;Q15029}

2621 Pathogen[ P03363] interacts with 39 human partners: {Q14978;Q9NVN8;O60841;Q969Q5;Q9H2T7;Q9ULW0;Q8IYD1;P50570;Q9NTK5;P68363;Q9BZE4;Q9Y295;P63000;Q8WYJ6;Q9NVA2;P41091;P57772;Q15029;Q13748;Q8IYM1;Q92599;Q9Y5B9;Q8N1I0;Q8IZD9;Q8TCY9;Q9UHD8;P49770;Q9BVP2;Q6ZU15;Q8N4C6;Q14141;P23258;Q99719;P62826;P60953;P08238;O43236;P68104;Q3YEC7}

2622 [Cluster 239]GO:0052909+F

2623 Pathogen[ Q2Q067] interacts with 1 human partners: {Q9UNQ2}

2624 Pathogen[ P0C214] interacts with 1 human partners: {Q9UNQ2}

2625 Pathogen[ P03346] interacts with 1 human partners: {Q9UNQ2}

2626 Pathogen[ Q85601] interacts with 1 human partners: {Q9UNQ2}

2627 Pathogen[ P14079] interacts with 1 human partners: {Q9UNQ2}

2628 Pathogen[ P03383] interacts with 1 human partners: {Q9UNQ2}

2629 Pathogen[ P03410] interacts with 1 human partners: {Q9UNQ2}

2630 Pathogen[ P14075] interacts with 1 human partners: {Q9UNQ2}

2631 Pathogen[ P0C206] interacts with 1 human partners: {Q9UNQ2}

2632 Pathogen[ P03363] interacts with 1 human partners: {Q9UNQ2}

2633 [Cluster 240]GO:0043008+F molecular\_function [name] ATP-dependent protein binding [def] "Interacting selectively and non-covalently with any protein or protein complex (a complex of two or more proteins that may include other nonprotein molecules) using energy from the hydrolysis of ATP." [GOC

2634 Pathogen[ Q2Q067] interacts with 2 human partners: {P04156;Q13838}

2635 Pathogen[ P0C214] interacts with 2 human partners: {P04156;Q13838}

2636 Pathogen[ P03346] interacts with 2 human partners: {Q13838;P04156}

2637 Pathogen[ Q85601] interacts with 2 human partners: {Q13838;P04156}

2638 Pathogen[ P14079] interacts with 2 human partners: {P04156;Q13838}

2639 Pathogen[ P03383] interacts with 2 human partners: {P04156;Q13838}

2640 Pathogen[ P03410] interacts with 2 human partners: {Q13838;P04156}

2641 Pathogen[ P14075] interacts with 2 human partners: {P04156;Q13838}

2642 Pathogen[ P0C206] interacts with 2 human partners: {P04156;Q13838}

2643 Pathogen[ P03363] interacts with 3 human partners: {P04156;Q13838;Q9UBE0}

2644 [Cluster 241]GO:0008144+F molecular\_function [name] drug binding [def] "Interacting selectively and non-covalently with a drug, any naturally occurring or synthetic substance, other than a nutrient, that, when administered or applied to an organism, affects the structure or functioning of the organism\_ in particular, any such substance used in the diagnosis, prevention, or treatment of disease." [GOC

2645 Pathogen[ Q2Q067] interacts with 4 human partners: {Q08209;P11388;P49356;P02795}

2646 Pathogen[ P0C214] interacts with 6 human partners: {P00374;P49356;Q16658;Q08209;P02795;P11388}

2647 Pathogen[ P03346] interacts with 7 human partners:{P07148;P11388;P49356;O75469;P02795;Q16658;Q08209}

2648 Pathogen[ Q85601] interacts with 4 human partners:{P02795;Q08209;P11388;P49356}

2649 Pathogen[ P14079] interacts with 8 human partners:{P00374;P11388;P02795;Q16658;P16298;O75469;P49356;Q08209}

2650 Pathogen[ P03383] interacts with 1 human partners:{P02795}

2651 Pathogen[ P03410] interacts with 6 human partners:{Q16658;Q08209;P49356;P00374;P02795;P11388}

2652 Pathogen[ P14075] interacts with 1 human partners:{P02795}

2653 Pathogen[ P0C206] interacts with 6 human partners:{O75469;Q16658;Q08209;P11388;P02795;P49356}

2654 Pathogen[ P03363] interacts with 2 human partners:{P02795;Q16658}

2655 [Cluster 242]GO:0008199+F molecular\_function [name] ferric iron binding [def] "Interacting selectively and non-covalently with ferric iron, Fe(III)." [GOC

2656 Pathogen[ Q2Q067] interacts with 1 human partners:{P02792}

2657 Pathogen[ P0C214] interacts with 2 human partners:{P02794;P02792}

2658 Pathogen[ P03346] interacts with 2 human partners:{P02792;P02794}

2659 Pathogen[ Q85601] interacts with 2 human partners:{P02792;P02794}

2660 Pathogen[ P14079] interacts with 1 human partners:{P02794}

2661 Pathogen[ P03383] interacts with 1 human partners:{P02794}

2662 Pathogen[ P03410] interacts with 2 human partners:{P02794;P02792}

2663 Pathogen[ P14075] interacts with 1 human partners:{P02794}

2664 Pathogen[ P0C206] interacts with 2 human partners:{P02794;P02792}

2665 Pathogen[ P03363] interacts with 1 human partners:{P02794}

2666 [Cluster 243]GO:0008047+F molecular\_function [name] enzyme activator activity [def] "Increases the activity of an enzyme." [GOC

2667 Pathogen[ Q2Q067] interacts with 8 human partners:{O15519;Q16082;Q9UBU7;Q9UKN8;Q9UJW3;P35251;Q8IY92;Q15750}

2668 Pathogen[ P0C214] interacts with 8 human partners:{Q16082;Q9UKN8;P35251;Q9UBU7;O15519;Q15750;Q8IY92;Q9UJW3}

2669 Pathogen[ P03346] interacts with 11 human partners:{Q16082;P59103;Q9UBU7;O15519;Q9UKN8;O75569;Q15750;P55211;P35251;Q8IY92;Q9UJW3}

2670 Pathogen[ Q85601] interacts with 8 human partners:{Q15750;Q9UJW3;Q9UBU7;Q9UKN8;Q8IY92;P35251;Q16082;O15519}

2671 Pathogen[ P14079] interacts with 12 human partners:{Q16873;O15519;P20292;Q9UKN8;P59103;Q15750;O75569;Q9UJW3;P35251;Q16082;Q9UBU7;Q8IY92}

2672 Pathogen[ P03383] interacts with 6 human partners:{Q9UKN8;Q9UJW3;Q8IY92;Q16082;P35251;Q15750}

2673 Pathogen[ P03410] interacts with 12 human partners:{Q15750;O15519;O75569;P35251;Q8IY92;Q16873;Q16082;Q9UBU7;Q9UJW3;P20292;Q9UKN8;P59103}

2674 Pathogen[ P14075] interacts with 7 human partners:{Q15750;Q9UJW3;Q16082;P35251;Q9UKN8;P59103;Q8IY92}

2675 Pathogen[ P0C206] interacts with 10 human partners:{P35251;O15519;Q16082;Q9UBU7;Q9UKN8;P20292;Q15750;P59103;Q8IY92;Q9UJW3}

2676 Pathogen[ P03363] interacts with 9 human partners:{Q16082;O15519;P35251;Q15750;Q8IY92;Q9UBU7;Q9UJW3;Q9UKN8;O75569}

2677 [Cluster 244]GO:0017134+F molecular\_function [name] fibroblast growth factor binding [def] "Interacting selectively and non-covalently with fibroblast growth factor." [PMID

2678 Pathogen[ Q2Q067] interacts with 3 human partners:{Q9BZZ5;P15880;Q86XR8}

2679 Pathogen[ P0C214] interacts with 3 human partners:{P15880;Q86XR8;Q9BZZ5}

2680 Pathogen[ P03346] interacts with 4 human partners:{Q86XR8;Q9BZZ5;P15880;O43427}

2681 Pathogen[ Q85601] interacts with 3 human partners:{P15880;Q9BZZ5;Q86XR8}

2682 Pathogen[ P14079] interacts with 5 human partners:{O43427;P15880;Q86XR8;Q9BZZ5;Q8TAT2}

2683 Pathogen[ P03383] interacts with 3 human partners:{Q86XR8;Q9BZZ5;P15880}

2684 Pathogen[ P03410] interacts with 4 human partners:{Q9BZZ5;P15880;O43427;Q8TAT2}

2685 Pathogen[ P14075] interacts with 4 human partners:{Q9BZZ5;O43427;Q86XR8;P15880}

2686 Pathogen[ P0C206] interacts with 4 human partners:{Q86XR8;O43427;Q9BZZ5;P15880}

2687 Pathogen[ P03363] interacts with 3 human partners:{Q9BZZ5;P15880;Q86XR8}

2688 [Cluster 245]GO:0048156+F molecular\_function [name] tau protein binding [def] "Interacting selectively and non-covalently with tau protein. tau is a microtubule-associated protein, implicated in Alzheimer's disease, Down Syndrome and ALS." [GOC

2689 Pathogen[ Q2Q067] interacts with 1 human partners:{Q9NY61}

2690 Pathogen[ P0C214] interacts with 1 human partners:{Q9NY61}

2691 Pathogen[ P03346] interacts with 1 human partners:{Q9NY61}

2692 Pathogen[ Q85601] interacts with 1 human partners:{Q9NY61}

2693 Pathogen[ P14079] interacts with 1 human partners:{Q9NY61}

2694 Pathogen[ P03383] interacts with 1 human partners:{Q9NY61}

2695 Pathogen[ P03410] interacts with 1 human partners:{Q9NY61}

2696 Pathogen[ P14075] interacts with 1 human partners:{Q9NY61}

2697 Pathogen[ P0C206] interacts with 1 human partners:{Q9NY61}

2698 Pathogen[ P03363] interacts with 1 human partners:{Q9NY61}

2699 [Cluster 246]GO:0008190+F molecular\_function [name] eukaryotic initiation factor 4E binding [def] "Interacting selectively and non-covalently with eukaryotic initiation factor 4E, a polypeptide factor involved in the initiation of ribosome-mediated translation." [ISBN

2700 Pathogen[ Q2Q067] interacts with 3 human partners:{Q13541;O60516;Q13542}

2701 Pathogen[ P0C214] interacts with 4 human partners:{P32243;O60516;Q13542;Q13541}

2702 Pathogen[ P03346] interacts with 4 human partners:{Q13542;Q13541;P32243;O60516}

2703 Pathogen[ Q85601] interacts with 4 human partners:{O60516;Q13541;P32243;Q13542}

2704 Pathogen[ P14079] interacts with 4 human partners:{Q13541;Q13542;P32243;O60516}

2705 Pathogen[ P03383] interacts with 4 human partners:{P32243;Q13542;Q13541;O60516}

2706 Pathogen[ P03410] interacts with 4 human partners:{Q13541;Q13542;P32243;O60516}

2707 Pathogen[ P14075] interacts with 4 human partners:{Q13542;O60516;P32243;Q13541}

2708 Pathogen[ P0C206] interacts with 4 human partners:{Q13541;Q13542;P32243;O60516}

2709 Pathogen[ P03363] interacts with 4 human partners:{P32243;Q13541;O60516;Q13542}

2710 [Cluster 247]GO:0008173+F molecular\_function [name] RNA methyltransferase activity [def] "Catalysis of the transfer of a methyl group from a donor to a nucleoside residue in an RNA molecule." [GOC

2711 Pathogen[ Q2Q067] interacts with 2 human partners:{Q7Z5W3;Q5T8I9}

2712 Pathogen[ P0C214] interacts with 3 human partners:{Q7Z5W3;Q5T8I9;Q6IN84}

2713 Pathogen[ P03346] interacts with 4 human partners:{Q5T8I9;Q6IN84;Q7Z5W3;Q13395}

2714 Pathogen[ Q85601] interacts with 2 human partners:{Q7Z5W3;Q5T8I9}

2715 Pathogen[ P14079] interacts with 5 human partners:{Q9HC36;Q7L2J0;Q6IN84;Q13395;Q7Z5W3}

2716 Pathogen[ P03383] interacts with 2 human partners:{Q5T8I9;Q7Z5W3}

2717 Pathogen[ P03410] interacts with 6 human partners:{Q9HC36;Q5T8I9;Q13395;Q6IN84;Q7Z5W3;Q7L2J0}

2718 Pathogen[ P14075] interacts with 3 human partners:{Q6IN84;Q7Z5W3;Q5T8I9}

2719 Pathogen[ P0C206] interacts with 4 human partners:{Q7Z5W3;Q5T8I9;Q6IN84;Q7L2J0}

2720 Pathogen[ P03363] interacts with 3 human partners:{Q5T8I9;Q13395;Q7Z5W3}

2721 [Cluster 248]GO:0000979+F molecular\_function [name] RNA polymerase II core promoter sequence-specific DNA binding [def] "Interacting selectively and non-covalently with the regulatory region composed of the transcription start site and binding sites for transcription factors of the RNA polymerase II basal transcription machinery." [GOC

2722 Pathogen[ Q2Q067] interacts with 12 human partners:{Q9NQ87;Q92985;Q02447;P08047;P56270;P14651;Q14872;Q86WI3;Q99717;Q16649;P42224;Q15797}

2723 Pathogen[ P0C214] interacts with 11 human partners:{P56270;Q14872;Q86WI3;P42224;P14651;Q92985;Q02447;Q99717;Q15797;Q9NQ87;P08047}

2724 Pathogen[ P03346] interacts with 15 human partners:{P56270;Q15797;Q14872;P41225;Q99717;P08047;Q06710;Q86WI3;Q9NQ87;Q16649;P42224;Q92481;Q92985;Q02447;P14651}

2725 Pathogen[ Q85601] interacts with 12 human partners:{P56270;Q15797;Q14872;Q86WI3;P08047;Q16649;Q99717;Q9NQ87;Q92985;P42224;Q02447;P14651}

2726 Pathogen[ P14079] interacts with 10 human partners:{Q16649;Q92985;Q02447;Q15797;P56270;P42224;Q14872;Q9NQ87;Q86WI3;P14651}

2727 Pathogen[ P03383] interacts with 10 human partners:{P08047;P56270;Q9NQ87;Q15797;Q14872;Q92985;Q02447;Q99717;Q86WI3;P14651}

2728 Pathogen[ P03410] interacts with 11 human partners:{Q02447;Q9NQ87;P14651;Q99717;Q86WI3;Q16649;Q14872;Q15797;P56270;P08047;Q92985}

2729 Pathogen[ P14075] interacts with 8 human partners:{Q86WI3;Q99717;Q9NQ87;Q02447;P56270;Q92985;Q14872;P08047}

2730 Pathogen[ P0C206] interacts with 12 human partners:{Q9NQ87;Q16649;Q86WI3;Q99717;P14651;P08047;Q92985;Q02447;Q14872;Q15797;P42224;P56270}

2731 Pathogen[ P03363] interacts with 11 human partners:{Q16649;Q92985;Q02447;P14651;Q9NQ87;Q15797;Q14872;Q86WI3;P56270;P08047;Q99717}

2732 [Cluster 249]GO:0050560+F molecular\_function [name] aspartate-tRNA(Asn) ligase activity [def] "Catalysis of the reaction

2733 Pathogen[ Q2Q067] interacts with 1 human partners:{Q6PI48}

2734 Pathogen[ P0C214] interacts with 1 human partners:{Q6PI48}

2735 Pathogen[ P03346] interacts with 1 human partners:{Q6PI48}

2736 Pathogen[ Q85601] interacts with 1 human partners:{Q6PI48}

2737 Pathogen[ P14079] interacts with 1 human partners:{Q6PI48}

2738 Pathogen[ P03383] interacts with 1 human partners:{Q6PI48}

2739 Pathogen[ P03410] interacts with 1 human partners:{Q6PI48}

2740 Pathogen[ P14075] interacts with 1 human partners:{Q6PI48}

2741 Pathogen[ P0C206] interacts with 1 human partners:{Q6PI48}

2742 Pathogen[ P03363] interacts with 1 human partners:{Q6PI48}

2743 [Cluster 250]GO:0046570+F molecular\_function [name] methylthioribulose 1-phosphate dehydratase activity [def] "Catalysis of the reaction

2744 Pathogen[ Q2Q067] interacts with 1 human partners:{Q96GX9}

2745 Pathogen[ P0C214] interacts with 1 human partners:{Q96GX9}

2746 Pathogen[ P03346] interacts with 1 human partners:{Q96GX9}

2747 Pathogen[ Q85601] interacts with 1 human partners:{Q96GX9}

2748 Pathogen[ P14079] interacts with 1 human partners:{Q96GX9}

2749 Pathogen[ P03383] interacts with 1 human partners:{Q96GX9}

2750 Pathogen[ P03410] interacts with 1 human partners:{Q96GX9}

2751 Pathogen[ P14075] interacts with 1 human partners:{Q96GX9}

2752 Pathogen[ P0C206] interacts with 1 human partners:{Q96GX9}

2753 Pathogen[ P03363] interacts with 1 human partners:{Q96GX9}

2754 [Cluster 251]GO:0001071+F molecular\_function [name] nucleic acid binding transcription factor activity [def] "Interacting selectively and non-covalently with a DNA or RNA sequence in order to modulate transcription. The transcription factor may or may not also interact selectively with a protein or macromolecular complex." [GOC

2755 Pathogen[ Q2Q067] interacts with 2 human partners:{Q8WW38;P19838}

2756 Pathogen[ P0C214] interacts with 2 human partners:{P19838;Q8WW38}

2757 Pathogen[ P03346] interacts with 5 human partners:{Q06945;Q8WW38;Q7Z4V0;P98177;P19838}

2758 Pathogen[ Q85601] interacts with 2 human partners:{Q8WW38;P19838}

2759 Pathogen[ P14079] interacts with 1 human partners:{Q8WW38}

2760 Pathogen[ P03383] interacts with 2 human partners:{Q8WW38;P19838}

2761 Pathogen[ P03410] interacts with 2 human partners:{P19838;Q8WW38}

2762 Pathogen[ P14075] interacts with 2 human partners:{Q8WW38;P19838}

2763 Pathogen[ P0C206] interacts with 2 human partners:{Q8WW38;P19838}

2764 Pathogen[ P03363] interacts with 2 human partners:{P19838;Q8WW38}

2765 [Cluster 252]GO:0003726+F molecular\_function [name] double-stranded RNA adenosine deaminase activity [def] "Catalysis of the reaction

2766 Pathogen[ Q2Q067] interacts with 2 human partners:{P55265;Q9H171}

2767 Pathogen[ P0C214] interacts with 2 human partners:{Q9H171;P55265}

2768 Pathogen[ P03346] interacts with 2 human partners:{P55265;Q9H171}

2769 Pathogen[ Q85601] interacts with 2 human partners:{Q9H171;P55265}

2770 Pathogen[ P14079] interacts with 2 human partners:{Q9H171;P55265}

2771 Pathogen[ P03383] interacts with 2 human partners:{Q9H171;P55265}

2772 Pathogen[ P03410] interacts with 2 human partners:{P55265;Q9H171}

2773 Pathogen[ P14075] interacts with 2 human partners:{P55265;Q9H171}

2774 Pathogen[ P0C206] interacts with 2 human partners:{P55265;Q9H171}

2775 Pathogen[ P03363] interacts with 2 human partners:{P55265;Q9H171}

2776 [Cluster 253]GO:0046934+F molecular\_function [name] phosphatidylinositol-4,5-bisphosphate 3-kinase activity [def] "Catalysis of the reaction

2777 Pathogen[ Q2Q067] interacts with 1 human partners:{Q5UE93}

2778 Pathogen[ P0C214] interacts with 1 human partners:{Q5UE93}

2779 Pathogen[ P03346] interacts with 1 human partners:{Q5UE93}

2780 Pathogen[ Q85601] interacts with 1 human partners:{Q5UE93}

2781 Pathogen[ P14079] interacts with 1 human partners:{Q5UE93}

2782 Pathogen[ P03383] interacts with 1 human partners:{Q5UE93}

2783 Pathogen[ P03410] interacts with 1 human partners:{Q5UE93}

2784 Pathogen[ P14075] interacts with 1 human partners:{Q5UE93}

2785 Pathogen[ P0C206] interacts with 1 human partners:{Q5UE93}

2786 Pathogen[ P03363] interacts with 1 human partners:{Q5UE93}

2787 [Cluster 254]GO:0005516+F molecular\_function [name] calmodulin binding [def] "Interacting selectively and non-covalently with calmodulin, a calcium-binding protein with many roles, both in the calcium-bound and calcium-free states." [GOC

2788 Pathogen[ Q2Q067] interacts with 31 human partners:{Q01844;Q01082;Q13033;Q05066;Q9P032;P41220;Q08209;Q9UKX2;Q13884;P29966;Q96SN8;Q9UKC9;Q07157;Q9UII2;P11171;Q9H9H5;Q9NRL3;P29474;P12883;Q15051;Q8IZT6;Q13425;Q9UBL0;P27986;P35579;Q95613;P49006;Q060869;Q8IW35;P32929;P48539}

2789 Pathogen[ P0C214] interacts with 42 human partners:{P29474;P41220;P49006;P29966;Q9UKX2;Q15051;Q00159;Q9Y2K3;Q9UM54;Q96SN8;P11055;Q13033;Q13884;Q01844;Q01082;P32929;Q8IW35;P35580;Q9UII2;Q13425;Q9H9H5;P13535;Q08209;Q93100;P12882;Q9UKC9;P12883;Q9UBL0;Q7Z406;P13533;Q9Y623;Q95613;Q060869;P48454;Q07157;Q8IZT6;Q9P032;P27986;P46020;P35749;P11171;Q9NRL3}

2790 Pathogen[ P03346] interacts with 40 human partners:{Q13425;A8MU46;Q9Y283;Q9P032;P29474;Q05066;P35579;Q13884;Q43815;Q15051;Q13813;Q13424;Q01082;Q9UII2;P11171;Q9H9H5;Q8IW35;Q13033;Q9UBL0;Q96SN8;P32929;Q07157;P11137;P29966;Q9ULV0;P49006;P48539;P48454;Q9UKX2;Q8IZT6;Q95613;Q96JE9;P41220;Q96L03;Q01844;Q060869;Q08209;Q9UKC9;Q9NRL3;P27986}

2791 Pathogen[ Q85601] interacts with 44 human partners:{Q9NRL3;Q13884;P13533;P41220;P35579;Q96SN8;Q9Y283;Q43815;P11171;P49006;Q01082;Q8IZT6;P27986;Q08209;Q9UKC9;Q9UII2;Q9UKX2;Q9Y2K3;Q00159;Q9H9H5;P12882;Q9UBL0;Q7Z406;Q15051;P11055;Q13425;P35749;Q8IW35;Q13033;P12883;P29966;P29474;Q07157;P35580;Q9UM54;Q95613;P13535;Q060869;P17677;Q9P032;P48454;Q9Y623;Q01844;P32929}

2792 Pathogen[ P14079] interacts with 46 human partners:{Q4G0U5;P48454;P35579;P17677;Q92686;P11171;Q01082;Q13033;Q07157;P49006;P24588;Q96DU7;P16298;Q9UII2;Q43815;Q93100;Q9UKC9;Q9UKX2;P41220;Q060869;Q9UM54;Q9H9H5;Q13424;P35611;Q9UBL0;Q9NRL3;P29966;Q15075;P32929;P12883;Q96JE9;Q05682;Q95613;Q9Y283;Q15051;Q9P032;Q99439;P11137;Q9UEY8;Q13813;Q8IW35;Q96SN8;Q08209;P48539;Q8IZT6;P46020}

2793 Pathogen[ P03383] interacts with 26 human partners:{P27986;P29474;Q15051;Q13884;P41220;Q96SN8;P49006;Q07157;Q9UII2;Q9H9H5;P4853

9;Q9UKX2;P29966;P12883;P35580;Q9UKC9;Q9NRL3;P35579;O95613;Q13033;Q01844;O60869;Q9P032;Q9UBL0;Q13425;Q8IW35}

2794 Pathogen[ P03410] interacts with 57 human  
partners:{P27986;Q9UBL0;P48539;Q96DU7;P11137;Q9NRL3;Q9UKX2;Q9UEY8;Q08209;P49006;P46020;P41220;Q05682;Q9ULV0;Q96SN8;P32929;Q13425;O00159;P35579;Q9Y283;Q96JE9;A8MU46;Q13884;Q8IZT6;P11171;Q9UII2;Q9UM54;Q93100;P29474;Q9H9H5;P63098;P12882;P48454;Q99439;Q07157;Q96L03;Q13033;Q9UKC9;P12883;Q15051;Q4G0U5;Q8IW35;P35580;O60869;P17677;Q92686;O43815;P13533;Q01082;Q9P032;Q13424;O95613;P13535;Q13813;P35611;P29966;P24588}

2795 Pathogen[ P14075] interacts with 27 human  
partners:{P29474;P49006;Q13884;Q15051;Q9UKX2;Q07157;Q96JE9;Q13425;Q93100;Q01844;P41220;Q96SN8;Q9UII2;Q9H9H5;P29966;Q9NRL3;P27986;Q9UKC9;P35579;O95613;O60869;Q9P032;Q13033;Q9UBL0;P11171;P48539;Q8IW35}

2796 Pathogen[ P0C206] interacts with 51 human  
partners:{Q9UKC9;Q01082;Q9UM54;Q96SN8;P17677;Q93100;Q9P032;P13533;Q9Y623;O43815;Q05066;Q96JE9;Q01844;Q8IZT6;Q9UBL0;P11055;P27986;Q9Y283;Q96DU7;P46020;Q9NRL3;Q13884;P11137;P12883;Q92686;O95613;Q13425;O00159;P49006;P32929;P12882;Q8IW35;P35749;P35579;Q9UKX2;P48454;O60869;P29474;Q07157;Q08209;Q13033;P41220;Q13424;P48539;P35580;Q15051;P13535;Q9UII2;P29966;P11171;Q9H9H5}

2797 Pathogen[ P03363] interacts with 35 human  
partners:{P11137;P29474;Q15051;P48539;P35579;Q9UKX2;Q01082;O95613;Q13033;Q07157;Q13425;Q9P032;Q05066;O43815;P11171;Q9Y283;Q13884;P41220;P29966;O60869;Q9NRL3;Q01844;Q8IW35;Q9UBL0;Q9UKC9;Q96L03;P49006;A8MU46;Q13813;P27986;Q8IZT6;Q96JE9;Q13424;Q96SN8;Q9H9H5}

2798 [Cluster 255]GO:0004721+F molecular\_function [name] phosphoprotein phosphatase  
activity [def] "Catalysis of the reaction

2799 Pathogen[ Q2Q067] interacts with 39 human  
partners:{Q9H0C8;Q99502;Q15398;Q8WY54;Q08209;A6NK39;O14974;O00167;O00743;P62140;Q9UNH5;P67775;P30304;O15355;Q9BV47;O14829;Q8WVY7;Q8IXW5;Q12959;Q99504;P62714;P30307;P36873;Q9Y5B0;P62136;P53041;Q9UQK1;O95476;P35813;O75688;P30305;P49593;Q9NP77;P60510;O14595;Q16829;Q9GZU7;A8MSY0;O15297}

2800 Pathogen[ P0C214] interacts with 52 human  
partners:{O60346;P35813;O14595;P30307;P62140;A6NK39;Q9BV47;O15194;O14829;O00167;Q8IXW5;Q8N819;A8MSY0;Q9GZU7;O14974;P60510;P62714;O95685;Q15398;Q08209;P62136;Q8WVY7;O95278;P67775;Q99504;P30305;Q16829;Q9UNH5;P53041;Q12959;Q9P0J1;O95476;O15297;Q8N3J5;Q8WY54;Q3ZCQ8;P36873;Q13615;A6NG73;Q9Y5B0;P49593;O00743;Q96GD0;O75688;Q9H0C8;P48454;P30304;Q9NP77;Q9P2J9;Q9UQK1;Q9H7J1;Q99502}

2801 Pathogen[ P03346] interacts with 57 human  
partners:{P62136;Q9UQK1;P43378;Q9NRX4;Q9H0C8;O00743;O60346;P35813;O95677;O14829;Q8WY54;O00167;O95685;Q8IXW5;Q8TF42;P30304;Q9H3S7;A8MSY0;Q9H7J1;P62714;P67775;Q99502;P49593;A6NK39;O15194;P30305;Q9BV47;Q8TF05;Q9Y5B0;Q9GZU7;Q15398;Q16667;P17706;P36873;O15297;O75688;P53041;Q8WVY7;Q16829;O95476;Q3ZCQ8;O15355;P48454;P62140;Q9NP77;Q08209;O95278;Q9Y2R2;Q99504;O14974;P24666;O14595;P60510;A6NG73;Q9UNH5;P30307;Q12959}

2802 Pathogen[ Q85601] interacts with 47 human  
partners:{O60346;O75688;O14829;A6NK39;Q15398;P62714;Q9GZU7;O15194;Q9H0C8;Q9UQK1;O95677;P49593;Q8WVY7;Q16829;Q99504;P30304;O95278;Q9BV47;Q08209;Q9NP77;Q9UNH5;P30305;O15355;P30307;P62136;Q9Y5B0;P36873;Q99502;O15297;Q3ZCQ8;A8MSY0;Q8IXW5;P53041;P67775;O95476;Q8WY54;Q12959;P60510;O14974;O00743;P62140;P35813;O00167;P48454;O14595;A6NG73;Q8N3J5}

2803 Pathogen[ P14079] interacts with 46 human  
partners:{O15194;Q3ZCQ8;P48454;Q9H7J1;Q99502;P49593;Q9NRX4;P30307;P53041;Q9Y5B0;Q8TF05;O15297;P36873;Q16829;A8MSY0;P16298;O14974;P62136;O60346;P30304;Q96GD0;Q8WVY7;P35813;Q8IXW5;Q8WY54;O95685;O14829;P62140;Q9UQK1;Q9H0C8;Q9BV47;Q9NP77;P60510;O95476;O75688;Q99504;A6NG73;P30305;O00167;A6NK39;O15355;Q08209;O00743;Q9UNH5;Q9GZU7;Q15398}

2804 Pathogen[ P03383] interacts with 26 human  
partners:{A6NG73;P30307;Q99504;P62140;A6NK39;O00167;Q9UQK1;Q9H0C8;P30304;P62714;Q8IXW5;A8MSY0;P67775;O15297;P35813;P36873;P62136;Q9GZU7;Q9UNH5;Q9H7J1;P53041;O15355;Q8WY54;Q9Y5B0;O00743;P60510}

2805 Pathogen[ P03410] interacts with 51 human  
partners:{P62714;O15355;P35813;Q8N3J5;Q15398;Q08209;P60510;Q99502;Q12959;Q9GZU7;Q8WY54;P62136;O95685;Q9NP77;Q9UNH5;Q9H7J1;Q9H0C8;O75688;Q9NRX4;Q96GD0;Q16829;O15297;P48454;Q3ZCQ8;P62140;P30304;O14974;P36873;P53041;Q99504;O95476;Q9Y5B0;P24666;A6NG73;O60346;O00167;P49593;Q8WVY7;A6NK39;Q8TF05;Q8IXW5;A8MSY0;P30305;P67775;Q9BV47;Q96HS1;P30307;O00743;O14829;O15194;Q9UQK1}

2806 Pathogen[ P14075] interacts with 28 human  
partners:{O15297;Q8IXW5;P35813;Q99504;A6NG73;Q9Y5B0;P60510;P62140;O00167;Q9UQK1;P36873;P62136;O00743;Q9H0C8;A6NK39;P53041;P30304;P62714;P67775;Q9GZU7;Q8WY54;Q99502;O95685;A8MSY0;Q9UNH5;O15355;P30307;Q9H7J1}

2807 Pathogen[ P0C206] interacts with 56 human  
partners:{Q8IXW5;O00167;Q99504;Q9BV47;O00743;Q9GZU7;P30307;Q8WY54;Q13615;Q9UQK1;Q9NRX4;P53041;P30305;P67775;Q9Y2R2;Q16829;O95476;P49593;O14974;O15355;Q3ZCQ8;P24666;O75688;Q9UNH5;Q9Y5B0;O95278;A6NK39;Q8TF05;P62714;P48454;P62140;P30304;Q99502;O14829;A6NG73;Q96GD0;O60346;Q08209;O15194;O14595;P60510;O95685;O15297;P36873;Q15398;Q8N3J5;Q12959;Q9H7J1;O95677;P17706;P62136;P35813;A8MSY0;Q9NP77;Q8WVY7;Q9H0C8}

2808 Pathogen[ P03363] interacts with 45 human  
partners:{P17706;Q12959;A8MSY0;P62136;O15355;Q9Y5B0;Q9H3S7;Q8TF42;Q9UNH5;P62714;O14829;P36873;Q9Y2R2;P43378;P62140;P53041;Q15398;Q16667;O00743;Q3ZCQ8;Q8IXW5;O95476;A6NK39;P30304;Q16829;Q9H0C8;Q8WVY7;Q99504;P60510;O14974;Q9UQK1;Q12923;O00167;Q9GZU7;Q9BV47;O15297;P30307;Q8TF05;O75688;P24666;P67775;A6NG73;Q8WY54;O14595;Q9NP77}

2809 [Cluster 256]GO:0004180+F molecular\_function [name] carboxypeptidase activity [def] "Catalysis of the hydrolysis of the terminal or penultimate peptide bond at the C-terminal end of a peptide or polypeptide." [ISBN

2810 Pathogen[ Q2Q067] interacts with 1 human partners:{Q13867}

2811 Pathogen[ P0C214] interacts with 1 human partners:{Q13867}

2812 Pathogen[ P03346] interacts with 1 human partners:{Q13867}

2813 Pathogen[ Q85601] interacts with 1 human partners:{Q13867}

2814 Pathogen[ P14079] interacts with 9 human partners:{Q96KP4;Q15155;Q96MI9;Q9UPW5;Q5JPE7;P69849;Q13867;Q8NDL9;Q9NPA0}

2815 Pathogen[ P03383] interacts with 1 human partners:{Q13867}

2816 Pathogen[ P03410] interacts with 4 human partners:{P69849;Q9UPW5;Q9NPA0;Q13867}

2817 Pathogen[ P14075] interacts with 1 human partners:{Q13867}

2818 Pathogen[ P0C206] interacts with 3 human partners:{Q8NDL9;Q13867;Q9UPW5}

2819 Pathogen[ P03363] interacts with 1 human partners:{Q13867}

2820 [Cluster 257]GO:0030165+F molecular\_function [name] PDZ domain binding [def] "Interacting selectively and non-covalently with a PDZ domain of a protein, a domain found in diverse signaling proteins." [GOC

2821 Pathogen[ Q2Q067] interacts with 21 human partners:{Q8IUD2;Q9P219;Q15596;O60260;Q6P1M3;Q13884;O14910;Q86UL8;P11532;P78352;Q8N1I0;Q9HB19;Q92796;Q8N448;Q8TBB1;Q02410;O60299;Q15599;Q8N6Y0;Q5T2W1;Q9NUP9}

2822 Pathogen[ P0C214] interacts with 20 human partners:{O14910;Q92796;Q15599;O15056;Q6P1M3;Q8N448;O60299;Q13884;Q5T2W1;P11532;P78352;Q9HB19;Q8TBB1;Q02410;Q8N1I0;Q8N6Y0;O60260;Q15596;Q9P219;Q8IUD2}

2823 Pathogen[ P03346] interacts with 30 human partners:{O14908;Q5T2W1;Q9HB19;Q96A65;Q9H2H0;P78352;Q13884;Q6P1M3;Q8IUD2;Q02410;Q92796;O15056;Q9P219;Q13424;Q9P021;Q15599;Q9NUP9;Q86UL8;Q15596;Q8TBB1;O60299;O60260;Q9HB21;Q5VV41;Q15700;Q8N6Y0;P11532;O75052;Q8N1I0;O14910}

2824 Pathogen[ Q85601] interacts with 22 human partners:{Q9NUP9;Q5T2W1;O14910;Q96A65;Q13884;Q86UL8;Q6P1M3;P11532;Q15596;Q9P219;Q9HB21;P78352;Q92796;Q8TBB1;O60260;Q9HB19;Q8N6Y0;Q02410;Q8N1I0;Q8IUD2;Q15599;O60299}

2825 Pathogen[ P14079] interacts with 24 human partners:{O60260;Q15596;P11532;Q15700;Q02410;Q8IUD2;Q13424;Q9HB19;Q8TBB1;Q9NUP9;Q8N6Y0;Q15599;Q5T2W1;Q86UL8;Q96A65;Q9HB21;O60299;Q9P021;Q92796;Q8N1I0;O14908;Q9P219;Q6P1M3;Q5VV41}

2826 Pathogen[ P03383] interacts with 16 human partners:{Q8TBB1;Q13884;Q15596;Q5T2W1;O60299;Q6P1M3;O60260;P11532;Q8N448;Q8N6Y0;Q02410;Q92796;Q8IUD2;Q9HB19;P78352;O14910}

2827 Pathogen[ P03410] interacts with 28 human partners:{Q9P219;O14910;Q5T2W1;O60299;Q8TBB1;P11532;O14908;Q6P1M3;Q9NUP9;O60260;Q9HB21;Q02410;Q13884;Q15700;Q8N6Y0;Q15599;Q8IUD2;Q96A65;Q92796;Q5VV41;Q15596;O75052;Q86UL8;Q9HB19;Q9P021;Q13424;P78352;Q8N1I0}

2828 Pathogen[ P14075] interacts with 16 human partners:{Q02410;P11532;Q13884;Q6P1M3;Q8IUD2;O14910;O60299;Q9HB19;Q92796;Q5T2W1;P78352;Q8N6Y0;Q8N448;Q8TBB1;O60260;Q15596}

2829 Pathogen[ P0C206] interacts with 27 human partners:{Q8N6Y0;Q9NUP9;Q9HB19;P78352;Q15700;Q9P021;Q9H2H0;Q8IUD2;O60299;Q96A65;Q5T2W1;Q15599;Q13884;O60260;Q9P219;O14908;Q8TBB1;O14910;Q9HB21;Q8N1I0;Q15596;Q92796;P11532;Q86UL8;Q13424;Q6P1M3;Q02410}

2830 Pathogen[ P03363] interacts with 27 human partners:{Q9P021;O14908;Q5VV41;Q8N448;Q96A65;O14910;P78352;Q15700;Q8TBB1;Q15596;Q6P1M3;Q8N1I0;Q8N6Y0;P11532;Q02410;O15056;Q13884;Q9HB19;Q15599;Q86UL8;Q92796;Q9NUP9;Q9P219;O60299;Q5T2W1;Q8IUD2;Q13424}

2831 [Cluster 258]GO:0030156+F molecular\_function [name] benzodiazepine receptor binding [def] "Interacting selectively and non-covalently with the peripheral benzodiazepine receptor (PBR)." [GOC

2832 Pathogen[ Q2Q067] interacts with 1 human partners:{O95153}

2833 Pathogen[ P0C214] interacts with 1 human partners:{O95153}

2834 Pathogen[ P03346] interacts with 1 human partners:{O95153}

2835 Pathogen[ Q85601] interacts with 1 human partners:{O95153}

2836 Pathogen[ P14079] interacts with 1 human partners:{O95153}

2837 Pathogen[ P03383] interacts with 1 human partners:{O95153}

2838 Pathogen[ P03410] interacts with 1 human partners:{O95153}

2839 Pathogen[ P14075] interacts with 1 human partners:{O95153}

2840 Pathogen[ P0C206] interacts with 1 human partners:{O95153}

2841 Pathogen[ P03363] interacts with 1 human partners:{O95153}

2842 [Cluster 259]GO:0003708+F molecular\_function [name] retinoic acid receptor activity [def] "Combining with retinoic acid and transmitting the signal to the transcriptional machinery by interacting selectively and non-covalently with a specific DNA sequence in order to modulate transcription by RNA polymerase II. Retinoic acid is one of the forms of vitamin A." [GOC

2843 Pathogen[ Q2Q067] interacts with 1 human partners:{P62508}

2844 Pathogen[ P0C214] interacts with 1 human partners:{P62508}

2845 Pathogen[ P03346] interacts with 1 human partners:{P62508}

2846 Pathogen[ Q85601] interacts with 1 human partners:{P62508}

2847 Pathogen[ P14079] interacts with 1 human partners:{P62508}

2848 Pathogen[ P03383] interacts with 1 human partners:{P62508}



2849 Pathogen[ P03410] interacts with 1 human partners:{P62508}  
2850 Pathogen[ P14075] interacts with 1 human partners:{P62508}  
2851 Pathogen[ P0C206] interacts with 1 human partners:{P62508}  
2852 Pathogen[ P03363] interacts with 1 human partners:{P62508}  
2853 [Cluster 260]GO:0034039+F molecular\_function [name] 8-oxo-7,8-dihydroguanine DNA  
N-glycosylase activity [def] "Catalysis of the removal of 8-oxo-7,8-dihydroguanine bases  
by cleaving the N-C1' glycosidic bond between the oxidized purine and the deoxyribose  
sugar." [GOC  
2854 Pathogen[ Q2Q067] interacts with 1 human partners:{O15527}  
2855 Pathogen[ P0C214] interacts with 1 human partners:{O15527}  
2856 Pathogen[ P03346] interacts with 1 human partners:{O15527}  
2857 Pathogen[ Q85601] interacts with 1 human partners:{O15527}  
2858 Pathogen[ P14079] interacts with 1 human partners:{O15527}  
2859 Pathogen[ P03383] interacts with 1 human partners:{O15527}  
2860 Pathogen[ P03410] interacts with 1 human partners:{O15527}  
2861 Pathogen[ P14075] interacts with 1 human partners:{O15527}  
2862 Pathogen[ P0C206] interacts with 1 human partners:{O15527}  
2863 Pathogen[ P03363] interacts with 1 human partners:{O15527}  
2864 [Cluster 261]GO:0001671+F molecular\_function [name] ATPase activator activity [def]  
"Functions to increase the rate of ATP hydrolysis." [GOC  
2865 Pathogen[ Q2Q067] interacts with 2 human partners:{O95433;O75190}  
2866 Pathogen[ P0C214] interacts with 2 human partners:{O75190;O95433}  
2867 Pathogen[ P03346] interacts with 3 human partners:{O75190;O95433;Q96KC8}  
2868 Pathogen[ Q85601] interacts with 2 human partners:{O75190;O95433}  
2869 Pathogen[ P14079] interacts with 3 human partners:{O95433;O75190;Q719I0}  
2870 Pathogen[ P03383] interacts with 2 human partners:{O95433;O75190}  
2871 Pathogen[ P03410] interacts with 3 human partners:{Q719I0;O75190;O95433}  
2872 Pathogen[ P14075] interacts with 2 human partners:{O95433;O75190}  
2873 Pathogen[ P0C206] interacts with 2 human partners:{Q719I0;O75190}  
2874 Pathogen[ P03363] interacts with 2 human partners:{O75190;O95433}  
2875 [Cluster 262]GO:0016779+F molecular\_function [name] nucleotidyltransferase activity  
[def] "Catalysis of the transfer of a nucleotidyl group to a reactant." [ISBN  
2876 Pathogen[ Q2Q067] interacts with 32 human  
partners:{Q9Y253;Q8TCS8;O95602;Q15054;O00411;Q9NRF9;Q9Y6K5;Q8NDF8;Q9HAN9;Q9UNA4;P3087  
6;Q9UBZ9;P49005;Q9H9Y6;Q5TAX3;P07902;Q16851;P06746;Q16222;Q9NR50;P56282;Q9HCU8;O14746  
;P24928;P54098;P04053;Q9UHN1;Q9NP87;Q9BWH6;Q9NVV4;O14802;P51003}  
2877 Pathogen[ P0C214] interacts with 40 human  
partners:{Q96T66;O00411;O14746;Q9HAN9;P30876;Q8NDF8;Q9H9Y6;P06746;P54098;P51003;Q1622  
2;Q9BWH6;Q9Y6K5;Q9UBZ9;P29728;P49005;O95396;Q9HCU8;Q13057;Q9NR50;Q16851;Q9UNA4;Q9BZQ4  
;Q8TCS8;Q9NRF9;Q9NW08;P24928;O95602;P07902;P04053;Q15054;Q9NP87;Q8NFW8;Q9NVV4;Q8NFF5;  
P56282;Q9Y253;O14802;Q5TAX3;Q9UHN1}  
2878 Pathogen[ P03346] interacts with 35 human  
partners:{Q9Y253;Q7Z5Q5;Q9HCU8;Q5XG87;P54098;Q9UNA4;Q9UBZ9;P56282;Q9H9Y6;Q16222;Q9UHN  
1;P49005;Q8NFW8;Q9NR33;Q9HAN9;Q9NRF9;P51003;Q16851;Q5TAX3;Q8TCS8;O14746;Q9NVV4;Q9BWH6  
;O00411;Q8NDF8;O95602;P30876;P04053;P24928;Q9NP87;P06746;Q9NR50;O14802;Q9Y6K5;Q15054}  
2879 Pathogen[ Q85601] interacts with 36 human  
partners:{O95602;Q9BWH6;P56282;Q9NR50;Q9UGP5;P49005;Q15054;Q9HAN9;Q9NRF9;Q9H9Y6;Q1622  
2;Q16851;Q9Y6K5;Q5XG87;P54098;Q5TAX3;Q8TCS8;Q9UBZ9;Q9UBT6;Q8NDF8;Q9NW08;Q9HCU8;O14746  
;P04053;P07902;P06746;P24928;P30876;Q9NP87;Q9NVV4;P51003;O00411;Q9UHN1;Q9Y253;Q9UNA4;  
O14802}  
2880 Pathogen[ P14079] interacts with 46 human  
partners:{O14746;Q8NFF5;Q9UNA4;Q16222;P29728;Q16851;Q9BWH6;Q9UGP5;Q8NFW8;Q9NW08;Q9NRG  
0;P49005;P30876;Q5XG87;Q9HCU8;Q9UBZ9;Q9NR50;Q15054;Q9NRF9;Q5TAX3;Q9BZQ4;Q7Z5Q5;Q9Y6K5  
;Q13057;P56282;Q9NVV4;Q9NWX6;P49642;Q9HAN9;Q9NP87;O00411;P06746;Q9Y253;P04053;P07902;  
O95602;Q96Q11;P24928;P51003;P54098;O14802;Q9UHN1;Q9UBT6;Q9NR33;Q8TCS8;Q9H9Y6}  
2881 Pathogen[ P03383] interacts with 27 human  
partners:{Q9NVV4;Q9Y253;Q9UHN1;O95602;P06746;P51003;Q9HCU8;P07902;Q9H9Y6;Q8NDF8;Q8TCS  
8;P49005;Q5TAX3;P56282;Q9NR50;Q16851;Q9HAN9;P54098;P24928;O14746;Q9UBZ9;Q15054;Q9Y6K5  
;O00411;P30876;O14802;Q9BWH6}  
2882 Pathogen[ P03410] interacts with 47 human  
partners:{Q9BWH6;Q96Q11;Q9NR50;Q8TCS8;Q16851;Q8NFF5;P29728;O14746;Q13057;P24928;Q9UBT  
6;Q5TAX3;P04053;Q16222;Q9UNA4;P07902;P06746;P30876;Q9NRG0;P56282;O00411;Q9NVV4;P51003  
;Q7Z5Q5;Q9UGP5;Q9UBZ9;Q9NW08;O95602;Q9Y253;Q15054;Q9NRF9;Q5XG87;Q9NR33;Q9HAN9;Q9Y6K5;  
P63135;P49005;Q8NFW8;Q9NP87;Q9UHN1;P54098;Q9NWX6;Q9BZQ4;O14802;P49642;Q9HCU8;Q9H9Y6}  
2883 Pathogen[ P14075] interacts with 28 human  
partners:{P51003;P54098;Q9BWH6;Q9UBZ9;O14746;Q8NDF8;P30876;Q9NVV4;P06746;Q5TAX3;P4900  
5;Q13057;P07902;Q9Y253;O00411;P24928;Q9Y6K5;Q15054;Q9H9Y6;O95602;Q8TCS8;Q9UHN1;Q9NR50  
;Q9HCU8;P56282;Q9HAN9;Q16851;O14802}  
2884 Pathogen[ P0C206] interacts with 44 human  
partners:{Q9Y253;Q16851;Q9BWH6;Q5XG87;Q9UHN1;Q9NRF9;Q16222;Q8TCS8;O95602;Q9NR33;Q9UBT  
6;Q9UNA4;Q9HCU8;Q7Z5Q5;Q13057;Q9Y6K5;Q9NW08;P06746;P29728;P54098;P51003;P49005;P49642  
;Q9NR50;Q9UGP5;Q15054;P04053;Q8NDF8;Q9BZQ4;P07902;Q9NP87;Q9NVV4;Q5TAX3;Q9UBZ9;Q9HAN9;  
P56282;P24928;Q8NFW8;O14802;Q9H9Y6;O95396;O14746;O00411;P30876}  
2885 Pathogen[ P03363] interacts with 31 human  
partners:{Q9Y6K5;O00411;Q9NVV4;Q8NFW8;Q16222;Q16851;Q9H9Y6;P30876;Q9HAN9;Q9NRF9;Q9Y25  
3;O95602;P24928;P49005;O14746;P54098;P04053;Q9NR50;Q9HCU8;P51003;Q8NDF8;P06746;Q9BWH6

```

;Q7Z5Q5;Q9NP87;Q5TAX3;Q15054;Q9UHN1;Q9UNA4;Q9NR33;Q9UBZ9}
2886 [Cluster 263]GO:000224+F    molecular_function [name]
peptide-N4-(N-acetyl-beta-glucosaminyl)asparagine amidase activity [def] "Catalysis of
the reaction
2887 Pathogen[ Q2Q067] interacts with 1 human partners:{Q96IV0}
2888 Pathogen[ P0C214] interacts with 1 human partners:{Q96IV0}
2889 Pathogen[ P03346] interacts with 1 human partners:{Q96IV0}
2890 Pathogen[ Q85601] interacts with 1 human partners:{Q96IV0}
2891 Pathogen[ P14079] interacts with 1 human partners:{Q96IV0}
2892 Pathogen[ P03383] interacts with 1 human partners:{Q96IV0}
2893 Pathogen[ P03410] interacts with 1 human partners:{Q96IV0}
2894 Pathogen[ P14075] interacts with 1 human partners:{Q96IV0}
2895 Pathogen[ P0C206] interacts with 1 human partners:{Q96IV0}
2896 Pathogen[ P03363] interacts with 1 human partners:{Q96IV0}
2897 [Cluster 264]GO:0019825+F    molecular_function [name] oxygen binding [def]
"Interacting selectively and non-covalently with oxygen (O2)." [GOC
2898 Pathogen[ Q2Q067] interacts with 2 human partners:{P68871;P69905}
2899 Pathogen[ P0C214] interacts with 7 human
partners:{P02042;P69905;Q9NPG2;P68871;P69892;P02100;P69891}
2900 Pathogen[ P03346] interacts with 4 human partners:{P02100;Q9NPG2;P69905;P68871}
2901 Pathogen[ Q85601] interacts with 7 human
partners:{P69905;P02042;P02100;P69892;P68871;Q9NPG2;P69891}
2902 Pathogen[ P14079] interacts with 13 human
partners:{Q8WWM9;P48775;P02042;Q9NPG2;P69891;P02100;P09105;P69905;P02008;P68871;Q6B0K
9;P02144;P69892}
2903 Pathogen[ P03383] interacts with 2 human partners:{P69905;P68871}
2904 Pathogen[ P03410] interacts with 13 human
partners:{Q6B0K9;P02008;P02144;P02100;P09105;Q8WWM9;P48775;P68871;P02042;Q9NPG2;P6989
2;P69905;P69891}
2905 Pathogen[ P14075] interacts with 2 human partners:{P68871;P69905}
2906 Pathogen[ P0C206] interacts with 11 human
partners:{P68871;Q6B0K9;P02100;P69892;P02008;P69891;Q9NPG2;P69905;P09105;P02042;Q8WWM
9}
2907 Pathogen[ P03363] interacts with 2 human partners:{P69905;P68871}
2908 [Cluster 265]GO:0048306+F    molecular_function [name] calcium-dependent protein binding
[def] "Interacting selectively and non-covalently with any protein or protein complex (a
complex of two or more proteins that may include other nonprotein molecules), in the
presence of calcium." [GOC
2909 Pathogen[ Q2Q067] interacts with 9 human
partners:{P50995;O75340;Q99816;P26447;Q8WUM4;P20073;P31949;P25815;Q9NZU7}
2910 Pathogen[ P0C214] interacts with 10 human
partners:{O75340;P19429;Q9NZU7;P25815;P26447;Q99816;P31949;P20073;P50995;Q8WUM4}
2911 Pathogen[ P03346] interacts with 12 human
partners:{Q96BU1;P20073;P25815;Q9NZU7;Q99816;P06703;O75340;P63316;P26447;P50995;Q8WUM
4;P31949}
2912 Pathogen[ Q85601] interacts with 9 human
partners:{Q99816;Q9NZU7;P26447;P50995;P25815;O75340;P20073;P31949;Q8WUM4}
2913 Pathogen[ P14079] interacts with 12 human
partners:{P19429;P50995;P31949;P25815;Q96BU1;Q8WUM4;O75340;P26447;P20073;P06703;Q9981
6;Q9NZU7}
2914 Pathogen[ P03383] interacts with 5 human
partners:{P50995;P25815;Q99816;Q8WUM4;P20073}
2915 Pathogen[ P03410] interacts with 14 human
partners:{P26447;P50995;P19429;P31949;Q9NRY6;P06703;P25815;Q99816;Q96BU1;Q9NZU7;P2007
3;P63316;O75340;Q8WUM4}
2916 Pathogen[ P14075] interacts with 6 human
partners:{Q8WUM4;Q96BU1;P20073;P50995;P25815;Q99816}
2917 Pathogen[ P0C206] interacts with 12 human
partners:{O75340;P31949;P26447;P50995;P19429;Q99816;Q9NZU7;P25815;Q96BU1;Q8WUM4;P0670
3;P20073}
2918 Pathogen[ P03363] interacts with 11 human
partners:{P26447;O75340;Q96BU1;P31949;P25815;P20073;P50995;Q8WUM4;Q9NZU7;Q99816;P1942
9}
2919 [Cluster 266]GO:0008967+F    molecular_function [name] phosphoglycolate phosphatase
activity [def] "Catalysis of the reaction
2920 Pathogen[ Q2Q067] interacts with 2 human partners:{Q7Z2E3;Q9BSH5}
2921 Pathogen[ P0C214] interacts with 3 human partners:{Q9BSH5;Q7Z2E3;Q9UHY7}
2922 Pathogen[ P03346] interacts with 3 human partners:{Q9UHY7;Q7Z2E3;Q9BSH5}
2923 Pathogen[ Q85601] interacts with 3 human partners:{Q9BSH5;Q9UHY7;Q7Z2E3}
2924 Pathogen[ P14079] interacts with 2 human partners:{Q9BSH5;Q7Z2E3}
2925 Pathogen[ P03383] interacts with 2 human partners:{Q7Z2E3;Q9BSH5}
2926 Pathogen[ P03410] interacts with 2 human partners:{Q7Z2E3;Q9BSH5}
2927 Pathogen[ P14075] interacts with 2 human partners:{Q7Z2E3;Q9BSH5}
2928 Pathogen[ P0C206] interacts with 3 human partners:{Q9UHY7;Q9BSH5;Q7Z2E3}
2929 Pathogen[ P03363] interacts with 2 human partners:{Q7Z2E3;Q9BSH5}
2930 [Cluster 267]GO:0030292+F    molecular_function [name] protein tyrosine kinase inhibitor

```

activity [def] "Stops, prevents or reduces the activity of a protein tyrosine kinase."  
[GOC

2931 Pathogen[ Q2Q067] interacts with 1 human partners:{095684}  
2932 Pathogen[ P0C214] interacts with 1 human partners:{095684}  
2933 Pathogen[ P03346] interacts with 2 human partners:{095684;Q9P2D0}  
2934 Pathogen[ Q85601] interacts with 2 human partners:{095684;Q9P2D0}  
2935 Pathogen[ P14079] interacts with 2 human partners:{095684;Q9P2D0}  
2936 Pathogen[ P03383] interacts with 1 human partners:{095684}  
2937 Pathogen[ P03410] interacts with 2 human partners:{095684;Q9P2D0}  
2938 Pathogen[ P14075] interacts with 1 human partners:{095684}  
2939 Pathogen[ P0C206] interacts with 2 human partners:{095684;Q9P2D0}  
2940 Pathogen[ P03363] interacts with 2 human partners:{095684;Q9P2D0}  
2941 [Cluster 268]GO:0035243+F molecular\_function [name] protein-arginine omega-N symmetric  
methyltransferase activity [def] "Catalysis of the addition of a second methyl group to  
methylated peptidyl-arginine. Methylation is on the terminal nitrogen (omega nitrogen)  
residue that is not already methylated, resulting in symmetrical  
peptidyl-N(omega),N'(omega)-dimethylated arginine residues." [PMID

2942 Pathogen[ Q2Q067] interacts with 2 human partners:{014744;Q9NVM4}  
2943 Pathogen[ P0C214] interacts with 1 human partners:{Q9NVM4}  
2944 Pathogen[ P03346] interacts with 2 human partners:{014744;Q9NVM4}  
2945 Pathogen[ Q85601] interacts with 2 human partners:{Q9NVM4;014744}  
2946 Pathogen[ P14079] interacts with 2 human partners:{Q9NVM4;014744}  
2947 Pathogen[ P03383] interacts with 1 human partners:{014744}  
2948 Pathogen[ P03410] interacts with 2 human partners:{Q9NVM4;014744}  
2949 Pathogen[ P14075] interacts with 1 human partners:{014744}  
2950 Pathogen[ P0C206] interacts with 2 human partners:{014744;Q9NVM4}  
2951 Pathogen[ P03363] interacts with 2 human partners:{014744;Q9NVM4}  
2952 [Cluster 269]GO:0055105+F molecular\_function [name] ubiquitin-protein ligase inhibitor  
activity [def] "Stops, prevents or reduces the activity of a ubiquitin-protein  
ligase." [GOC

2953 Pathogen[ Q2Q067] interacts with 1 human partners:{Q8N726}  
2954 Pathogen[ P0C214] interacts with 1 human partners:{Q8N726}  
2955 Pathogen[ P03346] interacts with 1 human partners:{Q8N726}  
2956 Pathogen[ Q85601] interacts with 1 human partners:{Q8N726}  
2957 Pathogen[ P14079] interacts with 1 human partners:{Q8N726}  
2958 Pathogen[ P03383] interacts with 1 human partners:{Q8N726}  
2959 Pathogen[ P03410] interacts with 1 human partners:{Q8N726}  
2960 Pathogen[ P14075] interacts with 1 human partners:{Q8N726}  
2961 Pathogen[ P0C206] interacts with 1 human partners:{Q8N726}  
2962 Pathogen[ P03363] interacts with 1 human partners:{Q8N726}  
2963 [Cluster 270]GO:0071535+F molecular\_function [name] RING-like zinc finger domain  
binding [def] "Interacting selectively and non-covalently with a RING-like zinc finger  
domain domain of a protein. The RING-like domain is a zinc finger domain that is related  
to the C3HC4 RING finger domain." [GOC

2964 Pathogen[ Q2Q067] interacts with 3 human partners:{P63279;P35226;Q99496}  
2965 Pathogen[ P0C214] interacts with 3 human partners:{P35226;P63279;Q99496}  
2966 Pathogen[ P03346] interacts with 3 human partners:{P35226;P63279;Q99496}  
2967 Pathogen[ Q85601] interacts with 3 human partners:{P63279;Q99496;P35226}  
2968 Pathogen[ P14079] interacts with 3 human partners:{P63279;Q99496;P35226}  
2969 Pathogen[ P03383] interacts with 3 human partners:{Q99496;P63279;P35226}  
2970 Pathogen[ P03410] interacts with 3 human partners:{Q99496;P63279;P35226}  
2971 Pathogen[ P14075] interacts with 3 human partners:{P63279;Q99496;P35226}  
2972 Pathogen[ P0C206] interacts with 2 human partners:{P35226;Q99496}  
2973 Pathogen[ P03363] interacts with 3 human partners:{Q99496;P35226;P63279}  
2974 [Cluster 271]GO:0019966+F molecular\_function [name] interleukin-1 binding [def]  
"Interacting selectively and non-covalently with interleukin-1." [GOC

2975 Pathogen[ Q2Q067] interacts with 1 human partners:{000165}  
2976 Pathogen[ P0C214] interacts with 1 human partners:{000165}  
2977 Pathogen[ P03346] interacts with 2 human partners:{095361;000165}  
2978 Pathogen[ Q85601] interacts with 1 human partners:{000165}  
2979 Pathogen[ P14079] interacts with 2 human partners:{000165;095361}  
2980 Pathogen[ P03383] interacts with 1 human partners:{000165}  
2981 Pathogen[ P03410] interacts with 1 human partners:{000165}  
2982 Pathogen[ P14075] interacts with 1 human partners:{000165}  
2983 Pathogen[ P0C206] interacts with 2 human partners:{000165;095361}  
2984 Pathogen[ P03363] interacts with 1 human partners:{000165}  
2985 [Cluster 272]GO:0001948+F molecular\_function [name] glycoprotein binding [def]  
"Interacting selectively and non-covalently with a glycoprotein, a protein that contains  
covalently bound glucose (monosaccharide) residues. These also include proteoglycans."  
[GOC

2986 Pathogen[ Q2Q067] interacts with 4 human partners:{Q8NI29;Q9NRD1;Q96DZ1;Q96EF6}  
2987 Pathogen[ P0C214] interacts with 5 human  
partners:{Q8NI29;Q9NRD1;Q96DZ1;Q96EF6}  
2988 Pathogen[ P03346] interacts with 5 human  
partners:{Q96DZ1;Q13438;Q8NI29;Q9NRD1;Q96EF6}  
2989 Pathogen[ Q85601] interacts with 4 human partners:{060884;Q8NI29;Q96EF6;Q9NRD1}

2990 Pathogen[ P14079] interacts with 7 human partners:{Q8NI29;Q96DZ1;Q96EF6;Q9GZZ8;Q9NRD1;O60884;Q13438}

2991 Pathogen[ P03383] interacts with 4 human partners:{Q96DZ1;Q8NI29;Q9NRD1;Q96EF6}

2992 Pathogen[ P03410] interacts with 7 human partners:{Q9NRD1;Q9GZZ8;Q8NI29;O60884;Q96DZ1;Q13438;Q96EF6}

2993 Pathogen[ P14075] interacts with 5 human partners:{Q96EF6;Q8NI29;Q9NRD1;Q9GZZ8;Q96DZ1}

2994 Pathogen[ P0C206] interacts with 6 human partners:{Q96DZ1;O60884;Q9NRD1;Q8NI29;Q13438;Q96EF6}

2995 Pathogen[ P03363] interacts with 5 human partners:{Q8NI29;Q96DZ1;Q96EF6;Q13438;Q9NRD1}

2996 [Cluster 273]GO:0005168+F molecular\_function [name] neurotrophin TRKA receptor binding [def] "Interacting selectively and non-covalently with the neurotrophin TRKA receptor." [GOC]

2997 Pathogen[ Q2Q067] interacts with 1 human partners:{P27986}

2998 Pathogen[ P0C214] interacts with 2 human partners:{P62993;P27986}

2999 Pathogen[ P03346] interacts with 2 human partners:{P62993;P27986}

3000 Pathogen[ Q85601] interacts with 2 human partners:{P62993;P27986}

3001 Pathogen[ P14079] interacts with 2 human partners:{Q8WU20;P62993}

3002 Pathogen[ P03383] interacts with 1 human partners:{P27986}

3003 Pathogen[ P03410] interacts with 3 human partners:{P27986;Q8WU20;P62993}

3004 Pathogen[ P14075] interacts with 1 human partners:{P27986}

3005 Pathogen[ P0C206] interacts with 3 human partners:{P27986;P62993;Q8WU20}

3006 Pathogen[ P03363] interacts with 1 human partners:{P27986}

3007 [Cluster 274]GO:0032407+F molecular\_function [name] MutSalpha complex binding [def] "Interacting selectively and non-covalently with the mismatch repair complex MutSalpha." [GOC]

3008 Pathogen[ Q2Q067] interacts with 3 human partners:{Q9UIF7;Q9UHC1;P54278}

3009 Pathogen[ P0C214] interacts with 5 human partners:{A8MQ11;Q9UHC1;Q9UIF7;P54278;P40692}

3010 Pathogen[ P03346] interacts with 4 human partners:{Q9UIF7;Q9UHC1;P54278;P54277}

3011 Pathogen[ Q85601] interacts with 5 human partners:{A8MQ11;Q9UIF7;P54278;Q9UHC1;P40692}

3012 Pathogen[ P14079] interacts with 8 human partners:{Q9UIF7;P40692;P54278;Q9UHC1;A8MQ11;O95744;Q9NSU2;P54277}

3013 Pathogen[ P03383] interacts with 2 human partners:{P54278;Q9UHC1}

3014 Pathogen[ P03410] interacts with 8 human partners:{P40692;P54277;Q9NSU2;O95744;A8MQ11;P54278;Q9UIF7;Q9UHC1}

3015 Pathogen[ P14075] interacts with 3 human partners:{Q9UIF7;Q9UHC1;P54278}

3016 Pathogen[ P0C206] interacts with 7 human partners:{P54278;Q9NSU2;P40692;Q9UHC1;A8MQ11;P54277;Q9UIF7}

3017 Pathogen[ P03363] interacts with 4 human partners:{Q9UHC1;P54278;P54277;Q9UIF7}

3018 [Cluster 275]GO:0004459+F molecular\_function [name] L-lactate dehydrogenase activity [def] "Catalysis of the reaction

3019 Pathogen[ Q2Q067] interacts with 4 human partners:{P07195;Q9BYZ2;P00338;P07864}

3020 Pathogen[ P0C214] interacts with 4 human partners:{P07864;Q6ZMR3;Q9BYZ2;P07195}

3021 Pathogen[ P03346] interacts with 3 human partners:{P00338;P07195;Q9BYZ2}

3022 Pathogen[ Q85601] interacts with 5 human partners:{Q6ZMR3;P07864;Q9BYZ2;P07195;P00338}

3023 Pathogen[ P14079] interacts with 5 human partners:{P00338;P07195;Q6ZMR3;P07864;Q9BYZ2}

3024 Pathogen[ P03383] interacts with 5 human partners:{P00338;Q9BYZ2;P07864;P07195;Q6ZMR3}

3025 Pathogen[ P03410] interacts with 5 human partners:{Q9BYZ2;Q6ZMR3;P07195;P00338;P07864}

3026 Pathogen[ P14075] interacts with 4 human partners:{P07195;P07864;P00338;Q9BYZ2}

3027 Pathogen[ P0C206] interacts with 5 human partners:{P07195;Q6ZMR3;P07864;Q9BYZ2;P00338}

3028 Pathogen[ P03363] interacts with 1 human partners:{Q9BYZ2}

3029 [Cluster 276]GO:0005109+F molecular\_function [name] frizzled binding [def] "Interacting selectively and non-covalently with the frizzled (fz) receptor." [GOC]

3030 Pathogen[ Q2Q067] interacts with 2 human partners:{O14641;Q5TCQ9}

3031 Pathogen[ P0C214] interacts with 3 human partners:{Q5TCQ9;O14641;Q9HD26}

3032 Pathogen[ P03346] interacts with 3 human partners:{Q5TCQ9;O14641;Q9HD26}

3033 Pathogen[ Q85601] interacts with 3 human partners:{O14641;Q9HD26;Q5TCQ9}

3034 Pathogen[ P14079] interacts with 3 human partners:{O14641;Q9HD26;Q13145}

3035 Pathogen[ P03383] interacts with 3 human partners:{Q9HD26;O14641;Q5TCQ9}

3036 Pathogen[ P03410] interacts with 4 human partners:{Q5TCQ9;Q13145;Q9HD26;O14641}

3037 Pathogen[ P14075] interacts with 3 human partners:{Q9HD26;Q5TCQ9;O14641}

3038 Pathogen[ P0C206] interacts with 2 human partners:{Q5TCQ9;Q9HD26}

3039 Pathogen[ P03363] interacts with 3 human partners:{Q5TCQ9;O14641;Q9HD26}

3040 [Cluster 277]GO:0004046+F molecular\_function [name] aminoacylase activity [def] "Catalysis of the reaction

3041 Pathogen[ Q2Q067] interacts with 1 human partners:{P14868}

3042 Pathogen[ P0C214] interacts with 1 human partners:{P14868}

3043 Pathogen[ P03346] interacts with 2 human partners:{P45381;P14868}

3044 Pathogen[ Q85601] interacts with 1 human partners:{P14868}  
3045 Pathogen[ P14079] interacts with 4 human partners:{P14868;Q96HD9;P45381;Q03154}  
3046 Pathogen[ P03383] interacts with 1 human partners:{P14868}  
3047 Pathogen[ P03410] interacts with 3 human partners:{Q96HD9;P45381;P14868}  
3048 Pathogen[ P14075] interacts with 1 human partners:{P14868}  
3049 Pathogen[ P0C206] interacts with 2 human partners:{P45381;P14868}  
3050 Pathogen[ P03363] interacts with 1 human partners:{P14868}  
3051 [Cluster 278]GO:0016810+F molecular\_function [name] hydrolase activity, acting on carbon-nitrogen (but not peptide) bonds [def] "Catalysis of the hydrolysis of any carbon-nitrogen bond, C-N, with the exception of peptide bonds." [GOC  
3052 Pathogen[ Q2Q067] interacts with 3 human partners:{Q96NU7;Q14194;Q9NQR4}  
3053 Pathogen[ P0C214] interacts with 4 human partners:{Q14194;O14531;Q9NQR4;Q96NU7}  
3054 Pathogen[ P03346] interacts with 5 human partners:{Q96NU7;Q9NQR4;O14531;Q14194;Q86X76}  
3055 Pathogen[ Q85601] interacts with 2 human partners:{Q14194;Q9NQR4}  
3056 Pathogen[ P14079] interacts with 7 human partners:{A8MPS7;Q96NU7;Q02083;Q9Y303;Q14194;Q6IA69;Q9NQR4}  
3057 Pathogen[ P03383] interacts with 1 human partners:{Q9NQR4}  
3058 Pathogen[ P03410] interacts with 8 human partners:{Q02083;Q96NU7;Q86X76;Q9NQR4;O14531;A8MPS7;Q14194;Q6IA69}  
3059 Pathogen[ P14075] interacts with 3 human partners:{Q9NQR4;Q02083;Q96NU7}  
3060 Pathogen[ P0C206] interacts with 7 human partners:{O14531;A8MPS7;Q9NQR4;Q02083;Q14194;Q86X76;Q96NU7}  
3061 Pathogen[ P03363] interacts with 4 human partners:{Q02083;Q14194;O14531;Q9NQR4}  
3062 [Cluster 279]GO:0004145+F molecular\_function [name] diamine N-acetyltransferase activity [def] "Catalysis of the reaction  
3063 Pathogen[ Q2Q067] interacts with 1 human partners:{P21673}  
3064 Pathogen[ P0C214] interacts with 1 human partners:{P21673}  
3065 Pathogen[ P03346] interacts with 1 human partners:{P21673}  
3066 Pathogen[ Q85601] interacts with 1 human partners:{P21673}  
3067 Pathogen[ P14079] interacts with 1 human partners:{P21673}  
3068 Pathogen[ P03383] interacts with 1 human partners:{P21673}  
3069 Pathogen[ P03410] interacts with 1 human partners:{P21673}  
3070 Pathogen[ P14075] interacts with 1 human partners:{P21673}  
3071 Pathogen[ P0C206] interacts with 1 human partners:{P21673}  
3072 Pathogen[ P03363] interacts with 1 human partners:{P21673}  
3073 [Cluster 280]GO:0004860+F molecular\_function [name] protein kinase inhibitor activity [def] "Stops, prevents or reduces the activity of a protein kinase, an enzyme which phosphorylates a protein." [GOC  
3074 Pathogen[ Q2Q067] interacts with 10 human partners:{Q96S95;O60239;Q9UD71;P38936;Q9UQF2;Q96RU7;Q9NS73;Q9H875;P46527;P49918}  
3075 Pathogen[ P0C214] interacts with 11 human partners:{O60239;Q9H875;Q96S95;P46527;P38936;Q9UD71;P49918;Q9NS73;Q9UQF2;Q96RU7;O15524}  
3076 Pathogen[ P03346] interacts with 13 human partners:{O60239;O15524;Q96S95;P49918;Q9UD71;Q9NS73;Q9H875;Q96RU7;Q9UQF2;P38936;P61925;P46527;Q9C010}  
3077 Pathogen[ Q85601] interacts with 10 human partners:{O60239;Q9UD71;Q96S95;Q9UQF2;Q9NS73;Q9H875;Q96RU7;P49918;P38936;P46527}  
3078 Pathogen[ P14079] interacts with 13 human partners:{Q9C010;Q9UD71;Q9UQF2;P49918;O60239;Q7Z7J9;P38936;Q96RU7;Q9H875;Q96S95;P46527;P61925;Q9NS73}  
3079 Pathogen[ P03383] interacts with 8 human partners:{Q9UD71;Q9NS73;Q9UQF2;P46527;Q96RU7;P49918;Q96S95;Q9H875}  
3080 Pathogen[ P03410] interacts with 13 human partners:{Q9H875;P46527;P61925;Q96S95;Q9NS73;O60239;P38936;Q9C010;Q7Z7J9;Q96RU7;P49918;Q9UQF2;Q9UD71}  
3081 Pathogen[ P14075] interacts with 10 human partners:{O60239;Q9UD71;Q9C010;P46527;Q96S95;P49918;Q96RU7;Q9UQF2;Q9NS73;Q9H875}  
3082 Pathogen[ P0C206] interacts with 13 human partners:{Q9UD71;Q9C010;O15524;Q9UQF2;Q96RU7;O60239;P46527;P38936;Q9H875;P61925;Q9NS73;P49918;Q96S95}  
3083 Pathogen[ P03363] interacts with 10 human partners:{P49918;Q9H875;Q9C010;O15524;Q9UD71;Q9UQF2;P61925;Q96S95;O60239;Q9NS73}  
3084 [Cluster 281]GO:0017111+F molecular\_function [name] nucleoside-triphosphatase activity [def] "Catalysis of the reaction  
3085 Pathogen[ Q2Q067] interacts with 16 human partners:{O75351;Q99741;Q14204;O76031;Q96S55;Q13415;P38935;Q06609;O43502;Q9BYK8;Q8N3C0;Q9UN37;O75943;P25205;P35251;Q8NE71}  
3086 Pathogen[ P0C214] interacts with 19 human partners:{Q06609;Q96S55;O75351;Q14204;P35251;P38935;P25205;Q9BYK8;O76031;Q8N3C0;Q8NE71;O43502;O75943;P35998;Q9UN37;Q99741;P55072;P17980;Q13415}  
3087 Pathogen[ P03346] interacts with 27 human partners:{P38935;Q06609;O43502;P35250;Q14204;P55072;Q8N3C0;O76031;O75943;P25205;Q96S55;O75643;O15315;Q13415;O75771;P35249;P33991;Q8NE71;O75351;P35251;Q9BYK8;O43933;P40937;Q99741;O43929;Q9UN37;Q9UBP0}

3088 Pathogen[ Q85601] interacts with 19 human partners:{O43502;O15315;Q9UBP0;P38935;Q13415;Q14204;O75943;O75351;P25205;P35251;Q9BYK8;Q8NE71;O43933;Q96S55;O76031;Q99741;Q06609;Q9UN37;Q8N3C0}

3089 Pathogen[ P14079] interacts with 25 human partners:{P62333;O15315;Q9BYK8;Q13415;P40937;Q14204;P35998;Q99741;P35250;O75943;P20930;Q96S55;Q8NE71;P35251;O43502;O43929;Q9UN37;P62191;P38935;O75351;P43686;O76031;Q06609;P25205;P17980}

3090 Pathogen[ P03383] interacts with 10 human partners:{Q06609;Q8NE71;P25205;Q96S55;O76031;P38935;Q9UN37;Q9BYK8;Q99741;P35251}

3091 Pathogen[ P03410] interacts with 23 human partners:{Q14204;P25205;O43929;Q8NE71;Q8N3C0;O75943;O15315;O75351;P35998;Q9BYK8;Q96S55;P20930;O76031;P38935;P35251;O43502;Q9UN37;P35250;P40937;P17980;Q06609;Q13415;Q99741}

3092 Pathogen[ P14075] interacts with 10 human partners:{P38935;O76031;P25205;P35251;Q8NE71;Q99741;Q96S55;Q9BYK8;Q06609;Q9UN37}

3093 Pathogen[ P0C206] interacts with 20 human partners:{O43502;O43933;Q9UN37;P38935;P35251;Q9UBP0;P25205;Q99741;O75943;Q9BYK8;Q14204;O15315;Q96S55;P55072;Q8NE71;Q13415;Q06609;O76031;O75351;Q8N3C0}

3094 Pathogen[ P03363] interacts with 20 human partners:{O43933;O75643;P25205;Q14204;P35251;O75351;Q9UN37;Q13415;Q99741;Q9BYK8;O76031;Q96S55;Q8NE71;O75771;Q06609;O75943;P38935;Q8N3C0;O43502;O15315}

3095 [Cluster 282]GO:0004000+F molecular\_function [name] adenosine deaminase activity [def] "Catalysis of the reaction

3096 Pathogen[ Q2Q067] interacts with 1 human partners:{P55265}

3097 Pathogen[ P0C214] interacts with 2 human partners:{P55265;Q9NS39}

3098 Pathogen[ P03346] interacts with 2 human partners:{P55265;Q9NS39}

3099 Pathogen[ Q85601] interacts with 1 human partners:{P55265}

3100 Pathogen[ P14079] interacts with 2 human partners:{Q9NS39;P55265}

3101 Pathogen[ P03383] interacts with 1 human partners:{P55265}

3102 Pathogen[ P03410] interacts with 1 human partners:{P55265}

3103 Pathogen[ P14075] interacts with 1 human partners:{P55265}

3104 Pathogen[ P0C206] interacts with 2 human partners:{P55265;Q9NS39}

3105 Pathogen[ P03363] interacts with 2 human partners:{Q9NS39;P55265}

3106 [Cluster 283]GO:0000975+F molecular\_function [name] regulatory region DNA binding [def] "Interacting selectively and non-covalently with a DNA region that regulates a DNA-based process. Such processes include transcription, DNA replication, and DNA repair." [GOC

3107 Pathogen[ Q2Q067] interacts with 11 human partners:{Q92985;Q01196;P14316;O14896;Q00978;Q14653;Q15306;P10914;Q02556;P19838;Q13568}

3108 Pathogen[ P0C214] interacts with 10 human partners:{P19838;Q13568;P10914;Q00978;Q92985;Q02556;O14896;Q14653;P14316;Q15306}

3109 Pathogen[ P03346] interacts with 11 human partners:{P14316;Q15306;Q00978;P10914;Q02556;O14896;Q14653;Q13568;Q01196;P19838;Q92985}

3110 Pathogen[ Q85601] interacts with 10 human partners:{O14896;P14316;Q02556;Q15306;Q00978;P10914;Q14653;Q92985;P19838;Q13568}

3111 Pathogen[ P14079] interacts with 9 human partners:{Q14653;O14896;Q92985;Q15306;Q13568;Q00978;Q02556;P14316;P10914}

3112 Pathogen[ P03383] interacts with 10 human partners:{P10914;P14316;Q14653;Q15306;Q00978;Q92985;O14896;Q13568;Q02556;P19838}

3113 Pathogen[ P03410] interacts with 10 human partners:{P19838;O14896;Q14653;Q15306;Q13568;Q02556;P10914;P14316;Q92985;Q00978}

3114 Pathogen[ P14075] interacts with 10 human partners:{Q00978;Q02556;Q13568;Q14653;Q15306;P14316;O14896;P19838;Q92985;P10914}

3115 Pathogen[ P0C206] interacts with 10 human partners:{P10914;Q13568;Q15306;Q02556;P19838;Q92985;O14896;Q00978;P14316;Q14653}

3116 Pathogen[ P03363] interacts with 10 human partners:{Q14653;Q92985;O14896;Q02556;Q13568;Q15306;P14316;P10914;P19838;Q00978}

3117 [Cluster 284]GO:0005095+F molecular\_function [name] GTPase inhibitor activity [def] "Stops, prevents or reduces the activity of any enzyme that catalyzes the hydrolysis of GTP to GDP and orthophosphate." [GOC

3118 Pathogen[ Q2Q067] interacts with 3 human partners:{O00410;O43924;Q13227}

3119 Pathogen[ P0C214] interacts with 3 human partners:{Q9NRR8;Q13227;P36404}

3120 Pathogen[ P03346] interacts with 5 human partners:{O00410;Q13098;Q13227;P36404;O43924}

3121 Pathogen[ Q85601] interacts with 4 human partners:{O43924;Q13098;Q13227;O00410}

3122 Pathogen[ P14079] interacts with 5 human partners:{O43924;Q9NRR8;Q13098;O00410;Q13227}

3123 Pathogen[ P03383] interacts with 2 human partners:{Q13227;O00410}

3124 Pathogen[ P03410] interacts with 5 human partners:{Q13227;Q13098;O43924;O00410;Q9NRR8}

3125 Pathogen[ P14075] interacts with 3 human partners:{O00410;Q13227;Q9NRR8}

3126 Pathogen[ P0C206] interacts with 5 human partners:{Q9NRR8;O00410;Q13098;O43924;Q13227}

3127 Pathogen[ P03363] interacts with 4 human partners:{Q13227;O43924;O00410;Q13098}

3128 [Cluster 285]GO:0016208+F molecular\_function [name] AMP binding [def] "Interacting selectively and non-covalently with AMP, adenosine monophosphate." [GOC  
3129 Pathogen[ Q2Q067] interacts with 3 human partners:{P07741;Q9P0M2;P09467}  
3130 Pathogen[ P0C214] interacts with 3 human partners:{P07741;Q9P0M2;P09467}  
3131 Pathogen[ P03346] interacts with 3 human partners:{Q9P0M2;P09467;P07741}  
3132 Pathogen[ Q85601] interacts with 3 human partners:{P07741;P09467;Q9P0M2}  
3133 Pathogen[ P14079] interacts with 3 human partners:{Q9P0M2;P09467;P07741}  
3134 Pathogen[ P03383] interacts with 2 human partners:{P09467;P07741}  
3135 Pathogen[ P03410] interacts with 3 human partners:{P07741;P09467;Q9P0M2}  
3136 Pathogen[ P14075] interacts with 2 human partners:{P07741;P09467}  
3137 Pathogen[ P0C206] interacts with 3 human partners:{P09467;Q9P0M2;P07741}  
3138 Pathogen[ P03363] interacts with 2 human partners:{P07741;Q9P0M2}  
3139 [Cluster 286]GO:0016301+F molecular\_function [name] kinase activity [def] "Catalysis of the transfer of a phosphate group, usually from ATP, to a substrate molecule." [ISBN  
3140 Pathogen[ Q2Q067] interacts with 25 human  
partners:{P22392;P31749;P24385;P19367;O14757;P32189;P14635;O75582;O96017;P24864;P5075  
0;Q13233;P50613;Q96RU7;O14920;P45984;O43318;P49336;P21675;P24941;P11802;O15111;Q15759  
;P51946;Q00534}  
3141 Pathogen[ P0C214] interacts with 45 human  
partners:{Q14410;P51946;O15111;Q14409;P23919;Q8TE04;P21675;Q14164;P50750;P50613;P1180  
2;O94921;P12277;P14635;P24385;Q9Y3D8;P32189;O43318;Q13057;Q96C11;O60825;Q00534;Q13233  
;P21127;Q00536;P14618;O96017;P49336;Q5ZEY9;P24941;P19367;O75582;Q9BZ23;Q96RU7;P24864;  
Q15759;P45984;Q9NWZ5;P16118;P22392;O14757;Q5EBM0;O14920;P00558;P31749}  
3142 Pathogen[ P03346] interacts with 37 human  
partners:{P45984;Q00536;O15111;P24385;O96017;P21127;P49336;P24941;P19367;O14757;P2486  
4;Q8IZE3;Q86Z02;P11802;P31749;P14635;Q8TD19;P51946;P50750;Q9Y3D8;Q13233;O75582;P22392  
;Q96RU7;P21675;Q15759;Q96PY6;P45985;P32189;Q00534;O14920;O94921;O43318;O14965;Q14164;  
Q9NWZ5;O00444}  
3143 Pathogen[ Q85601] interacts with 36 human  
partners:{P51946;Q00536;P31749;P24385;O96017;P50750;Q96PY6;O15111;P49336;O60825;P3218  
9;P16118;P11802;O14757;O14965;Q14164;P14618;P14635;O14920;O94921;O75582;P22392;P50613  
;Q96RU7;Q15759;P45984;P21675;P21127;Q13233;Q00534;O43318;P24941;P51955;Q5ZEY9;P24864;  
P19367}  
3144 Pathogen[ P14079] interacts with 43 human  
partners:{P31751;Q8TE04;Q14004;O95544;Q5EBM0;P53779;P49336;P51946;P52564;Q9UJ70;P2486  
4;P49842;O75582;Q14410;Q96DU7;Q4G0N4;Q14164;Q9NWZ5;P32189;Q96C11;Q14409;P45984;A2RU49  
;Q15078;P45983;P50613;P23919;P14635;P51955;Q9BZ23;P22392;Q16644;Q8IVS8;Q15759;P45985;  
Q13057;P21127;Q96RU7;Q13164;O14965;Q9H999;P21675;P50750}  
3145 Pathogen[ P03383] interacts with 36 human  
partners:{Q9NVV4;O14757;O75582;Q13233;Q8TD19;Q9NWZ5;O14920;P19367;P31749;O15111;P2239  
2;Q00536;P24385;Q00534;P14635;P11802;O43318;P21127;P49336;P50613;P51946;P24941;P50750  
;Q5ZEY9;Q15759;O94921;Q9BZ23;O14965;Q96RU7;Q96PY6;P21675;P32189;P45984;P24864;Q5EBM0;  
O96017}  
3146 Pathogen[ P03410] interacts with 41 human  
partners:{Q8IVS8;Q4G0N4;Q96DU7;O14920;Q8IZE3;Q8TE04;Q00534;Q96C11;Q13057;P16118;P2167  
5;O15111;O75582;Q14410;P51946;Q9NWZ5;P31749;Q5ZEY9;A2RU49;Q13233;P50613;P23919;O14965  
;P50750;O43318;P24385;P14635;P45985;P24941;P11802;O96017;Q5EBM0;O14757;Q9BZ23;P49336;  
Q14409;Q96RU7;P45984;P53779;P32189;P24864}  
3147 Pathogen[ P14075] interacts with 41 human  
partners:{P49336;O15111;P21675;P24941;P11802;Q9NWZ5;Q15759;P14635;O75582;Q8IVS8;P3218  
9;P50613;Q00534;P50750;P19367;Q13057;O14920;P16118;P31749;O96017;O14965;Q8TE04;Q96C11  
;O43318;P49842;P21127;Q9BZ23;P51946;Q96RU7;Q96PY6;P24385;Q13233;O94921;Q9UQ88;Q5EBM0;  
Q9NVV4;O14757;P22392;P24864;P45984;Q8TD19}  
3148 Pathogen[ P0C206] interacts with 51 human  
partners:{P49336;O14920;P31749;Q9Y3D8;P50750;O96017;P22392;P51955;O75582;P45984;Q8TE0  
4;Q13057;Q00536;Q5EBM0;O43318;Q96PY6;O00444;Q9NWZ5;Q9BZ23;Q8TD19;P19367;P32189;Q13233  
;Q5ZEY9;Q96RU7;Q96DU7;P30291;Q14164;P50613;O15111;P45985;O60825;Q96C11;P16118;P21127;  
P14635;O14965;Q8IVS8;P24864;P24941;Q15759;P11802;O94921;Q99640;P14618;Q99986;Q9UIG0;P  
21675;P51946;P24385;Q00534}  
3149 Pathogen[ P03363] interacts with 22 human  
partners:{Q9NWZ5;O14920;P24864;P21127;O15111;P51946;O43318;P24941;Q8IVS8;O96017;Q0053  
4;P31749;Q9Y3D8;P49336;P24385;P21675;P50750;Q8IZE3;P11802;Q00536;Q13233;O14757}  
3150 [Cluster 287]GO:0003747+F molecular\_function [name] translation release factor  
activity [def] "Involved in catalyzing the release of a nascent polypeptide chain from  
a ribosome." [ISBN  
3151 Pathogen[ Q2Q067] interacts with 4 human partners:{Q9H3J6;Q9UGC7;O75570;P62495}  
3152 Pathogen[ P0C214] interacts with 6 human  
partners:{Q9UGC7;P15170;Q14197;O75570;P62495;Q9H3J6}  
3153 Pathogen[ P03346] interacts with 4 human partners:{Q9UGC7;Q9H3J6;P62495;O75570}  
3154 Pathogen[ Q85601] interacts with 5 human  
partners:{P62495;O75570;Q9H3J6;P15170;Q9UGC7}  
3155 Pathogen[ P14079] interacts with 5 human  
partners:{P62495;Q9H3J6;O75570;Q9UGC7;Q14197}  
3156 Pathogen[ P03383] interacts with 4 human partners:{Q9H3J6;O75570;P62495;Q9UGC7}  
3157 Pathogen[ P03410] interacts with 6 human  
partners:{P15170;P62495;Q9UGC7;Q14197;Q9H3J6;O75570}

3158 Pathogen[ P14075] interacts with 4 human partners:{Q9UGC7;P62495;Q9H3J6;O75570}  
3159 Pathogen[ P0C206] interacts with 5 human  
partners:{Q9UGC7;P62495;Q9H3J6;Q14197;O75570}  
3160 Pathogen[ P03363] interacts with 4 human partners:{O75570;P62495;Q9H3J6;Q9UGC7}  
3161 [Cluster 288]GO:0005515+F molecular\_function [name] protein binding [def]  
"Interacting selectively and non-covalently with any protein or protein complex (a  
complex of two or more proteins that may include other nonprotein molecules)." [GOC  
3162 Pathogen[ Q2Q067] interacts with 2578 human  
partners:{Q9BTW9;Q92783;P19012;P04156;Q7Z3C6;O95376;Q68CZ2;Q13562;Q5VSL9;P51398;P4945  
4;Q9H4I2;Q01844;Q9UNP9;P23588;Q92900;P05198;Q96TC7;O15511;Q14974;Q7L2H7;Q9BUE0;Q9BYE7  
;Q9H583;Q66PJ3;O43290;Q13573;Q8TCS8;P61313;Q9NQG7;Q9BSU1;Q14526;Q9Y5K5;P30153;Q9NWS1;  
Q12798;O95602;Q2YD98;P83369;Q15054;Q9ULD0;Q9UKI9;Q9Y4R8;Q9Y2J2;Q9UBW5;Q9Y6X3;Q8NHY2;Q  
14151;Q9P2Y5;O14734;Q12905;O43463;Q9UPP1;Q9NNW5;Q8TAF3;Q8IUD2;P33240;Q01082;Q9NWK9;P2  
7540;P17544;O75525;P30281;Q13118;Q8WW35;Q9BZL4;P25490;Q6VMQ6;O60232;P01100;Q96J02;P83  
876;Q8IXJ6;Q99613;Q9UL45;P22392;P46108;Q9UH99;P50402;O00213;Q9Y6X8;Q92585;O75351;Q96H  
A8;Q92988;O00425;O75161;Q9Y3A2;Q96FV9;Q9ULR5;Q9GZT8;O43167;Q04864;P02538;Q8TA86;O0041  
1;O75832;P0C1Z6;Q5TAQ9;Q9Y2M0;Q8N5R6;Q86U42;O94973;O15234;Q9Y4A5;Q8WV44;P09917;Q13084  
;Q9NVH2;P54252;C9JE40;P18754;Q9NX08;Q15013;P23381;P02545;Q86VW0;P82933;Q8IU60;P07910;  
P31749;P52948;Q92890;Q7LBR1;Q13185;Q6NVH7;Q9BZ4;Q9BQY9;Q14258;P50995;P62312;Q93034;O  
75155;Q14008;Q9BSJ6;Q9Y2Y0;Q9Y333;Q9NRF9;Q9UNS2;Q12769;Q9H4X1;Q8WUQ7;Q46779;O00186;O1  
4744;Q9BVP2;Q9Y6K5;Q9UPN9;O60239;Q9Y5Q3;P35321;Q9Y6D6;Q9BYD1;Q9Y613;Q8IUC7;P00410;P56  
524;Q93009;Q12796;Q9BW66;Q9ULX6;Q9NR56;Q9H0C8;O75427;O75909;Q9Y3C7;Q9NQT4;Q15631;P550  
36;Q99747;Q8IZD2;Q4U2R6;Q99502;Q10567;Q9NR28;Q6ZW49;Q96HW7;Q9UPR3;P10827;P04198;P1588  
4;O75663;P20226;Q04726;Q96N03;Q96HR3;Q96KQ4;O15126;Q9HAU4;Q5D1E8;O60294;A9UHW6;Q9Y462  
;P55957;P24385;Q99417;Q7Z6J0;P55769;Q9Y5V3;P78559;Q16594;O75340;O00303;O75925;O95273;  
Q92922;Q6NUN9;P63104;Q96KN1;P07737;Q8NR98;Q9UII4;Q9Y3F4;P39687;Q13033;Q15398;Q96Q8H;O  
60664;Q9UQ80;Q9NS56;Q70YC5;O43747;Q9H5J4;P22087;P55265;P23511;P63172;Q7Z2Z1;Q9Y4P1;P2  
4278;P49790;Q99638;Q9H2H8;O95782;Q9P209;O15519;Q9Y5A7;Q8WVC0;Q8N1G4;Q05066;P07196;Q8W  
X93;Q14315;O60296;O60841;Q8TAD8;Q86WQ0;Q9H444;Q63HK5;Q9BY44;Q6ZVK8;Q8NI35;Q9BUP3;Q990  
81;Q9Y3B7;Q0182D1;Q96PV6;Q5VTD9;Q96C74;Q9GZL7;Q8IY63;Q14160;Q9NPB6;Q2VFP7;Q8IY18;O9543  
3;Q9Y3Q8;Q9UHB7;Q12888;Q9H175;O00512;Q96LI5;Q96B97;O00291;Q8WW12;O00470;P52272;Q8WY54  
;Q92889;Q9UHR5;Q9Y6G5;Q14980;Q92572;Q9P032;Q15293;O00267;P35080;P06400;Q9HB96;P61326;  
O43493;O60784;Q6NUP7;Q8IVG9;Q9H9T3;Q9NPJ6;O75494;Q9UMX3;Q8LZH2;Q7L9L4;Q8IWE5;O43257;P  
14866;Q7Z5K2;Q99547;P26373;O00233;P42167;Q9NPF5;P29692;P21980;Q9H2K2;O43663;P27694;P5  
1825;Q9C005;P49959;Q6RW13;P41220;Q8NEM7;Q15459;P49792;Q01094;Q9UKV0;Q14678;Q8WW38;Q9979  
575;Q9Y4B6;O95684;Q9H706;Q08999;P40763;Q8WYH8;P14921;Q9NXV6;Q9UBQ5;P62750;Q8WWL7;Q0VD  
F9;Q9NYB0;Q08209;O60732;Q96LA8;O15226;Q8IZD4;Q9BRV8;P31040;P01106;Q8N1N5;Q9H2P0;P6225  
8;Q13148;O95257;O75145;Q9BYG5;Q6PGQ7;Q7Z460;O75940;O14503;Q9HAZ2;P36402;O43159;Q9P2M7  
;Q8IZW8;P63151;Q16666;P46937;Q9UKX2;Q15910;Q8IWM0;O75167;O43447;O75151;Q9Y3T9;Q14690;  
O60481;P38432;Q6IE81;Q92636;P67809;Q9BQD3;Q12982;O95402;Q6PD62;Q13485;P09913;Q96DX5;Q  
9BRA2;O75334;Q9Y285;O43734;O95886;Q9UNS1;O14639;P10589;Q8N3V7;P62837;Q9NSC5;O14974;P4  
6087;P35680;P53804;P38646;Q8IUV8;P55735;Q9P0U4;Q9H9D4;Q9Y2L1;Q01130;O95997;P13056;Q14  
674;Q9NPI6;Q9NVN8;Q8IXK0;Q8WXE9;Q9H1B4;Q86XL3;Q9UJT2;Q9UHF7;O43516;P53675;P62318;P628  
26;Q99816;Q99741;Q96GY3;P62508;Q92797;Q9B1J9;Q3BQ1;Q9UBB5;Q8TF40;Q9BRP4;Q9Y3V2;A5YKK  
6;Q15386;Q15596;P48380;Q8WVM0;O95295;Q9BSW2;Q13405;P08779;Q9Y2Y9;Q96GC5;Q9HCK5;P35712  
;Q15233;Q13829;O95751;Q6VY07;P41182;Q9Y2X9;P19474;Q15554;P54259;Q8WWY3;Q99497;Q86VX2;  
Q5SQN1;P10828;Q15562;Q9GZS3;P15880;Q96R06;O60260;Q9P2H0;P30793;Q9NUL3;Q9H074;O96019;Q  
9HCS2;Q9H1H9;Q01664;Q9UDY8;Q9BXH1;P55197;Q5JTD0;Q9NUP1;Q9BUL9;O00570;Q7Z4G1;P61024;Q9  
6JI7;Q9BRQ6;Q9Y6E7;P49910;Q9P0M2;Q8N5U5;Q15326;O95243;P18847;Q9UHX1;P49427;P51531;P60  
660;P53990;Q9NPG3;Q99708;P08729;P01015;Q96F86;P18887;P41970;Q8N684;O75807;Q9HAF1;Q86X  
83;Q14204;Q7Z7A3;Q13111;Q8WXF8;Q5SW79;A6NIX2;Q9UKJ3;Q9Y5Q8;Q86VY4;Q8TD23;Q8N137;Q9NQ8  
7;O00762;P13349;Q9H0F6;Q9UI30;Q9NV31;Q9Y2X8;P61457;Q96IT1;O43255;Q9BQS6;Q96P71;Q9NZL3  
;O96004;Q8WV92;Q92985;O95400;Q9Y6M1;Q6P1K2;O43390;Q9HBM1;Q15059;Q8WXU2;Q8HWS3;O00167;  
Q9BXM0;P49419;Q8N1B3;P08151;O60437;Q9C086;Q15653;P49750;Q5TC12;Q01196;Q00613;Q9H211;O  
14618;O43439;Q9NRR4;Q9UJY4;Q16082;P33316;Q13077;Q92552;Q01105;Q96T88;Q9P0W5;P24534;O7  
5935;P23490;P19388;Q5T8A7;P08133;P37275;Q70Z53;P19367;Q7Z7A1;O75081;Q12815;Q05516;Q32  
MZ4;P20749;Q8NF64;Q5EE01;Q02930;P54274;Q9Y6K1;Q96DI7;P52435;P01009;Q9BW71;O00743;Q9NR  
N7;O14929;Q15696;O00257;Q9BSI4;Q9NZJ0;O43172;P49116;Q9UIF7;Q9BXW4;A8CG34;Q9Y5N5;O7548  
9;Q7Z2E3;Q9HCD5;Q9NX40;Q04206;P36543;Q99551;P49770;P11387;Q9UJY5;Q6ZU52;Q9BXL5;A8MVW5  
;Q9ULV3;Q9H944;P61981;P12980;P61604;Q9QD35;P50502;Q9UK45;Q9H4Z2;Q96C86;Q00994;Q92870;  
P05062;P30084;Q13868;Q12933;Q6ZNE5;O43639;Q9HAN9;O94829;Q8IV36;P62140;Q86SE9;Q9UHC1;Q  
6P1M3;Q96B36;O60238;Q96B01;P26641;Q13625;Q8WTR7;Q9NYJ8;Q13547;Q6PI26;Q9NP66;Q14511;Q9  
UP83;P08238;P38919;P63167;P14373;Q8N6F7;Q5VWX1;Q9UJY1;Q14103;Q9UIS9;P78358;O43752;P55  
345;O60506;Q01201;Q6UUV9;Q9UBU9;Q9BSB4;Q7Z6G3;P60604;Q3B820;Q15528;Q9684;Q5FBB7;Q9P1  
A6;P35244;O00566;P49450;O14662;Q13884;Q14814;O95347;Q13257;Q86XR8;P18850;Q9NVN8;Q9UBP  
6;Q6QNY0;P50549;P83436;Q92990;P32780;Q99594;Q9BZV1;Q86WB0;Q96AQ6;Q8N2Z9;O94983;Q8WUH2  
;Q5JY77;Q9XRX5;O00204;Q8IZP0;Q96FH0;O76031;O95999;Q9Y3C0;P14316;A8MT69;O94776;O15379;  
O15266;P36956;P61970;P62277;P18615;Q9C0E2;Q8IWL3;Q8N1B4;P56945;Q99933;P41134;Q5T681;Q  
9UKN8;Q14192;P07900;Q96EV8;P56537;Q13123;Q70EL1;Q9NQX1;P50616;Q9HC77;Q9UPV0;Q8TE76;Q9  
6M61;Q6NZI2;Q5VYV7;Q96EZ8;Q15633;Q96S55;Q9UNA4;P06748;P30876;O14757;Q9UNH5;P49789;Q9N  
WV8;O95503;Q4LE39;Q9UER7;O00148;Q86WV1;Q16520;P15976;O95931;Q9UNL4;Q96G21;Q8N8U2;Q8N7  
J2;Q9P2B4;P40222;Q5T3J3;Q8N196;Q96JC9;Q15542;Q15172;O14686;Q16626;Q9NXR1;Q9H8Y8;O0042  
3;Q13200;Q9HTEL6;Q6ZP82;Q9HCH5;Q13432;Q92754;Q96I23;Q96CN9;O94842;A8K8P3;Q96ST3;Q15025  
;Q5T7V8;Q96RK0;O15350;Q92759;Q9BTK6;P35638;Q7L804;Q9NY61;Q8TDY2;Q96GX9;P54727;  
Q9NPI1;Q9NQ48;P41236;P02511;P54198;Q7L5N1;Q02447;P25787;O15040;P52594;Q86YF9;Q14152;Q  
2M1K9;Q8TDH9;Q96T58;P08107;Q8N1L9;Q9P270;Q9H5P4;Q86YP4;Q9Y3Y4;Q53HL2;Q13522;P52657;Q6



ZNA4;O14896;Q8IX12;O00401;Q96SN8;P67775;O43684;Q8NBT2;Q8WUF5;Q96HR8;P51610;Q9H981;Q96K30;Q14457;Q8TBK2;P42704;Q7LOY3;O14910;Q5JTC6;P04792;P26447;Q9H668;P63279;O75362;Q8N5D0;Q96FX2;Q96AB3;Q9Y5A6;Q9UBZ9;Q92547;Q86YC2;Q13158;P05386;O75175;Q8ND90;P17036;P49005;Q7Z614;O15117;Q13838;Q9ULJ3;Q13415;O14776;Q8TBE0;Q6VVB1;D6RGH6;Q96P70;Q15560;P17676;Q2QGD7;Q16531;Q86V97;O95551;P17482;Q9P086;O00541;P11308;Q9Y3B2;Q07955;Q8N8AD1;Q9NTG7;Q6I9Y2;Q8WU90;Q9NPD3;Q96MH2;P38935;Q86TB9;Q96CB8;P5BJF2;Q9NYF8;P08047;Q9NF4;Q8NEU8;P11473;Q00978;P15924;Q99471;Q8NF91;O75928;P30304;O15355;O14907;Q92905;Q9NPE3;Q9BEI7;O75182;Q13769;Q13794;Q8NDT2;P22557;P63241;Q16629;Q15022;O43829;Q96EK5;P35573;Q9BSM1;P21953;Q8NHM5;Q9BQ15;Q9H9Y6;Q96KP1;Q9Y2D8;Q9BV47;Q14790;Q9Y262;O95848;Q8N5F7;O95793;Q92973;A6NKF1;P30154;P12270;Q7Z6Z7;Q92558;O75400;Q14749;Q9NZC7;O14829;Q96CS3;P51965;P22670;Q13420;O60563;Q9UIC8;Q5BJF6;Q9Y3I1;Q6P1W5;Q8TCI5;Q8IY31;Q9GZR1;Q8WYQ5;O15084;P13640;Q9NV11;P05413;Q00597;O43542;Q13129;Q6BDS2;Q9H7S9;Q2M2Z5;Q8N726;Q86UE4;P11831;O95198;P20265;O75531;Q9NR22;Q9H267;P15172;Q06609;P63010;Q86VP6;Q9BV57;O94906;Q5TAX3;Q9H9Q4;Q14CW9;P28702;O43148;Q00577;P48552;P54105;Q9Y3E5;Q9BSD3;Q86TP1;P80217;Q9BZE9;Q6PJT7;Q15561;O96000;Q8NBZ0;P31943;Q14134;O75446;Q8IZL8;Q9UBB4;P11388;Q9NP97;Q9UJW3;P28065;P35227;P54725;Q9873;Q12962;Q9H788;Q9Y295;Q14669;P37802;Q9Y5L0;Q8TF74;Q8N612;Q9NX18;P32189;Q86UL8;Q09028;O14818;O60663;Q15629;P61077;P14635;Q9P2T0;O43583;P08727;P49756;O95049;Q15424;P78545;P23528;P26196;O00170;Q8N6T7;Q9Y3D3;P09629;Q92575;P63165;Q9NS37;Q9UHD9;O43156;O15304;Q9BRP8;Q96QF0;P58340;Q9BUX1;Q8N9A8;Q10570;Q04323;Q9Y248;O75886;Q9NZQ3;Q8IXH6;Q8N8A2;P42568;Q9ULK4;Q68DK2;Q8TEP8;Q7Z2W4;P27695;Q15723;Q9UBC3;P62314;P08621;Q8IXO3;Q08050;Q9UHK0;P31948;Q13541;O75323;O43399;P11142;O75381;O75607;Q9NQS7;Q14203;O15405;P61978;A6NDB9;Q99569;Q16630;Q8N5C8;Q96B67;Q9BW60;O95163;P62324;Q9UKL0;O60711;Q9HAU5;Q9HBL0;Q06830;Q13287;Q96IF1;P29084;Q13112;Q96CW1;Q5TB30;Q12972;Q5JR98;Q14137;Q6ICB4;P27797;P12004;Q9UQL6;Q07021;Q00059;Q9Y3M2;O43524;Q8TDC0;Q16851;P53999;Q96G23;Q9BU89;Q12959;O43502;P63146;Q9Y297;Q96G25;Q9ULW3;P06746;O43745;Q9NYF0;Q9NRG4;Q8WXC3;P60520;Q9BY77;Q99966;Q9ULE6;O15162;Q9UDY4;Q15173;O15056;Q9UQB3;P24522;P38159;Q13469;Q9H1A3;P52747;Q15004;Q13137;O43264;P04264;Q9Y3A5;Q9Y5P8;Q9UHV2;Q1ZZU3;Q15003;O94811;O75396;P60896;O15127;Q9UBF1;Q9UHI6;Q9UKC9;Q9UK73;P78317;P11532;Q99504;P62081;P61247;Q9GZR5;Q96CJ1;P23769;Q8WUM4;P62304;P29372;Q8NFW9;Q29RF7;P54253;P62714;Q96L92;Q9UBS3;O94992;O14980;P35548;P55199;Q9UIV1;Q13428;Q9BVI4;P84103;O60645;O75817;Q9UI10;P20719;Q07157;Q9H8S9;P15036;Q15388;Q9BYK8;Q5H9R7;P30307;Q9UEU5;Q9GZZ1;Q9H2C0;Q6WZJ9;Q05048;P20073;Q14186;Q92674;Q5TA31;P78352;Q15699;Q86Y13;Q15532;Q9UJM3;O75582;O14508;P26678;O15131;Q96KR1;Q15047;Q9HB71;Q9BQ70;O43310;P49356;P62328;Q9BYV8;Q9UGP4;Q86WX3;P40337;Q99750;Q9BW27;O43924;O15235;Q14498;P56693;Q9Y6H5;P05787;O14787;O43236;Q96BT3;Q9H9C1;Q9BTP7;Q8NHQ1;Q969S8;P25791;Q86V81;P11171;P48788;Q99728;Q9NXB0;Q9H8E8;Q96PN9;Q2M3C7;Q86TA1;P26358;Q04695;P51948;Q13561;P31350;Q96F07;O75618;Q9Y221;Q92831;P60900;P46937;O43711;Q96MT3;Q9H5J8;Q9H8T0;Q07666;Q9BZD4;Q14653;Q9UBC9;Q9GZY8;P67870;Q9NX53;Q9Y6N9;O60934;Q9UPX8;Q9UKY1;Q8WWW0;Q96T37;P61289;Q9Y2D9;Q15654;P56270;Q6IQ32;Q15306;Q14746;O43482;Q86US8;Q96017;P51959;Q15370;Q9BU61;O60832;P12755;Q9UNN5;Q9BSH5;Q9Y4X5;Q14687;O43303;Q8NI10;Q9UBD5;Q9UBF6;Q92624;Q9UPN7;Q8N1E6;Q8TES7;Q9HCC9;Q14978;Q00610;Q96S59;P84022;Q9HB19;Q92796;Q9NZL4;Q969G3;O14641;P43358;Q63ZY3;Q9NXV2;P55212;P31949;Q6P1X5;P46939;P68871;Q9BQ83;P10914;Q8N5M1;P41252;P15927;Q9ULM3;Q86T82;P52815;Q06787;P41227;Q8N140;Q15102;Q14533;P25063;Q5VIR6;Q15024;Q8N3C0;O14933;Q7Z3B3;P09972;O00716;Q96IZ7;O14862;Q13310;Q12834;P55060;Q15643;O75528;Q9NQ31;P56279;P41002;P53992;Q9Y6K9;O95628;P36873;Q96GC6;P51668;P57081;Q9H0W8;Q2TAK8;Q9NUW8;Q14232;Q92843;Q15021;Q9P2R6;Q01658;P28347;Q8N3F8;Q8N895;Q92541;Q9NQP4;P31276;Q2VPK5;P22531;Q9UKJ5;Q8IYF3;P46777;O94888;Q05519;Q9BVC3;Q8TAT6;Q92562;Q9BVC4;P55854;Q9UBK9;P26368;P50748;Q92769;O43715;Q12904;Q8TBB1;Q96EP1;O14497;Q9NRL3;O00255;O15105;O43251;Q13114;P78344;Q06330;P15559;O14713;O75496;Q6P2Q9;P06396;Q96RL7;P14859;Q9BQ90;O75190;Q9NR50;Q15543;Q9UMS0;O14530;Q96PM5;Q86UW9;O95644;P24864;Q9GZV5;P09467;Q13127;Q7RTS9;P54278;P49848;Q9UQ84;Q9BQ89;O75843;Q96JM3;Q9BSJ2;O43541;Q9NSA3;Q9HCU9;Q9NWA0;Q6NZY4;Q9H8M7;Q5JR59;Q9HD42;P28324;Q9NPI8;Q9NQG5;Q53EL6;O00625;Q9H869;P29474;Q86Y97;Q9Y6X2;P78345;P50750;Q99732;P08865;Q9H2J4;Q96JB2;Q9ULH7;P11161;Q9NWT6;Q96LC9;Q6P4R8;Q9UDY2;Q15544;Q9NXX7;Q9H9G7;Q9Y603;Q9H4M3;Q9NWT8;P62913;Q8TAE8;Q12906;Q8WXE1;Q96AP0;P25788;Q9UN79;Q92529;Q9UL42;O75152;Q9HD36;Q13233;O15265;Q969U7;Q9HD40;O14602;P82094;Q8WXD5;Q08211;P48382;Q99733;O00268;Q00587;P09874;P51532;Q8NI51;A7MCD6;P60228;P42575;Q13426;Q5JSZ5;Q9BR76;P43357;P42025;P0DI81;Q9H4L7;P57077;Q9H6U6;Q53GL7;P08579;Q9BUL8;Q02410;Q9HCU8;Q7Z3K3;Q5T200;P62136;Q53HC0;Q96PU5;O75170;O75419;Q13616;P13807;Q96MT8;Q9UILL;Q16254;P52597;Q92530;Q68CJ9;P08697;Q8NI29;O43918;O15078;P41212;Q8TEB1;O75251;Q9UKX7;O94868;Q96Q83;Q9NVD7;Q9UHV9;P07814;Q8IWL9;O75306;P48634;Q8TF46;O14746;P23246;Q12873;P14678;Q96CV9;Q9UN37;Q9Y5S9;Q9UHY8;Q8IWX2;P25208;Q14677;P49354;O95810;Q8WVJ9;Q15327;P62424;Q9ULU4;Q92830;P04406;O15164;Q9GZX7;Q00005;Q9BQ95;Q9Y2T2;P49366;Q9UGK8;P78560;Q9H467;P61088;P35226;Q15329;P35869;Q9H160;Q8TD16;Q9HB75;Q8NI08;P25786;Q9NTI5;Q01081;Q99615;Q96BK5;O75530;Q9Y2J4;Q9Y2CQ9;Q5VU43;Q9Y6B2;Q9BQY4;Q8N8R7;Q16543;Q13439;Q14865;Q13094;Q8TEQ6;Q08379;Q13045;Q954L5;Q9UMS6;Q9NZZ3;Q92733;Q9Y605;Q8TE02;Q9P2M1;Q16514;Q9BVJ6;P78396;Q13951;O00567;Q15185;O15116;Q96GM5;Q9Y4E1;Q86TC9;Q9NR77;Q14157;P46100;Q9BSQ5;Q9NRY2;Q9H410;P46783;Q92993;P25815;Q8IYD1;Q8IX07;O60291;O60907;Q53G59;Q6UWZ7;O00198;Q9P2I0;P99999;P10599;O15527;Q9H9Z2;Q8NFH3;O00505;Q9BXS5;Q15599;Q9P278;Q9Y3C8;Q96EN9;Q7Z465;Q9H0B6;P50749;P53805;P53041;Q03468;O75030;O94850;Q99996;Q16890;P57678;P61244;Q8NHZ8;Q8NFD5;Q9BUN5;Q9P100;P13984;O60516;Q6P9B9;P62495;P55055;Q13243;Q9UK41;Q9ULW0;Q9661;P38936;Q13618;Q969S3;P12956;Q15796;O95232;O75475;P20248;Q8IWX3;P21912;Q9H0W9;Q9NZU7;Q14739;Q6PGP7;Q15369;P50570;Q02241;Q68E01;O60216;Q9UKV8;Q9P2R7;P39748;Q86VQ0;O75665;Q9NRL2;Q7Z7C8;P69905;Q15366;Q96KS0;O96020;O75164;Q8WVV9;Q16401;Q96BY0;O00139;Q96BP2;Q6WBX8;Q9NRA8;Q9UBU8;P12883;Q9HAV4;P16333;Q02556;Q99496;Q3L8U1;P23762;P09914;P13489;Q04725;Q5VTR2;O95218;P80294;P24928;P50453;Q969H6;Q7Z4T9;Q9Y6J9;Q99607;P19338;Q9NX63;P37198;P19419;Q96T23;Q13363;Q8WTV1;Q9H0A8;P49639;P61956;O95456;Q8WTV4;O43809;Q08AG7;P62879;O94986;Q86X95;Q9UQF2;Q9UKV3;O75122;Q9H4A6;Q96HA7;Q86WG3;Q15014;Q

9UQK1;O95777;Q9H7L9;Q7Z5V6;Q15029;O94874;Q92499;Q8NI27;Q9UKT7;Q8TAC9;O76064;Q9NX70;Q5  
TZA2;Q0VDD7;Q8WY41;Q13309;Q92621;Q86TG7;O95476;Q15819;P54920;Q5BKZ1;Q9UN36;P62072;Q9N  
P98;Q9BYZ2;Q9UK99;Q9NWF9;Q13216;Q07866;Q96IV0;Q8WWQ0;Q2NKJ3;Q8N720;Q9BQ69;Q15466;P198  
38;Q7Z739;Q9BX70;Q96RU7;O75143;P81274;Q9Y3E7;O75436;Q9NRI5;O75822;Q96QK1;Q9Y697;Q1476  
4;Q9NNW7;Q14145;O43299;P43351;Q8IX90;P78395;Q99962;P28749;Q8NG31;O15397;P09012;P20823  
;ALL3X0;Q8IZQ1;Q02952;Q68DX3;Q15051;O95865;Q8TDB6;O43504;O75943;Q9P1Q0;P78549;P23193;  
Q9H0C5;Q16186;Q9UFN0;P54098;Q13228;Q9UM11;Q96CD0;Q7L590;Q9C035;Q13144;P23258;Q13155;Q  
9H816;O95373;Q86VP1;Q9H9L3;P23396;Q9H6Z9;Q8TE69;P61201;Q9Y2P7;O43913;Q09161;Q9Y5J7;P2  
8074;P53618;P54136;P25789;Q93008;Q8WV24;Q92540;P52630;Q9P013;Q9UPY8;O43791;Q9HCE1;Q14  
839;Q9UBC1;Q96LL4;Q13620;Q6UVJ0;Q9UPV9;Q9Y6D9;P15336;O60885;O95996;Q95073;P59998;Q8IX  
H7;P21399;Q13526;Q9BVM5;P12757;Q8WU39;O43615;P35813;Q9BUJ2;P42768;Q9UKT4;P28698;Q9H3P  
2;Q6NUQ1;Q8NFX5;P25963;Q99619;P0CG47;Q9P2K3;Q9UGK3;P20042;P20290;Q13619;Q12983;Q13569  
;Q86U86;Q86UW6;Q9Y2M5;Q9BPZ3;O60573;Q9HB03;Q86XI8;Q9H5Z6;P08235;Q14686;Q6PJ61;Q9UNY4;  
Q8WV99;P57740;O95983;Q96T76;Q96BD8;Q9H446;Q04917;Q96QT6;Q9BZK7;Q6QNY1;Q9UI95;Q9H900;Q  
9Y3D0;Q9HC62;Q9Y934;O14920;Q9Y5N6;Q15545;Q9UID6;Q14872;Q969H0;P11441;Q9UDV6;Q3KNV8;P2  
7348;O75688;Q8N1V2;O95271;Q12789;Q03111;P31946;Q9Y3C5;Q717R9;Q99590;Q13416;O60759;Q8T  
B72;P22415;Q9H4D5;Q9NS73;Q8N3L3;Q96MG7;O75150;Q06455;Q13761;Q9UI32;P13647;O75410;Q9UK  
T9;Q9C000;P41208;P52292;Q9H0A6;Q5HYK7;O15155;Q5JVS0;Q96IY1;P52298;Q9NR09;Q3YBR2;P5265  
5;Q8TCTJ0;O14646;Q13901;Q96NY9;P31314;Q9BXP1;Q86XK3;O75113;Q9BYX4;Q9Y618;Q14209;Q9UFG5  
;O95619;Q20618;Q91AV6;P45984;Q15628;Q13642;P43356;A6NIH7;Q9HBM6;P42771;P17096;O95817;  
Q9UN67;Q04724;O95831;Q9ULG1;P35269;Q86SQ7;Q15427;Q9H6Z4;Q13425;P11474;Q99623;P09497;Q  
14139;Q8IUR6;Q9UKK6;O94925;Q12824;Q6DKK2;Q9Y2X3;O00161;Q8N6Y0;P80723;O43513;Q9NS23;Q6  
PI48;Q00653;Q9UHN1;Q9Y5J3;Q15833;Q8N488;P0CG48;P49459;P29083;O75791;O14925;P60953;Q96  
GG9;O75382;P25205;O60504;O75154;Q96EK4;P07315;Q9P0U1;O14556;Q9NWB7;P40855;Q08752;Q138  
95;P35251;Q9HCK8;P46013;Q14676;P62316;Q8N7H5;O43318;P47928;Q92600;Q495M9;O43395;P4933  
6;Q9GZT9;Q9ULZ2;Q96AY2;O95487;Q9Y294;P61758;Q96PU4;Q9H4B6;Q969V6;Q5T230;Q9H2L5;Q99700  
;Q6NZ67;O14964;Q9P1Z2;Q96PK6;Q9UIF9;Q8WVZ9;Q9Y4P8;O43765;Q68CP9;Q6ZVN8;Q96D15;Q9NUS5;  
Q7Z4H3;Q9BVS5;P24863;P27986;Q16385;Q5T2W1;Q05086;Q9UKF6;Q9NPP4;Q9Y2G2;Q8TAQ2;Q86WJ1;Q  
01831;P39019;Q92844;O75558;Q14493;Q8WUM0;P62256;Q96018;Q9BQE4;Q92793;Q12894;Q92734;Q9  
NY27;Q93052;Q01860;Q9H204;P18848;O94817;Q9NWX8;Q96MF7;Q9NSC2;P28066;P68036;P63000;Q9B  
ZR8;O00165;Q6ZRX2;Q9UBX3;Q8N6T1;P62987;P49593;Q9P287;Q8IXQ6;O95613;Q9UL18;Q14683;Q8WVM7;P527  
36;Q92845;Q01826;Q8WTW3;P63272;O75800;O15371;Q04637;P21675;Q9NXX8;Q9GZX5;Q3SYG4;Q9Y37  
5;Q86WI3;Q9H9A7;P20810;Q96SW2;P13994;Q96MN9;Q99436;Q15853;Q9GZV4;Q9BZF9;P24941;Q96MU7  
;Q96NA2;Q96RN5;Q9BQA5;P13010;Q8IY92;Q7L1V2;P78347;P30047;Q9UKK3;P07320;P62266;Q8N4C6;  
P42677;Q9H0G5;Q9NRD1;P35232;Q9UBD0;P49593;Q9H840;Q15652;O60869;P61962;O60518;O14512;Q  
8NET1;O95229;Q9UBX3;Q8N6T1;P62987;P49593;Q9P287;Q8IXQ6;O95613;Q9UL18;Q14683;Q8WVM7;P527  
36;Q92845;Q01826;Q8WTW3;P63272;O75800;O15371;Q04637;P21675;Q9NXX8;Q9GZX5;Q3SYG4;Q9Y37  
5;Q86WI3;Q9H9A7;P20810;Q

6X2;Q6IQ32;O14490;D6RGH6;Q9Y2W2;Q7Z3K3;Q9UHB7;Q96B67;Q96BK5;O15287;Q96FV9;Q9GZZ9;P30084;P62312;O00213;P08729;Q9BUH8;Q92585;Q8IWI2;Q14527;P55735;Q9Y3T9;Q9H9Q4;Q8ND76;P20248;P51946;P24863;P49354;Q8WX92;Q8TAP9;P49419;Q8N9A8;Q9UDY4;O15083;Q96CJ1;O15234;Q9P278;Q13619;O75306;P35226;Q9H5Z6;Q13617;Q13761;O15116;Q8IX03;Q96M61;Q13405;Q969S3;Q14739;P26368;Q8IYW8;P60709;Q13257;Q15327;Q5JTD0;Q9NWK9;P41220;Q15059;O75935;Q9Y3I1;P08294;O14910;Q6ZN17;P07315;Q16543;Q8WV28;Q5XUX1;P62316;Q9NS37;Q14746;Q16254;O75161;P49589;Q9NXB9;Q16864;O00411;Q96QE5;P25789;Q9HCS7;Q9H4X1;O75691;Q86TA1;Q9UID6;P20290;P11308;O15117;Q00653;P27695;Q8IXQ6;P05937;Q9BUL9;P32243;O60239;P09917;P49754;P35321;Q9BYD1;Q68DX3;Q9NVH2;P35813;Q00597;P83369;P38432;P63000;Q09161;Q16537;Q7Z6J0;Q9H5I1;Q96PM5;Q9H0A6;Q96C86;P35227;Q95817;P49639;P26196;Q9BQS6;P14625;Q8IX12;P15880;Q96T58;P55036;Q96HI0;P61244;Q12894;Q9ULE6;Q06609;O75663;P62081;Q9H040;Q12904;Q8WW12;Q9NV31;Q9UI10;P30307;P19474;Q02930;P56270;P62913;O43829;Q9HAU4;Q29RF7;P48788;Q9UK99;O15111;Q15022;P68133;O95810;Q8WXF8;Q9NPP4;Q00613;Q9BSJ2;Q6NZ67;P35869;Q9Y5V3;Q13469;Q15024;Q15154;P22695;Q06787;Q13573;O60663;Q9NRL2;Q9BVC4;Q5JVS0;P24522;O14787;O43172;O15061;Q14207;P51610;P11474;Q9H4A6;O75528;Q9NPE3;O60841;Q15047;O14746;Q8IZP0;Q8IY31;Q9H788;Q71SY5;Q96BT3;Q99728;Q13620;P35637;P55060;Q8N6F7;O94868;O95153;Q13952;Q08AD1;Q9BQ83;Q9Y6K9;Q9BU89;P31350;Q06546;Q9Y5Q8;Q96P70;P62140;O95456;Q13363;Q14008;P05783;Q9Y6J9;P13489;Q9UKX2;Q9H0A8;P61956;O43257;O95633;Q9Y376;Q6P2E9;Q99747;P49368;Q15388;Q9UHF7;P09914;O75934;O95198;Q969E8;Q8WV44;O94986;O95453;Q9BV47;Q96S55;Q13547;Q14865;Q8WWW0;Q9HAN9;Q12815;Q9HCD5;P49959;P16157;P02538;Q12824;O00762;Q66PJ3;P04264;Q9UPX8;P09913;Q9H2L5;Q14872;Q8IXK0;O0148;Q13490;Q86SE9;P38159;Q9H816;Q92624;P49902;Q9UKF6;Q96KR1;Q8NFF6;P12757;O75909;Q53HL2;C9JE40;Q00005;P62854;Q6PJ61;P78318;Q9Y2D9;Q6RW13;Q6VMQ6;P56945;P30876;Q16740;O75351;Q9Y5A6;P53992;O43264;Q8NI35;P28065;P39019;Q8N5D0;O95684;Q9H706;Q08999;Q9BRP8;P60842;P19838;P46087;P14921;Q15628;O94842;Q9H9E3;P49770;Q9UI12;Q8WUF5;Q9NRI5;Q9Y262;P41227;Q15013;P30153;P78371;O75925;Q7Z4H3;P41002;Q9BSB4;Q8WXE1;Q96IV0;Q9UPV9;Q02241;Q9BRV8;Q96JI7;Q9H9Y6;Q96IZ0;Q9Y2J4;O14497;Q9NXX6;P62993;P02533;Q6BDS2;Q96Y31;P49789;Q9UJY5;Q9P0V3;Q9BY44;Q8N5A5;O14829;P15336;Q969S8;Q9P086;P78543;Q7Z6G3;Q06547;Q13568;Q9NRR5;P52657;Q92889;P13010;P06746;P02489;Q9NS23;Q8IUC6;O43913;Q15051;Q99698;P54253;P54098;Q15003;O14879;Q969H6;Q9H9F9;Q7L0Y3;Q9BRA2;Q16186;P21675;Q9H8S9;Q9H175;P84103;P46379;O43159;Q6PJG6;O60716;Q7Z699;Q9NPI6;Q96ED9;Q86V81;P43360;P22735;P02511;Q04917;Q9BSI4;O60759;O94811;Q9UBB4;Q08379;P48552;Q9BSM1;Q96A44;Q9UKJ5;Q14164;P61758;Q9UPT5;Q6DKK2;Q14203;Q9Y281;Q92934;P31314;P23381;Q13625;Q9Y5S9;Q5TB30;O94888;P01011;P27348;P81274;Q13769;Q8WTW4;Q5TCQ9;Q12873;P15407;O95295;P51825;P52655;P06748;Q9P209;O95628;Q96LC9;Q13829;Q9Y3C0;P35269;Q15554;P50750;P26599;Q8NHQ1;P23396;P27815;Q92900;Q7L590;P25208;Q2TAK8;Q9081;Q00987;O15235;Q96FX2;Q9GZV4;O00267;P33316;Q9Y4E1;Q92841;P05388;P28331;Q9Y540;P5212;Q9H3M7;Q13309;O75190;Q8TAD8;Q9BU61;Q13112;Q92796;Q15014;P49427;O15372;Q9Y2L1;P33076;Q09666;Q96RK0;P29084;Q7Z465;P12694;P23025;Q9BW71;Q9NR56;Q96QK1;P07814;O75618;Q8TAC9;P23588;P42226;Q96GC5;Q9UM54;P43358;P51959;P15884;Q13158;Q5SW79;Q9HOS4;P36952;Q9NS56;Q8TD23;O14818;O60907;O15350;Q8TBN0;P13349;P40855;Q9C035;P15924;P14678;Q9NY27;Q14764;Q96EA4;O00167;Q8N2W9;Q14CW9;Q03112;Q9Y2D8;Q9BTW9;Q9Y285;P83916;O75530;Q13023;O75807;O75496;Q9H444;Q53HC0;P41252;Q96SN8;Q15029;P26373;Q8N1B3;Q5T230;Q9C086;Q495M9;O00541;Q8N5F7;Q9UDY8;Q86UW6;Q96R06;Q9Y2T2;Q13867;P01100;Q7Z4G1;Q969L4;Q14152;Q15599;Q96GV9;Q9BV57;O43261;Q14145;P41236;Q96BP2;Q92560;P52435;Q86WI3;Q9BSQ5;P55265;O15266;P57740;P17275;P62166;Q5EE01;Q9HD42;Q9Y4P1;P11802;Q9Y6K5;Q7Z417;A8K8P3;Q9H7H0;O15056;O75362;O14929;P57678;Q13111;P32519;Q9NPJ4;P08133;P31150;P23618;Q13526;Q9Y3B2;Q9Y3H7;Q9P0M2;O94921;P50748;A8MVW5;Q15233;P23769;Q92793;O60888;Q9Y6N9;P61604;Q9Y5J3;Q9UBY9;Q96NY9;Q00994;Q96KS0;P35711;Q8IZL8;Q9UIF8;O43865;P19419;P56693;Q6ZP82;Q92797;Q5VYV7;P67809;Q9NNW7;P61024;Q5T200;Q8IV36;Q7Z7A1;Q99613;Q6PGP7;Q9BUE0;P61586;Q9GZL7;Q6P1M3;Q4U2R6;Q9Y295;P53999;P46937;P31483;Q86WX3;Q6PI26;Q9NX70;Q13033;P61201;Q9NWX8;P61457;Q05048;Q1724T9;Q9H2J4;Q9NXF7;Q9Y375;Q9BXW4;Q96QT6;Q99708;Q9UBZ9;P63208;O43167;Q6P2Q9;Q04792;Q16082;P84022;Q8WW35;Q86VW0;P14649;O00186;Q9UMS6;P23246;Q12906;Q9Y512;O00567;Q15172;Q9BVW5;Q9BYV8;O14602;P54725;Q9BQD3;Q9UKN8;P17096;Q86WB0;Q8NFG4;O43156;P61962;Q14689;Q9NWA0;Q9H1D9;Q9NTX7;P15172;P78345;P17947;P46527;Q969T9;Q9GZR5;Q9P2R6;Q6NZ36;Q9BX66;P56524;Q96PU4;O95229;Q96F07;Q9GZV5;Q7Z7C8;Q6W2J9;P59557;Q99623;P23258;Q9NUS5;Q9Y6K1;O14907;O00425;Q5T681;O75821;P42704;P60660;Q14678;P12277;P17544;O43715;Q96NA2;P11831;Q9Y2Y9;Q00403;Q15906;Q8NI29;Q8TCI5;Q9UJM3;Q9HC77;Q96HR3;Q9UL40;Q9H0F6;Q99417;P78344;Q9BXM0;Q53EL6;Q96MN9;Q8IUD6;O14530;Q04206;Q9NPC6;O60516;O14639;Q8N1E6;Q9BVI4;P29692;Q16520;O95931;Q9UNL4;Q3L8U1;Q2M1K9;Q63HK5;P83436;Q7L2E3;Q6STE5;Q96GX9;Q12962;P69905;Q15121;Q9NPP8;Q15056;O14964;P63279;Q06455;P05787;Q9Y5Q3;Q9UHK0;Q96G21;P60953;P42224;Q676U5;Q9HAT8;O75607;O00423;Q12816;P49459;Q13404;Q9HCH5;Q96M88;P42568;P37275;Q68CJ9;P28347;Q7Z739;Q6NZI2;P10914;O60232;Q14204;Q96FH0;Q8NI08;Q6PJT7;Q92734;P78537;Q5HYK7;Q9P1A6;Q9HAV4;Q16666;Q9UI32;P17482;O43493;Q8TDY2;O43745;Q8NHY2;P49792;O75381;O75886;Q9ULG1;O95503;Q9GZZ1;O96018;Q8TDH9;Q9BYX4;P54920;O43395;Q8NG27;Q13618;P22087;P23284;O15127;Q9Y3C5;Q9UKI9;Q9BUL8;Q9UKX7;Q93034;Q9H869;Q9GZQ3;Q7LUM5;P36543;Q06330;Q99873;P11940;Q998168;Q12905;P35251;Q99497;Q15910;P14635;Q15370;Q14232;Q9Y296;Q99607;O60296;Q0VDD7;Q32MZ4;O00716;Q8NBT2;Q92529;Q10570;O75030;Q8N726;Q9UBS3;P78395;Q6WBX8;Q8N668;P48200;Q9Y613;Q9NRD1;Q9Y2M0;Q9NXV2;O75340;P20585;P26641;P06396;Q7L9L4;Q92540;Q8WVZ9;O14599;O60437;Q9NSC5;O75164;Q86SQ9;P55198;P40939;O60477;P05413;P55345;Q9NX18;P24385;Q6ZU52;O75151;O00139;Q9NVM9;Q04724;Q9BUR4;Q14676;P08865;P49005;Q14999;Q7Z614;Q96CW5;P05121;Q8WXD5;Q14194;Q15691;Q9NZI8;Q9UK41;Q13884;Q9H4L7;Q13200;Q13901;Q92733;P62266;Q9Y297;Q9Y468;Q68E01;Q9Y3D8;Q9HAU5;Q9NXX8;Q14686;P31948;Q99962;Q15545;P38935;Q9HAW4;O95396;Q99547;Q00978;Q8N612;Q9GZU7;P62877;Q2VPB7;P32189;O00308;Q6P1K2;Q15653;P22557;O43463;P63241;Q9UKG1;P46060;Q9UNS2;P62308;Q562F6;Q9NY61;O14556;Q15436;Q96TC7;Q9NWT8;Q9Y4Z0;Q8TBE0;Q13094;Q8TAQ2;Q8IWE5;P35573;Q9UK45;Q01844;Q9HCU8;Q9UI95;Q15560;O43318;P14868;O43148;P52565;P13640;Q6ZRQ5;P08579;P38936;O43390;Q92541;Q13542;Q16594;Q9Y5N6;Q5T447;Q99750;Q8N6I1;Q96MT3;Q15366;Q96FF9;O15131;O95232;O95347;Q9GZX5;Q8IWL3;Q16890;Q9H1A3;Q8N684;Q13064;Q86UE4;O95049;Q9

P2T0;Q9H4I2;Q12789;Q9HCE1;Q8WXG1;P51965;P17676;O43639;Q96EN9;P24278;Q96T88;P15170;Q9B  
PZ3;P43355;Q01105;Q9UKT7;P46976;Q99700;Q16630;P55789;P78317;Q15542;Q16385;P62277;O949  
06;Q92562;Q9H0M0;Q99615;Q9UIV1;Q9Y248;Q9Y3Z3;Q5VTD9;Q7Z2W4;O95619;O75843;P25205;P0506  
2;A8CG34;Q9Y3E5;O94874;Q09028;Q5JR59;Q8TF46;P55854;Q93008;O60732;Q9Y4Y9;Q9UI30;O14776  
;Q01082;P08779;P27816;P23490;P20810;Q01534;Q9NWF9;Q68CZ2;Q9UMS4;Q06830;P50914;Q9HB03;  
O95257;Q5VSL9;Q5TAQ9;P61077;Q9BZV1;Q9EIZ7;Q6ZW49;Q8WTV1;P32929;Q8N5U6;P62072;Q07955;P  
49450;P50749;P18615;Q9H0W9;Q7Z5V6;Q9UHH9;Q7L804;Q96QU8;Q9NZC7;Q13794;Q9BT92;Q13428;Q9  
Y250;Q6QNY0;A7MCY6;Q96CN9;P0C1Z6;Q9Y5P3;O14974;Q9H944;P60510;Q9UKJ3;Q9BYK8;Q5T2W1;Q9N  
R46;Q14315;Q5SQN1;Q9Y5K5;O75800;P48382;P20265;Q9P2R7;Q13216;Q14980;Q5VWG9;Q02078;Q8TE  
P8;Q9BW66;Q9UBX3;O14503;P11532;Q9UPV0;Q9HCE7;Q92665;Q9H2H8;Q13501;Q076031;Q8IZH2;P4936  
6;Q15561;Q969F1;O15519;P82094;Q9BZE9;Q9BT78;Q86V97;P46779;Q9H0B6;Q07352;P62714;O60921  
;Q8N5C8;O60825;Q9NYP7;Q8N3C0;Q8N2Z9;Q16548;O95201;Q6PGN9;O95707;P28698;O75525;Q00059;  
Q15633;P78352;Q14258;Q9Y3C7;Q9H0N5;Q92922;Q9BWU0;O43303;Q15102;Q8IW35;Q9Y333;O43299;Q  
9BXH1;Q9NSA3;Q9HB19;P63010;Q9H1K1;Q13129;P52298;Q8N8U2;Q13642;Q9GZT8;P13056;Q9UIS9;Q9  
H9A7;Q10567;P52272;P28066;Q99966;Q9UQB3;P28715;O00303;Q01094;O75832;Q14814;Q9H467;O75  
446;O43516;Q7LBR1;Q99614;Q8NCD3;Q13137;Q9UHY8;O75969;P18848;O75122;O43482;Q9ULJ3;O149  
25;Q96RN5;Q86WH2;P78358;Q9UHV9;Q86WV5;Q96HW7;Q9UML6;Q99575;Q14566;P17535;Q92597;A6NIX  
2;P62314;P41091;Q99732;Q96DX5;Q3KNV8;Q53GL7;P98170;O43734;P30793;Q86US8;Q86VS8;P07910  
;Q14493;Q9NX53;Q92754;Q92572;Q92698;Q15834;Q969G3;Q92674;Q9H1B4;Q8TAT6;O43439;Q8TF40;  
Q9UMS0;Q15819;P53675;Q00534;O43809;Q9NPB6;P09467;O75817;Q8NE71;Q15528;Q9HB96;Q13045;Q  
9UHX1;Q14533;Q13233;Q92844;P49790;P35580;Q13011;Q12798;Q9BUP3;Q8IVI9;P18583;Q8IXJ9;Q1  
5696;Q14186;Q9H8Y8;Q9UIF9;Q9Y3V2;P49116;Q01201;P21127;Q6R327;Q9UHR5;Q92985;O14980;Q8N  
F91;Q9H6Z9;P47928;P37198;Q9H5P4;Q9HAF1;Q9NPD3;Q00536;P49750;Q9BQ70;Q8IZQ1;P41134;Q9UK  
L3;Q8TF74;Q96TT1;P08621;Q9Y224;O75143;P10124;Q13426;P68871;Q13084;Q9BW27;Q15173;P1592  
3;Q9Y6H5;P46783;Q13425;P52294;P14618;O14613;Q04726;P51948;P25791;Q8WXF1;Q5JY77;Q9Y697  
;O95487;P99999;Q5VU43;Q9H4B6;Q53G59;Q9NXB0;P51398;Q96MH2;Q2M3C7;Q8TDB4;Q14103;Q9NVV9;  
P28370;P62310;Q9UER7;O94776;Q04695;O96017;Q14978;Q96BD8;Q92905;Q14687;Q9Y221;Q14749;O  
43542;Q96AY2;Q2VPK5;P49257;Q9UL42;Q07666;Q8TDR0;Q14151;A1L3X0;Q9H8T0;P63165;Q9UJY4;O9  
5071;P49336;P28074;Q9H6U6;O00165;Q9P0W2;Q8N3L3;Q7Z6E9;Q9HBM1;O95865;P21953;Q8N488;Q02  
556;Q06587;Q8N9R8;Q00577;Q9HCC9;Q9Y2X8;Q9NR50;Q6RFH8;O15126;Q9Y4B6;Q9NTG7;O95983;P557  
69;Q99933;Q99459;Q14137;Q9P0J0;Q9HBM6;P61326;Q9UNN5;A5YKK6;Q9Y3M2;O15162;Q14139;P4991  
8;P49356;Q16851;Q8TEQ6;Q96S59;O14832;P18887;Q8IWZ3;P0CG48;P46100;Q86TC9;P38919;Q9NX08  
;O14641;Q9UJT2;Q9BUX1;Q9UKK6;O75901;O43513;Q9UHCL;Q86XR8;P50402;Q9UNA4;Q86VP1;Q9UKL0;  
Q96L92;Q9Y2H0;P26358;P78396;Q15386;Q9UNY4;Q15398;Q9H074;Q9Y4R8;Q12982;Q6P1J9;Q6ZNE5;O  
95376;Q9Y6B2;O00422;Q7Z2E3;Q8WWQ0;O95999;O43615;Q12933;P30281;P78347;Q9XRX5;O75145;Q9  
NZM4;P24539;O43791;Q96MF7;P46939;Q86YP4;Q96SW2;P57081;Q13485;P62753;Q9Y2M5;Q9Y4P8;Q8N  
D04;Q13144;Q96B36;Q9UIF7;Q5JR98;Q8NEU8;Q8NHZ8;Q9UQC2;P22531;Q9NVP1;Q15369;A9UHW6;P551  
97;Q9NUL3;Q6VY07;Q16658;Q86XL3;P35658;Q9H8M7;Q92917;Q969X6;Q9NX63;O43310;Q08209;P1884  
7;Q9HD36;Q92556;Q9BYE7;Q92769;Q12834;Q6UWZ7;O15105;P55199;Q9ULW0;Q13243;Q9NZJ0;Q9C005  
;Q14240;P08670;P63151;Q9UPR3;O94817;Q9UII0;Q9UBU8;Q8TAF3;Q7L2H7;Q13522;Q15427;Q8N108;  
P63272;Q15544;P20749;Q9HAZ2;P83876;Q9P2I0;P17028;Q7RTS9;Q99590;Q9UMX3;P49848;O43663;Q  
86WU2;Q15643;Q15329;Q8TAE8;P50222;P28324;Q6P4R8;Q9UKV0;Q9HCU9;P52597;Q8WW38;Q96G23;O0  
0257;Q15652;Q8WXC3;Q9UL45;Q9H0E2;Q9NVI1;Q9NQG5;P15927;Q9H160;Q8TCS8;Q8IVM0;Q96MG7;O75  
152;P25788;Q9UNS1;O43502;P62136;O14896;Q9H9G7;P62495;P24941;Q14157;O75334;P40337;Q86T  
P1;Q05519;P53804;Q9Y603;Q9UBS8;Q9Y5N5;Q99689;Q8TDC0;Q76FK4;Q9HCK8;Q15654;O95278;P0279  
5;Q9GZT9;Q9UN79;Q13765;Q9UILL;Q3SYG4;P38646;P42574;P17480;Q8N7H5;Q04323;Q14019;P50616  
;P19367;Q13185;P63162;Q16576;O95886;Q9BVC3;Q2QGD7;O15226;O75376;Q96AB3;Q70Z53;Q49AN0;  
P0D181;Q8TE69;P19429;Q9ULD0;Q15025;P67775;Q5UE93;Q86TB9;Q8NFH3;P10809;Q9BUJ2;Q15459;O  
60264;Q9BXP1;Q15796;P48634;Q9NZ52;Q6NVH7;P42771;Q9NSC2;Q9UHI6;Q9H0G5;Q8TE76;Q9P0W5;P1  
1441;Q9H9L3;Q14192;P62324;O00204;Q6UUV9;P62318;Q96CS3;P25963;Q96KN1;Q96RL7;P59998;Q96  
GC6;Q99594;P41182;Q9Y6X8;P35244;Q96K30;O60711;O15360;O60294;Q9BXJ9;P07093;Q99504;Q9NR  
R4;Q9NS73;P11388;Q9BQY4;Q9H446;Q8NI27;Q8IY81;P46781;Q93009;Q9Y608;Q96KQ4;O43541;Q96P7  
1;Q13868;Q86X83;Q8TD16;O15379;P25786;Q8TAP6;P06733;Q01081;Q96RL1;Q9NZU7;Q9HB75;Q96PK6  
;Q6PIX5;O15205;Q9P1T7;Q96B01;P19012;Q99619;O14508;Q15004;Q9Y2D1;Q9Y2G2;Q8N6T7;Q96DI7;  
O75167;Q969U7;O75475;Q14690;Q16829;O43324;Q9NRF9;Q9NX95;Q9UNH5;Q8TE09;Q9P2M1;P10008;P  
33240;Q16514;Q9UKC9;Q9BXF6;O95251;Q96EV8;Q9H211;P25063;Q9Y3F4;Q8IXH6;Q13616;Q9NR77;Q9  
HCM9;O14618;Q8TBB1;O95202;Q9P2B4;Q8IYD1;Q8IX07;Q96CV9;Q9ULX6;P78559;Q8WXU2;Q8N5M1;O43  
752;Q8TES7;Q9H9Z2;P12755;P62879;O94850;Q13127;Q9ULZ2;Q4LE39;Q9UBF1;P13994;P23921;P530  
41;Q8IU60;Q01850;O75940;Q9BYC9;O75155;Q8N1B4;Q8WV99;Q9Y252;P13984;P20226;Q969H0;Q1295  
9;Q9UHV2;Q96AQ6;Q15424;Q13227;Q12874;Q14511;O95777;Q75QN2;Q92890;Q3YBR2;Q14160;Q14653  
;Q5TC12;Q86Y97;O00505;Q9UI36;Q9UBP6;Q9P2Y5;O75494;P09972;O75531;Q5TA31;P54727;Q9BSJ6;  
Q9H2K2;O75943;Q9BSD3;Q9UDY2;Q6ZNA4;Q14397;Q96D15;P25815;P32780;Q9Y4A5;Q7Z7A3;Q9UQF2;Q  
9UKV8;P41208;P51116;Q8N7W2;O00512;Q8WVC0;Q9H840;Q9Y2X9;P11387;P12883;Q9UDV6;Q92845;Q1  
5287;P24928;Q86YC2;O43918;Q99496;A8MTZ0;P36402;Q9Y3E7;Q9HD26;P52747;O75582;P26651;O60  
784;Q9BQI5;P10242;P62987;Q9NPI8;P57077;P16333;Q9BXF3;P62826;Q12983;P50453;Q9Y462;P087  
27;Q9H410;P22670;Q9H9T3;Q6NUP7;Q9UBD0;Q2TAZ0;Q15750;Q9UKT9;Q92558;P43243;O60671;Q1553  
2;Q04637;O60832;P31943;O60563;Q9H4P4;Q9Y294;P23497;Q8IUR6;O96000;O94992;Q92843;Q6IE81  
;P26447;Q99816;O75665;O15392;Q2M2Z5;Q5T8A7;Q9Y6G5;Q9NXV6;O43747;Q92499;P43356;P05412;  
P62304;Q9H1Y0;Q8N9B5;Q8WU90;Q8WY41;Q8N5R6;O95476;O95073;Q9UPY8;Q9E125;Q14669;Q9NYB0;Q  
8WVJ9;Q96CG3;Q9H3R5;Q86WV1;Q9NV92;P49711;Q14781;Q9NV88;Q8NFF5;Q01826;Q7Z5K2;Q9BQ69;Q0  
2447;O15297;Q9BX70;O75410;Q96RU7;P42677;Q9HBL0;O75436;Q9H2U1;O60291;O75822;Q9BXW9;Q14  
738;Q5VIR6;Q8IX90;P28749;O95273;P09012;Q14683;Q92831;O75419;P42025;O95793;P18146;Q8N3  
U4;P46776;P05198;O43504;O94973;Q9P1Q0;Q15631;Q9H204;Q8WTR7;Q6ZVM8;Q8TEL6;P07327;Q9P2M  
7;O15164;Q96G01;P58340;Q99436;Q13114;O43447;O95602;Q02577;Q8WVM7;Q9NPI1;Q9BVN2;Q8NG31  
;P24864;Q8N196;P04156;P10909;P63172;Q01831;Q96T23;Q15629;O75489;Q5T7V8;Q8WY54;Q16822;  
O14576;Q9NQX1;Q9P013;O94925;P27797;Q15853;Q96CB8;Q86U86;Q13439;Q9NQ48;P31949;Q03060;Q

7Z460;Q15759;Q9NPC3;O60885;Q9P031;Q9UFN0;O95751;Q9BV73;Q16526;Q9UHB4;Q04725;Q13895;O60238;P17036;Q9BYG5;P39748;P09497;P61981;Q9HCI5;Q02410;O60506;Q3ZCQ8;Q1ZZU3;P0CG47;P52815;Q8N1I0;Q9Y5J7;P25787;P55327;Q99814;Q86TG7;Q9BTL3;Q99471;P36873;Q86XI8;Q86XK2;P46777;Q9NZZ3;Q14154;P21980;Q9NZQ3;Q9UKK3;Q01658;Q9BZK7;Q9H900;A6NKF1;Q92830;Q9GZRL;O14893;Q9BSW2;Q9H469;Q5FBB7;O14734;O14558;Q9UP83;Q8IXJ6;Q12796;Q15054;Q9NQ31;Q96ST3;P55884;Q13416;P09629;Q86Y13;P10599;O75396;Q9Y2Y0;Q9NUP1;P24534;Q9Y6M1;P11161;Q9NVR2;Q13888;Q9BQ95;O75150;Q96JM3;Q9Y6X3;P13647;Q15038;Q9NQ57;P42765;Q9Y6D6;Q9GZX7;P09661;Q969M7;O75251;P45973;Q92973;Q9NR09;O15265;Q9UGK8;O43290;Q12888;Q86VY4;P23511;Q7Z6Z7;O75113;Q9NP97;P45984;Q9HCK5;Q8N7J2;Q9ULW3;P80294;Q96DZ1;Q8NC51;A6NIH7;Q5BJF6;P78549;Q03111;Q99717;O60664;P49593;Q86WV6;P15036;Q9HC62;O15144;P78560;Q96AJ1;Q9BW60;Q8N6Y0;P62424;P29372;Q08945;P46013;Q969V6;Q8IXH7;Q6PI48;O14862;Q04864;P80723;Q8WXE9;Q08211;O60293;Q9BZF9;Q8IY63;P40763;O00401;Q9H9D4;O60260;Q8WU39;Q9UQ84;Q8WVM0;O60504;O96004;Q12972;Q8WYA6;Q9H668;Q9Y5A7;Q96BT7;Q86SQ7;O76083;Q9H5J8;O95218;P27540;P49910;O95997;P52292;P12270;O00743;Q9NWZ5;Q9NVN8;Q96GD0;P27694;Q9NUW8;Q8NDT2;Q9NXR7;Q68DK2;Q9UK73;Q96N03;O95848;Q92600;Q9HD40;Q68CP9;Q8WWL7;P08151;Q9BTA9;P16118;Q92804;P07197;O15040;Q9UKV3;Q92614;O14727;P23508;Q3B820;Q14974;Q00839;P50570;O00625;O75688;P54278;P48380;Q96A56;Q9UIC8;Q9U LU4;Q96PV6;O95782;P09234;P35998;P60900;P78545;P61313;Q99684;P62256;Q9Y4L5;Q9H3P2;P50549;Q8IY92;Q9ULH7;Q08752;Q6NUN9;Q9NWS1;Q9NVD7;Q92988;Q86VX2;O60645;Q96MU7;P22392;Q9Y5P8;Q9P0U1;P52594;Q14011;Q9NNW5;Q9UN37;Q92575;Q9Y3A3;Q9Y3D0;Q92547;Q9P287;Q9BZE4;O95613;O75558;Q8WV24;O00566;Q8TC71;Q92636;P21673;Q9BQA5;P20042;P02545;P22415;Q9H9C1;Q9UQ80;Q86WG3;O14646;Q9P1Z2;Q99996;Q96QD9;Q9NRC8;Q13148;Q9UBB5;Q8NFH4;P22626;P10828;P23193;Q70EEL1;P35520;Q15596;Q8WYH8;Q15797;O43708;O00233;Q86XK3;O75791;Q9UM11;P19388;P52736;O15527;Q9H0W8;Q8N4C6;Q8N3V7;Q9UBQ5;Q9H2C0;P67870;O95644;Q8NFH8;Q15543;Q5C9Z4;Q6QNY1;Q8TA86;P40692;Q9BQY9;P51668;P16220;O43251;Q13569;O60869;P14373;O14757;O14512;Q92783;Q9H4D5;Q13228;Q9P2K3;O94763;P35232;Q8WTS6;Q9NRN7;Q9BYZ2;Q9Y605;Q9NQ92;O00463;Q96LI5;Q9NQR1;Q92466;O75674;P55210;Q08AG7;Q9Y3B7;Q9BQE4;P53805;Q9Y3Y4;P46108;Q9NXR1;Q5F1R6;Q8NFD5;Q9H0C8;P30047;Q9NQP4;O95271;Q15293;Q96C74;Q86Y01;Q5T3J3;P22830;Q86YF9;Q15562;Q99638;Q9Y4X5;Q96G25;Q8N895;Q8N3F8;P31946;Q02040;P62750;Q96IY1;Q9ULK4;P51531;Q9NR28;Q07157;P52630;Q5VTR2;Q19AV6;P42768;Q5VWX1;P30260;Q8TDB6;Q9BRQ6;P05386;P49454;P21912;Q8IUD2;Q9UNP9;P21399;Q9UPN7;P08107;Q04837;Q9Y3A5;Q96JC9;Q15326;Q9UQR1;Q8IYW5;Q13123;Q5D1E8;Q96EB1;P10515;Q86U42;Q9UBK9;Q99733;Q9P270;P63261;P61970;Q9UL03;Q96EY8;Q9H902;P50452;Q8TCJ0;P40222;Q9NVV4;Q9NWZ8;P06730;O43255;P19338;Q9NT62;Q9NZL3;P18754;P14672;Q96JJ3;Q96Q83;P20073;Q9Y5Y2;Q96JB2;Q9NTI5;Q9UNE7;Q9NQ87;Q9BYG3;O43236;P98171;Q9Y618;Q96CA5;O15524;Q15185;Q13838;Q6P9B6;Q7L1V2;P62508;Q9NRG4;Q9P032;Q9Y448;O76064;P30304;Q96EK4;Q8WUH2;Q9UBI1;P50995;Q01664;Q13561;Q99704;Q9UPN9;P27986;Q15365;Q6PD62;O43765;O95373;Q14498;O75175;Q9UJY1;Q9NP66;Q8WYQ5;Q9C0E2;Q8IYF3;Q9BRP4;P39687;Q92530;P26678;Q8IYI6;P61081;O95163;Q9GZY8;Q96QF0;P15822;Q96HA7;P07320;Q9NTK5;Q9NYF0;P56537;Q7L190;Q9UBC9;Q9H3K2;Q13287;Q15699;Q9UN36;Q96CM3;O15042;Q9H6Z4;P14859;Q9Y6E7;Q9H492;Q9ULV3;P13807;Q5JSZ5;Q5JTC6;P82933;Q9UMX1;Q16531;Q9H7T9;P15559;O14920;O15304;Q9BXS5;P23297;O00161;P56279;Q9ULR5;Q9UBC1;Q6P1W5;Q86X95;Q14209;Q93062;Q9UHD9;Q9Y2P7;P04406;O75323;Q01860;O60216;Q86WQ0;Q6UVJ0;Q86UW9;Q8WVW9;Q96GM5;O15155;Q9UMX0;Q6PGQ7;Q66K89;Q86VP6;O14713;Q9UBD5;Q8IYD8;P01106;O43660;O95402;O75400;Q96F86;Q9HB71;Q9BZD4;P14316;Q9BQ89;Q86WJ1;Q99551;Q9UL18;O75081;Q70YC5;O60518;Q8WUM0;Q03468;Q96EF6;Q9UBF6;P35712;O96019;Q9ULM3;P07196;O95433;Q9NPJ6;Q9UH77;Q9UQL6;Q7L5N1;Q9UPP1;Q9NYJ8;Q13105;P06400;O43583;O75953;Q92759;P35548;Q7Z2Z1;Q96T37;P08047;O00291;Q96B97;P49756;Q96EY1;Q9UKT4;Q05516;P42575;Q9HC52;P63146;Q96B26;P12956;Q8HWS3;Q9GZS3;P11171;O00255;Q12830;Q8ND90;Q9Y6D9;P52948;Q96JB5;Q92870;Q6VVB1;P12980;Q16629;P42772;P52737;Q92621;P31749;Q9BYG4;Q9NRY2;Q14839;Q9BXP5;Q63ZY3;Q9Y2X3;Q9H583;Q9BVS5;Q8N1L9;P61088;Q9NR22;Q8N8R7;P54252;P14866;O15397;O15405;Q8N8A2;Q13155;O60936;Q15021;P30154;P35638;P20618;Q5TZA2;Q96HA8;P62328;P29083;P31276;Q14677;Q06520;Q6ZVK8;Q9UGK3;Q15466;Q96T76;Q96PU5;P04198;Q9BQ15;Q9H8E8;P80303;Q66K74;Q8NBZ0;Q9UBU9;Q12769;P54274;O75154;Q8TEB1;Q9H7S9;Q9NPF5;Q13432;Q9UJW9;P09874;O15015;Q8WTW3;Q9BR76;Q96CD0;Q96EP1;P51532;Q9BVP2;Q8TBK2;Q9BQ90;Q99741;Q9H981;Q16401;Q92552;Q9UQK1;Q9Y3D3;Q8WVK7;O15371;Q7Z3C6;Q9P2W9;Q9NYF8;P50502;Q6VDF9;P43364;Q6I9Y2;Q8N140;P23760;Q13541;Q8IZD2;P54259;Q9BTP7;P36404;O96020;P55072;P63167;Q13951;Q9H2P0;Q96LA8;Q8IY57;P18054;Q15723;O75182;Q01130;P17980;O00570;Q9UJW3;Q13415;Q5TAX3;Q8WYH3;P43357;O75928;Q9H4M3;Q8TEK3;Q13347;Q8IZD4;Q9H7L9;Q96HR8;O75170;P13667;O94983;Q9UKT5;O60573;P11142;Q9NX40;O15084;Q9UKT8;P60604;Q9NRA8;Q96GG9;O43399;Q9UHN1;O15511;Q14790;Q9C000;P55771;P35900;Q13042;O14777;Q2NKJ3;P31269;Q9P2J5;Q15306;Q9H0C5;Q5H9L2;Q9NWT6;Q9NPG3;Q9H1J1;Q9NRL3;P41212;Q16278;O75427;Q9NZL9;Q9BZR8;P17661;O60481;Q9Y314;Q99502;Q9Y3A2;Q8N720;Q8NHM5;Q8N137;Q9UGR2;Q14674;Q8WUM4}

3164

Pathogen[ P03346] interacts with 3045 human partners: {O95166;Q13439;Q15172;Q13425;O60921;P08107;Q9BVJ6;Q9UPR3;Q9Y6N9;Q15723;Q5F1R6;O60437;Q12888;Q13596;Q06330;Q9NVM9;P37802;Q99081;Q9BSI4;Q9NSC5;Q7Z3K3;Q9NZJ0;P85037;Q9NPG3;Q8IYI6;Q06945;P43357;Q9BW60;Q96G01;Q9NQG7;Q9BSU1;P15924;P53805;O75382;Q15833;Q14781;Q9Y5S9;Q8NEA9;P62136;O00204;P54105;Q9UBW5;Q96FV9;Q9Y6D9;Q9Y3Z3;Q9NRI5;O95400;Q9H0A8;P21283;Q969S3;O14925;Q969S8;Q9BZI7;O15265;Q86UT5;P25787;Q9NS91;O60664;P30281;Q86TC9;Q6ZU52;Q9Y6J9;Q96CN9;Q96AP0;Q9BTM9;Q8N2Z9;P21980;Q6PD62;O95201;O75691;Q96ST3;Q9UPN9;Q9Y6K9;P21004;Q6P9B9;Q96J02;P19012;Q8NI51;Q8N3V7;Q96AB3;O14490;Q9BXU7;P23381;Q15427;Q15058;P05412;O00213;P08729;Q92585;Q9H0H0;P46779;Q96CJ1;Q96GY3;Q9ULR5;Q969H4;P56279;Q3KNV8;Q9UQK1;Q13077;Q12874;Q12830;Q15542;Q9GZT8;P02538;Q99615;Q9Y3A2;Q9UFG5;O00463;P09972;P55735;Q99828;P49639;Q7Z7A1;P43378;P46063;Q8ND76;Q86U42;Q5FBB7;O15234;Q96MU7;Q9NQ92;P61978;Q5VIR6;Q8TA86;Q15562;Q9UKT7;Q9UHF7;O95456;P46937;Q9H0C8;Q13263;Q96RK0;Q01534;O15042;Q9BU61;Q15370;Q9ULM6;Q9Y2B0;O00743;Q96P70;O43752;P31260;Q96QK1;O43172;Q7Z4G1;Q06520;Q9H1A3;P78396;Q14746;Q96HJ5;Q9UBS3;O95405;Q15438;Q8NFH4;Q7Z5V6;Q9UBB4;Q99698;P45984;Q00536;Q93009;Q8WUM0;Q9H4X1;Q9Y6K1;Q9P0M2;Q86VQ0;Q02078;Q13542;O60239;Q9GZR1;P38935;P35321;Q8IVM0;Q96B97;Q16666;Q9BYD1;Q9NQX1;Q86UW9;Q8NC51;Q14739;Q09161;P3104

0;P10827;Q9P2G1;Q969U7;P35813;P49910;P11473;O15524;Q9Y281;P25789;P28715;P55036;Q86UR1;Q8WXF1;P50570;P02549;Q15788;P28324;P06730;Q13895;Q16082;P23511;O15397;P45973;P13807;Q00005;Q8IX12;O14908;P07196;Q92560;O76064;P55198;Q7Z3C6;P62913;Q9HAU4;Q9UPT5;O15111;Q15366;Q95229;Q6ZVN8;Q6NZ67;P60660;Q9HAV4;Q9BV68;Q06787;Q9Y283;Q8IZD9;O95402;Q9P2W9;Q96HA7;Q96HW7;P12270;P12956;Q14207;O43290;Q9H2H8;Q9UHD9;O14576;Q08379;Q9NVI1;Q8WX93;Q6PJG6;Q99966;P24385;Q7Z2Z1;Q9NPJ6;Q9UGP4;Q9BPZ3;Q01201;O14829;Q8TBN0;Q9P031;O60907;Q9HCUG;Q9Y4P1;Q14315;Q9H469;P80303;Q06609;P04406;P18847;P50452;Q9NQG5;Q8N1L9;Q13362;O75112;P07900;P13489;Q8NBJ4;Q8N163;Q96MF7;Q15834;Q13228;Q9NRN7;P05783;Q96HY6;Q9NPI6;Q5T2W1;Q14678;Q96EK4;Q96PU8;P62277;Q9UDY2;P41091;O75427;Q96PU5;P68036;Q99873;P58012;Q14258;Q9Y5Q8;Q9HB19;O95551;Q14814;O96017;Q8IXH7;Q9BXF3;Q93062;Q6ZQ5;Q9NX70;Q8WY54;O75446;Q86XR8;Q9P032;P14373;Q14511;Q8WYB5;Q9NS69;Q9UP83;Q8TF40;Q12905;Q9Y3C0;Q12769;Q8WV24;Q16626;Q96KR1;P08779;Q96A65;Q9BUX1;P46100;Q8N9B5;Q96GM5;Q9C005;Q96RT1;O00567;P16220;O15392;Q86VS8;P82933;O43684;P98171;Q96NS5;Q68DX3;Q9UQR1;O75150;O43447;O95684;Q9H706;Q08999;P56270;P08727;Q2QGD7;O60888;Q12840;O75362;Q9UKL0;Q92734;Q9NX02;Q96BP2;Q9Y2P7;Q9UM11;Q9UH77;A7MICY6;Q86UE4;O14639;Q86US8;Q96PV6;Q8N3U4;P06401;Q8IW19;O43918;P43355;Q96FF9;P17676;P55265;Q96P71;O60732;Q9UIV1;O43167;P06748;Q9UBQ5;Q13616;P29474;Q9UNL4;Q8N1N5;P12757;Q96C86;Q96JB2;O75190;P36402;Q9ULW3;O75175;Q9NWF9;Q8IZW8;Q13489;Q15036;P14866;P05413;Q9H5P4;P15336;Q9UIF8;Q9GZV4;Q14764;O15511;Q9BTK6;Q99607;P55327;Q9BTL3;Q5JR59;Q86Y97;Q9BZE4;P63010;Q2M2Z5;Q99569;O60716;Q9BSD3;Q9BQY4;Q9POW2;P54098;O14787;O43639;O75531;Q86WV5;Q9BRA2;Q9H9L3;Q13129;Q9Y6R7;Q2VVP7;Q8NFH8;P36956;Q8NHU6;Q7Z5K2;P23258;Q05066;Q9UGR2;Q13449;Q8WYH8;Q8TAE8;Q5VTR2;Q9H2P0;P14625;Q6P1Q0;Q9Y3M2;P50502;Q29RF7;Q9P253;Q8IZQ1;Q00613;O15144;Q96F07;P35638;Q9BQA1;Q92622;Q9UKS6;P35548;O75489;O43516;Q9NZL4;Q96LC9;O75901;Q8WW38;Q9H6Q3;Q9Y613;P52747;Q7Z6J0;O94888;P23508;O00167;P07320;P08235;Q8IVI9;Q06547;P62304;O75530;P11831;Q6ZG61;P11388;O95171;P83876;Q15329;Q9UHR5;O95295;O43502;Q9UKX7;Q96A44;P11277;O95376;P20073;Q9UKF6;Q93008;O95751;P28347;O95777;Q15554;Q8IY31;Q8N612;O00541;Q86VX2;O43747;P42768;Q9UQ80;P62987;O15379;Q9P2H0;P27694;Q8TC71;Q96DZ1;Q96CS3;P02489;Q9UKT9;Q14011;Q96KQ4;P25815;Q99594;Q9BUP3;Q13158;Q92674;Q9NQR1;Q8NFD5;Q9UBX3;Q99471;Q9Y5K8;Q71SY5;Q92990;O95714;P21127;Q8N668;Q9UIL1;P49427;P23297;P06400;Q9H3K2;Q9Y3C5;P25963;Q7Z465;O75969;Q9NR28;Q9HD42;P35579;P61956;Q96I25;Q9Y6M1;Q9UHV9;P78352;Q9H788;Q92572;O75143;O00425;P25788;Q8NF67;Q9Y5N6;Q8WU90;Q12815;Q8WYJ6;Q9BVC4;Q99784;Q9NRR3;P60520;Q9BYM8;A8MT69;Q8TD33;Q15291;P51532;Q9Y2D8;P13349;Q99728;Q9C0E2;Q5SQN1;O43711;Q8N7J2;Q00577;P49754;Q8IZP0;P35226;P28074;Q13148;Q92614;Q15797;Q86XK3;Q9GZV5;P27469;P50549;Q00059;Q969X6;Q12772;Q96EZ8;Q8N1B3;Q8NPF5;Q92841;Q9C086;Q13541;Q9UMS6;O75410;Q15154;O60563;Q15653;O43734;Q8WXF8;P48382;Q9Y4Y9;O60238;O75935;Q96R06;Q9Y3Q8;Q9UHB4;Q96AQ6;Q01105;Q5TCQ9;Q13347;Q9UNA4;Q9NZL9;Q96GV9;Q9BV57;Q92543;O00139;Q13884;Q15038;Q15013;Q9UKI9;Q9H467;Q9UDY8;P08579;O94763;Q8N137;P07992;Q9BRV8;P07814;Q14247;O60841;O75400;Q8NHY2;Q9UFN0;Q9H9G7;Q9H9F9;P26678;O75159;Q9BPX1;P57740;Q15691;Q2M1K9;P17275;P78347;Q32MZ4;Q96J17;O96020;P82094;Q8IUD6;O95628;Q99733;Q5EE01;Q13322;Q9UBD5;P54274;Q9UBV8;Q9Y5N5;P49116;Q9ULZ2;Q8IWW1;Q15466;P42575;Q96M61;Q9H4A6;Q99689;P24863;P35244;Q7Z7C8;P49257;Q8WXH0;Q99962;P14316;Q15004;O14818;Q9UL18;Q9Y3Y4;P24278;Q8TBK2;Q6W BX8;P43243;P49336;Q8WV99;Q8WVV9;A8MVW5;O15360;P23769;Q08AD1;Q96QU8;Q14872;Q9UBZ9;Q99708;O43159;Q9BSJ6;Q14527;Q53GL7;P35250;P61604;Q9ULG1;P62258;P43360;Q96HR3;Q8WW12;P25490;Q9NRR5;O43615;Q9NQP4;O95848;Q99436;Q8N5U6;O15304;P19419;O95983;Q5VVV7;P17152;Q9NZU7;Q9UBF1;Q96A56;P80723;P24941;Q96FS4;Q8IV36;Q9NY27;Q68CZ1;Q13426;P55957;Q15633;Q9GZL7;P51610;Q9UMS4;Q6P1M3;Q15629;Q49AN0;Q8TE76;P0DJ33;Q14789;Q9UH99;Q6PI26;P14859;Q969U6;Q99NSC2;P30304;Q9P0U1;P48380;Q7Z4T9;Q14498;Q16531;P25208;P62937;O60506;P23246;Q13888;Q9Y6D5;P42772;P55197;Q96MG7;Q15149;Q969X5;P15923;P0CG48;P78371;Q8TEK3;Q13618;O60759;Q8W TW3;P62266;Q86WB0;Q9H1K1;Q9NZI8;Q9BZV1;O75886;Q8WXX3;Q86X83;P05787;Q9BQY9;A8MTZ0;Q8IUD2;Q9HC52;P15172;Q8N5M1;Q70Z53;Q8WXD5;Q15796;Q9BXS5;Q9UKK3;Q9H3S7;P56693;Q9UII4;Q969T9;Q96PM5;O75475;P49750;Q15185;O14744;Q96A26;P23760;Q9BWT7;P56524;O75970;Q9H3P2;Q6UWF3;P17535;Q9NUW8;P13010;Q16401;Q15327;Q96T51;Q9UNSL;O00410;Q5T681;Q9H4P4;O75335;Q04743;Q969H6;Q96NA2;P19367;Q15906;Q9ULE6;Q9HC77;Q9NQY0;O75170;P60709;P26641;Q9UJY1;Q9NX40;Q9Y5J7;P78358;P78344;Q96QT6;Q99426;Q9NPI1;P31276;O95707;P36543;O43815;Q9UMS0;P49789;O43255;O14757;Q66K74;Q8N5A5;Q9ULH7;O95347;Q9HBG6;Q9H9Y6;P38919;P27348;P56537;Q14141;Q9N X95;Q16520;O95931;Q12981;Q86WG5;O60573;O43264;P35227;Q86TG7;P62495;Q04206;P18054;Q2TAK8;Q5T3J3;Q9UIC8;Q7L2E3;P33076;Q8IVG9;P07910;Q12802;Q9BSB4;O95782;Q71UM5;Q86WU2;Q2TAZ0;Q9NIX7;Q9H9D4;O00170;Q9BRQ6;Q9NXL1;Q99816;P24864;O15061;Q9NX18;Q53HL2;P53618;Q9UQC2;Q9UKT8;Q9UMY4;P98170;Q5T200;Q8N895;Q9P209;Q9ULD0;P52737;Q9HCH5;Q8N684;Q12906;Q9NXV2;O95163;O94776;P28698;Q07021;Q9ULJ3;P13056;Q7Z739;O60232;Q96FH0;Q13835;P11142;Q14157;P25686;Q01850;O00268;Q9NWK9;P31948;Q9H1H9;Q8IXJ6;Q13023;Q9P2T0;Q96JY4;P02794;O75940;Q8TDY2;P18583;Q9UHN1;Q8NFG4;Q9NPB6;Q9NUL3;Q15056;Q9C035;Q9BYW2;Q9H583;Q96IF1;Q8WTT4;Q9ULM3;P08621;Q63HK5;Q00587;Q5TB30;P55854;Q8IXT5;Q08050;Q96G21;Q9H8E8;P11940;Q9UMX0;Q8IX03;P60953;Q14209;P42226;Q8WW35;Q8WV22;Q8IUR6;P18754;Q9BYE7;Q15306;Q9H2C0;P29692;Q8WTR7;O60296;Q86RLL1;P31943;Q9Y5Q3;Q96C03;Q9NVP1;Q9NT62;Q9BR76;Q9BXM0;Q99767;Q9UBC3;Q75QN2;Q93050;Q9P2Y4;O95630;P62993;P10588;Q14457;Q13522;Q00839;O60832;Q12824;P63279;O43482;P06703;O75396;P42574;Q96IY1;Q96TC7;Q7L9L4;Q9NZW5;Q16526;O00505;Q8IYF3;Q96GG9;O00257;Q9Y2D1;P27540;Q86XK2;Q5JSZ5;P58340;Q86U86;Q9UIF7;Q96AY2;Q969V6;Q9BUR4;Q86WQ0;P49005;Q7Z614;Q15942;P21673;Q92552;D6RGH6;P62424;Q13438;P26358;Q15386;Q9UAK41;P62714;Q15560;P67775;P19338;Q9UBL3;P55884;Q14204;Q99717;Q8IZE3;O14646;P20823;P49459;Q6XZF7;P15559;Q92831;Q99638;O14613;O15350;P49918;O95153;Q9NXX8;O15105;P26599;Q9NZM4;Q9Y6Z7;Q9BUJ2;Q9UI08;Q8ND04;Q14203;Q99502;Q9BSM1;Q8TAF3;P09467;Q9Y5K6;P69905;Q9BX66;Q9H0W9;Q13526;Q13287;Q9NRL2;Q16254;Q00978;Q00994;Q68CZ2;Q96CW5;P13667;P29084;Q04864;Q92562;Q08211;Q13769;Q96B26;P22557;P35573;P63241;P61024;O75030;Q9Y2X8;P37198;P20618;Q53HC0;Q9BQQ7;Q14749;Q9H0F6;P55060;Q86SQ9;Q8NFH3;P80294;Q8N1G4;Q9N033;P41002;Q969G9;P42771;P63272;Q96KN7;Q8WUH2;O00192;Q9NR33;Q9UI95;Q8N5F7;Q92698;P35658;O00570;P52298;P52565;P49593;O00409;P31269;Q9HAN9;Q9Y376;Q14152;O94842;Q5TA31;Q9UBC9;Q6ISU1;Q15652;O43390;P05937;P55212;Q68E

01;Q70YC5;Q9HCS7;P46976;Q96JJ3;Q86Z02;Q16629;Q13114;Q9NV92;Q9Y4B6;O75151;O75821;Q9NRF9;Q96BY2;O00291;P60842;Q9UKJ5;Q12983;Q9P278;O95644;Q9BYC9;P55072;P22626;Q8TDC0;Q9H0E2;Q9UI30;Q6P3W7;Q5JY77;Q9Y3B2;Q01094;Q9UID3;P46939;Q13829;Q9BQ89;Q6NZI2;Q9BZL4;O94906;Q86T82;Q9BT92;P51668;P49715;A5YKK6;Q9BUQ8;Q9NPF4;Q9Y333;Q9UEU5;P16157;P17096;Q66K89;Q92754;Q8NF64;P26038;Q9Y3E5;Q07955;P41252;Q5T447;O43463;O60784;Q9Y5J3;Q96AX9;Q01469;Q15059;Q9BUL7;P02545;Q9H1B4;Q01860;A8K0Z3;Q02410;Q92843;O75182;Q04917;Q9NWT8;Q9EBL8;P61077;Q8N8U2;O95997;Q8TDB4;Q9BTP7;Q9BZE9;Q9BVI4;Q08945;P20719;O14602;Q9NXW6;Q93034;Q5BJF2;O00186;O14508;P62826;Q8TB72;Q00987;Q8TEW0;P61962;Q12834;O00566;O15519;P62879;Q9BT78;Q6PGP7;Q6QNY0;Q9UKJ3;Q9BQ90;O95793;Q8NCD3;Q9Y6E7;Q9P086;Q9UKV3;P0C1Z6;Q9ULX6;Q15051;Q8N3C0;Q13404;O15083;Q13620;P30047;Q93045;Q9BV47;Q14980;P21912;Q9P013;P08047;Q9BXP5;Q92870;Q8TEP8;P12980;P16452;Q12816;O95433;Q8IYJ3;O14503;P11802;O95999;Q15853;Q9Y215;P06733;P20226;O76031;Q8IZH2;O00422;Q05048;P20265;Q9NRG4;Q86YF9;Q92796;Q8N5C8;P98168;Q96MT3;P18850;A6NDB9;Q15024;P17480;Q6ZNE5;Q9H0R8;Q13813;O00303;Q9H869;P22670;Q9H5Z6;O94868;Q9Y371;O15056;Q96NY9;P61088;Q16637;O95453;P52736;O75167;Q9H5J8;Q8TDW5;P52756;P30153;Q03111;Q9H2U1;Q9H0A6;O75381;Q8TF05;Q13424;Q9UKA1;Q9Y5P8;O75155;Q5TC12;P48553;Q96G25;Q13432;O75943;Q15561;Q6NZ36;Q9H9A7;Q8N1E6;Q8WXC3;Q9Y3P8;Q14103;O75832;O14530;O14618;Q9BWF3;Q9H902;Q5JTD0;Q9UQB3;Q9HAU0;Q8TAM2;Q8N7W2;O60663;Q14526;Q96SW2;Q9UKN8;Q13137;Q15532;Q92575;Q99417;Q9UHC1;Q8IY63;O00233;O96004;P17036;P51398;P01106;O60294;Q8IU60;O60518;Q5T230;Q9UL40;Q9UI32;Q13155;Q14566;P78560;Q6ZPB5;O43583;P14649;P62877;Q96DX5;P51843;Q6UW56;Q92879;Q96MN9;Q96B67;Q9NZZ3;O00299;Q9UHB7;P25205;P16333;Q9H0G5;P41208;P62854;P162794;Q9UHP3;Q5H9R7;Q12926;P07197;P19388;Q9NPF6;Q9Y608;Q14493;P38646;O75925;O75817;Q15528;Q8NI35;Q9Y2X3;Q01082;Q92621;Q15699;P28702;P35637;Q9NSA3;Q9HCK5;Q6ZTQ3;Q9H8W4;Q8TCJ0;Q14186;P50222;O14777;Q14139;Q07666;P62318;Q14687;Q9NVH2;Q92830;Q9BXW6;Q92499;O75161;P18848;Q9Y6D6;P59998;Q96B36;Q9Y6F6;Q53HV7;P99999;Q9H2K2;Q99700;Q9BQ70;Q10567;Q16890;Q09666;Q6NUQ1;Q9BZ29;Q9UKL3;Q86TB9;Q14151;Q96EP0;P14921;Q9HAW4;Q9BW27;O00161;Q06710;Q92794;P13640;Q9NS56;Q9BUN8;P84022;O43148;Q15643;Q8HWS3;Q14676;Q12904;P11308;Q04726;Q86SE9;Q9HB71;P25791;Q14694;Q14847;P08133;Q9BW71;Q86V81;O43513;O75843;P11171;Q9NXB0;O14980;Q2M3C7;O76041;P30154;Q9Y295;P09917;P49354;P17542;Q14232;Q04695;Q96IZ0;Q14978;O95232;Q96CV9;Q7Z3T8;O96019;P31350;P51116;Q9Y221;Q9Y285;Q9Y224;P49419;Q9UHY8;P20340;P50479;O75665;Q92973;Q9ULW0;Q9H8T0;P10144;P10242;Q9NTK5;Q96D15;Q8865;O60481;Q9UIS9;P17661;A6NDE4;Q8N3R9;P02511;P51784;Q15436;Q9H175;Q9Y3E7;Q8WXE9;O43236;A9UHW6;Q13227;Q8N140;Q7L804;O14556;Q96EA4;Q8NDT2;P13984;P56945;O43829;Q9H9E3;Q9NPP4;O43541;Q8N5D0;Q8WY6;Q15599;Q9NQS1;Q96S55;O60493;Q9GZU7;Q9NXR7;Q15398;O75340;Q16667;Q9UNN5;P22736;Q9UBY9;Q86UT6;Q15020;A6NKF1;O00423;Q088752;P17706;Q9Y2H0;Q8NEU8;P49356;P60604;Q96I34;Q9Y3C7;Q8N4B1;Q15851;P63162;Q96QG7;Q96S59;P43364;Q8IW35;P41227;Q5TAX3;Q8TAC9;P60228;Q7Z3B3;Q9ULU4;P15976;O15266;Q13033;O14641;Q9P0V3;Q9H2L5;Q86VW0;Q86UL8;Q9Y5A7;Q7Z4H3;P02533;O75934;P53999;O43660;P24539;Q92597;O15235;Q96L92;Q13469;Q06190;Q9BPX3;P81274;P78537;Q15631;Q8NI29;O75643;Q06546;P31749;Q15102;P61313;P67809;Q9H074;P14635;Q9P0U4;Q86VY4;Q13084;Q15596;O75663;Q9UNH7;Q03468;O00255;Q96EV8;Q9H9T3;O60477;O75528;P78395;Q86SQ7;O94972;P83369;O15287;Q13042;Q9Y4A5;Q9Y3F4;O95863;P10914;Q6VMQ6;Q8WTS6;Q12894;Q9BQ15;O94986;P51965;Q13309;Q9Y4Z0;P31483;Q9Y4R8;Q9Y3A3;P46060;O15315;P35080;Q9NYJ8;Q6QNY1;Q9NWB7;Q8NEM7;Q02556;Q15021;Q9NZQ3;Q9UDV6;Q92599;Q9P2J5;P22531;Q9HD26;Q9H5J4;P41134;Q9BYG5;Q15022;Q9P2R6;Q9H4I2;Q7Z6E9;Q9P0W5;Q5TAQ9;Q13951;Q86YP4;P63146;Q9UPV9;Q99684;Q01831;Q9Y296;Q8WVC0;Q96SN8;Q92769;O95373;Q8N841;Q9H444;O95251;P31150;P28065;Q14683;Q14192;Q15019;Q9BY77;Q9UKT5;Q9NWS1;Q9UBU8;Q9HB75;P52435;P11441;Q86WI3;Q9XRX5;P27815;Q8WWL7;Q9H1D9;Q13118;Q9Y4G6;O00512;Q9BVS5;Q04725;Q7RTS9;Q9NZC7;P49848;O14879;Q9UNE7;O75164;Q9Y248;P42704;O15131;P23490;Q9UHK0;Q8WU39;Q9UGK3;Q13094;Q9HCU9;Q9Y512;Q9H4M3;P36873;O75569;O60264;Q9P1Z2;Q13547;Q8TCS8;Q09028;O95817;Q16891;O00762;Q96CW1;Q9H668;Q03112;Q6NUP7;Q9NV31;Q8IXQ6;Q14008;Q9H040;Q9C0C7;Q6STE5;O43324;P51587;Q04724;P46379;Q96G23;Q92558;P20585;Q6P2E9;Q8N9A8;Q9HBM6;Q9UJT2;Q14738;Q96B01;Q99750;P32929;P49711;Q6UUV9;Q8WXU2;O15145;Q5T2T1;Q8N3L3;O75618;P20248;Q6P1X5;P54920;P62081;O43542;P17544;Q9Y2L1;Q96JB5;Q9NY61;Q15121;Q96K30;O95886;P09629;P33922;Q5VWX1;Q9Y6X8;P36404;Q9H492;O95361;P51825;O95198;Q9H7S9;Q7L2H7;Q7L1V2;O14907;Q9BXL5;Q9NQS7;Q9H446;Q02952;Q5XUX1;Q9NQ31;P26368;Q9BXJ9;Q14669;P46109;Q5D1E8;P49366;Q9NTI5;O14896;Q96QD9;Q9UER7;Q13111;P37275;Q8TD16;O95049;O75604;P55769;Q9H981;P25786;O15205;P61247;Q8TAP6;Q99704;Q01081;P35680;Q07157;P62837;P53675;O76003;Q9NV88;Q8N6I1;Q14240;P54136;Q2LD37;Q66PJ3;Q13415;Q13064;Q16543;Q9NQ87;Q99619;Q9NRD1;O95273;P49770;P53611;Q8TEQ6;O00198;P48200;Q14533;A6NIX2;Q96LL4;Q9Y6X3;Q9UKT4;Q8TE02;Q9NUS5;Q9P2M1;Q16514;Q9UIF9;Q9Y3D8;Q8IUQ4;Q9BYG4;Q15475;Q562F6;Q15041;Q9NR77;Q9Y3T9;Q9NYB0;Q96JC9;O43439;Q8IYD1;Q8IX07;O75771;Q99814;Q99814;P78559;O95865;Q16695;Q96T23;O00411;O43791;O96040;O96018;P42025;Q9Y6H5;Q6PGN9;P46781;P61326;Q19AV6;Q86WX3;Q13625;O75688;Q9Y3C8;P13994;Q16576;Q13123;Q13838;P53041;Q9P2B4;Q9HD40;Q99551;Q9HB03;Q9UNY4;Q12929;P50749;Q13233;P15927;P42224;Q9Y375;Q9HAU5;Q13428;Q9Y462;Q86UW6;Q9H081;O14686;Q8N1V2;O75582;Q9UBC1;P39687;Q9UPP1;Q8WVZ9;P62072;O43251;Q8NBT2;Q9NQT5;Q01167;P54727;Q13105;Q9HBM1;Q9UBP6;Q92541;Q6ZNA4;Q8N196;P63172;O00522;P15880;P22392;Q86YC2;O95810;P78314;O15116;Q9H8S9;Q9NQ48;Q8N6T7;O15126;Q15459;Q9BW66;Q9UKV8;O75376;Q6Q0C0;P14868;P98177;O94850;Q9Y2J4;Q5BJF6;Q15750;P35249;Q9UBD0;Q8NHZ8;Q9Y2J2;P63316;Q99590;P11137;Q9UL45;Q92540;O94983;Q07820;P63208;O95833;Q9UNP9;Q9UBI1;O60293;Q9Y5V3;O95831;Q12962;Q6ZMZ3;Q99496;Q13216;Q07352;Q16385;P61289;Q3YEC7;P26447;P50914;P78317;P49959;P46108;Q9Y468;Q2YD98;O94811;Q8WUF5;Q8N157;Q9EK85;O95996;Q6P9B6;Q9Y5P3;Q9BZR8;P50453;Q3B820;Q14653;O00267;Q99497;Q96JM3;Q9HB96;Q8N2W9;P50995;Q9H410;Q9NX08;Q0VDF9;Q8IYW5;Q8TBB1;Q5VTD9;Q13642;Q6VVB1;Q9UBS8;P62166;P49589;Q9HCD5;Q86TA1;O43708;Q9Y5Y2;P30622;Q8NBZ0;P42



285;P09874;O75122;Q14865;Q15910;Q96T58;Q6IE81;Q15014;Q9NWW8;O75469;Q16829;Q9BYG3;P504  
02;Q8IY81;Q15628;Q96Q83;Q99575;Q13568;Q99459;Q8WWY3;P43356;Q68DK2;P15407;Q8WY41;P2779  
7;P28066;O95476;P41182;Q6PJ61;O43809;Q8NFW9;P40337;Q6P2Q9;Q9BYX4;Q9NVD7;Q70EL1;P61981  
;O43765;Q99613;Q96BT7;P24534;Q02241;Q92733;Q96DI7;Q9BYV8;Q8N8R7;Q96T49;Q9BQ69;Q8TAP9;  
Q9GZS3;Q8WVM7;P08670;Q9BX70;Q96RU7;Q14562;Q92905;P33991;O75436;P83436;P27816;O60291;Q  
9BUZ4;P78549;O75822;P17028;O75909;Q13492;P43351;Q8IX90;Q8WX92;O75323;P28749;P39019;Q9  
6K8;P09012;P84103;P10412;Q8N3F8;P68871;O00165;P04198;Q92759;Q968CJ9;Q05516;O95619;O43  
504;P07315;Q14397;P20749;Q9P1Q0;P23588;Q9H944;Q8N720;Q8ND90;Q92797;Q13867;O60934;Q969  
Q5;Q9Y3D3;Q9H7H0;Q9ULV0;Q16537;Q9UHD1;P61244;P18887;P62314;Q8N5R6;P55199;P23396;Q9248  
1;O60260;Q06830;Q9NYF0;P78345;Q9BY44;Q13952;Q9BWF2;O95602;Q9UJ41;Q15233;P52272;Q5JRA6  
;P80217;P61201;Q9HB21;Q92889;Q4U2R6;Q8WVM3;P42677;Q04323;Q92547;Q9Y4E1;Q5VV41;Q8WWW0;  
Q9H4D5;Q8IUC6;Q15287;Q96CD0;O60936;Q969G3;Q63ZY3;O43310;P50748;O94925;P36405;P62750;P  
31946;Q4LE39;Q5T7V8;P09497;P21675;P11161;P35712;Q05519;Q5JVS0;Q96HA8;Q96ED9;O15151;P0  
2795;Q7Z417;Q9NPC3;O60885;P30876;Q15326;P63104;Q15369;O95073;Q8TF74;Q9UKV0;P55211;Q9H  
7Z6;Q96EF6;Q00597;P35269;O75607;Q9BXW9;Q8N108;Q9Y2D9;Q14790;Q8TAT6;Q15759;Q01130;P325  
19;P49450;Q3ZCQ8;P14678;A6NDV4;P0CG47;Q9HC62;Q8TDR0;Q99996;Q9H0S4;P35900;Q9UQ84;Q9H9Q  
4;Q96KS0;Q92832;Q9BQS6;Q13619;Q96PY6;Q13569;Q92922;O75251;P42568;Q8IWW8;O14734;P45985  
;Q96C74;O95218;Q9BZK7;Q969F2;Q92783;Q99623;Q96CB8;Q969F1;Q9Y6G5;Q14596;Q9UBU9;Q8NHQ1;  
O95271;Q12789;O95243;O95219;P62328;Q9UKG1;P54725;Q717R9;P54278;P41970;Q13416;P62508;P  
19474;A8CG34;P10828;Q9UGL1;Q6NVH7;P48634;P42765;Q8NE71;Q15047;O43257;Q0VDD7;Q16548;Q8  
N8A2;O15015;P52292;O14933;Q15700;P13647;Q14999;P26196;P56589;Q9H9C1;Q86QC6;Q5V5L9;Q7L  
190;Q5TZA2;P17947;Q5HYK7;Q15388;Q14137;Q01658;Q9NRR4;Q9UQF2;Q9NR09;Q99593;Q9UGK8;O150  
84;Q9NRY2;P04156;P11474;P32189;Q9BXW4;O75351;Q8TBZ2;O15355;Q14019;P50542;Q5T8A7;O7511  
3;Q13363;P83916;Q9UHV2;Q9NX53;Q8WWR8;P10599;Q8IYD8;Q9UKX2;Q12798;O75145;A6NIH7;P57678  
;Q9GZX5;Q13405;Q9Y6B2;Q9BU89;P48552;P49790;Q13490;P28370;Q86VP6;Q9Y448;Q7Z2E3;Q16658;  
O94992;Q9H7L9;P35232;Q9H1Y0;Q96MH2;Q13200;Q9P210;P40424;Q9ULT8;Q9HC24;Q96QE5;Q8N6Y0;P  
01009;P55210;Q6PI48;Q9BVC3;Q9Y5L0;Q92636;Q6P4R8;Q9BXF6;Q8TEL6;Q01196;P23025;O14964;P1  
1532;Q9BZF9;P41212;Q8TCI5;O15226;P19838;Q8IWX3;O60671;Q5UE93;O96000;O60504;Q12873;Q03  
060;Q9BSW2;O00625;Q96HI0;Q99547;P63167;P40855;Q13310;Q9H0W8;P23497;Q9UK99;Q16864;Q134  
85;Q9NPE3;Q8IXJ9;Q86YS3;Q9BVN2;Q00534;O95487;Q9Y4L5;P35251;Q9H6Z4;Q96PU4;P22087;Q9H4B  
6;P22681;Q9BSJ2;P46013;P24855;Q04637;Q08AG7;Q9P2D1;O14893;Q9Y5A6;P09913;Q7L0Y3;P25063  
;P31314;Q96FW1;Q92917;Q9UI14;Q7Z460;Q92845;Q05086;Q9UDY4;O43493;Q9BQ83;Q8TBE0;P05062;  
O60749;P07737;P56545;Q9UKY1;P53567;Q8WV28;Q5JR98;Q15424;Q9UHD8;P24928;P62140;P51959;P  
38432;P23193;Q96FX2;O75306;Q14160;Q9GZZ1;O14920;P06396;Q96IV0;P62256;P27695;Q8TES7;Q9  
NX63;P67870;Q7LBR1;P54253;Q8TDB6;Q70J99;Q9H0M0;Q02040;Q96IT1;P61457;Q9NPI8;Q9BYK8;Q9H  
AF1;Q16186;Q9H8M7;Q8IZD4;Q9Y2Y0;O94921;Q8IXK0;Q14CM0;P38936;Q9NRA8;Q96D71;P46777;Q9NW  
T6;Q9UMX3;Q9P287;O95613;P23528;Q6RW13;Q9UNS2;Q9Y2X9;Q96EN9;Q6GQQ9;P29083;Q6P1W5;O9478  
2;P20290;Q8NG31;O75334;O15078;Q9P1T7;Q8NHM5;Q9BRP8;Q9H8V3;P18146;Q92993;Q8TDH9;Q9Y2G2  
;P61970;Q6ZVK8;P52815;Q13045;O43865;Q5TCZ1;O15371;Q8NI08;O43399;Q9UKK6;Q86XL3;Q13573;  
Q14145;P22735;Q8IZL8;Q00403;P54257;Q7Z699;Q6RFH8;Q9H9Z2;P41220;O75398;Q13243;O43318;O  
00148;Q92793;Q9UJY5;O43299;O75525;Q9Y603;O75154;Q9UID6;O15117;Q9Y2M5;Q92985;Q8N4C6;Q1  
3283;Q15035;P39748;Q96IZ7;O95257;O43933;P62324;P51531;Q9P0J0;Q9BUH8;P49755;P38159;Q01  
844;Q6NUN9;Q8N488;O60869;P53804;Q9COH9;Q86X95;P35869;O14512;P78545;Q9Y4X5;Q14CW9;Q9NZ  
L3;Q8TE69;O75558;Q9Y605;P04264;Q969L4;Q9Y6X2;Q93052;Q92466;O00482;O75674;Q15029;O9482  
9;P62316;O14558;Q9H5I1;Q9UHX1;Q9P2Y5;Q8WTV1;P09914;Q9Y252;Q08209;Q02930;Q5VU3;P60896  
;Q86Y01;Q9UPY8;Q12982;Q15545;Q8IXH6;P21399;Q15293;Q3L8U1;Q13112;Q9Y6R0;O95071;Q96CG3;  
Q8IY57;Q96K80;Q6ICB4;O95278;Q8IWF2;Q676U5;Q86WJ1;Q14194;P41236;Q6R327;Q8N726;Q8IY92;Q  
9ULK4;Q9UN36;Q9HAZ2;Q9BWU0;P26651;Q2VPK5;Q9BQD3;P43358;Q9UI36;Q8IY18;Q6BDS2;Q9Y2R2;P1  
0515;P30260;P29558;O43663;P05386;Q92529;O75152;O75419;Q5VWG9;Q9UPN7;Q9HCE1;Q92900;Q04  
837;Q86WH2;Q9NYF8;O00401;Q9Y618;O75593;Q9H0N5;Q15173;Q9H816;P40222;Q13562;Q969E8;Q995  
04;O75928;Q6UWZ7;O75800;Q9P270;O95202;P46527;Q9UL03;P52630;Q9BQI5;Q9ULU8;Q8N9F1;O1552  
7;P14672;O94901;Q13144;Q96GC6;P62952;Q15696;Q9Y2J0;Q6FIF0;P35711;Q15003;Q96CA5;P20042  
;P20810;O94973;Q68CP9;P55209;Q9H3R5;Q9Y2M0;Q9Y2W2;Q15654;O96011;Q96QH2;O94817;Q8N1I0;  
O43715;P40763;O14974;Q8NG27;P35398;Q9Y297;Q96123;P46776;A8K8P3;Q14C87;P32243;Q96AJ1;P  
40937;Q99741;O43524;Q9UKC9;Q8IWN7;P06746;Q14677;Q969H0;O75386;P24666;Q9UPX8;Q12ZU3;Q7  
L590;O15155;P0C2W1;Q9BXH1;O43900;P52655;Q96HR8;Q9BVW5;Q13765;Q9NVN8;Q8TAQ2;P61758;Q92  
530;Q14674;Q9H211;Q9GZY8;Q7Z6G3;O94874;Q14690;Q9NR46;Q9UBK9;Q8WUQ7;O14862;Q92624;P525  
97;Q9NTG7;Q8TAD8;P78543;Q9H204;Q6VY07;Q96CM3;Q92804;Q9ULV3;Q9NR50;Q92556;Q9NQZ3;Q9NZ5  
2;P09234;Q96EB1;Q9Y294;O15040;P10916;Q86WV1;Q9UMX1;Q9NQ94;O75494;Q9H2J4;Q6PJT7;Q02577  
;O43929;Q6P1K2;Q8NI27;Q7Z6Z7;Q9HD36;Q9NS37;O14727;Q13285;Q9GZQ3;O14662;P15822;Q9NUP1;  
Q9NQT4;P42167;Q12972;Q06587;Q9Y3I1;Q9NWA0;Q6ZU15;Q9Y3V2;Q9NVV9;O60216;P08238;O75953;Q  
9H160;Q02447;O94822;Q8WUM4;P01100;Q99614;P48788;P62308;Q9UBB5;Q9H6U6;P62312;Q96PK6;Q9  
6BD8;Q8TEC5;Q6PGQ7;Q9H3M7;Q96KN1;Q96DX8;Q9BUL8;P62753;Q8TDZ2;O60711;Q9NS23;Q01664;O15  
372;P63000;Q9H267;P51948;Q10570;Q9P2A4;Q9NPD3;P29890;O14965;O75807;Q9UL42;Q96F86;Q8N3  
Y1;Q9BZD4;Q96LL5;O60516;Q9NP97;Q13185;Q9495M9;P15036;Q9NP85;Q15544;Q96DX7;Q9UBF6;Q9Y5K  
5;Q12796;O00716;Q14164;Q6UVJ0;Q8TEB1;Q86VP1;P52294;P57081;Q8NB16;P32780;Q9NRC8;Q14154  
;Q5SW79;Q8IZD2;P62995;Q9UQL6;Q6ZP82;P62310;O15164;Q7L5N1;Q8TF46;Q96T37;Q8IWL3;Q9UK45;  
Q86XP3;O60645;O75081;O95633;Q96EY1;Q96RN5;Q9HBF4;Q53EL6;Q9NRD5;Q9NR56;Q00610;P78318;Q  
9Y3D0;Q8N9R8;Q96BT3;O95503;P53992;P04792;P09661;Q9Y6K5;A0AVT1;O43913;Q01826;P55055;Q9  
UK73;P54198;Q15365;Q6W2J9;O14910;P31949;Q9Y2Y9;P54259;O15405;Q9HCC9;Q6P1J9;P18615;Q96  
LA8;Q96KP1;Q9BQ95;P26373;P33240;P60510;Q496Y0;Q00765;Q9H4Z2;Q9BUE0;O14929;Q96GX9;Q96T  
88;Q15363;Q9NRL3;Q86WG3;Q9NWZ5;Q9H6Z9;Q9Y4P8;Q96T76;Q8N7H5;Q9UI10;Q13136;Q92834;Q9H0E  
7;Q6DKK2;Q9P2M7;Q13901;Q16630;P27986;Q13868;Q9BRP4;Q15054;Q9P1A6;Q86Y13;P68104;Q8WVK7  
;Q13257;Q9UNH5;Q86XI8;Q9H0B6;P30307;Q6ZW49;P49454;Q9BVK6;Q99933;Q9UJW9;P15884;  
P46783;O43303;Q14134;Q9Y263;Q13794;Q99747;Q96EP1;Q9Y3B7;Q9BVP2;O14776;O43745;Q92844;Q  
6ZN17;Q9Y3A5;C9JEB40;Q9Y262;Q8IWX2;Q8TB45;Q00653;Q9NVR2;O75146;Q07866;Q14839;Q9UN37;O7



3165

5496;P17482;Q6I9Y2;Q86Y82;P54252;Q96GC5;Q13127;Q15276;Q14689;O43156;Q9Y2T2;Q5JTC6;P57077;P24522;P47928;Q9H900;P11387;Q13501;P30084;Q9H4L7;Q9UJW3;Q9UBP0;O15127;Q9H7T9;Q9H840;Q9HCI5;Q9NNW5;Q5C9Z4;Q92665;Q9BSQ5;Q92600;P22415;Q9BYZ2;Q76FK4;P49792;Q9UBF9;Q9H0C5;Q9UPV0;P23284;Q9BTA9;Q8LWE5;P63151;Q8WV44;Q9BUN5;Q8WYQ5;O00308;Q9BSH5;O75791;O43924;Q96MT8;Q9NXX6;Q96QF0;Q13561;Q5BKZ1;Q9BQA5;Q86V97;Q7Z2W4;Q9P2K3;Q9NP98;Q9C000;P08151;Q14686;Q06455;P61586;Q9NPF5;Q12959;Q14974;Q86TP1;Q92988;Q9NNW1;Q9NNW7;Q16594;P33316;Q15543;P55771;Q9H1J1;Q9UJW5;Q9UJM3;Q9NPC6;O00444;O43261;Q99732;P05198;P52948;Q9Y314;Q969T7;Q13617;Q15819;Q8WV41;Q5H9L2;O43395;O15162;Q2NKKJ3;Q9BV73;P53990;P10589}

Pathogen[ Q85601] interacts with 2643 human partners: {Q5T230;P43351;Q14139;Q9UQR1;Q3YBR2;Q14457;Q99569;Q9H492;Q13596;Q8NHQ1;P54259;Q9NVM9;P37802;Q8NBT2;Q9H4M3;O14530;P51946;Q8IYI6;Q16890;P46783;Q96QK1;Q9NV31;O95619;Q8IXK0;P10144;Q9NQG7;Q9BSU1;P01106;Q9P2R6;P18146;P52657;P28066;Q96IZ0;P17480;Q9UBW5;Q9HCE1;O14925;Q969S8;O00401;Q9BZI7;Q9ULW3;Q68CJ9;Q8N196;Q9H5I1;Q99816;O60664;P30281;Q86TC9;Q7Z6E9;Q96CN9;Q6PD62;O14639;O43765;Q9UPN9;O75182;Q96J02;P78317;P60900;Q8NI51;Q96MH2;Q9NZC7;O14490;Q9Y250;Q99497;P61981;P49454;O00186;Q9NRL3;Q14978;Q9BUL9;O00213;P08729;Q92585;Q8IWT2;P54920;Q9NRC8;Q96CJ1;Q15014;P69905;Q6QNY0;Q9NRN7;Q15532;O75161;O15511;Q15542;P28698;P02538;Q92734;O75496;P49639;Q9NWS1;Q9Y608;P09629;P26373;Q96JM3;O15234;Q6PGN9;P49756;Q96MU7;Q7Z739;P61978;P09234;O43913;Q6PJG6;Q96CB8;Q9H7T9;Q9Y2M0;Q9UHF7;P02489;Q86WV6;P52815;P54198;Q15643;O15527;Q96LC9;Q15370;Q6P2E9;O15126;Q13064;Q9Y3I1;O43715;Q9HCS7;Q9UKV0;Q16543;P08151;Q9Y4R8;O43493;P46087;Q14746;P11831;Q96X93;Q8N137;Q5T7V8;P07315;Q96T76;Q4LE39;Q00536;Q9BQA1;Q15853;P63104;Q9H4X1;Q96CW9;Q8ND90;O14896;Q02078;P53675;O60239;P17676;P15036;Q9NTK5;P35321;Q92575;Q16666;Q9BYD1;P80294;P09874;O75688;Q8NC51;P54136;O43324;O60481;Q13309;P62913;Q9BUE0;Q9P2G1;Q9ULZ2;P09913;Q9UB4;P11473;O95602;Q9UPX8;O75843;P08107;Q8N720;P55036;Q92614;Q06455;P83916;Q9UHY8;P27816;Q9NZU7;P25208;Q9P0J0;P22681;Q9H6Z9;O75145;P13807;O43502;P02545;P62879;O15315;P33076;Q9HAU4;P31946;Q9UPT5;P68133;O95229;Q9Y2J2;Q9UKL3;Q9NPD3;Q9HAV4;Q96PK6;O94925;Q9ULJ3;Q13127;Q9NS56;P16157;Q99733;Q9NVD7;P14373;Q9BXH1;O43148;Q96HA7;P62854;P26447;Q7L590;Q9NP97;Q00610;Q8TDR0;O75528;P23025;Q9H2H8;O75143;Q9Y2T2;P31749;Q7Z4H3;P99999;P62993;O75928;O00541;Q86VP1;P24539;P02533;P24385;Q7Z2Z1;Q13490;Q8TDB6;O43924;P14316;Q9BTP7;O14829;Q6N17;P17096;Q9H0E7;P06396;Q9NUP1;Q9Y2W2;P62081;O75154;O45831;Q9H5P4;P50452;O75112;P41134;Q86TA1;Q6UVJ0;P63146;Q9H0S4;O43390;P51116;Q15834;O14933;Q99575;Q02241;Q9NPI6;Q5T2W1;Q15038;Q8WVC0;Q8NFB4;Q96EK4;P14868;Q96RL1;Q92917;O43708;Q5JVS0;Q15750;Q01831;O94986;Q15388;Q9NQP4;Q9NR22;Q14258;O96017;Q07666;O14910;Q8NFB3;Q9BXP3;Q15154;Q92636;P46776;Q9H1D9;Q14689;Q92754;Q9NX08;P202556;P17028;O60563;P42568;Q6NUQ1;Q9P0W2;Q9UHD1;P36405;Q9H900;P31150;Q8WV24;Q93009;P08779;Q96A65;Q9BUX1;Q15398;Q9BSB4;Q15466;Q13884;Q9BVS5;Q8WV44;Q15004;Q86VS8;P82933;Q8IUR6;Q9UQ80;Q7L804;O95684;Q9H706;Q08999;P56270;Q9NYJ8;Q9H0N5;O95347;P15976;Q14008;O75909;Q969H0;A1L3X0;Q8IYD8;Q96BP2;Q6UUUV9;P25787;Q9GZ1;P46060;Q9UJY4;Q14194;P61313;P41091;O94776;Q5C9Z4;O60888;Q9UQ84;O00165;Q8WXE1;P61962;O15265;Q975396;Q96RT1;Q9UQC2;Q99613;Q8TBK2;Q95388;P50479;Q13243;P05750;Q9UBQ5;O75691;P15172;P49789;Q04724;O75190;Q9UN36;Q9HCK5;Q92547;Q9H040;Q5HYK7;P05413;P62714;Q9GZV4;P14921;Q8IYF3;P18887;Q9UBS3;O60437;Q9BZE4;Q8IUC6;Q92558;Q2M2Z5;P63151;Q9ULK4;Q6NZ36;Q5VYV7;Q9HD36;P62495;Q8N9R8;Q9Y5K6;P17661;Q9BQD3;Q86WV5;Q9BRA2;Q9NPG3;Q96CW1;Q9UQL6;Q9Y3B7;Q15629;P09917;O14879;Q9UGR2;Q15833;Q15293;Q9UIF9;Q3L8U1;O95487;Q9BXW9;Q6STE5;O75151;Q8TBE0;Q99547;Q7Z4T9;Q9UBB4;P21399;O75398;Q9Y3M2;A8MTZ0;P49589;Q9P253;Q9NSQ7;A8CG34;Q8IY18;P48634;Q9Y3D0;Q96F07;O95153;P17036;Q4U2R6;O15151;Q13439;Q14CW9;Q9NRR5;Q9BYG5;Q9BW71;Q9Y613;Q06546;O14599;Q05048;P23508;P61289;P06730;Q8IY63;Q9P2D1;P62304;Q9GZU7;O95251;P07196;Q9NY61;Q9Y603;Q96P70;Q13769;Q15329;Q8WW38;Q16531;O95295;Q12769;Q8TAC9;Q01130;A6NIX2;O14713;O95049;Q9H0W8;P43364;Q15554;O00463;O95166;Q9UJW3;O60506;Q68CZ2;Q14240;Q6P1J9;P41220;Q9UI95;Q92540;Q9UBU9;Q96FH0;Q96A44;Q96HR8;Q96CS3;Q9H0C8;Q9P2Y5;Q86WX3;Q9UBP0;Q13158;Q9NQRL1;Q9UBX3;Q99471;Q19AV6;O95714;Q9H081;P49427;P06400;Q06330;Q6ZP82;Q9Y3C5;Q969V6;Q92733;P08670;O75306;Q7Z465;O75969;P05787;P35579;Q9UQK1;Q96PY6;Q9HD40;Q68E01;Q96QT6;P25788;Q9H7S9;Q16548;P56279;O43541;P38935;P53567;Q12798;Q8WWW0;P36952;Q8TD23;O60907;P49593;P13349;Q9P2J5;Q13310;P23588;P39687;Q96T23;P50995;Q9Y2Y9;O15111;P12980;Q12796;Q14103;Q8WV92;Q9BX66;P81274;Q13148;Q15797;Q86YS3;Q9Y294;Q9BUL8;P50549;P14649;Q969X6;Q9H8M7;Q6NZ67;O75800;Q9Y2X8;Q13888;O15116;Q96SN8;Q00005;Q8N1B3;Q9Y283;Q99C086;Q15036;Q96BT3;Q9UP83;Q8N5F7;Q8N8R7;Q7Z7C8;P62072;Q9HAF1;Q13155;O75935;Q9Y3Q8;Q9BXS5;Q01105;Q92665;C9JE40;Q13112;Q9H467;Q9H9T3;Q9UDY8;Q9UKT4;Q9BQ95;P16333;Q8NEU8;P07814;Q13216;Q8N684;O75400;Q9Y6X2;Q9H9F9;Q13573;Q9BXP1;P57740;Q13951;Q2M1K9;Q14790;Q92560;P62877;Q99417;Q9H8S9;Q5EE01;Q9Y4P1;Q15459;Q15424;Q9NUS5;Q96SW2;Q99966;P40337;O75030;P23396;Q6P1W5;P35244;Q99962;P15822;Q9BZF9;Q07352;Q8NHZ8;Q9UL18;Q9BUR4;P15407;O95433;P49336;A8MVW5;Q14872;Q86UL8;Q99708;P18848;Q14533;Q9HC62;Q15654;Q9HBF4;P61604;O75832;Q9P0W5;Q14814;Q9UDV6;Q0VDD7;Q13129;O15304;P19419;P40763;O15155;Q9NWB7;Q8IV36;Q9NY27;Q9H0A6;Q13426;P28702;Q86X83;Q03112;Q9UMS4;Q8ND76;Q6P1M3;P35080;Q06787;Q49AN0;Q9Y697;Q8NFG4;P62753;P21912;Q75QN2;P32519;Q6PI26;P14859;O95793;Q93050;Q9UDY2;Q9Y468;Q9UBV6;Q9NY92;Q9H0R8;Q9Y4A5;P61201;O60663;Q8TF74;P27815;Q01534;P61956;Q8TDB4;Q12982;Q9UBP6;Q13868;P23769;Q6NVH7;P41970;P30622;P42772;Q13415;Q9NPI8;O60825;Q9UHV9;Q96MG7;P61326;Q9Y2Y0;Q9NYF0;Q9Y5N6;Q9NWT6;P22626;Q12894;P62826;Q9P1A6;O60759;Q86WB0;O15015;P78545;Q9UMS6;Q1ZZU3;P62324;Q9Y2X9;Q9UHX1;Q9UKK3;Q9HAT8;Q6NUN9;Q96BY2;Q92844;Q969T9;Q96PM5;Q5XUX1;Q15287;Q96PU4;Q8WUM0;Q9Y3A5;Q16829;Q9H3P2;Q93052;Q9UER7;P12757;O00148;Q9Y3A2;Q96T51;Q043865;Q14596;P63000;Q5T681;Q99728;Q969H6;P48200;Q9NVR2;Q9BYC9;Q9Y4L5;Q9HC77;Q5VWX1;Q04637;P01011;Q9Y5J7;P23381;Q9BVN2;Q15545;Q9NZJ0;Q9BXM0;Q13616;P15880;Q8IZL8;O43815;Q9UMS0;Q66K74;Q9H4D5;P80303;Q8N5A5;P46379;Q9BTA9;Q9ULH7;Q7Z2W4;O14686;Q8N8U2;P56537;Q96KR1;Q16520;O95931;Q9UBU8;Q2NKKJ3;Q12981;O43264;Q9BTW9;Q14204;Q99504;Q2TAK8;Q14738;Q7L2E3;Q15723;Q12772;Q9H7Z6;O60936;Q9GZX7;Q15121;Q2TAZ0;Q9BRQ6;P25490;Q9Y3C0;Q53HL2;Q96G25;P98170;Q9UNL4;Q9Y5N5;Q8N895;Q8IXJ9;Q9P209;Q9HCH5;Q9NRR4;Q9BY44;Q8WXE9;Q96JB2;O60232;O43747;P30153;Q9Y2G2;Q8WYA6;Q14157;Q13045;P24522;Q9Y618;O00268;Q96RL7;Q9NWK9;P31948;P

83436;P39019;Q96AY2;Q9H1H9;Q2QGD7;O14503;Q8TDY2;O15083;Q6PJ61;Q15172;Q8IX12;Q13642;Q96CG3;P35712;Q9Y376;Q8WTW4;P26641;Q9UIV1;P06733;O43299;P08621;P33316;Q8NG31;Q5TB30;Q9BRP4;Q96G21;Q96QE5;O43159;Q969L4;Q9GZQ3;Q96PU5;P11532;O95243;Q71UM5;P10242;Q00059;Q15173;Q9P013;Q9BQ15;Q9NR50;Q8TF40;Q9NR28;Q15306;Q8WXF1;Q9Y296;P46108;Q9GZV5;P61758;Q86VP6;P61970;O15078;Q9Y248;O14497;Q99767;Q97Z6G3;Q147764;O96019;Q9UBD5;Q8N1L9;Q14669;Q9NWF9;Q96B36;Q5TAQ9;Q99814;O15392;Q86WI3;P62424;P27797;Q9ULR5;P49959;P27540;Q86XK2;O15226;Q9NR56;P53999;Q13363;P0CG48;P49005;Q7Z614;Q8IUD6;P21673;Q92552;D6RGH5;P30304;P11171;P26358;Q15386;Q86V81;O94888;P19338;Q92834;O14646;Q5BJF6;Q13469;Q92831;O00303;Q9UBI1;Q5VIR6;Q9H3R5;Q9BUJ2;Q9NS23;Q9UMX3;Q14203;P49754;Q14674;Q96DX5;Q14690;Q01082;O60516;Q7LBR1;O75494;Q9H0W9;Q9BW66;Q00978;Q96CW5;Q9YZ3C7;Q2VPK5;Q92562;Q9UPV9;Q15653;P51948;O75940;P63241;P61024;Q8N2W9;Q96EA4;P23297;Q9NZQ3;Q53HC0;O15164;P27469;Q9ULW0;P18615;Q9H0F6;P52594;Q86SQ9;Q12815;P51959;P41002;P50749;O60216;Q92499;Q8WUH2;Q86SE9;Q15560;O43439;Q92698;P20042;P21953;P52565;O60732;Q8WVM7;Q9UJ41;Q13144;Q5TA31;Q16594;P02795;P12270;Q9BT92;Q96D15;Q16385;P05062;Q96JJ3;O43639;Q16629;Q13114;O75934;Q9UHD9;Q15596;Q10567;Q9Y4B6;P32189;Q5VSL9;O43791;Q9H6Z4;P52736;O95983;Q9NRY2;P63172;O43303;O95503;O95644;Q9BRP8;Q9Y285;Q9BZV1;Q9P2W9;Q9UK45;O96004;Q5JY77;Q96PV6;O75886;O14744;Q9BQ89;Q9NT15;Q08211;P62316;Q9BZL4;Q15054;Q9BR76;O94906;A6NKF1;P51668;Q29RF7;Q9UJY5;Q9Y2D9;Q15436;Q8WXU2;Q96FX2;P31350;Q00613;Q9HAN9;Q13867;P68036;O15405;Q9Y3E5;Q07955;P49770;O43463;P80723;P55055;Q04864;P20290;P49711;Q93008;Q9UID6;P55769;Q9BZE9;Q96R06;Q15059;Q13952;Q8N612;Q9H1B4;Q92600;O95278;Q04917;Q9C0E2;Q9NWT8;Q9H7H0;Q96GX9;Q9BV57;O43745;P24534;P61077;P59998;Q9P2R7;P63279;P61118;P27694;O14776;Q6ZRF5;O94817;O43542;P51610;O75953;Q14145;Q00597;Q96EN9;O14508;O00198;Q12834;P12755;P08697;Q13541;Q9GZS3;Q9Y2L1;Q8N3L3;Q9ULU4;Q9H9C1;Q12830;Q8WTW3;Q8NCD3;Q9Y5Q3;O75607;Q09161;Q9Y6E7;P30793;P0C1Z6;O95273;Q13404;Q14974;O15040;P30047;Q9UQF2;Q9BV47;Q9Y6J9;Q8WX92;P10914;Q9NQG5;P08047;Q5VWG9;Q96D17;Q12888;Q9NRF9;Q8IWE5;Q8TEP8;Q9NNW5;Q99623;P11802;Q13257;P30154;P27986;Q9H267;Q8IZH2;Q86TB9;O94829;Q12840;O43156;P54252;O43663;Q7Z3C6;O43752;P07737;Q8N5C8;O75152;Q9UKN8;Q96MT3;Q08209;Q9H9Y6;O95201;P52630;Q9HAU0;P80217;P55771;O95707;Q96NY9;Q92889;Q9UKC9;Q9H5Z6;P38919;P60709;P23258;Q9NPC6;Q96C86;Q9BWU0;Q8TAP9;Q5H9L2;P51531;Q9H944;O14757;P26651;Q13562;O43399;P14678;O15371;Q96AJ1;P01100;Q9UKA1;O75155;Q96L92;Q5TC12;Q9P2K3;Q7Z5K2;Q9HBM6;O14734;Q15022;O75167;O75943;Q92674;Q08752;Q9H865;Q8N611;P25789;O00170;Q8N1E6;Q13263;P15924;Q12840;O60291;Q8TE69;Q9BSJ6;P11387;Q8TCI5;P41212;Q9UQB3;Q86VY4;Q13405;Q8N7W2;O43516;Q14526;Q9NS73;Q13137;Q6IQ32;O60716;Q96FV9;Q96GM5;P22415;O00233;Q9NRR3;O96000;O75122;Q9UNH5;P51398;O60294;Q86WQ0;O60518;Q14566;O96020;Q9BVC4;Q9H9A7;Q9GZX5;Q14686;Q9BQY4;P01009;Q9UBL3;Q14677;O14965;Q96B67;Q8WYQ5;Q9BY77;Q9H4I2;Q9H0G5;Q08AD1;Q9Y3D3;P19388;Q9NP66;Q9BVC3;Q9UPV0;P29084;P43360;Q8NBZ0;Q86WV1;P60228;O75817;Q8NI35;Q9BXW4;Q6PJT7;P31260;Q16851;Q7Z3K3;Q9H2J4;P35637;Q96KQ4;Q8TEB1;P10599;P11940;Q9XRX5;O60296;Q14186;P50222;Q7Z6J0;Q9Y5Q8;Q86XR8;Q96GC5;Q9Y6B2;Q92830;Q9H2C0;Q9UKX2;O76003;Q9UH99;Q9BFX3;Q86XL3;Q04725;Q9Y512;P40424;Q14653;Q14164;Q9Y6M1;Q8N3Y1;Q13123;Q9H2K2;Q00577;P38432;Q9EQ70;P20618;Q09666;Q9BSJ2;Q14151;O15131;Q96LI5;Q9UKT7;Q9BW27;Q92624;Q92541;Q03468;O60711;Q9Y6K9;Q96S3;Q04726;Q9P0U4;P51791;O15117;P46976;Q86UW9;Q9NXB0;P17535;Q14154;Q9NQX1;Q2M3C7;O15355;P51532;Q9NVV9;Q96JC9;Q9Y295;P62310;P49354;P48788;Q04695;O15235;Q9H981;Q9H9G7;Q86TP1;P41227;Q9Y221;Q96RN5;Q9NXX8;P30307;Q9BTM9;O75351;Q8N6F7;Q86SQ7;O75665;Q9Y6K5;Q9H8T0;P62314;Q9UK41;Q9UIS9;Q16537;Q9H9E3;P13984;Q02930;Q9H175;Q9UK73;P63208;Q8N140;Q9Y5A6;Q9BW60;Q8NDT2;Q15013;O00423;P56945;P15170;Q9UKK6;Q99551;Q969K3;O76064;Q13901;Q9Y448;Q96M61;Q96JB5;Q9Y375;Q9HAU5;Q8N726;Q9UUN5;Q9UBX9;O94811;P35573;Q8N1V2;Q9BSM1;Q96MN9;P05783;O95232;O14556;Q9GZT9;P54098;Q8TEQ6;Q96S59;P25205;P54727;Q8WVZ9;Q5TAX3;Q9H6Q3;O95810;Q8IY92;Q9UGK3;Q9H788;O15266;Q92621;O14641;Q13428;Q04323;P23511;Q9H2L5;Q9ULX6;P40222;Q9NVI1;Q562F6;O14929;Q8WW12;Q969U7;P78537;Q9BXF6;Q8NI29;P14618;P14635;Q9UKV3;Q8TES7;P15927;Q13084;Q8IXJ6;P04264;Q92759;Q96EV8;Q9HAW4;O95402;O95373;Q8NFX5;Q9UKJ3;Q9HCC9;Q13042;Q9BXP5;P32780;Q99933;Q5JSZ5;P55060;Q15528;Q12933;Q969E8;Q8WTS6;Q9Y4P8;Q92973;Q9BV73;P51965;P63162;Q9Y4Z0;P58340;O75170;Q99873;Q9Y3A3;P18847;Q9Y2D8;Q8IZW8;P62136;P22531;Q9HD26;Q12906;Q9H5J4;Q96BK5;Q9UL40;Q6VY07;P36956;Q9NQ T4;Q13838;P78543;Q9BQ90;Q86YP4;P49257;Q96QU8;Q13526;P35711;P62258;Q9H8E8;Q92769;Q9H444;Q9UBF6;Q9UBF1;Q9NVP1;Q9NQC7;P42575;Q14683;Q96KS0;Q9C005;P63261;P16220;Q9UHV2;Q99717;Q9H469;Q9H0A8;Q15699;P52435;Q6PGQ7;Q9H1Y0;Q9Y3B2;O14920;Q92804;Q04206;A5YKK6;Q9BZD4;P45973;P42768;P42226;Q7RTS9;P49848;Q15035;Q16576;Q9ULM3;Q8WW35;O95628;Q9HCU9;Q9NZL3;O95453;P62318;P36873;P53990;P02511;Q8WXC3;Q12972;Q8TCS8;Q9Y5V3;P27348;Q6ICB4;Q96G01;Q9H668;Q15029;Q6NUP7;Q8NFX8;P54725;Q12873;Q8IXQ6;Q99502;P19012;Q14678;Q96G23;P20585;Q8N9A8;Q9Y6N9;Q9NWZ8;P52597;Q8TB72;O60573;Q8WWQ0;P57081;Q9UBZ9;Q76FK4;P09972;P21980;Q6DK K2;Q68DX3;Q9UN79;Q13765;Q14192;Q9P0Y2;P11142;Q9UHI6;Q6NZY4;P23284;Q9UI36;Q15691;Q8NFD5;O60447;Q96AB3;Q71SY5;Q15058;Q8N3V7;P46939;Q15051;P08238;Q92905;P0DI81;Q9UKJ5;Q9BPZ3;Q53HV7;Q92843;P42704;P68104;Q7Z7A3;Q13425;Q96MT8;Q02577;Q15025;Q96BD8;Q9HB21;O75427;Q6P4R8;Q10570;Q9H4L7;Q63ZY3;Q9Y6D9;Q8N1B4;P62312;P50570;O15297;A8MT69;O94868;Q9P2I0;Q96B01;Q8NHM5;Q99750;Q15562;P35269;Q9UI30;P55735;Q15942;O75618;O60921;Q13228;Q8TA86;Q6P1X5;Q676U5;Q96RK0;Q9P031;Q99594;P22736;Q9Y262;P52948;Q9NX18;Q9Y6X8;P41236;P54105;Q9Y5K5;P51825;P20248;Q9Y6G5;O14576;Q92529;P55957;O14907;Q6UWZ7;Q9H446;Q9NQ31;Q96GC6;Q8IV I9;Q9BXJ9;A7MXY6;P35548;P25815;Q9NWV8;Q9BYX4;Q86VQ0;O75530;Q15024;Q96QD9;Q8WXF8;Q8TD16;P35251;Q9Y6K1;Q96B97;Q99459;P25786;O15205;Q8IVM0;Q9UKX7;Q01081;P35680;Q8IZD4;O14862;P05412;Q9BYV8;Q9NPJ4;Q9NQ87;Q86V97;Q9H2P0;P11388;Q96T88;P29083;Q9ULM6;Q7Z7A1;Q9Y281;P31040;P49450;Q92985;Q15327;Q3ZCQ8;Q8TE02;Q9NZM4;Q9P2M1;Q16514;Q9BYE7;Q05519;P28347;Q9Y3F4;O95257;Q99615;O14613;Q5JR98;Q9NR77;Q14160;P78352;Q70Z53;O00255;P67809;P78396;Q8IYD1;Q8IX07;O75663;P18850;Q8ND04;O96018;Q01826;Q9NUW8;Q9H902;Q9UKI9;Q8NI27;O94921;Q8N668;Q13625;Q9BSH5;P13994;P42771;Q9BYK8;P53041;Q9P2B4;O75376;Q9HB03;Q5JTD0;O00470;P42224;O00425;O00762;Q9NXX7;Q96EB1;Q9Y462;Q01201;Q8IWX3;Q15369;Q6RW13;Q13185;O75582;P83369;P78344;Q8WV99;Q9UPP1;P06748;Q5TCQ9;Q8N108;Q16254;O00566;P08235;Q14865;O43711;Q92783;Q9NZZ3;Q12816;Q9NRL2;P49356;Q01658;P22392;Q53EL6;Q86YC2;Q9NV88;P60842;Q9BT78;Q3KNV8;

Q9NQ48;Q8N6T7;O43829;Q00403;Q92796;Q99689;Q9UDY4;Q9NPB6;Q9UKV8;Q8N2Z9;Q8TBN0;Q13200;Q9Y2T4;Q9ULG1;Q8GUE4;O14787;Q13033;P62277;P05121;P61586;P57077;Q14209;Q99590;Q9HB75;Q13569;O95456;O00512;O94983;Q9H074;P12883;P11474;Q9BV68;Q14315;Q6P9B6;O60293;P15923;O14964;O43395;Q99496;P36402;Q13118;Q96J17;P49459;Q32MZ4;P10827;Q8WUF5;O43290;O43615;P50453;Q3B820;P28065;O00267;P07900;Q6A56;Q8TAF3;P22670;Q9H6U6;Q9H410;Q8IYW5;P32243;Q8TBB1;Q6VVB1;Q15633;P48382;Q6ZWA9;Q5JTC6;Q9UHK0;O75340;Q96T58;Q6IE81;Q02447;O75558;O95630;Q90928;P56693;O75446;O94992;P55854;P23193;Q8IY81;Q5T8A7;Q9H4A6;Q8WWY3;Q8N5U6;Q68DK2;O14980;P67775;Q99684;P53805;Q8WY41;O75334;Q9H0C5;O95476;O95751;Q7L2H7;P50402;Q8IW19;P55265;Q13347;Q14207;Q15185;Q8WU90;O94973;Q99436;Q8TEK3;P48059;P50616;P29474;Q9C035;O15360;Q9BQ69;O00204;Q3SYG4;Q9BX70;Q96RU7;O75382;Q15628;O75436;Q07157;P17544;O75822;Q6ZVK8;Q8IX90;O75323;P28749;Q9NXF7;P20073;P84103;P09467;P55199;Q8NE71;P35658;P68871;Q9NUL3;Q05516;O75901;Q9HCU8;P13489;Q14397;Q9P1Q0;Q8N3U4;O95996;Q9H9L3;Q92797;Q86T82;Q14980;P26196;O75150;O14602;O00482;Q14152;Q96IF1;Q86US8;P61244;Q9ULE6;Q86Y97;P09914;Q2VBP7;Q9BQA5;P05198;Q9NX70;P84022;Q9Y3T9;O95376;O60260;Q06830;Q9P0M2;P78345;Q9BWF2;Q99607;Q9NPI1;Q15233;P53618;Q9NT62;O95777;P60520;P42677;O95400;Q5VTR2;Q9HCK8;Q9UM11;Q96CD0;Q9Y252;P49715;Q5JR59;Q9UIF8;P50748;Q9BTL3;Q8TAP6;Q8WY54;Q16082;Q06547;P09497;P14866;P62837;Q9Y2D1;Q12959;Q9UGP4;Q9NPC3;O60885;Q15326;Q8WVK7;P01008;Q6P2Q9;O14746;Q9P2T0;Q96IY1;Q96EF6;O60671;Q15759;Q86WG3;Q96IZ7;Q9UNS2;Q15906;P08727;P0CG47;Q8WYH8;Q99996;P83876;P31949;P63165;P45984;P49918;P07197;Q8WYJ6;Q8IZQ1;Q5VU43;P37275;Q96Q83;Q9UJM3;O43933;Q12983;Q96C74;O95218;Q96S55;Q8IXH7;Q9BZK7;Q9UPR3;P56524;P60953;Q6ZNA4;O43447;Q9NSC5;P60510;Q8IXH6;Q9UPN7;Q12789;Q9UIF7;P62328;Q9UKG1;Q8N163;Q92870;P54278;Q13416;P14625;P62508;Q92845;Q9NRI5;O15379;Q5VTD9;Q6NZI2;O15287;Q00839;Q8N8A2;P52292;Q08945;P18583;P52737;P13647;Q14999;Q12905;P18754;Q7L190;Q5TZA2;P17947;P38646;P21675;O15127;Q15910;Q9HB19;Q9NR09;Q9GZL7;Q9UGK8;P08133;O15084;P04156;P46937;Q08050;Q8TAD8;Q9UHC1;Q9UBS8;Q7Z6Z7;Q75113;Q9NX53;Q12962;Q6WBX8;A6NIH7;Q8WUM4;P04792;O14974;O75164;Q86TG7;P28370;Q96L4;Q7Z2E3;Q13077;Q9NX63;P82094;P35232;Q969M7;Q9Y6D6;Q9Y5Y2;P35869;P63272;Q13432;O00743;Q8N6Y0;P35226;O15105;Q9H8Y8;Q6PI48;Q96T37;P06746;Q92890;P46779;O15397;Q9H1A3;P21127;Q7Z460;O76031;Q01850;Q8IWZ3;Q02410;O94763;P12004;Q86WJ1;O60504;Q9UHB7;Q7L9L4;O00625;Q96HI0;P22655;Q5SW79;Q9NRA8;Q9Y2M5;Q9HCD5;Q9UK99;A9UHW6;P62750;Q9NPE3;O00567;P35580;O15350;P22087;Q5SQN1;O00291;P46013;P63010;Q9BU61;Q96TC7;Q08AG7;O14893;Q9NRG4;Q13547;P43356;Q00994;Q9S081;Q7L0Y3;P31314;P49116;Q9NWA0;Q05086;Q92597;Q9BQ83;Q66K59;Q9GZ85;Q9UKY1;O43660;Q14687;Q8N3F8;P78559;P24928;O75362;P62140;P28074;Q96F86;O15372;P49792;Q9Y6H5;Q7Z699;P62308;Q86U86;P24863;Q96P71;P62256;P52298;Q9P0V3;P67870;Q92530;P54253;Q13233;P38936;Q96IT1;P30876;O00570;Q92572;Q86VX2;Q9Y5A7;P04406;O15162;P50502;P62987;O95848;P38159;P35900;P13056;P33992;Q8WVM0;P48552;Q9UM54;O95886;Q9P287;Q13620;O95613;P23528;Q00534;Q9BQY9;P24278;Q7Z4G1;P55198;Q13618;P78371;P55212;Q13111;Q00653;Q15543;Q86UW6;Q9NSC2;Q9NYB0;Q15696;Q96EP1;Q92993;O95999;P23246;P26368;Q15652;Q53G59;P15336;P10828;Q9NVV4;P41182;P04198;Q9Y333;P41252;Q9P1T7;Q6RFH8;Q8IWL3;Q15047;O43318;Q9NS37;O00422;Q92793;O75525;Q9H4P4;Q15365;Q8N4C6;P11441;P39748;P31276;Q9NX40;P19474;Q6PGP7;Q9H1K1;Q8IZP0;Q8TDC0;Q9Y2P7;P40692;Q8N488;Q9BQS6;O60866;P48380;Q9P1Z2;O14512;Q9UI32;Q96NA2;Q66PJ3;O60264;Q13023;Q9UIC8;Q9HBL0;Q9NZL4;P78549;Q5BKZ1;Q92466;O75475;Q8TE76;P29692;O14558;Q6VMQ6;Q9NXR1;O95271;Q8N7J2;Q9BZR8;Q86Y01;Q9UPY8;P61088;Q5T3J3;Q16526;Q9NX95;O00505;Q96K30;O95071;Q9NXV2;O00257;Q8IY57;Q96K80;P19447;P35813;O75381;Q14527;Q99732;P07093;Q13895;P17677;Q9NP98;O43255;P43358;Q13829;Q9UKT8;P10515;P30260;O00167;P05386;Q9NZ52;Q9BSQ5;Q6QOC0;O14618;Q63HK5;O75419;O75807;Q8IX03;Q5T200;Q92900;P17275;Q04837;Q86WH2;Q9H816;O00411;Q9ULD0;Q9UH77;P43355;O95163;Q9H160;Q9UFN0;Q86U42;Q9UBK9;P78358;Q16637;Q9P270;Q9UL03;O43310;Q96EZ8;Q9UILL;Q00987;Q92922;Q8NF91;O75531;P60660;P14672;O94901;Q9H7L9;O94842;P31943;P60604;Q8TCTJ;Q96CA5;Q9BU89;O60238;P55209;Q96HA8;O43583;Q9NXX6;Q9P032;O95073;P02794;Q9GZY8;Q96KP1;Q8N1I0;Q68CP9;P19838;Q8IUD2;Q8NG27;P20823;Q9NSA3;Q9Y5L0;A8K8P3;Q12824;Q99741;Q96ED9;P62166;Q0VDF9;Q13568;Q9UKT5;Q9UNET;Q8WV22;Q07021;P23490;O95171;O43900;O75175;Q9H9Z2;Q13619;O43172;Q7Z417;Q9NVN8;Q14511;Q8TAQ2;Q9UBC9;P08865;Q06609;Q14137;Q9UKL0;Q9H211;O94874;Q9NR46;Q13485;Q9NTG7;P61247;Q9BVI4;Q86XK3;Q9H204;Q96HR3;Q15003;Q96CM3;Q5UE93;Q9UHN1;O14818;Q03111;Q9P278;Q9UNH7;Q8WTR7;P62937;O75925;Q8N9B5;Q96FF9;O95817;Q9UMX1;Q9H583;P78395;Q9Y2X3;Q9UN37;O43482;Q6P1K2;Q9GZM8;Q9BUP3;O14662;Q6QNY1;P78347;Q8NHY2;Q9UHR5;Q14232;Q5H9R7;Q06587;Q9GZR1;P24961;Q99700;Q9UNA4;Q14498;Q9UBD0;Q9HB71;Q9Y3E7;Q9UBB5;P42025;Q9HD42;P27695;Q9H3M7;Q8TAT6;Q96KN1;P11161;Q9Y6X3;Q9UKF6;P52294;Q8N5R6;Q01664;Q9BVP2;Q53GL7;O43167;Q9UL42;O00161;Q9Y3Y4;P30084;Q6I9Y2;O15519;Q96HW7;O75821;O14777;Q8TAE8;P31269;Q96QG7;Q96N03;P49790;Q01860;Q15544;Q014676;Q9UNY4;Q03060;Q96AQ6;O00716;Q9UID3;O43684;P63167;Q07866;Q8IZD2;Q14493;Q8WTV1;O00139;P46100;Q9NXR7;Q9H5J8;Q13227;Q96B26;Q7L5N1;O60832;O75410;Q8TF46;Q8N5D0;Q08379;O60645;P46777;Q14749;P07320;Q13105;Q9HBM1;P52747;P28324;Q9Y3V2;Q9Y224;Q96EY1;Q9UJY1;Q8N5M1;Q9H0B6;Q9NPJ6;P20749;P78318;Q9UKT9;Q9H4B6;Q9UJT2;Q99638;P53992;P09661;P51587;P61457;Q9NXV6;O95551;Q9BSW2;Q495M9;Q8NF64;O43918;Q15631;Q16401;Q8HWS3;O60784;O43513;P33240;Q9BRV8;Q86XI8;Q15561;Q15021;Q8TDH9;Q01844;Q15366;Q86VW0;Q01094;Q9HC52;Q9UMX0;P23760;Q9Y605;Q8N7H5;Q9UI10;Q13136;P78560;P46781;O15144;Q9Y4X5;P49419;Q16186;Q5FBB7;Q9P2M7;Q86X95;P40855;Q7L1V2;Q96GV9;P11308;P51955;O95997;O95198;Q93034;Q9NYF8;Q86Y13;P54274;Q96GG9;P55197;Q99698;Q9BUH8;Q8IY31;Q70EL1;Q9Y5J3;Q86YF9;O00410;Q96LA8;P13640;Q12874;Q14739;Q9UJW9;P15884;Q5D1E8;Q15599;Q8WVJ9;Q13794;Q99747;Q9H9Q4;O43809;O43236;P55210;Q9Y5S9;Q15796;Q99619;Q14839;Q9BVM5;Q8NI08;P13010;P17482;Q9Y5P8;Q13287;P12956;P20226;Q96IV0;P20265;Q9HCM9;Q9ULV3;Q8TEL6;P50914;O95865;O43257;P47928;Q9UBC3;Q13501;Q9BQE4;Q9P086;Q8WXD5;P46527;Q8IWW8;Q13094;P49910;Q9H840;Q9HCI5;Q96MF7;Q6W2J9;P62266;P55345;Q15102;Q9NS91;O75081;P49750;Q8IU60;O75674;O75791;Q8N3C0;Q13542;Q96QF0;Q13561;O15061;P35227;Q9UBC1;P35638;P32929;O95782;P29372;Q8WWL7;P98168;Q13761;P24864;P19367;Q9NPF5;Q9BYG4;Q92988;O60934;P41208;Q969F1;Q9NRD1;P36543;Q5F1R6;Q9H1J1;Q9HAZ2;Q14781;Q96ST3;Q9H9D4;Q93062;Q9UNS1;P25963;Q9Y314;Q13617;P43357;Q15819;Q9Y4Y9;Q9H2U1;P10589}

Pathogen[ P14079] interacts with 2897 human

partners:{Q9Y3C0;P31751;P04083;P36543;O14776;P02808;Q5TAQ9;Q13228;Q9UQL6;O60671;Q15629;Q16655;Q70E1L;O00625;Q9BXW6;Q9BRP4;P98168;O43809;Q5JTD0;P01215;Q96QK1;Q6VY07;Q9NQG7;Q02952;Q15691;P48552;Q6NUQ1;O95373;Q6R327;P22695;O43292;Q14980;Q5XUX1;Q9Y5Y5;Q13952;P52815;P46779;Q9UQR1;P28065;O15379;O75886;P07320;Q8NI29;Q9H204;Q7L2H7;Q9UHB4;Q2M2Z5;Q13492;Q04837;Q15560;Q9Y296;Q96CW1;Q99436;Q96A56;Q8N2W9;O43516;Q9UHY8;O75192;O75112;Q92844;Q96FX2;Q3QCQ8;Q04725;P51959;P52565;Q9BXL7;P35711;Q9H668;Q9NRQ2;Q99623;Q9NXX1;P54274;O43261;P05937;P16452;O43615;O00463;Q12929;Q9NR46;Q92552;Q8N5M1;O00422;O75161;Q13362;P11388;Q9H446;Q8N895;Q12894;Q9Y2J2;P35579;Q96MU7;Q99459;Q9Y333;Q96IY1;Q9Y285;P13164;Q9NPI1;O95402;Q9BTW9;O60260;Q15014;Q9H7T9;Q01105;Q8IX12;O43447;P08151;Q15293;Q9Y5K8;P20042;P15036;Q5JVS0;O95166;P62333;Q9BQ95;P13056;P53804;Q96GG9;O15164;Q8NEM7;Q8IXQ6;Q7L804;Q9BW27;O43513;Q96JL7;Q9UKT5;Q14004;O15315;Q14789;O14746;Q13416;O14773;Q14C87;Q9HAZ2;Q14746;Q9NWS1;Q96NA2;Q9GZT9;Q6PGP7;P23381;P20585;P55199;Q9UL40;O95628;Q9Y5U4;Q68DX3;Q9UKV8;Q9H295;Q9BQ15;P26373;P37802;Q9Y3E5;P57678;Q9UNH7;P62508;Q5TZA2;Q92562;P33076;P09327;O43156;P22531;Q96HA9;A9UHW6;P15502;Q96I25;P09874;Q8N1B3;Q8WVV9;Q9HAT8;P78543;P49257;Q15287;Q9Y4A5;P16278;Q12982;P35900;Q9NQ48;Q9H0S4;Q96K30;Q96QH2;Q16890;Q96T23;Q8TD23;Q6PGQ7;Q8IXH6;Q9Y6G5;Q4U2R6;Q9BQ90;Q9BQS6;O75618;P55327;Q9UPY8;Q08945;Q9BRQ6;P51965;P61970;O15162;P41227;Q6XZF7;Q5TA31;P27469;Q9H8S9;O75151;Q8WTR7;P31948;Q9NV88;Q8WXC3;P60842;Q9H8W4;P12755;Q9Y3B2;P55055;P21953;O14602;Q15036;Q9NR22;P23396;Q86V97;Q9Y4E1;Q7L590;O14613;Q5D1E8;Q9ULG1;O00291;O60293;Q9P2J5;O60294;P63261;Q15038;Q8N5C8;Q9UIF7;Q14242;Q8IZD4;Q15056;Q5EE01;Q86WV1;Q96B67;P11142;P10412;Q9P2M1;Q8WY41;Q9Y5Q3;Q9BXS5;Q9BYK8;P57077;Q9UDV6;P63279;Q16873;Q15561;P17677;Q9BZK7;Q6UW32;P41238;O75146;Q8WV41;Q12815;P14373;Q9UKG1;O75934;Q15532;Q9H0A6;Q6UVJ0;P17152;Q9NV31;Q9BVP2;P60468;P35869;Q96T37;Q8WV24;Q969X6;Q8TEQ6;Q02078;Q99814;Q8WU39;Q9Y375;O75817;Q9UIS9;Q8N5D0;Q96P71;Q96LL4;Q96B01;P0CG48;Q06413;P19429;P40855;O95793;Q86WG3;Q6STE5;P08779;Q9UNA4;Q8N196;P49069;Q9NXF7;Q99502;Q00610;P63172;P54257;Q9NPE3;O75419;O43482;Q9BYX4;O75400;Q9NWB7;Q14738;Q15596;Q68DK2;Q15047;Q08AD1;Q8TEL6;P28715;Q92600;P52630;P49593;Q9UL18;O00303;Q96MF7;O94906;Q9C005;P30307;Q6ZTQ3;Q14566;O43745;Q99996;O94888;Q9NT62;Q96AB3;Q9BUH8;Q9UJY4;Q96CB8;Q9H9G7;Q9Y2X3;Q8IY31;Q9UJC3;Q9NYV7;Q9GZV5;Q9NWT8;Q9BQE4;Q9NUX5;Q9NS23;Q06546;P14859;P83436;P04279;O75663;P53041;P02795;Q16567;Q8WV99;Q9UKT4;Q9UID3;O43187;Q16851;Q9NRR3;Q9Y2W2;Q8TEP8;Q96DX7;P31150;O75821;Q16526;Q8N163;P35637;Q9UL42;Q08752;Q9Y2Q5;Q969H0;P11532;P62324;Q6P9B6;P53779;Q9UBU8;Q9ULV3;P28749;P50452;P61201;D6RGH6;Q96LA8;Q9BYG5;P13349;Q01534;Q7Z460;Q14653;Q8NEU8;A1L3X0;Q96NY9;P06730;Q8IX90;Q6QNY0;Q86WV5;Q96A33;Q13765;Q92917;Q9UHV2;O75691;Q9UGK8;Q6ZVN8;Q9Y3A2;Q96BT3;Q99704;A6NIH7;P40222;P52747;Q16548;P25705;Q9C035;P61421;O75928;P09914;P35269;Q14186;Q13118;P11171;Q9UI10;O75528;P54136;Q8TF05;Q6ZMV9;Q9GZQ3;P49336;Q9H869;Q9Y4P8;Q13148;P51946;Q9UDY2;Q9NRG4;O95999;Q8IYW8;Q9UKF7;Q8TDZ2;Q15853;Q96P70;O15297;Q9BVN2;O60481;Q13415;Q7Z2W4;Q9HBM1;O95487;Q07866;P68036;O95684;Q9P209;Q9Y6K1;Q8IXJ9;Q16594;P22735;Q96S52;Q13309;O14893;Q9Y6X2;Q92734;Q96IV0;P56589;Q14192;Q9Y5N5;Q92830;O43736;Q15173;Q9H5J8;Q9NVR2;P22234;O60664;Q96PV6;P62072;O15519;Q8IXH7;Q9Y2Y9;Q96R06;O43597;Q15700;Q92614;Q9H4D5;O75362;Q96HI0;Q68CJ9;Q15723;P20292;P35398;Q9UKF6;Q9H0W8;Q9UKN8;Q01082;Q5T3J3;P78396;P09912;Q96CD0;O95271;O14896;P53567;Q16537;Q86VI4;Q9NX95;Q9UJ70;Q9Y5N6;Q9H9C1;Q14103;Q9UFG5;P67809;Q8IYD8;P80217;Q9BWU0;O95817;P68104;P53999;Q9UPN7;P50995;Q9UKJ5;A6NDV4;P24864;Q8IU60;Q2VPB7;Q8N108;Q8I2W8;Q86VS8;Q9BY44;Q99700;O95503;Q9UJM3;Q9ULX6;O43439;O15304;P43360;Q8TDY2;Q9BUE0;O43924;Q96CJ1;P46781;P36873;Q9NCP6;Q9NX70;Q6NUP7;Q9UJY5;Q16658;P49354;P05408;P11473;P57740;Q8N9B5;O60493;Q9UBL3;Q96CM3;Q13021;Q9XRX5;Q99873;Q99873;P43357;O75781;Q9H9Q4;Q9UBS3;Q9H492;P35680;P20265;P40937;P50479;Q9NY61;P13010;Q96ST3;Q8WUF5;Q13023;Q15819;P15515;P41091;Q15024;Q92558;Q9UKS6;Q9NQ31;P13498;Q9NP84;Q9NR12;Q96RK0;Q96CS3;P39656;O75582;Q16254;Q9UK45;O95229;O14641;P10828;Q92541;Q16829;Q9BSU1;Q14151;P62753;Q96JC9;Q9UBF6;Q8NBT2;Q13620;Q92542;Q969T7;Q12840;P56537;P82933;Q08722;Q14157;Q13323;Q2QG D7;Q9BSI4;P08235;Q10570;P98171;P02511;Q9UI47;Q9NZ42;P48634;Q8IUC6;Q92985;Q9UNY4;P15924;Q13404;O60832;P52298;P04156;Q9UMX0;P55036;P35658;Q9H1K0;O94986;Q96HY6;Q86UT5;P40692;Q9POM2;Q9NPI6;Q92804;Q14207;Q9Y314;Q9UQF2;Q3MIR4;Q5T230;Q7Z739;Q8IYJ3;Q92793;O00170;Q9P0U1;Q6NUN9;Q13033;Q9HCE1;P28074;Q96ED9;Q99733;Q9HC52;Q9NRL2;Q15172;Q07157;Q6WBX8;Q9UBB5;Q13618;Q15013;P26641;P21399;Q9UN2;Q8N157;Q9H1J1;Q9BXJ9;Q8TE76;Q8WX93;Q66K74;Q15528;Q12874;Q9BWF2;Q9NX08;Q8N3Y1;P28370;P61457;Q49AN0;Q99607;Q96FF9;Q9P2Y4;P01225;Q7L2E3;Q93052;Q02410;Q9Y468;Q9BTA9;Q9NVV9;Q86WQ0;P14672;Q9NPI8;O00165;Q13094;Q5T2T1;Q13129;Q9H4L7;Q75QN2;Q92556;Q969S8;Q9BYC9;Q6ZPB5;Q13243;Q9BVK6;Q14677;Q10567;Q8IWL3;Q8IVG9;Q14CW9;Q9HCK5;A8CG34;Q9H8E8;Q68CZ1;Q9Y5S9;Q9H040;Q15041;Q13522;P24588;Q7Z3K3;P13807;P55771;Q13835;P46109;Q13901;Q7Z6G3;O14639;Q02241;P48382;O96000;O15405;O75475;Q16531;Q9BZE9;Q9Y6D5;P49005;Q6PJT7;P13489;Q2TAZ0;Q9ULH8;Q9BUJ2;P16298;Q9BSW2;O14974;Q6RW13;Q6NZY4;Q8TBN0;Q8N5A5;O94901;Q14204;Q96HR3;Q12906;P62495;Q9C000;Q8NHU6;Q96D15;Q15329;P33240;Q15276;P31949;Q9GZL7;P26038;Q99594;P52737;O43913;Q92834;Q9H1K1;P60604;Q15699;P54252;Q9Y6H5;O94874;O75306;P28347;Q86TB9;P17096;P42566;P30876;Q96LI5;P00395;Q03060;P11474;Q92922;Q9Y2Y0;Q6ISU1;Q92621;Q70YB5;O43815;O95251;P48380;Q96EP0;Q9BZD4;P52294;Q9Y3C8;P51532;Q9H211;Q00597;O60518;Q14164;Q9Y2T2;Q9HC24;Q9UQB3;Q6UWZ7;O95644;P21980;Q9UGK3;Q99497;Q9UNL4;Q92783;Q9BTK6;Q9GZX5;Q8WXE1;O75800;Q7Z417;P54278;Q9P013;P26368;Q86U86;Q92540;O95405;Q8NFX9;Q9Y3C7;O14646;Q9NXV6;Q14865;Q9UDY4;P29372;Q99684;O15392;Q86TP1;P83876;Q01826;O60907;Q9H3P2;P35712;Q969T9;Q9UID6;Q7LBR1;O95163;Q93062;Q9ULK4;Q8NE01;O75807;Q9UMX1;P09972;Q8WVJ9;Q9H8T0;O95931;Q9NQ4;Q9Y250;Q13428;Q8N9A8;Q16891;Q717R9;Q9NWZ5;Q16186;P62136;P25787;Q00994;Q92902;Q92698;P51587;O60216;Q8N720;P80294;Q6UWF3;Q15070;P22557;Q6ZNA4;P07737;Q99966;Q13868;Q8IWX3;Q8NI27;P54198;P32189;Q9P1Q0;Q9UHC1;P51531;P42704;Q14209;Q9UKV0;O75832;Q9HCH5;O43167;P14866;P14868;Q5T200;Q8N726;Q6P1Q0;Q05516;Q96QG7;Q4LE39;P23246;O75446;O95153;P46783;P46060;Q86US8;Q9P2H0;P07910;Q9UI14;Q8NI08;Q9UBU9;Q9Y5A6;Q9NPD3;Q13310;Q8NBZ0;O96004;Q22736;P52594;Q8TCJ0;Q9HD42;Q13838;Q13573;O75674;O60645;P78371;Q8IZD9;Q92624;Q9NVM9;P05198;Q6NZ36;Q9P2T0;Q12816;Q9H840;Q9UBF9;Q8IZP0;Q9NRI5;O95433;Q02447;Q6P9B9;Q8NE86;Q5T8A7;Q8N3I7;Q13105;O00213;Q7Z4S6;Q15750;P15



1UM5;Q14134;O76041;Q92889;Q9BQA9;Q9Y512;Q9H0R8;Q8IX07;Q9Y3V2;Q14689;Q15366;O95983;Q68  
E01;A6NKF1;Q9Y248;Q15834;P55789;Q14533;P09497;Q14247;Q9BTL3;P56270;O60936;P04141;Q5TB  
30;O14836;P27695;Q12983;Q16082;Q13561;P51811;Q9NX18;Q92905;Q9UJY1;P62304;Q9P2K3;O4326  
4;P13232;O75335;P51116;P10124;Q9UBD0;Q8IWX2;Q5C9Z4;Q8N668;O94992;O95171;Q14194;O15235  
;Q9BR76;Q96KN1;Q9BQD3;Q9UMX3;Q9UKL0;P63010;A7MCY6;P32929;Q9UI32;P48788;Q9Y2M0;P09917;  
Q96903;Q15035;Q1ZZU3;Q9HAU5;Q9Y2L1;Q9Y281;Q96AJ1;A8MT69;P22830;Q9NXV2;O15397;Q96RL1;Q  
9Y607;Q8N140;Q1NNS5;O60264;Q96A26;Q8TDX9;Q9NPFJ;Q15327;Q92530;P49790;O15040;P62316;Q9  
NSC5;Q96DX5;Q8N7W2;Q13227;Q9UI36;P11277;Q86UE4;Q8WTV1;Q5SW79;P62310;Q9UI30;P35638;Q96  
J02;Q14154;O95551;P21127;Q07955;O15083;O95295;P49902;P23297;Q9UFN0;Q92754;P61962;P067  
48;P01106;Q9BSJ2;P62258;O14662;Q9UBC9;Q9ULU4;O43303;P12883;Q5HYK7;Q8WWR8;Q9H0G5;Q9Y26  
2;P50453;Q13596;Q9H8Y5;Q9H6Q3;P02794;Q96F07;O76003;Q7RTS9;P10620;O00505;O43502;Q8N3R9  
;Q6DKK2;Q13501;Q969L4;Q9H6Z4;Q13137;O43929;Q969H4;Q9NNTK5;Q9H3R5;P52657;P05783;P56693;  
Q9P2M7;O94973;Q5T2W1;Q8TDB4;Q9GZM8;Q8TAE8;Q06190;O43541;Q8N1B4;Q15365;Q00577;O95997;Q  
9P0U4;O14862;Q04726;Q8WUQ7;Q9HAN9;Q12972;Q86WB0;Q14139;Q9P031;Q96G01;Q9H0H0;Q9P0W5;Q9  
6A44;Q13405;Q8WW43;P42224;Q9HCU9;Q6P4R8;O00411;O75531;Q8N1V2;Q8IWX1;Q9UN37;Q13617;Q6U  
X71;P02810;P33992;Q96RU7;Q7Z614;P10588;Q6PGN9;Q8IXJ6;P63241;Q13542;Q9UBW5;Q86WG5;P352  
26;Q9UH77;P18850;Q8IZL8;Q8N612;P32243;Q86UL8;Q8WX92;O60296;Q9BT78;Q6PJ61;Q53HL2;P1462  
5;Q00587;P62081;Q3KNV8;Q15554;Q9H1A3;Q9UIV1;P41212;P32780;O75081;Q8TAP9;Q9BSJ6;Q53HV7  
;Q6PJW8;Q86SQ7;Q8N1L9;Q13064;Q04743;O95760;O75489;Q96A65;Q9BW71;Q715Y5;P41208;P46777;  
Q16626;Q8N488;Q7Z3T8;P42677;O14713;Q8IYI6;O14508;Q14814;Q96EK4;Q9Y5K6;Q6NZI2;Q86TG7;Q  
8TD06;Q9H4M3;Q8N9M5;Q9Y2G2;Q12933;Q13432;Q04724;P20248;O60841;Q6ICB4;P61978;Q14872;Q8  
NFH4;Q9UL03;P06746;Q9Y6N9;Q5T7B8;Q12789;Q9NQS7;P35227;P15927;Q63ZY3;Q7L5N1;P27815;P31  
943;Q8TES7;Q14676;Q14839;Q9Y2X8;Q86UT6;Q9Y3M2;Q93050;P20749;O75925;P15880;Q96LC9;Q018  
50;Q9H3K2;Q92547;Q14764;Q9P270;Q01081;P10515;P43358;O14512;P62993;O95810;Q86TAL;P4942  
7;P23193;Q8NF67;Q3B820;Q13158;O43918;A8K0Z3;P13984;P49750;Q9BYG3;Q9BFX3;Q9BZF9;Q8TDR0  
;P38432;Q14493;Q8WXE9;P30260;Q9UN79;Q8TAX7;P20073;O43639;O43299;O95613;Q9ULR5;P38646;  
Q8N729;Q7Z4T9;P15407;Q8TB45;Q9Y4R8;Q06455;O43747;Q8NCD3;P10599;Q9Y283;P27694;Q15051;Q  
9UBS8;Q8N9R8;Q86WX3;O43159;O75410;P63167;Q96KRL;O95456;Q00978;Q3YBR2;Q6PI26;P62191;Q9  
NNW5;O95777;Q6ZU52;Q9H0F6;P29459;Q9H7H0;O75182;O43752;Q8WYQ5;Q9NZV5;O75376;Q9Y605;O43  
791;P60510;Q9ULE6;P54259;Q92900;Q9BT92;O15042;Q86YF9;Q63HK5;O15260;O15078;P78317;Q096  
66;Q606787;O00198;Q8IY18;Q9Y3E7;Q495M9;Q92499;Q9B073;O43639;O43299;O95613;Q9Y6Y9;Q9BFC9;Q9UKT7;Q96B2  
6;Q96BK5;O95232;O15265;O00541;Q8TBK2;P67870;O95476;Q9P032;Q99638;Q02577;Q9HB96;Q9UI12  
;Q8IWE5;P46527;Q9P1T7;O43561;P03897;Q9Y6X3;P08865;O14787;O75688;P55735;Q8WXF8;Q9NVV5;  
Q96BY9;P62837;Q14011;Q9UQE7;Q13155;Q15562;Q5JSZ5;Q9UKI9;O75607;Q9UPR3;P15884;Q9NRD1;Q  
8WV92;Q99504;P55769;Q9H3M7;P78545;O60885;Q13164;P42025;P41134;P59998;Q53GL7;Q03468;P7  
8395;P49450;Q9BVS5;Q7Z5V6;O95886;Q96B36;Q9BQ70;P53675;Q9NZJ0;Q92543;Q9H9E3;Q9BTP7;Q2M  
3C7;Q8N137;O75154;Q92466;P15941;P38935;Q14137;Q96JB5;P12004;Q9Y3C5;P12757;Q9GZR5;Q96E  
V8;Q96DX8;P52597;O60516;O43390;Q14397;O15015;Q9NRY2;P09234;Q9BX70;Q9H2L5;P81274;O7538  
1;Q676U5;Q96MG7;Q9GZY8;P08670;O43493;Q9HAV4;O00762;Q9H5P4;O15226;Q5VSL9;O43504;O94817  
;Q9Y3B7;Q99615;Q14687;Q9P1A6;Q9P2B4;O95602;Q96G21;Q15910;Q68CP9;Q9BXL5;Q8NHQ1;P49023;  
P56279;Q16625;Q9UMY4;Q9NUP1;Q6NZ67;Q00765;O15351;Q9NQ87;Q13761;Q5JR59;Q02556;P26678;P  
24928;P04264;P11137;Q9NV92;Q86VW0;Q13829;P80723;Q9ULM6;O75665;Q8N1G4;P30153;Q15369;Q1  
3895;O95201;Q9NWB1;Q6ZW61;Q9Y6F6;Q9HTS9;Q9BRV8;Q9NWW5;Q12824;P49754;P43686;P48553;P10  
589;P78345;Q99471;Q96JB2;Q86WI3;P42575;Q12904;Q9NUS5;Q13469;P06703;Q9NZZ3;O00425;Q990  
81;P54098;Q13347;Q01831;O14503;P62826;O43399;P25788;Q15154;O95361;P63208;Q6IQ32;P0946  
7;Q86VY4;P43364;Q15004;Q8TAF3;P0DI81;P49116;O75436;Q9BQ83;Q92796;P07315;P09661;O76031  
;O00167;Q9UHD1;Q3SYG4;Q9NPF4;O14576;Q13616;Q9P2G1;O95273;Q01469;P13994;P05386;P50402;  
P52701;P23284;Q96SW2;Q8NF91;P28066;P05412;P83916;Q29RF7;Q9Y5P8;Q14232;Q9BRA2;Q15466;Q  
9NBP6;Q96K80;Q13569;Q86VP6;Q53G59;Q9HY294;Q9H444;Q86XR8;Q92845;P04792;Q96KQ4;Q9NXR1;Q9  
Y6B2;Q9Y2D8;P09748;O96020;Q9UHD9;Q9HBF4;Q12888;P17661;Q8WW35;O15084;P62913;Q12769;Q9B  
W60;Q9HD40;Q13526;Q9UH99;P10242;P49368;Q6P1J9;Q99698;Q9H0E2;Q16543;P02545;P56524;Q5F1  
R6;Q9H7L9;P51398;Q2YD98;Q6BDS2;Q9UHN1;Q15021;Q6PI48;Q96S59;Q13127;P99999;Q92529;Q9GZR  
1;Q90928;O75030;P49789;Q16864;Q9Y2B0;Q96QD9;Q9BXP5;Q99816;Q96IT1;Q9BX66;Q9NRC8;P25490  
;O43172;Q16514;P49639;Q9P2W9;O95619;Q14457;Q96QU8;P52756;O60238;O75494;O15355;P50616;  
Q7Z7A3;Q9BUX1;Q9UBQ5;Q9H1D9;P61247;Q6ZRQ5;Q8WV44;Q8WUW2;Q9H4I2;Q15233;Q7Z5K3;Q8N8R7;Q  
13813;P24539;Q99547;Q96TC7;P35244;Q9NTG7;Q9Y221;O15105;P78347;Q5JTC6;P54105;Q92575;Q9  
6BD8;Q8N1I0;P48059;Q86VQ0;Q06609;Q92988;O75122;Q9Y3I1;Q9Y6X8;Q07021;O00470;Q14683;O00  
267;P62318;P0CG47;Q9UN36;P52736;Q9NVP1;P54727;O14965;Q9UQ80;Q9Y5L0;Q96Q83;P02549;O952  
57;Q9H2J4;Q96MH2;P21673;Q5TCZ1;O94776;Q9H0B6;O15151;Q8WYA6;Q9H4A6;Q9UNS1;Q9Y4Y9;Q9NR7  
7;Q9P1Z2;Q9NVD7;Q9BYZ2;O75969;Q9BQQ7;Q13287;Q7Z2Z1;Q2NJK3;Q92622;P18583;Q9Y239;Q7Z2E3  
;Q5VYV7;P36956;O14879;Q96GY3;Q9Y5A7;Q9UQC2;Q6QNY1;Q9P2Y5;Q01094;Q9H902;Q9H5Z6;O75935;  
Q86X95;Q14678;Q96MT3;Q96G25;Q9Y224;Q92585;O00255;Q9NQC7;Q96KS0;Q8N6I1;Q9UBY9;P43355;O  
94868;O14933;P61244;Q9HC77;Q13951;Q8N7H5;P08872;Q8TEB1;Q9NRA8;Q15628;O15259;O14908;O1  
4618;Q9UEU5;Q9Y4J8;Q9H8M7;Q8IW35;Q9GZV4;P01100;O43395;P61313;P63146;O15273;Q9H816;A8M  
TZ0;O95218;Q9NZW5;Q9Y376;O15234;Q9BXW4;Q96EZ8;O14599;Q96SN8;P23769;O60716;P50502;Q96C  
03;P23511;Q86Y97;Q9P287;Q5UE93;Q9NV96;O15360;Q9HB75;Q08209;P14316;Q9NXX6;Q8WWW0;O6023  
2;Q7L1V2;Q5T7V8;P68133;Q15438;Q01658;P03886;Q969S3;P25205;Q9NR33;P52292;O43734;Q9NQG5  
;Q14152;P78537;Q7L0Y3;O75382;Q16401;Q8TD16;Q96CV9;Q13426;Q9UQ84;P10144;Q6P1W5;Q9NXXB0;  
Q5H9RD4;Q96T76;Q96I23;Q8WXD5;Q9BYV8;P53990;Q9BV57;Q14686;Q8NG41;Q15542;Q8NDT2;Q  
5VWG9;Q9UHF7;Q96C10;Q96CG3;P41970;Q14999;O60921;P49711;O94842;P54920;Q9NQS1;P17980;P7  
8318;Q9NXX8;Q15022;O75496;O75901;Q15326;P18754;Q9NZL4;Q9NQ92;O15131;Q96EY1;P78358;O14  
777;Q96PK6;P50222;P07814;Q6ZN17;Q9COE2;O95202;Q99836;O00743;Q8WYH8;Q16520;Q14203;O433  
24;Q9Y462;Q8IY63;Q9H5J4;Q8IYF3;P30047;Q9H9F9;O15144;Q96CN9;Q8WW38;P47928;Q9UJT2;Q5JR9  
8;O94850;P27816;Q9H788;O43684;P07992;Q9BTM9;Q8TCS8;Q9NZU7;P37275;P35241;Q07352;Q9UGP4  
;O14490;Q8TC71;Q96FW1;Q8TDC0;Q9BSM1;Q04323;Q99619;P19447;O95751;Q9UGR2;O43542;Q8WTS6;  
Q86XK3;Q15849;Q9UNH5;P39687;Q96AP0;Q96KN7;P46108;Q09161;P05388;Q6P1M3;P11441;P17535;Q

8IU6;Q9Y608;Q04637;P31483;Q9NSC2;P22626;Q14019;Q8NI51;Q7Z7A1;Q99767;Q8NFR9;Q13619;Q5H9L2;Q15643;O00522;Q8N8A2;Q96C74;P10914;Q9H160;O43236;Q86X83;P84103;Q9ULJ3;P29083;Q86SE9;Q9Y3P8;Q9H267;Q8IY92;O43257;O95865;Q92993;P19419;Q14690;P49917;O75170;Q9BU61;Q99551;Q13114;P55957;P21675;P13647;O00268;Q5VU43;Q16666;Q8IUR6;Q9HBM6;P30622;P39748;P38159;Q9NS73;Q9UIF8;Q13438;Q6P1K2;Q9UKT9;P58340;Q96CW5;P52948;O75113;Q14978;Q3L8U1;Q9ULD0;Q99750;Q96GC6;Q96T58;O75970;Q53EL6;Q9H9Y6;Q9P2I0;Q9UPV0;O15372;Q08999;Q96HW7;Q9NYF0;P50750;Q8WXG1;Q9H081;P20290;P42768;Q8TBE0;Q8WWM0;Q15545;Q13490;P46977;Q92870;P42771;Q99962;Q9Y295;Q8N138;P49366;Q9Y2D9;P10636;O00401;Q14008;Q9GZU7;Q9UI08;Q6ZP82;Q92733;Q9NPP4;P17028;P04406;Q5VW36;P23760;Q96GV9;Q9BVW5;Q9UPX8;P05060;P55884;Q8NHY2;Q92843;Q15942;Q5VV41;P46013;Q15398;Q9GZY6;Q06587;Q8N5F7;P22415;Q9H0C5;P43351;O15503;P61024;Q15653;P51948;Q8IWL9;P21912;Q9UMS6;Q13123;Q7Z4H3;O94983;P63162}

3167 Pathogen[ P03383] interacts with 2319 human partners: {P43351;Q9UQR1;Q7Z7A1;P35227;O75323;Q96MH2;P08107;Q9Y618;Q14683;O95402;Q0VDD7;P78345;Q86U86;Q9UNS1;Q13573;Q14457;Q8IXJ9;Q9H1B4;Q7Z2E3;P02545;O96018;P23490;Q06330;Q13761;O43167;Q9NYV4;Q5VSL9;P43357;Q13257;Q13228;Q96CW1;Q15329;O14879;Q15723;Q9NQG7;Q9BSU1;P15924;Q75167;P41002;P30307;Q8WU0;Q9NVV4;Q02577;Q9Y2Y0;Q9UBW5;Q9UJY4;Q8NHZ8;Q9NRR4;Q6ZVK8;P51398;Q8WTW4;Q68CJ9;Q9NQS7;O60716;Q6ZU52;Q09028;Q9Y6J9;Q9UKN8;P27986;P02794;Q13616;Q99504;O75182;Q8NI51;P62140;O00470;Q9UHN1;P78358;Q7L804;P05388;P62266;Q9Y285;Q14978;O00213;Q9UBU9;P08729;Q9NY61;Q92585;Q8IWIJ2;P39019;Q96LC9;Q07955;Q15014;Q6QNY0;P49454;P50995;Q9Y3C8;P55199;Q12830;Q6RW13;Q96EN9;P19474;P10914;Q8N3L3;O75925;Q9NQ31;Q8TF74;P26373;O15234;Q9Y5J7;Q7Z739;P62879;Q6PJG6;P56945;P8TA86;P14316;Q15561;Q9Y2L1;Q9P1A6;O15266;P09661;Q92831;O15126;Q9Y3I1;Q86XR8;Q5JR59;Q9UBD5;Q5JVS0;Q92621;Q16543;Q9UHV9;Q12888;Q32MZ4;Q99547;Q14746;P11831;P49792;O14757;Q15287;Q8N2Z9;Q8NPH4;Q53EL6;Q15047;Q96T76;Q8ND04;Q9BQA1;Q9H4X1;Q7Z417;Q06609;Q5TC12;Q7Z460;Q14839;P15036;P35321;Q6UVJ0;Q9BYD1;Q9Y281;Q86UW9;O75582;P62913;Q8NI27;Q05048;P80294;P35080;Q9Y3V2;Q12894;O14497;P35712;P50549;O95602;Q01105;O60671;P06746;Q6PJT7;P55036;P61024;Q13485;Q9Y4B6;Q6P1J9;P02533;Q12904;Q15369;Q8NPH8;P63272;Q9NQ92;Q9UHV2;Q14653;Q9BSJ2;O75494;P20290;Q9BZL4;Q9BVW5;Q06455;Q04864;Q96A56;O14862;Q7Z3C6;O95163;P33076;Q96I23;Q96TC7;O00716;O75791;Q15366;P08047;Q9H6U6;Q8HWS3;Q9UKL3;O96019;Q9NWT6;Q9P2J5;Q9H3P2;O94925;P06748;Q68E01;O43148;P13010;P62854;Q9ULM3;Q14209;P25815;Q96BD8;Q06610;P29084;P29474;Q969L4;Q9H9E3;O75528;O75143;O14933;O95865;P52112;Q99607;P53804;P17096;Q8TBB1;Q9H0F6;Q9H8S9;Q9UKI9;Q9NXX6;O15397;P16220;P08727;Q9HCU8;Q9BVJ6;P27540;Q9NWS1;O00167;Q15562;Q9Y2P7;Q8N1L9;O75251;Q68DK2;Q9BQD3;P14868;Q9H0S4;O43390;Q15051;A6NDB9;Q02241;P54278;Q8NBT2;Q9Y6K9;Q15544;Q14678;Q92844;Q92572;Q9UQK1;Q9H0C8;Q8N3U4;Q8TAD8;O94986;Q13469;Q9H9Z2;P62987;Q9NWB7;P17544;P56270;Q8N6T7;Q96B67;Q8IUR6;Q12824;Q9NVN8;P35269;Q8IUC6;P27469;Q96JI7;Q8WV99;Q14008;Q86VY4;Q14160;Q9NZJ0;Q13216;P32243;Q9UPX8;Q9H900;Q15691;Q9HD40;P62324;Q9Y3C0;P83876;Q9NX63;Q96AJ1;P19338;Q16626;Q13884;P51948;Q02040;Q13233;Q9H4I2;Q13084;P13640;Q9H840;Q00653;Q9UL18;Q15459;O00567;Q9H2J4;P62318;Q96IZ7;Q8WTV1;P55735;Q96QF0;O95684;Q9H706;Q89999;Q9UNP9;O94829;Q8IU60;Q8IY31;Q8N6I1;Q9BTA9;Q14139;P51965;O95433;Q95UVV9;Q86UE4;Q9GZL1;O14639;P53618;Q96HA9;O43290;Q9H944;O94776;P40337;P62312;P25789;O15040;P62750;Q8WXE1;P49711;Q9H4D5;P54105;P22626;P62072;Q9BUX1;Q9BUN5;P83436;Q8TD19;Q8N163;P08670;P60900;Q15596;Q6P4R8;P15172;Q01094;P49789;Q9BSJ6;Q8TAF3;Q15013;P04156;Q96RL7;Q5HYK7;Q8N1B4;P14866;O15371;Q9NYB0;Q9H869;O15511;Q9BTK6;P14921;Q15029;P55771;O75376;Q8WVJ9;Q9H1K1;Q6NZI2;Q9ULK4;Q5VYV7;Q14526;P54920;Q9UQL6;P17661;Q9BRA2;P38646;Q9H0C5;P58340;O14713;Q9Y5Q3;Q96RL1;Q9H981;Q9NWP5;O95487;Q12815;Q7Z4T9;Q9UBB4;Q6NUP7;O15162;Q9UH84;Q9UBQ5;P50502;Q9NWK9;O43264;P12270;Q03111;O14920;P31946;Q8TDB4;O95503;Q5FBB7;Q969H6;P01106;Q9BU61;Q13439;Q9UK73;Q15173;O43172;Q8WW38;Q86YP4;Q96CJ1;Q6PD62;P19367;Q5T2W1;O43257;P60228;Q06547;O95251;Q13769;Q9UHR5;Q7L590;P40424;O95295;Q96MU7;A6NIX2;P41220;O15304;Q13838;P24534;P78347;Q9H0W8;Q9HD26;Q6NVH7;Q15554;Q8TDH9;Q9UJW3;Q96GY3;O00541;Q9HCS7;O15527;Q9NRI5;A8CG34;Q9UPN9;P41227;Q8NE71;Q9UI95;P53990;Q13888;Q8IWW8;Q9P2X8;Q96SN8;Q8IWM0;Q00005;Q8N1B3;P56537;Q9UJM3;Q9C086;O43463;Q99700;Q9UMS6;O75410;O43734;Q8N5F7;P49589;P17482;P62424;Q9Y3E7;Q9BUN8;Q9H9Y6;P53999;Q15038;P31948;Q96AQ6;O95644;Q9UFN0;Q9BRP4;O75618;Q96GG9;P57740;O95886;Q9H7L9;Q92905;Q9UHC1;Q5EE01;Q9UI10;Q9Y4P1;Q5JY77;O00233;Q96SW2;Q96M61;Q8WWL7;O94811;P18847;Q9NR56;Q99689;Q9BZF9;Q8NEU8;Q15004;Q10567;Q96P70;Q96CW5;Q9BUR4;O14925;O43303;P25205;P60953;Q9H5J4;P82933;Q9UBC1;O95218;Q9NZZ3;A8MVM5;Q96KQ4;Q9BRQ6;P41208;P46013;Q01826;P22670;P20749;P61604;Q5JTD0;Q6VY07;Q9NS73;O00257;Q8IWL9;O43615;P62328;Q13490;P19419;Q6ZN17;Q14686;Q6STE5;Q8IV36;P28370;P55957;Q96FV9;Q9UBS8;Q9H2H8;Q6P1M3;P08697;Q96CG3;Q06787;Q12972;Q10570;P62753;P02511;Q9UH99;P52655;Q6PI26;Q96B01;O75489;O00186;Q86WV1;P62304;P25063;P30304;Q9NX95;Q9H9Q4;P61201;P48380;Q9H9C1;P62937;Q9BV73;Q9UBP6;P62714;Q9P2R7;P23769;P50222;Q5D1E8;O43399;P22392;Q92797;P69905;P13807;P09467;Q00059;Q8WYQ5;Q9Y262;Q92841;Q9H204;Q9GZT8;Q9NVM9;P61326;Q9BQS6;Q9GZV4;Q86WH2;Q9UHI6;Q9UMX3;Q9NWT8;P42677;Q96IZ0;Q86WB0;P37275;Q9BZV1;O75886;Q9Y3Q8;Q9BQ95;Q86X83;Q96MT3;P09972;Q9NQ87;P31276;A8MTG0;O95831;Q9HC52;Q70Z53;Q8WXD5;Q969T9;O75030;Q9ULU4;Q96PU4;Q96PU4;Q06587;Q15542;Q9UFT5;P24522;Q6RFH8;O94983;Q96BK5;P48200;P63000;Q5T681;P61247;Q9UEU5;Q92733;D6RGH6;Q96A26;Q9BYC9;Q6VMQ6;P52630;P35638;Q9HC77;O00762;Q9HBM6;Q96JB2;Q9BXM0;P15923;Q6P2Q9;Q8IZL8;Q9ULW3;Q9BWU0;P68871;Q5H9L2;P53805;O95347;P38919;Q12798;Q96KR1;Q16520;O95931;Q9UBU8;Q9Y4X9;Q86Y97;Q86TG7;O75155;O14490;Q14738;O95400;Q00536;O60936;Q15532;Q15121;Q2TAZ0;Q9NXT7;O00170;Q99816;Q9NX18;Q96G25;Q96VP1;Q9BZE4;Q96P71;Q9H0B6;Q9UNL4;Q12874;Q8TBZ2;O14646;Q9HCH5;Q6ZNA4;O60232;P24385;Q9Y6X3;Q01850;P26368;Q13243;Q9HCK5;Q8N1N5;Q04323;O14503;P35573;Q8TDY2;P63162;O00165;Q9UKT4;Q8IYI6;Q8TCS8;Q96QT6;P30153;Q14814;P26641;Q8NI29;Q01860;Q86XK2;P78317;Q08945;Q8WYH8;P0479



2;Q9GZQ3;O60841;Q15797;Q71UM5;P42226;Q9P013;P10599;P67775;P61978;Q9BYE7;Q8WXF1;Q9Y296  
;Q9H2C0;Q96JB5;Q9Y6D6;Q9UN36;Q9NRR7;Q9NT62;O75691;P11387;P26196;Q9P2K3;Q75QN2;O15405;  
Q96B36;P11940;Q14152;Q9BVS5;P31943;P63208;Q9NPE3;O00505;Q92993;Q9UQF2;Q9ULR5;O75400;Q  
99459;O75151;Q969V6;P49005;Q7Z614;Q05516;Q96K30;P28698;Q9GZX5;Q9Y4R8;Q13405;P12980;Q0  
7352;Q86V81;O94888;Q15306;O15297;O14734;Q9NPNJ6;P53675;Q9Y4E1;O60573;P07900;Q6ZW49;Q6P  
9B6;Q9NUS5;Q14690;Q5JR98;Q96T23;P49754;Q96DX5;Q96S55;P05783;O43493;Q92597;Q00978;Q5T2  
00;P61457;Q969X6;Q00534;Q96KS0;Q15631;Q15653;O15061;Q7L0Y3;Q08752;P63241;Q8N2W9;Q96EA  
4;Q9Y2W2;P35813;P20618;O43324;Q6NZY4;Q9H1Y0;Q9NQP4;Q04724;Q96EK4;Q13064;O60216;Q9UKT7  
;Q9Y5Q8;Q15560;Q13158;Q96MF7;O43156;Q92665;P78537;Q13625;Q13042;Q9H1D9;P02795;Q9Y248;  
P07737;Q8N5U6;Q6P1W5;Q13155;Q9UKF6;Q9H175;Q9NUP1;Q01831;Q96KP1;O15117;P55209;O00267;Q  
9NX11;P38432;Q13432;Q9H2L5;P14635;Q15022;Q12983;Q9P278;Q9Y3D0;Q8TDC0;Q9Y3B2;Q96MT8;Q1  
6385;P11802;P06400;P46939;O14744;O43318;O75190;P18146;Q08AG7;Q7L1V2;Q9NX08;O94906;O75  
306;Q13522;Q92558;Q96EV8;Q9UILL1;Q15436;P31350;P49750;Q66K89;Q8WW12;Q9Y3E5;Q9H9F9;Q96B  
T3;Q9UBB5;Q9Y697;Q13618;P78396;P38159;Q12769;Q61Q32;Q96R06;O75663;Q8N612;Q9BQ89;Q9Y3A  
2;Q01664;O95049;Q9BY44;O60921;Q96CN9;Q6ZPB5;Q9BV57;Q92870;P61077;Q15654;Q8TES7;P21127  
;A6NKF1;Q96HR3;Q14872;O14602;O75164;Q9H1H9;Q00403;P36873;Q96G21;Q13542;P62826;A8K8P3;  
Q07157;Q96LL4;O43913;Q6PGP7;Q9BW71;Q9UKJ3;Q14533;Q8WTW3;Q09161;O95628;O43447;Q9BXL5;Q  
16629;Q9ULD0;P83916;P25208;Q14CW9;Q8IXQ6;Q9NQG5;Q5VWG9;Q5TAX3;Q8TEP8;Q6WBX8;P20042;Q9  
Y3T9;Q9H0A8;P20226;P49366;Q8TE76;P09913;O43159;Q96EB1;Q8N5C8;Q5VU43;P62136;O95201;Q9N  
XF7;Q9UPR3;Q95707;Q14687;P61088;Q8IXH6;Q8NFG4;O75800;Q12834;Q13895;O75901;Q9HAZ2;Q5VW  
X1;Q96GX9;Q9Y5F8;Q96L92;Q66PJ3;Q6W2J9;P57077;Q9H9A7;Q13287;O75832;O75427;P52675;O1453  
0;Q6PGN9;Q9UQB3;Q9UBC9;P43360;P08779;O43516;Q8TCI5;Q8IYF3;Q13137;Q96RN5;Q99733;P62277  
;Q96GM5;O00401;O96004;Q8WTS6;Q92552;Q14397;Q86WQ0;Q15643;Q5TZA2;P46100;Q9Y613;Q13144;  
Q15326;Q9Y5A7;P29372;P78560;Q16822;P11473;O15105;Q15003;Q8N684;O14558;Q43395;P51610;Q  
6ZRQ5;Q12796;Q14C87;P01009;Q9BSM1;P23588;P06730;P11474;Q9NR50;Q9UBS3;O75817;Q16851;Q0  
3112;P49336;O00291;O95243;Q86TA1;Q9H8M7;Q9HAN9;Q9NSA3;Q13952;Q16594;P01008;O15015;Q12  
873;Q92985;O60296;Q14186;Q13428;Q2M2Z5;Q9H816;P54252;P27816;Q15629;Q53HL2;Q8IXH7;Q166  
37;O94763;P59998;P78543;Q9NVI1;O95777;Q7L9L4;P15927;Q9BQ70;Q13185;P62081;O75607;O9522  
9;Q9BW27;P45973;P49639;Q9UHX1;P55060;P84022;Q96AB3;Q8TEL6;P98168;Q9H160;Q04726;Q8N895  
;Q86SE9;O75081;P25791;P52292;P52747;P46976;Q9NXB0;P33240;Q9HB71;Q2M3C7;P11308;P81274;  
P62314;Q96PK6;O60238;Q9NVV9;Q9H583;P62310;P05787;Q04695;P18583;O60563;Q9UDV6;Q99747;Q  
9BT78;Q9C035;Q7Z2Z1;Q9Y221;Q8WVC0;Q00994;Q13111;Q9NXX8;P84103;Q9UID6;O75558;Q9BTM9;Q9  
NTG7;Q9H8T0;Q86SQ7;Q9Y2J4;Q9UK41;Q7LBR1;Q15652;Q9UHK0;P13984;Q96KN1;Q9P031;P39687;O60  
260;P42772;P32381;Q86VQ0;Q99551;Q969G3;Q9BXXJ9;O75843;Q9Y6B2;Q8NF64;P63104;Q9HAU5;P355  
48;Q9UNN5;Q99873;Q14674;Q96MN9;Q02447;P60604;Q9Y3C7;O14556;Q6ZVN8;P80217;P54098;Q8TEQ  
6;Q96S59;Q96HI0;Q9Y6K1;Q13105;Q8WVZ9;O14893;P28324;Q96A44;Q9Y2T2;Q8NA88;Q9H040;Q9H0W9  
;P61586;Q9Y3B7;Q92973;O14641;Q9NV31;Q13951;Q9H8E8;Q9BQE4;Q9NVV5;Q12816;O14896;O14929;  
Q9UHD9;Q9Y5N6;Q13541;Q9NZQ3;P28347;P63010;P35637;P51946;Q9BSW2;O60732;O15265;Q9UDY4;Q  
15819;P24928;P61313;Q9UKV3;Q53G59;Q13123;Q14192;P46527;Q03468;O14980;Q9NPF5;Q9HAW4;P0  
8865;O43747;Q5TA31;P42568;Q01130;Q8WVV9;P51959;O15287;Q9HAV4;Q9BQA5;Q9G5U7;Q9N  
PD3;Q15528;Q12933;O43684;Q969E8;A1L3X0;O15078;P24941;Q13568;Q9BVI4;Q9UJY5;P55854;Q9NR  
22;Q13426;P62495;Q9Y294;P22531;O43261;Q86US8;P17036;Q9BYG5;P24278;P18754;Q9NQT4;Q1340  
4;Q15388;Q9BXXF6;Q8IY81;O60294;Q92769;Q9H444;Q9ULZ2;Q9UBF6;Q8N8R7;P51825;Q96AY2;Q68CP9  
;Q16537;Q92830;O43715;Q9NRR3;Q9NPP9;Q9C005;O00625;Q9UPV9;Q99717;P43358;Q99590;Q9UKT5;  
Q9NXV2;Q6PGQ7;O60663;Q8TAT6;Q9UNH5;Q9UGP4;P17676;P09874;Q9XRX5;Q9NP16;Q14511;P23025;  
Q9BZD4;Q14493;Q04725;Q7RTS9;P49848;O00422;O60711;Q9UKX2;Q9HCU9;Q9Y5N5;Q9BSI4;Q13867;P7  
8395;Q14103;Q8WXC3;Q8IZQ1;Q9UM11;Q9Y5V3;Q16548;P07197;Q7Z3K3;Q9H9L3;Q9NYF8;P54725;O43  
711;Q9UMX0;Q8N6F7;Q99081;Q9ULH7;Q96CS3;Q9UJT2;Q99417;Q9H6Z9;Q96QD9;O95376;Q9NXX7;Q53G  
L7;O72TA08;Q9NSC2;Q15466;Q16254;P57081;O75381;Q8N7J2;O43541;Q6DKK2;Q9UN79;A5YKK6;Q1376  
5;O75199;Q9UH77;O14746;P49756;P63165;P15407;Q6P9B9;Q9HB03;Q9Y6X2;Q99732;P28702;Q9HCM9  
;P0DI81;Q6UWF3;P68104;Q9ULJ3;Q15025;Q9HCD5;Q9BQI5;P50750;P05198;Q8N5A5;Q9NPP6;Q96BP2;  
P04406;Q7L190;Q9P2M7;Q99471;Q86VP6;P02538;Q9H467;Q15154;O43745;Q01201;Q70YC5;Q96PM5;Q  
8TCU0;P35711;Q676U5;P14678;Q8NBZ0;Q9Y6X8;Q9NQA48;Q9BT92;Q9Y333;P51531;P14625;Q7L2H7;Q9  
9615;P42768;P35244;P15822;Q8WVK7;O15379;O00268;Q9Y5P3;O15350;P07196;Q9UIV1;Q9UGK3;P11  
532;Q9Y6E7;Q9UER7;Q5JTC6;P25786;Q01081;P20810;A8MT69;O95782;P62837;P07814;Q9BYV8;O948  
42;Q15759;Q86V97;P49770;O96020;Q8WU39;Q9NX40;Q15185;P99999;Q8TE02;Q9P2M1;Q16514;Q9UIF  
9;Q9NZL4;Q86TB9;Q5BJF2;Q9Y3F4;Q562F6;Q86VS8;Q9NR77;Q00613;Q9UMS0;Q9C0E2;Q9Y3M2;O00255  
;P26678;Q8IYD1;Q5H9R7;O75475;P11142;P40222;Q16666;P0C1Z6;Q96HA8;Q9H788;Q86WX3;P25963;  
P13994;Q92600;P53041;Q9Y5K5;O75935;Q9NPG3;Q9Y375;Q07666;Q9P0W5;Q9NZM4;P78344;Q8N140;P  
61962;Q9Y2M0;Q9Y462;Q07866;O43255;Q96B26;Q9NRY2;Q8ND76;O15084;Q9H7S9;P54727;Q9BY77;O1  
4787;Q9HBM1;Q13094;Q9UBZ9;Q7L5N1;Q15365;Q9NV88;Q6P1X5;O15355;O95810;O43829;Q14974;O94  
921;Q9UKV8;Q92759;P50749;O14776;P48788;Q13200;O94850;Q9ULM6;Q12905;Q8WVM0;Q15054;Q5BJ  
F6;Q8IWL3;Q13569;Q96ED9;O00512;Q9H074;P12883;Q9P0W2;Q96IT1;P31269;O43299;Q9Y6K5;Q8IY6  
3;Q99496;P36402;Q8TAQ2;Q9Y3A5;P35232;Q9UBF1;Q96HR8;O95999;Q9H4A6;Q9HD42;P50453;Q5TCQ9  
;P28065;Q13501;P04264;O43918;Q9HB96;Q9H410;Q9POU1;Q8N5R6;P51116;O60784;Q29RF7;Q8IZD4;  
Q8IX12;P41212;Q9NWW8;Q9BSH5;O94992;P50402;Q5T8A7;Q969H0;P42771;Q96T58;Q99684;Q9Y2G2;Q  
8WUF5;Q8WY41;P28066;P31314;O15131;O95751;Q6PJ61;Q13547;P26651;Q15853;O43809;Q14207;Q9  
2783;P35580;P52298;Q9ULX6;Q99613;Q5VTR2;P78371;Q9P2T0;P10124;P52737;P50616;Q8WUQ7;O14  
965;Q9BQ69;Q12906;Q99933;Q3SYG4;Q9BXT7;Q9UHB7;Q96RU7;Q96R20;O75436;Q15628;P17152;Q9H081;O758  
22;Q96PV6;O75446;Q8IX90;P28749;Q09666;P46087;P09012;Q9UKL0;Q9UIC8;P35658;Q9UKC9;Q96FF  
9;O43504;P13489;Q9Y4Z0;Q96IY1;Q8IY92;Q9P1Q0;P46783;Q8ND90;Q14980;Q9BRV8;Q3L8U1;Q71SY5  
;Q16082;Q9NSC5;Q9H7H0;Q8IX03;P54253;O75525;Q99708;O95232;P10242;P67870;P23497;Q96HY6;  
Q9UKJ5;Q9Y252;Q04637;P52815;O75419;Q9UK45;Q13617;Q9P086;Q8TE69;Q96C86;Q86WI3;Q9P2Y5;Q  
96GC6;Q15327;Q9HCI5;Q9H9D4;Q99638;Q96EK5;Q9UKK3;P37802;O15127;Q9HCK8;Q9UPV0;Q16401;Q8  
TAP6;Q8WY54;P01100;P04198;Q4LE39;Q5T7V8;Q8WXF8;Q8NCD3;P11161;Q9UQ80;Q05519;O95983;O43  
765;O60885;P10515;Q8NG31;Q92754;Q9UKV0;Q96CD0;Q00597;P61981;Q14145;Q8N108;P23760;Q9UI



F8;Q86XK3;Q9NRL3;Q9NY27;Q15906;Q9NYF0;P0CG47;Q96QK1;P49918;Q99750;Q9BUJ2;Q96HW7;Q9H6Z4;Q96PY6;Q9Y4P8;Q96RK0;Q15796;Q99594;P21675;Q9P209;Q9H0N5;Q96MG7;Q15059;Q9BZK7;P56524;Q9BUL8;Q9BUP3;Q96CB8;Q9Y6G5;C9JE40;Q92541;Q86YF9;Q9UHY8;Q9UPN7;Q8TC71;P46781;Q14232;Q9NUW8;Q717R9;Q8WWY3;Q86TP1;P41970;Q13416;P48634;P32519;Q13347;Q00577;P68036;Q14677;Q6P1K2;Q95153;Q8N9A8;P13647;Q8WWQ0;P62877;Q9P0V3;P23508;O75161;P52435;Q15910;Q63ZY3;Q9NR09;Q13309;Q9GZL7;Q9UGK8;Q5T230;Q08AD1;P32189;Q9H3M7;Q8N9B5;Q9NRL2;P23284;Q04206;Q9Y2X3;Q9HC62;P53992;Q8TF40;P95997;P78318;O75113;Q07021;P49910;P55265;Q9Y2D9;Q96Q88;P17535;Q8WWR8;Q8WTR7;O15360;Q9BQ15;P78545;A6NIH7;P57678;Q6NUN9;O43583;Q9NRR5;Q9BU89;P55769;Q8IY57;Q68DX3;Q9Y448;Q3B820;P49459;P45984;P82094;P51532;Q9BW66;Q8N137;P42704;Q9BTL3;Q9P2I0;O60645;Q8N6Y0;Q9UBI1;Q02556;Q6PI48;O00198;Q8WUM4;O43752;O76031;P80723;P53567;Q9UKT9;Q5UE93;O60504;Q9NPI1;O60518;Q9UY11;P50452;Q86YC2;Q8NDT2;O14907;Q5SW79;Q9NRA8;Q15370;P52736;Q9Y2M5;Q02410;Q99996;Q8N7W2;Q15233;P12757;Q9UBY9;Q13227;P0CG48;Q12962;O95373;O43310;P35579;P33316;Q96ST3;Q13310;O43542;P38935;Q9Y5A6;P43356;O75807;P62952;Q92845;O94817;O00411;P21980;Q8TBE0;P28074;Q92796;Q14258;O95456;Q96HA7;Q9BXP5;Q14151;P78559;P18887;Q96F86;O00425;Q9Y6H5;Q8N3V7;P62308;Q9NR46;Q8TBN0;P62256;P27695;Q6NUQ1;O95551;Q92530;P63146;Q96JC9;Q9UL42;P23246;Q9HAF1;P07320;Q86VX2;P19388;P23528;Q01534;Q16531;Q13148;Q9ULW0;P48552;Q8WU90;Q96Q83;Q9P287;O95613;Q15424;Q13561;P61289;O14777;P55197;Q9BSD3;Q9Y2X9;Q96CV9;P29083;P24863;O75152;Q96C03;Q9P1T7;Q8TAE8;Q8NFD5;Q96EP1;Q13033;P61970;Q13045;Q9H7T9;Q92922;Q00587;O43663;Q8TEK3;Q92990;Q12789;P15336;Q13794;P10828;Q9NXV6;Q8TBK2;Q9H1A3;Q92540;Q9NRD1;Q92499;P36543;Q9H446;Q9NS37;P47928;P37198;Q9UKX7;P18848;Q8N4C6;P11441;Q8N5M1;P01215;Q2M1K9;P18850;O60481;Q9UI30;Q8WXU2;P62508;Q01844;Q92547;O15116;O00161;O60869;Q14676;P41236;Q9H0G5;Q86X95;O14512;Q9UNS2;Q9NZL3;O95619;Q96EF6;Q8N196;Q8NHY2;P83369;Q6IE81;Q9BXH1;Q92466;P30876;Q9NPC6;P29692;Q9BXS5;Q3YBR2;Q9H4M3;Q9BUL9;P09629;Q9P0J0;O95271;Q02930;P24864;P60896;Q86Y01;Q15545;Q5T3F3;Q9NTI5;Q9BXF3;P19012;Q9NWX2;Q969U7;Q9H8Y8;Q96IV0;P30281;Q4U2R6;P41252;Q8IUD2;Q9Y2D8;Q9H5J8;Q2VPK5;Q13642;Q9Y2D1;Q9UI36;Q13829;P09497;P54136;Q15699;P30260;P05386;Q86WV5;Q92624;O15083;Q9NUL3;Q92674;P50914;Q2QGD7;Q9HCE1;Q9UPT5;P17275;Q04837;O15235;P20265;Q9NYJ8;O95273;O95453;Q86U42;Q9UBK9;Q9P270;Q9UL03;Q96EZ8;Q9GZS3;O75145;O60437;P17480;P14672;Q9Y3A3;P16333;P06733;O60664;O75150;Q8N720;O94973;Q9NWF9;Q9H3R5;Q9P032;O95073;P63167;Q8NC51;P61244;Q9GZY8;O00743;P19838;Q9Y5L0;P35869;Q8IW33;Q8N9R8;Q9NPI8;O14964;P56693;Q1ZZU3;P22087;Q9COH9;O14818;P17028;Q9BVC3;P67809;O75175;Q8WV24;Q9UBD0;Q9UL40;O14599;Q14137;P07315;O15205;Q9NNW5;P20073;P46937;Q9Y603;Q9NX53;O75665;P61758;Q96CM3;Q9NR28;P56279;Q8WYA6;Q9Y608;P62258;P09234;P13056;Q01658;Q9GZV5;Q02952;Q9UMX1;Q9HB19;Q9UN37;P54198;Q9UHF7;O43439;Q15834;Q92900;Q9NVH2;Q06546;O75334;Q9H5I1;Q7Z5V6;Q9NWA0;P08133;P08238;O75953;O75969;Q92917;P30047;Q13868;P24539;Q00839;Q92988;P78352;Q99436;P43364;Q9UPP1;Q3KNV8;Q16186;P52294;P52594;O94874;Q16890;Q13112;O15372;Q9BVP2;O60516;Q92890;P08621;Q2KNJ3;Q96LI5;Q9NQR1;Q9Y3Y4;P21673;Q6I9Y2;Q13114;Q96C74;Q9BYK8;P49790;P46776;Q9UNY4;O75170;Q03060;Q96GC5;O75821;Q2YD98;Q14764;Q9BPZ3;P26358;P32780;Q8NFX5;Q14154;Q9NQS1;Q9H211;P52597;Q9NXR7;Q9UPY8;Q9Y2H0;P15880;Q53HC0;O60832;P23396;Q8IWE5;Q14749;Q96EY1;Q8N5D0;Q9H4B6;Q9Y3D3;O75154;Q9BQ90;Q9BQ83;Q15024;P17947;Q9BTP7;Q9NPI4;Q6UWZ7;O14910;P63279;P20248;Q9H9T3;Q86UW6;P18615;Q96LA8;O43482;Q8IVG9;Q9BPX3;P60510;P15502;Q7Z4G1;Q8N7H5;Q86XI8;Q15021;O15226;Q9BUE0;A7MCY6;O75934;Q9H9G7;Q9P1Z2;Q9Y605;Q9UMS4;Q13363;O95257;Q16576;P49419;O60477;Q92793;Q13901;O75531;P40855;Q96GV9;Q96QE5;Q13526;P54274;Q9BRP8;O00566;Q02078;Q6ZNE5;Q96NA2;Q9Y224;Q8NFX3;Q8NHQ1;P00410;P35226;Q99623;Q9BQY9;Q9GZR1;Q969S8;Q9UJW9;P35900;Q2VPB7;Q9NRC8;Q8WX92;O75940;P54259;Q92575;P51668;Q9UDY2;Q9NVR2;Q14999;Q9619;Q9UIS9;Q8NI08;Q08379;Q9Y468;O75496;Q14157;Q99741;Q7Z5K2;P12956;Q13127;Q15276;Q15633;Q9ULV3;O75530;Q5VIR6;Q13425;O00148;Q9BVN2;Q9UKK6;Q8TAP9;P43355;Q8N726;P25787;Q5C9Z4;Q9BSQ5;P22415;Q6BDS2;Q969S3;Q96BY2;Q9HB75;P27797;O96017;P06396;Q9HAT8;Q9HCC9;Q8WUH2;Q5B KZ1;Q9Y6D9;P35251;Q7Z2W4;Q6QNY1;O95848;Q9BSB4;P25788;Q8IW35;Q15750;Q9BQY4;Q9BPX1;Q9Y3P8;Q13620;Q9N9B8;O75928;Q9NZ52;Q9BZ17;Q15543;Q9Y250;Q9H1J1;P50748;Q96NY9;Q14781;Q14498;Q8WVM7;Q6P2E9;Q93062;P05412;Q9Y314;Q96DI7;Q16526;Q9BYG4;Q70EL1;O60888;P27348;Q9H5Z6;Q13129}

3168

Pathogen { P03410 } interacts with 2993 human

partners: { Q96RL1;O60711;P78358;Q3B820;Q9UDY4;Q96LL4;Q86UW9;P84022;Q92830;Q9Y2P7;Q96AJ1;Q96LI5;O15511;P15559;O75192;Q8WUQ7;Q14687;A1L3X0;Q00610;Q9UJT2;Q8WV99;Q96AQ6;Q9BVN2;Q99594;Q9UKT4;Q8IWX8;Q99700;Q9P1A6;P26447;Q9NQG5;P83876;Q14397;P49750;O95684;Q9NQG7;Q99933;Q8IXH6;Q92540;Q92831;Q13838;Q00613;P20749;Q9Y5J3;Q8NHY2;Q9UKV0;Q9NUP1;Q8WV41;Q8IVS8;Q9UHF7;Q9UBW5;Q14CM0;Q8IX90;P62258;Q96FW1;O75665;Q9BSM1;Q96QT6;Q15726;Q7Z460;Q9HC24;Q92562;Q04206;Q08945;P62714;P46976;O43399;Q5JY77;Q9UQC2;Q92917;Q14204;Q9UH77;O95292;Q96TC7;Q9BV68;Q9ULU4;P13994;Q9HCV5;P05386;Q9NVN8;Q86UT5;Q9P2R7;O15392;P35712;P22670;Q9Y2Q5;Q96QG7;Q29RF7;Q5TB30;Q9NVR2;Q8IXJ6;P23025;P42771;Q969E8;P02810;Q9UI36;P49069;Q8IU60;Q9UPP1;P49959;Q96QH2;O95619;Q9BW27;Q96EK5;P04141;Q9H469;O96018;P11831;Q7L804;O43439;Q9Y2L1;Q9NS37;O75781;P49354;Q8WXF8;P78537;Q717R9;Q96HJ5;Q96FX2;P40692;Q6NZI2;Q9H981;P22087;O95782;Q9ULE6;P30047;Q9BYZ2;Q9Y512;P18887;Q13227;O75934;P23246;Q15041;P82094;P61247;O75335;P19838;Q9UHV2;Q68CJ9;P13489;Q9Y285;P30084;Q13094;P36956;Q53359;O75154;P46527;Q96CW1;Q86VQ0;Q5TC12;Q00839;Q96RL7;Q9H4X1;Q92529;P52655;Q14157;P35244;P55854;P53999;P25205;Q9NUX5;P51610;Q86WB0;Q15427;Q9H040;Q13137;Q9BZE9;Q9UKT7;Q16822;Q5JR59;O94763;Q8IWZ3;Q13829;Q9UI95;P26373;P27986;Q969F2;O14910;Q8WYH8;Q9H267;P05121;O75925;Q8LXK0;P55036;O43929;Q9HB71;Q9Y4Y9;Q9BU89;Q6ZNA4;Q9UMS6;Q12873;Q99733;P23490;P50479;P02794;Q15121;Q8WDX5;Q9NTG7;O75663;P02533;O00512;Q01081;Q7RTS9;P10599;P31350;Q03112;P49368;P0CG48;Q6PGP7;O15205;Q9Y6H5;O95218;Q8WXU2;Q9UJC3;P15924;O15355;Q9Y3C0;Q9UNY4;Q9NR50;Q9UGK3;Q9Y2Y9;Q9NXR7;Q7Z6G3;Q15293;O14893;O95405;Q96AB3;Q9H4M3;P02808;Q96T76;Q9NZL3;Q16666;Q5UE93;Q15058;Q9Y2G2;Q5HYK7;Q99708;Q8IWE5;Q9UNN5;P10144;P52594;P35638;O14920;Q14526;P26368;P68104;Q9H3R5;Q10570;Q9H869;Q9BVI4;O00470;Q14974;Q13155;O60293;Q8TCS8;P56279;O14556;P61326;Q9H4L7;P62072;Q9HB75;Q9GZ1;Q8WVC0;Q9GZR5;P11137;Q14103;P62304;P20585;Q96RT1;Q08AD1;Q15833;P35813;Q96LA8;P80303;Q14739;Q6P9B6;O15234;O15042;Q14C87

;Q9BZL4;Q96T23;Q8IX12;Q96GC9;P22531;O00505;Q96PK6;Q99496;P48634;Q9H5J8;Q9P2T0;Q9UI08;Q9NRL3;O43684;Q9UKX2;Q7Z614;Q16658;Q9HCM9;Q96HY6;Q9NZ43;P17482;Q8NE71;P54198;Q969T9;Q86WV1;Q15329;Q15038;Q6W2J9;P07315;Q14749;Q9Y239;Q9UPT5;Q9NRD1;Q9UKV8;Q8N3C0;Q15633;Q99497;Q8NFG4;Q07866;O14599;O95628;Q96D15;Q8NG41;Q9UBC9;P62328;P30622;O95503;Q16851;Q8WY3;Q6PJ61;Q9NX08;P18615;Q6QNY1;Q9BXS5;P37275;Q93062;Q96L92;Q8TEP8;Q8NI08;Q8IZE3;Q9NWT1;Q9H7H0;O43504;Q96JM3;P35080;Q9H3P2;Q9NPF4;O00268;Q96AY2;Q12983;Q8NFX5;Q15047;Q9NWT6;Q9H816;Q8N8Y2;Q5VWG9;Q9P2Y5;Q9UJ41;Q9UBF1;Q9BXP9;Q3KNV8;Q15388;P50995;P10916;Q96N03;Q15029;O60841;Q9BQS6;Q9H5P4;Q9BXP1;Q96SW2;Q8NFX9;O75787;Q15696;Q16520;Q9H1Y0;O75943;Q15014;Q9NP97;Q13561;Q8N729;Q9ULD0;Q8N3V7;P27816;P62913;Q96CB8;P17661;Q8TEL6;Q8WTR7;Q96JB2;Q8WVJ9;Q92804;P61978;O60610;O43597;P78560;Q8TAC9;Q9UK99;Q9UDV6;Q9UP83;O75822;Q9H902;O14929;Q9H0B6;Q04864;Q9GZY8;Q9NWB1;Q9HAZ2;Q9BP15;O00139;O43303;Q9NVV9;Q9UKX7;O60896;O60885;P15822;P60468;Q96K80;O15151;Q05048;P49257;P50502;P38646;O14896;Q5T2W1;O96004;Q9BSD3;Q9Y2J0;Q00534;Q16543;Q92698;Q9NSA3;Q15543;P25786;Q16629;Q13416;Q9Y4R8;P19419;P20963;Q9NR46;Q15652;Q9H840;Q04726;P42772;O15061;Q8IYD8;P12755;Q6ZP82;P78345;Q9NXR1;Q6UX71;Q15554;Q96G25;Q15398;Q6PD62;P31276;Q9BXM0;Q9P2R6;O76003;Q9UN79;Q9NWX8;Q66K89;Q08209;Q9UL03;Q9HC77;P63000;P17676;Q13596;P23511;Q9BPZ3;Q7Z699;Q8LZD9;Q96KS0;Q9H410;Q92900;Q9H7T9;Q96AP0;Q8N1N5;P22626;Q5T230;Q16401;Q99996;Q9Y2J4;Q9P0U4;O60895;Q9NRR5;Q9BQA9;Q8N726;P57077;O96005;Q15233;Q8NG31;Q9Y4P1;P08238;Q9GZM8;P11940;P49589;Q9H9D4;Q9NP98;Q9NWW5;Q9H4I2;P18847;Q8TDW5;Q9H6Z9;P01106;Q9NZ52;Q02447;Q9NVP1;Q9BUJ2;Q6PJT7;Q8N4B1;Q969X5;P49427;P63165;O95251;Q08752;O15372;P07992;P15880;Q15154;Q99814;Q9BTL3;P25705;Q8N1V2;Q8N127;O00267;P17947;P63272;P60510;Q53HL2;Q9H5J4;P46777;Q06330;O15315;O60481;P46776;Q99502;P04264;O14746;Q9BXP5;Q99575;P98171;Q9NUS5;P19429;Q9BSB4;P52294;Q04837;Q86U86;Q13445;Q96GM5;Q70EL1;P54105;O15259;Q8NFX4;O75251;Q01860;Q9NR28;P78318;Q96K30;O43736;O75351;P05413;Q13077;P24928;Q16548;P53992;Q9H1H9;Q6ZMZ3;O14497;Q9BXL1;Q15287;Q53GL7;Q8IX03;Q8NB16;P49356;Q8TCJ0;Q8N1B3;P60900;Q8WV44;Q0JRZ9;O96019;Q9Y3C8;P16118;Q3SYG4;Q8TDZ2;P54274;P62310;O75674;P55060;Q5T333;Q13011;Q9UBP6;O75419;P25791;O75382;Q15172;Q9P2B4;Q96S59;Q9ULH7;O43747;Q04917;Q92902;P41220;Q9UL18;Q495M9;P05388;Q9BXF3;O76041;P46013;Q12962;Q9BQA5;Q96G21;Q6ZW61;P21675;Q9BXW9;Q6QNY0;Q9BYE7;Q13620;O43516;P41212;P16157;Q9UQE7;Q7Z7A1;P09629;O15235;Q9Y5J7;O15111;Q9ULZ2;P29083;P06730;Q6NZY4;Q9NVV5;Q9UHD9;P15941;O75334;Q14686;Q70J99;Q8WTW4;Q9NQM8;Q9ULM6;Q9NWF9;Q96BT3;O00198;P18848;Q1ZZU3;Q8N138;Q6ISU1;P42575;Q9UPR3;Q9UW0;P36402;Q5H9L2;Q5TAX3;O75427;Q92614;Q9UHK0;Q96KR1;P35998;P50222;Q14242;Q15750;Q86Y97;O75843;Q9Y3M2;O95777;Q9NVM9;Q96A33;P51965;Q8N6I1;P06396;Q9NPI6;P61421;Q13526;P46781;Q12959;Q7Z739;Q9ULV0;Q15173;Q9BUL8;O15266;Q14019;Q9Y2D1;Q9UBI1;Q9UH99;O75446;Q12815;Q9UGP4;P48553;Q16655;O60749;O43542;Q8IV36;Q9NS73;O60282;Q8NHU6;Q6UVJ0;Q9BYK8;Q9Y224;Q9Y5S9;Q7L190;P13667;Q96QU8;Q8N6T7;Q9P0V3;Q5VW36;P60520;Q7Z522;Q6PI26;O75528;O94905;P54136;Q9NTK5;P10242;P53567;Q9UIF8;Q9Y228;Q9NPF5;Q96DX5;O43639;Q9Y605;Q8N6F7;P05141;O96000;O15405;O14646;Q9H8S9;Q7Z4S6;Q8NFX8;O75152;Q9H0W9;P24522;Q14493;Q15013;O00165;Q19AV6;P14859;Q96LC9;O95751;O75582;Q96P70;Q9GZU7;P27348;Q76FK4;P10124;O43561;Q99717;P20042;Q9H0G5;P25298;Q5JSZ5;Q14814;Q7Z4T9;P78545;Q9HAU0;Q9Y3I1;Q8TBB1;P41238;P11532;O00233;Q99614;Q8WWL7;Q7L1V2;O75030;Q9NZC7;Q8TAM2;Q14008;P35637;Q5TCQ9;Q96SN8;P61604;Q9NRQ2;P15884;O14862;Q14653;P51946;Q8N1B4;Q8N3L3;Q14207;Q5VSL9;P32929;Q6P1Q0;Q9NRR3;Q8TEK3;O43187;Q9Y5Y5;Q8WY54;P28324;Q9UNA4;Q9BVW5;Q16254;O75167;Q8TEQ6;O94811;Q15365;Q9Y5U4;Q92558;Q96KN7;D6RGH6;Q9NPC3;Q8TF46;O15519;Q9P287;Q10567;Q12830;O14713;Q8WVZ9;Q9NZW5;P14625;Q969S3;Q6WBX8;Q14978;P23381;Q9NPJ6;Q13490;Q92665;Q9UNL4;Q00059;Q9UEU5;P62136;O94868;Q92905;Q86X83;Q8LWV1;P24278;O75143;O95931;Q9NXX8;Q9Y333;Q8WV28;Q14533;O60716;P06733;Q9Y2H0;Q5SQN1;Q9P0W2;Q8WXE1;Q9BUX1;Q9NRA8;O75182;Q8WTS6;Q96PV6;Q6PJJ6;P36405;Q9BYX4;Q13867;Q14CW9;Q9NY61;P12694;Q14457;Q9ULG1;Q86WG3;Q13425;Q92572;P63172;O95273;Q8IVT9;O15145;Q8TDY2;O96011;Q01534;Q7Z465;Q9UBU8;Q92845;O43918;O00401;P35573;Q9ULJ3;P50748;O75969;Q5C9Z4;Q9Y6F6;Q9BX70;Q99732;Q86SE9;Q9Y6X2;Q96BY2;Q13868;Q07021;Q9UHD1;Q8NHZ8;O00148;Q9NS23;P49459;Q9NR56;P43355;P16278;Q9NWX5;O14639;Q2TAK8;O60645;Q04724;Q9P2W9;P55769;Q9H4Z2;Q9NQG6;O95456;P05787;Q9ULR5;Q9UBB5;Q96GC6;Q14689;P59998;O75928;Q13501;Q9H8T0;P25686;O43294;P09912;Q96HI0;Q96T37;O14908;Q9UKT5;P11142;O95865;O14662;Q93050;Q7L2H7;P39687;Q9HD36;Q2MLK9;P35321;Q92843;O00204;Q92783;P41134;P31749;P17096;P16452;Q99767;Q9Y5A7;Q96QK1;P35579;P52815;Q9NZQ3;P04792;Q9HAW4;Q7L9L4;Q9Y3Q8;Q969F1;P23396;Q9H3M7;O94777;O75161;Q14232;P10412;Q15003;Q96Q80;O00213;Q92934;Q9NXV6;O43299;Q8N2W9;Q96B67;P06746;Q6P1M3;Q9H668;P45973;Q562F6;P30876;P63167;Q03060;Q9NWA0;Q12798;Q86WQ0;P26599;Q96SN7;Q9P209;P42768;Q86V97;Q96CG3;Q9H8Y5;Q8N720;Q9Y287;Q92674;P62266;Q15653;Q9NS69;P54252;Q8N1E6;P40855;O60832;P50570;Q92889;P07900;Q00587;Q5VTR2;P02766;Q9BQA1;Q08999;Q9Y468;Q9H211;Q96S55;Q7Z7A3;Q9NPP4;P16333;A6NDV4;P20226;O75953;Q96MU7;Q0VDD7;Q9P013;O43583;Q15366;Q9GZR1;Q8N137;Q15370;Q92844;Q86YP4;O60239;Q86TP1;Q8NI35;P13640;Q01105;Q86VS8;P10828;Q9C000;O60732;Q9Y5Q8;Q5TA31;Q9NSC5;Q9H175;Q15004;Q15906;P63151;P21953;Q13794;Q9Y283;P62308;P50749;P14678;Q96Q83;O00291;Q9GZP9;P62316;Q9Y3T9;P50914;P31949;Q32MZ4;Q9HAU5;Q13835;P39748;Q8WUH2;P06748;Q9Y3F4;Q9UBK9;O75381;P06400;Q5VWX1;Q6DKK2;Q14137;Q96IZ7;Q60UV9;Q6NVH7;Q9UBS3;O15040;Q9BSI4;Q5F1R6;O14530;Q5JR98;Q9UJY1;Q9Y5Y2;Q9H9T3;Q9Y697;O60260;Q9UULM3;O75376;Q9UNH5;P31314;Q9BQB4;Q96CD0;Q15025;Q04323;Q9P2A4;Q8TAX7;P05060;Q9H0A8;Q06547;Q9HB21;P68036;O14490;Q9P253;Q9UBF1;Q86VI4;P14868;Q9BTP7;Q8IVG9;Q9HOS4;Q9BRA2;Q9GZL7;Q9BVC4;P61088;Q15059;Q13233;Q96R06;Q14160;Q96KQ4;Q99684;P01215;P43351;O60664;Q9H9G7;Q15327;O95997;P32519;P23193;P30793;Q03468;Q9Y4P8;P55265;Q9BQ83;Q9BT78;P15923;P26651;O00411;P05062;Q9UMY4;Q6NUQ1;Q6ZU15;Q99607;Q13045;P02538;O94850;P61313;Q9NP85;Q8WYQ5;Q9NXX6;Q9UIV1;Q9Y3C7;Q99615;Q8TD16;Q96EB1;Q8TBK2;P54725;P28715;Q99613;Q9NPG3;Q9H4A6;Q9UKF7;Q9NV92;P43364;Q12840;Q8TAP9;O43159;Q9NVV4;Q8TAD8;Q86VX2;P78549;Q969H4;O95817;P35227;P62508;Q4LE39;Q96KN1;Q96S52;P09467;P02549;Q9UBX3;O75146;Q14596;P0C1Z6;P52657;Q8NCD3;Q92466;Q06190;Q9BYV8;Q96ST3;Q9NFD5;Q8NC60;Q9NR22;Q9UJW9;Q13541;Q9Y295;O60216;Q15306;Q13568;Q9H1J1;O94817;P14866;Q9UHA4;Q9BQE4;Q9H204;Q5H9R7;Q14152;Q96EK4;Q14674;Q9UJY5;Q14258;Q96T49;Q9NRR4;Q99436;Q92832;P09012;Q13895;Q92585;Q01831;Q15819;Q96T58;Q8WW38;Q9UBV8;Q92541;O95760;Q01201;P2549

0;P01100;Q53HV7;O94925;Q02410;Q00577;Q8WVV9;Q9H1K1;Q86VP1;P49770;Q86WC6;P61244;P41236  
;P41002;Q9H0C8;O14933;A8MTZ0;P07320;Q9BZI7;Q15424;Q8NFW9;O15226;Q07666;Q8WXG1;Q15560;  
Q7Z434;Q9HCC9;Q5EE01;Q9NRY6;P17036;Q9NPC6;Q96FV9;P07196;Q9H1A3;P53990;Q13884;Q12904;O  
15273;Q9NX53;P38432;P06703;Q9UL45;P55957;Q8WXE9;O60663;Q96G23;O75069;P23508;P33992;Q9  
Y2X3;Q9NP66;Q13158;Q96QD9;O43264;Q6VMQ6;Q9BZV1;Q8TCG1;P62750;O75569;P42765;O95171;Q92  
575;A6NIH7;P17544;Q9NZ42;Q96MF7;Q9H074;Q9C005;P50452;Q16576;P50549;Q96JB5;Q9GZS3;Q9BW  
F2;Q86UW6;Q9Y5F3;P25815;P49454;Q15700;Q9NQY0;O75503;Q2TAZ0;P22234;Q8N6Y0;Q96134;Q9Y5K  
6;Q9GZV5;Q969U7;O60759;Q9UQR1;P11473;Q9UQL6;Q02556;Q96MG7;P51825;O95295;O95347;Q96QE5  
;O95219;P78396;Q9UI30;O14965;Q96EA4;Q9Y603;Q15654;O75688;Q13148;Q9P2J5;Q8N7H5;P08621;  
Q9UNH7;O95243;Q9HD26;P55884;O14925;P08865;Q969V6;P08779;O43809;O43708;Q96CM3;P37802;Q  
7Z2E3;O95644;Q9BQY4;P58340;Q9GZT9;Q9H4D5;Q96IF1;O95166;O15162;Q02930;Q9P1Z2;Q6RFH8;P5  
0750;Q96MN9;P11171;Q9UBF6;Q0VDF9;P61981;Q96GD0;Q00994;Q9Y5Q3;P26358;P27540;P67809;Q8W  
YA6;Q86WI3;Q86WV5;Q99081;Q5T2T1;Q99816;O00625;Q9NR09;Q9UM54;P33316;Q15599;Q9UHB7;O751  
51;Q96B36;Q15628;Q9H2H8;P62277;O15371;Q8IZH2;O60563;Q13127;Q86YS3;O60333;O43318;O0071  
6;Q9UKT9;Q16829;Q92624;O75970;Q9HCS7;Q7Z5V6;Q9Y2X9;P22695;O94906;Q13136;O95848;Q7L5N1  
;Q8NE86;Q9UMX0;Q8N1G4;Q9BYD1;O43715;Q9UBZ9;P22557;A6NIX2;Q92988;P12956;Q92556;O76031;  
Q9C035;Q9UNE7;P24385;Q9Y3E7;Q9Y3P8;Q9UDY2;Q9Y2W2;P0DI81;P07910;Q13492;P08579;Q96IY1;P  
55199;Q86UT6;O95551;P41227;Q99471;P35548;Q13618;Q9P0M2;Q15436;Q8IZD4;Q8IZW8;Q93052;O1  
4734;Q9P031;Q8WV24;Q92793;P63208;Q9BVK6;Q13472;P08133;Q969S8;Q16537;O00567;P38935;O95  
707;P29474;Q8N3F8;Q9H0H0;P35251;P49756;Q86Y01;O14576;O60936;Q86YF9;Q96B26;Q96JXC9;Q146  
77;Q9NRD5;Q13200;Q99828;Q9Y5L0;P49790;Q6NUN9;Q8IX07;Q05519;Q8N8A2;Q92519;Q8IXH7;Q8IY5  
7;Q9ULK4;Q9H8Y8;Q13287;Q9BT92;Q9Y448;P09972;Q9NRX5;O95402;Q9BSJ6;Q14764;O75150;P48382  
;Q8WX92;Q6IQ32;O94986;Q15561;P50552;P62937;Q14315;Q96F86;P03886;Q9UKV3;Q9GZY6;P25787;  
Q14980;P52701;Q99619;P15036;O00570;Q969G3;Q9UL40;Q8IUD2;Q9HC62;P49789;O15297;Q2M3C7;P  
29084;A9UHW6;Q09028;Q4U2R6;P68871;O15084;Q9BTK6;Q15369;Q99623;P62854;Q8TAP6;Q8TEB1;Q6  
ZMV9;Q9P1T7;Q9UER7;O95453;P14635;Q6P2E9;O75396;O95999;Q96BY9;Q9UKS6;P15502;Q99459;Q9Y  
608;Q9UM11;Q14511;O75400;P12270;Q8WWQ0;P21399;Q9HBM6;P38936;Q9UN36;Q92769;O43513;Q9Y4  
A5;Q9NRL2;Q9Y376;Q15691;Q68CZ2;P43243;Q9BU61;Q13042;O43172;Q96GY3;Q9HOR8;Q6ZVN8;P5273  
7;P26038;O43236;O95996;Q9Y6B2;Q9UILL;Q8WXX3;P52435;P45985;O14508;Q8N5A5;Q92797;Q92309  
;Q13522;P62826;Q8IY92;O95602;P17535;O14558;Q3ZCQ8;O43261;Q9H492;O43502;P62140;Q13294;  
O94842;P02489;O00264;P15170;Q9P2D1;Q8N163;Q9UGK8;O75323;Q9UPV9;Q969H0;P51959;P17028;Q  
9BUN8;O15287;P61586;Q07955;Q15942;P52597;P53805;P35658;P08107;P52298;P62081;Q9Y3C5;Q1  
6514;P28347;Q16637;P46783;Q9H9F9;Q7Z6J0;Q86XK2;Q9NPI8;P78395;Q9BXL7;Q8IY31;Q9BSH5;P25  
063;P11686;O75190;Q9BUL9;P62495;Q8IXQ6;Q96ED9;P27469;P30304;Q9UBS8;P24941;Q9P2I0;O755  
25;Q96123;Q07157;P08697;P31943;P17275;P62256;Q99638;O00170;Q13129;Q00597;O15527;Q9NQ  
R1;Q92499;Q9NWB7;Q12772;O15155;P62314;Q9UMX3;Q9ULV3;Q9BTW9;P60896;Q9BSU1;O00463;Q86SQ9  
;Q92990;P49848;P52736;Q5T681;O43660;Q92973;Q9BUH8;Q9BW60;Q86UR1;Q9UGR2;Q9NYJ8;Q9HD42;  
Q96D71;Q9UBC1;O14787;P83369;Q7Z2W4;O75800;Q8TDC0;P25208;Q9Y2T2;P62324;O14613;Q5TZA2;Q  
9UN37;Q95163;Q95271;Q96A65;Q5D1E8;Q9T8A7;P51587;Q15056;O43482;Q14872;P11802;O75362;Q9  
Y2J2;Q86UE4;Q6P1K2;P78317;Q9UMS0;P05937;Q9BWU0;O94829;O75531;Q8N8R7;O43734;Q16873;Q6U  
W32;P02511;P55198;O43310;O95198;Q15024;O15379;P56524;P22830;Q9BXW4;Q9Y6N9;Q9BYG3;Q5VU  
43;Q13111;Q99704;P61758;Q12905;Q8IXJ9;Q86VY4;Q9NQX7;Q96CV9;O14836;Q9HCE1;P46939;Q9279  
6;P33240;Q8IWL3;Q9NWT8;P49366;Q16082;P02795;Q96A26;Q9Y3A3;Q9H706;Q8N157;Q5JVS0;Q15629  
;Q9NV88;Q9NZM4;Q7Z4G1;Q9UNS2;Q96NY9;Q9H5I1;Q6NUP7;Q9NTI5;P02545;Q13569;Q08722;Q13033;  
Q9Y3VX1;Q9UHX1;Q15797;P62952;O43615;Q92922;Q6P1X5;P09497;Q6PJW8;Q14789;Q6P4R2;Q5VV41;Q  
8N5C8;Q01826;P42704;Q13112;P31040;Q13084;Q9UKC9;O15127;Q969G9;Q9H160;O43395;Q15049;Q1  
4847;P26678;O75909;Q2YD98;O75145;Q9HBL0;Q15326;P31269;Q8WV92;O95983;P62877;P19447;Q8I  
W19;Q9Y4X5;Q12796;P63146;Q9Y613;Q15363;Q9H0C5;P11387;Q9BXF6;Q14683;P05408;O14907;O602  
32;P42167;Q01658;Q09661;P47928;P48380;P22415;Q8WXF1;Q9ULX6;Q5T7V8;Q13485;P12883;Q9UI1  
2;P13807;O43726;Q3YBR2;Q15036;O15078;Q9NUW8;P10914;Q9P2G1;P49419;Q96A44;Q9Y6I8;Q15185  
;Q15459;Q96G01;Q13952;P22736;Q8N7W2;Q96IZ0;Q7L2E3;Q14186;Q9H7L9;Q9BUP3;O75489;P24539;  
Q9Y371;Q8N3I7;Q676U5;Q8NDT2;Q9H444;Q9HCK5;Q86V81;Q9BZD4;Q9H9A7;Q8TAF3;Q8TBE0;Q9UKJ5;O  
60784;O14974;Q8N9R8;O14776;Q2VPK5;O60447;Q8WVK7;Q15054;Q9HCK8;Q15849;Q9BVC3;Q6XZF7;Q9  
NZZ3;Q49Y2X8;P31483;Q86VP6;P28702;Q92834;Q12789;Q9Y6D6;Q9Y4E1;Q13064;P19338;P55327;Q13  
023;O43924;Q9NRF9;Q9H1K0;P52272;Q8IYX3;P04156;P43357;P09874;Q53EL6;Q16526;Q12933;Q8TC  
71;Q9H0E2;P36952;Q9H788;Q8WYJ6;Q9ULU8;P16220;Q96EN9;Q15466;Q15834;P56693;Q00403;O9583  
1;Q9BVA1;Q9BXL5;O14818;P12757;O96017;P53618;Q9UBU9;Q9NT62;P18583;O75436;P36873;Q8N4C6  
;Q9HBM1;Q86SQ7;A8MVW5;Q9Y6D5;Q9Y6X8;P53041;Q6PGQ7;Q5XUX1;O14757;P30154;O60671;Q92734;  
O75170;Q9BR76;P51668;Q9HAT8;Q8NI29;O14602;Q86XI8;Q9P0W5;P15515;Q6UWF3;P46937;Q8N196;P  
20290;Q13542;Q06455;Q6P1J9;Q8WU39;Q14118;Q9GZS5;Q13118;P68133;Q15699;O75410;Q86WX3;P8  
1274;P49910;P46100;Q8WTW3;Q49AN0;P60842;P21912;P35269;Q9NRN7;Q9Y4G6;Q9Y6J9;Q8WWW0;P61  
962;P55771;P42568;O43324;Q13185;Q8N5D0;O14832;Q5BJF6;Q8NEM7;Q9HB96;P21673;Q9GZX7;O759  
35;O75175;Q8N612;Q9H1B4;O75807;Q13469;Q6WUZ7;Q9BUN5;Q9UPY8;Q15910;P41182;Q8N3U4;Q1376  
9;O60921;Q9Y375;Q99504;Q9UHD8;Q14011;P51532;O00303;Q9NZU7;O15015;P38919;P49754;Q16594  
;Q15853;Q9NQ2;Q9NQT4;Q7Z2Z1;Q86WH2;Q16531;Q9NYF0;O95810;P48788;P13349;Q5JTD0;Q8IJP0;  
Q9NR33;Q96GX9;Q5BKZ1;Q66K74;O60296;Q13426;Q13642;Q6ICB4;P48059;O60504;Q9BQ89;Q9Y281;Q  
9BSJ2;P05412;O00522;Q96HA9;Q8IUR6;Q86X95;O43541;Q8N488;P04406;P49336;P50453;P49639;Q7  
L590;Q6RW13;Q9BQI5;Q04695;P20248;P99999;Q6ZU52;P50402;Q00765;O15360;O95400;Q9NBX63;Q12  
888;O60294;P31948;Q96HR3;Q15438;P49711;Q9UHB4;Q5JTC6;Q15051;Q96CJ1;P08670;Q8TND0;Q86W  
J1;Q14678;Q9NUL3;Q8ND04;P09234;O75558;Q16625;P98168;P53611;P54257;Q9Y263;P30281;Q9UKL  
3;Q9UK73;Q12834;Q6R327;Q8NBT2;O95232;Q92547;Q96T51;P80217;O15105;P78559;Q8WW12;O95476  
;P30260;P42226;P46779;P10636;Q86US8;Q9HAN9;Q09666;P11388;P63104;Q9UBC3;O94901;Q15596;  
Q13216;Q9P086;O15117;Q86TA1;P61201;Q8N108;Q9NP4;P51948;Q8NI51;Q9BQ69;P54826;Q9UIC8;Q  
8IW35;Q96RU7;P51531;Q7Z4H3;P24863;Q99547;P49450;Q6IAA8;Q9P1Q0;Q9Y6K5;P28749;Q9BW71;Q8  
TE02;Q8N1L9;Q92636;Q96IV0;Q9Y3E5;P25789;Q9UKI9;Q5FBB7;Q9NQ76;Q15544;P24666;P12980;P63  
010;Q8IYD1;Q96IT1;Q9P2H0;Q15643;Q13901;Q13888;Q15102;Q96QF0;Q86TG7;Q9Y6Y9;P60953;P420

25;P03897;Q01130;P09913;P78543;P46087;O60573;Q14738;Q9H8W4;P35580;O75477;Q9BVP2;Q9NRI5;Q969U6;Q9BQ95;Q13616;P32243;Q13951;Q969L4;Q8WVM0;Q9Y4Z0;P11474;P45984;P50542;Q14746;O75821;Q96FH0;Q9Y5V3;Q9Y6G5;Q9HD40;Q96RK0;P30153;P57081;Q9Y248;Q9ULW3;Q9UKF6;Q96M61;Q9HBF4;Q9BZF9;Q9BQ7;Q8TCT5;P20073;P23769;Q8IZAO;Q13761;Q96JI7;Q6I9Y2;Q2LD37;Q96EZ8;P46108;Q9BTA9;Q00005;P52630;Q3L8U1;Q96C10;P23258;P62987;Q9UIS9;Q8N9B5;Q96KP1;Q9ULW0;Q9HB03;Q9H467;O75081;P41252;Q9BY44;P56945;Q9UNSL;P53779;O94776;P27695;Q6ZTQ3;Q6BDS2;Q00425;Q13547;O00762;Q9HCI5;P68363;Q01664;O75496;Q16864;Q2M2Z5;Q9NVH2;Q96CS3;Q96A56;Q9BZR6;Q86TB9;Q8WUM0;Q6ZPB5;Q01094;Q9NPE3;P35680;P04279;Q9NWK9;O60869;Q8NBJ4;Q9BY77;P23297;Q969N2;O00167;Q14151;P28698;Q13619;P49116;Q9NV96;P57678;Q99698;Q9BVJ6;O00541;Q9UMS4;Q8TAQ2;Q8IY18;Q969W0;P13010;Q9BUR4;Q8WX3;P24534;Q12982;Q8WW43;Q9Y5K5;Q9UI47;Q496Y0;O75112;P63279;Q9H8E8;P13984;P49593;P54253;P10589;P78371;Q9NWS1;O95793;P14649;O75901;Q9H8G6;Q9BYC9;P56270;Q9H8M7;Q02577;P17677;P61024;Q08AG7;Q12972;Q13428;Q02078;Q9UIF9;Q92542;Q5VYV7;P11441;Q96BP2;Q96B97;Q8TEW0;P83916;Q8TE69;Q86XK3;O95886;O43815;Q9H2C0;P35900;Q8IUC6;Q9Y296;O75113;Q15542;A8MT69;O43752;Q8N684;P55209;Q9NFB6;P23284;P63241;Q16890;O15350;Q7Z3K3;Q96HR8;Q9UHV9;Q13347;Q9UNP9;P41970;Q2QGD7;P80723;Q8N140;Q16186;Q9H1D9;Q9H9Z2;Q9UPV0;Q8WVM7;Q9BZK7;P41091;P63316;Q8N8U2;Q99590;Q15631;A8CG34;Q96GV9;Q99962;Q86WV6;O75306;Q9P0U1;Q14498;Q8NEU8;Q9UKK3;Q969M7;Q8ND90;Q9NQ48;P09917;P62424;Q9UQB3;Q9Y462;Q13362;O94874;P63261;Q9Y250;Q6ZNE5;P33176;Q9NVD7;Q12816;P08047;Q06587;P49005;P27694;P46695;Q9H9C1;Q9Y3Y4;Q8TB45;O60506;Q96FC9;Q8IY81;Q9H900;Q09161;Q9BRP4;Q9NXB0;P55197;Q14139;Q9NZL4;O15265;Q92597;Q01082;P23760;O43711;O60291;Q9UBD0;Q9H0N5;Q00653;P21980;Q9BRQ6;Q9UPX8;P43360;Q13617;Q92600;Q8IWX6;O95229;P54278;O43148;Q15144;Q99417;Q14247;Q8N3Y1;Q9P2M7;Q9H081;Q9UI32;Q8N7J2;Q6NZ67;Q9P2M1;P07814;Q9NYF8;Q86UL8;O95201;Q9BTM9;Q8TF05;Q9NPD3;Q14676;Q9H7S9;Q8TE76;Q96F07;P48200;Q00987;Q8IZL8;P60604;Q96FF9;P56589;P35241;Q9UJW3;Q01469;Q02952;Q13228;P15927;O14512;Q9H2K2;Q68CP9;Q13404;Q96DX8;O75340;P49918;Q95475;Q06787;Q9H3K2;Q96BK5;Q8WW35;Q5T200;O43829;P17152;P78347;O43463;Q63HN17;Q15035;Q9HB19;O00410;Q14194;Q9Y3A2;Q15070;Q6P2Q9;Q9NV31;O14744;P80294;Q9H4B6;Q63HK5;O95073;Q9BZR8;P26641;P35250;Q9NX18;O15116;Q8N5M1;Q5TCZ1;P83436;O43745;P32189;Q9BQ70;Q96CW5;P18754;O00422;Q96DZ1;Q5TAQ9;P84103;P15407;Q9NRC8;P39019;Q9H8V3;P62312;O43791;Q8WU20;Q9UQF2;P01009;Q13123;Q9Y2B0;Q969H6;O00257;Q13105;Q9UQ84;Q5VIR6;Q96C03;Q9C0H9;Q6PGN9;Q9XRX5;A5YKK6;A6NKF1;Q9P270;P08729;Q96BD8;Q9P0J0;O75691;P14316;P82933;Q6NZ36;Q8TDR0;O95257;Q8TD23;Q9Y2M0;P20810;Q9UKL0;P43358;Q14209;P23528;Q16630;Q9Y6K9;Q96Z4;Q8U42;Q9NP84;O75618;Q6STE5;Q9Y5N6;Q2VPB7;O95153;Q9H0W8;Q04637;Q14781;Q96P71;Q9P032;P40222;O60516;Q9NX40;P25963;P57740;P55735;P54253;O14618;Q16891;Q96HW7;Q13424;Q9Y3Z3;O00423;Q9H944;Q9Y618;Q92985;P20265;O43290;O14879;O00186;Q16626;P53675;Q9H583;Q8TDB4;Q13439;O60264;O15260;P25788;Q12981;Q8WY41;P67870;Q9BPX3;P11308;Q15149;Q9NSC2;Q9UBB4;O94983;O95433;Q9UHY8;Q8IYF3;Q96NA2;Q9BVS5;Q9Y314;O43493;Q2NJK3;P35232;Q9UID6;Q9Y6K1;Q9Y5N5;O43257;Q13765;Q96C86;O75940;P39656;Q9BUE0;P18146;P29692;Q96GG9;Q9BQD3;O60477;Q9NYB0;Q5SW79;P53804;Q8N5U6;P60660;P62166;Q8N841;P31150;Q68CZ1;P55789;O75164;P13647;Q12769;Q9GZQ3;Q8N895;Q01850;Q7Z3C6;Q16740;Q9Y262;O95613;Q5VTD9;Q12824;P52292;Q13432;P69905;Q9HAV4;P35226;O43913;P40937;Q99426;Q96MT3;P20292;Q8N9A8;O95202;Q14865;Q13243;Q13449;Q9NX70;Q63ZY3;Q9Y2Y0;Q8TES7;Q96B01;Q9BWT7;Q68DX3;P78352;P52565;Q12874;O15503;P51811;P67775;Q14566;Q14145;Q9Y3D0;Q9H2L5;Q14154;Q8IWN7;P48552;Q13625;Q9Y5K8;P56537;Q9UKN8;O00255;P40424;Q8IVP5;Q15532;Q6VY07;P38159;Q04743;O15126;Q15796;P55212;Q8IY63;Q8TF40;P60228;Q8TA86;Q13813;Q15532;Q8N1I0;Q9Y3A5;P23921;Q5BJF2;P41208;Q14839;P08235;P62993;Q9UHN1;P15336;Q9NQX1;P11161;Q9NXF7;Q9Y4B6;Q9UHI6;Q92993;Q8WUM4;Q15723;Q9H6Z4;P19388;P28066;O43447;Q68DK2;Q15562;Q9BV57;Q969L2;O15131;Q9C086;Q08211;P24864;P12004;Q9NR77;Q8TB72;P40763;P32780;Q8TDH9;P61956;O75122;Q8NFB3;P09914;Q9UBD5;P54098;A6NDB9;Q9Y2D9;Q9UKY1;O75817;Q68E01;Q9UK45;P07737;Q86YC2;Q9UMX1;P42566;Q9UKJ3;P18850;P56715;Q75QN2;Q13310;Q9HCD5;Q8WXH0;Q9BRV8;Q93034;Q9P2K3;Q8NFR9;Q9P2X0;Q08727;P63162;Q96HA7;Q99551;O94992;Q9UJY9;P62879;P46109;Q9U114;P10515;O60907;P05783;Q9BV73;Q8TAT6;P33076;O00161;P43356;Q96JB3;Q9Y5A6;Q6PI48;Q8N668;Q13438;P28065;Q8ND76;Q9Y221;Q9BV47;Q7LBR1;Q9BQY9;Q92890;Q9NQS1;P27815;Q12906;O94973;Q9H9E3;Q9BRK5;Q96EF6;O43865;P04198;Q00978;Q8NF64;Q9H0A6;Q8WU90;Q969X6;Q96EV8;Q96RN5;P30307;Q92733;Q8WX93;Q7Z3B3;Q12929;Q86XL3;Q6ZW49;O00743;Q99750;Q14192;O60888;Q9P278;Q9UFG5;Q96EP1;Q96EY1;O15397;O43167;Q9UID3;Q9UKK6;Q9Y215;P15976;P11277;Q6P9B9;Q9NZL9;Q99747;Q9UKG1;O60437;Q93045;Q9UFN0;P29372;Q92543;Q6IE81;Q86TC9;O95471;P0CG47;Q8TF74;Q9BZE4;Q9BX66;Q06830;Q70YC5;Q07352;P36543;Q9BQ90;Q92759;Q8IWX2;Q9UJM3;Q9UL42;O60518;Q9BRQ5;Q92621;Q7Z3T8;P24588;O60934;Q9NRY2;P24855;Q9C0E2;Q8IYI6;Q9H9L3;Q70Z53;Q5JRA6;P29459;O60238;Q9BSQ5;Q06546;Q9Y2M5;P62753;P78344;O14829;O75886;Q15022;Q96I25;Q9UJY4;Q9UBQ5;P23588;Q15545;Q9NPI1;O60493;P46060;Q8NC51;A8K8P3;O94888;Q9UI10;Q9BXW6;Q9BYG4;Q9NY27;P17980;Q9H446;Q13405;Q8N3R9;A8K0Z3;Q5T7B8;Q9UPN9;O95994;Q8WWR8;P60709;Q71UM5;Q99873;Q9UIF7;Q9NX95;Q9H2J4;O00566;P31946;O75832;Q9HC52;Q9UHC1;O14980;P20618;O43156;Q13114;P49902;P40337;Q9HCU8;Q92754;Q9H9Q4;Q8IVM0;P28370;Q9Y5P8;P61077;Q03111;P07197;O14777;Q9Y4J8;Q9UPN7;Q13573;O95373;Q14203;C9JE40;Q9NNW5;O95487;P62837;P49792;Q8NFR3;Q06609;Q15276;Q9BYG5;A7MCY6;Q96MH2;Q14240;Q12894;Q8HWS3;Q8IZQ1;Q13323;Q02241;P55345;Q9NQX1;P28074;P14921;P10909;Q15021;O43663;Q72417;Q8N2Z9;P61289;O75530;P55210;Q9H9Y6;O75791;Q9Y5X2;O15083;P52747;Q9UHR5;Q9H665;P17480;Q9Y6M1;Q14690;Q969T7;O43390;P51398;Q04725;P01011;Q9H0F6;Q96AX1;Q9UQK1;Q9BW66;Q86WG5;O75494;P13056;O75155;Q9NRG4;Q13021;Q9H6Q3;Q8NBZ0;O95049;Q13257;Q99569;Q3MIR4;Q9NQS7;Q9NZJ0;Q13415;P13232;O75607;O14641;Q9H6U6;Q13144;O43900;Q9H5Z6;Q15528;Q08379;P42617;Q9Y3D3;O15304;P61970;Q9BXJ9;Q9Y3B2;P54920;Q99741;Q99689;P61457;Q96GC5;P50616;Q7L0Y3;Q8WUF5;Q9BRP8;Q8WTV1;Q9NV5;P22735;Q99966;Q16385;Q86VW0;Q8NFB9;Q9NNW7;Q9NXV2;P05198;P27797;Q9NWZ8;Q71SY5;Q02040;Q9H2U1;P54727;Q8TD06;Q8N5R6;Q6ZQR5;Q9Y3B7;P62318;Q86WU2;Q92870}

3169

Pathogen{ P14075} interacts with 2365 human partners: [P60953;P43351;Q9BQI5;Q14457;Q9H6Z4;P42704;Q8N196;Q96EB1;Q3L8U1;Q5VWX1;Q00059;O95453;Q9P2Y5;Q9NZL3;Q92797;Q9P0V3;P52630;Q96MT8;Q9NQG7;Q9BSU1;O75953;Q5VTR2;Q969F1;Q6P2E9;P53804;Q14781;A8MT69;Q9Y5P8;P11387;Q6P4R8;P17480;Q9UBW5;P49336;Q96RL7;P06733;

Q96BY2;Q2TAZ0;P60604;Q96F07;P78560;Q15059;O15297;Q3SYG4;Q9BTM9;Q9P0U1;Q9BQE4;Q9UBS3;P29474;Q5H9L2;P68871;Q96AQ6;Q7Z2E3;P54136;P78537;Q8NI51;P52292;O14530;Q99933;Q9Y6J9;Q96ST3;Q9NSC2;P22626;O00566;O00213;P08729;Q16576;Q14511;Q92585;O15131;Q8TEQ6;O14925;Q15366;Q12789;P43355;Q7L1V2;O14646;Q9UK73;P35869;Q9BUP3;Q15819;Q9H7H0;Q90666;O60663;Q96GX9;O15234;Q8TB72;Q9BQS6;P63165;Q9HB96;O43156;Q8N6T7;Q92990;Q96CS3;P62304;P09497;Q9GZV5;P51825;P52815;P46781;O95049;Q15643;Q969S3;Q9C0E2;Q8TAT6;Q99607;Q16543;Q68DX3;Q3KNV8;P54105;Q9UJY4;Q02410;Q9NZQ3;Q14746;Q96HJ5;P54203;Q05519;Q9H788;Q9H5J4;Q9NXV6;O43303;Q9H4X1;Q9NP97;P14866;O60239;Q9UK45;P35321;Q86WG3;Q9BYD1;Q9BRV8;Q12962;Q9BYV8;Q09161;Q9H5Z6;Q12983;O94811;P35813;Q02577;Q9H583;P62316;O95232;Q96MT3;Q96JB2;Q8TAD8;Q96PM5;P62495;O94777;P55036;Q6RFH8;Q8WXF1;P62952;P25788;Q14764;P11532;P54098;Q14690;Q00005;P42677;P13984;Q8N8R7;Q86X95;Q13155;Q9Y5A6;P19338;Q9GZT8;Q9Y6K1;Q9Y375;P62913;Q9H175;Q86SE9;Q08752;Q9H211;Q9NPJ6;Q92900;O15111;Q99504;Q9Y2J2;Q6NZ67;Q9UBY9;O60841;Q00613;Q01850;Q6ZNE5;P23497;P55327;Q9BW60;P55957;P23246;Q92759;P41227;Q9Y3C8;Q96KS0;P12956;P56537;Q14207;Q13042;Q8NBJ4;Q7Z2Z1;P11142;Q9Y3F4;P20042;Q96IV0;Q9NVI1;Q8WXD5;Q9UBC9;P24863;Q9GZT9;Q15102;P31350;Q13105;P28066;P07320;P55198;O15360;Q04206;Q9BSW2;O43809;Q63ZY3;P21675;Q9H1H9;Q8IVM0;P17482;Q96KQ4;Q9H4I2;Q9UKJ3;Q9P2I0;Q9P0W5;Q969E8;Q75QN2;Q15750;Q15528;Q8IHW1;O15265;Q9BUL8;Q8N3V7;P09913;Q9NX63;P20810;Q9BQ83;O00512;P24941;Q8WU39;P81274;Q13573;O60645;Q8WWQ0;Q9Y6H5;Q8N9A8;Q9H2C0;P40424;Q9NPC6;Q14526;Q969S8;P49902;Q9UBZ9;Q13951;P52737;Q9UMS0;Q7Z5V6;P05783;O75030;Q14683;Q96KR1;Q9BSB4;Q13884;Q96GMS;O96018;Q9UBU8;P62277;Q96QT6;P55265;Q9UQR1;P53990;O95684;Q9H706;Q08999;P08727;Q6ZW61;Q9NX70;Q8N1B4;P52675;Q8IXJ9;Q9Y6D9;Q92844;Q15051;O14746;P08621;O15372;O75607;O75323;O60888;P23025;Q9NUL3;Q8WU90;Q8WXE1;Q02241;Q2TAK8;Q96GC5;Q9UBF1;Q7L2H7;O43663;Q9NR46;Q9Y295;O94973;P23381;O15083;Q8IXQ6;P62072;P23284;P68036;Q9UPR3;Q9NPI1;P05412;Q16385;Q9BXL5;Q15542;Q07021;Q8N488;Q04725;Q13542;P18615;Q9NTX7;Q86WI3;P11802;P42226;O95503;Q5BKZ1;Q96A26;O94874;O96000;Q75832;P11474;Q9HB75;Q6NUP7;Q13034;Q8NFG4;Q9H9E3;Q9Y2D1;Q9H081;P68104;Q92734;Q9BRA2;Q96CW1;Q9UMX3;O75558;Q9NWZ5;Q15759;Q9HCK5;Q9BQA5;Q14103;O75886;Q9ULM6;Q86V81;P62324;O75475;P61024;Q4LE39;O00186;Q9NR22;P05060;Q13243;Q8IY57;Q9UEU5;Q14160;Q9NX08;Q9UI30;P62837;Q96P70;P23588;P08865;Q9BQA1;P14859;Q13618;P22670;Q5VU43;Q92831;Q16186;Q9UKX2;P11831;Q562F6;O60481;Q13769;O75410;P52747;Q95295;Q8N5D0;Q13522;O43236;O43395;P62328;Q15554;Q15906;Q8N1L9;P61970;Q8N612;Q9NPJ4;P10828;Q9BXJ9;Q9BSI4;P49756;Q9P2H0;Q07157;Q99615;P78545;Q86UE4;Q99619;Q13064;P78395;Q96Q83;Q8N9R8;O14787;Q9UKT4;O75791;Q9NPD3;O43752;P60900;Q15014;O60732;Q7L0Y3;Q08945;P49427;Q92845;Q9NT62;Q9NQS7;Q9Y6X3;Q15562;Q7Z465;Q9Y224;O00470;P27695;Q8N140;Q8IWX3;Q9UFG5;P51532;Q6BE01;P28347;Q8WVM7;O75143;O60516;P51959;Q9H7T9;P30876;Q9H0S4;Q9BRP8;P40222;Q15532;P53567;Q9UNY4;Q8TD23;O15127;Q2LD37;Q9H1Y0;Q9UHR5;P40855;Q07666;P14635;Q96HR3;Q6PJT7;P62879;P61326;P25208;Q7LBR1;O15162;Q12815;P38432;Q9H2L5;Q9UM11;Q86WX3;O00233;P52736;O43541;Q9BT78;Q9H444;Q9H9G7;Q9BXM0;Q8N1B3;Q9C086;Q01831;Q9NWX8;A8CG34;Q8N5F7;O14713;Q86YC2;Q96LL4;Q2NKJ3;Q14686;Q96R06;Q14493;O75582;Q9UHX1;P61088;Q01201;Q92674;Q01658;P57678;Q96GV9;Q9BV57;Q9BVN2;P80723;Q9WVK7;Q9H1A3;Q96MH2;Q9Y4Z0;Q9A488;Q5T8A7;P26196;Q8IVS8;P57740;Q08AG7;P17275;Q9Y5N6;Q8NVC2;Q96KP1;Q00403;P30281;Q96C03;P82094;Q13901;Q5EE01;Q8WUM4;Q14C87;Q15459;P53675;Q6P9B6;Q15388;Q13425;Q12816;Q96HW7;O75362;P32189;P55212;O75446;Q06546;P0C1Z6;Q6NUN9;Q9UKT7;O60563;Q9Y252;O14776;Q9Y2T2;Q9Y3Y4;Q9NVV4;Q9P2R6;Q8WWR8;P29083;Q86SQ7;A8MVW5;P23769;P08133;Q9NRL2;P61244;P49459;Q9UKL0;Q9UID6;Q8WW12;Q13287;P61604;Q9NX18;Q16822;Q96MT58;Q6NUQ1;Q7Z460;P19419;P41212;Q9H467;P26651;Q8IV36;Q12905;Q9H446;Q9GZL7;Q92600;Q6P1M3;P18847;Q8WVC0;P78559;Q01860;Q9UUP1;Q9UBD5;Q9Y6F6;Q6ZW49;Q14139;P28698;Q9ULU4;Q6PI26;Q9NY61;Q9Y468;P61201;P09234;Q9BQ15;P38159;P38935;P60510;Q86UW6;O95886;Q9UGP4;Q14839;Q9UBD0;Q9NPI8;P48380;Q9BQD3;P42768;P51610;Q13561;Q9Y2Y0;O15527;Q92973;Q8IY31;Q6ZU52;Q15652;O75419;Q86WB0;O15015;P35548;P11161;Q8NC51;Q15561;Q7Z3B3;Q9NVN8;Q53HV7;P15172;Q6PGP7;Q6P1X5;O00541;P49792;Q969T9;Q9Y2D8;P17096;Q92783;Q15327;Q9Y4P1;P56524;Q96PU4;Q00994;O43918;P17036;Q92917;Q99747;O00422;P51965;Q01844;Q96I27;A8K8P3;P05388;Q96IY1;Q08050;Q13257;Q53G59;Q9H9Z2;Q5T681;P18146;P41252;Q9UJW3;Q00534;Q9HC77;Q9HCE1;Q9NQG5;P26641;P78344;Q8IZQ1;O95257;Q96EZ8;Q9Y3D3;Q15047;P02810;Q9P1T7;P06746;Q96TC7;P29084;Q969U7;P80217;O95619;Q96RK0;Q16520;O95931;Q9NZ52;Q70EL1;Q8TE76;P42771;P41220;P20265;P33076;P17661;P04156;Q5UE93;Q8TDC0;O14734;Q92922;P54920;Q16537;O15226;Q67766;Q9BYG4;Q13620;Q99613;P19388;Q92870;Q9Y603;Q9HCH5;O95400;P49750;P48634;Q9P086;O94775;Q01130;O75925;O60232;Q5HYK7;Q9NQR1;Q6ZQR5;P35638;Q8TDY2;P50750;P15822;Q15070;Q16548;O15117;P19367;P41236;O75821;O95218;O95777;P42568;Q9UIF7;Q9UNP9;Q96NA2;P47928;P46777;Q9H840;O95997;Q9Y250;Q7Z4G1;O60671;Q9GZQ3;O75170;Q86VQ0;Q9NX53;O43172;P19012;Q9NQ31;Q93062;Q8TF40;Q15910;Q96IT1;Q9HB03;Q86TA1;Q9UKX7;P29692;Q9HD26;O95433;O43684;O60296;Q9GZV4;Q9BTP7;P04792;Q96SN8;Q6UVJ0;P78347;Q92988;O43167;P31943;P82094;P3162;Q7Z7C8;Q92890;O14933;Q16082;Q12906;Q13216;P23490;O15397;P39687;O75175;Q5TAX3;Q9H074;O00625;Q9BSJ6;Q15544;P49005;Q8WUF5;Q7Z614;P78371;Q8IUD2;P45973;Q02040;Q9UK41;Q14157;Q99717;Q13200;Q9UJY1;Q5TZA2;Q5H9R7;P06730;Q12798;P01009;P62140;Q8N5M1;O00167;Q9Y4A5;Q9UKV0;O00716;P56693;Q8IY81;Q9H9C1;Q9H040;Q16401;Q9NPI6;P62081;Q96FW1;O75494;Q96JB5;Q86VI4;Q9BW66;Q00978;Q8WW38;Q8N668;Q8IX12;P20226;Q5TQC9;P15336;P04198;Q15629;Q13111;Q9GZY8;Q9UHV2;Q15653;Q8NEU8;P63241;Q8N2W9;Q8NHQ1;Q9Y2X8;O15061;O14929;Q9NXR7;P62308;P15559;O43734;P62750;O15126;O00567;Q9UBB5;Q92754;Q9UHB4;P13489;Q96LI5;Q8IU60;P15927;Q96BD8;Q9Y613;Q9UI95;Q15560;P35658;P63279;P31040;O96020;Q9Y6D6;P10242;Q16666;P12270;O43390;O94983;Q15796;Q01105;Q53HC0;Q9UI10;P46976;Q9Y3I1;Q9NWA0;Q9NQ87;Q9HAP4;Q9UDY4;P63172;P04238;Q6ZVK8;O15304;Q9BYC9;Q5JY77;Q8TBK2;Q13148;P15923;Q66PJ3;Q96AV0;O94906;P53992;O60294;P20073;Q96LC9;P50402;Q9BT92;Q6PJG6;Q96JI7;Q9Y3E5;O75901;Q5JTD0;Q9NYF8;Q9UBB4;Q14209;Q8IY63;Q13952;P25963;Q9ULJ3;Q9BYE7;O75306;O14777;Q92621;P43358;P61981;O75182;P38646;Q13547;Q04323;P61077;Q13642;O00570;Q16594;P54198;O94763;P55854;P26358;O15511;Q9UQK1;Q13084;Q96IZ0;P13056;Q9Y2L1;Q8ND90;P55735;P01106;Q8WVJ9;Q86XI8;A9UHW6;Q92993;Q15185;Q9UKV3;Q9NRI5;Q8N163;Q96FF9;Q8NFX5;P53805;P36873;Q9Y618;O14497;Q96HR8;O95229;Q5VWG9;Q13868;Q9UHV9;Q15029;O75081;Q8TEP8;O95402;P05198;Q8WV24;O95347;O75400;O14503;Q9UPV9;Q9BVW5;O15371;O76031

;P49366;P56279;Q8TEL6;P62312;Q9Y248;Q86V97;Q9Y3B7;P54252;P31269;P07737;Q8N5C8;O75376;  
Q01826;Q5JR59;P46527;Q9Y4P8;P15515;Q9HAZ2;Q16637;P27540;Q6UWZ7;P51398;O43255;O75381;Q  
9Y3E7;Q00587;Q9HCM9;Q92624;Q9BUN5;P23528;Q96A44;P62136;Q8WTW4;Q3YBR2;O75940;Q8NI27;Q9  
UPN7;P78396;Q9BSH5;Q8N5A5;O00505;Q9UQB3;Q99459;Q13405;O43516;Q8N2Z9;Q02556;Q13137;O00  
743;P12757;Q9H8S9;Q9UFN0;Q9Y2M0;Q03468;Q9Y5P3;Q8NHZ8;P35711;Q96QD9;O43583;P57077;Q8WV  
99;Q96DI7;Q9H0C8;Q92530;A1L3X0;O00257;P55209;Q96DX5;O96004;Q9UKT5;Q9Y285;Q96HA8;P1633  
3;Q9BU89;Q13568;Q96EF6;Q96MN9;O00291;Q96BK5;Q13485;P35232;O94992;Q9UHK0;Q9NXV2;Q99638  
;O00255;Q8N7H5;Q9UPV0;Q86WV1;P09629;P63208;P17152;Q9BVC3;O75817;O75969;P07900;Q9NQT4;  
Q6P1J9;O75691;Q96SW2;Q8TAF3;Q9H3R5;Q9Y6E7;Q8WTR7;Q9NR28;Q6PJ61;Q92499;P11940;P24278;Q  
8TAX7;Q14186;Q6NZI2;Q09028;Q9NPF5;P15036;Q9Y2J4;Q9ULW0;Q96HI0;Q14999;O14980;P60228;Q9  
NTK5;Q15365;Q9H204;Q96B36;Q00839;O14920;Q15853;Q8N5R6;Q9H9Q4;Q8N1N5;Q8N5U6;Q9BQ70;P49  
116;Q9NWS1;O95628;P16118;Q9UKL3;Q16655;Q9NWF9;P50995;Q68DK2;O96019;Q9HAW4;Q9BW27;P461  
00;P35244;P54274;Q92541;O43493;Q8NBZ0;Q9HCC9;P52294;Q6IE81;Q04726;Q9UHI6;P25791;Q0658  
7;P31749;O95487;Q9H5I1;Q9H4B6;Q9Y6G5;Q9NXB0;Q2M3C7;P02545;Q19AV6;O95810;P0CG48;Q15631  
;Q96I23;Q96JC9;Q9UPY8;Q04695;O15235;P04406;Q96EN9;Q86US8;Q8IZD4;Q9Y221;Q02952;Q6I9Y2;  
P28324;P49419;Q6ZNA4;Q8N108;Q99996;O00762;Q8N7J2;O00401;Q9H8T0;Q9NY27;O15078;Q6ZVN8;P  
57081;Q13310;Q96CG3;O60573;Q9H5J8;O14964;Q15326;O75618;Q14CW9;Q9NPE3;Q08379;Q9BU61;Q9  
6EA4;Q15013;Q5SW79;Q9Y2W2;Q9Y3C7;Q8TDR0;O00139;Q5BJF6;Q9NQX1;P32519;Q9UP83;Q9Y512;Q86  
VP1;P49754;Q9UNN5;O00170;Q96GG9;P49918;Q14653;P62318;Q96S59;Q9Y5A7;Q06455;Q96HA7;Q9UG  
K3;P83369;Q15370;O15116;O14641;Q06547;Q10664;O00411;Q5VSL9;Q9UBC1;P99999;Q12874;Q1349  
0;O95983;P51116;P55769;Q9UHD9;P28074;O75935;O14744;O95865;Q14232;Q9UHB7;Q9HAF1;P23193  
;Q8TES7;P08779;Q8IWE5;O75161;Q9NR56;Q96LA8;Q2VPK5;P33240;Q9HD40;O75528;Q12830;Q12933;  
P26678;P61247;Q9NRL3;Q96BP2;O14910;Q99873;P62753;Q86XR8;Q9H0N5;Q9NP98;Q9Y6B2;Q14676;Q  
9NTG7;Q13469;Q9H0A8;O96017;P13640;Q9UJM3;Q96PK6;P22531;Q9UHC1;O95373;Q6W2J9;O15350;Q1  
6254;Q9H8E8;Q13526;Q99684;P04264;Q9UBK9;Q15038;Q92769;Q7L804;Q12904;Q86U86;Q2YD98;O95  
456;O14862;P25205;Q7Z5K2;O75145;P28065;Q6NZY4;Q9C005;O60518;Q9BUJ2;Q6ZNI17;P37802;O149  
65;Q05048;O75525;P11441;Q96K30;P78543;Q9NSA3;Q9Y5N5;Q9NQS1;Q99623;Q9Y5Q3;Q7RTS9;Q9NVH  
2;Q15834;P49848;Q15424;Q9NV31;Q68CP9;P46779;Q6UW32;Q96AB3;P35712;Q92665;P53618;O95831  
;Q9HCU9;Q613185;Q8WXC3;Q9ULX6;Q9NSC5;Q9Y2D9;Q9NWT8;Q9H2J4;Q8TE69;Q9H1D9;P55771;Q6VMQ6;  
Q6QNY1;Q6PD62;Q9H9D4;Q96NY9;Q6R327;Q15287;Q04637;Q9UIS9;P46939;Q9H944;Q9HC62;Q9BTK6;Q  
9HCK8;P50502;Q9UPN9;Q86WH2;Q8WXE9;Q8WWL7;Q9UN79;P50914;Q5JVS0;Q13765;Q99732;Q16890;P2  
4928;Q86WV5;Q15691;P61956;Q9UHF7;P67870;P50616;Q99733;Q8IW19;O75251;Q9BXH1;Q8TCJ0;P0D  
I81;O60238;Q8N611;Q9BV73;Q7Z7A3;Q86TB9;Q96HA9;Q5T7V8;Q9ULM3;Q15025;O95782;Q96MU7;P277  
97;Q14154;O43318;Q075150;Q15723;O75663;P51531;Q9BTA9;Q9HAT8;P30047;Q14738;Q9Y608;Q96AJ  
1;Q6UUV9;P02794;Q9UKT9;Q13158;P35269;P27986;P11473;Q99594;Q14677;Q9BUN8;Q86VP6;Q9Y6X8  
;Q96CJ1;Q6P2Q9;O14558;O75928;Q8IWX2;Q9H2J2;Q9ULW3;P37198;P54727;O75800;Q9UN36;Q8N137;  
Q8N895;Q9H816;P26368;Q7Z417;P23396;P48382;O14907;P20248;P53999;P19474;Q8WXF8;P22087;P  
35251;Q9Y6K5;P52655;P25786;Q8TAP6;Q01081;Q15306;Q16531;Q8TF74;Q92575;O43745;O00410;Q9  
69X6;P15880;Q96FH0;Q6QNY0;Q15173;O15405;P17947;Q9UIF9;Q8NE71;P78345;P62826;Q9UKC9;O14  
818;Q15054;Q99750;Q14687;A6NIX2;Q8TBE0;P11308;Q9H8Y8;Q9NZZ3;Q8TE02;Q9P2M1;P46087;Q165  
14;O95251;Q96BT3;Q9NQP4;P49770;Q9NUP1;O14613;Q5JR98;Q8TAQ2;Q9NR77;P78318;P62987;Q1415  
1;P67809;O43257;O14490;Q8IYD1;Q13309;O60907;Q06787;P63104;Q9P1Z2;P06396;Q9UH77;Q99417  
;Q9Y3P8;Q9C035;Q8TCI5;Q9HB19;O43747;Q13114;Q9NWT6;O14602;P13994;P53041;P21127;P35579;  
P08697;Q813358;Q9P031;Q99551;Q01534;P14868;Q9HAU5;P06748;Q15545;P23511;P61457;Q9H3M7;Q  
13227;Q8WVZ9;P35573;Q86VX2;P55197;P78317;Q5FBB7;P18848;Q9P2J5;O43711;Q9UBP6;Q53BL6;P8  
0294;Q9NRR4;Q96B26;Q13123;Q9UMS4;Q969V6;P09661;Q15436;Q92796;Q01094;O14639;Q9UKV8;Q9B  
TL3;P15502;P28370;Q8TA86;P61586;Q9NZM4;Q5D1E8;Q9NRR5;Q14258;Q9BUX1;Q9Y333;P10515;Q86X  
83;Q9BUR4;Q9BV55;Q8NHY2;P43364;P61978;O15105;Q9Y3A3;P14921;O95999;P62266;Q9BQ95;Q9GZS  
3;P50452;Q14397;Q99496;P36402;Q92572;P30304;P06400;Q13794;P83916;Q07352;P33316;O43542  
;Q9NWZ8;P02511;Q9UBI1;P50453;Q5TC12;Q9NWB7;Q9Y5Q8;Q6IQ32;Q9UILL1;Q13625;Q9H6U6;O15287;  
Q9H410;Q13867;Q15654;Q03112;Q02078;Q13426;P55789;Q15633;O94986;Q9NP66;P62714;Q5JTC6;P  
61758;O60832;P24539;Q9Y262;O43913;P27348;Q9NRR3;Q8IXH6;P41208;P17028;P27694;Q12824;P1  
4316;Q6UWF3;P50549;Q15628;Q13228;O14896;Q9NXX6;P43356;Q06330;Q9NX40;Q15233;Q9UIF8;P67  
775;Q8NEM7;Q5VIR6;Q5T2W1;Q8WY41;Q9H9Y6;O95073;O94829;Q96G21;Q13347;P08670;Q08896;Q130  
94;P30153;P51946;Q9BQY9;P63000;Q9BQ69;Q9UQ80;Q7Z2W4;Q9BX70;Q96U97;P52594;Q8IUC6;O7543  
6;Q9ULD0;O75822;O60477;Q15154;O14879;Q8IX90;P28749;P32780;Q9GZR5;O00161;O95163;Q96PV6  
;P09012;P55199;O15379;Q66K89;Q68CJ9;O43504;P61313;P98168;Q9P1Q0;Q8TC71;Q9Y3C0;Q9H9L3;  
A6NKF1;Q9ULK4;Q8TEK3;Q5VYV7;P01100;Q9BRQ6;Q8TDB4;Q8NFH3;O60921;Q9ULE6;Q86Y97;Q8NI29;Q  
14134;Q9GZU7;O00268;P14678;Q14789;Q8NDT2;Q9UNL4;Q02447;O95602;Q9BQ89;O43447;O75190;P6  
3010;Q9H904;Q8WY54;O94925;Q9BZE4;Q8TDH9;O43310;Q13439;Q8TCS8;Q9H4M3;Q9HCS7;Q96QW8;Q9Y  
4R8;P23508;P02795;Q9UHN1;O60885;Q53HL2;P20290;Q9UHY8;Q9Y2X9;O95751;O94817;Q9H9T3;Q29R  
F7;Q9Y3T9;Q9ULZ2;Q6ZPB5;Q9P2T0;Q9NRD1;O43159;Q9P1A6;P24522;Q7L190;Q96EV8;Q9NV92;P0CG4  
7;Q9UNS2;Q9BXF6;P62937;Q7Z4T9;Q6PGN9;P07197;Q96B01;P42772;Q9BSQ5;Q8NCD3;Q5T230;Q9UL42  
;P12980;P09972;P49711;P49789;P25787;Q13428;Q9BZK7;Q96T23;Q00577;Q99547;Q5C9Z4;Q96QF0;  
Q92793;Q9UDY2;P08107;P28702;P15884;Q8N7W2;O14832;Q7L5N1;P54725;Q717R9;Q9UNS1;Q13416;Q  
8WYA6;Q92841;P50748;Q9Y5S9;P78352;Q9UI36;Q9BVI4;O43463;O95376;P13647;Q9UH99;Q14674;Q1  
6526;P18754;Q13404;Q14137;Q9NR09;Q9UGK8;O75843;Q15699;P35080;O95243;Q96KN1;Q96C86;Q8T  
AC9;P46937;Q8ND76;Q13127;Q9UBS8;O75113;P35226;Q96PY6;Q9Y294;Q9HD42;Q9NR50;P31314;Q9UUK  
N8;Q32MZ4;O75192;Q96B67;Q9BYZ2;A6NIH7;Q9Y2P7;Q96RN5;P48552;Q99590;Q14533;Q9UDV6;Q9NXF  
7;O43439;P31276;O43715;Q05516;Q8N6Y0;Q96CV9;P35637;Q6PI48;Q9Y5L0;Q9HOC5;Q15022;O60711  
;Q9NRC8;Q9BYG5;Q9Y5J7;Q8WUH2;Q9BZF9;P46776;Q15466;P19838;Q9H9F9;Q96AY2;Q96HY6;Q86XK2;  
O60504;Q9UQL6;Q12769;Q03060;Q04724;Q2VPB7;Q99741;P07196;Q96GC6;Q9H0W8;Q9HCD5;Q9Y3Q8;P  
27469;Q14749;Q9NQ48;Q8NFD5;Q8IYI6;P48788;Q9UL40;Q95273;P83876;Q12888;Q13129;Q9UL18;Q9  
H981;P54259;Q14678;O75665;Q15024;P66270;Q99502;O952H0;O15266;Q00653;Q9HBM1;P16220;P31  
946;Q92558;O43791;O75934;Q92597;P84103;P54278;P20618;Q9HCU8;Q969W0;Q86VS8;Q6P1K2;Q997  
00;Q9Y6K9;P13807;Q9GZZ1;P24385;Q9BXP5;O43261;Q6P1W5;Q13363;P62256;P63146;Q9UKI9;O4314

8;Q9BXS5;O75154;Q5TA31;Q9H3P2;Q6P9B9;P10124;Q9NPB6;P13010;P61962;Q9NRA8;Q9UBU9;P35900;P46783;P41970;Q8WVM0;Q12894;Q15329;P48200;Q9P287;Q14974;O95613;Q9P209;Q14203;Q96DZ1;P22415;Q4U2R6;Q92985;Q9UMS6;A6NDB9;P84022;Q6NVH7;P59998;Q13144;Q15003;P21980;Q9HAN9;Q8NI08;P25815;P49790;Q9NVV5;Q86VY4;Q9UER7;Q99816;O60437;P15407;Q8IZL8;Q9Y3M2;Q96S55;Q9H1B4;Q9H7S9;Q9BZV1;P23760;Q07866;Q9H0G5;Q14008;O14599;Q12972;P49589;Q9P2M7;Q6RW13;P52597;Q8N720;Q9Y2M5;Q8N4C6;O00425;P17676;O43324;P37275;P01215;Q9BZL4;P30793;P41002;Q96MF7;Q8WUM0;O60936;P82933;Q13569;O60869;Q9H0B6;O14512;O75489;Q8WYH8;Q8IXH7;Q9C0H9;Q13829;O95153;P21673;Q9Y605;Q9BXF3;O14893;Q92466;Q2M1K9;O43264;Q6STE5;Q8TAP9;Q9H2H8;Q13616;O75496;O94842;Q71SY5;Q15121;Q9Y287;Q9NZJ0;O60716;Q96CD0;Q00597;P62314;O95271;Q13112;Q86Y01;Q1ZZU3;O15040;Q5T3J3;Q9BRP4;O75800;O95848;Q13233;Q9BVJ6;P38919;Q8N684;Q9NX95;P10914;Q96G25;Q9BUL9;Q8WUQ7;Q9H4D5;Q8TBB1;Q5JSZ5;Q14980;Q9Y4Y9;O94921;Q96FV9;Q9UBQ5;Q9UIV1;O75155;Q9BW71;P40337;O75909;P14625;Q6BDS2;P17544;O43290;P30260;P61289;P05386;Q9UKF6;Q9Y3A2;A8MTZ0;Q7Z3K3;Q8NG31;Q7L590;Q99081;Q92905;O43482;Q9NVN9;O00267;Q9Y5V3;Q04837;Q9BSD3;Q8WVV9;Q2QGD7;Q9NNW5;Q13838;Q9H160;Q86U42;Q9Y296;Q9NTI5;Q9P270;Q70Z53;Q9UL03;O95707;Q9NYF0;P02538;O43399;P07315;P17535;P51668;O60260;Q969H0;P14672;P31948;P49454;Q9H9A7;P29372;P39019;Q92830;Q9GZX5;Q9P032;O15205;Q13617;Q13432;Q9BSJ2;Q15369;D6RGGH6;Q99708;Q92552;P62424;O43513;Q99436;Q92540;P49910;Q9NYV4;P42167;P43360;Q16626;Q92547;Q12873;O75151;Q9BPZ3;Q9UKJ5;P09467;Q13033;Q16629;A5YKK6;Q9UNH5;Q96EK4;Q9BSM1;Q9BPX3;O75427;P32243;P46013;O15355;Q86XK3;Q9H4A6;Q8IUR6;Q96CM3;P27816;P30307;Q96FX2;Q14814;Q03111;Q9BY44;Q9ULV3;Q6WBX8;Q86YF9;Q8N9B5;O00165;Q9UMX1;Q96RL1;Q7Z7A1;Q9P0J0;Q9NRG4;P43357;Q9Y2X3;P24534;Q99471;Q8NFH4;Q9NS37;Q9ULR5;Q9XLR5;P54826;Q9UKK6;Q9UUF2;Q9P013;Q12796;Q8WTV1;Q9Y6X2;Q16851;Q10567;Q9Y448;P02533;Q9NVV9;O60216;Q86WQ0;Q8NFH8;Q9P278;P63167;Q96QE5;Q96CN9;Q8IWL3;P63272;Q92733;P02808;P42025;Q9NS73;Q6PGQ7;Q9Y3B2;Q15004;O15084;Q9HB71;Q9NRY2;Q70YC5;Q9BXW9;Q8IY92;Q96CT4;Q0VDD7;Q9H0F6;Q96MG7;Q14872;P83436;Q9NV88;P55060;Q8NBT2;Q96F86;Q9NZL4;Q9BZD4;P18583;Q10570;Q14192;Q13541;Q8TAE8;Q8HWS3;Q9BYK8;Q9NS69;Q8ND04;Q96A56;Q9UBF6;Q9NQ92;Q9Y462;O75477;Q9H0W9;Q02930;C9JE40;O00148;Q8WY3;O94850;Q9Y4E1;A7MCY6;P62508;O43829;Q9Y281;Q8WXU2;Q9BWU0;O14757;Q9NUS5;O14556;Q12834;Q96CW5;Q9NUW8;P22392;Q14978;Q9Y3V2;Q96EY1;Q969L4;Q9P2K3;Q00610;P50222;Q9P0W2;P11171;Q92854;Q96CB8;Q6VY07;Q8N6F7;Q2M2Z5;Q14145;Q9H7L9;Q9UJY5;Q8NF64;O95644;Q9BQY4;O95201;Q6Y2Y9;Q9UJT2;Q06609;Q13501;Q8N726;P26373;P07814;P50749;Q15021;P09874;P62877;Q7Z3C6;Q9HC15;Q9NS69;Q8ND04;Q96A56;Q9UBF6;Q9NQ92;Q9Y462;O75477;Q9H0W9;Q02930;C9JE40;O00148;Q8WY3;O94850;Q9Y4E1;A7MCY6;P62508;O43829;Q9Y281;Q8WXU2;Q9BWU0;O14757;Q9NUS5;O14556;Q12834;Q96CW5;Q9NUW8;P22392;Q14978;Q9Y3V2;Q96EY1;Q969L4;Q9P2K3;Q00610;P50222;Q9P0W2;P11171;Q92854;Q96CB8;Q6VY07;Q8N6F7;Q2M2Z5;Q14145;Q9H7L9;Q9UJY5;Q8NF64;O95644;Q9BQY4;O95201;Q6Y2Y9;Q9UJT2;Q06609;Q13501;Q8N726;P26373;P07814;P50749;Q15021;P09874;P62877;Q7Z3C6;Q9HC15;Q9NS69;Q8ND04;Q96A56;Q9UBF6;Q9NQ92;Q9Y462;O75477;Q9H0W9;Q02930;C9JE40;O00148;Q8WY3;O94850;Q9Y4E1;A7MCY6;P62508;O43829;Q9Y281;Q8WXU2;Q9BWU0;O14757;Q9NUS5;O14556;Q12834;Q96CW5;Q9NUW8;P22392;Q14978;Q9Y3V2;Q96EY1;Q969L4;Q9P2K3;Q00610;P50222;Q9P0W2;P11171;Q92854;Q96CB8;Q6VY07;Q8N6F7;Q2M2Z5;Q14145;Q9H7L9;Q9UJY5;Q8NF64;O95644;Q9BQY4;O95201;Q6Y2Y9;Q9UJT2;Q06609;Q13501;Q8N726;P26373;P07814;P50749;Q15021;P09874;P62877;Q7Z3C6;Q9HC15;Q9NS69;Q8ND04;Q96A56;Q9UBF6;Q9NQ92;Q9Y462;O75477;Q9H0W9;Q02930;C9JE40;O00148;Q8WY3;O94850;Q9Y4E1;A7MCY6;P62508;O43829;Q9Y281;Q8WXU2;Q9BWU0;O14757;Q9NUS5;O14556;Q12834;Q96CW5;Q9NUW8;P22392;Q14978;Q9Y3V2;Q96EY1;Q969L4;Q9P2K3;Q00610;P50222;Q9P0W2;P11171;Q92854;Q96CB8;Q6VY07;Q8N6F7;Q2M2Z5;Q14145;Q9H7L9;Q9UJY5;Q8NF64;O95644;Q9BQY4;O95201;Q6Y2Y9;Q9UJT2;Q06609;Q13501;Q8N726;P26373;P07814;P50749;Q15021;P09874;P62877;Q7Z3C6;Q9HC15;Q9NS69;Q8ND04;Q96A56;Q9UBF6;Q9NQ92;Q9Y462;O75477;Q9H0W9;Q02930;C9JE40;O00148;Q8WY3;O94850;Q9Y4E1;A7MCY6;P62508;O43829;Q9Y281;Q8WXU2;Q9BWU0;O14757;Q9NUS5;O14556;Q12834;Q96CW5;Q9NUW8;P22392;Q14978;Q9Y3V2;Q96EY1;Q969L4;Q9P2K3;Q00610;P50222;Q9P0W2;P11171;Q92854;Q96CB8;Q6VY07;Q8N6F7;Q2M2Z5;Q14145;Q9H7L9;Q9UJY5;Q8NF64;O95644;Q9BQY4;O95201;Q6Y2Y9;Q9UJT2;Q06609;Q13501;Q8N726;P26373;P07814;P50749;Q15021;P09874;P62877;Q7Z3C6;Q9HC15;Q9NS69;Q8ND04;Q96A56;Q9UBF6;Q9NQ92;Q9Y462;O75477;Q9H0W9;Q02930;C9JE40;O00148;Q8WY3;O94850;Q9Y4E1;A7MCY6;P62508;O43829;Q9Y281;Q8WXU2;Q9BWU0;O14757;Q9NUS5;O14556;Q12834;Q96CW5;Q9NUW8;P22392;Q14978;Q9Y3V2;Q96EY1;Q969L4;Q9P2K3;Q00610;P50222;Q9P0W2;P11171;Q92854;Q96CB8;Q6VY07;Q8N6F7;Q2M2Z5;Q14145;Q9H7L9;Q9UJY5;Q8NF64;O95644;Q9BQY4;O95201;Q6Y2Y9;Q9UJT2;Q06609;Q13501;Q8N726;P26373;P07814;P50749;Q15021;P09874;P62877;Q7Z3C6;Q9HC15;Q9NS69;Q8ND04;Q96A56;Q9UBF6;Q9NQ92;Q9Y462;O75477;Q9H0W9;Q02930;C9JE40;O00148;Q8WY3;O94850;Q9Y4E1;A7MCY6;P62508;O43829;Q9Y281;Q8WXU2;Q9BWU0;O14757;Q9NUS5;O14556;Q12834;Q96CW5;Q9NUW8;P22392;Q14978;Q9Y3V2;Q96EY1;Q969L4;Q9P2K3;Q00610;P50222;Q9P0W2;P11171;Q92854;Q96CB8;Q6VY07;Q8N6F7;Q2M2Z5;Q14145;Q9H7L9;Q9UJY5;Q8NF64;O95644;Q9BQY4;O95201;Q6Y2Y9;Q9UJT2;Q06609;Q13501;Q8N726;P26373;P07814;P50749;Q15021;P09874;P62877;Q7Z3C6;Q9HC15;Q9NS69;Q8ND04;Q96A56;Q9UBF6;Q9NQ92;Q9Y462;O75477;Q9H0W9;Q02930;C9JE40;O00148;Q8WY3;O94850;Q9Y4E1;A7MCY6;P62508;O43829;Q9Y281;Q8WXU2;Q9BWU0;O14757;Q9NUS5;O14556;Q12834;Q96CW5;Q9NUW8;P22392;Q14978;Q9Y3V2;Q96EY1;Q969L4;Q9P2K3;Q00610;P50222;Q9P0W2;P11171;Q92854;Q96CB8;Q6VY07;Q8N6F7;Q2M2Z5;Q14145;Q9H7L9;Q9UJY5;Q8NF64;O95644;Q9BQY4;O95201;Q6Y2Y9;Q9UJT2;Q06609;Q13501;Q8N726;P26373;P07814;P50749;Q15021;P09874;P62877;Q7Z3C6;Q9HC15;Q9NS69;Q8ND04;Q96A56;Q9UBF6;Q9NQ92;Q9Y462;O75477;Q9H0W9;Q02930;C9JE40;O00148;Q8WY3;O94850;Q9Y4E1;A7MCY6;P62508;O43829;Q9Y281;Q8WXU2;Q9BWU0;O14757;Q9NUS5;O14556;Q12834;Q96CW5;Q9NUW8;P22392;Q14978;Q9Y3V2;Q96EY1;Q969L4;Q9P2K3;Q00610;P50222;Q9P0W2;P11171;Q92854;Q96CB8;Q6VY07;Q8N6F7;Q2M2Z5;Q14145;Q9H7L9;Q9UJY5;Q8NF64;O95644;Q9BQY4;O95201;Q6Y2Y9;Q9UJT2;Q06609;Q13501;Q8N726;P26373;P07814;P50749;Q15021;P09874;P62877;Q7Z3C6;Q9HC15;Q9NS69;Q8ND04;Q96A56;Q9UBF6;Q9NQ92;Q9Y462;O75477;Q9H0W9;Q02930;C9JE40;O00148;Q8WY3;O94850;Q9Y4E1;A7MCY6;P62508;O43829;Q9Y281;Q8WXU2;Q9BWU0;O14757;Q9NUS5;O14556;Q12834;Q96CW5;Q9NUW8;P22392;Q14978;Q9Y3V2;Q96EY1;Q969L4;Q9P2K3;Q00610;P50222;Q9P0W2;P11171;Q92854;Q96CB8;Q6VY07;Q8N6F7;Q2M2Z5;Q14145;Q9H7L9;Q9UJY5;Q8NF64;O95644;Q9BQY4;O95201;Q6Y2Y9;Q9UJT2;Q06609;Q13501;Q8N726;P26373;P07814;P50749;Q15021;P09874;P62877;Q7Z3C6;Q9HC15;Q9NS69;Q8ND04;Q96A56;Q9UBF6;Q9NQ92;Q9Y462;O75477;Q9H0W9;Q02930;C9JE40;O00148;Q8WY3;O94850;Q9Y4E1;A7MCY6;P62508;O43829;Q9Y281;Q8WXU2;Q9BWU0;O14757;Q9NUS5;O14556;Q12834;Q96CW5;Q9NUW8;P22392;Q14978;Q9Y3V2;Q96EY1;Q969L4;Q9P2K3;Q00610;P50222;Q9P0W2;P11171;Q92854;Q96CB8;Q6VY07;Q8N6F7;Q2M2Z5;Q14145;Q9H7L9;Q9UJY5;Q8NF64;O95644;Q9BQY4;O95201;Q6Y2Y9;Q9UJT2;Q06609;Q13501;Q8N726;P26373;P07814;P50749;Q15021;P09874;P62877;Q7Z3C6;Q9HC15;Q9NS69;Q8ND04;Q96A56;Q9UBF6;Q9NQ92;Q9Y462;O75477;Q9H0W9;Q02930;C9JE40;O00148;Q8WY3;O94850;Q9Y4E1;A7MCY6;P62508;O43829;Q9Y281;Q8WXU2;Q9BWU0;O14757;Q9NUS5;O14556;Q12834;Q96CW5;Q9NUW8;P22392;Q14978;Q9Y3V2;Q96EY1;Q969L4;Q9P2K3;Q00610;P50222;Q9P0W2;P11171;Q92854;Q96CB8;Q6VY07;Q8N6F7;Q2M2Z5;Q14145;Q9H7L9;Q9UJY5;Q8NF64;O95644;Q9BQY4;O95201;Q6Y2Y9;Q9UJT2;Q06609;Q13501;Q8N726;P26373;P07814;P50749;Q15021;P09874;P62877;Q7Z3C6;Q9HC15;Q9NS69;Q8ND04;Q96A56;Q9UBF6;Q9NQ92;Q9Y462;O75477;Q9H0W9;Q02930;C9JE40;O00148;Q8WY3;O94850;Q9Y4E1;A7MCY6;P62508;O43829;Q9Y281;Q8WXU2;Q9BWU0;O14757;Q9NUS5;O14556;Q12834;Q96CW5;Q9NUW8;P22392;Q14978;Q9Y3V2;Q96EY1;Q969L4;Q9P2K3;Q00610;P50222;Q9P0W2;P11171;Q92854;Q96CB8;Q6VY07;Q8N6F7;Q2M2Z5;Q14145;Q9H7L9;Q9UJY5;Q8NF64;O95644;Q9BQY4;O95201;Q6Y2Y9;Q9UJT2;Q06609;Q13501;Q8N726;P26373;P07814;P50749;Q15021;P09874;P62877;Q7Z3C6;Q9HC15;Q9NS69;Q8ND04;Q96A56;Q9UBF6;Q9NQ92;Q9Y462;O75477;Q9H0W9;Q02930;C9JE40;O00148;Q8WY3;O94850;Q9Y4E1;A7MCY6;P62508;O43829;Q9Y281;Q8WXU2;Q9BWU0;O14757;Q9NUS5;O14556;Q12834;Q96CW5;Q9NUW8;P22392;Q14978;Q9Y3V2;Q96EY1;Q969L4;Q9P2K3;Q00610;P50222;Q9P0W2;P11171;Q92854;Q96CB8;Q6VY07;Q8N6F7;Q2M2Z5;Q14145;Q9H7L9;Q9UJY5;Q8NF64;O95644;Q9BQY4;O95201;Q6Y2Y9;Q9UJT2;Q06609;Q13501;Q8N726;P26373;P07814;P50749;Q15021;P09874;P62877;Q7Z3C6;Q9HC15;Q9NS69;Q8ND04;Q96A56;Q9UBF6;Q9NQ92;Q9Y462;O75477;Q9H0W9;Q02930;C9JE40;O00148;Q8WY3;O94850;Q9Y4E1;A7MCY6;P62508;O43829;Q9Y281;Q8WXU2;Q9BWU0;O14757;Q9NUS5;O14556;Q12834;Q96CW5;Q9NUW8;P22392;Q14978;Q9Y3V2;Q96EY1;Q969L4;Q9P2K3;Q00610;P50222;Q9P0W2;P11171;Q92854;Q96CB8;Q6VY07;Q8N6F7;Q2M2Z5;Q14145;Q9H7L9;Q9UJY5;Q8NF64;O95644;Q9BQY4;O95201;Q6Y2Y9;Q9UJT2;Q06609;Q13501;Q8N726;P26373;P07814;P50749;Q15021;P09874;P62877;Q7Z3C6;Q9HC15;Q9NS69;Q8ND04;Q96A56;Q9UBF6;Q9NQ92;Q9Y462;O75477;Q9H0W9;Q02930;C9JE40;O00148;Q8WY3;O94850;Q9Y4E1;A7MCY6;P62508;O43829;Q9Y281;Q8WXU2;Q9BWU0;O14757;Q9NUS5;O14556;Q12834;Q96CW5;Q9NUW8;P22392;Q14978;Q9Y3V2;Q96EY1;Q969L4;Q9P2K3;Q00610;P50222;Q9P0W2;P11171;Q92854;Q96CB8;Q6VY07;Q8N6F7;Q2M2Z5;Q14145;Q9H7L9;Q9UJY5;Q8NF64;O95644;Q9BQY4;O95201;Q6Y2Y9;Q9UJT2;Q06609;Q13501;Q8N726;P26373;P07814;P50749;Q15021;P09874;P62877;Q7Z3C6;Q9HC15;Q9NS69;Q8ND04;Q96A56;Q9UBF6;Q9NQ92;Q9Y462;O75477;Q9H0W9;Q02930;C9JE40;O00148;Q8WY3;O94850;Q9Y4E1;A7MCY6;P62508;O43829;Q9Y281;Q8WXU2;Q9BWU0;O14757;Q9NUS5;O14556;Q12834;Q96CW5;Q9NUW8;P22392;Q14978;Q9Y3V2;Q96EY1;Q969L4;Q9P2K3;Q00610;P50222;Q9P0W2;P11171;Q92854;Q96CB8;Q6VY07;Q8N6F7;Q2M2Z5;Q14145;Q9H7L9;Q9UJY5;Q8NF64;O95644;Q9BQY4;O95201;Q6Y2Y9;Q9UJT2;Q06609;Q13501;Q8N726;P26373;P07814;P50749;Q15021;P09874;P62877;Q7Z3C6;Q9HC15;Q9NS69;Q8ND04;Q96A56;Q9UBF6;Q9NQ92;Q9Y462;O75477;Q9H0W9;Q02930;C9JE40;O00148;Q8WY3;O94850;Q9Y4E1;A7MCY6;P62508;O43829;Q9Y281;Q8WXU2;Q9BWU0;O14757;Q9NUS5;O14556;Q12834;Q96CW5;Q9NUW8;P22392;Q14978;Q9Y3V2;Q96EY1;Q969L4;Q9P2K3;Q00610;P50222;Q9P0W2;P11171;Q92854;Q96CB8;Q6VY07;Q8N6F7;Q2M2Z5;Q14145;Q9H7L9;Q9UJY5;Q8NF64;O95644;Q9BQY4;O95201;Q6Y2Y9;Q9UJT2;Q06609;Q13501;Q8N726;P26373;P07814;P50749;Q15021;P09874;P62877;Q7Z3C6;Q9HC15;Q9NS69;Q8ND04;Q96A56;Q9UBF6;Q9NQ92;Q9Y462;O75477;Q9H0W9;Q02930;C9JE40;O00148;Q8WY3;O94850;Q9Y4E1;A7MCY6;P62508;O43829;Q9Y281;Q8WXU2;Q9BWU0;O14757;Q9NUS5;O14556;Q12834;Q96CW5;Q9NUW8;P22392;Q14978;Q9Y3V2;Q96EY1;Q969L4;Q9P2K3;Q00610;P50222;Q9P0W2;P11171;Q92854;Q96CB8;Q6VY07;Q8N6F7;Q2M2Z5;Q14145;Q9H7L9;Q9UJY5;Q8NF64;O95644;Q9BQY4;O95201;Q6Y2Y9;Q9UJT2;Q06609;Q13501;Q8N726;P26373;P07814;P50749;Q15021;P09874;P62877;Q7Z3C6;Q9HC15;Q9NS69;Q8ND04;Q96A56;Q9UBF6;Q9NQ92;Q9Y462;O75477;Q9H0W9;Q02930;C9JE40;O00148;Q8WY3;O94850;Q9Y4E1;A7MCY6;P62508;O43829;Q9Y281;Q8WXU2;Q9BWU0;O14757;Q9NUS5;O14556;Q12834;Q96CW5;Q9NUW8;P22392;Q14978;Q9Y3V2;Q96EY1;Q969L4;Q9P2K3;Q00610;P50222;Q9P0W2;P11171;Q92854;Q96CB8;Q6VY07;Q8N6F7;Q2M2Z5;Q14145;Q9H7L9;Q9UJY5;Q8NF64;O95644;Q9BQY4;O95201;Q6Y2Y9;Q9UJT2;Q06609;Q13501;Q8N726;P26373;P07814;P50749;Q15021;P09874;P62877;Q7Z3C6;Q9HC15;Q9NS69;Q8ND04;Q96A56;Q9UBF6;Q9NQ92;Q9Y462;O75477;Q9H0W9;Q02930;C9JE40;O00148;Q8WY3;O94850;Q9Y4E1;A7MCY6;P62508;O43829;Q9Y281;Q8WXU2;Q9BWU0;O14757;Q9NUS5;O14556;Q12834;Q96CW5;Q9NUW8;P22392;Q14978;Q9Y3V2;Q96EY1;Q969L4;Q9P2K3;Q00610;P50222;Q9P0W2;P11171;Q92854;Q96CB8;Q6VY07;Q8N6F7;Q2M2Z5;Q14145;Q9H7L9;Q9UJY5;Q8NF64;O95644;Q9BQY4;O95201;Q6Y2Y9;Q9UJT2;Q06609;Q13501;Q8N726;P26373;P07814;P50749;Q15021;P09874;P62877;Q7Z3C6;Q9HC15;Q9NS69;Q8ND04;Q96A56;Q9UBF6;Q9NQ92;Q9Y462;O75477;Q9H0W9;Q02930;C9JE40;O00148;Q8WY3;O94850;Q9Y4E1;A7MCY6;P62508;O43829;Q9Y281;Q8WXU2;Q9BWU0;O14757;Q9NUS5;O14556;Q12834;Q96CW5;Q9NUW8;P22392;Q14978;Q9Y3V2;Q96EY1;Q969L4;Q9P2K3;Q00610;P50222;Q9P0W2;P11171;Q92854;Q96CB8;Q6VY07;Q8N6F7;Q2M2Z5;Q14145;Q9H7L9;Q9UJY5;Q8NF64;O95644;Q9BQY4;O95201;Q6Y2Y9;Q9UJT2;Q06609;Q13501;Q8N726;P26373;P07814;P50749;Q15021;P09874;P62877;Q7Z3C6;Q9HC15;Q9NS69;Q8ND04;Q96A56;Q9UBF6;Q9NQ92;Q9Y462;O75477;Q9H0W9;Q02930;C9JE40;O00148;Q8WY3;O94850;Q9Y4E1;A7MCY6;P62508;O43829;Q9Y281;Q8WXU2;Q9BWU0;O14757;Q9NUS5;O14556;Q12834;Q96CW5;Q9NUW8;P22392;Q14978;Q9Y3V2;Q96EY1;Q969L4;Q9P2K3;Q00610;P50222;Q9P0W2;P11171;Q92854;Q96CB8;Q6VY07;Q8N6F7;Q2M2Z5;Q14145;Q9H7L9;Q9UJY5;Q8NF64;O95644;Q9BQY4;O95201;Q6Y2Y9;Q9UJT2;Q06609;Q13501;Q8N726;P26373;P07814;P50749;Q15021;P09874;P62877;Q7Z3C6;Q9HC15;Q9NS69;Q8ND04;Q96A56;Q9UBF6;Q9NQ92;Q9Y462;O75477;Q9H0W9;Q02930;C9JE40;O00148;Q8WY3;O94850;Q9Y4E1;A7MCY6;P62508;O43829;Q9Y281;Q8WXU2;Q9BWU0;O14757;Q9NUS5;O14556;Q12834;Q96CW5;Q9NUW8;P22392;Q14978;Q9Y3V2;Q96EY1;Q969L4;Q9P2K3;Q00610;P50222;Q9P0W2;P11171;Q92854;Q96CB8;Q6VY07;Q8N6F7;Q2M2Z5;Q14145;Q9H7L9;Q9UJY5;Q8NF64;O95644;Q9BQY4;O95201;Q6Y2Y9;Q9UJT2;Q06609;Q13501;Q8N726;P26373;P07814;P50749;Q15021;P09874;P62877;Q7Z3C6;Q9HC15;Q9NS69;Q8ND04;Q96A56;Q9UBF6;Q9NQ92;Q9Y462;O75477;Q9H0W9;Q02930;C9JE40;O00148;Q8WY3;O94850;Q9Y4E1;A7MCY6;P62508;O43829;Q9Y281;Q8WXU2;Q9BWU0;O14757;Q9NUS5;O14556;Q12834;Q96CW5;Q9NUW8;P22392;Q14978;Q9Y3V2;Q96EY1;Q969L4;Q9P2K3;Q00610;P50222;Q9P0W2;P11171;Q92854;Q96CB8;Q6VY07;Q8N6F7;Q2M2Z5;Q14145;Q9H7L9;Q9UJY5;Q8NF64;O95644;Q9BQY4;O95201;Q6Y2Y9;Q9UJT2;Q06609;Q13501;Q8N726;P26373;P07814;P5074



S0;Q8IYW5;Q95376;Q9Y3E7;Q9NR28;Q96017;Q9H4I2;Q9UNH7;P15407;P02538;Q9BZR8;Q13309;P6208  
1;P20226;Q8N3V7;Q9Y3D3;Q9BT92;O00308;O75145;Q14137;Q13642;P11161;P04156;Q9UBB5;Q09161  
;Q9HAU4;Q9UDY8;Q96MT3;Q04743;P53618;Q9BVP2;O43747;Q15544;Q5VSL9;Q9HCC9;Q9BXF6;P25786;  
Q9Y287;Q060759;Q8WY54;P18583;Q9H9E3;P55769;P16220;Q8NEU8;P17275;Q9NVV5;Q9GZT9;O60518;O  
95633;Q9UN79;Q06787;O75607;P30153;P39656;Q9UL42;O43516;Q9NR33;Q3SYG4;P62166;Q9HD36;Q9  
Y6D9;Q5T3J3;Q8TAM2;Q15700;Q9BTP7;Q8NI27;O14602;Q9HAU0;P35869;O15527;O14862;Q95810;Q86  
WI3;Q8WXD5;P17544;O75030;Q7L1V2;Q9UMX1;Q10567;Q8TAD8;O75925;P09874;Q6ZW49;P25788;P549  
20;Q86YC2;P20290;Q6NUQ1;Q93008;Q5H9R7;Q92562;P22392;Q9Y248;P25490;Q9BR76;O43815;P6803  
6;O14933;P43357;Q8NG27;Q9UIC8;O75161;Q969M7;Q96123;Q9ULW0;Q9ULD0;Q9UNA4;Q9BU61;Q04323  
;Q08AD1;Q9UK73;Q9HCU8;P18754;P02794;P18850;Q8IY31;Q96HI0;Q9UHV2;O60664;O75170;Q07021;  
P49910;Q13084;Q9H4M3;O75419;Q9UNY4;Q96HJ5;Q92733;P41236;Q14690;O15040;O75334;Q9NPD3;Q  
86XK2;Q5SQN1;P41252;P78395;Q86YF9;P51955;Q13023;Q8N5C8;Q96KN1;Q08752;O60907;P15502;Q8  
WYH8;O95049;Q9Y4P1;Q14258;Q6W2J9;Q6PI48;Q86XL3;Q9Y6N9;P41212;Q9UGP4;Q9H9T3;Q4U2R6;Q7L  
190;Q9BV68;Q9NSC2;Q8N5R6;O75154;P54105;P48382;Q99873;Q9NV92;P25205;O75381;P62304;P527  
01;P13489;Q05066;Q9Y6D6;O75582;Q9Y2Y9;Q9NVD7;Q86WC6;O14744;Q96EP1;P25787;Q99933;P5158  
7;Q05519;Q86VPL;O75306;Q15233;Q14315;A6NDB9;P48634;Q5F1R6;P45984;P50914;Q15121;Q01860  
;Q5TZA2;P51531;P56589;O75382;Q96IF1;P41182;Q05516;O43913;Q9NXV2;Q9Y2J0;Q13868;O95202;  
P08865;Q9UQK1;Q08211;Q86WV5;Q9UIV1;P08727;Q96CV9;Q9H869;Q13228;P41227;Q9HB03;P62750;O  
60294;Q6ZNA4;P49639;Q96CG3;Q8N1E6;Q9GZL7;Q8IY63;Q96CW5;Q15554;Q13625;O75807;Q9UMX0;Q9  
6B36;Q2VPB7;P09012;Q9UHK0;Q8N7W2;Q15327;P52657;O14713;P50995;Q6NZ36;Q9H492;Q9UH99;Q15  
172;Q9UKL3;O43752;P22531;Q96LI5;O75787;O94822;P46781;Q9BQY9;Q96B97;P78560;O95983;P623  
28;Q00613;O00470;P35226;Q13111;Q9UKL0;Q9UHR5;Q9NRG4;O60934;Q9Y6G5;O75604;P52737;O9523  
2;P62266;Q9H8T0;Q9UKA1;Q9BTW9;Q9HB96;Q496Y0;Q14232;P49754;O43493;O75469;P52565;Q99615  
;Q9BQ89;Q9NR56;P63167;Q9Y6K5;Q15691;Q9UMX3;O94811;Q96DX8;O60477;P09467;Q96JI7;O75081;  
Q9HIK0;Q8NE86;Q9BY77;Q5TCQ9;Q86VW0;P14866;Q8NFW9;C9JE40;Q9NRR3;P52655;Q99619;Q92665;Q  
8IYD8;O00255;Q00536;Q9H9L3;O60732;O95997;P40692;Q9H081;Q9Y2D9;O95999;Q8IYW1;Q8TEQ6;Q9  
UILL;Q8WTR7;Q13045;Q04726;Q9UHB7;Q9UMS6;Q8WXE9;Q9NX40;P21980;Q99623;P61978;P04264;Q99  
717;Q9Y697;P15559;P63162;P19388;Q6STE5;O14613;Q9P2M1;Q9H5P4;Q14974;Q6P1Q0;P05412;O147  
77;Q9P2D1;Q8IUQ4;O75940;Q8N684;Q9UKV0;Q14678;Q8WW38;P46100;O43463;P25963;O95630;P4601  
3;O00567;Q05086;Q15185;Q8N2W9;Q66PJ3;Q9HC62;O00268;Q9BSQ5;Q9Y5V3;P19429;Q9NXV6;A6NIX2  
;Q9UFP1;Q9Y3Y4;Q9HD40;Q96J02;Q13137;P19419;Q9BWU0;O14832;Q96PU8;P80303;Q8IYD1;Q96MH2;  
Q13951;P54198;Q8N8U2;Q86VY4;P78559;Q14011;Q9HAT8;P59998;Q15038;P55212;Q7Z4H3;Q9NUW8;Q  
96LA8;Q9NWF9;Q15173;Q9H8Y8;P10242;Q7Z5K2;P60660;Q9H1A3;Q99666;Q96QU8;Q8NI51;O14879;O0  
0505;Q8TD06;Q9Y448;Q9Y462;P26196;Q96T51;Q92988;Q8N196;Q9P278;Q9Y3C8;Q96EN9;Q9H2L5;P08  
729;P50749;Q29RF7;P53041;Q03468;Q96K30;Q8NFX3;Q96KP1;Q53GL7;O94850;Q96BP2;O15265;Q9BY  
G5;Q6PGQ7;Q86VQ0;Q16890;Q14457;O43318;Q8WXZ5;O75175;O60493;Q15021;Q96PY6;Q8IZW8;P6315  
1;Q15654;Q96P70;Q16666;P15336;P19338;P49755;P12980;O00444;Q9NP98;Q6UW56;O95886;P55327  
;Q9NQG5;Q6ICB4;P26358;Q5JRA6;Q969H0;Q6WBX8;Q96WU2;P06746;P30154;Q15653;Q16822;O95848;  
P48553;Q13243;Q12874;Q16629;Q92541;Q98U42;Q96968;Q15631;Q9UJY4;P55055;P54098;Q8WVV9;Q  
9UER7;Q00610;Q9H6U6;Q6QNY1;Q96QG7;Q9BZD4;Q9NPI6;P62314;P62316;P20248;P19012;O43390;Q8  
IWZ3;P60900;O43734;O75618;O00625;Q9Y3C7;Q96T23;P61201;Q9UHC1;Q96MG7;Q9UBD5;Q92922;Q6U  
VJ0;O15397;Q9UDY2;Q70EL1;P62837;Q96JB2;Q13895;Q9UHY8;Q15306;Q8IUD2;P21953;P53804;Q9NV  
H2;Q9NS91;P42771;P55735;Q96GG9;Q9Y5Y2;Q9UKV8;Q9P2K3;Q9P2R7;P43360;Q6ZNE5;O94829;A8K8P  
3;Q9ULJ3;P17532;Q16543;Q9NRL2;Q9UPV0;Q13547;O94777;P43355;Q01844;Q14186;P13056;Q9UKT2  
;Q99962;P04792;Q16531;Q9BSI4;Q9NPC3;Q15035;Q13416;P49715;Q9H410;Q14746;Q9UBX3;Q9YJ25;  
Q8N729;Q8TAT6;O94776;P36956;Q9UGK8;P07320;P42772;P98170;Q7Z6G3;Q96DZ1;P62495;Q13596;O  
15164;Q93009;Q9H668;O75494;Q13021;P49902;P62826;Q9H816;Q99816;Q8IUD6;Q2TAZ0;Q8IXQ6;Q5  
JR59;P41970;Q9NWZ5;O94888;Q8TDH9;Q04725;Q9Y3Q8;Q9P1Z2;P56693;Q04917;O15524;Q9P287;Q92  
993;P27348;Q8NBZ0;P57740;Q96GV9;Q86WV6;O15205;Q6PGN9;D6RGH6;Q12824;P43364;P49454;P114  
41;Q16891;Q13158;P48380;P49005;Q9UI08;Q96QE5;P22626;Q9UL03;P01009;Q9Y376;Q96BK5;O7555  
8;Q86YP4;Q9BXH1;P55771;Q99996;Q92542;P50453;P26641;Q9BX70;Q9Y6J9;Q07666;Q8TD19;Q9H0H0  
;Q9UI47;Q13616;O00716;O95751;Q96A26;Q12933;P15976;Q6PGP7;Q14533;Q02040;Q8NFR3;Q9BTL3;  
Q5TCZ1;Q01201;Q8N3I7;Q92783;Q99497;Q9Y4E1;P61956;O43809;Q86VX2;Q9H1H9;Q9BQS6;Q86XK3;Q  
86X83;Q13287;P49116;Q9ULX6;P67775;Q8TB72;Q96B26;O15145;Q15532;Q9UQF2;Q9H0G5;Q96KQ4;P3  
0622;O14686;P22736;Q15910;Q15014;Q9P2H0;Q930793;Q86U86;Q9NZU7;P19367;P29084;P50542;Q8N  
5U6;Q9Y2R2;P78317;Q99471;Q8WVM0;Q15699;Q5JTD0;Q15796;O95996;O43865;P10636;Q99741;Q96A  
56;Q96A65;Q8TAQ2;Q13257;P54252;Q15326;Q16829;Q9H446;O43257;Q9Y603;Q92973;Q14596;Q0099  
4;P32189;Q92831;Q96LC9;Q8WY41;Q9H0E7;Q9BQA5;O96020;Q86TG7;O95476;Q9Y4P8;Q5BKZ1;P49354  
;Q8TCJ0;Q9Y3V2;P49427;Q14669;Q9NNW5;P33076;O15226;P30260;Q8WVJ9;Q5VTR2;Q9H160;P24855;  
P80217;O00482;Q15036;Q13216;Q14141;Q9UPV9;Q6P3W7;O94901;O75791;Q9Y6X8;Q02241;Q13123;P  
27986;Q96IV0;P38646;Q14781;Q9P2Y4;O00410;Q8WWQ0;Q9Y6X3;Q9Y4Y9;Q13233;O15519;Q9GZM8;Q9  
BQ69;Q9NR50;Q13620;Q9BZE9;Q9Y512;Q9UI14;Q8IZL8;O00422;Q9UHX1;P62993;Q16254;Q9BW66;Q96  
RU7;Q99551;Q8N9B5;Q6BDS2;O43236;O95628;Q9Y6X2;O95153;O43261;P07315;Q9HAV4;P40424;Q8WU  
Q7;Q8NBJ4;Q9NNW7;Q9P2I0;Q14738;Q14145;O43299;Q9Y5J7;Q9Y2D8;P50461;Q8IX90;P06730;P2874  
9;P13984;Q5TA31;Q9H706;Q9Y4Z0;Q9UKJ3;Q8N6F7;Q5T2W1;Q66K74;P36952;P61247;Q9Y5Q8;O15405  
;Q9H5J4;Q8IZQ1;P11308;Q86VS8;Q9Y283;P48200;Q9P2R6;O95865;P13807;Q8TDB6;O43504;Q9NR77;  
O75943;Q53HV7;Q9NRY2;Q9NV11;Q9UK41;Q9Y5K5;Q9P1Q0;Q03111;P18146;Q96KN7;P07992;Q92624;P  
83369;P12755;Q9NZL3;Q96ED9;Q96JB5;Q8WYA6;Q15386;O75475;P51398;O43290;O96004;A6NDV4;P6  
1586;Q8TEP8;Q75069;P19447;Q9UHV9;P22695;P31946;Q92793;Q9UBF6;Q13144;O43399;Q9UF5;Q96  
9H6;P25815;Q96EZ8;Q01534;P54259;Q8N1B3;P10589;Q8N6T7;Q92754;O95777;Q9C086;Q9GZV5;Q9H5  
83;Q9NX70;Q9Y4X5;Q13769;O43513;Q8WV41;P05413;Q9NX95;Q8N3Y1;O95163;Q63HK5;Q86UT5;Q9293  
4;Q08999;P62913;Q99638;Q9H5J8;P30047;Q96M61;Q8N895;P25789;Q16548;Q9HOA8;Q13867;P32519  
;O14907;P49593;Q96FF9;O75151;Q6ZN17;P14649;Q9Y333;O00161;O14974;Q15853;Q9P0W5;Q9UJY1;  
Q9HCE1;Q9Y608;Q9H3K2;Q15003;Q14839;P30291;O76041;O43918;P51965;Q8NFH8;Q99689;P41134;P  
23246;Q70Z53;Q9H7S9;O75122;Q02556;O60437;O95292;P68133;Q14999;Q8TE76;P49366;Q92674;O1  
4599;Q9UJT2;Q9Y3C0;O00570;O95073;Q8WUM0;P80294;Q9BYK8;Q8TAP6;O75427;P21673;O75410;Q8N



3R9;Q99426;Q8WTV1;P69905;Q9UKT4;P23511;Q5EE01;O14787;Q9HCD5;O15355;P54274;Q6PJG6;Q99547;O00213;O60238;Q9NPG3;Q32MZ4;Q13064;O15105;Q9NRL3;Q92797;Q8TEW0;O43615;O43715;Q9Y2H0;Q96SN7;O75531;P23490;O14646;P46060;P63104;Q6PIK2;Q3ZCQ8;Q96QF0;Q99767;Q15599;Q9Y4J8;Q9H9Z2;P24666;Q9BYE7;P43351;Q13952;Q6DKK2;Q9Y2X3;P49792;Q6ZU15;Q6ZMZ3;Q92622;Q15025;O14497;P51825;Q9UGK3;Q8IZD4;O60749;Q8TFZ40;Q9H0W9;P60228;Q96019;Q6UUV9;P49770;Q13522;Q13619;Q13884;Q12983;Q13569;Q8NBT2;Q9BUZ4;Q8IYJ3;Q9NRD1;P16157;P11137;Q6ZU52;O60447;A8MVS5;Q96GC5;Q7Z3T8;Q14209;Q9NX63;Q6PJ61;P27816;Q9Y605;Q9BPX1;Q96BD8;O15151;P0C126;P27815;Q9BTK6;Q9UKT7;O60936;A6NKF1;Q8TBN0;P78347;Q9H0E2;Q9UKX7;Q9H3R5;P61088;Q9GZR1;P50502;Q9UK45;P05198;Q3KNV8;Q96NY9;Q12888;Q8WYJ6;Q2M2Z5;O75688;P30084;Q969S3;Q13617;P19838;Q96T49;Q9Y285;Q5T2T1;O75663;Q86US8;Q5VYV7;Q14204;Q14164;Q8NI08;Q96SW2;Q9H0B6;Q6R327;P49917;O14490;Q8IV36;Q16526;Q16082;Q717R9;Q8NF91;Q6PJW8;Q15054;Q969V6;Q86SE9;O60841;Q9H9Q4;Q9H8S9;P05060;P12883;Q92843;P35269;Q8ND04;Q9Y3P8;Q9NYF8;Q86X95;P10828;P55854;Q13428;Q6ZTQ3;Q9BQE4;P22415;Q9UNH5;Q9H4D5;Q96FV9;P62508;Q8N3L3;Q15041;Q2VPK5;Q6PI26;P25063;P35711;Q9UP83;Q9H788;Q15070;P08238;Q13888;P38159;Q9ULU8;Q9NRR5;Q05048;Q7Z4T9;O75446;Q03112;Q6UWF3;Q9NWT6;P53999;P13647;Q96RN5;O15287;O60506;Q9BXF3;Q9GZX7;Q8TF74;Q9ULV3;Q9BXS5;P08133;Q9P0W2;Q9Y3D0;Q99081;Q9H0A6;O15155;Q5HYK7;Q96HA8;Q6VY07;Q8N7H5;P35321;Q96C74;Q9UPY8;Q9UQE7;P60604;Q8NF64;Q5JVS0;Q6RW13;O96018;P22681;Q93045;Q13542;Q13310;P83916;O95402;Q9BYC9;Q9NR09;O00165;Q86Y97;Q13618;Q92917;Q9UIS9;P49450;Q9Y4A5;Q86XI8;Q9GZS3;O95400;O95347;Q8IXJ9;P23396;Q9BVM5;O95613;Q5T8A7;O75113;Q15560;P63000;O95257;Q7L0Y3;Q96EP0;Q9NSC5;P62258;Q13835;Q96HW7;P50549;Q9UKK3;O15083;Q92990;Q9H0W8;Q9NHY2;O95619;P20618;Q16658;Q13573;Q9ULW3;P32243;Q8WTW3;Q969X6;Q9BZV1;Q8IWN7;P17676;Q99700;Q9BVS5;P35080;Q9BUN5;Q6ZVK8;Q5VIR6;Q13838;Q9XRX5;Q9UNE7;P12757;Q8WU20;Q8IZP0;O95831;O14929;Q9ULG1;Q9NS69;Q13405;P15515;Q9NZ52;Q13425;O94992;O75112;P63208;P09497;Q9ULU4;Q14139;P35232;O43708;Q5XUX1;Q13200;Q9UBU9;O15379;Q9H1Y0;Q96CJ1;Q9Y6D5;P08047;Q9NP66;P17482;P24278;Q14CW9;P18615;P51959;O14556;P52597;P80723;Q9BPZ3;O95373;Q9NZM4;Q8NCD3;Q9Y5J3;P13349;P07900;P49459;Q16630;P29083;P51610;Q9POM2;Q8N488;Q9UPT5;Q13426;O00264;O43900;Q9UKN8;Q96MN9;Q8WXF8;Q6PJT7;Q14683;Q9UHF7;Q6P2E9;Q96EV8;Q8WVZ9;Q15906;Q9H944;P05386;P50616;Q96KR1;Q9H175;Q92985;Q969W0;Q9P013;Q9NWB7;P40855;Q9Y3B7;Q8N7J2;Q6RFH8;Q6IQ32;O60888;O60885;Q96FW1;O95707;Q9UBS8;Q9UJY5;Q7Z5V6;Q8WXF1;P63261;P48059;Q01658;Q14160;P22557;Q9NPJ6;Q14676;Q99569;P35680;O60239;P49789;Q96T88;O15315;P49711;Q9NWW8;P35548;P57081;Q8TD3;Q96EK5;Q6NZI2;Q96IY1;P01100;Q96F86;Q04206;Q495M9;Q06587;Q4LE39;Q9UI12;P53990;O95931;Q9NQ1;P32929;P49257;Q92889;Q8IVG9;O95487;O14508;Q86WV1;Q96AQ6;Q9NZL4;P09913;Q9Y6F6;P01215;Q9H4B6;O94874;O75152;O60260;Q9UIF8;O75817;Q16740;Q9UKI9;Q01831;Q96CW1;P15923;P26373;Q9H211;Q15942;Q71UM5;Q9BQA9;Q8ND90;Q5D1E8;O00198;Q96PK6;Q01094;Q9UIF9;Q14152;Q15293;Q16626;Q15102;Q14686;Q96BT3;O00204;Q9UQR1;P35637;O60296;Q6ZVN8;Q9H4Z2;O14908;P61981;Q7Z3K3;O94905;O95361;P15884;O15078;Q9BUN8;Q12816;Q8TEL6;Q43395;O15111;Q9NRI5;Q8WTS6;P20823;O14618;Q99728;P46777;O14734;O95278;P05388;Q8WWW0;Q9UI10;Q9NWT8;Q76FK4;Q9GZP9;P28347;Q99590;Q7Z739;P78345;Q9BWT7;Q8N9R8;Q96MU7;P13994;Q96FH0;Q9NS37;Q7Z417;Q02447;Q9Y5N6;P16452;Q06547;Q15834;Q9P0U1;Q6P2Q9;P05783;O95405;Q5T230;Q9Y2J4;P67870;Q8NI35;Q92759;Q86JJ3;Q8WVC0;P46527;O95551;Q8N841;P28324;O75969;P23284;O95793;Q9NVT1;Q96LL4;Q8TDY2;O43663;P62256;P04406;Q96AX1;Q96BY2;Q8IW35;P62318;Q9UPX8;P04198;Q5H9L2;Q9BT78;Q14790;P54727;Q6NZY4;Q15024;Q92558;Q96IT1;O15371;P40222;Q5FBB7;Q15370;P10909;O15234;O14893;P78545;P22830;Q9BUL8;O14925;Q8N157;P49916;Q9H1B4;Q9NUL3;P17947;Q02930;Q13901;Q92870;Q8NHM5;P28066;Q9NPB6;Q9BYV8;O76003;P17028;P38936;Q9NQ92;Q5VWG9;Q9UM11;Q96S55;Q86T82;Q96GC6;O60921;P31040;Q9UI30;Q5Q9Z4;P08107;P24539;P35579;O00401;P82933;Q15819;Q9BUH8;P56537;P17152;Q8TF05;Q04864;Q8N1L9;O43167;A5YKK6;P49750;P62714;Q5VU43;Q9HAF1;O43294;Q9NY27;Q9BRV8;Q9NYJ8;Q15628;Q53HL2;Q6GQQ9;O00762;Q92614;Q92552;Q9NRR4;O43482;Q9UKX2;Q96MF7;Q9H665;Q96QH2;Q9Y2L1;P42574;Q96JM3;Q6NUP7;Q9BXM0;Q9BZK7;Q9H5I1;Q15562;Q9BV57;O95376;P42568;Q9H8V3;Q8WWW3;Q9BQI5;Q8WUH2;Q9BV73;Q92841;Q9GZX5;O00267;Q9Y375;P39019;P02810;Q5TAQ9;Q9NVV4;Q5TAX3;Q92804;P20810;Q9H9A7;Q15424;Q9H9A7;Q15388;O43736;Q9BSM1;O60832;Q53EL6;O14818;P46783;P37802;Q9NRC8;P15036;O15392;Q14872;O14910;O14896;Q7Z465;Q9C035;P40763;P22670;Q9UDV6;P60520;O43597;Q96AB3;Q13485;Q9NQX7;Q9H3P2;Q9BTA9;Q9Y4R8;Q8N1N5;P25208;Q9UBZ9;Q9Y5A6;Q12840;P55209;P61244;Q9UPR3;Q6ISU1;Q15633;P55072;Q13129;Q9Y5N5;P60953;Q8IWW8;Q14240;P23258;O00139;P23760;Q9NTI5;Q9BUR4;P25791;P52435;Q92600;Q71SY5;Q9BXP5;P61962;Q86WQ0;O95295;Q7Z614;Q8IXJ6;Q9NTK5;O00463;Q13489;Q9NKR2;Q9NZJ0;Q9C0H9;O14776;P31150;Q8N612;Q9BZE4;Q15022;Q8TBE0;Q9HB21;Q2M1K9;O95782;Q9HB75;Q96HR8;Q9H6Z4;P28370;Q13148;Q8N5F7;O43172;P98171;P45985;Q9P0J0;Q96CB8;Q9H0C5;Q14527;Q96T58;Q9BRA2;Q15652;O60869;Q9H7L9;Q9NQY0;Q14677;Q9UJ41;Q15366;O00541;Q8NFG4;P62140;O75665;P32780;Q99704;Q04724;P0CG47;Q8NE71;O60825;Q99459;Q99684;O15144;Q9Y3B2;Q9Y5K8;Q9NQ48;Q15542;P61457;Q9HAN9;Q9HAU5;Q9UI32;Q9NXX8;P16333;Q13561;Q96T76;O75909;O43447;P55060;P17096;Q9Y5P3;Q8N1V2;Q9BSH5;Q75QN2;Q14157;Q16864;Q13562;P36405;Q8TE02;P23769;Q9Y6B2;Q9NYB0;Q8NHF4;Q99747;Q96GX9;A6NIH7;Q8IUC6;Q8IYI6;P29474;Q9Y2P7;Q8TEK3;Q8WUM4;Q15013;Q9BX66;P11831;Q9UJM3;Q8WU39;O96011;P62072;Q14194;Q08050;Q00978;Q9H0C8;P15924;Q9NV31;Q12981;Q8IX12;O15162;Q9H9G7;P46087;P06703;Q9UHP3;Q63ZY3;P30304;Q96JCR9;Q6P1X5;Q16520;O94868;P42566;Q96IZ7;Q6IE81;Q15797;Q9UID3;P63241;Q53HC0;Q01664;Q99966;Q9UKT8;Q67650;Q5TB30;P43243;Q9Y294;P02808;Q562F6;O75691;P54136;Q8N1I0;Q9H9F9;Q9H0F6;Q9BQ90;Q99502;Q8WWR8;O95218;P20749;Q9ULK4;Q9Y5K6;P84103;O94925;Q14674;Q07157;P18847;O75400;O75489;O15260;Q8IX07;Q9NVR2;Q3B820;Q96QD9;O75953;O94817;P02545;Q8N1G4;P23588;P16278;Q02952;Q01850;Q8NFJ9;Q9P0V3;P09972;Q9UBL3;Q86WJ1;O60293;Q7Z7A1;Q8IXK0;O75436;Q14154;P24534;P20292;P49368;Q8WXH0;Q9HCM9;P42226;Q6ZRQ5;P78396;Q8IY57;Q9UPN7;Q8N8R7;P78344;Q9HC24;Q8N4B1;Q92900;Q9H3M7;Q8NI29;Q9Y613;Q04837;Q15058;Q9Y3A5;Q9NZC7;Q9H6Z9;O75362;O14829;O75800;Q969X5;Q00653;Q13362;P28702;Q13155;P41208;P16118;Q5JR98;P05121;Q15596;Q6P1W5;Q969E8;P37275;O60671;Q99417;Q8WX92;Q15059;Q16576;O95817;Q9BXW6;P35712;Q13185;P20265;P22087;O15635;Q96GM5;Q13415;Q01826;Q7Z2Z1;Q8IYF3;Q8N3U4;P61758;Q00597;P14672;Q9UHD1;Q9ULE6;Q86UW6;Q9H2U1;Q9BYD1;Q9NXF7;Q6UWZ7;Q96FX2;Q96CN9;Q5UE93;Q86WB0;Q9HBM6;O75164;Q86UE4;P11277;Q99575;Q08379;Q15629;Q9P253;Q92636;Q9NYF0;Q96CA5;O95198;Q96GD0;P27540;Q2QGD7;Q9ULZ2;Q9

BY44;Q9GZR5;Q9BYZ2;P15172;Q9P2M7;Q06609;Q6P9B6;P28074;Q9H204;Q8TBK2;Q14151;P42704;Q96  
PM5;Q9BQD3;Q969G3;P62277;Q9BRP4;P27469;P10412;Q14397;O94906;Q96EB1;P57077;Q9UBS3;Q7L9  
L4;P27694;P20585;P42575;Q9UKT9;Q5VTD9;Q9NXR1;Q9P270;P52747;Q9BWF2;P56945;Q00765;O7584  
3;Q6ZP82;Q96EA4;Q9HD42;Q14192;Q14749;Q9Y3E5;Q15849;Q96NA2;Q09028;P49419;Q08209;O14639  
;P21127;Q13438;Q6ZPB5;Q14134;O60573;Q14814;Q5JY77;Q92734;P11388;P46776;Q9NWA0;O60663;  
Q7Z7C8;Q6XZF7;Q8ND76;P11474;P26678;P24928;Q9NUX5;Q9Y2M5;Q92530;Q9UHI6;P15927;Q8TAP9;Q  
12962;Q9UKY9;P01106;Q9P2T0;Q9GZY8;Q8NF28;Q8N2Z9;Q9UBK9;P62312;Q16181;Q9H2H8;Q8TW19;Q9  
6K80;Q9BQQ7;Q9NX18;Q70YC5;Q8WV44;Q9H7H0;Q04637;Q07352;P61077;Q9P209;Q15750;Q9UQ80;Q15  
047;Q9UN36;O15042;Q92832;P46108;A8CG34;Q96QK1;Q8IWL3;Q9NUP1;Q12798;P06748;Q9NZZ3;O435  
83;Q9H0N5;Q6P9B9;Q9UBC3;Q9C0E2;P49756;P55199;Q99594;O75398;Q12769;Q92796;P14635;O9545  
6;Q93034;Q12972;Q9UJC3;P01011;Q2M3C7;Q96QT6;Q7L804;O00170;Q96DI7;Q92466;Q96RL1;Q99814  
;Q96B67;P09629;P56279;Q7Z6Z7;O15015;P53992;Q6QNY0;P08670;P60510;Q14689;P63165;Q8WV99;  
Q15363;O95644;Q9NT62;P09661;Q92529;O15084;P55345;P11532;P11387;O43684;Q2TAK8;O43660;P  
62987;Q9H8W4;Q14865;Q9NQT4;Q9H2P0;Q86UL8;P56524;P42167;Q9BYX4;Q13033;Q8WXU2;O43439;Q9  
Y3I1;Q13404;P38919;Q14526;O75335;Q8N5D0;O75821;Q96PV6;Q13094;P41238;O75886;O00257;Q9Y  
2Y0;Q96C10;Q6NVH7;Q16637;P14373;Q96S59;P23297;Q9BXW9;P48788;P62308;Q00987;Q99614;O149  
65;P02511;P10599;Q14980;Q93062;Q13363;Q9P2J5;Q8N1B4;P39748;Q9Y4B6;Q9H5Z6;Q9UHB4;Q8N4C  
6;Q9HCH5;P41220;P42768;P29692;P35244;P07737;Q7Z2W4;Q96MT8;P62753;O14512;O75525;Q7Z460  
;Q9NVM9;Q02577;O76031;Q7Z6E9;Q9NTG7;P20719;Q96B01;O75351;Q9NTX7;Q9NS23;P08151;Q9BZF9;  
Q969T9;O43924;Q9Y2W2;Q13118;Q8TAC9;Q13424;Q8N668;P08621;Q7L5N1;O75143;P02795;P48552;Q  
49AN0;P54826;Q9Y221;Q13347;P46779;Q9NQS7;Q14203;Q9BQ83;Q00403;Q9BYM8;Q53G59;Q01130;O1  
5117;Q01469;P15822;O75935;Q66K89;O43310;O60711;P31948;Q15154;O14558;Q8NFH3;Q92547;P52  
294;Q9NXB0;P21912;O15297;P63172;Q3YBR2;Q00059;Q13105;Q06830;Q86WG3;P36873;Q13042;Q9BR  
Q6;Q9Y252;P42224;P62310;O15126;P47928;Q969S8;P60842;P02489;Q8WV92;P52736;Q9H040;O7606  
4;Q9Y6I8;Q8WXG1;Q5TC12;Q9NPC6;Q9BSW2;Q96A44;Q9H469;Q9H9Y6;Q92540;Q92499;Q8NHQ1;Q8TDC0  
;Q8Y18;Q969H4;Q9UMS0;Q9BXJ9;Q15643;Q8TDZ2;Q9BUB9;P50748;P49356;O60563;Q15398;Q96EY1;  
Q9BSJ6;Q9Y6M1;O00423;Q9UGR2;P15880;Q96G25;Q8WYQ5;P35580;P12956;P55197;Q86YS3;Q96N03;Q  
8IY22;Q9HAW4;Q13227;O43156;Q9NY61;P23528;Q00005;P42025;Q00839;Q15051;Q15833;P46379;P5  
3611;P55210;Q14498;Q96CS3;Q9UML6;Q9UI36;O43148;Q9UQC3;Q9UQC2;O00303;Q8IVS8;O75167;Q9N  
RD5;Q86VP6;O94983;Q68DX3;Q8TF46;P20073;O75674;Q14493;Q96EF6;Q15004;O43264;P10515;P248  
64;Q7Z3B3;Q9HCS7;Q9Y5P8;Q01105;Q9UL40;P24941;Q15369;Q15788;Q08AG7;Q08445;Q86YT6;Q1575  
9;Q9Y5A7;Q8TD16;Q9BSJ2;O43639;Q9UKT5;P62937;O43765;Q1ZZU3;Q9HCI5;Q9H1D9;O96000;Q13765  
;O43745;O95071;P60896;Q9BQ95;Q9UBF1;P62952;P23381;P02533;Q7Z2E3;P51668;Q9Y3T9;P36402;  
Q8N163;Q15459;Q9UH77;P11940;Q9H9C1;A8MTZ0;Q14566;P18848;O15304;P11142;Q12959;Q8WVM7;Q  
9NQ31;Q96EK4;Q8N3F8;Q99732;Q68CZ2;Q6P4R8;Q8NG31;Q14C87;Q5T681;Q8N5A5;P61970;Q8IU2K2;P2  
2735;Q9UBD0;Q9Y3A2;Q12830;O60516;Q8NC51;Q9NP85;P41002;Q9HD26;Q9NQS1;Q92834;Q8TU60;Q86  
SQ9;Q6VVB1;Q9H8M7;P29372;Q7L2E3;O00233;P52292;P38432;Q99750;Q13136;O75150;Q96CM3;Q9Y6  
18;P11802;O95714;Q86TA1;Q13472;P68104;P14316;O15235;O60232;O95243;Q15528;O75901;Q6P1J  
9;Q9Y250;Q9HBF4;Q9Y234;P10124;Q92560;Q12906;Q9BVC3;Q93052;Q99607;P51116;P11473;Q6P1M3  
;P17480;Q13761;Q8YI81;Q9P1T7;P35658;Q9UHD9;Q9UJW9;Q5VWX1;Q7Z699;Q12772;Q9H902;Q9M2C0;  
Q12789;P23025;Q8IVI9;O94921;P14868;Q14511;Q9Y6H5;Q86Y13;Q9UIF7;Q9NS73;O95166;P52630;Q  
9H267;Q5T200;P78371;Q9Y262;P13667;Q9NQF4;Q16401;P35900;P31943;Q9Y3C5;Q12834;Q8IWT2;Q9  
BX63;Q8WVK7;Q6Q0C0;P08235;Q9P2W9;Q9BZL4;Q969T7;Q6I9Y2;O95171;Q9Y6E7;Q96C03;Q9H467;Q9Y  
2J2;Q9UI95;Q9BYG4;Q969U6;Q9BQ70;P35638;P50570;Q99496;Q96RL7;Q6NZ67;P17706;Q15276;Q9NX  
X6;Q8N108;O15116;P18887;P21399;Q99640;Q86WX3;Q15561;Q9ULH7;Q9BVC4;P82094;O15372;Q9BW2  
7;Q14207;Q96PU4;Q8N3C0;Q92698;Q8NHZ8;Q8IX03;Q8TAX7;Q9BSD3;Q969L2;A8MT69;O75323;O75182  
;P33992;O00522;P31260;Q9P1A6;P55957;Q9UKS6;O95396;Q12904;P14618;P62136;Q9H2J4;Q969G9;  
Q9UJW3;Q9UNL4;Q92585;O94763;Q9NVV9;O75822;Q93050;Q8IZD2;Q9Y5S9;Q9NZQ3;Q86V81;P11171;Q  
12873;Q99986;Q9UKV3;P10827;P61604;O00566;Q7Z7A3;Q96GY3;O14746;Q5JSZ5;Q9H7Z6;Q9UIG0;Q9  
NWZ8;P21675;P14859;Q9UNS2;Q07866;P51946;P35813;Q14764;P0DI81;O75190;O60264;O00186;P63  
272;Q68CJ9;Q04695;P42677;Q9NXR7;A1L3X0;Q5JTC6;Q14978;P40337;Q13794;Q96CD0;P31350;Q9UK  
Y1;P12270;Q9UL18;P08697;P17036;Q9NRA8;Q9NRN7;Q68CP9;Q9UBY9;Q969L4;O95503;P51948;Q86V9  
7;Q9BRP8;Q9NUS5;P23508;P31276;P14625;P63146;P78543;P52815;P24385;Q96G01;Q8WTW4;Q8IWT3  
;O00425;O95229;P54253;P19474;Q12894;Q8NDT2;Q8WXC3;P35227;O00411;Q10570;Q9L7V8;Q9BTM9;  
Q9Y281;Q00534;Q16594;Q8WV24;Q14653;P62424;Q9BW60;P07197;P09914;Q9BVN2;Q3L8U1;Q9H1J1;Q  
8TDR0;P12004;Q92905;Q8TDB4;P30281;P06400;Q9H9D4;Q9BVJ6;O43303;Q7L590;Q9NX08;Q13490;Q0  
0587;Q00577;Q15029;Q02410;Q9Y314;P35573;Q9UQL6;P49918;Q9NWS1;P50479;Q8N9A8;P30876;Q8T  
E69;P78549;Q8TES7;Q9UBQ5;Q15436;O75155;Q9H0C8;P50222;P56270;P57678}

3171

Pathogen[ P03363] interacts with 2823 human  
partners: {Q8TDR0;Q8N6F7;P80294;Q96B67;Q86X95;Q6IE81;Q9BQ89;Q14139;O95376;Q5BJF6;Q9BSD  
3;Q9NQX1;O95777;P22681;Q9NPF5;O60832;Q9Y6N9;Q15654;Q86VP1;P49754;Q9UNN5;P46379;Q3YBR2  
;Q9UBY9;Q13112;Q9NWF9;Q15020;Q92547;O75940;P17706;P62913;P05783;O75190;O75410;Q9H816;  
Q9Y5A6;Q9NQT4;Q9H160;P49918;Q14653;Q9Y6E7;Q96EA4;O14734;Q14978;O75069;Q86VX2;P43364;Q  
9Y6K5;P62879;Q9Y3P8;Q5VTD9;Q9BUL8;Q14789;P62314;Q12959;P41227;O43399;Q15699;P52630;O9  
5619;P12956;P23284;Q9NQG7;Q9BSU1;Q86V88;O75953;Q96QT6;Q969F1;Q96A44;Q9UGK3;Q8TE69;Q86  
Y01;Q9Y3C0;O15266;Q92845;Q99684;O14787;P18887;Q06547;Q9HAU0;Q32MZ4;Q9BX63;Q15233;O608  
88;Q15528;O00411;Q9NVI1;Q9Y5P8;P02533;Q9NVR2;Q99615;A7MVCY6;Q06455;Q13490;P17535;Q8TB7  
2;Q9UBW5;O43395;Q5T681;P62952;Q9Y252;Q6ZN17;P98168;A6NKF1;P18848;Q8TDB6;Q96IV0;Q9ULW3  
;Q16186;O14744;Q9UID3;O95751;Q8NI29;Q15834;P11137;Q9H9A7;Q8IXJ9;O15205;Q96JC9;Q86TC9;  
Q9BUR4;O75335;P20810;Q13105;Q9NWT8;Q9BZD4;Q06787;Q8IW19;P08779;Q8IZP0;Q13309;P29474;P  
46060;O75159;O75081;Q9NVN8;Q01850;P02808;Q9BVC4;Q15051;P62258;P13994;Q3L8U1;P55957;P0  
5386;Q8N3V7;Q9Y6H5;Q9Y3F4;P43360;O43493;Q9NVV4;P46939;Q16082;O94972;Q9HCC9;Q13042;Q9H  
D40;O14907;Q9Y4Y9;Q9BXP5;P49454;Q96EP1;Q6VMQ6;Q12830;Q8N5U6;O95049;Q96IY1;Q92973;Q9GZ  
V4;P10828;O15371;Q92917;P51965;Q9Y2E3;P63162;Q9Y4Z0;P62750;Q9BQQ7;Q15366;P69905;Q96RT  
1;Q8WWL7;O43736;Q9BVJ6;Q07666;P27348;O75161;Q96B36;Q9UHF7;Q6P1K2;P23396;Q9UL42;P28698  
;P02538;Q96IZ7;Q92985;Q9H4D5;P42677;Q9BUP3;Q9BWF2;Q9UGK8;P19338;Q9H7H0;Q5JTC6;P62136;

Q9Y2W2;P49419;Q8NF91;O15287;P22531;Q9GZS3;Q9H5J4;P08865;P23246;Q9H902;Q99623;P29083;P29084;Q13835;Q96T58;P27694;Q8WTV1;P07197;P62937;Q14533;Q9Y2T2;P13807;Q8WXX3;O43933;P60604;Q96GC5;Q9UPV9;Q9HAW4;O15355;Q9UNH7;P31040;P36575;P35711;Q99962;Q9H8E8;Q9P2I0;Q9BXM0;P54198;Q9Y5K5;P54652;O60664;O15527;Q6ZVK8;Q7Z7A1;Q9H3S7;P38919;Q15370;P55771;Q5T8P6;A8K8P3;Q19AV6;Q9UFG5;Q6P9B6;Q0VDD7;Q9NWZ5;P0DJ3;P11277;Q15466;P41252;P07900;Q9Y5J3;O14908;Q04323;Q9Y6D9;P56715;P63167;P54727;P46087;Q6ZM3;Q7L804;Q9Y2X3;Q9HC77;Q14865;P11441;O60645;Q96NS5;O15360;Q8TB45;Q9NZL3;Q9NQ51;Q15438;Q9GZL7;Q9UNH5;Q14145;Q9Y2D9;Q96ED9;Q10570;O14920;P62714;Q8WWQ0;Q04206;Q15853;Q9H4X1;Q9BQ95;Q96CV9;Q9NRA8;O15519;Q86VQ0;Q95996;Q96K80;O14896;P27540;Q66K74;Q7RTS9;P49848;P02795;Q86WB0;P17676;P12270;Q9UI47;Q9H081;Q96GG9;P35321;Q92575;O14829;Q8TAM2;P49459;P52565;O75643;Q96DZ1;Q5C9Z4;Q8IY21;Q8NC51;P26447;O60481;P18146;Q9BYV8;P49116;Q8TF40;Q9P2Y5;Q969U7;Q9H981;Q9P2G1;O95628;Q8IVI9;Q9ULG1;Q9HCU9;Q9BX66;Q8WXX9;P19388;O95453;P36873;Q9BY44;Q9UHB4;Q12972;Q9H9C1;O15061;P24864;Q3B820;P14649;Q16851;P51784;O15524;Q6ICB4;Q5VV41;Q13148;Q16537;Q86UR1;Q8IXQ6;Q8NHU6;P02549;Q92674;P83916;P33316;Q8NFH4;Q6STE5;Q02930;Q9UHB7;Q9BXW9;Q9P0V3;Q00597;Q969X6;Q13428;Q8TAF3;Q9UMS0;P13984;O43310;P02545;Q8N9A8;O00762;P60709;Q15021;Q9Y468;Q9H175;Q9UP83;P35227;O95400;P52597;Q9BYD1;Q9C000;O60563;Q9HAU4;Q9NXX6;Q92543;P21127;P36543;Q92900;Q9BTK6;Q96HR3;O95229;O60291;Q6GQQ9;Q9NRL2;Q13227;P53567;P48382;Q8N5D0;P50502;Q14526;P05388;P68871;P35080;O43747;P33176;Q9HAV4;Q9Y4R8;O60841;Q9BZF3;Q9UN79;Q9H9Y6;P78559;Q9Y2R2;P16157;Q14194;Q9HB71;P60896;Q9UJY4;P35579;P61970;P14373;Q9UHI6;Q15554;Q6NZY4;Q75340;Q14781;Q9NZL4;Q99996;Q14247;Q9NVV9;Q9UMX1;P31150;P36402;O75607;Q9Y3C5;P09012;Q9ULR5;O94811;Q96HW7;Q96IZ0;Q715Y5;Q96T49;Q86YP4;O75886;P54259;Q9Y375;Q13347;P0DI81;P08151;Q9H5I1;Q8N5M1;P30154;Q99704;P55199;Q9H7S9;P99999;Q96L92;Q96MT8;Q5T7V8;Q96BD8;P43378;P11387;Q9UKV3;Q96MU7;Q9H4L7;P62753;Q7Z2Z1;O15078;Q9UHV9;Q7L190;Q9H492;O94992;P22314;Q8N1B4;O43924;P62312;Q8WX92;Q96BK5;P62140;Q969T7;Q9BTP7;P24863;Q92530;Q9H869;Q14397;Q9UHP3;Q8ND04;Q02952;Q86WV1;O15015;Q96EP0;P61201;Q02447;P62081;Q9NNW7;Q969Q5;Q9UL3;P50452;Q96LC9;Q15022;Q86Y13;Q103362;Q06546;Q063Y3;Q13952;Q8N1G4;Q9Y3D0;Q92990;O95232;P58340;O75618;Q96MT3;P30876;Q8TBZ2;Q13228;O75112;A9UHW6;O14933;Q96LA8;Q9Y2M0;Q99575;O43167;Q09028;P13010;Q02556;Q92831;Q8WVC0;Q86WQ0;Q9H444;Q96EK4;P14868;Q96RL1;P25963;Q9HAN9;Q9BUH8;P41236;Q15291;P12757;Q9HCS7;P62508;O60232;Q9BR76;Q14457;Q01831;P20248;Q7Z569;O75170;Q96GY3;O75817;Q9HC52;Q8NEM7;Q13561;P62328;Q8WW12;P25205;Q03112;P61084;Q13888;O60663;Q9NS37;O60437;O00213;Q86X83;Q7L1V2;O95219;Q9H706;P09914;Q14258;Q9BXL5;Q6UWZ7;Q92734;Q9H7L9;Q8IYI6;Q9UQF2;Q92783;Q15014;O95347;P56279;Q75QNZ;P18847;Q8NFH3;P45973;Q13794;P14866;Q05048;Q96HY6;P49589;P46776;Q9UKX2;O43303;P13640;Q15024;Q9NRF9;Q9UPX8;Q92879;Q6UWF3;Q13405;Q14980;Q13111;P37275;O75604;A5YKK6;Q9GZQ3;Q06330;Q96B97;P32780;Q99547;Q96AB3;O14980;Q86U8;Q8TAQ2;P37802;Q16531;Q3KNV8;Q8WNV2;Q8WW35;O76003;Q96T9;Q8NFW9;Q9NWZ8;P09913;Q92759;Q9UI10;P35637;Q12769;O00410;Q9B124;P23760;Q13283;Q2LD37;Q00005;Q9NQ87;Q96QK1;Q13439;Q9ULT8;P42167;O15111;Q9Y3B2;Q96DX8;Q9H2P0;Q96A65;P17947;Q8N720;O15379;P23490;Q9H0G5;Q9NZW5;O15304;Q9BXW4;Q99750;O94888;O14910;Q9UBF9;Q9NR46;Q6UW56;Q6P2E9;Q13618;Q9UHC1;O00505;Q9H9G7;Q15691;O60784;P51532;Q15388;Q9P2M1;Q16514;P20719;P78537;Q01082;Q14925;P28347;Q14738;O95684;Q8TE02;O95257;Q9NYJ8;P08579;P06733;Q9H0N5;Q7Z2W4;Q15459;Q8IZL8;Q9H1D9;Q14160;O75909;P78352;Q7Z6E9;Q9NZ52;Q969S8;Q9H8M7;Q9BZK7;Q9NYB0;Q9NX02;Q9NX70;Q12933;Q9GZT8;Q96BP2;Q9ULW0;Q86SE9;O43439;P04198;Q8IYD1;O94925;Q15056;P18850;Q9H6Z9;O95793;P51946;Q14847;Q9ULD0;Q9H7T9;Q70Z53;Q13045;Q92597;P25490;O43264;Q01826;Q99733;P53805;Q8TCl5;Q9NUL3;Q9UBC9;O95201;Q7Z739;O14558;Q8TES7;Q9UQ19;Q01469;Q8NHQ1;O75436;O00463;Q8NBT2;Q13625;Q2YD98;Q96BT7;O14602;Q9Y6X8;Q9BUX1;P50479;P09972;P53041;Q9UBL3;Q14154;P78358;P50570;Q8N140;Q9UBQ5;O14497;P31946;O75143;O75376;O60447;O60671;Q5JTD0;Q6BDS2;O95613;Q9H0C5;O60907;P29558;Q9H6U6;Q9UPR3;Q16520;Q9NTK5;O00425;Q9UN36;Q16629;Q9HCK5;P42704;Q15398;O94986;Q9Y462;Q9HCD5;Q15910;P68363;Q15545;Q9UMX0;Q9Y3A5;Q9NXTX7;Q6NUQ1;P49354;Q96P70;Q16667;Q92889;Q8ND76;Q99607;Q9UBS3;Q96I25;Q06190;Q13568;Q13769;Q9H3M7;Q14204;Q9BZE4;P31949;Q14CM0;P52815;Q9B752;O00567;P62318;P78317;Q9NPC3;Q9Y294;Q16254;Q9UBF1;P54920;Q969G9;P11474;P56545;P16220;Q8WYA6;Q9H9E3;Q8WV28;Q9H6Q3;Q9UHK0;P35251;Q9Y2D1;Q86WX3;Q9BTM9;Q9Y295;P23025;Q9Y605;Q9BQD3;P42768;Q8N196;Q86WV5;Q9NPG3;Q8NHZ8;Q9UBF6;Q15121;Q8WV44;Q9BRV8;O75558;Q13033;Q9NXV2;Q14152;Q53EL6;Q96I23;P78543;Q9NV31;Q9Y6K9;Q9BT78;Q02241;Q15436;Q13901;O95602;Q9P0U4;P48200;Q9UDY4;Q9NFB6;O00743;Q14C87;Q9UKV8;Q9UJY1;P15515;Q8N2Z9;Q1ZZU3;Q5VTR2;P80217;Q96K30;Q8N488;Q8TA86;O75145;Q66K89;Q9NUS5;Q4LE39;P57077;P24928;Q9Y2D8;Q9Y3M2;Q15631;P98171;P68133;P19419;O95456;O94983;Q16630;A8CG34;P83436;Q9UEU5;Q9UQL6;Q04726;Q13617;Q96F07;O75475;O95153;Q9UL40;P46109;O60293;P14921;P54252;O75164;Q9NYF0;Q9UER7;P35548;O15151;Q15427;Q96RU3;Q99496;P49366;Q8TEK3;Q53HL2;Q5F1R6;Q9BW71;Q00610;Q9Y5P3;Q9Y613;Q9UPN9;Q15041;P13489;Q00587;Q5VU43;Q8WVK7;P61289;O00268;Q8TAP6;Q96J17;Q9BVC3;Q8IY63;Q9Y6K1;Q15532;P62304;Q9NZZ3;Q9Y603;O75530;Q6NUN9;P49005;P78395;Q8WUF5;O43318;Q15700;Q9UL03;Q9UKX7;O15105;Q9BZR8;Q9BV68;Q8IXK0;Q15306;Q01130;Q86UW6;P50453;Q9H410;Q13522;Q6P2Q9;O00267;Q9BX70;O14713;O14746;P24941;Q99417;Q96GC6;Q9NFP8;Q9H467;P50748;Q15797;P04156;Q9C0E2;O95073;Q99V6;Q9Y6M1;Q8IYW5;P32243;Q5TAQ9;Q8TBB1;Q3ZCQ8;O15047;Q5T2T1;Q8IVS8;P09234;Q9BSQ5;Q6VVB1;Q9NFP4;P35244;P63146;Q9H5P4;Q04724;Q9BSI4;Q15596;P49756;Q9BYZ2;Q6PGQ7;Q13765;Q14839;Q8N302;Q9P2H0;Q86UE4;Q9UBU9;Q99828;P41208;P17028;Q92558;O43639;P15880;Q96CS3;Q9Y3Y4;P11940;Q9Y2X9;Q9UBK9;Q96KQ4;Q86U42;Q9H4A6;Q9NR56;Q8WWY3;P25815;Q15369;Q9NT62;Q13526;O14893;P53618;Q9BSJ6;Q68DK2;P49639;Q9P209;Q13158;O75791;P19883;Q14686;Q8IZD4;Q7Z4S6;Q99569;Q16695;P15927;Q8TBK2;O75970;Q99471;P60520;P23508;Q8WY41;O95476;Q8NI27;Q8N4B1;Q9BWF3;P23497;Q8TD06;P30260;P49427;Q8N1N5;P06400;P40337;Q15327;Q8WU90;Q14689;Q15633;Q6ZP82;Q13185;O43765;Q9BYG4;Q9Y697;Q15652;Q96FV9;P01106;Q9UMY4;P63000;P05787;P23381;Q8N1L9;Q8NI51;Q9BQ69;Q9UQ80;Q9H2K2;Q9BXS5;P50616;P10144;Q969E8;Q9NPD3;Q07157;Q07866;O75691;Q16548;O00409;Q8NFH8;Q9H0S4;Q9BRP8;P06748;Q7L576;P40222;Q8WYJ6;Q9P031;O14879;O60493;Q05086;Q8IX90;O00423;P28749;P41002;Q9NXF7;P27815;Q9Y6R7;O15372;P20073;Q9Y6I7;Q96T51;P36952;Q92890;Q9HAF1;O43447;Q9UNY4;Q9C040;P35869;P17275;Q93052;Q9NVA2;Q93045;P42226;Q9Y4G6;Q96AP0;P41091;Q86WC6;P13349;P21673;Q96PK6;Q8IXH7;P23588;Q9C005

;P39687;O43504;O94973;Q96PU8;P49711;Q9NR77;P50995;Q7Z4H3;Q9P1Q0;P62495;Q92797;Q6VY07;P18615;O00198;P61326;Q96LL4;P54098;O75150;Q96TC7;P81274;Q5FBB7;P48788;Q96IF1;Q15750;Q9UM11;Q8TEP8;Q6ZNA4;P52657;Q8N668;Q8IWE5;O95817;P61244;Q13425;P33992;Q14019;Q9P0M2;P05198;Q7Z7A3;P15924;P46100;Q9BSB4;O15116;O60296;Q05519;O95707;P78314;Q9UNL4;Q13895;P10588;Q9Y3B7;P26373;O94850;Q8N1B3;Q13127;P35269;Q8IY57;Q9H0W9;Q9C086;O60749;P11473;Q16666;Q9UJ41;Q8N8R7;P52272;Q6ZMV9;Q07021;P54105;Q13155;Q8NG27;P33369;Q4U2R6;O96017;Q7Z6Z7;Q8N9W6;Q96QD9;Q15029;Q9Y3Q8;O60264;Q15287;Q96CD0;P61088;Q14746;P06396;Q9NWB7;O75663;P25791;Q92529;O75351;Q9UPN7;Q5JR59;Q9H900;P57678;Q9P2W9;Q5BKZ1;Q9BTL3;O60282;Q9BQA1;C9JE40;Q9Y2J4;P30304;Q8WV41;P29372;Q9H1A3;Q8NEU8;Q12962;P10911;Q8IWX3;Q8N684;Q9BXF3;O75400;Q9Y608;O95405;Q9Y6X2;Q9BZF9;Q9H4M3;Q9H9F9;P63151;Q5TCZ1;Q92572;Q6NZ36;Q43524;O14599;Q5TZA2;P15923;Q9NVV5;P35900;Q9UGP4;P15336;Q9BXP1;O60885;O75334;Q15326;Q13951;P63104;Q9BQ90;Q2M1K9;Q8TDC0;Q6PGP7;Q13748;Q96T23;P43358;Q9H0R8;Q9P2T0;Q14690;Q00534;P07196;P20749;Q96EF6;Q5EE01;Q92636;Q96D15;Q9HD36;Q9NX08;Q13867;Q969L2;Q16543;Q9ULM6;Q00403;Q9UBV8;Q92560;Q9NRR5;Q8TAT6;Q15424;Q9UBI1;O15117;Q15653;Q13619;Q9ULU4;Q9Y4E1;Q9HB75;Q9P1T7;Q96P71;P55212;O75446;O43615;P08727;Q96FH0;Q92904;O15144;P32519;P15822;Q07352;Q9C0C7;Q9P032;P48552;Q9Y3I1;Q9UBU8;Q6PGN9;Q9Y333;Q14562;Q5JY77;Q92832;Q05066;P62316;A8MTZ0;Q8WUM0;P61457;A8MVW5;Q9NR50;P08133;Q96Q83;Q9H0B6;Q96QU8;Q9UBP6;Q99708;O95218;Q96JM3;Q08050;Q96F86;P30622;Q9HCU8;Q9NSA3;P20585;P07320;Q14669;Q9NX18;P11831;Q9P0W5;O15226;P54136;Q9UPY8;Q9NSC5;Q9NY61;Q969H4;Q9Y3V2;Q13129;Q8TC71;Q9HCK8;Q9UN37;Q8IYM1;P46937;Q9H0A8;Q15293;Q6A56;Q14872;Q16576;P56693;P27816;Q8IV36;Q53HC0;Q9H0W8;Q8WUQ7;Q13426;Q717R9;P28702;Q86XK3;Q7Z699;Q13416;Q6P1M3;Q96FX2;Q9NWA0;Q9Y3C8;Q96R06;Q9UI36;O96019;P59998;Q49AN0;Q6PI26;P14859;Q9Y4X5;O43809;Q2VPK5;Q9BUE0;Q13616;Q9ULZ2;O43684;Q92622;Q16829;O96020;Q12798;P63165;P38159;Q12906;P18583;P52737;P13647;Q00653;Q14999;Q15544;Q92599;Q96T76;P11308;Q9BY77;P08107;Q9BSM1;Q8N157;Q03111;Q92841;Q6DKK2;P26368;P26641;Q9NRG4;Q3SYG4;P42772;Q9BPZ3;Q8WUM4;Q13415;P62877;Q9NR09;O75030;P08235;Q86WG3;P63172;Q14240;P46063;Q15149;Q8IY31;Q96PU5;Q9UHY8;Q96HJ5;P17480;Q92902;Q9Y250;Q6P1J9;Q9BQ15;Q9UI08;Q9BQS6;Q99698;O75113;Q8N5F7;P24278;O75800;Q12894;Q86TA1;Q12874;Q9UHV2;Q15717;Q8IY81;Q9Y2M5;Q9GZV5;Q99426;Q9BXW6;Q14814;Q8N6T7;O95433;Q9NR28;P29692;P54278;P49450;Q8TEB1;Q6XZF7;Q8N1I0;P78545;P31943;Q9NZI8;Q08999;O43172;Q13480;Q9P0J0;Q9NR22;Q9UK99;Q9NWW8;Q9BW66;Q5UE93;P62324;Q9H267;Q15035;P31749;Q92830;Q9UDV6;Q9UKK3;Q14511;Q8N8B16;Q96BY2;Q7Z2E3;Q13077;P17096;Q9P1Z2;P54274;Q14677;Q66PJ3;Q9BWT7;Q13432;Q96KP1;P55209;Q13489;P14316;Q14527;Q9H3P2;Q9UKT5;Q9UHR5;Q9BVW5;Q9H0C8;Q01094;Q96QE5;Q9UIF9;Q8N6Y0;P35226;P16333;Q86WL3;O75901;Q8IZD9;Q6P148;Q9NQS7;Q8TAE8;Q92552;O00148;Q9UKV0;Q9Y3D8;P06746;P27797;Q9BSH5;Q99741;Q9HC62;P61024;Q13472;Q5VSL9;P20042;Q5JVS0;P11532;Q86VY4;Q969G3;O00522;Q9UBB4;Q7Z3C6;Q9H4Z2;P46781;Q9H668;Q02410;O94763;P50914;Q6ZNE5;Q9UIF8;Q9UNE9;Q86W99;P38646;P31260;Q13123;P19474;Q9BSW2;Q9HCE1;Q5VWX1;Q14134;Q9NQ65;Q7L5N1;Q5TCQ9;Q13310;P52736;O75155;Q9Y5J7;Q86T82;Q9P0U1;Q96ST3;P0C1Z6;P07998;Q5VYV7;Q99732;P78396;O00512;Q7Z7C8;P08670;Q5T230;Q96AQ6;Q92843;O43541;Q9UK41;Q14749;O43815;Q9UGR2;Q96EB1;Q9BZV1;O15056;P17661;Q8N5A5;Q9NPI1;O75381;P17036;P02766;Q9NPE3;Q13243;Q9ULH7;Q92870;Q15004;Q9HBG6;Q9H211;Q8WVM7;P56537;P06RNS5;Q8N3R9;Q8IYD8;O60477;O95931;P78318;Q8WXD5;Q86WG5;Q86V81;Q8NFG4;Q9BTW9;P41134;Q9BQA5;Q99504;P22087;P11171;Q7Z3B3;Q9UNS1;P05413;Q5SQN1;P10412;P20265;Q9H040;Q9HAU5;Q96C03;Q15796;O95983;Q15723;P63010;P07910;Q9H9L3;O75674;O75935;P57081;Q9NWB1;Q9UKL3;Q9Y3E7;Q9NUW8;Q9NQ48;Q8N108;Q08AG7;P84022;Q9BRQ6;Q9HBM1;Q5T7B8;Q9Y215;Q01167;Q7LBR1;Q7L0Y3;Q8WXC3;P04406;Q9NZU7;P31314;O15265;Q13620;Q12LH7;Q9UKT8;P98170;Q7Z460;Q9Y2L1;Q8N895;Q8N163;O14613;O75934;Q9BQ83;P49750;P48634;O00204;Q9UKT4;O95163;Q68CJ9;Q8N3L3;O95271;Q7Z465;Q99619;Q9UKY1;Q8N108;P47928;Q9BPX3;Q9BT92;O96004;P61313;Q8IZW8;P26358;Q5JR98;Q9UHD8;P24522;Q9Y618;Q92556;Q92499;P49336;Q9UI95;P31948;P39019;Q96AY2;P49792;Q9H9Z2;O43290;Q8N841;Q96I34;Q14011;Q9H788;P35638;Q86U86;Q15542;Q12929;Q96PM5;Q92624;Q9H0E2;Q6P1W5;Q969H0;Q12796;Q8TDY2;Q9UIF7;P10914;P62256;Q86UT5;Q14929;Q13573;Q6QNY1;Q8TCG1;P52298;P26196;Q9NRM7;Q13838;O60732;Q9C035;O43148;P35658;Q6ZVN8;P54253;Q6P9B9;Q9UHX1;Q9BQY9;Q14137;O95171;O75167;Q02040;O00566;Q96IT1;O75323;P08621;Q9BYK8;P55265;Q5T200;Q8NG31;Q53G59;O00470;P46779;Q96EK5;P49789;Q8WXU2;P46777;Q9H840;Q96G21;Q9NRR4;Q9H9Q4;Q9NYF8;P62987;Q9UN52;P35398;Q13257;Q9XRX5;O75925;Q14209;O95243;Q92600;O95198;Q8NCD3;Q9Y283;Q9HDJ4;Q00059;Q43243;Q14974;Q15173;Q96C74;P23528;P50549;Q8WX93;Q9ULB6;P55198;P46108;Q8ND90;P15407;Q9UPS6;Q8WTW3;Q6ZU52;Q6WBX8;P22415;P20290;P61758;O94868;Q9H8T0;P63279;Q9NVH2;Q96EZ8;Q9Y3T9;Q9Y512;Q9BV57;Q7Z6G3;Q9UKA1;Q6UUV9;Q6NZI2;Q12905;Q5TC12;Q96LI5;Q13547;O75807;P60510;Q9Y376;Q9NXK8;Q9Y2G2;Q7Z4T9;Q13868;Q00994;O43865;Q9ULV3;Q9BZE9;Q9Y3Z3;O43542;Q14674;Q9UDY2;Q96T37;Q9Y4P8;Q9NWX5;Q9UKK6;P49790;Q9P270;Q13884;P08729;P78560;Q9H8Y8;P22626;P19838;Q16626;Q7Z3K3;P54257;P42025;O95071;Q7L9L4;O76031;Q99814;Q8WVZ9;Q8IWL3;Q9Y5L0;Q6ZW61;Q9HB19;O14964;P83876;Q8IY92;O00186;Q6RFH8;Q96SW2;Q96S55;Q9UI30;Q9UBS8;P41220;Q495M9;Q86XK2;Q9BYG5;P53999;O00422;Q29RF7;Q92793;Q5TAX3;Q9H4P4;P50402;Q9Y5N5;O75154;Q15066;Q15365;P54725;Q9BXU7;O95295;Q7Z614;Q9NS23;O95848;Q15185;P31276;D6RGH6;Q6ZPB5;Q9H1K1;O14974;Q68CZ2;P40855;P05060;P26599;Q9H0H0;O14530;Q5XUX1;O75382;Q15386;O60936;Q96QH2;Q9UPV0;P82933;P57740;P50222;P51668;Q9NX53;Q92614;Q86V97;Q9BRA2;Q7Z7M0;O60869;Q9NRL3;Q9BYG3;Q96HA8;Q9UBEO;P24385;Q9UI32;Q13469;P49770;Q9BXF6;Q8WTW4;Q99638;P21675;P60228;Q13829;O14646;P33076;Q9UQK1;Q14CW9;Q92988;Q8IUD6;Q14103;Q6I9Y2;Q13023;Q9UIC8;Q5VIR6;Q6FIF0;P43357;P23193;Q9HBL0;Q9H4B6;Q2TAK8;Q01201;P56270;O14862;O95782;Q92466;P35712;Q9UKS6;Q08379;Q01844;O94829;O75496;Q15628;Q8N9R8;Q8NEA9;Q13569;A6NIH7;Q9Y5K8;Q9P2J5;Q01534;O00308;Q92844;O43711;Q91UM5;Q92665;Q9HBM6;Q9H583;Q96BT3;Q12923;Q00978;Q9P2K3;Q13438;Q8NI35;P10242;Q8WV92;Q9UL18;P20226;O15040;Q16526;P49910;O60239;Q9BVN2;P52655;Q9NY27;Q5TB30;P56945;Q96CG3;Q04725;Q8IWX2;P63241;Q5H9L2;O75362;Q15013;Q15172;Q8IWX3;Q8WWM0;P43351;Q13485;O75175;Q9NXX7;Q9NZQ3;Q96HI0;Q8N8726;P62310;Q7Z5V6;O95402;Q96RK0;Q92804;P60842;P27469;Q86XP3;Q2NKK3;O15126;Q9NQTS;Q9H0F6;P26651;P17482;O95865;Q9ULV1;O75969;Q8TD23;Q9H0A6;Q86TB9;P51959;O95714;Q03468;Q96RL7;Q9Y4A5;P50749;P63272;O15083;Q8WUH2;P10515;P50750;Q16890;O00167;Q96GV9;P08945;Q9GZZ1;O00570;Q14186;P31269;Q8IX12;Q63HK5;O15131;Q5T8A7;O60921;Q5TA31;Q9NVM9;O1466

2;Q9Y5V3;P12980;Q7Z6J0;Q04837;Q6ISU1;Q09666;Q86WH2;Q9UQR1;Q2QGD7;P61981;O00401;Q92541;Q07820;Q15599;Q16385;Q9NRI5;Q9UH77;Q70YC5;Q07955;O00625;O43159;Q8TAD8;Q2VPB7;P53804;O95551;Q96JJ3;Q13114;Q13136;O43660;Q5BJF2;Q8IZQ1;Q9UIL1;Q96NW4;Q9HCI5;P63261;P07315;O43463;Q8WWW0;Q92733;P62277;O75531;O60506;Q9NPNJ6;P60660;Q9H6Z4;Q9HCM9;P14672;O94901;P15884;Q43583;Q92540;O75398;Q01081;O94842;Q15025;Q9NQY0;O95644;Q7Z5H3;Q8TCJ0;Q9Y285;A6NXI2;P78371;Q9UMS6;Q96T88;O60294;Q96NA2;Q8IUR6;Q9UK45;Q96CA5;Q969H6;Q8NE71;Q9UKJ5;Q9H2L5;Q9BQY4;Q86UL8;Q8IVG9;Q96SN7;P35232;P62266;Q9BYX4;Q9BVP2;Q9BZI7;P61978;P05412;Q96MN9;Q8N612;Q6IQ32;Q96PV6;Q9H3R5;Q9NTI5;Q92834;P40424;Q9BZL4;Q15054;Q96G23;O94906;P53992;P78345;O14618;Q96DX5;Q969M7;Q9Y5Y2;Q8IWT3;Q9Y4L5;Q96AJ1;Q5D1E8;Q969L4;Q9BU61;O75843;Q8IWN7;Q9BVS5;Q00613;Q6PJG6;Q9UKT9;Q9NRR3;Q13642;O75386;O15405;Q9Y3E5;Q96J94;Q96CJ1;Q86VP6;O75771;Q8WV22;Q12873;Q7L590;Q9UKF7;P80723;O43900;Q8WU39;P42568;P62424;P28370;O43516;Q04864;Q6ZU15;O95886;Q9H3K2;O95487;Q99816;P55769;P67870;Q15058;O95373;Q9UJW3;Q15059;Q9Y6F6;P52948;Q06609;Q13596;Q9HB96;Q8N3U4;Q9UKL0;Q9C004;Q8IZE3;O14777;O75427;Q9NQR1;O96000;Q9Y296;Q86XR8;Q9NTG7;Q04917;A6NDE4;O60759;O15127;Q96GX9;O15259;Q9Y262;P61247;Q14739;O43745;Q6NVH7;P24534;P61077;Q8IWW8;Q9H446;O95997;Q9H204;O60573;Q96CM3;P55210;Q12789;O75146;Q8TEQ6;Q9UHN1;Q9Y6B2;Q9Y4P1;Q9NQ92;O14776;Q9Y224;Q96Q7;O60333;Q14157;Q5T3J3;Q13144;Q9NQZ3;O43918;Q9Y3A2;Q9UNA4;P61956;P09629;Q9H8W4;Q93034;Q9P1A6;Q7L2E3;O00165;Q9NVP1;Q96EN9;Q2M3C7;O14508;Q9Y3D3;P02489;Q00839;Q8N729;P61962;Q12834;P55197;Q14008;P09874;Q13084;P62308;Q8TDH9;Q9NQ31;Q7Z4G1;Q14687;Q9UJM3;P41970;Q9NR33;Q9P013;Q16637;Q9GZU7;Q8WTR7;Q14207;Q9UKF6;Q96MG7;Q86XI8;Q9Y2Y0;Q8NHY2;Q9Y3A3;O14490;P24855;Q13363;Q8WW38;Q9Y448;P84103;Q06587;Q9GZL1;Q8IVM0;Q9NXC3;Q9UKT7;P82094;O43156;Q13541;Q9NPN9;O75821;O43663;Q86YF9;Q96N03;P51116;Q562F6;Q8IX03;Q8N5C8;O75152;Q9UKN8;Q9NS69;Q15560;Q6W2J9;Q86VW0;Q9H2C0;Q14676;Q9Y6D6;O43390;Q9ULM3;P07814;P78344;Q9BUZ4;P48380;Q96KR1;O00716;Q8NFX9;Q13761;Q9NXR1;Q9H9D4;Q9Y248;Q9NXB0;Q96PU4;Q96NY9;Q8WXF1;Q9Y6R0;Q01105;Q9UKC9;O43261;P62995;Q14493;Q14141;P23258;O00139;Q9NPC6;P37198;O43829;Q01658;Q96C86;Q43255;Q8TF76;Q9BQI5;Q9UBD5;Q9BWU0;P51531;Q9NX44;P30153;Q9Y4B6;Q8TF46;P18754;Q92922;P14678;P43355;Q8WTS6;Q86WJ1;Q99719;Q9NWS1;O14556;Q15543;P17544;Q9P2R6;P52435;Q9UBZ9;Q00577;Q9NWK9;P04264;Q6NZ67;P30307;Q96EY1;P48553;Q13287;Q7Z5K2;Q2TAZ0;Q9NZJ0;Q8N3F8;Q676U5;Q8N2W9;P30281;O75943;Q9P0W2;P62854;P35573;Q96CB8;O94874;Q86SQ7;O95810;Q8N6I1;Q68CP9;O95503;Q8N1E6;P09661;Q96JB5;P62826;Q08211;Q8TF05;O14641;Q9NS91;Q9UBC3;P52292;O15235;P41212;P19429;Q9NRD1;Q9NR12;Q9UJY5;Q9UQB3;Q9UJU5;Q9P267;Q9H9T3;Q9UFN0;Q9U7W2;O43734;P09497;Q8NF64;O43752;Q13813;Q99590;Q9UK73;Q9NS73;P55884;Q13137;O43715;Q0VDF9;O15042;Q8IY18;O43708;Q9UJT2;Q9H6S0;Q92621;Q8HWS3;O95251;Q99459;Q8TD16;P15172;Q8WV99;Q14764;Q9UID6;Q96MH2;Q05516;Q96HA7;Q7Z417;Q9P2B4;O43513;Q9BUJ2;P51398;Q8WXF8;P33240;Q16658;O75688;Q0765;Q15561;O60518;P60953;Q9GZX5;O00541;Q9Y5N6;Q99717;Q9BYC9;P08238;O60238;Q9UBC1;Q96G25;Q5T2W1;O96018;O60716;P25208;P43356;P53675;O00170;Q8IUD2;Q06520;Q8TBN0;O00257;Q15047;P24666;Q15154;Q9UBD0;Q8N7H5;Q96B67;P46976;Q6ZTQ3;Q9NRC8;Q8WYQ5;Q6NUP7;O75525;Q15643;Q9H4I2;Q9BTA9;Q8TF74;Q9P2M7;P51825;P27986;Q96MF7;O95166;Q5H9R7;Q12926;Q9NP66;Q76FK4;Q00536;Q86Y97;P67775;P10589;Q6P1X5;Q969S3;Q9Y6G5;Q6QNY0;P63208;Q8NBZ0;Q8TBE0;P06730;P13056;Q8WYH8;Q99594;Q14678;Q70EL1;O43324;Q5VWG9;Q93008;Q86XL3;Q15329;Q9UMX3;Q9NUP1;Q99933;P55735;Q14683;Q9NXV6;Q14203;P78347;Q9UJW9;Q9Y5Q3;Q9Y5K6;Q8N9B5;Q13233;P04792;Q15696;Q01664;Q8IXH6;Q96HR8;Q8WVJ9;Q12982;Q99767;Q99747;Q9ULX6;Q9Y5Q8;Q9BVI4;O75182;P55327;Q2M2Z5;Q9UII4;A6NDB9;Q9BYE7;O43236;Q9BSJ2;Q86TP1;P15036;Q9NPI6;Q9HD26;O95833;Q9Y2J2;Q9UKG1;Q92993;P02794;P38935;Q9Y6J9;Q01860;Q9Y5S9;Q6ZRQ5;O94817;Q9H074;Q9P2Y4;Q9BXTJ9;Q9H5Z6;Q6R327;Q15003;Q9BUL9;Q14315;Q12824;P42771;Q53HV7;Q86TG7;Q8WVV9;Q9BV73;Q03060;Q96FS4;Q8IZH2;P38432;Q9BQ70;P23297;Q15942;Q9H469;Q6PJ61;O00291;O60516;Q15276;Q14151;Q7Z7E8;Q9H944;O15145;Q99551;O14576;O60711;Q9H1Y0;Q92905;Q10567;Q9H1B4;Q9BW27;O75419;O43257;P68104;Q9H2H8;Q12840;O43251;Q6P4R8;O14503;Q9UNP9;Q96FW1;O14686;O75528;P11142;P55854;Q9NRY2;Q12888;Q15906;Q8IXT5;Q92585;Q92698;P07737;O14639;Q13094;O75822;Q5T447;P22670;Q99873;Q96B01;Q9NX40;Q9NNW5;Q8WXE1;Q12815;A8MT69;Q96CN9;O43791;P61604;O75494;Q8WY54;Q9HD42;A0AVT1;Q15038;Q3YEC7;Q15102;Q04743;O75569;Q9NQ94;P51610;P67809;P10916;P05937;O15511;Q8IU60;Q96DI7;Q9BUN5;O94776;Q04695;Q86YC2;Q9Y5A7;O15397;Q96AX9;Q9UPT5;Q8N3C0;Q96KN7;Q9P2A4;Q13424;Q13542;Q6PJT7;Q96QF0;Q9UHD9;P52747;Q9Y221;O75928;P68036;Q6PD62;Q8TAP9;P28324;Q13118;Q8N8A2;Q9UH99;P23511;P49368;Q68DX3;Q96CW1;O60216;Q09161;Q6UVJ0;O43502;O95831;Q15833;O43299;O75665;Q8N7J2;P46783;Q99689;Q96CW5;Q9UBB5;Q02577;Q92754;Q9UIS9;Q16594;Q96SN8;Q08AD1;Q9C0H9;Q9GZY8;Q99613;Q8TEL6;Q04637;Q9H1J1;Q9H5J8;Q9HAZ2;O00303;Q9UQC2;O15315;P01100;Q96M61;P52294;P42285;O15234;O14757;O43913;Q8N137;Q9Y314;Q8N8U2;Q9NX95;Q12816;Q15819;Q14192;P11161;Q8NDT2;P53990;Q8N3Y1;Q9Y2P7;O00482;Q5SW79;P52756;Q9BRP4;Q9Y281;Q9UJC3;Q53GL7;Q02078;Q96JB2;Q9Y3C7}

- 3172 [Cluster 289]GO:0008995+F molecular\_function [name] ribonuclease E activity [def] "Catalysis of the cleavage of single-stranded RNA that is monophosphorylated at its 5'-end\_ cleavage occurs predominantly at 5 nucleotides from the 5'-end and in A + U-rich regions, and is blocked by the presence of a 5'-triphosphate group." [PMID
- 3173 Pathogen[ Q2Q067] interacts with 1 human partners:{Q12972}
- 3174 Pathogen[ P0C214] interacts with 1 human partners:{Q12972}
- 3175 Pathogen[ P03346] interacts with 1 human partners:{Q12972}
- 3176 Pathogen[ Q85601] interacts with 1 human partners:{Q12972}
- 3177 Pathogen[ P14079] interacts with 1 human partners:{Q12972}
- 3178 Pathogen[ P03383] interacts with 1 human partners:{Q12972}
- 3179 Pathogen[ P03410] interacts with 1 human partners:{Q12972}
- 3180 Pathogen[ P14075] interacts with 1 human partners:{Q12972}

3181 Pathogen[ P0C206] interacts with 1 human partners:{Q12972}  
3182 Pathogen[ P03363] interacts with 1 human partners:{Q12972}  
3183 [Cluster 290]GO:0032575+F molecular\_function [name] ATP-dependent 5'-3' RNA helicase activity [def] "Catalysis of the reaction  
3184 Pathogen[ Q2Q067] interacts with 1 human partners:{P38935}  
3185 Pathogen[ P0C214] interacts with 1 human partners:{P38935}  
3186 Pathogen[ P03346] interacts with 1 human partners:{P38935}  
3187 Pathogen[ Q85601] interacts with 1 human partners:{P38935}  
3188 Pathogen[ P14079] interacts with 1 human partners:{P38935}  
3189 Pathogen[ P03383] interacts with 1 human partners:{P38935}  
3190 Pathogen[ P03410] interacts with 1 human partners:{P38935}  
3191 Pathogen[ P14075] interacts with 1 human partners:{P38935}  
3192 Pathogen[ P0C206] interacts with 1 human partners:{P38935}  
3193 Pathogen[ P03363] interacts with 1 human partners:{P38935}  
3194 [Cluster 291]GO:000268+F molecular\_function [name] peroxisome targeting sequence binding [def] "Interacting selectively and non-covalently with a peroxisomal targeting sequence, any of several sequences of amino acids within a protein that can act as a signal for the localization of the protein into the peroxisome." [GOC  
3195 Pathogen[ Q2Q067] interacts with 1 human partners:{Q9NXR7}  
3196 Pathogen[ P0C214] interacts with 1 human partners:{Q9NXR7}  
3197 Pathogen[ P03346] interacts with 2 human partners:{Q9NXR7;P50542}  
3198 Pathogen[ Q85601] interacts with 1 human partners:{Q9NXR7}  
3199 Pathogen[ P14079] interacts with 2 human partners:{P50542;Q9NXR7}  
3200 Pathogen[ P03383] interacts with 1 human partners:{Q9NXR7}  
3201 Pathogen[ P03410] interacts with 2 human partners:{Q9NXR7;P50542}  
3202 Pathogen[ P14075] interacts with 1 human partners:{Q9NXR7}  
3203 Pathogen[ P0C206] interacts with 2 human partners:{P50542;Q9NXR7}  
3204 Pathogen[ P03363] interacts with 1 human partners:{Q9NXR7}  
3205 [Cluster 292]GO:0032093+F molecular\_function [name] SAM domain binding [def] "Interacting selectively and non-covalently with a SAM (Sterile Alpha Motif) domain, which is a 70-amino acid protein sequence that participates in protein-protein, protein-lipid, and protein-RNA interactions and is conserved from lower to higher eukaryotes." [GOC  
3206 Pathogen[ Q2Q067] interacts with 1 human partners:{Q9Y468}  
3207 Pathogen[ P0C214] interacts with 1 human partners:{Q9Y468}  
3208 Pathogen[ P03346] interacts with 1 human partners:{Q9Y468}  
3209 Pathogen[ Q85601] interacts with 1 human partners:{Q9Y468}  
3210 Pathogen[ P14079] interacts with 1 human partners:{Q9Y468}  
3211 Pathogen[ P03383] interacts with 1 human partners:{Q9Y468}  
3212 Pathogen[ P03410] interacts with 1 human partners:{Q9Y468}  
3213 Pathogen[ P14075] interacts with 1 human partners:{Q9Y468}  
3214 Pathogen[ P0C206] interacts with 1 human partners:{Q9Y468}  
3215 Pathogen[ P03363] interacts with 1 human partners:{Q9Y468}  
3216 [Cluster 293]GO:0030898+F molecular\_function [name] actin-dependent ATPase activity [def] "Catalysis of the reaction  
3217 Pathogen[ Q2Q067] interacts with 3 human partners:{P60660;P12883;P35579}  
3218 Pathogen[ P0C214] interacts with 5 human partners:{P60660;P35580;P12883;Q7Z406;P13533}  
3219 Pathogen[ P03346] interacts with 2 human partners:{P60660;P35579}  
3220 Pathogen[ Q85601] interacts with 6 human partners:{P13533;P35579;Q7Z406;P12883;P35580;P60660}  
3221 Pathogen[ P14079] interacts with 3 human partners:{P35579;P60660;P12883}  
3222 Pathogen[ P03383] interacts with 3 human partners:{P12883;P35580;P35579}  
3223 Pathogen[ P03410] interacts with 5 human partners:{P35579;P12883;P35580;P13533;P60660}  
3224 Pathogen[ P14075] interacts with 1 human partners:{P35579}  
3225 Pathogen[ P0C206] interacts with 5 human partners:{P13533;P60660;P12883;P35579;P35580}  
3226 Pathogen[ P03363] interacts with 2 human partners:{P35579;P60660}  
3227 [Cluster 294]GO:0043014+F molecular\_function [name] alpha-tubulin binding [def] "Interacting selectively and non-covalently with the microtubule constituent protein alpha-tubulin." [GOC  
3228 Pathogen[ Q2Q067] interacts with 4 human partners:{Q8NCR6;P49354;O75665;Q9ULG1}  
3229 Pathogen[ P0C214] interacts with 4 human partners:{P49354;Q8NCR6;Q9ULG1;O75665}  
3230 Pathogen[ P03346] interacts with 6 human partners:{Q9ULG1;Q8NCR6;A8K0Z3;P49354;O75665;Q9UBP0}  
3231 Pathogen[ Q85601] interacts with 5 human partners:{Q9UBP0;P49354;O75665;Q9ULG1;Q9GZM8}  
3232 Pathogen[ P14079] interacts with 8 human partners:{Q9ULG1;P49354;Q6VEQ5;Q9NQA3;Q9GZM8;A8K0Z3;O75665;Q8NCR6}  
3233 Pathogen[ P03383] interacts with 2 human partners:{Q8NCR6;O75665}  
3234 Pathogen[ P03410] interacts with 8 human partners:{O75665;P49354;Q9GZM8;Q8NCR6;Q9ULG1;Q6VEQ5;Q9NQA3;A8K0Z3}  
3235 Pathogen[ P14075] interacts with 2 human partners:{O75665;Q8NCR6}  
3236 Pathogen[ P0C206] interacts with 7 human partners:{Q9UBP0;Q8NCR6;P49354;Q9GZM8;Q6VEQ5;Q9ULG1;O75665}

3237 Pathogen[ P03363] interacts with 4 human partners:{Q9ULG1;P49354;Q8NCR6;O75665}

3238 [Cluster 295]GO:0016813+F molecular\_function [name] hydrolase activity, acting on carbon-nitrogen (but not peptide) bonds, in linear amidines [def] "Catalysis of the hydrolysis of any non-peptide carbon-nitrogen bond in a linear amidine, a compound of the form R-C(=NH)-NH2." [ISBN

3239 Pathogen[ Q2Q067] interacts with 1 human partners:{O95865}

3240 Pathogen[ P0C214] interacts with 2 human partners:{P50440;O95865}

3241 Pathogen[ P03346] interacts with 1 human partners:{O95865}

3242 Pathogen[ Q85601] interacts with 1 human partners:{O95865}

3243 Pathogen[ P14079] interacts with 2 human partners:{P50440;O95865}

3244 Pathogen[ P03383] interacts with 1 human partners:{O95865}

3245 Pathogen[ P03410] interacts with 2 human partners:{O95865;P50440}

3246 Pathogen[ P14075] interacts with 2 human partners:{O95865;P50440}

3247 Pathogen[ P0C206] interacts with 2 human partners:{O95865;P50440}

3248 Pathogen[ P03363] interacts with 1 human partners:{O95865}

3249 [Cluster 296]GO:0051747+F molecular\_function [name] cytosine C-5 DNA demethylase activity [def] "Catalysis of the reaction

3250 Pathogen[ Q2Q067] interacts with 2 human partners:{Q6NS38;Q96Q83}

3251 Pathogen[ P0C214] interacts with 2 human partners:{Q6NS38;Q96Q83}

3252 Pathogen[ P03346] interacts with 1 human partners:{Q96Q83}

3253 Pathogen[ Q85601] interacts with 2 human partners:{Q6NS38;Q96Q83}

3254 Pathogen[ P14079] interacts with 2 human partners:{Q6NS38;Q96Q83}

3255 Pathogen[ P03383] interacts with 1 human partners:{Q96Q83}

3256 Pathogen[ P03410] interacts with 2 human partners:{Q96Q83;Q6NS38}

3257 Pathogen[ P14075] interacts with 1 human partners:{Q96Q83}

3258 Pathogen[ P0C206] interacts with 2 human partners:{Q96Q83;Q6NS38}

3259 Pathogen[ P03363] interacts with 1 human partners:{Q96Q83}

3260 [Cluster 297]GO:0042162+F molecular\_function [name] telomeric DNA binding [def] "Interacting selectively and non-covalently with a telomere, a specific structure at the end of a linear chromosome required for the integrity and maintenance of the end." [GOC

3261 Pathogen[ Q2Q067] interacts with 10 human partners:{Q12888;Q9NYB0;Q15554;P54274;Q9BSI4;Q14103;Q86US8;O14746;P19338;P13010}

3262 Pathogen[ P0C214] interacts with 10 human partners:{O14746;P13010;Q9BSI4;Q15554;Q86US8;Q14103;Q9NYB0;Q12888;P19338;P54274}

3263 Pathogen[ P03346] interacts with 10 human partners:{Q12888;Q9BSI4;Q86US8;Q15554;P54274;P13010;P19338;Q14103;O14746;Q9NYB0}

3264 Pathogen[ Q85601] interacts with 9 human partners:{Q15554;Q14103;P19338;Q12888;Q86US8;O14746;Q9NYB0;P54274;P13010}

3265 Pathogen[ P14079] interacts with 10 human partners:{P54274;O14746;Q14103;P13010;Q9BSI4;Q86US8;P19338;Q9NYB0;Q15554;Q12888}

3266 Pathogen[ P03383] interacts with 10 human partners:{Q12888;P13010;P19338;Q9NYB0;Q15554;Q86US8;Q9BSI4;Q14103;O14746;P54274}

3267 Pathogen[ P03410] interacts with 10 human partners:{Q14103;Q15554;O14746;P54274;Q9BSI4;P19338;Q12888;Q86US8;P13010;Q9NYB0}

3268 Pathogen[ P14075] interacts with 10 human partners:{P19338;O14746;Q14103;Q15554;Q9BSI4;P54274;Q86US8;Q12888;P13010;Q9NYB0}

3269 Pathogen[ P0C206] interacts with 10 human partners:{Q14103;P13010;Q15554;P19338;Q9BSI4;P54274;Q12888;Q86US8;Q9NYB0;O14746}

3270 Pathogen[ P03363] interacts with 10 human partners:{P19338;Q15554;P13010;Q86US8;Q9NYB0;O14746;Q9BSI4;P54274;Q14103;Q12888}

3271 [Cluster 298]GO:0000049+F molecular\_function [name] tRNA binding [def] "Interacting selectively and non-covalently with transfer RNA." [GOC

3272 Pathogen[ Q2Q067] interacts with 17 human partners:{O95363;Q9BY44;Q9Y285;Q7Z7A3;Q15046;Q9UBP6;P38935;P18077;Q08J23;Q12904;Q9HD40;P57772;Q9HAV4;P54136;Q6PI48;O43592;P49589}

3273 Pathogen[ P0C214] interacts with 21 human partners:{P49589;Q12904;O95363;Q9BY44;P57772;P18077;Q9Y285;Q5JTZ9;Q9HAV4;P38935;P56192;Q08J23;O43592;P54577;P49588;Q9UBP6;Q7Z7A3;Q6PI48;Q9HD40;Q15046;Q9Y2Z4}

3274 Pathogen[ P03346] interacts with 15 human partners:{Q08J23;P38935;Q9HAV4;P57772;O43592;Q12904;Q9Y285;Q7Z7A3;P54136;Q9HD40;Q9UBP6;P49589;Q9BY44;Q6PI48;P18077}

3275 Pathogen[ Q85601] interacts with 16 human partners:{P54136;Q9HAV4;P18077;P57772;P49589;Q9HD40;P38935;Q9UBP6;Q9BY44;Q15046;Q9Y285;Q08J23;Q7Z7A3;O95363;Q6PI48;O43592}

3276 Pathogen[ P14079] interacts with 23 human partners:{Q9Y285;Q9BRP7;P54136;Q9BY44;P57772;O43592;O95363;P18077;O75648;P49589;Q15046;Q08J23;P56192;Q9NWX6;Q9Y2Z4;P38935;Q9HAV4;Q96Q11;Q12904;P49588;Q9HD40;Q6PI48;Q7Z7A3}

3277 Pathogen[ P03383] interacts with 18 human partners:{Q9Y285;Q12904;Q9HD40;P57772;Q7Z7A3;P49589;Q9UBP6;Q9BY44;P18077;Q9HAV4;Q15046;Q08J23;Q9Y2Z4;O95363;Q6PI48;P38935;O43592;P54136}

3278 Pathogen[ P03410] interacts with 25 human partners:{Q9BRP7;O75648;Q96Q11;Q9Y285;O75127;P56192;P49589;Q9UBP6;P49588;P54136;Q7Z7A3;Q12904;P18077;P38935;Q15046;P57772;Q08J23;Q9HD40;Q9BY44;Q9Y2Z4;Q9HAV4;O43592;Q9NWX6;O95363;Q6PI48}

3279 Pathogen[ P14075] interacts with 20 human



3280 partners:{Q9Y2Z4;P54136;O75648;P57772;P38935;O95363;Q9HAV4;O43592;Q9Y285;Q9HD40;P56192;Q12904;P18077;Q7Z7A3;Q9UBP6;Q6PI48;P49589;Q08J23;Q15046;Q9BY44}  
Pathogen[ P0C206] interacts with 20 human  
partners:{P49589;O95363;Q08J23;P38935;Q9Y2Z4;Q9UBP6;O43592;Q6PI48;Q9BRP7;Q9HD40;Q9HAV4;P18077;Q9Y285;P57772;P56192;P54136;Q9BY44;Q12904;Q7Z7A3;Q15046}

3281 Pathogen[ P03363] interacts with 17 human  
partners:{Q9Y2Z4;Q9HD40;P18077;Q08J23;Q9BY44;Q9HAV4;P49589;P57772;Q7Z7A3;Q9UBP6;P54136;Q6PI48;O95363;Q9Y285;P05455;O43592;P38935}

3282 [Cluster 299]GO:0005100+F molecular\_function [name] Rho GTPase activator activity  
[def] "Increases the rate of GTP hydrolysis by a GTPase of the Rho family." [GOC  
3283 Pathogen[ Q2Q067] interacts with 1 human partners:{Q9UJM3}  
3284 Pathogen[ P0C214] interacts with 4 human partners:{Q9UJM3;O14613;P05412;P98171}  
3285 Pathogen[ P03346] interacts with 4 human partners:{P05412;P98171;O14613;Q9UJM3}  
3286 Pathogen[ Q85601] interacts with 3 human partners:{P05412;O14613;Q9UJM3}  
3287 Pathogen[ P14079] interacts with 4 human partners:{O14613;Q9UJM3;P98171;P05412}  
3288 Pathogen[ P03383] interacts with 2 human partners:{Q9UJM3;P05412}  
3289 Pathogen[ P03410] interacts with 4 human partners:{P98171;O14613;P05412;Q9UJM3}  
3290 Pathogen[ P14075] interacts with 3 human partners:{P05412;Q9UJM3;O14613}  
3291 Pathogen[ P0C206] interacts with 4 human partners:{O14613;P05412;P98171;Q9UJM3}  
3292 Pathogen[ P03363] interacts with 4 human partners:{P98171;O14613;P05412;Q9UJM3}

3293 [Cluster 300]GO:0042609+F molecular\_function [name] CD4 receptor binding [def]  
"Interacting selectively and non-covalently with a CD4, a receptor found on the surface  
of T cells, monocytes and macrophages." [GOC  
3294 Pathogen[ Q2Q067] interacts with 2 human partners:{Q9NZD8;O15162}  
3295 Pathogen[ P0C214] interacts with 2 human partners:{Q9NZD8;O15162}  
3296 Pathogen[ P03346] interacts with 2 human partners:{Q9NZD8;O15162}  
3297 Pathogen[ Q85601] interacts with 1 human partners:{O15162}  
3298 Pathogen[ P14079] interacts with 2 human partners:{Q9NRQ2;O15162}  
3299 Pathogen[ P03383] interacts with 2 human partners:{Q9NZD8;O15162}  
3300 Pathogen[ P03410] interacts with 2 human partners:{Q9NRQ2;O15162}  
3301 Pathogen[ P14075] interacts with 2 human partners:{O15162;Q9NZD8}  
3302 Pathogen[ P0C206] interacts with 1 human partners:{O15162}  
3303 Pathogen[ P03363] interacts with 1 human partners:{Q9NZD8}

3304 [Cluster 301]GO:0000386+F molecular\_function [name] second spliceosomal  
transesterification activity [def] "Catalysis of the second transesterification  
reaction of spliceosomal mRNA splicing. Ligation of the two exons occurs via a  
transesterification reaction where the free 3'-hydroxyl group of the 5' exon is the  
nucleophile attacking the 3' splice site. Non-expressed sequences are now detached from  
the exons. In cis splicing, the intron is in a lariat structure." [GOC  
3305 Pathogen[ Q2Q067] interacts with 1 human partners:{O95391}  
3306 Pathogen[ P0C214] interacts with 1 human partners:{O95391}  
3307 Pathogen[ P03346] interacts with 1 human partners:{O95391}  
3308 Pathogen[ Q85601] interacts with 1 human partners:{O95391}  
3309 Pathogen[ P14079] interacts with 1 human partners:{O95391}  
3310 Pathogen[ P03383] interacts with 1 human partners:{O95391}  
3311 Pathogen[ P03410] interacts with 1 human partners:{O95391}  
3312 Pathogen[ P14075] interacts with 1 human partners:{O95391}  
3313 Pathogen[ P0C206] interacts with 1 human partners:{O95391}  
3314 Pathogen[ P03363] interacts with 1 human partners:{O95391}

3315 [Cluster 302]GO:0042289+F molecular\_function [name] MHC class II protein binding [def]  
"Interacting selectively and non-covalently with major histocompatibility complex class  
II molecules\_ a set of molecules displayed on cell surfaces that are responsible for  
lymphocyte recognition and antigen presentation." [GOC  
3316 Pathogen[ Q2Q067] interacts with 1 human partners:{Q04695}  
3317 Pathogen[ P0C214] interacts with 1 human partners:{Q04695}  
3318 Pathogen[ P03346] interacts with 1 human partners:{Q04695}  
3319 Pathogen[ Q85601] interacts with 1 human partners:{Q04695}  
3320 Pathogen[ P14079] interacts with 1 human partners:{Q04695}  
3321 Pathogen[ P03383] interacts with 1 human partners:{Q04695}  
3322 Pathogen[ P03410] interacts with 1 human partners:{Q04695}  
3323 Pathogen[ P14075] interacts with 1 human partners:{Q04695}  
3324 Pathogen[ P0C206] interacts with 1 human partners:{Q04695}  
3325 Pathogen[ P03363] interacts with 1 human partners:{Q04695}

3326 [Cluster 303]GO:0002039+F molecular\_function [name] p53 binding [def] "Interacting  
selectively and non-covalently with one of the p53 family of proteins." [GOC  
3327 Pathogen[ Q2Q067] interacts with 24 human  
partners:{Q93009;Q16594;Q12888;Q9NXV6;Q8N9N5;Q9UER7;P15976;O15350;Q9NPI1;Q8N726;Q9NRG4;  
P61289;Q96PM5;P51532;Q15327;O15164;Q5VTR2;Q12824;Q9HCK8;Q92793;P21675;Q5VWG9;Q00987;  
Q8WTS6}

3328 Pathogen[ P0C214] interacts with 24 human  
partners:{Q15327;Q96PM5;Q12824;P21675;Q00987;O15350;Q92793;Q8N9N5;Q8N726;Q16594;Q5VWG9;  
Q9UER7;Q9HCK8;P10809;Q93009;Q9NXV6;O15164;Q9NPI1;Q12888;Q8WTS6;Q9NQR1;Q5VTR2;Q9NRG4;  
P51532}

3329 Pathogen[ P03346] interacts with 27 human  
partners:{Q12888;Q93009;Q6PCD5;Q5VTR2;Q9NQR1;P51532;Q96PM5;Q15327;Q9NPI1;Q12824;O15350;  
Q9NXV6;Q00987;Q9NRG4;Q14694;P15976;Q8WTS6;Q9HCK8;Q9UER7;Q8N9N5;P61289;P21675;Q92793}



;Q8N726;Q5VWG9;O15164;Q16594}  
3330 Pathogen[ Q85601] interacts with 26 human  
partners:{Q93009;P15976;P61289;Q9NQR1;Q6PCD5;Q96PM5;Q9UER7;O15164;Q16594;Q5VWG9;Q12888;P51532;Q8N726;Q8WTS6;Q15327;Q8N9N5;Q9NPI1;Q5VTR2;Q9HCK8;P21675;O15350;Q9NRG4;Q92793;Q00987;Q12824;Q9NXV6}  
3331 Pathogen[ P14079] interacts with 25 human  
partners:{Q9NPI1;O15164;Q9NRG4;Q16594;Q92793;P51532;Q9NXV6;Q8N726;P15976;P61289;O15350;Q00987;Q8N9N5;Q9UER7;Q5VTR2;Q9NQR1;Q9HCK8;Q15327;P15941;Q12824;Q12888;P28360;Q5VWG9;Q8WTS6;P21675}  
3332 Pathogen[ P03383] interacts with 21 human  
partners:{Q12888;Q12824;Q9NRG4;Q5VWG9;Q8WTS6;Q16594;Q8N9N5;Q96PM5;O15350;Q9UER7;Q5VTR2;Q15327;Q9HCK8;P21675;P51532;Q9NPI1;P61289;Q9NXV6;Q9NQR1;Q92793;Q8N726}  
3333 Pathogen[ P03410] interacts with 23 human  
partners:{Q5VWG9;Q8N726;P21675;P15941;Q8N9N5;Q8WTS6;Q9NXV6;Q5VTR2;Q15327;Q92793;Q9UER7;Q9NQR1;Q9HCK8;P51532;Q16594;Q12888;O15350;Q00987;Q12824;P15976;Q9NPI1;P61289;Q9NRG4}  
3334 Pathogen[ P14075] interacts with 21 human  
partners:{Q5VTR2;Q9NXV6;Q96PM5;Q8N9N5;P21675;Q9NPI1;P51532;Q15327;Q9NQR1;Q16594;Q5VWG9;O15350;Q9HCK8;Q12824;Q92793;Q12888;Q9UER7;P61289;Q9NRG4;Q8N726;Q8WTS6}  
3335 Pathogen[ P0C206] interacts with 26 human  
partners:{P61289;Q9HCK8;Q6PCD5;Q8N9N5;P51532;Q9NPI1;Q8N726;Q15327;Q9NRG4;Q9NXV6;Q9UER7;O15164;Q93009;Q12824;P15976;Q5VTR2;Q92793;Q12888;Q9NQR1;Q8WTS6;Q5VWG9;O15350;Q96PM5;Q00987;P21675;Q16594}  
3336 Pathogen[ P03363] interacts with 21 human  
partners:{P51532;Q8N9N5;Q5VTR2;Q9UER7;P61289;Q15327;Q9HCK8;Q9NRG4;Q6PCD5;Q9NPI1;Q96PM5;Q92793;P21675;Q8N726;Q9NQR1;Q8WTS6;Q5VWG9;Q9NXV6;Q12824;Q12888;Q16594}  
3337 [Cluster 304]GO:0000993+F molecular\_function [name] RNA polymerase II core binding [def] "Interacting selectively and non-covalently with RNA polymerase II core enzyme, a multisubunit eukaryotic nuclear RNA polymerase typically composed of twelve subunits." [GOC  
3338 Pathogen[ Q2Q067] interacts with 9 human  
partners:{Q2YD98;Q6P1J9;Q9NRG4;Q9NQG5;Q5BKZ1;Q8N7H5;Q9BTA9;Q8N163;Q9Y224}  
3339 Pathogen[ P0C214] interacts with 8 human  
partners:{Q5BKZ1;Q8N163;Q9Y224;Q6P1J9;Q9NQG5;Q8N7H5;Q9BTA9;Q9NRG4}  
3340 Pathogen[ P03346] interacts with 9 human  
partners:{Q9NQG5;Q8N163;Q9NRG4;Q9Y224;Q2YD98;Q6P1J9;Q8N7H5;Q9BTA9;Q5BKZ1}  
3341 Pathogen[ Q85601] interacts with 8 human  
partners:{Q6P1J9;Q9BTA9;Q9NQG5;Q8N163;Q9NRG4;Q5BKZ1;Q9Y224;Q8N7H5}  
3342 Pathogen[ P14079] interacts with 9 human  
partners:{Q8N163;Q9NRG4;Q9BTA9;Q5BKZ1;Q6P1J9;Q2YD98;Q9Y224;Q8N7H5;Q9NQG5}  
3343 Pathogen[ P03383] interacts with 9 human  
partners:{Q6P1J9;Q9BTA9;Q8N163;Q9NRG4;Q9NQG5;Q2YD98;Q8N7H5;Q9Y224;Q5BKZ1}  
3344 Pathogen[ P03410] interacts with 9 human  
partners:{Q9NQG5;Q9Y224;Q8N7H5;Q8N163;Q2YD98;Q6P1J9;Q5BKZ1;Q9BTA9;Q9NRG4}  
3345 Pathogen[ P14075] interacts with 9 human  
partners:{Q5BKZ1;Q9Y224;Q9NQG5;Q8N163;Q8N7H5;Q6P1J9;Q2YD98;Q9BTA9;Q9NRG4}  
3346 Pathogen[ P0C206] interacts with 9 human  
partners:{Q9Y224;Q2YD98;Q9NRG4;Q9NQG5;Q5BKZ1;Q8N7H5;Q9BTA9;Q8N163;Q6P1J9}  
3347 Pathogen[ P03363] interacts with 9 human  
partners:{Q2YD98;Q5BKZ1;Q9NRG4;Q6P1J9;Q9NQG5;Q8N163;Q9Y224;Q8N7H5;Q9BTA9}  
3348 [Cluster 305]GO:0003906+F molecular\_function [name] DNA-(apurinic or apyrimidinic site) lyase activity [def] "Catalysis of the cleavage of the C-O-P bond 3' to the apurinic or apyrimidinic site in DNA by a beta-elimination reaction, leaving a 3'-terminal unsaturated sugar and a product with a terminal 5'-phosphate." [EC  
3349 Pathogen[ Q2Q067] interacts with 7 human  
partners:{Q969S2;P27695;Q8IW19;O15527;P78549;P23396;P17096}  
3350 Pathogen[ P0C214] interacts with 6 human  
partners:{Q8IW19;P27695;P23396;P17096;P78549;O15527}  
3351 Pathogen[ P03346] interacts with 8 human  
partners:{Q8IW19;P17096;Q969S2;P78549;P23396;P27695;O15527;Q9UBZ4}  
3352 Pathogen[ Q85601] interacts with 9 human  
partners:{Q9UBZ4;O15527;P17096;Q969S2;P23396;Q96FI4;Q8IW19;P78549;P27695}  
3353 Pathogen[ P14079] interacts with 10 human  
partners:{Q8TAT5;P23396;Q9UBZ4;P17096;O15527;P78549;Q969S2;Q96FI4;P27695;Q8IW19}  
3354 Pathogen[ P03383] interacts with 5 human  
partners:{P17096;O15527;Q8IW19;P27695;P23396}  
3355 Pathogen[ P03410] interacts with 10 human  
partners:{Q96FI4;P17096;P23396;Q8TAT5;P78549;Q9UBZ4;O15527;Q8IW19;P27695;Q969S2}  
3356 Pathogen[ P14075] interacts with 5 human  
partners:{P27695;O15527;P17096;Q8IW19;P23396}  
3357 Pathogen[ P0C206] interacts with 10 human  
partners:{P27695;O15527;Q9UBZ4;P23396;Q8TAT5;Q96FI4;P17096;Q969S2;Q8IW19;P78549}  
3358 Pathogen[ P03363] interacts with 6 human  
partners:{Q8IW19;P23396;O15527;Q96FI4;P17096;Q969S2}  
3359 [Cluster 306]GO:0010181+F molecular\_function [name] FMN binding [def] "Interacting selectively and non-covalently with FMN, flavin mononucleotide, the coenzyme or the

prosthetic group of various flavoprotein oxidoreductase enzymes." [GOC

3360 Pathogen[ Q2Q067] interacts with 2 human partners:{P29474;Q9UHB4}

3361 Pathogen[ P0C214] interacts with 2 human partners:{P29474;Q9UHB4}

3362 Pathogen[ P03346] interacts with 3 human partners:{Q9UBK8;P29474;Q9UHB4}

3363 Pathogen[ Q85601] interacts with 2 human partners:{Q9UHB4;P29474}

3364 Pathogen[ P14079] interacts with 3 human partners:{Q9UHB4;Q8IUH2;Q9NVS9}

3365 Pathogen[ P03383] interacts with 2 human partners:{P29474;Q9UHB4}

3366 Pathogen[ P03410] interacts with 3 human partners:{P29474;Q9UHB4;Q9NVS9}

3367 Pathogen[ P14075] interacts with 3 human partners:{P29474;Q9UHB4;Q9NVS9}

3368 Pathogen[ P0C206] interacts with 2 human partners:{P29474;Q9UHB4}

3369 Pathogen[ P03363] interacts with 2 human partners:{P29474;Q9UHB4}

3370 [Cluster 307]GO:0070694+F molecular\_function [name] deoxyribonucleoside 5'-monophosphate N-glycosidase activity [def] "Catalysis of the reaction

3371 Pathogen[ Q2Q067] interacts with 1 human partners:{O43598}

3372 Pathogen[ P0C214] interacts with 1 human partners:{O43598}

3373 Pathogen[ P03346] interacts with 1 human partners:{O43598}

3374 Pathogen[ Q85601] interacts with 1 human partners:{O43598}

3375 Pathogen[ P14079] interacts with 1 human partners:{O43598}

3376 Pathogen[ P03383] interacts with 1 human partners:{O43598}

3377 Pathogen[ P03410] interacts with 1 human partners:{O43598}

3378 Pathogen[ P14075] interacts with 1 human partners:{O43598}

3379 Pathogen[ P0C206] interacts with 1 human partners:{O43598}

3380 Pathogen[ P03363] interacts with 1 human partners:{O43598}

3381 [Cluster 308]GO:0017112+F molecular\_function [name] Rab guanyl-nucleotide exchange factor activity [def] "Stimulates the exchange of guanyl nucleotides associated with a GTPase of the Rab family. Under normal cellular physiological conditions, the concentration of GTP is higher than that of GDP, favoring the replacement of GDP by GTP in association with the GTPase." [GOC

3382 Pathogen[ Q2Q067] interacts with 3 human partners:{Q96QF0;Q8TBN0;Q7Z401}

3383 Pathogen[ P0C214] interacts with 3 human partners:{Q8TBN0;Q7Z401;Q96QF0}

3384 Pathogen[ P03346] interacts with 8 human partners:{Q6P3S1;Q8TBN0;Q8IV53;Q86WG5;Q8IWF6;Q7Z401;Q9UJ41;Q96QF0}

3385 Pathogen[ Q85601] interacts with 4 human partners:{Q9UJ41;Q7Z401;Q8TBN0;Q96QF0}

3386 Pathogen[ P14079] interacts with 11 human partners:{Q6P3S1;Q8TBN0;Q9UJ41;Q8IV53;Q96QF0;Q86WG5;Q7Z401;Q68D51;Q8IWF6;P78524;Q8NEG7}

3387 Pathogen[ P03383] interacts with 3 human partners:{Q96QF0;Q8IWF6;Q8TBN0}

3388 Pathogen[ P03410] interacts with 12 human partners:{Q9UJ41;Q8IWF6;Q7Z401;Q6P3S1;Q68D51;Q8TBN0;Q96QF0;O75064;Q8NEG7;Q8IV53;P78524;Q86WG5}

3389 Pathogen[ P14075] interacts with 3 human partners:{Q96QF0;Q8IWF6;Q8TBN0}

3390 Pathogen[ P0C206] interacts with 8 human partners:{Q96QF0;Q8TBN0;Q8IWF6;Q9UJ41;Q8NEG7;Q8IV53;Q7Z401;Q6P3S1}

3391 Pathogen[ P03363] interacts with 8 human partners:{Q8IWF6;Q9UJ41;Q86WG5;Q6P3S1;Q7Z401;Q8TBN0;Q8IV53;Q96QF0}

3392 [Cluster 309]GO:0030619+F molecular\_function [name] U1 snRNA binding [def] "Interacting selectively and non-covalently with the U1 small nuclear RNA (U1 snRNA)." [GOC

3393 Pathogen[ Q2Q067] interacts with 1 human partners:{P09234}

3394 Pathogen[ P0C214] interacts with 1 human partners:{P09234}

3395 Pathogen[ P03346] interacts with 1 human partners:{P09234}

3396 Pathogen[ Q85601] interacts with 1 human partners:{P09234}

3397 Pathogen[ P14079] interacts with 1 human partners:{P09234}

3398 Pathogen[ P03383] interacts with 1 human partners:{P09234}

3399 Pathogen[ P03410] interacts with 1 human partners:{P09234}

3400 Pathogen[ P14075] interacts with 1 human partners:{P09234}

3401 Pathogen[ P0C206] interacts with 1 human partners:{P09234}

3402 Pathogen[ P03363] interacts with 1 human partners:{P09234}

3403 [Cluster 310]GO:0003950+F molecular\_function [name] NAD+ ADP-ribosyltransferase activity [def] "Catalysis of the reaction

3404 Pathogen[ Q2Q067] interacts with 13 human partners:{Q8IXJ6;Q9H2K2;Q460N3;Q9Y6E7;Q460N5;Q9NTG7;Q8N6T7;Q7Z2W4;P09874;Q53GL7;O95271;Q8IXQ6;Q9UKK3}

3405 Pathogen[ P0C214] interacts with 13 human partners:{Q8IXQ6;Q460N5;Q7Z2W4;Q53GL7;Q9NTG7;Q8N6T7;Q9H2K2;Q460N3;Q9UKK3;Q8IXJ6;O95271;Q9Y6E7;P09874}

3406 Pathogen[ P03346] interacts with 15 human partners:{Q460N3;Q53GL7;Q9UKK3;Q8IXJ6;Q9Y6E7;Q9H2K2;Q8IXQ6;Q8N6T7;P09874;Q9UGN5;O95271;Q9Y6F1;Q460N5;Q9NTG7;Q7Z2W4}

3407 Pathogen[ Q85601] interacts with 15 human partners:{P09874;Q460N3;Q9UKK3;Q7Z2W4;Q9Y6E7;Q9H2K2;Q9Y6F1;Q8IXJ6;Q8IXQ6;Q8N6T7;Q9UGN5;O95271;Q460N5;Q9NTG7;Q53GL7}

3408 Pathogen[ P14079] interacts with 14 human partners:{Q8IXQ6;P09874;Q7Z2W4;O95271;Q9UGN5;Q9H2K2;Q9UKK3;Q460N3;Q8N6T7;Q8IXJ6;Q2NL67;Q53GL7;Q9NTG7;Q9Y6F1}

3409 Pathogen[ P03383] interacts with 9 human

3410 partners:{Q8N6T7;Q8IXQ6;Q9NTG7;P09874;Q53GL7;Q9Y6E7;Q9UKK3;O95271;Q7Z2W4}  
Pathogen[ P03410] interacts with 15 human

3411 partners:{Q8IXJ6;Q9NTG7;Q53GL7;Q8N6T7;Q460N3;Q9Y6F1;Q8IXQ6;Q7Z2W4;Q9UGN5;O95271;P09874;Q2NL67;Q9UKK3;Q460N5;Q9H2K2}  
Pathogen[ P14075] interacts with 9 human

3412 partners:{Q8N6T7;Q8IXQ6;Q9Y6E7;Q9NTG7;Q7Z2W4;O95271;P09874;Q53GL7;Q9UKK3}  
Pathogen[ P0C206] interacts with 15 human

3413 partners:{O95271;P09874;Q460N5;Q53GL7;Q8IXQ6;Q460N3;Q9Y6F1;Q8N6T7;Q9UGN5;Q9UKK3;Q8IXJ6;Q7Z2W4;Q9NTG7;Q9H2K2;Q9Y6E7}  
Pathogen[ P03363] interacts with 14 human

3414 partners:{Q9Y6E7;Q9UGN5;Q8IXQ6;Q7Z2W4;Q460N3;Q9H2K2;Q8N6T7;Q9UKK3;O95271;Q460N5;Q9NTG7;P09874;Q9Y6F1;Q53GL7}  
[Cluster 311]GO:0005068+F molecular\_function [name] transmembrane receptor protein tyrosine kinase adaptor activity [def] "The binding activity of a molecule that brings together a transmembrane receptor protein tyrosine kinase and one or more other molecules, permitting them to function in a coordinated way." [GOC

3415 Pathogen[ Q2Q067] interacts with 1 human partners:{P27986}  
3416 Pathogen[ P0C214] interacts with 3 human partners:{Q8WV28;Q9UQC2;P27986}  
3417 Pathogen[ P03346] interacts with 3 human partners:{Q9UQC2;Q8WV28;P27986}  
3418 Pathogen[ Q85601] interacts with 2 human partners:{Q9UQC2;P27986}  
3419 Pathogen[ P14079] interacts with 4 human partners:{Q8WV28;Q8WU20;Q6PIZ9;Q9UQC2}  
3420 Pathogen[ P03383] interacts with 1 human partners:{P27986}  
3421 Pathogen[ P03410] interacts with 5 human partners:{Q9UQC2;P27986;Q6PIZ9;Q8WV28;Q8WU20}  
3422 Pathogen[ P14075] interacts with 1 human partners:{P27986}  
3423 Pathogen[ P0C206] interacts with 3 human partners:{P27986;Q8WU20;Q9UQC2}  
3424 Pathogen[ P03363] interacts with 3 human partners:{Q8WV28;P27986;Q9UQC2}

3425 [Cluster 312]GO:0016274+F molecular\_function [name] protein-arginine N-methyltransferase activity [def] "Catalysis of the reaction

3426 Pathogen[ Q2Q067] interacts with 3 human partners:{P55345;Q86XK2;Q86X55}  
3427 Pathogen[ P0C214] interacts with 3 human partners:{P55345;Q86XK2;Q86X55}  
3428 Pathogen[ P03346] interacts with 3 human partners:{Q86XK2;P55345;Q86X55}  
3429 Pathogen[ Q85601] interacts with 3 human partners:{Q86X55;Q86XK2;P55345}  
3430 Pathogen[ P14079] interacts with 3 human partners:{Q86XK2;Q60678;P55345}  
3431 Pathogen[ P03383] interacts with 2 human partners:{Q86X55;Q86XK2}  
3432 Pathogen[ P03410] interacts with 3 human partners:{Q86X55;Q86XK2;P55345}  
3433 Pathogen[ P14075] interacts with 2 human partners:{Q86X55;Q86XK2}  
3434 Pathogen[ P0C206] interacts with 4 human partners:{Q86XK2;Q86X55;Q60678;P55345}  
3435 Pathogen[ P03363] interacts with 2 human partners:{Q86XK2;Q86X55}

3436 [Cluster 313]GO:0008289+F molecular\_function [name] lipid binding [def] "Interacting selectively and non-covalently with a lipid." [GOC

3437 Pathogen[ Q2Q067] interacts with 19 human partners:{O94973;Q12933;Q8N7J2;Q13432;Q5JTC6;Q7Z614;P05413;Q68DK2;Q96CW1;Q9Y2T7;Q9HB19;Q14677;O95810;Q9H4A6;Q99962;P08235;A6NIH7;Q9H4A5;Q86VN1}

3438 Pathogen[ P0C214] interacts with 24 human partners:{Q96CW1;O95810;Q9H4A6;Q9H201;Q92934;P05413;Q7Z614;Q9Y6I3;Q99962;Q9BY43;Q9HB19;Q9Y2T7;Q12933;O94973;Q9H4A5;Q8N7J2;A6NIH7;Q68DK2;Q5JTC6;Q86VN1;Q14677;Q8N944;Q13432;P55072}

3439 Pathogen[ P03346] interacts with 49 human partners:{Q13596;Q9H4A5;P29373;Q9HB19;P06401;Q15036;P05413;P07148;P08235;Q8N7J2;Q92543;Q9H4A6;Q99962;Q96T51;Q9UMY4;Q86VN1;Q7Z614;P55072;Q9BR61;Q01469;Q8TEW0;Q9Y371;Q13432;Q9NRS6;Q9BXW6;Q60493;Q9UNH7;Q96CW1;Q9Y5X2;P51161;O95810;Q68DK2;Q9H201;Q9HB21;Q9Y2T7;Q9BY43;O95219;P56589;A6NIH7;Q60749;Q14CM0;Q9Y6I3;O00482;Q9ULU8;O94973;Q96QH2;Q14677;Q13285;Q5JTC6}

3440 Pathogen[ Q85601] interacts with 29 human partners:{Q13596;Q9H4A5;Q9Y2T7;P05413;Q96CW1;P51161;Q15036;Q99962;Q96T51;Q86VN1;Q7Z614;Q14677;Q9BY43;O95810;Q12933;Q9HB21;P08235;Q9H201;Q5JTC6;Q9H4A6;Q68DK2;O94973;O00482;Q9HB19;A6NIH7;Q13432;Q9Y6I3;Q8N7J2;Q9UNH7}

3441 Pathogen[ P14079] interacts with 48 human partners:{Q9BXW6;Q96CW1;Q8N944;Q86VN1;Q9UNH7;Q96QH2;Q15036;Q16873;Q68DK2;A6NIH7;Q9UKF7;P56589;Q9Y6I3;Q60493;P08235;Q9BY43;Q14677;Q9ULU8;Q9NRS6;Q8N7J2;Q9Y371;P05413;Q9HB19;Q8TEW0;Q9Y2T7;Q9Y5X2;O00519;O00482;Q96T51;Q92934;O00264;Q60749;Q13596;O94973;Q7Z614;Q9H4A5;Q12933;Q13432;O95810;Q9HB21;Q92543;Q9UMY4;Q01469;Q5JTC6;Q9H4A6;Q9NZZD2;Q99962;Q9H201}

3442 Pathogen[ P03383] interacts with 16 human partners:{Q96CW1;Q68DK2;Q7Z614;Q13432;Q9Y2T7;Q12933;Q8N7J2;Q5JTC6;O95810;Q9H4A6;Q14677;A6NIH7;O94973;Q86VN1;Q9HB19;Q9H4A5}

3443 Pathogen[ P03410] interacts with 51 human partners:{Q14CM0;Q96QH2;O00519;Q96CW1;P51161;Q7Z614;Q13596;Q9Y6I3;P05413;Q60749;Q9BY43;Q92934;Q86VN1;P55157;Q9HB21;Q9UMY4;Q9H4A6;Q9UKF7;A6NIH7;O95219;Q9UNH7;Q14677;O00264;Q16873;Q15036;Q9Y371;Q9H201;Q12933;Q9ULU8;Q9NZZD2;Q9NRS6;O95810;Q5JTC6;Q96T51;Q8TEW0;Q99962;Q8N7J2;P56589;Q01469;Q9HB19;Q9Y2T7;Q13432;P08235;Q68DK2;O94973;Q92543;Q9H4A5;Q60493;Q9BXW6;Q8N944;Q9Y5X2}

3444 Pathogen[ P14075] interacts with 17 human partners:{O94973;Q96CW1;Q86VN1;Q7Z614;Q9H4A5;Q68DK2;O95810;Q8N7J2;Q12933;Q9Y2T7;Q14677;Q9HB19;Q5JTC6;A6NIH7;Q13432;Q9H4A6;Q8N944}

3445 Pathogen[ P0C206] interacts with 46 human partners: {Q68DK2;Q9HB19;Q9H4A6;O94973;Q9H201;P06401;Q13432;Q9UNH7;O95810;P51161;Q9NRS6;Q8N944;P56589;Q96T51;Q86VN1;O60493;Q99962;P29373;Q13596;Q12933;O00482;Q15036;Q9H4A5;P05413;Q92934;Q9NZD2;Q8TEW0;O60749;Q9ULU8;O00264;Q8N7J2;Q96CW1;Q9Y6I3;Q96QH2;P55072;Q7Z614;Q9HB21;Q14677;A6NIH7;Q9BY43;Q9BXW6;Q9BR61;Q01469;Q9Y2T7;P08235;Q5JTC6}

3446 Pathogen[ P03363] interacts with 38 human partners: {Q9H201;Q5JTC6;Q9UNH7;Q99962;Q92543;Q9BZF3;O95219;Q12933;Q01469;Q14CM0;Q96RU3;P51161;Q9H4A6;Q68DK2;Q9UMY4;O60493;Q96T51;O94973;O60749;P29373;P08235;Q86VN1;Q9BXW6;Q14677;Q13432;P05413;Q9HB19;Q7Z614;Q96QH2;A6NIH7;Q9UKF7;Q13596;Q9BR61;O95810;Q9Y2T7;Q96CW1;Q8N7J2;O00482}

3447 [Cluster 314]GO:0052906+F

3448 Pathogen[ Q2Q067] interacts with 1 human partners: {Q32P41}

3449 Pathogen[ P0C214] interacts with 1 human partners: {Q32P41}

3450 Pathogen[ P03346] interacts with 1 human partners: {Q32P41}

3451 Pathogen[ Q85601] interacts with 1 human partners: {Q32P41}

3452 Pathogen[ P14079] interacts with 1 human partners: {Q32P41}

3453 Pathogen[ P03383] interacts with 1 human partners: {Q32P41}

3454 Pathogen[ P03410] interacts with 1 human partners: {Q32P41}

3455 Pathogen[ P14075] interacts with 1 human partners: {Q32P41}

3456 Pathogen[ P0C206] interacts with 1 human partners: {Q32P41}

3457 Pathogen[ P03363] interacts with 1 human partners: {Q32P41}

3458 [Cluster 315]GO:0019777+F molecular\_function [name] Atg12 ligase activity [def] "Catalysis of the covalent attachment of the ubiquitin-like protein Atg12 to other proteins." [GOC]

3459 Pathogen[ Q2Q067] interacts with 1 human partners: {Q9NT62}

3460 Pathogen[ P0C214] interacts with 1 human partners: {Q9NT62}

3461 Pathogen[ P03346] interacts with 1 human partners: {Q9NT62}

3462 Pathogen[ Q85601] interacts with 1 human partners: {Q9NT62}

3463 Pathogen[ P14079] interacts with 2 human partners: {Q9NT62;Q9H0Y0}

3464 Pathogen[ P03383] interacts with 1 human partners: {Q9NT62}

3465 Pathogen[ P03410] interacts with 2 human partners: {Q9H0Y0;Q9NT62}

3466 Pathogen[ P14075] interacts with 1 human partners: {Q9NT62}

3467 Pathogen[ P0C206] interacts with 1 human partners: {Q9NT62}

3468 Pathogen[ P03363] interacts with 1 human partners: {Q9NT62}

3469 [Cluster 316]GO:0004061+F molecular\_function [name] arylformamidase activity [def] "Catalysis of the reaction

3470 Pathogen[ Q2Q067] interacts with 1 human partners: {Q63HML}

3471 Pathogen[ P0C214] interacts with 1 human partners: {Q63HML}

3472 Pathogen[ P03346] interacts with 1 human partners: {Q63HML}

3473 Pathogen[ Q85601] interacts with 1 human partners: {Q63HML}

3474 Pathogen[ P14079] interacts with 1 human partners: {Q63HML}

3475 Pathogen[ P03383] interacts with 1 human partners: {Q63HML}

3476 Pathogen[ P03410] interacts with 1 human partners: {Q63HML}

3477 Pathogen[ P14075] interacts with 1 human partners: {Q63HML}

3478 Pathogen[ P0C206] interacts with 1 human partners: {Q63HML}

3479 Pathogen[ P03363] interacts with 1 human partners: {Q63HML}

3480 [Cluster 317]GO:0031625+F molecular\_function [name] ubiquitin protein ligase binding [def] "Interacting selectively and non-covalently with a ubiquitin protein ligase enzyme, any of the E3 proteins." [GOC]

3481 Pathogen[ Q2Q067] interacts with 73 human partners: {Q9H2G9;O15234;P54252;Q93034;Q93009;P55957;O75925;Q6NUN9;Q9UQ80;P06400;Q99816;O60260;Q8TD23;Q13077;Q04206;Q12933;O95999;Q9UER7;P08107;Q96CS3;P15172;P63165;Q04323;P27797;P63146;Q9UBF1;Q9Y6H5;O96017;Q15370;P12755;Q9UNN5;Q9Y4X5;P84022;Q9NPD8;Q94888;O15105;Q13114;O43541;P11161;Q13616;Q13618;Q15796;Q15366;O75164;Q5VTR2;P24928;P61956;O76064;Q96RU7;O43791;Q13620;P25963;Q13619;O60573;O75150;P43356;Q9UNE7;P49459;P27986;Q92844;Q01860;P68036;P13010;Q9UJX6;Q86Y01;O00463;Q99717;Q9H3M7;Q13617;P62877;Q9NW38;Q8N2W9;Q14999}

3482 Pathogen[ P0C214] interacts with 78 human partners: {Q96B02;Q9UJX6;O15234;Q13619;Q13617;Q13620;P61956;O75925;P13010;O94888;Q9H3M7;Q8TD23;Q8N2W9;Q86Y37;P84022;P15172;P55957;Q04206;P49459;Q13618;Q93034;Q15370;O75164;Q14999;P62877;Q15366;P62253;Q92844;Q9Y6H5;P61086;Q9UER7;O96017;P63165;Q9UNN5;O95999;Q12933;O43791;O15105;Q9H2G9;Q04323;Q15796;Q96CS3;P25963;Q93009;O43541;Q13616;P12755;Q9UBF1;P24928;Q99816;P43356;Q96RU7;Q13114;P10909;P27797;P11161;O75150;Q99717;Q86WV6;O60260;Q6NUN9;Q9UQ80;P35520;O00463;Q86Y01;Q9Y4X5;Q5VTR2;P08107;Q9UNE7;O76064;Q9NPD8;P27986;Q01860;P06400;P63146;P54252;Q9NW38;O60573}

3483 Pathogen[ P03346] interacts with 83 human partners: {P08107;Q9NS91;Q13077;O00463;O15234;Q13263;Q15370;Q93009;O76064;Q15366;Q9H2G9;P68036;Q96017;O75150;Q13616;Q5VTR2;O94888;Q9UQ80;Q96CS3;O95714;P06400;P25963;P61956;Q8TD23;Q9UBF1;P55957;Q13618;P15172;Q15796;P13010;O60573;Q04206;Q99816;Q99717;P49459;O15105;Q13114;Q01860;Q93034;Q13620;O95999;Q9UJX6;P62877;O75925;P84022;O43541;Q9UNN5;O94972;P63146;Q9UNE7;O75164;P63165;Q8IWT3;Q9UER7;O75604;O43791;Q9Y6H5;Q86Y37;Q8NOX7;Q9NPD8;Q8N2W9;P43356;P27797;Q96RU7;Q9BUZ4;O60260;Q04323;P11161;Q13619;Q969F2;Q14999;Q96FW1;P24928;Q6NUN9;Q9Y4X5;Q9NW38;Q86Y01;Q9H3M7;O14965;P27986;Q92844;P54252;Q13617}

3484 Pathogen[ Q85601] interacts with 83 human partners: {Q99816;O15234;Q86WV6;Q15370;P08107;P62253;Q9UJX6;P63146;O96017;Q93009;Q9UQ80;P15172;O00463;Q96CS3;O95714;P06400;O43541;Q8TD23;P62877;P61956;Q6NUN9;Q92844;Q9UER7

;Q13616;P27797;O94888;Q86Y37;Q96B02;Q8N2W9;Q9NPD8;Q13114;O43791;P68036;P12755;P27986;P54252;Q13263;O14965;O76064;Q9UNN5;Q04323;Q12933;Q9UBF1;Q99717;Q04206;O60573;P61086;P55957;Q8N0X7;Q9NW38;P49459;Q96RU7;O75150;P84022;O60260;Q5VTR2;Q9H2G9;P63165;Q14999;O75164;Q13077;O15105;P43356;P24928;Q9Y6H5;Q13620;Q13618;O95999;Q86Y01;Q9UNE7;Q13619;O75925;Q9H3M7;P11161;Q01860;Q15366;Q9Y4X5;Q93034;Q15796;P13010;Q9NS91;P25963;Q13617}

3485 Pathogen[ P14079] interacts with 67 human partners: {Q8N2W9;Q92844;O00463;O60260;Q8TD23;P12755;O94888;O95999;Q9P055;P68036;P13010;Q96CS3;Q13620;Q6NUN9;Q13618;Q9NPD8;P54252;Q9Y6H5;P10909;P63165;P61956;Q9BUZ4;P62877;Q13077;O60573;P43356;Q9H2G9;Q86Y01;Q9UNN5;Q01860;Q9H2D6;P11161;Q9UER7;Q9UL15;Q5VTR2;Q86WV6;P08107;Q93034;P49459;Q9UBF1;Q15370;Q15366;Q8N0X7;O43541;Q9UJX6;Q13617;Q96RU7;Q12933;O75925;O43791;Q9H3M7;P24928;Q13616;Q86Y37;Q99816;O15105;Q9NW38;O14965;Q9UQ80;P63146;O15234;Q14999;Q96FW1;Q04323;Q13619;Q13114;P55957}

3486 Pathogen[ P03383] interacts with 66 human partners: {P08107;P27986;Q13616;O75925;O15234;Q15366;P13010;Q92844;Q9UJX6;P15172;P61956;Q8TD23;O43791;Q93034;P55957;Q9H2G9;Q99816;Q04323;Q01860;O94888;O60573;Q8N2W9;P06400;Q13618;O75164;O15105;P54252;P84022;O60260;Q9UNN5;P24928;Q12933;Q99717;Q96CS3;O43541;P63165;Q9UER7;P25963;Q9UBF1;O95999;Q5VTR2;O14965;Q96RU7;Q13617;P11161;Q9UQ80;Q15796;P68036;P62877;Q9H3M7;Q04206;Q6NUN9;P49459;Q15370;Q9NPD8;P43356;Q9Y6H5;P63146;Q9NW38;Q86Y01;O75150;Q13114;Q14999;P27797;O96017;Q13620}

3487 Pathogen[ P03410] interacts with 79 human partners: {P84022;Q96FW1;Q04206;P27986;Q969F2;O75925;Q9H2G9;Q9Y6H5;Q9UNN5;Q8N0X7;O15234;P12755;P63165;Q01860;Q13077;P24928;Q13620;Q9UQ80;Q99717;P49459;Q9H3M7;Q8N2W9;P54252;Q5VTR2;Q15366;Q15370;Q92844;P06400;O60260;Q9P055;Q04323;P68036;Q9UBF1;P55957;O14965;Q99816;Q9UNE7;Q13618;Q86Y01;Q6NUN9;O75150;Q9UER7;O95999;P08107;O00463;P62877;Q9Y4X5;P63146;Q12933;Q86Y37;O96017;Q9UL15;O43541;O15105;Q96RU7;O60573;Q13616;Q9NPD8;Q96CS3;Q13619;P13010;Q86WV6;Q13617;O43791;Q8TD23;Q9NW38;P25963;O75164;Q15796;P11161;P61956;Q93034;P43356;Q9UJX6;Q9H2D6;O94888;Q13114;P10909;P27797}

3488 Pathogen[ P14075] interacts with 67 human partners: {Q5VTR2;Q15366;O15234;P63165;Q96CS3;Q9H2G9;P55957;Q04206;Q9Y6H5;Q92844;Q9UBF1;P68036;Q93034;Q13618;Q8TD23;O43541;O94888;Q6NUN9;P49459;Q01860;P11161;P15172;Q13620;O75925;Q99717;Q96FW1;Q8N2W9;Q15796;P25963;Q04323;P54252;Q9NW38;Q9UJX6;Q9NPD8;Q14999;O60573;Q9UNN5;Q15370;Q12933;O96017;O14965;P24928;P61956;P27797;O75150;P27986;Q13114;Q9H3M7;O15105;O95999;P06400;P43356;Q9UQ80;Q96RU7;P08107;O43791;P63146;P13010;P84022;Q9UER7;Q99816;Q13616;Q86Y01;O60260;Q13617;P62877;O75164}

3489 Pathogen[ P0C206] interacts with 89 human partners: {Q9UNN5;Q6NUN9;P84022;Q86Y01;O43541;Q8N0X7;P62877;Q9NPD8;P13010;Q86Y37;P62253;Q13077;Q92844;P27797;Q13114;O43791;Q969F2;Q13263;P43356;O96017;P11161;O75925;P68036;Q04323;Q01860;O75604;O95999;Q99717;P25963;Q8N2W9;Q9UER7;Q9NS91;Q93009;Q99816;O94888;Q86WV6;Q13616;Q12933;P61956;Q15796;P54252;Q5VTR2;P27986;Q13620;Q96RU7;P12755;Q9Y4X5;Q14999;O15105;Q13619;Q9BUZ4;Q13617;Q13618;Q9UNE7;P49459;Q96FW1;Q8TD23;Q04206;O60260;Q15370;P10909;O15234;P08107;O00463;Q15366;Q9UJX6;Q9H2G9;Q9H3M7;O75164;P15172;O60573;P24928;Q9UQ80;Q93034;P63165;P61086;O14965;Q96B02;O76064;Q96CS3;Q9UBF1;O75150;O95714;Q9Y6H5;P55957;Q9NW38;P63146;Q8IWT3;P06400}

3490 Pathogen[ P03363] interacts with 76 human partners: {Q9UNN5;Q86Y01;Q9NW38;P55957;Q9Y6H5;Q9H2D6;O94972;Q15366;Q15370;Q04323;Q04206;P49459;P13010;P25963;O75604;O94888;Q13618;Q12933;O00463;Q9H3M7;Q9UBF1;Q8N0X7;Q5VTR2;P24928;Q13617;P54252;O75164;Q9UER7;Q6NUN9;O15105;P63146;Q96CS3;P06400;Q9UQ80;Q9UJX6;O75150;O96017;Q13619;Q9Y4X5;Q13616;P63165;Q14999;P08107;P62877;Q13077;P27797;Q9UNE7;O43541;Q15796;P84022;Q13620;O75925;Q9H2G9;Q92844;Q9NPD8;Q8TD23;O95714;Q13114;Q8IWT3;Q99816;O60573;P61956;Q93034;Q9BUZ4;Q8N2W9;Q9NS91;P15172;Q99717;P43356;P27986;Q01860;Q96FW1;O43791;P68036;O15234;P11161}

3491 [Cluster 318]GO:0000213+F molecular\_function [name] tRNA-intron endonuclease activity [def] "Catalysis of the endonucleolytic cleavage of pre-tRNA, producing 5'-hydroxyl and 2',3'-cyclic phosphate termini, and specifically removing the intron." [EC

3492 Pathogen[ Q2Q067] interacts with 2 human partners: {Q8NCE0;Q9BSV6}

3493 Pathogen[ P0C214] interacts with 2 human partners: {Q9BSV6;Q8NCE0}

3494 Pathogen[ P03346] interacts with 2 human partners: {Q9BSV6;Q8NCE0}

3495 Pathogen[ Q85601] interacts with 2 human partners: {Q9BSV6;Q8NCE0}

3496 Pathogen[ P14079] interacts with 2 human partners: {Q9BSV6;Q8NCE0}

3497 Pathogen[ P03383] interacts with 2 human partners: {Q8NCE0;Q9BSV6}

3498 Pathogen[ P03410] interacts with 2 human partners: {Q9BSV6;Q8NCE0}

3499 Pathogen[ P14075] interacts with 2 human partners: {Q9BSV6;Q8NCE0}

3500 Pathogen[ P0C206] interacts with 2 human partners: {Q9BSV6;Q8NCE0}

3501 Pathogen[ P03363] interacts with 2 human partners: {Q9BSV6;Q8NCE0}

3502 [Cluster 319]GO:0003735+F molecular\_function [name] structural constituent of ribosome [def] "The action of a molecule that contributes to the structural integrity of the ribosome." [GOC

3503 Pathogen[ Q2Q067] interacts with 150 human partners: {Q5JNZ5;Q9HD33;P61313;P62701;Q8NHW5;P82921;Q9BYD6;Q13084;Q9BZE1;P47914;P82933;P46779;Q96EL2;Q9BYD1;Q4U2R6;P82912;Q59GN2;P82932;Q9Y3B7;Q02543;P26373;Q9Y676;O75394;Q96A35;P62750;P62273;Q9Y2R9;Q13405;Q96GC5;Q6NVV1;P15880;P40429;Q9NWU5;P46782;Q9BRJ2;P35268;P22090;P46778;P82663;Q9BYC8;P62888;Q9Y3D9;P32969;P62277;P62241;Q9P0M9;P62244;P05387;Q5T653;Q9NVS2;P62861;P42766;P05386;Q9Y291;Q9P0J6;Q6P1L8;Q969Q0;Q9UNX3;P30050;Q8IXM3;Q9Y3D3;Q9Y2R5;P18077;P62891;Q9BQ48;P61927;Q9Y399;P39023;P62081;P61247;P61254;P62249;P62280;P83731;O15235;P62263;P60866;P62906;P82650;Q9BQC6;P52815;P82914;Q02878;P46777;Q7Z7F7;P62899;P08708;Q96EH5;P08865;Q9NZE8;Q07020;P62913;O60783;P62269;Q9NP92;Q9Y6G

- 3;P62424;P62917;P62829;O76021;Q9BYD3;P36578;P62857;Q9BYD2;Q9Y3D5;P62847;P49207;P23396;Q9H0U6;P63173;P18621;P82675;Q9NRX2;Q86TS9;P39019;P82664;P61353;Q96L21;P62266;P42677;Q9Y3U8;P63220;P62841;P83881;P62987;P49406;Q9P015;P50914;P46776;P82909;P62854;P09001;P62753;P05388;Q8N983;P18124;P62851;P25398;A6NKH3;P62910;Q92901;P46781;Q9BYC9;P27635;Q92665;P61513;P62945;Q71UM5;Q9NX20;P62979}
- 3504 Pathogen[ P0C214] interacts with 153 human partners: {Q9HD33;P62861;P84098;Q96A35;P61247;P49406;Q9Y399;Q8NHW5;Q13405;Q9Y3D5;Q9BYD2;Q96EL2;Q9BYD1;P15880;P62081;P42766;P62913;P22090;P82912;Q92901;P62249;Q9Y3D9;P62899;P62854;P39019;P62263;P82675;P0C6E6;Q9H0U6;Q16540;Q9Y676;Q86TS9;P62273;Q9NP92;P23396;P18077;O15235;P05388;P62847;Q9BYD3;Q96GC5;O76021;Q9NX20;P62829;P26373;P27635;P46778;Q6P5R6;Q4U2R6;Q5JNZ5;Q9NWU5;Q8IXM3;Q96EH5;P61513;Q7Z2W9;P83881;O75394;Q5T653;P62701;Q71UM5;P49207;P63220;P08865;P32969;Q02543;P62266;P09001;Q969Q0;P82664;P82914;P62277;Q8N983;P50914;Q92665;P46779;Q59GN2;P40429;Q9P0J6;P47914;P63173;Q13084;Q9BQ48;P82663;P82921;P62280;Q9UNX3;Q9Y3U8;Q6P1L8;P30050;P62753;P62910;P62891;Q8TD47;P82909;Q9NZE8;Q9Y6G3;P62269;P46781;Q9Y291;Q9Y2R9;A6NKH3;Q9BYC9;P61254;P62841;P62244;Q9NRX2;P62987;Q7Z7F7;Q9Y2R5;Q07020;P42677;P62945;Q6NVV1;Q9P0M9;P46776;Q9BQC6;P52815;P62241;P46777;P82932;P83731;Q96L21;P35268;P62424;P60866;Q9BYC8;P62857;P61313;P08708;Q9P015;P05387;P25398;Q9BZE1;Q9Y3B7;P61927;P62750;P62979;P05386;P62851;P46782;P82933;P18124;P82650;P61353;Q9BYD6;P36578;Q9BRJ2;Q9Y3D3;P18621;O60783;P62906;Q02878;Q9NVS2}
- 3505 Pathogen[ P03346] interacts with 157 human partners: {Q96A35;O76021;Q9NVS2;P05387;Q9Y399;Q8NHW5;P46779;Q96EL2;Q9BYD1;P63173;Q5JNZ5;P62917;O75394;P62249;P62913;P49406;Q9P0J6;Q8N983;P62861;P82912;P62277;Q02878;P82933;Q59GN2;P62280;P39023;P62987;P61927;Q9UNX3;P62857;Q9H0U6;Q8IXM3;P46778;P49207;Q6P5R6;P62266;Q9BYC8;P61254;Q9BQ48;Q71UM5;Q5T653;P62424;P62273;Q9BYD2;P83731;P60866;P0CW22;P62899;Q969Q0;P82909;Q9BYC9;Q6NVV1;P35268;P09001;P62891;P08708;Q8TD47;P46782;P61353;P62854;Q9Y3D9;Q9Y3U8;P82650;P47914;Q9Y2R5;P08865;Q96L21;Q9NRX2;Q7Z7F7;O15235;P61313;P25398;Q13084;P82914;O60783;P61513;Q9NZE8;A6NKH3;P05388;Q9Y2R9;P62269;Q6P1L8;Q02543;P42766;P62081;P61247;Q9BYD3;Q9HD33;Q9NWU5;P18621;Q9Y676;P46781;P82921;P84098;P15880;P50914;Q9Y6G3;P62829;P62979;Q9Y3D5;P39019;Q9BYD6;Q9Y3D3;P23396;Q4U2R6;P42677;P62750;Q96EH5;P62701;Q9BQC6;P30050;Q9NP92;P62910;P36578;Q86TS9;Q9BRJ2;Q9BZE1;P82675;P62847;Q13405;P62851;P22090;P46777;P82663;P52815;Q07020;P62263;P82664;P62841;P83881;P82932;P05386;P18077;Q7Z2W9;P46776;P62241;Q9Y291;P62753;P62945;Q92901;P32969;P26373;P18124;P40429;P27635;Q9P015;Q7Z7H8;Q9Y3B7;Q96GC5;P62906;Q92665;Q9P0M9;P62244;Q9NX20;P62888;P0C6E6;P63220}
- 3506 Pathogen[ Q85601] interacts with 150 human partners: {P32969;P61513;Q8NHW5;P26373;P62857;P52815;P62244;P09001;Q9BQC6;Q96EL2;Q9BYD1;P62913;P62854;P82912;P62081;Q6P5R6;P61353;Q96A35;P62891;P46776;P82933;P18077;P61313;Q9Y2R5;Q9Y3D5;P49406;P05388;Q9NP92;A6NKH3;Q9Y3B7;Q4U2R6;P63173;Q9H0U6;Q9NX20;P82921;Q92665;P23396;P62273;P46778;P62829;P30050;P62753;P27635;Q9BYC8;Q9BYC9;P82932;P15880;Q9BQ48;Q9P0M9;P83881;Q07020;P39019;P39019;Q5T653;Q9Y3U8;Q71UM5;P62701;P62241;P82675;P62424;Q9Y3D9;P83731;Q9BYD2;P62899;P62945;P62263;Q9P015;P62861;Q02878;Q9BYD6;P39023;P61254;Q9Y2R9;Q13405;Q9Y3D3;P49207;Q96GC5;Q9Y291;P62910;Q9Y6G3;Q9NRX2;Q8N983;P82909;O15235;P62249;P62280;P47914;P84098;Q96L21;Q7Z7F7;Q13084;P08708;O75394;P42766;Q9NZE8;Q9NVS2;P62269;Q9BYD3;Q9NWU5;P18621;Q9Y676;P05387;Q9BRJ2;Q9UNX3;P82650;P62277;P35268;P62979;P62847;Q9HD33;P42677;P63220;Q96EH5;Q8IXM3;Q86TS9;Q9BZE1;P46782;O60783;P46779;P62750;P62851;P62841;P62987;P82663;P22090;P82664;P61927;P36578;P05386;P82914;O76021;P08865;Q9Y399;P61247;Q9P0J6;Q5JNZ5;P46777;P62917;Q92901;P18124;P46781;Q6NVV1;P25398;P60866;Q02543;P62906;P50914;P62266;P40429;P62888;Q6P1L8}
- 3507 Pathogen[ P14079] interacts with 154 human partners: {Q9Y3U8;Q9BQC6;P27635;Q8IXM3;P52815;P84098;P46779;A6NKH3;Q9BYD6;Q7Z7F7;P26373;Q4U2R6;P23396;Q6NVV1;P40429;P18621;Q9H0U6;P83881;Q9UNX3;P82664;P46781;P83731;P61513;P62847;P62753;P82933;Q9BQ48;P39023;P62273;Q9Y2R9;Q9BYD2;Q9BYC9;P25398;Q9BRJ2;Q9Y6G3;Q9NRX2;P18077;Q9Y291;Q16540;P61254;P50914;Q7Z2W9;P62979;P62841;P18124;P42766;P62266;Q9Y2R5;P46782;P62987;Q5JNZ5;O60783;P62241;Q9Y3D3;P32969;P22090;Q9P0M9;P62829;P60866;P62854;Q07020;P39019;Q13084;Q9BZE1;P63220;P49207;Q96L21;P62244;P82921;P82650;P09001;Q96A35;P62263;Q02543;P62424;Q92901;P62277;P62750;P62910;Q86TS9;P63173;Q96GC5;P46776;Q9BYD3;P82912;O76021;P08708;Q92665;P36578;P0CW22;Q9BYD1;Q71UM5;Q9BYC8;O15235;P62906;P47914;P62280;Q6P5R6;P62899;Q9NP92;Q13405;P61353;P62081;P62945;Q9NX20;P46777;P42677;P30050;Q9P015;P15880;Q59GN2;O75394;Q7Z7H8;P62891;P82909;P82675;Q9NZE8;Q9HD33;P62888;P08865;P61927;P62917;Q9Y3B7;Q9P0J6;P46778;P62249;Q9Y676;Q969Q0;P05386;P35268;P62913;Q8N983;Q9NVS2;P05387;P61247;P62269;P62701;P61313;Q5T653;P82663;Q8TD47;Q96EL2;P62851;Q6P1L8;P0C6E6;P05388;Q96EH5;Q9Y3D5;P62857;P62861;Q9Y3D9;P82914;Q8NHW5;P49406}
- 3508 Pathogen[ P03383] interacts with 151 human partners: {P42766;P36578;P05388;P62266;Q8NHW5;P39019;P26373;Q96EL2;Q9BYD1;P62913;P62945;P62854;P40429;P82912;Q9BYD2;Q96A35;P62987;P62891;P25398;Q13084;P62280;P82664;Q07020;P62750;Q9BRJ2;P05387;Q9BQ48;P62249;P62888;P62899;P61927;A6NKH3;P46777;P46779;P49207;Q9P0J6;Q9NX20;P83731;P62424;P49406;P18124;P82933;P46778;Q92901;P62753;Q9BQC6;P42677;Q9NWU5;P61247;Q9BYC9;Q5JNZ5;P83881;P09001;Q9BYD3;P47914;Q5T653;Q9P0M9;Q71UM5;Q9Y2R9;P62917;Q9NP92;P82914;Q13405;P62273;Q9UNX3;Q9BZE1;Q96L21;Q969Q0;Q92665;Q9NRX2;P30050;P84098;Q9Y6G3;O75394;P32969;Q9NVS2;P82675;P62277;Q9BYD6;P18077;Q6P1L8;P63173;Q9Y3D9;O60783;P62081;Q9Y2R5;Q9Y3B7;P61313;P08865;P82909;P82663;P62851;P46782;Q9HD33;Q9NZE8;P62269;Q9P015;P63220;Q02543;P62244;Q02878;Q9Y3D5;Q86TS9;P82921;P62910;P27635;Q8IXM3;P62857;P82932;P62906;Q9Y3U8;P60866;P52815;P61254;P62979;P62241;Q7Z7F7;P46781;Q96EH5;P82650;P39023;P62841;Q6NVV1;P22090;P62701;P62829;Q9Y676;P62263;P62847;Q4U2R6;P05386;P50914;O15235;Q9Y291;Q9Y399;P62861;P18621;P46776;Q96GC5;P15880;P23396;Q8N983;Q9Y3D3;P61513;Q59GN2;Q9BYC8;O76021;Q9H0U6;P08708;P61353}

- 3509 Pathogen[ P03410] interacts with 157 human  
partners: {P62861;P05386;Q8NHW5;Q9Y399;Q7Z7F7;Q02543;P61247;P62241;P62829;P49207;P26373;P82663;Q9HD33;P61513;P82909;P62899;Q9P015;P0CW22;Q9P0M9;P62244;P62913;Q16540;Q02878;Q9NX20;Q92901;P15880;P46777;P46776;P62841;P82675;Q5JNZ5;P30050;P05388;Q8N983;O15235;P46781;P18124;Q96A35;P49406;Q92665;Q9BYD2;P62269;Q07020;P63220;P62910;P82650;P62847;Q59GN2;P62906;Q9P0J6;P52815;Q9NP92;P23396;P18621;P62266;Q9NWU5;P62249;P63173;P50914;Q969Q0;P62280;Q96EH5;Q9BQC6;P22090;Q9BYD6;P61313;P62979;Q9Y3D5;Q9BYD3;P62701;P62750;O60783;P82664;P08865;Q96L21;Q9UNX3;P62277;Q9Y676;P36578;Q9BYD1;P18077;P25398;P61927;P84098;Q4U2R6;P62854;P62273;Q9NRX2;Q9BYC8;P0C6E6;P62081;Q8TD47;Q6NVV1;Q9BRJ2;Q9Y3U8;Q13084;Q6P1L8;Q9Y291;P08708;Q9Y2R9;P46782;P32969;Q9Y6G3;Q9BQ48;Q8IXM3;Q5T653;P82912;P46779;P27635;Q96EL2;Q9NZE8;P62987;Q9Y3D9;Q7Z2W9;Q86TS9;P62857;Q9BYC9;P62263;P62424;P62888;P61254;P46778;A6NKH3;P62945;P05387;P42766;P09001;P39019;P47914;P82933;P40429;P39023;O76021;P82914;P62917;P62851;Q7Z7H8;P82921;Q9NVS2;P83731;P35268;Q9Y2R5;P61353;P62891;P62753;Q6P5R6;Q13405;Q71UM5;Q9BZE1;O75394;P83881;Q9H0U6;P60866;P42677;Q9Y3D3;Q96GC5;Q9Y3B7}
- 3510 Pathogen[ P14075] interacts with 151 human  
partners: {P42766;P49207;P62857;P52815;P46781;Q9BRJ2;P63220;O76021;P32969;Q96EL2;Q9BYD1;Q9BYD6;Q9NRX2;Q9BYD2;P42677;P62913;P82921;P22090;Q9P0M9;Q02878;P82912;Q96L21;Q9Y3D9;P62277;Q96GC5;P62851;Q59GN2;P08865;P62244;P49406;Q9BQC6;Q9Y2R5;Q9NX20;P08708;P61254;P46778;O75394;P05388;Q9Y3D3;Q9HD33;P83881;P82650;Q5T653;P46777;Q6P1L8;Q9Y3U8;P62249;P62081;P62750;P18621;Q969Q0;Q9Y3D5;Q02543;Q9BYC9;P18124;Q9UNX3;P25398;Q9BQ48;Q9BZE1;Q13084;P82909;Q9Y3B7;Q9Y2R9;Q13405;Q9Y676;P63173;Q9NWU5;P30050;O15235;P62979;Q9Y399;P83731;P84098;Q8N983;P61247;O60783;P62753;P46782;P62891;P62861;Q96A35;P18077;P82664;P46779;Q92665;P62917;P39023;Q9NZE8;P50914;Q6NVV1;P62269;P62847;P62910;P62273;Q9P015;Q86TS9;P40429;P82663;P23396;P62241;Q9Y291;P15880;P62987;P82914;P62841;P36578;Q5JNZ5;P62266;P82932;P61513;P61313;P27635;P62888;Q9H0U6;Q92901;Q8IXM3;P35268;P62945;P46776;Q96EH5;P09001;Q9BYD3;Q7Z7H8;Q4U2R6;P62701;Q9NP92;Q9BYC8;P62899;P82933;P47914;P62906;Q7Z7F7;P05386;P61353;P39019;P62424;P62829;P62280;Q9P0J6;Q07020;P62263;P62854;P60866;P82675;P26373;P05387;Q9Y6G3;A6NKH3;Q9NVS2;Q71UM5;P61927}
- 3511 Pathogen[ P0C206] interacts with 155 human  
partners: {Q6P1L8;P40429;P61313;Q96A35;Q9Y291;Q9Y3D5;Q9Y399;Q8NHW5;Q96L21;P27635;P18124;Q8IXM3;Q7Z2W9;P62854;Q9H0U6;Q96EL2;P49207;Q9BQ48;P62081;Q9Y3D3;Q9P015;P30050;O60783;P82914;Q13084;P62241;Q4U2R6;P62244;P50914;Q9BYC8;P08865;P62750;P18621;P46781;P62266;Q02543;Q92665;Q7Z7H8;Q9Y676;P09001;Q07020;Q9P0M9;P83881;P46778;P62263;P62273;Q02878;Q9P0J6;Q9NWU5;Q5T653;Q9NRX2;P62280;P49406;Q6P5R6;P62857;P62851;Q9Y6G3;P62910;P46782;Q9NZE8;P61247;Q9HD33;P18077;Q9BRJ2;P62913;P61927;P61353;P62888;Q6NVV1;O75394;P82664;P36578;Q96GC5;Q9NVS2;P62861;Q9BYC9;P35268;P23396;P39023;Q9Y2R9;P32969;Q13405;P82909;O76021;P62701;P05386;Q9Y3B7;Q86TS9;P22090;Q9BYD6;P84098;P62945;Q9BYD2;P26373;Q71UM5;P46777;P05388;P62979;P62899;P82933;P83731;Q9Y3D9;P82663;P82675;P39019;Q92901;P05387;P42766;P60866;Q9NP92;P62841;Q9UNX3;Q9BZE1;P82650;Q969Q0;P61513;A6NKH3;Q9BYD1;P62277;P0C6E6;P46776;Q8N983;P62906;P63173;P82932;P62987;Q9Y2R5;P62891;P62269;P62753;P46779;P63220;Q5JNZ5;P15880;Q9NX20;Q96EH5;P25398;P08708;Q7Z7F7;P47914;O15235;Q9BQC6;P62847;P61254;P82912;P42677;P62829;P52815;Q9BYD3;P62249;P62424;P82921;Q59GN2;Q9Y3U8;P62917}
- 3512 Pathogen[ P03363] interacts with 155 human  
partners: {P62913;P82650;Q9Y2R5;Q9BYD2;P18621;P05386;Q8NHW5;P62750;P23396;P42677;P63173;P08865;Q96GC5;P62847;P18077;P82664;P05387;Q96EL2;P84098;P42766;Q9NZE8;P62249;Q9BYD1;P82921;P05388;P36578;P49406;P62753;P62081;A6NKH3;P62910;Q8IXM3;P61513;P46776;Q13405;Q9BYD3;P82914;P61254;Q9P0J6;P62273;P32969;Q92901;P46778;Q9NVS2;Q9Y3D5;P61927;P62891;P52815;Q6P5R6;Q59GN2;P61353;Q96A35;Q9BZE1;P08708;P15880;Q96L21;Q7Z7F7;Q9H0U6;Q9HD33;Q9Y3B7;P26373;Q4U2R6;P83881;Q96EH5;O76021;Q9BRJ2;Q9NWU5;P22090;P62861;P62841;Q9UNX3;O75394;P30050;P82912;P62829;P82663;P46782;P35268;Q9NRX2;Q9Y6G3;Q9BYC8;P46781;P50914;Q9P0M9;Q9Y2R9;P63220;Q9Y3D9;P61313;P39019;Q9NX20;P46779;Q5T653;Q02543;P46777;P62987;Q8N983;Q7Z7H8;O60783;P25398;Q9NP92;P09001;P82675;Q5JNZ5;P82933;P83731;P62851;P62280;Q71UM5;Q92665;Q9Y3U8;P62888;Q969Q0;Q9Y676;P62244;P62277;P62906;P62266;P62945;P49207;P62241;Q9BQC6;P62424;P60866;P61247;Q9P015;Q9Y3D3;Q13084;P62899;P62857;Q02878;P82909;Q6NVV1;Q07020;P0C6E6;P39023;P82932;Q9BQ48;Q86TS9;P62854;Q9Y399;O15235;P62917;Q7Z2W9;Q9BYC9;P18124;P40429;P27635;P62263;P47914;Q9Y291;P62701;Q8TD47;Q9BYD6;P62269;Q6P1L8}
- 3513 [Cluster 320]GO:0016791+F molecular\_function [name] phosphatase activity [def]  
"Catalysis of the hydrolysis of phosphoric monoesters, releasing inorganic phosphate."  
[EC]
- 3514 Pathogen[ Q2Q067] interacts with 7 human  
partners: {Q9UNH5;Q9BV47;O95476;P49593;O14595;Q16829;Q9GZU7}
- 3515 Pathogen[ P0C214] interacts with 12 human  
partners: {O14595;Q9BV47;O15194;Q8TCD5;Q9GZU7;O95278;Q16829;Q9UNH5;O95476;Q13615;P49593;Q96GD0}
- 3516 Pathogen[ P03346] interacts with 17 human  
partners: {P43378;Q9H3S7;Q86WG5;P49593;O15194;Q9BV47;Q9GZU7;Q16667;P17706;Q96QG7;Q16829;O95476;O95278;Q9Y2R2;P24666;O14595;Q9UNH5}
- 3517 Pathogen[ Q85601] interacts with 10 human  
partners: {Q9GZU7;O15194;P49593;Q16829;O95278;Q9BV47;Q9UNH5;O95476;O14595;Q96QG7}
- 3518 Pathogen[ P14079] interacts with 12 human  
partners: {O15194;P49593;Q8TCD5;Q16829;Q96QG7;Q96GD0;Q9BV47;Q86WG5;Q9UNW1;O95476;Q9UNH5;Q9GZU7}
- 3519 Pathogen[ P03383] interacts with 2 human partners: {Q9GZU7;Q9UNH5}
- 3520 Pathogen[ P03410] interacts with 13 human  
partners: {Q96QG7;Q9GZU7;Q9UNH5;Q96GD0;Q16829;O95476;Q8TCD5;P24666;P49593;Q9UNW1;Q9BV4

7;O15194;Q86WG5}

3521 Pathogen[ P14075] interacts with 2 human partners:{Q9GZU7;Q9UNH5}

3522 Pathogen[ P0C206] interacts with 16 human partners:{Q9BV47;Q9GZU7;Q13615;Q96QG7;Q9Y2R2;Q16829;O95476;P49593;P24666;Q9UNH5;Q8TCD5;O95278;Q96GD0;O15194;O14595;P17706}

3523 Pathogen[ P03363] interacts with 15 human partners:{P17706;Q9H3S7;Q9UNH5;Q9Y2R2;P43378;Q16667;O95476;Q16829;Q86WG5;Q12923;Q96QG7;Q9GZU7;Q9BV47;P24666;O14595}

3524 [Cluster 321]GO:0070016+F molecular\_function [name] armadillo repeat domain binding [def] "Interacting selectively and non-covalently with the armadillo repeat domain of a protein, an approximately 40 amino acid long tandemly repeated sequence motif first identified in the Drosophila segment polarity protein armadillo. Arm-repeat proteins are involved in various processes, including intracellular signalling and cytoskeletal regulation." [GOC

3525 Pathogen[ Q2Q067] interacts with 5 human partners:{Q13033;Q9NRL3;Q9NSA3;Q9HCK8;Q9P1Z2}

3526 Pathogen[ P0C214] interacts with 5 human partners:{Q13033;Q9NSA3;Q9HCK8;Q9P1Z2;Q9NRL3}

3527 Pathogen[ P03346] interacts with 6 human partners:{O43815;Q9NSA3;Q13033;Q9P1Z2;Q9HCK8;Q9NRL3}

3528 Pathogen[ Q85601] interacts with 6 human partners:{Q9NRL3;O43815;Q13033;Q9HCK8;Q9P1Z2;Q9NSA3}

3529 Pathogen[ P14079] interacts with 5 human partners:{Q13033;O43815;Q9NRL3;Q9HCK8;Q9P1Z2}

3530 Pathogen[ P03383] interacts with 5 human partners:{Q9NSA3;Q9HCK8;Q9NRL3;Q13033;Q9P1Z2}

3531 Pathogen[ P03410] interacts with 6 human partners:{Q9NRL3;Q9NSA3;Q9P1Z2;Q13033;Q9HCK8;O43815}

3532 Pathogen[ P14075] interacts with 5 human partners:{Q9NRL3;Q9NSA3;Q9HCK8;Q9P1Z2;Q13033}

3533 Pathogen[ P0C206] interacts with 6 human partners:{Q9HCK8;Q9NSA3;O43815;Q9P1Z2;Q9NRL3;Q13033}

3534 Pathogen[ P03363] interacts with 6 human partners:{Q13033;Q9NSA3;Q9HCK8;Q9P1Z2;O43815;Q9NRL3}

3535 [Cluster 322]GO:0046872+F molecular\_function [name] metal ion binding [def] "Interacting selectively and non-covalently with any metal ion." [GOC

3536 Pathogen[ Q2Q067] interacts with 1049 human partners:{P04156;E7ETH6;O95376;Q0D2J5;Q12901;P02792;Q9HC78;Q09FC8;Q9Y253;Q9H4I2;Q01844;Q9UM63;O15014;Q92900;Q96SQ5;Q9Y473;Q9BYE7;Q9BU02;P07438;Q14526;Q8WV37;Q8N859;O95602;P52742;Q9BRH9;Q96N77;C9JN71;Q8NH7;Q9UPP1;Q9NWK9;P17544;Q13118;P25490;Q8IXJ6;P22392;Q9UK13;P35789;Q9HBH1;Q6V9R5;Q8NA42;Q9Y6X8;O95639;O43167;Q2M218;Q8TA86;Q9UJN7;Q9NXW9;Q03923;Q9Y2M0;Q8WV44;P09917;Q9UEG4;P62633;Q9H2U2;Q9BUG6;A6NDX5;Q8IU60;Q8NEM1;Q9UC06;Q14258;Q9ULX3;P98182;Q9H7X3;Q9H008;O14786;Q9Y6K5;Q9UPN9;Q9Y3S2;P56524;Q9UK11;Q9BY41;P17029;P52738;Q9ULX6;Q9NR56;Q9H0C8;A8MTY0;Q9HAW0;Q96NU7;Q9H7R0;Q96PE6;Q8IZD2;Q99502;Q8IZ26;P6002;Q9BRL0;P10827;A6NJL1;O43361;Q5D1E8;Q9Y462;Q7Z6J0;Q96NI8;Q9UGU0;Q96NB3;O75925;Q6NUN9;P55895;Q9UJL9;Q9UL41;Q9NS56;O60304;P55265;P24278;P49790;Q8NEP9;Q6ZQV5;Q9HBE1;Q9NXR8;Q63HK5;O95391;Q6ZVK8;Q86UA6;Q8N0Y2;Q92664;Q5VTD9;Q15928;Q96K75;Q96LI5;Q8WY54;Q13887;Q8TA94;Q9H9T3;Q7L9L4;O43257;Q8WW33;Q86YE8;P21980;Q9H2K2;P27694;Q08AN1;P49792;P58317;Q9UKV0;Q8WW38;Q6ZMY9;Q8WYH8;Q8N8Z8;Q5VZB9;Q6ZS27;Q08209;A6NP11;Q9UL59;Q8N4W9;Q13889;Q9H2P0;Q6NS38;P10073;Q9HAZ2;Q9BWG6;O75151;Q16775;O60481;Q6IE81;P62273;P13929;A6NGD5;Q5SXM1;Q6IV72;A8MVS1;Q9HAJ7;O14639;P10589;Q8N2I2;Q7Z6K1;Q6ECI4;Q9UC07;Q9NX58;P53804;Q8IWW8;Q9P0U4;Q9H9D4;Q12986;Q9NR48;P13056;Q8IXK0;Q9C0F0;Q6ZT77;Q9UHF7;O43189;P62508;Q9ULD5;P51508;Q14590;Q9NTW7;Q9Y2Y9;Q96NG8;Q6ZM06;P41182;Q9Y2X9;P19474;Q9H5H4;P10828;O60260;P30793;P55197;Q8NBB4;Q96H40;Q9Y6E7;P49910;Q8N5U6;Q15326;Q9NZV7;Q32MQ0;Q6P2D0;Q9HCL3;Q6U7Q0;Q93083;A6NIX2;Q9UKJ3;P22033;Q8TD23;Q53FD0;Q9H0F6;Q96SK3;Q96IT1;Q147U1;Q15697;O43255;Q96LW1;Q9NZL3;Q7L2R6;O00167;P08151;Q9C086;P36639;O96006;O14618;O43439;Q99676;Q9NRR4;Q96T88;Q96SL8;P37275;Q8IYW8;O75081;Q05516;Q8NF64;Q05481;Q02930;Q9Y6K1;Q9NVW2;Q8NCK3;O00743;Q8NDW4;Q9NRN7;Q15696;Q8NDF8;O75820;P49116;Q9UIF7;P10074;Q15046;Q7Z2E3;O60315;Q15181;Q9P0L1;Q9ULV3;Q14119;Q9H4Z2;Q00994;Q6P9A1;Q12933;Q96MA1;P62140;Q8IXT2;Q96PQ6;Q86SE9;Q8N782;Q969S2;Q96NL3;Q8WTR7;Q9NYJ8;Q8TAW3;P51815;P14373;Q9UIS9;Q8TF20;P34949;Q9HB58;Q6ZR52;O60930;Q99684;P52741;Q9UDV7;Q8N9V7;Q8TF68;Q3KQV3;Q9H777;Q86WB0;Q9P255;O76031;Q8NC26;O43296;Q76L83;O94776;Q9H4T2;Q9UBU7;Q8IWL3;O14709;Q08ER8;Q14192;Q5T5D7;Q9NQX1;Q9Y5R5;Q8TE76;Q96S55;Q6ZMW2;Q9UNA4;P30876;P15976;Q9UNL4;Q9BWX5;Q2M3W8;O14686;O15535;Q6H8Q1;Q4VC44;O14628;P58557;Q8TBC5;Q9UBQ0;O15350;Q6ZSS3;Q96GX9;P02511;Q02447;P52594;Q86YF9;Q9NSD4;Q2M1K9;Q86YP4;Q96SC8;Q9Y3Y4;Q6ZNA4;P67775;P17030;P17031;Q7Z340;Q86UE3;O75362;Q96FX2;Q16670;Q96N95;Q9Y5A6;Q9UBZ9;Q8TF47;Q9NQ29;P17036;Q9ULJ3;Q6VVB1;P17040;Q15560;Q2QGD7;O95551;P17010;O95625;P17038;Q9NTG7;Q9UK12;Q8WU90;Q9UDW3;P38935;Q9NYG5;Q96CB8;P08047;Q8TC21;P11473;Q96C28;O75928;O15355;Q92905;Q13342;Q16629;Q9ULJ6;Q15022;O43829;P16415;Q9BSM1;Q8NHM5;Q86Y25;Q9H9Y6;P0CG00;O95848;Q8N184;Q96NJ6;O14829;Q8WUB8;Q8WYQ5;P13640;Q13129;Q9H7S9;O95394;Q7Z3V5;Q8WUY3;Q3SXZ3;Q9BV57;Q5TAX3;Q14CW9;P28702;Q9UFB7;Q6IQ21;Q13398;Q53GI3;Q8IU81;Q96MR9;Q86TP1;Q6PJT7;P36871;Q14134;Q96BV0;O75446;Q9UJW3;P35227;A8MT65;A6NK53;Q86TJ2;Q9BUY5;O60663;P07902;Q96QC0;B2RXF5;Q8N3J9;Q8N6T7;Q9Y2P0;Q9Y2H8;O15304;P52743;Q499Z4;Q15937;Q68DK2;Q7Z2W4;P27695;Q9UBC3;Q9UHK0;Q68EA5;O43823;Q8N5C8;O60711;Q96IF1;Q68DY1;Q8IXW5;Q7RTV3;P27797;Q9UQL6;Q8N5P1;Q16851;Q9UBU9;Q9HCG1;O43593;P06746;P61927;Q6P280;Q9NRG4;O95159;Q8TAU3;Q92994;Q9UL58;P52747;Q96SR6;P78317;P11532;Q14929;Q99504;Q5T619;P23769;Q8NFW9;P62714;Q14593;Q15929;Q8TB69;Q5T6S3;Q



15072;Q15935;Q9H8S9;Q96C00;Q9BYK8;Q8IVP9;Q63HK3;Q5TA31;Q86Y13;Q9UII5;P04732;O75582;A8MUV8;Q9P243;Q9ULM2;Q9NP64;Q96N38;A8MWA4;P49356;Q9UGP4;Q5SVQ8;Q9BTC8;A8MQ14;Q96CX3;Q8IWS0;P25791;P17032;Q99728;Q86TA1;Q96BD5;Q6P9G9;P26358;P51948;Q52M93;Q96G03;P31350;P15621;Q6GPH4;Q92782;P46976;Q14585;Q9NQX6;Q96MT3;P17022;Q68D11;P51504;P67870;P04733;Q9UKY1;Q8WWW0;Q8N8C0;Q9Y2D9;Q96SZ4;Q15654;P56270;Q6IQ32;A2RRD8;B4DXR9;Q9UKD1;P6ANX45;Q86US8;Q96017;P17098;Q75437;Q8NF99;Q9Y4X5;Q13360;Q9UBF6;Q9HCC9;P84022;Q6P9A3;B1APH4;P46939;P68871;Q9BQ83;Q8N448;Q66K41;P0C7X5;Q8IYH5;Q13330;O60284;Q8WUU5;O60220;Q9Y6K9;O95628;P36873;Q96GC6;Q76KX8;Q96FQ6;A6NHJ4;Q9Y5J6;Q9P2R6;Q8N3F8;Q8N895;Q96N22;A8MXY4;Q8N141;Q03924;Q8TAT6;Q96LX8;Q8TBB1;Q5JNZ3;Q96EP1;Q9Y2Q1;Q9H091;Q6PK81;Q96NG5;Q13114;Q7LG56;P06396;Q96PM5;Q86UW9;A6NNF4;P09467;Q13127;Q9P2J8;O95780;Q9UQ84;Q96JM3;Q6PF04;Q6NZY4;Q9BR84;Q9H116;O00625;P29474;Q9Y6X2;Q9UBW7;Q96DE0;P11161;Q9NWT6;Q9NWX7;O75152;Q13233;Q05BQ5;P09874;Q8NI51;P15622;Q96K62;Q7Z3K3;Q5T200;P62136;Q3KP31;Q5JVG8;O43830;O43918;O75251;Q96Q83;Q49A33;Q8IW19;O75306;O14746;Q12873;P86452;Q9NX46;Q9ULU4;O15164;Q9GZX7;Q3SY52;P35226;B4DX44;Q9H160;Q01081;Q8N988;P59923;Q9Y4L5;Q9BRX2;Q969J2;Q5VUA4;Q9NYT6;Q494X3;A6NM28;Q9Y2L8;Q8IYB9;P46100;Q92993;Q8IX07;O60291;P99999;Q32M78;Q9H9Z2;P53041;O14771;Q9NQZ8;P0CH99;Q8WUI4;Q8N823;P17041;Q8N9K5;P55055;Q9UIH9;P38936;Q9BSG1;P0CJ79;Q3MJ62;Q969S3;Q8N7M2;Q9BT49;O60765;Q8NB50;P21912;Q9H0W9;Q9NZU7;Q3ZCT1;Q9UKV8;Q9P2R7;P39748;Q9NRL2;P69905;Q96KS0;O75164;Q5HYK9;P62875;Q99496;Q53G26;Q5VTR2;O95218;Q8N9Z0;P80294;O75312;Q92785;P24928;Q2VY69;Q9H6W3;Q96T23;Q8WTV1;P51523;Q9H963;Q969R5;Q9NYW8;O76064;Q8WY41;Q86TG7;Q5BKZ1;Q6BYN7;P62072;Q96GE5;Q9NWF9;Q96IV0;Q8N720;P51786;Q9HCZ1;Q8NB42;Q8IZQ1;Q8TDB6;P78549;P23193;Q9HBT7;Q7L590;Q9C035;Q9Y383;Q9H6Z9;Q8TBZ5;Q9HAH1;Q9H1B7;Q8N371;Q86VM9;Q9Y2P7;Q6P3V2;Q9Y5J7;O75346;Q14588;Q14839;Q6ZMV8;O15504;P15336;Q14592;P21399;Q6AZW8;Q6NSZ9;P28838;P35813;Q86V15;Q9UKT4;P28698;Q6ZNG0;Q8N9F8;P04053;P20042;P0C7V5;P17021;P08235;Q8WV99;Q96QT6;Q9UID6;Q14872;Q9UDV6;Q3KNV8;O75688;O95271;A4D1E1;Q5CZAA;Q9Y3C5;Q96HQ0;Q99590;Q9UKN5;Q9UNY5;Q9H707;O75150;Q9UM07;Q06455;Q9NSJ1;Q9UKT9;Q9H0A6;Q5SVZ6;Q96NY9;B4DU55;Q6PG37;O60290;O75373;Q9BYX4;Q8LW36;Q19AV6;Q96CS4;Q13642;Q49AA0;Q8N490;P11474;Q9GZU2;Q86TJ5;Q9NS23;Q8IVC4;Q8N488;Q96MB7;Q9UK10;A8MUZ8;Q9UPA5;P29083;P04731;O75382;Q96EK4;Q96SE7;P47974;Q86YI8;O43318;Q7L945;Q8NDQ6;O75764;Q13106;Q9GZT9;Q86XF7;Q5TEC3;Q96AY2;Q9UIL8;Q9HA77;Q96PU4;O14964;O95125;Q9UIF9;Q68CP9;Q7Z4H3;P17019;P0CG31;P16455;Q9UKF6;Q92844;P0C7X2;Q92793;Q9Y2G7;Q8IYX0;Q70IA6;Q93052;Q9UJW7;Q6IEG0;Q96MF7;Q9NSC2;Q03393;Q5T819;Q92670;P52736;Q8N3Z6;P63272;Q96NJ3;O75800;P14324;Q86XN6;Q9GZAA;Q9NP87;P53803;Q9H8G1;Q96MN9;Q9BQ52;P24941;Q9BQA5;P17025;P42677;A6NK75;P49593;Q15652;Q8N587;Q8N7Q3;Q7Z398;P13682;Q8IYI8;P26651;Q86V71;Q53T94;P52744;Q9UGR2;Q86Y01;Q93075;A6NN14;Q96JL9;Q9H974;P0CB33;Q6ZNH5;Q9H040;Q9NWS9;Q3ZCX4;Q9BX82;Q9UHR6;Q9NTM9;P49589;Q9UBL3;O95453;Q86XK2;Q9HCM9;Q9P0T4;P80297;Q8IY57;Q5VWG9;Q5HY98;O75792;Q9UIF8;Q9UH90;Q15637;P02489;Q8NEK5;Q9Y692;P55198;Q9Y252;Q8WXI9;O00463;Q8NB12;O43309;O14978;P35637;Q6ZM79;P06733;A7E2V4;Q9H7R5;Q9C0F3;Q9BXR0;O60870;Q8N972;Q13490;Q9H0M5;Q9UL40;Q9NVV4;Q6ZNO8;Q8NHY6;P31689;Q8TBZ8;P27815;Q9UIE0;Q9Y468;Q8IXJ9;Q68DY9;Q5VIY5;P0CG24;O75290;P22681;Q6P1K8;Q8WXB4;P60510;P49711;A2A288;Q8N5A5;Q9NVV9;P23297;Q00987;Q9HC16;Q9BWM5;Q8TF72;Q96GM8;Q16600;Q2M3X9;O14595;P52737;Q9UQR1;Q8N668;Q8TAF7;Q9W154;O14802;Q15776;Q66K89;Q08AG5;Q7LBC6;Q12874;O75132;Q86W11;P51522;P22736;Q96EY1;Q6ZM17;O15392;Q96PM9;Q96BR6;Q96IR2;Q06587;Q9ULM6;Q969W8;Q6ZNA1;A6NKH3;O95201;O43345;Q8TDD2;Q5FWF6;Q8N393;P62877;Q8WTV3;Q8NAP3;Q96ND8;Q96LW9;Q12830;Q3MIS6;Q9UL36;P02795;Q8TAQ5;Q13501;O95571;Q13105;Q9NV72;Q6ZNG1;Q9Y3A3;Q8IYN0;P48200;Q96JCA;P09234;O15015;Q9GZU7;Q9UPG8;Q9Y2A4;Q07352;P21506;Q14584;Q13888;Q9Y6R6;Q86XU0;Q96IU2;P17014;Q8IUD6;P17023;Q9Y242;Q8NDP4;P18146;P61513;P28715;Q7Z6E9;Q03112;Q15650;Q15428;Q9NW38;P17028;O96028;P15822;Q03936;Q00403;Q13064;Q9H1K1;Q6NZ36;Q8N2W9;P17024;Q7Z5L9;Q71UM5;A8K8V0;P98168;Q9UBS8;Q7Z3I7;P23025;P51003;Q9NUP7;Q03938;Q8TF39;O15297;Q9NRC8;P62979}

3537

Pathogen{ P0C214} interacts with 1233 human

partners[ P22681;Q8IW19;Q86UD4;A6NDX5;Q9UGP4;Q6ZN55;Q92993;Q5BKZ1;Q6NX49;Q6PDB4;O95551;P29474;Q92618;Q6NZY4;Q06732;Q8NEK5;Q9NQZ8;Q14526;Q9UKA1;Q8NFW9;Q8NI51;P02794;Q96GM8;Q9HAJ7;Q9Y6X2;Q6IQ32;Q7Z3K3;Q96C28;Q9HBH1;Q9GZZ9;Q14527;Q8N371;Q96MU6;Q9P255;Q9UKN5;O75306;Q96RE9;P35226;Q13907;Q969S3;Q8IWW8;A8MUV8;Q9NWK9;P08294;O43296;Q6ZM17;Q9ULX3;O60346;Q9BU02;P49589;Q8TBZ8;Q8IZC7;O75467;Q6ZM11;Q8N9V7;Q96LW9;Q86TA1;Q9UID6;P27695;P09917;P49754;P35813;Q6ZNA1;O75874;Q9P0T4;Q7Z6J0;P35789;Q8NDQ6;Q96PM5;Q13887;Q9H0A6;P35227;O14786;P17032;O14595;Q9H040;Q14593;Q15697;A6NGD5;A8MVS1;Q9HCZ1;P19474;Q02930;P56270;O43829;Q9NVH6;Q15022;P51508;Q7Z398;P22695;Q99643;O60663;Q9NRL2;P11474;A8MQ14;Q13330;O14746;P52743;Q99728;P35637;Q9BQ83;Q9Y6K9;Q9BT49;Q9BU89;P31350;Q8WUY3;P62140;Q4VC44;Q9POL1;P17010;O43257;Q63HK3;Q9ULD5;A8K8V0;Q9UHF7;Q8WV44;O75764;O95453;O43830;Q96S55;Q9BS34;Q9Y2A4;Q8WWW0;P60002;Q6PEW1;P0CI00;P35558;Q14872;Q8IXK0;Q8N7K0;Q13490;Q86SE9;Q16775;Q8IYN0;P49902;Q14929;Q9UKF6;Q6IEG0;Q8NF64;P28838;P17023;Q9BX82;Q9Y2D9;Q14591;P30876;Q9Y5A6;O15194;Q6ZN57;Q8NDF8;P51814;P02042;Q5T5D7;Q05481;A6NHJ4;Q96SQ5;Q92664;P0CB33;Q9UL59;O75925;Q7Z4H3;P52744;Q96IV0;Q6ZNH5;Q9H9Y6;Q5JVG8;Q8IWY8;Q8NC26;Q8N5A5;O14829;P15336;Q9Y473;Q96LW1;P06746;P02489;Q9NS23;A6NPF11;Q5SVZ6;Q9UH90;Q96I27;Q9UIL8;O15535;P53803;Q9H8S9;Q9BXS1;Q8TD17;Q6PG37;Q96GK7;P22735;Q9NTW7;P02511;Q9NTW7;P02511;Q9BSM1;Q9C0F0;O75820;P53396;Q9BWM5;Q8TAQ5;Q9UDW3;P52742;P51003;P62273;Q14587;Q12873;Q9NPC7;O95628;Q86UE3;Q9UIH9;P27815;Q92900;Q7L590;Q8TBC5;Q00987;Q96FX2;Q9GZU2;Q8NDP4;Q96CX3;Q96NJ3;P52738;P28331;Q5JVG2;P0CG31;P12694;P23025;Q9NR56;Q96K62;Q96BR6;Q9HBE1;Q8NCA9;Q7L2R6;Q9NS56;Q8TD23;Q9P2F9;O15350;Q9C035;Q8N587;Q53FD0;Q8TAU3;O00167;Q8N2W9;Q14119;Q14CW9;Q03112;Q9UJN7;P17019;Q8N0Y2;Q8IVP9;Q9UC06;C9JN71;Q9C086;O60220;Q68DY1;Q5MCW4;Q9P2N5;Q9BV57;Q99676;Q8NCK3;P55265;Q5JTZ9;Q8N823;Q9UNY5;Q8NEP9;Q08AN1;Q9Y6K5;P17022;O75362;Q9NUA8;Q9H6B1;P23769;Q9BRX2;Q5T6S3;Q92793;Q16587;Q9BTE6;Q7Z7K2;Q969W8;Q15637;Q96NY9;Q00994;Q96KS0;Q9UIF8;Q499Z4;Q5T200;Q96GE5;O95625;P79522;Q86XU0;Q96QT6;Q7Z5L9;Q8TF20;Q9UBZ9;O43167;Q6P9A1;P84022;O75437;Q6PK81;Q9H4G8;Q6P1L6;Q9UL58;P29401;Q86WB0;P29728;O95125;Q5TYW1;Q9NWX7;Q15428;Q6PF04;Q76L83;Q86WZ6;Q6PII5;Q9P2R6;Q6NZ36;P56524;Q96PU4;Q9UK11;Q86YE8;Q9NR11;Q96CS4;Q9Y6K1;O14709;P17029;P17544;Q12986;Q9Y2Y9;Q96BD5;Q00403;Q96SR6;Q8N

AP3;Q9UK13;P61513;Q9UL40;Q9H0F6;P17026;Q96MN9;Q8IUD6;Q96SK3;Q9NW07;O14639;Q9UNL4;Q5HY98;P48735;Q2M1K9;Q63HK5;Q8TCD5;Q96GX9;P69905;O75123;Q2M3W8;O14964;Q06455;Q9UHK0;Q02386;Q15973;Q3MJ62;Q9H777;P37275;Q3KP31;Q6PJT7;Q70IA6;Q8N8C0;Q15928;Q8N448;Q8IXW5;Q8NHY2;P49792;Q9ULJ6;Q86TJ2;Q9UPG8;Q96K58;Q9BYX4;Q8NG27;A8MT65;Q9Y3C5;Q96J4C;Q9HA92;Q71LUM5;P98168;Q7Z3I7;Q8IZ26;Q8N9F8;Q8N668;P48200;Q9Y2M0;P17024;Q9Y2Q1;Q6ZR52;Q06396;Q7L9L4;Q9NUQ29;O14771;Q9H6Q4;Q12901;Q96NG5;Q8N819;Q96N77;O75164;P55198;Q96SE7;P07511;Q9H091;Q9UBU7;Q6ZN19;Q9UL41;P17038;Q9Y468;Q9UC07;Q99807;P38935;O95396;Q494X3;Q96MR9;Q15Y2P0;Q9GZU7;Q96K75;P16083;P62877;O96006;Q9UII5;Q4V348;Q96SZ4;Q6IV72;Q9BXR0;P51854;Q8N141;Q86UY8;P51786;Q9BY31;Q01844;Q15560;O43318;Q9UHR6;Q96BV0;P13640;Q6P1K8;P38936;Q5SVQ8;Q8N883;Q96MT3;Q3SXZ3;Q9GZX5;Q8WW22;Q8IWL3;Q9NXT0;Q9UKD1;Q13064;P51523;Q9H4I2;Q147U1;Q8WXG1;Q9BSK1;P24278;Q96T88;P17031;O75792;P46976;Q9HCX3;P78317;Q9Y3Z3;Q5VTD9;Q7Z2W4;Q13398;Q53GI3;Q9HBT8;P86452;Q9NWF9;Q5VZB9;O60290;Q8WTFV1;Q8N5U6;P62072;O95571;P53701;Q9H0W9;P17030;Q9BWG6;Q03936;Q96NL3;Q99798;Q8TF68;P60510;Q9UKJ3;Q9BYK8;P80297;O75800;Q9P2R7;Q5VWG9;Q86XN6;P11532;Q13501;O76031;Q07352;P62714;O95989;Q8N5C8;O95201;Q8TC21;P28698;Q9NWS9;Q14258;Q9H3H1;P15622;Q6ECI4;Q9UM07;O75312;Q6ZSS3;Q9BRR0;Q6ZN08;Q8N859;Q9H1K1;Q13129;Q13642;P13056;Q9UIS9;Q9HC78;Q9NPG2;P28715;Q96MB7;O75446;Q9HC16;B1APH4;Q9UL36;Q9ULJ3;P13929;Q9ULM6;Q03393;A6NIX2;Q3KNV8;A2A288;P98170;P30793;Q86US8;Q96G03;Q9Y6R6;Q49AA0;O60870;Q8TAT6;O43439;P09467;Q9NTM9;Q13233;Q92844;P49790;O43681;Q7Z340;Q6ZNG1;Q96AT9;Q8IXJ9;Q15696;P50213;Q9UIF9;Q8IYH5;P55895;P49116;Q9H6Z9;P22033;P36871;Q8IZQ1;Q96IT1;O60765;Q15124;P68871;Q06730;Q9UJU3;Q8N184;Q9UGU0;Q86Y25;Q6NS38;B4DXR9;P14618;Q8IWS0;P51948;P25791;O75132;P69892;P99999;O75373;Q8WTZ3;Q9NVV9;O94776;O96017;Q92905;Q96AY2;Q9Y2H8;Q15929;P49257;Q8N4W9;A8MXY4;O95071;Q96PE6;Q3ZCX4;O43837;Q68DI1;Q7Z6E9;Q8N488;Q9H5H4;Q06587;Q6P280;Q9HCC9;Q5VUA4;Q16600;P17014;Q9NTG7;Q8N9K5;Q8NF99;Q9UJW7;Q8TBZ5;Q49A33;P09104;Q8N2I2;O75290;P49356;Q16851;O14832;Q96JF6;P46100;Q6P9A3;Q6AW86;Q9BQ52;Q9UNA4;Q6P587;Q26358;Q6ZMW2;Q8TF47;Q92994;Q6DD87;P04732;O43189;O95376;P51504;Q7Z2E3;Q96N95;Q8TF39;Q9BTP6;Q12933;Q9NVW2;Q96MF7;P46939;Q86YP4;Q6P2D0;Q9H6W3;Q9UIF7;Q9C0F3;Q9H7X3;Q96N22;Q8NBJ7;P55197;Q9HCK1;Q9NYT6;Q03924;Q5FWF6;Q08209;Q9Y242;Q9NYW8;Q08AG5;Q9BYE7;Q86TJ5;Q9H8G1;Q8IYL2;Q8N6M9;Q6GMV2;P63272;Q9HAZ2;Q8N7M2;P17028;Q9P2J8;O95780;P0CH99;Q99590;P98169;Q8N490;Q3MIS6;Q6P1N9;Q9UKV0;Q8WW38;Q9Y5J9;Q15652;B4DU55;Q9H160;Q9NQQ6;Q5T8I9;O75152;P81815;Q6ZS27;P62136;P02100;P51522;Q8N393;O43823;P24941;O15060;Q86TP1;P536804;Q9BUG6;Q9UBS8;Q15654;Q6ZMY9;O15014;P02795;Q9GZT9;P58557;Q8WXI9;Q5EMQ5;E7ETH6;P36639;Q2QGD7;Q9Y6X9;Q96N58;P17020;P04733;Q76KX8;P67775;Q9NSC2;Q9Y5J6;Q8TE76;Q969J2;Q9ULM2;Q14192;O60930;O43593;Q86V71;Q9Y3M9;P17027;Q86UQ0;Q96GC6;P41182;Q9Y6X8;O60711;Q6P9G9;Q03923;P14324;Q9H1B7;Q5VZL5;Q99504;Q9NRR4;Q8N972;P17098;Q8IV48;Q6ZT77;P21506;Q8IYB9;P06733;Q01081;Q9NCZ7;Q53G26;Q9UHY7;Q8N6T7;Q9UBW7;O95251;P17035;Q9HA77;Q9HCM9;Q17R31;O14618;Q8TBB1;P0C7X5;Q9NW08;Q8IX07;Q9ULX6;Q9UJL9;P49588;Q9H9Z2;Q6U7Q0;A4D1E1;A6NKH3;Q13127;Q8NDW4;Q9BSG1;P53041;Q8IU60;Q8WV99;Q9NXW9;Q15650;P62875;Q2VY69;Q9Y252;O75346;Q86YI8;A2RRD8;Q6ZNG0;Q15072;Q93075;P13682;Q9BTC8;Q86W11;Q12874;Q6NSZ9;A8MWA4;Q5SXM1;Q96ND8;Q5TA31;Q9H2K2;Q6ZNA4;Q9H4T2;Q9UKV8;P17040;Q96NB3;O95639;Q6GPH4;P16455;Q6V9R5;Q9P0J1;Q9Y2X9;P58317;Q9UDV6;Q96C00;P10074;P24928;O43918;Q68EA5;Q99496;Q9NP64;P52747;Q8IYX0;O75582;P26651;Q8N9Z0;Q9NV72;Q5VIY5;Q8WUB8;Q9Y462;Q9UEG4;Q15935;Q9H9T3;P62633;Q9UKT9;P36508;P43243;Q7L945;Q07343;O43345;Q9H4P4;Q6IE81;O15392;Q8WU90;Q9Y2G7;Q8WY41;P17041;Q8NB50;Q96HQ0;Q6NX45;P49711;Q13106;Q9NUP7;Q02447;Q99766;O15297;P42677;O60291;Q8N8Z8;Q53H82;P17021;P18146;Q96JL9;P0C7X2;Q8WTR7;Q8IU81;P07327;P0CG00;O15164;P15621;Q0D2J5;P0CJ78;Q13114;O95602;Q66K41;P04156;Q8IVC4;Q8N3J5;Q66MX3;Q14584;Q9UBQ0;Q96T23;Q3SY52;Q8WY54;Q16822;Q9NQL1;P27797;P07438;A6NKH75;Q96CB8;Q9C0D7;O15504;Q6ZNO6;P57071;Q9NPC3;Q6IQ21;P34949;Q96JB3;P07902;Q14592;P17036;O43309;P39748;P17039;Q9NX65;O95394;Q9Y5J7;P04053;Q8TAF7;P98182;P0C7V5;Q9UDV7;O14521;Q86TG7;Q96IU2;P36873;Q86XK2;P21980;Q8NB42;Q96H40;Q52M93;Q8IXJ6;Q13615;Q96NU7;Q8N8L2;Q86Y13;A6NMF4;Q9HB58;P02792;Q96SL8;Q8WW33;P11161;Q13888;Q6ZRF7;O75150;Q9UJW8;Q96JM3;Q9GZX7;O75251;Q6ZMV8;Q5T619;Q96PQ6;Q8NHY6;Q8IW36;Q3LIE5;Q14585;P80294;P78549;P49593;O14978;P16415;Q6ZQV5;Q9UIE0;Q2M218;Q9NR48;Q8N7K0;Q9HCG1;Q9NZV7;P04731;Q5TEC3;O60293;Q9H9D4;A8MUZ8;O60260;Q9UQ84;Q0VGE8;Q96BT7;O76083;Q08ER8;O95218;P49910;Q9BR84;Q86V15;O00743;Q8TB69;O60884;Q96GD0;P27694;Q68DK2;O95848;Q9H707;Q96N38;Q9HBT7;Q68CP9;Q9HAW0;P08151;Q92804;A4D2B0;Q9UFB7;O00625;Q075688;A6NM28;Q9ULU4;Q9H008;Q93083;P09234;Q53T94;Q15181;Q99684;Q6H8Q1;Q9Y4L5;Q9HCL3;Q6NUN3;Q9P243;P22392;P52594;Q13342;Q9Y3A3;Q9BUY5;Q86UA6;Q8N3J9;Q9BQA5;P20042;A6NFI3;Q15776;Q9BYN7;Q9UM63;Q8N782;Q9NP87;Q9NRC8;P10828;Q7RTV3;P23193;Q8N1W2;P35520;Q9H7R0;Q8WYH8;Q96FQ6;P52736;P67870;Q8WUI4;Q8TA86;Q13360;Q96NJ6;P14373;Q3KQV3;Q9NRN7;O00463;P17017;Q96LI5;O95391;O14628;Q9Y3Y4;Q9H974;Q5F1R6;Q15046;Q9H0C8;P69891;Q3ZCT1;O95271;Q86Y01;Q8NA42;Q7LG56;P22830;Q86YF9;Q96H86;O60315;Q9BWX1;P48428;Q9Y4X5;P61927;Q8N895;Q8N3F8;Q9Y3D2;Q9YX383;P62979;Q32M78;Q5VTR2;Q7Z6K1;Q19AV6;Q8NB12;Q8TDB6;Q14061;P48163;P21912;P0CJ79;Q96NG8;P21399;Q15326;Q9UQR1;Q6P3V2;Q8IYW5;Q6ZSB9;Q5D1E8;Q969R5;Q6AZW8;Q14590;Q9NVV4;O43255;Q9NZL3;Q96Q83;Q9Y5Y2;Q9UJ78;Q86XF7;Q96CA5;P62508;Q9NRG4;O76064;Q96EK4;Q96EG3;Q9H963;Q92782;Q9UPN9;Q9BS31;Q5EBL2;Q8WYQ5;Q5CZA5;P15822;Q96LX8;O60284;Q8WV37;P52746;Q9H0M5;O00757;Q9NSJ1;Q9UK12;Q9Y6E7;Q9Y2T3;Q9ULV3;Q9NYG5;Q96N20;Q9Y692;O15304;P23297;Q8WXB4;Q9Y253;Q9Y2P7;Q9ULD9;Q9Y2L8;Q2M3X9;Q86UW9;Q9NY33;Q66K89;Q96NI8;Q92785;O43361;Q8NEM1;O75081;Q9P2J9;O14802;A6NKH53;Q9UBF6;O60304;Q9H7R5;Q7LBC6;Q9UQL6;A7E2V4;Q9UPP1;Q9NYJ8;Q13105;Q16798;P80047;Q09FC8;Q14966;Q8IYI8;Q96EY1;Q9UKT4;Q8TA94;Q05516;Q12830;Q96PM9;Q6VVB1;B4DX44;Q16629;P52737;Q14839;Q8TF50;P0CG24;Q68DY9;O60384;A6NJJ1;Q9NQV7;Q5VZF2;Q5HYK9;Q9HAH1;Q14588;P29083;Q6ZVK8;Q9Y5R5;Q96QC0;Q7Z3V5;A8MTY0;P51553;Q9NW38;Q9UK10;Q8TDD2;Q9H7S9;Q8IWW7;Q8TAW3;P09874;Q5JNZ3;Q9NX46;O15015;Q6ZN79;P17025;Q96EP1;P47974;Q15937;Q8N3Z6;Q8IZD2;Q9PIU0;P10073;P52740;Q5EBM4;Q9H857;Q9H2P0;Q9H0P0;Q8IY57;Q86T29;P18054;Q96DE0;Q8NBB4;O94892;Q9UJW3;Q16670;Q32MQ0;Q5TAX3;O75928;Q7L3S4;Q86YG4;O96028;Q92670;P52741;Q9NS39;Q96IR2;Q8N988;Q9H116;Q96NN9;Q9BY41;Q8TF32;Q8N8J6;P59923;Q9NWT6;Q86VM9;Q03938;O60481;Q99502;Q3KNS6;Q8N720;Q8NHM5;A6NN14;Q9BRH9;Q9UGR2}

3538

Pathogen[ P03346] interacts with 1425 human

partners:{Q86UQ0;E7ETH6;Q96T92;Q5F1R6;A6NK53;P02792;O15014;Q7Z3K3;Q3KNS6;O75382;P62136;Q96NG5;Q5JVG2;Q9Y3Z3;Q969S3;Q13886;P08048;Q9BZE0;Q9NS91;Q12901;Q05481;Q9Y6X9;P21980;O95201;Q9NWS9;Q9UPN9;Q9Y6K9;Q7Z398;Q8NI51;Q9Y253;Q9HBH1;Q9UKS7;Q96N20;O95639;Q9Y467;P17097;Q3KKNV8;Q12874;Q12830;Q9NZU5;Q96LW1;O75603;O00463;Q9H2U2;P57071;Q5T5D7;O75592;Q4VC44;Q7Z7K2;Q9HBT8;Q8TA86;Q9UHF7;Q9H0C8;Q13263;Q494X3;A8MX4;Q9NQX6;Q9ULM6;O00743;Q9NR83;Q5TD97;Q9ULX3;O60346;P98182;Q95405;Q8TF39;Q9Y6K1;O95159;Q02386;P38935;Q9NQX1;P16083;Q86UW9;Q8WXA3;P10827;Q9P2G1;Q8N4W9;Q9H9P5;P35813;P49910;P11473;Q3MJ62;P28715;O94892;A6NGD5;O15535;Q8IZM8;Q9NP64;O76064;Q9NPA5;P55198;Q9BTC0;P86452;Q9NQV7;A2RRD8;Q6P1L6;P0CG31;Q9HAH1;Q9BV68;Q08AN1;O95677;Q9H8N7;Q96NJ6;A2A288;O95625;Q49A33;Q9BRR0;C9JN71;Q6ZRF7;Q96C55;Q9UGP4;Q7Z340;Q5T1R4;O14829;Q96MR9;Q96FQ6;Q8WV37;Q9NZV7;Q8WTZ3;Q96006;Q96C00;O75112;Q15928;Q96MF7;Q5XG87;Q9NRN7;Q9H091;Q96EK4;Q9BWM5;Q14591;Q99612;Q9BUY5;Q9UEG4;Q14258;O95551;O96017;Q99598;P36508;Q9Y2P0;A6NN14;Q8NCA9;Q8WY54;O75446;P14373;Q8WYB5;Q52M93;Q9H116;Q32MQ0;Q01538;Q8NAF0;Q3KNW1;Q15916;Q9ULD5;P46100;Q6PCD5;O15392;O60765;Q8IZC7;Q9UQR1;O75150;P56270;P17039;Q2QGD7;O75362;Q5T8I9;Q9Y2P7;Q8N6M9;Q8NAP8;O14639;Q86US8;Q5HYK9;P06401;Q9UL59;Q8IW19;O43918;Q9H0M5;P55265;O43167;Q9Y4X4;P17098;P29474;Q86V71;O14901;Q9UNL4;Q9H2H0;Q8NC26;Q96NJ3;Q9NWF9;P62633;Q13489;P15336;Q9UIF8;Q96HQ0;Q9NU63;Q13129;Q9H8W5;Q2M218;P52739;O15209;Q9UGR2;P0CJ78;Q8N141;Q8WYH8;Q5VTR2;Q7Z3V5;Q9H2P0;Q8IU81;Q9P253;Q9C0F0;Q8IZQ1;Q6ZT77;Q9UL58;Q8NCN2;Q8N823;Q8WW38;Q6ZQV5;P52747;Q7Z6J0;O00167;Q9Y2L8;P08235;O95171;Q3KQV3;O43296;Q8TAQ5;O95376;Q9UKF6;Q6PEW1;Q9BXA9;Q86TJ5;Q9Y5W3;P13929;O60930;Q96QC0;Q96K75;O43309;P61927;Q5FWF6;Q9ULM2;P27694;Q9NPM62;Q6ZSB9;Q7Z3I7;P02489;Q9UKT9;Q9P0T4;Q06732;Q96H40;O95714;Q8N668;P23297;P48443;Q8IXP5;Q8N7M2;O75123;Q9Y3C5;Q96IQ9;Q14590;P0CH99;Q96K62;Q9NW07;Q6V9R5;P35789;O75312;Q8WU90;P52740;Q9NR11;Q9BYM8;Q8TD23;Q08AG5;Q14149;Q99728;Q53FD0;Q9P2N5;P49754;P35226;Q969W8;Q7LBC6;Q96S24;O95391;Q96MU6;Q9C086;O60315;Q9BWX5;O60290;Q6P1K8;P17027;Q5MCW4;Q9UNA4;Q9BV57;P51786;Q8NH2;Q03936;Q96JG9;Q15911;Q2M1K9;Q86T29;A8MUV8;Q8IUD6;O95628;Q147U1;P02100;Q8TD17;Q14587;P52738;Q70IA6;Q9NQV6;Q8TF45;P49116;P0CB33;Q9UJQ4;Q8N680;P49257;Q9B339;Q9UK59;Q9Y3Y4;A8MVS1;P24278;P43243;Q8WV99;Q96KM6;Q8NEP9;P23769;Q14872;Q9UBZ9;Q5VIY5;Q14527;Q8IYL2;P25490;O95848;Q8N5U6;O15304;Q9NZU7;Q5H9K5;P24941;Q15637;Q9NS18;O14978;Q9Y483;Q8TE76;P55895;Q6P280;Q9NSC2;Q5T0B9;O43313;Q8N393;Q96I27;Q8TF20;Q13888;Q8NF99;P52741;P55197;Q9C0A1;Q86YE8;Q6ZMY9;Q86WB0;Q9H1K1;O75820;P25800;Q86W46;Q96PM5;Q8IZ20;P56524;Q9UL68;Q9UK11;Q9NTM9;P04732;Q8IYH5;O43298;O14709;Q96T51;Q6NX45;Q7Z366;Q9H4P4;Q3SY52;Q9Y5J7;P58557;Q96QT6;P17026;O43255;P53803;P17022;Q8N5A5;Q8TBC5;Q9H9Y6;Q12986;Q5HY98;P35227;Q86TG7;P18054;P36639;Q68DI1;Q9UBU7;Q9HAJ7;Q12802;Q86UE3;Q71UM5;Q9NTX7;Q9H9D4;P98170;Q5T200;Q3MIS6;Q8N9K5;Q8N895;P52737;Q9Y383;Q7L3S4;O94776;P28698;Q9ULJ3;P13056;Q9N69;Q9NWK9;Q8IYJ6;P02794;Q96CS4;Q9P0L1;Q9C035;Q96IF1;Q9H4W6;Q63HK5;P52742;Q8WV22;Q9UDV7;Q9C0D4;Q9BYE7;Q9NPG2;Q8WTR7;P15622;Q8NDQ6;Q9UBC3;Q7Z6K1;Q9P2Y4;Q96N77;O95630;P10588;Q9HCK0;Q8IVC4;Q8TA94;Q9C0F3;Q6PG37;P06703;Q7L9L4;Q9NYG5;Q9NX65;Q8TF32;A8MQ14;Q86XK2;Q86UD4;Q96SE7;Q9UIF7;Q96AY2;Q9HCG1;Q15942;P26358;P62273;P62714;Q15560;P67775;Q962F9;Q8TAF7;Q9UBL3;P0C7X2;Q9Y3M9;Q96BR9;P17038;Q9UBQ0;Q9H4Q3;A6NK75;Q9H609;O15350;Q96N38;O75626;Q9NTW7;Q99502;Q9Y3S2;Q9BSM1;P09467;P69905;Q9H0W9;Q9NRL2;Q14586;Q00994;P17014;Q92670;Q9NXW9;Q9Y5R5;Q8N587;P10074;Q9UM63;Q9H0F6;P0CI00;Q8NB42;P80294;Q9NV72;P63272;Q86VK4;Q3SXZ3;P49593;Q5TA31;Q15652;Q96BV0;Q9H165;Q09FC8;Q8N859;P52743;O15090;P46976;Q16629;Q13114;Q8NBB4;O75151;Q03923;O75764;Q8NCP5;Q8TAP4;Q6H8Q1;Q9UJW8;Q86V15;O15194;Q9BY31;P36871;P46939;Q9NUA8;P17032;Q03393;Q8N2I2;Q13398;Q66K89;Q53GI3;Q8NF64;Q8N554;A6NJL1;P17025;Q96AX9;P15621;P17010;Q16342;O43345;Q6P9A1;P59817;A8MT65;Q9HCX3;Q9ULJ6;Q9NYW8;O00151;Q13351;Q00987;Q9BWG6;P0CG40;Q0VGE8;Q8N7K0;Q9UKJ3;Q9H4T2;Q53T94;Q8NDX6;Q9NSD4;Q9Y6E7;Q66K41;Q9ULX6;Q499Z4;Q6P9G9;P21912;P08047;Q9BQW3;Q9H582;Q13889;Q96LW9;Q8TF68;P06733;O76031;Q9HC78;Q9H5H4;Q9NRG4;Q8N9F8;Q92766;Q86YF9;Q96JM2;Q8N5C8;Q8TDD2;P98168;Q96MT3;Q9H963;Q9UK10;Q7Z5L9;Q14119;O95600;Q96NY9;Q8N8E2;Q96CX3;A8MUZ8;O95453;P52736;Q8TDW5;Q9NX58;P52756;P98169;Q9H0A6;Q8N490;Q9UKA1;O43593;Q14592;Q6NZ36;Q14618;Q9BWF3;Q9C029;O15060;O60663;Q14526;P07438;P17036;Q6ZNH5;Q6ZMW2;Q8IU60;Q3ZCX4;Q8TBZ5;Q9BS34;Q9UL40;P0CJ79;P45381;B4DX44;P62877;Q96MN9;Q969S2;O60870;Q8NFT6;O75925;Q8NBF1;Q6ZNA1;P28702;P35637;Q9H8W4;P21506;P51508;Q9Y330;Q9UK13;Q8NOY2;P04733;Q8N8Z8;Q86VM9;Q9BT49;Q96JL9;Q9P243;Q8IYI8;P99999;Q8ND82;Q9H2K2;Q96EP0;Q92794;P13640;Q9NS56;Q9Y5J6;Q93083;P84022;O14628;Q86Y25;Q81WS0;Q86SE9;Q8N1W2;P25791;Q96DT7;Q14847;Q8IYX0;Q8NHY6;P09917;Q9BRH9;Q7Z3T8;P31350;Q9Y692;Q8WUU5;P50479;A7E2V4;O60481;Q9UIS9;Q6ZNI1;Q8NB15;P02511;Q6ECI4;Q9UNY5;Q8IYM9;Q7LG56;Q8N1G0;O43829;Q9H7R5;Q8TF47;Q96S55;Q9GZU7;P22736;Q5EEM4;P49356;A8MWA4;P51003;Q16851;P80297;Q15929;Q9UL36;Q9NXT0;Q5JT82;Q5TAX3;Q9ULU4;P15976;O43670;O95125;Q9BR84;Q7Z4H3;Q6P9A3;Q8N339;Q6ZMV8;Q969R5;Q96PE6;Q5JVG8;O43189;Q96F45;Q9P0U4;Q9H9T3;Q02446;O94972;O95863;Q969G2;P52746;Q15072;Q9Y3A3;Q9NYJ8;P16415;Q6AW86;Q9H7X3;Q96N22;Q9NQZ8;Q8IWY8;Q68EA5;Q9UDV6;Q15022;Q9P2R6;Q9H4I2;Q03924;Q7Z6E9;Q9BX82;Q86YP4;Q06730;Q99684;P17031;Q8N8J6;O95251;Q8N883;Q9UK12;Q15973;Q13342;Q14192;Q9H8G1;B2RFX5;Q96DE0;Q9UPQ4;Q5JNZ3;P27815;Q8WXI9;Q13118;Q8TBZ8;Q9P2J8;O95780;O75164;Q9UHK0;Q3KP31;O60220;Q6ZNP9;P52744;P36873;Q8IXT2;Q075541;Q03112;P61513;O75373;P17041;Q9H040;O60284;Q01Q32;Q9Y242;Q86V26;P52594;Q2M3W8;Q08ER8;Q5SVZ6;Q02086;A6NKH3;Q5SVQ8;Q14593;Q9GZT9;P48059;Q8TD19;Q96BR6;O14746;O43361;Q6NZY4;Q8TCN5;Q05BQ5;Q7Z4V0;Q9NVV4;P47974;Q9HCM9;B4DU55;O60304;Q14585;Q92784;Q9BY41;Q96N77;Q6IQ21;Q8N9V7;Q6ZS27;Q9H8Y5;Q8IWT3;O15297;O75840;Q8N7Q3;P49711;Q13330;Q01954;Q5VZF2;A4D1E1;P51815;P17544;Q9Y6X8;O95361;A6NNF4;P14324;Q9H7S9;Q8TAW3;Q8NA42;Q8NB12;Q96C28;Q96N95;Q5D1E8;B4DXR9;O75346;P37275;O75604;Q01081;Q7L2R6;O76003;P17029;Q13064;P36954;P53611;P48200;A6NIX2;Q6DD87;Q9UKT4;Q9UIF9;Q6PF04;Q8IUQ4;Q8NEM1;Q86XN6;Q9BU19;O43439;P10073;Q8IX07;Q96T23;Q9C040;Q8TC21;Q9BUG6;P31689;Q19AV6;O75688;P53041;Q13233;P17035;Q53G26;Q9UHY7;Q96NG8;Q9Y2Y4;Q9Y462;Q8WUI4;Q9HCZ1;O14686;Q9HCE3;Q9H777;Q95582;P17021;Q9UPP1;Q9Y5R6;P62072;Q6ZNO6;Q01167;Q63HK3;Q13887;Q13105;Q6ZNA4;Q8NDW4;Q5SXM1;Q9NQ29;Q96GM8;P22392;Q8N8C7;Q96N18;Q9H8S9;Q8N6T7;Q6N043;Q9UK18;Q6QNC0;B1APH4;Q9UDW3;Q96SK3;Q17R31;Q6BEB4;Q86YH2;Q86UA6;Q99590;Q4V348;O75554;P17030;O60293;Q99496;Q07352;Q9H5J0;P78317;O95718;Q8N9Z0;Q9Y468;O60281;Q3ZCT1;Q5TYW1;O94929;Q96JM3;Q8N

2W9;Q9H707;Q8IYW5;Q8TBB1;Q5VTD9;Q13642;Q96EG3;Q6VVB1;Q9UBS8;P49589;Q14966;Q86TA1;Q9Y5  
Y2;Q8NB50;P30622;P09874;Q6IE81;Q9Y6R6;O75132;O75469;Q9NQ03;Q96Q83;Q9HBE1;P78364;Q68DK  
2;Q15935;Q9Y2G7;P62979;Q8WY41;P27797;P41182;Q92994;Q8NFW9;Q9BYX4;Q76KX8;Q96BT7;Q8WUY3  
;Q8N5P1;Q9NUP7;Q8IYB9;P60002;Q9NRM2;Q8NDF8;Q92905;O60291;Q9BUZ4;P78549;P17028;P17020;  
Q9UH90;Q8N3F8;P68871;A6NP11;Q05516;Q8N371;Q9BWW7;Q8N720;Q96MA1;Q5T619;Q43830;P17017;Q  
9UM07;Q9UHD1;Q96SC8;O60260;Q86XU0;Q96G03;Q9BWF2;Q96ME7;Q96BD5;O95602;Q6ZSS3;Q6PDB4;Q9  
UJ41;Q9C0G0;P42677;Q8WWW0;Q14584;Q9H2C1;P36405;P10072;P11161;Q9BU02;O15151;Q8TBP6;P02  
795;Q96S99;Q9NPC3;P30876;Q15326;Q96JF6;Q9UKV0;Q9H7Z6;P17023;Q15937;Q9Y2D9;Q8TAT6;Q9BX  
R0;Q49AA0;Q15181;O75437;O95394;Q17R98;P04053;P0C7V5;Q9UQ84;Q96KS0;Q96PY6;O75251;Q8IYW  
8;Q6P2D0;Q95218;Q96NB3;O14771;Q96CB8;Q14596;Q96SL8;O95271;Q6GPH4;Q6U7Q0;Q96IU2;B2RXH2  
;P62508;P19474;Q9HB58;P10828;Q9UGL1;Q9UBR4;Q86XF7;P34949;Q9HBT7;O43257;Q8NAP3;O15015;  
Q9NSJ1;Q8TF50;Q9Y2K1;Q9BYN7;Q9H974;Q9NRR4;Q9UGU0;Q9GZU2;Q96MM3;Q96PQ6;Q6ZN30;Q9UII5;P  
04156;P11474;P51504;O15355;Q9BR11;Q9HA38;Q8IW36;P48454;Q05215;Q9P255;Q9GZX5;Q9BU89;Q9  
UK33;P49790;Q13490;Q7Z2E3;P61968;Q9H4Q4;Q9ULT8;Q96ND8;A6NDX5;Q76L83;P04731;P23025;O14  
964;P11532;Q9BSK1;Q9UH73;Q12873;O00625;Q8N972;Q86YI8;P58317;Q8IXJ9;Q9Y4L5;Q96PU4;P226  
81;P13682;Q2M3X9;Q9Y5A6;A8MTY0;Q96LX8;Q9UFB7;Q9BQ83;Q7L945;P17040;P51522;Q9UKY1;Q9UPG  
8;P59923;P24928;Q9H5V7;P62140;P23193;Q7Z5J4;Q96FX2;Q96NL3;O75306;P06396;Q96IV0;Q8WW33  
;P27695;P67870;Q9HCL3;Q5TC79;Q8TDB6;P0C7X5;Q96IT1;Q9UC06;Q13029;Q9BYK8;Q8IXK0;P38936;  
Q9NWT6;Q9Y2X9;Q6GQ09;P29083;Q8NHM5;Q969J2;Q16600;P18146;Q92993;Q8WUB8;Q8N782;Q6ZVK8;Q  
9BS31;Q9NP87;Q86UZ6;P22735;Q00403;Q9NQL9;Q9H9Z2;O75398;O43318;Q8IYN0;Q92793;Q9UID6;P3  
9748;Q15697;Q9NR48;Q6ZN04;Q6ZN57;Q01844;Q6NUN9;Q8N488;Q13360;P53804;Q5T6S3;Q5T7W0;Q16  
775;Q9Y4X5;O75467;Q14CW9;Q9NZL3;Q9H6W3;Q9Y6X2;Q93052;Q96H86;Q15776;Q9Y6Q3;P51523;O004  
82;Q86T24;Q9HAK2;Q8WTV1;Q5VZB9;Q9Y252;Q08209;Q9NW38;Q8NEK5;Q9Y2A4;Q02930;Q86Y01;Q1458  
8;Q6AZW8;P21399;O95071;Q8IY57;Q96K80;O75290;Q9HAZ2;Q01101;P26651;P17019;Q8NCK3;Q9BZR9  
;Q6IV72;Q16587;Q9P3V2;O75152;Q5VWG9;Q8IZ26;Q92900;Q9UIE0;Q9504;Q8N988;A1L020;Q8TD94;  
O75928;O75800;Q9ULU8;Q9UL41;Q96GC6;Q15696;Q9Y2J0;Q6FIF0;Q96CA5;P20042;Q68CP9;Q9BSG1;Q  
9Y2M0;Q15654;Q9BTC8;Q8NG27;Q6AHZ1;P35398;Q9BXX1;Q9UJU3;Q9BRX2;Q68DY9;P06746;Q9Y473;Q9  
6CK0;Q86UP3;Q9UJN7;Q7L590;Q8NEA6;Q8N3Z6;O43900;Q5EBL2;O00110;Q3SY56;Q0D2J5;Q16670;Q9U  
BZ4;Q9BQ52;Q9NTG7;Q9Y2H8;Q68G74;Q96RE9;Q9BWX1;Q92804;Q9ULV3;Q93075;Q8N3J9;P09234;Q8IV  
P9;Q5CZA5;Q9RTV3;Q6PJT7;Q92664;Q9NYT6;Q8WXB4;O14595;Q9UKN5;Q13285;P15822;A6NM28;P0CG0  
0;Q06587;Q9NVV9;Q9H160;Q02447;Q96N58;O94822;Q8TEC5;Q6ZNG1;Q6NX49;Q6NTD2;O60711  
;Q9NS23;O43823;P51948;Q99676;Q96LI5;Q96SR6;O14802;Q96DX7;Q9UBF6;Q6ZN08;Q9UIL8;Q9NRC8;  
Q8IZD2;Q9UQL6;O15164;Q8IWL3;O75081;Q96MB7;Q96EY1;Q9HBF4;Q9NRD5;Q9NR56;Q9UIH9;Q96PM9;Q  
9Y6K5;Q92618;Q92785;Q9UC07;Q14929;P55055;Q8TAU3;Q9Y2Y9;Q96SQ5;Q9HCC9;Q15650;Q6NSZ9;P6  
0510;Q49618;Q9NXR8;Q9H4Z2;Q13106;P17024;Q96GX9;Q96T88;Q9UJL9;Q9H1B7;O14786;P31629;Q9H  
008;Q9H6Z9;Q9UJW7;P51814;Q6ZR52;Q9HOE7;O95571;Q32M78;Q9Y4E5;P62875;Q9Y1Z0;Q86Y13;Q9NV  
W2;Q9UKD1;Q6ZN55;Q96JC4;Q2TB10;Q86W11;Q14134;Q2VY69;Q96EP1;O15504;Q92844;Q6ZN17;Q9NX4  
6;Q8N184;Q14839;O15062;Q8N8L2;P0CG24;Q96MX3;O00488;A8K8V0;Q6ZN19;Q13127;Q96JB3;Q6ZNG0  
;Q9UPA5;Q9P1U0;Q92782;Q9Y2Q1;Q13501;Q9H7R0;Q86DY1;Q9UJW3;Q86TJ2;Q15428;A6NHJ4;P49792;  
O96028;Q6IEG0;Q9GZV8;Q9NUK0;Q8WV44;Q8NDP4;Q86XN8;Q8WYQ5;Q96IR2;Q5BKZ1;Q9BQA5;O75792;Q  
6PK81;Q7Z2W4;Q9HAW0;P08151;Q06455;Q86TP1;Q9UJ78;Q5VUA4;Q9UBW7;Q96GE5;Q5U5Q3;Q96K58;Q0  
3938;Q9NPC7;Q969T7;Q92610;A6NFI3;P10589}

3539

Pathogen[ Q85601] interacts with 1286 human

partners: {Q9UQR1;Q9HCZ1;Q8N8C0;Q5SVZ6;Q9ULM2;Q9HCG1;Q9UBZ4;Q8IXK0;Q9P2R6;Q3KNS6;Q9261  
8;P18146;A4D1E1;Q494X3;Q96FQ6;O75373;Q8N1G0;P08048;O95625;Q7Z6E9;Q6NX45;O14639;Q9UPN9  
;P61513;P78317;Q8NI51;Q8IXT2;Q9HBB1;Q15637;P17097;Q9NRC8;P51786;P69905;Q9NRN7;Q969J2;  
Q8N9K5;Q9NZU5;Q32M78;P28698;Q8IZC7;Q92664;P15621;Q63HK3;Q96JM3;Q4VC44;Q9BQ52;P09234;P  
0CG00;Q96CB8;P51815;Q9Y2M0;Q9UHF7;P02489;Q9Y5T5;P36954;Q6ZR52;Q9NQX6;Q13064;Q9UKV0;P0  
8151;Q6PEW1;Q86W11;Q9ULX3;O60346;Q8NA42;Q14929;Q8NFW9;Q8TF39;Q9HBT8;Q9UPG8;Q9P1U0;Q9B  
XR0;P80294;P09874;O75688;O60481;Q14593;P62633;Q9P2G1;P17040;Q6ZN11;P11473;O95602;Q2VY  
69;Q3MJ62;Q8N720;Q86XU0;P34949;Q06455;Q96SZ4;Q9NZU7;Q9UNY5;Q14586;Q96MA1;P22681;Q9H6Z  
9;O15535;Q96S99;Q9NPA5;Q9UJW8;Q9BT49;Q8NBB4;Q9NQV7;Q96JB3;A6NHJ4;Q9ULJ3;Q13127;Q9NS56  
;P14373;Q9H707;Q2M3X9;Q7L590;P23025;Q96MX3;Q6V9R5;Q7Z4H3;Q5EBL2;C9JN71;P99999;O75928;  
Q13490;Q8TDB6;Q8N3Z6;Q7Z340;P31689;O14829;Q96K17;Q9Y383;Q9HOE7;P06396;Q8WV37;Q96SR6;Q  
5JN23;Q96ND8;O75112;Q86TA1;Q6PG37;Q96K62;Q96EK4;Q5TYW1;A6NFI3;Q14258;O96017;Q9UC07;Q9  
6CS4;P17028;P51522;P61968;Q8N7M2;Q969W8;Q9NUA8;Q8TDD2;Q9UHD1;Q9BWX5;A6NK75;P36405;Q01  
538;P0CB33;Q9ULD5;P21506;Q8N371;Q8WV44;Q12901;P56270;Q9NYJ8;Q9H8G1;P15976;Q3SXZ3;Q96S  
C8;Q9BY41;Q9UL59;O94776;Q9UQ84;Q7L945;Q92994;Q9C0G0;P50479;P17019;Q96NG8;Q14202;Q9H04  
0;P62714;Q5HY98;Q96BD5;Q969S2;Q6P1L6;Q8N8L2;Q6ZN57;Q96BR6;Q6NZ36;Q96HQ0;Q96JM2;A6NKH3  
;P86452;Q9UQL6;Q8NB12;P13682;P09917;Q9UGR2;Q9UIF9;Q86VM9;Q86V15;O75151;Q96JF6;P21399;  
O75398;P17032;P49589;Q9P253;Q9C0F0;Q6PF04;Q9UL58;P60002;P17036;Q6DD87;Q9HCL3;O15151;Q  
14CW9;P04732;Q9HCK1;Q9Y2L8;Q9GZU7;O95251;Q8WWW38;Q8IYW7;Q8TAQ5;A6NIX2;Q02386;Q86YE8;O0  
4663;Q9UJW3;Q9BYN7;Q8NAP3;O15194;Q9HBT7;Q5FWF6;Q6GPH4;Q32MQ0;Q9H0C8;Q8IYN0;Q9X3083;Q19  
AV6;O95714;Q9Z398;P17020;Q9Y3C5;Q96BV0;O75306;Q13360;Q96PY6;Q96QT6;Q9H7S9;B4DXR9;O753  
12;Q9UIL8;Q9H5L6;P38935;O95677;Q96LX8;Q8WWW0;B1APH4;O60290;Q8TD23;Q8N8J6;P49593;Q53FD  
0;A8MWA4;Q96T23;Q9BR84;Q6ZNG0;Q9Y2Y9;Q9P2N5;Q14966;P15622;Q96H40;Q2M3W8;O75800;O95391  
;Q13888;Q9C086;O60315;Q53G26;P16455;P62072;Q14587;A2RRD8;Q8NHY6;P17027;Q9UM07;Q9BU02;  
Q9H9T3;Q9UKT4;A8MUV8;Q9HC16;Q9NR11;P02042;Q9Y6X2;Q03936;Q08AG5;Q9Y2Y1;Q9H116;Q2M1K9;P  
62877;Q9H8S7;Q14872;Q8NDW4;Q9UKN5;Q6NSZ9;Q15654;Q9HBF4;Q9UDV6;Q13129;O15304;O95989;O14  
978;Q9H0A6;P28702;Q03112;P17030;P21912;P79522;Q9Y468;O60663;P27815;P52740;Q96KM6;Q8NF  
T6;Q6ZMY9;Q8TF20;P23769;P30622;Q9BUG6;Q6PCD5;Q9Y2Y4;Q9NWT6;O95789;Q9NR83;Q86WB0;O1501  
5;Q9H609;O60220;O75437;Q13106;Q9UL41;P07438;Q9Y2X9;Q86WZ6;Q6NUN9;Q9UJW7;Q92844;Q9Y242  
;Q96PM5;Q96PU4;Q9BS31;B4DU55;Q93052;Q8IVP9;Q8IYH5;O14709;Q96T51;Q14596;Q96SQ5;Q99728;  
Q6ZNG1;Q3KP31;P48200;Q09FC8;Q9Y4L5;Q86V71;Q9Y5J7;Q52M93;Q96H86;P17026;P53803;P17022;Q  
8N5A5;O60284;Q92610;Q7Z2W4;O14686;Q8TAW3;Q99504;Q9H0M5;P52744;P36639;Q2M218;Q9H7Z6;Q9

GZX7;P25490;Q8IZ26;P98170;Q6ZN55;Q9UNL4;Q8N895;Q8IXJ9;Q9NRR4;Q9BX82;Q96NG5;Q5T8I9;P0C7X2;Q8NF99;Q9NWK9;Q96AY2;Q2QGD7;Q9Y6X9;O75792;Q8NDP4;Q13642;Q86XN6;Q8WW22;Q14588;P06733;Q9UII5;Q9H4T2;Q96JC4;P11532;Q71UM5;Q8TBZ8;Q14592;Q9NP61;Q9UBU7;A6NK53;Q9NQZ8;Q9BZR9;Q14591;Q9H974;O00151;A1L020;O00757;Q9NWF9;P58317;Q9UGP5;O60884;Q9COF3;O15392;P47974;Q8TF32;P27797;Q15046;Q15776;A8MQ14;Q86XK2;Q3MIS6;Q3KQV3;O75290;Q9NR56;Q96SE7;B4DX44;Q8IUD6;P26358;Q9HAW0;Q9P2F9;Q9Y3M9;P17038;Q9P255;Q9NS23;P49754;A6NM28;Q6PK81;Q9H0W9;Q6ZNO6;P17031;Q8IHW8;P17014;P51948;Q96MU6;Q8N2W9;Q5T1R4;P23297;O15164;P10074;Q9H0F6;Q8NEP9;P52594;Q9NV72;Q49A33;Q9UJN7;Q86SE9;Q15560;O43439;P20042;Q9UJ41;Q6P1K8;Q5TA31;P02795;Q86VD1;Q9HAH1;Q08AN1;Q9NZV7;Q16629;Q13114;Q03923;P52736;Q8N823;Q6H8Q1;O14786;Q92782;P17024;Q14149;P17017;Q9Y692;O60304;Q9Y2D9;P59923;Q8N2I2;Q96FX2;P31350;Q13398;Q53GI3;Q9UK11;Q86UD4;P55055;P17010;P49711;Q9UID6;O43345;Q9UIH9;Q8TAF7;Q9H008;Q8N184;Q9BUY5;Q8TF47;Q96GX9;Q9BV57;Q9P2R7;Q9UJL9;Q9H777;P02100;P27694;Q8IYI8;Q9NYW8;Q8WUB8;A8MX4;O95125;Q9ULU4;Q12830;Q9Y6E7;P30793;Q66K41;Q499Z4;Q9HA77;O15504;Q9H7R0;P08047;Q5VWG9;Q969R5;Q8N6M9;Q9H6W3;Q9HCF7;Q8N9F8;Q6IQ21;Q8N5C8;O75152;Q96MT3;Q08209;Q9H9Y6;Q01954;O95201;Q5VIY5;Q96NY9;Q9UBW7;P26651;Q9NXW9;Q16587;Q9UKA1;Q15022;Q05481;Q13263;P28715;Q9H6Q4;O60291;Q68DI1;P52746;O15060;Q14526;Q6IQ32;O75820;Q8N6H7;Q8NEA6;Q3ZCX4;Q9Y6R6;Q8TF50;P0CJ79;Q9GZX5;Q9UBL3;O43361;Q9NW07;Q8WYQ5;Q9H4I2;O60870;P36508;Q8TC21;Q6PJT7;Q16851;Q7Z3K3;P35637;Q9UK12;O43681;Q9NX65;Q53T94;Q7Z6J0;Q8NDQ6;P51508;O76003;Q9UK13;Q9H2K2;Q6ZNO8;Q9GZU2;Q96LI5;Q8NBF1;O60711;Q9Y6K9;Q969S3;Q9P0U4;Q8IWS0;Q8N1W2;P25791;P69892;P46976;Q8N339;Q86UW9;Q15650;Q9NQX1;O15355;Q9NVV9;A6NGD5;Q86TP1;Q8WZ3;A6NJL1;Q9NP64;Q8NEK5;Q8N4W9;Q9Y6K5;Q5XG87;Q92785;Q96N38;Q8N587;Q9UIS9;P52742;Q02930;Q7LG56;Q16600;Q9Y5A6;P78364;Q9P0T4;Q9BTC0;Q9H7R5;O76064;P17098;Q6PII5;Q9BSM1;Q96MN9;P80297;Q70IA6;Q9P0L1;Q9GZT9;Q8NB42;Q9UL36;Q15928;Q5TAX3;Q9ULX6;Q96MR9;Q6P9A3;Q9Y4I5;Q5MCW4;P14618;Q96N20;Q8IXJ6;Q8IU81;Q15124;Q9H2U2;Q9UKJ3;P0CH99;Q9BRR0;Q9HCC9;A2A288;Q12933;Q9UM63;Q9Y3A3;P16415;Q9H7X3;Q96N22;P62136;Q9Y2G7;Q9UL40;Q9UDV7;Q03924;Q86YP4;P49257;Q96MB7;Q9Y2A4;P13929;Q9UBF6;Q96CX3;Q9NQCF;Q8N859;Q15973;Q8N6T3;Q96KS0;Q96DE0;O60765;Q9UPQ4;Q92804;Q8WXI9;Q9P2J8;O95780;P52738;P04733;Q147U1;O95628;Q9NZL3;Q8IYL2;O95453;P36873;P36871;P02511;Q12873;Q99502;P98169;Q9H8N7;Q96T92;Q08ER8;Q9UBZ9;P21980;O15014;Q5SVQ8;Q14192;Q9H6B1;Q6NZY4;Q05BQ5;Q96N58;E7ETH6;Q9NXT0;Q9UPA5;P46939;Q92905;Q8IYM9;Q7Z3V5;O15297;Q5JVG2;Q5T5D7;Q9P3V2;Q9NYG5;Q8NHM5;Q8N7Q3;Q9HLB58;Q13330;Q8IYX0;Q15942;Q8TA86;P22736;Q14585;Q9HA38;Q9Y6X8;Q0VGE8;P14324;Q96LW1;O14771;Q96GC6;Q86XF7;Q6ZT77;Q96N95;Q86UY8;O75346;Q9BYX4;O60281;Q96GM8;Q9Y6K1;Q5VZB9;Q01081;P17029;O95159;Q9H2P0;Q96T88;P29083;Q9ULM6;Q76L83;A6NP11;Q15929;Q9BYE7;Q8NEM1;Q9UBT6;P22033;P35789;Q6ZNA1;Q8IX07;Q14590;Q6U7Q0;Q8IXW5;Q9NQ29;Q8N668;Q9BYK8;P53041;Q9UC06;Q99612;Q9H5H4;Q8N883;Q9NXTX7;Q6ZRF7;Q9Y462;Q86YI8;O75582;Q8WV99;Q9UPP1;Q8NCA9;Q14061;P08235;Q7Z7K2;Q9NRL2;P49356;Q9NW38;P23922;P17023;Q96NI8;Q96F45;Q3KNV8;Q8N6T7;O43829;Q00403;P0CI00;Q8TD17;Q9UKV8;Q9UDW3;Q96SK3;Q99590;Q3SY52;Q4V348;Q96NJ3;P11474;O43830;Q9BV68;Q8TA94;O60293;Q86T29;O14964;Q99496;Q13118;Q8N9Z0;P10827;Q3ZCT1;Q5HYK9;O60384;Q8IYW5;Q8TBB1;Q96EG3;Q6VVB1;Q8IVC4;Q9UHK0;Q6IEE81;Q02447;Q95630;O75132;O75446;P23193;Q9BTC8;Q96N77;Q68EA5;Q8N5U6;Q8WU5;Q68DK2;P67775;Q99684;P62979;Q8WY41;Q8IWL9;P55265;Q8WU90;O43309;P48059;P29474;Q9C035;Q9NUP7;Q8TF68;O75382;Q8NDF8;Q8N5P1;P17544;Q6ZVK8;Q6GMV2;P09467;Q9NW08;Q6NS38;P68871;Q05516;Q6ZS27;Q9NTW7;Q7L2R6;O75150;O00482;Q96IF1;Q86US8;P51504;Q9BQA5;P84022;O95376;O60260;Q6ZNI9;Q9NPG2;Q0D2J5;Q9BWF2;Q6ZSS3;P42677;Q5VTR2;Q9Y252;Q14584;Q99766;Q9UIF8;Q8WV54;Q8TF45;P10072;Q9AC0D7;Q6ZQV5;Q8TB69;Q96RE9;Q9UGP4;Q9NPC3;Q15326;O14746;O43296;Q6ZS63;Q15937;O95639;Q49A00;Q8WYH8;O95394;P04053;Q96QC0;Q8N782;P0C7V5;Q9UGU0;Q8IZQ1;Q6ZSB9;P37275;Q96Q83;Q8WUY3;Q4G163;O95218;Q96S55;P56524;Q9UK10;Q8IYB9;Q86TJ5;Q5EBM4;Q6ZNA4;P60510;Q9UIF7;P62508;Q9NPC7;P02792;Q9Y2H8;Q5VTD9;A8MT65;P52737;Q8N8Z8;Q7Z6K1;Q9Y2P0;Q9UBQ0;O43189;P04156;Q6P9G9;P07902;Q9UBS8;Q8IWX3;Q9UHY7;Q9BRH9;Q06732;O75164;Q86TG7;Q7Z2E3;Q9Y5Y2;P63272;P00743;P35226;A7E2V4;Q6ZMW2;A6NDX5;P06746;P04731;P69891;O76031;Q9BSK1;Q7L9L4;O00625;Q0CG31;Q8NA92;Q8N972;Q13342;O94892;Q7L3S4;Q9Y5R5;O43823;Q9Y5R5;O43823;P0CWL9;O96006;O15350;Q9NRG4;Q00994;Q96C00;A8MTY0;P49116;O75764;Q9UFB7;Q9BQ83;Q66K89;Q6ECI4;Q5T619;Q9UKY1;Q8N3F8;P24928;O75362;P62140;O75626;P49792;Q9H0P0;Q96NL3;Q8WW33;Q96JL9;P67870;Q13233;P38936;Q96IT1;P30876;Q96SL8;Q9Y473;Q9P243;O60930;Q8NB50;O95848;A6NNF4;P13056;P17025;Q9P280;Q8N2C2;P24278;Q7Z3I7;P55198;Q9BWX1;Q9NSC2;Q15696;Q96EP1;Q92993;Q86UQ0;Q96C28;Q9NP87;Q15652;Q3LIE5;P15336;P51814;P10828;Q9NVV4;Q8N3J9;P41182;Q8IWL3;O43318;Q92793;A8MUZ8;Q9H4P4;P57071;Q9HAJ7;P39748;Q15697;P19474;Q9H1K1;Q5CZA5;Q14119;Q9UJU3;Q96NB3;Q8WUI4;Q9Y2P7;Q8N488;Q9BQW3;Q15181;P53804;P51003;Q16775;O75467;O43593;Q9Y6Q3;P78549;Q5BKZ1;P51523;P61927;Q8TE76;Q5SXM1;Q6PDB4;O95271;Q86Y01;Q8N8E2;Q6AZW8;O95071;Q8IY57;Q96K80;P35813;Q7LBC6;Q14527;O43255;Q76KX8;A6NN14;Q6IV72;O00167;Q6Q0C0;Q7Z5L9;Q9NXR8;O14618;Q63HK5;Q68DY9;Q9H963;Q5T200;Q92900;Q7Z7L9;A8K8V0;Q8N141;Q9UIE0;Q9H160;Q5VUA4;P58557;Q6ZMV8;Q96I27;Q00987;O95571;Q8NCK3;Q9BS34;Q96CA5;Q9BU89;Q8TBZ5;Q9BSG1;P02794;Q68CP9;Q8NG27;Q9BRX2;Q15935;O75123;P0C7X5;Q8WV22;B2RXF5;O95171;O43900;Q9H9Z2;Q6AW86;O14628;P0CG24;Q8N0Y2;Q9NTG7;Q96PQ6;Q9NSJ1;P48454;Q93075;Q8WTR7;Q86UE3;O75925;Q8WXB4;O14595;Q06730;Q8NHY2;Q7RTV3;Q06587;Q9Y253;P24941;Q9H091;Q8TBC5;Q9BY31;Q9UNA4;P27695;Q8N2C6;Q13907;Q8TAT6;Q6NX49;P11161;Q9UKF6;Q5TEC3;Q86Y25;O43167;Q99676;Q9NU63;Q9UEG4;Q9Y3Y4;Q96PE6;P49790;O14802;Q9BR11;Q6ZLN3;Q9BWM5;Q8IZD2;Q8WTV1;P46100;P52743;Q96K75;Q15072;P55895;Q13105;P52747;Q96EY1;Q96G03;Q13887;Q9UKT9;Q96PM9;P17035;O95551;Q8NF64;O43918;Q8TAU3;Q9NSD4;Q5JVG8;Q9ULJ6;Q01844;P8182;Q9ULD9;Q9H1B7;Q9Y4X5;P62875;P51955;Q86Y13;Q9NW22;P55197;Q9UHR6;Q8N7K0;Q86YF9;P13640;P17039;Q12874;Q5D1E8;Q6P2D0;Q8N393;Q9HCX3;Q9NX46;Q6ZNH5;Q96IU2;Q6P9A1;Q14839;Q5VZF2;Q96LW9;Q96IV0;Q9HCM9;Q9ULP3;Q16670;P10073;Q5VZL5;Q8N490;O43257;Q8N3J5;Q9Y2Q1;Q9UBC3;Q13501;Q68DY1;Q8IWW8;P49910;Q86TJ2;Q96MF7;Q8N988;Q9NYT6;O96028;Q6IEG0;Q9NS91;O75081;Q8IU60;Q9HBE1;P52741;Q96IR2;P17021;P35227;Q12986;P98168;Q9UJ78;P0CJ78;Q96GE5;Q5F1R6;Q9HAZ2;Q9H9D4;Q96K58;Q03938;Q9UH90;P17041;P10589}

3540 Pathogen[ P14079 ] interacts with 1477 human partners: {Q969J2;Q5VV42;Q9UQL6;P51854;Q15637;Q15916;O00625;P28838;Q96SC8;Q9BWM5;P9816

8;Q6P4F2;Q9NY59;Q8IYX0;Q8NHY6;Q6P1N9;Q9NV72;A7E2V4;Q92664;Q14585;Q6AW86;P15622;P52738  
;P22695;Q96C00;O60284;Q9UJN7;O15194;Q9UQR1;Q0D2J5;Q96CS4;Q8NA92;A7XXQ1;Q9UK12;Q9BXU3;  
A6NKH3;Q9NSD4;Q15560;Q8WUHL;O95159;Q8N2W9;Q32MQ0;Q7Z2T5;Q9HBT8;P52741;Q9HAK2;Q8WWM9;O  
75112;Q12986;Q92844;Q96FX2;Q8IZC7;Q3LIE5;Q9NQX1;Q3SY52;Q9Y4G2;O00463;P62875;Q8IV48;P0  
CW19;P80297;P51504;P48454;Q8N9Z0;P48775;Q8N895;Q9BXS1;O60260;Q9H857;Q8N9Q2;P17098;P08  
151;P20042;O94830;P13056;P53804;O15164;Q9BRX2;O75123;O14746;O14773;Q02642;Q6P587;Q9HA  
Z2;Q9H0P0;O75467;Q68DY9;P25800;Q9GZT9;Q9UL40;O95628;Q9H7R0;Q9UKV8;Q9W730;Q53GI3;O7534  
6;P60002;P62508;Q9ULD9;Q9HBT7;Q8TAT5;Q93083;P09874;Q96JB3;P49257;Q9NPG2;Q5MCW4;A8MTY0  
;P52742;Q96T23;Q8TD23;Q5HYK9;Q96IR2;P69891;Q5TA31;Q05BQ5;Q9H8S9;O75151;Q8WTR7;Q99807;  
Q9UL36;Q9H8W4;P55055;Q8TBK6;Q8N8L2;P0CG31;Q7HL590;Q5T1R4;Q5D1E8;O60293;O95544;Q8N5C8;Q  
9UIF7;Q92994;Q7Z7K0;Q96KR4;Q8WY41;A8K8A5;Q9HAJ7;Q9BYK8;Q9UDV6;Q8WXB4;Q9Y2Y4;P41238;P1  
4373;Q9H0A6;Q96LW1;Q9HJC5;Q9UC06;Q9Y2G7;O95125;Q7Z340;Q9UK13;Q9UIS9;Q8NDQ6;Q9BWX5;Q8N  
DP4;Q9UNA4;Q99502;Q76L83;Q96KP4;Q9BYX4;Q68DK2;P0C7V5;Q86V15;P10072;Q8N141;P28715;P495  
93;Q9BTE6;Q96MF7;Q96K62;Q9UJW7;Q96H86;P21506;Q9NQV6;Q13106;Q7Z7K2;Q8N490;Q96CB8;O1477  
1;Q9Y6Q3;Q9NS23;P29728;P53041;P02795;Q49AG3;Q8TF50;Q8WV99;Q96MU6;Q9UKT4;Q16851;Q96QC0  
;P10073;Q96DX7;Q7Z7L9;P47224;P35637;Q5VZF2;P11532;Q9ULV3;O43422;Q9UNY5;A6NK53;Q9UL59;  
Q96NY9;Q8N587;Q6ZNA1;O15553;Q8N9F8;P02100;O75437;P52747;Q9C035;O75928;Q15776;Q13118;Q  
96IU2;Q96GY0;Q86UQ0;Q6ZNG0;P08048;Q9NRG4;P17019;Q8IUV8;Q6ZMY9;Q8TDZ2;O15297;O60481;Q7  
Z2W4;Q3ZCX4;Q9Y6K1;Q6ZT77;O15535;Q8TXJ9;P22735;Q9C0B1;Q9GZU2;Q9Y6X2;Q8N339;Q96IV0;Q9H  
CG1;P17035;Q14192;Q9Y2P0;O75312;Q5TFG8;Q96SZ5;O75626;P62072;Q9C0B9;Q9Y2Y9;Q6P9G9;Q8TA  
94;O43309;Q15911;O75362;Q8TCD5;P17010;Q9UGP5;Q9Y2Q1;P35398;Q9UKF6;Q9NXX4;P0CB33;A1A51  
9;O95271;Q9UKD1;Q9BR84;Q7LFL8;P47974;Q8IU60;Q8N782;Q9NW08;Q9NUA8;Q9ULX6;O43439;Q7Z6K1  
;Q9UHR6;O15304;O95789;Q5SVZ6;P36873;Q9UFB7;P17022;P11473;Q9H0M5;Q3KP31;P17041;Q9UBL3;  
Q8IVL6;P10109;O60290;Q8N393;P61513;Q8IXT2;Q5TEC3;P50479;Q5T0B9;Q9NXW9;Q99676;Q92782;P  
31941;P13498;Q9NR12;A8MT65;O75582;Q8NCP5;Q08AN1;Q8NB42;P10828;Q9UBF6;Q96NU7;Q13907;A8  
MXV4;P16083;Q9H4G8;Q969T7;Q2QGD7;P08235;P02511;Q32M78;Q6PDB4;P17039;P04156;Q9H1K0;O15  
231;Q5EBM4;Q9HCK1;Q92804;Q9UBZ4;P0CH99;Q92793;Q6NUN9;P51522;Q9ULM2;Q9NRL2;Q5JVG8;Q70I  
A6;Q6GMV2;A6NHJ4;Q9NZ45;P21399;Q9Y5R5;Q8TE76;Q12874;Q9BWF2;P62273;Q9NTW7;O75290;O4382  
3;Q9P2Y4;P52746;Q6ZN57;Q93052;Q9Y468;Q9NVV9;O75792;Q13129;P47944;Q8IWL3;Q14CW9;Q63HK3  
;Q9NZV6;Q9H777;Q9NUP7;Q9H040;Q7Z3K3;Q8WUI4;Q9ZR52;O14639;Q6PJT7;Q8WV74;Q8NDH3;Q9ULU8;  
Q6P6C2;Q9UL41;P16298;Q6NZY4;Q8NEK5;Q8N5A5;Q8IYB9;Q9H707;Q96SR6;Q96PM9;Q9NQD9;Q6ZT21;Q  
9NX46;P52737;P35789;Q9H1K1;P51815;Q13330;Q86VZ6;O75306;P30876;Q14591;Q96LI5;P00395;P1  
1474;Q96NB3;Q6ZRF7;Q8TBZ8;O95251;Q96EP0;P00403;Q5XG87;Q8NCA9;P09105;A8MUV8;P21980;P17  
024;Q9P255;Q9UNL4;Q14592;Q9GZX5;O75800;Q3MJ62;Q9H5L6;Q9NSJ1;O95405;Q96BW5;Q96NG8;Q015  
38;Q6ZN79;P10606;Q9BTP6;Q99684;O15392;Q86TP1;Q9NTM9;Q92610;Q93099;Q96N20;Q96PEW1;Q9UID  
6;O00487;Q9H008;Q68DI1;Q9UPA5;P62136;Q00994;Q9UKK9;Q9NTJ4;Q8N0Y2;Q8N720;P80294;P07438  
;Q14966;Q6ZNA4;P29401;Q9H7X3;Q9HC16;Q9H773;Q6IEG0;Q96SE7;Q9UKV0;O43813;O94919;Q96MI9;  
Q5VLY5;O43167;Q5T200;Q86U28;Q05516;O75446;Q86U58;P0CG23;Q9Y5A6;P22736;P52594;Q76KX8;Q  
6NZ36;Q5SRE7;Q9BWE0;Q02447;O94929;Q13105;Q8N9V7;Q9Y383;Q9BUE6;P15976;Q5T5D7;Q9NVH6;Q9  
BWG6;Q3MIS6;Q9BYN7;Q8NEL9;O60346;Q96G61;Q8NC26;Q92785;Q86XK2;Q9NR83;Q9P2J8;Q9P0L1;Q9U  
PW5;Q9HCC9;Q9UBZ9;Q14596;Q5T2P8;Q9NS39;Q8TCF1;O95639;Q9H2K2;Q9Y303;Q4VC44;P69905;Q8N3  
F8;O60281;Q8N859;P16455;Q9Y5J7;Q13889;Q8NHM5;O95848;Q9UK11;Q8N7M2;P53803;Q96K83;Q1347  
2;Q6PG37;Q8N883;Q03923;Q9UJ41;Q14847;Q15124;Q96NI8;Q9H2P0;Q9NZU5;Q8IYI8;O43900;P62979  
;Q06732;Q5SVQ8;Q43829;Q96MR9;Q6ZN55;Q86YP4;O00151;Q6P2D0;Q96S99;Q9Y2P7;Q9P2R7;Q96NL3;  
P31350;Q3SXZ3;A6NGD5;O60711;Q96SZ4;Q96RE9;Q9P217;P78549;Q9BQA5;Q8WY91;Q96NG5;Q7L3S4;Q  
9UBW7;Q6ZMK1;Q9NR56;P48443;Q9UHK0;O60870;O43830;Q96LX8;Q8IYY4;P14324;Q8TDX5;Q9Y2T3;Q8  
6YG4;Q14258;P06733;Q16600;O43298;P79522;P30793;P02489;Q8TBC5;O60678;Q9H9Z2;Q9NYW8;Q9N  
U63;Q6IE81;P10827;O95453;Q96JM2;Q96JC4;Q6ZN06;P02008;Q96AY2;P23025;Q86TJ5;P52744;P570  
71;Q8IYW8;Q14249;Q15652;Q9NQZ8;Q3KQV3;P17027;P0CW20;Q9BUZ4;O15350;P62877;O94892;Q9UIL  
8;Q99612;Q16670;Q15072;O60315;Q6N021;Q9HCM9;P46939;P55197;Q7L656;Q9Y4I5;Q96GD0;Q49AA0  
;Q8TAP4;Q9HA77;Q03938;Q96MN9;Q12873;A1L020;Q8TF32;Q8IUV7;O95718;Q14588;A6NP11;Q86V71;  
Q3KNS6;P35611;Q00987;Q6BEB4;P55198;A4D1E1;Q8TBB1;O95394;Q96ND8;Q9BV68;P46100;Q9NWS9;P  
0CI00;Q9BRR0;P51814;P43243;A8MUZ8;Q9NPF4;P28698;Q9NYG5;Q8TF68;Q96GE5;P35813;Q96BV0;Q9  
6MB7;Q9UL58;Q9UKY1;Q14061;Q8IXW5;P0C7X2;Q14149;Q8TCN5;Q96JF6;Q8N0X4;Q9ULD5;Q9UC07;Q8N  
BB4;Q9NWK9;Q12802;O15504;A4D2B0;Q6V9R5;Q8WU90;A8K0R7;Q53FD0;P0C025;P20674;Q3V5L5;Q8TA  
W3;Q92670;Q9NPC3;Q16629;Q9H6W3;Q9H2U2;P68871;Q5BKZ1;Q9GZX7;O43189;Q13888;Q15929;P7836  
4;Q7L9L4;O15060;Q86Y25;Q14202;Q5TFE4;Q6ZN19;P36405;O95571;Q5VV52;B4DU55;Q9NZL3;Q9Y3A3  
;Q8WY54;O75152;O75952;Q9H4W6;Q96QT6;Q70IA8;P46976;Q03924;Q8NKN2;Q96N22;Q9BQW3;P41182;  
Q7Z6E9;Q86UE3;O75880;Q8NAP3;P10074;Q9UPG8;Q96CX3;Q86Y01;Q13642;Q8NCG7;Q3ZCT1;P17097;Q  
8N5U6;Q5TAX3;Q9P1U0;Q99496;P58317;Q96EG3;Q8WYQ9;P49589;Q9UBC3;A6NK75;Q9P2F9;Q00403;Q0  
3936;Q8N8Q3;Q147U1;Q08ER8;P51955;P15516;Q8TA86;Q9BX82;Q9NXT0;Q04760;Q15046;Q8TF39;O75  
373;Q9Y3Z3;O75764;Q5VTD9;Q9NP64;Q8NFW9;Q96HD9;B1APH4;Q05481;Q9ULX3;P17026;Q9BU89;Q96B  
D5;Q9UIH9;A6NN14;Q9UPN9;Q9H0W9;Q9HCE3;P11161;P22392;O00482;Q08AG5;Q9H9T3;Q9UJW3;Q8NF6  
4;Q9NWF9;Q96T51;A1L3X4;Q96K75;Q9H6Q4;Q86YE8;Q8N972;Q969R5;Q9H963;Q6DD87;P19474;P55265  
;P36639;P17544;Q9BR11;Q9UH90;Q9BXR0;O43681;Q9P220;Q8IY57;Q96IF1;Q6ZMV8;Q5SXM1;Q9H4T2;  
O14829;Q8NCK3;Q8TF20;Q9BY32;Q4G163;Q5VTR2;Q9UPP1;P17032;Q8N6T7;O95989;Q02930;Q9NWT6;Q  
8N823;Q8N8J6;O60663;O14709;Q9NR11;Q96S55;Q6U7Q0;P38936;Q8N680;Q8WTZ3;O14832;O60384;Q9  
Y6K9;Q6P280;Q68EA5;O43345;Q15075;Q7Z5L9;Q9Y473;Q9Y6K5;Q6NS38;O75469;P17017;P0CG40;Q3K  
RA9;P25791;P51508;Q16587;Q9H1B7;P0C7X5;O75820;Q6ZS27;Q2M1K9;Q8N6M9;P58557;Q9NY33;C9JN  
71;Q9H4Z2;P13640;Q96GX9;Q6ZNB6;Q9UIF9;P63272;Q400G9;Q12830;Q66K89;P17031;Q9UEG4;O7525  
1;Q9P2R6;Q9UKJ3;P17029;P34949;Q9BYE7;Q96SK3;Q9H8B1;Q8NB12;Q8NFP7;Q8WUY3;Q9H6Z9;A6NIX2  
;P17021;Q6ZTB9;P16415;Q86UW9;P62140;Q9NYT6;P15336;Q14593;Q9NRR4;Q19AV6;P45381;O95785;  
Q96JM3;Q96NC0;Q8IXK0;Q9HOC8;Q8IVP9;Q96LW9;Q9NVV4;P51523;Q8NDL9;Q15697;Q8N2I2;P48200;P  
28702;Q96NS2;P52743;P00156;P24278;Q9BYM8;Q9Y3M9;Q9BY41;P17020;O14978;Q8WV37;Q9Y3Y4;Q9  
Y6R6;Q8WUB8;Q9HB58;Q4V348;Q86UA6;Q9NRN7;O43294;Q8NBJ7;Q9UK10;Q15696;Q6GPH4;Q9P253;Q9P  
243;Q8TAT6;Q9Y2X9;Q8TF45;Q8NDX6;Q9Y5Y2;Q86XU0;Q9UJQ4;Q8TB69;Q13360;P49910;P16930;P493

56;Q9HAW0;P26358;Q5VZB9;Q8N4W9;Q86W11;P22033;P15822;Q71UM5;P51786;Q96MP5;Q14134;Q5JVJG  
2;Q8IX07;Q9UJW8;Q9HA92;Q2M3X9;Q8TBZ5;Q86UY8;P56270;O00110;P27695;Q8NA42;Q92905;Q15428  
;Q8N8U3;Q6ZMW2;Q7Z3V5;Q13351;Q96T92;Q9BU02;Q8N668;Q92618;Q9BQ52;O95171;Q8NEP9;Q96B70;  
Q49A33;Q9NX58;Q9Y2Y1;Q86VD1;Q9H8U3;Q96MA1;Q99766;Q9Y2M0;P09917;Q9H091;Q8NBK3;Q2VY69;Q  
96B54;P22830;Q14586;Q9NWX6;Q96NJ3;Q8NAM6;Q9NS56;Q9HC78;P49790;Q96GK7;Q93075;Q8IVC4;Q9  
C0F3;Q8WTV1;A8MVS1;Q9HA38;O95551;O43296;Q9NQ03;Q6H8Q1;Q9C0F0;Q9UDV7;P49902;P23297;P49  
642;Q9ULU4;O14569;Q15973;Q9H8Y5;P02794;Q9BTC8;O76003;Q9NZ20;Q86YI8;Q15181;Q13501;Q68D  
91;Q9NSU2;Q9UIE0;Q9H0W7;Q6P3V2;Q6P1L6;Q7Z3G6;Q86VK4;Q8NDW4;Q0VGE8;Q8NF99;P98169;Q9Y69  
2;P17025;Q5SXM8;Q13398;Q9Y3D2;Q9P0U4;Q494X3;Q9NP87;Q9Y4X4;Q86WB0;Q9BS34;Q7RTV3;Q96SL8  
;Q5VUA4;Q86UD4;Q6S9Z5;Q9UPV7;Q7Z570;O00488;P17038;Q6ECI4;Q8N3J9;P10588;Q569K4;Q8N1G0;  
Q8IXJ6;Q96JL9;P35226;Q3KNV8;Q86XF7;Q5HY98;A6NDX5;Q6P9A3;Q6B0K9;Q9Y2A4;O75081;Q86UZ6;Q  
8N5P1;Q9Y2K1;Q13064;Q16775;O43361;Q5TD97;Q8N488;Q7Z3T8;P04731;P42677;P13929;Q96EK4;Q9  
BUY5;Q86TG7;Q9H7R5;Q9HCX3;Q12933;Q6PK81;Q9BS31;Q14872;P06746;Q8TDD2;P35227;P27815;Q6Z  
SS3;Q14839;O75925;P0CJ78;Q68DY1;Q9NUK0;Q01081;Q9Y253;B2RFX5;Q86TA1;Q9H8N7;B4DX44;P231  
93;Q9Y5W3;Q5TYW1;O43918;Q96PE6;Q96AZ6;Q8N554;Q9BSK1;Q96SZ6;Q86VM9;Q9UII5;Q06455;Q5HYM  
0;P27694;O60220;Q9UBS8;Q2M218;Q86WZ6;Q96PQ6;Q8IYN0;Q9H0F6;Q9UBQ0;B4DXR9;Q16878;Q96MX3  
;Q8WYQ5;Q9H582;P00915;A8MXY4;P60510;P31689;Q92900;A8MWA4;Q6AZW8;Q86YF9;Q63HK5;P78317;  
Q96F45;Q5T619;Q8N9K5;Q8WW33;Q9HCI7;Q96KM6;Q96SQ5;P04053;Q96FC9;Q9HCZ1;Q9Y2H8;P17014;P  
67870;Q9BT30;Q96C55;Q15928;Q8IW36;O75688;Q6ZNH5;Q14590;Q9NPA5;Q14584;O75132;Q8N988;Q8  
N371;Q15493;P36508;Q99504;Q53H82;Q9BRH9;Q9H8G1;Q96GM8;Q9NQV7;Q9NZV7;P38935;Q9Y3C5;O14  
521;P61927;Q9Y5V0;Q9HAH1;P62633;O15015;P04732;P09234;Q02386;Q99598;Q9H0V9;P07902;Q8IW  
S0;Q8IZ20;Q96N38;O95602;P0CG00;Q68CP9;P49023;P24928;Q8IU81;Q96G03;Q9ULM6;Q8NEA6;Q8N18  
4;Q9P2N5;Q9NPC7;Q96K58;O95201;Q9H7S9;P13928;P49754;P10589;Q5EBL2;A2A288;Q96BR6;Q6PF04  
;P06703;Q9BUG6;P51003;Q9C0G0;Q8IW03;Q03393;Q499Z4;Q7L945;P17040;O95361;Q9H2M3;Q6IQ32;  
P98182;P09467;Q9GZV8;P49116;Q9BQ83;Q8TD17;O76031;P02144;O00167;Q9UHD1;P04733;Q9H3H1;Q  
9UKN5;O14802;Q9P2G1;Q9Y2L8;Q9BT49;Q86X67;O95600;P49588;Q14929;Q15650;Q96N77;Q12901;Q8  
WUU5;Q96K80;Q6NX45;Q8WW27;P13682;Q86XN6;A6NJL1;O00244;Q9BSG1;Q9HBF4;Q9UEY8;Q8N1W2;P15  
621;Q9H609;Q9Y6X9;Q9UM07;Q9UJU3;P56524;Q6P1K8;Q5F1R6;O60930;Q13127;P99999;Q52M93;Q6ZQ  
V5;Q6ZNG1;Q96DT7;Q96IT1;Q9NRC8;P25490;Q9NUM63;P52756;Q8IYL2;O43819;Q2M3W8;O15355;Q8WV4  
4;Q53T94;Q9H4I2;Q8WW22;P52740;O43313;Q9NTG7;Q9UDW3;Q7Z3I7;Q96HQ3;P48059;A6NF13;O14901  
;Q8NB50;Q9Y6X8;Q9NW38;P52736;Q6P9A1;Q15935;Q9NX65;O95780;Q96Q80;Q9ULF6;O94776;O15151;  
P69892;Q6ZMS4;Q9UJ78;P36954;O96006;Q7Z2E3;P17030;Q9H5H4;P36871;O43151;P53701;Q96MT3;P  
86452;Q9Y5J9;O60765;Q8N8C0;Q9NQC7;Q96KS0;O60884;Q17R31;Q15940;Q9NW07;O14618;Q9Y4J8;P1  
0075;Q9UBT6;Q8N7Q3;O95625;O95218;Q16342;P23769;Q9BTC0;Q96H40;Q08209;Q8WWW0;Q9H974;P0C  
G24;O43593;Q969S3;Q9NZJ9;Q9NQX6;Q9BZE0;O75382;Q9HBE1;Q9UQ84;Q9H9D4;Q8N3Z6;Q9Y3S2;Q9Y5  
L4;Q9BV57;Q5VWG9;Q5FWF6;Q9UHF7;Q96C10;P49711;Q15022;Q15326;Q96DE0;Q03154;Q96N95;Q8TC2  
1;Q96EY1;O60304;P17023;Q6ZN17;O00743;Q969W8;Q86TJ2;Q8WYH8;Q9Y462;Q8NFT6;Q9BY31;Q9UGU0  
;Q8WW38;Q9UBM8;Q9HCL3;Q8TAU3;Q9NZU7;P37275;Q8NEM1;Q07352;Q9UGP4;Q9BSM1;Q3SY56;Q9BWX1;  
Q9UGR2;O95391;Q9BU19;B7Z6K7;Q9UBU7;Q96EY9;A8MQ14;Q8IUD6;Q14587;Q6ZSB9;Q9UFC8;O14628;Q  
9NSC2;Q8N7K0;Q8N8E2;Q8NI51;Q6IV72;Q9NVT9;Q8NBF1;A6NM28;Q96N58;Q9H160;Q9ULJ3;Q7Z398;P2  
9083;Q96NJ6;Q13342;Q86SE9;O43257;Q9UK59;Q02446;Q92993;Q8TF47;P49917;O15014;Q13114;P30  
622;P39748;Q8IZ26;Q9UIF8;Q5CZA5;Q96I27;Q9H116;Q9UKT9;Q6IQ21;Q6NX49;Q96GC6;Q9UJL9;Q5JN  
Z3;Q9H9Y6;Q9H7M6;Q7LBC6;Q5VZL5;Q6ZN11;Q8WXG1;Q5T6S3;A8MT70;Q13490;Q8NAF0;Q9Y2D9;Q9GZU  
7;Q14119;P17028;Q9C0D7;Q8TAQ5;Q8NHY2;Q8TAF7;Q15942;P0CJ79;E7ETH6;Q96C28;Q6P2I3;Q06587  
;Q66K41;Q86T29;Q8WXI9;P51948;Q8IW19;Q6NSZ9;P21912;Q7Z4H3;Q9H6B1}

3541

Pathogen[ P03383] interacts with 791 human

partners: {Q969W8;Q96LX8;Q9UQR1;P35227;Q86UA6;O14628;Q8IXJ9;Q7Z2E3;O15504;O43167;Q9NVV  
4;Q9H7R0;P53803;Q9NRR4;Q6ZVK8;Q8WTZ3;P02794;Q99504;Q8NI51;P62140;Q9Y253;Q5FWF6;Q9HBH1  
;Q5JVJG8;A6NNF4;Q15935;Q12830;Q8NBB4;P19474;O75925;P34949;Q9NYW8;Q9Y5J7;Q63HK3;Q8TA86;  
Q96BR6;Q9H974;Q9ULX3;P49792;O95625;P04733;Q96G03;Q96SK3;Q14839;Q86UW9;O75582;Q6ZN08;P  
80294;O95602;P06746;Q6PJT7;Q9H2U2;Q96SZ4;P63272;Q9BSG1;Q5SVZ6;Q9UK10;Q06455;A6NK75;P0  
8047;Q9NWT6;P51003;Q9BTC8;P29474;Q9BR84;P53804;Q8TBB1;Q9H0F6;Q9H8S9;Q9NZV7;Q9H7R5;O00  
167;Q9Y2P7;O75251;Q68DK2;Q7Z6K1;Q8WW33;Q9Y6K9;Q49A33;Q93083;Q92844;Q9H0C8;Q9H9Z2;P175  
44;P56270;Q8N6T7;Q8WV99;Q9H777;Q32MQ0;P51948;Q13233;Q9H4I2;Q9NWP64;P13640;Q9NYG5;Q9HBE  
1;Q8WUY3;O60765;Q8WTV1;A8MVS1;Q9H8G1;Q8IU60;Q93075;O14639;A8MWA4;O94776;P49711;P17022  
;P62072;Q86V71;Q8TD19;Q96GE5;Q9H5H4;Q96SL8;P04156;P36639;Q5HY98;Q3KP31;Q15937;Q15072;  
Q9H1K1;Q9BU02;Q14526;Q9UQL6;P17029;P0CG00;Q9H4T2;Q15650;Q9NWK9;Q9C0F0;Q9Y5R5;O75792;Q  
9HCL3;Q8WW38;O75437;Q86YP4;Q96MB7;O43257;O95251;P61927;Q7L590;A8MXY4;A6NIX2;Q12986;O1  
5304;Q7Z5L9;Q9UKD1;Q9UJW3;Q96NI8;A6NKH3;Q9UPN9;Q13888;Q8IWW8;O96006;P49116;Q9P2R6;Q92  
670;O75362;P51815;Q9HAW0;P23193;Q8N668;P23297;Q19AV6;Q8N7M2;Q9BRR0;Q13360;P07902;P276  
94;A8MTY0;Q96BD5;Q9NRG4;Q96FX2;Q8TD23;Q05481;Q53FD0;Q9Y2Y9;P55198;Q96H40;Q2M3W8;Q8N4W  
9;Q9C086;P49589;O60290;Q6ZN06;Q9H9Y6;Q6ECI4;Q96DE0;Q6P3V2;Q92905;Q9NR56;Q9UK13;P51508  
;O95218;Q9BYN7;Q8IYL2;Q8IW19;Q8N3J9;Q13490;Q6ZN17;P52744;B4DX44;Q9UBS8;Q8NEP9;P02511;  
P62714;Q9P2R7;Q5CZA5;Q8TF20;P23769;Q5D1E8;P22392;P69905;P09467;Q8WYQ5;Q76KX8;P42677;Q  
86WB0;P37275;Q8NDQ6;Q96MT3;Q96N77;Q9UL58;Q9ULD5;Q9ULU4;P80297;Q96PU4;Q06587;O14709;P4  
8200;Q8IXW5;Q3MJ62;P68871;Q86TG7;P28838;Q12901;Q9C0F3;A4D1E1;Q9NXTX7;Q8NDF8;P35789;Q9U  
NL4;Q12874;Q6ZNA4;Q5T8I9;Q8NA42;Q6P9G9;P17019;Q9UKT4;Q96QT6;Q6IQ21;Q9BRX2;Q96N20;Q9Y2  
Q1;Q86XK2;P78317;Q8WYH8;Q96IU2;Q71UM5;P67775;Q9BYE7;Q9NRN7;Q96N95;Q03923;Q8N988;O4318  
9;Q92993;Q86V15;Q3MIS6;O75151;Q96SE7;Q86XF7;Q05516;P28698;Q9GZX5;P62273;Q8TB69;Q07352  
;P0C7X2;O15297;Q9P0L1;O60220;P17038;Q92782;Q96T23;P49754;Q96S55;Q13330;Q5T200;P15621;  
A6NK53;Q96KS0;Q86YE8;Q8WV37;Q9HAH1;Q8N2W9;P35813;Q6NZY4;P51504;Q8N587;Q9H6W3;Q6ZR52;Q  
96EK4;Q13064;Q15560;Q96MF7;Q6P1K8;P31689;P02795;Q8N5U6;P59923;P17098;Q9UKF6;Q9NQX1;Q1  
5022;B4DU55;Q6NSZ9;P0CI00;Q9Y692;P46939;O43318;P18146;O75306;Q9NTW7;P31350;Q13398;Q66  
K89;Q53GI3;Q9UK11;A2A288;Q49AA0;Q9NQ29;Q6IQ32;Q8TAF7;Q9NX46;Q9BV57;Q15654;Q8IYI8;Q9BQ  
52;Q14872;O75164;Q00403;P36873;Q9HAJ7;Q9UKJ3;Q9Y2L8;O95628;Q16629;P17014;Q14588;Q14CW  
9;Q7Z3V5;Q5VWG9;Q5TAX3;P20042;Q96LW9;Q8TE76;A8MUV8;A8K8V0;Q8TF47;Q8N5C8;P62136;Q9UBW7



;O95201;O75800;Q9HAZ2;Q96GX9;Q9HCG1;P52746;Q499Z4;A6NDX5;Q7L2R6;Q9BTE6;P46100;Q15326;Q16822;P11473;Q9H6Q4;Q9BSM1;O60870;Q5VUA4;P11474;Q6ZNA1;Q16851;Q03112;O14978;Q86TA1;O15015;Q12873;Q8IYX0;Q8NB50;Q7L9L4;P86452;Q9H963;Q96MR9;P84022;P98168;B4DXR9;Q92994;Q9H160;Q8IWS0;Q8N895;Q86SE9;O75081;P25791;P52747;P46976;Q15928;Q9NVV9;A6NGD5;Q96ND8;Q9UDV6;Q9C035;Q00994;Q9UID6;A6NJL1;Q8NEM1;Q9NVW72;Q9NTG7;Q5JNZ3;Q96N38;Q15652;P17010;Q9UH0;Q9UNY5;Q32M78;O60260;Q8NF64;Q96MN9;Q02447;Q8NZ36;Q9Y6K1;Q13105;Q9Y5J6;Q9X488;Q9H040;Q9H0W9;O95125;Q08AN1;P35637;P24928;Q14192;Q5TA31;Q9GZU2;Q9BQA5;P17040;Q9GZU7;O75290;Q12933;P52742;Q9Y383;P24941;P17032;P0CH99;Q96N22;Q8N859;Q86US8;Q9Y2G7;P17036;P24278;Q96LW1;Q6PG37;O43345;Q9BX82;Q52M93;Q9UBF6;Q76L83;Q96AY2;Q68CP9;Q13342;A6NHJ4;O00625;Q99590;O60663;Q8TAT6;Q9UGP4;P09874;P23025;Q9P2J8;O95780;O60304;O60711;Q15046;Q8IZQ1;Q7Z3K3;Q6ZNG1;Q9UM07;Q9H6Z9;O95376;Q9NSC2;O15014;P60002;P52743;O14746;Q05BQ5;Q8NF99;Q9Y6X2;P28702;Q9HCM9;Q9ULJ3;Q6IV72;Q8N5A5;Q96PM5;Q15697;Q8N7K0;Q86UE3;Q68DY1;Q9Y6X8;P14324;Q9UKN5;P15822;O15350;P11532;Q9Y6E7;Q01081;P55895;Q5VIY5;P99999;Q9UIF9;P22033;P10074;Q8N9V7;Q8N448;P10073;Q6U7Q0;Q96C28;P53041;A8MUZ8;Q03936;Q86YI8;Q9Y2M0;Q9Y462;O43255;Q15929;Q9H7S9;Q9UBZ9;Q96GM8;Q8N8C0;O15355;O43829;Q9BXR0;Q9UKV8;Q9ULM6;Q8IWL3;Q6IEG0;Q96IT1;Q9Y6K5;Q3ZCT1;Q99496;Q8N9Z0;Q13501;Q8N972;Q16775;O43918;Q9HA77;Q8TF32;Q68EA5;Q99684;Q8WY41;P04732;P26651;Q9ULX6;Q5VTR2;P52737;Q96IR2;Q9NUP7;A6NN14;Q9BY41;O75446;Q5SVQ8;Q16670;A6NP11;Q9BWG6;P67870;Q9H116;Q9Y252;Q15181;Q96GC6;Q9H9D4;O15535;P62633;Q494X3;Q8WY54;Q86XN6;Q9UC06;P11161;P62979;Q8N0Y2;A7E2V4;Q9UKV0;Q9UIF8;Q5HYK9;O95394;Q96QC0;Q8N782;P0C7V5;P62875;Q96PY6;P58557;Q5TEC3;Q96NB3;P56524;Q96CB8;Q86YF9;Q6P280;Q6ZMY9;Q86TP1;Q96NJ6;Q9HBT7;Q96NJ6;Q8NAP3;A8MT65;Q09FC8;P62877;Q9P255;Q9IWF8;Q9UII5;P51522;Q9NRL2;Q7RTV3;P49910;P55265;Q9Y2D9;Q8IW36;Q8WTR7;Q6NUN9;Q9BU89;Q8IY57;O60930;Q8WXI9;Q96SR6;P04731;O76031;Q9UKT9;O14771;P52736;Q9UM63;P38935;Q9Y5A6;P21980;Q14258;Q8IYN0;Q92785;Q9H1B7;P27695;O95551;Q99676;B1APH4;C9JN71;Q9UC07;P51786;Q969J2;Q8N371;Q9UHR6;Q8TAQ5;Q8WU90;Q96Q83;P55197;Q9Y2X9;P29083;O75152;Q969R5;Q96EP1;O75132;Q66K41;P15336;P10828;Q2M1K9;O60481;Q8WUI4;P62508;Q01844;Q9NZL3;Q8NHY2;Q6IE81;Q15776;P30876;Q5SXM1;Q9NW38;O95271;Q9Y2A4;Q02930;Q08ER8;Q86Y01;Q7LBC6;Q96IV0;Q13642;O95989;Q9UBQ0;Q86W11;Q08AG5;Q8N490;Q2QGD7;Q9NYJ8;O95453;O95571;Q9UL41;Q14585;P51523;Q9Y3A3;P06733;O75150;Q8N720;Q9NWF9;O00743;P07438;Q6ZN79;Q9Y5J9;Q9ULJ6;Q8N7Q3;Q8N141;Q8TA94;O14964;P17028;Q9UL40;Q15637;Q96PQ6;Q9NSJ1;P09234;P13056;Q9BUY5;Q6P9A1;Q9UHF7;Q8WXB4;O43439;Q92900;Q9H091;Q9UPP1;Q3KNV9;Q8NC26;P52594;Q96LI5;Q6V9R5;Q9Y3Y4;O75346;Q9BT49;Q13114;Q9BYK8;P49790;O14802;P26358;Q96EY1;O95391;O75312;Q8NHY6;P16415;Q9Y6R6;Q4VC44;Q9BQ83;Q9H9T3;Q9Y473;P60510;Q9BUG6;P61513;P98182;Q9ULD9;Q6ZMV8;Q92793;Q8N823;Q8TF39;P35226;Q9NRC8;Q2VY69;Q53G26;P13682;Q9UIS9;Q9Y468;Q13127;Q9ULV3;Q6ZQV5;Q96NG5;Q53T94;Q14593;Q9P0T4;Q969S3;P27797;O96017;P06396;P52741;Q8NB42;Q9HCC9;Q5BKZ1;Q7Z2W4;O95848;P0CB33;Q9H008;O75928;Q96NY9;Q03938;Q8IYB9;Q13129}

3542

Pathogen[ P03410] interacts with 1424 human partners: {Q9NSD4;O60711;Q15650;Q96EG3;Q86UW9;Q9HAW0;P84022;Q9Y2P7;Q96LI5;Q14202;Q400G9;Q8N9Q2;Q9HCG1;Q8WV99;Q9UKT4;Q8IWM8;Q96NI8;A8K8V0;Q6AW86;Q5CZA5;O14786;Q9H0M5;Q3KRA9;Q8NHY2;Q9BWE0;Q9UKV0;Q9UHF7;Q9BSM1;Q4G163;Q96QT6;P08048;P62714;O14771;P46976;O14569;Q9Y2L8;Q9BV68;Q9HC78;Q9ULU4;Q8N1W2;Q96JB3;Q6ZNG0;O14901;Q6ZNA1;Q9P2R7;O15392;P17031;Q5HY98;Q5SVZ6;P47944;Q8IXJ6;P23025;O43309;Q6ECI4;Q8IU60;Q9UPP1;Q9NVT9;Q96RE9;Q6V9R5;Q5JVG2;Q6B0K9;Q9H6W3;O60281;Q8NBF1;O43439;Q14588;Q96FX2;Q9Y5L4;Q96HD9;Q96BR6;Q5EBM4;O75290;B2RXF5;Q9BYN7;Q17R31;Q5JNZ3;Q8TAU3;Q8IYN0;Q9HAJ7;Q9UHR6;Q9NYW8;Q96IU2;P0C7V5;Q9UV7;Q86WB0;Q9H040;Q16822;P60002;Q8WYH8;O75925;Q8IXK0;Q9BU89;Q9B84;Q12873;P61513;P0C7X5;P50479;P02794;Q9UDW3;Q9HAH1;Q5T619;Q9UL41;Q9NTG7;Q01081;P31350;Q03112;Q6ZMY9;Q8NFP7;O95218;O15355;O95639;A6NN14;Q32M78;E7ETH6;Q9NP64;Q53FD0;Q9Y2Y9;Q13106;Q8N9Z0;O95405;Q8NDW4;Q9NZL3;Q9BU02;Q8WY91;Q9UDV7;Q14593;Q96EY9;P02008;P52594;A4D2B0;Q14526;Q9UK13;Q8N8E2;Q96N58;Q5SXM8;Q2M3W8;O60293;Q8WXA3;Q8N8Z8;P62072;O96006;P02144;P16415;Q96N22;P35813;Q6P6C2;Q8TCF1;Q13360;Q15697;Q96T23;Q13889;Q14061;Q8NCG7;O75373;Q99496;O95780;A8K0R7;Q5VUA4;Q8N3J5;Q86VM9;P0CJ79;Q8N7Q3;Q9HCM9;Q14929;Q9BY41;Q8TF68;Q9H0V9;Q9UEY8;Q9BTE6;Q9UKV8;P0CH99;P17040;Q9H974;O95628;Q8TCN5;P30622;Q96QC0;Q16851;Q96H86;Q99766;P15621;P02100;Q9NPA5;Q53G26;P37275;Q15637;P36954;P13682;Q96JM3;Q9H4T2;Q8N587;Q9UL59;Q96AY2;Q9NWT6;Q3V5L5;P36508;Q5VWG9;P58317;Q9UJ41;Q96C28;Q3KNV8;Q8IYH5;Q8N7M2;Q96N34;Q9BRH9;Q96S99;Q86XF7;Q15696;Q3MJ62;P98169;A6NDX5;Q96CB8;Q8WTR7;Q8WTR7;Q96CS4;Q92804;P36871;Q8IV48;Q9UDV6;Q8NBJ7;P07438;Q96NB3;Q9UPW5;Q9HAZ2;Q99676;Q92994;Q9NVV9;P15822;Q9H7R0;Q96K80;O15151;P49257;P52738;Q96MB7;Q9HBT8;Q9Y2J0;Q16629;Q15973;P52740;Q15652;P29728;Q9NVH6;Q9NV72;Q8NDH3;Q9P2R6;Q76KX8;O76003;Q5T0B9;Q66K89;Q08209;Q96KS0;Q96S24;Q92900;Q8WUB8;Q9P0U4;P98182;Q8TDD2;Q8N680;P80297;P49589;Q9H9D4;Q96SQ5;P36639;Q9H4I2;Q96JL9;Q8TDW5;Q9H6Z9;Q02447;Q6PJT7;O95251;Q9C0D7;Q9NXW9;A1L3X4;Q16600;P63272;P60510;O95125;O60481;Q99502;O14746;Q9HBT1;Q06730;Q92670;O15060;Q9BSG1;Q569K4;Q9P217;O75251;Q8N8C0;P0CG23;Q6AZW8;Q6ZMW2;Q6P3V2;P24928;Q9UC06;P49356;Q9UII5;Q6IEG0;A6NFI3;Q15776;Q8NB50;Q9UM07;Q8WV44;P0CW20;Q8TDZ2;Q9UKD1;P04733;Q9C0G0;P25791;O75382;Q9Y6Q3;P10073;Q0D2J5;Q9BQA5;Q9UBT6;Q9H2M3;Q9BTP6;Q9GZU2;Q9Y4I5;Q9BYE7;Q3ZCX4;Q14149;Q9Y5J7;P29083;Q6NZY4;Q8TAW3;Q9ULM6;Q9NQX6;Q8N4W9;Q9NWF9;Q5TAX3;Q9UHK0;Q8TAQ5;Q9UJ78;P06396;Q8BD91;Q8WU05;Q9H857;O75446;Q9UGP4;Q8TD17;Q8N3J9;Q3KP31;Q9BYK8;P49588;Q96N77;Q8N6T7;Q6PG37;Q8NCN2;Q8N8U3;P04053;Q8IYB9;Q9NPF4;Q9UIF8;Q9NYG5;Q9BWX1;Q9NRL1;Q9H1H1;A1L020;Q9H8S9;O75152;Q9H0W9;Q9NTM9;Q19AV6;P35789;O75582;Q9GZU7;Q8WXI9;P20042;Q8NF99;Q8IYX0;Q8TBB1;Q5VZF2;P41238;Q7L2R6;P11532;Q6P1N9;Q96K62;Q96PQ6;O15504;P35637;Q86WZ6;Q9UPG8;O75792;Q6ZN11;Q9H8U3;Q9NYT6;Q7Z5L9;Q9Y6X9;Q9H773;Q92610;Q8NBB4;Q8WY54;Q9UNA4;Q8TF50;P17017;Q8TF45;Q9NPC3;P07902;Q9UKK9;Q12830;Q8NFT6;Q5VIY5;Q969S3;Q96ND8;Q9BTC8;Q13490;O60870;Q8IYI8;Q9UPQ4;Q9UNL4;Q8IW36;P62136;Q92905;P24278;Q86UA6;Q2M218;P06733;Q6P2D0;Q5T8I9;P36405;Q9BYX4;Q14C49;Q08ER8;Q8N339;Q8TF39;Q5FWF6;P12694;Q9UK11;A8MT65;Q9HCI7;Q6H8Q1;Q9BQ52;O43918;A6NHJ4;Q9ULJ3;Q5HYM0;P0CB33;Q8WW27;Q9NXT0;Q9BU19;Q86SE9;Q9Y6X2;Q96JM2;Q9Y6X2;Q9ULD9;Q86YG4;P34949;Q9UHD1;Q9NS23;Q96LX8;Q9NR56;Q9UIH9;Q86XU0;O14639;Q2VY69;Q9H4Z2;Q6N021;Q6IQ21;Q96GC6;O75928;Q9HCK1;Q13501;P20674;O43294;Q9NPC7;Q86UQ0;O43830;Q9C0F3;Q2M1K9;Q9NZV7;P



57071;P45381;Q86TJ2;Q0VGE8;Q9H963;Q96N95;P09105;Q6NSZ9;Q9Y2K1;Q7L9L4;A2A288;Q15124;O75437;Q6ZSB9;P55895;Q8N2W9;Q9UL58;P06746;O14709;P30876;Q96K75;Q92785;Q9H8Y5;Q8N720;O94929;P52741;Q5VTR2;Q93075;Q9Y468;Q96S55;Q9BWG6;Q92844;Q86YP4;Q86TP1;P13640;Q9UK59;P10828;Q6NX45;Q5TA31;Q9UJL9;Q9NSJ1;Q6PFO4;Q9BT49;Q96Q83;O75764;O94892;P39748;Q9ULJ6;Q9Y3M9;Q6P4F2;Q5F1R6;A6NM28;Q9H116;Q03923;Q9Y5Y2;Q6PK81;Q9H9T3;Q9H3H1;Q53H82;O60260;Q8IWW7;Q6P2I3;Q9P243;Q9HCL3;O00110;Q68DY1;Q9NSU2;Q9P253;Q9H7X3;Q6GMV2;Q13233;Q99684;Q9H6Q4;Q9H2U3;Q9UIE0;P23193;P30793;Q53GI3;Q96NU7;Q8NB42;P55265;O60304;Q9BQ83;Q6U7Q0;P26651;Q09FC8;Q06732;Q6ZN19;Q4VC44;P17025;Q52M93;Q8WYQ5;P62979;P28715;Q8TAT5;Q9NWS9;Q6NS38;Q9NVV4;P78549;P35227;P62508;Q8NEM1;P09467;Q14596;P51523;Q8IWS0;Q6ZN55;Q6ZT77;Q8IYL2;Q96HQ0;Q9P2N5;Q96EK4;Q5VZB9;Q5H9K5;Q14258;Q96SC8;Q9NRR4;P28838;Q7LBC6;Q9H7M6;Q8WW38;P25490;Q96LW1;P52746;Q9H1K1;Q96MP5;Q9H0C8;Q8NFW9;Q8WXG1;Q15560;Q9HCC9;Q6IV72;P17036;Q8N490;O00757;Q8TC21;Q9NXE4;P06703;Q9NTW7;O60663;P51508;Q3MIS6;Q9H707;Q6PII5;Q96SR6;Q5TEC3;B4DXR9;Q8NEP9;O15231;O95171;Q8WUI4;P17544;Q96MF7;Q5SVQ8;Q16670;O60930;Q9BY32;Q7Z7K0;Q9BWF2;Q5EBL2;P17010;Q8N1G0;Q9UQR1;P11473;Q9UQL6;P51003;Q6ZMK1;Q9GZV8;Q9P2Z0;Q15654;O75688;Q14587;Q9UBQ0;Q96PE6;Q15928;Q9BRR0;Q05BQ5;Q9NZJ9;Q8TAF7;Q8N8L2;A7XYQ1;Q96NG8;Q86T29;Q7Z2E3;Q9ULD5;Q9GZT9;Q96IF1;Q8WWM9;O75952;Q8TBK6;Q02930;Q96MA1;Q9Y2T3;O95789;Q96MN9;P10072;Q9NX58;Q9UBF6;Q96GD0;Q00994;Q93099;P26358;O15535;O60384;Q6GPH4;O00625;Q6ZN06;Q96BV0;Q14590;O75151;Q9HC16;Q9UK10;Q9BUG6;Q13127;Q8WXB4;P17022;Q96GE5;Q5SXM1;O43318;Q9UKT9;P25800;Q9Y2X9;P22695;O95848;Q6ZMS4;Q08AN1;Q70IA8;Q9UGP5;P17029;Q7L3S4;Q8IVP9;Q9UBZ9;A6NIX2;O95571;Q9COB9;O76031;Q9C035;Q8N823;Q12986;Q7Z340;Q9UBZ4;Q8TB69;Q96H40;O95551;Q8NEK5;Q93052;Q3KQV3;P17098;Q92793;Q14966;Q13472;Q8TBZ5;P38935;P29474;Q8N3F8;Q9BR11;Q86Y01;Q86YF9;Q5T6S3;Q9NRD5;Q8TDX5;Q96KR4;Q9BWM5;P49790;Q6NUN9;Q8IX07;Q8IY57;P48775;A8MWA4;Q9Y2Q1;O75150;Q3KNS6;P51814;Q6IQ32;P10074;Q9Y3D2;P61927;Q6ZNH5;Q9UL40;Q8IU81;O15297;Q9NQV7;P68871;Q9NW08;O95453;P17026;Q01538;Q92782;Q9NTJ4;Q9BS31;P21399;P38936;Q9UIL8;Q9HCE3;Q02386;Q8NEA6;Q9NRL2;Q9BWX5;P0CG31;P43243;P04731;Q9UK12;P52737;P48454;Q96I27;Q7Z398;Q13342;Q8N5A5;P62273;O95602;Q96GM8;Q8N972;Q96B70;Q49AG3;P62140;P02489;Q7Z3I7;Q6ZN79;Q6P9G9;Q6PDB4;Q969W8;P17028;Q8N883;Q49A33;Q8NCK3;Q9UKN5;P17019;Q15942;Q96C00;Q9H4G8;Q8NAP3;Q9UNY5;Q03924;O75132;Q9Y3S2;Q9Y3C5;Q7Z6J0;Q86XK2;Q32MQ0;Q86UY8;Q68DY9;P17030;Q9BS34;P52743;Q9P0L1;Q9UBS8;P24941;P00156;Q13129;Q13330;Q9ULV3;Q9Y253;O0463;P52736;Q9UPA5;A6NGD5;Q9UGR2;Q9NYJ8;P0CI00;Q7Z2W4;O75800;Q9BRX2;Q6ZR62;Q9NP61;P51815;Q9NXR8;A6NKK5;O95271;Q9BQW3;Q5D1E8;Q14872;O75362;Q9UJW8;Q96BK8;Q96L76;Q16715;P78317;Q5HYK9;Q9HA92;P02511;P55198;Q5VZL5;P56524;P22830;P53701;P17014;Q8IXJ9;C9JN71;P0CG24;P46939;Q8IWL3;P02795;Q9Y3A3;Q68EA5;Q96SE7;Q9UBU7;Q96NY9;P53803;Q8NA42;Q93083;P79522;P16083;Q6P280;Q96AZ6;P17024;Q8N5C8;Q9H609;Q8N7K0;Q5T5D7;Q9H160;Q14847;Q14119;Q15428;Q6ZS27;Q15326;P16455;Q5TFE4;P62877;Q8IW19;Q9Y4X5;P17020;Q9ULX6;Q8N0X4;P0CW19;Q96DE0;Q9BUX5;Q9P2G1;Q96IR2;Q96B54;P22736;Q8ITZ6;O95989;Q969J2;Q96MX3;P62875;Q9H7R5;Q9BY31;Q76L83;Q9ULX3;P28702;O94830;Q13064;Q9Y5V0;Q9P1U0;Q147U1;Q9H1K0;Q9UM63;P04156;P09874;Q9BTC0;Q12933;Q8N5P1;Q9ULU8;Q96SK3;Q00403;P21506;Q7RTV3;O96017;O43296;Q9H1B7;A8MXV4;Q6P1L6;Q9H777;P36873;P86452;Q5XG87;Q9Y6X8;P17032;P53041;O15014;Q15046;P17027;P47974;Q9NQV6;Q3SY52;Q14585;A8MUV8;Q06455;Q9GZX5;Q13118;P47224;P49910;P46100;Q8N9V7;P21912;Q92618;Q9NRN7;Q8WWW0;Q86XN6;Q5VV52;O14832;P51786;Q9GZX7;B1APH4;Q9NZ20;P41182;Q99504;Q9NZU7;P0CG00;O15015;Q9HBT7;Q96BW5;P49754;P87889;Q13398;Q5JVG8;Q9NRW3;O75346;O95785;Q9H008;Q6ZRF7;Q96GX9;Q5BKZ1;Q13642;P48059;Q96MR9;Q8N488;Q99598;Q7L590;P99999;A2RRD8;Q9Y2Y1;Q96F45;Q9NAW07;P49711;Q9Y6R6;A8MT70;P02042;Q9NQ29;Q6ZTB9;Q96G03;Q9H6B1;Q8N988;P09234;O43151;Q8NA92;P98168;P53611;Q5MCW4;Q86V71;Q96T51;O95625;O43422;Q86US8;Q14628;Q9UBC3;Q8TCD5;Q86TA1;Q9Y5J6;P51948;Q8NI51;O60884;Q7Z7K2;Q7Z4H3;Q9Y6K5;Q99643;Q96IV0;Q9H8N7;Q9BT30;P51854;Q96IT1;B4DX44;Q9ULM2;Q13888;Q8WYQ9;Q86TG7;P13929;Q9Y2Y4;Q9H8W4;Q9Y5J9;Q8WV37;Q8NCC26;P15516;P11474;Q92664;A6NJL1;Q9UC07;Q9UKF6;Q9HBF4;Q9HA38;P23769;P31941;P63135;O60346;O43189;Q14586;Q15940;Q96C10;Q9UIS9;Q9NPG2;O75081;Q66K41;O94776;P27695;Q8NCA9;Q9C0F0;Q9P2F9;Q9UJN7;Q9NWK9;Q9H0P0;P23297;Q70IA6;O00167;P28698;Q7Z7L9;P49116;Q8NB12;P17035;A8MUZ8;Q53T94;O14978;P59923;Q496Y0;Q8WW33;O75112;P49593;P10589;Q9Y2H8;Q86VD1;Q6ZNB6;P31689;P56270;Q9P2J8;O14521;Q9UIF9;Q3LIE5;Q5TYW1;A8MQ14;O15350;Q96NG5;Q7Z3K3;Q2QG D7;Q6ZSS3;Q9H9Z2;Q6ZN08;O95159;Q99590;Q9H091;Q9Y383;Q9H8G1;Q9Y2P0;O75306;Q13907;Q96S2;P09917;O60220;Q9Y462;Q3SXZ3;Q86UE3;Q8WV74;P08047;Q06587;P27694;Q9Y3Y4;P00403;Q96FC9;Q9P255;P55197;P17039;P10109;O60291;Q86U28;P21980;A6NKH3;Q9UBW7;Q9UJU3;Q494X3;Q8TBC5;A6NK75;Q8N9K5;O95201;A6NP11;Q9H7S9;A8MTY0;Q8TE76;Q8TF20;A1A519;Q9NX46;P48200;Q00987;Q9NX65;Q9NQZ8;Q9UJW3;Q9H2K2;Q68CP9;O75626;Q8TF32;Q86UD4;Q63HK3;A7E2V4;Q15937;Q6P9A3;Q5T200;O43829;Q6ZN17;Q99807;P80294;Q63HK5;O75123;Q8N8J6;Q3ZCT1;Q8N782;Q8IXW5;Q9NUD5;Q96LW9;Q6ZQV5;Q8TF47;Q12901;Q9NRC8;O00151;Q14584;Q8N141;Q9NP87;Q13105;Q9UQ84;Q49AA0;Q6ZN57;Q9H4W6;Q9COB1;Q96BD5;Q6NZ36;Q8TD23;Q9Y2M0;Q15929;P17041;Q15283;Q9Y6K9;Q9NW38;Q8N3Z6;Q6PEW1;O14618;Q8WW22;Q96MU6;Q9Y3Z3;P16930;Q96N20;Q6DD87;Q9NY33;O60765;P69892;Q86YE8;Q7Z6K1;P02792;Q8NDP4;Q8TA94;Q8WY41;P67870;Q9NSC2;Q04760;Q8N371;Q9BR84;Q9UID6;Q9Y6K1;Q03936;O43257;P18146;Q96K58;P53804;Q9N5U6;P17021;O75164;P15622;P62633;P52744;P51522;P17023;O75820;Q8N895;Q15181;Q5VTD9;P69905;P35226;Q96JC4;Q96MT3;Q8TBZ8;Q6S9Z5;Q96NJ3;Q05481;Q8N859;Q9BX82;Q12874;P67775;Q7L945;Q14592;Q6P9A1;P78364;Q96JF6;Q86Y15;O43823;Q96CX3;A8MX4;O95394;P10075;P0C7X2;Q9UJQ4;Q8TA86;Q9UL36;Q14839;P08235;P15336;Q9UEG4;Q9NQX1;P11161;Q92993;Q68DK2;Q9BV57;Q9NUP7;Q8N2I2;Q15493;Q9C086;P0CJ78;A8MVS1;Q03393;O43681;Q9NU63;A6NNF4;Q68DI1;Q9NWX6;O43361;Q8NDQ6;Q9NZ45;Q9Y2D9;Q9UKY1;B4DU55;Q96GY0;P04732;Q96SL8;Q9UKJ3;Q9UGU0;Q86X67;O75880;Q4V348;O75467;Q969R5;Q8TAT6;Q9Y5A6;Q96G61;Q8N668;P58557;O14802;Q9BXU3;P27815;Q6ZMV8;P35611;Q14591;Q8NF64;O43345;Q9H0A6;Q8WU90;Q8IXT2;Q9HCZ1;Q6ZNG1;Q6NTF7;O00743;Q14192;Q9Y2G7;Q96EP1;Q96EY1;O43167;P15976;Q96PM9;Q6IE81;Q6P1K8;Q7LG56;Q15072;O75312;Q07352;Q9NUA8;Q86TJ5;Q9Y2A4;Q96SZ5;P52742;Q7Z3T8;Q9UJW7;Q6P587;Q6ZR52;P17038;O60290;O14829;Q15022;O15194;P17097;Q9HB58;Q8N6M9;Q5TFG8;Q9UPN9;O43593;Q7LUM5;Q8NHX6;Q9UIF7;Q9H5H4;Q7Z3V5;O95391;Q86W11;Q13114;P49902;P49642;P14324;Q86Y25;Q499Z4;P22033;Q9HBE1;Q8N393;Q2M3X9;P10606;Q9Y4J8;Q8NEL9;O60284;P49792;O43819;Q8N184;Q14249;Q8IZQ1;Q9H9Y6;Q9Y473;P52747;P0C025;Q96NJ6;Q8IVC4;Q9HCX3;Q8WUY3;Q969T7;A4D1E1;

Q9H0F6;P51504;B7Z6K7;Q8N9F8;P69891;P13056;Q9NRG4;Q96NL3;Q96GK7;O43900;Q9BUE6;P42677;O15304;Q8IYW8;Q8IZC7;Q8N0Y2;Q16587;Q08AG5;Q9UFBB7;Q8WTV1;Q9H0W7;Q15935;P22735;Q03938;Q86YI8;Q6NX49;P27797;Q9BSK1;Q9BXS1}

3543 Pathogen[ P14075] interacts with 777 human partners: {Q8N490;Q9H974;Q0D2J5;O95453;Q9NZL3;Q9C0F3;Q5VTR2;P53804;Q494X3;Q9BY41;P17029;P06733;Q8NDY1;Q9NVH6;Q9NTW7;O15297;P29474;P68871;Q7Z2E3;Q8NI51;Q9HBH1;P51003;Q9NSC2;Q96IU2;O60663;Q96GX9;Q8TAQ5;Q8N6T7;P51815;Q969S3;Q96GM8;Q8TAT6;Q15929;Q8IXW5;Q6V9R5;Q3KNV8;Q9ULX3;P35813;P31689;Q96MT3;Q96PM5;P11532;P42677;Q9Y5A6;Q9Y6K1;Q969J2;Q86SE9;Q9Y5J9;Q92900;A8MTY0;Q99504;Q96GE5;Q9GZU2;Q5SVZ6;Q9UHR6;Q96KS0;P20042;Q96IV0;Q8N3Z6;B4DXR9;Q9GZT9;Q8N141;P31350;Q13105;P58557;P55198;Q6ZNO8;Q9H4I2;Q9UKJ3;Q969R5;Q9Y5R5;Q9U M63;P51523;Q9BQ83;Q96DE0;P24941;Q14526;P49902;Q9UBZ9;P52737;P0C7X2;Q9NV72;Q9HAJ7;Q96Q T6;P55265;Q9UQR1;Q8NEM1;Q8N371;Q8IXJ9;Q92844;O14746;P23025;Q8WU90;P62072;Q8NC26;Q8N48 8;Q9H3H1;P04733;Q9NTX7;Q96NJ6;Q5BKZ1;P11474;Q2M3W8;Q8NDF8;Q9UM07;Q9BQA5;Q9ULM6;Q15928 ;Q8IY57;Q9C0F0;Q14593;P0C100;A6NHJ4;P80297;O60481;P52747;P10828;Q96QC0;Q8NA42;Q14588 ;Q13064;Q96Q83;Q92782;Q9UKT4;Q86XF7;Q15697;Q8NB50;O60765;Q8NBB4;Q6ZNG1;A1L3X4;P27695;Q 9Y2A4;Q6U7Q0;P30876;Q12901;Q8TD23;Q96GY0;Q53FD0;Q76L83;Q6PJT7;P0CB33;P52736;Q96MR9;P4 7944;Q15937;Q96SZ4;Q9UKN5;Q9C086;O75582;Q9BV57;O95391;Q9H7R5;Q53T94;Q9H116;Q00403;Q7L 2R6;O75362;O75446;Q6NUN9;Q9Y252;Q9Y3Y4;Q9NVV4;Q9P2R6;P29083;P23769;Q9NRL2;Q9UID6;Q9Y2 G7;P59923;Q16822;P26651;Q6P9A1;Q9UFP1;Q9BRX2;P36639;P28698;Q9ULU4;Q9Y468;Q8N782;P0923 4;Q9H7R0;Q9NX46;P38935;Q96SL8;P60510;Q9UGP4;Q14839;P34949;P62633;Q9HBT7;Q15652;Q96WB0 ;O15015;Q96C28;P11161;Q6ZQV5;A4D2B0;Q15428;Q96ND8;P49792;P56524;Q96PU4;Q00994;Q9UK11 ;Q9NTM9;O43918;P17036;Q01844;O14709;Q9H9Z2;P18146;O60930;Q9UJW3;Q9BXR0;Q9NYW8;Q8IZQ1;O 75312;O95625;P06746;Q6ECI4;Q8TE76;Q7LBC6;Q9UBQ0;P04156;Q3MIS6;O94776;O75925;Q5VZL5;Q9 HAH1;P17019;P15822;O95218;Q9UIF7;Q92994;A8MT65;Q96G03;Q96IT1;Q86TA1;O43167;Q8WUY3;Q5T AX3;O00625;Q9H091;O95159;Q93075;Q9HAW0;Q53G26;Q8TAF7;A8MXV4;P62140;O00167;Q9UKV0;Q9H0 40;Q8WW38;Q8N668;Q9BT49;P15336;Q8N2W9;Q9UL58;Q96LI5;Q8IU60;Q9BRR0;Q08AN1;Q96N9 5;P46976;P0CH99;Q8NHY6;Q6ZVK8;O15304;Q03936;Q6ZMV8;Q13398;Q53GI3;Q86W11;Q8N7Q3;Q14585 ;Q9ULJ3;Q9BYE7;O75306;Q13642;O95571;P26358;P13056;Q92993;Q9HA77;P36873;O75290;Q5VWG9 ;O75081;O75132;A7E2V4;O76031;Q9Y2Q1;P17040;Q8N5C8;Q92785;Q16670;Q8WV37;Q9HAZ2;Q8WW33;O 43255;Q9HCM9;P62136;Q9NW38;Q7RTV3;Q8N5A5;O00743;Q9H8S9;Q9Y2M0;Q9ULD5;Q8WV99;Q9H0C8;P0 7438;Q96NI8;Q9BU89;P17098;Q96MN9;Q9UHK0;A8MUZ8;O60870;Q9H777;Q9Y6U7;Q8WTR7;P24278;A4D 1E1;Q86XN6;Q5TEC3;Q86VM9;Q96MB7;Q8IYI8;Q8N5U6;P49116;O95628;Q9NWF9;Q68DK2;P46100;Q9HC L3;Q9HCC9;Q6IEB1;Q8IWS0;P25791;Q06587;Q5VIY5;P07902;Q19AV6;Q9BTE6;Q86US8;Q5VUA4;P6297 9;Q12986;Q6ZNA4;Q9Y692;Q9Y253;Q92670;O14964;Q15326;Q14CW9;Q8TA94;Q9NWX1;Q9NZV7;P49754 ;A6NGD5;Q06455;Q7Z6K1;P99999;Q12874;Q13490;P23193;P22033;Q9NR56;Q05481;Q9UNY5;Q12830 ;P52746;Q93083;Q12933;Q8N4W9;Q9P0L1;Q9BUY5;Q9NTG7;Q32M78;O96017;Q96N22;Q15650;P13640;Q 13889;O15350;P52742;Q8N7M2;Q99684;Q9BYN7;Q8N3J9;Q9HCG1;Q6NZY4;Q9H8G1;Q6ZN17;Q9H963;O9 5780;Q68CP9;Q8NDQ6;Q15637;Q9ULX6;Q9Y2D9;Q9BQ52;P86452;Q9NQ29;Q9H9D4;Q96NY9;Q9UIS9;P46 939;P51504;Q7Z5L9;P52744;O15014;Q9UPN9;P24928;Q8NAP3;Q05BQ5;Q9UHF7;P67870;Q6PG37;Q8IW 19;O75251;O43189;P62273;P27797;O43318;O75150;Q5T8I9;P02794;Q8IYX0;Q9UKT9;P0CG00;P1147 3;Q9Y6X8;Q9H008;P14324;O75928;Q9H6W3;Q6IV72;P0C025;Q8N587;Q8N895;Q96IR2;O60220;P19474 ;Q9Y6K5;Q01081;Q9UIF9;Q9UKD1;A6NIX2;O95251;O14628;O43257;O60290;P06396;Q9BR84;Q8NB42 ;Q9C035;Q8IYB9;Q9Y3S2;Q13114;Q9NWT6;P53041;Q86YI8;Q3ZCT1;Q8TBK6;Q96BD5;P55197;P78317;P 80294;Q9NRR4;O14639;Q6ZN79;Q9UKV8;O14978;Q8TA86;Q5D1E8;Q14258;Q8NHY2;Q9Y3A3;Q99496;Q9 Y2L8;Q07352;A8MWA4;Q8N9Z0;P02511;Q66K41;Q9BSG1;Q6IQ32;Q15935;Q99766;Q15654;Q03112;P52 743;P62714;Q8N988;A8MUV8;A8MVS1;P17028;P27694;Q9UIF8;P67775;Q9H2U2;Q8WY41;Q9H9Y6;Q9NU P7;Q7Z2W4;P52594;P61513;Q9UK10;Q66K89;P98168;Q8NF99;A8K8V0;Q8IYL2;P17010;Q14134;Q9GZU 7;Q9UNL4;Q02447;O95602;O75792;Q86YG4;Q8WY54;Q86YE8;Q96BR6;P02795;Q5HY98;Q9Y2X9;P15621 ;Q9H9T3;Q49AA0;Q13342;O95394;P98182;P0C7V5;Q13330;O15504;P49711;Q9Y383;Q96LW9;Q96H40 ;Q96T23;Q32MQ0;Q96N20;Q92793;P28702;O14832;O95376;Q8TF47;Q96PQ6;Q6P9G9;Q13127;Q9UBS8;Q 8IW36;P35226;Q96PY6;Q3MJ62;Q9Y2P7;Q99590;Q9UDV6;Q8TF39;O43439;Q05516;Q9NP64;P35637;Q8 N9V7;Q15022;O60711;Q9NRC8;P04731;Q9Y5J7;Q96AY2;Q86XK2;Q9UQL6;P60002;Q6ZN06;Q96GC6;P10 074;Q86UA6;Q9UL40;Q13129;Q09FC8;P56270;Q99502;P35789;O60304;Q96N38;P17022;Q8N448;Q9Y6 K9;Q96W8;Q49A33;Q5TA31;Q9Y473;Q9ULJ6;Q8TB69;Q96LW1;Q03923;P48200;O95125;P84022;Q86V7 1;P21980;P49790;Q96S55;Q9H7S9;O43309;P62875;P49589;Q8N720;Q7L9L4;P37275;P30793;Q96MF7 ;Q8WUI4;Q13360;Q8WYH8;Q8WTZ3;A6NK53;Q2M1K9;O95271;Q86Y01;O75800;O95848;O43823;Q13233 ;Q9UPA5;P04732;Q9UK13;Q15046;Q8TBB1;Q96NG5;Q6IEG0;Q9BU02;P17544;A1A519;Q9UKF6;Q14061;Q 7Z3K3;Q7L590;Q92905;Q9UII5;Q9H1B7;Q2QGD7;Q9H160;Q6ZMY9;P55895;Q9BX82;Q9NYG5;O60260;B4 DX44;Q8N859;P28838;Q9GZX5;Q9NXW9;Q9NX58;Q86V15;Q5FWF6;P49910;Q96N77;Q12873;O75151;P09 467;Q16629;Q96EK4;Q9BSM1;Q8N0Y2;Q8WXI9;O15355;Q63HK3;Q96FX2;Q9ULV3;Q86YF9;Q9NRC4;Q9Y5 J6;Q6P1K8;Q8WXB4;Q8WTV1;Q9ULD9;Q9Y6X2;Q16851;Q9NVV9;Q8IWL3;P63272;Q9UBW7;Q9H0F6;Q1487 2;Q68EA5;Q15776;Q14192;O75437;Q9BYK8;O14802;Q9UBF6;Q9Y462;Q9H0W9;Q02930;P10073;Q5JVG8 ;Q96NU7;P62508;O43829;Q9BTC8;Q8NEP9;P22392;Q96EY1;O96006;Q08AG5;Q96CB8;Q8IYW8;C9JN71 ;Q8NF64;O95201;Q76KX8;Q9Y2Y9;Q13501;Q15181;P09874;Q8N823;P62877;Q8N972;Q96NB3;Q16775;P 35227;O75346;Q9H1K1;O75164;Q9BWG6;Q86UW9;A6NP11;Q4VC44;Q9NRR7;Q8N7K0;A6NKB3;P23297;Q6 P280;Q96EP1;B1APH4;Q86YP4;O95989;Q8TF32;Q9P2R7;Q6S9Z5;P51948;Q86TG7;Q9Y6R6;Q15072;Q5T 200;A2A288;O75152;Q9H6Z9;Q8IWW8;Q6GMV2;Q9UL41;O95551;Q3KP31;O14771;Q9BUG6;P53803;Q8WY Q5;Q9HBE1;P52741;Q9NWK9;Q9UC07;Q86TP1;Q71UM5;Q03938;Q8TD19;P69905;Q9NYJ8;P61927;Q1388 8;P08047}

3544 Pathogen[ P0C206] interacts with 1533 human partners: {Q9UID6;P27695;P49589;Q02386;Q9UBW7;Q8N9K5;O95271;Q5VUA4;Q76L83;Q9NQC7;Q9NUA 8;O43829;Q8N720;Q6IEG0;P06733;O00488;Q9Y3S2;P28698;Q9H1K1;Q6NUN9;Q15072;Q8IW03;Q9Y253 ;Q86VD1;O14964;Q16851;Q9Y468;Q13887;P84022;Q9H857;Q9NWX1;Q3KNS6;Q86W11;Q8NBJ7;Q9Y2X9 ;Q96JL9;A8K8V0;Q86Y01;Q68DK2;P10588;Q9UK12;Q8N371;Q9Y3A3;Q96AX9;P99999;Q9NX58;Q6P9A3;Q 9NZV6;Q49AG3;B1APH4;Q86VZ6;P46939;Q53T94;P68871;Q86V15;Q969W8;Q9P1U0;O14628;Q13501;P0 8048;Q9NS56;P60002;P07438;Q9BZE0;P13640;O95081;Q9P2N5;Q9NWK9;O60291;Q9H5H4;Q9P0U4;Q8I

XW5;O43309;P62875;Q5XG87;O95201;Q86TP1;Q9Y5L4;Q8TC21;P62877;Q9Y3M9;Q8N988;P98168;Q96S  
E7;P0CB33;Q14587;Q6B0K9;O75952;Q96JC4;P51854;Q96Q83;Q9BTP6;Q19AV6;Q96MP5;Q9UKF6;O6048  
1;Q9Y2M0;P28715;Q96BV0;Q9NX46;Q9NQV6;Q32MQ0;P06396;Q63HK3;Q7Z7K0;Q9Y5J6;P0C025;Q7Z3I7  
;Q8TA86;Q96NI8;Q6PCD5;Q9UJN7;Q9UPV7;Q8WU90;Q96N22;A8MXY4;Q96AY2;Q9BUY5;P53701;Q96MM3;  
O60384;P35398;P23193;Q17RS7;P20042;P09917;Q14588;Q9YHCK1;O00167;Q7Z398;P49790;Q03924;Q  
8WV22;Q9BUG6;P17026;Q96IR2;Q9H4P4;Q6IV72;P55265;Q15493;O95453;P55198;P38935;Q5JN23;P0  
6401;Q5VZL5;Q60455;Q92844;Q9GZU2;Q8N6T3;Q5T5D7;O95251;Q9Y6K1;Q8N883;Q96CS4;P27797;Q01  
538;Q9HA92;Q86YG4;Q9ULX3;Q9NYT6;Q9NS18;P36639;Q9Y6Q3;P98182;Q99504;A8MXV4;Q86UW9;Q8NB  
50;Q9UJQ4;Q9HAZ2;Q8N9F8;Q13127;O95780;P13682;Q53H82;P50213;Q9Y6K9;O75251;Q9UPN9;Q8IYN  
0;Q05481;Q9UQ84;Q15911;P46976;Q01081;Q33SY56;Q9NSU2;Q99766;Q0VGE8;P26651;Q9Y4L5;Q9P2G1  
;O00733;Q6PF04;Q8NCN2;Q7Z6J0;Q9HAW0;Q13114;Q9Y242;Q08AG5;Q96KR4;B4DU55;Q9NVW2;O43255;  
Q6NX49;Q9UC06;Q8N8U3;Q9GZU7;P36954;O75123;Q147U1;Q14586;Q96PE6;Q13263;Q9UII5;Q15696;P  
52741;O95602;Q96KS0;A6NGD5;Q8IYW5;O95376;B7Z6K7;O96017;Q9H4I2;P02100;Q8WUU5;P78364;P6  
9892;Q13642;P11161;P04156;Q8IYX0;P17031;Q86VK4;Q96MT3;Q9HCC9;Q8WY54;A2RRD8;Q9NW07;Q9Y  
5T5;Q9Y5R6;Q9GZT9;P10074;Q9UBT6;Q9UK13;O43151;O43422;Q96SL8;P17544;Q96DT7;Q17R31;Q9UG  
U0;P0C7X5;O75925;P09874;Q9UDV7;P22392;P25490;O43313;O75290;P15622;Q8N9Z0;Q9NSD4;Q8NG2  
7;Q96G03;Q8NDL9;Q02446;Q8N8Z8;Q9UNA4;Q9HBE1;Q9UJL9;P79522;P02794;Q9UL41;Q14966;Q96F45  
;P49910;Q9P243;Q86XK2;Q92664;Q6ZSB9;Q86YF9;P51955;Q8N5C8;Q8WYH8;Q96N95;Q8TB69;Q9BT49;  
Q14258;Q49AA0;Q9UGP4;Q9C0B9;Q9H9T3;Q9BV68;Q9NSC2;Q96I27;O14521;Q9UC07;Q9NR11;O75582;Q  
9Y2Y9;Q15697;Q96EP1;Q5CZA5;O75306;P04732;Q5F1R6;Q7Z7K2;O75382;Q9H091;Q3KRA9;Q96IF1;P4  
1182;P17024;Q05516;Q9UPA5;Q6V9R5;Q9Y2J0;Q13615;P52743;Q6NS38;Q6ZNA4;Q9H7R0;Q9BS31;O43  
681;Q9UHK0;Q96K75;Q9NQZ8;Q9NR83;Q7L3S4;Q6NZ36;Q6ZMK1;Q9NXT0;Q8IV48;Q99598;Q96LI5;O948  
22;Q6PII5;P35226;Q9NRG4;Q9C0D7;O75604;P52737;P02008;Q9Y4I5;Q9UKA1;Q496Y0;P49754;O7546  
9;Q9NR56;P59923;Q8WXB4;Q9UK33;Q9Y6K5;Q8IYI8;P09467;O75081;Q9H1K0;Q9P2F9;Q8WXI9;Q8NFW9  
;Q9Y2Q1;Q9UL58;Q9Y2D9;Q9BU19;Q9H7B4;Q53G26;Q6WTR7;Q9H2H0;P21980;P17019;Q8IWB7;Q5VIY5;  
Q6ZRF7;O60870;Q9NPA5;O95600;Q5TFE4;Q05BQ5;Q5T1R4;Q8IYH5;Q8IUQ4;O95394;Q9UKV0;Q8WV38;P  
46100;Q8N8E2;O95630;Q9H5L6;O43670;A6NHJ4;Q8N2W9;Q86XF7;O94892;Q9H4T2;A6NIX2;Q9UPP1;Q9  
Y3Y4;Q86T29;Q9NW08;A2A288;O14832;Q9UM63;Q6ZS27;Q9Y2P0;Q96SK3;Q96MX3;A6NP11;Q3MI56;P28  
838;Q7Z4H3;Q9UL59;Q9UH90;Q9NWF9;Q8N1G0;O75764;Q8NI51;Q9NXW9;Q9Y462;Q96T51;Q9NS39;Q163  
42;Q6ZMY9;P35041;Q9ULJ6;Q15637;P10073;O60220;Q68EA5;Q96JF6;Q9UK59;Q3SY52;Q9Y383;Q9HCX  
3;O43318;Q9NVH6;Q8N680;Q96PY6;Q15654;P15336;Q6PDB4;Q86UD4;Q6ECI4;Q9UJW4;Q86V58;P26358;Q12901  
;Q969J2;P06746;P29728;P52738;Q9UIH9;Q16822;O95848;Q12874;Q16629;P62273;P55055;P17027;  
P51508;Q92670;P00915;Q8NFT6;Q8N7M2;O60765;Q7LBC6;Q5SXM1;Q86U28;O00625;Q96T23;Q96DE0;Q  
9HCG1;O75467;Q9BS34;Q96C00;P15621;O75626;P53804;Q9NS91;Q9Y5J9;Q9HA77;Q9Y5Y2;Q9UKV8;Q9  
P2R7;Q8N7K0;Q569K4;Q13342;Q9ULJ3;P51522;Q9NRL2;Q8N0Y2;Q8TAF7;Q01844;P13056;P17023;Q9N  
PC3;Q7LG56;A7E2V4;Q96KM6;Q6ZLN3;Q8TAT6;Q9C0F0;Q03936;O94776;Q9UBZ4;Q13398;P10072;Q96M  
B7;P98170;O15164;C9JN71;Q9UM07;Q7RTV3;Q14591;P49902;Q96T92;Q8IUD6;Q9NQX0;Q04760;O7543  
7;Q14590;P51003;Q92993;E7ETH6;Q68DY1;Q86YP4;A1A519;Q2VY69;Q8TD19;Q6ZNO6;Q6ZNB6;Q13330  
;Q12933;P15976;P34949;O60884;A6NNF4;P49642;Q86UE3;P49116;Q9ULX6;P67775;Q5EBM4;Q9HB58;  
P30622;P47224;O14686;P22736;P30793;Q00994;Q9Y2G7;Q9NXR8;Q8WY41;Q9H0E7;Q9BRH9;Q9BQA5;Q8  
6TG7;Q3MJ62;Q8NA92;Q5BKZ1;Q9NX65;Q5VTR2;Q9H160;O00482;Q8WTZ3;O95125;Q9Y6X8;Q5T8I9;A1L  
3X4;Q96IV0;Q8N3J9;P52740;Q9P2Y4;Q9Y6X9;A8MT70;Q13233;Q6P2D0;Q96K62;O60284;O95628;Q76K  
X8;Q9ULD9;Q9Y6X2;Q86TJ5;Q9Y5J7;P50461;B4DXR9;Q5TA31;Q969G2;Q9UJK3;Q9BY32;Q8IZQ1;P4820  
0;Q9P2R6;Q7Z340;Q9NP61;Q9UGP5;Q9BWM5;P10075;Q8TDB6;Q15124;Q9UJQ3;Q96S05;P18146;O14786  
;O94929;P62633;Q9NZL3;Q96MA1;Q8NEA6;Q8NEK5;P17025;Q8N2I2;P22695;Q9HBT7;Q92793;Q3KQV3;  
Q5JVG2;Q9UBF6;Q16587;P69891;A6NJL1;P10589;Q8N6T7;Q06730;Q9C086;A8MTY0;Q32M78;Q9Y4X5;P  
0CH99;Q6NSZ9;Q9BWX5;O75346;Q63HK5;Q9NPC7;Q6P280;Q6P1K8;Q8IZC7;Q16775;Q8N393;Q8N895;P6  
1927;Q96N58;P49593;Q6P1L6;P17022;Q9BSG1;Q6ZMW2;O75151;Q6ZNL7;Q9NQ29;P17029;Q8NDX6;Q9N  
QV7;Q14839;Q9HBT8;P30291;O43918;Q6ZMV8;Q6ZNV5;Q9H7S9;P57071;Q9NPG2;O60304;Q8TE76;O959  
89;Q9HCZ1;Q92782;Q9UK11;Q96JB3;Q05215;P80294;Q9BYK8;Q9UBQ0;Q16670;Q7Z3G6;Q92785;Q8WTV  
1;P69905;Q9UKT4;O60930;O15355;Q15916;Q5H9K5;Q13064;Q8NDW4;Q9NWS9;Q9NQ03;Q9Y4J8;Q9H9Z2  
;Q9BYE7;Q96LX8;Q9UIE0;Q92610;O95718;P49792;Q9UPQ4;Q9H609;P0C7V5;Q9P2J8;Q9H0W9;P53803;  
Q96N20;Q9BWG6;Q92784;P17021;Q9BUZ4;Q9BR11;Q14202;Q7Z3T8;O43345;O15151;Q86TJ2;Q8NF99;P  
27815;Q8N823;Q5VZB9;Q6P587;Q49A33;P14324;Q3KNV8;Q96NY9;Q93075;O75688;Q96N93;Q96NB3;Q8  
IWS0;Q86US8;Q6U7Q0;O43298;P49917;P36508;Q8IXT2;Q9NYG5;Q96PQ6;Q86SE9;Q9H8S9;Q99612;A6N  
K53;Q7Z5J4;Q6AW86;P10828;Q6ZNO4;Q6ZT77;P62508;Q8N6M9;Q15650;Q9BXU3;Q8WW22;Q8TA94;P040  
53;Q13888;Q13907;Q93083;Q96N77;Q9NSJ1;Q9ULU8;O75446;Q03112;Q9NWT6;Q9BXS1;O43361;Q8TF2  
0;Q9GZX7;Q9ULV3;Q9H0A6;P17035;Q8NF64;P22681;Q68G74;Q9BZR9;Q9UIS9;P0CW20;P17010;Q8N9V7  
;Q8IXJ9;Q8NAF0;Q15560;Q8WXA3;Q96EP0;Q86UQ0;Q8NHY6;Q8IWB6;Q8IWB6;Q8IWB6;Q8IWB6;Q8IWB6;Q8IWB6;  
Q9UKN5;Q6ZVK8;Q15973;Q8N490;Q8IWB7;Q8NC26;Q52M93;O43296;Q86WZ6;O75112;Q8TF47;Q9ULU4;Q  
9UBU7;Q8IZ20;Q9C0F3;Q9NR48;O00110;P52742;P08047;Q9UEG4;P24278;Q14CW9;A6NFI3;Q9NZV7;Q8  
N972;Q9UK10;Q12986;P29083;P04731;Q8N488;O43900;Q96MN9;Q96BR9;Q6PJT7;Q8N141;Q9UHF7;Q9U  
HY7;Q9H582;Q9H974;Q9BTE6;Q14593;Q9H1H1;Q5TEC3;Q6IQ32;Q8N5P1;Q9UBS8;Q14149;P48059;Q8WU  
I4;Q08ER8;P45381;P17032;Q96T88;P49711;Q8TD23;Q9HC78;Q9H2C1;Q06587;P16415;P86452;Q9Y5R  
5;P09105;P49257;Q5HY98;Q9Y2L8;P25800;Q8TAT5;O75152;O60260;P17017;Q9UIF8;Q9BTC0;Q9Y3D2  
;O75792;Q9H6W3;Q8TCD5;Q9P0L1;P52744;Q15942;Q71UM5;Q8TF50;Q5D1E8;Q3ZCT1;Q9UIF9;Q9NY33;  
Q5SXM8;Q9UQR1;P35637;Q9H4Z2;Q99807;O96028;Q7Z3K3;O00151;Q9HCI7;O95361;Q96CX3;Q9H0P0;Q  
9BR84;Q9Y692;Q96006;O00757;Q9H963;O14618;Q99728;Q9NUP7;Q8WWW0;P62979;Q8NDF8;P17020;Q9  
9590;Q96NL3;Q8NCA9;P58557;P17039;Q8TBC5;Q02447;Q8TF32;O95405;Q96GY0;P67870;Q6ZSS3;P35  
789;O95551;Q8TBB1;Q9H2M3;Q8N554;Q9H8N7;P17030;Q6NZY4;Q96IT1;Q9HCL3;O14771;Q6PEW1;Q8N7  
Q3;Q8IVC4;Q68DY9;P0CJ79;Q9Y4X4;A6NK75;P22830;Q8N9Q2;Q6P1N9;P49916;Q96HQ0;Q02930;Q8NHM  
5;O76003;P17028;P38936;Q5VWG9;Q96S55;Q96GC6;P51523;Q7L2R6;Q9H2U2;Q8N8J6;O43167;Q4VC4  
;P58317;Q6P9G9;P62714;O43294;P55895;Q9NYJ8;Q8NBF1;Q96S99;Q96S99;Q96S99;Q96S99;Q96S99;Q96S99;  
Q9HA38;Q6ZQV5;Q96MF7;Q96JM3;Q86XN8;Q9BV57;Q96MU6;Q9BYN7;Q9H165;Q7Z3V5;Q9Y6R6;P07902;Q  
9GZX5;Q8N782;Q6ZNG1;Q9NP87;P0CW19;P02792;Q9NVV4;Q5TAX3;Q92804;Q86XU0;Q06732;Q9BSM1;Q6

ZR52;Q9NRC8;O15392;Q5MCW4;Q14872;Q9C035;Q5FWF6;P31941;Q9UDV6;Q15937;Q6P9A1;Q86UZ6;Q8T  
AQ5;Q9UBZ9;Q9Y5A6;Q9H707;P48454;Q8IYW8;Q9H008;Q13129;Q8TF45;Q8IYW8;P25791;O15535;Q8IX  
J6;O00463;Q13489;Q8TF39;Q9BSK1;Q15022;Q5HYK9;Q5HYM0;Q9H116;Q2M1K9;O14709;Q96CB8;Q1452  
7;Q15652;Q9UJ41;P62140;Q99684;Q9ULD5;Q8N8L2;O75373;Q8N587;Q96N38;Q9BY31;Q8N4W9;Q96MR9  
;A6NM28;Q6NTF7;Q9UJ78;P36405;Q14592;Q9H4G8;Q9H3H1;P23769;Q96GX9;Q86V71;Q03923;Q8NDH3;  
P29474;Q9Y2P7;P62072;P06703;Q0D2J5;Q7Z7L9;A4D2B0;Q86YI8;O60315;Q8IZ26;Q6IE81;Q8NA42;Q  
969S2;Q13422;Q09FC8;Q8NDQ6;P43243;Q8N859;Q9H0F6;Q99502;P51786;Q15928;O95218;O43823;O9  
5639;Q8IX07;Q9BX82;Q86Y25;Q9NPF4;Q9UL36;Q96BR6;Q9UHR6;Q13889;Q9BRR0;Q9UBL3;O60293;P61  
513;Q8IXK0;Q8WUH1;A6NDX5;Q9HCM9;Q96C28;Q9H7M6;Q8IY57;Q9BQW3;Q5TD97;Q92900;Q96NJ6;P0C7  
X2;Q9H6Z9;O75362;O14829;O75800;P98169;Q6IQ21;Q9HCE3;P28702;Q99676;P37275;Q969R5;Q9H77  
7;Q8IYM9;O60678;Q8WUB8;Q4V348;Q9UKD1;P0CG31;O15350;Q9H7X3;Q6PK81;Q9UPG8;Q6ZN11;Q9UHD1  
;A6NKH3;Q9NQX6;Q03393;Q96FX2;Q86WB0;O75164;Q96LW9;Q9P253;O14901;Q96CA5;Q96GD0;Q8NB12;  
Q2QGD7;Q8NEM1;Q6ZN79;P17097;P17040;Q3SXZ3;Q96PM5;O95625;Q9BXR0;Q6S9Z5;Q96QC0;Q92994;Q  
8NDP4;Q7L9L4;Q2M3X9;O94830;P27694;A4D1E1;Q9UKT9;Q5VTD9;A1L020;Q9NP64;P52747;Q9BWF2;Q5  
3GI3;Q9H0M5;Q14192;Q9H6Q4;O60346;Q9HCL6;Q08209;O14639;Q14134;Q9C0G0;Q5EBL2;Q96EY9;Q9H  
AJ7;Q9UBR4;P51814;O60663;P11474;P51815;Q96BW5;P21506;A8MT65;Q96H86;P24928;O15194;Q86X  
67;O15504;Q8IW19;Q96K80;Q9P2Z0;Q8WV44;Q07352;Q8TBZ8;Q9NYW8;P52746;Q8IWL3;Q9ULM2;Q3ZCX  
4;O14595;Q9UBC3;O75398;P0CG24;Q8NFP7;Q8TAP4;B2RFX5;Q96QT6;Q8NBB4;Q9H8W5;Q14584;Q6DD87  
;Q9BY41;Q96SC8;Q14585;Q96K83;Q9UPW5;Q9P0T4;O15015;P60510;Q8WV99;P11532;Q99798;Q9Y483;  
Q9H8W4;Q8N184;Q9H2P0;P56524;Q9BYX4;P61968;O43439;Q14526;Q9NV72;Q96GE5;Q7Z6K1;Q9UFB7;P  
41238;Q96C10;P14373;P23297;Q6AZW8;Q00987;Q13106;P02511;Q9Y473;Q6NX45;P39748;Q8NCP5;Q6  
ZNH5;Q5T619;Q9GZV8;Q96SZ4;Q5SVZ6;Q96GM8;Q7Z2W4;Q8TF68;Q08AN1;Q86XN6;Q9H6B1;Q9HBB1;O76  
031;Q7Z6E9;Q9NTG7;Q9NTX7;Q9NS23;O95391;Q8N339;Q8TCN5;P08151;Q13118;Q15929;Q8N668;Q8IU  
81;P02795;Q5TFG8;Q5JVG8;Q9NUK0;P87889;Q6ZN55;Q5VV52;Q9BQ83;Q9NTW7;Q6ZNG0;P17038;Q0040  
3;Q9BYM8;A6NN14;Q86VM9;O14802;P15822;Q8NB42;Q15776;Q66K89;O60711;Q8NCK3;P02042;Q8N6H7  
;Q68D11;Q6PG37;P21912;O15297;Q13105;P36873;P0CG00;Q9Y252;P02489;Q9H1B7;Q9H4W6;Q9UK53;  
Q9Y2Y1;P52736;Q9H040;A8MVS1;O76064;Q8IYL2;Q8WXG1;Q4G163;Q9H9Y6;P22033;Q8TDZ2;Q9BU89;P  
49356;Q96EY1;Q8WUY3;O43593;Q96K58;Q9UGR2;Q6GPH4;B4DX44;Q8WYQ5;Q96RE9;P55197;Q494X3;Q9  
HAK2;A7XYQ1;O43189;Q96PM9;Q9BU02;Q14119;P17014;Q9NU63;Q9NZU5;P53611;Q92618;Q96GK7;Q8N  
EP9;Q9BQ52;Q96ME7;O95159;Q9ULM6;Q9C029;Q8TAU3;Q9NRD5;Q8IYB9;Q6ZNA1;Q8N3J5;Q15935;Q96B  
54;Q7L945;Q9UL40;P24941;Q86YT6;O75820;Q96SR6;Q8TDD2;Q14061;Q8TBK6;O95071;P13929;Q9UDW  
3;P16455;O75312;Q7Z2E3;Q2M218;Q14249;Q14929;Q8TD17;O15304;Q5VZF2;Q9NRM2;Q96EK4;Q8N3F8  
;Q8N5A5;Q9H2K2;P22735;Q96ND8;Q86UY8;Q12830;Q9BRX2;Q96IU2;Q96LW1;Q8IU60;Q6VVB1;O95571;  
O75150;O95789;Q9UIL8;O95714;Q8WY91;Q86TA1;Q13472;Q6P3V2;Q8WW33;Q5T6S3;Q9NUD5;Q9HBF4;P  
09234;Q8TCF1;Q93052;P11473;Q8NAP3;Q9P255;Q8TAW3;P23025;Q86Y13;Q9UIF7;P47974;Q96FQ6;Q9  
Y2A4;Q5T200;O14978;Q9H8G1;Q66K41;A8MWA4;Q7Z5L9;Q6ZN08;Q9Y3C5;Q9BX63;Q6Q0C0;Q8IYV9;P08  
235;P0CJ78;P31689;Q969T7;O95171;Q9Y6E7;A8MUV8;O95677;Q8WWM9;P51504;Q9NP62;Q99496;Q3KP  
31;P21399;Q99640;Q96EG3;Q5SVQ8;P17098;Q96PU4;Q9UJW7;Q9BWX1;P0CI00;Q5T0B9;Q16600;O9539  
6;P17041;P14618;P62136;Q9HCK0;Q9UJW3;Q96NG5;Q9UNL4;Q9NVV9;Q96JM2;Q6H8Q1;O15014;Q15428  
8;Q8IZD2;Q9NBD5;Q12873;O60290;P10827;Q6GMV2;Q53FD0;Q9NTM9;O14746;P36871;Q96NG8;Q9H7Z6;  
Q9UIG0;Q96BD5;P47944;P35813;P80297;P63272;P42677;Q70IA6;P31350;Q9BUE6;Q9UKY1;P17036;Q  
9NRN7;Q96NU7;Q68CP9;Q9BTC8;P51948;Q8TBZ5;P48443;Q8N1W2;Q01954;Q9Y2H8;Q9Y2K1;Q8IWT3;Q1  
3360;P19474;P29401;Q15046;O15060;P35227;Q2M3W8;Q86YE8;Q8NEL9;P16083;Q9Y2Y4;Q9H7R5;Q92  
905;Q9H9D4;Q7L590;Q6ZN19;Q13490;Q03938;Q15181;Q8N8C0;O43830;Q9UQL6;P50479;P30876;P785  
49;O75132;Q9HAH1;Q9H0C8;P56270}

3545

Pathogen[ P03363] interacts with 1168 human

partners: {A2RRD8;P80294;Q86TJ5;Q49AA0;Q6IE81;O95376;Q9NQX1;Q16587;P22681;Q15654;P4975  
4;Q9NWF9;Q86XU0;Q15911;Q9Y5A6;Q9NYG5;Q9H160;P80297;Q9P0L1;Q9Y6E7;Q8NB42;A8MQ14;Q9Y6K5  
;Q5VTD9;O75123;Q9C0F3;Q8NHY6;Q5T0B9;Q96QT6;P13682;O75820;Q3KNS6;Q86Y01;Q9NW38;Q99684;  
Q16342;A4D1E1;Q03923;Q9BX63;Q6P9A3;Q9UKD1;Q8NCK3;Q06455;Q13490;Q6ZMY9;P35789;O14901;O  
75373;Q9Y252;Q5SVQ8;Q6ZN17;P98168;Q9H8N7;Q8TDB6;Q96IV0;P08048;Q8IXJ9;Q13105;Q8IW19;P2  
9474;O75081;Q5SVZ6;Q9H2U2;P17027;P0CH99;Q5VUA4;Q9NVV4;P46939;Q9NSD4;Q8N9F8;O94972;Q9H  
CC9;Q86V71;Q6IQ21;Q96EP1;Q12830;Q8NSU6;Q99592;Q8N1G0;P10828;Q9H963;Q9UJQ4;Q969J2;P699  
05;Q8N988;Q9UHF7;Q8N2I2;Q96LW1;P28698;Q8IZC7;P42677;Q9BWF2;Q96N22;Q9NQZ8;P62136;Q6DD8  
7;P29083;Q8TAQ5;P27694;Q8WTV1;Q92766;Q03924;Q6ZNA1;O15355;Q14929;Q6ZVK8;Q9NQX6;Q9BZR9  
;Q7Z340;Q5T8P6;B4DU55;Q9H091;Q8N859;Q19AV6;O14978;Q6ZN06;Q86W11;Q9ULX3;Q8NA42;Q9NZL3;  
Q9Y2D9;Q8NAP3;P17021;P17010;P62714;Q8IYV9;O43296;Q8NA92;O14771;Q99598;O95780;Q96K80;Q  
86VK4;P02795;Q9Y383;Q86WB0;A6NK75;P52738;Q9BXR0;O14829;Q9NUA8;Q6NSZ9;Q12901;O60481;P1  
8146;Q13360;P49116;Q9P2G1;O95628;O95453;Q9H9P5;P36873;Q6ECI4;Q6P2D0;O75764;Q8NEK5;Q5  
386;Q16851;Q96J7C4;O60315;Q6P1K8;Q02930;O95391;P98169;Q96UP3;Q9P2J8;Q9Y468;P35227;Q5U5  
Q3;Q96T92;P0CG31;Q99676;Q3ZCT1;Q92900;Q6V9R5;O60291;Q6GQQ9;Q9NRL2;Q9C0A1;Q14526;A6NHJ  
4;P68871;Q9H9Y6;Q96MX3;Q9NZU5;Q8IU81;P14373;Q6NZY4;Q9H707;Q96NG8;Q9NVV9;O14786;Q9UC06  
;Q96SE7;Q9Y3C5;A2A288;Q86YP4;Q9BRR0;P08151;Q7L3S4;Q8N448;Q9H7S9;Q96K62;P86452;P99999;  
Q9BY41;Q9NS39;Q96JF6;Q14590;Q86UE3;P17098;P62140;Q969T7;Q08AN1;Q15928;Q8WV37;Q7Z398;Q  
68EA5;O15015;Q9UKN5;Q96SR6;Q96EP0;P62633;Q9ULM2;Q02447;Q96ND8;A6NKH3;Q8N3J9;Q9ULJ3;Q1  
5022;Q86Y13;Q6PG37;Q96MT3;P30876;O75112;Q93075;Q9Y2M0;O43167;Q6ZR52;Q96EK4;P62508;Q5E  
BL2;Q7Z569;P0CG00;Q96NJ6;Q03112;Q13888;Q9UEG4;O60663;Q14258;Q96QC0;Q9HAH1;Q9BWW7;Q6NX  
49;Q9Y2P0;P61513;P49589;O75346;P13640;O60281;Q9HBT8;O75132;P37275;O75604;Q969W8;Q8TDD  
2;Q86US8;Q3KNV8;Q96GM8;Q8NDW4;O76003;Q8NF09;P35637;Q9BU19;Q9ULT8;Q96N65;Q7R2V3  
;Q8N720;O15304;O95600;Q96LX8;P62273;Q8N9V7;P17024;Q15929;Q6ZQV5;Q9NYJ8;P06733;Q7Z2W4;  
Q9P243;Q494X3;Q5T8I9;Q7Z6E9;Q3SXZ3;Q9Y253;Q12933;Q86SE9;O43439;Q96MR9;Q9H6Z9;Q14847;Q  
8NCP5;Q5HYK9;Q5T1R4;Q9UL59;P25490;Q8IYH5;O95201;P61927;O60765;O00463;Q5T5D7;Q96BT7;Q9  
Y6X8;Q8NDQ6;P50479;Q9HCL3;P53041;Q9UBL3;Q8TCN5;Q8N883;Q16629;Q9Y462;Q9Y2H6;P15621;Q8N  
BB4;Q6P9A1;Q7Z6K1;Q9NTX7;P17030;Q9UC07;Q8N8C0;Q08AG5;P78317;Q9NPC3;Q0D2J5;Q15776;P114  
74;A6NGD5;Q9Y2L8;Q96HQ0;Q9UHK0;Q96MU6;Q68DI1;P23025;Q5JVG2;Q5SXM1;Q9UBF6;Q8WV44;Q9UDV  
7;A8MTY0;Q3KP31;P17031;Q13342;Q8N680;Q5JT82;Q9Y6K9;Q8NCN2;O95602;Q99612;Q9P0U4;Q8N141

;P48200;O00743;Q86V15;Q9UKV8;Q6ZN55;Q5VTR2;Q8N488;Q8TA86;Q9NW07;Q66K89;P24928;Q9UL41;O75437;Q9C0F0;Q76KX8;Q9UQL6;Q9UL40;Q9GSC8;O60293;O75164;O15151;Q99496;Q5F1R6;Q9UPN9;O43422;Q9Y6K1;Q8N9Z0;P04732;Q9Y467;Q6NUN9;Q9UK11;Q96MB7;O43318;Q3KQV3;Q9BV68;Q8IXK0;Q96PQ6;Q8N782;Q5TYW1;O14746;Q9Y2A4;Q8IWX8;P24941;Q96GC6;P04156;Q9UM63;Q8IYW5;Q8TBB1;Q9HCK0;Q9NPC7;Q9Y2K1;P09234;Q96EG3;Q6ZMV8;Q6VVB1;P36508;Q6BEB4;Q9Y2H8;P51522;O43309;Q14839;P16415;Q9HCZ1;Q9NSJ1;Q9BX82;Q9UJW7;Q14588;P17028;O75312;Q8NEA6;Q9Y3Y4;Q8I3Z6;Q96N20;Q9Y2X9;Q9NR56;Q68DK2;P59923;Q8IXW5;Q96MM3;Q8IY41;P17041;Q9NWS9;Q9BWF3;Q9Y5R6;A1L020;Q9HCX3;Q8WU90;Q86YE8;Q96BV0;Q9BUG6;Q8WUY3;Q15652;Q6ZNH5;Q9Y4X4;P0CG24;Q8NI51;Q96I27;Q9H2K2;Q14593;P17019;Q7Z7K2;B4DXR9;Q12986;Q9H5H4;Q9UNY5;P27815;O43189;Q96T51;B1APH4;Q9C040;Q93052;O95571;P49711;Q7Z4H3;Q9NTW7;Q9P2N5;Q7L2R6;O75150;Q8TBC5;Q96IF1;Q8IYL2;Q6ZNA4;Q9NZV7;Q8N668;Q9UK10;O00488;Q8NCA9;Q86VZ6;P46100;Q9UNL4;P10588;Q13127;Q8IY57;Q960W9;Q9Y2Y9;Q9C086;P11473;Q53G26;O75792;Q9UJ41;Q8N3Z6;Q86UA6;A6NNF4;Q8NG27;Q96BD5;Q9C0G0;Q6ZN11;O96017;P0C7X5;P17029;P06396;P25791;Q9UM07;Q96BR6;Q9P2Z0;Q6P1L6;Q5BKZ1;A6NK53;Q6IV72;P51786;Q8TF45;P10072;O95405;Q9Y6X2;Q03936;Q9NQ03;Q6NZ36;Q96RE9;Q9UGP4;Q6ZN19;P15336;Q15326;Q2M1K9;Q96T23;P17023;Q86T29;Q9ULM6;Q00403;Q8NAF0;Q96DT7;Q15937;Q8TAT6;Q9ULU4;O75446;P15822;Q07352;P04053;P0C7V5;O43593;A8MUZ8;Q8N6M9;Q2VY69;Q8WXI9;Q96Q83;Q96JM2;O43830;Q9BTC8;O95218;Q96JM3;C9JN71;Q96LW9;P30622;Q8IYB9;Q8TF39;Q9BS31;Q13129;Q9NX46;Q8N972;Q96MA1;Q14872;P28702;Q96FX2;Q9BYN7;Q96N58;Q9H4T2;Q9UDW3;Q9Y4X5;Q14119;Q53T94;Q8N393;Q8N5P1;P52737;Q96IR2;Q9UP68;Q9BSM1;Q8N8Z8;Q8TF20;Q9ULD5;Q9NRG4;Q9H974;Q8WW33;P62877;Q9GZU2;P08235;P51504;P21506;P24278;O75800;Q9HBT7;Q86TA1;Q9IUV36;Q12874;Q8N6T7;Q9P255;Q9BTE6;Q32MQ0;P17039;Q8IXT2;Q6PF04;Q8TAF7;Q96H40;Q5VIY5;Q9UDV6;Q5JNZ3;Q86WZ6;Q7Z2E3;Q96C28;P17032;Q8NB12;Q8IZ20;Q9BXX1;Q9H609;Q13489;Q9UJU3;P51003;Q14527;Q9H0C8;Q9UIF9;P35226;Q9Y5R5;Q8NDF8;A6NDX5;Q9NXT0;Q9UKV0;P06746;P27797;O14709;Q6NX45;Q13472;P04731;P20042;P11532;Q9H4Z2;P51814;Q6PCD5;Q9BSK1;Q9UIF8;Q6H8Q1;Q86UW9;Q15637;P19474;Q9NP64;Q96DE0;Q14134;Q16670;P52736;Q9Y5J7;Q5CZA5;Q8N7M2;Q9UH90;Q9UGR2;Q9Y6Q3;P17022;O60870;Q14966;Q8N5A5;P17036;Q63HK3;Q9Y3M9;O96006;Q9BQA5;Q99504;P52744;Q96SK3;Q2M218;Q9H040;P84022;Q01167;Q96C00;Q9NZU7;P98170;Q6U7Q0;Q96PE6;Q8N895;Q92782;Q9BQ83;Q9UKT4;Q5T619;Q9BRH9;Q8IVC4;O95271;Q9UKY1;Q8TF68;Q6ZN57;P26358;Q96AY2;P49792;Q9H9Z2;Q96N77;Q96PM5;Q9UIF7;Q6ZNG0;Q9NRN7;Q86XN6;Q9C035;Q9Y2G7;Q6ZN08;O95171;Q96IT1;Q92618;Q9BYK8;P55265;Q5T200;Q9NRR4;Q06732;P35398;Q9BQW3;Q9H0M5;O75925;P43243;Q92664;Q8N6P9;P17025;Q7Z3I7;Q9H582;Q9UK13;P55198;Q14592;Q96CX3;P51508;Q8N184;Q6ZSB9;Q9H008;Q8N7K0;P0CB33;Q9BUY5;Q9H7R0;Q9BV57;Q9UKA1;Q14591;Q96LI5;P60510;Q86UQ0;Q14584;Q9BS34;Q00994;Q8N8L2;Q9NP87;Q96SL8;Q9ULV3;Q9Y3Z3;P49790;A8MUV8;Q76L83;Q7Z3K3;O95071;Q7L9L4;O76031;Q8IWL3;O14964;Q6ZMW2;O43345;Q96S55;Q9UBS8;Q96SZ4;Q86XK2;Q9Y692;Q92793;Q86Y25;Q5TAX3;Q9H4P4;B4DX44;P57071;Q9NS23;Q6ZNG1;Q01954;O95848;Q15697;Q9H1B7;Q6ZN79;O95125;Q9H1K1;Q8N823;O75382;Q6ZSS3;Q8NC26;Q9UBQ0;Q9NR48;Q14585;Q14CW9;P52740;Q8IUD6;P51523;O96028;Q6FTF0;Q9BWX5;P23193;Q14587;P56270;Q9NPA5;Q01844;Q96NG5;Q92844;Q71UM5;P07438;Q8WUI4;P49910;Q6AZW8;P17014;Q9UPA5;Q9NX58;Q96GE5;Q9Y2Y4;O75362;Q92670;Q9UL58;Q15072;P10074;Q92804;Q9UBW7;Q9HOF6;P26651;Q8TD23;Q9H0A6;Q9Y6R6;O95714;P63272;Q9UJN7;O00167;P98182;Q6ZS27;Q63HK5;Q5TA31;Q5H Y98;Q7Z6J0;A8K8V0;Q9UQR1;Q2QGD7;Q8IYN0;Q8TUB9;Q96JL9;O00625;P53804;Q9NHT6;O95551;Q13114;Q8IZQ1;P17020;Q8WWW0;Q3MIS6;Q9Y483;Q9BR84;Q9HCM9;O75398;Q01081;Q8TF47;Q5VZF2;A6NP11;Q3SY52;A6NIX2;Q96T88;O43361;Q96CA5;Q9H7X3;Q9BSG1;Q09FC8;Q9UK12;Q15973;Q9BYX4;Q86XF7;Q96MN9;Q6IQ32;P17017;Q96K58;Q9BT49;Q9H116;Q9BRX2;O14618;O60304;Q9Y5Y2;Q8TAU3;Q8IWT3;Q9Y4L5;Q5D1E8;Q5H9K5;Q15428;Q13398;Q9UKT9;Q53GI3;Q13642;P04733;Q8WV22;Q86UD4;Q12873;B2RXP5;Q7L590;O43900;Q9HAJ7;Q147U1;Q9NR11;O60930;P58317;P67870;Q9UJW3;Q6AW86;Q8IYX0;Q5VZB9;Q96IU2;Q9ULJ6;P47974;Q9NTG7;Q6P280;Q8NDP4;Q96GX9;Q8IUV8;Q7L945;Q9NVW2;Q5EBM4;Q4V C44;O43918;Q9UNA4;Q8TC21;A8MXY4;Q9H8W4;P55895;Q8NB50;Q52M93;P02489;Q8N9K5;P55197;Q66K41;Q96N95;P09874;Q13330;Q8WXB4;P52741;Q9GZU7;Q8WTR7;Q9HCGL;Q9UKF6;Q8NHY2;Q9Y3A3;Q9Y2Q1;Q8WWW38;Q06587;Q99728;Q499Z4;O15504;Q9BY31;O94822;Q96NJ3;Q68DY9;P52743;Q8TAW3;Q8TEC5;P08047;P52594;Q8WTTZ3;Q9NQ29;Q5TEC3;O15297;A8MVS1;Q9UKJ3;Q9H8S9;Q9HC78;Q2M3X9;P15622;Q86YF9;Q8N5C8;O75152;O60290;Q93083;Q15560;Q8IWS0;Q9BU02;Q9BUZ4;Q9BTP6;O75626;P0C7X2;P52742;Q6ZRF7;Q9H9D4;Q6P3V2;Q2M3W8;Q5MCW4;Q15935;Q96PU4;Q96NY9;A6NFI3;O43298;Q9BWM5;O43829;Q8N1W2;O43255;Q8TE76;O60284;Q8N8J6;Q8N587;Q9NQV6;Q9UL36;P53803;P17544;Q9P2R6;Q9UBZ9;Q9NWK9;Q8IYI8;Q96EY1;P36639;P17040;O94892;Q0VGE8;Q9HCE3;Q8N3F8;Q96BR9;Q8N2W9;Q05481;Q96CB8;P0CJ78;O15060;Q96PM9;Q7Z5L9;Q68CP9;O95625;Q9N9S1;Q9UBC3;Q9P2F9;Q96K75;Q9NR12;Q9H9T3;Q5FWF6;Q8NF64;Q99590;Q9UIH9;Q9NYW8;O95251;P51815;Q8WV99;Q9UID6;Q96CS4;Q3MJ62;Q05516;A6NJL1;O75688;Q3ZCX4;Q8TBZ5;A8MT65;Q13106;Q9GZX5;Q8TF50;P17038;P0CJ79;Q6P9G9;Q96NI8;Q96NB3;Q8TF32;Q15181;Q9P0T4;P46976;Q9NRC8;Q8WYQ5;P60002;Q9H4I2;Q969S2;Q96MF7;Q32M78;P67775;P10589;Q969S3;Q96NL3;Q9Y473;P13056;Q8WYH8;Q9NTM9;Q5VWG9;Q8NEM1;Q3KNW1;Q13233;Q15696;P52746;Q9ULX6;Q05215;Q9BYE7;Q86TP1;Q9UII5;Q9BZE0;Q70IA6;Q92993;P02794;P38935;Q9P2Y4;Q08ER8;Q86TG7;Q4V348;Q9UJL9;Q49A33;P23297;Q9NV72;Q96N38;Q15942;Q06730;Q9UIE0;Q9H8G1;O60711;Q92905;Q02446;Q9UJW8;O43257;Q9BWG6;O14628;Q8NBF1;A6NN14;O14686;P58557;Q68DY1;O14639;Q49AG3;Q86TJ2;Q7Z3V5;Q9H7Q3;O95789;Q8TBZ8;Q15650;P10073;Q8WY54;Q8NF99;O75290;Q6IEG0;Q9NUK0;O14595;Q8IU60;O94776;Q9NR83;O15535;Q6ZT77;A8MWA4;Q96AX9;O75467;Q6PJT7;P52747;O75928;Q13118;Q96SQ5;P17035;Q8WUJ5;Q8N0Y2;Q8N4W9;A6NM28;Q92785;Q96633;Q9UIS9;Q6PK81;Q86VM9;Q9UFB7;Q9HAZ2;Q96H86;Q8TA94;Q5JVG8;Q03938;Q16600;Q14192;P11161;Q9Y2P7;O00482;P52756;Q9H7R5}

- 3546 [Cluster 323]GO:0003682+F molecular\_function [name] chromatin binding [def]  
 "Interacting selectively and non-covalently with chromatin, the network of fibers of DNA, protein, and sometimes RNA, that make up the chromosomes of the eukaryotic nucleus during interphase." [GOC]
- 3547 Pathogen[ Q2Q067] interacts with 211 human partners:{Q86W56;Q13562;P49454;Q29900;O43463;Q9UPP1;Q33E94;O00213;P18754;Q99583;Q12837;O14744;Q9BRR0;P10243;Q92922;P55895;Q7Z2Z1;Q9HBE1;Q63HK5;O00470;O00267;Q9NPF5;P27694;Q9H2P0;P36402;P46937;Q15910;Q9Y3T9;Q13485;P62826;Q99741;Q9UBB5;Q15596;P41182;Q15554;O96019;Q13111;Q15059;P08151;O75478;O75081;Q5SXM2;P54274;Q9Y6K1;O00257;Q7Z7J5;Q7Z2E3;Q

04206;P11387;Q9UHC1;P49450;P39880;Q8N2Z9;O94983;A6H8Y1;O94776;O15379;P36956;O60535;P05114;Q92800;P15976;O60356;Q96ST3;O15350;P54198;Q02447;Q04727;P51610;Q8TBE0;P17040;Q9H320;O75182;Q15022;Q8N5F7;O60563;P11831;P11388;P35227;Q86TJ2;P28069;Q15424;O15405;Q9UKL0;Q96IF1;Q13112;Q00059;Q99966;P38159;Q15004;Q99504;P23769;Q63HK3;Q9BTC8;P56693;Q96LB3;Q9BTP7;Q925791;Q96BD5;Q9Y2T7;P12755;P84022;Q969G3;Q99856;P50221;Q8IYH5;Q13330;Q9NPD8;Q96RY5;Q9P2R6;P25440;Q9UBK9;Q92769;O00255;Q9BQ90;Q8IZ40;Q7Z3K6;Q13127;O43541;P28324;P11161;O15265;O43918;A6NCL1;Q8WVJ9;Q92830;O15164;P35226;Q9H160;O75530;O75533;Q8NA31;P82970;P46100;Q03468;O75030;Q9UPW6;Q8WUI4;Q15796;O75475;Q8N344;Q99496;Q99543;P37198;Q86VE0;Q92499;Q99687;O76064;Q15583;P54098;O75360;Q07687;Q8N371;Q12968;Q6PBG2;O60248;P15336;P12757;Q9H3P2;Q9P2K3;O43186;Q86U86;Q14686;O95983;P10244;Q9UMQ3;Q9Y618;Q05BW5;Q04724;Q86YI8;Q9Y294;Q9P1Z2;Q8TAQ2;Q92793;Q86U70;Q8WYK2;Q9NSC2;Q14683;Q01826;Q9BQA5;Q9HBD4;P45973;P28370;Q04837;P15923;P10242;O75376;Q9Y468;Q15651;Q9Y222;Q3T8J9;Q9H5I1;Q9H7E2;P40425;P83916;Q9BTE3;Q14781;Q8IYD8;Q99459;A6NKF2;Q96FF9;O94763;Q06587;Q15361;Q9BTA9;P07199;Q96DN6;Q6P0N0;Q8N108;O96028;Q9NRC8}

3548 Pathogen[ POC214] interacts with 210 human partners: {O00470;P54198;O00213;Q05BW5;Q8N371;Q9Y3T9;P35226;A6NCL1;A6H8Y1;Q15059;Q9H5I1;P35227;Q04727;Q6P0N0;Q15022;P51610;Q13330;Q63HK3;Q15651;P38159;P12757;P15336;P54098;Q15361;O43186;Q15554;Q92900;O00267;Q3T8J9;Q13112;Q9HBE1;O75478;O15350;Q99856;P83916;O75530;Q8N5F7;Q92560;Q9HBD4;Q13111;P23769;Q92793;P56693;P46937;P84022;P34897;Q9P2R6;Q9Y6K1;P11831;Q96BD5;Q04206;Q63HK5;Q7L2E3;O60535;Q5SXM2;Q86TJ2;Q86W56;Q15910;O75030;Q96DN6;Q04724;P07199;Q9Y468;Q14686;O43463;Q8TBE0;Q8TAQ2;Q96FF9;Q8NA31;P10244;Q8N344;P49450;Q9BTE3;Q8N2Z9;Q00059;Q92922;Q9BRR0;Q99966;P10243;Q12968;Q86VE0;Q7Z7J5;Q969G3;Q9Y2T7;Q8IYH5;Q12837;P55895;Q07687;P37198;P15923;P25791;P28370;O94776;Q06587;O95983;Q99459;Q86U70;P46100;Q9UHC1;Q9UKL0;P25440;Q7Z2E3;Q8IZ40;Q13485;Q92769;Q8N108;P28324;O00257;O60356;Q9H160;O75376;O60264;Q15796;Q9NSC2;Q99687;P41182;Q99504;P11388;O43541;O15379;O75533;Q15004;O75475;P82970;P12755;Q13127;P28069;Q86YI8;Q9BTC8;Q15424;O75360;P17040;P11387;O43918;Q99496;P36402;P10242;P62826;P39880;O60563;Q9Y294;Q92499;Q9UMQ3;Q8WVJ9;Q14781;Q01826;Q02447;Q14683;O15164;Q86U86;Q9H7E2;P40425;Q6PBG2;Q92830;Q96ST3;P11161;Q8IXM2;P45973;O15265;P50221;P27694;Q99543;Q9UPW6;P08151;Q9BTA9;Q9H3P2;Q9H320;Q9BQA5;Q9P1Z2;Q9NRC8;Q9UBB5;Q96LB3;Q15596;Q8WUI4;Q9P2K3;O94763;P05114;Q92800;A6NKF2;P49454;Q04837;Q8IYW5;Q9UBK9;P18754;Q9Y618;O76064;Q9NPD8;Q99583;Q8IYD8;Q96RY5;O75081;O60248;Q03468;O96019;Q9UPP1;Q7Z2Z1;Q7Z3K6;O00255;O15405;Q33E94;P54274;Q9NPF5;Q9BQ90;Q99741;Q9BTP7;Q9H2P0;O75182;O96028;O94983;Q9Y222}

3549 Pathogen[ P03346] interacts with 236 human partners: {P10244;Q14781;O15265;Q8N2Z9;Q96ST3;O00213;P46937;P35453;Q9P267;Q9NRZ9;Q9Y6K1;Q86U70;Q15788;P28324;Q9HBD4;P45973;Q92560;O76064;Q99687;Q9BRR0;Q99966;Q7Z2Z1;P50221;Q8IXM2;P46100;Q9UPW6;Q9UKL0;O60248;O43918;Q96FF9;Q96BA8;Q99543;P12757;P36402;P15336;Q92800;P54098;P36956;Q96DN6;Q9H2P0;P07148;O75530;P11831;P11388;Q15554;Q9H7E2;O15379;P27694;P35226;Q00059;Q12772;O60563;O94763;Q12837;P54274;Q15004;P23769;Q15583;O95983;P51610;P55895;Q9NSC2;Q8TD26;P15923;Q15796;P56693;O75475;O14744;Q9H3P2;Q8IYH5;P05114;Q99856;Q7Z7J5;P35227;Q4206;Q8IZ40;Q7L2E3;O94776;Q6PBG2;Q92886;P56177;Q96IF1;Q63HK5;P18754;O43186;O00257;Q86U86;Q6P0N0;P25440;O15350;Q9UBX0;O75030;P37198;Q8N5F7;O43463;Q15059;O75182;Q9BTP7;P62826;Q9BQ90;P78426;Q9Y222;Q9UHC1;Q3T8J9;P28358;Q92830;Q92499;P84022;P25791;Q12968;P17542;O96019;Q9HCS4;P10242;O43541;P15976;O95096;O75478;Q15596;Q03468;O00255;Q86VE0;Q15361;Q33E94;Q15022;Q9P2R6;Q92769;Q14683;Q8NA31;O60264;Q9P1Z2;Q04724;P40425;O00470;Q8WVJ9;Q13330;A6NCL1;Q13111;O75533;Q15475;P82970;Q9Y3T9;Q12778;P10243;A6NKF2;Q8WUI4;Q9UPP1;Q63HK3;O75376;O94983;Q96LB3;Q9NPD8;Q99496;Q9Y468;O00267;Q8IYW5;Q15910;Q9HBE1;P78364;Q99459;P41182;Q96RY5;Q96KC8;Q8N344;Q8N371;Q96BD5;Q969G3;Q9Y2T7;P1161;Q8N108;P49450;Q92922;Q86W56;Q04727;P28069;Q05BW5;P83916;Q8IYD8;P28370;Q7Z2E3;O60356;O60535;Q86YI8;Q13485;Q9P2D1;P07199;O75360;Q8TBE0;P17040;Q15424;Q7Z3K6;Q99583;Q92793;P39880;Q15651;P38159;Q9H5I1;Q13112;Q5SXM2;Q92900;Q04837;Q9Y618;Q13562;Q99504;Q9BTC8;Q99741;Q9H320;Q8TAQ2;Q9UBK9;Q9Y294;Q13285;Q06587;Q9H160;Q02447;Q9UBB5;Q9UMQ3;Q9NRC8;O15164;O75081;Q9BTE3;Q01826;P54198;O15405;Q8WYK2;A6H8Y1;P49454;Q13127;P11387;Q86TJ2;O96028;Q9BTA9;Q9BQA5;Q9P2K3;P08151;Q14686;Q9NPF5}

3550 Pathogen[ Q85601] interacts with 220 human partners: {Q9P2R6;P10243;Q9H5I1;O75182;Q99543;P49454;O00213;Q9NRC8;Q63HK3;P54198;P08151;P11831;Q9Y2T7;Q9H7E2;O75360;P17040;P83916;Q13127;Q96LB3;Q9BTE3;Q7Z2Z1;Q9BTP7;O60563;Q99687;Q8N371;Q9UPW6;Q15004;P15976;Q8IYD8;O94776;O15265;Q04724;Q96BD5;Q9H320;Q8TBE0;Q86U70;Q9P2D1;Q15554;O43541;Q9Y294;Q8N5F7;Q13112;Q92560;Q15424;Q99966;O75030;Q33E94;P28069;Q9Y468;P23769;P62826;Q9H3P2;P12757;Q8IYH5;Q9BTA9;Q99504;Q7L2E3;Q12772;Q9Y618;Q15583;P10242;Q00059;O96019;P07199;O15164;Q9NPD8;Q92499;Q15596;O95983;O14744;O15405;O43463;Q15651;Q15059;P27694;P51610;P12755;Q13562;Q9P2K3;Q15022;Q05BW5;P11387;Q9P267;Q14686;Q5SXM2;Q92830;Q03468;P25791;Q12968;Q8NA31;Q6PBG2;Q8N344;Q9UMQ3;Q9UBX0;P78364;Q969G3;O76064;P54098;Q7Z3K6;Q9BRR0;P36956;Q9BQ90;Q92769;Q14683;Q04206;P45973;O60535;Q8IXM2;Q04727;P40425;O60248;Q13330;Q9Y222;O75530;Q9Y618;Q99459;Q9H2P0;P11388;P49450;P82970;O00255;A6H8Y1;Q01826;P10244;A6NKF2;O75376;O00470;Q86YI8;Q9UPP1;Q8N108;Q8N2Z9;O94983;P15923;Q99496;P36402;O00267;Q8IYW5;Q02447;P56693;Q9BTC8;Q96RY5;Q99583;Q9HBD4;Q96IF1;Q9BQA5;P84022;Q9Y3T9;Q86VE0;Q96DN6;O15379;P18754;Q15910;P46937;Q9UHC1;P25440;P28370;Q7Z2E3;O60356;P35226;O94763;O15350;P50221;Q8TD26;Q86U86;P38159;Q13111;Q9NSC2;P15336;P41182;Q8IZ40;Q92793;P39880;P05114;Q3T8J9;Q8WUI4;Q9P1Z2;Q15361;Q9HCS4;O60264;Q92800;O75475;O00257;Q63HK5;Q92900;Q04837;Q9H160;Q9UBK9;Q92922;Q99741;Q12837;Q8TAQ2;Q6P0N0;Q9UKL0;Q13485;Q96FF9;Q06587;Q9UBB5;O75478;P11161;P46100;P55895;P28324;Q86W56;O43918;Q07687;Q8WYK2;A6NCL1;Q99856;P54274;Q8WVJ9;Q15796;Q86TJ2;O96028;O75081;Q9HBE1;P35227;Q9NPF5;Q14781;Q96ST3}

3551 Pathogen[ P14079] interacts with 200 human partners: {Q3T8J9;P07199;Q5SXM2;O15379;Q9UPW6;Q6P0N0;Q04837;P54274;Q9H320;P11388;Q9945

9;P08151;O15164;Q8WYK2;P10243;P05114;Q9BQ90;P12755;Q15596;Q9Y6K1;A6NCL1;Q92830;Q8IYD8;Q8N108;P10244;O75533;Q96ST3;Q92793;Q9UBB5;P28370;Q96FF9;Q7L2E3;Q9Y468;Q9BTA9;Q63HK3;P39880;Q15583;Q8WUI4;Q9NPD8;O15405;O75475;Q86U70;Q7Z3K6;Q13330;Q92922;Q86U86;Q01826;Q9H3P2;Q8WVJ9;Q99966;P54198;Q9UHC1;Q99856;Q92800;Q02447;O00213;P15976;Q15059;Q8N344;Q13112;Q8TAQ2;Q13111;Q12968;P34897;A6H8Y1;Q9H2P0;P46937;A6NKF2;Q9BTE3;Q9BQA5;Q8NA31;P15923;Q12837;P51610;O15350;Q6PJJ2;P36402;Q9H5I1;Q96RY5;P46100;Q9BRR0;O94763;P28069;Q12772;Q99687;P45973;Q99741;P82973;Q9Y2T7;Q9P2D1;Q8TD26;Q15651;P78364;Q99583;Q99543;Q00059;Q9Y3T9;O14744;P41182;Q99496;O00257;Q14781;O75530;Q96BD5;P11161;Q9NPF5;Q92769;Q96IF1;Q9UPP1;O60248;Q92560;P25791;Q8N2Z9;Q9P2R6;P49450;P15336;Q15424;Q9UBK9;O75360;Q15788;P37198;O95983;Q9P2K3;Q9UKL0;Q7Z7J5;O60264;Q9UMQ3;Q9BTC8;Q86YI8;P56693;O43541;P35226;Q86VE0;Q15554;O75081;Q96DN6;Q07687;Q04724;P35227;Q9H7E2;O43918;P25440;Q8IXM2;P27694;O75182;O75376;Q92900;Q63HK5;O75478;Q86W56;Q92499;O15265;Q8N371;Q99504;Q03468;P49454;Q9BTP7;P12757;Q15910;O60356;P54098;P62826;P17040;Q15004;P52701;P83916;Q9Y294;Q96LB3;Q8IZ40;P10242;Q15361;Q13127;O75030;Q9NRC8;O00470;Q14683;O00267;O94776;Q9P1Z2;Q7Z2Z1;Q7Z2E3;P36956;O00255;Q9P267;P23769;Q9HBE1;Q14686;Q15022;P18754;Q04727;Q86TJ2;P50221;Q9NSC2;Q9H160;Q9Y222;P38159;Q06587;Q8N5F7;O94983}

3552 Pathogen[ P03383] interacts with 188 human partners: {P35227;Q9Y618;Q7Z7J5;Q14683;Q86U86;Q7Z2E3;P10244;Q99504;O75182;O00470;O00213;P49454;Q63HK3;Q8N344;P11831;Q8N2Z9;Q13485;Q9HBD4;Q9UPW6;O96019;Q9H3P2;Q9BTC8;O75478;P28069;Q9HBE1;Q9BTA9;P25440;O60248;O94776;Q3T8J9;Q15596;O75376;Q8WVJ9;Q07687;Q86U70;Q04727;Q15554;Q9H7E2;Q9P2R6;Q9BRR0;P27694;Q7Z3K6;Q96BD5;O75360;O43463;Q8N5F7;Q9UMQ3;Q9UHC1;Q15004;Q01826;O00257;Q9BTE3;Q14686;P28370;P23769;Q00059;O75030;Q06587;O94983;P15923;Q8NA31;Q6PJJ2;P11387;Q9P2K3;O15405;Q99459;Q86VE0;Q15651;Q13330;Q04724;O00267;Q15022;O14744;Q9UBB5;Q9Y2T7;P38159;O60535;P62826;P83916;Q9Y3T9;Q33E94;P46100;P51610;O94763;P45973;P84022;Q9H160;O75081;P25791;Q15361;O60563;Q7Z2Z1;Q13111;Q969G3;Q86W56;Q02447;P54098;Q9Y6K1;P28324;O15265;Q03468;Q9NPF5;Q9BQA5;P17040;Q99687;Q9Y294;P18754;Q92769;Q92830;Q9NSC2;A6NKF2;O43541;Q12837;Q12968;Q8IZ40;O15379;O15350;P55895;Q96DN6;P82970;O00255;O75475;Q86YI8;Q96LB3;Q99496;P36402;Q8TAQ2;Q99543;O43918;Q99583;Q9UKL0;Q96FF9;P10242;Q11161;O95983;P05114;O43186;P39880;Q8N108;A6H8Y1;Q15796;Q15059;Q15910;Q04206;Q9Y222;Q96RY5;P12757;Q9NPD8;Q9H320;Q96ST3;P07199;Q8TBE0;P50221;Q8N371;Q15424;Q6P0N0;Q92922;P15336;Q92499;Q99856;P37198;Q8WUI4;P10243;Q5SXM2;Q04837;Q9UBK9;P56693;P46937;P54198;Q92900;Q9H5I1;Q9UPP1;Q13112;Q9BQ90;Q9BTP7;Q9P1Z2;P40425;Q92793;P54274;P35226;Q92800;Q9NRC8;Q9Y468;Q99741;Q13127;O75530;Q14781;O60356}

3553 Pathogen[ P03410] interacts with 211 human partners: {P84022;Q92830;Q04206;P28069;Q9UPP1;P11831;P36956;P51610;O94763;O00470;Q8WYK2;Q99496;Q05BW5;P54198;P17040;Q9H3P2;Q8IYH5;Q8WVJ9;O60535;Q8IYD8;P12755;Q15554;P82970;Q9P2R6;Q92900;Q9UMQ3;Q02447;O00267;Q12968;Q04837;Q86U86;Q8N344;O96019;P54274;P25791;Q9BQA5;Q14686;P36402;P50221;Q6PJJ2;P10242;Q9NPF5;O15405;O75030;P28324;Q9BTE3;Q9BTC8;Q00059;O75182;O43918;Q04724;Q9UBB5;Q86TJ2;Q96DN6;O00213;P55895;Q99687;P45973;P10243;Q9Y468;Q86VE0;A6H8Y1;Q15651;Q15004;Q9Y3T9;Q9UBK9;O75376;Q9BTP7;Q15059;Q03468;P15923;Q9UPW6;P35227;Q6P0N0;Q96ST3;Q15424;Q8WUI4;P49454;Q9BRR0;Q7Z2E3;Q96IF1;Q9P1Z2;Q92800;O60563;Q13127;Q15583;Q7Z7J5;Q07687;Q92793;P10244;P52701;Q969G3;Q8IXM2;Q99459;Q92769;P62826;Q9Y294;Q9P2D1;Q92499;Q12772;Q13330;O15379;Q13111;Q9H5I1;Q92922;Q01826;Q13112;Q86U70;Q9H160;O95983;P11387;Q14683;Q13485;O60356;Q99583;Q7L2E3;Q04727;O75533;Q8TBE0;P56693;P12757;Q9H7E2;P46937;P46100;Q15910;P41182;Q99504;Q7Z2Z1;O43541;P39880;Q3T8J9;Q86W56;Q9Y222;P11388;Q15596;Q8N108;P49450;P23769;Q9NPD8;Q9BTA9;O75081;O94776;Q9HCS4;Q8TAQ2;P83916;O15350;P07199;Q06587;P27694;O60248;O15265;Q99856;Q8IZ40;Q9P267;Q96FF9;Q63HK3;O75475;O75478;O43463;Q96RY5;O14744;Q63HK5;P18754;Q9NRC8;O00257;Q8TD26;Q96BD5;O75360;Q9UKL0;Q14781;Q9Y2T7;Q15361;Q9Y618;A6NKF2;O60264;Q9H320;Q12837;Q9NSC2;Q96LB3;O94983;Q8N371;Q99543;Q9Y6K1;P35226;Q9HBD4;Q33E94;O00255;Q96ST3;P38159;Q15796;Q5SXM2;P15336;P11161;P54098;Q9P2K3;P15976;P05114;P34897;Q9BQ90;A6NCL1;Q15022;Q8NA31;Q9UHC1;P28370;Q9HBE1;Q8N2Z9;O75530;Q99741;Q99966;Q86YI8;P25440}

3554 Pathogen[ P14075] interacts with 187 human partners: {Q04727;P28069;Q00059;Q14781;P11387;Q15059;Q7Z2E3;Q96ST3;Q9NSC2;O00213;Q3T8J9;Q86U70;P54098;Q9Y6K1;Q92900;Q99504;Q7Z2Z1;Q04206;O15265;Q9HBD4;Q99687;O75030;Q14683;O60248;P25440;Q8N371;P40425;Q9BQA5;O75475;P11831;Q15554;O00470;O43541;P07199;Q8N5F7;Q14686;O60563;Q9P2R6;P23769;Q9UKL0;Q9UPP1;Q9Y468;P38159;P51610;Q33E94;P11161;Q12837;O43918;O43186;Q86VE0;Q92922;O94776;P10244;Q15910;Q9BTP7;Q92800;Q99543;Q5SXM2;P45973;P56693;P15336;Q13111;Q9UBB5;Q9BRR0;P10242;O94983;Q15796;P15923;Q7Z3K6;O75182;Q99856;P54198;O94763;Q8NA31;P39880;Q8WVJ9;A6H8Y1;Q96FF9;Q9Y618;O75081;Q07687;P17040;O75376;Q01826;Q99459;Q8N2Z9;P12757;Q9NPD8;Q03468;O00257;Q9BTE3;Q13485;O00255;Q92499;Q9NPF5;O96019;P46100;P54274;P25791;Q06587;Q9H5I1;O75478;P28324;Q8N108;Q8N344;Q9UPW6;O95983;O14744;Q96LB3;P50221;Q9Y2T7;Q9UHC1;O15350;Q9UBK9;Q92769;Q86U86;Q96RY5;Q15424;Q9H320;Q9BTA9;P37198;O15405;P62826;Q8TBE0;P82970;Q8TAQ2;Q9P1Z2;Q6PJJ2;Q86YI8;Q96BD5;O75360;Q9UMQ3;A6NKF2;O60356;P28370;Q99496;P36402;P83916;P27694;O15379;Q02447;Q9Y222;Q9H7E2;Q9Y3T9;Q13330;Q92793;O43463;P18754;P46937;Q13127;P35226;Q9Y294;Q15022;Q9NRC8;Q7Z7J5;Q04724;Q99741;Q15361;Q86W56;Q9H3P2;P84022;Q96DN6;Q99583;Q8WUI4;Q13112;O00267;Q04837;Q9H160;P55895;P49454;Q92830;Q6P0N0;Q63HK3;Q12968;Q15004;Q9BTC8;Q9P2K3;Q8IZ40;Q15651;P35227;Q15596;O60535;O75300;Q9BQ90;P10243;Q9HBE1;P05114}

3555 Pathogen[ P0C206] interacts with 227 human partners: {Q13112;Q6PJJ2;P46937;Q9Y468;P84022;Q3T8J9;Q07687;Q8N371;O43541;Q92769;Q9BTE3;Q9NPD8;O75530;Q63HK3;Q96RY5;P45973;Q92830;Q96ST3;Q8NA31;Q9Y6K1;Q7Z3K6;Q9NPF5;Q8TD26;Q7Z7J5;P40425;Q99504;Q13127;Q15361;Q8IYW5;P78364;P11161;Q9UBB5;P05114;Q9BTP7;O75030;Q9HBE1;P18754;Q9NSC2;P52701;O14744;A6NCL1;Q9H7E2;Q96IF1;P41182;Q15554;Q99583;O99583;O00470;P35226;Q13111;Q9UKL0;A6H8Y1;O75081;O75533;Q8IYD8;O00255;Q9UMQ3;Q9P2D1;Q8IYH5;P46100;O43463;Q9UPP1;P50221;P54198;Q8WYK2;P10242;Q03468;O15265;P15336;Q9H320;Q04727;Q92



800;P54098;Q9UHC1;Q92922;Q9P2K3;P34897;Q9P267;O94776;P36956;Q9HCS4;O15164;P62826;Q86VE0;Q9P1Z2;Q12968;P56693;P49454;Q13330;P15976;Q15910;Q86U86;Q15796;Q99741;Q8TAQ2;Q9BQA5;Q8WVJ9;Q9H160;Q14781;O15405;Q9P2R6;P12755;O75360;O75475;Q92793;Q63HK5;Q96FF9;O60356;O60248;O43918;Q12837;Q5SXM2;P54274;O00213;Q8IZ40;Q96019;Q15651;Q86TJ2;P82970;Q86W56;P10244;P34209;A6NKF2;P83916;P49450;Q8N344;P12757;Q05BW5;O15379;P51610;Q14683;Q8WUI4;Q99543;Q04206;Q06587;Q9UPW6;O60535;P15923;Q14686;O96028;Q02447;P28324;P55895;Q9Y222;Q9H5I1;O75376;O00267;Q15424;O75478;Q9NRC8;Q6P0N0;Q13485;Q9H3P2;Q9BTA9;P25791;P25440;Q15022;Q8TBE0;P28370;Q8N5F7;Q04724;Q99459;Q33E94;Q13562;P23769;Q8IXM2;P11831;Q86YI8;Q99966;Q9Y294;Q9BQ90;Q9BRR0;P07199;Q92900;Q04837;Q15596;Q15059;O15350;P10243;Q01826;Q7Z2Z1;Q99687;Q9NRZ9;P17040;Q969G3;Q9HBD4;P27694;Q86U70;P11388;Q8N2Z9;Q9UBK9;P39880;P11387;Q9H2P0;O00257;P28069;P08151;Q00059;O76064;Q9UBX0;Q92499;O60563;Q9Y2T7;O94983;Q15004;Q15788;Q7Z2E3;Q9Y3T9;P36402;Q7L2E3;Q9Y618;Q92560;Q96DN6;Q12772;Q99856;Q99496;Q8N108;O75182;O94763;Q9UIG0;Q96BD5;P56177;O60264;Q15583;Q9BTC8;P35227}

3556 Pathogen[ P03363] interacts with 206 human partners:{Q92886;Q9NPF5;Q13112;Q86VE0;Q8IXM2;Q9H160;Q86U70;O14744;A6NKF2;P35453;O75081;P49454;Q6P0N0;P27694;P54198;O75360;Q04206;O60356;P83916;Q9Y468;P35227;O60563;Q92900;O60535;Q15554;Q14781;P56177;P36402;Q9BRR0;Q99543;P08151;Q9H5I1;Q9BTE3;P11387;Q7Z2Z1;Q9BTP7;Q02447;Q15022;P12757;O00213;Q96RY5;P45973;Q13111;Q8TAQ2;O75533;Q9H2P0;O15379;Q9UHC1;Q99856;P82970;Q9H7E2;Q01826;Q8IYH5;O75376;Q6PJG2;Q15910;Q9Y294;Q8N2Z9;O94983;O75475;Q99496;Q9Y6K1;O75530;O00267;Q8IYW5;Q7Z3K6;Q04724;Q15596;Q9HCS4;Q9UBK9;Q14686;A6H8Y1;Q04727;Q8WYK2;P54098;Q96IF1;P07199;P46100;P50221;Q13127;P40425;Q96BD5;O60264;P25791;Q9H320;P15923;P15336;Q9BQ90;Q92560;Q15424;Q9BTC8;P11831;P46937;P56693;P28069;O96019;P28358;P38159;O75030;Q8N5F7;P49450;Q92830;Q7Z2E3;Q9P1Z2;P54274;Q9H3P2;Q3T8J9;P35226;Q99741;Q969G3;O43186;O94763;Q96ST3;Q9HBD4;O43541;Q63HK3;Q15004;Q8IYD8;Q9BQA5;Q99504;Q8IZ40;Q15796;O95983;Q8N108;P84022;A6NCL1;O15265;P10244;Q9Y618;Q92499;Q86U86;O00470;Q15583;Q00059;Q33E94;Q9Y3T9;Q92793;P05114;Q15651;Q15361;O96028;Q9P2K3;P10242;Q8WUI4;Q13485;Q12968;Q9NPD8;Q03468;Q63HK5;Q04837;Q99687;Q8TD26;O43463;P25440;Q9P267;Q86W56;O15405;Q5SXM2;P28370;Q15059;Q9UKL0;O43918;Q96DN6;Q7L2E3;P55895;Q13330;Q06587;Q96FF9;O75478;O60248;Q9UMQ3;Q7Z7J5;P37198;P18754;Q92922;Q9P2R6;P17040;P62826;Q92800;P39880;Q07687;Q96LB3;Q99459;Q12837;Q9UPW6;O00257;Q9Y2T7;Q9NRC8;Q9BTA9;Q8TBE0;Q99583;Q14683;Q8WVJ9;O75182;P10243;Q86TJ2;Q9Y222;P51610;Q8NA31;O94776;P28324;Q8N344;Q05BW5;Q9UBB5;Q9UBX0;P11161}

3557 [Cluster 324]GO:0001046+F molecular\_function [name] core promoter sequence-specific DNA binding [def] "Interacting selectively and non-covalently with a sequence of DNA that is part of a core promoter region composed of the transcription start site and binding sites for the basal transcription machinery. The transcribed region might be described as a gene, cistron, or operon." [GOC

3558 Pathogen[ Q2Q067] interacts with 3 human partners:{O00570;Q32MQ0;Q13127}

3559 Pathogen[ P0C214] interacts with 3 human partners:{Q13127;O00570;Q32MQ0}

3560 Pathogen[ P03346] interacts with 4 human partners:{Q06945;Q32MQ0;O00570;Q13127}

3561 Pathogen[ Q85601] interacts with 3 human partners:{Q13127;Q32MQ0;O00570}

3562 Pathogen[ P14079] interacts with 3 human partners:{Q32MQ0;O00570;Q13127}

3563 Pathogen[ P03383] interacts with 3 human partners:{Q32MQ0;O00570;Q13127}

3564 Pathogen[ P03410] interacts with 3 human partners:{Q13127;O00570;Q32MQ0}

3565 Pathogen[ P14075] interacts with 3 human partners:{O00570;Q32MQ0;Q13127}

3566 Pathogen[ P0C206] interacts with 3 human partners:{Q32MQ0;Q13127;O00570}

3567 Pathogen[ P03363] interacts with 3 human partners:{Q13127;Q32MQ0;O00570}

3568 [Cluster 325]GO:0050682+F molecular\_function [name] AF-2 domain binding [def] "Interacting selectively and non-covalently with the AF-2 domain of a protein, a highly conserved ligand-dependent transactivation domain which is essential for receptor-mediated transcriptional activation." [PMID

3569 Pathogen[ Q2Q067] interacts with 1 human partners:{P62508}

3570 Pathogen[ P0C214] interacts with 1 human partners:{P62508}

3571 Pathogen[ P03346] interacts with 2 human partners:{P51843;P62508}

3572 Pathogen[ Q85601] interacts with 1 human partners:{P62508}

3573 Pathogen[ P14079] interacts with 1 human partners:{P62508}

3574 Pathogen[ P03383] interacts with 1 human partners:{P62508}

3575 Pathogen[ P03410] interacts with 1 human partners:{P62508}

3576 Pathogen[ P14075] interacts with 1 human partners:{P62508}

3577 Pathogen[ P0C206] interacts with 1 human partners:{P62508}

3578 Pathogen[ P03363] interacts with 1 human partners:{P62508}

3579 [Cluster 326]GO:0045182+F molecular\_function [name] translation regulator activity [def] "Any molecular function involved in the initiation, activation, perpetuation, repression or termination of polypeptide synthesis at the ribosome." [GOC

3580 Pathogen[ Q2Q067] interacts with 6 human partners:{O00425;Q9Y6M1;Q9Y2T7;P62263;O43918;P46781}

3581 Pathogen[ P0C214] interacts with 7 human partners:{P62263;O00425;Q9NZI8;Q9Y2T7;P46781;O43918;Q9Y6M1}

3582 Pathogen[ P03346] interacts with 7 human partners:{O43918;Q9Y6M1;O00425;Q9NZI8;P46781;Q9Y2T7;P62263}

3583 Pathogen[ Q85601] interacts with 6 human partners:{Q9Y2T7;P62263;Q9Y6M1;O00425;O43918;P46781}

3584 Pathogen[ P14079] interacts with 6 human partners:{P46781;Q9Y2T7;P62263;Q9Y6M1;O43918;O00425}

3585 Pathogen[ P03383] interacts with 5 human partners:{Q9Y2T7;O43918;P46781;O00425;P62263}



3586 Pathogen[ P03410] interacts with 6 human  
partners:{P46781;O43918;O00425;P62263;Q9Y2T7;Q9Y6M1}

3587 Pathogen[ P14075] interacts with 5 human  
partners:{P46781;O43918;Q9Y2T7;O00425;P62263}

3588 Pathogen[ P0C206] interacts with 6 human  
partners:{P46781;P62263;O43918;Q9Y6M1;Q9Y2T7;O00425}

3589 Pathogen[ P03363] interacts with 7 human  
partners:{O00425;Q9Y6M1;Q9NZI8;P46781;O43918;Q9Y2T7;P62263}

3590 [Cluster 327]GO:0030247+F molecular\_function [name] polysaccharide binding [def]  
"Interacting selectively and non-covalently with any polysaccharide, a polymer of more  
than 20 monosaccharide residues joined by glycosidic linkages." [GOC]

3591 Pathogen[ Q2Q067] interacts with 1 human partners:{P35573}

3592 Pathogen[ P0C214] interacts with 1 human partners:{P35573}

3593 Pathogen[ P03346] interacts with 1 human partners:{P35573}

3594 Pathogen[ Q85601] interacts with 1 human partners:{P35573}

3595 Pathogen[ P14079] interacts with 1 human partners:{P35573}

3596 Pathogen[ P03383] interacts with 1 human partners:{P35573}

3597 Pathogen[ P03410] interacts with 1 human partners:{P35573}

3598 Pathogen[ P14075] interacts with 1 human partners:{P35573}

3599 Pathogen[ P0C206] interacts with 1 human partners:{P35573}

3600 Pathogen[ P03363] interacts with 1 human partners:{P35573}

3601 [Cluster 328]GO:0031369+F molecular\_function [name] translation initiation factor  
binding [def] "Interacting selectively and non-covalently with a translation initiation  
factor, any polypeptide factor involved in the initiation of ribosome-mediated  
translation." [GOC]

3602 Pathogen[ Q2Q067] interacts with 5 human  
partners:{Q13541;Q9UI10;Q9H9Z2;P62847;Q13144}

3603 Pathogen[ P0C214] interacts with 5 human  
partners:{Q9UI10;P62847;Q13144;Q9H9Z2;Q13541}

3604 Pathogen[ P03346] interacts with 6 human  
partners:{Q13541;Q92879;P62847;Q9H9Z2;Q13144;Q9UI10}

3605 Pathogen[ Q85601] interacts with 5 human  
partners:{Q13144;Q13541;P62847;Q9H9Z2;Q9UI10}

3606 Pathogen[ P14079] interacts with 5 human  
partners:{Q9UI10;P62847;Q9H9Z2;Q13144;Q13541}

3607 Pathogen[ P03383] interacts with 5 human  
partners:{Q9H9Z2;Q9UI10;Q13144;Q13541;P62847}

3608 Pathogen[ P03410] interacts with 5 human  
partners:{P62847;Q13541;Q9H9Z2;Q9UI10;Q13144}

3609 Pathogen[ P14075] interacts with 5 human  
partners:{Q9H9Z2;Q9UI10;P62847;Q13144;Q13541}

3610 Pathogen[ P0C206] interacts with 5 human  
partners:{Q13541;Q13144;Q9H9Z2;Q9UI10;P62847}

3611 Pathogen[ P03363] interacts with 6 human  
partners:{P62847;Q92879;Q9UI10;Q9H9Z2;Q13144;Q13541}

3612 [Cluster 329]GO:0043022+F molecular\_function [name] ribosome binding [def]  
"Interacting selectively and non-covalently with any part of a ribosome." [GOC]

3613 Pathogen[ Q2Q067] interacts with 17 human  
partners:{P05198;Q9BY44;Q9UBQ5;O95997;P56537;P38935;P63241;Q9BRP8;Q9Y3A5;P41227;P0886  
5;Q6IS14;P62495;Q9GZV4;Q8NE71;Q6R327;Q9BXJ9}

3614 Pathogen[ P0C214] interacts with 19 human  
partners:{Q6IS14;Q9BRP8;P41227;Q9BY44;P46379;Q9GZV4;P08865;P38935;P63241;Q8NE71;Q6R32  
7;P62495;Q9BXJ9;Q8IV48;P05198;O95997;Q9UBQ5;Q9Y3A5;P56537}

3615 Pathogen[ P03346] interacts with 19 human  
partners:{P38935;Q9UBQ5;Q9GZV4;P56537;P62495;P63241;O95997;Q6IS14;P08865;P41227;P4637  
9;Q6N069;Q9BXJ9;Q9BY44;Q8NE71;Q9BRP8;Q6R327;Q9Y3A5;P05198}

3616 Pathogen[ Q85601] interacts with 18 human  
partners:{Q6N069;Q9UBQ5;Q9GZV4;P62495;P38935;Q9Y3A5;P46379;P56537;Q9BY44;P63241;Q9BRP  
8;P41227;Q9BXJ9;Q8NE71;P05198;P08865;O95997;Q6IS14}

3617 Pathogen[ P14079] interacts with 19 human  
partners:{Q6R327;Q8IV48;P41227;Q9BY44;Q6IS14;P56537;Q9BXJ9;P62495;P05198;Q9Y3A5;Q9BRP  
8;Q8NE71;O95997;P63241;P08865;Q6N069;P38935;Q9UBQ5;Q9GZV4}

3618 Pathogen[ P03383] interacts with 15 human  
partners:{Q9UBQ5;P41227;Q8NE71;P56537;Q9GZV4;P63241;Q9BY44;Q9BXJ9;P08865;P62495;P0519  
8;Q9Y3A5;O95997;P38935;Q9BRP8}

3619 Pathogen[ P03410] interacts with 19 human  
partners:{Q8NE71;Q8IV48;O95997;P08865;P41227;P38935;Q6N069;P62495;Q6R327;Q9BY44;P6324  
1;Q9GZV4;P56537;Q9Y3A5;Q9UBQ5;Q9BXJ9;Q6IS14;Q9BRP8;P05198}

3620 Pathogen[ P14075] interacts with 16 human  
partners:{P62495;P41227;P56537;P08865;Q9BXJ9;Q9BRP8;P38935;O95997;Q9GZV4;P63241;P0519  
8;Q6R327;Q8NE71;Q9UBQ5;Q9BY44;Q9Y3A5}

3621 Pathogen[ P0C206] interacts with 20 human  
partners:{Q9GZV4;Q6IS14;P38935;P08865;P41227;Q8IV48;O95997;P62495;Q6N069;P05198;Q6R32  
7;P56537;Q8NE71;P63241;Q9Y3A5;Q9BY44;Q9BXJ9;P46379;Q9BRP8;Q9UBQ5}

3622 Pathogen[ P03363] interacts with 19 human  
partners:{P46379;P41227;Q6N069;Q9GZV4;P08865;Q9BY44;Q9UBQ5;Q9Y3A5;Q9BRP8;P62495;P0519

8;P56537;P63241;Q8NE71;O95997;Q6IS14;P38935;Q9BXJ9;Q6R327}

3623 [Cluster 330]GO:0004083+F molecular\_function [name] bisphosphoglycerate 2-phosphatase activity [def] "Catalysis of the reaction

3624 Pathogen[ Q2Q067] interacts with 4 human partners:{Q8N0Y7;P18669;P15259;P07738}

3625 Pathogen[ P0C214] interacts with 3 human partners:{P15259;Q8N0Y7;P07738}

3626 Pathogen[ P03346] interacts with 4 human partners:{P07738;P18669;Q8N0Y7;P15259}

3627 Pathogen[ Q85601] interacts with 4 human partners:{P18669;P15259;Q8N0Y7;P07738}

3628 Pathogen[ P14079] interacts with 4 human partners:{P15259;P07738;P18669;Q8N0Y7}

3629 Pathogen[ P03383] interacts with 4 human partners:{P18669;P07738;Q8N0Y7;P15259}

3630 Pathogen[ P03410] interacts with 4 human partners:{P07738;Q8N0Y7;P15259;P18669}

3631 Pathogen[ P14075] interacts with 4 human partners:{P18669;P15259;P07738;Q8N0Y7}

3632 Pathogen[ P0C206] interacts with 4 human partners:{Q8N0Y7;P07738;P18669;P15259}

3633 Pathogen[ P03363] interacts with 3 human partners:{P18669;Q8N0Y7;P15259}

3634 [Cluster 331]GO:0004170+F molecular\_function [name] dUTP diphosphatase activity [def] "Catalysis of the reaction

3635 Pathogen[ Q2Q067] interacts with 1 human partners:{P33316}

3636 Pathogen[ P0C214] interacts with 1 human partners:{P33316}

3637 Pathogen[ P03346] interacts with 1 human partners:{P33316}

3638 Pathogen[ Q85601] interacts with 1 human partners:{P33316}

3639 Pathogen[ P14079] interacts with 1 human partners:{P33316}

3640 Pathogen[ P03383] interacts with 1 human partners:{P33316}

3641 Pathogen[ P03410] interacts with 1 human partners:{P33316}

3642 Pathogen[ P14075] interacts with 1 human partners:{P33316}

3643 Pathogen[ P0C206] interacts with 1 human partners:{P33316}

3644 Pathogen[ P03363] interacts with 1 human partners:{P33316}

3645 [Cluster 332]GO:0009019+F molecular\_function [name] tRNA (guanine-N1-)-methyltransferase activity [def] "Catalysis of the reaction

3646 Pathogen[ Q2Q067] interacts with 1 human partners:{Q32P41}

3647 Pathogen[ P0C214] interacts with 1 human partners:{Q32P41}

3648 Pathogen[ P03346] interacts with 1 human partners:{Q32P41}

3649 Pathogen[ Q85601] interacts with 1 human partners:{Q32P41}

3650 Pathogen[ P14079] interacts with 1 human partners:{Q32P41}

3651 Pathogen[ P03383] interacts with 1 human partners:{Q32P41}

3652 Pathogen[ P03410] interacts with 1 human partners:{Q32P41}

3653 Pathogen[ P14075] interacts with 1 human partners:{Q32P41}

3654 Pathogen[ P0C206] interacts with 1 human partners:{Q32P41}

3655 Pathogen[ P03363] interacts with 1 human partners:{Q32P41}

3656 [Cluster 333]GO:0050661+F molecular\_function [name] NADP binding [def] "Interacting selectively and non-covalently with nicotinamide-adenine dinucleotide phosphate, a coenzyme involved in many redox and biosynthetic reactions\_ binding may be to either the oxidized form, NADP+, or the reduced form, NADPH." [GOC

3657 Pathogen[ Q2Q067] interacts with 5 human partners:{P29474;P04406;Q9NNW7;O14556;Q9UHB4}

3658 Pathogen[ P0C214] interacts with 12 human partners:{P29474;P52209;P11413;Q86XF0;Q9NNW7;P35270;O14556;P00374;Q16881;Q9UHB4;P48163;P04406}

3659 Pathogen[ P03346] interacts with 6 human partners:{P04406;Q9UBK8;P29474;Q9UHB4;O14556;Q9NNW7}

3660 Pathogen[ Q85601] interacts with 4 human partners:{Q9UHB4;O14556;P29474;P04406}

3661 Pathogen[ P14079] interacts with 6 human partners:{Q9UHB4;Q86XF0;P00374;P52209;Q9NNW7;P04406}

3662 Pathogen[ P03383] interacts with 4 human partners:{P29474;Q9UHB4;O14556;P04406}

3663 Pathogen[ P03410] interacts with 8 human partners:{O14556;P00374;P52209;P29474;Q86XF0;P04406;Q9UHB4;Q9NNW7}

3664 Pathogen[ P14075] interacts with 4 human partners:{P29474;Q9UHB4;P04406;O14556}

3665 Pathogen[ P0C206] interacts with 5 human partners:{Q9NNW7;O14556;P04406;P29474;Q9UHB4}

3666 Pathogen[ P03363] interacts with 5 human partners:{P29474;Q9UHB4;Q9NNW7;P04406;O14556}

3667 [Cluster 334]GO:0016740+F molecular\_function [name] transferase activity [def] "Catalysis of the transfer of a group, e.g. a methyl group, glycosyl group, acyl group, phosphorus-containing, or other groups, from one compound (generally regarded as the donor) to another compound (generally regarded as the acceptor). Transferase is the systematic name for any enzyme of EC class 2." [ISBN

3668 Pathogen[ Q2Q067] interacts with 176 human partners:{Q9Y253;Q8TCS8;O95602;Q15054;Q12905;O43463;P22392;O00411;P31749;Q9NRF9;Q96CB9;O14744;Q9Y6K5;Q8IZD2;P07741;Q9NVM4;O60294;Q9H5J4;P22087;Q9H9T3;P30419;P21980;Q9H2K2;Q9H5Q4;Q96LA8;O43159;Q15910;P46087;Q9NR48;Q6XQN6;Q93015;Q8WVM0;Q8NE18;Q460N3;Q9Y6E7;P10515;Q7Z7A3;P19367;Q9Y6K1;Q460N5;Q9NRN7;O14929;Q8NDF8;Q9Y5N5;Q9HAN9;P55345;P22061;Q9UBP6;O00204;P0CG30;Q9UKN8;Q92800;Q9UNA4;Q9H825;P30876;O14757;Q8WU03;O14686;P37837;A6NHQ2;Q8TBK2;Q7L0Y3;Q9UBZ9;Q330K2;P49005;Q6PF06;Q96DP5;P22557;P35573;Q9H9Y6;P13196;Q14749;Q9UIC8;Q9NR22;Q5TAX3;O43148;Q92979;Q99873;P32189;P07902;Q9UBC3;Q9BW60;Q16851;P06746;Q9NRG4;Q9GZR5;Q8N1G2;Q9GZZ1;O75582;Q15047;P49356;Q08J23;Q9BSU3;P26358;Q92831;P46976;P34896;O96017;Q16222;P41227;P54840;P56282;Q86Y97;P50750;Q13233;Q9HD40;P09874;Q53GL7;Q9HCU8;P13807;P50613;O14746;P49354;Q92830;P04406;P49366;Q96RS0;Q9BV86;Q96FX7;Q92993;O96007;P24928;Q9Y697;A1L3X0;P54098;Q13144;P04053;Q9HB03;P04818;O14920;O95271;Q7Z5W3;Q

- 32P41;Q9UI43;P45984;Q9UHN1;O43318;P49336;Q9BVS5;P16455;Q92793;Q5T8I9;P0CG29;Q8IXQ6;P14324;P21675;Q9NP87;P24941;Q9UKK3;Q8TEK3;Q9UNQ2;Q9H974;P11802;P51580;Q9BXR0;P21673;P1172;Q9BWH6;Q9NVV4;Q9H7H0;Q9H5I1;O15111;P08397;O14802;Q6PCE3;Q86X55;Q14442;Q15759;O43708;Q86TU7;Q8IY81;O96028;Q8WTS6;Q00534;P51003;Q9NUP7}
- 3669 Pathogen[ P0C214] interacts with 264 human partners: {P50440;Q04446;Q92993;Q14410;Q96T66;Q9H825;P48728;P49354;Q96FX7;Q9HBK9;Q9Y617;Q9NXX9;O00411;Q8IXQ6;Q9H5I1;O15111;O95045;Q14409;P04818;O95260;Q15047;O14746;P23919;P00480;Q9HAN9;Q8TE04;P30876;Q8NDF8;P46087;P41227;Q9H9Y6;O75390;P06746;P54098;Q7L0Y3;P21675;O43159;P22735;P0C7V9;Q14164;P53396;P07741;P51003;Q93015;P50750;Q16222;P50613;Q460N5;Q9BWH6;P0CG30;Q6PF06;A6NJ78;Q9NVM4;P11802;Q9Y6K5;Q9H7H0;A6NHQ2;O14929;O94921;Q92793;P51580;P40261;Q9UBZ9;P29401;Q9UKN8;P29728;P34897;Q96DP5;Q9BSU3;Q9GZR5;Q9Y6K1;P1277;P11172;Q9UNQ2;Q16613;Q6XQN6;Q9GZZ1;P22087;Q99873;Q12905;Q15910;Q9Y232;Q86SQ9;P55345;P49005;Q9Y3D8;O95396;Q8N6Q8;P32189;O60551;P22557;O43463;Q9BXR0;P51854;Q9UET6;P35573;Q9HCU8;O43318;P13196;O43148;Q9BTE1;P46976;Q13057;Q96C11;Q6PCE3;Q8NE18;Q9Y2G5;Q9HB03;Q86W50;P22061;O75223;P49366;O60825;Q9NYP7;P08397;P23786;Q9H3H1;Q53GL7;P37837;Q00534;Q13233;P21127;Q00536;Q16831;P14618;Q9Y697;O96017;Q14749;Q7Z5W3;A1L3X0;P49336;P34896;Q9H0A0;P49356;Q16851;Q92979;P52788;Q9UNA4;O15488;P26358;Q8J23;Q13144;Q9BZQ4;Q9BWD1;Q8IYL2;Q8WU03;Q8TCS8;Q5T8I9;P24941;O15382;P19623;Q9Y5N5;Q9UI43;P19367;O00204;Q86TU7;O60294;P14324;Q8IY81;Q96RS0;Q9NRF9;Q5T440;O95251;Q9NW08;Q5SZD4;Q86Y97;Q9UBP6;Q9H2K2;Q7Z7A3;P16455;O96007;P24928;O75582;Q9BZ3;Q9H9T3;P54687;Q32P41;Q9NUP7;Q92831;Q8IXQ9;Q13126;O95602;Q15759;P07902;P54840;P04053;P21980;Q8TEA1;Q460N3;Q9UKK3;Q92830;Q15054;O00399;P42765;P45984;Q969I3;A6NK58;Q9NR48;Q8N1G2;Q9HCE5;Q9BW60;P30419;Q8WVM0;Q96BT7;Q15274;Q9NWZ5;Q9HD40;P16118;Q86X55;Q9UIC8;P22392;P21673;Q96EK6;Q9NP87;Q6IN84;O43708;Q8NFW8;O14757;Q8WTS6;Q9NRN7;Q9NQR1;Q9H974;O95271;Q92800;Q8N159;Q16762;Q5EBM0;P10515;Q9NVV4;Q8NFF5;Q9NRG4;P56282;P43490;Q96CB9;Q5HYK3;Q9Y6E7;P13807;P31939;O14920;Q9Y253;P04406;P00558;O14802;Q9BV86;P31749;Q9BVS5;Q9NR22;Q9NQV7;Q06520;P36957;P09874;Q8TBK2;Q8IZD2;Q96LA8;Q9H5Q4;Q9H0P0;Q5TAX3;Q8TEK3;O96028;Q330K2;Q16773;Q9UHN1;Q6IB77;P0CG29}
- 3670 Pathogen[ P03346] interacts with 230 human partners: {O75390;Q08J23;Q9HCE5;Q9BW60;O00204;Q96FX7;P21980;Q9Y253;P50135;Q06520;P45984;Q00536;Q9Y6K1;P22061;Q7Z5Q5;Q15788;P13807;O15111;Q9NQV7;A6NJ78;Q92979;Q9HCU8;P04406;Q5XG87;Q9NRN7;Q99873;O96017;Q8WYB5;Q12905;Q5T8I9;Q9BSU3;Q92800;Q86Y97;P54098;Q8IXQ9;Q93015;Q32P41;Q460N3;Q9NQR1;P21127;O95260;A6NHQ2;Q9UNA4;Q9Y5N5;P51580;Q8TBK2;P49336;Q9UBZ9;O43159;Q53GL7;Q8IYL2;P24941;P56282;Q8TEK3;Q9UKK3;O14744;P19367;O14757;Q8WU03;Q9H9Y6;Q9UIC8;P23786;Q16222;Q9UHN1;Q9BYW2;Q9H825;Q9UBC3;P49005;P21673;P26358;Q92831;Q9Y697;Q8NFW8;P22557;P35573;Q14749;Q86SQ9;Q9NR33;P13196;Q9HAN9;P46976;Q86Z02;Q9NRF9;Q9BTE1;O43463;Q5T440;Q9Y6E7;P11802;Q6PCE3;Q9NRG4;Q9UNQ2;Q6XQN6;P37837;Q9UKN8;O60294;P0C7V9;Q92830;P0CG30;Q9H2K2;Q92794;O43148;P49354;Q96DP5;P49356;P51003;Q16851;P41227;Q5TAX3;Q7Z624;Q15646;P31749;Q9H9T3;Q9BWD1;Q8WTS6;Q86U44;Q9H5J4;O95251;Q9BVS5;P48728;Q8TCS8;Q8IXQ6;Q8TD19;P46087;O14746;Q9NVV4;Q7Z7A3;P55345;P50750;Q9NR22;Q9NVM4;P14324;Q9H5Q4;P49366;P53611;Q96RS0;Q9BWH6;Q9Y3D8;Q8N1G2;O00411;O00399;O14717;Q9HD40;Q9HB03;Q13233;O14686;O75582;Q9UBP6;P22392;O96007;P0CG29;O43708;P09874;Q15910;Q8IY81;Q96BT7;Q9NUP7;Q8NDF8;Q9H7H0;O95602;Q8WVM0;P21675;P30876;Q9H7Z6;P54840;Q9BXR0;Q15759;P04053;Q96PY6;P45985;Q6IN84;Q9UGN5;O95271;P42765;Q15047;Q9H974;P32189;Q6PF06;Q5SZD4;Q86X55;Q96GJ1;Q5HYK3;O95050;Q9BV86;Q8WUY8;Q00534;Q14442;P22087;Q9Y6F1;Q7L0Y3;Q9Y232;P24928;Q9GZZ1;O14920;Q13029;O94921;P11172;O15516;P07741;P22993;Q9NP87;P22735;O43318;P22735;Q7Z5W3;Q9NR48;Q9H5I1;Q460N5;P10515;Q13395;Q330K2;Q9UI43;Q13144;P06746;O14965;O14802;Q14164;Q8IZD2;Q9Y6K5;P40261;Q9HBK9;Q96LA8;O14929;Q9NWZ5;Q15054;Q96CB9;O96028;Q8NE18;O00444;Q969T7;Q86TU7}
- 3671 Pathogen[ Q85601] interacts with 213 human partners: {Q9H5I1;Q9NRN7;Q32P41;P46087;Q00536;Q5SZD4;Q9BXR0;P09874;O95602;P13807;Q9NQV7;O43148;Q8N1G2;P31749;O43708;Q9NR22;O96017;Q86X55;Q9BVS5;A1L3X0;Q9GZZ1;Q9BWH6;Q8TBK2;P50750;P0CG29;Q93015;O95251;P00480;P56282;Q9NQR1;Q92979;Q96PY6;Q9HD40;O15111;A6NHQ2;P16455;Q9H9T3;P0CG30;Q9NR48;Q330K2;P49336;Q8N6Q8;Q9Y697;P11172;Q9UBP6;Q86TU7;Q9H825;O60825;Q460N3;Q9NVM4;O15516;Q7Z5W3;Q9UKK3;Q8WU03;Q9BV86;O14686;P37837;Q9H7Z6;Q16613;Q9Y5N5;Q5T8I9;O43159;Q9H974;Q9UGP5;P49005;P21673;P26358;Q92831;Q96FX7;O60551;Q86SQ9;P13196;Q13144;P32189;Q9BTE1;O14744;Q15054;Q9HAN9;O43463;Q9H7H0;P16118;Q9Y6E7;Q9NRF9;P11802;Q9UKN8;Q9H9Y6;Q8NE18;Q6XQN6;O14757;Q16222;O60294;O14965;Q16851;Q92830;Q14164;Q9H2K2;Q8TEA1;Q9Y6F1;P46976;P49354;P41227;Q9Y6K5;Q5XG87;Q9BW60;P35573;P54098;O95045;Q5TAX3;O14929;O95260;P34896;Q9UI43;P14618;Q8WTS6;Q99873;Q9H5J4;Q6PF06;O14920;Q08J23;Q8IYL2;Q8TCS8;Q8IXQ6;Q9UBZ9;P21980;Q7Z7A3;P14324;Q9UET6;Q9Y6K1;Q96RS0;Q9UBT6;O94921;O00399;Q9HB03;O75582;P49356;P22392;O96007;P22061;P50613;Q96EK6;Q6IB77;P07741;Q8IY81;Q9BSU3;Q8TEK3;Q9NUP7;O00204;Q8NDF8;Q9NW08;Q9HCU8;Q04446;Q86Y97;O14746;Q15759;P04053;P45984;Q9UGN5;Q12905;P21675;Q15910;P07902;P08397;P06746;P21127;P54840;P22087;Q9NRG4;Q9H5Q4;Q7L0Y3;Q9GZR5;Q9BWD1;Q6PCE3;P24928;Q9H0P0;Q13233;P30876;P04406;Q8WVM0;Q00534;Q9HCE5;Q92993;Q9NP87;Q9NVV4;Q15047;O43318;Q92793;P51003;Q9UIC8;Q92800;P30419;O95271;Q460N5;P10515;O00411;Q9UHN1;Q9Y253;P24941;Q9UNA4;Q8IXQ9;Q53GL7;O14802;O15382;Q8IZD2;Q14749;Q969I3;P51955;Q96LA8;Q96CB9;Q9UBC3;P55345;O96028;P19367;Q9UNQ2}
- 3672 Pathogen[ P14079] interacts with 303 human partners: {P31751;Q5VV42;P51854;Q6PF06;Q8TE04;O75223;Q8N159;Q8IXQ6;Q14004;O14746;Q92979;Q9H0P0;P09874;P41227;Q96RS0;Q86UY6;Q9NR22;P13196;O95544;O60294;Q8NFF5;Q9UNA4;Q8TBZ6;Q9UI43;Q5EBM0;Q15047;Q16222;O43505;O75072;Q14442;Q9HC36;P29728;Q16851;P53779;Q96LA8;A1L3X0;Q12887;P49336;Q9NRG4;Q7L2J0;Q9Y6K1;P22735;Q9H0A0;Q9Y5N5;Q92830;Q9BWH6;P52564;Q6IPR3;Q86TN4;Q330K2;Q9UGP5;Q9UKN8;Q9BVM4;O95271;Q8NFW8;Q9UJ70;Q9UGN5;Q86YH6;P49842;Q9NW08;P31939;Q9UNQ2;P49354;Q99873;Q9Y617;Q9NRG0;P39656;O75582;Q9NVM4;Q969T7;Q14410;Q92793;Q5JXM2;P50135;P48728;Q8N1G2;Q9NUP7;Q96DU7;P13807;P49005;Q4G0N4;P57054;P30876;Q16831;O95251;P43490;Q5XG87;Q14164;Q9BV86;P21980;Q7Z4G4;Q86TU7;Q9NWZ5;P11172;P22557;P2940

1;P32189;Q9NRN9;Q92800;Q5SQI0;O43708;Q9BT22;Q9HCU8;Q96C11;Q5SZD4;Q9UBZ9;Q9BRB3;P04844;Q9H2K2;P16455;O95954;P34897;Q86SQ9;O00399;A6NHQ2;Q32P41;Q32NB8;Q96913;Q8TEA1;Q14409;Q9BTE0;P14324;O60678;Q9UKK3;Q9HB03;Q8IY81;P0C7V9;P22087;Q9NYU1;Q9HCE5;Q13144;Q9H5I1;Q16613;P45984;Q9BSU3;Q86U44;A2RU49;O96007;Q9H488;Q12905;O75648;Q9UIC8;A6NJ78;O43148;P45983;Q3V5L5;P50613;Q9BTE1;Q15054;P55345;O14744;P46976;Q460N3;P23919;Q9NRF9;Q5TAX3;Q9UBC3;Q14749;P51955;Q9BZ23;Q14353;O14929;P22392;Q9H9T3;Q16644;Q9NYU2;Q9BXR0;Q8IVS8;Q9BZQ4;Q7Z5Q5;Q6XQN6;Q9GZZ1;Q63ZY6;Q8TEK3;Q6IB77;Q15759;Q9Y6K5;O60502;P45985;P08397;Q13057;P56282;Q9UET6;Q9NQR1;Q8N8M0;P46087;P35573;Q9Y697;Q9NVV4;O60551;P30419;Q9NRN7;O95045;Q15788;Q96P11;Q93015;P49356;Q08J23;P26358;Q8WUY8;Q9NWX6;Q9H649;P21127;Q8IXQ9;P49642;P61803;Q9HBK9;P10620;Q6PCE3;Q6IN84;Q9HAN9;Q9NP87;P00480;O00411;Q9HAC7;Q8N3J2;Q16762;P06746;Q2NL67;Q9Y5R4;P10515;Q9Y253;Q96SZ6;Q9Y5Z9;Q96CB9;O43159;Q8N6Q8;Q9H7H0;Q86GJ1;P04053;Q8TBK2;P19623;Q13164;Q53GL7;Q9BVS5;Q9NQV7;Q9GZR5;P07902;O95602;Q96EK6;Q8NBL1;Q15910;Q96Q11;P24928;Q9H5Q4;Q13395;Q9Y234;P51003;P54098;Q9H2M3;O95260;Q9H3H1;O14802;E5RQL4;O15382;Q9BW60;Q9HD40;Q9UHN1;P50440;P54840;Q5T440;Q9Y2G5;Q8IYL2;Q7Z7A3;O14965;P21673;Q15274;Q5NDL2;A6NK58;P51580;P04818;Q5HYK3;Q9UBT6;Q96FX7;Q86Y97;Q9H974;Q9NR33;Q7L0Y3;Q9BV44;Q9Y6F1;Q8NE18;Q7Z624;P07741;Q9H5J4;O95050;Q96DP5;Q9UBM8;Q8TCS8;Q7Z5W3;Q8WTS6;O15488;Q92993;Q9H999;P21675;P34896;Q9H9Y6;P50750;Q86W50;Q8WVM0;P46977;P49366;P04406;P37837}

3673 Pathogen[ P03383] interacts with 168 human partners: {Q9NYV4;Q9NVV4;Q9UKN8;Q9Y253;Q9UHN1;Q92831;Q330K2;Q9H974;O14757;Q15047;O75582;O95602;P06746;P51003;O43148;Q9HCU8;Q9HD40;Q13233;Q9GZZ1;Q8TD19;Q9NWZ5;O14920;P19367;Q93015;O95251;P41227;Q9BW60;Q7Z7A3;P07902;P31749;Q9GZR5;Q9NRG4;O15111;P34896;O43463;Q9H9Y6;Q9H5J4;Q86X55;Q8IYL2;Q9UBP6;P22392;P13807;Q9H825;Q9UNQ2;Q86Y97;Q00536;Q8NDF8;Q16613;P37837;Q5T8I9;P35573;Q9H5Q4;Q8TCS8;Q9NRN7;Q9BVS5;Q92993;Q9UI43;P49005;Q86TU7;Q00534;Q7L0Y3;Q32P41;P11802;O14744;O43318;A6NJ78;Q9Y697;Q6PCE3;P21127;Q9BSU3;P0C7V9;Q8IXQ6;Q5TAX3;P49366;O43159;P56282;Q8WTS6;Q13144;Q16851;P49336;Q9HAN9;Q9UET6;P46976;P50613;Q99873;P54098;Q9Y6K1;Q8N159;O14929;P24928;A1L3X0;P24941;Q9NR22;Q8IY81;O60294;Q92830;Q6PF06;P09874;Q9Y5N5;Q53GL7;Q08J23;O14746;Q9HB03;P50750;P04406;P14324;Q9Y6E7;Q15759;Q96RS0;P22061;Q9UBZ9;Q9BXR0;O94921;Q12905;Q8WVM0;Q15054;O96007;Q9Y6K5;Q9BZ23;Q96FX7;P07741;Q8IXQ9;O14965;Q9NUP7;P46087;Q9UIC8;Q9H7H0;Q9UKK3;P10515;Q96DP5;Q96PY6;P21675;Q8WU03;Q15910;P32189;P08397;P45984;Q8WUY8;Q92979;P54840;O00411;P21980;Q96CB9;Q8TEK3;Q8TBK2;Q7Z5W3;P11172;P30876;O95271;Q5EBM0;P22087;Q9H5I1;Q9H0A0;Q9NQR1;P21673;O14802;P26358;Q14749;Q96913;Q9H9T3;Q96LA8;Q92793;Q8N1G2;Q92800;Q9BWH6;O96017;Q5SZD4;Q8NE18}

3674 Pathogen[ P03410] interacts with 311 human partners: {Q32P41;Q92830;Q9BWH6;A1L3X0;Q6IED9;O75648;Q92831;Q8IVS8;P46976;Q96DP5;A6NJ78;Q9BSU3;Q96Q11;P49354;P22087;O95045;Q15274;Q96RS0;Q4G0N4;Q96DU7;Q9HBK9;O14920;Q8TCS8;Q9GZZ1;Q9GZR5;Q96LA8;Q9H825;Q14353;P0CG30;Q96P11;Q14749;Q6PCE3;Q9H974;Q16851;P08397;Q9HCE5;Q93015;Q9H7H0;Q15047;Q3V5L5;Q8TBZ6;P37837;Q9HC36;Q8NFF5;O14929;Q8TE04;Q00534;P29728;P07741;Q8N159;P54840;Q5T440;O60551;O95251;Q96C11;Q9H5J4;O14746;Q13057;P24928;Q63ZY6;Q53GL7;P49356;P16118;Q9UBP6;Q9UBT6;Q9H2M3;P21675;O15111;Q8N3J2;Q9H0A0;Q5TAX3;O60502;Q86Y97;Q8IYT2;Q16831;P04053;Q9BUU2;O75582;Q6IB77;Q9H649;Q96CB9;Q16222;Q14410;Q8TEK3;Q9UNA4;Q9NRN9;P07902;Q8TEA1;O95954;Q04446;Q5T8I9;Q8WTS6;A6NHQ2;O95050;Q7Z4G4;P35573;Q9NVM4;Q86X55;Q460N3;Q9NWZ5;O00399;O00204;P11172;P31749;Q9Y5Z9;P06746;P30419;P30876;O95260;Q96EK6;Q7Z7A3;Q5SZD4;Q9NRG0;Q96913;Q6PF06;Q9H9T3;Q9H3H1;P56282;Q9Y697;A2RU49;Q13233;Q14442;P19623;Q6XQN6;O00411;P52788;Q9Y617;Q8TBK2;O43159;Q9NVV4;P23786;E5RQL4;Q9NR22;Q8IYL2;P50613;A6NK58;Q9Y6F1;Q8IXQ9;P23919;P42765;P0CG29;P51003;O14965;P43490;O43708;P50750;Q92979;Q92800;P26358;Q6IPR3;O43318;Q7Z5Q5;P00480;Q9UGP5;Q9UBZ9;P22557;O75600;Q9UNQ2;P41227;Q92793;Q9Y234;Q9NQV7;Q9NW08;P45985;O95602;Q9NYU1;Q13395;P04818;Q8IXQ6;P24941;Q6IN84;Q9NQR1;Q9Y253;Q16762;Q86SQ9;Q9BW60;Q86UY6;Q9UGN5;O96007;O95271;P11802;Q9BTE1;Q8N8M0;O15382;P48728;Q12905;Q16613;P49366;Q8N1G2;Q9H5I1;Q8NE18;Q9BYC2;P16455;Q9BV44;P13807;P55809;Q15054;Q9BRB3;Q9NRF9;P09874;O96017;Q5EBM0;Q5XG87;O14757;Q9H5Q4;P31939;Q9NRN7;Q96GJ1;P21673;Q15910;Q9BT22;Q9NR33;P04406;Q9BZ23;P49336;P04844;O60294;Q14409;O15488;Q8N6Q8;P53611;Q9HAN9;Q9UBC3;Q9UIC8;Q9Y6K5;P51854;Q08J23;Q7Z5W3;P46087;Q7Z624;Q8WVM0;P45984;Q9HD40;Q96FX7;Q2NL67;P63135;Q9UI43;Q330K2;Q9HB03;P53779;Q7L2J0;Q9H0P0;Q9UKK3;P49005;Q8IY81;P21980;Q9BV86;Q9BVM4;O43148;Q8NFW8;Q460N3;Q86TN4;Q5JXM2;Q9H2K2;O43463;O75223;Q8WU03;O14744;P32189;Q9NP87;Q86U44;Q5SQI0;P0C7V9;Q9BVS5;Q9Y6K1;Q9Y5N5;P39656;Q86W50;Q9Y2G5;Q9H488;Q9UKN8;Q12887;P22061;Q9UHN1;Q92993;P50440;Q9NUP7;P61803;Q86YH6;Q8WUY8;Q9BTE0;P54098;Q9NWX6;Q9BZQ4;P13196;P50135;P10515;O14802;Q5HYK3;O95568;Q9Y5R4;Q8NHY0;Q9UET6;P51580;P34897;P34896;Q86TU7;Q99873;O43505;P49642;Q9HCU8;P14324;O75390;P5345;Q9H9Y6;Q9NYU2;Q969T7;Q9NRG4;Q13144;Q7L0Y3;P22735}

3675 Pathogen[ P14075] interacts with 189 human partners: {Q9H974;P49336;P51003;Q9H7H0;Q8N1G2;Q5HYK3;Q9H5J4;Q5SZD4;Q9H5Q4;P54098;Q9Y6K1;O15111;Q9BW60;P41227;Q9BWH6;P21675;Q14442;P24941;Q9UBZ9;O14746;Q8IXQ6;Q9H3H1;P92979;P11802;Q8NDF8;Q9NWZ5;Q15759;O75648;Q9NR22;Q92831;Q93015;P11172;Q7L0Y3;P34896;P30876;O75582;Q6IN84;Q8IVS8;Q9UET6;P32189;Q9NVV4;P50613;Q12905;Q86TU7;Q9BSU3;Q9BXR0;Q00534;Q8NE18;Q8N159;Q15047;P06746;Q16613;Q9NQR1;P50750;P19367;Q5T440;Q9H825;Q15910;Q9HB03;Q92800;Q5TAX3;P49005;P08397;Q8IY81;O95045;O14929;P46976;P54840;Q8TBK2;Q7Z5W3;O60294;Q13057;Q96CB9;P26358;Q9H0A0;Q6PCE3;Q8WU03;Q92993;Q9UI43;P49366;Q6PF06;Q32P41;A1L3X0;Q9Y6E7;O14920;P16118;P31749;Q9H5I1;P07902;P04406;Q9Y253;O43505;Q8IXQ9;O00411;O14744;Q96LA8;Q9HD40;Q99873;O96017;O14965;Q9Y5N5;Q86X55;Q9UNQ2;P24928;Q8TE04;Q330K2;Q96C11;Q7Z7A3;Q9BVM4;O43318;Q5T8I9;P14324;P49842;P22087;Q9Y6K5;Q9Y2G5;Q96RS0;Q15054;P46087;O95251;Q8WUY8;P21127;P35573;Q9UBP6;P51580;P10515;O96007;Q9BVS5;P22061;P48728;Q9BZ23;Q9H9Y6;Q9NUP7;Q9GZR5;Q8TEK3;Q8IYL2;Q86Y97;P0C7V9;O95602;Q8TCS8;Q9UHN1;Q9H9T3;O43159;Q92793;O43463;Q96PY6;Q9UKN8;Q96913;Q14749;Q96FX7;Q9HCU8;P13807;Q9GZZ1;O43148;Q8WVM0;P56282;P07741;Q13144;P21980;Q9HAN9;Q08J23;P21673;O95271;Q13233;Q6XQN6;O94921;Q9UQ88;Q5EBM0;Q96EK6;P37837;Q92830;Q9NYV4;P50440;Q9NRG4;Q16851;O14802;A6NJ78;O14757;P22392;Q96DP5;P0987

- 4;Q53GL7;Q9NRN7;Q8WTS6;Q9UUKK3;Q9Y697;Q9UIC8;P45984;Q8TD19}  
3676 Pathogen[ P0C206] interacts with 290 human  
partners:{Q9Y234;O95271;Q9Y253;Q16831;Q16851;Q9BWH6;P0C7V9;Q96RS0;Q9Y232;Q08J23;Q5XG8  
7;A6NHQ2;P51854;O43159;P49336;Q92830;Q9UHN1;Q9GZZ1;Q9UI43;O14920;P31749;O95251;Q9Y6K1  
;Q9UBP6;O95260;Q9NRF9;Q12905;Q96CB9;Q16222;P46976;Q8TCS8;Q86W50;Q9BV86;Q9Y3D8;P50750;  
O95602;Q9BTE1;O96017;Q9BVM4;Q6XQN6;P39656;Q9NR33;Q9UBT6;P09874;P22392;Q9UIC8;Q9UNA4;P  
22061;Q9HCU8;Q330K2;P51955;P30419;Q9H9T3;Q99873;O75582;O14744;P45984;Q32P41;Q96GJ1;P4  
1227;Q9HB03;O60294;Q7Z5Q5;Q8TE04;O15382;Q8NE18;Q04446;Q9NRG4;Q86X55;Q13057;Q9Y6K5;Q00  
536;Q9H7B4;P21980;Q9Y697;O43463;Q460N5;Q9HD40;Q9NW08;Q96LA8;Q5EBM0;Q14442;Q53GL7;O433  
18;Q96PY6;O00444;P26358;Q86TU7;P06746;P29728;Q8TBZ6;Q92800;P54098;O96007;Q9Y5Z9;P3489  
7;Q7Z624;Q8IXQ6;Q9NWZ5;Q9NQX0;P51003;Q92993;P43490;P49005;P31939;Q9BZ23;Q8TD19;Q9UET6  
;P49642;O14686;Q15910;P19367;Q460N3;Q7Z5W3;Q8WVM0;Q969I3;P32189;Q92831;P49354;Q9NRN9;  
Q5T8I9;Q13233;O95045;P23786;Q6PF06;Q9H5J4;Q9UGP5;P13807;Q9Y6F1;Q92793;Q13144;Q8N159;Q  
96DU7;P51580;P0CG29;Q6PCE3;Q9UNQ2;Q9NQV7;P30291;Q8TEA1;O95954;P49366;P21673;Q8NFQ8;P5  
4840;Q9H825;P11172;Q9HBK9;Q93015;P14324;Q14164;Q15054;Q92979;Q96FX7;O15516;P04053;Q9U  
GN5;P50613;Q86Y97;Q9NVM4;Q7L0Y3;Q9UUKK3;Q9BVS5;O14929;O43708;Q9NR48;Q9UKN8;Q9H974;P348  
96;P22557;P50440;Q7Z4G4;Q9NQR1;O00204;Q8WUY8;O96028;Q9H0P0;O15111;Q8WTS6;Q9NUP7;Q8NDF  
8;Q9BZQ4;Q9H2M3;P04406;Q6IB77;Q9BWD1;Q9H5I1;Q9HCE5;P07902;Q9NP87;Q9NVV4;Q5TAX3;Q6IN84  
;Q8WU03;O00399;Q9UBZ9;Q9Y5N5;Q96EK6;Q9NR22;P04818;P45985;O60825;O60551;Q9HAN9;Q9H3H1;  
Q8TEK3;Q5T440;P46087;Q96C11;Q15274;Q9H5Q4;O75390;P16118;O60678;P56282;Q9BSU3;P22087;P  
07741;Q9GZR5;Q8TBK2;Q9BXR0;Q14749;P21127;P24928;Q9H7H0;Q15047;Q9UBC3;P55345;Q8NFW8;Q1  
6762;P13196;O14965;Q7L2J0;P08397;A6NK58;O14802;Q16613;P0CG30;Q5SZD4;Q8IYL2;Q9H9Y6;P49  
356;P53611;O43148;Q8IVS8;P10515;P24941;Q15788;Q15759;P16455;Q96DP5;P50135;Q9H2K2;P227  
35;Q8N1G2;Q86SQ9;P48728;Q8IXQ9;P11802;P37837;Q8IY81;O94921;P00480;Q9Y2G5;Q9H0A0;Q5HYK  
3;Q969T7;Q96E7;Q6IPR3;Q99640;A6NJ78;O95396;P14618;Q8IZD2;Q99986;Q7Z7A3;O14746;Q9H7Z6  
;Q9UIG0;P21675;O43505;A1L3X0;O15488;Q9NRN7;P29401;O00411;Q00534;Q9BW60;P35573;P30876}  
3677 Pathogen[ P03363] interacts with 185 human  
partners:{Q6XQN6;Q32P41;Q9UNQ2;Q9Y6E7;Q9Y6K5;P41227;Q92979;Q96RS0;O00411;O14744;Q9NVV  
4;Q9HD40;Q8NFW8;Q9H825;Q9H7H0;Q9H5J4;P13807;Q9UGN5;Q9NWZ5;P46087;O14920;Q08J23;Q16222  
;P51580;Q9BXR0;O95050;Q7Z624;Q16851;P0C7V9;Q8IXQ6;P21127;Q9H9Y6;Q330K2;Q9H5I1;Q969T7;  
P30878;Q96LA8;P0CG30;Q92831;Q9HAN9;O95568;Q9NRF9;Q8WVE0;Q9Y5R4;O15111;P50135;Q6PF06;Q  
9BV86;Q9NRN9;Q5T8I9;Q8N1G2;Q9Y253;O00399;Q96BT7;Q9BWD1;Q15910;P49354;O96007;O95602;P2  
4928;P49366;Q8TEK3;Q460N3;P07741;Q9Y6K1;Q9UET6;P49005;O43318;P11172;O14746;P24941;Q86  
U44;O15047;Q8IVS8;Q8TBK2;Q9Y697;O14717;Q9H2K2;Q8IXQ9;O95260;P21673;Q93015;P54098;Q8IY  
L2;Q7Z7A3;O96017;P48728;Q00534;Q9HBK9;P04053;Q9NVM4;Q9BSU3;Q9UBP6;Q9HCU8;Q9NRG4;Q9H97  
4;Q8IY81;Q9NR22;P31749;Q92830;Q9UUKK3;P51003;Q8NDF8;Q9Y3D8;P06746;P0CG29;Q9BWH6;Q8NE18  
;Q7Z5Q5;Q13395;Q14749;Q96FX7;P37837;P22087;Q7L0Y3;P04406;O00204;O95271;P26358;P49336;  
O14929;Q9NRN7;O43148;P54840;Q9UPS6;Q9HCE5;Q12905;Q9NP87;Q92793;Q5TAX3;Q9Y5N5;P21675;Q  
9NR48;Q9UIC8;O96028;A6NJ78;Q8N3J2;Q8WVM0;Q460N5;P10515;P50750;Q9GZZ1;P13196;O43159;O4  
3463;Q9BTE1;Q96W3;O60294;Q15054;Q9BVS5;Q7Z4G4;Q9NQR1;Q9UHN1;Q9UNA4;P09874;Q9NR  
R33;P11802;Q6P2P2;Q6PCE3;Q9UKN8;Q8WTS6;Q9UBZ9;P35573;Q92800;Q9UBC3;Q9UI43;Q9H9T3;O437  
08;O95251;Q06520;Q15047;P46976;Q00536;Q86Y97;Q13233;Q92993;Q86X55;Q9Y6F1;O14686;Q9987  
3;A6NHQ2;Q9H5Q4;O14757;Q53GL7}  
3678 [Cluster 335]GO:0003777+F molecular\_function [name] microtubule motor activity [def]  
"Catalysis of movement along a microtubule, coupled to the hydrolysis of a nucleoside  
triphosphate (usually ATP)." [GOC  
3679 Pathogen[ Q2Q067] interacts with 13 human  
partners:{Q8TF09;Q9H1H9;Q14204;Q9NP97;Q92624;Q96Q89;Q9H0B6;Q02241;O00139;Q07866;Q1340  
9;Q14683;O14576}  
3680 Pathogen[ P0C214] interacts with 13 human  
partners:{Q07866;Q92624;Q02241;O14645;Q8TF09;Q14204;O00139;Q9H0B6;Q96Q89;Q14683;O1457  
6;Q9NP97;Q13409}  
3681 Pathogen[ P03346] interacts with 18 human  
partners:{Q15058;Q9NSK0;O14576;Q12840;O00139;Q9H1H9;Q14204;Q8TF09;Q14683;Q6P597;Q96Q8  
9;Q02241;Q13409;O14645;Q92624;Q9NP97;Q9H0B6;Q07866}  
3682 Pathogen[ Q85601] interacts with 18 human  
partners:{Q13409;Q9NP97;Q02241;Q14204;Q9H1H9;O96015;Q12840;Q96Q89;Q92624;Q6P597;Q1468  
3;Q15058;O14576;O14645;Q8TF09;Q07866;O00139;Q9H0B6}  
3683 Pathogen[ P14079] interacts with 29 human  
partners:{Q8TF09;Q6ZMV9;Q07866;Q12840;Q02241;Q14204;Q92624;Q7Z4S6;Q9GZS0;Q9NP97;O1506  
6;Q99661;Q96Q89;O60282;O00139;Q15058;Q9H1H9;Q13409;Q86Y91;O14645;Q5T7B8;Q9UQE7;Q9NSK0  
;O14576;O96015;O95235;Q14683;Q9H0B6;Q6P597}  
3684 Pathogen[ P03383] interacts with 9 human  
partners:{Q14683;Q02241;Q9H0B6;Q9H1H9;Q9NP97;Q96Q89;Q07866;Q8TF09;Q92624}  
3685 Pathogen[ P03410] interacts with 29 human  
partners:{Q86Y91;Q14204;Q96Q89;Q15058;Q07866;Q13409;Q9NP97;Q9H0B6;O00139;Q8TF09;Q9H1H  
9;Q9UQE7;O60282;Q7Z4S6;Q9NSK0;Q12840;Q6P597;O60333;Q92624;O14576;Q6ZMV9;Q14683;P33176  
;O14645;Q9GZS0;Q5T7B8;O96015;Q02241;Q6PJI1}  
3686 Pathogen[ P14075] interacts with 10 human  
partners:{Q9NP97;Q9H1H9;Q14683;Q02241;Q8TF09;Q92624;O00139;Q07866;Q9H0B6;Q96Q89}  
3687 Pathogen[ P0C206] interacts with 22 human  
partners:{O14645;Q9NP97;O14576;Q96Q89;Q8TF09;Q6P597;Q9H1H9;Q02241;Q13409;Q92624;Q86Y9  
1;Q14204;Q9H0B6;Q9UQE7;Q14683;Q12840;Q9NSK0;O00139;Q15058;Q9BW19;O96015;Q07866}  
3688 Pathogen[ P03363] interacts with 27 human  
partners:{Q2VIQ3;P33176;Q9GZS0;Q14204;Q02241;Q7Z4S6;Q07866;Q14807;Q6ZMV9;O60282;Q9H0B  
6;Q8TF09;Q9NSK0;O14645;Q5T7B8;Q92624;Q13409;O15066;Q15058;Q96Q89;O60333;Q9H1H9;Q9NP97

```

;O00139;Q14683;O14576;Q12840}
3689 [Cluster 336]GO:0017070+F molecular_function [name] U6 snRNA binding [def]
"Interacting selectively and non-covalently with the U6 small nuclear RNA (U6 snRNA)."
[GOC
3690 Pathogen[ Q2Q067] interacts with 5 human
partners:{Q9Y333;Q9UK45;Q13838;P63241;O95777}
3691 Pathogen[ P0C214] interacts with 5 human
partners:{P63241;Q9UK45;Q9Y333;O95777;Q13838}
3692 Pathogen[ P03346] interacts with 5 human
partners:{O95777;P63241;Q9Y333;Q13838;Q9UK45}
3693 Pathogen[ Q85601] interacts with 5 human
partners:{P63241;Q9UK45;Q13838;O95777;Q9Y333}
3694 Pathogen[ P14079] interacts with 5 human
partners:{Q9Y333;Q9UK45;Q13838;P63241;O95777}
3695 Pathogen[ P03383] interacts with 5 human
partners:{Q13838;P63241;O95777;Q9Y333;Q9UK45}
3696 Pathogen[ P03410] interacts with 5 human
partners:{Q13838;O95777;Q9Y333;P63241;Q9UK45}
3697 Pathogen[ P14075] interacts with 5 human
partners:{Q9UK45;O95777;P63241;Q9Y333;Q13838}
3698 Pathogen[ P0C206] interacts with 5 human
partners:{O95777;Q9Y333;Q9UK45;Q13838;P63241}
3699 Pathogen[ P03363] interacts with 5 human
partners:{O95777;Q9Y333;Q13838;P63241;Q9UK45}
3700 [Cluster 337]GO:0003678+F molecular_function [name] DNA helicase activity [def]
"Catalysis of the reaction
3701 Pathogen[ Q2Q067] interacts with 6 human
partners:{P38935;P46100;Q03468;Q13216;Q9ULG1;Q9HCK8}
3702 Pathogen[ P0C214] interacts with 7 human
partners:{Q9ULG1;P38935;Q13216;Q14566;P46100;Q9HCK8;Q03468}
3703 Pathogen[ P03346] interacts with 10 human
partners:{P46063;P38935;P46100;Q9ULG1;Q7Z333;Q14566;Q03468;Q9HCK8;Q13216;P33991}
3704 Pathogen[ Q85601] interacts with 7 human
partners:{P38935;Q13216;Q14566;Q03468;Q9ULG1;Q9HCK8;P46100}
3705 Pathogen[ P14079] interacts with 8 human
partners:{Q9ULG1;Q14566;Q13216;P46100;Q9HCK8;Q96FC9;Q03468;P38935}
3706 Pathogen[ P03383] interacts with 5 human
partners:{Q13216;P46100;Q03468;Q9HCK8;P38935}
3707 Pathogen[ P03410] interacts with 8 human
partners:{Q9ULG1;Q03468;P38935;Q9HCK8;P46100;Q13216;Q96FC9;Q14566}
3708 Pathogen[ P14075] interacts with 5 human
partners:{P38935;Q13216;Q03468;P46100;Q9HCK8}
3709 Pathogen[ P0C206] interacts with 9 human
partners:{Q9HCK8;P38935;P46100;Q03468;Q13216;O94762;Q7Z333;Q9ULG1;Q14566}
3710 Pathogen[ P03363] interacts with 9 human
partners:{O94762;Q7Z333;Q9ULG1;P46100;Q9HCK8;P46063;Q03468;Q13216;P38935}
3711 [Cluster 338]GO:0003983+F molecular_function [name] UTP [def] "Catalysis of the
reaction
3712 Pathogen[ Q2Q067] interacts with 1 human partners:{Q16851}
3713 Pathogen[ P0C214] interacts with 1 human partners:{Q16851}
3714 Pathogen[ P03346] interacts with 1 human partners:{Q16851}
3715 Pathogen[ Q85601] interacts with 1 human partners:{Q16851}
3716 Pathogen[ P14079] interacts with 1 human partners:{Q16851}
3717 Pathogen[ P03383] interacts with 1 human partners:{Q16851}
3718 Pathogen[ P03410] interacts with 1 human partners:{Q16851}
3719 Pathogen[ P14075] interacts with 1 human partners:{Q16851}
3720 Pathogen[ P0C206] interacts with 1 human partners:{Q16851}
3721 Pathogen[ P03363] interacts with 1 human partners:{Q16851}
3722 [Cluster 339]GO:0005083+F molecular_function [name] small GTPase regulator activity
[def] "Modulates the rate of GTP hydrolysis by a small monomeric GTPase." [GOC
3723 Pathogen[ Q2Q067] interacts with 8 human
partners:{Q9Y2Y0;Q8WUH2;O00401;Q53G26;O95373;Q9UPY8;P42768;Q96EY1}
3724 Pathogen[ P0C214] interacts with 9 human
partners:{Q53G26;Q9HD26;Q9UPY8;Q9Y2Y0;O00401;P42768;Q8WUH2;O95373;Q96EY1}
3725 Pathogen[ P03346] interacts with 10 human
partners:{P42768;Q8WUH2;Q9HD26;O95373;Q53G26;O00522;Q9Y2Y0;Q9UPY8;O00401;Q96EY1}
3726 Pathogen[ Q85601] interacts with 9 human
partners:{O00401;Q53G26;Q9Y2Y0;Q8WUH2;O95373;Q9HD26;P42768;Q9UPY8;Q96EY1}
3727 Pathogen[ P14079] interacts with 10 human
partners:{O95373;Q9UPY8;Q9Y2Y0;Q59EK9;Q9HD26;Q8WUH2;Q96EY1;O00522;P42768;O00401}
3728 Pathogen[ P03383] interacts with 9 human
partners:{Q9Y2Y0;Q9HD26;O00401;P42768;O95373;Q9UPY8;Q96EY1;Q53G26;Q8WUH2}
3729 Pathogen[ P03410] interacts with 11 human
partners:{Q53G26;Q59EK9;O00401;P42768;Q8WUH2;Q9HD26;Q9UPY8;O00522;Q9Y2Y0;Q96EY1;O9537
3}
3730 Pathogen[ P14075] interacts with 9 human

```

3731 partners:{P42768;Q9Y2Y0;Q9HD26;Q53G26;Q9UPY8;O00401;O95373;Q8WUH2;Q96EY1}  
 Pathogen[ P0C206] interacts with 11 human  
 partners:{Q53G26;Q9UPY8;O95373;O00401;Q8WUH2;Q9Y2Y0;P42768;Q59EK9;Q96EY1;Q9HD26;O00522}

3732 Pathogen[ P03363] interacts with 10 human  
 partners:{P42768;Q53G26;Q9UPY8;O00522;Q8WUH2;O00401;O95373;Q9Y2Y0;Q96EY1;Q9HD26}

3733 [Cluster 340]GO:0008897+F molecular\_function [name] holo-[acyl-carrier-protein] synthase activity [def] "Catalysis of the reaction  
 3734 Pathogen[ Q2Q067] interacts with 1 human partners:{Q9NRN7}  
 3735 Pathogen[ P0C214] interacts with 1 human partners:{Q9NRN7}  
 3736 Pathogen[ P03346] interacts with 1 human partners:{Q9NRN7}  
 3737 Pathogen[ Q85601] interacts with 1 human partners:{Q9NRN7}  
 3738 Pathogen[ P14079] interacts with 1 human partners:{Q9NRN7}  
 3739 Pathogen[ P03383] interacts with 1 human partners:{Q9NRN7}  
 3740 Pathogen[ P03410] interacts with 1 human partners:{Q9NRN7}  
 3741 Pathogen[ P14075] interacts with 1 human partners:{Q9NRN7}  
 3742 Pathogen[ P0C206] interacts with 1 human partners:{Q9NRN7}  
 3743 Pathogen[ P03363] interacts with 1 human partners:{Q9NRN7}

3744 [Cluster 341]GO:0005049+F molecular\_function [name] nuclear export signal receptor activity [def] "Combining with a nuclear export signal (NES) to mediate transport of the NES-containing protein through the nuclear pore to the cytoplasm." [GOC  
 3745 Pathogen[ Q2Q067] interacts with 2 human partners:{Q9UIA9;O15504}  
 3746 Pathogen[ P0C214] interacts with 2 human partners:{Q9UIA9;O15504}  
 3747 Pathogen[ P03346] interacts with 2 human partners:{Q9UIA9;O15504}  
 3748 Pathogen[ Q85601] interacts with 2 human partners:{Q9UIA9;O15504}  
 3749 Pathogen[ P14079] interacts with 2 human partners:{O15504;Q9UIA9}  
 3750 Pathogen[ P03383] interacts with 2 human partners:{O15504;Q9UIA9}  
 3751 Pathogen[ P03410] interacts with 2 human partners:{O15504;Q9UIA9}  
 3752 Pathogen[ P14075] interacts with 2 human partners:{Q9UIA9;O15504}  
 3753 Pathogen[ P0C206] interacts with 2 human partners:{O15504;Q9UIA9}  
 3754 Pathogen[ P03363] interacts with 2 human partners:{O15504;Q9UIA9}

3755 [Cluster 342]GO:0004861+F molecular\_function [name] cyclin-dependent protein kinase inhibitor activity [def] "Stops, prevents or reduces the activity of a cyclin-dependent protein kinase." [GOC  
 3756 Pathogen[ Q2Q067] interacts with 9 human  
 partners:{P42773;Q96MH2;O94992;Q92831;P38936;P42771;P46527;P49918;P42772}  
 3757 Pathogen[ P0C214] interacts with 10 human  
 partners:{P46527;P38936;Q96MH2;P49918;P42574;P42771;P42773;O94992;Q92831;P42772}  
 3758 Pathogen[ P03346] interacts with 11 human  
 partners:{P55273;P42772;P42574;Q92831;P49918;P42771;P42773;O94992;Q96MH2;P38936;P46527}  
 3759 Pathogen[ Q85601] interacts with 10 human  
 partners:{Q96MH2;P55273;P42772;Q92831;P42771;P42773;O94992;P49918;P38936;P46527}  
 3760 Pathogen[ P14079] interacts with 8 human  
 partners:{P49918;P55273;P38936;O94992;P46527;P42773;Q96MH2;P42771}  
 3761 Pathogen[ P03383] interacts with 7 human  
 partners:{Q96MH2;Q92831;P42772;P46527;O94992;P42771;P49918}  
 3762 Pathogen[ P03410] interacts with 10 human  
 partners:{Q92831;P42771;P46527;P42772;P55273;P38936;P49918;P42773;O94992;Q96MH2}  
 3763 Pathogen[ P14075] interacts with 7 human  
 partners:{Q92831;Q96MH2;P42771;P46527;O94992;P49918;P42772}  
 3764 Pathogen[ P0C206] interacts with 11 human  
 partners:{Q96MH2;P42771;P42772;Q92831;P42773;O94992;P55273;P46527;P38936;P42574;P49918}  
 3765 Pathogen[ P03363] interacts with 7 human  
 partners:{P49918;O94992;Q92831;P42772;P42773;Q96MH2;P42771}

3766 [Cluster 343]GO:0001078+F molecular\_function [name] RNA polymerase II core promoter proximal region sequence-specific DNA binding transcription factor activity involved in negative regulation of transcription [def] "Interacting selectively and non-covalently with a sequence of DNA that is in cis with and relatively close to a core promoter for RNA polymerase II (RNAP II) in order to stop, prevent, or reduce the frequency, rate or extent of transcription from an RNA polymerase II promoter." [GOC  
 3767 Pathogen[ Q2Q067] interacts with 15 human  
 partners:{Q9HC78;Q12837;O14503;Q6P1N0;P15976;Q92754;Q02447;Q9UKL0;O14867;Q13127;Q8IX07;Q92793;Q16649;Q9UI36;Q5T0F9}  
 3768 Pathogen[ P0C214] interacts with 13 human  
 partners:{Q92793;O14503;Q9HC78;O14867;Q92754;Q12837;Q9UKL0;Q8IX07;Q13127;Q9UI36;Q02447;Q6P1N0;Q5T0F9}  
 3769 Pathogen[ P03346] interacts with 19 human  
 partners:{Q9UKL0;Q12837;Q92754;O14867;O14503;Q9HC78;O43680;Q6P1N0;Q9C0J9;P15976;O95863;Q16649;Q8IX07;Q9NQ03;Q92793;Q9UI36;Q02447;Q5T0F9;Q13127}  
 3770 Pathogen[ Q85601] interacts with 15 human  
 partners:{Q13127;Q92754;P15976;O14503;Q9HC78;Q16649;Q9UI36;Q8IX07;O14867;Q02447;Q92793;Q12837;Q6P1N0;Q9UKL0;Q5T0F9}  
 3771 Pathogen[ P14079] interacts with 16 human  
 partners:{O14867;Q16649;Q92793;Q5T0F9;Q02447;P15976;Q6P1N0;Q12837;Q8IX07;Q9UKL0;Q9HC78

8;Q9UI36;Q9NQ03;Q92754;O14503;Q13127}  
3772 Pathogen[ P03383] interacts with 10 human  
partners:{O14503;Q6P1N0;Q02447;Q12837;Q9UKL0;Q92754;Q9UI36;Q92793;Q5T0F9;Q13127}  
3773 Pathogen[ P03410] interacts with 14 human  
partners:{Q9HC78;Q9UI36;Q02447;Q5T0F9;Q13127;Q92793;Q8IX07;Q16649;Q9UKL0;Q12837;O1486  
7;P15976;Q6P1N0;Q92754}  
3774 Pathogen[ P14075] interacts with 10 human  
partners:{Q9UKL0;Q12837;Q92754;O14503;Q02447;Q92793;Q9UI36;Q13127;Q6P1N0;Q5T0F9}  
3775 Pathogen[ P0C206] interacts with 16 human  
partners:{Q16649;O14867;Q13127;Q9UKL0;Q9C0J9;P15976;Q92793;Q92754;Q12837;Q9NQ03;Q6P1N  
0;Q9HC78;Q02447;Q8IX07;Q9UI36;Q5T0F9}  
3776 Pathogen[ P03363] interacts with 15 human  
partners:{Q16649;Q02447;Q9C0J9;O14867;Q13127;Q9NQ03;Q9UI36;Q92793;Q6P1N0;Q9UKL0;Q9HC7  
8;Q12837;Q5T0F9;O14503;Q92754}  
3777 [Cluster 344]GO:0005158+F molecular\_function [name] insulin receptor binding [def]  
"Interacting selectively and non-covalently with the insulin receptor." [GOC  
3778 Pathogen[ Q2Q067] interacts with 3 human partners:{Q8WWQ0;P27986;Q9BX66}  
3779 Pathogen[ P0C214] interacts with 5 human  
partners:{Q9BX66;P11168;Q8WWQ0;Q99704;P27986}  
3780 Pathogen[ P03346] interacts with 6 human  
partners:{Q13322;Q9BX66;Q9Y4G6;Q8WWQ0;Q99704;P27986}  
3781 Pathogen[ Q85601] interacts with 4 human partners:{P11168;Q9BX66;P27986;Q8WWQ0}  
3782 Pathogen[ P14079] interacts with 5 human  
partners:{Q99704;Q8WWQ0;Q9Y4G6;Q8WU20;Q9BX66}  
3783 Pathogen[ P03383] interacts with 3 human partners:{P27986;P11168;Q8WWQ0}  
3784 Pathogen[ P03410] interacts with 7 human  
partners:{P27986;P11168;Q8WWQ0;Q99704;Q9Y4G6;Q8WU20;Q9BX66}  
3785 Pathogen[ P14075] interacts with 3 human partners:{Q8WWQ0;P27986;P11168}  
3786 Pathogen[ P0C206] interacts with 6 human  
partners:{P27986;Q8WWQ0;P11168;Q8WU20;Q99704;Q9BX66}  
3787 Pathogen[ P03363] interacts with 5 human  
partners:{Q8WWQ0;Q9BX66;Q99704;Q9Y4G6;P27986}  
3788 [Cluster 345]GO:0010175+F molecular\_function [name] sequence-specific core promoter  
binding RNA polymerase II transcription factor activity involved in preinitiation complex  
assembly [def] "Interacting selectively and non-covalently with a specific DNA  
sequence in an RNA polymerase II (Pol II) core promoter, the region composed of the  
transcription start site and binding sites for transcription factors of the Pol II basal  
transcription machinery, in order to promote assembly of the transcriptional  
preinitiation complex (PIC), the formation of which is a prerequisite for transcription  
from an RNA polymerase II promoter." [GOC  
3789 Pathogen[ Q2Q067] interacts with 1 human partners:{Q9UI36}  
3790 Pathogen[ P0C214] interacts with 1 human partners:{Q9UI36}  
3791 Pathogen[ P03346] interacts with 1 human partners:{Q9UI36}  
3792 Pathogen[ Q85601] interacts with 1 human partners:{Q9UI36}  
3793 Pathogen[ P14079] interacts with 1 human partners:{Q9UI36}  
3794 Pathogen[ P03383] interacts with 1 human partners:{Q9UI36}  
3795 Pathogen[ P03410] interacts with 1 human partners:{Q9UI36}  
3796 Pathogen[ P14075] interacts with 1 human partners:{Q9UI36}  
3797 Pathogen[ P0C206] interacts with 1 human partners:{Q9UI36}  
3798 Pathogen[ P03363] interacts with 1 human partners:{Q9UI36}  
3799 [Cluster 346]GO:0004668+F molecular\_function [name] protein-arginine deiminase  
activity [def] "Catalysis of the reaction  
3800 Pathogen[ Q2Q067] interacts with 5 human  
partners:{Q9ULC6;Q9Y2J8;Q9ULW8;Q9UM07;Q6TGC4}  
3801 Pathogen[ P0C214] interacts with 5 human  
partners:{Q9UM07;Q9ULC6;Q6TGC4;Q9ULW8;Q9Y2J8}  
3802 Pathogen[ P03346] interacts with 5 human  
partners:{Q9ULC6;Q6TGC4;Q9Y2J8;Q9ULW8;Q9UM07}  
3803 Pathogen[ Q85601] interacts with 5 human  
partners:{Q9ULW8;Q9UM07;Q6TGC4;Q9Y2J8;Q9ULC6}  
3804 Pathogen[ P14079] interacts with 5 human  
partners:{Q9ULC6;Q9ULW8;Q9Y2J8;Q6TGC4;Q9UM07}  
3805 Pathogen[ P03383] interacts with 5 human  
partners:{Q9ULW8;Q6TGC4;Q9UM07;Q9Y2J8;Q9ULC6}  
3806 Pathogen[ P03410] interacts with 5 human  
partners:{Q9UM07;Q9ULC6;Q6TGC4;Q9Y2J8;Q9ULW8}  
3807 Pathogen[ P14075] interacts with 5 human  
partners:{Q9ULC6;Q9UM07;Q9Y2J8;Q9ULW8;Q6TGC4}  
3808 Pathogen[ P0C206] interacts with 5 human  
partners:{Q9Y2J8;Q9UM07;Q6TGC4;Q9ULC6;Q9ULW8}  
3809 Pathogen[ P03363] interacts with 5 human  
partners:{Q9Y2J8;Q9ULW8;Q9UM07;Q6TGC4;Q9ULC6}  
3810 [Cluster 347]GO:0000400+F molecular\_function [name] four-way junction DNA binding  
[def] "Interacting selectively and non-covalently with DNA containing four-way junctions,  
also known as Holliday junctions, a structure where two DNA double strands are held  
together by reciprocal exchange of two of the four strands, one strand each from the two



```
original helices." [GOC
3811 Pathogen[ Q2Q067] interacts with 2 human partners:{P25490;O00255}
3812 Pathogen[ P0C214] interacts with 1 human partners:{O00255}
3813 Pathogen[ P03346] interacts with 2 human partners:{P25490;O00255}
3814 Pathogen[ Q85601] interacts with 2 human partners:{P25490;O00255}
3815 Pathogen[ P14079] interacts with 3 human partners:{P52701;P25490;O00255}
3816 Pathogen[ P03383] interacts with 1 human partners:{O00255}
3817 Pathogen[ P03410] interacts with 3 human partners:{P25490;P52701;O00255}
3818 Pathogen[ P14075] interacts with 1 human partners:{O00255}
3819 Pathogen[ P0C206] interacts with 3 human partners:{P25490;P52701;O00255}
3820 Pathogen[ P03363] interacts with 1 human partners:{P25490}
3821 [Cluster 348]GO:0008466+F molecular_function [name] glycogenin glucosyltransferase
activity [def] "Catalysis of the reaction
3822 Pathogen[ Q2Q067] interacts with 1 human partners:{P46976}
3823 Pathogen[ P0C214] interacts with 2 human partners:{P46976;O15488}
3824 Pathogen[ P03346] interacts with 1 human partners:{P46976}
3825 Pathogen[ Q85601] interacts with 1 human partners:{P46976}
3826 Pathogen[ P14079] interacts with 2 human partners:{P46976;O15488}
3827 Pathogen[ P03383] interacts with 1 human partners:{P46976}
3828 Pathogen[ P03410] interacts with 2 human partners:{P46976;O15488}
3829 Pathogen[ P14075] interacts with 1 human partners:{P46976}
3830 Pathogen[ P0C206] interacts with 2 human partners:{P46976;O15488}
3831 Pathogen[ P03363] interacts with 1 human partners:{P46976}
3832 [Cluster 349]GO:0003924+F molecular_function [name] GTPase activity [def] "Catalysis
of the reaction
3833 Pathogen[ Q2Q067] interacts with 17 human
partners:{Q9BZE4;Q9BVP2;O60841;Q9NVN8;P62826;P36639;O43236;P57772;Q8IYD1;P50570;P6287
9;Q15029;P23258;P60953;P63000;P61586;P68104}
3834 Pathogen[ P0C214] interacts with 24 human
partners:{P63000;O60841;P57772;Q15029;P61586;P23258;P60953;P15170;Q9H089;P41091;P1363
9;A4D1E9;P36639;Q8IYD1;P62879;P62826;Q9NVN8;P50570;Q9BZE4;O43236;Q05639;Q5VTE0;Q9BVP2
;P36404}
3835 Pathogen[ P03346] interacts with 22 human
partners:{P50570;P41091;Q9BZE4;P23258;P57772;O60841;P36639;P60953;P62826;P62879;P2034
0;O43236;P36404;Q8IYD1;P36405;Q9UHD8;Q15029;Q9NVN8;P63000;P68104;Q9BVP2;P61586}
3836 Pathogen[ Q85601] interacts with 23 human
partners:{P62879;P36405;P41091;Q9BZE4;Q5VTE0;P57772;P62826;P63000;P36639;Q9H089;P2325
8;P15170;Q15029;P68104;P50570;Q8IYD1;P61586;P60953;A4D1E9;Q9NVN8;Q05639;Q9BVP2;O43236
}
3837 Pathogen[ P14079] interacts with 29 human
partners:{Q9BVP2;Q9H4K7;P68104;P41091;P57772;A4D1E9;P68363;P46199;Q15029;O00178;P5057
0;Q8IYD1;Q9BZE4;Q96RP9;P36405;Q15814;Q8NC60;Q14692;P36639;P23258;P61586;P13639;Q969S9
;Q8N442;O60841;P62826;P49411;O43236;Q9H089}
3838 Pathogen[ P03383] interacts with 16 human
partners:{P62879;Q9NVN8;P36639;Q15029;P57772;O43236;P60953;P63000;Q9BZE4;O60841;P6282
6;P61586;P68104;Q8IYD1;Q9BVP2;A4D1E9}
3839 Pathogen[ P03410] interacts with 36 human
partners:{Q9H4K7;Q9NVN8;P68104;Q15029;O60841;P63000;P36639;Q14692;Q96RP9;P46199;P3640
5;Q969S9;P50570;Q15814;P13639;Q8NC60;Q8N442;O43236;P62826;P15170;P61586;Q9H089;Q9BVA1
;Q9UHD8;Q8IYD1;P57772;P60953;Q9BVP2;A4D1E9;P23258;P68363;P41091;O00178;P62879;Q9BZE4;
P49411}
3840 Pathogen[ P14075] interacts with 16 human
partners:{P60953;O60841;P68104;P57772;O43236;P62879;A4D1E9;P36639;Q9NVN8;Q15029;P6282
6;Q8IYD1;P61586;P63000;Q9BZE4;Q9BVP2}
3841 Pathogen[ P0C206] interacts with 23 human
partners:{P41091;P36639;Q9NVN8;P62879;Q9BVP2;Q14692;Q8IYD1;P62826;O43236;Q15814;P6158
6;Q9H089;O60841;P63000;P57772;P60953;P23258;Q9BZE4;P36405;A4D1E9;P68104;P50570;Q15029
}
3842 Pathogen[ P03363] interacts with 22 human
partners:{P62879;Q9NVN8;O60841;Q8IYD1;P50570;P68363;Q9BZE4;P63000;P41091;P57772;Q1502
9;Q13748;Q15814;Q9UHD8;Q9BVP2;P23258;Q99719;P36639;P62826;P60953;O43236;P68104}
3843 [Cluster 350]GO:0004844+F molecular_function [name] uracil DNA N-glycosylase activity
[def] "Catalysis of the cleavage of the N-C1' glycosidic bond between the damaged DNA
base and the deoxyribose sugar, releasing a free base and leaving an apyrimidinic (AP)
site. Enzymes with this activity recognize and remove uracil bases in DNA that result
from the deamination of cytosine or the misincorporation of dUTP opposite an adenine."
[GOC
3844 Pathogen[ Q2Q067] interacts with 4 human partners:{P22674;P27695;P13051;Q53HV7}
3845 Pathogen[ P0C214] interacts with 4 human partners:{P27695;Q53HV7;P22674;P13051}
3846 Pathogen[ P03346] interacts with 4 human partners:{Q53HV7;P13051;P27695;P22674}
3847 Pathogen[ Q85601] interacts with 4 human partners:{P22674;P13051;Q53HV7;P27695}
3848 Pathogen[ P14079] interacts with 4 human partners:{P27695;Q53HV7;P13051;P22674}
3849 Pathogen[ P03383] interacts with 4 human partners:{Q53HV7;P22674;P27695;P13051}
3850 Pathogen[ P03410] interacts with 4 human partners:{P22674;Q53HV7;P27695;P13051}
3851 Pathogen[ P14075] interacts with 4 human partners:{P13051;P27695;Q53HV7;P22674}
3852 Pathogen[ P0C206] interacts with 4 human partners:{P27695;Q53HV7;P13051;P22674}
```

3853 Pathogen[ P03363] interacts with 3 human partners:{P13051;P22674;Q53HV7}

3854 [Cluster 351]GO:0001102+F molecular\_function [name] RNA polymerase II activating transcription factor binding [def] "Interacting selectively and non-covalently with an RNA polymerase II transcription activating factor, a protein involved in positive regulation of transcription." [GOC

3855 Pathogen[ Q2Q067] interacts with 15 human partners:{Q13562;Q12888;P06400;O14503;P28069;P25791;P84022;P11161;Q8IX07;Q9HBH7;P15336;Q92793;Q86U70;Q02577;O75376}

3856 Pathogen[ P0C214] interacts with 16 human partners:{P15336;Q92793;Q9HBH7;P84022;O14503;P25791;Q86U70;O75376;Q8IX07;P28069;P05412;Q02577;P11161;Q12888;P16220;P06400}

3857 Pathogen[ P03346] interacts with 18 human partners:{Q12888;P05412;Q86U70;P16220;P15336;P06400;Q9HBH7;O14503;P84022;P25791;Q9C0J9;Q8IX07;O75376;P11161;P28069;Q92793;Q13562;Q02577}

3858 Pathogen[ Q85601] interacts with 17 human partners:{Q86U70;P06400;P28069;O14503;Q12888;Q13562;P25791;P16220;Q02577;P05412;Q9HBH7;Q8IX07;O75376;P84022;P15336;Q92793;P11161}

3859 Pathogen[ P14079] interacts with 13 human partners:{Q92793;Q86U70;P28069;P11161;P25791;P15336;Q9HBH7;Q8IX07;O75376;Q02577;O14503;P05412;Q12888}

3860 Pathogen[ P03383] interacts with 15 human partners:{Q02577;Q12888;P16220;P28069;O75376;Q86U70;O14503;P06400;P84022;P25791;Q9HBH7;P11161;P15336;Q92793;P05412}

3861 Pathogen[ P03410] interacts with 15 human partners:{P84022;P28069;P25791;P06400;O75376;Q92793;Q8IX07;Q9HBH7;Q86U70;P16220;P05412;Q12888;Q02577;P15336;P11161}

3862 Pathogen[ P14075] interacts with 15 human partners:{P28069;Q02577;Q86U70;P05412;P11161;P15336;O14503;O75376;P25791;Q9HBH7;P06400;Q92793;Q12888;P16220;P84022}

3863 Pathogen[ P0C206] interacts with 17 human partners:{P84022;P11161;P16220;P05412;Q9C0J9;P15336;Q92793;Q12888;O75376;Q9HBH7;P25791;Q13562;Q8IX07;Q86U70;P28069;Q02577;P06400}

3864 Pathogen[ P03363] interacts with 16 human partners:{Q86U70;Q9HBH7;O75376;Q9C0J9;P16220;P06400;P25791;P15336;P28069;P84022;Q92793;P05412;O14503;Q12888;Q02577;P11161}

3865 [Cluster 352]GO:0005080+F molecular\_function [name] protein kinase C binding [def] "Interacting selectively and non-covalently with protein kinase C." [GOC

3866 Pathogen[ Q2Q067] interacts with 14 human partners:{P31749;Q9NPB6;Q9UKV0;P61981;P29966;P04792;P15924;P11388;Q9UQL6;Q07021;Q9NYF0;Q8WUI4;Q99689;Q13501}

3867 Pathogen[ P0C214] interacts with 15 human partners:{P29966;Q969G5;P15924;P04792;Q13501;Q9NPB6;Q5SW24;Q9UKV0;Q99689;P11388;P61981;Q8WUI4;Q9NYF0;Q9UQL6;P31749}

3868 Pathogen[ P03346] interacts with 20 human partners:{P15924;O75112;P11388;Q9BYM8;Q99689;Q07021;Q9NPB6;Q8TEW0;P31749;O76003;Q8WUI4;P29966;P61981;Q9NYF0;Q9UKV0;Q92832;Q9UQL6;Q9NRD5;P04792;Q13501}

3869 Pathogen[ Q85601] interacts with 17 human partners:{P61981;Q9UKV0;P31749;O75112;Q9UQL6;Q9NYF0;P15924;O76003;P11388;Q99689;Q9NPB6;P29966;P04792;Q8WUI4;Q07021;Q13501;Q5SW24}

3870 Pathogen[ P14079] interacts with 24 human partners:{P31751;Q9UQL6;O75112;P11388;Q5SW24;P15924;Q8WUI4;Q9UKV0;Q96B18;Q8TEW0;P61981;Q99689;P29966;Q92832;Q9BYM8;O76003;Q13501;P49773;Q9NPB6;P04792;Q9UEY8;Q07021;Q969G5;Q9NYF0}

3871 Pathogen[ P03383] interacts with 13 human partners:{P15924;Q9UQL6;P31749;Q99689;P04792;Q9NPB6;P29966;Q13501;Q9UKV0;P61981;Q9NYF0;Q07021;Q8WUI4}

3872 Pathogen[ P03410] interacts with 24 human partners:{Q9UKV0;P15924;Q9UEY8;O76003;Q96B18;Q07021;Q13501;P31749;P04792;Q92832;Q8WUI4;Q9UQL6;P61981;Q9NRD5;P49773;Q5SW24;Q969G5;Q9NYF0;P11388;O75112;Q8TEW0;Q9NPB6;P29966;Q99689}

3873 Pathogen[ P14075] interacts with 13 human partners:{Q07021;P04792;Q9UKV0;P61981;P31749;P29966;Q9UQL6;Q9NPB6;Q8WUI4;Q9NYF0;Q13501;P15924;Q99689}

3874 Pathogen[ P0C206] interacts with 23 human partners:{Q13501;P31749;Q07021;Q9UKV0;Q969G5;P04792;Q96B18;Q5SW24;Q99689;Q8TEW0;O75112;Q8WUI4;P61981;Q9NPB6;O76003;P15924;Q9NYF0;P11388;Q92832;Q9BYM8;Q9NRD5;P29966;Q9UQL6}

3875 Pathogen[ P03363] interacts with 15 human partners:{O75112;O76003;Q9NPB6;Q9UQL6;Q9NYF0;P15924;Q07021;Q92832;P31749;Q9UKV0;P29966;Q8WUI4;P61981;P04792;Q99689}

3876 [Cluster 353]GO:0004521+F molecular\_function [name] endoribonuclease activity [def] "Catalysis of the hydrolysis of ester linkages within ribonucleic acid by creating internal breaks." [GOC

3877 Pathogen[ Q2Q067] interacts with 4 human partners:{Q9NRR4;Q86US8;Q9UKV8;Q9UKF6}

3878 Pathogen[ P0C214] interacts with 4 human partners:{Q9UKF6;Q86US8;Q9NRR4;Q9UKV8}

3879 Pathogen[ P03346] interacts with 4 human partners:{Q86US8;Q9UKF6;Q9UKV8;Q9NRR4}

3880 Pathogen[ Q85601] interacts with 4 human partners: {Q9NRR4;Q9UKV8;Q86US8;Q9UKF6}  
3881 Pathogen[ P14079] interacts with 4 human partners: {Q9UKV8;Q9UKF6;Q86US8;Q9NRR4}  
3882 Pathogen[ P03383] interacts with 4 human partners: {Q9NRR4;Q9UKF6;Q86US8;Q9UKV8}  
3883 Pathogen[ P03410] interacts with 4 human partners: {Q9UKV8;Q9NRR4;Q86US8;Q9UKF6}  
3884 Pathogen[ P14075] interacts with 4 human partners: {Q86US8;Q9NRR4;Q9UKV8;Q9UKF6}  
3885 Pathogen[ P0C206] interacts with 4 human partners: {Q9UKF6;Q9UKV8;Q86US8;Q9NRR4}  
3886 Pathogen[ P03363] interacts with 4 human partners: {Q86US8;Q9UKV8;Q9NRR4;Q9UKF6}  
3887 [Cluster 354]GO:0008171+F molecular\_function [name] O-methyltransferase activity [def] "Catalysis of the transfer of a methyl group to the oxygen atom of an acceptor molecule."  
[GOC  
3888 Pathogen[ Q2Q067] interacts with 3 human partners: {O95671;Q7Z5W3;Q5T8I9}  
3889 Pathogen[ P0C214] interacts with 3 human partners: {O95671;Q7Z5W3;Q5T8I9}  
3890 Pathogen[ P03346] interacts with 3 human partners: {Q5T8I9;O95671;Q7Z5W3}  
3891 Pathogen[ Q85601] interacts with 3 human partners: {O95671;Q7Z5W3;Q5T8I9}  
3892 Pathogen[ P14079] interacts with 2 human partners: {O95671;Q7Z5W3}  
3893 Pathogen[ P03383] interacts with 3 human partners: {Q5T8I9;O95671;Q7Z5W3}  
3894 Pathogen[ P03410] interacts with 3 human partners: {Q5T8I9;Q7Z5W3;O95671}  
3895 Pathogen[ P14075] interacts with 3 human partners: {Q7Z5W3;O95671;Q5T8I9}  
3896 Pathogen[ P0C206] interacts with 3 human partners: {O95671;Q7Z5W3;Q5T8I9}  
3897 Pathogen[ P03363] interacts with 3 human partners: {Q5T8I9;O95671;Q7Z5W3}  
3898 [Cluster 355]GO:0017162+F molecular\_function [name] aryl hydrocarbon receptor binding  
[def] "Interacting selectively and non-covalently with an aryl hydrocarbon receptor."  
[GOC  
3899 Pathogen[ Q2Q067] interacts with 2 human partners: {P27540;Q9HBZ2}  
3900 Pathogen[ P0C214] interacts with 2 human partners: {Q9HBZ2;P27540}  
3901 Pathogen[ P03346] interacts with 3 human partners: {P27540;O00327;Q9HBZ2}  
3902 Pathogen[ Q85601] interacts with 3 human partners: {O00327;P27540;Q9HBZ2}  
3903 Pathogen[ P14079] interacts with 2 human partners: {P27540;Q9HBZ2}  
3904 Pathogen[ P03383] interacts with 1 human partners: {P27540}  
3905 Pathogen[ P03410] interacts with 2 human partners: {Q9HBZ2;P27540}  
3906 Pathogen[ P14075] interacts with 1 human partners: {P27540}  
3907 Pathogen[ P0C206] interacts with 3 human partners: {O00327;P27540;Q9HBZ2}  
3908 Pathogen[ P03363] interacts with 3 human partners: {P27540;Q9HBZ2;O00327}  
3909 [Cluster 356]GO:0003899+F molecular\_function [name] DNA-directed RNA polymerase  
activity [def] "Catalysis of the reaction  
3910 Pathogen[ Q2Q067] interacts with 29 human  
partners: {O95602;P52434;O00411;Q9GZS1;P19388;P52435;Q9H944;P30876;P19387;P61218;Q9H9Y  
6;Q9BUI4;P62487;Q9Y5B0;Q9NVU0;P62875;P24928;Q13503;Q3B726;O15318;P53803;Q9Y535;Q9BWH6  
;P05423;O14802;Q9H1D9;Q9Y2S0;O15446;O15160}  
3911 Pathogen[ P0C214] interacts with 33 human  
partners: {O00411;P30876;Q9H9Y6;Q9BUI4;P53803;Q9NVU0;Q9BWH6;P52435;O15446;Q9H1A7;Q9H1D  
9;Q9Y2S0;P61218;P05423;Q9H944;Q9GZS1;P62487;Q3B726;O15318;Q9NW08;P62875;P24928;O15160  
;Q9Y535;Q9GZM3;O95602;Q9Y5B0;P52434;P19387;Q13503;P19388;O14802;Q9P1U0}  
3912 Pathogen[ P03346] interacts with 34 human  
partners: {Q9NVU0;P52434;P0CAP2;Q9H1A7;P05423;P53803;Q9H9Y6;P61218;Q9Y5B0;O15318;P6248  
7;P19388;Q9GZM3;P52435;Q9H1D9;O15160;Q9Y535;P36954;Q9BWH6;O00411;Q9BUI4;O15446;Q9H944  
;O95602;P30876;P24928;Q13503;O14802;Q9GZS1;Q9Y2S0;P62875;P19387;Q3B726;Q9P1U0}  
3913 Pathogen[ Q85601] interacts with 35 human  
partners: {P36954;Q9P1U0;O95602;Q9H1D9;Q9BWH6;Q9Y535;Q9BUI4;Q9Y2Y1;P53803;Q9Y2S0;P6121  
8;P05423;Q9GZS1;Q9NVU0;Q9H9Y6;Q9H944;P62487;Q13503;P19388;Q9H1A7;Q3B726;Q9Y5B0;P52435  
;Q9NW08;O15446;P19387;P24928;P30876;P52434;O15160;O00411;Q9GZM3;O14802;O15318;P62875}  
3914 Pathogen[ P14079] interacts with 38 human  
partners: {Q9Y2S0;P62875;Q9GZM3;P19387;Q9Y5B0;Q9BWH6;P62487;Q9NW08;O15446;P52434;Q9GZS  
1;O15514;P30876;P61218;P53803;Q9H1A7;Q9P1U0;P19388;Q9BUI4;P05423;O15160;P52435;Q3B726  
;Q9H944;Q9Y2Y1;P49642;O00411;Q13503;Q9NVU0;O95602;P24928;O14802;O15318;Q9H1D9;P36954;  
P0CAP2;Q9Y535;Q9H9Y6}  
3915 Pathogen[ P03383] interacts with 26 human  
partners: {P53803;O95602;Q9H944;Q9Y535;Q9H9Y6;P0CAP2;P52434;P61218;Q9GZS1;Q9H1D9;Q9NVU  
0;P62487;P19387;P24928;P62875;P52435;O15318;Q9Y5B0;O00411;P19388;P30876;O15446;O14802  
;Q9BWH6;Q3B726;Q13503}  
3916 Pathogen[ P03410] interacts with 38 human  
partners: {Q9BWH6;P19387;P36954;Q9GZM3;P24928;Q9H1A7;Q13503;P30876;O00411;O15514;O1531  
8;Q9Y535;Q9NW08;P52435;O95602;P53803;Q9Y2S0;P62875;P05423;Q9GZS1;Q9P1U0;P0CAP2;P61218  
;Q9Y2Y1;O15160;Q9Y5B0;P52434;Q3B726;P62487;Q9H1D9;O15446;Q9NVU0;Q9H944;P19388;O14802;  
Q9BUI4;P49642;Q9H9Y6}  
3917 Pathogen[ P14075] interacts with 26 human  
partners: {Q9NVU0;Q9BWH6;P0CAP2;Q9GZS1;P30876;Q9Y5B0;P19388;P61218;P19387;P62487;Q3B72  
6;O00411;Q9H1D9;Q9H944;P24928;Q9Y535;Q9H9Y6;O95602;Q13503;P62875;O15446;P52434;O14802  
;O15318;P52435;P53803}  
3918 Pathogen[ P0C206] interacts with 38 human  
partners: {Q9BWH6;Q9P1U0;P62875;Q9GZM3;P36954;O95602;P19388;P61218;Q9NW08;Q9BUI4;O1531  
8;P49642;Q3B726;Q9Y535;P05423;Q9NVU0;P53803;O15514;Q9Y5B0;P19387;Q9Y2S0;Q9H944;O15446  
;P52435;P62487;Q9GZS1;P24928;Q13503;O14802;Q9Y2Y1;Q9H9Y6;P0CAP2;Q9H1D9;P52434;O15160;  
Q9H1A7;O00411;P30876}  
3919 Pathogen[ P03363] interacts with 29 human  
partners: {O00411;Q9Y535;Q9Y5B0;Q13503;Q9GZM3;P19388;Q9H9Y6;P30876;P19387;Q9NVU0;P6121

8;Q9H1D9;O95602;P24928;Q9GZS1;O15446;Q3B726;Q9H1A7;P05423;O15318;Q9BWH6;P62487;POCAP2;P53803;P52435;P52434;Q9Y2S0;Q9H944;O15160}

3920 [Cluster 357]GO:0030331+F molecular\_function [name] estrogen receptor binding [def] "Interacting selectively and non-covalently with an estrogen receptor." [GOC

3921 Pathogen[ Q2Q067] interacts with 10 human

3922 partners: {Q8WXU2;P55345;P48552;Q12962;Q8N895;Q14686;Q96T76;Q99623;P27986;Q92841}

3922 Pathogen[ P0C214] interacts with 10 human

3923 partners: {P48552;Q92841;Q99623;Q12962;P55345;Q14686;Q8WXU2;Q8N895;P27986;Q96T76}

3923 Pathogen[ P03346] interacts with 13 human

3924 partners: {P58012;Q92841;Q9P2W1;O43815;Q8N895;P55345;Q8WXU2;Q12962;Q99623;P48552;Q96T76;P27986;Q14686}

3924 Pathogen[ Q85601] interacts with 10 human

3925 partners: {Q96T76;O43815;Q8N895;Q8WXU2;Q99623;P27986;Q14686;Q12962;P48552;P55345}

3925 Pathogen[ P14079] interacts with 9 human

3926 partners: {P48552;Q99623;Q8N895;O43815;Q8WXU2;P55345;Q12962;Q96T76;Q14686}

3926 Pathogen[ P03383] interacts with 9 human

3927 partners: {P27986;Q96T76;Q14686;Q92841;Q8N895;Q12962;P48552;Q8WXU2;Q99623}

3927 Pathogen[ P03410] interacts with 11 human

3928 partners: {P27986;Q8WXU2;Q96T76;Q12962;Q14686;Q99623;O43815;Q8N895;P48552;P55345;Q5MNNZ9}

3928 Pathogen[ P14075] interacts with 9 human

3929 partners: {Q12962;Q14686;Q99623;P27986;Q8N895;Q92841;P48552;Q8WXU2;Q96T76}

3929 Pathogen[ P0C206] interacts with 11 human

3930 partners: {O43815;Q99623;P27986;Q8N895;Q14686;Q92841;Q96T76;Q12962;P55345;Q8WXU2;P48552}

3930 Pathogen[ P03363] interacts with 10 human

3931 partners: {Q99623;Q14686;Q12962;P48552;Q96T76;Q92841;O43815;Q8N895;Q8WXU2;P27986}

3931 [Cluster 358]GO:0005164+F molecular\_function [name] tumor necrosis factor receptor binding [def] "Interacting selectively and non-covalently with the tumor necrosis factor receptor." [GOC

3932 Pathogen[ Q2Q067] interacts with 5 human

3933 partners: {Q12933;Q13158;Q14790;P42224;Q9NXR7}

3933 Pathogen[ P0C214] interacts with 6 human

3934 partners: {Q13158;P42224;Q12933;Q9NXR7;P80303;Q14790}

3934 Pathogen[ P03346] interacts with 6 human

3935 partners: {P80303;Q13158;Q9NXR7;O94972;P42224;Q14790}

3935 Pathogen[ Q85601] interacts with 6 human

3936 partners: {Q13158;Q14790;P80303;Q12933;P42224;Q9NXR7}

3936 Pathogen[ P14079] interacts with 6 human

3937 partners: {P80303;Q9NXR7;Q14790;P42224;Q12933;Q13158}

3937 Pathogen[ P03383] interacts with 3 human partners: {Q13158;Q12933;Q9NXR7}

3938 Pathogen[ P03410] interacts with 4 human partners: {Q9NXR7;P80303;Q13158;Q12933}

3939 Pathogen[ P14075] interacts with 3 human partners: {Q9NXR7;Q12933;Q13158}

3940 Pathogen[ P0C206] interacts with 6 human

3941 partners: {P80303;Q13158;Q12933;Q14790;P42224;Q9NXR7}

3941 Pathogen[ P03363] interacts with 4 human partners: {O94972;Q12933;Q13158;Q9NXR7}

3942 [Cluster 359]GO:0051864+F molecular\_function [name] histone demethylase activity (H3-K36 specific) [def] "Catalysis of the reaction

3943 Pathogen[ Q2Q067] interacts with 5 human

3944 partners: {Q9UPP1;Q8NHM5;O75164;Q9H6W3;Q8N371}

3944 Pathogen[ P0C214] interacts with 5 human

3945 partners: {Q8N371;O75164;Q9H6W3;Q9UPP1;Q8NHM5}

3945 Pathogen[ P03346] interacts with 5 human

3946 partners: {O75164;Q9UPP1;Q8N371;Q8NHM5;Q9H6W3}

3946 Pathogen[ Q85601] interacts with 5 human

3947 partners: {Q8N371;Q9H6W3;Q8NHM5;Q9UPP1;O75164}

3947 Pathogen[ P14079] interacts with 4 human partners: {Q8NHM5;Q9H6W3;Q9UPP1;Q8N371}

3948 Pathogen[ P03383] interacts with 4 human partners: {Q9H6W3;O75164;Q8N371;Q9UPP1}

3949 Pathogen[ P03410] interacts with 4 human partners: {Q9UPP1;Q9H6W3;Q8N371;O75164}

3950 Pathogen[ P14075] interacts with 4 human partners: {Q8N371;Q9UPP1;Q9H6W3;O75164}

3951 Pathogen[ P0C206] interacts with 5 human

3952 partners: {Q8N371;Q9UPP1;Q9H6W3;Q8NHM5;O75164}

3952 Pathogen[ P03363] interacts with 1 human partners: {O75164}

3953 [Cluster 360]GO:0043515+F molecular\_function [name] kinetochore binding [def] "Interacting selectively and non-covalently with a kinetochore, a proteinaceous structure on a condensed chromosome, beside the centromere, to which the spindle fibers are attached." [GOC

3954 Pathogen[ Q2Q067] interacts with 3 human partners: {Q7Z460;Q9H3R5;Q96EA4}

3955 Pathogen[ P0C214] interacts with 3 human partners: {Q96EA4;Q9H3R5;Q7Z460}

3956 Pathogen[ P03346] interacts with 3 human partners: {Q96EA4;Q7Z460;Q9H3R5}

3957 Pathogen[ Q85601] interacts with 3 human partners: {Q9H3R5;Q96EA4;Q7Z460}

3958 Pathogen[ P14079] interacts with 3 human partners: {Q7Z460;Q96EA4;Q9H3R5}

3959 Pathogen[ P03383] interacts with 3 human partners: {Q7Z460;Q96EA4;Q9H3R5}

3960 Pathogen[ P03410] interacts with 3 human partners: {Q7Z460;Q9H3R5;Q96EA4}

3961 Pathogen[ P14075] interacts with 3 human partners: {Q7Z460;Q9H3R5;Q96EA4}

3962 Pathogen[ P0C206] interacts with 3 human partners: {Q9H3R5;Q96EA4;Q7Z460}

3963 Pathogen[ P03363] interacts with 3 human partners:{Q96EA4;Q7Z460;Q9H3R5}  
3964 [Cluster 361]GO:0031699+F molecular\_function [name] beta-3 adrenergic receptor binding  
[def] "Interacting selectively and non-covalently with a beta-3 adrenergic receptor."  
[GOC  
3965 Pathogen[ Q2Q067] interacts with 1 human partners:{Q96B67}  
3966 Pathogen[ P0C214] interacts with 1 human partners:{Q96B67}  
3967 Pathogen[ P03346] interacts with 1 human partners:{Q96B67}  
3968 Pathogen[ Q85601] interacts with 1 human partners:{Q96B67}  
3969 Pathogen[ P14079] interacts with 1 human partners:{Q96B67}  
3970 Pathogen[ P03383] interacts with 1 human partners:{Q96B67}  
3971 Pathogen[ P03410] interacts with 1 human partners:{Q96B67}  
3972 Pathogen[ P14075] interacts with 1 human partners:{Q96B67}  
3973 Pathogen[ P0C206] interacts with 1 human partners:{Q96B67}  
3974 Pathogen[ P03363] interacts with 1 human partners:{Q96B67}  
3975 [Cluster 362]GO:0003724+F molecular\_function [name] RNA helicase activity [def]  
"Catalysis of the reaction  
3976 Pathogen[ Q2Q067] interacts with 4 human partners:{P26196;Q08211;Q92499;Q92841}  
3977 Pathogen[ P0C214] interacts with 4 human partners:{P26196;Q92841;Q92499;Q08211}  
3978 Pathogen[ P03346] interacts with 4 human partners:{Q92841;Q08211;Q92499;P26196}  
3979 Pathogen[ Q85601] interacts with 3 human partners:{Q92499;Q08211;P26196}  
3980 Pathogen[ P14079] interacts with 3 human partners:{Q08211;P26196;Q92499}  
3981 Pathogen[ P03383] interacts with 3 human partners:{Q92841;P26196;Q92499}  
3982 Pathogen[ P03410] interacts with 2 human partners:{Q92499;Q08211}  
3983 Pathogen[ P14075] interacts with 3 human partners:{P26196;Q92499;Q92841}  
3984 Pathogen[ P0C206] interacts with 4 human partners:{Q08211;P26196;Q92841;Q92499}  
3985 Pathogen[ P03363] interacts with 4 human partners:{Q92841;Q92499;P26196;Q08211}  
3986 [Cluster 363]GO:0003823+F molecular\_function [name] antigen binding [def]  
"Interacting selectively and non-covalently with an antigen, any substance which is  
capable of inducing a specific immune response and of reacting with the products of that  
response, the specific antibody or specifically sensitized T-lymphocytes, or both.  
Binding may counteract the biological activity of the antigen." [GOC  
3987 Pathogen[ Q2Q067] interacts with 3 human partners:{P30153;Q9NS56;Q86WV1}  
3988 Pathogen[ P0C214] interacts with 3 human partners:{P30153;Q9NS56;Q86WV1}  
3989 Pathogen[ P03346] interacts with 4 human partners:{P30153;Q9NS56;P01858;Q86WV1}  
3990 Pathogen[ Q85601] interacts with 3 human partners:{Q9NS56;P30153;Q86WV1}  
3991 Pathogen[ P14079] interacts with 4 human partners:{Q86WV1;Q9NS56;P30153;P01858}  
3992 Pathogen[ P03383] interacts with 2 human partners:{Q86WV1;P30153}  
3993 Pathogen[ P03410] interacts with 4 human partners:{Q86WV1;P01858;P12018;P30153}  
3994 Pathogen[ P14075] interacts with 3 human partners:{Q86WV1;P01858;P30153}  
3995 Pathogen[ P0C206] interacts with 4 human partners:{Q9NS56;P30153;P01858;Q86WV1}  
3996 Pathogen[ P03363] interacts with 3 human partners:{Q86WV1;P01858;P30153}  
3997 [Cluster 364]GO:0003725+F molecular\_function [name] double-stranded RNA binding [def]  
"Interacting selectively and non-covalently with double-stranded RNA." [GOC  
3998 Pathogen[ Q2Q067] interacts with 22 human  
partners:{Q12905;Q9Y6K5;Q9NR56;P55265;Q9NXV6;O15226;Q9NUL3;Q9NRR4;Q32MZ4;Q7Z2E3;Q1563  
3;O95793;Q8WYQ5;Q12906;Q08211;Q92499;Q9H9J2;Q9BYX4;Q9H875;Q9BWU0;Q9UL40;P18583}  
3999 Pathogen[ P0C214] interacts with 25 human  
partners:{Q9H9J2;Q9H875;Q9NR56;P55265;Q9Y6K5;Q12906;P29728;Q9UL40;Q9BYX4;Q12905;Q32MZ  
4;Q15633;Q9BWU0;P18583;Q7Z2E3;Q9NUL3;O15226;Q9NRR4;Q9NXV6;Q92499;Q9H2U1;O95793;Q08211  
;Q8WYQ5;Q9NS39}  
4000 Pathogen[ P03346] interacts with 27 human  
partners:{Q12905;P55265;Q32MZ4;Q9NS39;Q15633;Q12906;P18583;Q9NUL3;Q08211;Q9NXV6;Q9579  
3;Q9H2U1;Q9UL40;Q92499;Q15646;O75569;Q9H875;Q9BYX4;Q9NRR4;Q7Z2E3;O15226;Q9BWU0;Q9NQ94  
;Q9NR56;Q9Y6K5;Q9H9J2;Q8WYQ5}  
4001 Pathogen[ Q85601] interacts with 23 human  
partners:{O95793;Q9NRR4;O15226;Q9NR56;Q92499;Q08211;Q9BWU0;Q8WYQ5;Q9Y6K5;Q12906;Q9UL4  
0;Q9H875;Q9BYX4;Q32MZ4;Q15633;P55265;Q9NUL3;P18583;Q12905;Q7Z2E3;Q9H9J2;Q9NXV6;Q9H2U1  
}  
4002 Pathogen[ P14079] interacts with 26 human  
partners:{Q9UL40;O95793;Q9BYX4;P29728;Q9BWU0;Q12906;Q9NXV6;Q32MZ4;O75569;Q9NS39;Q9NR5  
6;Q08211;Q9NQ94;Q12905;P55265;Q9NUL3;Q9Y6K5;Q9NRR4;Q9H9J2;Q9H875;Q8WYQ5;Q92499;O15226  
;P18583;Q7Z2E3;Q96C10}  
4003 Pathogen[ P03383] interacts with 19 human  
partners:{Q7Z2E3;Q9NRR4;Q32MZ4;Q9NR56;Q8WYQ5;Q9BWU0;P18583;Q12905;Q9Y6K5;Q12906;Q9H9J  
2;P55265;Q9NXV6;Q92499;Q9NUL3;Q9H875;Q9UL40;O15226;Q15633}  
4004 Pathogen[ P03410] interacts with 26 human  
partners:{Q9H875;Q15633;P29728;Q9BYX4;Q9NR56;Q9NXV6;Q32MZ4;P55265;Q8WYQ5;Q9H9J2;Q9NRR  
4;O15226;O75569;Q7Z2E3;Q9UL40;Q92499;Q9BWU0;Q12905;P18583;Q9NUL3;Q9Y6K5;Q96C10;O95793  
;Q08211;Q12906;Q9H2U1}  
4005 Pathogen[ P14075] interacts with 19 human  
partners:{Q7Z2E3;Q9NXV6;P55265;Q9NUL3;Q12905;O15226;Q12906;Q9H9J2;Q92499;Q9NR56;Q9Y6K  
5;Q9NRR4;Q15633;Q32MZ4;Q9UL40;P18583;Q9BWU0;Q9H875;Q8WYQ5}  
4006 Pathogen[ P0C206] interacts with 26 human  
partners:{P55265;Q12905;P18583;Q08211;Q9NR56;Q9Y6K5;Q9NXV6;Q9BWU0;Q9NS39;P29728;O1522  
6;Q32MZ4;O95793;Q9NUL3;Q9NRR4;Q15633;Q9H875;Q9H2U1;Q9H9J2;Q9BYX4;Q96C10;Q92499;Q8WYQ5  
;Q9UL40;Q7Z2E3;Q12906}

4007 Pathogen[ P03363] interacts with 27 human partners: {Q9Y6K5; Q9H875; Q32MZ4; Q8IY21; Q9NS39; Q95793; Q9NUL3; Q9UL40; Q9H9J2; Q9NR56; Q15633; Q15226; Q12906; P18583; Q7Z2E3; Q92499; P55265; Q9NRR4; Q12905; Q9BYX4; Q9H2U1; Q9BWU0; Q08211; Q8WYQ5; Q9NXV6; Q75569; Q9NQ94}

4008 [Cluster 365]GO:0050072+F molecular\_function [name] m7G(5')pppN diphosphatase activity [def] "Catalysis of the reaction

4009 Pathogen[ Q2Q067] interacts with 1 human partners: {Q96C86}

4010 Pathogen[ P0C214] interacts with 1 human partners: {Q96C86}

4011 Pathogen[ P03346] interacts with 1 human partners: {Q96C86}

4012 Pathogen[ Q85601] interacts with 1 human partners: {Q96C86}

4013 Pathogen[ P14079] interacts with 1 human partners: {Q96C86}

4014 Pathogen[ P03383] interacts with 1 human partners: {Q96C86}

4015 Pathogen[ P03410] interacts with 1 human partners: {Q96C86}

4016 Pathogen[ P14075] interacts with 1 human partners: {Q96C86}

4017 Pathogen[ P0C206] interacts with 1 human partners: {Q96C86}

4018 Pathogen[ P03363] interacts with 1 human partners: {Q96C86}

4019 [Cluster 366]GO:0004842+F molecular\_function [name] ubiquitin-protein ligase activity [def] "Catalysis of the reaction

4020 Pathogen[ Q2Q067] interacts with 113 human partners: {Q95376; Q96J02; Q14258; Q9UPN9; Q9HAU4; Q5JXB2; Q9UII4; Q13356; Q9NS56; Q9UJX5; P62837; P53804; Q8IYW8; Q15386; Q13829; P19474; Q06260; Q9HC52; Q9UDY8; P49427; Q00762; Q9Y2X8; Q43255; Q96T88; Q9NVW2; Q9NZJ0; Q12933; P14373; P60604; Q9UJT9; Q6ZNA4; P63279; Q6VVB1; Q9NYG5; Q7Z6Z7; P51965; Q9Y3I1; P35227; Q14669; P61077; Q9UJX2; P63146; Q9Y297; Q9UKC9; Q9UK73; P78317; Q6W2J9; Q5TA31; Q86Y13; Q8NE65; Q9UM13; P40337; Q99728; Q9Y4X5; Q8N1E6; Q9NPD8; Q14933; Q95628; P51668; Q8TBB1; Q96EP1; Q13114; Q96PM5; Q9NTX7; Q13233; Q96PU5; Q15164; P61088; P35226; Q9Y4L5; Q60291; Q13618; Q99496; Q5VTR2; Q96FA3; Q9UKT7; Q76064; Q13309; Q9UK99; Q13216; Q8TDB6; Q9UJX4; Q9Y2M5; Q75150; Q9NR09; Q8TCJ0; Q9UNE7; Q14139; P49459; Q96PU4; Q05086; P62256; P68036; Q9H3F6; Q9UJX6; Q9NRD1; Q92466; Q86XK2; Q9UH90; Q9Y252; Q00463; Q13490; P22681; Q00987; Q9UMS4; Q8NEZ5; P63208; Q06587; Q9UKT5; P62877; Q8IUD6; Q7Z6E9; Q9NW38}

4021 Pathogen[ P0C214] interacts with 137 human partners: {P22681; Q05086; Q14933; Q96B02; Q9UJX6; Q9UKA1; Q96J02; Q9H832; P35226; Q8IYW8; Q9Y3I1; Q16763; Q96PM5; P35227; P19474; Q9HAU4; Q9UK99; Q99728; Q00762; Q13490; Q9UH90; Q95628; Q13829; Q00987; Q13309; P49427; Q9NS56; Q9UJX4; Q9UDY8; Q96FA3; Q9UJX5; P63208; Q9NTX7; Q96PU4; Q6W2J9; Q5JXB2; Q8IUD6; Q8N1E6; P63279; P49459; Q8NG27; Q13618; Q969T4; Q9NRD1; Q9UJX2; Q9Y297; P62877; Q00308; Q5T447; P51965; Q96T88; Q9UKT7; P78317; Q9H0M0; Q9UMS4; P61077; Q13216; Q9HCE7; Q14258; P62253; P98170; Q13233; P61086; Q95071; Q7Z6E9; Q06587; Q9Y2X8; Q14139; Q13356; Q15386; Q95376; Q12933; Q9NVW2; Q9Y2M5; Q9NZJ0; Q9UII4; P40337; P53804; Q8WZ19; Q9UKC9; Q8TBB1; Q9Y252; Q5TA31; Q6ZNA4; Q99496; Q9H4P4; Q14669; Q60291; Q15164; Q13114; Q9UJX4; Q94952; Q86XK2; Q9H469; Q86Y13; Q75150; Q9NR09; Q7Z6Z7; Q95155; Q60260; Q9UK73; Q712K3; P62256; Q9Y4L5; Q9H3F6; P51668; P14373; Q00463; Q92466; Q9Y4X5; Q5VTR2; Q8TDB6; Q8IYW5; Q8TCJ0; Q43255; Q9UNE7; Q96CA5; Q76064; Q9NPD8; Q9UPN9; Q8NE65; P61081; Q9UJX4; Q96LR5; Q9NYG5; Q9UM13; Q9HC52; P63146; Q6VVB1; P61088; Q96PU5; Q9NW38; Q8IYW7; Q96EP1; Q9UKT5; Q9UKT8; P60604}

4022 Pathogen[ P03346] interacts with 145 human partners: {Q9NZJ0; Q9UPN9; Q96J02; Q00463; Q9UKT7; Q13263; Q76064; Q9HAU4; Q9P2N7; Q9H469; Q8WZ19; Q96PU5; P68036; Q14258; P14373; Q6PCD5; Q75150; Q13489; Q5VTR2; Q95155; Q95376; Q9UJT9; Q95714; P49427; Q8NEZ5; Q9BYM8; Q99728; P35226; Q9UDY8; Q8IUD6; Q95628; Q8NE65; Q9UMS4; Q13618; Q9HC52; Q9UII4; Q96PM5; Q9H4P4; Q43255; P35227; Q9NTX7; Q9UKT8; P98170; Q9UM13; Q8WV22; P63279; Q9NYG5; Q86XK2; Q15386; P49459; Q9Y2X8; Q5TA31; Q13114; Q13829; P51668; Q5T447; Q96AX9; P61077; Q00987; Q96FA3; P61088; Q9UKA1; Q8N1E6; Q9UJX6; P62877; Q8TCJ0; Q14139; Q96EP0; Q9NS56; P60604; Q94972; P51965; Q13309; Q9UJX5; Q7Z6E9; P63146; Q9UKT5; Q9UNE7; Q00762; Q9UJX2; Q14669; P62837; Q9NRD1; Q8IUD6; Q9C040; Q13233; Q6ZNA4; Q6Q0C0; P63208; Q9NPD8; Q99496; Q13356; Q13216; P78317; Q8IYW5; Q8TBB1; Q6VVB1; P40337; Q60291; Q9BUZ4; Q9UH90; Q60260; Q9UJX4; Q94952; Q8IYW8; P19474; Q14933; Q9NR09; Q13490; Q9ULT8; Q9P2J3; Q9UK99; Q9Y4L5; Q5JXB2; Q96PU4; P22681; Q05086; P62256; Q8TDB6; Q9H0M0; Q9H3F6; Q9Y2M5; P53804; Q9Y4X5; Q92466; Q9Y252; Q9NW38; Q95071; Q9UJX4; Q96CA5; Q8NG27; Q9Y297; Q9UKC9; Q7Z6Z7; Q06587; Q9Y3I1; Q94822; Q15164; Q9UK73; Q6W2J9; Q96T88; Q86Y13; Q9NVW2; Q96EP1; Q00308}

4023 Pathogen[ Q85601] interacts with 138 human partners: {Q14139; Q9UJX2; Q7Z6E9; Q9UPN9; Q96J02; P78317; Q9Y3I1; Q13309; P62253; P22681; Q9HAU4; Q9NS56; P14373; Q9UJX6; Q16763; Q13490; Q8TDB6; P63146; Q14933; Q8WZ19; Q14258; Q8IYW7; Q00463; Q95714; P49427; Q9Y2X8; Q9UDY8; Q13216; P62877; P40337; Q9UMS4; Q6PCD5; Q96PM5; Q96PU4; Q99728; Q9Y4L5; Q9NZJ0; P98170; Q96PU5; Q969T4; Q14669; Q86XK2; Q8IUD6; Q15386; Q95155; Q96B02; Q15164; Q9NPD8; Q5TA31; Q13114; P51668; Q96LR5; P68036; P61077; Q9UJX4; P63279; Q96FA3; Q9UKC9; Q9UKA1; Q8N1E6; Q13263; Q60291; Q9UKT7; Q9UK73; P63208; Q76064; Q9UJX5; Q12933; P51965; Q9H469; Q95628; Q9UM13; Q9UJT9; Q9NYG5; P61086; Q96T88; Q00762; Q9NTX7; Q9NW38; Q99496; Q13356; P49459; Q8IYW5; Q8TBB1; Q6VVB1; Q8NE65; Q75150; Q95376; Q60260; Q9UJX4; Q9P2J3; Q5VTR2; Q9Y252; P62837; Q6ZNA4; Q9H832; Q9NR09; Q7Z6Z7; P35226; Q9Y2M5; Q9UK99; Q5JXB2; Q05086; P62256; Q13233; Q13618; Q96EP1; Q94952; Q9H3F6; Q9H4P4; P19474; P53804; Q92466; P61088; Q95071; Q43255; Q13829; Q9UKT8; Q6Q0C0; Q00987; P60604; Q8TCJ0; Q96CA5; Q8NG27; Q9UKT5; Q9UNE7; Q8WV22; Q06587; Q9HC52; Q9Y4X5; Q86Y13; Q9NVW2; Q8IYW8; Q6W2J9; Q8NEZ5; P35227; Q9NRD1; Q9UH90}

4024 Pathogen[ P14079] interacts with 88 human partners: {Q00463; Q60260; P53804; Q15164; Q9UKT5; Q95628; P51965; Q5TA31; P63279; P14373; Q8IYW8; P68036; Q13309; Q5JXB2; Q9HC52; Q13618; Q9NPD8; Q9UJX5; P60604; Q96EP0; Q6ZNA4; Q8TCJ0; Q86XK2; Q9UKC9; Q13216; Q8N1E6; Q9HAU4; Q14258; P61077; Q9BUZ4; P62877; Q96FA3; Q8IYW7; Q9NR09; Q00987; Q8TBB1; Q9NYG5; P62256; Q6W2J9; Q9UK73; P40337; Q7Z6E9; Q99496; P51668; Q9UMS4; Q13356; Q9UPN9; P19474; Q9UH90; Q5VTR2; Q9UM13; P49459; Q9BYM8; Q9Y2M5; Q9UK99; Q9NS56; Q96J02; Q94952; Q9UJX6; Q14139; P35226; Q12933; P35227; Q9Y2X8; P49427; Q8NEZ5; P78317; Q9UKT7; P62837; Q9NRD1; Q9NZJ0; Q92

466;O00762;Q9UJJP4;Q13829;P63208;Q9UJTT9;Q9Y3I1;Q9NW38;O14933;Q8NE65;P63146;Q9UJX4;Q9H3F6;Q8IUD6;Q13114;Q13490;Q06587}

4025 Pathogen[ P03383] interacts with 82 human partners: {P35227;P19474;Q9Y3I1;O14933;P53804;Q8TBB1;Q9NZJ0;Q13216;Q13233;Q9NYG5;Q13356;Q14139;P51965;Q9UJX6;P40337;Q9UK73;Q9UPN9;Q8IUV8;Q5JXB2;P49427;Q9Y2X8;Q13490;Q9HC52;Q96PU4;Q06587;O00762;Q9NTX7;Q6ZNA4;Q86XK2;P78317;P63208;Q9UKT7;Q13618;P61077;Q95628;P61088;Q6W2J9;O60260;Q9UM13;P60604;Q5TA31;Q12933;Q9UKT5;O95376;Q96PM5;Q8TCJ0;P62837;O43255;Q8NE65;Q99496;Q9H832;Q5VTR2;Q9UKC9;Q9Y252;Q9UJX4;Q96FA3;P68036;Q9UJX5;P62877;Q9NR09;Q13309;P49459;Q9Y2M5;Q9NPD8;Q14258;P62256;P63146;Q96EP1;O94952;Q9H3F6;Q9NRD1;Q9UJX2;Q92466;Q9NW38;Q13829;Q8NEZ5;O75150;Q13114;P63279;Q9UMS4;P35226;P51668}

4026 Pathogen[ P03410] interacts with 86 human partners: {Q8IUV8;Q9H469;Q9UKT7;Q13829;Q6ZNA4;Q99496;Q6W2J9;Q9NRD1;O95628;Q9UK99;P49427;Q8TCJ0;P51965;Q96FA3;Q9UJX4;Q9NYG5;Q9Y3I1;Q8TBB1;Q9UM13;Q13490;Q8WZ19;P49459;Q9UKT5;Q8N1E6;Q5VTR2;Q5TA31;O60260;Q8IUV7;P68036;P61088;Q13233;P35227;Q92466;Q14258;O14933;Q5JXB2;Q13356;Q9P2J3;Q9NR09;Q9UNE7;Q9H3F6;Q13618;P63208;O75150;Q13309;Q86XK2;Q8NEZ5;P62256;O00463;P78317;Q9UKC9;P62877;Q9Y4X5;P63146;Q9Y2X8;Q8NE65;Q12933;P51668;Q9UJX5;Q9UK73;Q13216;Q9NPD8;O00762;Q9UMS4;P63279;Q06587;Q14139;O60291;Q9UJJP4;Q00987;P60604;Q9NW38;Q9UJTT9;O94952;P53804;P35226;Q9UJX6;Q96EP1;Q9Y2M5;Q9UPN9;Q9HC52;Q13114;P40337;P61077;P62837;Q9NZJ0}

4027 Pathogen[ P14075] interacts with 79 human partners: {Q5VTR2;P53804;P60604;Q9UK73;Q96PM5;P68036;Q9NTX7;P62837;Q13618;P49427;P61088;Q9UKT7;Q9Y252;P49459;Q14139;Q96PU4;P51965;O14933;Q13216;Q9Y2X8;P63279;Q9Y3I1;Q9UJX2;P61077;O43255;Q9NW38;Q9UJX6;Q9NPD8;Q9UKT5;P63208;O95628;Q06587;Q6ZNA4;O00762;Q13490;Q9UJX5;Q12933;Q6W2J9;Q9UPN9;Q8TCJ0;O75150;Q9HC52;Q96FA3;P19474;Q9UKC9;Q13309;Q13114;Q8NEZ5;P78317;Q9UMS4;Q14258;Q99496;Q9UJX4;O94952;Q9NRD1;O95376;Q9NR09;P35226;Q86XK2;P62256;P63146;Q5TA31;Q9H3F6;Q9Y2M5;Q13829;Q92466;Q9NZJ0;Q13233;Q9UM13;Q8TBB1;P40337;P51668;Q9NYG5;O60260;Q8NE65;P62877;P35227;Q96EP1;Q8IUV8}

4028 Pathogen[ P0C206] interacts with 148 human partners: {Q16763;Q9Y2X8;Q9UKC9;Q9UJTT9;Q96AX9;Q9P2N7;Q9UMS4;Q96PU5;Q13829;Q9NS56;O60291;P62877;Q9NPD8;P62253;Q6PCD5;Q8WV22;Q9H4P4;Q9HC52;Q9UPN9;Q9Y4L5;Q13114;Q9NVW2;O43255;Q13263;Q8IYW5;O95376;Q13309;O00308;Q9HAU4;Q9UDY8;Q5JXB2;P68036;O14933;Q8NG27;Q9UK73;Q86XK2;Q14258;Q6W2J9;Q96EP1;Q9UJX5;Q9UJX2;Q6ZNA4;Q8N1E6;O94822;P35226;Q9UKA1;Q8IUQ4;Q05086;Q96J02;Q9UH90;Q96LR5;P62837;P53804;P98170;O15164;O94952;Q8IUD6;O95155;Q8NE65;Q12933;P78317;Q8TCJ0;P49427;Q14669;Q5VTR2;Q13216;Q13233;O95628;Q5TA31;Q8TDB6;Q15386;Q9Y4X5;Q712K3;Q9UJJP4;P51965;Q9BUZ4;Q9NRD1;Q9UKT7;P61088;Q9NYG5;Q9UJX4;Q8WZ19;P60604;P22681;Q9NR09;Q13618;Q96EP0;Q8IUV7;Q9UNE7;P63208;Q14139;P49459;Q96T88;Q06587;Q9P2J3;O60260;Q99728;Q8TBB1;P62256;Q969T4;O00762;Q9H3F6;Q8IUV8;O00463;Q13489;Q9NZJ0;Q9UJX6;Q13356;Q9UKT8;Q96FA3;Q9H832;Q96CA5;Q96PM5;Q9Y2M5;Q9UK99;P61077;Q92466;Q7Z6Z7;Q9Y3I1;P61086;P14373;Q00987;Q9UM13;Q7Z6E9;Q9NTX7;Q9BYM8;Q8NEZ5;Q96B02;Q9Y252;O76064;Q9H469;Q86YT6;Q9UKT5;O95071;P51668;Q6VVB1;O75150;O95714;Q86Y13;Q6Q0C0;Q99496;Q96PU4;Q9NW38;P40337;P63146;P19474;P35227;Q13490}

4029 Pathogen[ P03363] interacts with 139 human partners: {Q14139;O95376;P22681;Q9UJX2;Q9NYG5;Q9NW38;Q13490;Q9Y252;Q8TDB6;Q13309;Q9H832;O94972;Q96EP1;P51965;Q8NE65;P60604;P49459;O95628;O00762;P35227;Q9HAU4;O60291;P14373;Q8NEZ5;Q9UJTT9;Q96EP0;Q86Y13;O14933;Q7Z569;Q9HC52;P61081;Q14258;Q9P2N7;Q13356;Q9ULT8;Q13618;O95155;Q7Z6E9;Q12933;O00463;Q9NTX7;P78317;Q5VTR2;Q99496;Q9UPN9;Q8IYW5;Q8TBB1;Q6VVB1;P63146;Q9UJX5;P49427;P40337;Q5JXB2;Q05086;Q9C040;Q9UJX6;O75150;Q6ZNA4;Q8NG27;Q9UJX4;Q7Z6Z7;P61088;Q9Y3I1;O94952;Q14669;Q9Y4X5;P62877;Q9NR09;Q96FA3;Q96PU5;Q9Y2M5;Q9UK99;Q13489;Q9UKT5;P35226;Q6PCD5;Q9UNE7;P19474;Q9UH90;Q9UKT8;P98170;Q96PM5;P62256;Q969T4;P63279;Q9UKA1;Q9H3F6;O95071;Q86XK2;Q9H4P4;Q15386;Q13829;Q8IUD6;Q9P2J3;Q92466;O00308;Q9UM13;Q9NPD8;O95714;Q9UJJP4;Q5TA31;P53804;Q13114;Q8TCJ0;Q96T88;Q96CA5;Q9Y4L5;Q8WV22;P61077;Q8IUV8;Q9NVW2;Q06587;Q99728;Q9UMS4;O94822;Q13216;Q9Y2X8;P62837;Q9H0M0;Q9UKT7;Q6W2J9;Q8WZ19;Q9BUZ4;Q96PU4;Q9UKC9;O43255;Q9NZJ0;Q8N1E6;Q9NRD1;Q9UK73;P63208;Q13233;Q9UII4;Q9H469;Q7Z7E8;Q5T447;Q96AX9;P68036}

4030 [Cluster 367]GO:0016428+F molecular\_function [name] tRNA (cytosine-5--methyltransferase activity [def] "Catalysis of the reaction

4031 Pathogen[ Q2Q067] interacts with 1 human partners: {Q08J23}

4032 Pathogen[ P0C214] interacts with 1 human partners: {Q08J23}

4033 Pathogen[ P03346] interacts with 1 human partners: {Q08J23}

4034 Pathogen[ Q85601] interacts with 1 human partners: {Q08J23}

4035 Pathogen[ P14079] interacts with 1 human partners: {Q08J23}

4036 Pathogen[ P03383] interacts with 1 human partners: {Q08J23}

4037 Pathogen[ P03410] interacts with 1 human partners: {Q08J23}

4038 Pathogen[ P14075] interacts with 1 human partners: {Q08J23}

4039 Pathogen[ P0C206] interacts with 1 human partners: {Q08J23}

4040 Pathogen[ P03363] interacts with 1 human partners: {Q08J23}

4041 [Cluster 368]GO:0030362+F molecular\_function [name] protein phosphatase type 4 regulator activity [def] "Modulation of the activity of the enzyme protein phosphatase type 4." [GOC

4042 Pathogen[ Q2Q067] interacts with 1 human partners: {Q9NY27}

4043 Pathogen[ P0C214] interacts with 1 human partners: {Q9NY27}

4044 Pathogen[ P03346] interacts with 2 human partners: {Q9NY27;Q8TF05}

4045 Pathogen[ Q85601] interacts with 1 human partners: {Q9NY27}

4046 Pathogen[ P14079] interacts with 2 human partners: {Q8TF05;Q9NY27}

4047 Pathogen[ P03383] interacts with 1 human partners: {Q9NY27}

4048 Pathogen[ P03410] interacts with 2 human partners: {Q8TF05;Q9NY27}

4049 Pathogen[ P14075] interacts with 1 human partners:{Q9NY27}  
4050 Pathogen[ P0C206] interacts with 2 human partners:{Q8TF05;Q9NY27}  
4051 Pathogen[ P03363] interacts with 2 human partners:{Q9NY27;Q8TF05}  
4052 [Cluster 369]GO:0034450+F molecular\_function [name] ubiquitin-ubiquitin ligase activity [def] "Catalysis of the reaction  
4053 Pathogen[ Q2Q067] interacts with 4 human partners:{Q13356;Q9UNE7;Q14139;Q9UMS4}  
4054 Pathogen[ P0C214] interacts with 7 human partners:{Q9UMS4;P61086;O95071;Q14139;Q13356;O95155;Q9UNE7}  
4055 Pathogen[ P03346] interacts with 6 human partners:{O95155;Q9UMS4;Q14139;Q9UNE7;Q13356;O95071}  
4056 Pathogen[ Q85601] interacts with 7 human partners:{Q14139;Q9UMS4;O95155;P61086;Q13356;O95071;Q9UNE7}  
4057 Pathogen[ P14079] interacts with 3 human partners:{Q9UMS4;Q13356;Q14139}  
4058 Pathogen[ P03383] interacts with 3 human partners:{Q13356;Q14139;Q9UMS4}  
4059 Pathogen[ P03410] interacts with 4 human partners:{Q13356;Q9UNE7;Q9UMS4;Q14139}  
4060 Pathogen[ P14075] interacts with 2 human partners:{Q14139;Q9UMS4}  
4061 Pathogen[ P0C206] interacts with 7 human partners:{Q9UMS4;O95155;Q9UNE7;Q14139;Q13356;P61086;O95071}  
4062 Pathogen[ P03363] interacts with 6 human partners:{Q14139;Q13356;O95155;Q9UNE7;O95071;Q9UMS4}  
4063 [Cluster 370]GO:0017022+F molecular\_function [name] myosin binding [def] "Interacting selectively and non-covalently with any part of a myosin complex\_ myosins are any of a superfamily of molecular motor proteins that bind to actin and use the energy of ATP hydrolysis to generate force and movement along actin filaments." [GOC  
4064 Pathogen[ Q2Q067] interacts with 2 human partners:{Q9Y6D6;P61586}  
4065 Pathogen[ P0C214] interacts with 3 human partners:{P68133;P61586;Q9Y6D6}  
4066 Pathogen[ P03346] interacts with 4 human partners:{O14908;Q9Y6D5;Q9Y6D6;P61586}  
4067 Pathogen[ Q85601] interacts with 3 human partners:{P68133;P61586;Q9Y6D6}  
4068 Pathogen[ P14079] interacts with 7 human partners:{Q9Y6D5;P68032;Q9Y6D6;P61586;Q05682;O14908;P68133}  
4069 Pathogen[ P03383] interacts with 2 human partners:{Q9Y6D6;P61586}  
4070 Pathogen[ P03410] interacts with 6 human partners:{Q05682;O14908;P61586;Q9Y6D6;Q9Y6D5;P68133}  
4071 Pathogen[ P14075] interacts with 2 human partners:{Q9Y6D6;P61586}  
4072 Pathogen[ P0C206] interacts with 5 human partners:{Q9Y6D6;P61586;P68133;Q9Y6D5;O14908}  
4073 Pathogen[ P03363] interacts with 3 human partners:{O14908;P68133;Q9Y6D6}  
4074 [Cluster 371]GO:0008420+F molecular\_function [name] CTD phosphatase activity [def] "Catalysis of the reaction  
4075 Pathogen[ Q2Q067] interacts with 4 human partners:{Q8IXW5;Q9Y5B0;O14595;Q9GZU7}  
4076 Pathogen[ P0C214] interacts with 4 human partners:{O14595;Q8IXW5;Q9GZU7;Q9Y5B0}  
4077 Pathogen[ P03346] interacts with 4 human partners:{Q8IXW5;Q9Y5B0;Q9GZU7;O14595}  
4078 Pathogen[ Q85601] interacts with 4 human partners:{Q9GZU7;Q9Y5B0;Q8IXW5;O14595}  
4079 Pathogen[ P14079] interacts with 3 human partners:{Q9Y5B0;Q8IXW5;Q9GZU7}  
4080 Pathogen[ P03383] interacts with 3 human partners:{Q8IXW5;Q9GZU7;Q9Y5B0}  
4081 Pathogen[ P03410] interacts with 3 human partners:{Q9GZU7;Q9Y5B0;Q8IXW5}  
4082 Pathogen[ P14075] interacts with 3 human partners:{Q8IXW5;Q9Y5B0;Q9GZU7}  
4083 Pathogen[ P0C206] interacts with 4 human partners:{Q8IXW5;Q9GZU7;Q9Y5B0;O14595}  
4084 Pathogen[ P03363] interacts with 4 human partners:{Q9Y5B0;Q8IXW5;Q9GZU7;O14595}  
4085 [Cluster 372]GO:0004823+F molecular\_function [name] leucine-tRNA ligase activity [def] "Catalysis of the reaction  
4086 Pathogen[ Q2Q067] interacts with 1 human partners:{Q9P2J5}  
4087 Pathogen[ P0C214] interacts with 2 human partners:{Q15031;Q9P2J5}  
4088 Pathogen[ P03346] interacts with 1 human partners:{Q9P2J5}  
4089 Pathogen[ Q85601] interacts with 1 human partners:{Q9P2J5}  
4090 Pathogen[ P14079] interacts with 2 human partners:{Q9P2J5;Q15031}  
4091 Pathogen[ P03383] interacts with 2 human partners:{Q9P2J5;Q15031}  
4092 Pathogen[ P03410] interacts with 1 human partners:{Q9P2J5}  
4093 Pathogen[ P14075] interacts with 2 human partners:{Q9P2J5;Q15031}  
4094 Pathogen[ P0C206] interacts with 2 human partners:{Q15031;Q9P2J5}  
4095 Pathogen[ P03363] interacts with 2 human partners:{Q9P2J5;Q15031}  
4096 [Cluster 373]GO:0003887+F molecular\_function [name] DNA-directed DNA polymerase activity [def] "Catalysis of the reaction  
4097 Pathogen[ Q2Q067] interacts with 16 human partners:{Q9Y253;Q15054;Q9NRF9;Q8NDF8;Q9UNA4;Q9UBZ9;P49005;Q9BQG0;Q14181;P06746;P56282;Q9HCU8;P54098;P04053;Q9UHN1;Q9NP87}  
4098 Pathogen[ P0C214] interacts with 16 human partners:{Q8NDF8;P06746;P54098;Q9BQG0;Q9UBZ9;P49005;Q9HCU8;Q9UNA4;Q9NRF9;P04053;Q15054;Q9NP87;P56282;Q9Y253;Q14181;Q9UHN1}  
4099 Pathogen[ P03346] interacts with 19 human partners:{Q9Y253;Q7Z5Q5;Q9HCU8;Q5XG87;Q9BQG0;P54098;Q9UNA4;Q9UBZ9;P56282;Q9UHN1;P49005;Q9NR33;Q9NRF9;Q14181;Q8NDF8;P04053;Q9NP87;P06746;Q15054}  
4100 Pathogen[ Q85601] interacts with 19 human partners:{Q9BQG0;P56282;Q9UGP5;P49005;Q15054;Q9NRF9;Q5XG87;P54098;Q9UBZ9;Q9UBT6;Q14181;Q8NDF8;Q9HCU8;P04053;P06746;Q9NP87;Q9UHN1;Q9Y253;Q9UNA4}  
4101 Pathogen[ P14079] interacts with 22 human



4102 partners:{Q9UNA4;Q5QGS0;Q9UGP5;Q9NRG0;P49005;Q5XG87;Q9HCU8;Q9UBZ9;Q15054;Q9NRF9;Q7Z5Q5;P56282;Q9BQG0;Q14181;Q9NP87;P06746;Q9Y253;P04053;P54098;Q9UHN1;Q9UBT6;Q9NR33}  
Pathogen[ P03383] interacts with 12 human

4103 partners:{Q9BQG0;Q9Y253;Q9UHN1;P06746;Q9HCU8;Q14181;Q8NDF8;P49005;P56282;P54098;Q9UBZ9;Q15054}  
Pathogen[ P03410] interacts with 22 human

4104 partners:{Q5QGS0;Q14181;Q9UBT6;P04053;Q9UNA4;P06746;Q9NRG0;P56282;Q7Z5Q5;Q9UGP5;Q9UBZ9;Q9Y253;Q15054;Q9NRF9;Q5XG87;Q9BQG0;Q9NR33;P49005;Q9NP87;Q9UHN1;P54098;Q9HCU8}  
Pathogen[ P14075] interacts with 12 human

4105 partners:{P54098;Q9UBZ9;Q8NDF8;P06746;P49005;Q9BQG0;Q9Y253;Q15054;Q9UHN1;Q9HCU8;P56282;Q14181}  
Pathogen[ P0C206] interacts with 21 human

4106 partners:{Q9Y253;Q5XG87;Q9UHN1;Q9NRF9;Q9NR33;Q9UBT6;Q9UNA4;Q9HCU8;Q7Z5Q5;P06746;P54098;P49005;Q9UGP5;Q15054;P04053;Q9BQG0;Q14181;Q8NDF8;Q9NP87;Q9UBZ9;P56282}  
Pathogen[ P03363] interacts with 17 human

4107 [Cluster 374]GO:0050681+F molecular\_function [name] androgen receptor binding [def] "Interacting selectively and non-covalently with an androgen receptor." [GOC  
4108 Pathogen[ Q2Q067] interacts with 18 human

4109 partners:{Q75925;P06400;P62826;Q13772;P55345;Q14192;Q9UER7;O75928;O94906;P48552;P27797;P78317;P24864;P51532;P50613;Q92993;Q9Y252;Q9UBS8}  
Pathogen[ P0C214] interacts with 18 human

4110 partners:{Q92993;Q13772;O75925;P48552;P50613;P55345;P78317;O94906;Q9UER7;Q9UBS8;Q14192;Q9Y252;P62826;P24864;P27797;P06400;P51532;O75928}  
Pathogen[ P03346] interacts with 21 human

4111 partners:{Q15788;P06400;P51532;Q9P2W1;P24864;O94906;P62826;O43680;O75925;Q14192;P55345;Q9UER7;P78317;Q9UBS8;P27797;P48552;Q92993;Q9Y252;O75593;O75928;Q13772}  
Pathogen[ Q85601] interacts with 18 human

4112 partners:{P78317;O75928;P06400;P62826;Q9UER7;P27797;O94906;P51532;Q14192;Q13772;P50613;Q9Y252;Q9UBS8;P48552;Q92993;O75925;P55345;P24864}  
Pathogen[ P14079] interacts with 17 human

4113 partners:{P48552;Q13772;O94906;O75928;Q14192;P24864;P51532;P50613;P55345;Q9UER7;O43294;Q15788;O75925;Q9UBS8;P78317;P62826;Q92993}  
Pathogen[ P03383] interacts with 17 human

4114 partners:{O75925;Q9UBS8;P78317;Q92993;P06400;O94906;P62826;P50613;Q14192;Q9UER7;Q9Y252;P51532;Q13772;P48552;P24864;P27797;O75928}  
Pathogen[ P03410] interacts with 19 human

4115 partners:{O75925;Q13772;O75928;O43294;P06400;P50613;O94906;Q9UER7;P62826;Q9UBS8;P78317;P51532;P48552;Q92993;P24864;Q14192;P55345;Q5MNZ9;P27797}  
Pathogen[ P14075] interacts with 17 human

4116 partners:{P51532;Q9Y252;P50613;O75925;O94906;Q92993;P27797;O75928;P62826;P78317;P06400;Q13772;Q9UBS8;P48552;Q9UER7;Q14192;P24864}  
Pathogen[ P0C206] interacts with 19 human

4117 partners:{P27797;P51532;O75925;Q9UER7;P62826;Q92993;P78317;P50613;Q9UBS8;O43294;Q13772;O94906;Q14192;P55345;P48552;Q9Y252;P24864;Q15788;P06400}  
Pathogen[ P03363] interacts with 15 human

4118 partners:{Q9Y252;P24864;P51532;P78317;Q9UER7;P06400;P48552;P27797;O75925;Q9UBS8;O94906;P62826;Q92993;O75928;Q14192}  
[Cluster 375]GO:0008263+F molecular\_function [name] pyrimidine-specific mismatch base pair DNA N-glycosylase activity [def] "Catalysis of the removal of mismatched pyrimidine bases in DNA. Enzymes with this activity recognize and remove pyrimidines present in mismatches by cleaving the N-C1' glycosidic bond between the target damaged DNA base and the deoxyribose sugar. The reaction releases a free base and leaves an apyrimidinic (AP) site." [GOC  
4119 Pathogen[ Q2Q067] interacts with 2 human partners:{O95243;Q13569}  
4120 Pathogen[ P0C214] interacts with 2 human partners:{O95243;Q13569}  
4121 Pathogen[ P03346] interacts with 2 human partners:{Q13569;O95243}  
4122 Pathogen[ Q85601] interacts with 2 human partners:{O95243;Q13569}  
4123 Pathogen[ P14079] interacts with 2 human partners:{O95243;Q13569}  
4124 Pathogen[ P03383] interacts with 2 human partners:{O95243;Q13569}  
4125 Pathogen[ P03410] interacts with 2 human partners:{O95243;Q13569}  
4126 Pathogen[ P14075] interacts with 2 human partners:{O95243;Q13569}  
4127 Pathogen[ P0C206] interacts with 2 human partners:{Q13569;O95243}  
4128 Pathogen[ P03363] interacts with 2 human partners:{O95243;Q13569}  
4129 [Cluster 376]GO:0051861+F molecular\_function [name] glycolipid binding [def] "Interacting selectively and non-covalently with a glycolipid, any compound containing one or more monosaccharide residues bound by a glycosidic linkage to a hydrophobic group such as an acylglycerol, a sphingoid, a ceramide (N-acylsphingoid) or a prenyl phosphate." [http  
4130 Pathogen[ Q2Q067] interacts with 2 human partners:{A6NH11;O95397}  
4131 Pathogen[ P0C214] interacts with 2 human partners:{A6NH11;O95397}  
4132 Pathogen[ P03346] interacts with 3 human partners:{O95397;Q5TA50;A6NH11}  
4133 Pathogen[ Q85601] interacts with 1 human partners:{O95397}  
4134 Pathogen[ P14079] interacts with 4 human partners:{A6NH11;Q5TA50;O95397;Q9NZD2}  
4135 Pathogen[ P03383] interacts with 2 human partners:{A6NH11;O95397}

4136 Pathogen[ P03410] interacts with 4 human partners:{Q5TA50;A6NH11;Q9NZD2;O95397}  
4137 Pathogen[ P14075] interacts with 3 human partners:{O95397;A6NH11;Q5TA50}  
4138 Pathogen[ P0C206] interacts with 4 human partners:{O95397;Q9NZD2;A6NH11;Q5TA50}  
4139 Pathogen[ P03363] interacts with 3 human partners:{Q5TA50;O95397;A6NH11}  
4140 [Cluster 377]GO:0008267+F molecular\_function [name] poly-glutamine tract binding [def]  
"Interacting selectively and non-covalently with a polyglutamine tract, i.e. a series of  
consecutive glutamine residues, in a protein." [GOC  
4141 Pathogen[ Q2Q067] interacts with 1 human partners:{Q9P2R6}  
4142 Pathogen[ P0C214] interacts with 1 human partners:{Q9P2R6}  
4143 Pathogen[ P03346] interacts with 1 human partners:{Q9P2R6}  
4144 Pathogen[ Q85601] interacts with 1 human partners:{Q9P2R6}  
4145 Pathogen[ P14079] interacts with 1 human partners:{Q9P2R6}  
4146 Pathogen[ P03383] interacts with 1 human partners:{Q9P2R6}  
4147 Pathogen[ P03410] interacts with 1 human partners:{Q9P2R6}  
4148 Pathogen[ P14075] interacts with 1 human partners:{Q9P2R6}  
4149 Pathogen[ P0C206] interacts with 1 human partners:{Q9P2R6}  
4150 Pathogen[ P03363] interacts with 1 human partners:{Q9P2R6}  
4151 [Cluster 378]GO:0005528+F molecular\_function [name] FK506 binding [def]  
"Interacting selectively and non-covalently with the immunosuppressant FK506." [GOC  
4152 Pathogen[ Q2Q067] interacts with 1 human partners:{O95644}  
4153 Pathogen[ P0C214] interacts with 1 human partners:{O95644}  
4154 Pathogen[ P03346] interacts with 1 human partners:{O95644}  
4155 Pathogen[ Q85601] interacts with 1 human partners:{O95644}  
4156 Pathogen[ P14079] interacts with 1 human partners:{O95644}  
4157 Pathogen[ P03383] interacts with 1 human partners:{O95644}  
4158 Pathogen[ P03410] interacts with 1 human partners:{O95644}  
4159 Pathogen[ P14075] interacts with 1 human partners:{O95644}  
4160 Pathogen[ P0C206] interacts with 1 human partners:{O95644}  
4161 Pathogen[ P03363] interacts with 1 human partners:{O95644}  
4162 [Cluster 379]GO:0008768+F molecular\_function [name] UDP-sugar diphosphatase activity  
[def] "Catalysis of the reaction  
4163 Pathogen[ Q2Q067] interacts with 1 human partners:{O95848}  
4164 Pathogen[ P0C214] interacts with 1 human partners:{O95848}  
4165 Pathogen[ P03346] interacts with 1 human partners:{O95848}  
4166 Pathogen[ Q85601] interacts with 1 human partners:{O95848}  
4167 Pathogen[ P14079] interacts with 1 human partners:{O95848}  
4168 Pathogen[ P03383] interacts with 1 human partners:{O95848}  
4169 Pathogen[ P03410] interacts with 1 human partners:{O95848}  
4170 Pathogen[ P14075] interacts with 1 human partners:{O95848}  
4171 Pathogen[ P0C206] interacts with 1 human partners:{O95848}  
4172 Pathogen[ P03363] interacts with 1 human partners:{O95848}  
4173 [Cluster 380]GO:0004730+F molecular\_function [name] pseudouridylate synthase activity  
[def] "Catalysis of the reaction  
4174 Pathogen[ Q2Q067] interacts with 1 human partners:{Q9Y606}  
4175 Pathogen[ P0C214] interacts with 1 human partners:{Q9Y606}  
4176 Pathogen[ P03346] interacts with 1 human partners:{Q9Y606}  
4177 Pathogen[ Q85601] interacts with 1 human partners:{Q9Y606}  
4178 Pathogen[ P14079] interacts with 1 human partners:{Q9Y606}  
4179 Pathogen[ P03383] interacts with 1 human partners:{Q9Y606}  
4180 Pathogen[ P03410] interacts with 1 human partners:{Q9Y606}  
4181 Pathogen[ P14075] interacts with 1 human partners:{Q9Y606}  
4182 Pathogen[ P0C206] interacts with 1 human partners:{Q9Y606}  
4183 Pathogen[ P03363] interacts with 1 human partners:{Q9Y606}  
4184 [Cluster 381]GO:0032395+F molecular\_function [name] MHC class II receptor activity  
[def] "Combining with an MHC class II protein complex to initiate a change in cellular  
activity." [GOC  
4185 Pathogen[ Q2Q067] interacts with 1 human partners:{Q04695}  
4186 Pathogen[ P0C214] interacts with 1 human partners:{Q04695}  
4187 Pathogen[ P03346] interacts with 1 human partners:{Q04695}  
4188 Pathogen[ Q85601] interacts with 1 human partners:{Q04695}  
4189 Pathogen[ P14079] interacts with 1 human partners:{Q04695}  
4190 Pathogen[ P03383] interacts with 1 human partners:{Q04695}  
4191 Pathogen[ P03410] interacts with 1 human partners:{Q04695}  
4192 Pathogen[ P14075] interacts with 1 human partners:{Q04695}  
4193 Pathogen[ P0C206] interacts with 1 human partners:{Q04695}  
4194 Pathogen[ P03363] interacts with 1 human partners:{Q04695}  
4195 [Cluster 382]GO:0031683+F molecular\_function [name] G-protein beta/gamma-subunit  
complex binding [def] "Interacting selectively and non-covalently with a complex of  
G-protein beta/gamma subunits." [GOC  
4196 Pathogen[ Q2Q067] interacts with 4 human partners:{Q12798;Q8WYR1;P41208;O15182}  
4197 Pathogen[ P0C214] interacts with 3 human partners:{Q12798;Q8WYR1;P41208}  
4198 Pathogen[ P03346] interacts with 4 human partners:{Q8WYR1;P41208;Q12798;O15182}  
4199 Pathogen[ Q85601] interacts with 4 human partners:{O15182;Q12798;Q8WYR1;P41208}  
4200 Pathogen[ P14079] interacts with 4 human partners:{Q8WYR1;Q12798;P41208;O15182}  
4201 Pathogen[ P03383] interacts with 3 human partners:{P41208;Q12798;Q8WYR1}  
4202 Pathogen[ P03410] interacts with 4 human partners:{Q8WYR1;O15182;Q12798;P41208}

4203 Pathogen[ P14075] interacts with 3 human partners:{Q8WYR1;Q12798;P41208}  
4204 Pathogen[ P0C206] interacts with 4 human partners:{O15182;P41208;Q12798;Q8WYR1}  
4205 Pathogen[ P03363] interacts with 4 human partners:{Q8WYR1;P41208;Q12798;O15182}  
4206 [Cluster 383]GO:0003707+F molecular\_function [name] steroid hormone receptor activity  
[def] "Combining with a steroid hormone and transmitting the signal within the cell to  
initiate a change in cell activity or function." [GOC  
4207 Pathogen[ Q2Q067] interacts with 13 human  
partners:{P10827;P10589;P13056;P62508;P10828;P49116;P11473;P28702;P55055;Q15466;P0823  
5;P11474;P22736}  
4208 Pathogen[ P0C214] interacts with 6 human  
partners:{P11474;P13056;P49116;P10828;P62508;Q15466}  
4209 Pathogen[ P03346] interacts with 22 human  
partners:{P10827;P11473;P06401;P08235;P48443;P49116;Q15466;P13056;P10588;P51843;P2870  
2;P22736;O95718;O75469;P62508;P10828;P11474;O00482;P35398;Q13285;P55055;P10589}  
4210 Pathogen[ Q85601] interacts with 14 human  
partners:{P11473;Q15466;P28702;P55055;P22736;P08235;P11474;P10827;O00482;P62508;P4911  
6;P13056;P10828;P10589}  
4211 Pathogen[ P14079] interacts with 19 human  
partners:{P13056;P62508;P55055;P35398;P11473;P10828;P08235;P11474;P22736;P48443;P1082  
7;O95718;O00482;O75469;P28702;P10588;P10589;P49116;Q15466}  
4212 Pathogen[ P03383] interacts with 8 human  
partners:{P49116;P11473;P11474;Q15466;P28702;P10828;P62508;P13056}  
4213 Pathogen[ P03410] interacts with 11 human  
partners:{P10828;P62508;P11473;P22736;P28702;Q15466;P11474;P49116;P10589;P08235;P1305  
6}  
4214 Pathogen[ P14075] interacts with 8 human  
partners:{P11474;P10828;P13056;P49116;P11473;P28702;Q15466;P62508}  
4215 Pathogen[ P0C206] interacts with 20 human  
partners:{P10588;Q15466;P35398;P06401;O75469;P55055;P13056;P49116;P22736;O00482;P1058  
9;O95718;P10828;P62508;P28702;P11474;P11473;P08235;P10827;P48443}  
4216 Pathogen[ P03363] interacts with 13 human  
partners:{P10828;Q15466;P49116;P62508;P11474;P10588;P11473;P28702;P08235;P35398;P1058  
9;P13056;O00482}  
4217 [Cluster 384]GO:0048487+F molecular\_function [name] beta-tubulin binding [def]  
"Interacting selectively and non-covalently with the microtubule constituent protein  
beta-tubulin." [GOC  
4218 Pathogen[ Q2Q067] interacts with 10 human  
partners:{Q9BTW9;P50402;Q6VN20;Q9H2P0;P42704;Q8TCI5;O75381;P60520;Q9UBK9;Q66K74}  
4219 Pathogen[ P0C214] interacts with 10 human  
partners:{P60520;Q9BTW9;P42704;Q8TCI5;O75381;P50402;Q6VN20;Q9UBK9;Q66K74;Q9H2P0}  
4220 Pathogen[ P03346] interacts with 12 human  
partners:{O95166;Q9H2P0;P60520;Q66K74;Q9H0R8;O75381;Q6VN20;P42704;P50402;Q8TCI5;Q9UBK  
9;Q9UBP0}  
4221 Pathogen[ Q85601] interacts with 14 human  
partners:{O95166;Q9UBP0;Q9H0R8;Q66K74;Q9BTW9;Q6VN20;Q8TCI5;P42704;Q9H2P0;P50402;P6052  
0;O75381;Q9UBK9;Q9GZM8}  
4222 Pathogen[ P14079] interacts with 14 human  
partners:{Q6VN20;Q9BTW9;O95166;Q66K74;P42704;Q9H2P0;P60520;Q8TCI5;Q9UBK9;O95292;Q9H0R  
8;Q9GZM8;O75381;P50402}  
4223 Pathogen[ P03383] interacts with 5 human  
partners:{Q8TCI5;O75381;P50402;P42704;Q9UBK9}  
4224 Pathogen[ P03410] interacts with 13 human  
partners:{O95292;Q9GZM8;P60520;Q9UBK9;O75381;O95166;Q6VN20;Q9H0R8;Q9BTW9;P42704;Q66K7  
4;P50402;Q8TCI5}  
4225 Pathogen[ P14075] interacts with 5 human  
partners:{P42704;P50402;O75381;Q9UBK9;Q8TCI5}  
4226 Pathogen[ P0C206] interacts with 15 human  
partners:{Q8TCI5;P50402;Q9UBP0;O75381;Q9BTW9;Q9GZM8;Q66K74;O95292;Q6VN20;P60520;Q9H0R  
8;P42704;Q9UBK9;Q9H2P0;O95166}  
4227 Pathogen[ P03363] interacts with 12 human  
partners:{Q66K74;Q9H2P0;Q8TCI5;P42704;Q9UBK9;P60520;Q9H0R8;O75381;Q9BTW9;P50402;Q6VN2  
0;O95166}  
4228 [Cluster 385]GO:0051400+F molecular\_function [name] BH domain binding [def]  
"Interacting selectively and non-covalently with the Bcl-2 homology (BH) domain of a  
protein. Bcl-2-related proteins share homology in one to four conserved regions  
designated the Bcl-2 homology (BH) domains BH1, BH2, BH3 and BH4. These domains  
contribute at multiple levels to the function of these proteins in cell death and  
survival. Anti-apoptotic members of the Bcl-2 family have four BH domains (BH1-BH4).  
Pro-apoptotic members have fewer BH domains." [PMID  
4229 Pathogen[ Q2Q067] interacts with 1 human partners:{Q9UMX3}  
4230 Pathogen[ P0C214] interacts with 1 human partners:{Q9UMX3}  
4231 Pathogen[ P03346] interacts with 1 human partners:{Q9UMX3}  
4232 Pathogen[ Q85601] interacts with 1 human partners:{Q9UMX3}  
4233 Pathogen[ P14079] interacts with 2 human partners:{Q13323;Q9UMX3}  
4234 Pathogen[ P03383] interacts with 1 human partners:{Q9UMX3}  
4235 Pathogen[ P03410] interacts with 2 human partners:{Q9UMX3;Q13323}

4236 Pathogen[ P14075] interacts with 1 human partners:{Q9UMX3}  
4237 Pathogen[ P0C206] interacts with 1 human partners:{Q9UMX3}  
4238 Pathogen[ P03363] interacts with 1 human partners:{Q9UMX3}  
4239 [Cluster 386]GO:0032795+F molecular\_function [name] heterotrimeric G-protein binding [def] "Interacting selectively and non-covalently with a heterotrimeric G-protein." [GOC  
4240 Pathogen[ Q2Q067] interacts with 2 human partners:{Q12798;P41208}  
4241 Pathogen[ P0C214] interacts with 2 human partners:{Q12798;P41208}  
4242 Pathogen[ P03346] interacts with 2 human partners:{P41208;Q12798}  
4243 Pathogen[ Q85601] interacts with 2 human partners:{Q12798;P41208}  
4244 Pathogen[ P14079] interacts with 2 human partners:{Q12798;P41208}  
4245 Pathogen[ P03383] interacts with 2 human partners:{P41208;Q12798}  
4246 Pathogen[ P03410] interacts with 2 human partners:{Q12798;P41208}  
4247 Pathogen[ P14075] interacts with 2 human partners:{Q12798;P41208}  
4248 Pathogen[ P0C206] interacts with 2 human partners:{P41208;Q12798}  
4249 Pathogen[ P03363] interacts with 2 human partners:{P41208;Q12798}  
4250 [Cluster 387]GO:0019964+F molecular\_function [name] interferon-gamma binding [def] "Interacting selectively and non-covalently with interferon-gamma. Interferon-gamma is also known as type II interferon." [GOC  
4251 Pathogen[ Q2Q067] interacts with 1 human partners:{Q9Y2M5}  
4252 Pathogen[ P0C214] interacts with 1 human partners:{Q9Y2M5}  
4253 Pathogen[ P03346] interacts with 1 human partners:{Q9Y2M5}  
4254 Pathogen[ Q85601] interacts with 1 human partners:{Q9Y2M5}  
4255 Pathogen[ P14079] interacts with 1 human partners:{Q9Y2M5}  
4256 Pathogen[ P03383] interacts with 1 human partners:{Q9Y2M5}  
4257 Pathogen[ P03410] interacts with 1 human partners:{Q9Y2M5}  
4258 Pathogen[ P14075] interacts with 1 human partners:{Q9Y2M5}  
4259 Pathogen[ P0C206] interacts with 1 human partners:{Q9Y2M5}  
4260 Pathogen[ P03363] interacts with 1 human partners:{Q9Y2M5}  
4261 [Cluster 388]GO:0016818+F molecular\_function [name] hydrolase activity, acting on acid anhydrides, in phosphorus-containing anhydrides [def] "Catalysis of the hydrolysis of any acid anhydride which contains phosphorus." [GOC  
4262 Pathogen[ Q2Q067] interacts with 7 human partners:{P51531;O95848;P51532;Q12873;Q14839;Q9HBD4;P28370}  
4263 Pathogen[ P0C214] interacts with 9 human partners:{Q14527;Q12873;Q9HBD4;P28370;O60264;O95848;P51531;Q14839;P51532}  
4264 Pathogen[ P03346] interacts with 10 human partners:{Q9HBD4;P51532;Q14527;O95848;O60264;P42285;P28370;Q12873;P51531;Q14839}  
4265 Pathogen[ Q85601] interacts with 9 human partners:{P51531;P51532;Q12873;Q9HBD4;P28370;O95848;O60264;Q14527;Q14839}  
4266 Pathogen[ P14079] interacts with 8 human partners:{P28370;P51532;P51531;O95848;Q12873;O60264;Q14839;Q96FC9}  
4267 Pathogen[ P03383] interacts with 7 human partners:{Q14839;Q9HBD4;P28370;Q12873;P51531;P51532;O95848}  
4268 Pathogen[ P03410] interacts with 9 human partners:{Q12873;O95848;P51532;P51531;Q96FC9;O60264;Q9HBD4;Q14839;P28370}  
4269 Pathogen[ P14075] interacts with 7 human partners:{Q9HBD4;P51532;Q14839;P51531;P28370;O95848;Q12873}  
4270 Pathogen[ P0C206] interacts with 10 human partners:{P51532;P51531;O95848;Q14839;P28370;Q14527;Q9HBD4;Q9BX63;Q12873;O60264}  
4271 Pathogen[ P03363] interacts with 11 human partners:{Q9BX63;P51532;Q14839;O60264;Q14527;Q9HBD4;O95848;Q12873;P28370;P51531;P42285}  
4272 [Cluster 389]GO:0042277+F molecular\_function [name] peptide binding [def] "Interacting selectively and non-covalently with peptides, any of a group of organic compounds comprising two or more amino acids linked by peptide bonds." [GOC  
4273 Pathogen[ Q2Q067] interacts with 11 human partners:{P52948;Q13427;Q9H2P0;P27797;P49356;P48147;P09497;Q08752;P09496;P23284;P62937}  
4274 Pathogen[ P0C214] interacts with 13 human partners:{P30405;Q13427;P23284;P30414;P48147;P45877;P49356;P27797;P09497;P09496;Q08752;P52948;Q9H2P0}  
4275 Pathogen[ P03346] interacts with 11 human partners:{Q9H2P0;P62937;P09496;Q13427;Q08752;P49356;P27797;P09497;P48147;P23284;P52948}  
4276 Pathogen[ Q85601] interacts with 15 human partners:{P30405;P09496;P27797;P48147;Q13427;Q08752;P23284;P52948;Q9H2P0;P49356;P30414;P09497;P19447;P62937;P45877}  
4277 Pathogen[ P14079] interacts with 14 human partners:{O14773;Q08752;P48147;P29144;P62937;Q13427;Q9H2P0;P45877;P49356;P09497;P23284;P19447;P09496;P52948}  
4278 Pathogen[ P03383] interacts with 8 human partners:{P52948;P62937;Q08752;P48147;Q13427;P23284;P09497;P27797}  
4279 Pathogen[ P03410] interacts with 15 human partners:{P09496;Q08752;P49356;P48147;P52948;P62937;P09497;P45877;P19447;Q9BVA1;P23284;P30414;Q13427;P30405;P27797}  
4280 Pathogen[ P14075] interacts with 8 human

4281 partners:{P09497;Q08752;P09496;P23284;P27797;P62937;Q13427;P52948}  
Pathogen[ P0C206] interacts with 14 human  
partners:{P27797;P29144;Q08752;P48147;P09496;P19447;P09497;Q13427;P23284;P45877;Q9H2P  
0;P30405;P49356;P62937}

4282 Pathogen[ P03363] interacts with 8 human  
partners:{P23284;Q13427;P62937;Q9H2P0;Q08752;P27797;P52948;P09497}

4283 [Cluster 390]GO:0016773+F molecular\_function [name] phosphotransferase activity,  
alcohol group as acceptor [def] "Catalysis of the transfer of a phosphorus-containing  
group from one compound (donor) to an alcohol group (acceptor)." [GOC

4284 Pathogen[ Q2Q067] interacts with 3 human partners:{Q9Y4A5;P19367;P32189}  
4285 Pathogen[ P0C214] interacts with 8 human  
partners:{Q14410;Q14409;Q95299;P32189;Q96C11;P19367;Q9Y4A5;Q9NWZ5}

4286 Pathogen[ P03346] interacts with 4 human partners:{P19367;Q9Y4A5;P32189;Q9NWZ5}  
4287 Pathogen[ Q85601] interacts with 3 human partners:{Q9Y4A5;P32189;P19367}  
4288 Pathogen[ P14079] interacts with 7 human  
partners:{Q9Y4A5;Q14410;Q9NWZ5;P32189;Q96C11;Q14409;Q95299}

4289 Pathogen[ P03383] interacts with 4 human partners:{Q9NWZ5;P19367;Q9Y4A5;P32189}  
4290 Pathogen[ P03410] interacts with 7 human  
partners:{Q96C11;Q95299;Q14410;Q9NWZ5;Q9Y4A5;Q14409;P32189}

4291 Pathogen[ P14075] interacts with 5 human  
partners:{Q9NWZ5;P32189;P19367;Q9Y4A5;Q96C11}

4292 Pathogen[ P0C206] interacts with 5 human  
partners:{Q9NWZ5;P19367;P32189;Q9Y4A5;Q96C11}

4293 Pathogen[ P03363] interacts with 2 human partners:{Q9NWZ5;Q9Y4A5}

4294 [Cluster 391]GO:0004596+F molecular\_function [name] peptide alpha-N-acetyltransferase  
activity [def] "Catalysis of the reaction

4295 Pathogen[ Q2Q067] interacts with 2 human partners:{Q9BSU3;P41227}  
4296 Pathogen[ P0C214] interacts with 2 human partners:{P41227;Q9BSU3}  
4297 Pathogen[ P03346] interacts with 2 human partners:{Q9BSU3;P41227}  
4298 Pathogen[ Q85601] interacts with 2 human partners:{P41227;Q9BSU3}  
4299 Pathogen[ P14079] interacts with 2 human partners:{P41227;Q9BSU3}

4300 Pathogen[ P03383] interacts with 2 human partners:{P41227;Q9BSU3}  
4301 Pathogen[ P03410] interacts with 2 human partners:{Q9BSU3;P41227}  
4302 Pathogen[ P14075] interacts with 2 human partners:{P41227;Q9BSU3}  
4303 Pathogen[ P0C206] interacts with 2 human partners:{P41227;Q9BSU3}  
4304 Pathogen[ P03363] interacts with 2 human partners:{P41227;Q9BSU3}

4305 [Cluster 392]GO:0008821+F molecular\_function [name] crossover junction  
endodeoxyribonuclease activity [def] "Catalysis of the endonucleolytic cleavage at a  
junction such as a reciprocal single-stranded crossover between two homologous DNA  
duplexes (Holliday junction)." [EC

4306 Pathogen[ Q2Q067] interacts with 4 human partners:{O43502;Q9BQ83;Q8IY92;Q96QE5}  
4307 Pathogen[ P0C214] interacts with 4 human partners:{Q96QE5;Q9BQ83;O43502;Q8IY92}  
4308 Pathogen[ P03346] interacts with 4 human partners:{O43502;Q96QE5;Q9BQ83;Q8IY92}  
4309 Pathogen[ Q85601] interacts with 4 human partners:{O43502;Q96QE5;Q8IY92;Q9BQ83}  
4310 Pathogen[ P14079] interacts with 3 human partners:{O43502;Q9BQ83;Q8IY92}  
4311 Pathogen[ P03383] interacts with 3 human partners:{Q8IY92;Q9BQ83;Q96QE5}  
4312 Pathogen[ P03410] interacts with 4 human partners:{Q9BQ83;Q96QE5;Q8IY92;O43502}  
4313 Pathogen[ P14075] interacts with 3 human partners:{Q9BQ83;Q96QE5;Q8IY92}  
4314 Pathogen[ P0C206] interacts with 4 human partners:{O43502;Q96QE5;Q9BQ83;Q8IY92}  
4315 Pathogen[ P03363] interacts with 4 human partners:{Q96QE5;Q9BQ83;Q8IY92;O43502}

4316 [Cluster 393]GO:0003705+F molecular\_function [name] sequence-specific distal enhancer  
binding RNA polymerase II transcription factor activity [def] "Functions to initiate or  
regulate RNA polymerase II transcription by binding a distal enhancer region of DNA."  
[GOC

4317 Pathogen[ Q2Q067] interacts with 34 human  
partners:{P27540;Q9UHL9;Q05066;O00470;O14503;P35680;P48380;Q15562;Q01664;P13349;P0815  
1;Q04206;Q9BWX5;Q04727;P17676;P22670;P11831;P15172;Q00577;Q08050;O43524;P55347;Q14938  
;P56693;O95644;P35869;O75030;Q02556;Q86X95;P15336;P22415;Q15853;P49715;P17947}

4318 Pathogen[ P0C214] interacts with 31 human  
partners:{O00470;Q9UHL9;Q04727;P35869;P55347;P15336;P13349;P56693;P15172;P17947;P1183  
1;Q04206;O75030;Q14938;P17676;O14503;Q02556;Q00577;P22670;P05412;Q15853;P27540;P08151  
;P48380;P22415;O95644;P16220;Q15562;Q01664;Q86X95;P18846}

4319 Pathogen[ P03346] interacts with 52 human  
partners:{P85037;P05412;Q9UHL9;Q15562;P58012;P16220;P17676;P15336;Q05066;P11831;P1334  
9;Q00577;Q9BWX5;Q15911;P48380;P20264;P15172;P56693;Q04206;Q08050;P27540;O75030;O00409  
;O95644;P49715;O14503;Q15853;P22670;Q9C0J9;Q02556;O00470;P35680;Q12778;Q01167;P98177;  
Q13516;P55347;Q04727;P17947;Q86X95;P35869;O00482;O75593;O43524;O95343;Q13285;Q01664;Q  
14938;P18846;P22415;P08151;Q9UJU5}

4320 Pathogen[ Q85601] interacts with 36 human  
partners:{Q9UHL9;P08151;P11831;Q15853;P17676;Q02556;Q9BWX5;P15172;P13349;O75030;O1450  
3;P18846;P27540;O95644;P22415;Q00577;P16220;Q04206;Q04727;Q15562;P35680;P05412;O00470  
;P22670;P56693;O00482;P49715;P55347;P17947;Q08050;P35869;P15336;P48380;Q01664;Q14938;  
Q86X95}

4321 Pathogen[ P14079] interacts with 29 human  
partners:{P08151;P35869;Q9BWX5;P13349;Q15853;Q14938;Q15911;P35680;P55347;P48380;O9564  
4;O00482;P49715;P27540;P22670;P15336;Q01664;Q9UHL9;P56693;Q00577;Q15562;Q02556;O14503

4322 Pathogen[ P03383] interacts with 28 human partners: {O00470;Q9UHL9;P11831;P16220;P27540;Q15562;P15172;Q04727;O95644;P22670;P48380;O75030;O14503;P18846;Q01664;P55347;P17676;Q15853;Q00577;Q04206;Q02556;P15336;Q86X95;P35869;P56693;P17947;P22415;P05412}

4323 Pathogen[ P03410] interacts with 29 human partners: {Q04206;P22670;P11831;O00470;P17676;P17947;Q14938;Q9UHL9;O75030;P18846;Q00577;Q02556;O95644;P27540;Q9BWX5;P48380;P22415;Q04727;P16220;P56693;Q15853;P13349;P05412;Q86X95;P55347;Q01664;P35680;P15336;Q15562}

4324 Pathogen[ P14075] interacts with 30 human partners: {Q04727;Q9UHL9;P35869;Q86X95;Q04206;O75030;P05412;Q14938;P22670;P11831;Q15562;O00470;P48380;P15172;Q08050;P56693;P15336;O14503;P27540;P55347;Q02556;Q15853;Q01664;P17947;Q00577;P16220;P22415;P17676;O95644;P18846}

4325 Pathogen[ P0C206] interacts with 38 human partners: {Q9UHL9;Q15911;P16220;P35869;O75030;Q05066;O00470;P05412;Q9C0J9;P15336;Q04727;P49715;P56693;P18846;P48380;O00482;Q14938;Q9BWX5;Q15853;Q02556;Q86X95;P22415;P17676;P13349;P35680;Q04206;P17947;Q15562;P22670;P11831;Q08050;Q01664;P27540;P15172;O95644;P08151;Q00577;P55347}

4326 Pathogen[ P03363] interacts with 44 human partners: {Q86X95;Q15911;Q9UHL9;Q14938;Q04206;Q15853;P27540;P17676;Q13516;P08151;Q15562;Q02556;P17947;Q9C0J9;P16220;P55347;Q04727;O00409;P35869;P13349;Q43524;P15336;Q05066;Q08050;P11831;P56693;P20264;O75030;P18846;Q01167;O00470;P22415;Q9BWX5;O95644;P05412;O95343;P48380;Q00577;Q9UJU5;P15172;Q01664;O14503;P22670;O00482}

4327 [Cluster 394]GO:0005547+F molecular\_function [name] phosphatidylinositol-3,4,5-trisphosphate binding [def] "Interacting selectively and non-covalently with phosphatidylinositol-3,4,5-trisphosphate, a derivative of phosphatidylinositol in which the inositol ring is phosphorylated at the 3', 4' and 5' positions." [GOC

4328 Pathogen[ Q2Q067] interacts with 2 human partners: {P31749;P55895}

4329 Pathogen[ P0C214] interacts with 3 human partners: {P55895;Q9UQC2;P31749}

4330 Pathogen[ P03346] interacts with 6 human partners: {P55895;Q9UQC2;Q8TEW0;Q7Z3T8;P31749;Q9HBF4}

4331 Pathogen[ Q85601] interacts with 4 human partners: {P31749;Q9UQC2;Q9HBF4;P55895}

4332 Pathogen[ P14079] interacts with 4 human partners: {Q8TEW0;Q7Z3T8;Q9HBF4;Q9UQC2}

4333 Pathogen[ P03383] interacts with 2 human partners: {P31749;P55895}

4334 Pathogen[ P03410] interacts with 6 human partners: {Q9UQC2;P31749;P55895;Q9HBF4;Q8TEW0;Q7Z3T8}

4335 Pathogen[ P14075] interacts with 2 human partners: {P31749;P55895}

4336 Pathogen[ P0C206] interacts with 6 human partners: {P31749;Q8TEW0;Q7Z3T8;P55895;Q9UQC2;Q9HBF4}

4337 Pathogen[ P03363] interacts with 3 human partners: {P31749;P55895;Q9UQC2}

4338 [Cluster 395]GO:0005160+F molecular\_function [name] transforming growth factor beta receptor binding [def] "Interacting selectively and non-covalently with the transforming growth factor beta receptor." [GOC

4339 Pathogen[ Q2Q067] interacts with 3 human partners: {Q8WUH2;P84022;Q15796}

4340 Pathogen[ P0C214] interacts with 3 human partners: {P84022;Q15796;Q8WUH2}

4341 Pathogen[ P03346] interacts with 3 human partners: {Q15796;Q8WUH2;P84022}

4342 Pathogen[ Q85601] interacts with 3 human partners: {Q8WUH2;P84022;Q15796}

4343 Pathogen[ P14079] interacts with 1 human partners: {Q8WUH2}

4344 Pathogen[ P03383] interacts with 3 human partners: {P84022;Q15796;Q8WUH2}

4345 Pathogen[ P03410] interacts with 3 human partners: {P84022;Q8WUH2;Q15796}

4346 Pathogen[ P14075] interacts with 3 human partners: {Q15796;Q8WUH2;P84022}

4347 Pathogen[ P0C206] interacts with 3 human partners: {P84022;Q15796;Q8WUH2}

4348 Pathogen[ P03363] interacts with 3 human partners: {Q15796;P84022;Q8WUH2}

4349 [Cluster 396]GO:0003720+F molecular\_function [name] telomerase activity [def] "Catalysis of the reaction

4350 Pathogen[ Q2Q067] interacts with 3 human partners: {O60832;O14746;Q15185}

4351 Pathogen[ P0C214] interacts with 3 human partners: {O14746;O60832;Q15185}

4352 Pathogen[ P03346] interacts with 3 human partners: {Q15185;O60832;O14746}

4353 Pathogen[ Q85601] interacts with 3 human partners: {Q15185;O14746;O60832}

4354 Pathogen[ P14079] interacts with 3 human partners: {O14746;O60832;Q15185}

4355 Pathogen[ P03383] interacts with 3 human partners: {O14746;Q15185;O60832}

4356 Pathogen[ P03410] interacts with 3 human partners: {O14746;O60832;Q15185}

4357 Pathogen[ P14075] interacts with 3 human partners: {O14746;Q15185;O60832}

4358 Pathogen[ P0C206] interacts with 3 human partners: {Q15185;O60832;O14746}

4359 Pathogen[ P03363] interacts with 3 human partners: {O60832;O14746;Q15185}

4360 [Cluster 397]GO:0008081+F molecular\_function [name] phosphoric diester hydrolase activity [def] "Catalysis of the hydrolysis of a phosphodiester to give a phosphomonoester and a free hydroxyl group." [EC

4361 Pathogen[ Q2Q067] interacts with 4 human partners: {P27695;Q9NUW8;Q7Z4H3;P27815}

4362 Pathogen[ P0C214] interacts with 8 human partners: {P27695;Q7Z4H3;P27815;Q9NPB8;Q9Y3Z3;Q07343;O76083;Q9NUW8}

4363 Pathogen[ P03346] interacts with 5 human partners: {Q9Y3Z3;Q9NUW8;Q7Z4H3;P27815;P27695}

4364 Pathogen[ Q85601] interacts with 4 human partners: {Q7Z4H3;P27815;Q9NUW8;P27695}

4365 Pathogen[ P14079] interacts with 7 human

4366 partners:{Q9NPB8;Q9NUJ7;Q9NUW8;Q9Y3Z3;P27695;P27815;Q7Z4H3}  
Pathogen[ P03383] interacts with 2 human partners:{Q9NUW8;P27695}

4367 Pathogen[ P03410] interacts with 6 human  
partners:{Q9NPB8;Q9NUW8;Q7Z4H3;P27695;Q9Y3Z3;P27815}

4368 Pathogen[ P14075] interacts with 2 human partners:{P27695;Q9NUW8}

4369 Pathogen[ P0C206] interacts with 5 human  
partners:{P27695;Q7Z4H3;Q9NUW8;P27815;Q9NPB8}

4370 Pathogen[ P03363] interacts with 4 human partners:{P27815;Q7Z4H3;Q9NUW8;Q9Y3Z3}

4371 [Cluster 398]GO:0051087+F molecular\_function [name] chaperone binding [def]  
"Interacting selectively and non-covalently with a chaperone protein, a class of proteins  
that bind to nascent or unfolded polypeptides and ensure correct folding or transport."  
[http

4372 Pathogen[ Q2Q067] interacts with 23 human  
partners:{Q9BTW9;P04156;Q9HAV7;O95433;O60260;P61604;P50502;Q8IWL3;Q99933;O75347;Q8TAA  
5;Q96A04;P31948;P27797;Q9NQP4;O75190;Q9NZJ4;P62072;Q9Y5J7;O43615;O95817;O15392;O95429  
}

4373 Pathogen[ P0C214] interacts with 25 human  
partners:{O95817;Q9HAV7;O75347;O75190;Q9BTW9;P61604;P31948;Q8IWL3;P62072;Q9NZJ4;Q9993  
3;O43615;P10809;O95429;Q8TAA5;Q96A04;O15392;P04156;P27797;Q9Y5J7;O60260;Q9NQP4;O95433  
;P36957;P50502}

4374 Pathogen[ P03346] interacts with 23 human  
partners:{Q96A04;O15392;O75190;P50502;P61604;O43615;Q9NQP4;Q9Y5J7;P31948;Q9NZJ4;O9543  
3;O75347;Q9HAV7;O95817;P62072;P27797;Q96KC8;O60260;P04156;O95429;Q8TAA5;Q8IWL3;Q99933  
}

4375 Pathogen[ Q85601] interacts with 23 human  
partners:{Q8TAA5;Q9NQP4;O75190;P62072;O95433;P61604;Q96A04;Q9Y5J7;Q9BTW9;P31948;O1539  
2;P27797;Q99933;O75347;Q9HAV7;O43615;O60260;P04156;Q9NZJ4;P50502;Q8IWL3;O95429;O95817  
}

4376 Pathogen[ P14079] interacts with 26 human  
partners:{O43615;Q9BTW9;O60260;O95816;P31948;Q96A04;Q9NZJ4;P62072;O95817;P04156;O9542  
9;Q8IWL3;O15392;O95433;Q9Y5J7;Q9NQP4;O75190;P61604;Q15814;Q9UL15;Q99933;O75347;Q719I0  
;P50502;Q9HAV7;Q8TAA5}

4377 Pathogen[ P03383] interacts with 19 human  
partners:{Q9Y5J7;O95433;P62072;P04156;P50502;P31948;P61604;O43615;Q9HAV7;Q9NQP4;O7519  
0;Q96A04;O60260;O75347;Q8IWL3;Q8TAA5;Q99933;O95429;P27797}

4378 Pathogen[ P03410] interacts with 27 human  
partners:{Q99933;O15392;Q719I0;P62072;Q96A04;P50502;Q9Y5J7;P61604;O95816;Q8TAA5;Q1581  
4;O60260;O95817;Q9NZJ4;O75190;Q9BTW9;O95429;Q8IWL3;O43615;P04156;Q9UL15;P31948;Q9NQP4  
;O75347;Q9HAV7;O95433;P27797}

4379 Pathogen[ P14075] interacts with 19 human  
partners:{Q99933;Q9HAV7;P62072;O75347;P61604;Q8TAA5;P04156;O95433;Q96A04;P50502;P2779  
7;Q9NQP4;O75190;Q9Y5J7;O60260;P31948;Q8IWL3;O43615;O95429}

4380 Pathogen[ P0C206] interacts with 25 human  
partners:{P27797;P04156;Q99933;Q96A04;Q9BTW9;Q9HAV7;Q9NZJ4;Q9Y5J7;Q15814;O95816;O4361  
5;P50502;O95429;O60260;Q8TAA5;O15392;Q719I0;P62072;O95817;Q8IWL3;O75347;P31948;Q9NQP4  
;P61604;O75190}

4381 Pathogen[ P03363] interacts with 20 human  
partners:{O75190;O75347;Q9NZJ4;P50502;P04156;Q96A04;O95817;O43615;O95433;P27797;Q9Y5J  
7;Q15814;Q9BTW9;P31948;Q8TAA5;Q8IWL3;Q9NQP4;O95429;Q99933;P61604}

4382 [Cluster 399]GO:0016922+F molecular\_function [name] ligand-dependent nuclear receptor  
binding [def] "Interacting selectively and non-covalently, in a ligand dependent manner,  
with a nuclear receptor protein." [GOC

4383 Pathogen[ Q2Q067] interacts with 11 human  
partners:{Q15596;Q9HD15;Q969G3;O75528;O14497;O15164;Q14686;Q13901;Q9UIF9;Q6STE5;Q1565  
0}

4384 Pathogen[ P0C214] interacts with 11 human  
partners:{O75528;O14497;Q9HD15;Q6STE5;Q13901;Q14686;Q969G3;Q9UIF9;Q15650;O15164;Q1559  
6}

4385 Pathogen[ P03346] interacts with 12 human  
partners:{Q15788;Q9HD15;Q15596;O75528;Q6STE5;O14497;Q9UIF9;Q969G3;O15164;Q15650;Q1390  
1;Q14686}

4386 Pathogen[ Q85601] interacts with 11 human  
partners:{O75528;Q9UIF9;Q6STE5;O14497;O15164;Q15596;Q14686;Q15650;Q969G3;Q13901;Q9HD1  
5}

4387 Pathogen[ P14079] interacts with 11 human  
partners:{O15164;Q6STE5;Q15596;O75528;Q13901;O14497;Q9UIF9;Q9HD15;Q15788;Q15650;Q1468  
6}

4388 Pathogen[ P03383] interacts with 10 human  
partners:{O14497;O75528;Q15596;Q15650;Q14686;Q6STE5;Q9HD15;Q969G3;Q9UIF9;Q13901}

4389 Pathogen[ P03410] interacts with 10 human  
partners:{Q15650;O14497;Q14686;O75528;Q969G3;Q15596;Q13901;Q9UIF9;Q6STE5;Q9HD15}

4390 Pathogen[ P14075] interacts with 9 human  
partners:{Q14686;Q13901;O14497;O75528;Q15650;Q9UIF9;Q6STE5;Q9HD15;Q15596}

4391 Pathogen[ P0C206] interacts with 12 human  
partners:{O75528;Q6STE5;O15164;Q9HD15;O14497;Q15650;Q9UIF9;Q14686;Q13901;Q15596;Q969G  
3;Q15788}

4392 Pathogen[ P03363] interacts with 10 human partners:{Q6STE5;Q9HD15;Q14497;Q13901;Q15596;Q14686;Q9UIF9;Q969G3;O75528;Q15650}

4393 [Cluster 400]GO:0043141+F molecular\_function [name] ATP-dependent 5'-3' DNA helicase activity [def] "Catalysis of the reaction

4394 Pathogen[ Q2Q067] interacts with 1 human partners:{P38935}

4395 Pathogen[ P0C214] interacts with 1 human partners:{P38935}

4396 Pathogen[ P03346] interacts with 1 human partners:{P38935}

4397 Pathogen[ Q85601] interacts with 1 human partners:{P38935}

4398 Pathogen[ P14079] interacts with 1 human partners:{P38935}

4399 Pathogen[ P03383] interacts with 1 human partners:{P38935}

4400 Pathogen[ P03410] interacts with 1 human partners:{P38935}

4401 Pathogen[ P14075] interacts with 1 human partners:{P38935}

4402 Pathogen[ P0C206] interacts with 1 human partners:{P38935}

4403 Pathogen[ P03363] interacts with 1 human partners:{P38935}

4404 [Cluster 401]GO:0050660+F molecular\_function [name] flavin adenine dinucleotide binding [def] "Interacting selectively and non-covalently with FAD, flavin-adenine dinucleotide, the coenzyme or the prosthetic group of various flavoprotein oxidoreductase enzymes, in either the oxidized form, FAD, or the reduced form, FADH2." [CHEBI

4405 Pathogen[ Q2Q067] interacts with 6 human partners:{P31040;Q9Y2Z2;P29474;Q9NNW7;O95831;Q9UHB4}

4406 Pathogen[ P0C214] interacts with 11 human partners:{P29474;Q9NNW7;Q9Y2Z2;Q9UI17;Q16881;Q86WU2;P09622;Q9UL12;Q9UHB4;P13804;Q96NN9}

4407 Pathogen[ P03346] interacts with 9 human partners:{P31040;Q9UBK8;P29474;Q9UHB4;Q86WU2;Q9Y2Z2;O95831;Q8IWF2;Q9NNW7}

4408 Pathogen[ Q85601] interacts with 5 human partners:{Q9UHB4;O95831;Q9Y2Z2;P31040;P29474}

4409 Pathogen[ P14079] interacts with 9 human partners:{Q9UHB4;Q9Y2Z2;P13804;O95831;Q86WU2;Q9NNW7;P31040;Q9UL12;Q9UI17}

4410 Pathogen[ P03383] interacts with 5 human partners:{P29474;Q9UHB4;P31040;O95831;Q9Y2Z2}

4411 Pathogen[ P03410] interacts with 10 human partners:{P13804;Q9UI17;Q9Y2Z2;P29474;Q9UL12;P31040;O95831;Q9UHB4;Q9NNW7;Q86WU2}

4412 Pathogen[ P14075] interacts with 5 human partners:{P29474;Q9Y2Z2;Q9UHB4;P31040;O95831}

4413 Pathogen[ P0C206] interacts with 7 human partners:{Q9Y2Z2;Q86WU2;Q9NNW7;O95831;P31040;P29474;Q9UHB4}

4414 Pathogen[ P03363] interacts with 5 human partners:{P29474;P31040;Q9UHB4;Q9NNW7;O95831}

4415 [Cluster 402]GO:0003917+F molecular\_function [name] DNA topoisomerase type I activity [def] "Catalysis of a DNA topological transformation by transiently cleaving one DNA strand at a time to allow passage of another strand\_ changes the linking number by +1 per catalytic cycle." [PMID

4416 Pathogen[ Q2Q067] interacts with 1 human partners:{P11387}

4417 Pathogen[ P0C214] interacts with 1 human partners:{P11387}

4418 Pathogen[ P03346] interacts with 1 human partners:{P11387}

4419 Pathogen[ Q85601] interacts with 1 human partners:{P11387}

4420 Pathogen[ P14079] interacts with 2 human partners:{Q13472;Q969P6}

4421 Pathogen[ P03383] interacts with 1 human partners:{P11387}

4422 Pathogen[ P03410] interacts with 2 human partners:{Q13472;P11387}

4423 Pathogen[ P14075] interacts with 1 human partners:{P11387}

4424 Pathogen[ P0C206] interacts with 2 human partners:{P11387;Q13472}

4425 Pathogen[ P03363] interacts with 2 human partners:{P11387;Q13472}

4426 [Cluster 403]GO:0004535+F molecular\_function [name] poly(A)-specific ribonuclease activity [def] "Catalysis of the exonucleolytic cleavage of poly(A) to 5'-AMP." [EC

4427 Pathogen[ Q2Q067] interacts with 4 human partners:{Q96LI5;Q504Q3;O95453;Q9ULM6}

4428 Pathogen[ P0C214] interacts with 4 human partners:{O95453;Q504Q3;Q9ULM6;Q96LI5}

4429 Pathogen[ P03346] interacts with 4 human partners:{Q504Q3;Q9ULM6;O95453;Q96LI5}

4430 Pathogen[ Q85601] interacts with 4 human partners:{Q504Q3;Q96LI5;O95453;Q9ULM6}

4431 Pathogen[ P14079] interacts with 4 human partners:{Q96LI5;O95453;Q9ULM6;Q504Q3}

4432 Pathogen[ P03383] interacts with 3 human partners:{Q9ULM6;O95453;Q96LI5}

4433 Pathogen[ P03410] interacts with 4 human partners:{Q96LI5;Q9ULM6;O95453;Q504Q3}

4434 Pathogen[ P14075] interacts with 3 human partners:{O95453;Q9ULM6;Q96LI5}

4435 Pathogen[ P0C206] interacts with 4 human partners:{Q504Q3;O95453;Q96LI5;Q9ULM6}

4436 Pathogen[ P03363] interacts with 4 human partners:{Q504Q3;O95453;Q9ULM6;Q96LI5}

4437 [Cluster 404]GO:0019887+F molecular\_function [name] protein kinase regulator activity [def] "Modulates the activity of a protein kinase, an enzyme which phosphorylates a protein." [GOC

4438 Pathogen[ Q2Q067] interacts with 3 human partners:{Q6NXT1;P67870;Q9UNN5}

4439 Pathogen[ P0C214] interacts with 3 human partners:{Q9UNN5;Q6NXT1;P67870}

4440 Pathogen[ P03346] interacts with 3 human partners:{Q9UNN5;P67870;Q6NXT1}

4441 Pathogen[ Q85601] interacts with 3 human partners:{Q6NXT1;Q9UNN5;P67870}

4442 Pathogen[ P14079] interacts with 3 human partners:{Q6NXT1;Q9UNN5;P67870}

4443 Pathogen[ P03383] interacts with 2 human partners:{Q9UNN5;P67870}

4444 Pathogen[ P03410] interacts with 3 human partners:{Q9UNN5;Q6NXT1;P67870}

4445 Pathogen[ P14075] interacts with 2 human partners:{Q9UNN5;P67870}



4446 Pathogen[ P0C206] interacts with 3 human partners:{Q9UNN5;Q6NXT1;P67870}  
4447 Pathogen[ P03363] interacts with 3 human partners:{Q9UNN5;Q6NXT1;P67870}  
4448 [Cluster 405]GO:0004888+F molecular\_function [name] transmembrane signaling receptor activity [def] "Combining with an extracellular or intracellular signal and transmitting the signal from one side of the membrane to the other to initiate a change in cell activity." [GOC]  
4449 Pathogen[ Q2Q067] interacts with 1 human partners:{Q9UL03}  
4450 Pathogen[ P0C214] interacts with 1 human partners:{Q9UL03}  
4451 Pathogen[ P03346] interacts with 1 human partners:{Q9UL03}  
4452 Pathogen[ Q85601] interacts with 1 human partners:{Q9UL03}  
4453 Pathogen[ P14079] interacts with 1 human partners:{Q9UL03}  
4454 Pathogen[ P03383] interacts with 1 human partners:{Q9UL03}  
4455 Pathogen[ P03410] interacts with 2 human partners:{P20963;Q9UL03}  
4456 Pathogen[ P14075] interacts with 1 human partners:{Q9UL03}  
4457 Pathogen[ P0C206] interacts with 1 human partners:{Q9UL03}  
4458 Pathogen[ P03363] interacts with 1 human partners:{Q9UL03}  
4459 [Cluster 406]GO:0005078+F molecular\_function [name] MAP-kinase scaffold activity [def] "The binding activity of a molecule that functions as a physical support for the assembly of a multiprotein mitogen-activated protein kinase (MAPK) complex. Binds multiple kinases of the MAPKKK cascade, and also upstream signaling proteins, permitting those molecules to function in a coordinated way. Bringing together multiple enzymes and their substrates enables the signal to be transduced quickly and efficiently." [PMID]  
4460 Pathogen[ Q2Q067] interacts with 2 human partners:{Q7Z6J0;Q9UQF2}  
4461 Pathogen[ P0C214] interacts with 2 human partners:{Q7Z6J0;Q9UQF2}  
4462 Pathogen[ P03346] interacts with 2 human partners:{Q7Z6J0;Q9UQF2}  
4463 Pathogen[ Q85601] interacts with 2 human partners:{Q9UQF2;Q7Z6J0}  
4464 Pathogen[ P14079] interacts with 1 human partners:{Q9UQF2}  
4465 Pathogen[ P03383] interacts with 1 human partners:{Q9UQF2}  
4466 Pathogen[ P03410] interacts with 2 human partners:{Q7Z6J0;Q9UQF2}  
4467 Pathogen[ P14075] interacts with 1 human partners:{Q9UQF2}  
4468 Pathogen[ P0C206] interacts with 2 human partners:{Q7Z6J0;Q9UQF2}  
4469 Pathogen[ P03363] interacts with 2 human partners:{Q9UQF2;Q7Z6J0}  
4470 [Cluster 407]GO:0051059+F molecular\_function [name] NF-kappaB binding [def] "Interacting selectively and non-covalently with NF-kappaB, a transcription factor for eukaryotic RNA polymerase II promoters." [GOC]  
4471 Pathogen[ Q2Q067] interacts with 17 human partners:{Q92750;Q86VX2;Q7Z4G1;Q04206;Q13625;Q95999;P06748;Q8TBK2;Q86UE4;P60900;Q9UNN5;Q9HCU9;Q9NWT6;P23396;P25963;P42771;Q96EY1}  
4472 Pathogen[ P0C214] interacts with 17 human partners:{Q13625;P06748;P23396;Q7Z4G1;Q92750;Q04206;Q86UE4;Q9UNN5;Q95999;Q9HCU9;P42771;P25963;P60900;Q86VX2;Q96EY1;Q8TBK2;Q9NWT6}  
4473 Pathogen[ P03346] interacts with 18 human partners:{Q7Z4G1;Q86UE4;P06748;Q86VX2;P25963;Q8TBK2;Q04206;P42771;Q92750;Q95999;Q9UNN5;Q9HCU9;P60900;Q13625;P23396;Q9NWT6;Q96EY1;Q8N9B4}  
4474 Pathogen[ Q85601] interacts with 17 human partners:{P60900;Q8TBK2;P23396;Q9NWT6;Q9UNN5;Q04206;Q9HCU9;Q13625;P42771;P06748;Q86UE4;Q92750;Q86VX2;Q7Z4G1;Q95999;Q96EY1;P25963}  
4475 Pathogen[ P14079] interacts with 15 human partners:{P23396;Q95999;Q13625;Q7Z4G1;Q86VX2;Q9UNN5;P60900;Q9NWT6;Q92750;Q86UE4;P06748;Q9HCU9;Q8TBK2;Q96EY1;P42771}  
4476 Pathogen[ P03383] interacts with 17 human partners:{Q9NWT6;P06748;Q86UE4;P60900;Q13625;Q9UNN5;Q9HCU9;P25963;Q95999;P42771;Q92750;Q04206;Q86VX2;Q8TBK2;P23396;Q96EY1;Q7Z4G1}  
4477 Pathogen[ P03410] interacts with 16 human partners:{Q04206;P42771;Q9UNN5;Q9NWT6;Q92750;P60900;P23396;P06748;Q8TBK2;Q86VX2;Q95999;Q86UE4;Q7Z4G1;P25963;Q13625;Q96EY1}  
4478 Pathogen[ P14075] interacts with 17 human partners:{Q04206;Q86UE4;P60900;P42771;Q7Z4G1;Q8TBK2;P25963;Q92750;Q9UNN5;Q9HCU9;P23396;Q9NWT6;P06748;Q86VX2;Q95999;Q13625;Q96EY1}  
4479 Pathogen[ P0C206] interacts with 17 human partners:{Q9UNN5;Q9HCU9;Q7Z4G1;Q13625;Q95999;P25963;P60900;P42771;Q86VX2;Q92750;Q9NWT6;P23396;Q04206;Q86UE4;Q8TBK2;P06748;Q96EY1}  
4480 Pathogen[ P03363] interacts with 14 human partners:{Q9UNN5;Q86VX2;P23396;Q04206;Q9HCU9;P25963;Q13625;Q86UE4;Q8TBK2;P06748;Q92750;Q7Z4G1;Q96EY1;P42771}  
4481 [Cluster 408]GO:0042054+F molecular\_function [name] histone methyltransferase activity [def] "Catalysis of the reaction  
4482 Pathogen[ Q2Q067] interacts with 9 human partners:{O43463;Q96LA8;Q15910;P55345;Q15022;Q99873;O75530;Q8TEK3;Q86X55}  
4483 Pathogen[ P0C214] interacts with 9 human partners:{Q15022;O75530;Q99873;Q15910;P55345;O43463;Q86X55;Q96LA8;Q8TEK3}  
4484 Pathogen[ P03346] interacts with 9 human partners:{Q99873;O75530;Q8TEK3;O43463;Q15022;P55345;Q15910;Q86X55;Q96LA8}  
4485 Pathogen[ Q85601] interacts with 9 human partners:{Q86X55;O43463;Q15022;Q99873;O75530;Q8TEK3;Q15910;Q96LA8;P55345}  
4486 Pathogen[ P14079] interacts with 7 human

4487 partners:{Q96LA8;Q99873;P55345;O75530;Q8TEK3;Q15910;Q15022}  
Pathogen[ P03383] interacts with 8 human

4488 partners:{O43463;Q86X55;Q15022;Q99873;Q15910;Q8TEK3;Q96LA8;O75530}  
Pathogen[ P03410] interacts with 9 human

4489 partners:{Q96LA8;Q8TEK3;Q86X55;Q15910;O43463;Q15022;Q99873;P55345;O75530}  
Pathogen[ P14075] interacts with 8 human

4490 partners:{Q15910;Q96LA8;Q99873;Q86X55;Q8TEK3;O43463;Q15022;O75530}  
Pathogen[ P0C206] interacts with 9 human

4491 partners:{O75530;Q99873;Q86X55;O43463;Q96LA8;Q15910;Q15022;Q8TEK3;P55345}  
Pathogen[ P03363] interacts with 8 human

4492 partners:{Q15022;Q96LA8;Q15910;Q8TEK3;O75530;O43463;Q86X55;Q99873}  
[Cluster 409]GO:0008725+F molecular\_function [name] DNA-3-methyladenine glycosylase activity [def] "Catalysis of the reaction

4493 Pathogen[ Q2Q067] interacts with 1 human partners:{P29372}  
4494 Pathogen[ P0C214] interacts with 1 human partners:{P29372}  
4495 Pathogen[ P03346] interacts with 1 human partners:{P29372}  
4496 Pathogen[ Q85601] interacts with 1 human partners:{P29372}  
4497 Pathogen[ P14079] interacts with 1 human partners:{P29372}  
4498 Pathogen[ P03383] interacts with 1 human partners:{P29372}  
4499 Pathogen[ P03410] interacts with 1 human partners:{P29372}  
4500 Pathogen[ P14075] interacts with 1 human partners:{P29372}  
4501 Pathogen[ P0C206] interacts with 1 human partners:{P29372}  
4502 Pathogen[ P03363] interacts with 1 human partners:{P29372}

4503 [Cluster 410]GO:0034713+F molecular\_function [name] type I transforming growth factor beta receptor binding [def] "Interacting selectively and non-covalently with a type I transforming growth factor beta receptor." [GOC

4504 Pathogen[ Q2Q067] interacts with 3 human partners:{O15105;O43541;Q15796}  
4505 Pathogen[ P0C214] interacts with 3 human partners:{O15105;Q15796;O43541}  
4506 Pathogen[ P03346] interacts with 3 human partners:{Q15796;O15105;O43541}  
4507 Pathogen[ Q85601] interacts with 3 human partners:{O43541;O15105;Q15796}  
4508 Pathogen[ P14079] interacts with 2 human partners:{O43541;O15105}  
4509 Pathogen[ P03383] interacts with 3 human partners:{O15105;O43541;Q15796}  
4510 Pathogen[ P03410] interacts with 3 human partners:{O43541;O15105;Q15796}  
4511 Pathogen[ P14075] interacts with 3 human partners:{O43541;Q15796;O15105}  
4512 Pathogen[ P0C206] interacts with 3 human partners:{O43541;Q15796;O15105}  
4513 Pathogen[ P03363] interacts with 3 human partners:{O15105;O43541;Q15796}

4514 [Cluster 411]GO:0016757+F molecular\_function [name] transferase activity, transferring glycosyl groups [def] "Catalysis of the transfer of a glycosyl group from one compound (donor) to another (acceptor)." [GOC

4515 Pathogen[ Q2Q067] interacts with 17 human partners:{P07741;Q9H2K2;Q6XQN6;Q460N3;Q460N5;P35573;P46976;P54840;P09874;Q53GL7;P13807;O95271;Q9UKK3;Q9H974;Q9BXR0;P11172;Q14442}

4516 Pathogen[ P0C214] interacts with 24 human partners:{Q04446;O95045;P07741;Q460N5;P11172;Q6XQN6;Q9BXR0;P35573;P46976;Q9Y2G5;Q53GL7;Q16831;O15488;Q9H2K2;Q13126;P54840;Q460N3;Q9UKK3;Q15274;Q9H974;O95271;P43490;P13807;P09874}

4517 Pathogen[ P03346] interacts with 19 human partners:{P13807;Q460N3;Q53GL7;Q9UKK3;P35573;P46976;Q6XQN6;Q9H2K2;P09874;P54840;Q9BXR0;Q9UGN5;O95271;Q9H974;Q14442;Q9Y6F1;P11172;P07741;Q460N5}

4518 Pathogen[ Q85601] interacts with 20 human partners:{Q9BXR0;P09874;P13807;P11172;Q460N3;Q9UKK3;Q9H974;Q6XQN6;Q9H2K2;Q9Y6F1;P46976;P35573;O95045;P07741;Q04446;Q9UGN5;P54840;O95271;Q460N5;Q53GL7}

4519 Pathogen[ P14079] interacts with 36 human partners:{P09874;O43505;Q14442;O95271;Q9UGN5;P13807;P57054;Q16831;P43490;P11172;Q9BT2;Q9BRB3;Q9H2K2;Q9UKK3;Q9NYU1;Q9H488;Q3V5L5;P46976;Q460N3;Q9NYU2;Q9BXR0;Q6XQN6;P35573;O95045;Q2NL67;Q53GL7;Q8NBL1;P54840;Q9Y2G5;Q15274;Q5NDL2;Q9H974;Q9Y6F1;P07741;Q9UBM8;O15488}

4520 Pathogen[ P03383] interacts with 12 human partners:{Q9H974;P13807;P35573;P46976;P09874;Q53GL7;Q9BXR0;P07741;Q9UKK3;P54840;P11172;O95271}

4521 Pathogen[ P03410] interacts with 34 human partners:{P46976;O95045;Q15274;Q9H974;Q3V5L5;P07741;P54840;Q53GL7;Q16831;Q04446;P35573;Q460N3;P11172;Q14442;Q6XQN6;Q9Y6F1;P43490;Q9NYU1;Q9UGN5;O95271;P13807;Q9BRB3;P09874;Q9BT2;O15488;Q2NL67;Q9UKK3;Q460N5;Q9H2K2;Q9Y2G5;Q9H488;Q8NHY0;O43505;Q9NYU2}

4522 Pathogen[ P14075] interacts with 17 human partners:{Q9H974;Q14442;P11172;Q9BXR0;O95045;P46976;P54840;O43505;Q9Y2G5;P35573;P13807;P07741;O95271;Q6XQN6;P09874;Q53GL7;Q9UKK3}

4523 Pathogen[ P0C206] interacts with 27 human partners:{O95271;Q16831;P46976;Q6XQN6;P09874;Q04446;Q460N5;Q14442;Q53GL7;P43490;Q460N3;O95045;P13807;Q9Y6F1;P54840;P11172;Q9UGN5;Q9UKK3;Q9H974;Q15274;P07741;Q9BXR0;Q9H2K2;Q9Y2G5;O43505;O15488;P35573}

4524 Pathogen[ P03363] interacts with 18 human partners:{Q6XQN6;P13807;Q9UGN5;Q9BXR0;Q460N3;P07741;P11172;Q9H2K2;Q9H974;Q9UKK3;O95271;P54840;Q460N5;P09874;P35573;P46976;Q9Y6F1;Q53GL7}

4525 [Cluster 412]GO:0008079+F molecular\_function [name] translation termination factor activity [def] "Functions in the termination of translation." [GOC

4526 Pathogen[ Q2Q067] interacts with 1 human partners:{P62495}  
4527 Pathogen[ P0C214] interacts with 1 human partners:{P62495}  
4528 Pathogen[ P03346] interacts with 1 human partners:{P62495}  
4529 Pathogen[ Q85601] interacts with 1 human partners:{P62495}  
4530 Pathogen[ P14079] interacts with 1 human partners:{P62495}  
4531 Pathogen[ P03383] interacts with 1 human partners:{P62495}  
4532 Pathogen[ P03410] interacts with 1 human partners:{P62495}  
4533 Pathogen[ P14075] interacts with 1 human partners:{P62495}  
4534 Pathogen[ P0C206] interacts with 1 human partners:{P62495}  
4535 Pathogen[ P03363] interacts with 1 human partners:{P62495}  
4536 [Cluster 413]GO:0046982+F molecular\_function [name] protein heterodimerization activity [def] "Interacting selectively and non-covalently with a nonidentical protein to form a heterodimer." [GOC  
4537 Pathogen[ Q2Q067] interacts with 100 human partners:{Q13562;Q9H4I2;P30153;P27540;Q92750;Q9Y6X8;Q9NRF9;Q10587;Q9HBZ2;P15884;Q16594;Q99081;O00470;O00267;Q9UMX3;Q08209;O14503;P13929;Q9UNSL;P35680;P35712;Q01664;Q9NQ87;P13349;Q6VUC0;O96004;Q01196;Q5EE01;P54274;P49116;O60238;Q5VWX1;P49450;O95347;Q8N2Z9;O75486;P06748;Q2M1K9;P52657;A6NLC8;P17676;Q9NR22;P15172;P28702;P11388;Q15744;Q8TAK5;Q14181;P55347;Q15699;Q96BT3;Q99728;Q9UKY1;Q15102;Q01658;Q15543;O75444;P49848;Q15544;O0268;P25208;P35869;Q16514;Q8NHW3;P16890;P61244;Q7Z7C8;P12883;Q9Y6J9;Q15257;P20823;Q12983;O14920;P22415;Q9UKT9;P52655;P19484;P31314;Q9HBM6;Q9NP71;Q8WYK2;Q14683;P63272;Q15853;Q9NUQ3;P55327;Q13952;P15923;Q99814;Q9BX26;P35711;P22736;O15392;P23409;Q06547;Q02078;Q06546;P40424;P53567;P49715}  
4538 Pathogen[ P0C214] interacts with 98 human partners:{P40424;O00470;O00268;P53567;O75444;P32243;O75486;P61244;P35869;Q96BT3;Q99728;Q13952;Q06546;Q9Y6J9;P55347;P30153;Q06547;P52657;Q92934;P31314;P52655;P06748;P19484;P25208;Q99081;O00267;Q5H9I0;P15884;Q8NHW3;P13349;Q92750;Q5EE01;P35711;P15172;Q7Z7C8;Q2M1K9;Q15257;P68402;Q16594;O95347;Q16890;Q9H4I2;P17676;Q9NUQ3;Q10587;P49450;Q6VUC0;Q9HBZ2;Q02078;O14503;Q8N2Z9;Q15102;P13929;P49116;P15923;Q9HBM6;P09104;A6NLC8;Q08209;Q9UH92;P63272;Q15544;Q9UMX3;P49848;Q9UNSL;Q9Y6X8;Q9NP71;P11388;Q9NRF9;Q16514;P12883;Q8TAK5;Q12983;Q9UKT9;Q9BX26;O15392;Q14683;Q15853;O60238;P55327;Q99814;Q01658;O96004;P13533;P27540;Q6GYQ0;P22415;Q15543;Q5VWX1;Q9NQ87;Q01664;Q15699;O14920;P35712;Q9NR22;P54274;P18846;Q14181}  
4539 Pathogen[ P03346] interacts with 125 human partners:{Q99081;Q9Y6J9;Q8N2Z9;Q9UKS7;Q02078;P02549;O15392;P17676;P06748;P19484;P55327;Q8TAK5;Q06547;P11388;P11277;P13929;Q9UKT9;Q9BX26;Q8NFW5;A6NLC8;P13349;Q99728;O60238;Q2M1K9;Q5EE01;P54274;Q9UBV8;P49116;Q7Z7C8;O75486;P25208;P15923;P15172;Q15257;Q9UNSL;P23409;O95347;O00268;P15173;P27540;P20823;P63272;Q9NR33;Q9H165;Q9NRF9;Q12983;P49715;Q92750;O75444;Q14503;Q15853;Q13813;Q14919;P30153;O96004;Q15699;P28702;Q9NP71;O00327;Q16890;P17542;Q9NR22;P22736;Q6VUC0;Q06546;Q15102;Q9H4I2;Q14683;Q9NUQ3;P49848;Q9HBM6;O00470;P52657;Q9NR22;Q5T2T1;Q5VWX1;Q9Y6X8;Q15744;P35680;Q9NQ87;Q16514;Q99814;Q16695;Q5H9I0;Q07820;Q9HBZ2;O00267;Q14181;Q14190;Q6GYQ0;P61244;Q92481;Q13952;P35712;P49450;P55347;Q15700;Q01658;P40424;Q01196;P31314;Q9UKY1;P53567;O14920;Q9UMX3;Q9UH92;P35869;Q08209;Q10587;Q13562;P35711;Q8NHW3;P32243;P52655;Q01664;Q15544;Q96BT3;Q8WYK2;P15884;P18846;Q8IUM7;P22415;Q96SF7;Q16594;Q15543}  
4540 Pathogen[ Q85601] interacts with 105 human partners:{Q16890;P52657;Q15853;Q02078;P17676;P25208;Q6VUC0;Q9NR22;O95347;P19484;P15172;P13533;Q06546;P53567;P13349;Q96BT3;Q7Z7C8;Q2M1K9;Q5EE01;P28702;Q99728;Q5VWX1;O00327;P30153;O00268;O14503;P35712;Q10587;P18846;Q99814;O15392;P27540;Q9UMX3;Q16594;Q9BX26;O96004;Q9NP71;Q13952;Q9Y6J9;Q9NRF9;Q9UH92;Q08209;Q13562;Q9HBM6;Q8NHW3;P22415;Q9H4I2;P23409;O75444;P40424;P13929;P35711;Q14683;Q15699;O14920;P49848;A6NLC8;P22736;Q9Y6X8;Q15744;P35680;Q9NQ87;P11388;P49450;Q16514;O00470;Q9BVA0;P06748;Q01658;Q8N2Z9;P12883;P15923;Q9HBZ2;O00267;Q14181;P32243;Q5H9I0;P61244;P49715;Q06547;P55347;Q12983;Q92750;O75486;P35869;P63272;P52655;Q99081;P31314;P49116;Q9UKY1;Q15543;Q8TAK5;Q15257;O60238;P20823;Q01664;Q15544;Q9UKT9;Q8WYK2;P54274;Q9NUQ3;P15884;Q15102;Q9UNSL}  
4541 Pathogen[ P14079] interacts with 118 human partners:{Q13952;P35711;P54274;P11388;Q8WYK2;Q16890;P55327;Q9NR22;Q5EE01;Q10587;Q16873;P35869;Q02078;Q99814;Q06413;Q06546;Q9Y6J9;O43187;P13349;Q96BT3;Q15853;Q16594;P23409;Q15700;P20292;P53567;Q86YH6;P35680;Q9NRG0;P55347;P13498;Q13323;P01225;Q5T2T1;P16298;Q15699;O15392;P35712;Q5H9I0;Q8TAK5;O96004;P22736;P19484;P15923;Q06547;Q9NUQ3;Q15744;P35611;Q9UKY1;O75952;Q9NRF9;Q5VWX1;Q15543;Q86UW1;O95347;Q92934;O75409;P49715;Q15102;P49848;Q2M1K9;P27540;P63272;Q8N2Z9;P49450;Q92750;Q8NHW3;P28702;O95292;Q9UBV8;Q01664;Q12983;Q9UMX3;P11277;P06748;P12883;O75444;Q14181;Q9UH92;P52657;Q9BX26;P32243;P13929;P29459;Q9UQE7;P15884;Q9HBZ2;Q9NQ87;P30153;Q99081;O14503;P49116;Q9BZX4;Q16514;O60238;Q9H4I2;Q13813;Q9BVA0;Q9Y6X8;O00470;Q14683;O00267;P02549;Q9UNSL;O75486;P61244;Q9NP71;Q8IUM7;Q08209;Q01658;Q9NR33;O00268;Q9HBM6;Q86X10;Q9UKT9;Q6VUC0;A6NLC8;P22415}  
4542 Pathogen[ P03383] interacts with 78 human partners:{Q14683;Q9UNSL;Q9Y6J9;O00470;Q8N2Z9;Q9UH92;P35712;P63272;P06748;P27540;Q15544;Q8TAK5;P32243;Q5H9I0;Q9H4I2;P15172;O75486;P19484;O14920;Q15257;Q06547;P40424;Q14181;P49116;A6NLC8;Q9NUQ3;Q5EE01;P52655;Q9UMX3;Q9NQ87;Q9HBM6;P15923;O95347;O14503;P30153;P18846;O00267;Q12983;Q96BT3;Q9NP71;Q01664;P55347;P25208;Q5VWX1;P52657;O96004;Q13952;Q16594;O60238;Q6VUC0;Q9NR22;P17676;P49848;Q99081;P28702;P35711;Q9Y6X8;O00268;Q16514;P12883;P31314;Q15853;Q92750;P53567;Q9UKT9;Q2M1K9;Q15699;O75444;P61244;P35869;Q01658;Q06546;Q16890;P54274;Q02078;P22415;Q9BX26;Q15543}  
4543 Pathogen[ P03410] interacts with 119 human partners:{O95292;O15392;P35712;P23409;P52655;O14920;O00470;Q8WYK2;O00268;Q12983;Q14181

1;O96004;Q15543;Q08209;P17676;Q9H4I2;Q92750;Q99814;O00267;P63272;O75409;Q86UW1;P54274;Q9UQE7;Q9NQ87;Q96BT3;P53567;P15884;Q15257;O75444;O43187;Q5H9I0;Q9BZX4;Q2M1K9;Q92934;Q9NRG0;P06748;Q5VWX1;P19484;P55157;P31314;Q06547;P15923;P02549;P52657;Q9NR22;Q9UBV8;P18846;P61244;Q5EE01;O75486;Q15700;O95347;Q9HBBZ2;O75952;P27540;Q99081;Q5T2T1;Q9UKT9;Q9BX26;Q9HBM6;A6NLC8;Q16514;Q9UMX3;P49848;Q8TAK5;P25208;Q16873;Q9NP71;Q14683;Q01658;P22415;P12883;Q13952;P22736;P28702;P55327;Q9NRF9;Q9NUQ3;Q9Y6X8;Q15699;Q9Y6J9;Q16594;Q15853;P13349;Q9NR33;P11388;P49450;Q15544;Q6VUC0;Q15102;P55347;P13929;P32243;P30153;Q8NHW3;Q9UNS1;Q01664;P35680;P49116;Q10587;Q02078;Q16890;P13533;Q9UH92;Q15744;P20292;P40424;Q13813;Q86YH6;Q9UKY1;P35611;P11277;P29459;O60238;Q06546;Q9BVA0;Q13323;Q8N2Z9}

4544 Pathogen[ P14075] interacts with 81 human partners: {Q5VWX1;Q15257;A6NLC8;Q9Y6J9;P35869;Q12983;P55327;Q15102;Q9H4I2;P40424;Q14683;P52657;Q9UMX3;Q9NR22;O00470;P53567;P25208;Q01658;O75444;Q5EE01;Q06546;P61244;Q9BX26;P15172;P19484;Q9UH92;Q7Z7C8;Q15544;Q9NQ87;P15923;Q13952;Q16594;Q92750;O95347;O14503;P27540;P55347;Q8N2Z9;Q9NUQ3;P35711;O96004;Q9NP71;O14920;Q15853;P49116;P54274;Q06547;Q01664;P49848;P35712;Q16890;O60238;Q9UKT9;Q9Y6X8;P52655;Q16514;Q96BT3;P06748;Q02078;P30153;O00268;P28702;P15884;Q9UNS1;Q15699;P31314;O75486;P22415;P17676;Q2M1K9;Q14181;Q99081;O00267;P32243;P63272;Q6VUC0;P18846;Q8TAK5;Q5H9I0;Q15543;Q9HBM6}

4545 Pathogen[ P0C206] interacts with 121 human partners: {Q9UNS1;O75486;P53567;Q9NQ87;O75952;Q9BVA0;Q06546;O14920;P31314;Q16514;Q9NP71;Q9UBV8;Q9UH92;Q15543;Q9NUQ3;Q9NRF9;P49848;Q8TAK5;Q02078;P13533;Q9H4I2;Q15544;P30153;Q9NR33;Q15700;P35869;Q15744;O75444;P52657;O00470;Q9UMX3;P52655;O00268;Q9C0J9;Q8WYK2;P23409;Q16890;P55327;P49715;P19484;P18846;Q9Y6J9;P49116;P22736;Q10587;Q15699;Q9BX26;Q9Y6X8;P40424;Q6VUC0;O96004;Q92934;Q15853;O95292;Q5EE01;P54274;O60238;O00327;Q13952;Q12983;Q92750;Q5T2T1;Q14919;P12883;P22415;P35711;Q99081;Q9UQE7;P49450;O95347;P32243;P17676;Q14181;P13349;Q14683;Q01658;P35680;P15923;Q15102;Q96BT3;P15884;P20823;Q99728;Q06547;Q8NHW3;Q9H165;O00267;A6NLC8;O15392;P25208;P61244;Q9NR22;Q2M1K9;Q13422;Q01664;P20292;P28702;P35712;Q9HBM6;Q5H9I0;P11277;P27540;P15172;Q9UKT9;Q08209;P11388;Q7Z7C8;Q8N2Z9;P06748;Q99814;Q8IUM7;P13929;Q9NTJ3;Q15257;Q5VWX1;Q9HBBZ2;P63272;Q9UKY1;Q16594;P55347}

4546 Pathogen[ P03363] interacts with 107 human partners: {Q15699;Q06547;Q8IUM7;Q8NFW5;P35711;Q9UH92;P11277;O14920;Q15853;P27540;P49848;P17676;P49116;P02549;P53567;Q06546;Q13952;Q15744;O95347;Q9NRF9;Q9NQ87;Q16514;Q8NHW3;Q9Y6X8;Q9C0J9;Q8N2Z9;Q9HBBZ2;O00268;Q15700;O00267;Q14181;P32243;Q5T2T1;P55347;Q5H9I0;Q16695;A6NLC8;P06748;Q8WYK2;P35869;P13349;P52657;P61244;P15923;Q2M1K9;Q5EE01;Q9UBV8;P28702;Q15544;P49450;Q9NR22;P54274;P18846;O75444;O00327;Q5VWX1;Q7Z7C8;Q14919;Q9UNS1;P31314;Q9UKY1;O96004;O00470;P22415;Q92750;Q99814;Q8TAK5;Q9UBE0;P35712;Q9HBM6;Q96BT3;P52655;P23409;P63272;Q16890;P19484;Q15257;Q07820;P15884;P40424;Q9UKT9;Q9NUQ3;O75486;Q9NP71;Q9NR33;Q99728;Q99081;Q01658;P30153;Q15543;Q13813;P15172;O60238;P25208;Q9H4I2;Q9UMX3;Q14683;Q01664;P55327;Q9Y6J9;Q9BX26;O14503;Q10587;Q15102;Q16594;Q6VUC0;Q02078}

4547 [Cluster 414]GO:0016018+F molecular\_function [name] cyclosporin A binding [def] "Interacting selectively and non-covalently with cyclosporin A, a cyclic undecapeptide that contains several N-methylated and unusual amino acids." [GOC]

4548 Pathogen[ Q2Q067] interacts with 4 human partners: {Q9UNP9;Q13427;O43447;Q08752}

4549 Pathogen[ P0C214] interacts with 7 human partners: {P30405;Q13427;P30414;P45877;O43447;Q08752;Q9UNP9}

4550 Pathogen[ P03346] interacts with 4 human partners: {O43447;Q13427;Q08752;Q9UNP9}

4551 Pathogen[ Q85601] interacts with 6 human partners: {P30405;Q13427;Q08752;P30414;O43447;P45877}

4552 Pathogen[ P14079] interacts with 4 human partners: {O43447;Q08752;Q13427;P45877}

4553 Pathogen[ P03383] interacts with 4 human partners: {Q9UNP9;Q08752;O43447;Q13427}

4554 Pathogen[ P03410] interacts with 7 human partners: {Q08752;P45877;Q9UNP9;P30414;Q13427;O43447;P30405}

4555 Pathogen[ P14075] interacts with 4 human partners: {Q08752;Q9UNP9;O43447;Q13427}

4556 Pathogen[ P0C206] interacts with 6 human partners: {Q9UNP9;Q08752;Q13427;O43447;P45877;P30405}

4557 Pathogen[ P03363] interacts with 4 human partners: {Q13427;Q08752;O43447;Q9UNP9}

4558 [Cluster 415]GO:0008312+F molecular\_function [name] 7S RNA binding [def] "Interacting selectively and non-covalently with 7S RNA, the RNA component of the signal recognition particle (SRP)." [GOC]

4559 Pathogen[ Q2Q067] interacts with 4 human partners: {P49458;P09132;Q13868;Q9UHB9}

4560 Pathogen[ P0C214] interacts with 4 human partners: {Q13868;Q9UHB9;P49458;P09132}

4561 Pathogen[ P03346] interacts with 4 human partners: {P49458;P09132;Q9UHB9;Q13868}

4562 Pathogen[ Q85601] interacts with 3 human partners: {Q13868;Q9UHB9;P09132}

4563 Pathogen[ P14079] interacts with 4 human partners: {P09132;Q13868;P49458;Q9UHB9}

4564 Pathogen[ P03383] interacts with 4 human partners: {P49458;P09132;Q9UHB9;Q13868}

4565 Pathogen[ P03410] interacts with 4 human partners: {Q9UHB9;Q13868;P09132;P49458}

4566 Pathogen[ P14075] interacts with 4 human partners: {P09132;Q13868;P49458;Q9UHB9}

4567 Pathogen[ P0C206] interacts with 4 human partners: {P09132;Q13868;P49458;Q9UHB9}

4568 Pathogen[ P03363] interacts with 4 human partners: {P09132;Q9UHB9;Q13868;P49458}

4569 [Cluster 416]GO:0030628+F molecular\_function [name] pre-mRNA 3'-splice site binding [def] "Interacting selectively and non-covalently with the pre-mRNA 3' splice site sequence." [GOC]

4570 Pathogen[ Q2Q067] interacts with 2 human partners: {O95391;Q15696}

4571 Pathogen[ P0C214] interacts with 2 human partners: {Q15696;O95391}

4572 Pathogen[ P03346] interacts with 2 human partners: {O95391;Q15696}

4573 Pathogen[ Q85601] interacts with 2 human partners: {O95391;Q15696}

4574 Pathogen[ P14079] interacts with 2 human partners:{Q15696;O95391}

4575 Pathogen[ P03383] interacts with 1 human partners:{O95391}

4576 Pathogen[ P03410] interacts with 2 human partners:{Q15696;O95391}

4577 Pathogen[ P14075] interacts with 1 human partners:{O95391}

4578 Pathogen[ P0C206] interacts with 2 human partners:{Q15696;O95391}

4579 Pathogen[ P03363] interacts with 2 human partners:{O95391;Q15696}

4580 [Cluster 417]GO:0004470+F molecular\_function [name] malic enzyme activity [def]  
"Catalysis of the oxidative decarboxylation of malate with the concomitant production of pyruvate." [ISBN

4581 Pathogen[ Q2Q067] interacts with 1 human partners:{P40925}

4582 Pathogen[ P0C214] interacts with 2 human partners:{P48163;Q16798}

4583 Pathogen[ P03346] interacts with 1 human partners:{P40925}

4584 Pathogen[ Q85601] interacts with 1 human partners:{P40925}

4585 Pathogen[ P14079] interacts with 1 human partners:{P40925}

4586 Pathogen[ P03383] interacts with 1 human partners:{P40925}

4587 Pathogen[ P03410] interacts with 1 human partners:{P40925}

4588 Pathogen[ P14075] interacts with 1 human partners:{P40925}

4589 Pathogen[ P0C206] interacts with 1 human partners:{P40925}

4590 Pathogen[ P03363] interacts with 1 human partners:{P40925}

4591 [Cluster 418]GO:0017080+F molecular\_function [name] sodium channel regulator activity [def]  
"Modulates the activity of a sodium channel." [GOC

4592 Pathogen[ Q2Q067] interacts with 3 human partners:{Q96PU5;Q9HD47;Q04917}

4593 Pathogen[ P0C214] interacts with 3 human partners:{Q04917;Q9HD47;Q96PU5}

4594 Pathogen[ P03346] interacts with 4 human partners:{Q96NL6;Q96PU5;Q9HD47;Q04917}

4595 Pathogen[ Q85601] interacts with 3 human partners:{Q9HD47;Q96PU5;Q04917}

4596 Pathogen[ P14079] interacts with 3 human partners:{Q96NL6;Q04917;Q9HD47}

4597 Pathogen[ P03383] interacts with 1 human partners:{Q9HD47}

4598 Pathogen[ P03410] interacts with 3 human partners:{Q04917;Q9HD47;Q96NL6}

4599 Pathogen[ P14075] interacts with 1 human partners:{Q9HD47}

4600 Pathogen[ P0C206] interacts with 4 human partners:{Q96PU5;Q96NL6;Q04917;Q9HD47}

4601 Pathogen[ P03363] interacts with 3 human partners:{Q9HD47;Q96PU5;Q04917}

4602 [Cluster 419]GO:0031435+F molecular\_function [name] mitogen-activated protein kinase kinase kinase binding [def]  
"Interacting selectively and non-covalently with a mitogen-activated protein kinase kinase kinase, any protein that can phosphorylate a MAP kinase kinase." [GOC

4603 Pathogen[ Q2Q067] interacts with 4 human partners:{Q12933;Q9UQF2;P60953;P15923}

4604 Pathogen[ P0C214] interacts with 4 human partners:{P60953;P15923;Q12933;Q9UQF2}

4605 Pathogen[ P03346] interacts with 3 human partners:{P15923;P60953;Q9UQF2}

4606 Pathogen[ Q85601] interacts with 4 human partners:{Q9UQF2;Q12933;P15923;P60953}

4607 Pathogen[ P14079] interacts with 3 human partners:{Q9UQF2;P15923;Q12933}

4608 Pathogen[ P03383] interacts with 4 human partners:{P60953;P15923;Q9UQF2;Q12933}

4609 Pathogen[ P03410] interacts with 4 human partners:{P15923;Q12933;P60953;Q9UQF2}

4610 Pathogen[ P14075] interacts with 4 human partners:{P60953;P15923;Q12933;Q9UQF2}

4611 Pathogen[ P0C206] interacts with 4 human partners:{Q12933;Q9UQF2;P15923;P60953}

4612 Pathogen[ P03363] interacts with 4 human partners:{Q9UQF2;Q12933;P15923;P60953}

4613 [Cluster 420]GO:0004359+F molecular\_function [name] glutaminase activity [def]  
"Catalysis of the reaction

4614 Pathogen[ Q2Q067] interacts with 2 human partners:{Q9UI32;O94925}

4615 Pathogen[ P0C214] interacts with 2 human partners:{Q9UI32;O94925}

4616 Pathogen[ P03346] interacts with 2 human partners:{Q9UI32;O94925}

4617 Pathogen[ Q85601] interacts with 2 human partners:{O94925;Q9UI32}

4618 Pathogen[ P14079] interacts with 2 human partners:{O94925;Q9UI32}

4619 Pathogen[ P03383] interacts with 1 human partners:{O94925}

4620 Pathogen[ P03410] interacts with 2 human partners:{O94925;Q9UI32}

4621 Pathogen[ P14075] interacts with 1 human partners:{O94925}

4622 Pathogen[ P0C206] interacts with 2 human partners:{Q9UI32;O94925}

4623 Pathogen[ P03363] interacts with 2 human partners:{O94925;Q9UI32}

4624 [Cluster 421]GO:0016597+F molecular\_function [name] amino acid binding [def]  
"Interacting selectively and non-covalently with an amino acid, organic acids containing one or more amino substituents." [GOC

4625 Pathogen[ Q2Q067] interacts with 4 human partners:{Q15046;P34896;O95865;P30047}

4626 Pathogen[ P0C214] interacts with 7 human partners:{P00480;P34897;O95865;P34896;P49588;Q15046;P30047}

4627 Pathogen[ P03346] interacts with 2 human partners:{P30047;O95865}

4628 Pathogen[ Q85601] interacts with 5 human partners:{P00480;Q15046;P30047;P34896;O95865}

4629 Pathogen[ P14079] interacts with 8 human partners:{P48775;P34897;Q15046;P00480;P49588;P30047;O95865;P34896}

4630 Pathogen[ P03383] interacts with 4 human partners:{O95865;P34896;Q15046;P30047}

4631 Pathogen[ P03410] interacts with 8 human partners:{P30047;P49588;O95865;P00480;P48775;Q15046;P34897;P34896}

4632 Pathogen[ P14075] interacts with 4 human partners:{P34896;O95865;P30047;Q15046}

4633 Pathogen[ P0C206] interacts with 6 human partners:{P34897;O95865;P30047;P34896;P00480;Q15046}

4634 Pathogen[ P03363] interacts with 2 human partners:{O95865;P30047}

4635 [Cluster 422]GO:0042803+F molecular\_function [name] protein homodimerization activity

- [def] "Interacting selectively and non-covalently with an identical protein to form a homodimer." [GOC]
- 4636 Pathogen[ Q2Q067] interacts with 144 human  
partners: {P49454; Q9H4I2; Q9NQG7; Q9UL45; Q9Y6X8; Q9H008; Q93009; Q10587; A0AVK6; O75340; Q9HAV7; Q9C005; O95684; O14503; Q13485; P13929; Q9UNSL; P35680; P13056; Q15554; Q99497; P30793; Q01664; Q9NQ87; Q15697; Q6VUC0; O96004; Q01196; P05813; Q05516; P54274; O60543; O60238; P55345; O60930; Q13257; Q86XR8; A6NFD8; P07900; Q15633; P53672; P06748; Q9UER7; Q03933; Q7L804; P02511; Q2M1K9; P52657; Q8TAA5; P17676; Q9NVK5; P08047; Q8NF91; P11831; Q9NR22; P11388; Q8IXQ5; Q15744; O43399; O15405; Q6ICB4; Q8TAK5; Q99966; Q13137; Q9UII2; Q9HB71; Q92748; Q99728; Q14653; P34896; O96017; P84022; Q99856; P31949; P54840; Q96FQ6; Q12904; Q96PM5; Q9GZV5; O75444; Q5JR59; Q16719; Q9NWT6; Q9BUL8; P08697; O14746; Q8NHW3; Q16890; P61244; Q96BY2; P12883; Q86VE0; O43809; Q9H7L9; O76064; P62072; Q15257; Q15466; P19838; Q9Y697; Q9NNW7; P20823; Q9C035; Q9Y5J7; P28698; Q12983; Q14686; P22415; O75150; Q9UKT9; Q9UNE7; Q6PI48; O75154; Q495M9; Q9NP71; Q9Y2G2; Q86U70; Q03393; P35579; Q49AM1; Q15853; P55327; P49589; O14558; P23497; P15923; Q9NVV4; P23297; Q9HC16; Q8N668; P42224; P22736; Q86X55; O15392; P18124; Q9UKT5; O43708; P09234; P53567; P49715; Q15276; P28715; Q03112; P23025}
- 4637 Pathogen[ P0C214] interacts with 162 human  
partners: {Q9NQG7; P53567; O75444; Q6ICB4; P08697; P09417; Q13257; P49589; O75874; Q96PM5; P61244; P11413; Q12904; Q15697; A0AVK6; Q9NPP4; P53672; Q8N335; O14746; Q99728; Q9HAV7; O95684; P19838; Q96BY2; P52657; P02511; O60543; P06748; Q15554; P23025; Q8NHW3; Q9C035; Q99856; Q03112; Q495M9; Q9NNW7; P84022; P29401; Q9GZV5; P11831; Q2M1K9; P42224; Q9BUL8; Q49AM1; P05813; Q99497; Q15257; Q8N668; O75340; P20585; P68402; P55345; Q14686; Q9Y2G2; Q16890; Q9H4I2; P17676; Q03933; Q5JR59; Q10587; P62072; Q7L804; Q6VUC0; O75223; O14503; P28698; Q15633; P50747; P13056; Q99966; P28715; Q86VE0; Q13137; Q9HC16; P13929; Q03393; P30793; O43809; Q96AT9; Q9UII2; Q8NF91; P15923; Q9Y697; Q9UER7; O96017; P34896; P26639; P09104; Q86U70; Q86XR8; Q86XE5; Q13485; Q9C005; Q9UH92; Q9UL45; Q9UNSL; P19623; O60930; Q9Y6X8; Q9NP71; P11838; Q93009; Q9Y2G2; Q8TAA5; Q14653; Q9NVK5; Q8IXQ5; P12883; Q9HD26; Q8TAK5; Q12983; Q9UKT9; P23497; O15392; P05412; Q15853; P31949; O60238; P54840; Q9Y5J7; P55327; O14558; O75150; Q86WV6; Q6PI48; O96004; P13533; Q15274; Q86X55; Q9H008; P09234; P22415; P35520; O43708; Q96FQ6; P36551; P49454; Q92748; Q9NVV4; Q9UNE7; Q9NQ87; O76064; Q01664; P31939; P23297; P18124; Q9HB71; P08047; Q05516; Q9NR22; O15405; Q15466; P54274; Q16719; O75154; Q9Y2Z4; Q9H7L9; Q9UKT5; Q16773; O43399; Q9NWT6; P21695}
- 4638 Pathogen[ P03346] interacts with 171 human  
partners: {Q9NQG7; P05412; Q9UKS7; O75592; Q93009; Q86U70; P28715; O14908; O76064; Q99966; Q96FQ6; P07900; Q7RTS1; O96017; Q86XR8; A6NFD8; Q9C005; O15392; O75150; O95684; P17676; P06748; P55327; Q5JR59; Q8TAK5; P11831; P11388; Q15554; P13929; O60930; Q9UKT9; Q8N668; Q8NFW5; P23297; P35579; Q99728; Q9GZV5; Q03933; O60238; Q2M1K9; P54274; Q15466; Q9P2W1; Q15633; Q8IXQ5; P15923; Q15257; Q96PM5; Q9UNSL; Q9Y5J7; Q9NVK5; Q99856; Q86WG5; P28698; P13056; Q9C035; P06703; Q92748; P20823; Q9Y697; Q9H165; Q96BY2; Q12983; Q03393; P49715; O75444; P08047; O14503; Q15853; Q9Y371; P20132; Q13137; Q9HAV7; O96004; Q6ZPB5; P51843; Q9NP71; Q9UII2; Q16890; P84022; Q12904; Q9HB71; Q9C009; P02511; Q7L804; Q9NPP4; O75340; P22736; Q8N4B1; Q6VUC0; Q9UNH7; O94972; Q86VE0; Q9HD26; Q9H4I2; Q9UKT5; Q9UNE7; O75569; Q03112; P20585; O14746; Q9NVV4; P55345; P52657; Q9NR22; Q9Y6X8; Q15744; Q9UER7; P35680; Q9NQ87; P42224; Q16719; P62072; P63316; Q9UL45; Q14653; Q99497; P49589; O43708; P30622; O43809; Q05516; P61244; Q92481; Q13516; P54840; Q9H7L9; Q86X55; P05813; Q6PI48; Q01196; P23025; P19838; P23497; Q13485; Q86YS3; P53567; Q9NWT6; Q9H8V3; Q9Y2G2; Q9UH92; O43399; O75154; Q15697; O14558; Q6ICB4; Q9BZR9; Q10587; Q8NF91; A0AVK6; O96011; Q49AM1; Q8NHW3; O60543; P09234; Q8TAA5; P53672; Q9BUL8; Q01664; Q495M9; P31949; O15405; Q9H008; P18124; Q13257; P49454; Q15276; P22415; Q14686; Q96SF7; Q9NNW7}
- 4639 Pathogen[ Q85601] interacts with 147 human  
partners: {Q16890; Q9NQG7; P52657; Q96FQ6; Q99497; P49454; P28698; P09234; Q86WV6; P11831; Q15853; P17676; Q6VUC0; P23025; O75154; P26639; O43708; Q8TAA5; Q9NR22; P53672; O96017; Q93009; Q15466; Q86X55; Q7L804; O95684; P13533; P49589; Q86U70; Q15554; P35579; P53567; Q86YS3; Q9BUL8; P62072; Q03933; Q16719; Q9HC16; Q2M1K9; Q99966; Q03112; Q9Y697; P30622; Q9NWT6; Q96BY2; Q96PM5; Q9UER7; Q99728; Q9Y5J7; Q9Y2G2; O14503; Q10587; Q9GZV5; Q9BZR9; Q49AM1; O15392; P23297; O96004; O15405; Q9NP71; Q9H008; P08697; P30793; P08047; Q13257; Q9UH92; O43399; P28715; Q8NHW3; Q13137; P22415; Q9NVK5; Q14686; Q9H4I2; Q9UII2; Q86XR8; O75444; Q14653; O76064; P34896; O60543; Q8IXQ5; Q9HD26; P13929; A6NFD8; Q9C005; P02511; Q6ICB4; P20585; P22736; Q15744; Q15744; P35680; P05412; Q9NQ87; P11388; Q9HAV7; Q8N668; P42224; P06748; P12883; P15923; P07900; Q15633; O75340; Q9C035; Q05516; O75150; P61244; P84022; Q86VE0; P49715; Q5JR59; O14746; P31949; Q12983; Q6PI48; P54840; O60930; P13056; Q9NVV4; Q8TAK5; Q15697; O14558; Q15257; Q8NF91; Q9H7L9; O60238; A0AVK6; P19838; P20823; Q9UKT5; Q9UNE7; Q13485; Q9UNH7; Q9HB71; Q01664; Q9UKT9; Q495M9; Q99856; P18124; P54274; O43809; Q92748; P55345; Q9UNSL; P05813}
- 4640 Pathogen[ P14079] interacts with 180 human  
partners: {P04083; O43809; Q9NQG7; O75192; P54274; P11388; P35579; O75223; P13056; Q7L804; Q9UKT5; O14746; P20585; P26639; Q9UNH7; P09327; P05813; Q16890; P55327; Q9NR22; Q10587; P28715; Q9C005; Q9GZV5; O43187; Q14653; Q9C035; Q15853; O95684; P62072; P20132; P20292; P53567; P31939; P35680; O60543; Q49AM1; P02511; Q6ZPB5; O15405; Q86U70; Q9UII2; Q15276; P31949; Q99497; O15392; Q9H008; Q15070; P29401; Q99966; Q9HC16; Q05516; Q8TAK5; O96004; Q92748; P22736; Q99856; P51606; O43708; Q86YS3; O75569; Q9BUL8; Q9Y5J7; P18124; Q9Y371; P15923; P30793; Q03933; P23025; P23497; Q15744; P06280; P35611; P28698; Q9HD26; Q9HB71; P55345; P49589; O96011; Q9NNW7; Q14353; Q86UW1; O00519; Q96BY2; Q9UER7; Q16719; Q9UL45; Q7RTS1; Q86WV6; Q9NWT6; P49715; O75340; Q15075; O14558; Q2M1K9; Q13257; Q5VZ72; Q8N4B1; P11686; Q9Y697; Q9NVV4; Q8NHW3; Q15697; P07900; O95292; Q9H8V3; Q01664; O76027; Q12983; Q8N668; Q9NVK5; Q8NBK3; Q8IW40; P23297; P06748; P12883; P10620; O75444; Q9NSU2; Q13137; Q9UH92; P52657; Q9Y2Z4; P42224; Q86WG5; Q86VE0; Q15554; P13929; Q9Y2G2; P17050; Q6ICB4; P53602; Q495M9; P19623; P49454; P53672; O75154; P09234; P21695; Q9NQ87; Q5JR59; Q9NNW5; Q12904; P06703; Q03393; O14503; O43399; A0AVK6; P52701; Q8NF91; P05412; Q15466; Q9BZX4; Q86XR8; P36551; Q9H7L9; O60930; Q6PI48; P54840; O60238; Q86XE5; Q9H4I2; Q9Y6X8; Q9UNSL; Q9Y239; Q15274; A6NFD8; P61244; O14908; Q9NP71; Q14686; P30622; Q9UKT9; P34896; P43320; Q6VUC0; Q9HAV7; Q9NPP4; P22415; Q8TAA5}

- 4641 Pathogen[ P03383] interacts with 113 human partners: {Q9UNS1;Q13257;Q9NQG7;Q9NVV4;Q7L804;P49454;Q9Y5J7;Q86XR8;Q5JR59;P11831;Q9UH92;Q13485;Q12904;Q14653;P08047;Q9NWT6;P06748;O60543;Q8TAK5;Q9H4I2;O95684;P62072;Q86U70;Q15257;Q9HD26;Q15554;Q8N668;P23297;P34896;P49589;Q9H7L9;P18124;Q86X55;Q14686;P08697;Q9HAV7;P02511;O43399;Q9NQ87;P15923;O14503;O15405;Q05516;P28698;Q86VE0;P07900;Q12983;Q9Y697;Q9NP71;Q01664;Q6ZPB5;Q16719;P52657;Q13137;O96004;O14558;Q03112;Q9UII2;P84022;Q9HB71;O60238;Q9C035;Q6VUC0;Q9NR22;Q9C005;P53672;Q9UKT5;P17676;P23025;Q15466;O14746;Q96PM5;Q15697;Q9Y2Z4;Q9Y6X8;Q9UER7;P12883;Q8TAA5;Q9Y2G2;Q15853;O43809;Q92748;P23497;Q9BUL8;O60930;Q6PI48;P53567;Q9UKT9;P54840;P35579;Q99856;Q2M1K9;O75444;O75150;P61244;P19838;P05813;Q49AM1;P09234;P13056;Q9GZV5;Q16890;O75154;A0AVK6;P54274;Q15276;Q15633;P22415;Q96BY2;Q96017;Q9H008;Q03933;P05412}
- 4642 Pathogen[ P03410] interacts with 186 human partners: {P84022;O75192;O95684;Q9NQG7;O43399;O95292;O15392;P23025;P11831;Q7L804;P53602;Q15274;P43320;P19838;O00519;O75154;Q13137;Q5JR59;Q9HB71;Q03112;P51606;Q9Y2G2;P62072;P20585;Q15697;Q5VZ72;Q14353;Q9Y239;Q15633;Q99497;P30622;Q12983;Q9NWT6;O96004;Q49AM1;P20963;Q15554;P17676;P54840;P49589;Q9NWW5;Q9H4I2;Q8N4B1;O14746;Q86UW1;P54274;Q495M9;Q9Y5J7;Q14686;Q9NQ87;Q9BUL8;P18124;O76027;P53567;O15405;Q9NVK5;Q16719;Q8IXQ5;Q15257;Q14653;O75444;O43187;Q8TAA5;O96011;Q96BY2;Q86X55;Q9BZX4;O14908;Q9UKT5;Q2M1K9;P35579;Q7R7S1;A6NFD8;P20132;P07900;Q9NPP4;Q86VE0;P31949;P06748;Q9Y697;Q9NSU2;P30793;P19623;P15923;P28715;Q9NVV4;Q92748;P52657;Q9NR22;Q03933;P36551;P61244;Q12904;P06703;Q9UL45;O75569;Q9C005;O60930;P49454;Q9GZV5;Q9UNH7;Q9HD26;O43809;O43708;Q9UII2;Q9HC16;Q86YS3;Q9UKT9;Q9C035;Q9UNE7;O75150;P52701;Q9UER7;P26639;O14558;P11686;P08697;Q8TAK5;P02511;Q86U70;Q9NP71;P22415;Q13485;P12883;P22736;P55809;Q9H7L9;Q9Y371;P55327;Q15466;O96017;Q9Y6X8;P31939;Q86XE5;Q15853;Q9H008;Q6ICB4;P05412;P05813;P09234;P11388;Q6VUC0;P13929;Q8IW40;Q8NHW3;Q9UNS1;Q01664;Q6ZPB5;P35680;Q9Y2Z4;P23297;P28698;Q10587;Q16890;P63316;Q86VW6;O60543;P08047;P13533;Q99856;Q9HAV7;O75340;O75223;Q15070;Q9H8V3;Q9UH92;Q15744;P20292;Q03393;Q15517;Q6PI48;Q8N668;P35611;P34896;O60238;A0AVK6;P53672;Q15276;P55345;P21695;Q86WG5;P13056;Q13257;Q99966;Q8NF91;Q9NNW7}
- 4643 Pathogen[ P14075] interacts with 118 human partners: {Q9Y2Z4;Q9NQG7;Q96BY2;Q15257;Q9GZV5;Q9HAV7;Q12983;Q86U70;Q96PM5;Q16719;P23497;P55327;O43809;Q9H4I2;Q9BUL8;O95684;P52657;O14746;P23025;P62072;P05412;Q9NR22;P11831;Q15554;Q15697;Q86XE5;P34896;P53567;Q14686;P53672;O75444;Q9NVV4;P61244;P28698;P09234;Q8TAA5;Q03933;P05813;Q13257;O60930;Q86VE0;Q9UH92;Q15070;Q9HD26;Q8N668;Q9NQ87;P54840;P15923;P18124;Q99856;P13056;O14503;Q92748;Q5JR59;Q13137;O96004;Q9UKT5;Q13485;P07900;Q9NP71;Q9UII2;Q15853;P54274;Q14653;Q01664;Q86XR8;O96017;Q7L804;Q12904;Q9C005;Q86X55;Q49AM1;O60543;P16890;O60238;O75150;Q9UKT9;Q9Y6X8;Q9H008;O14558;O15405;Q9C035;Q9NWT6;P35579;P08697;P06748;P02511;Q03112;Q15633;Q6ZPB5;P26639;Q9UNS1;O75192;Q05516;Q6PI48;Q9Y5J7;Q15466;P19838;O75154;P22415;P84022;Q9UER7;P49589;P17676;P30793;Q2M1K9;O43399;P49454;Q9HB71;A0AVK6;Q9H7L9;Q6VUC0;P23297;Q9Y2G2;Q15276;Q8TAK5;Q9Y697;P08047}
- 4644 Pathogen[ P0C206] interacts with 175 human partners: {P49589;Q9UNS1;O75340;P28698;P84022;Q9NQG7;P53567;P31949;Q86XR8;Q9NQ87;Q8IXQ5;Q9C005;Q9HB71;P28715;Q49AM1;Q15466;O75192;P18124;Q9Y2G2;Q9NP71;Q9Y2Z4;Q9UH92;Q9UL45;Q9NSU2;O95684;Q8TAK5;P13533;O96017;Q9H4I2;Q9UNH7;Q15744;O75444;Q6PI48;O75154;P52701;Q15697;Q05516;Q15554;P52657;Q86X55;Q03933;Q9Y697;P05412;Q9HAV7;Q9C0J9;Q13137;A6NFD8;Q16890;P36551;P55327;Q6ICB4;Q9UER7;P13056;P49715;Q93009;Q5JR59;Q9NQ87;Q86VX0;Q86VW6;P49454;P31939;Q99497;O43809;P30622;P22736;P30793;Q10587;Q13257;Q9Y6X8;Q9NNW7;Q9Y5J7;O15405;Q9NVK5;Q6VUC0;O96004;O43399;Q9GZV5;Q15853;O95292;O60930;P54274;O60238;P54840;P20132;Q12983;P19838;Q8NF91;P12883;P22415;P05813;Q15070;Q03112;Q9NWT6;Q16719;Q9BZR9;Q86XE5;P17676;Q9UNE7;O43708;P08047;P07900;P34896;P35680;Q495M9;P15923;Q14686;O14908;A0AVK6;P20823;Q99728;Q96BY2;Q9BUL8;Q8NHW3;P35579;Q8TAA5;Q9H8V3;Q9H165;Q9NVV4;O15392;Q9C035;Q13485;P61244;Q9H008;Q15633;Q9NR22;Q2M1K9;Q9H7L9;P11831;O96011;P62072;P06703;Q01664;Q99966;Q15274;P20292;P53672;Q8N4B1;P26639;Q03933;Q96PM5;P20585;Q9UKT9;Q86U70;Q9HC16;Q6ZPB5;P11388;P06748;Q7L804;P55345;O60543;P23297;P02511;Q8N668;O14558;P42224;O76064;Q86YS3;Q9UKT5;P13929;Q9HD26;O75150;Q15257;P09234;P23025;Q9UII2;Q8IW40;Q96FQ6;Q99856;Q15276;Q12904;Q92748;O14746;P08697;P29401;Q14653}
- 4645 Pathogen[ P03363] interacts with 135 human partners: {Q7RTS1;Q86VE0;Q14653;Q9Y2Z4;Q86U70;Q9BUL8;O43399;Q9NQG7;Q8NF91;Q9NVV4;O94972;P49454;P28698;O60543;Q8NF91;Q9UNH7;Q9UH92;Q9BZR9;Q15466;P07900;O14908;Q7L804;Q15853;P17676;Q68DC2;Q6ICB4;P53567;Q9HB71;P35579;Q13516;Q15554;O75340;Q9NNW7;Q03933;Q15744;Q03112;P53672;Q9H7L9;P49589;Q9NQ87;Q99856;O95684;Q8NHW3;O14558;Q9Y6X8;Q9C0J9;P31949;P23025;Q9NVK5;Q9UER7;O14746;P09234;Q49AM1;Q14686;Q8N4B1;P23497;Q15633;Q9Y697;P06748;Q9C005;O75150;P52657;Q8N668;P61244;O96017;Q5JR59;P15923;Q2M1K9;P30622;P20585;P11831;Q8IYM1;Q8IXQ5;O43809;Q9GZV5;Q9NR22;Q96BY2;P54274;Q9UKT5;Q6PI48;O75444;Q9UNE7;Q9Y5J7;Q86WG5;Q9UNS1;P84022;A0AVK6;O96004;Q96PM5;Q9C035;P54840;Q8TAA5;Q13257;P22415;Q9H008;Q9Y2G2;P19838;P495M9;Q8TAK5;O75154;Q15697;Q6ZPB5;Q92748;Q8IW40;Q13485;Q16890;Q15257;P05412;Q9UKT9;O15405;O60930;Q86XR8;Q9NP71;Q99728;P08047;Q9NPP4;Q13137;O43708;Q05516;O60238;P18124;Q9H4I2;P13056;Q01664;P55327;Q9HD26;Q86X55;P23297;Q15276;O14503;Q10587;O75569;A6NFD8;Q6VUC0;P05813}
- 4646 [Cluster 423]GO:0070551+F molecular\_function [name] endoribonuclease activity, cleaving siRNA-paired mRNA [def] "Catalysis of the endonucleolytic cleavage of the mRNA in a double-stranded RNA molecule formed by the base pairing of an mRNA with an siRNA, yielding 5'-phosphomonoesters." [GOC
- 4647 Pathogen[ P2Q067] interacts with 1 human partners: {Q9UKV8}
- 4648 Pathogen[ P0C214] interacts with 1 human partners: {Q9UKV8}
- 4649 Pathogen[ P03346] interacts with 1 human partners: {Q9UKV8}
- 4650 Pathogen[ Q85601] interacts with 1 human partners: {Q9UKV8}

4651 Pathogen[ P14079] interacts with 1 human partners:{Q9UKV8}  
4652 Pathogen[ P03383] interacts with 1 human partners:{Q9UKV8}  
4653 Pathogen[ P03410] interacts with 1 human partners:{Q9UKV8}  
4654 Pathogen[ P14075] interacts with 1 human partners:{Q9UKV8}  
4655 Pathogen[ P0C206] interacts with 1 human partners:{Q9UKV8}  
4656 Pathogen[ P03363] interacts with 1 human partners:{Q9UKV8}  
4657 [Cluster 424]GO:0001104+F molecular\_function [name] RNA polymerase II transcription cofactor activity [def] "Interacting selectively and non-covalently with an RNA polymerase II (RNAP II) regulatory transcription factor and also with the RNAP II basal transcription machinery in order to modulate transcription. Cofactors generally do not bind DNA, but rather mediate protein-protein interactions between regulatory transcription factors and the basal RNAP II transcription machinery." [GOC  
4658 Pathogen[ Q2Q067] interacts with 27 human partners:{Q9BUE0;Q9Y3C7;Q96HR3;Q12888;Q9NPJ6;Q95402;Q9H944;Q9BTT4;Q93074;Q15528;O75586;O75448;O60244;Q9P086;Q96G25;Q9UHV7;Q9NWA0;A0JLT2;Q9NVC6;Q86YW9;Q13569;Q9NZN8;O43513;Q96PK6;Q96RN5;Q9Y2W1;Q71F56}  
4659 Pathogen[ P0C214] interacts with 27 human partners:{Q9NZN8;O75586;Q9P086;Q93074;Q9BUE0;Q9NWA0;Q96HR3;Q9NVC6;Q9BTT4;O60244;Q9H944;Q9Y3C7;Q96RN5;Q15528;A0JLT2;Q71F56;O43513;Q86YW9;Q96PK6;Q9UHV7;O75448;Q12888;Q13569;Q96G25;Q9Y2W1;O95402;Q9NPJ6}  
4660 Pathogen[ P03346] interacts with 28 human partners:{Q12888;O95402;Q9NPJ6;O75586;Q96HR3;Q86YW9;Q71F56;Q93074;O60244;Q9BTT4;Q9P086;Q9NZN8;Q96G25;O75448;Q15528;O43513;Q9Y3C7;A0JLT2;Q9H944;Q9NVC6;Q13569;O75593;Q9Y2W1;Q9NWA0;Q96PK6;Q9UHV7;Q96RN5;Q9BUE0}  
4661 Pathogen[ Q85601] interacts with 27 human partners:{Q9BUE0;Q96PK6;Q9UHV7;Q96G25;Q71F56;O75448;Q9Y3C7;Q9NZN8;Q12888;Q9H944;Q96RN5;O95402;Q15528;Q13569;A0JLT2;Q9BTT4;Q9NWA0;Q86YW9;O75586;Q9Y2W1;O60244;Q96HR3;Q93074;Q9NPJ6;Q9NVC6;O43513;Q9P086}  
4662 Pathogen[ P14079] interacts with 27 human partners:{Q60244;O95402;O43513;Q71F56;Q9BUE0;Q15528;Q96HR3;Q9Y3C7;Q9NVC6;A0JLT2;Q9P086;Q9NWA0;O75448;Q86YW9;O75586;Q9UHV7;Q96RN5;Q9H944;Q9NPJ6;Q9BTT4;Q93074;Q9NZN8;Q13569;Q12888;Q96G25;Q9Y2W1;Q96PK6}  
4663 Pathogen[ P03383] interacts with 26 human partners:{O95402;Q12888;Q9H944;Q86YW9;O60244;Q96G25;Q9NPJ6;Q93074;Q96HR3;Q96RN5;O75448;Q96PK6;Q9Y3C7;Q71F56;Q15528;Q13569;Q9NZN8;Q9P086;A0JLT2;Q9BTT4;Q9UHV7;Q9NVC6;O75586;Q9Y2W1;Q9NWA0;Q9BUE0}  
4664 Pathogen[ P03410] interacts with 27 human partners:{Q71F56;Q9Y2W1;Q9NZN8;Q96PK6;Q96G25;Q86YW9;Q9NVC6;Q9NPJ6;Q9NWA0;Q9Y3C7;O95402;O43513;Q13569;Q9BTT4;Q12888;Q96HR3;Q9P086;A0JLT2;O60244;Q9UHV7;Q93074;Q9H944;Q9BUE0;O75448;Q96RN5;O75586;Q15528}  
4665 Pathogen[ P14075] interacts with 27 human partners:{Q9NPJ6;Q15528;Q96HR3;Q71F56;Q9P086;O75448;Q9NZN8;Q9NWA0;Q86YW9;O95402;O75586;Q9BTT4;Q93074;Q9Y3C7;Q9UHV7;Q96PK6;Q9H944;O60244;A0JLT2;Q9NVC6;Q96RN5;Q12888;Q13569;Q96G25;Q9Y2W1;O43513;Q9BUE0}  
4666 Pathogen[ P0C206] interacts with 27 human partners:{Q9BUE0;Q96HR3;Q9P086;Q9NZN8;O75586;Q9Y3C7;Q86YW9;Q9UHV7;O43513;Q13569;Q12888;Q96RN5;O95402;Q9H944;Q9NPJ6;Q96PK6;Q9Y2W1;Q9BTT4;O60244;Q9NVC6;O75448;Q9NWA0;Q71F56;A0JLT2;Q96G25;Q93074;Q15528}  
4667 Pathogen[ P03363] interacts with 26 human partners:{Q15528;Q96HR3;Q9NZN8;Q96PK6;Q9NWA0;Q9BUE0;Q9NVC6;Q71F56;Q96RN5;Q9UHV7;A0JLT2;O75586;Q93074;O75448;Q13569;Q9BTT4;O95402;Q9NPJ6;O60244;Q9P086;Q86YW9;O43513;Q96G25;Q9H944;Q12888;Q9Y3C7}  
4668 [Cluster 425]GO:0004133+F molecular\_function [name] glycogen debranching enzyme activity [def] "Catalysis of the cleavage of branch points in branched glycogen polymers." [ISBN  
4669 Pathogen[ Q2Q067] interacts with 1 human partners:{P35573}  
4670 Pathogen[ P0C214] interacts with 1 human partners:{P35573}  
4671 Pathogen[ P03346] interacts with 1 human partners:{P35573}  
4672 Pathogen[ Q85601] interacts with 1 human partners:{P35573}  
4673 Pathogen[ P14079] interacts with 1 human partners:{P35573}  
4674 Pathogen[ P03383] interacts with 1 human partners:{P35573}  
4675 Pathogen[ P03410] interacts with 1 human partners:{P35573}  
4676 Pathogen[ P14075] interacts with 1 human partners:{P35573}  
4677 Pathogen[ P0C206] interacts with 1 human partners:{P35573}  
4678 Pathogen[ P03363] interacts with 1 human partners:{P35573}  
4679 [Cluster 426]GO:0009982+F molecular\_function [name] pseudouridine synthase activity [def] "Catalysis of the reaction  
4680 Pathogen[ Q2Q067] interacts with 6 human partners:{Q9Y606;O60832;Q9NY12;Q9BZE2;Q96CM3;O95900}  
4681 Pathogen[ P0C214] interacts with 9 human partners:{Q3MIT2;Q9UJJ7;Q9NY12;Q9BZE2;O95900;O60832;Q9Y606;Q8IZ73;Q96CM3}  
4682 Pathogen[ P03346] interacts with 8 human partners:{Q9Y606;O95900;Q9BZE2;O60832;Q8N0Z8;Q8WWH5;Q9NY12;Q96CM3}  
4683 Pathogen[ Q85601] interacts with 6 human partners:{Q9BZE2;Q9Y606;Q9UJJ7;Q9NY12;Q96CM3;O60832}  
4684 Pathogen[ P14079] interacts with 14 human



partners:{Q9BZE2;Q3MIT2;Q96CM3;Q6P087;O60832;Q8IZ73;Q96PZ0;Q8N0Z8;Q9NY12;Q9H0K6;Q9Y606;Q9UJJ7;O95900;Q8WWH5}

4685 Pathogen[ P03383] interacts with 6 human

partners:{Q9BZE2;Q9Y606;Q9NY12;O95900;Q96CM3;O60832}

4686 Pathogen[ P03410] interacts with 13 human

partners:{Q8IZ73;O60832;Q9UJJ7;Q96CM3;Q8N0Z8;Q9NY12;Q9BZE2;Q8WWH5;Q9Y606;O95900;Q6P087;Q9H0K6;Q3MIT2}

4687 Pathogen[ P14075] interacts with 9 human

partners:{Q8N0Z8;Q9Y606;Q8WWH5;O95900;Q9UJJ7;Q9BZE2;O60832;Q9NY12;Q96CM3}

4688 Pathogen[ P0C206] interacts with 11 human

partners:{Q8WWH5;Q9NY12;Q8IZ73;Q9UJJ7;Q9BZE2;Q6P087;O95900;O60832;Q9Y606;Q8N0Z8;Q96CM3}

4689 Pathogen[ P03363] interacts with 8 human

partners:{O60832;Q9BZE2;Q9Y606;Q9NY12;O95900;Q8N0Z8;Q8WWH5;Q96CM3}

4690 [Cluster 427]GO:0030983+F molecular\_function [name] mismatched DNA binding [def]  
"Interacting selectively and non-covalently with double-stranded DNA containing one or more mismatches." [GOC

4691 Pathogen[ Q2Q067] interacts with 3 human partners:{Q9UHC1;P54278;Q13569}

4692 Pathogen[ P0C214] interacts with 6 human

partners:{A8MQ11;P20585;Q9UHC1;P54278;P40692;Q13569}

4693 Pathogen[ P03346] interacts with 5 human

partners:{Q9UHC1;P20585;Q13569;P54278;P54277}

4694 Pathogen[ Q85601] interacts with 6 human

partners:{A8MQ11;P20585;Q13569;P54278;Q9UHC1;P40692}

4695 Pathogen[ P14079] interacts with 11 human

partners:{O43196;P20585;P40692;Q68D20;P54278;Q9UHC1;A8MQ11;O95744;P54277;P52701;Q13569}

4696 Pathogen[ P03383] interacts with 3 human partners:{P54278;Q9UHC1;Q13569}

4697 Pathogen[ P03410] interacts with 11 human

partners:{P40692;P20585;P54277;P52701;Q13569;O95744;Q68D20;O43196;A8MQ11;P54278;Q9UHC1}

4698 Pathogen[ P14075] interacts with 3 human partners:{Q9UHC1;P54278;Q13569}

4699 Pathogen[ P0C206] interacts with 8 human

partners:{P54278;P52701;P40692;Q9UHC1;A8MQ11;P54277;Q13569;P20585}

4700 Pathogen[ P03363] interacts with 5 human

partners:{Q9UHC1;P20585;P54278;P54277;Q13569}

4701 [Cluster 428]GO:0001968+F molecular\_function [name] fibronectin binding [def]  
"Interacting selectively and non-covalently with a fibronectin, a group of related adhesive glycoproteins of high molecular weight found on the surface of animal cells, connective tissue matrices, and in extracellular fluids." [GOC

4702 Pathogen[ Q2Q067] interacts with 1 human partners:{Q9HB19}

4703 Pathogen[ P0C214] interacts with 2 human partners:{O95633;Q9HB19}

4704 Pathogen[ P03346] interacts with 2 human partners:{Q9HB19;O95633}

4705 Pathogen[ Q85601] interacts with 1 human partners:{Q9HB19}

4706 Pathogen[ P14079] interacts with 2 human partners:{Q9HB19;Q9GZZ8}

4707 Pathogen[ P03383] interacts with 1 human partners:{Q9HB19}

4708 Pathogen[ P03410] interacts with 2 human partners:{Q9GZZ8;Q9HB19}

4709 Pathogen[ P14075] interacts with 2 human partners:{Q9HB19;Q9GZZ8}

4710 Pathogen[ P0C206] interacts with 2 human partners:{Q9HB19;O95633}

4711 Pathogen[ P03363] interacts with 1 human partners:{Q9HB19}

4712 [Cluster 429]GO:0004527+F molecular\_function [name] exonuclease activity [def]  
"Catalysis of the hydrolysis of ester linkages within nucleic acids by removing nucleotide residues from the 3' or 5' end." [GOC

4713 Pathogen[ Q2Q067] interacts with 22 human

partners:{Q8TCS8;Q9Y2M0;Q96SD1;Q99638;Q96LI5;Q8IZH2;P49959;Q9Y2L1;Q504Q3;P27695;Q9GZR2;Q9NUW8;Q9UQ84;Q8TF46;P39748;Q92499;P54098;Q9H816;Q9H9L3;O95453;O60671;Q9ULM6}

4714 Pathogen[ P0C214] interacts with 27 human

partners:{Q8N1G1;P27695;O95453;P49959;Q9H816;P54098;Q9Y2L1;Q504Q3;Q96SD1;Q9Y2M0;Q8TF46;Q8IZH2;Q9ULM6;Q8TCS8;Q9H9L3;Q8IV48;Q8WTP8;O60671;Q92499;Q9GZR2;P39748;Q9UQ84;Q8IYB7;Q9NUW8;Q96LI5;Q99638;Q9Y3B8}

4715 Pathogen[ P03346] interacts with 25 human

partners:{Q504Q3;Q9ULM6;Q96SD1;Q9GZR2;Q8IX06;P54098;Q9H9L3;Q9NUW8;Q99638;Q8IYB7;Q8IZH2;O95453;Q92499;Q8TCS8;Q9Y2L1;P49959;Q9UQ84;O60671;P27695;P39748;Q9H816;Q9Y2M0;Q9UBZ4;Q96LI5;Q8TF46}

4716 Pathogen[ Q85601] interacts with 24 human

partners:{Q9UBZ4;Q9Y2M0;Q9UQ84;P49959;Q92499;Q504Q3;Q9Y2L1;Q8IYB7;Q8IZH2;Q96LI5;P54098;Q96SD1;O95453;Q8TCS8;Q9ULM6;Q9NUW8;Q9GZR2;Q9H9L3;O60671;P39748;Q9H816;P27695;Q8TF46;Q99638}

4717 Pathogen[ P14079] interacts with 31 human

partners:{O60671;Q8IV48;Q9Y3B8;Q9UBZ4;Q96LI5;Q9GZR2;Q8TF46;O95453;Q9BQ50;Q8N1G1;Q8IYB7;Q8IZH2;Q9NUW8;Q9H790;Q9H9L3;P27695;Q9Y2M0;Q9Y2L1;Q9NSU2;Q96AZ6;Q96SD1;Q92499;Q99638;Q9ULM6;P54098;Q504Q3;Q9H816;Q9UQ84;Q8TCS8;P39748;Q8WTP8}

4718 Pathogen[ P03383] interacts with 14 human

partners:{Q9Y2L1;O60671;Q8TCS8;Q9H816;P54098;Q9H9L3;Q9Y2M0;Q9ULM6;Q99638;Q9NUW8;P27695;Q92499;O95453;Q96LI5}

4719 Pathogen[ P03410] interacts with 34 human

partners:{Q96LI5;P49959;Q9Y2L1;Q8WTP8;Q9GZR2;Q9Y3B8;Q8TCS8;Q9H816;Q8IV48;Q9BQ50;Q9ULM6;Q8TF46;Q8NHP7;P39748;Q9NSU2;Q96SD1;Q9H790;Q8IZH2;Q9UBZ4;Q95453;Q99638;Q92499;Q96AZ6;Q8IX06;Q9NUW8;Q8N1G1;O60671;Q8IYB7;P27695;Q9UQ84;Q9Y2M0;P54098;Q504Q3;Q9H9L3}

4720 Pathogen[ P14075] interacts with 14 human

partners:{Q95453;P54098;Q9ULM6;P27695;O60671;Q96LI5;Q9Y2L1;Q9Y2M0;Q99638;Q92499;Q9H816;Q9H9L3;Q8TCS8;Q9NUW8}

4721 Pathogen[ P0C206] interacts with 29 human

partners:{P27695;Q9Y2M0;Q504Q3;Q9H790;Q95453;P49959;Q9UQ84;Q9NSU2;Q8IZH2;Q8TCS8;Q8IV48;Q96LI5;Q9H9L3;Q9NUW8;P54098;Q96SD1;Q9UBZ4;Q9H816;Q8N1G1;Q99638;Q9Y3B8;Q9Y2L1;O60671;P39748;Q9GZR2;Q8IYB7;Q92499;Q9ULM6;Q8TF46}

4722 Pathogen[ P03363] interacts with 20 human

partners:{Q504Q3;Q9H816;Q9BQ50;Q95453;Q9Y2M0;Q9GZR2;O60671;P54098;Q9ULM6;Q8IYB7;Q8N1G1;Q9H9L3;Q9NUW8;Q9Y2L1;Q92499;Q96LI5;Q8IX06;Q99638;Q8TF46;Q8IZH2}

4723 [Cluster 430]GO:0008656+F molecular\_function [name] cysteine-type endopeptidase activator activity involved in apoptotic process [def] "Increases the rate of proteolysis catalyzed by a cysteine-type endopeptidase involved in the apoptotic process." [GOC

4724 Pathogen[ Q2Q067] interacts with 9 human

partners:{P54274;Q00994;Q15304;Q16890;Q9C000;Q9Y2G2;P46527;Q9UKL3;Q71UM5}

4725 Pathogen[ P0C214] interacts with 12 human

partners:{Q92934;Q00994;P46527;Q71UM5;Q16890;Q9UKL3;Q9Y2G2;O14727;Q15304;P54274;Q9C000;Q96NN9}

4726 Pathogen[ P03346] interacts with 10 human

partners:{P54274;Q15304;Q71UM5;Q00994;Q16890;Q9UKL3;Q9Y2G2;P46527;O14727;Q9C000}

4727 Pathogen[ Q85601] interacts with 8 human

partners:{Q16890;Q9UKL3;Q15304;Q9Y2G2;Q71UM5;Q00994;P54274;P46527}

4728 Pathogen[ P14079] interacts with 12 human

partners:{P54274;Q16890;Q15304;Q9C000;Q9BXX5;Q00994;Q9UKL3;Q92934;Q71UM5;Q9Y2G2;P46527;Q9Y239}

4729 Pathogen[ P03383] interacts with 8 human

partners:{Q9UKL3;Q15304;Q71UM5;Q00994;P46527;Q9Y2G2;Q16890;P54274}

4730 Pathogen[ P03410] interacts with 11 human

partners:{P46527;Q9Y2G2;Q9Y239;P54274;Q92934;Q9C000;Q00994;Q9UKL3;Q16890;Q71UM5;Q15304}

4731 Pathogen[ P14075] interacts with 8 human

partners:{Q00994;Q15304;P46527;Q9UKL3;P54274;Q16890;Q9Y2G2;Q71UM5}

4732 Pathogen[ P0C206] interacts with 11 human

partners:{Q9C000;Q9Y2G2;Q9UKL3;Q16890;Q00994;Q92934;P54274;Q71UM5;P46527;Q9BXX5;Q15304}

4733 Pathogen[ P03363] interacts with 8 human

partners:{Q9C000;Q15304;P54274;Q9UKL3;Q9Y2G2;Q00994;Q71UM5;Q16890}

4734 [Cluster 431]GO:0001191+F molecular\_function [name] RNA polymerase II transcription factor binding transcription factor activity involved in negative regulation of transcription [def] "Interacting selectively and non-covalently with an RNA polymerase II transcription factor, which may be a single protein or a complex, in order to stop, prevent, or reduce the frequency, rate or extent of transcription from an RNA polymerase II promoter. A protein binding transcription factor may or may not also interact with the template nucleic acid (either DNA or RNA) as well." [GOC

4735 Pathogen[ Q2Q067] interacts with 3 human partners:{O14503;Q96T58;Q92793}

4736 Pathogen[ P0C214] interacts with 3 human partners:{Q96T58;Q92793;O14503}

4737 Pathogen[ P03346] interacts with 4 human partners:{O14503;Q9C0J9;Q96T58;Q92793}

4738 Pathogen[ Q85601] interacts with 3 human partners:{O14503;Q96T58;Q92793}

4739 Pathogen[ P14079] interacts with 3 human partners:{Q92793;O14503;Q96T58}

4740 Pathogen[ P03383] interacts with 3 human partners:{O14503;Q96T58;Q92793}

4741 Pathogen[ P03410] interacts with 2 human partners:{Q96T58;Q92793}

4742 Pathogen[ P14075] interacts with 3 human partners:{Q96T58;O14503;Q92793}

4743 Pathogen[ P0C206] interacts with 3 human partners:{Q9C0J9;Q92793;Q96T58}

4744 Pathogen[ P03363] interacts with 4 human partners:{Q96T58;Q9C0J9;Q92793;O14503}

4745 [Cluster 432]GO:0008479+F molecular\_function [name] queuine tRNA-ribosyltransferase activity [def] "Catalysis of the reaction

4746 Pathogen[ Q2Q067] interacts with 2 human partners:{Q9H974;Q9BXR0}

4747 Pathogen[ P0C214] interacts with 2 human partners:{Q9BXR0;Q9H974}

4748 Pathogen[ P03346] interacts with 2 human partners:{Q9BXR0;Q9H974}

4749 Pathogen[ Q85601] interacts with 2 human partners:{Q9BXR0;Q9H974}

4750 Pathogen[ P14079] interacts with 2 human partners:{Q9BXR0;Q9H974}

4751 Pathogen[ P03383] interacts with 2 human partners:{Q9H974;Q9BXR0}

4752 Pathogen[ P03410] interacts with 1 human partners:{Q9H974}

4753 Pathogen[ P14075] interacts with 2 human partners:{Q9H974;Q9BXR0}

4754 Pathogen[ P0C206] interacts with 2 human partners:{Q9H974;Q9BXR0}

4755 Pathogen[ P03363] interacts with 2 human partners:{Q9BXR0;Q9H974}

4756 [Cluster 433]GO:0004590+F molecular\_function [name] orotidine-5'-phosphate decarboxylase activity [def] "Catalysis of the reaction

4757 Pathogen[ Q2Q067] interacts with 1 human partners:{P11172}

4758 Pathogen[ P0C214] interacts with 1 human partners:{P11172}

4759 Pathogen[ P03346] interacts with 1 human partners:{P11172}

4760 Pathogen[ Q85601] interacts with 1 human partners:{P11172}

4761 Pathogen[ P14079] interacts with 1 human partners:{P11172}  
4762 Pathogen[ P03383] interacts with 1 human partners:{P11172}  
4763 Pathogen[ P03410] interacts with 1 human partners:{P11172}  
4764 Pathogen[ P14075] interacts with 1 human partners:{P11172}  
4765 Pathogen[ P0C206] interacts with 1 human partners:{P11172}  
4766 Pathogen[ P03363] interacts with 1 human partners:{P11172}  
4767 [Cluster 434]GO:0070728+F molecular\_function [name] leucine binding [def]  
"Interacting selectively and non-covalently with 2-amino-4-methylpentanoic acid." [CHEBI  
4768 Pathogen[ Q2Q067] interacts with 1 human partners:{Q8I WV8}  
4769 Pathogen[ P0C214] interacts with 2 human partners:{Q8I WV8;Q8I WV7}  
4770 Pathogen[ P03346] interacts with 1 human partners:{Q8I WV8}  
4771 Pathogen[ Q85601] interacts with 2 human partners:{Q8I WV7;Q8I WV8}  
4772 Pathogen[ P14079] interacts with 2 human partners:{Q8I WV8;Q8I WV7}  
4773 Pathogen[ P03383] interacts with 1 human partners:{Q8I WV8}  
4774 Pathogen[ P03410] interacts with 2 human partners:{Q8I WV8;Q8I WV7}  
4775 Pathogen[ P14075] interacts with 1 human partners:{Q8I WV8}  
4776 Pathogen[ P0C206] interacts with 2 human partners:{Q8I WV7;Q8I WV8}  
4777 Pathogen[ P03363] interacts with 1 human partners:{Q8I WV8}  
4778 [Cluster 435]GO:0016817+F molecular\_function [name] hydrolase activity, acting on acid  
anhydrides [def] "Catalysis of the hydrolysis of any acid anhydride." [GOC  
4779 Pathogen[ Q2Q067] interacts with 9 human  
partners:{P51531;P51532;Q3L8U1;Q9BYX4;Q9ULG1;Q9HCK8;P13010;Q9HBD4;P28370}  
4780 Pathogen[ P0C214] interacts with 11 human  
partners:{P13010;Q9HBD4;Q3L8U1;Q9ULG1;Q9BYX4;Q92698;P28370;Q9HCK8;O60264;P51531;P5153  
2}  
4781 Pathogen[ P03346] interacts with 14 human  
partners:{Q9HBD4;P51532;Q9ULG1;Q8TD26;P13010;Q92698;O60264;Q9HCK8;P42285;Q9BYX4;P2837  
0;Q9P2D1;P51531;Q3L8U1}  
4782 Pathogen[ Q85601] interacts with 13 human  
partners:{Q3L8U1;Q9P2D1;Q92698;P51531;P51532;Q9BYX4;Q9ULG1;Q9HBD4;Q9HCK8;P28370;Q8TD2  
6;O60264;P13010}  
4783 Pathogen[ P14079] interacts with 14 human  
partners:{Q9ULG1;Q9BYX4;P13010;P28370;P51532;Q92698;P51531;Q9P2D1;Q8TD26;Q9HCK8;O6026  
4;Q96FC9;Q96C10;Q3L8U1}  
4784 Pathogen[ P03383] interacts with 7 human  
partners:{Q9HBD4;P13010;P28370;P51531;Q3L8U1;Q9HCK8;P51532}  
4785 Pathogen[ P03410] interacts with 15 human  
partners:{Q92698;Q9BYX4;Q9ULG1;Q9P2D1;Q9HCK8;P51532;P51531;Q3L8U1;Q96C10;P13010;Q96FC  
9;Q8TD26;O60264;Q9HBD4;P28370}  
4786 Pathogen[ P14075] interacts with 7 human  
partners:{Q3L8U1;Q9HBD4;P51532;Q9HCK8;P51531;P28370;P13010}  
4787 Pathogen[ P0C206] interacts with 15 human  
partners:{Q9HCK8;P13010;Q8TD26;P51532;P51531;Q9P2D1;Q9ULG1;P28370;Q9HBD4;Q9BYX4;Q96C1  
0;Q9BX63;Q92698;O60264;Q3L8U1}  
4788 Pathogen[ P03363] interacts with 14 human  
partners:{Q9BX63;Q3L8U1;Q9ULG1;P13010;P51532;O60264;Q9HCK8;Q9HBD4;Q8TD26;Q9BYX4;P2837  
0;P51531;Q92698;P42285}  
4789 [Cluster 436]GO:0003746+F molecular\_function [name] translation elongation factor  
activity [def] "Functions in chain elongation during polypeptide synthesis at the  
ribosome." [ISBN  
4790 Pathogen[ Q2Q067] interacts with 10 human  
partners:{P29692;P24534;P26641;P63241;Q6IS14;P57772;Q658K8;P43897;Q9GZV4;P68104}  
4791 Pathogen[ P0C214] interacts with 12 human  
partners:{Q6IS14;P57772;Q9GZV4;P29692;P26641;P63241;P13639;P43897;P24534;Q05639;Q5VTE  
0;Q658K8}  
4792 Pathogen[ P03346] interacts with 11 human  
partners:{Q9GZV4;P57772;P26641;P29692;P63241;Q6IS14;P43897;Q969K4;P24534;Q658K8;P6810  
4}  
4793 Pathogen[ Q85601] interacts with 12 human  
partners:{Q9GZV4;Q5VTE0;P57772;Q658K8;P26641;P63241;P24534;P68104;P43897;P29692;Q0563  
9;Q6IS14}  
4794 Pathogen[ P14079] interacts with 14 human  
partners:{Q658K8;P68104;Q6IS14;P57772;P26641;P29692;P43897;Q96RP9;P24534;P13639;Q969S  
9;P63241;Q9GZV4;P49411}  
4795 Pathogen[ P03383] interacts with 9 human  
partners:{Q658K8;P57772;P24534;Q9GZV4;P26641;P63241;P68104;P43897;P29692}  
4796 Pathogen[ P03410] interacts with 15 human  
partners:{P68104;Q96RP9;Q969S9;P13639;Q969K4;Q658K8;P57772;P24534;P63241;P26641;Q9GZV  
4;P29692;P49411;P43897;Q6IS14}  
4797 Pathogen[ P14075] interacts with 9 human  
partners:{Q658K8;P68104;P57772;P26641;P29692;Q9GZV4;P63241;P43897;P24534}  
4798 Pathogen[ P0C206] interacts with 10 human  
partners:{Q9GZV4;Q6IS14;Q658K8;P26641;P43897;P57772;P63241;P24534;P29692;P68104}  
4799 Pathogen[ P03363] interacts with 10 human  
partners:{P43897;Q9GZV4;P57772;P26641;P29692;P63241;P24534;Q6IS14;Q658K8;P68104}  
4800 [Cluster 437]GO:0008301+F molecular\_function [name] DNA binding, bending [def] "The

activity of binding to and distorting the original structure of DNA, typically a straight helix, into a bend, or increasing the bend if the original structure was intrinsically bent due to its sequence." [GOC

4801 Pathogen[ Q2Q067] interacts with 4 human partners:{P54274;P15976;Q08050;O43524}

4802 Pathogen[ P0C214] interacts with 1 human partners:{P54274}

4803 Pathogen[ P03346] interacts with 12 human partners:{P85037;P58012;P54274;Q08050;O00409;P15976;Q12778;Q01167;P98177;O75593;O43524;Q9UJU5}

4804 Pathogen[ Q85601] interacts with 3 human partners:{P15976;Q08050;P54274}

4805 Pathogen[ P14079] interacts with 2 human partners:{P54274;P15976}

4806 Pathogen[ P03383] interacts with 1 human partners:{P54274}

4807 Pathogen[ P03410] interacts with 2 human partners:{P54274;P15976}

4808 Pathogen[ P14075] interacts with 2 human partners:{Q08050;P54274}

4809 Pathogen[ P0C206] interacts with 3 human partners:{P15976;P54274;Q08050}

4810 Pathogen[ P03363] interacts with 6 human partners:{O00409;O43524;Q08050;P54274;Q01167;Q9UJU5}

4811 [Cluster 438]GO:0003680+F molecular\_function [name] AT DNA binding [def] "Interacting selectively and non-covalently with oligo(A) and oligo(T) tracts of DNA (AT DNA)." [GOC

4812 Pathogen[ Q2Q067] interacts with 1 human partners:{P17096}

4813 Pathogen[ P0C214] interacts with 1 human partners:{P17096}

4814 Pathogen[ P03346] interacts with 2 human partners:{P17096;P49335}

4815 Pathogen[ Q85601] interacts with 1 human partners:{P17096}

4816 Pathogen[ P14079] interacts with 2 human partners:{Q06413;P17096}

4817 Pathogen[ P03383] interacts with 1 human partners:{P17096}

4818 Pathogen[ P03410] interacts with 1 human partners:{P17096}

4819 Pathogen[ P14075] interacts with 1 human partners:{P17096}

4820 Pathogen[ P0C206] interacts with 1 human partners:{P17096}

4821 Pathogen[ P03363] interacts with 2 human partners:{P17096;P49335}

4822 [Cluster 439]GO:0030275+F molecular\_function [name] LRR domain binding [def] "Interacting selectively and non-covalently with a LRR domain (leucine rich repeats) of a protein." [GOC

4823 Pathogen[ Q2Q067] interacts with 3 human partners:{P52435;Q2QGD7;Q9Y608}

4824 Pathogen[ P0C214] interacts with 3 human partners:{P52435;Q2QGD7;Q9Y608}

4825 Pathogen[ P03346] interacts with 3 human partners:{Q2QGD7;Q9Y608;P52435}

4826 Pathogen[ Q85601] interacts with 3 human partners:{Q9Y608;Q2QGD7;P52435}

4827 Pathogen[ P14079] interacts with 3 human partners:{Q2QGD7;P52435;Q9Y608}

4828 Pathogen[ P03383] interacts with 3 human partners:{P52435;Q2QGD7;Q9Y608}

4829 Pathogen[ P03410] interacts with 3 human partners:{Q9Y608;P52435;Q2QGD7}

4830 Pathogen[ P14075] interacts with 3 human partners:{Q9Y608;Q2QGD7;P52435}

4831 Pathogen[ P0C206] interacts with 3 human partners:{Q9Y608;P52435;Q2QGD7}

4832 Pathogen[ P03363] interacts with 3 human partners:{Q9Y608;Q2QGD7;P52435}

4833 [Cluster 440]GO:0043426+F molecular\_function [name] MRF binding [def] "Interacting selectively and non-covalently with Myogenic Regulatory Factor (MRF), a member of the basic Helix-Loop-Helix (bHLH) superfamily of transcription factors." [PMID

4834 Pathogen[ Q2Q067] interacts with 3 human partners:{O14503;Q99576;Q92793}

4835 Pathogen[ P0C214] interacts with 3 human partners:{Q92793;Q99576;O14503}

4836 Pathogen[ P03346] interacts with 4 human partners:{O14503;Q9C0J9;Q99576;Q92793}

4837 Pathogen[ Q85601] interacts with 3 human partners:{O14503;Q99576;Q92793}

4838 Pathogen[ P14079] interacts with 3 human partners:{Q92793;Q99576;O14503}

4839 Pathogen[ P03383] interacts with 3 human partners:{Q99576;O14503;Q92793}

4840 Pathogen[ P03410] interacts with 2 human partners:{Q92793;Q99576}

4841 Pathogen[ P14075] interacts with 3 human partners:{Q99576;O14503;Q92793}

4842 Pathogen[ P0C206] interacts with 3 human partners:{Q9C0J9;Q92793;Q99576}

4843 Pathogen[ P03363] interacts with 4 human partners:{Q99576;Q9C0J9;Q92793;O14503}

4844 [Cluster 441]GO:0045322+F molecular\_function [name] unmethylated CpG binding [def] "Interacting selectively and non-covalently with unmethylated CpG motifs. Unmethylated CpG dinucleotides are often associated with gene promoters." [GOC

4845 Pathogen[ Q2Q067] interacts with 3 human partners:{Q9P0U4;Q9Y6K1;Q9UBC3}

4846 Pathogen[ P0C214] interacts with 1 human partners:{Q9Y6K1}

4847 Pathogen[ P03346] interacts with 3 human partners:{Q9Y6K1;Q9UBC3;Q9P0U4}

4848 Pathogen[ Q85601] interacts with 3 human partners:{Q9P0U4;Q9Y6K1;Q9UBC3}

4849 Pathogen[ P14079] interacts with 3 human partners:{Q9Y6K1;Q9UBC3;Q9P0U4}

4850 Pathogen[ P03383] interacts with 1 human partners:{Q9Y6K1}

4851 Pathogen[ P03410] interacts with 3 human partners:{Q9P0U4;Q9UBC3;Q9Y6K1}

4852 Pathogen[ P14075] interacts with 1 human partners:{Q9Y6K1}

4853 Pathogen[ P0C206] interacts with 3 human partners:{Q9P0U4;Q9Y6K1;Q9UBC3}

4854 Pathogen[ P03363] interacts with 3 human partners:{Q9P0U4;Q9Y6K1;Q9UBC3}

4855 [Cluster 442]GO:0019894+F molecular\_function [name] kinesin binding [def] "Interacting selectively and non-covalently and stoichiometrically with kinesin, a member of a superfamily of microtubule-based motor proteins that perform force-generating tasks such as organelle transport and chromosome segregation." [GOC

4856 Pathogen[ Q2Q067] interacts with 11 human partners:{O43747;Q8IWE5;Q96N16;Q96EK5;Q8TCI5;Q9H0B6;Q9UQF2;Q86WG3;Q5TZA2;Q92845;Q9NX95}

4857 Pathogen[ P0C214] interacts with 11 human

```
partners:{P60709;Q8TCI5;Q8IWE5;Q9H0B6;Q9NX95;Q9UQF2;Q92845;O43747;Q86WG3;Q5TZA2;Q96N16}
4858 Pathogen[ P03346] interacts with 13 human
partners:{Q96N16;O43747;P60709;Q9NX95;Q6P597;Q96EK5;Q5TZA2;Q9UQF2;Q8TCI5;Q92845;Q86WG3;Q9H0B6;Q8IWE5}
4859 Pathogen[ Q85601] interacts with 12 human
partners:{O43747;Q9UQF2;Q8IWE5;P60709;Q8TCI5;Q6P597;Q86WG3;Q92845;Q5TZA2;Q9NX95;Q9H0B6;Q96N16}
4860 Pathogen[ P14079] interacts with 13 human
partners:{Q5TZA2;Q86WG3;Q9NX95;Q9UQF2;Q96N16;Q96EK5;Q8TCI5;P60709;O43747;Q8IWE5;Q92845;Q9H0B6;Q6P597}
4861 Pathogen[ P03383] interacts with 11 human
partners:{Q86WG3;Q9NX95;Q9H0B6;Q9UQF2;Q8TCI5;Q5TZA2;Q96N16;O43747;Q96EK5;Q92845;Q8IWE5}
4862 Pathogen[ P03410] interacts with 14 human
partners:{Q96EK5;Q8IWE5;Q9H0B6;O43747;Q86WG3;Q92845;Q96N16;Q6P597;O60333;Q5TZA2;Q8TCI5;Q9UQF2;P60709;Q9NX95}
4863 Pathogen[ P14075] interacts with 11 human
partners:{Q86WG3;Q92845;Q96N16;Q5TZA2;Q8IWE5;Q8TCI5;O43747;Q9H0B6;Q9NX95;Q9UQF2;Q96EK5}
4864 Pathogen[ P0C206] interacts with 13 human
partners:{Q8TCI5;P60709;Q92845;Q8IWE5;O43747;Q5TZA2;Q6P597;Q9UQF2;Q96N16;Q9NX95;Q9H0B6;Q96EK5;Q86WG3}
4865 Pathogen[ P03363] interacts with 13 human
partners:{Q92845;P60709;O43747;Q9UQF2;Q8TCI5;Q8IWE5;Q5TZA2;Q9H0B6;Q86WG3;Q96EK5;O60333;Q96N16;Q9NX95}
4866 [Cluster 443]GO:0030742+F molecular_function [name] GTP-dependent protein binding [def] "Interacting selectively and non-covalently with any protein or protein complex (a complex of two or more proteins that may include other nonprotein molecules) using energy from the hydrolysis of GTP." [GOC]
4867 Pathogen[ Q2Q067] interacts with 5 human
partners:{Q9NPB6;P30793;P60953;P63000;P30047}
4868 Pathogen[ P0C214] interacts with 5 human
partners:{P63000;P60953;P30793;Q9NPB6;P30047}
4869 Pathogen[ P03346] interacts with 4 human partners:{Q9NPB6;P60953;P30047;P63000}
4870 Pathogen[ Q85601] interacts with 5 human
partners:{P63000;P30793;P30047;Q9NPB6;P60953}
4871 Pathogen[ P14079] interacts with 4 human partners:{P30793;Q15075;Q9NPB6;P30047}
4872 Pathogen[ P03383] interacts with 4 human partners:{P60953;P63000;Q9NPB6;P30047}
4873 Pathogen[ P03410] interacts with 5 human
partners:{P30047;P63000;P30793;P60953;Q9NPB6}
4874 Pathogen[ P14075] interacts with 5 human
partners:{P60953;P30047;P63000;Q9NPB6;P30793}
4875 Pathogen[ P0C206] interacts with 5 human
partners:{P30793;P30047;P63000;Q9NPB6;P60953}
4876 Pathogen[ P03363] interacts with 4 human partners:{Q9NPB6;P63000;P30047;P60953}
4877 [Cluster 444]GO:0043274+F molecular_function [name] phospholipase binding [def] "Interacting selectively and non-covalently with any phospholipase, enzymes that catalyze of the hydrolysis of a glycerophospholipid." [GOC]
4878 Pathogen[ Q2Q067] interacts with 2 human partners:{P20700;P84103}
4879 Pathogen[ P0C214] interacts with 2 human partners:{P84103;P20700}
4880 Pathogen[ P03346] interacts with 2 human partners:{P20700;P84103}
4881 Pathogen[ Q85601] interacts with 2 human partners:{P20700;P84103}
4882 Pathogen[ P14079] interacts with 2 human partners:{P20700;P84103}
4883 Pathogen[ P03383] interacts with 2 human partners:{P84103;P20700}
4884 Pathogen[ P03410] interacts with 2 human partners:{P20700;P84103}
4885 Pathogen[ P14075] interacts with 2 human partners:{P20700;P84103}
4886 Pathogen[ P0C206] interacts with 2 human partners:{P84103;P20700}
4887 Pathogen[ P03363] interacts with 2 human partners:{P20700;P84103}
4888 [Cluster 445]GO:0030515+F molecular_function [name] snoRNA binding [def] "Interacting selectively and non-covalently with small nucleolar RNA." [GOC]
4889 Pathogen[ Q2Q067] interacts with 7 human
partners:{P55769;Q96HR8;Q9UHK0;O00567;P78316;Q9NY12;Q9Y2X3}
4890 Pathogen[ P0C214] interacts with 7 human
partners:{O00567;Q9UHK0;Q9NY12;P78316;P55769;Q9Y2X3;Q96HR8}
4891 Pathogen[ P03346] interacts with 8 human
partners:{O00567;Q9Y2X3;Q9NX24;Q9UHK0;P78316;P55769;Q9NY12;Q96HR8}
4892 Pathogen[ Q85601] interacts with 7 human
partners:{Q96HR8;P55769;Q9UHK0;O00567;Q9NY12;Q9Y2X3;P78316}
4893 Pathogen[ P14079] interacts with 7 human
partners:{Q9Y2X3;Q96HR8;Q9UHK0;O00567;Q9NY12;P78316;P55769}
4894 Pathogen[ P03383] interacts with 7 human
partners:{O00567;Q9UHK0;P78316;Q9NY12;Q96HR8;Q9Y2X3;P55769}
4895 Pathogen[ P03410] interacts with 8 human
partners:{P78316;Q9UHK0;P55769;Q9Y2X3;Q9NX24;O00567;Q9NY12;Q96HR8}
4896 Pathogen[ P14075] interacts with 7 human
```

4897 partners:{000567;P78316;Q96HR8;Q9UHK0;P55769;Q9NY12;Q9Y2X3}  
Pathogen[ POC206] interacts with 7 human

4898 partners:{Q9NY12;P55769;Q9UHK0;O00567;P78316;Q9Y2X3;Q96HR8}  
Pathogen[ P03363] interacts with 8 human

4899 partners:{Q9NX24;Q9Y2X3;Q9NY12;O00567;Q9UHK0;P55769;P78316;Q96HR8}  
[Cluster 446]GO:0000166+F molecular\_function [name] nucleotide binding [def]  
"Interacting selectively and non-covalently with a nucleotide, any compound consisting of a nucleoside that is esterified with (ortho)phosphate or an oligophosphate at any hydroxyl group on the ribose or deoxyribose." [GOC

4900 Pathogen[ Q2Q067] interacts with 269 human  
partners:{095363;Q01844;Q9UNP9;P23588;Q92900;Q14151;P33240;P22392;O75351;O00425;Q86U4  
2;P23381;P07910;P31749;Q9BZE4;Q9BVP2;Q9Y6K5;P49591;P07195;O60841;Q9BUP3;Q8IY18;P52272  
;O75494;P14866;P62750;Q0VDF9;Q13148;Q9UKX2;Q9Y285;P62837;P38646;P55795;Q01130;Q9NVN8;  
Q9H1B4;P62826;Q99741;Q15233;P30793;Q9H1H9;Q9P0M2;Q9UHX1;P49427;P51531;Q8N684;Q14204;O  
00762;Q9Y2X8;Q9Y6M1;O43390;P19367;Q15696;Q15046;P11387;Q9HAN9;Q9NSD9;P08238;P38919;Q1  
4103;O60506;Q9UBU9;P60604;O95347;Q9H6T0;O76031;P18615;P07900;O60318;Q96S55;O14757;O00  
148;Q6ZRS2;Q96T58;P08107;P63279;Q5T160;Q13838;Q13415;Q07955;P38935;Q9BZI7;Q8NDT2;Q166  
29;P12270;Q9NZC7;P51965;Q14240;O43542;Q06609;Q96I59;P31943;O43776;P11388;Q9Y295;P3218  
9;P61077;P49756;Q15424;P26196;P08621;P11142;A6NDB9;Q16630;Q13287;O43502;P63146;Q9ULW3  
;Q9BY77;P38159;Q9UHI6;P84103;P59047;P17987;Q9BYK8;O75582;Q14498;O43236;Q86V81;Q96T37;  
O96017;P12755;Q14978;P41252;Q8N3C0;Q9NPD8;Q13310;O95628;P51668;Q05519;P26368;Q96EP1;O  
43251;P50991;P50750;Q96Q89;Q13233;Q08211;P51532;P42025;O14656;Q9H4L7;Q53GL7;P08579;P5  
2597;P50613;P07814;Q8IWL9;P23246;Q12873;Q9UN37;Q9Y5S9;P04406;P61088;Q01081;Q5TCQ9;P57  
772;P46100;Q8IYD1;Q9BRS8;Q03468;P13984;Q13243;P40925;P12956;P50570;Q02241;Q9P2R7;Q8WV  
V9;O00139;P12883;Q3L8U1;P19338;Q13363;Q9UKV3;Q15029;Q92499;Q9BYZ2;Q15257;P62847;P0901  
2;O75943;P23258;O43913;P54136;Q9HCEL1;Q14839;P12757;O43615;Q86UW6;Q9UNY4;P04818;O14920  
;Q9H4D5;Q9C000;P52298;O14646;Q9BPX1;Q9BYX4;P45984;Q9ULG1;Q15427;Q6PI48;Q9UHN1;P49459;  
P60953;P25205;O14556;P35251;Q9HCK8;P46013;P40926;O43318;P49336;Q9HA77;Q96PK6;P00338;Q  
86WJ1;P62256;Q9BW92;P68036;P63000;P41250;P35579;Q14683;P21675;Q86WI3;P24941;P13010;Q8  
N4C6;Q8NE71;P28370;P49589;O95453;Q9Y2W1;P11802;P78371;P35637;Q02040;P22626;Q9NVV4;P61  
586;P11940;Q8WXF1;O15111;Q93062;Q92841;Q9P2J5;Q9NTK5;Q8IYD8;P60842;Q16836;Q00839;Q9UI  
36;P07864;Q15056;Q15759;Q16526;P68104;P14868;O75821;Q8NG50;Q76FK4;P14625;Q00534;Q9H1J  
1;P33076;P23025;P51003}

4901 Pathogen[ P0C214] interacts with 427 human  
partners:{08IWL9;Q9BY77;Q16795;P41250;Q9BZI7;Q13310;Q96B02;Q14410;Q8IY18;Q96P26;Q9GZZ  
9;Q96T66;Q14527;Q9H832;Q8IX04;Q58FG0;P26368;P09417;P60709;Q9H6T0;P49589;P52209;A7E2Y1  
;Q05932;P63000;Q16763;Q9NSE4;P26196;P14625;Q96T58;Q06609;P11413;Q7L3T8;O15111;P68133;  
Q9NPP4;O95363;Q14409;P04818;Q99832;Q8N335;Q9UGM6;Q58FF7;O60841;P35637;Q13363;Q9UKX2;P  
49368;P23919;O95453;Q96S55;Q9HAN9;P35558;O00762;Q8TE04;O00148;P38159;P49902;P12757;P0  
7864;Q16740;O75351;O96033;P60842;P78371;Q02241;Q96I59;Q9NYK5;P13010;O43913;Q16540;Q9  
P81;P21675;O00159;P84103;P12081;Q5IOG3;Q86V81;P57772;P48643;Q9Y2K3;Q14164;P53396;P233  
81;Q9Y5S9;P51003;Q5TCQ9;Q12873;O95628;P50750;P26599;Q92900;P50613;Q92841;P49427;P3307  
6;P49590;P23025;P07814;P62847;P23588;Q9UM54;Q9HOS4;Q9Y285;P41252;Q15029;Q86UW6;Q9P2N5  
;P11055;Q86WI3;Q5JTZ9;P11802;Q9Y6K5;O15056;P34932;Q9P0M2;O94921;Q15233;Q9BTE6;P61586;  
Q9Y295;P31483;P23246;Q6ZRS2;P29728;P23258;O00425;O75821;P12277;Q58FGL;O60318;Q3L8U1;Q  
7L2E3;Q8TCD5;Q15056;P63279;P60953;P49459;O14656;Q14204;P35270;Q9ULG1;Q9BYX4;P11940;P3  
5251;Q969T4;Q15257;P20585;P40939;O00139;Q9NZI8;Q5JPH6;Q9H4L7;O43776;Q6ZMR3;Q9Y3D8;P38  
935;O95396;P40926;P32189;Q15031;O14556;Q01844;O43318;P14868;P08579;O43390;Q9Y2S2;O953  
47;Q8N684;P49591;Q9HCE1;P51965;P15170;Q13057;Q16630;P25205;P61077;Q9H089;Q9UPQ9;Q0795  
5;P18615;Q9NZC7;Q9BYK8;Q2VWA4;Q9P2R7;O76031;O60825;P55795;Q8N3C0;P50740;Q9H3H1;P52298  
;P52272;P62253;Q14566;P41091;Q53GL7;P30793;P07910;Q92698;Q9H1B4;Q00534;Q8NE71;Q9UHX1;  
Q13233;P35580;O43681;Q96Q89;Q9BUP3;Q15696;P13639;P21127;A4D1E9;Q00536;P08621;P56192;Q  
9HBL8;P14618;Q8WXF1;P61086;Q14103;P28370;O96017;Q14978;O43542;Q14151;P49336;Q9HOA0;P2  
6639;Q9Y2X8;P13535;Q9BRS8;P46100;P38919;Q9UNY4;O43615;Q9BZQ4;Q9NVP1;Q13243;Q14240;Q15  
427;P54577;P52597;O43502;A2RTX5;P24941;Q05519;Q76FK4;Q9HCK8;P38646;P19367;Q49A0;P300  
43;P10809;O60264;Q9BPX1;Q9UHI6;P12882;Q9NRF8;Q8NDV7;P11388;Q01081;Q96PK6;P33240;Q9HA7  
7;P62736;Q8IYD1;Q58FF6;P49588;P12755;Q96GW9;P23921;P13984;Q15424;Q9UI36;O75494;O75943  
;P11387;P12883;Q15287;O75582;P62826;Q9BZ23;P43243;P31943;Q92499;Q96I25;O00442;Q9H2U1;  
P09012;Q14683;P42025;Q9NUU7;P07327;Q16822;Q15759;Q16526;O60506;Q96I99;Q58FF8;P55884;Q  
9Y6M1;Q969M7;Q9UMR2;Q7Z406;P45984;Q9ULW3;Q5T160;P47897;P17987;Q9BW92;P46013;Q6PI48;Q0  
8211;Q96BT7;P13533;P12270;Q9NWZ5;Q9NVN8;Q8NDT2;Q5D0E6;P16118;Q92804;Q9UKV3;Q92614;O14  
727;Q712K3;Q00839;P50570;Q16698;P35998;Q9Y623;P62256;P22392;Q14011;Q9UN37;Q9BZE4;Q9HC  
J0;P50991;O14646;Q13148;P22626;Q8N4C6;P51668;O43251;O14757;Q9H4D5;Q9NSD9;Q9BYZ2;P2664  
0;Q15046;P17812;Q02040;P62750;Q14568;P51531;P48163;Q9UNP9;P08107;Q5EBM0;Q9Y2W1;Q86U42  
;P63261;Q9NVV4;P19338;Q5ST30;Q9Y5Y2;Q9BYG3;O43236;Q13838;Q8NFF5;Q14498;P61081;  
Q9NTK5;Q8NG50;Q13287;O15042;Q96LR5;O14920;Q93062;P59047;P04406;Q8WVV9;Q8IYD8;Q05639;P  
11586;P00558;Q86WJ1;Q03468;P35749;Q16798;Q96T37;P49756;Q14966;P63146;P12956;Q5VTE0;Q1  
6629;P31749;Q14839;P61088;P14866;P07195;P51553;Q9UBU9;Q9Y2Z4;Q96EP1;P51532;Q9BVP2;Q99  
741;Q0VDF9;P36404;P55072;Q9H0P0;Q01130;P17980;Q13415;P11142;P60604;Q9UHN1;Q9C000;Q9P2  
J5;Q9H1J1;P21695;Q9NZL9}

4902 Pathogen[ P03346] interacts with 378 human  
partners:{P08107;Q9Y5S9;Q9BZI7;P59047;P23381;Q15427;Q15058;P51991;P46063;Q86U42;O1504  
2;Q9NRZ9;P45984;Q00536;Q9P0M2;P38935;Q8WXF1;P50570;O15111;P12270;P12956;Q06609;P04406  
;Q08170;P07900;P41091;P68036;O96017;Q93062;Q9P2K5;P46100;P09651;Q12840;Q9NX02;Q8IWL9;  
P12757;Q9ULW3;P14866;Q9BZE4;P23258;Q16836;P57772;P14625;P11388;O43502;Q14011;Q9BUP3;P  
21127;P49427;P35579;Q96I25;Q9Y6M1;O00425;Q8WYJ6;P62736;O14656;P51532;Q9P2N5;Q9UMR2;Q1

3148;Q92614;Q92841;Q5TCQ9;Q9NZL9;O00139;P08579;P07814;O60841;Q9BPX1;P55795;O95628;Q4G0J3;P43243;P49336;Q8WVV9;Q14527;Q53GL7;P35250;Q9ULG1;O43615;P24941;Q49AN0;P0DJ3;Q14498;O60506;P23246;Q8TD26;P78371;Q9NZI8;Q15257;P13010;P19367;P60709;O60318;O14757;O95347;P38919;Q14141;Q7L2E3;P33076;P07910;Q8N684;P11142;Q9H1H9;Q9UHN1;Q15056;P08621;Q8IXT5;P11940;P60953;Q13242;P31943;Q9NVP1;Q00839;P63279;Q16526;Q13247;P19338;O43376;P55884;Q14204;Q14646;P49459;P26599;Q13287;Q8211;Q9Y2X8;Q92698;P52298;Q9HAN9;O43390;Q86202;Q16629;O75821;P60842;P55072;P22626;Q2VWA4;P51668;Q9BUQ8;Q07955;P41252;Q9H1B4;P61077;P62826;Q9UKV3;Q8N3C0;P11802;O76031;A6NDB9;O15056;P61088;O95453;P52756;Q9H2U1;O75943;Q14103;Q9BWF3;P41250;Q7Z333;Q14566;Q92879;P25205;Q12926;P38646;P35637;Q92499;Q14151;Q86V81;Q9Y295;Q14978;Q9Y285;P20340;Q9NTK5;A6NDE4;O43236;O14556;Q8NDT2;P13984;Q9NPP4;Q96S55;Q86UT6;Q15020;P60604;P51003;O75643;P31749;Q93468;P51965;P31483;O15315;Q92599;Q9P2J5;P63146;Q14683;Q15019;Q9BY77;Q86WI3;Q9NZC7;O60264;P50991;O00762;P20585;Q9HCK8;Q8TD19;Q9UHI6;P49756;Q9NVV4;P50750;P49368;Q8IWT3;O43542;P33992;Q8NG50;P36404;P84550;P26368;P40926;Q96Q89;Q01081;P62837;Q14240;P54136;Q13415;Q9Y3D8;Q8IYD1;O75771;P42025;Q13838;Q9H6T0;P31942;Q9UNY4;Q13233;Q86UW6;O75582;O43251;Q9GZT3;P22392;P14868;P35249;Q9UNP9;Q9NPD8;Q3YEC7;O14979;Q0VDF9;Q5VV67;P49589;Q14966;Q6ZRS2;P00338;Q9Y5Y2;P42285;Q96T58;Q9NH9;Q9BYG3;Q9BYX4;Q96BT7;Q02241;Q14562;P33991;P09012;P84103;Q9NUU7;P23588;Q969Q5;Q9ULV0;Q15233;P52272;Q9H4D5;Q15287;P36405;P62750;P21675;Q05519;Q15759;Q01130;Q9H0S4;P07195;Q96PY6;P45985;Q9UBU9;Q8NE71;P26196;P51858;P32189;O75351;P34932;Q13363;P62847;Q8IYD8;Q9UKX2;P28370;Q6PI48;P23025;Q12873;Q13310;Q00534;P35251;P46013;Q9P2D1;P56545;Q15424;Q9UH8;Q14920;P62256;Q02040;Q9BYK8;O94921;Q9HBL8;Q13243;O43318;O00148;Q8N4C6;Q13283;O43933;P51531;P38159;Q01844;Q9UPQ9;P40925;Q15029;Q9UHX1;Q3L8U1;Q86WJ1;Q9UI36;Q8IY18;P29558;Q9HCE1;Q92900;Q9Y2W1;Q15696;Q32P51;Q99729;P40937;Q99741;Q9NVN8;Q9BRS8;P52597;Q92804;Q9NQZ3;Q9NQ94;O75494;O43929;O14727;Q6ZU15;P08238;Q96PK6;P63000;O14965;Q14164;P62995;Q96T37;Q86XP3;Q9Y6K5;A0AVT1;O43913;P18615;P33240;Q9NWX5;Q16630;P68104;Q96EP1;Q9BVP2;Q14839;Q9UN37;P11387;Q9H4L7;Q9UBP0;Q9BYZ2;Q76FK4;O43719;Q9C000;P61586;Q9NWB1;Q9H1J1;O00444;Q969T7;P17987}

4903 Pathogen[ Q85601] interacts with 336 human partners: {Q9HCE1;P61163;Q9BZI7;Q9ULW3;Q9NZC7;Q14978;P49756;O43913;Q00536;Q9NTK5;P54136;Q9NSD9;P08107;P62253;Q92614;O43502;O15315;P33076;P68133;Q96PK6;Q16763;P23025;P31749;P26639;P63146;Q9H0S4;O43390;Q02241;P14868;O96017;P36405;Q9P2K5;Q6ZMR3;O95347;Q8IYD8;P41091;Q13243;P50750;Q9BZE4;Q5VTE0;Q3L8U1;P13533;P57772;P49589;Q8IY18;Q9P2D1;Q01130;Q58FF8;O60506;Q14240;Q9UBU9;Q9UBP0;P49427;P35579;Q96PY6;P38935;Q9P2J5;Q13310;P23588;O15111;Q9P2N5;Q14103;Q14966;Q13148;Q9Y2X8;P07814;Q8N684;Q9BPX1;Q15424;P49336;Q49AN0;Q13415;O60825;P22626;P62826;Q9UHX1;Q15287;P12757;O00148;Q9HBL8;P63000;P23381;O60318;Q9H4D5;Q9UMR2;Q14204;Q7L2E3;Q9H1H9;P08621;Q969T4;Q8WXF1;Q86WI3;Q15046;Q13363;Q9BRS8;Q86V81;P19338;O43776;O14646;P55795;O75494;Q96B02;P17987;P18615;Q9NPD8;Q92499;Q9BW92;Q92698;P12270;Q16629;P32189;Q9Y285;Q2VWA4;Q08211;P51668;Q9HAN9;Q96LR5;P68036;Q07955;Q9H1B4;Q9H089;P21077;Q9P2R7;P63279;P16118;O43542;P12755;P30793;Q9HA77;P11802;Q12840;P38919;P60709;P32588;P51531;O14757;O75943;Q8NG50;P11387;P41250;Q14566;O14965;Q9BY77;Q5T160;P35637;O43681;P11940;Q9UKX2;Q9Y2K3;Q96Q89;Q14164;Q9Y6M1;Q14151;Q03468;P07864;P51532;Q9Y295;Q5D0E6;O00159;O75351;Q9Y6K5;P50991;P13984;Q8NDT2;P15170;O14556;P25205;P12882;P14618;Q9UKV3;P51965;Q13838;Q7Z406;Q9NVP1;Q14683;P63261;O14920;Q92804;O95628;O95453;Q15029;Q12873;A2RTX5;P20585;P52597;Q76FK4;Q9BYZ2;P11142;Q9UHI6;Q9UI36;Q15058;P08238;P11055;P68104;Q9H4L7;P50570;Q9NUU7;P61086;Q9BYX4;P35251;Q01081;Q6ZRS2;P11388;P35749;Q05519;O14656;Q8IYD1;O94921;Q9NYK5;Q9BYK8;O00425;O00762;O75582;Q5TCQ9;Q96I59;P22392;P60842;Q9ULG1;P61586;P12883;P50613;P49459;O43615;P07900;Q96T58;Q8IW19;P62847;P84103;Q8NE71;P26196;O95363;P40925;Q9P0M2;Q15233;Q9HCK8;P14866;P62837;Q15759;P45984;P07195;Q8WYJ6;O43933;Q96S55;P60953;P14625;A4D1E9;Q00839;Q9H832;P38646;P21675;P34932;Q16836;P47897;P28370;Q969M7;Q9Y5Y2;Q6PI48;Q96T37;P21127;O76031;Q86WJ1;P62750;P35580;P46013;Q8TD26;Q9H0P0;P62256;P52298;Q13233;P04406;P38159;P33992;Q9UM54;Q00534;P78371;Q86UW6;Q15696;Q96EP1;P23246;P26368;Q9NVV4;P41252;O43318;Q8N4C6;P13535;P48643;P51003;Q9UPQ9;O60264;P61088;Q16526;P19447;Q14527;Q92900;Q15257;Q9Y2W1;Q86U42;P31943;P60604;Q14568;Q99741;Q0VDF9;Q9NVN8;Q06609;Q9UHN1;Q9UN37;P00338;Q9BUP3;P24941;Q14498;Q9Y623;P62736;P42025;Q05639;Q9BVP2;Q53GL7;O75821;Q9UNY4;O00139;P46100;P40926;P33240;Q01844;P51955;O43236;Q9Y5S9;Q14839;P13010;Q13287;P12956;Q8N3C0;P19367;P59047;Q9H1J1;Q93062;Q9H2U1}

4904 Pathogen[ P14079] interacts with 428 human partners: {P31751;Q8TE04;O43615;O43196;P11388;P35579;Q9Y285;P48643;P62333;Q14004;O15315;Q9H0P0;O00442;P23381;P20585;O95628;P26639;P33076;Q96I25;Q8WVV9;Q15287;Q9NPH2;Q9H0S4;O14841;P51965;P60842;P12755;Q96EV2;Q9ULG1;Q96GW9;O95544;Q9P2J5;P63261;Q15056;P11142;P55039;Q9BYK8;P63279;Q9BVP2;Q96T37;Q8NFF5;P0C7P3;Q9BYX4;O75879;Q5EBM0;Q7L3T8;Q9BTE6;Q14566;Q9BW92;O43716;Q9H0R6;P29728;O43187;O75821;Q16526;P35637;P53779;Q9H4K7;P25705;P54136;Q9NRG7;Q6ZMV9;P49336;Q13148;Q9Y3A4;Q13415;P68036;P00338;Q9H0A0;P22234;P52564;Q9626;Q92614;Q9H4D5;Q8TCD5;P17812;Q8N3Z3;Q9UJ70;Q15031;Q14103;Q8IYD8;P68104;Q5T160;P49842;P40937;P62847;P13010;P41091;O75582;Q14151;Q969T7;Q12840;Q499Z3;Q14410;Q9UNY4;P52298;Q9P0M2;Q92804;P52209;Q9HCE1;P57772;Q9H1J1;P28370;Q49AN0;Q7L2E3;Q5ST30;Q9H4L7;Q13243;Q9Y5S9;Q96DU7;Q9NPD8;Q02241;P50991;Q8NG50;Q14204;Q2VWA4;O15514;Q9C000;Q9NPF1;P33240;O43913;P60604;P47897;O95363;P51532;Q14164;P49591;P26368;O14646;A2RTX5;Q93062;A4D1E9;Q9NWX5;Q92698;Q14966;P32189;Q9H773;P51531;P14866;P14868;P23246;Q9UBU9;P07910;Q9UBU9;Q13310;Q13838;P78371;Q7Z4S6;P68363;Q6ZRS2;P46199;Q15029;P50990;Q13472;Q9UKX2;Q9H1B4;P18615;Q32NB8;Q9UM54;Q9P2R7;Q9UHI6;Q14240;P35998;Q9NZL9;Q14409;Q14498;P30793;Q15427;P61077;Q08211;Q9UHX1;O95453;P23025;Q16740;Q9NQ94;Q00839;Q9BY77;O00178;Q9HA77;Q12873;P50570;A6NDB9;P07195;Q8IYD1;P23588;Q9BUP3;P45984;Q9BZE4;Q9NRF8;P46100;O43776;P43243;Q5JPH6;P62256;Q96RP9;O75648;P19338;Q0VDF9;P45983;Q99741;P68032;O15066;Q16629;P50613;Q9P2D1;Q8TD26;P26599;P36405;P55795;O96033;P12956;Q9ULW3;Q99661;Q8WYJ6;Q6ZMR3;P35250;P23919;O14656;Q8NC60;P49756;P49589;P51668;Q9Y3T6;Q14692;P51955;O75943;P12270;Q9BZ23;Q9H6T0;Q1

5046;Q02040;P22392;Q8N4C6;Q9NZC7;Q16644;O60318;Q9UKV3;Q9HCJ0;O43681;Q9BZI7;O95347;Q8I  
VS8;P11940;Q9BZQ4;P62750;Q96Q89;Q9BY32;P26196;Q96S55;Q05519;P41252;Q15759;O60282;P082  
38;Q9Y6K5;P61158;Q969M7;P17987;P08107;P08621;P45985;Q13057;O00139;Q8N684;Q8NE71;Q1505  
8;P63267;Q86UW6;Q9BRS8;P35251;P49459;P41250;Q86WJ1;P23258;Q86V81;Q86U42;Q96I59;Q15424  
;Q9NVV4;Q9H1H9;O00148;Q16630;P07864;P26640;P61586;O60506;P07900;Q15696;Q9Y5Y2;P09012;  
P60709;P13639;P56192;Q9Y6M1;Q9HCK8;Q9NSD9;Q71RC2;Q9NWX6;O60264;Q9UI36;Q5RL73;Q969S9;P  
21117;Q07955;P49902;P12883;O43502;O43929;Q9NNTK5;Q9Y2Z4;P61163;Q9HAN9;Q9UN37;P33992;Q6  
IA69;P14625;Q92628;Q86Y91;P49915;Q8N442;O60841;Q9BXI3;Q5T7B8;P53602;P31943;Q14839;Q9Y  
2X8;Q86UT6;Q01081;P49427;P13984;Q9BYG3;P38646;P62191;Q9UGM6;Q92900;O15042;Q8IY18;Q924  
99;Q96FC9;Q9NSE4;P62837;Q14011;Q9UQE7;O15067;Q13164;P42025;Q53GL7;Q03468;P38935;P1275  
7;P52597;O43390;O00762;Q5D0E6;P21695;Q96Q11;O75351;Q9P2N5;Q9NWB1;P43686;Q86WI3;O00425  
;P51003;P62826;O76031;Q9H3H1;P52701;P49588;O95235;P49368;P40925;Q9UHN1;Q6PI48;P52756;  
O75494;Q15233;Q06609;Q14683;Q9NVP1;Q9NYK5;O14965;Q9BYZ2;Q13287;Q9Y239;O75616;Q969P6;P  
04818;P63146;P68133;P25205;Q92615;P59047;Q05932;Q8NDT2;Q96C10;P17980;Q9Y2W1;Q96PK6;P0  
7814;P19447;O43542;P49411;P31483;P22626;O43236;P84103;P49917;Q9H999;Q9H089;P21675;Q9U  
PQ9;P38159;Q14978;Q3L8U1;Q8NDV7;Q96T58;Q53F19;P50750;Q7Z5L2;Q16836;Q9Y295;Q9NPP4;P044  
06;Q9BYX7;P55884;P46013;Q8IW19}

4905 Pathogen[ P03383] interacts with 253 human

partners: {P08107;Q14683;Q9H1B4;Q9NYV4;Q9NVV4;Q9UHN1;Q9Y285;Q14978;Q9UBU9;Q07955;O1475  
7;Q15287;Q06609;Q14839;O75582;O75494;P33076;P51003;Q9P2J5;P13010;P40926;P14868;Q9H0S4  
;O43390;A6NDB9;Q02241;Q9NVN8;P19338;Q02040;Q13233;Q9UNP9;P51965;P62750;Q9H4D5;Q5D0E6;  
P22626;Q8TD19;P14866;Q15029;P38646;Q9NWX5;P57772;P12270;O14920;Q9UPQ9;P19367;Q15257;Q  
13838;P00338;Q8NE71;Q9Y5S9;Q9BYZ2;Q9NNTK5;P49427;P31749;P55795;O43236;P42025;Q9Y295;Q5  
JPH6;O15111;P07864;Q9Y2X8;P49589;Q5T160;Q15031;P25205;P60953;P46013;Q8IW19;O43615;Q16  
836;P28370;Q9P2R7;P22392;Q9NP81;Q92841;Q9UHI6;P63000;P40925;O00762;O60318;Q9ULW3;O953  
47;P38919;Q00536;Q9BZE4;O14646;P26368;Q13243;O60841;Q8WXF1;P11387;P26196;P11940;P3194  
3;Q86V81;P07900;Q96S55;Q00534;Q9BRS8;P11802;O43318;P38159;P61077;P21127;Q9H1H9;P62826  
;O43913;O95628;Q16629;P61088;Q13287;Q9BTE6;P46100;Q16822;Q8N684;P23588;P49336;Q9HAN9;  
Q12873;Q9UHX1;P33240;Q96PK6;P84103;P50613;P13984;P23381;Q9H6T0;P60604;O14556;P07195;Q  
6ZMR3;P61586;P35637;Q9UKV3;Q03468;Q01130;Q8WVW9;Q96I59;P24941;P23025;Q9UKX2;Q15046;Q1  
4103;A2RTX5;Q53GL7;P49756;P68104;P50750;P04406;Q9Y2Z4;O95363;P51531;P14625;Q96089;Q01  
081;P62837;P07814;Q15759;Q8IYD1;P11142;Q96GW9;Q9BY77;O94921;P12883;Q9Y6K5;Q9BZ23;Q5TC  
Q9;Q9HA77;Q96T58;Q9H832;P35580;P52298;P78371;O14965;P09012;Q3L8U1;Q86WI3;Q9HCK8;Q0551  
9;Q96PY6;P21675;Q9BUP3;P68036;P32189;O43776;P49459;P45984;P51532;Q6PI48;O76031;Q8NDT2  
;Q15233;P12757;P35579;Q9NPD8;Q13310;O43542;P38935;Q14151;O00425;P62256;P63146;P23246;  
Q13148;Q15424;Q96EP1;P41250;Q92499;Q8N4C6;Q01844;P62847;P41252;Q9UI36;P54136;Q9HCE1;Q  
5EBM0;Q9Y2W1;O95453;Q86U42;Q9NSD9;P49591;Q9UN37;Q92900;Q7L3T8;P08238;Q00839;Q9BVP2;P0  
8621;Q9H0A0;Q9BYK8;Q9UNY4;O75821;P52597;P63279;Q86UW6;P18615;Q13363;P51668;Q99741;P12  
956;O00148;A4D1E9;O96017;P35251;Q9BPX1;Q9BZI7;Q9H1J1;Q14498;Q9BW92;Q93062;Q16526}

4906 Pathogen[ P03410] interacts with 444 human

partners: {Q9Y6G9;Q9H4K7;O75648;Q13838;Q8IVS8;Q9Y2W1;Q86Y91;Q14204;Q9NVN8;Q9P2R7;Q9NPH  
2;P23025;Q9UI36;Q71RC2;Q96Q11;P53602;Q9BYZ2;Q9UPQ9;P23246;Q96P26;Q96Q89;Q9Y285;P17987  
;Q00839;P25205;Q15427;Q9HA77;Q16822;O43929;Q12873;Q01081;P49368;Q9UNY4;Q99832;Q96DU7;  
Q15058;O14920;P26368;P68104;O14556;Q9H4L7;Q14103;P20585;Q9NSE4;P56192;O15042;P62736;Q  
96PK6;Q9UKX2;Q8NE71;Q9Y239;Q9BTE6;Q8N3C0;O95628;P48643;P18615;Q93062;O00442;Q15029;O6  
0841;Q9BPX1;Q15696;P49915;O75943;Q92804;Q9Y3A4;Q8NFF5;Q9NWB1;O00139;Q8TE04;Q16540;P38  
646;Q00534;Q92698;Q16629;Q8IYD8;P12755;P29728;O75879;P63000;Q92900;P22626;Q15233;P082  
38;Q9NRF8;P11940;P49589;Q5ST30;Q9NVP1;P49427;P25705;O15315;Q13057;P17812;O75351;Q9H1H  
9;O14656;Q15287;Q53GL7;P16118;P46013;Q9BW92;P21675;Q9UQE7;O15111;Q9H0A0;Q92614;P35998  
;P51965;Q14692;Q9ULV0;O43542;O60282;Q9BYK8;P49588;Q9Y5S9;P54136;Q9NNTK5;O14646;Q7Z4S6;  
O75582;Q76FK4;Q96RP9;Q14410;Q9NZC7;P35637;Q5TCQ9;Q15257;Q9H773;O43187;P14625;Q14978;P  
23381;P46199;Q9HCJ0;P36405;Q9BYX4;Q9P2K5;Q9ULG1;Q8NG50;Q8NDV7;O00159;Q6ZMR3;O00148;P4  
9459;Q9NWX5;Q7L3T8;O43776;P62847;Q96T37;P11142;P31749;P35579;P59047;Q969S9;P26599;P50  
570;P07900;Q96S55;Q9NPP4;Q9C000;P47897;Q9Y5Y2;Q9H3H1;Q9NYK5;P68036;P14868;Q9H0S4;P610  
88;Q13233;P30793;Q03468;P13639;Q6ZU15;Q12840;Q9NVV4;Q8NC60;O15514;P07195;Q9Y295;P5061  
3;Q9H1J1;P14866;Q9P2N5;P61163;Q5D0E6;P09012;Q96T58;Q8WVW9;Q9BZI7;Q15424;Q9HBL8;P33992  
;P23919;P62750;Q9NSD9;Q9BY32;O14841;Q86UW6;P22234;Q8N442;O95347;P51003;Q5RL73;O14965;  
Q13148;Q9P2J5;P08621;P55884;P49591;Q9H4D5;P50750;P52209;Q0VDF9;Q86WI3;Q9UM54;O60333;O  
43318;Q9UMR2;P12956;O76031;Q92628;P07910;P08579;Q6ZRS2;Q86UT6;Q9P0M2;Q9BXI3;Q14966;Q1  
3472;P38935;P35251;P49756;Q05519;Q13287;Q9UKV3;P52701;Q53F19;Q6ZMV9;O95453;P12270;P12  
882;P43243;Q499Z3;O43236;P45985;Q9NUU7;P62826;P26639;O43502;P15170;Q9P2D1;P50990;Q2VW  
A4;P61586;Q07955;P52597;Q7Z5L2;P08107;P52298;P04818;P24941;Q96I59;P31943;P62256;Q9249  
9;P00338;Q9UN37;Q15056;P11802;Q9BYG3;Q9HCE1;P33240;Q9UHX1;O43615;P19447;Q8IW19;P63146  
;P11387;Q14683;P41250;Q8WXF1;P12883;O15067;Q7L2E3;Q9BUP3;Q8NDT2;Q86V81;Q9HCK8;Q9Y2X8;  
P31483;P19338;Q9H089;P52272;Q16526;Q8WYJ6;Q9BVA1;P12757;Q96017;Q5EBM0;Q9UBU9;Q8N4C6;Q  
9H0R6;O14757;Q15046;P51668;P68133;P46100;Q49AN0;P60842;Q9H1B4;Q9UHD8;Q14011;P51532;P3  
8919;P04406;Q9BZ23;P49336;O43196;Q14409;Q86WJ1;Q5JPH6;Q16836;Q9HAN9;P11388;Q8TCD5;P51  
531;Q9Y6K5;Q8IYD1;P57772;O60318;P60953;P42025;Q01130;P40926;P35580;Q9BVP2;A4D1E9;O960  
33;P45984;O75821;Q9ULW3;Q9H6T0;Q9NPD8;Q3L8U1;Q96C10;P23258;Q9UGM6;P41252;P53779;O0042  
5;O00762;P68363;Q9BY77;Q9Y2Z4;Q9H0P0;Q14151;Q8IY18;P13010;P63279;P13984;P26640;P78371  
;Q96GW9;Q8N684;Q9UNP9;P41091;Q14498;Q969M7;P63261;P33176;P13533;O60506;Q96FC9;P07864;  
P07814;P60604;P40925;P35250;P32189;P84103;Q8TD26;Q9NP81;Q16630;Q86U42;O00178;P55795;O  
60264;A2RTX5;Q16740;O43913;P40937;Q13243;Q9Y3T6;Q14566;P13535;P38159;P23921;Q05932;Q1  
4839;Q9UHN1;Q9UHI6;Q08211;O43681;Q6IA69;Q9NWX6;Q9BZQ4;A6NDB9;Q13310;O95363;P33076;Q6P  
I48;Q5T160;Q9BRS8;Q96EP1;Q9NZL9;Q9BZE4;Q92615;O43237;Q96I25;Q8N3Z3;P23588;P17980;Q5T7  
B8;P60709;P49411;P49902;P28370;P50991;P61077;P62837;Q06609;Q14240;Q02241;P21695;Q9Y6M



- 1;Q969T7;O43390;O75494;Q13415;Q99741;O75616;Q02040;Q9H2U1}  
4907 Pathogen[ P14075] interacts with 260 human  
partners: {Q9Y2Z4;P60953;Q3L8U1;O95453;P11387;P49336;P60604;P54136;Q15257;P51003;P22626;Q14646;Q9BUP3;P40925;Q05519;P14866;Q8WXF1;P13984;P19338;Q92900;O15111;O60841;Q9NYK5;P23246;P12956;P11142;P21675;Q9H1H9;P24941;P49902;Q14683;P41250;Q5D0E6;P08621;P23205;Q02241;Q9Y295;P23381;P68036;Q9H3H1;P18615;Q86W13;P11802;P68104;Q9NWZ5;Q15759;Q14103;O75648;Q86V81;P57772;Q13243;P62837;P23588;Q9UKX2;O43236;P49756;P49427;P51532;Q9H0S4;Q9UNY4;Q9NSD9;O75582;Q9UHX1;P61088;P26196;Q8IVS8;P32189;A4D1E9;Q9NVV4;P49459;P50613;Q13287;Q16822;Q96T58;P38159;P38935;Q86UW6;Q14839;Q9NVN8;P51965;Q01844;P41252;Q00534;Q9HCE1;P33076;Q01130;P50750;P19367;O75821;Q9UNP9;O95363;Q93062;P31943;P40926;P78371;Q02040;O75494;Q5TCQ9;Q9Y2X8;P62750;P63279;P12270;O43390;P08238;Q13148;Q13057;P38646;P61077;Q96GW9;P07195;Q9H0A0;Q9UKV3;Q9HA77;Q9NP81;Q15029;O95347;O76031;P12757;Q9NPD8;Q03468;Q9Y285;P07900;Q92499;P11940;Q9NTK5;Q00839;O14920;O95628;P16118;P46100;Q9UHI6;P31749;Q9BTE6;P04406;O00762;Q13310;O00139;Q7L3T8;P33240;P56192;O96017;Q96PK6;P25205;Q9UPQ9;O14965;Q15424;A2RTX5;Q15287;Q9HCK8;Q8TE04;P62847;Q9BW92;Q8IW19;O43776;O43318;P51531;Q16836;P49842;Q9ULW3;P26368;P35251;Q9Y6K5;Q01081;P07864;Q8NE71;P62826;Q14151;Q8IYD1;Q9BRS8;P21127;P35579;P14868;Q5T160;Q9P2J5;P28370;P61586;O43542;Q9BZ23;O43913;Q15233;P63000;P09012;Q8NDT2;Q9BZE4;Q9UHN1;P00338;P26639;P08107;Q92841;Q9Y5S9;Q9UI36;Q16526;Q96PY6;Q9BYZ2;P35637;Q6PI48;Q99741;P84103;Q96I59;Q13363;P62256;P63146;P13010;Q9UBU9;A6NDB9;Q9HAN9;Q96S55;Q9H1B4;P49589;P52597;Q8N4C6;O00425;P30793;Q5JPH6;Q13233;P38919;Q15046;Q8N684;Q9H4D5;O94921;Q9UQ88;P14625;Q5EBM0;Q8WVV9;Q9Y2W1;Q13838;Q86U42;P51668;Q9NVV4;Q12873;Q9NSE4;Q16629;P46013;Q96Q89;Q15031;P49591;P42025;Q9BYK8;O00148;O14757;O14556;P22392;Q14978;Q06609;P07814;O43615;Q14498;Q53GL7;Q96EP1;Q9BVP2;Q9BY77;Q9P2R7;Q9UN37;Q07955;P52298;Q9H6T0;Q9BZI7;Q9H1J1;P45984;Q8TD19}
- 4908 Pathogen[ P0C206] interacts with 412 human  
partners: {P49589;O95363;O43542;Q16763;Q9C000;Q9UNP9;P41091;Q9Y2X8;O43502;Q15287;Q9H0S4;P48643;Q9NSE4;P07195;Q9H4L7;P33240;P07814;Q9P2N5;O43933;Q9NPD8;Q0VDF9;O00148;Q9UN37;Q9HCK8;P60709;Q96T37;Q14103;P13010;P49336;Q9UM54;P31483;Q9Y295;P62253;Q9BZI7;Q9UHN1;Q9BYG3;Q07955;Q6ZMR3;O14920;P26368;P52298;O95453;P38935;P07864;P31749;Q8TD26;Q9Y2Z4;Q9NVN8;Q9BUP3;Q96Q89;Q9NUU7;Q01081;P51532;P35251;Q9UBP0;Q9NZL9;Q9Y3D8;P50750;Q15696;Q15019;P13533;O96017;Q9BVP2;Q86WI3;Q14692;P62736;P22392;Q9Y623;P68036;Q969M7;Q14966;Q9UNY4;P41252;P51955;Q6PI48;P25205;P52701;O75582;Q96EP1;Q05519;Q15233;A6NDB9;P45984;P51531;O43913;Q5ST30;Q08211;P62750;O43681;Q2VWA4;P09012;Q8TE04;Q16836;Q13057;Q9Y6K5;Q9BY77;Q5TCQ9;P14866;P34932;Q8IYD8;Q00536;Q9P2D1;Q8N684;P46100;P46013;Q8IYD1;Q9BRS8;A2RTX5;Q14011;Q5EBM0;P26196;Q9UGM6;Q03468;Q53GL7;O43318;Q96PY6;P19338;O00444;Q5JPH6;Q9NP81;Q9UPQ9;P29728;Q16822;Q13243;Q16629;Q86U42;Q8WVV9;Q6ZRS2;O43390;Q96LRS;P62837;O60318;Q9HA77;Q9Y5Y2;Q9P2R7;Q01844;P50991;O75494;P49902;P62826;Q9NWZ5;P51003;P22626;Q9BZ23;P41250;P17987;Q8TD19;Q02040;Q9H1H9;Q13287;P30793;P11055;P19367;O43237;Q99741;Q8NDV7;P32189;P49427;P33076;P26640;Q14141;Q02241;P38646;Q13233;Q9UHX1;O43236;O94762;O95628;P49591;P13984;Q9BY32;O75943;P12755;P61586;P19447;O43776;P61163;Q96DU7;Q7L2K3;Q9HCE1;Q14839;P30291;P51965;P23246;P68133;Q86Y91;Q9BYK8;O43615;O14646;Q6ZU15;Q9BXP1;P61088;Q8WYJ6;Q9Y285;Q9H089;Q14204;Q14164;P49917;Q16526;O15514;O60841;P12883;Q9H4D5;P08238;Q7Z333;P38159;O60506;Q9UQE7;P60604;Q9NSD9;Q13310;P50613;O95347;P59047;P63000;Q9ULW3;Q13838;P12757;Q9ULG1;Q9UBU9;Q5D0E6;P18615;O14556;P52597;P07900;P49459;Q16630;Q9P0M2;O00159;Q9P2K5;Q14683;Q9BTE6;Q8WXF1;P63261;O15315;O14656;Q8TCD5;Q16740;Q9Y6G9;Q96PK6;P12882;P40925;P35637;Q9H0P0;O15111;Q76FK4;P57772;Q9BZQ4;Q5T160;Q9NVP1;Q9Y2W1;P62256;P04406;Q9BW92;P35749;P40926;P49916;Q9H1B4;Q96S55;P08107;P35579;Q969T4;O00762;Q92614;Q9UKX2;Q92841;P55795;Q9NVV4;Q92804;Q15424;P56192;Q12840;P55072;P60953;Q14240;P23258;O00139;Q9NTK5;Q9BZE4;P04818;P28370;Q13148;P45985;Q14527;Q96T58;Q8NE71;O60825;Q9HAN9;P36405;Q9H3H1;A4D1E9;Q9H6T0;P43243;P54136;P84103;P23588;Q86WJ1;P49368;Q92900;Q15058;Q9NZC7;P16118;Q13415;P26639;Q9H832;Q53F19;Q86UW6;Q9H2U1;Q9NRZ9;Q9BYZ2;Q06609;Q14151;P20585;P21127;Q15031;P11388;Q9UHI6;Q16181;Q8IW19;P61077;O15042;P49756;Q9UMR2;Q9NYK5;P84550;P11387;Q9BXY4;P38919;P61086;O75821;Q96C10;Q7L3T8;O14965;Q93062;Q13363;Q9P2J5;Q8N4C6;O76031;O75351;P08621;Q9AN0;Q01130;Q96B02;P60842;Q92499;Q8IY18;Q9Y6M1;P35580;P12956;Q9BW19;P00338;P42025;Q00839;P13535;Q14498;Q9UI36;Q8IVS8;P24941;Q15759;P23381;P15759;P23828;P11940;Q14566;P11142;Q9NTJ3;Q7L2E3;P11802;Q13472;P68104;Q15257;P23205;O94921;P47897;P14868;P62847;P78371;Q9HBL8;Q9H0A0;P31943;Q9BX63;Q8NG50;Q969T7;P50570;Q99640;Q8N3C0;Q92698;P33992;Q96GW9;O95396;P14618;Q9Y5S9;Q86V81;Q12873;Q99986;Q9UKV3;Q9UIG0;P21675;O60264;Q14978;Q96I59;P12270;Q05932;P14625;P63146;Q8IWT3;O00425;Q8NDT2;Q15046;Q00534;Q3L8U1;Q9H1J1;Q15029}
- 4909 Pathogen[ P03363] interacts with 414 human  
partners: {Q15020;Q14978;Q9Y2Z4;Q9Y6K5;P51858;P12956;O94762;Q16836;Q9BX63;Q15233;Q9ULW3;Q8IW19;Q9NVN8;Q9H832;Q3L8U1;Q13151;Q9NVV4;Q13595;Q96EP1;P51965;P62750;Q9H4D5;Q9BUP3;P19338;Q9NWH9;P23246;Q96T58;O43933;P60604;Q7Z333;P54652;P38919;Q5T8P6;Q9NWZ5;P0DJD3;P41252;P07900;P62847;O14920;P12270;P49459;O75643;Q8IY21;Q9NSD9;O95628;Q9ULG1;Q9HCE1;O95453;Q2VIQ3;Q13148;P13984;A2RTX5;O00762;P60709;P52597;Q9C000;P21127;Q92900;Q9NW13;P33176;O60841;P35579;Q9UHI6;P09012;P11387;Q9UKV3;Q9H4L7;P22314;Q969T7;Q08170;P40925;Q969Q5;Q96I59;P13010;P14868;Q9HAN9;P51991;P12757;Q7Z569;P25205;P61081;O43347;O95347;P14866;P49589;Q9UKX2;Q92879;P35637;Q13283;Q6ZRS2;O15111;P41250;P51532;P09651;P08579;P62736;Q8IY67;Q9NX02;Q9NUU7;Q8IYD1;Q15056;Q96BT7;O75526;P50570;P29558;Q9NTK5;O00425;Q16629;P68363;Q96I25;Q14204;Q9BZE4;P56545;P35251;Q9Y295;P23205;Q02241;P47897;P68133;Q16630;Q4G0J3;Q15427;Q5JPH6;O43318;Q01130;Q86UW6;O43776;P24941;Q9Y6M1;O15047;Q8IVS8;P63146;P49756;Q9BYZ2;Q14839;Q9UBU9;P11940;Q86U42;Q7Z4S6;Q9BWF3;Q32P51;P49427;P63000;P23381;Q8NDV7;Q14807;Q92620;Q9H0S4;Q8WYJ6;Q9UNY4;Q9NVA2;P41091;Q96PK6;P23588;Q99729;P57772;Q9P2N5;P18615;P33992;Q9P0M2;P46100;Q05519;P50991;P52272;Q6ZMV9;O96017;Q8N9W6;Q15029;Q9NX07;O60264;Q15287;P61088;O75351;O60282;Q8N684;Q5VV67;Q9BXP1;Q13748;Q9Y3B4;Q00534;Q1542

4;O43615;Q92904;P61163;Q14562;Q13242;Q96J87;P20585;P54136;Q9HCK8;Q9UN37;Q8IYM1;Q9NUL7;Q9UI36;Q49AN0;P38159;Q92599;Q9BY77;P08107;Q92841;P26368;Q13415;Q14240;P46063;Q9GZT3;P34932;Q15717;Q9UPN6;P31943;Q9NZI8;Q9BTE6;Q9BX46;P31749;O14979;P51003;Q14527;Q86WI3;Q6PI48;O00148;Q9Y3D8;Q99741;Q9HBL8;Q13472;P38646;Q9HCE1;Q5TCQ9;Q96LT9;Q13310;O60318;Q14966;O15056;Q13243;Q8IYD8;Q86V81;P07910;Q9NWB1;Q5T7B8;P17987;P04406;P31942;Q9UHD8;Q92499;P49336;Q14011;P62256;P52298;P26196;Q13838;Q9UHX1;Q02040;P08621;Q9BYK8;P59047;P43243;Q969T4;O95363;Q9UPS6;P63279;Q9P2K5;O43542;Q96T37;P22626;P42025;O76031;Q96S55;O60812;Q9BRS8;O15066;P26599;P51668;Q92614;Q9BYG3;Q9UBE0;Q9UPQ9;P21675;O14646;P33076;Q14103;Q9UMR2;Q01844;P55795;Q9P2J5;Q16526;Q92804;P60842;Q86XP3;Q9NPD8;Q03468;Q9UKM9;O95319;Q9BW92;P50750;Q8TD26;Q15257;P84550;Q07955;P63261;P49591;O60506;Q96E39;Q01081;Q9Y285;P78371;Q8NE71;Q9BYX4;Q9BVP2;Q9BZI7;Q2VWA4;Q969M7;Q9Y5Y2;Q8IWT3;Q13247;O75771;Q12873;P05455;P28370;Q6ZU15;Q15058;Q5SZQ8;Q06609;Q7L3T8;A6NDE4;P61077;Q96Q89;Q9UHN1;O60333;Q9NQZ3;Q7L2E3;Q9NVP1;Q15031;Q00839;Q13363;P84103;Q14498;Q9H1H9;Q8N4C6;Q9Y2X8;P62837;Q9NP4;P31483;P11802;P46013;Q9H2U1;O75821;O43390;P07814;Q8N6W0;Q8WXF1;P62995;Q14141;P23258;O00139;P51531;Q86WJ1;Q16560;Q99719;O14556;Q13287;O75943;P62826;Q08211;P55884;Q0VDF9;O15042;Q8IY18;O43237;Q9H6S0;P33240;P60953;P08238;P48643;Q5T890;Q12926;Q76FK4;Q5T160;Q00536;Q9H6T0;Q9BTD8;Q14683;Q13233;Q15696;Q9HCJ3;A6NDB9;O43236;P38935;Q9Y5S9;Q8WVV9;Q14151;Q7Z7E8;Q9H1B4;P68104;Q12840;O43251;Q9UNP9;P11142;Q8IXT5;Q92698;O75494;A0AVT1;Q3YEC7;Q9NQ94;O43719;Q8N3C0;P68036;P49368;O43502;Q9H1J1;O15315;P42285;O14757;O43913;Q8NDT2;P52756;Q53GL7}

4910 [Cluster 447]GO:0004365+F molecular\_function [name] glyceraldehyde-3-phosphate dehydrogenase (NAD+) (phosphorylating) activity [def] "Catalysis of the reaction

4911 Pathogen[ Q2Q067] interacts with 2 human partners:{P04406;O14556}

4912 Pathogen[ P0C214] interacts with 2 human partners:{O14556;P04406}

4913 Pathogen[ P03346] interacts with 2 human partners:{P04406;O14556}

4914 Pathogen[ Q85601] interacts with 2 human partners:{O14556;P04406}

4915 Pathogen[ P14079] interacts with 1 human partners:{P04406}

4916 Pathogen[ P03383] interacts with 2 human partners:{O14556;P04406}

4917 Pathogen[ P03410] interacts with 2 human partners:{O14556;P04406}

4918 Pathogen[ P14075] interacts with 2 human partners:{P04406;O14556}

4919 Pathogen[ P0C206] interacts with 2 human partners:{O14556;P04406}

4920 Pathogen[ P03363] interacts with 2 human partners:{P04406;O14556}

4921 [Cluster 448]GO:0048037+F molecular\_function [name] cofactor binding [def] "Interacting selectively and non-covalently with a cofactor, a substance that is required for the activity of an enzyme or other protein. Cofactors may be inorganic, such as the metal atoms zinc, iron, and copper in certain forms, or organic, in which case they are referred to as coenzymes. Cofactors may either be bound tightly to active sites or bind loosely with the substrate." [ISBN

4922 Pathogen[ Q2Q067] interacts with 8 human partners:{P10746;Q9NZC7;P25791;Q9NWT6;P15259;Q13363;P04818;O15392}

4923 Pathogen[ P0C214] interacts with 13 human partners:{Q9GZZ9;P04818;Q13363;P15259;P53396;P29401;Q9NZC7;P10746;P25791;O14832;O15392;Q16798;Q9NWT6}

4924 Pathogen[ P03346] interacts with 8 human partners:{O15392;P10746;P25791;Q9NZC7;P15259;Q13363;P56545;Q9NWT6}

4925 Pathogen[ Q85601] interacts with 7 human partners:{Q9NZC7;P10746;Q9NWT6;O15392;Q13363;P15259;P25791}

4926 Pathogen[ P14079] interacts with 9 human partners:{P15259;O15392;P29401;P10746;Q9NZC7;Q9NWT6;O14832;P25791;P04818}

4927 Pathogen[ P03383] interacts with 4 human partners:{Q9NWT6;P25791;P15259;Q13363}

4928 Pathogen[ P03410] interacts with 8 human partners:{O15392;Q9NWT6;P25791;Q9NZC7;P10746;P04818;P15259;O14832}

4929 Pathogen[ P14075] interacts with 5 human partners:{P25791;Q9NWT6;P15259;O14832;Q13363}

4930 Pathogen[ P0C206] interacts with 10 human partners:{P10746;O14832;Q9NWT6;O15392;P25791;P04818;Q9NZC7;Q13363;P15259;P29401}

4931 Pathogen[ P03363] interacts with 4 human partners:{P56545;P25791;Q13363;P15259}

4932 [Cluster 449]GO:0051371+F molecular\_function [name] muscle alpha-actinin binding [def] "Interacting selectively and non-covalently with muscle isoforms of actinin. Muscle alpha-actinin isoforms are found in skeletal and cardiac muscle and are localized to the Z-disc." [PMID

4933 Pathogen[ Q2Q067] interacts with 3 human partners:{Q8WX93;Q9UMS6;Q86TC9}

4934 Pathogen[ P0C214] interacts with 2 human partners:{Q9UMS6;Q86TC9}

4935 Pathogen[ P03346] interacts with 3 human partners:{Q86TC9;Q8WX93;Q9UMS6}

4936 Pathogen[ Q85601] interacts with 3 human partners:{Q86TC9;Q8WX93;Q9UMS6}

4937 Pathogen[ P14079] interacts with 3 human partners:{Q8WX93;Q86TC9;Q9UMS6}

4938 Pathogen[ P03383] interacts with 1 human partners:{Q9UMS6}

4939 Pathogen[ P03410] interacts with 3 human partners:{Q9UMS6;Q8WX93;Q86TC9}

4940 Pathogen[ P14075] interacts with 1 human partners:{Q9UMS6}

4941 Pathogen[ P0C206] interacts with 3 human partners:{Q86TC9;Q9UMS6;Q8WX93}

4942 Pathogen[ P03363] interacts with 3 human partners:{Q86TC9;Q8WX93;Q9UMS6}

4943 [Cluster 450]GO:0008276+F molecular\_function [name] protein methyltransferase activity [def] "Catalysis of the transfer of a methyl group (CH<sub>3</sub>-) to a protein." [GOC

4944 Pathogen[ Q2Q067] interacts with 8 human partners:{Q9NVM4;Q9UI30;Q9Y5N5;Q9NR22;Q99873;Q9BV86;Q9H5I1;Q86X55}

4945 Pathogen[ P0C214] interacts with 9 human

4946 partners:{Q9H5I1;Q9NVM4;Q99873;Q9UI30;Q9Y5N5;Q8IXQ9;Q86X55;Q9BV86;Q9NR22}  
Pathogen[ P03346] interacts with 9 human

4947 partners:{Q99873;Q8IXQ9;Q9Y5N5;Q9UI30;Q9NR22;Q9NVM4;Q86X55;Q9BV86;Q9H5I1}  
Pathogen[ Q85601] interacts with 9 human

4948 partners:{Q9H5I1;Q9NR22;Q86X55;Q9NVM4;Q9BV86;Q9Y5N5;Q99873;Q9UI30;Q8IXQ9}  
Pathogen[ P14079] interacts with 10 human

4949 partners:{Q9NR22;Q9Y5N5;Q99873;Q9NVM4;Q9BV86;O60678;Q9H5I1;Q9UI30;Q8IXQ9;Q9Y5R4}  
Pathogen[ P03383] interacts with 7 human

4950 partners:{Q86X55;Q99873;Q9NR22;Q9Y5N5;Q8IXQ9;Q9UI30;Q9H5I1}  
Pathogen[ P03410] interacts with 11 human

4951 partners:{Q9NVM4;Q86X55;Q9NR22;Q8IXQ9;Q9UI30;Q9H5I1;Q9BV86;Q9Y5N5;O95568;Q9Y5R4;Q99873}  
Pathogen[ P14075] interacts with 7 human

4952 partners:{Q9NR22;Q9UI30;Q9H5I1;Q8IXQ9;Q99873;Q9Y5N5;Q86X55}  
Pathogen[ P0C206] interacts with 10 human

4953 partners:{Q9BV86;Q99873;Q86X55;Q9NVM4;Q9UI30;Q9H5I1;Q9Y5N5;Q9NR22;O60678;Q8IXQ9}  
Pathogen[ P03363] interacts with 12 human

4954 partners:{Q9H5I1;O95568;Q9Y5R4;Q9BV86;Q8IXQ9;Q9NVM4;Q9NR22;Q9UI30;Q9Y5N5;Q6P2P2;Q86X55;Q99873}  
[Cluster 451]GO:0034237+F molecular\_function [name] protein kinase A regulatory subunit binding [def] "Interacting selectively and non-covalently with one or both of the regulatory subunits of protein kinase A." [GOC

4955 Pathogen[ Q2Q067] interacts with 4 human partners:{Q9Y6D6;Q9P0M2;O43823;Q13023}  
4956 Pathogen[ P0C214] interacts with 4 human partners:{Q13023;Q9P0M2;O43823;Q9Y6D6}  
4957 Pathogen[ P03346] interacts with 6 human partners:{Q9P0M2;Q9Y6D5;Q13023;Q9Y6D6;Q9UKA4;O43823}  
4958 Pathogen[ Q85601] interacts with 4 human partners:{Q9P0M2;Q9Y6D6;O43823;Q13023}  
4959 Pathogen[ P14079] interacts with 7 human partners:{Q9UKA4;Q13023;Q9P0M2;O43823;P24588;Q9Y6D5;Q9Y6D6}  
4960 Pathogen[ P03383] interacts with 2 human partners:{Q13023;Q9Y6D6}  
4961 Pathogen[ P03410] interacts with 7 human partners:{Q9UKA4;Q9P0M2;Q9Y6D6;Q13023;Q9Y6D5;O43823;P24588}  
4962 Pathogen[ P14075] interacts with 3 human partners:{Q9Y6D6;O43823;Q13023}  
4963 Pathogen[ P0C206] interacts with 6 human partners:{Q13023;Q9Y6D6;Q9Y6D5;Q9P0M2;O43823;Q9UKA4}  
4964 Pathogen[ P03363] interacts with 3 human partners:{Q9P0M2;Q13023;Q9Y6D6}

4965 [Cluster 452]GO:0005175+F molecular\_function [name] CD27 receptor binding [def] "Interacting selectively and non-covalently with a CD27, a receptor found on the surface of T cells and some B cells and NK cells." [GOC

4966 Pathogen[ Q2Q067] interacts with 1 human partners:{O15304}  
4967 Pathogen[ P0C214] interacts with 1 human partners:{O15304}  
4968 Pathogen[ P03346] interacts with 1 human partners:{O15304}  
4969 Pathogen[ Q85601] interacts with 1 human partners:{O15304}  
4970 Pathogen[ P14079] interacts with 1 human partners:{O15304}  
4971 Pathogen[ P03383] interacts with 1 human partners:{O15304}  
4972 Pathogen[ P03410] interacts with 1 human partners:{O15304}  
4973 Pathogen[ P14075] interacts with 1 human partners:{O15304}  
4974 Pathogen[ P0C206] interacts with 1 human partners:{O15304}  
4975 Pathogen[ P03363] interacts with 1 human partners:{O15304}

4976 [Cluster 453]GO:0030332+F molecular\_function [name] cyclin binding [def] "Interacting selectively and non-covalently with cyclins, proteins whose levels in a cell varies markedly during the cell cycle, rising steadily until mitosis, then falling abruptly to zero. As cyclins reach a threshold level, they are thought to drive cells into G2 phase and thus to mitosis." [GOC

4977 Pathogen[ Q2Q067] interacts with 6 human partners:{Q9ULV3;P38936;Q13618;P24941;Q9P1T7;Q00534}  
4978 Pathogen[ P0C214] interacts with 8 human partners:{O94921;Q13618;P38936;Q00534;P24941;Q9P1T7;Q9ULV3;Q5XUX0}  
4979 Pathogen[ P03346] interacts with 9 human partners:{P24941;Q13618;O75604;Q00534;O94921;P38936;Q9P1T7;Q9ULV3;Q5XUX0}  
4980 Pathogen[ Q85601] interacts with 7 human partners:{O94921;P38936;Q00534;Q13618;Q9P1T7;P24941;Q9ULV3}  
4981 Pathogen[ P14079] interacts with 6 human partners:{Q5XUX0;Q14004;Q9ULV3;Q13618;P38936;Q9P1T7}  
4982 Pathogen[ P03383] interacts with 8 human partners:{Q9NYV4;Q00534;Q13618;P24941;O94921;Q9P1T7;Q5XUX0;Q9ULV3}  
4983 Pathogen[ P03410] interacts with 7 human partners:{Q00534;Q5XUX0;Q13618;Q9P1T7;P38936;P24941;Q9ULV3}  
4984 Pathogen[ P14075] interacts with 8 human partners:{P24941;Q13618;Q00534;Q9P1T7;O94921;Q9NYV4;Q9ULV3;Q5XUX0}  
4985 Pathogen[ P0C206] interacts with 9 human partners:{O75604;Q9ULV3;Q13618;P38936;Q5XUX0;P24941;Q9P1T7;O94921;Q00534}  
4986 Pathogen[ P03363] interacts with 7 human partners:{O75604;Q13618;P24941;Q00534;Q9P1T7;Q9ULV3;Q5XUX0}

4987 [Cluster 454]GO:0017005+F molecular\_function [name] 3'-tyrosyl-DNA phosphodiesterase activity [def] "Catalysis of the hydrolysis of 3'-phosphotyrosyl groups formed as

covalent intermediates (in DNA backbone breakage) between DNA topoisomerase I and DNA." [PMID

4988 Pathogen[ Q2Q067] interacts with 1 human partners:{Q9NUW8}

4989 Pathogen[ P0C214] interacts with 1 human partners:{Q9NUW8}

4990 Pathogen[ P03346] interacts with 1 human partners:{Q9NUW8}

4991 Pathogen[ Q85601] interacts with 1 human partners:{Q9NUW8}

4992 Pathogen[ P14079] interacts with 1 human partners:{Q9NUW8}

4993 Pathogen[ P03383] interacts with 1 human partners:{Q9NUW8}

4994 Pathogen[ P03410] interacts with 1 human partners:{Q9NUW8}

4995 Pathogen[ P14075] interacts with 1 human partners:{Q9NUW8}

4996 Pathogen[ P0C206] interacts with 1 human partners:{Q9NUW8}

4997 Pathogen[ P03363] interacts with 1 human partners:{Q9NUW8}

4998 [Cluster 455]GO:0016151+F molecular\_function [name] nickel cation binding [def]  
 "Interacting selectively and non-covalently with nickel (Ni) cations." [GOC

4999 Pathogen[ Q2Q067] interacts with 1 human partners:{P49789}

5000 Pathogen[ P0C214] interacts with 1 human partners:{P49789}

5001 Pathogen[ P03346] interacts with 1 human partners:{P49789}

5002 Pathogen[ Q85601] interacts with 1 human partners:{P49789}

5003 Pathogen[ P14079] interacts with 1 human partners:{P49789}

5004 Pathogen[ P03383] interacts with 1 human partners:{P49789}

5005 Pathogen[ P03410] interacts with 1 human partners:{P49789}

5006 Pathogen[ P14075] interacts with 1 human partners:{P49789}

5007 Pathogen[ P0C206] interacts with 1 human partners:{P49789}

5008 Pathogen[ P03363] interacts with 1 human partners:{P49789}

5009 [Cluster 456]GO:0035939+F molecular\_function [name] microsatellite binding [def]  
 "Interacting selectively and non-covalently with a microsatellite, a repeat\_region in DNA containing repeat units (2 to 4 base pairs) that is repeated multiple times in tandem." [GOC

5010 Pathogen[ Q2Q067] interacts with 2 human partners:{Q9NQ87;Q9Y5J3}

5011 Pathogen[ P0C214] interacts with 2 human partners:{Q9Y5J3;Q9NQ87}

5012 Pathogen[ P03346] interacts with 2 human partners:{Q9Y5J3;Q9NQ87}

5013 Pathogen[ Q85601] interacts with 2 human partners:{Q9NQ87;Q9Y5J3}

5014 Pathogen[ P14079] interacts with 2 human partners:{Q9Y5J3;Q9NQ87}

5015 Pathogen[ P03383] interacts with 1 human partners:{Q9NQ87}

5016 Pathogen[ P03410] interacts with 2 human partners:{Q9Y5J3;Q9NQ87}

5017 Pathogen[ P14075] interacts with 1 human partners:{Q9NQ87}

5018 Pathogen[ P0C206] interacts with 2 human partners:{Q9NQ87;Q9Y5J3}

5019 Pathogen[ P03363] interacts with 2 human partners:{Q9Y5J3;Q9NQ87}

5020 [Cluster 457]GO:0009055+F molecular\_function [name] electron carrier activity [def]  
 "Any molecular entity that serves as an electron acceptor and electron donor in an electron transport system." [ISBN

5021 Pathogen[ Q2Q067] interacts with 11 human partners:{P35754;Q9BRA2;P15121;P38117;O75489;O75306;P99999;P10599;P21912;O95831;Q9H299}

5022 Pathogen[ P0C214] interacts with 24 human partners:{P35754;O75306;P09417;Q99643;Q9BRA2;P28331;Q8N183;P16083;P15121;Q9H299;Q9UI17;Q16881;P99999;O43837;O14832;P38117;O75489;O14521;P10599;Q9UI09;P48163;P21912;P13804;P13667}

5023 Pathogen[ P03346] interacts with 16 human partners:{P16083;Q9BRA2;O75489;Q9NS18;P15121;O43396;P13667;P21912;P99999;Q9H299;O76003;P38117;O95831;P35754;P10599;O75306}

5024 Pathogen[ Q85601] interacts with 10 human partners:{P99999;O95831;Q9BRA2;O75306;P21912;P10599;O76003;P15121;P35754;Q9H299}

5025 Pathogen[ P14079] interacts with 29 human partners:{Q6P4F2;O60397;P10109;P13498;P16083;O75306;P00395;P00403;P13804;Q9H299;P20674;O95831;P38117;P35754;O14548;O14832;Q9UI09;P00156;O76003;Q9UI17;O75489;P10599;P24310;O14521;Q9BRA2;P99999;P14406;Q8N183;P21912}

5026 Pathogen[ P03383] interacts with 6 human partners:{Q9BRA2;O75489;O95831;P10599;O75306;P99999}

5027 Pathogen[ P03410] interacts with 30 human partners:{P10599;P13804;P35754;O76003;O75380;Q9UI17;O14548;Q9UI09;P13667;P20674;Q6P4F2;Q9BRA2;P38117;O60397;P00156;P16083;Q9H299;O75489;O95831;P21912;O14832;P99999;Q99643;O14521;P24310;O75306;P00403;P10109;Q8N183;P14406}

5028 Pathogen[ P14075] interacts with 9 human partners:{Q9BRA2;O75306;P14406;P99999;O95831;O14832;P38117;O75489;P10599}

5029 Pathogen[ P0C206] interacts with 19 human partners:{P99999;Q9H299;Q9NS18;O14521;O75306;P14406;O14832;P38117;P35754;Q9UI09;O95831;O76003;Q9BRA2;O75489;P15121;P10599;P21912;P13667;P16083}

5030 Pathogen[ P03363] interacts with 7 human partners:{Q9H299;P99999;O76003;P35754;O43396;Q9BRA2;O95831}

5031 [Cluster 458]GO:0005112+F molecular\_function [name] Notch binding [def]  
 "Interacting selectively and non-covalently with the Notch (N) protein, a surface receptor." [GOC

5032 Pathogen[ Q2Q067] interacts with 5 human partners:{Q13573;Q9BUX1;Q9NWT6;Q9Y618;Q86Y01}

5033 Pathogen[ P0C214] interacts with 5 human

5034 partners:{Q13573;Q9BUX1;Q86Y01;Q9Y618;Q9NWT6}  
Pathogen[ P03346] interacts with 5 human

5035 partners:{Q9BUX1;Q9NWT6;Q13573;Q86Y01;Q9Y618}  
Pathogen[ Q85601] interacts with 5 human

5036 partners:{Q9BUX1;Q13573;Q9NWT6;Q9Y618;Q86Y01}  
Pathogen[ P14079] interacts with 4 human partners:{Q13573;Q86Y01;Q9NWT6;Q9BUX1}

5037 Pathogen[ P03383] interacts with 5 human

5038 partners:{Q9Y618;Q13573;Q9NWT6;Q9BUX1;Q86Y01}  
Pathogen[ P03410] interacts with 5 human

5039 partners:{Q9NWT6;Q9BUX1;Q86Y01;Q9Y618;Q13573}  
Pathogen[ P14075] interacts with 5 human

5040 partners:{Q13573;Q9Y618;Q9NWT6;Q9BUX1;Q86Y01}  
Pathogen[ P0C206] interacts with 5 human

5041 partners:{Q86Y01;Q9BUX1;Q9NWT6;Q13573;Q9Y618}  
Pathogen[ P03363] interacts with 4 human partners:{Q86Y01;Q9BUX1;Q9Y618;Q13573}

5042 [Cluster 459]GO:0002151+F molecular\_function [name] G-quadruplex RNA binding [def]  
"Interacting selectively and non-covalently with G-quadruplex RNA structures, in which  
groups of four guanines adopt a flat, cyclic hydrogen-bonding arrangement known as a  
guanine tetrad." [PMID

5043 Pathogen[ Q2Q067] interacts with 1 human partners:{P51816}

5044 Pathogen[ P0C214] interacts with 2 human partners:{P51114;P51816}

5045 Pathogen[ P03346] interacts with 2 human partners:{P51114;P51816}

5046 Pathogen[ Q85601] interacts with 1 human partners:{P51114}

5047 Pathogen[ P14079] interacts with 1 human partners:{P51816}

5048 Pathogen[ P03383] interacts with 1 human partners:{P51816}

5049 Pathogen[ P03410] interacts with 2 human partners:{P51114;P51816}

5050 Pathogen[ P14075] interacts with 1 human partners:{P51816}

5051 Pathogen[ P0C206] interacts with 2 human partners:{P51816;P51114}

5052 Pathogen[ P03363] interacts with 2 human partners:{P51114;P51816}

5053 [Cluster 460]GO:0004887+F molecular\_function [name] thyroid hormone receptor activity  
[def] "Combining with thyroid hormone and transmitting the signal to the transcriptional  
machinery by interacting selectively and non-covalently with a specific DNA sequence in  
order to modulate transcription by RNA polymerase II." [GOC

5054 Pathogen[ Q2Q067] interacts with 3 human partners:{P10827;P10828;Q9H0E9}

5055 Pathogen[ P0C214] interacts with 2 human partners:{Q9H0E9;P10828}

5056 Pathogen[ P03346] interacts with 4 human partners:{P10827;P10588;Q9H0E9;P10828}

5057 Pathogen[ Q85601] interacts with 3 human partners:{Q9H0E9;P10827;P10828}

5058 Pathogen[ P14079] interacts with 4 human partners:{P10828;P10827;Q9H0E9;P10588}

5059 Pathogen[ P03383] interacts with 2 human partners:{Q9H0E9;P10828}

5060 Pathogen[ P03410] interacts with 2 human partners:{P10828;Q9H0E9}

5061 Pathogen[ P14075] interacts with 1 human partners:{P10828}

5062 Pathogen[ P0C206] interacts with 4 human partners:{P10588;P10828;Q9H0E9;P10827}

5063 Pathogen[ P03363] interacts with 3 human partners:{P10828;P10588;Q9H0E9}

5064 [Cluster 461]GO:0046914+F molecular\_function [name] transition metal ion binding [def]  
"Interacting selectively and non-covalently with a transition metal ions\_a transition  
metal is an element whose atom has an incomplete d-subshell of extranuclear electrons, or  
which gives rise to a cation or cations with an incomplete d-subshell. Transition metals  
often have more than one valency state. Biologically relevant transition metals include  
vanadium, manganese, iron, copper, cobalt, nickel, molybdenum and silver." [ISBN

5065 Pathogen[ Q2Q067] interacts with 3 human partners:{P02792;P31350;Q7LG56}

5066 Pathogen[ P0C214] interacts with 5 human  
partners:{P02794;P31350;Q99807;P02792;Q7LG56}

5067 Pathogen[ P03346] interacts with 5 human  
partners:{P02792;P02794;Q9BYW2;P31350;Q7LG56}

5068 Pathogen[ Q85601] interacts with 4 human partners:{P31350;Q7LG56;P02792;P02794}

5069 Pathogen[ P14079] interacts with 4 human partners:{Q99807;P31350;Q7LG56;P02794}

5070 Pathogen[ P03383] interacts with 2 human partners:{P02794;P31350}

5071 Pathogen[ P03410] interacts with 5 human  
partners:{P02794;P31350;Q99807;P02792;Q7LG56}

5072 Pathogen[ P14075] interacts with 2 human partners:{P31350;P02794}

5073 Pathogen[ P0C206] interacts with 5 human  
partners:{P02794;Q7LG56;Q99807;P02792;P31350}

5074 Pathogen[ P03363] interacts with 1 human partners:{P02794}

5075 [Cluster 462]GO:0047710+F molecular\_function [name] bis(5'-adenosyl)-triphosphatase  
activity [def] "Catalysis of the reaction

5076 Pathogen[ Q2Q067] interacts with 1 human partners:{P49789}

5077 Pathogen[ P0C214] interacts with 1 human partners:{P49789}

5078 Pathogen[ P03346] interacts with 1 human partners:{P49789}

5079 Pathogen[ Q85601] interacts with 1 human partners:{P49789}

5080 Pathogen[ P14079] interacts with 1 human partners:{P49789}

5081 Pathogen[ P03383] interacts with 1 human partners:{P49789}

5082 Pathogen[ P03410] interacts with 1 human partners:{P49789}

5083 Pathogen[ P14075] interacts with 1 human partners:{P49789}

5084 Pathogen[ P0C206] interacts with 1 human partners:{P49789}

5085 Pathogen[ P03363] interacts with 1 human partners:{P49789}

5086 [Cluster 463]GO:0051117+F molecular\_function [name] ATPase binding [def]

"Interacting selectively and non-covalently with an ATPase, any enzyme that catalyzes the hydrolysis of ATP." [GOC

5087 Pathogen[ Q2Q067] interacts with 7 human partners:{P05062;Q04323;P60520;Q9UII2;P40855;P27986;P23297}

5088 Pathogen[ P0C214] interacts with 8 human partners:{P60520;P16157;P40855;P05062;Q9UII2;Q04323;P27986;P23297}

5089 Pathogen[ P03346] interacts with 9 human partners:{P23297;P60520;Q93050;P16157;Q9UII2;Q04323;P40855;P05062;P27986}

5090 Pathogen[ Q85601] interacts with 9 human partners:{P16157;Q93050;P23297;P05062;P27986;Q9UII2;Q04323;P60520;P40855}

5091 Pathogen[ P14079] interacts with 9 human partners:{P40855;Q96LB4;Q9UII2;P16157;P60520;Q7Z412;P23297;Q93050;Q04323}

5092 Pathogen[ P03383] interacts with 5 human partners:{P27986;P23297;Q04323;Q9UII2;P40855}

5093 Pathogen[ P03410] interacts with 12 human partners:{P27986;P16157;P60520;P59646;Q93050;P40855;Q04323;P05062;Q9UII2;Q96LB4;P23297;O75348}

5094 Pathogen[ P14075] interacts with 5 human partners:{P40855;Q04323;Q9UII2;P27986;P23297}

5095 Pathogen[ P0C206] interacts with 9 human partners:{P05062;Q04323;P27986;P16157;P40855;P60520;P23297;Q9UII2;Q93050}

5096 Pathogen[ P03363] interacts with 6 human partners:{Q04323;P16157;P60520;P40855;P27986;P23297}

5097 [Cluster 464]GO:0008408+F molecular\_function [name] 3'-5' exonuclease activity [def] "Catalysis of the hydrolysis of ester linkages within nucleic acids by removing nucleotide residues from the 3' end." [GOC

5098 Pathogen[ Q2Q067] interacts with 5 human partners:{Q99638;P49959;P27695;Q8IW19;O60671}

5099 Pathogen[ P0C214] interacts with 7 human partners:{Q8IW19;P27695;P49959;Q8IV48;O60671;Q99638;Q9Y3B8}

5100 Pathogen[ P03346] interacts with 5 human partners:{Q8IW19;Q99638;P49959;O60671;P27695}

5101 Pathogen[ Q85601] interacts with 5 human partners:{P49959;Q8IW19;O60671;P27695;Q99638}

5102 Pathogen[ P14079] interacts with 8 human partners:{O60671;Q8IV48;Q9Y3B8;Q5QGS0;P27695;Q9NSU2;Q99638;Q8IW19}

5103 Pathogen[ P03383] interacts with 4 human partners:{O60671;Q8IW19;Q99638;P27695}

5104 Pathogen[ P03410] interacts with 10 human partners:{P49959;Q5QGS0;Q9Y3B8;Q8IV48;Q8NHP7;Q9NSU2;Q99638;Q8IW19;O60671;P27695}

5105 Pathogen[ P14075] interacts with 4 human partners:{P27695;O60671;Q99638;Q8IW19}

5106 Pathogen[ P0C206] interacts with 8 human partners:{P27695;P49959;Q9NSU2;Q8IV48;Q99638;Q9Y3B8;O60671;Q8IW19}

5107 Pathogen[ P03363] interacts with 3 human partners:{Q8IW19;O60671;Q99638}

5108 [Cluster 465]GO:0050115+F molecular\_function [name] myosin-light-chain-phosphatase activity [def] "Catalysis of the reaction

5109 Pathogen[ Q2Q067] interacts with 1 human partners:{P62140}

5110 Pathogen[ P0C214] interacts with 1 human partners:{P62140}

5111 Pathogen[ P03346] interacts with 1 human partners:{P62140}

5112 Pathogen[ Q85601] interacts with 1 human partners:{P62140}

5113 Pathogen[ P14079] interacts with 1 human partners:{P62140}

5114 Pathogen[ P03383] interacts with 1 human partners:{P62140}

5115 Pathogen[ P03410] interacts with 1 human partners:{P62140}

5116 Pathogen[ P14075] interacts with 1 human partners:{P62140}

5117 Pathogen[ P0C206] interacts with 1 human partners:{P62140}

5118 Pathogen[ P03363] interacts with 1 human partners:{P62140}

5119 [Cluster 466]GO:0001190+F molecular\_function [name] RNA polymerase II transcription factor binding transcription factor activity involved in positive regulation of transcription [def] "Interacting selectively and non-covalently with an RNA polymerase II transcription factor, which may be a single protein or a complex, in order to increase the frequency, rate or extent of transcription from an RNA polymerase II promoter. A protein binding transcription factor may or may not also interact with the template nucleic acid (either DNA or RNA) as well." [GOC

5120 Pathogen[ Q2Q067] interacts with 1 human partners:{P25791}

5121 Pathogen[ P0C214] interacts with 3 human partners:{P25791;P05412;P16220}

5122 Pathogen[ P03346] interacts with 6 human partners:{P05412;P16220;O00327;P25791;O15516;O75593}

5123 Pathogen[ Q85601] interacts with 5 human partners:{O15516;O00327;P25791;P16220;P05412}

5124 Pathogen[ P14079] interacts with 2 human partners:{P25791;P05412}

5125 Pathogen[ P03383] interacts with 3 human partners:{P16220;P25791;P05412}

5126 Pathogen[ P03410] interacts with 3 human partners:{P25791;P16220;P05412}

5127 Pathogen[ P14075] interacts with 3 human partners:{P05412;P25791;P16220}

5128 Pathogen[ P0C206] interacts with 5 human partners:{P16220;P05412;O00327;O15516;P25791}

5129 Pathogen[ P03363] interacts with 4 human partners:{P16220;P25791;O00327;P05412}

5130 [Cluster 467]GO:0052822+F molecular\_function [name] DNA-3-methylguanine glycosylase

```

activity [def] "Catalysis of the reaction
5131 Pathogen[ Q2Q067] interacts with 1 human partners:{P29372}
5132 Pathogen[ P0C214] interacts with 1 human partners:{P29372}
5133 Pathogen[ P03346] interacts with 1 human partners:{P29372}
5134 Pathogen[ Q85601] interacts with 1 human partners:{P29372}
5135 Pathogen[ P14079] interacts with 1 human partners:{P29372}
5136 Pathogen[ P03383] interacts with 1 human partners:{P29372}
5137 Pathogen[ P03410] interacts with 1 human partners:{P29372}
5138 Pathogen[ P14075] interacts with 1 human partners:{P29372}
5139 Pathogen[ P0C206] interacts with 1 human partners:{P29372}
5140 Pathogen[ P03363] interacts with 1 human partners:{P29372}
5141 [Cluster 468]GO:0008137+F molecular_function [name] NADH dehydrogenase (ubiquinone)
activity [def] "Catalysis of the reaction
5142 Pathogen[ Q2Q067] interacts with 10 human
partners:{O43920;P56181;O75489;O96000;O95178;O43678;O75251;O75306;Q9P0J0;E9PQ53}
5143 Pathogen[ P0C214] interacts with 21 human
partners:{Q16795;O75306;O43678;P56556;P28331;O43920;Q8N183;O95299;P17568;Q16718;O1456
1;O95298;Q9P0J0;O96000;E9PQ53;O95182;O75489;O75251;Q9UI09;P56181;O95178}
5144 Pathogen[ P03346] interacts with 10 human
partners:{P56181;O75489;O43678;O95178;O43920;E9PQ53;O75251;O96000;O75306;Q9P0J0}
5145 Pathogen[ Q85601] interacts with 7 human
partners:{Q9P0J0;O75306;O43678;P56181;O96000;O43920;E9PQ53}
5146 Pathogen[ P14079] interacts with 33 human
partners:{P56181;O43674;O43677;O43181;O95169;P56556;O95139;O96000;O95167;O75306;P1756
8;O95182;O43676;O43678;P51970;O95178;O75251;O14561;Q9UI09;O95299;E9PQ53;Q9P0J0;O75489
;P03923;Q16718;P03897;O43920;O15239;O00483;P03901;P03886;Q8N183;O95298}
5147 Pathogen[ P03383] interacts with 10 human
partners:{O75251;O96000;O43678;O43920;O75489;O75306;O95178;E9PQ53;Q9P0J0;P56181}
5148 Pathogen[ P03410] interacts with 36 human
partners:{O95168;O43674;P56556;P17568;O95178;O75380;O43678;O75251;O95299;P51970;O4392
0;Q9UI09;O96000;O95167;O15239;Q9Y6M9;P03886;O00483;O95298;O75438;E9PQ53;P56181;O14561
;O75489;P03897;O43677;O95169;O43181;Q16718;O75306;O43676;P03901;Q9P0J0;P03923;Q8N183;
O95182}
5149 Pathogen[ P14075] interacts with 16 human
partners:{O43674;P56181;O96000;O95182;O43677;O43920;O75306;O14561;O95298;O43678;O7525
1;E9PQ53;O75489;O95178;Q9P0J0;O43676}
5150 Pathogen[ P0C206] interacts with 18 human
partners:{P56181;O75251;O43920;O75306;O95182;Q9UI09;O95298;O14561;O00483;P17568;O9517
8;Q9P0J0;O43678;O75489;E9PQ53;O96000;O43674;P56556}
5151 Pathogen[ P03363] interacts with 3 human partners:{Q9P0J0;O96000;P56181}
5152 [Cluster 469]GO:0070037+F molecular_function [name] rRNA (pseudouridine)
methyltransferase activity [def] "Catalysis of the transfer of a methyl group from
S-adenosyl-L-methionine to a pseudouridine residue in an rRNA molecule." [GOC
5153 Pathogen[ Q2Q067] interacts with 1 human partners:{Q92979}
5154 Pathogen[ P0C214] interacts with 1 human partners:{Q92979}
5155 Pathogen[ P03346] interacts with 1 human partners:{Q92979}
5156 Pathogen[ Q85601] interacts with 1 human partners:{Q92979}
5157 Pathogen[ P14079] interacts with 1 human partners:{Q92979}
5158 Pathogen[ P03383] interacts with 1 human partners:{Q92979}
5159 Pathogen[ P03410] interacts with 1 human partners:{Q92979}
5160 Pathogen[ P14075] interacts with 1 human partners:{Q92979}
5161 Pathogen[ P0C206] interacts with 1 human partners:{Q92979}
5162 Pathogen[ P03363] interacts with 1 human partners:{Q92979}
5163 [Cluster 470]GO:0016594+F molecular_function [name] glycine binding [def]
"Interacting selectively and non-covalently with glycine, aminoethanoic acid." [GOC
5164 Pathogen[ Q2Q067] interacts with 2 human partners:{P22557;Q14749}
5165 Pathogen[ P0C214] interacts with 2 human partners:{P22557;Q14749}
5166 Pathogen[ P03346] interacts with 2 human partners:{P22557;Q14749}
5167 Pathogen[ Q85601] interacts with 1 human partners:{Q14749}
5168 Pathogen[ P14079] interacts with 2 human partners:{P22557;Q14749}
5169 Pathogen[ P03383] interacts with 1 human partners:{Q14749}
5170 Pathogen[ P03410] interacts with 2 human partners:{Q14749;P22557}
5171 Pathogen[ P14075] interacts with 1 human partners:{Q14749}
5172 Pathogen[ P0C206] interacts with 2 human partners:{P22557;Q14749}
5173 Pathogen[ P03363] interacts with 1 human partners:{Q14749}
5174 [Cluster 471]GO:0001106+F molecular_function [name] RNA polymerase II transcription
corepressor activity [def] "Interacting selectively and non-covalently with an RNA
polymerase II repressing transcription factor and also with the RNA polymerase II basal
transcription machinery in order to stop, prevent, or reduce the frequency, rate or
extent of transcription. Cofactors generally do not bind DNA, but rather mediate
protein-protein interactions between repressive transcription factors and the basal
transcription machinery." [GOC
5175 Pathogen[ Q2Q067] interacts with 12 human
partners:{Q99708;Q9NQ87;Q13547;O00712;Q96ST3;O14776;Q9UBK9;Q9ULU4;Q13363;Q96QT6;Q0472
4;O94763}
5176 Pathogen[ P0C214] interacts with 12 human

```

5177 partners:{Q13363;Q13547;Q96QT6;Q99708;Q04724;O14776;O00712;Q96ST3;Q9ULU4;O94763;Q9UBK9;Q9NQ87}  
Pathogen[ P03346] interacts with 16 human  
partners:{Q96ST3;O94763;Q99708;P41225;O00712;Q96QT6;Q9ULU4;Q13547;Q04724;Q9NQ87;Q92481;P51858;Q13363;Q9UBK9;O14776;Q96SF7}

5178 Pathogen[ Q85601] interacts with 12 human  
partners:{Q04724;Q96QT6;Q99708;Q13363;O14776;Q9ULU4;Q9NQ87;O94763;Q13547;O00712;Q9UBK9;Q96ST3}

5179 Pathogen[ P14079] interacts with 10 human  
partners:{O14776;Q96ST3;O94763;Q96QT6;Q99708;Q9UBK9;Q9ULU4;Q04724;Q9NQ87;O00712}

5180 Pathogen[ P03383] interacts with 12 human  
partners:{Q9NQ87;Q9ULU4;O00712;Q96QT6;Q04724;O94763;O14776;Q13547;Q99708;Q96ST3;Q9UBK9;Q13363}

5181 Pathogen[ P03410] interacts with 11 human  
partners:{Q96QT6;Q9ULU4;O94763;Q99708;Q9NQ87;Q04724;Q9UBK9;Q96ST3;O00712;O14776;Q13547}

5182 Pathogen[ P14075] interacts with 12 human  
partners:{Q96ST3;Q96QT6;O14776;Q9ULU4;Q9NQ87;Q13547;O94763;Q9UBK9;O00712;Q04724;Q13363;Q99708}

5183 Pathogen[ P0C206] interacts with 12 human  
partners:{Q9NQ87;Q96ST3;Q99708;Q13547;O00712;Q9ULU4;O14776;Q04724;Q9UBK9;Q96QT6;Q13363;O94763}

5184 Pathogen[ P03363] interacts with 13 human  
partners:{P51858;Q96QT6;O00712;Q9NQ87;Q04724;Q9UBK9;Q9ULU4;Q99708;O94763;Q96ST3;Q13547;O14776;Q13363}

5185 [Cluster 472]GO:0004197+F molecular\_function [name] cysteine-type endopeptidase activity [def] "Catalysis of the hydrolysis of internal, alpha-peptide bonds in a polypeptide chain by a mechanism in which the sulfhydryl group of a cysteine residue at the active center acts as a nucleophile." [GOC

5186 Pathogen[ Q2Q067] interacts with 10 human  
partners:{Q93009;O15519;Q9UDY8;Q14790;Q8WXC3;P55212;Q86T82;P42575;Q93008;Q13867}

5187 Pathogen[ P0C214] interacts with 11 human  
partners:{P55212;Q9UDY8;Q13867;Q93008;O15519;Q8WXC3;P42574;Q93009;P55210;P42575;Q14790}

5188 Pathogen[ P03346] interacts with 17 human  
partners:{Q93009;Q93008;Q9UDY8;P42575;P42574;P55212;Q86T82;O15519;Q8WXC3;Q14694;P51784;O75604;Q13867;P55211;Q14790;P55210;O94782}

5189 Pathogen[ Q85601] interacts with 12 human  
partners:{Q9Y5T5;Q93009;Q9UDY8;Q14790;Q13867;Q93008;P42575;Q8WXC3;Q86T82;P55212;O15519;P55210}

5190 Pathogen[ P14079] interacts with 8 human  
partners:{Q8WXC3;O15519;Q86TL0;P55212;Q14790;P55210;Q13867;P42575}

5191 Pathogen[ P03383] interacts with 3 human partners:{P55212;Q13867;Q8WXC3}

5192 Pathogen[ P03410] interacts with 7 human  
partners:{P42575;O15519;Q13867;Q86TL0;Q8WXC3;P55212;P55210}

5193 Pathogen[ P14075] interacts with 3 human partners:{P55212;Q8WXC3;Q13867}

5194 Pathogen[ P0C206] interacts with 15 human  
partners:{Q9UDY8;Q9Y5T5;Q93008;O75604;P55212;Q93009;O15519;Q13867;Q14790;Q86T82;P42574;Q86TL0;P42575;P55210;Q8WXC3}

5195 Pathogen[ P03363] interacts with 9 human  
partners:{O15519;P51784;O75604;Q13867;P55212;Q86T82;Q8WXC3;P55210;Q93008}

5196 [Cluster 473]GO:0043023+F molecular\_function [name] ribosomal large subunit binding [def] "Interacting selectively and non-covalently with any part of the larger ribosomal subunit." [GOC

5197 Pathogen[ Q2Q067] interacts with 1 human partners:{P06748}

5198 Pathogen[ P0C214] interacts with 1 human partners:{P06748}

5199 Pathogen[ P03346] interacts with 1 human partners:{P06748}

5200 Pathogen[ Q85601] interacts with 1 human partners:{P06748}

5201 Pathogen[ P14079] interacts with 1 human partners:{P06748}

5202 Pathogen[ P03383] interacts with 1 human partners:{P06748}

5203 Pathogen[ P03410] interacts with 1 human partners:{P06748}

5204 Pathogen[ P14075] interacts with 1 human partners:{P06748}

5205 Pathogen[ P0C206] interacts with 1 human partners:{P06748}

5206 Pathogen[ P03363] interacts with 1 human partners:{P06748}

5207 [Cluster 474]GO:0016706+F molecular\_function [name] oxidoreductase activity, acting on paired donors, with incorporation or reduction of molecular oxygen, 2-oxoglutarate as one donor, and incorporation of one atom each of oxygen into both donors [def] "Catalysis of the reaction

5208 Pathogen[ Q2Q067] interacts with 9 human  
partners:{Q9UPP1;Q9NXW9;Q6NS38;Q9NWT6;Q96Q83;Q96KS0;Q9H6W3;Q9H6Z9;Q9GZT9}

5209 Pathogen[ P0C214] interacts with 10 human  
partners:{Q96KS0;Q9H6Z9;Q6NS38;Q9H6W3;Q9GZT9;Q9NXW9;Q96BT7;Q96Q83;Q9UPP1;Q9NWT6}

5210 Pathogen[ P03346] interacts with 10 human  
partners:{Q9NXW9;Q9GZT9;Q9UPP1;Q96Q83;Q96BT7;Q96KS0;Q9UGL1;Q9NWT6;Q9H6W3;Q9H6Z9}

5211 Pathogen[ Q85601] interacts with 9 human  
partners:{Q9H6Z9;Q9NWT6;Q9H6W3;Q9NXW9;Q9GZT9;Q96KS0;Q9UPP1;Q6NS38;Q96Q83}



5212 Pathogen[ P14079] interacts with 15 human partners:{Q9GZT9;Q8IVL6;Q9NXW9;Q6P6C2;Q6N021;Q9H6W3;Q9UPP1;Q9NWT6;Q6NS38;Q3KRA9;Q9H6Z9;Q9BT30;Q96Q83;O43151;Q96KS0}

5213 Pathogen[ P03383] interacts with 6 human partners:{Q9NWT6;Q96KS0;Q9H6W3;Q9H6Z9;Q96Q83;Q9UPP1}

5214 Pathogen[ P03410] interacts with 14 human partners:{Q3KRA9;Q9UPP1;Q9H6W3;Q6P6C2;Q9NWT6;Q96KS0;Q9H6Z9;Q9NXW9;Q6N021;Q96Q83;Q6NS38;Q9GZT9;O43151;Q9BT30}

5215 Pathogen[ P14075] interacts with 8 human partners:{Q96KS0;Q9GZT9;Q96Q83;Q9UPP1;Q9H6W3;Q9NWT6;Q9NXW9;Q9H6Z9}

5216 Pathogen[ P0C206] interacts with 11 human partners:{Q96Q83;Q96KS0;Q9GZT9;O43151;Q3KRA9;Q6NS38;Q9UPP1;Q9NXW9;Q9NWT6;Q9H6W3;Q9H6Z9}

5217 Pathogen[ P03363] interacts with 3 human partners:{Q9H6Z9;Q96BT7;Q96Q83}

5218 [Cluster 475]GO:0071532+F molecular\_function [name] ankyrin repeat binding [def] "Interacting selectively and non-covalently with an ankyrin repeat of a protein. Ankyrin repeats are tandemly repeated modules of about 33 amino acids\_ each repeat folds into a helix-loop-helix structure with a beta-hairpin/loop region projecting out from the helices at a 90-degree angle, and repeats stack to form an L-shaped structure." [GOC

5219 Pathogen[ Q2Q067] interacts with 2 human partners:{Q04206;Q9NWT6}

5220 Pathogen[ P0C214] interacts with 2 human partners:{Q04206;Q9NWT6}

5221 Pathogen[ P03346] interacts with 2 human partners:{Q04206;Q9NWT6}

5222 Pathogen[ Q85601] interacts with 2 human partners:{Q9NWT6;Q04206}

5223 Pathogen[ P14079] interacts with 1 human partners:{Q9NWT6}

5224 Pathogen[ P03383] interacts with 2 human partners:{Q9NWT6;Q04206}

5225 Pathogen[ P03410] interacts with 2 human partners:{Q04206;Q9NWT6}

5226 Pathogen[ P14075] interacts with 2 human partners:{Q04206;Q9NWT6}

5227 Pathogen[ P0C206] interacts with 2 human partners:{Q9NWT6;Q04206}

5228 Pathogen[ P03363] interacts with 1 human partners:{Q04206}

5229 [Cluster 476]GO:0043236+F molecular\_function [name] laminin binding [def] "Interacting selectively and non-covalently with laminins, glycoproteins that are major constituents of the basement membrane of cells." [GOC

5230 Pathogen[ Q2Q067] interacts with 1 human partners:{Q9HB19}

5231 Pathogen[ P0C214] interacts with 1 human partners:{Q9HB19}

5232 Pathogen[ P03346] interacts with 1 human partners:{Q9HB19}

5233 Pathogen[ Q85601] interacts with 1 human partners:{Q9HB19}

5234 Pathogen[ P14079] interacts with 1 human partners:{Q9HB19}

5235 Pathogen[ P03383] interacts with 1 human partners:{Q9HB19}

5236 Pathogen[ P03410] interacts with 1 human partners:{Q9HB19}

5237 Pathogen[ P14075] interacts with 1 human partners:{Q9HB19}

5238 Pathogen[ P0C206] interacts with 1 human partners:{Q9HB19}

5239 Pathogen[ P03363] interacts with 1 human partners:{Q9HB19}

5240 [Cluster 477]GO:0032138+F molecular\_function [name] single base insertion or deletion binding [def] "Interacting selectively and non-covalently with double-stranded DNA containing a single base insertion or deletion." [GOC

5241 Pathogen[ Q2Q067] interacts with 1 human partners:{P54278}

5242 Pathogen[ P0C214] interacts with 1 human partners:{P54278}

5243 Pathogen[ P03346] interacts with 1 human partners:{P54278}

5244 Pathogen[ Q85601] interacts with 1 human partners:{P54278}

5245 Pathogen[ P14079] interacts with 1 human partners:{P54278}

5246 Pathogen[ P03383] interacts with 1 human partners:{P54278}

5247 Pathogen[ P03410] interacts with 1 human partners:{P54278}

5248 Pathogen[ P14075] interacts with 1 human partners:{P54278}

5249 Pathogen[ P0C206] interacts with 1 human partners:{P54278}

5250 Pathogen[ P03363] interacts with 1 human partners:{P54278}

5251 [Cluster 478]GO:0003916+F molecular\_function [name] DNA topoisomerase activity [def] "Catalysis of the transient cleavage and passage of individual DNA strands or double helices through one another, resulting a topological transformation in double-stranded DNA." [GOC

5252 Pathogen[ Q2Q067] interacts with 2 human partners:{P11387;P11388}

5253 Pathogen[ P0C214] interacts with 2 human partners:{P11388;P11387}

5254 Pathogen[ P03346] interacts with 2 human partners:{P11388;P11387}

5255 Pathogen[ Q85601] interacts with 2 human partners:{P11387;P11388}

5256 Pathogen[ P14079] interacts with 3 human partners:{P11388;Q13472;Q969P6}

5257 Pathogen[ P03383] interacts with 1 human partners:{P11387}

5258 Pathogen[ P03410] interacts with 3 human partners:{Q13472;P11387;P11388}

5259 Pathogen[ P14075] interacts with 1 human partners:{P11387}

5260 Pathogen[ P0C206] interacts with 3 human partners:{P11388;P11387;Q13472}

5261 Pathogen[ P03363] interacts with 2 human partners:{P11387;Q13472}

5262 [Cluster 479]GO:0046970+F molecular\_function [name] NAD-dependent histone deacetylase activity (H4-K16 specific) [def] "Catalysis of the reaction

5263 Pathogen[ Q2Q067] interacts with 10 human partners:{P56524;Q9BY41;Q9UKV0;Q13547;O15379;Q9UQL6;Q969S8;Q96DB2;Q92769;Q8WUI4}

5264 Pathogen[ P0C214] interacts with 10 human partners:{Q13547;Q969S8;Q96DB2;P56524;Q92769;Q9UKV0;O15379;Q8WUI4;Q9UQL6;Q9BY41}

5265 Pathogen[ P03346] interacts with 10 human

5266 partners:{Q969S8;Q96DB2;O15379;P56524;Q92769;Q13547;Q9BY41;Q8WUI4;Q9UKV0;Q9UQL6}  
Pathogen[ Q85601] interacts with 10 human

5267 partners:{Q969S8;Q9UKV0;Q96DB2;Q9BY41;Q9UQL6;Q92769;P56524;O15379;Q13547;Q8WUI4}  
Pathogen[ P14079] interacts with 9 human

5268 partners:{Q9UQL6;O15379;Q96DB2;Q969S8;Q8WUI4;Q9UKV0;Q92769;Q9BY41;P56524}  
Pathogen[ P03383] interacts with 9 human

5269 partners:{Q9UQL6;Q92769;O15379;Q13547;Q9BY41;Q9UKV0;P56524;Q8WUI4;Q969S8}  
Pathogen[ P03410] interacts with 10 human

5270 partners:{Q9UKV0;Q9BY41;Q8WUI4;Q9UQL6;Q969S8;Q92769;O15379;P56524;Q13547;Q96DB2}  
Pathogen[ P14075] interacts with 9 human

5271 partners:{Q9BY41;Q969S8;P56524;Q9UKV0;Q13547;Q92769;O15379;Q9UQL6;Q8WUI4}  
Pathogen[ P0C206] interacts with 10 human

5272 partners:{Q92769;Q96DB2;Q9UKV0;Q13547;O15379;Q8WUI4;Q9BY41;P56524;Q969S8;Q9UQL6}  
Pathogen[ P03363] interacts with 7 human

5273 partners:{Q9BY41;O15379;Q969S8;Q9UQL6;Q9UKV0;Q13547;Q8WUI4}  
[Cluster 480]GO:0000774+F molecular\_function [name] adenylyl-nucleotide exchange factor activity [def] "Stimulates the hydrolysis and exchange of adenylyl nucleotides by other proteins." [GOC

5274 Pathogen[ Q2Q067] interacts with 2 human partners:{Q9HAV7;Q8TAA5}

5275 Pathogen[ P0C214] interacts with 2 human partners:{Q9HAV7;Q8TAA5}

5276 Pathogen[ P03346] interacts with 2 human partners:{Q9HAV7;Q8TAA5}

5277 Pathogen[ Q85601] interacts with 2 human partners:{Q8TAA5;Q9HAV7}

5278 Pathogen[ P14079] interacts with 2 human partners:{Q9HAV7;Q8TAA5}

5279 Pathogen[ P03383] interacts with 2 human partners:{Q9HAV7;Q8TAA5}

5280 Pathogen[ P03410] interacts with 2 human partners:{Q8TAA5;Q9HAV7}

5281 Pathogen[ P14075] interacts with 2 human partners:{Q9HAV7;Q8TAA5}

5282 Pathogen[ P0C206] interacts with 2 human partners:{Q9HAV7;Q8TAA5}

5283 Pathogen[ P03363] interacts with 1 human partners:{Q8TAA5}

5284 [Cluster 481]GO:0004857+F molecular\_function [name] enzyme inhibitor activity [def] "Stops, prevents or reduces the activity of an enzyme." [GOC

5285 Pathogen[ Q2Q067] interacts with 11 human  
partners:{O14974;Q8N5D0;Q9UMX2;Q9UII2;Q9NZL4;Q9NZU7;O96018;P30047;Q9H3M7;O95190;Q8N163}

5286 Pathogen[ P0C214] interacts with 14 human  
partners:{Q9NZL4;Q8N163;Q8N5D0;Q9H3M7;O96018;P54368;O14974;P18545;Q9UII2;Q9UMX2;Q9NZU7;Q13956;O95190;P30047}

5287 Pathogen[ P03346] interacts with 11 human  
partners:{Q8N163;Q9NZL4;Q9NZU7;Q9UMX2;P30047;Q9UII2;Q8N5D0;O96018;O14974;Q9H3M7;O95190}

5288 Pathogen[ Q85601] interacts with 11 human  
partners:{Q9NZU7;P30047;Q9UMX2;Q9UII2;O95190;O96018;Q8N163;O14974;Q9NZL4;Q9H3M7;Q8N5D0}

5289 Pathogen[ P14079] interacts with 20 human  
partners:{Q8N5D0;Q8N163;P05408;Q9UMX2;O14974;Q9UII2;O95190;P51606;P18545;P54368;Q13956;O96018;O60256;P05814;Q9H3M7;Q14558;Q9BS40;Q9NZL4;P30047;Q9NZU7}

5290 Pathogen[ P03383] interacts with 8 human  
partners:{O96018;Q8N163;Q9UII2;O95190;Q9NZL4;Q9H3M7;P30047;Q8N5D0}

5291 Pathogen[ P03410] interacts with 20 human  
partners:{O96018;P30047;P51606;Q13956;Q9H3M7;O95190;Q9UII2;Q9BS40;Q8N163;P18545;Q14558;P05408;O14974;Q8N5D0;Q9NZU7;O60256;P54368;Q9NZL4;Q9UMX2;P05814}

5292 Pathogen[ P14075] interacts with 8 human  
partners:{O96018;Q8N5D0;Q8N163;Q9UII2;P30047;Q9H3M7;Q9NZL4;O95190}

5293 Pathogen[ P0C206] interacts with 14 human  
partners:{P18545;Q9NZU7;P30047;O14974;P54368;O96018;O95190;Q9NZL4;Q13956;Q9H3M7;Q8N5D0;Q8N163;Q9UII2;Q9UMX2}

5294 Pathogen[ P03363] interacts with 10 human  
partners:{Q8N5D0;Q9NZL4;Q9H3M7;Q9NZU7;Q8N163;O14974;Q9UMX2;P30047;O96018;O95190}

5295 [Cluster 482]GO:0035173+F molecular\_function [name] histone kinase activity [def] "Catalysis of the transfer of a phosphate group to a histone. Histones are any of a group of water-soluble proteins found in association with the DNA of plant and animal chromosomes." [GOC

5296 Pathogen[ Q2Q067] interacts with 2 human partners:{P14635;P24941}

5297 Pathogen[ P0C214] interacts with 2 human partners:{P14635;P24941}

5298 Pathogen[ P03346] interacts with 2 human partners:{P24941;P14635}

5299 Pathogen[ Q85601] interacts with 2 human partners:{P14635;P24941}

5300 Pathogen[ P14079] interacts with 1 human partners:{P14635}

5301 Pathogen[ P03383] interacts with 2 human partners:{P14635;P24941}

5302 Pathogen[ P03410] interacts with 2 human partners:{P14635;P24941}

5303 Pathogen[ P14075] interacts with 2 human partners:{P24941;P14635}

5304 Pathogen[ P0C206] interacts with 3 human partners:{P14635;P24941;Q9UIG0}

5305 Pathogen[ P03363] interacts with 1 human partners:{P24941}

5306 [Cluster 483]GO:0048185+F molecular\_function [name] activin binding [def] "Interacting selectively and non-covalently with activin, a dimer of inhibin-beta subunits." [GOC

5307 Pathogen[ Q2Q067] interacts with 1 human partners:{O15105}

5308 Pathogen[ P0C214] interacts with 3 human partners:{O95633;Q9HCE7;O15105}

5309 Pathogen[ P03346] interacts with 2 human partners:{O15105;O95633}

5310 Pathogen[ Q85601] interacts with 1 human partners:{O15105}

5311 Pathogen[ P14079] interacts with 1 human partners:{O15105}

5312 Pathogen[ P03383] interacts with 1 human partners:{O15105}

5313 Pathogen[ P03410] interacts with 1 human partners:{O15105}

5314 Pathogen[ P14075] interacts with 1 human partners:{O15105}

5315 Pathogen[ P0C206] interacts with 2 human partners:{O95633;O15105}

5316 Pathogen[ P03363] interacts with 2 human partners:{O15105;P19883}

5317 [Cluster 484]GO:0097371+F

5318 Pathogen[ Q2Q067] interacts with 2 human partners:{Q8N726;P61289}

5319 Pathogen[ P0C214] interacts with 1 human partners:{Q8N726}

5320 Pathogen[ P03346] interacts with 3 human partners:{Q6PCD5;P61289;Q8N726}

5321 Pathogen[ Q85601] interacts with 3 human partners:{P61289;Q6PCD5;Q8N726}

5322 Pathogen[ P14079] interacts with 2 human partners:{Q8N726;P61289}

5323 Pathogen[ P03383] interacts with 2 human partners:{P61289;Q8N726}

5324 Pathogen[ P03410] interacts with 2 human partners:{Q8N726;P61289}

5325 Pathogen[ P14075] interacts with 2 human partners:{P61289;Q8N726}

5326 Pathogen[ P0C206] interacts with 3 human partners:{P61289;Q6PCD5;Q8N726}

5327 Pathogen[ P03363] interacts with 3 human partners:{P61289;Q6PCD5;Q8N726}

5328 [Cluster 485]GO:0005261+F molecular\_function [name] cation channel activity [def] "Catalysis of the energy-independent passage of cations across a lipid bilayer down a concentration gradient." [GOC

5329 Pathogen[ Q2Q067] interacts with 1 human partners:{Q9NY12}

5330 Pathogen[ P0C214] interacts with 1 human partners:{Q9NY12}

5331 Pathogen[ P03346] interacts with 1 human partners:{Q9NY12}

5332 Pathogen[ Q85601] interacts with 1 human partners:{Q9NY12}

5333 Pathogen[ P14079] interacts with 2 human partners:{Q9NY12;Q9H6F2}

5334 Pathogen[ P03383] interacts with 1 human partners:{Q9NY12}

5335 Pathogen[ P03410] interacts with 2 human partners:{Q9H6F2;Q9NY12}

5336 Pathogen[ P14075] interacts with 1 human partners:{Q9NY12}

5337 Pathogen[ P0C206] interacts with 1 human partners:{Q9NY12}

5338 Pathogen[ P03363] interacts with 1 human partners:{Q9NY12}

5339 [Cluster 486]GO:0015631+F molecular\_function [name] tubulin binding [def] "Interacting selectively and non-covalently with monomeric or multimeric forms of tubulin, including microtubules." [GOC

5340 Pathogen[ Q2Q067] interacts with 8 human partners:{P04156;Q9HC77;Q96SN8;Q96K30;O94811;Q66K74;P27816;O15392}

5341 Pathogen[ P0C214] interacts with 9 human partners:{O94811;Q96SN8;Q9HC77;P27816;Q96K30;Q9BQI5;O15392;P04156;Q66K74}

5342 Pathogen[ P03346] interacts with 12 human partners:{O15392;Q9HC77;Q66K74;Q96SN8;Q8N841;Q96K30;P11137;O94811;P30622;P27816;P04156;Q9BQI5}

5343 Pathogen[ Q85601] interacts with 10 human partners:{P27816;Q96SN8;P30622;Q9HC77;Q66K74;O15392;O94811;Q9BW30;P04156;Q96K30}

5344 Pathogen[ P14079] interacts with 20 human partners:{O43292;Q96K30;P04156;Q66K74;O15392;Q96MI9;Q9UPW5;Q14118;Q7Z4L9;Q9BQI5;O94811;Q8NDL9;Q8N841;Q9BW30;P11137;Q9HC77;Q96SN8;P27816;P30622;P10636}

5345 Pathogen[ P03383] interacts with 7 human partners:{P04156;Q96SN8;O94811;Q9HC77;Q96K30;P27816;Q9BQI5}

5346 Pathogen[ P03410] interacts with 17 human partners:{O15392;P11137;P30622;P27816;Q9UPW5;Q9HC77;Q96K30;Q7Z4L9;Q96SN8;O94811;Q9BW30;P04156;Q14118;Q66K74;Q9BQI5;P10636;Q8N841}

5347 Pathogen[ P14075] interacts with 7 human partners:{Q9BQI5;O94811;Q9HC77;P04156;Q96SN8;Q96K30;P27816}

5348 Pathogen[ P0C206] interacts with 16 human partners:{Q96SN8;Q9HC77;P04156;Q8NDL9;O94811;Q96K30;P30622;P10636;Q66K74;P11137;P27816;Q8N841;Q9BQI5;O15392;Q9UPW5;Q9BW30}

5349 Pathogen[ P03363] interacts with 12 human partners:{P11137;Q9HC77;Q66K74;O94811;Q96K30;P04156;Q9BW30;P30622;P27816;Q8N841;Q9BQI5;Q96SN8}

5350 [Cluster 487]GO:0004818+F molecular\_function [name] glutamate-tRNA ligase activity [def] "Catalysis of the reaction

5351 Pathogen[ Q2Q067] interacts with 1 human partners:{P07814}

5352 Pathogen[ P0C214] interacts with 2 human partners:{P07814;Q5JPH6}

5353 Pathogen[ P03346] interacts with 1 human partners:{P07814}

5354 Pathogen[ Q85601] interacts with 1 human partners:{P07814}

5355 Pathogen[ P14079] interacts with 2 human partners:{Q5JPH6;P07814}

5356 Pathogen[ P03383] interacts with 2 human partners:{Q5JPH6;P07814}

5357 Pathogen[ P03410] interacts with 2 human partners:{Q5JPH6;P07814}

5358 Pathogen[ P14075] interacts with 2 human partners:{Q5JPH6;P07814}

5359 Pathogen[ P0C206] interacts with 2 human partners:{P07814;Q5JPH6}

5360 Pathogen[ P03363] interacts with 2 human partners:{Q5JPH6;P07814}

5361 [Cluster 488]GO:0008060+F molecular\_function [name] ARF GTPase activator activity [def] "Increases the rate of GTP hydrolysis by the GTPase ARF." [GOC

5362 Pathogen[ Q2Q067] interacts with 2 human partners:{Q9Y6D6;P52594}

5363 Pathogen[ P0C214] interacts with 2 human partners:{Q9Y6D6;P52594}

5364 Pathogen[ P03346] interacts with 2 human partners:{Q9Y6D6;P52594}

5365 Pathogen[ Q85601] interacts with 5 human partners:{Q9NP61;P52594;Q8N6H7;Q8N6T3;Q9Y6D6}

5366 Pathogen[ P14079] interacts with 2 human partners:{P52594;Q9Y6D6}

5367 Pathogen[ P03383] interacts with 2 human partners:{Q9Y6D6;P52594}

5368 Pathogen[ P03410] interacts with 3 human partners:{P52594;Q9NP61;Q9Y6D6}

5369 Pathogen[ P14075] interacts with 2 human partners:{Q9Y6D6;P52594}

5370 Pathogen[ P0C206] interacts with 5 human partners:{Q95081;Q8N6T3;Q9Y6D6;Q9NP61;Q8N6H7}

5371 Pathogen[ P03363] interacts with 2 human partners:{P52594;Q9Y6D6}

5372 [Cluster 489]GO:0043035+F molecular\_function [name] chromatin insulator sequence binding [def] "Interacting selectively and non-covalently and stoichiometrically with a chromatin insulator sequence, a DNA sequence that prevents enhancer-mediated activation or repression of transcription." [GOC

5373 Pathogen[ Q2Q067] interacts with 1 human partners:{P49711}

5374 Pathogen[ P0C214] interacts with 1 human partners:{P49711}

5375 Pathogen[ P03346] interacts with 1 human partners:{P49711}

5376 Pathogen[ Q85601] interacts with 1 human partners:{P49711}

5377 Pathogen[ P14079] interacts with 1 human partners:{P49711}

5378 Pathogen[ P03383] interacts with 1 human partners:{P49711}

5379 Pathogen[ P03410] interacts with 1 human partners:{P49711}

5380 Pathogen[ P14075] interacts with 1 human partners:{P49711}

5381 Pathogen[ P0C206] interacts with 1 human partners:{P49711}

5382 Pathogen[ P03363] interacts with 1 human partners:{P49711}

5383 [Cluster 490]GO:0030695+F molecular\_function [name] GTPase regulator activity [def] "Modulates the rate of GTP hydrolysis by a GTPase." [GOC

5384 Pathogen[ Q2Q067] interacts with 1 human partners:{P81274}

5385 Pathogen[ P0C214] interacts with 1 human partners:{P81274}

5386 Pathogen[ P03346] interacts with 2 human partners:{P81274;Q9Y4H4}

5387 Pathogen[ Q85601] interacts with 1 human partners:{P81274}

5388 Pathogen[ P14079] interacts with 2 human partners:{Q9Y4H4;P81274}

5389 Pathogen[ P03383] interacts with 2 human partners:{P81274;Q9Y4H4}

5390 Pathogen[ P03410] interacts with 2 human partners:{Q9Y4H4;P81274}

5391 Pathogen[ P14075] interacts with 2 human partners:{P81274;Q9Y4H4}

5392 Pathogen[ P0C206] interacts with 2 human partners:{Q9Y4H4;P81274}

5393 Pathogen[ P03363] interacts with 2 human partners:{Q9Y4H4;P81274}

5394 [Cluster 491]GO:0071209+F molecular\_function [name] U7 snRNA binding [def] "Interacting selectively and non-covalently with the U7 small nuclear RNA (U7 snRNA)." [GOC

5395 Pathogen[ Q2Q067] interacts with 1 human partners:{P83369}

5396 Pathogen[ P0C214] interacts with 1 human partners:{P83369}

5397 Pathogen[ P03346] interacts with 1 human partners:{P83369}

5398 Pathogen[ Q85601] interacts with 1 human partners:{P83369}

5399 Pathogen[ P14079] interacts with 1 human partners:{P83369}

5400 Pathogen[ P03383] interacts with 1 human partners:{P83369}

5401 Pathogen[ P03410] interacts with 1 human partners:{P83369}

5402 Pathogen[ P14075] interacts with 1 human partners:{P83369}

5403 Pathogen[ P0C206] interacts with 1 human partners:{P83369}

5404 Pathogen[ P03363] interacts with 1 human partners:{P83369}

5405 [Cluster 492]GO:0032041+F molecular\_function [name] NAD-dependent histone deacetylase activity (H3-K14 specific) [def] "Catalysis of the reaction

5406 Pathogen[ Q2Q067] interacts with 10 human partners:{P56524;Q9BY41;Q9UKV0;Q13547;O15379;Q9UQL6;Q969S8;Q96DB2;Q92769;Q8WUI4}

5407 Pathogen[ P0C214] interacts with 10 human partners:{Q13547;Q969S8;Q96DB2;P56524;Q92769;Q9UKV0;O15379;Q8WUI4;Q9UQL6;Q9BY41}

5408 Pathogen[ P03346] interacts with 10 human partners:{Q969S8;Q96DB2;O15379;P56524;Q92769;Q13547;Q9BY41;Q8WUI4;Q9UKV0;Q9UQL6}

5409 Pathogen[ Q85601] interacts with 10 human partners:{Q969S8;Q9UKV0;Q96DB2;Q9BY41;Q9UQL6;Q92769;P56524;O15379;Q13547;Q8WUI4}

5410 Pathogen[ P14079] interacts with 9 human partners:{Q9UQL6;O15379;Q96DB2;Q969S8;Q8WUI4;Q9UKV0;Q92769;Q9BY41;P56524}

5411 Pathogen[ P03383] interacts with 9 human partners:{Q9UQL6;Q92769;O15379;Q13547;Q9BY41;Q9UKV0;P56524;Q8WUI4;Q969S8}

5412 Pathogen[ P03410] interacts with 10 human partners:{Q9UKV0;Q9BY41;Q8WUI4;Q9UQL6;Q969S8;Q92769;O15379;P56524;Q13547;Q96DB2}

5413 Pathogen[ P14075] interacts with 9 human partners:{Q9BY41;Q969S8;P56524;Q9UKV0;Q13547;Q92769;O15379;Q9UQL6;Q8WUI4}

5414 Pathogen[ P0C206] interacts with 10 human partners:{Q92769;Q96DB2;Q9UKV0;Q13547;O15379;Q8WUI4;Q9BY41;P56524;Q969S8;Q9UQL6}

5415 Pathogen[ P03363] interacts with 7 human partners:{Q9BY41;O15379;Q969S8;Q9UQL6;Q9UKV0;Q13547;Q8WUI4}

5416 [Cluster 493]GO:0070513+F molecular\_function [name] death domain binding [def] "Interacting selectively and non-covalently with a death domain of a protein. The death domain (DD) is a homotypic protein interaction module composed of a bundle of six alpha-helices. DD bind each other forming oligomers. Some DD-containing proteins are involved in the regulation of apoptosis and inflammation through their activation of

```
caspace and NF-kappaB." [GOC
5417 Pathogen[ Q2Q067] interacts with 2 human partners:{P78560;Q15628}
5418 Pathogen[ P0C214] interacts with 2 human partners:{Q15628;P78560}
5419 Pathogen[ P03346] interacts with 3 human partners:{P78560;P51397;Q15628}
5420 Pathogen[ Q85601] interacts with 2 human partners:{Q15628;P78560}
5421 Pathogen[ P14079] interacts with 2 human partners:{P51397;Q15628}
5422 Pathogen[ P03383] interacts with 3 human partners:{P78560;Q15628;P51397}
5423 Pathogen[ P03410] interacts with 3 human partners:{P78560;Q15628;P51397}
5424 Pathogen[ P14075] interacts with 3 human partners:{P78560;P51397;Q15628}
5425 Pathogen[ P0C206] interacts with 3 human partners:{P78560;P51397;Q15628}
5426 Pathogen[ P03363] interacts with 2 human partners:{P78560;Q15628}
5427 [Cluster 494]GO:0030280+F molecular_function [name] structural constituent of
epidermis [def] "The action of a molecule that contributes to the structural integrity
of an epidermal cutaneous structure." [GOC
5428 Pathogen[ Q2Q067] interacts with 5 human
partners:{Q9NSB2;P23490;O76013;Q9NSB4;P13645}
5429 Pathogen[ P0C214] interacts with 5 human
partners:{O76013;Q9NSB2;P23490;Q9NSB4;P13645}
5430 Pathogen[ P03346] interacts with 6 human
partners:{Q9NSB4;Q13835;Q9NSB2;P13645;P23490;O76013}
5431 Pathogen[ Q85601] interacts with 5 human
partners:{O76013;Q9NSB4;P13645;P23490;Q9NSB2}
5432 Pathogen[ P14079] interacts with 8 human
partners:{Q9NSB4;Q13835;Q8IUG1;P13645;O75690;P23490;O76013;Q9NSB2}
5433 Pathogen[ P03383] interacts with 6 human
partners:{P23490;Q9NSB4;Q9NSB2;P13645;Q8IUG1;O76013}
5434 Pathogen[ P03410] interacts with 8 human
partners:{P13645;O75690;P23490;Q13835;Q9NSB4;O76013;Q8IUG1;Q9NSB2}
5435 Pathogen[ P14075] interacts with 7 human
partners:{Q9NSB4;Q9NSB2;P23490;P13645;O76013;Q8IUG1;O75690}
5436 Pathogen[ P0C206] interacts with 8 human
partners:{Q9NSB2;P13645;O75690;O76013;P23490;Q13835;Q9NSB4;Q8IUG1}
5437 Pathogen[ P03363] interacts with 6 human
partners:{Q13835;P13645;P23490;O76013;Q9NSB2;Q9NSB4}
5438 [Cluster 495]GO:0017018+F molecular_function [name] myosin phosphatase activity [def]
"Catalysis of the reaction
5439 Pathogen[ Q2Q067] interacts with 1 human partners:{P62140}
5440 Pathogen[ P0C214] interacts with 1 human partners:{P62140}
5441 Pathogen[ P03346] interacts with 1 human partners:{P62140}
5442 Pathogen[ Q85601] interacts with 1 human partners:{P62140}
5443 Pathogen[ P14079] interacts with 1 human partners:{P62140}
5444 Pathogen[ P03383] interacts with 1 human partners:{P62140}
5445 Pathogen[ P03410] interacts with 1 human partners:{P62140}
5446 Pathogen[ P14075] interacts with 1 human partners:{P62140}
5447 Pathogen[ P0C206] interacts with 1 human partners:{P62140}
5448 Pathogen[ P03363] interacts with 1 human partners:{P62140}
5449 [Cluster 496]GO:0004526+F molecular_function [name] ribonuclease P activity [def]
"Catalysis of the endonucleolytic cleavage of RNA, removing 5' extra nucleotides from
tRNA precursor." [EC
5450 Pathogen[ Q2Q067] interacts with 10 human
partners:{P78346;O75818;Q99575;Q9BUL9;O75817;P78345;Q969H6;O95707;Q9H633;O95059}
5451 Pathogen[ P0C214] interacts with 10 human
partners:{O75818;Q9H633;Q9BUL9;Q969H6;P78345;O95059;O95707;Q99575;O75817;P78346}
5452 Pathogen[ P03346] interacts with 10 human
partners:{P78346;Q9H633;Q969H6;O95707;Q9BUL9;O75817;O75818;Q99575;P78345;O95059}
5453 Pathogen[ Q85601] interacts with 10 human
partners:{Q9BUL9;P78346;Q99575;O95059;Q969H6;O95707;O75817;O75818;P78345;Q9H633}
5454 Pathogen[ P14079] interacts with 9 human
partners:{P78346;O75817;O95707;O95059;Q99575;Q9BUL9;Q9H633;O75818;P78345}
5455 Pathogen[ P03383] interacts with 10 human
partners:{P78345;Q969H6;Q9H633;Q99575;O95059;O95707;O75817;O75818;Q9BUL9;P78346}
5456 Pathogen[ P03410] interacts with 10 human
partners:{P78346;P78345;Q99575;O95707;Q9BUL9;O75818;Q969H6;Q9H633;O75817;O95059}
5457 Pathogen[ P14075] interacts with 10 human
partners:{O75817;P78345;P78346;O95059;Q9H633;Q9BUL9;O95707;O75818;Q99575;Q969H6}
5458 Pathogen[ P0C206] interacts with 10 human
partners:{Q9BUL9;O75818;O95059;Q969H6;O95707;O75817;P78345;Q99575;P78346;Q9H633}
5459 Pathogen[ P03363] interacts with 10 human
partners:{O95059;Q99575;O75817;O75818;O95707;Q9H633;Q969H6;P78345;P78346;Q9BUL9}
5460 [Cluster 497]GO:0034618+F molecular_function [name] arginine binding [def]
"Interacting selectively and non-covalently with 2-amino-5-(carbamimidamido)pentanoic
acid." [CHEBI
5461 Pathogen[ Q2Q067] interacts with 2 human partners:{P29474;P54136}
5462 Pathogen[ P0C214] interacts with 1 human partners:{P29474}
5463 Pathogen[ P03346] interacts with 2 human partners:{P29474;P54136}
5464 Pathogen[ Q85601] interacts with 2 human partners:{P54136;P29474}
```

```

5465 Pathogen[ P14079] interacts with 1 human partners:{P54136}
5466 Pathogen[ P03383] interacts with 2 human partners:{P29474;P54136}
5467 Pathogen[ P03410] interacts with 2 human partners:{P54136;P29474}
5468 Pathogen[ P14075] interacts with 2 human partners:{P29474;P54136}
5469 Pathogen[ P0C206] interacts with 2 human partners:{P29474;P54136}
5470 Pathogen[ P03363] interacts with 2 human partners:{P29474;P54136}
5471 [Cluster 498]GO:0008384+F molecular_function [name] IkappaB kinase activity [def]
"Catalysis of the reaction
5472 Pathogen[ Q2Q067] interacts with 2 human partners:{O14920;O15111}
5473 Pathogen[ P0C214] interacts with 3 human partners:{O15111;Q14164;O14920}
5474 Pathogen[ P03346] interacts with 3 human partners:{O15111;O14920;Q14164}
5475 Pathogen[ Q85601] interacts with 3 human partners:{O15111;Q14164;O14920}
5476 Pathogen[ P14079] interacts with 1 human partners:{Q14164}
5477 Pathogen[ P03383] interacts with 2 human partners:{O14920;O15111}
5478 Pathogen[ P03410] interacts with 2 human partners:{O14920;O15111}
5479 Pathogen[ P14075] interacts with 2 human partners:{O15111;O14920}
5480 Pathogen[ P0C206] interacts with 3 human partners:{O14920;Q14164;O15111}
5481 Pathogen[ P03363] interacts with 2 human partners:{O14920;O15111}
5482 [Cluster 499]GO:0050333+F molecular_function [name] thiamin-triphosphatase activity
[def] "Catalysis of the reaction
5483 Pathogen[ Q2Q067] interacts with 1 human partners:{Q9BU02}
5484 Pathogen[ P0C214] interacts with 1 human partners:{Q9BU02}
5485 Pathogen[ P03346] interacts with 1 human partners:{Q9BU02}
5486 Pathogen[ Q85601] interacts with 1 human partners:{Q9BU02}
5487 Pathogen[ P14079] interacts with 1 human partners:{Q9BU02}
5488 Pathogen[ P03383] interacts with 1 human partners:{Q9BU02}
5489 Pathogen[ P03410] interacts with 1 human partners:{Q9BU02}
5490 Pathogen[ P14075] interacts with 1 human partners:{Q9BU02}
5491 Pathogen[ P0C206] interacts with 1 human partners:{Q9BU02}
5492 Pathogen[ P03363] interacts with 1 human partners:{Q9BU02}
5493 [Cluster 500]GO:0051879+F molecular_function [name] Hsp90 protein binding [def]
"Interacting selectively and non-covalently with Hsp90 proteins, any of a group of heat
shock proteins around 90kDa in size." [GOC
5494 Pathogen[ Q2Q067] interacts with 5 human
partners:{Q99743;P35869;Q16543;Q9UNE7;P49321}
5495 Pathogen[ P0C214] interacts with 5 human
partners:{Q16543;P35869;Q99743;P49321;Q9UNE7}
5496 Pathogen[ P03346] interacts with 7 human
partners:{P49321;O00327;Q9UNE7;Q16543;Q9UHD1;P35869;Q99743}
5497 Pathogen[ Q85601] interacts with 7 human
partners:{Q16543;Q9UHD1;O00327;Q99743;P49321;P35869;Q9UNE7}
5498 Pathogen[ P14079] interacts with 5 human
partners:{Q99743;P35869;P49321;Q9UHD1;Q16543}
5499 Pathogen[ P03383] interacts with 3 human partners:{Q16543;P49321;P35869}
5500 Pathogen[ P03410] interacts with 5 human
partners:{Q99743;P49321;Q16543;Q9UHD1;Q9UNE7}
5501 Pathogen[ P14075] interacts with 3 human partners:{P49321;P35869;Q16543}
5502 Pathogen[ P0C206] interacts with 7 human
partners:{P35869;Q16543;P49321;O00327;Q99743;Q9UNE7;Q9UHD1}
5503 Pathogen[ P03363] interacts with 7 human
partners:{P49321;Q99743;P35869;Q16543;O00327;Q9UNE7;Q9H3U1}
5504 [Cluster 501]GO:0019843+F molecular_function [name] rRNA binding [def] "Interacting
selectively and non-covalently with ribosomal RNA." [GOC
5505 Pathogen[ Q2Q067] interacts with 23 human
partners:{P62701;P82932;P62750;Q9NV31;P22090;P32969;Q6NZI2;Q8NHM5;Q92979;Q9Y2R5;P6192
7;Q9Y3A5;P62280;Q9H9Y2;P46777;P62913;P62269;P62917;Q7Z6M4;Q9UGY1;P46781;Q9BYC9;Q9NX20
}
5506 Pathogen[ P0C214] interacts with 24 human
partners:{Q9UGY1;Q9NV31;P62913;P22090;Q9NX20;Q6NZI2;P62701;P32969;Q7Z6M4;P62280;Q9297
9;Q8TD47;P62269;Q8IV48;P46781;Q9BYC9;Q9Y2R5;P46777;P82932;Q9H9Y2;P61927;P62750;Q9Y3A5
;Q8NHM5}
5507 Pathogen[ P03346] interacts with 24 human
partners:{P62917;P62913;Q92979;P62280;P61927;Q9BYC9;Q6NZI2;Q8TD47;Q9Y2R5;Q9NV31;P6226
9;P46781;Q7Z6M4;P62750;P62701;P22090;P46777;Q8NHM5;Q9UGY1;P82932;P32969;Q9H9Y2;Q9Y3A5
;Q9NX20}
5508 Pathogen[ Q85601] interacts with 23 human
partners:{P32969;Q9NV31;Q9UGY1;P62913;Q7Z6M4;Q9Y2R5;Q92979;Q9NX20;Q9H9Y2;Q9Y3A5;Q9BYC
9;P82932;P62701;P62280;P62269;Q8NHM5;Q6NZI2;P62750;P22090;P61927;P46777;P62917;P46781
}
5509 Pathogen[ P14079] interacts with 25 human
partners:{Q8IV48;Q92979;Q9NV31;P46781;Q9BYC9;Q8NHM5;Q9Y3A5;Q9UGY1;Q9Y2R5;P32969;P2209
0;P62750;P62280;Q9NX20;P46777;Q6NZI2;Q9H9Y2;Q7Z6M4;P61927;P62917;P62913;P62269;P62701
;O75616;Q8TD47}
5510 Pathogen[ P03383] interacts with 21 human
partners:{P62913;P62280;P62750;Q6NZI2;P61927;P46777;Q9NX20;Q9BYC9;P62917;P32969;Q9Y2R
5;Q9NV31;P62269;Q9UGY1;Q9Y3A5;P82932;Q7Z6M4;P46781;Q92979;P22090;P62701}

```

5511 Pathogen[ P03410] interacts with 25 human partners:{Q6NZI2;P62913;Q8IV48;Q9UGY1;Q9NX20;P46777;P46781;P62269;P62280;P22090;P62701;P62750;Q96EY7;Q92979;P61927;Q9H9Y2;Q8TD47;P32969;Q9BYC9;Q9NV31;P62917;Q9Y3A5;Q9Y2R5;Q7Z6M4;O75616}

5512 Pathogen[ P14075] interacts with 22 human partners:{P46781;P32969;Q9UGY1;P62913;P22090;Q92979;Q9Y2R5;Q9NX20;P46777;P62750;Q9BYC9;Q6NZI2;Q9NV31;P62917;P62269;P82932;Q9H9Y2;P62701;P62280;Q7Z6M4;P61927;Q9Y3A5}

5513 Pathogen[ P0C206] interacts with 24 human partners:{Q7Z6M4;P62750;Q8IV48;P46781;P62280;P62913;P61927;Q92979;Q9BYC9;P32969;P62701;Q6NZI2;P22090;P46777;Q8NHM5;Q9NV31;Q9Y3A5;Q9H9Y2;P82932;Q9Y2R5;P62269;Q9NX20;Q9UGY1;P62917}

5514 Pathogen[ P03363] interacts with 22 human partners:{P62913;Q92979;Q9Y2R5;P62750;Q9H9Y2;P32969;P61927;Q9Y3A5;Q9NV31;Q9UGY1;P22090;P46781;Q9NX20;P46777;Q6NZI2;P62280;P82932;P62917;Q9BYC9;P62701;Q8TD47;P62269}

5515 [Cluster 502]GO:0003999+F molecular\_function [name] adenine phosphoribosyltransferase activity [def] "Catalysis of the reaction

5516 Pathogen[ Q2Q067] interacts with 1 human partners:{P07741}

5517 Pathogen[ P0C214] interacts with 1 human partners:{P07741}

5518 Pathogen[ P03346] interacts with 1 human partners:{P07741}

5519 Pathogen[ Q85601] interacts with 1 human partners:{P07741}

5520 Pathogen[ P14079] interacts with 1 human partners:{P07741}

5521 Pathogen[ P03383] interacts with 1 human partners:{P07741}

5522 Pathogen[ P03410] interacts with 1 human partners:{P07741}

5523 Pathogen[ P14075] interacts with 1 human partners:{P07741}

5524 Pathogen[ P0C206] interacts with 1 human partners:{P07741}

5525 Pathogen[ P03363] interacts with 1 human partners:{P07741}

5526 [Cluster 503]GO:0035255+F molecular\_function [name] ionotropic glutamate receptor binding [def] "Interacting selectively and non-covalently with an ionotropic glutamate receptor. Ionotropic glutamate receptors bind glutamate and exert an effect through the regulation of ion channels." [GOC

5527 Pathogen[ Q2Q067] interacts with 3 human partners:{P78352;Q9UPX8;Q92796}

5528 Pathogen[ P0C214] interacts with 3 human partners:{Q9UPX8;Q92796;P78352}

5529 Pathogen[ P03346] interacts with 4 human partners:{P78352;Q92796;Q9ULV0;Q9UPX8}

5530 Pathogen[ Q85601] interacts with 3 human partners:{Q9UPX8;P78352;Q92796}

5531 Pathogen[ P14079] interacts with 2 human partners:{Q92796;Q9UPX8}

5532 Pathogen[ P03383] interacts with 2 human partners:{Q92796;P78352}

5533 Pathogen[ P03410] interacts with 4 human partners:{Q9ULV0;Q92796;Q9UPX8;P78352}

5534 Pathogen[ P14075] interacts with 2 human partners:{Q92796;P78352}

5535 Pathogen[ P0C206] interacts with 3 human partners:{P78352;Q9UPX8;Q92796}

5536 Pathogen[ P03363] interacts with 3 human partners:{Q9UPX8;P78352;Q92796}

5537 [Cluster 504]GO:0016891+F molecular\_function [name] endoribonuclease activity, producing 5'-phosphomonoesters [def] "Catalysis of the hydrolysis of ester linkages within ribonucleic acids by creating internal breaks to yield 5'-phosphomonoesters." [GOC

5538 Pathogen[ Q2Q067] interacts with 2 human partners:{Q9H777;Q9UKV8}

5539 Pathogen[ P0C214] interacts with 2 human partners:{Q9H777;Q9UKV8}

5540 Pathogen[ P03346] interacts with 2 human partners:{Q9H777;Q9UKV8}

5541 Pathogen[ Q85601] interacts with 2 human partners:{Q9H777;Q9UKV8}

5542 Pathogen[ P14079] interacts with 2 human partners:{Q9UKV8;Q9H777}

5543 Pathogen[ P03383] interacts with 2 human partners:{Q9H777;Q9UKV8}

5544 Pathogen[ P03410] interacts with 2 human partners:{Q9UKV8;Q9H777}

5545 Pathogen[ P14075] interacts with 2 human partners:{Q9H777;Q9UKV8}

5546 Pathogen[ P0C206] interacts with 2 human partners:{Q9UKV8;Q9H777}

5547 Pathogen[ P03363] interacts with 1 human partners:{Q9UKV8}

5548 [Cluster 505]GO:0008143+F molecular\_function [name] poly(A) RNA binding [def] "Interacting selectively and non-covalently with a sequence of adenylyl residues in an RNA molecule, such as the poly(A) tail, a sequence of adenylyl residues at the 3' end of eukaryotic mRNA." [GOC

5549 Pathogen[ Q2Q067] interacts with 7 human partners:{P38919;Q5VWX1;O60506;Q13310;Q92499;P11940;Q93062}

5550 Pathogen[ P0C214] interacts with 8 human partners:{Q13310;P31483;P11940;P38919;Q92499;O60506;Q5VWX1;Q93062}

5551 Pathogen[ P03346] interacts with 9 human partners:{Q93062;O60506;P38919;P11940;Q92499;P31483;Q5VWX1;O14979;Q13310}

5552 Pathogen[ Q85601] interacts with 7 human partners:{O60506;Q13310;Q5VWX1;Q92499;P38919;P11940;Q93062}

5553 Pathogen[ P14079] interacts with 7 human partners:{Q93062;Q13310;Q5VWX1;P11940;O60506;Q92499;P31483}

5554 Pathogen[ P03383] interacts with 6 human partners:{P38919;P11940;Q5VWX1;Q13310;Q92499;Q93062}

5555 Pathogen[ P03410] interacts with 8 human partners:{Q93062;P11940;Q5VWX1;Q92499;P31483;P38919;O60506;Q13310}

5556 Pathogen[ P14075] interacts with 6 human partners:{Q5VWX1;Q93062;Q92499;P11940;Q13310;P38919}

5557 Pathogen[ P0C206] interacts with 8 human partners:{P31483;O60506;Q13310;P38919;Q93062;Q92499;P11940;Q5VWX1}

5558 Pathogen[ P03363] interacts with 8 human

5559 partners:{P38919;P11940;O14979;Q5VWX1;Q13310;Q92499;O60506;P31483}  
[Cluster 506]GO:0005154+F molecular\_function [name] epidermal growth factor receptor  
binding [def] "Interacting selectively and non-covalently with the epidermal growth  
factor receptor." [GOC  
5560 Pathogen[ Q2Q067] interacts with 2 human partners:{O15162;Q99700}  
5561 Pathogen[ P0C214] interacts with 3 human partners:{P62993;Q99700;O15162}  
5562 Pathogen[ P03346] interacts with 4 human partners:{O75159;P62993;Q99700;O15162}  
5563 Pathogen[ Q85601] interacts with 3 human partners:{P62993;O15162;Q99700}  
5564 Pathogen[ P14079] interacts with 3 human partners:{O15162;Q99700;P62993}  
5565 Pathogen[ P03383] interacts with 2 human partners:{O15162;Q99700}  
5566 Pathogen[ P03410] interacts with 3 human partners:{Q99700;O15162;P62993}  
5567 Pathogen[ P14075] interacts with 2 human partners:{O15162;Q99700}  
5568 Pathogen[ P0C206] interacts with 3 human partners:{P62993;Q99700;O15162}  
5569 Pathogen[ P03363] interacts with 2 human partners:{O75159;Q99700}  
5570 [Cluster 507]GO:0009882+F molecular\_function [name] blue light photoreceptor activity  
[def] "The function of absorbing and responding to electromagnetic radiation with a  
wavelength of approximately 400-470nm. The response may involve a change in  
conformation." [GOC  
5571 Pathogen[ Q2Q067] interacts with 1 human partners:{Q16526}  
5572 Pathogen[ P0C214] interacts with 2 human partners:{Q49AN0;Q16526}  
5573 Pathogen[ P03346] interacts with 2 human partners:{Q49AN0;Q16526}  
5574 Pathogen[ Q85601] interacts with 2 human partners:{Q49AN0;Q16526}  
5575 Pathogen[ P14079] interacts with 2 human partners:{Q16526;Q49AN0}  
5576 Pathogen[ P03383] interacts with 1 human partners:{Q16526}  
5577 Pathogen[ P03410] interacts with 2 human partners:{Q16526;Q49AN0}  
5578 Pathogen[ P14075] interacts with 1 human partners:{Q16526}  
5579 Pathogen[ P0C206] interacts with 2 human partners:{Q16526;Q49AN0}  
5580 Pathogen[ P03363] interacts with 2 human partners:{Q49AN0;Q16526}  
5581 [Cluster 508]GO:0019902+F molecular\_function [name] phosphatase binding [def]  
"Interacting selectively and non-covalently with any phosphatase." [GOC  
5582 Pathogen[ Q2Q067] interacts with 19 human  
partners:{Q9H175;Q5T8A7;Q8TEL6;Q9HCH5;A8K8P3;Q9H788;Q86UL8;Q8TEP8;Q12959;P55199;Q86Y1  
3;P84022;Q92796;Q9Y2V2;Q15599;Q15796;Q9NX63;Q7Z5V6;Q7Z699}  
5583 Pathogen[ P0C214] interacts with 19 human  
partners:{Q9H788;Q9H175;Q7Z699;Q92796;Q9Y2V2;Q15599;A8K8P3;P84022;Q9HCH5;Q7Z5V6;Q8TEP  
8;Q9NX63;P55199;Q15796;Q12959;Q5T8A7;Q8TEL6;Q96LQ0;Q86Y13}  
5584 Pathogen[ P03346] interacts with 23 human  
partners:{Q7Z5V6;Q9Y2V2;Q9H788;Q15796;Q86WG5;Q9HCH5;Q8TEP8;Q92796;Q6NYC8;P84022;Q9H17  
5;Q15599;Q86UL8;P55199;Q86WC6;Q5T8A7;Q8TEL6;Q9NX63;Q7Z699;A8K8P3;Q8TEC5;Q86Y13;Q12959  
}  
5585 Pathogen[ Q85601] interacts with 18 human  
partners:{Q86UL8;Q9HCH5;Q8TEP8;Q9H175;Q9H788;Q9Y2V2;Q92796;Q5T8A7;P55199;P84022;Q1295  
9;Q9NX63;Q7Z699;A8K8P3;Q86Y13;Q15599;Q15796;Q8TEL6}  
5586 Pathogen[ P14079] interacts with 21 human  
partners:{P55199;Q8TEL6;Q8TEP8;Q9HCH5;Q5T8A7;A8K8P3;Q6ZMI0;Q9H175;Q8TAP8;Q7Z699;Q1559  
9;Q86WC6;Q4KMQ1;Q86WG5;Q86UL8;Q6PJW8;Q7Z5V6;Q92796;Q9Y2V2;Q9H788;Q96LQ0}  
5587 Pathogen[ P03383] interacts with 14 human  
partners:{P55199;Q9NX63;Q9HCH5;Q9H175;A8K8P3;Q8TEP8;P84022;Q8TEL6;Q9H788;Q5T8A7;Q1579  
6;Q92796;Q9Y2V2;Q7Z5V6}  
5588 Pathogen[ P03410] interacts with 26 human  
partners:{P84022;Q9HCH5;Q6NYC8;Q8TEP8;Q8TEL6;Q7Z699;Q96LQ0;Q12959;Q9Y2V2;Q9H175;Q86WC  
6;Q15599;Q7Z5V6;P55199;Q5T8A7;Q92796;Q6PJW8;Q8TAP8;Q9H788;Q9NX63;Q86UL8;Q6ZMI0;Q15796  
;A8K8P3;Q4KMQ1;Q86WG5}  
5589 Pathogen[ P14075] interacts with 18 human  
partners:{Q9H788;Q9H175;Q9NX63;Q7Z5V6;Q5T8A7;A8K8P3;Q9HCH5;Q9Y2V2;Q15796;Q8TEP8;Q8TEL  
6;Q6NYC8;Q96LQ0;Q92796;P55199;P84022;Q8TAP8;Q4KMQ1}  
5590 Pathogen[ P0C206] interacts with 25 human  
partners:{P84022;Q86WC6;Q9Y2V2;A8K8P3;Q15796;Q8TEP8;Q15599;Q9NX63;Q6PJW8;Q9H788;Q5T8A  
7;Q96LQ0;Q9H175;Q7Z5V6;Q8TEL6;Q4KMQ1;Q6NYC8;P55199;Q92796;Q8TAP8;Q86UL8;Q9HCH5;Q12959  
;Q7Z699;Q86Y13}  
5591 Pathogen[ P03363] interacts with 23 human  
partners:{Q12959;A8K8P3;Q9H175;P55199;Q9Y2V2;Q86Y13;Q86WC6;Q8TEP8;Q7Z699;Q86WG5;Q1579  
6;P84022;Q9H788;Q7Z5V6;Q5T8A7;Q15599;Q86UL8;Q8TEC5;Q9HCH5;Q92796;Q9NX63;Q6NYC8;Q8TEL6  
}  
5592 [Cluster 509]GO:0004525+F molecular\_function [name] ribonuclease III activity [def]  
"Catalysis of the endonucleolytic cleavage of RNA with 5'-phosphomonoesters and 3'-OH  
termini\_ makes two staggered cuts in both strands of dsRNA, leaving a 3' overhang of 2  
nt." [PMID  
5593 Pathogen[ Q2Q067] interacts with 2 human partners:{Q9NRR4;Q9H9J2}  
5594 Pathogen[ P0C214] interacts with 2 human partners:{Q9H9J2;Q9NRR4}  
5595 Pathogen[ P03346] interacts with 2 human partners:{Q9NRR4;Q9H9J2}  
5596 Pathogen[ Q85601] interacts with 2 human partners:{Q9NRR4;Q9H9J2}  
5597 Pathogen[ P14079] interacts with 2 human partners:{Q9NRR4;Q9H9J2}  
5598 Pathogen[ P03383] interacts with 2 human partners:{Q9NRR4;Q9H9J2}  
5599 Pathogen[ P03410] interacts with 2 human partners:{Q9H9J2;Q9NRR4}  
5600 Pathogen[ P14075] interacts with 2 human partners:{Q9H9J2;Q9NRR4}



5601 Pathogen[ P0C206] interacts with 2 human partners:{Q9NRR4;Q9H9J2}  
5602 Pathogen[ P03363] interacts with 2 human partners:{Q9H9J2;Q9NRR4}  
5603 [Cluster 510]GO:0000989+F molecular\_function [name] transcription factor binding  
transcription factor activity [def] "Interacting selectively and non-covalently with a  
specific transcription factor, which may be a single protein or a complex, in order to  
modulate transcription. A protein binding transcription factor may or may not also  
interact with the template nucleic acid (either DNA or RNA) as well." [GOC  
5604 Pathogen[ Q2Q067] interacts with 5 human  
partners:{P27540;O94776;P35548;O43679;Q86U70}  
5605 Pathogen[ P0C214] interacts with 5 human  
partners:{O94776;Q86U70;O43679;P27540;P35548}  
5606 Pathogen[ P03346] interacts with 6 human  
partners:{Q86U70;P35548;O94776;Q92886;P27540;O43679}  
5607 Pathogen[ Q85601] interacts with 5 human  
partners:{O94776;Q86U70;P27540;O43679;P35548}  
5608 Pathogen[ P14079] interacts with 4 human partners:{O43679;Q86U70;P27540;O94776}  
5609 Pathogen[ P03383] interacts with 5 human  
partners:{P27540;O94776;Q86U70;P35548;O43679}  
5610 Pathogen[ P03410] interacts with 5 human  
partners:{O43679;P27540;P35548;Q86U70;O94776}  
5611 Pathogen[ P14075] interacts with 5 human  
partners:{Q86U70;P35548;O94776;P27540;O43679}  
5612 Pathogen[ P0C206] interacts with 5 human  
partners:{O43679;O94776;P35548;P27540;Q86U70}  
5613 Pathogen[ P03363] interacts with 6 human  
partners:{Q92886;Q86U70;P27540;P35548;O43679;O94776}  
5614 [Cluster 511]GO:0032813+F molecular\_function [name] tumor necrosis factor receptor  
superfamily binding [def] "Interacting selectively and non-covalently with any member of  
the tumor necrosis factor receptor superfamily." [GOC  
5615 Pathogen[ Q2Q067] interacts with 1 human partners:{Q13158}  
5616 Pathogen[ P0C214] interacts with 1 human partners:{Q13158}  
5617 Pathogen[ P03346] interacts with 1 human partners:{Q13158}  
5618 Pathogen[ Q85601] interacts with 1 human partners:{Q13158}  
5619 Pathogen[ P14079] interacts with 1 human partners:{Q13158}  
5620 Pathogen[ P03383] interacts with 1 human partners:{Q13158}  
5621 Pathogen[ P03410] interacts with 1 human partners:{Q13158}  
5622 Pathogen[ P14075] interacts with 1 human partners:{Q13158}  
5623 Pathogen[ P0C206] interacts with 1 human partners:{Q13158}  
5624 Pathogen[ P03363] interacts with 1 human partners:{Q13158}  
5625 [Cluster 512]GO:0015271+F molecular\_function [name] outward rectifier potassium  
channel activity [def] "Catalysis of the transmembrane transfer of a potassium ion by  
an outwardly-rectifying voltage-gated channel. An outwardly rectifying current-voltage  
relation is one where at any given driving force the outward flow of K+ ions exceeds the  
inward flow for the opposite driving force." [GOC  
5626 Pathogen[ Q2Q067] interacts with 1 human partners:{Q13127}  
5627 Pathogen[ P0C214] interacts with 1 human partners:{Q13127}  
5628 Pathogen[ P03346] interacts with 1 human partners:{Q13127}  
5629 Pathogen[ Q85601] interacts with 1 human partners:{Q13127}  
5630 Pathogen[ P14079] interacts with 1 human partners:{Q13127}  
5631 Pathogen[ P03383] interacts with 1 human partners:{Q13127}  
5632 Pathogen[ P03410] interacts with 1 human partners:{Q13127}  
5633 Pathogen[ P14075] interacts with 1 human partners:{Q13127}  
5634 Pathogen[ P0C206] interacts with 1 human partners:{Q13127}  
5635 Pathogen[ P03363] interacts with 1 human partners:{Q13127}  
5636 [Cluster 513]GO:0001076+F molecular\_function [name] RNA polymerase II transcription  
factor binding transcription factor activity [def] "Interacting selectively and  
non-covalently with an RNA polymerase II transcription factor, which may be a single  
protein or a complex, in order to modulate transcription. A protein binding transcription  
factor may or may not also interact with the template nucleic acid (either DNA or RNA) as  
well." [GOC  
5637 Pathogen[ Q2Q067] interacts with 5 human  
partners:{P46937;P11831;Q8WVJ9;P15336;Q6ZN01}  
5638 Pathogen[ P0C214] interacts with 5 human  
partners:{P15336;P46937;P11831;Q6ZN01;Q8WVJ9}  
5639 Pathogen[ P03346] interacts with 5 human  
partners:{P46937;P15336;P11831;Q8WVJ9;Q6ZN01}  
5640 Pathogen[ Q85601] interacts with 5 human  
partners:{P11831;Q6ZN01;P46937;P15336;Q8WVJ9}  
5641 Pathogen[ P14079] interacts with 3 human partners:{Q8WVJ9;P46937;P15336}  
5642 Pathogen[ P03383] interacts with 5 human  
partners:{P11831;Q8WVJ9;P15336;Q6ZN01;P46937}  
5643 Pathogen[ P03410] interacts with 5 human  
partners:{P11831;Q6ZN01;Q8WVJ9;P46937;P15336}  
5644 Pathogen[ P14075] interacts with 5 human  
partners:{Q6ZN01;P11831;P15336;Q8WVJ9;P46937}  
5645 Pathogen[ P0C206] interacts with 5 human

5646 Pathogen[ P03363] interacts with 5 human partners:{P46937;P15336;Q8WVJ9;P11831;Q6ZN01}

5647 [Cluster 514]GO:0005545+F molecular\_function [name] 1-phosphatidylinositol binding [def] "Interacting selectively and non-covalently with phosphatidylinositol, any glycerophospholipid with its sn-glycerol 3-phosphate residue is esterified to the 1-hydroxyl group of 1D-myo-inositol." [ISBN

5648 Pathogen[ Q2Q067] interacts with 6 human partners:{Q86VW0;P11171;Q9HB19;Q8IZQ1;Q68DX3;P27986}

5649 Pathogen[ P0C214] interacts with 6 human partners:{Q68DX3;Q86VW0;Q9HB19;Q8IZQ1;P27986;P11171}

5650 Pathogen[ P03346] interacts with 11 human partners:{O95405;Q9HB19;Q68DX3;Q8IZQ1;Q9HAU0;P11171;Q7Z3T8;Q86VW0;Q13492;Q9HBF4;P27986}

5651 Pathogen[ Q85601] interacts with 8 human partners:{Q9HBF4;P11171;P27986;Q9HAU0;Q68DX3;Q8IZQ1;Q9HB19;Q86VW0}

5652 Pathogen[ P14079] interacts with 11 human partners:{Q13492;Q68DX3;P11171;O95405;Q9HB19;Q9HAU0;Q9Y6U3;Q15075;Q7Z3T8;Q86VW0;Q9HBF4}

5653 Pathogen[ P03383] interacts with 4 human partners:{P27986;Q8IZQ1;Q68DX3;Q9HB19}

5654 Pathogen[ P03410] interacts with 12 human partners:{P27986;O95405;Q9HAU0;Q9Y6U3;P11171;Q13492;Q9HBF4;Q9HB19;Q68DX3;Q7Z3T8;Q8IZQ1;Q86VW0}

5655 Pathogen[ P14075] interacts with 5 human partners:{Q68DX3;Q8IZQ1;P27986;Q9HB19;P11171}

5656 Pathogen[ P0C206] interacts with 11 human partners:{Q9HB19;Q9HAU0;Q86VW0;Q8IWB7;P27986;Q8IZQ1;Q7Z3T8;O95405;Q68DX3;Q9HBF4;P11171}

5657 Pathogen[ P03363] interacts with 8 human partners:{Q9HAU0;O95405;P11171;Q9HB19;Q8IZQ1;Q86VW0;P27986;Q68DX3}

5658 [Cluster 515]GO:0080025+F molecular\_function [name] phosphatidylinositol-3,5-bisphosphate binding [def] "Interacting selectively and non-covalently with phosphatidylinositol-3,5-bisphosphate, a derivative of phosphatidylinositol in which the inositol ring is phosphorylated at the 3' and 5' positions." [GOC

5659 Pathogen[ Q2Q067] interacts with 3 human partners:{Q86VW0;P55895;Q9Y4P8}

5660 Pathogen[ P0C214] interacts with 3 human partners:{Q86VW0;P55895;Q9Y4P8}

5661 Pathogen[ P03346] interacts with 3 human partners:{P55895;Q86VW0;Q9Y4P8}

5662 Pathogen[ Q85601] interacts with 3 human partners:{Q9Y4P8;P55895;Q86VW0}

5663 Pathogen[ P14079] interacts with 2 human partners:{Q9Y4P8;Q86VW0}

5664 Pathogen[ P03383] interacts with 2 human partners:{P55895;Q9Y4P8}

5665 Pathogen[ P03410] interacts with 4 human partners:{P55895;Q9Y4P8;Q5MNZ9;Q86VW0}

5666 Pathogen[ P14075] interacts with 2 human partners:{Q9Y4P8;P55895}

5667 Pathogen[ P0C206] interacts with 3 human partners:{Q86VW0;Q9Y4P8;P55895}

5668 Pathogen[ P03363] interacts with 3 human partners:{Q9Y4P8;P55895;Q86VW0}

5669 [Cluster 516]GO:0071164+F molecular\_function [name] RNA trimethylguanosine synthase activity [def] "Catalysis of two successive methyl transfer reactions from AdoMet to the N-2 atom of guanosine, thereby converting 7-methylguanosine in an RNA cap to 2,2,7-trimethylguanosine." [GOC

5670 Pathogen[ Q2Q067] interacts with 1 human partners:{Q96RS0}

5671 Pathogen[ P0C214] interacts with 1 human partners:{Q96RS0}

5672 Pathogen[ P03346] interacts with 1 human partners:{Q96RS0}

5673 Pathogen[ Q85601] interacts with 1 human partners:{Q96RS0}

5674 Pathogen[ P14079] interacts with 1 human partners:{Q96RS0}

5675 Pathogen[ P03383] interacts with 1 human partners:{Q96RS0}

5676 Pathogen[ P03410] interacts with 1 human partners:{Q96RS0}

5677 Pathogen[ P14075] interacts with 1 human partners:{Q96RS0}

5678 Pathogen[ P0C206] interacts with 1 human partners:{Q96RS0}

5679 Pathogen[ P03363] interacts with 1 human partners:{Q96RS0}

5680 [Cluster 517]GO:0001228+F

5681 Pathogen[ Q2Q067] interacts with 2 human partners:{P11831;P25791}

5682 Pathogen[ P0C214] interacts with 2 human partners:{P11831;P25791}

5683 Pathogen[ P03346] interacts with 3 human partners:{P11831;P15173;P25791}

5684 Pathogen[ Q85601] interacts with 2 human partners:{P11831;P25791}

5685 Pathogen[ P14079] interacts with 1 human partners:{P25791}

5686 Pathogen[ P03383] interacts with 2 human partners:{P11831;P25791}

5687 Pathogen[ P03410] interacts with 2 human partners:{P11831;P25791}

5688 Pathogen[ P14075] interacts with 2 human partners:{P11831;P25791}

5689 Pathogen[ P0C206] interacts with 2 human partners:{P25791;P11831}

5690 Pathogen[ P03363] interacts with 2 human partners:{P25791;P11831}

5691 [Cluster 518]GO:0042623+F molecular\_function [name] ATPase activity, coupled [def] "Catalysis of the reaction

5692 Pathogen[ Q2Q067] interacts with 4 human partners:{O75351;Q14204;P11142;Q9UN37}

5693 Pathogen[ P0C214] interacts with 4 human partners:{O75351;Q14204;Q9UN37;P11142}

5694 Pathogen[ P03346] interacts with 5 human partners:{P11142;Q14204;O75351;O43933;Q9UN37}

5695 Pathogen[ Q85601] interacts with 6 human  
partners:{Q14204;O96015;O75351;P11142;O43933;Q9UN37}

5696 Pathogen[ P14079] interacts with 6 human  
partners:{P11142;Q14204;P50990;Q9UN37;O75351;O96015}

5697 Pathogen[ P03383] interacts with 2 human partners:{P11142;Q9UN37}

5698 Pathogen[ P03410] interacts with 6 human  
partners:{Q14204;O75351;P11142;P50990;Q9UN37;O96015}

5699 Pathogen[ P14075] interacts with 2 human partners:{P11142;Q9UN37}

5700 Pathogen[ P0C206] interacts with 6 human  
partners:{O43933;Q9UN37;Q14204;O75351;P11142;O96015}

5701 Pathogen[ P03363] interacts with 5 human  
partners:{O43933;Q14204;O75351;Q9UN37;P11142}

5702 [Cluster 519]GO:0070888+F molecular\_function [name] E-box binding [def]  
"Interacting selectively and non-covalently with an E-box, a DNA motif with the consensus  
sequence CANNTG that is found in the promoters of a wide array of genes expressed in  
neurons, muscle and other tissues." [GOC

5703 Pathogen[ Q2Q067] interacts with 12 human  
partners:{Q13562;P15884;Q99081;P01106;O14503;Q01664;P13349;P37275;P15172;P25791;P1592  
3;P23409}

5704 Pathogen[ P0C214] interacts with 10 human  
partners:{Q99081;P15884;P13349;P15172;P37275;O14503;P15923;P25791;Q01664;P01106}

5705 Pathogen[ P03346] interacts with 22 human  
partners:{Q99081;P13349;Q12772;P15923;P15172;P23409;Q92886;P15173;O15534;O14503;O4368  
0;P01106;P25791;P17542;Q9C0J9;P37275;Q99929;O15516;Q13562;Q01664;P15884;Q9H2A3}

5706 Pathogen[ Q85601] interacts with 15 human  
partners:{P01106;O15534;P15172;P13349;O15516;Q12772;O14503;Q13562;P23409;P25791;P1592  
3;P37275;Q99081;Q01664;P15884}

5707 Pathogen[ P14079] interacts with 12 human  
partners:{P13349;P23409;P15923;Q12772;P25791;Q01664;P01106;P15884;Q99081;O14503;P3727  
5;O15534}

5708 Pathogen[ P03383] interacts with 8 human  
partners:{P15172;P01106;P37275;P15923;O14503;Q01664;P25791;Q99081}

5709 Pathogen[ P03410] interacts with 11 human  
partners:{P23409;P37275;P01106;P25791;P15884;P15923;Q99081;Q12772;O15534;P13349;Q0166  
4}

5710 Pathogen[ P14075] interacts with 9 human  
partners:{P15172;P15923;P01106;O14503;P25791;Q01664;P15884;P37275;Q99081}

5711 Pathogen[ P0C206] interacts with 16 human  
partners:{O15534;Q9C0J9;P23409;O15516;Q99081;P13349;P15923;P15884;P25791;Q13562;Q0166  
4;P37275;P15172;P01106;Q12772;Q9H2A3}

5712 Pathogen[ P03363] interacts with 16 human  
partners:{Q92886;Q99929;P37275;Q9C0J9;P01106;P13349;P25791;P15923;P23409;P15884;Q9908  
1;P15172;O15534;Q01664;O14503;Q9H2A3}

5713 [Cluster 520]GO:0000182+F molecular\_function [name] rDNA binding [def] "Interacting  
selectively and non-covalently with DNA sequences encoding ribosomal RNA." [GOC

5714 Pathogen[ Q2Q067] interacts with 1 human partners:{Q9H2G4}

5715 Pathogen[ P0C214] interacts with 1 human partners:{Q9H2G4}

5716 Pathogen[ P03346] interacts with 1 human partners:{Q9H2G4}

5717 Pathogen[ Q85601] interacts with 1 human partners:{Q9H2G4}

5718 Pathogen[ P14079] interacts with 1 human partners:{Q9H2G4}

5719 Pathogen[ P03383] interacts with 1 human partners:{Q9H2G4}

5720 Pathogen[ P03410] interacts with 1 human partners:{Q9H2G4}

5721 Pathogen[ P14075] interacts with 1 human partners:{Q9H2G4}

5722 Pathogen[ P0C206] interacts with 1 human partners:{Q9H2G4}

5723 Pathogen[ P03363] interacts with 1 human partners:{Q9H2G4}

5724 [Cluster 521]GO:0042043+F molecular\_function [name] neurexin family protein binding  
[def] "Interacting selectively and non-covalently with neurexins, synaptic cell surface  
proteins related to latrotoxin receptor, laminin and agrin. Neurexins act as cell  
recognition molecules at nerve terminals." [GOC

5725 Pathogen[ Q2Q067] interacts with 1 human partners:{Q9HCH5}

5726 Pathogen[ P0C214] interacts with 1 human partners:{Q9HCH5}

5727 Pathogen[ P03346] interacts with 2 human partners:{Q9HCH5;Q8IYJ3}

5728 Pathogen[ Q85601] interacts with 1 human partners:{Q9HCH5}

5729 Pathogen[ P14079] interacts with 2 human partners:{Q8IYJ3;Q9HCH5}

5730 Pathogen[ P03383] interacts with 1 human partners:{Q9HCH5}

5731 Pathogen[ P03410] interacts with 2 human partners:{Q9HCH5;Q8IYJ3}

5732 Pathogen[ P14075] interacts with 1 human partners:{Q9HCH5}

5733 Pathogen[ P0C206] interacts with 2 human partners:{Q8IYJ3;Q9HCH5}

5734 Pathogen[ P03363] interacts with 1 human partners:{Q9HCH5}

5735 [Cluster 522]GO:0017151+F molecular\_function [name] DEAD/H-box RNA helicase binding  
[def] "Interacting selectively and non-covalently with the enzyme DEAD/H-box RNA  
helicase." [GOC

5736 Pathogen[ Q2Q067] interacts with 2 human partners:{Q9ULX6;Q8TDD2}

5737 Pathogen[ P0C214] interacts with 2 human partners:{Q9ULX6;Q8TDD2}

5738 Pathogen[ P03346] interacts with 3 human partners:{Q9ULX6;Q8TDD2;Q9NUX5}

5739 Pathogen[ Q85601] interacts with 2 human partners:{Q8TDD2;Q9ULX6}

5740 Pathogen[ P14079] interacts with 3 human partners:{Q9NUX5;Q9ULX6;Q8TDD2}

5741 Pathogen[ P03383] interacts with 1 human partners:{Q9ULX6}

5742 Pathogen[ P03410] interacts with 3 human partners:{Q9NUX5;Q8TDD2;Q9ULX6}

5743 Pathogen[ P14075] interacts with 1 human partners:{Q9ULX6}

5744 Pathogen[ P0C206] interacts with 3 human partners:{Q9ULX6;Q9NUX5;Q8TDD2}

5745 Pathogen[ P03363] interacts with 3 human partners:{Q8TDD2;Q9NUX5;Q9ULX6}

5746 [Cluster 523]GO:0071796+F molecular\_function [name] K6-linked polyubiquitin binding [def] "Interacting selectively and non-covalently and non-covalently with a polymer of ubiquitin formed by linkages between lysine residues at position 6 of the ubiquitin monomers." [GOC

5747 Pathogen[ Q2Q067] interacts with 1 human partners:{Q04323}

5748 Pathogen[ P0C214] interacts with 1 human partners:{Q04323}

5749 Pathogen[ P03346] interacts with 1 human partners:{Q04323}

5750 Pathogen[ Q85601] interacts with 1 human partners:{Q04323}

5751 Pathogen[ P14079] interacts with 1 human partners:{Q04323}

5752 Pathogen[ P03383] interacts with 1 human partners:{Q04323}

5753 Pathogen[ P03410] interacts with 1 human partners:{Q04323}

5754 Pathogen[ P14075] interacts with 1 human partners:{Q04323}

5755 Pathogen[ P0C206] interacts with 1 human partners:{Q04323}

5756 Pathogen[ P03363] interacts with 1 human partners:{Q04323}

5757 [Cluster 524]GO:0030274+F molecular\_function [name] LIM domain binding [def] "Interacting selectively and non-covalently with a LIM domain (for Lin-11 Isl-1 Mec-3) of a protein, a domain with seven conserved cysteine residues and a histidine, that binds two zinc ions and acts as an interface for protein-protein interactions." [GOC

5758 Pathogen[ Q2Q067] interacts with 3 human partners:{Q9H8E8;O43679;Q86U70}

5759 Pathogen[ P0C214] interacts with 3 human partners:{Q86U70;O43679;Q9H8E8}

5760 Pathogen[ P03346] interacts with 3 human partners:{Q86U70;Q9H8E8;O43679}

5761 Pathogen[ Q85601] interacts with 3 human partners:{Q86U70;Q9H8E8;O43679}

5762 Pathogen[ P14079] interacts with 3 human partners:{O43679;Q9H8E8;Q86U70}

5763 Pathogen[ P03383] interacts with 3 human partners:{Q86U70;Q9H8E8;O43679}

5764 Pathogen[ P03410] interacts with 3 human partners:{O43679;Q86U70;Q9H8E8}

5765 Pathogen[ P14075] interacts with 3 human partners:{Q86U70;Q9H8E8;O43679}

5766 Pathogen[ P0C206] interacts with 2 human partners:{O43679;Q86U70}

5767 Pathogen[ P03363] interacts with 3 human partners:{Q86U70;Q9H8E8;O43679}

5768 [Cluster 525]GO:0032399+F molecular\_function [name] HECT domain binding [def] "Interacting selectively and non-covalently with a HECT, 'Homologous to the E6-AP Carboxyl Terminus', domain of a protein." [GOC

5769 Pathogen[ Q2Q067] interacts with 1 human partners:{O14599}

5770 Pathogen[ P0C214] interacts with 1 human partners:{O14599}

5771 Pathogen[ P03346] interacts with 1 human partners:{O14599}

5772 Pathogen[ Q85601] interacts with 1 human partners:{O14599}

5773 Pathogen[ P14079] interacts with 1 human partners:{O14599}

5774 Pathogen[ P03383] interacts with 1 human partners:{O14599}

5775 Pathogen[ P03410] interacts with 1 human partners:{O14599}

5776 Pathogen[ P14075] interacts with 1 human partners:{O14599}

5777 Pathogen[ P0C206] interacts with 1 human partners:{O14599}

5778 Pathogen[ P03363] interacts with 1 human partners:{O14599}

5779 [Cluster 526]GO:0032564+F molecular\_function [name] dATP binding [def] "Interacting selectively and non-covalently with dATP, deoxyadenosine triphosphate." [GOC

5780 Pathogen[ Q2Q067] interacts with 2 human partners:{P50502;P08238}

5781 Pathogen[ P0C214] interacts with 1 human partners:{P50502}

5782 Pathogen[ P03346] interacts with 2 human partners:{P50502;P08238}

5783 Pathogen[ Q85601] interacts with 3 human partners:{P08238;P50502;P19447}

5784 Pathogen[ P14079] interacts with 3 human partners:{P08238;P50502;P19447}

5785 Pathogen[ P03383] interacts with 2 human partners:{P50502;P08238}

5786 Pathogen[ P03410] interacts with 3 human partners:{P50502;P08238;P19447}

5787 Pathogen[ P14075] interacts with 2 human partners:{P08238;P50502}

5788 Pathogen[ P0C206] interacts with 3 human partners:{P19447;P50502;P08238}

5789 Pathogen[ P03363] interacts with 2 human partners:{P50502;P08238}

5790 [Cluster 527]GO:0035254+F molecular\_function [name] glutamate receptor binding [def] "Interacting selectively and non-covalently with a glutamate receptor." [GOC

5791 Pathogen[ Q2Q067] interacts with 1 human partners:{Q9BSU1}

5792 Pathogen[ P0C214] interacts with 1 human partners:{Q9BSU1}

5793 Pathogen[ P03346] interacts with 1 human partners:{Q9BSU1}

5794 Pathogen[ Q85601] interacts with 1 human partners:{Q9BSU1}

5795 Pathogen[ P14079] interacts with 1 human partners:{Q9BSU1}

5796 Pathogen[ P03383] interacts with 1 human partners:{Q9BSU1}

5797 Pathogen[ P03410] interacts with 1 human partners:{Q9BSU1}

5798 Pathogen[ P14075] interacts with 1 human partners:{Q9BSU1}

5799 Pathogen[ P0C206] interacts with 1 human partners:{Q9BSU1}

5800 Pathogen[ P03363] interacts with 1 human partners:{Q9BSU1}

5801 [Cluster 528]GO:0008234+F molecular\_function [name] cysteine-type peptidase activity [def] "Catalysis of the hydrolysis of peptide bonds in a polypeptide chain by a mechanism in which the sulfhydryl group of a cysteine residue at the active center acts as a nucleophile." [GOC

5802 Pathogen[ Q2Q067] interacts with 16 human

5803 partners:{Q9Y5K5;P54252;Q93009;O00303;Q9Y4P1;O15519;Q14674;Q14790;Q9GZR1;P55212;Q86T82;P42575;Q93008;Q9HC62;Q13867;Q96HI0}  
Pathogen[ P0C214] interacts with 19 human

5804 partners:{Q96HI0;P55212;Q13867;Q92560;Q9Y4P1;Q93008;Q9Y5K5;O15519;O00303;P42574;Q93009;Q9GZR1;Q9HC62;P55210;Q9H3M9;P42575;P54252;Q14790;Q14674}  
Pathogen[ P03346] interacts with 31 human

5805 partners:{Q9BXU7;Q93009;Q9GZR1;Q92560;Q9Y4P1;Q9H3M9;Q93008;P42575;P42574;P55212;Q86T82;O15519;O00303;Q9UHP3;Q14694;P51784;Q86UV5;O75604;Q13867;P55211;Q14790;Q9HC62;P55210;Q96HI0;Q96FW1;Q6GQQ9;O94782;Q14674;Q9Y5K5;Q9H0E7;P54252}  
Pathogen[ Q85601] interacts with 22 human

5806 partners:{Q9Y5T5;Q9H0E7;Q93009;Q14790;Q92560;Q9Y4P1;Q9HC62;Q9H3M9;O00303;Q14674;Q13867;Q93008;P54252;Q9NQC7;P42575;Q9Y5K5;Q86T82;Q96HI0;P55212;Q9GZR1;O15519;P55210}  
Pathogen[ P14079] interacts with 23 human

5807 partners:{Q9NUQ7;O00303;Q9H3M9;O15519;Q96HI0;P54252;Q86TL0;Q9NXJ5;Q14674;Q9Y4P1;P55212;Q9Y5K5;Q9HC62;Q14790;P55210;Q92560;Q13867;Q5W0Q7;A6NFU8;P42575;Q9GZR1;Q9NQC7;Q96FW1}  
Pathogen[ P03383] interacts with 10 human

5808 partners:{P55212;Q9Y4P1;P54252;Q14674;Q96HI0;Q13867;Q9Y5K5;Q9HC62;Q9H3M9;Q9GZR1}  
Pathogen[ P03410] interacts with 18 human

5809 partners:{Q96FW1;Q9H3M9;Q9Y4P1;P42575;O15519;Q13867;Q96HI0;P54252;Q9GZR1;Q14674;Q9NXJ5;Q86TL0;Q9HC62;A6NFU8;O00303;Q9Y5K5;P55212;P55210}  
Pathogen[ P14075] interacts with 11 human

5810 partners:{P55212;Q9Y4P1;Q96FW1;P54252;Q96HI0;Q9HC62;Q13867;Q14674;Q9H3M9;Q9GZR1;Q9Y5K5}  
Pathogen[ P0C206] interacts with 29 human

5811 partners:{Q9NQC7;Q9NXJ5;Q9Y5T5;Q93008;Q96HI0;Q9Y4P1;O75604;Q9HC62;P55212;Q93009;P54252;Q9H0E7;O15519;Q9Y5K5;Q13867;Q9GZR1;Q9H3M9;Q96FW1;Q14790;Q86T82;Q6GQQ9;P42574;Q9UHP3;Q14674;Q86TL0;P42575;P55210;O00303;Q92560}  
Pathogen[ P03363] interacts with 21 human

5812 partners:{Q9Y5K5;O15519;P51784;Q6GQQ9;Q9UHP3;O75604;P54252;Q13867;Q92560;P55212;Q9HC62;Q86T82;Q14674;Q9BXU7;Q96HI0;P55210;Q9Y4P1;Q9GZR1;Q93008;Q96FW1;O00303}  
[Cluster 529]GO:0035197+F molecular\_function [name] siRNA binding [def]  
"Interacting selectively and non-covalently with a small interfering RNA, a 21-23 nucleotide RNA that is processed from double stranded RNA (dsRNA) by an RNase enzyme."  
[PMID

5813 Pathogen[ Q2Q067] interacts with 4 human partners:{Q9UBB5;O60535;Q15633;Q9UKV8}  
5814 Pathogen[ P0C214] interacts with 4 human partners:{O60535;Q15633;Q9UKV8;Q9UBB5}  
5815 Pathogen[ P03346] interacts with 4 human partners:{Q15633;Q9UKV8;O60535;Q9UBB5}  
5816 Pathogen[ Q85601] interacts with 4 human partners:{O60535;Q9UKV8;Q15633;Q9UBB5}  
5817 Pathogen[ P14079] interacts with 2 human partners:{Q9UKV8;Q9UBB5}  
5818 Pathogen[ P03383] interacts with 4 human partners:{Q9UBB5;O60535;Q9UKV8;Q15633}  
5819 Pathogen[ P03410] interacts with 4 human partners:{Q9UKV8;Q15633;O60535;Q9UBB5}  
5820 Pathogen[ P14075] interacts with 4 human partners:{Q9UBB5;Q9UKV8;Q15633;O60535}  
5821 Pathogen[ P0C206] interacts with 4 human partners:{Q9UBB5;Q9UKV8;O60535;Q15633}  
5822 Pathogen[ P03363] interacts with 4 human partners:{O60535;Q9UKV8;Q15633;Q9UBB5}  
5823 [Cluster 530]GO:0016279+F molecular\_function [name] protein-lysine N-methyltransferase activity [def]  
"Catalysis of the transfer of a methyl group from S-adenosyl-L-methionine to the epsilon-amino group of a lysine residue in a protein substrate." [PMID

5824 Pathogen[ Q2Q067] interacts with 3 human partners:{Q8TBK2;Q9NRG4;Q8WTS6}  
5825 Pathogen[ P0C214] interacts with 4 human partners:{Q8WTS6;Q9NQR1;Q9NRG4;Q8TBK2}  
5826 Pathogen[ P03346] interacts with 4 human partners:{Q9NQR1;Q8TBK2;Q9NRG4;Q8WTS6}  
5827 Pathogen[ Q85601] interacts with 4 human partners:{Q8TBK2;Q9NQR1;Q8WTS6;Q9NRG4}  
5828 Pathogen[ P14079] interacts with 4 human partners:{Q9NRG4;Q9NQR1;Q8TBK2;Q8WTS6}  
5829 Pathogen[ P03383] interacts with 4 human partners:{Q9NRG4;Q8WTS6;Q8TBK2;Q9NQR1}  
5830 Pathogen[ P03410] interacts with 4 human partners:{Q8WTS6;Q8TBK2;Q9NQR1;Q9NRG4}  
5831 Pathogen[ P14075] interacts with 4 human partners:{Q9NQR1;Q8TBK2;Q9NRG4;Q8WTS6}  
5832 Pathogen[ P0C206] interacts with 4 human partners:{Q9NRG4;Q9NQR1;Q8WTS6;Q8TBK2}  
5833 Pathogen[ P03363] interacts with 4 human partners:{Q8TBK2;Q9NRG4;Q9NQR1;Q8WTS6}  
5834 [Cluster 531]GO:0005215+F molecular\_function [name] transporter activity [def]  
"Enables the directed movement of substances (such as macromolecules, small molecules, ions) into, out of or within a cell, or between cells." [GOC

5835 Pathogen[ Q2Q067] interacts with 26 human  
partners:{P52948;Q10567;O43747;P49790;Q92572;Q9Y2B5;O75694;P61970;Q99567;Q08378;O00189;P05413;O95198;P11166;Q96CW1;O14980;Q13428;P62072;O95373;Q9Y5J7;O95487;Q5T2W1;P14672;P35658;Q13367;O75901}

5836 Pathogen[ P0C214] interacts with 29 human  
partners:{Q9Y2B5;Q96CW1;O95198;O00189;Q13367;Q99567;O75694;Q08378;P05413;P62072;P11166;Q13428;Q5T2W1;Q10567;P11168;Q92572;P49790;O43681;O14980;O95487;O75901;P35658;O43747;Q9Y5J7;P53680;P61970;P14672;O95373;P52948}

5837 Pathogen[ P03346] interacts with 38 human  
partners:{P21283;P29373;Q5T2W1;Q9Y6B7;Q99567;P05413;O75901;P07148;O43747;O75694;Q92572;P53680;Q9Y5J7;Q08378;O00189;P35658;Q01469;Q10567;O14980;Q9Y587;O95373;Q96CW1;P51161;O95198;P11166;Q13428;Q99829;P62072;O75131;Q13367;P49790;O95487;O14617;P61970;P14672;Q9Y2J0;Q9Y2B5;P52948}

5838 Pathogen[ Q85601] interacts with 31 human

partners:{Q13367;P11168;Q5T2W1;P05413;Q96CW1;O95487;P51161;P62072;Q9Y5J7;O43747;Q08378;P61970;Q10567;O75694;O43681;Q9Y2B5;P11166;Q13428;O95373;P52948;P53680;O14980;P35658;O75901;Q9Y6B7;Q99567;Q92572;P14672;P49790;O00189;O95198}

5839 Pathogen[ P14079] interacts with 39 human  
partners:{O95373;Q96CW1;P61970;O95487;Q8NBQ7;P62072;P35658;Q99829;P14672;Q10567;Q9Y6B7;Q13428;O00189;Q08378;Q9Y5J7;P11166;P05413;Q96NT5;Q92572;Q95198;Q86UW1;O43681;Q99567;Q9Y2B5;P05814;O14653;P51811;P49790;Q5T2W1;Q13367;O43747;O14617;Q01469;O95235;O75694;P53680;O75901;Q9Y587;P52948}

5840 Pathogen[ P03383] interacts with 25 human  
partners:{Q96CW1;Q9Y5J7;Q92572;P62072;O95487;Q5T2W1;P52948;Q10567;Q9Y2B5;O00189;P11168;Q99567;O75901;Q13428;O14980;O43747;P35658;Q13367;P11169;O95373;P61970;P14672;P49790;O75694;P22732}

5841 Pathogen[ P03410] interacts with 43 human  
partners:{Q99567;Q96CW1;P22732;P51161;P62072;P47710;P53680;Q5T2W1;Q9Y2J0;P11166;Q86UW1;P05413;O43747;Q9Y5J7;P05141;P52948;Q10567;P11168;Q92572;Q08378;O75694;Q9Y2B5;Q99829;O14617;Q9Y587;Q9Y6B7;P49790;P35658;O95198;Q15049;O75901;Q13428;O14653;Q01469;Q13367;P51811;O43681;P18859;O14980;O95373;O95487;P05814;P61970}

5842 Pathogen[ P14075] interacts with 25 human  
partners:{P11169;P62072;Q96CW1;P61970;P22732;P35658;O75901;O14980;O00189;O95487;O95373;O43747;Q92572;Q5T2W1;Q13428;Q99567;Q9Y5J7;P11168;P49790;P14672;O75694;Q10567;Q9Y2B5;Q13367;P52948}

5843 Pathogen[ P0C206] interacts with 36 human  
partners:{P53680;Q9Y6B7;P49790;Q92572;O43747;Q10567;O14653;P51161;Q9Y2J0;O43681;Q9Y2B5;P29373;Q99829;P11166;Q9Y5J7;Q5T2W1;Q9Y587;P05413;P11168;Q13428;O95373;O75694;O95487;Q96CW1;Q08378;Q99567;P62072;P14672;O14617;O95198;Q01469;O00189;P61970;O75901;P35658;Q13367}

5844 Pathogen[ P03363] interacts with 30 human  
partners:{Q9Y2B5;Q99829;Q13367;Q13428;O43747;P61970;O14980;Q01469;Q9Y6B7;P51161;Q92572;Q99567;P29373;O75901;Q9Y5J7;P05413;P35658;Q08378;O95198;O75694;P49790;O00189;P14672;O95487;O95373;P52948;Q5T2W1;P11166;Q10567;Q96CW1}

5845 [Cluster 532]GO:0030366+F molecular\_function [name] Mo-molybdopterin synthase activity [def] "Catalysis of the conversion of precursor Z to molybdopterin, the final step in molybdopterin biosynthesis." [PMID  
5846 Pathogen[ Q2Q067] interacts with 1 human partners:{O96007}  
5847 Pathogen[ P0C214] interacts with 2 human partners:{O96033;O96007}  
5848 Pathogen[ P03346] interacts with 1 human partners:{O96007}  
5849 Pathogen[ Q85601] interacts with 1 human partners:{O96007}  
5850 Pathogen[ P14079] interacts with 2 human partners:{O96007;O96033}  
5851 Pathogen[ P03383] interacts with 1 human partners:{O96007}  
5852 Pathogen[ P03410] interacts with 2 human partners:{O96007;O96033}  
5853 Pathogen[ P14075] interacts with 1 human partners:{O96007}  
5854 Pathogen[ P0C206] interacts with 1 human partners:{O96007}  
5855 Pathogen[ P03363] interacts with 1 human partners:{O96007}

5856 [Cluster 533]GO:0070611+F molecular\_function [name] histone methyltransferase activity (H3-R2 specific) [def] "Catalysis of the reaction  
5857 Pathogen[ Q2Q067] interacts with 1 human partners:{Q96LA8}  
5858 Pathogen[ P0C214] interacts with 1 human partners:{Q96LA8}  
5859 Pathogen[ P03346] interacts with 1 human partners:{Q96LA8}  
5860 Pathogen[ Q85601] interacts with 1 human partners:{Q96LA8}  
5861 Pathogen[ P14079] interacts with 1 human partners:{Q96LA8}  
5862 Pathogen[ P03383] interacts with 1 human partners:{Q96LA8}  
5863 Pathogen[ P03410] interacts with 1 human partners:{Q96LA8}  
5864 Pathogen[ P14075] interacts with 1 human partners:{Q96LA8}  
5865 Pathogen[ P0C206] interacts with 1 human partners:{Q96LA8}  
5866 Pathogen[ P03363] interacts with 1 human partners:{Q96LA8}

5867 [Cluster 534]GO:0004427+F molecular\_function [name] inorganic diphosphatase activity [def] "Catalysis of the reaction  
5868 Pathogen[ Q2Q067] interacts with 4 human partners:{Q9H2U2;Q9H008;Q15181;Q86TP1}  
5869 Pathogen[ P0C214] interacts with 3 human partners:{Q86TP1;Q9H008;Q15181}  
5870 Pathogen[ P03346] interacts with 4 human partners:{Q9H2U2;Q15181;Q9H008;Q86TP1}  
5871 Pathogen[ Q85601] interacts with 4 human partners:{Q9H008;Q86TP1;Q9H2U2;Q15181}  
5872 Pathogen[ P14079] interacts with 4 human partners:{Q86TP1;Q9H008;Q9H2U2;Q15181}  
5873 Pathogen[ P03383] interacts with 4 human partners:{Q9H2U2;Q15181;Q86TP1;Q9H008}  
5874 Pathogen[ P03410] interacts with 4 human partners:{Q86TP1;Q9H2U2;Q9H008;Q15181}  
5875 Pathogen[ P14075] interacts with 4 human partners:{Q9H008;Q9H2U2;Q15181;Q86TP1}  
5876 Pathogen[ P0C206] interacts with 4 human partners:{Q86TP1;Q9H2U2;Q9H008;Q15181}  
5877 Pathogen[ P03363] interacts with 4 human partners:{Q9H2U2;Q9H008;Q15181;Q86TP1}

5878 [Cluster 535]GO:0002020+F molecular\_function [name] protease binding [def] "Interacting selectively and non-covalently with any protease or peptidase." [GOC  
5879 Pathogen[ Q2Q067] interacts with 15 human  
partners:{O15519;Q7Z6K1;Q9UDY8;P01009;O95999;Q13158;Q14790;Q6P4R8;P08697;P78560;P50453;Q16186;P54098;P0CG48;P35237}

5880 Pathogen[ P0C214] interacts with 16 human  
partners:{P08697;P35237;P54098;Q16186;Q13158;Q9UDY8;P05121;O15519;P0CG48;O95999;Q6P4R8;P01008;P50453;P78560;Q7Z6K1;Q14790}

5881 Pathogen[ P03346] interacts with 16 human

5882 partners:{P54098;Q13158;Q9UDY8;P35237;P0CG48;Q7Z6K1;O15519;O95999;P78560;P04080;P51587;P50453;Q14790;P01009;Q6P4R8;Q16186}  
Pathogen[ Q85601] interacts with 18 human  
5883 partners:{Q13158;Q9UDY8;Q14790;P0CG48;P35237;P08697;P01009;P54098;Q6P4R8;P05121;P50453;P01008;Q7Z6K1;O95999;O15519;P51587;P78560;Q16186}  
Pathogen[ P14079] interacts with 14 human  
5884 partners:{P35237;P0CG48;O95999;O15519;Q7Z6K1;P04080;Q16186;P51587;P02686;Q14790;P50453;Q6P4R8;Q13158;P54098}  
Pathogen[ P03383] interacts with 13 human  
5885 partners:{Q7Z6K1;Q6P4R8;P08697;Q13158;P78560;P01009;P01008;P54098;O95999;P50453;P35237;P0CG48;Q16186}  
Pathogen[ P03410] interacts with 16 human  
5886 partners:{P05121;P0CG48;P78560;P02686;O15519;Q13158;O95999;P08697;P51587;Q6P4R8;P50453;Q16186;P01009;Q7Z6K1;P35237;P54098}  
Pathogen[ P14075] interacts with 12 human  
5887 partners:{Q6P4R8;P78560;P54098;Q16186;P01009;P0CG48;Q7Z6K1;Q13158;P08697;O95999;P50453;P35237}  
Pathogen[ P0C206] interacts with 18 human  
5888 partners:{P0CG48;P01008;Q16186;Q9UDY8;P51587;P78560;O95999;P54098;P35237;Q13158;P01009;P50453;O15519;Q14790;P05121;Q7Z6K1;Q6P4R8;P08697}  
Pathogen[ P03363] interacts with 9 human  
5889 partners:{Q16186;P35237;O15519;Q7Z6K1;P50453;Q13158;P54098;P78560;Q6P4R8}  
[Cluster 536]GO:0003968+F molecular\_function [name] RNA-directed RNA polymerase activity [def] "Catalysis of the reaction  
5890 Pathogen[ Q2Q067] interacts with 1 human partners:{P24928}  
5891 Pathogen[ P0C214] interacts with 1 human partners:{P24928}  
5892 Pathogen[ P03346] interacts with 1 human partners:{P24928}  
5893 Pathogen[ Q85601] interacts with 1 human partners:{P24928}  
5894 Pathogen[ P14079] interacts with 1 human partners:{P24928}  
5895 Pathogen[ P03383] interacts with 1 human partners:{P24928}  
5896 Pathogen[ P03410] interacts with 1 human partners:{P24928}  
5897 Pathogen[ P14075] interacts with 1 human partners:{P24928}  
5898 Pathogen[ P0C206] interacts with 1 human partners:{P24928}  
5899 Pathogen[ P03363] interacts with 1 human partners:{P24928}  
5900 [Cluster 537]GO:0016627+F molecular\_function [name] oxidoreductase activity, acting on the CH-CH group of donors [def] "Catalysis of an oxidation-reduction (redox) reaction in which a CH-CH group acts as a hydrogen or electron donor and reduces a hydrogen or electron acceptor." [GOC  
5901 Pathogen[ Q2Q067] interacts with 1 human partners:{P31040}  
5902 Pathogen[ P0C214] interacts with 1 human partners:{Q99643}  
5903 Pathogen[ P03346] interacts with 1 human partners:{P31040}  
5904 Pathogen[ Q85601] interacts with 1 human partners:{P31040}  
5905 Pathogen[ P14079] interacts with 1 human partners:{P31040}  
5906 Pathogen[ P03383] interacts with 1 human partners:{P31040}  
5907 Pathogen[ P03410] interacts with 2 human partners:{P31040;Q99643}  
5908 Pathogen[ P14075] interacts with 1 human partners:{P31040}  
5909 Pathogen[ P0C206] interacts with 1 human partners:{P31040}  
5910 Pathogen[ P03363] interacts with 1 human partners:{P31040}  
5911 [Cluster 538]GO:0046935+F molecular\_function [name] 1-phosphatidylinositol-3-kinase regulator activity [def] "Modulates the activity of the enzyme 1-phosphatidylinositol-3-kinase activity." [GOC  
5912 Pathogen[ Q2Q067] interacts with 3 human partners:{Q8WYR1;P27986;Q5UE93}  
5913 Pathogen[ P0C214] interacts with 3 human partners:{Q8WYR1;Q5UE93;P27986}  
5914 Pathogen[ P03346] interacts with 3 human partners:{Q8WYR1;Q5UE93;P27986}  
5915 Pathogen[ Q85601] interacts with 3 human partners:{P27986;Q8WYR1;Q5UE93}  
5916 Pathogen[ P14079] interacts with 2 human partners:{Q8WYR1;Q5UE93}  
5917 Pathogen[ P03383] interacts with 3 human partners:{P27986;Q8WYR1;Q5UE93}  
5918 Pathogen[ P03410] interacts with 3 human partners:{P27986;Q5UE93;Q8WYR1}  
5919 Pathogen[ P14075] interacts with 3 human partners:{Q8WYR1;Q5UE93;P27986}  
5920 Pathogen[ P0C206] interacts with 3 human partners:{P27986;Q5UE93;Q8WYR1}  
5921 Pathogen[ P03363] interacts with 3 human partners:{Q8WYR1;Q5UE93;P27986}  
5922 [Cluster 539]GO:0016407+F molecular\_function [name] acetyltransferase activity [def] "Catalysis of the transfer of an acetyl group to an acceptor molecule." [GOC  
5923 Pathogen[ Q2Q067] interacts with 4 human partners:{Q92831;P41227;Q92793;Q9BXJ9}  
5924 Pathogen[ P0C214] interacts with 4 human partners:{P41227;Q92793;Q9BXJ9;Q92831}  
5925 Pathogen[ P03346] interacts with 8 human  
partners:{Q8WYB5;Q92831;Q92794;P41227;Q6N069;Q9BXJ9;Q9H7Z6;Q92793}  
5926 Pathogen[ Q85601] interacts with 6 human  
partners:{Q6N069;Q9H7Z6;Q92831;P41227;Q9BXJ9;Q92793}  
5927 Pathogen[ P14079] interacts with 4 human partners:{P41227;Q92793;Q9BXJ9;Q6N069}  
5928 Pathogen[ P03383] interacts with 4 human partners:{Q92831;P41227;Q9BXJ9;Q92793}  
5929 Pathogen[ P03410] interacts with 5 human  
partners:{Q92831;P41227;Q92793;Q6N069;Q9BXJ9}  
5930 Pathogen[ P14075] interacts with 4 human partners:{P41227;Q92831;Q9BXJ9;Q92793}  
5931 Pathogen[ P0C206] interacts with 6 human  
partners:{P41227;Q92831;Q6N069;Q92793;Q9BXJ9;Q9H7Z6}

5932 Pathogen[ P03363] interacts with 5 human partners:{P41227;Q6N069;Q92831;Q92793;Q9BXJ9}

5933 [Cluster 540]GO:0004482+F molecular\_function [name] mRNA (guanine-N7-)-methyltransferase activity [def] "Catalysis of the reaction

5934 Pathogen[ Q2Q067] interacts with 1 human partners:{043148}

5935 Pathogen[ P0C214] interacts with 1 human partners:{043148}

5936 Pathogen[ P03346] interacts with 1 human partners:{043148}

5937 Pathogen[ Q85601] interacts with 1 human partners:{043148}

5938 Pathogen[ P14079] interacts with 1 human partners:{043148}

5939 Pathogen[ P03383] interacts with 1 human partners:{043148}

5940 Pathogen[ P03410] interacts with 1 human partners:{043148}

5941 Pathogen[ P14075] interacts with 1 human partners:{043148}

5942 Pathogen[ P0C206] interacts with 1 human partners:{043148}

5943 Pathogen[ P03363] interacts with 1 human partners:{043148}

5944 [Cluster 541]GO:0004822+F molecular\_function [name] isoleucine-tRNA ligase activity [def] "Catalysis of the reaction

5945 Pathogen[ Q2Q067] interacts with 1 human partners:{P41252}

5946 Pathogen[ P0C214] interacts with 2 human partners:{Q9NSE4;P41252}

5947 Pathogen[ P03346] interacts with 1 human partners:{P41252}

5948 Pathogen[ Q85601] interacts with 1 human partners:{P41252}

5949 Pathogen[ P14079] interacts with 2 human partners:{P41252;Q9NSE4}

5950 Pathogen[ P03383] interacts with 1 human partners:{P41252}

5951 Pathogen[ P03410] interacts with 2 human partners:{Q9NSE4;P41252}

5952 Pathogen[ P14075] interacts with 2 human partners:{P41252;Q9NSE4}

5953 Pathogen[ P0C206] interacts with 2 human partners:{Q9NSE4;P41252}

5954 Pathogen[ P03363] interacts with 1 human partners:{P41252}

5955 [Cluster 542]GO:0004091+F molecular\_function [name] carboxylesterase activity [def] "Catalysis of the reaction

5956 Pathogen[ Q2Q067] interacts with 3 human partners:{O14734;Q9Y305;Q86TX2}

5957 Pathogen[ P0C214] interacts with 5 human partners:{Q9Y305;Q86TX2;O00154;O14734;Q3I5F7}

5958 Pathogen[ P03346] interacts with 6 human partners:{Q6ZUV0;Q86TX2;Q3I5F7;Q9Y305;O14734;P10768}

5959 Pathogen[ Q85601] interacts with 4 human partners:{P10768;Q86TX2;O14734;Q9Y305}

5960 Pathogen[ P14079] interacts with 8 human partners:{P49753;Q9Y305;Q3I5F7;O14734;Q6ZUV0;Q86TX2;Q9HAT2;Q8WXI4}

5961 Pathogen[ P03383] interacts with 2 human partners:{Q9Y305;O14734}

5962 Pathogen[ P03410] interacts with 10 human partners:{Q9Y305;P10768;Q9HAT2;Q6ZUV0;Q8WXI4;O14734;O00154;Q3I5F7;Q86TX2;P49753}

5963 Pathogen[ P14075] interacts with 2 human partners:{O14734;Q9Y305}

5964 Pathogen[ P0C206] interacts with 7 human partners:{Q8WXI4;Q6ZUV0;Q86TX2;P10768;Q3I5F7;Q9Y305;O14734}

5965 Pathogen[ P03363] interacts with 4 human partners:{O14734;P10768;Q3I5F7;Q6ZUV0}

5966 [Cluster 543]GO:0043996+F molecular\_function [name] histone acetyltransferase activity (H4-K8 specific) [def] "Catalysis of the reaction

5967 Pathogen[ Q2Q067] interacts with 3 human partners:{Q96EZ8;P51610;Q7Z3B3}

5968 Pathogen[ P0C214] interacts with 2 human partners:{P51610;Q96EZ8}

5969 Pathogen[ P03346] interacts with 4 human partners:{Q96EZ8;P51610;Q7Z3B3;Q9H7Z6}

5970 Pathogen[ Q85601] interacts with 3 human partners:{Q9H7Z6;P51610;Q96EZ8}

5971 Pathogen[ P14079] interacts with 5 human partners:{P51610;Q7Z3B3;Q9P2N6;Q96EZ8;Q9H9L4}

5972 Pathogen[ P03383] interacts with 2 human partners:{P51610;Q96EZ8}

5973 Pathogen[ P03410] interacts with 5 human partners:{Q9P2N6;P51610;Q9H9L4;Q96EZ8;Q7Z3B3}

5974 Pathogen[ P14075] interacts with 3 human partners:{P51610;Q7Z3B3;Q96EZ8}

5975 Pathogen[ P0C206] interacts with 6 human partners:{Q9H9L4;Q96EZ8;P51610;Q9P2N6;Q7Z3B3;Q9H7Z6}

5976 Pathogen[ P03363] interacts with 3 human partners:{Q7Z3B3;Q96EZ8;P51610}

5977 [Cluster 544]GO:0043047+F molecular\_function [name] single-stranded telomeric DNA binding [def] "Interacting selectively and non-covalently with single-stranded telomere-associated DNA." [GOC

5978 Pathogen[ Q2Q067] interacts with 2 human partners:{Q9H668;P22626}

5979 Pathogen[ P0C214] interacts with 2 human partners:{Q9H668;P22626}

5980 Pathogen[ P03346] interacts with 3 human partners:{P22626;Q9H668;Q9NUX5}

5981 Pathogen[ Q85601] interacts with 2 human partners:{P22626;Q9H668}

5982 Pathogen[ P14079] interacts with 3 human partners:{Q9H668;Q9NUX5;P22626}

5983 Pathogen[ P03383] interacts with 1 human partners:{P22626}

5984 Pathogen[ P03410] interacts with 3 human partners:{Q9NUX5;P22626;Q9H668}

5985 Pathogen[ P14075] interacts with 2 human partners:{P22626;Q9H668}

5986 Pathogen[ P0C206] interacts with 3 human partners:{Q9H668;P22626;Q9NUX5}

5987 Pathogen[ P03363] interacts with 3 human partners:{Q9H668;Q9NUX5;P22626}

5988 [Cluster 545]GO:0000981+F molecular\_function [name] sequence-specific DNA binding RNA polymerase II transcription factor activity [def] "Interacting selectively and non-covalently with a specific DNA sequence in order to modulate transcription by RNA polymerase II. The transcription factor may or may not also interact selectively with a protein or macromolecular complex." [GOC



5989 Pathogen[ Q2Q067] interacts with 16 human partners:{P40763;O14503;O00712;Q14814;P15976;Q92754;Q14934;O94993;P56693;P25791;Q13761;Q8TE85;Q01860;P35232;Q9Y651;Q02078}

5990 Pathogen[ P0C214] interacts with 15 human partners:{Q13761;P56693;Q02078;O14503;Q8TE85;Q14814;Q92754;O00712;P25791;Q14934;P40763;Q9Y651;P35232;Q01860;O94993}

5991 Pathogen[ P03346] interacts with 21 human partners:{Q02078;Q14814;O14901;Q8IYA7;P56693;O00712;Q8TE85;Q92754;Q01860;O14503;Q14934;P25791;P17542;Q9C0J9;P15976;Q13761;O94993;Q92481;P35232;Q9Y651;P40763}

5992 Pathogen[ Q85601] interacts with 16 human partners:{Q8TE85;Q02078;Q92754;P15976;Q9Y651;Q14814;P40763;O14503;Q14934;P25791;P56693;O94993;P35232;O00712;Q01860;Q13761}

5993 Pathogen[ P14079] interacts with 16 human partners:{Q02078;Q06413;Q8TE85;P15976;P35232;Q01860;Q14934;P25791;Q92754;P56693;Q14814;Q13761;O14503;O14901;O94993;O00712}

5994 Pathogen[ P03383] interacts with 12 human partners:{Q13761;O00712;O14503;Q14814;Q01860;Q8TE85;Q14934;P25791;P35232;Q92754;P56693;Q02078}

5995 Pathogen[ P03410] interacts with 15 human partners:{O14901;Q01860;P25791;Q14814;O00712;Q8TE85;P56693;Q13761;Q02078;O94993;P35232;P40763;Q14934;P15976;Q92754}

5996 Pathogen[ P14075] interacts with 12 human partners:{Q8TE85;Q01860;P56693;Q92754;O14503;P35232;P25791;Q14934;Q02078;O00712;Q14814;Q13761}

5997 Pathogen[ P0C206] interacts with 17 human partners:{Q8TE85;Q02078;Q01860;Q9C0J9;P56693;P15976;Q92754;O00712;O94993;P35232;P40763;P25791;Q14934;O14901;Q14814;Q13761;Q9Y651}

5998 Pathogen[ P03363] interacts with 17 human partners:{O14901;O00712;Q9C0J9;P25791;Q8TE85;P56693;Q14814;Q9Y651;P35232;O94993;Q14934;Q8IYA7;Q13761;Q01860;O14503;Q92754;Q02078}

5999 [Cluster 546]GO:0016846+F molecular\_function [name] carbon-sulfur lyase activity [def] "Catalysis of the elimination of hydrogen sulfide or substituted H2S." [EC

6000 Pathogen[ Q2Q067] interacts with 2 human partners:{Q7Z7K6;P32929}

6001 Pathogen[ P0C214] interacts with 2 human partners:{P32929;Q7Z7K6}

6002 Pathogen[ P03346] interacts with 2 human partners:{P32929;Q7Z7K6}

6003 Pathogen[ Q85601] interacts with 2 human partners:{Q7Z7K6;P32929}

6004 Pathogen[ P14079] interacts with 2 human partners:{P32929;Q7Z7K6}

6005 Pathogen[ P03383] interacts with 1 human partners:{Q7Z7K6}

6006 Pathogen[ P03410] interacts with 2 human partners:{P32929;Q7Z7K6}

6007 Pathogen[ P14075] interacts with 1 human partners:{Q7Z7K6}

6008 Pathogen[ P0C206] interacts with 2 human partners:{P32929;Q7Z7K6}

6009 Pathogen[ P03363] interacts with 1 human partners:{Q7Z7K6}

6010 [Cluster 547]GO:0000980+F molecular\_function [name] RNA polymerase II distal enhancer sequence-specific DNA binding [def] "Interacting selectively and non-covalently with a RNA polymerase II (Pol II) distal enhancer. In mammalian cells, enhancers are distal sequences that increase the utilization of some promoters, and can function in either orientation and in any location (upstream or downstream) relative to the core promoter." [GOC

6011 Pathogen[ Q2Q067] interacts with 7 human partners:{Q01543;Q92754;P23769;P56693;O95644;P15336;P17947}

6012 Pathogen[ P0C214] interacts with 9 human partners:{P15336;P23769;P56693;P17947;Q92754;Q01543;P05412;O95644;P16220}

6013 Pathogen[ P03346] interacts with 12 human partners:{P05412;P16220;Q9H2W2;P15336;P23769;P56693;O95644;Q92754;P17542;O95718;P17947;Q01543}

6014 Pathogen[ Q85601] interacts with 9 human partners:{Q92754;P23769;O95644;P16220;Q01543;P05412;P56693;P17947;P15336}

6015 Pathogen[ P14079] interacts with 8 human partners:{O95644;O95718;Q01543;P15336;Q92754;P56693;P05412;P23769}

6016 Pathogen[ P03383] interacts with 9 human partners:{P16220;O95644;P23769;Q01543;Q92754;P15336;P56693;P17947;P05412}

6017 Pathogen[ P03410] interacts with 9 human partners:{P17947;O95644;P16220;P56693;P05412;P23769;P15336;Q01543;Q92754}

6018 Pathogen[ P14075] interacts with 9 human partners:{P05412;Q01543;P23769;P56693;P15336;Q92754;P17947;P16220;O95644}

6019 Pathogen[ P0C206] interacts with 10 human partners:{P16220;P05412;P15336;P56693;Q92754;O95718;P17947;P23769;O95644;Q01543}

6020 Pathogen[ P03363] interacts with 9 human partners:{P17947;Q9H2W2;Q01543;P16220;P15336;P56693;O95644;P05412;Q92754}

6021 [Cluster 548]GO:0004176+F molecular\_function [name] ATP-dependent peptidase activity [def] "Catalysis of the reaction

6022 Pathogen[ Q2Q067] interacts with 2 human partners:{O76031;Q96SW2}

6023 Pathogen[ P0C214] interacts with 2 human partners:{O76031;Q96SW2}

6024 Pathogen[ P03346] interacts with 3 human partners:{O76031;Q96SW2;Q496Y0}

6025 Pathogen[ Q85601] interacts with 2 human partners:{Q96SW2;O76031}

6026 Pathogen[ P14079] interacts with 2 human partners:{O76031;Q96SW2}

6027 Pathogen[ P03383] interacts with 2 human partners:{Q96SW2;O76031}  
6028 Pathogen[ P03410] interacts with 3 human partners:{Q96SW2;O76031;Q496Y0}  
6029 Pathogen[ P14075] interacts with 2 human partners:{O76031;Q96SW2}  
6030 Pathogen[ P0C206] interacts with 3 human partners:{Q496Y0;Q96SW2;O76031}  
6031 Pathogen[ P03363] interacts with 2 human partners:{O76031;Q96SW2}  
6032 [Cluster 549]GO:0097110+F molecular\_function [name] scaffold protein binding [def]  
"Interacting selectively and non-covalently with a scaffold protein. Scaffold proteins  
are crucial regulators of many key signaling pathways. Although not strictly defined in  
function, they are known to interact and/or bind with multiple members of a signaling  
pathway, tethering them into complexes." [GOC  
6033 Pathogen[ Q2Q067] interacts with 8 human  
partners:{P19012;P15924;P78352;P05787;P13647;P08670;Q00987;P05783}  
6034 Pathogen[ P0C214] interacts with 8 human  
partners:{P05783;Q00987;P15924;P05787;P78352;P08670;P19012;P13647}  
6035 Pathogen[ P03346] interacts with 8 human  
partners:{P15924;P19012;P05783;P78352;P05787;Q00987;P08670;P13647}  
6036 Pathogen[ Q85601] interacts with 8 human  
partners:{P08670;P05787;P15924;P05783;P19012;P78352;P13647;Q00987}  
6037 Pathogen[ P14079] interacts with 5 human  
partners:{P15924;Q00987;P05783;P08670;P13647}  
6038 Pathogen[ P03383] interacts with 7 human  
partners:{P15924;P08670;P05783;P05787;P13647;P19012;P78352}  
6039 Pathogen[ P03410] interacts with 7 human  
partners:{P15924;P05787;P08670;Q00987;P13647;P78352;P05783}  
6040 Pathogen[ P14075] interacts with 7 human  
partners:{P05783;P19012;P08670;P78352;P13647;P05787;P15924}  
6041 Pathogen[ P0C206] interacts with 8 human  
partners:{P05787;P78352;P19012;P13647;P05783;P15924;P08670;Q00987}  
6042 Pathogen[ P03363] interacts with 6 human  
partners:{P05783;P78352;P05787;P15924;P13647;P08670}  
6043 [Cluster 550]GO:0008494+F molecular\_function [name] translation activator activity  
[def] "Any of a group of soluble proteins functioning in the activation of  
ribosome-mediated translation of mRNA into a polypeptide." [GOC  
6044 Pathogen[ Q2Q067] interacts with 4 human partners:{Q9H074;Q8NE71;P11940;Q71UM5}  
6045 Pathogen[ P0C214] interacts with 4 human partners:{Q71UM5;P11940;Q8NE71;Q9H074}  
6046 Pathogen[ P03346] interacts with 5 human  
partners:{Q71UM5;P11940;Q9H074;Q8NE71;Q9NQZ3}  
6047 Pathogen[ Q85601] interacts with 4 human partners:{Q71UM5;P11940;Q9H074;Q8NE71}  
6048 Pathogen[ P14079] interacts with 4 human partners:{Q9H074;P11940;Q8NE71;Q71UM5}  
6049 Pathogen[ P03383] interacts with 4 human partners:{Q8NE71;Q71UM5;P11940;Q9H074}  
6050 Pathogen[ P03410] interacts with 4 human partners:{Q8NE71;P11940;Q9H074;Q71UM5}  
6051 Pathogen[ P14075] interacts with 4 human partners:{Q9H074;P11940;Q8NE71;Q71UM5}  
6052 Pathogen[ P0C206] interacts with 4 human partners:{Q9H074;Q71UM5;Q8NE71;P11940}  
6053 Pathogen[ P03363] interacts with 7 human  
partners:{P11940;Q8N9W6;Q92904;Q71UM5;Q8NE71;Q9NQZ3;Q9H074}  
6054 [Cluster 551]GO:0008083+F molecular\_function [name] growth factor activity [def]  
"The function that stimulates a cell to grow or proliferate. Most growth factors have  
other actions besides the induction of cell growth or proliferation." [ISBN  
6055 Pathogen[ Q2Q067] interacts with 6 human  
partners:{P53370;Q6ZN28;Q9Y3E1;P69208;P06744;Q15276}  
6056 Pathogen[ P0C214] interacts with 5 human  
partners:{Q9Y3E1;P53370;P69208;P55789;Q6ZN28}  
6057 Pathogen[ P03346] interacts with 7 human  
partners:{P69208;P53370;Q9Y3E1;P51858;P06744;Q6ZN28;Q15276}  
6058 Pathogen[ Q85601] interacts with 6 human  
partners:{Q9Y3E1;P55145;P06744;P53370;Q6ZN28;P69208}  
6059 Pathogen[ P14079] interacts with 14 human  
partners:{P20809;Q15276;P69208;P06744;Q9H5N1;Q9NS71;Q9Y3E1;P53370;Q9GZZ8;P55789;P0414  
1;P13232;Q6ZN28;P29459}  
6060 Pathogen[ P03383] interacts with 6 human  
partners:{P53370;P69208;P06744;Q6ZN28;P55145;Q15276}  
6061 Pathogen[ P03410] interacts with 14 human  
partners:{P04141;P06744;Q9GZZ8;P20809;Q9NS71;P53370;Q9Y3E1;P69208;Q6ZN28;Q9H5N1;P5578  
9;P29459;Q15276;P13232}  
6062 Pathogen[ P14075] interacts with 9 human  
partners:{P06744;P69208;P55789;Q6ZN28;P53370;P20809;Q9GZZ8;Q9NS71;Q15276}  
6063 Pathogen[ P0C206] interacts with 10 human  
partners:{Q9Y3E1;P69208;P55789;P55145;Q6ZN28;P06744;P53370;P20809;Q9H5N1;Q15276}  
6064 Pathogen[ P03363] interacts with 7 human  
partners:{P51858;Q9Y3E1;P69208;P06744;Q6ZN28;Q15276;P53370}  
6065 [Cluster 552]GO:0019911+F molecular\_function [name] structural constituent of myelin  
sheath [def] "The action of a molecule that contributes to the structural integrity of  
the myelin sheath of a nerve." [GOC  
6066 Pathogen[ Q2Q067] interacts with 1 human partners:{Q13875}  
6067 Pathogen[ P0C214] interacts with 1 human partners:{Q13875}  
6068 Pathogen[ P03346] interacts with 1 human partners:{Q13875}

6069 Pathogen[ Q85601] interacts with 1 human partners:{Q13875}

6070 Pathogen[ P14079] interacts with 2 human partners:{P02686;Q13875}

6071 Pathogen[ P03383] interacts with 1 human partners:{Q13875}

6072 Pathogen[ P03410] interacts with 2 human partners:{P02686;Q13875}

6073 Pathogen[ P14075] interacts with 1 human partners:{Q13875}

6074 Pathogen[ P0C206] interacts with 1 human partners:{Q13875}

6075 Pathogen[ P03363] interacts with 1 human partners:{Q13875}

6076 [Cluster 553]GO:0071987+F molecular\_function [name] WD40-repeat domain binding [def] "Interacting selectively and non-covalently with a WD40 repeat domain of a protein. The WD40 repeat is a short structural motif of approximately 40 amino acids, often terminating in a tryptophan-aspartic acid (W-D) dipeptide. Several of these repeats are combined to form a type of protein domain called the WD domain." [GOC]

6077 Pathogen[ Q2Q067] interacts with 1 human partners:{Q99459}

6078 Pathogen[ P0C214] interacts with 1 human partners:{Q99459}

6079 Pathogen[ P03346] interacts with 1 human partners:{Q99459}

6080 Pathogen[ Q85601] interacts with 1 human partners:{Q99459}

6081 Pathogen[ P14079] interacts with 1 human partners:{Q99459}

6082 Pathogen[ P03383] interacts with 1 human partners:{Q99459}

6083 Pathogen[ P03410] interacts with 1 human partners:{Q99459}

6084 Pathogen[ P14075] interacts with 1 human partners:{Q99459}

6085 Pathogen[ P0C206] interacts with 1 human partners:{Q99459}

6086 Pathogen[ P03363] interacts with 1 human partners:{Q99459}

6087 [Cluster 554]GO:0043560+F molecular\_function [name] insulin receptor substrate binding [def] "Interacting selectively and non-covalently with any of the insulin receptor substrate (IRS) proteins, adaptor proteins that bind to the transphosphorylated insulin and insulin-like growth factor receptors, are themselves phosphorylated and in turn recruit SH2 domain-containing signaling molecules to form a productive signaling complex." [PMID]

6088 Pathogen[ Q2Q067] interacts with 2 human partners:{Q9NNW5;P27986}

6089 Pathogen[ P0C214] interacts with 3 human partners:{P62993;Q9NNW5;P27986}

6090 Pathogen[ P03346] interacts with 3 human partners:{P62993;P27986;Q9NNW5}

6091 Pathogen[ Q85601] interacts with 3 human partners:{P62993;Q9NNW5;P27986}

6092 Pathogen[ P14079] interacts with 2 human partners:{P62993;Q9NNW5}

6093 Pathogen[ P03383] interacts with 2 human partners:{P27986;Q9NNW5}

6094 Pathogen[ P03410] interacts with 3 human partners:{P27986;P62993;Q9NNW5}

6095 Pathogen[ P14075] interacts with 2 human partners:{P27986;Q9NNW5}

6096 Pathogen[ P0C206] interacts with 3 human partners:{Q9NNW5;P27986;P62993}

6097 Pathogen[ P03363] interacts with 2 human partners:{P27986;Q9NNW5}

6098 [Cluster 555]GO:0071568+F molecular\_function [name] UFM1 conjugating enzyme activity [def] "Catalysis of the covalent attachment of the ubiquitin-like protein UFM1 to other proteins or other substrate molecules." [GOC]

6099 Pathogen[ Q2Q067] interacts with 2 human partners:{Q9Y3C8;O94874}

6100 Pathogen[ P0C214] interacts with 1 human partners:{O94874}

6101 Pathogen[ P03346] interacts with 2 human partners:{Q9Y3C8;O94874}

6102 Pathogen[ Q85601] interacts with 1 human partners:{O94874}

6103 Pathogen[ P14079] interacts with 2 human partners:{O94874;Q9Y3C8}

6104 Pathogen[ P03383] interacts with 2 human partners:{Q9Y3C8;O94874}

6105 Pathogen[ P03410] interacts with 2 human partners:{Q9Y3C8;O94874}

6106 Pathogen[ P14075] interacts with 2 human partners:{Q9Y3C8;O94874}

6107 Pathogen[ P0C206] interacts with 2 human partners:{Q9Y3C8;O94874}

6108 Pathogen[ P03363] interacts with 2 human partners:{Q9Y3C8;O94874}

6109 [Cluster 556]GO:0044020+F molecular\_function [name] histone methyltransferase activity (H4-R3 specific) [def] "Catalysis of the reaction

6110 Pathogen[ Q2Q067] interacts with 3 human partners:{Q9NVM4;Q96LA8;Q99873}

6111 Pathogen[ P0C214] interacts with 3 human partners:{Q9NVM4;Q99873;Q96LA8}

6112 Pathogen[ P03346] interacts with 3 human partners:{Q99873;Q9NVM4;Q96LA8}

6113 Pathogen[ Q85601] interacts with 3 human partners:{Q9NVM4;Q99873;Q96LA8}

6114 Pathogen[ P14079] interacts with 3 human partners:{Q96LA8;Q99873;Q9NVM4}

6115 Pathogen[ P03383] interacts with 2 human partners:{Q99873;Q96LA8}

6116 Pathogen[ P03410] interacts with 3 human partners:{Q96LA8;Q9NVM4;Q99873}

6117 Pathogen[ P14075] interacts with 2 human partners:{Q96LA8;Q99873}

6118 Pathogen[ P0C206] interacts with 3 human partners:{Q99873;Q96LA8;Q9NVM4}

6119 Pathogen[ P03363] interacts with 3 human partners:{Q96LA8;Q9NVM4;Q99873}

6120 [Cluster 557]GO:0005125+F molecular\_function [name] cytokine activity [def] "Functions to control the survival, growth, differentiation and effector function of tissues and cells." [ISBN]

6121 Pathogen[ Q2Q067] interacts with 3 human partners:{P40222;Q12904;P06744}

6122 Pathogen[ P0C214] interacts with 3 human partners:{Q12904;P40222;P43490}

6123 Pathogen[ P03346] interacts with 3 human partners:{Q12904;P06744;P40222}

6124 Pathogen[ Q85601] interacts with 2 human partners:{P06744;P40222}

6125 Pathogen[ P14079] interacts with 15 human partners:{P40222;P20809;Q96DZ9;P43490;P06744;Q8NEV9;P04141;P13232;Q8IU54;Q96QR1;O95760;Q8TAZ6;P29459;Q12904;Q6EBC2}

6126 Pathogen[ P03383] interacts with 3 human partners:{Q12904;P06744;P40222}

6127 Pathogen[ P03410] interacts with 17 human partners:{P04141;Q53HR8;Q96QR1;Q96DZ9;P06744;Q8TAZ6;P20809;Q6EBC2;O95760;Q12904;P43490}

0;Q969D9;Q8NEV9;P40222;Q9NRJ3;P29459;P13232}

6128 Pathogen[ P14075] interacts with 5 human partners:{P06744;P40222;Q96QR1;Q12904;P20809}

6129 Pathogen[ P0C206] interacts with 7 human partners:{P43490;P06744;P40222;P20809;Q53HR8;Q12904;Q8TAZ6}

6130 Pathogen[ P03363] interacts with 2 human partners:{P06744;P40222}

6131 [Cluster 558]GO:0001786+F molecular\_function [name] phosphatidylserine binding [def] "Interacting selectively and non-covalently with phosphatidylserine, a class of glycopospholipids in which a phosphatidyl group is esterified to the hydroxyl group of L-serine." [ISBN

6132 Pathogen[ Q2Q067] interacts with 3 human partners:{Q86VW0;Q9HCH5;O95810}

6133 Pathogen[ P0C214] interacts with 3 human partners:{O95810;Q86VW0;Q9HCH5}

6134 Pathogen[ P03346] interacts with 4 human partners:{Q9HCH5;Q86VW0;Q99829;O95810}

6135 Pathogen[ Q85601] interacts with 3 human partners:{Q9HCH5;O95810;Q86VW0}

6136 Pathogen[ P14079] interacts with 6 human partners:{Q99829;Q9HCH5;Q9Y6U3;O76027;O95810;Q86VW0}

6137 Pathogen[ P03383] interacts with 2 human partners:{Q9HCH5;O95810}

6138 Pathogen[ P03410] interacts with 7 human partners:{Q9HCH5;Q0JRZ9;O76027;Q9Y6U3;Q99829;O95810;Q86VW0}

6139 Pathogen[ P14075] interacts with 2 human partners:{Q9HCH5;O95810}

6140 Pathogen[ P0C206] interacts with 4 human partners:{O95810;Q86VW0;Q99829;Q9HCH5}

6141 Pathogen[ P03363] interacts with 4 human partners:{Q99829;Q9HCH5;Q86VW0;O95810}

6142 [Cluster 559]GO:0001849+F molecular\_function [name] complement component C1q binding [def] "Interacting selectively and non-covalently with the C1q component of the classical complement cascade." [GOC

6143 Pathogen[ Q2Q067] interacts with 2 human partners:{P27797;Q07021}

6144 Pathogen[ P0C214] interacts with 1 human partners:{P27797}

6145 Pathogen[ P03346] interacts with 2 human partners:{Q07021;P27797}

6146 Pathogen[ Q85601] interacts with 2 human partners:{P27797;Q07021}

6147 Pathogen[ P14079] interacts with 1 human partners:{Q07021}

6148 Pathogen[ P03383] interacts with 2 human partners:{Q07021;P27797}

6149 Pathogen[ P03410] interacts with 2 human partners:{Q07021;P27797}

6150 Pathogen[ P14075] interacts with 2 human partners:{Q07021;P27797}

6151 Pathogen[ P0C206] interacts with 2 human partners:{P27797;Q07021}

6152 Pathogen[ P03363] interacts with 2 human partners:{Q07021;P27797}

6153 [Cluster 560]GO:0010861+F molecular\_function [name] thyroid hormone receptor activator activity [def] "A receptor activator activity that binds to, thyroid hormone receptor in a ligand-dependent manner and enhances ligand-induced transcriptional activity of the receptor." [GOC

6154 Pathogen[ Q2Q067] interacts with 1 human partners:{Q9HD15}

6155 Pathogen[ P0C214] interacts with 1 human partners:{Q9HD15}

6156 Pathogen[ P03346] interacts with 1 human partners:{Q9HD15}

6157 Pathogen[ Q85601] interacts with 1 human partners:{Q9HD15}

6158 Pathogen[ P14079] interacts with 1 human partners:{Q9HD15}

6159 Pathogen[ P03383] interacts with 1 human partners:{Q9HD15}

6160 Pathogen[ P03410] interacts with 1 human partners:{Q9HD15}

6161 Pathogen[ P14075] interacts with 1 human partners:{Q9HD15}

6162 Pathogen[ P0C206] interacts with 1 human partners:{Q9HD15}

6163 Pathogen[ P03363] interacts with 1 human partners:{Q9HD15}

6164 [Cluster 561]GO:0070260+F molecular\_function [name] 5'-tyrosyl-DNA phosphodiesterase activity [def] "Catalysis of the hydrolysis of 5'-phosphotyrosyl groups formed as covalent intermediates (in DNA backbone breakage) between DNA topoisomerase II and DNA." [PMID

6165 Pathogen[ Q2Q067] interacts with 1 human partners:{O95551}

6166 Pathogen[ P0C214] interacts with 1 human partners:{O95551}

6167 Pathogen[ P03346] interacts with 1 human partners:{O95551}

6168 Pathogen[ Q85601] interacts with 1 human partners:{O95551}

6169 Pathogen[ P14079] interacts with 1 human partners:{O95551}

6170 Pathogen[ P03383] interacts with 1 human partners:{O95551}

6171 Pathogen[ P03410] interacts with 1 human partners:{O95551}

6172 Pathogen[ P14075] interacts with 1 human partners:{O95551}

6173 Pathogen[ P0C206] interacts with 1 human partners:{O95551}

6174 Pathogen[ P03363] interacts with 1 human partners:{O95551}

6175 [Cluster 562]GO:0004827+F molecular\_function [name] proline-tRNA ligase activity [def] "Catalysis of the reaction

6176 Pathogen[ Q2Q067] interacts with 1 human partners:{P07814}

6177 Pathogen[ P0C214] interacts with 2 human partners:{Q7L3T8;P07814}

6178 Pathogen[ P03346] interacts with 1 human partners:{P07814}

6179 Pathogen[ Q85601] interacts with 1 human partners:{P07814}

6180 Pathogen[ P14079] interacts with 2 human partners:{Q7L3T8;P07814}

6181 Pathogen[ P03383] interacts with 2 human partners:{P07814;Q7L3T8}

6182 Pathogen[ P03410] interacts with 2 human partners:{Q7L3T8;P07814}

6183 Pathogen[ P14075] interacts with 2 human partners:{Q7L3T8;P07814}

6184 Pathogen[ P0C206] interacts with 2 human partners:{P07814;Q7L3T8}

6185 Pathogen[ P03363] interacts with 2 human partners:{Q7L3T8;P07814}

6186 [Cluster 563]GO:0009922+F molecular\_function [name] fatty acid elongase activity [def]

```

" Catalysis of the reaction
6187 Pathogen[ Q2Q067] interacts with 2 human partners: {Q9H5J4;Q9BW60}
6188 Pathogen[ P0C214] interacts with 3 human partners: {Q9NXB9;Q9NYP7;Q9BW60}
6189 Pathogen[ P03346] interacts with 2 human partners: {Q9BW60;Q9H5J4}
6190 Pathogen[ Q85601] interacts with 2 human partners: {Q9BW60;Q9H5J4}
6191 Pathogen[ P14079] interacts with 2 human partners: {Q9BW60;Q9H5J4}
6192 Pathogen[ P03383] interacts with 2 human partners: {Q9BW60;Q9H5J4}
6193 Pathogen[ P03410] interacts with 2 human partners: {Q9H5J4;Q9BW60}
6194 Pathogen[ P14075] interacts with 2 human partners: {Q9H5J4;Q9BW60}
6195 Pathogen[ P0C206] interacts with 2 human partners: {Q9H5J4;Q9BW60}
6196 Pathogen[ P03363] interacts with 1 human partners: {Q9H5J4}
6197 [Cluster 564]GO:0005518+F molecular_function [name] collagen binding [def]
"Interacting selectively and non-covalently with collagen, a group of fibrous proteins of
very high tensile strength that form the main component of connective tissue in animals.
Collagen is highly enriched in glycine (some regions are 33% glycine) and proline,
occurring predominantly as 3-hydroxyproline (about 20%)." [GOC]
6198 Pathogen[ Q2Q067] interacts with 3 human partners: {Q13485;P84022;O15105}
6199 Pathogen[ P0C214] interacts with 4 human partners: {P84022;P10124;Q13485;O15105}
6200 Pathogen[ P03346] interacts with 3 human partners: {O15105;P84022;Q13485}
6201 Pathogen[ Q85601] interacts with 3 human partners: {P84022;O15105;Q13485}
6202 Pathogen[ P14079] interacts with 3 human partners: {Q9GZZ8;P10124;O15105}
6203 Pathogen[ P03383] interacts with 4 human partners: {Q13485;O15105;P84022;P10124}
6204 Pathogen[ P03410] interacts with 5 human
partners: {P84022;Q9GZZ8;P10124;Q13485;O15105}
6205 Pathogen[ P14075] interacts with 5 human
partners: {Q13485;O15105;Q9GZZ8;P10124;P84022}
6206 Pathogen[ P0C206] interacts with 4 human partners: {P84022;O15105;Q13485;P10124}
6207 Pathogen[ P03363] interacts with 3 human partners: {O15105;P84022;Q13485}
6208 [Cluster 565]GO:0043169+F molecular_function [name] cation binding [def]
"Interacting selectively and non-covalently with cations, charged atoms or groups of
atoms with a net positive charge." [GOC]
6209 Pathogen[ Q2Q067] interacts with 1 human partners: {P35573}
6210 Pathogen[ P0C214] interacts with 4 human partners: {Q04446;Q9H227;P35573;P16278}
6211 Pathogen[ P03346] interacts with 3 human partners: {P35573;P16278;Q8WVB3}
6212 Pathogen[ Q85601] interacts with 2 human partners: {P35573;Q04446}
6213 Pathogen[ P14079] interacts with 8 human
partners: {P16278;P04066;P35475;P06280;P54803;P35573;P17050;Q8WVB3}
6214 Pathogen[ P03383] interacts with 1 human partners: {P35573}
6215 Pathogen[ P03410] interacts with 6 human
partners: {P54803;P04066;Q04446;P35573;P16278;Q8WVB3}
6216 Pathogen[ P14075] interacts with 1 human partners: {P35573}
6217 Pathogen[ P0C206] interacts with 4 human partners: {Q04446;Q8WVB3;P16278;P35573}
6218 Pathogen[ P03363] interacts with 2 human partners: {Q8WVB3;P35573}
6219 [Cluster 566]GO:0016805+F molecular_function [name] dipeptidase activity [def]
" Catalysis of the hydrolysis of a dipeptide." [http]
6220 Pathogen[ Q2Q067] interacts with 1 human partners: {Q12765}
6221 Pathogen[ P0C214] interacts with 2 human partners: {Q96FV2;Q12765}
6222 Pathogen[ P03346] interacts with 1 human partners: {Q12765}
6223 Pathogen[ Q85601] interacts with 1 human partners: {Q12765}
6224 Pathogen[ P14079] interacts with 4 human partners: {Q96FV2;Q96KP4;Q0VDG4;Q12765}
6225 Pathogen[ P03383] interacts with 1 human partners: {Q12765}
6226 Pathogen[ P03410] interacts with 3 human partners: {Q0VDG4;Q96FV2;Q12765}
6227 Pathogen[ P14075] interacts with 2 human partners: {Q12765;Q96FV2}
6228 Pathogen[ P0C206] interacts with 2 human partners: {Q12765;Q96FV2}
6229 Pathogen[ P03363] interacts with 1 human partners: {Q12765}
6230 [Cluster 567]GO:0008607+F molecular_function [name] phosphorylase kinase regulator
activity [def] "Modulation of the activity of the enzyme phosphorylase kinase." [EC]
6231 Pathogen[ Q2Q067] interacts with 3 human partners: {Q9H9T3;O95163;Q96EB1}
6232 Pathogen[ P0C214] interacts with 3 human partners: {Q9H9T3;Q96EB1;O95163}
6233 Pathogen[ P03346] interacts with 3 human partners: {O95163;Q9H9T3;Q96EB1}
6234 Pathogen[ Q85601] interacts with 3 human partners: {Q9H9T3;Q96EB1;O95163}
6235 Pathogen[ P14079] interacts with 3 human partners: {O95163;Q96EB1;Q9H9T3}
6236 Pathogen[ P03383] interacts with 3 human partners: {O95163;Q96EB1;Q9H9T3}
6237 Pathogen[ P03410] interacts with 3 human partners: {Q9H9T3;Q96EB1;O95163}
6238 Pathogen[ P14075] interacts with 3 human partners: {Q96EB1;O95163;Q9H9T3}
6239 Pathogen[ P0C206] interacts with 3 human partners: {Q9H9T3;O95163;Q96EB1}
6240 Pathogen[ P03363] interacts with 3 human partners: {Q96EB1;O95163;Q9H9T3}
6241 [Cluster 568]GO:0052815+F molecular_function [name] medium-chain acyl-CoA hydrolase
activity [def] "Catalysis of the reaction
6242 Pathogen[ Q2Q067] interacts with 1 human partners: {O14734}
6243 Pathogen[ P0C214] interacts with 1 human partners: {O14734}
6244 Pathogen[ P03346] interacts with 1 human partners: {O14734}
6245 Pathogen[ Q85601] interacts with 1 human partners: {O14734}
6246 Pathogen[ P14079] interacts with 1 human partners: {O14734}
6247 Pathogen[ P03383] interacts with 1 human partners: {O14734}
6248 Pathogen[ P03410] interacts with 1 human partners: {O14734}

```

6249 Pathogen[ P14075] interacts with 1 human partners:{O14734}

6250 Pathogen[ P0C206] interacts with 1 human partners:{O14734}

6251 Pathogen[ P03363] interacts with 1 human partners:{O14734}

6252 [Cluster 569]GO:0048027+F molecular\_function [name] mRNA 5'-UTR binding [def] "Interacting selectively and non-covalently with the 5' untranslated region of an mRNA molecule." [GOC

6253 Pathogen[ Q2Q067] interacts with 4 human partners:{O00425;Q9Y6M1;P62263;P21399}

6254 Pathogen[ P0C214] interacts with 5 human partners:{P62263;O00425;Q9NZI8;Q9Y6M1;P21399}

6255 Pathogen[ P03346] interacts with 5 human partners:{Q9Y6M1;O00425;Q9NZI8;P62263;P21399}

6256 Pathogen[ Q85601] interacts with 4 human partners:{P21399;P62263;Q9Y6M1;O00425}

6257 Pathogen[ P14079] interacts with 4 human partners:{P21399;P62263;Q9Y6M1;O00425}

6258 Pathogen[ P03383] interacts with 2 human partners:{O00425;P62263}

6259 Pathogen[ P03410] interacts with 4 human partners:{P21399;O00425;P62263;Q9Y6M1}

6260 Pathogen[ P14075] interacts with 2 human partners:{O00425;P62263}

6261 Pathogen[ P0C206] interacts with 4 human partners:{P62263;Q9Y6M1;P21399;O00425}

6262 Pathogen[ P03363] interacts with 4 human partners:{O00425;Q9Y6M1;Q9NZI8;P62263}

6263 [Cluster 570]GO:0051020+F molecular\_function [name] GTPase binding [def] "Interacting selectively and non-covalently with a GTPase, any enzyme that catalyzes the hydrolysis of GTP." [GOC

6264 Pathogen[ Q2Q067] interacts with 4 human partners:{Q8N1I0;Q13439;P62879;Q12983}

6265 Pathogen[ P0C214] interacts with 4 human partners:{P62879;Q12983;Q13439;Q8N1I0}

6266 Pathogen[ P03346] interacts with 6 human partners:{Q13439;Q8IZD9;Q12983;P62879;Q9BZ29;Q8N1I0}

6267 Pathogen[ Q85601] interacts with 4 human partners:{P62879;Q13439;Q12983;Q8N1I0}

6268 Pathogen[ P14079] interacts with 4 human partners:{Q8IZD9;Q13439;Q12983;Q8N1I0}

6269 Pathogen[ P03383] interacts with 3 human partners:{P62879;Q13439;Q12983}

6270 Pathogen[ P03410] interacts with 5 human partners:{Q12983;Q8IZD9;Q13439;Q8N1I0;P62879}

6271 Pathogen[ P14075] interacts with 3 human partners:{Q12983;P62879;Q13439}

6272 Pathogen[ P0C206] interacts with 5 human partners:{Q13439;Q8IZD9;P62879;Q12983;Q8N1I0}

6273 Pathogen[ P03363] interacts with 4 human partners:{P62879;Q13439;Q8N1I0;Q8IZD9}

6274 [Cluster 571]GO:0005522+F molecular\_function [name] profilin binding [def] "Interacting selectively and non-covalently with profilin, an actin-binding protein that forms a complex with G-actin and prevents it from polymerizing to form F-actin." [ISBN

6275 Pathogen[ Q2Q067] interacts with 1 human partners:{O43516}

6276 Pathogen[ P0C214] interacts with 2 human partners:{Q9UI08;O43516}

6277 Pathogen[ P03346] interacts with 2 human partners:{O43516;Q9UI08}

6278 Pathogen[ Q85601] interacts with 1 human partners:{O43516}

6279 Pathogen[ P14079] interacts with 4 human partners:{O43516;P50552;O60610;Q9UI08}

6280 Pathogen[ P03383] interacts with 1 human partners:{O43516}

6281 Pathogen[ P03410] interacts with 4 human partners:{Q9UI08;O60610;O43516;P50552}

6282 Pathogen[ P14075] interacts with 1 human partners:{O43516}

6283 Pathogen[ P0C206] interacts with 2 human partners:{O43516;Q9UI08}

6284 Pathogen[ P03363] interacts with 2 human partners:{Q9UI08;O43516}

6285 [Cluster 572]GO:0000983+F molecular\_function [name] RNA polymerase II core promoter sequence-specific DNA binding transcription factor activity [def] "Interacting selectively and non-covalently with a specific DNA sequence in an RNA polymerase II (Pol II) core promoter, the region composed of the transcription start site and binding sites for transcription factors of the Pol II basal transcription machinery, in order to modulate transcription by Pol II. The transcription factor may or may not also interact selectively with a protein or macromolecular complex." [GOC

6286 Pathogen[ Q2Q067] interacts with 4 human partners:{Q9NQ87;P11831;Q9Y5J3;P42224}

6287 Pathogen[ P0C214] interacts with 4 human partners:{Q9Y5J3;P11831;P42224;Q9NQ87}

6288 Pathogen[ P03346] interacts with 5 human partners:{P11831;Q9Y5J3;Q9NQ87;P42224;Q92481}

6289 Pathogen[ Q85601] interacts with 4 human partners:{P11831;Q9NQ87;P42224;Q9Y5J3}

6290 Pathogen[ P14079] interacts with 4 human partners:{Q06413;Q9Y5J3;P42224;Q9NQ87}

6291 Pathogen[ P03383] interacts with 2 human partners:{P11831;Q9NQ87}

6292 Pathogen[ P03410] interacts with 3 human partners:{Q9Y5J3;P11831;Q9NQ87}

6293 Pathogen[ P14075] interacts with 2 human partners:{P11831;Q9NQ87}

6294 Pathogen[ P0C206] interacts with 4 human partners:{Q9NQ87;Q9Y5J3;P11831;P42224}

6295 Pathogen[ P03363] interacts with 3 human partners:{Q9Y5J3;Q9NQ87;P11831}

6296 [Cluster 573]GO:0017136+F molecular\_function [name] NAD-dependent histone deacetylase activity [def] "Catalysis of the reaction

6297 Pathogen[ Q2Q067] interacts with 2 human partners:{Q8IXJ6;Q8N6T7}

6298 Pathogen[ P0C214] interacts with 2 human partners:{Q8N6T7;Q8IXJ6}

6299 Pathogen[ P03346] interacts with 2 human partners:{Q8IXJ6;Q8N6T7}

6300 Pathogen[ Q85601] interacts with 2 human partners:{Q8IXJ6;Q8N6T7}

6301 Pathogen[ P14079] interacts with 2 human partners:{Q8N6T7;Q8IXJ6}

6302 Pathogen[ P03383] interacts with 1 human partners:{Q8N6T7}

6303 Pathogen[ P03410] interacts with 2 human partners:{Q8IXJ6;Q8N6T7}

6304 Pathogen[ P14075] interacts with 1 human partners:{Q8N6T7}

6305 Pathogen[ P0C206] interacts with 2 human partners:{Q8N6T7;Q8IXJ6}

6306 Pathogen[ P03363] interacts with 1 human partners:{Q8N6T7}  
6307 [Cluster 574]GO:0043425+F molecular\_function [name] bHLH transcription factor binding  
[def] "Interacting selectively and non-covalently with any of the basic Helix-Loop-Helix  
(bHLH) superfamily of transcription factors, important regulatory components in  
transcriptional networks of many developmental pathways." [PMID  
6308 Pathogen[ Q2Q067] interacts with 9 human  
partners:{O00233;O14503;O96004;P63279;P08047;P25791;P22415;Q15853;P15923}  
6309 Pathogen[ P0C214] interacts with 9 human  
partners:{P63279;O14503;P15923;P25791;Q15853;O96004;P22415;O00233;P08047}  
6310 Pathogen[ P03346] interacts with 12 human  
partners:{P15923;P63279;P08047;O14503;Q15853;O43680;O00233;O96004;O00327;P25791;Q9C0J  
9;P22415}  
6311 Pathogen[ Q85601] interacts with 10 human  
partners:{Q15853;O00327;O14503;O96004;P63279;P08047;P22415;O00233;P25791;P15923}  
6312 Pathogen[ P14079] interacts with 8 human  
partners:{P63279;Q15853;O96004;O00233;P15923;P25791;O14503;P22415}  
6313 Pathogen[ P03383] interacts with 9 human  
partners:{P08047;O00233;P15923;O14503;O96004;P25791;Q15853;P63279;P22415}  
6314 Pathogen[ P03410] interacts with 8 human  
partners:{O96004;P25791;O00233;P15923;P22415;Q15853;P63279;P08047}  
6315 Pathogen[ P14075] interacts with 9 human  
partners:{O00233;P63279;P15923;O14503;O96004;Q15853;P25791;P22415;P08047}  
6316 Pathogen[ P0C206] interacts with 9 human  
partners:{Q9C0J9;O96004;Q15853;O00327;P22415;P08047;P15923;P25791;O00233}  
6317 Pathogen[ P03363] interacts with 10 human  
partners:{Q15853;Q9C0J9;P25791;P15923;O00327;O96004;P22415;P63279;P08047;O14503}  
6318 [Cluster 575]GO:0003774+F molecular\_function [name] motor activity [def] "Catalysis  
of movement along a polymeric molecule such as a microfilament or microtubule, coupled to  
the hydrolysis of a nucleoside triphosphate." [GOC  
6319 Pathogen[ Q2Q067] interacts with 18 human  
partners:{P63172;Q9P2M7;Q9UKX2;Q8TF09;P60660;Q14204;P63167;Q9NP97;Q14203;Q13561;O0013  
9;P12883;Q07866;Q13409;P35579;Q96FJ2;P51808;O14576}  
6320 Pathogen[ P0C214] interacts with 32 human  
partners:{Q07866;A7E2Y1;Q9UKX2;O00159;Q9Y2K3;Q14203;O14645;Q9UM54;Q8TF09;P11055;P1464  
9;P60660;Q14204;P51808;O00139;P35580;P13535;P12882;P12883;Q9P2M7;P63172;O14576;Q96FJ2  
;Q7Z406;Q9NP97;P13533;Q92614;Q9Y623;Q13409;Q13561;P35749;P63167}  
6321 Pathogen[ P03346] interacts with 24 human  
partners:{Q96FJ2;P60660;O14576;Q96JP2;Q12840;P35579;Q92614;O00139;P51808;Q14204;Q1420  
3;Q8TF09;P14649;Q8IZS6;P63172;Q9ULV0;Q13409;Q9UKX2;O14645;P63167;Q9NP97;Q9P2M7;Q07866  
;Q13561}  
6322 Pathogen[ Q85601] interacts with 35 human  
partners:{Q13409;Q92614;Q9NP97;P51808;Q96JP2;P13533;P35579;P14649;Q14204;Q8IZS6;Q1420  
3;P63172;O96015;Q12840;Q9UKX2;Q9Y2K3;O00159;P12882;Q7Z406;P11055;O14576;P35749;P12883  
;O14645;P35580;Q9UM54;P13535;P60660;Q9Y623;Q8TF09;P63167;Q07866;O00139;Q9P2M7;Q13561}  
6323 Pathogen[ P14079] interacts with 27 human  
partners:{Q8TF09;P35579;P63172;P51808;Q07866;Q92614;Q96FJ2;Q12840;Q14204;Q9UKX2;Q9UM5  
4;P14649;Q9GZS0;Q9NP97;Q9UI46;O00139;P60660;Q13409;Q13561;P12883;Q9P2M7;O14645;P63167  
;O14576;Q8IZS6;O96015;Q14203}  
6324 Pathogen[ P03383] interacts with 14 human  
partners:{P51808;Q96FJ2;P63172;Q14203;Q9NP97;Q9UKX2;Q9P2M7;Q07866;P12883;P35580;P3557  
9;Q8TF09;Q13561;P63167}  
6325 Pathogen[ P03410] interacts with 37 human  
partners:{Q9Y6G9;Q14204;Q8IZS6;P51808;Q9UKX2;Q07866;Q13409;Q9NP97;Q13561;O00139;Q8TF0  
9;Q9UI46;Q92614;Q9ULV0;Q0VF96;P63172;O00159;P35579;P63167;Q8TCX1;Q12840;Q9UM54;O14576  
;P12882;P12883;P12883;P35580;P14649;P13533;Q9P2M7;Q96JP2;P60660;O14645;Q9GZS0;P13535;O43237;  
O96015;Q14203}  
6326 Pathogen[ P14075] interacts with 13 human  
partners:{Q9NP97;Q9UKX2;P51808;Q13561;Q8TF09;P63172;O00139;Q96FJ2;P35579;Q14203;Q0786  
6;Q9P2M7;P63167}  
6327 Pathogen[ P0C206] interacts with 35 human  
partners:{O14645;Q9UM54;Q9NP97;O14576;P13533;Q9Y623;P63167;P60660;Q8TF09;P11055;O4323  
7;Q13409;P14649;Q14204;P12883;P51808;O00159;Q96JP2;Q9Y6G9;P12882;Q8IZS6;P35749;P35579  
;Q92614;Q9UKX2;Q12840;O00139;Q13561;Q9P2M7;Q14203;P63172;P35580;P13535;O96015;Q07866}  
6328 Pathogen[ P03363] interacts with 26 human  
partners:{P63167;P14649;P35579;Q9GZS0;Q13561;Q9UKX2;Q96JP2;Q14204;Q07866;Q8IZS6;Q8TF0  
9;P63172;O14645;Q13409;P51808;Q92614;P60660;Q9UI46;Q9NP97;O00139;O43237;Q9P2M7;Q96FJ2  
;Q14203;O14576;Q12840}  
6329 [Cluster 576]GO:0003729+F molecular\_function [name] mRNA binding [def] "Interacting  
selectively and non-covalently with messenger RNA (mRNA), an intermediate molecule  
between DNA and protein. mRNA includes UTR and coding sequences, but does not contain  
introns." [GOC  
6330 Pathogen[ Q2Q067] interacts with 33 human  
partners:{Q15631;Q9UBB5;Q99497;P46782;Q9UBU9;Q9H6T0;P62277;O60535;P42766;Q9BZI7;P4975  
6;Q16630;P27797;P38159;Q9Y2T7;Q06787;Q9Y5S9;Q96QR8;Q9H9Z2;O95232;Q8WVV9;O43809;P23396  
;Q9H4D5;Q14493;Q9H0G5;P26651;P62854;Q96QD9;P60842;P18124;A7MD48;Q07352}  
6331 Pathogen[ P0C214] interacts with 35 human

6332 partners:{Q9BZI7;Q9H6T0;P42766;Q06787;P38159;P62854;P60842;Q86XF0;Q96QR8;Q9Y5S9;P23396;O60535;Q99497;Q9NZI8;O95232;Q16630;P62277;Q07352;P00374;Q14493;O43809;Q9Y2T7;Q9H0G5;Q9H9Z2;P26651;Q15631;P27797;Q96QD9;Q9UBB5;Q9H4D5;P46782;P18124;Q8WVV9;P49756;Q9UBU9}  
Pathogen[ P03346] interacts with 44 human

6333 partners:{Q9Y5S9;Q9BZI7;Q96QR8;Q06787;P62277;Q8NHU6;Q8WVV9;P0DJ3;Q9NZI8;Q96J94;P60842;A7MD48;P52756;Q9BWF3;P46782;Q92879;Q9H0G5;P62854;Q14493;O95232;Q15631;P49756;P42766;Q96QD9;Q9H6T0;Q07352;Q99497;P27797;O43809;P23396;Q9H4D5;Q9Y2T7;Q9UBU9;O60535;P51513;Q9H9Z2;P38159;P26651;Q99729;Q9NQ94;Q9UBB5;P62995;P18124;Q16630}  
Pathogen[ Q85601] interacts with 29 human

6334 partners:{Q9BZI7;Q99497;P49756;Q96QR8;Q9Y2T7;P62854;Q9UBU9;P23396;Q07352;Q06787;Q9H4D5;P27797;P26651;Q9H0G5;O95232;O60535;P42766;Q96QD9;P60842;P62277;P46782;P38159;Q9H9Z2;Q9UBB5;Q14493;Q15631;P18124;O43809;Q9Y5S9}  
Pathogen[ P14079] interacts with 35 human

6335 partners:{O43809;Q86XF0;P00374;Q8WVV9;P60842;P23396;Q9H4D5;Q96QR8;Q9UBB5;Q9Y5S9;Q8NHU6;Q99497;Q9UBU9;P18124;P42766;Q9H9Z2;Q9NQ94;P46782;Q9Y2T7;P62854;Q15631;P49756;Q9H6T0;A7MD48;P62277;Q9BZI7;Q16630;Q9H0G5;Q14493;Q06787;O95232;Q96QD9;P52756;Q07352;P38159}  
Pathogen[ P03383] interacts with 30 human

6336 partners:{P42766;Q9UBU9;P62854;Q9H9Z2;Q9H4D5;Q9Y5S9;P18124;Q06787;Q07352;Q15631;Q9UBB5;Q9Y2T7;P38159;O60535;P62277;A7MD48;Q9H6T0;Q8WVV9;Q14493;P46782;Q96QD9;P49756;P26651;O43809;O95232;Q9H0G5;Q96QR8;P23396;P27797;Q9BZI7}  
Pathogen[ P03410] interacts with 36 human

6337 partners:{Q99497;O60535;P18124;Q8NHU6;Q9Y5S9;P00374;Q14493;Q9H0G5;Q9UBB5;P23396;P26651;Q8WVV9;Q9BZI7;Q96QD9;O43809;Q9H4D5;P62277;P49756;P62854;Q86XF0;P46782;Q9UBU9;P60842;O95232;Q9H6T0;A7MD48;Q9H9Z2;Q15631;P42766;Q06787;Q16630;Q9Y2T7;Q96QR8;P38159;Q07352;P27797}  
Pathogen[ P14075] interacts with 30 human

6338 partners:{P42766;Q96QR8;O95232;O43809;P62277;P49756;Q14493;P26651;P38159;Q9H9Z2;Q9UBB5;P18124;Q96QD9;Q15631;P46782;Q9Y2T7;P27797;P23396;Q06787;Q07352;A7MD48;Q9Y5S9;Q9UBU9;Q9H0G5;Q9H4D5;Q8WVV9;P62854;O60535;Q9H6T0;Q9BZI7}  
Pathogen[ P0C206] interacts with 33 human

6339 partners:{Q9BZI7;P18124;P62854;P27797;P26651;Q9UBB5;Q06787;O95232;Q96QR8;Q15631;Q8WVV9;Q99497;O43809;Q9H0G5;P46782;Q9H9Z2;Q9H4D5;P38159;P23396;Q9UBU9;Q16630;O60535;P42766;Q9H6T0;Q96QD9;P62277;A7MD48;Q07352;P49756;P60842;Q9Y2T7;Q14493;Q9Y5S9}  
Pathogen[ P03363] interacts with 46 human

6340 partners:{Q06787;P23396;Q9H4D5;P0DJ3;P42766;Q8NHU6;O60535;O95232;Q92879;Q9H0G5;Q96QR8;Q15631;Q16630;P49756;Q9UBU9;Q9BWF3;Q99729;Q96QD9;Q07352;O43809;P38159;P46782;Q15717;Q9NZI8;P27797;Q9H9Z2;P60842;P26651;P62277;Q9BZI7;Q96J94;P05455;Q5SZQ8;A7MD48;P51513;P62995;Q14493;P62854;Q9Y2T7;P18124;Q9H6T0;Q9Y5S9;Q8WVV9;Q9NQ94;Q9UBB5;P52756}  
[Cluster 577]GO:0043142+F molecular\_function [name] single-stranded DNA-dependent ATPase activity [def] "Catalysis of the reaction

6341 Pathogen[ Q2Q067] interacts with 1 human partners:{Q06609}

6342 Pathogen[ P0C214] interacts with 1 human partners:{Q06609}

6343 Pathogen[ P03346] interacts with 1 human partners:{Q06609}

6344 Pathogen[ Q85601] interacts with 1 human partners:{Q06609}

6345 Pathogen[ P14079] interacts with 1 human partners:{Q06609}

6346 Pathogen[ P03383] interacts with 1 human partners:{Q06609}

6347 Pathogen[ P03410] interacts with 1 human partners:{Q06609}

6348 Pathogen[ P14075] interacts with 1 human partners:{Q06609}

6349 Pathogen[ P0C206] interacts with 1 human partners:{Q06609}

6350 Pathogen[ P03363] interacts with 1 human partners:{Q06609}

6351 [Cluster 578]GO:0005198+F molecular\_function [name] structural molecule activity [def] "The action of a molecule that contributes to the structural integrity of a complex or assembly within or outside a cell." [GOC

6352 Pathogen[ Q2Q067] interacts with 109 human

partners:{P19012;Q9Y2J2;P35908;O75161;P02538;P02545;P35321;P20700;P78559;Q9NSB2;P07196;Q14980;P41219;O14579;P53675;Q15323;P08779;I6L9F6;Q6A162;P08729;P78385;Q9UJG1;Q8IUC1;Q7Z3Z0;O75935;P23490;O76013;Q99456;Q8N1N4;P13646;Q7RTS7;Q9H307;P14136;Q3LI83;A6NCN2;Q9NSB4;Q03252;Q14152;Q14532;Q7Z3Y9;P15924;Q7Z3Y7;Q5BJF6;P12035;P08727;Q9C075;P22528;Q9H7C4;O95678;O15061;P04264;Q8N1A0;Q86Y46;Q9BYR6;Q9UBF2;Q9BZW7;P05787;O43236;P11171;Q04695;P35527;Q9UBC9;Q00610;Q14533;P22531;Q7Z3Y8;P78386;Q14525;P48668;Q3SY84;Q9BYR8;O43790;O76009;Q5TZA2;Q14CN4;O76014;P13645;P53618;P19013;P13647;Q8N9Z9;P09497;O76015;Q6KB66;Q14244;Q2M2I5;P35606;Q9Y678;P07476;P08670;Q9BYR7;P04259;P09496;Q9UH77;P02533;Q01546;P27816;P35900;Q16352;O76011;P05783;Q7Z794;Q5XKE5;P07197;Q9NRR3;Q6A163;Q92764;Q96CW5;P17661}

6353 Pathogen[ P0C214] interacts with 110 human

partners:{Q9H7C4;Q9NRR3;Q14CN4;O76011;P08729;Q14532;O75935;Q2M2I5;O75161;P35321;P12035;O76013;Q8IUC1;O15061;P05783;P35527;Q86Y46;Q7Z3Y8;P16157;P02538;P04264;P13646;P02533;Q7Z3Y7;P07476;O76015;Q9BYR7;Q7Z794;O14579;P15924;Q9BYR8;Q14152;Q3LI83;O95678;P53618;P41219;Q16352;P35606;Q9NSB2;Q3SY84;Q13515;Q9H307;P05787;P14136;P20700;Q96CW5;P35908;Q5XKE5;P08779;P27816;P23490;P78386;Q14980;Q8N1A0;P48668;P53675;Q14533;Q15124;Q03252;Q9UBF2;Q04695;Q14244;P78385;P22531;Q8N1N4;P08670;A6NCN2;Q9BZW7;P19012;P04259;P78559;I6L9F6;Q9C075;Q8N9Z9;P08727;P43243;Q99456;Q15323;Q6A162;P09497;O76009;P13647;Q7RTS7;Q5BJF6;P09496;Q6KB66;P07197;Q7Z3Z0;P02545;Q9UJG1;Q7Z3Y9;Q01546;Q9Y678;P19013;O43236;O43790;Q6A163;Q9UBC9;O76014;Q92764;P07196;Q9UH77;P11171;Q5TZA2;Q9NSB4;Q9BYR6;P13645;P35900;P17661;Q14525}

6354 Pathogen[ P03346] interacts with 118 human



- partners: {P13646; Q6KB66; P15924; Q8N1N4; P19012; P08729; P02538; Q86Y46; Q9C075; Q3SY84; Q16352; Q14525; P35321; P07196; P05783; Q7Z3Y8; P08779; P08727; Q9UH77; Q15323; Q13515; P35527; P20700; Q9NRR3; Q7Z3Z0; O75935; Q5XKE5; P43243; Q9NSB4; Q9H307; P05787; O76009; O95678; P19013; Q9Y678; P07476; Q15061; P53618; P14136; P48668; Q14532; Q8IUC1; P78386; O76014; A6NCN2; Q14579; Q96CW5; Q14152; Q9UBC9; P09496; P16157; P02545; Q14980; P35908; Q7Z794; P07197; O75161; Q2M2I5; P11171; Q04695; Q9NSB2; P17661; O43236; Q7Z3Y9; Q9UPM8; P02533; Q8N9Z9; P22531; O43790; P13645; Q9Y4G6; P23490; P58107; O43491; Q9UBF2; Q9UI47; P41219; P53675; Q14533; Q9BYR8; P78559; P12035; Q8N1A0; O76011; Q5BJF6; Q9Y2J2; P11137; P08670; P27816; Q03252; Q7RTS7; Q9H7C4; P09497; O76015; P35900; I6L9F6; Q14244; Q7Z3Y7; P13647; Q5TZA2; P22528; Q6A163; Q99456; Q6A162; P04259; P04264; Q14CN4; Q9BZW7; Q3LI83; P35606; Q01546; Q9BYR6; Q92764; P78385; Q00610; Q9UJG1; Q9BYR7; O76013}
- 6355 Pathogen[ Q85601] interacts with 111 human  
partners: {P13646; Q8N1N4; P20700; P08729; O75161; P02538; Q14525; P53675; P35321; P78386; P27816; P02545; Q9Y2J2; P16157; Q00610; O76013; P02533; P09496; Q9NSB4; Q5XKE5; P08779; Q3SY84; P17661; O14579; P07196; Q9H307; Q14244; P08670; P05787; Q9BYR8; P19013; O75935; O76009; Q14533; Q7Z3Y8; Q2M2I5; O95678; P14136; Q9UPM8; Q03252; P11171; Q5BJF6; P04259; Q96CW5; Q7Z3Y9; Q6A162; Q7Z3Y7; P15924; Q7Z794; Q9NRR3; Q13515; Q14CN4; Q92764; Q7Z3Z0; Q04695; P05783; P04264; Q15124; Q01546; Q9UBF2; P22531; O43790; Q9Y678; P19012; P48668; Q9C075; P13645; Q7RTS7; P12035; P41219; Q15323; Q14980; Q14152; P53618; P09497; P78385; P08727; P07197; O76011; I6L9F6; Q9BYR7; Q8IUC1; P13647; A6NCN2; Q5TZA2; Q14532; P35527; Q8N9Z9; Q6A163; P35908; O76015; P78559; P35900; Q16352; Q99456; Q3LI83; P35606; Q9UH77; P23490; Q9UBC9; Q9BYR6; Q8N1A0; Q9NSB2; Q9UJG1; Q86Y46; Q9H7C4; O76014; O43236; Q6KB66; Q15061; Q9BZW7}
- 6356 Pathogen[ P14079] interacts with 149 human  
partners: {P04083; Q14980; Q14525; P22528; O75161; Q9Y2J2; P48668; Q5TZA2; P22531; P35900; Q8N7P3; Q3SY84; C9JDP6; P08779; Q00610; Q9BYR8; P35908; Q7Z794; P04279; Q9H7C4; Q9NRR3; P41219; P61570; Q02383; Q5D862; P11171; Q14532; Q99456; P56750; Q9BYR6; Q7Z3Z0; O76011; P07476; Q9UI47; P15924; P35606; A6NM45; Q9UPM8; Q9NSB4; Q9UKH3; Q902F9; Q7RTS7; Q9Y678; P13646; A6NCN2; Q86U28; Q9BUE6; P08729; P68363; Q14244; P16157; Q15323; Q15124; O71037; Q01546; P35527; Q9BYR7; Q9Y4G6; Q04695; A6NFC5; P61550; Q9H307; Q8N1A0; Q00501; P07196; Q03252; P02533; P35611; P43243; Q15061; Q9C075; P14136; Q3LI83; P78559; Q8N6F1; P78385; Q5BJF6; P13645; Q7Z3Y9; Q6A162; Q8N1N4; Q69384; Q7Z3Y8; O75425; P20930; Q2M2I5; P07197; Q8IUC1; Q92764; Q7Z3Y7; P48681; P35321; Q6A163; Q9UBF2; Q86Y46; P23490; P35663; Q9UJG1; O95292; Q96B33; O76013; Q6KB66; O76015; P78386; Q14533; P09497; O76014; Q5XKE5; Q92817; Q9NX77; Q9UBC9; Q14CN4; P05783; Q8N8A4; O42043; Q9UH77; P20700; Q902F8; O14579; Q13515; P53675; P61567; P08670; Q16625; P04264; P11137; P61566; Q8N9Z9; P58107; O43790; O95678; Q9UEY8; P17661; P04259; P02545; O75935; P08727; O15259; Q9NSB2; P12035; Q14152; P27816; P09496; O76009; O43236; P13647; Q96CW5; P43320; Q9BZW7}
- 6357 Pathogen[ P03383] interacts with 106 human  
partners: {Q14244; O95678; P02545; P23490; P15924; P08729; Q8N1N4; Q86Y46; Q16352; P35321; P02533; P19013; Q00610; P08727; O14579; Q8IUC1; Q13515; Q9NSB4; Q9NSB2; Q9C075; P53618; Q8N1A0; Q9Y678; P08670; Q14CN4; P17661; Q5XKE5; O43236; Q99456; Q7Z3Z0; Q96CW5; Q6A162; Q9BYR6; Q2M2I5; Q9BZW7; P14136; P13645; O76011; Q7Z3Y8; O76014; Q14152; P53675; P05783; O15061; Q9BYR7; Q14525; P78386; Q14533; P35527; Q9UBC9; P08779; Q5TZA2; P27816; P41219; P05787; Q04695; P20700; Q01546; Q7Z794; Q9BYR8; P22531; Q9NRR3; P12035; P07197; P07476; Q9UH77; P02538; P07196; Q9UBF2; O75935; Q5BJF6; Q9UJG1; Q3SY84; P04264; P48668; P22528; Q15323; P35908; Q14980; Q9H307; Q9H7C4; P13647; Q03252; O75161; O76015; P78385; P78559; O76009; P13646; P04259; P19012; Q6A163; P09497; Q7RTS7; Q92764; Q8N9Z9; Q6KB66; A6NCN2; Q14532; Q7Z3Y9; Q3LI83; I6L9F6; Q7Z3Y7; P35900; O43790; O76013}
- 6358 Pathogen[ P03410] interacts with 161 human  
partners: {Q00610; P78385; P13645; P09496; Q9UH77; O95292; Q9UPM8; P13646; O71037; P43320; Q9BYR7; Q14CN4; P23490; P02533; P15924; Q96B33; P61550; P61565; Q9UKH3; O76011; P11137; Q15323; Q6A163; P22531; Q14525; Q9UEY8; Q9UBC9; Q8N1N4; Q9NX77; Q69384; Q8N7P3; P27816; P17661; O15061; Q9UJG1; P04264; P61567; O15259; Q902F9; P12035; P16157; P22528; Q7Z3Z0; Q16352; P35527; Q9NRR3; Q3LI83; P19013; O00501; P35606; Q14533; P58107; A6NCN2; P20700; Q13515; Q8N1A0; O95678; Q92764; P05787; Q3SY84; P35321; O14579; Q15124; O75161; Q8N6F1; O76015; Q5D862; Q7Z794; P48668; Q6A162; P02538; Q9NSB4; P56747; Q14152; P07196; Q9H7C4; P41219; P08779; P11171; P20930; Q902F8; Q14980; Q8IUC1; P61570; C9JDP6; P43243; Q8N9Z9; P35908; O43236; A6NFC5; P35663; O43491; Q9NPE6; Q03252; Q5TZA2; Q9Y678; Q9Y2J2; P02545; Q14532; P09497; Q02383; Q9C075; P78386; Q9BVA1; P53618; Q2M2I5; Q9Y4G6; Q5BJF6; O75935; Q7RTS7; P87889; P04259; P61566; Q04695; Q5XKE5; O76013; Q9BZW7; P08670; Q16625; P78559; O42043; P63135; P68363; P04279; O43790; Q9UI47; Q9BYR8; Q99456; Q01546; P35900; P14136; Q7Z3Y8; Q86U28; A6NM45; Q86Y46; Q6KB66; Q96CW5; Q9NSB2; P08729; P56750; P53675; O75425; P13647; Q9BYR6; Q14244; Q92817; I6L9F6; O76014; P08727; P05783; P35611; O95471; Q8N8A4; Q7Z3Y9; O76009; P07197; Q9UBF2; Q9H307; Q9BUE6; P07476; Q7Z3Y7}
- 6359 Pathogen[ P14075] interacts with 109 human  
partners: {Q9H307; Q92764; P48668; A6NFC5; O76014; Q7Z3Z0; P08729; P09497; Q16352; Q7Z3Y9; P35321; Q7Z3Y7; Q9Y2J2; Q9UBC9; P09496; P05783; P08727; Q9C075; O43236; P53675; Q9UBF2; Q8IUC1; Q9NSB4; P78559; P20700; Q9NSB2; O43790; P17661; P14136; Q13515; P19012; P23490; P13645; P12035; Q5TZA2; O15061; A6NCN2; Q9UJG1; P78385; Q86Y46; Q6A163; Q9H7C4; P9BYR6; P41219; Q9BYR8; Q15323; P02545; Q04695; P35908; Q5BJF6; Q7Z3Y8; Q14532; O76013; O75935; P08779; O75161; P22531; P04264; P13646; Q5XKE5; P53618; P04259; Q99456; O76015; Q9UH77; Q9NRR3; P08670; P22528; P78386; O76009; Q9Y678; P07197; Q7RTS7; P13647; Q14533; I6L9F6; P07196; Q9BZW7; Q7Z794; O95678; O76011; P35900; Q9BYR7; Q14525; Q14CN4; P07476; Q14980; Q8N1N4; P02538; P35527; Q01546; P27816; P02533; Q6A162; Q8N9Z9; Q6KB66; Q3SY84; Q96CW5; Q00610; P19013; P11171; Q03252; Q14152; Q2M2I5; Q14244; P05787; P15924; Q3LI83; O14579}
- 6360 Pathogen[ P0C206] interacts with 130 human  
partners: {Q9BYR7; P05787; Q9NSB2; O14579; Q14525; Q69384; Q9Y678; P53675; Q7Z3Y9; P17661; P08779; P07196; P35527; Q6A162; P78385; O15061; Q5BJF6; Q9UBC9; P02538; P53618; O75161; Q5TZA2; P08727; P41219; Q96CW5; Q13515; P22531; Q9NRR3; P04264; Q2M2I5; P13645; Q3LI83; P78559; Q9H307; P08729; Q00610; P19012; Q86U28; I6L9F6; Q6KB66; Q7Z794; P78386; Q9BYR6; Q9BZW7; O95678; Q9UI47; Q14533; Q

03252;Q9UJG1;O43236;P09496;Q15124;Q7Z3Z0;O76014;Q14244;Q9C075;O95292;Q14532;O76013;P23490;P19013;P16157;P11137;P27816;Q9UPM8;P13647;Q6A163;P35321;Q8N9Z9;O76011;P48668;P09497;P14136;P35606;Q9UKH3;A6NFC5;Q14152;O43491;P61570;P05783;Q8IUC1;Q14CN4;Q01546;P61565;O76009;Q7Z3Y8;Q7Z3Y7;P15924;Q9H7C4;P43243;O76015;P02545;Q9UBF2;Q5XKE5;P20700;Q8N1N4;Q3SY84;P35663;Q16181;Q9NSB4;P08670;P04259;Q16352;Q8N1A0;Q7RTS7;Q14980;P87889;O75935;Q9BYR8;Q15323;P12035;P02533;Q9UH77;Q86Y46;P07476;P13646;P35900;Q99456;Q9Y2J2;O75425;P35908;P11171;Q902F8;Q04695;O43790;Q9BUE6;Q92764;P07197;P22528;A6NCN2}

6361 Pathogen[ P03363] interacts with 123 human partners: {Q5BJF6;P78385;P05783;P02533;P11137;Q8N9Z9;P08779;O75161;P02538;P22531;P07197;Q14533;Q9BYR6;Q14244;P13645;Q14525;Q16352;Q9UI47;P35321;O15061;P02545;Q9BYR7;P78559;P16157;Q92764;Q7RTS7;O76014;Q86Y46;Q14980;P20700;P23490;Q9Y678;Q3SY84;Q3LI83;Q9UBC9;Q99456;P68363;Q9H307;Q14152;A6NCN2;O76009;Q00610;O14579;O76011;P48668;Q7Z3Y8;P53618;Q15323;P05787;Q7Z3Y9;Q9Y4G6;P15924;P35908;Q9H7C4;Q03252;Q5TZA2;Q9C075;P35900;Q6A162;Q13748;P07196;P08727;P27816;O43790;Q8IUC1;O76013;P13647;Q14532;P04259;Q14CN4;P35527;O95678;I6L9F6;Q6A163;P22528;P08670;P17661;Q9BYR8;P11171;O75935;P14136;Q9NSB2;P43243;P08729;P41219;P07476;Q7Z7M0;O43491;Q7Z3Z0;Q7Z3Y7;P12035;P35606;Q9UH77;Q9UBF2;P78386;Q9NRR3;Q9BZW7;P19013;O15259;P13646;O76015;Q6KB66;Q01546;Q99719;Q8N1N4;P04264;Q9UJG1;P09497;Q5XKE5;Q7Z794;P53675;Q92817;Q2M2I5;O43236;Q9Y2J2;Q9NSB4;P35663;Q8N1A0;P58107;Q13515;Q04695;Q96CW5;Q9UPM8}

6362 [Cluster 579]GO:0017091+F molecular\_function [name] AU-rich element binding [def] "Interacting selectively and non-covalently with a region of RNA containing frequent adenine and uridine bases." [GOC

6363 Pathogen[ Q2Q067] interacts with 6 human partners: {Q06265;Q9NPD3;O43809;P26651;Q07352;Q96B26}

6364 Pathogen[ P0C214] interacts with 7 human partners: {P31483;Q07352;O43809;Q9NPD3;P26651;Q06265;Q96B26}

6365 Pathogen[ P03346] interacts with 8 human partners: {Q96B26;P31483;Q07352;O43809;Q06265;P26651;Q9NPD3;Q86XN8}

6366 Pathogen[ Q85601] interacts with 6 human partners: {Q9NPD3;Q07352;P26651;Q06265;Q96B26;O43809}

6367 Pathogen[ P14079] interacts with 7 human partners: {O43809;P41238;Q9NPD3;Q96B26;Q06265;Q07352;P31483}

6368 Pathogen[ P03383] interacts with 6 human partners: {Q06265;Q07352;Q9NPD3;Q96B26;P26651;O43809}

6369 Pathogen[ P03410] interacts with 8 human partners: {Q06265;P41238;P26651;O43809;Q96B26;P31483;Q9NPD3;Q07352}

6370 Pathogen[ P14075] interacts with 6 human partners: {O43809;Q9NPD3;P26651;Q96B26;Q07352;Q06265}

6371 Pathogen[ P0C206] interacts with 9 human partners: {P31483;P26651;Q9NPD3;O43809;Q96B26;Q06265;Q86XN8;Q07352;P41238}

6372 Pathogen[ P03363] interacts with 8 human partners: {Q96B26;Q13151;Q9NPD3;Q07352;O43809;Q15717;P26651;P31483}

6373 [Cluster 580]GO:0042301+F molecular\_function [name] phosphate ion binding [def] "Interacting selectively and non-covalently with phosphate." [GOC

6374 Pathogen[ Q2Q067] interacts with 1 human partners: {Q04206}

6375 Pathogen[ P0C214] interacts with 2 human partners: {P00480;Q04206}

6376 Pathogen[ P03346] interacts with 2 human partners: {Q04206;Q9Y2J0}

6377 Pathogen[ Q85601] interacts with 2 human partners: {P00480;Q04206}

6378 Pathogen[ P14079] interacts with 1 human partners: {P00480}

6379 Pathogen[ P03383] interacts with 1 human partners: {Q04206}

6380 Pathogen[ P03410] interacts with 3 human partners: {Q04206;Q9Y2J0;P00480}

6381 Pathogen[ P14075] interacts with 1 human partners: {Q04206}

6382 Pathogen[ P0C206] interacts with 3 human partners: {Q9Y2J0;Q04206;P00480}

6383 Pathogen[ P03363] interacts with 1 human partners: {Q04206}

6384 [Cluster 581]GO:0070975+F molecular\_function [name] FHA domain binding [def] "Interacting selectively and non-covalently with a FHA domain of a protein. The FHA domain is a phosphopeptide recognition domain found in many regulatory proteins, and consists of approximately 80-100 amino acid residues folded into an 11-stranded beta sandwich." [GOC

6385 Pathogen[ Q2Q067] interacts with 1 human partners: {Q14676}

6386 Pathogen[ P0C214] interacts with 1 human partners: {Q14676}

6387 Pathogen[ P03346] interacts with 1 human partners: {Q14676}

6388 Pathogen[ Q85601] interacts with 1 human partners: {Q14676}

6389 Pathogen[ P14079] interacts with 1 human partners: {Q14676}

6390 Pathogen[ P03383] interacts with 1 human partners: {Q14676}

6391 Pathogen[ P03410] interacts with 1 human partners: {Q14676}

6392 Pathogen[ P14075] interacts with 1 human partners: {Q14676}

6393 Pathogen[ P0C206] interacts with 1 human partners: {Q14676}

6394 Pathogen[ P03363] interacts with 1 human partners: {Q14676}

6395 [Cluster 582]GO:0031432+F molecular\_function [name] titin binding [def] "Interacting selectively and non-covalently with titin, any of a family of giant proteins found in striated and smooth muscle. In striated muscle, single titin molecules span half the sarcomere, with their N- and C-termini in the Z-disc and M-line, respectively." [GOC

6396 Pathogen[ Q2Q067] interacts with 1 human partners: {Q15327}

6397 Pathogen[ P0C214] interacts with 2 human partners: {Q15327;Q86SG2}

6398 Pathogen[ P03346] interacts with 2 human partners: {Q86SG2;Q15327}

6399 Pathogen[ Q85601] interacts with 2 human partners:{Q86SG2;Q15327}  
6400 Pathogen[ P14079] interacts with 3 human partners:{Q86SG2;Q15327;O15273}  
6401 Pathogen[ P03383] interacts with 1 human partners:{Q15327}  
6402 Pathogen[ P03410] interacts with 3 human partners:{Q15327;O15273;Q86SG2}  
6403 Pathogen[ P14075] interacts with 1 human partners:{Q15327}  
6404 Pathogen[ POC206] interacts with 2 human partners:{Q15327;Q86SG2}  
6405 Pathogen[ P03363] interacts with 2 human partners:{Q15327;Q86SG2}  
6406 [Cluster 583]GO:0060090+F molecular\_function [name] binding, bridging [def] "The binding activity of a molecule that brings together two or more molecules, permitting those molecules to function in a coordinated way." [GOC  
6407 Pathogen[ Q2Q067] interacts with 2 human partners:{075340;Q15628}  
6408 Pathogen[ P0C214] interacts with 2 human partners:{Q15628;075340}  
6409 Pathogen[ P03346] interacts with 2 human partners:{075340;Q15628}  
6410 Pathogen[ Q85601] interacts with 2 human partners:{075340;Q15628}  
6411 Pathogen[ P14079] interacts with 2 human partners:{075340;Q15628}  
6412 Pathogen[ P03383] interacts with 1 human partners:{Q15628}  
6413 Pathogen[ P03410] interacts with 2 human partners:{Q15628;075340}  
6414 Pathogen[ P14075] interacts with 1 human partners:{Q15628}  
6415 Pathogen[ POC206] interacts with 2 human partners:{075340;Q15628}  
6416 Pathogen[ P03363] interacts with 2 human partners:{075340;Q15628}  
6417 [Cluster 584]GO:0043027+F molecular\_function [name] cysteine-type endopeptidase inhibitor activity involved in apoptotic process [def] "Stops, prevents or reduces the activity of a cysteine-type endopeptidase involved in the apoptotic process." [GOC  
6418 Pathogen[ Q2Q067] interacts with 3 human partners:{043715;P50453;O15392}  
6419 Pathogen[ P0C214] interacts with 4 human partners:{043715;P98170;P50453;O15392}  
6420 Pathogen[ P03346] interacts with 6 human partners:{O15392;P98170;P50453;Q92481;O43715;O95379}  
6421 Pathogen[ Q85601] interacts with 4 human partners:{043715;P98170;O15392;P50453}  
6422 Pathogen[ P14079] interacts with 5 human partners:{P09327;O15392;O43715;O95379;P50453}  
6423 Pathogen[ P03383] interacts with 2 human partners:{043715;P50453}  
6424 Pathogen[ P03410] interacts with 4 human partners:{O15392;O95379;O43715;P50453}  
6425 Pathogen[ P14075] interacts with 2 human partners:{P50453;O43715}  
6426 Pathogen[ POC206] interacts with 5 human partners:{P98170;P50453;O43715;O15392;O95379}  
6427 Pathogen[ P03363] interacts with 4 human partners:{P50453;O95379;P98170;O43715}  
6428 [Cluster 585]GO:0005057+F molecular\_function [name] receptor signaling protein activity [def] "Conveys a signal from an upstream receptor or intracellular signal transducer, converting the signal into a form where it can ultimately trigger a change in the state or activity of a cell." [GOC  
6429 Pathogen[ Q2Q067] interacts with 6 human partners:{Q92636;Q99933;Q9UER7;Q99717;Q15797;O95429}  
6430 Pathogen[ P0C214] interacts with 7 human partners:{Q9UER7;Q99933;O95429;Q99717;Q92636;Q15797;Q99704}  
6431 Pathogen[ P03346] interacts with 9 human partners:{Q15797;Q99717;Q9UER7;Q99704;Q9BWF2;Q12788;Q92636;O95429;Q99933}  
6432 Pathogen[ Q85601] interacts with 7 human partners:{Q92636;Q15797;Q9UER7;Q99933;Q99717;Q9BWF2;O95429}  
6433 Pathogen[ P14079] interacts with 8 human partners:{P13164;Q99704;Q9BWF2;O95429;Q92636;Q15797;Q9UER7;Q99933}  
6434 Pathogen[ P03383] interacts with 5 human partners:{Q15797;Q99717;Q9UER7;Q99933;O95429}  
6435 Pathogen[ P03410] interacts with 9 human partners:{Q99933;Q99717;Q9BWF2;Q9UER7;O95429;Q99704;Q15797;Q92636;Q12788}  
6436 Pathogen[ P14075] interacts with 4 human partners:{Q99933;Q99717;Q9UER7;O95429}  
6437 Pathogen[ POC206] interacts with 8 human partners:{Q99933;Q99717;Q9UER7;O95429;Q99704;Q15797;Q92636;Q9BWF2}  
6438 Pathogen[ P03363] interacts with 8 human partners:{Q9BWF2;Q99704;Q9UER7;Q15797;Q92636;O95429;Q99717;Q99933}  
6439 [Cluster 586]GO:0004725+F molecular\_function [name] protein tyrosine phosphatase activity [def] "Catalysis of the reaction  
6440 Pathogen[ Q2Q067] interacts with 9 human partners:{Q99502;O00167;Q9UNH5;P30304;Q9BV47;Q99504;P30307;P30305;Q16829}  
6441 Pathogen[ P0C214] interacts with 12 human partners:{P30307;Q9BV47;O00167;O95278;Q99504;P30305;Q16829;Q9UNH5;Q3ZCQ8;Q13615;P30304;Q99502}  
6442 Pathogen[ P03346] interacts with 19 human partners:{P43378;O95677;O00167;Q8TF42;P30304;Q9H3S7;Q99502;P30305;Q9BV47;Q16667;P17706;Q16829;Q3ZCQ8;O95278;Q9Y2R2;Q99504;P24666;Q9UNH5;P30307}  
6443 Pathogen[ Q85601] interacts with 12 human partners:{O95677;Q16829;Q99504;P30304;O95278;Q9BV47;Q9UNH5;P30305;P30307;Q99502;Q3ZCQ8;O00167}  
6444 Pathogen[ P14079] interacts with 10 human partners:{Q3ZCQ8;Q99502;P30307;Q16829;P30304;Q9BV47;Q99504;P30305;O00167;Q9UNH5}  
6445 Pathogen[ P03383] interacts with 5 human partners:{P30307;Q99504;O00167;P30304;Q9UNH5}

6446 Pathogen[ P03410] interacts with 11 human partners:{Q99502;Q9UNH5;Q16829;Q3ZCQ8;P30304;Q99504;P24666;O00167;P30305;Q9BV47;P30307}

6447 Pathogen[ P14075] interacts with 6 human partners:{Q99504;O00167;P30304;Q99502;Q9UNH5;P30307}

6448 Pathogen[ P0C206] interacts with 16 human partners:{O00167;Q99504;Q9BV47;P30307;Q13615;P30305;Q9Y2R2;Q16829;Q3ZCQ8;P24666;Q9UNH5;O95278;P30304;Q99502;O95677;P17706}

6449 Pathogen[ P03363] interacts with 16 human partners:{P17706;Q9H3S7;Q8TF42;Q9UNH5;Q9Y2R2;P43378;Q16667;Q3ZCQ8;P30304;Q16829;Q99504;Q12923;O00167;Q9BV47;P30307;P24666}

6450 [Cluster 587]GO:0016615+F molecular\_function [name] malate dehydrogenase activity [def] "Catalysis of the reversible conversion of pyruvate or oxaloacetate to malate." [GOC]

6451 Pathogen[ Q2Q067] interacts with 2 human partners:{P40925;P40926}

6452 Pathogen[ P0C214] interacts with 2 human partners:{Q5I0G3;P40926}

6453 Pathogen[ P03346] interacts with 2 human partners:{P40926;P40925}

6454 Pathogen[ Q85601] interacts with 2 human partners:{P40925;P40926}

6455 Pathogen[ P14079] interacts with 1 human partners:{P40925}

6456 Pathogen[ P03383] interacts with 2 human partners:{P40926;P40925}

6457 Pathogen[ P03410] interacts with 2 human partners:{P40926;P40925}

6458 Pathogen[ P14075] interacts with 2 human partners:{P40925;P40926}

6459 Pathogen[ P0C206] interacts with 2 human partners:{P40925;P40926}

6460 Pathogen[ P03363] interacts with 1 human partners:{P40925}

6461 [Cluster 588]GO:0004222+F molecular\_function [name] metalloendopeptidase activity [def] "Catalysis of the hydrolysis of internal, alpha-peptide bonds in a polypeptide chain by a mechanism in which water acts as a nucleophile, one or two metal ions hold the water molecule in place, and charged amino acid side chains are ligands for the metal ions." [GOC]

6462 Pathogen[ Q2Q067] interacts with 1 human partners:{P58557}

6463 Pathogen[ P0C214] interacts with 2 human partners:{P22695;P58557}

6464 Pathogen[ P03346] interacts with 1 human partners:{P58557}

6465 Pathogen[ Q85601] interacts with 1 human partners:{P58557}

6466 Pathogen[ P14079] interacts with 3 human partners:{P22695;Q96KR4;P58557}

6467 Pathogen[ P03383] interacts with 1 human partners:{P58557}

6468 Pathogen[ P03410] interacts with 3 human partners:{P22695;Q96KR4;P58557}

6469 Pathogen[ P14075] interacts with 1 human partners:{P58557}

6470 Pathogen[ P0C206] interacts with 3 human partners:{Q96KR4;P22695;P58557}

6471 Pathogen[ P03363] interacts with 1 human partners:{P58557}

6472 [Cluster 589]GO:0044325+F molecular\_function [name] ion channel binding [def] "Interacting selectively and non-covalently with one or more specific sites on an ion channel, a protein complex that spans a membrane and forms a water-filled channel across the phospholipid bilayer allowing selective ion transport down its electrochemical gradient." [GOC]

6473 Pathogen[ Q2Q067] interacts with 5 human partners:{Q6VY07;Q12959;Q9HD47;Q04917;Q13642}

6474 Pathogen[ P0C214] interacts with 6 human partners:{Q04917;Q13642;Q6VY07;Q12959;Q9HD26;Q9HD47}

6475 Pathogen[ P03346] interacts with 8 human partners:{Q9NRX4;Q9HD47;Q04917;Q14694;Q9HD26;Q13642;Q6VY07;Q12959}

6476 Pathogen[ Q85601] interacts with 6 human partners:{Q9HD47;Q13642;Q04917;Q9HD26;Q6VY07;Q12959}

6477 Pathogen[ P14079] interacts with 8 human partners:{Q6VY07;Q9NRX4;Q04917;Q9HD26;Q13642;O60610;O15273;Q9HD47}

6478 Pathogen[ P03383] interacts with 4 human partners:{Q9HD47;Q9HD26;Q6VY07;Q13642}

6479 Pathogen[ P03410] interacts with 9 human partners:{O60610;Q04917;Q12959;Q9HD47;O15273;Q9HD26;Q9NRX4;Q13642;Q6VY07}

6480 Pathogen[ P14075] interacts with 4 human partners:{Q9HD26;Q13642;Q9HD47;Q6VY07}

6481 Pathogen[ P0C206] interacts with 7 human partners:{Q13642;Q9NRX4;Q04917;Q9HD47;Q6VY07;Q12959;Q9HD26}

6482 Pathogen[ P03363] interacts with 7 human partners:{Q12959;Q9HD47;Q6VY07;Q8IWX8;Q13642;Q04917;Q9HD26}

6483 [Cluster 590]GO:0043015+F molecular\_function [name] gamma-tubulin binding [def] "Interacting selectively and non-covalently with the microtubule constituent protein gamma-tubulin." [GOC]

6484 Pathogen[ Q2Q067] interacts with 12 human partners:{P22392;Q86XR8;Q8TCI5;Q76KD6;Q99608;O75665;Q6QNY1;Q99689;Q9BPU9;Q92597;Q9BXF6;Q96CW5}

6485 Pathogen[ P0C214] interacts with 13 human partners:{Q8TCI5;Q99608;Q96CW5;Q76KD6;Q92597;Q8IYX8;Q9BPU9;Q86XR8;Q99689;Q9BXF6;O75665;P22392;Q6QNY1}

6486 Pathogen[ P03346] interacts with 14 human partners:{Q86XR8;Q9BPU9;Q99689;Q96CW5;Q8IYX8;Q76KD6;O75665;Q92597;Q6QNY1;P51587;P22392;Q99608;Q9BXF6;Q8TCI5}

6487 Pathogen[ Q85601] interacts with 14 human partners:{Q96CW5;Q99608;Q76KD6;Q8TCI5;Q86XR8;O75665;Q9BXF6;P22392;Q99689;Q9BPU9;Q92597}

7;Q6QNY1;P51587;Q8IYX8}  
6488 Pathogen[ P14079] interacts with 14 human  
partners:{P51587;Q92597;Q76KD6;Q99608;Q99689;Q9BXF6;P22392;Q8TCI5;Q9BPU9;O75665;Q86XR  
8;Q8IYX8;Q6QNY1;Q96CW5}  
6489 Pathogen[ P03383] interacts with 11 human  
partners:{Q86XR8;Q99608;Q99689;Q96CW5;P22392;Q92597;Q76KD6;Q8TCI5;Q9BXF6;O75665;Q6QNY  
1}  
6490 Pathogen[ P03410] interacts with 12 human  
partners:{O75665;Q6QNY1;Q99608;Q8IYX8;Q9BPU9;P51587;Q9BXF6;Q8TCI5;Q92597;Q96CW5;Q76KD  
6;Q99689}  
6491 Pathogen[ P14075] interacts with 12 human  
partners:{Q99608;Q76KD6;Q86XR8;Q6QNY1;Q9BPU9;Q8TCI5;Q9BXF6;O75665;Q92597;Q96CW5;P2239  
2;Q99689}  
6492 Pathogen[ P0C206] interacts with 14 human  
partners:{Q9BPU9;Q8TCI5;Q92597;Q86XR8;Q9BXF6;P22392;P51587;Q96CW5;Q6QNY1;Q99689;Q8IYX  
8;Q99608;O75665;Q76KD6}  
6493 Pathogen[ P03363] interacts with 12 human  
partners:{Q92597;Q8TCI5;Q99608;Q9BPU9;Q6QNY1;Q9BXF6;Q76KD6;Q8IYX8;Q86XR8;O75665;Q9968  
9;Q96CW5}  
6494 [Cluster 591]GO:0008139+F molecular\_function [name] nuclear localization sequence  
binding [def] "Interacting selectively and non-covalently with a nuclear localization  
sequence, a specific peptide sequence that acts as a signal to localize the protein  
within the nucleus." [GOC  
6495 Pathogen[ Q2Q067] interacts with 8 human  
partners:{Q14974;Q92973;O14787;Q14978;O00505;P25963;P52292;P52294}  
6496 Pathogen[ P0C214] interacts with 8 human  
partners:{O14787;P52294;Q14978;P25963;O00505;Q92973;P52292;Q14974}  
6497 Pathogen[ P03346] interacts with 8 human  
partners:{O14787;P25963;O00505;Q14978;Q92973;P52292;P52294;Q14974}  
6498 Pathogen[ Q85601] interacts with 8 human  
partners:{Q14978;Q14974;Q92973;O14787;P52292;O00505;P52294;P25963}  
6499 Pathogen[ P14079] interacts with 7 human  
partners:{P52294;Q14974;Q92973;O00505;O14787;P52292;Q14978}  
6500 Pathogen[ P03383] interacts with 8 human  
partners:{Q14978;O00505;P52292;Q92973;P25963;O14787;Q14974;P52294}  
6501 Pathogen[ P03410] interacts with 8 human  
partners:{Q14974;O00505;P52294;Q14978;Q92973;O14787;P25963;P52292}  
6502 Pathogen[ P14075] interacts with 8 human  
partners:{P52292;O14787;Q92973;P25963;O00505;P52294;Q14974;Q14978}  
6503 Pathogen[ P0C206] interacts with 8 human  
partners:{Q14974;P25963;O00505;Q92973;O14787;P52294;P52292;Q14978}  
6504 Pathogen[ P03363] interacts with 9 human  
partners:{Q14978;O14787;Q92973;P25963;Q7Z569;O00505;Q14974;P52292;P52294}  
6505 [Cluster 592]GO:0030060+F molecular\_function [name] L-malate dehydrogenase activity  
[def] "Catalysis of the reaction  
6506 Pathogen[ Q2Q067] interacts with 2 human partners:{P40925;P40926}  
6507 Pathogen[ P0C214] interacts with 1 human partners:{P40926}  
6508 Pathogen[ P03346] interacts with 2 human partners:{P40926;P40925}  
6509 Pathogen[ Q85601] interacts with 2 human partners:{P40925;P40926}  
6510 Pathogen[ P14079] interacts with 1 human partners:{P40925}  
6511 Pathogen[ P03383] interacts with 2 human partners:{P40926;P40925}  
6512 Pathogen[ P03410] interacts with 2 human partners:{P40926;P40925}  
6513 Pathogen[ P14075] interacts with 2 human partners:{P40925;P40926}  
6514 Pathogen[ P0C206] interacts with 2 human partners:{P40925;P40926}  
6515 Pathogen[ P03363] interacts with 1 human partners:{P40925}  
6516 [Cluster 593]GO:0031490+F molecular\_function [name] chromatin DNA binding [def]  
"Interacting selectively and non-covalently with DNA that is assembled into chromatin."  
[GOC  
6517 Pathogen[ Q2Q067] interacts with 9 human  
partners:{P10827;P41182;P10828;O15379;Q8N5F7;P11831;P27695;P84022;Q92769}  
6518 Pathogen[ P0C214] interacts with 8 human  
partners:{P27695;Q8N5F7;P84022;P11831;Q92769;P41182;O15379;P10828}  
6519 Pathogen[ P03346] interacts with 11 human  
partners:{P10827;P11831;O15379;Q92858;Q8N5F7;P84022;Q92769;P41182;P10828;P27695;Q9UIW  
0}  
6520 Pathogen[ Q85601] interacts with 9 human  
partners:{P11831;Q8N5F7;Q92769;P10827;P84022;O15379;P10828;P41182;P27695}  
6521 Pathogen[ P14079] interacts with 7 human  
partners:{O15379;P10828;P10827;P41182;Q92769;P27695;Q8N5F7}  
6522 Pathogen[ P03383] interacts with 7 human  
partners:{P11831;Q8N5F7;P84022;Q92769;O15379;P27695;P10828}  
6523 Pathogen[ P03410] interacts with 7 human  
partners:{P84022;P11831;P10828;Q92769;O15379;P41182;P27695}  
6524 Pathogen[ P14075] interacts with 7 human  
partners:{P11831;P10828;P27695;Q8N5F7;Q92769;O15379;P84022}  
6525 Pathogen[ P0C206] interacts with 9 human

```
partners:{P27695;P84022;Q92769;P41182;P10828;O15379;Q8N5F7;P11831;P10827}
6526 Pathogen[ P03363] interacts with 6 human
partners:{Q9UIW0;P10828;O15379;P11831;Q8N5F7;P84022}
6527 [Cluster 594]GO:0003688+F molecular_function [name] DNA replication origin binding
[def] "Interacting selectively and non-covalently with the DNA replication origin, a
unique DNA sequence of a replicon at which DNA replication is initiated and proceeds
bidirectionally or unidirectionally." [GOC
6528 Pathogen[ Q2Q067] interacts with 3 human partners:{Q9UBD5;O43913;Q13416}
6529 Pathogen[ P0C214] interacts with 4 human partners:{O43913;P10809;Q13416;Q9UBD5}
6530 Pathogen[ P03346] interacts with 4 human partners:{Q9UBD5;Q13416;O43929;O43913}
6531 Pathogen[ Q85601] interacts with 3 human partners:{O43913;Q9UBD5;Q13416}
6532 Pathogen[ P14079] interacts with 4 human partners:{Q13416;O43913;Q9UBD5;O43929}
6533 Pathogen[ P03383] interacts with 3 human partners:{Q9UBD5;O43913;Q13416}
6534 Pathogen[ P03410] interacts with 4 human partners:{O43929;Q13416;O43913;Q9UBD5}
6535 Pathogen[ P14075] interacts with 3 human partners:{Q9UBD5;O43913;Q13416}
6536 Pathogen[ P0C206] interacts with 3 human partners:{O43913;Q9UBD5;Q13416}
6537 Pathogen[ P03363] interacts with 3 human partners:{Q13416;Q9UBD5;O43913}
6538 [Cluster 595]GO:0051718+F molecular_function [name] DNA
(cytosine-5-)-methyltransferase activity, acting on CpG substrates [def] "Catalysis of
the reaction
6539 Pathogen[ Q2Q067] interacts with 2 human partners:{Q9Y6K1;Q9UBC3}
6540 Pathogen[ P0C214] interacts with 1 human partners:{Q9Y6K1}
6541 Pathogen[ P03346] interacts with 2 human partners:{Q9Y6K1;Q9UBC3}
6542 Pathogen[ Q85601] interacts with 2 human partners:{Q9Y6K1;Q9UBC3}
6543 Pathogen[ P14079] interacts with 2 human partners:{Q9Y6K1;Q9UBC3}
6544 Pathogen[ P03383] interacts with 1 human partners:{Q9Y6K1}
6545 Pathogen[ P03410] interacts with 2 human partners:{Q9UBC3;Q9Y6K1}
6546 Pathogen[ P14075] interacts with 1 human partners:{Q9Y6K1}
6547 Pathogen[ P0C206] interacts with 2 human partners:{Q9Y6K1;Q9UBC3}
6548 Pathogen[ P03363] interacts with 2 human partners:{Q9Y6K1;Q9UBC3}
6549 [Cluster 596]GO:0033699+F molecular_function [name] DNA 5'-adenosine monophosphate
hydrolase activity [def] "Catalysis of the reaction
6550 Pathogen[ Q2Q067] interacts with 1 human partners:{Q7Z2E3}
6551 Pathogen[ P0C214] interacts with 1 human partners:{Q7Z2E3}
6552 Pathogen[ P03346] interacts with 1 human partners:{Q7Z2E3}
6553 Pathogen[ Q85601] interacts with 1 human partners:{Q7Z2E3}
6554 Pathogen[ P14079] interacts with 1 human partners:{Q7Z2E3}
6555 Pathogen[ P03383] interacts with 1 human partners:{Q7Z2E3}
6556 Pathogen[ P03410] interacts with 1 human partners:{Q7Z2E3}
6557 Pathogen[ P14075] interacts with 1 human partners:{Q7Z2E3}
6558 Pathogen[ P0C206] interacts with 1 human partners:{Q7Z2E3}
6559 Pathogen[ P03363] interacts with 1 human partners:{Q7Z2E3}
6560 [Cluster 597]GO:0070628+F molecular_function [name] proteasome binding [def]
"Interacting selectively and non-covalently with a proteasome, a large multisubunit
protein complex that catalyzes protein degradation." [GOC
6561 Pathogen[ Q2Q067] interacts with 4 human partners:{Q9Y5K5;Q9NZJ4;Q16186;O15205}
6562 Pathogen[ P0C214] interacts with 5 human
partners:{Q16186;P46379;Q9Y5K5;Q9NZJ4;O15205}
6563 Pathogen[ P03346] interacts with 6 human
partners:{P25686;Q9NZJ4;P46379;O15205;Q16186;Q9Y5K5}
6564 Pathogen[ Q85601] interacts with 5 human
partners:{P46379;Q9Y5K5;O15205;Q9NZJ4;Q16186}
6565 Pathogen[ P14079] interacts with 5 human
partners:{Q9NZJ4;O00487;Q16186;Q9Y5K5;O15205}
6566 Pathogen[ P03383] interacts with 3 human partners:{Q9Y5K5;O15205;Q16186}
6567 Pathogen[ P03410] interacts with 5 human
partners:{O15205;P25686;Q9NZJ4;Q9Y5K5;Q16186}
6568 Pathogen[ P14075] interacts with 3 human partners:{Q16186;O15205;Q9Y5K5}
6569 Pathogen[ P0C206] interacts with 5 human
partners:{Q16186;Q9NZJ4;O15205;Q9Y5K5;P46379}
6570 Pathogen[ P03363] interacts with 5 human
partners:{P46379;Q16186;O15205;Q9Y5K5;Q9NZJ4}
6571 [Cluster 598]GO:0008262+F molecular_function [name] importin-alpha export receptor
activity [def] "Interacting selectively and non-covalently with importin-alpha to
mediate its transfer through the nuclear pore to the cytoplasm." [GOC
6572 Pathogen[ Q2Q067] interacts with 1 human partners:{P55060}
6573 Pathogen[ P0C214] interacts with 1 human partners:{P55060}
6574 Pathogen[ P03346] interacts with 1 human partners:{P55060}
6575 Pathogen[ Q85601] interacts with 1 human partners:{P55060}
6576 Pathogen[ P14079] interacts with 1 human partners:{P55060}
6577 Pathogen[ P03383] interacts with 1 human partners:{P55060}
6578 Pathogen[ P03410] interacts with 1 human partners:{P55060}
6579 Pathogen[ P14075] interacts with 1 human partners:{P55060}
6580 Pathogen[ P0C206] interacts with 1 human partners:{P55060}
6581 Pathogen[ P03363] interacts with 1 human partners:{P55060}
6582 [Cluster 599]GO:0003713+F molecular_function [name] transcription coactivator activity
```

[def] "Interacting selectively and non-covalently with a activating transcription factor and also with the basal transcription machinery in order to increase the frequency, rate or extent of transcription. Cofactors generally do not bind DNA, but rather mediate protein-protein interactions between activating transcription factors and the basal transcription machinery." [GOC

- 6583 Pathogen[ Q2Q067] interacts with 178 human  
partners: {Q13562;Q9UNN4;P27540;P25490;Q92585;Q9Y4A5;Q99583;Q8IZL2;Q9Y2Y0;Q8IZD2;Q99417;Q9Y5V3;Q16594;Q9UGU0;O75925;Q92922;Q9BUP3;Q96RK1;P06400;O00233;Q9HAZ2;P46937;O75151;O95402;O00287;P10589;Q9UI56;P62826;Q15596;O96019;Q01664;P51531;P61457;O96004;Q6P1K2;Q15653;Q86UU0;Q13772;P37275;Q14140;Q9HD15;P49116;Q16633;P55345;Q99990;Q93074;P18850;O95999;O75486;Q14192;P06748;Q9UNL4;O75586;Q9H0E3;Q03933;Q8N8G2;Q6ZRS2;O75448;Q9NPI1;O60244;P52657;P51610;Q14934;O14776;P17010;Q9Y4Z2;O75928;Q92905;Q86UE4;P15172;O94906;Q14CW9;P28702;P48552;Q12962;P78545;O00170;Q9Y4A8;Q9ULK4;P27695;Q8IX03;Q9Y5Z7;P53999;Q9ULW3;Q99966;Q8N0Z2;P78317;Q9BYK8;Q14186;O60828;O75529;P56693;Q92831;Q9UKD1;O14948;Q969G3;Q92539;Q15643;O75528;Q92925;O14497;Q9UHV7;P24864;Q9GZV5;Q9ULH7;Q15544;O00268;P51532;Q6P2C8;P62380;P50613;Q9NVC6;Q92830;O15164;Q14865;Q16514;Q13951;Q96GM5;Q16621;Q92993;P61244;Q8NFD5;Q5VTR2;Q9Y6J9;Q13503;Q58F21;O94805;P15336;Q9Y2X0;O94864;Q14686;Q96T76;Q15545;Q14872;P52655;P35269;Q12824;O43513;Q00653;Q969V6;Q5T230;Q9P1Z2;Q05086;Q8TAQ2;Q92793;P68036;P21675;Q9NPA8;Q9BQA5;O60869;Q86Y01;Q6STE5;Q8IY57;Q9Y2W1;P23497;Q9Y692;Q13952;P15923;Q13490;Q96BN2;P57086;Q8IXJ9;O95905;Q9H7E2;Q93062;Q92841;Q96JK9;Q14207;Q66K89;Q86X55;Q86TU7;P54821;Q06546;Q15650;Q8N9B5;Q14693;Q9UBS8;P33076}
- 6584 Pathogen[ P0C214] interacts with 175 human  
partners: {Q05086;Q92993;O00170;O00268;P18850;Q92585;Q58F21;Q8IX03;Q00653;P27695;O75486;P61244;Q9Y5Z7;Q9Y5V3;Q8N0Z2;Q14207;P51610;O75528;Q13952;Q06546;Q9Y6J9;P17010;Q9Y4A8;Q14865;Q12824;Q14872;Q13490;Q13772;O75925;O14497;O75586;P15336;P52657;Q8IZL2;P21675;P48552;P62380;P52655;P06748;P35269;Q9HD15;P50613;Q92841;P33076;Q9Y2X0;Q14CW9;Q5T230;Q16621;Q93074;P17275;Q92793;P56693;P53999;P46937;P61457;Q8N8G2;Q6ZRS2;P15172;Q9GZV5;Q99417;Q9UNN4;Q99990;Q9NVC6;Q9UNL4;Q6STE5;Q12962;P37275;Q96BN2;P55345;O75151;Q14686;O94864;Q15545;O60244;Q6P1K2;Q15653;Q8TAQ2;Q16594;Q9UKD1;Q86UE4;P78317;O94906;Q03933;O14776;O60828;Q9BYK8;P57086;Q92922;Q99966;Q16633;Q969G3;Q9BUP3;Q8IXJ9;Q14186;P49116;P15923;Q9UGU0;Q92905;Q92539;O14948;O43513;O95999;Q15544;Q9HAZ2;Q15643;Q96RK1;Q9NPA8;Q9UBS8;Q92925;Q14192;Q86TU7;Q96JK9;Q16514;Q4LE28;Q14934;Q15650;Q6P2C8;O75529;Q86UU0;Q9Y4A5;Q14140;Q9UHV7;P62826;P23497;P05412;Q8N9B5;Q92831;O75448;O15164;Q9NPI1;P24864;Q9H7E2;Q92830;Q9Y2Y0;Q9ULW3;Q9UI56;Q969V6;O95905;O96004;P27540;Q86X55;P78545;Q9ULH7;Q9BQA5;Q9P1Z2;Q15596;Q13503;O00233;O60869;Q8NFD5;Q86Y01;Q9ULK4;P51531;Q5VTR2;O94805;Q9Y2W1;Q01664;Q9Y692;Q99583;Q93062;Q96GM5;Q66K89;O95402;O96019;P06400;O00287;Q96T76;P51532;Q8IZD2;Q13951;Q9H0E3;Q8IY57;P17980;O75928;Q14693}
- 6585 Pathogen[ P03346] interacts with 192 human  
partners: {Q9Y6J9;P54821;P05412;Q92585;Q16621;P46937;Q13263;Q9Y4Z2;Q8N0Z2;Q5TD97;Q15788;O95402;Q14207;Q99966;Q8N8G2;P68036;Q93062;Q8N9B5;Q96GM5;Q86UE4;P06748;Q9UNL4;Q9ULW3;O75586;P15336;Q5VTR2;Q9Y5Z7;Q9H7E2;Q9BUP3;Q8NFD5;P06400;P51532;Q9GZV5;Q92841;Q15653;Q03933;P17275;P49116;Q14872;Q9HD15;P25490;P51610;O75486;Q92925;P15923;P15172;P56693;O00287;Q93074;Q9NPI1;Q9ULH7;P33076;O00170;P24864;O00268;O60244;Q8IX03;Q12824;P27540;Q969V6;Q9H0E3;Q92831;O75151;O94906;Q66K89;P17010;O00151;P62826;O95999;P18850;Q14934;Q99417;O00233;O96004;Q4LE28;Q5T230;O75448;O75925;P28702;Q14186;Q92830;Q6BN2;Q58F21;Q92794;Q15643;O43513;O96019;Q9Y692;Q99990;O14948;O94864;O95096;P53999;Q92539;Q06546;Q15596;Q02446;O75528;Q9Y4A5;O75529;P62380;Q6P2C8;Q13951;Q14192;Q9UNN4;Q9P1Z2;Q6STE5;O14497;P55345;P52657;O95905;O75840;O94805;P37275;Q16514;Q9Y5V3;Q12962;P78317;O95718;Q9UBS8;Q6ZRS2;Q14865;O75469;Q92905;Q16633;Q96RK1;P61244;Q92481;Q13952;Q969G3;P21675;P35269;Q9NVC6;Q92922;Q9UGU0;P48552;Q13490;Q9UL56;Q86X55;P23497;Q8IXJ9;Q05086;P27695;P61457;Q9BYK8;Q9Y2Y0;Q86UU0;Q92993;Q9Y2X0;Q99583;Q92793;P51531;O60869;P78545;Q14CW9;Q13503;O60828;Q86Y01;Q15545;Q8IY57;Q9ULK4;Q9HAZ2;Q9Y2W1;Q13562;O75928;P52655;Q8TAQ2;Q9NPA8;Q6P1K2;Q13285;Q01664;Q15544;Q8IZD2;Q13772;O15164;Q9UHV7;Q15650;Q96T76;Q9UKD1;Q96JK9;O14776;Q8IZL2;Q00653;Q9Y4A8;Q14693;Q14140;Q9BQA5;Q14686;P57086;Q16594;Q86TU7;P10589}
- 6586 Pathogen[ Q85601] interacts with 179 human  
partners: {Q5T230;Q96RK1;Q9UNN4;P52657;Q9ULW3;P78317;Q9Y2X0;Q92585;Q9Y5T5;Q15643;Q9H7E2;Q96T76;Q96JK9;O94864;P33076;O75528;O75928;Q13490;Q8N8G2;Q9Y4Z2;Q86X55;P15172;Q9ULK4;Q6STE5;O75151;Q14CW9;Q06546;Q16621;P06400;Q969V6;Q03933;Q9H0E3;Q13951;Q99417;Q9UHV7;Q92925;Q99966;Q14872;P28702;Q9Y4A5;Q86TU7;Q9Y2Y0;P62826;P78545;Q15545;Q9ULH7;Q86UU0;P25490;Q9UNL4;Q8IXJ9;O00268;Q9GZV5;O14497;O96019;O00151;P27540;P53999;O75448;Q92831;Q15653;O15164;Q16594;Q15596;O96004;Q9Y692;O94906;P68036;P17010;Q13952;O14776;P51610;Q9Y6J9;P51531;Q13562;Q14934;O00170;Q13263;Q96GM5;O00233;Q16633;Q14686;Q13503;Q14186;Q92830;Q15650;P51532;Q969G3;O14948;Q9HD15;O95402;O75529;Q9Y5V3;Q14192;Q8NFD5;Q92905;P35269;Q13772;P05412;Q8IZL2;Q6ZRS2;Q9Y4A8;Q16514;P18850;Q9BYK8;P57086;P06748;Q14865;Q86UE4;P50613;P15923;O95905;P56693;Q14207;Q99583;P61244;Q9BQA5;Q9NPI1;Q5VTR2;Q9Y5Z7;Q9UGU0;P37275;P21675;Q96BN2;P46937;Q6P2C8;Q9NPA8;Q9UBS8;Q12962;Q4LE28;O75486;P52655;Q99990;P49116;Q05086;Q66K89;Q14140;P48552;O00287;Q00653;Q92993;O95999;P15336;Q92793;O60869;Q9P1Z2;O75586;Q8N0Z2;O60828;Q86Y01;Q8IY57;O94805;Q8IX03;P17275;Q9Y2W1;Q92922;Q12824;Q8TAQ2;O60244;P62380;O75925;Q8N9B5;Q6P1K2;Q9BUP3;Q93074;P27695;Q01664;Q92539;Q58F21;Q15544;Q8IZD2;P61457;Q9NVC6;O43513;P55345;Q14693;P24864;Q9HAZ2;Q93062;P10589}
- 6587 Pathogen[ P14079] interacts with 173 human  
partners: {O14776;P48552;Q13952;Q13772;Q9H0E3;O60244;Q9NPI1;O95402;O15164;Q9Y2X0;O43513;Q9HAZ2;P33076;Q9Y4A5;O75151;Q9BYK8;P57086;Q6STE5;Q8N8G2;Q15596;O94906;Q9GZV5;Q06546;Q9Y6J9;Q14693;O60828;O75928;P35269;Q14186;O75528;O95999;P68036;Q8IXJ9;Q16594;Q14192;Q92830;P17010;Q9UKD1;P53999;P24864;Q8N9B5;Q96JK9;Q58F21;Q14207;Q5T230;Q92793;O00170;Q16633;P61457;Q9UI56;Q14CW9;Q92922;Q9Y2Y0;P51532;Q9UNL4;Q6P2C8;Q14865;O75529;Q93062;Q9

- ULK4;Q86TU7;Q9NVC6;Q99966;P51531;O96004;Q6ZRS2;Q8IZL2;O14497;Q8TAQ2;O95905;P46937;O60869;O00151;O00233;O94864;P62380;Q9BQA5;P15923;Q969V6;Q03933;Q96BN2;P23497;P51610;Q92539;O95718;Q9BUP3;O75448;P50613;Q9Y5Z7;Q99583;P55345;Q9ULW3;O94805;Q9Y5V3;Q86Y01;O75586;Q8IX03;Q12962;Q9ULH7;Q8IY57;Q9UHV7;Q5VTR2;Q14934;O75469;P27540;Q66K89;P17275;Q99990;P15336;Q9HD15;Q96GM5;P28702;Q8NFD5;O43294;Q15788;Q9UNN4;Q01664;Q99417;P27695;Q92905;Q96RK1;O00287;Q86UE4;Q86UU0;Q16621;P06748;P52657;P56693;Q9Y692;P18850;Q8N0Z2;Q5TD97;Q14872;Q9H7E2;O75925;Q13503;Q9UBS8;P78317;P78545;O14948;Q12824;P10589;Q93074;P62826;P49116;P05412;Q15650;Q9Y4A8;P25490;Q16514;Q14140;Q9P1Z2;Q92585;O75486;P61244;Q13951;Q96T76;Q14686;P17980;Q9Y2W1;Q9NPA8;Q9UGU0;P37275;Q92925;Q15643;Q02446;Q92993;P21675;O00268;Q6P1K2;Q15545;Q13490;Q15653}
- 6588 Pathogen[ P03383] interacts with 165 human  
partners: {O95402;Q8IXJ9;Q9Y2Y0;Q9Y6J9;Q92585;O75925;Q92831;Q96T76;Q96JK9;O14497;P33076;O96019;P06748;O75528;P27540;Q15544;Q9NPA8;Q12824;Q16633;P35269;Q00653;O94805;Q86UE4;Q15596;P15172;O75486;Q9ULK4;O00287;Q15650;Q9UKD1;Q9H7E2;P49116;Q9Y4A5;O60244;O94864;P53999;Q92905;O00233;Q4LE28;Q86X55;Q8IZL2;Q13490;Q14686;Q6STE5;Q9UBS8;P52655;Q92841;P37275;P15923;Q9ULW3;O00170;Q9UNL4;P78317;Q96BN2;Q96RK1;Q92993;O75151;Q969V6;Q86TU7;P61457;Q15653;Q93074;Q86UU0;Q9Y692;P06400;O94906;Q66K89;Q01664;Q14872;P62826;Q14CW9;Q9HAZ2;P52657;Q14934;O75448;Q96GM5;Q8N8G2;O96004;O75529;Q15643;P51610;Q13952;Q16594;Q14186;Q6P2C8;Q16621;Q9HD15;P17010;P50613;Q969G3;O14948;Q99990;Q13951;Q14192;Q9BQA5;Q92830;Q9Y5V3;Q9ULH7;Q99417;P28702;P51531;Q9UNN4;O00268;O60828;Q16514;Q8N0Z2;O14776;Q92925;Q8TAQ2;O95999;Q58F21;Q14207;Q9UI56;Q5VTR2;Q99583;Q8IX03;P23497;P21675;Q9BUP3;P68036;Q6P1K2;Q9Y4A8;Q5T230;Q8N9B5;P78545;Q8IY57;P51532;Q9NPI1;Q13772;Q12962;P27695;P57086;Q14140;P48552;Q9UHV7;Q8NFD5;Q92922;P15336;Q9NVC6;P18850;O60869;O75586;P24864;Q86Y01;Q15545;P17275;Q9Y2W1;P61244;P56693;P46937;Q9GZV5;Q06546;Q92539;Q9BYK8;Q9Y2X0;Q9P1Z2;Q92793;O95905;Q13503;Q14693;Q9H0E3;O75928;Q93062;Q03933;P05412}
- 6589 Pathogen[ P03410] interacts with 175 human  
partners: {Q15650;Q92830;P57086;Q92831;Q9Y2W1;Q9UI56;P52655;P53999;P51610;Q9UNN4;O75925;Q96T76;Q13772;P37275;Q93062;O00268;Q9HAZ2;O96004;Q66K89;Q5T230;Q96GM5;O14948;O14497;Q8IX03;Q8N8G2;O96019;Q9UKD1;Q9ULH7;Q12962;Q9BQA5;P21675;Q14686;Q13503;Q9BYK8;O75528;Q9NVC6;P78545;O00233;Q14207;Q13490;Q9UNL4;Q92905;Q14CW9;Q9Y692;Q86X55;P62380;O75928;O43294;Q15653;Q5VTR2;P06748;P06400;Q16633;P68036;P15923;P52657;Q8NFD5;P50613;Q03933;Q92585;P25490;P61244;Q14693;O75486;P17010;Q9GZV5;Q9H0E3;Q92925;Q969V6;Q9P1Z2;P27540;O75151;O94906;Q8IZL2;Q9NPA8;Q99990;Q96JK9;Q6ZRS2;Q92793;O95905;Q86Y01;Q8IY57;Q9ULK4;O95402;Q969G3;Q96BN2;O95999;O43513;Q9Y4A5;O94805;P62826;Q16514;Q9UBS8;P17275;O00170;Q16621;Q9Y5Z7;Q14872;Q86UE4;Q6P1K2;P78317;Q8IXJ9;Q92922;Q14140;O94864;Q99583;Q13952;Q14186;Q9BUP3;O14776;P28702;P56693;Q9H7E2;P46937;Q6P2C8;P35269;Q9Y6J9;P51532;Q16594;Q4LE28;P05412;O60828;Q15596;P51531;Q15544;Q15643;O60244;Q9UHV7;Q13951;Q9Y5V3;Q9ULW3;Q8N9B5;P27695;Q01664;O60869;Q96RK1;P49116;O00287;Q8TAQ2;P10589;Q8N0Z2;Q00653;Q99417;Q9Y2X0;Q93074;O00151;Q9Y4A8;Q6STE5;O75529;Q9HD15;Q12824;Q14865;Q9Y2Y0;Q92539;P48552;P15336;Q92993;P24864;Q58F21;Q9UGU0;P18850;P33076;Q14934;Q86UU0;O75448;Q14192;Q06546;Q15545;Q9NPI1;P17980;Q86TU7;O75586;P55345;P61457;Q99966}
- 6590 Pathogen[ P14075] interacts with 165 human  
partners: {Q16633;Q5VTR2;Q86UU0;Q9Y6J9;Q92585;Q9BUP3;Q9GZV5;Q15643;Q12962;P23497;Q99990;Q14207;P21675;Q13951;Q96GM5;P52657;Q8IXJ9;P68036;Q9NPI1;P05412;Q9BQA5;Q8IY57;O60828;Q92831;P78545;Q86UE4;P27695;P51532;O00233;Q14686;P17275;Q9Y4A8;P57086;Q06546;O14776;P61244;P50613;Q86TU7;Q03933;P51610;Q9Y2Y0;P15172;P33076;Q92922;O75925;Q96RK1;O00287;Q93062;Q15544;O75448;Q9Y4A5;P56693;P15336;Q15653;Q96BN2;P15923;O94906;Q13952;Q16594;Q8N0Z2;Q92993;O14497;O95402;Q9HAZ2;P27540;O75586;Q9H0E3;O96004;Q93074;O94864;Q14186;P49116;O96019;Q92539;Q9Y692;Q14CW9;Q4LE28;O14948;O00170;Q01664;Q13490;Q58F21;Q9UHV7;O75528;Q15650;Q86X55;P51531;Q14934;P35269;Q9NPA8;O60244;O75928;Q9ULW3;Q92925;P53999;P52655;Q9UKD1;P62826;Q16514;Q8TAQ2;Q9P1Z2;Q99417;P06748;Q15545;P61457;P78317;Q96JK9;Q969V6;O95999;P06400;Q12824;O94805;Q66K89;Q9ULK4;P17010;O00268;Q9UNL4;Q9UNN4;Q9H7E2;Q6P2C8;Q5T230;Q92793;P28702;Q9NVC6;Q92841;Q13772;P46937;Q9UBS8;P48552;O75486;Q13503;Q8NFD5;Q00653;Q6P1K2;O75529;Q16621;Q99583;P37275;O60869;Q6STE5;Q8IZL2;Q86Y01;Q92905;Q9Y5V3;Q9Y2W1;Q92830;O43513;O75151;Q8N9B5;Q14872;Q14192;Q9HD15;Q14693;Q9UI56;Q8N8G2;Q9Y2X0;Q96T76;Q15596;O95905;Q9ULH7;P18850;Q8IX03;Q14693;Q14140;P24864}
- 6591 Pathogen[ P0C206] interacts with 188 human  
partners: {P27695;Q99990;P46937;O75486;Q86Y01;Q92539;O75528;Q92830;Q06546;Q15545;Q16514;Q9BUP3;Q9HAZ2;P51532;Q9NPI1;Q9Y4A8;Q86UU0;Q13263;O94864;Q15544;Q9Y5T5;P17275;O14948;Q9UGU0;O75925;P25490;P68036;Q02446;P18850;Q9H7E2;Q9Y4Z2;P51531;P54821;Q99583;P62380;P52657;Q86X55;O75469;Q96JK9;P52655;O95999;Q03933;Q6STE5;P05412;Q05086;O00268;Q9Y5V3;Q13951;Q9Y5Z7;O75586;O60828;P15336;Q86TU7;Q15653;P57086;Q6ZRS2;Q6P2C8;Q92922;Q14186;Q14140;O15164;P62826;Q9P1Z2;P56693;O95905;Q92993;Q12824;Q9Y6J9;Q9UNN4;O75529;Q92925;P49116;Q9HD15;Q9UHV7;P78317;Q8TAQ2;Q92831;Q9BQA5;P33076;Q5VTR2;Q8N9B5;O96004;Q92793;P10589;Q9GZV5;O43513;Q9H0E3;O75151;Q9BYK8;Q6P1K2;Q13952;O95718;O14497;O96019;Q16633;Q969V6;P35269;Q15650;P53999;O95402;P50613;P17010;Q9Y4A5;Q8IXJ9;Q9ULW3;Q9UI56;Q8IZL2;Q14CW9;P51610;Q9UBS8;P15923;Q14686;O00151;Q9Y692;Q5T230;Q9Y2W1;P78545;O43294;Q92841;Q14872;P61244;O14776;O60869;P61457;Q14934;Q96T76;Q13562;Q96RK1;O60244;Q01664;Q99966;Q9ULK4;Q8IY57;Q5TD97;Q00653;P28702;Q15596;P37275;Q99417;Q9UKD1;Q16621;Q86UE4;O00287;P27540;Q9NVC6;P15172;Q969G3;Q13772;O94906;Q14192;Q96BN2;O75448;Q8NFD5;Q12962;Q58F21;P06748;O00170;Q13503;P55345;Q14865;Q9Y2X0;Q9Y2Y0;Q93062;P48552;Q66K89;Q15643;Q14693;Q9NPA8;Q8N0Z2;P24864;Q15788;Q93074;O00233;O94805;Q9ULH7;Q14207;Q8IX03;Q9UNL4;Q92585;Q8N8G2;Q8IZD2;P21675;Q4LE28;Q16594;Q92905;P06400;Q13490}
- 6592 Pathogen[ P03363] interacts with 165 human  
partners: {Q9UNN4;Q86Y01;Q9UKD1;Q13490;Q8N8G2;Q9ULW3;Q8IXJ9;Q9Y4Z2;Q6P1K2;Q9BUP3;P62380;Q92925;Q4LE28;Q14865;Q13503;P17010;P27540;P49116;P24864;Q6STE5;Q58F21;Q92539;Q06546}



;Q13952;Q92831;Q03933;Q9HD15;P37275;Q8TAQ2;Q9Y4A8;Q6ZRS2;P51532;Q16514;P18850;Q9H7E2;P25490;O14497;Q15545;O95905;P78317;O94864;Q96JK9;Q16621;Q5VTR2;Q66K89;O00268;Q99417;Q969V6;O14948;Q15596;Q86UE4;Q14686;P23497;P06400;P57086;P06748;Q05086;P17275;Q96RK1;Q8N0Z2;P52657;P61244;Q9UNL4;P35269;Q8IY57;Q12962;P15923;P15336;Q13951;Q15653;Q14140;P48552;Q9Y5Z7;P61457;O75529;P46937;Q14872;P56693;P28702;O96019;Q00653;Q15544;Q96T76;Q92841;Q96BN2;Q9GZV5;P78545;Q92830;Q9P1Z2;Q9NVC6;Q969G3;Q5T230;Q9NPI1;Q9ULH7;Q9BQA5;Q9UHV7;O75586;O96004;O94805;Q9BYK8;Q9NPA8;O75925;Q86U00;O00287;P54821;Q93074;Q9UBS8;Q9Y692;P53999;Q92793;Q16633;O75448;Q9UI56;O60869;P21675;P33076;Q14CW9;Q99990;P52655;O95402;Q9Y4A5;Q14186;Q9Y5V3;P05412;O94906;Q14934;O60244;O75486;O14776;Q9H0E3;Q14207;Q9Y2Y0;Q8NFD5;Q96GM5;Q9ULK4;Q8IX03;P51531;Q92922;O60828;P62826;Q6P2C8;P15172;O43513;O00170;Q15643;P10589;Q99583;Q8N9B5;Q01664;Q8IZL2;Q92993;Q9Y6J9;Q12824;Q86X55;Q92905;Q02446;O75528;Q92585;Q15650;P51610;O75928;P68036;Q16594;Q9HAZ2;Q14192}

6593 [Cluster 600]GO:0031434+F molecular\_function [name] mitogen-activated protein kinase kinase binding [def] "Interacting selectively and non-covalently with a mitogen-activated protein kinase kinase, any protein that can phosphorylate a MAP kinase." [GOC]

6594 Pathogen[ Q2Q067] interacts with 5 human partners:{Q12959;Q13233;Q9UQF2;Q13526;P78318}

6595 Pathogen[ P0C214] interacts with 5 human partners:{P78318;Q13526;Q13233;Q12959;Q9UQF2}

6596 Pathogen[ P03346] interacts with 5 human partners:{Q13526;Q13233;Q9UQF2;P78318;Q12959}

6597 Pathogen[ Q85601] interacts with 5 human partners:{Q9UQF2;Q13526;Q12959;Q13233;P78318}

6598 Pathogen[ P14079] interacts with 3 human partners:{Q9UQF2;Q13526;P78318}

6599 Pathogen[ P03383] interacts with 4 human partners:{Q13233;Q9UQF2;P78318;Q13526}

6600 Pathogen[ P03410] interacts with 5 human partners:{P78318;Q13526;Q12959;Q13233;Q9UQF2}

6601 Pathogen[ P14075] interacts with 4 human partners:{Q13526;P78318;Q13233;Q9UQF2}

6602 Pathogen[ P0C206] interacts with 5 human partners:{P78318;Q13526;Q9UQF2;Q13233;Q12959}

6603 Pathogen[ P03363] interacts with 5 human partners:{Q12959;Q9UQF2;Q13526;P78318;Q13233}

6604 [Cluster 601]GO:0042605+F molecular\_function [name] peptide antigen binding [def] "Interacting selectively and non-covalently with an antigen peptide." [GOC]

6605 Pathogen[ Q2Q067] interacts with 1 human partners:{Q92585}

6606 Pathogen[ P0C214] interacts with 1 human partners:{Q92585}

6607 Pathogen[ P03346] interacts with 1 human partners:{Q92585}

6608 Pathogen[ Q85601] interacts with 1 human partners:{Q92585}

6609 Pathogen[ P14079] interacts with 1 human partners:{Q92585}

6610 Pathogen[ P03383] interacts with 1 human partners:{Q92585}

6611 Pathogen[ P03410] interacts with 1 human partners:{Q92585}

6612 Pathogen[ P14075] interacts with 1 human partners:{Q92585}

6613 Pathogen[ P0C206] interacts with 1 human partners:{Q92585}

6614 Pathogen[ P03363] interacts with 1 human partners:{Q92585}

6615 [Cluster 602]GO:0016705+F molecular\_function [name] oxidoreductase activity, acting on paired donors, with incorporation or reduction of molecular oxygen [def] "Catalysis of an oxidation-reduction (redox) reaction in which hydrogen or electrons are transferred from each of two donors, and molecular oxygen is reduced or incorporated into a donor." [GOC]

6616 Pathogen[ Q2Q067] interacts with 3 human partners:{Q96KS0;Q9H6Z9;Q9GZT9}

6617 Pathogen[ P0C214] interacts with 3 human partners:{Q96KS0;Q9H6Z9;Q9GZT9}

6618 Pathogen[ P03346] interacts with 3 human partners:{Q9GZT9;Q96KS0;Q9H6Z9}

6619 Pathogen[ Q85601] interacts with 3 human partners:{Q9H6Z9;Q9GZT9;Q96KS0}

6620 Pathogen[ P14079] interacts with 4 human partners:{Q9GZT9;Q8IVL6;Q9H6Z9;Q96KS0}

6621 Pathogen[ P03383] interacts with 2 human partners:{Q96KS0;Q9H6Z9}

6622 Pathogen[ P03410] interacts with 3 human partners:{Q96KS0;Q9H6Z9;Q9GZT9}

6623 Pathogen[ P14075] interacts with 3 human partners:{Q96KS0;Q9GZT9;Q9H6Z9}

6624 Pathogen[ P0C206] interacts with 3 human partners:{Q96KS0;Q9GZT9;Q9H6Z9}

6625 Pathogen[ P03363] interacts with 1 human partners:{Q9H6Z9}

6626 [Cluster 603]GO:0005044+F molecular\_function [name] scavenger receptor activity [def] "Combining with any modified low-density lipoprotein (LDL) or other polyanionic ligand and delivering the ligand into the cell via endocytosis. Ligands include acetylated and oxidized LDL, Gram-positive and Gram-negative bacteria, apoptotic cells, beta-amyloid fibrils, and advanced glycation end products (AGEs)." [GOC]

6627 Pathogen[ Q2Q067] interacts with 1 human partners:{Q96JS3}

6628 Pathogen[ P0C214] interacts with 1 human partners:{Q96JS3}

6629 Pathogen[ P03346] interacts with 1 human partners:{Q96JS3}

6630 Pathogen[ Q85601] interacts with 1 human partners:{Q96JS3}

6631 Pathogen[ P14079] interacts with 2 human partners:{Q6AZY7;Q96JS3}

6632 Pathogen[ P03383] interacts with 1 human partners:{Q96JS3}

6633 Pathogen[ P03410] interacts with 2 human partners:{Q96JS3;Q6AZY7}

6634 Pathogen[ P14075] interacts with 1 human partners:{Q96JS3}

6635 Pathogen[ P0C206] interacts with 1 human partners:{Q96JS3}

6636 Pathogen[ P03363] interacts with 1 human partners:{Q96JS3}

6637 [Cluster 604]GO:0051082+F molecular\_function [name] unfolded protein binding [def]

"Interacting selectively and non-covalently with an unfolded protein." [GOC  
6638 Pathogen[ Q2Q067] interacts with 48 human  
partners:{Q9HAV7;O75494;P38646;Q13111;P61604;P50502;P08238;O76031;P07900;P06748;O7534  
7;P02511;P08107;Q8TAA5;Q99471;O00170;Q9UBS4;P11142;Q13112;P27797;Q9UDY4;Q9UBS3;P17987  
;Q15388;Q9NQP4;Q9UBK9;O75190;P50991;Q99733;O14656;Q9UHV9;Q99615;Q16543;Q15185;P25685;  
Q53G26;P61758;Q9Y375;O75953;P02489;P78371;P23284;P31689;Q96EY1;O94763;P62937;Q9NZD4;P  
14625}  
6639 Pathogen[ P0C214] interacts with 62 human  
partners:{O00170;Q9UDY4;Q58FG0;Q16543;P14625;Q99832;Q58FF7;P49368;Q15388;Q9HAV7;O7534  
7;P78371;P02489;P02511;P48643;P61758;P06748;O75190;Q13112;Q13111;P61604;Q9Y375;Q58FG1  
;O14656;P23284;Q9UBS3;Q8WW22;Q9UBS4;Q99615;O76031;Q99614;P45877;Q9UHV9;Q9NZD4;P49257;  
P38646;P10809;Q53G26;Q8TAA5;Q58FF3;Q58FF6;O75494;P27797;Q99471;Q58FF8;O60925;P17987;O  
60884;P50991;O94763;Q5F1R6;Q9NQP4;Q14568;P08107;Q9UBK9;Q99733;Q15185;O75953;Q96EY1;P5  
0502;P11142;P25685}  
6640 Pathogen[ P03346] interacts with 56 human  
partners:{P08107;Q5F1R6;Q99615;Q9UBS3;P07900;P25685;P06748;O75190;P14625;P50502;P0248  
9;Q99471;Q9UHV9;O14656;O94763;Q99733;Q9NZD4;P49257;P61604;Q9NQP4;P62937;P78371;Q15185  
;O00170;P11142;P25686;Q9H173;O76031;O75347;Q9HAV7;P38646;P02511;P50991;P49368;Q13111;  
Q16543;P31689;Q9Y375;Q53G26;P27797;Q96KC8;Q9UBS4;O60925;Q15388;Q9UDY4;Q13112;P61758;Q  
9UBK9;Q8TAA5;O75494;P08238;O75953;Q99614;Q96EY1;P23284;P17987}  
6641 Pathogen[ Q85601] interacts with 57 human  
partners:{P02489;Q16543;P08107;Q99733;P31689;Q8TAA5;Q15388;Q9NQP4;O75190;Q9UBS3;Q58FF  
8;Q99471;Q53G26;Q13112;P61604;Q9UHV9;Q9UBS4;Q8WW22;P61758;O60884;P27797;O75494;P17987  
;P25685;O75953;O00170;P50991;Q9Y375;P49257;P02511;P11142;P23284;O75347;P08238;Q9HAV7;  
Q99615;O14656;P06748;Q9UDY4;Q9NZD4;P07900;Q15185;P14625;P38646;O76031;O94763;Q58FF3;P  
50502;P78371;Q13111;P48643;Q9UBK9;Q14568;P62937;Q96EY1;P45877;Q5F1R6}  
6642 Pathogen[ P14079] interacts with 59 human  
partners:{P48643;P49257;O60925;P11142;Q9Y375;P05408;Q9UBS3;P02511;O00170;Q99733;P5099  
1;Q9UBS4;Q9UDY4;P78371;Q9UHV9;Q13112;P50990;Q13111;P62937;Q9NQP4;O75190;P61758;P02489  
;P25685;P61604;Q15388;O94763;Q99614;Q9NUG6;O14656;P45877;Q9NYU2;P08238;P17987;P08107;  
Q9NZD4;Q9UBK9;O75953;P07900;Q15185;P06748;P14625;P38646;P31689;Q99615;O75347;Q99471;O  
76031;P23284;P49368;Q16543;Q5F1R6;O75494;Q8WW22;O60884;P50502;Q96EY1;Q9HAV7;Q8TAA5}  
6643 Pathogen[ P03383] interacts with 44 human  
partners:{P08107;Q16543;Q9UHV9;O75494;P06748;P38646;P50502;P61604;Q9HAV7;P02511;P6293  
7;O00170;P07900;Q9NQP4;P31689;O75190;Q9UBS4;Q99733;Q9UBS3;O94763;Q13111;O75347;Q9UDY4  
;Q15388;Q99471;P14625;Q99615;Q15185;P11142;Q9Y375;Q8TAA5;P78371;O60925;P23284;O76031;  
Q9UBK9;P61758;P08238;O75953;Q13112;Q96EY1;Q53G26;P27797;Q9NZD4}  
6644 Pathogen[ P03410] interacts with 65 human  
partners:{Q9UDY4;P17987;O94763;Q99733;P49368;Q99832;P48643;Q53G26;Q15388;P49257;P5050  
2;P38646;Q16543;P08238;O14656;P25685;Q99614;P61604;P14625;Q8TAA5;P25686;P11142;P07900  
;O75953;P06748;Q9UBK9;Q9UBS3;Q5F1R6;Q99615;Q9NUG6;O76031;Q99471;P62937;P02489;P50990;  
P08107;O75190;O00170;P02511;Q58FF3;Q13111;P61758;P45877;Q13112;P05408;Q15185;Q9H173;Q  
9Y375;Q9NQP4;O60884;O75347;Q9UBS4;O60925;P78371;P31689;P23284;Q9UHV9;Q9HAV7;Q8WW22;Q9  
6EY1;P50991;Q9NYU2;O75494;Q9NZD4;P27797}  
6645 Pathogen[ P14075] interacts with 44 human  
partners:{O75953;Q9UBS3;Q16543;Q9HAV7;P31689;Q9Y375;P11142;O75347;P23284;Q99615;Q1538  
8;P61604;Q8TAA5;P78371;Q53G26;O75494;Q13111;Q9UDY4;P08238;P38646;O94763;Q15185;Q9UHV9  
;O76031;P07900;O00170;Q9UBK9;P50502;Q99733;P27797;Q9NQP4;P06748;P02511;P61758;O75190;  
P62937;P08107;O60925;Q9UBS4;Q13112;P14625;Q9NZD4;Q99471;Q96EY1}  
6646 Pathogen[ P0C206] interacts with 58 human  
partners:{Q13112;P48643;Q99733;Q9UDY4;P27797;Q5F1R6;Q13111;Q99615;Q53G26;Q9UBS4;Q9HAV  
7;Q15185;Q16543;P50991;O75494;P17987;O60884;Q99471;P38646;Q9UHV9;P50502;O60925;Q8WW22  
;P08238;Q58FF3;P07900;O14656;P49257;P23284;P08107;Q8TAA5;Q9Y375;Q15388;O75953;P49368;  
P61758;Q9UBS3;P25685;P45877;Q9UBK9;P06748;O00170;O75347;Q99614;P02511;O76031;Q9NZD4;P  
02489;Q96EY1;P62937;P11142;P78371;Q9NQP4;P31689;O94763;P61604;O75190;P14625}  
6647 Pathogen[ P03363] interacts with 51 human  
partners:{Q13112;O75190;P23284;O75953;Q99615;O75347;P62937;P54652;P07900;P50502;Q9Y37  
5;Q9UHV9;Q13111;Q15388;Q99733;Q9UBS3;Q9UDY4;Q5F1R6;Q9UBK9;Q99471;P06748;Q53G26;P50991  
;Q9NZN9;Q16543;O60925;P08107;P27797;O94763;Q9UBS4;P38646;P17987;Q8TAA5;P61758;O76031;  
Q15185;Q9NZD4;Q9NUG6;P25685;P78371;P02489;Q99614;Q9NQP4;Q96EY1;P08238;P48643;O00170;P  
11142;P61604;O75494;P49368}  
6648 [Cluster 605]GO:0004591+F molecular\_function [name] oxoglutarate dehydrogenase  
(succinyl-transferring) activity [def] "Catalysis of the reaction  
6649 Pathogen[ Q2Q067] interacts with 1 human partners:{Q9ULD0}  
6650 Pathogen[ P0C214] interacts with 1 human partners:{Q9ULD0}  
6651 Pathogen[ P03346] interacts with 1 human partners:{Q9ULD0}  
6652 Pathogen[ Q85601] interacts with 1 human partners:{Q9ULD0}  
6653 Pathogen[ P14079] interacts with 1 human partners:{Q9ULD0}  
6654 Pathogen[ P03383] interacts with 1 human partners:{Q9ULD0}  
6655 Pathogen[ P03410] interacts with 1 human partners:{Q9ULD0}  
6656 Pathogen[ P14075] interacts with 1 human partners:{Q9ULD0}  
6657 Pathogen[ P0C206] interacts with 1 human partners:{Q9ULD0}  
6658 Pathogen[ P03363] interacts with 1 human partners:{Q9ULD0}  
6659 [Cluster 606]GO:0030957+F molecular\_function [name] Tat protein binding [def]  
"Interacting selectively and non-covalently with Tat, a viral transactivating regulatory  
protein from the human immunodeficiency virus, or the equivalent protein from another

```

virus." [GOC
6660 Pathogen[ Q2Q067] interacts with 4 human partners:{P06748;P51532;Q12824;Q9P1T7}
6661 Pathogen[ P0C214] interacts with 5 human
partners:{P60709;Q12824;P06748;Q9P1T7;P51532}
6662 Pathogen[ P03346] interacts with 5 human
partners:{P06748;P51532;P60709;Q12824;Q9P1T7}
6663 Pathogen[ Q85601] interacts with 5 human
partners:{P60709;P51532;P06748;Q9P1T7;Q12824}
6664 Pathogen[ P14079] interacts with 5 human
partners:{P51532;P60709;P06748;Q9P1T7;Q12824}
6665 Pathogen[ P03383] interacts with 4 human partners:{P06748;Q12824;P51532;Q9P1T7}
6666 Pathogen[ P03410] interacts with 5 human
partners:{P06748;Q9P1T7;P51532;Q12824;P60709}
6667 Pathogen[ P14075] interacts with 4 human partners:{P51532;Q9P1T7;P06748;Q12824}
6668 Pathogen[ P0C206] interacts with 5 human
partners:{P60709;P51532;Q12824;P06748;Q9P1T7}
6669 Pathogen[ P03363] interacts with 5 human
partners:{P60709;P51532;P06748;Q9P1T7;Q12824}
6670 [Cluster 607]GO:0017137+F molecular_function [name] Rab GTPase binding [def]
"Interacting selectively and non-covalently with Rab protein, any member of the Rab
subfamily of the Ras superfamily of monomeric GTPases." [GOC
6671 Pathogen[ Q2Q067] interacts with 8 human
partners:{Q8IUD2;Q9HCH5;Q8TCI5;Q8NFW9;Q8TD16;O75154;Q96NA2;Q92597}
6672 Pathogen[ P0C214] interacts with 9 human
partners:{Q8NFW9;Q96NA2;Q8TCI5;Q9HCH5;Q92597;Q8TD16;Q96G01;Q8IUD2;O75154}
6673 Pathogen[ P03346] interacts with 16 human
partners:{Q96G01;Q8IUD2;Q96NA2;Q9HCH5;Q8IYJ3;Q8TDW5;Q92597;Q6ZP65;Q5JSH3;Q8TD16;Q8NFW
9;Q9ULV0;Q8TCI5;Q86YS3;O75154;Q9Y2J0}
6674 Pathogen[ Q85601] interacts with 12 human
partners:{Q8NFW9;O75154;Q5JSH3;Q86YS3;Q9HCH5;Q6ZP65;Q8TCI5;Q96G01;Q8TD16;Q92597;Q96NA
2;Q8IUD2}
6675 Pathogen[ P14079] interacts with 16 human
partners:{Q96NA2;Q8NEV8;Q9H1K0;Q8IYJ3;Q9HCH5;Q86YS3;Q92597;Q8IUD2;Q8NFW9;Q5JSH3;Q8TCI
5;Q15042;Q6ZP65;Q96G01;O75154;Q8TD16}
6676 Pathogen[ P03383] interacts with 6 human
partners:{Q9HCH5;Q92597;Q8TCI5;Q8IUD2;O75154;Q96NA2}
6677 Pathogen[ P03410] interacts with 19 human
partners:{Q9HCH5;Q5JSH3;O75154;Q9Y2J0;Q8TDW5;Q9ULV0;Q8TD16;Q8NFW9;Q86YS3;Q8IUD2;Q8NEV
8;Q96G01;Q9H1K0;Q8IYJ3;Q8TCI5;Q92597;Q6ZP65;Q96NA2;Q15042}
6678 Pathogen[ P14075] interacts with 6 human
partners:{Q9HCH5;Q96NA2;Q8IUD2;Q8TCI5;Q92597;O75154}
6679 Pathogen[ P0C206] interacts with 15 human
partners:{Q8TCI5;Q92597;O75154;Q9Y2J0;Q9H1K0;Q8NFW9;Q8IUD2;Q6ZP65;Q8IYJ3;Q96NA2;Q5JSH
3;Q9HCH5;Q86YS3;Q8TD16;Q96G01}
6680 Pathogen[ P03363] interacts with 9 human
partners:{Q8NFW9;Q92597;Q8TCI5;Q6ZP65;O75154;Q96NA2;Q9HCH5;Q8TD16;Q8IUD2}
6681 [Cluster 608]GO:0051019+F molecular_function [name] mitogen-activated protein kinase
binding [def] "Interacting selectively and non-covalently with a mitogen-activated
protein kinase." [GOC
6682 Pathogen[ Q2Q067] interacts with 4 human partners:{P17544;Q15025;Q13233;P78347}
6683 Pathogen[ P0C214] interacts with 4 human partners:{P17544;Q13233;P78347;Q15025}
6684 Pathogen[ P03346] interacts with 5 human
partners:{P78347;Q15025;P17544;Q13233;Q14596}
6685 Pathogen[ Q85601] interacts with 5 human
partners:{Q14596;Q15025;P17544;Q13233;P78347}
6686 Pathogen[ P14079] interacts with 4 human partners:{Q14596;Q15025;P17544;P78347}
6687 Pathogen[ P03383] interacts with 4 human partners:{P17544;Q13233;P78347;Q15025}
6688 Pathogen[ P03410] interacts with 5 human
partners:{Q15025;Q13233;Q14596;P17544;P78347}
6689 Pathogen[ P14075] interacts with 4 human partners:{P78347;Q15025;Q13233;P17544}
6690 Pathogen[ P0C206] interacts with 5 human
partners:{P17544;Q14596;Q13233;Q15025;P78347}
6691 Pathogen[ P03363] interacts with 4 human partners:{Q15025;P17544;P78347;Q13233}
6692 [Cluster 609]GO:0035064+F molecular_function [name] methylated histone residue binding
[def] "Interacting selectively and non-covalently with a methylated residue on a histone
protein. Histones are any of a group of water-soluble proteins found in association with
the DNA of plant and animal chromosomes." [GOC
6693 Pathogen[ Q2Q067] interacts with 29 human
partners:{Q9UPP1;P55895;Q9NXR8;Q12888;Q8WYH8;O43159;O75151;Q9HC52;Q96T88;O00257;P4269
5;O95931;Q9UNL4;Q8N5Y2;Q15022;Q86XI2;Q99549;Q96ES7;O15164;Q9H160;O75164;Q969R5;O14646
;Q9HCK8;Q86YI8;P45973;Q9Y468;Q9H7E2;Q14781}
6694 Pathogen[ P0C214] interacts with 27 human
partners:{Q86XI2;Q15022;O43159;P42695;O95931;Q9UNL4;O75164;O75151;Q9Y468;Q96T88;P5589
5;Q99549;O00257;Q9H160;Q9HCK8;Q86YI8;Q14781;O15164;Q9H7E2;P45973;Q12888;O14646;Q8WYH8
;Q969R5;Q96ES7;Q9UPP1;Q9HC52}
6695 Pathogen[ P03346] interacts with 32 human

```

partners:{Q12888;Q14781;Q96ES7;P45973;Q9Y657;Q9UNL4;Q8WYH8;Q9H7E2;Q15291;O43159;P55895;Q9HC52;O95931;O00257;O14646;Q86XI2;O75151;Q969R5;Q8N5Y2;Q15022;O75164;Q9HCK8;Q9UPP1;Q9Y468;P42695;Q9H7Z6;Q99549;Q86YI8;Q9H160;O15164;Q9NXR8;Q96T88}

6696 Pathogen[ Q85601] interacts with 30 human  
partners:{Q8N5Y2;Q9H7E2;O75151;Q9Y468;O95931;P42695;Q9H7Z6;Q9UNL4;Q96ES7;O43159;O14646;Q99549;O15164;Q12888;Q969R5;Q15022;P45973;Q96T88;Q86YI8;Q9UPP1;Q9HCK8;Q8WYH8;O75164;Q86XI2;O00257;Q9NXR8;Q9H160;P55895;Q9HC52;Q14781}

6697 Pathogen[ P14079] interacts with 26 human  
partners:{O15164;O75151;Q9HC52;Q99549;Q9Y468;Q9UNL4;O14646;O95931;P45973;O00257;Q14781;Q8N5Y2;Q969R5;Q9UPP1;Q9HCK8;Q96ES7;Q86YI8;Q9H7E2;O43159;Q86XI2;Q12888;P42695;Q15022;Q8WYH8;Q9Y657;Q9H160}

6698 Pathogen[ P03383] interacts with 24 human  
partners:{Q12888;Q86XI2;Q96ES7;Q9H7E2;O00257;Q9HC52;O95931;Q9UNL4;O14646;Q8WYH8;O75151;Q15022;O75164;O43159;Q99549;P45973;Q9H160;P55895;Q86YI8;Q9HCK8;Q969R5;Q9UPP1;Q9Y468;Q14781}

6699 Pathogen[ P03410] interacts with 28 human  
partners:{Q9UPP1;Q8WYH8;Q99549;O14646;Q9UNL4;O95931;P42695;P55895;P45973;Q9Y468;Q96ES7;O43159;O75151;Q9NXR8;Q9H160;Q9HCK8;Q9H7E2;Q12888;Q9Y657;O00257;Q14781;Q86XI2;O75164;Q8N5Y2;Q969R5;Q15022;Q9HC52;Q86YI8}

6700 Pathogen[ P14075] interacts with 24 human  
partners:{Q14781;O14646;Q969R5;Q86XI2;Q9UPP1;Q9Y468;O95931;P45973;O00257;Q9HCK8;Q9HC52;Q86YI8;Q99549;Q9UNL4;Q9H7E2;O43159;Q15022;Q12888;Q8WYH8;Q96ES7;Q9H160;P55895;O75151;O75164}

6701 Pathogen[ P0C206] interacts with 32 human  
partners:{Q9Y468;Q9HCK8;O43159;P45973;Q9HC52;Q8WYH8;Q9H7E2;Q9UPP1;P42695;O15164;Q9NXR8;Q9H160;Q14781;O75151;O14646;Q12888;Q86XI2;Q96T88;O95931;P55895;Q96ES7;Q9Y657;Q15022;Q86YI8;Q969R5;O75164;O00257;Q9UK53;Q99549;Q8N5Y2;Q9UNL4;Q9H7Z6}

6702 Pathogen[ P03363] interacts with 25 human  
partners:{Q9H160;Q8N5Y2;Q9Y468;Q14781;Q15022;Q15291;Q9HC52;P45973;Q86XI2;Q9H7E2;Q9Y657;O75164;Q9UNL4;Q99549;Q9HCK8;O95931;O14646;P42695;O43159;Q96T88;P55895;Q96ES7;O00257;Q8WYH8;Q12888}

6703 [Cluster 610]GO:0005159+F molecular\_function [name] insulin-like growth factor receptor binding [def] "Interacting selectively and non-covalently with the insulin-like growth factor receptor." [GOC]

6704 Pathogen[ Q2Q067] interacts with 4 human partners:{P61981;O14508;Q04917;P27986}

6705 Pathogen[ P0C214] interacts with 5 human  
partners:{Q04917;O14508;P61981;O15524;P27986}

6706 Pathogen[ P03346] interacts with 5 human  
partners:{O15524;Q04917;O14508;P61981;P27986}

6707 Pathogen[ Q85601] interacts with 4 human partners:{P61981;Q04917;O14508;P27986}

6708 Pathogen[ P14079] interacts with 3 human partners:{Q04917;P61981;O14508}

6709 Pathogen[ P03383] interacts with 2 human partners:{P27986;P61981}

6710 Pathogen[ P03410] interacts with 4 human partners:{P27986;Q04917;P61981;O14508}

6711 Pathogen[ P14075] interacts with 2 human partners:{P61981;P27986}

6712 Pathogen[ P0C206] interacts with 5 human  
partners:{Q04917;O15524;P27986;O14508;P61981}

6713 Pathogen[ P03363] interacts with 5 human  
partners:{O15524;P61981;Q04917;O14508;P27986}

6714 [Cluster 611]GO:0004483+F molecular\_function [name] mRNA (nucleoside-2'-O-)-methyltransferase activity [def] "Catalysis of the reaction

6715 Pathogen[ Q2Q067] interacts with 1 human partners:{Q8N1G2}

6716 Pathogen[ P0C214] interacts with 1 human partners:{Q8N1G2}

6717 Pathogen[ P03346] interacts with 1 human partners:{Q8N1G2}

6718 Pathogen[ Q85601] interacts with 1 human partners:{Q8N1G2}

6719 Pathogen[ P14079] interacts with 1 human partners:{Q8N1G2}

6720 Pathogen[ P03383] interacts with 1 human partners:{Q8N1G2}

6721 Pathogen[ P03410] interacts with 1 human partners:{Q8N1G2}

6722 Pathogen[ P14075] interacts with 1 human partners:{Q8N1G2}

6723 Pathogen[ P0C206] interacts with 1 human partners:{Q8N1G2}

6724 Pathogen[ P03363] interacts with 1 human partners:{Q8N1G2}

6725 [Cluster 612]GO:0004742+F molecular\_function [name] dihydrolipoyllysine-residue acetyltransferase activity [def] "Catalysis of the reaction

6726 Pathogen[ Q2Q067] interacts with 1 human partners:{P10515}

6727 Pathogen[ P0C214] interacts with 1 human partners:{P10515}

6728 Pathogen[ P03346] interacts with 1 human partners:{P10515}

6729 Pathogen[ Q85601] interacts with 1 human partners:{P10515}

6730 Pathogen[ P14079] interacts with 1 human partners:{P10515}

6731 Pathogen[ P03383] interacts with 1 human partners:{P10515}

6732 Pathogen[ P03410] interacts with 1 human partners:{P10515}

6733 Pathogen[ P14075] interacts with 1 human partners:{P10515}

6734 Pathogen[ P0C206] interacts with 1 human partners:{P10515}

6735 Pathogen[ P03363] interacts with 1 human partners:{P10515}

6736 [Cluster 613]GO:0031545+F molecular\_function [name] peptidyl-proline 4-dioxygenase activity [def] "Catalysis of the reaction

6737 Pathogen[ Q2Q067] interacts with 3 human partners:{Q96KS0;Q9H6Z9;Q9GZT9}

6738 Pathogen[ P0C214] interacts with 3 human partners:{Q96KS0;Q9H6Z9;Q9GZT9}

6739 Pathogen[ P03346] interacts with 3 human partners:{Q9GZT9;Q96KS0;Q9H6Z9}  
6740 Pathogen[ Q85601] interacts with 3 human partners:{Q9H6Z9;Q9GZT9;Q96KS0}  
6741 Pathogen[ P14079] interacts with 3 human partners:{Q9GZT9;Q9H6Z9;Q96KS0}  
6742 Pathogen[ P03383] interacts with 2 human partners:{Q96KS0;Q9H6Z9}  
6743 Pathogen[ P03410] interacts with 3 human partners:{Q96KS0;Q9H6Z9;Q9GZT9}  
6744 Pathogen[ P14075] interacts with 3 human partners:{Q96KS0;Q9GZT9;Q9H6Z9}  
6745 Pathogen[ P0C206] interacts with 3 human partners:{Q96KS0;Q9GZT9;Q9H6Z9}  
6746 Pathogen[ P03363] interacts with 1 human partners:{Q9H6Z9}  
6747 [Cluster 614]GO:0004373+F molecular\_function [name] glycogen (starch) synthase  
activity [def] "Catalysis of the reaction  
6748 Pathogen[ Q2Q067] interacts with 2 human partners:{P54840;P13807}  
6749 Pathogen[ P0C214] interacts with 2 human partners:{P54840;P13807}  
6750 Pathogen[ P03346] interacts with 2 human partners:{P13807;P54840}  
6751 Pathogen[ Q85601] interacts with 2 human partners:{P13807;P54840}  
6752 Pathogen[ P14079] interacts with 2 human partners:{P13807;P54840}  
6753 Pathogen[ P03383] interacts with 2 human partners:{P13807;P54840}  
6754 Pathogen[ P03410] interacts with 2 human partners:{P54840;P13807}  
6755 Pathogen[ P14075] interacts with 2 human partners:{P54840;P13807}  
6756 Pathogen[ P0C206] interacts with 2 human partners:{P13807;P54840}  
6757 Pathogen[ P03363] interacts with 2 human partners:{P13807;P54840}  
6758 [Cluster 615]GO:0003964+F molecular\_function [name] RNA-directed DNA polymerase  
activity [def] "Catalysis of the reaction  
6759 Pathogen[ Q2Q067] interacts with 1 human partners:{O14746}  
6760 Pathogen[ P0C214] interacts with 1 human partners:{O14746}  
6761 Pathogen[ P03346] interacts with 1 human partners:{O14746}  
6762 Pathogen[ Q85601] interacts with 1 human partners:{O14746}  
6763 Pathogen[ P14079] interacts with 1 human partners:{O14746}  
6764 Pathogen[ P03383] interacts with 1 human partners:{O14746}  
6765 Pathogen[ P03410] interacts with 2 human partners:{O14746;P63135}  
6766 Pathogen[ P14075] interacts with 1 human partners:{O14746}  
6767 Pathogen[ P0C206] interacts with 1 human partners:{O14746}  
6768 Pathogen[ P03363] interacts with 1 human partners:{O14746}  
6769 [Cluster 616]GO:0034513+F molecular\_function [name] box H/ACA snoRNA binding [def]  
"Interacting selectively and non-covalently with box H/ACA small nucleolar RNA." [GOC  
6770 Pathogen[ Q2Q067] interacts with 1 human partners:{Q14978}  
6771 Pathogen[ P0C214] interacts with 1 human partners:{Q14978}  
6772 Pathogen[ P03346] interacts with 1 human partners:{Q14978}  
6773 Pathogen[ Q85601] interacts with 1 human partners:{Q14978}  
6774 Pathogen[ P14079] interacts with 1 human partners:{Q14978}  
6775 Pathogen[ P03383] interacts with 1 human partners:{Q14978}  
6776 Pathogen[ P03410] interacts with 1 human partners:{Q14978}  
6777 Pathogen[ P14075] interacts with 1 human partners:{Q14978}  
6778 Pathogen[ P0C206] interacts with 1 human partners:{Q14978}  
6779 Pathogen[ P03363] interacts with 1 human partners:{Q14978}  
6780 [Cluster 617]GO:0016798+F molecular\_function [name] hydrolase activity, acting on  
glycosyl bonds [def] "Catalysis of the hydrolysis of any glycosyl bond." [GOC  
6781 Pathogen[ Q2Q067] interacts with 11 human  
partners:{Q9UIF7;Q969S2;Q8NFI3;P35573;O43598;O15527;P78549;Q13569;Q8WVR8;P13051;Q53HV  
7}  
6782 Pathogen[ P0C214] interacts with 13 human  
partners:{Q8WVR8;Q8NFI3;Q9H227;Q53HV7;Q9Y3R4;P35573;Q9UIF7;O43598;P78549;O15527;Q1356  
9;P13051;P16278}  
6783 Pathogen[ P03346] interacts with 13 human  
partners:{O43598;Q9UIF7;P35573;Q8NFI3;Q969S2;P16278;Q53HV7;Q8WVR8;P13051;P78549;Q1356  
9;Q8WVR8;O15527}  
6784 Pathogen[ Q85601] interacts with 10 human  
partners:{O15527;O43598;Q969S2;P13051;Q96FI4;P35573;Q53HV7;Q13569;Q9UIF7;P78549}  
6785 Pathogen[ P14079] interacts with 26 human  
partners:{Q8TAT5;P16278;Q9UIF7;P04066;P54802;P35475;O43598;Q9NTJ4;Q8NFI3;O15527;P7854  
9;P06280;P54803;Q32M88;O60502;P35573;Q969S2;Q96FI4;Q8WVR8;Q9Y3R4;Q53HV7;P17050;Q13569  
;Q8WVR8;P17405;P13051}  
6786 Pathogen[ P03383] interacts with 7 human  
partners:{O15527;Q53HV7;P35573;O43598;Q13569;Q8WVR8;P13051}  
6787 Pathogen[ P03410] interacts with 23 human  
partners:{P54803;Q96FI4;Q8NFI3;P04066;O60502;P54802;P35573;P16278;Q8TAT5;P78549;Q53HV  
7;Q9NTJ4;O15527;Q13569;Q8WVR8;Q969S2;Q9Y3R4;P13051;Q32M88;O43598;P17405;Q8WVR8;Q9UIF7  
}  
6788 Pathogen[ P14075] interacts with 9 human  
partners:{P13051;O43598;Q8WVR8;O15527;Q53HV7;Q9UIF7;P35573;Q8NFI3;Q13569}  
6789 Pathogen[ P0C206] interacts with 16 human  
partners:{O43598;O15527;Q8NFI3;Q53HV7;Q13569;Q9Y3R4;Q8WVR8;Q8TAT5;Q96FI4;Q969S2;Q8WVR  
8;P16278;P13051;Q9UIF7;P35573;P78549}  
6790 Pathogen[ P03363] interacts with 11 human  
partners:{O15527;Q96FI4;P13051;Q8NFI3;Q9UIF7;Q13569;Q8WVR8;P35573;O43598;Q969S2;Q53HV  
7}  
6791 [Cluster 618]GO:0016651+F molecular\_function [name] oxidoreductase activity, acting on

NADH or NADPH [def] "Catalysis of an oxidation-reduction (redox) reaction in which NADH or NADPH acts as a hydrogen or electron donor and reduces a hydrogen or electron acceptor." [GOC

6792 Pathogen[ Q2Q067] interacts with 4 human partners:{075489;075251;075306;Q9BQ95}

6793 Pathogen[ P0C214] interacts with 7 human partners:{075306;P28331;Q16718;075489;Q9BQ95;075251;Q16698}

6794 Pathogen[ P03346] interacts with 4 human partners:{075489;075251;075306;Q9BQ95}

6795 Pathogen[ Q85601] interacts with 2 human partners:{075306;Q9BQ95}

6796 Pathogen[ P14079] interacts with 8 human partners:{Q9BQ95;O43181;075306;Q6P2C0;075251;075489;Q16718;P03901}

6797 Pathogen[ P03383] interacts with 4 human partners:{075251;075489;Q9BQ95;075306}

6798 Pathogen[ P03410] interacts with 8 human partners:{075251;Q6P2C0;075489;Q9BQ95;O43181;Q16718;075306;P03901}

6799 Pathogen[ P14075] interacts with 4 human partners:{075306;075251;Q9BQ95;075489}

6800 Pathogen[ P0C206] interacts with 5 human partners:{Q6P2C0;075251;075306;075489;Q9BQ95}

6801 Pathogen[ P03363] interacts with 1 human partners:{Q9BQ95}

6802 [Cluster 619]GO:0017174+F molecular\_function [name] glycine N-methyltransferase activity [def] "Catalysis of the reaction

6803 Pathogen[ Q2Q067] interacts with 1 human partners:{Q14749}

6804 Pathogen[ P0C214] interacts with 1 human partners:{Q14749}

6805 Pathogen[ P03346] interacts with 1 human partners:{Q14749}

6806 Pathogen[ Q85601] interacts with 1 human partners:{Q14749}

6807 Pathogen[ P14079] interacts with 1 human partners:{Q14749}

6808 Pathogen[ P03383] interacts with 1 human partners:{Q14749}

6809 Pathogen[ P03410] interacts with 1 human partners:{Q14749}

6810 Pathogen[ P14075] interacts with 1 human partners:{Q14749}

6811 Pathogen[ P0C206] interacts with 1 human partners:{Q14749}

6812 Pathogen[ P03363] interacts with 1 human partners:{Q14749}

6813 [Cluster 620]GO:0035198+F molecular\_function [name] miRNA binding [def] "Interacting selectively and non-covalently with a microRNA, a 21-23 nucleotide RNA that is processed from a stem-loop RNA precursor (pre-miRNA) that is encoded within plant and animal genomes." [PMID

6814 Pathogen[ Q2Q067] interacts with 3 human partners:{Q8TCS8;Q9H9Z2;Q01860}

6815 Pathogen[ P0C214] interacts with 3 human partners:{Q8TCS8;Q9H9Z2;Q01860}

6816 Pathogen[ P03346] interacts with 4 human partners:{Q01860;Q9BWF3;Q8TCS8;Q9H9Z2}

6817 Pathogen[ Q85601] interacts with 3 human partners:{Q8TCS8;Q9H9Z2;Q01860}

6818 Pathogen[ P14079] interacts with 4 human partners:{Q06413;Q9H9Z2;Q01860;Q8TCS8}

6819 Pathogen[ P03383] interacts with 3 human partners:{Q9H9Z2;Q8TCS8;Q01860}

6820 Pathogen[ P03410] interacts with 3 human partners:{Q8TCS8;Q01860;Q9H9Z2}

6821 Pathogen[ P14075] interacts with 3 human partners:{Q01860;Q9H9Z2;Q8TCS8}

6822 Pathogen[ P0C206] interacts with 3 human partners:{Q8TCS8;Q01860;Q9H9Z2}

6823 Pathogen[ P03363] interacts with 3 human partners:{Q9BWF3;Q9H9Z2;Q01860}

6824 [Cluster 621]GO:0003824+F molecular\_function [name] catalytic activity [def] "Catalysis of a biochemical reaction at physiological temperatures. In biologically catalyzed reactions, the reactants are known as substrates, and the catalysts are naturally occurring macromolecular substances known as enzymes. Enzymes possess specific binding sites for substrates, and are usually composed wholly or largely of protein, but RNA that has catalytic activity (ribozyme) is often also regarded as enzymatic." [ISBN

6825 Pathogen[ Q2Q067] interacts with 82 human partners:{P78346;Q9H0C8;P07195;Q8WY54;Q9H9T3;P30419;Q8N0Y7;Q14674;P30793;Q9P0M2;O95243;P22033;P19367;Q9UIF7;Q7Z2E3;Q96C86;P05062;P30084;Q969S2;P07954;P49789;Q8N8U2;Q9NQE9;P37837;Q96AB3;Q96DP5;O15355;P22557;P35573;P21953;P13196;P60174;P07902;P06746;P29372;P49356;P34896;P09972;P54840;P09467;Q9UQ84;P18669;Q16719;Q9HD40;P13807;P07814;Q9GZX7;O15527;P13984;P40925;P12956;Q9P2R7;P39748;Q9Y2P8;P15259;Q9BYZ2;Q9Y697;O95865;P78549;P07738;P35813;P04053;O75688;Q96NY9;P35269;P40926;P00338;Q7Z4H3;P16455;Q9NP87;P49593;P11172;P27815;Q14689;Q9HC16;P32929;P07864;Q14442;O43708;Q15750;P28715;O15297}

6826 Pathogen[ P0C214] interacts with 152 human partners:{Q16795;Q04446;O95243;Q9GZZ9;P30084;Q14527;Q8IX04;Q9Y617;O60346;P35813;Q9NSE4;Q96C86;P22695;O95045;P11177;P49902;P07864;P15259;Q7Z4H3;P49789;P06746;Q5I0G3;Q96GK7;P53396;P35269;P27815;P07814;P42898;P07954;Q9H227;Q9P0M2;Q96NY9;P29401;P34897;Q14689;Q96DP5;P12277;P11172;Q9Y315;Q9HA92;Q9Y232;Q8N819;P40939;Q9Y3R4;Q6ZMR3;O95396;P40926;O60551;P22557;P51854;P35573;P13196;Q8WXG1;Q9BXD5;Q13057;Q9Y3Z3;P05062;P32929;Q9P2R7;O60825;P50747;Q8N8U2;P28715;Q9Y2P8;Q9HC16;P30793;P37837;P09467;Q13011;Q96AT9;P22033;Q16831;P14618;Q9Y697;O95865;P21953;P34896;P49356;O14832;P52788;Q6P587;Q7Z2E3;Q86XE5;Q9UIF7;O00154;Q9BWD1;Q93100;Q86WU2;O15382;P19623;P19367;Q96AB3;P23921;P13984;P09972;P16455;Q9P0J1;Q9H9T3;Q15750;P54687;Q07343;O00442;Q9NQE9;O15297;Q13126;Q8N3J5;Q8WY54;P07902;P54840;P39748;P04053;Q96I99;Q8N0Y7;P42765;Q9GZX7;O15305;P78549;P49593;A6NK58;P29372;P30419;Q9UQ84;Q96BT7;O76083;Q15274;Q9HD40;P16118;O75688;P04424;P60174;Q9NP87;P35520;O43708;O15527;P07738;Q9BYZ2;Q9H0C8;Q8NFF5;P46020;P78346;O00757;P13807;P31939;P11586;Q9P2J9;P12956;P07195;Q16719;P30566;Q16773;P16278;Q14674}

6827 Pathogen[ P03346] interacts with 86 human partners:{Q9Y3Z3;Q96AB3;P09972;Q9H0C8;O60346;Q9P0M2;P35813;P28715;P13807;P12956;P78346;Q8WY54;Q96C86;Q9NQE9;P07814;Q14527;Q969U6;P07738;P19367;P49789;Q86WU2;P60174;Q9UIF7;Q9Y697;P09467;P22557;P35573;P13196;P49593;Q8N8U2;Q96NY9;P37837;Q969S2;P16278;P18669;P10144;Q96DP5;Q9Y2P8;P13984;P49356;Q8WV3;Q8N0Y7;Q7Z4H3;Q9H9T3;Q9BWD1;P27815;P29372;O

- 15297;P32929;P40926;P53611;O95865;O75688;Q9HD40;Q16719;Q15750;P00338;O43708;Q96BT7;P78549;P35269;P54840;P04053;Q9UQ84;P07195;O95243;P42765;P15259;O15355;Q7Z2E3;Q14442;Q9Y6F1;Q9Y232;P05062;P11172;Q9NP87;P39748;P40925;P07954;O15527;P06746;Q14674;A0AVT1;Q14689;P30084;Q9BYZ2}
- 6828 Pathogen[ Q85601] interacts with 97 human  
partners: {P10144;O15527;P60174;O60346;O75688;P13807;P78346;Q7Z4H3;O43708;Q15750;Q14689;Q6ZMR3;Q9UQ84;P49789;Q969S2;Q9H0C8;Q9HD40;P49593;P16455;Q16719;Q9H9T3;Q9HC16;P07814;P18669;Q9Y697;P27815;P11172;O60825;Q9BXD5;Q8N8U2;P37837;Q9GZX7;O95243;O00757;Q9UGP5;Q14674;O60551;P13196;P21953;P05062;Q9P2R7;P16118;Q96FI4;P15259;P30793;P07954;Q96NY9;Q96C86;P28715;Q9Y6F1;P07864;O15355;P13984;P35573;O95045;P34896;P14618;P09972;Q9BYZ2;Q96AB3;O15297;P35269;Q9Y2P8;P22033;P49356;P09467;Q04446;P40925;Q9P0M2;Q8WY54;P04053;P07195;Q9UIF7;P07902;Q7Z2E3;P06746;P54840;Q9BWD1;Q9NP87;Q8N0Y7;P39748;P78549;P30419;P07738;P35813;Q14527;P00338;P30084;O15382;P40926;Q9NQE9;P12956;O95865;Q8N3J5;P32929;P29372;P19367}
- 6829 Pathogen[ P14079] interacts with 160 human  
partners: {Q5VV42;P51854;P22695;Q8NBV4;P15259;P78346;Q6P587;O00442;Q8TAT5;P16278;O14841;P42357;P21953;P13196;Q9UIF7;P07954;Q8NFF5;P28715;P49593;Q96AB3;Q14442;O15305;Q96NY9;P35269;O15297;P04066;P00338;P22234;Q9UGP5;P31939;Q9Y617;P31941;Q9P0M2;P13807;O15514;Q9Y315;Q16831;P35475;P29372;P09972;Q93100;P11172;Q9NTJ4;P22557;P29401;Q9HC16;O43813;Q96C23;P51606;Q15750;P30084;O43708;O60346;Q96C86;Q14674;P16455;O95954;P34897;Q32NB8;Q9P2R7;O15527;P78549;Q8TDX5;P30793;P07738;P06280;Q69YN2;P07195;P35813;Q8N0X4;Q9GZX7;Q8WY54;P12956;Q6ZMR3;P54803;Q86WU2;Q9Y3Z3;Q9H9T3;Q32M88;Q16719;O14832;O60502;Q13057;O95243;Q9H0C8;P35573;Q9Y697;Q969S2;Q13510;P07864;O60551;P30419;O95045;P16930;P49356;Q8N8U2;Q96FI4;P22033;Q14689;Q9HA92;Q96B70;P32929;Q96GK7;Q2TBE0;P49902;Q9BXD5;Q9Y3R4;Q9NP87;Q9HAC7;P17050;P06746;P27815;P13984;P30039;Q96SZ6;P04053;P19623;O75688;Q9NSE4;O15067;P18669;Q9NS86;P07902;P49773;Q9Y2P8;Q96CD2;Q9Y234;P09467;P04424;O15382;Q9HD40;P40925;P49789;P54840;O15355;Q86XE5;Q9BYZ2;Q7Z2E3;Q15274;A6NK58;Q6ZV70;Q96PZ2;Q8WVB3;Q9UQ84;P10144;Q9Y6F1;Q8N0Y7;P07814;Q96DP5;Q9NQE9;Q96EY9;P46020;O95865;P39748;P34896;Q8WXG1;P42898;Q6P2I3;P37837;Q7Z4H3}
- 6830 Pathogen[ P03383] interacts with 51 human  
partners: {Q7Z2E3;P06746;P40926;O95865;Q9Y2P8;Q9H0C8;P35269;Q9HD40;P49789;P19367;P00338;O15527;Q9BYZ2;P07902;P07864;P34896;P18669;Q9P2R7;P13807;P09467;P09972;P40925;P37837;P35573;O15297;P35813;Q9Y697;Q16719;P07738;P29372;O95243;Q96AB3;P13984;Q14674;P07195;Q6ZMR3;P07814;P22033;Q8N0Y7;O15355;Q96C86;Q8WY54;Q96DP5;P54840;P11172;P78346;P15259;Q9H9T3;P12956;Q15750;Q96NY9}
- 6831 Pathogen[ P03410] interacts with 170 human  
partners: {P30039;P54803;Q96DP5;Q9P2R7;Q9NS86;O95045;Q9BYZ2;Q15274;P30084;Q96FI4;Q9Y315;Q2TBE0;P51606;O15355;Q96AB3;Q96EY9;P10144;P35813;Q9NSE4;Q8N3J5;P78346;P04066;O00442;P37837;Q8NFF5;P54840;Q96PZ2;O60551;Q13057;P49356;P16118;P46020;Q13011;Q69YN2;O60502;Q15750;Q16831;P04053;Q16719;P32929;Q8WY54;P07902;O95954;P04424;Q04446;P35573;Q9BXD5;Q6ZMR3;P16278;Q14689;O95865;P11172;P06746;P30419;P21953;P39748;Q9H9T3;Q9Y697;Q6P2I3;Q14442;P30793;P19623;P05062;P52788;Q9Y617;P28715;Q8TAT5;P78549;P09467;O15514;P07195;Q14674;Q9H0C8;A6NK58;Q8WXG1;Q9Y6F1;O00757;P42765;O14841;P22234;O75688;O95243;O43708;Q7Z2E3;Q9HC16;P22695;Q93100;Q9UGP5;P22557;O75600;P12956;Q9P0M2;O00154;Q13510;Q8TDX5;Q9Y234;P09972;P49789;O15297;P49773;Q9NTJ4;Q96B70;P07738;O15527;P07954;P00338;Q9HA92;O15382;Q96CD2;P30566;Q96NY9;P16455;Q8N0X4;P13807;O15067;P42898;Q8N0Y7;P15259;Q96C23;P31939;Q86XE5;P35269;O14832;Q9GZX7;Q9NRW3;P18669;P53611;Q96CN7;O15305;Q6ZV70;Q7Z4H3;P51854;P40926;Q969U6;Q9HD40;P31941;P63135;O60346;Q9NQE9;Q8WVB3;P13984;P49593;Q8N8U2;Q969S2;P07864;P07814;Q9Y3R4;P40925;Q9NP87;Q9UQ84;Q32M88;Q9Y3Z3;P16930;Q9Y2P8;Q96C86;P23921;P13196;P27815;Q6NTF7;P29372;P34897;Q6P587;P34896;Q9UIF7;P49902;P22033;Q8NBV4;Q9NQ88;Q96GK7;Q86WU2}
- 6832 Pathogen[ P14075] interacts with 65 human  
partners: {O15297;Q7Z2E3;P40925;Q9NQE9;P35813;Q16719;P13984;P12956;Q14442;Q15750;P49902;P11172;Q86XE5;P34896;O15527;Q93100;P18669;P06746;P19367;Q9UIF7;Q13510;P40926;O95045;P54840;Q9BXD5;Q13057;P07195;Q9H0C8;Q9Y315;P16118;P07902;Q9Y2P8;O95865;P22033;Q9HD40;Q96AB3;Q96NY9;P35269;P07864;P78346;P35573;Q8WY54;P00338;Q9H9T3;P09972;P49789;P15259;O14832;Q14674;O95243;Q96C86;Q9BYZ2;P13807;P30793;P07738;P37837;P29372;Q9NSE4;P09467;O15355;Q96DP5;Q8N0Y7;P07814;Q9P2R7;Q9Y697}
- 6833 Pathogen[ P0C206] interacts with 141 human  
partners: {Q9Y234;Q16831;P10144;Q9Y232;Q9NSE4;P07195;P07814;P05062;P51854;Q9NQE9;P28715;Q17RS7;Q6ZMR3;P07864;Q9HA92;Q93100;Q9UQ84;P60174;Q96C86;Q8WY54;O15527;P30419;Q9H9T3;O15382;Q04446;Q13057;P09467;Q9Y315;Q9Y697;Q9HD40;O14832;Q8N8U2;Q7Z4H3;Q14442;Q86WU2;P06746;P21953;Q9P2R7;P34897;P49902;P31939;P30793;P19367;O95045;P13984;Q9UGP5;O95865;P13807;Q9Y6F1;P22695;P49593;P46020;O95954;O15355;P54840;P11172;P27815;Q9Y3R4;Q9Y3R4;Q96NY9;O75688;P30084;O15514;P35269;P04053;Q9GZX7;Q16719;Q86XE5;Q8WVB3;O43708;Q96C23;Q9P0M2;P34896;P22557;P49789;P32929;Q8TAT5;P40925;O00757;P30039;P40926;Q6PIY2;Q8N0Y7;Q9BWD1;Q9Y2P8;P07902;Q9NP87;Q96FI4;P31941;Q96AB3;Q14527;O60825;O60551;Q6NTF7;Q969S2;Q15274;Q14674;P16278;P09972;P16118;Q9BYZ2;O60346;Q9HC16;Q96EY9;Q15750;Q14689;P13196;Q9NS86;P39748;P07738;A6NK58;P07954;O15297;O8WXG1;Q9BXD5;P22033;P49356;P12956;P00338;P78346;P53611;Q96GK7;Q8N3J5;P16455;Q7Z2E3;Q96DP5;P29372;P37837;O95243;Q9UIF7;Q969U6;Q8NBV4;P18669;O95396;P14618;P15259;P35813;P29401;P35573;P78549;Q9H0C8}
- 6834 Pathogen[ P03363] interacts with 64 human  
partners: {P12956;Q9HD40;P13807;O15355;O15527;Q6PIY2;P18669;P13984;P22314;P40925;Q96AB3;Q96BT7;P09972;Q9BWD1;Q9Y2P8;Q96FI4;P11172;Q9BYZ2;Q14689;Q9Y697;P10144;P27815;Q7Z4H3;Q15750;Q9P0M2;P35269;P29372;P04053;Q7Z2E3;Q14527;Q9H0C8;P06746;Q8N0Y7;P37837;Q9UIF7;P54840;P49789;O95243;Q9NP87;Q9Y3Z3;Q14674;Q9UBE0;O95865;Q9NQE9;P13196;Q8WVB3;P78346;O

15297;Q969U6;P07814;Q96NY9;Q96C86;P35573;Q9H9T3;O43708;O75688;Q969S2;P15259;Q9Y6F1;Q8WY54;A0AVT1;Q9Y315;Q9BXD5;Q8N8U2}

6835 [Cluster 622]GO:0019104+F molecular\_function [name] DNA N-glycosylase activity [def] "Catalysis of the removal of damaged bases by cleaving the N-C1' glycosidic bond between the target damaged DNA base and the deoxyribose sugar. The reaction releases a free base and leaves an apurinic/aprimidinic (AP) site." [GOC

6836 Pathogen[ Q2Q067] interacts with 3 human partners: {O15527;P78549;Q53HV7}

6837 Pathogen[ P0C214] interacts with 3 human partners: {Q53HV7;P78549;O15527}

6838 Pathogen[ P03346] interacts with 3 human partners: {Q53HV7;P78549;O15527}

6839 Pathogen[ Q85601] interacts with 4 human partners: {O15527;Q96FI4;Q53HV7;P78549}

6840 Pathogen[ P14079] interacts with 5 human partners: {Q8TAT5;O15527;P78549;Q96FI4;Q53HV7}

6841 Pathogen[ P03383] interacts with 2 human partners: {O15527;Q53HV7}

6842 Pathogen[ P03410] interacts with 5 human partners: {Q96FI4;Q8TAT5;P78549;Q53HV7;O15527}

6843 Pathogen[ P14075] interacts with 2 human partners: {O15527;Q53HV7}

6844 Pathogen[ P0C206] interacts with 5 human partners: {O15527;Q53HV7;Q8TAT5;Q96FI4;P78549}

6845 Pathogen[ P03363] interacts with 3 human partners: {O15527;Q96FI4;Q53HV7}

6846 [Cluster 623]GO:0003880+F molecular\_function [name] protein C-terminal carboxyl O-methyltransferase activity [def] "Catalysis of the transfer of a methyl group to the oxygen atom of a carboxyl group at the C-terminal of a protein." [PMID

6847 Pathogen[ Q2Q067] interacts with 1 human partners: {Q9UIC8}

6848 Pathogen[ P0C214] interacts with 1 human partners: {Q9UIC8}

6849 Pathogen[ P03346] interacts with 1 human partners: {Q9UIC8}

6850 Pathogen[ Q85601] interacts with 1 human partners: {Q9UIC8}

6851 Pathogen[ P14079] interacts with 1 human partners: {Q9UIC8}

6852 Pathogen[ P03383] interacts with 1 human partners: {Q9UIC8}

6853 Pathogen[ P03410] interacts with 1 human partners: {Q9UIC8}

6854 Pathogen[ P14075] interacts with 1 human partners: {Q9UIC8}

6855 Pathogen[ P0C206] interacts with 1 human partners: {Q9UIC8}

6856 Pathogen[ P03363] interacts with 1 human partners: {Q9UIC8}

6857 [Cluster 624]GO:0017166+F molecular\_function [name] vinculin binding [def] "Interacting selectively and non-covalently with vinculin, a protein found in muscle, fibroblasts, and epithelial cells that binds actin and appears to mediate attachment of actin filaments to integral proteins of the plasma membrane." [ISBN

6858 Pathogen[ Q2Q067] interacts with 2 human partners: {O15061;O60504}

6859 Pathogen[ P0C214] interacts with 2 human partners: {O15061;O60504}

6860 Pathogen[ P03346] interacts with 2 human partners: {O15061;O60504}

6861 Pathogen[ Q85601] interacts with 2 human partners: {O60504;O15061}

6862 Pathogen[ P14079] interacts with 4 human partners: {O60504;Q14118;O15061;P49023}

6863 Pathogen[ P03383] interacts with 2 human partners: {O15061;O60504}

6864 Pathogen[ P03410] interacts with 3 human partners: {O15061;Q14118;O60504}

6865 Pathogen[ P14075] interacts with 2 human partners: {O15061;O60504}

6866 Pathogen[ P0C206] interacts with 2 human partners: {O60504;O15061}

6867 Pathogen[ P03363] interacts with 1 human partners: {O15061}

6868 [Cluster 625]GO:0030296+F molecular\_function [name] protein tyrosine kinase activator activity [def] "Increases the activity of a protein tyrosine kinase, an enzyme which phosphorylates a tyrosyl phenolic group on a protein." [GOC

6869 Pathogen[ Q2Q067] interacts with 2 human partners: {Q8IZP0;P25063}

6870 Pathogen[ P0C214] interacts with 2 human partners: {Q8IZP0;P25063}

6871 Pathogen[ P03346] interacts with 2 human partners: {Q8IZP0;P25063}

6872 Pathogen[ Q85601] interacts with 1 human partners: {Q8IZP0}

6873 Pathogen[ P14079] interacts with 2 human partners: {Q8IZP0;P25063}

6874 Pathogen[ P03383] interacts with 1 human partners: {P25063}

6875 Pathogen[ P03410] interacts with 2 human partners: {P25063;Q8IZP0}

6876 Pathogen[ P14075] interacts with 1 human partners: {P25063}

6877 Pathogen[ P0C206] interacts with 2 human partners: {P25063;Q8IZP0}

6878 Pathogen[ P03363] interacts with 1 human partners: {Q8IZP0}

6879 [Cluster 626]GO:0042134+F molecular\_function [name] rRNA primary transcript binding [def] "Interacting selectively and non-covalently with an unprocessed ribosomal RNA transcript." [GOC

6880 Pathogen[ Q2Q067] interacts with 1 human partners: {Q6NZI2}

6881 Pathogen[ P0C214] interacts with 1 human partners: {Q6NZI2}

6882 Pathogen[ P03346] interacts with 1 human partners: {Q6NZI2}

6883 Pathogen[ Q85601] interacts with 1 human partners: {Q6NZI2}

6884 Pathogen[ P14079] interacts with 1 human partners: {Q6NZI2}

6885 Pathogen[ P03383] interacts with 1 human partners: {Q6NZI2}

6886 Pathogen[ P03410] interacts with 1 human partners: {Q6NZI2}

6887 Pathogen[ P14075] interacts with 1 human partners: {Q6NZI2}

6888 Pathogen[ P0C206] interacts with 1 human partners: {Q6NZI2}

6889 Pathogen[ P03363] interacts with 1 human partners: {Q6NZI2}

6890 [Cluster 627]GO:0008426+F molecular\_function [name] protein kinase C inhibitor activity [def] "Stops, prevents or reduces the activity of protein kinase C, an enzyme which phosphorylates a protein." [GOC

6891 Pathogen[ Q2Q067] interacts with 2 human partners: {P61981;P04792}



6892 Pathogen[ P0C214] interacts with 2 human partners:{P04792;P61981}

6893 Pathogen[ P03346] interacts with 2 human partners:{P61981;P04792}

6894 Pathogen[ Q85601] interacts with 2 human partners:{P61981;P04792}

6895 Pathogen[ P14079] interacts with 2 human partners:{P61981;P04792}

6896 Pathogen[ P03383] interacts with 2 human partners:{P04792;P61981}

6897 Pathogen[ P03410] interacts with 2 human partners:{P04792;P61981}

6898 Pathogen[ P14075] interacts with 2 human partners:{P04792;P61981}

6899 Pathogen[ P0C206] interacts with 2 human partners:{P04792;P61981}

6900 Pathogen[ P03363] interacts with 2 human partners:{P61981;P04792}

6901 [Cluster 628]GO:0051015+F molecular\_function [name] actin filament binding [def]  
 "Interacting selectively and non-covalently with an actin filament, also known as F-actin, a helical filamentous polymer of globular G-actin subunits." [ISBN

6902 Pathogen[ Q2Q067] interacts with 9 human partners:{Q9UL45;P29966;P42704;Q96IF1;Q9UBK9;Q9BR76;P59998;P35579;Q66K74}

6903 Pathogen[ P0C214] interacts with 11 human partners:{P29966;Q9UM54;P42704;P35580;Q16658;Q9UL45;P59998;Q7Z406;Q9UBK9;Q66K74;Q9BR76}

6904 Pathogen[ P03346] interacts with 16 human partners:{P02549;P11277;P35579;Q66K74;Q96IF1;Q9BR76;P59998;Q14847;O76041;P42704;P63316;Q9UL45;P29966;Q16658;Q96KN3;Q9UBK9}

6905 Pathogen[ Q85601] interacts with 11 human partners:{P35579;Q66K74;Q9BR76;P59998;Q7Z406;P42704;P29966;Q96IF1;P35580;Q9UM54;Q9UBK9}

6906 Pathogen[ P14079] interacts with 23 human partners:{P35579;O95425;P09327;Q16658;Q66K74;P42704;Q14847;Q9UM54;Q9H269;P35611;Q9NQT6;Q9Y6U3;Q2M3G4;Q9UL45;Q96IF1;P29966;Q9UBK9;O76041;Q9BR76;P11277;P59998;P02549;Q6JBY9}

6907 Pathogen[ P03383] interacts with 6 human partners:{P59998;P29966;P35580;P42704;P35579;Q9UBK9}

6908 Pathogen[ P03410] interacts with 23 human partners:{Q16658;Q2M3G4;O76041;P59998;P35579;Q9UBK9;Q9Y6U3;P02549;Q9UL45;Q96IF1;Q9UM54;O95425;P42704;Q14847;Q9BR76;Q66K74;P35580;P63316;Q6JBY9;Q9H269;P35611;P11277;P29966}

6909 Pathogen[ P14075] interacts with 6 human partners:{P42704;Q6JBY9;P29966;Q9UBK9;P35579;P59998}

6910 Pathogen[ P0C206] interacts with 16 human partners:{Q6JBY9;Q9UM54;Q9UL45;Q9BR76;Q96IF1;P59998;Q66K74;O76041;Q16658;Q2M3G4;P35579;P11277;P42704;Q9UBK9;P35580;P29966}

6911 Pathogen[ P03363] interacts with 17 human partners:{P11277;Q2M3G4;Q66K74;P02549;P35579;Q9BR76;Q14847;P42704;Q8NHY3;Q9UBK9;Q7L576;Q96IF1;P59998;Q96KN3;P29966;O76041;Q16658}

6912 [Cluster 629]GO:0030911+F molecular\_function [name] TPR domain binding [def]  
 "Interacting selectively and non-covalently with a tetratricopeptide repeat (TPR) domain of a protein, the consensus sequence of which is defined by a pattern of small and large hydrophobic amino acids and a structure composed of helices." [GOC

6913 Pathogen[ Q2Q067] interacts with 3 human partners:{P08238;P07900;Q9UNE7}

6914 Pathogen[ P0C214] interacts with 1 human partners:{Q9UNE7}

6915 Pathogen[ P03346] interacts with 3 human partners:{P07900;Q9UNE7;P08238}

6916 Pathogen[ Q85601] interacts with 3 human partners:{P08238;P07900;Q9UNE7}

6917 Pathogen[ P14079] interacts with 2 human partners:{P08238;P07900}

6918 Pathogen[ P03383] interacts with 2 human partners:{P07900;P08238}

6919 Pathogen[ P03410] interacts with 3 human partners:{P08238;P07900;Q9UNE7}

6920 Pathogen[ P14075] interacts with 2 human partners:{P08238;P07900}

6921 Pathogen[ P0C206] interacts with 3 human partners:{P08238;Q9UNE7;P07900}

6922 Pathogen[ P03363] interacts with 3 human partners:{P07900;Q9UNE7;P08238}

6923 [Cluster 630]GO:0034046+F molecular\_function [name] poly(G) RNA binding [def]  
 "Interacting selectively and non-covalently with a sequence of guanine residues in an RNA molecule." [GOC

6924 Pathogen[ Q2Q067] interacts with 3 human partners:{Q8TCS8;Q86TB9;P54253}

6925 Pathogen[ P0C214] interacts with 3 human partners:{P54253;Q8TCS8;Q86TB9}

6926 Pathogen[ P03346] interacts with 3 human partners:{Q86TB9;Q8TCS8;P54253}

6927 Pathogen[ Q85601] interacts with 3 human partners:{Q86TB9;Q8TCS8;P54253}

6928 Pathogen[ P14079] interacts with 3 human partners:{Q86TB9;P54253;Q8TCS8}

6929 Pathogen[ P03383] interacts with 3 human partners:{Q8TCS8;Q86TB9;P54253}

6930 Pathogen[ P03410] interacts with 3 human partners:{Q8TCS8;Q86TB9;P54253}

6931 Pathogen[ P14075] interacts with 3 human partners:{P54253;Q86TB9;Q8TCS8}

6932 Pathogen[ P0C206] interacts with 3 human partners:{Q86TB9;Q8TCS8;P54253}

6933 Pathogen[ P03363] interacts with 2 human partners:{P54253;Q86TB9}

6934 [Cluster 631]GO:0000014+F molecular\_function [name] single-stranded DNA specific endodeoxyribonuclease activity [def]  
 "Catalysis of the hydrolysis of ester linkages within a single-stranded deoxyribonucleic acid molecule by creating internal breaks." [GOC

6935 Pathogen[ Q2Q067] interacts with 4 human partners:{Q96SD1;Q92889;P49959;Q99708}

6936 Pathogen[ P0C214] interacts with 4 human partners:{P49959;Q92889;Q96SD1;Q99708}

6937 Pathogen[ P03346] interacts with 5 human partners:{Q96SD1;P07992;Q99708;P49959;Q92889}

6938 Pathogen[ Q85601] interacts with 4 human partners:{Q99708;P49959;Q92889;Q96SD1}  
6939 Pathogen[ P14079] interacts with 4 human partners:{Q99708;Q92889;Q96SD1;P07992}  
6940 Pathogen[ P03383] interacts with 1 human partners:{Q99708}  
6941 Pathogen[ P03410] interacts with 5 human  
partners:{P49959;Q99708;P07992;Q92889;Q96SD1}  
6942 Pathogen[ P14075] interacts with 1 human partners:{Q99708}  
6943 Pathogen[ P0C206] interacts with 5 human  
partners:{P49959;Q99708;Q96SD1;P07992;Q92889}  
6944 Pathogen[ P03363] interacts with 2 human partners:{Q92889;Q99708}  
6945 [Cluster 632]GO:0000977+F molecular\_function [name] RNA polymerase II regulatory  
region sequence-specific DNA binding [def] "Interacting selectively and non-covalently  
with a specific sequence of DNA that is part of a regulatory region that controls the  
transcription of a gene or cistron by RNA polymerase II." [GOC  
6946 Pathogen[ Q2Q067] interacts with 11 human  
partners:{O14813;Q14814;P15976;Q92754;P15036;P25791;Q13761;Q9HBD4;Q16649;Q02078;Q1058  
6}  
6947 Pathogen[ P0C214] interacts with 9 human  
partners:{O14813;Q13761;Q9HBD4;Q10586;Q02078;Q14814;Q92754;P25791;P15036}  
6948 Pathogen[ P03346] interacts with 13 human  
partners:{Q02078;Q9HBD4;O14813;Q14814;P15173;Q92754;P25791;P15976;Q13761;Q16649;Q9959  
3;Q10586;P15036}  
6949 Pathogen[ Q85601] interacts with 11 human  
partners:{Q02078;P15036;O14813;Q92754;P15976;Q14814;P25791;Q16649;Q9HBD4;Q10586;Q1376  
1}  
6950 Pathogen[ P14079] interacts with 11 human  
partners:{P15036;Q02078;Q06413;Q16649;P15976;P25791;Q92754;Q14814;Q13761;O14813;Q1058  
6}  
6951 Pathogen[ P03383] interacts with 8 human  
partners:{Q13761;P15036;Q9HBD4;Q14814;P25791;Q92754;Q10586;Q02078}  
6952 Pathogen[ P03410] interacts with 11 human  
partners:{O14813;P25791;Q14814;P15036;Q16649;Q10586;Q13761;Q02078;Q9HBD4;P15976;Q9275  
4}  
6953 Pathogen[ P14075] interacts with 8 human  
partners:{Q9HBD4;Q92754;Q10586;P15036;P25791;Q02078;Q14814;Q13761}  
6954 Pathogen[ P0C206] interacts with 11 human  
partners:{Q16649;Q02078;P15976;Q92754;O14813;P15036;P25791;Q9HBD4;Q14814;Q13761;Q1058  
6}  
6955 Pathogen[ P03363] interacts with 10 human  
partners:{Q16649;Q10586;P25791;Q14814;Q9HBD4;Q13761;P15036;O14813;Q92754;Q02078}  
6956 [Cluster 633]GO:0004045+F molecular\_function [name] aminoacyl-tRNA hydrolase activity  
[def] "Catalysis of the reaction  
6957 Pathogen[ Q2Q067] interacts with 2 human partners:{Q86Y79;Q9Y3E5}  
6958 Pathogen[ P0C214] interacts with 3 human partners:{Q86Y79;Q9Y3E5;Q14197}  
6959 Pathogen[ P03346] interacts with 2 human partners:{Q9Y3E5;Q86Y79}  
6960 Pathogen[ Q85601] interacts with 2 human partners:{Q9Y3E5;Q86Y79}  
6961 Pathogen[ P14079] interacts with 3 human partners:{Q9Y3E5;Q86Y79;Q14197}  
6962 Pathogen[ P03383] interacts with 2 human partners:{Q9Y3E5;Q86Y79}  
6963 Pathogen[ P03410] interacts with 3 human partners:{Q86Y79;Q14197;Q9Y3E5}  
6964 Pathogen[ P14075] interacts with 2 human partners:{Q9Y3E5;Q86Y79}  
6965 Pathogen[ P0C206] interacts with 3 human partners:{Q86Y79;Q9Y3E5;Q14197}  
6966 Pathogen[ P03363] interacts with 2 human partners:{Q86Y79;Q9Y3E5}  
6967 [Cluster 634]GO:0045155+F molecular\_function [name] electron transporter, transferring  
electrons from CoQH2-cytochrome c reductase complex and cytochrome c oxidase complex  
activity [def] "Enables the directed movement of electrons from the CoQH2-cytochrome c  
reductase complex and the cytochrome c oxidase complex." [GOC  
6968 Pathogen[ Q2Q067] interacts with 1 human partners:{P99999}  
6969 Pathogen[ P0C214] interacts with 1 human partners:{P99999}  
6970 Pathogen[ P03346] interacts with 1 human partners:{P99999}  
6971 Pathogen[ Q85601] interacts with 1 human partners:{P99999}  
6972 Pathogen[ P14079] interacts with 1 human partners:{P99999}  
6973 Pathogen[ P03383] interacts with 1 human partners:{P99999}  
6974 Pathogen[ P03410] interacts with 1 human partners:{P99999}  
6975 Pathogen[ P14075] interacts with 1 human partners:{P99999}  
6976 Pathogen[ P0C206] interacts with 1 human partners:{P99999}  
6977 Pathogen[ P03363] interacts with 1 human partners:{P99999}  
6978 [Cluster 635]GO:0001077+F molecular\_function [name] RNA polymerase II core promoter  
proximal region sequence-specific DNA binding transcription factor activity involved in  
positive regulation of transcription [def] "Interacting selectively and non-covalently  
with a sequence of DNA that is in cis with and relatively close to a core promoter for  
RNA polymerase II (RNAP II) in order to activate or increase the frequency, rate or  
extent of transcription from the RNAP II promoter." [GOC  
6979 Pathogen[ Q2Q067] interacts with 29 human  
partners:{Q12837;P15884;Q32MQ0;Q9NQ87;Q9BZE3;Q02930;P15976;Q92754;P17676;P08047;P1183  
1;P28069;P61978;O15162;P23769;Q9P243;Q06330;O75030;Q9UIH9;O15370;Q99687;P20823;P15336  
;Q9NY43;Q99814;P22736;Q9UPG8;Q10586;P78543}  
6980 Pathogen[ P0C214] interacts with 26 human

partners:{P32243;Q02930;P15336;P78543;Q9UIH9;P15884;Q9BZE3;P23769;P11831;Q9UPG8;Q06330;O75030;P17676;Q10586;Q92754;Q12837;O15162;Q99687;P28069;Q99814;Q9P243;O15370;Q9NQ87;P08047;Q9NY43;Q32MQ0}

6981 Pathogen[ P03346] interacts with 38 human  
partners:{Q06330;Q06945;Q9BZE0;P61978;Q99687;Q7RTS3;Q32MQ0;Q9H2W2;Q96BA8;P17676;O15370;P15336;P11831;Q9BZE3;Q12837;P23769;P28023;O75030;Q92754;Q9UBC0;P08047;O43680;Q9P243;P22736;P15976;Q9NQ87;Q99814;Q92481;P28069;Q10586;Q9UPG8;Q02930;P32243;P78543;Q9NY43;Q9UIH9;P15884;O15162}

6982 Pathogen[ Q85601] interacts with 30 human  
partners:{P61978;P11831;Q9UPG8;P17676;Q92754;Q99687;P15976;Q32MQ0;Q06330;Q9BZE3;O75030;P28069;P23769;Q99814;Q9UIH9;P08047;O15370;Q02930;P78543;P22736;Q9NQ87;P32243;Q9P243;O15162;P15336;P20823;Q12837;Q9NY43;P15884;Q10586}

6983 Pathogen[ P14079] interacts with 28 human  
partners:{Q32MQ0;P78543;O15162;Q99814;Q06413;O15370;P22736;P15976;Q9NY43;Q12837;P28069;Q99687;Q06330;Q9UPG8;Q9BZE3;Q9UIH9;Q02930;P15336;Q9P243;Q92754;P32243;P61978;P15884;Q9NQ87;O75030;Q10586;P23769;Q9BZE0}

6984 Pathogen[ P03383] interacts with 21 human  
partners:{Q06330;P11831;P08047;P28069;P32243;Q32MQ0;O15162;P23769;Q9NQ87;O75030;P61978;P78543;Q99687;P17676;Q12837;O15370;Q92754;Q10586;Q9NY43;P15336;Q02930}

6985 Pathogen[ P03410] interacts with 29 human  
partners:{P28069;P11831;P61978;P17676;Q99814;Q06330;Q9NQ87;O75030;Q9UPG8;P15884;Q9BZE3;Q9UIH9;Q99687;Q9P243;O15162;Q02930;Q32MQ0;P22736;Q10586;P78543;P32243;P23769;P08047;O15370;Q12837;Q9NY43;P15336;P15976;Q92754}

6986 Pathogen[ P14075] interacts with 22 human  
partners:{P28069;Q99687;O75030;P11831;O15162;P23769;Q12837;P15336;Q92754;Q9NQ87;Q10586;Q9NY43;P78543;O15370;P61978;Q06330;Q32MQ0;P15884;P17676;P32243;Q02930;P08047}

6987 Pathogen[ P0C206] interacts with 32 human  
partners:{Q9NQ87;Q9BZE0;Q32MQ0;Q06330;Q9NY43;O75030;Q9P243;P61978;Q9UBC0;P15336;Q9UIH9;P15976;P22736;Q92754;Q9BZE3;Q12837;P32243;P17676;P08047;P15884;P20823;Q02930;O15370;P23769;P11831;O15162;Q9UPG8;Q99687;Q99814;P28069;Q10586;P78543}

6988 Pathogen[ P03363] interacts with 29 human  
partners:{O15370;Q9UBC0;P17676;Q02930;Q10586;Q06330;Q9NQ87;Q7RTS3;Q9P243;Q9H2W2;P78543;P32243;Q9BZE3;P15336;P11831;P28069;Q9UPG8;O75030;Q32MQ0;Q99814;Q99687;P15884;P61978;P08047;Q9NY43;Q9UIH9;Q12837;Q9BZE0;Q92754}

6989 [Cluster 636]GO:0031072+F molecular\_function [name] heat shock protein binding [def] "Interacting selectively with a heat shock protein, any protein synthesized or activated in response to heat shock." [GOC

6990 Pathogen[ Q2Q067] interacts with 21 human  
partners:{Q95997;Q8IWL3;Q9UER7;Q9UBS4;Q9UDY4;Q9UBS3;Q6W2J9;Q9UNN5;O75190;Q99615;Q16543;P25685;Q9NZJ4;Q53G26;Q99543;P19838;P25963;Q08752;O75953;P31689;Q96EY1}

6991 Pathogen[ P0C214] interacts with 25 human  
partners:{Q9UDY4;Q16543;P19838;O75190;Q6W2J9;Q9UBS3;Q8WW22;Q8IWL3;Q9UBS4;Q99615;Q9NZJ4;Q9UER7;Q9UNN5;P25963;Q53G26;Q95997;O60884;Q96GD0;Q99543;Q08752;Q5F1R6;O75953;Q96EY1;P36957;P25685}

6992 Pathogen[ P03346] interacts with 24 human  
partners:{Q5F1R6;Q99615;Q9UBS3;P25685;Q99543;O75190;P25963;P25686;Q9NZJ4;O95997;Q9UNN5;Q08752;Q9UER7;Q16543;P31689;Q53G26;Q96KC8;Q9UBS4;P19838;Q9UDY4;O75953;Q8IWL3;Q96EY1;Q6W2J9}

6993 Pathogen[ Q85601] interacts with 24 human  
partners:{Q99543;Q16543;P31689;O75190;Q9UBS3;Q53G26;Q9UER7;Q9UBS4;Q8WW22;O60884;P25685;O75953;Q08752;Q9UNN5;Q99615;Q9UDY4;Q9NZJ4;Q8IWL3;P19838;Q96EY1;Q95997;Q6W2J9;Q5F1R6;P25963}

6994 Pathogen[ P14079] interacts with 22 human  
partners:{Q08752;Q9NZJ4;Q9UBS3;Q8IWL3;Q9UBS4;Q9UDY4;O75190;P25685;Q96GD0;Q6W2J9;Q99543;Q9UNN5;Q9UER7;O75953;Q95997;P31689;Q99615;Q16543;Q5F1R6;Q8WW22;O60884;Q96EY1}

6995 Pathogen[ P03383] interacts with 19 human  
partners:{Q16543;Q08752;P31689;O75190;Q9UBS4;Q6W2J9;Q9UBS3;Q9UNN5;Q9UDY4;Q99615;Q9UER7;P25963;Q8IWL3;Q99543;Q95997;P19838;O75953;Q96EY1;Q53G26}

6996 Pathogen[ P03410] interacts with 26 human  
partners:{Q9UDY4;P19838;Q9UNN5;Q6W2J9;Q53G26;Q16543;Q08752;P25685;P25686;O75953;Q9UBS3;Q5F1R6;O95997;Q99615;Q96GD0;Q9UER7;Q9NZJ4;O75190;Q8IWL3;O60884;Q9UBS4;P31689;P25963;Q8WW22;Q99543;Q96EY1}

6997 Pathogen[ P14075] interacts with 19 human  
partners:{O75953;Q9UBS3;Q16543;P31689;Q08752;Q99615;Q95997;Q99543;Q53G26;Q9UDY4;P25963;Q9UNN5;Q6W2J9;O75190;P19838;Q9UBS4;Q9UER7;Q8IWL3;Q96EY1}

6998 Pathogen[ P0C206] interacts with 25 human  
partners:{Q9UNN5;Q9UDY4;Q08752;Q6W2J9;Q5F1R6;Q99615;Q95997;Q53G26;Q9UBS4;P25963;Q9NZJ4;Q9UER7;Q16543;O60884;P19838;Q8WW22;Q99543;O75953;Q96GD0;Q9UBS3;P25685;Q8IWL3;Q96EY1;P31689;O75190}

6999 Pathogen[ P03363] interacts with 21 human  
partners:{Q9UNN5;O75190;O75953;Q99615;Q9NZJ4;Q99543;P25963;Q9UBS3;Q08752;Q9UDY4;Q9UER7;Q5F1R6;Q53G26;Q16543;Q9UBS4;P19838;Q8IWL3;P25685;Q95997;Q6W2J9;Q96EY1}

7000 [Cluster 637]GO:0005543+F molecular\_function [name] phospholipid binding [def] "Interacting selectively and non-covalently with phospholipids, a class of lipids containing phosphoric acid as a mono- or diester." [ISBN

7001 Pathogen[ Q2Q067] interacts with 21 human

7002 partners:{Q01082;P31749;Q9NQW6;O00291;Q8IWE5;Q96TA1;Q13884;Q86WV1;Q8NEU8;Q6ICB4;Q9HB19;O95810;P50570;Q8WV24;Q9UGK3;Q13425;Q9ULZ2;Q9UKG1;Q92556;Q96JJ3;Q8IYI6}  
Pathogen[ P0C214] interacts with 27 human

7003 partners:{Q6ICB4;O60346;O95810;P00480;Q92934;Q13884;Q9UKG1;Q8IWE5;Q01082;Q9HB19;Q13425;Q8NEU8;Q9UQC2;Q92556;Q96TA1;Q9ULZ2;Q9BQI5;Q86WV1;P50570;Q8WV24;Q96JJ3;Q99704;Q8IYI6;Q9H492;O00291;P31749;Q9UGK3}  
Pathogen[ P03346] interacts with 56 human

7004 partners:{Q13425;Q5JU85;Q8IYI6;Q96AC1;Q969H4;Q8IY22;O60346;Q15438;P50570;Q9NQW6;Q9HB19;Q8WV24;Q9H4E7;P07148;Q13884;Q13322;Q9ULZ2;Q86WG5;Q12802;Q9UQC2;Q9NRF2;Q96JJ3;O00291;Q13424;Q9HAU0;Q01082;Q9H8W4;Q9BXW6;Q9BZ29;Q96TA1;Q8NEU8;Q8N4B1;P31749;Q9UGK3;Q9H492;Q99704;Q6DN90;Q95810;P78314;Q13492;Q9UPP2;Q9HB21;Q5VV41;Q96S99;Q9UKG1;Q9H8V3;O00482;Q6ICB4;Q9BQI5;Q9ULU8;Q92556;Q86WV1;Q13285;Q6IQ23;O75146;Q8IWE5}  
Pathogen[ Q85601] interacts with 29 human

7005 partners:{Q9H492;Q8IYI6;O60346;Q9ULZ2;Q96S99;P31749;Q9NQW6;Q8WV24;Q13884;Q9UQC2;P00480;Q8NEU8;Q6IQ23;Q01082;Q96JJ3;Q8IWE5;Q9HAU0;Q86WV1;Q96TA1;O95810;Q9UGK3;Q6ICB4;Q13425;Q9HB21;P50570;O00482;Q9UKG1;Q9HB19;O00291}  
Pathogen[ P14079] interacts with 63 human

7006 partners:{P31751;P04083;Q9BXW6;Q494U1;Q13492;Q9Y4G2;Q9NQW6;Q9UPP2;Q9H8W4;O00291;Q86WV1;O75146;Q9UKG1;Q8WV24;Q86XR2;Q6IQ23;Q8NEU8;Q99704;Q01082;Q9H492;Q92556;Q9ULU8;Q8IY22;Q9UGK3;O60346;Q96S99;Q96JJ3;Q13424;Q96BJ8;P50570;Q9HB19;P10911;Q12802;Q9ULZ2;P08758;Q9HAU0;Q9H2D6;O00519;O00482;Q6NSJ2;Q92934;Q9BQI5;Q8N4B1;Q96AC1;Q9H8V3;Q53GA4;O76027;Q969H4;P00480;Q86WG5;Q8IYI6;Q6ICB4;O95810;Q99487;Q9HB21;Q8IWE5;Q96TA1;Q6DN90;Q53GL0;Q9UQC2;Q15438;Q9NSN8;Q5VV41}  
Pathogen[ P03383] interacts with 15 human

7007 partners:{Q13884;P31749;Q8NEU8;Q86WV1;Q8IYI6;O00291;Q96TA1;Q9ULZ2;Q9BQI5;Q9UGK3;O95810;Q8WV24;Q9HB19;Q8IWE5;Q13425}  
Pathogen[ P03410] interacts with 57 human

7008 partners:{Q9UQC2;O00519;Q96TA1;Q9UGK3;Q8IWE5;Q86WV1;Q96S99;Q8IY22;Q8N4B1;Q9ULZ2;O76027;Q53GA4;Q9HAU0;Q6NSJ2;Q13425;P31749;Q92934;P50570;O00291;Q9HB21;Q9NQW6;Q969H4;O75146;Q13884;O60333;P00480;Q92556;Q13492;Q8WV24;Q9H492;Q99704;Q9UPP2;Q5VV41;Q96BJ8;Q9ULU8;O95810;Q6ICB4;Q9BQI5;Q15438;Q9H8W4;O60346;Q494U1;Q8NEU8;Q01082;Q53GL0;Q9HB19;Q9H8V3;Q15283;Q13424;Q86XR2;Q96JJ3;Q9UKG1;Q9H2D6;Q8IYI6;Q6IQ23;Q9BXW6;Q86WG5}  
Pathogen[ P14075] interacts with 15 human

7009 partners:{Q9BQI5;Q13884;Q13425;Q8NEU8;Q8WV24;Q96TA1;O00291;Q86WV1;P31749;O95810;Q9UGK3;Q8IWE5;Q9HB19;Q9ULZ2;Q8IYI6}  
Pathogen[ P0C206] interacts with 44 human

7010 partners:{Q01082;Q9UKG1;Q9HB19;Q92556;P31749;Q8IWE5;O00291;Q8NEU8;Q9HAU0;O95810;Q9NQW6;Q9H492;Q8IY22;Q96TA1;Q6ICB4;O00482;Q92934;Q9UGK3;Q13884;Q9ULU8;Q13425;Q6NSJ2;Q86WV1;Q96JJ3;Q96S99;Q9H8V3;Q9BQI5;Q9HB21;Q99704;Q8IYI6;Q8N4B1;Q9UPP2;Q9BXW6;Q9ULZ2;O60346;Q9H8W4;Q13424;Q969H4;Q9UQC2;Q6IQ23;Q9H4E7;P00480;P50570;Q8WV24}  
Pathogen[ P03363] interacts with 50 human

7011 partners:{Q9UGK3;Q9HAU0;Q9H2D6;Q15438;Q6ICB4;Q5VV41;Q9BZF3;Q99704;Q9H492;Q86WV1;Q9NQW6;Q8IYI6;Q9UPP2;Q8WV24;Q01082;P50570;Q8N4B1;Q8IWE5;Q13425;P78314;Q8NEU8;P10911;Q969H4;Q9ULZ2;Q9BXW6;Q13480;P31749;Q86WG5;Q92556;Q13884;Q9HB19;Q8IY22;Q5JU85;Q96JJ3;Q7Z5H3;Q6DN90;O75146;O60333;Q9H8W4;Q96AC1;Q96TA1;Q9BQI5;O95810;Q6IQ23;Q9NSN8;Q9UKG1;O00291;Q13424;Q9UQC2;O00482}  
[Cluster 638]GO:0004874+F molecular\_function [name] aryl hydrocarbon receptor activity [def] "Combining with an aryl hydrocarbon to initiate a change in cell activity. The aryl hydrocarbon receptor is a ligand-activated transcription factor which translocates to the nucleus to activate transcription upon ligand-binding." [GOC  
7012 Pathogen[ Q2Q067] interacts with 1 human partners:{P27540}  
7013 Pathogen[ P0C214] interacts with 1 human partners:{P27540}  
7014 Pathogen[ P03346] interacts with 1 human partners:{P27540}  
7015 Pathogen[ Q85601] interacts with 1 human partners:{P27540}  
7016 Pathogen[ P14079] interacts with 1 human partners:{P27540}  
7017 Pathogen[ P03383] interacts with 1 human partners:{P27540}  
7018 Pathogen[ P03410] interacts with 1 human partners:{P27540}  
7019 Pathogen[ P14075] interacts with 1 human partners:{P27540}  
7020 Pathogen[ P0C206] interacts with 1 human partners:{P27540}  
7021 Pathogen[ P03363] interacts with 1 human partners:{P27540}

7022 [Cluster 639]GO:0031491+F molecular\_function [name] nucleosome binding [def] "Interacting selectively and non-covalently with a nucleosome, a complex comprised of DNA wound around a multisubunit core and associated proteins, which forms the primary packing unit of DNA into higher order structures." [GOC  
7023 Pathogen[ Q2Q067] interacts with 5 human partners:{Q9Y3T9;P78317;Q2TAK8;P28370;Q9Y468}  
7024 Pathogen[ P0C214] interacts with 7 human partners:{Q9Y3T9;Q2TAK8;Q9Y468;P78317;P28370;O60264;Q8IYW5}  
7025 Pathogen[ P03346] interacts with 7 human partners:{Q2TAK8;O60264;Q9Y3T9;P78317;Q9Y468;Q8IYW5;P28370}  
7026 Pathogen[ Q85601] interacts with 7 human partners:{P78317;Q9Y468;Q2TAK8;Q8IYW5;Q9Y3T9;P28370;O60264}  
7027 Pathogen[ P14079] interacts with 6 human partners:{P28370;Q9Y468;Q2TAK8;Q9Y3T9;O60264;P78317}  
7028 Pathogen[ P03383] interacts with 5 human partners:{P28370;P78317;Q9Y3T9;Q2TAK8;Q9Y468}

7029 Pathogen[ P03410] interacts with 6 human partners:{Q2TAK8;Q9Y468;Q9Y3T9;P78317;O60264;P28370}

7030 Pathogen[ P14075] interacts with 5 human partners:{Q2TAK8;Q9Y468;P78317;P28370;Q9Y3T9}

7031 Pathogen[ P0C206] interacts with 7 human partners:{Q9Y468;Q8IYW5;P78317;P28370;Q2TAK8;Q9Y3T9;O60264}

7032 Pathogen[ P03363] interacts with 7 human partners:{Q9Y468;P78317;Q8IYW5;O60264;Q9Y3T9;Q2TAK8;P28370}

7033 [Cluster 640]GO:0008973+F molecular\_function [name] phosphopentomutase activity [def] "Catalysis of the reaction

7034 Pathogen[ Q2Q067] interacts with 1 human partners:{Q96G03}

7035 Pathogen[ P0C214] interacts with 1 human partners:{Q96G03}

7036 Pathogen[ P03346] interacts with 1 human partners:{Q96G03}

7037 Pathogen[ Q85601] interacts with 1 human partners:{Q96G03}

7038 Pathogen[ P14079] interacts with 1 human partners:{Q96G03}

7039 Pathogen[ P03383] interacts with 1 human partners:{Q96G03}

7040 Pathogen[ P03410] interacts with 1 human partners:{Q96G03}

7041 Pathogen[ P14075] interacts with 1 human partners:{Q96G03}

7042 Pathogen[ P0C206] interacts with 1 human partners:{Q96G03}

7043 Pathogen[ P03363] interacts with 1 human partners:{Q96G03}

7044 [Cluster 641]GO:0001540+F molecular\_function [name] beta-amyloid binding [def] "Interacting selectively and non-covalently with beta-amyloid peptide/protein and/or its precursor." [GOC

7045 Pathogen[ Q2Q067] interacts with 5 human partners:{O00213;O95886;Q92870;Q02410;O96018}

7046 Pathogen[ P0C214] interacts with 5 human partners:{O00213;O96018;O95886;Q02410;Q92870}

7047 Pathogen[ P03346] interacts with 7 human partners:{O00213;Q99767;Q02410;Q92870;O95886;O96018;Q96D09}

7048 Pathogen[ Q85601] interacts with 6 human partners:{O00213;Q99767;O96018;Q92870;Q02410;O95886}

7049 Pathogen[ P14079] interacts with 10 human partners:{Q02410;O00213;Q9NQX7;Q9Y287;O96018;A4D1B5;O95886;Q99767;Q92870;Q96D09}

7050 Pathogen[ P03383] interacts with 5 human partners:{O96018;O00213;O95886;Q92870;Q02410}

7051 Pathogen[ P03410] interacts with 10 human partners:{O96018;A4D1B5;Q96D09;Q99767;O00213;Q9Y287;Q02410;Q9NQX7;O95886;Q92870}

7052 Pathogen[ P14075] interacts with 6 human partners:{O00213;Q02410;O96018;O95886;Q92870;Q9Y287}

7053 Pathogen[ P0C206] interacts with 10 human partners:{Q9Y287;O95886;O00213;Q99767;O96018;A4D1B5;Q92870;Q9NQX7;Q96D09;Q02410}

7054 Pathogen[ P03363] interacts with 7 human partners:{Q96D09;O00213;Q02410;Q92870;O95886;O96018;Q99767}

7055 [Cluster 642]GO:0015035+F molecular\_function [name] protein disulfide oxidoreductase activity [def] "Catalysis of the reaction

7056 Pathogen[ Q2Q067] interacts with 3 human partners:{P35754;P10599;Q9H299}

7057 Pathogen[ P0C214] interacts with 5 human partners:{P35754;Q9H299;Q16881;P10599;P13667}

7058 Pathogen[ P03346] interacts with 7 human partners:{Q9NS18;O43396;P13667;Q9H299;O76003;P35754;P10599}

7059 Pathogen[ Q85601] interacts with 4 human partners:{P10599;O76003;P35754;Q9H299}

7060 Pathogen[ P14079] interacts with 4 human partners:{Q9H299;P35754;O76003;P10599}

7061 Pathogen[ P03383] interacts with 1 human partners:{P10599}

7062 Pathogen[ P03410] interacts with 5 human partners:{P10599;P35754;O76003;P13667;Q9H299}

7063 Pathogen[ P14075] interacts with 1 human partners:{P10599}

7064 Pathogen[ P0C206] interacts with 6 human partners:{Q9H299;Q9NS18;P35754;O76003;P10599;P13667}

7065 Pathogen[ P03363] interacts with 4 human partners:{Q9H299;O76003;P35754;O43396}

7066 [Cluster 643]GO:0070577+F molecular\_function [name] histone acetyl-lysine binding [def] "Interacting selectively and non-covalently with an acetylated lysine residue within a histone." [GOC

7067 Pathogen[ Q2Q067] interacts with 11 human partners:{Q15059;Q9NPI1;P25440;P51532;O15164;Q58F21;Q8WWQ0;Q8IZX4;Q9UIF9;P21675;Q86X55}

7068 Pathogen[ P0C214] interacts with 12 human partners:{Q58F21;Q15059;P21675;Q9UIF9;P25440;Q8WWQ0;Q8IZX4;Q9H8M2;O15164;Q9NPI1;Q86X55;P51532}

7069 Pathogen[ P03346] interacts with 12 human partners:{P51532;Q9NPI1;P25440;Q15059;Q58F21;Q8WWQ0;Q9UIF9;Q9H8M2;P21675;Q86X55;Q8IZX4;O15164}

7070 Pathogen[ Q85601] interacts with 12 human partners:{Q9H8M2;Q86X55;Q9UIF9;O15164;Q15059;Q8IZX4;P51532;Q8WWQ0;Q9NPI1;P21675;P25440;Q58F21}

7071 Pathogen[ P14079] interacts with 11 human partners:{Q9NPI1;O15164;Q8IZX4;Q9H8M2;Q58F21;P51532;Q8WWQ0;Q15059;Q9UIF9;P25440;P2167

5}  
7072 Pathogen[ P03383] interacts with 10 human  
partners:{P25440;Q86X55;Q8IZX4;Q9UIF9;Q58F21;P21675;Q15059;Q8WWQ0;P51532;Q9NPI1}  
7073 Pathogen[ P03410] interacts with 11 human  
partners:{Q8IZX4;P21675;Q86X55;Q15059;Q9H8M2;Q8WWQ0;P51532;Q9UIF9;Q58F21;Q9NPI1;P25440}  
7074 Pathogen[ P14075] interacts with 10 human  
partners:{Q15059;P21675;Q8WWQ0;P25440;Q9NPI1;P51532;Q58F21;Q86X55;Q9UIF9;Q8IZX4}  
7075 Pathogen[ P0C206] interacts with 13 human  
partners:{P51532;Q9NPI1;Q86X55;O15164;Q8WWQ0;Q8IZX4;Q9H8M2;Q9UIF9;P25440;Q15059;Q58F21;Q9UIG0;P21675}  
7076 Pathogen[ P03363] interacts with 11 human  
partners:{Q8IZX4;Q8WWQ0;Q9H8M2;Q58F21;P51532;Q9UIF9;Q9NPI1;P21675;P25440;Q15059;Q86X55}  
7077 [Cluster 644]GO:0019213+F molecular\_function [name] deacetylase activity [def]  
"Catalysis of the hydrolysis of an acetyl group or groups from a substrate molecule." [GOC]  
7078 Pathogen[ Q2Q067] interacts with 1 human partners:{Q9BQ69}  
7079 Pathogen[ P0C214] interacts with 1 human partners:{Q9BQ69}  
7080 Pathogen[ P03346] interacts with 1 human partners:{Q9BQ69}  
7081 Pathogen[ Q85601] interacts with 1 human partners:{Q9BQ69}  
7082 Pathogen[ P14079] interacts with 1 human partners:{Q9Y530}  
7083 Pathogen[ P03383] interacts with 1 human partners:{Q9BQ69}  
7084 Pathogen[ P03410] interacts with 2 human partners:{Q9Y530;Q9BQ69}  
7085 Pathogen[ P14075] interacts with 1 human partners:{Q9BQ69}  
7086 Pathogen[ P0C206] interacts with 2 human partners:{Q9Y530;Q9BQ69}  
7087 Pathogen[ P03363] interacts with 1 human partners:{Q9BQ69}  
7088 [Cluster 645]GO:000403+F molecular\_function [name] Y-form DNA binding [def]  
"Interacting selectively and non-covalently with segment of DNA shaped like a Y. This shape occurs when DNA contains a region of paired double-stranded DNA on one end and a region of unpaired DNA strands on the opposite end." [GOC]  
7089 Pathogen[ Q2Q067] interacts with 1 human partners:{O00255}  
7090 Pathogen[ P0C214] interacts with 2 human partners:{P20585;O00255}  
7091 Pathogen[ P03346] interacts with 3 human partners:{Q9NS91;O00255;P20585}  
7092 Pathogen[ Q85601] interacts with 3 human partners:{P20585;O00255;Q9NS91}  
7093 Pathogen[ P14079] interacts with 2 human partners:{P20585;O00255}  
7094 Pathogen[ P03383] interacts with 1 human partners:{O00255}  
7095 Pathogen[ P03410] interacts with 2 human partners:{P20585;O00255}  
7096 Pathogen[ P14075] interacts with 1 human partners:{O00255}  
7097 Pathogen[ P0C206] interacts with 3 human partners:{O00255;Q9NS91;P20585}  
7098 Pathogen[ P03363] interacts with 2 human partners:{P20585;Q9NS91}  
7099 [Cluster 646]GO:0005509+F molecular\_function [name] calcium ion binding [def]  
"Interacting selectively and non-covalently with calcium ions (Ca2+)." [GOC]  
7100 Pathogen[ Q2Q067] interacts with 56 human  
partners:{Q12798;P50995;O75340;Q15293;P40763;Q08209;Q12982;Q9BSW2;P30793;Q9ULC6;P60660;Q96P71;Q9Y2J8;Q01196;P08133;Q7Z6G3;O00423;Q8IX12;P26447;O14829;Q14765;P27797;O43745;O15162;Q9Y5P8;O94811;Q5THR3;P20073;Q16143;P31949;P46939;Q96FQ6;P06396;Q969Q6;Q9H8M7;P25815;Q8IY85;Q9NZU7;Q9ULW8;P52630;Q9UM07;P41208;Q8N987;O75154;O15182;Q96D15;P16455;Q8N4C6;P55327;P42226;P22681;P23297;P42224;Q6TGC4;Q8NFH8;P14625}  
7101 Pathogen[ P0C214] interacts with 61 human  
partners:{P22681;P05937;P14625;Q8IX12;O14829;Q969Q6;Q7Z6G3;O94811;P42226;Q14765;P62166;P08133;P14649;P60660;P42224;O00423;O43745;O75340;P06396;O14561;Q9UM07;P30793;Q12798;Q9ULC6;Q6TGC4;Q96K9;O15162;Q12982;P46939;Q9H8M7;Q08209;Q9ULW8;Q8IY85;Q96P71;Q9NZU7;Q95202;Q96D15;P25815;P41208;P16455;Q9P0J1;Q5THR3;P26447;Q9Y2J8;P27797;P31949;P55327;Q9BSW2;Q16143;P40763;Q9Y5P8;Q96FQ6;Q8N4C6;Q8NFH8;Q15293;P52630;P20073;P50995;P23297;P80303;O75154}  
7102 Pathogen[ P03346] interacts with 83 human  
partners:{Q9ULC6;Q99828;P02549;Q8IX12;Q60660;O14829;Q96FQ6;P80303;Q6TGC4;Q96P71;P55327;Q8NFH8;P14625;P20073;P25815;P23297;Q9UJ72;Q9Y2J8;Q9UBV8;Q9NZU7;P42226;P06703;Q8WWZ8;Q969G9;P05937;P46939;Q13813;Q9Y5P8;P14649;P41208;P08133;Q96D15;Q13609;O75340;O00423;Q5THR3;Q06190;Q13938;Q8TD86;P42566;Q16143;P42224;Q9ULW8;P63316;P26447;Q969Q6;O94811;P50995;P62166;P27797;Q9UM07;Q9Y2I6;Q92832;Q969F2;Q12798;Q01196;Q9BSW2;Q86YS3;P22681;P06396;Q9H8M7;Q96D71;O15182;O75154;Q8N4C6;Q6ZN04;Q08209;Q14765;Q12982;Q15293;O95202;P52630;Q9ULU8;Q9Y2J0;Q8N987;P40763;Q7Z6G3;P10916;P31949;Q8IY85;O43745;Q6ZJW1;O15162}  
7103 Pathogen[ Q85601] interacts with 62 human  
partners:{Q96FQ6;Q9ULW8;Q9NZU7;P22681;P26447;O14829;P06396;O75154;Q14765;Q15293;O15182;Q12798;P50995;Q86YS3;P14649;Q9H8M7;P16455;Q9UM07;P40763;Q12982;Q6ZJW1;Q6TGC4;P80303;Q8IX12;Q7Z6G3;P27797;Q9Y2I6;P23297;Q96D15;O43745;P30793;Q08209;P52630;O00423;O94811;Q9Y2J8;P42226;Q8NFH8;P46939;Q9BW30;P25815;Q9ULC6;P42224;O75340;P20073;Q5THR3;P31949;Q8IY85;P14625;P08133;Q8TD86;Q96P71;O15162;Q8N4C6;P60660;P62166;Q14257;Q969Q6;Q9BSW2;Q9Y5P8;Q16143;P41208}  
7104 Pathogen[ P14079] interacts with 106 human  
partners:{P04083;Q5THR3;Q9NRQ2;P05937;Q8IX12;Q15293;P09327;Q12982;P27216;P55327;O15162;Q96P71;Q13609;P52630;O43745;Q96A33;Q5D862;Q9ULC6;A4FU69;P50995;Q7Z6G3;Q9ULU8;P16298;Q9BSW2;Q96D15;P31949;Q5JST6;Q8N987;Q8N0U7;P42566;Q16143;Q8NCQ7;P10916;Q86YS3;Q5T2P8;P16455;O00423;Q32NB8;Q99828;Q14118;P30793;Q14765;P14649;P23327;P46939;P25815;Q9ULW8;Q

15078;Q9Y2J8;P42226;P80303;Q8IY85;O75952;P08758;Q16586;Q9Y6U3;Q8N4C6;P20930;O14829;Q5H9T9;Q8NFH8;O75340;P09525;Q92832;Q12798;O14561;P62166;O94811;P05814;P60660;Q9UBV8;O76027;P26447;P23297;Q13316;Q9NZ20;Q06190;P42224;Q9UPV7;P14625;P41208;P20073;Q969Q6;Q8TD86;Q6NXP0;Q9BW30;Q6TGC4;Q15493;O75154;O15182;P13928;P06703;Q9Y5P8;Q96KC9;Q9UM07;Q6ZJW1;Q9Y2I6;Q13813;P02549;Q9Y4J8;Q9H8M7;P51571;Q08209;O95202;Q9NZU7;P13693}

7105 Pathogen[ P03383] interacts with 30 human partners: {P50995;Q969Q6;Q8NFH8;P25815;O15162;P23297;O94811;P41208;P52630;Q12798;Q96P71;P42226;Q9ULW8;P46939;Q9Y5P8;Q9H8M7;Q9BSW2;Q6TGC4;Q9UM07;O43745;P14625;Q9Y2J8;Q8IX12;Q8N4C6;Q9ULC6;P20073;P08133;O75154;P27797;P06396}

7106 Pathogen[ P03410] interacts with 107 human partners: {P26447;O75154;Q9UPV7;Q969F2;Q96KC9;Q7Z6G3;Q15293;Q14257;P80303;Q8IX12;Q96D15;P50995;P10916;Q9Y2I6;Q9Y2J0;Q969Q6;Q08209;Q8TD86;Q6ZJW1;Q9UM07;Q96A33;P06396;Q13609;O76027;Q8NFH8;Q9NRQ2;O94811;P14625;O15182;Q14765;Q16143;Q12798;Q5THR3;Q5D862;P31949;Q9Y6U3;Q5JST6;P30793;P23327;P02549;Q06190;Q92832;Q9UBV8;Q9NRY6;P06703;Q9UMZ2;P25815;Q9UJ72;Q8N987;Q9ULC6;O75952;O15162;P20930;Q86YS3;P08133;Q8N0U7;Q99828;Q8IY85;P63098;Q8WWZ8;Q9BW30;O14561;Q96D71;P05937;P46939;Q969G9;P16455;P13693;P55327;Q9ULU8;Q8N4C6;Q14118;Q9NZ20;Q9NZU7;Q6TGC4;P42226;P20073;A4FU69;P52630;Q8NQC7;P23297;Q12982;P14649;Q9H8M7;Q9Y2J8;P63316;Q5H9T9;O75340;O43745;Q96P71;O00423;P60660;P62166;O95202;Q13813;P41208;Q15493;P40763;P42566;Q9BRK5;O14829;Q9Y5P8;Q9Y4J8;P05814;Q9ULW8;Q13316;P27797}

7107 Pathogen[ P14075] interacts with 37 human partners: {P52630;Q9Y5P8;O94811;Q9ULC6;P55327;Q9BSW2;P42226;Q9UM07;O15162;P08133;Q12798;Q8IX12;Q9Y2J8;Q5JST6;P20073;O14561;Q969Q6;P50995;P23327;Q96KC9;Q8N0U7;P46939;P27797;O43745;P06396;Q9ULW8;P41208;Q6TGC4;O75154;P25815;Q8N4C6;P30793;P14625;Q8NFH8;Q96P71;P23297;Q9H8M7}

7108 Pathogen[ P0C206] interacts with 90 human partners: {Q96P71;O75340;Q96A33;Q12982;O15182;P31949;P46939;Q06190;Q96KC9;O75952;Q8N0U7;P06396;Q9UPV7;Q96D15;P26447;Q99828;Q15493;P27797;Q9UBV8;Q969F2;Q8TD86;P62166;Q6ZJW1;O75154;Q8IY85;Q9Y2J0;O95202;P50995;O94811;P80303;P60660;P55327;Q9Y2J8;Q13316;Q7Z6G3;Q9UM07;P30793;Q9NZU7;P25815;O14561;P14649;Q8NFH8;Q6TGC4;Q969Q6;Q9Y4J8;Q9ULC6;Q6ZN04;Q5H9T9;Q9ULU8;P08133;P22681;Q15293;Q16143;Q13609;P23327;P40763;Q8IX12;O15162;P06703;Q5THR3;P42566;P42226;O14829;P41208;Q8N987;Q5JST6;Q08209;Q14765;Q92832;Q12798;Q14257;P23297;Q9ULW8;Q8N4C6;Q9UJ72;P42224;Q9BSW2;O00423;Q86YS3;P20073;Q9Y5P8;O43745;P16455;Q9H8M7;Q96FQ6;P52630;Q9BW30;Q969G9;Q9Y2I6;P14625}

7109 Pathogen[ P03363] interacts with 63 human partners: {P22681;P52630;Q9Y5P8;Q9Y2I6;P46939;Q14765;Q9Y2J8;O14829;P26447;Q969Q6;P14649;P02549;O75340;O94811;Q9H8M7;Q06190;P31949;Q9ULW8;Q969G9;Q99828;P41208;P25815;Q8NFH8;O00423;P20073;P42226;P50995;P06396;Q9UM07;Q96D15;Q9UBV8;Q13609;Q96P71;Q92832;Q9BW30;P08133;Q8IY85;Q15293;Q12798;P27797;Q9BSW2;Q6TGC4;Q8TD86;Q9NZU7;Q6ZJW1;Q7Z6G3;O75154;Q7Z7M0;Q5THR3;O15182;Q8IX12;P60660;O43745;Q8N4C6;Q13813;Q8N987;Q12982;P55327;Q9ULC6;Q16143;P23297;P10916;P05937}

7110 [Cluster 647]GO:0008853+F molecular\_function [name] exodeoxyribonuclease III activity [def] "Catalysis of the degradation of double-stranded DNA. It acts progressively in a 3' to 5' direction, releasing 5'-phosphomononucleotides." [EC

7111 Pathogen[ Q2Q067] interacts with 2 human partners: {Q99638;O60671}

7112 Pathogen[ P0C214] interacts with 2 human partners: {O60671;Q99638}

7113 Pathogen[ P03346] interacts with 2 human partners: {Q99638;O60671}

7114 Pathogen[ Q85601] interacts with 2 human partners: {O60671;Q99638}

7115 Pathogen[ P14079] interacts with 4 human partners: {O60671;Q9BQ50;Q9NSU2;Q99638}

7116 Pathogen[ P03383] interacts with 2 human partners: {O60671;Q99638}

7117 Pathogen[ P03410] interacts with 4 human partners: {Q9BQ50;Q9NSU2;Q99638;O60671}

7118 Pathogen[ P14075] interacts with 2 human partners: {O60671;Q99638}

7119 Pathogen[ P0C206] interacts with 3 human partners: {Q9NSU2;Q99638;O60671}

7120 Pathogen[ P03363] interacts with 3 human partners: {Q9BQ50;O60671;Q99638}

7121 [Cluster 648]GO:0016788+F molecular\_function [name] hydrolase activity, acting on ester bonds [def] "Catalysis of the hydrolysis of any ester bond." [GOC

7122 Pathogen[ Q2Q067] interacts with 9 human partners: {Q9Y2M0;Q7KZF4;Q9UBQ0;Q7KZ85;Q9UQ84;Q8TEA8;P39748;Q96FN9;P28715}

7123 Pathogen[ P0C214] interacts with 10 human partners: {Q8TEA8;Q7KZ85;Q9Y2M0;Q7KZF4;P28715;Q9UBQ0;P39748;Q9UQ84;Q96FN9;Q9Y3B8}

7124 Pathogen[ P03346] interacts with 12 human partners: {Q7KZ85;P28715;Q8TEA8;Q9UK59;Q9UBQ0;P45381;Q7KZF4;Q9UQ84;P10768;P39748;Q96FN9;Q9Y2M0}

7125 Pathogen[ Q85601] interacts with 10 human partners: {Q9Y2M0;P10768;Q9UQ84;Q8TEA8;Q7KZF4;P28715;Q7KZ85;Q9UBQ0;P39748;Q96FN9}

7126 Pathogen[ P14079] interacts with 18 human partners: {Q8TEA8;Q96FN9;Q9Y3B8;P28715;Q96BW5;Q96JX3;Q7KZ85;Q96HD9;O00519;P45381;Q6P1S2;Q9Y2M0;Q9UBQ0;Q7KZF4;Q9UQ84;Q9UK59;P39748;Q96FM1}

7127 Pathogen[ P03383] interacts with 6 human partners: {Q96FN9;Q7KZF4;Q9Y2M0;Q9UBQ0;Q8TEA8;Q7KZ85}

7128 Pathogen[ P03410] interacts with 18 human partners: {Q96HD9;O00519;P10768;Q9Y3B8;Q8TEA8;Q96FM1;Q7KZ85;P45381;Q9UK59;P39748;P28715;Q9UBQ0;Q96JX3;Q96BW5;Q7KZF4;Q9UQ84;Q9Y2M0;Q96FN9}

7129 Pathogen[ P14075] interacts with 6 human partners: {Q9UBQ0;Q7KZ85;Q96FN9;Q8TEA8;Q9Y2M0;Q7KZF4}

7130 Pathogen[ P0C206] interacts with 14 human partners: {Q9Y2M0;P28715;Q9UQ84;Q9UK59;Q7KZF4;P10768;Q9UBQ0;P45381;Q9Y3B8;Q7KZ85;Q96FN

9;Q96BW5;P39748;Q8TEA8}  
7131 Pathogen[ P03363] interacts with 7 human  
partners:{Q9Y2M0;P10768;Q7KZF4;Q7KZ85;Q9UBQ0;Q8TEA8;Q96FN9}  
7132 [Cluster 649]GO:0042809+F molecular\_function [name] vitamin D receptor binding [def]  
"Interacting selectively and non-covalently with the vitamin D receptor, a nuclear  
receptor that mediates the action of vitamin D by binding DNA and controlling the  
transcription of hormone-sensitive genes." [GOC  
7133 Pathogen[ Q2Q067] interacts with 14 human  
partners:{Q96HR3;Q9NPJ6;Q93074;O75448;O60244;P28702;O43593;Q14106;Q9UHV7;Q15544;Q9NVC  
6;Q9Y2X0;Q15545;Q9Y2W1}  
7134 Pathogen[ P0C214] interacts with 13 human  
partners:{Q9Y2X0;Q93074;Q96HR3;Q9NVC6;Q15545;O60244;Q15544;O43593;Q9UHV7;O75448;Q1410  
6;Q9Y2W1;Q9NPJ6}  
7135 Pathogen[ P03346] interacts with 14 human  
partners:{Q9NPJ6;Q96HR3;Q93074;O60244;O43593;O75448;P28702;Q9NVC6;Q14106;Q9Y2X0;Q1554  
5;Q9Y2W1;Q15544;Q9UHV7}  
7136 Pathogen[ Q85601] interacts with 14 human  
partners:{Q9Y2X0;Q9UHV7;P28702;Q15545;Q14106;O75448;O43593;Q9Y2W1;O60244;Q96HR3;Q9307  
4;Q15544;Q9NPJ6;Q9NVC6}  
7137 Pathogen[ P14079] interacts with 13 human  
partners:{O60244;Q9Y2X0;Q96HR3;Q9NVC6;Q14106;O75448;Q9UHV7;P28702;Q9NPJ6;Q93074;O4359  
3;Q9Y2W1;Q15545}  
7138 Pathogen[ P03383] interacts with 13 human  
partners:{Q15544;Q14106;O60244;Q9NPJ6;Q93074;Q96HR3;O75448;P28702;Q9UHV7;Q9NVC6;Q1554  
5;Q9Y2W1;Q9Y2X0}  
7139 Pathogen[ P03410] interacts with 14 human  
partners:{Q9Y2W1;Q9NVC6;Q9NPJ6;Q14106;P28702;Q96HR3;Q15544;O60244;Q9UHV7;Q9Y2X0;Q9307  
4;O75448;Q15545;O43593}  
7140 Pathogen[ P14075] interacts with 13 human  
partners:{Q9NPJ6;Q96HR3;Q15544;O75448;Q93074;Q14106;Q9UHV7;O60244;Q15545;P28702;Q9NVC  
6;Q9Y2W1;Q9Y2X0}  
7141 Pathogen[ P0C206] interacts with 15 human  
partners:{Q96HR3;Q15545;Q15544;Q9UHV7;Q14106;Q9NPJ6;Q9Y2W1;O60244;P28702;Q9NVC6;O7544  
8;Q9Y2X0;O43593;Q93074;Q9UIG0}  
7142 Pathogen[ P03363] interacts with 12 human  
partners:{Q96HR3;Q15545;O43593;P28702;Q15544;Q9NVC6;Q9UHV7;Q14106;Q93074;O75448;Q9NPJ  
6;O60244}  
7143 [Cluster 650]GO:0050816+F molecular\_function [name] phosphothreonine binding [def]  
"Interacting selectively and non-covalently with a phosphorylated threonine residue  
within a protein." [GOC  
7144 Pathogen[ Q2Q067] interacts with 1 human partners:{Q13526}  
7145 Pathogen[ P0C214] interacts with 1 human partners:{Q13526}  
7146 Pathogen[ P03346] interacts with 1 human partners:{Q13526}  
7147 Pathogen[ Q85601] interacts with 1 human partners:{Q13526}  
7148 Pathogen[ P14079] interacts with 1 human partners:{Q13526}  
7149 Pathogen[ P03383] interacts with 1 human partners:{Q13526}  
7150 Pathogen[ P03410] interacts with 1 human partners:{Q13526}  
7151 Pathogen[ P14075] interacts with 1 human partners:{Q13526}  
7152 Pathogen[ P0C206] interacts with 1 human partners:{Q13526}  
7153 Pathogen[ P03363] interacts with 1 human partners:{Q13526}  
7154 [Cluster 651]GO:0047617+F molecular\_function [name] acyl-CoA hydrolase activity [def]  
"Catalysis of the reaction  
7155 Pathogen[ Q2Q067] interacts with 2 human partners:{O14734;Q86TX2}  
7156 Pathogen[ P0C214] interacts with 4 human partners:{Q86TX2;O00154;O14734;Q9NPJ3}  
7157 Pathogen[ P03346] interacts with 3 human partners:{Q86TX2;O14734;Q9NPJ3}  
7158 Pathogen[ Q85601] interacts with 2 human partners:{Q86TX2;O14734}  
7159 Pathogen[ P14079] interacts with 5 human  
partners:{P49753;Q9NPJ3;O14734;Q86TX2;Q8WXI4}  
7160 Pathogen[ P03383] interacts with 1 human partners:{O14734}  
7161 Pathogen[ P03410] interacts with 6 human  
partners:{Q9NPJ3;Q8WXI4;O14734;O00154;Q86TX2;P49753}  
7162 Pathogen[ P14075] interacts with 1 human partners:{O14734}  
7163 Pathogen[ P0C206] interacts with 4 human partners:{Q9NPJ3;Q8WXI4;Q86TX2;O14734}  
7164 Pathogen[ P03363] interacts with 2 human partners:{O14734;Q9NPJ3}  
7165 [Cluster 652]GO:0008565+F molecular\_function [name] protein transporter activity [def]  
"Enables the directed movement of proteins into, out of or within a cell, or between  
cells." [ISBN  
7166 Pathogen[ Q2Q067] interacts with 44 human  
partners:{Q14974;Q9UI26;O60684;O94973;O00410;Q10567;P56377;Q96QU8;O43747;O95782;Q9257  
2;Q9H2T7;Q96DC7;O94829;Q53FT3;Q96P70;Q92973;P63010;Q96PC3;O14980;O15131;O14787;Q8TEX9  
;Q14746;P61966;A9QM74;P55060;O75843;Q96JB2;O00505;Q9UIA9;Q9NRA8;Q9HAV4;O75436;O15397;  
O95373;O00629;P52292;O60763;O43592;Q8WUX9;P52294;Q13367;O95149}  
7167 Pathogen[ P0C214] interacts with 46 human  
partners:{O94829;Q8TEX9;Q9UI26;A9QM74;Q14746;Q9UIA9;O14787;Q8WUX9;P55060;Q96P70;P5978  
0;Q13367;O60684;Q9HAV4;O95149;O15131;O75843;Q96DC7;Q96QU8;Q53FT3;P63010;Q10567;Q92572  
;O14980;P52294;P56377;O43592;Q96PC3;O60763;O00505;O43747;O75436;O94973;Q9UJ9;Q92973;



7168 Pathogen[ P03346] interacts with 55 human  
partners: {Q13596; Q8TEX9; Q9UI26; P61966; Q96P70; Q14746; O00629; O15397; Q9HAV4; Q9Y6B7; O95149; Q99598; Q9H2T7; Q96JB2; P63010; O14787; Q96DC7; O43747; Q92572; P53680; P56377; Q96QU8; P59780; Q96T51; O00410; O95782; O00505; P55060; Q9UIA9; Q9NRS6; O43592; Q10567; O75843; O14980; Q7Z3T8; Q92973; Q9Y587; O95373; O15131; Q96PC3; A9QM74; O60763; O75436; Q13367; P52292; O60684; O14617; O60749; Q9NRA8; O94829; O94973; P52294; Q53FT3; Q8WUX9; Q14974}

7169 Pathogen[ Q85601] interacts with 51 human  
partners: {Q13367; Q13596; Q9UI26; Q14746; O00629; Q53FT3; O75843; Q9HAV4; Q9UIA9; O95149; Q96DC7; Q96P70; O60763; P56377; Q9UJH9; Q96T51; Q96JB2; O43747; Q9NP61; Q10567; Q14974; Q8WUX9; O94829; O15131; O95373; P55060; Q92973; Q96QU8; Q8TEX9; A9QM74; P53680; O14787; O14980; O94973; Q96PC3; O75436; Q9Y6B7; P52292; O15397; Q9NRA8; P63010; Q9H2T7; Q92572; P61966; P59780; O00505; O60684; O43592; P52294; O00410; O95782}

7170 Pathogen[ P14079] interacts with 59 human  
partners: {Q96DC7; O95373; Q8N4H5; Q14746; P61966; Q96P70; Q10567; O43592; P56377; P52294; Q9Y6B7; O60684; P59780; O60895; Q99442; Q9NRS6; O95149; Q92572; O75843; Q9UJH9; O95782; Q53FT3; Q96T51; O94829; O00410; Q9UI26; Q8WUX9; Q14974; P55060; Q92973; O60749; P60059; P63010; O15397; A9QM74; Q13596; O00505; O94973; Q8TEX9; Q7Z3T8; Q13367; O43747; O14787; Q9UIA9; Q99598; Q9HAV4; Q96JB2; O14617; O75436; Q96PC3; Q9H2T7; Q96QU8; Q9NRA8; O00629; P53680; P52292; O15131; Q9Y587; O60763}

7171 Pathogen[ P03383] interacts with 39 human  
partners: {Q9UI26; P56377; Q14746; Q9UIA9; O15397; Q92572; O94829; Q8WUX9; Q10567; Q96P70; Q96JB2; O00505; A9QM74; P55060; P52292; Q9H2T7; O75843; Q92973; P63010; O14980; O43747; Q9HAV4; O95149; O95782; O14787; Q14974; O15131; O75436; Q13367; Q53FT3; Q96QU8; Q9NRA8; O95373; O43592; O94973; O00629; P52294; Q96DC7; O00410}

7172 Pathogen[ P03410] interacts with 64 human  
partners: {Q8N4H5; O00203; O95782; Q96PC3; Q14974; A9QM74; O00505; Q99442; P53680; Q96JB2; O60896; P60059; Q13596; O60895; P52294; P55060; O43747; O75843; O60749; Q96QU8; Q96P70; Q10567; Q9NRA8; Q92572; Q53FT3; Q8TEX9; O14617; Q9Y587; Q9Y6B7; Q9UJH9; Q8WUX9; O60763; O00629; O60684; Q92973; O14787; Q9NP61; O94829; Q15049; O75436; Q9NRS6; Q99598; Q96T51; P63010; Q9H2T7; Q14746; O00410; P59780; Q9UI26; Q13367; P52292; Q9HAV4; O43592; P61966; Q9UIA9; O15131; O94973; P56377; O15397; Q7Z3T8; O14980; O95373; Q96DC7; O95149}

7173 Pathogen[ P14075] interacts with 40 human  
partners: {Q9UI26; P52292; O15131; Q14746; Q96JB2; Q53FT3; O94973; Q96P70; Q9H2T7; O14787; Q8WUX9; Q92973; O00629; O15397; Q9HAV4; O43592; O00505; O14980; P52294; O95373; Q9UJH9; O95782; O00410; O43747; Q9UIA9; Q96DC7; Q92572; O95149; O94829; O75436; P63010; Q96QU8; A9QM74; O75843; P56377; Q9NRA8; Q14974; Q10567; P55060; Q13367}

7174 Pathogen[ P0C206] interacts with 57 human  
partners: {P53680; P63010; O15131; Q8WUX9; Q9Y6B7; O94973; Q96DC7; O95149; Q92572; O43592; O43747; Q9UJH9; Q10567; Q9NRS6; A9QM74; Q99598; O00629; O60684; P61966; Q14974; Q96QU8; O00505; Q96T51; Q96P70; O15397; Q96JB2; O94829; Q14746; Q13596; Q92973; O00410; Q9HAV4; Q9NP61; O95782; P55060; O75436; Q14617; O75843; Q9UIA9; P52294; Q96PC3; Q8N4H5; Q53FT3; P52292; Q13367; P56377; Q9UI26; Q9NRA8}

7175 Pathogen[ P03363] interacts with 46 human  
partners: {O60763; Q53FT3; O14787; Q92973; O60684; Q99598; Q9NRA8; Q13367; O43747; Q9HAV4; A9QM74; O14980; O00410; Q9H2T7; O00505; O75436; Q96P70; Q96DC7; Q9Y6B7; O00629; Q96T51; O94973; O60749; Q14746; Q92572; Q96QU8; Q8TEX9; P63010; Q14974; O95782; O94829; O15131; O75843; Q9UI26; O95373; Q13596; P55060; O43592; P52292; O95149; Q8WUX9; Q10567; Q9UIA9; O15397; P52294; Q96JB2}

7176 [Cluster 653]GO:0008429+F molecular\_function [name] phosphatidylethanolamine binding [def] "Interacting selectively and non-covalently with phosphatidylethanolamine, any of a class of glycerophospholipids in which a phosphatidyl group is esterified to the hydroxyl group of ethanolamine." [ISBN

7177 Pathogen[ Q2Q067] interacts with 1 human partners: {P50995}

7178 Pathogen[ P0C214] interacts with 2 human partners: {P50995; Q9H492}

7179 Pathogen[ P03346] interacts with 2 human partners: {Q9H492; P50995}

7180 Pathogen[ Q85601] interacts with 2 human partners: {Q9H492; P50995}

7181 Pathogen[ P14079] interacts with 2 human partners: {P50995; Q9H492}

7182 Pathogen[ P03383] interacts with 1 human partners: {P50995}

7183 Pathogen[ P03410] interacts with 2 human partners: {P50995; Q9H492}

7184 Pathogen[ P14075] interacts with 1 human partners: {P50995}

7185 Pathogen[ P0C206] interacts with 2 human partners: {P50995; Q9H492}

7186 Pathogen[ P03363] interacts with 2 human partners: {Q9H492; P50995}

7187 [Cluster 654]GO:0016772+F molecular\_function [name] transferase activity, transferring phosphorus-containing groups [def] "Catalysis of the transfer of a phosphorus-containing group from one compound (donor) to another (acceptor)." [GOC

7188 Pathogen[ Q2Q067] interacts with 18 human  
partners: {Q9Y4A5; P31749; O14757; O75582; O96017; P50750; Q13233; P50613; Q96RU7; O14920; P45984; O43318; P49336; P24941; P11802; O15111; Q15759; Q00534}

7189 Pathogen[ P0C214] interacts with 23 human  
partners: {O15111; Q14164; P50750; P50613; P11802; O94921; P12277; O43318; Q00534; Q13233; P21127; Q00536; O96017; P49336; P24941; Q9Y4A5; O75582; Q96RU7; Q15759; P45984; O14757; O14920; P31749}

7190 Pathogen[ P03346] interacts with 32 human  
partners: {P45984; Q00536; O15111; O96017; P21127; P49336; P24941; O14757; Q8IZE3; Q86Z02; Q6P3W7; P11802; Q496M5; P31749; Q9Y4A5; Q8TD19; P50750; Q13233; O75582; Q96RU7; Q15759; Q96PY6; P45985; Q00534; Q96KG9; O14920; O94921; O43318; O14965; Q14164; Q8NB16; O00444}

7191 Pathogen[ Q85601] interacts with 27 human

partners:{Q00536;P31749;O96017;P50750;Q96PY6;O15111;P49336;Q9Y4A5;P11802;O14757;O14965;Q14164;O14920;O94921;O75582;P50613;Q96RU7;Q15759;P45984;P21127;Q96KG9;Q13233;Q00534;O43318;Q496M5;P24941;P51955}

7192 Pathogen[ P14079] interacts with 24 human partners:{P31751;Q14004;Q9Y4A5;O43187;P53779;P49336;P52564;Q86TN4;O75582;Q14164;P45984;A2RU49;P45983;P50613;P51955;Q16644;Q15759;P45985;P21127;Q96RU7;Q13164;O14965;P50750;Q96KG9}

7193 Pathogen[ P03383] interacts with 25 human partners:{Q9NYV4;O14757;O75582;Q13233;Q8TD19;O14920;Q9Y4A5;P31749;O15111;Q00536;Q00534;P11802;O43318;P21127;P49336;P50613;P24941;P50750;Q15759;O94921;O14965;Q96RU7;Q96PY6;P45984;O96017}

7194 Pathogen[ P03410] interacts with 26 human partners:{O14920;Q8IZE3;Q00534;Q8NB16;O15111;O75582;O43187;P31749;A2RU49;Q13233;P50613;O14965;P50750;O43318;Q9Y4A5;Q96KG9;P45985;P24941;P11802;O96017;O14757;P49336;Q96RU7;P45984;P53779;Q86TN4}

7195 Pathogen[ P14075] interacts with 25 human partners:{P49336;O15111;P24941;P11802;Q15759;O75582;P50613;Q00534;P50750;Q9Y4A5;O14920;P31749;O96017;O14965;O43318;P21127;Q96RU7;Q96PY6;Q13233;O94921;Q9UQ88;Q9NYV4;O14757;P45984;Q8TD19}

7196 Pathogen[ P0C206] interacts with 33 human partners:{P49336;Q496M5;O14920;P31749;P50750;O96017;P51955;O75582;P45984;Q00536;O43318;Q96PY6;O00444;Q8TD19;Q96KG9;Q6P3W7;Q13233;Q96RU7;P30291;Q14164;P50613;Q9Y4A5;O15111;P45985;P21127;O14965;P24941;Q15759;P11802;O94921;Q99640;Q99986;Q00534}

7197 Pathogen[ P03363] interacts with 18 human partners:{O14920;P21127;O15111;O43318;P24941;O96017;Q00534;P31749;Q8NB16;Q96KG9;P49336;Q9Y4A5;P50750;Q8IZE3;P11802;Q00536;Q13233;O14757}

7198 [Cluster 655]GO:0008553+F molecular\_function [name] hydrogen-exporting ATPase activity, phosphorylative mechanism [def] "Catalysis of the transfer of a solute or solutes from one side of a membrane to the other according to the reaction

7199 Pathogen[ Q2Q067] interacts with 1 human partners:{P36543}

7200 Pathogen[ P0C214] interacts with 1 human partners:{P36543}

7201 Pathogen[ P03346] interacts with 2 human partners:{P21283;P36543}

7202 Pathogen[ Q85601] interacts with 1 human partners:{P36543}

7203 Pathogen[ P14079] interacts with 3 human partners:{P36543;P61421;Q96LB4}

7204 Pathogen[ P03383] interacts with 1 human partners:{P36543}

7205 Pathogen[ P03410] interacts with 3 human partners:{P61421;Q96LB4;P36543}

7206 Pathogen[ P14075] interacts with 1 human partners:{P36543}

7207 Pathogen[ P0C206] interacts with 1 human partners:{P36543}

7208 Pathogen[ P03363] interacts with 1 human partners:{P36543}

7209 [Cluster 656]GO:0016538+F molecular\_function [name] cyclin-dependent protein kinase regulator activity [def] "Modulates the activity of a cyclin-dependent protein kinase, enzymes of the protein kinase family that are regulated through association with cyclins and other proteins." [GOC

7210 Pathogen[ Q2Q067] interacts with 7 human partners:{P24385;P61024;P24864;O96020;P33552;Q8TDN4;Q8ND76}

7211 Pathogen[ P0C214] interacts with 7 human partners:{Q8ND76;P61024;P24385;Q8TDN4;P24864;P33552;O96020}

7212 Pathogen[ P03346] interacts with 8 human partners:{Q8ND76;P24385;O96020;P24864;P61024;Q8TDN4;P33552;Q9BT7}

7213 Pathogen[ Q85601] interacts with 7 human partners:{P24385;Q8ND76;P61024;Q8TDN4;O96020;P33552;P24864}

7214 Pathogen[ P14079] interacts with 7 human partners:{P24864;Q9BT7;Q8ND76;P33552;Q8TDN4;O96020;P61024}

7215 Pathogen[ P03383] interacts with 7 human partners:{P61024;P24385;P33552;O96020;Q8TDN4;Q8ND76;P24864}

7216 Pathogen[ P03410] interacts with 8 human partners:{Q9BT7;O96020;P24385;P33552;P61024;Q8TDN4;P24864;Q8ND76}

7217 Pathogen[ P14075] interacts with 7 human partners:{P61024;O96020;Q8ND76;P24385;Q8TDN4;P33552;P24864}

7218 Pathogen[ P0C206] interacts with 8 human partners:{P61024;Q8TDN4;O96020;P33552;Q8ND76;Q9BT7;P24864;P24385}

7219 Pathogen[ P03363] interacts with 7 human partners:{P24864;P33552;Q8ND76;O96020;P61024;P24385;Q8TDN4}

7220 [Cluster 657]GO:0017089+F molecular\_function [name] glycolipid transporter activity [def] "Enables the directed movement of glycolipids, compounds containing (usually) 1-4 linked monosaccharide residues joined by a glycosyl linkage to a lipid, into, out of or within a cell, or between cells." [GOC

7221 Pathogen[ Q2Q067] interacts with 2 human partners:{A6NH11;O95397}

7222 Pathogen[ P0C214] interacts with 2 human partners:{A6NH11;O95397}

7223 Pathogen[ P03346] interacts with 3 human partners:{O95397;Q5TA50;A6NH11}

7224 Pathogen[ Q85601] interacts with 1 human partners:{O95397}

7225 Pathogen[ P14079] interacts with 4 human partners:{A6NH11;Q5TA50;O95397;Q9NZD2}

7226 Pathogen[ P03383] interacts with 2 human partners:{A6NH11;O95397}

7227 Pathogen[ P03410] interacts with 4 human partners:{Q5TA50;A6NH11;Q9NZD2;O95397}

7228 Pathogen[ P14075] interacts with 3 human partners:{O95397;A6NH11;Q5TA50}

7229 Pathogen[ P0C206] interacts with 4 human partners:{O95397;Q9NZD2;A6NH11;Q5TA50}

7230 Pathogen[ P03363] interacts with 3 human partners:{Q5TA50;O95397;A6NH11}

7231 [Cluster 658]GO:0004879+F molecular\_function [name] ligand-activated sequence-specific DNA binding RNA polymerase II transcription factor activity [def] "Combining with a signal and transmitting the signal to the transcriptional machinery by interacting selectively and non-covalently with a specific DNA sequence in order to modulate transcription by RNA polymerase II." [GOC

7232 Pathogen[ Q2Q067] interacts with 8 human partners:{P10827;P40763;P10589;P28702;P35869;P55055;P11474;P22736}

7233 Pathogen[ P0C214] interacts with 3 human partners:{P35869;P11474;P40763}

7234 Pathogen[ P03346] interacts with 16 human partners:{P10827;P06401;P10588;P51843;P28702;P22736;O95718;O75469;P11474;P35869;O00482;P40763;P35398;Q13285;P55055;P10589}

7235 Pathogen[ Q85601] interacts with 9 human partners:{P40763;P28702;P55055;P22736;P11474;P10827;O00482;P35869;P10589}

7236 Pathogen[ P14079] interacts with 13 human partners:{P55055;P35869;P35398;P11474;P22736;P10827;O95718;O00482;O75469;P28702;P10588;Q8WWB7;P10589}

7237 Pathogen[ P03383] interacts with 3 human partners:{P11474;P28702;P35869}

7238 Pathogen[ P03410] interacts with 6 human partners:{P22736;P28702;Q8WWB7;P11474;P10589;P40763}

7239 Pathogen[ P14075] interacts with 3 human partners:{P35869;P11474;P28702}

7240 Pathogen[ P0C206] interacts with 15 human partners:{P10588;P35398;P06401;P35869;O75469;P55055;P22736;O00482;P10589;O95718;Q8WWB7;P40763;P28702;P11474;P10827}

7241 Pathogen[ P03363] interacts with 7 human partners:{P11474;P35869;P10588;P28702;P35398;P10589;O00482}

7242 [Cluster 659]GO:0032557+F molecular\_function [name] pyrimidine ribonucleotide binding [def] "Interacting selectively and non-covalently with a pyrimidine ribonucleotide, any compound consisting of a pyrimidine ribonucleoside that is esterified with (ortho)phosphate or an oligophosphate at any hydroxyl group on the ribose moiety." [GOC

7243 Pathogen[ Q2Q067] interacts with 1 human partners:{Q16851}

7244 Pathogen[ P0C214] interacts with 1 human partners:{Q16851}

7245 Pathogen[ P03346] interacts with 1 human partners:{Q16851}

7246 Pathogen[ Q85601] interacts with 1 human partners:{Q16851}

7247 Pathogen[ P14079] interacts with 1 human partners:{Q16851}

7248 Pathogen[ P03383] interacts with 1 human partners:{Q16851}

7249 Pathogen[ P03410] interacts with 1 human partners:{Q16851}

7250 Pathogen[ P14075] interacts with 1 human partners:{Q16851}

7251 Pathogen[ P0C206] interacts with 1 human partners:{Q16851}

7252 Pathogen[ P03363] interacts with 1 human partners:{Q16851}

7253 [Cluster 660]GO:0008536+F molecular\_function [name] Ran GTPase binding [def] "Interacting selectively and non-covalently with Ran, a conserved Ras-like GTP-binding protein, implicated in nucleocytoplasmic transport, cell cycle progression, spindle assembly, nuclear organization and nuclear envelope (NE) assembly." [GOC

7254 Pathogen[ Q2Q067] interacts with 11 human partners:{Q6VN20;O00410;P49790;P49792;Q96S59;O15397;O95373;Q9H6Z4;Q9UKK6;P43487;O15392}

7255 Pathogen[ P0C214] interacts with 10 human partners:{P43487;P49792;P49790;Q96S59;Q9UKK6;O15392;Q6VN20;O95373;Q9H6Z4;O15397}

7256 Pathogen[ P03346] interacts with 12 human partners:{O15397;O15392;P43487;O00410;Q96S59;O95373;Q6VN20;O14715;P49790;Q9H6Z4;Q9UKK6;P49792}

7257 Pathogen[ Q85601] interacts with 11 human partners:{P43487;O15392;Q9H6Z4;Q6VN20;Q9UKK6;Q96S59;O95373;O15397;P49792;P49790;O00410}

7258 Pathogen[ P14079] interacts with 10 human partners:{O95373;Q6VN20;O14715;O15392;O00410;Q9UKK6;O15397;P49790;Q9H6Z4;Q96S59}

7259 Pathogen[ P03383] interacts with 9 human partners:{P49792;O15397;P43487;Q96S59;Q9H6Z4;O95373;P49790;O00410;Q9UKK6}

7260 Pathogen[ P03410] interacts with 12 human partners:{O15392;Q96S59;Q6VN20;O14715;P49790;P43487;O00410;Q9H6Z4;O15397;Q9UKK6;O95373;P49792}

7261 Pathogen[ P14075] interacts with 9 human partners:{Q9H6Z4;P43487;P49792;O15397;Q96S59;O95373;O00410;P49790;Q9UKK6}

7262 Pathogen[ P0C206] interacts with 12 human partners:{P49790;Q9UKK6;O15397;O00410;P49792;Q6VN20;P43487;O95373;O15392;Q9H6Z4;Q96S59;O14715}

7263 Pathogen[ P03363] interacts with 10 human partners:{O00410;P43487;P49792;Q9UKK6;P49790;Q9H6Z4;O95373;Q6VN20;Q96S59;O15397}

7264 [Cluster 661]GO:0043621+F molecular\_function [name] protein self-association [def] "Interacting selectively and non-covalently with a domain within the same polypeptide." [GOC

7265 Pathogen[ Q2Q067] interacts with 10 human partners:{Q9P219;Q9UDY8;Q96IT1;O95999;P54253;O14641;O60299;Q9UID6;P40926;Q86U70}

7266 Pathogen[ P0C214] interacts with 11 human partners:{Q9UID6;P54253;Q9UDY8;O60299;P40926;Q8WXG1;Q96IT1;Q86U70;O14641;O95999;Q9P21

9}  
7267 Pathogen[ P03346] interacts with 10 human  
partners:{Q86U70;Q9UDY8;O95999;Q9P219;O14641;P40926;O60299;P54253;Q96IT1;Q9UID6}  
7268 Pathogen[ Q85601] interacts with 10 human  
partners:{Q86U70;Q9UDY8;Q9UID6;Q9P219;O14641;P54253;Q96IT1;O95999;P40926;O60299}  
7269 Pathogen[ P14079] interacts with 10 human  
partners:{O95999;O14641;P20933;Q86U70;Q9UID6;P54253;O60299;Q96IT1;Q9P219;Q8WXG1}  
7270 Pathogen[ P03383] interacts with 8 human  
partners:{P40926;Q86U70;O60299;Q9UID6;O14641;Q96IT1;O95999;P54253}  
7271 Pathogen[ P03410] interacts with 11 human  
partners:{Q9P219;O60299;Q8WXG1;O95999;Q86U70;Q96IT1;P40926;P20933;P54253;Q9UID6;O1464  
1}  
7272 Pathogen[ P14075] interacts with 8 human  
partners:{P54253;Q86U70;Q9UID6;Q96IT1;P40926;O14641;O60299;O95999}  
7273 Pathogen[ P0C206] interacts with 10 human  
partners:{Q9UID6;Q9UDY8;O95999;O60299;Q9P219;Q96IT1;P40926;Q86U70;Q8WXG1;P54253}  
7274 Pathogen[ P03363] interacts with 7 human  
partners:{Q86U70;P54253;Q96IT1;Q9P219;O60299;O14641;Q9UID6}  
7275 [Cluster 662]GO:0005200+F molecular\_function [name] structural constituent of  
cytoskeleton [def] "The action of a molecule that contributes to the structural  
integrity of a cytoskeletal structure." [GOC  
7276 Pathogen[ Q2Q067] interacts with 36 human  
partners:{P19012;O15511;Q01082;P35908;P02538;Q9Y615;Q9NSB2;P07196;O00291;Q15323;P0877  
9;O60437;P23490;P14136;P15924;P08727;O15061;P04264;P11532;P11171;Q04695;P35527;O94805  
;P23258;P13647;O95619;O60504;Q9UGJ1;P08670;P04259;P02533;P35900;Q16352;P07197;Q96CW5;  
P17661}  
7277 Pathogen[ P0C214] interacts with 43 human  
partners:{P60709;Q9Y615;P68133;O15061;P35527;P16157;P02538;P04264;P02533;P15924;Q1635  
2;Q9NSB2;P23258;Q13515;P14136;O60437;Q96CW5;P35908;Q9UGJ1;O95619;Q01082;P08779;P23490  
;P11532;Q04695;P08670;P19012;P04259;P08727;Q15323;Q96G01;P13647;O15144;O60504;P07197;  
O94805;P63261;P07196;O00291;P11171;O15511;P35900;P17661}  
7278 Pathogen[ P03346] interacts with 54 human  
partners:{O60437;Q96G01;P15924;P19012;P02538;Q16352;P02549;P07196;P08779;Q96RT1;P0872  
7;Q15323;O15511;Q13515;P23258;P35527;O15144;P11277;O94875;Q9H329;P60709;O15061;P14136  
;Q9Y5K6;Q96CW5;O00291;P16157;P26038;P16452;Q13813;P35908;P07197;Q01082;P11171;Q04695;  
Q9NSB2;P17661;P02533;Q9Y4G6;P23490;Q9UGJ1;O15145;O94805;Q9Y614;P08670;O95619;P35900;P  
13647;P11532;O60504;P04259;P04264;Q16204;Q9Y615}  
7279 Pathogen[ Q85601] interacts with 46 human  
partners:{O95619;O15511;P02538;P68133;P16157;P02533;P08779;Q96RT1;O60437;Q9Y5K6;P1766  
1;P07196;P08670;P14136;P11532;P11171;P04259;Q01082;Q96CW5;P60709;P23258;P15924;Q13515  
;Q04695;Q9UGJ1;P04264;P63261;Q96G01;P19012;Q15323;Q9Y615;Q16204;P08727;P07197;P13647;  
P35527;O60504;O00291;P35908;P35900;Q16352;O94805;P23490;Q9NSB2;O15144;O15061}  
7280 Pathogen[ P14079] interacts with 57 human  
partners:{P16452;P35900;O00291;P63261;Q9Y614;P08779;P35908;P11532;P11171;Q01082;P1592  
4;Q9UGJ1;P26038;P68363;Q9Y615;O60437;O60504;P16157;Q15323;P35527;Q9Y4G6;Q04695;P07196  
;P02533;Q96RT1;O15061;O15145;Q16204;O15511;P14136;O94805;P07197;Q14093;O15195;P23258;  
P23490;P35663;P60709;P11277;Q96G01;Q9Y5K6;Q13515;P08670;P04264;Q9UEY8;P17661;P04259;O  
95619;Q13813;P02549;P08727;Q9NSB2;P68133;O15144;P13647;Q96CW5;P10636}  
7281 Pathogen[ P03383] interacts with 33 human  
partners:{P23490;P15924;Q16352;P02533;P08727;Q13515;Q9NSB2;O94805;P08670;O15511;P1766  
1;Q96CW5;P14136;O15061;P35527;P08779;O00291;Q04695;P07197;P02538;P07196;P11532;P04264  
;Q15323;P35908;P13647;O60504;O95619;P04259;P19012;O60437;Q9Y615;P35900}  
7282 Pathogen[ P03410] interacts with 59 human  
partners:{O15511;O95619;P23490;P02533;P15924;Q96RT1;Q15323;Q9UEY8;Q9Y614;P17661;O1506  
1;Q9Y615;Q9H329;P04264;P16157;Q16352;P35527;P11532;O15145;Q13515;P16452;O00291;P02538  
;P02549;P07196;Q9Y5K6;P08779;P11171;O94805;P26038;P35908;P35663;Q96G01;P68133;Q9Y4G6;  
Q14093;P04259;O60504;Q04695;P08670;P10636;P23258;P68363;P35900;P14136;Q16204;P63261;Q  
01082;O15144;Q96CW5;Q9NSB2;P13647;Q13813;P08727;P11277;O60437;Q9UGJ1;P60709;P07197}  
7283 Pathogen[ P14075] interacts with 33 human  
partners:{Q16352;P11532;P08727;Q9NSB2;O95619;P17661;P14136;Q13515;P19012;P23490;O1506  
1;O15511;O00291;Q15323;Q04695;P35908;P08779;P04264;P04259;O94805;P08670;P07197;P13647  
;O60504;P07196;P35900;O60437;P02538;P35527;P02533;Q96CW5;P11171;P15924}  
7284 Pathogen[ P0C206] interacts with 52 human  
partners:{O15511;Q9NSB2;Q01082;P60709;P17661;Q96RT1;P08779;P07196;P35527;O60504;O0029  
1;O15061;P02538;P08727;Q96CW5;Q13515;P04264;Q9Y614;P19012;O15145;P10636;Q9UGJ1;O60437  
;P68133;P23490;P16157;P13647;O95619;P14136;P63261;Q16204;P16452;P23258;O15144;P15924;  
Q9Y5K6;P11277;P35663;P08670;P11532;P04259;Q16352;Q15323;P02533;Q9Y615;P35900;O94805;P  
35908;P11171;Q04695;Q96G01;P07197}  
7285 Pathogen[ P03363] interacts with 56 human  
partners:{Q9Y614;O95619;P02533;P08779;Q96RT1;P02538;P07197;P11277;Q16352;O15061;P0254  
9;P60709;P16157;O60437;P23490;Q01082;Q14093;P68363;P68133;Q15323;O94875;Q9Y4G6;P15924  
;P35908;P35900;P07196;Q16204;P08727;O15144;P13647;P04259;P35527;P11532;P08670;P17661;  
P11171;P14136;O94805;O15143;Q9Y615;Q9NSB2;P63261;Q9UGJ1;P16452;P23258;Q9H329;P04264;Q  
13813;Q9Y5K6;P35663;O00291;O15145;Q13515;O15511;Q04695;Q96CW5}  
7286 [Cluster 663]GO:0016505+F molecular\_function [name] apoptotic protease activator  
activity [def] "Increases the activity of a peptidase that is involved in the

activation of apoptosis." [GOC

7287 Pathogen[ Q2Q067] interacts with 1 human partners:{Q9UKL3}

7288 Pathogen[ P0C214] interacts with 2 human partners:{Q9UKL3;O14727}

7289 Pathogen[ P03346] interacts with 2 human partners:{Q9UKL3;O14727}

7290 Pathogen[ Q85601] interacts with 1 human partners:{Q9UKL3}

7291 Pathogen[ P14079] interacts with 2 human partners:{Q9UKL3;O00559}

7292 Pathogen[ P03383] interacts with 1 human partners:{Q9UKL3}

7293 Pathogen[ P03410] interacts with 2 human partners:{O00559;Q9UKL3}

7294 Pathogen[ P14075] interacts with 1 human partners:{Q9UKL3}

7295 Pathogen[ P0C206] interacts with 1 human partners:{Q9UKL3}

7296 Pathogen[ P03363] interacts with 1 human partners:{Q9UKL3}

7297 [Cluster 664]GO:0005506+F molecular\_function [name] iron ion binding [def]  
"Interacting selectively and non-covalently with iron (Fe) ions." [GOC

7298 Pathogen[ Q2Q067] interacts with 19 human  
partners:{P02792;Q9UPP1;Q9HBH1;P09917;O75151;O14829;P27797;P68871;Q9UMS0;P29474;Q9NWT  
6;P99999;P69905;Q96KS0;Q9H6W3;Q9H6Z9;Q9GZT9;Q9UHB4;Q9H1K1}

7299 Pathogen[ P0C214] interacts with 31 human  
partners:{P29474;Q9UKA1;P02794;Q9HBH1;P09917;Q9NVH6;P02042;O14829;Q96KS0;P69905;O7515  
1;Q99798;Q9H1K1;Q9NPG2;Q9UMS0;Q9H6Z9;P68871;P69892;P99999;Q9H6W3;P02100;Q9GZT9;P27797  
;Q9UHB4;O14521;P02792;P69891;P22830;Q9UPP1;P18054;Q9NWT6}

7300 Pathogen[ P03346] interacts with 25 human  
partners:{P02792;Q9HBH1;O14829;Q9UBK8;P29474;Q9UHB4;P02100;Q9H1K1;Q9UMS0;P18054;P0279  
4;Q9NPG2;P69905;O75151;Q9UKA1;P99999;P09917;Q9GZT9;Q9UPP1;P27797;P68871;Q96KS0;Q9NWT6  
;Q9H6W3;Q9H6Z9}

7301 Pathogen[ Q85601] interacts with 26 human  
partners:{Q9HBH1;P69905;Q9UHB4;Q9H6Z9;P99999;O14829;P09917;O75151;P02042;Q9NWT6;Q9UMS  
0;P27797;P02100;Q9H6W3;Q9UKA1;P69892;Q9GZT9;Q96KS0;Q9UPP1;P29474;P68871;Q9NPG2;P02792  
;P69891;Q9H1K1;P02794}

7302 Pathogen[ P14079] interacts with 35 human  
partners:{Q9UHB4;Q8WWM9;P48775;P02042;Q9GZT9;Q9NPG2;P69891;O75151;P02100;Q8IVL6;P1010  
9;Q9H1K1;P00395;P09105;Q9NVH6;P69905;P02008;Q9H6W3;P68871;Q9UMS0;O14829;Q9UPP1;Q9NWT6  
;Q9HBH1;Q9H6Z9;P09917;P22830;P02794;Q6B0K9;Q16878;O14521;P02144;P99999;P69892;Q96KS0}

7303 Pathogen[ P03383] interacts with 16 human  
partners:{P02794;Q9HBH1;Q9NWT6;P29474;Q9H1K1;Q9UHB4;P69905;P68871;O75151;Q96KS0;Q9H6W  
3;Q9H6Z9;P99999;Q9UMS0;Q9UPP1;P27797}

7304 Pathogen[ P03410] interacts with 35 human  
partners:{Q9UPP1;Q6B0K9;Q9H6W3;P02794;P02008;P02144;P02100;Q9NWT6;Q9NVH6;Q96KS0;Q9H6Z  
9;Q9HBH1;P09105;Q9H1K1;Q9GZT9;Q8WWM9;O75151;P29474;P48775;P68871;Q9UMS0;P22830;P99999  
;Q9UHB4;P02042;Q9NPG2;O14521;P09917;P10109;P69892;P02792;P69905;O14829;P69891;P27797}

7305 Pathogen[ P14075] interacts with 18 human  
partners:{Q9NVH6;P29474;P68871;Q9HBH1;Q96KS0;Q9GZT9;Q9UMS0;Q9UPP1;Q9UHB4;P99999;P2779  
7;P02794;Q9H6W3;Q9NWT6;O75151;Q9H1K1;Q9H6Z9;P69905}

7306 Pathogen[ P0C206] interacts with 34 human  
partners:{Q9H1K1;P99999;P68871;Q6B0K9;P09917;P27797;Q96KS0;P02100;P69892;Q9GZT9;P0279  
4;O14521;P02008;Q9UKA1;Q9UPP1;Q9NVH6;P69891;O75151;Q9NPG2;P69905;Q9NWT6;P09105;Q9H6W3  
;P22830;P02792;P29474;Q9H6Z9;O14829;Q99798;Q9UHB4;Q9HBH1;P02042;Q9UMS0;Q8WWM9}

7307 Pathogen[ P03363] interacts with 12 human  
partners:{P29474;P69905;O14829;Q9UHB4;Q9UMS0;P68871;P99999;Q9H6Z9;P27797;Q9UKA1;Q9H1K  
1;P02794}

7308 [Cluster 665]GO:0005536+F molecular\_function [name] glucose binding [def]  
"Interacting selectively and non-covalently with the D- or L-enantiomer of glucose."  
[CHEBI

7309 Pathogen[ Q2Q067] interacts with 3 human partners:{Q16851;P46976;P13807}

7310 Pathogen[ P0C214] interacts with 4 human partners:{P11413;P46976;Q16851;P13807}

7311 Pathogen[ P03346] interacts with 3 human partners:{P13807;P46976;Q16851}

7312 Pathogen[ Q85601] interacts with 3 human partners:{P13807;Q16851;P46976}

7313 Pathogen[ P14079] interacts with 3 human partners:{Q16851;P13807;P46976}

7314 Pathogen[ P03383] interacts with 3 human partners:{P13807;Q16851;P46976}

7315 Pathogen[ P03410] interacts with 3 human partners:{P46976;Q16851;P13807}

7316 Pathogen[ P14075] interacts with 3 human partners:{P46976;P13807;Q16851}

7317 Pathogen[ P0C206] interacts with 3 human partners:{Q16851;P46976;P13807}

7318 Pathogen[ P03363] interacts with 3 human partners:{P13807;Q16851;P46976}

7319 [Cluster 666]GO:0043130+F molecular\_function [name] ubiquitin binding [def]  
"Interacting selectively and non-covalently with ubiquitin, a protein that when  
covalently bound to other cellular proteins marks them for proteolytic degradation." [GOC

7320 Pathogen[ Q2Q067] interacts with 19 human  
partners:{Q8IXJ6;Q9Y2M0;Q99816;O95999;P04792;Q96CS3;P11388;Q04323;Q9UNN5;P84022;O9488  
8;P61088;Q99543;P37198;Q9H040;Q86VN1;O75674;Q13501;Q6NZ36}

7321 Pathogen[ P0C214] interacts with 21 human  
partners:{Q9H040;O94888;P04792;P84022;Q6NZ36;Q9Y2M0;Q13501;P37198;O95071;Q9UNN5;O9599  
9;Q04323;Q96CS3;P11388;Q99816;Q8IXJ6;Q99543;O75674;Q8IYW5;Q86VN1;P61088}

7322 Pathogen[ P03346] interacts with 25 human  
partners:{Q99543;O94888;P11388;Q96CS3;Q9BYM8;Q99816;Q8IXJ6;Q86VN1;P37198;O95999;P6108  
8;Q6NZ36;Q96EP0;P84022;Q9UNN5;Q9H040;Q8IYW5;Q04323;Q14596;Q96FW1;O75674;O95071;Q9Y2M0  
;P04792;Q13501}

7323 Pathogen[ Q85601] interacts with 22 human

7324 partners:{Q99816;Q99543;Q9Y2M0;Q9Y5T5;Q9H040;Q6NZ36;Q96CS3;Q14596;Q86VN1;O94888;Q9UNN5;Q04323;Q8IXJ6;P11388;Q8IYW5;P84022;P04792;O95999;P61088;O95071;Q13501;O75674}  
Pathogen[ P14079] interacts with 22 human

7325 partners:{P11388;Q86VN1;O94888;O95999;Q96CS3;Q9H040;Q96EP0;O75674;Q6NZ36;Q14596;Q99543;Q9UNN5;Q9BYM8;P37198;Q9Y2M0;Q13501;Q8IXJ6;Q5W0Q7;P04792;Q99816;Q96FW1;Q04323}  
Pathogen[ P03383] interacts with 15 human

7326 partners:{Q99816;Q04323;P04792;O94888;P61088;P84022;Q9UNN5;Q9H040;Q96CS3;Q9Y2M0;O95999;Q99543;Q13501;P37198;Q86VN1}  
Pathogen[ P03410] interacts with 20 human

7327 partners:{P84022;Q96FW1;Q8IXJ6;Q9H040;Q9UNN5;O75674;Q13501;P04792;Q86VN1;Q04323;P61088;Q14596;Q99816;O95999;P11388;Q96CS3;Q6NZ36;Q9Y2M0;Q99543;O94888}  
Pathogen[ P14075] interacts with 16 human

7328 partners:{Q96CS3;P61088;O94888;Q86VN1;P04792;Q99543;Q9H040;Q96FW1;Q04323;Q9Y2M0;Q9UNN5;P37198;O95999;P84022;Q99816;Q13501}  
Pathogen[ P0C206] interacts with 25 human

7329 partners:{Q9UNN5;P84022;Q13501;Q9Y2M0;Q8IYW5;Q9Y5T5;Q04323;Q6NZ36;O95999;Q86VN1;P04792;Q99816;O94888;Q14596;P61088;Q96EP0;Q96FW1;Q99543;Q8IXJ6;P11388;Q9BYM8;Q9H040;Q96CS3;O75674;O95071}  
Pathogen[ P03363] interacts with 19 human

7330 partners:{Q9UNN5;Q04323;Q99543;Q96EP0;Q9Y2M0;O94888;Q8IYW5;Q96CS3;P61088;Q6NZ36;Q86VN1;Q9H040;O75674;P84022;O95071;Q99816;P37198;P04792;Q96FW1}  
[Cluster 667]GO:0001158+F molecular\_function [name] enhancer sequence-specific DNA binding [def] "Interacting selectively and non-covalently with a specific sequence of DNA that is part of an enhancer, a transcription regulatory region that is somewhat distal from the core promoter and which enhances transcription from that promoter." [GOC

7331 Pathogen[ Q2Q067] interacts with 4 human partners:{P15976;Q9BWX5;P23769;Q86U70}  
7332 Pathogen[ P0C214] interacts with 2 human partners:{P23769;Q86U70}  
7333 Pathogen[ P03346] interacts with 6 human partners:{Q86U70;Q9BWX5;P23769;P15976;Q92481;P61968}  
7334 Pathogen[ Q85601] interacts with 5 human partners:{P61968;Q9BWX5;P15976;Q86U70;P23769}  
7335 Pathogen[ P14079] interacts with 4 human partners:{Q9BWX5;Q86U70;P15976;P23769}  
7336 Pathogen[ P03383] interacts with 2 human partners:{Q86U70;P23769}  
7337 Pathogen[ P03410] interacts with 4 human partners:{Q9BWX5;Q86U70;P23769;P15976}  
7338 Pathogen[ P14075] interacts with 2 human partners:{Q86U70;P23769}  
7339 Pathogen[ P0C206] interacts with 5 human partners:{P15976;Q9BWX5;P23769;Q86U70;P61968}

7340 Pathogen[ P03363] interacts with 2 human partners:{Q86U70;Q9BWX5}

7341 [Cluster 668]GO:0003918+F molecular\_function [name] DNA topoisomerase (ATP-hydrolyzing) activity [def] "Catalysis of a DNA topological transformation by transiently cleaving a pair of complementary DNA strands to form a gate through which a second double-stranded DNA segment is passed, after which the severed strands in the first DNA segment are rejoined\_ product release is coupled to ATP binding and hydrolysis\_ changes the linking number in multiples of 2." [PMID

7342 Pathogen[ Q2Q067] interacts with 2 human partners:{P11387;P11388}  
7343 Pathogen[ P0C214] interacts with 2 human partners:{P11388;P11387}  
7344 Pathogen[ P03346] interacts with 2 human partners:{P11388;P11387}  
7345 Pathogen[ Q85601] interacts with 2 human partners:{P11387;P11388}  
7346 Pathogen[ P14079] interacts with 2 human partners:{P11388;Q969P6}  
7347 Pathogen[ P03383] interacts with 1 human partners:{P11387}  
7348 Pathogen[ P03410] interacts with 2 human partners:{P11387;P11388}  
7349 Pathogen[ P14075] interacts with 1 human partners:{P11387}  
7350 Pathogen[ P0C206] interacts with 2 human partners:{P11388;P11387}  
7351 Pathogen[ P03363] interacts with 1 human partners:{P11387}

7352 [Cluster 669]GO:0035605+F molecular\_function [name] peptidyl-cysteine S-nitrosylase activity [def] "Catalysis of the transfer of a nitric oxide (NO) group to a sulphur atom within a cysteine residue of a protein." [EC

7353 Pathogen[ Q2Q067] interacts with 1 human partners:{P04406}  
7354 Pathogen[ P0C214] interacts with 1 human partners:{P04406}  
7355 Pathogen[ P03346] interacts with 1 human partners:{P04406}  
7356 Pathogen[ Q85601] interacts with 1 human partners:{P04406}  
7357 Pathogen[ P14079] interacts with 1 human partners:{P04406}  
7358 Pathogen[ P03383] interacts with 1 human partners:{P04406}  
7359 Pathogen[ P03410] interacts with 1 human partners:{P04406}  
7360 Pathogen[ P14075] interacts with 1 human partners:{P04406}  
7361 Pathogen[ P0C206] interacts with 1 human partners:{P04406}  
7362 Pathogen[ P03363] interacts with 1 human partners:{P04406}

7363 [Cluster 670]GO:0015026+F molecular\_function [name] coreceptor activity [def] "Combining with an extracellular or intracellular messenger, and in cooperation with a nearby primary receptor, initiating a change in cell activity." [GOC

7364 Pathogen[ Q2Q067] interacts with 2 human partners:{O14786;Q6ZVN8}  
7365 Pathogen[ P0C214] interacts with 2 human partners:{O14786;Q6ZVN8}  
7366 Pathogen[ P03346] interacts with 2 human partners:{Q6ZVN8;O14786}  
7367 Pathogen[ Q85601] interacts with 1 human partners:{O14786}  
7368 Pathogen[ P14079] interacts with 3 human partners:{Q6ZVN8;O60895;Q9Y6Y9}  
7369 Pathogen[ P03383] interacts with 1 human partners:{Q6ZVN8}

7370 Pathogen[ P03410] interacts with 5 human partners:{O14786;O60896;O60895;Q6ZVN8;Q9Y6Y9}

7371 Pathogen[ P14075] interacts with 1 human partners:{Q6ZVN8}

7372 Pathogen[ P0C206] interacts with 2 human partners:{O14786;Q6ZVN8}

7373 Pathogen[ P03363] interacts with 2 human partners:{O14786;Q6ZVN8}

7374 [Cluster 671]GO:0017049+F molecular\_function [name] GTP-Rho binding [def] "Interacting selectively and non-covalently with the GTP-bound form of the Rho protein." [GOC]

7375 Pathogen[ Q2Q067] interacts with 1 human partners:{Q13829}

7376 Pathogen[ P0C214] interacts with 3 human partners:{Q13829;O14613;Q8WZ19}

7377 Pathogen[ P03346] interacts with 3 human partners:{Q8WZ19;O14613;Q13829}

7378 Pathogen[ Q85601] interacts with 3 human partners:{Q8WZ19;O14613;Q13829}

7379 Pathogen[ P14079] interacts with 5 human partners:{O14613;Q6NZY7;Q9H2D6;Q13829;Q9H3Q1}

7380 Pathogen[ P03383] interacts with 1 human partners:{Q13829}

7381 Pathogen[ P03410] interacts with 6 human partners:{Q13829;Q8WZ19;Q9H3Q1;Q6NZY7;O14613;Q9H2D6}

7382 Pathogen[ P14075] interacts with 2 human partners:{O14613;Q13829}

7383 Pathogen[ P0C206] interacts with 3 human partners:{Q13829;O14613;Q8WZ19}

7384 Pathogen[ P03363] interacts with 4 human partners:{Q9H2D6;O14613;Q13829;Q8WZ19}

7385 [Cluster 672]GO:0004713+F molecular\_function [name] protein tyrosine kinase activity [def] "Catalysis of the reaction

7386 Pathogen[ Q2Q067] interacts with 1 human partners:{O95684}

7387 Pathogen[ P0C214] interacts with 1 human partners:{O95684}

7388 Pathogen[ P03346] interacts with 5 human partners:{O95684;Q96PY6;P45985;Q96KG9;O00444}

7389 Pathogen[ Q85601] interacts with 3 human partners:{O95684;Q96PY6;Q96KG9}

7390 Pathogen[ P14079] interacts with 4 human partners:{O95684;P52564;P45985;Q96KG9}

7391 Pathogen[ P03383] interacts with 2 human partners:{O95684;Q96PY6}

7392 Pathogen[ P03410] interacts with 3 human partners:{O95684;Q96KG9;P45985}

7393 Pathogen[ P14075] interacts with 2 human partners:{O95684;Q96PY6}

7394 Pathogen[ P0C206] interacts with 7 human partners:{O95684;Q96PY6;O00444;Q96KG9;P30291;P45985;Q9UIG0}

7395 Pathogen[ P03363] interacts with 2 human partners:{O95684;Q96KG9}

7396 [Cluster 673]GO:0008176+F molecular\_function [name] tRNA (guanine-N7-)-methyltransferase activity [def] "Catalysis of the reaction

7397 Pathogen[ Q2Q067] interacts with 2 human partners:{Q9UBP6;P57081}

7398 Pathogen[ P0C214] interacts with 2 human partners:{P57081;Q9UBP6}

7399 Pathogen[ P03346] interacts with 2 human partners:{Q9UBP6;P57081}

7400 Pathogen[ Q85601] interacts with 2 human partners:{Q9UBP6;P57081}

7401 Pathogen[ P14079] interacts with 1 human partners:{P57081}

7402 Pathogen[ P03383] interacts with 2 human partners:{Q9UBP6;P57081}

7403 Pathogen[ P03410] interacts with 2 human partners:{Q9UBP6;P57081}

7404 Pathogen[ P14075] interacts with 2 human partners:{P57081;Q9UBP6}

7405 Pathogen[ P0C206] interacts with 2 human partners:{Q9UBP6;P57081}

7406 Pathogen[ P03363] interacts with 2 human partners:{Q9UBP6;P57081}

7407 [Cluster 674]GO:0016887+F molecular\_function [name] ATPase activity [def] "Catalysis of the reaction

7408 Pathogen[ Q2Q067] interacts with 19 human partners:{Q6VMQ6;O75351;Q6NVH7;Q14204;Q9UHC1;O76031;P07900;Q96S55;P54278;Q96Q89;P12883;Q96T23;Q9UKV3;Q15257;Q9ULG1;Q86WJ1;P35579;Q8NE71;P24539}

7409 Pathogen[ P0C214] interacts with 30 human partners:{Q14527;A8MQ11;Q96S55;Q6VMQ6;O75351;Q9UI12;Q14204;Q9ULG1;Q15257;P36542;O76031;Q8NE71;O43681;Q96Q89;Q9UHC1;P24539;P10809;O60264;Q6NVH7;P12883;P10909;Q96T23;P13533;Q9UKV3;P54278;P35998;P40692;Q15008;Q86WJ1;P55072}

7410 Pathogen[ P03346] interacts with 23 human partners:{P07900;P35579;Q14527;Q9ULG1;Q15257;Q14204;P55072;Q9UKV3;O76031;Q9UHC1;Q96S55;P24539;Q6VMQ6;O60264;Q96Q89;Q96T23;P54278;Q6NVH7;Q8NE71;O75351;Q86WJ1;P54277;Q9NRD5}

7411 Pathogen[ Q85601] interacts with 26 human partners:{P24539;P13533;P35579;Q96T23;A8MQ11;Q6NVH7;Q14204;O43681;Q96Q89;O75351;Q9UKV3;Q9ULG1;P12883;P07900;Q8NE71;Q96S55;P54278;Q9UHC1;O76031;Q86WJ1;P40692;O60264;Q6VMQ6;P19447;Q14527;Q15257}

7412 Pathogen[ P14079] interacts with 41 human partners:{P36542;P35579;P62333;Q96T23;Q9ULG1;P56134;P25705;P40692;Q14204;P54278;P56385;Q9UHC1;P10909;P35998;A8MQ11;Q6NVH7;P68032;Q6VMQ6;P03928;Q9UKV3;O43681;Q96Q89;Q96S55;Q8NE71;Q86WJ1;P07900;O60264;O95744;P12883;P54277;O75964;P62191;Q9UI12;P56381;Q15008;O75351;P43686;O76031;P52701;P24539;P19447}

7413 Pathogen[ P03383] interacts with 15 human partners:{P54278;Q15257;Q6NVH7;Q8NE71;Q9UHC1;Q6VMQ6;P07900;Q96T23;Q96S55;Q9UKV3;Q96Q89;P12883;O76031;P35579;P24539}

7414 Pathogen[ P03410] interacts with 42 human partners:{Q14204;P40692;Q96Q89;Q96T23;Q8NE71;P36542;Q15008;P25705;O75351;P35998;P54277;Q15257;Q9ULG1;P35579;P56385;P07900;Q96S55;Q6NVH7;Q6VMQ6;P56381;O60333;O76031;Q9NRD5;Q9UKV3;P52701;P03928;P19447;P12883;Q9UI12;P24539;O95744;O75964;Q86WJ1;A8MQ11;P13533;P54278;O60264;O43681;P18859;P56134;Q9UHC1;P10909}

7415 Pathogen[ P14075] interacts with 15 human partners:{Q15257;Q9UKV3;O76031;P07900;Q9UHC1;Q6VMQ6;Q8NE71;P35579;P24539;Q96T23;P54278;P56385;Q6NVH7;Q96S55;Q96Q89}

7416 Pathogen[ P0C206] interacts with 35 human partners:{P54278;Q6VMQ6;Q96Q89;P13533;P52701;O43681;P36542;P40692;Q96T23;Q9UHC1;A8MQ11;P19447;P14204;P12883;Q9ULG1;P07900;Q9UI12;P10909;Q96S55;P24539;P35579;P55072;Q14527;Q8NE71;Q86WJ1;P56381;Q6NVH7;O76031;O75351;Q9NRD5;P56385;Q15257;Q9UKV3;O60264}

7417 Pathogen[ P03363] interacts with 21 human partners:{Q6VMQ6;P07900;Q9ULG1;P35579;Q9UKV3;Q9UHC1;Q14204;O60264;O75351;Q96T23;P54278;Q14527;P54277;O76031;Q96S55;Q15257;Q8NE71;Q6NVH7;Q96Q89;O60333;Q86WJ1}

7418 [Cluster 675]GO:0042975+F molecular\_function [name] peroxisome proliferator activated receptor binding [def] "Interacting selectively and non-covalently with any of the peroxisome proliferator activated receptors, alpha, beta or gamma." [GOC

7419 Pathogen[ Q2Q067] interacts with 7 human partners:{P55345;Q76L83;Q15466;P17096;Q92793;Q8IXJ9;Q14693}

7420 Pathogen[ P0C214] interacts with 7 human partners:{Q92793;P17096;Q76L83;P55345;Q8IXJ9;Q15466;Q14693}

7421 Pathogen[ P03346] interacts with 7 human partners:{Q15466;P17096;P55345;Q76L83;Q8IXJ9;Q92793;Q14693}

7422 Pathogen[ Q85601] interacts with 7 human partners:{P17096;Q15466;Q8IXJ9;Q76L83;Q92793;P55345;Q14693}

7423 Pathogen[ P14079] interacts with 7 human partners:{Q76L83;Q14693;Q8IXJ9;Q92793;P17096;P55345;Q15466}

7424 Pathogen[ P03383] interacts with 6 human partners:{Q8IXJ9;P17096;Q76L83;Q15466;Q92793;Q14693}

7425 Pathogen[ P03410] interacts with 7 human partners:{P17096;Q14693;Q92793;Q8IXJ9;Q76L83;Q15466;P55345}

7426 Pathogen[ P14075] interacts with 6 human partners:{Q8IXJ9;Q76L83;P17096;Q92793;Q15466;Q14693}

7427 Pathogen[ P0C206] interacts with 7 human partners:{Q76L83;Q15466;Q92793;Q8IXJ9;P17096;P55345;Q14693}

7428 Pathogen[ P03363] interacts with 5 human partners:{Q8IXJ9;Q15466;P17096;Q76L83;Q92793}

7429 [Cluster 676]GO:0008097+F molecular\_function [name] 5S rRNA binding [def] "Interacting selectively and non-covalently with 5S ribosomal RNA, the smallest RNA constituent of a ribosome." [GOC

7430 Pathogen[ Q2Q067] interacts with 2 human partners:{P46777;Q9H0U6}

7431 Pathogen[ P0C214] interacts with 3 human partners:{Q9H0U6;P46777;Q16762}

7432 Pathogen[ P03346] interacts with 2 human partners:{Q9H0U6;P46777}

7433 Pathogen[ Q85601] interacts with 2 human partners:{Q9H0U6;P46777}

7434 Pathogen[ P14079] interacts with 3 human partners:{Q9H0U6;Q16762;P46777}

7435 Pathogen[ P03383] interacts with 2 human partners:{P46777;Q9H0U6}

7436 Pathogen[ P03410] interacts with 3 human partners:{P46777;Q16762;Q9H0U6}

7437 Pathogen[ P14075] interacts with 2 human partners:{P46777;Q9H0U6}

7438 Pathogen[ P0C206] interacts with 3 human partners:{Q9H0U6;P46777;Q16762}

7439 Pathogen[ P03363] interacts with 2 human partners:{Q9H0U6;P46777}

7440 [Cluster 677]GO:0008469+F molecular\_function [name] histone-arginine N-methyltransferase activity [def] "Catalysis of the reaction

7441 Pathogen[ Q2Q067] interacts with 7 human partners:{O14744;Q9NVM4;Q96LA8;P55345;Q9NR22;Q99873;Q86X55}

7442 Pathogen[ P0C214] interacts with 6 human partners:{Q9NVM4;Q99873;P55345;Q86X55;Q9NR22;Q96LA8}

7443 Pathogen[ P03346] interacts with 7 human partners:{Q99873;O14744;P55345;Q9NR22;Q9NVM4;Q86X55;Q96LA8}

7444 Pathogen[ Q85601] interacts with 7 human partners:{Q9NR22;Q86X55;Q9NVM4;O14744;Q99873;Q96LA8;P55345}

7445 Pathogen[ P14079] interacts with 6 human partners:{Q9NR22;Q96LA8;Q99873;Q9NVM4;P55345;O14744}

7446 Pathogen[ P03383] interacts with 5 human partners:{Q86X55;O14744;Q99873;Q9NR22;Q96LA8}

7447 Pathogen[ P03410] interacts with 7 human partners:{Q96LA8;Q9NVM4;Q86X55;Q9NR22;O14744;Q99873;P55345}

7448 Pathogen[ P14075] interacts with 5 human partners:{Q9NR22;O14744;Q96LA8;Q99873;Q86X55}

7449 Pathogen[ P0C206] interacts with 7 human partners:{Q99873;O14744;Q86X55;Q96LA8;Q9NVM4;Q9NR22;P55345}

7450 Pathogen[ P03363] interacts with 6 human partners:{O14744;Q96LA8;Q9NVM4;Q9NR22;Q86X55;Q99873}

7451 [Cluster 678]GO:0003697+F molecular\_function [name] single-stranded DNA binding [def] "Interacting selectively and non-covalently with single-stranded DNA." [GOC

7452 Pathogen[ Q2Q067] interacts with 37 human partners:{P81877;Q6NVH7;Q9GZP8;Q92889;P27694;P67809;Q96AE4;Q9UHC1;Q96B01;P35244;Q9BWW4;Q96AH0;P54727;Q96T58;P42704;Q9H668;O95551;P38935;Q13156;Q9BQ15;Q06609;Q00577;P54725;P61978;P53999;P15927;Q9NUW8;Q92541;P54278;Q96QR8;Q2NKJ3;P16989;Q9UHN1;Q01831;Q9Y2W2;Q04837;P28715}

7453 Pathogen[ P0C214] interacts with 42 human



partners:{Q95551;Q9BWW4;Q9Y2W2;A8MQ11;Q96T58;Q06609;P16989;Q13156;Q92889;Q96QR8;P67809;P53999;P81877;P54725;P42704;Q96AH0;P20585;P38935;Q92541;P28715;Q14566;Q00577;Q9UHC1;P15927;Q49AN0;P10809;Q6NVH7;P35244;Q96B01;P54727;Q01831;Q96AE4;Q9H668;P27694;Q9NUW8;P54278;P40692;Q04837;Q15365;Q9BQ15;Q9UHN1;Q2NKJ3}

7454 Pathogen[ P03346] interacts with 49 human  
partners:{P61978;Q96QR8;P38935;P28715;Q06609;Q95551;P09651;P27694;Q9GZP8;Q00577;P07992;P35244;Q49AN0;Q13156;Q96AH0;Q9NUW8;Q9UHN1;Q96AE4;P16989;Q9BWW4;Q9UHC1;Q14566;Q9BWW4;P53999;P67809;Q9BQ15;Q01831;P42704;Q9H668;P51587;P20585;Q96B01;P15927;P54727;Q92541;Q14979;Q96T58;P33991;Q92889;P54725;P54278;Q6NVH7;P81877;P29558;Q04837;Q9Y2W2;P54277;Q15365;Q2NKJ3}

7455 Pathogen[ Q85601] interacts with 43 human  
partners:{P61978;Q96QR8;Q9Y2W2;Q01831;Q96AH0;P38935;A8MQ11;P35244;Q49AN0;Q6NVH7;Q2NKJ3;Q9BQ15;P53999;P27694;Q92889;P28715;Q14566;Q00577;Q92541;P54727;P15927;Q9H668;P54725;P20585;P42704;Q96B01;Q9BWW4;P67809;Q9NUW8;Q96T58;P54278;Q96AE4;Q9UHC1;Q13156;Q15365;P40692;Q04837;Q06609;Q9UHN1;P16989;P51587;Q95551;P81877}

7456 Pathogen[ P14079] interacts with 50 human  
partners:{P04083;Q04837;Q9H668;P20585;Q9BQ15;Q8TAT5;Q96B01;P28715;Q14566;Q9Y2W2;Q96QR8;P67809;P53999;Q92541;P40692;Q49AN0;P54278;P51587;Q9UHC1;P42704;Q9BWW4;Q13156;Q96AH0;A8MQ11;Q6NVH7;Q9NUW8;Q96AE4;P16989;Q9BWW4;Q92889;Q95744;Q95551;Q9GZP8;Q9NSU2;P54277;Q15365;Q00577;P81877;P61978;P15927;P27694;P38935;Q01831;Q9UHN1;P35244;Q06609;P54727;Q2NKJ3;P07992;Q96T58}

7457 Pathogen[ P03383] interacts with 35 human  
partners:{Q9UHN1;P16989;Q06609;P54278;Q6NVH7;P27694;Q9BWW4;P53999;Q9UHC1;Q96B01;P61978;Q9Y2W2;Q01831;Q9GZP8;P15927;P54725;P35244;P54727;Q15365;Q96T58;Q92541;Q9NUW8;Q00577;Q96AE4;Q9BQ15;P42704;P38935;Q95551;Q13156;Q04837;Q96AH0;Q96QR8;P67809;Q2NKJ3;P81877}

7458 Pathogen[ P03410] interacts with 50 human  
partners:{P40692;Q9GZP8;P35244;P53999;P20585;P61978;Q9BQ15;Q9BWW4;P16989;P07992;Q04837;P54277;Q15365;Q9BWW4;Q9H668;Q92889;Q6NVH7;Q9NSU2;P54725;P28715;Q8TAT5;Q01831;Q96T58;Q92541;Q00577;P67809;Q9Y2W2;Q95551;P38935;Q96AH0;P51587;P42704;Q13156;Q9NUW8;Q95744;Q49AN0;P27694;A8MQ11;P54278;P15927;Q96QR8;Q2NKJ3;Q96B01;Q14566;Q9UHN1;P81877;Q96AE4;Q9UHC1;Q06609;P54727}

7459 Pathogen[ P14075] interacts with 36 human  
partners:{P42704;Q96QR8;P16989;Q9BWW4;Q9GZP8;Q01831;Q2NKJ3;Q96T58;Q9BQ15;P38935;P15927;Q13156;Q15365;P35244;Q92541;Q9Y2W2;Q9UHC1;P54727;P53999;P67809;Q96AH0;P61978;P27694;Q9UHN1;Q96B01;Q00577;P54725;P54278;P81877;Q6NVH7;Q04837;Q96AE4;Q9NUW8;Q06609;Q95551;Q9H668}

7460 Pathogen[ P0C206] interacts with 49 human  
partners:{P67809;P54278;Q2NKJ3;P28715;P54725;Q15365;Q9UHN1;P38935;Q9BQ15;Q9NSU2;Q13156;P51587;Q96QR8;P40692;P61978;Q9NUW8;Q92541;Q9UHC1;Q9H668;A8MQ11;P81877;P07992;P54277;P53999;P16989;Q9BWW4;Q92889;Q8TAT5;Q01831;Q95551;P54727;Q96T58;Q9BWW4;Q04837;Q06609;P42704;P27694;P20585;P15927;Q96AE4;Q6NVH7;P35244;Q96B01;Q9Y2W2;Q49AN0;Q14566;Q9GZP8;Q96AH0;Q00577}

7461 Pathogen[ P03363] interacts with 44 human  
partners:{Q9Y2W2;Q96T58;P27694;P54727;Q9GZP8;Q01831;Q9UHC1;Q96AH0;P09651;Q9BWW4;P29558;P42704;Q92889;Q96QR8;P35244;P15927;P20585;Q49AN0;Q96AE4;P81877;Q9BQ15;Q13156;P54278;Q14979;Q9H668;P54277;Q9NUW8;P53999;Q15365;P54725;Q2NKJ3;Q04837;Q92541;Q95551;P61978;Q06609;Q6NVH7;Q9UHN1;Q9BWW4;P16989;Q00577;P38935;Q96B01;P67809}

7462 [Cluster 679]GO:0008026+F molecular\_function [name] ATP-dependent helicase activity  
[def] "Catalysis of the reaction

7463 Pathogen[ Q2Q067] interacts with 19 human  
partners:{Q12798;P38919;O00148;Q13838;Q14240;P26196;Q9UHI6;Q8N3C0;Q08211;Q12873;P13984;Q92499;Q14839;Q9UNY4;P41208;Q86WJ1;Q92841;Q8IYD8;P60842}

7464 Pathogen[ P0C214] interacts with 25 human  
partners:{P26196;O00148;P60842;Q12873;Q92841;Q9H0S4;Q7L2E3;Q8N3C0;Q12798;P38919;Q9UNY4;Q9NVP1;Q14240;Q9UHI6;P13984;P41208;Q92499;Q9H2U1;Q9NUU7;Q9UMR2;Q08211;Q13838;Q8IYD8;Q86WJ1;Q14839}

7465 Pathogen[ P03346] interacts with 32 human  
partners:{P46063;Q9UMR2;Q92841;Q8TD26;P38919;Q7L2E3;Q9NVP1;Q08211;P60842;Q9BUQ8;Q8N3C0;Q9H2U1;P41208;Q92499;P13984;Q75643;Q9UHI6;Q14240;Q13838;Q9UNY4;P42285;Q14562;Q9NUU7;Q9H0S4;P26196;Q8IYD8;Q12798;Q12873;O00148;Q86WJ1;Q86XP3;Q14839}

7466 Pathogen[ Q85601] interacts with 25 human  
partners:{Q9H0S4;Q8IYD8;Q14240;Q12798;O00148;Q9UMR2;Q7L2E3;Q92499;Q08211;P38919;P13984;Q13838;Q9NVP1;Q12873;Q9UHI6;Q9NUU7;P60842;P26196;Q86WJ1;Q8TD26;Q9UNY4;Q14839;Q8N3C0;P41208;Q9H2U1}

7467 Pathogen[ P14079] interacts with 21 human  
partners:{Q9H0S4;P60842;Q8IYD8;Q9UNY4;Q7L2E3;Q13838;Q9UHI6;Q14240;Q08211;Q12873;Q8TD26;P26196;Q12798;Q86WJ1;O00148;P41208;Q14839;P13984;Q92499;Q96FC9;Q9NVP1}

7468 Pathogen[ P03383] interacts with 14 human  
partners:{Q14839;Q9H0S4;Q13838;P41208;Q92841;Q9UHI6;P38919;Q12798;P26196;Q12873;P13984;Q92499;Q9UNY4;O00148}

7469 Pathogen[ P03410] interacts with 25 human  
partners:{Q13838;Q12873;Q9UNY4;Q8N3C0;Q8IYD8;Q9NVP1;O00148;Q12798;Q9H0S4;Q9UMR2;Q9NUU7;Q92499;Q7L2E3;P60842;P38919;Q86WJ1;P13984;Q96FC9;Q8TD26;P41208;Q14839;Q9UHI6;Q08211;Q14240;Q9H2U1}

7470 Pathogen[ P14075] interacts with 14 human  
partners:{P13984;Q9H0S4;Q9UNY4;P26196;Q14839;Q12798;Q92499;Q9UHI6;P41208;Q92841;P38919}

9;Q13838;Q12873;O00148}  
7471 Pathogen[ P0C206] interacts with 28 human  
partners:{Q9H0S4;O00148;Q8TD26;Q9NUU7;Q9UNY4;Q08211;Q8IYD8;P26196;O94762;P13984;Q1483  
9;Q13838;Q9NVP1;Q92841;Q14240;Q86WJ1;P41208;Q9H2U1;Q9UHI6;Q12798;Q9UMR2;P38919;P60842  
;Q92499;Q7L2E3;Q9BX63;Q8N3C0;Q12873}  
7472 Pathogen[ P03363] interacts with 38 human  
partners:{O94762;Q9BX63;P38919;O75643;Q8IY21;P13984;Q9UHI6;Q9NUU7;Q14839;P41208;Q9262  
0;Q9H0S4;Q9UNY4;Q14562;Q9NUL7;Q12798;Q92841;Q14240;P46063;O00148;Q8IYD8;Q92499;P26196  
;Q13838;Q9UMR2;P60842;Q86XP3;Q8TD26;Q12873;Q7L2E3;Q9NVP1;Q9H2U1;Q86WJ1;Q08211;Q9H6S0;  
Q5T890;Q8N3C0;P42285}  
7473 [Cluster 680]GO:0032266+F molecular\_function [name] phosphatidylinositol-3-phosphate  
binding [def] "Interacting selectively and non-covalently with  
phosphatidylinositol-3-phosphate, a derivative of phosphatidylinositol in which the  
inositol ring is phosphorylated at the 3' position." [GOC  
7474 Pathogen[ Q2Q067] interacts with 5 human  
partners:{Q86VW0;Q68DK2;Q9HCC9;Q9Y4P8;Q86VN1}  
7475 Pathogen[ P0C214] interacts with 5 human  
partners:{Q86VW0;Q9HCC9;Q9Y4P8;Q68DK2;Q86VN1}  
7476 Pathogen[ P03346] interacts with 8 human  
partners:{Q86VN1;Q8TEW0;O60493;Q86VW0;Q68DK2;Q96S99;Q9HCC9;Q9Y4P8}  
7477 Pathogen[ Q85601] interacts with 6 human  
partners:{Q96S99;Q86VN1;Q9HCC9;Q9Y4P8;Q68DK2;Q86VW0}  
7478 Pathogen[ P14079] interacts with 10 human  
partners:{Q86VN1;Q68DK2;Q9Y4P8;O60493;Q8N3I7;Q9HCC9;Q96S99;Q8TEW0;Q9NS86;Q86VW0}  
7479 Pathogen[ P03383] interacts with 4 human partners:{Q68DK2;Q9Y4P8;Q86VN1;Q9HCC9}  
7480 Pathogen[ P03410] interacts with 11 human  
partners:{Q9NS86;Q96S99;Q86VN1;Q9Y4P8;Q9HCC9;Q8N3I7;Q8TEW0;Q68DK2;O60493;Q5MNZ9;Q86VW  
0}  
7481 Pathogen[ P14075] interacts with 4 human partners:{Q86VN1;Q9Y4P8;Q68DK2;Q9HCC9}  
7482 Pathogen[ P0C206] interacts with 10 human  
partners:{Q68DK2;Q9HCC9;Q86VW0;Q86VN1;O60493;Q8N3I7;Q9Y4P8;Q8TEW0;Q96S99;Q9NS86}  
7483 Pathogen[ P03363] interacts with 6 human  
partners:{Q9HCC9;Q68DK2;O60493;Q86VN1;Q9Y4P8;Q86VW0}  
7484 [Cluster 681]GO:0017069+F molecular\_function [name] snRNA binding [def]  
"Interacting selectively and non-covalently with a small nuclear RNA (snRNA)." [GOC  
7485 Pathogen[ Q2Q067] interacts with 7 human  
partners:{Q96MH2;O60563;O94992;P50750;P08579;Q8TEQ6;P09012}  
7486 Pathogen[ P0C214] interacts with 7 human  
partners:{P50750;P08579;Q96MH2;Q8TEQ6;O60563;O94992;P09012}  
7487 Pathogen[ P03346] interacts with 7 human  
partners:{O60563;P08579;P50750;Q8TEQ6;P09012;O94992;Q96MH2}  
7488 Pathogen[ Q85601] interacts with 5 human  
partners:{Q96MH2;O60563;P50750;Q8TEQ6;O94992}  
7489 Pathogen[ P14079] interacts with 5 human  
partners:{Q8TEQ6;P09012;O94992;Q96MH2;P50750}  
7490 Pathogen[ P03383] interacts with 6 human  
partners:{Q96MH2;O60563;Q8TEQ6;P50750;O94992;P09012}  
7491 Pathogen[ P03410] interacts with 7 human  
partners:{Q8TEQ6;P09012;P50750;O60563;P08579;O94992;Q96MH2}  
7492 Pathogen[ P14075] interacts with 6 human  
partners:{Q8TEQ6;Q96MH2;O60563;P50750;O94992;P09012}  
7493 Pathogen[ P0C206] interacts with 6 human  
partners:{P50750;P09012;Q8TEQ6;Q96MH2;O94992;O60563}  
7494 Pathogen[ P03363] interacts with 7 human  
partners:{O60563;P09012;O94992;P08579;P50750;Q8TEQ6;Q96MH2}  
7495 [Cluster 682]GO:0016290+F molecular\_function [name] palmitoyl-CoA hydrolase activity  
[def] "Catalysis of the reaction  
7496 Pathogen[ Q2Q067] interacts with 4 human partners:{O14734;Q86TX2;Q5T1C6;Q8N1Q8}  
7497 Pathogen[ P0C214] interacts with 5 human  
partners:{Q86TX2;Q8N1Q8;O00154;O14734;Q5T1C6}  
7498 Pathogen[ P03346] interacts with 4 human partners:{Q6ZUV0;Q86TX2;O14734;Q8N1Q8}  
7499 Pathogen[ Q85601] interacts with 4 human partners:{Q86TX2;O14734;Q8N1Q8;Q5T1C6}  
7500 Pathogen[ P14079] interacts with 6 human  
partners:{P49753;Q5T1C6;O14734;Q6ZUV0;Q86TX2;Q8N1Q8}  
7501 Pathogen[ P03383] interacts with 3 human partners:{Q8N1Q8;O14734;Q5T1C6}  
7502 Pathogen[ P03410] interacts with 7 human  
partners:{Q6ZUV0;O14734;O00154;Q5T1C6;Q8N1Q8;Q86TX2;P49753}  
7503 Pathogen[ P14075] interacts with 3 human partners:{O14734;Q8N1Q8;Q5T1C6}  
7504 Pathogen[ P0C206] interacts with 5 human  
partners:{Q6ZUV0;Q8N1Q8;Q86TX2;O14734;Q5T1C6}  
7505 Pathogen[ P03363] interacts with 2 human partners:{O14734;Q6ZUV0}  
7506 [Cluster 683]GO:0005212+F molecular\_function [name] structural constituent of eye lens  
[def] "The action of a molecule that contributes to the structural integrity of the lens  
of an eye." [GOC  
7507 Pathogen[ Q2Q067] interacts with 8 human  
partners:{P05813;P53672;P02511;P07315;P07320;P08670;O14558;P02489}

7508 Pathogen[ P0C214] interacts with 11 human partners:{P07315;P53672;P02489;P02511;P11844;Q13515;P05813;P08670;P26998;O14558;P07320}

7509 Pathogen[ P03346] interacts with 10 human partners:{Q13515;P07320;P02489;P07316;P02511;P08670;P07315;P05813;O14558;P53672}

7510 Pathogen[ Q85601] interacts with 10 human partners:{P02489;P07315;P53672;P08670;Q13515;P02511;P11844;O14558;P07320;P05813}

7511 Pathogen[ P14079] interacts with 16 human partners:{P07320;P07316;P05813;P11844;P26998;P02511;P02489;P53673;P53674;P22914;O14558;Q13515;P53672;P08670;P07315;P43320}

7512 Pathogen[ P03383] interacts with 9 human partners:{Q13515;P11844;P08670;P02511;O14558;P53672;P07320;P05813;P07315}

7513 Pathogen[ P03410] interacts with 15 human partners:{P43320;P07315;P26998;P11844;Q13515;P07320;P53674;O14558;P02489;P02511;P08670;P05813;P07316;P22914;P53672}

7514 Pathogen[ P14075] interacts with 11 human partners:{P53673;P07320;P53672;P05813;Q13515;P11844;O14558;P02511;P26998;P08670;P07315}

7515 Pathogen[ P0C206] interacts with 13 human partners:{Q13515;P53673;P07320;P07315;P05813;P11844;P26998;P07316;P53672;P08670;P02511;O14558;P02489}

7516 Pathogen[ P03363] interacts with 10 human partners:{P07316;P53672;O14558;P11844;P07320;P08670;P07315;P02489;Q13515;P05813}

7517 [Cluster 684]GO:0001187+F molecular\_function [name] RNA polymerase I CORE element sequence-specific DNA binding transcription factor recruiting transcription factor activity [def] "Interacting selectively and non-covalently with the CORE element, a regulatory region composed of the transcription start site and binding sites for transcription factors of the RNA polymerase I transcription machinery and also binding to an RNA polymerase I (RNAP I) transcription factor to recruit it to the transcription machinery complex in order to modulate transcription by RNA polymerase I." [GOC

7518 Pathogen[ Q2Q067] interacts with 1 human partners:{Q53T94}

7519 Pathogen[ P0C214] interacts with 1 human partners:{Q53T94}

7520 Pathogen[ P03346] interacts with 1 human partners:{Q53T94}

7521 Pathogen[ Q85601] interacts with 1 human partners:{Q53T94}

7522 Pathogen[ P14079] interacts with 1 human partners:{Q53T94}

7523 Pathogen[ P03383] interacts with 1 human partners:{Q53T94}

7524 Pathogen[ P03410] interacts with 1 human partners:{Q53T94}

7525 Pathogen[ P14075] interacts with 1 human partners:{Q53T94}

7526 Pathogen[ P0C206] interacts with 1 human partners:{Q53T94}

7527 Pathogen[ P03363] interacts with 1 human partners:{Q53T94}

7528 [Cluster 685]GO:0004540+F molecular\_function [name] ribonuclease activity [def] "Catalysis of the hydrolysis of phosphodiester bonds in chains of RNA." [GOC

7529 Pathogen[ Q2Q067] interacts with 9 human partners:{P78346;Q9Y2L1;O60930;Q9BYK8;Q8TF46;Q969H6;O75792;O95707;O95059}

7530 Pathogen[ P0C214] interacts with 10 human partners:{Q969H6;Q9Y2L1;O75792;Q8TF46;Q9BYK8;O95059;O95707;O60930;Q8IYB7;P78346}

7531 Pathogen[ P03346] interacts with 10 human partners:{P78346;O60930;Q969H6;O95707;Q8IYB7;Q9Y2L1;Q9BYK8;O95059;Q8TF46;O75792}

7532 Pathogen[ Q85601] interacts with 10 human partners:{P78346;O95059;Q969H6;O75792;Q9Y2L1;Q8IYB7;O95707;Q9BYK8;O60930;Q8TF46}

7533 Pathogen[ P14079] interacts with 9 human partners:{P78346;Q9BYK8;O75792;Q8TF46;O95707;O95059;Q8IYB7;Q9Y2L1;O60930}

7534 Pathogen[ P03383] interacts with 8 human partners:{Q9Y2L1;O75792;Q969H6;O95059;O95707;O60930;P78346;Q9BYK8}

7535 Pathogen[ P03410] interacts with 10 human partners:{Q9Y2L1;P78346;Q9BYK8;O75792;Q8TF46;O60930;O95707;Q8IYB7;Q969H6;O95059}

7536 Pathogen[ P14075] interacts with 8 human partners:{O60930;Q9Y2L1;P78346;O75792;O95059;O95707;Q9BYK8;Q969H6}

7537 Pathogen[ P0C206] interacts with 10 human partners:{O95059;Q969H6;Q9BYK8;O60930;O95707;O75792;Q9Y2L1;Q8IYB7;P78346;Q8TF46}

7538 Pathogen[ P03363] interacts with 10 human partners:{O95059;O95707;O75792;Q8IYB7;Q9Y2L1;Q9BYK8;Q969H6;O60930;P78346;Q8TF46}

7539 [Cluster 686]GO:0051011+F molecular\_function [name] microtubule minus-end binding [def] "Interacting selectively and non-covalently with the minus end of a microtubule." [GOC

7540 Pathogen[ Q2Q067] interacts with 2 human partners:{Q9P1Y5;O15078}

7541 Pathogen[ P0C214] interacts with 2 human partners:{O15078;Q9P1Y5}

7542 Pathogen[ P03346] interacts with 2 human partners:{Q9P1Y5;O15078}

7543 Pathogen[ Q85601] interacts with 2 human partners:{Q9P1Y5;O15078}

7544 Pathogen[ P14079] interacts with 2 human partners:{Q9P1Y5;O15078}

7545 Pathogen[ P03383] interacts with 2 human partners:{O15078;Q9P1Y5}

7546 Pathogen[ P03410] interacts with 2 human partners:{Q9P1Y5;O15078}

7547 Pathogen[ P14075] interacts with 2 human partners:{O15078;Q9P1Y5}

7548 Pathogen[ P0C206] interacts with 2 human partners:{Q9P1Y5;O15078}

7549 Pathogen[ P03363] interacts with 2 human partners:{O15078;Q9P1Y5}

7550 [Cluster 687]GO:0017025+F molecular\_function [name] TBP-class protein binding [def]

"Interacting selectively and non-covalently with a member of the class of TATA-binding proteins (TBP), including any of the TBP-related factors (TRFs)." [GOC

7551 Pathogen[ Q2Q067] interacts with 12 human  
partners:{O75155;P10827;P52657;Q86VP6;Q92994;Q9ULM3;Q01658;Q8IZX4;P52655;P21675;Q53T94;Q00403}

7552 Pathogen[ P0C214] interacts with 11 human  
partners:{P52657;P21675;P52655;Q00403;Q92994;O75155;Q8IZX4;Q01658;Q53T94;Q86VP6;Q9ULM3}

7553 Pathogen[ P03346] interacts with 12 human  
partners:{P10827;Q9ULM3;Q53T94;O75155;P52657;Q92994;P21675;Q01658;Q86VP6;Q8IZX4;Q00403;P52655}

7554 Pathogen[ Q85601] interacts with 12 human  
partners:{P52657;Q92994;Q86VP6;Q8IZX4;O75155;Q53T94;Q9ULM3;Q01658;Q00403;P10827;P21675;P52655}

7555 Pathogen[ P14079] interacts with 11 human  
partners:{Q92994;Q8IZX4;Q9ULM3;O75155;P10827;Q00403;P52657;Q86VP6;Q53T94;Q01658;P21675}

7556 Pathogen[ P03383] interacts with 11 human  
partners:{Q9ULM3;P52655;O75155;Q8IZX4;Q00403;P52657;Q92994;Q86VP6;P21675;Q01658;Q53T94}

7557 Pathogen[ P03410] interacts with 11 human  
partners:{Q8IZX4;P52655;Q92994;P21675;Q9ULM3;P52657;Q01658;Q86VP6;Q00403;Q53T94;O75155}

7558 Pathogen[ P14075] interacts with 11 human  
partners:{P21675;P52657;Q01658;Q53T94;Q00403;Q92994;Q9ULM3;Q86VP6;P52655;O75155;Q8IZX4}

7559 Pathogen[ P0C206] interacts with 12 human  
partners:{Q53T94;Q9ULM3;P52657;P52655;Q8IZX4;Q01658;Q92994;Q00403;Q86VP6;P10827;P21675;O75155}

7560 Pathogen[ P03363] interacts with 10 human  
partners:{Q8IZX4;P52657;Q00403;Q53T94;O75155;P21675;P52655;Q86VP6;Q9ULM3;Q01658}

7561 [Cluster 688]GO:0030371+F molecular\_function [name] translation repressor activity  
[def] "Antagonizes ribosome-mediated translation of mRNA into a polypeptide." [GOC

7562 Pathogen[ Q2Q067] interacts with 3 human partners:{O60516;Q8WY41;Q9BPZ3}

7563 Pathogen[ P0C214] interacts with 5 human  
partners:{Q9UPU9;O60516;Q9BPZ3;Q8WY41;Q14011}

7564 Pathogen[ P03346] interacts with 4 human partners:{Q9BPZ3;Q14011;Q8WY41;O60516}

7565 Pathogen[ Q85601] interacts with 4 human partners:{O60516;Q9BPZ3;Q8WY41;Q9UPU9}

7566 Pathogen[ P14079] interacts with 5 human  
partners:{Q8WY41;Q9UPU9;Q9BPZ3;Q14011;O60516}

7567 Pathogen[ P03383] interacts with 3 human partners:{Q8WY41;O60516;Q9BPZ3}

7568 Pathogen[ P03410] interacts with 5 human  
partners:{Q9BPZ3;Q9UPU9;Q14011;O60516;Q8WY41}

7569 Pathogen[ P14075] interacts with 3 human partners:{O60516;Q8WY41;Q9BPZ3}

7570 Pathogen[ P0C206] interacts with 5 human  
partners:{Q14011;Q8WY41;Q9UPU9;Q9BPZ3;O60516}

7571 Pathogen[ P03363] interacts with 5 human  
partners:{Q8WY41;Q9BPZ3;Q9UPU9;Q14011;O60516}

7572 [Cluster 689]GO:0005546+F molecular\_function [name]  
phosphatidylinositol-4,5-bisphosphate binding [def] "Interacting selectively and non-covalently with phosphatidylinositol-4,5-bisphosphate, a derivative of phosphatidylinositol in which the inositol ring is phosphorylated at the 4' and 5' positions." [GOC

7573 Pathogen[ Q2Q067] interacts with 9 human  
partners:{Q86VW0;P07737;P55895;P35080;Q8N7J2;Q9HCH5;Q5JTC6;Q02410;Q9Y3E7}

7574 Pathogen[ P0C214] interacts with 8 human  
partners:{P35080;Q86VW0;Q9HCH5;P55895;Q9Y3E7;Q02410;Q8N7J2;Q5JTC6}

7575 Pathogen[ P03346] interacts with 13 human  
partners:{Q8N7J2;P55895;Q9HCH5;Q02410;Q8TEW0;Q9Y3E7;Q86VW0;P35080;P07737;Q14CM0;Q9Y2J0;O75386;Q5JTC6}

7576 Pathogen[ Q85601] interacts with 9 human  
partners:{P35080;Q9HCH5;P07737;Q5JTC6;Q02410;Q8N7J2;Q9Y3E7;P55895;Q86VW0}

7577 Pathogen[ P14079] interacts with 11 human  
partners:{P09327;Q02410;P07737;Q9HCH5;P35080;Q8N7J2;Q8TEW0;Q9Y6U3;Q9Y3E7;Q86VW0;Q5JTC6}

7578 Pathogen[ P03383] interacts with 8 human  
partners:{P35080;Q9Y3E7;Q9HCH5;P07737;Q8N7J2;Q5JTC6;P55895;Q02410}

7579 Pathogen[ P03410] interacts with 14 human  
partners:{Q14CM0;Q9HCH5;P35080;Q9Y2J0;Q0JRZ9;P55895;Q9Y6U3;Q02410;Q9Y3E7;Q5JTC6;Q8TEW0;Q8N7J2;P07737;Q86VW0}

7580 Pathogen[ P14075] interacts with 8 human  
partners:{Q02410;Q9HCH5;P07737;Q9Y3E7;Q8N7J2;Q5JTC6;P35080;P55895}

7581 Pathogen[ P0C206] interacts with 11 human  
partners:{Q9Y3E7;Q9Y2J0;Q86VW0;Q8TEW0;P35080;Q8N7J2;P55895;Q9HCH5;P07737;Q5JTC6;Q02410}

7582 Pathogen[ P03363] interacts with 11 human

partners:{Q5JTC6;P35080;Q14CM0;Q02410;Q9Y3E7;O75386;P55895;Q9HCH5;Q86VW0;P07737;Q8N7J2}

7583 [Cluster 690]GO:0001164+F molecular\_function [name] RNA polymerase I CORE element sequence-specific DNA binding [def] "Interacting selectively and non-covalently with the regulatory region composed of the transcription start site and binding sites for transcription factors of the RNA polymerase I transcription machinery. This site is often referred to as the CORE element. In mammalian cells, the CORE element functions in conjunction with the Upstream Control Element (UCE), while in fungi, protozoa, and plants, the CORE element functions without a UCE." [GOC

7584 Pathogen[ Q2Q067] interacts with 1 human partners:{Q53T94}

7585 Pathogen[ P0C214] interacts with 1 human partners:{Q53T94}

7586 Pathogen[ P03346] interacts with 1 human partners:{Q53T94}

7587 Pathogen[ Q85601] interacts with 1 human partners:{Q53T94}

7588 Pathogen[ P14079] interacts with 1 human partners:{Q53T94}

7589 Pathogen[ P03383] interacts with 1 human partners:{Q53T94}

7590 Pathogen[ P03410] interacts with 1 human partners:{Q53T94}

7591 Pathogen[ P14075] interacts with 1 human partners:{Q53T94}

7592 Pathogen[ P0C206] interacts with 1 human partners:{Q53T94}

7593 Pathogen[ P03363] interacts with 1 human partners:{Q53T94}

7594 [Cluster 691]GO:0044212+F molecular\_function [name] transcription regulatory region DNA binding [def] "Interacting selectively and non-covalently with a DNA region that regulates the transcription of a region of DNA, which may be a gene, cistron, or operon. Binding may occur as a sequence specific interaction or as an interaction observed only once a factor has been recruited to the DNA by other factors." [GOC

7595 Pathogen[ Q2Q067] interacts with 92 human partners:{P25490;P01100;P56524;P10827;P20226;Q16594;Q6NUN9;Q99081;P14866;P40763;P36402;P46937;Q13485;P35680;P48380;P35712;Q9Y2X9;Q01664;Q8N5U6;P51531;Q15697;O96004;Q8HWS3;P08151;Q04206;Q99684;O94776;P41161;Q9NQX1;Q9BWX5;Q15542;O14686;O15350;Q9NPI1;Q96SN8;O75362;P08047;P28702;Q08050;Q9UQL0;Q9UQL6;Q8TAK5;Q99966;Q13469;P35548;Q6W2J9;P56693;P19532;Q14653;P84022;Q6P1X5;O00255;O15105;O95644;Q13127;O43541;P50750;Q96E29;P11161;Q8NI51;O43918;P35869;Q14865;O60907;P12956;P19838;P20823;P28698;Q9BZK7;Q15545;Q9UID6;P19484;P80723;Q9P1Z2;Q01860;P21675;Q49AM1;Q9BQA5;P13010;P35232;Q9UBL3;P15923;O75376;P49711;P35711;Q86X55;Q9BT81;Q06547;Q06546;P49715;P18146;P33076}

7596 Pathogen[ P0C214] interacts with 84 human partners:{Q8NI51;Q9UID6;Q15697;P35869;Q13469;Q06546;Q14865;P19838;Q06547;P13010;P21675;P50750;P19484;Q99081;P33076;O60907;O15350;Q96SN8;P01100;O75362;P35711;P56693;P46937;P84022;P56524;Q6W2J9;Q04206;Q49AM1;Q15545;Q9BT81;Q16594;Q15542;Q8N5U6;P28698;Q99966;P17535;P15923;O94776;Q9UQL0;Q13485;O15105;Q96E29;O75376;P19532;O43541;Q6P1X5;Q13127;P20226;Q14653;Q9Y2X9;O43918;P36402;Q8TAK5;P05412;P49711;P18146;Q9NPI1;Q9NQX1;Q9BZK7;P11061;P80723;P40763;O96004;P08151;Q86X55;P48380;Q99684;Q6NUN9;Q9BQA5;Q9P1Z2;O95644;P35232;P51531;Q01664;Q01860;P35712;Q9UQL6;P41161;P35548;P08047;P12956;Q8HWS3;O00255;P14866}

7597 Pathogen[ P03346] interacts with 112 human partners:{P31271;Q99081;Q9BZE0;Q8NI51;P05412;Q15542;P46937;Q9NQX1;P10827;P12956;Q99966;O60907;Q9UQL0;O43918;P19484;O14901;P36402;P14866;P35548;Q8TAK5;Q06547;Q15291;Q70SY1;Q9BWX5;Q15911;P25490;Q8N5U6;P80723;P48380;P15923;P56693;P56524;P17535;P13010;Q9NPI1;Q04206;P33076;O94776;P28698;P41161;Q08050;Q9UBL3;P20823;O15350;O15105;O95644;P49715;Q01860;Q13351;P08047;P20226;Q8N8E2;O96004;P28702;Q06710;P84022;Q8HWS3;P17542;Q9HCS4;O43541;Q5JT82;Q13469;Q06546;O00255;P19532;Q99684;Q96SN8;Q9P1Z2;Q96E29;P50750;P49711;Q6P1X5;P35680;Q15475;O14686;O75376;Q14653;Q14865;P35713;P21675;P11161;P35712;Q9BZK7;P35232;Q86X55;P19838;P56178;Q13485;Q9Y2X9;P18146;Q9UID6;Q15697;P51531;Q6NUN9;P35869;O00482;Q15545;O75593;P35711;Q49AM1;P40763;P01100;Q01664;Q9UQL6;Q6W2J9;Q9BT81;Q13127;Q9BQA5;P08151;Q16594;Q9UJU5}

7598 Pathogen[ Q85601] interacts with 98 human partners:{P18146;Q8NI51;Q15542;P28698;P08151;P33076;Q13127;Q9BWX5;Q86X55;O94776;P19484;P50750;Q9UQL6;Q06546;O43541;O60907;Q96SN8;Q99966;P40763;P28702;Q9Y2X9;Q6NUN9;Q15545;O14686;P25490;P35712;Q49AM1;Q13469;P19532;Q16594;O95644;O96004;P80723;P49711;Q9UID6;P08047;P51531;P01100;Q9UBL3;Q14653;P17535;Q9NQX1;P35711;Q04206;Q96E29;Q6P1X5;P35548;P35680;P05412;O00255;O75376;Q14865;P15923;P36402;P10827;P56693;Q8N5U6;Q99684;O00482;Q9BQA5;P84022;Q9NPI1;P31271;P49715;Q06547;P14866;P41161;Q9BZK7;P56524;P21675;P46937;Q08050;P35232;P35869;O15105;O15350;Q99081;O75362;Q8TAK5;Q15697;P48380;Q9P1Z2;Q9HCS4;Q8N8E2;P19838;P20823;Q9UQL0;Q13485;P11161;Q01664;Q01860;O43918;Q9BT81;Q8HWS3;P13010;P12956;P20226;Q6W2J9}

7599 Pathogen[ P14079] interacts with 90 human partners:{Q9UQL6;P35711;Q9NQX1;Q9NPI1;P08151;P33076;Q9BZK7;P35869;Q06413;Q9BWX5;Q9BT81;Q06546;Q14653;Q16594;Q15911;O75362;Q9UBL3;P35680;P13010;Q49AM1;Q6NUN9;P48380;O95644;Q14865;Q99684;O60907;P35712;Q9UID6;Q99966;P51531;P14866;Q8TAK5;O96004;P35232;P19484;P46937;P41161;Q96E29;Q9BQA5;P31271;P15923;Q06547;P10827;O15350;P36402;P28698;Q6W2J9;Q6P1X5;Q8HWS3;P12956;Q8N5U6;Q01860;P19532;P11161;O00482;P49715;Q15697;P28702;Q9Y2X9;Q01664;Q13351;Q9UQL0;P56693;O43541;Q8WWB7;O43918;O75376;P80723;Q13469;Q99081;P05412;P56524;Q13127;P25490;O15105;O14901;O94776;Q9P1Z2;O00255;P01100;Q96SN8;Q9BZE0;Q15542;P49711;P17535;Q8N8E2;Q8NI51;P21675;P50750;Q15545}

7600 Pathogen[ P03383] interacts with 80 human partners:{Q8NI51;P35712;Q13485;Q14653;P33076;P08047;Q8HWS3;P13010;Q13469;Q8TAK5;O94776;P49711;P14866;O75376;Q9UQL6;P19484;Q06547;O75362;O60907;Q96SN8;O95644;Q86X55;P48380;Q15542;P15923;Q01860;P28698;Q8N5U6;Q9NQX1;P18146;Q01664;P20226;Q6W2J9;O96004;O15105;

P41161;Q16594;P84022;Q9UID6;P35548;Q9BQA5;Q99081;Q96E29;O43541;P28702;P50750;P35711;Q15697;P51531;O15350;O00255;Q6P1X5;P36402;P35232;O43918;Q99684;Q9UKL0;P01100;P11161;P21675;Q9BZK7;P56524;Q04206;P17535;Q6NUN9;P80723;Q9NPI1;Q9Y2X9;Q15545;P19838;P35869;P56693;Q49AM1;P46937;Q06546;P19532;Q9P1Z2;P12956;Q13127;P05412}

7601 Pathogen[ P03410] interacts with 89 human partners: {P84022;Q04206;O14901;P35712;P19838;Q8N8E2;Q15697;Q6W2J9;O96004;Q49AM1;Q01860;Q9BQA5;P21675;P36402;Q96SN8;Q14653;O43918;Q86X55;P19532;P20226;P19484;O75376;Q06547;Q99684;P15923;P14866;P25490;P01100;Q9UQL6;O95644;Q9P1Z2;P50750;Q99081;Q13127;Q9Y2X9;P41161;P12956;P35548;Q6NUN9;Q9BWX5;P17535;Q8TAK5;O75362;P56524;Q6P1X5;P48380;Q13485;P28702;P56693;Q8WWB7;P46937;Q13469;Q16594;P05412;O43541;P49711;O15105;Q8NI51;P51531;O94776;Q9HCS4;Q01664;P35680;P28698;P13010;Q15542;O15350;P80723;Q9BZK7;P08047;Q9UKL0;P35232;Q9UID6;P18146;Q8N5U6;Q96E29;Q9BT81;Q14865;O00255;Q9NQX1;P11161;P40763;O60907;P33076;Q06546;Q15545;Q9NPI1;Q8HWS3;Q99966}

7602 Pathogen[ P14075] interacts with 80 human partners: {Q8NI51;P35869;P14866;P12956;Q04206;P21675;Q9NPI1;P05412;Q15542;Q9BQA5;Q15697;O43541;P80723;O75362;Q06546;Q6NUN9;Q9UKL0;Q9UID6;Q01860;P28698;P48380;P35548;P11161;Q6P1X5;P56524;O43918;Q08050;P18146;P19484;P33076;O94776;P50750;Q96SN8;P56693;P20226;P15923;Q16594;O75376;P35711;O96004;Q13485;P35232;O00255;Q8N5U6;Q9NQX1;Q14653;Q06547;Q01664;Q13469;Q6W2J9;O15350;Q99684;Q86X55;P35712;Q96E29;Q49AM1;P51531;O60907;Q9P1Z2;Q15545;O15105;P36402;P01100;Q9Y2X9;P49711;Q9BZK7;P28702;P46937;Q13127;P19838;Q9UQL6;P13010;P84022;Q99081;P17535;P19532;Q8HWS3;O95644;Q8TAK5;P08047}

7603 Pathogen[ P0C206] interacts with 102 human partners: {Q9UID6;Q8HWS3;P28698;Q6NUN9;P46937;P84022;Q9NQX1;Q9Y2X9;O43541;Q9BZE0;P13010;Q49AM1;Q06546;Q15545;Q96SN8;Q13469;Q13127;Q15911;Q9NPI1;Q8TAK5;P50750;P20226;P11161;P35869;P25490;O60907;Q6W2J9;Q15697;Q01860;P51531;Q9UKL0;Q86X55;P14866;O00255;P05412;Q8N8E2;Q8NI51;P17535;P49715;O94776;Q9HCS4;P19484;Q9P1Z2;P56693;P48380;O14686;P19532;Q8N5U6;Q9BQA5;P33076;O00482;Q96E29;P18146;O96004;Q9BT81;Q9BWX5;O43918;O15105;P19838;Q8WWB7;P35711;Q99081;P35232;P08047;P80723;P35680;P49711;P35548;P01100;Q04206;P15923;P20823;Q06547;Q9BZK7;O75376;P40763;Q13485;Q99684;Q15542;Q08050;Q6P1X5;Q01664;Q99966;Q9UBL3;O75362;P28702;P35712;P31271;O15350;O14901;O95644;Q14865;P56524;P08151;P41161;P12956;P36402;P10827;P21675;Q16594;Q14653;Q9UQL6}

7604 Pathogen[ P03363] interacts with 94 human partners: {Q9NQX1;Q15911;Q14653;P12956;Q99684;Q06547;P17535;O14901;Q8N5U6;P28698;P35711;Q14865;Q04206;P18146;P36402;P08151;Q06546;P13010;Q15291;P14866;P31271;Q9BZK7;P25490;Q9UBL3;O75376;O60907;Q15545;Q5JT82;Q9UQL6;P35548;Q6NUN9;O15105;Q9HCS4;Q9Y2X9;Q49AM1;Q8N8E2;Q8NI51;P35869;P49711;Q13127;P15923;Q08050;P46937;P56693;P28702;Q9P1Z2;O43541;Q9NPI1;Q9BQA5;P84022;P41161;O96004;Q15542;P19838;Q8TAK5;Q15697;Q13469;P21675;P33076;Q9BWX5;P35712;P20226;O75362;Q13485;P50750;P19484;O95644;P35232;P05412;P80723;P19532;Q9UKL0;O43918;P08047;Q99081;Q6W2J9;P48380;P51531;Q9UJU5;Q9BT81;Q8HWS3;Q9UID6;Q6P1X5;Q01664;Q9BZE0;Q01860;Q86X55;O14686;O94776;Q16594;Q96SN8;P01100;P11161;O00482}

7605 [Cluster 692]GO:0017076+F molecular\_function [name] purine nucleotide binding [def] "Interacting selectively and non-covalently with purine nucleotides, any compound consisting of a purine nucleoside esterified with (ortho)phosphate." [GOC]

7606 Pathogen[ Q2Q067] interacts with 1 human partners: {Q9NRY5}

7607 Pathogen[ P0C214] interacts with 4 human partners: {P35558;Q9NRY5;P23921;Q16822}

7608 Pathogen[ P03346] interacts with 1 human partners: {Q9NRY5}

7609 Pathogen[ Q85601] interacts with 1 human partners: {Q9NRY5}

7610 Pathogen[ P14079] interacts with 3 human partners: {P51606;Q9NRY5;Q9NPA0}

7611 Pathogen[ P03383] interacts with 2 human partners: {Q16822;Q9NRY5}

7612 Pathogen[ P03410] interacts with 5 human partners: {Q16822;P51606;Q9NPA0;Q9NRY5;P23921}

7613 Pathogen[ P14075] interacts with 2 human partners: {Q16822;Q9NRY5}

7614 Pathogen[ P0C206] interacts with 2 human partners: {Q16822;Q9NRY5}

7615 Pathogen[ P03363] interacts with 1 human partners: {Q9NRY5}

7616 [Cluster 693]GO:0031720+F molecular\_function [name] haptoglobin binding [def] "Interacting selectively and non-covalently with a haptoglobin, any alpha2 globulin of blood plasma that can combine with free oxyhemoglobin to form a stable complex." [GOC]

7617 Pathogen[ Q2Q067] interacts with 2 human partners: {P68871;P69905}

7618 Pathogen[ P0C214] interacts with 2 human partners: {P69905;P68871}

7619 Pathogen[ P03346] interacts with 2 human partners: {P69905;P68871}

7620 Pathogen[ Q85601] interacts with 2 human partners: {P69905;P68871}

7621 Pathogen[ P14079] interacts with 2 human partners: {P69905;P68871}

7622 Pathogen[ P03383] interacts with 2 human partners: {P69905;P68871}

7623 Pathogen[ P03410] interacts with 2 human partners: {P68871;P69905}

7624 Pathogen[ P14075] interacts with 2 human partners: {P68871;P69905}

7625 Pathogen[ P0C206] interacts with 2 human partners: {P68871;P69905}

7626 Pathogen[ P03363] interacts with 2 human partners: {P69905;P68871}

7627 [Cluster 694]GO:0004332+F molecular\_function [name] fructose-bisphosphate aldolase activity [def] "Catalysis of the reaction

7628 Pathogen[ Q2Q067] interacts with 2 human partners: {P05062;P09972}

7629 Pathogen[ P0C214] interacts with 2 human partners: {P05062;P09972}

7630 Pathogen[ P03346] interacts with 2 human partners: {P09972;P05062}

7631 Pathogen[ Q85601] interacts with 2 human partners: {P05062;P09972}

7632 Pathogen[ P14079] interacts with 1 human partners: {P09972}

7633 Pathogen[ P03383] interacts with 1 human partners: {P09972}

7634 Pathogen[ P03410] interacts with 2 human partners: {P05062;P09972}

7635 Pathogen[ P14075] interacts with 1 human partners:{P09972}  
7636 Pathogen[ P0C206] interacts with 2 human partners:{P05062;P09972}  
7637 Pathogen[ P03363] interacts with 1 human partners:{P09972}  
7638 [Cluster 695]GO:0000988+F molecular\_function [name] protein binding transcription factor activity [def] "Interacting selectively and non-covalently with any protein or protein complex (a complex of two or more proteins that may include other nonprotein molecules), in order to modulate transcription. A protein binding transcription factor may or may not also interact with the template nucleic acid (either DNA or RNA) as well." [GOC]  
7639 Pathogen[ Q2Q067] interacts with 7 human partners:{Q13485;Q9NQ87;P84022;Q8N895;P78337;Q9Y5J3;Q16526}  
7640 Pathogen[ P0C214] interacts with 8 human partners:{P78337;Q9Y5J3;P84022;Q13485;Q49AN0;Q16526;Q8N895;Q9NQ87}  
7641 Pathogen[ P03346] interacts with 11 human partners:{P78337;Q49AN0;Q8N895;Q16526;Q9Y5J3;O15055;O15534;P84022;Q9NQ87;Q9UBR4;Q13485}  
7642 Pathogen[ Q85601] interacts with 10 human partners:{O15534;Q49AN0;Q8N895;P78337;Q9NQ87;P84022;O15055;Q16526;Q13485;Q9Y5J3}  
7643 Pathogen[ P14079] interacts with 9 human partners:{Q8N895;Q16526;P78337;Q49AN0;Q9Y5J3;Q8WWB7;Q9NQ87;O15055;O15534}  
7644 Pathogen[ P03383] interacts with 6 human partners:{Q13485;Q9NQ87;P78337;P84022;Q8N895;Q16526}  
7645 Pathogen[ P03410] interacts with 11 human partners:{P84022;Q9Y5J3;Q9NQ87;O15055;O15534;Q13485;Q16526;Q8WWB7;Q49AN0;Q8N895;P78337}  
7646 Pathogen[ P14075] interacts with 6 human partners:{P78337;Q9NQ87;Q13485;Q8N895;Q16526;P84022}  
7647 Pathogen[ P0C206] interacts with 12 human partners:{P84022;Q9NQ87;O15534;Q8N895;P78337;Q8WWB7;Q16526;Q9Y5J3;Q13485;O15055;Q9UBR4;Q49AN0}  
7648 Pathogen[ P03363] interacts with 10 human partners:{Q9Y5J3;Q9NQ87;Q49AN0;P84022;Q8N895;Q16526;Q13485;O15055;P78337;O15534}  
7649 [Cluster 696]GO:0005496+F molecular\_function [name] steroid binding [def] "Interacting selectively and non-covalently with a steroid, any of a large group of substances that have in common a ring system based on 1,2-cyclopentanoperhydrophenanthrene." [GOC]  
7650 Pathogen[ Q2Q067] interacts with 3 human partners:{P62508;P08235;P11474}  
7651 Pathogen[ P0C214] interacts with 2 human partners:{P11474;P62508}  
7652 Pathogen[ P03346] interacts with 5 human partners:{P06401;P08235;O95718;P62508;P11474}  
7653 Pathogen[ Q85601] interacts with 3 human partners:{P08235;P11474;P62508}  
7654 Pathogen[ P14079] interacts with 7 human partners:{O75556;P62508;P08235;P11474;O95718;O00264;Q13296}  
7655 Pathogen[ P03383] interacts with 2 human partners:{P11474;P62508}  
7656 Pathogen[ P03410] interacts with 5 human partners:{Q13296;P62508;O00264;P11474;P08235}  
7657 Pathogen[ P14075] interacts with 4 human partners:{P11474;Q13296;O75556;P62508}  
7658 Pathogen[ P0C206] interacts with 7 human partners:{P06401;O95718;P62508;Q13296;O00264;P11474;P08235}  
7659 Pathogen[ P03363] interacts with 3 human partners:{P62508;P11474;P08235}  
7660 [Cluster 697]GO:0030295+F molecular\_function [name] protein kinase activator activity [def] "Increases the activity of a protein kinase, an enzyme which phosphorylates a protein." [GOC]  
7661 Pathogen[ Q2Q067] interacts with 1 human partners:{Q9H4X1}  
7662 Pathogen[ P0C214] interacts with 2 human partners:{Q9H4X1;Q9Y376}  
7663 Pathogen[ P03346] interacts with 2 human partners:{Q9H4X1;Q9Y376}  
7664 Pathogen[ Q85601] interacts with 2 human partners:{Q9H4X1;Q9Y376}  
7665 Pathogen[ P14079] interacts with 1 human partners:{Q9Y376}  
7666 Pathogen[ P03383] interacts with 1 human partners:{Q9H4X1}  
7667 Pathogen[ P03410] interacts with 2 human partners:{Q9H4X1;Q9Y376}  
7668 Pathogen[ P14075] interacts with 1 human partners:{Q9H4X1}  
7669 Pathogen[ P0C206] interacts with 2 human partners:{Q9H4X1;Q9Y376}  
7670 Pathogen[ P03363] interacts with 2 human partners:{Q9H4X1;Q9Y376}  
7671 [Cluster 698]GO:0005047+F molecular\_function [name] signal recognition particle binding [def] "Interacting selectively and non-covalently with the signal recognition particle." [ISBN]  
7672 Pathogen[ Q2Q067] interacts with 2 human partners:{P49458;Q9UHB9}  
7673 Pathogen[ P0C214] interacts with 2 human partners:{Q9UHB9;P49458}  
7674 Pathogen[ P03346] interacts with 2 human partners:{P49458;Q9UHB9}  
7675 Pathogen[ Q85601] interacts with 1 human partners:{Q9UHB9}  
7676 Pathogen[ P14079] interacts with 2 human partners:{P49458;Q9UHB9}  
7677 Pathogen[ P03383] interacts with 2 human partners:{P49458;Q9UHB9}  
7678 Pathogen[ P03410] interacts with 2 human partners:{Q9UHB9;P49458}  
7679 Pathogen[ P14075] interacts with 2 human partners:{P49458;Q9UHB9}  
7680 Pathogen[ P0C206] interacts with 2 human partners:{P49458;Q9UHB9}  
7681 Pathogen[ P03363] interacts with 2 human partners:{Q9UHB9;P49458}

7682 [Cluster 699]GO:0008198+F molecular\_function [name] ferrous iron binding [def]  
"Interacting selectively and non-covalently with ferrous iron, Fe(II)." [GOC  
7683 Pathogen[ Q2Q067] interacts with 4 human partners:{Q6NS38;Q96Q83;Q96KS0;P06132}  
7684 Pathogen[ P0C214] interacts with 5 human  
partners:{P06132;Q96KS0;Q6NS38;P22830;Q96Q83}  
7685 Pathogen[ P03346] interacts with 3 human partners:{P06132;Q96Q83;Q96KS0}  
7686 Pathogen[ Q85601] interacts with 4 human partners:{Q96KS0;P06132;Q6NS38;Q96Q83}  
7687 Pathogen[ P14079] interacts with 7 human  
partners:{Q9C0B1;P06132;Q6NS38;P22830;Q16878;Q96Q83;Q96KS0}  
7688 Pathogen[ P03383] interacts with 3 human partners:{Q96KS0;P06132;Q96Q83}  
7689 Pathogen[ P03410] interacts with 6 human  
partners:{Q96KS0;Q96Q83;P06132;Q6NS38;P22830;Q9C0B1}  
7690 Pathogen[ P14075] interacts with 3 human partners:{Q96KS0;P06132;Q96Q83}  
7691 Pathogen[ P0C206] interacts with 5 human  
partners:{Q96Q83;Q96KS0;Q6NS38;P22830;P06132}  
7692 Pathogen[ P03363] interacts with 2 human partners:{P06132;Q96Q83}  
7693 [Cluster 700]GO:0050683+F molecular\_function [name] AF-1 domain binding [def]  
"Interacting selectively and non-covalently with the AF-1 domain of a protein, a  
ligand-independent transactivation domain which is required for the full transcriptional  
activity of the receptor." [PMID  
7694 Pathogen[ Q2Q067] interacts with 1 human partners:{Q9NQ87}  
7695 Pathogen[ P0C214] interacts with 1 human partners:{Q9NQ87}  
7696 Pathogen[ P03346] interacts with 1 human partners:{Q9NQ87}  
7697 Pathogen[ Q85601] interacts with 1 human partners:{Q9NQ87}  
7698 Pathogen[ P14079] interacts with 1 human partners:{Q9NQ87}  
7699 Pathogen[ P03383] interacts with 1 human partners:{Q9NQ87}  
7700 Pathogen[ P03410] interacts with 1 human partners:{Q9NQ87}  
7701 Pathogen[ P14075] interacts with 1 human partners:{Q9NQ87}  
7702 Pathogen[ P0C206] interacts with 1 human partners:{Q9NQ87}  
7703 Pathogen[ P03363] interacts with 1 human partners:{Q9NQ87}  
7704 [Cluster 701]GO:0008428+F molecular\_function [name] ribonuclease inhibitor activity  
[def] "Stops, prevents or reduces the activity of a ribonuclease, any enzyme that  
catalyzes the hydrolysis of phosphodiester bonds in chains of RNA." [GOC  
7705 Pathogen[ Q2Q067] interacts with 1 human partners:{P13489}  
7706 Pathogen[ P0C214] interacts with 1 human partners:{P13489}  
7707 Pathogen[ P03346] interacts with 1 human partners:{P13489}  
7708 Pathogen[ Q85601] interacts with 1 human partners:{P13489}  
7709 Pathogen[ P14079] interacts with 1 human partners:{P13489}  
7710 Pathogen[ P03383] interacts with 1 human partners:{P13489}  
7711 Pathogen[ P03410] interacts with 1 human partners:{P13489}  
7712 Pathogen[ P14075] interacts with 1 human partners:{P13489}  
7713 Pathogen[ P0C206] interacts with 1 human partners:{P13489}  
7714 Pathogen[ P03363] interacts with 1 human partners:{P13489}  
7715 [Cluster 702]GO:0016504+F molecular\_function [name] peptidase activator activity [def]  
"Increases the activity of a peptidase, any enzyme that catalyzes the hydrolysis peptide  
bonds." [GOC  
7716 Pathogen[ Q2Q067] interacts with 1 human partners:{076031}  
7717 Pathogen[ P0C214] interacts with 1 human partners:{076031}  
7718 Pathogen[ P03346] interacts with 1 human partners:{076031}  
7719 Pathogen[ Q85601] interacts with 1 human partners:{076031}  
7720 Pathogen[ P14079] interacts with 1 human partners:{076031}  
7721 Pathogen[ P03383] interacts with 1 human partners:{076031}  
7722 Pathogen[ P03410] interacts with 1 human partners:{076031}  
7723 Pathogen[ P14075] interacts with 1 human partners:{076031}  
7724 Pathogen[ P0C206] interacts with 1 human partners:{076031}  
7725 Pathogen[ P03363] interacts with 1 human partners:{076031}  
7726 [Cluster 703]GO:0001105+F molecular\_function [name] RNA polymerase II transcription  
coactivator activity [def] "Interacting selectively and non-covalently with an RNA  
polymerase II (RNAP II) regulatory transcription factor and also with the RNAP II basal  
transcription machinery in order to increase the frequency, rate or extent of  
transcription. Cofactors generally do not bind DNA, but rather mediate protein-protein  
interactions between activating transcription factors and the basal RNAP II transcription  
machinery." [GOC  
7727 Pathogen[ Q2Q067] interacts with 11 human  
partners:{Q13562;Q03052;Q8WW38;P51531;P20265;P28069;Q15327;O75475;O15370;Q92793;Q0207  
8}  
7728 Pathogen[ P0C214] interacts with 10 human  
partners:{Q03052;Q15327;Q92793;P20265;Q02078;Q8WW38;O75475;P28069;O15370;P51531}  
7729 Pathogen[ P03346] interacts with 13 human  
partners:{Q06945;Q02078;Q03052;O15370;Q8WW38;O75475;Q15327;P20265;Q92481;P28069;Q9279  
3;P51531;Q13562}  
7730 Pathogen[ Q85601] interacts with 11 human  
partners:{Q02078;Q03052;Q8WW38;P28069;P51531;Q13562;O15370;Q15327;Q92793;O75475;P2026  
5}  
7731 Pathogen[ P14079] interacts with 10 human  
partners:{Q02078;O15370;P20265;Q92793;O75475;P51531;P28069;Q15327;Q03052;Q8WW38}



7732 Pathogen[ P03383] interacts with 9 human partners:{P28069;Q8WW38;P51531;O75475;O15370;Q15327;P20265;Q92793;Q02078}

7733 Pathogen[ P03410] interacts with 10 human partners:{P28069;Q15327;Q03052;Q8WW38;Q92793;P51531;Q02078;O75475;O15370;P20265}

7734 Pathogen[ P14075] interacts with 9 human partners:{P28069;O75475;Q15327;P20265;Q8WW38;O15370;P51531;Q02078;Q92793}

7735 Pathogen[ P0C206] interacts with 11 human partners:{Q02078;P51531;Q15327;Q8WW38;O75475;Q92793;Q03052;O15370;Q13562;P20265;P28069}

7736 Pathogen[ P03363] interacts with 10 human partners:{O15370;O75475;Q15327;P28069;P20265;Q92793;Q8WW38;P51531;Q03052;Q02078}

7737 [Cluster 704]GO:0031433+F molecular\_function [name] telethonin binding [def] "Interacting selectively and non-covalently with telethonin, a protein found in the Z disc of striated muscle and which is a substrate of the titin kinase." [GOC

7738 Pathogen[ Q2Q067] interacts with 1 human partners:{Q9NPC6}

7739 Pathogen[ P0C214] interacts with 1 human partners:{Q9NPC6}

7740 Pathogen[ P03346] interacts with 1 human partners:{Q9NPC6}

7741 Pathogen[ Q85601] interacts with 1 human partners:{Q9NPC6}

7742 Pathogen[ P14079] interacts with 1 human partners:{Q9NPC6}

7743 Pathogen[ P03383] interacts with 1 human partners:{Q9NPC6}

7744 Pathogen[ P03410] interacts with 1 human partners:{Q9NPC6}

7745 Pathogen[ P14075] interacts with 1 human partners:{Q9NPC6}

7746 Pathogen[ P0C206] interacts with 2 human partners:{P50461;Q9NPC6}

7747 Pathogen[ P03363] interacts with 1 human partners:{Q9NPC6}

7748 [Cluster 705]GO:0003689+F molecular\_function [name] DNA clamp loader activity [def] "Catalysis of the reaction

7749 Pathogen[ Q2Q067] interacts with 1 human partners:{P35251}

7750 Pathogen[ P0C214] interacts with 1 human partners:{P35251}

7751 Pathogen[ P03346] interacts with 1 human partners:{P35251}

7752 Pathogen[ Q85601] interacts with 1 human partners:{P35251}

7753 Pathogen[ P14079] interacts with 1 human partners:{P35251}

7754 Pathogen[ P03383] interacts with 1 human partners:{P35251}

7755 Pathogen[ P03410] interacts with 1 human partners:{P35251}

7756 Pathogen[ P14075] interacts with 1 human partners:{P35251}

7757 Pathogen[ P0C206] interacts with 1 human partners:{P35251}

7758 Pathogen[ P03363] interacts with 1 human partners:{P35251}

7759 [Cluster 706]GO:0032947+F molecular\_function [name] protein complex scaffold [def] "Functions to provide a physical support for the assembly of a multiprotein complex." [GOC

7760 Pathogen[ Q2Q067] interacts with 7 human partners:{Q9P0M2;Q12959;Q96GM5;Q9NX63;O43504;Q13023;Q9H1K1}

7761 Pathogen[ P0C214] interacts with 8 human partners:{Q13023;Q9P0M2;Q9H1K1;Q9NX63;Q12959;O43504;P55884;Q96GM5}

7762 Pathogen[ P03346] interacts with 11 human partners:{Q9P0M2;Q96GM5;Q9H1K1;Q13023;P55884;Q15019;Q9UKA4;Q5T2T1;O43504;Q9NX63;Q12959}

7763 Pathogen[ Q85601] interacts with 6 human partners:{Q96GM5;Q9P0M2;Q12959;Q9NX63;Q9H1K1;Q13023}

7764 Pathogen[ P14079] interacts with 12 human partners:{Q9UKA4;Q9Y2Q5;Q13023;Q9P0M2;Q5T2T1;Q9H1K1;Q9UHA4;Q0VGL1;Q6IAA8;Q96GM5;O43504;P55884}

7765 Pathogen[ P03383] interacts with 5 human partners:{Q9NX63;Q9H1K1;Q13023;Q96GM5;O43504}

7766 Pathogen[ P03410] interacts with 14 human partners:{Q9Y2Q5;O43504;Q9UKA4;Q96GM5;Q12959;Q9UHA4;Q9H1K1;P55884;Q5T2T1;Q9P0M2;Q13023;Q9NX63;Q6IAA8;Q0VGL1}

7767 Pathogen[ P14075] interacts with 5 human partners:{Q9NX63;Q96GM5;O43504;Q9H1K1;Q13023}

7768 Pathogen[ P0C206] interacts with 12 human partners:{Q9H1K1;Q9UHA4;Q15019;Q13023;O43504;Q9NX63;Q5T2T1;Q9P0M2;Q96GM5;Q12959;Q9UKA4;Q9UIG0}

7769 Pathogen[ P03363] interacts with 9 human partners:{Q12959;Q5T2T1;O43504;Q9P0M2;Q9H1K1;Q13023;Q96GM5;Q9NX63;P55884}

7770 [Cluster 707]GO:0030276+F molecular\_function [name] clathrin binding [def] "Interacting selectively and non-covalently with a clathrin heavy or light chain, the main components of the coat of coated vesicles and coated pits, and which also occurs in synaptic vesicles." [GOC

7771 Pathogen[ Q2Q067] interacts with 4 human partners:{O00291;P63010;Q14677;Q6ULP2}

7772 Pathogen[ P0C214] interacts with 4 human partners:{P63010;Q6ULP2;O00291;Q14677}

7773 Pathogen[ P03346] interacts with 5 human partners:{P63010;O00291;Q13492;Q6ULP2;Q14677}

7774 Pathogen[ Q85601] interacts with 4 human partners:{Q14677;Q6ULP2;O00291;P63010}

7775 Pathogen[ P14079] interacts with 5 human partners:{Q13492;O00291;Q6ULP2;Q14677;P63010}

7776 Pathogen[ P03383] interacts with 4 human partners:{O00291;P63010;Q14677;Q6ULP2}

7777 Pathogen[ P03410] interacts with 5 human

```

partners:{000291;Q13492;Q14677;P63010;Q6ULP2}
7778 Pathogen[ P14075] interacts with 4 human partners:{000291;Q14677;P63010;Q6ULP2}
7779 Pathogen[ P0C206] interacts with 4 human partners:{P63010;000291;Q6ULP2;Q14677}
7780 Pathogen[ P03363] interacts with 4 human partners:{Q6ULP2;Q14677;P63010;000291}
7781 [Cluster 708]GO:0002134+F molecular_function [name] UTP binding [def] "Interacting
selectively and non-covalently with UTP, uridine 5'-triphosphate." [GOC
7782 Pathogen[ Q2Q067] interacts with 2 human partners:{P08238;Q9NVV4}
7783 Pathogen[ P0C214] interacts with 1 human partners:{Q9NVV4}
7784 Pathogen[ P03346] interacts with 2 human partners:{Q9NVV4;P08238}
7785 Pathogen[ Q85601] interacts with 2 human partners:{P08238;Q9NVV4}
7786 Pathogen[ P14079] interacts with 2 human partners:{P08238;Q9NVV4}
7787 Pathogen[ P03383] interacts with 2 human partners:{Q9NVV4;P08238}
7788 Pathogen[ P03410] interacts with 2 human partners:{P08238;Q9NVV4}
7789 Pathogen[ P14075] interacts with 2 human partners:{Q9NVV4;P08238}
7790 Pathogen[ P0C206] interacts with 2 human partners:{P08238;Q9NVV4}
7791 Pathogen[ P03363] interacts with 2 human partners:{Q9NVV4;P08238}
7792 [Cluster 709]GO:0050144+F molecular_function [name] nucleoside deoxyribosyltransferase
activity [def] "Catalysis of the reaction
7793 Pathogen[ Q2Q067] interacts with 1 human partners:{043598}
7794 Pathogen[ P0C214] interacts with 1 human partners:{043598}
7795 Pathogen[ P03346] interacts with 1 human partners:{043598}
7796 Pathogen[ Q85601] interacts with 1 human partners:{043598}
7797 Pathogen[ P14079] interacts with 1 human partners:{043598}
7798 Pathogen[ P03383] interacts with 1 human partners:{043598}
7799 Pathogen[ P03410] interacts with 1 human partners:{043598}
7800 Pathogen[ P14075] interacts with 1 human partners:{043598}
7801 Pathogen[ P0C206] interacts with 1 human partners:{043598}
7802 Pathogen[ P03363] interacts with 1 human partners:{043598}
7803 [Cluster 710]GO:0035497+F molecular_function [name] cAMP response element binding
[def] "Interacting selectively and non-covalently with the cyclic AMP response element
(CRE), a short palindrome-containing sequence found in the promoters of genes whose
expression is regulated in response to cyclic AMP." [PMID
7804 Pathogen[ Q2Q067] interacts with 2 human partners:{P15336;Q66K89}
7805 Pathogen[ P0C214] interacts with 4 human partners:{P15336;P05412;P16220;Q66K89}
7806 Pathogen[ P03346] interacts with 5 human
partners:{P05412;P16220;P15336;Q70SY1;Q66K89}
7807 Pathogen[ Q85601] interacts with 4 human partners:{P16220;P05412;Q66K89;P15336}
7808 Pathogen[ P14079] interacts with 3 human partners:{Q66K89;P15336;P05412}
7809 Pathogen[ P03383] interacts with 4 human partners:{P16220;Q66K89;P15336;P05412}
7810 Pathogen[ P03410] interacts with 4 human partners:{Q66K89;P16220;P05412;P15336}
7811 Pathogen[ P14075] interacts with 4 human partners:{P05412;P15336;Q66K89;P16220}
7812 Pathogen[ P0C206] interacts with 4 human partners:{P16220;P05412;P15336;Q66K89}
7813 Pathogen[ P03363] interacts with 4 human partners:{P16220;Q66K89;P15336;P05412}
7814 [Cluster 711]GO:0050662+F molecular_function [name] coenzyme binding [def]
"Interacting selectively and non-covalently with a coenzyme, any of various nonprotein
organic cofactors that are required, in addition to an enzyme and a substrate, for an
enzymatic reaction to proceed." [ISBN
7815 Pathogen[ Q2Q067] interacts with 5 human
partners:{P30793;P22557;Q9NZC7;P08397;Q16836}
7816 Pathogen[ P0C214] interacts with 10 human
partners:{Q16795;P52209;Q8N335;P40939;P22557;Q9Y2S2;Q9NZC7;P08397;P30793;P21695}
7817 Pathogen[ P03346] interacts with 3 human partners:{Q16836;P22557;Q9NZC7}
7818 Pathogen[ Q85601] interacts with 4 human partners:{Q9NZC7;P30793;Q16836;P08397}
7819 Pathogen[ P14079] interacts with 7 human
partners:{P52209;P22557;P30793;Q9NZC7;P08397;P21695;Q16836}
7820 Pathogen[ P03383] interacts with 2 human partners:{Q16836;P08397}
7821 Pathogen[ P03410] interacts with 7 human
partners:{P08397;Q9NZC7;P30793;P52209;P22557;Q16836;P21695}
7822 Pathogen[ P14075] interacts with 3 human partners:{P08397;Q16836;P30793}
7823 Pathogen[ P0C206] interacts with 5 human
partners:{Q16836;P30793;P22557;Q9NZC7;P08397}
7824 Pathogen[ P03363] interacts with 1 human partners:{Q16836}
7825 [Cluster 712]GO:0050265+F molecular_function [name] RNA uridylyltransferase activity
[def] "Catalysis of the reaction
7826 Pathogen[ Q2Q067] interacts with 1 human partners:{Q5TAX3}
7827 Pathogen[ P0C214] interacts with 1 human partners:{Q5TAX3}
7828 Pathogen[ P03346] interacts with 1 human partners:{Q5TAX3}
7829 Pathogen[ Q85601] interacts with 1 human partners:{Q5TAX3}
7830 Pathogen[ P14079] interacts with 1 human partners:{Q5TAX3}
7831 Pathogen[ P03383] interacts with 1 human partners:{Q5TAX3}
7832 Pathogen[ P03410] interacts with 1 human partners:{Q5TAX3}
7833 Pathogen[ P14075] interacts with 1 human partners:{Q5TAX3}
7834 Pathogen[ P0C206] interacts with 1 human partners:{Q5TAX3}
7835 Pathogen[ P03363] interacts with 1 human partners:{Q5TAX3}
7836 [Cluster 713]GO:0032794+F molecular_function [name] GTPase activating protein binding
[def] "Interacting selectively and non-covalently with a GTPase activating protein." [GOC

```

7837 Pathogen[ Q2Q067] interacts with 1 human partners:{Q13526}  
7838 Pathogen[ P0C214] interacts with 1 human partners:{Q13526}  
7839 Pathogen[ P03346] interacts with 1 human partners:{Q13526}  
7840 Pathogen[ Q85601] interacts with 1 human partners:{Q13526}  
7841 Pathogen[ P14079] interacts with 1 human partners:{Q13526}  
7842 Pathogen[ P03383] interacts with 1 human partners:{Q13526}  
7843 Pathogen[ P03410] interacts with 1 human partners:{Q13526}  
7844 Pathogen[ P14075] interacts with 1 human partners:{Q13526}  
7845 Pathogen[ P0C206] interacts with 1 human partners:{Q13526}  
7846 Pathogen[ P03363] interacts with 1 human partners:{Q13526}  
7847 [Cluster 714]GO:0008601+F molecular\_function [name] protein phosphatase type 2A regulator activity [def] "Modulation of the activity of the enzyme protein phosphatase type 2A." [GOC  
7848 Pathogen[ Q2Q067] interacts with 15 human partners:{P30153;P63151;Q86XL3;Q01105;Q66LE6;Q15172;Q15173;Q9Y5P8;O43768;Q00005;P56211;Q15257;Q16537;P78318;Q14738}  
7849 Pathogen[ P0C214] interacts with 15 human partners:{O43768;Q16537;Q00005;P78318;P30153;Q15172;Q66LE6;Q15257;Q01105;P56211;Q15173;Q86XL3;P63151;Q14738;Q9Y5P8}  
7850 Pathogen[ P03346] interacts with 17 human partners:{Q15172;Q66LE6;Q00005;Q13362;Q01105;Q15257;P56211;O43768;P30153;Q9Y5P8;Q06190;Q14738;Q16537;Q86XL3;Q15173;P78318;P63151}  
7851 Pathogen[ Q85601] interacts with 15 human partners:{P63151;Q00005;Q01105;Q14738;P30153;Q15172;Q15173;Q66LE6;P56211;Q86XL3;Q16537;O43768;Q15257;P78318;Q9Y5P8}  
7852 Pathogen[ P14079] interacts with 16 human partners:{Q13362;Q01105;Q14738;O43768;Q15173;Q16537;Q15172;Q86XL3;P56211;P63151;Q00005;Q66LE6;Q06190;P30153;Q9Y5P8;P78318}  
7853 Pathogen[ P03383] interacts with 11 human partners:{Q01105;Q15173;Q15257;Q00005;Q14738;P30153;Q9Y5P8;O43768;Q16537;P78318;P56211}  
7854 Pathogen[ P03410] interacts with 17 human partners:{P78318;Q15172;Q15173;Q15257;Q01105;P63151;Q06190;Q16537;O43768;Q14738;P30153;Q00005;Q13362;Q66LE6;P56211;Q86XL3;Q9Y5P8}  
7855 Pathogen[ P14075] interacts with 11 human partners:{Q9Y5P8;Q15257;Q00005;Q16537;Q01105;O43768;Q14738;Q15173;P78318;P30153;P56211}  
7856 Pathogen[ P0C206] interacts with 17 human partners:{Q06190;P78318;Q16537;P30153;Q86XL3;P56211;Q15172;Q66LE6;Q15173;P63151;Q14738;O43768;Q13362;Q00005;Q9Y5P8;Q01105;Q15257}  
7857 Pathogen[ P03363] interacts with 17 human partners:{Q9Y5P8;Q16537;Q13362;Q00005;Q14738;Q06190;Q66LE6;P63151;P78318;O43768;Q15173;Q15172;Q15257;P56211;Q01105;P30153;Q86XL3}  
7858 [Cluster 715]GO:0043997+F molecular\_function [name] histone acetyltransferase activity (H4-K12 specific) [def] "Catalysis of the reaction  
7859 Pathogen[ Q2Q067] interacts with 1 human partners:{Q92830}  
7860 Pathogen[ P0C214] interacts with 1 human partners:{Q92830}  
7861 Pathogen[ P03346] interacts with 1 human partners:{Q92830}  
7862 Pathogen[ Q85601] interacts with 1 human partners:{Q92830}  
7863 Pathogen[ P14079] interacts with 1 human partners:{Q92830}  
7864 Pathogen[ P03383] interacts with 1 human partners:{Q92830}  
7865 Pathogen[ P03410] interacts with 1 human partners:{Q92830}  
7866 Pathogen[ P14075] interacts with 1 human partners:{Q92830}  
7867 Pathogen[ P0C206] interacts with 1 human partners:{Q92830}  
7868 Pathogen[ P03363] interacts with 1 human partners:{Q92830}  
7869 [Cluster 716]GO:0030159+F molecular\_function [name] receptor signaling complex scaffold activity [def] "Functions to provide a physical support for the assembly of a multiprotein receptor signaling complex." [GOC  
7870 Pathogen[ Q2Q067] interacts with 6 human partners:{Q8WXF8;O43639;Q86UL8;P16333;P37198;Q96T76}  
7871 Pathogen[ P0C214] interacts with 5 human partners:{Q8WXF8;O43639;P37198;P16333;Q96T76}  
7872 Pathogen[ P03346] interacts with 7 human partners:{O43639;Q8WXF8;Q9BWT7;P37198;P16333;Q86UL8;Q96T76}  
7873 Pathogen[ Q85601] interacts with 5 human partners:{Q96T76;P16333;Q86UL8;O43639;Q8WXF8}  
7874 Pathogen[ P14079] interacts with 7 human partners:{P16333;P37198;Q86UL8;O43639;Q8WXF8;Q9BZX4;Q96T76}  
7875 Pathogen[ P03383] interacts with 4 human partners:{Q96T76;Q8WXF8;P37198;P16333}  
7876 Pathogen[ P03410] interacts with 7 human partners:{Q8WXF8;Q96T76;O43639;Q9BZX4;P16333;Q86UL8;Q9BWT7}  
7877 Pathogen[ P14075] interacts with 4 human partners:{P16333;P37198;Q8WXF8;Q96T76}  
7878 Pathogen[ P0C206] interacts with 6 human partners:{Q8WXF8;Q9BWT7;P16333;Q96T76;Q86UL8;O43639}  
7879 Pathogen[ P03363] interacts with 7 human partners:{O43639;Q96T76;Q9BWT7;P16333;Q86UL8;P37198;Q8WXF8}

7880 [Cluster 717]GO:0008353+F molecular\_function [name] RNA polymerase II carboxy-terminal domain kinase activity [def] "Catalysis of the reaction

7881 Pathogen[ Q2Q067] interacts with 9 human  
partners:{Q13889;P32780;Q92759;P51948;P50750;P50613;P49336;Q13888;P51946}

7882 Pathogen[ P0C214] interacts with 8 human  
partners:{P51946;P50750;P50613;P51948;P49336;P32780;Q13888;Q92759}

7883 Pathogen[ P03346] interacts with 8 human  
partners:{P49336;Q13888;Q13889;P51946;P50750;Q92759;P51948;P32780}

7884 Pathogen[ Q85601] interacts with 9 human  
partners:{P51946;P50750;Q13888;P49336;P51948;Q92759;P32780;P50613;P19447}

7885 Pathogen[ P14079] interacts with 11 human  
partners:{Q14004;P49336;P51946;Q13889;P50613;Q13888;Q92759;P32780;P19447;P50750;P51948}

7886 Pathogen[ P03383] interacts with 9 human  
partners:{Q9NYV4;P51948;Q13888;P49336;P50613;P51946;P50750;Q92759;P32780}

7887 Pathogen[ P03410] interacts with 10 human  
partners:{Q13889;P51946;P50613;P50750;P19447;P49336;P51948;Q13888;P32780;Q92759}

7888 Pathogen[ P14075] interacts with 10 human  
partners:{P49336;Q92759;P50613;P50750;Q13889;P51946;P32780;Q9NYV4;P51948;Q13888}

7889 Pathogen[ P0C206] interacts with 10 human  
partners:{P49336;P50750;P19447;Q13888;P50613;Q92759;P32780;Q13889;P51946;P51948}

7890 Pathogen[ P03363] interacts with 6 human  
partners:{Q13888;P32780;Q92759;P51946;P49336;P50750}

7891 [Cluster 718]GO:0008168+F molecular\_function [name] methyltransferase activity [def] "Catalysis of the transfer of a methyl group to an acceptor molecule." [ISBN

7892 Pathogen[ Q2Q067] interacts with 64 human  
partners:{O43463;Q96CB9;O14744;Q8IZD2;Q9NVM4;O60294;P22087;Q9H5Q4;Q96LA8;O43159;Q15910;P46087;Q9NR48;Q8WVM0;Q8NE18;Q9Y6K1;Q9Y5N5;P55345;P22061;Q9UBP6;Q92800;Q9H825;O14686;A6NHQ2;Q8TBK2;Q7L0Y3;Q6PF06;Q96DP5;Q14749;Q9UIC8;Q9NR22;O43148;Q92979;Q99873;Q9UBC3;Q9NRG4;Q8N1G2;Q15047;Q08J23;P26358;Q86Y97;Q96RS0;Q9BV86;Q96FX7;Q7L592;P04818;Q7Z5W3;Q32P41;Q9UI43;Q9BVS5;P16455;Q5T8I9;O60869;Q8TEK3;Q9UNQ2;P51580;Q9H7H0;Q9H5I1;Q86X55;Q86TU7;Q8IY81;O96028;Q8WTS6;Q9NUP7}

7893 Pathogen[ P0C214] interacts with 78 human  
partners:{Q9H825;Q96FX7;Q9HBK9;Q9H5I1;P04818;Q15047;P46087;Q7L0Y3;O43159;P0C7V9;Q6PF06;A6NJ78;Q9NVM4;Q9H7H0;A6NHQ2;P51580;P40261;P34897;Q96DP5;Q9Y6K1;Q9UNQ2;P22087;Q99873;Q15910;P55345;Q8N6Q8;O43463;Q9UET6;O43148;Q7L592;Q8NE18;Q86W50;P22061;Q14749;Q7Z5W3;Q92979;P26358;Q08J23;Q8IYL2;Q5T8I9;Q9Y5N5;Q9UI43;Q86TU7;O60294;Q8IY81;Q96RS0;Q86Y97;Q9UBP6;P16455;Q32P41;Q9NUP7;Q8IXQ9;Q8TEA1;Q9NR48;Q8N1G2;Q9HCE5;Q8WVM0;Q96BT7;Q86X55;Q9UIC8;Q6IN84;O60869;Q8WTS6;Q9NQR1;Q92800;Q9NRG4;Q96CB9;Q5HYK3;Q9BV86;Q9BVS5;Q9NR22;Q9NUV7;Q8TBK2;Q8IZD2;Q96LA8;Q9H5Q4;Q8TEK3;O96028}

7894 Pathogen[ P03346] interacts with 83 human  
partners:{Q08J23;Q9HCE5;Q96FX7;P50135;Q9Y6K1;P22061;Q9NQV7;A6NJ78;Q92979;Q99873;Q5T8I9;Q92800;Q86Y97;Q8IXQ9;Q32P41;Q9NQR1;A6NHQ2;Q9Y5N5;P51580;Q8TBK2;O43159;Q8IYL2;Q8TEK3;O14744;Q9UIC8;Q9BYW2;Q9H825;Q9UBC3;P26358;Q14749;O43463;Q9NRG4;Q9UNQ2;O60294;P0C7V9;O43148;Q96DP5;Q7Z624;Q8WTS6;Q86U44;Q9BVS5;P46087;P55345;Q9NR22;Q9NVM4;Q9BVS5;Q96RS0;Q7L592;Q8N1G2;O14717;O14686;Q9UBP6;Q15910;Q8IY81;Q96BT7;Q9NUP7;Q9H7H0;Q8WVM0;Q6IN84;Q15047;Q6PF06;Q86X55;Q96GJ1;Q5HYK3;O95050;Q9BV86;P22087;Q7L0Y3;Q13029;Q7Z5W3;Q9NR48;O60869;Q9H5I1;Q13395;Q9UI43;Q8IZD2;P40261;Q9HBK9;Q96LA8;Q96CB9;O96028;Q8NE18;Q86TU7}

7895 Pathogen[ Q85601] interacts with 68 human  
partners:{Q9H5I1;Q32P41;P46087;Q9NQV7;O43148;Q8N1G2;Q9NR22;Q86X55;Q9BVS5;Q8TBK2;Q9NQR1;Q92979;A6NHQ2;P16455;Q9NR48;Q8N6Q8;Q9UBP6;Q86TU7;Q9H825;Q9NVM4;Q7Z5W3;Q9BV86;O14686;Q9Y5N5;Q5T8I9;O43159;P26358;Q96FX7;O14744;O43463;Q9H7H0;Q8NE18;O60294;Q8TEA1;Q9UI43;Q8WTS6;Q99873;Q6PF06;Q08J23;Q8IYL2;Q9UET6;Q9Y6K1;Q96RS0;P22061;Q8IY81;Q8TEK3;Q9NUP7;Q86Y97;Q15910;P22087;Q9NRG4;Q9H5Q4;Q7L0Y3;Q8WVM0;Q9HCE5;Q15047;O60869;Q9UIC8;Q92800;Q8IXQ9;Q8IZD2;Q14749;Q96LA8;Q96CB9;Q9UBC3;P55345;O96028;Q9UNQ2}

7896 Pathogen[ P14079] interacts with 91 human  
partners:{Q6PF06;Q92979;Q96RS0;Q9NR22;O60294;Q8TBZ6;Q9UI43;Q15047;Q9HC36;Q7L592;Q96LA8;Q9NRG4;Q7L2J0;Q9Y6K1;Q9Y5N5;Q6IPR3;Q9UNQ2;Q99873;Q9NVM4;Q5JXM2;P50135;Q8N1G2;Q9NUP7;Q9BV86;Q7Z4G4;Q86TU7;Q9NRN9;Q92800;P16455;P34897;A6NHQ2;O60869;Q32P41;Q8TEA1;O60678;Q8IY81;P0C7V9;P22087;Q9HCE5;Q9H5I1;Q86U44;Q9UIC8;A6NJ78;O43148;P55345;O14744;Q9UBC3;Q14749;Q14353;Q63ZY6;Q8TEK3;Q9UET6;Q9NQR1;P46087;Q96P11;Q08J23;P26358;Q9H649;Q8IXQ9;Q9HBK9;Q6IN84;Q8N3J2;Q9Y5R4;Q96CB9;O43159;Q8N6Q8;Q9H7H0;Q96GJ1;Q8TBK2;Q9BVS5;Q9NQV7;Q15910;Q9H5Q4;Q13395;Q9H2M3;Q8IYL2;P51580;P04818;Q5HYK3;Q96FX7;Q86Y97;Q7L0Y3;Q9BV44;Q8NE18;Q7Z624;O95050;Q96DP5;Q7Z5W3;Q8WTS6;Q86W50;Q8WVM0}

7897 Pathogen[ P03383] interacts with 58 human  
partners:{Q15047;O43148;Q7L592;Q9NRG4;O43463;Q86X55;Q8IYL2;Q9UBP6;Q9H825;Q9UNQ2;Q86Y97;Q5T8I9;Q9H5Q4;Q9BVS5;Q9UI43;Q86TU7;Q7L0Y3;Q32P41;O14744;A6NJ78;P0C7V9;O43159;Q8WTS6;Q9UET6;Q99873;Q9Y6K1;Q9NR22;Q8IY81;O60294;Q6PF06;Q9Y5N5;Q08J23;Q96RS0;P22061;Q8WVM0;Q96FX7;Q8IXQ9;Q9NUP7;P46087;Q9UIC8;Q9H7H0;Q96DP5;Q15910;Q92979;Q96CB9;Q8TEK3;Q8TBK2;Q7Z5W3;O60869;P22087;Q9H5I1;Q9NQR1;P26358;Q14749;Q96LA8;Q8N1G2;Q92800;Q8NE18}

7898 Pathogen[ P03410] interacts with 99 human  
partners:{Q32P41;Q7L592;Q96DP5;A6NJ78;P22087;Q96RS0;Q9HBK9;Q96LA8;Q9H825;Q14353;Q96P11;Q14749;Q9HCE5;Q9H7H0;Q15047;Q8TBZ6;Q9HC36;Q63ZY6;Q9UBP6;Q9H2M3;Q8N3J2;Q86Y97;Q8IYT2;Q9BUU2;Q9H649;Q96CB9;Q8TEK3;Q9NRN9;Q8TEA1;Q5T8I9;Q8WTS6;A6NHQ2;O95050;Q7Z4G4;Q9NVM4;Q86X55;Q6PF06;Q8TBK2;O43159;Q9NR22;Q8IYL2;Q8IXQ9;Q92979;Q92800;P26358;Q6IPR3;Q9UNQ2;Q9NQV7;Q13395;P04818;Q6IN84;Q9NQR1;Q8N1G2;Q9H5I1;Q8NE18;P16455;Q9BV44;Q9H5Q4;Q96GJ1;Q1

5910;O60294;Q8N6Q8;Q9UBC3;Q9UIC8;Q08J23;Q7Z5W3;P46087;Q7Z624;Q8WVM0;Q96FX7;Q9UI43;O60869;Q7L2J0;Q8IY81;Q9BV86;O43148;Q5JXM2;O43463;O14744;Q86U44;P0C7V9;Q9BVS5;Q9Y6K1;Q9Y5N5;Q86W50;P22061;Q9NUP7;P50135;Q5HYK3;O95568;Q9Y5R4;Q9UET6;P51580;P34897;Q86TU7;Q99873;P55345;Q9NRG4;Q7L0Y3}

7899 Pathogen[ P14075] interacts with 61 human  
partners: {Q9H7H0;Q8N1G2;Q5HYK3;Q7L592;Q9H5Q4;Q9Y6K1;Q92979;Q9NR22;Q7L0Y3;Q6IN84;Q9UET6;Q86TU7;Q8NE18;Q15047;Q9NQR1;Q9H825;Q15910;Q92800;Q8IY81;Q8TBK2;Q7Z5W3;O60294;Q96CB9;P26358;Q9UI43;Q6PF06;Q32P41;Q9H5I1;Q8IXQ9;O14744;Q96LA8;Q99873;Q9Y5N5;Q86X55;Q9UNQ2;Q5T8I9;P22087;Q96RS0;P46087;Q9UBP6;P51580;Q9BVS5;P22061;Q9NUP7;Q8TEK3;Q8IYL2;Q86Y97;P0C7V9;O43159;O43463;Q14749;Q96FX7;O43148;Q8WVM0;O60869;Q08J23;Q9NRG4;A6NJ78;Q96DP5;Q8WTS6;Q9UIC8}

7900 Pathogen[ P0C206] interacts with 91 human  
partners: {P0C7V9;Q96RS0;Q08J23;A6NHQ2;O43159;Q9UI43;Q9Y6K1;Q9UBP6;Q96CB9;Q86W50;Q9BV86;Q9UIC8;P22061;Q99873;O14744;Q32P41;Q96GJ1;O60294;Q8NE18;Q9NRG4;Q86X55;Q9H7B4;O43463;Q96LA8;P26358;Q86TU7;Q8TBZ6;Q92800;P34897;Q7Z624;Q9NQX0;Q9UET6;O14686;Q15910;Q7Z5W3;Q8WVM0;Q9NRN9;Q5T8I9;Q6PF06;P51580;Q9UNQ2;Q9NQV7;Q8TEA1;Q8N6Q8;Q9H825;Q9HBM9;Q92979;Q96FX7;Q86Y97;Q9NVM4;Q7L0Y3;Q9BVS5;Q9NR48;Q7Z4G4;Q9NQR1;O96028;Q8WTS6;Q9NUP7;Q9H2M3;Q9H5I1;Q9HCE5;Q6IN84;Q9Y5N5;Q9NR22;P04818;O60869;Q8TEK3;P46087;Q9H5Q4;O60678;P22087;Q8TBK2;Q14749;Q9H7H0;Q15047;Q9UBC3;P55345;Q7L2J0;Q8IYL2;O43148;P16455;Q96DP5;P50135;Q8N1G2;Q8IXQ9;Q8IY81;Q5HYK3;Q6IPR3;Q7L592;A6NJ78;Q8IZD2}

7901 Pathogen[ P03363] interacts with 79 human  
partners: {Q32P41;Q9UNQ2;Q92979;Q96RS0;O14744;Q9H825;Q9H7H0;P46087;Q08J23;P51580;O95050;Q7Z624;P0C7V9;Q9H5I1;Q96LA8;O95568;Q8WVE0;Q9Y5R4;Q7L592;P50135;Q6PF06;Q9BV86;Q9NRN9;Q5T8I9;Q8N1G2;Q96BT7;Q15910;Q8TEK3;Q9Y6K1;Q9UET6;Q86U44;O15047;Q8TBK2;O14717;Q8IXQ9;Q8IYL2;Q9HBM9;Q9NVM4;Q9UBP6;Q9NRG4;Q8IY81;Q9NR22;Q8NE18;Q13395;Q14749;Q96FX7;P22087;Q7L0Y3;P26358;O43148;Q9UPS6;Q9HCE5;Q9Y5N5;O60869;Q9NR48;Q9UIC8;O96028;A6NJ78;Q8N3J2;Q8WVM0;O43159;O43463;Q7Z5W3;O60294;Q9BVS5;Q7Z4G4;Q9NQR1;Q6P2P2;Q8WTS6;Q92800;Q9UBC3;Q9UI43;Q15047;Q86Y97;Q86X55;O14686;Q99873;A6NHQ2;Q9H5Q4}

7902 [Cluster 719]GO:0031593+F molecular\_function [name] polyubiquitin binding [def]  
"Interacting selectively and non-covalently with a polymer of ubiquitin." [GOC]

7903 Pathogen[ Q2Q067] interacts with 11 human  
partners: {Q9H0F6;P54727;P35573;P54725;Q04323;Q86Y13;Q6UWZ7;Q8NFZ5;Q9NRR5;Q9NXR7;Q6NZ36}

7904 Pathogen[ P0C214] interacts with 13 human  
partners: {Q9NRR5;P46379;P54725;Q6NZ36;Q9H0F6;P35573;Q6UWZ7;Q04323;P54727;Q8NFZ5;Q86Y13;Q9NXR7;P55072}

7905 Pathogen[ P03346] interacts with 16 human  
partners: {Q9NS91;Q8NFZ5;Q9NRR5;P25686;P35573;Q9H0F6;P55072;Q6NZ36;Q9NXR7;P46379;P54727;Q04323;P54725;Q6UWZ7;Q6FIF0;Q86Y13}

7906 Pathogen[ Q85601] interacts with 13 human  
partners: {Q6NZ36;Q9NRR5;P46379;Q9H0F6;P35573;P54727;Q04323;Q8NFZ5;P54725;Q6UWZ7;Q9NXR7;Q86Y13;Q9NS91}

7907 Pathogen[ P14079] interacts with 11 human  
partners: {Q96KP6;Q15018;Q6UWZ7;Q6NZ36;Q9NRR5;Q9NXR7;Q8NFZ5;P35573;Q9H0F6;P54727;Q04323}

7908 Pathogen[ P03383] interacts with 9 human  
partners: {Q9H0F6;Q04323;P35573;P54725;P54727;Q9NRR5;Q8NFZ5;Q9NXR7;Q6UWZ7}

7909 Pathogen[ P03410] interacts with 13 human  
partners: {Q9NXR7;Q8NFZ5;Q9NRR5;P35573;P25686;Q15018;Q04323;P54725;Q96KP6;Q6UWZ7;Q6NZ36;Q9H0F6;P54727}

7910 Pathogen[ P14075] interacts with 9 human  
partners: {Q9NXR7;Q04323;Q8NFZ5;Q6UWZ7;P54727;P35573;Q9NRR5;P54725;Q9H0F6}

7911 Pathogen[ P0C206] interacts with 15 human  
partners: {P54725;Q04323;Q6NZ36;Q8NFZ5;Q9NS91;Q9NRR5;P54727;P55072;Q9H0F6;Q6UWZ7;Q15018;P46379;Q86Y13;Q9NXR7;P35573}

7912 Pathogen[ P03363] interacts with 14 human  
partners: {P46379;Q04323;P54727;Q86Y13;Q6UWZ7;Q6NZ36;Q9NRR5;P54725;Q6FIF0;Q9NXR7;Q9H0F6;Q8NFZ5;P35573;Q9NS91}

7913 [Cluster 720]GO:0004826+F molecular\_function [name] phenylalanine-tRNA ligase activity [def] "Catalysis of the reaction  
7914 Pathogen[ Q2Q067] interacts with 4 human partners: {O95363;Q8N1G4;Q9Y285;Q9NSD9}  
7915 Pathogen[ P0C214] interacts with 3 human partners: {O95363;Q9Y285;Q9NSD9}  
7916 Pathogen[ P03346] interacts with 2 human partners: {Q8N1G4;Q9Y285}  
7917 Pathogen[ Q85601] interacts with 3 human partners: {Q9NSD9;Q9Y285;O95363}  
7918 Pathogen[ P14079] interacts with 5 human  
partners: {Q9Y285;Q9BRP7;O95363;Q9NSD9;Q8N1G4}  
7919 Pathogen[ P03383] interacts with 3 human partners: {Q9Y285;O95363;Q9NSD9}  
7920 Pathogen[ P03410] interacts with 5 human  
partners: {Q9BRP7;Q9Y285;Q9NSD9;Q8N1G4;O95363}  
7921 Pathogen[ P14075] interacts with 3 human partners: {Q9NSD9;O95363;Q9Y285}  
7922 Pathogen[ P0C206] interacts with 5 human  
partners: {O95363;Q9BRP7;Q9Y285;Q9NSD9;Q8N1G4}  
7923 Pathogen[ P03363] interacts with 4 human partners: {Q9NSD9;Q8N1G4;O95363;Q9Y285}

7924 [Cluster 721]GO:0002055+F molecular\_function [name] adenine binding [def]  
"Interacting selectively and non-covalently with adenine, a purine base." [GOC]

7925 Pathogen[ Q2Q067] interacts with 1 human partners: {P07741}

7926 Pathogen[ P0C214] interacts with 1 human partners:{P07741}

7927 Pathogen[ P03346] interacts with 1 human partners:{P07741}

7928 Pathogen[ Q85601] interacts with 1 human partners:{P07741}

7929 Pathogen[ P14079] interacts with 1 human partners:{P07741}

7930 Pathogen[ P03383] interacts with 1 human partners:{P07741}

7931 Pathogen[ P03410] interacts with 1 human partners:{P07741}

7932 Pathogen[ P14075] interacts with 1 human partners:{P07741}

7933 Pathogen[ P0C206] interacts with 1 human partners:{P07741}

7934 Pathogen[ P03363] interacts with 1 human partners:{P07741}

7935 [Cluster 722]GO:0016624+F molecular\_function [name] oxidoreductase activity, acting on the aldehyde or oxo group of donors, disulfide as acceptor [def] "Catalysis of an oxidation-reduction (redox) reaction in which an aldehyde or ketone (oxo) group acts as a hydrogen or electron donor and reduces a disulfide." [GOC

7936 Pathogen[ Q2Q067] interacts with 1 human partners:{Q9ULD0}

7937 Pathogen[ P0C214] interacts with 2 human partners:{P12694;Q9ULD0}

7938 Pathogen[ P03346] interacts with 1 human partners:{Q9ULD0}

7939 Pathogen[ Q85601] interacts with 1 human partners:{Q9ULD0}

7940 Pathogen[ P14079] interacts with 1 human partners:{Q9ULD0}

7941 Pathogen[ P03383] interacts with 1 human partners:{Q9ULD0}

7942 Pathogen[ P03410] interacts with 2 human partners:{Q9ULD0;P12694}

7943 Pathogen[ P14075] interacts with 1 human partners:{Q9ULD0}

7944 Pathogen[ P0C206] interacts with 1 human partners:{Q9ULD0}

7945 Pathogen[ P03363] interacts with 1 human partners:{Q9ULD0}

7946 [Cluster 723]GO:0008138+F molecular\_function [name] protein tyrosine/serine/threonine phosphatase activity [def] "Catalysis of the reactions

7947 Pathogen[ Q2Q067] interacts with 4 human partners:{Q9UNH5;Q9BV47;Q99504;Q16829}

7948 Pathogen[ P0C214] interacts with 5 human partners:{Q9BV47;Q95278;Q99504;Q16829;Q9UNH5}

7949 Pathogen[ P03346] interacts with 6 human partners:{Q9BV47;Q16667;Q16829;Q95278;Q99504;Q9UNH5}

7950 Pathogen[ Q85601] interacts with 5 human partners:{Q16829;Q99504;Q95278;Q9BV47;Q9UNH5}

7951 Pathogen[ P14079] interacts with 4 human partners:{Q16829;Q9BV47;Q99504;Q9UNH5}

7952 Pathogen[ P03383] interacts with 2 human partners:{Q99504;Q9UNH5}

7953 Pathogen[ P03410] interacts with 4 human partners:{Q9UNH5;Q16829;Q99504;Q9BV47}

7954 Pathogen[ P14075] interacts with 2 human partners:{Q99504;Q9UNH5}

7955 Pathogen[ P0C206] interacts with 5 human partners:{Q99504;Q9BV47;Q16829;Q9UNH5;Q95278}

7956 Pathogen[ P03363] interacts with 5 human partners:{Q9UNH5;Q16667;Q16829;Q99504;Q9BV47}

7957 [Cluster 724]GO:0030618+F molecular\_function [name] transforming growth factor beta receptor, pathway-specific cytoplasmic mediator activity [def] "A TGF-beta cytoplasmic mediator that is phosphorylated by a TGFbeta receptor and complexes with a common-partner mediator. The- heterocomplex translocates to the nucleus to regulate transcription." [GOC

7958 Pathogen[ Q2Q067] interacts with 5 human partners:{P84022;O15198;Q15796;Q99717;Q15797}

7959 Pathogen[ P0C214] interacts with 5 human partners:{O15198;P84022;Q15796;Q99717;Q15797}

7960 Pathogen[ P03346] interacts with 5 human partners:{Q15797;Q15796;Q99717;O15198;P84022}

7961 Pathogen[ Q85601] interacts with 5 human partners:{O15198;Q15797;Q99717;P84022;Q15796}

7962 Pathogen[ P14079] interacts with 2 human partners:{O15198;Q15797}

7963 Pathogen[ P03383] interacts with 5 human partners:{O15198;Q15797;P84022;Q99717;Q15796}

7964 Pathogen[ P03410] interacts with 5 human partners:{P84022;Q99717;O15198;Q15797;Q15796}

7965 Pathogen[ P14075] interacts with 4 human partners:{Q99717;Q15796;O15198;P84022}

7966 Pathogen[ P0C206] interacts with 5 human partners:{P84022;Q99717;Q15796;Q15797;O15198}

7967 Pathogen[ P03363] interacts with 5 human partners:{Q15797;Q15796;P84022;Q99717;O15198}

7968 [Cluster 725]GO:0030235+F molecular\_function [name] nitric-oxide synthase regulator activity [def] "Modulates the activity of nitric oxide synthase." [GOC

7969 Pathogen[ Q2Q067] interacts with 3 human partners:{P31749;P08238;P07900}

7970 Pathogen[ P0C214] interacts with 1 human partners:{P31749}

7971 Pathogen[ P03346] interacts with 3 human partners:{P07900;P31749;P08238}

7972 Pathogen[ Q85601] interacts with 3 human partners:{P31749;P08238;P07900}

7973 Pathogen[ P14079] interacts with 2 human partners:{P08238;P07900}

7974 Pathogen[ P03383] interacts with 3 human partners:{P31749;P07900;P08238}

7975 Pathogen[ P03410] interacts with 3 human partners:{P08238;P31749;P07900}

7976 Pathogen[ P14075] interacts with 3 human partners:{P08238;P07900;P31749}

7977 Pathogen[ P0C206] interacts with 3 human partners:{P31749;P08238;P07900}

7978 Pathogen[ P03363] interacts with 3 human partners:{P07900;P31749;P08238}

7979 [Cluster 726]GO:0005086+F molecular\_function [name] ARF guanyl-nucleotide exchange factor activity [def] "Stimulates the exchange of guanyl nucleotides associated with the

GTPase ARF. Under normal cellular physiological conditions, the concentration of GTP is higher than that of GDP, favoring the replacement of GDP by GTP in association with the GTPase." [GOC

7980 Pathogen[ Q2Q067] interacts with 1 human partners:{Q9Y6D6}

7981 Pathogen[ P0C214] interacts with 1 human partners:{Q9Y6D6}

7982 Pathogen[ P03346] interacts with 7 human partners:{Q5JU85;Q15438;Q9Y6D5;Q9Y6D6;Q7Z3U7;Q6DN90;Q9UPP2}

7983 Pathogen[ Q85601] interacts with 1 human partners:{Q9Y6D6}

7984 Pathogen[ P14079] interacts with 5 human partners:{Q9UPP2;Q9Y6D5;Q9Y6D6;Q6DN90;Q15438}

7985 Pathogen[ P03383] interacts with 1 human partners:{Q9Y6D6}

7986 Pathogen[ P03410] interacts with 5 human partners:{Q9UPP2;Q9Y6D6;Q9Y6D5;Q15438;Q7Z3U7}

7987 Pathogen[ P14075] interacts with 1 human partners:{Q9Y6D6}

7988 Pathogen[ P0C206] interacts with 3 human partners:{Q9Y6D6;Q9Y6D5;Q9UPP2}

7989 Pathogen[ P03363] interacts with 5 human partners:{Q15438;Q9UPP2;Q5JU85;Q6DN90;Q9Y6D6}

7990 [Cluster 727]GO:0031624+F molecular\_function [name] ubiquitin conjugating enzyme binding [def] "Interacting selectively and non-covalently with a ubiquitin conjugating enzyme, any of the E2 proteins." [GOC

7991 Pathogen[ Q2Q067] interacts with 1 human partners:{Q9UBW7}

7992 Pathogen[ P0C214] interacts with 1 human partners:{Q9UBW7}

7993 Pathogen[ P03346] interacts with 2 human partners:{P58012;Q9UBW7}

7994 Pathogen[ Q85601] interacts with 1 human partners:{Q9UBW7}

7995 Pathogen[ P14079] interacts with 1 human partners:{Q9UBW7}

7996 Pathogen[ P03383] interacts with 1 human partners:{Q9UBW7}

7997 Pathogen[ P03410] interacts with 1 human partners:{Q9UBW7}

7998 Pathogen[ P14075] interacts with 1 human partners:{Q9UBW7}

7999 Pathogen[ P0C206] interacts with 1 human partners:{Q9UBW7}

8000 Pathogen[ P03363] interacts with 1 human partners:{Q9UBW7}

8001 [Cluster 728]GO:0034056+F molecular\_function [name] estrogen response element binding [def] "Interacting selectively and non-covalently with the estrogen response element (ERE), a conserved sequence found in the promoters of genes whose expression is regulated in response to estrogen." [GOC

8002 Pathogen[ Q2Q067] interacts with 2 human partners:{O15405;O15164}

8003 Pathogen[ P0C214] interacts with 2 human partners:{O15164;O15405}

8004 Pathogen[ P03346] interacts with 2 human partners:{O15164;O15405}

8005 Pathogen[ Q85601] interacts with 2 human partners:{O15164;O15405}

8006 Pathogen[ P14079] interacts with 2 human partners:{O15164;O15405}

8007 Pathogen[ P03383] interacts with 1 human partners:{O15405}

8008 Pathogen[ P03410] interacts with 1 human partners:{O15405}

8009 Pathogen[ P14075] interacts with 1 human partners:{O15405}

8010 Pathogen[ P0C206] interacts with 2 human partners:{O15164;O15405}

8011 Pathogen[ P03363] interacts with 1 human partners:{O15405}

8012 [Cluster 729]GO:0005344+F molecular\_function [name] oxygen transporter activity [def] "Enables the directed movement of oxygen into, out of or within a cell, or between cells." [GOC

8013 Pathogen[ Q2Q067] interacts with 2 human partners:{P68871;P69905}

8014 Pathogen[ P0C214] interacts with 7 human partners:{P02042;P69905;Q9NPG2;P68871;P69892;P02100;P69891}

8015 Pathogen[ P03346] interacts with 4 human partners:{P02100;Q9NPG2;P69905;P68871}

8016 Pathogen[ Q85601] interacts with 7 human partners:{P69905;P02042;P02100;P69892;P68871;Q9NPG2;P69891}

8017 Pathogen[ P14079] interacts with 12 human partners:{Q8WWM9;P02042;Q9NPG2;P69891;P02100;P09105;P69905;P02008;P68871;Q6B0K9;P02144;P69892}

8018 Pathogen[ P03383] interacts with 2 human partners:{P69905;P68871}

8019 Pathogen[ P03410] interacts with 12 human partners:{Q6B0K9;P02008;P02144;P02100;P09105;Q8WWM9;P68871;P02042;Q9NPG2;P69892;P69905;P69891}

8020 Pathogen[ P14075] interacts with 2 human partners:{P68871;P69905}

8021 Pathogen[ P0C206] interacts with 11 human partners:{P68871;Q6B0K9;P02100;P69892;P02008;P69891;Q9NPG2;P69905;P09105;P02042;Q8WWM9}

8022 Pathogen[ P03363] interacts with 2 human partners:{P69905;P68871}

8023 [Cluster 730]GO:0043916+F molecular\_function [name] DNA-7-methylguanine glycosylase activity [def] "Catalysis of the reaction

8024 Pathogen[ Q2Q067] interacts with 1 human partners:{P29372}

8025 Pathogen[ P0C214] interacts with 1 human partners:{P29372}

8026 Pathogen[ P03346] interacts with 1 human partners:{P29372}

8027 Pathogen[ Q85601] interacts with 1 human partners:{P29372}

8028 Pathogen[ P14079] interacts with 1 human partners:{P29372}

8029 Pathogen[ P03383] interacts with 1 human partners:{P29372}

8030 Pathogen[ P03410] interacts with 1 human partners:{P29372}

8031 Pathogen[ P14075] interacts with 1 human partners:{P29372}

8032 Pathogen[ P0C206] interacts with 1 human partners:{P29372}

8033 Pathogen[ P03363] interacts with 1 human partners:{P29372}  
8034 [Cluster 731]GO:0016888+F molecular\_function [name] endodeoxyribonuclease activity,  
producing 5'-phosphomonoesters [def] "Catalysis of the hydrolysis of ester linkages  
within deoxyribonucleic acids by creating internal breaks to yield 5'-phosphomonoesters."  
[GOC  
8035 Pathogen[ Q2Q067] interacts with 1 human partners:{Q93075}  
8036 Pathogen[ P0C214] interacts with 3 human partners:{Q6P1N9;Q17R31;Q93075}  
8037 Pathogen[ P03346] interacts with 4 human partners:{Q13609;Q17R31;P24855;Q93075}  
8038 Pathogen[ Q85601] interacts with 2 human partners:{Q17R31;Q93075}  
8039 Pathogen[ P14079] interacts with 7 human  
partners:{Q6P1N9;Q13609;P49184;Q8N8Q3;P24855;Q93075;Q17R31}  
8040 Pathogen[ P03383] interacts with 1 human partners:{Q93075}  
8041 Pathogen[ P03410] interacts with 6 human  
partners:{Q17R31;P49184;Q13609;Q6P1N9;Q93075;P24855}  
8042 Pathogen[ P14075] interacts with 1 human partners:{Q93075}  
8043 Pathogen[ P0C206] interacts with 5 human  
partners:{Q17R31;P24855;Q93075;Q6P1N9;Q13609}  
8044 Pathogen[ P03363] interacts with 3 human partners:{Q93075;Q13609;P24855}  
8045 [Cluster 732]GO:0033613+F molecular\_function [name] activating transcription factor  
binding [def] "Interacting selectively and non-covalently with an activating  
transcription factor, any protein whose activity is required to initiate or upregulate  
transcription." [GOC  
8046 Pathogen[ Q2Q067] interacts with 10 human  
partners:{P56524;Q16594;Q04206;Q13547;Q14814;Q8WUI4;Q15796;O75475;Q02078;P33076}  
8047 Pathogen[ P0C214] interacts with 10 human  
partners:{Q13547;P33076;P56524;Q04206;Q16594;Q02078;Q14814;Q15796;O75475;Q8WUI4}  
8048 Pathogen[ P03346] interacts with 10 human  
partners:{Q02078;Q14814;Q15796;O75475;P56524;Q04206;P33076;Q13547;Q8WUI4;Q16594}  
8049 Pathogen[ Q85601] interacts with 10 human  
partners:{Q02078;P33076;Q14814;Q16594;Q04206;P56524;Q13547;Q8WUI4;O75475;Q15796}  
8050 Pathogen[ P14079] interacts with 8 human  
partners:{P33076;Q02078;Q06413;Q16594;Q8WUI4;O75475;Q14814;P56524}  
8051 Pathogen[ P03383] interacts with 10 human  
partners:{P33076;Q14814;Q16594;O75475;Q13547;Q15796;P56524;Q04206;Q8WUI4;Q02078}  
8052 Pathogen[ P03410] interacts with 10 human  
partners:{Q04206;Q14814;Q8WUI4;P56524;Q16594;Q13547;Q02078;O75475;Q15796;P33076}  
8053 Pathogen[ P14075] interacts with 10 human  
partners:{Q04206;O75475;P56524;P33076;Q15796;Q13547;Q16594;Q02078;Q8WUI4;Q14814}  
8054 Pathogen[ P0C206] interacts with 10 human  
partners:{Q02078;Q13547;Q15796;P33076;O75475;Q8WUI4;Q04206;Q14814;P56524;Q16594}  
8055 Pathogen[ P03363] interacts with 9 human  
partners:{Q04206;O75475;Q14814;Q15796;Q13547;P33076;Q8WUI4;Q16594;Q02078}  
8056 [Cluster 733]GO:0070411+F molecular\_function [name] I-SMAD binding [def]  
"Interacting selectively and non-covalently with an inhibitory SMAD signaling protein."  
[GOC  
8057 Pathogen[ Q2Q067] interacts with 5 human  
partners:{Q13485;O15105;O43541;Q15796;Q15797}  
8058 Pathogen[ P0C214] interacts with 6 human  
partners:{Q9HCE7;Q13485;O15105;Q15796;O43541;Q15797}  
8059 Pathogen[ P03346] interacts with 5 human  
partners:{Q15797;Q15796;O15105;O43541;Q13485}  
8060 Pathogen[ Q85601] interacts with 5 human  
partners:{O43541;Q15797;O15105;Q13485;Q15796}  
8061 Pathogen[ P14079] interacts with 4 human partners:{Q15797;O43294;O43541;O15105}  
8062 Pathogen[ P03383] interacts with 5 human  
partners:{Q13485;Q15797;O15105;O43541;Q15796}  
8063 Pathogen[ P03410] interacts with 6 human  
partners:{O43294;Q15797;Q13485;O43541;O15105;Q15796}  
8064 Pathogen[ P14075] interacts with 4 human partners:{O43541;Q15796;Q13485;O15105}  
8065 Pathogen[ P0C206] interacts with 6 human  
partners:{O43541;Q15796;O15105;O43294;Q13485;Q15797}  
8066 Pathogen[ P03363] interacts with 5 human  
partners:{O15105;Q15797;O43541;Q15796;Q13485}  
8067 [Cluster 734]GO:0070530+F molecular\_function [name] K63-linked polyubiquitin binding  
[def] "Interacting selectively and non-covalently and non-covalently with a polymer of  
ubiquitin formed by linkages between lysine residues at position 63 of the ubiquitin  
monomers." [GOC  
8068 Pathogen[ Q2Q067] interacts with 5 human  
partners:{Q9NYJ8;Q9H040;Q96RL1;Q13501;Q6NZ36}  
8069 Pathogen[ P0C214] interacts with 6 human  
partners:{Q9H040;Q6NZ36;Q13501;Q96RL1;Q8IYW5;Q9NYJ8}  
8070 Pathogen[ P03346] interacts with 6 human  
partners:{Q96RL1;Q6NZ36;Q9NYJ8;Q9H040;Q8IYW5;Q13501}  
8071 Pathogen[ Q85601] interacts with 6 human  
partners:{Q96RL1;Q9NYJ8;Q9H040;Q6NZ36;Q8IYW5;Q13501}  
8072 Pathogen[ P14079] interacts with 4 human partners:{Q9H040;Q6NZ36;Q96RL1;Q13501}



8073 Pathogen[ P03383] interacts with 4 human partners:{Q96RL1;Q9H040;Q13501;Q9NYJ8}

8074 Pathogen[ P03410] interacts with 5 human partners:{Q96RL1;Q9H040;Q13501;Q9NYJ8;Q6NZ36}

8075 Pathogen[ P14075] interacts with 4 human partners:{Q9H040;Q96RL1;Q13501;Q9NYJ8}

8076 Pathogen[ P0C206] interacts with 6 human partners:{Q13501;Q8IYW5;Q6NZ36;Q9NYJ8;Q96RL1;Q9H040}

8077 Pathogen[ P03363] interacts with 5 human partners:{Q96RL1;Q9NYJ8;Q8IYW5;Q6NZ36;Q9H040}

8078 [Cluster 735]GO:0016876+F molecular\_function [name] ligase activity, forming aminoacyl-tRNA and related compounds [def] "Catalysis of the joining of an amino acid and a nucleic acid (usually tRNA) or poly(ribitol phosphate), with the concomitant hydrolysis of the diphosphate bond in ATP or a similar triphosphate. The reaction forms an aminoacyl-tRNA or a related compound." [EC

8079 Pathogen[ Q2Q067] interacts with 2 human partners:{P07814;Q9BW92}

8080 Pathogen[ P0C214] interacts with 9 human partners:{P07814;Q5JTZ9;Q9BTE6;Q5JPH6;P26639;A2RTX5;P49588;P47897;Q9BW92}

8081 Pathogen[ P03346] interacts with 1 human partners:{P07814}

8082 Pathogen[ Q85601] interacts with 5 human partners:{P26639;P07814;Q9BW92;A2RTX5;P47897}

8083 Pathogen[ P14079] interacts with 8 human partners:{P26639;Q9BTE6;Q9BW92;P47897;A2RTX5;Q5JPH6;P49588;P07814}

8084 Pathogen[ P03383] interacts with 5 human partners:{Q5JPH6;Q9BTE6;A2RTX5;P07814;Q9BW92}

8085 Pathogen[ P03410] interacts with 8 human partners:{Q9BTE6;Q9BW92;P49588;P47897;P26639;Q5JPH6;P07814;A2RTX5}

8086 Pathogen[ P14075] interacts with 6 human partners:{Q9BTE6;A2RTX5;Q9BW92;P26639;Q5JPH6;P07814}

8087 Pathogen[ P0C206] interacts with 7 human partners:{P07814;A2RTX5;Q5JPH6;Q9BTE6;Q9BW92;P26639;P47897}

8088 Pathogen[ P03363] interacts with 6 human partners:{A2RTX5;P47897;Q5JPH6;Q9BTE6;Q9BW92;P07814}

8089 [Cluster 736]GO:0070612+F molecular\_function [name] histone methyltransferase activity (H2A-R3 specific) [def] "Catalysis of the reaction

8090 Pathogen[ Q2Q067] interacts with 1 human partners:{Q96LA8}

8091 Pathogen[ P0C214] interacts with 1 human partners:{Q96LA8}

8092 Pathogen[ P03346] interacts with 1 human partners:{Q96LA8}

8093 Pathogen[ Q85601] interacts with 1 human partners:{Q96LA8}

8094 Pathogen[ P14079] interacts with 1 human partners:{Q96LA8}

8095 Pathogen[ P03383] interacts with 1 human partners:{Q96LA8}

8096 Pathogen[ P03410] interacts with 1 human partners:{Q96LA8}

8097 Pathogen[ P14075] interacts with 1 human partners:{Q96LA8}

8098 Pathogen[ P0C206] interacts with 1 human partners:{Q96LA8}

8099 Pathogen[ P03363] interacts with 1 human partners:{Q96LA8}

8100 [Cluster 737]GO:0003684+F molecular\_function [name] damaged DNA binding [def] "Interacting selectively and non-covalently with damaged DNA." [GOC

8101 Pathogen[ Q2Q067] interacts with 28 human partners:{Q9Y253;Q12888;Q92889;Q13889;Q99708;P18887;Q7Z2E3;Q969S2;Q9UNA4;O15350;P54727;Q9UBZ9;Q16531;Q06609;P54725;P27695;P06746;P29372;O60934;O15527;P39748;P23396;Q13569;Q01831;Q92466;O15287;O60671;P23025}

8102 Pathogen[ P0C214] interacts with 27 human partners:{O15287;P27695;Q06609;Q92889;P06746;P23396;P23025;O15350;Q99708;Q9UBZ9;P54725;P20585;P18887;Q9UNA4;Q7Z2E3;Q49AN0;P54727;O60671;Q01831;P39748;Q12888;P29372;O15527;Q13569;Q92466;Q16531;Q9Y253}

8103 Pathogen[ P03346] interacts with 33 human partners:{Q12888;Q9NS91;Q9Y253;Q06609;Q9UNA4;P07992;Q9UBZ9;Q99708;Q49AN0;Q16531;O15350;Q6ZNB5;Q13889;Q969S2;O15287;Q01831;P20585;P29372;P54727;O60934;P18887;P23396;Q92889;Q13569;P54725;Q7Z2E3;P23025;O60671;P27695;P39748;Q92466;O15527;P06746}

8104 Pathogen[ Q85601] interacts with 33 human partners:{O15527;P23025;Q01831;P18887;Q969S2;Q16531;P23396;Q99708;Q49AN0;Q96FI4;Q12888;Q92889;P54727;P54725;P20585;Q9UBZ9;Q9UBT6;Q13569;O60671;O15287;Q7Z2E3;P06746;O15350;P39748;Q92466;P19447;Q06609;Q9Y253;Q9UNA4;P27695;Q9NS91;P29372;O60934}

8105 Pathogen[ P14079] interacts with 36 human partners:{O60671;O43196;P20585;Q8TAT5;P23396;Q9UNA4;Q49AN0;Q16531;Q6ZNB5;P29372;Q9UBZ9;Q13889;O60934;O15527;P23025;O15350;Q99708;P18887;Q969S2;Q96FI4;Q92889;P27695;P06746;Q9Y253;Q92466;Q01831;P52701;Q13569;Q12888;Q06609;P54727;Q7Z2E3;Q9UBT6;P07992;P19447;P39748}

8106 Pathogen[ P03383] interacts with 22 human partners:{Q7Z2E3;Q9Y253;Q12888;Q06609;O60671;P06746;O15527;Q01831;P29372;O15287;P23025;P54725;O15350;P54727;Q9UBZ9;Q13569;Q99708;P18887;P27695;Q16531;Q92466;P23396}

8107 Pathogen[ P03410] interacts with 38 human partners:{P23025;P18887;Q96FI4;Q99708;P20585;Q13889;P07992;Q9UBT6;Q9UNA4;P23396;P06746;Q92889;P39748;P54725;Q8TAT5;Q92466;Q01831;Q7Z2E3;Q9UBZ9;P52701;O15287;O15527;Q9Y253;Q13569;P19447;O60671;Q49AN0;Q16531;Q12888;O43196;Q6ZNB5;P27695;O15350;Q969S2;P29372;O60934;Q06609;P54727}

8108 Pathogen[ P14075] interacts with 23 human partners:{Q7Z2E3;Q9UBZ9;P23025;P27695;Q01831;O15527;P06746;O60671;Q9Y253;Q13889;O15350}

0;P54727;P23396;Q16531;O15287;P54725;Q12888;Q13569;Q92466;P29372;Q99708;Q06609;P18887  
}  
8109 Pathogen[ P0C206] interacts with 38 human  
partners:{P27695;Q9Y253;Q6ZNB5;P54725;Q99708;Q9UBT6;O15527;Q9UNA4;P52701;O60934;P0674  
6;Q9NS91;Q16531;P07992;P19447;Q13569;Q12888;O15287;P23396;Q92889;Q8TAT5;Q01831;P54727  
;Q96FI4;Q9UBZ9;Q969S2;Q13889;O60671;O15350;Q06609;P20585;Q92466;P39748;Q49AN0;Q7Z2E3;  
P29372;P23025;P18887}  
8110 Pathogen[ P03363] interacts with 28 human  
partners:{P18887;P23396;O15287;O15527;P54727;Q01831;Q16531;Q9Y253;O60671;Q96FI4;Q9288  
9;P23025;P29372;Q99708;P20585;Q49AN0;Q7Z2E3;P06746;Q6ZNB5;P54725;Q92466;Q13569;Q06609  
;Q9UNA4;Q9UBZ9;Q9NS91;Q969S2;Q12888}  
8111 [Cluster 738]GO:0016785+F molecular\_function [name] transferase activity, transferring  
selenium-containing groups [def] "Catalysis of the transfer of a selenium-containing  
group from one compound (donor) to another (acceptor)." [GOC  
8112 Pathogen[ Q2Q067] interacts with 1 human partners:{Q9HD40}  
8113 Pathogen[ P0C214] interacts with 1 human partners:{Q9HD40}  
8114 Pathogen[ P03346] interacts with 1 human partners:{Q9HD40}  
8115 Pathogen[ Q85601] interacts with 1 human partners:{Q9HD40}  
8116 Pathogen[ P14079] interacts with 1 human partners:{Q9HD40}  
8117 Pathogen[ P03383] interacts with 1 human partners:{Q9HD40}  
8118 Pathogen[ P03410] interacts with 1 human partners:{Q9HD40}  
8119 Pathogen[ P14075] interacts with 1 human partners:{Q9HD40}  
8120 Pathogen[ P0C206] interacts with 1 human partners:{Q9HD40}  
8121 Pathogen[ P03363] interacts with 1 human partners:{Q9HD40}  
8122 [Cluster 739]GO:0070698+F molecular\_function [name] type I activin receptor binding  
[def] "Interacting selectively and non-covalently with a type I activin receptor." [GOC  
8123 Pathogen[ Q2Q067] interacts with 1 human partners:{O43541}  
8124 Pathogen[ P0C214] interacts with 1 human partners:{O43541}  
8125 Pathogen[ P03346] interacts with 1 human partners:{O43541}  
8126 Pathogen[ Q85601] interacts with 1 human partners:{O43541}  
8127 Pathogen[ P14079] interacts with 1 human partners:{O43541}  
8128 Pathogen[ P03383] interacts with 1 human partners:{O43541}  
8129 Pathogen[ P03410] interacts with 1 human partners:{O43541}  
8130 Pathogen[ P14075] interacts with 1 human partners:{O43541}  
8131 Pathogen[ P0C206] interacts with 1 human partners:{O43541}  
8132 Pathogen[ P03363] interacts with 1 human partners:{O43541}  
8133 [Cluster 740]GO:0008266+F molecular\_function [name] poly(U) RNA binding [def]  
"Interacting selectively and non-covalently with a sequence of uracil residues in an RNA  
molecule." [GOC  
8134 Pathogen[ Q2Q067] interacts with 6 human  
partners:{Q8TCS8;Q5VWX1;Q86TB9;P31943;P54253;Q13310}  
8135 Pathogen[ P0C214] interacts with 6 human  
partners:{Q13310;P54253;Q8TCS8;Q86TB9;P31943;Q5VWX1}  
8136 Pathogen[ P03346] interacts with 6 human  
partners:{P31943;Q86TB9;Q8TCS8;Q5VWX1;Q13310;P54253}  
8137 Pathogen[ Q85601] interacts with 6 human  
partners:{Q13310;Q5VWX1;Q86TB9;Q8TCS8;P54253;P31943}  
8138 Pathogen[ P14079] interacts with 6 human  
partners:{Q86TB9;Q13310;P54253;Q5VWX1;P31943;Q8TCS8}  
8139 Pathogen[ P03383] interacts with 6 human  
partners:{Q8TCS8;P31943;Q5VWX1;Q86TB9;P54253;Q13310}  
8140 Pathogen[ P03410] interacts with 6 human  
partners:{Q8TCS8;Q5VWX1;P31943;Q86TB9;P54253;Q13310}  
8141 Pathogen[ P14075] interacts with 6 human  
partners:{Q5VWX1;P54253;P31943;Q13310;Q86TB9;Q8TCS8}  
8142 Pathogen[ P0C206] interacts with 6 human  
partners:{Q86TB9;Q8TCS8;Q13310;Q5VWX1;P31943;P54253}  
8143 Pathogen[ P03363] interacts with 6 human  
partners:{O43347;P31943;Q5VWX1;Q13310;P54253;Q86TB9}  
8144 [Cluster 741]GO:0001085+F molecular\_function [name] RNA polymerase II transcription  
factor binding [def] "Interacting selectively and non-covalently with an RNA polymerase  
II transcription factor, any protein required to initiate or regulate transcription by  
RNA polymerase II." [GOC  
8145 Pathogen[ Q2Q067] interacts with 14 human  
partners:{Q5VTD9;O94776;P15976;Q96T58;Q86UE4;O95644;Q08211;Q15327;Q8IX07;P47928;Q9279  
3;Q02078;P17947;Q14693}  
8146 Pathogen[ P0C214] interacts with 14 human  
partners:{Q15327;Q96T58;Q92793;P17947;O00308;Q86UE4;Q5VTD9;Q02078;P47928;O94776;Q8IX0  
7;Q08211;O95644;Q14693}  
8147 Pathogen[ P03346] interacts with 17 human  
partners:{Q02078;Q86UE4;Q8IYA7;Q15327;O94776;Q08211;O95644;P17542;P15976;Q8IX07;Q5VTD  
9;Q96T58;P17947;Q92793;P47928;O00308;Q14693}  
8148 Pathogen[ Q85601] interacts with 14 human  
partners:{Q02078;P15976;O94776;O95644;Q08211;Q15327;Q8IX07;Q86UE4;Q96T58;Q5VTD9;P1794  
7;Q92793;P47928;Q14693}  
8149 Pathogen[ P14079] interacts with 13 human

partners:{Q02078;Q14693;Q92793;O95644;P15976;Q08211;Q5VTD9;Q8IX07;Q15327;Q86UE4;O94776;P47928;Q96T58}

8150 Pathogen[ P03383] interacts with 10 human  
partners:{Q86UE4;O94776;O95644;Q96T58;Q15327;P47928;P17947;Q92793;Q02078;Q14693}

8151 Pathogen[ P03410] interacts with 14 human  
partners:{P17947;Q15327;Q96T58;Q14693;O95644;Q92793;Q8IX07;Q86UE4;P47928;O94776;Q02078;Q5VTD9;Q08211;P15976}

8152 Pathogen[ P14075] interacts with 10 human  
partners:{Q86UE4;Q96T58;Q15327;O94776;P47928;P17947;Q02078;Q92793;O95644;Q14693}

8153 Pathogen[ P0C206] interacts with 15 human  
partners:{Q02078;O00308;Q08211;Q15327;O94776;P15976;Q92793;P17947;Q96T58;Q8IX07;Q86UE4;Q5VTD9;O95644;P47928;Q14693}

8154 Pathogen[ P03363] interacts with 13 human  
partners:{Q5VTD9;Q96T58;P17947;Q86UE4;Q15327;P47928;Q92793;O00308;O95644;Q8IYA7;Q08211;O94776;Q02078}

8155 [Cluster 742]GO:0004867+F molecular\_function [name] serine-type endopeptidase inhibitor activity [def] "Stops, prevents or reduces the activity of serine-type endopeptidases, enzymes that catalyze the hydrolysis of nonterminal peptide bonds in a polypeptide chain\_ a serine residue (and a histidine residue) are at the active center of the enzyme." [GOC

8156 Pathogen[ Q2Q067] interacts with 6 human  
partners:{P01009;P08697;P50453;P48595;P50452;P35237}

8157 Pathogen[ P0C214] interacts with 26 human  
partners:{P08697;P35237;Q9UK55;P01011;P29622;P36952;P48594;Q86WD7;P05121;P29508;O75830;O75635;A8MV23;P05543;P05546;P07093;P01008;P30740;Q96P63;P50453;P05120;Q99574;Q9UIV8;Q96P15;P50452;P48595}

8158 Pathogen[ P03346] interacts with 8 human  
partners:{P50452;P35237;O75635;P50453;Q96P63;P01009;Q96P15;P48595}

8159 Pathogen[ Q85601] interacts with 17 human  
partners:{P50452;P36952;Q96P15;P01011;P35237;P08697;P01009;P05121;P50453;P05120;P01008;P48595;P30740;O75635;P07093;P29508;Q96P63}

8160 Pathogen[ P14079] interacts with 5 human  
partners:{P35237;P50452;P03973;P50453;P48595}

8161 Pathogen[ P03383] interacts with 11 human  
partners:{P36952;P08697;P30740;P01009;P01008;P48595;P50453;Q96P63;P35237;P50452;O75635}

8162 Pathogen[ P03410] interacts with 14 human  
partners:{P05121;Q9H1F0;Q96P63;P50452;Q96P15;P08697;P36952;P50453;P01009;P35237;O75635;P30740;P48595;P01011}

8163 Pathogen[ P14075] interacts with 6 human  
partners:{P01009;P48595;P08697;P50452;P50453;P35237}

8164 Pathogen[ P0C206] interacts with 14 human  
partners:{P50452;P01008;P35237;P01009;P50453;P36952;Q96P15;O75635;P05121;P48595;Q96P63;P01011;P30740;P08697}

8165 Pathogen[ P03363] interacts with 8 human  
partners:{P35237;P50452;P50453;P36952;Q96P63;O75635;Q96P15;P48595}

8166 [Cluster 743]GO:0016829+F molecular\_function [name] lyase activity [def] "Catalysis of the cleavage of C-C, C-O, C-N and other bonds by other means than by hydrolysis or oxidation, or conversely adding a group to a double bond. They differ from other enzymes in that two substrates are involved in one reaction direction, but only one in the other direction. When acting on the single substrate, a molecule is eliminated and this generates either a new double bond or a new ring." [EC

8167 Pathogen[ Q2Q067] interacts with 24 human  
partners:{P10746;P13929;P61457;P05062;P30084;Q969S2;P07954;Q96GX9;P27695;P06746;Q9UG56;P09972;Q8IW19;O15527;P12956;P78549;P21399;Q03393;P06132;P06733;P11172;P32929;Q96JJ3;Q9H0N5}

8168 Pathogen[ P0C214] interacts with 37 human  
partners:{Q8IW19;P06132;P30084;P27695;P35558;P06746;P07954;P61457;P11172;Q9Y315;Q96GX9;P40939;Q9BXD5;P05062;P32929;P53701;Q99798;P10746;Q9H0N5;P13929;Q03393;P09104;Q86XE5;P06733;Q9UG56;P09972;Q16822;P78549;P04424;P35520;O15527;P22830;P21399;Q96JJ3;P12956;P30566;Q16773}

8169 Pathogen[ P03346] interacts with 26 human  
partners:{P09972;P12956;Q8IW19;P13929;P10746;Q96JJ3;Q03393;P06733;P20132;Q969S2;P32929;P06132;P78549;Q9UG56;P05062;P27695;P61457;P11172;P07954;P21399;Q9H0N5;O15527;P06746;Q9UBZ4;Q96GX9;P30084}

8170 Pathogen[ Q85601] interacts with 27 human  
partners:{Q9UBZ4;O15527;Q9UG56;Q9H0N5;Q969S2;P21399;P10746;P11172;Q9BXD5;P06733;Q9UGP5;P05062;Q96JJ3;Q96GX9;Q96FI4;P07954;P13929;P09972;P06132;Q8IW19;P06746;P78549;P27695;P30084;P61457;P12956;P32929}

8171 Pathogen[ P14079] interacts with 47 human  
partners:{P17707;Q8TAT5;P42357;Q16873;P07954;P22234;P20132;Q9UGP5;Q9UBZ4;P21399;P61457;Q9Y315;Q96N76;P09972;P11172;P30084;P10746;O95954;Q96JJ3;O15527;P78549;Q8TDX5;P06733;O95822;Q8N0X4;Q9H0N5;Q9UG56;P12956;P06132;Q04760;Q96GX9;Q969S2;Q96FI4;P27695;P32929;P22830;Q9BXD5;P13929;P06746;P53602;P00915;Q96CD2;Q03393;P04424;Q86XE5;P53701;Q8IW19}

8172 Pathogen[ P03383] interacts with 13 human  
partners:{P06746;O15527;Q8IW19;P09972;P61457;Q96GX9;Q16822;P06132;Q9H0N5;P27695;P1117

2;P06733;P12956}  
8173 Pathogen[ P03410] interacts with 48 human  
partners:{P53602;P30084;Q96FI4;Q16822;Q9Y315;P32929;O95954;P04424;P06733;Q9BXD5;P1117  
2;P06746;P20132;P06132;P05062;Q8TAT5;P78549;P22234;P10746;Q9UGP5;P12956;Q9UBZ4;Q8TDX5  
;P09972;P21399;Q96N76;O15527;P07954;Q16873;P22830;P53701;Q96CD2;P30566;Q8IW19;Q8N0X4;  
Q86XE5;Q96GX9;P13929;P27695;Q969S2;Q9H0N5;P17707;Q04760;Q03393;Q96JJ3;Q9UG56;O95822;P  
61457}  
8174 Pathogen[ P14075] interacts with 17 human  
partners:{P06733;Q96GX9;P12956;P06132;P11172;Q86XE5;P27695;Q16822;O15527;P06746;Q9BXD  
5;Q9Y315;Q9H0N5;Q8IW19;P61457;P09972;Q9UG56}  
8175 Pathogen[ P0C206] interacts with 39 human  
partners:{P27695;P06733;P05062;P10746;P53701;O15527;Q9Y315;P06746;Q16822;P00915;Q9UBZ  
4;Q04760;Q9UGP5;O95954;P20132;P11172;P30084;Q86XE5;P32929;Q8TAT5;Q9UG56;Q96JJ3;P22830  
;Q96FI4;P61457;Q96GX9;Q969S2;P09972;Q03393;Q8IW19;Q9H0N5;Q99798;P07954;Q9BXD5;P12956;  
P13929;P06132;P21399;P78549}  
8176 Pathogen[ P03363] interacts with 16 human  
partners:{P12956;Q8IW19;O15527;P06733;Q9H0N5;P09972;Q96FI4;P06132;P11172;P61457;P0674  
6;Q96JJ3;Q96GX9;Q969S2;Q9Y315;Q9BXD5}  
8177 [Cluster 744]GO:0005487+F molecular\_function [name] nucleocytoplasmic transporter  
activity [def] "Enables the directed movement of substances between the nucleus and  
the cytoplasm of a cell." [GOC  
8178 Pathogen[ Q2Q067] interacts with 10 human  
partners:{Q12769;Q9UBU9;Q7Z3B4;Q9BZI7;Q9BVL2;P37198;P57740;Q8WUM0;P35658;Q9H1J1}  
8179 Pathogen[ P0C214] interacts with 10 human  
partners:{Q9BZI7;P57740;P37198;P35658;Q9BVL2;Q7Z3B4;Q8WUM0;Q9UBU9;Q12769;Q9H1J1}  
8180 Pathogen[ P03346] interacts with 10 human  
partners:{Q9BZI7;Q8WUM0;Q12769;P57740;Q9BVL2;P37198;P35658;Q9UBU9;Q7Z3B4;Q9H1J1}  
8181 Pathogen[ Q85601] interacts with 9 human  
partners:{Q9BZI7;Q12769;Q9UBU9;P57740;Q8WUM0;P35658;Q9BVL2;Q7Z3B4;Q9H1J1}  
8182 Pathogen[ P14079] interacts with 10 human  
partners:{P57740;P35658;Q9H1J1;Q9UBU9;Q9BVL2;Q8WUM0;Q9BZI7;P37198;Q7Z3B4;Q12769}  
8183 Pathogen[ P03383] interacts with 10 human  
partners:{Q9BVL2;Q8WUM0;Q9UBU9;P57740;Q12769;P35658;P37198;Q7Z3B4;Q9BZI7;Q9H1J1}  
8184 Pathogen[ P03410] interacts with 9 human  
partners:{Q7Z3B4;Q9H1J1;Q9BZI7;P35658;Q9UBU9;Q8WUM0;P57740;Q12769;Q9BVL2}  
8185 Pathogen[ P14075] interacts with 10 human  
partners:{P57740;P35658;P37198;Q12769;Q9UBU9;Q9BVL2;Q8WUM0;Q7Z3B4;Q9BZI7;Q9H1J1}  
8186 Pathogen[ P0C206] interacts with 9 human  
partners:{Q9BZI7;Q7Z3B4;P57740;Q8WUM0;Q9UBU9;Q12769;P35658;Q9BVL2;Q9H1J1}  
8187 Pathogen[ P03363] interacts with 10 human  
partners:{Q7Z3B4;Q12769;Q9UBU9;Q8WUM0;Q9BVL2;P35658;P57740;Q9BZI7;P37198;Q9H1J1}  
8188 [Cluster 745]GO:0043734+F molecular\_function [name] DNA-N1-methyladenine dioxygenase  
activity [def] "Catalysis of the oxidative demethylation of N1-methyladenine and  
N3-methylcytosine in DNA and RNA, with concomitant decarboxylation of 2-oxoglutarate and  
released oxidized methyl group on N1-methyladenine and N3-methylcytosine as  
formaldehyde." [IMG  
8189 Pathogen[ Q2Q067] interacts with 2 human partners:{Q6NS38;Q96Q83}  
8190 Pathogen[ P0C214] interacts with 2 human partners:{Q6NS38;Q96Q83}  
8191 Pathogen[ P03346] interacts with 1 human partners:{Q96Q83}  
8192 Pathogen[ Q85601] interacts with 2 human partners:{Q6NS38;Q96Q83}  
8193 Pathogen[ P14079] interacts with 3 human partners:{Q9C0B1;Q6NS38;Q96Q83}  
8194 Pathogen[ P03383] interacts with 1 human partners:{Q96Q83}  
8195 Pathogen[ P03410] interacts with 3 human partners:{Q96Q83;Q6NS38;Q9C0B1}  
8196 Pathogen[ P14075] interacts with 1 human partners:{Q96Q83}  
8197 Pathogen[ P0C206] interacts with 2 human partners:{Q96Q83;Q6NS38}  
8198 Pathogen[ P03363] interacts with 1 human partners:{Q96Q83}  
8199 [Cluster 746]GO:0003692+F molecular\_function [name] left-handed Z-DNA binding [def]  
"Interacting selectively and non-covalently with DNA in the Z form, i.e. a left-handed  
helix in which the phosphate backbone zigzags." [ISBN  
8200 Pathogen[ Q2Q067] interacts with 1 human partners:{Q9H171}  
8201 Pathogen[ P0C214] interacts with 1 human partners:{Q9H171}  
8202 Pathogen[ P03346] interacts with 1 human partners:{Q9H171}  
8203 Pathogen[ Q85601] interacts with 1 human partners:{Q9H171}  
8204 Pathogen[ P14079] interacts with 1 human partners:{Q9H171}  
8205 Pathogen[ P03383] interacts with 1 human partners:{Q9H171}  
8206 Pathogen[ P03410] interacts with 1 human partners:{Q9H171}  
8207 Pathogen[ P14075] interacts with 1 human partners:{Q9H171}  
8208 Pathogen[ P0C206] interacts with 1 human partners:{Q9H171}  
8209 Pathogen[ P03363] interacts with 1 human partners:{Q9H171}  
8210 [Cluster 747]GO:0003691+F molecular\_function [name] double-stranded telomeric DNA  
binding [def] "Interacting selectively and non-covalently with double-stranded  
telomere-associated DNA." [GOC  
8211 Pathogen[ Q2Q067] interacts with 5 human  
partners:{Q15554;P54274;Q00577;P12956;P13010}  
8212 Pathogen[ P0C214] interacts with 5 human  
partners:{P13010;Q15554;Q00577;P12956;P54274}

8213 Pathogen[ P03346] interacts with 5 human partners:{P12956;Q15554;Q00577;P54274;P13010}

8214 Pathogen[ Q85601] interacts with 5 human partners:{Q15554;Q00577;P54274;P13010;P12956}

8215 Pathogen[ P14079] interacts with 5 human partners:{P54274;P13010;P12956;Q00577;Q15554}

8216 Pathogen[ P03383] interacts with 5 human partners:{P13010;Q15554;Q00577;P54274;P12956}

8217 Pathogen[ P03410] interacts with 5 human partners:{Q15554;P54274;Q00577;P12956;P13010}

8218 Pathogen[ P14075] interacts with 5 human partners:{P12956;Q15554;P54274;Q00577;P13010}

8219 Pathogen[ P0C206] interacts with 5 human partners:{P13010;Q15554;P54274;P12956;Q00577}

8220 Pathogen[ P03363] interacts with 5 human partners:{P12956;Q15554;P13010;P54274;Q00577}

8221 [Cluster 748]GO:0000287+F molecular\_function [name] magnesium ion binding [def] "Interacting selectively and non-covalently with magnesium (Mg) ions." [GOC

8222 Pathogen[ Q2Q067] interacts with 26 human partners:{O95363;Q9Y2M0;Q9H2U2;Q9H008;P13929;O00167;A6NNW6;Q9NRN7;Q15181;Q9NSD9;O60930;Q9UBZ9;O95551;O95394;P36871;O75582;Q96G03;P25815;P39748;P28838;P35813;O75688;O43318;P06733;Q9NVV4;P51003}

8223 Pathogen[ P0C214] interacts with 44 human partners:{O95551;Q96P26;Q13907;P35813;O75874;Q9NPP4;O95363;P35558;P28838;P54922;P51003;O00167;Q9UBZ9;P29401;P48735;Q9Y2M0;Q8N819;O43318;O95989;P13929;Q96G03;A6NNW6;P50213;A4D1E9;P36871;Q15124;P14618;O43837;P09104;O60930;P06733;Q9UHY7;P25815;O75582;P39748;O95394;O75688;Q9H008;Q15181;Q9NSD9;Q9NRN7;Q9NVV4;P51553;Q9H0P0}

8224 Pathogen[ P03346] interacts with 28 human partners:{P85037;Q9H2U2;P35813;Q9NRN7;O95551;A6NNW6;O00167;P13929;O60930;P25815;Q9UBZ9;P36871;P06733;Q9NPP4;P51003;Q9NVV4;O75688;Q9UHY7;O75582;Q01167;Q96G03;Q15181;O95394;O43318;P39748;Q9Y2M0;Q9H008;Q969T7}

8225 Pathogen[ Q85601] interacts with 31 human partners:{Q9NRN7;Q9Y2M0;O75688;Q9NSD9;O95989;P06733;Q9H008;P14618;Q15124;Q9H2U2;P13929;P36871;Q9UBZ9;P25815;O75582;O95363;O95394;A4D1E9;Q9UHY7;Q9H0P0;O60930;Q9NVV4;O43318;P39748;Q15181;P51003;P35813;O00167;Q13907;Q96G03;O95551}

8226 Pathogen[ P14079] interacts with 46 human partners:{P28838;Q9H0P0;Q9BRP7;P54922;Q9H4K7;Q8NDY3;Q96P26;O75582;Q13907;Q969T7;O95363;A4D1E9;Q9H008;Q9UUKK9;P29401;Q9H773;A6NNW6;Q9UBZ9;Q15124;P06733;P25815;O95394;P35813;Q9H2U2;Q8N8Q3;O95989;O60256;Q9NVV4;Q9NRN7;Q9NSD9;Q9Y2M0;Q9NWX6;O95551;Q15181;P13929;Q9BXI3;O75688;Q14558;Q96G03;P51003;O00167;P52701;O60930;P36871;P39748;Q9NPP4}

8227 Pathogen[ P03383] interacts with 25 human partners:{Q9NVV4;Q96G03;O75582;Q9H2U2;A6NNW6;P51003;P25815;O00167;P54922;P28838;Q9NRN7;P35813;O43318;O95363;Q9Y2M0;Q9UBZ9;Q15181;O95394;O60930;O95551;O95989;P06733;Q9NSD9;A4D1E9;Q9H008}

8228 Pathogen[ P03410] interacts with 45 human partners:{Q9BRP7;Q9H4K7;Q96P26;P35813;P36871;O75582;Q9H773;Q9UUKK9;P06733;Q15124;Q8NDY3;Q9NPP4;P39748;Q9H2U2;Q9NVV4;P28838;Q9NSD9;O60930;P25815;P51003;O75688;O43318;Q9UBZ9;O95551;Q9BXI3;P52701;Q14558;O95989;Q9NRN7;O60256;Q9H008;Q96G03;P13929;A4D1E9;Q9H0P0;O00167;P54922;Q13907;Q9Y2M0;Q15181;O95394;A6NNW6;Q9NWX6;O95363;Q969T7}

8229 Pathogen[ P14075] interacts with 25 human partners:{P06733;P51003;P35813;Q9UBZ9;P54922;Q9NSD9;O75582;A4D1E9;Q9NVV4;O60930;O95363;Q96G03;O00167;Q9Y2M0;O43318;Q9H008;A6NNW6;Q9H2U2;O95394;P25815;P28838;Q15181;Q9NRN7;O95989;O95551}

8230 Pathogen[ P0C206] interacts with 40 human partners:{O95363;P06733;Q9Y2M0;O00167;P50213;Q96G03;P52701;O75582;Q9BRP7;O95394;P28838;O43318;P51003;A6NNW6;Q15124;P25815;P54922;P30291;O95989;O60930;O75688;Q13907;Q9NSD9;Q9UHY7;Q9H0P0;O95551;Q9H2U2;Q9NVV4;Q9UBZ9;Q9H008;A4D1E9;P39748;P13929;Q969T7;P14618;P36871;P35813;Q9NRN7;P29401;Q15181}

8231 Pathogen[ P03363] interacts with 22 human partners:{Q9H2U2;Q9NVV4;Q9NSD9;Q969T7;Q9Y2M0;P06733;O43318;P25815;A6NNW6;P51003;Q01167;Q9NRN7;O95363;Q9H008;O00167;O95551;O60930;Q9NPP4;Q9UBZ9;O75688;Q15181;Q96G03}

8232 [Cluster 749]GO:0070990+F molecular\_function [name] snRNP binding [def] "Interacting selectively and non-covalently with any part of a small nuclear ribonucleoprotein particle." [GOC

8233 Pathogen[ Q2Q067] interacts with 1 human partners:{Q8WWY3}

8234 Pathogen[ P0C214] interacts with 1 human partners:{Q8WWY3}

8235 Pathogen[ P03346] interacts with 1 human partners:{Q8WWY3}

8236 Pathogen[ Q85601] interacts with 1 human partners:{Q8WWY3}

8237 Pathogen[ P14079] interacts with 1 human partners:{Q8WWY3}

8238 Pathogen[ P03383] interacts with 1 human partners:{Q8WWY3}

8239 Pathogen[ P03410] interacts with 1 human partners:{Q8WWY3}

8240 Pathogen[ P14075] interacts with 1 human partners:{Q8WWY3}

8241 Pathogen[ P0C206] interacts with 1 human partners:{Q8WWY3}

8242 Pathogen[ P03363] interacts with 1 human partners:{Q8WWY3}

8243 [Cluster 750]GO:0070742+F molecular\_function [name] C2H2 zinc finger domain binding [def] "Interacting selectively and non-covalently with a C2H2-type zinc finger domain of

a protein. The C2H2 zinc finger is the classical zinc finger domain, in which two conserved cysteines and histidines co-ordinate a zinc ion." [GOC

8244 Pathogen[ Q2Q067] interacts with 9 human partners:{Q16594;Q9UBB5;P15976;Q2QGD7;P23769;P26368;Q9BT49;Q9UQ35;P98168}

8245 Pathogen[ P0C214] interacts with 8 human partners:{P26368;Q9BT49;P23769;P98168;Q16594;Q2QGD7;Q9UQ35;Q9UBB5}

8246 Pathogen[ P03346] interacts with 10 human partners:{Q2QGD7;P23769;P98168;Q9BT49;P15976;P26368;Q9UQ35;Q9UH73;Q9UBB5;Q16594}

8247 Pathogen[ Q85601] interacts with 9 human partners:{Q9BT49;P15976;P23769;Q2QGD7;Q16594;Q9UQ35;P26368;Q9UBB5;P98168}

8248 Pathogen[ P14079] interacts with 9 human partners:{P98168;Q16594;Q2QGD7;Q9UBB5;P26368;P15976;Q9UQ35;Q9BT49;P23769}

8249 Pathogen[ P03383] interacts with 8 human partners:{P23769;P26368;Q9UBB5;Q16594;P98168;Q9UQ35;Q2QGD7;Q9BT49}

8250 Pathogen[ P03410] interacts with 9 human partners:{P26368;Q9UBB5;Q9BT49;Q9UQ35;Q16594;P98168;P23769;Q2QGD7;P15976}

8251 Pathogen[ P14075] interacts with 8 human partners:{P23769;Q9BT49;Q9UBB5;Q9UQ35;Q16594;P26368;P98168;Q2QGD7}

8252 Pathogen[ P0C206] interacts with 9 human partners:{P98168;P26368;Q9UBB5;Q9BT49;P15976;Q9UQ35;P23769;Q2QGD7;Q16594}

8253 Pathogen[ P03363] interacts with 7 human partners:{P98168;P26368;Q2QGD7;Q9BT49;Q9UQ35;Q9UBB5;Q16594}

8254 [Cluster 751]GO:0008242+F molecular\_function [name] omega peptidase activity [def] "Catalysis of the removal of terminal peptide residues that are substituted, cyclized or linked by isopeptide bonds (peptide linkages other than those of alpha-carboxyl to alpha-amino groups)." [EC

8255 Pathogen[ Q2Q067] interacts with 2 human partners:{Q9Y5K5;P54252}

8256 Pathogen[ P0C214] interacts with 3 human partners:{Q9Y5K5;Q9H3M9;P54252}

8257 Pathogen[ P03346] interacts with 4 human partners:{Q9H3M9;Q96FW1;Q9Y5K5;P54252}

8258 Pathogen[ Q85601] interacts with 3 human partners:{Q9H3M9;P54252;Q9Y5K5}

8259 Pathogen[ P14079] interacts with 4 human partners:{Q9H3M9;P54252;Q9Y5K5;Q96FW1}

8260 Pathogen[ P03383] interacts with 3 human partners:{P54252;Q9Y5K5;Q9H3M9}

8261 Pathogen[ P03410] interacts with 4 human partners:{Q96FW1;Q9H3M9;P54252;Q9Y5K5}

8262 Pathogen[ P14075] interacts with 4 human partners:{Q96FW1;P54252;Q9H3M9;Q9Y5K5}

8263 Pathogen[ P0C206] interacts with 4 human partners:{P54252;Q9Y5K5;Q9H3M9;Q96FW1}

8264 Pathogen[ P03363] interacts with 3 human partners:{Q9Y5K5;P54252;Q96FW1}

8265 [Cluster 752]GO:0004649+F molecular\_function [name] poly(ADP-ribose) glycohydrolase activity [def] "Catalysis of the hydrolysis of poly(ADP-ribose) at glycosidic (1''-2') linkage of ribose-ribose bond to produce free ADP-ribose." [EC

8266 Pathogen[ Q2Q067] interacts with 2 human partners:{Q86W56;Q9NX46}

8267 Pathogen[ P0C214] interacts with 2 human partners:{Q86W56;Q9NX46}

8268 Pathogen[ P03346] interacts with 2 human partners:{Q86W56;Q9NX46}

8269 Pathogen[ Q85601] interacts with 2 human partners:{Q86W56;Q9NX46}

8270 Pathogen[ P14079] interacts with 2 human partners:{Q9NX46;Q86W56}

8271 Pathogen[ P03383] interacts with 2 human partners:{Q9NX46;Q86W56}

8272 Pathogen[ P03410] interacts with 2 human partners:{Q86W56;Q9NX46}

8273 Pathogen[ P14075] interacts with 2 human partners:{Q9NX46;Q86W56}

8274 Pathogen[ P0C206] interacts with 2 human partners:{Q9NX46;Q86W56}

8275 Pathogen[ P03363] interacts with 2 human partners:{Q9NX46;Q86W56}

8276 [Cluster 753]GO:0004704+F molecular\_function [name] NF-kappaB-inducing kinase activity [def] "Catalysis of the phosphorylation of the alpha or beta subunit of the inhibitor of kappaB kinase complex (IKK)." [PMID

8277 Pathogen[ Q2Q067] interacts with 1 human partners:{P60510}

8278 Pathogen[ P0C214] interacts with 2 human partners:{Q14164;P60510}

8279 Pathogen[ P03346] interacts with 2 human partners:{Q14164;P60510}

8280 Pathogen[ Q85601] interacts with 2 human partners:{Q14164;P60510}

8281 Pathogen[ P14079] interacts with 2 human partners:{Q14164;P60510}

8282 Pathogen[ P03383] interacts with 1 human partners:{P60510}

8283 Pathogen[ P03410] interacts with 1 human partners:{P60510}

8284 Pathogen[ P14075] interacts with 1 human partners:{P60510}

8285 Pathogen[ P0C206] interacts with 2 human partners:{Q14164;P60510}

8286 Pathogen[ P03363] interacts with 1 human partners:{P60510}

8287 [Cluster 754]GO:0030374+F molecular\_function [name] ligand-dependent nuclear receptor transcription coactivator activity [def] "The function of a transcription cofactor that activates transcription in conjunction with a ligand-dependent nuclear receptor from a RNA polymerase II promoter\_ does not bind DNA itself." [GOC

8288 Pathogen[ Q2Q067] interacts with 27 human partners:{Q96HR3;Q9NPJ6;Q99816;Q9BQA1;Q15596;Q9Y606;Q8NF64;Q9HD15;Q93074;O75448;O60244;Q8IX12;Q14CW9;Q9BYK8;Q15532;O75528;Q9UHV7;Q9NVC6;Q8NI08;Q14686;P17096;Q9P1Z2;Q96PK6;Q9NPA8;Q6STE5;Q9Y2W1;Q86X55}

8289 Pathogen[ P0C214] interacts with 26 human partners:{Q8IX12;O75528;Q8NF64;Q9HD15;Q14CW9;Q93074;P17096;Q96HR3;Q9NVC6;Q6STE5;Q8NI08;Q14686;O60244;Q9BYK8;Q9NPA8;Q96PK6;Q9UHV7;Q15532;Q99816;O75448;Q86X55;Q9P1Z2;Q15596;Q9Y606;Q9Y2W1;Q9NPJ6}

8290 Pathogen[ P03346] interacts with 30 human partners:{Q9Y606;Q15788;Q8IX12;Q9NPJ6;Q9BQA1;Q9P2W1;Q9HD15;Q96HR3;Q58WW2;Q93074;Q9981

6;O60244;P17096;Q8NF64;Q15532;O75448;Q15596;O75528;Q9P1Z2;Q6STE5;Q9NVC6;Q86X55;Q9BYK8;Q8NI08;Q14CW9;Q9Y2W1;Q9NPA8;Q96PK6;Q9UHV7;Q14686}

8291 Pathogen[ Q85601] interacts with 27 human partners:{Q99816;Q15532;Q9BQA1;Q96PK6;O75528;P17096;Q86X55;Q6STE5;Q14CW9;Q9Y606;Q9UHV7;Q8IX12;O75448;Q15596;Q14686;Q9HD15;Q9BYK8;Q9NPA8;Q9P1Z2;Q9Y2W1;O60244;Q96HR3;Q93074;Q9NPJ6;Q8NF64;Q9NVC6;Q8NI08}

8292 Pathogen[ P14079] interacts with 27 human partners:{O60244;Q8IX12;Q9BYK8;Q15532;Q6STE5;Q15596;O75528;Q14CW9;Q96HR3;P17096;Q9NVC6;Q8NI08;O75448;Q8NF64;Q9UHV7;Q9BQA1;Q9HD15;Q15788;Q9NPJ6;Q9Y606;Q93074;Q99816;Q9P1Z2;Q14686;Q9Y2W1;Q9NPA8;Q96PK6}

8293 Pathogen[ P03383] interacts with 27 human partners:{Q9BQA1;O75528;P17096;Q9NPA8;Q15596;O60244;Q86X55;Q14686;Q6STE5;Q15532;Q99816;Q9NPJ6;Q93074;Q96HR3;Q14CW9;O75448;Q9Y606;Q9HD15;Q96PK6;Q8NF64;Q8IX12;Q9UHV7;Q9NVC6;Q9Y2W1;Q9BYK8;Q9P1Z2;Q8NI08}

8294 Pathogen[ P03410] interacts with 27 human partners:{Q9Y2W1;Q8IX12;Q96PK6;Q8NI08;Q14686;Q9BYK8;O75528;Q9NVC6;Q9NPJ6;Q14CW9;Q86X55;P17096;Q9BQA1;Q9P1Z2;Q99816;Q9NPA8;Q96HR3;Q15596;Q9Y606;O60244;Q9UHV7;Q93074;Q6STE5;Q9HD15;Q15532;Q8NF64;O75448}

8295 Pathogen[ P14075] interacts with 27 human partners:{Q9NPJ6;Q9BQA1;Q15532;Q96HR3;Q14686;P17096;Q9Y606;O75448;Q8IX12;Q93074;Q14CW9;Q9UHV7;O75528;Q96PK6;Q86X55;Q9NPA8;O60244;Q9P1Z2;Q9NVC6;Q8NI08;Q99816;Q6STE5;Q9Y2W1;Q9HD15;Q9BYK8;Q8NF64;Q15596}

8296 Pathogen[ P0C206] interacts with 28 human partners:{O75528;Q96HR3;Q9BQA1;Q86X55;Q6STE5;Q99816;Q9P1Z2;Q15532;Q9HD15;Q9UHV7;Q9BYK8;Q8NI08;Q8NF64;Q14CW9;Q9NPJ6;Q96PK6;Q14686;Q9Y2W1;P17096;Q9Y606;O60244;Q8IX12;Q15596;Q9NVC6;O75448;Q9NPA8;Q15788;Q93074}

8297 Pathogen[ P03363] interacts with 27 human partners:{Q6STE5;Q96HR3;Q9Y606;Q9HD15;Q15532;Q15596;Q14686;Q96PK6;Q9BQA1;P17096;Q9P1Z2;Q9NVC6;Q9UHV7;Q8NI08;Q9BYK8;Q9NPA8;Q93074;O75448;Q14CW9;Q8IX12;Q9NPJ6;Q99816;O60244;Q8NF64;Q58WW2;Q86X55;O75528}

8298 [Cluster 755]GO:0046404+F molecular\_function [name] ATP-dependent polydeoxyribonucleotide 5'-hydroxyl-kinase activity [def] "Catalysis of the reaction

8299 Pathogen[ Q2Q067] interacts with 1 human partners:{Q86UW6}

8300 Pathogen[ P0C214] interacts with 1 human partners:{Q86UW6}

8301 Pathogen[ P03346] interacts with 1 human partners:{Q86UW6}

8302 Pathogen[ Q85601] interacts with 1 human partners:{Q86UW6}

8303 Pathogen[ P14079] interacts with 1 human partners:{Q86UW6}

8304 Pathogen[ P03383] interacts with 1 human partners:{Q86UW6}

8305 Pathogen[ P03410] interacts with 1 human partners:{Q86UW6}

8306 Pathogen[ P14075] interacts with 1 human partners:{Q86UW6}

8307 Pathogen[ P0C206] interacts with 1 human partners:{Q86UW6}

8308 Pathogen[ P03363] interacts with 1 human partners:{Q86UW6}

8309 [Cluster 756]GO:0010997+F molecular\_function [name] anaphase-promoting complex binding [def] "Interacting selectively and non-covalently with an anaphase-promoting complex. A ubiquitin ligase complex that degrades mitotic cyclins and anaphase inhibitory protein, thereby triggering sister chromatid separation and exit from mitosis." [GOC

8310 Pathogen[ Q2Q067] interacts with 1 human partners:{Q9HAW4}

8311 Pathogen[ P0C214] interacts with 1 human partners:{Q9HAW4}

8312 Pathogen[ P03346] interacts with 1 human partners:{Q9HAW4}

8313 Pathogen[ Q85601] interacts with 1 human partners:{Q9HAW4}

8314 Pathogen[ P14079] interacts with 1 human partners:{Q9HAW4}

8315 Pathogen[ P03383] interacts with 1 human partners:{Q9HAW4}

8316 Pathogen[ P03410] interacts with 1 human partners:{Q9HAW4}

8317 Pathogen[ P14075] interacts with 1 human partners:{Q9HAW4}

8318 Pathogen[ P0C206] interacts with 1 human partners:{Q9HAW4}

8319 Pathogen[ P03363] interacts with 1 human partners:{Q9HAW4}

8320 [Cluster 757]GO:0001222+F

8321 Pathogen[ Q2Q067] interacts with 1 human partners:{Q96QT6}

8322 Pathogen[ P0C214] interacts with 1 human partners:{Q96QT6}

8323 Pathogen[ P03346] interacts with 2 human partners:{Q96QT6;P51858}

8324 Pathogen[ Q85601] interacts with 1 human partners:{Q96QT6}

8325 Pathogen[ P14079] interacts with 1 human partners:{Q96QT6}

8326 Pathogen[ P03383] interacts with 1 human partners:{Q96QT6}

8327 Pathogen[ P03410] interacts with 1 human partners:{Q96QT6}

8328 Pathogen[ P14075] interacts with 1 human partners:{Q96QT6}

8329 Pathogen[ P0C206] interacts with 1 human partners:{Q96QT6}

8330 Pathogen[ P03363] interacts with 2 human partners:{P51858;Q96QT6}

8331 [Cluster 758]GO:0032089+F molecular\_function [name] NACHT domain binding [def] "Interacting selectively and non-covalently with a NACHT (NAIP, CIITA, HET-E and TP1) domain. The NACHT domain consists of seven distinct conserved motifs, including an ATP/GTPase specific P-loop, a Mg(2+)-binding site and five more specific motifs." [GOC

8332 Pathogen[ Q2Q067] interacts with 1 human partners:{Q9Y2G2}

8333 Pathogen[ P0C214] interacts with 1 human partners:{Q9Y2G2}

8334 Pathogen[ P03346] interacts with 2 human partners:{Q9Y2G2;Q9Y2G2}

8335 Pathogen[ Q85601] interacts with 1 human partners:{Q9Y2G2}

8336 Pathogen[ P14079] interacts with 2 human partners:{Q9Y2G2;Q9Y2G2}

8337 Pathogen[ P03383] interacts with 1 human partners:{Q9Y2G2}  
8338 Pathogen[ P03410] interacts with 1 human partners:{Q9Y2G2}  
8339 Pathogen[ P14075] interacts with 1 human partners:{Q9Y2G2}  
8340 Pathogen[ P0C206] interacts with 2 human partners:{Q9Y2G2;O95361}  
8341 Pathogen[ P03363] interacts with 1 human partners:{Q9Y2G2}  
8342 [Cluster 759]GO:0008432+F molecular\_function [name] JUN kinase binding [def]  
"Interacting selectively and non-covalently with JUN kinase, an enzyme that catalyzes the phosphorylation and activation of members of the JUN family." [GOC  
8343 Pathogen[ Q2Q067] interacts with 4 human partners:{P54259;Q13233;Q9UQF2;Q9UI95}  
8344 Pathogen[ P0C214] interacts with 4 human partners:{Q9UI95;Q13233;Q9UQF2;P54259}  
8345 Pathogen[ P03346] interacts with 4 human partners:{Q9UI95;Q13233;Q9UQF2;P54259}  
8346 Pathogen[ Q85601] interacts with 4 human partners:{P54259;Q9UI95;Q9UQF2;Q13233}  
8347 Pathogen[ P14079] interacts with 2 human partners:{Q9UQF2;P54259}  
8348 Pathogen[ P03383] interacts with 4 human partners:{Q13233;Q9UI95;Q9UQF2;P54259}  
8349 Pathogen[ P03410] interacts with 4 human partners:{Q9UI95;Q13233;P54259;Q9UQF2}  
8350 Pathogen[ P14075] interacts with 4 human partners:{Q9UI95;P54259;Q13233;Q9UQF2}  
8351 Pathogen[ P0C206] interacts with 4 human partners:{Q9UQF2;Q13233;P54259;Q9UI95}  
8352 Pathogen[ P03363] interacts with 4 human partners:{P54259;Q9UQF2;Q9UI95;Q13233}  
8353 [Cluster 760]GO:0003676+F molecular\_function [name] nucleic acid binding [def]  
"Interacting selectively and non-covalently with any nucleic acid." [GOC  
8354 Pathogen[ Q2Q067] interacts with 724 human  
partners:{E7ETH6;O95376;Q0D2J5;Q12901;Q9HC78;Q09FC8;Q01844;Q9UNP9;Q9UM63;P23588;Q96SQ  
5;Q9Y473;Q14526;Q8WV37;Q8N859;Q12798;P52742;Q9BRH9;Q96N77;C9JN71;Q14151;Q7RTT3;P33240  
;P17544;Q13118;P25490;Q96D70;Q9UK13;P35789;Q6V9R5;Q8NA42;O00425;O95639;O43167;Q2M218;  
Q8TA86;Q9UJN7;Q96MW7;Q03923;Q86U42;Q9UEG4;P26233;Q9BUG6;A6NDX5;P07910;Q8NEM1;Q9UC06;P  
98182;Q9H7X3;Q9UK11;P17029;P52738;Q9NR56;A8MTY0;Q9H7R0;Q96PE6;Q8IZ26;Q9BRR0;A6NJL1;O4  
3361;Q9Y462;Q96NI8;O75925;Q6NUN9;Q9UJL9;Q9UL41;O60304;P24278;Q8NEP9;Q6ZQV5;Q9HBE1;O95  
391;Q8N0Y2;Q92664;Q5VTD9;Q15928;Q96K75;P52272;Q92889;Q13887;Q8TA94;O75534;O75494;Q8IZ  
H2;Q8NCE0;P14866;Q86YE8;P27694;Q08AN1;P58317;Q8WW38;Q6ZMY9;Q8N8Z8;Q6ZS27;A6NP11;Q9UL5  
9;O15226;Q8N4W9;Q53EQ6;Q9H2P0;Q13148;P10073;Q9HAZ2;O60481;Q7KZF4;P67809;A6NGD5;Q5SXM1  
;Q6IV72;A8MSL1;Q8N2I2;Q7Z6K1;Q6ECI4;Q9UC07;Q9H9D4;Q12986;P55795;Q01130;Q6ZT77;Q9ULD5;  
P51508;Q14590;Q9NTW7;Q9Y2Y9;Q96NG8;Q9HCK5;Q6ZNO6;Q15233;P41182;Q9Y2X9;Q9H5H4;Q8NBB4;Q  
9BUL9;P82979;Q96H40;P49910;Q9NZV7;Q9UHX1;P51531;Q8N684;Q6P2D0;Q9HCL3;Q6U7Q0;Q9UKJ3;Q8  
TD23;Q96SK3;Q96IT1;Q147U1;Q15697;Q96LW1;Q9NZL3;Q9Y6M1;O43390;Q7L2R6;P08151;O96006;Q99  
676;Q13435;Q96SL8;P37275;Q8IYW8;Q05516;Q05481;Q02930;Q8NCK3;Q8NDW4;Q15696;O75820;Q7Z7  
J5;P10074;Q15046;Q9Y5N5;O60315;Q9P0L1;Q9ULV3;Q14119;Q9H4Z2;Q6P9A1;Q96P6;Q8N782;Q969S  
2;Q96NL3;Q4W5G0;Q8WTR7;Q8TAW3;P38919;P51815;P14373;Q14103;O60506;Q8TF20;Q6ZR52;O60930  
;Q99684;P52741;Q9UDV7;Q8TF68;Q3KQV3;Q9P255;Q9H6T0;Q8NC26;O43296;Q6R2W3;Q9H4T2;Q9UBU7;  
P18615;O14709;C9JBD0;Q08ER8;Q5T5D7;Q9NQX1;Q9ZMW2;P06748;O00148;Q2M3W8;O15535;Q7RTT5;O  
14628;Q8TBC5;Q6ZSS3;Q6ZRS2;Q96AH0;Q02447;Q99909;Q86YF9;Q9NSD4;Q2M1K0;Q96LX12;Q9  
Y534;P17030;P17031;Q7Z340;Q86UE3;Q9H668;O75362;Q16670;Q96N95;Q9Y5A6;Q8TF47;P17036;Q13  
838;Q9ULJ3;P17040;Q15560;Q2QGD7;Q16531;P17010;O95625;P17038;Q07955;Q9UK12;Q8WU90;Q9UD  
W3;P38935;P08047;Q8TC21;Q13156;Q96C28;O75928;Q7RTT6;Q8NDT2;Q16629;O43829;P16415;Q86Y2  
5;Q9BQ15;P0CG00;Q8N184;Q96NJ6;Q14240;Q504Q3;Q13129;Q9H7S9;Q7Z3V5;Q3SXZ3;Q5TAX3;Q9UBF7  
;Q96159;Q6IQ21;Q13398;Q53GI3;Q96MR9;Q6PJT7;P31943;Q96BV0;O43776;A8MT53;Q9BUY5;  
Q96QC0;P49756;Q15424;B2RXP5;P26196;Q8N3J9;Q9Y2P0;Q9Y2H8;P52743;Q499Z4;Q10570;Q15937;Q  
7Z2W4;P08621;Q9GZR2;Q68EA5;Q9Y2K5;O75607;Q16630;Q68DY1;Q7RTV3;Q8N5P1;Q9HCG1;Q6P280;Q9  
BY77;Q8TAU3;Q9UL58;P38159;P52747;Q96SR6;Q9UHI6;Q14929;Q5T619;Q9BSV6;Q14593;Q15929;O75  
391;Q9UIV1;Q8TB69;P84103;Q15072;Q15935;Q96C00;Q8N1G2;Q8IVP9;Q63HK3;Q9UII5;Q8NE65;A8MU  
V8;Q96KR1;Q96JM3;Q9ULM2;Q9NP64;Q96N38;A8MWA4;Q5SVQ8;A8MQ14;Q14498;Q96CX3;P17032;Q86V8  
1;Q8IWX8;Q6P9G9;Q9Y2T7;Q52M93;P15621;Q14585;Q9NQX6;P17022;Q68DI1;P51504;Q96T37;Q8N8C0  
;Q9Y2D9;Q96SZ4;P56270;A2RRD8;B4DXR9;Q6NX45;P17098;O75437;Q8NF99;Q13360;Q6P9A3;B1APH4;  
P15927;Q66K41;P0C7X5;Q8N3C0;Q13310;O95628;Q96GC6;Q76KX8;A6NHJ4;Q8N895;Q96N22;A8MX4;Q  
8N141;Q05519;Q03924;Q96LX8;P26368;Q5JNZ3;Q9Y2Q1;Q6PK81;Q96NG5;O43251;A6NNF4;Q13127;Q9  
P2J8;O95780;Q96JM3;Q6PF04;Q6NZY4;Q9Y2V2;Q9BR84;Q9H116;Q9Y6X2;Q9UBB9;Q9ULH7;P11161;Q9H  
9G7;O75152;Q08211;P51532;Q8NI51;P62269;P15622;Q9H4L7;Q96K62;P08579;Q7Z3K3;Q5T200;Q3KP  
31;Q5JVG8;O43830;P52597;Q49A33;P23246;Q12873;P86452;Q9Y5S9;Q3SY52;B4DX44;Q9UFF9;Q0108  
1;Q96BK5;Q8N988;P59923;Q969J2;Q5VUA4;Q9NYT6;Q494X3;A6NM28;Q9Y2L8;Q8IYB9;P46100;Q8IX07  
;Q32M78;Q9H9Z2;O60225;Q03468;O14771;Q9NQZ8;P0CH99;Q8N823;P17041;Q8N9K5;Q9UIH9;Q13243;  
Q9BSG1;P0CJ79;Q3MJ62;Q969S3;P12956;Q8N7M2;Q9BT49;O60765;Q8NB50;Q3ZCT1;Q9UKV8;Q8WVV9;Q  
5HYK9;Q3L8U1;Q8N9Z0;Q92785;Q2VY69;P19338;Q8WTV1;P51523;Q9UKV3;Q9H963;Q92499;Q9NYW8;Q8  
6TG7;Q9BYN7;Q96GE5;Q86UP8;Q8N720;P51786;O75564;Q9HCZ1;Q8NB42;P09012;P23193;P54098;Q9H  
BT7;Q9H9L3;Q8TBZ5;Q9HAH1;Q86VM9;Q9Y2P7;Q6P3V2;O75346;Q14588;Q14839;Q6ZMV8;O15504;P153  
36;Q14592;Q6AZW8;Q6NSZ9;Q9BUJ2;P28698;Q6ZNG0;Q8N9F8;P0C7V5;P17021;Q9UNY4;Q9UID6;Q1487  
2;Q9UDV9;Q5CZAS;Q96HQ0;Q9BRR8;Q9UKN5;Q9UNY5;Q9H707;Q9NSJ1;Q9UKT9;P41208;Q5SVZ6;P52298  
;O14646;P16989;B4DU55;Q6PG37;O60290;O75373;Q9BYX4;Q8IW36;Q96CS4;Q49AA0;Q9ULG1;Q15427;  
Q9GZU2;Q86TJ5;Q9UBL0;Q6PI48;Q8IVC4;Q9UK10;A8MUZ8;Q96EK4;Q96SE7;Q9HCK8;P47974;Q7L945;Q  
8NDQ6;O75764;Q13106;Q86XF7;Q5TEC3;Q969V6;O95125;Q96PK6;Q16385;P17019;P0CG31;Q86WJ1;P0  
C7X2;Q9Y2G7;Q8IYX0;Q9UJW7;Q9NSC2;Q92670;Q9UL18;P52736;Q96N3Z6;Q8NXN6;Q8N5L8;Q9G  
ZX5;Q9H8G1;Q96MN9;Q9BQA5;P17025;A6NK75;Q9HBD4;Q8N587;Q8N7Q3;Q7Z398;P13682;Q8IYI8;P266  
51;Q86V71;P52744;Q9UGR2;A6NN14;Q96JL9;P28370;P0CB33;Q6ZNH5;Q9NWS9;Q3ZCX4;Q9BX82;O9545  
3;Q9P0T4;Q5HY98;Q6B0B8;O75792;Q15637;Q8NEK5;O43309;O14978;P35637;Q6ZN79;Q9H7R5;P22626  
;Q9COF3;Q8N972;Q9H0M5;Q9UL40;Q8WVK2;P18583;Q6ZNO8;Q8NHY6;Q8TBZ8;Q16384;Q9UIE0;Q92917;  
Q68DY9;P11940;Q5VIY5;P0CG24;O75290;Q8WXF1;Q8WXB4;P49711;A2A288;Q8N5A5;Q93062;Q9NVV9;Q  
92841;Q9BWM5;Q8TF32;Q96GM8;Q16600;Q2M3X9;P52737;Q9UQR1;Q8TAF7;Q8N7K0;Q15776;Q66K89;Q8  
IYD8;Q08AG5;Q12874;O75132;Q86W11;P60842;P51522;Q6ZN17;A6NEJ1;Q96PM9;Q96BR6;Q00839;Q96



8355

IR2;Q969W8;Q6ZNA1;Q15056;Q96QE5;O95201;O43345;Q8TDD2;Q5FWF6;Q8N393;P07199;Q8WTZ3;Q8NAP3;Q96ND8;Q96LW9;Q3MIS6;Q9UL36;Q8TAQ5;Q13105;Q9NV72;Q6ZNG1;Q8IYN0;Q96JC4;P09234;O15015;Q9UPG8;P14868;Q9Y2A4;Q07352;O75821;P21506;Q14584;Q13888;Q9Y6R6;Q8NG50;Q86XU0;P17014;Q6ZMS7;P17023;Q8NDP4;Q6ZNO1;P18146;Q7Z6E9;Q03112;Q15428;P17028;Q76FK4;P15822;Q03936;Q13064;Q8N2W9;P17024;A8K8V0;P98168;Q7Z3I7;Q03938;Q8TF39;O60224}

Pathogen[PC214] interacts with 858 human partners: {Q9BY77;Q86UD4;A6NDX5;Q6ZNS5;Q6NX49;Q6PDB4;Q13310;Q92618;Q6NZY4;Q06732;Q8NEK5;Q9NQZ8;Q14526;P82979;Q8NI51;Q96GM8;Q9Y6X2;Q7Z3K3;Q96C28;Q96BK5;Q14527;Q96MU6;Q9P255;Q6B0B8;Q9UKN5;Q96RE9;Q8N1G1;Q969S3;P26368;Q7Z2F6;A8MUV8;Q9H6T0;O43296;Q6ZNI17;Q8TBZ8;Q96QE5;Q8IZC7;O75467;Q6ZNI1;Q96LW9;Q9UID6;Q9BUL9;Q6ZNA1;Q9P0T4;P35789;Q8NDQ6;Q13887;P26196;Q8IX12;Q96T58;P17032;Q14593;Q15697;A6NGD5;A8MVS1;Q9HCZ1;Q02930;P56270;O43829;P51508;Q7Z398;P16989;A8MQ14;P52743;P35637;Q13156;Q9BT49;Q17R26;Q9P0L1;P17010;Q63HK3;Q9ULD5;A8K8V0;O75764;O95453;O43830;Q9BS34;Q9Y2A4;Q6PEW1;P0CI00;Q14872;Q53EQ6;O00148;Q8N7Q3;P38159;Q8IYN0;Q14929;Q96KR1;P17023;Q9BX82;Q6R2W3;Q9Y2D9;Q14591;Q9Y5A6;Q6ZNS7;P51814;Q5T5D7;P60842;Q05481;A6NHJ4;Q96SQ5;Q92664;P0CB33;Q9UL59;O75925;P52744;Q6ZNH5;Q5JVG8;Q8IYW8;Q8NC26;Q96I59;Q8N5A5;P15336;Q9Y473;Q92889;Q96LW1;A6NP11;Q5SVZ6;P54098;Q96I27;O15535;P84103;Q8TD17;Q6PG37;Q86V81;Q9NTW7;Q8TF45;O75820;Q9BWM5;Q8TAQ5;Q9UDW3;P52742;Q9Y5S9;Q14587;Q12873;Q9NPC7;P06748;O95628;Q86UE3;P26599;Q9UIH9;Q8TBC5;Q9GZU2;Q8NDP4;Q96CX3;Q96NJ3;P52738;Q92841;Q5JVG2;P0CG31;Q9NR56;Q96K62;Q96BR6;Q9HBE1;Q8NCA9;P23588;Q7L2R6;Q9H0S4;Q8JTD23;Q9P2F9;Q8N587;Q8TAU3;Q8N2W9;Q14119;Q03112;Q9UJN7;P17019;Q8N0Y2;Q8IVP9;Q9UC06;C9JN71;Q504Q3;Q9Y2V2;Q68DY1;Q5MCW4;Q16384;Q9P2N5;Q99676;Q9HCI6;Q8NCK3;Q5JTZ9;Q8N823;Q8N5L8;Q9UNY5;Q8NEP9;Q08AN1;P17022;Q9HBD4;Q6NT04;O15056;O75362;Q9NUA8;Q9H6B1;O60224;Q15233;Q16587;Q9BTE6;Q7Z7K2;Q969W8;Q15637;P67809;Q499Z4;Q5T200;Q96GE5;P31483;O95625;P79522;Q86XU0;Q8TF20;O43167;Q6P9A1;O75437;P23246;Q6ZRS2;Q6PK81;Q6P1L6;Q9UL58;Q8IYW8;O95125;Q5TYW1;Q15428;Q6PF04;Q86WZ6;Q9UK11;Q86YE8;Q9NR11;Q96CS4;O14709;P17029;O0425;O75821;P17544;Q12986;Q9Y2Y9;Q96SR6;Q5JUW0;Q8NAP3;Q9UK13;Q9UL40;P17026;Q96MM9;Q96SK3;Q96AH0;Q9NW07;Q5HY98;Q3L8U1;Q2M1K9;Q7L2E3;O75123;Q2M3W8;Q15056;Q02386;O75607;Q15973;Q3MJ62;P37275;Q3KP31;Q6PJT7;Q8N8C0;Q15928;Q9ULG1;Q9UPG8;Q96K58;Q9BYX4;A8MT65;Q96JC4;P11940;P98168;Q7Z3I7;Q8IZ26;Q10570;Q8N9F8;P17024;Q9Y2Q1;Q6ZR52;O14771;P112901;Q96NG5;Q96N77;Q96SE7;Q9UBU7;Q6ZMS7;Q9NZI8;Q9H4L7;Q6ZNI19;Q9UL41;P07199;Q43776;P17038;Q9UC07;P38935;Q494X3;Q96MR9;Q9Y2P0;Q96K75;O96006;Q9UI15;Q4V348;Q7KZF4;Q96S24;Q6IV72;Q8N141;P51786;Q9BY31;Q01844;Q15560;P14868;Q96BV0;P08579;A6NEJ1;Q5SVQ8;O43390;Q8N883;Q3SXZ3;Q9GZX5;Q8N684;Q9NXT0;Q13064;P51523;Q147U1;Q9BSK1;P24278;P17031;O75792;Q9HCX3;Q16630;Q16385;Q9UIV1;Q9Y3Z3;Q5VTD9;Q7Z2W4;Q13398;Q53GI3;Q9HBT8;P86452;Q99909;O60290;Q8WTV1;Q07955;P18615;P17030;Q9Y534;O75564;Q03936;Q96NL3;Q8TF68;Q9UKJ3;Q9BSV6;Q9RRT4;Q86XN6;Q8IZH2;Q7RTT5;Q07352;P55795;Q8N3C0;O95201;Q8TC21;Q96D70;P28698;Q9NWS9;P15622;Q6ECI4;Q6ZSS3;Q9BRR0;Q6ZNO8;Q8N859;Q13129;P52298;P52272;Q9HC78;B1APH4;Q9UL36;Q9ULJ3;Q8WVK2;A2A288;Q7Z7J5;P07910;Q9Y6R6;Q49AA0;Q92698;Q9UHX1;Q9Y2T7;Q7Z340;Q12798;Q6ZNG1;P18583;Q15696;Q9BRR8;Q96IT1;P08621;O60765;Q06730;Q9UJU3;Q8N184;Q9HY25;B4DXR9;Q8WXF1;O75132;O75373;Q8WTZ3;Q14103;Q9NVV9;P28370;Q9Y2H8;Q15929;Q9N4E4;Q8N4W9;A8MXY4;Q14151;Q96PE6;Q3ZCX4;Q68D11;O60225;Q7Z6E9;Q9H5H4;Q6P280;Q5VUA4;Q16600;P17014;Q8N9K5;Q8N9F9;Q9UJW7;Q8TBZ5;Q49A33;Q8N2I2;O75290;Q96JF6;P46100;P38919;Q6P9A3;Q6AW86;Q6ZMW2;Q9UNY4;Q8TF47;Q6DD87;O95376;P51504;Q96N95;Q8TF39;Q6P2D0;Q9C0F3;Q4W5G0;Q9H7X3;Q96N22;Q9NVP1;Q9HCK1;Q9NVT6;Q03924;Q92917;Q5FWF6;Q9NYW8;Q08AG5;Q86TJ5;Q13243;Q14240;Q9H8G1;Q8IYL2;Q86UP8;Q15427;Q9HAZ2;Q8N7M2;P17028;Q9P2J8;O95780;P0CH99;P98169;Q3MIS6;P52597;Q8WW38;B4DU55;P15927;Q9NQX6;O75152;P51815;Q6ZS27;P51522;Q8N393;Q9H9G7;O15060;Q05519;Q9BUG6;Q9Y5N5;Q76FK4;Q9HCK8;Q6ZMY9;E7ETH6;P62269;Q2QGD7;O15226;Q96N58;P17020;Q76KX8;Q6ZNO1;Q9BUJ2;O60264;Q9NSC2;Q9UHI6;Q969J2;Q9ULM2;Q9H9L3;O60930;Q86V71;Q8NDV7;Q9Y3M9;P17027;Q86UQ0;Q96GC6;P41182;Q6P9G9;Q03923;Q8N972;P17098;Q8IV48;Q6ZT77;P21506;Q8IYB9;Q10181;Q96PK6;P33240;P17035;P0C7X5;Q8IX07;Q8WTP8;Q9UJL9;P49588;Q9H9Z2;Q6U7Q0;Q13127;Q8NDW4;Q9BSG1;Q2VY69;O75346;A2RRD8;Q6ZNG0;Q15072;P13682;Q15424;Q86W11;Q12874;Q6NSZ9;A8MWA4;O75534;Q5SXM1;O75494;Q96ND8;Q9H4T2;Q9UKV8;P41208;P17040;O95639;Q6V9R5;Q9Y2X9;P58317;Q9UDV6;Q96C00;P10074;Q15287;Q68EA5;Q9NP64;P52747;Q8IYX0;P26651;Q8N9Z0;Q9NV72;Q5VIY5;Q9Y462;Q9UEG4;Q15935;P62633;Q9UKT9;P36508;P43243;Q7L945;O43345;P31943;Q92499;Q9H8M2;Q8WU90;Q9Y2G7;P17041;Q8NB50;Q96J125;Q96HQ0;Q6NX45;P49711;Q13106;Q02447;Q9H2U1;P09012;Q8N8Z8;P17021;P18146;Q9NUU7;Q96JL9;P0C7X2;Q8WTR7;P0CG00;P15621;Q0D2J5;P0CJ78;Q66K41;Q8IVC4;Q96MX3;Q14584;O75391;Q3SY52;Q9NQX1;A6NK75;Q9C0D7;O15504;Q6ZNO6;Q9GZR2;P57071;Q6IQ21;Q96JB3;Q14592;P17036;O43309;P17039;O60506;Q9NX65;Q8TAF7;P98182;P0C7V5;Q9UDV7;Q86TG7;Q8NB42;Q96H40;Q52M93;Q9UBL0;P55884;Q8N8L2;A6NNF4;Q96SL8;Q9Y6M1;P11161;Q13888;Q6ZRF7;Q9UJW8;Q96JM3;Q9UMR2;Q6ZMV8;Q5T619;Q96PQ6;Q7RTT3;Q9UFF9;Q9NSD4;Q8NHY6;Q8IW36;Q9HCK5;Q14585;O14978;P16415;Q6ZQV5;Q9UIE0;Q2M218;Q8N1G2;Q969V6;Q6PI48;Q8N7K0;Q9HCG1;Q08211;Q9NZV7;Q5TEC3;Q9H9D4;A8MUZ8;Q0VGE8;Q9H668;C9JBD0;Q08ER8;Q7RTT6;P49910;Q9BR84;Q8TB69;P27694;Q8NDT2;Q9H707;Q96N38;Q9HBT7;P08151;Q92804;Q9UF7;Q9UKV3;Q13435;Q00839;A6NM28;P09234;Q99684;Q9HCL3;Q9ULH7;Q6NUN9;Q9P243;Q9BSN8;Q14011;Q9BUY5;Q8N3J9;Q9BQA5;Q9HCJ0;A6NFT3;Q15776;Q9BYN7;Q9UM63;Q8N782;O14646;Q13148;P22626;Q7RTV3;P23193;Q8N1W2;Q9H7R0;P52736;Q8TA86;O43251;Q13360;Q96NJ6;P14373;Q3KQV3;P17017;O95391;O14628;Q9BV97;Q5F1R6;Q15046;Q3ZCT1;Q8NA42;Q86YF9;Q96H86;O60315;Q8N895;P51531;Q32M78;Q7Z6K1;P0CJ79;Q9UNP9;Q96NG8;Q9UQR1;Q6P3V2;Q6ZSB9;Q86U42;Q6AZW8;Q14590;P19338;Q9NZL3;Q86XF7;Q9BYG3;Q13838;Q96EK4;Q96EG3;Q9H963;Q14498;Q9BS31;Q5EBL2;Q8NE65;Q5CZA5;P15822;Q96LX8;Q8NG50;Q8WV37;P52746;Q9H0M5;O15042;Q9NSJ1;Q9UK12;Q9ULV3;Q96N20;Q16531;Q8WXB4;Q93062;Q9Y2P7;Q9Y2L8;Q2M3X9;Q8WVV9;Q66K89;Q96NI8;Q8IYD8;Q92785;O43361;Q86WJ1;Q9UL18;Q8NEM1;Q03468;A6NK53;O60304;Q9H7R5;Q13105;Q9UBB9;Q96T37;P08047;Q09FC8;P49756;Q14966;Q8IYI8;Q8TA94;Q05516;P12956;Q96PM9;B4DX44;Q16629;P52737;Q8NCE0;Q14839;Q8TF50;Q9Y3B8;P14866;P0CG24;Q68DY9;O60384;A6NJL1;Q9NQV7;Q5VZF2;Q5HYK9;Q9HAH1;Q14588;Q96QC0;Q9BQ15;Q7Z3V5;A8MTY0;Q8TDD2;Q9H7S9;Q8TAW3;Q5JNZ3;O15015;Q6ZN79;P17025;P51532;P47974;Q15937;Q8N3Z6;Q9P1U0;P10073;P52740;Q5EBM4;Q9H2P0;Q86T29;Q01130;Q8NBB4;O94892;Q16670;Q5TAX3;O75928;Q7L3S4;Q92670;P52741;Q96IR2;Q8N988;Q9H116;Q8TF32;Q8N8J6;P599

8356

23;Q86VM9;Q96MW7;Q03938;O60481;Q3KNS6;Q8N720;A6NN14;Q9BRH9;Q9UGR2}  
Pathogen[ P03346] interacts with 1019 human  
partners: {Q86UQ0;E7ETH6;Q96T92;Q5F1R6;A6NK53;Q6R2W3;Q7Z3K3;Q3KNS6;Q9Y5S9;Q96NG5;Q5JVG  
2;Q9Y3Z3;Q969S3;Q13886;P08048;Q9BZE0;Q9NS91;Q5JUW0;Q12901;Q05481;Q95201;Q9NWS9;Q7Z398  
;Q8NI51;Q96D70;Q15427;Q9UKS7;Q96N20;P51991;O95639;Q9Y467;P17097;Q12874;P63119;Q96LW1;  
Q9BRR8;P46063;P57071;Q5T5D7;Q86U42;Q7Z7K2;Q9HBT8;Q8TA86;Q494X3;A8MX4;Q15042;Q9NQX6;Q  
50482;Q9NR83;O75564;P98182;Q9NRZ9;Q8TF39;Q02386;P38935;Q9NQX1;Q8N4W9;Q9H9P5;P49910;Q3  
MJ62;Q8WXF1;O94892;Q9HBD4;A6NGD5;O15535;Q8IX12;Q8IZM8;Q9NP64;Q9NPA5;P86452;Q9NQV7;A2R  
RD8;Q6P1L6;P0CG31;Q9HAH1;Q08AN1;Q96NJ6;A2A288;O95625;P12956;Q49A33;Q9BRR0;C9JN71;Q6ZR  
F7;Q96C55;Q7Z340;Q5T1R4;Q96MR9;Q8WV37;Q9NZV7;Q8WTZ3;O96006;Q08170;Q96C00;Q15928;Q96EK  
4;Q9BWM5;Q14517;Q99612;Q9BUY5;Q9UEG4;P36508;Q93062;Q9Y2P0;A6NN14;Q8NCA9;P14373;Q52M93  
;Q9H116;Q8NAF0;Q3KNW1;Q15916;Q9P2K5;Q9ULD5;Q96KR1;P46100;Q9GZR2;O60765;Q9BV97;Q8IZC7;  
P09651;Q9UQR1;P56270;P17039;Q2QGD7;O75362;Q8IX06;Q9Y2P7;Q5HYK9;Q9UL59;Q9H0M5;Q9UIV1;O  
43167;Q16384;P06748;Q9Y4X4;P17098;Q86V71;O14901;Q8NC26;Q96NJ3;P62633;P14866;P15336;P5  
4098;Q96HQ0;Q9NU63;Q9H9L3;Q13129;Q9Y2V2;Q1KMD3;Q2M218;P52739;O15209;Q9UGR2;P0CJ78;Q8N  
141;Q7Z3V5;Q9H2P0;Q6ZT77;Q9UL58;Q8NCN2;Q8N823;Q8WV38;Q6ZQV5;P52747;Q9Y2L8;Q3KQV3;O432  
96;Q8TAQ5;O95376;Q6PEW1;Q9BXA9;Q86TJ5;Q9Y5W3;O60930;Q96QC0;Q96K75;O43309;Q5FWF6;Q9ULM  
2;P27694;Q6ZSB9;Q7Z3I7;Q9UKT9;Q14011;Q9P0T4;Q06732;Q96H40;Q8N7M2;O75123;Q14590;P0CH99  
;Q96I25;Q9Y6M1;Q96K62;Q9NW07;O00425;Q6V9R5;P35789;Q8WU90;P52740;Q9NR11;Q8TD23;Q08AG5;  
P51532;Q9P2N5;Q969W8;Q9UMR2;Q13148;Q96SZ4;O95391;Q96MU6;Q92841;O60315;O60290;P17027;Q  
5MCM4;P51786;P08579;Q03936;Q9H9G7;Q96JG9;Q15911;P55795;Q2MLK9;Q86T29;A8MUV8;O95628;Q1  
47U1;Q8TD17;Q14587;Q9Y5N5;P52738;Q9NQV6;Q8TF45;P0CB33;Q9UJQ4;Q8N680;Q4G0J3;Q9UL18;A8M  
VS1;P24278;P43243;Q8WV9;Q8NEP9;Q14872;Q8NE65;Q5VIY5;Q14527;Q9ULG1;Q8IYL2;P25490;Q5H9  
K5;Q15637;O14978;P0DJ3;Q6P280;Q9NSC2;Q5T0B9;Q8N393;Q14498;Q16531;Q13156;Q96AH0;O6050  
6;P23246;Q96I27;Q8TF20;Q13888;Q8NF99;P52741;Q8TD26;Q9C0A1;Q86YE8;Q6ZMY9;Q9NZI8;O75820  
;Q86WZ6;Q8IZ20;Q9UK11;O43298;O14709;Q6NX45;Q3SY52;O75534;P17026;P17022;Q8N5A5;Q7Z7J5;  
Q9ULH7;Q8TBC5;P38919;Q12986;Q5HY98;Q86TG7;Q68DI1;Q7L2E3;Q9UBU7;P07910;Q86UE3;Q9H9D4;Q  
5T200;Q3MIS6;Q8N9K5;Q8N895;P52737;Q8N684;Q7L3S4;P28698;Q6ZMS7;Q9ULJ3;P82979;Q96394;P1  
8583;Q96CS4;Q9P0L1;Q15056;P08621;Q8IXT5;Q17R26;P11940;Q13242;P52742;Q9UDV7;Q9C0D4;Q8W  
TR7;P31943;Q9NVP1;P15622;Q8NDQ6;Q7Z6K1;Q9P2Y4;Q9HCK0;Q8IVC4;Q00839;Q8TA94;Q9C0F3;Q6PG  
37;Q9NX65;Q13247;Q8TF32;A8MQ14;Q86UD4;Q96SE7;Q969V6;Q9HCG1;P16989;Q15560;P19338;Q9P2F  
9;Q8TAF7;O43776;P55884;P0C7X2;O14646;Q9Y3M9;Q96BR9;P17038;Q9H4Q3;A6NK75;Q9H609;Q96N38  
;P26599;O75626;Q9NTW7;Q6NT04;Q9BUJ2;Q9Y534;Q14586;Q7RTT6;Q08211;P17014;Q92670;Q8N587;  
P10074;Q9UM63;P0CI00;Q8NB42;O60224;Q9NV72;Q86VK4;Q3SXZ3;Q92698;P52298;A6NEJ1;O43390;Q  
96BV0;Q8H165;Q09FC8;Q8N859;P52743;O15090;Q16629;Q8NBB4;Q9HCI6;O75821;Q0K823;Q5764;P6  
0842;Q8NCP5;P22626;Q9UJW8;Q9BY31;Q9NUA8;P17032;Q9BUQ8;Q8N2I2;Q13398;Q66K99;Q53GT3;Q07  
955;Q8N554;A6NJL1;P17025;P15621;P17010;O43345;Q6P9A1;Q9BUL9;A8MT65;Q9HCX3;Q6EKJ0;Q9NY  
W8;Q13351;P0CG40;Q0VGE8;Q8N7K0;Q9UKJ3;Q9H4T2;Q8NDX6;Q9NSD4;Q86SE8;Q9UKV3;Q66K41;Q499Z  
4;Q8N3C0;Q6P9G9;P08047;Q9H582;Q96LW9;Q8TF68;Q9HC78;Q8IZH2;Q9H5H4;Q8N9F8;Q92766;Q86YF8;  
Q96JM2;Q8TDD2;P98168;Q9H963;Q9UK10;Q14119;O95600;Q8IX01;O15056;Q8N8E2;Q96CX3;A8MUV9;  
O95453;P52736;P52756;Q9H2U1;P98169;Q14592;Q14103;Q9BWF3;O60225;O15060;Q14526;P17036;Q  
6ZNH5;Q6ZMW2;Q3ZCX4;Q8TBZ5;Q9BS34;Q9UL40;P0CJ79;Q8WVK2;B4DX44;Q92879;Q96MN9;Q969S2;P4  
1208;Q8NFT6;Q12926;O75925;Q8NBF1;Q6ZNA1;P35637;Q9HCK5;P21506;P51508;Q9Y330;Q9UK13;Q8N  
OY2;Q92499;Q8N8Z8;Q86VM9;Q9BT49;Q8N954;Q96JL9;Q9P243;Q8IYI8;Q14151;Q9P215;O14628;Q86Y  
25;Q8N1W2;Q6TD7;Q8IYX0;Q86V81;Q8NHY6;Q9BRH9;O60481;Q6ZN11;A6NDE4;Q8NB15;Q6EC14;Q9UNY  
5;Q8NDT2;Q8N1G0;O43829;Q9H7R5;Q8TF47;O75391;Q5EBM4;Q15020;A8MWA4;Q15929;Q9UL36;Q9NXT0  
;Q5JT82;Q5TAX3;O95125;Q9BR84;Q6P9A3;Q7RTT4;Q6ZMV8;Q96PE6;Q5JVG8;O75643;P67809;Q96F45;  
Q03468;Q02446;O95863;P52746;Q9BQ15;Q15072;Q9UBL0;P31483;P16415;Q4W5G0;Q6AW86;Q9H7X3;Q  
96N22;Q9NQZ8;Q8IYW8;Q68EA5;Q9UDV6;Q03924;Q7Z6E9;Q9BX82;Q06730;Q13435;Q99684;Q7KZF4;P1  
7031;Q8N5L8;Q8N8J6;Q8N883;Q9UK12;Q15973;Q9H8G1;B2RXF5;Q9BY77;Q5JN23;Q13118;Q8TBZ8;Q9P  
2J8;O95780;Q3KP31;Q6ZN79;P52744;O60264;O75541;Q9H668;Q03112;O75373;P17041;Q86VZ6;Q2M3  
W8;Q7RTT3;Q08ER8;Q5SVZ6;Q9HCK8;Q02086;Q5SVQ8;Q14593;Q96BR6;Q9UHI6;O43361;Q6NZY4;Q8TCN  
5;P49756;Q7Z4V0;P62269;P47974;B4DU55;O60304;Q14585;Q92784;Q96N77;Q6Q21;Q6ZS27;Q96BK5  
;O75840;Q8N7Q3;P49711;Q5VZF2;P51815;P17544;Q8NG50;A6NNF4;Q9H7S9;Q8TAW3;Q6NA42;P26368;  
Q96C28;Q96N95;B4DXR9;O75346;P37275;Q01081;Q7L2R6;P17029;Q14240;Q13064;P36954;Q99909;Q  
6DD87;Q9NW75;Q6PF04;Q8NEM1;Q86XN6;Q9BU19;Q8N1G2;P10073;Q8IX07;Q9H8M2;Q8TC21;Q9BUG6;Q1  
3838;Q9H6T0;P31942;Q9UNY4;P15927;P17035;Q96NG8;Q53EQ6;Q9Y2Y4;Q9Y462;Q9HCZ1;Q9HCE3;P17  
021;P35659;Q6ZN06;O43251;Q9GZT3;Q63HK3;Q13887;Q13105;Q8NDW4;Q5SXM1;Q96GM8;Q8N8C0;Q96N  
I8;Q9UKV8;P14868;B1APH4;Q9UDW3;Q96SK3;Q6BEB4;Q4V348;O75554;C9JBD0;P17030;Q9UNP9;Q7RTT  
5;Q07352;Q16385;Q9H5J0;O14979;Q8N9Z0;O60281;Q3ZCT1;Q5TYW1;Q96JM3;Q8N2W9;Q9H707;Q5VTD9  
;Q96EG3;Q5VV67;Q14966;Q6ZRS2;Q8NB50;P30622;P42285;Q96T58;Q9Y6R6;O75132;Q9NWH9;Q9BYG3;  
Q9NQ03;Q9HBE1;Q15935;Q9Y2G7;P41182;Q9BYX4;Q76KX8;Q8N5P1;Q8IYB9;Q14562;P17028;P17020;P  
09012;P84103;A6NP11;Q05516;Q9BWW7;Q9NUU7;P23588;Q8N720;Q5T619;O43830;P17017;Q8IWX8;P8  
6XU0;Q6ZS01;Q6ZSS3;Q6PDB4;Q15233;P52272;Q9C0G0;Q92889;Q15287;Q14584;P10072;Q9Y2T7;P11  
61;Q05519;Q8TB69;Q96JF6;O75607;P17023;Q15937;Q9Y2D9;Q49AA0;Q01130;O75437;Q17R98;Q9H0  
S4;P0C7V5;Q6P2D0;O14771;Q96SL8;Q6U7Q0;Q86XF7;Q9HBT7;Q8NAP3;O15015;Q9NSJ1;Q8TF50;P2619  
6;Q9Y2K1;Q9BYN7;Q9GZU2;Q96MM3;Q96PQ6;Q9UII5;Q96MW7;P51504;Q9HA38;Q8IWX3;Q8IYD8;Q05215  
;Q12798;Q9P255;Q9GZX5;Q9UK33;P28370;Q9H4Q4;Q96QE5;Q96ND8;Q6PI48;A6NDX5;O15226;Q9BSK1;  
Q12873;Q13310;Q8N972;P58317;P13682;Q2M3X9;Q9P2D1;Q9Y5A6;P07199;A8MTY0;Q92917;Q96LX8;Q  
9UFB7;Q7L945;P17040;P51522;Q9UPG8;P59923;Q15424;Q9H5V7;P23193;Q96NL3;Q9HCL3;Q5TC79;P0  
C7X5;Q96IT1;Q9UC06;Q13029;Q13401;Q9Y2X9;Q969J2;Q16600;P18146;Q9UFF9;Q8N782;Q9BS31;Q86  
UZ6;Q9H9Z2;Q13243;Q8IYN0;O00148;Q9UID6;Q13283;Q15697;P51531;P38159;Q6ZN57;Q01844;Q6NU  
N9;Q13360;Q5T7W0;O75467;Q9NZL3;Q9AY6X2;Q96H81;Q15776;Q9Y6Q3;P51523;Q86T24;Q9UHX1;Q8WTV  
1;Q8NEK5;Q9Y2A4;Q02930;Q14588;Q6AZW8;Q3L8U1;Q96K80;Q86WJ1;O75290;Q9HAZ2;Q01101;P26651  
;P17019;Q8NCK3;Q6IV72;P29558;Q86UP8;Q16587;Q6P3V2;O75152;Q8IZ26;Q9UIE0;Q8N988;Q8TD94;  
O75928;Q9UL41;Q96GC6;Q15696;Q9BSG1;Q32P51;Q6AHZ1;Q9Y4A0;Q99729;Q9BXX1;Q9UJU3;Q68DY9;Q

9Y473;Q96CK0;Q86UP3;Q9UJN7;Q8NEA6;Q8N3Z6;Q5EBL2;O00110;Q3SY56;Q0D2J5;Q16670;P52597;Q9Y2H8;Q96RE9;Q92804;Q9ULV3;Q9NQZ3;Q8N3J9;P09234;Q8IVP9;Q9BSN8;Q5CZA5;Q7RTV3;Q9NQ94;O75494;Q6PJT7;Q92664;Q9NYT6;Q8WXB4;Q9UKN5;P15822;A6NM28;P0CG00;Q9NVV9;Q17RP2;Q02447;Q96N58;Q96PK6;Q6ZNG1;Q6NX49;Q5TEC3;Q10570;Q99676;Q96SR6;Q9BSV6;Q6ZN08;P62995;Q96T37;Q86XP3;Q15393;Q9NR56;Q9UIH9;Q96PM9;Q92618;Q92785;Q9UC07;Q14929;Q8TAU3;Q9Y2Y9;Q96SQ5;Q6NSZ9;P18615;P33240;Q9H4Z2;Q13106;P17024;Q9UJL9;P31629;Q9UJW7;Q7Z2F6;P51814;Q6ZR52;Q16630;Q32M78;Q9P1Z0;Q6ZN55;Q96JC4;Q2TB10;Q86W11;Q2VY69;O15504;Q6ZN17;Q8N184;Q14839;Q8NCE0;O15062;Q8N8L2;P0CG24;Q96MX3;A8K8V0;Q6ZN19;Q13127;Q96JB3;Q6ZNG0;Q9P1U0;Q9Y2Q1;Q9H7R0;Q9H4L7;Q68DY1;Q15428;A6NHJ4;Q76FK4;Q9GZV8;Q8IY51;Q9NUK0;Q8NDP4;Q96IR2;O43719;Q9Y2K5;Q9BQA5;O75792;Q6PK81;Q7Z2W4;P08151;Q6B0B8;Q9NWB1;Q5VUA4;Q96GE5;Q96K58;Q03938;Q9NPC7;A6NF13}

8357 Pathogen[ Q85601] interacts with 871 human partners: {Q53EQ6;Q9UQR1;Q9HCZ1;Q8N8C0;Q9Y534;Q5SVZ6;Q6R2W3;Q9ULM2;Q9HCG1;A6NNJ1;Q3KNS6;Q92618;P18146;Q494X3;O75373;Q8N1G0;P08048;O95625;Q7Z6E9;Q6NX45;Q8N151;O60225;Q9BUL9;Q15637;P17097;P51786;Q969J2;Q8N9K5;Q32M78;P28698;Q8IZC7;Q9BRR8;Q92664;P15621;Q63HK3;Q96JM3;P49756;P09234;P0CG00;P51815;P36954;Q6ZR52;Q9NQX6;Q13064;P08151;Q6PEW1;Q86W11;Q8NA42;Q9Y2T7;Q14929;Q8TF39;Q9HBT8;Q9UPG8;Q9P1U0;O60481;Q14593;P62633;P17040;Q6ZN11;Q2VY69;Q3MJ62;Q8N720;Q86XU0;Q96SZ4;Q9UNY5;Q14586;O15535;Q9NPA5;Q9UJW8;Q9BT49;Q8NBB4;Q9NQV7;Q9H8M2;Q96JB3;A6NHJ4;Q96PK6;Q9UJL3;Q13127;P14373;Q9H707;Q2M3X9;Q8N1G2;Q96MX3;Q6V9R5;Q5EBL2;C9JN71;O75928;Q8N3Z6;Q7Z340;Q9HCI6;Q6ZN17;Q8WV37;Q96SR6;Q5JNZ3;Q96ND8;Q6PG37;Q9H0S4;O43390;Q96K62;Q96EK4;P14868;Q92917;Q5TYW1;A6NFI3;Q9UC07;Q96CS4;P17028;P51522;Q8N7M2;Q969W8;Q9NUA8;Q8TDD2;A6NK75;P0CB33;Q9P2K5;Q9ULD5;P21506;Q96AH0;Q12901;P56270;Q9H8G1;Q3SXZ3;Q8IYD8;Q9UL59;Q7L945;Q9C0G0;Q16384;Q13243;P17019;Q96NG8;Q9HCK5;Q5HY98;Q6B0B8;Q969S2;Q6P1L6;Q8N8L2;Q6ZN57;Q96BR6;Q6ZMS7;Q96HQ0;Q96JM2;P86452;P13682;Q9UGR2;Q3L8U1;Q86VM9;Q6JF6;P17032;Q6PF04;Q9UL58;P17036;Q6DD87;Q9HCL3;Q9HCK1;Q9Y2L8;Q9P2D1;Q8W38;Q16531;Q01130;Q8TAQ5;Q02386;Q86Y8;Q9BYN7;Q8NAP3;O60506;Q14240;Q9HBT7;Q5FWF6;Q8IYN0;Q7Z398;P17020;Q969V6;Q96BV0;Q13360;Q9H7S9;B4DXR9;Q9H5L6;P38935;Q96LX8;Q12798;B1APH4;O60290;Q8TD23;Q8N8J6;Q13310;P23588;A8MWA4;Q9BR84;Q6ZNG0;Q9Y2Y9;Q9P2N5;Q14103;Q14966;Q13148;P15622;Q96H40;Q2M3W8;O95391;Q13888;O60315;Q14587;A2RRD8;Q8NHY6;P17027;A8MUV8;Q9NR11;Q8N684;Q9Y6X2;Q03936;Q08AG5;Q9Y2Y1;Q9H116;Q2M1K9;Q86SE8;Q6ZN79;Q15424;Q9NWS9;Q8N680;Q7RTT3;P15822;Q07352;Q9UL18;A8MVS1;Q14872;Q8NDW4;Q9UKN5;Q6NSZ9;Q9UDV6;Q13129;O14978;Q03112;P17030;P79522;P52740;Q8NFT6;Q6ZMY9;Q8TF20;P30622;Q9BUG6;Q9Y2Y4;O95789;P22626;Q9NR83;O15015;Q9H609;O75437;Q13106;Q9UL41;Q9Y2X9;Q9UHX1;Q86WZ6;Q6NUN9;Q9UJW7;Q15287;Q9BS31;B4DU55;Q8IVP9;O00148;O14709;Q96SQ5;Q6ZNG1;Q3KP31;O75534;Q09FC8;Q86V71;Q52M93;Q96H86;P17026;P17022;Q8N5A5;Q9ULH7;Q7Z2W4;Q8TAW3;Q96KR1;Q9UMR2;Q9HOM5;P52744;Q2M218;Q7L2E3;P25490;Q8IZ26;Q6ZN55;Q9Y5N5;Q8N895;Q9B82;Q96NG5;P0C7X2;Q9UKN5;Q2QGD7;O75792;Q8IX12;Q8NDP4;Q86XN6;Q9UIV1;Q14588;P08621;Q9UII5;Q7Z2F6;Q96QE5;Q9H4T2;Q96JC4;Q9BQ15;Q8TBZ8;Q8WXF1;Q14592;Q9UBU7;A6NK53;Q9NQZ8;Q14591;P58317;Q9C0F3;P47974;Q8TF32;Q15046;Q15776;A8AMQ14;O15226;Q3MIS6;Q3KQV3;O75290;Q9NR56;Q96SE7;B4DX44;Q86V81;P19338;Q9P2F9;O43776;O14646;Q9Y3M9;P17038;Q9P255;Q9BUJ2;A6NM28;P55795;O75494;Q6PK81;P07199;Q6ZN06;P17031;Q8IYW8;P17014;Q96MU6;Q8N2W9;Q5T1R4;P10074;P18615;Q8NEP9;Q9NV72;Q49A33;Q9UJN7;Q92499;Q15560;Q92698;Q9UFF9;A6NEJ1;Q7KZF4;Q9HAH1;Q16385;Q08AN1;Q9NZV7;Q16629;Q03923;P52736;Q8N823;P17024;P17017;Q08211;O60304;Q9Y2D9;P59923;Q8N2I2;Q13398;Q53G13;Q9UK11;Q07955;Q86UD4;P17010;P49711;Q9UID6;O43345;Q9UIH9;Q8TAF7;Q8N184;Q9BSV6;Q9BUY5;Q8TF47;Q9UJL9;Q504Q3;P27694;Q8IYI8;Q9NYW8;Q96FI4;A8MXY4;Q9UBB9;O95125;O75607;Q66K41;Q499Z4;O15504;Q9H7R0;P08047;Q9HC78;Q8IZH2;Q8N9F8;Q6IQ21;O75152;O95201;P82979;Q96D70;Q5VIY5;Q92889;P38919;P51531;P26651;Q16587;Q05481;Q8NG50;Q68DI1;P52746;O15060;Q14526;O75820;Q8NEA6;Q3ZCX4;Q9Y6R6;Q8TF50;P0CJ79;Q9GZX5;O43361;Q9NW07;Q9BY77;P36508;Q8TC21;Q6PJT7;Q7Z3K3;P35637;Q9UK12;P11940;Q9NX65;Q8NDQ6;P51508;Q9UK13;Q9Y6M1;Q6ZN08;Q14151;Q9GZU2;Q8NBF1;Q30468;Q969S3;Q8N1W2;Q9NQX1;P51532;Q9NVV9;A6NGD5;Q9H9G7;Q8WTZ3;A6NJL1;Q13435;Q9NP33;Q8NEK5;Q8N4W9;Q92785;Q96N38;Q8N587;P52742;Q02930;Q16600;Q9Y5A6;Q8NDT2;Q9P0T4;Q9H7R5;Q5JUW0;P17098;Q96MN9;Q9P0L1;Q8NB42;P54098;Q9UL36;Q15928;Q5TAX3;Q96MR9;Q6P9A3;Q5MCW4;Q9UKV3;P15927;Q96N20;Q9UKJ3;P0CH99;Q9BRR0;A2A288;Q9UM63;Q9UBL0;P16415;Q4W5G0;Q9H7X3;Q96N22;Q96BK5;Q9Y2G7;Q9UL40;Q9UDV7;Q13838;Q03924;Q9Y2A4;Q96CX3;Q9NVP1;Q8N859;Q12873;O60765;Q92804;Q9P2J8;O95780;P52738;Q147U1;O95628;Q9NZL3;Q8IYL2;O95453;Q9H668;Q12973;P98169;A6NDY2;P52597;Q96T92;Q08ER8;Q76FK4;Q5SVQ8;Q9UHI6;Q9H6B1;Q6NZY4;Q96N58;E7ETH6;P62269;Q9NXT0;Q17R26;Q10570;Q9Y2V2;Q9H4L7;Q7Z3V5;Q5JVG2;Q9NUU7;Q5T5D7;Q6P3V2;Q8N7Q3;Q96NJ6;Q8IYX0;Q8TA86;Q14585;Q9HA38;Q0VGE8;Q96LW1;O14771;Q96GC6;Q86XF7;Q6ZT77;Q96N95;O75346;Q9BYX4;O60281;Q96GM8;Q01081;P17029;Q6ZRS2;Q9H2P0;Q99909;A6NP11;Q15929;Q05519;Q8NEM1;P35789;Q6ZNA1;P67809;Q8IX07;Q14590;Q6U7Q0;Q9UC06;Q99612;Q9H5H4;Q8N883;O00425;Q6ZRF7;Q9Y462;Q8NCA9;P06748;Q7Z7K2;Q96I59;P17023;Q96NI8;Q96F45;P60842;O43829;P0CI00;Q8TD17;Q9UKV8;Q9GZR2;Q9UDW3;Q96SK3;Q9ULG1;Q3SY52;Q4V348;Q96NJ3;C9JBD0;O43830;Q8TA94;Q86T29;Q13118;Q8N9Z0;Q3ZCT1;Q5HYK9;Q8N5L8;O60384;Q96EG3;Q8IVC4;Q96T58;Q02447;O75132;P23193;Q8NE65;Q96N77;Q68EA5;Q99684;Q8WU90;O43309;Q8TF68;Q8N5P1;P17544;Q9HBD4;P84103;Q05516;Q6ZS27;Q9NTW7;Q9H9L3;Q7L2R6;P26196;P51504;Q9BQA5;O95376;Q6ZN19;Q6ZN01;Q0D2J5;Q6ZSS3;Q15233;Q7RTT5;Q9HCK8;Q14584;Q8TF45;P10072;Q9C0D7;P14866;Q6ZQV5;Q8TB69;Q96RE9;O43296;Q15937;O95639;Q49AA0;Q96QC0;Q8N782;P0C7V5;Q6ZSB9;P37275;Q9UK10;Q8IYB9;Q86TJ5;Q5EBM4;Q9NPC7;Q9Y2H8;Q5VTD9;A8MT65;Q00839;P18583;P52737;Q8N8Z8;Q7Z6K1;Q9Y2P0;Q96MW7;Q6P9G9;Q8IW36;Q13156;Q9BRH9;Q06732;Q86TG7;P28370;Q6ZMW2;Q6PI48;A6NDX5;Q96T37;Q9BSK1;P0CG31;Q8NA92;Q8N972;Q7RTT6;O94892;Q7L3S4;Q92670;O96006;Q96C00;A8MTY0;O75764;Q9UFB7;Q66K89;Q6ECI4;Q5T619;Q8TD26;O75362;O75626;Q96NL3;A6NKCO;P52298;Q96JL9;Q96IT1;Q96SL8;Q9Y473;Q9P243;O60930;Q8NB50;P38159;A6NNF4;P17025;Q6P280;Q8NCC2;P24278;Q7Z3I7;Q7Z7J5;O60224;Q9NSC2;Q15696;Q86UQ0;Q96C28;P23246;P26368;P15336;P51814;Q8N3J9;P41182;A8MUZ8;P57071;A6NE21;Q15697;Q5CZA5;Q14119;Q9UJU3;Q9Y2P7;O75467;O60264;Q9Y6Q3;P51523;Q5SXM1;Q6PDB4;Q8N8E2;Q6AZW8;Q96K80;P19447;Q14527;Q76KX8;A6NN14;Q6IV72;Q68DY9;Q9H963;Q5T200;Q7Z7L9;A8K8V0;Q8N141;Q9UIE0;Q5VUA4;Q86U42;Q6ZMV8;Q96I27;Q8NCK3;Q9BS34;P31943;Q8TBZ5;Q9BSG1;Q15935;O75123;P0C7X

8358

5;B2RFX5;Q9BV97;Q9H9Z2;Q6AW86;O14628;P0CG24;Q8N0Y2;Q96PQ6;Q9NSJ1;Q8WTR7;Q86UE3;O75925;P16989;Q9BSN8;Q8WXB4;O75564;Q06730;Q7RTV3;O75391;Q8TBC5;Q9BY31;Q14498;Q8NC26;Q6NX49;P11161;Q5TEC3;Q86Y25;O43167;Q99676;Q9NU63;Q9UEG4;O75821;Q96PE6;Q9UNY4;Q9BWM5;Q8WTV1;P46100;P52743;Q96K75;Q15072;Q13105;P52747;Q13887;Q9UKT9;Q96PM9;P17035;Q8TAU3;Q9NSD4;P33240;Q5JVG8;Q01844;P98182;Q8N7K0;Q86YF9;P17039;Q12874;Q6P2D0;Q8N393;Q9HCX3;Q6ZNH5;Q9Y5S9;Q6P9A1;Q14839;Q8NCE0;Q5VZF2;Q86UP8;P12956;Q96LW9;Q9ULV3;Q16670;P10073;Q9Y2Q1;Q68DY1;P49910;Q8N988;Q9NYT6;Q9NS91;Q9HBE1;P52741;Q96IR2;Q8N3C0;P17021;Q12986;P98168;P0CJ78;P41208;Q96GE5;Q5F1R6;Q9HAZ2;Q9H9D4;Q96K58;Q03938;Q93062;P17041;Q9H2U1}

Pathogen[ P14079] interacts with 972 human partners: {Q969J2;Q15637;Q15916;Q9BWM5;P98168;O60225;P07199;Q8IYX0;Q8NHY6;Q9NV72;Q92664;Q14585;Q6AW86;P15622;P52738;Q96C00;Q9UJN7;Q9UQR1;Q0D2J5;Q96CS4;Q8NA92;Q9UK12;Q9NSD4;Q15560;Q8N2W9;Q9HBT8;P52741;Q12986;A6NNJ1;Q8IZC7;Q9H668;Q9NQX1;Q3SY52;Q8IV48;P51504;Q8N9Z0;Q8N895;Q8N9Q2;P17098;Q8IX12;P08151;O75123;Q9NXP7;Q9HAZ2;O75467;Q68DY9;Q9UL40;O95628;Q9H7R0;Q9UKV8;Q06730;Q9BQ15;Q53GI3;O75346;Q9HBT7;Q8TAT5;Q9Y3B8;Q96I25;Q96JB3;Q8WV9;Q15287;Q5MCW4;Q9H0S4;A8MTY0;P52742;Q8TD23;Q5HYK9;Q96IR2;Q8WTR7;Q9UL36;P60842;A6NEJ1;Q8TBK6;Q8N8L2;P0CG31;Q96EV2;Q5T1R4;Q9ULG1;Q15056;A8K8V0;Q9UDV6;Q8WXB4;Q9Y2Y4;P14373;Q96LW1;Q9UC06;Q96T37;Q9Y2G7;O95125;Q7Z340;Q9UK13;Q8NDQ6;Q8NDP4;Q9BYX4;P0C7V5;P10072;Q8N141;Q9UL18;Q9BTE6;Q96K62;Q9UJW7;Q96H86;P21506;Q9NQV6;Q13106;Q7Z7K2;O14771;Q9Y6Q3;Q9H9G7;C9JBD0;Q49AG3;Q8TF50;Q96MU6;Q96QC0;P10073;Q7Z7L9;O75821;P35637;Q5VZF2;Q6NT04;Q9H8M2;Q9ULV3;O43422;Q9UNY5;A6NK53;Q9UL59;Q8N587;Q6ZNA1;Q92917;Q8N9F8;Q75437;P52747;O75928;Q15776;Q6ZNG9;Q13118;Q86UQ0;Q6ZNG0;Q13148;P08048;P17019;Q96ZMY9;Q9Y3A4;O60481;Q7Z2W4;Q3ZCX4;Q6ZT77;O15535;Q9UPR6;Q9GZU2;A6NIJ5;Q9Y6X2;Q9HCG1;P17035;Q9Y5N5;Q9Y2P0;O75626;Q9C0B9;Q9Y2Y9;Q6P9G9;Q8TA94;O43309;Q15911;O75362;P17010;Q9HCI6;Q9Y2Q1;P0CB33;Q9BR84;Q14103;P67809;Q8IYD8;P47974;Q8N782;Q9NUA8;Q7Z6K1;O95789;Q5SVZ6;Q9UFB7;Q7RTT3;P17022;P82979;Q9H0M5;Q3KP31;P17041;O60290;Q8N393;Q5TEC3;Q5T0B9;Q99676;A8MT65;Q8NCP5;Q9AN1;Q8NB42;Q14151;Q2QGD7;Q10570;Q32M78;Q6PDB4;Q9UNY4;P17039;P52298;Q5EBM4;A6NKC0;Q9HCK1;Q92804;P0CH99;Q6NUN9;P51522;Q9ULM2;Q5JVG8;Q96I76;A6NHJ4;Q12874;P28370;Q9NTW7;O75290;Q9P2Y4;P52746;Q7L2E3;Q6ZNS7;Q9NVV9;O75792;O75564;Q13129;Q9H4L7;Q13243;Q8N1G2;Q63HK3;Q9HCK5;Q9Y5S9;Q7Z3K3;Q6ZR52;Q16531;Q8NG50;Q6PJT7;A6NNH2;Q9BUJ2;Q9UL41;Q6NZY4;Q8NEK5;Q8N5A5;Q8IYB9;Q9H707;Q96SR6;Q96PM9;P33240;Q9BSV6;P52737;P35789;P51815;Q86VZ6;Q14591;Q6ZR7;Q7RTB8;P51532;Q8NCA9;A8MUV8;P17024;Q9P255;Q14592;Q9GZX5;Q7Z4G4;Q3MJ62;P26369;Q9H5L6;Q9NSJ1;Q96NG8;O14646;Q6ZN79;Q99684;Q96N20;Q6PEW1;Q9UID6;Q93062;Q68DI1;Q92698;Q8N0Y2;Q8N720;Q14966;Q9H7X3;P51531;Q96SE7;O94919;Q5VLY5;O43167;P14866;P14868;Q5T200;Q05516;P23246;P07910;P0CG23;Q5T3I0;Q9Y5A6;Q13310;Q9NRR9;Q13838;Q9GZR2;Q96KX8;Q96D70;Q9BWE0;Q02447;Q13105;Q5T5D7;Q3MIS6;Q9BYN7;Q6ZRS2;Q8NC26;Q92785;Q9NR83;Q9P2J8;Q92679;Q9Y2T7;Q9639;O60281;Q8N859;Q9UK11;Q8N7M2;Q96K83;Q13472;Q6PG37;Q8N883;Q03923;Q96NI8;Q9H2P0;Q96ZM57;Q8IYI8;Q06732;Q5SVQ8;O43829;P18615;Q96MR9;Q6ZN55;Q6P2D0;Q9Y2P7;Q96NL3;Q8NCE0;Q3SXZ3;Q9UI6;Q14240;A6NGD5;Q96SZ4;Q96RE9;Q9BQA5;Q8WY91;Q96NG5;Q9P215;Q7L3S4;Q9NR56;O43830;Q96LX8;Q13156;Q14498;Q16600;O43298;P79522;Q8TBC5;Q969V6;Q15427;Q08211;Q7RTT4;Q9H9Z2;Q16385;Q9NYW8;Q9NU63;Q9UHX1;Q96AH0;O95453;Q96JM2;Q96JC4;Q6ZN06;Q86TJ5;P52744;P957071;Q8IY8;Q14249;Q9NQZ8;Q3KQV3;Q9NQ94;P17027;Q6EKJ0;Q00839;Q9BY77;O94892;Q15032;Q99612;Q16670;Q15072;O60315;Q49AA0;Q9BQ50;Q03938;Q96MN9;Q12873;Q8TF32;A6NDY2;Q9BV97;Q14588;A6NP11;Q86V71;Q3KNS6;Q6BEB4;P23588;P0CF97;P0C7W9;Q96ND8;P46100;Q9NWS9;P0CI00;Q9BRR0;P51814;O43776;P43243;A8MUZ8;P28698;Q8TF68;Q96GE5;Q96BV0;Q9UL58;P0C7X2;Q8TCN5;Q96JF6;Q9ULD5;Q9UC07;Q8NBB4;P19338;O15504;Q9UBL0;Q6V9R5;Q8WU90;Q8N1G1;Q8TAW3;Q92670;Q16629;Q9Y2T7;Q9P2D1;Q8TD26;Q13888;Q15929;O15060;Q86Y25;P26599;Q6ZN19;Q5VV52;B4DU55;Q96MW7;Q9NZL3;P55795;O75152;P12956;Q9Y534;Q03924;Q8NCN2;Q96N22;P41182;Q7Z6E9;Q86UE3;Q8NAP3;Q8IZH2;P10074;Q9UP68;Q96CX3;Q3ZCT1;P17097;Q86UP8;Q5TAX3;Q9P1U0;P58317;Q96EG3;Q8WYQ9;P49756;Q9Y3T6;A6NK75;Q9P2F9;Q03936;Q147U1;Q08ER8;Q8TA86;Q9BX82;Q9NXT0;Q9H6T0;Q15046;Q8TF39;O75373;Q9Y3Z3;O75764;Q5VTD9;Q9NP64;B1APH4;Q05481;P17026;P16989;Q9UIH9;A6NN14;Q9HCE3;P11161;Q08AG5;Q96K75;Q86YE8;Q8N972;Q9UKV3;Q9H963;Q6DD87;Q9ULH7;P17544;Q9HJC0;Q9P2Z0;Q6ZMV8;Q5SXM1;Q9H4T2;P11940;Q8NCK3;Q8TF20;P17032;P26196;Q02930;Q8N823;Q8N8J6;O14709;Q9NR11;Q6U7Q0;Q05519;Q8N680;Q8WTV3;O60384;Q6P280;Q68EA5;O43345;Q9Y473;P17017;Q9BRR8;P0CG40;Q12798;P08621;P51508;Q16587;P0C7X5;O75820;Q6ZS27;Q2M1K9;Q8N684;C9JN71;Q9H4Z2;O75534;Q66K89;P17031;Q9UEG4;Q9UKJ3;P17029;Q96SK3;P17021;Q6ZTB9;P16415;Q9NYT6;Q9H9L3;Q86WJ1;Q86V81;P15336;Q14593;Q86U42;Q6R2W3;Q96JM3;Q96NC0;Q8IVP9;P0C7W8;Q16384;Q96I59;Q15424;Q96LW9;A6NEW6;P51523;Q15697;Q8N2I2;O00148;Q969S2;P52743;P24278;Q16630;Q9Y3M9;P17020;O14978;Q8WV37;Q9Y4A0;Q9Y6R6;Q4V348;O60506;Q9UK10;Q15696;Q9P243;Q9Y2X9;Q8TF45;Q8NDX6;Q86XU0;Q9UB9;Q9UFF9;Q9UJQ4;P09012;Q8TB69;Q13360;P49910;Q9BUL9;Q9Y6M1;Q8N4W9;Q86W11;Q96FI4;Q9HCK8;P15822;P51786;Q92889;Q5JVG2;Q71RC2;Q8IX07;Q9UJW8;P16415;Q9NYT6;Q2M3X9;Q8TBZ5;Q6P1S2;P56270;O00110;Q8NA42;Q15428;Q8N8U3;Q6ZMW2;Q7Z3V5;Q13351;Q99909;Q96T92;Q92618;Q8NEP9;Q96B70;Q17RP2;Q49A33;Q9Y2Y1;Q7Z7J5;Q2VY69;Q14586;Q96NJ3;Q8NAM6;O60264;Q9HC78;Q8IVC4;Q9C0F3;Q8WTV1;A8MVS1;Q9HA38;Q07955;O43296;Q9NQ03;Q9UDV7;P06748;Q15973;Q9NSU2;Q9UIE0;Q9H0W7;Q6P3V2;Q6P1L6;Q86VK4;Q8NDW4;Q0VGE8;Q8NF99;P98169;P17025;Q13398;Q494X3;Q9Y4X4;Q9S34;Q7RTV2;Q8WVK2;Q96SL8;Q5VUA4;Q86UD4;P17038;Q6ECI4;Q8N3J9;Q569K4;Q8N1G0;Q8NA58;Q96JL9;Q86XF7;Q5HY98;A6NDX5;Q6P9A3;Q9UIV1;Q8N3J2;Q9Y2A4;Q86UZ6;Q8N5P1;Q9Y2K1;Q13064;O43361;P41208;Q96EK4;Q9BUY5;Q86TG7;Q9H7R5;Q9HCX3;Q6PK81;Q9BS31;Q14872;Q8TDD2;P15927;P31943;Q6ZSS3;Q14839;O75925;P0CJ78;Q9Y5R4;Q68DY1;Q9NUK0;Q01081;B2RFX5;P35659;B4DX44;P23193;Q9Y5W3;Q5TYW1;Q96PE6;Q96AZ6;Q9BYG3;Q8N554;Q9BSK1;Q86VM9;Q9UII5;Q5HYM9;Q9Y2N5;Q49X44;Q8N5L8;Q96KR1;Q2M218;Q86WZ6;Q96PQ6;Q8IYN0;B4DXR9;Q96MX3;Q9H582;A8MXY4;A8MWA4;Q6AZW8;O15042;Q86YF9;Q7Z2F6;Q96F45;Q5T619;Q8N9K5;Q92499;Q96SQ5;Q96FC9;Q96BK5;Q9HCZ1;Q9Y2H8;P17014;Q96C55;Q15928;Q8IW36;A6NJQ4;Q6ZNH5;Q14590;Q9NPA5;Q14584;Q14011;O75132;Q8N988;O75607;P36508;Q9BRH9;Q03468;Q9H8G1;Q96GM8;Q9NQV7;Q9NZV7;P38935;Q9HAH1;P52597;P62633;Q43390;O15015;Q7KZF4;P02386;Q02386;O15226;Q8IZ20;Q96N38;P0CG00;Q8NEA6;Q8N184;Q9P2N5;Q9NPC7;Q96K58;O95201;Q9NWB1;Q9H7S9;Q5EBL2;A2A288;Q96BR6;Q6PF04;Q9BUG6;O00425;Q9C0G0;P54098;Q6B0B8;Q499Z4;Q7L945;P17040;P98182;Q9GZV8;Q8TD17;Q9UKN5;Q9Y2L8;Q9BT49;O95600;P49588;Q14929;Q

96N77;Q12901;Q96K80;Q6NX45;P13682;Q86XN6;A6NJL1;Q9BSG1;Q8N1W2;P15621;Q9H609;Q9UUJ3;Q5F1R6;O60930;Q6PI48;Q13127;Q52M93;Q6ZQV5;Q6ZNG1;Q96DT7;Q96IT1;P25490;Q9UM63;A6NE21;P52756;Q8IYL2;Q2M3W8;O75494;Q5JUW0;Q15233;P52740;Q9UDW3;Q7Z3I7;Q96HQ0;A6NFI3;O14901;Q8NB50;P52736;Q9NVV1;Q6P9A1;Q15935;Q9NX65;O95780;P62269;Q86YD7;Q6ZMS4;P18583;P36954;O96006;P17030;Q9H5H4;Q504Q3;P86452;O60765;Q8N8C0;Q15940;Q9NW07;Q8NE65;P10075;Q8N7Q3;O95625;Q96H40;P0CG24;Q96S3;Q9NQX6;Q9BZE0;Q92615;Q4W5G0;Q9HBE1;Q9H9D4;Q8N3Z6;Q8NDT2;Q5FWF6;Q96C10;P49711;Q96N95;Q8TC21;O60304;Q96PK6;P17023;Q6ZLN17;Q969W8;Q9Y2V2;Q9Y462;Q8NFT6;Q9BY31;Q8IY51;Q8WW38;Q9HCL3;Q8TAU3;P37275;Q8NEM1;Q07352;P19447;Q3SY56;Q9UGR2;O95391;Q9BU19;B7Z6K7;Q9UBU7;A8MQ14;P0C7X0;Q14587;Q6ZSB9;Q09FC8;P31483;O14628;Q9NSC2;P22626;Q8N7K0;Q8N8E2;Q8NI51;Q6IV72;Q8NBF1;A6NM28;Q96N58;P84103;Q9ULJ3;Q7Z398;Q96NJ6;Q8IWZ8;Q02446;O60224;Q8TF47;Q9Y2K5;P30622;P38159;Q8IZ26;Q5CZA5;Q96I27;Q9H116;Q9UKT9;Q6IQ21;Q6NX49;Q3L8U1;Q8NDV7;Q96GC6;Q96T58;Q9UJL9;Q5JNZ3;Q6ZLN11;Q53EQ6;Q8NAF0;Q9Y2D9;Q14119;P17028;Q9COD7;Q8TAQ5;P55884;Q8TAF7;P0CJ79;E7ETH6;Q96C28;Q66K41;Q86T29;Q6NSZ9;Q8WTP8;Q17R26;Q9H6B1;O75391}

8359 Pathogen[ P03383] interacts with 543 human

partners: {Q969W8;Q96LX8;Q9UQR1;Q7Z7J5;O14628;O15504;O43167;Q9H7R0;Q8WTZ3;Q8NI51;Q5FWF6;Q5JVG8;A6NNF4;P16989;Q15935;Q07955;Q8NBB4;O75925;Q9NYW8;Q63HK3;Q8TA86;Q96BR6;Q15287;O95625;Q96SK3;Q14839;O75534;Q6ZN08;Q6PJT7;Q96SZ4;Q9HBD4;Q9BSG1;Q5SVZ6;O75494;Q9UK10;A6NK75;P08047;P06748;Q9BR84;Q9NZV7;Q9H7R5;Q9Y2P7;P14868;Q7Z6K1;Q9H0S4;O43390;Q49A33;Q9H9Z2;P17544;P56270;P19338;Q9NP64;Q9HBE1;Q9UL18;O60765;Q8WTV1;A8MVS1;Q9H8G1;Q9UNP9;Q15MWA4;P49711;P17022;P22626;Q86V71;Q96GE5;Q9H5H4;Q96SL8;P14866;Q5HY98;Q3KP31;Q15937;Q81072;Q14526;P17029;P0CG00;Q9H4T2;O75792;Q9HCL3;Q8WW38;O75437;A8MXY4;Q12986;Q13838;Q96N18;Q13888;O96006;Q9Y5S9;Q92670;O75362;P51815;P23193;Q8N7M2;Q9BRR0;Q13360;P27694;A8MTY0;P55795;Q8TD23;Q05481;Q9Y2Y9;Q96H40;Q2M3W8;Q8N4W9;O60290;Q6ZLN06;Q6ECI4;Q6P3V2;Q9NR56;Q9UK13;P51508;P41208;Q9BYN7;Q8IYL2;Q8N3J9;Q6ZLN17;P52744;P28370;B4DX44;Q8NEP9;Q10570;Q5CZA5;Q8TF20;Q76KX8;Q92841;Q9UHI6;P37275;Q8NDQ6;Q96N77;Q9UL58;Q96BK5;O14709;Q3MJ62;Q8NCE0;P38919;Q12798;Q96KR1;Q86TG7;Q12901;Q9C0F3;P35789;Q9UFF9;Q12874;O14646;P26368;Q13243;Q9HCK5;Q8NA42;Q6P9G9;P17019;Q6IQ21;Q96N20;Q9Y2Q1;Q8WXF1;Q96N95;P26196;Q03923;Q8N988;P11940;P31943;Q3MIS6;Q96SE7;Q969V6;Q86XF7;Q05516;P28698;Q9GZX5;Q8TB69;Q07352;Q86V81;P0C7X2;Q9P0L1;P17038;Q13435;Q5T200;P15621;A6NK53;Q86Y88;Q8WV37;Q9HAH1;Q8N2W9;Q6NZY4;P51504;Q8N587;Q6ZR52;Q96EK4;Q13064;Q15560;P59923;P17098;Q9NQX1;B4DU51;Q6NSZ9;P0CI00;Q16385;P18146;Q9NTW7;Q13398;Q66K89;Q53GI3;Q9UK11;Q9Y2T7;P38159;A2A288;Q49AA0;Q8TAF7;Q8IYI8;Q14872;Q9UKJ3;Q9Y2L8;O95628;Q16629;P17014;Q14588;Q7Z3V5;Q5TAX3;Q96LW9;A8MUV8;A8K8V0;Q8TF47;O95201;Q96D70;Q9HAZ2;Q9HCG1;P52746;Q499Z4;A6NDX5;Q7L2R6;Q9BTE6;P46100;Q8N684;P23588;Q5VUA4;Q6ZNA1;Q03112;O14978;O15015;Q12873;Q9BSV6;Q8IYX0;Q8NB50;P15927;P86452;O75607;Q9H963;Q96MR9;Q9UHX1;P98168;B4DXR9;Q8N895;P52747;P33240;Q15928;Q96PK6;Q9NVV9;P18583;A6NGD5;Q96ND8;Q9UDV6;Q53EQ6;P84103;Q9UID6;A6NJL1;Q8NEM1;Q9NV72;Q5JNZ3;Q96N38;P17010;Q9UNY5;Q32M78;Q9H6T0;Q96MN9;Q02447;P54098;Q8N3Z6;Q7RTT5;Q13105;O95125;Q08AN1;P35637;Q9UKV3;Q03468;Q01130;Q8WVV9;Q2GZU2;Q9BQA5;P17040;O75290;Q96I59;P52742;P17032;P0CH99;Q96N22;Q8N859;Q9Y2G7;P17036;P24278;Q96LW1;Q6PG37;O43345;Q9B82;Q7KZF4;Q52M93;A6NHJ4;Q9P2J8;O95780;O60304;Q15046;Q9Y5N5;Q14103;Q7Z3K3;Q9H9L3;Q6ZNG1;Q9ULH7;O95376;Q9NSC2;P52743;P49756;P62269;Q9Y2K5;Q8NF99;Q9Y6X2;O60225;Q9ULJ3;Q6IV72;Q8N5A5;Q15697;Q8N7K0;Q86UE3;Q68DY1;Q9UKN5;P51531;P15822;Q9UIV1;C9JBD0;Q01081;Q5VIV5;Q9BRR8;P10074;P10073;Q6U7Q0;Q96C28;A8MUZ8;Q03936;P82979;Q9Y462;Q15929;Q9H7S9;Q9BY77;Q8NE65;Q96GM8;Q8N8C0;O43829;Q9UKV8;Q96IT1;Q3ZCT1;Q8N9Z0;Q8N972;Q8IX12;Q8TF32;Q68EA5;Q96T58;Q96684;Q8WVK2;P26651;P52298;P52737;Q96IR2;A6NN14;Q6ZMS7;P09012;Q5SVQ8;Q16670;A6NP11;Q3L8U1;Q9H116;Q96GC6;Q9H9D4;O15535;Q9HCK8;P62633;Q494X3;Q86XN6;Q9UC06;P11161;Q05519;Q8N0Y2;Q5HYK9;Q96QC0;Q8N782;P0C7V5;Q9BUJ2;Q5TEC3;Q86YF9;Q6P280;Q6ZMY9;O43309;Q9HBT7;Q96NJ6;Q8NAP3;A8MT65;Q09FC8;Q9P255;Q99909;Q8IYW8;Q9UII5;P51522;Q7RTV3;P49910;Q9Y2D9;Q8IW36;O43776;Q8WTR7;Q9BUN9;O60930;P51532;Q96SR6;Q6PI48;Q9UKT9;O14771;Q8NDT2;P52736;Q7RTT6;Q15233;Q9UM63;Q13310;P38935;Q9Y5A6;P07199;Q6R2W3;Q8IYN0;Q14151;Q92785;O00425;Q99676;B1APH4;C9JN71;Q9UC07;P23246;P51786;Q969J2;Q16531;Q13148;Q9UBB9;Q8TAQ5;Q8WU90;Q15424;Q9Y2X9;O75152;Q13156;O75132;Q66K41;P15336;Q92499;Q2M1K9;O60481;Q01844;Q9Y534;Q9NZL3;Q15776;Q5SXM1;Q9BUL9;Q9Y2A4;Q02930;Q08ER8;Q6ZLN0;Q9Y2V2;Q86W11;Q08AG5;Q2QGD7;O95453;Q86U42;Q9UL41;Q14585;P51523;Q96AH0;Q8N5L8;Q8N720;Q6ZLN79;Q8N7Q3;Q8N141;Q8TA94;P17028;P67809;Q9UL40;Q15637;Q96PQ6;Q9NSJ1;P09234;Q9BUY5;Q6P9A1;Q8WXB4;O75564;O75391;Q92917;Q00839;Q8NC26;P08621;Q6V9R5;O75346;Q9BT49;Q9UNY4;O75821;P52597;Q16384;Q9UBL0;O95391;Q8NHY6;P16415;Q9Y6R6;P18615;Q9Y473;O15226;Q9BUG6;P98182;Q9H9G7;Q6ZMV8;Q8N823;Q96QE5;Q8TF39;Q8N1G2;Q2VY69;P13682;P12956;Q13127;Q9ULV3;Q6ZQV5;O00148;Q96NG5;Q14593;Q9P0T4;Q969S3;P52741;Q8NB42;Q7Z2W4;P0CB33;O75928;Q14498;Q03938;Q93062;Q8IYB9;Q13129}

8360 Pathogen[ P03410] interacts with 970 human

partners: {Q9NSD4;Q96EG3;Q9Y2P7;Q8N9Q2;Q9HCG1;Q7RTT6;Q96NI8;A8K8V0;Q6AW86;Q5CZA5;Q9H0M5;Q13838;Q9BWE0;P08048;O14771;Q92917;Q9Y2L8;Q9HC78;Q8N1W2;Q96JB3;O60224;Q6ZNG0;O14901;Q6ZNA1;P17031;Q5HY98;Q5SVZ6;O43309;Q6ECI4;Q96RE9;Q86SE8;Q6V9R5;Q5JVG2;Q71RC2;O60281;Q8NBF1;Q8N5L8;Q14588;Q96BR6;Q5EBM4;O75290;B2RXP5;Q9BYN7;Q5JNZ3;P23246;Q8TAU3;Q8IYN0;Q9NYW8;P0C7V5;Q00839;Q15427;Q8WTP8;Q96FI4;Q9UBL0;O75925;Q12873;P0C7X5;Q9UDW3;Q9HAH1;Q6ZLN01;Q5T619;Q9UL41;Q01081;Q03112;Q6ZMY9;A6NNJ1;O95639;A6NN14;Q32M78;E7ETH6;Q9UNY4;Q9NP64;Q9Y2Y9;Q13106;Q8N9Z0;Q8NDW4;Q9NZL3;Q8WY91;Q9UFF9;Q9UDV7;Q14593;Q14526;Q9GZR2;P26368;Q10570;Q9UK13;Q9Y3B8;Q8N8E2;Q96N58;Q2M3W8;Q8N8Z8;Q9H4L7;Q86YD7;Q14103;O96006;P16415;Q96N22;Q13360;A6NE21;Q15697;O15042;Q8IX12;O75373;Q96PK6;O95780;Q5VUA4;Q86VM9;P0CJ79;Q8N7Q3;Q14929;Q8TF68;Q9Y534;Q9BTE6;Q9UKV8;Q8N3C0;P0CH99;P17040;O95628;Q8TCN5;P30622;Q96QC0;Q96H86;P15621;P18615;Q9NPA5;P37275;Q15637;Q93062;P36954;P13682;Q96JM3;Q9H4T2;Q8N587;Q9UL59;P36508;P58317;Q96C28;Q8N7M2;Q96N38;Q9BRH9;Q86XF7;Q15696;Q3MJ62;P98169;A6NDX5;Q8WTR7;Q8WTR7;Q96CS4;Q82804;Q9Y3A4;Q8IV48;Q9UDV6;Q9NWB1;Q9HAZ2;Q9676;Q9BQ15;Q9NVV9;P15822;Q9H7R0;Q96K80;P52738;Q9HBT8;Q92698;Q16629;Q15973;P52740;Q8IYD8;Q9NV72;Q76KX8;Q5T0B9;Q66K89;Q96SZ4;Q9BQ50;P22626;P98182;Q8TDD2;Q15233;Q8N680;P11940;Q9H9D4;Q96SQ

5;Q96JL9;Q02447;P16989;Q9NVP1;Q9BUJ2;Q6PJT7;Q9C0D7;Q16600;O95125;O60481;Q06730;Q92670;O15060;Q9BSG1;Q569K4;Q17RP2;Q8N8C0;P0CG23;Q6AZW8;Q6ZMW2;Q6P3V2;Q15287;Q9UC06;Q9UII5;A6NFI3;Q15776;Q8NB50;Q9C0G0;Q9Y6Q3;Q9ULH7;P10073;Q9UL18;Q0D2J5;Q9BQA5;Q9GZU2;Q3ZCX4;Q6NZY4;Q8TAW3;Q9NQX6;Q8N4W9;Q8N3J2;Q5TAX3;Q96KR1;Q8TAQ5;A8MXZ1;Q15393;Q8TD17;Q8N3J9;Q3KP31;P49588;A6NNH2;Q9Y5S9;Q96N77;Q6PG37;Q8NCN2;Q8N8U3;Q8IYB9;Q9NR11;O14646;Q075152;P35789;Q76FK4;A6NEW6;Q8N9F9;Q8IYX0;Q5VZF2;Q7L2R6;Q96K62;Q96PQ6;O15504;P35637;Q86WZ6;Q9UPG8;O75792;Q6ZNL1;Q9NYT6;Q8NBB4;Q8TF50;P17017;Q8TF45;Q9NRN9;Q8NFT6;Q5VYI5;Q969S3;Q96ND8;Q8IYI8;Q8IW36;P24278;Q53EQ6;Q9HCJ0;Q2M218;Q6P2D0;Q9BYX4;Q08ER8;Q8TF39;Q5FWF6;Q9P2K5;Q9UK11;Q9ULG1;Q17R26;Q8NHP7;A8MT65;P62269;Q8NG50;Q8NDV7;Q7Z4G4;A6NHJ4;Q9ULJ3;Q5HYM0;P0CB33;Q9NXT0;Q9BU19;Q9Y6X2;Q96JM2;O00148;Q6LX8;Q9NR56;Q9UIH9;Q86XU0;O43776;Q2VY69;Q9H4Z2;Q6IQ21;Q9HCI6;Q96GC6;O75928;Q9HCK1;Q9NPC7;Q96T37;Q86UQ0;O43830;Q9C0F3;Q2M1K9;Q9NZV7;P57071;Q0VGE8;Q9H963;Q96N95;Q6NSZ9;Q9Y2K1;A2A288;O75437;Q6ZSB9;Q8N2W9;Q9UL58;O14709;Q9H668;Q12798;P26599;Q96K75;Q9Y2V2;Q92785;Q8N720;P52741;Q92889;P82979;Q6NX45;Q9UJL9;Q9NSJ1;Q6PF04;Q9BT49;O75764;O94892;Q9UBB9;P06748;Q9Y3M9;Q5F1R6;A6NM28;Q9H116;Q03923;Q6PK81;Q9P243;Q9HCL3;O00110;Q68DY1;Q9NSU2;P14868;Q9H7X3;Q9H0S4;Q99684;Q9H9G7;Q9UIE0;P23193;Q9NXP7;Q53GI3;Q03468;Q8NB42;O60304;Q6U7Q0;P26651;Q09FC8;Q06732;Q6ZNL9;P17025;Q52M93;Q9UIV1;Q8TAT5;Q9NWS9;Q9BSV6;P0CF97;Q8NEM1;P51523;Q6ZN55;Q6ZT77;Q7Z2F6;Q8IYL2;Q96HQ0;P14866;Q9P2N5;Q96EK4;Q5H9K5;P09012;Q96T58;Q8WW38;P25490;Q96LW1;P52746;Q8WVV9;Q15424;O15226;Q15560;Q6IV72;P17036;Q8TC21;Q9NTW7;P51508;Q3MIS6;Q9H707;Q96SR6;Q5TEC3;B4DXR9;Q8NEP9;Q5JUW0;P17544;Q5SVQ8;Q16670;P35659;O60930;Q5EBL2;Q9H8M2;P17010;Q8NLG0;Q9UQU1;Q96D70;A6NKC0;Q96QE5;Q9GZV8;Q9P226;Q13148;Q14587;Q96PE6;Q15928;Q9BRR0;P08621;P55884;Q8TAF7;Q969V6;Q8N8L2;Q96NG8;Q86T29;Q9ULD5;A8MXJ8;Q8TBK6;Q02930;O95789;Q96MN9;P10072;O15535;O60384;P67809;A8MX19;Q6ZN06;Q96BV0;Q14590;Q9UK10;Q9BUG6;Q8IZH2;Q13127;Q8WXB4;P17022;Q96GE5;Q5SXM1;Q9UKT9;Q15032;Q6ZMS7;Q9Y2X9;Q6ZMS4;Q08AN1;P17029;Q7L3S4;Q8IVP9;Q9UMR2;Q7Z7J5;P12956;Q9C0B9;Q8N823;Q12986;P07910;Q7Z340;Q8TB69;P08579;Q6ZRS2;Q96H40;Q8NEK5;Q7RTT5;Q6R2W3;Q3KQV3;P17098;Q14966;Q13472;Q6B0B8;Q8TBZ5;P38935;P49756;Q86YF9;Q9BWM5;Q6NUN9;Q8IX07;Q05519;A8MWA4;Q9Y2Q1;Q3KNS6;P51814;P10074;Q9UKV3;Q6ZNH5;Q9UL40;Q8WVK2;Q9NQV7;Q9BV97;O95453;P17026;Q9BS31;Q6EKJ0;Q9HCE3;Q02386;Q8NEA6;P0CG31;P43243;Q5T3I0;Q9UK12;P52737;Q96I27;Q7Z398;Q8NA58;Q8N5A5;Q9NUU7;O60225;Q96GM8;Q8N972;Q96B70;Q49AG3;Q4W5G0;Q7Z3I7;Q6ZNV9;Q9P2D1;Q6P9G9;Q9PDB4;Q969W8;P17028;Q8N883;Q49A33;Q8NCK3;Q9UKN5;P17019;Q7Q7955;P52597;Q96C00;Q8NAP3;Q9UNY5;Q03924;O75132;P52298;Q68D99;P17030;O75534;Q9BS34;Q9BUL9;P52743;Q9P0L1;Q96I59;P31943;Q13129;Q92499;Q9ULV3;P52736;A6NGD5;Q9UGR2;P0CI00;Q6NT04;Q7Z2W4;Q6ZXR2;Q96AH0;P51815;A6NKC5;Q15056;Q14872;O75362;Q9UJW8;Q96K83;Q9H5L6;Q5HYK9;Q9BYG3;P17014;C9JN71;P0CG24;P33240;Q68EA5;Q96SE7;Q8N1G2;Q9UBU7;Q8NA42;P79522;Q9UHX1;Q6P280;Q96AZ6;P17024;Q9H609;Q8N7K0;Q5T5D7;Q14119;Q15428;Q9IX06;Q6ZS27;P19447;Q9P215;P17020;Q99909;Q8WXF1;Q13156;Q9BUY5;Q96IR2;Q7L2E3;Q8IZ26;Q969J2;Q8NNDT2;Q9HCK5;Q86V81;Q96MX3;Q9H7R5;Q9BY31;Q9HCK8;Q8NE65;P31483;Q13064;P19338;Q9P1U0;Q147U1;P52272;Q9UM63;Q8N1G1;P0C7W9;Q9BRR8;Q8N5P1;Q96SK3;P21506;Q7RTV3;O43296;Q6P1L6;P18583;P86452;P17032;Q15046;P17027;P47974;Q9NQV6;Q3SY52;Q14585;A8MUV8;Q9GZX5;Q13118;P49910;Q46100;P60842;Q92618;Q86XN6;Q5VV52;P51786;B1APH4;P41182;Q14011;P51532;P0CG00;O15015;Q9HBT7;P38919;P87889;Q13398;Q5JVG8;Q16531;O75346;Q6ZRF7;Q96MR9;A2RRD8;Q9Y2Y1;Q96F45;Q9NW07;P49711;Q9Y6R6;Q6ZTB9;Q9H6B1;Q8N988;Q86WJ1;P09234;Q8NA92;P98168;Q5MCW4;Q86V71;A6NIJ5;O95625;O43422;O14628;Q8NI51;Q7Z7K2;P51531;Q96IT1;B4DX44;Q9ULM2;Q13888;Q8WQ9;Q86TG7;Q01130;Q9Y2Y4;Q8WV37;Q8NC26;Q92664;O75821;A6NJL1;Q9UC07;Q9HA38;Q9H6T0;P63135;Q14586;Q15940;Q3L8U1;Q96C10;Q66K41;Q8NCA9;O00425;Q9P2F9;Q9UJN7;Q9BY77;A6NEJ1;Q14151;P28698;Q7Z7L9;P17035;A8MUZ8;O14978;P59923;Q9Y2H8;P56270;Q9P2J8;Q5TYW1;Q8N684;A8MQ14;Q96NG5;Q7Z3K3;P07199;Q9UNP9;Q2QGD7;Q6ZSS3;Q9H9Z2;Q6ZN08;Q9H8G1;Q7KZF4;Q9Y2P0;Q14498;Q969S2;Q9Y462;Q3SXX3;Q86UE3;P08047;P27694;O60506;Q96FC9;Q9P255;P17039;C9JBD0;Q9UJU3;Q494X3;Q8TBC5;A6NKT2;Q8N9K5;O95201;A6NP11;Q9H7S9;A8MTY0;Q8TF20;Q9NX65;Q16384;Q9NQZ8;P15927;O75626;Q8TF37;Q86UD4;Q63HK3;Q15937;Q96BK5;Q6P9A3;Q5T200;O43829;Q6ZNL7;Q9Y4A0;P0C7X0;O75123;Q8N8J6;Q7RTT4;Q3ZCT1;Q8N782;Q9NUD5;Q96LW9;Q6ZQV5;Q8TF47;P84103;Q12901;Q14584;Q8N141;Q13105;Q49AA0;Q6ZN57;Q8TD26;P0C7W8;Q8TD23;Q15929;P17041;Q16630;O75564;Q86U42;Q8N3Z6;Q6PEW1;Q9Y2T7;Q96MU6;Q9Y3Z3;Q8NCEO;Q96N20;Q6DD87;O60765;Q86YE8;P55795;Q7Z6K1;O60264;Q8NDP4;Q8TA94;Q8IY51;P0C7V4;Q9NSC2;Q9BR84;Q9UID6;Q9Y5N5;Q03936;P18146;Q96K58;P17021;P15622;P62633;P52744;P51522;P17023;O75820;Q8N895;Q5VTD9;Q96JC4;Q8TBZ8;Q13243;Q8TBN3;Q05481;Q8N859;Q9BX82;Q12874;Q9HBD4;Q9Y3T6;Q7L945;Q14592;Q96MW7;Q6P9A1;Q96JF6;Q96CX3;A8MXY4;P38159;P10075;Q96I76;P0C7X2;Q9UJQ4;Q8IWZ8;Q8TA86;Q9UL36;P41208;Q14839;P15336;Q9UEG4;Q9NQX1;P11161;Q9UHI6;Q8N2I2;Q08211;P0CJ78;A8MVS1;Q9NU63;A6NNF4;Q68DI1;P54098;Q504Q3;O43361;Q8NDQ6;Q9Y2D9;B4DU55;Q96SL8;Q9UKJ3;Q13310;O75391;Q4V348;O75467;Q9Y5A6;Q6PI48;Q6ZMV8;Q9UPR6;Q9Y2K5;Q14591;O43345;Q8WU90;Q9HCZ1;Q6ZNG1;Q9Y5R4;Q9Y2G7;O43167;Q96PM9;Q15072;Q86UP8;Q07352;Q9NUA8;Q86TJ5;Q9Y2A4;Q92615;P52742;Q9UJW7;Q9H9L3;Q6ZRS2;P17038;A6NDY2;O60290;Q7RTT3;P17097;Q96I25;P23588;Q8NHY6;Q9H5H4;Q7Z3V5;Q6ZNG9;O95391;Q86W11;Q86Y25;Q499Z4;P28370;Q9HBE1;Q8N393;Q2M3X9;Q8N184;Q14240;Q14249;A6NJQ4;Q9Y473;P52747;Q96NJ6;Q8IVC4;Q9HCX3;Q9Y6M1;Q13435;O43390;P51504;B7Z6K7;Q8N9F8;O75494;Q96NL3;O75607;Q8IWY8;Q8IZC7;Q8N0Y2;Q16587;Q08AG5;Q9UFB7;Q8WTV1;Q9H0W7;Q15935;Q03938;Q16385;Q6NX49;Q9BSK1;Q9H2U1} Pathogen[ P14075] interacts with 502 human partners: {Q3L8U1;Q0D2J5;O95453;Q9NZL3;Q9C0F3;Q494X3;P17029;Q68DY1;Q9NTW7;P82979;Q8NI51;Q9NSC2;P22626;O14646;Q8N1G2;Q8TAQ5;P51815;Q969S3;Q96GM8;Q15929;Q6V9R5;Q7RTT5;O75564;Q05519;P14866;Q8WXF1;P54098;Q9BSV6;O75391;Q9Y5A6;P19338;Q969J2;P35659;A8MTY0;Q96GE5;Q9GZU2;Q5SVZ6;P23246;P12956;Q8N3Z6;B4DXR9;Q8N141;Q13105;Q6ZN08;Q9UKJ3;Q9UM63;Q8N5L8;P51523;Q9HBD4;Q14526;P16989;P52737;P0C7X2;Q9NV72;Q96KR1;Q9UQR1;Q8NEM1;P08621;O75607;Q8WU90;Q8NC26;Q16385;P18615;Q96NJ6;Q2M3W8;Q9HCK5;Q9BQA5;Q14103;Q6ZN01;Q15928;Q86V81;Q13243;Q14593;P23588;P0CI00;A6NHJ4;O60481;P52747;Q96QC0;P49756;Q8NA42;Q14588;Q13064;Q86XF7;Q15697;Q8NB50;O60765;Q8NBB4;Q6ZNG1;Q9Y2A4;P51532;Q6U7Q0;Q9H0S4;Q12901;Q9UNY4;Q8TD23;Q6PJT7;P0CB33;P52736;Q96MR9;P07199;Q15937;Q96SZ4;Q9H9G7;Q9UKN5;Q9UHX1;O95391;P26196;Q9H7R5;Q9H116;Q7L2R6;O75362;Q6NUN9;Q9UID6;Q9Y2G7;P59923;Q96T58;P26651;Q6P9A1;P28698;

8361

Q8N782;P09234;Q9BQ15;P38159;Q9H7R0;P38935;Q96SL8;Q14839;P62633;Q9HBT7;O15015;Q96C28;P11161;Q6ZQV5;Q15428;Q96ND8;Q9UK11;P17036;Q92917;Q01844;O14709;Q9H9Z2;P18146;O60930;Q9NYW8;Q16384;O95625;Q6ECI4;O15226;Q3MIS6;Q01130;O75925;Q9HAH1;Q9Y2V2;P17019;P15822;O75821;Q53EQ6;Q9UNP9;A8MT65;Q93062;Q96IT1;O43167;P31943;Q5TAX3;Q8TAF7;Q12798;O75494;Q8WW38;Q8IX12;Q9BT49;P15336;Q8N2W9;Q9UL58;P15927;Q15560;Q9BRR0;O43390;Q8AN1;Q96N95;P0CH99;Q8NHV6;Q03936;Q13148;Q6ZMV8;Q13398;Q53GI3;Q86W11;Q8N7Q3;Q14585;Q9ULJ3;Q9UKV3;O75290;O75132;Q9Y2Q1;P17040;Q96D70;Q92785;Q16670;Q8WV37;Q9HAZ2;Q7RTV3;Q8N5A5;C9JBD0;Q73468;Q9ULD5;Q96NI8;P17098;Q96MN9;Q96BK5;A8MUZ8;Q8WTR7;Q13156;Q92499;P11940;P24278;Q86XN6;Q5TEC3;Q86VM9;Q00839;Q8IYI8;O95628;P46100;Q9HCL3;Q9UHI6;Q5VIY5;Q9BTE6;Q5VUA4;Q12986;Q13435;Q8NCE0;Q13310;Q92670;Q8TA94;Q9NQX1;Q9NZV7;A6NGD5;Q7Z6K1;Q12874;P23193;Q9NR56;Q05481;P33240;Q9UNY5;P52746;Q8N4W9;Q9P0L1;Q99909;Q9BUY5;Q32M78;Q96N22;Q96PK6;Q9Y2T7;P52742;Q8N7M2;Q99684;Q9BYN7;Q8N3J9;Q9HCG1;Q6NZY4;Q9H8G1;Q9BUJ2;Q6ZN17;Q9H963;Q9Y5N5;O95780;Q15424;Q8NDQ6;Q9UBB9;Q15637;Q9Y2D9;P86452;Q9H9D4;Q15287;P51504;P52744;Q9HCK8;Q8NAP3;P62269;Q6PG37;O43776;P51531;Q8IYX0;Q9UKT9;P0CG00;O75928;Q6IV72;Q8N587;Q8N895;Q96IR2;P26368;Q01081;Q16531;Q6R2W3;O14628;Q14151;P67809;O60290;Q9BR84;Q8NB42;Q8IYB9;P14868;P06748;Q3ZCT1;Q8TBK6;Q969V6;Q6ZN79;Q9UKV8;O14978;P28370;Q8TA86;Q96AH0;Q9Y2L8;Q07352;A8MWA4;Q8N9Z0;Q66K41;Q9BSG1;Q15935;Q03112;P52743;Q8N988;A8MUV8;A8MVS1;P41208;P17028;P27694;Q15233;Q7Z2W4;P09012;Q9UK10;Q66K89;Q6ZMS7;P98168;Q8NF99;Q9H9L3;A8K8V0;Q8IYL2;P17010;Q8NDT2;Q02447;O75792;Q6B0B8;Q9Y534;Q86YE8;Q96BR6;Q5HY98;Q9Y2X9;P15621;Q9UFF9;Q49AA0;P98182;Q9BRR8;P0C7V5;O15504;P49711;Q96LW9;Q96H40;Q96N20;Q92841;Q9Y5S9;O95376;Q8TF47;Q96PQ6;Q6P9G9;Q13127;Q8IWX3;Q3MJ62;Q9Y2P7;Q9UDV6;Q8TF39;Q05516;Q9NPF6;P35637;Q6PI48;Q7Z7J5;Q6ZN06;Q96GC6;P10074;Q7RTT6;Q9UL40;Q13129;Q09FC8;Q9UL18;P56270;P35789;O60304;Q96N38;P17022;P84103;Q96I59;Q7RTT3;Q7KZF4;Q969W8;Q49A33;Q8WVK2;Q9Y473;Q8TB69;Q96LW1;Q03923;O95125;Q86V71;Q9H7S9;O43309;P52597;O75534;Q8N720;O00425;P37275;Q13360;Q8WTT3;A6N53;Q2M1K9;P38919;Q9UK13;Q15046;Q8N684;Q9BUL9;Q96NG5;Q9UIV1;P17544;Q7Z3K3;Q9UII5;Q8WV9;Q9QGD7;Q13838;Q86U42;Q6ZMY9;Q9BX82;B4DX44;Q8N859;Q9GZX5;Q5FWF6;P49910;Q96N77;Q12873;Q16629;O60225;Q96EK4;Q8N0Y2;Q63HK3;Q9ULV3;Q86YF9;Q8WXB4;Q8WTV1;Q9Y6X2;Q9NVV9;Q96QE5;Q8NE65;Q14872;Q68EA5;P18583;Q15776;Q10570;O75437;Q9Y462;Q02930;P10073;O00148;Q5JVG8;O43829;Q8NEP9;Q96006;Q08AG5;Q9UBL0;Q8IWX8;C9JN71;O95201;Q76KX8;Q9Y2Y9;Q8N823;Q8N972;Q14498;O75346;A6NP11;Q8N7K0;Q6P280;B1APH4;Q9BY77;Q8TF32;Q9ULH7;Q07955;Q86TG7;Q9Y6R6;Q15072;P52298;Q9Y2K5;Q5T200;A2A288;O75152;Q9UL41;Q3KP31;O14771;Q9BUG6;Q9H668;Q9HBE1;P52741;Q9UC07;Q9H6T0;Q03938;Q13888;P08047}

8362

Pathogen[ P0C206] interacts with 969 human

partners: {Q9UID6;Q02386;Q9BUJ2;Q8N9K5;Q5VUA4;Q9NUA8;O43829;Q8N720;P28698;Q6NUN9;Q15072;Q9UNP9;Q13887;Q15287;Q9NQX1;Q3KNS6;Q86V11;Q9UFF9;Q9Y2X9;Q96JL9;Q9HOS4;A8K8V0;Q9UK12;Q6P9A3;Q9BUL9;Q49AG3;B1APH4;Q86VZ6;P67809;Q969W8;Q9H4L7;Q9P1U0;Q16385;O14628;P33240;P08048;Q9BZE0;Q9P2N5;Q9H5H4;O43309;O95201;Q9BSN8;Q8TC21;Q9Y3M9;Q8N988;P98168;Q96SE7;P0CB33;Q14587;O00148;Q96J4C;Q9HCK8;Q96T37;O60481;Q14103;Q96BV0;Q9NQV6;P31483;Q63HK3;Q9HCK5;Q7Z3I7;Q8TA86;Q96NI8;Q9UJN7;Q8WU90;Q96N22;Q504Q3;A8MX4;Q9BUY5;Q52983;O60384;P23193;Q14588;Q9HCK1;Q7Z398;Q9BYG3;Q03924;Q07955;Q9BUG6;P17026;P26368;P52298;Q66IR2;Q7Z2F6;Q6IV72;O95453;P38935;Q5JNZ3;Q9GZU2;Q5T5D7;Q8N883;Q96CS4;Q8TD26;Q7Z7J5;Q9BSV6;Q9NYT6;Q9Y6Q3;P98182;Q8NB50;Q9UJQ4;Q9HAZ2;Q9BQ15;Q8N9F8;Q13127;O95780;P13682;Q9NUU7;Q8IYN0;Q05481;Q15911;Q01081;Q3SY56;Q9NSU2;Q0VGE8;P51532;P26651;Q8IZH2;Q6PF04;Q8NCN2;Q08AG5;B4DU55;Q8NX49;Q9UC06;Q8N8U3;P36954;O75123;Q147U1;Q14586;Q96PE6;A6NKC0;Q9UII5;Q15696;P52741;A6NGD5;O95376;B7Z6K7;P11161;Q8IYX0;P17010;Q86VK4;P18583;A2RRD8;Q9NW07;P10074;O75607;Q9UK13;O43422;Q96SL8;P17544;Q96DT7;P0C7X5;O75925;Q9UDV7;P25490;Q8IY51;O75290;P15622;Q8N9Z0;Q9NSD4;Q02446;Q86UP8;Q8N8Z8;Q9HBE1;Q9UJL9;P79522;Q9UL41;Q14966;Q96F45;P49910;Q9UNY4;Q9P243;Q92664;Q6ZSB9;O60225;Q13156;Q86YF9;Q96N95;Q8TB69;Q9BT49;Q6PI48;Q49AA0;Q9C0B9;Q9NSC2;Q96I27;Q9UC07;Q9NR11;Q9Y2Y9;Q15697;Q5CZA5;Q05519;Q15233;Q5F1R6;Q7Z7K2;P51531;P41182;P17024;Q05516;Q6V9R5;P52743;Q08211;Q9UIV1;Q9H7R0;Q9B331;P09012;Q96K75;Q9NQZ8;Q9NR83;Q7L3S4;Q9NXT0;Q8IV48;Q9C0D7;P52737;Q9NR56;P59923;Q8N5L8;Q8WXB4;Q9UK33;Q8IYI8;Q9Y2V2;Q9P2F9;Q9BY77;P14866;Q9Y2Q1;Q8IYD8;Q9UL58;Q9H9L3;Q9Y2D9;Q9BU19;Q8WTR7;P17019;Q5VIY5;Q6ZRF7;Q9NPA5;O95600;Q9P2D1;Q5T1R4;Q8N684;Q8WW38;P46100;Q8N8E2;Q9H5L6;A6NHJ4;Q8N2W9;Q86XF7;O94892;Q9H4T2;Q86T29;A2A288;Q9UM63;Q6ZS27;Q9Y2P0;Q9Y2K5;P0CF97;Q14011;Q96SK3;Q96M33;A6NP11;Q3MIS6;Q9UL59;Q8N1G0;O75764;Q8NI51;Q9Y462;P26196;Q6ZMY9;Q15637;P10073;Q03468;Q68EA5;Q96JF6;Q7RTT3;Q3SY52;Q9HXC3;Q9HCI6;Q8N680;P15336;P19338;Q6PDB4;Q86UD4;Q6ECI4;Q53EQ6;Q9UJW8;Q12901;Q969J2;P52738;Q9UIH9;Q13243;Q12874;Q16629;Q7KZF4;Q86U42;P17027;P54098;Q8WV9;P51508;Q92670;Q8NFT6;Q8N7M2;O60765;Q6ZRS2;Q9P215;Q5SXM1;O43390;Q9HCG1;O75467;Q9BS34;Q96C00;P15621;O75626;Q9NS91;Q9UKV8;Q8N7K0;Q569K4;Q9ULJ3;P51522;Q99909;Q8N0Y2;Q86YD7;Q8TAF7;Q01844;Q16531;P17023;Q03936;Q13398;P10072;Q9H668;O75494;C9JN71;Q7RTV3;Q14591;Q9UBL0;Q96T92;C9JBD0;Q9NQX0;O75437;Q14590;E7ETH6;Q6R2W3;Q68DY1;Q96QE5;P22626;Q96BK5;Q2VY69;Q8NE65;Q6ZN06;A6NNF4;Q86UE3;Q5EBM4;P30622;A8MQ14;A8MUZ8;Q9UBB9;Q5TYW1;Q8WV37;Q8NDV7;Q96H40;Q9Y2G7;Q9BRH9;Q9BQA5;Q86TG7;Q3MJ62;Q8NA92;O15226;Q9NX65;Q8N7Z3;Q9NRN9;O95125;Q8N3J9;P52740;Q8N1G1;Q9P2Y4;Q6P2D0;Q9UHX1;Q96K62;O94762;O95628;Q76KX8;Q9Y6X2;Q86TJ5;B4DXR9;Q9UKJ3;Q7Z340;Q9BWM5;P10075;Q9UJH3;Q96SQ5;P18146;P62633;Q9NZL3;Q8NEA6;Q8NEK5;O75534;P17025;Q8N2I2;P19447;Q9HBT7;O43776;Q3KQV3;Q5JVG2;Q16587;A6NJL1;Q06730;A8MTY0;Q32M78;P0CH99;Q6NSZ9;O75346;Q9NPC7;Q6P280;Q8IZC7;Q8N393;Q8N895;Q96N58;Q6P1L6;P17022;Q9BSG1;Q6ZMW2;Q6ZN17;Q9H8M2;P17029;Q8NDX6;Q9NQV7;Q14839;Q9HBT8;Q6ZMV8;Q6ZN17;P23246;Q9H7S9;P57070;O63014;A6NEJ1;Q5JUW0;Q9HCZ1;Q9UK11;Q96JB3;Q05215;Q16670;Q92785;Q8WTV1;Q13435;O60930;Q15916;Q5H9K5;Q13064;Q8NDW4;Q9NWS9;O14646;Q9NQ03;Q9H9Z2;Q96LX8;Q9UIE0;Q9H609;P0C7V5;Q9P2J8;Q96N20;Q92784;P17021;A6NE21;O43345;Q8NF99;Q8N823;Q49A33;Q969S3;Q6U7Q0;A6NNJ1;O43298;P36508;Q969V6;Q96PQ6;Q99612;Q9BRR8;A6NK53;Q6AW86;Q6ZT77;Q8TA94;Q13888;Q96N77;P38159;Q9NSJ1;Q03112;O60506;O43361;Q8TF20;Q9ULV3;P17035;Q13310;Q92917;P17010;O75564;P16989;Q8NAF0;Q15560;Q86UQ0;Q8NHV6;Q8IW36;Q9UNY5;Q499Z4;Q9UKN5;Q13838;Q15973;Q8NC26;Q9ULG1;Q52M93;O43296;Q86WZ6;Q8TF47;Q9UBU7;Q8IZ20;Q9C0F3;O00110;P0C7W8;P52742;P08047;Q9UEG4;A6NJQ4;P24278;P18615;A6NFI3;P52597;Q16630;Q9NZV



7;Q8N972;Q9UK10;Q12986;O75391;Q96MN9;Q9P2K5;Q96BR9;Q6PJT7;Q8N141;Q9H582;Q9BTE6;Q96KR1;Q14593;Q5TEC3;Q8N5P1;Q8WXP1;Q08ER8;P17032;P49711;Q8TD23;Q9HC78;P16415;P86452;Q7Z4G4;Q5HY98;Q92889;Q9Y2L8;Q9Y3B8;Q8TAT5;O75152;P17017;O75792;Q9P0L1;P52744;Q8TF50;Q96PK6;Q3ZCT1;Q9UQR1;P35637;Q9H4Z2;Q7Z3K3;Q96CX3;Q9BR84;O96006;Q9H963;Q76FK4;P17020;Q96NL3;Q8NCA9;P17039;Q6TEBC5;Q02447;Q8TF32;Q6ZSS3;P35789;Q9NV1;Q8N554;P17030;Q6NZY4;Q96IT1;Q9HCL3;O14771;Q9PEW1;Q8N7Q3;Q8IVC4;Q68D9;P0CJ79;Q9Y4X4;A6NK75;Q8N9Q2;Q96HQ0;Q02930;P17028;Q96GC6;P51523;Q7L2R6;Q8N8J6;O43167;Q9NXP7;P58317;Q6P9G9;Q8NBF1;Q96NJ3;Q86SE8;O60281;Q9HA38;Q6ZQV5;Q96JM3;Q96MU6;Q9BYN7;Q9H165;Q7Z3V5;Q92841;Q9Y6R6;Q9GZX5;Q8N782;Q6ZNG1;P55795;Q5TAX3;Q92804;Q15424;Q86XU0;Q06732;Q6ZR52;Q96FI4;Q5MCW4;Q14872;Q5FWF6;Q9UDV6;Q15937;Q6P9A1;Q86UZ6;Q8TAQ5;Q9Y5A6;Q9H707;Q8IYW8;Q8IWX8;Q13129;Q9Y5N5;Q8TF45;Q14240;O15535;Q8TF39;Q9BSK1;Q5HYK9;Q5HYM0;Q9H116;Q2M1K9;P28370;O14709;Q13148;Q14527;Q96T58;Q99684;Q9ULD5;Q8N8L2;O75373;Q8N587;Q96N38;Q9BY31;Q8N4W9;Q96MR9;A6NM28;Q16384;Q14592;Q86V71;Q03923;Q9Y2P7;Q8IX12;Q9H9G7;Q0D2J5;Q7Z7L9;Q9H6T0;O60315;Q8IZ26;Q8NA42;Q969S2;Q13422;Q09FC8;Q8NDQ6;P43243;Q8N859;P51786;Q15928;O95639;P84103;Q8IX07;Q9BX82;Q86Y25;Q9UL36;Q96BR6;P23588;Q9BRR0;Q86WJ1;P07199;A6NDX5;Q96C28;P35659;Q96NJ6;P0C7X2;O75362;P98169;Q6IQ21;Q9HC3;P41208;Q99676;P37275;Q4V348;P0CG31;Q9H7X3;Q6PK81;Q9UPG8;Q6ZN11;Q9NQX6;Q9H2U1;Q9NRZ9;Q96LW9;O14901;Q2QGD7;Q8NEM1;Q6ZN79;P17097;P17040;Q3SXZ3;Q14151;Q8NA58;O95625;Q9HBD4;Q96QC0;Q8NDP4;Q2M3X9;P27694;Q9UKT9;Q5VTD9;Q9NP64;P52747;Q53GI3;Q9HOM5;Q9C0G0;Q5EBL2;P51814;P51815;P21506;A8MT65;Q9UHI6;P15927;Q96H86;O15504;Q96K80;Q9P2Z0;A6NEW6;Q07352;Q8TBZ8;Q9NYW8;P52746;O15042;Q12798;Q9ULM2;Q3ZCX4;P06748;P49756;P0CG24;B2RXF5;Q8NCE0;Q8NB42;Q14584;Q6DD87;Q9UMR2;Q14585;Q96K83;Q9P0T4;O15015;Q6B0B8;Q17R26;Q8N184;Q9H2P0;Q9BYX4;P38919;Q14526;Q7RTT5;Q9NV72;Q96GE5;O75821;Q7Z6K1;Q9UFB7;Q96C10;P14373;Q6AZW8;Q13106;Q9Y473;Q6NX45;Q93062;P62269;Q8NCP5;Q6ZNH5;Q5T619;Q9GZV8;Q96SZ4;Q9GZR2;Q5SVZ6;Q96GM8;Q7Z2W4;Q8TF68;Q08AN1;Q86XN6;Q9H6B1;Q7Z6E9;O95391;Q8TCN5;P08151;Q13118;Q15929;P08621;Q5JVJG8;Q9NUK0;P87889;Q86XN5;Q5VV52;Q9NTW7;Q6ZNG0;P17038;Q01130;A6NN14;Q86VM9;P15822;Q8NB42;Q15776;Q66K89;Q8NCK3;Q68D11;Q6PG37;Q13105;P0CG00;P60842;Q9Y2Y1;P52736;A8MVS1;Q8IYL2;Q96MW7;Q92499;Q9Y6M1;Q96K58;Q9UGR2;B4DX44;Q96RE9;P12956;Q494X3;Q7RTT6;Q96PM9;Q14119;P17014;Q9NU63;Q00839;Q9Y2T7;Q92618;Q14498;Q8NEP9;Q8TAU3;Q8IYB9;Q96D70;Q6ZNA1;Q6NT04;Q15935;Q7L945;Q9UL40;O75820;Q96SR6;Q8TDD2;Q8TBK6;Q9UDW3;Q2M218;Q14249;Q14929;Q8TD17;P11940;Q5VZF2;Q96EK4;Q8WVK2;Q8N5A5;Q96ND8;Q8N1G2;Q96LW1;Q7L2E6;Q6EKJ0;O95789;Q8WY91;Q13472;Q6P3V2;Q9NUD5;P09234;Q9Y534;Q8NAP3;Q9P255;Q8TAD5;P14868;A6NDY2;P47974;Q9Y2A4;Q5T200;O14978;Q9H8G1;Q66K41;A8MWA4;Q6ZN08;P31943;Q9BV97;Q9BX63;Q8IVP9;P0CJ78;Q8NG50;Q4W5G0;A8MUV8;P51504;Q3KP31;O60224;Q6ZMS7;Q96EG3;Q5SVQ8;Q9ULH7;P17098;Q8N3C0;Q92698;Q6ZN01;Q9UJW7;P0CI00;Q5T0B9;Q16600;P17041;Q9HCK0;Q96NG5;Q9NVV9;Q96JM2;Q15428;Q9Y5S9;Q6WB81;Q12873;O60290;Q9UKV3;Q96NG8;Q96AH0;O60264;Q07RTT4;Q96I59;Q9UL18;P17036;Q8TBZ5;Q8N1W2;Q9Y2H8;Q9Y2K1;Q13360;O00425;Q8NDT2;Q15046;O15060;Q10570;Q2M3W8;Q86YEB8;Q3L8U1;Q9Y2Y4;Q9H7R5;Q9H9D4;Q6ZN19;Q03938;Q8N8C0;O43830;O75132;Q9HAH1;P56270}

8363

Pathogen[ P03363] interacts with 1010 human

partners: {Q1KMD3;A2RRD8;Q86TJ5;Q49AA0;O95376;Q9NQX1;Q16587;Q504Q3;Q5JUW0;Q15020;Q86XU0;Q15911;Q9Y5A6;Q9P0L1;Q8NB42;A8MQ14;Q5VTD9;O75123;Q9C0F3;Q9BQ50;P12956;Q8NHY6;O94762;Q5T0B9;P13682;O75820;Q3KNS6;Q99684;Q03923;Q9BX63;Q15233;Q6P9A3;Q8NCK3;Q6ZMY9;P35789;O14901;O75373;Q5SVQ8;Q6ZN17;P98168;P08048;Q13105;Q5SVZ6;P17027;P0CH99;Q3L8U1;Q13151;Q5VUA4;Q9NSD4;Q13595;Q8N9F8;Q86V71;Q6IQ21;P63131;Q99592;Q8N1G0;Q9H963;Q92917;Q9UJQ4;Q99909;Q969J2;Q9N988;Q4W5G0;Q8N2I2;P63119;Q96LW1;Q82698;Q8IZC7;Q8NE65;P19338;Q96N22;Q9NQ08;Q6DD87;Q9NWH9;P23246;Q8TAQ5;Q96T58;P27694;Q8WTV1;Q92766;Q6ZNA1;Q14929;Q9NQX6;P38919;Q7Z340;Q5T8P6;B4DU55;Q8N859;P0DJD3;O14978;Q6ZN06;Q86W11;Q8NA42;Q9NZL3;Q9Y2D9;Q8NAP3;P17021;Q10570;P17010;Q8IVP9;O43296;Q8NA92;O14771;O95780;Q96K80;Q86VK4;A6NK75;P52738;P10265;O75643;Q9NUA8;Q6NSZ9;Q8IY21;Q12901;O60481;P18146;Q13360;O95628;Q9ULG1;Q8NG50;O95453;Q9H9P5;Q6ECI4;Q6P2D0;O75764;Q8NEK5;Q02386;Q13148;Q96JC4;O60315;Q13435;Q02930;O95391;O60224;Q9BSV6;P98169;O75391;Q7Z334;Q9P2J8;Q86UP3;Q6NT04;P25971;Q96T92;P0CG31;Q99676;Q3ZCT1;Q6V9R5;Q9NW13;Q9H8M2;Q9C0A1;Q14526;A6NHJ4;Q96MX3;P14373;Q9UHI6;Q6NZY4;Q9H707;Q96NG8;Q9NVV9;O75607;Q9UC06;Q96SE7;P09012;A2A288;Q9BRR0;P08151;Q7L3S4;Q9H7S9;Q96K62;P86452;Q96JF6;Q9UKV3;Q14590;Q9Y2V2;Q9H4L7;Q86UE3;Q96BK5;P17098;Q08AN1;Q15928;Q8WVJ3;Q6PG37;Q9Y2K5;Q96I59;O43167;Q6ZR52;Q96EK4;P14868;Q8IX01;P51991;Q5EBL2;P0CG00;Q96NJ6;Q03112;Q13888;Q9UEG4;Q96QC0;Q9HAH1;O43347;Q9BWW7;Q6NX49;P14866;Q9Y2P0;O75346;O60281;Q9HBT8;Q15393;O75132;Q92879;P37275;Q8WVE0;Q969W8;Q8TDD2;Q16531;Q96GM8;Q9Y5R4;Q8NDW4;P35637;Q13283;Q6ZRS2;Q9BU19;Q9H2P0;Q9NX65;Q7RTV3;Q8N720;Q9GZR2;O95600;Q96LX8;Q9H9G7;P51532;Q96AH0;P17024;Q15929;P09651;Q6ZQV5;Q9NRP9;P08579;Q7Z2W4;Q9P243;Q494X3;Q7Z6E9;Q3SXZ3;Q8N1G2;Q8IY67;Q9NUU7;Q96MR9;Q15056;Q8NCP5;Q5HYK9;Q5T1R4;Q9UL59;P25490;Q6EKJ0;O95201;Q9P215;O60765;Q5T5D7;O75526;Q16384;Q8NDQ6;Q9HCL3;Q8TCN5;Q9BRR8;P29558;Q8N883;Q53EQ6;O00425;Q16629;Q9HCK5;Q9Y462;E7ETH6;P15621;Q8NBB4;Q6P9A1;Q7Z6K1;Q96FI4;P17030;Q92889;Q9UC07;Q96I25;Q8N8C0;P35659;Q08AG5;Q0D2J5;Q15776;A6NGD5;Q9Y2L8;Q96HQ0;Q96MU6;Q68DI1;Q5JVJG2;Q5SXM1;Q9UDV7;A8MTY0;Q3KP31;P17031;Q8N680;Q5JT82;Q8NKN2;Q9612;Q8N141;Q9UKV8;Q6ZN55;Q8TA86;Q9NW07;Q66K89;P63121;Q9UL41;O75437;Q16630;Q76KX8;Q9UL40;Q4G0J3;Q96D70;Q15427;Q5F1R6;O43422;Q8N9Z0;Q9Y467;Q6NUN9;Q9UK11;Q3KQV3;Q96PQ6;Q01130;Q8N782;Q5TYW1;O43776;Q9Y2A4;Q8IYW8;Q96GC6;Q8N5L8;Q7RTT5;Q9UM63;Q969V6;Q9NW75;Q9Y6M1;Q9HCI6;Q9HCK0;Q9NCP7;O15047;Q9Y2K1;P09234;Q96EG3;Q6ZMV8;P36508;Q6BEB4;Q9Y2H8;P51522;P49756;O43309;Q14839;Q8N302;P16415;Q9HCZ1;Q9NSJ1;Q9BX82;Q9UJW7;Q14588;P41208;Q8NEA6;Q8IZ26;Q96N20;P11940;Q9Y2X9;Q86U42;Q9NR56;P59923;P15927;Q96MM3;P17041;Q9NWS9;Q9BWF3;Q32P51;Q9HXC3;Q8WU90;Q86YEB8;Q96BV0;Q9BUG6;Q9Y6I0;Q6ZNH5;Q9Y4X4;P0CG24;Q8NI51;Q96I27;Q14593;Q8NDV7;P17019;Q7Z7K2;B4DXR9;Q92620;Q9HOS4;Q7KZF4;Q12986;P06748;Q9H5H4;Q9UNY5;B1APH4;Q9UNY4;Q96PK6;P23588;Q99729;P49711;Q9NTW7;Q9P2N5;Q7L2R6;P18615;P54098;Q8TBC5;Q8IWX8;Q8IYL2;Q9NZV7;Q9UK10;Q8NCA9;P07199;Q86VZ6;P46100;Q05519;Q13127;Q9Y2Y9;O75792;Q8N3Z6;P52272;A6NNF4;Q9C0G0;Q6ZN11;Q8N9W6;P0C7X5;P17029;Q9NX07;O60264;Q15287;Q96BR6;Q9P2Z0;Q6P1L6;A6NK53;Q6IV72;P51786;Q8TF45;P10072;Q8N684;Q9Y6X2;Q03936;Q9NQ03;Q5VV67;Q96RE9;Q6ZN19;



P15336;Q2M1K9;Q9Y3B4;P17023;Q86T29;Q9BSN8;Q8NAF0;Q96DT7;Q15937;Q15424;Q92904;P15822;Q07352;P0C7V5;Q14562;A8MUZ8;Q2VY69;Q13242;Q96JM2;Q96J87;A6NEJ1;O43830;Q96JM3;C9JN71;Q96LW9;P30622;Q8IYB9;Q6ZNG9;O15226;Q8TF39;Q9BS31;Q13129;Q9HCK8;Q8N972;Q14872;Q9NUL7;Q9BYN7;Q96N58;Q9H4T2;Q9UDW3;Q14119;Q8N393;Q12798;P38159;P18583;Q8N5P1;P52737;Q9BY77;Q96IR2;Q9UPG8;Q8N8Z8;Q8TF20;Q92841;Q9ULD5;P26368;Q9GZU2;Q17RP2;Q14240;P46063;Q9GZT3;P51504;Q9BQ15;P21506;P24278;Q9HBT7;Q8IW36;Q12874;Q15717;Q13156;Q9UPN6;P31943;Q9P255;Q9NZI8;Q9BTE6;Q9BX46;P17039;Q6PF04;Q8TAF7;Q96H40;Q5VYI5;Q9UDV6;Q5JNZ3;Q86WZ6;Q96C28;P17032;O14979;Q8IZ20;Q9BXX1;Q9H609;P63124;Q9UJU3;Q14527;Q96QE5;Q6PI48;Q8N1G1;A6NDX5;O00148;Q9NXT0;O14709;Q6NX45;Q13472;Q8IY51;Q9H4Z2;Q9H668;P51814;O75534;Q9BSK1;Q15637;Q9NP64;Q96LTY;Q13310;Q16670;P52736;Q9HBD4;P07998;Q5CZA5;Q8N7M2;Q9UGR2;Q9Y6Q3;P17002;Q6B0B8;Q14966;O15056;Q8N5A5;P17036;Q13243;Q9ULH7;Q63HK3;Q9Y3M9;Q8IYD8;Q86UP8;Q96006;Q86V81;Q9BQA5;P52744;Q96SK3;Q2M218;P07910;Q9H9L3;Q9NWB1;Q96C00;Q6U7Q0;Q96PE6;Q8N895;Q5T619;Q9BRH9;Q8IVC4;P31942;Q7RTT3;O75564;Q8TF68;Q6ZN57;Q92499;Q9H9Z2;Q96N77;Q14011;Q6ZNG0;P52298;P26196;Q13838;Q86XN6;Q9Y2G7;Q6ZNO8;Q9UHX1;Q96I76;Q96IT1;Q92618;P08621;Q5T200;Q06732;Q9HOM5;O75925;P43243;Q92664;Q8NEP9;P17025;Q7Z3I7;Q9H582;Q9UK13;Q14592;Q96CX3;Q9UPS6;P51508;Q8N184;Q6ZSB9;Q8N7K0;P0CB33;Q9BUY5;Q9H7R0;Q14591;Q86UQ0;Q14584;Q9BS34;Q8N8L2;Q96SL8;Q9P2K5;Q9ULV3;Q9Y3Z3;Q96T37;A8MUV8;P22626;Q8IX06;Q7Z3K3;Q6ZMW2;O43345;Q96SZ4;Q86Y25;Q5TAX3;O60812;B4DX44;P57071;Q9Y5N5;P82979;Q6ZNG1;Q8IWX8;Q15697;Q6ZN79;O95125;P26599;Q8N823;Q7RTT4;Q6ZSS3;Q8NC26;Q9BYG3;Q14585;O14646;P52740;Q14103;P51523;P23193;Q9UMR2;Q14587;P56270;Q9NPA5;Q01844;Q96NG5;P55795;Q8N3J2;Q9UL18;P49910;Q6AZW8;P17014;Q96GE5;Q9Y2Y4;O75362;Q92670;Q9UL58;Q15072;P10074;Q92804;P60842;Q86XP3;P26651;Q9UIV1;Q8TD23;Q9Y6R6;Q03468;Q9UKM9;Q9UJN7;O95319;P98182;Q8IX12;Q6ZS27;Q6ZN01;Q9UBL0;Q5HY98;O60225;A8K8V0;Q9UQR1;Q2QGD7;Q8IYN0;Q8TD26;Q8TB69;Q16385;Q96JL9;Q07955;Q9NYT6;P17020;O60506;Q3MIS6;Q9BR84;Q96E39;Q01081;Q8TF47;Q5VZF2;A6NP11;Q3SY52;Q8N954;O43361;Q9H7X3;Q9BSG1;Q09FC8;Q9UK12;Q15973;Q9BYX4;Q86XF7;Q96MN9;P17017;Q96K58;Q9BT49;Q9H116;O60304;Q8TAU3;C9JBD0;Q13247;Q5H9K5;Q15428;Q13398;Q9UKT9;Q53GI3;Q96J94;Q7Z4G4;Q7Z2F6;Q86UD4;Q12873;B2RXF5;P05455;P28370;Q147U1;Q9NR11;O60930;P58317;Q5SZQ8;Q8WVK2;Q6AW86;Q8IYX0;P47974;A6NDE4;Q6P280;Q8NDP4;Q7L945;Q5EBM4;Q9NQZ3;Q8TC21;A8MX4;Q7L2E3;P16989;Q8NB50;Q9NVP1;Q9UFF9;Q52M93;Q00839;Q8N9K5;Q66K41;Q96N95;Q8WXB4;P52741;Q8WTR7;Q9HCG1;Q9Y2Q1;Q8WW38;Q9Y534;Q86SE8;P84103;Q5T3I0;Q499Z4;O15504;Q9BY31;Q96NJ3;Q14498;Q68DY9;P52743;Q8TAW3;P08047;Q8WTZ3;P31483;Q5TEC3;A8MVS1;Q9H2U1;Q9UKJ3;Q9HC78;Q2M3X9;P15622;O75821;Q86YF9;O75152;O60290;Q15560;O43390;Q96KR1;O75626;P0C7X2;P52742;Q6ZRF7;Q8N6W0;Q9H9D4;Q6P3V2;Q2M3W8;Q5MCW4;Q7Z7J5;Q15935;Q8WXF1;A6NFI3;O43298;Q9BWM5;P62995;O43829;Q8N1W2;P51531;Q8N8J6;Q8N587;Q9NQV6;Q86WJ1;Q16560;Q9UL36;P17544;Q8IYI8;P17040;Q94892;Q0VGE8;Q9HCE3;Q96BR9;Q8N2W9;Q05481;P0CJ78;O15060;Q96PM9;Q08211;O95625;Q9NS91;Q9P2F9;Q96K75;Q5FWF6;P55884;O15042;Q9UIH9;Q9NYW8;Q9H6S0;P51815;Q9UID6;Q96CS4;Q3MJ62;Q05516;A6NJL1;Q9BUJ2;P33240;Q3ZCX4;Q8TBZ5;A8MT65;Q13106;Q9GZX5;Q8TF50;P17038;P0CJ79;Q6P9G9;Q6R2W3;Q5T890;Q96NI8;Q8TF32;Q6ZMS7;Q9Y2T7;Q9P0T4;Q969S2;Q12926;Q76FK4;Q32M78;Q9BV97;Q969S3;Q9H6T0;P63129;Q96NLI3;Q9Y473;Q9BTD8;Q17R26;Q8NEM1;Q3KNW1;Q15696;P52746;Q9HJC3;Q05215;Q9UII5;Q9BZE0;P38935;P0CF97;Q9Y5S9;Q8NCE0;Q9P2Y4;Q08ER8;Q9BUL9;Q86TG7;Q9WVV9;Q4V348;Q9UJL9;Q8IZH2;Q49A33;Q9NVP2;Q96N38;Q06730;Q9UIE0;Q14151;Q9H8G1;Q02446;Q9UJW8;O14628;O43251;Q8NBF1;A6NN14;Q9UNP9;Q68DY1;Q8IXT5;Q92698;Q49AG3;Q7Z3V5;Q8N7Q3;O95789;Q8TBZ8;O75494;P10073;Q8NFP9;O75290;P62269;Q9NQ94;P67809;Q9NUK0;Q9NR83;O15535;Q6ZT77;A8MWA4;O43719;Q8N3C0;O75467;Q6PJT7;P52747;O75928;Q13118;Q96SQ5;P17035;Q96MW7;Q8N0Y2;Q8N4W9;A6NM28;Q92785;Q6PK81;Q13401;Q86V79;Q9UFB7;Q9HAZ2;Q96H86;Q8TA94;Q5JVG8;Q03938;P42285;Q7RTT6;Q16600;Q15032;P11161;Q8NDT2;Q9Y2P7;P52756;Q9H7R5}

- 8364 [Cluster 761]GO:0050733+F molecular\_function [name] RS domain binding [def]  
 "Interacting selectively and non-covalently with an RS domain of a protein\_ RS domains are usually highly phosphorylated and characterized by the presence of arginine (R)/serine (S) dipeptides. The RS domain promotes protein-protein interactions and directs subcellular localization and, in certain situations, nucleocytoplasmic shuttling of individual SR proteins. They also play a role in splicing." [PMID
- 8365 Pathogen[ Q2Q067] interacts with 6 human  
 partners:{O75494;Q9NQ29;Q07955;Q01081;Q13243;P18583}
- 8366 Pathogen[ P0C214] interacts with 6 human  
 partners:{Q9NQ29;Q07955;P18583;Q13243;Q01081;O75494}
- 8367 Pathogen[ P03346] interacts with 6 human  
 partners:{P18583;Q07955;Q01081;Q9NQ29;Q13243;O75494}
- 8368 Pathogen[ Q85601] interacts with 6 human  
 partners:{Q13243;O75494;Q07955;Q01081;Q9NQ29;P18583}
- 8369 Pathogen[ P14079] interacts with 6 human  
 partners:{Q13243;Q9NQ29;Q07955;Q01081;O75494;P18583}
- 8370 Pathogen[ P03383] interacts with 6 human  
 partners:{Q07955;O75494;Q13243;Q9NQ29;P18583;Q01081}
- 8371 Pathogen[ P03410] interacts with 6 human  
 partners:{Q01081;Q07955;P18583;Q9NQ29;Q13243;O75494}
- 8372 Pathogen[ P14075] interacts with 6 human  
 partners:{Q13243;O75494;Q9NQ29;Q01081;P18583;Q07955}
- 8373 Pathogen[ P0C206] interacts with 6 human  
 partners:{Q07955;Q01081;P18583;Q13243;O75494;Q9NQ29}
- 8374 Pathogen[ P03363] interacts with 6 human  
 partners:{P18583;Q13243;Q07955;Q01081;Q9NQ29;O75494}
- 8375 [Cluster 762]GO:0004864+F molecular\_function [name] protein phosphatase inhibitor activity [def]  
 "Stops, prevents or reduces the activity of a protein phosphatase, an enzyme that hydrolyzes phosphate groups from phosphorylated proteins." [GOC
- 8376 Pathogen[ Q2Q067] interacts with 16 human

8377 partners:{Q9UD71;O75167;Q01105;Q5T8A7;Q9Y6J0;P41236;Q6NXS1;Q13522;O60927;Q96QC0;Q12972;O43768;Q96C90;Q9C0D0;P56211;O94763}  
Pathogen[ P0C214] interacts with 19 human

8378 partners:{O43768;Q96PQ5;Q6NXS1;Q96C90;O60927;P41236;Q9UD71;Q01105;P56211;Q13522;Q96KR7;O75167;Q9C0D0;Q5T8A7;Q96LQ0;Q12972;O94763;Q96QC0;Q9Y6J0}  
Pathogen[ P03346] interacts with 22 human

8379 partners:{Q96KR7;Q96QC0;Q01105;O94763;Q13522;Q9NXH3;Q96C90;P56211;O75167;O43768;Q9UD71;Q9Y6J0;Q96A00;O60927;Q6NXS1;Q9C0D0;Q86WC6;Q5T8A7;Q8WVI7;P41236;Q12972;Q8TEC5}  
Pathogen[ Q85601] interacts with 16 human

8380 partners:{Q9UD71;Q01105;Q9Y6J0;P56211;O75167;O43768;Q12972;P41236;Q96C90;Q9C0D0;Q5T8A7;O60927;Q96QC0;Q6NXS1;O94763;Q96PQ5}  
Pathogen[ P14079] interacts with 27 human

8381 partners:{Q01105;Q9UD71;Q9C0D0;Q96QC0;O43768;O14990;Q13522;Q9NXH3;Q8WVI7;Q5T8A7;P56211;Q8TAP8;P41236;O75167;O94763;Q96KR7;Q96A00;Q6NXS1;Q86WC6;Q12972;Q8TAE6;Q96C90;O60927;Q9Y6J0;O96001;Q96LQ0;Q96PQ5}  
Pathogen[ P03383] interacts with 15 human

8382 partners:{Q9UD71;O75167;O60927;Q01105;Q96C90;Q12972;O14990;Q13522;O94763;O43768;Q6NXS1;Q5T8A7;Q96QC0;P56211;P41236}  
Pathogen[ P03410] interacts with 27 human

8383 partners:{Q8WVI7;O94763;Q9Y6J0;Q96QC0;Q96LQ0;Q9C0D0;Q9NXH3;O75167;Q96A00;Q01105;Q86WC6;P41236;Q96KR7;Q13522;Q8TAE6;Q5T8A7;O60927;Q8TAP8;O14990;Q96C90;O43768;Q12972;O96001;Q96PQ5;Q6NXS1;Q9UD71;P56211}  
Pathogen[ P14075] interacts with 20 human

8384 partners:{Q13522;Q96C90;Q96QC0;Q5T8A7;P41236;Q01105;Q96A00;Q9UD71;Q6NXS1;O94763;Q8TAE6;O43768;Q9NXH3;Q96LQ0;P56211;Q12972;O60927;Q8TAP8;O14990;O75167}  
Pathogen[ P0C206] interacts with 26 human

8385 partners:{Q6NXS1;Q9NXH3;Q8WVI7;Q96C90;P41236;Q9UD71;Q86WC6;O60927;P56211;Q8TAE6;Q9C0D0;Q13522;Q9Y6J0;Q5T8A7;Q96LQ0;O43768;Q96A00;Q96PQ5;Q96QC0;Q12972;Q8TAP8;O75167;Q01105;Q96KR7;O14990;O94763}  
Pathogen[ P03363] interacts with 21 human

8386 partners:{Q9Y6J0;O60927;Q12972;Q9NXH3;P41236;Q9UD71;Q96QC0;Q96C90;Q9C0D0;Q13522;Q86WC6;Q6NXS1;O94763;O43768;O75167;Q5T8A7;P56211;Q8TEC5;Q96KR7;Q01105;Q96A00}  
[Cluster 763]GO:0000978+F molecular\_function [name] RNA polymerase II core promoter proximal region sequence-specific DNA binding [def] "Interacting selectively and non-covalently with a sequence of DNA that is in cis with and relatively close to a core promoter for RNA polymerase II." [GOC]

8387 Pathogen[ Q2Q067] interacts with 10 human  
partners:{Q12837;P15884;Q6P1N0;P15976;P08047;P11831;P61978;P56693;Q06330;Q5T0F9}

8388 Pathogen[ P0C214] interacts with 8 human  
partners:{P15884;P56693;P11831;Q06330;Q12837;Q6P1N0;P08047;Q5T0F9}

8389 Pathogen[ P03346] interacts with 16 human  
partners:{Q06330;P61978;Q9H2W2;P11831;Q12772;Q12837;P56693;O15534;P08047;Q6P1N0;Q9C0J9;P15976;Q9UBG7;O15516;Q5T0F9;P15884}

8390 Pathogen[ Q85601] interacts with 14 human  
partners:{P61978;P11831;O15534;P15976;Q06330;O15516;Q12772;Q9UBG7;P08047;P56693;Q12837;Q6P1N0;Q5T0F9;P15884}

8391 Pathogen[ P14079] interacts with 12 human  
partners:{Q5T0F9;P15976;Q6P1N0;Q12837;Q12772;Q06330;P56693;P61978;P15884;P15941;O15534;Q9UBG7}

8392 Pathogen[ P03383] interacts with 8 human  
partners:{Q06330;P11831;P08047;P61978;Q6P1N0;Q12837;P56693;Q5T0F9}

8393 Pathogen[ P03410] interacts with 14 human  
partners:{P11831;P61978;Q06330;P15941;P15884;Q5T0F9;Q12772;O15534;P56693;P08047;Q12837;P15976;Q6P1N0;Q9UBG7}

8394 Pathogen[ P14075] interacts with 9 human  
partners:{P11831;Q12837;P56693;P61978;Q06330;P15884;Q6P1N0;Q5T0F9;P08047}

8395 Pathogen[ P0C206] interacts with 15 human  
partners:{Q06330;P61978;O15534;Q9C0J9;P56693;P15976;Q12837;O15516;Q6P1N0;P08047;P15884;P11831;Q9UBG7;Q12772;Q5T0F9}

8396 Pathogen[ P03363] interacts with 13 human  
partners:{Q06330;Q9H2W2;Q9C0J9;P11831;P56693;P15884;P61978;Q6P1N0;Q9UBG7;P08047;Q12837;O15534;Q5T0F9}

8397 [Cluster 764]GO:0008195+F molecular\_function [name] phosphatidate phosphatase activity [def] "Catalysis of the reaction

8398 Pathogen[ Q2Q067] interacts with 3 human partners:{Q66LE6;Q92539;Q14693}

8399 Pathogen[ P0C214] interacts with 4 human partners:{Q66LE6;Q92539;Q9BQK8;Q14693}

8400 Pathogen[ P03346] interacts with 3 human partners:{Q66LE6;Q92539;Q14693}

8401 Pathogen[ Q85601] interacts with 3 human partners:{Q66LE6;Q92539;Q14693}

8402 Pathogen[ P14079] interacts with 4 human partners:{Q9BQK8;Q14693;Q92539;Q66LE6}

8403 Pathogen[ P03383] interacts with 2 human partners:{Q92539;Q14693}

8404 Pathogen[ P03410] interacts with 4 human partners:{Q9BQK8;Q14693;Q66LE6;Q92539}

8405 Pathogen[ P14075] interacts with 2 human partners:{Q92539;Q14693}

8406 Pathogen[ P0C206] interacts with 4 human partners:{Q92539;Q66LE6;Q9BQK8;Q14693}

8407 Pathogen[ P03363] interacts with 2 human partners:{Q92539;Q66LE6}

8408 [Cluster 765]GO:0046625+F molecular\_function [name] sphingolipid binding [def] "Interacting selectively and non-covalently with sphingolipids, a class of lipids

containing the long-chain amine diol sphingosine or a closely related base (a sphingoid)." [ISBN

8409 Pathogen[ Q2Q067] interacts with 2 human partners:{Q12933;Q13233}

8410 Pathogen[ P0C214] interacts with 2 human partners:{Q13233;Q12933}

8411 Pathogen[ P03346] interacts with 1 human partners:{Q13233}

8412 Pathogen[ Q85601] interacts with 2 human partners:{Q12933;Q13233}

8413 Pathogen[ P14079] interacts with 1 human partners:{Q12933}

8414 Pathogen[ P03383] interacts with 2 human partners:{Q13233;Q12933}

8415 Pathogen[ P03410] interacts with 2 human partners:{Q13233;Q12933}

8416 Pathogen[ P14075] interacts with 2 human partners:{Q12933;Q13233}

8417 Pathogen[ P0C206] interacts with 2 human partners:{Q12933;Q13233}

8418 Pathogen[ P03363] interacts with 2 human partners:{Q12933;Q13233}

8419 [Cluster 766]GO:0008237+F molecular\_function [name] metallopeptidase activity [def] "Catalysis of the hydrolysis of peptide bonds by a mechanism in which water acts as a nucleophile, one or two metal ions hold the water molecule in place, and charged amino acid side chains are ligands for the metal ions." [GOC

8420 Pathogen[ Q2Q067] interacts with 3 human partners:{Q92905;Q6P1X5;Q9HD42}

8421 Pathogen[ P0C214] interacts with 4 human partners:{Q9HD42;Q92905;Q6P1X5;Q9NY33}

8422 Pathogen[ P03346] interacts with 4 human partners:{Q9HD42;Q95630;Q6P1X5;Q92905}

8423 Pathogen[ Q85601] interacts with 4 human partners:{Q92905;Q6P1X5;Q95630;Q9HD42}

8424 Pathogen[ P14079] interacts with 12 human partners:{Q96KR4;Q96KP4;O00487;Q96MI9;Q9HD42;Q9UPW5;Q6P1X5;Q9NY33;Q400G9;Q8NDL9;Q92905;Q03154}

8425 Pathogen[ P03383] interacts with 3 human partners:{Q92905;Q6P1X5;Q9HD42}

8426 Pathogen[ P03410] interacts with 7 human partners:{Q400G9;Q9UPW5;Q92905;Q96KR4;Q9HD42;Q6P1X5;Q9NY33}

8427 Pathogen[ P14075] interacts with 3 human partners:{Q6P1X5;Q9HD42;Q92905}

8428 Pathogen[ P0C206] interacts with 8 human partners:{Q96KR4;Q8NDL9;Q95630;Q9NY33;Q6P1X5;Q9HD42;Q9UPW5;Q92905}

8429 Pathogen[ P03363] interacts with 3 human partners:{Q6P1X5;Q92905;Q9HD42}

8430 [Cluster 767]GO:0019212+F molecular\_function [name] phosphatase inhibitor activity [def] "Stops, prevents or reduces the activity of a phosphatase, an enzyme which catalyzes of the removal of a phosphate group from a substrate molecule." [GOC

8431 Pathogen[ Q2Q067] interacts with 2 human partners:{O43768;P56211}

8432 Pathogen[ P0C214] interacts with 2 human partners:{O43768;P56211}

8433 Pathogen[ P03346] interacts with 3 human partners:{P56211;O43768;Q9BTT0}

8434 Pathogen[ Q85601] interacts with 3 human partners:{Q9BTT0;P56211;O43768}

8435 Pathogen[ P14079] interacts with 4 human partners:{O43768;P56211;Q9BTT0;O96001}

8436 Pathogen[ P03383] interacts with 2 human partners:{O43768;P56211}

8437 Pathogen[ P03410] interacts with 4 human partners:{Q9BTT0;O43768;O96001;P56211}

8438 Pathogen[ P14075] interacts with 2 human partners:{O43768;P56211}

8439 Pathogen[ P0C206] interacts with 3 human partners:{P56211;Q9BTT0;O43768}

8440 Pathogen[ P03363] interacts with 3 human partners:{O43768;P56211;Q9BTT0}

8441 [Cluster 768]GO:0070095+F molecular\_function [name] fructose-6-phosphate binding [def] "Interacting selectively and non-covalently with fructose 6-phosphate." [GOC

8442 Pathogen[ Q2Q067] interacts with 1 human partners:{Q14397}

8443 Pathogen[ P0C214] interacts with 2 human partners:{Q14397;P16118}

8444 Pathogen[ P03346] interacts with 1 human partners:{Q14397}

8445 Pathogen[ Q85601] interacts with 2 human partners:{P16118;Q14397}

8446 Pathogen[ P14079] interacts with 1 human partners:{Q14397}

8447 Pathogen[ P03383] interacts with 1 human partners:{Q14397}

8448 Pathogen[ P03410] interacts with 2 human partners:{Q14397;P16118}

8449 Pathogen[ P14075] interacts with 2 human partners:{P16118;Q14397}

8450 Pathogen[ P0C206] interacts with 2 human partners:{P16118;Q14397}

8451 Pathogen[ P03363] interacts with 1 human partners:{Q14397}

8452 [Cluster 769]GO:0003785+F molecular\_function [name] actin monomer binding [def] "Interacting selectively and non-covalently with monomeric actin, also known as G-actin." [GOC

8453 Pathogen[ Q2Q067] interacts with 2 human partners:{P29474;Q969V6}

8454 Pathogen[ P0C214] interacts with 2 human partners:{P29474;Q969V6}

8455 Pathogen[ P03346] interacts with 4 human partners:{P29474;Q969V6;Q96KN3;P10916}

8456 Pathogen[ Q85601] interacts with 2 human partners:{Q969V6;P29474}

8457 Pathogen[ P14079] interacts with 2 human partners:{P10916;Q969V6}

8458 Pathogen[ P03383] interacts with 2 human partners:{P29474;Q969V6}

8459 Pathogen[ P03410] interacts with 3 human partners:{P10916;Q969V6;P29474}

8460 Pathogen[ P14075] interacts with 2 human partners:{P29474;Q969V6}

8461 Pathogen[ P0C206] interacts with 2 human partners:{Q969V6;P29474}

8462 Pathogen[ P03363] interacts with 4 human partners:{P29474;Q969V6;Q96KN3;P10916}

8463 [Cluster 770]GO:0008307+F molecular\_function [name] structural constituent of muscle fiber. [def] "The action of a molecule that contributes to the structural integrity of a muscle fiber." [GOC

8464 Pathogen[ Q2Q067] interacts with 6 human partners:{Q9UKX2;P60660;P08727;O15061;P11532;P12883}

8465 Pathogen[ P0C214] interacts with 11 human partners:{O15061;Q9UKX2;P14649;P60660;P11532;P13535;P12883;P08727;P13533;Q9Y623;P35749}

8466 Pathogen[ P03346] interacts with 11 human partners:{P60660;P08727;Q94875;Q15149;O15061;P14649;O76041;Q9UKX2;P11532;P10916;Q9UBF9}

8467 Pathogen[ Q85601] interacts with 11 human partners:{P13533;P14649;P11532;Q9UKX2;P35749;P12883;P08727;P13535;P60660;Q9Y623;O15061}

8468 Pathogen[ P14079] interacts with 14 human partners:{P11532;P07951;Q9UBF9;P10916;Q9UKX2;Q14118;P14649;O15061;Q15149;P60660;O76041;P12883;P08727;O15273}

8469 Pathogen[ P03383] interacts with 5 human partners:{P08727;O15061;Q9UKX2;P11532;P12883}

8470 Pathogen[ P03410] interacts with 16 human partners:{Q9UKX2;Q9UBF9;P10916;O15061;O76041;P11532;O15273;P07951;P12883;Q14118;P14649;P13533;Q15149;P60660;P13535;P08727}

8471 Pathogen[ P14075] interacts with 4 human partners:{P11532;P08727;Q9UKX2;O15061}

8472 Pathogen[ P0C206] interacts with 13 human partners:{O15061;P13533;Q9Y623;P08727;P60660;P50461;P14649;O76041;P12883;P35749;Q9UKX2;P11532;P13535}

8473 Pathogen[ P03363] interacts with 11 human partners:{O15061;P14649;Q9UKX2;Q9UBF9;O94875;P08727;Q15149;P11532;P60660;O76041;P10916}

8474 [Cluster 771]GO:0048273+F molecular\_function [name] mitogen-activated protein kinase p38 binding [def] "Interacting selectively and non-covalently with mitogen-activated protein kinase p38, an enzyme that catalyzes the transfer of phosphate from ATP to hydroxyl side chains on proteins in response to mitogen activation." [GOC

8475 Pathogen[ Q2Q067] interacts with 1 human partners:{O95644}

8476 Pathogen[ P0C214] interacts with 1 human partners:{O95644}

8477 Pathogen[ P03346] interacts with 1 human partners:{O95644}

8478 Pathogen[ Q85601] interacts with 1 human partners:{O95644}

8479 Pathogen[ P14079] interacts with 1 human partners:{O95644}

8480 Pathogen[ P03383] interacts with 1 human partners:{O95644}

8481 Pathogen[ P03410] interacts with 1 human partners:{O95644}

8482 Pathogen[ P14075] interacts with 1 human partners:{O95644}

8483 Pathogen[ P0C206] interacts with 1 human partners:{O95644}

8484 Pathogen[ P03363] interacts with 1 human partners:{O95644}

8485 [Cluster 772]GO:0019207+F molecular\_function [name] kinase regulator activity [def] "Modulates the activity of a kinase, an enzyme which catalyzes of the transfer of a phosphate group, usually from ATP, to a substrate molecule." [GOC

8486 Pathogen[ Q2Q067] interacts with 1 human partners:{Q9P287}

8487 Pathogen[ P0C214] interacts with 1 human partners:{Q9P287}

8488 Pathogen[ P03346] interacts with 1 human partners:{Q9P287}

8489 Pathogen[ Q85601] interacts with 1 human partners:{Q9P287}

8490 Pathogen[ P14079] interacts with 1 human partners:{Q9P287}

8491 Pathogen[ P03383] interacts with 1 human partners:{Q9P287}

8492 Pathogen[ P03410] interacts with 1 human partners:{Q9P287}

8493 Pathogen[ P14075] interacts with 1 human partners:{Q9P287}

8494 Pathogen[ P0C206] interacts with 1 human partners:{Q9P287}

8495 Pathogen[ P03363] interacts with 1 human partners:{Q9P287}

8496 [Cluster 773]GO:0016209+F molecular\_function [name] antioxidant activity [def] "Inhibition of the reactions brought about by dioxygen (O2) or peroxides. Usually the antioxidant is effective because it can itself be more easily oxidized than the substance protected. The term is often applied to components that can trap free radicals, thereby breaking the chain reaction that normally leads to extensive biological damage." [ISBN

8497 Pathogen[ Q2Q067] interacts with 3 human partners:{Q06830;Q9BQE4;Q96A56}

8498 Pathogen[ P0C214] interacts with 5 human partners:{P08294;Q9BRX8;Q06830;Q96A56;Q9BQE4}

8499 Pathogen[ P03346] interacts with 4 human partners:{P07148;Q96A56;P63302;Q06830}

8500 Pathogen[ Q85601] interacts with 3 human partners:{Q96A56;Q06830;Q9BQE4}

8501 Pathogen[ P14079] interacts with 4 human partners:{Q96A56;Q9BQE4;Q9BRX8;P63302}

8502 Pathogen[ P03383] interacts with 2 human partners:{Q96A56;Q9BQE4}

8503 Pathogen[ P03410] interacts with 5 human partners:{P63302;Q9BQE4;Q96A56;Q9BRX8;Q06830}

8504 Pathogen[ P14075] interacts with 3 human partners:{Q9BQE4;P63302;Q96A56}

8505 Pathogen[ P0C206] interacts with 5 human partners:{Q96A56;Q9BQE4;P63302;Q06830;Q9BRX8}

8506 Pathogen[ P03363] interacts with 2 human partners:{Q96A56;P63302}

8507 [Cluster 774]GO:0019905+F molecular\_function [name] syntaxin binding [def] "Interacting selectively and non-covalently with a syntaxin, a SNAP receptor involved in the docking of synaptic vesicles at the presynaptic zone of a synapse." [ISBN

8508 Pathogen[ Q2Q067] interacts with 7 human partners:{Q9UL45;O00186;P40222;P54920;Q8N3L3;Q9NUQ3;Q9BZA5}

8509 Pathogen[ P0C214] interacts with 8 human partners:{O00186;P54920;Q5T447;Q9NUQ3;Q8N3L3;Q9UL45;Q9BZA5;P40222}

8510 Pathogen[ P03346] interacts with 9 human partners:{Q9H115;Q5T447;O00186;Q9NUQ3;Q8N3L3;P54920;Q9UL45;Q9BZA5;P40222}

8511 Pathogen[ Q85601] interacts with 6 human

8512 partners:{000186;P54920;Q8N3L3;P40222;Q9BZA5;Q9NUQ3}  
Pathogen[ P14079] interacts with 12 human

8513 partners:{014810;P40222;Q9BZA5;Q9NUQ3;000186;Q8N3L3;Q6PUV4;Q9UL45;Q9H115;Q8WVH0;Q7Z7G2;P54920}  
Pathogen[ P03383] interacts with 6 human

8514 partners:{Q8N3L3;P54920;Q9NUQ3;000186;Q9BZA5;P40222}  
Pathogen[ P03410] interacts with 12 human

8515 partners:{Q9BZA5;Q9H115;014810;Q8N3L3;Q8WVH0;Q9UL45;Q7Z7G2;Q9NUQ3;Q6PUV4;P40222;000186;P54920}  
Pathogen[ P14075] interacts with 6 human

8516 partners:{000186;P40222;P54920;Q9NUQ3;Q9BZA5;Q8N3L3}  
Pathogen[ P0C206] interacts with 9 human

8517 partners:{Q9NUQ3;Q9UL45;P54920;Q9BZA5;Q8N3L3;Q7Z7G2;Q6PUV4;P40222;000186}  
Pathogen[ P03363] interacts with 7 human

8518 partners:{P54920;P40222;Q9BZA5;Q8N3L3;000186;Q9NUQ3;Q5T447}  
[Cluster 775]GO:0008094+F molecular\_function [name] DNA-dependent ATPase activity [def] "Catalysis of the reaction

8519 Pathogen[ Q2Q067] interacts with 21 human  
partners:{Q13889;P51531;P32780;Q92759;P38935;O43542;Q06609;P11388;Q09028;O43502;P51948;P51532;P50613;Q03468;Q13216;Q9UNY4;Q9HCK8;P28370;Q12830;Q13888;P51946}

8520 Pathogen[ P0C214] interacts with 22 human  
partners:{P51946;Q06609;P50613;P20585;P38935;Q09028;Q13216;P51948;P28370;O43542;Q9UNY4;O43502;Q9HCK8;P11388;P32780;Q13888;Q92614;P51531;Q03468;Q92759;Q12830;P51532}

8521 Pathogen[ P03346] interacts with 25 human  
partners:{Q12830;P38935;Q06609;P11388;O43502;P51532;Q92614;Q13888;Q13889;Q03468;O15315;Q09028;P20585;Q9HCK8;P51946;O43542;O75771;Q9UNY4;Q13216;Q92759;P28370;P51531;O43543;P51948;P32780}

8522 Pathogen[ Q85601] interacts with 24 human  
partners:{P51946;Q92614;O43502;O15315;P38935;Q13888;Q13216;P51948;O43542;Q12830;P51531;Q03468;P51532;Q92759;P32780;P20585;P11388;P50613;Q09028;Q9HCK8;P28370;P19447;Q06609;Q9UNY4}

8523 Pathogen[ P14079] interacts with 29 human  
partners:{O43196;P11388;O15315;P20585;P51946;Q92614;Q9UNY4;P28370;P51532;P51531;Q13216;Q13889;P50613;Q13888;Q12830;Q92759;Q9HCK8;O43502;O43543;P32780;Q96FC9;Q03468;P38935;P52701;Q09028;Q06609;P19447;O43542;P51948}

8524 Pathogen[ P03383] interacts with 18 human  
partners:{Q09028;Q12830;Q06609;Q13216;P51948;Q13888;P28370;P50613;P51946;Q03468;P51531;Q92759;Q9HCK8;P51532;O43542;P38935;Q9UNY4;P32780}

8525 Pathogen[ P03410] interacts with 29 human  
partners:{Q9UNY4;P20585;Q13889;O15315;Q92614;O43542;P51946;Q12830;Q03468;P50613;P38935;P52701;Q09028;O43502;P19447;Q9HCK8;P51532;O43196;P11388;Q13216;P51948;P51531;Q13888;O43543;Q96FC9;P32780;Q92759;P28370;Q06609}

8526 Pathogen[ P14075] interacts with 19 human  
partners:{Q92759;P51532;Q9UNY4;P50613;P38935;Q13216;Q03468;Q09028;Q12830;Q13889;Q9HCK8;P51531;P28370;O43542;P51946;P32780;Q06609;P51948;Q13888}

8527 Pathogen[ P0C206] interacts with 27 human  
partners:{O43542;O43502;Q9HCK8;P38935;P51532;Q9UNY4;P52701;P51531;Q03468;Q13216;P19447;Q13888;P50613;O15315;Q92759;Q92614;P28370;P32780;Q13889;O43543;Q06609;P20585;Q09028;P11388;Q12830;P51946;P51948}

8528 Pathogen[ P03363] interacts with 21 human  
partners:{Q12830;Q09028;Q13888;P32780;Q92759;P51532;P51946;Q9UNY4;P20585;Q9HCK8;O43542;Q92614;Q03468;O75771;P28370;Q06609;Q13216;P51531;P38935;O43502;O15315}

8529 [Cluster 776]GO:0004820+F molecular\_function [name] glycine-tRNA ligase activity [def] "Catalysis of the reaction

8530 Pathogen[ Q2Q067] interacts with 2 human partners:{Q9UHN1;P41250}

8531 Pathogen[ P0C214] interacts with 2 human partners:{P41250;Q9UHN1}

8532 Pathogen[ P03346] interacts with 2 human partners:{Q9UHN1;P41250}

8533 Pathogen[ Q85601] interacts with 2 human partners:{P41250;Q9UHN1}

8534 Pathogen[ P14079] interacts with 2 human partners:{P41250;Q9UHN1}

8535 Pathogen[ P03383] interacts with 2 human partners:{Q9UHN1;P41250}

8536 Pathogen[ P03410] interacts with 2 human partners:{P41250;Q9UHN1}

8537 Pathogen[ P14075] interacts with 2 human partners:{P41250;Q9UHN1}

8538 Pathogen[ P0C206] interacts with 2 human partners:{Q9UHN1;P41250}

8539 Pathogen[ P03363] interacts with 2 human partners:{P41250;Q9UHN1}

8540 [Cluster 777]GO:000405+F molecular\_function [name] bubble DNA binding [def] "Interacting selective with DNA that contains a bubble. A bubble occurs when DNA contains a region of unpaired, single-stranded DNA flanked on both sides by regions of paired, double-stranded DNA." [GOC

8541 Pathogen[ Q2Q067] interacts with 2 human partners:{Q01831;P28715}

8542 Pathogen[ P0C214] interacts with 2 human partners:{P28715;Q01831}

8543 Pathogen[ P03346] interacts with 2 human partners:{P28715;Q01831}

8544 Pathogen[ Q85601] interacts with 2 human partners:{Q01831;P28715}

8545 Pathogen[ P14079] interacts with 3 human partners:{Q8TAT5;P28715;Q01831}

8546 Pathogen[ P03383] interacts with 1 human partners:{Q01831}

8547 Pathogen[ P03410] interacts with 3 human partners:{P28715;Q8TAT5;Q01831}

8548 Pathogen[ P14075] interacts with 1 human partners:{Q01831}

8549 Pathogen[ P0C206] interacts with 3 human partners:{P28715;Q8TAT5;Q01831}  
8550 Pathogen[ P03363] interacts with 1 human partners:{Q01831}  
8551 [Cluster 778]GO:0004067+F molecular\_function [name] asparaginase activity [def]  
"Catalysis of the reaction  
8552 Pathogen[ Q2Q067] interacts with 1 human partners:{Q7L266}  
8553 Pathogen[ P0C214] interacts with 1 human partners:{Q7L266}  
8554 Pathogen[ P03346] interacts with 1 human partners:{Q7L266}  
8555 Pathogen[ Q85601] interacts with 1 human partners:{Q7L266}  
8556 Pathogen[ P14079] interacts with 1 human partners:{Q7L266}  
8557 Pathogen[ P03383] interacts with 1 human partners:{Q7L266}  
8558 Pathogen[ P03410] interacts with 1 human partners:{Q7L266}  
8559 Pathogen[ P14075] interacts with 1 human partners:{Q7L266}  
8560 Pathogen[ P0C206] interacts with 1 human partners:{Q7L266}  
8561 Pathogen[ P03363] interacts with 1 human partners:{Q7L266}  
8562 [Cluster 779]GO:0008135+F molecular\_function [name] translation factor activity,  
nucleic acid binding [def] "Functions during translation by binding nucleic acids  
during polypeptide synthesis at the ribosome." [GOC  
8563 Pathogen[ Q2Q067] interacts with 14 human  
partners:{P29692;Q13889;P47813;P78344;Q9NR50;P41567;Q9H2K0;P20042;O60573;Q04637;Q8NE7  
1;P60842;Q15056;Q13888}  
8564 Pathogen[ P0C214] interacts with 15 human  
partners:{P60842;P47813;P78344;P29692;Q15056;P41091;Q8NE71;Q9NR50;P41567;Q04637;Q1388  
8;Q9H2K0;P20042;Q05639;O60573}  
8565 Pathogen[ P03346] interacts with 16 human  
partners:{P41567;P41091;P47813;Q13888;P78344;O60573;Q15056;P29692;P60842;Q13889;Q8NE7  
1;Q9H2K0;Q04637;Q92616;P20042;Q9NR50}  
8566 Pathogen[ Q85601] interacts with 13 human  
partners:{P47813;P41091;Q13888;Q04637;Q9NR50;P20042;O60573;P78344;P60842;Q8NE71;P4156  
7;P29692;Q05639}  
8567 Pathogen[ P14079] interacts with 19 human  
partners:{P20042;P60842;Q15056;O75879;Q9H2K0;P47813;P41567;P41091;O43432;P46199;Q1388  
9;P29692;P78344;O60573;Q9NR50;Q13888;Q8NE71;Q92616;Q04637}  
8568 Pathogen[ P03383] interacts with 11 human  
partners:{Q8NE71;Q13888;P41567;O60573;P20042;Q9NR50;P47813;Q9H2K0;P78344;Q04637;P2969  
2}  
8569 Pathogen[ P03410] interacts with 19 human  
partners:{Q9NR50;Q13889;Q8NE71;O75879;Q9H2K0;P20042;P46199;O43432;P47813;P41567;Q1505  
6;P60842;Q92616;Q13888;O60573;P41091;Q04637;P29692;P78344}  
8570 Pathogen[ P14075] interacts with 12 human  
partners:{P20042;P78344;P29692;P47813;Q9H2K0;O60573;Q13889;Q04637;Q8NE71;Q9NR50;P4156  
7;Q13888}  
8571 Pathogen[ P0C206] interacts with 15 human  
partners:{P41091;P20042;P41567;Q9NR50;Q92616;Q13888;Q9H2K0;P47813;Q8NE71;Q13889;P7834  
4;O60573;Q04637;P29692;P60842}  
8572 Pathogen[ P03363] interacts with 14 human  
partners:{Q13888;Q15056;P41091;P41567;Q9NR50;P29692;P20042;P47813;P60842;Q92616;Q8NE7  
1;O60573;P78344;Q04637}  
8573 [Cluster 780]GO:0070063+F molecular\_function [name] RNA polymerase binding [def]  
"Interacting selectively and non-covalently with an RNA polymerase molecule or complex."  
[GOC  
8574 Pathogen[ Q2Q067] interacts with 2 human partners:{Q12962;Q9NYV6}  
8575 Pathogen[ P0C214] interacts with 2 human partners:{Q12962;Q9NYV6}  
8576 Pathogen[ P03346] interacts with 2 human partners:{Q12962;Q9NYV6}  
8577 Pathogen[ Q85601] interacts with 2 human partners:{Q9NYV6;Q12962}  
8578 Pathogen[ P14079] interacts with 2 human partners:{Q9NYV6;Q12962}  
8579 Pathogen[ P03383] interacts with 2 human partners:{Q9NYV6;Q12962}  
8580 Pathogen[ P03410] interacts with 2 human partners:{Q12962;Q9NYV6}  
8581 Pathogen[ P14075] interacts with 2 human partners:{Q12962;Q9NYV6}  
8582 Pathogen[ P0C206] interacts with 2 human partners:{Q12962;Q9NYV6}  
8583 Pathogen[ P03363] interacts with 3 human partners:{Q12962;Q9UPN6;Q9NYV6}  
8584 [Cluster 781]GO:0000104+F molecular\_function [name] succinate dehydrogenase activity  
[def] "Catalysis of the reaction  
8585 Pathogen[ Q2Q067] interacts with 1 human partners:{P31040}  
8586 Pathogen[ P0C214] interacts with 2 human partners:{Q99643;O14521}  
8587 Pathogen[ P03346] interacts with 1 human partners:{P31040}  
8588 Pathogen[ Q85601] interacts with 1 human partners:{P31040}  
8589 Pathogen[ P14079] interacts with 2 human partners:{P31040;O14521}  
8590 Pathogen[ P03383] interacts with 1 human partners:{P31040}  
8591 Pathogen[ P03410] interacts with 3 human partners:{P31040;Q99643;O14521}  
8592 Pathogen[ P14075] interacts with 1 human partners:{P31040}  
8593 Pathogen[ P0C206] interacts with 2 human partners:{O14521;P31040}  
8594 Pathogen[ P03363] interacts with 1 human partners:{P31040}  
8595 [Cluster 782]GO:0035538+F molecular\_function [name] carbohydrate response element  
binding [def] "Interacting selectively and non-covalently with the carbohydrate response  
element (ChoRE) found in the promoters of genes whose expression is regulated in response  
to carbohydrates, such as the triglyceride synthesis genes." [GOC

8596 Pathogen[ Q2Q067] interacts with 1 human partners:{Q9NP71}

8597 Pathogen[ P0C214] interacts with 1 human partners:{Q9NP71}

8598 Pathogen[ P03346] interacts with 1 human partners:{Q9NP71}

8599 Pathogen[ Q85601] interacts with 1 human partners:{Q9NP71}

8600 Pathogen[ P14079] interacts with 1 human partners:{Q9NP71}

8601 Pathogen[ P03383] interacts with 1 human partners:{Q9NP71}

8602 Pathogen[ P03410] interacts with 1 human partners:{Q9NP71}

8603 Pathogen[ P14075] interacts with 1 human partners:{Q9NP71}

8604 Pathogen[ P0C206] interacts with 1 human partners:{Q9NP71}

8605 Pathogen[ P03363] interacts with 1 human partners:{Q9NP71}

8606 [Cluster 783]GO:0032422+F molecular\_function [name] purine-rich negative regulatory element binding [def] "Interacting selectively and non-covalently with a 30-bp purine-rich negative regulatory element\_ the best characterized such element is found in the first intronic region of the rat cardiac alpha-myosin heavy chain gene, and contains two palindromic high-affinity Ets-binding sites (CTTCCCTGGAAG). The presence of this element restricts expression of the gene containing it to cardiac myocytes." [GOC

8607 Pathogen[ Q2Q067] interacts with 3 human partners:{P41970;Q00577;Q96QR8}

8608 Pathogen[ P0C214] interacts with 3 human partners:{P41970;Q96QR8;Q00577}

8609 Pathogen[ P03346] interacts with 3 human partners:{Q96QR8;Q00577;P41970}

8610 Pathogen[ Q85601] interacts with 3 human partners:{Q96QR8;P41970;Q00577}

8611 Pathogen[ P14079] interacts with 3 human partners:{Q96QR8;Q00577;P41970}

8612 Pathogen[ P03383] interacts with 3 human partners:{P41970;Q00577;Q96QR8}

8613 Pathogen[ P03410] interacts with 3 human partners:{Q00577;P41970;Q96QR8}

8614 Pathogen[ P14075] interacts with 3 human partners:{Q96QR8;Q00577;P41970}

8615 Pathogen[ P0C206] interacts with 3 human partners:{Q96QR8;P41970;Q00577}

8616 Pathogen[ P03363] interacts with 3 human partners:{Q96QR8;P41970;Q00577}

8617 [Cluster 784]GO:0005521+F molecular\_function [name] lamin binding [def] "Interacting selectively and non-covalently with lamin\_ any of a group of intermediate-filament proteins that form the fibrous matrix on the inner surface of the nuclear envelope." [GOC

8618 Pathogen[ Q2Q067] interacts with 7 human partners:{Q9UH99;P42167;O60238;Q8NF91;Q14739;P42166;Q9UHQ1}

8619 Pathogen[ P0C214] interacts with 6 human partners:{Q14739;P42166;Q9UH99;Q9UHQ1;Q8NF91;O60238}

8620 Pathogen[ P03346] interacts with 8 human partners:{Q14739;O60238;Q9UH99;Q13835;P42166;Q8NF91;P42167;Q9UHQ1}

8621 Pathogen[ Q85601] interacts with 6 human partners:{P42166;Q9UH99;Q9UHQ1;Q8NF91;O60238;Q14739}

8622 Pathogen[ P14079] interacts with 9 human partners:{Q9UHQ1;Q13835;Q14739;P42167;Q5JTV8;P42166;Q8NF91;Q9UH99;O60238}

8623 Pathogen[ P03383] interacts with 3 human partners:{Q9UH99;Q9UHQ1;O60238}

8624 Pathogen[ P03410] interacts with 9 human partners:{Q14739;Q9UH99;Q13835;P42166;Q9UHQ1;P42167;Q5JTV8;O60238;Q8NF91}

8625 Pathogen[ P14075] interacts with 4 human partners:{O60238;Q9UHQ1;Q9UH99;P42167}

8626 Pathogen[ P0C206] interacts with 8 human partners:{Q14739;Q9UHQ1;Q9UH99;O60238;Q8NF91;P42166;Q13835;P42167}

8627 Pathogen[ P03363] interacts with 8 human partners:{Q8NF91;Q13835;P42167;Q9UHQ1;Q14739;O60238;P42166;Q9UH99}

8628 [Cluster 785]GO:0035539+F molecular\_function [name] 8-oxo-7,8-dihydrodeoxyguanosine triphosphate pyrophosphatase activity [def] "Catalysis of the reaction

8629 Pathogen[ Q2Q067] interacts with 1 human partners:{P36639}

8630 Pathogen[ P0C214] interacts with 1 human partners:{P36639}

8631 Pathogen[ P03346] interacts with 1 human partners:{P36639}

8632 Pathogen[ Q85601] interacts with 1 human partners:{P36639}

8633 Pathogen[ P14079] interacts with 1 human partners:{P36639}

8634 Pathogen[ P03383] interacts with 1 human partners:{P36639}

8635 Pathogen[ P03410] interacts with 1 human partners:{P36639}

8636 Pathogen[ P14075] interacts with 1 human partners:{P36639}

8637 Pathogen[ P0C206] interacts with 1 human partners:{P36639}

8638 Pathogen[ P03363] interacts with 1 human partners:{P36639}

8639 [Cluster 786]GO:0005124+F molecular\_function [name] scavenger receptor binding [def] "Interacting selectively and non-covalently with scavenger receptors, a family of proteins that are expressed on myeloid cells and are involved in the uptake of effete cellular components and foreign particles." [GOC

8640 Pathogen[ Q2Q067] interacts with 1 human partners:{Q5T2W1}

8641 Pathogen[ P0C214] interacts with 1 human partners:{Q5T2W1}

8642 Pathogen[ P03346] interacts with 1 human partners:{Q5T2W1}

8643 Pathogen[ Q85601] interacts with 1 human partners:{Q5T2W1}

8644 Pathogen[ P14079] interacts with 1 human partners:{Q5T2W1}

8645 Pathogen[ P03383] interacts with 1 human partners:{Q5T2W1}

8646 Pathogen[ P03410] interacts with 1 human partners:{Q5T2W1}

8647 Pathogen[ P14075] interacts with 1 human partners:{Q5T2W1}

8648 Pathogen[ P0C206] interacts with 1 human partners:{Q5T2W1}

8649 Pathogen[ P03363] interacts with 1 human partners:{Q5T2W1}

8650 [Cluster 787]GO:0008093+F molecular\_function [name] cytoskeletal adaptor activity [def] "The binding activity of a molecule that brings together a cytoskeletal protein and

one or more other molecules, permitting them to function in a coordinated way." [GOC

8651 Pathogen[ Q2Q067] interacts with 3 human partners:{O43639;P16333;Q9NR46}

8652 Pathogen[ P0C214] interacts with 5 human partners:{P16157;O43639;Q9NR46;P16333;Q96G01}

8653 Pathogen[ P03346] interacts with 8 human partners:{Q96G01;O43639;O94875;Q9NQY0;P16157;Q9Y371;P16333;Q9NR46}

8654 Pathogen[ Q85601] interacts with 5 human partners:{P16157;P16333;O43639;Q96G01;Q9NR46}

8655 Pathogen[ P14079] interacts with 6 human partners:{Q9NR46;P16157;Q9Y371;P16333;Q96G01;O43639}

8656 Pathogen[ P03383] interacts with 2 human partners:{Q9NR46;P16333}

8657 Pathogen[ P03410] interacts with 7 human partners:{Q9NR46;P16157;O43639;P16333;Q9NQY0;Q96G01;Q9Y371}

8658 Pathogen[ P14075] interacts with 2 human partners:{Q9NR46;P16333}

8659 Pathogen[ P0C206] interacts with 6 human partners:{Q9NR46;P16157;Q9NQY0;P16333;O43639;Q96G01}

8660 Pathogen[ P03363] interacts with 7 human partners:{P16157;Q9NR46;Q8NHY3;O43639;O94875;P16333;Q9NQY0}

8661 [Cluster 788]GO:0003714+F molecular\_function [name] transcription corepressor activity [def] "Interacting selectively and non-covalently with a repressing transcription factor and also with the basal transcription machinery in order to stop, prevent, or reduce the frequency, rate or extent of transcription. Cofactors generally do not bind DNA, but rather mediate protein-protein interactions between repressive transcription factors and the basal transcription machinery." [GOC

8662 Pathogen[ Q2Q067] interacts with 121 human partners:{Q9NZI7;P25490;Q6VMQ6;Q9Y6X8;Q03923;Q99583;O75461;P56524;P15884;O75925;Q8N9R8;Q9Y2D1;Q9NPF5;Q01094;Q9UKV0;Q8WW38;P46937;Q9NR55;Q9Y3T9;Q01130;Q99816;Q9Y2X9;P54259;P10828;P18847;P41970;A6NIX2;Q9NQ87;O43255;O43439;P37275;Q9NVW2;O00257;Q9NZI6;P50548;Q9ULV5;Q05195;Q9UIS9;Q01201;Q96AQ6;O15379;P50616;Q96ST3;P35638;Q9NPI1;P54198;Q04727;Q96T58;Q8WUF5;O95551;Q99471;O75182;P48552;O75446;P27695;Q9UBC3;O75381;Q96IF1;Q9UQL6;O43593;Q6W2J9;Q15699;Q9UGP4;Q9UKY1;P12755;O14948;Q96GC6;Q01658;O43251;O75496;Q8IZ40;Q9GZV5;Q719H9;P51532;Q15742;Q15327;Q9Y6B2;O60907;Q8WUI4;Q04725;O14770;Q86X95;Q96HA7;Q96R5;Q15466;Q96RU7;Q15583;P61201;P12757;Q9BZK7;P31946;Q13901;P16989;Q9Y618;Q9HBM6;Q04724;P80723;Q8N488;P47928;O60682;Q86U70;Q14582;Q8IY57;Q96IZ0;Q15637;P23497;Q8NB12;P06733;O75376;Q16384;Q8IXJ9;Q9UMX1;P49711;Q16649;P52737;Q14207;Q66K89;Q13227;O43660;O00422;Q9UKL3}

8663 Pathogen[ P0C214] interacts with 117 human partners:{P41970;Q9UGP4;O95551;Q15742;P54198;Q9Y3T9;Q15327;Q05195;P27695;Q96T58;Q04727;P16989;Q14207;O75461;P12757;Q6VMQ6;Q8WUF5;O75925;Q96IZ0;P48552;P15884;O60907;O75496;Q16384;Q9NR55;P17275;P50548;Q15637;P46937;P61201;P56524;Q9GZV5;Q6W2J9;P37275;O75381;Q04724;Q13901;Q9NZI7;Q2VWA4;Q9UIS9;Q01094;O75446;A6NIX2;O43439;Q8IXJ9;Q01201;P47928;Q9UKL3;Q8N488;Q8N9R8;Q9HBM6;O14948;Q86U70;Q9Y6B2;O00422;Q9NVW2;Q8IZ40;P18847;Q9UKV0;Q8WW38;O00257;P50616;O75376;O43593;Q96GC6;Q9Y6X8;Q03923;O15379;P06733;Q9Y2D1;P12755;Q96AQ6;Q13227;Q9Y2X9;Q9ULV5;P23497;Q99816;P49711;Q96RU7;Q9NZI6;Q719H9;Q9NPI1;Q04725;Q99471;Q01658;Q9BZK7;Q96ST3;P80723;O14770;P10828;Q8WUI4;O43251;Q9NQ87;P31946;Q8NB12;Q96R5;O43255;Q9NQ87;Q9Y618;Q96HA7;Q15699;Q9UMX1;Q99583;Q86X95;Q66K89;O43660;Q9UQL6;P52737;P35638;Q15466;Q9NPF5;P51532;P54259;Q8IY57;O75182;Q01130;P17980}

8664 Pathogen[ P03346] interacts with 144 human partners:{Q96ST3;Q9NZU5;P46937;Q13263;Q86U70;Q96HA7;Q14207;Q9UGP4;Q01201;O60907;P18847;O95551;O75446;Q16384;Q9Y4X4;P12757;P35638;Q02535;Q8WW38;O15379;Q9NQR1;Q99471;P51532;Q9GZV5;Q96AQ6;Q99626;P17275;Q15466;Q9NZI6;P25490;Q15583;P80723;Q15637;P50548;Q9NR55;P56524;Q15327;Q9NPI1;O43255;Q8IZ40;Q99816;P52737;Q9NQ69;Q96IF1;Q9UBC3;O00257;Q9Y2D1;P16989;O60682;Q9H165;Q03923;Q01094;Q2VWA4;Q66K89;O75182;P06733;O00422;Q14919;O75381;O43593;P51843;O75925;Q15699;Q14582;Q9UKL3;Q15742;Q96IZ0;Q9UIS9;Q8IYM9;Q13227;O14948;Q96R5;O43660;Q6VMQ6;Q04725;Q04724;Q9HBM6;Q86VZ6;P50616;P49711;Q9Y6X8;P84550;Q8NB12;P37275;Q9NQ87;Q16649;A6NIX2;Q9Y3T9;O43439;Q9Y2Y4;Q8WUI4;O43251;O75376;P50539;Q8WUF5;Q05195;Q96T58;P09630;Q96RU7;Q92481;P61201;P31946;Q9UKV0;Q01130;Q9BZK7;Q04727;O75461;P41970;P10828;Q9UGL1;Q01658;Q9Y6B2;P48552;P23497;Q8IXJ9;P56545;Q9UKY1;P27695;Q9Y2X9;Q99583;Q8N488;Q86X95;Q8IY57;Q9ULV5;Q9H9S0;Q9Y618;Q96GC6;Q9UMX1;Q9UQL6;Q8N9R8;P54198;Q6W2J9;P54259;O14770;Q9NZI7;Q13901;O75506;Q9NVW2;P15884;O75496;O00488;P47928;Q9NPF5;Q99581}

8665 Pathogen[ Q85601] interacts with 127 human partners:{P54259;Q96IZ0;Q99816;O75182;Q15637;Q9NZU5;O75496;P54198;Q9UKV0;P31946;Q9UKL3;Q96HA7;Q15466;P50539;Q16384;Q04724;Q9ULV5;Q8N9R8;Q9UQL6;Q8NB12;Q86U70;P50548;Q8WW38;Q01130;A6NIX2;Q9NQR1;Q99471;O60907;Q05195;P61201;P41970;Q9Y2Y4;Q9Y2X9;P12757;P25490;Q8IXJ9;Q9Y618;P06733;Q15583;Q9GZV5;O60682;O43439;Q15742;Q03923;Q2VWA4;P80723;P49711;P12755;Q969R5;Q9HBM6;Q13263;Q9Y6B2;Q04725;P51532;O75461;Q9UIS9;Q13901;O14948;Q14582;Q16649;P18847;Q15699;Q04727;Q8IYM9;Q9Y6X8;Q96GC6;Q9NQ87;Q15327;O75376;Q01201;Q01658;Q8WUF5;Q96T58;O75446;Q14207;P50616;Q99583;Q96RU7;Q9NZI6;Q96IF1;Q9Y3T9;Q9NPI1;Q9Y2D1;Q9UGP4;P37275;Q9BZK7;P56524;O15379;P52737;P46937;Q9UKY1;O43660;P48552;P10828;Q8IZ40;O00422;Q8WUI4;Q8N488;O43593;Q6VMQ6;O00257;Q8IY57;O75381;O43255;P12755;O75925;P16989;Q9UMX1;P27695;Q96AQ6;Q13227;O95551;Q01094;O14770;Q9NZI7;Q86X95;Q9NVW2;Q9NR55;P15884;Q719H9;P47928;Q9UBC3;Q6W2J9;P35638;Q9NPF5;Q96ST3}

8666 Pathogen[ P14079] interacts with 125 human partners:{Q9UQL6;Q15637;P48552;O15379;Q04725;O00422;Q9NPI1;P12755;Q9Y2Y4;Q9BZK7;Q9UIS9;Q9GZV5;P61201;Q16649;Q8IXJ9;Q99581;O43439;O60682;Q96ST3;Q8WUF5;P10828;Q14207;Q15583;Q8WUI4;Q13901;Q86U70;Q2VWA4;P52737;Q15699;Q86VZ6;P51532;Q15742;O60907;Q9UMX1;P54198;



Q9UKV0;O75446;Q03923;Q9NZU5;P46937;O75461;P06733;P23497;Q719H9;Q01201;O75506;Q9UKY1;Q6W2J9;Q9NZI7;Q9UKL3;Q99583;Q9Y3T9;Q6VMQ6;Q9UBC3;O00257;Q96HA7;P16989;Q969R5;Q9NPF5;Q8IY57;Q96IF1;P31946;Q9NZI6;Q66K89;Q9NQR1;Q8NB12;A6NIX2;P17275;Q16384;Q96IZ0;Q9Y2X9;Q96AQ6;P27695;Q15327;P50539;Q13227;P35638;Q95551;Q9Y4X4;Q96RU7;O00488;P50548;Q05195;Q8N488;O14770;Q04724;O75925;Q8N9R8;O75182;O75376;P54259;P15884;Q9NR55;P12757;O14948;O75381;Q9NQ87;P80723;Q99471;Q15466;Q9Y6B2;Q8IZ40;P56524;Q99816;P25490;P50616;Q9Y6X8;Q14582;Q9ULV5;Q01094;Q86X95;Q01658;O43593;P41970;P49711;P17980;O75496;Q04727;Q8WW38;P47928;P37275;Q9UGP4;Q9HBM6;Q96GC6;Q96T58}

8667 Pathogen[ P03383] interacts with 107 human  
partners: {Q9Y618;Q8IXJ9;O75182;Q719H9;P16989;O75925;Q9UKL3;P49711;Q01094;O75376;Q9UQL6;P31946;Q8WW38;Q86U70;A6NIX2;Q04727;O60907;Q96AQ6;P18847;O00257;P61201;Q96IZ0;P37275;Q9NQ87;Q15742;Q6VMQ6;P35638;O75461;Q9HBM6;Q99816;Q03923;Q04724;Q66K89;Q9Y3T9;O14770;Q6W2J9;Q9Y6B2;O14948;Q8N488;Q9ULV5;Q9NPF5;Q01130;Q05195;Q9UGP4;Q04725;O00422;Q15466;O75381;Q99471;Q01201;Q9Y6X8;Q8IZ40;O15379;O43255;Q96T58;Q8WUF5;Q14207;P52737;P50616;Q99583;Q96RU7;O75446;Q9NZI6;P23497;Q96GC6;Q15327;Q9UKV0;Q9NZI7;Q9BZK7;P56524;P41970;Q8IY57;P51532;P80723;Q9NPI1;P12757;Q13227;Q96ST3;Q96HA7;P50548;P27695;O95551;P48552;Q9Y2X9;Q969R5;P10828;P47928;Q8WUI4;Q86X95;Q9Y2D1;Q15699;P17275;P06733;Q8N9R8;Q15637;P46937;Q01658;Q9GZV5;Q9UMX1;P54198;O43439;Q9NQR1;Q16384;Q13901;P54259;Q9UIS9;O75496}

8668 Pathogen[ P03410] interacts with 124 human  
partners: {Q96AQ6;Q9UKV0;O43439;Q13227;O75461;O75925;P35638;P54198;Q6W2J9;P37275;Q15637;P12755;Q96K89;P18847;P16989;O14948;O60682;Q9NQ87;Q9Y2D1;O75446;Q9UGP4;Q9NPF5;P15884;Q14207;P06733;O75182;Q04724;Q96GC6;P10828;Q9Y3T9;O75381;Q03923;O75376;Q15327;Q96ST3;Q96T58;Q8WW38;Q01201;P25490;Q6VMQ6;Q8WUI4;Q9GZV5;Q9UQL6;Q96IF1;Q99816;Q9Y2X9;Q15583;A6NIX2;O95551;Q99471;Q719H9;Q8IY57;Q16649;Q9HBM6;P52737;Q9Y6B2;Q2VWA4;P17275;Q9NQR1;O43660;O15379;P56524;Q8IXJ9;Q86U70;Q01658;P47928;O75506;Q99583;Q96IZ0;Q04727;Q8N9R8;Q15466;P12757;Q9Y6X8;P46937;Q15699;P51532;Q86X95;Q8N488;P49711;Q9UKL3;Q9UBC3;P61201;Q96RU7;Q13901;P50539;Q01130;Q9Y2Y4;Q15742;Q9UIS9;P27695;O75496;Q01094;Q8NB12;P54259;P41970;P80723;Q9NZI6;Q9BZK7;P50548;Q8IZ40;Q16384;Q9ULV5;O00422;O00257;Q9NZI7;Q14582;Q9Y618;P48552;Q9NR55;Q9UKY1;Q9UMX1;Q96HA7;O60907;Q969R5;O14770;Q9NPI1;P17980;O43593;P31946;Q05195;Q04725;P50616;Q8WUF5}

8669 Pathogen[ P14075] interacts with 108 human  
partners: {Q04727;P06733;Q96AQ6;Q96ST3;Q9GZV5;Q86U70;Q86X95;P23497;Q14207;P50548;Q969R5;P16989;P52737;Q8IXJ9;Q9NPI1;Q8N488;Q04725;Q9Y2D1;Q8IY57;P10828;Q8N9R8;P27695;P51532;Q01201;Q01658;P80723;P17275;Q13901;O75446;Q96T58;P18847;P61201;Q9UGP4;Q15327;P56524;O00422;Q16384;Q01130;O75925;Q9NQR1;P35638;Q719H9;P47928;Q8WUF5;Q9UKV0;Q8WW38;Q9NZI7;Q9NQ87;O75182;Q05195;P54198;Q96IZ0;Q9Y618;O75376;O43255;O75381;P12757;O00257;Q9NPF5;Q9UKL3;O14770;Q9ULV5;O14948;Q96HA7;Q9Y6B2;Q6W2J9;Q15637;Q6VMQ6;Q9UIS9;P50616;Q9Y6X8;A6NIX2;O60907;Q13227;Q01094;Q15742;Q96RU7;Q9NZI6;O15379;Q66K89;Q9Y2X9;Q9Y3T9;P49711;Q9BZK7;P15884;Q15699;P46937;P48552;O43439;Q15466;Q9UQL6;Q04724;Q96GC6;P54259;P31946;Q03923;P41970;Q99816;Q99583;P37275;Q8WUI4;O75496;Q9UMX1;Q99471;O75461;Q8IZ40;O95551;Q9HBM6}

8670 Pathogen[ P0C206] interacts with 135 human  
partners: {P27695;Q96HA7;P06733;O00488;P46937;Q9Y2X9;Q8WUF5;Q86VZ6;Q9NQ87;Q16649;Q05195;Q9Y2D1;Q15466;Q96ST3;Q6VMQ6;Q9NPF5;O75496;Q96IZ0;P51532;Q9NPI1;Q9NR55;Q9NVW2;O43255;Q13263;P17275;O14948;Q9UMX1;O75925;P25490;O60907;Q6W2J9;Q9UGP4;O75381;Q96IF1;Q99583;Q2VWA4;Q15327;Q9UKL3;P52737;Q9UKV0;Q8WW38;A6NIX2;P54198;Q15637;Q04727;P61201;Q99816;P41970;Q04725;O14770;Q01201;Q9NZI7;Q99471;Q15699;Q9Y6X8;O00422;Q96RU7;P12755;P31946;P54259;Q9GZV5;Q15742;Q8IZ40;O60682;Q99581;Q14919;Q86X95;P10828;Q9ULV5;O75446;Q9UIS9;P16989;Q8IXJ9;P12757;O15379;P80723;Q8N488;P50616;Q8WUI4;Q01658;P49711;Q9NQR1;Q96AQ6;Q01094;P15884;P50539;Q8N9R8;O95551;Q14582;Q9Y4X4;Q13901;Q96GC6;Q9BZK7;O75376;Q9H165;Q96T58;Q04724;Q16384;Q9Y6B2;Q03923;Q9NZI6;P18847;Q719H9;Q8IY57;P37275;Q969R5;Q8IYM9;Q9HBM6;Q8NB12;Q9H9S0;Q86U70;Q9UBC3;P84550;O43660;P56524;O43439;O00257;P48552;Q01130;Q66K89;P47928;P50548;O43593;Q13227;Q9NZU5;O75461;Q9Y3T9;Q9Y618;P35638;Q14207;O75182;Q15583;Q9UKY1;Q9Y2Y4;Q9UQL6}

8671 Pathogen[ P03363] interacts with 132 human  
partners: {Q719H9;Q86X95;Q9NPF5;Q86U70;Q9NR55;Q15699;Q03923;O75461;Q8IXJ9;Q16649;Q6VMQ6;P10828;Q96T58;P54198;Q15466;Q99626;Q14582;Q13227;Q9NZU5;Q9UMX1;Q96IZ0;P54259;P61201;P50539;P12757;P18847;P37275;Q9NQ87;O15379;P51532;P06733;Q9BZK7;O43439;P25490;Q16384;Q9Y6X8;P31946;O75376;O60907;P56545;Q9Y2D1;Q13901;Q8N488;Q66K89;Q9UQL6;P50548;Q8WUF5;Q01130;Q96GC6;O14948;Q04724;O75506;Q9Y2X9;Q99471;P23497;Q15327;Q9Y4X4;P50616;Q04727;P17275;P49711;Q96IF1;O00488;Q86VZ6;Q8IY57;Q9UGP4;O75446;P48552;O43593;P46937;P52737;Q9GZV5;Q9NZI6;Q8NB12;Q01094;Q9UKV0;Q15637;Q96ST3;Q96AQ6;Q9NPI1;O75381;Q14919;Q8IZ40;Q9UKL3;Q9NZI7;Q9UKY1;P47928;Q9Y618;P35638;Q15742;Q15583;O75925;Q9Y3T9;O00422;Q01201;O75496;Q8N9R8;O60682;Q9HBM6;Q8WUI4;Q9Y2Y4;Q04725;Q05195;Q9ULV5;P84550;O95551;O43660;P15884;A6NIX2;Q2VWA4;P80723;Q99581;Q99816;Q9NQR1;Q9NVW2;Q9Y6B2;P16989;P41970;Q14207;Q8WW38;Q6W2J9;Q01658;O43255;P09630;Q9UBC3;Q9H9S0;Q96HA7;O00257;Q99583;O75182;O43251;Q9UIS9}

8672 [Cluster 789]GO:0003723+F molecular\_function [name] RNA binding [def] "Interacting selectively and non-covalently with an RNA molecule or a portion thereof." [GOC

8673 Pathogen[ Q2Q067] interacts with 403 human  
partners: {Q01844;Q9UNP9;P23588;Q92900;P05198;Q8TCS8;P61313;P83369;Q14151;Q12905;P33240;O75525;P25490;P62701;O00425;O95639;Q96FV9;Q9BYD6;Q6UN15;Q86U42;O15234;C9JE40;P49458;P47914;Q8IU60;P07910;P62312;Q9Y333;P46779;Q9Y6K5;Q9NR56;Q9NQT4;Q15631;A9UHW6;P55769;P49591;Q9UQ80;P22087;P55265;Q8N1G4;A6NGQ2;Q92664;Q9H7N4;P52272;Q02543;P61326;O75534;O75494;Q8IZH2;Q96I24;P14866;Q99547;P26373;Q15459;Q9NXV6;P62750;O15226;P61579;P47813;Q13148;O75940;Q12872;Q14690;P67809;P46087;Q9Y2L1;P55795;Q01130;Q9Y2R9;Q9H1B4;P62318;Q9Y606;Q9HCK5;Q15233;P19474;Q8WWY3;Q99497;Q96AE4;P15880;O94818;Q9NUL3;Q9H074;Q06265;Q9BU

L9;P82979;P09132;Q9UHX1;Q96F86;Q8N684;P46782;Q7Z7A3;Q9NV31;P10155;P35268;Q9Y6M1;O43390;Q9NRR4;P78406;Q15696;P22090;P46778;Q9UK45;Q13868;Q9NSD9;Q96B01;P38919;Q5VWX1;Q14103;O60506;Q9UBU9;O60930;P62888;Q9UBP6;P61573;Q9H6T0;P32969;P18615;Q13601;Q9H171;P57723;Q6NZ12;Q15633;P06748;Q69383;P62244;P05387;Q96AH0;Q92945;P52594;P62861;Q96T58;Q9Y534;A6NHQ2;Q75683;Q96HR8;P42704;Q9Y3Y2;P05386;Q9H6R4;Q13838;Q9Y3B2;Q07955;Q6I9Y2;Q9NPD3;P38935;Q86TB9;Q9BZ17;Q96N16;Q13769;Q8NDT2;P63241;Q16629;Q8NHM5;O95793;Q14240;Q8WYQ5;P30050;P0C7T5;O94906;P57721;O43148;Q6PJT7;P31943;Q92979;Q96QC0;Q15424;Q7KZ85;P26196;Q9BRP8;Q9Y2R5;Q10570;Q12996;P18077;P62891;Q7Z2W4;P27695;P62314;P08621;Q9UHK0;P61978;Q16630;Q9HAU5;Q12972;Q8N5P1;Q9ULW3;P61927;Q5RKV6;Q9BY77;P39023;P38159;P62487;P62081;P61247;P62304;P54253;O14980;Q9UHB9;P84103;P61254;P62249;Q9BYK8;Q8IYB3;Q05048;Q86Y13;Q96KR1;Q9NP64;P62280;O43310;P83731;Q14498;Q08J23;Q86V81;Q99728;Q8IWX8;P61576;P26358;Q9Y2T7;Q9Y221;P60900;Q07666;Q96T37;Q9H9Y2;P56270;P62263;P51816;O60832;P61572;P61571;P60866;P62906;P52815;Q06787;Q15024;Q13310;O95628;Q02878;P46777;Q05519;P26368;Q12904;P62899;O43251;P78344;Q6P2Q9;Q9Y2V2;Q53EL6;Q96DE0;Q07020;Q9H9G7;P62913;Q12906;O14602;Q08211;P62269;P08579;P52597;P07814;Q8TF46;O14746;P23246;Q6IS14;P14678;Q9Y5S9;P62424;P25786;Q01081;P62917;Q8TEQ6;O00567;O15116;Q9BRS8;O76021;Q9P2I0;Q9H9Z2;P61574;P62495;Q13243;P09661;Q8IWX3;P36578;Q8N9N2;Q9UKV8;Q15366;Q8WVV9;Q9HAV4;P09914;O95218;P19338;O43809;O95777;Q92499;Q8NI27;Q8WY41;P09012;P49207;P23396;Q09161;Q9P013;Q9H0U6;Q9HCE1;Q9HCG8;P21399;Q9UQ35;Q9BUJ2;P20042;O60573;P63173;Q8TB72;Q9H4D5;Q9NY12;P82675;P52298;Q9H9J2;Q13901;Q9BYX4;Q15427;Q9BZE2;P47974;P61575;Q99700;Q96PK6;Q9UIF9;Q9UKF6;P39019;Q14493;Q5T8I9;Q5C9Z4;Q9UL18;Q04637;Q9GZV4;O43592;Q9H0G5;P62306;P62841;P06730;P51116;Q9UNQ2;Q9UGY1;O95453;Q8NC51;O75792;Q15637;O95707;P35637;Q02040;P22626;O60870;Q9BTL3;Q9UL40;P50914;P46776;Q9NVV4;P18583;Q9ULC4;Q7Z417;Q96CM3;Q16637;P11940;Q8WXF1;Q93062;P63162;Q92841;P62308;Q9HC16;P09001;Q16600;P61578;Q96QD9;P05388;Q99459;P60842;Q6ZN17;P18124;P62851;Q00839;Q9ULM6;A7MD48;Q15056;Q9Y4Z0;O60936;Q92901;P46781;P48200;P09234;Q9H814;P62310;O75821;Q96B26;Q9BUR4;Q8NG50;Q969L4;O95900;P41214;P17947;Q96T21;Q76FK4;P14625;O95149;Q9Y4Y9;P62945;Q9H1J1;P51003;O95059}

8674 Pathogen[ P0C214] interacts with 455 human partners: {P62861;Q9BY77;Q12996;Q9BZI7;O75683;Q13310;P84098;Q8TB72;P82979;P61247;Q16637;P51114;Q96FV9;P62312;Q3MIT2;O15234;O15116;P26368;Q9H6T0;Q6ZN17;P27695;Q9BUL9;Q9UGY1;P83369;Q9H9J2;Q09161;P26196;P14625;P15880;Q6IS14;Q96T58;P62081;Q12904;Q9NV31;P19474;P56270;P62913;P22090;Q15024;Q06787;O14746;Q99728;P35637;Q92901;P62249;P09914;Q8N9N2;P62899;O95453;P38159;Q9UKF6;Q96KR1;C9JE40;P39019;P62263;Q9BRP8;P60842;P46087;P82675;P57721;Q92664;Q9H0U6;Q9UJJ7;Q16540;P54253;P84103;Q86V81;Q9Y5S9;P61571;P51003;Q13769;P06748;O95628;P26599;P23396;Q92900;P18077;Q9GZV4;Q92841;P05388;Q9H814;Q7KZ85;Q9H171;Q9Y2L1;Q9NR56;P07814;P23588;O76021;Q9H0S4;P14678;Q9Y2V2;P26373;P62306;Q969L4;Q9P2N5;P78406;P55265;Q5JTT9;Q9Y6K5;Q7Z417;A6NHQ2;O15056;P61572;Q9Y3B2;P47813;P46778;Q15233;Q16587;Q8N5X7;Q15637;P67809;A6NMX2;P31483;Q05048;Q6P2Q9;P23246;Q12906;O00567;O14602;P29728;Q8IWX8;P61573;Q15397;P17947;O00425;O75821;P42704;Q9UL40;P78344;Q53EL6;Q9UNQ2;Q96AH0;Q7Z2W9;Q7L2E3;Q15056;Q9UHK0;Q6NZI2;Q6PJT7;Q9HAV4;Q9BYX4;P22087;P62701;P49207;P11940;Q12905;Q99497;Q10570;Q5RKV6;P48200;P61575;Q9H6R4;Q9BUR4;Q9NZI8;P32969;Q5JPH6;Q02543;Q13901;Q9HAU5;O95149;P38935;Q99547;P09001;Q9NY12;P63241;P62308;Q9Y4Z0;Q9UK45;Q01844;O43148;P08579;O43390;Q15366;Q8N684;P49591;Q9HCE1;O75792;Q99700;Q16630;O94906;Q9Y3Z3;Q7Z2W4;Q8TF46;Q9Y4Y9;Q8N9N8;P50914;Q9UPQ9;Q07955;P18615;Q9Y534;Q9BYK8;O95059;Q8IZH2;P46779;P55795;O95707;O75525;Q15633;Q9Y333;P52298;P52272;Q9HC16;P00374;P2487;Q9ULM6;P62314;P07910;Q14493;Q8IYB3;O60870;P47914;Q9H1B4;O43809;Q9UHX1;Q9Y2T7;P18583;Q15696;P63173;Q9UIF9;O14980;Q9NPD3;P08621;P56192;Q8WXF1;Q14103;P62310;Q9Y221;Q07666;Q14151;O95071;Q16600;P55769;Q99459;P62280;P61326;Q8TEQ6;Q9BZE2;Q92979;Q8IWX3;Q9BRS8;P38919;P61576;P0C7T5;P26358;Q9H074;P30050;Q08J23;Q9NRX1;Q659C4;Q6PKG0;P62891;P61574;Q9NVP1;A9UHW6;Q9NUL3;O43310;Q14671;Q13243;Q14240;Q8TD47;O43592;Q15427;Q9P2I0;P54577;P52597;Q8TCS8;Q5T8I9;Q12872;Q9H9G7;P62495;Q05519;Q76FK4;O95900;P62269;P63162;O15226;Q86TB9;Q9BUJ2;Q15459;Q96I24;Q9H0G5;P61579;P51816;Q96T21;O60930;P62318;Q8NDV7;O60381;Q9NRR4;Q8IV48;Q8NI27;P46781;P61578;Q13868;P25786;Q01081;Q96PK6;Q9Y2R9;Q96B01;Q14690;P33240;P49588;Q9H9Z2;Q8IU60;Q075940;P61254;Q15424;O95777;O75534;Q9UBP6;O75494;Q7Z7A3;Q9UKV8;P51116;O95639;P62841;Q15287;P62244;Q9NP64;P43243;Q04637;O60832;P31943;Q9Y2R5;Q92499;P62304;Q07020;Q8WY41;Q96I25;O00442;Q69383;P62945;P09012;O95793;P46776;P05198;Q9NUU7;Q15631;Q9P013;O60506;Q3ZCQ8;P52815;Q9BTL3;P46777;Q8TEA1;Q9HCG8;P55884;Q86Y13;Q9H9Y2;Q9Y6M1;P83731;P09661;Q9UMR2;Q9UQ35;Q96AE4;P35268;Q9HCK5;Q9ULW3;Q8NC51;Q9UHB9;P62424;Q08211;P60866;Q12972;Q96BT7;O95218;Q8IYB7;Q8NDT2;Q92804;Q00839;P49458;P09234;P60900;P61313;P52594;Q92945;Q14011;P20042;Q9HCF0;Q13601;Q9UQ80;P05387;Q6IN84;Q96QD9;Q13148;P22626;Q5C9Z4;O43251;Q9H4D5;Q9NSD9;Q9Y606;P61927;Q02040;P62750;O94818;Q16762;Q5VWX1;P05386;Q06265;P09132;Q9UNP9;P21399;P62851;Q86U42;Q9NVV4;P06730;P19338;Q9BYG3;Q13838;Q8IZ73;Q9H7N4;Q15365;Q14498;P46782;Q8WYQ5;Q9ULC4;Q8NG50;Q96CM3;O15042;Q9Y3Y2;P18124;Q93062;Q9NQ4;Q86U38;Q8WVV9;Q96F86;Q9UL18;P10155;Q96T37;Q14966;Q96B26;Q16629;Q9BYD6;P14866;P36578;Q5VZF2;O60936;Q96QC0;Q9UBU9;Q9Y2Z4;P47974;Q6UN15;Q6I9Y2;Q96DE0;Q01130;Q8WWY3;P62906;Q96HR8;O60573;Q9NS39;Q02878;Q9H1J1;Q96N16;Q8NHM5;P41214}

8675 Pathogen[ P03346] interacts with 501 human partners: {Q08J23;O75179;Q9Y606;Q9Y5S9;Q96FV9;Q9Y3Z3;Q9BZI7;Q7KZ85;O76021;Q15427;P05387;P51991;O95639;P46779;Q5RKV6;Q86U42;O15234;P61978;Q9Y3Y2;O15042;Q9ULM6;P38935;Q8NC51;Q09161;P63173;Q8WXF1;P06730;P62917;Q9NP64;P62249;P62913;Q15366;Q9HAV4;Q06787;Q92979;P61579;P62861;Q08170;Q8IYB3;Q96PU8;Q02878;O95149;Q93062;Q12905;Q14671;Q9P2K5;P47813;Q96KR1;O00567;P09651;P56270;Q5T8I9;P55265;P06748;Q96N16;P0C7T5;Q9ULW3;P14866;Q9GZV4;Q9BTL3;Q9NRX1;Q9Y2V2;P62280;P39023;Q8NHU6;P14625;P62304;Q9UKF6;O95777;O60930;Q96QC0;Q9UQ80;P61927;Q14011;O95900;Q96I25;Q9Y6M1;O00425;Q9H171;Q9H0U6;Q99728;Q92925;Q9UMR2;Q13148;A6NHQ2;Q92841;Q9Y4Y9;P08579;P07814;P78406;Q9H9G7;P55795;O95628;P61578;Q4G0J3;Q9UNW9;Q9NS39;Q9UL18;P43243;P46778;Q8WVV9;P49207;Q8N5X7;P25490;Q15637;Q15633;P0DJ3;Q9BZE2



40;Q6IS14;Q15024;Q6P087;Q9UK45;Q14151;Q10570;O60832;P52298;Q92804;Q9HCE1;Q9H171;P21399;P39023;Q9H1J1;Q7L2E3;O75792;Q9Y2R9;Q13243;Q9HCK5;Q15397;Q9Y5S9;O43592;Q13901;O43432;Q8NG50;Q6PJT7;Q9BUJ2;Q12906;P62495;Q8NHU6;P33240;Q86TB9;P49591;Q99497;Q7Z417;Q9P013;P26368;Q9NXV6;P61579;P18077;Q93062;Q9NQT4;Q14966;O75179;Q13868;Q8IWX3;Q8NI27;Q9HC16;P42704;P14866;P23246;Q16540;A6NC42;P07910;Q9UBU9;Q9NPD3;Q13310;P52594;Q13838;P05198;P61254;P50914;Q659C4;Q7Z2W9;O75569;O15116;Q9NSF3;O95639;Q9H074;P62312;Q14240;Q9H1B4;P18615;Q9UGY1;A6NHQ2;Q96HR8;Q9Y3Y2;Q6P2Q9;Q8TF46;P62841;P18124;Q14444;Q14445;Q8TEA1;Q9NR56;Q9UHK0;O60870;P62314;P54253;Q14498;O95707;Q16600;Q15427;Q08211;Q9H9Z2;Q9UHX1;Q96AH0;O95453;Q05048;Q9Y2R5;Q9NQ94;O95149;A6NGQ2;P46782;Q00839;Q9BY77;Q8TB72;P22087;Q96N16;A1L020;O95059;Q8WWY3;Q96FV9;P83369;Q15459;P78344;O00567;P23588;P32969;P22090;P62306;Q86U44;Q8IZ73;P43243;Q5JPH6;P14678;O60573;Q13769;Q96PZ0;P60866;Q8IYB3;Q12905;Q9BUR4;O75648;P19338;O43148;Q16629;Q9Y2T7;Q9H6R4;Q15631;Q07020;P39019;P26599;Q8IYB7;P55795;O75940;Q7KZ85;P61572;Q9ULW3;Q9Y534;Q6I9Y2;Q96T21;P61326;Q8IZH2;Q16637;Q96AE4;P49207;Q5VWX1;P62244;Q9H7N4;Q9H6T0;A7MD48;Q9Y3Z3;Q8N0Z8;P60900;Q9NP64;Q8NC51;Q02040;P09001;P62263;Q02543;P19474;P62424;P55265;Q92901;Q9HCT0;Q96I24;Q9BZI7;P11940;P62750;P63173;O94818;Q9Y4Z0;P26196;P49458;Q07666;P61573;Q05519;Q5RKY6;P46776;Q9NUL3;Q9BRP8;Q9Y6K5;Q9NY12;Q96F86;P08621;O76021;Q16587;P61571;Q4VXA5;Q92945;Q8N684;Q9UQ35;Q9UIF9;O75525;O75534;Q9BRS8;Q86V81;Q8N5X7;Q9NRR4;P46087;Q86U42;Q15424;Q9NVV4;P48200;P36578;O43310;Q16630;Q9NRX1;P62308;O60506;Q15696;P09012;Q08J23;P26358;Q9BUL9;P56192;Q9Y6M1;Q9NSD9;Q71RC2;Q15366;Q9BTL3;P56270;O60936;P27695;Q53H11;P62304;P51116;Q9H0K6;Q5C9Z4;P62906;Q9HAU5;Q9Y2L1;P47914;P62280;Q5RL73;P62310;Q9HA38;Q07955;P61574;P06748;Q9H0G5;Q969L4;P62899;Q9Y2Z4;Q6IN84;Q15365;Q9Y606;Q12972;Q13601;P63241;P14625;P62081;P62945;Q16762;Q8N5P1;P46777;Q9H9J2;P30050;Q6NZI2;P61978;P31943;P15880;Q9H9Y2;Q01081;Q96AZ6;Q9BYG3;Q14493;P78406;Q9UJ7;P62891;Q9HCG8;Q96KR1;O95777;P82675;Q8WQ5;Q92900;O15042;Q06787;Q92499;Q96FC9;Q96B26;P62888;Q14011;P55769;P38935;P61927;P52597;O43390;P62917;P09234;Q9HAV4;O15226;Q12872;Q96Q11;Q6PKG0;Q9ULM6;Q13395;Q8N1G4;P46778;Q9P2N5;P62249;Q9NWB1;P51816;Q12904;O00425;P51003;Q12996;P09661;P05386;P49588;P35268;P62913;P41214;Q14671;O60930;Q96QD9;P25490;P05387;P52756;O75494;Q7Z7A3;P61247;Q15233;Q99547;Q9Y221;P62318;Q9NVP1;Q9UQ80;P62269;Q9Y4Y9;P61578;P62701;Q6UN15;P18583;Q9UHB9;O75616;P61575;O95900;Q06265;Q9GZV4;P61313;O95218;Q9Y683;O15234;Q9NZB2;Q92615;Q8TD47;Q8NDT2;Q96C10;Q9BV44;P0C7T5;Q96DE0;Q96PK6;P07814;Q6ZNI7;Q9Y2V2;P62851;Q8TCS8;Q09161;P05388;Q04637;P31483;P22626;P84103;Q8IWX8;Q14690;Q8WWH5;Q9UPQ9;P38159;Q8NDV7;Q96T58;Q53EL6;Q9P2I0;Q69383;P55884;P62861;Q9H814;P63162}

8678

Pathogen[ P03383] interacts with 368 human

partners: {Q9H1B4;Q9NVV4;Q9NRR4;P36578;Q06265;Q12872;P05388;Q9UBU9;P39019;Q07955;Q13601;P19474;P26373;O15234;Q9Y2L1;P09661;Q99547;Q15287;Q53EL6;Q7Z417;O75534;P62913;Q8NI27;Q05048;P62945;Q6PJT7;Q12904;P61574;O75494;Q15366;P51003;P06748;O43148;Q969L4;Q9H0S4;O43390;Q9H9Z2;P56270;P62891;P0C7T5;P61572;P19338;Q02040;Q9NP64;Q9UL18;Q15459;O00567;P62280;P62318;Q07020;Q9UNP9;Q8IU60;P49458;P62312;P62750;Q9H4D5;P22626;P60900;P14866;P05387;P62249;Q6NZI2;P62888;P62899;P61571;O75712;Q9UPQ9;Q13769;P61927;Q13838;P46777;Q7Z7A3;Q9Y5S9;P46779;P49207;P55795;Q5JPH6;A9UHW6;Q99700;P83731;P62424;Q96DE0;P78406;Q9NR56;Q9BUR4;P18124;P46778;O95218;Q6ZNI7;Q96FV9;Q06787;Q12972;Q92901;Q10570;Q96B01;P62304;Q9UBP6;Q8WYQ5;Q92841;P61326;Q9GZV4;P61573;P48200;P61247;Q9UNQ2;Q6P2Q9;Q9ULW3;P38919;Q96KR1;Q9Y4Y9;O60936;Q8TB72;Q5T8I9;O95059;P26368;Q13243;Q9HCK5;P09001;P62316;Q8TCS8;P47914;Q9P013;Q9Y2R9;P61978;Q8WXF1;Q96T21;P61927;P11940;P51916;P31943;P62917;Q99459;P61575;Q86V81;O60573;Q14690;Q9H6R4;Q15631;P63241;Q9H7N4;P09132;O75683;Q9UKF6;Q9BZE2;Q9BRS8;P30050;Q9Y3B2;O94906;P10155;P84098;Q9Y2T7;P38159;O14602;P32969;Q09161;O95628;Q16629;P20042;O95707;P82675;Q5VWX1;P62487;Q9BYD6;P18077;Q8N684;O60870;P23588;P06730;P63173;Q8IYB3;Q9Y606;Q16637;O95777;P62081;A7MD48;Q9UHX1;P33240;P62314;Q96PK6;P62310;P18583;Q9Y221;P84103;Q96N16;Q9Y2R5;Q92945;Q9UHK0;Q9H6T0;Q9HAU5;A6NGQ2;Q8TF46;Q9NV31;P35637;P61313;O14980;Q01130;Q8WV9;Q9HAV4;Q9NPD3;O94818;P62851;P62495;Q9NQT4;Q9H171;P47813;Q14493;P46782;Q14103;Q96QD9;P41214;Q08J23;O14746;O95149;P62269;P57721;P05198;Q02543;P62244;Q9UGY1;P14678;Q02878;Q9Y2Z4;Q9NY12;Q9Y333;P14625;P25786;Q01081;P07814;Q9UIF9;Q86TB9;Q07666;P82979;P78344;Q96B26;Q9BY77;Q15365;Q9UKV8;Q9ULM6;Q12905;Q9H074;Q9Y6K5;Q96HR8;P51116;Q96T58;Q8WY41;O43809;P52298;Q12906;P46087;P09012;P62906;Q9Y4Z0;P54253;O75525;P60866;Q04637;P52815;Q9UK45;Q5RKY6;P61254;Q9UQ80;Q05519;P61579;Q96QC0;Q9BUJ2;C9JE40;P46781;Q8WWY3;Q9UQ35;Q96AE4;Q9H9J2;P39023;P55265;P55769;O60930;Q9UHB9;P42704;Q9BTL3;Q9P2I0;Q8NDT2;Q92979;Q15233;O43310;Q13310;P38935;Q14151;P62841;Q96F86;O00425;Q69383;P62308;P27695;P23246;Q13148;Q15424;P22090;O43592;Q9NXV6;Q92499;P62701;Q01844;O15116;Q9H0G5;Q9Y534;P83369;O95900;P62263;Q9BUL9;P35268;Q9Y2V2;P05386;Q9NUL3;P50914;Q9HCE1;O95453;Q86U42;P61576;Q96AH0;Q8NC51;Q8IWX3;P22087;Q9NSD9;P49591;P67809;Q9UL40;Q15637;Q9ULC4;Q9HCG8;Q9Y3Y2;P61578;Q96CM3;Q6UN15;P09234;Q92900;P62861;Q13868;Q00839;P52594;P08621;Q6I9Y2;Q9BYK8;P46776;O75821;P26358;P52597;P15880;O60832;P23396;Q15024;P17947;P18615;O15226;Q9H9J7;Q13901;Q13901;Q15633;Q9H814;Q5C9Z4;P62306;O76021;Q9H0U6;Q7Z2W4;Q9BZI7;Q9H1J1;Q14498;Q93062;Q7KZ85}

8679

Pathogen[ P03410] interacts with 488 human

partners: {Q99700;O75648;Q13838;Q9Y2W6;P62861;Q96T21;P05386;A8MWD9;P61576;Q8IU60;Q71RC2;Q96Q11;Q9Y2L1;Q6NZI2;P22087;Q92945;Q02543;Q8IZ73;Q9UPQ9;P23246;P61247;Q00839;P49207;Q15427;Q8IWX3;P26373;P61578;Q9Y4Y9;Q01081;O95218;O95639;Q9NP64;P52594;P26368;Q10570;Q8TCS8;P61326;O75683;Q14103;P62304;P62899;P56192;O15234;O15042;Q96PK6;Q9Y534;Q9UKV8;Q15633;Q99497;O95628;Q9UHB9;Q96QC0;Q8WWY3;P18615;Q15637;Q93062;P62244;Q12996;O00442;Q15696;P62913;Q92804;P61978;Q9Y3A4;P0C7T5;Q9HC36;Q8IV48;Q9NWB1;Q9UGY1;Q16540;Q05048;P25786;Q16629;P29728;Q02878;Q92901;Q92900;P22626;Q15233;P11940;Q9NVP1;Q9BUJ2;Q6PJT7;A6NGQ2;P15880;Q9BTL3;Q8NI27;P17947;P62306;Q16600;P46776;O14746;P46776;P62841;P82675;P30050;Q15287;P60900;P62310;Q9UBP6;Q9UL18;P05388;P06730;Q9ULM6;Q9UQ80;Q9UHK0;Q96KR1;O95777;P46781;P18124;Q8NHU6;Q9BYK8;P49588;Q9Y5S9;P00374;Q06265;Q7KZ85;A1L020;Q14493;Q76FK4;

P20042;Q9H0G5;P57723;Q5VZF2;P41238;P35637;O75792;Q5RKV6;Q8TEQ6;Q15365;Q8TF46;Q8TEA1;P14625;O60870;Q9HCJ0;Q9Y333;Q5T8I9;Q9BYX4;Q9P2K5;P62269;Q8NG50;A6NHQ2;Q8NDV7;Q5C9Z4;Q07020;Q13868;Q9NR56;P57721;P55769;P62906;Q96T37;Q9NRX1;P52815;P23396;Q9NXV6;P78406;P26599;Q9Y2V2;Q6PKG0;O60832;Q8N9N2;Q7Z7A3;P82979;Q9P013;Q96N16;Q15366;P62249;P62308;P14678;P63173;P50914;Q9HAU5;P06748;Q5VWX1;P62280;Q9H0S4;O43432;Q9H9G7;P55265;P22090;Q9BYD6;P61313;Q69383;Q8WYQ5;P47813;Q9NVV4;Q9H9J2;Q9H171;Q9H1J1;P14866;Q9P2N5;Q9NRR4;P41214;P09012;P62701;Q96T58;P25490;Q8WVV9;Q9BZI7;Q15424;O15226;Q07666;Q96FV9;Q12904;Q96QD9;Q9UQ35;Q9UJJ7;P62750;O75569;Q9NSD9;Q9H074;Q96EY7;O60381;O60930;Q659C4;P51003;Q5RL73;Q9H7N4;Q13148;P08621;P55884;P49591;O43809;Q96CM3;Q9H4D5;Q92979;P26358;P67809;Q53HI1;Q9ULC4;Q9HC16;Q8IZH2;Q9NX24;Q4VXA5;O94906;P36578;Q8N1G4;P61573;Q9UMR2;P18077;Q9UNQ2;P07910;P08579;Q14966;O00567;P38935;O95707;O60936;Q96B26;Q05519;O43818;Q9H814;Q96F86;P61927;Q9UL40;P84098;A9UHW6;P61571;O95453;Q99459;P21399;P43243;Q9NUU7;Q3ZCQ8;P09132;Q6UN15;Q07955;P52597;P52298;Q9H9Y2;P62081;Q13395;Q16637;P61574;O75534;Q9BUL9;P62495;Q9P2I0;O75525;Q6IN84;Q8TD47;P31943;Q92499;P62314;Q16762;P83369;Q7Z2W4;Q96AH0;Q15056;Q8N0Z8;Q9H6R4;O43310;Q15024;Q9BYG3;Q12905;Q9HCE1;P33240;Q9UHX1;Q96AZ6;P42704;P09661;Q9BV44;Q8WXF1;Q96I24;Q96DE0;Q9NY12;Q15459;Q7L2E3;Q8NDT2;Q9HCK5;Q86V81;P31483;P19338;P52272;Q53EL6;Q9Y2R9;Q8N5P1;P46782;P32969;Q9UBU9;P18583;Q9BZE2;P47974;O14602;P60842;Q9H1B4;Q13769;P61572;Q14011;Q8IYB3;P38919;Q9NQT4;Q8IYB7;Q9UNW9;Q8WWH5;Q9Y3Y2;Q9NUL3;P09234;Q5JPH6;P46779;P51114;Q99547;Q9Y6K5;Q9Y606;Q08J23;Q13901;Q01130;P46087;O60573;Q969L4;Q9Y4Z0;Q92664;Q075821;Q9ULW3;Q9UKF6;Q9HA38;Q9H6T0;P63135;Q6I9Y2;Q96C10;P27695;Q7Z2W9;O00425;Q15397;Q86TB9;Q9BY77;Q9Y2Z4;Q14151;Q9BUR4;Q8N5X7;O95793;A7MD48;Q8N9N8;P56270;Q12972;Q9UIF9;Q8N684;P63241;Q96HR8;Q9UNP9;O94818;P62487;Q9H9Z2;P62263;Q15631;Q14498;P62424;P62888;O60506;Q96FC9;Q12872;P61254;Q09161;P46778;P51816;O43148;P62945;Q96A72;O95900;P05387;P07814;Q9NPD3;P48200;Q13601;Q06787;Q6ZNI7;Q6P2Q9;Q9NV31;Q6P087;O15116;Q9H0K6;P09001;P84103;P39019;P62312;P47914;Q86U44;Q16630;Q9GZV4;Q86U42;Q04637;Q9Y2T7;P54253;P49458;Q9Y3Z3;P39023;P55795;Q14671;Q8WY41;O75940;O76021;Q9HAV4;Q13243;A6NMX2;Q96B01;P62917;O43592;P62851;P83731;P38159;Q8IWX8;P61579;Q3MIT2;Q9NZB2;P35268;Q08211;Q8TB72;Q9Y2R5;P09914;Q96AE4;Q9UK45;Q13310;O75179;P63162;P62891;P61575;Q86U38;Q9Y221;Q12906;Q9BRS8;A6NC42;Q92615;P78344;Q96I25;P23588;Q8NC51;O14980;C9JE40;Q14240;O95059;Q7Z417;Q9H0U6;Q9Y6M1;Q14690;P60866;O43390;O95149;O75494;Q9HCG8;Q9Y3B2;Q6IS14;P10155;Q16587;Q9BRP8;O75616;P05198;Q02040;P62318}

8680

Pathogen[ P14075] interacts with 376 human

partners: {Q9Y2Z4;P42704;Q5VWX1;O95453;Q8N0Z8;Q69383;P82979;P51003;P22626;Q8TEQ6;Q15366;P61575;P49207;O15234;P09132;Q8TB72;P62304;P52815;P46781;P54253;Q05519;Q76021;P32969;Q9NXV6;Q9UGY1;P14866;Q9UK45;Q9BYD6;Q09161;Q9H814;P62495;Q8WXF1;Q14690;P19338;P62913;Q92900;P22090;P23246;P20042;Q02878;O43809;Q9P210;Q96DE0;P51816;Q96KR1;P55265;O14746;P08621;Q9NUL3;P62851;Q92979;P18615;Q9H6R4;Q9HCK5;Q14103;O75648;Q9ULM6;Q86V81;Q13243;P23588;P61576;Q13769;Q96QC0;Q9NPD3;P60900;P27695;Q8IWX3;P62244;Q9Y3Y2;Q9H0S4;Q9BRP8;Q9Y2R5;Q07666;P61579;Q6PJT7;P61326;Q9H9G7;Q9NSD9;Q14493;Q9UHX1;Q6IN84;Q96N16;Q9Y4Z0;P78406;P26196;Q13901;Q15459;P61572;O94818;P61254;Q9NVV4;P46778;Q6UN15;Q96F58;Q12905;P09234;P38159;P38935;Q92945;Q8NC51;P61573;Q9Y606;Q01844;P05388;Q9H9Z2;O60930;Q9HCE1;P78344;P0C7T5;Q96T21;O15226;Q7KZ85;Q01130;Q9Y2V2;O75821;O95218;O95777;Q9UNP9;P46777;Q93062;Q9GZV4;P31943;P62249;P63162;Q12906;Q13601;Q9H7N4;Q9H074;Q02040;P06730;P62306;P62081;O75494;Q9H9J2;P63241;P62308;P62750;O00567;Q8IU60;O43390;Q02543;Q9HAV4;Q8WWH5;Q9NZB2;Q9UQ35;Q13148;P18124;O94906;Q9HCG8;Q12872;P26358;Q9Y2L1;A9UHW6;P47813;O95900;Q96HR8;Q13868;P61574;P05198;P62312;Q16637;Q9Y2R9;O75940;Q8NI27;O43592;Q99459;P62487;Q96QD9;Q9UH9J2;O60870;Q9NQT4;Q92499;P11940;P10155;Q6NZI2;O14980;P63173;Q15365;Q00839;O95628;P30050;P57721;Q15631;Q9Y221;Q6I9Y2;Q13310;O60573;P83731;P49458;P84098;P62318;P83369;O15116;O75683;P51116;P55769;Q9NR56;P33240;P56192;P61247;P46782;P62891;Q96PK6;Q9Y2T7;P62861;Q12904;P61571;Q9BUJ2;Q6ZNI7;Q9UPQ9;P18077;Q05048;O75525;Q15424;Q9NV31;P46779;P62917;Q15637;P39023;P41214;Q15287;Q04637;Q9UNQ2;P50914;P62269;Q7Z7A3;Q86TB9;Q5T8I9;Q6P2Q9;Q5RKV6;Q9ULW3;P26368;Q7Z417;P23396;P19474;P22087;Q9Y6K5;P25786;Q9UJJ7;Q01081;P15880;P17947;Q9UIF9;P46087;Q14151;P67809;Q06787;O14602;Q9BRS8;Q9HAU5;P06748;Q9UBP6;Q53EL6;Q9NR94;Q96B26;P09661;Q8IYB3;Q9UKV8;Q9BTL3;P62841;Q96AH0;Q9Y333;P36578;Q9BUR4;P61978;O95149;Q15633;Q9BZE2;O60832;A6NGQ2;Q9H9Y2;Q15233;Q8WY41;Q9UQ80;Q7Z2W4;P52594;P09012;P61313;A7MD48;P14678;Q8NDT2;O75792;O95059;Q9Y534;P62888;O43310;Q8TCS8;Q9H0U6;Q92901;Q96B01;Q99547;Q5C9Z4;Q92841;Q9Y5S9;P35268;Q9UHB9;P62945;Q9NP64;P35637;P46776;P09001;Q9UL40;Q9UL18;Q15024;P56270;P84103;Q99700;O43148;Q9UBU9;P48200;P62701;Q53HI1;Q9H1B4;Q9H0G5;Q12972;P62899;P52597;O75534;O00425;Q5JPH6;O60936;Q08J23;P47914;P62906;P62314;P38919;Q8N684;Q9BUL9;Q9H4D5;Q9Y4Y9;Q96FV9;P14625;P05386;Q9UKF6;Q9NY12;Q8WVV9;Q13838;Q86U42;O95707;P39019;P62424;Q16629;Q06265;Q96AE4;Q9ULC4;Q96CM3;Q9P013;P62280;P49591;Q9Y3B2;Q96F86;P18583;Q10570;Q9BYK8;Q07020;C9JE40;Q8WY3;Q9H171;P62263;Q969L4;P60866;P82675;P26373;P07814;Q14498;P61578;P05387;P62310;Q9BY77;Q07955;P52298;Q8WYQ5;Q9H6T0;Q9BZI7;Q9H1J1;P61927}

8681

Pathogen[ P0C206] interacts with 454 human

partners: {P27695;Q9BUJ2;A6NGQ2;A9UHW6;P61572;Q9UNP9;P09132;Q15287;P61313;Q12872;Q9H0S4;O75683;Q9BUL9;P67809;Q08J23;P33240;P07814;Q9P2N5;Q9H074;A6NHQ2;Q9UKF6;Q13601;Q8N9N2;Q96T37;Q14103;P14678;P31483;Q9HCK5;Q9GZV4;Q8WWH5;Q9BZI7;P20042;Q15365;P18124;Q9BYG3;Q6IS14;Q07955;P95149;Q86TB9;P26368;P52298;Q7Z2W9;P55265;O95453;P61576;P38935;Q9H0U6;Q9Y2Z4;Q9UBP6;Q12905;Q9NUU7;Q15397;P61326;Q01081;P49207;Q8IZH2;Q8TCS8;O43592;Q86U38;Q15696;P62081;Q09161;P30050;P25786;Q9NY12;P18583;P55769;Q06787;Q8NI27;O14602;P25490;Q14966;Q14690;Q9NPD3;Q92664;Q6UN15;Q5RKV6;P62304;P62244;Q05519;Q15233;Q8IYB3;P50914;A6NC42;Q13868;Q08211;P62750;P09012;Q9UHK0;Q9H7N4;Q8IV48;P46781;Q02543;Q9NR56;Q9Y6K5;Q9Y2V2;Q9BY77;P14866;C9JE40;Q8TEQ6;P61978;P63162;O60870;O75940;Q8N684;P09001;O00567;O95059;Q9NXV6;Q07020;Q96PU8;P46778;Q9BRS8;Q14011;P51816;P26196;Q9NS39;Q15637;P19338;P62263;Q5JPH6;P26358;Q9UPQ9;P29728;Q13243;Q16629;Q86U42;Q15631;Q8WVV9;P62314;O43390;Q8IWX3;P

60900;Q96DE0;Q02878;Q9UKV8;Q01844;P62495;O75494;P51003;P62280;P22626;Q07666;Q8N9N8;Q02040;Q9BTL3;Q99497;O43809;P0C7T5;Q8TB72;Q96B26;Q9H0G5;P62851;O94818;Q8IZ73;Q8NDV7;Q8WY41;O15226;Q5T8I9;Q9Y4Y9;Q96N16;Q9UHX1;P46782;O95628;Q9HAV4;Q9P2I0;P49591;P06730;Q9Y4Z0;P61247;P48200;P57721;P83369;O75534;Q16587;Q9UJ7;P18077;O95777;Q13769;P62913;P61927;Q9UNQ2;Q6ZNI7;Q9Y333;Q9BZE2;Q9HCE1;Q8TEA1;P62888;P23246;Q9H6R4;Q6PKG0;Q9BYK8;Q9UQ35;O60930;P51114;Q99547;Q3ZCQ8;Q9H9Z2;P36578;Q9H814;O60936;Q9UK45;P62861;P05198;Q92979;Q6ZNO4;Q9H4D5;Q96FV9;P38159;Q05048;O60506;Q8N5X7;Q9NSD9;Q13310;P35268;P23396;P39023;Q9ULW3;Q99700;Q13838;Q9Y2R9;P32969;Q06265;Q9UBU9;Q53HI1;P18615;P52597;O76021;P62701;Q16630;Q6P087;Q9P2K5;Q6PJT7;P61575;Q9H171;P05386;Q96KR1;Q9P013;Q8N5P1;O95707;Q8WXF1;Q6NZI2;P61571;Q96F86;P22090;Q9BYD6;P84098;P62945;P10155;O75792;Q7KZ85;P26373;Q96PK6;Q9UIF9;P35637;Q99728;P46777;P05388;Q9NRX1;Q76FK4;Q7Z417;Q6P2Q9;A6NMX2;O95793;Q659C4;Q9NVP1;P62318;Q15024;O15234;Q9H1B4;Q9NUL3;P17947;Q13901;Q8NHM5;P62899;Q12996;Q5C9Z4;P47813;Q9NRR4;P83731;Q9HA38;Q9Y2L1;Q86XN8;O95900;P82675;Q8WWY3;Q92841;P55795;P39019;Q92901;Q9NVV4;P05387;Q92804;Q15424;O60381;Q6IN84;O60832;Q53EL6;P56192;Q15633;Q8IWX8;P60866;Q14240;Q9BUR4;P62306;P62487;Q96HR8;Q13148;Q96T58;P62841;Q15366;Q99459;Q9Y3B2;Q9HAU5;Q9HCG8;Q9Y606;Q9NV31;Q9H9G7;P46087;Q9H6T0;P61574;P63241;P43243;O95218;O95639;P84103;Q96QD9;Q8N1G4;P23588;P78344;Q92900;P49458;P22087;P78406;Q14151;P42704;O94906;Q96QC0;Q9UB9;A7MD48;A1L020;Q9NP64;Q9HC16;Q9H9Y2;O60573;P46776;Q9H9J2;Q9ULC4;P62906;P62312;P41214;Q96AE4;Q04637;Q9UQ80;O15042;P63173;P06748;Q92945;Q12972;Q9UMR2;P09661;O75179;Q9NQT4;Q9Y2R5;Q9BYX4;Q16762;P38919;O75821;P41238;Q96C10;Q16637;P62308;P62891;Q93062;P62269;Q7Z2W4;Q8N0Z8;Q96I24;O75525;Q96B01;P08621;Q9Y221;P46779;Q01130;O43310;Q8IYB7;P62310;P60842;Q92499;Q9Y6M1;P15880;Q8WYQ5;Q00839;Q9Y2T7;Q14498;Q9ULM6;O43148;P61579;Q8TF46;Q14493;Q9UL40;O95071;Q15459;P11940;Q5VZF2;Q9Y3Y2;Q8NC51;Q8IU60;Q7L2E3;P47914;Q96CM3;P61578;P09234;Q12906;P51116;Q9Y534;Q5VWX1;Q86Y13;P47974;Q9NZB2;P31943;P61254;Q8NG50;Q6I9Y2;O15116;P21399;Q69383;Q16600;Q12904;Q9UGY1;Q9Y5S9;Q86V81;Q14671;Q7Z7A3;Q96T21;O14746;Q96AH0;Q9UL18;Q969L4;Q9BRP8;P14625;P52815;O00425;P54253;P19474;Q8NDT2;Q10570;P62249;P62424;P09914;Q9H1J1;P61573;P62917;P56270}

8682

Pathogen[ P03363] interacts with 521 human partners: {Q96B26;A6NGQ2;Q16587;O95777;O60832;Q15020;O75940;P62913;O75179;Q9UNQ2;Q9NX24;Q9NQT4;Q9Y2Z4;Q9Y6K5;P62314;Q92979;Q15233;Q9Y2R5;Q8TB72;Q6ZNI7;Q9ULW3;A8MWD9;P09132;Q9BUR4;Q06787;Q8N9N2;P0C7T5;P05386;Q13151;Q9NVV4;Q13595;Q9Y4Y9;Q5RKV6;Q9BZE2;Q9GZV4;P63162;Q9Y4Z0;P62750;Q15366;Q07666;P23396;Q9H4D5;P19338;P63173;Q96J01;Q9NWH9;P23246;Q96T58;O94818;Q9P2I0;Q96I24;A6NC42;P38919;Q5T8P6;P0DJJD3;P46087;Q9UNW9;P18077;Q10570;Q08J23;P05387;Q15883;Q5C9Z4;Q8IY21;Q8NC51;Q9NSD9;O95628;Q8NG50;O95453;P84098;Q12972;Q13148;Q8NHU6;Q12872;O43310;Q7Z3Z4;P62249;P52597;Q5U5Q3;Q92900;Q9NW13;P05388;Q9HAV4;P36578;P09012;Q9NS39;O95059;Q9Y2V2;P62312;P62081;Q08170;Q86Y13;Q8N1G4;O60306;A9UHW6;Q8IX01;P51991;Q9Y2W6;Q9H9Y2;P09914;Q96QC0;Q9Y606;O43347;P14866;Q05048;P46776;Q15024;Q92879;Q99547;O14980;P35637;Q13283;Q9Y3B2;P17947;Q9H0G5;Q69383;P61254;Q9H9G7;Q9UHB9;Q96AH0;P09651;P32969;Q92901;P08579;Q7Z2W4;Q15459;Q5T8I9;Q8IY67;Q9NUU7;P46778;Q15056;O95793;P25490;Q9NY12;Q9NUL3;P61927;Q96BT7;O75526;O14602;P29558;P57723;O00425;Q16629;Q9HCK5;P62891;P42704;Q96I25;Q13769;Q9Y3Y2;P52815;O00567;P62318;Q9UHK0;O95900;Q659C4;Q53EL6;Q9NV31;Q13901;P48200;Q9UKV8;Q15631;Q16630;Q9UL40;Q4G0J3;Q15427;Q9H9J2;Q5JPH6;P62304;Q01130;Q6P2Q9;O14746;Q86U44;Q9Y6M1;Q3ZCQ8;O15047;P09234;O60381;Q9UBU9;P15880;P11940;Q86U42;Q9NR56;Q8WWY3;Q13601;Q8WY41;Q8NI27;Q9BWF3;Q32P51;Q9UGY1;A1L020;P61575;Q15633;Q96FV9;Q6UN15;Q9UQ80;Q96T21;O14717;Q8NDV7;Q9NPD3;Q9H0S4;Q9BRP8;P06748;Q9H0G5;Q96PK6;P23588;Q99729;Q96PU8;Q9P2N5;P62495;P18615;O43818;P61326;Q8IWX8;P62306;P05198;Q7Z7A3;O15116;Q7KZ85;Q05519;O95707;P26373;O75792;P52272;P83369;Q8N9W6;Q96QD9;Q9NX07;Q15287;Q9BTL3;C9JE40;O76021;Q8IWX3;Q8N684;Q5VW67;Q9Y3B4;Q14690;Q9ULM6;P61578;Q15424;P22090;Q92904;Q9Y333;Q14562;P62861;P62841;Q13242;Q96J87;Q9UBP6;O95218;P10155;Q96F86;O15226;P30050;Q8IYB3;Q9NUL7;Q8N5X7;O43809;P38159;Q12906;P18583;Q8N5P1;Q96AE4;Q9BY77;Q92841;P26368;Q9H7N4;Q14240;Q9GZT3;P46782;Q92945;P35268;Q8IYB7;Q15717;Q9UPN6;P61571;P31943;Q9NZI8;Q9BX46;O14979;P51003;Q9UIF9;P20042;P46781;P47813;O75534;P50914;Q15637;P19474;Q9NP64;Q96DE0;Q9HCE1;Q5VWX1;Q96LT9;Q13310;Q13395;O60870;Q14966;O15056;Q13243;A6NMX2;Q9Y2R9;Q86V81;P22087;Q9HAU5;P07910;Q9NWB1;P57721;Q9Y2L1;P31942;P61313;P26358;Q92499;P39019;Q9H9Z2;Q14011;P52298;P26196;Q13838;O43148;P54253;Q9UHX1;Q02040;P08621;Q9BYK8;P55265;P46779;Q02543;P46777;Q9NRR4;P51114;P43243;Q92664;Q9UPS6;Q6NZI2;Q12905;Q13868;Q9P2K5;Q9Y3Z3;Q96T37;P22626;O95071;P09001;P82675;P61572;O60812;P82979;Q9BRS8;Q15365;Q8IWX8;P61574;P26599;P62487;O60936;Q9BYG3;Q9UPQ9;Q14103;Q6I9Y2;Q9UMR2;P83731;P62851;P62280;P56270;Q01844;P55795;P62888;P49458;Q9UL18;Q9H171;P41214;P63241;P62310;Q92804;P60842;Q86XP3;Q9NQT5;Q86TB9;Q9UKM9;O95319;Q8N0Z8;Q07955;P49591;P62244;P51816;O60506;P62906;Q96E39;Q01081;Q5VZF2;Q14671;Q96A72;Q9UK45;Q9BYX4;P78406;Q9BZI7;P61978;P62945;O94906;P49207;Q9HCG8;Q969L4;Q13247;Q96J94;Q8WWH5;Q9H6R4;P05455;P62424;O60930;P55769;Q5SZQ8;Q9ULC4;P47974;P60866;P61579;A6NDE4;P61247;O60573;Q96CM3;Q8TEQ6;Q9NQZ3;Q7L2E3;Q9NVP1;Q00879;P62308;P62899;Q9P013;Q16637;Q9UKF6;Q9Y534;P84103;Q99728;Q99700;Q14498;A7MD48;Q02878;P52594;P31483;Q6IS14;P51513;Q75821;P51116;O43390;P07814;P78344;Q96KR1;Q07020;Q8NGW0;P39023;Q8WXF1;P62995;Q14493;Q8TF46;P14678;Q16560;P09661;Q08211;O43592;P62917;Q7Z2W9;P55884;Q96N16;O15042;Q99459;Q7Z417;Q9BUJ2;P33240;Q9UQ35;Q9Y2T7;Q8WYQ5;O75525;P18124;Q12926;Q76FK4;Q9H6T0;P06730;P62263;Q9BTD8;O95149;Q9NXV6;Q15696;Q96HR8;Q9HCT3;P47914;P38935;P62701;Q9Y5S9;Q9H074;Q9H814;Q9BUL9;Q8WVV9;Q8IHZ2;Q14151;Q12996;Q9H1B4;O43251;Q8TD47;Q9UNP9;Q9YD6;Q8IXT5;P61573;Q96B01;P61576;Q9BZJ0;O75494;P62269;Q9NRX1;O75569;Q9NQ94;P67809;Q8IU60;O43719;Q6PJT7;Q9Y221;Q09161;A6NHQ2;Q8N9N8;Q04637;Q9H1J1;O15234;Q16600;Q8NDT2;P52756}

8683 [Cluster 790]GO:0001030+F molecular\_function [name] RNA polymerase III type 1 promoter DNA binding [def] "Interacting selectively and non-covalently with a region of DNA that is a part of a type 1 promoter that controls transcription by RNA polymerase III. Type 1 promoters are found in 5S rRNA genes, downstream of the transcription start site within

the sequence of the mature RNA, and require TFIIIA for recognition." [GOC

8684 Pathogen[ Q2Q067] interacts with 1 human partners:{Q9H063}

8685 Pathogen[ P0C214] interacts with 1 human partners:{Q9H063}

8686 Pathogen[ P03346] interacts with 1 human partners:{Q9H063}

8687 Pathogen[ Q85601] interacts with 1 human partners:{Q9H063}

8688 Pathogen[ P14079] interacts with 1 human partners:{Q9H063}

8689 Pathogen[ P03383] interacts with 1 human partners:{Q9H063}

8690 Pathogen[ P03410] interacts with 1 human partners:{Q9H063}

8691 Pathogen[ P14075] interacts with 1 human partners:{Q9H063}

8692 Pathogen[ P0C206] interacts with 1 human partners:{Q9H063}

8693 Pathogen[ P03363] interacts with 1 human partners:{Q9H063}

8694 [Cluster 791]GO:0030375+F molecular\_function [name] thyroid hormone receptor coactivator activity [def] "The function of a transcription cofactor that activates transcription in conjunction with a thyroid hormone-dependent nuclear receptor from a RNA polymerase II promoter\_ does not bind DNA itself." [GOC

8695 Pathogen[ Q2Q067] interacts with 3 human partners:{Q15596;P28702;Q9Y2X0}

8696 Pathogen[ P0C214] interacts with 2 human partners:{Q9Y2X0;Q15596}

8697 Pathogen[ P03346] interacts with 3 human partners:{P28702;Q15596;Q9Y2X0}

8698 Pathogen[ Q85601] interacts with 3 human partners:{Q9Y2X0;P28702;Q15596}

8699 Pathogen[ P14079] interacts with 3 human partners:{Q9Y2X0;Q15596;P28702}

8700 Pathogen[ P03383] interacts with 3 human partners:{Q15596;P28702;Q9Y2X0}

8701 Pathogen[ P03410] interacts with 3 human partners:{P28702;Q15596;Q9Y2X0}

8702 Pathogen[ P14075] interacts with 3 human partners:{P28702;Q9Y2X0;Q15596}

8703 Pathogen[ P0C206] interacts with 3 human partners:{P28702;Q15596;Q9Y2X0}

8704 Pathogen[ P03363] interacts with 2 human partners:{Q15596;P28702}

8705 [Cluster 792]GO:0004177+F molecular\_function [name] aminopeptidase activity [def] "Catalysis of the hydrolysis of N-terminal amino acid residues from in a polypeptide chain." [GOC

8706 Pathogen[ Q2Q067] interacts with 2 human partners:{P28838;Q13867}

8707 Pathogen[ P0C214] interacts with 3 human partners:{P28838;Q13867;Q9NY33}

8708 Pathogen[ P03346] interacts with 1 human partners:{Q13867}

8709 Pathogen[ Q85601] interacts with 1 human partners:{Q13867}

8710 Pathogen[ P14079] interacts with 5 human partners:{P28838;Q8NDH3;P29144;Q13867;Q9NY33}

8711 Pathogen[ P03383] interacts with 2 human partners:{P28838;Q13867}

8712 Pathogen[ P03410] interacts with 4 human partners:{Q8NDH3;Q13867;P28838;Q9NY33}

8713 Pathogen[ P14075] interacts with 2 human partners:{Q13867;P28838}

8714 Pathogen[ P0C206] interacts with 5 human partners:{P29144;P28838;Q13867;Q9NY33;Q8NDH3}

8715 Pathogen[ P03363] interacts with 1 human partners:{Q13867}

8716 [Cluster 793]GO:0016874+F molecular\_function [name] ligase activity [def] "Catalysis of the joining of two substances, or two groups within a single molecule, with the concomitant hydrolysis of the diphosphate bond in ATP or a similar triphosphate." [EC

8717 Pathogen[ Q2Q067] interacts with 118 human partners:{O95363;O95376;Q8NH2;Q96J02;Q8WV44;P23381;Q14258;Q9UPN9;Q9HAU4;Q7Z6J0;P49591;O75925;Q9UII4;Q9NS56;P49792;Q9Y285;P62837;P53804;Q8IUV8;Q12986;Q15386;P19474;O60260;P49427;O00762;Q9HAB8;Q9Y2X8;O43255;Q96T88;Q9NVW2;O00257;Q15046;Q12933;Q9NSD9;P14373;P60604;Q6ZNA4;P63279;Q5T160;Q6VVB1;O75928;Q7Z6Z7;P51965;Q96I59;Q8IU81;O43776;Q14669;P61077;P63146;Q9Y297;P78317;Q5TA31;Q86Y13;Q99728;Q9Y4X5;P41252;Q9NPD8;O14933;O95628;P51668;Q8TBB1;Q96EP1;Q13114;Q96PM5;Q86UW9;Q9Y6X2;P11161;Q9NTX7;Q13426;Q96PU5;P07814;O15164;P61088;Q9Y4L5;O60291;Q9P2R7;Q99496;Q5VTR2;Q96FA3;O94874;O76064;Q9NWF9;Q8TDB6;Q9C035;P54136;O75150;Q9NR09;Q9UNE7;Q6PI48;P49459;Q9HA77;Q96PU4;Q05086;P62256;Q9BW92;Q96MF7;P68036;P41250;Q86Y01;P49589;Q9HCM9;Q9HAT8;Q9Y252;Q13490;P22681;Q9NT62;Q00987;Q9P2J5;Q66K89;Q06587;P62877;P14868;Q8IUD6;Q7Z6E9;Q9NW38;Q13064;Q8N2W9;Q9UBS8}

8718 Pathogen[ P0C214] interacts with 166 human partners:{P22681;Q05086;P41250;O14933;Q96B02;Q96J02;Q9Y6X2;Q14527;Q9H832;Q8IUV8;P49589;Q05932;Q7Z6J0;Q16763;Q96PM5;Q9NSE4;P19474;Q7L3T8;Q9HAU4;O95363;Q9UGM6;Q99728;Q8WV44;O00762;Q9HAB8;Q13490;O75925;Q96I59;Q9NP81;P12081;P23381;O95628;Q00987;P49427;P49590;P07814;Q9NS56;Q9C035;Q8N2W9;Q9Y285;P41252;Q5JTZ9;Q96FA3;Q9NTX7;Q96PU4;Q12986;Q8IUD6;P63279;Q9HAT8;P49459;Q8NH2;P49792;Q8NG27;Q969T4;Q5JPH6;O43776;Q9Y297;Q8N2H9;P62877;O00308;Q15031;P14868;Q5T447;Q13064;P49591;P51965;Q96T88;P78317;Q9H0M0;O94874;Q9NWF9;P61077;Q9P2R7;Q9HCE7;Q14258;P50747;P62253;P98170;Q13426;P56192;P61086;O95071;Q7Z6E9;Q06587;P26639;Q9Y2X8;Q15386;O95376;Q12933;Q9NVW2;Q96MF7;Q9UII4;P54577;O00257;A2RTX5;P53804;Q9UBS8;Q9NRF8;Q9HA77;Q9HCM9;Q8TBB1;P49588;Q96GW9;Q9Y252;Q5TA31;Q6ZNA4;Q99496;Q9H4P4;Q14669;O00442;O60291;Q8IU81;O15164;Q13114;Q9NPC3;Q96I99;Q86Y13;P11161;O75150;Q969M7;Q9NR09;Q7Z6Z7;Q5T160;P47897;Q9BW92;A6NK58;Q6PI48;O60260;Q712K3;P62256;Q9Y4L5;P51668;P14373;Q9NSD9;P26640;Q15046;P17812;Q86Y01;Q9Y4X5;Q5VTR2;Q8TDB6;Q8IYW5;O43255;Q5ST30;Q9NT62;Q9UNE7;Q96CA5;O76064;Q9NPD8;Q9UPN9;P61081;Q96LR5;Q86UW9;Q66K89;P11586;P63146;Q6VVB1;P61088;Q96PU5;Q9NW38;Q8IUV7;Q9Y2Z4;Q96EP1;O75928;P60604;Q9P2J5}

8719 Pathogen[ P03346] interacts with 145 human partners:{Q9NS91;Q9UPN9;Q96J02;P23381;O75592;Q13263;Q86UW9;Q9H9P5;O76064;Q9HAU4;Q96MF7;Q96PU5;P68036;Q14258;P14373;Q6PCD5;O75150;Q9NWF9;Q13489;Q5VTR2;Q8IU81;Q7Z6J0;O95376;O95714;P49427;Q9BYM8;Q99728;P07814;Q8NH2;Q8IUD6;O95628;Q14527;Q13426;Q9UII4;Q96PM5;Q9H4P4;O43255;Q12986;Q9NTX7;P98170;Q9C035;Q8WV22;Q9NT62;P63279;O00257;Q15386;O43776;P49459;Q9Y2X8;Q5TA31;Q13114;P51668;Q66K89;P41252;Q5T447;Q96AX9;P61077;Q00987;Q96FA3;P61088;P41250;P62877;O75925;Q96EP0;Q9NS56;Q9Y285;Q8IYM9;P60604;O94972;P51965;Q9P2J5;Q7Z



- 6E9;P63146;Q8N841;Q9UNE7;O00762;Q9HCM9;Q9HAT8;Q8N2H9;Q14669;P62837;P54136;Q13064;Q8IUQ4;Q9C040;Q6ZNA4;Q6Q0C0;P14868;Q9NPD8;Q99496;P78317;Q8N2W9;Q8IYW5;Q8TBB1;Q6VVBL;Q9UBS8;P49589;O60291;O60260;Q7Z6J8;P11161;Q9NPC3;Q8IYW8;P19474;O14933;Q9NR09;Q13490;Q9ULT8;Q6PI48;Q9Y4L5;Q96PU4;P22681;Q05086;P62256;Q8TDB6;Q9H0M0;P53804;Q9Y4X5;Q9Y6X2;Q9Y252;Q9NW38;Q86Y01;Q95071;Q9HAB8;Q9BZR9;Q75928;Q96CA5;Q8NG27;Q9Y297;Q94874;Q7Z6Z7;Q06587;O94822;Q8TEC5;O15164;A0AVT1;Q96T88;Q86Y13;Q9NVW2;Q96EP1;Q6EMB2;P49792;Q8WV44;O00308;Q5U5Q3}
- 8720 Pathogen[ Q85601] interacts with 142 human partners: {Q7Z6E9;Q9UPN9;Q96J02;P78317;Q13064;P54136;Q9NSD9;P62253;P22681;Q9HAU4;Q9NS56;P14373;Q16763;Q75928;Q13490;Q8TDB6;P26639;P63146;O14933;P14868;Q14258;Q8WV44;P49589;Q8IYW7;O95714;P49427;Q9P2J5;Q9Y2X8;P07814;Q9Y6X2;P62877;Q13426;Q6PCD5;Q9HAT8;Q96PM5;Q96PU4;Q99728;Q9Y4L5;P23381;P98170;Q96PU5;Q969T4;Q9BZR9;Q14669;Q9NWF9;Q15046;Q8IUD6;Q15386;O43776;Q96B02;Q8N2W9;O15164;Q9NPD8;Q9BW92;Q5TA31;Q13114;Q9Y285;P51668;Q96LR5;P68036;P61077;Q9P2R7;P63279;Q96FA3;Q9HA77;Q13263;O60291;P41250;Q5T160;Q7Z6J0;Q86UW9;O76064;Q8IU81;Q12933;P51965;O95628;A2RTX5;Q8IYM9;P61086;Q96T88;O00762;Q9NTX7;Q96I59;Q9NW38;Q99496;P49459;Q8IYW5;Q8TBB1;Q6VVBL;Q9C035;O75150;O95363;O95376;O60260;Q9NT62;Q5VTR2;Q9Y252;P62837;Q9NPC3;Q6ZNA4;Q9H832;Q9NR09;Q9UBS8;Q7Z6Z7;P47897;Q969M7;Q6PI48;Q05086;Q66K89;P49792;P62256;Q96EP1;P41252;Q9H4P4;P19474;P53804;Q86Y01;P61088;O95071;O00257;Q14527;O43255;Q6Q0C0;Q00987;P60604;Q96CA5;Q8NG27;Q9UNE7;Q8WV22;O94874;O75925;Q8NHY2;Q06587;P11161;Q9Y4X5;Q86Y13;Q9NVW2;Q9HCM9;Q8IYW8;Q96MF7;Q9NS91;Q12986}
- 8721 Pathogen[ P14079] interacts with 129 human partners: {Q8N2W9;Q12986;Q9Y285;O60260;P53804;O15164;O00442;P23381;O95628;P26639;Q9HAT8;P51965;Q5TA31;Q96GW9;Q9P2J5;P63279;P14373;O75879;Q7L3T8;Q96MF7;Q9NT62;Q9BW92;O43716;Q9HOR6;Q9C035;O75928;P54136;Q8IYW8;P68036;Q9Y6X2;P22234;P17812;Q15031;Q5T160;Q9H0Y0;Q5ST30;Q9NPD8;Q9NP81;P60604;O94874;P47897;O95363;Q96EP0;Q8N2H9;P49591;A2RTX5;Q6ZNA4;P14868;O95922;Q9P2R7;Q7Z6J8;Q9HAU4;Q14258;P61077;Q9Y4R7;P62877;Q9HCM9;Q9HA77;Q96FA3;Q8IYW7;Q9NR09;Q00987;Q8TBB1;Q9NRF8;O43776;Q5JPH6;P62256;Q9NPC3;A6PVC2;Q7Z6E9;Q86Y01;Q99496;P49589;P51668;O00257;Q15046;Q9UPN9;P11161;Q9NWF9;P19474;Q5VTR2;P41252;Q969M7;Q66K89;P49459;P41250;Q86UW9;Q96I59;Q9BYM8;P26640;Q8N841;P56192;Q9NSD9;Q9NS56;Q96J02;Q9Y2Z4;Q6IA69;Q13064;P49915;Q12933;Q9Y2X8;O75925;P49427;Q9UBS8;Q9UGM6;P78317;Q6EMB2;Q9NSE4;P62837;O15067;O00762;Q8IU81;P49588;Q6PI48;Q8WV44;Q9NW38;A6NK58;O14933;P63146;Q13426;Q05932;P07814;Q8IUD6;P49917;Q9HAB8;Q13114;Q13490;Q8NHY2;Q06587}
- 8722 Pathogen[ P03383] interacts with 96 human partners: {Q9Y285;P19474;O75925;P49792;Q86UW9;Q9P2J5;O14933;P53804;Q8TBB1;P14868;P51965;Q12986;Q9UPN9;Q8IYW8;P49427;Q5JPH6;Q9Y2X8;P49589;Q5T160;Q15031;O00257;Q13490;Q9UBS8;Q9P2R7;Q9NP81;Q96PU4;Q06587;O00762;Q9NTX7;Q6ZNA4;P78317;Q9NT62;Q8N2W9;Q13064;Q96MF7;Q66K89;P61077;O95628;P61088;Q9C035;O60260;P23381;P60604;Q5TA31;Q96I59;Q12933;Q13426;Q15046;A2RTX5;O95376;Q9Y6X2;Q9HCM9;Q96PM5;Q9Y2Z4;O95363;P62837;P07814;Q96GW9;O43255;Q99496;Q9HA77;Q9H832;Q5VTR2;Q9Y252;P11161;Q96FA3;P68036;P62877;Q9NR09;O43776;P49459;Q6PI48;Q9NPD8;Q14258;P62256;P63146;Q96EP1;P41250;Q8NHY2;Q9NW38;Q86Y01;P41252;Q9HAB8;P54136;O75150;Q9NWF9;Q9NSD9;P49591;Q7L3T8;O94874;Q13114;P63279;P51668;Q9HAT8;O75928;Q9BW92}
- 8723 Pathogen[ P03410] interacts with 124 human partners: {Q86UW9;Q8IYW8;Q9H0Y0;Q8NHY2;Q9P2R7;Q9Y4R7;Q9Y285;Q9HA77;O75925;Q6ZNA4;Q9NSE4;P56192;Q99496;Q9HCM9;O95628;O00442;P49915;Q66K89;O75879;Q9NRF8;P49589;Q5ST30;P49427;P17812;Q8WV44;Q9BW92;Q9NWF9;P51965;Q96FA3;P49588;P54136;Q8TBB1;Q9NPC3;P23381;Q13490;Q9Y6X2;P49459;Q7L3T8;O43776;O75928;Q8N2W9;Q5VTR2;Q5TA31;P47897;O60260;Q8IYW7;P68036;P14868;P61088;Q14258;O14933;A6NK58;Q96MF7;Q9NSD9;P22234;Q9P2J5;Q8N2H9;P49591;Q9NR09;Q9C035;Q9UNE7;Q12986;Q86Y01;O75150;Q8IU81;P26639;Q7Z6J0;Q9UBS8;Q96I59;P62256;P78317;P62877;Q9Y4X5;P63146;P41250;O15067;Q9Y2X8;Q13064;Q12933;Q9NT62;Q9H0R6;Q15046;P51668;Q9HAT8;Q13426;Q5JPH6;Q9NPD8;Q9UGM6;P41252;O00762;Q9Y2Z4;P63279;P26640;Q7Z6J8;Q96GW9;O95922;Q969M7;O94874;Q06587;O60291;P07814;Q00987;P60604;O00257;Q9NP81;Q9NW38;A2RTX5;P53804;Q8N841;A6PVC2;Q9HAB8;Q05932;P11161;Q6IA69;O95363;Q6PI48;Q5T160;Q96EP1;Q6EMB2;Q9UPN9;Q13114;P61077;P62837;P49792}
- 8724 Pathogen[ P14075] interacts with 99 human partners: {Q9Y2Z4;Q5VTR2;P53804;P60604;P54136;Q9HAB8;Q96PM5;P41250;P23381;P68036;Q9NTX7;O94874;P62837;Q13064;P49427;Q9NT62;Q9NSD9;P61088;Q9Y252;P49459;P11161;P49792;Q96PU4;P51965;P41252;O75925;O95363;O14933;Q7Z6J8;Q8N2W9;Q9Y2X8;P63279;P61077;Q96GW9;Q9HA77;Q9NP81;O43255;Q9HCM9;Q9NW38;Q9NPD8;O00257;Q9Y285;O95628;Q9NWF9;Q06587;Q12986;Q6ZNA4;O00762;Q7L3T8;Q13490;P56192;Q12933;A2RTX5;Q9UPN9;Q9BW92;O43776;O75150;Q9HAT8;O75928;Q96FA3;P19474;Q9C035;Q13114;P14868;Q5T160;P78317;Q9P2J5;Q14258;Q8NHY2;Q99496;Q13426;Q66K89;P26639;O95376;Q9NR09;Q9UBS8;Q6PI48;Q96I59;P62256;P63146;Q5TA31;P49589;Q96MF7;Q5JPH6;Q86Y01;Q15046;Q8TBB1;P51668;O60260;Q9NSE4;Q15031;Q9Y6X2;P49591;P07814;P62877;Q86UW9;Q96EP1;Q9P2R7;Q8IYW8}
- 8725 Pathogen[ P0C206] interacts with 171 human partners: {P49589;O95363;Q16763;Q9Y2X8;Q86Y01;Q96AX9;Q9NSE4;Q96PU5;P07814;Q9NS56;O60291;P62877;Q9NPD8;P62253;Q6PCD5;Q8N2H9;Q8WV22;Q9H4P4;Q9Y2Z4;Q86UW9;Q9UPN9;Q9Y4L5;Q7Z6J0;Q13114;Q9NVW2;O43255;Q13263;Q8IYW5;O95376;O00308;P11161;Q9HAU4;O75925;P68036;O14933;Q8NG27;Q969M7;P41252;Q14258;Q6PI48;Q96EP1;Q5ST30;Q6ZNA4;O94822;Q8IUQ4;Q05086;Q12933;Q96J02;A2RTX5;Q9HAT8;Q9NWF9;Q9UGM6;Q5JPH6;Q9NP81;Q96LR5;P62837;P53804;Q9NS91;Q9HA77;Q9P2R7;Q9NPC3;P98170;O15164;Q8IUD6;P41250;Q12933;P78317;P49427;Q14669;P26640;Q5VTR2;O95628;Q9Y6X2;P49591;Q5TA31;Q9HAB8;Q8TDB6;Q15386;O43776;Q9Y4X5;Q712K3;P51965;Q13064;P49792;P61088;Q9Y285;P49917;Q7Z6J8;P60604;P22681;Q9NSD9;Q9NR09;Q9BZR9;Q96EP0;Q8NHY2;Q8IYW7;Q9UNE7;P49459;Q12986;Q13426;O95922;Q9UBS8;Q96T88;Q06587;O94874;O60260;Q99728;Q8N841;Q5T160;Q8TBB1;P62256;Q9BW92;P49916;Q969T4;O00762;Q96MF7;Q9C035;P56192;Q8IYW8;Q13489;Q14527;P54136;Q96FA3;Q9HCM9;Q8IYM9;P26639;Q9H832;Q96CA5;Q96PM5;Q15031;Q8WV44;P61077;Q



7Z6Z7;Q9NT62;P61086;O00257;P14373;Q7L3T8;Q00987;Q9P2J5;Q7Z6E9;Q9NTX7;Q8IU81;Q9BYM8;A6  
 NK58;Q66K89;Q96B02;Q9Y252;O76064;Q86Y6T;O95071;P23381;P51668;Q6VVB1;Q6EMB2;O75150;O95  
 714;P47897;P14868;Q86Y13;Q6Q0C0;Q99496;Q96PU4;Q96GW9;Q9NW38;Q96I59;Q05932;P63146;P194  
 74;Q15046;Q13490}

8726 Pathogen[ P03363] interacts with 152 human partners:{O95376;P22681;Q9NWF9;Q9Y2Z4;Q86Y01;Q9NW38;Q13490;Q9Y252;Q8TDB6;Q9H832;O9497  
 2;Q96EP1;P51965;P60604;Q9BZR9;P41252;Q6EMB2;P49459;Q9NSD9;O95628;Q9H9P5;A2RTX5;O00762  
 ;Q5U5Q3;Q9HAU4;O60291;Q8IU81;P14373;P22314;Q96EP0;Q86Y13;Q96I59;O14933;P14868;Q7Z569;  
 P61081;Q14258;P49589;Q9ULT8;P41250;Q7Z6E9;Q12933;O95922;Q9NTX7;P78317;Q9NPC3;Q8WV44;Q  
 5VTR2;Q66K89;P47897;Q99496;Q5JPH6;Q9UPN9;O43776;Q8IYW5;Q8TBB1;Q6VVB1;P63146;Q9NT62;Q8  
 N2H9;P49427;P23381;Q12986;Q05086;Q9C040;O75150;Q6ZNA4;Q7Z6J8;Q8NG27;Q7Z6Z7;P61088;Q9Y  
 6X2;Q14669;P54136;Q13426;Q9Y4X5;P62877;Q9NR09;Q96FA3;Q96PU5;Q13489;Q14527;Q6PI48;Q6PC  
 D5;Q9UNE7;Q86UW9;P19474;P98170;P49792;Q8N841;Q96PM5;P62256;Q9C035;O75925;Q969T4;O9536  
 3;P63279;O95071;Q9UBS8;Q9H4P4;Q15386;P51668;Q9UBE0;Q8IUD6;Q9P2J5;O00308;Q9NPD8;O95714  
 ;Q9BW92;Q5TA31;Q7Z6J0;P53804;Q13114;P49591;Q9HCM9;Q9Y285;Q96T88;Q96CA5;Q969M7;Q9Y4L5;  
 Q8WV22;Q7L3T8;P61077;Q8IYW8;Q9NVW2;Q15031;Q8NHV2;Q06587;Q99728;O94822;Q9HAT8;Q8TEC5;Q  
 9Y2X8;P62837;Q9H0M0;P07814;Q96PU4;O43255;Q8N2W9;O94874;Q9NS91;O00257;Q96MF7;Q5T160;Q9  
 UII4;Q7Z7E8;Q5T447;A0AVT1;Q96AX9;O75928;P68036;P11161}

8727 [Cluster 794]GO:0031071+F molecular\_function [name] cysteine desulfurase activity  
 [def] "Catalysis of the reaction

8728 Pathogen[ Q2Q067] interacts with 1 human partners:{Q9Y697}

8729 Pathogen[ P0C214] interacts with 1 human partners:{Q9Y697}

8730 Pathogen[ P03346] interacts with 1 human partners:{Q9Y697}

8731 Pathogen[ Q85601] interacts with 1 human partners:{Q9Y697}

8732 Pathogen[ P14079] interacts with 1 human partners:{Q9Y697}

8733 Pathogen[ P03383] interacts with 1 human partners:{Q9Y697}

8734 Pathogen[ P03410] interacts with 1 human partners:{Q9Y697}

8735 Pathogen[ P14075] interacts with 1 human partners:{Q9Y697}

8736 Pathogen[ P0C206] interacts with 1 human partners:{Q9Y697}

8737 Pathogen[ P03363] interacts with 1 human partners:{Q9Y697}

8738 [Cluster 795]GO:0030350+F molecular\_function [name] iron-responsive element binding  
 [def] "Interacting selectively and non-covalently with the iron-responsive element, a  
 regulatory sequence found in the 5'- and 3'-untranslated regions of mRNAs encoding many  
 iron-binding proteins." [PMID

8739 Pathogen[ Q2Q067] interacts with 2 human partners:{P21399;P48200}

8740 Pathogen[ P0C214] interacts with 3 human partners:{P48200;P22830;P21399}

8741 Pathogen[ P03346] interacts with 2 human partners:{P48200;P21399}

8742 Pathogen[ Q85601] interacts with 2 human partners:{P21399;P48200}

8743 Pathogen[ P14079] interacts with 3 human partners:{P21399;P48200;P22830}

8744 Pathogen[ P03383] interacts with 1 human partners:{P48200}

8745 Pathogen[ P03410] interacts with 3 human partners:{P21399;P22830;P48200}

8746 Pathogen[ P14075] interacts with 1 human partners:{P48200}

8747 Pathogen[ P0C206] interacts with 3 human partners:{P48200;P22830;P21399}

8748 Pathogen[ P03363] interacts with 1 human partners:{P48200}

8749 [Cluster 796]GO:0046961+F molecular\_function [name] proton-transporting ATPase  
 activity, rotational mechanism [def] "Catalysis of the transfer of a solute or solutes  
 from one side of a membrane to the other according to the reaction

8750 Pathogen[ Q2Q067] interacts with 1 human partners:{P36543}

8751 Pathogen[ P0C214] interacts with 4 human partners:{Q16864;Q9UI12;P36543;P36542}

8752 Pathogen[ P03346] interacts with 3 human partners:{P21283;P36543;Q16864}

8753 Pathogen[ Q85601] interacts with 1 human partners:{P36543}

8754 Pathogen[ P14079] interacts with 7 human partners:{P36543;P36542;P25705;Q5VTU8;Q9UI12;P56381;Q16864}

8755 Pathogen[ P03383] interacts with 1 human partners:{P36543}

8756 Pathogen[ P03410] interacts with 7 human partners:{P36542;P25705;P56381;Q5VTU8;Q9UI12;Q16864;P36543}

8757 Pathogen[ P14075] interacts with 1 human partners:{P36543}

8758 Pathogen[ P0C206] interacts with 5 human partners:{P36543;P36542;Q9UI12;Q16864;P56381}

8759 Pathogen[ P03363] interacts with 1 human partners:{P36543}

8760 [Cluster 797]GO:0045159+F molecular\_function [name] myosin II binding [def]  
 "Interacting selectively and non-covalently with a class II myosin, any member of the  
 class of 'conventional' double-headed myosins that includes muscle myosin." [GOC

8761 Pathogen[ Q2Q067] interacts with 1 human partners:{Q8N6F7}

8762 Pathogen[ P0C214] interacts with 1 human partners:{Q8N6F7}

8763 Pathogen[ P03346] interacts with 1 human partners:{Q8N6F7}

8764 Pathogen[ Q85601] interacts with 1 human partners:{Q8N6F7}

8765 Pathogen[ P14079] interacts with 2 human partners:{Q9H2D6;Q8N6F7}

8766 Pathogen[ P03383] interacts with 1 human partners:{Q8N6F7}

8767 Pathogen[ P03410] interacts with 2 human partners:{Q8N6F7;Q9H2D6}

8768 Pathogen[ P14075] interacts with 1 human partners:{Q8N6F7}

8769 Pathogen[ P0C206] interacts with 1 human partners:{Q8N6F7}

8770 Pathogen[ P03363] interacts with 2 human partners:{Q8N6F7;Q9H2D6}

8771 [Cluster 798]GO:0016620+F molecular\_function [name] oxidoreductase activity, acting on  
 the aldehyde or oxo group of donors, NAD or NADP as acceptor [def] "Catalysis of an  
 oxidation-reduction (redox) reaction in which an aldehyde or ketone (oxo) group acts as a

hydrogen or electron donor and reduces NAD or NADP." [GOC

8772 Pathogen[ Q2Q067] interacts with 3 human partners: {P49419;P04406;O14556}

8773 Pathogen[ P0C214] interacts with 3 human partners: {P49419;O14556;P04406}

8774 Pathogen[ P03346] interacts with 3 human partners: {P04406;P49419;O14556}

8775 Pathogen[ Q85601] interacts with 3 human partners: {O14556;P04406;P49419}

8776 Pathogen[ P14079] interacts with 1 human partners: {P04406}

8777 Pathogen[ P03383] interacts with 3 human partners: {O14556;P04406;P49419}

8778 Pathogen[ P03410] interacts with 3 human partners: {O14556;P49419;P04406}

8779 Pathogen[ P14075] interacts with 3 human partners: {P04406;P49419;O14556}

8780 Pathogen[ P0C206] interacts with 3 human partners: {O14556;P04406;P49419}

8781 Pathogen[ P03363] interacts with 3 human partners: {P49419;P04406;O14556}

8782 [Cluster 799]GO:0019903+F molecular\_function [name] protein phosphatase binding [def] "Interacting selectively and non-covalently with any protein phosphatase." [GOC

8783 Pathogen[ Q2Q067] interacts with 15 human partners: {Q9UJX3;Q9UJX5;P56945;Q5H9R7;P78352;Q9UPN7;Q92796;P15927;Q9UQK1;Q9UJX4;P27986;P30260;P46527;P14625;O60716}

8784 Pathogen[ P0C214] interacts with 18 human partners: {Q5H9R7;P14625;P56945;P62993;O60716;Q92934;Q92796;Q9UJX5;P46527;P78352;P15927;Q9UJX4;Q9UJX3;P30260;Q9UPN7;P27986;Q9UQK1;P55072}

8785 Pathogen[ P03346] interacts with 20 human partners: {Q9UQK1;O60716;P14625;P78352;P62993;P55072;Q92796;Q5H9R7;P56945;O60493;Q9UJX5;P15927;Q9UJX3;Q96T49;Q9UJX4;Q9UQ13;P30260;Q9UPN7;P46527;P27986}

8786 Pathogen[ Q85601] interacts with 17 human partners: {P62993;Q9UQK1;P27986;O60716;P56945;P15927;Q9UJX5;P78352;Q92796;Q9UJX3;Q9UJX4;Q9UPN7;P14625;P30260;Q5H9R7;P51955;P46527}

8787 Pathogen[ P14079] interacts with 18 human partners: {Q9UPN7;O60493;Q9UJX3;Q9UJX5;P51955;Q92934;B7ZBB8;Q9UQK1;Q96T49;P14625;P15927;P62993;P30260;P46527;Q92796;O60716;Q9UJX4;Q5H9R7}

8788 Pathogen[ P03383] interacts with 15 human partners: {O60716;P27986;P56945;Q9UQK1;P15927;P46527;P14625;Q5H9R7;Q9UJX4;Q9UPN7;Q9UJX5;Q92796;P30260;Q9UJX3;P78352}

8789 Pathogen[ P03410] interacts with 21 human partners: {O00203;B7ZBB8;P46527;P27986;Q9UJX4;P14625;O60716;Q92934;Q5H9R7;Q96T49;Q92796;Q9UJX5;P30260;Q9UJX3;P56945;P15927;P78352;P62993;O60493;Q9UPN7;Q9UQK1}

8790 Pathogen[ P14075] interacts with 15 human partners: {Q5H9R7;P15927;Q9UQK1;P46527;Q9UPN7;Q9UJX5;P27986;Q92796;Q9UJX4;P78352;O60716;P14625;P30260;Q9UJX3;P56945}

8791 Pathogen[ P0C206] interacts with 22 human partners: {O60716;P78352;Q9UJX3;Q5H9R7;P51955;Q9UJX5;Q9UQK1;O60493;P30260;P27986;P62993;Q92934;Q96T49;Q9UJX4;P46527;B7ZBB8;P55072;Q9UPN7;P56945;P15927;Q92796;P14625}

8792 Pathogen[ P03363] interacts with 17 human partners: {Q96T49;P78352;Q9UJX3;Q9UJX5;P15927;P30260;O60493;Q9UJX4;Q9UPN7;B7ZBB8;Q9UQK1;Q9UQ13;P56945;Q92796;O60716;P27986;Q5H9R7}

8793 [Cluster 800]GO:0008073+F molecular\_function [name] ornithine decarboxylase inhibitor activity [def] "The stopping, prevention or reduction of the activity of the enzyme ornithine decarboxylase." [GOC

8794 Pathogen[ Q2Q067] interacts with 2 human partners: {Q9UMX2;O95190}

8795 Pathogen[ P0C214] interacts with 3 human partners: {P54368;Q9UMX2;O95190}

8796 Pathogen[ P03346] interacts with 2 human partners: {Q9UMX2;O95190}

8797 Pathogen[ Q85601] interacts with 2 human partners: {Q9UMX2;O95190}

8798 Pathogen[ P14079] interacts with 3 human partners: {Q9UMX2;O95190;P54368}

8799 Pathogen[ P03383] interacts with 1 human partners: {O95190}

8800 Pathogen[ P03410] interacts with 3 human partners: {O95190;P54368;Q9UMX2}

8801 Pathogen[ P14075] interacts with 1 human partners: {O95190}

8802 Pathogen[ P0C206] interacts with 3 human partners: {P54368;O95190;Q9UMX2}

8803 Pathogen[ P03363] interacts with 2 human partners: {Q9UMX2;O95190}

8804 [Cluster 801]GO:0005262+F molecular\_function [name] calcium channel activity [def] "Catalysis of facilitated diffusion of a calcium ion (by an energy-independent process) involving passage through a transmembrane aqueous pore or channel without evidence for a carrier-mediated mechanism." [GOC

8805 Pathogen[ Q2Q067] interacts with 1 human partners: {Q93034}

8806 Pathogen[ P0C214] interacts with 1 human partners: {Q93034}

8807 Pathogen[ P03346] interacts with 1 human partners: {Q93034}

8808 Pathogen[ Q85601] interacts with 1 human partners: {Q93034}

8809 Pathogen[ P14079] interacts with 2 human partners: {Q8NE86;Q93034}

8810 Pathogen[ P03383] interacts with 1 human partners: {Q93034}

8811 Pathogen[ P03410] interacts with 3 human partners: {Q8NE86;Q8IU99;Q93034}

8812 Pathogen[ P14075] interacts with 1 human partners: {Q93034}

8813 Pathogen[ P0C206] interacts with 2 human partners: {Q8NE86;Q93034}

8814 Pathogen[ P03363] interacts with 1 human partners: {Q93034}

8815 [Cluster 802]GO:0055056+F molecular\_function [name] D-glucose transmembrane transporter activity [def] "Catalysis of the transfer of the D-enantiomer of the hexose monosaccharide glucose from one side of the membrane to the other." [GOC

8816 Pathogen[ Q2Q067] interacts with 2 human partners: {P11166;P14672}

8817 Pathogen[ P0C214] interacts with 3 human partners: {P11166;P11168;P14672}

8818 Pathogen[ P03346] interacts with 2 human partners: {P11166;P14672}

8819 Pathogen[ Q85601] interacts with 3 human partners:{P11168;P11166;P14672}  
8820 Pathogen[ P14079] interacts with 2 human partners:{P14672;P11166}  
8821 Pathogen[ P03383] interacts with 2 human partners:{P11168;P14672}  
8822 Pathogen[ P03410] interacts with 2 human partners:{P11166;P11168}  
8823 Pathogen[ P14075] interacts with 2 human partners:{P11168;P14672}  
8824 Pathogen[ P0C206] interacts with 3 human partners:{P11166;P11168;P14672}  
8825 Pathogen[ P03363] interacts with 2 human partners:{P14672;P11166}  
8826 [Cluster 803]GO:0031996+F molecular\_function [name] thioesterase binding [def]  
"Interacting selectively and non-covalently with any thioesterase enzyme." [GOC  
8827 Pathogen[ Q2Q067] interacts with 7 human  
partners:{Q13077;Q12933;Q99871;Q13114;P60953;P63000;O00463}  
8828 Pathogen[ P0C214] interacts with 6 human  
partners:{P63000;P60953;Q12933;Q99871;Q13114;O00463}  
8829 Pathogen[ P03346] interacts with 7 human  
partners:{Q13077;O00463;Q99871;P60953;Q13114;Q9BUZ4;P63000}  
8830 Pathogen[ Q85601] interacts with 7 human  
partners:{Q99871;O00463;P63000;Q13114;Q12933;P60953;Q13077}  
8831 Pathogen[ P14079] interacts with 6 human  
partners:{O00463;Q99871;Q9BUZ4;Q13077;Q12933;Q13114}  
8832 Pathogen[ P03383] interacts with 5 human  
partners:{P60953;P63000;Q99871;Q12933;Q13114}  
8833 Pathogen[ P03410] interacts with 7 human  
partners:{P63000;Q13077;O00463;Q12933;P60953;Q99871;Q13114}  
8834 Pathogen[ P14075] interacts with 5 human  
partners:{P60953;Q99871;Q12933;Q13114;P63000}  
8835 Pathogen[ P0C206] interacts with 8 human  
partners:{Q13077;Q13114;Q12933;Q9BUZ4;P63000;P60953;O00463;Q99871}  
8836 Pathogen[ P03363] interacts with 8 human  
partners:{Q12933;O00463;P63000;Q13077;Q99871;Q13114;Q9BUZ4;P60953}  
8837 [Cluster 804]GO:0030306+F molecular\_function [name] ADP-ribosylation factor binding  
[def] "Interacting selectively and non-covalently with ARF, ADP-ribosylation factor, a  
small monomeric cytosolic GTPase that, when bound to GTP, binds to the membranes of  
cells." [ISBN  
8838 Pathogen[ Q2Q067] interacts with 3 human partners:{Q9UJY4;O75154;Q9NZ52}  
8839 Pathogen[ P0C214] interacts with 3 human partners:{Q9UJY4;Q9NZ52;O75154}  
8840 Pathogen[ P03346] interacts with 4 human partners:{Q9UJY4;Q86YS3;O75154;Q9NZ52}  
8841 Pathogen[ Q85601] interacts with 4 human partners:{O75154;Q9UJY4;Q86YS3;Q9NZ52}  
8842 Pathogen[ P14079] interacts with 4 human partners:{Q9UJY4;Q86YS3;Q9NZ52;O75154}  
8843 Pathogen[ P03383] interacts with 3 human partners:{Q9UJY4;O75154;Q9NZ52}  
8844 Pathogen[ P03410] interacts with 4 human partners:{O75154;Q9NZ52;Q86YS3;Q9UJY4}  
8845 Pathogen[ P14075] interacts with 3 human partners:{Q9UJY4;Q9NZ52;O75154}  
8846 Pathogen[ P0C206] interacts with 4 human partners:{O75154;Q9UJY4;Q9NZ52;Q86YS3}  
8847 Pathogen[ P03363] interacts with 3 human partners:{Q9UJY4;Q9NZ52;O75154}  
8848 [Cluster 805]GO:0003674+F molecular\_function [name] molecular\_function [def]  
"Elemental activities, such as catalysis or binding, describing the actions of a gene  
product at the molecular level. A given gene product may exhibit one or more molecular  
functions." [GOC  
8849 Pathogen[ Q2Q067] interacts with 201 human  
partners:{Q5VSL9;O95411;Q9HD33;O43290;O95671;Q9NYP9;Q99865;Q14657;O94973;Q5TD94;Q96S6  
5;P98182;Q96EL2;A5PL33;Q96NU7;O75474;P59022;Q7Z4H7;Q9GZW5;Q9NVU7;Q9HB96;Q5SRH9;P23610  
;Q53EQ6;P10073;O00193;Q9HCN2;Q9BZQ8;Q9ULD5;Q0PNE2;Q96BZ8;P57060;Q9UKJ3;O94927;Q15059;  
Q9BXM0;O60829;P49750;Q5VYK3;P05813;A6NNW6;Q12765;Q8NDF8;Q9UM82;Q9UJY5;Q9UKY7;Q9UP83;A  
3KN83;Q6QNY0;Q9BZV1;Q9H322;O15453;P56555;Q8IWL3;Q9Y5R5;P53672;Q4LE39;Q9NVX0;O60356;Q8  
TDN6;Q03252;Q9BY42;Q9H5F2;Q8NBR6;Q04727;Q9Y3R5;Q9ULQ0;P53801;O95990;Q86V97;Q5T280;O95  
625;Q9Y2B4;Q7RTU5;Q9NY87;Q96NJ6;Q9BZE9;Q9NZP6;O14972;O43583;Q8N3J9;Q96AQ7;Q9NYZ3;Q159  
37;Q9Y2A0;Q9H6Y2;Q14181;Q9BZE7;Q9NS25;O60287;Q9Y2Q9;Q15935;Q7Z7K6;Q2TAL8;Q9H2C0;Q63HK  
3;P49901;Q9UII5;Q05084;Q9NWX4;Q9BZW7;Q9H2W6;Q15050;Q9BZD4;Q96A73;Q13495;Q96DF8;Q6IQ32  
;Q9BTE7;Q9UKZ1;P43358;Q69YI7;P50221;Q9NZH5;Q96JM7;P53992;Q9UKJ5;O60826;O95486;Q9HB07;  
Q9NPI8;Q9BUW7;Q9NZM5;Q9BT25;O94855;P62269;Q9H6D7;Q99618;Q68D10;Q9NRG9;Q9Y592;Q9BVC6;O  
75920;Q4VC05;Q8NOV3;Q12980;Q9NSI6;Q9H0A9;P12036;P41162;Q0VDD7;Q9UN36;Q9Y6Z5;Q8N720;O7  
5564;Q9H1B7;O43913;Q9Y4K1;Q99619;O76042;O75638;Q9H9J2;O60290;Q96Q35;Q9H0U9;Q13642;Q9U  
BL0;Q9BQ65;Q5TEC3;Q8WVZ9;P0C7X2;Q12894;Q9BW92;Q92670;P82664;Q96FN9;Q3SYG4;Q9BZF9;P841  
01;P62266;Q96M91;P43359;Q8WYQ3;Q9BYS1;Q01850;Q5T7W7;Q9HCM9;Q9UH90;P09496;Q9Y421;Q969X  
6;Q9Y675;P27469;Q96CS2;Q92917;Q9P0V3;Q14602;Q6PI98;Q7Z794;P49754;Q14129;Q01534;P25398  
;Q68CZ6;Q9NQ50;Q9NYP3;P43360;O14879;Q14693;Q9Y5P3;Q9NQR4}  
8850 Pathogen[ P0C214] interacts with 239 human  
partners:{Q9HD33;P27469;Q6RFH5;Q6IQ32;O94927;O95671;Q96S65;Q15059;Q14264;Q8N573;Q96EL  
2;P49754;Q9H9J2;Q9BQ65;Q12894;P84101;Q04727;P53672;Q8WUX2;Q9H6Y2;Q63HK3;Q9ULD5;P49901  
;Q9H4I8;Q53EQ6;P53992;O15194;Q8NDF8;Q9UJJ7;Q9UJY5;Q9P0V3;Q9NYK5;Q96M91;O43913;Q9UH90;  
O14879;Q99865;P43360;O60826;Q9UKJ5;Q7Z4H7;P43358;Q7Z794;Q13015;O60829;Q9NUA8;Q5SRH9;Q  
9BTE6;O95625;Q5VYK3;Q8NBR6;Q9BXM0;Q53S33;Q96A73;P05813;Q0VDD7;Q15050;Q9NSI6;Q9Y2A0;Q8  
WVZ9;Q9Y2Q9;Q9H0A9;P62266;Q14129;Q8NEY3;Q9NYP3;Q7RTU5;Q9UII5;O60287;O76042;Q8IWL3;P82  
664;Q8WXG1;Q96C11;Q8TDN6;Q9NZP6;Q01534;Q8IWE4;Q5VSL9;Q9BZV1;O60290;Q6QNY0;O75564;Q9Y5  
P3;Q9UKJ3;Q96CS2;Q9BZE9;Q86V97;Q9BY42;Q14696;Q13642;Q9ULQ0;Q9Y421;Q9ULQ0;Q9Y6Z5;Q9HB96;A6NNW  
6;Q6PI98;P49750;Q03252;P57060;Q12980;Q9NQR4;Q8IYX8;Q9HB07;Q9H0A0;O15453;Q9BZQ8;Q9GZW5  
;Q9NYP9;Q9NZH5;Q96JM7;Q9BT25;Q9NRG9;Q68D10;Q5JTJ3;Q92917;Q969X6;Q96DF8;Q6GMV2;P98169;

Q9BUK6;O60356;Q9BUW7;Q9BZE7;A2RTX5;Q3SYG4;Q99618;P62269;Q9NVU7;Q9BZW7;Q69YI7;O95411;Q9H1B7;Q9NQ50;Q9HCN2;Q3SYA9;Q0PNE2;Q99619;Q9H322;Q2M3D2;Q9HCM9;A3KN83;Q7Z7K6;O00193;Q4LE39;Q01850;P43359;Q9Y4X0;Q9H5X1;Q9BTE7;P59022;Q9NPI8;Q15935;O75920;Q9H6D7;Q8N2G8;Q9NZM5;P12036;O75474;O94973;P0C7X2;Q9NS25;Q9BVC6;Q9UM82;P98182;Q9NYZ3;Q12765;Q9H0U9;Q9UP83;Q9UBL0;Q96NU7;Q9UKZ1;O43290;Q9UKY7;Q68CZ6;Q9BW92;Q5TEC3;O14972;Q9BZF9;Q9H2W6;Q9Y675;P09496;Q8WWM7;Q8N0V3;Q14602;P50221;Q9NWW4;Q5H9L4;Q05084;P41162;P56555;Q8N3J9;P25398;Q5T7W7;Q5T280;Q9H2C0;Q5TD94;Q96NJ6;P23610;Q8N2L5;Q96FN9;Q5F1R6;Q9Y3R5;Q9BZL1;Q9BYS1;Q96AQ7;Q14657;Q9NVX0;Q9H5F2;Q8IZ73;Q96Q35;Q8WYQ3;Q9NY87;Q8WV07;Q9H3K2;Q9UN36;P52746;Q96N20;Q96BZ8;Q86U38;Q9BZD4;Q13495;O95486;Q4VC05;O43583;Q9BVG4;Q2TAL8;Q9Y5R5;Q15937;Q9Y4K1;P10073;Q8WW59;Q14181;O75638;Q92670;O94855;Q9Y592;Q14693;Q8N720}

8851 Pathogen[ P03346] interacts with 287 human partners: {Q5F1R6;Q9Y2A0;Q9UKS7;Q96N20;Q9BT25;Q9H7Z3;Q8WYQ3;Q9Y238;Q96S65;Q01534;Q9H6D7;Q96DF8;O75564;P98182;Q14320;Q15050;Q9BZL1;Q96EL2;Q8N573;Q96A73;Q9NQC8;Q9NY87;Q96NJ6;O95625;O43290;A3KN83;P50221;Q6P2D8;Q9UKY7;Q9UP83;Q9HCS5;Q9ULD5;Q9H0A9;Q96JP2;P23610;Q9BYG8;O60287;Q9H2Z4;Q8NFV4;O14633;Q4VC05;A6NNW6;Q7Z4H7;Q9H305;P57060;P84101;Q9H3K2;Q9UKZ1;Q96Q35;Q9GZW5;Q9UM82;Q2TAL8;P49754;Q9NZM5;P27469;Q969X6;Q9BY42;Q9UBI9;Q9NRG9;Q4L180;O60290;Q5T280;O15225;Q5T7W7;Q9BUK6;Q9Y5M1;Q96BZ8;Q9NSI6;Q8WV07;P43360;P17152;Q0PNE2;Q8NHX4;O95177;O75474;Q9Y6Z2;P62266;Q9BZV1;P49750;P56555;Q9P2F5;Q5TD94;Q06250;Q01850;O95671;Q8WW59;Q9GZL8;O00193;Q9H2C0;Q14129;Q9BXM0;Q96NU7;Q9HCK0;Q9H2W6;Q9NWW4;P0C7X2;Q96BR9;Q15847;Q7RTU5;Q6PI98;Q05084;Q96AQ7;Q92670;Q9Y5R5;O14972;Q9UKJ5;Q9BZE7;Q8IYX8;Q8LWE4;O15194;P09496;Q9UID3;Q9NUA8;Q4V328;Q15059;Q9NZP6;Q9BZE9;P22103;Q6QNY0;Q9UKJ3;Q9NS25;O94855;Q9H5F2;Q9Y592;P98169;Q9HB31;Q7Z794;Q9BQ65;Q9C0H6;Q9Y675;P41162;O43583;Q6UW56;Q9Y421;Q68D10;A6NF36;Q9Y3R5;P12036;Q14153;Q9NQR4;Q9H4I8;Q9NVX0;Q14264;Q13166;Q8WXE0;Q9BVC5;Q9P0V3;P25398;Q9NZH5;Q96JM7;Q9BZQ8;Q9Y4H4;P13985;P52746;Q12894;Q9UBL0;O60826;O95990;Q9UPQ4;Q9H322;O14879;Q8N0V3;Q9BUW7;Q9BZD3;Q6IQ32;Q3SYG4;P62269;Q9NVU7;Q68CZ6;Q9HCM9;Q9BTE7;Q5VYK3;Q9NQ50;Q99619;Q9HD33;Q9Y4P9;P10073;Q9BVG4;Q7Z7K6;O15453;O95411;Q53EQ6;Q9HCN2;Q8WVZ9;Q13495;Q63HK3;Q2M3D2;Q9H0U9;Q13015;O75920;Q9Y5P3;Q9HB96;Q14181;Q13642;Q5SRH9;Q96M91;Q15935;O95486;A5PL33;Q9BVC6;Q8NDF8;Q9UH90;P01358;Q8N720;Q03252;Q8TE68;Q4LE39;Q9Y6Z5;P02728;Q15937;Q9BTY7;Q9NYP3;O75638;Q96CS2;Q04727;Q69YI7;Q9NYZ3;Q8TDN6;Q0VDD7;O43763;Q5VSL9;Q12765;Q9UII5;Q6RFH5;Q15527;Q8NEY3;Q06356;P05813;Q9BZF9;P53801;Q12980;Q92917;Q9BXM8;Q7Z3D6;P59022;Q5H9L4;Q9NPI8;Q13401;Q9Y4K1;O96002;O94927;Q10571;Q9UJY5;Q8NI36;P82664;O60829;Q9BZW7;Q9BYS1;Q9UN36;P43358;Q96FN9;Q8TAU0;Q9NQZ2;Q5JTJ3;Q8WXX7;O76042;Q9NYP9;Q14602;Q6FIF0;O94973;Q99865;Q9Y2B4;Q14C87;P49901;Q8NBR6;Q3SYA9;Q8N3J9;Q14657;P53672;Q5TEC3;P53367;Q9HB07;Q9BZD4;Q99618;Q8IWL3;P53992;O43913;Q00765;Q9H1B7;Q8N2G8;P43359;Q9H9J2;Q14693;Q86V97;Q9Y2Q9;Q8WU76}

8852 Pathogen[ Q85601] interacts with 203 human partners: {Q53EQ6;Q5VYK3;O95625;Q6QNY0;Q63HK3;O43913;Q96S65;Q4LE39;Q9BZL1;Q96EL2;Q96A73;Q8N720;Q13495;Q9NY87;Q9GZW5;Q7Z7K6;P09496;Q9H5F2;Q6P2D8;Q92917;P53672;Q9NUA8;Q8N0V3;Q9ULD5;Q96JP2;Q9UN36;O14879;Q9H6D7;Q9BT25;O95671;P57060;O15194;Q9UKZ1;P12036;O60290;Q969X6;Q9UP83;Q5TD94;Q7Z4H7;Q9Y6Z5;Q9H2W6;P59022;Q9NRG9;Q9BZF9;Q9NWW4;Q5H9L4;Q0VDD7;Q01534;Q9NPI8;P56555;Q12894;Q9BXM0;Q8TDN6;P0C7X2;Q03252;Q13642;Q9UII5;P55145;Q5SRH9;Q9UJJ7;P49754;Q7RTU5;Q96AQ7;P27469;Q9BW92;Q9H6Y2;Q5VSL9;O14972;Q9BZV1;P41162;Q9UJY5;Q9BZE9;Q15059;Q9NZP6;O75474;Q9NS25;Q9BZQ8;Q9UM82;Q9Y592;P52746;Q7Z794;Q6IQ32;Q9Y675;Q9H0A9;Q8NEY3;P43360;Q9H2C0;Q9NQR4;Q9HB96;Q6PI98;Q5T280;Q8WVZ9;Q9H322;Q96N20;Q9NZH5;Q96JM7;Q4L180;Q9UKJ3;Q9UBL0;Q14657;Q8WV07;Q9NYP9;Q0PNE2;Q9UPQ4;Q9BZD4;Q9618;Q04727;Q15050;P98169;A2RTX5;P62269;Q9UKJ5;Q2TAL8;Q96NJ6;Q9NSI6;Q9Y2Q9;Q86V97;Q9Y4K1;Q9NYZ3;Q9NYK5;Q8WWM7;Q2M3D2;Q13015;O94927;O75920;O43290;Q14181;O95486;O94973;Q3SYG4;Q8NDF8;Q6GMV2;Q9HD33;O60287;Q15937;Q9UKY7;O00193;O75638;Q9NZM5;Q96CS2;Q9BUK6;P84101;Q8NBR6;O15453;Q12765;A3KN83;Q9NQ50;Q6RFH5;O60356;O60826;Q01850;Q96Q35;Q9Y5R5;Q92670;P50221;Q9P0V3;Q9Y3R5;Q8IWE4;Q8N3J9;Q8IWL3;Q8N2G8;P82664;Q9BY42;Q9Y421;O94855;Q14129;P43358;Q9H9J2;O76042;P43359;Q9BTE7;Q14602;O43583;Q9H0U9;Q15935;Q9C0H6;O75564;Q14264;Q5TEC3;Q9HB07;Q9UID3;P53992;Q05084;Q68CZ6;P98182;Q9H1B7;P25398;Q9ULQ0;Q96DF8;Q96M91;Q99619;Q96FN9;Q9HCM9;Q8IYX8;P10073;Q9NVU7;P62266;P49750;Q14693;Q5F1R6;Q9BZW7;Q9UH90;Q69YI7;P05813}

8853 Pathogen[ P14079] interacts with 381 human partners: {Q5VV42;Q9H0U9;Q96M91;Q8N6M3;Q5TGZ0;O15442;O15194;A6NF36;Q9GZN8;Q9BZP3;Q9BQ08;Q9BUV8;Q9Y4P9;Q12894;Q8N573;Q8NEY3;Q9H061;Q9UGV2;O76087;Q8N3T6;Q14C87;Q9NQ50;Q96FN9;Q8NEB7;Q9BZL1;Q9GZU0;O15225;P05813;Q9BVC5;Q9BT25;Q9P2X8;P27469;Q9GZL8;Q86V97;Q05084;P17152;Q969X6;Q9NSI6;P02728;O60826;Q9BTE6;Q8NHX4;Q7Z794;Q9BW92;Q86VI1;Q86U38;Q9UID3;P10073;Q14693;Q01534;Q9NZM5;Q6QNY0;Q92917;Q5H9L4;Q24JP5;Q9ULQ0;A3KN83;Q8NBR6;Q9NVU7;Q9UM82;Q8NBQ7;Q9H0A9;Q8N6L1;Q4VC05;Q9UKJ5;Q9HB07;Q9BVC6;O15258;Q15155;Q9NUA8;P43360;P82664;Q9UJY5;O15453;O60290;Q5TEC3;O00193;P56378;Q5T7W7;Q9BY42;Q96NU7;Q02083;Q9BUW7;P13985;Q92564;P43359;Q96DF8;Q92545;Q9Y675;Q6GMV2;Q13166;Q9Y5R5;P52746;Q14696;Q9NPI8;O75564;Q8WYQ3;Q9NYZ3;Q96A73;Q8IWL3;Q63HK3;P12036;P25398;Q9BZE9;Q9UKZ1;Q9NVX0;O43913;Q99932;Q9BUK6;Q9BZD3;Q9BYS1;Q14320;O95990;Q9BZD4;Q14264;Q8NE00;Q12980;Q01804;A2RTX5;Q96N20;Q8N720;O94855;Q9BUB7;Q4LE39;O60287;Q9H305;A6NNW6;Q96C11;Q15059;Q15050;Q15527;P53992;Q6NTE8;Q96CP2;Q9BQ65;Q9Y6Z2;Q9NV29;Q9BZV1;Q8N0V3;Q14129;Q10571;Q9UIG4;Q86YL5;Q8TDN6;Q9H0C3;Q9Y4H4;Q5VYK3;Q8IVB5;P62266;Q9NRQ5;Q3SYA9;Q03252;Q9P0V3;P58511;Q9BTE7;O43290;Q9HCM9;Q96S65;Q9H5X1;Q9Y6Z5;Q8NB25;Q9YJN2;Q9BVV7;Q9BXM8;Q99618;Q5TD94;O95671;Q9Y592;Q5SRH9;Q9Y421;Q9NS71;Q8IZ73;O95156;Q9UJ55;Q6PI98;P55081;P53673;P0C7X2;Q9ULD5;Q9UBL0;Q92670;Q99865;O14633;Q8WVZ9;P27544;Q9P0I2;Q9H790;Q13642;Q96Q35;Q8IUX1;Q9BXM0;P22103;Q9H7Z3;Q9H2C0;Q14657;Q14DG7;P30408;Q13066;Q9UBI9;Q9Y238;Q5T6V5;Q9BVG4;Q0VDD7;Q9UEE9;Q9Y6Z4;Q96AQ7;Q9UH90;Q9NQA3;Q9H2W6;Q9Y5P3;Q53FP2;Q8IYQ7;P55808;P84101;Q9NQZ2;O60829;P48681;Q9H1B7;Q96JM7;Q96J86;O95177;Q9UKJ3;Q8N2G8;Q9NY87;Q9NYP8;Q9JTB3;Q9Y2Q9;Q8WV07;Q8N1H7;Q9NP67;Q9NP3;Q9H6D7;Q9NWP3;Q8WWM7;Q15847;Q9Y4X0;O43583;Q5JTJ3;Q14153;Q8N1D0;Q9Y5U8;Q9NS25;Q2TAL8;Q8TCU4;O96002;Q68D10;Q9NYP9;Q4KMQ1;Q9NRT5;Q14181;Q12765;O94973;P98169;P59022;P01358;Q8N3J9;Q9NUM4;A4D263;Q9H9J2;Q9UKR5;O75920;Q9GZW5;P23610;Q01850;Q9H3K

2;P43358;Q9H0A9;P49750;P30039;Q9BZF9;Q9BTY7;A5D6W6;Q9UJJ7;P60602;P10163;Q5T011;Q9UKY7;Q9UII5;Q9C0H6;P59020;Q4V328;Q14602;Q9NZV5;Q5T750;Q96AN5;Q9H5F2;Q9HB96;Q9HD33;Q9HBU9;P41162;Q8WXX7;O14972;Q7Z4H7;Q9NQC8;P53672;O75204;A5PL33;Q15011;Q9Y2A0;Q9Y2B4;Q6NVU6;Q9BT25;Q5VSL9;Q9HCN2;Q5SRD1;Q00765;O60356;O75638;Q68CZ6;Q69YI7;P49754;Q9Y4K1;Q0PNE2;Q6IQ32;P98182;Q3SYG4;Q9H478;O95486;Q9Y3R5;Q9P2F5;Q5F1R6;P53801;Q96AQ2;O95411;Q13015;P57060;Q8NFP0;O75474;Q9UNP3;P56555;Q9NYK5;Q15935;P62269;Q8IYX8;O14879;Q9Y2M6;O76042;Q9BZQ8;Q53S33;Q9H6K1;Q9NRG9;O14523;P10075;O95625;Q60250;P04280;Q9NQR4;Q9Y531;Q96EL2;Q9BZW4;Q04727;Q9NZH5;Q12893;Q8IXM6;P02729;Q99619;Q9NWX4;P09496;P50221;O14524;Q2M3D2;Q96NJ6;O94927;Q7Z7K6;P49901;Q9BYG8;Q13296;Q8WXG1;P40305;Q9NUG4;Q53EQ6;Q9H322;Q5T280;Q5T5P2;Q86TL2;Q8IWE4;P43362;Q13495;Q96CS2;Q9BZW7}

8854 Pathogen[ P03383] interacts with 255 human

partners: {Q0VDD7;Q5VSL9;O14879;O76087;P62266;P43359;Q15935;Q6QNY0;O75920;Q9H7Z3;P84101;Q63HK3;Q96S65;Q8NBR6;Q9BZE7;O95625;Q96EL2;Q12894;Q9Y6Z5;Q9BYG8;A6NNW6;Q9GZW5;P25398;P27469;Q9UP83;O60287;P82664;Q14129;Q13166;O43290;Q96M91;Q15937;P02728;Q9NVX0;Q4VC05;Q9Y5R5;Q9Y675;Q9GZN8;Q04727;Q14181;Q92670;Q9ULQ0;Q3SYA9;P12036;Q9H6Y2;Q5VYK3;Q96BZ8;Q9BZL1;Q96A73;O60290;Q7Z4H7;Q9H2W6;Q8N0V3;Q9BQ65;O14972;Q9BZF9;Q5SRH9;A3KN83;Q8NEY3;Q5H9L4;Q8N3J9;O95177;Q9NYP9;O75474;Q96AQ7;Q0PNE2;Q9BZV1;Q9ULD5;Q9BZE9;Q8WWM7;Q9P2F5;Q9BZW7;O00193;Q06250;Q5TD94;Q9BXM0;Q9NS25;Q8NDF8;Q9NZM5;O95486;Q01850;Q96N20;Q9GZL8;O75638;O60826;Q9H2C0;Q9UNP3;Q9NWX4;Q9Y592;P0C7X2;Q7Z7K6;P49754;Q15847;Q15050;Q7RTU5;Q969X6;Q9Y2A0;Q6PI98;Q9BXM8;P41162;Q9BTY7;Q4V328;P49750;Q6IQ32;Q8IWE4;Q9NZP6;O96002;Q96618;O43913;Q9UKJ3;P01358;P13985;Q9BZQ8;Q9Y6Z2;Q13495;P52746;P43360;Q5084;Q9H0A9;Q14C87;Q96CS2;Q8NHX4;O94927;Q9Y3R5;Q9BVC6;Q9Y2Q9;Q9Y4K1;Q53EQ6;Q96FN9;Q8WVZ9;Q13015;Q9NZH5;Q96JM7;Q5JTT3;O94855;Q9UJY5;Q7Z794;Q13066;Q12765;P53672;P43358;Q9Y5M1;Q9H322;Q9BZD4;P49901;Q9BUW7;Q14696;Q9HD33;A2RTX5;P55145;A5PL33;Q14657;A6NF36;P62269;Q68CZ6;Q9H0A9;Q9NY87;O95411;Q9NSI6;P53801;Q9Y5P3;Q86V97;Q9BT25;Q68D10;Q9NYZ3;Q2TAL8;P10073;Q9HB07;Q9BVG4;O15453;Q9HCN2;Q9UKY7;Q8IWL3;Q9H0U9;Q12980;Q9Y4H4;Q9HB96;P57677;O60829;Q9NQR4;Q14264;Q3SYG4;P17152;O76042;Q8WYQ3;Q9UKJ5;O14633;Q4LE39;Q5T280;Q96Q35;Q14153;A4D263;Q5TEC3;Q9NYP3;Q15059;P56555;Q9BVC5;Q9NRG9;Q96NJ6;Q15527;Q03252;Q9P0V3;Q9H9J2;Q9UII5;P22103;P53992;Q9NQ50;Q99865;O43583;O95671;Q14602;Q9UKZ1;Q53S33;Q9H6D7;Q96DF8;P50221;Q9H1B7;Q01534;Q8NFP0;P23610;Q9BY42;Q9BYS1;Q13642;Q9NYP8;Q8TDN6;Q9UM82;O15225;Q9BTE7;Q9Y4P9;Q8N720;O94973;Q2M3D2;Q9Y421;P05813;Q9NPI8;Q8WXX7;O75564;P59022;Q92917;Q9H0A0;O95990;P57060;Q9UBL0;P98182;Q5T6V5;Q99619;Q9NVU7;Q9UBI9;Q14693;Q8WV07;Q9BW92;O60356;Q9H5F2;Q69YI7}

8855 Pathogen[ P03410] interacts with 378 human

partners: {P30039;O60287;Q2M3D2;P49750;Q0PNE2;Q9BVC5;Q9Y2Q9;P09496;Q92917;Q5SRD1;A6NF36;Q9H305;Q9NZM5;Q9HB07;Q8IZ73;Q9H6K1;Q9BZE9;Q92564;Q9H0C3;Q9UBL0;Q9HD33;A4D263;Q9Y6Z5;Q8NEB7;Q12893;Q9BUB7;Q9BTE7;P49901;Q9Y675;Q9NZH5;Q14129;A5D6W6;O75638;Q8WUX2;Q13296;P59022;Q3SYA9;Q9C0H6;Q14C87;Q9BZL1;Q4VC05;Q8WXX7;Q9HCM9;P12036;Q9BTE6;Q15050;Q9H6D7;P41162;Q9H0U9;Q6PI98;Q13495;Q8N6L1;P98169;Q9UP83;Q9WYQ3;Q6PJE2;Q9BVC6;O95990;P02729;O96002;Q14181;Q96M91;Q99618;Q9Y4P9;Q02083;Q9BXM0;Q8IWE4;O76087;Q9GZL8;P98182;Q86TL2;O94855;Q96CP2;Q8NFP0;Q15527;Q9UJY5;Q13015;Q96C11;P56378;O76042;Q92670;Q9BZD3;Q4L180;P53992;Q9BUW7;Q8N7X4;Q9UII5;Q14264;Q8WV07;Q3SYG4;P10073;Q9BW92;Q6QNY0;Q9NQZ2;Q10571;Q12765;Q69YN2;Q9H0A0;A3KN83;Q96AQ7;P50221;Q14153;Q8N3J9;Q9BVG4;Q9Y2B4;Q9P0V3;Q5T6V5;Q69YI7;Q9BZP3;Q9P2F5;Q9BZE7;Q5VSL9;P57060;P53367;O75474;Q9BY42;Q5T750;Q8WVZ9;Q9UPQ4;Q53EQ6;Q9UBI9;P13985;P62269;Q92545;P23610;Q5VYK3;Q01534;Q5TD94;Q14657;Q9NYP9;Q9H5X1;Q15847;Q9H478;P43359;Q9P2X8;P58511;Q9BUV8;Q8TCU4;Q9NYP8;Q86V97;Q8N720;P62266;Q9UEE9;Q7Z794;Q8TDN6;Q0VDD7;O43583;Q96J86;Q96AN5;O15225;P27544;Q12980;Q9NYZ3;Q24JP5;Q99865;Q5F1R6;Q9BTD3;Q9NYK5;Q6GMV2;Q15059;O14972;Q96NU7;Q14DG7;Q8WWM7;Q5JTT3;O00193;Q9H322;Q4LE39;Q8IYX8;Q9H9J2;Q9Y4X0;Q05084;P02812;Q68CZ6;Q9UJY5;Q9NS71;Q96CS2;P52746;Q6P2D8;O15258;Q8WXG1;Q8N6M3;O60826;Q8WU76;Q5TEC3;Q9UJJ7;Q14693;Q9BZV1;Q9Y5P3;Q7Z7K6;Q9Y5P3;Q7Z7K6;Q9Y592;Q6RFH5;Q9Y5M1;Q9ULD5;Q5SRH9;Q9H790;O95158;Q9Y4H4;Q9BUK6;Q9NS25;Q5T7W7;Q5H9L4;Q9Y6Z4;A5PL33;P25398;Q9NQR4;Q6IQ32;Q99619;Q9UM82;O14523;Q9UNP3;Q96JM7;Q68D10;P43362;Q5T280;Q9BXM8;Q9NV29;Q9NPI8;Q03252;P27469;Q9UKZ1;Q9NWX4;Q96BZ8;P60602;O14633;P56555;Q8IWL3;Q0727;Q9BZD4;Q9UKJ5;Q13066;Q9NVU7;P02728;Q9H1B7;P84101;Q9NQ50;Q14320;Q9NB96;Q9H87;P43365;P49754;Q9ULQ0;Q13642;Q9Y5U8;Q8N3T6;O94927;Q9H7Z3;Q00765;Q9Y334;Q9BZW7;Q9UKY7;P05813;Q9Y4K1;O95625;Q96CN7;Q9NYP3;Q96EL2;Q9NSI6;Q7Z3D6;Q9BTY7;Q9Y6Z2;Q9BYG8;Q9BZF9;Q9H0A9;O75920;O95671;Q8NBR6;Q99932;P01358;O95411;Q5J5C9;Q9GZN8;Q9H2C0;P10163;Q7RTU5;Q15011;Q9H2W6;P43360;Q9NUG4;Q8N1D0;O15442;O15453;Q96DF8;Q96Q35;Q63HK3;Q9BZQ8;Q9H3K2;Q15937;Q96AQ2;P17152;Q9NQC8;Q6NVU6;Q86VI1;Q8NE00;Q9P0I2;P43358;Q9BQ65;O75564;P55808;O14524;Q14696;O60829;Q96N20;O43290;O14879;Q86YL5;Q96JP2;Q9BYS1;A2RTX5;Q4V328;Q9Y238;Q2TAL8;Q01850;Q9H5F2;Q9Y2A0;O43913;Q8N0V3;Q8IXU6;Q9GZU0;P40305;P10075;Q13166;P0C7X2;A6NNW6;Q8IXM6;Q9NRG9;Q9BZW4;Q8WW59;Q9UKJ3;Q9NRT5;Q86U38;Q9BT25;Q9NQA3;O94973;Q9Y421;Q969X6;O95177;P04280;Q9UID3;Q96A73;Q8N573;P22103;Q9NUA8;Q7Z4H7;Q5T5P2;O60290;Q9GZW5;Q9NZP6;O15194;Q8NB25;Q9H6Y2;P53672;Q96FN9;Q9NRQ5;O95156;Q12894;Q9HBU9;Q53S33;Q9BQ08;Q4KMQ1;Q96NJ6;Q9NZV5;Q15935;P53801}

8856 Pathogen[ P14075] interacts with 306 human

partners: {Q04727;P53673;Q9P0V3;Q92545;Q15059;Q3SYG4;P84101;Q9HB96;Q96S65;P53801;Q14129;O75564;Q14602;Q96EL2;P59022;Q99932;Q9NQR4;Q9BVC6;Q14264;Q9NYK5;Q01850;P09496;Q8WV07;Q8NEY3;Q9UKJ3;Q9H322;Q9NRQ5;Q9Y5R5;Q9H2C0;Q99865;P0C7X2;Q8N0V3;Q9H0A9;Q9Y2Q9;O94973;Q13495;Q5T6V5;Q96NJ6;Q96J86;P01358;Q8NDF8;Q9BVC5;Q4LE39;Q13166;Q9UM82;Q7Z4H7;Q9BZD3;Q9NYP3;Q9UKZ1;Q13296;Q96BZ8;Q5TD94;Q99619;Q10571;Q9GZW5;Q9P2X8;Q15937;Q9BXM0;Q9BY42;Q02083;O96002;Q9Y6Z5;P53672;O76087;Q2M3D2;Q14C87;Q9NSI6;Q5T750;Q68D10;Q9Y6Z4;O95177;P13985;Q96M91;Q8N6L1;Q9NPI8;Q5JTT3;Q14153;Q9NQP8;P05813;Q92917;Q68CZ6;Q13015;Q9NRT5;O95625;Q14320;Q9HD33;P49750;Q9Y4K1;Q53EQ6;Q9Y2A0;Q96FN9;Q5SRH9;O15453;Q9BVG4;P04280;P02728;Q9H2W6;Q9P2X3;A3KN83;Q7RTU5;Q12980;Q9H9J2;Q9ULQ0;Q86TL2;Q9H6Y2;P53992;P25398}

;Q4V328;Q9NVU7;Q9NZP6;P43358;Q9BT25;Q13642;Q9H0A0;A6NF36;Q96AQ2;O75638;Q9UBI9;P43359;Q9H478;P22103;Q86V97;Q9HCN2;Q96AQ7;Q9Y2B4;Q9HCM9;Q9Y5P3;Q9ULD5;O15225;O43583;P41162;Q15847;P17152;Q9H6K1;A5PL33;Q9Y238;Q3SYA9;Q5TEC3;P12036;P56378;Q9BTE6;O75920;Q92670;P60602;Q9UP83;P49754;Q5VSL9;O60287;Q2TAL8;Q9NZH5;Q96JM7;Q9BZQ8;Q96DF8;P52746;P50221;Q9HB07;Q12066;Q6PI98;Q8N3J9;O95990;P82664;Q9BQ65;Q9BZP3;Q9BUW7;O14523;A2RTX5;Q9H7Z3;Q9BYG8;P2269;Q9BW92;Q14696;Q9Y421;Q96C11;O95671;Q9NYP9;Q9H5F2;Q9NS25;Q9BTD3;Q9NZM5;Q8WYQ3;Q5T7W7;Q14657;Q9UN36;Q9NQ50;Q96Q35;A6NNW6;Q9BZL1;P57060;Q8NDX9;Q9UJ7;P56555;Q8IXM6;O75474;Q969X6;Q6QNY0;Q96CS2;Q9Y4P9;O60290;Q01534;Q8WVZ9;O15442;Q9NWW4;Q9P2F5;O60356;Q9UIG4;Q9Y5M1;Q9H0U9;P62266;Q9GZL8;Q8NBR6;Q6IQ32;Q15935;Q9NV29;Q9Y3R5;O43913;Q5H9L4;O60826;Q6NVU6;O14879;Q8WWM7;Q7Z7K6;P02812;Q96A73;Q9BZE7;Q9UEE9;Q05084;Q9UKY7;A4D263;P98182;P58511;Q9NVX0;Q96N20;Q9BTY7;Q69Y17;Q8N6M3;Q4VC05;Q9BZF9;Q15011;O94927;P27469;Q9BZV1;Q99618;Q8N720;Q15050;Q9NYZ3;P23610;Q9BUB7;Q9BYS1;Q8TDN6;Q14181;Q9Y592;O43290;Q9UII5;Q8WXX7;Q9H1B7;Q9BTE7;O14633;Q9BXM8;P49901;P43360;Q9NRG9;Q12765;Q9UKJ5;Q9GZU0;Q9H6D7;Q63HK3;O95486;O14972;Q8IWL3;Q53S33;Q9Y4H4;Q0VDD7;O60829;Q9BZD4;P10073;O95411;Q96NU7;Q5T280;Q9UBL0;Q0PNE2;Q9UJY5;Q15527;O00193;Q9GZN8;Q03252;Q4KMQ1;Q9BZE9;Q9NY87;P55808;Q5VYK3;Q6GMV2;Q14693;Q9Y675;Q9Y5U8}

8857 Pathogen[ P0C206] interacts with 345 human

partners: {Q9NUA8;Q4L180;Q8N720;Q9NY87;O60829;Q9NQC8;Q9Y5M1;Q9NPI8;Q9BZQ8;Q14320;Q8N0V3;O96002;O95081;Q2M3D2;Q8NB25;Q14657;Q9GZW5;Q9NZH5;Q96JM7;Q9Y4H4;Q63HK3;P01358;Q99865;Q0VDD7;Q94973;P40305;Q96S65;Q8IXM6;Q9H790;Q9H305;P98182;Q9Y2A0;Q9GZL8;Q9NRG9;Q96EL2;Q9NSI6;Q9NZM5;Q9NS25;Q86U38;P43358;Q9UII5;O75474;Q9Y5U8;Q5TD94;Q13642;Q5VSL9;Q9BVC5;Q9P2X8;O14524;O94855;Q3SYG4;Q9H5F2;Q9NVU7;Q9UJ55;P57060;Q5F1R6;O15258;Q8N2G8;O75638;O43913;P49901;Q8TCU4;Q9BQ65;Q9BTE7;P62266;Q9HB96;P49754;A5D6W6;Q8NBR6;Q9C0H6;O60826;Q99619;Q9UEE9;Q14602;Q9BUB6;Q6PI98;Q8NFP0;P50221;A2RTX5;Q9Y4K1;Q8WXX7;Q9UH90;Q9BZP3;O00193;Q9Y6Z5;Q96A73;O14879;Q99618;Q9BT25;Q3SYA9;P10073;Q9NYP9;P53673;Q53EQ6;Q6UW56;Q9BUB7;Q04727;Q92670;Q9BZD4;Q8IWE4;Q9BZE7;Q9H6Y2;Q9Y6Z4;P56555;P43360;Q7Z794;Q96Q35;Q13066;Q9UKJ5;O95671;Q9UBL0;Q9HB07;Q9BZW7;Q9Y592;Q5JTJ3;A6NNW6;Q9Y3R5;Q86YL5;Q96BZ8;Q15050;P43359;Q8TDN6;Q8IZ73;Q4VC05;Q9H6K1;O14633;P55145;Q03252;Q8N3J9;Q9BZE9;P53801;Q7Z3D6;P02728;Q13495;P09496;Q9UKJ3;Q5SRD1;P10075;Q9Y4X0;Q9HD33;O43290;Q9NVX0;Q9UJ7;Q01534;P22103;Q95920;A5PL33;Q9Y421;Q9Y675;A4D263;P23610;O60356;Q9H3K2;Q9H0A9;P43362;Q9UM82;Q9BTY7;P82664;Q9UPQ4;P12036;Q96N20;Q13166;Q8WV07;P41162;Q8N6M3;Q96DF8;Q5T280;Q5T7W7;P05813;Q9Y4P9;Q8WV59;Q2TAL8;Q9UP83;Q13296;O76087;Q9H4I8;Q8WYQ3;Q92917;Q9BUV8;O14972;O75564;Q12980;O95486;Q969X6;Q9BZV1;Q6RFH5;O95990;Q9H322;Q9BZL1;Q14181;Q13015;Q92564;Q9BVC6;Q96BR9;Q9RTU5;Q8WVZ9;Q9BTE6;Q5TEC3;Q6IQ32;Q15011;Q9UJY5;Q96JP2;Q4LE39;Q8IYX8;Q9Y5R5;Q86V11;Q9NQR4;O15225;Q0PNE2;Q7Z7K6;Q8NDF8;P59022;Q9H7Z3;P30039;Q96CS2;Q8N1D0;Q8WU76;Q5H9L4;Q9BW92;Q7Z4H7;Q02083;Q5T6V5;Q96AQ7;Q9HCN2;P17152;O94927;P49750;Q9P2F5;Q9BXM0;Q12893;Q15937;Q9UKZ1;Q12765;O15453;Q9NYP8;Q9H0U9;O60287;Q9ULD5;Q9Y5P3;O95411;Q9H2W6;Q5VYK3;Q14264;Q9BUW7;Q96C11;Q9BVG4;Q9UID3;Q9BYS1;Q96M91;Q01850;Q9P0V3;Q9HCM9;Q9P2D8;Q9BY42;P53672;Q9H6D7;Q9Y2Q9;Q96NJ6;P0C7X2;P98169;Q9BYG8;Q5T5P2;Q9ULQ0;Q15059;Q96GZ8;Q9Y2B4;Q96FN9;Q9NQ50;Q14129;O95625;P27469;Q8N573;Q8NEY3;Q00765;Q4V328;Q4KMQ1;Q8WUX2;Q15847;Q9H9J2;P84101;Q53S33;Q9NZP6;O15194;Q99932;Q9UN36;P52746;Q14696;Q8IWL3;O43583;Q5SRH9;Q9NYK5;P53992;Q6QNY0;Q9NYZ3;P62269;A6NF36;Q9BZF9;Q8TAU0;Q8NHX4;Q06250;Q8WWM7;Q9NQZ2;Q9P2X3;Q9H1B7;O95177;Q8WXG1;A3KN83;Q9BXM8;Q14693;Q9UBI9;P25398;Q96CP2;Q14153;Q15935;Q14DG7;Q5T750;Q68CZ6;Q14C87;Q68D10;O43763;O15442;Q9NYP3;P60602;Q9Y6Z2;Q9H5X1;Q9H2C0;Q9H0A0;Q9BZD3;Q69YI7;P13985;Q05084;O76042;Q9UKY7;Q9NWW4;Q9HCK0;Q10571;O60290;Q6GMV2;Q9Y238;Q9NRT5;Q96NU7;Q86V97;Q12894;Q15527;Q01804}

8858 Pathogen[ P03363] interacts with 277 human

partners: {P49754;O95990;O60829;Q9UID3;Q9H7Z3;Q9BZD4;Q5T5P2;Q9NZH5;Q96JM7;Q01850;P43360;Q9Y592;O75638;Q92917;Q96AQ7;Q9NYP9;Q14264;Q7Z7K6;Q96S65;Q9BXM0;Q9NYP3;Q0VDD7;Q96DF8;P53801;P82664;Q15050;O60356;Q96EL2;O75474;P10265;Q9NUA8;Q8WXX7;Q8N0V3;O95411;Q9P0V3;Q969X6;P98169;A2RTX5;Q9UP83;Q02083;Q9Y4H4;Q9NY87;Q9BZQ8;Q4VC05;Q9H5F2;Q69YI7;Q8N3J9;Q6P2D8;Q9Y3R5;Q96NJ6;Q14657;P53672;P02728;Q9GZL8;P23610;O43763;Q9NVU7;Q8N720;Q9UBI9;Q6UW56;Q96JP2;Q8TE68;P59022;Q9BYG8;Q9HC35;Q9Y2Q9;Q53EQ6;Q9UN36;Q10571;Q9H6D7;Q9Y5M1;Q14C87;Q2M3D2;Q9BT25;O95671;Q4LE39;Q8N2G8;Q13015;Q8WU76;Q5F1R6;Q9H9J2;Q9Y5P3;P57060;Q9BXM8;Q9Y4P9;Q14181;Q9HCK0;Q9UKZ1;Q9NQ50;O95486;Q5TD94;Q9H322;Q96N20;O00193;Q9NWW4;Q04727;O14879;Q9GZW5;P01358;Q9UGV2;O94973;Q9BTE7;Q9HD33;Q9HCS5;Q9HCN2;P50221;O75920;Q13495;A4D263;Q9BZF9;Q03252;O60287;A6NF36;P43358;Q9H305;Q15937;Q9NRG9;Q9H0U9;Q06250;Q3SYA9;A3KN83;Q14602;P22103;A6NNW6;Q4L180;Q9H4I8;P84101;Q68CZ6;Q68D10;Q9NSI6;Q9BZD3;O94927;Q9ULD5;O96002;Q3SYG4;Q9BZP3;Q96BZ8;Q8WV59;Q12894;Q9BTE6;Q8NEY3;O15453;O60826;Q9Y5R5;Q8NDF8;Q5VSL9;Q9H2W6;Q9NVX0;Q9UH90;Q9BZV1;O14633;Q14320;Q63HK3;Q05084;Q15847;Q9Y4K1;P49750;Q9Y6Z5;Q99619;O75564;Q9H2Z4;Q8NBR6;O43290;Q9NYZ3;P13985;Q96PQ7;Q9UM82;P25398;Q9BZE9;Q96CS2;Q9HB31;Q9Y2A0;Q9BQ65;Q8WVZ9;Q8IWL3;Q14129;Q9BTY7;Q99618;Q9C0H6;Q9H1B7;Q86V97;Q6FIF0;Q96M91;Q0PNE2;Q5T280;Q01534;Q9BUW7;Q7RTU5;Q9BYS1;Q92670;P27469;Q9BW92;P98182;Q9UBL0;O76042;Q8WV07;Q9HCM9;O43583;P41162;Q9UKJ5;Q9H0A9;Q8IYX8;P62266;Q6IQ32;P53992;Q13642;Q9BZW7;Q9H3K2;Q9BY42;Q9BZL1;Q5T7W7;Q15059;Q9HB96;Q9NZP6;Q9UKY7;Q9Y6Z2;O14972;Q12765;Q9NS25;Q2TAL8;Q9NPI8;Q5TEC3;Q9UKJ3;Q9HB07;Q96FN9;Q8WXE0;Q8TAU0;P12036;Q9H6Y2;O60290;Q9H2C0;Q9Y238;P0C7X2;Q15935;O15225;P43359;Q12980;Q96BR9;O95625;P49901;Q9UJY5;Q7Z794;Q9Y2B4;Q7Z4H7;Q00765;Q9Y675;Q9BVG4;Q15527;Q99865;Q5H9L4;P56555;Q9BZE7;Q6RFH5;Q6QNY0;Q96A73;Q5SRH9;Q9ULQ0;Q9BVC5;P52746;Q9UII5;O94855;Q14153;Q9NQR4;Q9NQC8;Q5VYK3;A5PL33;Q9NZM5;P10073;P62269;Q9Y421;Q13166;Q8TDN6;Q13401;Q6PI98;O43913;Q96Q35;P05813}

8859 [Cluster 806]GO:0050699+F molecular\_function [name] WW domain binding [def]  
"Interacting selectively and non-covalently with a WW domain of a protein, a small module composed of 40 amino acids and plays a role in mediating protein-protein interactions via proline-rich regions." [PMID

8860 Pathogen[ Q2Q067] interacts with 7 human

8861 partners:{Q9UHQ7;P30307;Q99732;Q96Q89;Q16621;Q6ICG8;Q9Y2W2}  
Pathogen[ P0C214] interacts with 9 human

8862 partners:{Q9Y2W2;P30307;Q9UHQ7;Q16621;Q6ICG8;Q99732;Q96Q89;Q9NV92;Q15038}  
Pathogen[ P03346] interacts with 11 human

8863 partners:{Q16621;Q96G27;Q15038;Q6ICG8;Q9NV92;Q9UHQ7;Q96Q89;Q9BUZ4;Q9Y2W2;P30307;Q99732}  
Pathogen[ Q85601] interacts with 8 human

8864 partners:{Q9Y2W2;Q15038;Q16621;Q6ICG8;Q96Q89;P30307;Q9UHQ7;Q99732}  
Pathogen[ P14079] interacts with 14 human

8865 partners:{Q15038;P30307;Q9Y2W2;P81408;Q96G27;Q9BUZ4;Q9UHQ7;Q8N114;Q99732;Q96Q89;Q16621;Q6ICG8;Q9NV92;Q969W9}  
Pathogen[ P03383] interacts with 9 human

8866 partners:{P30307;Q96G27;Q15038;Q9Y2W2;Q16621;Q99732;Q9UHQ7;Q96Q89;Q6ICG8}  
Pathogen[ P03410] interacts with 13 human

8867 partners:{Q96Q89;Q969W9;Q15038;Q99732;Q6ICG8;Q8N114;Q9NV92;P81408;Q9Y2W2;Q96G27;Q16621;Q9UHQ7;P30307}  
Pathogen[ P14075] interacts with 11 human

8868 partners:{Q9UHQ7;Q6ICG8;Q9Y2W2;Q15038;Q99732;Q9NV92;Q16621;Q96G27;Q96Q89;P30307;P81408}  
Pathogen[ P0C206] interacts with 11 human

8869 partners:{Q96Q89;P30307;Q9UHQ7;Q9NV92;Q15038;Q96G27;Q6ICG8;Q9BUZ4;Q16621;Q9Y2W2;Q99732}  
Pathogen[ P03363] interacts with 10 human

8870 partners:{Q9Y2W2;Q16621;Q99732;Q9UHQ7;Q6ICG8;Q96G27;Q96Q89;Q9BUZ4;P30307;Q15038}  
[Cluster 807]GO:0018024+F molecular\_function [name] histone-lysine N-methyltransferase activity [def] "Catalysis of the reaction

8871 Pathogen[ Q2Q067] interacts with 15 human  
partners:{O43463;Q8IZD2;Q15910;Q9NR48;Q92800;O14686;Q9NRG4;Q15047;O00255;Q86Y97;Q8TEK3;Q9H5I1;Q86TU7;O96028;Q8WTS6}

8872 Pathogen[ P0C214] interacts with 16 human  
partners:{Q9H5I1;Q15047;Q15910;O43463;Q86TU7;Q86Y97;Q9NR48;Q8WTS6;Q9NQR1;Q92800;Q9NRG4;O00255;Q9NQV7;Q8IZD2;Q8TEK3;O96028}

8873 Pathogen[ P03346] interacts with 19 human  
partners:{Q9NQV7;Q92800;Q86Y97;Q9NQR1;Q8TEK3;Q9BYW2;O43463;Q9NRG4;O00255;Q8WTS6;O14686;Q15910;Q15047;Q13029;Q9NR48;Q9H5I1;Q8IZD2;O96028;Q86TU7}

8874 Pathogen[ Q85601] interacts with 17 human  
partners:{Q9H5I1;Q9NQV7;Q9NQR1;Q9NR48;Q86TU7;O14686;O43463;Q8WTS6;O00255;Q8TEK3;Q86Y97;Q15910;Q9NRG4;Q15047;Q92800;Q8IZD2;O96028}

8875 Pathogen[ P14079] interacts with 12 human  
partners:{Q15047;Q9NRG4;Q86TU7;Q92800;Q9H5I1;Q8TEK3;Q9NQR1;Q9NQV7;Q15910;O00255;Q86Y97;Q8WTS6}

8876 Pathogen[ P03383] interacts with 12 human  
partners:{Q15047;Q9NRG4;O43463;Q86Y97;Q86TU7;Q8WTS6;O00255;Q15910;Q8TEK3;Q9H5I1;Q9NQR1;Q92800}

8877 Pathogen[ P03410] interacts with 13 human  
partners:{Q15047;Q86Y97;Q8TEK3;Q8WTS6;Q92800;Q9NQV7;Q9NQR1;Q9H5I1;Q15910;O43463;O00255;Q86TU7;Q9NRG4}

8878 Pathogen[ P14075] interacts with 12 human  
partners:{Q86TU7;Q15047;Q9NQR1;Q15910;Q92800;O00255;Q9H5I1;Q8TEK3;Q86Y97;O43463;Q9NRG4;Q8WTS6}

8879 Pathogen[ P0C206] interacts with 19 human  
partners:{Q9NRG4;O00255;Q9H7B4;O43463;Q86TU7;Q92800;Q9NQX0;O14686;Q15910;Q9NQV7;Q86Y97;Q9NR48;Q9NQR1;O96028;Q8WTS6;Q9H5I1;Q8TEK3;Q15047;Q8IZD2}

8880 Pathogen[ P03363] interacts with 15 human  
partners:{Q9H5I1;Q15910;Q8TEK3;O15047;Q9NRG4;Q9UPS6;Q9NR48;O96028;O43463;Q9NQR1;Q8WTS6;Q92800;Q15047;Q86Y97;O14686}

8881 [Cluster 808]GO:0016811+F molecular\_function [name] hydrolase activity, acting on carbon-nitrogen (but not peptide) bonds, in linear amides [def] "Catalysis of the hydrolysis of any non-peptide carbon-nitrogen bond in a linear amide." [GOC

8882 Pathogen[ Q2Q067] interacts with 3 human partners:{Q8IXJ6;Q96HA8;Q9NTG7}

8883 Pathogen[ P0C214] interacts with 3 human partners:{Q9NTG7;Q8IXJ6;Q96HA8}

8884 Pathogen[ P03346] interacts with 4 human partners:{Q8IXJ6;P45381;Q96HA8;Q9NTG7}

8885 Pathogen[ Q85601] interacts with 3 human partners:{Q8IXJ6;Q96HA8;Q9NTG7}

8886 Pathogen[ P14079] interacts with 6 human  
partners:{Q96HA8;Q96HD9;O00519;P45381;Q8IXJ6;Q9NTG7}

8887 Pathogen[ P03383] interacts with 2 human partners:{Q9NTG7;Q96HA8}

8888 Pathogen[ P03410] interacts with 5 human  
partners:{Q8IXJ6;Q96HD9;O00519;Q9NTG7;P45381}

8889 Pathogen[ P14075] interacts with 2 human partners:{Q96HA8;Q9NTG7}

8890 Pathogen[ P0C206] interacts with 4 human partners:{Q96HA8;P45381;Q8IXJ6;Q9NTG7}

8891 Pathogen[ P03363] interacts with 2 human partners:{Q96HA8;Q9NTG7}

8892 [Cluster 809]GO:0046983+F molecular\_function [name] protein dimerization activity [def] "The formation of a protein dimer, a macromolecular structure consists of two noncovalently associated identical or nonidentical subunits." [ISBN

8893 Pathogen[ Q2Q067] interacts with 119 human  
partners:{Q13562;Q9NQG7;Q9UKI9;P27540;P17544;P01100;Q16236;Q99583;Q10587;Q9HBZ2;P0419



- 8;P15884;O75340;Q99081;Q9Y2D1;Q6XD76;Q8WYA1;Q9UMX3;P40763;Q08209;P01106;O14503;Q9NR55;Q15596;Q01664;P18847;P49716;Q9BW11;Q9NQ87;P13349;O96004;Q9UL49;O96006;Q02930;P12980;Q05195;Q14814;P18850;Q6R2W3;P36956;A6NFD8;P41134;P19387;Q16520;Q15542;Q92754;P35638;Q16534;Q8N1L9;P67775;P17676;Q9Y4Z2;Q8NDY6;Q7RTU5;Q96RJ6;Q9NZC7;P11831;P15172;Q9NS37;Q9Y4A8;Q15744;Q9Y297;Q99743;O14867;P19532;Q8TEM1;O14948;P12525;Q9Y2N7;Q9HAP2;Q68CJ9;P15408;P86452;Q8WVJ9;P35869;Q16621;O75030;P61244;Q02080;P12524;Q8NFJ8;Q9NQ33;P19838;P20823;P17861;Q7RTU4;Q9Y543;P15336;Q9BYV9;P22415;Q5SVZ6;P19484;O60290;Q9Y5J3;Q7RTU0;P47928;Q9NP71;O60682;Q8WYK2;Q14582;P18848;Q5TGS1;P41250;Q15853;Q02577;Q03060;P15923;P15407;Q99814;Q16649;Q0VG99;O75132;Q7RTU3;P23409;Q02078;P53567;P49715;O15160;Q10586}
- 8894 Pathogen[ P0C214] interacts with 109 human  
partners: {P41250;Q9NQG7;P53567;P18850;Q9BW11;Q05195;Q9NS37;P61244;Q02930;P35869;Q9Y4A8;Q6R2W3;P19838;P15336;Q5SVZ6;P15407;P19484;Q99081;Q8TEM1;Q7RTU4;P15884;P13349;Q02080;Q8NDY6;Q16621;P01100;Q9NR55;P17275;Q99743;Q9Y5J3;P15408;Q8NFJ8;P15172;P17544;P11831;Q16520;Q68CJ9;Q9UKI9;O75030;O75340;Q9Y297;Q7RTU5;O96006;P17676;Q15542;P86452;O60290;P49716;Q10587;Q10586;Q9NZC7;Q9HBZ2;Q02078;O14503;Q8IXF0;Q14814;Q9Y2N7;P18848;O14867;P17535;Q92754;P47928;P41134;P15923;O75132;P17861;O14948;Q9Y543;Q96RJ6;Q08209;P18847;Q9UH92;Q9UMX3;P67775;P19532;Q9NP71;Q9Y2D1;Q7RTU3;Q8WYA1;Q6XD76;P05412;Q8WVJ9;O15160;Q16534;Q02577;Q15853;Q03060;Q99814;P40763;O96004;Q7RTU0;P27540;P22415;P19387;Q15596;P16220;Q9NQ87;Q01664;Q9NQ33;Q99583;Q5TGS1;P01106;P12980;Q8N1L9;P35638;P04198;Q9HAP2;P18846;Q16236}
- 8895 Pathogen[ P03346] interacts with 174 human  
partners: {Q8TEM1;Q6R2W3;Q99081;Q9NQG7;P49716;P05412;Q15542;Q16621;Q99742;Q9Y4Z2;P12524;Q02078;Q86UU5;Q15788;P86452;Q6QHK4;O96006;P18847;Q8N1L9;Q7RTS1;Q14814;Q7RTS3;A6NFD8;P16220;Q96BA8;P17676;P19484;P15336;P36956;P35638;Q02535;Q9HD90;P11831;Q0VG99;P13349;Q70SY1;Q12772;O60290;Q96HZ4;Q9UKI9;Q16559;P17275;Q9UBV8;P17861;Q8IWI9;Q9NR55;P15923;P15172;Q9BW11;P15408;P17535;Q92858;P23409;Q16520;Q8TAK6;Q92886;Q9H4W6;P15173;P12525;Q9NQ33;Q9Y2D1;P27540;P67775;P20823;Q02575;Q8NDY6;Q9BYE0;O60682;Q7RTU5;O75030;Q96RJ6;Q6XD76;P49715;Q92754;Q9Y5J3;Q96SQ7;O14867;Q9BQW3;P12980;O14503;Q15853;P18850;Q16236;P41250;O43680;O96004;P01106;Q9UL49;Q9NP71;P18848;Q14582;O00327;P17542;Q9BYV9;Q8IXF0;Q9C0J9;O75340;O14948;Q15596;O60519;P19532;P41134;Q9NZC7;Q9Y2N7;Q5SVZ6;O15160;Q9HAP2;Q16534;Q8WVJ9;Q5JUK2;P17544;Q15744;Q9NQ87;Q16649;Q99814;Q8NFJ8;A6N15;Q5TGS1;P50539;Q9HBZ2;Q05195;Q14190;O75132;P15407;P04198;Q68CJ9;P61244;Q92481;Q13516;P56589;Q9Y543;Q99929;Q10586;Q02080;A9YTQ3;P19838;Q9UH73;Q03060;Q7RTU0;Q8WYA1;P53567;Q9UMX3;O15516;Q9UH92;Q99583;Q8TEY5;P35869;Q7RTU3;Q9HAK2;Q08209;Q02930;Q10587;Q13562;P40763;Q9Y297;Q02577;Q9NS37;P01100;Q96NK8;Q01664;P53539;Q99743;Q8WYK2;P19387;P15884;Q7RTU4;P18846;Q8IUM7;Q9HC6;P47928;Q8N100;P22415;Q9Y4A8;Q9H2A3}
- 8896 Pathogen[ Q85601] interacts with 131 human  
partners: {Q8TEM1;Q5SVZ6;Q6R2W3;Q9NQG7;P01106;Q68CJ9;Q9NZC7;Q15542;P11831;Q15853;Q02078;P17676;Q16236;P41134;Q9Y4Z2;Q92754;P50539;P19484;P15172;Q9Y2N7;P86452;Q0VG99;Q16621;P53567;O60290;P13349;P12980;Q8NDY6;O75030;P15407;P18848;Q14814;P40763;Q05195;O15516;Q8WYA1;Q16520;Q12772;O00327;O14503;Q7RTU4;Q10587;P18846;Q8N1L9;Q9NQ33;Q99814;P27540;Q9UMX3;O60682;Q7RTU5;P19532;Q99743;Q15596;O96004;Q9NP71;Q02080;Q9UH92;Q08209;Q13562;P01100;P41250;P22415;P23409;Q8NFJ8;P49716;P12524;P17535;Q9BYV9;Q8IXF0;Q02930;O14948;Q14582;Q16649;P18847;P36956;Q5TGS1;A6NFD8;P16220;Q02577;Q15744;P05412;Q9Y543;Q9NQ87;Q9Y4A8;P18850;Q9UKI9;Q9HAP2;A9YTQ3;P15923;Q9HBZ2;O14867;O75340;O75132;P67775;Q99583;P17544;P61244;P49715;Q9Y2D1;Q96RJ6;P19387;P35869;Q16534;Q7RTU0;Q9BW11;O96006;Q99081;P15336;P04198;Q9NS37;Q9BQW3;Q7RTU3;O15160;P17275;P19838;P20823;P12525;Q01664;P53539;P17861;Q03060;Q8WYK2;P15408;Q9NR55;Q9Y5J3;P15884;Q8WVJ9;Q10586;P47928;P35638;Q6XD76}
- 8897 Pathogen[ P14079] interacts with 125 human  
partners: {Q9NQG7;Q9HAK2;Q9BW11;Q8WYK2;O14867;Q99743;Q96RJ6;Q10587;P35869;Q02078;Q99814;Q06413;Q15596;O43422;P13349;Q16649;P19387;Q15853;P56589;P23409;Q68CJ9;Q9Y2N7;P53567;Q5SVZ6;O60290;O60682;Q6XD76;P12524;P16298;Q03060;Q8TEM1;Q8IXF0;Q8WVJ9;Q92902;Q9HAP2;O96004;P19484;Q7Z7C7;P15923;Q9NS37;Q9C093;Q15744;Q12772;Q86UU5;Q99583;Q9H4W6;Q9BQW3;Q9UL49;P12525;P19532;P12980;Q9NZC7;P17544;Q7RTS1;Q02930;Q9NQ33;P49715;O75340;O15160;P27540;Q9Y5J3;P41250;P17275;P15336;Q6R2W3;P04198;Q15788;Q5TGS1;A9YTQ3;Q9UBV8;Q01664;Q9UMX3;Q9BYV9;P50539;P35638;Q16621;Q92754;P01106;Q9UH92;Q16236;Q7RTU0;P18850;Q8N1L9;Q05195;Q14814;P15407;Q02577;O75132;Q9UKI9;P15884;Q9NR55;P41134;Q9HBZ2;O14948;Q9NQ87;Q99081;O14503;P05412;Q9Y4A8;Q7RTU3;O75030;P49716;Q16534;Q8WYA1;Q14582;O96006;P36956;A6NFD8;P86452;Q7RTU4;P15408;P61244;Q02080;P01100;Q9NP71;Q10586;Q8IUM7;Q08209;Q15542;Q8NFJ8;Q16520;P47928;P17535;Q8NDY6;P22415}
- 8898 Pathogen[ P03383] interacts with 83 human  
partners: {Q9NQG7;Q02577;Q68CJ9;Q86UU5;P11831;Q9UH92;Q02080;Q5SVZ6;Q9UKI9;P16220;P27540;Q8N1L9;P17544;Q15596;P15172;Q8WVJ9;P19484;P01106;O96006;Q9UL49;O60290;P18847;P17861;Q9UMX3;Q9NQ87;O75030;Q15542;P35638;P15923;Q02080;O14503;Q14814;P67775;P18846;P12980;Q8TEM1;Q7RTU5;P15408;Q9NP71;Q01664;O96004;Q16621;P86452;P19387;O14948;Q05195;P17676;Q9Y2N7;Q99081;P15407;Q9NQ33;Q16236;Q15853;Q99583;P01100;P04198;Q92754;Q9Y4A8;Q10586;P17535;P53567;Q6R2W3;Q9HAP2;Q5TGS1;O75132;P15336;P41250;Q9NS37;P47928;P18848;P18850;Q02930;Q9Y2D1;P17275;P61244;P19838;P35869;Q16534;Q03060;P19532;Q02078;P22415;P05412}
- 8899 Pathogen[ P03410] interacts with 131 human  
partners: {Q9NQG7;Q99743;Q9Y5J3;Q5SVZ6;P23409;P11831;Q9NS37;P19838;Q68CJ9;P36956;Q8IXF0;P35638;P19387;O96006;Q8WYK2;P17861;Q16520;Q8WVJ9;O96004;Q08209;P17676;Q9BYV9;P18847;P01106;Q99814;O14948;O60682;Q92902;A9YTQ3;Q9NQ87;P18848;Q9Y2N7;Q9Y2D1;P53567;Q14814;Q9UL49;O75030;Q9NZC7;P15884;Q16236;Q9Y543;P12525;P41134;Q7RTS1;A6NFD8;Q03060;P19532;P19484;P49716;P15923;Q9UBV8;P01100;P18846;P61244;Q7RTU4;P15408;P17544;Q6XD76;Q9HBZ2;Q9BW11;Q8NDY6;Q7RTU0;Q02930;P27540;Q99081;Q6R2W3;Q16649;Q5TGS1;P17535;O75132;P17275;Q12772;Q9UMX3;Q16621;Q9BQW3;Q8TEM1;Q9NP71;Q7Z7C7;P41250;P47928;P22415;Q99583;P16220;P864



52;Q8NFXJ8;Q15853;P13349;P05412;Q9NQ33;Q10586;O43422;Q15596;O15160;Q9HAP2;Q8N1L9;Q9UKI9;P12980;P50539;Q9C093;Q01664;Q02577;Q10587;Q02078;Q15542;Q16534;Q7RTU5;P56589;O75340;P12524;P15407;Q9UH92;Q9Y4A8;Q9H4W6;Q15744;Q14582;Q02080;Q7RTU3;Q86UU5;P67775;O14867;P15336;Q9NR55;P40763;P18850;P04198;O60290;Q92754;Q05195;Q8WYA1;Q96RJ6;Q16559}

8900 Pathogen[ P14075] interacts with 85 human partners: {Q9NQ33;Q9NQ7;P35869;Q02577;Q5SVZ6;Q9HAP2;Q5TGS1;O75030;P41250;P05412;Q15542;Q9Y2D1;Q9UMX3;P11831;Q8N1L9;P17861;P53567;P17275;Q9Y4A8;P61244;P18847;P15172;P19484;Q16520;Q9Y2N7;Q9UH92;P35638;P47928;Q02080;P19387;Q7RTU5;P15336;P04198;Q92754;Q9NQ87;P15923;P15408;Q05195;P01106;Q8WVJ9;O14503;O75132;P27540;Q86UU5;O96004;Q9NP71;Q10586;Q15853;O14948;Q01664;Q9UL49;Q8TEM1;P86452;Q6R2W3;O60290;P18848;Q02078;P67775;Q68CJ9;P01100;P12980;P15884;P19838;Q03060;P16220;Q9UKI9;P22415;P15407;Q16621;Q99583;P17676;Q16236;P17544;Q99081;P17535;Q14814;Q9NS37;P19532;Q02930;O96006;Q7Z7C7;Q15596;P18846;P18850;Q16534}

8901 Pathogen[ P0C206] interacts with 144 human partners: {O75340;Q9NQ7;P53567;Q9NQ87;Q16649;Q03060;Q05195;Q9Y2D1;Q7RTU3;O14867;Q9NP71;Q9UBV8;Q9UH92;Q9Y4A8;Q9NR55;Q02078;Q5TGS1;Q9Y2N7;P15407;P12525;P16220;P17275;O14948;O43422;P35869;P17544;O75030;Q15744;P18850;Q9Y4Z2;P56589;Q99583;Q6XD76;Q9UMX3;P05412;Q9C0J9;Q9UL49;Q8WYK2;Q8NFXJ8;P23409;A6NFD8;P15336;P12980;P17535;P49715;P36956;P19484;P12524;Q6R2W3;P18846;P41250;P67775;P19532;Q10587;Q8WVJ9;Q96HZ4;O96004;Q9BYE0;P17861;Q92754;Q15853;P41134;O00327;Q9BYV9;Q7Z7C7;O60682;Q8TEM1;Q02080;P19838;Q99743;O15516;P22415;P19387;Q99081;Q9Y543;P17676;Q9Y5J3;P13349;Q7RTU5;Q9HAP2;Q7RTU4;Q7RTU0;P01100;P86452;Q9UKI9;P15923;P15884;O96006;P20823;P50539;P53539;Q9NS37;P04198;Q14582;Q02930;Q16534;Q9NQ33;Q8N1L9;P40763;P61244;Q8WYA1;Q15542;Q13562;P11831;Q16520;Q01664;P18847;P49716;Q9BQW3;Q9BW11;Q9NZC7;Q15596;Q16236;Q16621;P27540;P15172;Q08209;Q14814;P01106;Q99814;Q8IUM7;Q86UU5;A9YTQ3;Q5SVZ6;Q02577;P47928;Q9H4W6;Q9HAK2;Q15788;P18848;Q0VG99;P15408;Q12772;Q96RJ6;P35638;O15160;O60290;Q9HBZ2;Q10586;Q68CJ9;Q8IXF0;Q8NDY6;Q9H2A3;O75132}

8902 Pathogen[ P03363] interacts with 144 human partners: {Q92886;Q16236;Q5TGS1;Q7RTS1;Q8TAK6;Q9NR55;Q9NQ7;Q8IUM7;P17535;P18848;Q5SVZ6;P49716;Q16649;Q9Y4Z2;Q96RJ6;Q8NDY6;Q9UH92;P12525;Q9Y5J3;Q15853;P27540;P17676;Q5JUK2;Q02930;Q14582;P53567;Q9BYV9;Q13516;O75340;P12524;P86452;P53539;Q99742;P50539;Q0VG99;Q15744;Q9NS37;P18847;Q99929;Q10586;O75132;Q9Y4A8;P19387;Q9NQ87;P41250;Q7RTS3;P04198;P18850;Q96HZ4;Q9UKI9;Q16520;Q9C0J9;P16220;Q9Y2D1;Q16621;Q02080;Q9NQ33;Q9HBZ2;O43422;O14867;O14948;Q15596;Q9HAP2;P01106;Q8N1L9;Q99743;Q8WYK2;P35869;P17275;P13349;Q9BYE0;P61244;P15923;P15336;Q9UBV8;P11831;O75030;Q92902;Q14814;Q86UU5;P18846;Q8WYA1;O00327;Q7RTU0;Q9BW11;P17861;O96006;Q9Y2N7;P41134;Q6XD76;Q68CJ9;Q9HCC6;P47928;O96004;Q8IXF0;P35638;Q15542;Q9BQW3;P15407;P22415;Q96NK8;A9YTQ3;P19838;Q99814;Q8IWI9;O60682;Q7RTU5;Q7RTU4;Q05195;P23409;P12980;P19484;P15884;P05412;P19532;Q8NFXJ8;Q9Y543;Q96SQ7;Q9NP71;Q99081;O60290;P17544;Q16534;P15172;Q6R2W3;P67775;P15408;Q9UMX3;Q9UL49;Q99583;Q01664;Q8WVJ9;Q03060;O14503;Q10587;O15160;Q02577;Q92754;Q7RTU3;A6NFD8;P01100;Q9H2A3;Q6QHK4;Q02078}

8903 [Cluster 810]GO:0051010+F molecular\_function [name] microtubule plus-end binding [def] "Interacting selectively and non-covalently with the plus end of a microtubule." [GOC

8904 Pathogen[ Q2Q067] interacts with 3 human partners: {Q7Z460;O75122;Q15691}

8905 Pathogen[ P0C214] interacts with 3 human partners: {Q15691;O75122;Q7Z460}

8906 Pathogen[ P03346] interacts with 4 human partners: {Q15691;P30622;O75122;Q7Z460}

8907 Pathogen[ Q85601] interacts with 4 human partners: {P30622;O75122;Q15691;Q7Z460}

8908 Pathogen[ P14079] interacts with 5 human partners: {Q15691;Q7Z460;Q99661;O75122;P30622}

8909 Pathogen[ P03383] interacts with 2 human partners: {Q7Z460;Q15691}

8910 Pathogen[ P03410] interacts with 4 human partners: {Q7Z460;P30622;Q15691;O75122}

8911 Pathogen[ P14075] interacts with 2 human partners: {Q7Z460;Q15691}

8912 Pathogen[ P0C206] interacts with 4 human partners: {Q15691;P30622;O75122;Q7Z460}

8913 Pathogen[ P03363] interacts with 4 human partners: {Q9UDT6;Q15691;P30622;Q7Z460}

8914 [Cluster 811]GO:0030170+F molecular\_function [name] pyridoxal phosphate binding [def] "Interacting selectively and non-covalently with pyridoxal 5' phosphate, 3-hydroxy-5-(hydroxymethyl)-2-methyl-4-pyridine carboxaldehyde 5' phosphate, the biologically active form of vitamin B6." [GOC

8915 Pathogen[ Q2Q067] interacts with 7 human partners: {P22557;P13196;P34896;Q16719;Q9HD40;Q9Y697;P32929}

8916 Pathogen[ P0C214] interacts with 12 human partners: {Q9Y617;P34897;P22557;P13196;P32929;Q9Y697;P34896;O94903;Q9HD40;P35520;Q16719;Q16773}

8917 Pathogen[ P03346] interacts with 7 human partners: {Q9Y697;P22557;P13196;P20132;P32929;Q9HD40;Q16719}

8918 Pathogen[ Q85601] interacts with 7 human partners: {Q9HD40;Q16719;Q9Y697;P13196;P34896;O94903;P32929}

8919 Pathogen[ P14079] interacts with 11 human partners: {P13196;P20132;Q9Y617;P22557;P34897;O94903;Q16719;Q9Y697;P32929;Q9HD40;P34896}

8920 Pathogen[ P03383] interacts with 4 human partners: {Q9HD40;P34896;Q9Y697;Q16719}

8921 Pathogen[ P03410] interacts with 12 human partners: {Q16719;P32929;P20132;Q9Y697;Q9Y617;P22557;O75600;Q9HD40;P13196;O94903;P34897;P34896}

8922 Pathogen[ P14075] interacts with 5 human partners: {Q16719;P34896;O94903;Q9HD40;Q9Y697}

8923 Pathogen[ P0C206] interacts with 10 human partners: {Q9Y697;Q9HD40;P34897;P20132;Q16719;P34896;P22557;P32929;O94903;P13196}

8924 Pathogen[ P03363] interacts with 3 human partners:{Q9HD40;Q9Y697;P13196}

8925 [Cluster 812]GO:0004221+F molecular\_function [name] ubiquitin thiolesterase activity  
[def] "Catalysis of the reaction

8926 Pathogen[ Q2Q067] interacts with 8 human  
partners:{Q9Y5K5;P54252;Q93009;Q70EL1;Q504Q3;Q86T82;Q70EK8;Q93008}

8927 Pathogen[ P0C214] interacts with 8 human  
partners:{Q504Q3;Q92560;Q93008;Q9Y5K5;Q70EK8;Q93009;Q70EL1;P54252}

8928 Pathogen[ P03346] interacts with 21 human  
partners:{Q9BXU7;Q504Q3;Q93009;Q92560;Q70EK8;Q93008;P0C7H9;P0C7I0;Q86T82;Q9UHP3;Q1469  
4;P51784;Q86UV5;O75604;Q70EL1;Q6GQQ9;O94782;Q9Y5K5;A6NCW7;Q9H0E7;P54252}

8929 Pathogen[ Q85601] interacts with 12 human  
partners:{Q9Y5T5;Q9H0E7;Q93009;Q92560;Q93008;Q504Q3;P54252;Q9NQC7;Q70EK8;Q9Y5K5;Q86T8  
2;Q70EL1}

8930 Pathogen[ P14079] interacts with 9 human  
partners:{Q70EL1;P54252;Q70EK8;O00487;Q9Y5K5;Q92560;Q5W0Q7;Q504Q3;Q9NQC7}

8931 Pathogen[ P03383] interacts with 4 human partners:{P54252;Q9Y5K5;Q70EK8;Q70EL1}

8932 Pathogen[ P03410] interacts with 5 human  
partners:{Q70EL1;P54252;Q70EK8;Q9Y5K5;Q504Q3}

8933 Pathogen[ P14075] interacts with 4 human partners:{Q70EL1;Q70EK8;P54252;Q9Y5K5}

8934 Pathogen[ P0C206] interacts with 15 human  
partners:{Q9NQC7;Q504Q3;Q9Y5T5;Q93008;O75604;Q70EL1;Q93009;P54252;Q9H0E7;Q9Y5K5;Q86T8  
2;Q6GQQ9;Q9UHP3;Q92560;Q70EK8}

8935 Pathogen[ P03363] interacts with 12 human  
partners:{Q504Q3;Q9Y5K5;P51784;Q6GQQ9;Q9UHP3;O75604;P54252;Q92560;Q86T82;Q9BXU7;Q70EL  
1;Q93008}

8936 [Cluster 813]GO:0003721+F molecular\_function [name] telomeric template RNA reverse  
transcriptase activity [def] "Catalysis of the extension of the 3' end of a DNA strand  
by one deoxynucleotide at a time. Cannot initiate a chain de novo\_ uses the RNA subunit  
of the telomerase enzyme complex as its template." [EC

8937 Pathogen[ Q2Q067] interacts with 1 human partners:{O14746}

8938 Pathogen[ P0C214] interacts with 1 human partners:{O14746}

8939 Pathogen[ P03346] interacts with 1 human partners:{O14746}

8940 Pathogen[ Q85601] interacts with 1 human partners:{O14746}

8941 Pathogen[ P14079] interacts with 1 human partners:{O14746}

8942 Pathogen[ P03383] interacts with 1 human partners:{O14746}

8943 Pathogen[ P03410] interacts with 1 human partners:{O14746}

8944 Pathogen[ P14075] interacts with 1 human partners:{O14746}

8945 Pathogen[ P0C206] interacts with 1 human partners:{O14746}

8946 Pathogen[ P03363] interacts with 1 human partners:{O14746}

8947 [Cluster 814]GO:0004619+F molecular\_function [name] phosphoglycerate mutase activity  
[def] "Catalysis of the reaction

8948 Pathogen[ Q2Q067] interacts with 4 human partners:{Q8N0Y7;P18669;P15259;P07738}

8949 Pathogen[ P0C214] interacts with 3 human partners:{P15259;Q8N0Y7;P07738}

8950 Pathogen[ P03346] interacts with 4 human partners:{P07738;P18669;Q8N0Y7;P15259}

8951 Pathogen[ Q85601] interacts with 4 human partners:{P18669;P15259;Q8N0Y7;P07738}

8952 Pathogen[ P14079] interacts with 4 human partners:{P15259;P07738;P18669;Q8N0Y7}

8953 Pathogen[ P03383] interacts with 4 human partners:{P18669;P07738;Q8N0Y7;P15259}

8954 Pathogen[ P03410] interacts with 4 human partners:{P07738;Q8N0Y7;P15259;P18669}

8955 Pathogen[ P14075] interacts with 4 human partners:{P18669;P15259;P07738;Q8N0Y7}

8956 Pathogen[ P0C206] interacts with 4 human partners:{Q8N0Y7;P07738;P18669;P15259}

8957 Pathogen[ P03363] interacts with 3 human partners:{P18669;Q8N0Y7;P15259}

8958 [Cluster 815]GO:0017065+F molecular\_function [name] single-strand selective uracil DNA  
N-glycosylase activity [def] "Catalysis of the cleavage of the N-C1' glycosidic bond  
between the damaged DNA base and the deoxyribose sugar, releasing a free base and leaving  
an apyrimidinic (AP) site. Enzymes with this activity recognize and remove uracil bases  
present in single-stranded DNA." [GOC

8959 Pathogen[ Q2Q067] interacts with 1 human partners:{Q53HV7}

8960 Pathogen[ P0C214] interacts with 1 human partners:{Q53HV7}

8961 Pathogen[ P03346] interacts with 1 human partners:{Q53HV7}

8962 Pathogen[ Q85601] interacts with 1 human partners:{Q53HV7}

8963 Pathogen[ P14079] interacts with 1 human partners:{Q53HV7}

8964 Pathogen[ P03383] interacts with 1 human partners:{Q53HV7}

8965 Pathogen[ P03410] interacts with 1 human partners:{Q53HV7}

8966 Pathogen[ P14075] interacts with 1 human partners:{Q53HV7}

8967 Pathogen[ P0C206] interacts with 1 human partners:{Q53HV7}

8968 Pathogen[ P03363] interacts with 1 human partners:{Q53HV7}

8969 [Cluster 816]GO:0046976+F molecular\_function [name] histone methyltransferase activity  
(H3-K27 specific) [def] "Catalysis of the reaction

8970 Pathogen[ Q2Q067] interacts with 1 human partners:{Q92800}

8971 Pathogen[ P0C214] interacts with 1 human partners:{Q92800}

8972 Pathogen[ P03346] interacts with 1 human partners:{Q92800}

8973 Pathogen[ Q85601] interacts with 1 human partners:{Q92800}

8974 Pathogen[ P14079] interacts with 1 human partners:{Q92800}

8975 Pathogen[ P03383] interacts with 1 human partners:{Q92800}

8976 Pathogen[ P03410] interacts with 1 human partners:{Q92800}

8977 Pathogen[ P14075] interacts with 1 human partners:{Q92800}

8978 Pathogen[ P0C206] interacts with 1 human partners:{Q92800}  
8979 Pathogen[ P03363] interacts with 1 human partners:{Q92800}  
8980 [Cluster 817]GO:0070087+F molecular\_function [name] chromo shadow domain binding [def] "Interacting selectively and non-covalently with a chromo shadow domain, a protein domain that is distantly related, and found in association with, the chromo domain." [GOC  
8981 Pathogen[ Q2Q067] interacts with 4 human partners:{Q13111;P46100;Q14739;P23497}  
8982 Pathogen[ P0C214] interacts with 4 human partners:{Q14739;Q13111;P46100;P23497}  
8983 Pathogen[ P03346] interacts with 5 human partners:{Q13263;Q14739;P46100;Q13111;P23497}  
8984 Pathogen[ Q85601] interacts with 4 human partners:{Q13263;Q13111;P46100;Q14739}  
8985 Pathogen[ P14079] interacts with 4 human partners:{Q14739;Q13111;P23497;P46100}  
8986 Pathogen[ P03383] interacts with 3 human partners:{P46100;Q13111;P23497}  
8987 Pathogen[ P03410] interacts with 3 human partners:{Q14739;Q13111;P46100}  
8988 Pathogen[ P14075] interacts with 3 human partners:{P23497;Q13111;P46100}  
8989 Pathogen[ P0C206] interacts with 4 human partners:{Q14739;Q13263;Q13111;P46100}  
8990 Pathogen[ P03363] interacts with 4 human partners:{Q13111;P23497;P46100;Q14739}  
8991 [Cluster 818]GO:0000340+F molecular\_function [name] RNA 7-methylguanosine cap binding [def] "Interacting selectively and non-covalently with the 7-methylguanosine group added cotranscriptionally to the 5' end of RNA molecules transcribed by polymerase II." [GOC  
8992 Pathogen[ Q2Q067] interacts with 3 human partners:{Q96C86;Q9UKV8;P52298}  
8993 Pathogen[ P0C214] interacts with 3 human partners:{Q96C86;P52298;Q9UKV8}  
8994 Pathogen[ P03346] interacts with 3 human partners:{Q96C86;P52298;Q9UKV8}  
8995 Pathogen[ Q85601] interacts with 3 human partners:{Q96C86;Q9UKV8;P52298}  
8996 Pathogen[ P14079] interacts with 3 human partners:{Q9UKV8;P52298;Q96C86}  
8997 Pathogen[ P03383] interacts with 3 human partners:{Q9UKV8;P52298;Q96C86}  
8998 Pathogen[ P03410] interacts with 3 human partners:{Q9UKV8;P52298;Q96C86}  
8999 Pathogen[ P14075] interacts with 3 human partners:{Q9UKV8;Q96C86;P52298}  
9000 Pathogen[ P0C206] interacts with 3 human partners:{P52298;Q96C86;Q9UKV8}  
9001 Pathogen[ P03363] interacts with 3 human partners:{Q9UKV8;P52298;Q96C86}  
9002 [Cluster 819]GO:0036105+F  
9003 Pathogen[ Q2Q067] interacts with 1 human partners:{P40855}  
9004 Pathogen[ P0C214] interacts with 1 human partners:{P40855}  
9005 Pathogen[ P03346] interacts with 1 human partners:{P40855}  
9006 Pathogen[ Q85601] interacts with 1 human partners:{P40855}  
9007 Pathogen[ P14079] interacts with 1 human partners:{P40855}  
9008 Pathogen[ P03383] interacts with 1 human partners:{P40855}  
9009 Pathogen[ P03410] interacts with 1 human partners:{P40855}  
9010 Pathogen[ P14075] interacts with 1 human partners:{P40855}  
9011 Pathogen[ P0C206] interacts with 1 human partners:{P40855}  
9012 Pathogen[ P03363] interacts with 1 human partners:{P40855}  
9013 [Cluster 820]GO:0004674+F molecular\_function [name] protein serine/threonine kinase activity [def] "Catalysis of the reactions  
9014 Pathogen[ Q2Q067] interacts with 20 human partners:{P31749;O14757;O75582;P67870;O96017;P50750;Q13233;P50613;Q8IZX4;O14920;P45984;O43318;P49336;P21675;P24941;P11802;O15111;Q15759;Q13501;Q00534}  
9015 Pathogen[ P0C214] interacts with 25 human partners:{O15111;Q9Y376;P21675;Q14164;P50750;P50613;P11802;O94921;O43318;Q13501;Q00534;Q13233;P21127;Q00536;O96017;P49336;P24941;Q8IZX4;O75582;Q15759;P45984;P67870;O14757;O14920;P31749}  
9016 Pathogen[ P03346] interacts with 31 human partners:{P45984;Q00536;O15111;O96017;P21127;P49336;P24941;O14757;Q9Y376;Q86Z02;P11802;P31749;Q8TD19;P50750;Q13233;O75582;O75131;P21675;Q15759;Q96PY6;P45985;Q00534;O14920;P67870;O94921;Q8IZX4;O43318;O14965;Q14164;Q13501;O00444}  
9017 Pathogen[ Q85601] interacts with 28 human partners:{Q00536;P31749;O96017;P50750;Q96PY6;O15111;P49336;Q9Y376;Q8IZX4;P11802;O14757;O14965;Q14164;O14920;O94921;O75582;P50613;Q15759;P45984;P21675;P21127;P67870;Q13233;Q00534;O43318;P24941;P51955;Q13501}  
9018 Pathogen[ P14079] interacts with 24 human partners:{P31751;Q14004;Q8IZX4;P53779;P49336;P52564;P49842;O75582;Q14164;P45984;P45983;P50613;P51955;Q16644;Q15759;P45985;P21127;Q13501;P67870;Q13164;O14965;Q9Y376;P21675;P50750}  
9019 Pathogen[ P03383] interacts with 27 human partners:{Q9NYV4;O14757;O75582;Q13233;Q8TD19;O14920;P31749;O15111;Q00536;Q8IZX4;Q00534;P11802;O43318;P21127;P49336;P50613;P24941;P50750;Q15759;O94921;Q13501;O14965;P67870;Q96PY6;P21675;P45984;O96017}  
9020 Pathogen[ P03410] interacts with 23 human partners:{Q8IZX4;O14920;Q00534;P21675;O15111;O75582;Q13501;P31749;Q13233;P50613;O14965;P50750;O43318;Q9Y376;P45985;P24941;P11802;O96017;O14757;P49336;P45984;P53779;P67870}  
9021 Pathogen[ P14075] interacts with 28 human partners:{P49336;O15111;P21675;P24941;P11802;Q15759;O75582;P50613;Q00534;P50750;O14920;P31749;O96017;O14965;P67870;O43318;P49842;P21127;Q96PY6;Q13233;O94921;Q9UQ88;Q9NYV4;O14757;Q13501;Q8IZX4;P45984;Q8TD19}  
9022 Pathogen[ P0C206] interacts with 33 human partners:{Q13501;P49336;O14920;P31749;P50750;O96017;P51955;O75582;P45984;Q00536;O43318;Q96PY6;O00444;Q9Y376;Q8TD19;Q13233;Q8IZX4;P30291;Q14164;P50613;O15111;P67870;P45985

;P21127;O14965;P24941;Q15759;P11802;O94921;Q99640;Q99986;P21675;Q00534}

9023 Pathogen[ P03363] interacts with 18 human partners:{Q8IZX4;O14920;P21127;O15111;O43318;P24941;O96017;Q00534;P31749;P49336;Q9Y376;P21675;P50750;P67870;P11802;Q00536;Q13233;O14757}

9024 [Cluster 821]GO:0030346+F molecular\_function [name] protein phosphatase 2B binding [def] "Interacting selectively and non-covalently with the enzyme protein phosphatase 2B." [GOC

9025 Pathogen[ Q2Q067] interacts with 2 human partners:{Q9Y6J0;Q9NPC6}

9026 Pathogen[ P0C214] interacts with 2 human partners:{Q9NPC6;Q9Y6J0}

9027 Pathogen[ P03346] interacts with 2 human partners:{Q9Y6J0;Q9NPC6}

9028 Pathogen[ Q85601] interacts with 2 human partners:{Q9Y6J0;Q9NPC6}

9029 Pathogen[ P14079] interacts with 4 human partners:{P24588;P16298;Q9NPC6;Q9Y6J0}

9030 Pathogen[ P03383] interacts with 1 human partners:{Q9NPC6}

9031 Pathogen[ P03410] interacts with 3 human partners:{Q9Y6J0;Q9NPC6;P24588}

9032 Pathogen[ P14075] interacts with 1 human partners:{Q9NPC6}

9033 Pathogen[ P0C206] interacts with 2 human partners:{Q9Y6J0;Q9NPC6}

9034 Pathogen[ P03363] interacts with 2 human partners:{Q9Y6J0;Q9NPC6}

9035 [Cluster 822]GO:0050815+F molecular\_function [name] phosphoserine binding [def] "Interacting selectively and non-covalently with a phosphorylated serine residue within a protein." [GOC

9036 Pathogen[ Q2Q067] interacts with 3 human partners:{P62258;Q13526;P31946}

9037 Pathogen[ P0C214] interacts with 2 human partners:{Q13526;P31946}

9038 Pathogen[ P03346] interacts with 3 human partners:{P62258;Q13526;P31946}

9039 Pathogen[ Q85601] interacts with 3 human partners:{P31946;Q13526;P62258}

9040 Pathogen[ P14079] interacts with 3 human partners:{P31946;P62258;Q13526}

9041 Pathogen[ P03383] interacts with 3 human partners:{P31946;P62258;Q13526}

9042 Pathogen[ P03410] interacts with 3 human partners:{P62258;Q13526;P31946}

9043 Pathogen[ P14075] interacts with 3 human partners:{Q13526;P31946;P62258}

9044 Pathogen[ P0C206] interacts with 3 human partners:{Q13526;P31946;P62258}

9045 Pathogen[ P03363] interacts with 3 human partners:{P62258;P31946;Q13526}

9046 [Cluster 823]GO:0030246+F molecular\_function [name] carbohydrate binding [def] "Interacting selectively and non-covalently with any carbohydrate, any of a group of organic compounds based of the general formula Cx(H2O)y." [GOC

9047 Pathogen[ Q2Q067] interacts with 5 human partners:{P27797;P04264;Q9Y4K1;Q9NRD1;Q14397}

9048 Pathogen[ P0C214] interacts with 8 human partners:{P04264;Q9NRD1;Q9NPB8;P49257;O95278;Q14397;P27797;Q9Y4K1}

9049 Pathogen[ P03346] interacts with 10 human partners:{P49257;Q13438;Q8TCE9;Q9NRD1;P27797;Q14397;Q9Y4K1;Q96DT0;P04264;O95278}

9050 Pathogen[ Q85601] interacts with 7 human partners:{P27797;O95278;P04264;P49257;Q9Y4K1;Q14397;Q9NRD1}

9051 Pathogen[ P14079] interacts with 18 human partners:{A8MUM7;P49257;Q9NPB8;Q15155;Q96DT0;Q9NTJ4;Q96C23;Q68DQ2;Q5JPE7;P69849;Q8N1P7;Q9NRD1;Q14397;Q9H0V9;P04264;Q9Y4K1;Q9NPA0;Q13438}

9052 Pathogen[ P03383] interacts with 5 human partners:{Q14397;Q9Y4K1;P04264;Q9NRD1;P27797}

9053 Pathogen[ P03410] interacts with 17 human partners:{P69849;Q14397;Q9H0V9;Q9NRD1;Q9NPA0;P49257;P04264;Q9NPB8;Q96DT0;Q9NTJ4;Q96C23;Q9Y4K1;Q8TCE9;Q68DQ2;Q13438;Q8N1P7;P27797}

9054 Pathogen[ P14075] interacts with 5 human partners:{Q9Y4K1;P04264;P27797;Q14397;Q9NRD1}

9055 Pathogen[ P0C206] interacts with 12 human partners:{P27797;Q8N1P7;P04264;Q9Y4K1;Q9NRD1;Q96C23;P49257;O95278;Q96DT0;Q9NPB8;Q14397;Q13438}

9056 Pathogen[ P03363] interacts with 6 human partners:{Q14397;P27797;Q9Y4K1;Q13438;P04264;Q9NRD1}

9057 [Cluster 824]GO:0030414+F molecular\_function [name] peptidase inhibitor activity [def] "Stops, prevents or reduces the activity of a peptidase, any enzyme that catalyzes the hydrolysis peptide bonds." [GOC

9058 Pathogen[ Q2Q067] interacts with 9 human partners:{P01009;P08697;P50453;Q9NR09;P48595;P20810;P50452;O15392;P35237}

9059 Pathogen[ P0C214] interacts with 29 human partners:{P08697;P35237;Q9UK55;P01011;P29622;P48594;Q86WD7;P05121;P29508;P20810;O75830;P98170;O75635;A8MV23;P05546;P07093;P01008;P30740;Q96P63;P50453;O15392;P05120;Q99574;Q9NR09;Q9UIV8;Q96P15;P50452;Q96CA5;P48595}

9060 Pathogen[ P03346] interacts with 15 human partners:{P50452;O15392;P35237;P98170;O75635;P04080;P50453;Q96P63;Q9NR09;P01009;Q9H112;Q96P15;Q96CA5;P20810;P48595}

9061 Pathogen[ Q85601] interacts with 20 human partners:{P50452;Q96P15;P01011;P98170;O15392;P35237;P08697;P01009;P05121;P50453;P05120;P01008;Q9NR09;P48595;P30740;O75635;P07093;Q96CA5;P29508;Q96P63}

9062 Pathogen[ P14079] interacts with 9 human partners:{P35237;P50452;P04080;O15392;P20810;Q9NR09;P03973;P50453;P48595}

9063 Pathogen[ P03383] interacts with 12 human partners:{P08697;P30740;P01009;P01008;P48595;P20810;P50453;Q96P63;P35237;Q9NR09;P50452;O75635}

9064 Pathogen[ P03410] interacts with 18 human partners: {O15392;P05121;Q8IUB3;Q9H1F0;Q96P63;P50452;Q9NR09;Q96P15;P08697;P50453;P01009;P20810;Q99935;P35237;O75635;P30740;P48595;P01011}

9065 Pathogen[ P14075] interacts with 8 human partners: {P20810;P01009;P48595;P08697;P50452;P50453;Q9NR09;P35237}

9066 Pathogen[ P0C206] interacts with 18 human partners: {P50452;P01008;P98170;P35237;P01009;P50453;Q9NR09;Q96P15;O75635;P20810;O15392;P05121;Q96CA5;P48595;Q96P63;P01011;P30740;P08697}

9067 Pathogen[ P03363] interacts with 12 human partners: {P20810;P35237;P50452;P50453;Q96P63;Q9H112;Q9NR09;O75635;P98170;Q96P15;Q96CA5;P48595}

9068 [Cluster 825]GO:0004866+F molecular\_function [name] endopeptidase inhibitor activity [def] "Stops, prevents or reduces the activity of an endopeptidase, any enzyme that hydrolyzes nonterminal peptide bonds in polypeptides." [GOC

9069 Pathogen[ Q2Q067] interacts with 4 human partners: {Q9Y5K5;Q92530;P08697;P20810}

9070 Pathogen[ P0C214] interacts with 5 human partners: {P08697;P20810;Q9Y5K5;P05546;Q92530}

9071 Pathogen[ P03346] interacts with 4 human partners: {P04080;P20810;Q92530;Q9Y5K5}

9072 Pathogen[ Q85601] interacts with 3 human partners: {P08697;Q9Y5K5;Q92530}

9073 Pathogen[ P14079] interacts with 6 human partners: {P04080;P51606;P20810;Q9Y5K5;P03973;Q92530}

9074 Pathogen[ P03383] interacts with 4 human partners: {P08697;P20810;Q9Y5K5;Q92530}

9075 Pathogen[ P03410] interacts with 5 human partners: {P51606;P08697;Q9Y5K5;P20810;Q99935}

9076 Pathogen[ P14075] interacts with 4 human partners: {P20810;Q92530;P08697;Q9Y5K5}

9077 Pathogen[ P0C206] interacts with 4 human partners: {Q9Y5K5;P20810;Q92530;P08697}

9078 Pathogen[ P03363] interacts with 3 human partners: {P20810;Q9Y5K5;Q92530}

9079 [Cluster 826]GO:0042393+F molecular\_function [name] histone binding [def] "Interacting selectively and non-covalently with a histone, any of a group of water-soluble proteins found in association with the DNA of plant and animal chromosomes. They are involved in the condensation and coiling of chromosomes during cell division and have also been implicated in nonspecific suppression of gene activity." [GOC

9080 Pathogen[ Q2Q067] interacts with 36 human partners: {O00213;P18754;Q9NVM4;Q96LA8;Q9Y3T9;Q01105;Q96T88;P06748;Q9NPI1;Q8N5D0;Q96P70;Q09028;Q13112;Q15021;Q8NI51;O43918;O60907;Q5VTR2;Q99543;Q96T23;Q96HA7;Q58F21;Q969R5;O76064;Q8TDB6;O95373;Q9BZK7;Q9HCK8;Q9Y294;Q96PU4;Q9BQA5;P49321;Q8NCD3;Q9Y468;Q96RL1;Q9NQ92}

9081 Pathogen[ P0C214] interacts with 38 human partners: {Q8NI51;O00213;Q9Y3T9;Q58F21;Q96P70;Q8N5D0;P06748;Q13112;O60907;Q9NVM4;Q96PU4;Q9Y468;Q96T88;Q01105;Q09028;Q8NCD3;P49321;Q9HCK8;O60264;Q96RL1;O43918;Q9Y294;Q9NPI1;Q96T23;Q9BZK7;Q99543;Q9BQA5;Q9NQ92;Q5VTR2;Q8TDB6;Q8IYW5;Q969R5;P18754;O76064;O95373;Q96HA7;Q15021;Q96LA8}

9082 Pathogen[ P03346] interacts with 40 human partners: {Q8NI51;O00213;Q9NQ92;Q96P70;O76064;Q96HA7;O60907;O43918;P06748;Q99543;Q5VTR2;Q01105;Q9NPI1;P18754;Q96RL1;P49321;Q8NCD3;Q86SE8;Q58F21;Q8N5D0;Q969R5;Q15021;O95373;O60264;Q09028;Q9HCK8;Q9NVM4;Q9Y3T9;Q96T23;P35659;Q9Y468;Q8IYW5;Q9BZK7;Q96PU4;Q8TDB6;Q13112;Q9Y294;Q96LA8;Q96T88;Q9BQA5}

9083 Pathogen[ Q85601] interacts with 40 human partners: {Q8NI51;Q99543;O00213;Q9Y5T5;Q96HA7;Q8TDB6;Q96RL1;Q96P70;O60907;Q96T23;Q9Y294;Q01105;Q13112;Q86SE8;Q9Y468;Q9NQ92;Q9NVM4;Q96PU4;P49321;Q8NCD3;Q969R5;O76064;O95373;Q96T88;P06748;Q8IYW5;Q09028;Q9BQA5;Q9Y3T9;Q9NPI1;Q5VTR2;Q9HCK8;Q9BZK7;P18754;O60264;Q58F21;Q8N5D0;O43918;Q15021;Q96LA8}

9084 Pathogen[ P14079] interacts with 34 human partners: {O95373;Q9NPI1;Q01105;Q96T23;Q9BZK7;Q8N5D0;Q96LA8;Q96P70;Q58F21;Q9NVM4;Q9Y468;O60907;O00213;Q13112;Q9BQA5;Q99543;Q9Y3T9;Q96HA7;Q969R5;Q5VTR2;Q9HCK8;Q96RL1;O60264;P06748;P35659;O43918;Q8NCD3;P49321;Q9Y294;Q15021;Q09028;P18754;Q9NQ92;Q8NI51}

9085 Pathogen[ P03383] interacts with 32 human partners: {Q09028;Q8NI51;O00213;Q01105;Q9NQ92;P06748;Q96RL1;O60907;Q96P70;Q96PU4;P49321;Q96T23;Q9Y3T9;Q9BQA5;Q9Y294;P18754;Q99543;O43918;Q58F21;Q5VTR2;Q9HCK8;Q8NCD3;Q9BZK7;Q9NPI1;O95373;Q96HA7;Q969R5;Q13112;Q8N5D0;Q96LA8;Q15021;Q9Y468}

9086 Pathogen[ P03410] interacts with 35 human partners: {Q96RL1;P49321;Q86SE8;Q96LA8;Q96T23;Q9BQA5;Q96P70;O43918;Q9NVM4;O00213;Q5VTR2;Q9Y468;Q01105;Q9Y3T9;P06748;Q8NCD3;P35659;Q09028;Q9Y294;Q13112;Q9HCK8;Q8N5D0;Q9NQ92;Q8NI51;Q9BZK7;P18754;O60264;Q99543;Q58F21;Q96HA7;O60907;Q969R5;Q9NPI1;O95373;Q15021}

9087 Pathogen[ P14075] interacts with 33 human partners: {P49321;Q5VTR2;Q8NI51;O00213;P35659;Q969R5;Q9NPI1;Q9BQA5;Q96P70;Q8N5D0;Q9Y468;Q96PU4;O43918;Q99543;Q01105;Q09028;Q96HA7;Q58F21;Q96LA8;O95373;Q9HCK8;O60907;P06748;Q9Y3T9;Q8NCD3;Q9BZK7;Q96T23;P18754;Q9Y294;Q13112;Q96RL1;Q9NQ92;Q15021}

9088 Pathogen[ P0C206] interacts with 42 human partners: {Q96HA7;Q13112;Q9Y468;Q9HCK8;Q9NPI1;Q8IYW5;Q9Y5T5;P18754;O60907;Q96LA8;Q8NI51;Q15021;Q96P70;Q96T23;P49321;Q9BQA5;Q5VTR2;Q8TDB6;O43918;O00213;Q9NVM4;O95373;Q8NCD3;Q99543;Q96T88;Q9NQ92;Q86SE8;Q9BZK7;Q9Y294;P35659;Q969R5;Q09028;Q58F21;P06748;Q96RL1;Q8N5D0;O76064;Q01105;Q9Y3T9;Q96PU4;Q9UIG0;O60264}

9089 Pathogen[ P03363] interacts with 38 human partners: {Q13112;Q8TDB6;Q15021;P49321;Q9Y468;Q8N5D0;Q58F21;Q99543;Q96LA8;Q09028;Q96RL1;O00213;Q9BZK7;O60907;Q96P70;P35659;Q9Y294;Q5VTR2;Q8IYW5;Q8NI51;P06748;O60264;Q96T23}

```
;Q9NVM4;Q9HCK8;Q9NPI1;Q9BQA5;Q8NCD3;Q9Y3T9;Q96T88;O95373;Q9NQ92;O43918;Q86SE8;Q96PU4;
Q01105;P18754;Q96HA7}
9090 [Cluster 827]GO:0001664+F molecular_function [name] G-protein coupled receptor binding
[def] "Interacting selectively and non-covalently with a G-protein coupled receptor."
[GOC
9091 Pathogen[ Q2Q067] interacts with 1 human partners:{P62879}
9092 Pathogen[ P0C214] interacts with 1 human partners:{P62879}
9093 Pathogen[ P03346] interacts with 1 human partners:{P62879}
9094 Pathogen[ Q85601] interacts with 1 human partners:{P62879}
9095 Pathogen[ P14079] interacts with 4 human partners:{P24588;Q8N729;Q8NG41;P0DJI8}
9096 Pathogen[ P03383] interacts with 1 human partners:{P62879}
9097 Pathogen[ P03410] interacts with 5 human
partners:{P0DJI8;Q8NG41;Q8N729;P62879;P24588}
9098 Pathogen[ P14075] interacts with 1 human partners:{P62879}
9099 Pathogen[ P0C206] interacts with 2 human partners:{P62879;Q8N729}
9100 Pathogen[ P03363] interacts with 2 human partners:{P62879;Q8N729}
9101 [Cluster 828]GO:0001032+F molecular_function [name] RNA polymerase III type 3 promoter
DNA binding [def] "Interacting selectively and non-covalently with a region of DNA that
is a part of a type 3 promoter that controls transcription by RNA polymerase III. A type
3 Pol III promoter is composed of elements upstream of the transcription start site,
including a TATA box. The human U6 snRNA gene has a type 3 promoter. Type 3 Pol III
promoters have not been observed in S. cerevisiae." [GOC
9102 Pathogen[ Q2Q067] interacts with 1 human partners:{Q9H063}
9103 Pathogen[ P0C214] interacts with 1 human partners:{Q9H063}
9104 Pathogen[ P03346] interacts with 1 human partners:{Q9H063}
9105 Pathogen[ Q85601] interacts with 1 human partners:{Q9H063}
9106 Pathogen[ P14079] interacts with 1 human partners:{Q9H063}
9107 Pathogen[ P03383] interacts with 1 human partners:{Q9H063}
9108 Pathogen[ P03410] interacts with 1 human partners:{Q9H063}
9109 Pathogen[ P14075] interacts with 1 human partners:{Q9H063}
9110 Pathogen[ P0C206] interacts with 1 human partners:{Q9H063}
9111 Pathogen[ P03363] interacts with 1 human partners:{Q9H063}
9112 [Cluster 829]GO:0046523+F molecular_function [name] S-methyl-5-thioribose-1-phosphate
isomerase activity [def] "Catalysis of the reaction
9113 Pathogen[ Q2Q067] interacts with 4 human partners:{P49770;Q9UI10;Q14232;Q9BV20}
9114 Pathogen[ P0C214] interacts with 4 human partners:{Q9UI10;P49770;Q14232;Q9BV20}
9115 Pathogen[ P03346] interacts with 4 human partners:{Q9BV20;Q14232;P49770;Q9UI10}
9116 Pathogen[ Q85601] interacts with 4 human partners:{P49770;Q9BV20;Q14232;Q9UI10}
9117 Pathogen[ P14079] interacts with 3 human partners:{Q9UI10;Q9BV20;Q14232}
9118 Pathogen[ P03383] interacts with 4 human partners:{Q9UI10;P49770;Q9BV20;Q14232}
9119 Pathogen[ P03410] interacts with 4 human partners:{Q14232;P49770;Q9BV20;Q9UI10}
9120 Pathogen[ P14075] interacts with 4 human partners:{Q9BV20;Q9UI10;Q14232;P49770}
9121 Pathogen[ P0C206] interacts with 4 human partners:{Q9BV20;Q14232;P49770;Q9UI10}
9122 Pathogen[ P03363] interacts with 3 human partners:{Q9UI10;P49770;Q9BV20}
9123 [Cluster 830]GO:0004815+F molecular_function [name] aspartate-tRNA ligase activity
[def] "Catalysis of the reaction
9124 Pathogen[ Q2Q067] interacts with 2 human partners:{Q6PI48;P14868}
9125 Pathogen[ P0C214] interacts with 2 human partners:{P14868;Q6PI48}
9126 Pathogen[ P03346] interacts with 2 human partners:{P14868;Q6PI48}
9127 Pathogen[ Q85601] interacts with 2 human partners:{P14868;Q6PI48}
9128 Pathogen[ P14079] interacts with 2 human partners:{P14868;Q6PI48}
9129 Pathogen[ P03383] interacts with 2 human partners:{P14868;Q6PI48}
9130 Pathogen[ P03410] interacts with 2 human partners:{P14868;Q6PI48}
9131 Pathogen[ P14075] interacts with 2 human partners:{P14868;Q6PI48}
9132 Pathogen[ P0C206] interacts with 2 human partners:{Q6PI48;P14868}
9133 Pathogen[ P03363] interacts with 2 human partners:{P14868;Q6PI48}
9134 [Cluster 831]GO:0031078+F molecular_function [name] histone deacetylase activity
(H3-K14 specific) [def] "Catalysis of the reaction
9135 Pathogen[ Q2Q067] interacts with 10 human
partners:{P56524;Q9BY41;Q9UKV0;Q13547;O15379;Q9UQL6;Q969S8;Q96DB2;Q92769;Q8WUI4}
9136 Pathogen[ P0C214] interacts with 10 human
partners:{Q13547;Q969S8;Q96DB2;P56524;Q92769;Q9UKV0;O15379;Q8WUI4;Q9UQL6;Q9BY41}
9137 Pathogen[ P03346] interacts with 10 human
partners:{Q969S8;Q96DB2;O15379;P56524;Q92769;Q13547;Q9BY41;Q8WUI4;Q9UKV0;Q9UQL6}
9138 Pathogen[ Q85601] interacts with 10 human
partners:{Q969S8;Q9UKV0;Q96DB2;Q9BY41;Q9UQL6;Q92769;P56524;O15379;Q13547;Q8WUI4}
9139 Pathogen[ P14079] interacts with 9 human
partners:{Q9UQL6;O15379;Q96DB2;Q969S8;Q8WUI4;Q9UKV0;Q92769;Q9BY41;P56524}
9140 Pathogen[ P03383] interacts with 9 human
partners:{Q9UQL6;Q92769;O15379;Q13547;Q9BY41;Q9UKV0;P56524;Q8WUI4;Q969S8}
9141 Pathogen[ P03410] interacts with 10 human
partners:{Q9UKV0;Q9BY41;Q8WUI4;Q9UQL6;Q969S8;Q92769;O15379;P56524;Q13547;Q96DB2}
9142 Pathogen[ P14075] interacts with 9 human
partners:{Q9BY41;Q969S8;P56524;Q9UKV0;Q13547;Q92769;O15379;Q9UQL6;Q8WUI4}
9143 Pathogen[ P0C206] interacts with 10 human
partners:{Q92769;Q96DB2;Q9UKV0;Q13547;O15379;Q8WUI4;Q9BY41;P56524;Q969S8;Q9UQL6}
```

- 9144 Pathogen[ P03363] interacts with 7 human  
partners:{Q9BY41;O15379;Q969S8;Q9UQL6;Q9UKV0;Q13547;Q8WUI4}
- 9145 [Cluster 832]GO:0016787+F molecular\_function [name] hydrolase activity [def]  
"Catalysis of the hydrolysis of various bonds, e.g. C-O, C-N, C-C, phosphoric anhydride  
bonds, etc. Hydrolase is the systematic name for any enzyme of EC class 3." [ISBN
- 9146 Pathogen[ Q2Q067] interacts with 280 human  
partners:{Q86W56;Q92900;P78346;Q8TCS8;Q9BU02;Q9Y5K5;O14734;Q8IXJ6;Q9HBH1;P53370;Q96HA  
8;Q9Y2M0;Q9H2U2;P54252;Q8IU60;Q9Y305;P40306;Q96SD1;Q9H008;P56524;Q93009;Q9BY41;Q9H0C8  
;Q96NU7;Q15631;Q99502;Q5D1E8;O00303;P55265;Q9Y4P1;Q99638;Q6ZVK8;Q6ICB0;Q96LI5;O75818;  
Q6PJP8;Q8WY54;Q92889;Q8IZH2;Q8NCE0;P49959;Q9UKV0;Q99575;Q08209;Q8IZD4;A6NK39;Q8N0Y7;Q  
16775;Q9Y2L1;Q14674;Q9NPI6;Q86TX2;Q99497;P30793;Q9UDY8;Q9BUL9;P28072;Q9Y6E7;Q9ULC6;O9  
5243;P51531;Q99708;Q9Y2J8;O00167;P36639;Q9NRR4;P33316;O00743;Q9UIF7;Q7Z2E3;P36543;Q15  
181;O95336;Q96C86;P62140;Q969S2;Q13547;P38919;A5LHX3;O60930;Q9H777;Q86Y79;O15379;Q96S  
55;Q9UNH5;P49789;O00148;Q9UBQ0;Q6ZRS2;P25787;Q9NQE9;P67775;Q13838;O95551;Q9NTG7;P3893  
5;Q63HM1;Q8NFI3;P30304;O15355;Q92905;P35573;Q9BV47;Q14790;O95848;O14829;Q14240;Q504Q3  
;Q9GZR1;Q9Y3E5;Q86TP1;P28065;O14818;P26196;Q8N6T7;P27695;Q9GZR2;Q8WVY7;Q8IXW5;Q12972;  
Q9UQL6;O75884;Q9UHI6;Q99504;Q9BSV6;P29372;P62714;O75817;Q9BYK8;P30307;A4GXA9;Q969S8;P  
52758;Q9H2W6;P60900;Q96DB2;Q86US8;Q9BSH5;P55212;Q9BQ83;Q92539;Q86T82;Q15102;Q8N3C0;P3  
6873;Q9NUW8;Q92562;Q92769;P28062;P09467;P54278;Q9UQ84;P18669;Q16719;P78345;O43598;Q96  
DE0;Q9Y5B0;P25788;Q08211;P51532;P42575;Q9H4L7;P62136;Q8TF46;Q12873;Q9NX46;Q9GZX7;P257  
86;Q9BRX2;P46100;Q96DG6;Q9P2I0;O15527;Q8TEA8;P53041;Q03468;Q8WUI4;P13984;P12956;Q9H0W  
9;P50570;Q9UKV8;P39748;Q8N1Q8;Q3L8U1;P15259;Q969H6;O43809;Q92499;O95476;Q96IV0;Q9BQ69  
;O95865;P78549;Q9ULW8;P07738;Q9H816;Q9H9L3;P28074;Q7L266;P25789;Q93008;Q9HCE1;Q14839;  
P28838;P35813;Q13569;Q86UW6;Q9UNY4;Q9HC62;O75688;Q9UM07;Q9UI32;Q9H9J2;O14646;Q96NY9;Q  
9BYX4;P20618;Q8N490;P48147;Q9ULG1;O94925;Q96MB7;P25205;Q9HCK8;Q9BQ65;Q96AY2;Q9UKF6;P2  
8070;Q86WJ1;P28066;P30305;Q96FN9;Q9BRQ3;Q9BQ52;Q99436;Q8TAA3;P13010;P49593;Q93075;P28  
370;Q8WWR8;O95453;P49721;P13051;O75792;O95707;P49720;P27815;Q9NP77;P60510;A2A288;Q928  
41;Q9BRJ7;Q9HCL6;Q13867;Q9NTK5;O14595;Q96HI0;Q8IYD8;O60671;Q96IU4;P60842;Q9ULM6;Q1682  
9;Q9H633;Q14194;O95571;Q53HV7;Q9GZU7;Q6TGC4;P28715;O76075;A8MSY0;Q14693;O15297;O95059  
;Q9NRC8;Q9NQR4}
- 9147 Pathogen[ P0C214] interacts with 365 human  
partners:{Q9BSH5;Q8WWR8;O95551;O95243;Q96P26;Q9HBH1;Q14527;O75608;Q13907;Q8N1G1;O7581  
8;O60346;Q9BU02;P25789;Q9H633;P27695;Q9BUL9;P35813;Q9H9J2;Q96C86;P26196;Q9BQ65;Q96HI0  
;O14595;P30307;Q9BQ83;P62140;A6NK39;P28062;Q9H4I8;O95453;Q9BV47;A5LHX3;Q96S55;Q13547;  
Q8TEA8;Q8NFI3;P49959;O00148;Q9H816;Q16775;P49902;Q9UKF6;P28838;Q16740;Q96065;O15194;Q  
86Y79;P60842;P15259;Q96IV0;P49789;O14829;Q969S8;Q92889;P54922;P13010;Q969H6;Q7L266;Q9  
BXS1;Q9NPI6;Q96GK7;Q96DB2;Q12873;P27815;Q92900;P33316;Q92841;P55212;Q9Y2L1;Q9H0S4;O14  
818;O00167;Q504Q3;Q96SD1;Q9UDY8;Q86UW6;Q13867;Q9H227;Q92560;P55265;Q9Y4P1;P53370;O150  
56;Q9Y305;Q53HV7;Q9BRX2;Q96NY9;Q86TX2;O43865;Q99708;Q6ZRS2;Q9BRQ3;P78345;Q6PII5;P5652  
4;O75884;Q3L8U1;Q7L2E3;Q8TCD5;Q9H777;Q9UI32;Q8IXW5;Q9ULG1;Q9BYX4;P40306;Q86W56;P36543  
;Q99497;Q9Y2M0;P68402;Q8N819;Q14194;Q9H4L7;Q9Y3R4;P38935;A8MSY0;Q9GZU7;Q9NPB8;Q86UY8;  
P35573;Q9HCE1;O75792;Q92562;P48147;Q9Y3Z3;P25205;Q9Y3E5;Q8TF46;Q93008;Q9H089;O95571;Q  
9H0W9;P60510;Q9BYK8;Q9Y5K5;Q9BSV6;O95059;Q8IZH2;P62714;O95989;O60825;Q8N3C0;O95707;Q6  
PJP8;Q14197;Q15102;Q9UM07;P28066;P28715;O00303;Q96MB7;Q9HC16;P18545;Q9ULM6;Q99575;Q14  
566;A2A288;P30793;Q86US8;Q92698;O43809;P09467;O75817;O43681;Q9ULC6;P28370;Q8N1Q8;O145  
31;Q92905;Q6TGC4;Q6ICB0;Q92539;Q96AY2;Q9NQR4;P49720;P28074;O95865;Q9NTG7;P46100;P3891  
9;Q63HM1;Q9BQK8;Q9BQ52;Q6P587;Q9UNY4;O95336;Q7Z2E3;Q9UIF7;O00154;Q9NVP1;Q08209;Q92769  
;Q14240;Q9P2I0;Q8N490;Q6P1N9;Q9UKV0;Q8TCS8;P25788;Q9ULW8;P62136;Q86TP1;Q9HCK8;Q8WVY7;  
O95278;P42574;P36639;P67775;O60264;Q9UHI6;Q9H9L3;O60930;O43598;P07311;Q99504;Q9NRR4;Q  
8IV48;Q93009;P30305;O15379;P25786;A4GXA9;Q9UHY7;Q8N6T7;Q16829;Q9UNH5;Q17R31;Q6NVY1;Q8  
WTP8;P53041;Q8IU60;P13984;Q93075;P28072;Q9UKV8;Q9P0J1;Q8TAA3;O60671;Q07343;Q92499;O95  
476;Q9NQE9;Q9BQ69;O15297;Q9Y2J8;Q9H2U1;Q53H82;Q9NUU7;Q15631;Q96IU4;Q99436;Q8N3J5;Q9UB  
Q0;Q8WY54;O94925;Q9C0D7;Q9GZR2;P39748;P25787;P36873;Q13956;Q9GZR1;O14734;Q8IXJ6;Q1361  
5;P23526;Q96NU7;Q8N0Y7;A6NG73;Q9Y5B0;Q9GZX7;Q9UMR2;Q3LIE5;P78549;P49593;Q9HC62;P29372  
;Q08211;Q9UQ84;Q9H2W6;Q12972;O76083;Q8IYB7;O00743;Q96GD0;Q9NUW8;P52758;Q9NPT3;O95848;  
P16118;A4D2B0;Q9BRJ7;P50570;O75688;P54278;Q9H008;P35998;P60900;Q15181;O14646;Q9NRC8;O  
15527;Q8WUI4;P07738;Q13569;Q96LI5;P55210;Q96FN9;Q9H0C8;Q6L8Q7;Q99638;P48454;P51531;Q5  
D1E8;Q13838;P30304;Q9NTK5;P78346;O00757;Q9Y6E7;Q9Y2T3;P31939;Q9H3M9;Q9NY33;Q9NP77;Q8I  
YD8;P11586;Q86WJ1;O76075;Q5TA45;Q9P2J9;Q03468;Q9UQL6;P28070;P42575;P12956;Q96DG6;Q8NC  
E0;Q14839;Q9Y3B8;P54252;P20618;P13051;Q96HA8;Q6ZVK8;Q16719;P49721;Q9NX46;P51532;P5507  
2;Q9H857;Q9H0P0;Q96DE0;P17980;Q86YG4;Q8IZD4;Q9NS39;Q14693;Q14790;Q9BY41;P16278;Q3I5F7  
;Q99502;Q14674}
- 9148 Pathogen[ P03346] interacts with 365 human  
partners:{P62136;Q9Y3Z3;Q969S8;P25787;Q9BXU7;Q9HBH1;Q9ULC6;P63119;Q9H2U2;P43378;P4606  
3;Q9NRR4;P28070;Q9H0C8;Q504Q3;Q9ULM6;O00743;O60346;O75608;Q9NRZ9;Q93009;Q9GZR1;P38935  
;P35813;P25789;P28715;P50570;Q92560;O95677;A2A288;P12956;P78346;O14829;Q9Y4P1;Q6ICB0;  
P83111;Q9NPI6;Q6TGC4;O95551;Q8WY54;Q96SD1;P46100;Q9GZR2;Q8TEA8;Q8IXO6;Q9H3M9;Q86US8;P  
55265;Q96C86;Q8NFI3;P23526;Q9H9L3;Q9H633;O43598;O00167;Q96DB2;Q9NQE9;P52758;Q9UKF6;Q9  
3008;O60930;O15379;Q6ZUV0;P28072;Q8IXW5;P25788;O95336;P51532;P28074;Q9UMR2;P49721;Q92  
841;Q9Y2J8;Q9UDY8;P07992;P42575;Q8TF42;Q9NS39;O14818;Q9UK59;Q99708;Q14527;Q9ULG1;O958  
48;Q99436;Q7L266;Q96IU4;P30304;Q8TD26;Q9H3S7;P56524;Q9NUW8;P13010;P07738;A5LHX3;Q969H  
6;Q63HM1;O95707;P36543;P49789;P38919;P36639;Q7L2E3;A8MSY0;Q8IXJ6;P28062;Q9NVP1;Q96NU7  
;Q96HM7;O95630;P42574;Q9H2W6;Q86TX2;Q9UIF7;Q96AY2;P62714;P67775;O14646;Q9UBQ0;Q99638;  
Q99502;P09467;Q9H0W9;Q92562;Q08211;P35573;Q3I5F7;P20618;Q92698;P49593;A6NK39;P55212;Q  
96DG6;P60842;P55072;O15194;Q9H1Q7;Q86T82;Q9BUQ8;Q9Y3E5;Q9BUL9;P30305;Q8IYB7;Q9Y6E7;Q8  
N3C0;Q9BV47;Q8IZH2;O00303;O15056;Q96NY9;O95453;Q8NFI3;Q9H2U1;Q8N490;P53370;Q9Y5B0;Q86

Y79;Q9BQ65;Q7Z333;Q8IU60;Q9UI32;Q14566;P45381;P25205;Q969S2;P16278;Q9UHP3;O75817;Q92499;Q53HV7;Q9NQR4;Q9H4I8;P18669;Q14694;Q9BRJ7;P10144;Q9NTK5;P51784;P13984;Q13609;Q96S55;Q9GZU7;Q16667;P17706;Q8WVB3;Q8N0Y7;O75884;Q15631;Q92539;O75643;Q15102;O14531;Q03468;Q92769;P49720;P28065;Q96DE0;P27815;Q86UV5;P36873;O60264;Q13547;Q8TCS8;P13051;Q9HCK8;Q9UHI6;P29372;P60900;Q9BY41;O15297;Q9Y305;Q9Y2L1;P33992;O75818;Q5D1E8;O75604;P25786;Q14240;O95865;O75688;Q13838;P53041;Q9UNY4;Q9UHY7;Q8WUI4;Q86UW6;Q9H777;Q16719;Q9ULW8;Q8N6T7;Q8WVY7;Q9UKV8;Q17R31;P49959;Q99497;Q6ZRS2;P42285;Q16829;Q99575;P28066;O95476;O43809;Q9BYX4;Q9BQ69;Q14562;Q92905;P33991;P78549;Q9NUU7;Q13867;Q9UM07;P78345;Q92889;O76075;O94925;Q8TAA3;Q96HA8;Q9BU02;Q9UKV0;P55211;Q14790;Q15181;Q9HC62;Q9H0S4;Q9UQ84;Q13569;O14734;Q86W56;O95243;P54278;P10768;P26196;Q9NRR4;P15259;O15355;Q8WWR8;P48454;Q8IYD8;P48147;P28370;Q7Z2E3;Q9P2I0;P55210;O60671;Q12873;Q6PJP8;Q96HI0;P24855;Q9P2D1;Q96FW1;Q9BQ83;P62140;Q96IV0;P27695;Q9BYK8;Q8IZD4;Q6GQQ9;O94782;Q6ZVK8;O43865;O00148;Q13283;P39748;P51531;Q16775;Q9NP77;Q08209;Q3L8U1;O95278;Q86WJ1;Q14194;Q86X76;Q96FN9;Q9Y2R2;Q9HCE1;Q92900;Q9H816;Q99504;O15527;Q9Y2M0;Q8N1Q8;Q9BRX2;P24666;O95059;Q14674;Q9UBZ4;Q9BQ52;Q9NTG7;Q93075;O14595;Q96AB6;Q12972;Q96LI5;Q9BSV6;A4GXA9;Q9Y5K5;Q9NRC8;Q9UQL6;Q8TF46;Q86XP3;Q96MB7;P60510;Q8TDQ7;Q9H008;Q9H0E7;P40306;A6NG73;O95571;Q9UNH5;P30307;Q9NX46;Q14839;Q8NCE0;P54252;Q9H9J2;Q9H4L7;Q9UBP0;Q9BSH5;Q14693;O75792;Q9NPJ3;Q86TP1;P33316;Q5TA45;Q969T7}

9149

Pathogen[ Q85601] interacts with 325 human

partners: {Q5TA45;Q9UBZ4;P10144;P28066;Q9HCE1;Q969S8;P60900;Q99497;Q9HBH1;Q9BUL9;Q9NRC8;Q9BQ52;Q9Y2M0;Q9Y5T5;Q15527;O43598;Q9UKV0;O60346;Q9NTK5;O75688;Q96DB2;Q9ULW8;O94925;P78346;O14829;Q9H0E7;A6NK39;Q9H0S4;Q99575;P10768;Q9NPI6;Q93009;Q8IYD8;P25787;Q9BY41;Q14194;Q9UQ84;P49789;O95059;P62714;Q969S2;Q9UQL6;P13051;Q3L8U1;Q9P2D1;Q9GZU7;Q14240;O15194;Q9H0C8;Q9UBP0;P25788;P52758;P38935;O95677;O95336;P49593;Q16719;Q8TEA8;Q9UM07;Q9BU02;Q9H2W6;Q9UDY8;Q9HC16;Q14790;Q92560;Q9Y4P1;Q17R31;Q99708;A4GXA9;Q9HC62;Q8WVY7;Q86TX2;P18669;O95989;Q7L266;P27815;O60825;Q16829;O00148;O43865;Q969H6;Q9H3M9;Q6TGC4;Q9UMR2;Q99504;P36639;Q7L2E3;Q9GZX7;Q9NRR4;Q96IU4;Q96AY2;O75792;P33316;O95243;O00757;P49959;P30304;O14646;O00303;Q14674;Q9H0W9;O76075;Q92562;Q92499;Q92698;Q08211;P48147;Q13867;Q9Y3E5;Q93008;Q9H008;Q9BSV6;Q9H089;O95278;Q504Q3;Q9H777;P16118;Q96FI4;P15259;Q9Y2L1;Q8IYB7;Q9Y6E7;P30793;Q9BV47;Q8IZH2;P53370;P54252;Q08209;O95707;Q96NY9;Q92889;P38919;Q96C86;P51531;Q9NP77;O14734;P25789;P28715;Q63HML;Q9UNH5;Q14566;P30305;O75817;O75818;O43681;P20618;Q9NQR4;Q96LI5;Q9Y305;Q03468;O15355;P51532;Q9BRJ7;Q86TP1;P30307;Q6ICB0;P13984;Q8N1Q8;P35573;Q6PII5;P25205;P40306;Q8IXJ6;Q9H2U2;A2A288;P62136;Q13838;Q9Y2J8;Q96MB7;Q9Y5B0;Q92769;P49720;Q9NVP1;Q9NQC7;P42575;Q86Y79;Q96DE0;Q96SD1;O95453;P36873;Q12972;Q8TCS8;Q12873;Q99502;P28062;Q9UHI6;P49721;Q92905;Q53HV7;Q9H4L7;P50570;O15297;Q9NUU7;Q9P2I0;Q9Y5K5;Q86UY8;Q9BYX4;P25786;Q9ULC6;Q8I2D0;Q6ZRS2;Q9ULM6;A8MSY0;Q9NUW8;Q8IXW5;Q9BSH5;Q9BYK8;P53041;P28072;P60842;Q8N6T7;Q9UKV8;Q9GZR2;Q9ULG1;Q13569;O75884;P28065;O95630;P67775;O95476;P55265;Q99436;Q9BQ69;Q6ZVK8;P28070;P09467;Q9H9L3;Q86T82;P26196;Q86US8;P78345;Q9HCK8;Q8WY54;Q8TAA3;Q9C0D7;O60671;Q96S55;P56524;P60510;Q9UIF7;P54278;O15379;Q9UBQ6;Q9UHY7;P28370;Q7Z2E3;P23526;O00743;Q6PJP8;Q86WJ1;Q96HI0;Q13547;Q96DG6;Q9BQ83;Q8TD20;P62140;P28074;Q9H0P0;O60930;O95848;P33992;P55212;Q86UW6;Q3LIE5;Q8N0Y7;A5LHX3;P39748;Q8WUI4;Q15181;Q9UI32;Q16775;O60264;P78549;P07738;P19447;P35813;Q14527;Q9H9J2;O00167;Q9H633;Q92900;Q9H816;O95571;Q96HA8;Q9BRX2;Q9NTG7;O14818;P48454;Q93075;O14595;Q9GZR1;P27695;Q13907;Q9UKF6;Q92539;Q9UNY4;P46100;Q8TF46;Q99638;Q86W56;Q95551;Q15631;A6NG73;Q6L8Q7;Q5D1E8;O43809;Q9NQE9;Q9NX46;P55210;Q14839;Q8NCE0;P13010;Q96FN9;P12956;Q96IV0;Q8N490;O95865;Q8N3J5;Q15102;Q8IU60;Q8N3C0;Q14693;P29372;P36543;Q9H2U1}

9150

Pathogen[ P14079] interacts with 462 human

partners: {P36543;Q5SRI9;Q9UQL6;O60671;P28838;O43809;Q9NY59;Q6P1N9;O15442;O15194;P28065;O15379;Q8NBV4;Q99436;P15259;Q96AB6;Q3LIE5;P52758;Q8IV48;P48454;P78346;Q9BXS1;Q9H857;O94830;P62333;Q8TEA8;Q9BRX2;O14773;Q6P587;Q9H0P0;Q96FN9;Q9UKV8;Q9Y3E5;Q92562;P49753;Q8TAT5;Q9Y3B8;P16278;Q9BQK8;Q9H0S4;O14841;O76075;P60842;Q5D1E8;Q9ULG1;Q9UIF7;Q8IZD4;Q96KR4;P54922;Q9BYK8;Q9NPB8;P41238;O75817;Q13609;Q99502;Q96KP4;Q9NUQ7;Q9BYX4;Q6ICB0;P28715;P49593;Q9NRR4;O00303;P30307;Q14566;Q8N490;P53041;Q8WZ82;Q14693;Q5VSG8;Q96NY9;Q9Y5B0;Q9ULC6;Q96DB2;Q9Y305;P14621;O15297;Q8NDY3;P40066;Q96IV0;Q9H3M9;Q96P26;Q96HI0;Q8TCD5;Q9UKF6;Q9NXE4;Q8IYD8;Q8IU60;P31939;P36873;P13010;P40306;P31941;Q8N8W4;Q16829;Q86Y79;Q96NU7;Q02083;Q13907;A8MXV4;Q969T7;Q9UNY4;Q9NPI6;Q6P988;Q9UBZ4;Q9HCE1;P28074;P28370;P07311;Q7L2E3;O75792;P20933;A8MSY0;Q9H4L7;Q969S8;Q9H777;Q8WUI4;Q8WV74;Q8NDH3;P16298;Q63HML;P48147;Q9BSV6;P54802;Q6ZT21;Q9NX46;P54252;Q96LI5;Q8TDQ7;P51532;Q99497;P54278;P35475;Q96BW5;O14646;P29372;Q6PCB6;Q86TP1;O43598;P49720;Q9BU70;O00487;Q9H008;P62136;Q86TLO;P25787;Q5VTU8;Q9UKK9;Q92698;Q9NTJ4;Q9NXJ5;P49184;Q9HC16;Q9H773;P51531;Q9UKV0;O94919;Q96MI9;Q86US8;Q13838;Q9GZR2;Q6ZRS2;Q8NEL9;O60346;Q96G61;Q9UPW5;P29144;Q96C86;A5LHX3;Q9NS39;Q14674;Q9Y303;O95848;Q9BQ65;Q9Y2B2;Q8TF46;Q8NFI3;Q8NCE0;O15527;Q9UHI6;Q14240;O00115;P33998;P78549;O95707;Q9Y2T3;Q86YG4;O75608;P30793;P33316;Q08211;O95453;Q96AY2;Q16740;P30304;Q14249;Q96HA8;Q92539;Q4J6C6;Q7L8Q7;Q9Y4P1;Q8N6M5;Q96GD0;P55212;Q9UBQ5;P07738;Q7L266;P60280;Q12873;O95059;P50570;Q9NPJ3;A4GXA9;Q8WVY7;P20618;P46100;Q9ULW8;Q9BRJ7;P35813;Q9Y2J8;Q96MB7;Q8TAA3;Q8IXW5;Q96DG6;Q3I5F7;A4D2B0;Q9H1Q7;Q8N1G1;P0C025;Q9H2U2;Q9P2D1;Q8TD26;O43865;Q15631;Q9GZX7;P18545;Q5TFE4;O95571;Q8IYB7;Q8WY54;P12956;Q8I2H2;Q9NUW8;Q9H790;Q8NCG7;P54803;Q9Y5K5;Q8N8Q3;Q9HC62;Q14790;O94925;Q8N661;Q9Y3Z3;P28062;P60900;Q96HD9;O00519;Q9H0W9;Q32M88;Q13956;P55265;Q16719;P36639;Q92769;O43681;Q9H2W6;O14829;Q9BY32;P26196;Q8N6T7;O95989;Q86T03;Q99708;P55210;Q9BSH5;Q15102;Q96S55;Q92560;O60502;Q13867;O95243;O14734;Q9NY33;Q6ZUV0;Q400G9;Q86UW6;Q9HBH1;Q8NFP7;P62140;Q9H9L3;Q86WJ1;Q9NRR4;P45381;Q99575;Q9H0C8;P24855;Q86TX2;P35573;Q9BV47;P53370;Q8NDL9;O00148;Q969S2;Q13510;Q9BY41;P16930;Q9BUL9;Q96FI4;Q9HCK8;O14818;Q92889;Q86UY8;P27695;P49721;Q92905;Q9BU02;Q9H633;Q9BQ52;Q14194;Q9UI32;Q9Y2M0;Q9Y2L1;O60264;Q96GK7;P46926;Q93075;O95336;O95551;P49902;Q9NP77;Q9H6P5;Q8WWR8;Q9NZ20;Q15181;Q68D91;Q9NSU2;Q9NTK5;Q9Y3R4;Q12972;P33992;Q8IXJ6;Q5W0Q7;Q96IU4;Q53HV7;Q16775;Q8N442;Q9H9J2;P17050;Q96PE3;Q9BXI3;P2781



5;Q14839;A6NFU8;Q8WZ79;Q96AZ6;Q7Z6Z6;P13984;O75818;Q9UNW1;Q99487;Q96SD1;Q5HYM0;Q6GMR7;P62191;Q9UBQ0;P60510;Q92900;Q86W56;Q6TGC4;Q92499;Q96FC9;O95476;Q99638;O75688;Q15493;P56381;Q5TA45;Q99504;Q53H82;Q03468;P18669;O75884;P38935;A6NG73;P23526;P30305;P49773;Q9ULM6;P43686;Q9BRQ3;A2A288;P78345;P42575;P25788;P09467;Q9BQ83;O00167;Q9BXW7;Q14197;A6NK39;Q6PJP8;P28066;Q86X67;Q13569;Q8WW27;Q9UM07;P56524;O60930;Q9GZR1;P49789;Q9NRC8;Q9Y530;O15355;Q96HM7;Q9BSY9;Q9NTG7;Q9NVP1;Q7Z2E3;Q504Q3;P83111;Q9NZC7;Q17R31;Q9H816;Q9HA T2;Q8WVB3;Q08209;Q9H300;P25205;Q9NZJ9;Q9UQ84;P10144;Q9NQR4;P17405;Q9NCR10;P17980;O15327;Q96DE0;Q03154;Q8N0Y7;O00743;Q9NQE9;P07992;Q8TCS8;Q96FW1;P28072;P19447;Q8N1Q8;Q9UNH5;Q96EY9;P13051;Q8IYS1;O95865;Q9UK59;Q9H089;P39748;Q3L8U1;Q9P2I0;Q9GZU7;Q9C0D7;Q8WXI4;Q6P2I3;Q8WTP8}

9151 Pathogen[ P03383] interacts with 225 human

partners: {P78345;Q7Z2E3;A6NG73;P30307;Q9NRR4;Q6ZVK8;Q99504;P62140;Q9HBB1;Q9BRJ7;Q9Y2L1;Q14839;O60671;Q9H2U2;P07311;A6NK39;O94925;P13010;O95865;Q9Y305;P55212;O00167;Q9H0S4;P54278;Q9H0C8;Q8N6T7;Q9H777;Q8IU60;Q93075;P25789;P53370;P60900;P49789;P36639;P54922;Q9BU02;Q9UQL6;O75792;Q969H6;Q96MB7;Q9H633;Q13838;O15527;Q99575;Q9NTK5;Q53HV7;Q8N1Q8;A4GXA9;P40306;Q96DE0;Q9H2W6;Q92905;Q9Y4P1;Q9BQ65;P25205;P18669;P28370;Q12972;P30304;P62714;Q5D1E8;P09467;Q9BRQ3;Q92841;Q9UHI6;Q8IXW5;Q63HM1;Q6PJP8;Q8NCE0;P38919;P28838;P49721;O14646;O95059;A8MSY0;P35573;Q9H1Q7;O43598;Q8TCS8;Q9BRX2;P67775;P26196;O15297;O14734;Q96S55;Q15631;Q9ULW8;P35813;P20618;Q9UKF6;P48147;Q9Y3E5;A2A288;Q9NX46;Q9BQ52;P36873;P62136;O95707;P52758;Q16719;Q7L266;P07738;P46100;P29372;O75817;O95243;Q12873;Q9BSV6;Q9H816;P54252;Q9NTG7;P13984;Q96FN9;Q86W56;Q14674;Q96HI0;Q9H0W9;Q03468;Q9GZU7;O75884;Q86US8;Q92769;Q6ICB0;Q6TGC4;Q96AY2;Q9UNH5;Q9NPI6;Q13867;Q9H9L3;Q9UM07;P51531;O75818;O15379;Q9Y6E7;P25786;Q96HA8;P53041;Q9Y5K5;Q8N0Y7;Q9Y2M0;P28072;O15355;Q9UKV8;Q9ULM6;Q13569;Q9Y2J8;P28065;Q16775;Q8IZD4;Q9BSH5;Q9NQR4;P28066;Q13547;O43809;Q9BQ69;Q9BY41;Q3L8U1;Q99708;Q96C86;Q15181;Q99638;Q9HCK8;Q8WY54;Q86Y79;Q9UKV0;P56524;Q9NUW8;Q86TP1;Q9H9J2;Q9HC62;P55265;Q8WWR8;O60930;P51532;Q9P2I0;Q9Y5B0;Q9H3M9;P33316;P38935;P28074;P27695;O95551;P49720;Q8TAA3;Q92499;P36543;Q8WUI4;P28062;Q9BUL9;Q96IV0;P13051;O95989;Q9UBQ0;Q9ULC6;Q8N490;Q9HCE1;O95453;O95571;Q96HM7;O00743;O14818;P78346;Q92900;Q99436;Q92539;Q96LI5;Q9BYK8;Q9UNY4;P15259;Q9BQ83;Q86UW6;P60510;P28070;Q9GZR1;Q969S8;Q9NRC8;P12956;Q8TEA8;O00148;P25787;Q14693;O95848;P25788;Q9H008;Q96NY9}

9152 Pathogen[ P03410] interacts with 461 human

partners: {Q96LI5;Q400G9;Q9Y305;P54803;Q13838;Q9BQK8;Q9UKV0;Q96FW1;Q92562;P62714;Q5TA45;Q9H3M9;Q8IXJ6;Q8IU60;P28070;P49959;Q9Y2L1;Q96HD9;Q17R31;Q96P26;O00519;P25205;P10768;Q8WTP8;Q96FI4;Q8TDQ7;Q12873;Q96PE3;Q9NTG7;Q8NFP7;O15355;Q9UNY4;Q9BU02;Q99708;Q96EY9;P10144;A4D2B0;Q9GZR2;Q9Y3B8;Q8TCS8;Q9H4L7;P35813;Q6L8Q7;P49184;Q8NCG7;Q8N3J5;Q9BY41;Q8NF13;Q7L266;P78346;Q9UKV8;Q8N3C0;Q5VSG8;Q99497;P04066;Q8TEA8;Q9BU70;Q96AB6;Q96AY2;Q9H816;Q8IV48;O15327;Q9UPW5;Q86T03;Q96MB7;Q92698;P25786;Q8IYD8;P78345;Q02083;Q8NDH3;Q08209;Q92900;Q9BQ50;Q9Y4P1;A4GXA9;P36639;Q9NVP1;Q8N661;Q9C0D7;P07992;P60510;Q99502;Q9HBH1;Q99575;P60900;Q9UM07;P16118;Q9Y2B2;Q9UML6;P42575;P35998;O60502;Q9NPI6;Q8N6M5;Q68D91;Q13609;Q9H857;Q9BXW7;Q9BYK8;Q8N6T7;Q9NTK5;P54802;O14646;Q9H0W9;P48147;Q9GZU7;P41238;Q16719;Q6P1N9;O76075;O75792;Q9H773;Q86Y79;Q8WY54;Q8TF46;Q9UKK9;P62136;Q92905;Q9BYX4;Q13867;Q9NPP3;Q9ULG1;Q8NHP7;Q9BQ52;P35573;Q5HYM0;Q13956;Q8WW27;Q86YG4;O00148;P16278;Q96HI0;O95865;Q8TAA3;P45381;Q6PCB6;A2A288;Q8NDY3;Q9NPF7;P49721;P54252;Q6NVY1;P50570;Q92889;Q93075;Q96S55;Q9GZR1;Q86TP1;Q9UK59;Q9HAT2;P39748;Q53H82;Q6P2I3;Q9UNH5;Q9NSU2;Q9H0S4;Q6P988;Q96SD1;Q9H2U2;P30793;Q96NU7;Q03468;P55265;Q86X76;Q9BQ83;A5LHX3;Q9Y530;P28715;Q8TAT5;Q9BSV6;P78549;P09467;Q9H9J2;Q6ZUV0;Q14674;Q9NRR4;Q99436;P28838;Q53HV7;O94925;Q9H0C8;Q8N490;O00757;Q9NXE4;P33992;Q6PII5;Q14693;Q8WUI4;P46926;O60930;Q9BY32;Q8WXI4;O14841;Q86UW6;Q9NXJ5;Q8N442;Q9UQL6;O75688;Q9UBQ0;Q5SRI9;Q9NZJ9;O95243;Q9NRX4;O43809;Q7Z2E3;Q9ULC6;P56381;Q9Y2T3;P40306;Q96GD0;P33316;Q9H790;Q9HC16;Q8IZH2;Q16829;O95848;Q86TL0;Q9UMR2;O95571;P12956;Q9UBZ4;Q6ZRS2;O95551;Q9BXI3;Q8IZD4;O14734;Q9NPP8;O00154;Q9NQR4;Q969S8;Q13510;P38935;O95707;Q63HM1;Q96KR4;O14531;P25787;Q9HC62;P49789;O15297;O95453;P49773;Q9NTJ4;Q6ICB0;Q92769;P48454;Q5VTU8;Q9NUU7;P62140;P07738;Q9P2D1;P18545;P53370;O75608;Q6PJP8;Q9BSH5;Q86UY8;Q9BRJ7;Q9BUL9;P30304;Q9P2I0;Q99638;O15527;Q92499;Q8WZ82;Q9BRX2;Q5D1E8;Q16775;O15379;P56524;Q9HCE1;O75818;Q96NY9;Q13569;P28062;Q96AZ6;Q8IX06;Q5TFE4;P19447;Q3I5F7;Q14197;Q9NUW8;Q96DE0;Q7L2E3;Q8N0Y7;O95989;P07311;Q9HCK8;O94830;Q9H089;Q8N1G1;P15259;O14818;A8MXV4;Q9H777;A6NFU8;P36873;P53041;O60671;P31939;P46100;P60842;Q9GZX7;Q9NZ20;Q99504;P51532;O00303;P38919;Q96BW5;Q9NRW3;Q9H008;Q8IYB7;Q9BRQ3;P23526;P18669;Q86W56;Q86WJ1;Q8N1Q8;Q6TGC4;O95476;Q86US8;Q8TCD5;Q9BQ69;P51531;Q9Y5B0;Q96IV0;Q9Y3E5;P25789;P24666;P49720;Q86TX2;Q15102;A6NG73;Q9UKF6;P31941;P63135;O60346;Q3L8U1;Q96C10;Q9NQE9;P27695;Q13547;Q9H0P0;O00167;Q8WVB3;P54922;P13010;Q9Y5K5;P13984;P49593;P20933;Q8N8W4;Q12972;Q9Y2J8;Q3LIE5;Q8WVY7;Q9UNW1;A6NK39;Q9H6P5;Q15631;Q13907;Q969S2;Q9H1Q7;Q8WV74;O00115;Q96FC9;Q9H2W6;P52758;P28072;P54278;P83111;Q9UI32;O95336;Q9Y3R4;P13051;Q9NX46;P49753;O15442;Q14194;Q8IXW5;Q9NRC8;Q969H6;Q9UQ84;Q8TD26;A8MSY0;Q9Y2M0;Q32M88;Q9BQ65;Q6GMR7;P30305;Q9Y3Z3;P16930;Q8NCE0;Q9NY33;O60264;P25788;Q96C86;Q96633;Q7Z6Z6;Q15181;Q16775;P67775;Q14566;Q92539;P55212;Q14839;Q9UHI6;P28066;Q15493;Q08211;Q96HM7;O43681;Q504Q3;P14621;O75817;Q86X67;Q96G61;P28065;Q9BV47;P27815;Q96DG6;O43865;Q96HS1;P30307;Q6NTF7;O00743;P29372;P36543;P24855;Q6P587;Q9H9L3;O43598;O75884;Q96IU4;O14829;O15194;P17405;P17980;Q8WWR8;Q9UIF7;P20618;P49902;Q96FN9;P28370;Q8NEL9;Q8NBV4;Q14240;Q14249;Q9BSY9;P28074;O95059;P55210;Q9ZLW8;P0C025;Q9NQ88;Q969T7;Q96GK7;Q96DB2;Q9BXS1;Q9H2U1}

9153 Pathogen[ P14075] interacts with 243 human

partners: {Q8N490;Q3L8U1;O95453;P13051;Q9BY41;O15297;Q7Z2E3;Q9HBB1;O14646;Q9NQE9;Q8N6T7;Q8IXW5;P35813;Q9ULC6;Q16719;P25788;Q9BSV6;P13984;Q92900;Q9NQR4;Q99504;P12956;Q96IV0;Q5SRI9;Q15102;P28066;O43809;Q9P2I0;Q9BQ83;Q96DE0;Q969S8;P49902;P55265;P4922;Q9UM07;Q9ULM6;A6NG73;Q8TAA3;P60900;P27695;P51532;Q9H0S4;Q9UNY4;O43598;Q02083;P26196;P55212;P49720;Q9Y5B0;Q8WWR8;Q9BRQ3;Q9BRX2;P36639;Q9NX46;P38935;P60510;Q86UW6;Q14839;O15527;Q5

3HV7;A4D2B0;Q9Y4P1;P56524;O60930;Q9HCE1;P18669;Q9UBQ0;O14734;Q9UIF7;Q96FN9;Q8TEA8;O60671;Q13510;Q8N1Q8;Q9H2W6;Q93075;A8MXV4;P62140;O00167;Q9UKV0;Q9NPI6;Q96FW1;Q9H9J2;Q96LI5;Q8IU60;Q9Y2J8;Q6ZVK8;P28070;Q9Y3E5;Q13547;P49721;O95571;Q9Y2L1;Q86Y79;P36873;P54252;P62136;Q9BSH5;O00743;Q6ICB0;Q9Y2M0;Q03468;Q9HOC8;Q96HA8;Q99638;Q9H777;O75817;Q9Y6E7;Q92499;Q96HI0;Q9NNTK5;Q96MB7;P16118;P46100;Q9UHI6;Q15631;Q86US8;Q8IZD4;Q92539;Q8NCE0;P28062;P28074;O95865;A6NK39;Q9NTG7;Q7L266;Q92769;P25205;P28065;Q63HML1;Q9BQ65;Q9BQ52;Q96NY9;Q9HC62;Q9HCK8;P51531;Q9H008;Q9C025;Q9H816;P25786;P78345;O14818;O95336;P78346;P53041;O15442;P35573;P28072;Q9NRR4;Q9ULW8;Q9UKV8;P28370;Q5D1E8;P30304;P33316;Q13867;P62714;P67775;Q9H2U2;P53370;Q9BQ69;O15379;Q9H9L3;Q9GZU7;O75792;Q86YG4;O95059;Q9H633;Q8WY54;O94925;Q8TCS8;P49789;P25787;P15259;Q92841;Q14674;O95243;Q96C86;Q9H3M9;Q6TGC4;O75884;Q9NRC8;Q96AY2;Q9UQL6;Q99502;P54278;P20618;Q86W56;P52758;P13010;Q8NFI3;Q96S55;Q12972;Q9BRJ7;P30793;Q8WUI4;A8MSY0;Q13569;P07738;O95848;P38919;Q9BUL9;Q9BU02;Q9UKF6;Q92905;P07311;Q13838;O95707;P40306;P29372;P28838;Q6PJP8;Q99708;Q99436;Q12873;P09467;Q9UNH5;O15355;P30307;O75818;Q9BYK8;Q9Y305;Q9H0W9;O00148;Q96NU7;Q9NUW8;Q8N661;Q8N0Y7;Q15181;Q16775;Q96HM7;Q99575;Q9GZR1;O95989;Q9Y5K5;A4GXA9;A2A288;O95551;Q14693;P25789;Q86TP1;Q969H6;P36543}

9154

Pathogen[ P0C206] interacts with 437 human

partners: {P27695;P33316;Q9NQC7;O43598;Q9H857;Q9H0S4;Q99436;P28062;P10144;Q96DG6;Q9BUL9;Q5SRI9;Q9H4L7;Q92769;P54278;Q92539;Q9NJP3;Q8IXW5;Q86TP1;O00148;Q9HCK8;Q9NQE9;Q9UKF6;Q9Y2M0;P28715;P13010;Q9NX46;P0C025;Q504Q3;Q96AY2;Q17RS7;Q96AB6;P36543;O00167;Q8WXI4;Q9H790;P55265;Q15493;O95453;P38935;P40306;Q8TD26;Q86YG4;P49959;P28065;Q9BSV6;P36639;Q99504;A8MXV4;Q9BV47;Q53H82;Q9NUU7;Q9UQ84;Q9NXJ5;Q9NSU2;P51532;Q8IZH2;Q8TCS8;O00743;Q9UBP0;Q96KR4;Q96C86;Q9GZU7;Q99708;P30307;Q9UDY8;P18545;P25786;Q8WY54;Q9Y5T5;O75884;O15527;Q17R31;P25788;Q93008;Q92562;P29144;Q8NNDL9;Q96HI0;Q9UNY4;Q9Y4P1;P25205;P25787;P51531;Q13615;Q08211;O43681;Q6ZUV0;Q8IV48;Q9BQ65;Q96LI5;P48147;Q6PII5;O75818;Q96DB2;O75608;Q6PJP8;O76075;Q9C0D7;O75604;P09467;Q8IYD8;Q9H9L3;P49720;Q5TFE4;Q9P2D1;Q9UKV0;P46100;O95630;Q9HC62;O95059;P07311;A2A288;P28838;P55212;Q9NUW8;Q9NRX4;P26196;Q9NS39;Q9BRQ3;Q8N1Q8;Q8N661;P53041;Q03468;Q9UK59;O95848;Q9Y2J8;Q15631;Q9NPI6;Q6ZRS2;P60900;Q9BRJ7;Q96DE0;O14531;Q9UKV8;Q13547;Q96SD1;Q9UBZ4;Q86TX2;Q96MB7;P30305;Q93009;Q9UM07;P49902;Q9H816;P31939;P14621;P10768;Q99497;O43809;P67775;Q6ICB0;Q96HM7;P30793;Q9Y2R2;Q9Y530;O43865;P54252;Q16829;Q9H0E7;O95476;P24855;Q96IV0;Q8N1G1;Q8NFI3;Q9BQ69;P83111;O94762;A5LHX3;Q9P2I0;P13984;A4GXA9;Q9BY32;O95865;Q53HV7;Q9Y5K5;P07992;P19447;Q969H6;Q8N6T7;Q16775;Q99638;P54922;P25789;Q13867;P49593;Q9HCE1;Q14839;O95989;Q9BYK8;Q9UBQ0;Q6TGC4;O60930;O15355;O14646;P24666;Q8IZD4;Q9H0W9;Q13569;P27815;Q9GZR1;Q6P587;Q9Y3R4;Q96NY9;Q93075;O75688;Q9ULC6;Q9H089;Q86US8;Q86W56;Q9UNH5;Q9Y5B0;Q7Z333;Q13907;Q3I5F7;Q9BXS1;Q9GZX7;Q96HA8;Q16719;Q9H4I8;Q9BSY9;Q9H3M9;P20618;Q3LIE5;Q6ZVK8;Q13838;Q8N490;Q8WVB3;Q9ULG1;O15379;Q8TAA3;Q9Y305;P28070;Q9UHY7;P53370;Q96FW1;O95707;Q8WUI4;P45381;P49789;Q92889;Q9Y3B8;Q8TDQ7;Q8TAT5;O75817;O75792;Q8TCD5;Q9NQR4;Q16740;Q5D1E8;Q9BQK8;Q15102;Q9NY33;P23526;Q9H0P0;O00757;O14734;O95278;P78345;Q9Y2B2;O95551;Q9NVP1;Q14790;Q5TA45;Q02083;Q13956;Q6P1N9;Q13609;Q8N0Y7;A6NK39;P28066;Q96S55;Q86T82;Q9H2U2;P62714;Q6GQQ9;Q9NRR4;Q5VWZ2;Q9NBP8;Q9Y2L1;P42574;Q92841;O14818;Q96FI4;Q9NRC8;P31941;P48454;Q9H008;Q9H1Q7;P55072;Q14240;Q8IXJ6;Q9NNTK5;Q5HYM0;Q6L8Q7;P28370;Q14527;P62140;O60825;Q9UI32;Q9BSH5;Q6NTF7;Q9H2W6;Q8NDH3;Q14194;P28072;Q63HML1;Q9UHP3;O95336;P30304;A4D2B0;Q969S2;Q99502;Q8NWR8;O94925;Q14674;P16278;Q86WJ1;Q86TL0;Q92900;O14829;Q86Y79;P16118;O60671;Q9H777;A6NG73;P56381;Q8WZ82;Q86UW6;Q9H2U1;Q9NRZ9;Q99575;Q96GD0;Q96FN9;P28074;P46926;Q94830;P42575;Q9Y3E5;O60346;Q9HC16;Q08209;Q14197;Q96EY9;Q9H9J2;Q96BW5;Q9UHI6;O15194;Q86X67;P49721;O14595;Q8NFP7;Q12972;Q8NCE0;Q7L266;Q9UMR2;Q9BY41;Q9UPW5;P60510;P56524;Q9BYX4;P38919;P41238;Q96C10;Q9ULW8;P39748;Q9GZR2;Q9H8H1;Q9NTG7;P07738;Q9BQ83;O15297;P36873;Q8IYB7;Q969S8;P60842;Q96IU4;P52758;P13051;Q92499;Q14693;P12956;Q9BU02;P78346;Q86T03;P55210;Q96GK7;Q9BQ52;Q9ULM6;O00303;Q8TF46;Q8N3J5;Q8TEA8;Q7Z2E3;Q14249;Q9H633;Q14566;Q86UY8;Q9BRX2;Q8IU60;P29372;Q7L2E3;O15442;O95571;O95243;Q92560;Q9UIF7;Q9BX63;Q969T7;Q9Y6E7;O95677;P50570;P17706;Q8NBV4;Q8N3C0;Q92698;P18669;P33992;P62136;Q12873;Q86X76;P15259;P35813;O60264;A8MSY0;Q9NP77;Q96NU7;Q9BU70;Q8WVY7;Q8NEL9;Q3L8U1;Q92905;Q15181;P35573;Q9UQL6;P78549;Q9H0C8}

9155

Pathogen[ P03363] interacts with 296 human

partners: {Q504Q3;P17706;Q9H816;Q9Y6E7;O14734;Q9BQ50;P12956;Q9NJP3;O94762;Q9BX63;P52758;A8MSY0;Q96IV0;Q96HM7;Q9H2U2;Q3L8U1;P63131;P63119;P62136;Q9Y2J8;O15355;Q9P2I0;Q9Y5B0;Q9Y5K5;Q7Z333;O15527;Q6ZVK8;Q9H3S7;P38919;Q8TF42;Q86Y79;Q9UNH5;P62714;P18669;O14829;P10265;Q075643;Q8IY21;Q9ULG1;O95453;P36873;Q12972;P51784;P33316;Q9BSV6;P13984;Q02083;P36543;Q92900;Q6GQQ9;Q9Y2R2;Q14194;Q9UHI6;Q96IU4;A2A288;Q9BY41;Q9NS39;P43378;O95059;Q9H4L7;Q92539;P62140;Q969T7;Q96DG6;Q9UHP3;Q96AB6;Q93075;Q9Y2M0;Q99575;P13010;O75817;P25205;O75604;Q86US8;Q13283;Q6ZRS2;O15379;Q9GZR2;P51532;Q969S8;O75818;Q9NUU7;O94925;P53041;P50570;O60671;Q9NNTK5;Q96FI4;Q16667;Q92889;Q9ULW8;O75884;P10768;P13051;O00743;Q9UKV8;P63121;Q15631;Q9UQL6;P54252;Q9H9J2;Q96MB7;Q86UW6;Q5VWZ2;Q14839;Q8IZD4;Q8IXW5;O95476;Q9Y6I0;Q9BQ69;Q9BRJ7;P10144;Q92620;Q9H0S4;P27815;Q63HML1;Q9UNY4;O95571;A6NK39;P33992;P46100;O95707;Q3I5F7;Q9H0W9;O75792;Q9H633;O60264;Q9UM07;P30304;P29372;Q13867;Q9ULM6;Q13609;Q92560;P55212;Q14562;Q99708;Q9H4I8;Q9NX46;Q9HCK8;Q7L266;Q9NUL7;O43809;Q16829;Q92841;Q14240;P46063;Q8IYB7;Q8N6T7;P54278;Q7Z2E3;P63124;Q14527;Q9H0C8;Q8N1G1;O00148;Q9UKV0;Q9BSH5;Q8N0Y7;Q9H2W6;Q96DE0;Q9HCE1;Q86T82;Q8WVY7;O76075;Q6TGC4;P07998;Q8WZ82;O15056;Q8NFI3;Q8IYD8;Q99504;Q9H9L3;Q9NUW8;Q9Y2L1;Q9BQ83;Q92499;Q96AY2;Q9UIF7;P26196;Q13838;Q9BYK8;P55265;P49789;Q9NRR4;O95243;Q9H008;Q96LI5;Q13547;P60510;O43865;Q9Y3Z3;Q14674;Q9BQ65;Q8IX06;Q6PJP8;Q96S55;Q9BXU7;O95848;Q96HA8;Q9UI32;Q9UBQ0;Q99638;O14646;Q9UMR2;Q13569;Q12923;O14531;Q8WUI4;Q96HI0;P60842;Q86XP3;O95865;Q03468;O00167;Q9NQE9;Q8TD26;O95551;O95336;Q9BYX4;Q9H1Q7;Q9BRX2;P78345;Q5D1E8;Q86W56;Q9Y3E5;Q12873;P28370;O60930;Q8WVB3;Q8TEA8;Q9NTG7;P55210;Q9Y4P1;Q7L2E3;Q9NVP1;Q9GZU7;Q9UKF6;P24855;Q9GZR1;Q9BV47;P78346;O15297;Q9H2U1;Q96FN9;A4GXA9;Q9BU02;Q96NY9;Q96C86;P51531;Q8TF46;Q86W

J1;P30307;P36639;P35573;Q08211;Q9H6S0;O75688;Q6ICB0;O43598;Q5T890;P24666;Q15181;Q9NRC8;Q969S2;P67775;P63129;Q93008;P15259;Q86TP1;Q9NPI6;A6NG73;P38935;Q8NCE0;Q9ULC6;Q9BUL9;Q53HV7;Q8IZH2;Q9NQR4;Q92905;Q96FW1;Q92698;Q8WY54;Q15102;Q6ZUV0;O14595;Q8IU60;Q8N3C0;Q9NP77;O00303;Q5TA45;P42285;P53370;Q8TDQ7}

9156 [Cluster 833]GO:0008270+F molecular\_function [name] zinc ion binding [def]  
"Interacting selectively and non-covalently with zinc (Zn) ions." [GOC]

9157 Pathogen[ Q2Q067] interacts with 823 human partners: {E7ETH6;O95376;Q0D2J5;Q12901;Q9HC78;Q09FC8;Q9H4I2;Q01844;Q9UM63;O15014;Q92900;Q96SQ5;Q14974;Q9Y473;Q9BYE7;P07438;Q14526;Q8WV37;Q8N859;O95602;P52742;Q9BRH9;Q96N77;C9JN71;Q8NHY2;O43463;Q9UPP1;P17544;Q13118;P25490;P52434;Q8IXJ6;Q9UK13;P35789;Q6V9R5;Q8NA42;Q9Y6X8;O95639;O43167;Q2M218;Q8TA86;Q9UJN7;Q03923;Q8WV44;Q9UEG4;P62633;Q9BUG6;A6NDX5;Q8NEM1;Q9UC06;Q14258;P98182;Q9H7X3;Q9UPN9;Q9Y3S2;P56524;Q9UK11;P17029;P52738;Q9ULX6;Q9NR56;A8MTY0;Q9HAW0;Q9H7R0;Q96PE6;Q8IZD2;Q8IZ26;Q9BRR0;P10827;A6NJL1;O43361;Q9Y462;Q7Z6J0;Q96NI8;Q9UGU0;O75925;Q6NUM9;P55895;Q9UJL9;Q9UL41;Q9NS56;Q70YC5;O60304;P24278;P49790;Q8NEP9;Q6ZQV5;Q9HBE1;Q9NXR8;Q63HK5;O95391;Q8N0Y2;Q92664;Q5VTD9;Q15928;Q96K75;Q13887;Q8TA94;Q86YE8;Q08AN1;P49792;P58317;Q8WW38;Q6ZMY9;Q8WYH8;Q8N8Z8;Q6ZS27;A6NP11;Q9UL59;Q8N4W9;Q9H2P0;P10073;Q9HAZ2;O75151;Q16775;O60481;Q6IE81;P62273;A6NGD5;Q5SXM1;Q6IV72;A8MVS1;O14639;P10589;Q8N2I2;Q6ECI4;Q9UC07;P53804;Q8IUV8;Q9P0U4;Q9H9D4;Q12986;Q9NR48;P13056;Q8IXK0;Q6ZT77;Q9UHF7;O43189;P62508;Q9ULD5;P51508;Q14590;Q9NTW7;Q9Y2Y9;Q96NG8;Q6ZN06;P41182;Q9Y2X9;P19474;Q9H5H4;Q10828;O60260;P30793;P55197;Q8NBB4;Q96H40;P49910;Q8N5U6;Q15326;Q9NZV7;Q32MQ0;Q6P2D0;Q9HCL3;Q6U7Q0;Q93083;A6NIX2;Q9UKJ3;Q8TD23;Q9H0F6;Q96SK3;Q96IT1;Q147U1;Q15697;O43255;Q96LW1;Q9NZL3;Q7L2R6;P08151;O14618;O43439;Q99676;O75478;Q13077;Q96T88;Q96SL8;P37275;Q8IYW8;O75081;Q05516;Q8NF64;Q05481;Q02930;Q9NVW2;Q8NCK3;Q8NDW4;Q15696;O75820;P49116;P10074;Q7Z2E3;O60315;Q9P0L1;Q9ULV3;Q14119;Q9H4Z2;Q6P9A1;Q12933;Q96PQ6;Q86SE9;Q8N782;Q969S2;Q96NL3;Q8WTR7;Q9NYJ8;Q8TAW3;P51815;P14373;Q9UI59;Q8TF20;P34949;Q9HBS8;Q6ZR52;Q99684;P52741;Q9UDV7;Q8TF68;Q3KVC3;Q96WB0;Q9P255;Q8NC26;O43296;O94776;Q9H4T2;Q9UBU7;O14709;Q08ER8;Q14192;Q5T5D7;Q9NQX1;Q8TE76;Q6ZMW2;P15976;Q9UNL4;Q9BWX5;Q2M3W8;O14686;O15535;Q6H8Q1;O14628;Q8TBC5;Q6ZSS3;Q02447;P52594;Q86YF9;Q9NSD4;Q2M1K9;Q86YP4;Q9Y3Y4;Q6ZNA4;P17030;P17031;Q7Z340;Q86UE3;O75362;Q16670;Q96N95;Q9Y5A6;Q8TF47;P17036;Q9ULJ3;Q6VVB1;P17040;Q15560;Q2QGD7;P17010;Q95625;P17038;Q9NTG7;Q9UK12;Q8WU90;Q9UDW3;P38935;Q9NYG5;Q96CB8;P08047;Q8TC21;P11473;Q96C28;O75928;Q13342;Q16629;Q9ULJ6;Q15022;O43829;P16415;Q9BSM1;Q8NHM5;Q86Y25;P0CG00;Q8N184;Q96NJ6;Q8WUB8;P13640;Q13129;Q9H7S9;Q7Z3V5;Q3SXZ3;Q5TAX3;P28702;Q9UFB7;Q6IQ21;Q13398;Q53GI3;Q96MR9;Q6PJT7;Q14134;Q96BV0;P35227;A8MT65;A6NK53;Q86TJ2;Q9BUY5;O60663;P07902;Q96QC0;B2RFX5;Q8N3J9;Q8N6T7;Q9Y2P0;Q9Y2H8;O15304;P52743;Q49924;Q15937;Q7Z2W4;Q9UHK0;Q68EA5;O43823;Q8N5C8;O60711;Q96IF1;Q68DY1;Q7RTV3;P27797;Q8N5P1;Q9HCG1;Q6P280;Q9NRG4;O95159;Q8TAU3;Q92994;Q9UL58;P52747;Q96SR6;P78317;P11532;Q14929;Q5T619;P23769;Q8NFW9;Q14593;Q15929;Q8TB69;Q5T6S3;Q15072;Q15935;Q96C00;Q9BYK8;Q8IVP9;Q63HK3;Q5TA31;Q86Y13;Q9UI15;P04732;A8MUV8;Q96KR1;Q9P243;Q9ULM2;Q15047;Q9NP64;Q96N38;A8MWA4;P49356;Q9UGP4;Q5SVQ8;Q9BTC8;A8MQ14;Q96CX3;Q8IWS0;P25791;P17032;Q99728;Q96BD5;Q6P9G9;P26358;P51948;Q52M93;P15621;Q6GPH4;Q92782;Q14585;Q9NQX6;Q96MT3;P17022;Q68DI1;P51504;P04733;Q9UKY1;Q8N8C0;Q9Y2D9;Q96NSZ4;Q15654;P56270;Q6IQ32;A2RRD8;B4DXR9;Q6NX45;P17098;O75437;Q8NF99;P12755;Q9Y4X5;Q13360;Q9UBF6;P84022;Q6P9A3;B1APH4;Q6P1X5;P46939;Q8N448;Q66K41;P0C7X5;Q8IYH5;Q13330;Q15437;O60284;Q8WU55;P35992;O95628;Q96GC6;Q76KX8;A6NHJ4;Q9P2R6;Q8N3F8;Q8N895;Q96N22;A8MX4;Q8N141;Q03924;Q8TAT6;Q96LX8;O95486;Q8TBB1;A5JNZ3;Q96EP1;Q9Y2Q1;Q9H091;Q96K81;Q96NG5;Q13114;Q96PM5;Q86UW9;A6NNF4;Q13127;Q9P2J8;O95780;Q96JM3;Q6PF04;Q6NZY4;Q9HD42;Q9BR84;Q9H116;Q9Y6X2;Q9UBW7;P11161;Q9NWT6;Q9NTX7;O94855;O75152;Q13233;O15265;Q05BQ5;P09874;Q8NI51;P15622;Q96K62;Q7Z3K3;Q5T200;Q3KP31;Q5JV8;O43830;O43918;Q49A33;Q12873;Q9ULU4;O15164;Q9GZX7;Q3SY52;P35226;B4DX44;Q9H160;Q01081;Q8N988;P59923;Q9Y4L5;Q969J2;Q5VUA4;Q9NYT6;Q494X3;A6NM28;Q9Y2L8;Q8IYB9;P46100;Q8IX07;O60291;Q32M78;Q9H9Z2;O14771;Q9NQZ8;P0CH99;Q8N823;P17041;Q8N9K5;P55055;Q9UIH9;Q9BSG1;P0CJ79;Q3MJ62;Q969S3;Q8N7M2;O60765;Q8NB50;Q3ZCT1;Q9NRL2;O75164;Q5HYK9;P62875;Q99496;Q5VTR2;O95218;Q8N9Z0;P80294;O75312;Q92785;Q2VY69;Q96T23;P51523;Q9H963;Q969R5;Q9NYW8;O76064;Q8WY41;Q86TG7;Q5BKZ1;Q9BYN7;P62072;Q96GE5;Q9NWF9;Q86VP8;Q8N720;P51786;Q9HCZ1;Q8NB42;Q8TDB6;P23193;Q9HBT7;Q9C035;Q86VP1;Q8TBZ5;Q9HAH1;Q86VM9;Q9Y2P7;Q6P3V2;Q9Y5J7;O75346;Q14588;Q14839;Q6ZMV8;O15504;P15336;Q14592;Q6AZW8;Q6NSZ9;P28838;Q86V15;P28698;Q6ZNG0;Q8N9F8;P0C7V5;P17021;P08235;Q9UNY4;Q8WV99;Q96QT6;Q9UID6;Q14872;Q9UDV6;Q3KNV8;O95271;A4D1E1;Q5CZA5;Q9Y3C5;Q96HQ0;Q99590;Q9UKN5;Q9UNY5;Q9H707;O75150;Q06455;Q9NSJ1;Q9UKT9;Q9H0A6;Q5SVZ6;B4DU55;Q6PG37;O75373;Q9BYX4;Q8IW36;Q19AV6;Q96CS4;Q13642;Q49AA0;Q8N490;P11474;Q9GZU2;Q86TJ5;Q9NS23;Q8IVC4;Q8N488;Q9UK10;A8MUZ8;P29083;P04731;O75382;Q96SE7;P47974;Q86YI8;Q7L945;Q8NDQ6;O75764;Q13106;Q9GZT9;Q86XF7;Q5TEC3;O95487;Q9UIL8;Q96PU4;O95125;Q9UIF9;Q68CP9;P17019;P0CG31;P0C7X2;Q92793;Q9Y2G7;Q8IYX0;Q93052;Q9UJW7;Q96MF7;Q9NSC2;Q92670;P52736;Q8N3Z6;P63272;Q96NJ3;O75800;Q86XN6;Q9GZX5;P53803;Q9H8G1;Q96MN9;Q9BQA5;P17025;P42677;A6NK75;Q8N587;Q8N7Q3;Q7Z398;P13682;Q8IYI8;P26651;Q86V71;P52744;Q9UGR2;Q86Y01;A6NN14;Q96JL9;P0CB33;Q9ZNH5;Q9NWS9;Q3ZCX4;Q9BX82;Q86XK2;Q9HCM9;Q9P0T4;P80297;Q8IY57;Q5VVG9;Q5HY98;Q9UIF8;Q9UH90;Q15637;Q8NA19;Q8NEK5;P55198;Q9Y252;Q8WXI9;O00463;Q8NB12;O43309;O14978;P35637;Q6ZN79;A7E2V4;Q9H7R5;Q9C0F3;O60870;Q8N972;Q13490;Q9H0M5;Q9UL40;Q6ZNO8;Q8NHY6;Q8TBZ8;Q9UIE0;Q9Y468;Q68DY9;Q5VIY5;Q9CQG24;O75290;Q9H5I1;P22681;Q6P1K8;Q8WXB4;P49711;A2A288;Q8N5A5;Q9NVV9;Q00987;Q9HC16;P9BWM5;Q8TF32;Q96GM8;Q16600;Q2M3X9;P52737;Q9UQR1;Q8TAF7;Q8N7K0;P49754;O14802;Q15776;Q66K89;Q08AG5;Q12874;Q15436;Q86W11;P51522;P22736;Q6ZN17;O15392;Q96PM9;Q96BR6;Q96IR2;Q06587;Q969W8;Q6ZNA1;O95201;O43345;Q8TDD2;Q5FWF6;Q8N393;P62877;Q8WTZ3;Q8NAP3;Q96ND8;Q96LW9;Q12830;Q3MIS6;Q9UL36;P02795;Q8TAQ5;Q13501;Q13105;Q9NV72;Q6ZNG1;Q8IYNO;Q96JC4;P09234;O15015;Q9UPG8;Q9Y2A4;Q07352;P21506;Q14584;Q13888;Q9Y6R6;Q86XU0;P17014;Q8IUD6;P17023;Q9Y242;Q8NDP4;P18146;Q7Z6E9;Q03112;Q15650;Q15428;Q9NW38;P17028;O96028;P15822;Q03936;Q00403;Q13064;Q8N2W9;P17024;A8K8V0;P98168;Q9UBS8;Q7Z3I7;Q03938;Q8TF39}

9158 Pathogen[ P0C214] interacts with 922 human

partners: {P22681; Q86UD4; A6NDX5; Q9UGP4; Q6ZN55; Q5BKZ1; Q6NX49; Q6PDB4; Q92618; Q6NZY4; Q06732; Q8NEK5; Q9NQZ8; Q14526; Q8NFW9; Q8NI51; Q96GM8; Q9Y6X2; Q6IQ32; Q7Z3K3; Q96C28; Q14527; Q96MU6; Q9P255; Q9UKN5; Q9RE9; P35226; Q8NA19; Q969S3; Q8IWW8; A8MUV8; P08294; O43296; Q6ZN17; Q8TBZ8; Q8IZC7; O75467; Q6ZN11; Q96LW9; Q9UID6; P49754; Q6ZNA1; Q9P0T4; Q7Z6J0; P35789; Q8NDQ6; Q9H5I1; Q96PM5; Q13887; Q9H0A6; P35227; P17032; Q14593; Q15697; A6NGD5; A8MVS1; Q9HCZ1; P19474; Q02930; P56270; O43829; Q15022; P51508; Q7Z398; O60663; Q9NRL2; P11474; A8MQ14; Q15047; Q13330; P52743; Q97728; P35637; Q9POL1; P17010; Q63HK3; Q9ULD5; A8K8V0; Q9UHF7; Q8WV44; O75764; O43830; Q9BS34; Q9Y2A4; Q6PEW1; P0CI00; Q14872; Q8IXK0; Q8N7Q3; Q13490; Q86SE9; Q16775; Q8IYN0; Q14929; Q96KR1; Q8NF64; P28838; P17023; Q9BX82; Q9Y2D9; Q14591; Q9Y5A6; P53992; Q6ZLN57; P51814; Q5T5D7; Q05481; A6NHJ4; Q96SQ5; Q92664; P0CB33; Q9UL59; O75925; P52744; Q6ZNH5; Q5JVG8; Q8IYW8; Q8NC26; Q8N5A5; P15336; Q9Y473; Q96LW1; Q9NS23; A6NP11; Q5SVZ6; Q9UH90; Q96I27; Q9UJL8; O15535; P53803; Q8TD17; Q6PG37; Q9NTW7; Q8TF45; Q9BSM1; O75820; Q9BWM5; Q8TAQ5; Q9UDW3; P52742; P62273; Q14587; Q12873; Q9NPC7; O95628; Q86UE3; Q9UIH9; Q92900; Q8TBC5; Q00987; Q9GZU2; Q8NDP4; Q96CX3; Q96NJ3; P52738; Q5JVG2; P0CG31; Q9NR56; Q96K62; Q96BR6; Q9HBE1; Q8NCA9; Q7L2R6; Q9NS56; O75478; Q8TD23; Q9P2F9; Q9C035; Q8N587; Q8TAU3; Q8N2W9; Q14119; Q03112; Q9UJN7; P17019; Q8N0Y2; Q8IVP9; Q9UC06; C9JN71; Q68DY1; Q5MCW4; Q9P2N5; Q99676; Q8NCK3; Q8N823; Q9UNY5; Q8NEP9; Q9HD42; Q08AN1; P17022; O75362; Q9NUA8; Q9H6B1; P23769; Q5T6S3; Q92793; Q16587; Q7Z7K2; Q969W8; Q15637; Q9UIF8; Q499Z4; Q5T200; Q96GE5; O95625; P79522; Q86XU0; Q96QT6; Q8TF20; O43167; Q6P9A1; P84022; O75437; Q6PK81; Q6P1L6; Q9UL58; Q86WB0; P29728; O95125; Q5TYW1; Q9NTX7; Q15428; Q6PF04; Q86WZ6; Q6PII5; Q9P2R6; P56524; Q96PU4; Q9UK11; Q86YE8; Q9NR11; Q96CS4; O14709; P17029; P17544; Q12986; Q9Y2Y9; Q96BD5; Q00403; Q96SR6; Q8NAP3; Q9UK13; Q9UL40; Q9H0F6; P17026; Q96MN9; Q8IUD6; Q96SK3; Q9NW07; O14639; Q9UNL4; Q5HY98; Q2MLK9; Q63HK5; O75123; Q2M3W8; Q06455; Q9UHK0; Q02386; Q15973; Q3MJ62; P37275; Q3KP31; Q6PJT7; Q8N8C0; Q15928; Q8N448; Q8NHY2; P49792; Q9ULJ6; Q86TJ2; Q9UPG8; Q96K58; Q9BYX4; Q8NG27; A8MT65; Q9Y3C5; Q96JC4; P98168; Q7Z3I7; Q8IZ26; Q8N9F8; P17024; Q9Y2Q1; Q6ZR52; O14771; Q12901; Q96NG5; Q96N77; O75164; P55198; Q96SE7; O75151; Q9H091; Q9UBU7; Q6ZN19; Q9UL41; P17038; Q9Y468; Q9UC07; P38935; Q494X3; Q96MR9; Q9Y2P0; Q96K75; P62877; Q9UII5; Q4V348; O43463; Q96SZ4; Q6IV72; Q8N141; Q15436; P51786; Q9BY31; Q01844; Q15560; Q96BV0; P13640; Q6P1K8; Q5SVQ8; Q8N883; Q96MT3; Q3SXZ3; Q9GZX5; Q9NXT0; Q13064; P51523; Q9H4I2; Q147U1; Q9BSK1; P24278; Q96T88; P17031; Q9HCX3; P78317; Q5VTD9; Q7Z2W4; Q13398; Q53GI3; Q9HBT8; Q9NWF9; Q8N5U6; P62072; P17030; Q03936; Q96NL3; Q8TF68; Q9UKJ3; Q9BYK8; P80297; O75800; Q5VWG9; Q86XN6; P11532; Q13501; Q07352; Q8N5C8; O95201; Q8TC21; P28698; Q9NWS9; Q14258; P15622; Q6ECI4; O75312; Q6ZSS3; Q9BRR0; Q6ZN08; Q8N859; Q13129; Q13642; P13056; Q9UIS9; Q9HC78; Q9HCL6; B1APH4; Q9UL36; Q9ULJ3; A6NIX2; Q3KNV8; A2A288; P98170; P30793; Q9Y6R6; Q49AA0; O60870; Q8TAT6; O43439; Q13233; P49790; Q7Z340; Q6ZNG1; Q15696; Q9UIF9; Q8LYH5; P55895; P49116; Q96IT1; O60765; Q06730; Q9UJU3; Q8N184; Q9UGU0; Q86Y25; B4DXR9; Q8IWS0; P51948; P52791; O95487; O75373; Q8W7Z3; Q9NVV9; O94776; Q9Y2H8; Q15929; Q8N4W9; A8MYX4; O95071; Q96PE6; Q3ZCX4; Q7Z6E9; Q8N488; Q9H5H4; Q06587; Q6P280; Q5VUA4; Q16600; P17014; Q9NTG7; Q8N9K5; Q8NF99; Q9UJW7; Q8TBZ5; Q49A33; Q8N2I2; O75290; P49356; Q96JF6; P46100; Q6P9A3; Q6AW86; Q86VP1; P26358; Q6ZMW2; Q9UNY4; Q8TF47; Q92994; Q6DD87; P04732; O43189; O95376; Q15437; P51504; Q7Z2E3; Q96N95; Q8TF39; Q12933; Q9NVW2; Q96MF7; P46939; Q86YP4; Q6P2D0; Q9C0F3; Q9H7X3; Q8YN22; P55197; Q9HCK1; Q9NYT6; Q03924; Q5FWF6; Q9Y242; Q9NYW8; Q8AG5; Q9BYE7; Q86TJ5; Q9H8G1; Q8IYL2; Q86UP8; Q8N6M9; P63279; Q9HZ42; Q8W7M2; P17028; Q9P2J8; O95780; P0CH99; Q99590; P98169; Q8N490; Q3MIS6; Q8WW38; Q9Y5J9; B4DU55; Q9H160; Q9N9X6; O75152; P51815; Q6ZS27; P51522; Q8N393; O43823; O15060; P53804; Q9BUG6; Q9UBS8; Q15654; Q6ZMY9; O15014; P02795; Q9GZT9; Q8WXI9; Q05B05; E7ETH6; Q2QGD7; Q9Y6X9; Q96N58; P17020; P04733; Q76KX8; Q9NSC2; Q8TE76; Q969J2; Q9ULM2; Q14192; Q86V71; Q9Y3M9; P17027; Q86UQ0; Q96GC6; P41182; Q9Y6X8; O60711; Q6P9G9; Q03923; Q5VZL5; Q8N972; P17098; Q6ZT77; P21506; Q8IYB9; Q01081; Q6P1X5; Q8N6T7; Q9UBW7; O95251; Q4LE28; P17035; Q9HCM9; O14618; Q8TBB1; P0C7X5; Q8IX07; Q9ULX6; Q9UJL9; Q9H9Z2; P12755; Q6U7Q0; A4D1E1; Q13127; Q8NDW4; Q9BSG1; Q8WV99; Q15650; P62875; Q2VY69; Q9Y252; O75346; Q86YI8; A2RRD8; Q6ZNG0; Q15072; P13682; Q9BTC8; Q86W11; Q12874; Q6NSZ9; A8MWA4; Q5SXM1; Q96ND8; Q5T431; Q6ZNA4; Q9H4T2; P17040; O95639; Q6GPH4; Q6V9R5; Q9Y2X9; P58317; Q9UDV6; Q96C00; P10074; O43918; Q68EA5; Q99496; Q9NP64; P52747; Q8IYX0; P26651; Q8N9Z0; Q9NV72; Q5VIY5; Q8NUB8; Q9Y462; Q9UEG4; Q15935; P62633; Q9UKT9; P36508; P43243; Q7L945; O43345; Q9H4P4; Q6IE81; O15392; Q8WU90; Q9Y2G7; Q8WY41; P17041; Q8NB50; Q96HQ0; Q6NX45; P49711; Q13106; Q02447; P42677; O60291; Q8N8Z8; P17021; P18146; Q96JL9; P0C7X2; Q8WTR7; P07327; P0CG00; O15164; P15621; Q0D2J5; P0CJ78; Q13114; O95602; Q66K41; Q8IVC4; Q96MX3; Q14584; Q96T23; Q3SY52; Q9NQX1; P27797; P07438; A6NK75; Q96CB8; Q9C0D7; O15504; Q6ZN06; P57071; Q6IQ21; P34949; Q96J83; P07902; Q14592; P17036; O43309; P17039; Q9NX65; Q9Y5J7; Q8TAF7; P98182; P0C7V5; Q9UDV7; Q86TG7; Q86XK2; Q8NB42; Q96H40; Q52M93; Q8IXJ6; Q8N8L2; Q86Y13; A6NNF4; Q9HBS8; Q96SL8; P11161; Q13888; Q6ZRF7; O75150; Q9UJW8; Q96JM3; Q9GZX7; Q6ZMV8; Q5T619; O15265; Q96PQ6; Q9NSD4; Q8NHY6; Q8IW36; Q14585; P80294; O14978; P16415; Q6ZQV5; Q9UIE0; Q2M218; Q9NR48; P52434; Q8N7K0; Q9HCG1; Q9NZV7; P04731; Q5TEC3; Q9H9D4; A8MUZ8; O60260; Q0VGE8; Q08ER8; O95218; P49910; Q9BR84; Q86V15; Q8TB69; Q9H707; Q96N38; Q9HBT7; Q68CP9; P08151; Q92804; Q9UFB7; Q14974; A6NM28; Q9ULU4; Q93083; P09234; Q99684; Q6H8Q1; Q9Y4L5; Q9HCL3; Q6NUN9; Q9P243; P52594; Q13342; Q9BUY5; Q8N3J9; Q9BQA5; A6NFI3; Q15776; Q9BYN7; Q9UM63; Q8N782; P10828; Q7RTV3; P23193; Q8N1W2; Q9H7R0; Q8WYH8; P52736; Q8TA86; Q13360; Q96NJ6; P14373; Q3KQV3; O00463; P17017; O95391; O14628; Q9Y3Y4; Q5F1R6; Q3ZCT1; O95271; Q86Y01; Q8NA42; Q86YF9; Q96H86; O60315; Q9BWX1; Q9Y4X5; Q8N895; Q8N3F8; Q9Y3D2; Q32M78; Q5VTR2; Q19AV6; Q8NB12; Q8TDB6; P0CJ79; Q96NG8; Q15326; Q9UQR1; Q6P3V2; Q8IYW5; Q6ZSB9; Q969R5; Q6AZW8; Q14590; O43255; Q9NZL3; Q9UJ78; Q86XF7; Q96CA5; P62508; Q9NRG4; O76064; Q96EG3; Q9H963; Q92782; Q9UPN9; Q9BS31; Q5EBL2; Q5CZA5; P15822; Q96LX8; O60284; Q8WV37; P52746; Q9H0M5; Q9NSJ1; Q9UK12; Q9Y2T3; Q9ULV3; Q9NYG5; Q96N20; O15304; Q8WXB4; Q9Y2P7; Q9ULD9; Q9Y2L8; Q2M3X9; Q86UW9; Q66K89; Q96NI8; Q92785; O43361; Q8NEM1; O75081; Q70YC5; O14802; A6NK53; Q9UBF6; O60304; Q9H7R5; A7E2V4; Q9UPP1; Q9NYJ8; O95486; Q13105; P08047; Q09FC8; Q14966; Q8IYI8; Q8TA94; Q05516; Q12830; Q96PM9; Q6VVB1; B4DX44; Q16629; P52737; Q14839; Q8TF50; P0CG24; Q68DY9; O60384; A6NJL1; Q9NQV7; Q5VZF2; Q5HYK9; Q9HAH1; Q14588; P29083; Q96QC0; Q7Z3V5; A8MTY0; Q9NW38; Q9UK10; Q8TDD2; Q9H7S9; Q8IWW7; Q8TAW3; P09874; Q5JNZ3; O15015; Q6ZN79; P17025; Q96EP1; P47974; Q15937; Q8N3Z6; Q9IZD2; Q9P1U0; P10073; P52743; Q5EBM4; Q9H2P0; Q8IY57; Q86T29; Q8NBB4; O94892; Q16670; Q32MQ0; Q5TAX3; O75928; Q7L3S4; O96028; Q92670; O94855; P52741; Q96IR2; Q8N988; Q9H116; Q8TF32; Q8N8J6; P59923; Q9NWT6; Q86VM9; Q03938; O60481; Q3KNS6; Q8N720; Q8NHM5; A6NN14; Q9BRH9; Q9U

GR2}  
9159 Pathogen[ P03346] interacts with 1154 human partners: {Q86UQ0;E7ETH6;Q96T92;Q5F1R6;A6NK53;O15014;Q7Z3K3;Q3KNS6;O75382;Q96NG5;Q5JVG2;Q969S3;Q13886;O15265;P08048;Q9BZEO;Q9NS91;Q12901;Q05481;Q9Y6X9;O95201;Q9NWS9;Q9UPN9;Q7Z398;Q8NI51;Q9UKS7;Q96N20;O95639;Q9Y467;P17097;Q3KNV8;Q13077;Q12874;Q12830;Q9NZU5;Q96LW1;O00463;P57071;Q5T5D7;O75592;Q7Z7K2;Q9HBT8;Q8TA86;Q9UHF7;Q13263;Q494X3;A8MY4;Q9NQX6;Q9NR83;Q5TD97;P98182;Q8TF39;O95159;Q02386;P38935;Q9NQX1;Q86UW9;P10827;Q9P2G1;Q8N4W9;Q9H9P5;P49910;P11473;Q3MJ62;O94892;A6NGD5;O15535;Q8IZM8;Q9NP64;O76064;Q9NPA5;P55198;Q9BTC0;Q9NQV7;A2RRD8;Q6P1L6;P52434;P0CG31;Q9HAH1;Q9BV68;Q08AN1;Q9H8N7;Q96NJ6;A2A28;O95625;Q49A33;Q9BRR0;C9JN71;Q6ZRF7;Q96C55;Q9UGP4;Q7Z340;Q5T1R4;Q96MR9;Q8WV37;Q9NZV7;Q8WTF3;Q96C00;O75112;Q15928;Q96MF7;Q9H091;Q9BWM5;Q14591;Q99612;Q9BUY5;Q9UEG4;Q14258;P36508;Q9Y2P0;A6NN14;Q8NCA9;P14373;Q8WYB5;Q52M93;Q9H116;Q32MQ0;Q01538;Q8NAF0;Q3KNW1;Q15916;Q9ULD5;Q96KR1;P46100;Q6PCD5;O15392;O60765;Q8IZC7;Q9UQR1;O75150;P56270;P17039;Q2QGD7;O75362;Q9Y2P7;Q8N6M9;Q8NAP8;O14639;Q5HYK9;P06401;Q9UL59;O43918;Q9H0M5;O43167;Q9Y4X4;P17098;Q86V71;O14901;Q9UNL4;Q9H2H0;Q8NC26;Q96NJ3;Q9NWF9;P62633;Q13489;P15336;Q9U1F8;Q96HQ0;Q9NU63;Q13129;Q9H8W5;Q2M218;P52739;O15209;Q9UGR2;P0CJ78;Q8N141;Q8WYH8;Q5VTR2;Q7Z3V5;Q9H2P0;Q6ZT77;Q9UL58;Q8NCN2;Q8N823;Q8WW38;Q6ZQV5;P52747;Q7Z6J0;Q9Y2L8;P08235;O95171;Q3KQV3;O43296;Q8TAQ5;O95376;Q6PEW1;Q9BXA9;Q86TJ5;Q9Y5W3;Q96QC0;Q96K75;O43309;Q5FWF6;Q9ULM2;Q9NP62;Q6ZSB9;Q7Z3I7;Q9UKT9;Q9POT4;Q06732;Q96H40;O95714;P48443;Q8N7M2;O75123;Q9Y3C5;Q96IQ9;Q14590;Q9HD42;P0CH99;Q96K62;Q9NW07;Q6V9R5;P35789;O75312;Q8WU90;O94875;P52740;Q9NR11;Q9BYM8;Q8TD23;Q08AG5;Q14149;Q99728;Q9P2N5;P49754;P35226;Q969W8;Q96SZ4;O95391;Q96MU6;O60315;Q9BWX5;Q6P1K8;P17027;Q5MCW4;P51786;Q8NHY2;Q03936;Q96JG9;Q15911;Q2M1K9;Q86T29;A8MUV8;Q8IUD6;O95628;Q147U1;Q8TD17;Q14587;P52738;Q9NQV6;Q8TF45;P49116;P0CB33;Q9UUQ4;Q8N680;Q9Y3Y4;A8MV51;P24278;P43243;Q8WV99;Q96KM6;Q8NEP9;P23769;Q14872;Q5VIY5;Q14527;Q8IYL2;P25490;Q8N5U6;O15304;Q5H9K5;Q15637;O14978;Q8NA19;Q9Y483;Q8TE76;P55895;Q6P280;Q9NSC2;Q5T0B9;O43313;Q8N393;Q96127;Q8TF20;Q13888;Q8NF99;P52741;P55197;Q9C0A1;Q86YE8;Q6ZMY9;Q86WB0;O75820;P25800;Q86WZ6;Q96PM5;Q8IZ20;P56524;Q9UL68;Q9UK11;P04732;Q8IYH5;O43298;O14709;Q96T51;Q6NX45;Q7Z3G6;Q9H4P4;Q3SY52;Q9Y5J7;Q96QT6;P17026;O43255;P53803;P17022;Q8N5A5;Q8TBC5;Q12986;Q5HY98;P35227;Q86TG7;Q68DI1;Q9UBU7;Q86UE3;Q9N1TX7;Q9H9D4;P98170;Q5T200;Q3MIS6;Q8N9K5;Q8N895;P52737;Q7L3S4;O94776;P28698;Q9ULJ3;P13056;Q9NQ69;Q8IXH6;Q96CS4;Q9P0L1;Q9C035;Q96IF1;Q63HK5;P52742;Q8WV22;Q9UDV7;Q9C0D4;Q9BYE7;Q8WTR7;P15622;Q8NDQ6;Q9P2Y4;P10588;Q9HCK0;Q8IVC4;Q8TA94;Q9C0F3;Q6PG37;P06703;Q9NYG5;Q9NX65;Q8TF32;A8MQ14;Q86XK2;Q86UD4;Q96SE7;Q9HCG1;Q15942;P26358;P62273;Q15560;Q9P2F9;Q8TAF7;P0C7X2;Q9Y3M9;Q96BR9;P17038;Q9H4Q3;A6NK75;Q9H609;Q96N38;O75626;Q9NTW7;Q9Y3S2;Q9BSM1;Q9NRL2;Q14586;P17014;Q92670;Q8N587;P10014;Q9UM63;Q9H0F6;P0C100;Q8NB42;P80294;Q9NV72;P63272;Q86VK4;Q3SXZ3;Q5TA31;Q96BV0;Q9H165;Q09FC8;Q8N859;Q70YC5;P52743;O15090;Q16629;Q13114;Q8NBB4;O75151;Q03923;O75764;Q8NCP5;Q8TAP4;Q6H8Q1;Q9UJW8;Q86V15;Q9BY31;P46939;Q9NUA8;P17032;Q8N2I2;Q13398;Q66K89;Q53GI3;Q8NF64;Q8N554;A6N1JL1;P17025;O43463;Q96AX9;P155621;P17010;Q16342;O43345;Q6P9A1;P59K17;A8MT65;Q9HCX3;Q9ULJ6;Q6EKJ0;Q9NYW8;O00151;Q13351;Q00987;P0CG40;Q0VGE8;Q8N7K0;Q9UKJ3;Q9H4T2;Q8NDX6;Q9NSD4;Q66K41;Q9ULX6;Q499Z4;Q6P9G9;O94855;P08047;Q9H582;Q96LW9;Q8TF68;Q9HC78;Q9H5H4;Q9NRG4;Q8N9F8;Q92766;Q86YF9;Q96JM2;Q8N5C8;Q8TDD2;P98168;Q96MT3;Q9H963;Q9UK10;Q14119;O95600;Q8N8E2;Q96CX3;A8MUZ8;P52736;P52756;P98169;Q9H0A6;Q8N490;Q14592;O14618;Q9BWF3;Q9C029;O15060;O60663;Q14526;P07438;P17036;Q6ZNH5;Q6ZMW2;Q3ZCX4;Q8TBZ5;Q4LE28;Q9BS34;Q9UL40;P0CJ79;B4DX44;P62877;Q96MN9;Q969S2;O60870;Q8NFT6;O75925;Q8NBF1;Q6ZNL1;P28702;P35637;P21506;P51508;Q9Y330;Q9UK13;Q8N0Y2;P04733;Q8N8Z8;Q86VM9;Q96JL9;Q9P243;Q8IYI8;Q8ND82;Q96EP0;Q92794;P13640;Q9NS56;Q93083;P84022;O14628;Q86Y25;Q8IWS0;Q86SE9;Q8N1W2;P25791;Q96DT7;Q14847;Q8IYX0;Q8NHY6;Q9BRH9;Q8WUU5;P50479;A7E2V4;O60481;Q9UIS9;Q6ZNL1;Q8NB15;Q6ECI4;Q15436;Q9UNY5;Q8IYM9;Q8N1G0;O43829;Q9H7R5;Q8TF47;P22736;Q5EBM4;P49356;A8MWA4;P80297;Q15929;Q9UL36;Q9NXT0;Q5JT82;Q5TAX3;Q9ULU4;P15976;O43670;O95125;Q9BR84;Q6P9A3;Q8N339;Q6ZMV8;Q969R5;Q96PE6;Q5JVG8;O75478;O43189;Q96F45;Q9P0U4;Q02446;Q15437;O94972;O95863;Q969G2;P52746;Q15072;Q9NYJ8;P16415;Q6AW86;Q9H7X3;Q96N22;Q9NQZ8;Q8IYW8;Q68EA5;Q9UDV6;Q15022;Q9P2R6;Q9H4I2;Q03924;Q7Z6E9;Q9BX82;Q86YP4;Q06730;Q99684;P17031;Q8N8J6;O95251;Q8N883;Q9UK12;Q15973;Q13342;Q14192;Q9H8G1;P2RXF5;Q9UPQ4;Q5JNZ3;Q8WXI9;Q13118;Q8TBZ8;Q9P2J8;O95780;O75164;Q9UHK0;Q3KP31;Q6ZN79;P52744;O75541;Q03112;O75373;P17041;O60284;Q6IQ32;Q9Y242;Q86V26;P52594;Q2M3W8;Q08ER8;Q5SVZ6;Q02086;Q5SVQ8;Q14593;Q9GZT9;P48059;Q96BR6;O43361;Q6NZY4;Q8TCN5;Q05BQ5;Q7Z4V0;P47974;Q9HCM9;B4DU55;O60304;Q14585;Q92784;Q96N77;Q6IQ21;Q6ZS27;Q9H8Y5;Q8IWT3;O75840;Q8N7Q3;P49711;Q13330;Q01954;Q5VZF2;A4D1E1;P51815;Q6P1X5;P17544;Q9Y6X8;O95361;A6NNF9;Q9H7S9;Q8TAW3;Q8NA42;Q8NB12;Q96C28;Q96N95;B4DXR9;O75346;P37275;Q01081;Q07L2R6;P17029;Q13064;P36954;A6NIX2;Q6DD87;Q9UIF9;Q6PF04;Q8IUQ4;Q8NEM1;Q86XN6;Q9BU19;O43439;P10073;Q8IX07;Q96T23;Q9C040;Q8TC21;Q9BUG6;Q19AV6;Q9UNY4;Q13233;P17035;Q96NG8;Q9Y2Y4;Q9Y462;Q9HCZ1;O14686;Q9HCE3;P17021;Q9UPP1;P62072;Q6ZN06;Q63HK3;Q13887;Q13105;Q6ZNA4;Q8NDW4;Q5SXM1;Q96GM8;Q8N8C0;Q96NI8;Q8N6T7;Q6N043;Q6Q0C0;B1APH4;Q9UDW3;Q96SK3;Q6BEB4;Q86YH2;Q99590;Q4V348;O75554;P17030;Q99496;Q07352;Q9H5J0;P78317;O95718;Q8N9Z0;Q9Y468;O60281;Q3ZCT1;Q5TYW1;O94929;Q96JM3;Q8N2W9;Q9H707;Q8IYW5;Q8TBB1;Q5VTD9;Q13642;Q96EG3;Q6VVB1;Q9UBS8;Q14966;Q8NB50;P30622;P09874;Q6IE81;Q9Y6R6;O75469;Q9NQ03;Q9HBE1;P78364;Q15935;O95486;Q9Y2G7;Q8WY41;P27797;P41182;Q92994;Q8NFW9;Q9BYX4;Q76KX8;Q8N5P1;Q8IYB9;Q9NRM2;O60291;Q9BUZ4;P17028;P17020;Q9UH90;Q8N3F8;A6NP11;Q05516;Q9BWW7;Q8N720;Q9Y2619;O43830;P17017;Q9UHD1;O60260;Q86XU0;Q9BWF2;Q96ME7;Q96B59;O95602;Q6ZSS3;Q6PDB4;Q9UJ41;Q9C0G0;P42677;Q14584;Q9H2C1;P10072;P11161;O15151;Q8TB69;P02795;Q15326;Q96JF6;P17023;Q15937;Q9Y2D9;Q8TAT6;Q49AA0;O75437;Q17R98;P0C7V5;Q8IYW8;Q6P2D0;O95218;O14771;Q96CB8;Q14596;Q96SL8;O95271;Q6GPH4;Q6U7Q0;P62508;P19474;Q9H8B5;P10828;Q9UGL1;Q9UBR4;Q86XF7;Q15047;P34949;Q9HBT7;Q8NAP3;O15015;Q9NSJ1;Q8TF50;Q9Y2K1;Q9BYN7;Q9UGU0;Q9GZU2;Q96MM3;Q96PQ6;Q6ZN30;Q9UII5;P11474;P51504;Q9BR11;Q9HA38;Q8IWB3;Q05215;Q9P255;Q9GKX5;Q9UK33;P49790;Q13490;Q7Z2E3;P61968;Q9H4Q4;Q96ND8;A6NDX5;P04731;P11532;Q9BSK1;Q12873;Q8N972;Q86YI8;P58317;O95487;Q9Y4L5;Q96PU4;P22681;P13682;Q2M3X9;Q9Y5A6;A8MTY0;Q96LX8;Q9UFB7;Q7L945;P17040;P

51522;Q9UKY1;Q9UPG8;P59923;Q9H5V7;P23193;Q7Z5J4;Q96NL3;Q9HCL3;Q5TC79;Q8TDB6;P0C7X5;Q96ITL;Q9UC06;Q13029;Q9BYK8;Q8IXK0;Q9NWT6;Q9Y2X9;Q6GQQ9;P29083;Q8NHM5;Q969J2;Q16600;P18146;Q8WUB8;Q8N782;Q9BS31;Q86UZ6;Q00403;Q9H9Z2;O75398;Q8IYN0;Q92793;Q9UID6;Q15697;Q9NR48;Q6ZNO4;Q6ZNS7;Q01844;Q6NUN9;Q8N488;Q13360;P53804;Q5T6S3;Q5T7W0;Q16775;Q9Y4X5;O75467;Q9NZL3;Q9Y6X2;Q93052;Q96H86;Q15776;Q9Y6Q3;P51523;O00482;Q86T24;Q9H5I1;Q9Y252;Q9WN38;Q8NEK5;Q9Y2A4;Q02930;Q86Y01;Q14588;Q6AZW8;O95071;Q8IY57;Q96K80;O75290;Q9HAZ2;Q01101;P26651;P17019;Q8NCK3;Q9BZR9;Q6IV72;Q86UP8;Q16587;Q6P3V2;O75152;Q5VWG9;Q8IZ26;Q92900;Q9UIE0;Q8N988;A1L020;Q8TD94;O75928;O75800;Q9UL41;Q96GC6;Q15696;Q9Y2J0;Q6FIF0;Q96CA5;Q68CP9;Q9BSG1;Q15654;Q9BTC8;Q8NG27;Q6AHZ1;P35398;Q9BXX1;Q9UJU3;Q68DY9;Q9Y473;Q96CK0;Q86UP3;Q9UJN7;Q8NEA6;Q8N3Z6;O43900;Q5EBL2;O00110;Q3SY56;Q0D2J5;Q16670;Q9UBZ4;Q9NTG7;Q9Y2H8;Q68G74;Q9HRE9;Q9BWX1;Q92804;Q9ULV3;Q8N3J9;P09234;Q8IVP9;Q5CZA5;Q7RTV3;Q6PJT7;Q92664;Q9NYT6;Q8WXB4;Q9UKN5;Q13285;P15822;A6NM28;P0CG00;Q06587;Q9NVV9;Q9H160;Q02447;Q96N58;O94822;Q8TEC5;Q6ZNG1;Q6NX49;Q5TEC3;Q8TDZ2;O60711;Q9NS23;O43823;P51948;Q99676;Q96SR6;O14802;Q96DX7;Q9UBF6;Q6ZNO8;Q9UUL8;Q86VP1;Q8IZD2;O15164;O75081;Q9HBF4;Q9NR56;Q9UIH9;Q96PM9;P53992;Q92618;Q92785;Q9UC07;Q14929;P55055;Q8TAU3;Q9Y2Y9;Q96SQ5;Q15650;Q6NSZ9;Q496Y0;Q9NXR8;Q9H4Z2;Q13106;P17024;Q96T88;Q9UJL9;P31629;Q9UJW7;P51814;Q6ZR52;Q9H0E7;Q132M78;Q9Y4E5;P62875;Q9P1Z0;Q86Y13;Q9NVW2;Q6ZNS5;Q96JC4;Q2TB10;Q86W11;Q14134;Q2VY69;Q96EP1;O15504;Q6ZNL7;Q8N184;Q14839;O15062;Q8N8L2;P0CG24;Q96MX3;O00488;A8K8V0;Q6ZNL9;Q13127;Q96JB3;Q6ZNG0;Q9P1U0;Q92782;Q9Y2Q1;Q13501;Q9H7R0;Q68DY1;Q86TJ2;Q15428;A6NHJ4;P49792;O96028;Q9GZV8;Q9NUK0;Q8WV44;Q8NDP4;Q86XN8;Q96IR2;Q5BKZ1;Q9BQA5;Q6PK81;Q7Z2W4;Q9HAW0;P08151;Q06455;Q14974;Q9UJ78;Q5VUA4;Q9UBW7;Q96GE5;Q5U5Q3;Q96K58;Q03938;Q9NPC7;Q92610;A6NFI3;P10589}

9160

Pathogen[ Q85601] interacts with 1025 human

partners: {Q9UQR1;Q9HCZ1;Q8N8C0;Q5SVZ6;Q9ULM2;Q9HCG1;Q9UBZ4;A6NNJ1;Q8IXK0;Q9P2R6;Q3KNS6;Q92618;P18146;A4D1E1;Q494X3;O75373;Q8N1G0;P08048;Q9H5I1;O95625;Q7Z6E9;Q6NX45;O14639;Q9UPN9;P78317;Q8NI51;Q15637;P17097;P51786;Q969J2;Q8N9K5;Q9NZU5;Q32M78;P28698;Q8IZC7;Q92664;P15621;Q63HK3;Q96JM3;P09234;P0CG00;Q96CB8;P51815;Q9UHF7;Q9Y5T5;P36954;Q6ZR52;Q9NQX6;Q13064;P08151;Q6PEW1;Q86W11;Q8NA42;Q14929;Q8NFW9;Q8TF39;Q9HBT8;Q9UPG8;Q9P1U0;P80294;P09874;O60481;Q14593;P62633;Q9P2G1;P17040;Q6ZNL1;P11473;O95602;Q2VY69;Q3MJ62;Q8N720;Q86XU0;P34949;Q06455;Q96SZ4;Q9UNY5;Q14586;P22681;O15535;Q9NPA5;Q9UJW8;Q8NBB4;Q9NQV7;Q96JX3;A6NHJ4;Q9ULJ3;Q13127;Q9NS56;P14373;Q9H707;Q2M3X9;Q96MX3;Q5EBL2;C9JN71;O75928;Q86VP1;Q13490;Q8TDB6;Q8N3Z6;Q7Z340;Q6ZNL7;Q9H0E7;Q8WV37;Q96SR6;Q5JNZ3;Q96ND8;O75112;Q6PG37;Q96K62;Q5TYW1;A6NFI3;Q14258;Q9UC07;Q96CS4;P17028;P51522;P61968;Q8N7M2;Q969W8;Q9NUA8;Q8TDD2;Q9UHD1;Q9BWX5;A6NK75;Q01538;P0CB33;Q9ULD5;P21506;Q8WV44;Q12901;P56270;Q9NYJ8;Q9H8G1;P15976;Q3SXZ3;Q9UL59;O94776;Q7L945;Q92994;O15265;Q9C0G0;P50479;P17019;Q96NG8;Q14202;Q5HY98;Q96BD5;Q969S2;Q6P1L6;Q8N8L2;Q6ZNS5;Q96B65;Q96HQ0;Q96JM7;Q8NB12;P13682;Q9UGR2;Q9UIF9;Q86VM9;Q86V15;O95487;O75151;Q96JF6;O75398;P17032;Q6PF04;Q9UL58;P17036;Q6DD87;Q9HCL3;O15151;P04732;Q9HCK1;Q9Y2L8;O95251;Q8WW38;Q8LWV7;Q8TAQ5;A6NIX2;Q02386;Q86YE8;O00463;Q9BYN7;Q8NAP3;Q9HBT7;Q5FWF6;Q6GPH4;Q32MQ0;Q8IYN0;Q93083;Q19AV6;O95714;Q7Z3Y8;P17020;Q9Y3C5;Q96BV0;Q13360;Q96QT6;Q9H7S9;B4DXR9;O75312;Q9UUL8;P38935;Q96LX8;B1APH4;Q8TD23;Q8N8J6;A8MWA4;Q96T23;Q9BR84;Q6ZNG0;Q9Y2Y9;Q9P2N5;Q14966;P15622;Q96H40;Q2M3W8;O75800;O95391;Q13888;O60315;P62072;Q14587;A2RRD8;Q8NHY6;P17027;A8MUV8;Q9HC16;Q9NR11;Q9Y6X2;Q03936;Q08AG5;Q9Y2Y1;Q9H116;Q2M1K9;P62877;Q6ZNS7;Q9NWS9;Q8N680;Q9NR48;P15822;P62273;Q07352;Q9Y5J9;A8MVS1;Q14872;Q8NDW4;Q9UKN5;Q6NSZ9;Q15654;Q9HBF4;Q9UDV6;Q13129;O15304;O14978;Q9H0A6;P28702;Q03112;P17030;P79522;Q9Y468;O60663;P52740;Q96KM6;Q8NFT6;Q6ZMY9;Q8TF20;P23769;P30622;Q9BUG6;Q6PCD5;Q9Y2Y4;Q9NWT6;O95789;Q9NR83;Q86WB0;O15015;Q9H609;O75437;Q13106;Q9UL41;P07438;Q9Y2X9;Q86WZ6;Q6NUN9;Q9UJW7;Q9Y242;Q96PM5;Q96PU4;Q9BS31;B4DU55;Q93052;Q8IVP9;Q8IYH5;O14709;Q96T51;Q14596;Q96SQ5;Q99728;Q6ZNG1;Q3KP31;Q09FC8;Q9Y4L5;Q86V71;Q9Y5J7;Q52M93;Q96H86;P17026;P53803;P17022;Q8N5A5;O60284;Q92610;Q7Z2W4;Q14686;Q8TAW3;Q96KR1;Q9H0M5;P52744;Q2M218;Q9GZX7;P25490;Q8IZ26;P98170;Q6ZN55;Q9UNL4;Q8N895;Q9BX82;Q96NG5;P0C7X2;Q8NFP9;Q2QGD7;Q9Y6X9;Q8NDP4;Q13642;Q86XN6;Q14588;Q9UII5;Q9H4T2;Q96JC4;P11532;Q8TBZ8;Q14592;Q9NP61;Q9UBU7;A6NK53;Q9NQZ8;Q9BZR9;Q14591;O00151;A1L020;Q9NWF9;P58317;Q9C0F3;O15392;P47974;Q8TF32;P27797;Q15776;A8MQ14;Q86XK2;Q3MIS6;Q3KQV3;O75290;Q9NR56;Q96SE7;B4DX44;Q8IUD6;P26358;Q9HAW0;Q8NA19;Q9P2F9;Q9Y3M9;P17038;Q9P255;Q9NS23;P49754;A6NM28;Q6PK81;Q6ZNO6;P17031;Q8IYW8;P17014;P51948;Q96MU6;Q8N2W9;Q5T1R4;O15164;P10074;Q9H0F6;Q8NEP9;P52594;Q9NV72;Q49A33;Q9UJN7;Q86SE9;Q15560;O43439;Q9UJ41;Q6P1K8;Q5TA31;P02795;Q86VD1;Q9HAH1;Q08AN1;Q9NZV7;Q16629;Q13114;Q03923;P52736;Q8N823;Q6H8Q1;Q92782;P17024;Q14149;P17017;O60304;Q9Y2D9;Q15436;P59923;Q8N2I2;Q13398;Q53GI3;Q9UK11;Q86UD4;O43463;P55055;P17010;P49711;Q9UID6;O43345;Q9UIH9;Q8TAF7;Q8N184;Q9BUY5;Q8TF47;Q9UJL9;Q8IYI8;Q9NYW8;Q8WUB8;Q96FI4;A8MX4;P12755;O95125;Q9ULU4;Q12830;P30793;Q66K41;Q499Z4;O15504;Q14974;Q9H7R0;P08047;Q5VWG9;Q969R5;Q8N6M9;Q9HC78;Q8N9F8;Q6IQ21;Q8N5C8;O75152;Q96MT3;Q01954;O95201;Q6V1Y5;Q9UBW7;P26651;Q16587;Q15022;Q05481;Q13263;O60291;Q68DI1;P52746;O15060;Q14526;Q6IQ32;O75820;Q8N6H7;Q8NEA6;Q3ZCX4;Q9Y6R6;Q8TF50;P0CJ79;Q6GZX5;O43361;Q9NW07;Q9H4I2;O60870;P36508;Q8TC21;Q6PJT7;Q7Z3K3;P35637;Q9U12;Q9NX65;Q7Z6J0;Q8NDQ6;P51508;Q9UK13;Q6ZNO8;Q9GZU2;Q8NBF1;O60711;Q969S3;Q9P0U4;Q8IWS0;Q8N1W2;P25791;Q8N339;Q86UW9;Q15650;Q9NQX1;Q9NVV9;A6NGD5;Q8WTZ3;A6NJJ1;Q9NP64;Q8NEK5;Q8N4W9;Q92785;Q96N38;Q8N587;Q9UIS9;P52742;Q02930;Q16600;Q9Y5A6;P78364;Q9P0T4;Q9BTC0;Q9H7R5;Q9L064;P17098;Q6PII5;Q9BSM1;Q96MN9;P80297;Q9P0L1;Q9GZT9;Q8NB42;Q9UL36;Q15928;Q5TAX3;Q9UX63;Q96MR9;Q6P9A3;Q5MCW4;Q96N20;Q8IXJ6;Q9UKJ3;P0CH99;Q15437;Q9BRR0;A2A288;Q12933;Q9UM63;P16415;Q9H7X3;Q96N22;Q9Y2G7;Q9UL40;Q9UDV7;Q03924;Q86YP4;Q9Y2A4;Q9UBF6;Q96CX3;Q9NQ7;Q8N859;Q15973;Q8N6T3;O60765;Q9UPQ4;Q92804;Q8WXI9;Q9P2J8;O95780;P52738;P04733;Q147U1;O95628;Q9NZL3;Q8IYL2;Q12873;P98169;A6NDY2;Q9H8N7;Q96T92;Q08ER8;O15014;Q5SV7;Q8I4192;Q9H6B1;Q6NZY4;Q05BQ5;Q96N58;E7ETH6;Q9NXT0;P46939;Q8IYM9;Q7Z3V5;Q5JVG2;Q5T5D7;Q6P3V2;Q9NYG5;Q8NHM5;Q8N7Q3;Q9HB58;Q96X65;Q13330;Q8IYX0;Q15942;Q8TAV6;Q6P1X5;P22736;Q14585;Q9HA38;Q9Y6X8;Q0VGE8;Q96LW1;O14771;Q96GC6;Q86XF7;Q6ZT77;Q96N95;O75346;Q9BYX4;O60281;Q96GM8;Q01081;P17029;O95159;Q9H2P0;Q96T88;P29083;A6NP11;Q15929;Q9BYE7;Q8NEM1;P





2;Q3ZCT1;P17097;Q8N5U6;Q86UP8;Q5TAX3;Q9P1U0;Q99496;P58317;Q96EG3;Q8WYQ9;A6NK75;Q9P2F9;Q00403;Q03936;Q147U1;Q08ER8;Q8TA86;Q9BX82;Q9NXT0;Q8TF39;O75373;O75764;Q5VTD9;Q9NP64;Q8NFW9;B1APH4;Q05481;P17026;Q96BD5;Q9UIH9;A6NN14;Q9UPN9;Q9HCE3;P11161;O00482;Q08AG5;Q8NF64;Q9NWF9;Q96T51;Q96K75;Q86YE8;Q8N972;Q969R5;Q9H963;Q6DD87;P19474;P17544;Q9BR11;Q9UH90;Q8IY57;Q96IF1;Q6ZMV8;Q5SXM1;Q9H4T2;Q8NCK3;Q8TF20;Q4G163;Q5VTR2;Q9UPP1;P17032;Q8N6T7;Q02930;Q9NWT6;Q8N823;Q8N8J6;O60663;O14709;Q9NR11;Q6U7Q0;Q8N680;Q8NWTZ3;O60384;Q6P280;Q68EA5;O43345;Q15075;Q9Y473;O75469;P17017;P0CG40;P25791;P51508;Q16578;P0C7X5;O75820;Q6ZS27;Q2M1K9;Q8N6M9;C9JN71;Q9H4Z2;P13640;Q6ZNB6;Q9UIF9;P63272;Q400G9;Q12830;Q66K89;P17031;Q9UEG4;Q14974;Q9P2R6;Q9UKJ3;P17029;P34949;Q9BYE7;Q96SK3;Q8NB12;A6NIX2;P17021;Q6ZTB9;P16415;Q86UW9;Q9NYT6;P15336;Q14593;Q19AV6;O95785;Q96JM3;Q96NC0;Q8IXK0;Q8IVP9;P0C7W8;Q96LW9;A6NEW6;P51523;Q8NDL9;Q15697;Q8N2I2;P28702;Q969S2;P52743;P24278;Q9BYM8;Q9Y3M9;P17020;O14978;Q8WV37;Q9Y3Y4;Q9Y6R6;Q8WUB8;Q9HB58;Q4V348;O43294;Q9UK10;Q15696;Q6GPH4;Q9P243;Q8TAT6;Q9Y2X9;Q8TF45;Q8NDX6;Q86XU0;Q9UJQ4;Q8TB69;Q13360;P49910;P49356;Q9HAW0;P26358;Q8N4W9;Q86W11;Q96F14;P15822;P51786;Q96MP5;Q14134;Q5JVG2;Q8IX07;Q9UJW8;Q2M3X9;Q8TBZ5;P56270;O00110;Q8NA42;Q15428;Q8N8U3;Q6ZMW2;Q7Z3V5;Q13351;Q96T92;Q92618;O95171;Q8NEP9;Q96B70;Q49A33;Q9Y2Y1;Q86VD1;Q9H8U3;Q9H091;Q2VY69;Q96B54;Q14586;Q96NJ3;Q8NAM6;Q9NS56;Q9HC78;P49790;Q8IVC4;Q9C0F3;A8MVS1;Q9HA38;O43296;Q9NQ03;Q6H8Q1;Q9UDV7;Q9ULU4;Q15973;Q9H8Y5;Q9BTC8;Q86YI8;Q13501;Q9UIE0;Q6P3V2;Q6P1L6;Q7Z3G6;Q86VK4;Q8NDW4;Q0VGE8;Q8NF99;P98169;P17025;Q5SXM8;Q13398;Q9Y3D2;Q9P0U4;Q494X3;Q9Y4X4;Q86WB0;Q9BS34;Q7RTV3;Q96SL8;Q5VUA4;Q86UD4;Q6S9Z5;Q7Z570;O00488;P17038;Q6ECI4;Q8N3J9;P10588;Q569K4;Q8N1G0;Q8IXJ6;Q96JL9;P35226;Q3KNV8;Q86XF7;Q5HY98;A6NDX5;Q6P9A3;Q9Y2A4;O75081;Q86UZ6;Q8N5P1;Q9Y2K1;Q13064;Q16775;O43361;Q5TD97;Q8N488;P04731;P42677;Q9BUY5;Q86TG7;Q9H7R5;Q9HCX3;Q12933;Q6PK81;Q9BS31;C9JLR9;Q14872;Q8TDD2;P35227;Q6ZSS3;Q14839;O75925;P0CJ78;Q68DY1;Q9NUK0;Q01081;B2RFX5;Q9H8N7;B4DX44;P23193;Q9Y5W3;Q5TYW1;O43918;Q96PE6;Q8N554;Q9BSK1;Q86VM9;Q9UII5;Q06455;Q5HYM0;Q9UBS8;Q96KR1;Q2M218;Q86WZ6;Q96PQ6;Q8IYN0;Q9H0F6;B4DXR9;Q96MX3;Q9H582;P00915;A8MXY4;Q92900;A8MWA4;Q6AZW8;Q86YF9;Q63HK5;P78317;O75478;Q96F45;Q5T619;Q8N9K5;Q9HCI7;Q96KM6;Q96SQ5;Q9HCZ1;O15265;Q9Y2H8;P17014;Q96C55;Q15928;Q8IW36;A6NJQ4;Q6ZNH5;Q14590;Q9NPA5;Q14584;Q8N988;Q15493;P36508;Q9BRH9;Q9H8G1;Q96GM8;Q9NQV7;Q9NZV7;P38935;Q9Y3C5;Q9Y5V0;Q9HAH1;P62633;O15015;P04732;P09234;Q02386;P07902;Q8IWS0;Q8IZ20;Q96N38;O95602;Q0CG00;Q68CP9;P49023;Q8NEA6;P8N184;Q9P2N5;Q9NPC7;Q96K58;O95201;Q9H7S9;P49754;P10589;Q5EBC2;A2A288;Q96BR6;Q6PF04;P06703;Q9BUC6;Q9C0G0;Q49924;Q7L945;P17040;O95361;Q9H2M3;Q6IQ32;P98182;Q9GZV8;P49116;Q8TD17;Q9UHD1;P04733;Q9UKN5;O14802;Q9P2G1;Q9Y2L8;O95600;Q14929;O95486;Q15650;Q96N77;Q12901;Q8WUU5;Q96K80;Q6NX45;Q8WW27;P13682;Q86XN6;A6NJL1;Q9BSG1;Q9HBF4;Q8N1W2;P15621;Q9H609;Q9Y6X9;Q9UJU3;P56524;Q6P1K8;Q5F1R6;Q13127;Q52M93;Q6ZQV5;Q6ZNG1;Q96DT7;Q96IT1;P25490;Q9UM63;A6NE21;P52756;Q8IYL2;Q2M3W8;Q8WV44;Q9H4I2;P52740;O43313;Q9NTG7;Q9UDW3;Q7Z3I7;Q96HQ0;P48059;A6NFI3;O14901;Q8NB50;Q9Y6X8;Q9NW38;P52736;Q6P9A1;Q15935;Q9NX65;O95780;Q9ULJ6;O94776;Q86YD7;O15151;Q6ZMS4;Q9UJ78;P36954;Q7Z2E3;P17030;Q9H5H4;Q96MT3;Q9Y5J9;O60765;Q8N8C0;Q9NQC7;Q15940;Q9NW07;O14618;Q9Y4J8;P10075;Q9HWQ3;O95625;O95218;Q16342;P23769;Q9BTC0;Q96H40;P0CG24;Q969S3;Q9NQX6;Q9BZE0;O75326;Q9HBE1;Q9H9D4;Q8N3Z6;Q9Y3S2;Q9Y5L4;Q5VWG9;Q5FWF6;Q9UHF7;Q96C10;P49711;Q15022;Q15326;Q96N95;Q8TC21;O60304;P17023;Q6ZNI7;Q969W8;Q86TJ2;Q8WYH8;Q9Y462;Q8NFT6;Q9BY31;Q9UGU0;Q8WW38;Q9HCL3;Q8TAU3;P37275;Q8NEM1;Q07352;Q9UGP4;Q9BSM1;Q3SY56;Q9BWX1;Q9UGR2;O95391;Q9BU19;B7Z6K7;Q9UBU7;Q96EY9;A8MQ14;P0C7X0;Q8IUD6;Q14587;Q6ZSB9;Q09FC8;O14628;Q9NSC2;Q8N7K0;Q8N8E2;Q8NI51;Q6IV72;Q8NBF1;A6NM28;Q96N58;Q9H160;Q9ULJ3;Q7Z398;P29083;Q96NJ6;Q13342;Q86SE9;Q02446;Q8TF47;O15014;Q13114;P30622;Q8IZ26;Q9UIF8;Q5CZ5;Q96I27;Q9H116;Q9UKT9;Q6IQ21;Q6NX49;Q96GC6;Q9UJL9;Q5JNZ3;Q9H7M6;Q5VZL5;Q6ZNI1;Q5T6S3;A8MT70;Q13490;Q8NAF0;Q9Y2D9;Q14119;P17028;Q9C0D7;Q8TAQ5;Q8NHY2;Q8TAF7;Q15942;P0CJ79;E7ETH6;Q96C28;Q06587;Q66K41;Q86T29;Q8WXI9;P51948;Q6NSZ9;Q9H6B1}

9162

Pathogen{ P03383} interacts with 604 human

partners: [Q969W8;Q96LX8;Q9UQR1;P35227;O14628;Q7Z2E3;O15504;O43167;Q9H7R0;P53803;Q8WTZ3;Q8NI51;Q5FWF6;Q5JVG8;A6NNF4;Q15935;Q12830;Q8NBB4;P19474;O75925;P34949;Q9NYW8;Q9Y5J7;Q63HK3;Q8TA86;Q96BR6;P49792;Q15047;O95625;P04733;Q96SK3;Q14839;Q86UW9;Q6ZN08;P80294;O95602;Q6PJT7;Q96SZ4;P63272;Q9BSG1;Q5SVZ6;Q9UK10;Q06455;A6NK75;P08047;Q9NWT6;Q9BTC8;Q9BR84;P53804;Q8TBB1;O75478;Q9H0F6;Q9NZV7;Q9H7R5;Q9Y2P7;Q49A33;Q93083;Q9H9Z2;P17544;P56270;Q8N6T7;Q8WV99;Q32MQ0;P51948;Q13233;Q9H4I2;Q9NP64;P13640;Q9NYG5;Q9HBE1;O60765;A8MVS1;Q9H8G1;O14639;A8MWA4;O94776;P49711;P17022;P62072;Q86V71;Q96GE5;Q9H5H4;Q96SL8;Q5HY98;Q3KP31;Q15937;Q15072;Q14526;P17029;P0CG00;Q9H4T2;O95487;Q15650;Q9HCL3;Q8WW38;O75437;Q86YP4;O95251;A8MXY4;A6NIX2;Q12986;O15304;Q96NI8;Q9UPN9;Q13888;Q8IWW8;P49116;Q9P2R6;Q26270;O75362;P51815;Q9HAW0;P23193;Q19AV6;Q8N7M2;Q9BRR0;Q13360;P07902;A8MTY0;Q96BD5;Q9NRG4;Q8TD23;Q05481;Q9Y2Y9;P51198;Q96H40;Q2M3W8;Q8N4W9;O43463;Q6ZN06;Q6ECI4;Q6P3V2;Q4LE28;Q9NR56;Q9UK13;P51508;O95218;Q9BYN7;Q8IYL2;Q8N3J9;Q13490;Q6ZNI7;P52744;B4DX44;Q9UBS8;Q8NEP9;Q5CZA5;Q8TF20;P23769;Q76KX8;P42677;Q86WB0;P37275;Q8NDQ6;Q96MT3;Q96N77;Q9UL58;Q9ULD5;Q9ULU4;P80297;Q96PU4;Q06587;O14709;Q3MJ62;Q96KR1;Q86TG7;P28838;Q12901;Q9C0F3;A4D1E1;Q9NXT7;P35789;Q86VP1;Q9UNL4;Q12874;O95486;Q6ZNA4;P52434;Q8NA42;Q6P9G9;P17019;Q96QT6;Q6IQ21;Q96N20;Q9Y2Q1;Q86XK2;P78317;Q8WYH8;Q9BYE7;Q96N95;Q03923;Q8N988;O43189;Q86V15;Q3MIS6;O75151;Q96SE7;Q86XF7;Q05516;P28698;Q9GZX5;P62273;Q8TB69;Q07352;P0C7X2;Q9POL1;P17038;Q92782;Q96T23;P49754;Q13330;Q5T200;P15621;A6NK53;Q86YE8;Q8WV37;Q9HAH1;Q8N2W9;Q6NZY4;P51504;Q8N587;Q6ZR52;Q13064;Q15560;Q96MF7;Q6P1K8;P02795;Q8N5U6;P59923;P17098;Q9NQX1;Q15022;B4DU55;Q6NSZ9;P0C100;P46939;P18146;Q9NTW7;Q15436;Q13398;Q66K89;Q53GI3;Q9UK11;A2A288;Q49AA0;Q6IQ32;Q8TAF7;Q15654;Q8IYI8;Q14872;O75164;Q00403;Q9UKJ3;Q9Y2L8;O95628;Q16629;P17014;Q14588;Q7Z3V5;Q5VWG9;Q5TAX3;Q96LW9;Q8TE76;A8MUV8;A8K8V0;Q8TF47;Q8N5C8;Q9UBW7;O95201;O75800;Q9HAZ2;Q9HCG1;P52746;Q499Z4;A6NDX5;Q7L2R6;P46100;Q15326;P11473;Q9BSM1;Q60870;Q5VUA4;P11474;Q6ZNA1;Q03112;O14978;O15015;Q12873;Q8IYX0;Q8NB50;Q9H963;Q96MR9;P84022;P98168;B4DXR9;Q92994;Q9H160;Q8IWS0;Q8N895;Q86SE9;O75081;P25791;P52747;Q15928;Q9NVV9;A6NGD5;Q96ND8;Q9UDV6;Q9C035;Q9UID6;A6NJL1;Q8NEM1;Q9NV72;Q9NTG7;Q5JNZ3;Q96N38;P17010;Q9UHK0;Q9UNY5;Q32M78;O60260;Q8NF64;Q96MN9;Q02447;Q8N3Z6;Q13105;Q8N



488;O95125;Q08AN1;P35637;O15265;Q14192;Q5TA31;Q15437;Q9GZU2;Q9BQA5;P17040;O94855;O75290;Q12933;P52742;P17032;P0CH99;Q96N22;Q8N859;Q9Y2G7;P17036;P24278;Q96LW1;Q6PG37;O43345;Q9BX82;Q52M93;Q9UBF6;Q68CP9;Q13342;A6NHJ4;Q99590;O60663;Q8TAT6;Q9UGP4;P09874;Q9P2J8;O95780;O60304;O60711;Q7Z3K3;Q6ZNG1;O95376;Q9NSC2;O15014;P52743;Q05BQ5;Q8N9F9;Q9Y6X2;P28702;Q9H9CM9;Q9ULJ3;Q6IV72;Q8N5A5;Q70YC5;Q96PM5;Q15697;Q8N7K0;Q86UE3;Q68DY1;Q9Y6X8;Q9UKN5;P15822;P11532;Q01081;P55895;Q5VIY5;Q9UIF9;P10074;Q8N448;P10074;Q8N448;P10074;Q6U7Q0;Q96C28;A8MUZ8;Q03936;Q86YI8;Q9Y462;O43255;Q15929;Q9H7S9;Q96GM8;Q8N8C0;Q6P1X5;O43829;Q14974;Q96IT1;Q3ZCT1;Q99496;Q8N9Z0;Q9HD42;Q13501;Q8N972;Q16775;O43918;Q8TF32;Q68EA5;Q99684;Q8WY41;P04732;P26651;Q9ULX6;Q5VTR2;P52737;Q96IR2;A6NN14;Q5SVQ8;Q16670;A6NP11;Q9H116;Q9Y252;Q96GC6;Q9H9D4;O15535;P62633;Q494X3;Q86XN6;Q9UC06;P11161;Q8N0Y2;A7E2V4;Q9UIF8;Q5HYK9;Q96QC0;Q8N782;P0C7V5;P62875;Q5TEC3;P56524;Q96CB8;Q86YF9;Q6P280;Q6ZMY9;O43309;Q9HBT7;Q96NJ6;Q8NAP3;A8MT65;Q09FC8;P62877;Q9P255;Q8IWY8;Q9UII5;P51522;Q9NRL2;Q7RTV3;P53992;P49910;Q9Y2D9;Q8IW36;Q8WTR7;Q6NUN9;Q8IY57;Q8WXI9;Q96SR6;P04731;Q9UKT9;O14771;P52736;Q9UM63;P38935;Q9Y5A6;Q14258;Q8IYN0;Q92785;Q99676;B1APH4;C9JN71;Q9UC07;P51786;Q969J2;Q8TAQ5;Q8WU90;P55197;Q9Y2X9;P29083;O75152;Q969R5;Q96EP1;Q66K41;P15336;P10828;Q2M1K9;O60481;P62508;Q01844;Q9NZL3;Q8NHY2;Q6IE81;Q15776;Q5SXM1;Q9NW38;O95271;Q9Y2A4;Q02930;Q08ER8;Q86Y01;Q13642;Q86W11;Q08AG5;Q8N490;Q2QGD7;Q9NYJ8;Q9UL41;Q14585;P51523;O75150;Q8N720;Q9NWF9;P07438;Q6ZN79;Q9Y5J9;Q9ULJ6;Q8N7Q3;Q8N141;Q8TA94;P17028;Q9UL40;Q15637;Q96PQ6;Q9NSJ1;P09234;P13056;Q9BUY5;Q6P9A1;Q9UHF7;Q8WXB4;O43439;Q92900;Q9H5T1;Q9H091;Q9UFP1;Q3KNV8;Q8NC26;P52594;Q6V9R5;Q9Y3Y4;O75346;Q13114;Q9BYK8;P49790;O14802;Q9UNY4;P26358;O95391;O75312;Q8NHY6;P16415;Q9Y6R6;Q9Y473;Q9BUG6;P98182;Q9ULD9;Q6ZMV8;Q92793;Q8N823;Q8TF39;P35226;Q2VY69;P13682;Q9UIS9;Q9Y468;Q13127;Q9ULV3;Q6ZQV5;Q96NG5;Q14593;Q9P0T4;Q969S3;P27797;P52741;Q8NB42;Q5BKZ1;Q7Z2W4;P0CB33;O75928;Q03938;Q8IYB9;Q13129}

Pathogen[ P03410] interacts with 1064 human partners: {Q9NSD4;O60711;Q15650;Q96EG3;Q86UW9;Q9HAW0;P84022;Q9Y2P7;Q14202;Q400G9;Q8N9Q2;Q9HCG1;Q8WV99;Q8IYW8;Q96NI8;A8K8V0;Q6AW86;Q5CZA5;Q9H0M5;Q8NHY2;Q9BWE0;Q9UHF7;Q9BSM1;Q4G163;Q96QT6;P08048;O14771;Q9Y2L8;Q9BV68;Q9HC78;Q9ULU4;Q8N1W2;Q96JB3;Q6ZNG0;O14901;Q6ZNA1;O15392;P17031;Q5HY98;Q5SVZ6;P47944;Q8IXJ6;O43309;Q6ECI4;Q9UFP1;Q96RE9;Q6V9R5;Q5JVJ2;O60281;Q8NBF1;O43439;Q14588;Q9Y5L4;Q96BR6;Q5EBM4;O75290;B2RFX5;Q9BYN7;Q5JNZ3;Q8TAU3;Q8IYN0;Q9NHW8;P0C7V5;Q86WB0;Q96FI4;Q8WYH8;O75925;Q8IXK0;Q6ZNA4;Q12873;P0C7X5;P50479;Q9UDW3;Q9HAH1;Q5T619;Q9UL41;Q9NTG7;Q01081;Q03112;Q6ZMY9;O95218;A6NNJ1;O95639;A6NN14;Q32M78;E7ETH6;Q9UNY4;Q9NP64;Q9Y2Y9;Q13106;Q8N9Z0;Q8NDW4;Q9NZL3;Q9UDV7;Q14593;Q96EY9;P52594;Q14526;Q9UK13;Q8N8E2;Q96N58;Q5SXM8;Q2M3W8;Q14974;Q8N8Z8;P62072;Q86YD7;P16415;Q96N22;Q8TFC1;Q13360;A6NE21;Q15697;Q96T23;O75373;Q99496;O95780;A8K0R7;Q5VUA4;Q86VM9;P0CJ79;Q8WV99;Q9H9CM9;Q14929;Q8TF68;P0CH99;P17040;O95628;Q8TCN5;P30622;Q15047;Q96H86;P15621;Q9NPA5;P37275;Q15637;P36954;P13682;Q96JM3;Q9H4T2;Q8N587;Q9UL59;Q15047;Q9NWT6;P36508;Q5VWV9;P58317;Q9UJ41;Q96C28;Q3KNV8;Q8IYH5;Q8N7M2;Q96N38;Q9BRH9;Q86XF7;Q15696;Q3MJ62;P98169;A6NDX5;Q96CB8;Q8WVZ3;Q8WTR7;Q96CS4;Q92804;Q9UDV6;P07438;Q9UPW5;Q9HAZ2;Q99676;Q92994;Q9NVV9;P15822;Q8NA19;Q9H7R0;Q96K80;O15151;P52738;Q9HBT8;Q9Y2J0;Q16629;Q15973;P52740;P12755;P29728;Q9NV72;Q9P2R6;Q76KX8;Q5T0B9;Q66K89;Q96SZ4;Q92000;Q8WUB8;Q9P0U4;P98182;Q8TDD2;O94855;Q8N680;P80297;Q9H9D4;Q96SQ5;Q9H4I2;Q96JL9;Q02447;Q6PJT7;O95251;Q9C0D7;Q16600;P63272;O95125;O60481;Q06730;Q92670;O15060;Q9BSG1;Q569K4;Q9P217;Q8N8C0;P0CG23;Q6AZW8;Q6ZMW2;Q6P3V2;Q13077;P53992;Q9UC06;P49356;Q9UII5;A6NFI3;Q15776;Q8NB50;Q8WV44;P0CW20;Q8TDZ2;P04733;Q9C0G0;P25791;O75382;Q9Y6Q3;P10073;Q0D2J5;Q9BQA5;Q9H2M3;Q9GZU2;Q9BYE7;Q3ZCX4;Q14149;Q9Y5J7;P29083;Q6NZY4;Q8TAW3;Q9NQX6;Q8N4W9;Q9NWF9;Q5TAX3;Q9UHK0;Q96KR1;Q8TAQ5;Q9UJ78;A8MXZ1;Q8WUU5;Q9UGP4;Q8TD17;Q8N3J9;Q3KP31;Q9BYK8;A6NNH2;Q96N77;Q8N6T7;Q6PG37;Q8NCN2;Q8N8U3;Q8IYB9;C9JLR9;Q9UIF8;Q9NYG5;Q9BWX1;Q9NR11;A1L020;O75152;Q19AV6;P35789;A6NEW6;Q8WXI9;Q8N9F9;Q8IYX0;Q8TBB1;Q5VZF2;P41238;Q7L2R6;P11532;Q96K62;Q96PQ6;O15504;P35637;Q86WZ6;Q9UPG8;Q6ZM11;Q9H8U3;Q9NYT6;Q9Y6X9;Q92610;Q8NBB4;Q8TF50;P17017;Q8TF45;P07902;Q12830;Q8NFT6;Q5VIY5;Q969S3;Q96ND8;Q9BTC8;Q13490;O60870;Q8IYI8;Q9UPQ4;Q9UNL4;Q8IW36;P24278;Q2M218;Q6P2D0;Q9BYX4;Q08ER8;Q8N339;Q8TF39;Q5FWF6;Q9UK11;A8MT65;Q9HCI7;Q6H8Q1;O43918;A6NHJ4;Q9ULJ3;Q5HYM0;P0CB33;Q8WW27;Q9NXT0;Q9BU19;Q86SE9;Q9Y6X2;Q96JM2;Q9ULD9;P34949;Q9UHD1;Q9NS23;Q96LX8;Q9NR56;Q9UIH9;Q86XU0;O14639;Q2VY69;Q9H4Z2;Q6IQ21;Q96GC6;O75928;Q9HCK1;Q13501;O43294;Q9NPC7;Q86UQ0;O43830;Q9C0F3;Q2M1K9;Q9NZW7;P57071;Q86TJ2;Q0VGE8;Q9H963;Q96N95;Q6NSZ9;Q9Y2K1;A2A288;O75437;Q6Z889;P55895;Q8N2W9;Q9UL58;O14709;Q96K75;Q92785;Q9H8Y5;Q8N720;O94929;P52741;Q5VTR2;Q9Y468;Q86YP4;P13640;P10828;Q6NX45;Q5TA31;Q9UJL9;Q9NSJ1;Q6PF04;O75764;O94892;Q9ULJ6;Q9Y3M9;Q5F1R6;A6NM28;Q9H116;Q03923;Q6PK81;O60260;Q8IYW7;Q9P243;Q9HCL3;O00110;Q68DY1;Q9H7X3;Q13233;Q99684;Q9UIE0;P23193;P30793;Q53GI3;Q8NB42;O60304;Q6U7Q0;P26651;Q09FC8;Q06732;Q6ZN19;P17025;Q52M93;Q8TAT5;Q9NWS9;P35227;P62508;Q8NEM1;Q14596;P51523;Q6KIWS0;Q6ZN55;Q6ZT77;Q8IYL2;Q96HQ0;Q9P2N5;Q5H9K5;Q14258;P28838;Q9H7M6;Q8WW38;P25490;Q96LW1;P52746;Q86VP1;Q96MP5;Q8NFW9;Q15560;Q6IV72;P17036;Q8N490;Q8TCT1;P06703;Q9NTW7;O60663;P51508;Q3MIS6;Q9H707;Q6PII5;Q96SR6;Q5TEC3;B4DXR9;Q8NEP9;O15231;O95171;P17544;Q96MF7;Q5SVQ8;Q16670;Q9BWF2;Q5EBL2;P17010;Q8N1G0;Q9UQR1;P11473;A6NKC0;Q6ZMK1;Q9GZV8;Q15654;Q14587;Q96PE6;Q15928;Q9BRR0;Q05BQ5;Q8TAF7;Q8N8L2;Q96NG8;Q86T29;Q7Z2E3;Q9ULD5;A8MXJ8;Q9GZT9;Q96IF1;Q8TBK6;Q02930;Q9Y2T3;O95789;Q96MN9;P10072;Q9UBF6;P26358;O15535;O60384;A8MX19;Q6GPH4;Q6ZN06;Q96BV0;Q14590;O75151;Q9HCL6;Q9UK10;Q9BUG6;Q13127;Q8WXB4;P17022;Q96GE5;Q5SXM1;Q9UKT9;P25800;Q9Y2X9;Q6ZMS4;Q08AN1;P17029;Q7L3S4;Q8IYP9;A6NIX2;Q9C0B9;Q9C035;Q8N823;Q12986;Q7Z340;Q9UBZ4;Q8TB69;Q96H40;Q15436;Q8NEK5;Q93052;Q3KQV3;P17038;Q14966;Q13472;Q8TBZ5;P38395;Q8N3F8;Q9BR11;Q86Y01;Q86YF9;Q5T6S3;Q96KR4;Q9BWM5;P49790;Q6NUN9;Q8IX07;Q8IY57;A8MWA4;Q9Y2Q1;O75150;Q3KNS6;P51814;Q6IQ32;P10074;Q9Y3D2;Q6ZNH5;Q9UL40;Q9NQV7;P17026;Q01538;Q92782;Q9NTJ4;Q9BS31;Q6EKJ0;Q9UIL8;Q9HCE3;Q02386;Q8NEA6;Q9NRL2;Q9BWX5;P0CG31;P43243;P04731;Q9UK12;P52737;Q96I27;Q7Z398;Q13342;Q15437;Q8N5A5;P62273;O95602;Q96GM8;Q8N972;Q96B70;Q7Z3I7;Q6ZNT9;Q6PDB4;Q969G9;Q6PDB4;P17028;Q8N883;Q49A33;Q8NCK3;Q9UKN5;P17019;Q15942;Q96C00;Q8NAP3;Q9UNY5;Q03924;Q9Y3S2;Q9Y3C5;Q7Z6J0;Q86XK2;Q32MQ0;Q68DY9;P17030;Q9BS34;P52743;Q9P0L1;Q9UBS8;Q13129;Q13330;Q9ULV3;O00463;P52736;A6NGD5;Q9UGR2;Q9NYJ8;Q9HD42;

9163

P0CI00;Q7Z2W4;O75800;Q6ZR62;Q9NP61;P51815;Q9NXR8;A6NK53;O95271;Q14872;O75362;Q9UJW8;Q96K83;Q16775;P78317;Q5HYK9;P55198;Q5VZL5;P56524;P17014;C9JN71;P0CG24;P46939;P02795;Q68EA5;Q96SE7;Q9UBU7;Q9H5I1;P53803;Q8NA42;Q93083;P79522;Q6P280;Q6P1X5;P17024;O95486;Q8N5C8;Q9H609;Q8N7K0;Q5T5D7;Q9H160;Q14847;Q14119;Q15428;Q6ZS27;Q15326;P62877;Q9Y4X5;P17020;Q9ULX6;P0CW19;Q9BUY5;Q9P2G1;Q96IR2;Q96B54;P22736;Q8IZ26;Q969J2;Q96MX3;P62875;Q9H7R5;Q9BY31;P28702;Q13064;Q9Y5V0;Q9P1U0;Q147U1;Q9L1K0;Q9UM63;P09874;P0C7W9;Q9BTC0;Q12933;Q8N5P1;Q96SK3;Q00403;P21506;Q7RTV3;O43296;Q6P1L6;Q9Y6X8;P17032;O15014;P17027;P47974;Q9NQV6;Q3SY52;Q14585;A8MUJ8;Q06455;Q9GZX5;Q13118;P47224;P49910;P46100;Q92618;Q86XN6;Q5VV52;P51786;Q9GZX7;B1APH4;P41182;P0CG00;O15015;Q9HBT7;Q96BW5;P49754;P87889;Q13398;Q5JVG8;Q9NRW3;O75346;O95785;Q6ZRF7;Q5BKZ1;Q4LE28;Q13642;P48059;Q96MR9;Q8N488;A2RRD8;Q9Y2Y1;Q96F45;Q9NW07;P49711;Q9Y6R6;A8MT70;Q6ZTB9;Q9H6B1;Q8N988;P09234;P98168;Q5MCW4;Q86V71;A6NIJ5;Q96T51;O95625;O14628;P51948;Q8NI51;Q7Z7K2;Q9H8N7;Q96IT1;B4DX44;Q9ULM2;Q13888;Q8WYQ9;Q86TG7;Q9Y2Y4;Q9Y5J9;Q8WV37;Q8NC26;P11474;Q92664;A6NJL1;Q9UC07;Q9HBF4;P52434;Q9HA38;P23769;P31941;P63135;O43189;Q14586;Q15940;Q96C10;Q9UIS9;O75081;Q66K41;O94776;Q8NCA9;Q9P2F9;Q9UJN7;P28698;Q7Z7L9;P49116;Q8NB12;P17035;A8MUZ8;O14978;P59923;Q496Y0;O75112;P10589;Q9Y2H8;Q86VD1;Q6ZNB6;P56270;Q9P2J8;Q9UIF9;Q5TYW1;A8MQ14;Q96NG5;Q7Z3K3;Q2QGD7;Q6ZSS3;Q9H9Z2;Q6ZN08;O95159;Q99590;Q9H091;Q9H8G1;Q9Y2P0;Q969S2;Q9Y462;Q3SXZ3;Q86UE3;P08047;Q06587;Q9Y3Y4;Q9P255;P55197;P17039;O15265;O60291;Q9UBW7;Q9UJU3;Q494X3;Q8TB5;A6NK75;Q8N9K5;O95201;A6NP11;Q9H7S9;A8MTY0;Q8TE76;Q8TF20;A1A519;Q00987;Q9NX65;Q9NQZ8;Q68CP9;O75626;Q8TF32;Q86UD4;Q63HK3;A7E2V4;Q15937;O75478;Q6P9A3;Q5T200;Q43829;O43463;Q6ZM17;P80294;P0C7X0;Q63HK5;O75123;Q8N8J6;Q3ZCT1;Q8N782;Q9NUD5;Q96LW9;Q86V15;Q8TF47;Q12901;O00151;Q14584;Q8N141;Q13105;Q49AA0;Q6ZN57;P0C7W8;Q96BD5;Q8TD23;Q15929;P17041;Q9NW38;Q8N3Z6;Q6PEW1;O14618;Q96MU6;Q96N20;Q6DD87;O60765;Q86YE8;Q8NDP4;Q8TA94;Q8WY41;P0C7V4;Q9NSC2;Q9BR84;Q9UID6;Q03936;P18146;Q96K58;P53804;Q8N5U6;P17021;O75164;P15622;P62633;P52744;P51522;P17023;O75820;Q8N895;Q5VTD9;P35226;Q96JC4;Q96MT3;Q8TBZ8;Q6S9Z5;Q96N73;Q05481;Q8N859;Q9BX82;Q12874;Q7L945;Q14592;Q6P9A1;P78364;Q96JF6;Q86V15;O43823;Q96CX3;A8MXY4;P10075;P0C7X2;Q9UJQ4;Q8TA86;Q9UL36;Q14839;P08235;P15336;Q9UEG4;Q9NQX1;P11161;Q8N2I2;Q15493;P0CJ78;A8MVS1;Q9NU63;A6NNF4;Q68D11;Q8N123;O43361;Q8NDQ6;Q9Y2D9;Q9UKY1;B4DU55;P04732;Q96SL8;Q9UKJ3;Q9UGU0;Q4V348;O75467;Q969R5;Q8TAT6;Q9Y5A6;O14802;Q9BXU3;Q6ZMV8;Q9UPR6;Q14591;Q8NF64;O43345;Q9H0A6;Q8WU90;Q9HCZ1;Q6ZNG1;Q6NYF7;Q14192;Q9Y2G7;Q96P11;O43167;P15976;Q96PM9;Q6IE81;Q6P1K8;Q15072;Q86UP8;O75312;Q70YC5;Q07352;Q9NUA8;Q86TJ5;Q9Y2A4;P52742;Q9UJW7;Q6ZR52;P17038;A6NDY2;Q15022;P17097;Q9HB58;Q8N6M9;Q9UPN9;Q8NHY6;Q9H5H4;Q7Z3V5;O95391;Q86W11;Q13114;Q86Y25;Q499Z4;Q9HBEL;Q8N393;Q2M3X9;Q9Y4J8;O95487;O60284;P49792;Q8N184;A6NJQ4;Q9Y473;P52747;Q96NJ6;Q8IVC4;Q9HCX3;Q8WTZ4;A4D1E1;Q9H0F6;P51504;B7Z6K7;Q8N9F8;P13056;Q9NRG4;Q96NL3;O43900;P42677;O15304;Q8IYW8;Q8IZC7;Q8N0Y2;Q16587;Q08AG5;Q9UFB7;Q15935;Q03938;Q86YI8;Q6NX49;P27797;Q9BSK1}

9164

Pathogen[ P14075] interacts with 571 human partners: {Q8N490;Q0D2J5;Q9NZL3;Q9C0F3;Q5VTR2;P53804;Q494X3;P17029;Q68DY1;Q9NTW7;Q7Z2E3;Q8NI51;Q9NSC2;O60663;Q8TAQ5;Q8N6T7;P51815;Q969S3;Q96GM8;Q8TAT6;Q15929;Q669R5;Q3KNV8;Q96MT3;Q96PM5;P11532;P42677;Q9Y5A6;Q969J2;Q86SE9;Q9Y5J9;Q92900;A8MTY0;Q9Y5J9;Q96GE5;Q9GZU2;Q5SVZ6;Q8N3Z6;B4DXR9;Q9GZT9;Q8N141;Q13105;P55198;Q6ZN08;Q9H4I2;Q9UKJ3;Q969R5;O15265;Q9UM63;C9JLR9;P51523;Q14526;P52737;P0C7X2;Q9NV72;Q96KR1;Q96QT6;Q9UQR1;Q8NEM1;Q8WU90;P62072;Q8NC26;Q8N488;P04733;Q9NTX7;Q96NJ6;Q5BKZ1;P11474;Q2M3W8;Q9BQA5;Q15928;Q8IY57;Q14593;P0CI00;A6NHJ4;P80297;O60481;P52747;P10828;Q96QC0;Q8NA42;Q14588;Q13064;Q92782;Q86XF7;Q15697;O60765;Q8NBB4;Q6ZNG1;Q9Y2A4;Q6U7Q0;Q12901;Q9UNY4;Q8T2D3;Q6PJT7;P0CB33;P52736;Q96MR9;P47944;Q15937;Q96SZ4;Q9UKN5;O95391;Q9H7R5;Q9H116;Q00403;Q7L2R6;O75362;Q6NUN9;Q9Y252;Q9Y3Y4;Q9P2R6;P29083;P23769;Q9NRL2;Q9UID6;Q9Y2G7;P59923;P26651;Q6P9A1;Q9UBP1;P28698;Q9ULU4;Q9Y468;Q8N782;P09234;Q9H7R0;P38935;Q96SL8;Q9UGP4;Q14839;P34949;P62633;Q9HBT7;Q86WB0;O15015;Q96C28;P11161;Q6ZQV5;Q15428;Q96ND8;Q6P1X5;P49792;P56524;Q96PU4;Q9UK11;O43918;P17036;Q01844;O14709;Q9H9Z2;P18146;Q9NYW8;Q15047;O75312;O95625;Q6ECI4;Q8TE76;Q3MIS6;O94776;O75925;Q5VZL5;Q9HAH1;P17019;P15822;O95218;Q92994;A8MT65;Q96IT1;O43167;Q5TAX3;Q9H091;O95159;Q9HAW0;Q8TAF7;Q8WW38;P15336;Q8N2W9;Q9UL58;Q15560;Q9BRR0;Q08AN1;Q96N95;P0CH99;Q8NHY6;O15304;Q03936;Q6ZMV8;P53992;Q13398;Q53GI3;Q86W11;Q8N7Q3;Q14585;Q9ULJ3;Q9BYE7;Q13642;P26358;P13056;O75290;Q95VWG9;O75081;A7E2V4;Q9Y2Q1;P17040;Q8N5C8;Q92785;Q16670;Q8WV37;Q9HAZ2;O43255;Q9HCM9;Q9NW38;Q7RTV3;Q8N5A5;Q9ULD5;Q8WV99;P07438;Q96NI8;P17098;Q96MN9;Q9UHK0;A8MUZ8;O60870;Q8WTR7;P24278;A4D1E1;Q86XN6;Q5TEC3;Q86VM9;Q8IYI8;Q8N5U6;P49116;O95628;Q9NWF9;P46100;Q9HCL3;Q6IE81;Q8IWS0;P25791;Q06587;Q5VIY5;O95487;Q9H5I1;P07902;Q19AV6;O75478;Q5VUA4;Q12986;Q6ZNA4;Q92670;Q15326;Q8TA94;Q9NQX1;Q9NZV7;Q4LE28;Q86VP1;P49754;A6NGD5;Q06455;Q12874;Q13490;P23193;Q9NR56;Q05481;Q15437;Q9UNY5;Q12830;P52746;Q93083;Q12933;Q8N4W9;Q9P0L1;Q9BUY5;Q9NTG7;Q32M78;Q96N22;Q15650;P13640;P52742;Q8N7M2;Q99684;Q9BYN7;Q8N3J9;Q9HCG1;Q6NZY4;Q9H8G1;Q6ZM17;Q9H963;O95780;Q68CP9;Q8NDQ6;Q15637;Q9ULX6;Q9Y2D9;Q9H9D4;Q9UIS9;P46939;P51504;P52744;O15014;Q9UPN9;Q8NAP3;Q05BQ5;Q9UHF7;Q6PG37;O43189;P62273;P27797;O75150;Q8IYX0;Q9UKT9;P0CG00;P11473;Q9Y6X8;O75928;Q6IV72;Q8N587;Q8N895;Q96IR2;P19474;Q01081;Q9UIF9;A6NIX2;O95251;O14628;Q9BR84;Q8NB42;Q9C035;Q8IYB9;Q9Y3S2;Q13114;Q9NWT6;Q86YI8;Q3ZCT1;Q8TBK6;Q96BD5;P55197;P78317;P80294;Q15436;O14639;Q6ZN79;O14978;Q8TA86;Q14258;Q8NHY2;Q99496;Q9Y2L8;Q07352;A8MWA4;Q8N9Z0;Q66K41;Q9BSG1;Q6IQ32;Q15935;Q15654;Q03112;P52743;Q8N988;A8MUJ8;A8MVS1;P17028;Q9UIF8;Q8WY41;Q7Z2W4;P52594;Q9UK10;Q66K89;P98168;Q8NF99;A8K8V0;Q8IYL2;P17010;Q14134;Q9UNL4;Q02447;O95602;Q86YE8;Q96BR6;P02795;Q5HYH8;Q9Y2X9;P15621;Q49AA0;Q13342;P98182;P0C7V5;Q12330;O15504;P49711;Q96LW9;Q96H40;Q96T23;Q32MQ0;Q96N20;Q92793;P28702;O43463;O95376;Q8TF47;Q96PQ6;Q6P9G9;Q13127;Q9UBS8;Q8IW36;P35226;Q9HD42;Q3MJ62;Q9Y2P7;Q99590;Q9UDV6;Q8TF39;O43439;Q05516;Q9NP64;P35637;Q15022;O60711;P04731;Q9Y5J7;Q86XK2;Q6ZN06;Q96GC6;P10074;Q9UL40;Q13129;Q09FC8;P56270;P35789;O60304;Q96N38;P17022;Q8N448;Q969W8;Q49A33;O94855;Q5TA31;Q9Y473;Q9ULJ6;Q8TB69;Q96LW1;Q03923;Q14974;O95125;P84022;Q86V71;P49790;Q9H7S9;O43309;P62875;Q8N720;P37275;P30793;Q96MF7;Q13360;Q8WYH8;Q8WTZ3;A6NK53;Q2M1K9;O95271;Q86Y01;O75800;O43823;Q13233;P04732;Q9UK13;Q8TBB1;Q96NG5;P17544;A1A519;Q7Z3K3;Q

9UII5;Q2QGD7;Q9H160;Q6ZMY9;P55895;Q9BX82;Q9NYG5;O60260;B4DX44;Q8N859;P28838;Q9GZX5;Q86V15;Q5FWF6;P49910;Q96N77;Q12873;O75151;Q16629;P52434;Q9BSM1;Q8N0Y2;Q8WXI9;Q63HK3;O95486;Q9ULV3;Q86YF9;Q9NRG4;Q6P1K8;Q8WXB4;Q9ULD9;Q9Y6X2;Q9NVV9;P63272;Q9UBW7;Q70YC5;Q9H0F6;Q14872;Q68EA5;Q15776;Q14192;O75437;Q9BYK8;Q14802;Q9UBF6;Q9Y462;Q02930;P10073;Q5JVG8;P62508;O43829;Q9BTC8;Q8NEP9;Q08AG5;Q96CB8;Q8IYW8;C9JN71;Q8NF64;Q95201;Q76KX8;Q9Y2Y9;P13501;Q09874;Q8N823;P62877;Q8N972;Q16775;P35227;O75346;O75164;Q86UW9;A6NP14;Q8N7K0;Q6P280;Q96EP1;B1APH4;Q86YP4;Q8TF32;Q6S9Z5;P51948;Q86TG7;Q9Y6R6;Q15072;Q5T200;A2A288;O75152;Q8IYW8;Q9UL41;Q3KP31;O14771;Q9BUG6;P53803;Q9HBE1;P52741;Q9UC07;Q03938;Q9NYJ8;Q13888;P08047}

9165

Pathogen: [P0C206] interacts with 1179 human

partners: {Q9UID6;Q02386;Q9UBW7;Q8N9K5;O95271;Q5VUA4;Q9NQC7;Q9NUA8;O43829;Q8N720;O00488;Q9Y3S2;P28698;Q6NUN9;Q15072;Q86VD1;Q9Y468;Q13887;P84022;Q9NQX1;Q3KNS6;Q86W11;Q9Y2X9;Q96JL9;A8K8V0;Q86Y01;P10588;Q9UK12;Q96AX9;Q6P9A3;Q9NZV6;B1APH4;Q86VZ6;P46939;Q86V15;Q969W8;Q9P1U0;O14628;Q13501;P08048;Q9NS56;P07438;Q9BZE0;P13640;O95081;Q9P2N5;O60291;Q9H5H4;Q9P0U4;O43309;P62875;O95201;Q9Y5L4;Q8TC21;P62877;Q9Y3M9;Q8N988;P98168;Q96SE7;P0CB33;Q15437;Q14587;Q96JJC4;Q19AV6;Q96MP5;O60481;Q96BV0;Q9NQV6;Q32MQ0;Q63HK3;Q7Z3I7;Q8TA86;Q96NI8;Q6PCD5;Q9UJN7;Q8WU90;Q96N22;A8MX4;Q9BUY5;Q96MM3;O60384;P35398;P23193;Q14588;Q9HCK1;Q7Z398;Q13077;P49790;Q03924;Q8WV22;Q8NA19;Q9BUG6;P17026;Q96IR2;Q9H4P4;Q6IV72;Q15493;P55198;P38935;Q5JNZ3;P06401;Q5VZL5;Q06455;Q9GZU2;Q8N6T3;Q5T5D7;O95251;Q8N883;Q96CS4;P27797;Q01538;Q9NYT6;Q9Y6Q3;P98182;Q86UW9;Q8NB50;Q9UJQ4;Q9HAZ2;Q8N9F8;Q13127;O95780;P13682;Q9UPN9;Q8IYN0;Q05481;Q15911;Q01081;Q3SY56;Q0VGE8;P26651;Q9Y4L5;Q9P2G1;Q6PF04;Q8NCN2;Q7Z6J0;Q9HAW0;Q13114;Q9Y242;Q08AG5;Q96KR4;B4DU55;Q9NVW2;O43255;Q6NX49;Q9UC06;Q8N8U3;P36954;O75123;Q147U1;Q14586;Q96PE6;Q13263;A6NKC0;Q9UII5;Q15696;P52741;O95602;A6NGD5;Q8IYW5;O95376;B7Z6K7;Q9H4T2;Q8WUU5;P78364;Q13642;P11161;Q8IYX0;P17031;Q86VK4;Q96MT3;A2RRD8;Q9NW07;Q9Y5T5;Q9GZT9;P10074;O94855;Q9UK13;Q96SL8;P17544;Q96DT7;Q9UGU0;P0C7X5;O75925;P09874;Q9UDV7;P25490;O43313;O75290;P15622;Q8N9Z0;Q9NSD4;Q8NG27;Q8NDL9;Q02446;Q86UP8;Q8N8Z8;Q9HBE1;Q9UJL9;P79522;Q9UL41;Q14966;Q96F45;P49910;Q9UNY4;Q9P243;Q86XK2;Q92664;Q6ZSB9;Q86YF9;Q8N5C8;Q8WYH8;Q96N95;Q8TB69;Q14258;Q49AA0;Q9UGP4;Q9C0B9;Q9BV68;Q9NSC2;Q96I27;Q9UC07;Q9NR11;Q9Y2Y9;Q15697;Q96EP1;Q5CZA5;Q86V1P;P04732;Q5F1R6;Q7Z7K2;Q15382;Q9H091;Q96IF1;P41182;P17024;Q05516;Q6V9R5;Q9Y2J0;P52743;Q6ZNA4;Q9HR70;Q9B531;Q9UHK0;Q96K75;Q9NQZ8;Q9NR83;Q7L3S4;Q6ZMK1;Q9NXT0;O94822;Q6PII5;P35226;Q9NRG4;Q9C0D7;P52737;Q496Y0;P49754;O75469;Q9NR56;P59923;Q8WXB4;Q9UK33;Q8IYI8;O75081;Q9H1K0;Q9P2F9;Q8WXI9;Q8NFW9;Q9Y2Q1;Q9UL58;Q9Y2D9;Q9BU19;Q9H7B4;Q8WTR7;Q9H2H0;P17019;Q8IWB7;Q5VIY5;Q6ZRF7;O60870;Q9NPA5;Q14974;O95600;Q05BQ5;Q5T1R4;Q8IYH5;Q8IUQ4;Q8WW38;P46100;Q43463;Q8N8E2;O43670;A6NHJ4;Q8N2W9;Q86XF7;O94892;Q9H4T2;C9JLR9;A6NIX2;Q9UPP1;Q9Y3Y4;Q86T29;A2A288;Q9UM63;Q6ZSH7;Q9Y2P0;Q96SK3;Q96MX3;A6NP11;Q3MIS6;P28838;Q9UL59;Q9UH90;Q9NWF9;Q8N1G0;O75764;Q8NI51;Q9Y462;Q96T51;Q16342;Q6ZMY9;Q9ULJ6;Q15637;P10073;O15265;Q68EA5;Q96JF6;Q3SY52;Q9HCX3;Q8N680;Q15654;P15336;Q6PDB4;Q86UD4;Q6ECT4;Q9UJW8;P26358;Q12901;Q969J2;P29728;P52738;Q9UIH9;Q12874;Q16629;P62273;P55055;P17027;P51508;Q92670;P00915;Q8NFT6;Q8N7M2;O60765;Q5SXM1;Q96T23;Q9HCG1;O75467;Q9BS34;Q96C00;P15621;O75626;P53804;Q9NS91;Q9Y5J9;Q8N7K0;Q569K4;Q13342;Q9ULJ3;P51522;Q9NRL2;Q8N0Y2;Q86YD7;Q8TAF7;Q01844;P13056;P17023;A7E2V4;Q96KM6;Q6ZN30;Q8TAT6;Q03936;O94776;Q9UBZ4;Q13398;P10072;P98170;O15164;C9JN71;Q7RTV3;Q14591;Q96T92;Q8IUD6;Q9NQX0;O75437;Q14590;E7ETH6;Q68DY1;Q86YP4;A1A519;Q2VY69;Q6ZNO6;Q6ZNB6;Q13330;Q12933;P15976;P34949;A6NNF4;Q86UE3;P49116;Q9ULX6;Q5EBM4;Q9HB58;P30622;Q14724;O14686;P22736;P30793;A8MQ14;Q8N5U6;P78317;A8MUZ8;P04733;Q15326;Q5TYW1;Q8WV37;Q96H40;Q14596;Q9Y2G7;Q9NXR8;Q8WY41;Q9H0E7;Q9BRH9;Q9BQA5;Q86TG7;Q3MJ62;Q5BKZ1;Q9NX65;Q5VTR2;Q9H160;O00482;Q8WTZ3;O95125;Q9Y6X8;Q8N3J9;P52740;Q9P2Y4;Q9Y6X9;A8MT70;Q13233;Q6P2D0;Q96K62;O60284;O95628;Q76KX8;Q9ULD9;Q9Y6X2;Q8N123;Q86TF5;Q9Y5J7;P50461;B4DXR9;Q5TA31;Q96G2;Q9UKJ3;Q9P2R6;Q7Z340;Q9NP61;Q9BWM5;P10075;Q8TDB6;Q9UJU3;Q96SQ5;P18146;O94929;P62633;P12755;Q9NZL3;Q8NEA6;Q8NEK5;P17025;Q8N2I2;Q9HBT7;Q92793;Q3KQV3;Q5JVG2;Q9UBF6;Q16587;A6NJL1;P10589;Q8N6T7;Q06730;A8MTY0;Q32M78;Q9Y4X5;P0CH99;Q6NSZ9;Q9BWX5;O75346;Q63HK5;Q9NPC7;Q6P280;Q6P1K8;Q8IZC7;Q16775;Q8N393;Q8N895;Q96N58;Q6P1L6;P17022;Q9BSG1;Q6ZMW2;O75151;Q6ZN17;P17029;Q8NDX6;Q9NQV7;Q14839;Q9HBT8;O43918;Q6ZMV8;Q6ZN57;Q9H7S9;P57071;O60304;Q8TE76;Q9HCZ1;Q92782;Q9UK11;Q96JB3;Q05215;P80294;Q9BYK8;Q16670;Q7Z3G6;Q92785;Q15916;Q5H9K5;Q13064;Q8NDW4;Q9NWK9;Q9NQ03;Q9Y4J8;Q9H9Z2;Q9B6L8;Q9UIE0;Q92610;O95718;P49792;Q9UPQ4;Q9H609;P0C7V5;Q9P2J8;P53803;Q96N20;Q92784;P17021;Q9BUZ4;Q9BR11;A6NE21;Q14202;O43345;O15151;Q86TJ2;Q8NF99;Q8N823;Q49A33;Q3KNV8;Q969S3;Q8IWS0;Q6U7Q0;A6NNJ1;O43298;P36508;Q9NYG5;Q96PQ6;Q86SE9;Q99612;A6NK53;Q7Z5J4;Q6AW86;P10828;Q6ZN04;Q6ZT77;P62508;Q8N6M9;Q15650;Q9BXU3;Q8TA94;Q13888;Q93083;Q96N77;Q9NSJ1;Q03112;Q9NWT6;O43361;Q8TF20;Q9GZX7;Q9ULV3;Q9H0A6;P17035;Q8NF64;P22681;Q68G74;Q9BZR9;Q9UIS9;P0CW20;P17010;Q8NAF0;Q15560;Q96EP0;Q86UQ0;Q8NHY6;Q8IW36;O95486;Q9UNY5;Q8NHY2;Q499Z4;Q9UKN5;Q15973;Q8N490;Q8IWW7;Q8NC26;Q52M93;O43296;Q86WZ6;O75112;Q8TF47;Q9ULU4;Q9UBU7;Q8I2Z2;Q9C0F3;Q9NR48;O00110;P0C7W8;P52742;P08047;Q9UEG4;A6NJQ4;P24278;A6NFI3;Q9NZV7;Q8N972;Q9UK10;Q12986;P29083;P04731;Q8NA48;O43900;Q96MN9;Q96BR9;Q6PJT7;Q8N141;Q9UHF7;Q9H582;Q96KR1;Q14593;Q5TEC3;Q6IQ32;Q8N5P1;Q9UBS8;Q14149;P48059;Q08ER8;P17032;Q96T88;P49711;Q8TD23;Q9HC78;Q9H2C1;Q06587;P16415;Q5HY98;Q9Y2L8;O95487;P25800;Q8TAT5;O75152;O60260;P17017;Q9UIF8;Q9BTC0;Q9Y3D2;Q9P0L1;P52744;Q15942;Q8TF50;Q3ZCT1;Q9UIF9;Q5SXM8;Q9UQR1;P35637;Q9H4Z2;Q96028;Q7Z3K3;O00151;Q9HCI7;O95361;Q96CX3;Q9BR84;Q9H963;O14618;Q99728;P17020;Q99590;Q96NL3;Q8NCA9;P17039;Q8TB55;Q02447;Q8TF32;Q6ZSS3;P35789;Q8TBB1;Q9H2M3;Q8N554;Q9H8N7;P17030;Q6NZY4;Q96IT1;Q9HCL3;O14771;Q6PEW1;Q8N7Q3;Q8IVC4;Q68DY9;P0CJ79;Q9Y4X4;A6NK75;Q8N9Q2;P49916;Q96HQ0;Q02930;Q8NHM5;P17028;Q5VWG9;Q96GC6;P51523;Q7L2R6;Q8N8J6;O43167;P58317;Q6P9G9;O43294;P55895;Q9NYJ8;Q8NBF1;Q6GQ09;Q96NJ3;O60281;Q9HA38;Q6ZQV5;Q96MF7;Q96JM3;Q86XN8;Q9H5I1;Q96MU6;Q9BYN7;Q9H165;Q7Z3V5;Q9Y6R6;P07902;Q9GZX5;Q8N782;Q6ZNG1;P0CW19;Q5TAX3;Q92804;Q86XU0;Q06732;Q9BSM1;Q6ZR52;O75478;Q66FI4;O15392;Q5MCW4;Q14872;Q9C035;Q5FWF6;P31941;Q9UDV6;Q15937;Q6P9A1;Q86UZ6;Q8TAQ5;Q9Y5A6;Q9H707;Q8IYW8;Q13129;Q8TF45;Q8IWW8;P25791;O15535;Q8IXJ6;O00463;Q13489;Q8TF39;Q9BSK1;Q15022;Q5HYK9;

Q5HYM0;Q9H116;Q2M1K9;O14709;Q96CB8;Q14527;Q9UJ41;Q99684;Q9ULD5;Q8N8L2;O75373;Q8N587;Q96N38;Q9BY31;Q8N4W9;Q96MR9;A6NM28;Q6NTF7;Q9UJ78;Q14592;P23769;Q86V71;Q03923;Q9Y2P7;P62072;P06703;Q0D2J5;Q7Z7L9;Q86YI8;O60315;Q6P1X5;Q8IZ26;Q6IE81;Q8NA42;Q969S2;Q13422;Q09FC8;Q8NDQ6;P43243;Q8N859;Q9H0F6;P51786;Q15928;O95218;O43823;O95639;Q8IX07;Q9BX82;Q86Y25;Q9UL36;Q96BR6;Q9BRR0;Q8IXK0;Q8WU11;A6INDX5;Q9HCM9;Q96C28;Q9H7M6;Q8IY57;Q5TD97;Q92900;Q96NJ6;P0C7X2;O75362;O75800;P98169;Q9H611;Q6IQ21;Q9HCE3;P28702;Q99676;P32725;Q969R5;Q8IYM9;O60678;Q8WUB8;Q4V348;P0CG31;Q9H7X3;Q6PK81;Q9UP68;Q6ZLN11;Q9UHD1;Q9NQX6;Q86WB0;O75164;Q96LW9;O14901;Q96CA5;Q8NB12;Q2QGD7;Q8NEM1;Q6ZLN79;P17097;P17040;Q3SXZ3;Q96PM5;O95625;Q6S9Z5;Q96QC0;Q92994;Q8NDP4;Q2M3X9;A4D1E1;Q9UKT9;Q5VTD9;A1L020;Q9NPN64;P52747;Q9BWF2;Q53GI3;Q9H0M5;Q9HD42;Q14192;Q9HC16;O14639;Q14134;Q9C0G0;Q5EBL2;Q96EY9;Q9UBR4;P51814;O60663;P11474;P51815;Q96BW5;P21506;A8MT65;Q96H86;O15504;Q96K80;A6NEW6;Q70YC5;Q8WV44;Q07352;Q8TBZ8;Q9NYW8;Q15047;P52746;Q9ULM2;Q3ZCX4;O75398;P0CG24;Q8TAP4;B2RFX5;Q96QT6;Q8NBB4;Q9H8W5;Q14584;Q6DD87;Q14585;Q96K83;Q9UPW5;Q9P0T4;O15015;P53992;Q8WV99;P11532;Q9Y483;Q8N184;Q9H2P0;P56524;Q9BYX4;P61968;O43439;Q14526;Q9NV72;Q96GE5;Q9UF67;P41238;Q96C10;P14373;Q6AZW8;Q00987;Q13106;Q9Y473;Q6NX45;Q8NCP5;Q6ZNH5;Q5T619;Q9GZV8;Q96SZ4;Q5SVZ6;Q96GM8;Q7Z2W4;Q8TF68;Q08AN1;Q86XN6;Q9H6B1;Q7Z6E9;Q9NTG7;Q9NTX7;Q9NS23;O95391;Q8N339;Q8TCN5;P08151;Q13118;Q15929;P02795;Q5JVG8;Q9NUK0;P87889;Q6ZN55;Q5VV52;Q9NTW7;Q6ZNG0;P17038;Q00403;Q9BYM8;A6NN14;Q86VM9;O14802;P15822;Q8NB42;Q15776;Q66K89;O60711;Q8NCK3;Q8N6H7;Q68DI1;Q6PG37;Q13105;P0CG00;Q9Y252;Q9UK53;Q9Y2Y1;P52736;A8MVS1;O76064;Q8IYL2;Q4G163;Q8TDZ2;P49356;Q96K58;Q9UGR2;Q6GPH4;B4DX44;Q96RE9;P55197;Q494X3;O43189;Q96PM9;Q14119;P17014;Q9NU63;Q9NZU5;Q92618;Q8NEP9;Q96ME7;O95159;Q9C029;Q8TAU3;Q8IYB9;Q6ZNA1;Q15935;Q96B54;Q7L945;Q9UL40;Q86YT6;O75820;Q96SR6;Q8TDD2;Q8TBK6;O95071;Q9UDW3;O75312;Q7Z2E3;Q2M218;Q14929;Q8TD17;O15304;Q5VZF2;Q9NRM2;Q8N3F8;Q8N5A5;Q96ND8;Q12830;Q96LW1;Q6VVB1;O75150;Q6EKJ0;O95789;Q9UUL8;O95714;Q13472;Q6P3V2;Q5T6S3;Q9NUD5;Q9HBF4;P09234;Q8TCF1;Q93052;P11473;Q8NAP3;Q9P255;Q8TAW3;Q86Y13;A6NDY2;P47974;Q9Y2A4;Q5T200;O14978;Q9H8G1;Q66K41;A8MWA4;Q6ZNA8;Q9Y3C5;Q6Q0C0;Q8IVP9;P88235;P0CJ78;O95171;A8MUV8;P51504;P52434;Q9NP62;Q99496;Q3KP31;Q96EG3;Q5SVQ8;P17098;Q96PU4;Q9UJW7;Q9BWX1;P0CI00;Q5T0B9;Q16600;P17041;Q9HCK0;Q96NG5;Q9UNL4;Q9NVV9;Q96JM2;Q6H8Q1;O15014;Q15428;Q8IZD2;Q9NW38;Q12873;P10827;Q96NG8;Q9UIG0;Q96BD5;Q4LE28;P47944;P80297;P63272;P42677;Q9UKY1;P17036;Q68CP9;Q9BTC8;P51948;Q8TBZ5;P48443;Q8N1W2;Q01954;Q9Y2H8;Q9Y2K1;Q8IWT3;Q13360;P19474;O15060;P35227;Q8WTZ4;Q2M3W8;Q66YE8;Q9Y2Y4;Q9H7R5;Q9H9D4;Q6ZLN19;Q13490;Q03938;Q8N8C0;O43830;P50479;Q9H

9166

Pathogen[ P03363] interacts with 973 human

partners: {A2RRD8;P80294;Q86TJ5;Q49AA0;Q6IE81;O95376;Q9NQX1;Q16587;P22681;Q15654;Q86VP1;P49754;Q9NWF9;Q86XU0;Q15911;Q9Y5A6;Q9NYG5;Q9H160;P80297;Q9P0L1;Q8NB42;A8MQ14;Q5VTD9;O75123;Q9C0F3;Q8NHY6;Q5T0B9;Q96QT6;P13682;O75820;Q3KNS6;Q86Y01;Q9NW38;Q99684;Q16342;A4D1E1;Q03923;Q6P9A3;Q8NCK3;Q06455;Q13490;Q6ZMY9;P35789;O14901;O75373;Q9Y252;Q5SVQ8;Q6ZLN17;P98168;Q9H8N7;Q8TDB6;P08048;Q13105;O75081;Q5SVZ6;P17027;P0CH99;Q5VUA4;P46939;Q9NSD4;Q8N9F8;O94972;Q86V71;Q6IQ21;Q96EP1;Q12830;Q8N5U6;Q99592;Q8N1G0;P10828;Q9H963;Q9UJQ4;Q969J2;Q9N988;Q9UHF7;Q8N2I2;Q96LW1;P28698;Q8IZC7;P42677;Q9BWF2;Q9NQ22;Q9NQC8;Q6DD87;P29083;Q8TAQ5;Q92766;Q03924;Q6ZNA1;Q14929;Q9NQX6;Q9BZR9;Q7Z340;Q5T8P6;B4DU55;Q9H091;Q8N859;Q19AV6;O14978;Q6ZN06;Q4LE28;Q86W11;Q8NA42;Q9NZL3;Q9Y2D9;Q8NAP3;P17021;P17010;Q8IVP9;O43296;O14771;O95780;Q96K80;Q86VK4;P02795;Q86WB0;A6NK75;P52738;Q9NUA8;Q6NSZ9;Q12901;O60481;P18146;Q13360;P49116;Q9P2G1;O95628;Q9H9P5;Q6ECI4;Q6P2D0;O75764;Q8NEK5;Q02386;Q96JC4;O60315;Q6P1K8;Q02930;O95391;P98169;Q9P2J8;Q86UP3;Q9Y468;P35227;Q5U5Q3;Q96T92;P0CG31;Q99676;Q3ZCT1;Q92900;Q6V9R5;O60291;Q6GQ09;Q9NRL2;Q9C0A1;Q14526;A6NHJ4;Q96MX3;Q9NZU5;P14373;Q6NZY4;Q9H707;Q96NG8;Q9NVV9;Q9UC06;Q96SE7;Q9Y3C5;A2A288;Q86YP4;Q9BR0;P08151;Q7L354;Q8N448;Q9H5I1;Q9H759;Q96K62;Q96JF6;Q14590;Q86UE3;P17098;Q08AN1;Q15928;Q8WV37;Q7Z398;Q68EA5;O15015;Q9UKN5;Q96SR6;Q96EP0;P62633;Q9ULM2;Q02447;Q96ND8;Q8N3J9;Q9ULJ3;Q15022;Q86Y13;Q6PG37;Q96MT3;O75112;O43167;Q6ZR52;P62508;Q5EBL2;Q7Z569;P0CG00;Q96NJ6;Q03112;Q13888;Q9UEG4;O60663;Q14258;Q96QC0;Q9HAH1;Q9BWW7;Q6NX49;Q9Y2P0;O75346;P13640;O60281;Q9HBT8;P37275;Q969W8;Q8TDD2;Q3KNV8;Q96GM8;Q8NDW4;Q8NFW9;P35637;Q9BU19;Q9H2P0;Q9NX65;Q7RTV3;Q8N720;O15304;O95600;Q96LX8;P62273;P17024;Q15929;Q6ZQV5;Q9NYX8;Q7Z2W4;Q9P243;Q494X3;Q7Z6E9;Q3SXZ3;Q12933;Q86SE9;O43439;Q96MR9;Q14847;Q8NCP5;Q5HYK9;Q5T1R4;Q9UL59;P25490;Q6EKJ0;Q8IYH5;O95201;O60765;O00463;Q5T5D7;Q9Y6X8;Q8NDQ6;P50479;Q9HCL3;Q8TCN5;Q8N883;Q16629;Q9Y462;E7ETH6;P15621;Q8NBB4;Q6P9A1;Q9NTX7;Q96FI4;P17030;Q9UC07;Q8N8C0;Q08AG5;P78317;Q0D2J5;Q15776;P11474;A6NGD5;Q9Y2L8;Q96HQ0;Q9UHK0;Q96MU6;Q68DI1;Q5JVG2;Q5SXM1;Q9UBF6;Q8WV44;Q9UDV7;A8MTY0;Q3KP31;P17031;Q13342;Q8N680;Q5JT82;Q8NCC2;Q15436;O95602;Q96612;Q9P0U4;Q8N141;Q86V15;Q6ZN55;Q5VTR2;Q8N488;Q8TA86;Q9NW07;Q66K89;Q9UL41;O75437;Q76KX8;Q9UL40;O75164;O15151;Q99496;Q5F1R6;Q9UPN9;Q8N9Z0;P04732;Q9Y467;Q6NUN9;Q9UK11;Q3KQV3;Q9BV68;Q8IXK0;Q96PQ6;Q8N782;Q5TYW1;Q9Y2A4;Q8IYW8;Q96GC6;Q9UM63;Q8IYW5;Q8TBB1;Q9HCK0;Q9NPC7;Q9Y2K1;P09234;Q96EG3;Q6ZMV8;Q6VVB1;P36508;Q6BEB4;Q9Y2H8;P51522;Q43309;O95486;Q14839;P16415;Q9HCZ1;Q9NSJ1;Q9BX82;Q9UJW7;Q14588;P17028;O75312;Q8NEA6;Q9Y3Y4;Q8IZ26;Q96N20;Q9Y2X9;Q9NR56;P59923;Q96MM3;Q8WY41;P17041;Q9NWS9;Q9BWF3;A1L020;Q9HCX3;Q8WU90;Q86YE8;Q96BV0;Q9BUG6;Q6ZNH5;Q9Y4X4;P0CG24;Q8NI51;Q96I27;Q14593;P17019;Q7Z7K2;B4DXR9;Q12986;Q9H5H4;Q9UNY5;O94875;O43189;Q96T51;B1APH4;Q9UNY4;Q9C040;Q93052;P49711;Q9NTW7;Q9P2N5;Q7L2R6;O75150;Q8TBC5;Q96IF1;Q8IYL2;Q6ZNA4;Q9NZV7;Q9UK10;O00488;Q8NCA9;Q86VZ6;P46100;Q9UNL4;P10588;Q13127;Q8IY57;Q9Y2Y9;P11473;Q9UJ41;Q8N3Z6;A6NNF4;Q8NG27;Q96BD5;Q9C0G0;Q6ZLN11;P0C7X5;P17029;P25791;Q96BR6;Q6P1L6;A6NK53;Q6IY72;P51786;Q8TF45;P10072;Q9Y6X2;Q03936;Q9NQ03;Q96RE9;Q9UGP4;Q6ZLN19;P15336;Q15326;Q2M1K9;Q96T23;P17023;Q86T29;Q00403;Q8NAF0;Q96DT7;Q15937;Q8TAT6;Q9ULU4;P15822;Q07352;P0C7V5;A8MUZ8;Q8N6M9;Q2VY69;Q8WXI9;Q96JM2;O43830;Q9BTC8;O95218;Q96JM3;C9JN71;Q96LW9;P30622;Q8IYB9;Q8TF39;Q9BS31;Q13129;Q8N972;Q14872;P28702;Q9BYN7;Q96N58;Q9H4T2;Q9UDW3;Q9Y4X5;Q14119;Q8N393;Q8N5P1;P52737;Q96IR2;Q9UPG8;Q9BSM1;Q8N8Z8;Q8TF20;Q9ULD5;Q9NRG4;P62877;Q9GZU2;P08235;P51504;P21506;P24278;O75800;Q9HBT7;Q8IW36;Q12874;Q8N6T7;Q9P255;Q32MQ0;P17039;Q6PF04;Q8TAF7;Q96H40;Q5VIY5;Q9UDV6;Q5JNZ3;Q86WZ6;Q7Z2E3;Q96C28;Q13077;P17032;Q8NB12;Q8IZ2

0;Q9BXX1;Q9H609;Q13489;Q9UJU3;Q14527;Q9UIF9;P35226;A6NDX5;Q9NXT0;P27797;O14709;Q6NX45;Q13472;P04731;P11532;Q9H4Z2;P51814;Q6PCD5;Q9BSK1;Q9UIF8;Q6H8Q1;Q86UW9;Q15637;P19474;Q9NP64;Q14134;Q16670;P52736;Q9Y5J7;Q5CZA5;Q8N7M2;Q9UH90;Q9UGR2;Q9Y6Q3;P17022;O60870;Q14966;Q8N5A5;P17036;Q63HK3;Q9Y3M9;Q86UP8;Q9BQA5;P52744;Q96SK3;Q2M218;P84022;Q96C00;O15265;P981170;Q9U7Q0;Q96PE6;Q8N895;Q92782;Q5T619;Q9BRH9;Q8IVC4;O95271;Q9UKY1;Q8TF68;Q6Z N57;P26358;P46792;Q9H9Z2;Q96N77;Q96PM5;Q6ZNG0;Q8XN6;Q9C035;Q9Y2G7;Q6ZN08;O95171;Q96I T1;Q92618;Q9BYX8;Q5T200;Q06732;P35398;Q9H0M5;O75925;P43243;Q14974;Q92664;Q8NEP9;P1702 5;Q7Z3I7;Q9H582;Q9UK13;P55198;Q14592;Q96CX3;P51508;Q8N184;Q6ZSB9;Q8N7K0;P0CB33;Q9BUY5 ;Q9H7R0;Q14591;Q86UQ0;Q14584;Q9BS34;Q8N8L2;Q96SL8;Q9ULV3;P49790;A8MUV8;Q7Z3K3;Q95071; Q6ZMW2;O43345;Q9UBS8;Q96SZ4;Q86XK2;Q92793;Q86Y25;Q5TAX3;Q9H4P4;B4DX44;P57071;Q9NS23;Q 6ZNG1;Q01954;Q15697;Q6ZN79;O95125;Q8N823;O75382;Q6ZSS3;Q8NC26;Q9NR48;Q14585;P52740;Q8 IUD6;P51523;O96028;Q6FIF0;Q9BWX5;P23193;Q14587;P56270;Q9NPA5;Q01844;Q96NG5;P07438;P49 910;Q6AZW8;P17014;Q96GE5;Q9Y2Y4;O75362;Q92670;Q9UL58;Q8NA19;Q15072;P10074;Q92804;Q9UB W7;Q9H0F6;P26651;Q8TD23;Q9H0A6;Q9Y6R6;O95714;P63272;Q9UJN7;P98182;Q6ZS27;Q63HK5;Q5TA3 1;Q5HY98;Q7Z6J0;A8K8V0;Q9UQR1;Q2QGD7;Q8IYN0;Q8TB69;Q96JL9;Q70YC5;P53804;Q9NYT6;Q13114 ;P17020;O43463;Q3MIS6;Q9Y483;Q9BR84;Q9HCM9;O75398;Q01081;Q8TF47;Q5VZF2;A6NPL1;Q3SY52; A6NIX2;Q96T88;O43361;Q96CA5;Q9H7X3;Q9BSG1;Q09FC8;Q9UK12;Q15973;Q9BYX4;Q86XF7;Q96MN9;Q 6IQ32;P17017;Q96K58;Q9H116;P53992;O14618;O60304;Q8TAU3;Q8IWT3;Q9Y4L5;Q5H9K5;Q15428;Q1 3398;Q9UKT9;Q53GI3;Q13642;P04733;Q8WV22;Q86UD4;Q12873;B2RXF5;O43900;Q147U1;Q9NR11;P58 317;O95487;Q6AW86;Q8IYX0;Q9ULJ6;P47974;Q9NTG7;Q6P280;Q8NDP4;Q8IYW8;Q7L945;Q9NVW2;Q5EB M4;O43918;Q8TC21;A8MXY4;P55895;Q8NB50;Q52M93;Q8N9K5;P55197;Q66K41;Q96N95;P09874;Q1333 0;Q8WXB4;P52741;Q8WTR7;Q9HCG1;Q8NHY2;Q9Y2Q1;Q8WW38;Q06587;Q99728;Q499Z4;O15504;Q9BY31 ;O94822;Q96NJ3;O75478;Q68DY9;P52743;Q8TAW3;Q8TEC5;P08047;P52594;Q8WTZ3;Q5TEC3;A8MVS1; Q9UKJ3;Q9HC78;Q2M3X9;P15622;Q86YF9;Q8N5C8;O75152;Q93083;Q15560;Q8IWS0;Q9BUZ4;Q96KR1;O 75626;P0C7X2;P52742;Q6ZRF7;Q9H9D4;Q6P3V2;Q2M3W8;Q5MCW4;Q15935;Q96PU4;A6NFI3;O43298;Q9 BWM5;O43829;Q8N1W2;O43255;Q8TE76;O60284;Q8N8J6;Q8N9K5;P55197;Q66K41;Q96N95;P09874;Q1333 0;Q8WXB4;P52741;Q8WTR7;Q9HCG1;Q8NHY2;Q9Y2Q1;Q8WW

9194 Pathogen[ P14079] interacts with 1 human partners:{Q9UHB9}  
9195 Pathogen[ P03383] interacts with 1 human partners:{Q9UHB9}  
9196 Pathogen[ P03410] interacts with 1 human partners:{Q9UHB9}  
9197 Pathogen[ P14075] interacts with 1 human partners:{Q9UHB9}  
9198 Pathogen[ P0C206] interacts with 1 human partners:{Q9UHB9}  
9199 Pathogen[ P03363] interacts with 1 human partners:{Q9UHB9}  
9200 [Cluster 837]GO:0043531+F molecular\_function [name] ADP binding [def] "Interacting selectively and non-covalently with ADP, adenosine 5'-diphosphate." [GOC  
9201 Pathogen[ Q2Q067] interacts with 2 human partners:{P11142;P35579}  
9202 Pathogen[ P0C214] interacts with 7 human partners:{P68133;Q9UM54;P35580;P14618;O14727;P48163;P11142}  
9203 Pathogen[ P03346] interacts with 3 human partners:{P35579;P11142;O14727}  
9204 Pathogen[ Q85601] interacts with 6 human partners:{P68133;P35579;P14618;P11142;P35580;Q9UM54}  
9205 Pathogen[ P14079] interacts with 6 human partners:{P35579;P11142;P25705;Q9UM54;P52701;P68133}  
9206 Pathogen[ P03383] interacts with 3 human partners:{P11142;P35580;P35579}  
9207 Pathogen[ P03410] interacts with 7 human partners:{P25705;P11142;P35579;Q9UM54;P52701;P68133;P35580}  
9208 Pathogen[ P14075] interacts with 2 human partners:{P11142;P35579}  
9209 Pathogen[ P0C206] interacts with 7 human partners:{Q9UM54;P52701;P68133;P35579;P35580;P11142;P14618}  
9210 Pathogen[ P03363] interacts with 3 human partners:{P35579;P68133;P11142}  
9211 [Cluster 838]GO:0030674+F molecular\_function [name] protein binding, bridging [def] "The binding activity of a molecule that brings together two or more protein molecules, or a protein and another macromolecule or complex, permitting those molecules to function in a coordinated way." [GOC  
9212 Pathogen[ Q2Q067] interacts with 19 human partners:{P46108;P35321;P23490;P20749;P50502;P39880;Q86YP4;P15924;Q9UHK0;P22528;O00255;P78560;P59998;Q96T76;Q9UNE7;Q96PK6;Q9NY27;P45973;P07476}  
9213 Pathogen[ P0C214] interacts with 19 human partners:{P35321;P07476;P15924;Q9NY27;Q9UHK0;P23490;Q86YP4;Q16658;P20749;P59998;Q96PK6;P39880;P45973;P78560;P46108;Q9UNE7;O00255;Q96T76;P50502}  
9214 Pathogen[ P03346] interacts with 21 human partners:{P15924;Q969H4;P35321;P45973;P50502;Q9NY27;P07476;P78560;P59998;O00255;Q86YP4;Q9UNE7;P23490;Q9UHK0;P46108;P20749;P22528;Q16658;P39880;Q96PK6;Q96T76}  
9215 Pathogen[ Q85601] interacts with 17 human partners:{Q96T76;P35321;Q96PK6;Q9NY27;P46108;P59998;P15924;Q86YP4;P45973;O00255;Q9UHK0;P50502;P39880;Q9UNE7;P23490;P20749;P78560}  
9216 Pathogen[ P14079] interacts with 24 human partners:{P04083;P22528;P62333;Q16658;P07476;P15924;P39880;Q9NY27;Q86YP4;Q9UHK0;P45973;Q9NQT6;P35321;P23490;Q92817;Q969H4;P20749;P59998;O00255;O15273;P50502;Q96T76;Q96PK6;P46108}  
9217 Pathogen[ P03383] interacts with 17 human partners:{P23490;P15924;Q96T76;P35321;P50502;Q86YP4;P20749;P78560;P59998;P45973;Q96PK6;Q9UHK0;P07476;O00255;P22528;P39880;Q9NY27}  
9218 Pathogen[ P03410] interacts with 23 human partners:{P20749;P23490;P15924;Q96T76;Q96PK6;Q16658;P78560;P50502;P22528;Q9UHK0;P59998;P35321;P45973;Q86YP4;Q969H4;O15273;Q9UNE7;P39880;P46108;O00255;Q92817;Q9NY27;P07476}  
9219 Pathogen[ P14075] interacts with 17 human partners:{P78560;P35321;P23490;P45973;P39880;Q9UHK0;O00255;Q9NY27;Q96PK6;P50502;P22528;P59998;P07476;Q96T76;P20749;Q86YP4;P15924}  
9220 Pathogen[ P0C206] interacts with 21 human partners:{P45973;Q9UHK0;P78560;O00255;P59998;Q86YP4;P23490;P50502;P35321;Q16658;Q9UNE7;Q96PK6;Q9NY27;Q96T76;P15924;P20749;P46108;P39880;Q969H4;P07476;P22528}  
9221 Pathogen[ P03363] interacts with 22 human partners:{P35321;P50502;Q86YP4;P45973;P23490;Q9UHK0;Q96PK6;P15924;P20749;Q969H4;P59998;Q96T76;Q9UNE7;P22528;P46108;P78560;P07476;Q9NY27;P39880;Q16658;Q9P2Q2;Q92817}  
9222 [Cluster 839]GO:0004693+F molecular\_function [name] cyclin-dependent protein kinase activity [def] "Catalysis of the reaction  
9223 Pathogen[ Q2Q067] interacts with 7 human partners:{P30281;P50750;P50613;P49336;P24941;P11802;Q00534}  
9224 Pathogen[ P0C214] interacts with 10 human partners:{P50750;P50613;P11802;O94921;Q00534;P21127;Q00536;P49336;P30281;P24941}  
9225 Pathogen[ P03346] interacts with 9 human partners:{P30281;Q00536;P21127;P49336;P24941;P11802;P50750;Q00534;O94921}  
9226 Pathogen[ Q85601] interacts with 10 human partners:{P30281;Q00536;P50750;P49336;P11802;O94921;P50613;P21127;Q00534;P24941}  
9227 Pathogen[ P14079] interacts with 6 human partners:{Q14004;P49336;Q15078;P50613;P21127;P50750}  
9228 Pathogen[ P03383] interacts with 11 human partners:{Q9NYV4;Q00536;Q00534;P11802;P21127;P49336;P50613;P24941;P50750;O94921;P30281}  
9229 Pathogen[ P03410] interacts with 7 human partners:{Q00534;P50613;P50750;P24941;P11802;P49336;P30281}

9230 Pathogen[ P14075] interacts with 11 human partners:{P49336;P24941;P11802;P30281;P50613;Q00534;P50750;P21127;O94921;Q9UQ88;Q9NYV4}

9231 Pathogen[ P0C206] interacts with 10 human partners:{P49336;P50750;Q00536;P50613;P21127;P24941;P11802;O94921;Q00534;P30281}

9232 Pathogen[ P03363] interacts with 8 human partners:{P21127;P24941;Q00534;P49336;P50750;P11802;P30281;Q00536}

9233 [Cluster 840]GO:0004614+F molecular\_function [name] phosphoglucomutase activity [def] "Catalysis of the reaction

9234 Pathogen[ Q2Q067] interacts with 3 human partners:{P36871;Q96G03;Q6PCE3}

9235 Pathogen[ P0C214] interacts with 4 human partners:{Q6PCE3;Q96G03;P36871;Q15124}

9236 Pathogen[ P03346] interacts with 3 human partners:{P36871;Q6PCE3;Q96G03}

9237 Pathogen[ Q85601] interacts with 4 human partners:{Q15124;P36871;Q6PCE3;Q96G03}

9238 Pathogen[ P14079] interacts with 4 human partners:{Q15124;Q6PCE3;Q96G03;P36871}

9239 Pathogen[ P03383] interacts with 2 human partners:{Q96G03;Q6PCE3}

9240 Pathogen[ P03410] interacts with 4 human partners:{Q6PCE3;P36871;Q15124;Q96G03}

9241 Pathogen[ P14075] interacts with 2 human partners:{Q96G03;Q6PCE3}

9242 Pathogen[ P0C206] interacts with 4 human partners:{Q96G03;Q15124;Q6PCE3;P36871}

9243 Pathogen[ P03363] interacts with 2 human partners:{Q6PCE3;Q96G03}

9244 [Cluster 841]GO:0008127+F molecular\_function [name] quercetin 2,3-dioxygenase activity [def] "Catalysis of the reaction

9245 Pathogen[ Q2Q067] interacts with 1 human partners:{000625}

9246 Pathogen[ P0C214] interacts with 1 human partners:{000625}

9247 Pathogen[ P03346] interacts with 1 human partners:{000625}

9248 Pathogen[ Q85601] interacts with 1 human partners:{000625}

9249 Pathogen[ P14079] interacts with 1 human partners:{000625}

9250 Pathogen[ P03383] interacts with 1 human partners:{000625}

9251 Pathogen[ P03410] interacts with 1 human partners:{000625}

9252 Pathogen[ P14075] interacts with 1 human partners:{000625}

9253 Pathogen[ P0C206] interacts with 1 human partners:{000625}

9254 Pathogen[ P03363] interacts with 1 human partners:{000625}

9255 [Cluster 842]GO:0048257+F molecular\_function [name] 3'-flap endonuclease activity [def] "Catalysis of the cleavage of a 3' flap structure in DNA, but not other DNA structures\_ processes the 3' ends of Okazaki fragments in lagging strand DNA synthesis." [GOC

9256 Pathogen[ Q2Q067] interacts with 2 human partners:{Q96NY9;Q8IY92}

9257 Pathogen[ P0C214] interacts with 2 human partners:{Q96NY9;Q8IY92}

9258 Pathogen[ P03346] interacts with 2 human partners:{Q96NY9;Q8IY92}

9259 Pathogen[ Q85601] interacts with 2 human partners:{Q96NY9;Q8IY92}

9260 Pathogen[ P14079] interacts with 2 human partners:{Q96NY9;Q8IY92}

9261 Pathogen[ P03383] interacts with 2 human partners:{Q8IY92;Q96NY9}

9262 Pathogen[ P03410] interacts with 2 human partners:{Q8IY92;Q96NY9}

9263 Pathogen[ P14075] interacts with 2 human partners:{Q96NY9;Q8IY92}

9264 Pathogen[ P0C206] interacts with 2 human partners:{Q96NY9;Q8IY92}

9265 Pathogen[ P03363] interacts with 2 human partners:{Q8IY92;Q96NY9}

9266 [Cluster 843]GO:0005070+F molecular\_function [name] SH3/SH2 adaptor activity [def] "Interacting selectively and non-covalently and simultaneously with one or more signal transduction molecules, usually acting as a scaffold to bring these molecules into close proximity either using their own SH2/SH3 domains (e.g. Grb2) or those of their target molecules (e.g. SAM68)." [GOC

9267 Pathogen[ Q2Q067] interacts with 13 human partners:{Q92783;P46108;Q96JZ2;Q13625;P50616;Q86WV1;O14508;Q07666;O75791;Q9ULZ2;Q9BX66;Q9BVN2;O75368}

9268 Pathogen[ P0C214] interacts with 18 human partners:{P55822;Q8WV28;P62993;Q13625;Q9BX66;Q96JZ2;Q07666;Q9UQC2;P50616;O14508;Q9ULZ2;Q86WV1;Q9BVN2;O75791;Q92783;P46108;P98171;O75368}

9269 Pathogen[ P03346] interacts with 25 human partners:{Q13588;P98171;Q9H6Q3;Q13322;Q9ULZ2;Q9UQC2;P62993;Q9BX66;O14508;Q07666;Q14847;P55822;P50616;P46109;Q13625;Q12929;P78314;P46108;Q96JZ2;Q92783;Q9BVN2;Q8WV28;Q86WV1;O75368;O75791}

9270 Pathogen[ Q85601] interacts with 16 human partners:{Q9ULZ2;P62993;Q07666;Q9UQC2;Q9BX66;Q9BVN2;P46108;O14508;Q86WV1;Q9H6Q3;P55822;Q13625;Q92783;P50616;Q96JZ2;O75791}

9271 Pathogen[ P14079] interacts with 23 human partners:{Q12929;Q86WV1;Q9BVN2;O75368;P98171;P46109;Q92783;Q14847;Q13625;P55822;Q9ULZ2;O75791;Q8WV28;Q07666;Q96JZ2;Q9H6Q3;O14508;P62993;O43561;Q9BX66;P50616;Q9UQC2;P46108}

9272 Pathogen[ P03383] interacts with 9 human partners:{O75791;Q86WV1;Q13625;Q9ULZ2;Q07666;Q92783;P50616;O75368;Q9BVN2}

9273 Pathogen[ P03410] interacts with 23 human partners:{Q9BVN2;Q9UQC2;Q86WV1;P55822;P98171;Q9ULZ2;O43561;Q8WV28;Q92783;O75368;Q07666;O14508;Q14847;P46108;Q96JZ2;Q13625;P62993;P46109;Q12929;Q9BX66;O75791;Q9H6Q3;P50616}

9274 Pathogen[ P14075] interacts with 10 human partners:{O75791;Q07666;Q9BVN2;Q92783;Q86WV1;P55822;P50616;Q13625;Q9ULZ2;O75368}

9275 Pathogen[ P0C206] interacts with 18 human



partners:{Q9H6Q3;Q13625;Q07666;Q92783;O75791;P62993;Q96JZ2;P50616;O14508;Q86WV1;P9817  
1;Q9BX66;O75368;Q9ULZ2;P46108;Q9UQC2;P55822;Q9BVN2}

9276 Pathogen[ P03363] interacts with 23 human  
partners:{Q07666;O75368;Q9BX66;Q96JZ2;Q86WV1;Q92783;Q14847;Q13625;Q8WV28;Q9H6Q3;P9817  
1;P46109;O75791;P50616;P78314;Q9ULZ2;Q13480;Q13588;Q12929;P46108;Q9BVN2;O14508;Q9UQC2  
}

9277 [Cluster 844]GO:0017130+F molecular\_function [name] poly(C) RNA binding [def]  
"Interacting selectively and non-covalently with a sequence of cytosine residues in an  
RNA molecule." [GOC  
9278 Pathogen[ Q2Q067] interacts with 1 human partners:{Q13310}  
9279 Pathogen[ P0C214] interacts with 1 human partners:{Q13310}  
9280 Pathogen[ P03346] interacts with 1 human partners:{Q13310}  
9281 Pathogen[ Q85601] interacts with 1 human partners:{Q13310}  
9282 Pathogen[ P14079] interacts with 1 human partners:{Q13310}  
9283 Pathogen[ P03383] interacts with 1 human partners:{Q13310}  
9284 Pathogen[ P03410] interacts with 1 human partners:{Q13310}  
9285 Pathogen[ P14075] interacts with 1 human partners:{Q13310}  
9286 Pathogen[ P0C206] interacts with 1 human partners:{Q13310}  
9287 Pathogen[ P03363] interacts with 1 human partners:{Q13310}

9288 [Cluster 845]GO:0043565+F molecular\_function [name] sequence-specific DNA binding  
[def] "Interacting selectively and non-covalently with DNA of a specific nucleotide  
composition, e.g. GC-rich DNA binding, or with a specific sequence motif or type of DNA  
e.g. promotor binding or rDNA binding." [GOC  
9289 Pathogen[ Q2Q067] interacts with 301 human  
partners:{Q13562;Q9H4I2;Q14526;O43365;Q9UKI9;P27540;P17544;P01100;Q9Y6X8;Q92988;Q1623  
6;O43364;O15525;Q8IX15;Q9NRF9;Q12837;Q9Y5Q3;Q03052;P56524;Q10587;Q15631;A6NFK7;Q7Z353  
;P10827;Q9Y462;P09067;Q06416;Q63HK5;P0CJ88;Q9Y2D1;O00470;Q9UBX2;Q6ZN32;Q01094;P40763;  
P78424;P14921;Q5VZB9;Q9H2P0;Q9HAZ2;P36402;Q15910;Q9NR55;O60481;Q13485;Q01543;P10589;P  
35680;Q14549;P31274;P13056;P31268;Q8IUE1;Q9UHF7;P62508;O14813;P35712;P41182;Q9Y2X9;P1  
0828;Q01664;Q96IS3;P18847;P0CJ87;P49716;P41970;O60004;Q9BZE3;Q00613;P37275;Q02930;P49  
116;O60315;Q04206;P50548;Q96MA1;Q9ULV5;Q8IXT2;P39880;P18850;P50549;Q8IUE0;P17483;O947  
76;O15266;P36956;O95948;P41161;P0C7M4;Q9NQX1;Q7Z5D8;Q9Y5R5;Q16520;P15976;Q9BWX5;Q8N19  
6;Q03933;P28356;O15350;P35638;Q16534;Q2M1K9;Q8N1L9;Q86YP4;Q96SC8;P09086;Q94993;P17676  
;P17482;P11308;E9PGG2;P08047;P11473;Q15022;Q01892;P09017;O95416;P11831;P20265;O43248;  
Q6NT76;P28702;Q96PT3;P11388;P28069;O60663;Q9UKW6;P78545;P09629;Q9NS37;P54845;Q9Y4A8;Q  
00444;Q15723;Q15744;Q8N7G0;Q08050;Q14765;Q8N5F1;O43524;Q96G23;Q8N5J4;Q13469;P78412;P5  
5347;A6NLW8;P23769;P35548;Q4G112;P20719;P15036;P40426;Q59GR2;Q15699;A8MZ59;Q9BTC8;Q8N  
7R0;O14867;Q9ULX9;O43711;Q9UKY1;O75505;Q96SZ4;Q6IQ32;P84022;P78414;P50221;P10914;Q133  
30;P0CJ89;Q8WUU5;P0CJ90;Q96GC6;Q00056;Q9P2R6;Q01658;Q6NSW7;P31276;O15499;Q92769;O0025  
5;P14859;O95644;O75444;P28324;Q2M1V0;Q9H116;Q9Y603;Q9UN79;A6NDR6;Q8NI51;Q68CJ9;P41212  
;P0CJ86;P15408;P25208;O15164;P35226;P35869;Q9BQY4;Q9GZN2;P0CJ85;Q8NHW3;Q16621;P14651;  
Q9UPW6;P61244;P55055;O00321;P78337;P23760;O14770;Q99607;P19419;P49639;Q8N7U7;Q99687;P  
41162;P09016;O43812;P19838;Q9H4S2;A8K0S8;O60675;P43268;P20823;Q15583;O75360;A6NJG6;P1  
7861;Q07687;O14529;P15336;Q9BYV9;O43186;P08235;P22415;Q6VB84;Q9UKT9;Q9UMQ3;O95238;P31  
314;P14652;P11474;Q8IUR6;P29083;Q9NY43;Q9P1Z2;P58304;Q8N693;Q8WYK2;Q01860;P18848;Q018  
26;P21675;Q15853;Q9UBD0;O60869;P13682;Q04743;P50222;Q03060;P42226;Q96PT4;A6NJ46;Q6XYB  
7;Q8WXI9;P14653;Q13952;P15923;O60422;P15407;O75376;Q99814;P49711;P40425;Q8N5A5;Q16649  
;Q9NVV9;Q9UQR1;P42224;P22736;Q6RFH8;P07199;Q12830;P54821;Q02078;Q9UPG8;Q96LI6;Q06546;  
P40424;P31269;P53567;P49715;P18146;P17947;P17028;P31260;P32519;Q10586;Q3C1V8}

9290 Pathogen[ P0C214] interacts with 227 human  
partners:{P41970;P40424;O00470;Q9UKW6;P53567;O75444;Q9HA82;Q14526;Q03052;P18850;Q8NI5  
1;Q6IQ32;O14813;P35226;Q9NS37;O14529;P11308;P32243;O43365;P49639;P61244;Q02930;Q15022  
;Q00613;P35869;Q13469;O60663;P11474;Q13330;O95238;Q13952;Q06546;P55347;Q9UHF7;Q9Y4A8;  
P78337;P31249;O00321;P19838;P14921;Q7Z5D8;Q8N5A5;P15336;P21675;Q96LI6;O43186;P31314;P  
15407;P25208;Q8N693;P42226;Q8NHW3;O15350;Q14765;Q9BZE3;Q16621;P01100;Q9NR55;O15266;P1  
7275;P32519;P23769;P50548;P19419;P15408;P84022;P17947;Q9P2R6;P56524;Q6NT76;P17544;P11  
831;Q04206;Q16520;Q2M1K9;Q63HK5;Q9Y5Q3;P42224;P37275;Q68CJ9;P10914;P17482;Q9UPG8;Q9UK  
I9;Q15910;Q99607;Q8N5J4;P07199;Q96SZ4;Q9H4I2;P17676;P14651;Q03933;Q8N7U7;O43248;Q5VZB  
9;P49716;Q10587;Q10586;P20265;Q02078;P13056;Q01094;P18848;O14867;P17535;Q12837;P49116  
;Q07687;P15923;O95416;Q9NVV9;O94776;P17861;Q6RFH8;O43812;P14653;Q86YP4;Q13485;P18847;  
Q92769;Q9HAZ2;P17028;P50222;P28324;Q96G23;Q9Y603;Q9UN79;Q8WXI9;O75376;Q9ULX9;O15525;Q  
01543;Q96GC6;Q99687;P41182;Q9Y6X8;P11388;Q9BQY4;Q01892;P43268;Q9Y2D1;Q9NRF9;P28069;P1  
3682;Q9BTC8;O75360;Q9Y2X9;P36402;Q9ULV5;Q9Y462;P39880;Q9UBD0;Q9UKT9;Q8IUR6;P05412;Q9U  
MQ3;P49711;Q01826;P18146;Q16534;Q15631;O15164;Q8N196;Q9NQX1;Q15853;Q03060;P40425;Q998  
14;P09086;Q01658;P09629;Q59GR2;P15036;P40763;Q96004;P27540;P50221;Q9UPW6;P78545;P5054  
9;O14770;Q92988;P41162;P22415;Q9P1Z2;P10828;O95644;P16220;O60869;O95948;O60315;Q6ZN32  
;P54845;Q9UQR1;Q8IX15;O15499;P62508;Q01664;Q15699;P14859;Q01860;Q3C1V8;O60675;P35712;  
P41161;P35548;P08047;O00255;Q12830;Q8N1L9;Q9NY43;P35638;P29083;P31276;Q9Y5R5;P18846;O  
94993;P23760;Q9H2P0;Q15723;Q16236;Q9H116;P31269;P41212;Q4G112;O60481}

9291 Pathogen[ P03346] interacts with 446 human  
partners:{Q15723;P31271;P85037;Q3C1V8;Q9NPC8;Q8N7U7;P31249;P49716;P54821;Q8NI51;P4790  
2;P05412;Q12830;P78424;O75603;P49639;Q16621;Q9UHF7;Q13263;Q9NZR4;P35453;O75364;P31260  
;P50219;P09086;Q02078;Q9NQX1;P52954;P10827;E9PGG2;P0CJ88;P11473;P31268;P28324;Q99811;  
Q6QHK4;Q99687;Q8IUE1;Q8N7R0;Q9UD57;P50221;P18847;Q8N1L9;O14813;P58012;P78337;Q99598;O  
15522;Q9H116;Q7RTS3;Q9UPW6;A6NJ46;P16220;Q9UQR1;Q9H2W2;P06401;Q96BA8;P17676;Q9H2Z4;Q0  
3052;P78414;P36402;P15336;Q99607;Q9BQY4;Q05925;P78415;P36956;Q9H2P0;Q03828;Q00613;P35



638;P35548;Q9BYU1;P08235;P11831;P11388;P31270;Q9Y5W3;Q8IUE0;Q9UKT9;Q7Z5D8;Q8NFW5;P48443;P0CJ87;Q4G112;P40426;Q14774;O43711;P35226;P54845;Q70SY1;O60393;P50549;Q12772;Q96SZ4;Q9BZE3;O60315;Q9BWX5;Q03933;Q9UKI9;Q99626;Q12837;Q00056;Q15911;Q2M1K9;P17275;P49116;Q6XYB7;Q9UIU6;P17861;P23769;Q8N693;P0C7M4;Q15583;P19419;Q9H4S2;O75505;P14859;Q8IYA7;P25208;P150548;Q8IX15;Q9NR55;Q9C0A1;P20264;P15923;Q6VB84;P78413;P23760;P56524;Q6NSW7;P15408;P17535;P19622;Q04743;Q92858;P31276;A6NFQ7;Q8N5A5;Q16520;Q04206;P0CJ85;O95238;O94776;P13056;Q9NQ69;O00321;P52951;P41161;P56177;Q92826;Q04741;Q63HK5;Q08050;Q9BPY8;P42226;Q8IUR6;Q9Y5Q3;P23759;P10588;Q96QS3;P14652;O43186;Q9Y2D1;P27540;Q8N5J4;Q9NP08;P58304;A6NJT0;P20823;P0CJ89;O15350;O75626;Q9UBX0;O60902;Q9Y5R5;O43316;P14653;Q9NR33;O00409;P31269;A2RU54;P13378;P17483;Q9NRF9;O95644;Q01094;P49715;Q9ULX9;P31274;Q9UBC0;Q01860;O14867;P20719;O75444;P78426;P0CJ90;P08047;Q15853;P20265;P18850;Q14919;Q16236;Q9HB31;O60663;Q14526;O96004;O43364;P41162;P51843;O43365;Q15699;P28702;P28358;P50222;P18848;Q2M1V0;P14921;Q06710;P84022;P11308;P31275;Q9HCS4;Q9BYV9;Q8WUU5;Q14863;O60481;O95231;P2736;P15976;O15266;O95096;Q13469;Q9GZN2;Q15631;Q06546;O00255;O60519;P17481;O95863;Q969G2;P10914;Q96PT4;P49640;O60479;O95948;Q59GR2;Q15022;Q9P2R6;Q9H4I2;Q86YP4;Q92769;Q6ZN32;Q8WXI9;O15499;O95076;Q8IXT2;Q9P1Z2;Q96G23;Q6IQ32;P40425;Q9UN79;O00470;P28356;P09017;Q16534;Q9NZC4;P49711;Q13330;P17544;P09629;Q9Y6X8;Q15744;P37275;P35680;P31273;Q16649;Q15475;O14627;Q99814;Q12778;P42224;Q9Y462;Q9Y5R6;Q9UBX2;Q01167;Q8N196;O75376;P98177;Q6BEB4;Q9UBD0;P09016;O95718;Q06416;P78367;P78411;P35713;Q15910;O75469;O94993;P09630;P15407;P41182;A6NNA5;Q8N5P1;A8K0S8;P17028;A6NDR6;O95475;Q68CJ9;P31267;Q96MA1;P61244;Q96SC8;Q92481;Q13952;O15525;Q9H2C1;P21675;P35712;P32242;P32519;P55347;A6NMT0;P41970;P62508;P10828;Q9UBR4;O60422;A8MTQ0;P28069;O43763;P17947;Q01658;Q99929;Q9GZZ0;Q99593;P11474;Q5XKR4;Q10586;Q8N7G0;P78412;P40424;P41212;P19838;Q03060;P56178;Q13485;P13682;Q15270;P07199;O75360;O43812;P31314;Q9UKY1;Q9UPG8;P53567;A6NLW8;Q96IS3;Q9Y2X9;Q96KN3;P29083;P18146;P43268;Q96LI6;Q9NQL9;Q6RFH8;Q7Z353;P39880;Q9Y603;Q8TEY5;O60869;Q9UKW6;P35869;P78545;O00482;Q5VZB9;Q14765;Q02930;O60675;Q9HAZ2;Q9ULV5;Q8TAU0;Q9H9S0;Q6NT76;Q10587;O75593;Q13562;Q96GC6;Q01892;Q9BTC8;Q9BZ11;P40763;P35398;Q99729;Q8NHW3;P32243;O43524;Q86UP3;Q68G74;P56915;Q9NS37;O95343;Q13285;Q9NVV9;P01100;Q9U1W0;Q9UMQ3;P49335;Q01664;Q9NY43;P53539;A6NJG6;P15036;P09067;P17509;O15164;Q00444;O95416;O14529;P0CJ86;Q01826;P55055;A8MV59;O43248;Q8WYK2;Q96PT3;Q14549;Q14770;Q01543;P14651;P18846;P35452;P17482;Q6ZNG2;Q8NHV9;P22415;Q9HBU1;Q9Y4A8;Q92988;Q15319;Q99581;Q9UJU5;Q9H2A3;P10589}

9292

Pathogen[ Q85601] interacts with 299 human

partners: {Q9UQR1;Q9P2R6;P18146;Q68CJ9;Q8N196;Q8NI51;Q8IXT2;P78424;P49639;P09629;Q9UHF7;Q7Z5D8;P11831;Q15853;Q9UPG8;Q02078;P17676;P15036;O60481;O75360;P11473;Q96SZ4;P25208;Q96MA1;O14529;O15499;O43316;Q8IUE1;Q16236;O14813;Q14765;P17028;Q9BWX5;Q99687;P09086;Q6XYB7;Q01892;Q9UPW6;A6NJ46;Q8IUR6;P15976;Q96SC8;O94776;A6NNA5;P14921;Q9ULV5;Q03052;P13682;Q06546;P50548;Q9Y603;Q14549;A6NDR6;Q16621;P0CJ87;Q8N7R0;P53567;P54845;P50549;P14653;Q8N7U7;Q9BZE3;O43248;O60315;Q03933;Q9H116;Q2M1K9;P15407;Q8N7G0;P18848;P19419;P40763;P28702;P28069;P32519;P14859;O60663;Q23769;P41970;P78545;Q9Y2X9;Q96PT3;Q96IS3;Q8N5A5;Q16520;Q15723;Q12772;O43364;P35712;Q10587;Q15583;A6NFQ7;P18846;Q8N1L9;Q99814;P27540;Q8IUE0;Q13469;P07199;O15164;P78337;Q6NT76;O95644;O96004;P41162;Q00613;O15525;P55055;P49711;Q13952;Q12830;Q9Y5Q3;P10914;P08047;Q9NRF9;Q13562;P01100;Q15022;Q13263;Q8NHW3;P41212;Q14526;Q6IQ32;P22415;Q9BQY4;Q9H4I2;P31260;P50222;O75444;P40424;P49716;P0CJ88;P17535;Q9NQX1;Q9NVV9;Q9BYV9;Q02930;Q9UMQ3;Q9UBX0;A6NJG6;O15266;P0CJ90;P0CJ89;Q16649;P18847;O95948;P36956;Q86YP4;O95416;Q9UKW6;Q92769;P16220;Q15699;Q04206;Q8WXI9;P42226;Q96G23;P40425;Q9UN79;Q3C1V8;Q13330;P22736;Q01543;Q9Y6X8;Q15744;Q96GC6;P35548;Q5VZB9;P35680;P05412;Q9H2P0;Q9Y4A8;P11388;P29083;O00255;P18850;Q01826;Q9UKI9;O75376;O00470;P42224;Q9Y462;P08235;O43711;Q6ZN32;Q01658;P11474;P15923;P36402;Q8N5J4;P10827;P58304;O43812;P32243;O14867;Q2M1V0;Q8N693;O94993;Q9BTC8;Q8WUU5;P0C7M4;Q8N5P1;P17544;A8K0S8;P31249;O00482;P61244;P84022;Q99607;P31271;P49715;Q9Y2D1;P41161;P55347;P37275;P56524;P31274;P62508;O60422;P17947;P21675;Q15910;Q08050;P35869;Q9GZN2;P35226;Q16534;Q9Y5R5;O15350;Q9UBX2;P50221;P31314;P49116;P14651;Q9UKY1;O75626;P13056;P40426;O43365;P43268;Q96LI6;P15336;P10828;P41182;Q6NSW7;Q6RFH8;Q9NS37;P39880;Q59GR2;P31276;O60869;Q9P1Z2;Q9HCS4;Q06416;Q4G112;O60675;Q63HK5;P17275;P19838;P20823;Q12837;Q13485;Q9UBD0;Q9H4S2;Q01664;Q9NY43;P53539;P17861;P31269;Q01860;Q03060;Q00444;P28324;Q9UKT9;Q15631;Q7Z353;Q9ULX9;Q07687;Q8WYK2;Q01094;O14770;P23760;P0CJ86;P11308;P15408;A6NLW8;Q9NR55;Q8IX15;P17482;P20265;Q10586;O00321;O95238;P0CJ85;P35638;Q92988;Q9HAZ2;O75505;P10589}

9293

Pathogen[ P14079] interacts with 278 human

partners: {Q96SC8;P07199;Q7Z5D8;Q13952;Q9UQR1;Q9UPW6;Q9NQX1;E9PGG2;P11388;P15036;Q8N7U7;P13056;O15164;Q8WYK2;P0CJ89;Q9HAZ2;O14867;P0CJ88;P0C7M4;P62508;Q4G112;Q6XYB7;P55055;O95416;Q10587;Q9Y5Q3;O43364;P35869;Q02078;Q99814;Q9BWX5;Q8N196;Q8IUE1;Q8N693;Q06546;P14859;Q96PT4;A8K0S8;P78337;Q16649;Q2M1V0;Q15853;O00321;O60481;Q99581;O75626;Q15911;Q68CJ9;Q15723;P35398;P53567;Q96LI6;P11473;P35680;P20265;Q8IXT2;Q9NRG0;P55347;P09086;A6NJG6;P10828;P08235;O95948;Q9Y5R5;Q9607;Q9NVV9;P39880;Q15583;Q8N5A5;P0CJ86;Q15699;Q1330;Q03060;P11474;Q6ZN32;O95644;O60675;Q01826;P35712;Q8IX15;P58304;Q9GZN2;A8MZ59;Q9HA82;O96004;P22736;O43812;P15976;Q9NY43;P32519;Q9H2P0;Q86YP4;O60869;P41161;Q96SZ4;P31271;P15923;Q9NS37;P48443;Q8N7G0;Q03933;Q14765;P10827;Q12837;P54845;O15350;Q15744;P09629;O60315;P36402;P11308;O95718;Q6BEB4;P28069;Q12772;Q9UKY1;P31276;P0CJ90;Q99687;Q6NT76;P42226;Q9NZC4;Q3C1V8;Q15631;Q00613;Q01892;P41182;P31274;Q01543;Q8N5J4;P0CJ87;Q9UPG8;Q14549;Q9NRF9;Q9BZE3;Q01860;O00482;P17544;Q6RFH8;O95238;Q92769;O43711;Q02930;P49715;Q96G23;O60663;O15266;A6NFQ7;O75469;P31269;Q2M1K9;P27540;Q12830;Q9P2R6;P50549;A6NLW8;P17275;P15336;Q8NHW3;P28702;Q9BQY4;O75360;Q9Y2X9;Q5VZB9;Q01664;P31249;P78424;Q9UBD0;Q9BYV9;Q96MA1;Q96PT3;Q9Y603;Q9ULX9;O43365;Q9UMQ3;P35638;Q16621;Q9BTC8;O75444;Q16236;Q00444;P42224;P10588;P35226;P18850;P32243;P41212;P50548;Q8N5P1;Q8N1L9;Q04743;Q07687;O14770;Q8IUE0;Q9Y5W3;O15525;Q9UN79;P15407;Q96IS3;O75376;O14529;Q63HK5;A6NNA5;P41162;Q9UKI9;P78414;Q9NR55;P78545;Q99598;Q15910;Q03052;P10589;Q13469;Q6IQ32;Q7Z353;P49116;O75505;P

- 05412;Q8WUU5;P13682;O15499;Q9Y4A8;P56524;O14813;P49716;Q06416;P49639;Q16534;Q9UBX2;Q9H4I2;P28360;Q92988;Q9Y6X8;O00470;Q94776;Q9P1Z2;P36956;Q9ULV5;Q01094;A6NDR6;O00255;P15408;P61244;P01100;P78412;Q10586;P23769;Q01658;Q9NR33;Q9UKW6;Q9UHF7;P41970;P49711;Q15022;P50222;Q94993;Q16520;Q9Y462;P37275;P17535;P50221;P0CJ85;Q8NI51;P10914;P29083;Q6NSW7;P19419;P21675;Q8IUR6;P14651;Q9H116;Q9UKT9;Q96GC6;Q8N7R0;P17028;P23760;P22415;Q8WXI9 }
- 9294 Pathogen[ P03383] interacts with 198 human partners: {Q9UQR1;Q15723;Q68CJ9;Q8IX15;Q8NI51;O00470;Q12830;P10914;O15266;P11831;P15036;P35712;P50549;Q13485;Q96SZ4;P08047;Q9UPW6;Q9BTC8;Q99607;Q9UKI9;P16220;P27540;Q8N1L9;P28069;Q13469;P17544;Q8IUR6;P32243;Q9H4I2;Q94776;P49711;Q01094;P14921;O75376;Q14526;Q07687;Q9Y5Q3;Q9Y5R5;Q86YP4;P40424;Q6NT76;P49116;Q9P2R6;P14859;Q9UKW6;O75360;P17482;Q9UMQ3;O95644;P18847;P17861;Q01826;P19419;Q96LI6;P23769;P50222;P37275;P31276;Q6RFH8;P35638;O43365;P15923;Q16520;Q01860;P42226;P18846;Q8N693;Q13330;Q15631;P15408;P78337;O00321;Q9NQX1;Q15022;P18146;P41162;O15525;Q6IQ32;Q01664;P31249;P55347;P25208;Q9HAZ2;O14770;Q4G112;O96004;P11473;P41161;P11474;Q013952;Q01892;Q16621;P54845;P49639;P84022;P11308;Q9NVV9;P35548;P28324;Q9ULV5;Q99687;Q92769;Q6ZN32;O60663;P17676;O43711;Q9UN79;P15407;P28702;Q8N5A5;Q12837;Q01543;Q9Y6X8;O15350;Q00613;O00255;Q7Z5D8;Q9Y462;P31269;P36402;Q8N5J4;P41212;Q16236;P31314;Q15853;Q9H116;Q96GC6;O95238;P01100;P43268;O43186;P39880;P23760;P21675;P56524;P41970;P32519;Q9Y4A8;Q15910;Q04206;Q10586;P17535;P78545;Q9NY43;Q8WXI9;P53567;Q9UKT9;O60675;P07199;P50221;P50548;Q8N7U7;Q9Y2X9;P29083;P15336;P10828;Q9NS37;P18848;Q2M1K9;P18850;O60481;P62508;O60869;Q8N196;P09629;Q9Y2D1;Q15699;P17275;P20265;O75444;P61244;P19838;P35869;P17028;Q9UBD0;Q16534;Q9Y603;P13056;Q01658;Q9ULX9;Q9UHF7;Q06546;Q3C1V8;Q92988;Q03060;P17947;Q59GR2;Q9P1Z2;P40425;Q02078;P35226;P14651;P13682;P22415;Q9BQY4;Q03933;P05412 }
- 9295 Pathogen[ P03410] interacts with 284 human partners: {P84022;O75505;Q96LI6;O14813;Q00613;Q9UHF7;P40426;Q04206;P28069;Q9BZI1;P35712;P11831;Q9NS37;P0CJ87;P19838;Q68CJ9;P36956;Q96PT3;O60675;Q8N5J4;P35638;Q14526;O95238;Q59GR2;O00470;Q8N7R0;Q8N7G0;Q8WYK2;P17482;P17861;P37275;P13682;P41162;Q16520;Q9HAZ2;Q9NVV9;O96004;P31274;P19419;P31276;Q14549;Q9P2R6;Q9UN79;P17676;Q96SZ4;Q9BYV9;Q9UMQ3;Q9H4I2;P18847;Q99814;P17947;O60481;Q01860;P54845;Q8IUE0;P21675;P41212;P09629;P29083;P18848;P36402;P50222;P50221;O15266;Q9Y2D1;Q8WUU5;P14651;P53567;P14859;Q8WXI9;P78545;Q9UPG8;O75444;P28324;Q16236;Q3C1V8;Q12830;Q2M1V0;Q9BZE3;Q9BTC8;Q4G112;P31249;Q14765;Q96GC6;Q6NSW7;Q2M1K9;P78414;Q9UBX2;Q99687;Q03060;P0CJ85;A6NNG6;A6NNA5;Q86YP4;O95948;P10828;O00321;Q9NRG0;Q9H116;O75376;P31314;P49716;P32519;Q8N7U7;P15923;Q99607;Q03052;P0CJ90;Q9UPW6;P62508;Q03933;Q5VZB9;Q96SC8;Q9UKW6;P01100;P18846;P61244;A6NFQ7;P15408;A8K0S8;O60663;Q96G23;P17544;P50549;Q9UQR1;P11473;Q9Y603;Q6ZNG2;A6NJ46;O95644;Q9BQY4;Q02930;Q9P1Z2;Q6RFH8;Q96MA1;Q9Y5Q3;P27540;Q9UKT9;O15525;Q9Y2X9;Q15583;P41161;Q92988;Q07687;P35548;Q6IQ32;P15036;A8MZ59;Q16649;Q92769;Q9BWX5;Q8N5A5;P17535;P17028;A6NLW8;Q9HA82;Q7Z353;P17275;Q12772;Q13330;Q16621;P0CJ89;P25208;P56524;Q01826;P43268;P31269;Q01658;P22415;Q13485;P10914;Q9ULX9;Q13952;P22736;P28702;Q9NRF9;P16220;Q9Y6X8;P78412;Q8N196;O43364;Q15699;Q13469;Q15910;P41182;Q15853;Q9NR33;P05412;Q8IUR6;Q99598;P39880;P49639;Q10586;Q6XYB7;P49711;A6NDR6;P42226;P11388;Q8NI51;Q8N1L9;Q9UKI9;P0CJ88;P55347;Q8IUE1;P32243;P11474;P0CJ86;P23769;Q8NHW3;Q94776;Q9HCS4;Q01664;Q01094;P35680;O60869;P49116;Q96IS3;P10589;Q10587;Q02078;Q16534;O15350;P07199;P41970;Q15631;Q9GZN2;O43812;Q9Y462;P08047;P50548;P23760;O43711;Q9UBD0;O75626;Q06416;Q63HK5;Q8N693;Q9ULV5;P15407;E9PGG2;Q9Y4A8;O75360;Q15744;O94993;P20265;Q12837;P11308;Q9NY43;P18146;Q8IX15;P35226;O95416;O00255;O14867;P40424;P78424;Q04743;P08235;P15336;Q9NQX1;Q15723;Q9NR55;O60422;Q96PT4;P40763;Q9UKY1;P18850;Q6ZN32;Q8IXT2;O43365;P15976;O14770;P0C7M4;Q06546;Q15022;Q7Z5D8;Q01543;P78337;Q01892;P14921;P13056;O15499;O14529 }
- 9296 Pathogen[ P14075] interacts with 193 human partners: {P28069;Q8N196;Q8NI51;P35869;O60663;Q99607;Q6RFH8;Q6ZN32;Q00613;P50548;Q04206;P21675;P17482;Q9H4I2;Q9Y5R5;P78337;P40424;Q14526;Q99687;Q9UQR1;Q8N5J4;P05412;P42226;P40425;P11474;Q9Y2D1;Q01543;P14859;P11831;O60481;Q8N1L9;P10828;P78545;P17861;O00470;P53567;P25208;P07199;Q96SZ4;Q01658;O75444;Q9H116;P17275;Q9Y4A8;Q06546;P43268;Q9P2R6;P29083;P23769;P61244;P19419;P41212;P18847;Q01860;Q9UBD0;Q03933;P35548;Q12837;P56524;Q08050;O43186;P18146;O60675;Q16520;P20265;Q9Y603;Q94776;P35638;P31249;Q9ULX9;Q15910;Q92988;P15336;P15923;P15408;Q13952;O43365;P13056;P39880;Q07687;P31269;O75376;Q01826;Q4G112;Q9HAZ2;P27540;P55347;Q8N5A5;P41162;O96004;Q13485;O00255;P09629;Q10586;P15036;Q15853;P49116;O14770;Q15631;Q8N7U7;Q9NY43;Q9ULV5;P28324;Q9NQX1;P32519;Q9UPW6;Q01664;P54845;Q12830;P50221;Q13469;O15350;Q8N693;Q92769;Q01892;Q9Y5Q3;P35712;Q9UN79;Q9UHF7;Q15723;Q9UKT9;P11473;Q9Y6X8;P17947;P11308;Q8IX15;Q9P1Z2;P18848;O75360;O43711;Q9UMQ3;Q01094;P14921;P36402;Q6IQ32;Q02078;P17028;P50549;Q3C1V8;Q68CJ9;P01100;O15525;Q9Y2X9;Q13330;P49711;Q96LI6;P28702;Q9UKW6;Q15699;P35226;P31314;P31276;Q15022;P19838;Q03060;Q96GC6;O15266;P16220;Q9UKI9;P41970;P22415;P84022;P15407;Q16621;P23760;P17676;P37275;Q16236;O60869;Q2M1K9;P10914;P17544;P17535;P32243;Q8WXI9;Q8IUR6;Q9NS37;Q9NVV9;Q6NT76;Q7Z5D8;Q9Y462;Q02930;P62508;Q9BTC8;P50222;O95644;Q9BQY4;Q86YP4;P18846;O00321;P18850;Q16534;P08047 }
- 9297 Pathogen[ P0C206] interacts with 347 human partners: {Q15723;P84022;Q9NQX1;Q9Y2X9;P53567;Q07687;P10588;P0CJ87;Q8IX15;P10914;Q92769;P78424;Q16649;Q03060;A6NDR6;Q8IUR6;Q7Z353;Q15270;O60481;Q00444;P0CJ90;Q9Y2D1;Q96G23;P35398;Q06546;O43711;P31269;P31314;P06401;O14867;O60393;Q13469;P40425;Q9NRF9;Q9HAZ2;P13682;Q9Y5Q3;P14921;Q15911;Q9NY43;Q06416;Q9Y4A8;Q9NR55;Q02078;O15266;A6NNA5;Q13263;Q9H4I2;Q8WUU5;P15407;O43365;Q04743;P16220;P17275;Q9Y5R6;P09067;Q9UN79;Q9NR33;P35869;P17544;Q15744;O75444;P18850;Q8N7R0;O43812;P41212;P78414;Q01860;P41182;P54821;P49639;Q99598;O14529;Q00613;O00470;P35226;Q9UBX2;O75469;Q6ZN32;Q8WXI9;O00255;Q03933;Q9UMQ3;P05412;P78411;P19419;P50221;Q8WYK2;Q8NI51;Q9Y462;P14651;Q92988;Q8N196;O15499;Q9UBC0;P1533

6;P0CJ86;Q8N7G0;Q15631;P55055;P43268;O75626;P17535;P13056;P49715;O94776;P31268;P36956;P17483;Q9HCS4;O15164;P41970;Q9P1Z2;P18846;P0CJ89;O14770;Q86YP4;O15525;P54845;Q13330;P15976;P49116;P22736;Q15910;Q10587;Q15699;O00321;O95238;Q9Y603;Q96IS3;O00482;Q9Y6X8;P40424;Q969G2;P0CJ85;P11308;Q9P2R6;P18146;Q96MA1;O75360;O96004;P14653;P17861;P10589;Q9BZE3;Q9BWX5;Q63HK5;P32519;Q15853;Q12837;P14652;A8MZ59;Q9GZN2;Q9BYV9;Q13952;O95718;P78337;Q6ZNG2;O43248;P49640;P41162;Q5VZB9;P19838;Q9H4S2;Q8IXT2;Q99581;Q14919;P10828;P22415;P62508;Q9ULV5;P40426;P09086;Q68G7;Q9HA82;Q6XYB7;A6NFQ7;P50549;P32243;P17676;P78413;O94993;A6NJ46;O14813;P08047;P17482;P29083;A6NJG6;Q9UHF7;Q6RFH8;Q6IQ32;Q8N5P1;Q01658;P35680;P49711;P35548;P01100;Q8N7U7;Q9H2C1;Q04206;O75505;Q9Y5R5;Q9UPW6;Q9UKI9;P0CJ88;P15923;Q01094;Q9UQR1;P20823;O95416;P53539;Q9NS37;Q8N693;Q3C1V8;P28324;Q03052;P78545;P17947;Q02930;Q16534;P17028;Q96GC6;Q8NHW3;A6NLW8;Q8N1L9;O75376;Q9BQY4;P15036;P40763;Q13485;Q9BZI1;P25208;P61244;P0C7M4;Q8N5J4;P23760;Q15022;Q9H116;Q2M1K9;O60869;Q13562;E9P GG2;P23769;P11831;Q08050;Q59GR2;O60315;Q16520;Q13422;Q01664;Q6NSW7;P18847;Q4G112;P07199;P49716;P42226;Q7Z5D8;Q9UKW6;P28702;P37275;P35712;Q16236;P20265;P31271;O15350;Q16621;Q9UPG8;Q01826;Q99687;P27540;Q14863;Q9UKT9;Q9H9S0;O43364;P31274;P11388;Q14765;Q9UBR4;O60663;P11474;Q96LI6;Q9NZC4;Q99814;P39880;Q96SC8;P09629;O95644;Q14549;Q9H2P0;P56524;Q14526;P28356;P28069;Q96SZ4;P20719;Q8TAU0;O60675;Q96PT4;P41161;A8K0S8;P31249;P42224;P50548;Q6VB84;Q9UBX0;Q6NT76;P09016;Q01892;P78412;P36402;P18848;Q8IUE0;Q8N5A5;O60422;Q9UBD0;Q12830;O43763;Q01543;Q2M1V0;P15408;Q99607;P11473;Q12772;P08235;O43316;P58304;P35638;P31260;Q9NVV9;P10827;P21675;P14859;P56177;Q8IUE1;Q10586;Q9ULX9;Q68CJ9;Q15583;Q9UKY1;Q9BTC8;P48443;P31276;Q96PT3;P55347;Q9H2A3;O95948;P50222}

9298 Pathogen[ P03363] interacts with 390 human partners: {Q16236;Q9NQX1;P56179;Q15911;Q9NR55;Q15699;Q9UBC0;P13682;O15266;P31273;O43812;P17535;Q9GZN2;P18848;Q9UIW0;P35453;Q8NFW5;P49716;Q16649;Q14765;Q12830;Q99592;P10828;Q9UHF7;O95948;Q59GR2;P19622;P29083;P47902;Q9NZR4;P78415;Q6XYB7;P0CJ87;P0CJ88;Q9BYU1;P09067;O75360;P31274;O14529;Q04206;Q15853;Q99598;P27540;P17676;O60481;P18146;P49116;P0CJ86;Q9UBX2;O60315;Q02930;Q86UP3;Q7Z353;Q99626;P53567;Q9C0A1;Q14526;Q8N7R0;Q9UN79;Q9BYV9;P56177;Q3C1V8;Q9NVV9;P36402;P78424;Q86YP4;Q8IUE1;P78412;P53539;P31267;Q14863;O43365;Q15022;Q06546;A8MTQ0;Q13952;Q03933;O60422;Q9UKW6;Q96LI6;P62508;P14651;Q15744;O6063;Q9NS37;Q8N7U7;P18847;Q99929;Q10586;Q9NRF9;O43763;P37275;P0CJ89;Q9Y4A8;P28356;P23760;P09086;Q9H2P0;P17947;Q01892;P78413;P20719;Q7RTS3;P31271;Q8NHW3;P18850;Q9H2W2;Q01826;Q9UKI9;P17481;Q9Y6X8;O75376;Q16520;Q01543;Q9Y462;Q15910;O60902;Q99607;P11474;P16220;Q9Y2D1;P78414;Q8N196;O43316;Q16621;P58304;Q15631;P19419;Q96SC8;P14921;P35548;P50548;Q96IS3;Q9Y603;P78411;Q96GC6;Q6NT76;P32243;O14867;Q06479;Q6BEB4;O95231;Q8N693;Q9HCS4;P43268;P55347;P17028;O43248;E9PGG2;Q9Y2X9;P49639;O95476;P17483;Q8N1L9;Q9H4S2;P8K0S8;O00409;Q8WYK2;A6NDR6;P0CJ90;P35869;P17275;P42226;P17509;P31249;Q99729;P49711;P54845;P61244;O00321;P07199;P14653;P50221;P10588;Q96PT4;Q9BZE3;P11473;P40425;O43524;P15923;P15336;Q9UD57;Q2M1K9;O15499;P32519;Q2M1V0;Q8N7G0;Q8WXI9;Q9BTC8;Q08050;P13378;P0CJ85;P11831;Q96MA1;P28702;Q9BPY8;P20264;P28069;P14859;P28358;Q6ZNG2;Q00444;P56915;Q8N5P1;P11308;Q9UPG8;A8MZ59;Q8IX15;O95238;Q9GZZ0;Q96KN3;P08235;Q6ZN32;A6NJT0;Q9NZC4;Q6VB84;P78545;Q14549;Q8IXT2;Q9P1Z2;P32242;P18846;Q01094;P35226;Q9Y5R5;O75444;P14652;O75505;Q9NP08;O43186;O15525;P31260;A6NMT0;Q06416;Q8N5A5;P17861;Q4G112;Q14919;P20265;Q15723;P31268;Q15270;P84022;Q01167;P31314;Q8N5J4;P41161;Q68CJ9;Q9UKY1;O96004;Q9H2Z4;Q00056;P35638;P10914;Q92826;O00470;Q05925;Q15583;P35398;Q5XKR4;P50549;P15407;P22415;A6NFQ7;P54821;P23759;Q9HB31;P19838;Q99814;Q6NSW7;Q6RFH8;Q96SZ4;P09016;P31276;P50222;O60869;Q13469;P21675;Q92988;Q9BWX5;P35712;O60393;O43711;Q13485;O95076;Q9ULV5;P17482;P52951;P49335;P78367;P31269;Q63HK5;Q9UQR1;Q99687;Q9C056;P41162;O95644;A6NLW8;Q8IUR6;Q9BQY4;Q9BZI1;Q96QS3;O94993;Q8IUE0;P05412;Q6IQ32;P40424;Q96G23;Q9H116;Q04741;A2RU54;Q00613;Q9UKT9;O60675;P0C7M4;Q99581;Q5VZB9;P09629;P40426;P35452;Q13330;O95343;Q8IYA7;P41970;Q9NR33;O95416;O43364;Q03828;P08047;Q9UMQ3;Q96PT3;Q9NY43;Q8TAU0;O75626;Q01658;O95475;P17544;Q9P2R6;P09630;Q99811;Q8NHW9;Q16534;P41212;P09017;Q9UJU5;O15522;P39880;Q9H9S0;Q9ULX9;Q07687;A6NJG6;P78337;Q12837;P50219;P25208;Q9UPW6;Q9UBD0;Q9H4I2;P10589;P15408;P13056;Q9NPC8;Q9Y5Q3;Q01664;A6NNA5;P15036;Q01860;P31275;O14813;Q03060;O14627;Q03052;Q10587;Q9HBU1;A6NJ46;Q7Z5D8;Q04743;O94776;P28324;Q8WU5;Q15319;Q9HAZ2;P01100;Q9UBX0;Q9H2A3;P49640;Q6QHK4;O00482;Q02078}

9299 [Cluster 846]GO:0008599+F molecular\_function [name] protein phosphatase type 1 regulator activity [def] "Modulation of the activity of the enzyme protein phosphatase type 1." [GOC

9300 Pathogen[ Q2Q067] interacts with 3 human partners: {Q9UD71;Q12972;Q9Y2W2}

9301 Pathogen[ P0C214] interacts with 3 human partners: {Q9Y2W2;Q9UD71;Q12972}

9302 Pathogen[ P03346] interacts with 4 human partners: {Q9UD71;Q15435;Q9Y2W2;Q12972}

9303 Pathogen[ Q85601] interacts with 3 human partners: {Q9Y2W2;Q9UD71;Q12972}

9304 Pathogen[ P14079] interacts with 3 human partners: {Q9UD71;Q9Y2W2;Q12972}

9305 Pathogen[ P03383] interacts with 3 human partners: {Q9UD71;Q12972;Q9Y2W2}

9306 Pathogen[ P03410] interacts with 3 human partners: {Q9Y2W2;Q12972;Q9UD71}

9307 Pathogen[ P14075] interacts with 3 human partners: {Q9UD71;Q9Y2W2;Q12972}

9308 Pathogen[ P0C206] interacts with 4 human partners: {Q15435;Q9UD71;Q12972;Q9Y2W2}

9309 Pathogen[ P03363] interacts with 4 human partners: {Q9Y2W2;Q12972;Q9UD71;Q15435}

9310 [Cluster 847]GO:0070097+F molecular\_function [name] delta-catenin binding [def] "Interacting selectively and non-covalently with the delta subunit of the catenin complex." [GOC

9311 Pathogen[ Q2Q067] interacts with 1 human partners: {Q9NYF0}

9312 Pathogen[ P0C214] interacts with 2 human partners: {Q5SW24;Q9NYF0}

9313 Pathogen[ P03346] interacts with 2 human partners: {Q9NYF0;Q6IQ23}

9314 Pathogen[ Q85601] interacts with 3 human partners: {Q9NYF0;Q6IQ23;Q5SW24}

9315 Pathogen[ P14079] interacts with 4 human partners: {Q6IQ23;Q5SW24;Q96B18;Q9NYF0}

9316 Pathogen[ P03383] interacts with 1 human partners:{Q9NYF0}

9317 Pathogen[ P03410] interacts with 4 human partners:{Q96B18;Q5SW24;Q9NYF0;Q6IQ23}

9318 Pathogen[ P14075] interacts with 1 human partners:{Q9NYF0}

9319 Pathogen[ P0C206] interacts with 4 human partners:{Q96B18;Q5SW24;Q9NYF0;Q6IQ23}

9320 Pathogen[ P03363] interacts with 2 human partners:{Q9NYF0;Q6IQ23}

9321 [Cluster 848]GO:0004519+F molecular\_function [name] endonuclease activity [def] "Catalysis of the hydrolysis of ester linkages within nucleic acids by creating internal breaks." [GOC

9322 Pathogen[ Q2Q067] interacts with 38 human partners:{Q9Y2M0;Q96SD1;Q15631;Q5D1E8;P55895;Q92889;Q8NCE0;P49959;Q9Y2L1;Q99708;Q9NRR4;Q9UIF7;O60930;Q9H777;P27695;Q12972;Q9BSV6;A4GXA9;P52758;Q86US8;Q9BQ83;P54278;Q9UQ84;Q9BRX2;O15527;Q9UKV8;P39748;P78549;P23396;Q86UW6;Q9H9J2;Q96NY9;Q96AY2;Q9UKF6;Q9BQ52;O75792;A2A288;P28715}

9323 Pathogen[ P0C214] interacts with 39 human partners:{P27695;Q9H9J2;Q9BQ83;P49959;Q9UKF6;Q92889;P23396;Q9Y2L1;Q96SD1;Q86UW6;Q9BRX2;Q96NY9;Q99708;Q9H777;Q9Y2M0;O75792;Q9BSV6;P28715;A2A288;Q86US8;P55895;Q96AY2;Q9BQ52;Q9UIF7;O60930;Q9NRR4;A4GXA9;Q9UKV8;Q15631;Q9C0D7;P39748;P78549;Q9UQ84;Q12972;P52758;P54278;O15527;Q5D1E8;Q8NCE0}

9324 Pathogen[ P03346] interacts with 43 human partners:{P28715;A2A288;Q96SD1;Q86US8;P52758;Q9UKF6;O60930;P07992;Q99708;P55895;Q9UIF7;Q96AY2;Q96NY9;Q13609;Q15631;Q9Y2L1;Q5D1E8;Q86UW6;Q9H777;Q9UKV8;P49959;P78549;P23396;Q92889;Q9UQ84;P54278;Q9NRR4;P24855;Q9BQ83;P27695;Q13283;P39748;O15527;Q9Y2M0;Q9BRX2;Q9UBZ4;Q9BQ52;Q12972;Q9BSV6;A4GXA9;Q8NCE0;Q9H9J2;O75792}

9325 Pathogen[ Q85601] interacts with 40 human partners:{Q9UBZ4;Q9BQ52;Q9Y2M0;O15527;Q9UQ84;P52758;P23396;Q99708;A4GXA9;Q9NRR4;Q96AY2;O75792;P49959;Q9BSV6;Q9H777;Q9Y2L1;Q96NY9;Q92889;P28715;A2A288;Q96SD1;Q12972;Q9UKV8;Q86US8;Q9C0D7;Q9UIF7;P54278;Q9BQ83;O60930;Q86UW6;P39748;P78549;Q9H9J2;Q9BRX2;P27695;Q9UKF6;P55895;Q15631;Q5D1E8;Q8NCE0}

9326 Pathogen[ P14079] interacts with 48 human partners:{P52758;Q9BRX2;Q9UKV8;P23396;Q5D1E8;Q9UIF7;Q13609;P28715;Q96NY9;Q9UKF6;Q9UBZ4;O75792;Q9H777;Q9BSV6;P54278;P49184;O94919;Q86US8;Q8NCE0;O15527;O00115;P78549;Q96AY2;Q14249;A4GXA9;Q15631;Q8N8Q3;Q99708;Q86UW6;Q9NRR4;P24855;Q92889;P27695;Q9BQ52;Q9Y2M0;Q9Y2L1;Q12972;Q9H9J2;Q8WZ79;Q96SD1;Q5HYM0;A2A288;Q9BQ83;O60930;Q9UQ84;P07992;P39748;Q9C0D7}

9327 Pathogen[ P03383] interacts with 30 human partners:{Q9NRR4;Q9Y2L1;P54278;Q9H777;O75792;O15527;A4GXA9;Q12972;Q5D1E8;Q8NCE0;Q9BRX2;Q15631;Q9UKF6;A2A288;Q9BQ52;P52758;Q9BSV6;Q86US8;Q96AY2;P55895;Q9Y2M0;Q9UKV8;Q99708;Q9H9J2;O60930;P27695;P23396;Q9BQ83;Q86UW6;Q96NY9}

9328 Pathogen[ P03410] interacts with 48 human partners:{P49959;Q9Y2L1;Q99708;P49184;Q9UKV8;Q96AY2;A4GXA9;Q9C0D7;P07992;Q13609;O75792;Q9BQ52;Q5HYM0;A2A288;P23396;P55895;Q92889;P39748;Q96SD1;Q9BQ83;P28715;Q9BSV6;P78549;Q9H9J2;Q9NRR4;O60930;Q86UW6;Q9UBZ4;O15527;Q9BRX2;Q5D1E8;Q96NY9;Q9H777;Q86US8;Q9UKF6;P63135;P27695;Q12972;Q15631;O00115;P52758;P54278;Q9UQ84;Q9Y2M0;Q8NCE0;P24855;Q9UIF7;Q14249}

9329 Pathogen[ P14075] interacts with 31 human partners:{Q9BSV6;Q9BQ83;P27695;Q9BRX2;Q86UW6;O15527;O60930;Q9UIF7;Q9H9J2;Q9Y2L1;Q9Y2M0;Q9H777;Q15631;Q86US8;Q8NCE0;Q9BQ52;Q96NY9;P23396;Q9NRR4;Q9UKV8;Q5D1E8;O75792;Q96AY2;P54278;P52758;Q12972;Q9UKF6;P55895;Q99708;A4GXA9;A2A288}

9330 Pathogen[ P0C206] interacts with 46 human partners:{P27695;P54278;Q9UKF6;Q9Y2M0;P28715;Q96AY2;Q17RS7;P49959;Q9BSV6;Q9UQ84;Q99708;O15527;Q9C0D7;A2A288;Q15631;Q9UKV8;Q96SD1;Q9UBZ4;P24855;A4GXA9;P07992;O60930;Q96NY9;Q86US8;P23396;Q92889;O75792;Q5D1E8;Q13609;P55895;Q9NRR4;Q9Y2L1;Q5HYM0;Q9H777;Q86UW6;Q9H9J2;Q12972;Q8NCE0;P39748;Q9BQ83;P52758;Q9BQ52;Q14249;Q9BRX2;Q9UIF7;P78549}

9331 Pathogen[ P03363] interacts with 33 human partners:{P52758;P23396;O15527;Q12972;Q9BSV6;A2A288;Q9Y2M0;Q86US8;Q13283;Q92889;Q9UKV8;Q15631;Q9H9J2;Q86UW6;O75792;Q13609;Q99708;P54278;P07998;Q9Y2L1;Q9BQ83;Q96AY2;Q9UIF7;Q9NRR4;Q9BRX2;Q5D1E8;O60930;P55895;Q9UKF6;P24855;A4GXA9;Q96NY9;Q8NCE0}

9332 [Cluster 849]GO:0035242+F molecular\_function [name] protein-arginine omega-N asymmetric methyltransferase activity [def] "Catalysis of the addition of a second methyl group to methylated peptidyl-arginine. Methylation is on the same terminal nitrogen (omega nitrogen) residue that was previously methylated, resulting in asymmetrical peptidyl-N(omega),N(omega)-dimethylated arginine residues." [PMID

9333 Pathogen[ Q2Q067] interacts with 3 human partners:{Q96LA8;Q9NR22;Q86X55}

9334 Pathogen[ P0C214] interacts with 3 human partners:{Q86X55;Q9NR22;Q96LA8}

9335 Pathogen[ P03346] interacts with 3 human partners:{Q9NR22;Q86X55;Q96LA8}

9336 Pathogen[ Q85601] interacts with 3 human partners:{Q9NR22;Q86X55;Q96LA8}

9337 Pathogen[ P14079] interacts with 3 human partners:{Q9NR22;Q96LA8;O60678}

9338 Pathogen[ P03383] interacts with 3 human partners:{Q86X55;Q9NR22;Q96LA8}

9339 Pathogen[ P03410] interacts with 3 human partners:{Q96LA8;Q86X55;Q9NR22}

9340 Pathogen[ P14075] interacts with 3 human partners:{Q9NR22;Q96LA8;Q86X55}

9341 Pathogen[ P0C206] interacts with 4 human partners:{Q86X55;Q96LA8;Q9NR22;O60678}

9342 Pathogen[ P03363] interacts with 3 human partners:{Q96LA8;Q9NR22;Q86X55}

9343 [Cluster 850]GO:0004816+F molecular\_function [name] asparagine-tRNA ligase activity [def] "Catalysis of the reaction

9344 Pathogen[ Q2Q067] interacts with 2 human partners:{Q96I59;O43776}

9345 Pathogen[ P0C214] interacts with 2 human partners:{Q96I59;O43776}

9346 Pathogen[ P03346] interacts with 1 human partners:{043776}

9347 Pathogen[ Q85601] interacts with 2 human partners:{043776;Q96I59}

9348 Pathogen[ P14079] interacts with 2 human partners:{043776;Q96I59}

9349 Pathogen[ P03383] interacts with 2 human partners:{Q96I59;043776}

9350 Pathogen[ P03410] interacts with 2 human partners:{043776;Q96I59}

9351 Pathogen[ P14075] interacts with 2 human partners:{043776;Q96I59}

9352 Pathogen[ P0C206] interacts with 2 human partners:{043776;Q96I59}

9353 Pathogen[ P03363] interacts with 2 human partners:{Q96I59;043776}

9354 [Cluster 851]GO:0043024+F molecular\_function [name] ribosomal small subunit binding [def] "Interacting selectively and non-covalently with any part of the small ribosomal subunit." [GOC

9355 Pathogen[ Q2Q067] interacts with 2 human partners:{P06748;Q9H2K0}

9356 Pathogen[ P0C214] interacts with 2 human partners:{P06748;Q9H2K0}

9357 Pathogen[ P03346] interacts with 2 human partners:{P06748;Q9H2K0}

9358 Pathogen[ Q85601] interacts with 1 human partners:{P06748}

9359 Pathogen[ P14079] interacts with 4 human partners:{Q9H2K0;P46199;P06748;O75616}

9360 Pathogen[ P03383] interacts with 2 human partners:{P06748;Q9H2K0}

9361 Pathogen[ P03410] interacts with 5 human partners:{Q9H2K0;P46199;P06748;Q96EY7;O75616}

9362 Pathogen[ P14075] interacts with 2 human partners:{Q9H2K0;P06748}

9363 Pathogen[ P0C206] interacts with 2 human partners:{Q9H2K0;P06748}

9364 Pathogen[ P03363] interacts with 1 human partners:{P06748}

9365 [Cluster 852]GO:0036317+F

9366 Pathogen[ Q2Q067] interacts with 1 human partners:{095551}

9367 Pathogen[ P0C214] interacts with 1 human partners:{095551}

9368 Pathogen[ P03346] interacts with 1 human partners:{095551}

9369 Pathogen[ Q85601] interacts with 1 human partners:{095551}

9370 Pathogen[ P14079] interacts with 1 human partners:{095551}

9371 Pathogen[ P03383] interacts with 1 human partners:{095551}

9372 Pathogen[ P03410] interacts with 1 human partners:{095551}

9373 Pathogen[ P14075] interacts with 1 human partners:{095551}

9374 Pathogen[ P0C206] interacts with 1 human partners:{095551}

9375 Pathogen[ P03363] interacts with 1 human partners:{095551}

9376 [Cluster 853]GO:0030544+F molecular\_function [name] Hsp70 protein binding [def] "Interacting selectively and non-covalently with Hsp70 proteins, any of a group of heat shock proteins around 70kDa in size." [ISBN

9377 Pathogen[ Q2Q067] interacts with 6 human partners:{P50502;Q53FT3;P31948;Q9NZJ4;Q99543;Q9UNE7}

9378 Pathogen[ P0C214] interacts with 7 human partners:{P46379;P31948;Q53FT3;Q9NZJ4;Q99543;Q9UNE7;P50502}

9379 Pathogen[ P03346] interacts with 8 human partners:{Q99543;P50502;P25686;P31948;Q9NZJ4;Q9UNE7;P46379;Q53FT3}

9380 Pathogen[ Q85601] interacts with 7 human partners:{Q99543;Q53FT3;P46379;P31948;Q9NZJ4;P50502;Q9UNE7}

9381 Pathogen[ P14079] interacts with 6 human partners:{P31948;Q9NZJ4;Q99543;Q53FT3;P53602;P50502}

9382 Pathogen[ P03383] interacts with 4 human partners:{P50502;P31948;Q99543;Q53FT3}

9383 Pathogen[ P03410] interacts with 8 human partners:{P53602;P50502;P25686;Q53FT3;Q9UNE7;Q9NZJ4;P31948;Q99543}

9384 Pathogen[ P14075] interacts with 4 human partners:{Q53FT3;Q99543;P50502;P31948}

9385 Pathogen[ P0C206] interacts with 7 human partners:{Q9NZJ4;P50502;Q9UNE7;Q99543;P31948;P46379;Q53FT3}

9386 Pathogen[ P03363] interacts with 7 human partners:{Q53FT3;P46379;Q9NZJ4;P50502;Q99543;Q9UNE7;P31948}

9387 [Cluster 854]GO:0030234+F molecular\_function [name] enzyme regulator activity [def] "Modulates the activity of an enzyme." [GOC

9388 Pathogen[ Q2Q067] interacts with 4 human partners:{Q99460;Q13200;Q14232;O43242}

9389 Pathogen[ P0C214] interacts with 5 human partners:{Q9UI12;O43242;Q14232;Q13200;Q99460}

9390 Pathogen[ P03346] interacts with 7 human partners:{Q99460;Q14232;Q96QG7;Q15019;Q15435;Q13200;O43242}

9391 Pathogen[ Q85601] interacts with 4 human partners:{Q13200;Q99460;Q14232;Q96QG7}

9392 Pathogen[ P14079] interacts with 8 human partners:{Q96QG7;O00631;Q99460;Q9UI12;Q15493;Q14558;O43242;Q14232}

9393 Pathogen[ P03383] interacts with 3 human partners:{Q99460;Q13200;Q14232}

9394 Pathogen[ P03410] interacts with 9 human partners:{Q96QG7;Q99460;Q14232;Q13200;Q14558;Q9UI12;O00631;Q15493;O43242}

9395 Pathogen[ P14075] interacts with 2 human partners:{Q13200;Q14232}

9396 Pathogen[ P0C206] interacts with 9 human partners:{Q15435;Q15493;Q15019;Q14232;Q96QG7;O43242;Q13200;Q9UI12;Q99460}

9397 Pathogen[ P03363] interacts with 2 human partners:{Q15435;Q96QG7}

9398 [Cluster 855]GO:0015643+F molecular\_function [name] toxin binding [def] "Interacting selectively and non-covalently with a toxin, a poisonous substance that causes damage to biological systems. Toxins are differentiated from simple chemical poisons and vegetable alkaloids by their high molecular weight and antigenicity (they elicit an antibody response)." [GOC

9399 Pathogen[ Q2Q067] interacts with 1 human partners:{Q9H814}  
9400 Pathogen[ P0C214] interacts with 1 human partners:{Q9H814}  
9401 Pathogen[ P03346] interacts with 1 human partners:{Q9H814}  
9402 Pathogen[ Q85601] interacts with 1 human partners:{Q9H814}  
9403 Pathogen[ P14079] interacts with 1 human partners:{Q9H814}  
9404 Pathogen[ P03383] interacts with 1 human partners:{Q9H814}  
9405 Pathogen[ P03410] interacts with 1 human partners:{Q9H814}  
9406 Pathogen[ P14075] interacts with 1 human partners:{Q9H814}  
9407 Pathogen[ P0C206] interacts with 1 human partners:{Q9H814}  
9408 Pathogen[ P03363] interacts with 1 human partners:{Q9H814}  
9409 [Cluster 856]GO:0042799+F molecular\_function [name] histone methyltransferase activity  
(H4-K20 specific) [def] "Catalysis of the reaction  
9410 Pathogen[ Q2Q067] interacts with 1 human partners:{Q86Y97}  
9411 Pathogen[ P0C214] interacts with 1 human partners:{Q86Y97}  
9412 Pathogen[ P03346] interacts with 1 human partners:{Q86Y97}  
9413 Pathogen[ Q85601] interacts with 1 human partners:{Q86Y97}  
9414 Pathogen[ P14079] interacts with 1 human partners:{Q86Y97}  
9415 Pathogen[ P03383] interacts with 1 human partners:{Q86Y97}  
9416 Pathogen[ P03410] interacts with 1 human partners:{Q86Y97}  
9417 Pathogen[ P14075] interacts with 1 human partners:{Q86Y97}  
9418 Pathogen[ P0C206] interacts with 1 human partners:{Q86Y97}  
9419 Pathogen[ P03363] interacts with 1 human partners:{Q86Y97}  
9420 [Cluster 857]GO:0005355+F molecular\_function [name] glucose transmembrane transporter  
activity [def] "Catalysis of the transfer of the hexose monosaccharide glucose from  
one side of the membrane to the other." [GOC  
9421 Pathogen[ Q2Q067] interacts with 2 human partners:{P11166;P14672}  
9422 Pathogen[ P0C214] interacts with 3 human partners:{P11166;P11168;P14672}  
9423 Pathogen[ P03346] interacts with 2 human partners:{P11166;P14672}  
9424 Pathogen[ Q85601] interacts with 3 human partners:{P11168;P11166;P14672}  
9425 Pathogen[ P14079] interacts with 2 human partners:{P14672;P11166}  
9426 Pathogen[ P03383] interacts with 4 human partners:{P11168;P11169;P14672;P22732}  
9427 Pathogen[ P03410] interacts with 3 human partners:{P22732;P11166;P11168}  
9428 Pathogen[ P14075] interacts with 4 human partners:{P11169;P22732;P11168;P14672}  
9429 Pathogen[ P0C206] interacts with 3 human partners:{P11166;P11168;P14672}  
9430 Pathogen[ P03363] interacts with 2 human partners:{P14672;P11166}  
9431 [Cluster 858]GO:0003727+F molecular\_function [name] single-stranded RNA binding [def]  
"Interacting selectively and non-covalently with single-stranded RNA." [GOC  
9432 Pathogen[ Q2Q067] interacts with 11 human  
partners:{O75525;P10827;Q9HC52;O00257;O95503;O95931;P52597;Q07687;Q9BYX4;P26651;P0923  
4}  
9433 Pathogen[ P0C214] interacts with 11 human  
partners:{O95931;O95503;Q9BYX4;O75525;Q07687;P52597;O00257;P26651;P09234;Q9HC52;Q9NS3  
9}  
9434 Pathogen[ P03346] interacts with 14 human  
partners:{P10827;P09651;Q9NS39;Q9HC52;O95931;Q96J94;O00257;Q9BYX4;O75525;P26651;P5259  
7;P09234;Q9NQ94;O95503}  
9435 Pathogen[ Q85601] interacts with 11 human  
partners:{P09234;O95931;O95503;P26651;P52597;Q9BYX4;P10827;O75525;O00257;Q07687;Q9HC5  
2}  
9436 Pathogen[ P14079] interacts with 14 human  
partners:{P04083;Q9BYX4;O95503;Q9HC52;O95931;Q9NS39;P10827;Q9NQ94;O00257;O75525;Q0768  
7;P52597;P09234;Q96C10}  
9437 Pathogen[ P03383] interacts with 9 human  
partners:{Q07687;O95503;O00257;Q9HC52;O95931;P26651;O75525;P09234;P52597}  
9438 Pathogen[ P03410] interacts with 11 human  
partners:{O95503;O95931;Q9BYX4;P26651;Q07687;P52597;O75525;P09234;Q96C10;O00257;Q9HC5  
2}  
9439 Pathogen[ P14075] interacts with 9 human  
partners:{O95503;P26651;P09234;O95931;Q07687;O00257;O75525;Q9HC52;P52597}  
9440 Pathogen[ P0C206] interacts with 13 human  
partners:{Q07687;Q9HC52;P26651;Q9NS39;P52597;O95931;Q9BYX4;O00257;Q96C10;O75525;P0923  
4;P10827;O95503}  
9441 Pathogen[ P03363] interacts with 16 human  
partners:{Q8IY21;P52597;Q9NS39;Q9HC52;O43347;P09651;P09234;O95931;P26651;Q9BYX4;Q96J9  
4;O95503;Q07687;O00257;O75525;Q9NQ94}  
9442 [Cluster 859]GO:0004175+F molecular\_function [name] endopeptidase activity [def]  
"Catalysis of the hydrolysis of internal, alpha-peptide bonds in a polypeptide chain."  
[http  
9443 Pathogen[ Q2Q067] interacts with 21 human  
partners:{P40306;P28072;A5LHX3;P25787;P28065;O14818;P60900;P55212;P28062;P25788;P2578  
6;P28074;P25789;P20618;P48147;P28070;P28066;Q99436;Q8TAA3;P49721;P49720}  
9444 Pathogen[ P0C214] interacts with 21 human  
partners:{P25789;P28062;A5LHX3;P28065;P55212;O14818;P40306;P48147;P28066;P49720;P2807  
4;P25788;P25786;P28072;Q8TAA3;Q99436;P25787;P60900;P28070;P20618;P49721}  
9445 Pathogen[ P03346] interacts with 21 human  
partners:{P25787;P28070;P25789;P28072;P25788;P28074;P49721;O14818;Q99436;A5LHX3;P2806

2;P20618;P55212;P49720;P28065;P60900;P25786;P28066;Q8TAA3;P48147;P40306}  
9446 Pathogen[ Q85601] interacts with 21 human  
partners:{P28066;P60900;P25787;P25788;P48147;P25789;P20618;P40306;P49720;P28062;P4972  
1;P25786;P28072;P28065;Q99436;P28070;Q8TAA3;P28074;P55212;A5LHX3;O14818}  
9447 Pathogen[ P14079] interacts with 22 human  
partners:{P28065;Q99436;O14773;P40306;Q92542;P28074;P48147;P49720;Q9BXS4;P25787;P2914  
4;A5LHX3;P55212;P20618;Q8TAA3;P28062;P60900;O14818;P49721;P25788;P28066;P28072}  
9448 Pathogen[ P03383] interacts with 20 human  
partners:{P55212;P25789;P60900;P40306;P49721;P20618;P48147;P25786;P28072;P28065;P2806  
6;P28074;P49720;Q8TAA3;P28062;O14818;Q99436;P28070;P25787;P25788}  
9449 Pathogen[ P03410] interacts with 23 human  
partners:{P28070;P25786;P60900;P48147;Q8TAA3;P49721;A5LHX3;Q99436;P40306;P25787;P2806  
2;O14818;P25789;P49720;Q92542;P28072;Q9BXS4;P25788;P55212;P28066;P28065;P20618;P28074  
}  
9450 Pathogen[ P14075] interacts with 19 human  
partners:{P25788;P28066;Q8TAA3;P60900;P55212;P49720;P28070;P49721;P28062;P28074;P2806  
5;P25786;O14818;P28072;P25787;P20618;P40306;Q99436;P25789}  
9451 Pathogen[ P0C206] interacts with 23 human  
partners:{Q99436;P28062;P40306;P28065;P25786;P25788;P29144;P25787;P48147;P49720;P5521  
2;P60900;Q92542;A5LHX3;P25789;P20618;Q8TAA3;P28070;P28066;O14818;P28072;P28074;P49721  
}  
9452 Pathogen[ P03363] interacts with 1 human partners:{P55212}  
9453 [Cluster 860]GO:0000339+F molecular\_function [name] RNA cap binding [def]  
"Interacting selectively and non-covalently with a 7-methylguanosine (m7G) group or  
derivative located at the 5' end of an RNA molecule." [GOC  
9454 Pathogen[ Q2Q067] interacts with 6 human  
partners:{Q09161;O60573;P52298;P06730;P60842;O95149}  
9455 Pathogen[ P0C214] interacts with 6 human  
partners:{Q09161;P60842;O95149;P52298;P06730;O60573}  
9456 Pathogen[ P03346] interacts with 6 human  
partners:{Q09161;P06730;O95149;O60573;P52298;P60842}  
9457 Pathogen[ Q85601] interacts with 6 human  
partners:{O95149;P06730;Q09161;O60573;P60842;P52298}  
9458 Pathogen[ P14079] interacts with 7 human  
partners:{P60842;P06730;P52298;O43432;O95149;O60573;Q09161}  
9459 Pathogen[ P03383] interacts with 5 human  
partners:{O60573;Q09161;P06730;O95149;P52298}  
9460 Pathogen[ P03410] interacts with 7 human  
partners:{P06730;O43432;P52298;P60842;O60573;Q09161;O95149}  
9461 Pathogen[ P14075] interacts with 5 human  
partners:{Q09161;P06730;O60573;O95149;P52298}  
9462 Pathogen[ P0C206] interacts with 6 human  
partners:{O95149;P52298;Q09161;P06730;O60573;P60842}  
9463 Pathogen[ P03363] interacts with 6 human  
partners:{P52298;P60842;O60573;P06730;O95149;Q09161}  
9464 [Cluster 861]GO:0000404+F molecular\_function [name] loop DNA binding [def]  
"Interacting selectively and non-covalently with DNA containing a loop. A loop occurs  
when DNA contains a large insertion or deletion that causes a region of unpaired  
single-stranded DNA to loop out, while the rest of the DNA is in a paired double-stranded  
configuration." [GOC  
9465 Pathogen[ Q2Q067] interacts with 1 human partners:{Q01831}  
9466 Pathogen[ P0C214] interacts with 2 human partners:{P20585;Q01831}  
9467 Pathogen[ P03346] interacts with 2 human partners:{Q01831;P20585}  
9468 Pathogen[ Q85601] interacts with 2 human partners:{Q01831;P20585}  
9469 Pathogen[ P14079] interacts with 2 human partners:{P20585;Q01831}  
9470 Pathogen[ P03383] interacts with 1 human partners:{Q01831}  
9471 Pathogen[ P03410] interacts with 2 human partners:{P20585;Q01831}  
9472 Pathogen[ P14075] interacts with 1 human partners:{Q01831}  
9473 Pathogen[ P0C206] interacts with 2 human partners:{Q01831;P20585}  
9474 Pathogen[ P03363] interacts with 2 human partners:{Q01831;P20585}  
9475 [Cluster 862]GO:0003690+F molecular\_function [name] double-stranded DNA binding [def]  
"Interacting selectively and non-covalently with double-stranded DNA." [GOC  
9476 Pathogen[ Q2Q067] interacts with 53 human  
partners:{Q13562;P01100;Q10587;Q9GZP8;P49959;Q13148;Q16666;P67809;Q7Z2E3;Q99551;Q96B0  
1;Q8N2Z9;A8MT69;Q9Y237;O15350;Q9UFW8;Q02447;Q16534;Q9Y4Z2;P08047;Q06609;Q00577;Q15424  
;Q08050;O43823;O43524;P51826;P84022;O14862;Q9NUW8;O00255;O75444;Q96QR8;P12956;Q15796;  
P39748;P19838;P20823;P78549;Q9Y543;P22415;P16989;Q8WYK2;Q01826;Q15853;P13010;O60870;Q  
9UQR1;P42224;Q16526;P53567;P18146;P28715}  
9477 Pathogen[ P0C214] interacts with 49 human  
partners:{P53567;O75444;Q06609;P16989;P49959;P19838;Q9UFW8;P13010;Q96QR8;O15350;P0110  
0;P17275;P67809;P84022;P42224;Q16666;Q10587;Q8N2Z9;Q9Y237;P28715;O60870;Q00577;Q9Y543  
;P51826;Q7Z2E3;O43823;Q15796;Q96B01;Q15424;P05412;Q01826;Q02447;P18146;Q16534;Q15853;  
Q16526;P39748;P78549;O14862;Q9NUW8;P22415;Q13148;P16220;Q9UQR1;Q99551;P08047;Q14966;P  
12956;O00255}  
9478 Pathogen[ P03346] interacts with 75 human  
partners:{P85037;Q8N2Z9;P05412;Q9Y4Z2;Q96QR8;Q16666;P28715;P12956;Q06609;Q99612;P5801

2;O15522;P16220;Q9UQR1;A8MT69;Q9GZP8;Q00577;Q13148;P17275;Q15796;Q9NUW8;P13010;P51826;Q08050;Q16526;P16989;P20823;O15350;O43316;O00409;O75444;P08047;Q15853;Q9UFW8;P51843;O60870;P84022;Q9Y237;P67809;O00255;Q16534;Q96B01;Q12778;Q99551;P42224;Q01167;P98177;O14979;P49959;Q14966;P78549;Q9Y543;Q7Z2E3;P19838;P53567;Q15424;P18146;O75398;P39748;P29558;Q10587;O75593;Q13562;O43524;O14862;Q13285;Q02447;P01100;P49335;O43823;Q01826;Q8WYK2;P22415;Q99581;Q9UJU5}

9479 Pathogen[ Q85601] interacts with 58 human  
partners: {Q9UQR1;P18146;Q96QR8;Q15853;Q16666;O43316;Q9Y4Z2;O75398;P53567;Q14966;Q13148;Q15424;P51826;Q10587;P49959;P08047;Q9UFW8;Q13562;P01100;P28715;P22415;O60870;O75444;Q00577;Q99551;P16220;A8MT69;Q96B01;O14862;P05412;Q9Y543;O00255;P67809;Q01826;Q9NUW8;Q99612;P42224;Q8N2Z9;Q02447;P84022;Q08050;Q7Z2E3;Q16534;O43823;O15350;P39748;P78549;Q16526;P17275;P19838;P20823;Q06609;P16989;Q9Y237;Q8WYK2;Q15796;P13010;P12956}

9480 Pathogen[ P14079] interacts with 49 human  
partners: {Q9UQR1;Q8WYK2;Q8TAT5;Q10587;Q96B01;P28715;Q16526;Q13148;Q15853;Q99581;Q96QR8;P53567;P67809;Q9Y237;P13010;O43823;Q01826;Q14966;Q9UFW8;Q02447;P78549;O60870;O15350;Q99612;P12956;Q9NUW8;P16989;Q8N2Z9;P17275;Q15424;A8MT69;Q9GZP8;O75444;Q9NSU2;Q00577;O14862;P42224;P52701;P05412;Q16534;Q06609;P51826;Q7Z2E3;O00255;P01100;Q99551;Q16666;P39748;P22415}

9481 Pathogen[ P03383] interacts with 41 human  
partners: {Q9UQR1;Q7Z2E3;P16989;Q8N2Z9;Q06609;O14862;P08047;P13010;P16220;Q01826;Q96B01;P18146;O60870;Q9GZP8;P84022;Q99551;Q02447;Q9UFW8;O15350;A8MT69;O00255;Q16666;Q15853;P01100;Q15796;Q9NUW8;Q00577;P53567;Q13148;Q15424;P17275;O75444;P19838;Q96QR8;P67809;Q16534;P51826;P12956;P22415;P05412;Q16526}

9482 Pathogen[ P03410] interacts with 54 human  
partners: {P84022;P49959;Q9GZP8;P19838;Q16666;Q8WYK2;Q02447;P16989;P53567;O14862;O75444;O60870;Q9Y543;P51826;P39748;Q9NSU2;P28715;Q8TAT5;P78549;P01100;Q00577;Q15424;Q9UQR1;Q13148;Q7Z2E3;P67809;P12956;Q14966;P52701;P17275;Q01826;P22415;Q9NUW8;Q16526;P16220;Q15853;P05412;P13010;Q10587;A8MT69;Q16534;O15350;P08047;Q9UFW8;Q96QR8;P18146;Q96B01;O00255;O43823;Q15796;Q9Y237;Q99551;Q06609;Q8N2Z9}

9483 Pathogen[ P14075] interacts with 43 human  
partners: {A8MT69;Q7Z2E3;Q96QR8;P12956;P16989;Q9UQR1;P05412;P53567;Q9GZP8;O75444;P17275;Q08050;P18146;Q9UFW8;Q16666;Q15796;Q13148;Q01826;Q8N2Z9;O60870;O00255;Q15853;O15350;O14862;Q15424;P67809;Q99551;P01100;Q02447;Q96B01;Q00577;Q16526;P19838;P16220;P13010;P22415;P84022;O43823;Q9NUW8;Q06609;P51826;Q16534;P08047}

9484 Pathogen[ P0C206] interacts with 63 human  
partners: {P84022;P53567;P67809;P28715;P13010;P49959;Q9NSU2;P16220;P17275;O14862;O75444;Q14966;P52701;Q9Y4Z2;Q96QR8;O00255;O60870;P05412;Q8WYK2;Q9NUW8;Q16666;Q9UFW8;Q10587;Q15796;Q99551;P18146;Q15853;P19838;Q16526;Q99581;Q99612;P22415;P16989;Q9Y543;P08047;P01100;Q8TAT5;Q9UQR1;P20823;Q02447;Q16534;P51826;Q15424;Q13148;Q13562;Q08050;Q9Y237;O43823;O15350;Q01826;Q06609;Q8N2Z9;O75398;P39748;Q96B01;P42224;P12956;Q7Z2E3;O43316;A8MT69;Q9GZP8;Q00577;P78549}

9485 Pathogen[ P03363] interacts with 59 human  
partners: {P12956;Q9UFW8;Q9Y4Z2;Q15853;Q8IY21;P18146;Q13148;P53567;Q9GZP8;Q02447;P13010;Q01826;P29558;P16220;O43316;Q99612;Q8N2Z9;Q96QR8;P51826;O00409;Q8WYK2;P17275;Q16666;O43524;Q15424;Q08050;Q7Z2E3;O14979;O75444;O60870;Q14966;Q15796;Q9NUW8;P84022;Q01167;P22415;P19838;O14862;Q16526;Q9Y237;P49335;Q9UQR1;O75398;P05412;Q99581;Q06609;P16989;Q9Y543;P08047;Q00577;Q16534;Q9UJU5;O15522;Q99551;Q10587;Q96B01;A8MT69;P67809;P01100}

9486 [Cluster 863]GO:0004672+F molecular\_function [name] protein kinase activity [def]  
"Catalysis of the phosphorylation of an amino acid residue in a protein, usually according to the reaction

9487 Pathogen[ Q2Q067] interacts with 35 human  
partners: {P52434;P31749;P24385;Q13889;P19388;P52435;Q9UJY1;P32780;P30876;O14757;P61218;Q92759;O95163;P62487;O75582;P51948;O96017;P50750;Q13233;P50613;O15164;P62875;P24928;Q8WTW4;O14920;P45984;O43318;P49336;P24941;P11802;O15111;Q15759;Q13888;P51946;Q00534}

9488 Pathogen[ P0C214] interacts with 39 human  
partners: {P51946;O15111;Q969Z0;P30876;Q14164;Q8WTW4;P50750;P50613;P52435;P11802;O94921;P61218;P24385;O43318;P62487;Q00534;Q13233;P21127;Q00536;P51948;O96017;P49336;P24941;P62875;P32780;P24928;O75582;O15164;Q15759;Q13888;P45984;P52434;P19388;O14757;Q9UJY1;O95163;O14920;Q92759;P31749}

9489 Pathogen[ P03346] interacts with 50 human  
partners: {Q13263;P45984;Q00536;O15111;P52434;P24385;O96017;P21127;P49336;P24941;Q13888;Q9UJY1;O14757;O95163;P61218;Q8WTW4;Q86Z02;Q6P3W7;Q13889;P11802;P62487;P19388;Q496M5;P31749;P52435;Q8TD19;P51946;P50750;P36954;Q13233;O75582;Q92759;P30876;Q15759;Q96PY6;P45985;Q00534;Q96KG9;P24928;O14920;O94921;O43318;P51948;O14965;Q14164;Q8NB16;P32780;O15164;P62875;O00444}

9490 Pathogen[ Q85601] interacts with 47 human  
partners: {P51946;P36954;Q00536;P31749;P24385;O96017;P50750;Q96PY6;O15111;Q13888;P49336;Q969Z0;P61218;Q8WTW4;P51948;O15164;P11802;O14757;Q13263;P62487;O14965;P19388;Q14164;Q92759;P32780;P52435;O14920;O94921;O75582;P50613;Q15759;P45984;P21127;Q96KG9;P24928;Q13233;P30876;Q00534;P52434;O43318;Q496M5;P19447;O95163;P24941;Q9UJY1;P62875;P51955}

9491 Pathogen[ P14079] interacts with 47 human  
partners: {P31751;P62875;O15164;Q14004;Q9NYY8;O43187;P53779;P49336;P51946;P52564;P62487;O75582;P52434;O15514;P30876;Q14164;P61218;O95163;Q13889;Q53R41;Q7L8L6;Q14CZ7;P45984;Q15078;P45983;P50613;Q13888;P19388;P51955;Q16644;Q15759;P45985;P52435;Q8WTW4;Q92759;Q9UJY1;Q969Z0;P21127;P32780;Q13164;P24928;O14965;P36954;P19447;P50750;Q96KG9;P51948}

9492 Pathogen[ P03383] interacts with 41 human



partners:{Q9NYV4;Q8WTW4;O14757;O75582;O95163;P51948;Q13233;Q8TD19;O14920;Q13888;P31749;O15111;Q00536;P52434;P24385;P61218;Q00534;P11802;O43318;P21127;Q969Z0;P62487;P49336;P50613;P51946;P24928;P24941;P50750;Q15759;O94921;Q92759;O14965;P62875;Q96PY6;P52435;P45984;Q9UJY1;P19388;P30876;P32780;O96017}

9493 Pathogen[ P03410] interacts with 47 human  
partners:{P7L8L6;O14920;Q13889;Q53R41;P36954;Q9NYY8;Q00534;P24928;Q8NB16;O15111;Q8WTW4;O75582;P51946;O43187;P31749;P30876;Q9UJY1;Q13233;O15514;P50613;O14965;P50750;O43318;P24385;Q96KG9;P52435;P45985;P24941;O95163;P11802;P19447;P62875;O96017;O14757;P61218;P49336;P51948;Q13888;P45984;P52434;P53779;Q14CZ7;P62487;P19388;P32780;Q969Z0;Q92759}

9494 Pathogen[ P14075] interacts with 42 human  
partners:{P49336;O15111;Q92759;Q969Z0;P24941;P11802;Q15759;P30876;O75582;P50613;Q00534;P19388;P61218;P50750;Q9UJY1;Q8WTW4;P62487;O14920;P31749;O96017;Q13889;O14965;P24928;O43318;P21127;P51946;P32780;O95163;Q96PY6;P24385;P62875;Q13233;O94921;Q9UQ88;Q9NYV4;P52434;O14757;P51948;P52435;P45984;Q8TD19;Q13888}

9495 Pathogen[ P0C206] interacts with 57 human  
partners:{P62875;P49336;Q496M5;O14920;P31749;P36954;Q13263;P50750;O96017;P51955;O75582;P45984;Q00536;P19388;P61218;O43318;Q96PY6;O00444;O15164;Q8TD19;Q96KG9;Q6P3W7;Q13233;P19447;O95163;Q9UJY1;P30291;Q14164;O15514;Q13888;P50613;Q969Z0;O15111;Q92759;P52435;P62487;P45985;P32780;Q13889;P21127;P24928;O14965;P24941;Q15759;Q9NYY8;P11802;O94921;P52434;Q99640;Q99986;P51946;P51948;P24385;Q8WTW4;Q00534;Q7L8L6;P30876}

9496 Pathogen[ P03363] interacts with 31 human  
partners:{O14920;P19388;P21127;P30876;Q13888;P32780;Q92759;O15111;P61218;P51946;Q9UJY1;P24928;O43318;P24941;O96017;Q00534;P31749;Q8NB16;Q96KG9;O95163;P49336;P62487;P24385;Q8WTW4;P50750;P11802;P52435;P52434;Q00536;Q13233;O14757}

9497 [Cluster 864]GO:0046870+F molecular\_function [name] cadmium ion binding [def]  
"Interacting selectively and non-covalently with cadmium (Cd) ions." [GOC]

9498 Pathogen[ Q2Q067] interacts with 6 human  
partners:{P07438;Q93083;P04732;P04733;P29474;P04731}

9499 Pathogen[ P0C214] interacts with 6 human  
partners:{P29474;P04732;P04733;P07438;P04731;Q93083}

9500 Pathogen[ P03346] interacts with 6 human  
partners:{P29474;P04732;P07438;P04733;Q93083;P04731}

9501 Pathogen[ Q85601] interacts with 6 human  
partners:{P04732;Q93083;P07438;P04733;P29474;P04731}

9502 Pathogen[ P14079] interacts with 5 human  
partners:{Q93083;P07438;P04731;P04732;P04733}

9503 Pathogen[ P03383] interacts with 6 human  
partners:{P04733;P29474;Q93083;P04732;P04731;P07438}

9504 Pathogen[ P03410] interacts with 6 human  
partners:{P07438;P04733;P29474;P04731;Q93083;P04732}

9505 Pathogen[ P14075] interacts with 6 human  
partners:{P29474;P04733;P07438;Q93083;P04731;P04732}

9506 Pathogen[ P0C206] interacts with 6 human  
partners:{P07438;P04732;P04733;Q93083;P04731;P29474}

9507 Pathogen[ P03363] interacts with 6 human  
partners:{P29474;P04732;P04731;P07438;P04733;Q93083}

9508 [Cluster 865]GO:0004135+F molecular\_function [name] amylo-alpha-1,6-glucosidase activity [def]  
"Catalysis of the hydrolysis of (1->6)-alpha-D-glucosidic branch linkages in glycogen phosphorylase limit dextrin. Limit dextrin is the highly branched core that remains after exhaustive treatment of glycogen with glycogen phosphorylase. It is formed because these enzymes cannot hydrolyze the (1->6) glycosidic linkages present."  
[EC]

9509 Pathogen[ Q2Q067] interacts with 1 human partners:{P35573}

9510 Pathogen[ P0C214] interacts with 1 human partners:{P35573}

9511 Pathogen[ P03346] interacts with 1 human partners:{P35573}

9512 Pathogen[ Q85601] interacts with 1 human partners:{P35573}

9513 Pathogen[ P14079] interacts with 1 human partners:{P35573}

9514 Pathogen[ P03383] interacts with 1 human partners:{P35573}

9515 Pathogen[ P03410] interacts with 1 human partners:{P35573}

9516 Pathogen[ P14075] interacts with 1 human partners:{P35573}

9517 Pathogen[ P0C206] interacts with 1 human partners:{P35573}

9518 Pathogen[ P03363] interacts with 1 human partners:{P35573}

9519 [Cluster 866]GO:0043995+F molecular\_function [name] histone acetyltransferase activity (H4-K5 specific) [def]  
"Catalysis of the reaction

9520 Pathogen[ Q2Q067] interacts with 3 human partners:{Q96EZ8;P51610;Q7Z3B3}

9521 Pathogen[ P0C214] interacts with 2 human partners:{P51610;Q96EZ8}

9522 Pathogen[ P03346] interacts with 4 human partners:{Q96EZ8;P51610;Q7Z3B3;Q9H7Z6}

9523 Pathogen[ Q85601] interacts with 3 human partners:{Q9H7Z6;P51610;Q96EZ8}

9524 Pathogen[ P14079] interacts with 5 human  
partners:{P51610;Q7Z3B3;Q9P2N6;Q96EZ8;Q9H9L4}

9525 Pathogen[ P03383] interacts with 2 human partners:{P51610;Q96EZ8}

9526 Pathogen[ P03410] interacts with 5 human  
partners:{Q9P2N6;P51610;Q9H9L4;Q96EZ8;Q7Z3B3}

9527 Pathogen[ P14075] interacts with 3 human partners:{P51610;Q7Z3B3;Q96EZ8}

9528 Pathogen[ P0C206] interacts with 6 human  
partners:{Q9H9L4;Q96EZ8;P51610;Q9P2N6;Q7Z3B3;Q9H7Z6}

9529 Pathogen[ P03363] interacts with 3 human partners:{Q7Z3B3;Q96EZ8;P51610}

9530 [Cluster 867]GO:0009008+F molecular\_function [name] DNA-methyltransferase activity  
[def] "Catalysis of the transfer of a methyl group to a DNA molecule." [GOC

9531 Pathogen[ Q2Q067] interacts with 3 human partners:{Q9UBC3;P26358;P16455}

9532 Pathogen[ P0C214] interacts with 2 human partners:{P26358;P16455}

9533 Pathogen[ P03346] interacts with 2 human partners:{Q9UBC3;P26358}

9534 Pathogen[ Q85601] interacts with 3 human partners:{P16455;P26358;Q9UBC3}

9535 Pathogen[ P14079] interacts with 3 human partners:{P16455;Q9UBC3;P26358}

9536 Pathogen[ P03383] interacts with 1 human partners:{P26358}

9537 Pathogen[ P03410] interacts with 3 human partners:{P26358;P16455;Q9UBC3}

9538 Pathogen[ P14075] interacts with 1 human partners:{P26358}

9539 Pathogen[ P0C206] interacts with 3 human partners:{P26358;Q9UBC3;P16455}

9540 Pathogen[ P03363] interacts with 2 human partners:{P26358;Q9UBC3}

9541 [Cluster 868]GO:0046403+F molecular\_function [name] polynucleotide 3'-phosphatase  
activity [def] "Catalysis of the reaction

9542 Pathogen[ Q2Q067] interacts with 1 human partners:{Q7Z2E3}

9543 Pathogen[ P0C214] interacts with 1 human partners:{Q7Z2E3}

9544 Pathogen[ P03346] interacts with 1 human partners:{Q7Z2E3}

9545 Pathogen[ Q85601] interacts with 1 human partners:{Q7Z2E3}

9546 Pathogen[ P14079] interacts with 1 human partners:{Q7Z2E3}

9547 Pathogen[ P03383] interacts with 1 human partners:{Q7Z2E3}

9548 Pathogen[ P03410] interacts with 1 human partners:{Q7Z2E3}

9549 Pathogen[ P14075] interacts with 1 human partners:{Q7Z2E3}

9550 Pathogen[ P0C206] interacts with 1 human partners:{Q7Z2E3}

9551 Pathogen[ P03363] interacts with 1 human partners:{Q7Z2E3}

9552 [Cluster 869]GO:0008327+F molecular\_function [name] methyl-CpG binding [def]  
"Interacting selectively and non-covalently with a methylated cytosine/guanine  
dinucleotide." [GOC

9553 Pathogen[ Q2Q067] interacts with 6 human  
partners:{Q9UBB5;Q96T88;Q9UIS9;O60535;Q9ULJ3;P26358}

9554 Pathogen[ P0C214] interacts with 6 human  
partners:{O60535;Q96T88;Q9UIS9;Q9ULJ3;P26358;Q9UBB5}

9555 Pathogen[ P03346] interacts with 6 human  
partners:{Q9ULJ3;P26358;Q9UIS9;O60535;Q9UBB5;Q96T88}

9556 Pathogen[ Q85601] interacts with 6 human  
partners:{Q9ULJ3;P26358;Q9UIS9;O60535;Q96T88;Q9UBB5}

9557 Pathogen[ P14079] interacts with 4 human partners:{Q9UIS9;Q9UBB5;P26358;Q9ULJ3}

9558 Pathogen[ P03383] interacts with 5 human  
partners:{Q9UBB5;O60535;Q9ULJ3;P26358;Q9UIS9}

9559 Pathogen[ P03410] interacts with 5 human  
partners:{O60535;Q9ULJ3;Q9UBB5;P26358;Q9UIS9}

9560 Pathogen[ P14075] interacts with 5 human  
partners:{Q9UBB5;Q9ULJ3;P26358;Q9UIS9;O60535}

9561 Pathogen[ P0C206] interacts with 6 human  
partners:{Q9UBB5;P26358;Q9ULJ3;Q9UIS9;Q96T88;O60535}

9562 Pathogen[ P03363] interacts with 6 human  
partners:{O60535;Q9ULJ3;P26358;Q96T88;Q9UBB5;Q9UIS9}

9563 [Cluster 870]GO:0001031+F molecular\_function [name] RNA polymerase III type 2 promoter  
DNA binding [def] "Interacting selectively and non-covalently with a region of DNA that  
is a part of a type 2 promoter that controls transcription by RNA polymerase III. Type 2  
promoters consist of an A box and a B box downstream of the transcription start site  
within the sequence within the sequence of the mature RNA. Type 2 promoters are found in  
many tRNA genes as well as in other small RNAs." [GOC

9564 Pathogen[ Q2Q067] interacts with 1 human partners:{Q9H063}

9565 Pathogen[ P0C214] interacts with 1 human partners:{Q9H063}

9566 Pathogen[ P03346] interacts with 1 human partners:{Q9H063}

9567 Pathogen[ Q85601] interacts with 1 human partners:{Q9H063}

9568 Pathogen[ P14079] interacts with 1 human partners:{Q9H063}

9569 Pathogen[ P03383] interacts with 1 human partners:{Q9H063}

9570 Pathogen[ P03410] interacts with 1 human partners:{Q9H063}

9571 Pathogen[ P14075] interacts with 1 human partners:{Q9H063}

9572 Pathogen[ P0C206] interacts with 1 human partners:{Q9H063}

9573 Pathogen[ P03363] interacts with 1 human partners:{Q9H063}

9574 [Cluster 871]GO:0004871+F molecular\_function [name] signal transducer activity [def]  
"Conveys a signal across a cell to trigger a change in cell function or state. A signal  
is a physical entity or change in state that is used to transfer information in order to  
trigger a response." [GOC

9575 Pathogen[ Q2Q067] interacts with 47 human  
partners:{P27540;Q8IUC6;Q9HBZ2;Q8WY1A1;P29692;P40763;Q13352;O14974;P53675;Q15596;Q9UDY  
8;Q15653;Q12933;Q6P1N0;P55345;Q9HB58;P56945;P11308;Q86UL8;O00170;O95163;Q14765;Q9UIV1  
;Q99743;O14641;P25063;Q9Y6K9;Q13114;Q9Y2N7;Q99732;Q92529;P35869;P53041;P62879;P61201;  
P52630;P35813;Q15628;Q92793;Q92734;P42226;Q9UMX1;P22681;Q99814;P42224;O43660;Q8N108}

9576 Pathogen[ P0C214] interacts with 50 human  
partners:{P22681;O00170;P11308;P35813;P35869;Q9Y6K9;P56945;Q15628;Q8IUC6;P42226;Q1476  
5;Q9UDY8;Q99743;Q92793;P61201;P29692;P42224;Q92734;Q92529;P55345;Q15653;Q9UIV1;O14974  
;Q9HBZ2;Q8IXF0;Q9Y2N7;Q99732;P53675;O14641;Q12933;Q13352;Q8N108;P54577;Q9H0E2;P25063;

Q8WYA1;P62879;P53041;Q9NV92;Q13114;Q99814;Q9HB58;P40763;P27540;Q6P1N0;Q15596;P52630;O95163;Q9UMX1;O43660}

9577 Pathogen[ P03346] interacts with 67 human partners: {Q9Y6K9;Q99742;P35813;Q15788;Q92734;Q9UIV1;Q15653;Q9UDY8;Q12802;O00170;O95163;Q13835;P42226;P29692;P27540;Q15269;Q9NRF2;Q13114;Q9NV92;Q9H0E2;O15055;Q96AX9;P62879;O15534;Q6P1N0;O00327;P11308;Q8IXF0;P56945;O14641;Q86UL8;O43660;Q15596;Q9Y2N7;P55345;P46109;P53675;Q99814;P53041;P42224;Q9HBZ2;Q14190;Q15628;P61201;Q8IUC6;Q8N108;Q9HB58;A9YTQ3;P22681;Q8WYA1;P25063;O15516;Q9H8V3;Q92793;P35869;Q14765;P56645;Q92529;P52630;P40763;O14974;Q9UMX1;Q99743;Q13352;Q13136;Q8IUM7;Q99732}

9578 Pathogen[ Q85601] interacts with 54 human partners: {Q92734;P53675;P22681;P62879;Q14765;O15534;Q8IUC6;Q9Y2N7;P56645;Q9UDY8;Q86UL8;P40763;P61201;O15516;Q8WYA1;O00327;Q9UIV1;Q99814;P27540;Q15653;Q13114;Q99743;Q15596;P52630;O00170;Q13352;Q9Y6K9;Q8IXF0;P56945;O14641;Q12933;P42226;Q9HB58;Q92529;P53041;P42224;Q8N108;A9YTQ3;Q9HBZ2;Q15628;O15055;O14974;P35869;O43660;Q92793;P29692;P35813;Q99732;O95163;Q6P1N0;Q9UMX1;Q13136;P11308;P55345}

9579 Pathogen[ P14079] interacts with 66 human partners: {Q99743;P35869;Q99814;Q15596;P52630;Q9NVV7;P53041;Q14236;P61201;Q92734;Q9Y2N7;Q7LFL8;Q8N108;O14641;Q8IUC6;Q92793;O00170;Q13835;P46109;O14974;Q8IXF0;O95163;Q9UMX1;Q6P1N0;Q8TCD1;Q14765;P29692;Q13136;Q7Z434;P11308;P35813;Q12802;P42226;P55345;Q8N114;Q99732;Q9BYI3;Q9Y6K9;P27540;P25063;Q9HB58;Q15788;Q9H8V3;A9YTQ3;B7ZAQ6;P56645;P42224;Q86UL8;Q9UIV1;Q12933;P47874;Q96AW1;P53675;Q9HBZ2;Q9Y3E0;Q9NV92;O15055;Q9H0E2;Q92529;Q8WYA1;Q13352;Q15628;Q8IUM7;O15534;Q13114;Q15653}

9580 Pathogen[ P03383] interacts with 31 human partners: {P62879;P56945;O95163;P27540;Q9Y6K9;Q8IUC6;Q15596;P25063;P61201;P52630;O00170;P42226;P53675;Q13352;Q15653;P35813;Q6P1N0;P11308;O14641;Q12933;Q9Y2N7;Q99732;Q9UIV1;P53041;Q15628;Q8N108;P29692;P35869;Q9UMX1;Q13114;Q92793}

9581 Pathogen[ P03410] interacts with 64 human partners: {Q99743;Q92529;Q8IXF0;P35813;Q99814;B7ZAQ6;A9YTQ3;Q9Y2N7;Q96AW1;Q9BYI3;Q99732;Q14765;Q8N114;Q15653;Q13835;Q9Y3E0;Q9UIV1;Q9NV92;P33241;O15055;Q7Z434;Q9HBZ2;P27540;Q15628;Q13136;Q92793;P25063;O00170;O43660;O95163;P56645;O15534;O14974;Q12933;Q9H0E2;P53041;Q92734;P42226;Q15596;P61201;Q8N108;P52630;P56945;Q8IUC6;Q86UL8;Q9H8V3;Q9Y6K9;Q8TCD1;P53675;P11308;P29692;P40763;Q9UMX1;P62879;P46109;P47874;Q14236;Q6P1N0;Q13352;Q9HB58;Q13114;P55345;Q8WYA1;O14641}

9582 Pathogen[ P14075] interacts with 34 human partners: {P52630;P35869;P35813;P42226;Q92734;P62879;P53675;P61201;Q9Y2N7;P29692;Q15653;Q9BYI3;P27540;Q8N108;O00170;O14641;Q12933;Q99732;P11308;Q13114;P53041;Q15628;Q8IUC6;O95163;Q9NV92;Q92793;Q9Y6K9;Q13352;Q9UIV1;Q6P1N0;Q9UMX1;Q15596;P56945;P25063}

9583 Pathogen[ P0C206] interacts with 64 human partners: {Q96AX9;P53675;Q9Y6K9;Q13114;P62879;Q9Y2N7;Q9UDY8;P35869;Q9UMX1;Q9NV92;Q9UIV1;O15534;P53041;Q15653;P61201;Q12933;Q9HB58;P11308;Q15269;Q92793;O95163;O14974;O00327;Q9H0E2;Q99743;O15516;Q6P1N0;P25063;P56645;P22681;Q13835;Q13352;Q15628;Q9H8V3;P40763;Q8WYA1;Q8IUC6;P42226;Q15596;O15055;P27540;P56945;Q92734;Q14765;O00170;Q99814;Q8IUM7;Q92529;P55345;O43660;Q86UL8;A9YTQ3;P29692;P42224;Q15788;Q99732;Q13136;Q9BYI3;P52630;Q8N108;Q9HBZ2;P35813;B7ZAQ6;Q8IXF0}

9584 Pathogen[ P03363] interacts with 55 human partners: {P22681;P62879;P52630;Q8IUM7;Q14765;Q13835;P27540;Q9UMX1;Q99742;P61201;Q92734;Q12933;P53041;Q9Y6K9;P46109;Q9HBZ2;Q15596;P19883;Q99743;P35869;P42226;P56645;Q92529;Q15653;P11308;P29692;Q13480;Q8WYA1;O00327;Q99732;Q9Y2N7;Q8N108;O95163;Q8IXF0;Q9H0E2;A9YTQ3;Q99814;Q92793;O14974;Q15628;P56945;Q9UIV1;Q15269;Q13114;Q13136;O43660;Q86UL8;O15055;Q6P1N0;O14641;Q13352;O15534;P53675;O00170;Q96AX9}

9585 [Cluster 872]GO:0046790+F molecular\_function [name] virion binding [def] "Interacting selectively and non-covalently with a virion, either by binding to components of the capsid or the viral envelope." [GOC]

9586 Pathogen[ Q2Q067] interacts with 2 human partners: {P62937;P14625}

9587 Pathogen[ P0C214] interacts with 1 human partners: {P14625}

9588 Pathogen[ P03346] interacts with 2 human partners: {P14625;P62937}

9589 Pathogen[ Q85601] interacts with 2 human partners: {P14625;P62937}

9590 Pathogen[ P14079] interacts with 2 human partners: {P62937;P14625}

9591 Pathogen[ P03383] interacts with 2 human partners: {P62937;P14625}

9592 Pathogen[ P03410] interacts with 2 human partners: {P14625;P62937}

9593 Pathogen[ P14075] interacts with 2 human partners: {P62937;P14625}

9594 Pathogen[ P0C206] interacts with 2 human partners: {P62937;P14625}

9595 Pathogen[ P03363] interacts with 1 human partners: {P62937}

9596 [Cluster 873]GO:0004803+F molecular\_function [name] transposase activity [def] "Catalysis of the transposition of transposable elements or transposons. Transposases are involved in site-specific DNA recombination required for transposition in bacteria and other organisms." [ISBN]

9597 Pathogen[ Q2Q067] interacts with 1 human partners: {O96006}

9598 Pathogen[ P0C214] interacts with 1 human partners: {O96006}

9599 Pathogen[ P03346] interacts with 2 human partners: {O96006;Q9H8Y1}

9600 Pathogen[ Q85601] interacts with 1 human partners: {O96006}

9601 Pathogen[ P14079] interacts with 2 human partners: {Q9H8Y1;O96006}

9602 Pathogen[ P03383] interacts with 1 human partners: {O96006}

9603 Pathogen[ P03410] interacts with 2 human partners: {Q9H8Y1;O96006}

9604 Pathogen[ P14075] interacts with 2 human partners: {O96006;Q9H8Y1}

9605 Pathogen[ P0C206] interacts with 2 human partners: {Q9H8Y1;O96006}

9606 Pathogen[ P03363] interacts with 2 human partners:{O96006;Q9H8Y1}

9607 [Cluster 874]GO:0016831+F molecular\_function [name] carboxy-lyase activity [def] "Catalysis of the nonhydrolytic addition or removal of a carboxyl group to or from a compound." [http

9608 Pathogen[ Q2Q067] interacts with 4 human partners:{P21953;Q9UG56;P06132;P11172}

9609 Pathogen[ P0C214] interacts with 7 human partners:{P06132;P35558;P12694;P11172;P21953;Q9UG56;Q16822}

9610 Pathogen[ P03346] interacts with 3 human partners:{P06132;Q9UG56;P11172}

9611 Pathogen[ Q85601] interacts with 4 human partners:{Q9UG56;P11172;P21953;P06132}

9612 Pathogen[ P14079] interacts with 9 human partners:{P17707;P21953;P22234;P11172;Q8TDX5;O95822;Q9UG56;P06132;Q96CD2}

9613 Pathogen[ P03383] interacts with 3 human partners:{Q16822;P06132;P11172}

9614 Pathogen[ P03410] interacts with 11 human partners:{Q16822;P12694;P11172;P21953;P06132;P22234;Q8TDX5;Q96CD2;P17707;Q9UG56;O95822}

9615 Pathogen[ P14075] interacts with 4 human partners:{P06132;P11172;Q16822;Q9UG56}

9616 Pathogen[ P0C206] interacts with 5 human partners:{Q16822;P21953;P11172;Q9UG56;P06132}

9617 Pathogen[ P03363] interacts with 2 human partners:{P06132;P11172}

9618 [Cluster 875]GO:0004869+F molecular\_function [name] cysteine-type endopeptidase inhibitor activity [def] "Stops, prevents or reduces the activity of a cysteine-type endopeptidase, any enzyme that hydrolyzes peptide bonds in polypeptides by a mechanism in which the sulfhydryl group of a cysteine residue at the active center acts as a nucleophile." [GOC

9619 Pathogen[ Q2Q067] interacts with 4 human partners:{O95997;Q9NR09;P20810;O15392}

9620 Pathogen[ P0C214] interacts with 6 human partners:{P20810;P98170;O15392;Q9NR09;O95997;Q96CA5}

9621 Pathogen[ P03346] interacts with 8 human partners:{O15392;P98170;O95997;P04080;Q9NR09;Q9H112;Q96CA5;P20810}

9622 Pathogen[ Q85601] interacts with 5 human partners:{P98170;O15392;Q9NR09;Q96CA5;O95997}

9623 Pathogen[ P14079] interacts with 5 human partners:{P04080;O15392;P20810;Q9NR09;O95997}

9624 Pathogen[ P03383] interacts with 3 human partners:{P20810;Q9NR09;O95997}

9625 Pathogen[ P03410] interacts with 4 human partners:{O15392;O95997;Q9NR09;P20810}

9626 Pathogen[ P14075] interacts with 3 human partners:{P20810;O95997;Q9NR09}

9627 Pathogen[ P0C206] interacts with 6 human partners:{O95997;P98170;Q9NR09;P20810;O15392;Q96CA5}

9628 Pathogen[ P03363] interacts with 6 human partners:{P20810;Q9H112;Q9NR09;P98170;Q96CA5;O95997}

9629 [Cluster 876]GO:0051575+F molecular\_function [name] 5'-deoxyribose-5-phosphate lyase activity [def] "Catalysis of the beta-elimination of the 5' deoxyribose-5-phosphate at an abasic site in DNA where a DNA-(apurinic or apyrimidinic site) lyase has already cleaved the C-O-P bond 3' to the apurinic or apyrimidinic site." [PMID

9630 Pathogen[ Q2Q067] interacts with 3 human partners:{P12956;P17096;P13010}

9631 Pathogen[ P0C214] interacts with 3 human partners:{P13010;P17096;P12956}

9632 Pathogen[ P03346] interacts with 3 human partners:{P12956;P13010;P17096}

9633 Pathogen[ Q85601] interacts with 3 human partners:{P17096;P13010;P12956}

9634 Pathogen[ P14079] interacts with 3 human partners:{P13010;P17096;P12956}

9635 Pathogen[ P03383] interacts with 3 human partners:{P13010;P17096;P12956}

9636 Pathogen[ P03410] interacts with 3 human partners:{P17096;P12956;P13010}

9637 Pathogen[ P14075] interacts with 3 human partners:{P12956;P17096;P13010}

9638 Pathogen[ P0C206] interacts with 3 human partners:{P13010;P17096;P12956}

9639 Pathogen[ P03363] interacts with 3 human partners:{P12956;P13010;P17096}

9640 [Cluster 877]GO:0005524+F molecular\_function [name] ATP binding [def] "Interacting selectively and non-covalently with ATP, adenosine 5'-triphosphate, a universally important coenzyme and enzyme regulator." [ISBN

9641 Pathogen[ Q2Q067] interacts with 173 human partners:{O95363;Q92900;Q12798;Q12905;P22392;O75351;P23381;P31749;Q9Y6K5;P49591;Q8IY18;Q0VDF9;Q9UKX2;Q9Y285;P62837;P38646;Q99741;O96019;Q9H1H9;P49427;P51531;Q14204;Q7Z7A3;O00762;Q9Y2X8;Q01196;P19367;Q15046;P49770;P11387;P61604;Q9HAN9;Q9UHC1;Q9NSD9;P08238;P38919;P60604;Q95347;O76031;P07900;Q8TE76;Q96S55;O14757;O00148;Q6ZRS2;P08107;P63279;Q5T160;Q13838;Q13415;P38935;P12270;P51965;Q14240;O43542;Q06609;Q96I59;O43776;P11388;P32189;P61077;P26196;P11142;A6NDB9;O95163;O43502;P63146;Q9UHI6;P59047;P17987;Q9BYK8;O7582;O96017;Q14978;P41252;Q8N3C0;Q9NPD8;P51668;P54278;P50991;P50750;Q96Q89;Q13233;Q08211;P51532;P42025;O14656;Q9H4L7;P50613;P07814;Q12873;Q9UN37;P61088;Q9NTI5;Q5TCQ9;P46100;Q03468;Q9P0J0;P13984;Q9NZJ4;Q9ULW0;P12956;Q02241;Q9P2R7;O00139;P12883;Q3L8U1;Q53G26;Q92499;Q15257;Q96RU7;O94805;O75943;O43913;P54136;Q9HCE1;Q14839;O43615;Q86UW6;Q9UNY4;O14920;Q13761;Q9C000;P41208;O14646;Q9BYX4;P45984;Q9ULG1;Q6PI48;Q9UHN1;P49459;P25205;P35251;Q9HCK8;P46013;O43318;P49336;Q9HA77;Q86WJ1;P62256;Q9BW92;P68036;P41250;P35579;Q14683;P21675;Q86WI3;P24941;P13010;Q9HBD4;Q8NE71;P28370;P49589;Q9Y2W1;P11802;P78371;Q9NVV4;P31689;O15111;Q92841;Q9P2J5;Q9NTK5;Q9H9F9;Q8IYD8;P60842;Q96EY1;Q00839;Q15759;P14868;P14625;Q00534;P33076;P51003}

9642 Pathogen[ P0C214] interacts with 284 human partners:{P41250;Q96B02;Q14410;Q8IY18;Q9GZZ9;Q96T66;Q14527;A8MQ11;Q9H832;Q58FG0;Q13761;P60709;P49589;A7E2Y1;Q05932;Q16763;Q9NSE4;P26196;P14625;Q06609;Q7L3T8;O15111;P68133}

;Q9NPP4;O95363;Q14409;Q99832;Q9UGM6;Q58FF7;Q9UKX2;P49368;P23919;Q96S55;Q9HAN9;O00762;Q8TE04;O00148;Q16740;O75351;P60842;P49770;P78371;Q02241;Q96I59;P13010;O43913;Q9H9F9;Q9NP81;P21675;O00159;P12081;P48643;Q9Y2K3;Q14164;P53396;P23381;P51003;Q5TCQ9;Q12873;P50750;Q92900;P50613;Q92841;P49427;P33076;P49590;P07814;Q9UM54;Q9H0S4;Q9Y285;P41252;Q86UW6;P11055;O95299;Q86WI3;Q5JTTZ9;P11802;Q9Y6K5;Q9HBD4;P34932;O94921;Q9BTE6;P61604;Q6ZR52;P29728;P12277;Q58FG1;Q3L8U1;Q7L2E3;P63279;P49459;O14656;Q9ULG1;Q9BYX4;Q12905;P35251;Q969T4;Q15257;P20585;O00139;Q5JPH6;Q9H4L7;O43776;Q9Y3D8;P38935;O95396;P32189;Q15031;O43318;P14868;O95347;Q8WW22;P49591;Q9HCE1;P51965;Q13057;P25205;P61077;Q9BYK8;Q9P2R7;O76031;O60825;Q8N3C0;P50747;Q9H3H1;Q9NZJ4;P62253;Q14566;Q92698;Q00534;Q8NE71;Q13233;P35580;O43681;Q96Q89;Q12798;P21127;Q00536;P56192;P14618;P61086;P28370;O96017;Q14978;O43542;P49336;Q9H0A0;P26639;Q9Y2X8;Q9P0J0;P13535;P46100;P38919;Q9UHC1;Q9UNY4;O43615;Q9BZQ4;Q9NVP1;Q9ULW0;Q14240;P54577;O43502;A2RTX5;P24941;Q9HCK8;P38646;P19367;Q9Y6X9;P10809;O60264;Q9UHI6;Q8TE76;P12882;Q9NRF8;P11388;Q53G26;Q9HA77;P62736;Q58FF3;Q58FF6;P49588;Q96GW9;P23921;P13984;O75943;Q7Z7A3;P41208;P11387;P12883;O75582;Q9BZ23;Q92499;O00442;Q96RU7;Q9H2U1;Q14683;P42025;Q9NUU7;Q15759;Q96I99;Q58FF8;Q969M7;Q9UMR2;Q7Z406;P45984;Q5T160;P47897;P17987;Q9BW92;P46013;Q6PI48;Q08211;P13533;P12270;Q9NWZ5;O60884;Q5D0E6;P16118;Q92614;O14727;Q712K3;Q00839;P54278;P35998;Q9Y623;P62256;P22392;Q9UN37;P50991;O14646;P40692;P51668;O14757;Q9NSD9;P26640;Q15046;P17812;Q14568;P51531;O94805;P08107;Q5EBM0;Q9Y2W1;P63261;Q9NVV4;Q5ST30;Q9Y5Y2;Q9NTI5;Q13838;Q8NFF5;Q9NPD8;P61081;O95163;Q9NTK5;Q96LR5;O14920;P59047;Q8IYD8;P11586;P00558;Q86WJ1;Q03468;O96019;P35749;Q96EY1;P63146;P12956;P31749;Q14839;P61088;P51553;Q9Y2Z4;P51532;Q99741;Q0VDF9;P55072;P17980;Q13415;P11142;P60604;Q9UHN1;Q9C000;Q9P2J5}

9643

Pathogen[ P03346] interacts with 238 human partners: {P08107;Q9Y6X9;P59047;P23381;Q15058;P46063;Q9NRZ9;P45984;Q00536;P38935;Q9HBD4;O15111;P12270;P12956;Q06609;P07900;P68036;O96017;Q12905;P46100;Q96JP2;Q12840;Q9NX02;P14625;Q6ZW61;P11388;O43502;P21127;P49427;P35579;P62736;O14656;P51532;Q14149;Q9UMR2;Q92614;Q92841;Q5TCQ9;O00139;P07814;Q9H9F9;P49336;Q14527;P35250;P61604;Q9ULG1;O43615;P24941;Q8TE76;Q8TD26;P78371;Q15257;P13010;P19367;P60709;O14757;O95347;P38919;Q7L2E3;P33076;O95163;P11142;Q9H1H9;Q9UHN1;Q9NVP1;Q00839;P63279;O43776;Q14204;Q8IZE3;O14646;P49459;Q9NZJ4;Q08211;Q9Y2X8;Q92698;Q9HAN9;Q86Z02;P60842;P55072;Q6P3W7;P51668;Q9BUQ8;P41252;P61077;A5A3E0;Q8N3C0;P16452;P11802;O76031;A6NDB9;P61088;Q9H2U1;O75943;P41250;Q7Z333;Q9UHC1;Q14566;P25205;P41208;P38646;Q92499;Q14978;O96019;Q9Y285;Q9ULW0;Q9NTK5;Q496M5;P13984;Q9NPP4;Q96S55;Q86UT6;P60604;P51003;Q15646;O75643;P31749;Q03468;P51965;O15315;Q9P2J5;P63146;Q8N841;Q14683;Q86WI3;O60264;P50991;O00762;P20585;Q9HCK8;Q13761;Q8TD19;Q9UHI6;Q9NVV4;Q7Z7A3;P50750;P49368;Q8IWT3;O94805;O43542;P33992;Q9NTI5;Q96Q89;P62837;Q14240;P54136;Q13415;P49770;Q9Y3D8;O75771;P42025;P31689;Q13838;Q9UNY4;Q13233;Q5326;Q86UW6;O75582;P22392;P14868;P35249;Q9NPD8;Q0VDF9;P49589;Q6ZRS2;Q9Y5Y2;P42285;Q9BYX4;Q02241;Q96RU7;Q14562;P33991;Q9NUU7;Q9ULW0;P21675;Q15759;Q9H0S4;Q96PY6;P45985;P54278;Q8NE71;P26196;P32189;O75351;P34932;Q8IYD8;Q9UKX2;Q12798;P28370;Q6PI48;Q01196;Q12873;Q00534;P35251;Q96KG9;P46013;Q9P2D1;O14920;P62256;Q9BYK8;Q13401;O94921;O43318;O00148;Q13283;O43933;P51531;Q9P0J0;Q3L8U1;Q86WJ1;O43543;Q8IY18;Q9HCE1;Q92900;Q9Y2W1;P40937;Q99741;O43929;O14727;P08238;P54277;O14965;Q14164;Q8NB16;Q86XP3;Q96EY1;Q9Y6K5;A0AVT1;O43913;Q9NWZ5;Q14839;Q9UN37;P11387;Q9H4L7;Q9UBP0;Q9C000;O00444;P17987}

9644

Pathogen[ Q85601] interacts with 244 human partners: {Q9HCE1;P61163;Q14978;O43913;Q00536;Q9NTK5;P54136;Q9NSD9;P08107;P62253;Q92614;Q9P0J0;O43502;O15315;P33076;P68133;Q16763;P31749;P31689;P26639;P63146;Q9H0S4;Q02241;P14868;O96017;Q96JP2;O95347;Q8IYD8;P50750;Q3L8U1;P13533;P49589;Q8IY18;Q9P2D1;Q58FF8;Q14240;Q9UBP0;P49427;P35579;Q96PY6;P38935;Q12798;Q9P2J5;O15111;Q9Y2X8;Q53G26;P07814;Q9H9F9;A8MQ11;P49336;P61604;Q13415;O60825;O00148;P23381;Q9UMR2;Q14204;Q7L2E3;Q9H1H9;Q9Y6X9;Q8WW22;Q969T4;O96019;O60884;Q86WI3;Q15046;O43776;O14646;Q96B02;P17987;Q9ULW0;Q9NPD8;Q92499;Q9BW92;Q92698;P12270;Q86VD1;P32189;Q9Y285;Q14149;Q9NTI5;Q08211;P51668;Q9HAN9;Q96LR5;P68036;P49770;P61077;Q9P2R7;P63279;P16118;O43542;Q9HA77;P11802;Q12840;P38919;P60709;P51531;O14757;O75943;P11387;P41250;Q14566;O14965;Q5T160;O43681;Q9UKX2;Q9Y2K3;Q96Q89;Q14164;Q03468;P51532;Q5D0E6;O00159;O75351;Q9Y6K5;P50991;P13984;P25205;P12882;P14618;P51965;Q13838;Q7Z406;Q9NVP1;Q14683;P63261;O14920;Q12873;A2RTX5;P20585;P11142;Q9UHI6;Q15058;P08238;P11055;Q7Z7A3;Q9H4L7;Q9NUU7;P61086;Q9BYX4;P35251;Q6ZRS2;P11388;P35749;O14656;O94921;Q9BYK8;O00762;O75582;Q5TCQ9;Q96I59;P22392;P60842;Q9ULG1;P12883;P50613;P49459;O43615;P07900;Q96RU7;Q9HBD4;Q8NE71;P26196;O95363;Q9HCK8;P62837;Q15759;P45984;O43933;Q96S55;P54278;P14625;Q00839;Q9H832;Q12905;P38646;P21675;P34932;Q9UHC1;P47897;P28370;Q969M7;Q9Y5Y2;Q6PI48;P21127;O76031;Q86WJ1;P35580;Q96KG9;P46013;Q9NZJ4;Q58FF3;Q8TD26;P62256;Q13233;P33992;Q9UM54;Q00534;P78371;Q86UW6;Q9NVV4;P41252;O43318;P13535;P40692;P48643;P51003;O60264;Q496M5;Q8TE76;P61088;P19447;Q14527;O94805;Q92900;Q15257;Q9Y2W1;O95163;P60604;Q14568;Q99741;Q0VDF9;Q06609;Q9UHN1;Q9UN37;P24941;Q9Y623;P62736;P42025;Q9UNY4;O00139;P46100;Q96EY1;P51955;Q14839;P13010;P12956;Q8N3C0;Q13761;P19367;P41208;P59047;Q9H2U1}

9645

Pathogen[ P14079] interacts with 312 human partners: {P31751;Q8TE04;P16452;O43615;O43196;P11388;P35579;Q9Y285;P48643;P62333;Q14004;O15315;O00442;P23381;P20585;P26639;P33076;Q6IEE8;Q9H0S4;O14841;P51965;P60842;Q9BRP7;Q9ULG1;Q96GW9;O95544;Q9P2J5;P63261;P11142;Q9BYK8;P63279;Q8NFF5;P0C7F3;Q9BYX4;O75897;Q5EBM0;Q7L3T8;Q9BTE6;Q14566;Q9BW92;O43716;Q9H0R6;P29728;O43187;P53779;Q8IYM2;Q9NZJ4;P25705;P54136;Q6ZMV9;P49336;Q13415;P68036;Q9H0A0;P22234;P52564;Q92614;P17812;Q9UJ70;Q15031;Q8IYD8;Q5T160;P49842;P40937;P13010;O75582;Q12840;Q499Z3;Q14410;Q9UNY4;P40692;Q9HCE1;Q8TE76;P28370;Q7L2E3;Q5ST30;Q9H4L7;Q96DU7;Q9NPD8;Q02241;P50991;Q14204;Q9C000;Q9NPD81;O43913;Q68D20;P60604;P47897;O95363;P51532;Q14164;P49591;P54278;O14646;A2RTX5;O95163;Q9NWZ5;Q92698;P32189;Q9UHC1;P51531;P14868;Q13838;P78371;O95922;P51606;Q7Z4S6;Q6ZRS2;Q9ULW0;P50990;Q13472;Q9UKX2;Q32NB8;Q9UM54;Q9P2R7;Q9UHI6;Q14240;P35998;Q14409;P61077;

Q08211;Q16740;Q9C093;Q00839;P61604;Q9HA77;Q12873;A6NDB9;Q9NTI5;P45984;A8MQ11;Q9NRF8;P46100;O43776;Q5JPH6;Q14149;P62256;Q12905;O75648;Q0VDF9;P45983;Q99741;P68032;O15066;P50613;Q9P2D1;Q8TD26;Q9NQX7;P12956;O94805;Q99661;P35250;P23919;O14656;P49589;P51668;Q14692;Q9Y287;P51955;O75943;P12270;Q9BZ23;Q15046;P22392;Q16644;O43681;O95347;Q8IVS8;Q9BZQ4;Q96Q89;Q86XW9;P26196;Q8IYQ7;Q96S55;P41252;Q15759;O60282;P08238;Q9Y6K5;P61158;Q969M7;P17987;P08107;Q12798;A5A3E0;P45985;Q13057;O00139;Q8NE71;Q15058;P63267;Q86UW6;P35251;P49459;P41250;Q86WJ1;Q96I59;Q9NVV4;Q9H1H9;O00148;O95299;P26640;P07900;Q9Y5Y2;P60709;Q8N841;P56192;Q9HCK8;Q9P0J0;Q9NSD9;Q86VD1;Q9NWX6;O60264;O95744;P21127;P12883;O43502;P54277;O43929;Q9NTK5;Q9Y2Z4;P61163;Q9HAN9;Q9UN37;P33992;Q96RU7;O43543;Q6ZVT0;Q6IA69;P14625;Q92628;Q86Y91;P49915;P41208;Q5T7B8;P53602;Q14839;Q9Y2X8;Q86UT6;P49427;P13984;P38646;P62191;Q9UGM6;P31689;Q92900;Q8IY18;Q92499;Q96FC9;Q9NSE4;P62837;Q9UQE7;O15067;Q13164;P42025;Q03468;P38935;Q9NS86;O00762;Q5D0E6;Q96Q11;O75351;Q13761;Q6ZW61;P43686;Q86WI3;P51003;O76031;Q9H3H1;P52701;P49588;O95235;Q9Y6X9;P49368;Q9UHN1;Q6PI48;Q7Z7A3;Q8WW22;Q06609;Q14683;Q9NVP1;Q6S8J3;O14965;Q9Y239;Q969P6;P0CG38;O60884;P63146;P68133;P25205;P59047;Q05932;Q96C10;P17980;Q9Y2W1;Q96EY1;P07814;Q9H9F9;P0CG39;P19447;O43542;Q4G0Z9;P49917;Q9H999;P21675;Q14978;Q3L8U1;P50750;Q96KG9;Q9NPP4;Q9BYX7;P46013}

9646 Pathogen[ P03383] interacts with 170 human partners: {P08107;Q14683;Q13761;Q9NVV4;Q9NVV4;Q9UHN1;Q9Y285;Q14978;O14757;Q06609;Q14839;O75582;Q9HBD4;O95163;P33076;O96019;P51003;Q9P2J5;P13010;P14868;Q9H0S4;A6NDB9;Q02241;P54278;Q13233;O94805;P51965;Q5D0E6;Q8TD19;P38646;Q9NWX5;P12270;O14920;P19367;Q15257;Q13838;Q8NE71;Q7Z7A3;Q9NTK5;P49427;P31749;P42025;Q5JPH6;O15111;Q9Y2X8;P49589;Q5T160;Q9UHC1;Q15031;P25205;P41208;P46013;P61604;O43615;P28370;Q9P2R7;P22392;Q9NP81;Q92841;Q9UHI6;O00762;O95347;P38919;Q12798;Q00536;O14646;P11387;P26196;P07900;Q96S55;Q00534;P31689;P11802;O43318;Q9H9F9;P61077;P21127;Q9H1H9;O43913;Q8TE76;P61088;Q9BTE6;P46100;P49336;Q9HAN9;Q12873;P50613;P13984;P23381;P60604;Q03468;Q96I59;P24941;Q9UKX2;Q15046;A2RTX5;P50750;Q9Y2Z4;O95363;P51531;P14625;Q96Q89;P62837;P07814;Q15759;P49770;P11142;Q96GW9;O94921;Q12905;P12883;Q9Y6K5;Q9BZ23;Q5TCQ9;Q9HA77;Q9H832;P35580;P78371;O14965;Q96RU7;Q3L8U1;Q86WI3;Q9HCK8;Q96PY6;P21675;P68036;P32189;O43776;P49459;P45984;P51532;Q6PI48;O76031;P35579;Q9NPD8;O43542;P38935;P62256;P63146;Q9ULW0;P41250;Q92499;Q9P0J0;Q9NTI5;P41252;P54136;Q9HCE1;Q5EBM0;Q9Y2W1;Q9NSD9;P49591;Q9UN37;Q92900;Q7L3T8;P08238;Q00839;Q9H0A0;Q9BYK8;Q9UNY4;Q96EY1;P63279;Q86UW6;P51668;Q53G26;Q99741;P12956;O00148;O96017;P35251;Q9BW92}

9647 Pathogen[ P03410] interacts with 321 human partners: {Q9BRP7;Q9Y6G9;O75648;Q13838;Q8IVS8;Q9Y2W1;Q86Y91;Q14204;Q9P2R7;Q9NS86;Q96Q11;P53602;P40692;Q96Q89;Q9Y285;P17987;Q00839;P25205;Q9HA77;O43929;Q12873;P49368;P51606;Q9UNY4;Q99832;Q96DU7;Q15058;O14920;Q9H4L7;P20585;Q9NSE4;P56192;P62736;Q9UKX2;Q8NE71;Q9Y239;Q9BTE6;Q8N3C0;P48643;Q53G26;Q8IZE3;O00442;P49915;O75943;Q6ZVT0;Q8NFF5;O00139;Q8TE04;P38646;Q00534;Q92698;Q8IYD8;P29728;O75879;Q92900;P08238;Q9NRF8;P49589;Q5T30;Q9NVP1;P49427;P25705;O15315;Q13057;P17812;O75351;Q9H1H9;O14656;Q8NB16;O96019;P16118;O95299;P46013;Q9BW92;Q6ZW61;P21675;Q9UQE7;Q14149;O15111;Q9H0A0;Q92614;P35998;A5A3E0;P51965;Q14692;P54277;Q9ULV0;O43542;O60282;Q9BYK8;P49588;P54136;Q9NTK5;O14646;Q7Z4S6;O75582;Q14410;Q5TCQ9;P61604;Q15257;Q9Y6X9;O43187;P14625;Q14978;P23381;Q6IEE8;Q9BYX4;Q9ULG1;O00159;O00148;P49459;Q9NWX5;Q7L3T8;O43776;P11142;Q4G0Z9;P31749;P16452;P35579;P59047;Q12798;Q9Y287;P07900;Q96S55;Q7Z7A3;Q9NPP4;Q9C000;P47897;Q9Y5Y2;Q9H3H1;P68036;P14868;Q9H0S4;P61088;Q13233;Q03468;Q12840;Q9NVV4;P50613;P61163;Q5D0E6;P49770;P33992;P23919;Q9NSD9;O14841;Q86UW6;P22234;O95347;P51003;O14965;Q9P2J5;P49591;P50750;Q0VDF9;Q86WI3;Q9UM54;O60333;O43318;Q9UMR2;P12956;O76031;Q92628;Q6ZRS2;Q86UT6;Q13472;P38935;P35251;P52701;Q6ZMV9;Q9NZZ4;P12270;P12882;Q96KG9;O94805;Q499Z3;P45985;Q9NUU7;P26639;O43502;Q9P2D1;P50990;P08107;Q9H9F9;P24941;Q96I59;P62256;Q92499;Q9UN37;O95163;P11802;P0CG39;Q58FF3;Q12905;Q9NQX7;Q9HCE1;Q9NTI5;O43615;P19447;P63146;P33176;P11387;Q14683;P41250;P12883;O15067;Q7L2E3;Q9HCK8;Q9Y2X8;O96017;Q5EBM0;O95744;Q9H0R6;O14757;Q15046;P51668;Q68D20;P68133;P46100;P60842;P51532;P38919;Q9BZ23;P49336;O43196;Q14409;Q86WJ1;Q5JPH6;Q9HAN9;P11388;O60884;Q96RU7;P51531;Q9Y6K5;P42025;Q9C093;P35580;P45984;Q13761;Q9NPD8;Q3L8U1;Q96C10;Q9ULW0;Q9UGM6;P41252;P53779;O00762;Q9Y2Z4;Q8IY18;P13010;O43543;P63279;P13984;P26640;P78371;Q86VD1;P31689;Q96GW9;O95922;Q969M7;P63261;P33176;P11387;P13533;Q96FC9;P54278;Q86XW9;P07814;Q8TE76;P60604;P35250;P32189;Q9P0J0;Q8TD26;Q9NP81;Q8WW22;Q96JP2;O60264;A2RTX5;Q8N841;Q16740;O43913;P40937;Q9HBD4;Q14566;P13535;P23921;Q05932;P41208;Q14839;Q9UHN1;Q9UHI6;Q08211;O43681;Q6IA69;P0CG38;Q9NWX6;Q9BZQ4;A6NDB9;O95363;P33076;Q6PI48;Q5T160;Q96EY1;Q6S8J3;Q8IYM2;O43237;P17980;Q5T7B8;P60709;Q9UHC1;P28370;P50991;P61077;P62837;Q06609;Q14240;Q02241;Q13415;Q99741;Q6PJ11;Q9H2U1}

9648 Pathogen[ P14075] interacts with 180 human partners: {Q9Y2Z4;Q3L8U1;P11387;P49336;P60604;P54136;Q15257;P51003;O14646;P31689;P13984;Q92900;O15111;P12956;P11142;P21675;Q9H1H9;P24941;Q9HBD4;Q14683;P41250;Q5D0E6;Q6ZW61;Q02241;P23381;P68036;Q9H3H1;Q86WI3;P11802;Q9NWX5;Q15759;O75648;P62837;Q9UKX2;P49427;P51532;Q9H0S4;Q9UNY4;Q9NSD9;O75582;P61088;P26196;Q8IVS8;P32189;Q9NVV4;P49459;P50613;P61604;Q12905;P38935;Q86UW6;Q14839;P51965;P41252;Q00534;Q9HCE1;Q8TE76;P33076;P50750;P19367;O95363;P78371;Q53G26;Q12798;Q5TCQ9;Q9Y2X8;P63279;P12270;P08238;Q13057;P38646;P61077;Q96GW9;Q9H0A0;Q9HA77;Q9NP81;O95347;O76031;Q9NPD8;Q03468;Q9Y285;P07900;Q92499;Q9ULW0;Q9NTK5;Q00839;O14920;P16118;O96019;P46100;Q9UHI6;P31749;Q9BTE6;O00762;O00139;Q7L3T8;P56192;O96017;Q9UHC1;P25205;O14965;A2RTX5;Q9HCK8;Q8TE04;Q9BW92;O43776;Q7Z7A3;O43318;P51531;P49842;P35251;Q9Y6K5;Q8NE71;P49770;P21127;P35579;P14868;Q5T160;Q9P2J5;P28370;O43542;Q9BZ23;O43913;P41208;O94805;Q96RU7;O95163;Q9UHN1;P26639;P08107;Q92841;Q96PY6;Q6PI48;Q9H9F9;Q99741;Q96I59;P54278;P62256;P63146;P13010;A6NDB9;Q9HAN9;Q96S55;P49589;Q5JPH6;Q9Y287;Q13233;P38919;Q15046;O94921;Q9UQ88;P14625;Q5EBM0;Q9Y2W1;Q13838;Q9NTI5;P51668;Q9NYV4;Q12873;Q9NSE4;P46013;Q96Q89;Q15031;Q9P0J0;P49591;P42025;Q9BYK8;O00148;O14757;P22392;Q14978;Q96EY1;Q06609;P07814;O43615;Q9P2R7;Q9UN37;Q13761;P45984;Q8TD19}

- 9649 Pathogen[ P0C206] interacts with 311 human partners: {P49589;O95363;O43542;Q16763;Q9C000;Q86VD1;Q9Y2X8;O43502;Q6ZVT0;Q9H0S4;P48643;Q9NSE4;Q9H4L7;P54278;P07814;O43933;Q9NPD8;Q0VDF9;O00148;Q9UN37;Q9HCK8;P60709;P13010;P49336;Q9UM54;Q496M5;P62253;Q9UHN1;O14920;Q6ZW61;Q8IYM2;P38935;P31749;Q8TD26;Q9Y2Z4;Q96Q89;Q12905;Q29NUU7;P51532;P35251;Q9UBP0;Q9Y3D8;P50750;P13533;O96017;Q9Y287;Q86WI3;Q14692;P62736;P22392;Q9Y623;P68036;Q969M7;Q9ULW0;Q9UNY4;P41252;P51955;Q6PI48;P25205;P52701;O75582;A6NDB9;P45984;P51531;O43913;Q5ST30;Q08211;O43681;Q8TE04;Q9BRP7;Q13057;Q9Y6K5;Q5TCQ9;P34932;Q8IYD8;Q00536;P40692;Q53G26;Q9P2D1;P46100;P46013;A2RTX5;Q5EBM0;P26196;Q9UGM6;Q03468;O43318;Q96PY6;O00444;Q5JPH6;Q9NP81;Q9NZJ4;P29728;Q6ZRS2;Q96LR5;Q9UHC1;P62837;Q9HA77;Q9Y5Y2;Q9P2R7;P50991;Q9NWZ5;P51003;Q9BZ23;P41250;P17987;Q8TD19;A8MQ11;O60884;Q9H1H9;P11055;P19367;Q96KG9;O43237;Q99741;P32189;P49427;P33076;P26640;Q6P3W7;Q02241;P38646;Q9Y6X9;Q13233;Q96RU7;O94762;P49591;P13984;O75943;Q86XW9;P19447;O43776;P61163;Q96DU7;O95163;Q712K3;Q9HCE1;Q14839;P30291;P51965;P68133;Q86Y91;Q8TE76;Q9BYK8;O43615;P54277;O14646;O96019;P49770;P61088;Q9Y285;Q14204;Q14164;P49917;P12883;Q8WW22;P08238;Q7Z333;Q9UQE7;P60604;Q9NSD9;P50613;O95347;P59047;Q13838;Q9ULG1;Q5D0E6;Q58FF3;P07900;P49459;O00159;Q14683;O95922;Q9BTE6;Q14149;P63261;O15315;O15315;Q15315;P11388;Q9UHI6;P61077;Q16740;Q9Y6G9;P12882;O15111;P16452;Q8N841;Q9BZQ4;Q5T160;Q9NVP1;Q9Y2W1;P62256;Q9BW92;P35749;P49916;Q96S55;P08107;P35579;Q969T4;O00762;Q92614;Q9UKX2;Q92841;Q9NVV4;Q9NQX7;P56192;Q12840;P55072;Q14240;O00139;Q9NTI5;Q9NTK5;P28370;P45985;Q9P0J0;Q14527;Q8NE71;O60825;Q9HAN9;Q9H3H1;P54136;Q9H9F9;Q86WJ1;P49368;Q92900;Q15058;P41208;P16118;Q13415;P26639;Q9H832;O43543;Q86UW6;Q9H2U1;Q9NRZ9;Q06609;Q9HBD4;P20585;P21127;Q15031;P11388;Q9UHI6;P61077;Q12798;Q9UMR2;P11387;Q9BYX4;P38919;P61086;Q96C10;Q7L3T8;O14965;Q9P2J5;Q9NS86;O76031;O75351;Q96B02;P60842;A5A3E0;Q92499;Q8IY18;Q96EY1;P35580;P12956;Q9BW19;P42025;Q00839;P13535;Q8IVS8;P24941;Q15759;P23381;P51668;Q14566;P11142;Q9NTJ3;Q7L2E3;P11802;Q13472;Q15257;Q13761;O94921;P47897;P14868;P78371;Q9H0A0;Q9BX63;P31689;O94805;Q99640;Q8N3C0;Q92698;P33992;Q96GW9;O95396;P14618;Q12873;Q99986;P61604;Q7Z7A3;Q9UIG0;P21675;O60264;Q14978;Q96I59;P12270;Q05932;P14625;P63146;Q8IWT3;Q15046;Q00534;Q3L8U1}
- 9650 Pathogen[ P03363] interacts with 243 human partners: {A14978;Q9Y2Z4;Q9Y6K5;P12956;O94762;Q9BX63;Q9H832;Q3L8U1;Q9NVV4;P51965;O43933;P60604;A5A3E0;Q7Z333;P54652;P38919;Q9NWZ5;P41252;P07900;O14920;P12270;P49459;O75643;Q8IY21;Q9NSD9;Q9ULG1;Q2VIQ3;P13984;A2RTX5;O00762;P60709;Q9NZJ4;Q9C000;P21127;Q92900;P33176;P35579;Q9UHI6;P11387;Q9H4L7;P22314;Q96I59;P13010;P14868;Q9HAN9;P25205;P61081;O95347;P49589;Q9UKX2;Q13283;Q6ZRS2;O15111;P41250;Q9UHC1;P51532;Q96JP2;P62736;Q9NX02;Q9ULW0;Q9NUU7;O95922;Q9NTK5;Q14204;P35251;Q02241;P47897;P68133;Q5JPH6;O43318;Q86UW6;O43776;P24941;Q8IVS8;P63146;Q14839;P41208;Q7Z4S6;P49427;P23381;Q14807;Q92620;Q9H0S4;Q9UNY4;P33992;Q7Z7A3;P46100;Q53G26;P50991;Q6ZMV9;O96017;O60264;P61088;O75351;O60282;Q9H9F9;Q00534;O43615;P61163;Q14562;P20585;P54136;Q9HCK8;Q9UN37;Q9NUL7;O96019;Q12798;P08107;Q92841;Q13415;Q14240;P46063;P34932;P54278;Q9BTE6;Q9P0J0;P31749;Q8NB16;P51003;Q14527;Q86WI3;Q6PI48;O00148;Q9Y3D8;Q99741;Q13472;P38646;Q9HCE1;Q5TCQ9;Q9HBD4;Q8IYD8;P54277;Q96KG9;Q5T7B8;P17987;O95163;Q92499;P49336;Q8N841;O94805;P62256;P26196;Q13838;Q9BYK8;P59047;Q969T4;O95363;P63279;Q86XW9;Q12905;Q4G0Z9;O43542;P42025;O76031;Q6ZW61;Q96S55;O15066;P51668;Q92614;P49770;P21675;O14646;P33076;Q9UMR2;Q9P2J5;P60842;Q86XP3;Q9NPD8;Q03468;Q9BW92;P50750;Q8TD26;Q15257;P63261;P49591;Q9Y285;P78371;Q8NE71;Q9BYX4;Q9NTI5;Q969M7;Q9Y5Y2;Q8IWT3;O75771;Q12873;P28370;Q15058;Q06609;Q7L3T8;Q8IZE3;P61077;Q96Q89;Q9UHN1;O60333;Q7L2E3;Q9NVP1;Q15031;Q00839;Q9H1H9;P16452;Q9Y2X8;P62837;Q9NPP4;P11802;P46013;Q9H2U1;P07814;Q13761;O00139;Q8TE76;P51531;Q86WJ1;Q96EY1;O75943;Q08211;Q0VDF9;Q8IY18;O43237;Q9H6S0;P08238;P48643;Q5T890;Q5T160;Q00536;Q14683;Q13233;A6NDB9;P38935;Q7Z7E8;Q12840;P11142;Q92698;P61604;A0AVT1;Q8N3C0;P68036;P49368;O43502;Q13401;O15315;P42285;O14757;O43913}
- 9651 [Cluster 878]GO:0000987+F molecular\_function [name] core promoter proximal region sequence-specific DNA binding [def] "Interacting selectively and non-covalently with a sequence of DNA that is in cis with and relatively close to the core promoter. The transcribed region might be described as a gene, cistron, or operon." [GOC
- 9652 Pathogen[ Q2Q067] interacts with 6 human partners: {Q13485;Q96T88;Q02447;P08047;P84022;Q92793}
- 9653 Pathogen[ P0C214] interacts with 6 human partners: {Q92793;P84022;Q96T88;Q13485;Q02447;P08047}
- 9654 Pathogen[ P03346] interacts with 9 human partners: {P15173;Q13351;P08047;P84022;Q9Y5R6;Q13485;Q92793;Q02447;Q96T88}
- 9655 Pathogen[ Q85601] interacts with 6 human partners: {P08047;Q96T88;Q02447;P84022;Q92793;Q13485}
- 9656 Pathogen[ P14079] interacts with 3 human partners: {Q92793;Q02447;Q13351}
- 9657 Pathogen[ P03383] interacts with 5 human partners: {Q13485;P08047;P84022;Q02447;Q92793}
- 9658 Pathogen[ P03410] interacts with 5 human partners: {P84022;Q02447;Q92793;Q13485;P08047}
- 9659 Pathogen[ P14075] interacts with 5 human partners: {Q13485;Q02447;Q92793;P84022;P08047}
- 9660 Pathogen[ P0C206] interacts with 7 human partners: {P84022;Q9Y5R6;Q92793;P08047;Q96T88;Q02447;Q13485}
- 9661 Pathogen[ P03363] interacts with 7 human partners: {Q02447;Q9Y5R6;P84022;Q92793;Q13485;Q96T88;P08047}
- 9662 [Cluster 879]GO:0051721+F molecular\_function [name] protein phosphatase 2A binding [def] "Interacting selectively and non-covalently with the enzyme protein phosphatase 2A." [GOC
- 9663 Pathogen[ Q2Q067] interacts with 8 human

9664 partners:{Q9UPR3;Q13033;Q86XL3;O43768;Q9NRL3;P56211;Q15257;Q92540}  
Pathogen[ P0C214] interacts with 8 human

9665 partners:{O43768;Q13033;Q15257;Q92540;P56211;Q86XL3;Q9UPR3;Q9NRL3}  
Pathogen[ P03346] interacts with 10 human

9666 partners:{Q9UPR3;Q15257;O43815;P56211;O43768;Q13033;Q12778;Q92540;Q86XL3;Q9NRL3}  
Pathogen[ Q85601] interacts with 9 human

9667 partners:{Q9NRL3;Q92540;O43815;P56211;Q86XL3;O43768;Q13033;Q9UPR3;Q15257}  
Pathogen[ P14079] interacts with 8 human

9668 partners:{O43768;Q13033;O43815;Q92540;Q86XL3;P56211;Q9NRL3;Q9UPR3}  
Pathogen[ P03383] interacts with 7 human

9669 partners:{Q15257;Q9UPR3;O43768;Q9NRL3;Q13033;Q92540;P56211}  
Pathogen[ P03410] interacts with 9 human

9670 partners:{Q92540;Q9NRL3;Q9UPR3;Q15257;Q13033;O43768;O43815;P56211;Q86XL3}  
Pathogen[ P14075] interacts with 7 human

9671 partners:{Q15257;Q9UPR3;O43768;Q9NRL3;P56211;Q92540;Q13033}  
Pathogen[ P0C206] interacts with 9 human

9672 partners:{O43815;Q86XL3;P56211;Q9NRL3;O43768;Q9UPR3;Q13033;Q92540;Q15257}  
Pathogen[ P03363] interacts with 9 human

9673 partners:{Q9UPR3;Q13033;O43815;O43768;Q9NRL3;Q15257;Q92540;P56211;Q86XL3}  
[Cluster 880]GO:0019237+F molecular\_function [name] centromeric DNA binding [def]  
"Interacting selectively and non-covalently with a centromere, a region of chromosome  
where the spindle fibers attach during mitosis and meiosis." [GOC

9674 Pathogen[ Q2Q067] interacts with 3 human partners:{Q9UHC1;O43264;P07199}  
9675 Pathogen[ P0C214] interacts with 4 human partners:{O43264;P20585;P07199;Q9UHC1}  
9676 Pathogen[ P03346] interacts with 4 human partners:{O43264;Q9UHC1;P20585;P07199}  
9677 Pathogen[ Q85601] interacts with 4 human partners:{O43264;P07199;P20585;Q9UHC1}  
9678 Pathogen[ P14079] interacts with 5 human  
partners:{P07199;P20585;Q9UHC1;Q99661;O43264}

9679 Pathogen[ P03383] interacts with 3 human partners:{O43264;Q9UHC1;P07199}  
9680 Pathogen[ P03410] interacts with 4 human partners:{P20585;O43264;P07199;Q9UHC1}  
9681 Pathogen[ P14075] interacts with 3 human partners:{P07199;Q9UHC1;O43264}  
9682 Pathogen[ P0C206] interacts with 4 human partners:{Q9UHC1;P07199;P20585;O43264}  
9683 Pathogen[ P03363] interacts with 4 human partners:{Q9UHC1;O43264;P07199;P20585}

9684 [Cluster 881]GO:0019901+F molecular\_function [name] protein kinase binding [def]  
"Interacting selectively and non-covalently with a protein kinase, any enzyme that  
catalyzes the transfer of a phosphate group, usually from ATP, to a protein substrate."  
[GOC

9685 Pathogen[ Q2Q067] interacts with 109 human  
partners:{P30281;Q92585;P31749;P42773;Q9Y333;Q9H4X1;Q8IUC6;P56524;O75909;P24385;Q9963  
8;O43663;O95684;P40763;Q8WWL7;Q6PGQ7;O14974;Q9Y3C4;Q9UJT2;O60260;Q9P0M2;Q8N1B3;Q96SL8  
;Q04206;P30279;P62140;Q86WB0;O95999;P36956;P56945;Q9HC77;P06748;Q86WV1;O15350;Q7L804;  
Q8TDY2;Q96SN8;P04792;P30304;O60563;Q8TCI5;Q2M2Z5;P22674;P14635;Q08050;O43524;Q12959;P  
30307;Q9UJM3;Q92831;O96017;P12755;Q9UNN5;Q5MJ68;P84022;Q5MJ70;O76095;Q86T82;P25063;P3  
6873;Q13114;P24864;O95067;P18669;Q13233;P13807;Q16543;P78396;Q8WUI4;Q9ULW0;P20248;O96  
020;Q96S94;O94986;Q9UQF2;Q96RU7;O75143;P23396;P15336;Q9UKT4;Q8NFX5;O14920;P22415;P427  
71;P60953;O60583;P24863;P27986;Q9BZR8;P30305;Q9H875;P26651;Q9BX66;P08670;O95453;Q8ND7  
6;Q9UMX1;P62753;Q96EY1;Q15797;Q16526;Q13501;P68104;Q7Z699;P42772;Q9BV73;P51946;Q9UK58  
;Q96JB5}

9686 Pathogen[ P0C214] interacts with 112 human  
partners:{Q96S94;Q92585;Q8ND76;P20248;P51946;P24863;P60709;Q16543;Q9H4X1;P30307;Q9H87  
5;P62140;O94986;O95453;O75909;P56945;O95684;Q9Y3C4;P62993;P15336;Q8IUC6;Q7Z699;Q92934  
;P06748;P23396;O15350;Q96SN8;Q8N1B3;Q9P0M2;P04792;Q86Y37;P84022;Q86WB0;Q9BX66;P56524;  
Q8TCI5;Q9UJM3;Q9HC77;Q04206;P60953;Q8TDY2;P14635;P24385;Q5MJ68;Q9UK58;Q7L804;O14974;Q  
13501;O60825;Q9Y333;Q13233;O75143;O96017;Q9UNN5;Q9UJT2;P78396;O95999;P30281;P62753;O6  
0583;Q9ULW0;P08670;O43663;O95067;P19429;P42771;P22674;P30305;P25063;P12755;Q12959;Q9U  
QF2;P26651;P42773;O60563;Q2M2Z5;Q86WV1;Q8NFX5;Q96RU7;Q92831;Q13114;P24864;P30279;Q9BV  
73;Q16526;P36873;Q96SL8;Q86WV6;P40763;O60260;P13533;Q5MJ70;Q8WWL7;P22415;Q15797;Q8WUI  
4;Q99638;P63261;O15524;P30304;P27986;P13807;Q9UMX1;O14920;Q6PGQ7;Q96EY1;Q9UKT4;Q96JB5  
;P42772;P31749;O96020;Q9BZR8}

9687 Pathogen[ P03346] interacts with 125 human  
partners:{P30281;Q92585;Q8ND76;P78396;Q9H4X1;Q9P0M2;O15524;P13807;P55273;P24385;P3027  
9;O96017;Q96S94;O95684;P06748;P15336;Q5MJ70;Q2M2Z5;P36956;O75143;Q15797;Q8N1B3;Q8NFX5  
;O60563;P0C7Q3;O96020;Q9P2D0;Q8IUV1;P24863;Q969U6;P30304;P42772;Q86WB0;P56524;Q9HC77;  
P60709;Q04206;P24864;Q8TDY2;Q08050;P60953;P62993;Q16526;Q92831;Q99638;O15350;Q9BX66;P  
42771;O95067;Q13114;Q86T82;Q9Y333;P26038;P30305;O95999;O95453;O60583;Q5MJ68;P18669;P8  
4022;Q9ULW0;Q7L804;P56945;Q9UNN5;Q9Y3C4;P31749;P14635;O94986;Q96SN8;Q8WWL7;P36873;Q9U  
JT2;Q8TD19;P51946;P20248;Q96JB5;Q8NFX2;Q16543;Q9UK58;Q9UKT4;Q12778;Q13233;Q8WUI4;Q86Y  
37;P98177;Q9H875;Q9BZR8;P42773;P08670;Q96RU7;Q9BUZ4;O75909;P23396;O60260;Q8IUC6;Q96SL  
8;Q9UQF2;Q8TCI5;P25063;P62140;O14920;Q7Z699;O76095;Q9C0H9;P26651;O43663;P40763;O14974  
;O43524;Q86WV1;Q9UMX1;Q6PGQ7;P62753;O14965;P22674;Q96EY1;P04792;P27986;P68104;P30307;  
Q13501;P22415;Q12959;Q9UJM3;Q9BV73}

9688 Pathogen[ Q85601] interacts with 118 human  
partners:{P51946;P30281;P22674;Q92585;Q86WV6;Q16543;Q9H4X1;P13807;O75143;P55273;P3174  
9;P62993;P24385;O94986;O96017;O60563;Q7L804;O95684;O75909;Q8IUC6;Q2M2Z5;P13533;Q9UK58  
;Q9P2D0;P08670;Q9BX66;Q15797;Q96SN8;Q8N1B3;Q9UKT4;P23396;P40763;P18669;Q8ND76;O60583;  
P62753;P42772;O60825;Q86WB0;Q9HC77;Q8TDY2;P30304;Q92831;Q86Y37;Q9ULW0;Q13114;P12755;Q



- 9688 9UQF2;P27986;O43663;P60709;P26651;Q8TCI5;P22415;O96020;P30305;O14965;Q86WV1;P30307;P56945;Q96JB5;Q9UNN5;P14635;Q8NFZ5;Q9BV73;P36956;Q9NQC7;P63261;Q6PGQ7;O14920;Q04206;Q9H875;O95453;P36873;P68104;P30279;P20248;P78396;P42771;P06748;Q5MJ68;P42773;Q96RU7;Q96S94;Q86T82;P84022;O60260;Q9P0M2;Q12959;O76095;Q9UJM3;P56524;P60953;Q08050;P04792;O14974;O15350;P62140;Q7Z699;P24863;Q13233;Q96SL8;O95067;O95999;P15336;Q9Y333;Q8WUI4;Q9BZR8;Q16526;Q9Y3C4;Q9UMX1;Q96EY1;Q9UJT2;Q99638;Q13501;Q8WVW1;P24864;Q5MJ70}
- Pathogen[ P14079] interacts with 119 human
- partners: {Q2M2Z5;Q9H8S5;Q9Y333;O60260;Q7L804;Q8N1B3;Q6PGQ7;P12755;Q5MJ70;P23396;P63261;Q86WV1;P19429;P30307;Q9UKT4;Q16526;P51946;O95999;O95684;P52564;O43597;Q9BV87;P78396;P68104;P24864;Q9UJM3;Q8TDY2;P36873;P62753;Q8IUC6;Q8N0X2;O94986;O76095;Q9P0M2;Q9UQF2;P24588;P13807;Q8WUI4;O14974;P26038;Q96S94;Q9UMX1;O95067;Q5MJ68;Q9BV73;Q8ND76;Q9ULW0;Q9C0H9;Q15797;O95453;O75143;P30304;Q9BUZ4;O15350;Q7Z434;P55273;Q15078;O75952;Q9BZR8;Q7Z699;O43663;Q7Z7J9;P14635;Q9UNN5;Q9UK58;Q92934;Q86WV6;Q8NFZ5;P24863;Q8TCI5;Q9Y478;P25063;P62140;P15336;Q9Y3C4;O75909;P60709;Q8WVW1;P06748;Q13501;Q86WB0;Q96SL8;Q8IUV1;Q96RU7;P20248;P62993;Q9H875;Q96SZ6;O60583;Q99638;O43561;P18669;Q96JB5;P08670;P30305;P42773;Q8N7R7;P04792;O96020;P0C7Q3;O95235;Q86Y37;Q16543;P56524;Q9BX66;O14965;P36956;Q92585;Q9NQC7;Q9HC77;Q96SN8;Q96EY1;Q9P2D0;Q9UJT2;P22674;Q13114;P42771;P10636;P22415}
- 9690 Pathogen[ P03383] interacts with 97 human
- partners: {P30307;P27986;P62140;Q7L804;Q92585;P56945;Q92831;Q16543;Q9H4X1;Q9UK58;P06748;O75143;Q94986;Q8IUC6;Q13233;O95684;Q8TD19;P08670;Q96SL8;O14920;P31749;P22674;Q96SN8;Q8N1B3;Q9UJM3;Q8WVW1;P60953;P18669;P62753;Q86WV1;P25063;P30304;Q9BV73;P13807;Q86WB0;Q9HC77;P24385;Q8TDY2;Q9UKT4;P04792;Q15797;Q96JB5;Q9UQF2;P14635;P78396;P36873;P30279;Q8TCI5;Q2M2Z5;P84022;O60563;O60260;P42772;Q9UNN5;P51946;Q6PGQ7;Q9UJT2;Q5MJ68;O75909;P68104;O95067;Q9Y333;O15350;O96020;Q8ND76;O95999;Q13501;P42771;P26651;O14965;Q9Y3C4;Q96RU7;Q99638;P56524;Q04206;Q9ULW0;P24863;O43663;P15336;O76095;Q8WUI4;P24864;P30281;O95453;Q9C0H9;Q9H875;Q9UMX1;O60583;Q13114;Q8NFZ5;P23396;Q96EY1;P20248;P22415;O96017;Q5MJ70;Q16526}
- 9691 Pathogen[ P03410] interacts with 132 human
- partners: {P84022;Q9UJT2;Q9UKT4;O95684;Q92831;Q04206;O60583;Q9H875;P42771;Q7L804;P36956;Q9H4X1;Q86WB0;P27986;Q9UNN5;O14920;P68104;Q86WV1;P30279;Q8NFZ5;O43597;Q16543;P42772;P12755;Q9HC77;Q7Z699;P19429;Q8N1B3;O96020;Q8N0X2;Q12959;Q9Y3C4;O43561;Q8WVW1;Q96SN8;P51946;Q8IUV1;O75143;Q9Y333;Q8TDY2;P55273;Q13501;P22674;O95067;P31749;P04792;P23396;Q92934;P06748;O60260;Q13233;P26651;Q5MJ68;Q92585;Q9BV87;Q7Z434;Q8WUI4;Q96JB5;P78396;O14965;O75952;O60563;P24385;Q9P0M2;O94986;O95453;P14635;O95999;P26038;P62140;P25063;P30304;Q99638;P56524;Q15797;O75909;P22415;P13807;O14974;Q16526;Q86Y37;O96017;P36873;Q96S94;Q7Z7J9;Q6PGQ7;P20248;P18669;P08670;P30281;P10636;Q96RU7;P24863;P60953;Q969U6;Q8TCI5;Q9ULW0;P56945;Q2M2Z5;Q8IUC6;O15350;Q86WV6;P63261;P13533;Q5MJ70;O76095;Q9BZR8;Q9UQF2;Q9C0H9;P30305;Q9UK58;Q9P2D0;Q8N7R7;P0C7Q3;P62993;P15336;P24864;P40763;Q96SL8;Q9UMX1;P42773;Q9BV73;Q8ND76;P30307;Q96EY1;Q9BX66;Q9UJM3;P24588;P62753;P60709;Q13114;O43663}
- 9692 Pathogen[ P14075] interacts with 98 human
- partners: {P60953;O95453;Q92585;Q16543;Q9H4X1;P24863;Q04206;O95067;Q8IUV1;O95684;O43663;Q5MJ70;P68104;Q92831;Q9Y3C4;O76095;Q9UKT4;O75143;P14635;Q8N1B3;P30281;P30279;O60563;P26651;Q96SL8;Q86WB0;P56524;Q08050;Q9HC77;P18669;P42771;Q8TDY2;O60583;P04792;Q96SN8;P62140;Q96JB5;P15336;O96020;Q5MJ68;Q8NFZ5;P36873;P78396;Q99638;Q86WV1;Q9ULW0;O14920;P31749;Q9UNN5;P22674;P62753;O96017;Q9UJM3;O15350;Q7L804;O14965;Q8WVW1;Q9BV73;P27986;P23396;P20248;Q8TCI5;Q13114;P06748;Q9Y333;O95999;P30304;O94986;P08670;P51946;Q96RU7;Q8IUC6;Q9UK58;P42772;Q16526;Q8ND76;P13807;P24385;P22415;P84022;Q8WUI4;Q9C0H9;Q13233;O75909;O60260;P30307;Q9UMX1;Q9UQF2;Q6PGQ7;Q96EY1;Q2M2Z5;Q9UJT2;Q13501;Q9H875;P56945;P25063;P24864;Q8TD19}
- 9693 Pathogen[ P0C206] interacts with 131 human
- partners: {Q8TCI5;Q9NQC7;Q9UNN5;P84022;P24863;Q13501;Q8WVW1;O75952;P60709;O94986;Q86Y37;O14920;Q96SN8;O95453;P31749;Q9HC77;Q9H4X1;P26651;O95684;Q13114;Q5MJ68;P30307;P13533;O96017;Q9BZR8;Q96SL8;Q9UMX1;Q9ULW0;P30279;O95999;Q8IUV1;P19429;Q8NFZ5;Q6PGQ7;P15336;P20248;P42771;Q16543;P04792;P36956;P42772;P30305;O15524;Q86WV6;Q96S94;Q8TD19;Q9UQF2;P10636;Q92831;O96020;P27986;Q13233;P62993;Q96RU7;P13807;P12755;Q96JB5;Q8N1B3;P0C7Q3;Q92934;Q99638;Q9Y333;O14974;Q9UJT2;Q9UKT4;P42773;Q9BUZ4;Q9UK58;Q2M2Z5;Q16526;P22415;P25063;P23396;Q9P0M2;P63261;Q8WUI4;Q04206;Q86WV1;O60260;P55273;Q8TDY2;O43663;Q86T82;Q9BV73;P40763;O43597;P60953;Q9C0H9;P62140;O60825;O75909;Q9H875;Q8IUC6;Q9BX66;Q9UJM3;Q08050;P30304;Q15797;P78396;Q9Y3C4;O15350;Q86WB0;O95067;P56945;Q8ND76;P06748;P14635;Q7L804;P08670;P56524;O60583;O14965;P62753;O75143;Q9P2D0;P36873;O60563;Q96EY1;P24864;Q12959;P68104;P22674;Q7Z699;Q5MJ70;Q969U6;P18669;Q92585;O76095;P51946;P24385;P30281}
- 9694 Pathogen[ P03363] interacts with 108 human
- partners: {Q9UNN5;Q96S94;Q12959;Q9H875;Q13151;Q8WVW1;P23396;Q8N0X2;P13807;Q7L804;Q9HC77;O14920;Q04206;Q9H4X1;Q86WB0;P18669;Q9BX66;O95453;P36873;P24864;O15524;P60709;O60563;Q9UMX1;P62753;P62140;P24863;Q86WV1;P30279;Q92831;P20248;Q9UQF2;O95684;O75909;Q9ULW0;P51946;Q8TCI5;O75143;Q9P2D0;O94986;Q8ND76;Q5MJ68;P0C7Q3;Q9BZR8;Q15797;Q6PGQ7;P06748;Q9P0M2;Q8N1B3;O96017;P30304;O43524;P15336;Q9UK58;Q16543;Q9Y333;Q08050;Q7Z699;O60583;O95067;O96020;P42772;Q9Y3C4;Q15717;P31749;Q86T82;P78396;P08670;Q5MJ70;P84022;Q9UKT4;Q8TDY2;P22415;Q96SL8;O76095;O14974;P24385;Q99638;Q16526;Q8WUI4;P56945;P26651;Q13114;P63261;Q9UJM3;Q8NFZ5;P42773;Q969U6;O43663;P22674;Q9BUZ4;P30307;Q96EY1;P30281;Q96JB5;P19429;Q9UJT2;P60953;P27986;Q13233;P04792;Q2M2Z5;P42771;Q9BV73;P68104;Q92585;Q96SN8;Q9C0H9}
- 9695 [Cluster 882]GO:0008649+F molecular\_function [name] rRNA methyltransferase activity [def] "Catalysis of the transfer of a methyl group from S-adenosyl-L-methionine to a nucleoside residue in an rRNA molecule." [GOC
- 9696 Pathogen[ Q2Q067] interacts with 3 human partners: {Q9H5Q4;Q8WVM0;Q9UNQ2}

9697 Pathogen[ P0C214] interacts with 3 human partners: {Q9UNQ2;Q8WVM0;Q9H5Q4}  
9698 Pathogen[ P03346] interacts with 3 human partners: {Q9UNQ2;Q9H5Q4;Q8WVM0}  
9699 Pathogen[ Q85601] interacts with 3 human partners: {Q9H5Q4;Q8WVM0;Q9UNQ2}  
9700 Pathogen[ P14079] interacts with 4 human partners: {Q9UNQ2;Q96FB5;Q9H5Q4;Q8WVM0}  
9701 Pathogen[ P03383] interacts with 3 human partners: {Q9UNQ2;Q9H5Q4;Q8WVM0}  
9702 Pathogen[ P03410] interacts with 4 human partners: {Q9UNQ2;Q9H5Q4;Q96FB5;Q8WVM0}  
9703 Pathogen[ P14075] interacts with 3 human partners: {Q9H5Q4;Q9UNQ2;Q8WVM0}  
9704 Pathogen[ P0C206] interacts with 3 human partners: {Q8WVM0;Q9UNQ2;Q9H5Q4}  
9705 Pathogen[ P03363] interacts with 3 human partners: {Q9UNQ2;Q8WVM0;Q9H5Q4}  
9706 [Cluster 883]GO:0035035+F molecular\_function [name] histone acetyltransferase binding  
[def] "Interacting selectively and non-covalently with the enzyme histone  
acetyltransferase." [GOC  
9707 Pathogen[ Q2Q067] interacts with 8 human  
partners: {Q8IXJ6;P08047;Q9Y6B2;Q15545;Q14872;Q99814;Q02078;P18146}  
9708 Pathogen[ P0C214] interacts with 8 human  
partners: {Q14872;Q15545;Q02078;Q9Y6B2;P18146;Q99814;Q8IXJ6;P08047}  
9709 Pathogen[ P03346] interacts with 8 human  
partners: {Q02078;Q14872;Q8IXJ6;P08047;Q99814;Q9Y6B2;P18146;Q15545}  
9710 Pathogen[ Q85601] interacts with 8 human  
partners: {P18146;Q02078;Q14872;Q15545;Q99814;P08047;Q9Y6B2;Q8IXJ6}  
9711 Pathogen[ P14079] interacts with 6 human  
partners: {Q02078;Q99814;Q8IXJ6;Q14872;Q9Y6B2;Q15545}  
9712 Pathogen[ P03383] interacts with 6 human  
partners: {P08047;P18146;Q14872;Q9Y6B2;Q15545;Q02078}  
9713 Pathogen[ P03410] interacts with 8 human  
partners: {Q8IXJ6;Q99814;Q9Y6B2;Q14872;Q02078;P08047;P18146;Q15545}  
9714 Pathogen[ P14075] interacts with 6 human  
partners: {P18146;Q9Y6B2;Q15545;Q02078;Q14872;P08047}  
9715 Pathogen[ P0C206] interacts with 8 human  
partners: {Q15545;Q02078;P18146;P08047;Q14872;Q8IXJ6;Q9Y6B2;Q99814}  
9716 Pathogen[ P03363] interacts with 7 human  
partners: {P18146;Q15545;Q14872;Q99814;Q9Y6B2;P08047;Q02078}  
9717 [Cluster 884]GO:0000179+F molecular\_function [name] rRNA  
(adenine-N6,N6-)-dimethyltransferase activity [def] "Catalysis of the dimethylation two  
adjacent A residues in the loop closing the 3'-terminal stem of the 18S rRNA, using  
S-adenosyl-L-methionine as a methyl donor." [ISBN  
9718 Pathogen[ Q2Q067] interacts with 3 human partners: {Q9H5Q4;Q8WVM0;Q9UNQ2}  
9719 Pathogen[ P0C214] interacts with 3 human partners: {Q9UNQ2;Q8WVM0;Q9H5Q4}  
9720 Pathogen[ P03346] interacts with 3 human partners: {Q9UNQ2;Q9H5Q4;Q8WVM0}  
9721 Pathogen[ Q85601] interacts with 3 human partners: {Q9H5Q4;Q8WVM0;Q9UNQ2}  
9722 Pathogen[ P14079] interacts with 4 human partners: {Q9UNQ2;Q96FB5;Q9H5Q4;Q8WVM0}  
9723 Pathogen[ P03383] interacts with 3 human partners: {Q9UNQ2;Q9H5Q4;Q8WVM0}  
9724 Pathogen[ P03410] interacts with 4 human partners: {Q9UNQ2;Q9H5Q4;Q96FB5;Q8WVM0}  
9725 Pathogen[ P14075] interacts with 3 human partners: {Q9H5Q4;Q9UNQ2;Q8WVM0}  
9726 Pathogen[ P0C206] interacts with 3 human partners: {Q8WVM0;Q9UNQ2;Q9H5Q4}  
9727 Pathogen[ P03363] interacts with 3 human partners: {Q9UNQ2;Q8WVM0;Q9H5Q4}  
9728 [Cluster 885]GO:0003755+F molecular\_function [name] peptidyl-prolyl cis-trans  
isomerase activity [def] "Catalysis of the reaction  
9729 Pathogen[ Q2Q067] interacts with 12 human  
partners: {Q9UNP9;Q13356;Q9H2H8;P49792;Q13427;O43447;Q9Y237;Q15257;Q13526;Q08752;P2328  
4;P62937}  
9730 Pathogen[ P0C214] interacts with 21 human  
partners: {Q9Y536;Q6UX04;A2BFH1;Q13526;P30405;Q13427;P49792;P23284;Q15257;P30414;Q9H2H  
8;Q9Y237;P45877;Q9Y3C6;F5H284;Q13356;Q96BP3;O43447;Q08752;Q8IXY8;Q9UNP9}  
9731 Pathogen[ P03346] interacts with 17 human  
partners: {Q9H2H8;O43447;Q9Y3C6;Q6UX04;P62937;Q15257;Q96BP3;Q13526;Q13427;Q9Y237;Q0875  
2;Q9UNP9;Q13356;Q9Y536;A2BFH1;P49792;P23284}  
9732 Pathogen[ Q85601] interacts with 21 human  
partners: {F5H284;P30405;Q6UX04;A2BFH1;Q9H2H8;Q96BP3;Q13427;Q08752;Q13526;P23284;Q9Y3C  
6;Q13356;P30414;O43447;P49792;Q8IXY8;Q15257;Q9Y536;P62937;Q9Y237;P45877}  
9733 Pathogen[ P14079] interacts with 16 human  
partners: {O43447;Q8IXY8;Q08752;Q9Y237;P62937;Q13427;F5H284;Q13356;P45877;Q9H2H8;A2BFH  
1;P23284;Q6UX04;Q13526;Q9Y536;Q96BP3}  
9734 Pathogen[ P03383] interacts with 12 human  
partners: {P49792;Q13356;Q9UNP9;Q15257;Q96BP3;Q9H2H8;P62937;Q08752;O43447;Q13427;P2328  
4;Q13526}  
9735 Pathogen[ P03410] interacts with 22 human  
partners: {Q08752;Q13526;Q9Y536;Q96BP3;Q15257;Q13356;Q9H2H8;P62937;P45877;Q6UX04;Q9Y3C  
6;P23284;Q9UNP9;F5H284;Q8IXY8;P30414;Q13427;Q9Y237;O43447;P30405;A2BFH1;P49792}  
9736 Pathogen[ P14075] interacts with 10 human  
partners: {Q15257;Q08752;P23284;P49792;Q9UNP9;Q13526;O43447;P62937;Q13427;Q9H2H8}  
9737 Pathogen[ P0C206] interacts with 21 human  
partners: {Q9Y536;Q9UNP9;Q13526;Q08752;Q96BP3;A2BFH1;F5H284;P49792;Q9Y3C6;Q13427;P2328  
4;Q13356;O43447;Q9Y237;P45877;Q9H2H8;P30405;P62937;Q15257;Q8IXY8;Q6UX04}  
9738 Pathogen[ P03363] interacts with 17 human  
partners: {P23284;Q13427;P62937;A2BFH1;Q6UX04;Q13356;Q96BP3;Q9Y3C6;Q08752;Q13526;O4344

7;P49792;Q9Y237;Q15257;Q9Y536;Q9H2H8;Q9UNP9]

9739 [Cluster 886]GO:0034512+F molecular\_function [name] box C/D snoRNA binding [def]  
"Interacting selectively and non-covalently with box C/D small nucleolar RNA." [GOC

9740 Pathogen[ Q2Q067] interacts with 1 human partners:{Q14978}

9741 Pathogen[ P0C214] interacts with 1 human partners:{Q14978}

9742 Pathogen[ P03346] interacts with 1 human partners:{Q14978}

9743 Pathogen[ Q85601] interacts with 1 human partners:{Q14978}

9744 Pathogen[ P14079] interacts with 1 human partners:{Q14978}

9745 Pathogen[ P03383] interacts with 1 human partners:{Q14978}

9746 Pathogen[ P03410] interacts with 1 human partners:{Q14978}

9747 Pathogen[ P14075] interacts with 1 human partners:{Q14978}

9748 Pathogen[ P0C206] interacts with 1 human partners:{Q14978}

9749 Pathogen[ P03363] interacts with 1 human partners:{Q14978}

9750 [Cluster 887]GO:0046965+F molecular\_function [name] retinoid X receptor binding [def]  
"Interacting selectively and non-covalently with a retinoid X receptor." [GOC

9751 Pathogen[ Q2Q067] interacts with 9 human  
partners:{P11473;P48552;P55055;Q15466;Q14686;P17096;Q71SY5;O75376;Q96RL1}

9752 Pathogen[ P0C214] interacts with 7 human  
partners:{Q71SY5;P48552;P17096;Q14686;O75376;Q96RL1;Q15466}

9753 Pathogen[ P03346] interacts with 9 human  
partners:{P11473;Q71SY5;Q15466;Q96RL1;P17096;O75376;P48552;P55055;Q14686}

9754 Pathogen[ Q85601] interacts with 9 human  
partners:{P11473;P17096;Q96RL1;Q15466;P55055;Q14686;Q71SY5;O75376;P48552}

9755 Pathogen[ P14079] interacts with 9 human  
partners:{P48552;P55055;P11473;P17096;Q96RL1;Q71SY5;O75376;Q15466;Q14686}

9756 Pathogen[ P03383] interacts with 8 human  
partners:{P17096;O75376;Q96RL1;Q14686;P11473;Q15466;Q71SY5;P48552}

9757 Pathogen[ P03410] interacts with 8 human  
partners:{Q96RL1;Q14686;P17096;O75376;P11473;Q15466;P48552;Q71SY5}

9758 Pathogen[ P14075] interacts with 8 human  
partners:{Q14686;P17096;O75376;P11473;P48552;Q15466;Q71SY5;Q96RL1}

9759 Pathogen[ P0C206] interacts with 9 human  
partners:{Q15466;P55055;Q14686;O75376;Q71SY5;P17096;Q96RL1;P48552;P11473}

9760 Pathogen[ P03363] interacts with 8 human  
partners:{Q15466;Q71SY5;Q96RL1;O75376;Q14686;P11473;P48552;P17096}

9761 [Cluster 888]GO:0031014+F molecular\_function [name] troponin T binding [def]  
"Interacting selectively and non-covalently with troponin T, the tropomyosin-binding  
subunit of the troponin complex." [GOC

9762 Pathogen[ Q2Q067] interacts with 1 human partners:{P48788}

9763 Pathogen[ P0C214] interacts with 2 human partners:{P48788;P19429}

9764 Pathogen[ P03346] interacts with 2 human partners:{P63316;P48788}

9765 Pathogen[ Q85601] interacts with 1 human partners:{P48788}

9766 Pathogen[ P14079] interacts with 2 human partners:{P19429;P48788}

9767 Pathogen[ P03383] interacts with 1 human partners:{P48788}

9768 Pathogen[ P03410] interacts with 3 human partners:{P19429;P48788;P63316}

9769 Pathogen[ P14075] interacts with 1 human partners:{P48788}

9770 Pathogen[ P0C206] interacts with 2 human partners:{P19429;P48788}

9771 Pathogen[ P03363] interacts with 2 human partners:{P48788;P19429}

9772 [Cluster 889]GO:0032403+F molecular\_function [name] protein complex binding [def]  
"Interacting selectively and non-covalently with any protein complex (a complex of two or  
more proteins that may include other nonprotein molecules)." [GOC

9773 Pathogen[ Q2Q067] interacts with 26 human  
partners:{Q9Y4R8;Q9Y3C7;P10827;Q13033;Q86UA6;P01106;P50502;Q6NXT1;Q9BSB4;Q96ST3;P2195  
3;P63010;Q86UL8;Q9NRL3;Q13127;Q02410;P50613;Q9H160;Q03468;P61244;Q13216;Q15466;P12757  
;O75150;P49715;P33076}

9774 Pathogen[ P0C214] interacts with 27 human  
partners:{P61244;P22695;P12757;Q9BSB4;P50613;P33076;P12694;Q13033;Q13216;Q9Y3C7;P6301  
0;P21953;Q9Y4R8;Q9H160;Q13127;Q6NXT1;Q9P0J1;Q02410;Q96ST3;O75150;Q86UA6;P01106;Q03468  
;Q15466;P18846;P50502;Q9NRL3}

9775 Pathogen[ P03346] interacts with 31 human  
partners:{Q9NPC8;Q96ST3;P10827;Q96A65;O75150;P12757;P63010;P50502;Q15466;O43815;P3307  
6;Q9BSB4;P49715;Q02410;P01106;Q9Y3C7;Q13033;Q86UL8;Q03468;Q9Y4R8;Q86UA6;Q13216;P61244  
;P14317;O43933;Q9Y2J0;Q6NXT1;Q9H160;Q9NRL3;P18846;Q13127}

9776 Pathogen[ Q85601] interacts with 31 human  
partners:{P01106;Q9NRL3;Q9Y4R8;P33076;Q13127;Q96A65;Q9BSB4;Q15466;Q13216;Q86UA6;Q86UL  
8;P12757;O43815;Q6NXT1;P18846;Q9Y3C7;P21953;Q03468;Q13033;P50613;P10827;O75150;P61244  
;P49715;P14317;O43933;Q02410;P63010;P50502;Q9H160;Q96ST3}

9777 Pathogen[ P14079] interacts with 31 human  
partners:{P22695;P33076;P21953;Q96ST3;Q13033;Q02410;P24588;O43815;Q9Y3C7;Q13216;P0791  
9;P10827;Q9BSB4;Q9NRL3;P50613;Q6NXT1;P49715;Q86UA6;Q7Z412;P63010;P01106;Q86UL8;Q96A65  
;Q9Y4R8;Q03468;P12757;Q15466;Q13127;P61244;P50502;Q9H160}

9778 Pathogen[ P03383] interacts with 22 human  
partners:{Q86UA6;P33076;Q13216;P50502;P01106;P18846;Q9Y4R8;Q9H160;P50613;Q9Y3C7;P6301  
0;Q03468;Q15466;Q9NRL3;Q02410;P12757;Q96ST3;Q13033;O75150;P61244;Q13127;Q9BSB4}

9779 Pathogen[ P03410] interacts with 33 human  
partners:{Q9NRL3;P50502;Q9Y2J0;Q9Y4R8;P01106;Q9BSB4;Q6NXT1;Q86UA6;P12694;P07919;P2195

3;Q03468;Q9Y3C7;Q96ST3;P50613;P18846;Q02410;P61244;Q13127;P22695;O75150;Q96A65;Q13033  
;Q9H160;Q15049;Q15466;P12757;Q13216;P63010;O43815;Q86UL8;P33076;P24588}

9780 Pathogen[ P14075] interacts with 22 human  
partners:{Q96ST3;Q02410;Q9BSB4;P61244;P50613;P33076;Q13216;P01106;P12757;Q03468;Q9Y3C  
7;Q9NRL3;P50502;O75150;P63010;Q9Y4R8;Q13127;Q15466;Q86UA6;Q9H160;Q13033;P18846}

9781 Pathogen[ P0C206] interacts with 32 human  
partners:{Q6NXT1;P63010;Q9BSB4;O43933;Q15466;Q96ST3;Q13127;O43815;Q9Y2J0;P14317;Q0346  
8;Q9Y3C7;P21953;P49715;P18846;Q96A65;P33076;Q9H160;Q13216;P22695;Q9NRL3;P50502;P50613  
;P12757;Q9Y4R8;P61244;P01106;Q86UL8;Q13033;O75150;P10827;Q02410}

9782 Pathogen[ P03363] interacts with 28 human  
partners:{Q9H160;O43933;Q15466;P50502;Q9Y4R8;P12757;Q96A65;Q6NXT1;Q13033;P01106;O7515  
0;P61244;Q9BSB4;Q13127;Q86UA6;P18846;Q02410;Q96ST3;O43815;P63010;P14317;Q9NRL3;P33076  
;Q03468;Q86UL8;Q13216;Q9NPC8;Q9Y3C7}

9783

```

1 [Section 9] cellular compartments where the HTLV viruses may interact with the host
2
3
4 [Cluster 1]GO:000120+C cellular_component [name] RNA polymerase I transcription factor
complex [def] "A transcription factor complex that acts at promoters of genes transcribed
by RNA polymerase I." [GOC
5 Pathogen[ Q2Q067] interacts with 2 human partners:{Q15573;O15446}
6 Pathogen[ P0C214] interacts with 2 human partners:{Q15573;O15446}
7 Pathogen[ P03346] interacts with 2 human partners:{Q15573;O15446}
8 Pathogen[ Q85601] interacts with 2 human partners:{Q15573;O15446}
9 Pathogen[ P14079] interacts with 2 human partners:{Q15573;O15446}
10 Pathogen[ P03383] interacts with 2 human partners:{Q15573;O15446}
11 Pathogen[ P03410] interacts with 2 human partners:{Q15573;O15446}
12 Pathogen[ P14075] interacts with 2 human partners:{Q15573;O15446}
13 Pathogen[ P0C206] interacts with 2 human partners:{O15446;Q15573}
14 Pathogen[ P03363] interacts with 2 human partners:{O15446;Q15573}
15 [Cluster 2]GO:0032040+C cellular_component [name] small-subunit processome [def] "A
large ribonucleoprotein complex that is an early preribosomal complex. In S. cerevisiae,
it has a size of 80S and consists of the 35S pre-rRNA, early-associating ribosomal
proteins most of which are part of the small ribosomal subunit, the U3 snoRNA and
associated proteins." [PMID
16 Pathogen[ Q2Q067] interacts with 6 human
partners:{Q9Y3A2;Q5TAP6;P62081;Q9BVJ6;P78316;O75691}
17 Pathogen[ P0C214] interacts with 6 human
partners:{Q9BVJ6;O75691;P62081;P78316;Q5TAP6;Q9Y3A2}
18 Pathogen[ P03346] interacts with 8 human
partners:{Q9BVJ6;O75691;Q9Y3A2;Q5TAP6;P78316;P62081;Q12788;Q8NI36}
19 Pathogen[ Q85601] interacts with 5 human
partners:{P62081;O75691;Q9BVJ6;Q9Y3A2;P78316}
20 Pathogen[ P14079] interacts with 6 human
partners:{O75691;Q9Y3A2;Q5TAP6;Q9BVJ6;P78316;P62081}
21 Pathogen[ P03383] interacts with 6 human
partners:{Q9BVJ6;Q5TAP6;O75691;Q9Y3A2;P62081;P78316}
22 Pathogen[ P03410] interacts with 7 human
partners:{P78316;Q5TAP6;P62081;Q9BVJ6;Q9Y3A2;O75691;Q12788}
23 Pathogen[ P14075] interacts with 6 human
partners:{P62081;P78316;O75691;Q9BVJ6;Q9Y3A2;Q5TAP6}
24 Pathogen[ P0C206] interacts with 6 human
partners:{P62081;P78316;O75691;Q9Y3A2;Q5TAP6;Q9BVJ6}
25 Pathogen[ P03363] interacts with 6 human
partners:{Q9BVJ6;P62081;O75691;Q5TAP6;Q9Y3A2;P78316}
26 [Cluster 3]GO:0005721+C cellular_component [name] centromeric heterochromatin [def] "A
region of heterochromatin located near the centromere of a chromosome." [PMID
27 Pathogen[ Q2Q067] interacts with 4 human partners:{Q03188;Q9NQS7;P26358;P83916}
28 Pathogen[ P0C214] interacts with 4 human partners:{P83916;Q03188;P26358;Q9NQS7}
29 Pathogen[ P03346] interacts with 5 human
partners:{Q9NRZ9;P26358;Q9NQS7;Q03188;P83916}
30 Pathogen[ Q85601] interacts with 4 human partners:{P83916;Q03188;Q9NQS7;P26358}
31 Pathogen[ P14079] interacts with 4 human partners:{Q03188;P26358;Q9NQS7;P83916}
32 Pathogen[ P03383] interacts with 4 human partners:{Q9NQS7;Q03188;P83916;P26358}
33 Pathogen[ P03410] interacts with 4 human partners:{Q03188;P26358;P83916;Q9NQS7}
34 Pathogen[ P14075] interacts with 4 human partners:{Q9NQS7;P26358;P83916;Q03188}
35 Pathogen[ P0C206] interacts with 7 human
partners:{P26358;P83916;Q13422;Q9NRZ9;Q9NQS7;Q03188;Q9UIG0}
36 Pathogen[ P03363] interacts with 4 human partners:{P83916;Q9NQS7;P26358;Q03188}
37 [Cluster 4]GO:0005839+C cellular_component [name] proteasome core complex [def] "A
multisubunit barrel shaped endoprotease complex, which is the core of the proteasome
complex." [GOC
38 Pathogen[ Q2Q067] interacts with 20 human
partners:{P40306;P28072;A5LHX3;P25787;P28065;O14818;P60900;P28062;P25788;Q92530;P2578
6;P28074;P25789;P20618;P28070;P28066;Q99436;Q8TAA3;P49721;P49720}
39 Pathogen[ P0C214] interacts with 20 human
partners:{P25789;P28062;A5LHX3;P28065;O14818;P40306;P28066;P49720;P28074;P25788;P2578
6;P28072;Q8TAA3;Q99436;P25787;P60900;Q92530;P28070;P20618;P49721}
40 Pathogen[ P03346] interacts with 20 human
partners:{P25787;P28070;P25789;P28072;P25788;P28074;P49721;O14818;Q99436;A5LHX3;P2806
2;P20618;P49720;P28065;P60900;P25786;P28066;Q8TAA3;Q92530;P40306}
41 Pathogen[ Q85601] interacts with 20 human
partners:{P28066;P60900;P25787;P25788;P25789;P20618;P40306;P49720;P28062;P49721;P2578
6;P28072;P28065;Q99436;P28070;Q8TAA3;P28074;Q92530;A5LHX3;O14818}
42 Pathogen[ P14079] interacts with 17 human
partners:{P28065;Q99436;P40306;P28074;P49720;P25787;A5LHX3;P20618;Q8TAA3;P28062;P6090
0;O14818;P49721;Q92530;P25788;P28066;P28072}
43 Pathogen[ P03383] interacts with 19 human
partners:{P25789;P60900;P40306;P49721;P20618;P25786;P28072;P28065;P28066;P28074;Q9253
0;P49720;Q8TAA3;P28062;O14818;Q99436;P28070;P25787;P25788}

```

44 Pathogen[ P03410] interacts with 19 human  
partners:{P28070;P25786;P60900;Q8TAA3;P49721;A5LHX3;Q99436;P40306;P25787;P28062;O1481  
8;P25789;P49720;P28072;P25788;P28066;P28065;P20618;P28074}

45 Pathogen[ P14075] interacts with 19 human  
partners:{P25788;P28066;Q8TAA3;P60900;P49720;P28070;P49721;Q92530;P28062;P28074;P2806  
5;P25786;O14818;P28072;P25787;P20618;P40306;Q99436;P25789}

46 Pathogen[ P0C206] interacts with 20 human  
partners:{Q99436;P28062;P40306;P28065;P25786;P25788;P25787;P49720;P60900;A5LHX3;P2578  
9;P20618;Q8TAA3;P28070;P28066;O14818;P28072;P28074;Q92530;P49721}

47 Pathogen[ P03363] interacts with 1 human partners:{Q92530}

48 [Cluster 5]GO:0005655+C cellular\_component [name] nucleolar ribonuclease P complex [def]  
"A ribonuclease P complex located in the nucleolus of a eukaryotic cell, where it  
catalyzes the 5' endonucleolytic cleavage of precursor tRNAs to yield mature tRNAs.  
Eukaryotic nucleolar ribonuclease P complexes generally contain a single RNA molecule  
that is necessary but not sufficient for catalysis, and several protein molecules." [GOC

49 Pathogen[ Q2Q067] interacts with 7 human  
partners:{P78346;O75818;Q99575;O75817;P78345;Q969H6;O95707}

50 Pathogen[ P0C214] interacts with 7 human  
partners:{O75818;Q969H6;P78345;O95707;Q99575;O75817;P78346}

51 Pathogen[ P03346] interacts with 7 human  
partners:{P78346;Q969H6;O95707;O75818;Q99575;P78345}

52 Pathogen[ Q85601] interacts with 7 human  
partners:{P78346;Q99575;Q969H6;O95707;O75817;O75818;P78345}

53 Pathogen[ P14079] interacts with 6 human  
partners:{P78346;O75817;O95707;Q99575;O75818;P78345}

54 Pathogen[ P03383] interacts with 7 human  
partners:{P78345;Q969H6;Q99575;O95707;O75817;O75818;P78346}

55 Pathogen[ P03410] interacts with 7 human  
partners:{P78346;P78345;Q99575;O95707;O75818;Q969H6;O75817}

56 Pathogen[ P14075] interacts with 7 human  
partners:{O75817;P78345;P78346;O95707;O75818;Q99575;Q969H6}

57 Pathogen[ P0C206] interacts with 7 human  
partners:{O75818;Q969H6;O95707;O75817;P78345;Q99575;P78346}

58 Pathogen[ P03363] interacts with 7 human  
partners:{Q99575;O75817;O75818;O95707;Q969H6;P78345;P78346}

59 [Cluster 6]GO:0072669+C cellular\_component [name] tRNA-splicing ligase complex [def] "A  
protein complex that catalyzes the ligation of cleaved pre-tRNAs by directly joining  
spliced tRNA halves to mature-sized tRNAs by incorporating the precursor-derived splice  
junction phosphate into the mature tRNA as a canonical 3',5'-phosphodiester." [GOC

60 Pathogen[ Q2Q067] interacts with 2 human partners:{Q92499;Q9Y224}

61 Pathogen[ P0C214] interacts with 2 human partners:{Q9Y224;Q92499}

62 Pathogen[ P03346] interacts with 3 human partners:{Q92499;Q9Y224;Q9BVC5}

63 Pathogen[ Q85601] interacts with 2 human partners:{Q92499;Q9Y224}

64 Pathogen[ P14079] interacts with 4 human partners:{Q9BVC5;Q52LJ0;Q92499;Q9Y224}

65 Pathogen[ P03383] interacts with 3 human partners:{Q9BVC5;Q92499;Q9Y224}

66 Pathogen[ P03410] interacts with 4 human partners:{Q9BVC5;Q52LJ0;Q9Y224;Q92499}

67 Pathogen[ P14075] interacts with 4 human partners:{Q52LJ0;Q9BVC5;Q9Y224;Q92499}

68 Pathogen[ P0C206] interacts with 3 human partners:{Q9Y224;Q9BVC5;Q92499}

69 Pathogen[ P03363] interacts with 3 human partners:{Q92499;Q9Y224;Q9BVC5}

70 [Cluster 7]GO:0016459+C cellular\_component [name] myosin complex [def] "A protein  
complex, formed of one or more myosin heavy chains plus associated light chains and other  
proteins, that functions as a molecular motor\_ uses the energy of ATP hydrolysis to move  
actin filaments or to move vesicles or other cargo on fixed actin filaments\_ has  
magnesium-ATPase activity and binds actin. Myosin classes are distinguished based on  
sequence features of the motor, or head, domain, but also have distinct tail regions that  
are believed to bind specific cargoes." [GOC

71 Pathogen[ Q2Q067] interacts with 7 human  
partners:{Q9P2M7;Q9UKX2;P60660;Q96LC9;P12883;P35579;Q96FJ2}

72 Pathogen[ P0C214] interacts with 20 human  
partners:{A7E2Y1;Q9UKX2;O00159;Q9Y2K3;Q96LC9;Q9UM54;P11055;P14649;P60660;P35580;P1353  
5;P12882;P12883;Q9P2M7;Q96FJ2;Q7Z406;P13533;Q92614;Q9Y623;P35749}

73 Pathogen[ P03346] interacts with 12 human  
partners:{Q96FJ2;P60660;Q96JP2;Q96LC9;P35579;Q92614;Q4L180;P14649;Q9ULV0;Q9UKX2;P1091  
6;Q9P2M7}

74 Pathogen[ Q85601] interacts with 21 human  
partners:{Q96LC9;Q92614;Q96JP2;P13533;P35579;P14649;Q9UKX2;Q9Y2K3;O00159;P12882;Q4L18  
0;Q7Z406;P11055;P35749;P12883;P35580;Q9UM54;P13535;P60660;Q9Y623;Q9P2M7}

75 Pathogen[ P14079] interacts with 11 human  
partners:{P35579;Q92614;Q96FJ2;P10916;Q9UKX2;Q9UM54;P14649;P60660;P12883;Q9P2M7;Q96LC  
9}

76 Pathogen[ P03383] interacts with 7 human  
partners:{Q96LC9;Q96FJ2;Q9UKX2;Q9P2M7;P12883;P35580;P35579}

77 Pathogen[ P03410] interacts with 19 human  
partners:{Q9UKX2;P10916;Q4L180;Q92614;Q9ULV0;Q0VF96;Q96LC9;O00159;P35579;Q9UM54;P1288  
2;P12883;P35580;P14649;P13533;Q9P2M7;Q96JP2;P60660;P13535}

78 Pathogen[ P14075] interacts with 5 human

79 partners:{Q9UKX2;Q96LC9;Q96FJ2;P35579;Q9P2M7}  
Pathogen[ P0C206] interacts with 19 human  
partners:{Q4L180;Q9UM54;P13533;Q9Y623;P60660;P11055;Q96LC9;P14649;P12883;O00159;Q96JP  
2;P12882;P35749;P35579;Q92614;Q9UKX2;Q9P2M7;P35580;P13535}

80 Pathogen[ P03363] interacts with 11 human  
partners:{P14649;P35579;Q96LC9;Q9UKX2;Q96JP2;Q4L180;Q92614;P60660;Q9P2M7;Q96FJ2;P1091  
6}

81 [Cluster 8]GO:0005929+C cellular\_component [name] cilium [def] "A specialized  
eukaryotic organelle that consists of a filiform extrusion of the cell surface. Each  
cilium is bounded by an extrusion of the cytoplasmic membrane, and contains a regular  
longitudinal array of microtubules, anchored basally in a centriole." [GOC

82 Pathogen[ Q2Q067] interacts with 25 human  
partners:{Q8WW24;O75161;Q5TD94;P08151;Q9H5P4;Q5BJF6;Q8IY31;Q9BYV8;Q9NXB0;O15078;Q86VQ  
0;O75665;Q96NB1;Q717R9;P41208;A6NIH7;Q9NWB7;Q3SYG4;Q9BPU9;Q96M29;Q9UMX1;Q6Q759;Q96GV9  
;A8MTZ0;Q9BV73}

83 Pathogen[ P0C214] interacts with 23 human  
partners:{Q9NWB7;O15078;O75161;Q8IY31;Q96GV9;Q9BYV8;Q8WW24;Q9H5P4;Q9NXB0;Q9BPU9;Q3SYG  
4;P41208;A8MTZ0;O75665;Q9BV73;A6NIH7;Q5BJF6;P08151;Q5TD94;Q96M29;Q9UMX1;Q96NB1;Q6Q759  
}

84 Pathogen[ P03346] interacts with 43 human  
partners:{Q86VQ0;Q9NQC8;Q9Y283;Q9H5P4;Q6ZW61;Q9BPU9;Q8IY31;Q96GV9;Q68CZ1;Q9UIF3;A8MTZ  
0;Q9H3S7;Q5TD94;Q9HBG6;Q96M29;Q96KN7;Q8TAM2;P41208;O75161;Q9NXB0;O75665;Q9NWB7;Q8N841  
;Q3SYG4;Q8N0X2;Q9Y4P9;Q5BJF6;Q8N157;Q9BYV8;P36405;Q717R9;A6NIH7;O15078;Q6Q759;Q8IWN7;  
O75386;Q9UMX1;Q8WW24;Q92834;Q96NB1;Q6EMB2;P08151;Q9BV73}

85 Pathogen[ Q85601] interacts with 29 human  
partners:{O75161;P08151;Q9H5P4;P36405;Q6Q759;A8MTZ0;Q9Y283;Q5TD94;Q9NWB7;O15078;Q9283  
4;Q5BJF6;O96015;Q9BXP9;Q8WW24;Q9NXB0;O75665;Q9BV73;Q96M29;Q86VQ0;Q9BYV8;Q3SYG4;Q9BPU9  
;A6NIH7;Q9UMX1;Q96GV9;Q8IY31;Q96NB1;P41208}

86 Pathogen[ P14079] interacts with 76 human  
partners:{P04083;Q9H1X1;Q8WYA0;Q9P0N5;Q9Y4P9;Q4G0U5;O75161;P08151;Q8N4P2;Q5JQC9;Q9NWB  
7;O95876;Q8IY31;Q9NPI0;A6NIH7;Q86WT1;Q8N0X2;Q8N157;Q68CZ1;Q96Q45;Q92834;Q8NFI9;Q9UMX1  
;Q717R9;Q9BXP9;Q6Q759;Q8N3I7;Q9BV73;P57679;Q96M29;Q86UK5;Q9Y4R7;Q8IWN7;Q9GZS0;Q5TD94;  
Q7RTU9;Q8IYW6;P56715;A6PVC2;P36405;O75952;A0AVF1;Q5BJF6;Q5H9T9;Q9UI46;Q8TAM2;Q8N841;Q  
9BPU9;Q8TCU4;Q9P2L0;Q8IW40;Q8WW24;Q9UFE4;Q969V4;P41208;Q9Y283;O15078;Q6EMB2;Q9UIF3;Q9  
P2K1;Q9NQC8;A6NGG8;Q9H5P4;O75665;Q6ZW61;Q3SYG4;O96015;Q86VQ0;O15259;A8MTZ0;Q9NXB0;Q9B  
YV8;Q6IQ19;Q96KN7;Q96NB1;Q96GV9}

87 Pathogen[ P03383] interacts with 23 human  
partners:{Q9NWB7;Q8IY31;P41208;Q9BV73;A8MTZ0;Q5TD94;Q96M29;Q96NB1;Q9NXB0;Q86VQ0;O1507  
8;Q8WW24;Q9BYV8;Q5BJF6;Q3SYG4;Q717R9;Q6Q759;O75161;A6NIH7;Q9Y4P9;O75665;Q9UMX1;Q96GV9  
}

88 Pathogen[ P03410] interacts with 75 human  
partners:{O75665;Q717R9;Q9Y4R7;Q86VQ0;Q6Q759;Q96NB1;Q9H5P4;Q8NFI9;Q9Y4P9;Q9BXP9;Q9UI4  
6;O15259;Q3SYG4;Q6ZW61;Q8N0X2;Q96RY7;Q96Q45;Q8TAM2;Q96KN7;Q5JQC9;A0AVF1;P36405;Q5TD94  
;O75161;Q8TCU4;Q9UIF3;Q9Y283;Q8TCX1;Q9H1X1;Q9BYV8;Q9UFE4;A8MTZ0;A6NIH7;O75952;Q6IQ19;  
Q9NPI0;Q9NPE6;Q8N4P2;Q9BPU9;Q8IY31;A6NGG8;Q9NWB7;Q7RTU9;Q8N157;Q9P0N5;Q8WYA0;O15078;Q  
8N3I7;Q9P2K1;Q92834;O95876;Q5BJF6;Q4G0U5;Q8IW40;Q9HBG6;Q96GV9;Q9NXB0;Q8IYW6;Q5H9T9;Q9  
NQC8;Q9P2L0;Q8N841;Q68CZ1;A6PVC2;Q8IWN7;Q9GZS0;P41208;Q969V4;Q9UMX1;P56715;Q96M29;Q9B  
V73;Q6EMB2;O96015;Q86UK5}

89 Pathogen[ P14075] interacts with 25 human  
partners:{Q3SYG4;Q9BYV8;Q6Q759;Q6ZW61;Q5TD94;Q96GV9;Q8IY31;Q86VQ0;Q9NXB0;O15078;Q5BJF  
6;O75161;Q6IQ19;Q96NB1;Q9BV73;Q9Y4P9;Q9BPU9;Q9NWB7;P41208;Q717R9;A6NIH7;O75665;Q96M29  
;A8MTZ0;Q9UMX1}

90 Pathogen[ P0C206] interacts with 56 human  
partners:{Q9BPU9;Q9NQC8;O75952;Q6ZW61;P56715;Q5BJF6;Q5JQC9;Q5TD94;Q3SYG4;Q8TAM2;Q9UMX  
1;O75161;Q8IY31;Q8TCU4;Q9P2K1;Q9H5P4;Q9UIF3;Q86VQ0;Q96GV9;Q8WYA0;Q8N3I7;Q9Y283;Q96KN7  
;Q717R9;Q9Y4P9;Q5H9T9;Q9UFE4;Q8IWN7;Q9NWB7;Q6IQ19;O15078;Q9H1X1;Q8N841;Q8N157;Q9BYV8;  
Q9BV73;A6NGG8;O75665;P36405;A6NIH7;Q9BXP9;Q8NFI9;P41208;Q96M29;Q16181;P08151;Q6Q759;Q  
9NXB0;Q96NB1;O95876;A8MTZ0;Q92834;Q6EMB2;O96015;Q8IW40;Q8WW24}

91 Pathogen[ P03363] interacts with 53 human  
partners:{Q5BJF6;O75161;Q8N0X2;Q9H3S7;P56715;Q6EMB2;Q86VQ0;Q8TAM2;Q9BYV8;Q9UMX1;P0815  
1;O15078;Q9GZS0;Q969V4;Q9P2K1;Q9H1X1;Q96M29;Q9Y4P9;Q9H5P4;Q5TD94;P41208;Q9NWB7;A8MTZ0  
;Q8IYM1;Q717R9;Q9BXP9;Q8N157;Q3SYG4;Q8IY31;Q6IQ19;Q9BPU9;Q9HBG6;Q8N841;Q9Y283;Q96NB1;  
Q6ZW61;Q8IW40;A6NIH7;Q9UIF3;Q96GV9;Q92834;Q8IWN7;O75386;O15259;Q9UI46;Q8NFI9;Q9NXB0;Q  
6Q759;Q9BV73;Q9NQC8;Q8WW24;Q96KN7;O75665}

92 [Cluster 9]GO:0016593+C cellular\_component [name] Cdc73/Paf1 complex [def] "A  
multiprotein complex that associates with RNA polymerase II and general RNA polymerase II  
transcription factor complexes and may be involved in both transcriptional initiation and  
elongation. In *Saccharomyces* the complex contains Paf1p, Cdc73p, Ctr9p, Rtf1p, and  
Leop1." [PMID

93 Pathogen[ Q2Q067] interacts with 6 human  
partners:{Q8WVC0;Q6PD62;Q6P1J9;Q9GZS3;Q92541;Q8N7H5}

94 Pathogen[ P0C214] interacts with 6 human  
partners:{Q92541;Q6P1J9;Q8N7H5;Q8WVC0;Q6PD62;Q9GZS3}

95 Pathogen[ P03346] interacts with 6 human  
partners:{Q6PD62;Q8WVC0;Q92541;Q9GZS3;Q6P1J9;Q8N7H5}

96 Pathogen[ Q85601] interacts with 6 human

```

97     partners:{Q6PD62;Q8WVC0;Q6P1J9;Q9GZS3;Q92541;Q8N7H5}
    Pathogen[ P14079] interacts with 6 human
98     partners:{Q92541;Q9GZS3;Q6PD62;Q8WVC0;Q6P1J9;Q8N7H5}
    Pathogen[ P03383] interacts with 6 human
99     partners:{Q6P1J9;Q6PD62;Q8WVC0;Q92541;Q9GZS3;Q8N7H5}
    Pathogen[ P03410] interacts with 6 human
100    partners:{Q8WVC0;Q6PD62;Q92541;Q9GZS3;Q8N7H5;Q6P1J9}
    Pathogen[ P14075] interacts with 6 human
101    partners:{Q8WVC0;Q8N7H5;Q6P1J9;Q92541;Q6PD62;Q9GZS3}
    Pathogen[ P0C206] interacts with 6 human
102    partners:{Q6PD62;Q92541;Q8N7H5;Q9GZS3;Q8WVC0;Q6P1J9}
    Pathogen[ P03363] interacts with 6 human
103    partners:{Q9GZS3;Q8WVC0;Q6P1J9;Q92541;Q8N7H5;Q6PD62}
[Cluster 10]GO:0005845+C    cellular_component [name] mRNA cap binding complex [def]
"Any protein complex that binds to an mRNA cap at any time in the lifetime of the mRNA."
[GOC
104    Pathogen[ Q2Q067] interacts with 8 human
    partners:{O43148;Q06787;Q9UKV8;Q09161;O60573;P52298;P06730;Q9BTL3}
105    Pathogen[ P0C214] interacts with 10 human
    partners:{Q09161;Q06787;Q8N5X7;A6NMX2;O43148;P52298;Q9UKV8;Q9BTL3;P06730;O60573}
106    Pathogen[ P03346] interacts with 11 human
    partners:{Q09161;P06730;Q06787;Q9BTL3;Q8N5X7;O60573;Q96J94;P52298;O43148;Q9UKV8;A6NMX
2}
107    Pathogen[ Q85601] interacts with 9 human
    partners:{O43148;P06730;Q8N5X7;Q06787;Q09161;O60573;Q9UKV8;Q9BTL3;P52298}
108    Pathogen[ P14079] interacts with 10 human
    partners:{A6NMX2;Q9UKV8;P06730;P52298;O60573;O43148;Q8N5X7;Q9BTL3;Q06787;Q09161}
109    Pathogen[ P03383] interacts with 8 human
    partners:{O43148;Q06787;O60573;Q09161;P06730;Q9UKV8;P52298;Q9BTL3}
110    Pathogen[ P03410] interacts with 10 human
    partners:{Q9UKV8;Q9BTL3;P06730;P52298;O60573;Q8N5X7;Q09161;O43148;Q06787;A6NMX2}
111    Pathogen[ P14075] interacts with 8 human
    partners:{Q09161;P06730;O60573;Q06787;Q9UKV8;Q9BTL3;O43148;P52298}
112    Pathogen[ P0C206] interacts with 10 human
    partners:{P52298;Q09161;Q06787;Q9UKV8;Q9BTL3;P06730;Q8N5X7;A6NMX2;O60573;O43148}
113    Pathogen[ P03363] interacts with 12 human
    partners:{Q06787;Q9UKV8;Q7L576;Q9BTL3;Q8N5X7;A6NMX2;P52298;O43148;Q96J94;O60573;P0673
0;Q09161}
114 [Cluster 11]GO:0042585+C    cellular_component [name] germinal vesicle [def] "The
enlarged, fluid filled nucleus of a primary oocyte, the development of which is suspended
in prophase I of the first meiotic division between embryhood and sexual maturity." [GOC
115    Pathogen[ Q2Q067] interacts with 1 human partners:{P29966}
116    Pathogen[ P0C214] interacts with 1 human partners:{P29966}
117    Pathogen[ P03346] interacts with 1 human partners:{P29966}
118    Pathogen[ Q85601] interacts with 1 human partners:{P29966}
119    Pathogen[ P14079] interacts with 1 human partners:{P29966}
120    Pathogen[ P03383] interacts with 1 human partners:{P29966}
121    Pathogen[ P03410] interacts with 1 human partners:{P29966}
122    Pathogen[ P14075] interacts with 1 human partners:{P29966}
123    Pathogen[ P0C206] interacts with 1 human partners:{P29966}
124    Pathogen[ P03363] interacts with 1 human partners:{P29966}
125 [Cluster 12]GO:0070461+C    cellular_component [name] SAGA-type complex [def] "A
histone acetyltransferase complex that acetylates nucleosomal H3 and H2B and is required
for the expression of a subset of Pol II-transcribed genes. The budding yeast complex
includes the acetyltransferase Gcn5p, several proteins of the Spt and Ada families, and
several TBP-associate proteins (TAFs)_ analogous complexes in other species have
analogous compositions, and usually contain homologs of the yeast proteins." [GOC
126    Pathogen[ Q2Q067] interacts with 5 human
    partners:{Q8NEM7;P51610;Q86TJ2;Q96ES7;Q96BN2}
127    Pathogen[ P0C214] interacts with 4 human partners:{P51610;Q96BN2;Q86TJ2;Q96ES7}
128    Pathogen[ P03346] interacts with 5 human
    partners:{Q96ES7;P51610;Q96BN2;Q8NEM7;Q86TJ2}
129    Pathogen[ Q85601] interacts with 4 human partners:{Q96ES7;P51610;Q96BN2;Q86TJ2}
130    Pathogen[ P14079] interacts with 5 human
    partners:{Q8NEM7;Q96BN2;P51610;Q96ES7;Q86TJ2}
131    Pathogen[ P03383] interacts with 3 human partners:{Q96ES7;Q96BN2;P51610}
132    Pathogen[ P03410] interacts with 5 human
    partners:{P51610;Q86TJ2;Q96ES7;Q96BN2;Q8NEM7}
133    Pathogen[ P14075] interacts with 4 human partners:{P51610;Q96BN2;Q8NEM7;Q96ES7}
134    Pathogen[ P0C206] interacts with 4 human partners:{Q86TJ2;P51610;Q96ES7;Q96BN2}
135    Pathogen[ P03363] interacts with 5 human
    partners:{Q8NEM7;Q96BN2;Q96ES7;Q86TJ2;P51610}
136 [Cluster 13]GO:0034704+C    cellular_component [name] calcium channel complex [def] "An
ion channel complex through which calcium ions pass." [GOC
137    Pathogen[ Q2Q067] interacts with 3 human partners:{Q86VW0;Q15257;Q13023}
138    Pathogen[ P0C214] interacts with 3 human partners:{Q13023;Q86VW0;Q15257}

```



139 Pathogen[ P03346] interacts with 3 human partners:{Q15257;Q13023;Q86VW0}  
140 Pathogen[ Q85601] interacts with 3 human partners:{Q13023;Q15257;Q86VW0}  
141 Pathogen[ P14079] interacts with 2 human partners:{Q13023;Q86VW0}  
142 Pathogen[ P03383] interacts with 2 human partners:{Q15257;Q13023}  
143 Pathogen[ P03410] interacts with 3 human partners:{Q15257;Q13023;Q86VW0}  
144 Pathogen[ P14075] interacts with 2 human partners:{Q15257;Q13023}  
145 Pathogen[ P0C206] interacts with 3 human partners:{Q13023;Q86VW0;Q15257}  
146 Pathogen[ P03363] interacts with 3 human partners:{Q13023;Q15257;Q86VW0}  
147 [Cluster 14]GO:0005671+C cellular\_component [name] Ada2/Gcn5/Ada3 transcription  
activator complex [def] "A multiprotein complex that possesses histone  
acetyltransferase and is involved in regulation of transcription. The budding yeast  
complex includes Gcn5p, two proteins of the Ada family, and two TBP-associate proteins  
(TAFs)\_ analogous complexes in other species have analogous compositions, and usually  
contain homologs of the yeast proteins." [PMID  
148 Pathogen[ Q2Q067] interacts with 12 human  
partners:{Q9NRF9;P51610;Q9H8E8;Q92831;Q9ULM3;O75528;Q01658;Q96ES7;Q92830;Q14157;Q9NS7  
3;O43318}  
149 Pathogen[ P0C214] interacts with 12 human  
partners:{P51610;O75528;O43318;Q14157;Q9NS73;Q9NRF9;Q92831;Q01658;Q92830;Q96ES7;Q9ULM  
3;Q9H8E8}  
150 Pathogen[ P03346] interacts with 13 human  
partners:{Q96ES7;P51610;Q14157;Q9ULM3;Q9H8E8;Q92831;Q9NR33;Q9NRF9;Q92830;O75528;Q9NS7  
3;Q01658;O43318}  
151 Pathogen[ Q85601] interacts with 12 human  
partners:{O75528;Q96ES7;Q14157;Q92831;P51610;Q9NRF9;Q9NS73;Q92830;Q9H8E8;Q9ULM3;Q0165  
8;O43318}  
152 Pathogen[ P14079] interacts with 11 human  
partners:{O75528;Q92830;Q14157;Q9H8E8;Q9ULM3;P51610;Q9NRF9;Q96ES7;Q01658;Q9NR33;Q9NS7  
3}  
153 Pathogen[ P03383] interacts with 11 human  
partners:{Q92831;Q9ULM3;Q96ES7;O75528;Q9NS73;O43318;P51610;Q9H8E8;Q92830;Q01658;Q1415  
7}  
154 Pathogen[ P03410] interacts with 13 human  
partners:{Q92830;Q92831;Q14157;P51610;Q9NS73;O75528;Q9ULM3;Q96ES7;O43318;Q01658;Q9NRF  
9;Q9NR33;Q9H8E8}  
155 Pathogen[ P14075] interacts with 11 human  
partners:{Q92831;Q01658;P51610;Q14157;O75528;Q9H8E8;Q9ULM3;O43318;Q96ES7;Q92830;Q9NS7  
3}  
156 Pathogen[ P0C206] interacts with 12 human  
partners:{O75528;Q92830;Q9NRF9;Q9ULM3;Q9NR33;O43318;Q92831;P51610;Q01658;Q96ES7;Q1415  
7;Q9NS73}  
157 Pathogen[ P03363] interacts with 13 human  
partners:{Q9H8E8;Q92831;Q9NRF9;O43318;Q92830;Q14157;Q9NR33;Q96ES7;Q9ULM3;Q01658;Q9NS7  
3;O75528;P51610}  
158 [Cluster 15]GO:0005773+C cellular\_component [name] vacuole [def] "A closed  
structure, found only in eukaryotic cells, that is completely surrounded by unit membrane  
and contains liquid material. Cells contain one or several vacuoles, that may have  
different functions from each other. Vacuoles have a diverse array of functions. They can  
act as a storage organelle for nutrients or waste products, as a degradative compartment,  
as a cost-effective way of increasing cell size, and as a homeostatic regulator  
controlling both turgor pressure and pH of the cytosol." [GOC  
159 Pathogen[ Q2Q067] interacts with 1 human partners:{P53804}  
160 Pathogen[ P0C214] interacts with 1 human partners:{P53804}  
161 Pathogen[ P03346] interacts with 1 human partners:{P53804}  
162 Pathogen[ Q85601] interacts with 1 human partners:{P53804}  
163 Pathogen[ P14079] interacts with 3 human partners:{P53804;Q9NPI0;Q96GC9}  
164 Pathogen[ P03383] interacts with 1 human partners:{P53804}  
165 Pathogen[ P03410] interacts with 3 human partners:{Q96GC9;Q9NPI0;P53804}  
166 Pathogen[ P14075] interacts with 1 human partners:{P53804}  
167 Pathogen[ P0C206] interacts with 1 human partners:{P53804}  
168 Pathogen[ P03363] interacts with 1 human partners:{P53804}  
169 [Cluster 16]GO:0000445+C cellular\_component [name] THO complex part of transcription  
export complex [def] "The THO complex when it is part of the TREX (TRanscription EXport)  
complex that is involved in coupling transcription to export of mRNAs to the cytoplasm.  
In *S. cerevisiae*, it is composed of four subunits  
170 Pathogen[ Q2Q067] interacts with 4 human partners:{Q96FV9;Q6I9Y2;Q13769;Q8NI27}  
171 Pathogen[ P0C214] interacts with 4 human partners:{Q96FV9;Q13769;Q8NI27;Q6I9Y2}  
172 Pathogen[ P03346] interacts with 4 human partners:{Q96FV9;Q13769;Q8NI27;Q6I9Y2}  
173 Pathogen[ Q85601] interacts with 4 human partners:{Q13769;Q96FV9;Q8NI27;Q6I9Y2}  
174 Pathogen[ P14079] interacts with 4 human partners:{Q8NI27;Q96FV9;Q13769;Q6I9Y2}  
175 Pathogen[ P03383] interacts with 4 human partners:{Q8NI27;Q13769;Q96FV9;Q6I9Y2}  
176 Pathogen[ P03410] interacts with 4 human partners:{Q8NI27;Q96FV9;Q13769;Q6I9Y2}  
177 Pathogen[ P14075] interacts with 4 human partners:{Q13769;Q8NI27;Q6I9Y2;Q96FV9}  
178 Pathogen[ P0C206] interacts with 4 human partners:{Q8NI27;Q13769;Q96FV9;Q6I9Y2}  
179 Pathogen[ P03363] interacts with 4 human partners:{Q13769;Q8NI27;Q96FV9;Q6I9Y2}  
180 [Cluster 17]GO:0005764+C cellular\_component [name] lysosome [def] "A small lytic

vacuole that has cell cycle-independent morphology and is found in most animal cells and that contains a variety of hydrolases, most of which have their maximal activities in the pH range 5-6. The contained enzymes display latency if properly isolated. About 40 different lysosomal hydrolases are known and lysosomes have a great variety of morphologies and functions." [GOC

181 Pathogen[ Q2Q067] interacts with 17 human  
partners:{Q9NQG7;Q9P2Y5;Q8TAF3;O75351;P05062;Q95999;Q5BJF2;Q9H267;Q99732;Q9Y2T2;Q9H0R1;O43504;Q9NUS5;Q96NA2;Q8WWR8;Q86VN1;O75674}

182 Pathogen[ P0C214] interacts with 16 human  
partners:{Q8WWR8;Q9NQG7;O75351;Q9Y2T2;Q9NUS5;Q96NA2;Q9H0R1;P05062;Q99732;Q95999;Q8TAF3;Q9P2Y5;O43504;O75674;Q86VN1;P16278}

183 Pathogen[ P03346] interacts with 26 human  
partners:{O95166;Q9NQG7;Q9P253;Q92622;Q9H0R1;Q96NA2;Q86VN1;Q8TAF3;Q5BJF2;O95999;P16278;Q96AX1;Q9NUS5;O43504;Q8N357;Q96S99;Q14596;O75351;Q8WWR8;P05062;Q70J99;O75674;Q9P2Y5;Q9H267;Q9Y2T2;Q99732}

184 Pathogen[ Q85601] interacts with 18 human  
partners:{Q9NQG7;Q96S99;Q9Y2T2;Q9P253;O95166;Q9P2Y5;Q9NUS5;Q14596;Q86VN1;P05062;Q9H267;O75351;Q8TAF3;O95999;Q96NA2;Q99732;Q9H0R1;O75674}

185 Pathogen[ P14079] interacts with 59 human  
partners:{Q9NQG7;O95166;O14773;Q96NA2;Q86VN1;P16278;Q3ZAQ7;Q9Y2Q5;O95999;P04066;P86790;Q02083;P20933;P54802;Q9Y2T2;P35475;Q92902;O75674;O60895;Q14596;P86791;Q96S99;O00115;Q5BJF2;Q96NT0;Q9H269;Q0VGL1;P06280;Q9H8M9;O75503;Q9NQG7;Q8N357;P54803;Q99732;Q86T03;Q6IAA8;Q96AX1;Q9NZ43;Q13510;Q9P253;Q8WWR8;Q9NUM4;Q8N682;P17050;Q8WWB7;Q9H0R1;Q8WZ79;Q86WC4;O43504;O75351;Q6UX65;Q9NUS5;Q8TAF3;Q92622;Q9P2Y5;Q9NUN5;Q9HAT2;P17405;Q9H267}

186 Pathogen[ P03383] interacts with 12 human  
partners:{Q9NQG7;Q8TAF3;Q9NUS5;Q9Y2T2;Q99732;Q5BJF2;O95999;O43504;Q9P2Y5;Q8WWR8;Q86VN1;Q96NA2}

187 Pathogen[ P03410] interacts with 52 human  
partners:{P54803;Q9NQG7;Q9Y2Q5;Q9H267;Q9NZ43;P04066;O43504;Q9P2Y5;Q96S99;Q86T03;O60896;Q02083;O60895;Q9NUS5;O75351;O75674;Q92902;Q70J99;P54802;Q99732;P16278;Q9HAT2;Q86VN1;Q9P253;P05062;P86791;Q14596;O75503;O95166;Q13510;Q9NUN5;O95999;Q8N357;Q86WC4;Q9Y2T2;Q9NQG7;Q6UX65;Q15049;Q8TAF3;Q8WWB7;Q9H0R1;P86790;Q6IAA8;Q0VGL1;P20933;O00115;Q96NA2;Q5BJF2;Q9H269;P17405;Q8WWR8;Q96AX1}

188 Pathogen[ P14075] interacts with 14 human  
partners:{Q9P2Y5;Q9NQG7;Q02083;Q9Y2T2;Q8WWR8;Q86VN1;Q96NA2;Q13510;Q8TAF3;Q99732;Q95999;O43504;Q9NUS5;Q5BJF2}

189 Pathogen[ P0C206] interacts with 30 human  
partners:{Q5BJF2;Q9NQG7;P05062;Q8TAF3;Q9P2Y5;Q9H0R1;O95999;Q86VN1;Q9Y2T2;Q14596;O43504;Q92622;Q8WWB7;Q8N357;Q96AX1;Q02083;Q96S99;Q9NQG7;Q8WWR8;P16278;Q9P253;Q96NA2;O75351;Q86T03;O75674;Q99732;O95166;Q9H267;Q86WC4;Q9NUS5}

190 Pathogen[ P03363] interacts with 20 human  
partners:{Q9NQG7;Q9Y2T2;Q9P2Y5;Q8TAF3;Q02083;Q9NUS5;Q96RU3;O43504;O75351;Q92622;Q9H0R1;Q86VN1;Q92902;Q9H267;Q99732;O75674;Q5BJF2;Q96NW4;Q96NA2;O95166}

191 [Cluster 18]GO:0030175+C cellular\_component [name] filopodium [def] "Thin, stiff protrusion extended by the leading edge of a motile cell such as a crawling fibroblast or amoeba, or an axonal growth cone\_ usually approximately 0.1 um wide, 5-10 um long, can be up to 50 um long in axon growth cones\_ contains a loose bundle of about 20 actin filaments oriented with their plus ends pointing outward." [GOC

192 Pathogen[ Q2Q067] interacts with 2 human partners:{Q8IZP0;P60953}

193 Pathogen[ P0C214] interacts with 4 human partners:{Q8IZP0;P60953;Q8NEJ9;Q16658}

194 Pathogen[ P03346] interacts with 6 human  
partners:{Q99828;Q8IZP0;P60953;P26038;Q8NEJ9;Q16658}

195 Pathogen[ Q85601] interacts with 2 human partners:{P60953;Q8IZP0}

196 Pathogen[ P14079] interacts with 12 human  
partners:{P09327;Q16658;O75781;P26038;Q8IZP0;Q9Y4F9;Q99828;Q14118;P50552;O95868;Q8NEJ9;P35241}

197 Pathogen[ P03383] interacts with 1 human partners:{P60953}

198 Pathogen[ P03410] interacts with 11 human  
partners:{O75781;Q16658;Q8NEJ9;Q99828;P50552;P26038;Q14118;Q8IZP0;P60953;O95868;P35241}

199 Pathogen[ P14075] interacts with 2 human partners:{P60953;Q8NEJ9}

200 Pathogen[ P0C206] interacts with 6 human  
partners:{Q99828;Q8NEJ9;Q16658;Q8IZP0;P60953;O95868}

201 Pathogen[ P03363] interacts with 5 human  
partners:{Q8IZP0;Q99828;Q16658;P60953;Q8NEJ9}

202 [Cluster 19]GO:0000780+C cellular\_component [name] condensed nuclear chromosome, centromeric region [def] "The region of a condensed chromosome in the nucleus that includes the centromere and associated proteins, including the kinetochore. In monocentric chromosomes, this region corresponds to a single area of the chromosome, whereas in holocentric chromosomes, it is evenly distributed along the chromosome." [GOC

203 Pathogen[ Q2Q067] interacts with 5 human  
partners:{Q5FBB7;P49450;Q03188;O75177;Q86Y97}

204 Pathogen[ P0C214] interacts with 5 human  
partners:{P49450;Q03188;Q86Y97;Q5FBB7;O75177}

205 Pathogen[ P03346] interacts with 5 human  
partners:{Q5FBB7;Q86Y97;Q03188;P49450;O75177}

206 Pathogen[ Q85601] interacts with 5 human partners:{Q03188;P49450;Q86Y97;Q5FBB7;O75177}

207 Pathogen[ P14079] interacts with 5 human partners:{Q03188;Q5FBB7;P49450;Q86Y97;O75177}

208 Pathogen[ P03383] interacts with 4 human partners:{Q03188;Q5FBB7;Q86Y97;O75177}

209 Pathogen[ P03410] interacts with 5 human partners:{Q03188;Q86Y97;O75177;P49450;Q5FBB7}

210 Pathogen[ P14075] interacts with 4 human partners:{Q5FBB7;Q86Y97;Q03188;O75177}

211 Pathogen[ P0C206] interacts with 5 human partners:{O75177;Q86Y97;P49450;Q5FBB7;Q03188}

212 Pathogen[ P03363] interacts with 5 human partners:{Q5FBB7;P49450;Q03188;Q86Y97;O75177}

213 [Cluster 20]GO:0032059+C cellular\_component [name] bleb [def] "A cell extension characterized by rapid formation, rounded shape, and scarcity of organelles within the protrusions." [PMID

214 Pathogen[ Q2Q067] interacts with 1 human partners:{Q9Y613}

215 Pathogen[ P0C214] interacts with 1 human partners:{Q9Y613}

216 Pathogen[ P03346] interacts with 1 human partners:{Q9Y613}

217 Pathogen[ Q85601] interacts with 1 human partners:{Q9Y613}

218 Pathogen[ P14079] interacts with 1 human partners:{Q9Y613}

219 Pathogen[ P03383] interacts with 1 human partners:{Q9Y613}

220 Pathogen[ P03410] interacts with 2 human partners:{Q9Y613;Q9BRK5}

221 Pathogen[ P14075] interacts with 1 human partners:{Q9Y613}

222 Pathogen[ P0C206] interacts with 1 human partners:{Q9Y613}

223 Pathogen[ P03363] interacts with 1 human partners:{Q9Y613}

224 [Cluster 21]GO:0032021+C cellular\_component [name] NELF complex [def] "A complex of five proteins, designated NELF-A, -B, -C, -D, and -E in human, that can physically associate with RNP polymerase II to induce transcriptional pausing." [PMID

225 Pathogen[ Q2Q067] interacts with 4 human partners:{P18615;Q8IXH7;Q9H3P2;Q8WX92}

226 Pathogen[ P0C214] interacts with 4 human partners:{Q8WX92;P18615;Q8IXH7;Q9H3P2}

227 Pathogen[ P03346] interacts with 4 human partners:{Q8IXH7;Q9H3P2;Q8WX92;P18615}

228 Pathogen[ Q85601] interacts with 4 human partners:{Q9H3P2;P18615;Q8WX92;Q8IXH7}

229 Pathogen[ P14079] interacts with 4 human partners:{Q8IXH7;Q9H3P2;P18615;Q8WX92}

230 Pathogen[ P03383] interacts with 4 human partners:{Q9H3P2;Q8IXH7;P18615;Q8WX92}

231 Pathogen[ P03410] interacts with 4 human partners:{P18615;Q9H3P2;Q8IXH7;Q8WX92}

232 Pathogen[ P14075] interacts with 4 human partners:{P18615;Q9H3P2;Q8IXH7;Q8WX92}

233 Pathogen[ P0C206] interacts with 4 human partners:{Q8IXH7;P18615;Q9H3P2;Q8WX92}

234 Pathogen[ P03363] interacts with 4 human partners:{Q8WX92;Q8IXH7;P18615;Q9H3P2}

235 [Cluster 22]GO:0045121+C cellular\_component [name] membrane raft [def] "Any of the small (10-200 nm), heterogeneous, highly dynamic, sterol- and sphingolipid-enriched membrane domains that compartmentalize cellular processes. Small rafts can sometimes be stabilized to form larger platforms through protein-protein and protein-lipid interactions." [PMID

236 Pathogen[ Q2Q067] interacts with 15 human partners:{P04156;Q9HAU4;P19367;Q12933;O95999;Q13158;Q14790;Q12959;O15162;P11532;Q99856;P25063;O14920;Q9BX66;A6NKF2}

237 Pathogen[ P0C214] interacts with 15 human partners:{Q9HAU4;Q13158;Q99856;Q9BX66;P11532;O15162;O95999;Q12933;P19367;P25063;Q12959;P04156;A6NKF2;O14920;Q14790}

238 Pathogen[ P03346] interacts with 17 human partners:{Q9HAU4;Q13158;Q8IWW1;P19367;Q99856;Q9BX66;O95999;A6NKF2;Q14790;P04156;P11532;P25063;O14920;Q9NP85;Q86Y82;Q12959;O15162}

239 Pathogen[ Q85601] interacts with 14 human partners:{Q9HAU4;Q13158;Q9BX66;Q14790;P11532;Q12933;O14920;A6NKF2;Q12959;P04156;O15162;O95999;Q99856;P19367}

240 Pathogen[ P14079] interacts with 23 human partners:{Q9BXL7;O15162;P11532;O95999;Q13021;P04156;Q99856;Q9NP85;Q9BY14;A6NKF2;Q14118;Q9HAU4;Q16586;Q14790;Q6IAA8;P25063;Q8IWW1;Q12933;Q13158;O43561;Q14699;Q9BX66;Q9GZY6}

241 Pathogen[ P03383] interacts with 11 human partners:{P04156;O15162;O14920;P19367;P25063;Q13158;Q12933;A6NKF2;P11532;O95999;Q99856}

242 Pathogen[ P03410] interacts with 24 human partners:{O14920;Q12959;O43561;P11532;Q8IWW1;Q9NP85;Q9BY14;Q13158;O15162;Q9GZY6;O95999;Q9BXL7;P25063;Q15049;P04156;Q12933;Q14118;Q6IAA8;Q14699;Q99856;P27105;A6NKF2;Q9BX66;Q13021}

243 Pathogen[ P14075] interacts with 12 human partners:{P11532;Q8IWW1;O15162;P04156;P19367;Q99856;O14920;Q12933;Q13158;A6NKF2;O95999;P25063}

244 Pathogen[ P0C206] interacts with 19 human partners:{O14920;P04156;Q9HAU4;O95999;Q8IWW1;Q13021;Q14699;Q13158;Q12933;P19367;P25063;A6NKF2;Q14790;Q9BX66;O15162;P11532;Q12959;Q9NP85;Q99856}

245 Pathogen[ P03363] interacts with 10 human partners:{Q12959;A6NKF2;O14920;Q9BX66;Q9HAU4;Q99856;Q12933;P04156;Q13158;P11532}

246 [Cluster 23]GO:0030140+C cellular\_component [name] trans-Golgi network transport vesicle [def] "A vesicle that mediates transport between the trans-Golgi network and

other parts of the cell." [GOC

247 Pathogen[ Q2Q067] interacts with 2 human partners:{Q9NZD8;P14672}

248 Pathogen[ P0C214] interacts with 3 human partners:{Q9NZD8;Q9HD26;P14672}

249 Pathogen[ P03346] interacts with 5 human partners:{Q9NZD8;Q9HD26;P49755;P14672;Q9BVK6}

250 Pathogen[ Q85601] interacts with 2 human partners:{Q9HD26;P14672}

251 Pathogen[ P14079] interacts with 4 human partners:{P14672;Q9BVK6;Q9HD26;P49755}

252 Pathogen[ P03383] interacts with 3 human partners:{Q9NZD8;Q9HD26;P14672}

253 Pathogen[ P03410] interacts with 2 human partners:{Q9HD26;Q9BVK6}

254 Pathogen[ P14075] interacts with 3 human partners:{Q9HD26;Q9NZD8;P14672}

255 Pathogen[ P0C206] interacts with 4 human partners:{Q9BVK6;P49755;P14672;Q9HD26}

256 Pathogen[ P03363] interacts with 3 human partners:{P14672;Q9NZD8;Q9HD26}

257 [Cluster 24]GO:0005840+C cellular\_component [name] ribosome [def] "An intracellular organelle, about 200 A in diameter, consisting of RNA and protein. It is the site of protein biosynthesis resulting from translation of messenger RNA (mRNA). It consists of two subunits, one large and one small, each containing only protein and RNA. Both the ribosome and its subunits are characterized by their sedimentation coefficients, expressed in Svedberg units (symbol

258 Pathogen[ Q2Q067] interacts with 170 human partners:{Q5JNZ5;Q8N5N7;P51398;Q9HD33;P61313;P62701;Q8NHW5;P82921;Q9BYD6;Q13084;Q9BZE1;P47914;P82933;P46779;Q96EL2;Q9BYD1;Q4U2R6;P82912;Q59GN2;P82932;Q9Y3B7;Q02543;P26373;Q9Y676;Q75394;Q96A35;P62750;Q0VDF9;P62273;Q9Y2R9;Q13405;Q96GC5;Q6NVV1;P82930;P15880;P40429;Q9BYN8;Q9NWU5;P46782;Q9BRJ2;P35268;Q92552;P22090;P46778;P82663;Q9BYC8;P62888;Q9Y3D9;P32969;P62277;P62241;Q9P0M9;P62244;P05387;Q5T653;Q9NVS2;P62861;P42766;P05386;Q9Y291;Q9P0J6;Q6P1L8;Q969Q0;Q9UNX3;P30050;Q8IXM3;Q9Y3D3;Q9Y2R5;P18077;P62891;P27695;Q9BQ48;P61927;Q9Y399;P39023;P62081;Q9Y2Q9;P61247;Q9UHB9;P61254;P62249;P62280;P83731;Q15235;Q9H2W6;P62263;P60866;P62906;P82650;Q9BQC6;P52815;P82914;Q02878;P46777;Q7Z7F7;P62899;P08708;Q96EH5;P08865;Q9NZE8;Q07020;P62913;Q060783;P62269;Q9NP92;Q9Y6G3;Q6P1L61;P62424;P62917;P62829;P46783;Q9BYD3;P36578;P62857;Q9BYD2;Q9Y3D5;P62847;P49207;P23396;Q9H0U6;P63173;P18621;P82675;Q9H9J2;Q9NRX2;Q86TS9;Q8TCC3;P39019;P82664;P61353;Q96L21;P62266;P42677;Q9Y3U8;P63220;P62841;Q8NE71;P83881;P62987;P49406;Q15637;Q9P015;Q9BXR0;P50914;P46776;Q9H7H0;Q96DV4;P82909;P62854;P09001;P62753;P05388;Q8N983;P18124;P62851;P25398;A6NKH3;Q9NQ50;P62910;Q92901;P46781;P82673;Q9BYC9;P27635;Q92665;P61513;P62945;Q71UM5;Q9NX20;P62979}

259 Pathogen[ P0C214] interacts with 175 human partners:{Q9HD33;P62861;P84098;Q96A35;P61247;P49406;Q9Y399;Q8N5N7;Q8NHW5;P82930;Q13405;Q9Y3D5;Q9BYD2;P27695;Q96EL2;Q9BYD1;Q9H9J2;P15880;P62081;P42766;P62913;P22090;P82912;Q92901;P62249;Q9Y3D9;P62899;Q96DV4;P62854;P39019;P62263;P82675;P0C6E6;Q9H0U6;Q9NYK5;Q16540;Q6P1L61;Q9Y676;Q86TS9;P62273;Q9NP92;P23396;P18077;Q15235;P05388;P62847;Q9BYD3;Q96GC5;Q9NX20;P62829;P26373;Q9H7H0;P27635;P46778;Q15637;Q6P5R6;Q4U2R6;Q5JNZ5;Q9NWU5;Q8IXM3;Q96EH5;P61513;Q7Z2W9;P83881;Q75394;Q5T653;P62701;Q71UM5;P49207;P63220;P08865;Q9Y2Q9;P32969;Q02543;P62266;P09001;Q9BXR0;Q969Q0;P82664;P82914;P62277;Q8N983;P50914;Q92665;P46779;Q59GN2;P40429;Q9P0J6;P47914;Q8TCC3;Q8NE71;P63173;Q13084;P46783;P51398;Q9BQ48;P82663;P82921;P62280;Q9UNX3;Q9Y3U8;Q9BYN8;Q6P1L8;P30050;P62753;P62910;P62891;Q8TD47;P82909;Q9NZE8;Q9Y6G3;P62269;Q9NQ50;P46781;Q9Y291;Q9Y2R9;A6NKH3;Q9BYC8;P61254;P62841;P62244;Q9NRX2;P62987;Q7Z7F7;Q9Y2R5;Q07020;P42677;P62945;Q6NVV1;Q9P0M9;P46776;Q9BQC6;P52815;P62241;P46777;P82932;P83731;Q96L21;P35268;Q9UHB9;P62424;P60866;Q9H2W6;Q9BYC8;P62857;P61313;P08708;Q9P015;P05387;P25398;Q9BZE1;Q9Y3B7;Q5F1R6;P61927;P62750;P62979;P82673;P05386;P62851;P46782;P82933;P18124;P82650;P61353;Q9BYD6;P36578;Q9BRJ2;Q92552;Q9Y3D3;Q0VDF9;P18621;Q06783;P62906;Q02878;Q9NVS2}

260 Pathogen[ P03346] interacts with 182 human partners:{Q5F1R6;Q9NQ39;Q96A35;Q9NVS2;P05387;Q9Y399;Q8NHW5;P46779;P82930;Q96EL2;Q9BYD1;P63173;Q5JNZ5;P62917;Q75394;P62249;P62913;P49406;Q9P0J6;Q8N983;P62861;P82912;P62277;Q02878;P82933;Q96EL3;Q6P1L61;Q59GN2;P62280;P39023;P62987;P61927;Q9UNX3;P62857;Q9H0U6;Q8TCC3;Q8IXM3;P46778;P49207;Q15637;Q6P5R6;P62266;Q9BYC8;P61254;Q9BQ48;Q71UM5;Q5T653;Q9H2W6;Q92552;P62424;P62273;Q9BYD2;P83731;P60866;P0CW22;P62899;Q969Q0;P82909;Q9BYC9;Q6NVV1;P35268;P09001;P62891;P08708;Q8TD47;P46782;P61353;P51398;P62854;Q9Y3D9;Q9Y3U8;P82650;P47914;Q9Y2R5;P08865;Q96L21;Q6DKI1;Q9NRX2;Q7Z7F7;Q15235;P61313;P25398;Q13084;P82914;Q060783;P61513;Q9NZE8;A6NKH3;P05388;Q9Y2R9;P62269;Q6P1L8;Q02543;P42766;P62081;Q9NQ50;P61247;Q9BYD3;Q9HD33;Q9NWU5;Q96DV4;P18621;Q9Y676;P46781;P82921;P84098;P15880;P50914;Q0VDF9;Q9Y6G3;P62829;P62979;Q9Y3D5;P39019;Q9BYD6;Q9Y3D3;Q9H7H0;P23396;Q4U2R6;P42677;P62750;Q96EH5;P62701;Q9BQC6;P30050;Q9NP92;Q9BXR0;P62910;P36578;Q86TS9;Q8NE71;Q9BRJ2;Q9BZE1;P82675;P62847;Q13405;Q9UHB9;P62851;Q8N5N7;P22090;Q92616;P27695;P46777;P82663;P52815;Q07020;P62263;P82664;P62841;P83881;P82932;P05386;P18077;Q7Z2W9;P46776;P62241;Q9Y291;Q9BYN8;P62753;P62945;Q92901;P32969;P26373;P18124;P40429;P27635;Q9P015;Q7Z7H8;P46783;Q9Y3B7;P82673;Q96GC5;P62906;Q9H9J2;Q92665;Q9P0M9;P62244;Q9NX20;P62888;P0C6E6;P63220;Q9Y2Q9}

261 Pathogen[ Q85601] interacts with 171 human partners:{P46783;P32969;P61513;Q15637;Q8NHW5;P26373;P62857;P52815;P62244;P09001;Q9BQC6;Q96EL2;Q9BXR0;Q9BYD1;P62913;P62854;P82930;P82912;P62081;Q6P5R6;P61353;Q96A35;P62891;P46776;P82933;P18077;P61313;Q9Y2R5;Q9Y3D5;P49406;P05388;Q9NP92;A6NKH3;Q9Y3B7;Q4U2R6;P63173;Q9H0U6;Q9NX20;Q8TCC3;P82921;Q92665;Q9H2W6;P23396;P62273;P46778;P62829;P30050;P62753;P27635;Q9BYC8;Q9BYC9;P82932;P15880;Q9BQ48;Q9P0M9;P83881;Q07020;P39019;Q5T653;Q9Y3U8;Q71UM5;Q9BYN8;P62701;P62241;P82675;P62424;Q92552;Q9Y3D9;P83731;Q9BYD2;P62899;P62945;Q9H7H0;P62263;Q9P015;P62861;Q02878;Q9BYD6;P39023;P61254;Q9Y2R9;Q13405;P51398;Q9Y3D3;P49207;Q96GC5;Q9Y291;P62910;Q9Y6G3;Q9NRX2;Q8N983;P82909;Q15235;P62249;P62280;P4791

- 4;P84098;Q96L21;Q7Z7F7;Q13084;P08708;O75394;P42766;Q9NZE8;Q9NVS2;P62269;Q9Y2Q9;Q9BYD3;Q9NWU5;Q8N5N7;P18621;Q9Y676;P05387;Q9NYK5;Q9BRJ2;Q9UNX3;P82650;P62277;P35268;P62979;P62847;Q8NE71;Q9HD33;P42677;P63220;Q96EH5;Q8IXM3;Q86TS9;Q9BZE1;P46782;Q9NQ50;Q9UHB9;O60783;P46779;P62750;P62851;P62841;Q96DV4;P62987;P82663;P22090;P82664;P61927;P36578;Q9H9J2;P05386;P82914;Q0VDF9;P08865;Q9Y399;P61247;P27695;Q9P0J6;Q5JNZ5;P46777;P62917;Q92901;Q6P161;P18124;P46781;Q6NVV1;P25398;P60866;Q02543;P62906;P50914;P62266;P40429;P62888;Q5F1R6;Q6P1L8}
- 262 Pathogen[ P14079] interacts with 182 human partners: {Q9NQ39;Q15637;Q9Y3U8;Q9BQC6;P27635;Q8IXM3;P52815;P84098;P46779;A6NKH3;Q9BYD6;Q92552;Q7Z7F7;Q9NQ50;P26373;Q4U2R6;P23396;Q6NVV1;P40429;P18621;Q9H0U6;P83881;Q6P161;Q8TCC3;Q9UNX3;P82664;P46781;P83731;P61513;P62847;P62753;P82933;Q9BQ48;P39023;P62273;Q9Y2R9;Q9BYD2;Q9BYC9;P25398;Q9BRJ2;Q9Y6G3;Q9NRX2;P18077;Q9Y291;Q16540;P46783;P61254;P50914;Q7Z2W9;P62979;P62841;P18124;P42766;O60678;P62266;Q9Y2R5;P46782;P62987;Q5JNZ5;O60783;P62241;Q9Y3D3;P32969;P22090;Q9P0M9;P62829;P60866;Q0VDF9;P62854;Q07020;P39019;Q13084;Q9BZE1;P63220;P49207;Q96L21;P62244;P82921;P82650;P09001;Q96A35;P62263;Q02543;P62424;Q92901;P62277;Q9BXR0;Q9H2W6;P62750;P62910;Q86TS9;P63173;Q9Y6X1;Q6DKI1;Q96GC5;P46776;Q9BYD3;P82912;Q8NE71;P08708;Q92665;Q92616;Q9Y2Q9;P36578;Q8N5N7;P0CW22;Q9BYD1;Q71UM5;Q9BYC8;P27695;O15235;P62906;P47914;P62280;Q6P5R6;P62899;Q9NP92;Q9BYN8;Q13405;P61353;P62081;P62945;Q96EL3;Q9NX20;P46777;P42677;Q9H9J2;P30050;Q9P015;P15880;Q59GN2;O75394;Q7Z7H8;P62891;P82909;Q9H7H0;P82675;Q9NZE8;Q9HD33;P62888;P08865;P82673;P61927;P62917;Q9Y3B7;Q9P0J6;P6778;P62249;Q9Y676;P82930;Q96DV4;Q969Q0;P05386;P35268;P62913;Q5F1R6;P51398;Q8N983;Q9NVS2;P05387;P61247;Q9NYK5;P62269;P62701;Q9UHB9;P61313;Q5T653;P82663;Q8TD47;Q96EL2;P62851;Q6P1L8;P0C6E6;P05388;Q96EH5;Q9Y3D5;P62857;P62861;Q9Y3D9;P82914;Q8NHW5;P49406}
- 263 Pathogen[ P03383] interacts with 167 human partners: {P42766;P51398;P36578;P05388;P62266;Q8NHW5;P39019;P26373;Q96EL2;Q9BYD1;P62913;P62945;P62854;P82930;P40429;P82912;Q9BYD2;Q96A35;P62987;P62891;P25398;Q13084;P62280;P82664;Q07020;P62750;Q9BRJ2;P05387;Q9BQ48;P62249;P62888;P62899;P61927;A6NKH3;Q8NE71;P46777;P46779;P49207;Q9P0J6;Q9NX20;P83731;P62424;Q9H2W6;P49406;P18124;P82933;P46778;Q92901;P62753;Q9BQC6;P42677;Q9NWU5;P61247;Q9BYC9;Q5JNZ5;P83881;P09001;Q9BYD3;P47914;Q5T653;Q9P0M9;Q71UM5;Q9Y2R9;P62917;Q9NP92;P82914;Q13405;P62273;Q9UNX3;Q9BZE1;Q96L21;Q969Q0;Q92665;Q9NRX2;P30050;P84098;Q9Y6G3;O75394;P32969;Q9BYN8;Q9NVS2;P82675;P62277;Q92552;Q9BYD6;P18077;Q6P1L8;P63173;Q9Y3D9;O60783;P62081;Q9Y2Q9;Q9Y2R5;Q9Y3B7;P61313;P08865;P82909;P82663;P62851;P46782;Q9HD33;Q9NZE8;P62269;Q9P015;P63220;Q02543;P62244;Q02878;Q9Y3D5;Q86TS9;P82921;P62910;P27635;Q9BXR0;Q8IXM3;P62857;P82932;P62857;P82906;P46783;Q9H7H0;Q9Y3U8;P60866;P52815;P61254;P62979;P62241;Q7Z7F7;P46781;Q96EH5;Q9H9J2;P82650;P39023;Q9NQ50;Q9UHB9;Q8TCC3;P62841;P27695;Q6NVV1;P22090;P62701;P62829;Q9Y676;P62263;P62847;P35268;Q4U2R6;P05386;P50914;O15235;Q9Y291;Q15637;Q9Y399;P62861;P18621;P46776;Q96GC5;P15880;P23396;Q8N5N7;Q8N983;Q9Y3D3;P61513;Q59GN2;Q9BYC8;Q9H0U6;P08708;P61353}
- 264 Pathogen[ P03410] interacts with 183 human partners: {Q9Y2Q9;P62861;P05386;Q8NHW5;Q9Y399;Q7Z7F7;Q02543;P61247;P62241;P62829;P49207;P26373;P82663;Q9HD33;P61513;P82909;P62899;Q9P015;Q8NE71;P0CW22;Q9P0M9;Q9UHB9;Q15637;P62244;Q9H7H0;P62913;Q8TCC3;Q16540;Q02878;Q9NX20;Q92901;P15880;P46777;P46776;P62841;P82675;Q5JNZ5;P30050;Q9NQ39;P05388;Q8N983;O15235;P46781;P18124;Q96A35;P49406;Q92665;Q9BYD2;P62269;Q07020;P63220;P62910;P62910;P62847;Q59GN2;P62906;Q9P0J6;P52815;Q9NP92;P23396;P18621;P62266;Q9NWU5;P62249;P63173;P50914;Q969Q0;Q96DV4;P62280;Q5F1R6;Q96EH5;Q9BQC6;Q9NYK5;Q9BYN8;Q6DKI1;P22090;Q9BYD6;P61313;P62979;Q9Y3D5;Q9H9J2;Q9BYD3;P62701;P62750;O60783;P82664;P08865;Q96L21;Q0VDF9;Q9UNX3;P62277;Q9Y676;P36578;Q9BYD1;P18077;P25398;Q92552;Q9Y6X1;P61927;P84098;Q4U2R6;P62854;Q96EL3;P62273;Q9NRX2;Q9BYC8;P0C6E6;Q8N5N7;P62081;P46783;Q8TD47;Q6NVV1;Q9BRJ2;Q9Y3U8;Q13084;Q6P1L8;Q9Y291;P08708;Q9Y2R9;P46782;P32969;Q9Y6G3;Q9BQ48;Q9NQ50;Q8IXM3;P82673;Q5T653;P82912;Q92616;P46779;P27635;Q96EL2;Q9NZE8;P62987;Q9Y3D9;P27695;Q7Z2W9;Q86TS9;P62857;Q9BYC9;P62263;P62424;P62888;P61254;Q9H2W6;P46778;A6NKH3;P62945;P05387;P42766;P09001;P39019;P47914;P82933;P40429;P39023;Q6P161;P82914;P62917;P62851;Q7Z7H8;P82921;Q9NVS2;P83731;P82930;P35268;Q9Y2R5;P61353;P62891;P62753;Q6P5R6;Q13405;Q71UM5;Q9BZE1;O75394;P83881;Q9H0U6;P60866;P51398;P42677;Q9Y3D3;Q96GC5;Q9Y3B7}
- 265 Pathogen[ P14075] interacts with 168 human partners: {P42766;Q9H7H0;P49207;P62857;P52815;P46781;Q9BRJ2;P63220;P32969;Q96EL2;Q9BYD1;Q9BYD6;Q9NRX2;Q9BYD2;P42677;P62913;P82921;P22090;Q9P0M9;Q9NYK5;Q02878;P82912;Q96L21;Q9Y3D9;P62277;Q96GC5;Q9Y2Q9;P62851;Q59GN2;P08865;P27695;P62244;P49406;Q9BQC6;Q9Y2R5;Q9NX20;P08708;P61254;P46778;O75394;P05388;Q9BXR0;Q9Y3D3;Q9HD33;P83881;P82650;Q5T653;P46777;Q6P1L8;Q9Y3U8;P62249;Q9H2W6;Q8N5N7;P62081;Q9H9J2;P62750;P18621;Q969Q0;Q9Y3D5;Q02543;Q9BYC9;P18124;Q9UNX3;P25398;Q9BQ48;Q9BZE1;Q13084;P82909;Q9Y3B7;P51398;Q9Y2R9;Q13405;Q9Y676;P63173;Q9NWU5;P30050;O15235;P62979;Q9Y399;P83731;P84098;Q8N983;Q8TCC3;P61247;O60783;P62753;P46782;P62891;P62861;Q96A35;P18077;P82664;P46779;P82665;P62917;Q15637;P39023;Q9NZE8;P50914;Q6NVV1;P62269;P62847;P62910;P62273;Q9P015;Q86TS9;P40429;Q9NQ50;P82663;P23396;P62241;Q9Y291;P15880;Q8NE71;P82930;P62987;P82914;P62841;P36578;Q5JNZ5;P62266;P82932;P61513;P61313;P27635;P62888;Q9H0U6;Q92901;Q8IXM3;P35268;Q9BYN8;Q9UHB9;P62945;P46776;Q96EH5;P09001;Q9BYD3;P62861;Q7Z7H8;Q4U2R6;P62701;Q9NP92;Q9BYC8;P62899;P82933;P47914;P62906;Q7Z7F7;P05386;P61353;P39019;Q92552;P62424;P62829;P62280;Q9P0J6;Q07020;P62263;P62854;P60866;P82675;P26373;P05387;Q9Y6G3;A6NKH3;Q9NVS2;Q71UM5;P61927}
- 266 Pathogen[ P0C206] interacts with 181 human partners: {P27695;Q8N5N7;Q6P1L8;P40429;P61313;Q6P161;Q96A35;Q9Y291;Q9Y3D5;Q0VDF9;Q9Y399;Q8NHW5;Q96L21;P27635;P82930;P18124;Q8IXM3;Q96EL3;Q7Z2W9;P62854;Q9H0U6;Q96EL2;P49207;Q9BQ48;P62081;Q9Y3D3;Q9P015;P30050;O60783;P82914;Q13084;P62241;Q4U2R6;P62244;Q5F1R6;P50914;Q9BYC8;P08865;P62750;P18621;P46781;P62266;Q02543;Q92665;Q7Z7H8;Q9Y676;P09001;Q

07020;Q9P0M9;P83881;P46778;Q15637;P62263;P62273;Q02878;Q9P0J6;Q9NWU5;Q5T653;P82673;Q9NRX2;P62280;P49406;Q6P5R6;P62857;P62851;Q9BYN8;Q9Y6G3;P62910;P46782;Q9NZE8;P61247;P51398;Q9HD33;P18077;Q92616;Q9BRJ2;P62913;P61927;P61353;P62888;Q6NVV1;O75394;P82664;P36578;Q96GC5;Q9NVS2;P62861;Q9BYC9;P35268;P23396;P39023;Q9Y2R9;P32969;Q13405;P82909;P62701;P05386;Q9Y3B7;Q86TS9;P22090;Q9BYD6;P84098;P62945;Q9BYD2;P26373;Q71UM5;Q8TCC3;P46777;P05388;P62979;P62899;P82933;Q92552;P83731;Q9Y3D9;P82663;P82675;P39019;Q92901;P05387;P46783;P42766;P60866;Q9NP92;P62841;Q8NE71;Q9H2W6;Q9UNX3;Q9BZE1;P82650;Q969Q0;P61513;Q9Y2Q9;O60678;A6NKH3;Q9BYD1;Q9NQ50;P62277;Q9BXR0;Q9UHB9;P0C6E6;P46776;Q9H9J2;Q8N983;P62906;Q9H7H0;P63173;P82932;Q9NYK5;P62987;Q9Y2R5;P62891;P62269;P62753;P46779;P63220;Q5JNZ5;P15880;Q9NX20;Q96EH5;P25398;P08708;Q7Z7F7;P47914;O15235;Q9BQC6;P62847;P61254;Q96DV4;P82912;P42677;P62829;P52815;Q9BYD3;P62249;P62424;P82921;Q59GN2;Q6DKI1;Q9Y3U8;P62917}

267 Pathogen[ P03363] interacts with 178 human partners: {P62913;P82650;Q9Y2R5;Q9BYD2;P18621;P05386;Q8NHW5;P62750;P23396;P42677;Q9H7H0;P63173;P08865;Q96GC5;P62847;P18077;P82664;P05387;Q96EL2;Q9BXR0;P84098;P42766;Q9NZE8;P62249;Q9BYD1;P82921;P05388;P36578;P49406;P62753;P62081;A6NKH3;P62910;Q8IXM3;P61513;P46776;Q13405;Q9BYD3;P82914;P61254;Q9P0J6;P62273;Q9UHB9;P32969;Q92901;Q8N5N7;P46778;Q9NVS2;Q9Y3D5;P61927;P82930;Q9Y2Q9;P62891;P52815;Q6P5R6;Q59GN2;P61353;Q96EL3;Q5F1R6;Q9H9J2;Q96A35;Q9BZE1;P08708;Q9NQ50;P15880;Q96L21;Q7Z7F7;Q8TCC3;Q96DV4;Q9H0U6;Q9HD33;Q9Y3B7;P26373;Q4U2R6;P83881;Q96EH5;Q9BRJ2;Q9NWU5;P22090;P62861;P62841;Q9UNX3;O75394;P30050;P82912;P62829;P82663;P46782;P35268;Q9NRX2;Q6P161;Q9Y6G3;Q92552;Q9BYC8;P46781;P50914;Q9H2W6;Q15637;Q9P0M9;Q9Y2R9;P63220;Q9Y3D9;P61313;P39019;Q9NX20;P46779;Q5T653;Q02543;P46777;P62987;Q8N983;Q7Z7H8;O60783;P25398;Q9NP92;P09001;P82675;Q5JNZ5;P82933;P83731;P62851;P62280;Q71UM5;Q92665;Q9Y3U8;P62888;Q969Q0;Q92616;Q9Y676;P62244;P62277;P62906;Q8NE71;P62266;P62945;P49207;P62241;Q9BQC6;P62424;P60866;P61247;Q9P015;Q9Y3D3;Q13084;P62899;P62857;Q02878;P82909;Q6NVV1;Q07020;P0C6E6;P39023;P82932;Q9NQ39;Q9BQ48;Q86T59;P62854;Q9Y399;O15235;P62917;Q7Z2W9;Q0VDF9;P51398;Q9BYC9;P18124;P40429;P27635;P62263;P47914;Q9Y291;P62701;Q9BYN8;Q8TD47;Q9BYD6;P62269;P46783;Q6P1L8;Q6DKI1}

268 [Cluster 25]GO:0044530+C

269 Pathogen[ Q2Q067] interacts with 3 human partners: {Q92900;P55265;P38159}

270 Pathogen[ P0C214] interacts with 3 human partners: {P38159;Q92900;P55265}

271 Pathogen[ P03346] interacts with 3 human partners: {P55265;P38159;Q92900}

272 Pathogen[ Q85601] interacts with 3 human partners: {P55265;P38159;Q92900}

273 Pathogen[ P14079] interacts with 3 human partners: {P55265;Q92900;P38159}

274 Pathogen[ P03383] interacts with 3 human partners: {P38159;P55265;Q92900}

275 Pathogen[ P03410] interacts with 3 human partners: {Q92900;P55265;P38159}

276 Pathogen[ P14075] interacts with 3 human partners: {Q92900;P55265;P38159}

277 Pathogen[ P0C206] interacts with 3 human partners: {P55265;P38159;Q92900}

278 Pathogen[ P03363] interacts with 3 human partners: {Q92900;P38159;P55265}

279 [Cluster 26]GO:0015030+C cellular\_component [name] Cajal body [def] "A class of nuclear body, first seen after silver staining by Ramon y Cajal in 1903, enriched in small nuclear ribonucleoproteins, and certain general RNA polymerase II transcription factors\_ ultrastructurally, they appear as a tangle of coiled, electron-dense threads roughly 0.5 micrometers in diameter\_ involved in aspects of snRNP biogenesis\_ the protein coilin serves as a marker for Cajal bodies. Some argue that Cajal bodies are the sites for preassembly of transcriptosomes, unitary particles involved in transcription and processing of RNA." [http

280 Pathogen[ Q2Q067] interacts with 40 human partners: {O43290;P22087;O75940;P38432;Q8WWY3;O43172;Q8WTR7;Q6PI26;Q96JC9;Q9NPE3;Q9UHI6;O14980;P55199;O43482;O60832;Q14978;Q8WDX5;Q01081;Q96RS0;Q8TEQ6;P57678;Q15029;Q9UQ35;Q9NY12;Q9Y2X3;O43395;Q9NWZ8;P24941;Q9BQA5;Q9H840;Q16637;Q14331;O14893;Q14207;Q9UBY9;P09234;Q9H814;Q9BUR4;Q8NG50;Q969L4}

281 Pathogen[ P0C214] interacts with 42 human partners: {Q16637;P38432;Q14331;O43172;Q14207;Q9NPE3;Q9H814;Q15029;Q969L4;P57678;Q9UBY9;Q6PI26;O43395;P22087;Q9BUR4;Q8WDX5;Q9Y3D8;Q9NY12;Q9H089;O43482;O14980;Q14978;Q8TEQ6;P55199;P24941;Q9UHI6;Q01081;Q96RS0;O75940;Q9H840;O60832;Q8WTR7;O14893;Q9UQ35;O43290;P09234;Q9BQA5;Q96JC9;Q9NWZ8;Q8NG50;Q9Y2X3;Q8WWY3}

282 Pathogen[ P03346] interacts with 44 human partners: {O43172;Q14207;O43290;P24941;Q6PI26;Q9H814;Q8WDX5;O75940;Q8WTR7;O60832;O43482;Q9BUR4;Q16637;Q9Y2X3;O14980;Q14978;Q8IYM9;Q9UBY9;Q9NX24;Q9NWZ8;Q9UHI6;Q8NG50;Q01081;Q96RS0;Q8TEQ6;Q9Y3D8;Q96JC9;Q8WWY3;Q9UQ35;P55199;P57678;Q9NPE3;P22087;O14893;P38432;Q969L4;Q15029;Q9NY12;P09234;Q86XP3;Q9H840;Q9BQA5;Q14331;O43395}

283 Pathogen[ Q85601] interacts with 41 human partners: {Q14978;P09234;Q14331;Q9BUR4;Q6PI26;Q969L4;O75940;Q9H089;Q8NG50;P38432;Q9H814;Q96JC9;Q9UBY9;Q8TEQ6;Q15029;Q9NWZ8;Q9UHI6;Q8IYM9;Q01081;Q96RS0;Q9UQ35;O43395;O43290;Q8WWY3;O14980;Q14207;P55199;Q9BQA5;Q9NPE3;P22087;O14893;Q9NY12;Q16637;O43172;Q8WTR7;Q9Y2X3;O43482;P24941;O60832;Q8WDX5;Q9H840}

284 Pathogen[ P14079] interacts with 40 human partners: {P55199;P57678;Q96RS0;Q8WTR7;Q8TEQ6;Q9NPE3;O43482;Q9Y2X3;O14893;Q96JC9;O60832;Q14207;Q8NG50;Q9H840;Q15029;Q9UHI6;Q9BQA5;P22087;O43290;Q8WWY3;Q9BUR4;Q9NWZ8;O75940;Q16637;Q9NY12;Q9UQ35;Q969L4;Q5W0Q7;Q01081;P38432;Q6PI26;Q14331;P09234;O43172;Q9UBY9;O43395;Q8WDX5;Q9H089;Q14978;Q9H814}

285 Pathogen[ P03383] interacts with 39 human partners: {Q14978;P55199;Q969L4;Q9H840;O43290;Q15029;O43172;Q9BUR4;Q6PI26;Q9UHI6;Q8WDX5;Q14331;Q9NPE3;P38432;O43395;Q16637;Q8TEQ6;O14893;O14980;Q9BQA5;P24941;Q9NY12;Q01081;Q96RS0;Q14207;Q8WWY3;Q9UQ35;Q9Y2X3;Q8WTR7;P57678;Q9UBY9;Q96JC9;Q9NWZ8;P22087;P09234;

286 O60832;O43482;O75940;Q9H814}  
Pathogen[ P03410] interacts with 42 human  
partners:{P22087;Q96RS0;Q8WXD5;Q01081;O14893;Q8WWY3;Q15029;Q8WTR7;Q9H840;Q9BQA5;Q6PI2  
6;Q14207;Q8TEQ6;Q14978;Q8NG50;O60832;P38432;Q9Y2X3;Q9UQ35;Q9NX24;P55199;Q96JC9;Q9H814  
;O43172;Q16637;P24941;O43482;O43395;Q9NY12;Q9H089;P09234;Q969L4;Q9NPE3;P57678;Q9BUR4;  
O43290;O75940;Q9UHI6;Q9UBY9;O14980;Q14331;Q9NWZ8}

287 Pathogen[ P14075] interacts with 39 human  
partners:{Q8TEQ6;Q9H814;Q9UBY9;Q14207;Q8WXD5;P24941;Q9BQA5;O43395;P38432;P57678;Q6PI2  
6;P09234;Q9H840;O43172;Q9UQ35;Q15029;Q16637;O75940;Q8WTR7;O14980;Q9UHI6;Q96JC9;Q9NPE3  
;P22087;Q01081;Q96RS0;Q9BUR4;Q9NWZ8;O60832;P55199;O14893;Q14331;O43290;Q9NY12;O43482;  
Q9Y2X3;Q8WWY3;Q14978;Q969L4}

288 Pathogen[ P0C206] interacts with 42 human  
partners:{Q96RS0;Q9NPE3;Q9H840;Q01081;Q9Y3D8;Q9NY12;Q8WXD5;Q8TEQ6;Q8WTR7;O75940;Q9BQA  
5;O43290;Q9UQ35;Q9Y2X3;Q9H814;Q9H089;Q6PI26;O43395;O14893;O43482;Q8WWY3;O60832;Q9BUR4  
;O43172;Q96JC9;Q8IYM9;P22087;Q9UHI6;P55199;Q14331;Q16637;P24941;P38432;P09234;Q8NG50;  
Q14207;Q9NWZ8;Q14978;Q9UBY9;Q969L4;Q15029;P57678}

289 Pathogen[ P03363] interacts with 43 human  
partners:{O60832;Q9UBY9;O75940;Q9NX24;Q14978;Q96RS0;O43395;Q96JC9;Q9BUR4;Q9Y2X3;Q8NG5  
0;Q9UHI6;P55199;Q14331;O14980;Q9NWZ8;Q9NY12;P24941;P09234;Q8WWY3;O14893;Q15029;P57678  
;Q6PI26;O43172;Q9Y3D8;Q9NPE3;Q8WXD5;Q9BQA5;P22087;O43290;Q9H840;Q86XP3;Q01081;Q969L4;  
Q8TEQ6;Q16637;Q8WTR7;Q14207;O43482;Q9UQ35;Q9H814;P38432}

290 [Cluster 27]GO:0044297+C cellular\_component [name] cell body [def] "The portion of  
a cell bearing surface projections such as axons, dendrites, cilia, or flagella that  
includes the nucleus, but excludes all cell projections." [GOC

291 Pathogen[ Q2Q067] interacts with 7 human  
partners:{Q9UER7;P14136;Q13158;Q14790;Q9HB71;Q9UQF2;Q9NRI5}

292 Pathogen[ P0C214] interacts with 9 human  
partners:{P05937;Q9NRI5;Q13158;P14136;Q9UER7;O00154;Q9UQF2;Q9HB71;Q14790}

293 Pathogen[ P03346] interacts with 10 human  
partners:{Q9NRI5;Q13158;P14136;P05937;Q9H0R8;Q9HB71;Q9UER7;P11137;Q14790;Q9UQF2}

294 Pathogen[ Q85601] interacts with 9 human  
partners:{Q13158;Q14790;Q9H0R8;Q9UER7;P14136;Q9UQF2;Q9NRI5;Q9GZM8;Q9HB71}

295 Pathogen[ P14079] interacts with 11 human  
partners:{P05937;Q9UQF2;Q9NRI5;P14136;Q9HB71;Q14790;Q9UER7;Q9H0R8;Q9GZM8;Q13158;P1113  
7}

296 Pathogen[ P03383] interacts with 6 human  
partners:{Q9NRI5;P14136;Q9UQF2;Q13158;Q9HB71;Q9UER7}

297 Pathogen[ P03410] interacts with 11 human  
partners:{Q9HB71;P11137;Q9GZM8;Q13158;O00154;Q9UER7;Q9H0R8;P05937;Q9NRI5;P14136;Q9UQF  
2}

298 Pathogen[ P14075] interacts with 6 human  
partners:{P14136;Q9NRI5;Q13158;Q9UER7;Q9UQF2;Q9HB71}

299 Pathogen[ P0C206] interacts with 10 human  
partners:{Q9HB71;Q9UER7;Q13158;Q9UQF2;Q9GZM8;P11137;P14136;Q9NRI5;Q14790;Q9H0R8}

300 Pathogen[ P03363] interacts with 10 human  
partners:{P11137;Q9HB71;Q9UQF2;Q9UER7;Q13158;Q9H0R8;P14136;Q12923;Q9NRI5;P05937}

301 [Cluster 28]GO:0000797+C cellular\_component [name] condensin core heterodimer [def]  
"The core heterodimer of a condensin complex, a multisubunit protein complex that plays a  
central role in chromosome condensation." [GOC

302 Pathogen[ Q2Q067] interacts with 1 human partners:{Q15021}

303 Pathogen[ P0C214] interacts with 1 human partners:{Q15021}

304 Pathogen[ P03346] interacts with 1 human partners:{Q15021}

305 Pathogen[ Q85601] interacts with 1 human partners:{Q15021}

306 Pathogen[ P14079] interacts with 1 human partners:{Q15021}

307 Pathogen[ P03383] interacts with 1 human partners:{Q15021}

308 Pathogen[ P03410] interacts with 1 human partners:{Q15021}

309 Pathogen[ P14075] interacts with 1 human partners:{Q15021}

310 Pathogen[ P0C206] interacts with 1 human partners:{Q15021}

311 Pathogen[ P03363] interacts with 1 human partners:{Q15021}

312 [Cluster 29]GO:0035517+C cellular\_component [name] PR-DUB complex [def] "A  
multimeric protein complex that removes monoubiquitin from histone H2A. In Drosophila and  
mammals, the core of the complex is composed of Calypso/BAP1 and Asx/ASXL1,  
respectively." [PMID

313 Pathogen[ Q2Q067] interacts with 1 human partners:{Q8IXJ9}

314 Pathogen[ P0C214] interacts with 2 human partners:{Q92560;Q8IXJ9}

315 Pathogen[ P03346] interacts with 2 human partners:{Q92560;Q8IXJ9}

316 Pathogen[ Q85601] interacts with 2 human partners:{Q92560;Q8IXJ9}

317 Pathogen[ P14079] interacts with 2 human partners:{Q8IXJ9;Q92560}

318 Pathogen[ P03383] interacts with 1 human partners:{Q8IXJ9}

319 Pathogen[ P03410] interacts with 1 human partners:{Q8IXJ9}

320 Pathogen[ P14075] interacts with 1 human partners:{Q8IXJ9}

321 Pathogen[ P0C206] interacts with 2 human partners:{Q8IXJ9;Q92560}

322 Pathogen[ P03363] interacts with 2 human partners:{Q8IXJ9;Q92560}

323 [Cluster 30]GO:0005938+C cellular\_component [name] cell cortex [def] "The region of  
a cell that lies just beneath the plasma membrane and often, but not always, contains a  
network of actin filaments and associated proteins." [GOC

- 324 Pathogen[ Q2Q067] interacts with 25 human  
partners: {Q96J02;A6NGQ2;Q9NQW6;Q9NPB6;Q9BYG5;Q7Z460;Q12933;Q14511;Q9UER7;P29966;P59047;P11171;O14641;P54840;P56279;Q9NZU7;P19338;O75122;Q96PI1;P81274;Q02952;O60759;Q9H808;P35579;P61586}
- 325 Pathogen[ P0C214] interacts with 24 human  
partners: {Q96J02;P29966;O60759;P81274;Q9UM54;P61586;Q9H808;O75122;Q9NPB6;P35580;Q9UER7;O14641;Q12933;Q9NZU7;Q14511;Q7Z460;Q9BYG5;P54840;P19338;P56279;P59047;P11171;Q9NVN3;Q96PI1}
- 326 Pathogen[ P03346] interacts with 39 human  
partners: {Q96J02;P59047;Q96AC1;Q969H4;P56279;P02549;O14908;Q9NQW6;Q14511;P11277;P35579;Q14247;Q9NZU7;O60759;Q9NPB6;P19338;Q8TEW0;A5A3E0;Q13813;Q96PI1;Q14847;P11171;Q9P0K7;O14641;P81274;Q9BYG5;Q15019;Q9H808;Q02952;Q9UER7;O75604;O76003;O75122;P29966;Q9NVN3;P54840;Q7Z460;A6NGQ2;P61586}
- 327 Pathogen[ Q85601] interacts with 25 human  
partners: {Q96J02;Q9NZU7;Q9NQW6;Q9BYG5;P35579;P56279;P81274;O60759;Q9UER7;P11171;P19338;O75122;O76003;Q9H808;O14641;Q12933;Q9NPB6;P61586;P29966;Q7Z460;P54840;P35580;Q9UM54;Q14511;P59047}
- 328 Pathogen[ P14079] interacts with 43 human  
partners: {Q02952;Q9NQW6;P35579;O95876;Q9BYG5;Q7Z460;P11171;O14641;Q587J8;O60759;Q14847;Q9UM54;A6NGQ2;Q9H808;Q8TEW0;P19338;Q9Y6U3;Q9UER7;P29966;A5A3E0;Q96AC1;P61586;Q14247;P11277;Q96J02;O76003;Q969H4;Q12933;P81274;P49023;P56279;Q9NPB6;Q9UEY8;P54840;Q13813;O75122;P02549;O14908;Q9NVN3;P59047;Q96PI1;Q9NZU7;Q9P0K7}
- 329 Pathogen[ P03383] interacts with 19 human  
partners: {Q7Z460;P19338;Q96PI1;P81274;Q9H808;A6NGQ2;P61586;O14641;Q12933;Q9BYG5;Q14511;Q9NPB6;P29966;Q9UER7;P35580;P54840;P35579;P56279;Q02952}
- 330 Pathogen[ P03410] interacts with 42 human  
partners: {Q7Z460;P56279;Q9UEY8;O76003;P54840;A6NGQ2;A5A3E0;O14908;P35579;P59047;Q9Y6U3;Q9H808;Q9NQW6;Q969H4;P02549;Q9NVN3;O60759;P11171;Q9UM54;Q9UER7;Q14511;P61586;Q14847;P19338;O95876;Q12933;Q96PI1;P81274;Q9NZU7;P35580;Q8TEW0;Q9NPB6;Q14247;Q02952;Q13813;O75122;Q587J8;P11277;P29966;Q9P0K7;Q9BYG5;O14641}
- 331 Pathogen[ P14075] interacts with 19 human  
partners: {Q96PI1;Q14511;P19338;P81274;Q7Z460;P54840;P56279;Q02952;O14641;P29966;Q12933;Q9H808;P35579;P61586;A6NGQ2;Q9BYG5;Q9NPB6;Q9UER7;P11171}
- 332 Pathogen[ P0C206] interacts with 36 human  
partners: {A6NGQ2;Q9UM54;P81274;Q15019;O60759;Q96PI1;Q9NQW6;O75604;Q96J02;Q9BYG5;P19338;Q9UER7;Q12933;Q9NZU7;Q9H808;P61586;O75122;Q8TEW0;P54840;P59047;O14908;Q9NPB6;O76003;P35579;Q02952;P11277;P56279;Q7Z460;A5A3E0;Q969H4;P35580;O95876;Q9NVN3;Q14511;P29966;P11171}
- 333 Pathogen[ P03363] interacts with 37 human  
partners: {A6NGQ2;P19338;A5A3E0;P11277;O14908;P02549;P35579;Q14247;Q02952;Q9NQW6;P56279;O75604;O76003;Q12933;Q14847;Q9NPB6;Q9UER7;Q96RU3;P81274;Q969H4;Q9P0K7;Q76G19;Q14511;Q9H808;P11171;Q9NZU7;Q7Z460;P54840;P59047;P29966;Q9BYG5;Q96PI1;O60759;Q96AC1;Q99719;O14641;Q13813}
- 334 [Cluster 31]GO:0012505+C cellular\_component [name] endomembrane system [def] "A collection of membranous structures involved in transport within the cell. The main components of the endomembrane system are endoplasmic reticulum, Golgi bodies, vesicles, cell membrane and nuclear envelope. Members of the endomembrane system pass materials through each other or through the use of vesicles." [GOC
- 335 Pathogen[ Q2Q067] interacts with 12 human  
partners: {Q9UL45;O00291;Q5SQN1;Q9BXW4;Q9BZE9;Q8N1I0;Q9HD42;Q00587;Q15599;Q9BZR8;Q96NA2;P14672}
- 336 Pathogen[ P0C214] interacts with 13 human  
partners: {Q15599;Q9HD42;Q9BXW4;Q96NA2;Q5SQN1;Q9BZE9;O14613;Q9UL45;Q8N1I0;P14672;Q9H492;O00291;Q9BZR8}
- 337 Pathogen[ P03346] interacts with 26 human  
partners: {O95166;Q96HJ5;Q9HD42;Q5SQN1;Q96FS4;Q96NA2;Q00587;O14613;O00291;Q9BZE9;Q8TEW0;Q96FZ7;Q9BZ29;Q8N3R9;Q15599;Q9NQS1;Q9H492;Q15041;Q9UL45;Q9BZR8;Q9BXW4;O43427;P14672;Q8N1I0;O75146;Q86Y82}
- 338 Pathogen[ Q85601] interacts with 14 human  
partners: {Q9H492;O95166;Q9BZE9;Q96FZ7;Q9BXW4;O14613;Q5SQN1;O00291;Q96NA2;Q9BZR8;P14672;Q8N1I0;Q9HD42;Q15599}
- 339 Pathogen[ P14079] interacts with 32 human  
partners: {O95166;Q96NA2;O14613;O00291;O75146;Q86VI4;Q9H492;Q13323;P14672;Q15041;Q9BZE9;Q9HD42;Q5SQN1;Q9UKI2;Q15012;Q8TEW0;Q6NZY7;O43427;Q9BZR8;O00519;Q969L2;Q96HJ5;Q9UL45;Q15599;Q8WU20;Q8N3R9;Q96FZ7;Q00587;Q8N1I0;Q9H3Q1;Q9BXW4;Q9NQS1}
- 340 Pathogen[ P03383] interacts with 7 human  
partners: {Q9BZE9;O00291;Q9HD42;Q00587;P14672;Q9NQS1;Q96NA2}
- 341 Pathogen[ P03410] interacts with 33 human  
partners: {Q96HJ5;Q15041;O00519;Q9BZE9;Q9BRV3;Q8TEW8;O43427;Q5SQN1;Q9UKI2;Q00587;O00291;Q86VI4;Q9H3Q1;Q6NZY7;O75146;Q9UL45;O95166;Q15599;Q9H492;Q9HD42;O14613;Q9BXW4;Q96FZ7;Q8TEW0;Q9BZR8;Q8WU20;Q96NA2;Q8N1I0;Q969L2;Q9NQS1;Q15012;Q8N3R9;Q13323}
- 342 Pathogen[ P14075] interacts with 11 human  
partners: {Q96HJ5;O43427;Q96NA2;Q86VI4;Q00587;O00291;Q9NQS1;O14613;Q9HD42;P14672;Q9BZE9}
- 343 Pathogen[ P0C206] interacts with 24 human  
partners: {Q9BXW4;Q9UL45;O00291;Q9BZR8;O43427;Q96HJ5;Q5SQN1;Q9H492;O14613;Q9BZE9;Q8N3R



9;Q8TEW0;Q15599;Q15041;Q8WU20;Q8N1I0;P14672;Q9HD42;Q96NA2;Q96FZ7;Q9NQS1;O95166;Q969L2;Q00587}

344 Pathogen[ P03363] interacts with 21 human partners:{Q9NQS1;Q9H492;Q9BXW4;Q15041;Q00587;Q9BZR8;Q969L2;Q96HJ5;Q8N1I0;Q8N3R9;Q5SQN1;O14613;Q9BZE9;Q15599;P14672;Q96NA2;O75146;O95166;Q96FS4;O00291;Q9HD42}

345 [Cluster 32]GO:0005786+C cellular\_component [name] signal recognition particle, endoplasmic reticulum targeting [def] "A ribonucleoprotein particle of 325 kDa composed of a 7S (300 nucleotide) RNA molecule and a complex of six different polypeptides. This binds both to the N-terminal signal peptide for proteins destined for the endoplasmic reticulum as they emerge from the large ribosomal subunit and also to the ribosome. This binding arrests further translation thereby preventing the proteins from being released into the cytosol. The SRP-ribosome complex then diffuses to the endoplasmic reticulum where it is bound to the signal recognition particle receptor, which allows resumption of protein synthesis and facilitates the passage of the growing polypeptide chain through the translocon. Through a process involving GTP hydrolysis, the SRP-SRP receptor complex dissociates and SRP returns to the cytosol. Of the six polypeptides of SRP the 54 kDa subunit (SRP54) is the central player. It contains an N-terminal GTPase domain and a C-terminal domain that binds directly to the signal peptide and the SRP RNA. Examples of this component are found in *Mus musculus*, *Saccharomyces cerevisiae* and *Arabidopsis thaliana*." [GOC

346 Pathogen[ Q2Q067] interacts with 3 human partners:{P49458;P09132;Q9UHB9}

347 Pathogen[ P0C214] interacts with 3 human partners:{Q9UHB9;P49458;P09132}

348 Pathogen[ P03346] interacts with 3 human partners:{P49458;P09132;Q9UHB9}

349 Pathogen[ Q85601] interacts with 2 human partners:{Q9UHB9;P09132}

350 Pathogen[ P14079] interacts with 3 human partners:{P09132;P49458;Q9UHB9}

351 Pathogen[ P03383] interacts with 3 human partners:{P49458;P09132;Q9UHB9}

352 Pathogen[ P03410] interacts with 3 human partners:{Q9UHB9;P09132;P49458}

353 Pathogen[ P14075] interacts with 3 human partners:{P09132;P49458;Q9UHB9}

354 Pathogen[ P0C206] interacts with 3 human partners:{P09132;P49458;Q9UHB9}

355 Pathogen[ P03363] interacts with 3 human partners:{P09132;Q9UHB9;P49458}

356 [Cluster 33]GO:0030289+C cellular\_component [name] protein phosphatase 4 complex [def] "The complex formed by the catalytic subunit of protein phosphatase 4 plus a regulatory subunit." [PMID

357 Pathogen[ Q2Q067] interacts with 1 human partners:{Q9NY27}

358 Pathogen[ P0C214] interacts with 1 human partners:{Q9NY27}

359 Pathogen[ P03346] interacts with 2 human partners:{Q9NY27;Q8TF05}

360 Pathogen[ Q85601] interacts with 1 human partners:{Q9NY27}

361 Pathogen[ P14079] interacts with 2 human partners:{Q8TF05;Q9NY27}

362 Pathogen[ P03383] interacts with 1 human partners:{Q9NY27}

363 Pathogen[ P03410] interacts with 2 human partners:{Q8TF05;Q9NY27}

364 Pathogen[ P14075] interacts with 1 human partners:{Q9NY27}

365 Pathogen[ P0C206] interacts with 2 human partners:{Q8TF05;Q9NY27}

366 Pathogen[ P03363] interacts with 2 human partners:{Q9NY27;Q8TF05}

367 [Cluster 34]GO:0019185+C cellular\_component [name] snRNA-activating protein complex [def] "A protein complex that recognizes the proximal sequence element of RNA polymerase II and III snRNA promoters." [PMID

368 Pathogen[ Q2Q067] interacts with 1 human partners:{Q5SXM2}

369 Pathogen[ P0C214] interacts with 1 human partners:{Q5SXM2}

370 Pathogen[ P03346] interacts with 1 human partners:{Q5SXM2}

371 Pathogen[ Q85601] interacts with 1 human partners:{Q5SXM2}

372 Pathogen[ P14079] interacts with 1 human partners:{Q5SXM2}

373 Pathogen[ P03383] interacts with 1 human partners:{Q5SXM2}

374 Pathogen[ P03410] interacts with 1 human partners:{Q5SXM2}

375 Pathogen[ P14075] interacts with 1 human partners:{Q5SXM2}

376 Pathogen[ P0C206] interacts with 1 human partners:{Q5SXM2}

377 Pathogen[ P03363] interacts with 1 human partners:{Q5SXM2}

378 [Cluster 35]GO:0022625+C cellular\_component [name] cytosolic large ribosomal subunit [def] "The large subunit of a ribosome located in the cytosol." [GOC

379 Pathogen[ Q2Q067] interacts with 51 human partners:{P61313;P47914;P46779;Q02543;P26373;P62750;P40429;P35268;P46778;P62888;P32969;P05387;P42766;P05386;P30050;P18077;P62891;P61927;P39023;P61254;Q9NP64;P83731;P62906;Q02878;P46777;P62899;Q96EH5;Q07020;P62913;P62424;P62917;P62829;P36578;P49207;P63173;P18621;P61353;Q96L21;Q9Y3U8;P83881;P62987;P51116;P50914;P46776;P05388;P18124;P62910;Q92901;P27635;P61513;P62945}

380 Pathogen[ P0C214] interacts with 49 human partners:{P84098;P42766;P62913;Q92901;P62899;P18077;P05388;P62829;P26373;P27635;P46778;Q96EH5;P61513;P83881;P49207;P32969;Q02543;P50914;P46779;P40429;P47914;P63173;Q9Y3U8;P30050;P62910;P62891;P61254;P51116;Q9NP64;P62987;Q07020;P62945;P46776;P46777;P83731;Q96L21;P35268;P62424;P61313;P05387;P61927;P62750;P05386;P18124;P61353;P36578;P18621;P62906;Q02878}

381 Pathogen[ P03346] interacts with 52 human partners:{P05387;P46779;P63173;P62917;Q9NP64;P62913;Q02878;P39023;P62987;P61927;P46778;P49207;P61254;P62424;P83731;P62899;P35268;P62891;P61353;Q9Y3U8;P47914;P51116;Q96L21;P61313;P61513;P05388;Q02543;P42766;P18621;P84098;P50914;P62829;P62750;Q96EH5;P30050;P62910;P36578;P46777;Q07020;P83881;P05386;P18077;P46776;P62945;Q92901;P32969;P26373;P18124;P40429;P27635;P62906;P62888}

382 Pathogen[ Q85601] interacts with 52 human partners: {P32969;P61513;P26373;P62913;P51116;P61353;P62891;P46776;P18077;P61313;P05388;P63173;P46778;P62829;P30050;P27635;P83881;Q07020;Q9Y3U8;P62424;P83731;P62899;P62945;Q02878;P39023;P61254;P49207;P62910;Q9NP64;P47914;P84098;Q96L21;P42766;P18621;P05387;P35268;Q96EH5;P46779;P62750;P62987;P61927;P36578;P05386;P46777;P62917;Q92901;P18124;Q02543;P62906;P50914;P40429;P62888}

383 Pathogen[ P14079] interacts with 51 human partners: {Q9Y3U8;P27635;P84098;P46779;P26373;P40429;P18621;P83881;P83731;P61513;P39023;P18077;P61254;P50914;P18124;P42766;P62987;P32969;P62829;Q07020;P49207;Q96L21;Q9NP64;Q02543;P62424;Q92901;P62750;P62910;P63173;P46776;P36578;P51116;P62906;P47914;P62899;P61353;P62945;P46777;P30050;P62891;P62888;P61927;P62917;P46778;P05386;P35268;P62913;P05387;P61313;P05388;Q96EH5}

384 Pathogen[ P03383] interacts with 52 human partners: {P42766;P36578;P05388;P26373;P62913;P62945;P40429;P62987;P62891;Q9NP64;Q07020;P62750;P05387;P62888;P62899;P61927;P46777;P46779;P49207;P83731;P62424;P18124;P46778;Q92901;P83881;P47914;P62917;Q96L21;P30050;P84098;P32969;P18077;P63173;P61313;Q02878;P62910;P27635;P51116;P62906;Q9Y3U8;P61254;Q96EH5;P39023;P62829;P35268;P05386;P50914;P18621;P46776;P61513;P61353}

385 Pathogen[ P03410] interacts with 51 human partners: {P05386;Q02543;P62829;P49207;P26373;P61513;Q9NP64;P62899;P62913;Q02878;Q92901;P46777;P46776;P30050;P05388;P18124;Q07020;P62910;P62906;P18621;P63173;P50914;Q96EH5;P61313;P62750;Q96L21;P36578;P18077;P61927;P84098;Q9Y3U8;P32969;P46779;P27635;P62987;P62424;P62888;P61254;P46778;P62945;P05387;P42766;P47914;P40429;P39023;P62917;P83731;P35268;P61353;P62891;P83881}

386 Pathogen[ P14075] interacts with 52 human partners: {P42766;P49207;P32969;P62913;Q02878;Q96L21;P61254;P46778;P05388;P83881;P46777;Q9Y3U8;P62750;P18621;Q02543;P18124;P63173;P30050;P83731;P84098;P51116;P62891;P18077;P46779;P62917;P39023;P50914;P62910;P40429;P62987;P36578;P61513;P61313;P27635;P62888;Q92901;P35268;P62945;Q9NP64;P46776;Q96EH5;P62899;P47914;P62906;P05386;P61353;P62424;P62829;Q07020;P26373;P05387;P61927}

387 Pathogen[ P0C206] interacts with 52 human partners: {P40429;P61313;Q96L21;P27635;P18124;P49207;P30050;P50914;P62750;P18621;Q02543;Q07020;P83881;P46778;Q02878;P62910;P18077;P62913;P61927;P61353;P62888;P36578;P35268;P39023;P32969;P05386;P84098;P62945;P26373;P46777;P05388;P62899;P83731;Q92901;P05387;P42766;P61513;Q9NP64;P46776;P62906;P63173;P62987;P62891;P46779;Q96EH5;P47914;P51116;P61254;P62829;P62424;Q9Y3U8;P62917}

388 Pathogen[ P03363] interacts with 52 human partners: {P62913;P18621;P05386;P62750;P63173;P18077;P05387;P84098;P42766;P05388;P36578;P62910;P61513;P46776;P61254;P32969;Q92901;P46778;P61927;P62891;P61353;Q96L21;P26373;P83881;Q96EH5;P30050;P62829;P35268;P50914;Q9NP64;P61313;P46779;Q02543;P46777;P62987;P83731;Q9Y3U8;P62888;P62906;P62945;P49207;P62424;P62899;Q02878;P51116;Q07020;P39023;P62917;P18124;P40429;P27635;P47914}

389 [Cluster 36]GO:0030135+C cellular\_component [name] coated vesicle [def] "Small membrane-bounded organelle formed by pinching off of a coated region of membrane. Some coats are made of clathrin, whereas others are made from other proteins." [ISBN

390 Pathogen[ Q2Q067] interacts with 1 human partners: {P53675}

391 Pathogen[ P0C214] interacts with 2 human partners: {P53675;P10809}

392 Pathogen[ P03346] interacts with 1 human partners: {P53675}

393 Pathogen[ Q85601] interacts with 1 human partners: {P53675}

394 Pathogen[ P14079] interacts with 1 human partners: {P53675}

395 Pathogen[ P03383] interacts with 1 human partners: {P53675}

396 Pathogen[ P03410] interacts with 1 human partners: {P53675}

397 Pathogen[ P14075] interacts with 1 human partners: {P53675}

398 Pathogen[ P0C206] interacts with 1 human partners: {P53675}

399 Pathogen[ P03363] interacts with 1 human partners: {P53675}

400 [Cluster 37]GO:0070531+C cellular\_component [name] BRCA1-A complex [def] "A protein complex that contains the BRCA1-BARD1 heterodimer, RAP80/UIMC1, BRCC3/BRCC36, BRE/BRCC45, FAM175A/CCDC98/Abxaxas and MERIT40/NBA1, and specifically recognizes and binds K63-linked polyubiquitin chains present on histone H2A and H2AX at DNA damage sites." [GOC

401 Pathogen[ Q2Q067] interacts with 5 human partners: {Q9NWX8;Q99728;Q6UWZ7;Q9NXX7;Q96RL1}

402 Pathogen[ P0C214] interacts with 5 human partners: {Q99728;Q9NWX8;Q6UWZ7;Q96RL1;Q9NXX7}

403 Pathogen[ P03346] interacts with 5 human partners: {Q99728;Q96RL1;Q9NXX7;Q9NWX8;Q6UWZ7}

404 Pathogen[ Q85601] interacts with 5 human partners: {Q96RL1;Q99728;Q6UWZ7;Q9NWX8;Q9NXX7}

405 Pathogen[ P14079] interacts with 4 human partners: {Q6UWZ7;Q9NXX7;Q9NWX8;Q96RL1}

406 Pathogen[ P03383] interacts with 4 human partners: {Q96RL1;Q9NWX8;Q9NXX7;Q6UWZ7}

407 Pathogen[ P03410] interacts with 4 human partners: {Q96RL1;Q9NXX7;Q9NWX8;Q6UWZ7}

408 Pathogen[ P14075] interacts with 4 human partners: {Q9NWX8;Q9NXX7;Q6UWZ7;Q96RL1}

409 Pathogen[ P0C206] interacts with 5 human partners: {Q9NWX8;Q99728;Q6UWZ7;Q96RL1;Q9NXX7}

410 Pathogen[ P03363] interacts with 5 human partners: {Q96RL1;Q6UWZ7;Q9NWX8;Q9NXX7;Q99728}

411 [Cluster 38]GO:0044609+C

```

412 Pathogen[ Q2Q067] interacts with 2 human partners:{Q5BKZ1;Q8N163}
413 Pathogen[ P0C214] interacts with 2 human partners:{Q5BKZ1;Q8N163}
414 Pathogen[ P03346] interacts with 2 human partners:{Q8N163;Q5BKZ1}
415 Pathogen[ Q85601] interacts with 2 human partners:{Q8N163;Q5BKZ1}
416 Pathogen[ P14079] interacts with 2 human partners:{Q8N163;Q5BKZ1}
417 Pathogen[ P03383] interacts with 2 human partners:{Q8N163;Q5BKZ1}
418 Pathogen[ P03410] interacts with 2 human partners:{Q8N163;Q5BKZ1}
419 Pathogen[ P14075] interacts with 2 human partners:{Q5BKZ1;Q8N163}
420 Pathogen[ P0C206] interacts with 2 human partners:{Q5BKZ1;Q8N163}
421 Pathogen[ P03363] interacts with 2 human partners:{Q5BKZ1;Q8N163}
422 [Cluster 39]GO:0009897+C cellular_component [name] external side of plasma membrane
[def] "The side of the plasma membrane that is opposite to the side that faces the
cytoplasm." [GOC
423 Pathogen[ Q2Q067] interacts with 2 human partners:{P27797;P14672}
424 Pathogen[ P0C214] interacts with 2 human partners:{P27797;P14672}
425 Pathogen[ P03346] interacts with 2 human partners:{P27797;P14672}
426 Pathogen[ Q85601] interacts with 2 human partners:{P27797;P14672}
427 Pathogen[ P14079] interacts with 6 human
partners:{Q9NYV7;P14672;Q96005;P08758;O75787;O14836}
428 Pathogen[ P03383] interacts with 2 human partners:{P14672;P27797}
429 Pathogen[ P03410] interacts with 4 human partners:{O75787;Q96005;O14836;P27797}
430 Pathogen[ P14075] interacts with 2 human partners:{P27797;P14672}
431 Pathogen[ P0C206] interacts with 3 human partners:{P27797;O75787;P14672}
432 Pathogen[ P03363] interacts with 2 human partners:{P27797;P14672}
433 [Cluster 40]GO:0005801+C cellular_component [name] cis-Golgi network [def] "The
network of interconnected tubular and cisternal structures located at the convex side of
the Golgi apparatus, which abuts the endoplasmic reticulum." [ISBN
434 Pathogen[ Q2Q067] interacts with 7 human
partners:{Q9UMS5;Q9P299;Q9H9H5;Q96JB2;O15155;Q86VS8;Q9Y296}
435 Pathogen[ P0C214] interacts with 8 human
partners:{Q9P299;Q9Y296;Q86VS8;Q9H9H5;Q9UMS5;P68543;Q96JB2;O15155}
436 Pathogen[ P03346] interacts with 12 human
partners:{Q9UMS5;Q9Y5R8;Q86VS8;Q96JB2;Q9P299;Q9H9H5;Q9Y296;Q9Y2L5;Q96KG9;P49755;O1515
5;P68543}
437 Pathogen[ Q85601] interacts with 9 human
partners:{Q86VS8;Q9P299;O15155;Q96JB2;Q9Y296;Q9H9H5;Q9Y2L5;Q9UMS5;Q96KG9}
438 Pathogen[ P14079] interacts with 17 human
partners:{Q9Y296;O75072;Q86VS8;Q9H9H5;O15155;P33947;O00461;P24390;P49755;Q9P299;P6854
3;Q9H6L5;Q9Y5R8;Q96JB2;Q9UMS5;Q96KG9;Q9Y2L5}
439 Pathogen[ P03383] interacts with 5 human
partners:{Q9UMS5;Q96JB2;Q9Y296;Q9H9H5;Q86VS8}
440 Pathogen[ P03410] interacts with 16 human
partners:{Q9Y2L5;Q96JB2;Q9P299;P68543;Q9UMS5;P33947;Q9H6L5;Q86VS8;Q9Y5R8;O00461;O9524
9;Q9H9H5;Q96KG9;O15155;P24390;Q9Y296}
441 Pathogen[ P14075] interacts with 6 human
partners:{Q96JB2;Q9UMS5;O00461;Q9H9H5;Q86VS8;Q9Y296}
442 Pathogen[ P0C206] interacts with 16 human
partners:{Q9Y296;Q9UMS5;Q9P299;Q9Y2L5;Q9H6L5;P49755;Q96JB2;P68543;Q96KG9;Q86VS8;O1515
5;P33947;O00461;P24390;Q9Y5R8;Q9H9H5}
443 Pathogen[ P03363] interacts with 8 human
partners:{Q86VS8;Q9UMS5;Q9Y2L5;Q9P299;Q96KG9;Q9Y296;Q9H9H5;Q96JB2}
444 [Cluster 41]GO:0005689+C cellular_component [name] U12-type spliceosomal complex
[def] "Any spliceosomal complex that forms during the splicing of a messenger RNA primary
transcript to excise an intron_ the series of U12-type spliceosomal complexes is involved
in the splicing of the majority of introns that contain atypical AT-AC terminal
dinucleotides, as well as other non-canonical introns. The entire splice site signal, not
just the terminal dinucleotides, is involved in determining which spliceosome utilizes
the site." [GOC
445 Pathogen[ Q2Q067] interacts with 18 human
partners:{P67809;P62318;Q13435;Q15696;Q9BWJ5;Q9UDW3;Q9BV90;P62314;P62304;P14678;O7553
3;Q7RTV0;Q15427;Q8N8D1;P62316;Q6IEG0;P62306;P62308}
446 Pathogen[ P0C214] interacts with 18 human
partners:{P62316;Q6IEG0;Q9UDW3;P14678;P62306;P67809;Q9BWJ5;P62308;P62314;Q15696;Q8N8D
1;Q15427;Q7RTV0;P62318;O75533;P62304;Q13435;Q9BV90}
447 Pathogen[ P03346] interacts with 19 human
partners:{Q15427;Q9BV90;Q7RTV0;P62304;P62318;P67809;Q13435;P62306;O75533;Q9UDW3;Q9BWJ
5;P62314;P14678;P62316;Q15696;Q8N8D1;P62308;Q15393;Q6IEG0}
448 Pathogen[ Q85601] interacts with 15 human
partners:{Q7RTV0;P62304;Q8N8D1;P62316;P14678;Q13435;P62314;P62306;P62318;P67809;Q9UDW
3;P62308;Q15696;Q9BWJ5;Q6IEG0}
449 Pathogen[ P14079] interacts with 16 human
partners:{P67809;Q8N8D1;O75533;Q6IEG0;P62314;Q15427;P62306;P14678;Q9BWJ5;Q7RTV0;P6230
8;Q15696;P62304;P62316;Q9UDW3;P62318}
450 Pathogen[ P03383] interacts with 13 human
partners:{P62318;P62316;P62304;Q13435;P62314;P14678;Q6IEG0;P62308;P67809;Q8N8D1;Q7RTV
0;Q9BWJ5;P62306}

```

451 Pathogen[ P03410] interacts with 19 human  
partners:{Q15427;Q9BWJ5;Q9UDW3;P62304;Q15696;P62306;Q6IEG0;Q15393;P62308;P14678;P6231  
6;P67809;P62314;O75533;Q7RTV0;Q9BV90;Q8N8D1;Q13435;P62318}

452 Pathogen[ P14075] interacts with 13 human  
partners:{P62304;P62316;P62306;P62308;Q13435;Q8N8D1;P62318;P67809;Q9BWJ5;P14678;P6231  
4;Q6IEG0;Q7RTV0}

453 Pathogen[ P0C206] interacts with 17 human  
partners:{Q6IEG0;Q9BV90;P67809;P14678;Q15696;P62304;O75533;P62314;P62316;Q13435;Q9BWJ  
5;Q8N8D1;P62318;Q7RTV0;P62306;P62308;Q9UDW3}

454 Pathogen[ P03363] interacts with 22 human  
partners:{P62314;Q13435;Q9BV90;Q15393;O75533;Q7RTV0;P62318;Q8N8D1;Q15427;P62304;P6230  
6;Q9Y3B4;Q9BWJ5;P62316;Q9UDW3;Q96LT9;P62308;P14678;Q16560;Q15696;Q6IEG0;P67809}

455 [Cluster 42]GO:0031234+C cellular\_component [name] extrinsic to internal side of  
plasma membrane [def] "Loosely bound to the surface of the plasma membrane that faces the  
cytoplasm, but not integrated into the hydrophobic region." [GOC

456 Pathogen[ Q2Q067] interacts with 2 human partners:{P78352;Q9UJM3}

457 Pathogen[ P0C214] interacts with 3 human partners:{Q9UJM3;P78352;Q00536}

458 Pathogen[ P03346] interacts with 4 human partners:{Q00536;P78352;P06703;Q9UJM3}

459 Pathogen[ Q85601] interacts with 4 human partners:{Q00536;Q9NQC7;P78352;Q9UJM3}

460 Pathogen[ P14079] interacts with 3 human partners:{Q9UJM3;P06703;Q9NQC7}

461 Pathogen[ P03383] interacts with 3 human partners:{Q9UJM3;Q00536;P78352}

462 Pathogen[ P03410] interacts with 3 human partners:{P06703;P78352;Q9UJM3}

463 Pathogen[ P14075] interacts with 2 human partners:{Q9UJM3;P78352}

464 Pathogen[ P0C206] interacts with 5 human  
partners:{Q9NQC7;P78352;Q00536;Q9UJM3;P06703}

465 Pathogen[ P03363] interacts with 3 human partners:{P78352;Q9UJM3;Q00536}

466 [Cluster 43]GO:0005956+C cellular\_component [name] protein kinase CK2 complex [def]  
"A protein complex that possesses protein serine/threonine kinase activity, and contains  
two catalytic alpha subunits and two regulatory beta subunits. Protein kinase CK2  
complexes are found in nearly every subcellular compartment, and can phosphorylate many  
protein substrates in addition to casein." [GOC

467 Pathogen[ Q2Q067] interacts with 1 human partners:{P67870}

468 Pathogen[ P0C214] interacts with 1 human partners:{P67870}

469 Pathogen[ P03346] interacts with 1 human partners:{P67870}

470 Pathogen[ Q85601] interacts with 1 human partners:{P67870}

471 Pathogen[ P14079] interacts with 1 human partners:{P67870}

472 Pathogen[ P03383] interacts with 1 human partners:{P67870}

473 Pathogen[ P03410] interacts with 1 human partners:{P67870}

474 Pathogen[ P14075] interacts with 1 human partners:{P67870}

475 Pathogen[ P0C206] interacts with 1 human partners:{P67870}

476 Pathogen[ P03363] interacts with 1 human partners:{P67870}

477 [Cluster 44]GO:0070188+C cellular\_component [name] Stn1-Ten1 complex [def] "A  
nuclear telomere cap complex that is formed by the association of the Stn1 and Ten1  
proteins with telomeric DNA\_ in some species a third protein is present." [GOC

478 Pathogen[ Q2Q067] interacts with 3 human partners:{Q9H668;Q2NKJ3;Q86WV5}

479 Pathogen[ P0C214] interacts with 3 human partners:{Q86WV5;Q9H668;Q2NKJ3}

480 Pathogen[ P03346] interacts with 3 human partners:{Q86WV5;Q9H668;Q2NKJ3}

481 Pathogen[ Q85601] interacts with 3 human partners:{Q86WV5;Q2NKJ3;Q9H668}

482 Pathogen[ P14079] interacts with 3 human partners:{Q9H668;Q86WV5;Q2NKJ3}

483 Pathogen[ P03383] interacts with 2 human partners:{Q86WV5;Q2NKJ3}

484 Pathogen[ P03410] interacts with 3 human partners:{Q9H668;Q86WV5;Q2NKJ3}

485 Pathogen[ P14075] interacts with 3 human partners:{Q2NKJ3;Q86WV5;Q9H668}

486 Pathogen[ P0C206] interacts with 3 human partners:{Q2NKJ3;Q86WV5;Q9H668}

487 Pathogen[ P03363] interacts with 3 human partners:{Q86WV5;Q9H668;Q2NKJ3}

488 [Cluster 45]GO:0034451+C cellular\_component [name] centriolar satellite [def] "A  
small (70-100 nm) cytoplasmic granule that contains a number of centrosomal proteins\_  
centriolar satellites traffic toward microtubule minus ends and are enriched near the  
centrosome." [GOC

489 Pathogen[ Q2Q067] interacts with 6 human  
partners:{P05062;Q96NB1;Q9UPT5;Q86VS8;P05783;Q15154}

490 Pathogen[ P0C214] interacts with 6 human  
partners:{Q15154;P05783;Q9UPT5;P05062;Q86VS8;Q96NB1}

491 Pathogen[ P03346] interacts with 6 human  
partners:{Q9UPT5;P05783;Q86VS8;Q15154;P05062;Q96NB1}

492 Pathogen[ Q85601] interacts with 6 human  
partners:{Q9UPT5;Q15154;Q86VS8;P05062;P05783;Q96NB1}

493 Pathogen[ P14079] interacts with 5 human  
partners:{Q86VS8;Q9UPT5;P05783;Q15154;Q96NB1}

494 Pathogen[ P03383] interacts with 5 human  
partners:{P05783;Q96NB1;Q15154;Q86VS8;Q9UPT5}

495 Pathogen[ P03410] interacts with 6 human  
partners:{Q9UPT5;Q96NB1;Q15154;Q86VS8;P05062;P05783}

496 Pathogen[ P14075] interacts with 5 human  
partners:{P05783;Q96NB1;Q15154;Q86VS8;Q9UPT5}

497 Pathogen[ P0C206] interacts with 6 human  
partners:{P05062;Q86VS8;Q9UPT5;P05783;Q15154;Q96NB1}

498 Pathogen[ P03363] interacts with 5 human  
partners:{P05783;Q86VS8;Q96NB1;Q15154;Q9UPT5}

499 [Cluster 46]GO:0016939+C cellular\_component [name] kinesin II complex [def] "A complex consisting of two distinct motor subunits that form a heterodimer complexed with a third non-motor accessory subunit, the kinesin associated protein or KAP\_ the KIF3 heterodimer interacts via its C-terminal portion with KAP, which is thought to regulate the binding of the motor to cargo membranes." [http

500 Pathogen[ Q2Q067] interacts with 1 human partners:{Q92845}

501 Pathogen[ P0C214] interacts with 1 human partners:{Q92845}

502 Pathogen[ P03346] interacts with 1 human partners:{Q92845}

503 Pathogen[ Q85601] interacts with 1 human partners:{Q92845}

504 Pathogen[ P14079] interacts with 2 human partners:{O15066;Q92845}

505 Pathogen[ P03383] interacts with 1 human partners:{Q92845}

506 Pathogen[ P03410] interacts with 1 human partners:{Q92845}

507 Pathogen[ P14075] interacts with 1 human partners:{Q92845}

508 Pathogen[ P0C206] interacts with 1 human partners:{Q92845}

509 Pathogen[ P03363] interacts with 2 human partners:{Q92845;O15066}

510 [Cluster 47]GO:0009841+C cellular\_component [name] mitochondrial endopeptidase Clp complex [def] "A Clp endopeptidase complex located in the mitochondrion." [GOC

511 Pathogen[ Q2Q067] interacts with 1 human partners:{O76031}

512 Pathogen[ P0C214] interacts with 1 human partners:{O76031}

513 Pathogen[ P03346] interacts with 1 human partners:{O76031}

514 Pathogen[ Q85601] interacts with 1 human partners:{O76031}

515 Pathogen[ P14079] interacts with 1 human partners:{O76031}

516 Pathogen[ P03383] interacts with 1 human partners:{O76031}

517 Pathogen[ P03410] interacts with 1 human partners:{O76031}

518 Pathogen[ P14075] interacts with 1 human partners:{O76031}

519 Pathogen[ P0C206] interacts with 1 human partners:{O76031}

520 Pathogen[ P03363] interacts with 1 human partners:{O76031}

521 [Cluster 48]GO:0005811+C cellular\_component [name] lipid particle [def] "Any particle of coalesced lipids in the cytoplasm of a cell. May include associated proteins." [GOC

522 Pathogen[ Q2Q067] interacts with 6 human  
partners:{O60664;O60543;Q96CS3;Q96AQ7;P04406;P27469}

523 Pathogen[ P0C214] interacts with 9 human  
partners:{P27469;O60543;P34932;Q8WXG1;Q96CS3;Q96Q06;O60664;Q96AQ7;P04406}

524 Pathogen[ P03346] interacts with 7 human  
partners:{O60664;P04406;Q96CS3;P27469;Q96AQ7;P34932;O60543}

525 Pathogen[ Q85601] interacts with 8 human  
partners:{O60664;Q96CS3;Q96Q06;P27469;O60543;P34932;P04406}

526 Pathogen[ P14079] interacts with 9 human  
partners:{P27469;O60664;O60543;Q96CS3;Q96AQ7;Q96Q06;Q99541;Q8WXG1;P04406}

527 Pathogen[ P03383] interacts with 7 human  
partners:{O60543;P27469;Q96AQ7;Q96CS3;P04406;Q96Q06;O60664}

528 Pathogen[ P03410] interacts with 9 human  
partners:{Q96AQ7;Q96Q06;O60664;Q8WXG1;P27469;P04406;Q00G26;Q96CS3;O60543}

529 Pathogen[ P14075] interacts with 7 human  
partners:{Q96CS3;Q96AQ7;P04406;O60543;Q96Q06;P27469;O60664}

530 Pathogen[ P0C206] interacts with 9 human  
partners:{O60664;P34932;P04406;Q96AQ7;P27469;O60543;Q96Q06;Q8WXG1;Q96CS3}

531 Pathogen[ P03363] interacts with 7 human  
partners:{O60543;Q96AQ7;O60664;Q96CS3;P34932;P04406;P27469}

532 [Cluster 49]GO:0005875+C cellular\_component [name] microtubule associated complex [def] "Any multimeric complex connected to a microtubule." [GOC

533 Pathogen[ Q2Q067] interacts with 14 human  
partners:{P78559;O75935;P63167;O00423;O95793;P49356;Q92624;Q96S59;P49354;Q14244;Q96FJ2;Q15121;Q66K74;P27816}

534 Pathogen[ P0C214] interacts with 14 human  
partners:{P49354;O75935;Q92624;Q15121;O00423;P27816;Q14244;P49356;Q96S59;P78559;O95793;Q96FJ2;Q66K74;P63167}

535 Pathogen[ P03346] interacts with 16 human  
partners:{O95166;Q96FJ2;O75935;Q66K74;O95793;P49354;O00423;P49356;Q96S59;Q15121;P78559;P11137;P27816;Q14244;P63167;Q92624}

536 Pathogen[ Q85601] interacts with 17 human  
partners:{P61163;P27816;O95166;Q14244;O75935;O95793;Q66K74;Q15121;O96015;Q92624;P49354;O00423;Q96S59;P49356;P78559;Q9GZM8;P63167}

537 Pathogen[ P14079] interacts with 23 human  
partners:{O95166;O95793;O15553;Q96FJ2;P49354;Q66K74;Q92624;Q14244;O00423;P56715;P78559;Q15121;P49356;P61163;Q9GZM8;P63167;P49023;P11137;O96015;Q96S59;O75935;P27816;P10636}

538 Pathogen[ P03383] interacts with 9 human  
partners:{Q14244;Q96FJ2;Q15121;P27816;Q96S59;O75935;P78559;Q92624;P63167}

539 Pathogen[ P03410] interacts with 21 human  
partners:{P49354;Q15121;P11137;P27816;Q9GZM8;P49356;Q96S59;P63167;P61163;O95166;O60333;Q92624;O75935;Q66K74;P78559;P10636;O95793;O00423;Q14244;P56715;O96015}

540 Pathogen[ P14075] interacts with 9 human

541 partners:{P78559;Q92624;Q96S59;Q96FJ2;O75935;Q15121;P27816;P63167;Q14244}  
Pathogen[ POC206] interacts with 21 human  
partners:{P56715;Q15121;P63167;P78559;P10636;P49354;Q9GZM8;Q66K74;Q92624;P61163;Q1424  
4;P11137;P27816;O95793;Q96S59;O75935;P49356;O00423;Q9BW19;O96015;O95166}

542 Pathogen[ P03363] interacts with 19 human  
partners:{Q9UDT6;P11137;Q14244;P56715;P63167;Q66K74;P78559;O95793;P49354;Q15121;O0042  
3;P61163;P27816;O75935;Q92624;O60333;Q96S59;O95166;Q96FJ2}

543 [Cluster 50]GO:0071204+C cellular\_component [name] histone pre-mRNA 3'end processing  
complex [def] "A ribonucleoprotein that binds to specific sites in, and is required for  
cleavage of, the 3'-end of histone pre-mRNAs. The complex contains the U7 snRNP and  
additional proteins, including the stem-loop binding protein (SLBP) and the exonuclease  
3'hExo/Eri-1." [GOC  
544 Pathogen[ Q2Q067] interacts with 5 human  
partners:{P83369;P67809;O60506;P14678;Q14493}  
545 Pathogen[ POC214] interacts with 6 human  
partners:{P83369;P14678;P67809;Q14493;Q8IV48;O60506}  
546 Pathogen[ P03346] interacts with 5 human  
partners:{O60506;Q14493;P67809;P83369;P14678}  
547 Pathogen[ Q85601] interacts with 5 human  
partners:{O60506;P14678;P67809;P83369;Q14493}  
548 Pathogen[ P14079] interacts with 6 human  
partners:{Q8IV48;P67809;P83369;P14678;O60506;Q14493}  
549 Pathogen[ P03383] interacts with 4 human partners:{Q14493;P14678;P83369;P67809}  
550 Pathogen[ P03410] interacts with 6 human  
partners:{Q8IV48;Q14493;P14678;P67809;P83369;O60506}  
551 Pathogen[ P14075] interacts with 4 human partners:{Q14493;P83369;P67809;P14678}  
552 Pathogen[ POC206] interacts with 6 human  
partners:{P67809;P14678;Q8IV48;P83369;O60506;Q14493}  
553 Pathogen[ P03363] interacts with 5 human  
partners:{P83369;O60506;Q14493;P14678;P67809}

554 [Cluster 51]GO:0008278+C cellular\_component [name] cohesin complex [def] "A protein  
complex that is required for sister chromatid cohesion in eukaryotes. The cohesin complex  
forms a molecular ring complex, and is composed of structural maintenance of chromosomes  
(SMC) and kleisin proteins. For example, in yeast, the complex is composed of the SMC  
proteins Smc1p and Smc3p, and the kleisin protein Scclp. In vertebrates, the complex is  
composed of the SMC1 (SMC1A or SMC1B) and SMC3 heterodimer attached via their hinge  
domains to a kleisin (RAD21, REC8 or RAD21L) which links them, and one STAG protein  
(STAG1, STAG2 or STAG3)." [GOC  
555 Pathogen[ Q2Q067] interacts with 3 human partners:{Q7Z5K2;O60216;Q96FF9}  
556 Pathogen[ POC214] interacts with 3 human partners:{Q96FF9;Q7Z5K2;O60216}  
557 Pathogen[ P03346] interacts with 3 human partners:{Q96FF9;Q7Z5K2;O60216}  
558 Pathogen[ Q85601] interacts with 3 human partners:{O60216;Q7Z5K2;Q96FF9}  
559 Pathogen[ P14079] interacts with 4 human partners:{Q96FF9;O60216;Q9UQE7;Q7Z5K2}  
560 Pathogen[ P03383] interacts with 3 human partners:{O60216;Q96FF9;Q7Z5K2}  
561 Pathogen[ P03410] interacts with 4 human partners:{Q9UQE7;Q7Z5K2;O60216;Q96FF9}  
562 Pathogen[ P14075] interacts with 3 human partners:{Q96FF9;Q7Z5K2;O60216}  
563 Pathogen[ POC206] interacts with 4 human partners:{O60216;Q7Z5K2;Q96FF9;Q9UQE7}  
564 Pathogen[ P03363] interacts with 3 human partners:{Q96FF9;Q7Z5K2;O60216}

565 [Cluster 52]GO:0016327+C cellular\_component [name] apicolateral plasma membrane [def]  
"The apical end of the lateral plasma membrane of epithelial cells." [GOC  
566 Pathogen[ Q2Q067] interacts with 1 human partners:{Q07157}  
567 Pathogen[ POC214] interacts with 1 human partners:{Q07157}  
568 Pathogen[ P03346] interacts with 3 human partners:{O75970;Q7Z3G6;Q07157}  
569 Pathogen[ Q85601] interacts with 1 human partners:{Q07157}  
570 Pathogen[ P14079] interacts with 5 human  
partners:{O75781;Q07157;Q7Z3G6;Q16625;O75970}  
571 Pathogen[ P03383] interacts with 1 human partners:{Q07157}  
572 Pathogen[ P03410] interacts with 4 human partners:{O75781;O75970;Q07157;Q16625}  
573 Pathogen[ P14075] interacts with 1 human partners:{Q07157}  
574 Pathogen[ POC206] interacts with 2 human partners:{Q7Z3G6;Q07157}  
575 Pathogen[ P03363] interacts with 2 human partners:{O75970;Q07157}

576 [Cluster 53]GO:0005829+C cellular\_component [name] cytosol [def] "The part of the  
cytoplasm that does not contain organelles but which does contain other particulate  
matter, such as protein complexes." [GOC  
577 Pathogen[ Q2Q067] interacts with 1028 human  
partners:{Q92783;Q86W56;Q96S95;P02792;P49454;P23588;Q92900;P05198;Q14974;O43290;P6131  
3;Q9BU02;Q9Y5K5;P30153;Q4G0F5;Q8NH2;Q96EE3;Q01082;Q99460;O15027;Q96J02;Q99613;Q9UL45  
;P62701;P22392;P46108;O75351;Q96HA8;O00425;O75161;Q04864;O75832;Q16236;P48556;O94973;  
O15234;P09917;P62633;P10746;Q96N21;P49458;Q96H22;P47914;P23381;Q6VN20;Q8IU60;P31749;P  
52948;Q92890;P35754;Q71F23;Q7LBR1;P40306;Q14258;P62312;Q93034;Q14008;P42773;Q9Y333;Q1  
2769;P46779;O00186;Q9H008;O14786;O14744;Q9Y6K5;Q9Y6D6;Q9Y6Q5;Q8IUC6;P56524;Q93009;Q9N  
QT4;Q96NU7;P55036;P07741;Q10567;Q9NR28;Q9UPR3;P10827;Q9NVM4;Q9HAU4;P55957;P24385;Q7Z6  
J0;P56377;P78559;O00303;Q9Y266;P49591;P07195;P63104;Q9UII4;Q9Y3F4;Q96RT8;O43747;Q9UD7  
1;O95782;Q9P209;P07196;Q14315;O60841;Q9H444;Q8IY63;Q9NPNB6;O95433;Q96LI5;Q96B97;Q14980  
;Q02543;P61326;O60784;P30419;O00231;Q8IZH2;Q7L9L4;P26373;O00233;P29692;Q9UJX3;Q9UJX5;  
P41220;P49792;O95684;P40763;Q9UBQ5;P62750;Q0VDF9;Q08209;Q8IZD4;Q9BRV8;Q13352;O14579;P

47813;P62258;Q96JZ2;Q9BYG5;Q7Z460;P63151;P46937;Q14690;P62273;Q12982;Q13485;P13929;P09913;Q9BRA2;Q9Y285;Q3LI64;P62837;P51665;P55735;Q9Y2L1;Q9Y3C4;O95997;Q9NPI6;Q6IPU0;Q86TX2;P62318;P62826;Q99741;Q6XQN6;Q9BQA1;A5YKK6;O95295;Q9HCK5;Q6VY07;Q99497;P15880;P40429;O60260;P30793;Q9H074;Q9UDY8;Q9BXL1;Q06265;Q9NUP1;P28072;Q96JI7;Q9UBB6;P09132;Q9P0M2;Q14684;P60660;Q96F86;Q8WYR4;P57076;Q075807;Q43805;P46782;Q14204;Q7Z7A3;Q000762;Q9HAB8;Q9Y244;Q9H0F6;P61457;O43255;Q92985;P35268;Q9Y6M1;Q6P1K2;Q9HBM1;Q9NZZ8;P49419;P08151;P15121;Q15653;Q9H211;O14618;Q96TA1;Q16082;Q9BRG1;Q01105;Q9UJW0;P24534;O75935;O00273;P19367;Q7Z7A1;O00743;Q9NRN7;P22090;Q15046;Q04206;P36543;P49770;Q15181;Q8WYP5;P46778;O95336;P61981;Q9H3R5;P50502;Q9UK45;Q96C86;Q00994;Q8NHV4;P30279;P05062;Q13868;Q12933;O43639;Q9NSD9;Q5T1C6;Q96B36;P26641;Q9NYJ8;Q13547;Q6PI26;Q9UP83;P08238;P38919;P63167;Q14103;P55345;A5LHX3;Q01201;P34949;Q9UBU9;P60604;Q5FBB7;P49450;P62888;Q53FT3;P39880;Q8N9V7;Q13257;Q86XR8;Q6QNY0;O43617;Q96AQ6;Q8N2Z9;O00204;Q8IZP0;P32969;O95999;P14316;P61970;P62277;Q99567;P56945;Q99933;P07900;Q96EV8;Q9H171;Q9HC77;Q9UPV0;Q03188;O60318;Q6NZI2;Q15633;O14757;P49789;Q9NVX0;Q9UER7;P62241;Q66LE6;Q9NXR1;P14136;Q13200;Q13432;A8K8P3;P62244;O15350;P05387;Q8TDY2;Q96GX9;Q92945;P48444;P02511;P57075;P25787;P37837;Q14152;P62861;P08107;Q53HL2;O14896;P42766;Q06323;O00401;Q96SN8;P67775;O43684;Q8NBT2;Q14934;Q5JTC6;P04792;Q8N5D0;Q13158;P05386;O75175;O15117;Q13415;Q9P258;Q9Y3B2;Q49B96;Q9NPD3;Q9NVK5;Q9NYG5;Q86TB9;Q8NFH4;Q00978;Q63HML;Q8NFI3;P30304;Q9BZI7;Q13794;P63241;Q9H1A4;P35573;Q14790;Q92973;Q14749;Q9NZC7;P51965;Q14240;Q9UNX3;Q5BJF6;Q504Q3;P05413;Q00597;O95394;P60174;O75531;Q5JTW2;P30050;P63010;Q9BV57;P57721;Q96PC3;P54105;Q9Y3E5;P80217;Q9BZE9;P36871;Q5EBL4;Q96LW7;Q9UBB4;O43776;Q9UJW3;P28065;Q99873;P32189;O14818;P61077;P07902;P14635;P26196;O00170;Q96AQ7;Q96QF0;Q9BUX1;P18077;O75886;Q8IXH6;P62891;Q8TEP8;P62314;Q8IX03;Q13541;P11142;Q9NQS7;Q14203;Q8N5C8;Q9Y5B6;Q9HAU5;Q96IF1;Q13112;Q96CW1;Q9UJX2;P27797;Q9UQL6;Q9HTC4;O43524;Q16851;Q9BU89;P61923;Q12959;Q9Y297;P61927;Q9NRG4;Q5RKV6;Q8WXC3;P60520;Q99966;Q9ULE6;O15162;P39023;Q15173;Q13469;Q9UMX2;O43264;Q14CS0;Q9UHI6;P11532;P62081;P61247;Q8WUM4;P62304;P62714;Q96L92;O14980;Q9UHB9;Q9UIV1;P61254;Q99743;Q9UI10;Q07157;P59047;Q9H8S9;P17987;P62249;Q8IYB3;P30307;P20073;Q92674;Q99608;O14508;Q05084;O15131;Q9P243;Q9UM13;P62280;Q14997;P62328;P83731;O00471;Q9BYV8;P40337;Q9BW27;Q96M53;Q92748;Q96BT3;Q8NHQ1;O14867;Q86V81;P48788;Q6PGN9;Q13561;Q96G03;P31350;Q66GS9;Q6GPH4;P60900;P46976;Q96MT3;Q9BPZ7;Q9UL46;Q9BZD4;Q14653;P67870;Q9Y6N9;P34896;P61289;Q15306;P62263;Q86US8;Q15370;Q9UNN5;Q9Y4X5;O43303;Q8N1I0;Q9HCC9;Q00610;Q96S59;P84022;P61966;Q9UKZ1;Q96RT7;Q8WYR1;Q16222;P60866;O14641;P62906;Q9NXV2;Q9NSP4;P55212;P68871;P10914;P41252;Q92539;A9QM74;Q15102;Q15024;O14933;P09972;O14862;Q12834;P54840;P53992;Q9Y6K9;O95628;P36873;P51668;Q96FQ6;Q9H0W8;Q14232;Q92843;Q15468;Q9NQ4;Q02878;P46777;Q8TAT6;Q9BVC4;O95486;P50748;P28062;Q12904;O00255;P62899;O15105;Q13114;P78344;P15559;O14713;O75496;P06396;Q9BQ90;Q9NR50;Q9UMS0;O95644;P24864;Q9GZV5;P09467;Q13127;Q5TBC7;O95067;P18669;P08708;Q9BSJ2;O43541;Q9NSA3;Q9Y2V2;Q9BV20;Q53EL6;Q16719;P29474;P50991;Q9UNM6;Q9Y2N7;P08865;Q9UBW7;Q9NWT6;Q07020;Q96LC9;Q9UDY2;Q9NXT7;Q9H9G7;P62913;P25788;Q92529;O94855;Q9HD36;Q13233;Q8WXD5;P62269;P60228;P42575;Q13426;Q6RSH7;P42025;P57077;Q9BUL8;P62136;Q96PU5;Q13616;Q99618;P13807;Q96MT8;Q9UILL1;Q92530;Q9UQ10;Q15078;Q9NVD7;P50613;P07814;Q8IW19;O15198;P14678;Q9UN37;Q9Y5S9;Q14677;P49354;O95810;Q15327;Q96H20;P62424;P04406;O15164;P49366;P61088;Q9H0R1;P35869;P25786;Q9UFF9;P62917;Q9Y2J4;Q16543;Q13094;Q96RS0;Q8TEQ6;Q9Y4L5;P62829;Q9NZZ3;P78396;P20962;Q15185;O15116;Q9H410;P46783;Q8IYD1;Q96DG6;O60291;P99999;P10599;Q8NFH3;O00505;Q9BXS5;A6NK89;Q7Z465;Q9H0B6;P53041;Q99996;P57678;Q8NHZ8;P62495;Q9UK41;P38936;P40925;Q15796;O75475;P36578;Q15369;P50570;Q02241;Q9UKV8;O75665;Q9C0C2;P62857;P69905;Q15366;O96020;Q16401;O00139;O96007;Q9NRA8;Q9HAV4;P16333;Q02556;P09914;Q53G26;P15259;Q99543;Q7L5D6;P50453;Q96FA3;O94986;Q9UQF2;Q9UKV3;O75122;Q9H4A6;O00232;Q13309;P54920;Q9UN36;P62847;Q07866;P19838;Q96RU7;O75143;Q9Y3E7;O75436;O75822;Q96QK1;Q9Y697;Q99962;Q8NG31;O43504;P49207;Q9UFN0;Q13228;Q9UM11;Q13144;P23258;Q13155;Q86VP1;Q96CF2;P23396;Q9H6Z9;Q9UJX4;Q09161;Q12968;P28074;P53618;P54136;P25789;Q93008;Q92540;P52630;O00629;Q9HCE1;O15504;Q9Y6D9;P21399;P35813;P42768;Q9UKT4;Q8NFZ5;P25963;P0CG47;P20042;O60573;P57740;P06744;Q96BD8;P04818;Q9H900;O14920;P11441;O75688;P63173;P18621;Q9NZN8;P31946;Q9UKN5;Q6ULP2;P13647;Q9C000;P41208;P52292;Q5HYK7;Q5JVS0;Q96Y1;P52298;Q9BPX1;Q9BYX4;P20618;P45984;Q15628;Q13642;P42771;P17096;Q9NP79;O95817;Q9UNE7;Q04724;P48147;O95831;Q86SQ7;O60763;O94925;Q00653;Q15833;P0CG48;P49459;O75791;P60953;O60504;O14556;P40855;Q13409;P62316;O43318;Q92600;Q495M9;Q9GZT9;O95487;Q9HA77;Q9H4B6;Q9UHD4;O43633;O14964;Q9Y4P8;P00338;Q9NUS5;P27986;Q05086;Q9NP71;P28070;P39019;Q92844;Q14493;Q8WUM0;Q01860;P28066;P63000;Q9BZR8;Q03393;P41250;Q9UGJ1;P35579;Q8IXQ6;O95613;Q9UL18;P35606;Q96FJ2;P61353;Q92845;P14324;O15371;Q04637;P30305;Q86WI3;Q99436;Q9GZV4;Q9BZF9;P24941;Q8TAA3;Q9NUQ3;P30047;P84101;P62266;Q9BU64;P42677;Q9Y3U8;Q9UJX6;Q8WUX9;P62306;P63220;P49593;Q9H840;P62841;O95229;Q9Y678;P83881;P06132;P62987;P26651;O43242;P06730;Q9BX66;P08670;Q86Y01;O14777;Q9UKG1;Q86YV9;Q562F6;O75953;P49589;O95453;P30260;Q13404;P49721;Q9HCM9;P42226;Q9BPU9;Q9UPT5;Q9Y316;P11802;Q9HAT8;Q92597;P78371;P09496;Q9BYG4;Q66K74;Q5UE93;P46527;P49720;Q9NRR5;Q99717;P06733;P51580;Q8TDN4;P15407;Q9UH77;P21673;Q9U533;P11172;Q13568;Q13490;P50914;P46776;P50452;Q6R327;Q13042;P27815;P61586;Q86VN1;Q8ND04;Q92556;Q16637;P11940;Q15691;P22681;Q9H081;Q99814;Q8WVK7;Q9NT62;Q9H3M7;O15111;P35658;P62854;O43324;Q9Y2Z0;P62308;Q00987;Q9HC16;P49247;Q9P2J5;Q13867;P62753;P08397;O14893;P05388;P49754;Q15154;P52294;Q6PCE3;P42224;Q15436;O95190;P08842;P32929;Q9NPA3;Q96EY1;Q86X55;O75674;O15392;P62208;P18124;P62851;Q9BTM0;Q13617;Q9ULM6;P25398;Q15056;Q96EA4;Q15759;Q96J3;Q16829;P62937;Q15797;P78537;Q9Y4Z0;O60936;P62877;Q14194;P62910;O43708;P02795;Q13501;Q92901;P68104;P46781;P48200;Q9H814;O14576;P14868;P62310;P27635;O14879;Q07352;O75821;Q96B26;Q96IU2;P42772;Q15750;Q8IUD6;O15372;Q13347;Q9UPZ3;P48539;P61513;O75901;Q9BV73;O76075;Q9UHB4;Q9HIK1;Q14693;Q96CW5;P14625;O95149;Q9Y4Y9;P62945;Q00534;Q96A56;Q9H1J1;O60716;Q6P2E9;Q14999;Q14397;P17661;Q9Y314;P35237;Q8TAP6;O95429;P62979}

Pathogen[ P0C214] interacts with 1204 human partners: {P62861;P80217;P22681;Q9Y316;Q8IW19;P06132;Q05086;P41250;O14933;Q04446;Q9H7C

578

4;Q9BPZ7;P60520;Q9BZI7;P84098;O00170;P29474;Q9UJX6;Q14997;Q96CW1;Q15833;P55822;Q3LI64;Q9H081;O15078;Q07866;P61247;P51665;P60228;Q9BTM9;Q96P26;O15198;O43684;Q16637;Q96J02;Q9UI08;P02794;P61923;P62312;Q96T66;P35754;O75608;P55735;P49354;Q9UKN5;P49419;O15234;Q13907;Q9UBB6;Q13617;A9QM74;Q9NZN8;O15116;Q8IX03;P09417;P60709;Q13257;Q15327;P41220;O75935;P08294;Q16543;Q9HKB9;Q8WV28;P35237;Q9Y617;P62316;O60346;O75161;Q9BU02;P49589;P52209;Q16864;P25789;Q8N9V7;O15117;Q00653;Q8IXQ6;P05937;P09917;P49754;Q05932;P35813;Q00597;P63000;Q09161;O75874;O43805;Q7Z6J0;Q96C86;O95817;O14786;P26196;P14625;P15880;P55036;Q9ULE6;P62081;P42766;P11413;Q12904;Q9UI10;P30307;P84101;P62913;Q9HAU4;P48788;O15111;P68133;O95810;P22090;Q9NPP4;Q9BSJ2;P35869;Q13469;Q15024;Q15154;O95045;Q96M53;Q9BVC4;Q5JVS0;P04818;Q99832;Q8WUX9;Q8N335;Q9H4A6;O60841;Q96CF2;Q8IZP0;Q96BT3;Q9Y6K9;Q9BU89;P31350;Q92901;P28062;Q14008;P62249;P62249;Q9Y376;Q6P2E9;P49368;P23919;P09914;O94986;P62899;O95453;A5LHX3;Q13547;Q8NFI3;P35558;P16157;O00762;P09913;Q8TE04;Q9HAB8;Q13490;P49902;Q53HL2;P62854;P56945;O75351;P53992;O43264;P28065;P39019;O96033;P62263;Q8N5D0;P02042;O95684;P60842;P19838;Q15628;P57721;P49770;Q9UI12;Q9Y3C4;P15259;P30153;P78371;Q9UJW0;Q02241;Q9BRV8;Q96JI7;Q9Y2J4;P62993;P02533;P49789;Q13568;Q9NRR5;Q8IUC6;Q99698;O14879;Q9BRA2;Q96S95;Q9H8S9;Q9BXS1;P12081;P46379;O60716;Q9NPI6;Q86V81;P02511;P48643;Q9UBB4;Q14164;Q9UPT5;Q14203;P53396;Q92934;P23381;Q96N21;Q9Y5S9;P07741;P62273;P15407;O95295;Q9P209;O95628;Q96LC9;Q8NHQ1;P23396;P27815;Q92900;P18077;Q00987;Q9GZV4;Q16222;P50613;P05388;P55212;Q9H3M7;Q13309;Q9H814;Q13112;Q9H171;O15372;Q9Y2L1;Q7Z465;Q96QK1;P07814;P62847;P23588;P42226;Q9UM54;P42898;Q13158;O14818;O14579;O15350;P40855;Q9NP79;P14678;Q96EA4;Q9C0C2;Q9Y285;P62829;Q504Q3;O75807;O75496;Q9H444;Q9Y2V2;P41252;Q96SN8;P26373;Q495M9;Q9UDY8;P62306;Q13867;Q9H227;Q14152;Q9BV57;Q9NPA3;P11055;Q86WI3;P57740;Q9NVM4;P62166;P11802;Q9Y6K5;A8K8P3;P27635;Q99567;O15056;P57678;P31150;P53618;P34932;O43242;Q9Y3B2;P47813;Q8WYP5;P46778;Q9P0M2;O94921;P50748;Q99743;Q96FA3;Q9Y6N9;P51580;Q8WYR4;Q9UJX5;Q8N5X7;Q00994;Q8NHV4;Q86TX2;Q7Z7A1;Q99613;P61586;P46937;P40261;Q6PI26;P61457;P35606;P63208;P04792;Q16082;P84022;P14649;O00186;Q9ULP0;P48444;Q9BYV8;P29401;Q5TBC7;P17096;P29728;Q9N7TX7;P46527;Q9Y244;Q9BX66;P56524;O95229;Q9GZV5;P55957;P23258;Q9NUS5;O00425;O75821;P60660;P12277;Q9HCT7;P61513;Q5JTW2;Q9H0F6;P78344;P11172;O60318;Q53EL6;Q8IUD6;Q04206;P29692;Q8TCD5;Q96GX9;P69905;Q66LE6;Q96EE3;P83881;Q15056;O14964;Q16613;Q6XQN6;P60953;P42224;Q9HAT8;P14136;P49459;Q13404;P48556;Q96MT8;Q6NZI2;P10914;Q14204;P78537;Q5HYK7;Q9HAV4;Q8TDY2;Q8NH12;P49792;P35270;O75886;Q86YV9;Q9BYV8;P54920;P57075;Q9Y5B6;A0MX2;Q9BUL8;P40306;Q93034;Q86W56;P62701;Q99608;P36543;Q6IPU0;P49207;Q99873;P11940;Q99497;P14635;Q15370;Q14232;P63220;Q8NBT2;Q92529;Q5RKV6;P48200;O43617;Q9NXV2;P68402;P26641;P06396;Q7L9L4;Q92540;P05413;P55345;P24385;O00139;Q04724;Q9UQN3;P08865;Q14999;Q96CX5;Q8WXD5;Q14194;Q15691;Q9N1I8;P32969;Q9UK41;Q02543;Q13200;O43776;P62266;Q9UJX2;Q9Y297;Q9HAU5;Q99962;O95149;O95396;Q8N2H9;Q9H0R1;Q00978;P62877;P32189;Q9NPB8;O60551;Q49B96;Q6P1K2;Q15653;P63241;Q9UKG1;P46060;P62308;Q562F6;O14556;Q86UY8;Q15436;Q9Y4Z0;Q13094;Q9Y266;P35573;Q9UK45;O43318;P14868;P52565;P38936;O00232;Q96MT3;Q15366;Q9Y2S2;O15131;P49591;Q9HCE1;P151965;O43639;Q9BTE1;Q9UD71;Q01105;P46976;P62277;P48147;Q9H0M0;Q9UIV1;Q96RT7;Q9UGJ1;P05062;Q9Y3E5;Q93008;Q96JZ2;Q6PCE3;Q9Y4Y9;Q01082;P50914;P61077;Q9NUQ3;Q9H089;Q9U9PQ9;P32929;P49450;P54368;Q9N2C7;Q13794;Q6QNY0;Q8TBF2;Q14315;Q9Y5K5;Q14980;Q8TEP8;Q75223;Q53FT3;P11532;Q9UPV0;Q9HCE7;Q13501;Q8IZH2;P49366;Q9BZE9;P46779;Q9H0B6;Q07352;P62714;Q8N5C8;Q8TDN4;O60825;Q8N2Z9;P10746;P08397;Q6PGN9;Q15633;P15121;Q14258;P50747;Q9BY43;Q03188;Q43303;Q15102;Q9Y333;Q9BXH1;Q9NSA3;P63010;Q99460;Q9H1K1;P52298;Q13642;Q10567;P28066;Q99966;O00303;Q12968;O75832;Q7LBR1;Q9Y2N7;Q9HC16;P11168;P00374;O75122;O00273;P13929;P18545;P40429;Q9ULM6;Q03393;O14867;Q92597;P62314;P41091;P98170;P30793;Q86US8;Q96G03;Q14493;Q8IYB3;Q92674;P47914;Q8TAT6;Q9UMS0;P37837;Q00534;Q9NPB6;P09467;Q13233;Q92844;Q96AT9;P63173;P13639;Q01201;Q6R327;Q16881;Q92985;O14980;Q9H1A4;Q9H6Z9;Q9NPD3;P36871;O75143;Q15124;Q13426;P68871;Q9BW27;Q15173;P56192;P46783;P52294;Q16831;P14618;P69892;Q9Y697;O95487;P99999;Q9H4B6;Q14103;P62310;Q9UER7;O14531;Q96BD8;Q66GS9;Q14749;Q92539;P49720;Q9N2D8;P28074;Q9HBM1;Q02556;P34896;P26639;Q9Y2Z0;Q9HCC9;Q9NR50;Q8WYR1;Q99933;P62280;Q9UHD4;Q9BPU9;P61326;Q9UNN5;P09104;A5YKK6;O15162;Q16851;Q8TEQ6;Q9UNX3;Q96S59;P52788;P13535;Q9BRG1;P0CG48;Q9UL46;P38919;O14641;Q63HM1;Q9BUX1;O75901;Q9NWM0;Q9Y3U8;Q9P258;Q86XR8;Q86VP1;O15488;Q96L92;P56377;Q9P587;P78396;O95336;Q9H074;Q12982;P30050;O95999;Q12933;Q13485;P62753;P62910;Q9Y4P8;Q8ND04;Q13144;Q96B36;P62891;Q96LW7;O00154;Q8NHZ8;Q9UQC2;Q15369;Q6VY07;Q16658;P35658;Q08209;Q96MP8;Q9HD36;Q92556;Q12834;Q93100;O15105;Q14671;Q14240;Q15468;P08670;P63151;Q9UPR3;Q9UII4;Q13352;P54577;O95067;Q8WXC3;Q9UL45;Q9H0E2;P25788;P62136;O14896;P02100;Q9H9G7;P62495;Q96TA1;P24941;P40337;P19623;Q95278;P02795;Q9GZT9;Q9BQQ3;Q96PC3;Q9UIL1;P42574;Q99618;P62269;P19367;Q9Y6X9;P30043;Q9UNM6;P19429;P67775;Q5UE93;Q86TB9;Q8NFH3;P10809;O00231;Q9BXP1;Q15796;P42771;Q9UHI6;P11441;O00204;P62318;Q9NRF8;Q8NDV7;P25963;O95429;P14324;P07093;Q06323;Q9UMX2;Q9NP71;P46781;Q93009;O43541;Q13868;P30305;P25786;Q8TAP6;P06733;Q96RT8;O14508;Q53G26;Q96RS0;Q9UHY7;Q9UBW7;O75475;Q14690;Q16829;O43324;Q96EV8;Q9H211;Q9Y3F4;Q8IXH6;Q9HA77;P62736;Q13616;Q9HCM9;O14618;Q5EBL4;Q8IYD1;P78559;Q9BRT3;P49588;Q13127;Q14934;P23921;P53041;Q8IU60;O60763;Q12959;P61254;Q96AQ6;P28072;Q92890;Q14653;Q9NVK5;O00505;P09972;O75531;Q9UDY2;Q14397;Q7Z7A3;Q9UQF2;Q9UKV8;P41208;Q7L5D6;Q6GPH4;P62841;Q8TAA3;Q9H840;O96007;Q92845;Q15287;Q9Y3E7;P62244;P26651;O60784;P62987;P57077;P16333;P62826;P50453;Q9H410;P39880;P42773;P62633;Q15750;P54687;Q07343;Q04637;Q9H4P4;Q92843;O75665;O15392;O43747;P05412;P62304;Q07020;Q9H3R5;Q8NFX5;Q96RU7;P42677;P62945;O75436;O60291;O75822;P42025;P46776;P05198;O43504;O94973;P07327;Q9H9E1;O15164;Q96G01;Q99436;Q13126;Q13114;Q9Y6Q5;Q8NG31;P24864;P30279;Q9UJX4;P20962;P10909;O14576;O94925;P27797;O15504;Q7Z460;Q15759;P34949;Q9UFN0;Q9BV73;P07902;Q9UHB4;P68543;Q9BYG5;P54840;P61981;P0CC47;Q8N1I0;O95394;P25787;Q99814;P62241;Q96IU2;P36873;P46777;Q9NZZ3;Q9H900;Q96FJ2;O14893;Q5FBB7;Q9UP83;Q13615;P23526;P55884;Q96NU7;P10599;P02792;Q9NUP1;P24534;Q9Y6M1;O00399;P83731;Q6ULP2;P13647;Q9NQS7;Q9Y6D6;Q9UKZ1;Q92973;O43290;Q9UFF9;P35268;O15305;Q9UJX3;P45984;Q9HCK5;Q14684;Q5BJF6;Q99717;P47897;P49593;P17987;Q9UHB9;P62424;O14862;Q04864;Q9NSP4;P61966;Q9BZF9;Q8IY63;P30419;P608



66;P40763;O00401;O60260;O60504;Q6VN20;Q96BT7;Q86SQ7;O76083;P13533;O95190;P62857;P09496;O95997;P52292;Q15274;O00743;Q96GDO;Q6GYQ0;Q99543;Q71F23;Q92600;P08151;P16118;Q9UKV3;O14727;Q96H20;Q86X55;Q14974;P50570;P49458;O75688;Q96A56;Q5T1C6;Q9H008;O95782;P35998;P60900;P61313;Q15181;P08708;P04424;Q9Y4L5;Q05084;Q9P243;Q9NVD7;P22392;Q92945;Q9UN37;P60174;O95613;P21673;P20042;Q9HCJ0;Q96EK6;P05387;P50991;P25398;Q99996;Q8NFH4;P35520;Q15797;O43708;O00233;O75791;Q9UM11;Q96F06;Q9H0W8;Q9UBQ5;P67870;O95644;Q13409;P51668;O14757;Q92783;Q13228;Q9NSD9;Q9NRN7;O43633;P26640;Q96LI5;O75674;Q8N0S6;P55210;P46108;Q9NXR1;Q15046;P17812;P69891;P30047;Q9NQP4;Q86Y01;P48454;Q9Y4X5;P61927;P31946;P62750;Q96IY1;P62979;Q9NR28;Q07157;P52630;Q96AQ7;P42768;P30260;P05386;P49454;Q06265;P48163;Q5VZK9;P09132;P21399;P53680;Q9Y678;P08107;P62851;Q92748;Q9NVX0;P63261;P61970;P50452;P06730;O43255;Q9NT62;Q96JJ3;P20073;Q9UNE7;P98171;O15524;Q15185;Q8NFF5;Q9NRG4;P30304;Q13561;Q99704;P27986;P46782;P43490;O75175;Q92530;Q96QF0;P46020;Q9UN36;O00757;Q9H492;Q9Y2T3;P13807;P31939;Q9NYG5;Q5JTC6;P15559;O14920;Q15008;Q9BXS5;A6NK89;P18124;P59047;Q9NQT4;P04406;Q14CS0;Q01860;P57076;P49247;O14713;Q9UM13;O15027;P11586;Q96F86;P00558;Q9BZD4;P14316;Q9UL18;O76075;Q8WUM0;P07196;O95433;Q9UH77;Q9UQL6;Q9NYJ8;O95486;P35749;Q86VN1;P28070;O75953;Q96B97;Q96EY1;Q9UKT4;P42575;Q96B26;O00255;Q9Y6D9;P52948;Q96DG6;P42772;P31749;Q9BYG4;P61353;P61088;P36578;Q13155;O60936;P20618;Q4G0F5;Q96HA8;P62328;Q14677;Q06520;Q9BU64;P07195;Q96PU5;P80303;Q66K74;Q9UBU9;Q12769;O00629;Q16719;Q8IYW7;Q13432;P49721;Q9BQ90;Q99741;Q16401;Q8WVK7;O15371;P30566;P50502;Q0VDF9;P18621;Q9UPZ3;Q13541;P36404;O96020;P55072;P63167;Q9H0P0;P18054;O00471;P17980;Q9UJW3;Q13415;Q9BV20;Q13347;P62906;Q6RSH7;Q16236;O94855;Q8I2D4;O60573;P11142;Q9NVN3;Q14693;P60604;Q16773;Q9NRA8;Q14790;Q9C000;Q96NN9;Q13042;O14777;Q02878;Q9P2J5;Q15306;Q9NWT6;Q9H1J1;P21695;Q9NZL9;Q3I5F7;Q9BZR8;P17661;Q9Y314;Q8WUM4}

579

Pathogen { P03346 } interacts with 1172 human

partners: { P08107;Q9UPR3;Q9Y6N9;P02792;Q13596;Q6P3S1;Q66LE6;Q96G01;Q15833;Q13588;Q9Y5S9;P62136;O00204;P54105;Q9Y6D9;P21283;Q9BZI7;Q86UT5;P25787;Q9BTM9;Q9Y6X9;Q8N2Z9;Q9Y6K9;Q86YV9;Q96J02;P59047;P23381;Q96AC1;P05387;P05412;Q4G0F5;P46779;P61966;Q5RKV6;P09972;P55735;Q7Z7A1;Q5FBB7;O15234;Q9NRX4;P28070;Q96FJ2;P46937;Q15370;Q504Q3;Q9UML6;O00743;Q96QK1;Q06520;P78396;O60346;Q6RSH7;Q8NFH4;Q9UBB4;Q99698;O75608;P45984;Q93009;Q8WUM0;Q9P0M2;O00629;Q96B97;Q09161;P10827;P35813;P63173;O15524;P25789;P55036;Q96N21;P50570;P02549;P06730;P62917;Q16082;Q9UJW0;P13807;O14908;P07196;P62249;P62913;Q9HAU4;Q9UPT5;O15111;Q15366;O95229;P60660;Q9HAV4;Q9Y2Z0;Q96MP8;O15027;O43290;P55273;O14576;Q99966;P24385;Q7L2Z9;Q01201;Q96FQ6;P62861;Q9NSV4;Q14315;P80303;P04406;P50452;Q96S95;P07900;P30279;Q13228;Q9NRN7;Q8IYB3;Q9NPI6;P62277;Q02878;Q9UDY2;P41091;O95149;Q96PU5;Q99873;Q14258;Q86XR8;Q9UP83;O00471;P49247;Q9UBK8;Q12769;Q14671;P47813;Q8N2Y8;Q9BUX1;Q5JTW2;Q3LI64;O15392;O43684;P98171;O95684;Q12840;Q99460;Q9UM11;Q9UH77;Q86US8;Q96EE3;Q8IWL9;Q9UUV1;Q99567;Q99543;Q9UBQ5;Q13616;P29474;Q96C86;O75175;P62633;Q15036;P05413;Q9GZV4;Q9BS16;P63010;P23526;O60716;Q9UL46;O43639;O75531;Q9BRA2;Q9Y2V2;P62280;P39023;P23258;Q9H9A5;Q8WYR1;P14625;P50502;Q9BQA1;Q96RT8;Q96LC9;O75901;Q9BV20;P07148;Q7Z6J0;P62304;O95295;Q9BPU9;P11277;P20073;Q93008;P13929;P84101;O43747;P42768;P62987;P61927;P62987;P28072;Q13158;Q92674;Q9Y5K8;Q9UUL1;P25963;Q9UKZ1;Q7Z465;Q9NR28;P35579;Q9ULP0;Q9Y6M1;P62857;O75143;O00425;P25788;P62736;O95336;Q9BVC4;P60520;Q9H171;P53680;Q96M53;P49754;Q8IZP0;P28074;Q15797;Q9GZV5;P49721;Q8NFZ5;Q13541;Q15154;Q15653;Q9Y4Y9;O75935;Q9UHB4;Q96AQ6;Q01105;Q13347;Q9NZL9;Q9BV57;O00139;Q9UDY8;Q9BRV8;P07814;O60841;Q8NHY2;Q9UFN0;Q9H9G7;Q9BXP1;P57740;Q15691;Q9BPZ7;Q96JI7;O96020;Q8IUD6;O95628;Q13322;P02100;P42575;Q9H4A6;P56377;Q99962;P14316;O14818;Q9UL18;P51580;Q8WYP5;P46778;P49207;P62258;Q8N5X7;Q8NHV4;Q9NRR5;Q9NQP4;Q99436;Q96A56;Q9UMX2;P24941;Q96FS4;Q13426;P55957;Q15633;Q6PI26;P30304;Q9H814;P62937;Q9Y6D5;P42772;P35237;Q15149;P0CG48;P78371;P62266;Q9H1K1;Q9NZI8;O75886;Q8IV53;Q8WXD5;Q15796;Q9BXS5;Q9UII4;O75475;Q15185;O14744;P56524;Q16401;Q15327;Q9HOR1;Q9H4P4;A5LHX3;P19367;Q9ULE6;P15121;Q9HC77;P60709;P26641;Q63HM1;P78344;O60318;P36543;Q9NVK5;Q9UMS0;P49789;O43255;P61254;O14757;Q66K74;P10746;Q9Y678;P38919;O60573;O43264;P62495;Q04206;P18054;Q12802;O95782;Q49B96;Q9NTX7;O00170;Q9NXR1;P24864;Q53HL2;P53618;P14136;Q9UQC2;P98170;Q9NZD8;Q9P209;Q9NXV2;Q16222;P11142;Q9UM13;P02794;Q8TDY2;Q9NRP6;Q15056;P60174;P28062;Q96IF1;P57075;Q86VN1;P11940;Q8IX03;P60953;P42226;Q15306;P29692;Q9NT62;Q96NU7;P62993;P06703;P42574;Q96IY1;Q7L9L4;Q9NYG5;O00505;Q86TX2;P21673;P62424;P62273;P28289;Q9UK41;P62714;P67775;Q9P258;O43776;P55884;Q14204;Q7L5D6;Q99717;Q92748;P49459;P15559;O15350;O15105;Q9Y697;P83731;Q9UI08;Q8ND04;Q14203;P60866;P09467;O14579;P69905;Q92945;Q9BX66;Q00978;Q00994;P49458;Q96CW5;Q05084;Q04864;Q96AQ7;Q96B26;P35573;P63241;Q3I5F7;P20618;Q8TDN4;Q14749;P62899;Q9H0F6;Q8NFH3;P42771;O95067;P35658;P52298;P52565;P49593;O00232;Q9Y376;Q14152;P05937;P55212;Q9NRF2;P46976;Q96JJ3;Q13114;Q96DG6;P55196;O75821;P60842;O95644;P55072;Q9BTE1;Q9H0E2;Q9Y3B2;P09496;P36871;Q6NZI2;Q03393;P51668;A5YKK6;Q9Y333;P16157;P17096;P35268;Q9Y3E5;P41252;O60784;Q01860;Q92843;Q5EBL8;P61077;O95997;Q96H20;O14867;Q9BZE9;P09132;Q93034;O43805;O00186;O14508;P62826;Q000987;Q8TEW0;Q12834;O15198;P30305;Q96FA3;Q6QNY0;Q96FZ7;Q9BQ90;Q9UKV3;Q13404;P30047;O94855;P62891;Q14980;P08708;Q8TEP8;O95433;P11802;O95999;P06733;Q6PCE3;Q8TZH2;Q9NRG4;Q8N5C8;Q96MT3;Q9Y316;Q15024;Q13813;O00303;Q9NZN8;O15056;P61088;Q16637;O95453;Q6XQN6;P37837;P30153;Q8NFI3;P57076;Q13432;Q16236;Q14934;Q8WXC3;Q14103;O75832;O14618;P46782;P41250;Q14CS0;P61353;Q8IY63;O00233;Q8IUI6;Q9UJX6;Q13155;Q9BRT3;P14649;P62877;Q96CF2;Q9NZZ3;Q9Y266;P16333;P41208;Q9NRS6;P62854;Q14493;Q9Y3U8;Q01082;Q9NSA3;Q9HCK5;Q9NP71;O14777;P62318;A6NK89;Q9Y5B6;O75161;Q9Y6D6;Q96B36;Q9P243;P99999;Q10567;Q9BZ29;Q86TB9;P47914;Q9BW27;P18669;P84022;Q12904;Q9H9E1;Q12968;Q86V81;O14980;Q9NVX0;P09917;P49354;P48444;Q14232;P31350;Q66GS9;Q9Y285;P49419;P20340;O75665;Q92973;P10144;P08865;P17661;P02511;Q15436;Q9Y3E7;O14556;Q96EA4;P56945;Q9NCP4;O92541;Q8N5D0;Q96TA1;Q9UNN5;P60604;Q16851;Q96S59;P60228;O14641;O00221;P02533;Q9Y3C4;Q43597;Q96L92;Q13469;P78537;Q92539;P31749;Q15102;P61313;Q9H074;P14635;P25398;O14531;O00255;Q96EV8;P55822;Q86SQ7;Q13042;Q9Y3F4;P10914;O94986;P51965;Q13309;O43633;Q9Y4Z0;P46060;Q9NYJ8;Q02556;Q9UJX5;Q9UD71;Q9P2J5;Q9BYG5;Q5TBC7;Q96SN8;P49720;Q9H444;

P31150;P28065;P11441;Q86WI3;Q6VN20;Q9NUQ3;P27815;Q9NZC7;O14879;Q9UNE7;O15131;Q13094;Q9Y2N7;P36873;P50991;Q13547;Q95817;Q9H939;O00762;Q96CW1;P61513;Q8IXQ6;Q14008;O43324;Q04724;P46379;Q6P2E9;Q9UJX2;P62306;P42566;P05388;Q9GZT9;P48059;Q96PC3;Q9UHI6;P62269;Q9H CM9;Q7Z7A3;P60900;P55345;Q9UGJ1;Q8N9V7;O14713;P49368;Q9HAT8;P51161;Q9NVM4;P32929;Q025 43;P42766;P54920;A9QM74;P62081;Q9Y2L1;P36404;Q9H492;P14324;Q8N2H9;Q5JSH3;Q9NQS7;P4610 9;P49366;O14896;Q9UER7;P25786;P61247;Q8TAP6;Q99704;Q07157;O00231;P62837;Q14240;P54136 ;Q13415;Q16543;P49770;Q96RS0;Q8TEQ6;P48200;Q9UKT4;Q9NUS5;Q8IUQ4;Q9BYG4;Q562F6;Q15041; P18621;Q8IYD1;Q99814;Q12778;P78559;P61923;P42025;Q6PGN9;P46781;P61326;O00399;Q9BRG1;O 75688;Q9H7H1;P53041;Q13233;P42224;Q53G26;Q9HAU5;Q9UHY7;Q9H081;Q16719;P84098;Q8NBT2;Q9 NQT5;P06132;Q9HBM1;P15880;P22392;O75131;Q95810;O15116;Q9H8S9;Q9UKV8;P14868;Q9UJX3;P98 177;Q9Y2J4;Q5BJF6;Q15750;Q8NHZ8;P63316;Q9UL45;Q92540;O96007;P63208;Q5EBL4;O95831;Q073 52;P61289;P50914;O60763;P46108;Q9C0C2;Q9BZR8;P50453;Q14653;Q99497;Q9H410;Q0VDF9;P4277 3;Q13642;Q14684;P62166;Q6GYQ0;P49589;P00338;O43708;P30622;O75122;Q16829;Q9UQN3;Q9H1A4 ;Q15628;Q13568;Q9BU64;P62829;O95486;P15407;P62979;P27797;P28066;Q9UNM6;P40337;Q9BYX4; Q9NVD7;P61981;Q9BQQ3;Q99613;Q96BT7;P24534;Q02241;Q9BYV8;P08670;Q96RU7;O75436;Q03188;O 60291;O75822;P39019;P68871;O43504;Q14397;P23588;Q13867;Q969Q5;P62314;P23396;Q9608;O6 0260;Q96G03;P80217;Q96JZ2;Q9UJX4;P42677;Q96LW7;Q9Y2I6;Q5VV41;Q8IUC6;Q15287;O60936;P50 748;O76075;Q9H7C4;O94925;P62750;P31946;P62701;Q8TAA3;Q9NVN3;Q5JVS0;P30050;Q96HA8;Q9BU 02;P02795;P63104;Q15369;P55211;Q00597;Q14790;Q8TAT6;P54840;Q15759;Q15181;P49450;P1467 8;P62910;P0CG47;Q99996;O95394;Q13409;P07195;P45985;P36578;Q86W56;Q9BY43;P35754;Q92783 ;Q9Y244;Q14596;Q9UBU9;Q8WYR4;P48539;Q8NHQ1;Q6GPH4;Q96IU2;Q9NP79;P62328;Q9UKG1;P34949; P52292;O14933;Q6ULP2;P13647;Q14999;P26196;Q5HYK7;Q9UQF2;P15259;P32189;O75351;P34932;P 50542;P62847;P48454;P10599;Q14997;P57678;Q9BU89;P48147;Q13490;Q16658;Q9UHB9;Q13200;Q8 6X55;P48556;P62851;P55210;P06744;O14964;P11532;Q9BZF9;P19838;O95050;Q5UE93;O60504;O75 031;P63167;P48055;Q9UBB6;Q9H0W8;Q16864;Q13485;P22090;Q00534;O95487;Q9Y4L5;Q9H4B6;P226 81;P20962;Q9BSJ2;Q04637;O14893;P09913;Q7Z460;Q92845;Q05086;Q6IPU0;P05062;Q8WV28;O1492 0;P06396;P51665;P67870;Q7LBR1;Q9H0M0;P61457;Q8IZD4;O94921;P11172;P38936;Q9NRA8;P46777 ;Q9NWT6;O95613;Q06265;O15516;Q8NG31;O15078;Q96RT7;P07741;Q9H8V3;Q9UHF9;P61970;O15371; P41220;Q9Y7020;O43318;P62263;P39880;O15117;Q92985;Q13283;O43933;P62841;P35869;Q9UPQ9;P 40925;Q9Y4X5;P83881;O75674;Q8N0S6;Q9Y6Q5;P62316;Q06323;P09914;O95429;Q9H209;Q86Y01;Q1 2982;Q8IXH6;P21399;Q13112;O95278;Q14194;Q6R327;Q9UN36;P35606;P26651;Q9HAB8;P30260;P05 386;Q92529;Q9HCE1;Q92900;O00401;Q15173;P46527;P52630;Q9ULU8;P18077;Q13144;Q9Y2J0;P200 42;O94973;Q9H3R5;Q8N1I0;P40763;Q9Y297;P46776;Q15468;A8K8P3;Q99741;P62241;O43524;Q1467 7;Q9BXH1;Q92530;Q9H211;Q14690;O14862;Q9NSP4;Q6VY07;Q9NR50;Q92556;Q96H22;P10916;Q6P1K2 ;Q9HD36;O14727;Q9UKN5;Q9NUP1;Q9NQT4;P08238;O07593;Q8WUM4;P48788;P62308;P62312;Q96BD8; Q9H3M7;Q9BUL8;P62753;P53367;O15372;P63000;Q9NPD3;Q92890;O14965;O75807;Q96F86;Q9BZD4;Q 96LI5;O43242;Q99618;Q99743;Q495M9;Q9Y5K5;P62945;Q14164;Q86VP1;P52294;Q9UQL6;P62310;Q9 UHD4;O15164;Q9UK45;Q96EY1;Q53EL6;Q00610;Q96BT3;P53992;P04792;Q9Y6K5;P40261;Q9HKB9;Q9U PZ3;Q9HCC9;Q71F23;Q92901;P32969;P26373;P58546;Q96GX9;O14786;Q9NSI8;Q9H008;Q96H6Z9;Q9Y4 P8;Q9U110;Q13352;P18124;P40306;Q5VZK9;P27986;P40429;Q13868;P27635;P62631;Q9H104;Q8WVK7;Q1325 7;Q9H0B6;P30307;P49454;Q9NPA3;Q99933;P46783;O43303;Q13794;O95190;O00273;O15504;Q92844 ;Q00653;Q07866;Q9UN37;O75496;Q53FT3;O43617;Q8WUX9;Q13127;P62906;Q5JTC6;P57077;Q9H900; Q13501;Q9UJW3;Q9H840;Q92600;P49792;Q9UPV0;P63151;P62244;O75791;Q96MT8;Q96QF0;Q14693;Q 13561;Q9C000;P08151;P61586;Q12959;Q14974;P62888;Q9UBW7;Q9H1J1;P57721;P63220;O00444;P0 5198;P52948;Q9Y314;Q13617;P17987;O15162;P68543;Q9BV73}

580 Pathogen[ Q85601] interacts with 1088 human partners: {Q9UJX2;Q9H492;Q13596;Q8NHQ1;Q8NBT2;P46783;Q96QK1;P32969;P10144;P28066;Q96FQ 6;Q9HCE1;P61163;O00401;Q9BZI7;Q9UNM6;O15198;P61513;Q96J02;P60900;Q99543;Q9NZC7;Q9UPZ3 ;Q99497;P61981;P49454;O00186;P54920;P69905;Q6QNY0;Q9NRN7;O75161;Q5RKV6;O75496;P26373; O15234;Q6PGN9;P62857;Q96LC9;Q15370;Q6P299;Q16543;P08151;P60174;P62244;Q13409;O60346;Q 9BQA1;P63104;O14896;O00629;O75688;P54136;O43324;Q13309;Q9NSD9;P62913;P62633;P09913;Q9 UHB4;Q53FT3;P08107;P55036;P34949;P22681;Q9UJW0;Q9H6Z9;P13807;P11168;Q9HAU4;P31946;Q9U PT5;P68133;O95229;Q9NPD3;Q9HAV4;O94925;Q13127;P16157;Q9NP79;Q9NVD7;Q9BXH1;P62854;O150 27;P48444;Q9UJX6;Q00610;O75143;P55273;Q931749;Q16236;P99999;P62993;Q86VP1;P02533;P2438 5;Q13490;P14316;P09496;P17096;P06396;Q9NUP1;Q9UQN3;P62081;O95831;P26639;P50452;O14933 ;Q02241;Q8IYB3;Q9NPI6;Q8NPFH4;P14868;Q9UD71;O43708;Q5JVS0;P61353;Q15750;O94986;O95149; Q9NQP4;Q14258;P62891;Q8NPF3;Q15154;Q03188;P46776;Q02556;Q9H900;P31150;O00471;Q93009;P 47813;Q9BUX1;Q86X55;P18077;O95684;Q9NYJ8;Q14008;P25787;P46060;Q96EE3;Q14194;P61313;P4 1091;Q9BQQ3;Q96H20;Q9UQC2;Q99613;P05388;Q9UBQ5;Q9Y2Z0;P49789;Q04724;Q9UN36;Q9HCK5;Q5H YK7;P05413;P62714;Q9GZV4;Q8IUC6;P63151;Q5JSH3;Q9HD36;P62495;P17661;Q9Y2N7;Q9BRA2;Q96C W1;Q9UQL6;P09917;O14879;Q15833;O14579;P13533;O95487;Q9UBB4;P21399;P49589;Q9NQS7;Q96RT 8;Q9NRR5;Q9BYG5;P61289;P06730;Q8IY63;P62304;P07196;O95295;Q12769;Q8IYW7;O14713;Q9H0W8 ;Q9UJW3;Q14240;P41220;Q92540;Q9UBU9;O60763;Q6GPH4;P51161;Q13158;Q9H081;P08670;Q9UKZ1; Q7Z465;P35579;P63173;P25788;O43541;O95336;Q96MP8;Q9P258;P49593;Q9P2J5;P23588;O15111;Q 14103;Q9BX66;Q15797;Q9BUL8;P14649;O15116;Q96SN8;Q15036;Q96BT3;Q53G26;Q9UP83;Q13155;Q1 6719;O75935;Q9BXS5;Q01105;P10746;Q9BU02;Q13112;Q9UDY8;Q9UKT4;Q9HC16;P16333;P07814;P02 042;Q9BXP1;P57740;Q9BPZ7;Q14790;P62877;Q9H8S9;Q9NUS5;Q99966;P40337;Q14684;P23396;Q9BR G1;P56377;Q99962;Q9BZF9;P62273;Q9NVX0;Q07352;Q8NHZ8;Q9UL18;P15407;O95433;Q8WYP7;P4677 8;Q9UKN5;P62829;Q75832;Q8N5X7;Q8NHV4;Q86TX2;P40763;P18669;P30050;Q13426;Q9Y697;P62753 ;Q6PI26;Q9UDY2;P27815;P11172;Q12982;Q13868;P30622;P42772;P27635;Q13415;Q9H1A4;O60825; P61326;Q9NVM4;Q9NWT6;P62826;O15516;Q9HAT8;Q92844;Q15287;Q8WUM0;Q16829;Q9UER7;Q71F23;Q 14596;P63000;P48200;Q9Y4L5;Q9HC77;Q04637;P23381;O60318;Q13616;P15880;Q9UMS0;Q66K74;P8 0303;P46379;O43264;Q14204;P37837;O60936;P83881;Q49B96;Q16613;Q53HL2;Q07020;P14136;P98 170;Q86V11;Q9P209;O43747;P30153;P61923;P39019;Q9Y6X9;Q8TDY2;Q13642;Q9Y376;P26641;Q9UI V1;P57075;P06733;Q8NG31;Q9Y3U8;Q96PU5;P11532;Q15173;Q96S95;Q9NR50;Q9NR28;Q15306;P4610 8;Q9GZV5;Q9NP61;P61970;O15078;O00757;O43633;Q96B36;P62701;P06744;Q99814;O15392;P62241

;Q86WI3;P62424;P27797;Q15046;P0CG48;Q8IUD6;P21673;P30304;Q86V81;O43776;Q7L5D6;Q5BJF6;Q13469;O00303;Q9Y2I6;Q9H3R5;P83731;Q14203;P49754;Q14690;Q01082;Q7LBR1;Q00978;P17987;Q96CW5;Q66LE6;O76075;Q96AQ7;Q15653;Q9NZN8;P63241;Q96EA4;Q8TDN4;O15164;Q9UHD4;P62899;Q9H0F6;O60551;P20042;P52565;Q9UFF9;Q9Y244;Q13144;P02795;P62945;P05062;Q96JJ3;O43639;Q13114;Q99743;Q10567;P32189;Q99608;O43303;O95644;Q9Y285;Q9BTE1;O14786;Q4G0F5;Q9UK45;O75886;O14744;P62316;P51668;P48147;P53237;Q15436;P31350;P49247;Q13867;P493E5;P49770;Q9NP71;Q04864;Q93008;Q9BZE9;Q9H008;Q92600;Q9H089;O95278;Q96GX9;O43617;Q9BV57;Q8WYR4;P24534;P61077;Q504Q3;P16118;P02100;O75953;Q00597;P62263;P15259;O14508;Q12834;Q13541;Q96FA3;Q9Y2L1;P62861;Q96FZ7;Q02878;Q09161;Q5JTW2;P30793;Q9HA77;O15504;Q13404;Q14974;P30047;Q86YV9;Q9UQF2;P10914;Q6VN20;Q8TEP8;P11802;Q8WUX9;Q13257;P27986;Q8IZH2;Q86TB9;Q12840;Q8N5C8;Q96MT3;Q08209;P52630;P80217;P39023;Q9UBW7;P38919;P60709;P23258;P61254;Q6XQN6;Q96C86;O14757;P26651;Q96CF2;P14678;O15371;Q96L92;Q92674;Q14934;P25789;O00170;O60291;Q63HM1;P41250;O60716;O00233;O75122;Q16222;Q9NVK5;O96020;Q9BVC4;P30305;Q14677;O14965;Q9Y266;Q9UPV0;P49207;P60228;Q9UMX2;Q16851;P10599;P11940;Q7Z6J0;Q86XR8;Q9Y316;Q96TA1;Q14653;Q14164;Q9Y6M1;P20618;P62910;Q9BSJ2;O15131;Q96LI5;Q9BW27;Q13352;Q9Y6K9;O15117;P69892;P46976;Q12968;Q9H814;P62310;P49354;P48788;Q9H9G7;Q66GS9;P30307;P62249;Q9BTM9;O75351;P62280;Q86SQ7;O75665;Q9Y6K5;P62314;Q9UK41;Q9H171;P50991;P63208;P56945;P62306;Q9HAU5;Q9UNN5;P35573;P47914;O14556;Q9GZT9;Q8TEQ6;P84098;Q96S59;Q9BY43;O95045;O95810;O14641;P40306;Q562F6;Q9UGJ1;P78537;P34896;P14618;P14635;Q9UKV3;P08708;Q15124;Q96EV8;Q8NFF5;Q9HC9;Q13042;Q9UJX5;Q99933;Q12933;Q9Y4P8;Q92973;Q9BV73;P51965;Q9Y4Z0;Q99873;P62136;Q9BU64;Q6VY07;Q9NQ4;Q5VZK9;Q5TBC7;Q9BQ90;P13929;P62258;Q9H444;P49720;Q9NQ7;P42575;Q8N6T3;P63261;Q9Y678;Q99717;Q9Y3B2;O14920;Q04206;A5YKK6;Q9BZD4;P42768;Q99618;P42226;O95628;O95453;P62318;P36873;P36871;Q9UM13;P02511;Q8WXC3;P42766;Q96G01;Q8IXQ6;Q9Y6N9;P28062;O60573;P09972;P11142;Q9UHT6;Q15691;P49721;P62269;O95190;P08238;P11055;Q92843;P68104;Q727A3;Q96MT8;Q96BD8;Q9Y2V2;Q9Y6D9;P62312;P50570;Q9NYG5;P55735;P30279;Q13228;A9QM74;P52948;P54105;Q9Y5K5;P14324;O14576;Q92529;P55957;Q96N21;Q86UY8;Q9BYX4;Q15024;O00273;Q96B97;P25786;Q8IZD4;O14862;P05412;Q9BYV8;Q96RS0;Q9UML6;P35749;Q7Z7A1;P49450;Q92985;Q15327;Q9Y3F4;P55822;O00255;A6NK89;P78396;P18621;Q8IYD1;Q8ND04;P05387;O94921;O00399;P42771;P53041;P53680;P42224;O00425;O00762;Q9NTX7;Q9NPA3;Q01201;Q15369;P78344;P28072;P06132;Q92783;Q9NZZ3;Q9UNX3;P22392;Q53EL6;P15121;P60842;Q9NPB6;Q9UKV8;Q8N2Z9;Q9UJX3;Q13200;Q9Y274;P62277;P61586;P57077;O96007;Q9H074;Q14315;P50613;O14964;Q96J17;P49459;P10827;Q9C0C2;O43290;P50453;P28065;P07900;Q96A56;Q9H410;P42773;P35268;O14867;Q15633;Q5JTC6;Q96EK6;P07741;Q9H4A6;Q14980;O95486;P67775;Q06265;P62979;Q8IWL9;Q13347;Q15185;O94973;Q99436;P62847;P48059;P29474;Q96PC3;O00204;Q96RU7;Q15628;O75436;Q07157;O75822;P28070;P20073;P09467;P35658;P68871;O75901;Q14397;Q14980;P26196;Q14152;Q96IF1;Q04446;P40925;Q86US8;Q9ULE6;P09914;P05198;P84022;O60260;Q9P0M2;P53618;Q9NT62;Q96JZ2;Q9UJX4;P60520;P42677;Q9UM11;P63220;P50748;Q8TAP6;Q16082;Q8TAA3;P62837;Q12959;Q9UL46;Q8WVK7;Q99460;Q96IY1;Q6RS7;O00231;Q15759;P0CG47;Q99996;O95394;Q9BPU9;P45984;P07195;O43933;Q99567;Q9UPR3;P35754;P56524;P60953;Q8IXH6;P84101;P62328;Q9UKG1;P14625;Q92845;P02792;Q6NZI2;P52292;Q6U LP2;P13647;Q14999;P46782;P46937;P34932;P07902;Q9UHY7;Q8WUM4;P47897;P04792;P08397;Q9UH B9;Q9Y6D6;Q8WYR1;P35869;Q13432;P23526;P48556;O00743;O15105;Q92890;P46779;P69891;Q7Z460;O60504;Q7L9L4;Q9NRA8;P62750;P54840;O15350;P62851;P63010;Q92945;O14893;Q9NRG4;Q13547;Q00994;Q9H9E1;Q96DG6;Q05086;Q92597;P62841;Q6PCE3;P78559;Q96M53;P28074;Q96F86;O15372;P49792;Q9H0P0;P62308;P52298;P67870;Q92530;Q13233;P38936;Q9P243;P04406;O15162;P50502;P62987;Q9UM54;O95613;Q00534;P61966;P78371;P20962;P22090;P55212;Q00653;O95067;O95999;Q9Y333;P41252;O43318;P39880;Q9H4P4;P11441;A5LHX3;P13535;Q9H1K1;Q8IZP0;P48643;Q9BV20;Q15181;Q9UPQ9;P61927;P57721;Q9Y6Q5;Q96LW7;O75475;P30419;P29692;Q9NXR1;P36578;Q9BZR8;Q86Y01;P61088;O00505;Q9NXV2;P35813;O94855;P07093;Q06323;O43255;P35606;P30260;P05386;O14618;Q9Y3C4;Q05807;Q8IX03;Q92900;Q9UH77;Q9UFN0;Q16637;Q9U1L1;Q00987;O75531;P60660;Q60604;Q14671;Q9BU89;Q96HA8;P02794;Q8N1I0;P19838;O95429;Q9NSA3;A8K8P3;Q99741;P62166;P0VDF0;Q13568;Q9UNE7;O75175;P08865;Q9H211;Q13485;P61247;Q9Y5B6;Q5UE93;O14818;P48454;P62937;O95817;Q5T1C6;Q9UN37;Q6P1K2;P00338;Q9GZM8;Q8NHY2;Q14232;P24941;Q9Y3E7;P62736;P42025;Q9H3M7;Q13907;Q8TAT6;P52294;Q92539;O75821;O14777;Q01860;Q96AQ6;P09132;O43684;P63167;Q07866;Q14493;O00139;Q96B26;Q8N5D0;P46777;Q14749;Q9HBM1;Q96EY1;Q96G03;Q9H0B6;Q9H4B6;P53992;Q05084;P61457;Q86W56;Q495M9;P62917;Q16401;Q9H0R1;Q92901;O60784;Q9BRV8;Q15366;Q9UI10;P18124;P46781;Q9Y4X5;P49419;Q5FBB7;P40855;P51955;O43805;O95997;Q93034;Q99698;P25398;Q9NUQ3;P60866;Q9H7C4;Q13794;Q96IU2;P55210;Q9Y5S9;Q15796;Q02543;Q9HCM9;Q5EBL4;P62906;P50914;Q13501;Q96RT7;Q8WXD5;P46527;Q13094;Q9H840;P62266;Q92748;P55345;Q15102;Q8IU60;P40429;Q05674;O75791;Q96QF0;Q14693;Q13561;P32929;O95782;P24864;P19367;Q9BYG4;P62888;P41208;P36543;P59947;Q9H1J1;Q14CS0;P25963;Q9Y314;Q13617;Q9Y4Y9}

581

Pathogen[ P14079] interacts with 1209 human partners: {P31751;P36543;Q5EBL4;Q13228;Q9UQL6;O75031;Q96QK1;Q6VY07;Q9Y3U8;P27635;Q15691;Q6R327;Q14980;P84098;P46779;P28065;O75886;Q9UHB4;Q96CWL;Q99436;Q96A56;P00374;P15259;P17707;Q92844;O14810;Q6VN20;P52565;Q9BXL7;P05937;Q8TE04;Q86YV9;Q14CS0;P48454;O75161;P48775;Q49B96;P35579;Q9BXS1;Q9Y333;Q96IY1;Q9Y285;O75223;O60260;Q01105;P48643;P08151;Q9Y5K8;P20042;Q03188;Q5JVS0;P62333;O15164;Q8IXQ6;Q9BW27;P13805;P35237;Q96JI7;P02042;Q6P587;O14867;Q9H0P0;Q9GZT9;P23381;O95628;P26639;Q9UKV8;Q99743;P26373;Q9Y3E5;P57678;Q86VN1;Q6P3S1;P57076;Q9HAT8;Q15287;Q12982;O14841;P61923;P48556;Q8IXH6;P42357;Q9BQ90;O76075;O15027;Q96LW7;P51965;P61970;O15162;P09132;P69891;Q96RS0;Q9H8S9;Q96CF2;Q96Q5;Q8WXC3;Q9UD71;P60842;Q9Y3B2;Q15036;P61966;P23396;O95544;Q6ULP2;Q9P2J5;Q05084;P63261;Q8N5C8;Q8IZD4;Q15056;P11142;Q9BXS5;P57077;Q9NPB8;Q9UKG1;P35869;Q8TEQ6;Q8NFF5;Q99814;Q8N5D0;P0CG48;P19429;P40855;Q00610;Q96KPA;P40429;Q9BYX4;Q16222;Q92600;P52630;P49593;Q9UL18;Q9NRR4;O00303;P30307;Q99996;Q9NT62;Q9H939;Q9H9G7;P20962;Q9GZV5;Q96H20;O15305;P29728;P53041;Q9H7C4;P02795;Q9NPA3;Q9UKT4;O43187;Q16851;Q8TEP8;P31150;O75821;P11532;P53779;Q14693;Q9Y316;P50452;Q9BYG5;Q7Z460;Q14653;P06730;Q6QNY0;O15553;Q96BT3;P02100;Q99704;P09914;P57721;Q96IU2;Q9UI10;P54136;Q9Y4P8;Q9UDY2;Q9NRG4;O95999;P18621;Q13415;Q9HBM1;O9548

7;Q07866;O95684;Q9P209;Q8NBQ7;P00338;Q13309;O14893;P47813;P07951;Q15173;Q8N0S6;P83881;P22234;P52564;Q96P26;O43597;Q8TCD5;Q9Y2N7;P17812;Q9H0W8;Q01082;P78396;O14896;Q96M53;Q14103;P80217;Q12799;O95817;P68104;Q96FJ2;P24864;Q8IU60;Q8TDY2;Q9UNX3;P31939;P46781;P36873;Q16658;P49354;P57740;P83731;Q99873;Q9H492;P61513;Q7L5D6;Q9Y6L7;P62847;P41091;Q15024;P40306;Q9UK45;O95229;O14641;Q16829;P62753;Q96NU7;Q8NBT2;Q9NVM4;Q13907;A6NK89;Q12840;Q9UJX3;P98171;P02511;Q8IUC6;Q92985;Q13404;P52298;P55036;P35658;O94986;P35606;Q86UT5;Q9P0M2;Q9NPF16;P47756;Q9Y314;Q9UQF2;Q9BY43;P52209;Q9BV20;O00170;Q9HCE1;P28074;Q07157;Q96LB4;Q9H171;P26641;P21399;P39023;Q9H1J1;Q66K74;O00232;P62273;P61457;Q13094;Q9H7H1;Q92556;Q9H1A4;O95429;O00471;Q14677;Q10567;Q9HCK5;Q9UGJ1;P39880;Q9UMX2;Q9Y5S9;Q15041;P24588;P13807;P46109;O43432;Q02241;Q9UJX5;P25398;O75475;P50991;Q9BZE9;Q9Y6D5;Q9NPF79;Q9ULU8;O15198;Q9UKZ1;P16298;Q63HM1;Q9NVX0;Q12504;P48147;P62495;Q9C000;Q5JTW2;Q9H1K1;A0MZ66;P60604;Q86TB9;P17096;P42566;P47897;Q96LI5;P56377;Q16831;P43490;Q9BZD4;P52294;Q8N2H9;Q9H211;Q00597;Q14164;Q9Y678;P49591;Q96N76;O95644;Q99497;Q8WYR1;Q92783;Q92540;P49247;Q66GS9;O15392;Q93099;Q9ULP0;P18077;P49720;Q7LBR1;O75807;Q6ZUJ8;O00487;Q9H008;P09972;Q95190;Q9NQT4;Q93100;P62136;P11172;P25787;Q00994;Q9NXJ5;P29401;Q99966;Q13868;P32189;Q9HC16;Q9H773;O94855;O75832;Q96MI9;P14868;Q9Y266;P46783;P46060;Q86US8;Q9UBU9;Q9NPD3;Q92748;O75674;P57075;O95067;P78371;P05198;Q9H840;Q8IZP0;P61254;O95433;Q8N9V7;Q15750;P50914;P10916;Q9BV73;Q9UILL;O43708;O60346;P06744;Q8NG31;P19237;Q9UPW5;Q9NRS6;Q969X0;P29144;Q96C86;Q9HCC9;P10909;Q14596;A5LHX3;O15116;P53992;Q9BUL8;Q9Y3F4;P69905;Q9H074;Q13112;Q9Y2J4;P62312;P50990;O60504;P10746;P16157;Q6IPU0;O95954;Q12968;Q96B97;P62937;Q9UNQ4;P41220;Q15124;P62979;O00399;Q9H900;P46937;A8K8P3;Q9UM54;O00233;O60784;Q8TAP6;Q9UJW0;Q96JJ3;Q8NFI3;Q6P2E9;P62841;P31350;Q92597;P18124;Q96L92;Q9UPT5;Q14444;P15559;Q9UHI6;Q14240;Q9BVC4;P35998;A5YKK6;Q9NZZL9;Q9UBW7;Q15306;Q9HAU4;P62314;P14324;P05413;P42766;Q8TDX5;Q9Y2T3;Q9NUQ3;Q14258;Q15797;O75608;P06733;P30793;O60678;P61077;P10827;Q460F5;O95822;P61289;O95453;O75143;P63151;Q7Z465;P62266;P14649;P30304;Q99608;Q96HA8;O95149;Q92890;Q92539;P29692;O15371;O15350;P46782;P62877;Q4J6C6;Q9BXH1;P62987;P07196;P02533;O43290;P50552;Q5FBB7;Q9HCM9;Q9H410;Q96GD0;P55212;O00178;Q9HA77;Q96FA3;Q8IWW7;Q13144;P09913;P55273;P50570;P62241;P51665;P55822;Q01201;Q16613;Q99618;P07195;Q13541;Q8IYD1;P35611;P20618;P78344;Q00987;P23588;P45984;O95394;P32969;P63104;Q9NRF8;P22090;P62306;Q9Y244;O43776;P15078;P62829;Q9NYG5;P35813;Q9NRR5;P14678;P10911;O60573;Q8TEW0;O96007;Q8TAA3;P60866;Q8IYB3;Q96DG6;Q3I5F7;Q12802;P42226;O15504;O00186;P80303;Q15149;Q0VDF9;P14136;Q9H9E1;P45983;Q99741;P68032;O15066;P50613;P68871;P62854;Q6PUV4;P40337;Q9BTE1;Q9NR50;O95831;Q07020;P39019;Q7L9L4;P78559;P18545;Q15833;Q99543;Q9NSP4;Q8TDN4;O96033;Q13568;P61981;Q9C0C2;Q9BZR8;P55345;O15117;P06132;P54368;O14744;Q99661;P46976;P50542;P63220;P61326;Q5BJF6;Q8IZH2;P23919;Q16637;Q71F23;Q86Y01;Q8WU00;Q14997;O75791;Q13642;P49207;Q9Y5K5;P49589;P62244;P51668;P14635;Q8NHZ8;Q14749;Q14315;P60520;P51955;P35754;Q9UMS0;O95782;Q14790;Q9UNN5;O94925;Q14353;Q8NHV4;Q01860;Q15046;Q53FT3;P28062;P60900;Q8IX03;Q9BU89;Q9UPZ3;P22392;Q9UJW3;Q9NZC7;P24534;Q16644;O60318;P62263;Q9UKV3;Q9UER7;Q02543;P62424;Q16719;Q92901;Q8WYP5;P62277;Q96AQ7;Q9HCJ0;Q9IUL45;O75822;Q9BZI7;Q96IF1;Q9UM11;P11940;Q92934;P62750;O43623;Q8WV28;Q9UBB6;P62910;Q8IV53;Q9UBQ4;Q6XQ6;Q9BQA1;P63173;Q9Y4Z0;P2196;P31946;Q8NFF5;Q8WUM4;P49458;Q9NWT6;P55210;Q8ND04;Q14934;Q15102;P28289;Q5RKY6;P38936;P41252;Q15759;Q9UM13;P46776;Q9Y6K9;Q15075;P08238;Q9BRT3;Q5JSH3;Q9HD36;P84101;Q9Y6K5;Q96RT8;Q9Y6D6;P17987;Q99933;Q96F86;P08107;P45985;P08397;Q13042;Q99567;Q5T1C6;O00139;Q92945;Q9UNM6;Q13867;P16333;Q9BYG4;Q96GX9;Q93034;P08708;Q96JZ2;Q8WUX9;P63267;P48220;Q9Y478;Q13257;P62328;Q14974;Q96EA4;Q92973;Q99613;P34949;Q562F6;P49459;Q96H29;Q81250;Q9H4B6;Q96QF0;Q8WVK7;Q66LE6;P49450;P23258;Q86V81;Q8N5X7;P62166;Q99460;Q86TX2;P35573;Q9Y697;Q9UP83;Q8NDL9;P48200;Q96AC1;Q96H22;P36578;P60660;Q9NR28;Q9Y3C4;P62308;Q96RT7;P26640;O60551;O75175;O75953;Q8NFH3;P30419;Q9NRR7;P61586;P07900;Q15370;Q15468;Q6GPH4;Q9P243;Q8TAT6;O95045;Q96EE3;Q9UFF9;P60709;Q15185;P13639;Q9H8V3;P16930;P56192;Q9Y6M1;Q96AQ6;O76027;O14818;Q13794;O00221;Q9NSD9;Q14684;Q9BPU9;Q15366;Q9P258;Q86UY8;O43903;Q13409;O60936;Q16082;Q13561;P49721;P62304;Q8TCU4;O43264;Q9BU02;Q14194;Q9NVK5;P63010;P32929;P62906;P68543;P48788;P09917;Q9HAU5;Q9Y2L1;Q9NXV2;Q15327;Q92530;P62316;P47914;P62280;P11277;Q9BQQ3;P62310;O95336;Q96J02;O95295;P49902;Q9UFN0;A9QM74;Q9BSJ2;P62258;O43303;Q5HYK7;P50453;Q13596;P02794;Q9HBK9;Q6PCE3;O00505;Q15181;Q13501;P62899;Q9H3R5;Q16236;O94973;P61163;Q8WVH0;Q9GZM8;Q9Y3R4;O43541;O95997;O14862;Q9UJX6;Q96G01;P48444;P42224;O75531;Q9UN37;Q13617;Q96RU7;Q96FZ7;Q6PGN9;Q6IA69;P63241;Q9UH77;P61353;Q53HL2;P14625;P62081;P62945;Q9UIV1;Q3LI64;Q86SQ7;P49915;P41208;P46777;P42677;O14713;O14508;P13929;P30050;Q6NZI2;Q12933;Q8TBF2;Q13432;Q04724;Q96PE3;O60841;Q9BXI3;Q8NFH4;Q9Y6N9;Q9NQS7;P53602;P27815;Q8WVB7;P15880;Q96LC9;Q9H0R1;P62993;O95810;Q05682;Q13158;Q96S95;Q9BZF9;Q86WC4;Q14493;P30260;Q03633;P20073;O43639;P62891;O95613;P15407;O43747;P10599;Q6RSH7;P63167;Q00978;Q6PI26;P62191;Q9H0F6;Q16878;Q9H9A5;P00915;Q9ULE6;Q92900;O15078;O14579;Q9Y3E7;Q86W56;Q495M9;Q92674;Q96B26;P67870;Q9UI12;P62888;P19623;P46527;P08865;O75688;P55735;P62837;Q13155;O15067;Q9UPR3;Q9H3M7;Q13164;P42025;P49454;Q96B36;P18669;Q96EV8;P61927;P62633;Q14397;O95670;P62917;Q9NS86;P08670;Q9HAV4;P07902;Q96MP8;O00762;O43504;P21695;Q96EK6;P23526;P30305;Q8NHQ1;Q9BU64;Q15008;Q16625;Q9NUP1;O75351;Q02556;Q96TA1;Q96G03;Q9UJL6;P42773;O75665;P30153;Q15369;P46778;P62249;Q9BRV8;P49754;P43686;Q86WI3;P42575;Q12904;Q9NUS5;Q96CD2;Q13469;P06703;Q9NZZ3;O00425;Q13347;O43242;Q03393;P62826;P25788;Q15154;P63208;P09467;O75436;Q9UKN5;O14576;Q9NZN8;O00231;Q13616;P05386;P28066;P05412;P49588;P35268;O95486;Q14232;Q9BRA2;Q9NPB6;Q9H444;Q86XR8;Q9UL46;Q92845;P04424;P04792;Q9BRG1;Q9NXR1;O00244;P50748;O96020;Q9BPZ7;P17661;P62913;Q12769;Q96PC3;Q9Y6X9;P49368;P40925;Q99698;Q9H0E2;Q16543;P56524;Q14671;Q96S59;Q13127;P99999;Q92529;Q9Y426;P49789;Q16864;Q8WYR4;Q9BX66;P54840;P05387;Q7Z7A3;Q9BUX1;Q9UBQ5;P61247;Q9Y2I6;Q13813;O15105;Q5JTC6;P54105;Q96BD8;Q8N1I0;P48059;O75122;P62318;P0CC47;Q9UN36;O14965;P02549;P62269;P21673;Q9H0B6;Q9H4A6;P69892;Q9Y4Y9;Q9NVD7;P62701;Q9Y239;Q9UHB9;Q15274;O43617;P36871;O14879;Q9UQC2;Q13352;O75935;Q9Y5B6;Q504Q3;Q7L2Z9;Q96MT3;Q9Y2Z0;O00255;Q9NQC7;O14933;Q9HC77;P51580;Q9NRA8;Q15628;O14908;P04818;O14618;Q06265;Q9GZV4;P61313;Q5TBC7;O15273;Q9NPF71;Q9Y376;O152

582

34;Q96SN8;O60716;P50502;Q9NVN3;Q5UE93;Q08209;P14316;O00629;P68133;P53680;P52292;Q14152;P78537;Q16401;Q13426;P59047;P10144;Q05932;Q9UJX4;Q8WXD5;Q9BYV8;Q9BV57;Q14999;P54920;P17980;O15327;O75496;O75901;Q03154;O15131;Q96EY1;O14777;P07814;Q9UHD4;Q99836;O00743;P07741;Q9Y2V2;Q14203;O43324;Q8IY63;P30047;O95050;P48539;P62851;O43684;Q9NVS9;Q9BTM9;Q07352;P28072;P46108;Q09161;P05388;O43805;P11441;Q8IUD6;Q04637;P09496;P46020;Q727A1;Q15488;O60763;P10914;Q14690;Q9H089;Q9HAB8;Q13114;P55957;Q9UQN3;Q9UPQ9;P13647;P30622;Q161K2;Q96CW5;P52948;P34896;Q8NDV7;Q53EL6;Q9UPV0;O15372;Q9H081;O00273;P42768;Q13490;P42771;Q99962;P49366;P10636;O00401;P42898;Q14008;Q9UI08;Q9NPP4;P04406;P62857;Q9BYX7;P55884;Q8NHY2;P62861;Q92843;Q5VV41;P37837;Q15653;Q8IWL9;Q9H814}

Pathogen{ P03383} interacts with 866 human partners: {Q9UD71;Q7Z7A1;P08107;Q96EE3;O15504;P42766;Q13257;Q13228;Q96CW1;O14879;P30307;Q8WUM0;Q8NHZ8;Q7L5D6;P36578;Q9NQS7;O60716;P27986;O15198;P02794;Q13616;Q03188;Q06265;P05388;P62266;Q9Y285;Q9UBU9;P39019;Q96LC9;Q6QNY0;P49454;P10914;P34949;P26373;O15234;P84101;P56945;P14316;Q9Y2L1;P56377;Q86XR8;Q5JVS0;Q16543;P49792;O14757;Q15287;Q8N2Z9;Q8NFH4;Q53EL6;Q8ND04;Q9BQA1;Q9UBB6;Q96G03;Q7Z460;P62913;P62945;Q01105;P55036;Q96N21;Q13485;Q9UJW0;P02533;Q12904;Q15369;Q6IPU0;Q14653;Q9BSJ2;Q04864;Q96A56;O14862;O75791;Q15366;Q9NWT6;Q9P2J5;O94925;P62854;Q96BD8;Q00610;P29474;O75143;O14933;P55212;P17096;P40429;Q9H0F6;Q9H8S9;Q9Y244;O14579;P14868;Q02241;Q8NBT2;Q9Y6K9;Q92844;O94986;Q13469;P62987;P62891;P25398;Q8IUC6;Q96JI7;Q14008;Q9UP83;Q9H900;Q15691;Q13233;Q9NYG5;Q9H840;Q00653;Q9UL18;P62280;P62318;P55735;Q96QF0;O95684;Q07020;Q8IU60;P51965;O95433;P49458;P53618;Q43290;Q9UJX6;P40337;P62312;P25789;P62750;Q9NZD8;P54105;Q8WUX9;Q9BUX1;Q9Y678;P08670;P60900;P49789;Q5HYK7;O15371;P05387;P62249;Q9H1K1;Q6NZI2;Q9BU02;P54920;Q9UQL6;P17661;Q9BRA2;Q9NVX0;O14713;Q96H20;P62888;O95487;P62899;Q9UBB4;O15162;Q9UHB4;Q9UBQ5;P50502;O43264;O14920;P31946;Q9UPQ9;Q5FBB7;Q15173;Q96FJ2;P19367;P60228;P611927;O95295;P41220;P24534;Q9H0W8;Q9UJW3;P00338;Q99608;P46777;Q7Z7A3;Q9Y5S9;Q9Y5B6;P46779;P52948;P49207;Q7Z465;P07902;P31749;P00NRG4;Q9P258;Q9BPZ7;Q9ULE6;P62316;P42025;O15111;P34896;Q14203;Q93034;Q96SN8;P49589;P83731;P62424;Q9Y3E7;P40306;Q96AQ6;O95644;Q9UFN0;P57740;Q9NUQ3;Q9UI10;O00233;Q9BZF9;Q10567;Q96CW5;O43303;P60953;P18124;Q86X55;Q8WYP5;P46778;Q9NZZ3;P41208;Q6VY07;Q8IWL9;Q8NHV4;P62328;Q13490;P18669;P55957;Q92901;P62753;P02511;Q6PI26;O00186;P62304;P30304;P62937;Q9BV73;P62714;P22392;P69905;P13807;P09467;Q96AQ7;P61326;Q9GZV4;Q9UHI6;P42677;O75886;Q96MT3;P09972;O95831;Q8WXD5;Q9BZE9;P48200;P63000;P61247;P40925;P52630;Q9HC77;O00762;Q63HM1;O60318;Q15468;P68871;P38919;Q9Y4Y9;P49721;Q06323;O60936;P83881;Q9NXT7;O00170;Q16613;P37837;Q86VP1;P14136;Q9H0B6;Q9UFF9;O95486;P24385;Q9HCK5;P35573;Q8TDY2;Q9UKT4;P30153;P26641;Q01860;P47914;P04792;Q9C0C2;Q96I22;O60841;Q15797;P142226;Q96H22;Q14997;Q9H1A4;P10599;P67775;P9Y6D6;Q9UN36;Q9NPN7;Q9NT62;P26196;Q96B36;P119240;Q14152;P63208;O00505;P62917;Q9UQF2;P49247;P62233;Q07352;Q86V81;Q15306;O60573;P07900;Q9NUS5;Q14690;P49754;Q13352;Q92597;Q00978;P61457;Q00534;Q15653;Q9UNX3;P63241;Q96EA4;P35813;P20618;O43324;Q9NQP4;Q04724;Q9UHD4;P09132;Q13158;P78537;Q13042;P02795;Q13155;Q9NUP1;O15117;Q13432;Q14684;P14635;P30050;Q9Y3B2;Q96MT8;P11802;O14744;O43318;Q6RSH7;P48147;Q96EV8;Q9UILL1;Q15436;P84098;P31350;Q9Y3E5;Q96BT3;Q9Y697;P78396;Q12769;P30279;A9QM74;Q9BV57;P61077;Q6PCE3;P36873;P62826;A8K8P3;Q07157;P32969;Q99618;P11168;P10279;Q09161;O95628;Q8IXQ6;Q8TEP8;P20042;Q71F23;P49366;P09913;Q8N5C8;P62136;Q99567;Q9UBW7;Q9UPR3;P61088;Q8IXH6;Q12834;O75901;Q16719;Q96GX9;Q96L92;P57077;O75832;Q6PGN9;Q14934;P62277;O0401;Q14397;Q05084;Q13144;P18077;O15105;P23588;P06730;P63173;Q8IYB3;Q9NR50;Q16851;Q9NSA3;Q92985;P06744;Q53HL2;Q9Y316;Q16637;Q7L9L4;P62081;O95229;Q9BW27;P84022;Q9BU64;P52292;P46976;P62314;P62310;Q66GS9;Q00994;Q9BTM9;P06132;Q86SQ7;Q9Y2J4;Q92945;Q9UK41;Q7LBR1;P50613;O60260;P42772;P23381;P20962;Q49B96;Q96TA1;O00273;Q86W56;P63104;Q9HAU5;Q9UNN5;Q9UM13;Q99873;P60604;O14556;O43633;P80217;Q8TEQ6;Q96S59;P07195;O14893;P61586;Q92973;O14641;O14896;Q13541;P63010;P61313;Q9UKV3;P48539;P46527;O14980;P08865;O43747;Q9HAV4;O94855;Q9NPD3;Q12933;O43684;O00471;O15078;P24941;Q13568;P62851;Q13426;P62495;Q86US8;Q9BYG5;Q9NQ4;Q13404;O43617;Q9H444;Q9H171;P47813;Q99717;Q9NXV2;Q8TAT6;Q9NPI6;Q9BZD4;Q14493;P46782;Q15046;Q9Y2N7;Q13867;Q14103;Q8WXC3;Q9UM11;Q9H6Z9;O43541;A5YKK6;Q9UL46;Q9UH77;O95149;P15407;P62269;O95190;P57721;Q9HCM9;P68104;Q9UNM6;P63220;P05198;Q9NPN6;P04406;Q12968;Q02543;P62244;Q15154;Q01201;O95067;P14678;Q02878;P14324;Q9UKN5;Q9Y333;P14625;P42768;Q8WVK7;O15350;P07196;Q9UIV1;P11532;Q9UER7;Q5JTC6;P25786;Q99460;O95782;P62837;P07814;Q9BYV8;Q15759;P49770;Q96RS0;O96020;Q15185;P99999;Q86TB9;Q9Y3F4;Q562F6;Q9UMS0;Q8N9V7;O00255;Q8IYD1;O75475;Q86YV9;P11142;Q96HA8;Q9BRG1;P25963;Q92600;P53041;Q9Y5K5;O75935;Q8TDN4;P78344;Q07866;P28072;O43255;Q96B26;Q9HBM1;Q13094;P62910;P27635;O95810;Q14974;O94921;Q9UKV8;P48788;Q13200;Q9UML6;Q5BJF6;O96007;Q9H074;Q9Y6K5;Q9Y266;Q8IY63;O95999;Q9H4A6;Q99543;P50453;P28065;Q13501;Q9HA77;Q9H410;O15027;O60784;Q8IZD4;Q16236;P07741;P57076;P42771;P62857;P28066;O15131;Q13547;P26651;Q92783;P52298;Q99613;P78371;O14965;Q99933;Q9Y3C4;Q96RU7;Q15628;O75436;Q9H081;O75822;Q92748;P35658;P62906;O43504;Q9Y4Z0;Q96IY1;P46783;Q14980;Q9BV20;Q9BRV8;Q16082;Q9NZN8;Q8IX03;Q9Y3U8;P67870;P60866;Q04637;Q9UK45;Q9RKV6;Q13617;Q96C86;Q86WI3;Q15181;Q15327;Q5EBL4;Q9UJX4;P61254;Q9UPV0;P62633;Q16401;Q8TAP6;Q9H7C4;P62979;Q8NG31;O00231;Q00597;P61981;P39880;P0CG47;O95394;Q96QK1;Q9Y4P8;Q15796;P62241;Q9P209;P56524;Q9BUL8;Q96FA3;P46781;Q14232;P35237;Q53FT3;Q13347;Q14677;Q6P1K2;Q6ULP2;P13647;Q9UJX5;P62877;O75161;Q13309;P32189;Q9H3M7;Q04206;P39023;P53992;O95997;O43776;P57678;P08397;Q9NRR5;Q9BU89;P49459;Q9UHB9;P45984;Q8WYR1;Q96S95;Q9UPZ3;Q02556;Q8WUM4;Q9UKZ1;Q5UE93;O60504;P50452;Q9NRA8;Q15370;Q99996;P0CG48;P54840;P39579;Q3LL64;O75807;Q92845;P28074;Q14258;P62841;P78559;Q96M53;Q96F86;O00425;P62308;Q92530;P49720;Q8TAA3;O95613;Q13561;P61289;O14777;P22090;P61970;Q13794;Q92540;P41250;P36543;Q9UJX2;P62701;P11441;P62829;P11172;O15116;Q8NHY2;Q9BXX1;P29692;Q9BXS5;P62263;P28062;P62847;P24864;Q86Y01;P35268;P41252;Q13642;Q9HAB8;Q9Y2V2;P54136;P30260;P05386;Q92674;P50914;Q9HCE1;Q9UPT5;Q9NYJ8;O95453;P16333;P06733;O94973;P48556;Q9H3R5;P63167;O00743;P19838;O00629;P35869;O14964;Q14CS0;Q9NSD9;O14818;P49591;O75175;Q9UJX3;P20073;P46937;O75665;Q9NR28;P62258;Q9GZV5;Q86VN1;Q5T1C6;Q9UN37;Q92900;P62861;P08238;O75953;P30047;Q13868;

583

Q99436;P18621;P52294;Q13112;O15372;Q92539;Q92890;Q96LI5;P21673;Q13114;P46776;O75821;Q8NFZ5;A6NK89;Q9H211;Q9NPA3;P15880;P23396;Q14749;Q96EY1;Q8N5D0;P15259;Q9H4B6;Q9BQ90;Q15024;O95429;P28070;P61513;Q9H9G7;P49419;O75531;P40855;Q9UQN3;Q8NFH3;Q8NHQ1;P51668;Q53G26;Q9UDY2;Q14999;O75496;Q99741;Q13127;Q15633;Q9H814;P25787;P62306;P27797;P08708;P06396;Q9HAT8;Q9HCC9;Q14693;Q9Y6D9;P25788;Q96LW7;Q15750;Q9BPX1;Q9H008;Q9BZI7;Q9H1J1;P50748;P61353;Q6P2E9;P05412;Q9Y314;Q9BYG4}

Pathogen[ P03410] interacts with 1240 human partners: {P84022;Q96LI5;Q03188;P15559;Q99567;Q00610;Q96AQ6;Q9UKT4;Q9BRT3;O14786;Q14397;O95684;Q99933;Q8IXH6;Q99743;Q92540;Q8NHY2;Q9NUP1;P09496;P62258;O75665;Q7Z460;Q04206;P62714;Q9Y6Q5;P46976;Q9UQC2;P62861;Q14204;Q9UH77;P05386;Q86UT5;O15392;Q9NS86;P42771;Q8IU60;P28070;Q5JSH3;Q9BW27;P53602;Q9Y2L1;P49354;P78537;Q6NZI2;Q9YLE6;O95045;P30047;Q92945;Q15274;Q02543;Q9UPQ9;Q15041;P61247;P19838;Q96PC3;Q96P26;P62241;Q9Y285;P17987;Q13094;Q96TA1;P46527;Q96CW1;Q96IU2;Q92529;P62829;P49207;Q9HA77;Q9BZE9;P26373;P27986;Q9NZN8;P48539;P55036;Q96RS0;Q9Y4Y9;Q9BU89;P61513;Q96PE3;P02794;Q8WXD5;P02533;P10599;P31350;P49368;P0CG48;Q9NR50;Q99832;Q9NSP4;P51161;O14893;Q9BU02;Q5UE93;Q5HYK7;Q9UFF9;Q9UNN5;Q9HBK9;P10144;O14920;P68104;Q9H3R5;Q14974;Q13155;O14556;P61326;A9QM74;Q14103;P62304;P62899;Q15833;P35813;P80303;P56192;O15234;Q8N0S6;Q14353;O43633;O00505;P62736;Q9UI08;O43684;Q16658;Q9HCM9;P06744;Q96H22;Q8NFI3;Q14749;Q9Y239;Q9UPT5;Q6PCE3;Q9UKV8;Q15633;Q99497;Q07866;O95628;P48643;Q13409;Q9UHB9;P62328;P30622;Q16851;P08397;P35754;P02100;Q8WYR1;P53G26;Q9BXS5;Q96L92;Q8TEP8;P62244;P30279;O43504;Q8NFZ5;Q9NWT6;O43903;Q9BQQ3;P53680;P10916;O60841;Q9BPX1;P49915;P37837;Q13561;P47756;P62913;Q7L5D6;Q17661;P36871;O43597;Q9UP83;O75822;O15327;Q9H1A4;Q8NFF5;Q9UPW5;Q9H0B6;Q04864;Q9Y2I6;O00139;Q8TE04;O43303;P55822;Q9Y2Z0;P50502;O14896;Q9Y2J0;Q00534;Q16543;Q9NSA3;P25786;Q66GS9;Q9H840;P42772;Q99618;Q14684;Q9NXR1;P29728;Q02878;P07741;Q08209;Q15008;Q9HCT7;P63000;Q13596;Q92901;Q9H410;Q92900;Q16401;Q99996;Q9Y2J4;Q9NRR5;O94855;P57077;P54840;Q8NG31;P08238;Q9GZM8;Q9NRF8;P11940;P49589;Q9H6Z9;O60551;O15372;P15880;Q15154;Q99814;P62306;Q53HL2;Q12968;Q9NP79;P46777;P46776;P98171;Q9NUS5;P62841;P19429;P52294;P54105;Q8NFH4;P17812;P30050;Q01860;Q9NR28;O75351;P05413;Q6IPU0;P53992;Q9BXH1;Q15287;Q8IX03;P60900;P16118;P62310;O75674;P46020;Q9UHD4;Q96020;Q96S59;O43747;P41220;Q9UL18;Q495M9;P05388;Q9Y316;Q6QNY0;Q14997;O75031;P16157;Q7Z7A1;O15111;P06730;Q9ULM6;Q96BT3;P42575;Q9UPR3;P35998;Q15750;Q49B96;P51965;Q96FA3;P06396;Q9NPI6;Q05682;Q96A67;Q96S95;P46781;Q12959;Q15173;Q9BUL8;Q9Y2N7;Q99460;P18124;O76027;P49588;Q9Y5S9;Q16831;P60520;Q9Y3C4;Q6PI26;P00374;Q06265;Q9UJX4;P54136;Q9NYG5;O43639;Q9H8S9;O14810;P48147;Q14493;Q96LC9;P48444;Q99717;Q9NVK5;P20042;P52948;Q99608;Q16719;P11532;Q16222;O00233;Q9C0C2;O76075;Q9NZC7;O15504;Q14008;Q96SN8;O14862;Q14653;Q9Y6X9;Q9BPZ7;P68543;Q9H773;P32929;O43187;Q5RKY6;Q8TEQ6;Q9UM13;P53367;Q16236;P07902;Q10567;O14713;P14625;Q15468;O95954;P11168;P23381;P04424;Q04446;Q13490;P62136;P35606;O75143;Q9HCT0;Q9Y333;Q8WV28;O60716;P06733;Q9BUX1;O00232;Q9NRA8;Q9BYX4;Q13867;O15198;P62269;P28289;Q8TDY2;Q8NDV7;O95050;Q7Z465;Q92845;O00273;O00401;P35573;P55273;P50748;Q9NVM4;P34949;P57075;Q07020;Q86X55;Q13868;Q8NHZ8;P49459;P57721;P63220;Q04724;O43776;P62910;Q9H939;Q13501;P62847;P62906;O95067;O14908;P11142;Q9HD36;O00399;Q8TAA3;Q92843;O00204;Q92783;Q9BY43;P11172;P31749;P17096;O14579;Q96QK1;Q9H7H1;P35579;P04792;P59047;Q7L9L4;P23396;Q9H3M7;Q15124;O75161;Q14232;Q8TCU4;Q92934;P30419;P18621;P48556;Q562F6;P63167;Q9P209;Q9Y2V2;P42768;P49721;Q92674;P62266;Q15653;O95190;P40855;P50570;P07900;Q9B2A1;Q9H211;Q96EK6;Q53FT3;Q7Z7A3;Q9NPP4;P16333;Q9UJW0;O75953;Q15366;Q15370;Q92844;P62249;Q01105;Q9C000;P63151;Q13794;P62308;Q9H1J1;A0MZ66;P14678;P63173;P62316;P50914;Q9HA5;Q9Y3F4;P47897;Q8TCX1;Q86VN1;P62280;Q969X0;P06132;Q9Y697;O60260;Q8IWW7;Q9P243;P14868;Q9BRA2;Q9BVC4;P61088;Q96N21;O43432;Q13233;Q8WVH0;Q9H9G7;Q15327;O95997;P30793;P19623;Q96NU7;Q9Y4P8;Q6XQ6;A5LHX3;P22090;P26651;P05062;P13639;P52788;Q9Y617;P61313;Q9UUV1;P62979;Q99613;Q9H4A6;Q12840;P47813;Q95817;Q92748;P09467;P02549;Q14596;Q9BYV8;Q9NVN3;Q05084;Q9H171;Q13541;P07195;Q15306;Q13568;P50613;Q9H1J1;A0MZ66;Q14152;Q9H9A5;P61163;Q14258;Q99436;P62701;Q01201;O94925;Q9H1K1;Q86VP1;P49770;Q9BV20;O14933;Q9BZI7;Q9HCC9;P07196;O00757;Q12904;O15273;P06703;Q9UL45;P55957;Q9H7C4;Q13158;O43264;Q14693;P23919;P62750;Q9NSD9;Q9H074;P50452;O14841;P49454;Q9NXX5;P22234;Q9GZV5;Q9UQL6;Q02556;O95295;P78396;O14965;P43490;Q96EA4;O75688;Q9P2J5;P55884;P08865;Q8N2H9;Q9NRX4;P49591;O43708;O95644;Q9GZT9;Q96IF1;O15162;Q9Y2T3;P40306;P52209;Q0VDF9;P61981;Q96GD0;Q00994;Q93099;P10746;Q6GPH4;Q86WI3;Q9UNX3;O43805;Q9UM54;Q96B36;Q15628;Q9HC16;Q06323;P62277;O15371;Q8IZH2;Q13127;Q8NHV4;O43318;Q16829;Q93100;P36578;P18077;Q8WYR4;Q6VN20;Q92556;Q9UNE7;P24385;Q9Y3E7;Q9UDY2;Q96IY1;Q9P0M2;Q15436;Q9BXI3;Q8IZD4;Q9NPB8;O00154;Q96MP8;Q8WUX9;P25398;P63208;P29474;Q86Y01;O14576;O60936;O60763;Q96B26;Q14677;Q63HM1;Q8TDX5;Q13200;P48775;P09972;Q9H814;Q9UQN3;P63098;O94986;O14531;P50552;P62937;Q14315;Q96F86;Q9UKV3;P25787;Q14980;P61927;P49789;P84098;P68871;Q15369;P62854;Q8TAP6;Q9UER7;O95453;P14635;Q6P2E9;P07951;O95999;Q9UM11;P21399;P38936;Q9UN36;Q9Y376;Q15691;Q13042;P48454;Q9UUL1;P45985;O14508;Q8N2Y8;Q13309;Q6ZUJ8;P62826;P62273;O00629;P26639;Q9UPZ3;Q9H492;P09132;Q96N76;P50990;P18545;Q86YV9;Q5TLC6;Q9BPU9;Q9UKN5;P61586;P35658;P08107;P52298;P62081;Q16637;P46783;Q7Z6J0;O75608;Q9BXL7;Q86UY8;P04818;P62495;Q8IXQ6;P30304;P24941;Q07157;Q9UKZ1;O00170;Q00597;P62314;Q86WC4;Q92973;Q9NYJ8;O95429;Q9NP61;O96007;P00338;Q9UN37;Q9Y678;Q15056;P11802;Q9BTE1;Q6PK2;Q9UMS0;P05937;O75531;P02511;Q15024;P56524;Q9Y6N9;Q99704;Q96CD2;Q16613;Q9UBB6;Q9HCE1;P49366;Q16082;P30566;P02795;Q9NVX0;Q5JVS0;Q9Y3U8;P28062;Q14CS0;Q15797;Q71F23;Q9ULP0;O95486;Q5VV41;Q8N5C8;Q13112;Q9NPF1;A6NK89;P51665;P62877;Q8IW19;Q9Y4X5;Q3I5F7;P41250;Q13485;Q9UI12;P13807;O15067;Q15036;O15078;Q96LB4;P10914;P49419;Q15185;Q96G01;P42898;Q9H444;Q9HCK5;Q86V81;Q9BZD4;O60784;Q8WVK7;Q9NZZ3;Q9Y6D6;Q9H089;P08708;Q53EL6;P15259;Q12933;Q9H0E2;P46782;Q9ULU8;P32969;Q9NUQ3;O95831;O14818;P53618;Q9UBU9;P84101;Q9NT62;O75436;P36873;Q9HBM1;Q86SQ7;P61923;Q9Y6D5;P53041;Q8WVW7;Q96EE3;O14757;Q15046;P51668;Q9HAT8;Q9BRG1;P46937;Q6P3S1;P31939;P68133;Q9UJX5;Q8N9V7;P60842;Q9NRR7;O43324;Q8N5D0;Q5BJF6;Q9Y244;P21673;O75935;O75175;O75807;Q13469;Q9NRS6;O95670;Q8IYB3;O00303;P38919;P49754;Q96FZ7;Q9NQT4;Q6PUV4;O95810;P48788;Q9H008;Q8IZP0;Q9H0R1;Q96GX9;Q66K74;Q13

426;Q13642;P48059;O60504;Q9BSJ2;P05412;O43541;P04406;P50453;P39880;P99999;P20962;P23526;Q9UHB4;Q5TBC7;Q5JTC6;P18669;P02042;O00231;O15488;Q86W56;Q96G03;P08670;Q8ND04;Q9UNM6;Q16625;Q12834;Q6R327;Q8NBT2;P80217;O15105;P78559;P54368;P30260;P42226;P46779;P10636;Q86US8;O15305;P63104;O15117;Q8TCD5;P27635;Q9NQ4;Q9NVS9;Q96RU7;Q6RSH7;P49450;Q9Y6K5;Q9Y3E5;P25789;Q5FBB7;P49720;Q86TX2;P63010;Q8IYD1;O60318;Q15102;Q4G0F5;Q96QF0;P60953;P42025;P09913;P13929;O60573;Q13616;Q9Y4Z0;O96033;P45984;P50542;O75821;P30153;Q9UJX3;P96RT8;Q9BZF9;P20073;Q12799;Q96JI7;O60346;P46108;P52630;P23258;P62987;P41252;P56945;P53779;O00425;Q13547;O00762;O75496;Q16864;Q96A56;Q86TB9;Q8WUM0;Q9Y426;Q9H0P0;P57678;Q99698;Q8WXC3;P24534;Q12982;Q9Y5K5;P62857;P49593;P26640;Q8N5X7;P78371;P14649;O75901;Q6ULP2;P11441;Q96B97;Q8TEW0;Q8IUC6;Q9NBP6;P63241;O15350;Q13347;P62263;Q9UPV0;P41091;P63316;P14136;Q99962;Q13907;P09917;P62424;O15027;P63261;Q9NVD7;P62888;P13533;Q9H900;P61254;Q09161;Q92597;Q01082;Q96JZ2;Q9Y266;O60291;Q00653;P46778;Q13617;Q92600;P28072;Q9UBW7;O95229;P62945;Q9H081;P05387;O95336;P07814;Q9Y3R4;Q9BTM9;Q9NPD3;P48200;Q00987;P60604;P42766;Q9UJW3;Q13228;Q13404;Q5VZK9;O75475;P40925;Q14194;O75223;O14744;Q9H4B6;Q66LE6;Q9BZR8;P26641;O15116;P32189;Q96CW5;P15407;P39019;Q9H8V3;P62312;P47914;Q9UQF2;Q6PGN9;A5YKZ6;Q96BD8;P14316;Q9Y6K9;Q9GZV4;Q9H0W8;P40429;Q04637;P25963;P57740;P55735;O14618;P17707;P49458;P30305;P16930;Q92985;O43290;O00178;O14879;O00186;P69892;P39023;Q14671;P02792;P25788;P67870;Q96RT7;Q15149;Q9UBB4;O95433;Q9Y314;P13805;Q99543;Q96C86;O43617;P29692;P60600;P62166;P31150;P57076;P62633;P13647;Q12769;Q3LI64;Q15181;O95613;P52292;Q13432;P69905;Q9HAV4;Q96H20;Q96MT3;Q9HAB8;P62917;P52565;P62851;P67775;Q92539;P63731;Q9Y5K8;P61966;O00255;Q14867;O95394;P13535;Q6VY07;Q15796;P55212;Q8IY63;P60228;Q96CF2;Q13813;P35237;Q9P258;Q8N1I0;Q9UD71;P23921;Q05932;P41208;P62993;Q9UHI6;Q8WUM4;P28066;Q8TDN4;Q9BV57;Q8IV53;O15131;P35268;P24864;Q8WYP5;Q03393;P40763;Q6IA69;O75122;Q8NHF3;P09914;Q8TBF2;Q504Q3;Q9UMX2;Q5EBL4;P61353;Q9UK45;P42566;P42773;O00471;Q9BRV8;Q93034;P46109;P62891;Q9BV73;Q8TAT6;Q96JJ3;P28065;Q7LBR1;Q14934;Q92890;O43242;P27815;Q96DG6;Q9Y5B6;O94973;P35611;Q00978;P56377;Q96EV8;Q96M53;P30307;Q9NPA3;O00743;Q9UJX6;Q96EY1;O75348;P49247;P11277;Q9NZL9;Q9UKG1;Q9UFN0;P51580;P0CG47;Q9BX66;Q07352;P36543;Q9BQ90;Q9H9E1;Q9UGJ1;P24588;Q6P587;P34896;O00221;P62753;P78344;O43237;Q13352;O95822;O75886;Q9UBQ5;P23588;Q5JTW2;P46060;A8K8P3;Q9UI10;Q9BYG4;P17980;P60709;Q99873;Q7L2Z9;P31946;O75832;O14980;P20618;Q13114;P49902;P40337;P14324;P50991;P61077;O14777;Q14203;O95487;P62837;P49792;Q9BYG5;Q14240;Q9UL46;Q02241;P55345;Q9BU64;P28074;P10909;Q8N2Z9;P61289;P55210;O75791;Q5MNX9;P83881;P21695;Q9Y6M1;Q14690;P60866;O95149;Q9H0F6;P69891;Q9NRG4;Q13257;Q9NQS7;Q13415;O14641;Q13144;P42677;P61970;Q9Y3B2;P54920;Q96LW7;Q99741;P61457;Q99966;Q9NXV2;P05198;P27797;Q9BXS1;P62318}

584

Pathogen[ P14075] interacts with 887 human

partners: {P60953;O95453;P52630;Q96MT8;O75953;Q6P2E9;P06733;P60604;Q9BTM9;P29474;P68871;P42766;Q96AQ6;P54136;P78537;P52292;Q9HAB8;O43617;Q99933;O15131;Q8TEQ6;Q6IPU0;Q15366;P84101;Q96IU2;P35869;P49207;P40925;Q96GX9;O15234;P09132;P62857;P62304;Q9GZV5;P46781;Q8TAT6;P63220;Q16543;P54105;Q96N21;P32969;O43303;Q9UK45;Q9BRV8;Q9BYV8;Q09161;P35813;P62316;Q96MT3;Q9H814;Q53FT3;Q16719;P62495;P55036;P25788;Q9Y5B6;P11532;Q14690;P42677;Q99608;Q9Y266;Q13155;P62913;Q9UHD4;Q9H211;Q92900;O15111;P22090;O60841;Q9H7H1;P55957;Q13042;P11142;Q9Y3F4;P20042;Q02878;Q8WXD5;O00273;P09496;Q9GZT9;Q15102;P31350;P28066;Q04206;O95067;Q15750;Q9BUL8;P06132;P09913;P24941;P49902;Q9UMS0;P41250;P62277;O95684;P06744;Q9Y6D9;Q92844;O15372;Q02241;Q96LW7;O94973;P23381;Q8IXQ6;Q9UPR3;P05412;P62851;Q9NXT7;Q86WI3;P11802;P42226;Q06323;O75832;Q3034;Q9H081;P68104;Q9BRA2;Q96CW1;Q15759;Q9HCK5;Q14103;O75886;Q9ULM6;Q86V81;O75475;Q8WYR1;O00186;P62837;P23588;P08865;Q9BQA1;Q562F6;P11172;O95295;Q8TAA3;Q8N5D0;Q9Y3C4;P62328;P61970;Q9UKZ1;Q07157;Q9UKT4;O75791;Q9NPD3;P60900;P34896;Q92845;Q9NT62;Q9NQS7;Q72465;P62244;O75143;A6NK89;P40855;P14635;P61326;Q7LBR1;O15162;Q9UM11;O00233;P08708;O43541;Q9H444;Q9H9G7;Q9UKN5;Q9NSD9;O14713;Q14493;P61088;Q01201;Q92674;Q9UL46;P57678;Q9BV57;Q8WVK7;Q9Y4Z0;P26196;P57740;P30279;Q8WUX9;Q8WUM4;P32189;P55212;P49720;P61254;Q8WYP5;P46778;Q86SQ7;P49459;P50613;Q8NHV4;Q7Z460;P26651;Q92600;P78559;Q01860;Q6PI26;P34949;P42768;Q92945;P62633;Q13561;Q92973;Q93100;P49792;P17096;Q92783;Q15327;P56524;Q00994;Q9BV20;Q9NPF9;P51965;A8K8P3;P05388;Q96IY1;Q13257;P41252;Q9UJW3;Q00534;Q9HC77;Q9HCE1;P26641;P78344;P18669;P80217;Q9Y2N7;P42771;P41220;Q6RSH7;P83881;P170651;O00629;Q5UE93;Q16613;P54920;Q86VN1;P14136;Q9BYG4;Q99613;Q9Y244;Q5HYK7;Q9Y2V2;Q8TDY2;O15117;P19367;O75821;P46777;Q9H840;O95997;Q96H22;Q96G03;P29692;O95433;O43684;Q9GZV4;P57076;Q9Y3U8;P04792;Q96SN8;P62249;Q92890;O14933;Q16082;Q99543;O75175;Q9H074;P78371;Q53G26;Q9UK41;O15027;Q99717;Q13200;P08397;P48556;P06730;P62306;Q16401;Q9NPI6;P62081;Q5TBC7;Q00978;O95045;Q15653;P63241;Q8NHQ1;P62308;P15559;Q5T1C6;P62750;P18621;Q9UHB4;Q96LI5;Q8IU60;Q96BD8;Q9NZD8;P35658;Q9NZN8;O96020;Q9Y6D6;Q15796;Q01105;Q02543;Q9UI10;P46976;Q9HAV4;P54840;P08238;P28070;Q9UD71;P18124;Q9UNX3;P53992;P20073;P25398;Q96LC9;Q96JI7;Q9Y3E5;O75901;Q9UBB4;Q8IY63;P25963;O14777;P61981;Q13547;Q9UJX2;P61077;Q13642;P49721;P07195;P20962;Q9Y2L1;P55735;Q6PCE3;P39880;P47813;O00471;Q15185;Q9UKV3;Q96H20;Q9HA77;Q8NFX5;P36873;O95229;Q13868;Q8TEP8;P05198;O15371;P49366;P62312;O00231;Q8N5C8;Q92748;Q9Y316;P46527;Q9Y4P8;Q96AQ7;Q96TA1;P16637;O43255;Q9Y3E7;Q9HCM9;Q9H7C4;P62136;P78396;Q9UJX6;O00505;Q8N2Z9;Q02556;O00743;Q9H8S9;Q9UFN0;Q9NUQ3;Q8NHZ8;P57077;Q92530;Q9Y285;Q96HA8;P16333;Q9BU89;Q13568;Q13485;Q9NXV2;O00255;Q9UPV0;P63208;P07900;Q9NQ4;Q9H3R5;Q3LI64;Q9NPF1;Q9NR28;P11940;Q6NZI2;Q9BPZ7;Q9Y2J4;Q14999;O14980;P60228;P63173;Q96B36;O14920;P55822;O95628;P16118;Q9BW27;P30050;Q9HCC9;P52294;Q9UHI6;P31749;O95487;Q9H4B6;P07902;P57721;O95810;P0CG48;P04406;Q86US8;Q8IZD4;Q66GS9;Q92539;P62979;P49419;Q99996;O00762;Q96S95;O00401;O15078;O60573;O14964;P83731;Q9BU64;Q96EA4;P49458;P84098;O00139;Q5BJF6;Q9UP83;Q86VP1;P49754;Q9UNN5;O00170;Q14653;P62318;Q96559;P28062;Q96FJ2;Q96M53;Q15370;O15116;O14641;P99999;Q13490;Q9P258;P28074;O75935;O14744;Q14232;O75161;Q9UJX5;P56192;Q12933;P61247;Q99873;P62753;Q86XR8;P46782;P62891;Q13469;P62891;O15350;Q14684;Q12904;O14862;P28065;Q63HM1;Q9UPQ9;P18077;O14965;P11441;Q9NVS9;Q9NPA3;Q9NSA3;P46779;Q86X55;P62917;P53618;O95831;Q8WXC3;Q9UQN3;P39023;Q6R327;Q15287;Q04637;P50502;P50



914;Q5JVS0;Q8TE04;Q15691;P67870;P62269;P62847;Q8IW19;P62910;Q9BXH1;O43776;P62273;Q9BV73;Q7Z7A3;Q86TB9;O95782;P27797;O43318;Q9HAT8;P30047;Q14934;P02794;Q13158;P27986;O15198;Q14CS0;Q14677;Q96EE3;Q9H008;P14324;Q5RKV6;Q86YV9;P40429;O75807;Q9UN36;Q96FA3;P23396;P62241;Q9Y6K5;P25786;Q8TAP6;Q15306;P15880;Q6QNY0;Q15173;Q96RS0;P62826;Q14818;Q9NZZ3;O95336;Q96BT3;Q9NQF4;P49770;Q9NUP1;P62987;Q8IYD1;Q13309;Q9BPU9;P63104;P06396;Q9UHF77;O43747;Q13114;Q9NWT6;P53041;P35579;P14868;Q9HAU5;P61457;Q9H3M7;P35573;P28072;Q5FHB7;Q9P2J5;Q53EL6;Q96B26;P51580;Q15436;Q8IYB3;Q9UKV8;P61586;Q9NRR5;Q14258;Q9BUX1;P62841;Q9Y333;O96007;P36578;Q8NHY2;O15105;O95999;P62266;P50452;Q14397;P30304;Q13794;Q07352;P02511;P50453;Q9UILL1;Q9H410;O95149;Q13867;Q13426;Q15633;Q9UBB6;O94986;P62714;Q5JTC6;Q9UPZ3;Q8IXH6;P41208;P14316;Q15628;Q13228;O14896;P67775;Q13347;P08670;Q13094;P30153;P63000;Q14997;Q96RU7;Q8IUC6;O75436;P61513;Q75822;Q15154;O14879;O43504;P61313;P27635;Q8NFH3;Q9ULE6;P14678;Q9UJX4;P63010;Q9H900;Q5EBL4;O94925;P62888;P02795;Q53HL2;P00338;Q9UFF9;Q05084;Q9Y678;Q92901;Q96EV8;P0CG47;O95394;P62937;Q6PGN9;A9QM74;P42772;O15504;Q9NVX0;P09972;P49789;P25787;P15259;P26639;Q96QF0;Q9UDY2;P08107;P50748;Q9Y5S9;P35268;Q6ULP2;P13647;Q13404;Q15468;P49247;Q96C86;P46937;Q13127;Q9NR50;Q9BRG1;Q9UHB9;Q7L5D6;P62945;Q99567;P56377;Q8N977;Q9BYG5;Q9BZF9;P46776;P19838;O60504;Q9UQL6;Q12769;Q04724;Q99741;P11168;P07196;Q9H0W8;Q14749;P48788;Q9UL18;O75665;Q15024;Q00653;Q9HBM1;P31946;Q92597;P20618;Q9H1A4;Q6P1K2;Q9Y6K9;P13807;P24385;O94855;Q86W56;Q9BXS5;Q9NPB6;Q9NRA8;Q9UBU9;P46783;P48200;Q14974;O95613;Q9P209;Q14203;Q8NFI3;P62701;Q92985;P07741;P84022;Q13144;Q9UER7;P15407;Q13352;Q07866;Q14008;P49589;P62899;Q99618;Q7L9L4;O00425;O43324;P30793;Q8WUM0;Q9COC2;Q16236;O60936;Q9H0B6;P47914;Q9UNM6;P21673;Q14893;P62906;P62906;Q13616;O75496;O60716;Q00597;P62314;Q13112;Q86Y01;Q13233;P38919;Q15046;Q9UM13;Q9UJW0;P10914;Q6XQN6;Q14980;Q9Y4Y9;O94921;Q9UBQ5;Q9UIV1;Q9BU02;P40337;P14625;O43290;Q03188;P30260;P61289;P05386;Q8NG31;Q9UJX3;Q8TDN4;P40306;Q96EK6;P61353;P51668;Q9NYG5;O60260;P49454;P37837;P39019;Q13617;Q13432;Q9BSJ2;Q15369;P62424;Q99436;Q92540;P09467;A5YKK6;Q06265;O95486;Q09H4A6;P30307;Q7Z7A1;Q9NRG4;P24534;Q71F23;Q8NFH4;Q9UQF2;P62829;P62280;Q16851;Q10567;P2533;P63167;Q12968;P49591;P42025;Q9Y3B2;Q9UBW7;Q9H0F6;Q8NBT2;Q96F86;Q9BZD4;Q13541;P35237;Q8ND04;Q96A56;Q07020;Q96NU7;O14757;Q9H171;Q9NUS5;P62263;O14556;Q12834;Q96CW5;P22392;Q96EY1;Q00610;P62854;Q6VY07;P60866;O95644;Q13501;Q15181;P26373;P07814;P62877;O60784;P05387;O95429;Q9H1K1;P56945;Q9NRN7;Q14152;P62310;O95190;Q9Y5K5;Q9UN37;P52948;Q9BZE9;P62258;Q96L92;Q04864;P48539;P52298;Q8IX03;Q9H6Z9;O75531;Q9BQ90;Q9Y697;O75031;Q9UPT5;Q14693;P25789;P24864;P10599;Q49B96;Q96QK1;Q9BZI7;P36543;O14579;Q9H1J1;P45984;Q9Y314;P69905;Q9NYJ8;P61927}

585

Pathogen[ P0C206] interacts with 1206 human partners: {P49589;Q9UBW7;Q9BPU9;P61289;Q9NQC7;Q5JTW2;Q13112;P06733;Q9UNN5;Q9H1K1;Q9C000;Q96EE3;Q9HBM1;O14964;Q9BRG1;Q16831;P46937;Q16851;P41091;Q12982;P09132;P84022;Q15287;Q92597;P53680;P40429;Q8IXH6;Q9UFF9;P61313;P63010;O60716;Q99436;P28062;Q9NPA3;P10144;Q86Y01;Q9UFN0;Q96RS0;O43541;P99999;Q9UNM6;Q96DG6;P48643;Q86XR8;Q4G0F5;P07195;P68871;Q96L92;O43324;O14579;Q96PU5;P10914;Q13501;Q13541;P0CG48;Q8WYP5;P07814;Q92539;Q01082;O15131;Q9H074;O60291;O43933;Q15468;Q9Y2Z0;P62877;P05062;Q0VDF9;P57076;Q9UKG1;Q9Y678;Q99613;P10746;Q9Y3F4;Q8WUX9;Q9UN37;P60709;O94986;Q14103;P27635;Q9UM54;P14678;P17661;P06396;Q9HCK5;Q9GZV4;P50452;Q9H4A6;O75832;Q9BZI7;Q504Q3;Q6IPU0;Q13568;P20042;O94973;P36543;P09917;P18124;Q9NSP4;P07196;Q8N2H9;Q96N21;O95149;Q86TB9;O14920;P52298;Q92556;Q96SN8;Q9H4P4;O95453;O00221;Q9H444;Q92844;P31749;P78537;Q8N6T3;Q92890;P62854;O14867;P27797;Q7LBR1;P40306;Q14CS0;Q13469;Q9NP71;O75496;P28065;Q9HC77;Q14997;Q86S07;Q14008;Q9H840;Q9NUQ3;Q9UBB4;O14576;Q9UL45;Q93100;Q13432;Q8TDN4;Q13127;Q9UJX3;O60504;Q16222;Q9BUX1;Q9Y6K9;P61326;Q9H900;Q9NXJ5;P46976;P47756;Q9Y6Q5;P49207;Q92845;P26651;Q8IZH2;Q9Y4L5;Q9BQA1;P60174;O00743;Q5BJF6;Q7Z6J0;Q9NSA3;O95684;Q13114;Q49B96;Q96C86;O43255;Q9NZL9;Q9BV20;O60784;P55036;Q9ULP0;P30307;Q9Y2N7;P13533;Q9Y3E7;Q9NR28;Q9BTE1;P02100;P15407;Q9BZR8;Q13309;P62081;P69892;Q13642;Q09161;Q9HAU4;Q9UDY8;Q96MT3;P18545;P53618;O43747;Q6XQN6;Q9HCC9;P30050;P25786;Q9GZT9;O94855;P30153;P62166;Q9HD36;Q9Y6D9;P35869;Q9UPZ3;O14862;O95810;Q86WI3;Q8WXD5;P62736;Q10567;P25788;P54920;Q5EBL4;Q93008;P51161;P22392;P29144;O14933;Q96G03;Q8NDL9;O75161;Q96RT7;P02794;Q7L2Z9;Q9P243;Q14690;Q9NPD3;P41252;Q9NRS6;P51955;Q8N5C8;P30419;Q14258;Q9Y6N9;Q9UD71;P62241;Q5RKV6;P54105;Q99873;P62304;Q9Y6D6;Q9NVD7;P62244;O14744;P25787;Q99933;Q86VP1;Q14315;Q8IYB3;A9QM74;P45984;P50914;Q01860;Q9UJX5;Q96IF1;Q9NXV2;Q9Y2J0;Q13868;Q13615;Q9NZN8;P08865;Q8TCU4;Q9UIV1;Q13228;P62750;Q9UJX2;Q8IY63;Q96CW5;O75807;Q06323;Q96B36;P18621;Q15327;O14713;Q9H492;Q8TE04;Q96LI5;P48147;P46781;P30279;Q96B97;P62328;Q9H0R1;Q04446;O75608;Q9NRG4;Q86X55;O76075;O00629;P62266;Q02543;Q14232;P49754;P52565;P63167;Q6LE6;Q9Y6K5;Q15691;P09467;Q96JI7;Q9Y2V2;P34932;O00255;O95997;Q9H081;O95999;Q8TEQ6;P61966;Q9UILL1;Q53G26;P49720;Q99717;Q9Y697;P15559;Q8IWB7;Q14974;P05412;O14777;Q8IUQ4;O95394;P25963;Q8N0S6;Q05086;Q15185;P19429;Q9UQN3;Q07020;Q96J02;P83881;P80303;Q8IYD1;P46778;Q8TBF2;P78559;Q9HAT8;P55212;Q15173;Q9NRX4;P60660;O14879;O00505;P26196;Q9H7H1;Q99618;P53041;Q8NFZ5;Q9BYG5;O43318;Q86VN1;O75175;P63151;O00444;P62263;Q96TA1;O00232;Q9UPQ9;P29728;Q15653;P62273;Q99698;Q9UER7;Q00610;P00915;Q9BZD4;Q9NPI6;P62314;P62316;O96007;P60900;Q9UDY2;Q02878;P62837;O60318;Q9H9E1;Q15306;O14531;P42771;P55735;Q9HA77;Q9UKV8;A8K8P3;P68543;Q16543;Q9UPV0;Q13547;Q99962;P04792;Q9H410;Q8TAT6;P35754;Q86TX2;P42772;P98170;P50991;P62495;Q13596;P30305;O15164;Q93009;P35237;P49902;P62826;Q8IUD6;Q8IXQ6;P20962;Q12968;P62280;O15524;P43490;P57740;Q6PGN9;P49454;P11441;Q13158;Q9UI08;Q9Y376;Q9BHX1;Q99996;P31939;P50453;P41250;P26641;Q3LI64;P17987;Q13616;Q12933;P34949;Q01201;Q92783;Q99497;P67775;Q96B26;Q9UQF2;P30622;P62857;P62851;P30793;P11055;P19367;P50542;O43237;O43242;Q15796;P62910;P10636;Q99741;Q9H9A5;Q96A56;Q13257;Q16829;Q8NDV7;Q92973;Q14596;Q00994;P32189;Q96LC9;O96020;Q9Y4P8;P49354;P26640;Q9BU64;P30260;P80217;Q15036;O75791;Q02241;P27986;Q9Y6X9;Q9Y4Y9;Q13233;Q9GZM8;Q8NFI3;Q9NR50;Q9BZE9;Q13409;P62993;P46782;Q96RU7;O95045;O95628;A5LHX3;Q9HAV4;P49591;P06730;P09496;Q9UGJ1;Q9Y4Z0;Q66K74;P61247;Q9NVK5;Q9HAB8;P48200;Q9NP61;P57721;P13807;O43504;Q15124;Q9UK41;Q9Y5K5;O14786;P62633;O75475;O43290;P61586;Q8TEP8;P31946;O43776;P69891;Q131



44;Q9NVX0;P18077;P61163;Q96LW7;Q9GZV5;Q9Y4X5;P05413;P51580;Q86UT5;Q92934;Q9Y316;P62913;Q6PCE3;P30047;P61927;P25789;Q13867;P49593;Q9Y5B6;P14649;Q9Y333;Q9HCE1;P61353;P51965;P62888;P46020;O75122;Q02556;P68133;Q14999;O95954;P49366;Q92674;Q8WUM0;Q8TAP6;P21673;P69905;Q9UKT4;P42773;O15105;Q8TEW0;P54840;O75531;P46060;P63104;P11168;Q6P1K2;Q9H1A4;Q96QF0;P49792;P11172;Q8IZD4;P36578;P60228;Q9HKB9;P49770;Q8NBT2;P16157;Q9H814;Q9BPX1;Q96BD8;P27815;Q9YWR4;O60936;P06744;Q9H0E2;Q9H3R5;P61088;Q6P587;P50502;Q9UK45;P14324;Q9Y3R4;P62861;P05198;O75688;Q13617;P19838;Q9Y285;Q9H089;Q86US8;Q14204;Q99743;Q86W56;Q14164;Q8WWB7;Q9H0B6;Q6R327;Q16082;Q9NYG5;O60841;Q9H8S9;Q92843;Q8ND04;O15516;Q96JZ2;Q15041;Q6PI26;Q9UP83;Q9UJX4;P08238;Q13907;Q9ULU8;Q9NRR5;Q3I5F7;Q6VNV20;Q9NWT6;Q6ULP2;P13647;Q9BXS1;P54368;Q9BXS5;Q8N5X7;Q5HYK7;Q96HA8;Q6VY07;P60604;Q16719;Q5JVS0;Q9UJW0;P22681;Q9NSD9;P50613;P49450;Q6RSH7;Q9NVM4;P35268;Q8N9V7;P59047;P23396;O95613;P39023;P63000;P62258;O95486;Q9H0W8;Q8NHV2;P20618;Q16658;Q9UKN5;Q8IWW7;Q9UNE7;Q8IZP0;P32969;O95831;Q06265;Q96H20;O95429;P63208;O43708;Q13200;P14136;Q9UBU9;Q8TAA3;Q9Y6D5;O14556;Q5VZK9;P62701;P28070;P07900;P49459;Q9P0M2;Q9UPT5;Q13426;P35606;P55196;Q6P2E9;Q96EV8;Q9UHV7;Q9H171;P05386;Q92985;P40855;P63261;O95190;P48059;P34896;Q99543;P49789;Q6NZI2;Q96IY1;Q96F86;P22090;Q04206;Q495M9;Q9UI12;P32929;O95487;O14508;P84098;Q96AQ6;P09913;P62945;O60763;Q9H4B6;O60260;Q99460;Q8TCD5;Q96CW1;P26373;Q9H211;Q14152;Q15102;P40925;Q96BT3;O00204;O14908;P23526;P61981;O15078;Q9H0P0;O00757;O15111;O14618;P46777;O95278;P05388;Q9UI10;P62979;Q6PUV4;Q5T1C6;Q9Y2J4;P67870;Q96GJ3;Q66GS9;P55273;P46527;O43633;Q8TDY2;P04406;P62318;Q14790;P48444;Q15024;Q13352;O15371;P35749;Q5FBB7;P57075;Q15370;P10909;O15234;O14893;Q9BUL8;A6NKR8;P28066;Q9NPB6;Q9BYV8;P62899;P38936;Q9UM11;Q99608;Q96AQ7;P08107;P35579;Q9BPZ7;O00401;Q9UBB6;P47813;Q04864;A5YKK6;P62714;Q9BRV8;Q9NYJ8;Q15628;Q53HL2;O00762;P83731;A0MZ66;Q9NPB8;Q9Y2L1;P42574;Q9BV57;Q9H8V3;Q9BV73;P07902;P39019;Q92901;P02792;P05387;Q8NHV4;Q53EL6;O14818;P46783;O00399;O15392;O14896;Q7Z465;P40763;P60520;O43597;Q13485;P56192;P48454;P42766;Q12840;Q9UPR3;Q9H008;Q15633;P55072;P60953;P60866;Q14240;P23258;O00139;Q9UKZ1;Q92600;Q96EK6;O95295;O43617;P62306;P31150;P04818;Q96CF2;Q7L5D6;O95782;P98171;Q9P258;P45985;Q9BRA2;P62841;Q14677;Q15366;Q99567;O75665;Q9UJX6;Q99704;Q04724;P0CG47;O60825;Q96H22;Q9Y3B2;Q9Y5K8;O60551;Q9C0C2;P61457;Q9HAU5;Q14934;P16333;Q13561;P17096;Q16864;Q96MP8;Q8NFH4;Q96GX9;Q8IUC6;P29474;Q8WUM4;Q9BX66;Q14194;Q00978;P28072;O15162;Q9H9G7;Q9BY43;P06703;Q63HM1;O95336;P30304;Q9H7C4;P42566;Q11579;P63241;Q9UNX3;Q99966;Q562F6;P54136;Q8N1I0;Q9UHD4;Q9H0F4;Q15274;Q9BQ90;O94925;Q07157;O75953;P23588;P09972;Q7Z7A1;P61513;O75436;P24534;Q96FA3;P49368;Q9HCM9;P42226;P78396;P78344;Q92900;Q9H3M7;Q9NZC7;Q9H6Z9;P49458;Q00653;Q13155;P41208;Q9Y3C4;P16118;O60678;O95817;Q16236;O15350;Q13415;P26639;Q00597;Q9ULE6;Q03393;Q5UE93;P11277;P07741;Q96GD0;Q8IV53;P28074;P62277;Q14397;Q9UHB9;P57077;Q7L9L4;P42575;O95067;Q9NXR1;P56945;Q96EA4;Q14749;Q9Y3E5;P49419;O60346;Q9HCB1;Q08209;O60573;P46776;P84101;O75031;Q92530;Q9UHI6;Q8N259;P62906;P62312;O15504;Q8IW19;Q04637;Q07352;P61077;Q9P209;P15121;Q15750;P49721;Q9UN36;P46108;Q9NP79;P63173;Q96QK1;Q5JSH3;Q9NUP1;Q9NZZ3;Q12769;P14635;Q93034;Q92945;O00170;Q99814;P39880;O15198;Q9UPW5;P53992;Q6QNY0;Q96FZ7;P08670;O95644;Q9NT62;Q92529;P55345;P11532;Q43684;P62987;Q9NQT4;P56524;Q9BYX4;Q13404;P38919;Q8N5D0;O75821;Q13094;O75886;Q16637;Q96859;P48788;P62308;Q00987;O14965;P02511;Q9BQQ3;P10599;P62891;Q14980;P49247;P62269;Q9P2J5;Q9NS86;Q9UHB4;O43805;P41220;P42768;P29692;Q9UM13;Q96MT8;P62753;Q86YV9;P08397;Q7Z460;O75351;Q9NTX7;P08151;Q9BZF9;O75143;P02795;Q13347;P48539;P46779;Q9NQS7;Q14203;O15117;O75935;Q9UL46;Q96M53;Q15154;Q16613;Q8NFH3;P02042;P52294;P63220;P36873;Q13042;P42224;P62310;P60842;Q96PC3;Q92540;Q8NHQ1;Q9UMS0;Q9BU89;P50748;Q96EY1;Q14693;Q96Y61;Q6GPH4;P15880;Q9Y244;O15027;Q9BU02;P00338;P42025;Q15833;P46379;P13535;P55210;Q9UML6;P25398;Q9UQC2;O00303;Q71F23;P20073;P08708;O75674;Q14493;O43264;P24864;Q01105;P24941;Q15369;Q15759;Q9BSJ2;O43639;P62937;Q5TBC7;P13929;P23381;P02533;P51668;Q9UH77;P11940;P11142;Q12959;Q53FT3;Q8NG31;P61970;Q86UY8;O00273;P06132;Q96IU2;Q9Y266;Q9NVN3;Q8IU60;O00233;P52292;P47914;P11802;P37837;P68104;P14316;P48556;O75901;P35658;O94921;P47897;P14868;P62847;Q96FQ6;P52630;P78371;Q9NQP4;Q16401;Q86WC4;O00471;Q12834;P61254;Q8WVK7;Q05084;Q9BYG4;P50570;O15116;P21399;Q9BVC4;O15372;Q9BW27;Q9BRT3;Q8NHZ8;Q8IX03;P18669;Q03188;P55957;O95396;Q12904;P14618;P62136;Q9UJW3;P56377;O75822;Q92748;Q9Y5S9;Q86V81;Q14671;Q9UKV3;P10827;Q7Z7A3;P36871;Q14684;O00231;Q07866;P15259;P35813;Q6P3S1;O00186;P61923;P42677;Q5JTC6;O15488;P62829;P55822;P40337;Q13794;P31350;Q9UL18;Q9NRA8;Q9NRR7;Q96NU7;Q9NUS5;Q9Y2I6;Q05932;P14625;P24385;Q96G01;O00425;O95229;P29401;Q15046;Q8WXC3;Q9BTM9;Q00534;P62249;Q14653;P62424;P09914;Q9H1J1;O43303;Q13490;Q15181;Q9Y314;Q9Y3U8;P35573;Q9UQL6;Q8WYR1;Q96S95;Q9UBQ5;P62917;Q15436;Q9UMX2;P57678}

586

Pathogen{ P03363} interacts with 986 human

partners[ O60763;Q53FT3;Q96B26;Q6XQN6;Q9Y316;Q5BJF6;Q16236;P22681;Q9UJX2;Q9Y6N9;Q86VP1;P49754;Q9UNN5;P46379;Q13112;Q504Q3;P62913;Q9NQT4;Q9NYG5;Q14653;Q96EA4;Q9Y6K5;Q9BUL8;P62314;Q12959;Q96M53;P52630;O75953;Q86Y01;Q92845;Q96RS0;P02533;Q13490;Q9Y2I6;O14744;P09132;P18621;Q9BZD4;Q8IW19;Q8IZP0;Q13309;P29474;P46060;Q9BVC4;P62258;P55957;P05386;Q9Y3F4;Q16082;Q9HCC9;Q13042;Q9Y4Y9;P49454;Q9RKV6;Q96IY1;Q8N2Y8;Q92973;Q9GZV4;O15371;P51965;Q9Y4Z0;P62750;Q15366;P69905;Q9Y5B6;Q9NSI8;O00273;O75161;Q96B36;Q6P1K2;P23396;Q92985;P42677;Q96AQ7;Q5JTC6;P62136;P63173;P49419;P08865;P62937;P13807;O43933;P60604;Q99962;Q9Y5K5;Q7Z7A1;P38919;Q15370;A8K8P3;P11277;P41252;P07900;O14908;Q14CS0;Q9Y6D9;P63167;P62847;Q9HC77;Q9UBB6;P11441;P18077;P06744;O14920;P62714;Q04206;Q16222;P05387;P35237;Q9NRA8;P51580;O14896;Q66K74;P02795;Q8WYR1;Q9H081;P18669;P49459;P52565;Q15468;Q9NSD9;Q9BYV8;O95628;Q9BX66;O95453;O95050;P36873;Q2VIQ3;Q9UHB4;P84098;P42766;P24864;P14649;Q16851;O15524;Q5VV41;Q8IXQ6;P02549;Q92674;Q8NFH4;O00221;Q00597;Q9UMS0;O00762;P60709;P62249;Q9UP83;Q9C000;Q9HAU4;P36543;Q92900;O95229;O60291;P48539;Q8N5D0;P50502;P05388;P68871;O43747;Q9HAV4;O60841;P78559;P16157;Q14194;P35579;P61970;Q9UHI6;Q99996;P31150;P36578;O14786;Q9UPZ3;P48444;O75886;Q9ULP0;Q96LW7;Q13357;P3347;P08151;Q99543;P99999;Q96L92;Q96MT8;Q96BD8;Q9UKV3;Q9Y2V2;P62753;O15078;Q92539;Q9H492;P62312;Q92530;Q96DG6;Q14397;Q8ND04;Q96JZ2;Q8NHV4;Q9UKN5;P62633;P62081;O43805;P40925;Q969Q5;P62910;P50452;Q96LC9;

Q96MT3;P30279;Q13228;A9QM74;O14933;Q02556;Q8WYP5;Q9H444;P14868;P25963;Q9UD71;Q66GS9;Q13561;P62328;P09914;Q14258;Q9UQF2;Q92783;Q8NHF3;Q13794;P61513;P49589;P46776;O43303;Q5VZK9;Q15024;Q14980;Q9Y266;A5YKK6;Q96B97;O14980;Q86US8;O00471;P09913;Q9UI10;Q12769;Q13283;Q96QK1;O15111;Q9Y3B2;P41250;Q9Y678;P61254;P62273;Q6P2E9;O00505;Q9H9G7;Q9UHB9;Q15691;O60784;Q8N9V7;P32969;P78537;Q01082;Q9H5684;Q92597;Q09NYJ8;P06733;P62736;Q9P243;Q9UJW0;Q12933;Q8IYD1;P46778;O94925;Q15056;Q9H6Z9;Q92901;O43264;P61927;Q8NHQ1;O75436;O00399;Q8NBT2;Q96BT7;Q9BUX1;P09972;P53041;P50570;Q9UBQ5;P31946;O75143;O95613;Q9UPR3;O00425;Q9UN36;Q9HCK5;P62891;O94986;Q9NXTX7;P49354;Q13568;Q9H3M7;Q14204;P62318;P06132;P54920;Q8WV28;Q9BTM9;P42768;O96007;Q8NHZ8;Q9NVK5;Q9BRV8;Q9NXV2;Q14152;Q53EL6;Q9Y6K9;Q02241;Q15436;P48200;Q9NPB6;O00743;Q9UKV8;Q8NZZ9;Q9P258;Q9UJX3;P80217;P61353;Q9NUS5;P47897;P57077;P98171;P68133;Q9UQL6;Q13617;O75475;P46109;Q9NSV4;Q5EBL4;Q9UER7;P49366;Q53HL2;Q00610;P07741;Q15041;Q8WVK7;P61289;Q8TAP6;Q96JI7;Q8IY63;P62304;Q9NZZ3;O43318;P11172;O15105;Q9BZR8;Q15306;O14579;P50453;Q9H410;O43776;O14713;P24941;P50748;Q15797;Q9Y6M1;O14867;P08708;Q9UKZ1;Q04724;Q9UJX5;O95486;Q9UBU9;P41208;O43639;P15880;P51161;P11940;Q9H4A6;Q15369;Q9NT62;O14893;P53618;Q9P209;Q13158;O75791;Q8IZD4;P60520;Q5TBC7;Q8N2H9;P30260;P40337;Q15327;Q15633;Q96H20;Q9BYG4;Q9Y697;P63000;P23381;Q9NZN8;Q9BXS5;P10144;Q8NDV7;Q9NPD3;Q99743;Q07157;Q07866;Q14807;O00629;O14879;Q05086;P27815;Q63HML;O15372;P20073;Q92890;P35869;P42226;P41091;Q9UJX6;P21673;P23588;O43504;O94973;P61923;P62495;Q6VY07;P61326;Q5FBB7;P48788;Q96IF1;Q15750;Q66LE6;Q9UM11;Q8TEP8;P35754;O95817;Q9P0M2;P62306;P05198;Q7Z7A3;Q49B96;O15116;P26373;Q13127;Q3I5F7;Q5HG26;P50991;P54105;Q13155;Q99608;Q9UJX4;Q15287;P61088;Q9H7C4;P66396;Q92529;O75351;Q9H900;P57678;Q9BQA1;P83881;Q9Y2J4;P30304;P10911;Q9BZF9;P63151;O43524;Q9BXP1;P63104;Q9BQ90;Q14684;Q14690;Q00534;P07196;Q6RSH7;Q9HBK9;Q9HD36;Q13867;Q16543;Q9ULM6;Q9NRR5;Q8TAT6;O15117;Q15653;P55212;O75031;P22090;Q5JTW2;Q07352;P61163;Q6PGN9;Q9Y333;P62861;Q9NVM4;P62841;P62316;Q8WUM0;P61457;Q9UNX3;Q9NR50;Q9H0B6;Q99567;Q96F86;P30622;Q9NSA3;P54136;Q9UN37;P84101;P30050;P46937;Q96A56;Q9H0W8;Q13426;Q8IYB3;Q8N5X7;Q6PI26;Q9Y4X5;P62829;Q13616;O43684;O95067;Q16829;O96020;P57076;Q6ULP2;P13647;Q00653;Q14999;P08107;P26641;Q9NRG4;P42772;Q8WUM4;Q9HOR1;Q13415;P62877;Q96FA3;Q86VN1;Q14240;Q15149;P46782;Q96PU5;Q92945;P35268;P34932;Q9UI08;Q99698;Q9Y3C4;Q15717;Q9GZV5;O95433;Q9NR28;P29692;P20962;P49450;Q8N1I0;Q9NZI8;Q9BRG1;Q13480;Q5UE93;P31749;P17096;Q9CO2;Q14677;Q13432;Q13588;P14316;P16333;Q86WI3;Q95901;Q9NQS7;P27797;Q99741;P20042;Q5JVS0;P11532;Q9UBB4;P46781;P47813;Q96RT8;P50914;Q9UNE1;Q9NVX0;Q9HCE1;O60318;O76075;Q9BPU9;Q9H939;P78396;P08670;Q96AQ6;Q92843;O43541;Q9UK41;Q14749;O15056;P17661;Q8NFI3;Q9NSP4;Q9H211;Q8WXD5;Q86V81;Q9Y2N7;P37837;P05413;Q9HAU5;Q15796;P63010;O75674;O75935;Q9Y3E7;P63220;P57721;P84022;Q05084;Q9HBM1;Q7LBR1;P17987;Q8WXC3;Q9H9E1;P04406;P14136;P98170;Q7Z460;Q9Y2L1;O00204;Q9UKT4;Q7Z465;P61313;Q9H1A4;Q92556;P39019;P49792;Q3LL64;O43290;Q9H0E2;Q8TDY2;P10914;Q86UT5;P52298;P26196;Q9NRN7;P35658;P54840;P57075;Q03188;Q8NG31;P46779;P49789;Q02543;P46777;Q9H840;P59047;P62987;Q9Y2Z0;Q13257;Q92600;Q14974;Q15173;Q96S95;Q9ULE6;P46108;P15407;Q9H008;Q9BV57;Q6NZI2;Q96LI5;Q13547;O75807;Q9Y376;Q13868;Q00994;P25398;Q9BZE9;Q9UDY2;Q9Y4P8;Q8WYR4;P19838;P42025;Q7L9L4;Q99814;Q971F23;Q13409;O14964;O00186;P41220;Q495M9;Q9BYG5;Q96618;Q9H4P4;O15066;Q95295;Q15185;Q9H1K1;P40855;P28289;O60936;Q9UPV0;P57740;P51668;Q9BRA2;Q92748;Q96HA8;P24385;Q9UPQ9;Q13469;P49770;P60228;Q8IUD6;Q14103;Q9H4B6;P83731;P62851;P62280;Q01201;O14862;O95782;O75496;Q15628;Q9Y5K8;Q9P2J5;Q9BV20;Q92844;Q96BT3;Q9Y3U8;Q00978;P62888;P49458;O14531;Q9UL18;Q9UM13;Q9H171;P56945;P63241;Q8TDN4;Q13485;O75175;P62310;Q9UBW7;P60842;Q9NQT5;Q9H0F6;P35606;Q12968;P26651;Q9UIV1;Q86TB9;Q96RT7;O15131;Q7Z6J0;P61981;O00401;A6NK89;Q9UH77;Q6P3S1;Q96JJ3;Q13114;Q9UILL1;P63261;P49591;O95336;P62244;Q9UGJ1;P62277;O75531;P60660;Q9HCM9;P62906;Q92540;O95644;Q7Z5H3;Q9Y285;Q14671;Q9BTE1;P78371;Q9UK45;P62266;Q9BYX4;Q9BZI7;P62945;P05412;Q9H3R5;P53992;O14618;Q9Y4L5;P49207;P62241;Q86W56;Q9UMX2;Q13642;Q9Y3E5;Q14934;P62424;Q04864;O95487;Q9NUQ3;P67870;Q9UJW3;P52948;Q13596;Q6VN20;O14777;Q96IU2;Q86XR8;P60866;Q96GX9;Q9Y244;P61247;P24534;P61077;Q95997;O60573;P55210;Q8TEQ6;Q13144;Q93034;Q9UFF9;O14508;O43617;Q12834;Q14008;P62308;Q9NP71;Q9UQN3;P62899;Q16637;Q8NHY2;P62857;Q9NZD8;O15504;Q13404;P30047;Q96S59;Q9HAT8;Q8NFX5;P42773;Q02878;Q96AC1;P62837;Q9NQP4;Q9NPP4;P11802;Q9NVD7;Q9H8S9;Q5HYK7;Q6PCE3;Q9H0M0;Q9BXX1;Q13541;O75821;Q562F6;Q8IX03;Q9NP79;Q8N5C8;Q9Y6D6;P07814;Q9BU02;P78344;Q9NPA3;Q07020;Q9NXX1;P39023;Q01105;Q01449;Q96TA1;O95429;P23258;O00139;Q96C86;O43255;P30153;P14678;O14556;P30307;Q96EY1;P62854;P35573;Q86SQ7;O95810;P62826;O14641;P52292;P19429;Q9UFN0;P39880;P62917;Q13813;P55884;Q0VDF9;O43708;O43237;Q13352;Q16658;O75688;P60953;Q99717;P08238;O60716;P48643;O00170;Q06520;Q15154;Q15181;P46976;Q7L5D6;P18124;P27986;P40429;P67775;P27635;Q6QNY0;P63208;O15198;P06730;P62263;Q96N21;Q96FJ2;O43324;Q93008;P15259;O95149;Q9NUP1;Q99933;P55735;Q14203;Q13233;P04792;Q8IXH6;Q12982;Q8IV53;Q9UII4;Q9BSJ2;P47914;Q9NPI6;Q9UKG1;P02794;P62701;Q01860;Q9Y5S9;Q9H074;Q6R327;Q9H814;Q14315;P42771;Q9BV73;Q86X55;Q96FS4;O94855;Q8IZH2;Q8WUX9;O14576;Q10567;Q96MP8;Q9BW27;P68104;Q12840;O95190;P11142;Q13094;O75822;Q99873;P62269;Q15102;P10916;P05937;Q8IU60;Q9UPT5;Q96QF0;P49368;Q96CW1;Q09161;O95831;Q15833;O75665;P46783;Q96CW5;Q96G03;Q96SN8;Q99613;Q04637;Q9H1J1;O00303;Q9UQC2;P52294;O15234;O14757;Q9Y314;Q96CF2;Q4G0F5}

- 587 [Cluster 54]GO:0005785+C cellular\_component [name] signal recognition particle receptor complex [def] "A transmembrane heterodimeric protein located in the membrane of the rough endoplasmic reticulum. Both subunits contain GTPase domains with which signal recognition particle interacts. In the presence of GTP and SRP receptor, SRP is released from the ribosome-nascent chain complex." [ISBN
- 588 Pathogen[ Q2Q067] interacts with 2 human partners: {Q8TA86;P49458}
- 589 Pathogen[ P0C214] interacts with 2 human partners: {P49458;Q8TA86}
- 590 Pathogen[ P03346] interacts with 2 human partners: {Q8TA86;P49458}
- 591 Pathogen[ Q85601] interacts with 1 human partners: {Q8TA86}
- 592 Pathogen[ P14079] interacts with 2 human partners: {Q8TA86;P49458}
- 593 Pathogen[ P03383] interacts with 2 human partners: {Q8TA86;P49458}

594 Pathogen[ P03410] interacts with 2 human partners:{P49458;Q8TA86}  
595 Pathogen[ P14075] interacts with 2 human partners:{P49458;Q8TA86}  
596 Pathogen[ P0C206] interacts with 2 human partners:{Q8TA86;P49458}  
597 Pathogen[ P03363] interacts with 2 human partners:{Q8TA86;P49458}  
598 [Cluster 55]GO:0055037+ cellular\_component [name] recycling endosome [def]  
"Organelle consisting of networks of 60nm tubules organized around the microtubule  
organizing centre in some cell types. They transport receptors from late endosomes back  
to the plasma membrane for recycling and are also involved in membrane trafficking." [GOC  
599 Pathogen[ Q2Q067] interacts with 9 human  
partners:{O43747;Q6ICB4;Q9H9C1;Q92562;Q9Y2J4;Q6QNY1;Q9Y3C5;O75154;Q15276}  
600 Pathogen[ P0C214] interacts with 8 human  
partners:{Q6ICB4;Q9Y2J4;Q9Y3C5;Q92562;O43747;Q9H9C1;Q6QNY1;O75154}  
601 Pathogen[ P03346] interacts with 15 human  
partners:{O43747;Q9Y3C5;Q9Y6D5;Q92562;A8K0Z3;Q8N4B1;Q8IWF6;Q6QNY1;Q9Y2J4;Q9UJ41;Q9H9C  
1;Q70J99;O75154;Q6ICB4;Q15276}  
602 Pathogen[ Q85601] interacts with 9 human  
partners:{O75154;Q9Y3C5;O43747;Q92562;Q9UJ41;Q9H9C1;Q6ICB4;Q9Y2J4;Q6QNY1}  
603 Pathogen[ P14079] interacts with 17 human  
partners:{Q92562;Q9H9C1;Q9Y6D5;Q15276;Q6VEQ5;Q9Y2J4;Q9UJ41;Q9H269;Q9NQA3;Q8N4B1;Q6ICB  
4;A8K0Z3;O43747;O75154;Q9Y3C5;Q8IWF6;Q6QNY1}  
604 Pathogen[ P03383] interacts with 7 human  
partners:{Q9H9C1;Q9Y2J4;O43747;Q8IWF6;O75154;Q15276;Q6QNY1}  
605 Pathogen[ P03410] interacts with 19 human  
partners:{Q92562;O75154;Q6QNY1;Q9UJ41;Q9Y2J4;Q8N4B1;O43747;Q8IWF6;Q70J99;Q9Y3C5;Q1504  
9;Q9Y6D5;Q6VEQ5;Q6ICB4;Q9H9C1;Q9H269;Q9NQA3;A8K0Z3;Q15276}  
606 Pathogen[ P14075] interacts with 7 human  
partners:{Q9H9C1;Q9Y2J4;Q6QNY1;O43747;O75154;Q8IWF6;Q15276}  
607 Pathogen[ P0C206] interacts with 14 human  
partners:{O43747;Q92562;O75154;Q6ICB4;Q6QNY1;Q6VEQ5;Q9Y6D5;Q9Y2J4;Q8IWF6;Q9UJ41;Q8N4B  
1;Q9H9C1;Q9Y3C5;Q15276}  
608 Pathogen[ P03363] interacts with 11 human  
partners:{Q9H9C1;Q6ICB4;O43747;Q9Y3C5;Q8IWF6;Q8N4B1;Q9UJ41;Q9Y2J4;Q6QNY1;O75154;Q1527  
6}  
609 [Cluster 56]GO:0070876+ cellular\_component [name] SOSS complex [def] "A protein  
complex that functions downstream of the MRN complex to promote DNA repair and the G2/M  
checkpoint. The SOSS complex associates with single-stranded DNA at DNA lesions and is  
composed of SOSS-B (SOSS-B1/OBFC2B or SOSS-B2/OBFC2A), SOSS-A/INTS3 and SOSS-C/C9orf80."  
[PMID  
610 Pathogen[ Q2Q067] interacts with 4 human partners:{Q96AH0;Q9BQ15;Q9NRY2;Q68E01}  
611 Pathogen[ P0C214] interacts with 4 human partners:{Q96AH0;Q68E01;Q9NRY2;Q9BQ15}  
612 Pathogen[ P03346] interacts with 4 human partners:{Q96AH0;Q68E01;Q9BQ15;Q9NRY2}  
613 Pathogen[ Q85601] interacts with 4 human partners:{Q96AH0;Q68E01;Q9BQ15;Q9NRY2}  
614 Pathogen[ P14079] interacts with 4 human partners:{Q9BQ15;Q96AH0;Q68E01;Q9NRY2}  
615 Pathogen[ P03383] interacts with 4 human partners:{Q68E01;Q9NRY2;Q9BQ15;Q96AH0}  
616 Pathogen[ P03410] interacts with 4 human partners:{Q9BQ15;Q96AH0;Q68E01;Q9NRY2}  
617 Pathogen[ P14075] interacts with 4 human partners:{Q68E01;Q9BQ15;Q96AH0;Q9NRY2}  
618 Pathogen[ P0C206] interacts with 4 human partners:{Q68E01;Q9BQ15;Q9NRY2;Q96AH0}  
619 Pathogen[ P03363] interacts with 4 human partners:{Q96AH0;Q9BQ15;Q68E01;Q9NRY2}  
620 [Cluster 57]GO:0030130+ cellular\_component [name] clathrin coat of trans-Golgi  
network vesicle [def] "A clathrin coat found on a vesicle of the trans-Golgi network."  
[GOC  
621 Pathogen[ Q2Q067] interacts with 6 human  
partners:{O95782;P53675;Q00610;P61966;P09497;P09496}  
622 Pathogen[ P0C214] interacts with 5 human  
partners:{P53675;P09497;P61966;P09496;O95782}  
623 Pathogen[ P03346] interacts with 6 human  
partners:{P61966;O95782;P09496;P53675;P09497;Q00610}  
624 Pathogen[ Q85601] interacts with 6 human  
partners:{P53675;Q00610;P09496;P09497;P61966;O95782}  
625 Pathogen[ P14079] interacts with 6 human  
partners:{P61966;Q00610;O95782;P09497;P53675;P09496}  
626 Pathogen[ P03383] interacts with 4 human partners:{Q00610;P53675;O95782;P09497}  
627 Pathogen[ P03410] interacts with 7 human  
partners:{Q00610;P09496;O95782;Q9UMZ2;P09497;P53675;P61966}  
628 Pathogen[ P14075] interacts with 5 human  
partners:{P09497;P09496;P53675;O95782;Q00610}  
629 Pathogen[ P0C206] interacts with 6 human  
partners:{P53675;P61966;Q00610;P09496;P09497;O95782}  
630 Pathogen[ P03363] interacts with 4 human partners:{Q00610;O95782;P09497;P53675}  
631 [Cluster 58]GO:0071001+ cellular\_component [name] U4/U6 snRNP [def] "A  
ribonucleoprotein complex that contains base-paired U4 and U6 small nuclear RNAs." [GOC  
632 Pathogen[ Q2Q067] interacts with 3 human partners:{O43447;O43172;O94906}  
633 Pathogen[ P0C214] interacts with 3 human partners:{O43172;O94906;O43447}  
634 Pathogen[ P03346] interacts with 3 human partners:{O43172;O43447;O94906}  
635 Pathogen[ Q85601] interacts with 3 human partners:{O94906;O43447;O43172}  
636 Pathogen[ P14079] interacts with 3 human partners:{O43447;O94906;O43172}

637 Pathogen[ P03383] interacts with 3 human partners: {043172;094906;043447}

638 Pathogen[ P03410] interacts with 3 human partners: {094906;043172;043447}

639 Pathogen[ P14075] interacts with 3 human partners: {043172;094906;043447}

640 Pathogen[ P0C206] interacts with 3 human partners: {043172;043447;094906}

641 Pathogen[ P03363] interacts with 3 human partners: {043447;043172;094906}

642 [Cluster 59]GO:0042641+C cellular\_component [name] actomyosin [def] "Any complex of actin, myosin, and accessory proteins." [GOC

643 Pathogen[ Q2Q067] interacts with 2 human partners: {P56524;Q92831}

644 Pathogen[ P0C214] interacts with 3 human partners: {P56524;Q92831;Q92614}

645 Pathogen[ P03346] interacts with 3 human partners: {Q92614;P56524;Q92831}

646 Pathogen[ Q85601] interacts with 3 human partners: {Q92614;Q92831;P56524}

647 Pathogen[ P14079] interacts with 2 human partners: {Q92614;P56524}

648 Pathogen[ P03383] interacts with 2 human partners: {Q92831;P56524}

649 Pathogen[ P03410] interacts with 3 human partners: {Q92831;Q92614;P56524}

650 Pathogen[ P14075] interacts with 2 human partners: {Q92831;P56524}

651 Pathogen[ P0C206] interacts with 3 human partners: {Q92831;Q92614;P56524}

652 Pathogen[ P03363] interacts with 2 human partners: {Q92831;Q92614}

653 [Cluster 60]GO:0033257+C cellular\_component [name] Bcl3/NF-kappaB2 complex [def] "A protein complex containing one Bcl protein and one or more copies of NF-kappaB2\_ formation of complexes of different stoichiometry depends on the Bcl3

654 Pathogen[ Q2Q067] interacts with 2 human partners: {P20749;Q00653}

655 Pathogen[ P0C214] interacts with 2 human partners: {Q00653;P20749}

656 Pathogen[ P03346] interacts with 2 human partners: {P20749;Q00653}

657 Pathogen[ Q85601] interacts with 2 human partners: {Q00653;P20749}

658 Pathogen[ P14079] interacts with 1 human partners: {P20749}

659 Pathogen[ P03383] interacts with 2 human partners: {Q00653;P20749}

660 Pathogen[ P03410] interacts with 2 human partners: {P20749;Q00653}

661 Pathogen[ P14075] interacts with 2 human partners: {Q00653;P20749}

662 Pathogen[ P0C206] interacts with 2 human partners: {P20749;Q00653}

663 Pathogen[ P03363] interacts with 2 human partners: {P20749;Q00653}

664 [Cluster 61]GO:0005576+C cellular\_component [name] extracellular region [def] "The space external to the outermost structure of a cell. For cells without external protective or external encapsulating structures this refers to space outside of the plasma membrane. This term covers the host cell environment outside an intracellular parasite." [GOC

665 Pathogen[ Q2Q067] interacts with 17 human partners: {014786;Q8IVG9;P67809;P01009;Q15046;P40222;P27797;P62328;Q12904;P06396;P08697;P10599;Q8WU39;P06744;Q5JVS0;Q9BZF9;P62937}

666 Pathogen[ P0C214] interacts with 39 human partners: {P08697;P08294;014786;Q12904;Q5JVS0;Q9UK55;095633;P01011;P29622;P36952;P67809;P48594;Q53S33;Q86WD7;P06396;P05121;P29508;P55789;075830;P10124;A8MV23;P05543;P05546;Q49AN0;P07093;P01008;P10909;P05120;P27797;Q99574;P10599;Q9BZF9;Q8WU39;Q9UIV8;Q15046;P40222;Q17RY6;P62328;P80303}

667 Pathogen[ P03346] interacts with 24 human partners: {P80303;Q9Y6R7;Q49AN0;P62937;Q8IVG9;Q5EBL8;Q12904;P67809;Q8WU39;P27797;Q5JVS0;Q92832;P62328;P10599;P01009;P06744;Q9BZF9;P24855;P06396;075398;P40222;075386;095633;014786}

668 Pathogen[ Q85601] interacts with 26 human partners: {P06396;Q5JVS0;Q17RY6;075398;P36952;Q9BZF9;Q49AN0;P01011;P80303;P55145;P06744;P27797;Q15046;014786;P08697;P01009;P10599;P40222;P67809;P05121;P05120;P01008;P62328;P07093;P29508;P62937}

669 Pathogen[ P14079] interacts with 194 human partners: {P04083;P02808;P01215;Q9BQ08;A8MUN3;Q8NHW6;P0CJ70;Q5JVS0;P0CJ74;A1E959;P07498;Q30KQ8;Q8NEB7;P15502;Q7Z5L0;Q8N307;Q30KQ9;Q8WFF1;Q6UW32;Q8WU39;P04279;Q6UXB0;Q02383;Q96KW9;Q5TEV5;P40222;P20809;A8MTW9;Q30KR1;A8MXU0;Q9UHF0;Q9H7Y0;Q6UXV3;P67809;Q8NEX6;P05408;P20396;P15515;Q5T742;Q6P988;Q30KQ7;P27352;Q5JXM2;Q9BT56;Q49AN0;P01225;Q69YU5;Q8IVG9;P0CJ75;Q6UXU1;Q04118;Q96MU5;Q6B9Z1;P0CJ68;094919;P06744;Q6UWK7;P10909;P62937;P60022;Q71RG6;Q9UIG4;Q6UXQ8;Q8NEV9;Q14118;Q6UW78;P0CJ77;Q7Z4B0;Q8IUG1;P06280;Q9UF72;Q14667;Q8N5W8;Q9NS71;095156;Q8N104;Q17RY6;P55081;Q9P1C3;P80303;P0C854;015263;Q0P5P2;A6ND2;Q9Y287;P15516;075690;Q15046;Q8IUH2;Q6UXQ6;075200;P03973;Q8NFM4;E0CX11;Q6ZRZ4;Q15726;Q92832;Q6UWF9;P0CJ69;Q6UXQ4;Q9NQ76;Q6UWT2;Q9H1M4;P62328;Q96I85;P11686;094964;P24855;Q30KQ1;Q17RF5;P05814;P0CJ72;Q9GZZ8;Q969H8;Q6UWT4;Q6NSX1;P55789;P04141;043612;P13232;P10124;P81172;Q6UWQ7;Q16378;Q6UXP8;Q8IU54;Q7Z7B8;Q8IZN7;Q13316;Q9NZ20;Q6UX46;Q8N7Q2;Q6UXR6;Q96QR1;Q6ZR5;Q2M2E5;P02810;C9J442;Q4QY38;095760;Q5VUM1;Q8TD06;Q9BUN1;Q8WZ79;Q99541;Q9BZF9;Q07627;Q4W5P6;Q8TAX7;P10163;Q8N729;P10599;Q6UWP8;P29459;Q9NZV5;Q9H972;Q9Y6Y9;Q9BT30;Q7Z7B7;P15941;Q5BLP8;Q12904;Q6UXB1;Q9Y426;Q86SH4;Q6EBC2;P81277;Q96LU7;P0CJ76;Q6URK8;Q8WUF8;Q53S33;Q30KQ6;Q9HAT2;P04280;Q8NET1;Q8NG41;Q6MZM9;P0CJ71;P0DJI8;P02729;Q8N688;Q8NFR9;Q5SRR4;P59861;C9JXX5;Q96L11;Q30KP9;A6NHN6;Q9H6E4;P81534;Q9BYX7;P05060;Q8TAT2}

670 Pathogen[ P03383] interacts with 26 human partners: {Q17RY6;Q5JVS0;Q12904;P36952;Q9BZF9;P62328;P08697;P62937;P10599;P01009;P01008;P06744;Q15046;P55145;Q8WU39;Q07627;P40222;P10124;Q53S33;P01215;P67809;Q8IUG1;Q8IVG9;P15502;P27797;P06396}

671 Pathogen[ P03410] interacts with 206 human partners: {014786;Q30KP8;Q15726;P02810;Q9BT56;Q6UXR6;P04141;Q30KR1;Q2M2E5;Q17RF5;Q7Z7B7;P07498;075690;P05121;Q7Z4B0;014960;Q96KW9;Q96QR1;Q8NEB7;P10599;Q30KP9;Q6NSX1;P0DJI8

;Q4QY38;P02808;Q6UXU1;P80303;P0C854;Q765I0;P06744;P47710;A6NHN6;P59861;Q8NG41;P62328;Q8N688;P12018;O94964;Q13072;Q6ZRZ4;Q8N729;O43612;P02729;Q71RG6;Q7Z5L0;P0CJ75;Q8IUB3;Q9GZZ8;Q6UXV3;Q96MU5;Q6UWT2;Q6UX46;P15941;P06396;Q8NEX6;Q7Z7B8;Q9H1F0;Q969E1;Q4G0G5;Q3OKQ1;P10124;P10645;Q8N307;Q5JTB6;Q8N5W8;P20809;Q86Y27;P0CJ70;Q6EBC2;Q5TEV5;Q69YU5;Q9H972;Q9Y287;P02766;Q9HAT2;P60022;A6NJ69;Q9YQB4;Q8TAX7;P05060;Q6UXQ8;Q8IVG9;Q6P988;P01215;Q8N7Q2;C9JXX5;P0CJ71;Q30KQ6;P02812;Q5T742;Q92832;Q6UXQ6;Q9NS71;Q96I85;O95760;Q6UXQ4;Q12904;Q6UWF9;P0CJ74;P67809;O95158;Q8IZN7;P0CJ76;Q96DR8;P62937;Q6UWT4;P15502;Q8TAT2;P11686;P08697;Q969D9;P0CJ68;Q86SH4;Q9NRR1;Q9UHF0;Q6UW32;Q6URK8;Q9UIG4;Q5JVS0;Q5VUM1;Q02383;Q9UF72;Q8NHW6;P05408;Q8NEV9;P81172;Q16378;P36952;Q15046;P0CJ72;P15515;Q8WU39;Q14118;Q49AN0;Q6UWQ7;Q96A98;Q9NZ20;Q6UW10;Q9Y334;Q6UWK7;Q6UWP8;Q9NQ76;Q9BT30;Q9Y6Y9;P0CJ73;P15516;P0CJ69;Q9BZF9;Q8NFU4;Q86Y28;Q9Y426;P04279;Q6UXB1;Q5BLP8;Q8N104;Q8IUG1;Q86TE4;Q04118;Q5J5C9;A8MTW9;P10163;Q07627;Q30KQ9;Q5JXM2;Q96L11;Q9NRM1;P01009;A1E959;P81277;Q6UXP8;P40222;Q6MZM9;Q99935;Q14507;P55789;Q6ZRU5;A8MUN3;P27352;Q6UW78;Q15517;Q8NFR9;Q9P1C3;Q9NRJ3;Q30KQ7;P04280;P24855;Q30KQ8;P29459;P81534;O15263;Q95994;E0CX11;Q6B9Z1;P05814;O95156;Q53S33;Q9BQ08;P10909;P01011;P13232;Q13316;P20396;Q9NZV5;P27797;Q8TD06;P0CJ77}

672 Pathogen[ P14075] interacts with 40 human partners:{Q8WU39;P06744;Q07627;P05060;P62328;P40222;P02810;P04280;Q8IVG9;P01009;Q17RY6;P15515;Q96QR1;Q8TAX7;Q12904;Q6UW32;Q5JVS0;P27797;Q8NDX9;P67809;P06396;P08697;Q9UIG4;P15502;P55789;P02812;P20809;P62937;Q8IUG1;Q9BZF9;Q9GZZ8;Q9NS71;P10124;P01215;Q9Y287;Q15046;P02808;Q53S33;O75690;P10599}

673 Pathogen[ P0C206] interacts with 64 human partners:{Q9BT56;P0CJ74;P67809;P0CJ71;P06396;P0CJ76;P55789;P27797;P01008;Q07627;P0CJ72;Q9Y287;O95633;O94964;P15502;P62328;P0CJ75;P80303;Q8TD06;O75690;Q13316;Q8N729;P0CJ69;P0CJ73;P01009;P55145;P24855;P36952;O14786;P06744;P05060;Q5JVS0;P15515;Q7Z7B7;Q17RY6;Q8IVG9;P01215;P40222;P10909;P20809;P02810;Q17RF5;Q8WU39;P02808;P07498;P05121;Q53S33;Q92832;O75398;P01011;P10599;Q9BZF9;P20396;Q49AN0;P62937;P0CJ68;P10124;P0CJ70;Q8IUG1;Q8TAX7;Q12904;P0CJ77;P08697;Q15046}

674 Pathogen[ P03363] interacts with 28 human partners:{P02808;P62937;P06744;O14786;P62328;P15515;Q8N302;P19883;Q8TD06;P40222;Q9Y6R7;P36952;P06396;Q9BZF9;Q92832;Q49AN0;P27797;Q5JVS0;P07998;P02766;P05060;O75398;Q8IVG9;O75386;Q8WU39;Q8N729;P24855;P67809}

675 [Cluster 62]GO:0030659+cellular\_component [name] cytoplasmic vesicle membrane [def] "The lipid bilayer surrounding a cytoplasmic vesicle." [GOC

676 Pathogen[ Q2Q067] interacts with 21 human partners:{Q9Y6Q5;Q10567;P56377;O43747;Q96B97;Q92572;Q6RW13;P53675;O95295;Q96EV8;Q7L804;Q96PC3;O15049;Q92624;Q00610;P61966;O75843;Q9BXS5;Q8WV24;P09497;P09496}

677 Pathogen[ P0C214] interacts with 22 human partners:{Q92624;Q6RW13;P59780;O95295;O75843;Q7L804;Q9BY43;O15049;Q10567;Q92572;P53675;P56377;Q96PC3;Q96EV8;O43747;Q9Y6Q5;P09497;P61966;P09496;Q8WV24;Q9BXS5;Q96B97}

678 Pathogen[ P03346] interacts with 32 human partners:{P61966;Q96B97;Q8WV24;Q15036;O95295;O43747;Q92572;Q92543;P56377;P59780;Q9BXS5;Q93050;P09496;Q9NRS6;Q10567;O75843;Q7L804;O15049;Q9UNH7;Q96EV8;Q96PC3;P53675;P30622;Q9ULV0;P09497;Q9BY43;Q6RW13;Q9Y6Q5;Q9ULU8;Q92624;Q00610;Q15363}

679 Pathogen[ Q85601] interacts with 27 human partners:{P53675;O75843;Q00610;P09496;Q8WV24;Q7L804;O95295;Q15036;Q9BXS5;P56377;Q93050;P30622;O43747;Q10567;Q92624;O15049;Q9BY43;Q96EV8;Q96B97;Q6RW13;Q96PC3;P09497;Q92572;P61966;P59780;Q9Y6Q5;Q9UNH7}

680 Pathogen[ P14079] interacts with 34 human partners:{Q7L804;Q9UNH7;Q9Y6Q5;Q15036;P61966;Q9BXS5;Q8WV24;Q00610;Q9BY43;Q10567;Q9ULU8;Q6RW13;P56377;P59780;Q92624;Q9NRS6;Q96B97;Q92572;Q15363;O75843;Q9NPB0;O15049;P09497;Q8TF30;O95295;Q93050;O43747;Q96AW1;P53675;Q92543;Q96EV8;Q96PC3;P09496;P30622}

681 Pathogen[ P03383] interacts with 16 human partners:{Q7L804;Q6RW13;P56377;Q00610;Q92572;O95295;Q10567;P53675;Q96EV8;O75843;O43747;Q9BXS5;O15049;P09497;Q92624;Q8WV24}

682 Pathogen[ P03410] interacts with 36 human partners:{Q00610;P09496;Q9Y6Q5;Q7L804;Q96PC3;P30622;Q9BXS5;O43747;O75843;Q9ULV0;Q96AW1;Q9NPB0;Q10567;Q92572;Q93050;Q9BY43;O15049;Q8TF30;O95295;Q9UNH7;O60333;Q92624;Q8WV24;P09497;Q15363;Q15036;Q9ULU8;Q9NRS6;Q6RW13;Q96B97;P59780;P53675;P61966;P56377;Q96EV8;Q92543}

683 Pathogen[ P14075] interacts with 17 human partners:{P09497;P09496;O95295;P53675;Q8WV24;Q92624;Q7L804;O43747;Q92572;Q96EV8;O75843;P56377;Q9BXS5;Q6RW13;O15049;Q10567;Q00610}

684 Pathogen[ P0C206] interacts with 31 human partners:{Q8TF30;P53675;Q9Y6Q5;Q92572;Q9UNH7;O43747;Q10567;Q9NRS6;Q96B97;P61966;Q00610;P30622;Q15036;P09496;Q92624;P59780;Q9ULU8;Q9BXS5;Q6RW13;P09497;Q96EV8;O15049;O95295;Q9BY43;O75843;Q7L804;Q15363;Q96PC3;P56377;Q93050;Q8WV24}

685 Pathogen[ P03363] interacts with 18 human partners:{Q9UNH7;Q7L804;Q92543;O43747;Q96B97;Q8WV24;O15049;Q00610;Q9BXS5;Q92572;P30622;Q92624;O95295;O75843;O60333;P09497;P53675;Q10567}

686 [Cluster 63]GO:0008024+cellular\_component [name] positive transcription elongation factor complex b [def] "A transcription elongation factor complex that facilitates the transition from abortive to productive elongation by phosphorylating the CTD domain of the large subunit of DNA-directed RNA polymerase II, holoenzyme. Contains cyclin T and a cyclin-dependent protein kinase catalytic subunit." [PMID

687 Pathogen[ Q2Q067] interacts with 1 human partners:{Q15545}

688 Pathogen[ P0C214] interacts with 1 human partners:{Q15545}

689 Pathogen[ P03346] interacts with 1 human partners:{Q15545}

690 Pathogen[ Q85601] interacts with 1 human partners:{Q15545}

691 Pathogen[ P14079] interacts with 1 human partners:{Q15545}

692 Pathogen[ P03383] interacts with 1 human partners:{Q15545}

693 Pathogen[ P03410] interacts with 1 human partners:{Q15545}

694 Pathogen[ P14075] interacts with 1 human partners:{Q15545}

695 Pathogen[ P0C206] interacts with 1 human partners:{Q15545}

696 Pathogen[ P03363] interacts with 1 human partners:{Q15545}

697 [Cluster 64]GO:0030424+C cellular\_component [name] axon [def] "The long process of a neuron that conducts nerve impulses, usually away from the cell body to the terminals and varicosities, which are sites of storage and release of neurotransmitter." [GOC

698 Pathogen[ Q2Q067] interacts with 19 human partners:{O14786;P07196;P41219;Q9H2P0;Q99497;Q9UBB6;Q96EV8;P38935;P09972;Q9NZJ4;Q9UQF2;Q86WG3;P12036;Q99689;P08670;Q9Y252;P08397;P42224;P07197}

699 Pathogen[ P0C214] interacts with 28 human partners:{Q9UBB6;P60709;P05937;O14786;Q9UM54;P62166;P41219;P42224;A0MZ66;Q99497;Q8NEJ9;P38935;P08397;Q9NZJ4;P35580;P08670;Q99689;Q96EV8;Q9Y252;P09972;Q9UQF2;P12036;Q7Z406;P07197;Q86WG3;P63261;P07196;Q9H2P0}

700 Pathogen[ P03346] interacts with 28 human partners:{P09972;O75592;P38935;P07196;P78415;Q9H2P0;Q6TFL4;Q99689;P60709;Q9NZJ4;P05937;Q93045;P07197;P12036;Q8NEJ9;Q96EV8;P41219;P42224;Q99497;P62166;P08670;Q9UQF2;Q9UBB6;Q9C0H9;Q9Y252;P58546;O14786;Q86WG3}

701 Pathogen[ Q85601] interacts with 27 human partners:{Q99497;P07196;P08670;P12036;P38935;O14786;Q9UQF2;P60709;Q96EV8;Q7Z406;P63261;P09972;Q9H2P0;P41219;P42224;Q9BVA0;Q99689;Q9Y252;Q86WG3;P07197;P08397;P35580;Q9NZJ4;Q9UM54;P17677;P62166;Q9GZM8}

702 Pathogen[ P14079] interacts with 37 human partners:{P05937;P63261;P17677;Q86WG3;P41219;Q9NZJ4;O75781;Q9UQF2;P12036;A0MZ66;Q99497;P09972;Q9H2P0;Q9UM54;Q9C0H9;P07196;Q9H269;Q15078;Q93045;Q99689;Q9UBB6;P07197;P08397;Q9NZ72;P62166;P60709;Q9GZM8;O75366;P42224;P47874;P38935;Q96EV8;P08670;Q8NEJ9;Q9BVA0;Q6IQ19;P10636}

703 Pathogen[ P03383] interacts with 16 human partners:{Q9UBB6;P08670;Q86WG3;P12036;Q99689;P09972;Q9UQF2;Q96EV8;P41219;P07197;P07196;P35580;Q9Y252;P08397;P38935;Q9C0H9}

704 Pathogen[ P03410] interacts with 35 human partners:{O14786;O75781;P12036;Q99497;P08397;Q9GZM8;Q86WG3;Q8NEJ9;A0MZ66;P07196;P41219;Q9UM54;P38935;P09972;Q6IQ19;Q9NZJ4;P05937;Q9UBB6;P08670;P10636;P35580;Q9NZ72;P17677;P63261;Q9UQF2;Q9C0H9;P62166;Q9H269;P47874;Q96EV8;Q93045;P60709;Q9BVA0;P07197;Q99689}

705 Pathogen[ P14075] interacts with 17 human partners:{Q8NEJ9;Q86WG3;Q9Y252;P38935;P08397;P41219;P12036;Q6IQ19;Q9UBB6;P08670;Q96EV8;P07197;P09972;P07196;Q9C0H9;Q9UQF2;Q99689}

706 Pathogen[ P0C206] interacts with 34 human partners:{P60709;Q9UM54;Q9BVA0;P07196;P38935;P17677;P62166;P41219;Q9NZJ4;Q99497;Q9UQF2;P10636;Q9GZM8;O14786;Q8NEJ9;Q99689;P12036;Q93045;Q96EV8;P63261;Q6IQ19;Q9NZ72;Q9UBB6;A0MZ66;Q9C0H9;P09972;P08670;Q9H2P0;P08397;Q86WG3;Q9Y252;P42224;P35580;P07197}

707 Pathogen[ P03363] interacts with 25 human partners:{Q9Y252;P07197;P78415;Q9UBB6;P60709;Q9NZJ4;O14786;Q9UQF2;Q9H2P0;P09972;Q9NVA2;Q93045;P07196;Q86WG3;Q6IQ19;P08670;P41219;P63261;Q6TFL4;P12036;Q8NEJ9;P38935;P05937;Q99689;Q9C0H9}

708 [Cluster 65]GO:0030915+C cellular\_component [name] Smc5-Smc6 complex [def] "A conserved complex that contains a heterodimer of SMC proteins (Smc5p and Smc6p, or homologs thereof) and several other proteins, and is involved in DNA repair and maintaining cell cycle arrest following DNA damage. In *S. cerevisiae*, this is an octameric complex called Mms21-Smc5-Smc6 complex, with at least five of its subunits conserved in fission yeast and humans." [GOC

709 Pathogen[ Q2Q067] interacts with 5 human partners:{Q8IY18;Q8N140;Q96MG7;Q96MF7;Q9NXX6}

710 Pathogen[ P0C214] interacts with 5 human partners:{Q8IY18;Q9NXX6;Q96MF7;Q96MG7;Q8N140}

711 Pathogen[ P03346] interacts with 6 human partners:{Q96MF7;Q96MG7;Q8WV22;Q8N140;Q8IY18;Q9NXX6}

712 Pathogen[ Q85601] interacts with 6 human partners:{Q8IY18;Q96MG7;Q8N140;Q9NXX6;Q8WV22;Q96MF7}

713 Pathogen[ P14079] interacts with 5 human partners:{Q96MF7;Q8N140;Q8IY18;Q96MG7;Q9NXX6}

714 Pathogen[ P03383] interacts with 4 human partners:{Q9NXX6;Q96MF7;Q8N140;Q96MG7}

715 Pathogen[ P03410] interacts with 5 human partners:{Q9NXX6;Q96MF7;Q96MG7;Q8IY18;Q8N140}

716 Pathogen[ P14075] interacts with 4 human partners:{Q8N140;Q9NXX6;Q96MF7;Q96MG7}

717 Pathogen[ P0C206] interacts with 6 human partners:{Q8N140;Q8WV22;Q96MG7;Q96MF7;Q8IY18;Q9NXX6}

718 Pathogen[ P03363] interacts with 6 human partners:{Q9NXX6;Q8N140;Q8WV22;Q96MG7;Q8IY18;Q96MF7}

719 [Cluster 66]GO:0032982+C cellular\_component [name] myosin filament [def] "A protein complex containing myosin heavy chains, plus associated light chains and other proteins,

in which the myosin heavy chains are arranged into a filament." [GOC  
720 Pathogen[ Q2Q067] interacts with 2 human partners:{Q9UKX2;P12883}  
721 Pathogen[ P0C214] interacts with 10 human  
partners:{A7E2Y1;Q9UKX2;Q9Y2K3;P11055;P13535;P12882;P12883;P13533;Q9Y623;P35749}  
722 Pathogen[ P03346] interacts with 1 human partners:{Q9UKX2}  
723 Pathogen[ Q85601] interacts with 9 human  
partners:{P13533;Q9UKX2;Q9Y2K3;P12882;P11055;P35749;P12883;P13535;Q9Y623}  
724 Pathogen[ P14079] interacts with 2 human partners:{Q9UKX2;P12883}  
725 Pathogen[ P03383] interacts with 2 human partners:{Q9UKX2;P12883}  
726 Pathogen[ P03410] interacts with 5 human  
partners:{Q9UKX2;P12882;P12883;P13533;P13535}  
727 Pathogen[ P14075] interacts with 1 human partners:{Q9UKX2}  
728 Pathogen[ P0C206] interacts with 8 human  
partners:{P13533;Q9Y623;P11055;P12883;P12882;P35749;Q9UKX2;P13535}  
729 Pathogen[ P03363] interacts with 1 human partners:{Q9UKX2}  
730 [Cluster 67]GO:0043625+C cellular\_component [name] delta DNA polymerase complex [def]  
"A multimeric DNA polymerase enzyme complex which differs in composition amongst species\_ in humans it is a heterotetramer of four subunits of approximately 125, 50, 68 and 12kDa, while in *S. cerevisiae*, it has three different subunits which form a heterotrimer, and the active enzyme is a dimer of this heterotrimer. Functions in DNA replication, mismatch repair and excision repair." [GOC  
731 Pathogen[ Q2Q067] interacts with 1 human partners:{Q15054}  
732 Pathogen[ P0C214] interacts with 1 human partners:{Q15054}  
733 Pathogen[ P03346] interacts with 1 human partners:{Q15054}  
734 Pathogen[ Q85601] interacts with 1 human partners:{Q15054}  
735 Pathogen[ P14079] interacts with 2 human partners:{Q5QGS0;Q15054}  
736 Pathogen[ P03383] interacts with 1 human partners:{Q15054}  
737 Pathogen[ P03410] interacts with 2 human partners:{Q5QGS0;Q15054}  
738 Pathogen[ P14075] interacts with 1 human partners:{Q15054}  
739 Pathogen[ P0C206] interacts with 1 human partners:{Q15054}  
740 Pathogen[ P03363] interacts with 1 human partners:{Q15054}  
741 [Cluster 68]GO:0005794+C cellular\_component [name] Golgi apparatus [def] "A compound membranous cytoplasmic organelle of eukaryotic cells, consisting of flattened, ribosome-free vesicles arranged in a more or less regular stack. The Golgi apparatus differs from the endoplasmic reticulum in often having slightly thicker membranes, appearing in sections as a characteristic shallow semicircle so that the convex side (cis or entry face) abuts the endoplasmic reticulum, secretory vesicles emerging from the concave side (trans or exit face). In vertebrate cells there is usually one such organelle, while in invertebrates and plants, where they are known usually as dictyosomes, there may be several scattered in the cytoplasm. The Golgi apparatus processes proteins produced on the ribosomes of the rough endoplasmic reticulum\_ such processing includes modification of the core oligosaccharides of glycoproteins, and the sorting and packaging of proteins for transport to a variety of cellular locations. Three different regions of the Golgi are now recognized both in terms of structure and function  
742 Pathogen[ Q2Q067] interacts with 219 human  
partners:{P04156;Q7Z3C6;O43290;Q8IUD2;O15027;P35908;Q9H2G9;Q8WWX9;Q9BZE4;Q8IZL2;Q9Y6D6;Q9Y6Q5;Q10567;Q9Y615;O15126;Q7Z6J0;P56377;Q92681;Q9Y266;Q63HQ0;Q13033;O60664;O43747;P63172;O00291;Q13887;Q92572;O43493;Q8IZH2;Q9H2K2;Q9C005;Q6RW13;O14579;Q7Z6B0;Q7Z460;O14503;Q9UKX2;Q9NR48;Q6XQN6;Q9BQA1;Q15596;O95295;Q9BSW2;Q6VY07;Q15554;O60260;Q9H1H9;Q5JTD0;Q9P299;P08729;Q14204;O75865;Q96P71;Q9NZD8;Q9UJY4;O75081;O00257;Q9UJY5;A8MVW5;Q8IV36;Q14511;Q9UP83;O43752;Q9NZI5;O14662;Q86XR8;Q8IUR0;O43617;P83436;P36956;Q8N1B4;Q86SZ2;Q9NVX0;Q9H8Y8;Q9HCH5;Q96CN9;Q5T7V8;Q6ZRS2;Q9NY61;P48444;P02511;Q08378;P52594;Q96SN8;Q14457;O00189;O95359;Q8NF91;Q9BV47;Q9NZC7;Q8TCI5;Q8IY31;Q8WUY3;Q9BV57;Q96PC3;P07902;P78545;Q9BUX1;Q7Z2W4;Q8IX03;P31948;O43823;Q6ICB4;P27797;Q9UQL6;Q9Y3M2;P61923;Q12959;P60520;O15162;O95159;Q13137;Q14CS0;O75396;O15127;P17987;P53677;Q05084;Q15047;Q9UBF2;Q9BSU3;P11171;Q9H8T0;Q16143;Q9H9H5;Q14746;P61966;Q9UL33;Q5VIR6;Q15437;Q15643;P53992;Q9UKJ5;Q8TBZ0;Q92562;O95486;Q12904;Q7RTS9;O75843;P29474;Q99732;Q96JB2;O94855;P82094;Q00587;P0DI81;Q53GL7;Q9BUL8;Q99550;Q9UILL1;P0DI82;Q96CV9;Q8IWI2;Q14677;O95810;Q9Y2T2;Q8TD16;Q5VU43;Q13439;Q08379;Q9BRS8;Q9BXS5;P53041;Q99996;Q96JE7;Q13618;Q969S3;Q9NZU7;O75122;Q9H4A6;Q8TAC9;Q9UN36;Q56P03;Q9C035;O95373;P53618;O95996;P21399;Q9BVW5;Q9Y2M5;Q15545;Q969H0;O95271;Q6ULP2;Q5HYK7;O15155;Q9NR09;O60763;O00161;Q9NWB7;O95487;Q99700;O75558;P35606;Q8WTV3;Q49MG5;Q96RN5;Q9Y678;Q9H4A5;Q9BVN2;Q86VS8;Q9Y296;Q9P2W9;Q9NVV4;Q15691;Q9Y250;Q9UQR1;Q15436;Q9H9E3;O75674;Q9Y3A3;Q9NZ52;Q9P1T7;Q13367;O60921;Q9ULD2;Q9HBQ8;Q9NX95;Q03938}  
743 Pathogen[ P0C214] interacts with 241 human  
partners:{Q9NWB7;Q14457;P60520;P29474;Q9UM00;Q6ICB4;P61923;P08729;Q8IWI2;O75865;Q8IX03;Q969S3;Q5JTD0;Q9Y615;Q14746;Q7Z6J0;Q13887;Q12904;O95810;Q9P299;Q9H4A6;Q15047;Q8IY31;Q8N2H4;Q8TBZ0;Q8WUY3;Q9UKX2;Q9BV47;Q6RW13;P53992;Q9H9E3;P62993;P59780;Q9UJY5;Q8IZL2;P02511;Q08379;Q9UKJ5;O95295;Q15554;Q8TAC9;Q9UM54;O14579;Q9C035;Q8WWX9;Q96SN8;Q9Y2T2;Q9BV57;P62166;O00189;Q13367;P53618;A8MVW5;Q8IV36;Q13033;P35606;Q6ZRS2;P48444;Q9BVW5;Q9NZI5;Q9BSU3;Q8TCI5;P83436;Q8NCE8;Q6XQN6;Q9HCH5;Q14204;Q5HYK7;O43493;Q13618;O15127;Q9BUL8;Q08378;Q9Y296;O43617;Q15691;P35908;P31948;Q15545;O60551;Q9NY61;Q15436;Q9Y266;Q96Q05;Q8IUR0;Q8WXG1;Q99700;Q92562;Q7Z2W4;O75843;Q9Y2G5;Q9NZC7;O95359;Q9Y250;Q96CN9;O14503;Q8IZH2;P82094;O60921;Q10567;Q13137;O75122;Q92681;Q96RN5;Q99732;Q53GL7;Q86VS8;Q92572;Q9H8Y8;Q8NF91;P10124;Q9UBF2;O95487;Q5VU43;P49257;Q9H8T0;Q9UJY4;Q9NZD8;Q9H9H5;O15126;Q9Y3M2;O15162;Q9BRS8;P53677;Q9BUX1;Q86XR8;P56377;Q15437;Q9Y2M5;Q9BZQ4;Q6VY07;Q9C005;Q

7RTS9;Q15643;O00257;Q9H2G9;O43823;Q9BQQ3;Q96PC3;Q9U1L1;Q9ULD2;P0DI81;Q99550;Q9NZ52;Q56P03;Q7Z6B0;Q96P71;Q8TD16;Q9NZU7;Q9P1T7;Q9NX95;Q96CV9;O43752;P53041;Q8N1B4;O60763;Q969H0;Q12959;Q14511;Q9H2K2;Q9HD26;O43747;Q9NV92;Q5VIR6;Q9H4A5;Q96G01;Q9Y6Q5;Q9BVN2;P04156;P63172;Q5T7V8;P27797;Q5VZ66;Q13439;Q7Z460;P07902;Q9BSW2;Q9UP83;O75396;Q6ULP2;Q9Y6D6;Q9UJH9;Q9NR09;O43290;Q16143;O60664;P17987;Q9NR48;O15144;P61966;O60260;Q176083;O14727;P78545;Q5T215;Q05084;P52594;Q9Y3A3;Q9BZE4;O75558;Q9HBQ8;Q96EK6;Q99996;Q15596;O75674;O95271;Q9BWX1;Q63HQ0;Q96JE7;Q8IUD2;P21399;Q9Y678;Q9UQR1;Q9NVX0;Q9NVV4;Q96JB2;Q96CA5;O95373;Q9UL33;Q9UN36;Q9BXS5;O00161;Q14CS0;O15155;O15027;O75081;Q9UQL6;O95486;O00291;P11171;Q14677;Q49MG5;P80303;P0DI82;Q86SZ2;Q8WTW3;Q7Z3C6;Q9P2W9;P36404;O94855;Q03938}

744 Pathogen[ P03346] interacts with 306 human partners: {O95166;Q13439;O60921;Q92681;Q13596;Q96G01;Q969S3;Q9H4A5;O60664;Q96CN9;P08729;Q9H5Y0;P61966;Q5VIR6;O43752;Q14746;O95159;Q08AF8;A8MS94;Q7Z3C6;Q9P2W9;O15027;Q9H2G9;O43290;Q08379;P80303;Q8NBJ4;Q9Y5R8;Q9Y6B7;P0CG33;Q99598;Q86XR8;Q14511;Q9UP83;Q9P2K5;Q96A65;Q9BUX1;Q9C005;Q86VS8;Q9UQR1;P59103;Q96P71;Q9BSU3;P29474;Q96JB2;Q15036;Q9BZE4;P36956;Q9Y3M2;O15144;Q9BQA1;Q92622;Q7Z6J0;O95295;Q15554;Q8IY31;O43747;Q9U1L1;Q92572;Q96MW5;P60520;Q56P03;Q12772;Q9BV57;Q15691;P82094;Q8I1V1;Q9H4A6;P49257;P56377;A8MVW5;Q53GL7;Q9NZU7;Q8IV36;Q14789;Q49MI3;Q9Y6D5;O95359;O75865;Q969X5;P59780;Q13618;Q8WTW3;Q8IUD2;Q9BXS5;Q86SZ2;Q9Y678;Q9NX95;P53618;Q9NZD8;Q9HCH5;P31948;Q9H1H9;Q9C035;Q13190;Q00587;Q08378;Q8IX03;Q93050;P62993;Q14457;O75396;O00257;Q9NZI5;Q14204;Q8I2E3;Q6XZF7;Q9P299;O14579;O00189;Q05084;Q92562;Q9NV92;O00291;Q9UKJ5;Q6P3W7;Q9UID3;A6NDN3;Q53HI1;Q8WWW9;Q93045;Q9BV47;O94855;O14503;Q8IZH2;Q7Z6B0;Q9HOR8;Q9Y371;P35908;Q6XQNG;P48553;Q5JTD0;Q13137;Q14CS0;Q9Y266;Q9Y2V7;Q7L4P6;Q9Y6D6;Q9H2K2;Q99700;Q10567;O00161;Q15643;Q12904;O75843;P11171;Q9NVX0;P48444;Q96CV9;P20340;Q96AA8;Q9H8T0;P02511;Q15436;Q8IYM9;Q9H9H5;Q9H9E3;Q8N4B1;Q9UL33;Q9UPM8;Q8TAC9;Q13033;O00221;Q8TBZ0;Q5T215;Q15596;Q15437;Q9Y3A3;Q9NB7;Q9HD26;Q9Y296;Q9Y587;Q96SN8;Q96JE7;O95373;Q8N2H4;Q96Q05;Q9Y2L5;Q7RTS9;Q9NZC7;P52594;Q9UBF2;Q9H8Y8;Q96PC3;Q9NVV4;P0DI81;Q9Y250;Q9UJY4;Q9P1T7;Q8N1B4;P51161;P36404;Q5JSH3;Q8TD16;Q16143;P61923;P53041;Q9ULD2;Q13887;P63172;O95810;O15126;O60763;O95996;Q8IUR0;P62166;Q6ZRS2;O75122;O95486;P27797;Q9BQQ3;Q8WUY3;P83436;Q13492;Q08AE8;P0DI82;O60260;Q8N357;P36405;Q5T7V8;Q99996;A6NCC3;Q13367;O95271;Q5VZ66;Q15047;P10768;Q6ULP2;Q5HYK7;Q99550;Q9NR09;P04156;P50542;Q9UKX2;Q9HC24;Q8TCI5;Q9BSW2;Q9BVN2;O95487;Q96KG9;O14617;Q9UI14;Q7Z460;O43493;Q8NCE8;Q7Z392;Q13029;Q6RW13;Q9P1T7;Q9UJY5;Q96JE9;Q9UJY5;Q9Y2M5;Q8TEY5;Q9NR48;P49755;P78545;O75558;O75674;Q9Y6Q5;Q5VU43;Q15545;P21399;Q6ICB4;Q63HQ0;Q9UN36;P35606;Q8NF91;Q96CA5;Q14677;Q969H0;O15155;Q9BVW5;Q9HBQ8;Q9BRS8;Q6VY07;Q9BWX1;Q9NZ52;Q9Y615;O14727;O14662;Q9BUL8;O43823;Q9UQL6;O75081;Q96RN5;Q9HBF4;Q9NRD5;P53992;Q15363;Q92834;Q9BVK6;P53677;Q8IZL2;Q8I1WJ2;O43617;Q86Y82;Q9Y2T2;O15127;Q9NUK0;Q7Z2W4;Q12959;Q03938;Q99732;P17987;O15162}

745 Pathogen[ Q85601] interacts with 262 human partners: {Q9UQR1;Q13367;Q14457;Q13596;Q9H4A5;O60664;Q96CN9;Q63HQ0;Q9NZC7;Q9Y250;P08729;Q8I1WJ2;Q15643;O15126;O43493;Q14746;Q5T7V8;Q9BQA1;Q96CV9;O75843;Q56P03;Q9NZU7;O15027;P48444;Q9Y2T2;P62993;P10768;P36405;Q9P2K5;Q96A65;Q9BUX1;Q8N2H4;Q86VS8;Q969H0;Q9UJY4;Q9BQQ3;O75396;Q9UN36;Q5HYK7;Q9UL33;Q9BZE4;Q5JSH3;Q9UQL6;O14579;O95487;P21399;Q9Y3M2;Q13439;Q9NY61;O95295;Q8TAC9;Q15554;O95166;O60763;P51161;Q96JE7;Q9BUL8;Q96SN8;Q15036;Q9UP83;Q9BXS5;Q9NR48;P56377;Q9NVX0;A8MVW5;Q9HBF4;Q9P299;O15155;Q9NWB7;Q8IV36;Q9UJH9;Q93050;Q9H0R8;A6NCC3;Q49MG5;P78545;Q9BVN2;Q15545;P80303;Q7Z2W4;Q14204;Q12772;Q9HCH5;Q96JB2;O43747;P61923;P31948;P83436;Q9H1H9;Q9UPM8;O14503;Q08378;Q9Y296;Q9NP61;P27797;Q9BRS8;P11171;Q92834;Q5VIR6;P17987;Q92562;O60551;P52594;Q15596;Q10567;P63172;Q9P2W9;Q9UJY5;Q15436;O43617;Q9BV57;Q8WTW3;Q9BV47;Q8IZH2;Q7Z3C6;O43752;Q6XQNG;Q5VSY0;Q8TCI5;Q13137;O75122;Q8N6H7;Q14677;Q9Y266;Q5T215;Q7Z6J0;Q86XR8;Q9UKX2;Q9H2K2;Q8NCE8;Q969S3;Q96RN5;Q9H8T0;Q9H9E3;Q9H9H5;Q92681;O95810;Q96AA8;Q9UM00;O95373;Q15437;Q9Y3A3;Q9UBF2;Q9HD26;Q6VY07;P36956;P49257;Q8N6T3;Q9C005;Q9Y678;Q96Q05;Q9Y2L5;Q7RTS9;P02511;Q6ICB4;Q96G01;Q15691;P0DI81;Q9UKJ5;Q8IYM9;Q8N1B4;O60921;Q8TD16;Q8IZL2;O95159;Q6ZRS2;Q99550;P53041;Q5JTD0;Q6RW13;Q13033;O43290;O75558;Q96EK6;Q9H4A6;O95486;Q9BSU3;P29474;Q96PC3;Q9C035;Q7Z6B0;O95996;P0DI82;O60260;P53618;P60520;Q9H2G9;Q9Y6B7;Q9Y615;Q12959;Q99996;P53677;Q5VU43;Q8WUY3;Q6ULP2;Q9HBQ8;O15127;Q9NR09;P04156;P07902;P82094;Q9Y6D6;Q9H8Y8;Q7Z460;Q9Y2M5;O43823;Q96KG9;O00291;P35908;Q96P71;Q92572;O75865;O15162;Q9UM54;P61966;Q13618;P59780;Q9BWX1;Q8WWW9;Q9NVV4;Q9P1T7;Q15047;Q9Y6Q5;O95271;Q9NX95;O00257;O94855;Q99732;P35606;Q9NZ52;Q8IX03;Q9U1L1;Q8NF91;Q96CA5;Q8IUD2;P62166;Q14511;O14662;Q99700;Q9NZI5;Q53GL7;O00161;Q9UID3;Q08379;Q13887;P53992;Q05084;Q9BSW2;Q9ULD2;O00189;O15144;Q86SZ2;Q8IY31;Q9BVW5;O95359;Q16143;O75081;O75674;Q14CS0;Q03938;Q8TBZ0;Q8IUR0}

746 Pathogen[ P14079] interacts with 380 human partners: {Q5SRI9;Q9UQL6;Q16655;O94923;Q5JTD0;Q9NY59;Q6VY07;Q15691;O95373;P0CG08;Q9UQR1;Q13492;Q9Y296;O95070;O95159;Q14CS0;Q96G79;O60260;O95166;Q96M27;Q14789;Q6ZVE7;Q14746;Q8WWW9;Q92562;Q9UL33;Q969M3;P49257;P61923;A6NDN3;O15027;O15162;Q6XZF7;P31948;Q86SZ2;Q9Y6Q5;Q15036;P61966;O00291;Q6ULP2;Q05084;Q9BXS5;Q86VE9;Q96P71;P63172;Q9NWB7;Q15596;Q15047;P35908;O43505;Q9C005;Q99996;Q9UJY4;O75072;Q8IY31;Q92681;P83436;P53041;Q9UID3;Q969H0;Q5VSG8;Q7Z460;A8MS94;Q5VSY0;Q24JP5;F8WBI6;Q9C035;Q56P03;P11171;Q7L4P6;Q8NFM7;Q9BVN2;Q7Z2W4;O95487;O95359;O60664;A6NP81;Q9NXE4;O95271;P56750;Q9NX95;Q96RQ1;Q9UKJ5;Q86VS8;Q99700;O15258;Q9UJY5;P59103;Q9NY61;P13498;Q92542;A6NC78;P02511;Q9NZ42;P04156;P35606;Q63HQ0;Q13033;Q9UPM8;Q13618;P21399;Q4G0N0;O43823;Q14677;Q10567;Q9Y6D5;Q9BXS5;Q6RW13;Q9NVX0;Q14204;Q92834;P56377;O75865;Q9Y2T2;Q9Y678;Q9HC24;Q5VZ66;Q9Y6B7;Q0D2H9;Q9H8T0;Q9Y250;Q9BXS4;Q8N8X6;P59780;O94855;O00189;Q9HCH5;Q9Y266;Q16143;Q9UI14;P52594;O75674;Q08378;P08729;Q6ZRS2;Q9U1L1;Q8IZL2;A8MVW5;P53992;Q13439;Q9BUL8;Q9H2K2;Q9Y615;O95954;Q9UKX2;Q9UM54;Q8IUD2;A6NN73;Q9H9H5;Q9Y371;Q7Z3C6;O15155;A8MQT2;Q9NYA3;Q96JE7;Q8IUR0;O43290;P33947;Q92572;Q03938;P06280;Q9NZ52;O00461;Q9NR09;Q15363;O75843;Q9BSU3;Q9BZE4;O75558;Q9UJH9;Q15012;O75396;Q9Y2V7;Q12772;Q9H2G9;Q9UL01;P80303;Q9HD26;O75503;P82094;Q3V5L5;H3BSY2;Q9H8Y8;P27544;Q08AE8;Q9Y5U9;Q9NQX7;Q8N357;P36405;Q9Y3A3;Q93045;P50542



;Q8IZH2;Q9Y287;Q8NHG7;P60520;O00257;Q5T215;Q8NBJ4;Q8WTW3;Q8IX03;Q9NZC7;Q99732;A6NCC3;Q8TAC9;Q8IUH2;Q9UK28;Q8IVS8;Q969X5;Q9BZQ4;Q6XQN6;P49755;Q9BQA1;Q9P299;Q8IV36;Q08379;Q96RN5;Q5JSH3;Q9Y6D6;Q7Z392;P17987;O95996;I6L899;Q9NZ72;A6NDK9;Q8TCI5;O95866;Q6IAA8;Q96AA8;Q9BRS8;Q8WUY3;Q8N4B1;Q9UBF2;P62166;Q9BV47;Q9UP83;O00559;Q9NVV4;Q9H1H9;Q9BTV4;O60551;Q9Y2M5;O95292;Q5VIR6;O00221;O14653;Q9H0R8;A4D1B5;Q9NZI5;Q96Q05;Q53HI1;P10124;Q8IWIJ2;Q49MG5;Q8TF30;Q7Z5B4;P53677;Q9BQ3;Q95295;D6RF30;Q9H5Y0;O14662;Q5HYK7;Q13596;Q7RTS9;Q13137;B7ZAQ6;A6NMD2;Q8N1B4;Q9H6L5;Q8N2H4;Q96G01;P48444;P0CJ92;Q96JE9;Q8IWI1;Q8TBZ0;Q9ULD2;Q96S66;Q00587;Q15554;Q9Y5R8;Q96MW5;O75081;Q6PJW8;Q96A65;Q9H4A5;Q13367;Q6ICB4;Q9Y3M2;Q93050;Q9NUK0;P62993;O95810;O43747;Q9UM00;O43752;P00915;O15260;O14579;Q92896;Q9P1T7;P78545;Q53GL7;Q9H9E3;A8MW95;P0CG33;Q9Y3E0;Q99598;Q9H0V9;O43493;P07902;Q96EK6;Q9HC07;Q6UX65;Q9NV92;P0DI82;P48553;Q96JB2;Q12904;O14617;O14503;P0DI81;Q8NF91;O95486;Q8TBQ9;Q86XR8;Q2TAP0;Q9HBF4;Q7Z5G4;O95235;Q96PC3;Q96FX8;Q9P2W9;Q14457;Q9252G5;Q9BUX1;O75122;Q9UN36;Q6UWH4;Q9H4A6;Q9NRX6;Q92622;P36956;O43617;Q9HBQ8;Q96SN8;Q5T7V8;Q969S3;Q8TD16;Q96CV9;Q9BV57;O60921;Q12893;O15144;Q96CN9;Q6UWI2;Q9UBM8;Q9NZU7;Q96S06;Q9BWX1;Q6AZY7;Q99550;P07305;Q15643;Q9Y587;O60763;Q08AF8;Q5VU43;Q8NCE8;Q8WXG1;Q15545;Q7Z6B0;Q96KG9;Q9Y2L5;Q9BVW5;Q9GZM5;Q9BSR8;Q96FM1}

747 Pathogen[ P03383] interacts with 182 human partners: {Q9UQR1;Q14457;Q92681;Q9NVV4;Q9UJY4;P08729;Q9NY61;Q8IWIJ2;Q6RW13;P56377;O15126;Q86XR8;Q14746;Q15047;Q9BQA1;Q7Z460;Q56P03;Q12904;Q9BVW5;Q7Z3C6;P29474;Q9H9E3;O14579;Q92572;Q9NWB7;Q7Z6B0;Q9UP83;Q15691;Q8WUY3;Q8IY31;P53618;O43290;Q9NZD8;Q9BUX1;P83436;Q9Y678;Q15596;P04156;Q5HYK7;Q8N1B4;Q9UQL6;Q9NVX0;O95487;O15162;Q13439;O95295;Q9UL33;Q99HD26;Q15554;Q8TAC9;P07902;P63172;Q96SN8;Q99700;P31948;Q10567;A8MVW5;Q8IZL2;Q5JTD0;Q6VY07;O00257;Q8IV36;P02511;Q9NX95;Q96JB2;Q9H2G9;Q9BZE4;Q96P71;O95486;Q9HCH5;O14503;Q9Y296;Q9Y6D6;Q9UN36;O43493;O00189;P53677;Q9BRS8;Q9UJL1;Q15436;Q13618;Q8N2H4;O60921;Q96CN9;Q9BV57;Q9H1H9;Q9BSU3;Q8WTW3;Q8NHG7;Q5VU43;Q8TCI5;Q13137;Q96RN5;Q15643;Q05084;Q8IUR0;O00291;O75081;Q9C035;O75558;Q9H8T0;Q9H9H5;O60260;O75843;Q8NCE8;Q9Y2T2;Q9BSW2;O43747;Q15437;O94855;Q9UJY5;O43617;O75865;Q9C005;Q14511;Q7RTS9;Q9UKX2;P0DI82;Q53GL7;Q99732;P0DI81;Q86VS8;Q9Y3M2;Q9UBF2;P53041;O95810;Q9Y266;Q9H4A6;O15027;Q969H0;P10124;P35908;Q8IX03;Q9UKJ5;O15127;Q5T7V8;Q9BUL8;Q96JE7;Q13367;Q9H5Y0;Q14677;Q6ULP2;Q9NR09;P53992;P78545;P82094;O43752;Q9Y2M5;Q99996;O95373;Q9UM00;Q96CV9;Q9P1T7;Q13033;Q00587;Q49MG5;Q9NZI5;O00161;Q9BXS5;O95271;Q15545;Q9H8Y8;Q8IUD2;Q9Y3A3;O60664;Q14CS0;Q9HBQ8;Q63HQ0;P52594;Q9Y615;Q86SZ2;Q08379;Q5VIR6;Q9BVN2;Q9H4A5;Q8WWW9;Q969S3;P27797;Q7Z2W4;Q9NZ52;Q9Y250;Q03938}

748 Pathogen[ P03410] interacts with 390 human partners: {Q9BVN2;Q99700;Q9HC07;Q8IVS8;Q7Z460;Q9HC24;P0DI82;Q92562;Q9Y6Q5;Q7L4P6;Q14204;O95292;Q9HCH5;Q9UPM8;Q86VE9;Q9BSU3;Q4G0N0;O00203;Q5JSH3;P82094;Q96PC3;P17987;P36956;Q86SZ2;P10768;Q13137;Q9H2G9;Q7RTS9;Q12893;P51161;O75865;Q5VSY0;Q5HYK7;P52594;O95359;P80303;Q9UKX2;Q9H0V9;Q9Y2L5;Q5VSG8;Q96M27;Q9BXS5;Q13190;Q8IZE3;Q15047;Q3V5L5;Q9BQ3;Q9HBQ8;Q9BRV3;Q96JB2;Q8TAC9;Q9UP83;Q7Z5B4;Q96FM1;P49257;Q8TBQ9;Q15554;Q9NYA3;A4D1B5;Q13596;Q99996;Q94855;Q9Y615;Q9NZ52;O60551;Q8N4B1;Q969X5;Q7Z392;Q13445;B7ZAQ6;P53992;Q9Y2V7;Q9H1H9;Q08AE8;Q53GL7;Q8IX03;Q9P299;O75674;O43747;O75843;Q9Y3M2;Q12959;Q9BUL8;P48553;Q16655;Q8IV36;P60520;Q9BWX1;Q9UL33;P48444;P10124;P78545;Q9NZC7;Q7Z5G4;Q96SN8;Q8N1B4;Q9BVW5;Q08AF8;P07902;Q10567;Q969S3;O95954;Q8IWI1;P35606;Q7Z6B0;Q9BUX1;Q5T215;P36405;A8MS94;Q9P2K5;Q9NY61;Q14457;Q92572;P63172;P33947;Q99732;Q08378;Q9P2W9;Q9NZI5;Q16143;A6NCC3;Q9H8T0;O14662;Q93050;O14579;H3BSY2;Q9BZQ4;Q00587;Q9BQA1;Q96EK6;Q9H6L5;P27544;A6NCC3;O00291;A8MQT2;Q24JP5;P55157;O60260;O60664;Q96JE9;Q6XQN6;Q9Y3E0;Q8N2H4;Q8TD16;Q9H4A6;Q9NV92;Q9NVV4;Q8TF30;Q9Y5R8;A6NP81;O00461;Q05084;O14617;Q9UJY5;Q9Y587;Q9Y6B7;O15258;Q8WXG1;Q9NXE4;Q12904;F8WB16;Q9UMZ2;O00559;Q9NZ42;Q9C005;O95249;O75503;Q9UQR1;Q9UQL6;O95295;Q5SRI9;Q9HD26;Q92896;O95166;O15162;P11171;Q53HI1;Q9NR09;Q9UM54;Q9UHT9;Q8IZH2;Q96MW5;Q8IZL2;O95866;Q9C035;P0DI81;Q9BTV4;Q13492;Q6ZRS2;Q13618;Q15436;Q9BVK6;P29474;Q9H9H5;O60763;Q14677;Q9NRD5;Q9H8Y8;Q8IUD2;Q96AA8;Q9P1T7;Q6UWI2;Q5VZ66;O75396;Q14511;P21399;Q9UN36;Q96FX8;Q96KG9;Q15691;Q9H0R8;Q969M3;P35908;O95996;Q15437;Q9UJL1;I6L899;Q8IUR0;P0CG08;Q969H0;Q96RQ1;Q7Z6J0;Q8N357;Q8IY31;Q9UK28;Q9NWB7;Q12772;O15155;Q7Z2W4;Q9ULD2;Q9Y2T2;Q9NP61;O95271;Q96A65;Q9Y678;Q9BSR8;P02511;Q5VU43;Q9NQX7;Q96CV9;Q9Y3A3;Q9NVX0;Q99550;Q13033;Q14CS0;Q6PJW8;Q14789;O95486;Q6UX65;O15127;P0CG33;Q15363;Q5T7V8;Q15036;Q96G01;A7E2F4;A6NDK9;Q9Y371;Q9UKJ5;Q6XZF7;Q92834;Q9Y6D6;P04156;P53618;A8MVW5;P61923;Q9Y6D5;Q8WWW9;P53041;Q96JE7;Q8WTW3;A6NND3;O60921;P0CJ92;Q9NZU7;O95810;Q5JTD0;Q96S06;Q6ICB4;Q99598;Q6RW13;P31948;P53677;O75558;Q0D2H9;Q15596;Q6IAA8;Q96S66;Q15643;P50542;Q14746;Q9HBF4;Q8TCI5;O75081;Q96Q05;Q8NBJ4;Q9Y5U9;Q56P03;Q63HQ0;Q75064;Q6ULP2;Q9NZ72;Q92542;Q6UWH4;Q9Y296;O43752;O95159;Q8N8X6;O15027;Q9Y250;Q9H5Y0;Q96G79;Q9Y266;O14653;O15144;A6NMD2;Q9H2K2;P59780;Q92805;P83436;Q9BXS4;O00257;Q5VIR6;Q9UL01;P08729;P56750;Q96P71;Q6ZVE7;O43290;Q13439;O15260;Q13367;O43493;O43617;D6RF30;P62166;Q7Z3C6;Q9Y2G5;Q9UM00;P61966;O43823;Q6VY07;O15126;P62993;A8MW95;Q9BV57;O75122;Q8NCE8;Q9BZQ4;Q8NFM7;Q9UI14;O00161;A6NN73;Q9BV47;Q92681;Q6AZY7;Q9H9E3;Q9BRK5;Q9BRS8;P56377;Q96RN5;Q49MG5;Q9UID3;Q8NHY0;Q15012;P59103;Q93045;Q9BZE4;Q9H4A5;Q8IUD2;O00221;Q9Y2M5;Q9UJY4;Q15545;Q8TBZ0;O95070;Q9NX95;O43505;O95373;O95487;Q8NHG7;Q2TAP0;Q5MNZ9;Q8WUY3;Q9UBF2;Q08379;Q03938;Q8NF91;P27797}

749 Pathogen[ P14075] interacts with 209 human partners: {Q14457;P29474;O43617;P08729;Q14511;Q15643;Q969S3;Q9UJY4;Q14746;Q9H2G9;Q96JB2;Q08AF8;Q9Y266;Q96JE7;Q92681;Q8NBJ4;Q96FX8;Q5SRI9;Q9BSW2;Q9H1H9;Q8IWI1;Q9BUL8;Q9UQR1;Q8N1B4;Q8N2H4;Q9H9E3;O75558;Q9BQA1;Q13618;Q5VU43;Q9UKX2;O95295;Q15554;P78545;Q49MG5;O43752;O15127;O15162;Q56P03;Q9BV57;Q9BVN2;Q8IVS8;P82094;Q96JE9;Q9Y2T2;Q9NVV4;A8MVW5;Q9UBF2;Q7Z460;Q8IV36;Q9NY61;Q86SZ2;Q9BSU3;Q8IY31;Q15047;Q9P1T7;Q9NZ52;Q8WWW9;P04156;Q9HCH5;Q5HYK7;Q9Y250;Q9HD26;Q96SN8;Q8WUY3;Q8IUD2;O95159;O15027;O15126;Q9NZD8;Q9Y6D6;P63172;P53992;Q5JTD0;O75081;O14503;Q9BVW5;Q7Z392;Q00587;O00461;Q13137;Q9H4A5;O00257;O00291;Q96AA8;Q16655;O75865;O43493;O00189;O95487;P07902;O95810;P35908;Q99996;Q9H8T0;Q9H9H

5;Q08379;O43505;Q9UP83;Q8TBZ0;Q15437;Q8NHG7;Q7Z6B0;Q86XR8;O95373;Q9UHT9;Q12904;Q9C005;Q7RTS9;Q2TAP0;P53618;Q99732;Q8IUR0;Q15691;Q63HQ0;P0DI81;Q5T7V8;P27797;Q14CS0;Q14677;Q8IHWJ2;Q9UN36;Q9Y2G5;Q9H8Y8;Q9C035;Q8TCI5;O43747;Q9BRS8;P53041;Q9HBQ8;Q15545;Q15436;Q9BUX1;Q9Y3A3;Q92572;P02511;Q9NWB7;Q9UILL1;Q9UK28;Q5VIR6;Q7Z2W4;P52594;O00161;O60921;Q14789;Q9BZE4;Q13439;Q05084;Q9Y678;Q9NZI5;Q9NV92;Q9NVX0;Q6ULP2;Q9NR09;O75843;Q8TAC9;Q96RN5;Q96CV9;P56377;Q9UQL6;Q86VS8;Q99700;O94855;Q9BXS5;P10124;Q53HI1;Q9UL33;Q9Y3M2;Q6RW13;Q9Y2M5;P59103;Q9Y287;O95271;Q8IZL2;O43823;Q9NX95;Q6XQN6;O43290;Q9Y296;Q96EK6;O60260;Q969H0;P31948;Q9UKJ5;Q13033;O95486;Q9H4A6;Q6UWI2;Q10567;Q96CN9;P83436;Q8NCE8;P11171;Q6VY07;Q9UJY5;Q13367;Q7Z3C6;P0DI82;O60664;Q9UM00;Q15596;Q53GL7;Q96P71;Q8WTW3;Q7L4P6;Q8IX03;Q9H5Y0;O14579;Q03938}

750 Pathogen[ P0C206] interacts with 354 human

partners: {Q96P71;Q13439;O95271;Q8TCI5;Q8TF30;Q7Z3C6;O14662;Q13887;Q9Y3A3;Q14789;Q5SRI9;Q9BVK6;Q86XR8;O14579;Q16655;Q63HQ0;Q9HBQ8;Q9C005;O15127;P0DI82;A6NCC3;Q9Y678;Q15437;Q9Y6B7;O95359;Q9UM54;Q9UM00;Q9H4A6;P83436;Q15545;Q9Y296;Q96SN8;O00221;Q8N6T3;P27797;O75865;Q14CS0;O75396;Q9Y2V7;Q9NZI5;Q9BV47;Q7RTS9;Q9BUX1;Q9Y6Q5;Q8IZH2;O00291;Q9BQA1;Q92572;Q7Z6J0;Q9NZ42;Q8WXX9;P04156;P53618;Q9P299;O43747;Q6XQN6;Q9Y287;Q9H9E3;O94855;P62166;Q92681;A8MS94;Q9UHT9;O95810;Q10567;O14653;Q92562;P51161;Q8IY31;O60664;Q96FX8;Q7Z5B4;Q56P03;Q9NV92;Q9Y6D6;O15258;Q96CV9;Q15554;Q8NHG7;O43752;Q99598;Q96JE9;Q0D2H9;Q9Y2L5;Q9H8T0;O43493;Q15691;P0CJ92;O75081;Q9H6L5;Q8IHW1;P61966;Q9UILL1;Q8TBZ0;Q13137;P80303;Q9BRS8;O95070;Q9H8Y8;P08729;P53041;Q53GL7;Q96AA8;Q14457;P49755;Q6ICB4;Q969H0;P48553;Q9UJY4;P00915;Q6ZRS2;Q96JB2;Q8IUD2;Q99550;Q9Y2T2;Q14746;Q9UKJ5;P36956;Q13596;A6NN73;O75558;Q99996;Q92542;P17987;P10768;Q9H1H9;Q9NZU7;P50542;Q96KG9;Q5JTD0;O95996;Q96A65;Q15036;Q6P3W7;Q9UI14;P62993;Q8NBJ4;Q9H5Y0;Q86VS8;Q9NYA3;Q9NP61;Q9Y587;O43290;Q9NVX0;Q9UL01;Q9H4A5;Q9NX95;O00161;Q96S66;P59780;Q8N2H4;O75122;P53677;O95292;A8MW95;O95954;A6NMD2;D6RF30;Q92622;A8MVW5;Q9UK28;Q969S3;Q14204;Q8IV36;Q8NF91;Q6PJW8;Q9UPM8;Q9UP83;Q6ULP2;Q96RN5;Q9BXS5;O15155;Q5HYK7;Q6VY07;Q6RW13;Q93045;Q9NR09;Q13618;Q96Q05;Q9BVM5;O95486;Q969M3;Q8WTW3;Q99700;Q5VIR6;Q6ZVE7;Q9NZ52;Q8IZL2;Q9NR48;Q53HI1;Q9Y6D5;O95373;Q7L4P6;P35606;Q86SZ2;Q9P2K5;Q8N357;Q9NWB7;P33947;Q9UJY5;Q96JE7;O00461;P49257;O95487;A4D1B5;O60763;O60260;Q9NZ72;Q9UQR1;Q9BZQ4;P48444;Q9ULD2;P78545;Q9BUL8;Q16143;Q08378;Q6UWH4;O60921;Q5VU43;Q9UKX2;Q9BV57;Q12893;Q49MG5;P07902;Q9NVV4;Q7Z392;Q9C035;P60520;Q9NQX7;Q08AF8;Q8IUR0;Q96EK6;O95295;O43617;Q9BZE4;Q14677;O15144;O60551;P36405;Q9H2G9;P29474;Q9H0R8;P0CG08;O15162;Q9UID3;Q5T215;O43823;O15260;Q9UBF2;Q5VSY0;Q9HC24;Q8N4B1;Q9NZC7;Q969X5;Q15596;Q8IYM9;Q9BSU3;Q96CN9;Q08379;O14617;Q96CA5;A6NDN3;O75843;Q96RQ1;Q6XZF7;Q9Y2M5;Q9UL33;Q6UWI2;Q15047;Q9UN36;Q5JSH3;P59103;P53992;Q15363;Q13033;Q9Y5R8;Q9Y5U9;O00257;P02511;Q9BQQ3;Q8N1B4;Q9HCH5;Q7Z2W4;Q7Z460;Q7Z6B0;Q8TAC9;Q9NUK0;P31948;Q8N6H7;P63172;O15126;Q96PC3;Q8WXG1;Q9BSW2;Q15643;Q8WUY3;O15027;Q9NY61;Q8NCE8;O95159;Q8IVS8;Q9NR15;O75674;O00189;Q8TD16;P0CG33;A6NC78;Q12959;Q99732;Q9Y615;Q9H2K2;Q9Y266;Q9HD26;Q92834;Q5VZ66;Q9Y250;Q9HBF4;P10124;Q9P1T7;Q12772;Q9BTV4;Q14511;O95166;Q9Y2G5;Q8IHWJ2;Q13367;Q9P2W9;Q05084;Q96S06;Q08AE8;P21399;Q99640;P82094;Q8IX03;Q9BWX1;Q12904;P56377;P35908;Q93050;P11171;Q2TAP0;O43505;A6NDK9;P0DI81;P61923;B7ZAQ6;Q96G01;Q5T7V8;Q9BVN2;Q9H9H5;Q00587;Q03938;Q9UQL6;Q15436}

751 Pathogen[ P03363] interacts with 225 human

partners: {O60763;Q6XQN6;Q9H5Y0;Q08AE8;Q9BUL8;Q14789;Q12959;Q86VS8;Q9UID3;P29474;O75081;O43493;Q9NVV4;Q8NF91;Q9Y2T2;O60664;Q14CS0;Q96CV9;Q99598;O95996;Q7RTS9;Q13367;Q6ICB4;O00221;Q9UP83;Q9NW13;O43747;Q9UJY4;Q15554;Q99996;P48444;Q63HQ0;P0DI81;Q5T7V8;Q8N1B4;Q8TBZ0;Q14457;Q8NCE8;Q9UKX2;Q9Y266;Q6ZRS2;Q13439;Q96A65;Q9Y678;P53677;Q13618;Q15691;Q56P03;Q7Z2W4;Q9NZ52;Q8TCI5;Q99550;Q9BUX1;P53041;Q5JTD0;Q9UN36;Q15545;Q9UL33;Q14204;Q9BZE4;P10768;Q9H9E3;O75558;Q13033;Q15436;Q9Y3M2;Q9Y2L5;P83436;Q9UQL6;Q00587;Q5VU43;Q9Y6B7;O14579;P04156;Q8IVS8;Q15596;O95486;Q49MG5;P51161;Q9H4A6;P53618;P60520;Q8N4B1;Q8WUY3;Q9H2K2;Q9BXS5;Q9P299;Q93045;Q9C005;P61923;Q6VY07;P0DI82;P35908;Q14746;Q9NWB7;Q9P2W9;Q9BQA1;Q92572;Q9H0R8;Q9P1T7;Q96P71;O15144;Q9BSU3;A8MVW5;Q9NY61;Q9HBQ8;Q8IV36;Q92622;Q6ULP2;Q9NR09;P63172;Q8IY31;Q9Y250;Q9Y2M5;Q6XZF7;P78545;Q14511;Q14677;Q9BVW5;P27797;Q7Z3C6;Q9NVX0;Q9BSW2;Q99732;Q96RN5;P11171;Q96KG9;O75674;Q05084;P17987;Q9NZU7;Q7Z460;O95271;Q9NZI5;P31948;O43290;Q969H0;Q9C035;Q9Y615;Q969S3;Q08378;Q8WTW3;Q9H8T0;Q9BV57;Q9P2K5;P08729;Q9H8Y8;O00189;Q9BRS8;O95295;Q9NR48;Q5VIR6;Q08379;Q9H2G9;Q92681;Q9BVN2;Q8IHWJ2;O15126;P35606;O60921;O14662;Q7Z6J0;Q9UQR1;Q9UILL1;Q96CA5;Q9UKJ5;Q9UBF2;Q92834;P53992;O75843;O95359;O95487;O95373;Q13596;Q8IZE3;Q9Y296;Q86XR8;O15127;O43617;Q9Y3A3;Q9NZD8;Q99700;Q9BV47;Q9H1H9;P52594;Q9HCH5;Q5HYK7;O00161;P82094;Q7Z6B0;Q8IX03;Q9Y6D6;P48553;Q49MI3;O95810;Q9UJY5;O43752;Q9ULD2;Q13137;Q8TD16;Q8IUD2;O00257;Q15047;Q15643;O95166;Q969S3;Q8IZL2;Q9HD26;Q8WXX9;Q16143;O94855;Q8IZH2;O00291;Q10567;O14503;Q96CN9;Q96JE9;Q9NUK0;Q96AA8;Q96SN8;Q9H9H5;Q03938;Q9NX95;Q9UPM8;Q53GL7;Q96JB2}

752 [Cluster 69]GO:0008023+C cellular\_component [name] transcription elongation factor complex [def] "Any protein complex that interacts with RNA polymerase II to increase (positive transcription elongation factor) or reduce (negative transcription elongation factor) the rate of transcription elongation." [GOC

753 Pathogen[ Q2Q067] interacts with 13 human  
partners: {Q9HB65;Q9H9T3;Q15560;Q9UHK0;O95163;P55199;P50750;Q6IA86;Q03468;O00472;Q9UNY4;Q14241;Q96EB1}

754 Pathogen[ P0C214] interacts with 13 human  
partners: {P50750;Q9UHK0;Q15560;Q6IA86;Q9UNY4;P55199;Q9H9T3;O00472;Q9HB65;Q96EB1;O95163;Q03468;Q14241}

755 Pathogen[ P03346] interacts with 13 human  
partners: {Q9HB65;O95163;Q15560;O00472;Q03468;Q9H9T3;Q9UHK0;P50750;Q9UNY4;P55199;Q6IA86;Q96EB1;Q14241}

756 Pathogen[ Q85601] interacts with 13 human  
partners: {P50750;Q9H9T3;Q14241;Q15560;O00472;Q03468;Q96EB1;Q9UHK0;P55199;Q6IA86;Q9HB65}

5;O95163;Q9UNY4}  
757 Pathogen[ P14079] interacts with 13 human  
partners:{Q15560;P55199;Q14241;Q6IA86;Q9UNY4;O95163;Q96EB1;Q9UHK0;Q9H9T3;O00472;Q0346  
8;Q9HB65;P50750}  
758 Pathogen[ P03383] interacts with 13 human  
partners:{P55199;O95163;O00472;Q15560;Q9HB65;Q96EB1;Q9UHK0;Q03468;P50750;Q14241;Q6IA8  
6;Q9UNY4;Q9H9T3}  
759 Pathogen[ P03410] interacts with 13 human  
partners:{O00472;Q9UNY4;Q9UHK0;Q9H9T3;Q03468;Q96EB1;Q15560;P50750;P55199;O95163;Q6IA8  
6;Q14241;Q9HB65}  
760 Pathogen[ P14075] interacts with 13 human  
partners:{Q96EB1;Q9UNY4;Q14241;Q6IA86;P50750;Q15560;Q03468;Q9UHK0;O00472;O95163;P5519  
9;Q9H9T3;Q9HB65}  
761 Pathogen[ P0C206] interacts with 13 human  
partners:{Q9HB65;P50750;Q9UNY4;Q9H9T3;Q9UHK0;Q6IA86;Q03468;Q14241;O95163;Q15560;O0047  
2;Q96EB1;P55199}  
762 Pathogen[ P03363] interacts with 13 human  
partners:{P55199;Q6IA86;Q9UHK0;Q9HB65;Q9UNY4;Q14241;Q96EB1;O95163;Q03468;P50750;O0047  
2;Q15560;Q9H9T3}  
763 [Cluster 70]GO:0016590+C cellular\_component [name] ACF complex [def] "A  
chromatin-remodeling complex that catalyzes the ATP-dependent assembly of periodic  
nucleosome arrays. In Drosophila, the complex comprises ACF1 and ISWI." [GOC  
764 Pathogen[ Q2Q067] interacts with 1 human partners:{Q9NRL2}  
765 Pathogen[ P0C214] interacts with 1 human partners:{Q9NRL2}  
766 Pathogen[ P03346] interacts with 1 human partners:{Q9NRL2}  
767 Pathogen[ Q85601] interacts with 1 human partners:{Q9NRL2}  
768 Pathogen[ P14079] interacts with 1 human partners:{Q9NRL2}  
769 Pathogen[ P03383] interacts with 1 human partners:{Q9NRL2}  
770 Pathogen[ P03410] interacts with 1 human partners:{Q9NRL2}  
771 Pathogen[ P14075] interacts with 1 human partners:{Q9NRL2}  
772 Pathogen[ P0C206] interacts with 1 human partners:{Q9NRL2}  
773 Pathogen[ P03363] interacts with 1 human partners:{Q9NRL2}  
774 [Cluster 71]GO:0042272+C cellular\_component [name] nuclear RNA export factor complex  
[def] "A protein complex that contains two proteins (know in several organisms, including  
Drosophila, as NXF1 and NXF2) and is required for the export of the majority of mRNAs  
from the nucleus to the cytoplasm\_ localized in the nucleoplasm and at both the  
nucleoplasmic and cytoplasmic faces of the nuclear pore complex\_ shuttles between the  
nucleus and the cytoplasm." [PMID  
775 Pathogen[ Q2Q067] interacts with 2 human partners:{P54253;Q9H4D5}  
776 Pathogen[ P0C214] interacts with 2 human partners:{P54253;Q9H4D5}  
777 Pathogen[ P03346] interacts with 2 human partners:{Q9H4D5;P54253}  
778 Pathogen[ Q85601] interacts with 2 human partners:{Q9H4D5;P54253}  
779 Pathogen[ P14079] interacts with 2 human partners:{Q9H4D5;P54253}  
780 Pathogen[ P03383] interacts with 2 human partners:{Q9H4D5;P54253}  
781 Pathogen[ P03410] interacts with 2 human partners:{Q9H4D5;P54253}  
782 Pathogen[ P14075] interacts with 2 human partners:{P54253;Q9H4D5}  
783 Pathogen[ P0C206] interacts with 2 human partners:{Q9H4D5;P54253}  
784 Pathogen[ P03363] interacts with 2 human partners:{Q9H4D5;P54253}  
785 [Cluster 72]GO:0016938+C cellular\_component [name] kinesin I complex [def] "A  
complex of two kinesin heavy chains and two kinesin light chains." [http  
786 Pathogen[ Q2Q067] interacts with 1 human partners:{Q9H0B6}  
787 Pathogen[ P0C214] interacts with 1 human partners:{Q9H0B6}  
788 Pathogen[ P03346] interacts with 1 human partners:{Q9H0B6}  
789 Pathogen[ Q85601] interacts with 1 human partners:{Q9H0B6}  
790 Pathogen[ P14079] interacts with 1 human partners:{Q9H0B6}  
791 Pathogen[ P03383] interacts with 1 human partners:{Q9H0B6}  
792 Pathogen[ P03410] interacts with 1 human partners:{Q9H0B6}  
793 Pathogen[ P14075] interacts with 1 human partners:{Q9H0B6}  
794 Pathogen[ P0C206] interacts with 1 human partners:{Q9H0B6}  
795 Pathogen[ P03363] interacts with 1 human partners:{Q9H0B6}  
796 [Cluster 73]GO:0017101+C cellular\_component [name] aminoacyl-tRNA synthetase  
multienzyme complex [def] "A multienzyme complex found in all multicellular eukaryotes  
composed of eight proteins with aminoacyl-tRNA synthetase activities (abbreviated as  
797 Pathogen[ Q2Q067] interacts with 3 human partners:{Q15046;Q12904;P54136}  
798 Pathogen[ P0C214] interacts with 2 human partners:{Q12904;Q15046}  
799 Pathogen[ P03346] interacts with 2 human partners:{Q12904;P54136}  
800 Pathogen[ Q85601] interacts with 2 human partners:{P54136;Q15046}  
801 Pathogen[ P14079] interacts with 3 human partners:{P54136;Q15046;Q12904}  
802 Pathogen[ P03383] interacts with 3 human partners:{Q12904;Q15046;P54136}  
803 Pathogen[ P03410] interacts with 3 human partners:{P54136;Q12904;Q15046}  
804 Pathogen[ P14075] interacts with 3 human partners:{P54136;Q12904;Q15046}  
805 Pathogen[ P0C206] interacts with 3 human partners:{P54136;Q12904;Q15046}  
806 Pathogen[ P03363] interacts with 1 human partners:{P54136}  
807 [Cluster 74]GO:0031519+C cellular\_component [name] PcG protein complex [def] "A  
chromatin-associated multiprotein complex containing Polycomb Group proteins. In  
Drosophila, Polycomb group proteins are involved in the long-term maintenance of gene

repression, and PcG protein complexes associate with Polycomb group response elements (PREs) in target genes to regulate higher-order chromatin structure." [PMID

808 Pathogen[ Q2Q067] interacts with 21 human partners:{Q9BYE7;P25490;Q8IXK0;Q9HC52;O00257;Q86SE9;O95503;O95931;Q9BSM1;Q8NHM5;P35227;Q9UQR0;Q6W2J9;P67870;P35226;Q99496;Q3KNV8;Q8N488;Q14781;P63208;Q06587}

809 Pathogen[ P0C214] interacts with 20 human partners:{P35226;P35227;Q8IXK0;Q86SE9;Q9BSM1;P63208;Q6W2J9;O95931;O95503;Q3KNV8;Q8N488;Q06587;Q9BYE7;O00257;Q9UQR0;Q99496;Q14781;P67870;Q9HC52;Q8NHM5}

810 Pathogen[ P03346] interacts with 22 human partners:{Q14781;Q3KNV8;P35226;P25490;Q9HC52;O95931;P35227;Q9BYE7;O00257;Q9BSM1;Q86SE9;P63208;Q99496;P78364;P67870;Q8IXK0;Q8NHM5;Q8N488;Q06587;O95503;Q6W2J9;Q9UQR0}

811 Pathogen[ Q85601] interacts with 22 human partners:{Q8IXK0;O95931;P25490;Q86SE9;O95503;P63208;P78364;Q9BSM1;Q8NHM5;Q9BYE7;Q3KNV8;Q99496;P35226;P67870;Q8N488;Q9UQR0;O00257;Q06587;Q9HC52;Q6W2J9;P35227;Q14781}

812 Pathogen[ P14079] interacts with 22 human partners:{O95503;Q9HC52;Q9UQR0;O95931;Q8NHM5;Q6W2J9;P78364;Q99496;O00257;Q14781;Q9BYE7;Q8IXK0;P35226;Q3KNV8;Q8N488;P35227;P67870;P63208;P25490;Q9BSM1;Q86SE9;Q06587}

813 Pathogen[ P03383] interacts with 18 human partners:{P35227;O95503;O00257;Q9HC52;Q06587;O95931;Q9BYE7;P63208;Q6W2J9;Q9UQR0;Q9BSM1;Q86SE9;Q8N488;Q99496;P67870;Q3KNV8;P35226;Q14781}

814 Pathogen[ P03410] interacts with 21 human partners:{Q9BSM1;Q8IXK0;Q99496;Q6W2J9;O95503;Q3KNV8;Q9BYE7;O95931;Q86SE9;P35227;P25490;P63208;Q8N488;Q06587;O00257;Q9UQR0;Q14781;P67870;P35226;P78364;Q9HC52}

815 Pathogen[ P14075] interacts with 18 human partners:{Q14781;Q3KNV8;Q86SE9;Q8N488;O95503;Q9UQR0;O95931;Q9BYE7;O00257;P63208;Q06587;Q6W2J9;P67870;Q9HC52;Q99496;P35226;Q9BSM1;P35227}

816 Pathogen[ P0C206] interacts with 22 human partners:{Q9HC52;P78364;P25490;Q6W2J9;Q9UQR0;P35226;Q14781;Q9BYE7;Q3KNV8;Q86SE9;P63208;Q8N488;Q06587;O95931;P67870;Q8NHM5;Q9BSM1;Q8IXK0;O00257;Q99496;O95503;P35227}

817 Pathogen[ P03363] interacts with 20 human partners:{P35227;Q14781;Q9HC52;Q3KNV8;Q86SE9;P25490;Q8N488;Q99496;Q8IXK0;Q9BSM1;P35226;O95931;Q9UQR0;P67870;Q06587;Q6W2J9;O95503;O00257;P63208;Q9BYE7}

818 [Cluster 75]GO:0060053+cellular\_component [name] neurofilament cytoskeleton [def] "Intermediate filament cytoskeletal structure that is made up of neurofilaments. Neurofilaments are specialized intermediate filaments found in neurons." [GOC

819 Pathogen[ Q2Q067] interacts with 1 human partners:{O15061}

820 Pathogen[ P0C214] interacts with 1 human partners:{O15061}

821 Pathogen[ P03346] interacts with 1 human partners:{O15061}

822 Pathogen[ Q85601] interacts with 2 human partners:{Q9GZM8;O15061}

823 Pathogen[ P14079] interacts with 2 human partners:{O15061;Q9GZM8}

824 Pathogen[ P03383] interacts with 1 human partners:{O15061}

825 Pathogen[ P03410] interacts with 2 human partners:{O15061;Q9GZM8}

826 Pathogen[ P14075] interacts with 1 human partners:{O15061}

827 Pathogen[ P0C206] interacts with 2 human partners:{O15061;Q9GZM8}

828 Pathogen[ P03363] interacts with 1 human partners:{O15061}

829 [Cluster 76]GO:0005944+cellular\_component [name] 1-phosphatidylinositol-4-phosphate 3-kinase, class IB complex [def] "A heterodimeric protein complex that possesses 1-phosphatidylinositol-4-phosphate 3-kinase activity\_ comprises a catalytic Class IB phosphoinositide 3-kinase (PI3K) subunit of 110-120 kDa and an associated regulatory subunit that is larger than, and unrelated to, the p85 proteins present in class IA complexes. Class I PI3Ks phosphorylate phosphatidylinositol [PI], phosphatidylinositol-4-phosphate [PI(4)P] and phosphatidylinositol-4,5-bisphosphate [PI(4,5)P2] and are divided into subclasses A and B according to the type of adaptor subunit with which they associate. Class IB PI3Ks are stimulated by G-proteins and do not interact with the SH2-domain containing adaptors that bind to Class IA PI3Ks." [PMID

830 Pathogen[ Q2Q067] interacts with 2 human partners:{Q8WYR1;Q5UE93}

831 Pathogen[ P0C214] interacts with 2 human partners:{Q8WYR1;Q5UE93}

832 Pathogen[ P03346] interacts with 2 human partners:{Q8WYR1;Q5UE93}

833 Pathogen[ Q85601] interacts with 2 human partners:{Q8WYR1;Q5UE93}

834 Pathogen[ P14079] interacts with 2 human partners:{Q8WYR1;Q5UE93}

835 Pathogen[ P03383] interacts with 2 human partners:{Q8WYR1;Q5UE93}

836 Pathogen[ P03410] interacts with 2 human partners:{Q5UE93;Q8WYR1}

837 Pathogen[ P14075] interacts with 2 human partners:{Q8WYR1;Q5UE93}

838 Pathogen[ P0C206] interacts with 2 human partners:{Q5UE93;Q8WYR1}

839 Pathogen[ P03363] interacts with 2 human partners:{Q8WYR1;Q5UE93}

840 [Cluster 77]GO:0031011+cellular\_component [name] Ino80 complex [def] "A multisubunit protein complex that contains the Ino80p ATPase\_ exhibits chromatin remodeling activity and 3' to 5' DNA helicase activity." [GOC

841 Pathogen[ Q2Q067] interacts with 12 human partners:{Q9Y5K5;P25490;P0C1Z6;O96019;Q9C086;Q96EZ8;Q9H981;Q8NBZ0;Q6P4R8;Q9ULG1;Q6PI98;Q9H9F9}

842 Pathogen[ P0C214] interacts with 11 human partners:{Q9H9F9;Q9C086;Q9ULG1;P0C1Z6;Q9Y5K5;Q6PI98;Q6P4R8;Q96EZ8;O96019;Q8NBZ0;Q9H981}

843 Pathogen[ P03346] interacts with 12 human partners:{Q96EZ8;Q9C086;Q9H9F9;Q9ULG1;P25490;Q6PI98;P0C1Z6;O96019;Q9H981;Q8NBZ0;Q6P4R8}

844 Pathogen[ Q85601] interacts with 12 human partners: {Q9C086;Q9H9F9;P25490;O96019;P0C1Z6;Q8NBZ0;Q6PI98;Q9H981;Q6P4R8;Q9Y5K5;Q9ULG1;Q96EZ8}

845 Pathogen[ P14079] interacts with 10 human partners: {Q9ULG1;Q8NBZ0;Q6PI98;Q9H981;Q9Y5K5;P0C1Z6;Q6P4R8;P25490;Q96EZ8;Q9H9F9}

846 Pathogen[ P03383] interacts with 10 human partners: {O96019;Q6P4R8;Q9H981;Q9C086;Q6PI98;Q9H9F9;Q8NBZ0;P0C1Z6;Q9Y5K5;Q96EZ8}

847 Pathogen[ P03410] interacts with 12 human partners: {Q9H981;Q6PI98;O96019;Q9ULG1;P0C1Z6;P25490;Q9H9F9;Q6P4R8;Q96EZ8;Q9Y5K5;Q9C086;Q8NBZ0}

848 Pathogen[ P14075] interacts with 10 human partners: {Q6P4R8;Q9C086;P0C1Z6;Q96EZ8;O96019;Q8NBZ0;Q6PI98;Q9H9F9;Q9H981;Q9Y5K5}

849 Pathogen[ P0C206] interacts with 12 human partners: {Q9H981;P25490;Q6PI98;Q8NBZ0;Q9Y5K5;Q96EZ8;Q9C086;O96019;P0C1Z6;Q9ULG1;Q9H9F9;Q6P4R8}

850 Pathogen[ P03363] interacts with 12 human partners: {Q9Y5K5;Q9H981;Q9ULG1;P25490;Q9C086;Q9H9F9;O96019;P0C1Z6;Q96EZ8;Q8NBZ0;Q6P4R8;Q6PI98}

851 [Cluster 78]GO:0043596+C cellular\_component [name] nuclear replication fork [def] "The Y-shaped region of a nuclear replicating DNA molecule, resulting from the separation of the DNA strands and in which the synthesis of new strands takes place. Also includes associated protein complexes." [GOC

852 Pathogen[ Q2Q067] interacts with 5 human partners: {Q8NF64;P12004;Q9H4L7;Q96HA7;Q6ZRQ5}

853 Pathogen[ P0C214] interacts with 5 human partners: {Q8NF64;Q9H4L7;Q6ZRQ5;O60264;Q96HA7}

854 Pathogen[ P03346] interacts with 6 human partners: {P12004;Q96HA7;Q6ZRQ5;Q8NF64;O60264;Q9H4L7}

855 Pathogen[ Q85601] interacts with 6 human partners: {Q96HA7;Q6ZRQ5;Q9H4L7;P12004;O60264;Q8NF64}

856 Pathogen[ P14079] interacts with 6 human partners: {Q9H4L7;Q96HA7;Q8NF64;O60264;P12004;Q6ZRQ5}

857 Pathogen[ P03383] interacts with 3 human partners: {Q6ZRQ5;Q8NF64;Q96HA7}

858 Pathogen[ P03410] interacts with 6 human partners: {Q9H4L7;O60264;P12004;Q96HA7;Q8NF64;Q6ZRQ5}

859 Pathogen[ P14075] interacts with 3 human partners: {Q6ZRQ5;Q96HA7;Q8NF64}

860 Pathogen[ P0C206] interacts with 7 human partners: {Q96HA7;Q9H4L7;Q8NF64;Q6ZRQ5;Q9UIG0;O60264;P12004}

861 Pathogen[ P03363] interacts with 5 human partners: {Q9H4L7;O60264;Q8NF64;Q96HA7;Q6ZRQ5}

862 [Cluster 79]GO:0005849+C cellular\_component [name] mRNA cleavage factor complex [def] "Any macromolecular complex involved in cleavage or polyadenylation of mRNA molecules." [GOC

863 Pathogen[ Q2Q067] interacts with 4 human partners: {Q8N684;Q16630;O94913;O43809}

864 Pathogen[ P0C214] interacts with 4 human partners: {O94913;Q8N684;Q16630;O43809}

865 Pathogen[ P03346] interacts with 4 human partners: {Q8N684;O94913;O43809;Q16630}

866 Pathogen[ Q85601] interacts with 3 human partners: {Q8N684;O94913;O43809}

867 Pathogen[ P14079] interacts with 4 human partners: {O43809;O94913;Q8N684;Q16630}

868 Pathogen[ P03383] interacts with 3 human partners: {Q8N684;O94913;O43809}

869 Pathogen[ P03410] interacts with 4 human partners: {O43809;O94913;Q8N684;Q16630}

870 Pathogen[ P14075] interacts with 3 human partners: {O43809;Q8N684;O94913}

871 Pathogen[ P0C206] interacts with 4 human partners: {O94913;Q8N684;O43809;Q16630}

872 Pathogen[ P03363] interacts with 4 human partners: {Q16630;O94913;Q8N684;O43809}

873 [Cluster 80]GO:0044427+C cellular\_component [name] chromosomal part [def] "Any constituent part of a chromosome, a structure composed of a very long molecule of DNA and associated proteins (e.g. histones) that carries hereditary information." [GOC

874 Pathogen[ Q2Q067] interacts with 2 human partners: {Q2YD98;Q6NZ36}

875 Pathogen[ P0C214] interacts with 1 human partners: {Q6NZ36}

876 Pathogen[ P03346] interacts with 2 human partners: {Q6NZ36;Q2YD98}

877 Pathogen[ Q85601] interacts with 1 human partners: {Q6NZ36}

878 Pathogen[ P14079] interacts with 2 human partners: {Q6NZ36;Q2YD98}

879 Pathogen[ P03383] interacts with 1 human partners: {Q2YD98}

880 Pathogen[ P03410] interacts with 2 human partners: {Q2YD98;Q6NZ36}

881 Pathogen[ P14075] interacts with 1 human partners: {Q2YD98}

882 Pathogen[ P0C206] interacts with 2 human partners: {Q2YD98;Q6NZ36}

883 Pathogen[ P03363] interacts with 2 human partners: {Q2YD98;Q6NZ36}

884 [Cluster 81]GO:0016442+C cellular\_component [name] RNA-induced silencing complex [def] "A ribonucleoprotein complex that contains members of the Argonaute family of proteins, small interfering RNAs (siRNAs) or microRNAs (miRNAs), and miRNA or siRNA-complementary mRNAs, in addition to a number of accessory factors. The RISC complex is involved in posttranscriptional repression of gene expression through downregulation of translation or induction of mRNA degradation." [PMID

885 Pathogen[ Q2Q067] interacts with 7 human partners: {Q8IU60;Q7KZF4;Q15633;P26196;Q9UGP4;Q9UKV8;P06730}

886 Pathogen[ P0C214] interacts with 7 human

887 partners:{Q9UGP4;P26196;Q7KZF4;Q15633;Q8IU60;Q9UKV8;P06730}  
Pathogen[ P03346] interacts with 7 human

888 partners:{P06730;Q9UGP4;Q15633;Q8IU60;Q7KZF4;Q9UKV8;P26196}  
Pathogen[ Q85601] interacts with 7 human

889 partners:{P06730;Q7KZF4;Q9UKV8;Q15633;P26196;Q9UGP4;Q8IU60}  
Pathogen[ P14079] interacts with 6 human

890 partners:{Q9UKV8;P06730;Q8IU60;P26196;Q7KZF4;Q9UGP4}  
Pathogen[ P03383] interacts with 7 human

891 partners:{Q8IU60;P26196;P06730;Q7KZF4;Q9UGP4;Q9UKV8;Q15633}  
Pathogen[ P03410] interacts with 6 human

892 partners:{Q8IU60;Q9UKV8;Q15633;P06730;Q9UGP4;Q7KZF4}  
Pathogen[ P14075] interacts with 7 human

893 partners:{P26196;Q9UGP4;P06730;Q8IU60;Q9UKV8;Q15633;Q7KZF4}  
Pathogen[ P0C206] interacts with 7 human

894 partners:{Q9UGP4;P26196;Q7KZF4;Q9UKV8;P06730;Q15633;Q8IU60}  
Pathogen[ P03363] interacts with 7 human

895 partners:{Q9UKV8;Q15633;Q7KZF4;Q9UGP4;P26196;P06730;Q8IU60}  
[Cluster 82]GO:0008180+C cellular\_component [name] signalosome [def] "A protein complex that catalyzes the deneddylation of proteins, including the cullin component of SCF ubiquitin E3 ligase\_ deneddylation increases the activity of cullin family ubiquitin ligases. The signalosome is involved in many regulatory process, including some which control development, in many species\_ also regulates photomorphogenesis in plants\_ in many species its subunits are highly similar to those of the proteasome." [PMID

896 Pathogen[ Q2Q067] interacts with 18 human  
partners:{Q9NNW5;Q9UNS2;Q8IY63;Q9Y4B6;P08238;P63167;Q7L5N1;P08107;Q92905;Q99627;Q9NZQ3;A2RU30;Q9UBW8;P61201;Q8N1K5;P80723;Q9BT78;P35579}

897 Pathogen[ P0C214] interacts with 18 human  
partners:{P62993;P61201;A2RU30;Q9UNS2;Q9BT78;Q92905;Q9Y4B6;Q9H9Q2;Q9NZQ3;P80723;Q8IY63;Q9NNW5;Q99627;Q9UBW8;P08107;Q8N1K5;Q7L5N1;P63167}

898 Pathogen[ P03346] interacts with 23 human  
partners:{P08107;A2RU30;Q99627;P35579;P80723;P62993;P28289;Q9Y4B6;Q9BT78;Q13098;Q8IY63;Q9NZQ3;O43491;Q92905;P61201;Q9H9Q2;P63167;Q9UBW8;Q9UNS2;Q8N1K5;P08238;Q7L5N1;Q9NNW5}

899 Pathogen[ Q85601] interacts with 20 human  
partners:{P08107;P62993;Q8IY63;P35579;P61201;Q9UBW8;Q9NZQ3;Q9Y4B6;P80723;Q9NNW5;Q13098;Q8N1K5;P08238;Q92905;Q9BT78;Q9H9Q2;Q9UNS2;Q99627;P63167;Q7L5N1}

900 Pathogen[ P14079] interacts with 25 human  
partners:{P35579;Q99627;P61201;P25705;Q9UBW8;A2RU30;Q13098;Q9UNS2;Q9H9Q2;Q9NZQ3;P28289;P08238;P08107;Q9UJZ1;Q9Y4B6;Q92905;Q9BT78;Q7L5N1;P62993;P63167;Q9NNW5;O43561;Q8N1K5;P80723;Q8IY63}

901 Pathogen[ P03383] interacts with 18 human  
partners:{P08107;Q9Y4B6;Q92905;Q9UBW8;P61201;Q8N1K5;Q9BT78;Q9NZQ3;Q7L5N1;Q8IY63;P80723;P35579;Q9UNS2;P63167;A2RU30;Q99627;Q9NNW5;P08238}

902 Pathogen[ P03410] interacts with 26 human  
partners:{Q9H9Q2;P08238;P25705;Q13098;O43561;Q92905;Q99627;P28289;A2RU30;P35579;Q9NZQ3;P63167;Q9BT78;Q8N1K5;Q7L5N1;O43491;P08107;Q9UNS2;Q9UJZ1;P61201;Q9UBW8;P80723;Q8IY63;P62993;Q9Y4B6;Q9NNW5}

903 Pathogen[ P14075] interacts with 18 human  
partners:{Q9NZQ3;Q9BT78;P80723;P61201;P08238;Q8IY63;Q8N1K5;A2RU30;P35579;Q9UNS2;P08107;Q7L5N1;Q92905;Q9NNW5;Q99627;Q9UBW8;P63167;Q9Y4B6}

904 Pathogen[ P0C206] interacts with 23 human  
partners:{Q9UJZ1;Q9H9Q2;Q8N1K5;Q8IY63;P63167;P61201;Q9NNW5;P62993;Q9UBW8;P08238;P80723;O43491;Q9BT78;P08107;P35579;Q99627;Q13098;Q9Y4B6;Q7L5N1;Q9NZQ3;Q9UNS2;A2RU30;Q92905}

905 Pathogen[ P03363] interacts with 22 human  
partners:{P63167;A2RU30;Q9H9Q2;P35579;P61201;Q9BT78;Q8N1K5;Q8IY63;P08107;Q99627;Q7L5N1;Q9UNS2;P28289;O43491;Q9NZQ3;P80723;Q9Y4B6;P08238;Q9UBW8;Q92905;Q9NNW5;Q13098}

906 [Cluster 83]GO:0030008+C cellular\_component [name] TRAPP complex [def] "A large complex present on the cis-Golgi that acts prior to SNARE complex assembly to mediate vesicle docking and fusion. Ras guanyl-nucleotide exchange factor activity has been demonstrated for this complex in *S. cerevisiae*." [GOC

907 Pathogen[ Q2Q067] interacts with 3 human partners:{Q8IUR0;O43617;Q9Y296}

908 Pathogen[ P0C214] interacts with 3 human partners:{Q9Y296;O43617;Q8IUR0}

909 Pathogen[ P03346] interacts with 4 human partners:{Q9Y5R8;Q9Y296;Q8IUR0;O43617}

910 Pathogen[ Q85601] interacts with 3 human partners:{Q9Y296;O43617;Q8IUR0}

911 Pathogen[ P14079] interacts with 4 human partners:{Q9Y296;Q8IUR0;Q9Y5R8;O43617}

912 Pathogen[ P03383] interacts with 3 human partners:{Q9Y296;Q8IUR0;O43617}

913 Pathogen[ P03410] interacts with 4 human partners:{Q9Y5R8;Q8IUR0;Q9Y296;O43617}

914 Pathogen[ P14075] interacts with 3 human partners:{O43617;Q8IUR0;Q9Y296}

915 Pathogen[ P0C206] interacts with 4 human partners:{Q9Y296;Q8IUR0;O43617;Q9Y5R8}

916 Pathogen[ P03363] interacts with 2 human partners:{Q9Y296;O43617}

917 [Cluster 84]GO:0030054+C cellular\_component [name] cell junction [def] "A plasma membrane part that forms a specialized region of connection between two cells or between a cell and the extracellular matrix. At a cell junction, anchoring proteins extend through the plasma membrane to link cytoskeletal proteins in one cell to cytoskeletal proteins in neighboring cells or to proteins in the extracellular matrix." [GOC

- 918 Pathogen[ Q2Q067] interacts with 99 human  
partners: {Q9BTW9;Q68CZ2;O75161;Q14258;Q92681;Q9Y3F4;Q8WX93;Q8NI35;Q8IY63;Q14160;Q9NPB6;Q96B97;P30419;Q9BYG5;Q9P2M7;Q8IZW8;O95886;Q8N3V7;Q9NSC5;Q9NR48;Q92797;O95295;P54259;Q5JTD0;Q9GZS1;Q9NPG3;A6NIX2;O60437;Q96TA1;A6NKD9;Q14511;Q9P1Y5;Q9P1A6;Q13884;Q8IZP0;P56945;Q96EV8;Q9H307;Q96SN8;Q96HR8;O14910;P15924;Q9Y2D8;Q86UE4;Q86TP1;Q86UL8;O95049;Q00444;Q99569;O60711;Q9HBL0;Q96IF1;Q12959;Q9NYF0;O95721;O15061;Q9UQB3;P11532;Q90157;P17987;P78352;Q05084;Q9UGP4;Q96F07;Q9UPX8;Q15654;Q8TES7;P46939;Q9C0D0;Q674X7;Q9UDY2;Q9NVD7;Q5TCQ9;O60299;Q9NZU7;P50570;Q86WG3;Q8TAC9;Q9NRI5;Q68DX3;P35269;Q86SQ7;Q13425;O00161;Q9UPA5;O60504;Q93052;Q8WVM7;Q9BX66;Q9BVN2;Q9BYG4;Q12857;P61586;Q9Y250;O15083;Q8N668;Q96EY1;Q9NUP9;O14490}
- 919 Pathogen[ P0C214] interacts with 95 human  
partners: {Q9UGP4;O14490;O15083;Q5JTD0;O14910;O75161;Q68DX3;O15061;Q8IZP0;Q9UPX8;P56945;Q8NI35;Q9NRI5;Q5TCQ9;O95295;P35269;Q8TAC9;P15924;Q9Y2D8;Q9BTW9;Q9P1Y5;Q96SN8;P62166;Q92797;P61586;Q9BX66;Q96F07;Q9UPU9;Q9H307;Q9P1A6;O60299;O95721;Q8N668;O60437;Q9NSC5;Q13884;Q86UE4;O95049;Q68CZ2;Q9Y250;P11532;P78352;Q14258;Q9GZS1;Q9UQB3;Q92681;Q674X7;A6NIX2;Q9NPB6;Q15124;Q13425;P46939;Q16658;Q96TA1;Q86TP1;Q15654;O95886;O60711;Q9NZU7;Q96EV8;Q9Y3F4;Q8TES7;Q12959;Q14511;Q14160;Q9UDY2;Q9HD26;Q9C0D0;Q12857;Q9HBL0;Q9P2M7;Q8WVM7;Q9BVN2;Q9BYG5;P17987;Q9NR48;Q8IY63;P30419;O60504;Q86SQ7;A6NKD9;P50570;Q05084;Q9NVD7;Q86WG3;Q8N3V7;Q07157;Q9NYF0;O00161;Q96B97;Q96EY1;Q9BYG4;P54259;Q96HR8;Q9NPG3}
- 920 Pathogen[ P03346] interacts with 141 human  
partners: {Q13425;O60437;A6NKD9;Q92681;Q5JU85;Q9NSC5;Q9NPG3;P15924;Q9NRI5;Q8N3V7;O14490;Q96AC1;Q96B97;P50570;Q8WX93;Q9UGP4;Q9UDY2;Q14258;Q14511;Q96RT1;Q68DX3;Q86UE4;Q8IZW8;Q99569;Q96F07;O95295;Q12857;Q8N668;P78352;Q9Y2D8;Q8IZP0;Q5TCQ9;Q13884;Q6ZWB6;Q9NZU7;Q68CZ1;Q9Y6D5;Q15149;Q9H307;O75970;O15061;Q13835;Q9NPB6;Q96IF1;Q9P1Y5;Q15942;Q6XZF7;Q9BX66;Q68CZ2;Q05084;P55196;P46939;Q8TEW0;O15083;Q9Y215;Q69YQ0;Q13424;Q5JTD0;Q9UQB3;Q8IY63;Q68DU8;Q8NI35;O75161;O00161;Q8N3R9;P56945;Q9P021;Q96TA1;Q8TAC9;Q9NUP9;Q86UL8;Q96EV8;Q86SQ7;Q9Y3F4;Q9HD26;Q9BYG5;Q96SN8;Q9Y4G6;O43491;O95721;P48059;Q9HBL0;Q9Y250;Q5T2T1;O95886;O95049;Q07157;A6NIX2;Q6DN90;Q9BYG4;O00522;Q9C0D0;Q8N157;P62166;O60299;Q9HAP6;Q9NVD7;Q8WVM7;Q9BUZ4;Q92797;Q9NYF0;Q9UPP2;P35269;Q15700;Q16658;P11532;O60504;Q9BVN2;Q9UI14;P56545;Q96CX2;Q14160;Q8TES7;Q674X7;Q9H8V3;Q5TCZ1;Q9NR48;Q9C0H9;Q93052;Q9ULU8;Q9Y2J0;Q15654;Q9UPX8;P0C214;Q96HR8;O60711;Q00444;Q96EY1;Q9NRD5;Q9GZS1;O14910;P54259;Q86WG3;Q9P2M7;Q9P1A6;Q6IQ23;Q9UPA5;P61586;Q12959;Q86TP1;P17987}
- 921 Pathogen[ Q85601] interacts with 110 human  
partners: {Q99569;P54259;O14490;Q9Y250;O75161;Q8WX93;Q9UPX8;Q9NZU7;Q9NVD7;Q9NUP9;Q14258;O14910;Q13884;Q96RT1;O60437;Q9NPG3;Q96F07;Q9BYG5;Q8IY63;O95295;Q8TAC9;A6NIX2;O95049;Q9H307;Q68CZ2;Q96HR8;Q12857;Q9BX66;Q96SN8;Q9NR48;Q86UL8;Q15654;Q9UDY2;Q9P1Y5;Q9NYF0;Q9P1A6;Q93052;Q9BVN2;Q9BTW9;O15083;Q6IQ23;P11532;P17987;Q8WVM7;Q9GZS1;P15924;Q9UQB3;Q8NI35;Q96TA1;O60711;Q86TP1;Q86SQ7;Q92681;P56945;Q8TES7;Q15124;Q96EV8;Q9Y2D8;Q8IZW8;Q9HD26;Q68DX3;Q9UPA5;Q8N3V7;P46939;Q13425;P50570;P35269;Q15942;Q96B97;Q9Y3F4;Q14160;P78352;Q8N668;Q5JTD0;Q5TCQ9;Q9NPB6;Q86UE4;P61586;Q9C0D0;Q69YQ0;P48059;Q07157;Q92797;Q96IF1;A6NKD9;Q12959;Q9UGP4;Q86WG3;Q9NSC5;Q9NRI5;O60504;Q96CX2;Q674X7;O95886;Q8IZP0;Q9HBL0;P30419;P17677;Q9UPU9;P62166;Q14511;O00161;Q00444;Q96EY1;Q05084;O95721;Q9P2M7;O60299;O15061;Q9BYG4}
- 922 Pathogen[ P14079] interacts with 160 human  
partners: {Q5JTD0;O75161;Q9BTW9;O95425;Q68DX3;O43759;Q6XZF7;Q9UPP2;Q05084;Q8N7P3;C9JDP6;P17677;Q8TB68;Q86WG3;Q9C0D0;Q92681;Q6IQ23;P11532;Q9BYG5;P35269;Q9UDY2;Q9BVN2;Q9P266;A4UGR9;Q15700;P56750;Q8IZW8;Q16658;Q9NR12;P15924;Q9HBM0;O15231;A6NM45;Q07157;Q8N157;Q8WX93;Q93052;Q5T2T1;Q68CZ1;Q9GZS1;Q13835;Q9Y6D5;Q9ULU8;Q9UPU9;Q9UQB3;Q86TP1;Q9Y250;Q9UPA5;Q9UI14;A6NKD9;Q8IZP0;Q9NRI5;Q9Y3F4;O60437;O60504;Q96B97;Q15124;Q96HR8;O60711;Q14118;Q13424;Q69YQ0;Q9C0H9;Q14258;Q9H307;Q9BUZ4;O00501;P50552;P46939;Q92797;Q92797;Q96RT1;O15061;Q8TEW0;Q9HBL0;B4DS77;Q9HD26;Q15149;Q9NUP9;O95721;Q8N6F1;Q7Z7J9;Q8TAC9;Q96IF1;Q8NI35;O95049;Q68CZ2;P17987;Q9NPG3;Q9BYG4;Q702N8;Q99569;A6NIX2;P62166;Q96AC1;Q8N3V7;Q68DU8;P30419;P61586;O43294;Q96B33;Q9H8V3;Q9HAP6;Q9BQJ4;O43612;Q8N668;Q9NSC5;Q86UE4;O15083;O95295;Q92817;Q5T0D9;Q96F07;Q8N3R9;Q9P2M7;Q8WVH0;Q00444;Q86UL8;Q86SQ7;Q8TES7;Q9P1Y5;P54259;Q96CX2;Q9UKB5;O60299;O95886;Q7Z7G2;Q96EV8;Q9P021;Q9P1A6;P49023;Q16625;Q96TA1;Q6DN90;Q9NPB6;Q9Y2D8;Q96FX8;Q9BX66;P48059;Q5TCZ1;Q9NVD7;Q12857;O15259;Q9Y4J8;Q96SN8;O43761;Q96EY1;Q8IY63;Q9NZU7;Q9UGP4;O14490;Q96A59;Q674X7;O00522;O75970;Q9NYF0;Q5VW36;Q9UPX8;Q15942}
- 923 Pathogen[ P03383] interacts with 74 human  
partners: {Q92681;P15924;P56945;Q9P1A6;P35269;Q14160;Q13884;Q86UE4;A6NKD9;O95295;A6NIX2;Q9HD26;Q9NRI5;Q86WG3;Q8TAC9;Q8N668;Q96SN8;O95886;O60299;Q5JTD0;Q92797;O14490;Q9GZS1;O15061;P46939;Q96EV8;O95049;Q15654;Q8TES7;Q07157;Q9UQB3;Q05084;Q86SQ7;Q12857;Q96TA1;P61586;Q96F07;Q9BYG5;Q9UGP4;Q14511;O60711;Q9P1Y5;Q9NPB6;Q9P2M7;P11532;Q9Y3F4;Q9NPG3;Q8IY63;Q96HR8;Q5TCQ9;Q9H307;Q9NSC5;Q9NYF0;Q86TP1;O75161;Q68DX3;O60504;Q14258;Q8N3V7;O00161;Q9Y2D8;O15083;O60437;Q9C0H9;P78352;Q96EY1;O14910;P54259;Q9UDY2;Q13425;Q9BVN2;Q9Y250;Q8WVM7;Q9BYG4}
- 924 Pathogen[ P03410] interacts with 174 human  
partners: {O60711;Q9BVN2;Q9P1A6;P17987;Q96TA1;Q9HBM0;O14910;P15924;Q96B33;A6NKD9;Q96RT1;Q16658;Q8N7P3;Q8N3V7;Q8TAC9;O43612;Q9Y2J0;O15061;Q8TEW8;Q702N8;O15259;Q12959;Q9C0D0;Q9P1Y5;Q9UGP4;Q0VF96;Q5VW36;O43759;O60299;P11532;Q5TCQ9;Q96SN8;Q12857;O00501;Q86WG3;Q13425;Q68DU8;O43294;Q69YQ0;Q15124;O75161;P30419;Q8N6F1;Q8TB68;Q9NUP9;P50570;Q86TP1;Q8NI35;Q9NSC5;Q13835;Q9Y3F4;O14490;Q8WVH0;Q14160;Q9NPG3;P56747;Q05084;O43761;Q14258;Q13884;O15231;Q9HAP6;Q15700;Q9BQJ4;O95295;Q6ZWB6;Q15654;Q9HD26;Q96IF1;Q5T2T1;O95425;O75970;A6NIX2;Q96A59;Q9UDY2;Q8IZW8;Q93052;Q9NRD5;P50552;Q7Z7G2;Q14511;Q96FX8;C9JDP6;Q68CZ2;Q92797;O43491;Q96CX2;P61586;Q15942;Q07157;Q9BTW9;Q9UPA5;Q86UE4;Q674X7;Q9UPU9;P46939;Q8N157;Q9UPP2;Q9HBL0;Q9GZS1;Q6XZF7;Q9P266;Q9ULU8;Q86SQ7;Q9Y6D5;Q7Z7J9;Q14118;P35269}

;Q9Y4G6;Q9NZU7;Q9NYF0;Q5JTD0;Q8IZP0;P48059;O60504;O00522;Q16625;Q9NRI5;A4UGR9;P56945;B4DS77;P54259;Q5T0D9;P17677;Q96B97;Q8TEW0;O95886;Q9NPB6;Q96HR8;Q8WVM7;Q9UQB3;Q9Y250;Q9NVD7;Q9UPX8;Q9P2M7;A6NM45;Q86UL8;Q96F07;Q9P021;Q5TCZ1;Q9H8V3;Q9C0H9;P56750;Q13424;O95721;Q15149;P62166;Q68CZ1;Q8TES7;Q68DX3;P78352;Q8IY63;Q92817;Q9BSN7;Q9UI14;O00161;Q8N668;Q92681;Q96EV8;Q8WX93;Q96EY1;Q9Y215;O60437;O95471;Q9BX66;Q6IQ23;Q9BYG4;Q8N3R9;Q9Y4J8;Q9BYG5;O15083;Q9H307;O95049;Q99569}

925 Pathogen[ P14075] interacts with 79 human partners: {Q9H307;Q92797;Q96F07;Q14511;Q9P266;O95049;Q68DX3;Q86WG3;P11532;Q92681;Q9Y3F4;Q96FX8;Q8N3V7;Q9GZS1;Q13884;O15083;Q14160;O95295;Q07157;Q86UE4;Q8WVM7;Q9BVN2;Q13425;Q86SQ7;O95886;Q9UGP4;Q9Y2D8;Q9BYG4;Q9Y250;Q9HD26;Q96SN8;Q8N668;Q5TCQ9;O15061;Q5T0D9;Q5JTD0;Q8IY63;Q9NRI5;Q96HR8;Q96TA1;Q9UQB3;Q12857;Q8TES7;O75161;O14910;O60299;Q9NSC5;P46939;P35269;A6NIX2;O14490;P61586;Q14258;Q15654;O00161;Q05084;Q9P1A6;Q96EV8;Q9UDY2;P78352;Q8TAC9;Q9HBM0;A6NKD9;O60711;Q9BYG5;O60504;P54259;Q9NPB6;O60437;Q9P2M7;Q9C0H9;Q9UPA5;Q9NYF0;Q9P1Y5;Q96EY1;P56945;P15924;Q86TP1;Q9NPG3}

926 Pathogen[ P0C206] interacts with 142 human partners: {A6NKD9;Q9HBL0;P46939;Q9NUP9;Q86TP1;Q9Y3F4;Q00444;P78352;Q96RT1;Q96SN8;Q96F07;P17677;Q86SQ7;O60504;O15061;Q8N3V7;P62166;Q92681;Q15700;O75161;O43759;Q96FX8;O95721;P30419;O95049;Q14258;Q9UGP4;Q9NVD7;Q96IF1;Q9UPA5;Q9Y2J0;Q8IY63;Q96CX2;Q96B97;Q9P021;Q9BTW9;Q5TCQ9;Q9P266;A6NIX2;Q9H307;Q9BYG5;Q8WX93;Q8IZW8;Q15654;Q96TA1;O95886;Q9UDY2;P17987;Q5TCZ1;O60299;Q9NZU7;Q5JTD0;Q9C0D0;Q9UI14;Q9Y2D8;Q15124;P61586;Q9P1Y5;P54259;Q12857;Q69YQ0;O00161;O60437;Q5T0D9;Q8N3R9;Q9NPG3;Q92797;Q8TEW0;Q9Y4J8;Q13884;Q9BUZ4;Q5T2T1;O14490;P35269;Q9ULU8;Q7Z7G2;Q9NSC5;Q13835;O15083;Q16658;Q9UPU9;Q8IZP0;Q13425;Q9NR48;Q9Y6D5;P55196;Q96EV8;P48059;Q14160;Q99569;Q15942;O43491;Q9NRI5;Q8N135;Q9UPX8;Q8N157;Q9NPB6;O43294;Q9H8V3;O14910;O95295;Q9C0H9;Q96HR8;Q9BX66;P15924;Q9GZS1;Q07157;Q9UPP2;Q86UE4;Q9NYF0;Q9P2M7;Q674X7;P56945;Q6XZF7;P11532;Q86UL8;Q8TAC9;Q13424;Q8N668;O60711;Q86WG3;Q9HBM0;Q96EY1;Q9UQB3;Q9NRD5;Q68DX3;Q6IQ23;Q12959;Q8WVM7;Q9HD26;Q9Y250;Q93052;Q14511;Q05084;Q9BYG4;Q9BQJ4;P50570;O00522;Q9P1A6;Q9BVN2;Q8TES7}

927 Pathogen[ P03363] interacts with 128 human partners: {Q9P021;Q15654;Q12959;Q8IZP0;Q8N3V7;Q9Y3F4;P46939;O95049;Q96RT1;O75161;Q13835;A6NKD9;Q9BX66;O15061;P54259;O60437;Q14258;Q9UPP2;Q9UPX8;Q96B97;O14910;Q14160;P78352;Q8TES7;P50570;Q5JTD0;P56545;Q9NPG3;Q9H307;Q9NPB6;Q9Y2D8;Q96F07;Q9C0D0;Q9NYF0;Q8IY63;Q15700;Q9GZS1;Q5T2T1;Q86UE4;Q99569;O75970;Q9BYG4;Q07157;Q7L576;Q93052;Q9NVA2;Q9Y4G6;Q92797;Q96IF1;Q8N668;Q13425;P15924;P35269;Q5TCZ1;Q9UGP4;Q9NSC5;Q00444;Q8N157;Q86WG3;Q15149;Q9UPU9;Q9P1Y5;Q9Y250;Q6XZF7;O95721;Q14511;P11532;O00522;Q5TCQ9;Q8WVM7;Q8N3R9;Q9BTW9;Q05084;Q9Y215;P17987;Q9NZU7;Q8IZW8;Q674X7;Q8WX93;Q9UDY2;Q13884;Q9BYG5;O95295;Q68CZ2;Q9NR48;Q9HBL0;O43491;Q8N135;Q92681;Q9BVN2;Q5JU85;P56945;Q9NRI5;O15083;A6NIX2;Q86UL8;O95886;Q6DN90;O15259;Q9P1A6;O14490;Q96AC1;Q9NVD7;O00161;Q9BUZ4;Q9NUP9;Q96TA1;O60299;Q96EY1;Q86SQ7;Q9NR12;Q9UQB3;Q16658;Q12857;Q9P2M7;Q92817;Q6IQ23;Q96HR8;Q86TP1;Q9HD26;Q15942;O60711;Q13424;Q68DX3;Q69YQ0;Q96SN8;Q9C0H9}

928 [Cluster 85]GO:0005672+C cellular\_component [name] transcription factor TFIIA complex [def] "A component of the transcription machinery of RNA Polymerase II. In humans, TFIIA is a heterotrimer composed of an alpha (P35), beta (P19) and gamma subunits (P12)." [GOC

929 Pathogen[ Q2Q067] interacts with 5 human partners: {Q9UNN4;P20226;P52657;P62380;P52655}

930 Pathogen[ P0C214] interacts with 5 human partners: {P52657;P62380;P52655;Q9UNN4;P20226}

931 Pathogen[ P03346] interacts with 5 human partners: {P20226;P62380;Q9UNN4;P52657;P52655}

932 Pathogen[ Q85601] interacts with 5 human partners: {Q9UNN4;P52657;P52655;P62380;P20226}

933 Pathogen[ P14079] interacts with 3 human partners: {P62380;Q9UNN4;P52657}

934 Pathogen[ P03383] interacts with 4 human partners: {P52655;P20226;P52657;Q9UNN4}

935 Pathogen[ P03410] interacts with 5 human partners: {P52655;Q9UNN4;P62380;P20226;P52657}

936 Pathogen[ P14075] interacts with 4 human partners: {P52657;P20226;P52655;Q9UNN4}

937 Pathogen[ P0C206] interacts with 5 human partners: {P20226;P62380;P52657;P52655;Q9UNN4}

938 Pathogen[ P03363] interacts with 5 human partners: {Q9UNN4;P62380;P52657;P20226;P52655}

939 [Cluster 86]GO:0031526+C cellular\_component [name] brush border membrane [def] "The portion of the plasma membrane surrounding the brush border." [GOC

940 Pathogen[ Q2Q067] interacts with 3 human partners: {P08238;P40855;Q5T2W1}

941 Pathogen[ P0C214] interacts with 3 human partners: {P40855;Q5T2W1;P11168}

942 Pathogen[ P03346] interacts with 3 human partners: {Q5T2W1;P40855;P08238}

943 Pathogen[ Q85601] interacts with 4 human partners: {P11168;Q5T2W1;P08238;P40855}

944 Pathogen[ P14079] interacts with 3 human partners: {P40855;P08238;Q5T2W1}

945 Pathogen[ P03383] interacts with 4 human partners: {Q5T2W1;P11168;P08238;P40855}

946 Pathogen[ P03410] interacts with 5 human partners: {Q5T2W1;P08238;P11168;P40855;P55157}

947 Pathogen[ P14075] interacts with 4 human partners: {P40855;P08238;Q5T2W1;P11168}

948 Pathogen[ P0C206] interacts with 4 human partners: {Q5T2W1;P11168;P08238;P40855}

949 Pathogen[ P03363] interacts with 3 human partners: {P40855;P08238;Q5T2W1}

950 [Cluster 87]GO:0005643+C cellular\_component [name] nuclear pore [def] "Any of the numerous similar discrete openings in the nuclear envelope of a eukaryotic cell, where the inner and outer nuclear membranes are joined." [ISBN

951 Pathogen[ Q2Q067] interacts with 58 human



partners: {Q14974; Q96EE3; P52948; Q12769; O00410; Q96HA1; P49790; P49792; P55735; Q9H2T7; O75694; P62826; P78406; A8CG34; Q8WYP5; Q9UBU9; Q13257; P61970; Q99567; Q8NFH7; P52594; Q7Z3B4; Q8NFH4; P63241; P12270; P63165; Q9UND3; Q9BW27; Q53GS7; Q8TEM1; Q8TEX9; Q9BVL2; Q9UKX7; Q6IS14; Q9NRG9; Q8NFH3; O00505; Q9UIA9; Q14739; P37198; A6NF01; Q92621; Q14764; O95373; O15504; Q9Y6D9; P57740; Q9HC62; O95271; Q9UKK6; Q8WUM0; Q9GZV4; O43592; P35658; Q8NFH5; P52294; Q5SRE5; O95149}

952 Pathogen[ P0C214] interacts with 61 human  
partners: {Q8TEX9; P55735; Q14739; Q13257; Q6IS14; Q9UIA9; Q8NFH5; O00159; Q9GZV4; Q8TEM1; Q14764; P78406; P57740; Q99567; Q8WYP5; Q9UND3; Q8NF1F7; O75694; Q96EE3; P49792; Q9UKX7; O95149; P63241; P46060; A8CG34; P49790; A6NF01; P37198; Q9BW27; P52294; P63165; Q53GS7; Q9UKK6; Q9NRG9; P35658; O43592; Q8NFH3; O00505; P62826; Q9NUU7; O15504; Q9UMR2; Q9HC62; P12270; Q14974; P52594; Q9H2T7; Q8NFH4; Q9BVL2; O95271; P61970; Q5SRE5; O95373; Q7Z3B4; Q8WUM0; Q9Y6D9; P52948; Q92621; Q9UBU9; Q12769; Q96HA1}

953 Pathogen[ P03346] interacts with 64 human  
partners: {Q8TEM1; Q8TEX9; Q9Y6D9; P55735; Q9H1M0; Q8NFH4; Q8WUM0; Q14739; P12270; O95149; Q12769; Q9H2T7; Q96EE3; Q99567; Q9GZV4; Q14764; Q9UKX7; O75694; Q9UMR2; Q9NRG9; P78406; P57740; Q8WYP5; Q9BVL2; Q8NF1F7; O00410; Q53GS7; O00505; Q8NFH5; P63241; P37198; Q8NFH3; P35658; Q9UIA9; P62826; Q6IS14; Q5SRE5; Q9BTX1; O43592; Q92621; Q9BW27; P46060; O95373; O14715; P52594; P63165; Q9NUU7; Q9HC62; Q9UBU9; O95271; A8CG34; Q9UND3; P49790; P61970; Q96HA1; Q9UKK6; A6NF01; Q7Z3B4; P52294; Q13257; O15504; P49792; Q14974; P52948}

954 Pathogen[ Q85601] interacts with 61 human  
partners: {Q8TEM1; Q5SRE5; Q9UIA9; Q8NFH4; O95149; Q8NFH3; P46060; Q96EE3; Q9GZV4; A8CG34; Q12769; Q9UBU9; P78406; P57740; Q53GS7; Q9NRG9; Q8WYP5; Q9HC62; P62826; Q8WUM0; Q8NF1F7; Q9UMR2; P61970; Q14764; P63241; P52594; P12270; O75694; O15504; Q14974; Q13257; Q9BW27; O00159; Q9UKK6; Q92621; O95373; Q8TEX9; Q9Y6D9; Q9NUU7; P55735; P52948; A6NF01; Q9UKX7; Q8NFH5; P35658; P63165; Q99567; Q9H2T7; P49792; Q9BVL2; Q96HA1; O95271; O00505; O43592; Q9UND3; Q7Z3B4; P52294; P49790; O00410; Q14739; Q6IS14}

955 Pathogen[ P14079] interacts with 59 human  
partners: {Q8NFH5; O95373; Q9BW27; Q96HA1; P61970; O95271; P57740; Q8NF1F7; Q6IS14; P35658; A6NF01; A8CG34; O43592; O14715; Q92621; P52294; Q8TEM1; P46060; Q9UBU9; P52594; Q14739; P63165; O95149; Q9UKX7; Q9BVL2; O15504; Q8WUM0; Q9HC62; P12270; Q53GS7; Q9UND3; Q8WYP5; O00410; Q99567; Q13257; Q14974; Q9BVL2; Q8NFH3; Q96EE3; P37198; P49790; O00505; Q8TEX9; P63241; Q8NFH4; Q14764; P78406; Q7Z3B4; Q9UIA9; P55735; P62826; Q12769; Q9H2T7; Q5SRE5; Q9NRG9; Q9GZV4; O75694; Q9BTX1; P52948}

956 Pathogen[ P03383] interacts with 56 human  
partners: {Q9BVL2; Q96EE3; O15504; Q13257; Q8WUM0; Q9UBU9; Q92621; P49792; Q8NFH4; Q9UIA9; A6NF01; P55735; P12270; A8CG34; P52948; P78406; P57740; Q8NFH5; Q8WYP5; Q9GZV4; Q8NF1F7; O00505; Q8TEM1; Q53GS7; P63241; Q12769; P62826; Q99567; Q9BW27; Q9H2T7; P63165; O95149; Q9BTX1; Q14974; Q5SRE5; P35658; Q96HA1; Q9NRG9; Q9UND3; Q9HC62; O95373; P61970; O43592; P37198; Q9UKX7; O95271; Q7Z3B4; P52294; P52594; P49790; Q14764; O75694; Q8NFH3; O00410; Q9UKK6; Q9Y6D9}

957 Pathogen[ P03410] interacts with 63 human  
partners: {Q99567; Q7Z3B4; Q9BW27; Q9H1M0; P52594; Q14974; Q14739; O00505; A6NF01; Q9UKX7; P63165; P52294; Q8NFH4; Q5SRE5; P52948; O15504; O00159; O75694; P78406; Q96HA1; Q8TEX9; Q8NF1F7; Q9UMR2; O14715; P49790; Q14764; Q9HC62; P12270; Q9NUU7; P62826; P35658; O95271; Q8NFH5; Q9UND3; Q8TEM1; Q9UBU9; Q96EE3; Q9H2T7; Q8WUM0; P63241; A8CG34; O00410; Q9GZV4; P57740; P55735; Q12769; O43592; Q9UIA9; Q9NRG9; Q8WYP5; Q8NFH3; Q9BVL2; Q9UKK6; Q9BTX1; Q92621; P46060; O95373; P49792; O95149; Q13257; P61970; Q6IS14; Q53GS7}

958 Pathogen[ P14075] interacts with 56 human  
partners: {P63165; Q14764; Q9Y6D9; P61970; Q9H2T7; A8CG34; P78406; P57740; Q8WYP5; Q53GS7; P49792; Q8NF1F7; Q13257; Q9UKX7; Q9GZV4; P63241; P35658; P12270; A6NF01; Q92621; P55735; O43592; Q9BTX1; O00505; Q96HA1; Q9BW27; P52294; O95373; Q8TEM1; Q9UND3; Q9HC62; Q96EE3; P37198; O00410; Q5SRE5; P62826; Q9UIA9; O95149; P52594; Q8NFH3; O15504; Q99567; Q12769; Q9UBU9; Q14974; Q9BVL2; P49790; Q8WUM0; O95271; O75694; Q9NRG9; Q7Z3B4; Q8NFH4; Q9UKK6; Q8NFH5; P52948}

959 Pathogen[ P0C206] interacts with 61 human  
partners: {O95271; Q53GS7; Q96EE3; Q92621; Q8WYP5; Q9GZV4; P49790; Q6IS14; O95149; Q14739; Q5SRE5; Q8NFH5; Q9NRG9; Q9NUU7; O43592; Q9UKK6; Q9Y6D9; Q7Z3B4; Q14974; Q9HC62; Q96HA1; O00505; P55735; P62826; P57740; Q13257; O00410; Q8WUM0; P46060; P49792; Q8TEM1; Q9UKX7; Q9UBU9; O95373; O75694; O00159; Q8TEX9; Q9BTX1; A6NF01; Q9H2T7; Q99567; Q8NFH4; P63241; P78406; O15504; A8CG34; Q9UIA9; Q12769; Q9UMR2; P63165; Q9UND3; Q8NFH3; P52294; Q8NF1F7; P61970; P35658; Q9BW27; Q9BVL2; Q14764; P12270; O14715}

960 Pathogen[ P03363] interacts with 60 human  
partners: {P46060; Q53GS7; Q7Z3B4; Q9GZV4; Q9Y6D9; Q5SRE5; P12270; Q8NFH4; Q9UND3; P61970; Q8WYP5; Q8NFH3; Q12769; O00410; Q9H2T7; O00505; Q9NUU7; A6NF01; A8CG34; Q9UKX7; Q9UBU9; Q9NRG9; Q8WUM0; Q9BVL2; Q99567; P63165; Q9HC62; Q8TEX9; O95271; Q96HA1; P49792; P35658; Q13257; Q14974; O75694; Q9UKK6; P49790; P57740; Q9UMR2; Q9BTX1; P63241; P78406; O95373; P52948; Q14739; O15504; P52594; Q6IS14; P37198; P62826; O43592; Q8NF1F7; Q92621; Q14764; Q8NFH5; O95149; P55735; Q9BW27; Q9UIA9; P52294}

961 [Cluster 88]GO:0044302+C cellular\_component [name] dentate gyrus mossy fiber [def] "Distinctive, unmyelinated axons produced by granule cells." [NIF\_Subcellular

962 Pathogen[ Q2Q067] interacts with 1 human partners: {Q9UQF2}

963 Pathogen[ P0C214] interacts with 1 human partners: {Q9UQF2}

964 Pathogen[ P03346] interacts with 1 human partners: {Q9UQF2}

965 Pathogen[ Q85601] interacts with 1 human partners: {Q9UQF2}

966 Pathogen[ P14079] interacts with 1 human partners: {Q9UQF2}

967 Pathogen[ P03383] interacts with 1 human partners: {Q9UQF2}

968 Pathogen[ P03410] interacts with 1 human partners: {Q9UQF2}

969 Pathogen[ P14075] interacts with 1 human partners: {Q9UQF2}

970 Pathogen[ P0C206] interacts with 1 human partners: {Q9UQF2}

971 Pathogen[ P03363] interacts with 1 human partners:{Q9UQF2}  
972 [Cluster 89]GO:0044309+ cellular\_component [name] neuron spine [def] "A small  
membranous protrusion, often ending in a bulbous head and attached to the neuron by a  
narrow stalk or neck." [ISBN  
973 Pathogen[ Q2Q067] interacts with 1 human partners:{P78352}  
974 Pathogen[ P0C214] interacts with 1 human partners:{P78352}  
975 Pathogen[ P03346] interacts with 1 human partners:{P78352}  
976 Pathogen[ Q85601] interacts with 1 human partners:{P78352}  
977 Pathogen[ P14079] interacts with 1 human partners:{O75781}  
978 Pathogen[ P03383] interacts with 1 human partners:{P78352}  
979 Pathogen[ P03410] interacts with 2 human partners:{O75781;P78352}  
980 Pathogen[ P14075] interacts with 1 human partners:{P78352}  
981 Pathogen[ P0C206] interacts with 1 human partners:{P78352}  
982 Pathogen[ P03363] interacts with 1 human partners:{P78352}  
983 [Cluster 90]GO:0005905+ cellular\_component [name] coated pit [def] "A part of the  
endomembrane system in the form of an invagination of a membrane upon which a clathrin  
coat forms, and that can be converted by vesicle budding into a clathrin-coated vesicle.  
Coated pits form on the plasma membrane, where they are involved in receptor-mediated  
selective transport of many proteins and other macromolecules across the cell membrane,  
in the trans-Golgi network, and on some endosomes." [GOC  
984 Pathogen[ Q2Q067] interacts with 14 human  
partners:{O94973;P56377;O95782;P53675;O00189;P63010;Q96PC3;Q96CW1;Q00610;P61966;P0949  
7;P09496;P14672;Q9P0V3}  
985 Pathogen[ P0C214] interacts with 18 human  
partners:{Q96CW1;Q9P0V3;Q9UM54;O00189;Q9Y6I3;P63010;P53675;P56377;Q96PC3;P10809;Q9BQI  
5;O94973;P09497;P61966;P09496;O95782;P53680;P14672}  
986 Pathogen[ P03346] interacts with 22 human  
partners:{P61966;P63010;P53680;P56377;O95782;O00189;P09496;Q9P0V3;Q9Y587;Q96CW1;P4256  
6;Q96PC3;P53675;Q13492;P09497;Q96D71;Q9Y6I3;Q9BQI5;P14672;O94973;Q00610;O75146}  
987 Pathogen[ Q85601] interacts with 17 human  
partners:{P53675;Q00610;P09496;Q96CW1;P56377;P53680;O94973;Q96PC3;P09497;Q9Y6I3;P6301  
0;Q9P0V3;Q9UM54;P61966;P14672;O00189;O95782}  
988 Pathogen[ P14079] interacts with 25 human  
partners:{Q13492;Q96CW1;P61966;O75146;Q00610;Q9Y6I3;P14672;P42566;P56377;O00189;O6089  
5;Q9UM54;Q9P0V3;O95782;Q8NC96;Q9BQI5;Q9NVZ3;P09497;P63010;O94973;P53675;Q96PC3;P53680  
;P09496;Q9Y587}  
989 Pathogen[ P03383] interacts with 12 human  
partners:{Q96CW1;P56377;Q00610;P53675;O00189;P63010;Q9BQI5;O95782;Q9P0V3;P09497;P1467  
2;O94973}  
990 Pathogen[ P03410] interacts with 25 human  
partners:{Q00610;Q8NC96;P09496;O95782;Q96PC3;Q96CW1;P53680;Q9Y6I3;O60895;Q9NVZ3;Q0JRZ  
9;Q9P0V3;O75146;Q9Y587;Q9UM54;Q13492;Q96D71;P09497;Q9BQI5;P63010;P53675;P61966;P42566  
;O94973;P56377}  
991 Pathogen[ P14075] interacts with 13 human  
partners:{Q9BQI5;Q9P0V3;P09497;P09496;O94973;Q96CW1;P53675;O00189;O95782;P63010;P5637  
7;P14672;Q00610}  
992 Pathogen[ P0C206] interacts with 21 human  
partners:{P53680;P63010;P53675;Q9UM54;O94973;Q8NC96;P61966;Q00610;P09496;Q9Y587;P0949  
7;Q96CW1;Q9Y6I3;Q9BQI5;O95782;P42566;Q9P0V3;P14672;Q96PC3;O00189;P56377}  
993 Pathogen[ P03363] interacts with 13 human  
partners:{Q9P0V3;Q96RU3;Q00610;O94973;P63010;O00189;O95782;P14672;O75146;Q9BQI5;P0949  
7;P53675;Q96CW1}  
994 [Cluster 91]GO:0008287+ cellular\_component [name] protein serine/threonine  
phosphatase complex [def] "A complex, normally consisting of a catalytic and a regulatory  
subunit, which catalyzes the removal of a phosphate group from a serine or threonine  
residue of a protein." [GOC  
995 Pathogen[ Q2Q067] interacts with 1 human partners:{Q6NUP7}  
996 Pathogen[ P0C214] interacts with 1 human partners:{Q6NUP7}  
997 Pathogen[ P03346] interacts with 1 human partners:{Q6NUP7}  
998 Pathogen[ Q85601] interacts with 1 human partners:{Q6NUP7}  
999 Pathogen[ P14079] interacts with 1 human partners:{Q6NUP7}  
1000 Pathogen[ P03383] interacts with 1 human partners:{Q6NUP7}  
1001 Pathogen[ P03410] interacts with 1 human partners:{Q6NUP7}  
1002 Pathogen[ P14075] interacts with 1 human partners:{Q6NUP7}  
1003 Pathogen[ P0C206] interacts with 1 human partners:{Q6NUP7}  
1004 Pathogen[ P03363] interacts with 1 human partners:{Q6NUP7}  
1005 [Cluster 92]GO:0048476+ cellular\_component [name] Holliday junction resolvase  
complex [def] "A protein complex that mediates the conversion of a Holliday junction into  
two separate duplex DNA molecules\_ the complex includes a single- or multisubunit  
helicase that catalyzes the extension of heteroduplex DNA by branch migration and a  
nuclease that resolves the junction by nucleolytic cleavage." [PMID  
1006 Pathogen[ Q2Q067] interacts with 1 human partners:{Q8IY92}  
1007 Pathogen[ P0C214] interacts with 1 human partners:{Q8IY92}  
1008 Pathogen[ P03346] interacts with 1 human partners:{Q8IY92}  
1009 Pathogen[ Q85601] interacts with 1 human partners:{Q8IY92}  
1010 Pathogen[ P14079] interacts with 1 human partners:{Q8IY92}

1011 Pathogen[ P03383] interacts with 1 human partners:{Q8IY92}

1012 Pathogen[ P03410] interacts with 1 human partners:{Q8IY92}

1013 Pathogen[ P14075] interacts with 1 human partners:{Q8IY92}

1014 Pathogen[ P0C206] interacts with 1 human partners:{Q8IY92}

1015 Pathogen[ P03363] interacts with 1 human partners:{Q8IY92}

1016 [Cluster 93]GO:0005686+C cellular\_component [name] U2 snRNP [def] "A ribonucleoprotein complex that contains small nuclear RNA U2." [GOC

1017 Pathogen[ Q2Q067] interacts with 3 human partners:{P08579;P09661;Q7RTV0}

1018 Pathogen[ P0C214] interacts with 3 human partners:{P08579;Q7RTV0;P09661}

1019 Pathogen[ P03346] interacts with 3 human partners:{Q7RTV0;P08579;P09661}

1020 Pathogen[ Q85601] interacts with 2 human partners:{Q7RTV0;P09661}

1021 Pathogen[ P14079] interacts with 2 human partners:{Q7RTV0;P09661}

1022 Pathogen[ P03383] interacts with 2 human partners:{P09661;Q7RTV0}

1023 Pathogen[ P03410] interacts with 3 human partners:{P08579;P09661;Q7RTV0}

1024 Pathogen[ P14075] interacts with 2 human partners:{P09661;Q7RTV0}

1025 Pathogen[ P0C206] interacts with 2 human partners:{Q7RTV0;P09661}

1026 Pathogen[ P03363] interacts with 3 human partners:{P08579;Q7RTV0;P09661}

1027 [Cluster 94]GO:0005674+C cellular\_component [name] transcription factor TFIIF complex [def] "A general transcription initiation factor which in humans consists of a heterodimer of an alpha and a beta subunit. Helps recruit RNA polymerase II to the initiation complex and promotes translation elongation." [GOC

1028 Pathogen[ Q2Q067] interacts with 2 human partners:{P13984;P35269}

1029 Pathogen[ P0C214] interacts with 2 human partners:{P35269;P13984}

1030 Pathogen[ P03346] interacts with 2 human partners:{P13984;P35269}

1031 Pathogen[ Q85601] interacts with 2 human partners:{P13984;P35269}

1032 Pathogen[ P14079] interacts with 2 human partners:{P35269;P13984}

1033 Pathogen[ P03383] interacts with 2 human partners:{P35269;P13984}

1034 Pathogen[ P03410] interacts with 2 human partners:{P35269;P13984}

1035 Pathogen[ P14075] interacts with 2 human partners:{P13984;P35269}

1036 Pathogen[ P0C206] interacts with 2 human partners:{P13984;P35269}

1037 Pathogen[ P03363] interacts with 2 human partners:{P13984;P35269}

1038 [Cluster 95]GO:0033186+C cellular\_component [name] CAF-1 complex [def] "A conserved heterotrimeric protein complex that promotes histone H3 and H4 deposition onto newly synthesized DNA during replication or DNA repair\_ specifically facilitates replication-dependent nucleosome assembly with the major histone H3 (H3.1). In many species the CAF-1 subunits are designated p150, p60, and p48." [PMID

1039 Pathogen[ Q2Q067] interacts with 3 human partners:{Q13111;Q09028;Q13112}

1040 Pathogen[ P0C214] interacts with 3 human partners:{Q13112;Q13111;Q09028}

1041 Pathogen[ P03346] interacts with 3 human partners:{Q09028;Q13111;Q13112}

1042 Pathogen[ Q85601] interacts with 3 human partners:{Q13112;Q09028;Q13111}

1043 Pathogen[ P14079] interacts with 3 human partners:{Q13112;Q13111;Q09028}

1044 Pathogen[ P03383] interacts with 3 human partners:{Q09028;Q13111;Q13112}

1045 Pathogen[ P03410] interacts with 3 human partners:{Q09028;Q13111;Q13112}

1046 Pathogen[ P14075] interacts with 3 human partners:{Q13111;Q09028;Q13112}

1047 Pathogen[ P0C206] interacts with 3 human partners:{Q13112;Q13111;Q09028}

1048 Pathogen[ P03363] interacts with 3 human partners:{Q13112;Q09028;Q13111}

1049 [Cluster 96]GO:0015935+C cellular\_component [name] small ribosomal subunit [def] "The smaller of the two subunits of a ribosome." [GOC

1050 Pathogen[ Q2Q067] interacts with 24 human partners:{P51398;P62701;P82932;P62273;P15880;P46782;P62861;Q9Y399;P62249;O15235;P60866;P08865;P62269;P62857;P62847;P23396;P62266;P63220;P62841;P62854;P62753;P62851;P46781;P62979}

1051 Pathogen[ P0C214] interacts with 24 human partners:{P62861;Q9Y399;P15880;P62249;P62854;P62273;P23396;O15235;P62847;P62701;P63220;P08865;P62266;P51398;P62753;P62269;P46781;P62841;P82932;P60866;P62857;P62979;P62851;P46782}

1052 Pathogen[ P03346] interacts with 24 human partners:{Q9Y399;P62249;P62861;P62857;P62266;P62273;P60866;P46782;P51398;P62854;P08865;O15235;P62269;P46781;P15880;P62979;P23396;P62701;P62847;P62851;P62841;P82932;P62753;P63220}

1053 Pathogen[ Q85601] interacts with 24 human partners:{P62857;P62854;P23396;P62273;P62753;P82932;P15880;P62701;P62861;P51398;O15235;P62249;P62269;P62979;P62847;P63220;P46782;P62851;P62841;P08865;Q9Y399;P46781;P60866;P62266}

1054 Pathogen[ P14079] interacts with 22 human partners:{P23396;P46781;P62847;P62753;P62273;P62979;P62841;P62266;P46782;P60866;P62854;P63220;O15235;P15880;P08865;P62249;P51398;P62269;P62701;P62851;P62857;P62861}

1055 Pathogen[ P03383] interacts with 24 human partners:{P51398;P62266;P62854;P62249;P62753;P62273;P08865;P62851;P46782;P62269;P63220;P62857;P82932;P60866;P62979;P46781;P62841;P62701;P62847;O15235;Q9Y399;P62861;P15880;P23396}

1056 Pathogen[ P03410] interacts with 23 human partners:{P62861;Q9Y399;P15880;P62841;O15235;P46781;P62269;P63220;P62847;P23396;P62266;P62249;P62979;P62701;P08865;P62854;P62273;P46782;P62857;P62851;P62753;P60866;P51398}

1057 Pathogen[ P14075] interacts with 24 human

- partners:{P62857;P46781;P63220;P62851;P08865;P62249;P51398;O15235;P62979;Q9Y399;P62753;P46782;P62861;P62269;P62847;P62273;P23396;P15880;P62841;P62266;P82932;P62701;P62854;P60866}
- 1058 Pathogen[ P0C206] interacts with 24 human  
partners:{Q9Y399;P62854;P08865;P46781;P62266;P62273;P62857;P62851;P46782;P51398;P62861;P23396;P62701;P62979;P60866;P62841;P82932;P62269;P62753;P63220;P15880;O15235;P62847;P62249}
- 1059 Pathogen[ P03363] interacts with 23 human  
partners:{P23396;P08865;P62847;P62249;P62753;P62273;P15880;P62861;P62841;P46782;P46781;P63220;P62851;P62266;P60866;P62857;P82932;P62854;Q9Y399;O15235;P51398;P62701;P62269}
- 1060 [Cluster 97]GO:0005815+C cellular\_component [name] microtubule organizing center [def] "A cytoplasmic structure that can catalyze gamma-tubulin-dependent microtubule nucleation and that can anchor microtubules by interacting with their minus ends, plus ends or sides." [ISBN
- 1061 Pathogen[ Q2Q067] interacts with 149 human  
partners:{Q12798;Q5SZL2;Q9BTV5;O75161;Q96GE4;Q6P2H3;Q14008;Q9Y2Y0;Q9H4X1;Q7Z4H7;Q96RT8;Q70YC5;Q9P209;O95684;Q7Z460;O43189;Q96ST8;Q9H1H9;O43805;O94927;Q5VYK3;Q9UJW0;O75935;Q7Z7A1;Q9NZJ0;A8MVW5;Q8NHV4;P05062;Q6P1N0;Q01201;Q5FBB7;Q86XR8;Q9BZV1;Q96EY5;Q9UJT9;Q9HC77;P06748;O14757;Q9UNH5;Q9NVX0;Q6P582;Q9NXR1;Q13432;Q96SN8;Q96K30;Q92547;O95359;Q1MSJ5;A6NKF1;Q5BJF6;Q2M2Z5;Q5JTW2;P14635;Q99871;Q68DK2;Q96IF1;Q76KD6;P26081;Q8WUM4;P17987;Q9C0D2;Q9BYV8;Q8NHQ1;Q9NXB0;Q13561;Q6IN85;O76095;Q96RT7;Q12834;Q9UBK9;Q5MIZ7;Q9BQ89;Q9BSJ2;Q9HD42;P50991;Q9BT25;P42025;Q9H6D7;Q9C0F1;Q96MT8;O15078;Q12873;Q5VU43;Q13045;Q5TB80;Q1W6H9;A6NK89;Q99996;Q86VQ0;O00139;Q53EZ4;Q96NB1;Q8N8E3;Q08AG7;O94986;Q86X95;O75122;Q9NRI5;Q15051;P23258;Q9H816;Q14839;Q6UVJ0;Q9Y6D9;Q6QNY1;O75410;Q9NR09;Q96IK1;Q8TC76;Q6DKK2;Q9NS23;P60953;O75154;O15182;Q6NZ67;Q9NY27;P18848;Q9UGJ1;O95613;Q96QY1;Q3SYG4;P24941;Q8N4C6;Q99689;Q9H7T9;Q9UPT5;Q92597;Q15834;Q96CS2;Q13042;Q15691;P60510;Q8TAP9;Q8IW35;Q96ED9;P05783;Q15154;Q96EA4;Q68CZ6;Q14194;Q9BRK4;Q9Y224;Q5VT06;Q7Z6E9;Q9ULD2;Q15650;Q9BV73;Q96CW5;Q8TAP6}
- 1062 Pathogen[ P0C214] interacts with 146 human  
partners:{Q5SZL2;O15078;Q5MIZ7;O94927;Q8TAP9;O75935;O75161;Q9H4X1;O43805;P62081;Q9BSJ2;Q6NZ67;Q15154;Q14008;P05783;Q1MSJ5;O94986;Q9H816;O95684;Q9NRI5;Q9UJW0;Q9NS23;Q15051;Q9BRK4;Q96ED9;P48643;Q9UPT5;Q6DKK2;Q7Z4H7;Q12873;P06748;Q9P209;Q8NHQ1;Q9NY27;Q96EA4;Q96SN8;Q9HD42;A8MVW5;Q8NHV4;Q7Z7A1;Q5VYK3;Q9BYV8;P23258;Q9HC77;Q5JTW2;P60953;Q96MT8;P14635;O00139;Q96CW5;Q14194;Q15691;Q96RT7;Q9UGJ1;P05062;Q9BZV1;O95359;P60510;Q96CS2;Q9C0F1;Q96ST8;Q8IW35;Q76KD6;P18848;O75122;Q92597;Q15834;Q13045;Q96EY5;Q12798;Q01201;Q9Y224;Q5VU43;Q9NXB0;Q7Z6E9;Q8IYX8;Q86XR8;O43189;Q9BT25;Q12834;Q9NZJ0;Q53EZ4;P24941;Q99689;Q3SYG4;Q9ULD2;Q6P2H3;Q96K30;P30305;Q8TAP6;Q96RT8;Q8TC76;Q9UNH5;Q15650;Q99871;Q1W6H9;Q6IN85;Q2M2Z5;Q9H6D7;O75410;P42025;Q7Z460;Q9BV73;A6NKF1;Q5FBB7;Q9BTV5;Q9Y2Y0;Q9NR09;Q68CZ6;Q5BJF6;P17987;Q5VT06;Q68DK2;Q6P1N0;Q92547;O95613;P50991;Q99996;Q8N4C6;Q6QNY1;O14757;Q08AG7;Q9NXR1;Q9UBK9;Q9NVX0;Q6P582;Q9Y5Y2;Q13561;Q5TB80;Q9UJT9;Q9C0D2;Q9H7T9;A6NK89;Q86X95;Q6UVJ0;Q9BQ89;Q70YC5;Q9Y6D9;Q96NB1;Q14839;Q8N8E3;O75154;Q13432;P36404;Q13042;Q8WUM4}
- 1063 Pathogen[ P03346] interacts with 174 human  
partners:{Q9NZJ0;Q5SZL2;Q6P582;Q9Y6D9;Q9NRI5;Q5T6F0;Q7Z7A1;Q9BT25;Q5FBB7;Q9H6D7;Q9H4X1;Q86VQ0;Q9UJW0;Q9UPT5;Q6NZ67;Q01201;Q15834;P05783;Q86XR8;Q8N8E3;Q5JTW2;O95684;P06748;Q2M2Z5;P23258;Q99871;Q96RT8;Q7Z4H7;Q9UJT9;Q5MIZ7;Q9HD42;Q8WYJ6;O75410;Q15154;O75935;O00139;Q15691;Q99689;A8MVW5;Q8NHV4;P24941;Q9NY27;Q68CZ1;Q9Y6D5;O95359;Q9BZV1;Q9HC77;O14757;Q9NXR1;Q9P209;Q9H1H9;Q96IF1;P60953;Q96IK1;Q96CW5;Q70YC5;Q8IYX8;Q9BQ89;Q9C0F1;O43805;Q12834;Q9Y664;P30305;Q15051;Q6P2H3;Q96ST8;Q13432;Q9BRK4;Q76KD6;Q8TAM2;Q6P1N0;Q5TB80;A6NK89;Q9C0D2;O75161;P18848;Q9NXB0;Q9NVX0;Q9Y224;Q8N960;Q96EA4;A6NKF1;Q8IW35;Q92597;P14635;O43189;Q13042;O94986;Q6QNY1;Q7Z6E9;Q96SN8;P50991;Q6ZP65;Q14008;Q5VT06;Q9UKA4;Q3SYG4;O60447;Q68CZ6;Q8TC76;Q9UGJ1;Q5VYK3;P62081;Q96K30;P36404;Q9BTV5;Q53EZ4;Q8TAP6;Q9NVR7;P42025;Q9ULD2;Q5BJF6;Q9Y5Y2;O75122;Q68DK2;Q9BYV8;Q8TAP9;Q92547;Q9Y2I6;P36405;Q96ED9;Q99996;Q96PY6;Q96CS2;Q8NHQ1;Q9NR09;Q6IN85;Q12798;Q12873;Q96KG9;Q9BSJ2;Q9Y6F1;Q08AG7;Q7Z460;P05062;Q9Y2Y0;O95613;O15182;O15078;Q96GE4;Q96RT7;Q13045;O94927;O75154;Q8N4C6;O76095;Q86X95;Q5VU43;Q14194;Q9H816;Q96EY5;Q1MSJ5;Q9UBK9;Q8WUM4;Q9NS23;O14965;Q1W6H9;Q6UVJ0;Q76N32;Q15650;P60510;Q92834;Q6DKK2;Q6IQ23;Q9UNH5;Q96NB1;Q14839;Q96M02;Q9UBP0;Q9H7T9;Q96MT8;Q13561;P17987;Q9BV73}
- 1064 Pathogen[ Q85601] interacts with 169 human  
partners:{Q53EZ4;Q8NHQ1;Q5VYK3;Q5SZL2;P61163;Q7Z6E9;Q96M02;O75161;Q9H7T9;Q9H4X1;Q9UJW0;Q9UPT5;P62081;O75154;Q6UVJ0;Q15834;O94986;Q15154;P36405;Q8N8E3;O95684;Q14008;Q6IN85;Q14194;Q92547;Q2M2Z5;Q9H6D7;Q9BT25;O15182;Q99871;Q96RT8;Q5MIZ7;Q9UBP0;Q96PY6;Q12798;Q96IK1;Q6NZ67;Q96SN8;O75935;Q7Z4H7;Q9NVX0;A8MVW5;P18848;Q8NHV4;Q9NY27;Q9Y2Y0;Q9HC77;Q9NZJ0;Q9P209;Q13045;Q9H1H9;Q6IQ23;O15078;Q92834;Q5BJF6;Q9Y2I6;Q9NS23;Q6ZP65;P17987;Q96CW5;Q96EA4;P05062;Q9BZV1;Q6P2H3;Q9BQ89;A6NKF1;Q96FI4;Q12834;Q5JTW2;P23258;Q8TAP9;O14757;Q96ST8;Q76KD6;O75122;Q9UNH5;P30305;O14965;Q86XR8;Q9BSJ2;Q9Y6F1;Q9NXB0;Q15650;P50991;Q76N32;P05783;Q9UGJ1;P14635;Q13042;Q9BV73;Q12873;Q5VT06;Q9C0F1;Q9BRK4;Q6DKK2;Q15691;O60447;Q15051;Q8TC76;Q96MT8;Q9Y6D9;Q9UJT9;Q1MSJ5;Q86VQ0;Q9BYV8;Q7Z7A1;A6NK89;Q5TB80;Q9BVA0;Q01201;Q8IW35;P06748;Q99689;O94927;Q68DK2;Q3SYG4;Q96IF1;Q8TAP6;O76095;Q99996;Q8WYJ6;Q5VU43;Q96CS2;P60953;P60510;Q9BTV5;Q9NRI5;O43189;Q9NR09;Q8WUM4;Q9Y5Y2;Q13432;Q7Z460;Q96KG9;Q08AG7;Q92597;O95613;Q8N4C6;P48643;Q9NXR1;Q96K30;Q6P582;Q9H816;Q9UBK9;Q96EY5;Q96ED9;Q6P1N0;Q9C0D2;Q9GZM8;Q6QNY1;P24941;P42025;Q9HD42;Q1W6H9;O00139;O75410;Q9Y224;Q9ULD2;Q68CZ6;Q5FBB7;Q86X95;P51955;O43805;Q96NB1;Q14839;O95359;Q8IYX8;Q96RT7;Q13561}
- 1065 Pathogen[ P14079] interacts with 173 human

- partners: {Q15691; Q9UKA4; Q2M2Z5; O75161; Q9H7T9; P48643; Q96K30; Q96EY5; Q9Y664; Q9BTV5; Q6UVJ0; Q68DK2; Q99996; Q9NS23; Q6IQ23; Q7Z460; O95684; Q9P209; O95359; Q96GE4; A6NK89; O94986; O76095; Q99871; Q96ED9; Q9UGJ1; Q68CZ1; P50991; Q9Y6D5; Q9NVX0; Q5JTW2; Q92834; Q9Y2Y0; Q70YC5; Q1MSJ5; Q96ST8; Q8N8E3; Q9HD42; Q9NRI5; Q6P582; Q6P1N0; Q9BV73; Q9NY27; A8MVW5; Q1W6H9; Q13045; P50990; Q9BZV1; Q9NVR7; Q8TAP6; Q9UJW0; Q92597; Q76KD6; Q9UPT5; Q76N32; Q5VYK3; Q5FBB7; Q12873; Q01201; Q8N960; Q9NR09; Q5SZL2; Q08AG7; Q96M02; Q96IK1; O43189; P36405; Q8WYJ6; Q5BJF6; Q96T89; Q5MIZ7; P14635; P51955; Q99689; Q8NHV4; Q8N4C6; Q9BQ89; Q96IF1; Q5VT06; Q7Z4L9; Q96WU4; Q766E9; P17987; Q12798; Q13042; O00139; Q96EA4; Q8TAM2; P23258; Q9H1H9; Q9UBK9; Q96RT7; Q9H6D7; Q9Y5Y2; Q96FI4; A6NKF1; Q15834; Q13561; Q8TCU4; Q9P2L0; Q14194; P06748; Q9BSJ2; Q6ZP65; Q8NEM0; Q9C0F1; Q6DKK2; P05783; P61163; Q9GZM8; Q5TB80; Q9ULD2; P62081; Q8TAP9; Q6IN85; Q13432; Q14839; Q92547; O95613; Q15051; O75410; Q8TC76; P60510; O15078; P42025; Q7Z4H7; Q9NZJ0; O75154; Q9BT25; O15182; Q6P2H3; P30305; Q8NHQ1; Q6NZ67; Q68CZ6; Q15154; Q9UJT9; Q3SYG4; Q15650; Q86XR8; Q9NXR1; Q5T6F0; Q9Y2I6; Q86VQ0; Q9BVA0; O75122; O14965; Q9BRK4; Q8IYX8; Q6QNY1; O75935; Q86X95; Q9C0D2; Q9Y224; Q9HC77; Q8IW35; Q9H816; Q96SN8; Q9NXB0; Q9BYV8; Q9Y6F1; Q9UNH5; O43805; Q53EZ4; Q7Z7A1; O94927; Q5VU43; Q96CW5; Q96NB1; Q96KG9; Q14008; Q8WVJ2; Q96CS2}
- 1066 Pathogen[ P03383] interacts with 126 human partners: {Q7Z7A1; Q9BRK4; Q9Y2Y0; Q8TC76; Q86XR8; O14757; Q9H4X1; Q7Z460; Q14839; Q6UVJ0; Q9UJW0; Q9BSJ2; P06748; Q1MSJ5; Q68DK2; Q15051; O94986; Q14008; Q9NZJ0; Q15691; O95684; Q9NVX0; Q15650; Q5FBB7; Q9NRI5; Q5VYK3; P42025; Q6NZ67; Q96SN8; O75410; Q7Z4H7; Q99689; Q96CW5; P60953; A8MVW5; Q8NHV4; Q9BV73; Q9BZV1; Q9HC77; Q12798; O43189; Q96K30; P05783; Q92597; Q96EA4; Q13042; Q13432; P14635; Q5VT06; Q96MT8; Q08AG7; Q9BQ89; Q9C0F1; A6NKF1; Q9H1H9; Q5VU43; Q12834; Q6P1N0; Q76KD6; Q99871; Q96NB1; Q5TB80; Q12873; Q96CS2; Q2M2Z5; Q9H816; O94927; P62081; Q9NXB0; Q86VQ0; O15078; P24941; Q9UNH5; Q6DKK2; Q68CZ6; Q15154; Q01201; Q70YC5; Q9BYV8; Q9BT25; O75935; Q5BJF6; Q96ED9; Q6IN85; Q9HD42; Q5MIZ7; O14965; Q3SYG4; Q96ST8; Q6P582; Q8TAP6; Q9NY27; Q96PY6; Q9P209; O75161; Q9NR09; Q8WUM4; Q9H6D7; Q99996; O95613; Q13561; Q13045; Q9H7T9; P18848; Q8N4C6; O76095; Q92547; Q86X95; Q6P2H3; Q8N8E3; Q9UPT5; Q9UBK9; Q9C0D2; Q15834; Q96EY5; A6NK89; Q53EZ4; O75154; P60510; Q9Y224; Q8NHQ1; Q8TAP9; Q1W6H9; Q9Y6D9; Q6QNY1; Q8IW35}
- 1067 Pathogen[ P03410] interacts with 176 human partners: {Q15650; Q96M02; O95684; Q7Z460; P17987; Q8WVJ2; O75154; Q86VQ0; Q8N960; Q9H4X1; Q96FI4; Q12873; O95359; Q9UPT5; P48643; Q96NB1; Q9H6D7; Q6QNY1; Q9H816; Q5MIZ7; Q9UKA4; Q8TC76; Q13561; Q9Y2I6; O00139; Q9NXR1; Q9HC77; Q9H7T9; Q99996; Q9GZM8; Q15154; P60510; Q96K30; Q9H1H9; Q3SYG4; Q7Z7A1; P18848; Q6UVJ0; Q9Y224; Q7Z4L9; Q8TAM2; Q14008; Q96SN8; P36405; O15182; Q5VYK3; Q9NS23; Q9C0D2; O75161; Q8TCU4; Q12798; Q9P209; Q9UJW0; P06748; Q9UBK9; Q6DKK2; Q9Y5Y2; Q9UNH5; P05062; Q13045; Q8TAP9; Q8IYX8; Q9BYV8; Q68CZ6; P61163; Q01201; Q96CS2; Q9Y6F1; Q9BTV5; Q9BZV1; O14965; Q96EA4; Q96IF1; O43805; Q9NR09; Q8NHV4; O94986; Q8TAP6; P14635; Q6P2H3; Q96KG9; Q15691; Q13042; Q9NVR7; P50990; Q5SZL2; Q96GE4; P62081; Q96ED9; P24941; Q9HD42; Q9ULD2; Q5VU43; Q9NVX0; A6NK89; O15078; Q6IN85; O60447; Q92834; Q8WYJ6; Q15834; Q96ST8; Q8N4C6; A8MVW5; Q9Y6D5; O14757; O75410; Q5T6F0; Q5BJF6; O75935; Q53EZ4; Q9BQ89; Q9BSJ2; Q86X95; O94927; Q15051; Q12834; Q92547; Q8IW35; Q5FBB7; P60953; P42025; Q9NRI5; Q96RT8; O43189; P23258; Q2M2Z5; Q5TB80; Q08AG7; Q1MSJ5; Q9NXB0; Q92597; Q6NZ67; Q6ZP65; Q96EY5; O76095; Q14194; Q96CW5; A6NKF1; Q99871; Q76N32; P30305; Q9UJT9; Q96RT7; Q9P2L0; Q9Y664; Q68CZ1; O95613; Q13432; Q9C0F1; Q9Y2Y0; Q6P582; Q1W6H9; Q14839; Q8WUM4; Q68DK2; O75122; P05783; Q9BV73; Q76KD6; Q9BT25; Q70YC5; Q6P1N0; Q7Z4H7; Q9UGJ1; Q5JTW2; Q6IQ23; Q9NY27; Q9BVA0; Q8N8E3; P50991; Q8NEM0; Q5VT06; Q9NZJ0; Q96IK1; Q99689}
- 1068 Pathogen[ P14075] interacts with 129 human partners: {P60953; Q96MT8; Q99871; Q3SYG4; Q9H4X1; Q9BYV8; Q96EY5; Q86X95; Q6NZ67; Q13042; Q9H1H9; P24941; Q1W6H9; P05783; O95684; Q6P582; Q9Y6D9; Q15051; Q5VT06; Q5VU43; Q7Z4H7; O75410; O76095; Q9Y224; Q9H7T9; A6NK89; P14635; Q5MIZ7; Q01201; Q08AG7; Q8WUM4; A8MVW5; Q8NHV4; Q7Z460; P60510; Q14839; Q13561; Q9Y2Y0; Q68CZ6; Q9HC77; Q86VQ0; Q96SN8; Q6UVJ0; Q12798; P62081; Q8NHQ1; Q96ST8; Q9BT25; Q96GE4; Q9NRI5; Q76KD6; Q68DK2; Q9NXB0; Q9C0F1; Q99996; Q9NY27; O15078; Q96EA4; O00139; Q5BJF6; Q6IN85; O75935; O75161; Q86XR8; Q15650; Q9UBK9; O14965; Q96NB1; Q96K30; Q15834; Q6QNY1; Q15691; O43189; Q9BV73; Q5TB80; Q6P2H3; Q9H816; Q8TAP6; Q96CS2; P06748; Q5FBB7; P18848; O94986; Q15154; A6NKF1; Q9BQ89; Q53EZ4; Q9BRK4; Q9NVX0; Q9NR09; Q96PY6; Q9HD42; O94927; Q92597; O75154; O95613; Q9P209; Q9BZV1; Q14008; Q8N4C6; Q8TAP9; Q9NZJ0; Q9UJW0; Q1MSJ5; Q8N8E3; Q13432; Q9BSJ2; Q96IK1; Q92547; Q12873; Q9UNH5; Q9H6D7; Q9C0D2; Q6P1N0; Q7Z7A1; P42025; Q70YC5; O14757; Q12834; Q96CW5; Q2M2Z5; Q13045; Q6DKK2; Q8TC76; Q96ED9; Q8IW35; Q5VYK3; Q9UPT5; Q99689}
- 1069 Pathogen[ P0C206] interacts with 175 human partners: {Q5JTW2; Q92597; Q9Y224; Q9UJT9; O15182; Q68DK2; P48643; Q86XR8; P05062; Q96M02; Q8N8E3; O95359; O94986; Q9BVA0; Q5SZL2; Q96SN8; Q9HC77; Q9H7T9; Q14008; Q13432; Q9H4X1; Q96ST8; Q9UBP0; Q5BJF6; O95684; P62081; Q3SYG4; Q9Y6D9; Q8TAM2; Q6IN85; O75161; Q96RT7; P51955; O75154; Q9C0D2; Q6P2H3; Q96IF1; Q8TCU4; Q9BTV5; Q96CW5; Q9BQ89; Q15691; Q13045; Q9BT25; Q96K30; Q86VQ0; Q96PY6; Q6QNY1; Q9NVR7; Q6UVJ0; Q9Y5Y2; Q6ZP65; P50991; P30305; Q9H816; Q99996; P17987; Q01201; Q9H1H9; Q96KG9; Q9GZM8; Q9UGJ1; Q9Y6F1; Q96ED9; Q9NVX0; P61163; Q14839; Q99689; O75122; Q8TAP6; O75410; Q6DKK2; O60447; A8MVW5; A6NKF1; Q8WYJ6; Q2M2Z5; Q86X95; Q9UNH5; Q6P1N0; Q15650; Q9UJW0; Q9NR09; O95613; Q9BZV1; Q9Y6D5; Q9UPT5; Q8IYX8; O15078; Q9NRI5; Q15834; P05783; Q96CS2; Q8IW35; Q7Z4H7; Q5FBB7; Q9ULD2; Q5VT06; A6NK89; Q9BYV8; O94927; Q5VU43; Q9NY27; Q8TC76; Q9BV73; Q8NHV4; Q96FI4; P60953; P23258; O00139; Q9NZJ0; Q13561; Q76N32; P36405; Q5VYK3; Q8WUM4; Q14194; Q6P582; Q7Z7A1; Q9H6D7; Q99871; Q5T6F0; Q9NXR1; Q96EA4; Q9HD42; Q5MIZ7; Q8TAP9; Q9UBK9; Q70YC5; Q9P209; Q12798; P06748; P14635; P60510; Q1MSJ5; Q9Y2Y0; O14965; O43805; Q8N4C6; Q96MT8; Q7Z460; Q9C0F1; Q7Z6E9; Q9NS23; O75935; Q15154; Q92547; Q9NXB0; Q13042; Q8NHQ1; Q96IK1; Q96NB1; Q9BVA0; O43189; P42025; Q15051; Q6IQ23; P24941; Q08AG7; Q9BSJ2; Q68CZ6; P18848; Q92834; Q5TB80; Q8N960; Q12834; Q6NZ67; Q96EY5; Q9UKA4; Q12873; O76095; Q96GE4; Q9Y2I6; Q1W6H9; Q76KD6}
- 1070 Pathogen[ P03363] interacts with 167 human partners: {Q86X95; Q9BQ89; Q5BJF6; Q92547; P05783; O75410; Q9H816; Q96EA4; Q5SZL2; A6NKF1; Q9Y2I6; P18848; Q15834; Q15051; Q96IK1; Q13042; O75161; Q7Z7A1; Q9Y6D9; Q9HC77; Q9UNH5; Q96ED9; Q9H4X1; Q86VQ0; Q76N32; Q8TAM2; Q9BYV8; Q5VT06; Q9BRK4; Q14194; Q99996; Q96MT8; O15078; Q9UJT9; Q8NHV4; P62081; O43805; Q1MSJ5; Q13561; Q15691; O95684; Q6P582; Q9UJW0; Q7Z6E9; Q9H7T9; Q13045; Q92597; Q

8NHQ1;O60447;O95613;O94986;Q96FI4;Q9H6D7;Q96K30;Q9BT25;Q5VU43;Q8TAP6;Q96M02;P24941;Q14839;Q9UBK9;Q68DK2;Q9P209;Q96GE4;P06748;Q8WYJ6;O43189;Q5FBB7;Q96IF1;Q6ZP65;P50991;Q5JTW2;P61163;A8MVW5;Q5T6F0;Q53EZ4;Q68CZ6;Q12798;O94927;Q6DKK2;Q3SYG4;Q8WUM4;Q9NR09;Q13432;Q96RT8;Q9NVX0;Q9BZV1;Q96KG9;Q96ST8;O75935;Q08AG7;P17987;Q7Z460;Q6QNY1;Q6P2H3;Q6IN85;Q9NVR7;P60510;Q96NB1;Q96CS2;P42025;Q99871;Q96EY5;O76095;O75154;Q9NS23;Q01201;Q9NY27;Q8IW35;O15182;Q96RT7;Q76KD6;Q8TC76;A6NK89;Q9NR15;Q70YC5;Q9UGJ1;Q9C0F1;Q8IYX8;Q92834;Q9Y5Y2;Q12873;Q95359;Q6P1N0;Q86XR8;Q9Y224;Q12834;Q14008;Q9Y664;Q9Y2Y0;Q9H1H9;Q8N4C6;Q8N8E3;Q1W6H9;Q9NXR1;Q9NXB0;Q9C0D2;P23258;O00139;Q6NZ67;Q9NZJ0;Q9ULD2;Q7Z4H7;Q5MIZ7;P60953;P48643;Q5T890;Q15154;Q5TB80;Q6IQ23;Q2M2Z5;Q9BSJ2;Q9BTV5;Q9BV73;Q8NEM0;Q9Y6F1;Q5VYK3;Q15650;Q9HD42;Q9UPT5;Q8TAP9;Q6UVJ0;Q99689;Q96CW5;Q96SN8;O14757;Q8N960}

1071 [Cluster 98]GO:0000444+C cellular\_component [name] MIS12/MIND type complex [def] "A multiprotein kinetochore subcomplex that binds to centromeric chromatin and forms part of the inner kinetochore. It helps to recruit outer kinetochore subunits that will bind to microtubules. In humans, it consists of MIS12, DSN1, NSL1 and PMF1." [GOC]

1072 Pathogen[ Q2Q067] interacts with 4 human partners:{Q6P1K2;Q9H410;Q96IY1;Q9H081}

1073 Pathogen[ P0C214] interacts with 4 human partners:{Q9H081;Q6P1K2;Q9H410;Q96IY1}

1074 Pathogen[ P03346] interacts with 4 human partners:{Q96IY1;Q9H081;Q9H410;Q6P1K2}

1075 Pathogen[ Q85601] interacts with 4 human partners:{Q9H081;Q9H410;Q96IY1;Q6P1K2}

1076 Pathogen[ P14079] interacts with 4 human partners:{Q96IY1;Q9H410;Q6P1K2;Q9H081}

1077 Pathogen[ P03383] interacts with 4 human partners:{Q9H410;Q9H081;Q96IY1;Q6P1K2}

1078 Pathogen[ P03410] interacts with 4 human partners:{Q9H410;Q96IY1;Q6P1K2;Q9H081}

1079 Pathogen[ P14075] interacts with 4 human partners:{Q9H081;Q96IY1;Q9H410;Q6P1K2}

1080 Pathogen[ P0C206] interacts with 4 human partners:{Q9H081;Q9H410;Q6P1K2;Q96IY1}

1081 Pathogen[ P03363] interacts with 4 human partners:{Q96IY1;Q6P1K2;Q9H081;Q9H410}

1082 [Cluster 99]GO:0071565+C cellular\_component [name] nBAF complex [def] "A SWI/SNF-type complex that is found in post-mitotic neurons, and in human contains actin and proteins encoded by the ARID1A/BAF250A or ARID1B/BAF250B, SMARCD1/BAF60A, SMARCD3/BAF60C, SMARCA2/BRM/BAF190B, SMARCA4/BRG1/BAF190A, SMARCB1/BAF47, SMARCC1/BAF155, SMARCE1/BAF57, SMARCC2/BAF170, DPF1/BAF45B, DPF3/BAF45C, ACTL6B/BAF53B genes. The nBAF complex along with CREST plays a role regulating the activity of genes essential for dendrite growth." [GOC]

1083 Pathogen[ Q2Q067] interacts with 12 human partners:{Q92922;P51531;Q92782;Q969G3;O14497;P51532;Q96GM5;O94805;Q12824;Q8TAQ2;Q9HBD4;Q6STE5}

1084 Pathogen[ P0C214] interacts with 12 human partners:{Q12824;O14497;Q9HBD4;Q6STE5;Q8TAQ2;Q92922;Q969G3;P51531;O94805;Q92782;Q96GM5;P51532}

1085 Pathogen[ P03346] interacts with 13 human partners:{Q9HBD4;Q96GM5;P51532;Q12824;Q6STE5;O14497;Q92784;O94805;Q969G3;Q92922;P51531;Q8TAQ2;Q92782}

1086 Pathogen[ Q85601] interacts with 12 human partners:{Q6STE5;O14497;Q92782;P51531;Q96GM5;P51532;Q969G3;Q9HBD4;O94805;Q92922;Q12824;Q8TAQ2}

1087 Pathogen[ P14079] interacts with 10 human partners:{Q6STE5;Q92782;Q92922;P51532;P51531;O14497;Q8TAQ2;O94805;Q96GM5;Q12824}

1088 Pathogen[ P03383] interacts with 12 human partners:{O14497;Q9HBD4;Q12824;O94805;Q6STE5;Q92782;Q96GM5;Q969G3;P51531;Q8TAQ2;P51532;Q92922}

1089 Pathogen[ P03410] interacts with 12 human partners:{Q96GM5;O14497;Q969G3;Q92782;O94805;Q92922;P51532;P51531;Q8TAQ2;Q6STE5;Q12824;Q9HBD4}

1090 Pathogen[ P14075] interacts with 11 human partners:{Q9HBD4;Q96GM5;Q92782;P51532;Q92922;O14497;P51531;Q8TAQ2;Q12824;O94805;Q6STE5}

1091 Pathogen[ P0C206] interacts with 13 human partners:{P51532;P51531;Q6STE5;Q92922;Q12824;Q8TAQ2;Q92782;O14497;Q92784;Q96GM5;Q969G3;Q9HBD4;O94805}

1092 Pathogen[ P03363] interacts with 12 human partners:{Q6STE5;Q8TAQ2;P51532;O14497;Q969G3;Q9HBD4;Q92782;O94805;Q96GM5;P51531;Q92922;Q12824}

1093 [Cluster 100]GO:0005719+C cellular\_component [name] nuclear euchromatin [def] "The dispersed less dense form of chromatin in the interphase nucleus. It exists in at least two forms, a some being in the form of transcriptionally active chromatin which is the least condensed, while the rest is inactive euchromatin which is more condensed than active chromatin but less condensed than heterochromatin." [ISBN]

1094 Pathogen[ Q2Q067] interacts with 6 human partners:{Q13185;P20226;P38159;O15164;Q9HBD4;Q9BXF3}

1095 Pathogen[ P0C214] interacts with 8 human partners:{P38159;Q9HBD4;Q13185;P20226;Q9BXF3;P05412;O15164;P16220}

1096 Pathogen[ P03346] interacts with 9 human partners:{P05412;Q13263;Q9HBD4;Q9BXF3;P16220;P20226;P38159;Q13185;O15164}

1097 Pathogen[ Q85601] interacts with 9 human partners:{Q9BXF3;O15164;Q13263;P16220;P05412;Q13185;Q9HBD4;P38159;P20226}

1098 Pathogen[ P14079] interacts with 5 human partners:{O15164;Q13185;Q9BXF3;P05412;P38159}

1099 Pathogen[ P03383] interacts with 7 human

1100 partners:{Q9HBD4;P16220;P38159;P20226;Q13185;Q9BXF3;P05412}  
Pathogen[ P03410] interacts with 7 human

1101 partners:{Q9BXF3;P20226;P16220;Q13185;P05412;Q9HBD4;P38159}  
Pathogen[ P14075] interacts with 7 human

1102 partners:{Q9HBD4;P05412;P38159;P20226;Q13185;P16220;Q9BXF3}  
Pathogen[ P0C206] interacts with 9 human

1103 partners:{Q13263;P20226;P16220;P05412;O15164;P38159;Q9BXF3;Q13185;Q9HBD4}  
Pathogen[ P03363] interacts with 7 human

1104 partners:{P16220;Q13185;Q9BXF3;P38159;Q9HBD4;P20226;P05412}  
[Cluster 101]GO:0070382+C cellular\_component [name] exocytic vesicle [def] "A transport vesicle that mediates transport from an intracellular compartment to the plasma membrane, and fuses with the plasma membrane to release various cargo molecules, such as proteins or hormones, by exocytosis." [GOC

1105 Pathogen[ Q2Q067] interacts with 2 human partners:{Q9P0M2;Q9HCH5}  
1106 Pathogen[ P0C214] interacts with 2 human partners:{Q9P0M2;Q9HCH5}  
1107 Pathogen[ P03346] interacts with 3 human partners:{Q9P0M2;Q9HCH5;Q70J99}  
1108 Pathogen[ Q85601] interacts with 2 human partners:{Q9HCH5;Q9P0M2}  
1109 Pathogen[ P14079] interacts with 2 human partners:{Q9P0M2;Q9HCH5}  
1110 Pathogen[ P03383] interacts with 1 human partners:{Q9HCH5}  
1111 Pathogen[ P03410] interacts with 3 human partners:{Q9HCH5;Q70J99;Q9P0M2}  
1112 Pathogen[ P14075] interacts with 1 human partners:{Q9HCH5}  
1113 Pathogen[ P0C206] interacts with 2 human partners:{Q9P0M2;Q9HCH5}  
1114 Pathogen[ P03363] interacts with 2 human partners:{Q9P0M2;Q9HCH5}

1115 [Cluster 102]GO:0034045+C cellular\_component [name] pre-autophagosomal structure membrane [def] "A cellular membrane associated with the pre-autophagosomal structure." [GOC

1116 Pathogen[ Q2Q067] interacts with 6 human  
partners:{Q6ZNE5;Q8TDY2;Q9Y4P8;O94817;Q676U5;Q9H1Y0}  
1117 Pathogen[ P0C214] interacts with 6 human  
partners:{Q676U5;Q8TDY2;Q6ZNE5;Q9Y4P8;O94817;Q9H1Y0}  
1118 Pathogen[ P03346] interacts with 6 human  
partners:{Q8TDY2;Q6ZNE5;Q9H1Y0;Q676U5;O94817;Q9Y4P8}  
1119 Pathogen[ Q85601] interacts with 5 human  
partners:{Q8TDY2;O94817;Q9Y4P8;Q9H1Y0;Q676U5}  
1120 Pathogen[ P14079] interacts with 6 human  
partners:{Q9Y4P8;Q8TDY2;Q9H1Y0;Q6ZNE5;Q676U5;O94817}  
1121 Pathogen[ P03383] interacts with 6 human  
partners:{Q8TDY2;Q9H1Y0;Q676U5;Q9Y4P8;O94817;Q6ZNE5}  
1122 Pathogen[ P03410] interacts with 7 human  
partners:{Q9H1Y0;Q8TDY2;Q9Y4P8;O94817;Q676U5;Q6ZNE5;Q5MNZ9}  
1123 Pathogen[ P14075] interacts with 6 human  
partners:{Q6ZNE5;Q9H1Y0;Q676U5;Q8TDY2;Q9Y4P8;O94817}  
1124 Pathogen[ P0C206] interacts with 6 human  
partners:{Q6ZNE5;Q9Y4P8;Q9H1Y0;Q8TDY2;Q676U5;O94817}  
1125 Pathogen[ P03363] interacts with 6 human  
partners:{Q6ZNE5;Q8TDY2;Q9Y4P8;Q676U5;O94817;Q9H1Y0}

1126 [Cluster 103]GO:0042719+C cellular\_component [name] mitochondrial intermembrane space protein transporter complex [def] "Soluble complex of the mitochondrial intermembrane space composed of various combinations of small Tim proteins\_ acts as a protein transporter to guide proteins to the Tim22 complex for insertion into the mitochondrial inner membrane." [PMID

1127 Pathogen[ Q2Q067] interacts with 4 human partners:{O60220;Q9Y5J6;P62072;Q9Y5J7}  
1128 Pathogen[ P0C214] interacts with 5 human  
partners:{O60220;P62072;Q9Y5J9;Q9Y5J6;Q9Y5J7}  
1129 Pathogen[ P03346] interacts with 4 human partners:{Q9Y5J7;Q9Y5J6;O60220;P62072}  
1130 Pathogen[ Q85601] interacts with 5 human  
partners:{P62072;Q9Y5J9;Q9Y5J6;O60220;Q9Y5J7}  
1131 Pathogen[ P14079] interacts with 5 human  
partners:{P62072;Q9Y5J7;O60220;Q9Y5J9;Q9Y5L4}  
1132 Pathogen[ P03383] interacts with 5 human  
partners:{Q9Y5J7;P62072;O60220;Q9Y5J6;Q9Y5J9}  
1133 Pathogen[ P03410] interacts with 6 human  
partners:{Q9Y5L4;P62072;Q9Y5J7;Q9Y5J6;Q9Y5J9;O60220}  
1134 Pathogen[ P14075] interacts with 5 human  
partners:{Q9Y5J9;P62072;O60220;Q9Y5J7;Q9Y5J6}  
1135 Pathogen[ P0C206] interacts with 6 human  
partners:{Q9Y5L4;Q9Y5J6;O60220;Q9Y5J9;Q9Y5J7;P62072}  
1136 Pathogen[ P03363] interacts with 1 human partners:{Q9Y5J7}

1137 [Cluster 104]GO:0005868+C cellular\_component [name] cytoplasmic dynein complex [def] "Any dynein complex that catalyzes movement along a cytoplasmic microtubule\_ cytoplasmic dynein complexes participates in many transport activities in eukaryotes, such as mRNA localization, intermediate filament transport, nuclear envelope breakdown, apoptosis, transport of centrosomal proteins, mitotic spindle assembly, virus transport, kinetochore functions, and movement of signaling and spindle checkpoint proteins. Subunits associated with the dynein heavy chain mediate association between dynein heavy chain and cargoes, and may include light chains and light intermediate chains." [GOC

1138 Pathogen[ Q2Q067] interacts with 10 human  
partners:{Q9NS56;P63172;Q8TF09;Q14204;P63167;Q9NP97;Q14203;Q13409;P51808;O14576}

1139 Pathogen[ P0C214] interacts with 10 human  
partners:{Q14203;Q9NS56;Q8TF09;Q14204;P51808;P63172;O14576;Q9NP97;Q13409;P63167}

1140 Pathogen[ P03346] interacts with 11 human  
partners:{O14576;P51808;Q14204;Q14203;Q8TF09;Q9NS56;P63172;Q13409;O95219;P63167;Q9NP97}

1141 Pathogen[ Q85601] interacts with 10 human  
partners:{Q13409;Q9NS56;Q9NP97;P51808;Q14204;Q14203;P63172;O14576;Q8TF09;P63167}

1142 Pathogen[ P14079] interacts with 10 human  
partners:{Q8TF09;P63172;P51808;Q14204;Q9NP97;Q13409;Q9NS56;P63167;O14576;Q14203}

1143 Pathogen[ P03383] interacts with 6 human  
partners:{P51808;P63172;Q14203;Q9NP97;Q8TF09;P63167}

1144 Pathogen[ P03410] interacts with 12 human  
partners:{Q9Y6G9;Q14204;P51808;Q13409;Q9NP97;Q8TF09;P63172;P63167;O95219;O14576;O43237;Q14203}

1145 Pathogen[ P14075] interacts with 6 human  
partners:{Q9NP97;P51808;Q8TF09;P63172;Q14203;P63167}

1146 Pathogen[ P0C206] interacts with 12 human  
partners:{Q9NS56;Q9NP97;O14576;P63167;Q8TF09;O43237;Q13409;Q14204;P51808;Q9Y6G9;Q14203;P63172}

1147 Pathogen[ P03363] interacts with 11 human  
partners:{P63167;O95219;Q14204;Q8TF09;P63172;Q13409;P51808;Q9NP97;O43237;Q14203;O14576}

1148 [Cluster 105]GO:0033503+C cellular\_component [name] HULC complex [def] "A ubiquitin-conjugating enzyme complex that contains two RING finger proteins, which have ubiquitin ligase activity, in addition to a protein with ubiquitin-conjugating enzyme activity\_ catalyzes the ubiquitination of histone H2B at lysine 119 (or the equivalent residue). In Schizosaccharomyces the subunits are Rhp1, Brl2/Rfp1 and Brll1/Rfp2." [GOC]

1149 Pathogen[ Q2Q067] interacts with 4 human partners:{P63146;Q5VTR2;O75150;P49459}

1150 Pathogen[ P0C214] interacts with 4 human partners:{P49459;O75150;Q5VTR2;P63146}

1151 Pathogen[ P03346] interacts with 4 human partners:{O75150;Q5VTR2;P49459;P63146}

1152 Pathogen[ Q85601] interacts with 4 human partners:{P63146;P49459;O75150;Q5VTR2}

1153 Pathogen[ P14079] interacts with 3 human partners:{Q5VTR2;P49459;P63146}

1154 Pathogen[ P03383] interacts with 4 human partners:{Q5VTR2;P49459;P63146;O75150}

1155 Pathogen[ P03410] interacts with 4 human partners:{P49459;Q5VTR2;O75150;P63146}

1156 Pathogen[ P14075] interacts with 4 human partners:{Q5VTR2;P49459;O75150;P63146}

1157 Pathogen[ P0C206] interacts with 4 human partners:{Q5VTR2;P49459;O75150;P63146}

1158 Pathogen[ P03363] interacts with 4 human partners:{P49459;Q5VTR2;P63146;O75150}

1159 [Cluster 106]GO:0016514+C cellular\_component [name] SWI/SNF complex [def] "A SWI/SNF-type complex that contains nine or more proteins, including both conserved (core) and nonconserved components\_ the Swi2/Snf2 ATPase is one of the core components." [GOC]

1160 Pathogen[ Q2Q067] interacts with 14 human  
partners:{Q92922;P06400;O96019;P51531;Q969G3;Q92925;O14497;P51532;Q96GM5;Q8NFD5;O94805;Q12824;Q8TAQ2;Q6STE5}

1161 Pathogen[ P0C214] interacts with 14 human  
partners:{Q12824;O14497;Q6STE5;Q8TAQ2;Q92922;Q969G3;Q92925;Q8NFD5;P51531;O94805;Q96GM5;O96019;P06400;P51532}

1162 Pathogen[ P03346] interacts with 14 human  
partners:{Q96GM5;Q8NFD5;P06400;P51532;Q92925;Q12824;O96019;Q6STE5;O14497;O94805;Q969G3;Q92922;P51531;Q8TAQ2}

1163 Pathogen[ Q85601] interacts with 14 human  
partners:{Q6STE5;P06400;Q92925;O14497;O96019;P51531;Q96GM5;P51532;Q969G3;Q8NFD5;O94805;Q92922;Q12824;Q8TAQ2}

1164 Pathogen[ P14079] interacts with 11 human  
partners:{Q6STE5;Q92922;P51532;P51531;O14497;Q8TAQ2;O94805;Q96GM5;Q8NFD5;Q12824;Q92925}

1165 Pathogen[ P03383] interacts with 14 human  
partners:{O14497;O96019;Q12824;O94805;Q6STE5;P06400;Q96GM5;Q969G3;P51531;Q92925;Q8TAQ2;P51532;Q8NFD5;Q92922}

1166 Pathogen[ P03410] interacts with 14 human  
partners:{Q96GM5;O14497;O96019;P06400;Q8NFD5;Q92925;Q969G3;O94805;Q92922;P51532;P51531;Q8TAQ2;Q6STE5;Q12824}

1167 Pathogen[ P14075] interacts with 13 human  
partners:{Q96GM5;P51532;Q92922;O14497;O96019;P51531;Q92925;Q8TAQ2;P06400;Q12824;O94805;Q8NFD5;Q6STE5}

1168 Pathogen[ P0C206] interacts with 14 human  
partners:{P51532;P51531;Q6STE5;Q92922;Q12824;Q92925;Q8TAQ2;O14497;O96019;Q96GM5;Q969G3;Q8NFD5;O94805;P06400}

1169 Pathogen[ P03363] interacts with 14 human  
partners:{Q92925;Q6STE5;Q8TAQ2;P51532;O14497;P06400;O96019;Q969G3;O94805;Q8NFD5;Q96GM5;P51531;Q92922;Q12824}

1170 [Cluster 107]GO:0042564+C cellular\_component [name] NLS-dependent protein nuclear import complex [def] "A protein complex which usually consists of three components, e.g. in Xenopus, the importin alpha and beta-subunits and any protein which has a nuclear localization sequence (NLS). The complex acts to import proteins with an NLS into the



nucleus through a nuclear pore." [GOC  
1171 Pathogen[ Q2Q067] interacts with 1 human partners:{Q9BQG0}  
1172 Pathogen[ P0C214] interacts with 1 human partners:{Q9BQG0}  
1173 Pathogen[ P03346] interacts with 1 human partners:{Q9BQG0}  
1174 Pathogen[ Q85601] interacts with 1 human partners:{Q9BQG0}  
1175 Pathogen[ P14079] interacts with 1 human partners:{Q9BQG0}  
1176 Pathogen[ P03383] interacts with 1 human partners:{Q9BQG0}  
1177 Pathogen[ P03410] interacts with 1 human partners:{Q9BQG0}  
1178 Pathogen[ P14075] interacts with 1 human partners:{Q9BQG0}  
1179 Pathogen[ P0C206] interacts with 1 human partners:{Q9BQG0}  
1180 Pathogen[ P03363] interacts with 1 human partners:{Q9BQG0}  
1181 [Cluster 108]GO:0001741+C cellular\_component [name] XY body [def] "A structure found  
in a male mammalian spermatocyte containing an unpaired X chromosome that has become  
densely heterochromatic, silenced and localized at the nuclear periphery." [GOC  
1182 Pathogen[ Q2Q067] interacts with 5 human  
partners:{Q92922;O75182;P63146;Q12824;P49459}  
1183 Pathogen[ P0C214] interacts with 5 human  
partners:{Q12824;P49459;Q92922;P63146;O75182}  
1184 Pathogen[ P03346] interacts with 7 human  
partners:{Q9NS91;Q9BYU1;Q12824;P49459;O75182;P63146;Q92922}  
1185 Pathogen[ Q85601] interacts with 6 human  
partners:{O75182;P63146;P49459;Q92922;Q12824;Q9NS91}  
1186 Pathogen[ P14079] interacts with 6 human  
partners:{Q92922;P49459;O75182;Q12824;Q96JY0;P63146}  
1187 Pathogen[ P03383] interacts with 5 human  
partners:{O75182;Q12824;P49459;P63146;Q92922}  
1188 Pathogen[ P03410] interacts with 5 human  
partners:{O75182;P49459;Q92922;P63146;Q12824}  
1189 Pathogen[ P14075] interacts with 5 human  
partners:{P49459;Q92922;O75182;Q12824;P63146}  
1190 Pathogen[ P0C206] interacts with 6 human  
partners:{Q92922;Q9NS91;Q12824;P49459;O75182;P63146}  
1191 Pathogen[ P03363] interacts with 8 human  
partners:{Q9BYU1;P49459;P63146;Q96JY0;Q92922;Q9NS91;O75182;Q12824}  
1192 [Cluster 109]GO:0031371+C cellular\_component [name] ubiquitin conjugating enzyme  
complex [def] "Any complex that possesses ubiquitin conjugating enzyme activity." [GOC  
1193 Pathogen[ Q2Q067] interacts with 2 human partners:{Q9UNE7;Q13404}  
1194 Pathogen[ P0C214] interacts with 2 human partners:{Q13404;Q9UNE7}  
1195 Pathogen[ P03346] interacts with 2 human partners:{Q13404;Q9UNE7}  
1196 Pathogen[ Q85601] interacts with 2 human partners:{Q13404;Q9UNE7}  
1197 Pathogen[ P14079] interacts with 1 human partners:{Q13404}  
1198 Pathogen[ P03383] interacts with 1 human partners:{Q13404}  
1199 Pathogen[ P03410] interacts with 2 human partners:{Q9UNE7;Q13404}  
1200 Pathogen[ P14075] interacts with 1 human partners:{Q13404}  
1201 Pathogen[ P0C206] interacts with 2 human partners:{Q9UNE7;Q13404}  
1202 Pathogen[ P03363] interacts with 2 human partners:{Q9UNE7;Q13404}  
1203 [Cluster 110]GO:0031201+C cellular\_component [name] SNARE complex [def] "A protein  
complex involved in membrane fusion\_ a stable ternary complex consisting of a four-helix  
bundle, usually formed from one R-SNARE and three Q-SNAREs with an ionic layer sandwiched  
between hydrophobic layers. One well-characterized example is the neuronal SNARE complex  
formed of synaptobrevin 2, syntaxin 1a, and SNAP-25." [PMID  
1204 Pathogen[ Q2Q067] interacts with 5 human  
partners:{Q9UL45;O43752;O14662;Q8TAC9;Q15833}  
1205 Pathogen[ P0C214] interacts with 4 human partners:{Q15833;Q8TAC9;Q9UL45;O43752}  
1206 Pathogen[ P03346] interacts with 8 human  
partners:{Q15833;O43752;Q12981;Q13190;Q8TAC9;Q9UL45;O14662;Q86Y82}  
1207 Pathogen[ Q85601] interacts with 5 human  
partners:{Q15833;Q8TAC9;Q12981;O43752;O14662}  
1208 Pathogen[ P14079] interacts with 8 human  
partners:{O14810;Q6PUV4;Q15833;Q8TAC9;Q9UL45;Q12981;O14662;O43752}  
1209 Pathogen[ P03383] interacts with 2 human partners:{Q8TAC9;O43752}  
1210 Pathogen[ P03410] interacts with 10 human  
partners:{Q15833;Q13190;Q8TAC9;O14810;O14662;Q9UL45;O95249;Q6PUV4;O43752;Q12981}  
1211 Pathogen[ P14075] interacts with 2 human partners:{O43752;Q8TAC9}  
1212 Pathogen[ P0C206] interacts with 7 human  
partners:{O14662;Q9UL45;O43752;Q6PUV4;Q12981;Q8TAC9;Q15833}  
1213 Pathogen[ P03363] interacts with 3 human partners:{O14662;O43752;Q15833}  
1214 [Cluster 111]GO:0005760+C cellular\_component [name] gamma DNA polymerase complex [def]  
"A DNA polymerase complex consisting of a large subunit, responsible for the catalytic  
activities, and a small accessory subunit. Functions in the replication and repair of  
mitochondrial DNA." [GOC  
1215 Pathogen[ Q2Q067] interacts with 1 human partners:{P54098}  
1216 Pathogen[ P0C214] interacts with 1 human partners:{P54098}  
1217 Pathogen[ P03346] interacts with 1 human partners:{P54098}  
1218 Pathogen[ Q85601] interacts with 1 human partners:{P54098}  
1219 Pathogen[ P14079] interacts with 1 human partners:{P54098}

1220 Pathogen[ P03383] interacts with 1 human partners:{P54098}

1221 Pathogen[ P03410] interacts with 1 human partners:{P54098}

1222 Pathogen[ P14075] interacts with 1 human partners:{P54098}

1223 Pathogen[ P0C206] interacts with 1 human partners:{P54098}

1224 Pathogen[ P03363] interacts with 1 human partners:{P54098}

1225 [Cluster 112]GO:0044294+C cellular\_component [name] dendritic growth cone [def] "The migrating motile tip of a growing nerve cell dendrite." [GOC]

1226 Pathogen[ Q2Q067] interacts with 1 human partners:{Q9UQF2}

1227 Pathogen[ P0C214] interacts with 1 human partners:{Q9UQF2}

1228 Pathogen[ P03346] interacts with 1 human partners:{Q9UQF2}

1229 Pathogen[ Q85601] interacts with 1 human partners:{Q9UQF2}

1230 Pathogen[ P14079] interacts with 1 human partners:{Q9UQF2}

1231 Pathogen[ P03383] interacts with 1 human partners:{Q9UQF2}

1232 Pathogen[ P03410] interacts with 1 human partners:{Q9UQF2}

1233 Pathogen[ P14075] interacts with 1 human partners:{Q9UQF2}

1234 Pathogen[ P0C206] interacts with 1 human partners:{Q9UQF2}

1235 Pathogen[ P03363] interacts with 1 human partners:{Q9UQF2}

1236 [Cluster 113]GO:0016580+C cellular\_component [name] Sin3 complex [def] "A multiprotein complex that functions broadly in eukaryotic organisms as a transcriptional repressor of protein-coding genes, through the gene-specific deacetylation of histones. Amongst its subunits, the Sin3 complex contains Sin3-like proteins, and a number of core proteins that are shared with the NuRD complex (including histone deacetylases and histone binding proteins). The Sin3 complex does not directly bind DNA itself, but is targeted to specific genes through protein-protein interactions with DNA-binding proteins." [PMID]

1237 Pathogen[ Q2Q067] interacts with 9 human partners:{Q13547;Q96ST3;Q09028;Q92769;Q9H160;Q9UBU8;Q9H7L9;Q96QT6;O75376}

1238 Pathogen[ P0C214] interacts with 9 human partners:{Q13547;Q96QT6;Q09028;Q92769;Q9UBU8;Q9H160;O75376;Q96ST3;Q9H7L9}

1239 Pathogen[ P03346] interacts with 9 human partners:{Q96ST3;Q96QT6;Q92769;Q9UBU8;Q13547;Q09028;O75376;Q9H7L9;Q9H160}

1240 Pathogen[ Q85601] interacts with 9 human partners:{Q96QT6;Q9UBU8;Q92769;O75376;Q09028;Q13547;Q9H160;Q9H7L9;Q96ST3}

1241 Pathogen[ P14079] interacts with 9 human partners:{Q9UBU8;Q96ST3;Q9NP50;Q96QT6;Q92769;O75376;Q9H7L9;Q09028;Q9H160}

1242 Pathogen[ P03383] interacts with 10 human partners:{Q09028;O75376;Q9H7L9;Q9UBU8;Q96QT6;Q9H160;Q92769;Q13547;Q9NP50;Q96ST3}

1243 Pathogen[ P03410] interacts with 10 human partners:{Q96QT6;Q9UBU8;O75376;Q96ST3;Q09028;Q92769;Q9H160;Q9H7L9;Q13547;Q9NP50}

1244 Pathogen[ P14075] interacts with 10 human partners:{Q96ST3;Q9UBU8;Q96QT6;Q9NP50;Q13547;O75376;Q09028;Q92769;Q9H160;Q9H7L9}

1245 Pathogen[ P0C206] interacts with 10 human partners:{Q92769;Q96ST3;Q9UBU8;Q13547;Q9H160;O75376;Q9H7L9;Q09028;Q96QT6;Q9NP50}

1246 Pathogen[ P03363] interacts with 8 human partners:{Q9H160;Q96QT6;Q09028;Q9H7L9;O75376;Q9UBU8;Q96ST3;Q13547}

1247 [Cluster 114]GO:0030868+C cellular\_component [name] smooth endoplasmic reticulum membrane [def] "The lipid bilayer surrounding the smooth endoplasmic reticulum." [GOC]

1248 Pathogen[ Q2Q067] interacts with 2 human partners:{P05062;Q15436}

1249 Pathogen[ P0C214] interacts with 2 human partners:{Q15436;P05062}

1250 Pathogen[ P03346] interacts with 2 human partners:{Q15436;P05062}

1251 Pathogen[ Q85601] interacts with 2 human partners:{P05062;Q15436}

1252 Pathogen[ P14079] interacts with 1 human partners:{Q8NHG7}

1253 Pathogen[ P03383] interacts with 2 human partners:{Q15436;Q8NHG7}

1254 Pathogen[ P03410] interacts with 3 human partners:{P05062;Q15436;Q8NHG7}

1255 Pathogen[ P14075] interacts with 2 human partners:{Q8NHG7;Q15436}

1256 Pathogen[ P0C206] interacts with 3 human partners:{P05062;Q8NHG7;Q15436}

1257 Pathogen[ P03363] interacts with 1 human partners:{Q15436}

1258 [Cluster 115]GO:0005640+C cellular\_component [name] nuclear outer membrane [def] "The outer, i.e. cytoplasm-facing, lipid bilayer of the nuclear envelope\_ continuous with the endoplasmic reticulum of the cell and sometimes studded with ribosomes." [ISBN]

1259 Pathogen[ Q2Q067] interacts with 7 human partners:{P50402;Q96CM4;P78406;P42704;Q8NF91;Q9BVC6;Q13023}

1260 Pathogen[ P0C214] interacts with 8 human partners:{Q13023;P78406;P42704;Q8NF91;P50402;Q96CM4;Q9BVC6;P80303}

1261 Pathogen[ P03346] interacts with 10 human partners:{Q96CM4;P80303;P78406;Q8WXH0;Q13023;P42704;Q6ZMZ3;P50402;Q9BVC6;Q8NF91}

1262 Pathogen[ Q85601] interacts with 7 human partners:{P78406;P80303;Q96CM4;P42704;P50402;Q13023;Q8NF91}

1263 Pathogen[ P14079] interacts with 12 human partners:{Q16873;Q9BVC6;Q13023;P42704;P80303;Q8N205;Q8WXH0;Q6ZMZ3;P78406;P50402;Q8NF91;Q96CM4}

1264 Pathogen[ P03383] interacts with 5 human partners:{Q13023;P78406;Q9BVC6;P50402;P42704}

1265 Pathogen[ P03410] interacts with 12 human partners:{P80303;Q9BVC6;Q6ZMZ3;P78406;Q8N205;Q96CM4;Q16873;P42704;Q13023;P50402;Q8WXH0;Q8NF91}

1266 Pathogen[ P14075] interacts with 5 human partners:{P50402;Q96CM4;P78406;P42704;Q8NF91}

1267 partners:{P42704;Q9BVC6;P78406;P50402;Q13023}  
 Pathogen[ P0C206] interacts with 11 human  
 partners:{P50402;Q13023;P80303;Q96CM4;Q6ZMZ3;Q8NF91;Q9BVC6;Q8N205;Q8WXH0;P78406;P42704}

1268 Pathogen[ P03363] interacts with 6 human  
 partners:{Q8NF91;Q6ZMZ3;P42704;P50402;Q13023;P78406}

1269 [Cluster 116]GO:0071339+C cellular\_component [name] MLL1 complex [def] "A protein complex that can methylate lysine-4 of histone H3. MLL1/MLL is the catalytic methyltransferase subunit, and the complex also contains the core components ASH2L, HCFC1/HCF1 WDR5 and RBBP5." [GOC

1270 Pathogen[ Q2Q067] interacts with 16 human  
 partners:{O75461;Q16594;Q8WWY3;Q96EZ8;P51610;Q8IZL8;Q7Z3B3;P49848;O00268;Q9Y4W2;P61244;Q99496;Q15545;Q9HCK8;P21675;Q6PI98}

1271 Pathogen[ P0C214] interacts with 16 human  
 partners:{O00268;P61244;P51610;O75461;P21675;Q8IZL8;Q15545;Q16594;Q6PI98;P49848;Q9HCK8;Q9Y4W2;Q99496;Q8IXM2;Q96EZ8;Q8WWY3}

1272 Pathogen[ P03346] interacts with 20 human  
 partners:{Q8IXM2;Q15291;Q96EZ8;P51610;Q8IWI9;O00268;Q6PI98;Q7Z3B3;P49848;Q9HCK8;Q99496;Q8WWY3;P61244;P21675;Q9H7Z6;O75461;Q8IZL8;Q15545;Q9Y4W2;Q16594}

1273 Pathogen[ Q85601] interacts with 17 human  
 partners:{Q9Y4W2;Q15545;Q8IZL8;Q9H7Z6;O00268;Q16594;P51610;O75461;Q6PI98;P49848;Q8IXM2;Q99496;Q8WWY3;P61244;Q9HCK8;P21675;Q96EZ8}

1274 Pathogen[ P14079] interacts with 18 human  
 partners:{Q16594;O75461;P51610;Q8WWY3;Q6PI98;Q99496;P49848;Q9Y4W2;Q7Z3B3;Q9HCK8;Q8IZL8;Q8IXM2;Q9NXF1;P61244;Q96EZ8;P21675;O00268;Q15545}

1275 Pathogen[ P03383] interacts with 15 human  
 partners:{O75461;Q8IZL8;Q6PI98;P51610;Q16594;P49848;O00268;Q99496;Q9HCK8;P21675;Q8WWY3;Q15545;Q96EZ8;P61244;Q9Y4W2}

1276 Pathogen[ P03410] interacts with 18 human  
 partners:{Q9NXF1;O75461;P51610;Q99496;Q8WWY3;O00268;Q6PI98;P21675;P61244;Q9Y4W2;Q8IXM2;P49848;Q9HCK8;Q16594;Q96EZ8;Q8IZL8;Q7Z3B3;Q15545}

1277 Pathogen[ P14075] interacts with 16 human  
 partners:{P21675;P61244;P51610;Q7Z3B3;Q96EZ8;Q16594;Q6PI98;P49848;Q9HCK8;Q15545;Q99496;Q9Y4W2;O00268;Q8IZL8;O75461;Q8WWY3}

1278 Pathogen[ P0C206] interacts with 18 human  
 partners:{Q9HCK8;Q15545;P49848;O00268;Q6PI98;Q8IZL8;Q96EZ8;P51610;Q8WWY3;P61244;Q8IXM2;O75461;Q7Z3B3;Q9Y4W2;Q99496;Q9H7Z6;P21675;Q16594}

1279 Pathogen[ P03363] interacts with 19 human  
 partners:{Q8IXM2;O75461;P49848;Q9Y4W2;Q15291;Q8IZL8;Q15545;Q99496;O00268;Q8WWY3;P61244;Q9HCK8;Q7Z3B3;Q96EZ8;P21675;Q8IWI9;P51610;Q16594;Q6PI98}

1280 [Cluster 117]GO:0030687+C cellular\_component [name] preribosome, large subunit precursor [def] "A preribosomal complex consisting of 27SA, 27SB, and/or 7S pre-rRNA, 5S rRNA, ribosomal proteins including late-associating large subunit proteins, and associated proteins\_ a precursor of the eukaryotic cytoplasmic large ribosomal subunit." [PMID

1281 Pathogen[ Q2Q067] interacts with 2 human partners:{Q9GZL7;O00541}

1282 Pathogen[ P0C214] interacts with 2 human partners:{O00541;Q9GZL7}

1283 Pathogen[ P03346] interacts with 2 human partners:{O00541;Q9GZL7}

1284 Pathogen[ Q85601] interacts with 2 human partners:{O00541;Q9GZL7}

1285 Pathogen[ P14079] interacts with 2 human partners:{Q9GZL7;O00541}

1286 Pathogen[ P03383] interacts with 2 human partners:{O00541;Q9GZL7}

1287 Pathogen[ P03410] interacts with 2 human partners:{Q9GZL7;O00541}

1288 Pathogen[ P14075] interacts with 2 human partners:{Q9GZL7;O00541}

1289 Pathogen[ P0C206] interacts with 2 human partners:{Q9GZL7;O00541}

1290 Pathogen[ P03363] interacts with 2 human partners:{Q9GZL7;O00541}

1291 [Cluster 118]GO:0000930+C cellular\_component [name] gamma-tubulin complex [def] "A multiprotein complex composed of gamma-tubulin and other non-tubulin proteins. Gamma-tubulin complexes are localized to microtubule organizing centers, and play an important role in the nucleation of microtubules. The number and complexity of non-tubulin proteins associated with these complexes varies between species." [GOC

1292 Pathogen[ Q2Q067] interacts with 6 human  
 partners:{Q14008;Q9NS56;Q9UBK9;O15078;P23258;Q6QNY1}

1293 Pathogen[ P0C214] interacts with 6 human  
 partners:{O15078;Q14008;Q9NS56;P23258;Q6QNY1;Q9UBK9}

1294 Pathogen[ P03346] interacts with 6 human  
 partners:{P23258;Q9NS56;Q6QNY1;Q14008;O15078;Q9UBK9}

1295 Pathogen[ Q85601] interacts with 6 human  
 partners:{Q9NS56;Q14008;O15078;P23258;Q9UBK9;Q6QNY1}

1296 Pathogen[ P14079] interacts with 6 human  
 partners:{P23258;Q9UBK9;Q9NS56;O15078;Q6QNY1;Q14008}

1297 Pathogen[ P03383] interacts with 4 human partners:{Q14008;O15078;Q9UBK9;Q6QNY1}

1298 Pathogen[ P03410] interacts with 5 human  
 partners:{Q6QNY1;Q14008;Q9UBK9;O15078;P23258}

1299 Pathogen[ P14075] interacts with 4 human partners:{O15078;Q9UBK9;Q6QNY1;Q14008}

1300 Pathogen[ P0C206] interacts with 6 human  
 partners:{Q9NS56;Q14008;Q6QNY1;O15078;P23258;Q9UBK9}

1301 Pathogen[ P03363] interacts with 5 human partners: {O15078;Q9UBK9;Q6QNY1;Q14008;P23258}

1302 [Cluster 119]GO:0005797+C cellular\_component [name] Golgi medial cisterna [def] "The middle Golgi cisterna (or cisternae)." [ISBN

1303 Pathogen[ Q2Q067] interacts with 2 human partners: {Q8IV36;Q9H8Y8}

1304 Pathogen[ P0C214] interacts with 3 human partners: {Q8IV36;Q9H8Y8;P80303}

1305 Pathogen[ P03346] interacts with 3 human partners: {P80303;Q8IV36;Q9H8Y8}

1306 Pathogen[ Q85601] interacts with 3 human partners: {Q8IV36;P80303;Q9H8Y8}

1307 Pathogen[ P14079] interacts with 4 human partners: {P80303;Q9H8Y8;Q8IV36;Q92896}

1308 Pathogen[ P03383] interacts with 2 human partners: {Q8IV36;Q9H8Y8}

1309 Pathogen[ P03410] interacts with 4 human partners: {P80303;Q8IV36;Q92896;Q9H8Y8}

1310 Pathogen[ P14075] interacts with 2 human partners: {Q8IV36;Q9H8Y8}

1311 Pathogen[ P0C206] interacts with 3 human partners: {P80303;Q9H8Y8;Q8IV36}

1312 Pathogen[ P03363] interacts with 2 human partners: {Q8IV36;Q9H8Y8}

1313 [Cluster 120]GO:0005958+C cellular\_component [name] DNA-dependent protein kinase-DNA ligase 4 complex [def] "A large protein complex which is involved in the repair of DNA double-strand breaks and, in mammals, V(D)J recombination events. It consists of the DNA-dependent protein kinase catalytic subunit (DNA-PKcs), the DNA end-binding heterodimer Ku, the nuclear phosphoprotein XRCC4 or a homolog thereof, and DNA ligase IV." [GOC

1314 Pathogen[ Q2Q067] interacts with 3 human partners: {Q13426;P12956;P13010}

1315 Pathogen[ P0C214] interacts with 3 human partners: {P13010;Q13426;P12956}

1316 Pathogen[ P03346] interacts with 3 human partners: {P12956;Q13426;P13010}

1317 Pathogen[ Q85601] interacts with 3 human partners: {Q13426;P13010;P12956}

1318 Pathogen[ P14079] interacts with 4 human partners: {P13010;P12956;Q13426;P49917}

1319 Pathogen[ P03383] interacts with 3 human partners: {P13010;Q13426;P12956}

1320 Pathogen[ P03410] interacts with 3 human partners: {P12956;Q13426;P13010}

1321 Pathogen[ P14075] interacts with 3 human partners: {P12956;Q13426;P13010}

1322 Pathogen[ P0C206] interacts with 4 human partners: {P13010;P49917;Q13426;P12956}

1323 Pathogen[ P03363] interacts with 3 human partners: {P12956;P13010;Q13426}

1324 [Cluster 121]GO:0070062+C cellular\_component [name] extracellular vesicular exosome [def] "A membrane-bounded vesicle that is released into the extracellular region by fusion of the limiting endosomal membrane of a multivesicular body with the plasma membrane." [GOC

1325 Pathogen[ Q2Q067] interacts with 3 human partners: {P11142;P38159;P14672}

1326 Pathogen[ P0C214] interacts with 3 human partners: {P38159;P14672;P11142}

1327 Pathogen[ P03346] interacts with 3 human partners: {P11142;P38159;P14672}

1328 Pathogen[ Q85601] interacts with 3 human partners: {P11142;P38159;P14672}

1329 Pathogen[ P14079] interacts with 4 human partners: {P11142;Q08722;P14672;P38159}

1330 Pathogen[ P03383] interacts with 3 human partners: {P38159;P11142;P14672}

1331 Pathogen[ P03410] interacts with 3 human partners: {P11142;Q08722;P38159}

1332 Pathogen[ P14075] interacts with 3 human partners: {P11142;P38159;P14672}

1333 Pathogen[ P0C206] interacts with 3 human partners: {P38159;P14672;P11142}

1334 Pathogen[ P03363] interacts with 3 human partners: {P38159;P14672;P11142}

1335 [Cluster 122]GO:0000793+C cellular\_component [name] condensed chromosome [def] "A highly compacted molecule of DNA and associated proteins resulting in a cytologically distinct structure." [GOC

1336 Pathogen[ Q2Q067] interacts with 16 human partners: {P27694;Q9UHC1;O95347;O00541;Q06609;P11388;O43823;Q15021;Q96JM3;Q13426;P46013;P24941;Q9Y468;P49711;P08397;Q9BXW9}

1337 Pathogen[ P0C214] interacts with 18 human partners: {Q06609;O00541;Q9Y468;O95347;P08397;Q13426;Q9UHC1;O43823;P24941;O60264;P11388;P49711;Q9BXW9;Q96JM3;P46013;P27694;P40692;Q15021}

1338 Pathogen[ P03346] interacts with 16 human partners: {Q06609;P11388;O00541;P27694;P24941;Q13426;O95347;Q9UHC1;Q15021;O60264;P49711;Q9Y468;Q96JM3;Q9BXW9;P46013;O43823}

1339 Pathogen[ Q85601] interacts with 18 human partners: {Q96JM3;O00541;O95347;Q9BXW9;Q13426;Q9Y468;P49711;P27694;P11388;Q9UHC1;P08397;O43823;P46013;P40692;O60264;Q06609;P24941;Q15021}

1340 Pathogen[ P14079] interacts with 18 human partners: {P11388;P40692;O43823;Q9Y468;Q9UHC1;Q9BXW9;O95347;P08397;Q96JM3;O60264;P27694;O00541;Q15021;Q06609;Q13426;P49711;P49917;P46013}

1341 Pathogen[ P03383] interacts with 13 human partners: {Q06609;P49711;O00541;P27694;Q9BXW9;Q9UHC1;P46013;O95347;P24941;Q13426;P08397;Q15021;Q9Y468}

1342 Pathogen[ P03410] interacts with 18 human partners: {P40692;P08397;Q96JM3;P46013;Q9BXW9;Q9Y468;O95347;P24941;Q13426;P49711;P11388;O00541;P27694;O60264;O43823;Q9UHC1;Q06609;Q15021}

1343 Pathogen[ P14075] interacts with 14 human partners: {P24941;Q9Y468;O00541;P08397;O95347;Q9UHC1;Q13426;P27694;P49711;O43823;P46013;Q9BXW9;Q06609;Q15021}

1344 Pathogen[ P0C206] interacts with 20 human partners: {Q9Y468;P40692;P46013;Q15021;Q9UHC1;P49917;O95347;Q13426;P49711;Q96JM3;O00541;O43823;Q06609;P27694;P11388;Q9BXW9;P08397;P24941;Q9UIG0;O60264}

1345 Pathogen[ P03363] interacts with 14 human partners: {P27694;Q9BXW9;Q15021;Q9Y468;O95347;Q9UHC1;P24941;P49711;O60264;Q96JM3;Q13426}

6;Q06609;P46013;O00541}

1346 [Cluster 123]GO:0031674+C cellular\_component [name] I band [def] "A region of a sarcomere that appears as a light band on each side of the Z disc, comprising a region of the sarcomere where thin (actin) filaments are not overlapped by thick (myosin) filaments\_ contains actin, troponin, and tropomyosin\_ each sarcomere includes half of an I band at each end." [ISBN

1347 Pathogen[ Q2Q067] interacts with 4 human partners:{P02511;Q92831;Q15327;Q86TC9}

1348 Pathogen[ P0C214] interacts with 5 human partners:{Q15327;P02511;Q86TC9;Q86SG2;Q92831}

1349 Pathogen[ P03346] interacts with 7 human partners:{A8MU46;Q86TC9;Q86SG2;Q15327;Q92831;O76041;P02511}

1350 Pathogen[ Q85601] interacts with 5 human partners:{Q86TC9;Q86SG2;Q92831;P02511;Q15327}

1351 Pathogen[ P14079] interacts with 7 human partners:{P02511;Q86SG2;Q86TC9;P68032;O76041;Q15327;O15273}

1352 Pathogen[ P03383] interacts with 3 human partners:{Q92831;P02511;Q15327}

1353 Pathogen[ P03410] interacts with 8 human partners:{Q92831;O76041;Q15327;A8MU46;O15273;P02511;Q86SG2;Q86TC9}

1354 Pathogen[ P14075] interacts with 3 human partners:{Q92831;Q15327;P02511}

1355 Pathogen[ P0C206] interacts with 6 human partners:{Q86TC9;Q15327;Q92831;O76041;Q86SG2;P02511}

1356 Pathogen[ P03363] interacts with 6 human partners:{Q86TC9;Q92831;Q15327;Q86SG2;O76041;A8MU46}

1357 [Cluster 124]GO:0019008+C cellular\_component [name] molybdopterin synthase complex [def] "A protein complex that possesses molybdopterin synthase activity. In E. coli, the complex is a heterotetramer consisting of two Moad and two MoaE subunits." [GOC

1358 Pathogen[ Q2Q067] interacts with 1 human partners:{O96007}

1359 Pathogen[ P0C214] interacts with 2 human partners:{O96033;O96007}

1360 Pathogen[ P03346] interacts with 1 human partners:{O96007}

1361 Pathogen[ Q85601] interacts with 1 human partners:{O96007}

1362 Pathogen[ P14079] interacts with 2 human partners:{O96007;O96033}

1363 Pathogen[ P03383] interacts with 1 human partners:{O96007}

1364 Pathogen[ P03410] interacts with 2 human partners:{O96007;O96033}

1365 Pathogen[ P14075] interacts with 1 human partners:{O96007}

1366 Pathogen[ P0C206] interacts with 1 human partners:{O96007}

1367 Pathogen[ P03363] interacts with 1 human partners:{O96007}

1368 [Cluster 125]GO:0016363+C cellular\_component [name] nuclear matrix [def] "The dense fibrillar network lying on the inner side of the nuclear membrane." [ISBN

1369 Pathogen[ Q2Q067] interacts with 56 human partners:{P49454;P25490;Q96FV9;P09917;P54252;P02545;Q9Y6D6;Q9ULX6;Q6ZW49;P20700;Q5VTD9;P52272;Q14980;Q13427;Q9P0U4;Q15233;P54259;Q96T88;Q5EE01;Q9Y6K1;O14929;Q9BSI4;Q8WYP5;Q9UIS9;Q99684;Q5T3J3;P17676;O75400;P23528;Q9UHK0;O43823;P54253;Q8IYB3;P05787;P60900;O00255;Q9HD42;O15265;Q9H4L7;P23246;Q15527;Q9UPW6;Q5BKZ1;Q13216;Q7RTV0;Q06455;O95619;Q01826;Q9GZX5;Q9BX66;P10242;O60870;Q9Y281;Q8WXF1;P49715;Q8N2W9}

1370 Pathogen[ P0C214] interacts with 56 human partners:{Q5BKZ1;Q96FV9;P09917;P54253;Q9BSI4;Q9Y281;Q8N2W9;Q5EE01;Q9HD42;O14929;Q8WYP5;Q15233;P23246;Q9BX66;Q9Y6K1;Q06455;P05787;Q9UHK0;Q13427;P20700;Q9H4L7;Q9GZX5;P17676;Q96T88;Q5VTD9;O95619;Q6ZW49;Q13216;Q14980;P50747;Q9UIS9;P52272;Q8IYB3;O60870;Q8WXF1;O43823;Q7RTV0;Q96KR7;Q9ULX6;P10242;P43243;Q01826;Q9Y6D6;O15265;Q9UPW6;P60900;Q99684;P02545;O15527;Q5T3J3;P49454;Q7L5Y9;O75400;O00255;P54252;P54259}

1371 Pathogen[ P03346] interacts with 61 human partners:{Q9BSI4;Q8NEA9;Q96FV9;O15265;Q9Y6K1;Q96KR7;Q9Y281;Q8WXF1;Q8IYB3;Q9UPW6;P17676;Q7RTV0;P20700;Q9HD42;O75400;Q5EE01;P43243;Q8WYP5;P25490;P23246;P05787;Q5T3J3;O14682;Q9BX66;P49715;P02545;Q13427;Q9ULX6;Q14980;O60870;Q9Y6D6;P09917;P10242;Q9UIS9;Q9P0U4;O00255;Q99684;Q9UHK0;P60900;Q13216;Q8N2W9;Q5VTD9;O95619;Q15233;P52272;Q9GZX5;P54253;P23528;O15527;O43823;Q01826;Q96IK5;P54259;O14929;Q96T88;Q6ZW49;P49454;P54252;Q9H4L7;Q5BKZ1;Q06455}

1372 Pathogen[ Q85601] interacts with 55 human partners:{P54259;O95619;P60900;P49454;P20700;O15527;P17676;Q06455;P02545;Q8IYB3;Q9UPW6;Q7RTV0;O15265;P09917;P05787;Q9BX66;Q13216;O75400;Q5EE01;Q8WYP5;Q7L5Y9;P25490;P10242;Q8WXF1;Q8N2W9;Q13427;P54252;Q96FV9;Q9GZX5;O60870;Q9P0U4;Q9UIS9;Q9ULX6;O14929;Q9H4L7;Q9Y6K1;Q96T88;Q9Y281;O00255;Q01826;Q6ZW49;Q9UHK0;Q99684;Q14980;Q15233;P49715;Q5VTD9;Q9Y6D6;O43823;P54253;P23528;P23246;Q5BKZ1;Q5T3J3;Q9HD42}

1373 Pathogen[ P14079] interacts with 56 human partners:{Q14980;Q9UPW6;Q8N2W9;Q5EE01;Q9UIS9;O75400;Q9Y6K1;Q5T3J3;Q9ULX6;Q9BSI4;O43823;Q9H4L7;P54252;Q9GZX5;Q99684;Q01826;P23246;Q9HD42;Q13216;Q7L5Y9;Q13427;O15527;Q9UHK0;O60870;P54253;Q96FV9;P43243;Q8IYB3;Q5BKZ1;Q96KR7;O14929;Q5VTD9;P60900;Q8WYP5;P23528;P49715;Q7RTV0;Q9Y6D6;Q6ZW49;O43294;P09917;Q9Y281;Q9P0U4;P20700;Q06455;P54259;O15265;Q9UQE7;P49454;P10242;P02545;Q9BX66;P25490;O95619;Q15233;O00255}

1374 Pathogen[ P03383] interacts with 46 human partners:{P02545;P49454;Q9Y281;Q06455;Q9UPW6;Q13216;P60900;O15527;Q5EE01;Q8WYP5;Q01826;Q96FV9;Q8WXF1;Q9Y6D6;O75400;Q9GZX5;Q6ZW49;Q8N2W9;O60870;Q8IYB3;P54252;Q13427;P05787;Q9UHK0;P20700;Q9Y6K1;O14929;O15265;P17676;Q9BSI4;O00255;Q9HD42;Q99684;Q9ULX6;Q14980;P54253;P10242;Q15233;P23246;P23528;O95619;Q5T3J3;Q7RTV0;P54259;Q9UIS9;Q5BKZ1}

1375 Pathogen[ P03410] interacts with 59 human partners:{O95619;P23246;Q9H4L7;O14929;P17676;Q9P0U4;Q15233;P60900;Q5T3J3;Q9UQE7;Q9UHK

- 0;P10242;O60870;P20700;P05787;O43294;Q8N2W9;P54252;Q9BSI4;Q99684;Q9UPW6;P25490;Q5EE01;Q96FV9;P49454;Q14980;Q96KR7;O75400;P43243;O15527;Q9HD42;P02545;Q01826;Q8WXF1;Q9ULX6;Q9Y6D6;P52272;Q06455;Q9GZX5;Q8IYB3;Q5BKZ1;Q9Y281;Q13216;Q9UIS9;Q7RTV0;P54259;P09917;O15265;P23528;P54253;Q9Y6K1;Q5VTD9;Q13427;O00255;O43823;Q8WYP5;Q7L5Y9;Q6ZW49;Q9BX66}
- 1376 Pathogen[ P14075] interacts with 48 human  
partners: {P54253;Q8WXF1;Q9Y6K1;P23246;O15265;Q5BKZ1;Q9BSI4;P60900;Q5EE01;Q8WYP5;Q6ZW49;O15527;P20700;O95619;Q7L5Y9;Q13216;Q8N2W9;O14929;Q9Y6D6;P10242;O75400;P54252;Q01826;P23528;Q9UHK0;O60870;O00255;P02545;Q9UPW6;Q06455;Q99684;Q9ULX6;Q9UIS9;Q8IYB3;Q15233;Q9HD42;P54259;Q13427;P17676;Q5T3J3;O43823;Q14980;Q96FV9;P49454;Q9GZX5;Q9Y281;P05787;Q7RTV0}
- 1377 Pathogen[ P0C206] interacts with 60 human  
partners: {P05787;Q9H4L7;Q8WYP5;Q9POU4;P09917;Q06455;Q9Y6K1;Q5T3J3;O15527;Q6ZW49;P25490;Q9Y6D6;Q15233;Q8IYB3;Q9UHK0;O00255;O60870;Q8N2W9;P10242;O15265;P60900;Q9BSI4;P49715;P49454;Q9ULX6;P54252;Q5BKZ1;Q13216;P54259;P23246;Q5EE01;Q96FV9;Q7L5Y9;Q9UQE7;Q9UIS9;O95619;P17676;O14929;Q13427;Q8WXF1;Q96T88;Q9UPW6;Q7RTV0;O43294;Q9GZX5;Q99684;Q9BX66;P43243;O43823;O75400;P02545;Q01826;P20700;Q5VTD9;Q9HD42;Q14980;P23528;Q96KR7;P54253;Q9Y281}
- 1378 Pathogen[ P03363] interacts with 57 human  
partners: {Q5VTD9;O95619;Q99684;Q15233;Q06455;P49454;Q13427;P23246;O15527;P17676;Q9BX66;Q2VIQ3;O14682;P02545;P54259;Q9H4L7;Q8WYP5;Q14980;P20700;P25490;Q01826;Q7RTV0;Q9UHK0;Q9POU4;P54252;Q9Y6K1;Q9BSI4;Q96FV9;P05787;P52272;Q5BKZ1;O75400;Q5EE01;Q8IYB3;Q9UPN6;O60870;O15265;O14929;P54253;P43243;P23528;Q8NEA9;P10242;Q96T88;Q5T3J3;Q13216;Q6ZW49;Q96KR7;Q9Y6D6;Q8WXF1;Q8N2W9;Q9GZX5;Q9UPW6;Q9ULX6;Q9HD42;Q9UIS9;Q9Y281}
- 1379 [Cluster 126]GO:0001726+C cellular\_component [name] ruffle [def] "Projection at the leading edge of a crawling cell\_ the protrusions are supported by a microfilament meshwork." [ISBN
- 1380 Pathogen[ Q2Q067] interacts with 9 human  
partners: {P22392;Q8WX93;Q9NPB6;P56945;P31949;O14713;P06396;P35579;Q00534}
- 1381 Pathogen[ P0C214] interacts with 8 human  
partners: {P56945;Q9UM54;P06396;Q00534;Q9NPB6;P31949;P22392;O14713}
- 1382 Pathogen[ P03346] interacts with 16 human  
partners: {Q8WX93;P35579;Q14247;Q9NPB6;P06703;Q9Y5K6;O60662;P56945;Q9Y4G6;O14713;P22392;P30622;Q00534;P06396;P31949;Q9NSI8}
- 1383 Pathogen[ Q85601] interacts with 12 human  
partners: {Q8WX93;P06396;Q9Y5K6;O14713;P35579;P30622;P56945;P22392;Q9NPB6;P31949;Q9UM54;Q00534}
- 1384 Pathogen[ P14079] interacts with 16 human  
partners: {P35579;P09327;Q9NP84;Q9NR12;Q8WX93;P31949;Q9UM54;Q9Y4G6;P22392;Q14247;O14713;Q9Y5K6;P06703;Q9NPB6;P35241;P30622}
- 1385 Pathogen[ P03383] interacts with 7 human  
partners: {P56945;O14713;P22392;Q00534;Q9NPB6;P35579;P06396}
- 1386 Pathogen[ P03410] interacts with 16 human  
partners: {P30622;Q00534;P06396;O14713;P35579;P31949;P06703;Q9Y5K6;Q9UM54;Q9Y4G6;P56945;Q9NPB6;Q14247;P35241;Q9NP84;Q8WX93}
- 1387 Pathogen[ P14075] interacts with 7 human  
partners: {O14713;Q00534;P06396;P35579;Q9NPB6;P22392;P56945}
- 1388 Pathogen[ P0C206] interacts with 13 human  
partners: {P31949;Q9UM54;P06396;P22392;O14713;Q8WX93;P30622;Q9NPB6;P35579;P06703;Q9Y5K6;P56945;Q00534}
- 1389 Pathogen[ P03363] interacts with 16 human  
partners: {Q9NSI8;P35579;Q14247;P31949;Q9NPB6;O14713;Q7L576;Q9Y4G6;P06396;Q00534;P30622;Q8WX93;P56945;O60662;Q9NR12;Q9Y5K6}
- 1390 [Cluster 127]GO:0005777+C cellular\_component [name] peroxisome [def] "A small, membrane-bounded organelle that uses dioxygen (O2) to oxidize organic molecules\_ contains some enzymes that produce and others that degrade hydrogen peroxide (H2O2)." [ISBN
- 1391 Pathogen[ Q2Q067] interacts with 6 human  
partners: {O14734;O75381;Q9GZY8;Q9NR77;P40855;P08670}
- 1392 Pathogen[ P0C214] interacts with 13 human  
partners: {Q13907;O75874;Q9H4I8;Q9BXS1;P40855;P29401;O75381;Q13011;O14832;P08670;Q9NR77;O14734;Q9GZY8}
- 1393 Pathogen[ P03346] interacts with 12 human  
partners: {O75381;Q9H4I8;O94972;Q9NR77;P08670;O14734;P56589;P50542;P40855;O43933;O96011;Q9GZY8}
- 1394 Pathogen[ Q85601] interacts with 8 human  
partners: {P08670;O14734;Q9NR77;O43933;O75381;Q9GZY8;Q13907;P40855}
- 1395 Pathogen[ P14079] interacts with 26 human  
partners: {Q9Y5Y5;O75192;Q9BXS1;Q96HA9;P40855;P56589;Q13907;A8MXV4;P29401;O95822;Q7Z434;Q9Y6I8;P50542;O96011;Q53FP2;O14832;O14734;Q7Z412;P53602;Q5T011;O75381;Q9GZY8;P08670;Q8NFP0;Q9NR77;Q86UB9}
- 1396 Pathogen[ P03383] interacts with 8 human  
partners: {Q96HA9;P08670;O14734;O75381;Q9NR77;Q8NFP0;Q9GZY8;P40855}
- 1397 Pathogen[ P03410] interacts with 24 human  
partners: {O75192;P53602;Q9GZY8;Q8NFP0;Q13011;Q9Y5Y5;O96011;P40855;O75381;Q7Z434;O14734;Q9Y6I8;A8MXV4;O14832;Q96HA9;P08670;Q96CN7;P50542;Q13907;P56589;Q86UB9;Q9NR77;O95822;Q9BXS1}
- 1398 Pathogen[ P14075] interacts with 11 human

partners:{P40855;O14734;A8MXV4;Q9GZY8;O75381;Q96HA9;Q9NR77;P08670;O14832;O75192;Q8NFP0}  
 1399 Pathogen[ P0C206] interacts with 21 human  
 partners:{O43933;O75192;A8MXV4;Q96HA9;O75381;P56589;O14832;Q8NFP0;P50542;Q9NR77;Q13907;Q9BXS1;Q9H4I8;P40855;O14734;O96011;Q9GZY8;P08670;Q9Y6I8;Q86UB9;P29401}  
 1400 Pathogen[ P03363] interacts with 9 human  
 partners:{O14734;O94972;O43933;Q9NR77;Q9H4I8;P08670;O75381;P40855;Q9GZY8}  
 1401 [Cluster 128]GO:0000124+C cellular\_component [name] SAGA complex [def] "A SAGA-type histone acetyltransferase complex that contains Spt8 (in budding yeast) or a homolog thereof\_ additional polypeptides include Spt group, consisting of Spt7, Spt3, and Spt20/Ada5, which interact with the TATA-binding protein (TBP)\_ the Ada group, consisting of Adal, Ada2, Ada3, Ada4/Gcn5, and Ada5/Spt20, which is functionally linked to the nucleosomal HAT activity\_ Tral, an ATM/PI-3 kinase-related protein that targets DNA-bound activators for recruitment to promoters\_ the TBP-associated factor (TAF) proteins, consisting of Taf5, Taf6, Taf9, Taf10, and Taf12, which mediate nucleosomal HAT activity and are thought to help recruit the basal transcription machinery." [PMID  
 1402 Pathogen[ Q2Q067] interacts with 2 human partners:{Q14CW9;Q9NPA8}  
 1403 Pathogen[ P0C214] interacts with 2 human partners:{Q14CW9;Q9NPA8}  
 1404 Pathogen[ P03346] interacts with 2 human partners:{Q14CW9;Q9NPA8}  
 1405 Pathogen[ Q85601] interacts with 2 human partners:{Q14CW9;Q9NPA8}  
 1406 Pathogen[ P14079] interacts with 2 human partners:{Q14CW9;Q9NPA8}  
 1407 Pathogen[ P03383] interacts with 2 human partners:{Q9NPA8;Q14CW9}  
 1408 Pathogen[ P03410] interacts with 2 human partners:{Q14CW9;Q9NPA8}  
 1409 Pathogen[ P14075] interacts with 2 human partners:{Q14CW9;Q9NPA8}  
 1410 Pathogen[ P0C206] interacts with 2 human partners:{Q14CW9;Q9NPA8}  
 1411 Pathogen[ P03363] interacts with 2 human partners:{Q9NPA8;Q14CW9}  
 1412 [Cluster 129]GO:0000784+C cellular\_component [name] nuclear chromosome, telomeric region [def] "The terminal region of a linear chromosome in the nucleus that includes the telomeric DNA repeats and associated proteins." [GOC  
 1413 Pathogen[ Q2Q067] interacts with 13 human  
 partners:{Q92889;Q9H2K2;Q9NYB0;Q15554;P54274;Q9H668;Q00577;O60934;Q2NKJ3;O95271;P13010;Q8IY92;Q86WV5}  
 1414 Pathogen[ P0C214] interacts with 12 human  
 partners:{Q92889;P13010;Q15554;Q86WV5;Q00577;Q9H2K2;Q9NYB0;Q9H668;Q8IY92;O95271;P54274;Q2NKJ3}  
 1415 Pathogen[ P03346] interacts with 15 human  
 partners:{Q86WV5;Q15554;Q00577;P07992;P54274;P13010;Q9H2K2;Q9H668;Q9NUX5;Q9NYB0;O60934;Q92889;O95271;Q8IY92;Q2NKJ3}  
 1416 Pathogen[ Q85601] interacts with 13 human  
 partners:{Q86WV5;Q15554;Q2NKJ3;Q92889;Q9H2K2;Q00577;Q8IY92;Q9H668;Q9NYB0;O95271;P54274;P13010;O60934}  
 1417 Pathogen[ P14079] interacts with 16 human  
 partners:{Q9H668;P54274;Q9NUX5;Q86WV5;O95271;P13010;Q9H2K2;O60934;Q9NYB0;Q92889;Q8NAM6;Q00577;Q15554;Q2NKJ3;P07992;Q8IY92}  
 1418 Pathogen[ P03383] interacts with 9 human  
 partners:{P13010;Q9NYB0;Q15554;Q8IY92;Q00577;O95271;Q86WV5;Q2NKJ3;P54274}  
 1419 Pathogen[ P03410] interacts with 15 human  
 partners:{Q9NUX5;Q15554;P07992;P54274;Q9H668;Q92889;Q00577;Q86WV5;Q8IY92;O95271;P13010;Q9H2K2;Q2NKJ3;Q9NYB0;O60934}  
 1420 Pathogen[ P14075] interacts with 10 human  
 partners:{Q15554;Q2NKJ3;P54274;Q86WV5;Q00577;P13010;O95271;Q8IY92;Q9NYB0;Q9H668}  
 1421 Pathogen[ P0C206] interacts with 15 human  
 partners:{O95271;Q2NKJ3;P13010;Q86WV5;Q15554;O60934;Q9H668;P07992;P54274;Q92889;Q9NYB0;Q9NUX5;Q8IY92;Q9H2K2;Q00577}  
 1422 Pathogen[ P03363] interacts with 13 human  
 partners:{Q15554;P13010;Q9NYB0;Q92889;Q86WV5;Q9H2K2;P54274;Q9H668;O95271;Q9NUX5;Q8IY92;Q2NKJ3;Q00577}  
 1423 [Cluster 130]GO:0005731+C cellular\_component [name] nucleolus organizer region [def] "A region of a chromosome where nucleoli form during interphase, and where genes encoding the largest rRNA precursor transcript are tandemly arrayed." [PMID  
 1424 Pathogen[ Q2Q067] interacts with 1 human partners:{Q9NRC8}  
 1425 Pathogen[ P0C214] interacts with 1 human partners:{Q9NRC8}  
 1426 Pathogen[ P03346] interacts with 1 human partners:{Q9NRC8}  
 1427 Pathogen[ Q85601] interacts with 1 human partners:{Q9NRC8}  
 1428 Pathogen[ P14079] interacts with 1 human partners:{Q9NRC8}  
 1429 Pathogen[ P03383] interacts with 1 human partners:{Q9NRC8}  
 1430 Pathogen[ P03410] interacts with 1 human partners:{Q9NRC8}  
 1431 Pathogen[ P14075] interacts with 1 human partners:{Q9NRC8}  
 1432 Pathogen[ P0C206] interacts with 1 human partners:{Q9NRC8}  
 1433 Pathogen[ P03363] interacts with 1 human partners:{Q9NRC8}  
 1434 [Cluster 131]GO:0030118+C cellular\_component [name] clathrin coat [def] "A membrane coat found on coated pits and some coated vesicles\_ consists of polymerized clathrin triskelions, each comprising three clathrin heavy chains and three clathrin light chains, linked to the membrane via one of the AP adaptor complexes." [GOC  
 1435 Pathogen[ Q2Q067] interacts with 3 human partners:{Q00610;P09497;P09496}  
 1436 Pathogen[ P0C214] interacts with 2 human partners:{P09497;P09496}

1437 Pathogen[ P03346] interacts with 4 human partners: {P09496;Q13492;P09497;Q00610}

1438 Pathogen[ Q85601] interacts with 3 human partners: {Q00610;P09496;P09497}

1439 Pathogen[ P14079] interacts with 4 human partners: {Q13492;Q00610;P09497;P09496}

1440 Pathogen[ P03383] interacts with 2 human partners: {Q00610;P09497}

1441 Pathogen[ P03410] interacts with 4 human partners: {Q00610;P09496;Q13492;P09497}

1442 Pathogen[ P14075] interacts with 3 human partners: {P09497;P09496;Q00610}

1443 Pathogen[ P0C206] interacts with 3 human partners: {Q00610;P09496;P09497}

1444 Pathogen[ P03363] interacts with 2 human partners: {Q00610;P09497}

1445 [Cluster 132]GO:0043265+C cellular\_component [name] ectoplasm [def] "Granule free cytoplasm, lying immediately below the plasma membrane." [GOC

1446 Pathogen[ Q2Q067] interacts with 1 human partners: {P54840}

1447 Pathogen[ P0C214] interacts with 1 human partners: {P54840}

1448 Pathogen[ P03346] interacts with 1 human partners: {P54840}

1449 Pathogen[ Q85601] interacts with 1 human partners: {P54840}

1450 Pathogen[ P14079] interacts with 1 human partners: {P54840}

1451 Pathogen[ P03383] interacts with 1 human partners: {P54840}

1452 Pathogen[ P03410] interacts with 1 human partners: {P54840}

1453 Pathogen[ P14075] interacts with 1 human partners: {P54840}

1454 Pathogen[ P0C206] interacts with 1 human partners: {P54840}

1455 Pathogen[ P03363] interacts with 1 human partners: {P54840}

1456 [Cluster 133]GO:0008021+C cellular\_component [name] synaptic vesicle [def] "A secretory organelle, some 50 nm in diameter, of presynaptic nerve terminals\_ accumulates in high concentrations of neurotransmitters and is secreted these into the synaptic cleft by fusion with the 'active zone' of the presynaptic plasma membrane." [PMID

1457 Pathogen[ Q2Q067] interacts with 6 human partners: {Q8WXE9;O95295;P11142;P78352;Q02410;Q9Y296}

1458 Pathogen[ P0C214] interacts with 7 human partners: {O95295;Q9Y296;P78352;Q00536;Q02410;Q8WXE9;P11142}

1459 Pathogen[ P03346] interacts with 11 human partners: {Q00536;O14908;O95295;P78352;Q14141;P11142;Q02410;Q8WXE9;Q9Y296;Q9UI14;Q9Y2J0}

1460 Pathogen[ Q85601] interacts with 7 human partners: {Q00536;O95295;Q8WXE9;Q9Y296;P11142;P78352;Q02410}

1461 Pathogen[ P14079] interacts with 12 human partners: {Q9Y296;O43759;P11142;P61421;Q02410;Q9UI14;O43612;O95295;Q5T0D9;Q8WXE9;O14908;O43761}

1462 Pathogen[ P03383] interacts with 7 human partners: {O95295;Q8WXE9;Q00536;Q9Y296;P11142;Q02410;P78352}

1463 Pathogen[ P03410] interacts with 14 human partners: {O43612;Q9Y2J0;P61421;O43759;O14908;P11142;O43761;Q02410;Q8WXE9;O95295;Q5T0D9;Q9Y296;P78352;Q9UI14}

1464 Pathogen[ P14075] interacts with 7 human partners: {Q02410;P11142;O95295;Q5T0D9;Q8WXE9;P78352;Q9Y296}

1465 Pathogen[ P0C206] interacts with 13 human partners: {P78352;Q9Y296;O43759;Q9Y2J0;Q00536;Q8WXE9;Q14141;Q9UI14;Q5T0D9;O14908;O95295;P11142;Q02410}

1466 Pathogen[ P03363] interacts with 10 human partners: {O14908;Q8WXE9;P78352;Q02410;O95295;Q9Y296;Q14141;Q99719;Q00536;P11142}

1467 [Cluster 134]GO:000139+C cellular\_component [name] Golgi membrane [def] "The lipid bilayer surrounding any of the compartments of the Golgi apparatus." [GOC

1468 Pathogen[ Q2Q067] interacts with 71 human partners: {Q8IUD2;O15027;Q9Y6D6;Q9Y6Q5;Q10567;P56377;O43747;Q9H2K2;Q6RW13;O14579;O95295;Q9H1H9;Q9P299;O75081;A8MVW5;Q8IV36;Q9UP83;O43752;O14662;P39880;P18850;O43617;P83436;P36956;Q9H8Y8;Q96CN9;P48444;Q08378;O00401;Q9Y3R5;Q96PC3;P61923;P60520;O75396;Q05084;Q9UBF2;Q14746;P61966;Q15437;P53992;Q92562;O95486;O75843;P29474;O94855;P82094;Q9BUL8;Q99550;Q9UIL1;Q13439;Q9BXS5;Q96JE7;Q9NZU7;P50570;Q8TAC9;Q99962;P53618;O95996;O95271;O15155;O60763;P60953;O95487;P35606;Q8WTW3;Q9Y678;Q9P2W9;Q15436;Q9H9E3;Q9NX95;Q9Y314}

1469 Pathogen[ P0C214] interacts with 78 human partners: {P60520;P29474;Q9UM00;P18850;P61923;Q14746;Q9P299;Q8N2H4;Q6RW13;P53992;Q9H9E3;O95295;Q8TAC9;O14579;P53618;A8MVW5;Q8IV36;P35606;P48444;P83436;P60953;Q9BUL8;Q08378;O43617;Q99962;Q15436;Q92562;O75843;Q96CN9;P82094;Q10567;Q9H8Y8;P10124;Q9UBF2;O95487;P49257;Q08AM6;P56377;Q15437;Q9BZQ4;Q9BQQ3;Q96PC3;Q9UIL1;Q99550;Q9NZU7;Q9NX95;O43752;O60763;Q9H2K2;Q9HD26;P39880;O43747;Q9NV92;Q9Y6Q5;Q13439;Q9UP83;O75396;Q9Y6D6;Q9UJH9;P61966;O00401;P50570;Q05084;Q96EK6;Q9Y3R5;O95271;Q96JE7;Q8IUD2;Q9Y678;Q9BXS5;O15155;O15027;O75081;O95486;Q8WTW3;Q9P2W9;O94855;Q9Y314}

1470 Pathogen[ P03346] interacts with 93 human partners: {O95166;Q13439;Q96CN9;P61966;O43752;Q14746;P50570;Q9P2W9;O15027;Q9UP83;P29474;P36956;O95295;O43747;Q9UIL1;Q96MW5;P60520;Q12772;P82094;P49257;P56377;Q99962;A8MVW5;Q9NZU7;Q8IV36;Q14789;Q9Y6D5;Q969X5;Q8WTW3;Q8IUD2;Q9BXS5;Q9Y678;Q9NX95;P53618;Q9H1H9;Q13190;Q08378;P60953;O75396;Q9P299;O14579;Q05084;Q92562;Q9NV92;Q53HI1;O94855;P18850;Q9Y371;Q9Y2V7;Q9Y3R5;Q9Y6D6;Q9H2K2;Q10567;O75843;P48444;P20340;Q15436;Q9H9E3;Q8TAC9;Q15437;Q9HD26;Q96JE7;Q8N2H4;Q9UBF2;Q9H8Y8;Q96PC3;P61923;O60763;O95996;O95486;Q9BQQ3;P83436;P36405;O95271;Q99550;Q9HC24;O95487;O14617;Q6RW13;P39880;Q8TEY5;Q9Y6Q5;P35606;O00401;O15155;O14662;Q9BUL8;P53367;O75081;P53992;O43617;Q86Y82;Q9Y314}

1471 Pathogen[ Q85601] interacts with 84 human partners: {O00401;Q96CN9;Q14746;O75843;Q9NZU7;O15027;P48444;Q08AM6;P36405;Q8N2H4;Q9BQQ



- 3;O75396;O14579;O95487;Q13439;O95295;Q8TAC9;O95166;O60763;Q96JE7;Q9BUL8;Q9UP83;Q9BXS5;P56377;Q99962;A8MVW5;Q9P299;O15155;Q8IV36;Q9UHF9;Q12772;O43747;P61923;P83436;Q9H1H9;Q08378;Q9NP61;Q92562;Q10567;Q9P2W9;Q15436;O43617;Q8WTW3;O43752;Q8N6H7;Q9H2K2;Q9H9E3;Q9UM00;Q15437;Q9UBF2;Q9HD26;P36956;P49257;Q9Y678;P50570;P18850;Q99550;Q6RW13;Q96EK6;O95486;P29474;Q96PC3;O95996;P53618;P60520;P60953;P82094;Q9Y6D6;Q9H8Y8;Q9Y3R5;P61966;P39880;Q9Y6Q5;O95271;Q9NX95;O94855;P35606;Q9U1L1;Q8IUD2;O14662;P53992;Q05084;O75081;Q9Y314}
- 1472 Pathogen[ P14079] interacts with 131 human partners: {Q5SRI9;O94923;Q9NY59;P0CG08;O95070;Q96G79;O95166;Q14789;Q6ZVE7;Q14746;Q92562;P49257;P61923;O15027;Q9Y6Q5;P61966;Q05084;Q9BXS5;O14828;O43505;O75072;P83436;Q5VSG8;Q24JP5;Q8NFM7;O95487;Q9NXE4;O95271;Q9NX95;O15258;Q13021;P35606;Q9Y314;O00400;Q10567;P39880;Q9Y6D5;Q6RW13;P56377;Q9Y678;Q9HC24;Q9BXS4;O94855;Q08378;Q9U1L1;A8MVW5;P53992;Q13439;Q9BUL8;Q9H2K2;Q8IUD2;Q9Y371;O15155;Q96JE7;P50570;O75843;Q9UHF9;O75396;Q9Y2V7;Q12772;Q9UL01;Q9HD26;P82094;Q3V5L5;Q9H8Y8;P27544;P36405;Q9Y287;Q8NHG7;P60520;Q8WTW3;Q8TAC9;Q9UK28;Q969X5;Q9BZQ4;Q9P299;Q8IV36;P61158;Q9Y6D6;O95996;Q9UBF2;Q9UP83;O00559;Q9H1H9;O14653;Q53H11;P10124;Q7Z5B4;Q9BQQ3;O95295;O14662;B7ZAQ6;Q8N2H4;P48444;P18850;Q96MW5;O75081;O43747;Q9UM00;O43752;O15260;O14579;Q92896;Q9H9E3;A8MW95;Q9Y3E0;Q9H0V9;Q96EK6;Q9NV92;O14617;O95486;Q8TBQ9;Q2TAP0;Q7Z5G4;Q9Y3R5;Q96PC3;Q9P2W9;Q6UWH4;Q9NRX6;P36956;O43617;Q96CN9;Q6UWI2;Q9UBM8;Q9NZU7;Q6AZY7;Q99550;O60763;Q99962;O00401;Q96FM1}
- 1473 Pathogen[ P03383] interacts with 54 human partners: {Q6RW13;P56377;Q14746;P29474;Q9H9E3;O14579;Q9UP83;P53618;P83436;Q9Y678;O95487;Q13439;O95295;Q9HD26;Q8TAC9;Q10567;P60953;A8MVW5;Q8IV36;Q9NX95;O95486;Q9Y6D6;Q9U1L1;Q15436;Q8N2H4;Q96CN9;Q9H1H9;Q8WTW3;Q8NHG7;O00401;Q05084;Q9Y3R5;O75081;O75843;O43747;Q15437;O94855;O43617;Q9UBF2;O15027;P10124;P39880;Q9BUL8;Q96JE7;P53992;P82094;O43752;Q9UM00;P18850;Q9BXS5;O95271;Q9H8Y8;Q8IUD2;Q9Y314}
- 1474 Pathogen[ P03410] interacts with 136 human partners: {Q9HC24;Q92562;Q9Y6Q5;P82094;Q96PC3;P36956;O14828;Q9H0V9;Q5VSG8;Q9BXS5;Q13190;Q3V5L5;Q9BQQ3;Q9BRV3;Q8TAC9;Q9UP83;Q7Z5B4;Q96FM1;P49257;Q8TBQ9;O94855;Q969X5;B7ZAQ6;P53992;Q9Y2V7;Q9H1H9;Q9P299;O43747;O75843;Q9BUL8;Q8IV36;O00400;P60520;P48444;P10124;Q7Z5G4;P53367;Q10567;P35606;P36405;O00401;Q08378;Q9P2W9;O14662;O14579;Q9Y287;P50570;Q96EK6;P27544;Q24JP5;Q9Y3E0;Q8N2H4;Q9NV92;Q05084;O14617;O15258;Q9NXE4;O00559;O95249;O95295;Q5SRI9;Q9HD26;Q92896;O95166;Q53H11;Q9UHF9;Q96MW5;Q15436;P29474;O60763;Q9H8Y8;Q08AM6;Q8IUD2;Q6UWI2;O75396;O95996;Q15437;Q9U1L1;P0CG08;Q9UK28;Q12772;O15155;Q9NP61;O95271;Q9Y678;Q99550;Q14789;O95486;Q9Y371;Q9Y6D6;P53618;A8MVW5;P61923;Q9Y6D5;Q96JE7;Q8WTW3;Q9NZU7;P39880;Q6RW13;P60953;Q14746;O75081;Q6UWH4;O43752;Q99962;O15027;Q96G79;O14653;Q9H2K2;P83436;Q9BXS4;Q9UL01;Q6ZVE7;Q13439;O15260;Q9Y314;O43617;Q9UM00;P61966;A8MW95;Q9BZQ4;P18850;Q8NFM7;Q6AZY7;Q9H9E3;P56377;Q8NHY0;O95070;Q9NX95;O43505;O95487;Q8NHG7;Q2TAP0;Q5MNZ9;Q9UBF2;Q13021}
- 1475 Pathogen[ P14075] interacts with 65 human partners: {P60953;P29474;O43617;Q14746;Q96JE7;Q5SRI9;Q9H1H9;Q9BUL8;Q8N2H4;Q9H9E3;O95295;O43752;P82094;A8MVW5;Q9UBF2;Q8IV36;Q9HD26;Q8IUD2;O15027;Q9Y6D6;P53992;P39880;O75081;O95487;O00401;O43505;Q9UP83;Q15437;Q8NHG7;Q9UHF9;Q2TAP0;P53618;Q9H8Y8;O43747;Q15436;Q9U1L1;Q9Y3R5;Q9UK28;Q14789;Q13439;Q05084;Q9Y678;Q9NV92;O75843;Q8TAC9;P56377;O94855;Q9BXS5;P10124;Q53H11;Q6RW13;Q9Y287;O95271;Q9NX95;Q96EK6;O95486;Q6UWI2;Q10567;Q96CN9;P83436;Q9UM00;Q8WTW3;P18850;O14579;Q9Y314}
- 1476 Pathogen[ P0C206] interacts with 115 human partners: {Q13439;O95271;O14662;Q14789;Q5SRI9;O14579;Q9Y678;Q15437;Q9UM00;P83436;O14828;O75396;Q9Y2V7;Q9Y6Q5;P53618;Q9P299;O43747;Q9Y287;Q9H9E3;O94855;Q9UHF9;Q10567;O14653;Q92562;P18850;Q7Z5B4;Q9NV92;Q9Y6D6;O15258;Q8NHG7;O43752;O75081;P61966;Q9U1L1;O95070;Q9H8Y8;Q8IUD2;Q99550;Q99962;Q14746;P36956;Q13021;Q9Y3R5;Q9H1H9;Q9NZU7;O95996;Q9NP61;Q9UL01;Q9NX95;Q8N2H4;A8MW95;A8MVW5;Q9UK28;Q8IV36;Q9UP83;Q9BXS5;O15155;Q6RW13;O95486;Q8WTW3;Q6ZVE7;Q53H11;Q9Y6D5;P35606;Q96JE7;P49257;O95487;O60763;Q9BZQ4;P48444;Q9BUL8;Q08378;Q6UWH4;O00401;P60520;P60953;Q96EK6;O95295;O43617;P36405;P29474;P0CG08;O15260;Q9UBF2;Q9HC24;Q969X5;Q96CN9;O14617;O75843;Q6UWI2;P39880;P53992;Q9BQQ3;Q8TAC9;Q8N6H7;Q96PC3;O15027;Q9H2K2;Q9HD26;P10124;Q12772;O95166;Q9P2W9;Q05084;P50570;Q99640;P82094;P56377;Q2TAP0;O43505;P61923;B7ZAQ6;Q08AM6;Q9Y314;Q15436}
- 1477 Pathogen[ P03363] interacts with 61 human partners: {O60763;Q9BUL8;Q14789;P29474;O75081;Q99962;O95996;Q9UP83;O43747;P48444;Q9Y3R5;Q13439;Q9Y678;P18850;Q99550;P50570;Q9H9E3;Q15436;P83436;O14579;O95486;P53618;P60520;Q9H2K2;Q9BXS5;Q9P299;P61923;Q14746;Q9P2W9;A8MVW5;Q8IV36;Q05084;Q9NZU7;O95271;Q08378;Q8WTW3;Q9H8Y8;O95295;P35606;O14662;O00401;Q9U1L1;Q9UBF2;P53992;O75843;O95487;O43617;Q9H1H9;P82094;Q9Y6D6;O43752;P39880;P60953;Q8IUD2;O95166;Q9HD26;O94855;Q10567;Q96CN9;Q9Y314;Q9NX95}
- 1478 [Cluster 135]GO:0030014+C cellular\_component [name] CCR4-NOT complex [def] "A large multimeric transcription factor complex that can regulate transcription positively or negatively\_ consists of a core complex plus additional proteins\_ may interact with other proteins to control initiation of transcription. In Saccharomyces the core complex comprises Ccr4p, Caf1p, Not1p, Not2p, Not3p, Not4p, and Not5p\_ Caf4p, Caf16p, and several less well characterized proteins." [PMID
- 1479 Pathogen[ Q2Q067] interacts with 2 human partners: {Q86TB9;Q9UIV1}
- 1480 Pathogen[ P0C214] interacts with 2 human partners: {Q9UIV1;Q86TB9}
- 1481 Pathogen[ P03346] interacts with 2 human partners: {Q9UIV1;Q86TB9}
- 1482 Pathogen[ Q85601] interacts with 2 human partners: {Q9UIV1;Q86TB9}
- 1483 Pathogen[ P14079] interacts with 2 human partners: {Q86TB9;Q9UIV1}
- 1484 Pathogen[ P03383] interacts with 2 human partners: {Q9UIV1;Q86TB9}
- 1485 Pathogen[ P03410] interacts with 2 human partners: {Q9UIV1;Q86TB9}

1486 Pathogen[ P14075] interacts with 2 human partners:{Q86TB9;Q9UIV1}  
1487 Pathogen[ P0C206] interacts with 2 human partners:{Q86TB9;Q9UIV1}  
1488 Pathogen[ P03363] interacts with 2 human partners:{Q9UIV1;Q86TB9}  
1489 [Cluster 136]GO:0005763+C cellular\_component [name] mitochondrial small ribosomal  
subunit [def] "The smaller of the two subunits of a mitochondrial ribosome." [GOC  
1490 Pathogen[ Q2Q067] interacts with 19 human  
partners:{P82921;P82933;Q96EL2;P82912;Q9Y676;Q9BYN8;P82663;Q9NVS2;Q9Y291;Q9Y3D3;Q9Y2R  
5;Q9Y2Q9;P82650;P82914;Q9Y6G3;Q9Y3D5;P82909;P82673;Q92665}  
1491 Pathogen[ P0C214] interacts with 19 human  
partners:{Q9Y3D5;Q96EL2;P82912;Q9Y676;Q9Y2Q9;P82914;Q92665;P82663;P82921;Q9BYN8;P8290  
9;Q9Y6G3;Q9Y291;Q9Y2R5;P82673;P82933;P82650;Q9Y3D3;Q9NVS2}  
1492 Pathogen[ P03346] interacts with 19 human  
partners:{Q9NVS2;Q96EL2;P82912;P82933;P82909;P82650;Q9Y2R5;P82914;Q9Y676;P82921;Q9Y6G  
3;Q9Y3D5;Q9Y3D3;P82663;Q9Y291;Q9BYN8;P82673;Q92665;Q9Y2Q9}  
1493 Pathogen[ Q85601] interacts with 18 human  
partners:{Q96EL2;P82912;P82933;Q9Y3D5;P82921;Q92665;Q9BYN8;Q9Y3D3;Q9Y291;Q9Y6G  
3;P82909;Q9NVS2;Q9Y2Q9;Q9Y676;P82650;P82663;P82914}  
1494 Pathogen[ P14079] interacts with 19 human  
partners:{P82933;Q9Y6G3;Q9Y291;Q9Y2R5;Q9Y3D3;P82921;P82650;P82912;Q92665;Q9Y2Q9;Q9BYN  
8;P82909;P82673;Q9Y676;Q9NVS2;P82663;Q96EL2;Q9Y3D5;P82914}  
1495 Pathogen[ P03383] interacts with 18 human  
partners:{Q96EL2;P82912;P82933;P82914;Q92665;Q9Y6G3;Q9BYN8;Q9NVS2;Q9Y2Q9;Q9Y2R5;P8290  
9;P82663;Q9Y3D5;P82921;P82650;Q9Y676;Q9Y291;Q9Y3D3}  
1496 Pathogen[ P03410] interacts with 19 human  
partners:{Q9Y2Q9;P82663;P82909;Q92665;P82650;Q9BYN8;Q9Y3D5;Q9Y676;Q9Y291;Q9Y6G3;P8267  
3;P82912;Q96EL2;P82933;P82914;P82921;Q9NVS2;Q9Y2R5;Q9Y3D3}  
1497 Pathogen[ P14075] interacts with 18 human  
partners:{Q96EL2;P82921;P82912;Q9Y2Q9;Q9Y2R5;Q9Y3D3;P82650;Q9Y3D5;P82909;Q9Y676;Q9266  
5;P82663;Q9Y291;P82914;Q9BYN8;P82933;Q9Y6G3;Q9NVS2}  
1498 Pathogen[ P0C206] interacts with 19 human  
partners:{Q9Y291;Q9Y3D5;Q96EL2;Q9Y3D3;P82914;Q92665;Q9Y676;P82673;Q9BYN8;Q9Y6G3;Q9NVS  
2;P82909;P82933;P82663;P82650;Q9Y2Q9;Q9Y2R5;P82912;P82921}  
1499 Pathogen[ P03363] interacts with 18 human  
partners:{P82650;Q9Y2R5;Q96EL2;P82921;P82914;Q9NVS2;Q9Y3D5;Q9Y2Q9;P82912;P82663;Q9Y6G  
3;P82933;Q92665;Q9Y676;Q9Y3D3;P82909;Q9Y291;Q9BYN8}  
1500 [Cluster 137]GO:0005874+C cellular\_component [name] microtubule [def] "Any of the  
long, generally straight, hollow tubes of internal diameter 12-15 nm and external  
diameter 24 nm found in a wide variety of eukaryotic cells\_ each consists (usually) of 13  
protofilaments of polymeric tubulin, staggered in such a manner that the tubulin monomers  
are arranged in a helical pattern on the microtubular surface, and with the alpha/beta  
axes of the tubulin subunits parallel to the long axis of the tubule\_ exist in  
equilibrium with pool of tubulin monomers and can be rapidly assembled or disassembled in  
response to physiological stimuli\_ concerned with force generation, e.g. in the spindle."  
[ISBN  
1501 Pathogen[ Q2Q067] interacts with 114 human  
partners:{Q9BTW9;Q8WW24;Q96TC7;Q8WZ33;Q8IXJ6;P50402;Q9BTV5;Q7Z4H7;P78559;Q9Y266;Q96RT  
8;P63172;Q14980;O43663;Q7Z460;Q8TF09;Q15596;Q96R06;Q9NUL3;Q9H1H9;Q14204;Q5SW79;O94927  
;Q9BXW4;Q8WWK9;Q969S2;P63167;Q9P1Y5;Q86XR8;Q96AQ6;Q9HC77;Q9NVX0;O75347;Q9NXR1;O00423;Q  
96SN8;P42704;Q9P258;Q08AD1;Q1MSJ5;Q96N16;Q5BJF6;Q9NP97;Q9NYZ3;Q99871;Q96DB5;Q9NQS7;Q  
14203;Q12959;P06746;Q9Y448;O94811;P17987;Q13561;Q8WWW0;Q92624;Q96RT7;Q9BSJ2;Q5JR59;P5  
0991;Q9BT25;Q96Q89;Q9H6D7;Q1W6H9;Q9H0B6;Q9ULW0;P50570;Q02241;O00139;O75122;Q07866;Q9N  
RI5;Q8IX90;P23258;Q9UPY8;Q5T5Y3;O95996;Q96BD8;Q9ULG1;Q13425;Q9NS23;Q13409;Q9BXS6;Q142  
44;Q9UGJ1;O95613;Q96FJ2;Q49MG5;Q8N4C6;Q99689;Q9BVN2;Q86VS8;Q92597;P78371;Q66K74;Q96CS  
2;P51808;P27816;Q86WH2;Q96M29;Q15691;Q8WVK7;Q96ED9;P49754;Q6Q759;Q9NPA3;O15392;Q68CZ6  
;O14576;Q9BRK4;Q9BSH3;Q8IYK2;Q9ULD2;Q96CW5}  
1502 Pathogen[ P0C214] interacts with 116 human  
partners:{Q07866;O94927;P49754;Q9BSJ2;Q99832;Q08AD1;P49368;Q1MSJ5;Q8WWW0;Q92624;O7534  
7;Q9NRI5;P78371;Q02241;P06746;Q9NS23;Q9BRK4;Q96ED9;P48643;O94811;Q14203;Q7Z4H7;Q5SW79  
;Q9BTW9;Q9P1Y5;Q96SN8;Q8TF09;Q96R06;Q9BXS6;Q9NPA3;Q9BSH3;Q9BXW4;Q8WW24;P23258;P42704;  
Q9HC77;O00423;Q14204;Q9ULG1;P51808;O00139;Q96CW5;Q15691;Q96TC7;Q9Y266;Q96RT7;Q9UGJ1;Q  
5JR59;P27816;Q96CS2;Q14980;Q9H0B6;O75122;Q86WH2;Q92597;Q86VS8;Q96Q89;Q13425;Q96BD8;Q8  
IYX8;Q14244;Q9P258;Q86XR8;P50402;Q9BT25;Q9NUL3;Q9ULW0;O43663;Q99689;Q9ULD2;Q5T5Y3;Q96  
DB5;Q96RT8;P78559;Q12959;Q99871;Q96AQ6;Q1W6H9;O15392;Q9H6D7;Q9UPY8;Q8IX90;Q9BVN2;P631  
72;O14576;Q7Z460;Q9NYZ3;Q96FJ2;Q8IXJ6;Q9BTV5;Q9NQS7;Q68CZ6;Q9NP97;Q5BJF6;P17987;Q8WWK  
9;Q8WZ33;P50570;O95613;P50991;Q15596;Q8N4C6;Q13409;Q9NXR1;Q9NVX0;Q9Y448;Q13561;Q9H492  
;Q96M29;Q49MG5;Q66K74;Q8WVK7;P63167;Q6Q759;Q8IYK2;Q96N16}  
1503 Pathogen[ P03346] interacts with 138 human  
partners:{Q95166;Q13425;Q5T5Y3;Q8IYK2;Q9NRI5;Q15058;Q9BT25;Q96FJ2;Q9BXS6;Q9H6D7;P5057  
0;Q9NSK0;Q9Y283;O14576;Q86XR8;O15392;Q86VS8;Q12840;Q96N16;Q5JR59;P23258;Q99871;Q96RT8  
;Q7Z4H7;Q9BSH3;P49754;Q96R06;Q96AQ6;O00139;P51808;Q15691;Q99689;Q08AD1;Q9ULG1;Q9UIF3;  
Q8WZ33;P78371;Q9HC77;Q99426;Q66K74;Q9NXR1;Q9H1H9;Q8IXJ6;Q9NUL3;Q96M29;Q96TC7;Q9P1Y5;Q  
9P258;Q14204;Q14203;Q96CW5;Q8IYX8;Q8TF09;Q14980;O75347;Q9H0R8;Q9BRK4;Q15555;Q9Y266;Q9  
69S2;Q9NVX0;Q9ULW0;O00423;Q92597;Q15596;Q96SN8;P42704;P50991;Q68CZ6;Q9UGJ1;P49368;Q6P  
597;Q8IZS6;Q9H492;Q9BTV5;Q5JSH3;Q9NQS7;Q8N0X2;Q96Q89;P78559;Q9ULD2;P63172;Q5BJF6;P111  
37;O94811;O95996;P30622;O75122;P50402;Q02241;P27816;Q8IX90;Q9Y2I6;Q8WWW0;Q96ED9;Q1340  
9;Q96DB5;Q14244;Q96CS2;Q9NYZ3;Q9BXW4;Q9Y448;Q8WWK9;P63167;Q9BVN2;Q9BSJ2;Q7Z460;Q9UHD8

- 1504 Pathogen[ Q85601] interacts with 135 human partners: {Q9H492; Q13409; P27816; Q9NP97; Q02241; P51808; Q86VS8; Q8WVK9; Q6Q759; Q969S2; Q5JSH3; Q9H6D7; Q9BT25; Q99871; Q9NQS7; Q96RT8; O95166; Q14244; Q9UBP0; Q8WWW0; Q9P258; Q96SN8; Q9Y283; Q7Z4H7; Q9NVX0; Q9H0R8; P30622; Q49MG5; Q9P1Y5; Q9HC77; Q9BVN2; Q66K74; Q9BTW9; Q14204; Q9BXS6; Q9H1H9; Q9BSH3; Q8IZS6; O15392; Q5BJF6; Q9Y2I6; Q9NS23; Q14203; P49754; P17987; Q96CW5; Q9ULW0; Q8WZ33; Q15596; P63172; Q96R06; Q96015; Q12840; O43663; P23258; Q9BXF9; O75122; O14965; Q9Y266; Q08AD1; Q9BXW4; Q86XR8; Q96Q89; Q9BSJ2; Q92624; Q8WW24; Q15555; Q6P597; P50991; O00423; Q9Y448; O94811; Q9UGJ1; Q8IXJ6; Q96M29; Q9NQC7; Q9BRK4; Q15691; O75347; Q15058; P42704; Q13425; Q96BD8; P50570; Q5T5Y3; Q1MSJ5; Q9BW30; O14576; Q9NYZ3; Q9BVA0; Q9NPA3; Q99689; Q9ULG1; O94927; P50402; Q8IX90; Q9NUL3; O95996; Q14980; Q5JR59; Q12959; Q8WVK7; Q96CS2; Q9BTV5; Q9NRI5; P06746; Q7Z460; Q5SW79; Q96TC7; Q92597; P78559; O95613; P78371; Q8N4C6; P48643; Q9NXR1; Q9UPY8; Q86WH2; Q96ED9; Q9GZM8; Q8TF09; Q1W6H9; Q96AQ6; P63167; Q07866; O00139; Q9H0B6; Q9ULD2; Q96N16; Q68CZ6; Q96DB5; P51955; Q8IYX8; Q96RT7; Q13561}
- 1505 Pathogen[ P14079] interacts with 175 human partners: {Q15691; Q14980; Q8TF09; Q9BTW9; P48643; O95166; Q8WZ33; Q9UPY8; Q9ULG1; Q9BTV5; P63172; Q15596; Q08AD1; Q9UJC3; Q9NS23; Q9NPA3; Q7Z460; P51808; Q8IX90; O15553; Q6ZMV9; Q9BVN2; Q07866; Q8IYK2; Q96R06; O43597; Q96FJ2; Q86VS8; Q9H492; Q12840; Q8N0X2; Q99871; Q96ED9; Q66K74; Q9NYZ3; Q9UGJ1; Q02241; P50991; Q9NVX0; Q14204; O15392; Q1MSJ5; P42704; Q9Y266; Q9BXF9; Q6Q759; P78371; Q92624; O95922; Q9NRI5; Q7Z4S6; P68363; Q14244; Q1W6H9; Q9ULW0; P50990; O00423; Q96M29; Q92597; Q9Y448; Q9Y4R7; Q8IWN7; Q9BXS6; Q96N16; Q9GZS0; P50570; Q86WH2; Q9NP97; A6PVL3; O15066; P56715; A6PVC2; P78559; Q99661; O43663; Q5BJF6; Q15814; Q9BSH3; P51955; Q99689; Q2M3G4; Q8N4C6; Q96Q89; Q9UI46; Q05BV3; Q99426; O60282; Q5JSH3; Q9NUL3; Q96RT8; P17987; O95996; O00139; Q15555; Q15058; Q8WVK7; P23258; O94811; Q9H1H9; Q969S2; Q96RT7; Q9H6D7; Q96AQ6; Q9H0R8; Q9P258; Q13409; Q13561; Q49MG5; Q5SW79; Q9Y4F5; Q9BSJ2; Q9NUJ3; Q9GZM8; Q8WW24; Q5T5Y3; Q96JE9; Q96DB5; Q8IXJ6; Q9ULD2; Q68CL5; Q969V4; Q8WVK9; Q86Y91; P06746; Q5T7B8; Q9NQS7; O95613; Q9Y283; P63167; Q9P1Y5; Q6ZMW3; Q9BW30; Q9UIF3; Q7Z4H7; Q9BT25; O75347; Q5JR59; P11137; Q68CZ6; Q9NSK0; P49754; O14576; P50402; Q8IZS6; Q86XR8; Q9NXR1; Q96015; O95235; P49368; Q9BY60; Q9Y2I6; Q96TC7; Q96BD8; Q9BVA0; O75122; Q32P44; O14965; Q9H0B6; Q8IYX8; Q9NQC7; Q9HC77; Q9BXW4; Q96SN8; Q8WWW0; Q14203; P27816; Q6P597; O94927; P30622; Q96LZ7; Q96CW5; P10636; Q8IUZ0; Q96CS2}
- 1506 Pathogen[ P03383] interacts with 87 human partners: {Q14244; Q9BRK4; Q9NQS7; Q86XR8; Q5JR59; Q8WZ33; Q7Z460; P06746; Q9BSJ2; Q96TC7; Q1MSJ5; Q96BD8; Q02241; P51808; Q15691; Q8WVK9; Q15596; Q9NVX0; Q96FJ2; Q9NRI5; Q9P258; Q9BXS6; P63172; Q14203; Q96SN8; Q7Z4H7; Q96AQ6; O94811; Q99689; Q96CW5; Q86WH2; Q9HC77; Q9H0B6; Q96M29; P49754; Q92597; Q96R06; Q96DB5; Q9H1H9; Q99871; Q96CS2; P27816; O94927; Q96N16; O75347; Q8IYK2; Q9NP97; Q9P1Y5; Q68CZ6; Q8WVK7; Q8WW24; Q96Q89; Q9BT25; Q86VS8; Q9NYZ3; Q07866; Q5BJF6; Q96ED9; Q9Y266; P50402; P78371; O14965; Q8IX90; Q14980; Q5T5Y3; Q6Q759; Q08AD1; Q9Y448; P42704; Q9H6D7; Q5SW79; P78559; Q8TF09; Q9ULW0; O95613; Q13561; O43663; Q49MG5; Q8N4C6; Q92624; Q9NUL3; P63167; Q9NPA3; Q9UPY8; Q13425; Q9BVN2; Q1W6H9}
- 1507 Pathogen[ P03410] interacts with 176 human partners: {Q96AQ6; Q9BVN2; Q9Y6G9; Q96LZ7; Q8IX90; Q7Z460; Q86Y91; Q14204; Q96TC7; O15392; Q8IXJ6; Q5JSH3; Q8IZS6; Q9Y4R7; Q96Q89; P17987; Q5JR59; Q6ZMW3; Q68CL5; P49368; Q9UJC3; P51808; Q99832; Q15058; Q6Q759; A6PVL3; P11137; Q08AD1; Q8IYK2; Q07866; P48643; Q13409; P30622; Q9H6D7; Q2M3G4; Q9NP97; Q13561; P27816; O43597; Q9H0B6; Q96DB5; Q9Y2I6; O00139; Q9NXR1; Q9HC77; Q8TF09; Q9BXF9; Q9GZM8; Q9UI46; Q32P44; Q9H1H9; Q8IUZ0; Q8N0X2; Q12959; Q9P1Y5; O60282; Q7Z4S6; Q8WVK9; Q96SN8; O94811; Q9ULG1; Q13425; P63172; Q9NSK0; Q9NS23; P06746; P63167; P50570; Q96N16; Q86VS8; Q9UIF3; Q9Y283; Q15814; Q9NYZ3; Q8TCX1; Q96R06; Q96JE9; Q9BXS6; Q12840; Q6P597; Q8IYX8; Q68CZ6; Q96CS2; Q9BTV5; O14965; O95166; Q5T5Y3; O60333; Q92624; Q8WZ33; Q14576; Q9Y448; Q14980; Q6ZMV9; Q15555; Q15691; Q9H0R8; Q9BSH3; O95996; Q9H492; Q9NPE6; P50990; Q9BW30; Q96ED9; Q9BTW9; Q9ULD2; Q9BXW4; Q9NVX0; P42704; Q8WVK7; Q9BVA1; Q8N4C6; Q8WWW0; Q5BJF6; Q9UPY8; Q9UHD8; P49754; Q86WH2; Q66K74; Q9BSJ2; O94927; P50402; Q9NUL3; P78559; P10636; Q15596; Q9NUJ3; O75347; Q9NRI5; Q96RT8; P23258; Q9ULW0; P68363; P78371; Q9BY60; Q1MSJ5; O95922; Q969S2; P33176; Q92597; Q9Y266; Q96CW5; Q99871; Q96BD8; O0423; Q96RT7; Q9Y4F5; Q5SW79; A6PVC2; O95613; Q99426; Q8IWN7; Q9GZS0; Q9P258; Q1W6H9; Q14244; O75122; Q969V4; P56715; Q96M29; Q9BT25; Q9NPA3; Q49MG5; Q05BV3; Q7Z4H7; Q9UGJ1; O43237; Q5T7B8; Q9BVA0; P50991; O96015; Q14203; Q02241; O43663; Q9NQS7; Q99689}
- 1508 Pathogen[ P14075] interacts with 89 human partners: {P42704; Q99871; Q96AQ6; Q9NP97; O94811; Q6Q759; Q9Y266; Q9NUJ3; Q9H1H9; Q1W6H9; Q9NUL3; Q02241; O43663; O75347; Q7Z4H7; Q49MG5; Q9NQS7; Q96R06; Q96N16; Q9BVN2; P51808; Q8WVK7; Q96JE9; Q13425; Q7Z460; P78559; Q13561; Q68CZ6; Q9HC77; P06746; Q96TC7; Q9BXS6; Q96SN8; Q8TF09; P78371; Q96BD8; P63172; P50402; Q9BT25; Q9NRI5; Q5JR59; Q92624; Q9ULW0; Q9UPY8; Q5SW79; O00139; Q5BJF6; P49754; Q96FJ2; Q9P258; Q86XR8; O14965; Q9NPA3; Q86WH2; Q15691; Q5T5Y3; Q96CS2; Q8IYK2; Q96DB5; Q8IX90; Q9BRK4; Q9NVX0; Q8WZ33; Q8WVK9; O94927; Q92597; Q86VS8; O95613; Q14203; Q96M29; Q07866; Q8N4C6; Q9H0B6; Q9NYZ3; Q14980; Q1MSJ5; Q9BSJ2; Q9H6D7; Q96Q89; P27816; Q9P1Y5; Q9Y448; P63167; Q96CW5; Q15596; Q96ED9; Q14244; Q99689; Q08AD1}
- 1509 Pathogen[ P0C206] interacts with 155 human partners: {Q9NQC7; Q96TC7; Q5SW79; Q92597; Q9NPA3; P48643; Q86XR8; Q86WH2; P50402; Q96DB5; Q9BVA0; Q96SN8; P56715; Q9NP97; Q9BXW4; Q9HC77; O14576; Q96Q89; Q9UBP0; Q5BJF6; Q9ULW0; Q96RT7; Q08AD1; P51955; Q9BTV5; Q96CW5; Q9H492; Q96JE9; Q9BTW9; P49754; P63167; Q15691; O94811; P78559; Q5T5Y3; Q9UIF3; Q9Y448; Q9BT25; Q8WZ33; P06746; Q8TF09; Q6P597; P50991; Q5JR59; P17987; Q9H1H9; P30622; O43237; O95996; P10636; Q02241; Q9GZM8; Q96N16; Q13409; Q8IX90; Q9UGJ1; Q66K74; Q15814; Q86VS8; Q9Y283; Q92624; Q96ED9; Q9P1Y5; Q9NVX0; Q14244; Q99689; O75122; Q68CL5; Q86Y91; Q99426; P11137; P27816; Q96BD8; Q14204; Q9H0B6; Q9UPY8; O95613; Q8IWN7; Q9ULG1; Q13425; P51808; O95922; Q8IYX8; Q96AQ6; Q9Y6G9; Q9NRI5; Q8WWW0; Q8IZS6; Q96CS2; O43663; Q7Z4H7; Q9ULD2; Q2M3G4; Q9NUL3; O94927; Q49MG5; O15392; O43597; Q12840; Q9NSK0; P23258; O00139; Q8IXJ6; Q9NUJ3; Q9P258; Q13561; Q9H0R8; Q969S2}

;Q9BXF9;P49368;Q9H6D7;Q15058;Q99871;Q15596;P42704;Q9NXR1;Q96M29;Q15555;Q5JSH3;Q9UJC3;Q9BXS6;Q1MSJ5;Q9NYZ3;O75347;O14965;Q14980;Q8N4C6;Q7Z460;Q9NS23;Q9NQS7;Q14203;Q6Q759;P63172;Q8IYK2;O00423;Q9BW19;Q8WWK9;Q9BSJ2;Q68CZ6;Q12959;Q9Y266;O96015;O95166;P78371;Q8WVK7;Q9BSH3;P50570;Q9BW30;Q8WW24;Q07866;Q96LZ7;Q9Y2I6;Q1W6H9;Q9BY60;Q9BVN2}

1510 Pathogen[ P03363] interacts with 165 human partners: {Q5BJF6;Q6ZMW3;P49754;Q12959;Q86VS8;Q9Y2I6;Q9UDT6;P11137;O75347;Q9BSH3;Q8N0X2;Q96DB5;Q14244;P56715;Q2M3G4;P63167;Q9HC77;Q96ED9;O95996;Q66K74;Q9ULG1;Q2VIQ3;Q8WZ33;P33176;P78559;Q9BRK4;O94811;Q96BD8;Q9H492;Q8IYK2;Q9GZS0;Q1MSJ5;Q969V4;Q13561;Q8WWK9;Q14980;Q9Y266;Q9BXW4;Q15691;Q9ULW0;Q92597;Q9NUL3;O95922;Q9HC35;P50570;O95613;P42704;P68363;O94967;Q14204;Q9H6D7;Q02241;Q9P258;Q9BT25;Q8WVK7;Q9BXS6;Q96M29;Q8NHY3;Q15596;Q49MG5;Q7Z4S6;Q07866;Q14807;Q8IX90;O00423;Q96TC7;Q13425;P50991;Q6ZMV9;Q5JR59;Q8IZS6;O60282;Q13748;Q9H0R8;Q9BW30;Q9H0B6;P30622;Q9UPY8;P27816;Q96R06;Q68CZ6;Q8TF09;Q9BXF9;O94927;P63172;Q9P1Y5;Q9NSK0;Q99426;Q9NQS7;P06746;Q96RT8;Q9NVX0;Q32P44;Q96AQ6;Q15814;Q9BTW9;Q5T7B8;P17987;Q7Z460;Q9UHD8;Q9NYZ3;Q92624;Q9Y283;Q9Y4F5;Q96CS2;Q99871;Q13409;P51808;P50402;O15066;Q9NS23;Q9BY60;Q9BVN2;Q9UIF3;Q96RT7;Q8IUZ0;Q86WH2;Q68CL5;Q9NRI5;Q8WWW0;Q9UGJ1;P78371;Q8IYX8;Q8IWN7;Q15058;Q86XR8;Q96Q89;O60333;Q9Y448;Q9H1H9;Q8N4C6;Q9UI46;Q9NP97;Q1W6H9;O43663;Q9NPA3;Q9NXR1;P23258;O00139;Q6Q759;Q9ULD2;Q96N16;O43237;Q7Z4H7;Q05BV3;P48643;Q969S2;O95166;Q96FJ2;Q14203;Q9BSJ2;Q9BTV5;O14576;Q12840;Q8WW24;Q15555;Q96JE9;P49368;Q99689;Q96CW5;Q96SN8;Q08AD1;Q5T5Y3;Q5SW79;Q9UJC3}

1511 [Cluster 138]GO:0032777+C cellular\_component [name] Piccolo NuA4 histone acetyltransferase complex [def] "A heterotrimeric H4/H2A histone acetyltransferase complex with a substrate preference of chromatin over free histones. It contains a subset of the proteins found in the larger NuA4 histone acetyltransferase complex\_ for example, the *S. cerevisiae* complex contains Esa1p, Yng2p, and Epl1p." [PMID

1512 Pathogen[ Q2Q067] interacts with 4 human partners: {Q9NXR8;Q52LR7;Q92993;Q9H2F5}

1513 Pathogen[ P0C214] interacts with 3 human partners: {Q92993;Q52LR7;Q9H2F5}

1514 Pathogen[ P03346] interacts with 4 human partners: {Q52LR7;Q9H2F5;Q92993;Q9NXR8}

1515 Pathogen[ Q85601] interacts with 4 human partners: {Q9H2F5;Q52LR7;Q92993;Q9NXR8}

1516 Pathogen[ P14079] interacts with 3 human partners: {Q52LR7;Q9H2F5;Q92993}

1517 Pathogen[ P03383] interacts with 3 human partners: {Q52LR7;Q9H2F5;Q92993}

1518 Pathogen[ P03410] interacts with 4 human partners: {Q52LR7;Q9H2F5;Q9NXR8;Q92993}

1519 Pathogen[ P14075] interacts with 3 human partners: {Q9H2F5;Q52LR7;Q92993}

1520 Pathogen[ P0C206] interacts with 4 human partners: {Q9H2F5;Q52LR7;Q92993;Q9NXR8}

1521 Pathogen[ P03363] interacts with 3 human partners: {Q9H2F5;Q52LR7;Q92993}

1522 [Cluster 139]GO:0071203+C cellular\_component [name] WASH complex [def] "A protein complex that localizes at the surface of endosomes, where it recruits and activates the Arp2/3 complex to induce actin polymerization. In human, the WASH complex is composed of F-actin-capping protein subunits alpha and beta, WASH1, FAM21, KIAA1033, KIAA0196 and CCDC53." [GOC

1523 Pathogen[ Q2Q067] interacts with 2 human partners: {Q9Y3C0;Q9Y4E1}

1524 Pathogen[ P0C214] interacts with 4 human partners: {Q9Y3C0;Q9Y4E1;Q641Q2;Q5SNT6}

1525 Pathogen[ P03346] interacts with 3 human partners: {Q9Y3C0;A8K0Z3;Q9Y4E1}

1526 Pathogen[ Q85601] interacts with 1 human partners: {Q9Y3C0}

1527 Pathogen[ P14079] interacts with 11 human partners: {Q9Y3C0;Q9Y4E1;P47756;Q6VEQ5;Q2M389;Q9NQA3;Q641Q2;Q5SRD0;A8K0Z3;Q12768;Q5SNT6}

1528 Pathogen[ P03383] interacts with 2 human partners: {Q9Y3C0;Q9Y4E1}

1529 Pathogen[ P03410] interacts with 11 human partners: {Q5SNT6;Q9Y3C0;P47756;Q2M389;Q641Q2;Q9Y4E1;Q6VEQ5;Q5SRD0;Q12768;Q9NQA3;A8K0Z3}

1530 Pathogen[ P14075] interacts with 3 human partners: {Q9Y3C0;Q641Q2;Q9Y4E1}

1531 Pathogen[ P0C206] interacts with 8 human partners: {P47756;Q641Q2;Q12768;Q2M389;Q9Y4E1;Q9Y3C0;Q6VEQ5;Q5SNT6}

1532 Pathogen[ P03363] interacts with 2 human partners: {Q9Y3C0;Q9Y4E1}

1533 [Cluster 140]GO:0071920+C cellular\_component [name] cleavage body [def] "A nuclear body that contains proteins involved in pre-mRNA 3'-end cleavage and polyadenylation, such as DDX1, CSTF2 and CPSFs, as well as the transcription factors TFIIE and TFIIF. Cleavage bodies are localized adjacent to Cajal bodies and are involved in mRNA3'-end processing." [PMID

1534 Pathogen[ Q2Q067] interacts with 2 human partners: {P33240;Q92499}

1535 Pathogen[ P0C214] interacts with 2 human partners: {P33240;Q92499}

1536 Pathogen[ P03346] interacts with 2 human partners: {Q92499;P33240}

1537 Pathogen[ Q85601] interacts with 2 human partners: {Q92499;P33240}

1538 Pathogen[ P14079] interacts with 2 human partners: {P33240;Q92499}

1539 Pathogen[ P03383] interacts with 2 human partners: {P33240;Q92499}

1540 Pathogen[ P03410] interacts with 2 human partners: {Q92499;P33240}

1541 Pathogen[ P14075] interacts with 2 human partners: {Q92499;P33240}

1542 Pathogen[ P0C206] interacts with 2 human partners: {P33240;Q92499}

1543 Pathogen[ P03363] interacts with 2 human partners: {Q92499;P33240}

1544 [Cluster 141]GO:0030692+C cellular\_component [name] Noc4p-Nop14p complex [def] "A heterodimer associated with precursors of the eukaryotic small ribosomal subunit, including the 90S preribosome\_ involved in small subunit biogenesis." [PMID

1545 Pathogen[ Q2Q067] interacts with 1 human partners: {P78316}

1546 Pathogen[ P0C214] interacts with 1 human partners: {P78316}

1547 Pathogen[ P03346] interacts with 1 human partners: {P78316}

1548 Pathogen[ Q85601] interacts with 1 human partners: {P78316}

1549 Pathogen[ P14079] interacts with 1 human partners:{P78316}  
1550 Pathogen[ P03383] interacts with 1 human partners:{P78316}  
1551 Pathogen[ P03410] interacts with 1 human partners:{P78316}  
1552 Pathogen[ P14075] interacts with 1 human partners:{P78316}  
1553 Pathogen[ P0C206] interacts with 1 human partners:{P78316}  
1554 Pathogen[ P03363] interacts with 1 human partners:{P78316}  
1555 [Cluster 142]GO:0030666+C cellular\_component [name] endocytic vesicle membrane [def] "The lipid bilayer surrounding an endocytic vesicle." [GOC  
1556 Pathogen[ Q2Q067] interacts with 12 human partners:{O94973;O95782;O00401;P63010;Q96CW1;P78352;P29474;P0CG47;P0CG48;P62987;Q00987;P62979}  
1557 Pathogen[ P0C214] interacts with 14 human partners:{P29474;Q96CW1;Q00987;P78352;P63010;Q8IVI9;P0CG48;P62987;O94973;P0CG47;O00401;O95782;P62979;P53680}  
1558 Pathogen[ P03346] interacts with 15 human partners:{P29474;P63010;Q8IVI9;P62987;P78352;P53680;P0CG48;O95782;Q00987;Q96CW1;P62979;P0CG47;O00401;O94973;Q9NRD5}  
1559 Pathogen[ Q85601] interacts with 14 human partners:{O00401;Q96CW1;P0CG48;Q8IVI9;P78352;P53680;P62979;O94973;P29474;P0CG47;P63010;P62987;Q00987;O95782}  
1560 Pathogen[ P14079] interacts with 12 human partners:{Q96CW1;P0CG48;P62979;P62987;Q00987;Q8IVI9;O95782;P63010;O94973;P0CG47;P53680;O00401}  
1561 Pathogen[ P03383] interacts with 11 human partners:{Q96CW1;P29474;P62987;O00401;P63010;O95782;P62979;P0CG47;P0CG48;O94973;P78352}  
1562 Pathogen[ P03410] interacts with 15 human partners:{O95782;Q96CW1;P0CG48;P53680;Q8IVI9;O00401;P62979;P29474;Q9NRD5;P63010;P62987;Q00987;P78352;O94973;P0CG47}  
1563 Pathogen[ P14075] interacts with 11 human partners:{P29474;O94973;Q96CW1;P0CG48;P62979;O00401;O95782;P62987;P63010;P0CG47;P78352}  
1564 Pathogen[ P0C206] interacts with 15 human partners:{P53680;P63010;P0CG48;P78352;O94973;Q96CW1;P62979;O00401;O95782;P0CG47;P29474;P62987;Q00987;Q9NRD5;Q8IVI9}  
1565 Pathogen[ P03363] interacts with 9 human partners:{P29474;Q8IVI9;P78352;O94973;P63010;P62987;O95782;O00401;Q96CW1}  
1566 [Cluster 143]GO:0030055+C cellular\_component [name] cell-substrate junction [def] "A cell junction that forms a connection between a cell and the extracellular matrix." [GOC  
1567 Pathogen[ Q2Q067] interacts with 2 human partners:{Q9HBL0;P11532}  
1568 Pathogen[ P0C214] interacts with 3 human partners:{P11532;Q15124;Q9HBL0}  
1569 Pathogen[ P03346] interacts with 2 human partners:{Q9HBL0;P11532}  
1570 Pathogen[ Q85601] interacts with 3 human partners:{P11532;Q15124;Q9HBL0}  
1571 Pathogen[ P14079] interacts with 3 human partners:{P11532;Q15124;Q9HBL0}  
1572 Pathogen[ P03383] interacts with 1 human partners:{P11532}  
1573 Pathogen[ P03410] interacts with 3 human partners:{P11532;Q15124;Q9HBL0}  
1574 Pathogen[ P14075] interacts with 1 human partners:{P11532}  
1575 Pathogen[ P0C206] interacts with 3 human partners:{Q9HBL0;Q15124;P11532}  
1576 Pathogen[ P03363] interacts with 2 human partners:{P11532;Q9HBL0}  
1577 [Cluster 144]GO:0032154+C cellular\_component [name] cleavage furrow [def] "In animal cells, the first sign of cleavage, or cytokinesis, is the appearance of a shallow groove in the cell surface near the old metaphase plate. A contractile ring containing actin and myosin is located just inside the plasma membrane at the location of the furrow. Ring contraction is associated with centripetal growth of the membrane that deepens the cleavage furrow and divides the cytoplasm of the two daughter cells. While the term 'cleavage furrow' was initially associated with animal cells, such a structure occurs in many other types of cells, including unicellular protists." [ISBN  
1578 Pathogen[ Q2Q067] interacts with 9 human partners:{Q9BTV5;O75935;Q9NXR1;P36873;O00255;Q53EZ4;O75154;P35579;P61586}  
1579 Pathogen[ P0C214] interacts with 10 human partners:{O75935;P61586;P35580;Q53EZ4;P36873;Q9BTV5;Q96GD0;Q9NXR1;O00255;O75154}  
1580 Pathogen[ P03346] interacts with 15 human partners:{P35579;O75935;Q14141;Q9NXR1;O95630;O00255;Q15019;P36873;Q9BTV5;Q53EZ4;Q86YS3;Q9H8V3;O75154;P61586;O00444}  
1581 Pathogen[ Q85601] interacts with 12 human partners:{Q53EZ4;O75154;P35579;Q86YS3;O75935;P36873;O00255;P61586;O95630;Q9BTV5;P35580;Q9NXR1}  
1582 Pathogen[ P14079] interacts with 13 human partners:{P35579;Q9BTV5;P36873;Q86YS3;Q96GD0;P61586;Q9H8V3;O75154;Q9NXR1;O75935;O00255;P35241;Q53EZ4}  
1583 Pathogen[ P03383] interacts with 8 human partners:{P36873;P61586;O00255;O75935;P35580;P35579;Q53EZ4;O75154}  
1584 Pathogen[ P03410] interacts with 14 human partners:{O75154;Q9NXR1;P35579;Q9BTV5;Q96GD0;Q86YS3;P61586;P36873;O75935;Q53EZ4;P35580;P35241;Q9H8V3;O00255}  
1585 Pathogen[ P14075] interacts with 7 human

1586 partners:{P36873;O00255;O75935;P35579;P61586;Q53EZ4;O75154}  
Pathogen[ P0C206] interacts with 17 human

1587 partners:{Q15019;O75154;Q9BTV5;O00255;O95630;O00444;Q14141;P61586;P35579;Q9H8V3;Q96GD  
0;Q9NXR1;Q16181;O75935;P36873;P35580;Q86YS3}

1588 Pathogen[ P03363] interacts with 9 human  
partners:{P36873;P35579;Q8IYM1;Q53EZ4;O75935;O75154;Q9NXR1;Q14141;Q9BTV5}

1589 [Cluster 145]GO:0000794+C cellular\_component [name] condensed nuclear chromosome [def]  
"A highly compacted molecule of DNA and associated proteins resulting in a cytologically  
distinct structure that remains in the nucleus." [GOC

1590 Pathogen[ Q2Q067] interacts with 17 human  
partners:{O43463;P18754;P27694;P49959;O14757;P42704;Q92547;Q9H6R4;Q06609;Q9UJW3;Q1505  
0;Q8IYF3;Q9HD42;P23258;O60885;Q14683;Q92845}

1591 Pathogen[ P0C214] interacts with 19 human  
partners:{Q06609;P49959;Q9HD42;P23258;P42704;Q15050;Q9H6R4;O43463;Q92845;Q14683;O6088  
5;P27694;Q92547;P40692;O14757;P18754;Q9BYG3;Q8IYF3;Q9UJW3}

1592 Pathogen[ P03346] interacts with 20 human  
partners:{Q15050;Q06609;P23258;P27694;Q9HD42;Q99626;O14757;P18754;Q8IYF3;O43463;Q1468  
3;P42704;P49959;Q9BYG3;Q92547;O60885;Q92845;Q92791;Q9UJW3;Q9H6R4}

1593 Pathogen[ Q85601] interacts with 19 human  
partners:{Q92547;Q8IYF3;Q9UJW3;P49959;O43463;P27694;P23258;O14757;Q14683;Q15050;P4270  
4;O60885;Q92845;P18754;P40692;Q9H6R4;Q06609;Q9HD42;P51955}

1594 Pathogen[ P14079] interacts with 19 human  
partners:{P40692;P42704;Q9HD42;Q15050;Q9H6R4;P51955;Q9UJW3;P23258;Q92791;Q92547;Q9BYG  
3;P27694;O60885;Q92845;Q9UEY8;Q06609;Q14683;P18754;Q8IYF3}

1595 Pathogen[ P03383] interacts with 15 human  
partners:{Q14683;O14757;Q06609;Q9UJW3;P27694;O43463;Q9H6R4;Q15050;Q8IYF3;P18754;Q9HD4  
2;O60885;P42704;Q92845;Q92547}

1596 Pathogen[ P03410] interacts with 21 human  
partners:{P49959;P40692;Q9UEY8;Q15050;O60885;Q92845;Q92791;Q9HD42;Q9H6R4;Q9BYG3;P4270  
4;Q14683;O14757;Q92547;P23258;P27694;Q9UJW3;O43463;P18754;Q8IYF3;Q06609}

1597 Pathogen[ P14075] interacts with 15 human  
partners:{P42704;Q14683;Q9H6R4;Q92845;Q9UJW3;P27694;O60885;O43463;P18754;Q9HD42;Q1505  
0;Q92547;O14757;Q06609;Q8IYF3}

1598 Pathogen[ P0C206] interacts with 20 human  
partners:{Q9BYG3;P49959;Q92845;P18754;P51955;P40692;O43463;Q92791;Q15050;Q9H6R4;Q1468  
3;O60885;P23258;Q8IYF3;Q06609;P42704;P27694;Q9HD42;Q92547;Q9UJW3}

1599 Pathogen[ P03363] interacts with 18 human  
partners:{Q92547;Q92845;P27694;Q15050;Q99626;P42704;Q92791;O60885;Q9BYG3;O43463;Q9H6R  
4;Q9UJW3;Q06609;P23258;P18754;Q14683;Q9HD42;O14757}

1600 [Cluster 146]GO:0032311+C cellular\_component [name] angiogenin-PRI complex [def] "A  
stable heterodimer of angiogenin and placental ribonuclease inhibitor\_ interaction  
between angiogenin and PRI prevents angiogenin binding to its receptor to stimulate  
angiogenesis." [PMID

1601 Pathogen[ Q2Q067] interacts with 1 human partners:{P13489}

1602 Pathogen[ P0C214] interacts with 1 human partners:{P13489}

1603 Pathogen[ P03346] interacts with 1 human partners:{P13489}

1604 Pathogen[ Q85601] interacts with 1 human partners:{P13489}

1605 Pathogen[ P14079] interacts with 1 human partners:{P13489}

1606 Pathogen[ P03383] interacts with 1 human partners:{P13489}

1607 Pathogen[ P03410] interacts with 1 human partners:{P13489}

1608 Pathogen[ P14075] interacts with 1 human partners:{P13489}

1609 Pathogen[ P0C206] interacts with 1 human partners:{P13489}

1610 Pathogen[ P03363] interacts with 1 human partners:{P13489}

1611 [Cluster 147]GO:0005833+C cellular\_component [name] hemoglobin complex [def] "An  
iron-containing, oxygen carrying complex. In vertebrates it is made up of two pairs of  
associated globin polypeptide chains, each chain carrying a noncovalently bound heme  
prosthetic group." [GOC

1612 Pathogen[ Q2Q067] interacts with 3 human partners:{P68871;P69905;Q9NZD4}

1613 Pathogen[ P0C214] interacts with 8 human  
partners:{P02042;P69905;Q9NPG2;P68871;P69892;Q9NZD4;P02100;P69891}

1614 Pathogen[ P03346] interacts with 5 human  
partners:{P02100;Q9NZD4;Q9NPG2;P69905;P68871}

1615 Pathogen[ Q85601] interacts with 8 human  
partners:{P69905;P02042;P02100;P69892;Q9NZD4;P68871;Q9NPG2;P69891}

1616 Pathogen[ P14079] interacts with 11 human  
partners:{P02042;Q9NPG2;P69891;P02100;P09105;P69905;P02008;P68871;Q9NZD4;Q6B0K9;P6989  
2}

1617 Pathogen[ P03383] interacts with 3 human partners:{P69905;P68871;Q9NZD4}

1618 Pathogen[ P03410] interacts with 11 human  
partners:{Q6B0K9;P02008;P02100;P09105;P68871;P02042;Q9NPG2;P69892;P69905;P69891;Q9NZD  
4}

1619 Pathogen[ P14075] interacts with 3 human partners:{P68871;Q9NZD4;P69905}

1620 Pathogen[ P0C206] interacts with 11 human  
partners:{P68871;Q6B0K9;P02100;P69892;P02008;P69891;Q9NPG2;P69905;P09105;Q9NZD4;P0204  
2}

1621 Pathogen[ P03363] interacts with 3 human partners:{P69905;P68871;Q9NZD4}

1621 [Cluster 148]GO:0030119+C cellular\_component [name] AP-type membrane coat adaptor complex [def] "Any of several heterotetrameric complexes that link clathrin (or another coat-forming molecule, as hypothesized for AP-3 and AP-4) to a membrane surface\_ they are found on coated pits and coated vesicles, and mediate sorting of cargo proteins into vesicles. Each AP complex contains two large (a beta and one of either an alpha, gamma, delta, or epsilon) subunits (110-130 kDa), a medium (mu) subunit (approximately 50 kDa), and a small (sigma) subunit (15-20 kDa)." [GOC

1622 Pathogen[ Q2Q067] interacts with 9 human  
partners:{P56377;O43747;Q2VPB7;Q92572;O00189;P53677;Q9H0R1;O43299;Q9NUS5}

1623 Pathogen[ P0C214] interacts with 9 human  
partners:{O00189;Q9NUS5;Q9H0R1;Q2VPB7;O43299;Q92572;P53677;P56377;O43747}

1624 Pathogen[ P03346] interacts with 9 human  
partners:{Q2VPB7;O43747;Q92572;P56377;Q9H0R1;O00189;Q9NUS5;O43299;P53677}

1625 Pathogen[ Q85601] interacts with 9 human  
partners:{Q9NUS5;P56377;O43747;O43299;Q2VPB7;P53677;Q92572;Q9H0R1;O00189}

1626 Pathogen[ P14079] interacts with 9 human  
partners:{Q2VPB7;P56377;O00189;Q92572;P53677;Q9H0R1;O43299;O43747;Q9NUS5}

1627 Pathogen[ P03383] interacts with 8 human  
partners:{P56377;Q92572;Q9NUS5;O00189;P53677;O43747;O43299;Q2VPB7}

1628 Pathogen[ P03410] interacts with 8 human  
partners:{Q9NUS5;O43747;Q92572;O43299;Q9H0R1;P53677;Q2VPB7;P56377}

1629 Pathogen[ P14075] interacts with 7 human  
partners:{O00189;O43747;Q92572;P56377;Q2VPB7;Q9NUS5;O43299}

1630 Pathogen[ P0C206] interacts with 9 human  
partners:{Q92572;O43747;Q2VPB7;Q9H0R1;O43299;P53677;O00189;P56377;Q9NUS5}

1631 Pathogen[ P03363] interacts with 8 human  
partners:{O43747;P53677;Q9NUS5;Q92572;Q9H0R1;O00189;Q2VPB7;O43299}

1632 [Cluster 149]GO:0016272+C cellular\_component [name] prefoldin complex [def] "A multisubunit chaperone that acts to delivers unfolded proteins to cytosolic chaperonin. In humans, the complex is a heterohexamers of two PFD-alpha and four PFD-beta type subunits." [GOC

1633 Pathogen[ Q2Q067] interacts with 6 human  
partners:{Q99471;Q9NQP4;Q9UBK9;Q9UHV9;P61758;O94763}

1634 Pathogen[ P0C214] interacts with 7 human  
partners:{P61758;Q9UHV9;Q99471;O60925;O94763;Q9NQP4;Q9UBK9}

1635 Pathogen[ P03346] interacts with 7 human  
partners:{Q99471;Q9UHV9;O94763;Q9NQP4;O60925;P61758;Q9UBK9}

1636 Pathogen[ Q85601] interacts with 6 human  
partners:{Q9NQP4;Q99471;Q9UHV9;P61758;O94763;Q9UBK9}

1637 Pathogen[ P14079] interacts with 8 human  
partners:{O60925;Q9UHV9;Q9NQP4;P61758;O94763;Q9NUG6;Q9UBK9;Q99471}

1638 Pathogen[ P03383] interacts with 7 human  
partners:{Q9UHV9;Q9NQP4;O94763;Q99471;O60925;Q9UBK9;P61758}

1639 Pathogen[ P03410] interacts with 8 human  
partners:{O94763;Q9UBK9;Q9NUG6;Q99471;P61758;Q9NQP4;O60925;Q9UHV9}

1640 Pathogen[ P14075] interacts with 7 human  
partners:{O94763;Q9UHV9;Q9UBK9;Q9NQP4;P61758;O60925;Q99471}

1641 Pathogen[ P0C206] interacts with 7 human  
partners:{Q99471;Q9UHV9;O60925;P61758;Q9UBK9;Q9NQP4;O94763}

1642 Pathogen[ P03363] interacts with 8 human  
partners:{Q9UHV9;Q9UBK9;Q99471;O60925;O94763;P61758;Q9NUG6;Q9NQP4}

1643 [Cluster 150]GO:0031372+C cellular\_component [name] UBC13-MMS2 complex [def] "A heterodimeric ubiquitin conjugating enzyme complex that catalyzes assembly of K63-linked polyubiquitin chains, which act as a signal to promote error-free DNA postreplication repair\_ in Saccharomyces the complex comprises Ubc13p and Mms2p." [GOC

1644 Pathogen[ Q2Q067] interacts with 2 human partners:{P61088;Q15819}

1645 Pathogen[ P0C214] interacts with 2 human partners:{Q15819;P61088}

1646 Pathogen[ P03346] interacts with 2 human partners:{P61088;Q15819}

1647 Pathogen[ Q85601] interacts with 2 human partners:{P61088;Q15819}

1648 Pathogen[ P14079] interacts with 1 human partners:{Q15819}

1649 Pathogen[ P03383] interacts with 2 human partners:{P61088;Q15819}

1650 Pathogen[ P03410] interacts with 2 human partners:{P61088;Q15819}

1651 Pathogen[ P14075] interacts with 2 human partners:{Q15819;P61088}

1652 Pathogen[ P0C206] interacts with 2 human partners:{P61088;Q15819}

1653 Pathogen[ P03363] interacts with 2 human partners:{P61088;Q15819}

1654 [Cluster 151]GO:0016324+C cellular\_component [name] apical plasma membrane [def] "The region of the plasma membrane located at the apical end of the cell." [GOC

1655 Pathogen[ Q2Q067] interacts with 14 human  
partners:{O00186;O95782;Q8NI35;Q8IY63;Q9P0M2;P08133;P36543;P08238;Q86UE4;O95049;Q9Y2J4;Q15599;Q15833;Q9Y250}

1656 Pathogen[ P0C214] interacts with 13 human  
partners:{Q15833;Q8NI35;Q9Y2J4;Q15599;P08133;Q9P0M2;O00186;P36543;Q86UE4;O95049;Q9Y250;Q8IY63;O95782}

1657 Pathogen[ P03346] interacts with 17 human  
partners:{Q15833;Q99828;Q9P0M2;Q86UE4;O75970;P36543;O95782;P26038;O00186;Q8IY63;Q8NI35;P08133;Q15599;Q9Y250;O95049;Q9Y2J4;P08238}

1658 Pathogen[ Q85601] interacts with 14 human partners:{Q9Y250;O00186;Q15833;Q8IY63;O95049;Q8NI35;P08238;Q9Y2J4;Q86UE4;Q9P0M2;P08133;Q15599;O95782;P36543}

1659 Pathogen[ P14079] interacts with 31 human partners:{P36543;Q8N307;O95876;P61421;P13498;Q9P0M2;P27352;P26038;Q9Y250;Q9Y2J4;Q99828;Q96NT5;A6NFC5;A6PVL3;O00186;Q15833;O95782;Q96HD9;Q969L2;Q8NI35;O95049;Q15599;P08238;Q8N8Y2;Q86UE4;Q9UKB5;O43687;P15941;Q8IY63;Q15849;O75970}

1660 Pathogen[ P03383] interacts with 10 human partners:{Q86UE4;O00186;O95049;Q9Y2J4;O95782;Q8IY63;P36543;P08133;P08238;Q9Y250}

1661 Pathogen[ P03410] interacts with 30 human partners:{Q96HD9;O95782;A6PVL3;Q15833;Q8N8Y2;Q9Y2J4;P08238;P15941;P61421;Q8N307;Q8NI35;Q15599;O75970;Q9P0M2;P08133;Q99828;P26038;A6NFC5;Q86UE4;Q15049;Q15849;O95876;Q9Y250;O43687;O00186;Q8IY63;P27352;Q969L2;P36543;O95049}

1662 Pathogen[ P14075] interacts with 11 human partners:{A6NFC5;O95049;O00186;Q86UE4;P08133;Q9Y250;P08238;Q8IY63;Q9Y2J4;O95782;P36543}

1663 Pathogen[ P0C206] interacts with 20 human partners:{P36543;Q99828;O95049;Q8IY63;Q15599;P08238;P08133;Q9P0M2;A6NFC5;Q9Y2J4;Q8NI35;O95782;Q86UE4;Q15849;Q16181;Q15833;O95876;Q9Y250;Q969L2;O00186}

1664 Pathogen[ P03363] interacts with 17 human partners:{O95049;P36543;Q8IY63;Q86UE4;Q99828;O75970;Q9P0M2;Q9Y2J4;Q969L2;P08133;Q9Y250;O00186;O95782;Q8NI35;Q15599;P08238;Q15833}

1665 [Cluster 152]GO:0005901+C cellular\_component [name] caveola [def] "A membrane raft that forms small pit, depression, or invagination that communicates with the outside of a cell and extends inward, indenting the cytoplasm and the cell membrane. Examples include any of the minute pits or incupings of the cell membrane formed during pinocytosis. Such caveolae may be pinched off to form free vesicles within the cytoplasm." [GOC

1666 Pathogen[ Q2Q067] interacts with 5 human partners:{Q6NZI2;P11166;P29474;O95810;Q7Z699}

1667 Pathogen[ P0C214] interacts with 5 human partners:{P29474;O95810;Q7Z699;Q6NZI2;P11166}

1668 Pathogen[ P03346] interacts with 5 human partners:{P29474;Q6NZI2;P11166;O95810;Q7Z699}

1669 Pathogen[ Q85601] interacts with 5 human partners:{P11166;O95810;P29474;Q6NZI2;Q7Z699}

1670 Pathogen[ P14079] interacts with 4 human partners:{P11166;Q7Z699;Q6NZI2;O95810}

1671 Pathogen[ P03383] interacts with 3 human partners:{P29474;Q6NZI2;O95810}

1672 Pathogen[ P03410] interacts with 6 human partners:{Q6NZI2;Q7Z699;P11166;P29474;Q15049;O95810}

1673 Pathogen[ P14075] interacts with 3 human partners:{P29474;Q6NZI2;O95810}

1674 Pathogen[ P0C206] interacts with 5 human partners:{O95810;P11166;Q6NZI2;P29474;Q7Z699}

1675 Pathogen[ P03363] interacts with 5 human partners:{P29474;Q7Z699;Q6NZI2;O95810;P11166}

1676 [Cluster 153]GO:0043197+C cellular\_component [name] dendritic spine [def] "Protrusion from a dendrite. Spines are specialised subcellular compartments involved in the synaptic transmission. They are linked to the dendritic shaft by a restriction. Because of their bulb shape, they function as a biochemical and an electrical compartment. Spine remodeling is thought to be involved in synaptic plasticity." [GOC

1677 Pathogen[ Q2Q067] interacts with 8 human partners:{O00213;O95886;Q8N3V7;Q96EV8;Q9UPX8;P62136;O60299;Q9Y250}

1678 Pathogen[ P0C214] interacts with 10 human partners:{O00213;Q9UPX8;O60299;Q9NZI8;Q9Y250;P35580;P62136;O95886;Q96EV8;Q8N3V7}

1679 Pathogen[ P03346] interacts with 15 human partners:{P62136;Q8N3V7;O00213;O14908;Q9Y6D5;Q9NZI8;O43815;Q9P021;Q96EV8;Q9Y250;O95886;O60299;Q9ULV0;Q14CM0;Q9UPX8}

1680 Pathogen[ Q85601] interacts with 10 human partners:{Q9Y250;O00213;Q9UPX8;O43815;Q96EV8;P62136;Q8N3V7;P35580;O95886;O60299}

1681 Pathogen[ P14079] interacts with 18 human partners:{O75781;P24588;Q9Y6D5;O43815;Q9Y250;P62136;O00213;P35611;Q15078;Q9NP74;Q8N3V7;Q05682;O60299;O95886;Q96EV8;Q9P021;O14908;Q9UPX8}

1682 Pathogen[ P03383] interacts with 8 human partners:{O00213;O95886;O60299;Q96EV8;P62136;P35580;Q8N3V7;Q9Y250}

1683 Pathogen[ P03410] interacts with 20 human partners:{Q14CM0;O75781;Q8N3V7;Q05682;Q9ULV0;O60299;P62136;O14908;O00213;Q9Y6D5;P35580;O95886;O43815;Q9Y250;Q9UPX8;Q9P021;Q9NP74;P35611;Q96EV8;P24588}

1684 Pathogen[ P14075] interacts with 7 human partners:{O00213;Q8N3V7;O95886;Q9Y250;P62136;O60299;Q96EV8}

1685 Pathogen[ P0C206] interacts with 13 human partners:{Q8N3V7;O43815;Q9P021;O95886;O60299;O00213;Q9Y6D5;Q96EV8;O14908;Q9UPX8;P35580;Q9Y250;P62136}

1686 Pathogen[ P03363] interacts with 13 human partners:{Q9P021;Q8N3V7;P62136;O14908;O00213;Q9UPX8;Q14CM0;Q9NVA2;Q9Y250;Q9NZI8;O43815;O95886;O60299}

1687 [Cluster 154]GO:0070761+C cellular\_component [name] pre-snoRNP complex [def] "A ribonucleoprotein complex that contains a precursor small nucleolar RNA (pre-snoRNA) and



associated proteins, and forms during small nucleolar ribonucleoprotein complex (snoRNP) assembly. Pre-snoRNP complexes may contain proteins not found in the corresponding mature snoRNP complexes." [GOC

1688 Pathogen[ Q2Q067] interacts with 5 human  
partners:{Q9NWK9;Q16594;Q9UHK0;O00567;Q9Y2X3}

1689 Pathogen[ P0C214] interacts with 6 human  
partners:{Q9NWK9;O00567;Q9UHK0;Q16594;Q9NWS0;Q9Y2X3}

1690 Pathogen[ P03346] interacts with 5 human  
partners:{O00567;Q9NWK9;Q9Y2X3;Q9UHK0;Q16594}

1691 Pathogen[ Q85601] interacts with 5 human  
partners:{Q9NWK9;Q16594;Q9UHK0;O00567;Q9Y2X3}

1692 Pathogen[ P14079] interacts with 6 human  
partners:{Q9Y2X3;Q16594;Q9UHK0;Q9NWS0;O00567;Q9NWK9}

1693 Pathogen[ P03383] interacts with 5 human  
partners:{O00567;Q9NWK9;Q16594;Q9UHK0;Q9Y2X3}

1694 Pathogen[ P03410] interacts with 6 human  
partners:{Q9UHK0;Q9Y2X3;O00567;Q9NWS0;Q16594;Q9NWK9}

1695 Pathogen[ P14075] interacts with 5 human  
partners:{O00567;Q16594;Q9UHK0;Q9Y2X3;Q9NWK9}

1696 Pathogen[ P0C206] interacts with 6 human  
partners:{Q9NWK9;Q9UHK0;O00567;Q9Y2X3;Q9NWS0;Q16594}

1697 Pathogen[ P03363] interacts with 5 human  
partners:{Q9Y2X3;O00567;Q9UHK0;Q9NWK9;Q16594}

1698 [Cluster 155]GO:0000785+C cellular\_component [name] chromatin [def] "The ordered and organized complex of DNA, protein, and sometimes RNA, that forms the chromosome." [GOC

1699 Pathogen[ Q2Q067] interacts with 55 human  
partners:{Q86W56;P05204;P49454;Q92900;Q13573;Q14526;Q9NWS1;Q9Y6X3;Q16236;Q13185;P04198;P06400;Q7Z5K2;Q08999;Q8IYW8;P62826;Q9UBB5;O95243;Q7Z2E3;Q8WYP5;P30279;O15379;O60535;P05114;O14757;O94842;Q96ST3;O15350;Q00597;Q96QC0;P63146;Q29RF7;O43482;Q9BVC3;O00255;Q8IZ40;O75444;Q13127;P60228;Q9NTI5;P82970;O95983;Q13416;P17096;P49459;P42166;P83916;Q01826;P11802;Q8N3U4;Q9Y468;Q15651;Q9H5I1;P83916;O00479}

1700 Pathogen[ P0C214] interacts with 59 human  
partners:{O75444;O95243;Q14526;P60228;Q8IYW8;Q00597;Q9H5I1;Q29RF7;Q13573;P42166;Q15651;Q08999;O94842;Q92900;O15350;P83916;P05204;P17275;P11802;Q8WYP5;P17096;O60535;P49459;Q86W56;Q9Y468;P50747;O43482;P17535;O00479;O95983;Q7Z2E3;Q8IZ40;Q13185;Q9BVC3;O15379;P82970;Q13127;P62826;Q01826;Q7Z5K2;Q8N3U4;Q8WVM7;P30279;Q96ST3;Q13416;Q9Y6X3;Q9NWS1;Q9UBB5;P16220;O14757;P05114;P49454;Q9NTI5;P06400;P63146;O00255;Q96QC0;P04198;Q16236}

1701 Pathogen[ P03346] interacts with 60 human  
partners:{Q9NS91;Q96ST3;Q13263;P30279;P16220;Q08999;O00479;Q8N3U4;Q7Z5K2;Q29RF7;Q96QC0;O15379;P06400;P17275;Q8WYP5;O95983;P17535;P05114;O14757;Q8IZ40;O43482;P49459;O15350;O94842;P42166;P17096;P62826;O75444;P11802;Q16236;Q14526;P60228;O00255;P63146;Q9NWS1;Q9NTI5;Q9Y6X3;P82970;Q9Y468;Q8WVM7;P04198;Q00597;Q8IYW8;Q86W56;O95243;Q13416;P83916;Q7Z2E3;Q9BVC3;O60535;Q13573;Q15651;Q9H5I1;Q92900;P05204;Q9UBB5;Q13185;Q01826;P49454;Q13127}

1702 Pathogen[ Q85601] interacts with 60 human  
partners:{Q9H5I1;P49454;Q9NWS1;P83916;Q13127;Q16236;P17096;P63146;Q08999;P06400;Q13573;Q8WYP5;Q9Y468;P62826;O95243;Q8WVM7;P42166;O95983;Q9NTI5;Q29RF7;Q15651;Q00597;P11802;O14757;Q7Z5K2;Q13263;Q14526;Q9BVC3;P60228;O75444;P17535;P16220;O60535;P30279;P82970;O00255;Q01826;Q13185;O00479;P49459;Q8N3U4;Q96QC0;Q13416;O15379;Q7Z2E3;O15350;P04198;Q8IZ40;P05114;Q92900;P17275;O94842;O43482;Q9UBB5;Q9Y6X3;Q86W56;P05204;Q8IYW8;Q9NS91;Q96ST3}

1703 Pathogen[ P14079] interacts with 52 human  
partners:{O15379;Q13416;Q9NWS1;P05114;O43482;Q96QC0;Q8IYW8;Q96ST3;Q9UBB5;Q9Y468;P17096;Q00597;Q01826;Q13573;O15350;Q9H5I1;Q9NTI5;P82970;Q8N3U4;Q15651;Q13185;Q8WYP5;Q9UN42;O95243;P49459;Q9BVC3;P17275;P04198;P05204;O95983;O75444;Q16236;Q92900;Q86W56;Q9Y6X3;Q9UQE7;P49454;P42166;P62826;O00479;P83916;Q29RF7;Q96JY0;Q8IZ40;Q13127;Q7Z5K2;Q7Z2E3;O00255;P63146;O94842;P17535;Q08999}

1704 Pathogen[ P03383] interacts with 57 human  
partners:{Q13573;Q7Z2E3;P49454;O14757;P17096;P16220;Q9NWS1;Q8N3U4;Q08999;Q14526;P60228;Q8IYW8;P05204;Q8WYP5;Q01826;Q9Y6X3;Q15651;P11802;P06400;Q9UBB5;O60535;P62826;P30279;P83916;O95243;Q13185;Q86W56;Q8IZ40;O15379;O15350;O00479;O94842;P82970;O00255;Q29RF7;Q16236;P04198;O95983;P05114;Q00597;Q96QC0;Q13416;P17535;P49459;Q96ST3;P63146;Q9NTI5;P17275;O75444;Q9BVC3;Q92900;Q9H5I1;O43482;Q9Y468;Q7Z5K2;Q13127;Q8WVM7}

1705 Pathogen[ P03410] interacts with 59 human  
partners:{Q8IYW8;Q29RF7;Q14526;Q96QC0;P30279;O60535;Q13416;P82970;Q92900;Q9UQE7;Q7Z5K2;O75444;Q16236;P49459;Q9UBB5;P17096;Q08999;Q9Y468;Q15651;P06400;Q96ST3;P49454;O95243;Q7Z2E3;Q13127;P42166;P62826;P17535;O94842;P17275;Q00597;O43482;P11802;O15379;Q9H5I1;Q9NTI5;Q01826;O95983;P63146;Q9UN42;Q9BVC3;P16220;O14757;Q13185;Q8N3U4;Q86W56;O00479;Q9NWS1;P83916;O15350;Q8WVM7;P05204;Q8IZ40;O00255;P60228;Q8WYP5;P04198;P05114;Q13573}

1706 Pathogen[ P14075] interacts with 57 human  
partners:{P05204;Q7Z2E3;Q96ST3;Q92900;Q13573;Q14526;Q08999;P11802;Q96QC0;Q9Y6X3;Q8WVM7;O75444;P17275;P30279;Q8WYP5;P49459;Q9Y468;P17096;P04198;Q9UBB5;Q01826;O00255;Q9BVC3;P60228;Q9NWS1;Q9H5I1;O95983;O15350;Q7Z5K2;Q13185;P62826;P82970;P06400;P83916;O15379;Q29RF7;Q13416;O95243;Q13127;P16220;P63146;Q86W56;O00479;Q16236;O94842;Q00597;O43482;Q9NTI5;P17535;P49454;O14757;Q8IZ40;Q15651;O60535;Q8N3U4;Q8IYW8;P05114}

1707 Pathogen[ P0C206] interacts with 61 human partners: {Q9Y468;Q8WYP5;Q94842;Q96ST3;Q13127;Q13263;Q9UBB5;P05114;P16220;P17275;O75444;P05204;P30279;O95983;O00255;Q7Z5K2;Q29RF7;Q9NS91;P17535;Q13416;P62826;P49454;Q9Y6X3;Q08999;Q8IZ40;P60228;Q15651;P82970;Q86W56;Q9UQE7;P83916;P42166;Q13573;O15379;P49459;O60535;P04198;O43482;Q9H5I1;Q8IYW8;Q9NTI5;P17096;Q92900;Q13185;Q16236;O15350;Q01826;Q8N3U4;Q00597;Q96QC0;Q9UN42;Q14526;O00479;Q7Z2E3;Q8WVM7;P11802;O95243;Q9BVC3;P63146;P06400;Q9NWS1}

1708 Pathogen[ P03363] interacts with 59 human partners: {Q16236;P17535;P49454;P49459;P83916;Q00597;Q9Y468;Q92900;Q14526;O60535;Q9H5I1;P30279;Q8WYP5;Q96QC0;O15379;P82970;P04198;Q01826;P16220;Q9BVC3;P63146;P06400;Q13185;Q14807;P17275;Q13127;Q13416;Q08999;Q7Z2E3;P17096;Q96JY0;O75444;Q96ST3;Q8WVM7;Q8IZ40;O95983;Q13573;O00479;O95243;Q29RF7;P05114;Q15651;P60228;O94842;Q9NTI5;Q86W56;Q8N3U4;Q8IYW8;O43482;Q9Y6X3;P11802;Q9NWS1;Q7Z5K2;P62826;P05204;Q9NS91;P42166;Q9UBB5;O14757}

1709 [Cluster 156]GO:0031305+C cellular\_component [name] integral to mitochondrial inner membrane [def] "Located such that some or all of the gene product itself penetrates at least one phospholipid bilayer of the mitochondrial inner membrane. May also refer to the state of being buried in the bilayer with no exposure outside the bilayer." [GOC

1710 Pathogen[ Q2Q067] interacts with 1 human partners: {O14925}

1711 Pathogen[ P0C214] interacts with 1 human partners: {O14925}

1712 Pathogen[ P03346] interacts with 3 human partners: {O14925;P17152;Q16891}

1713 Pathogen[ Q85601] interacts with 1 human partners: {O14925}

1714 Pathogen[ P14079] interacts with 4 human partners: {P17152;Q16891;O14925;Q99595}

1715 Pathogen[ P03383] interacts with 2 human partners: {O14925;P17152}

1716 Pathogen[ P03410] interacts with 4 human partners: {O14925;Q99595;P17152;Q16891}

1717 Pathogen[ P14075] interacts with 2 human partners: {O14925;P17152}

1718 Pathogen[ P0C206] interacts with 3 human partners: {Q16891;O14925;P17152}

1719 Pathogen[ P03363] interacts with 1 human partners: {O14925}

1720 [Cluster 157]GO:0009986+C cellular\_component [name] cell surface [def] "The external part of the cell wall and/or plasma membrane." [GOC

1721 Pathogen[ Q2Q067] interacts with 15 human partners: {O14786;O75145;O75334;P38646;P02511;P04792;P11142;P27797;P11532;Q9UII2;P25063;O15078;Q9Y2M5;Q6ZVN8;Q00839}

1722 Pathogen[ P0C214] interacts with 18 human partners: {O15078;O14786;P02511;P04792;O75330;P11532;Q9UII2;O75145;Q9Y2M5;O75334;P38646;P10809;P25063;Q6ZVN8;P27797;Q00839;P13667;P11142}

1723 Pathogen[ P03346] interacts with 22 human partners: {Q6ZVN8;P11277;O75335;P11142;Q00839;P13667;O75330;P26038;P38646;Q9UII2;P02511;Q15019;P27797;A6NDV4;O75145;P11532;P25063;O75334;O15078;Q9Y2M5;P04792;O14786}

1724 Pathogen[ Q85601] interacts with 14 human partners: {O75145;O75330;P11532;O15078;P27797;O14786;Q9UII2;P02511;P11142;O75334;Q00839;P38646;P04792;Q9Y2M5}

1725 Pathogen[ P14079] interacts with 30 human partners: {Q9H295;P11142;O43187;P11532;Q6ZVN8;Q8NBQ7;P30040;A6NDV4;Q14210;Q9NP84;P02511;Q9UII2;P26038;O60895;Q00839;Q7RTU9;O75145;O00264;O75334;P25063;Q9Y2M5;O76027;O75335;P11277;Q8N9M5;P38646;O15078;P15941;P04792;O75330}

1726 Pathogen[ P03383] interacts with 14 human partners: {P38646;P02511;P25063;P04792;Q9UII2;Q6ZVN8;O15078;P11532;P11142;Q9Y2M5;O75145;O75334;Q00839;P27797}

1727 Pathogen[ P03410] interacts with 32 human partners: {O14786;O75335;Q00839;O75330;O60896;P38646;O60895;P15941;O75334;O76027;P13667;P11532;O43187;Q14210;P30040;P11142;P04792;A6NDV4;Q9UII2;Q6ZVN8;P26038;O00264;P25063;Q7RTU9;P02511;O75145;O15078;Q9BZR6;Q9NP84;P11277;Q9Y2M5;P27797}

1728 Pathogen[ P14075] interacts with 15 human partners: {P11532;P11142;P04792;P38646;Q9UII2;Q00839;O15078;Q6ZVN8;O75145;P27797;P02511;Q9Y2M5;O75330;O75334;P25063}

1729 Pathogen[ P0C206] interacts with 22 human partners: {P27797;Q15019;O75145;O75334;P04792;P38646;O14786;A6NDV4;P25063;O75330;O00264;Q6ZVN8;O15078;P11277;Q9Y2M5;P11532;O75335;P02511;Q00839;P11142;Q9UII2;P13667}

1730 Pathogen[ P03363] interacts with 15 human partners: {O75335;P54652;P11277;O14786;O15078;O75145;O75334;Q9Y2M5;P27797;P11532;P38646;Q6ZVN8;Q00839;P04792;P11142}

1731 [Cluster 158]GO:0031224+C cellular\_component [name] intrinsic to membrane [def] "Located in a membrane such that some covalently attached portion of the gene product, for example part of a peptide sequence or some other covalently attached group such as a GPI anchor, spans or is embedded in one or both leaflets of the membrane." [GOC

1732 Pathogen[ Q2Q067] interacts with 1 human partners: {O60238}

1733 Pathogen[ P0C214] interacts with 2 human partners: {P22735;O60238}

1734 Pathogen[ P03346] interacts with 2 human partners: {O60238;P22735}

1735 Pathogen[ Q85601] interacts with 1 human partners: {O60238}

1736 Pathogen[ P14079] interacts with 5 human partners: {Q4LDR2;P22735;P60606;O60238;P0C2S0}

1737 Pathogen[ P03383] interacts with 1 human partners: {O60238}

1738 Pathogen[ P03410] interacts with 5 human partners: {P0C2S0;P60606;Q4LDR2;O60238;P22735}

1739 Pathogen[ P14075] interacts with 1 human partners: {O60238}

1740 Pathogen[ P0C206] interacts with 2 human partners: {O60238;P22735}

1741 Pathogen[ P03363] interacts with 1 human partners:{O60238}

1742 [Cluster 159]GO:0043209+C cellular\_component [name] myelin sheath [def] "An electrically insulating fatty layer that surrounds the axons of many neurons. It is an outgrowth of glial cells

1743 Pathogen[ Q2Q067] interacts with 1 human partners:{Q9BXM0}

1744 Pathogen[ P0C214] interacts with 1 human partners:{Q9BXM0}

1745 Pathogen[ P03346] interacts with 2 human partners:{Q96A65;Q9BXM0}

1746 Pathogen[ Q85601] interacts with 2 human partners:{Q96A65;Q9BXM0}

1747 Pathogen[ P14079] interacts with 4 human partners:{Q86VE9;P02686;Q9BXM0;Q96A65}

1748 Pathogen[ P03383] interacts with 1 human partners:{Q9BXM0}

1749 Pathogen[ P03410] interacts with 4 human partners:{Q86VE9;Q9BXM0;P02686;Q96A65}

1750 Pathogen[ P14075] interacts with 1 human partners:{Q9BXM0}

1751 Pathogen[ P0C206] interacts with 2 human partners:{Q96A65;Q9BXM0}

1752 Pathogen[ P03363] interacts with 2 human partners:{Q9BXM0;Q96A65}

1753 [Cluster 160]GO:0005666+C cellular\_component [name] DNA-directed RNA polymerase III complex [def] "RNA polymerase III, one of three nuclear DNA-directed RNA polymerases found in all eukaryotes, is a multisubunit complex\_ typically it produces 5S rRNA, tRNAs and some of the small nuclear RNAs. Two large subunits comprise the most conserved portion including the catalytic site and share similarity with other eukaryotic and bacterial multisubunit RNA polymerases. The remainder of the complex is composed of smaller subunits (generally ten or more), some of which are also found in RNA polymerase I and others of which are also found in RNA polymerases I and II. Although the core is competent to mediate ribonucleic acid synthesis, it requires additional factors to select the appropriate template." [GOC

1754 Pathogen[ Q2Q067] interacts with 6 human partners:{Q9BUI4;O15318;Q9Y535;P05423;O14802;Q9H1D9}

1755 Pathogen[ P0C214] interacts with 6 human partners:{Q9BUI4;Q9H1D9;P05423;O15318;Q9Y535;O14802}

1756 Pathogen[ P03346] interacts with 6 human partners:{P05423;O15318;Q9H1D9;Q9Y535;Q9BUI4;O14802}

1757 Pathogen[ Q85601] interacts with 7 human partners:{Q9H1D9;Q9Y535;Q9BUI4;Q9Y2Y1;P05423;O14802;O15318}

1758 Pathogen[ P14079] interacts with 7 human partners:{Q9BUI4;P05423;Q9Y2Y1;O14802;O15318;Q9H1D9;Q9Y535}

1759 Pathogen[ P03383] interacts with 4 human partners:{Q9Y535;Q9H1D9;O15318;O14802}

1760 Pathogen[ P03410] interacts with 7 human partners:{O15318;Q9Y535;P05423;Q9Y2Y1;Q9H1D9;O14802;Q9BUI4}

1761 Pathogen[ P14075] interacts with 4 human partners:{Q9H1D9;Q9Y535;O14802;O15318}

1762 Pathogen[ P0C206] interacts with 7 human partners:{Q9BUI4;O15318;Q9Y535;P05423;O14802;Q9Y2Y1;Q9H1D9}

1763 Pathogen[ P03363] interacts with 4 human partners:{Q9Y535;Q9H1D9;P05423;O15318}

1764 [Cluster 161]GO:0005776+C cellular\_component [name] autophagic vacuole [def] "A double-membrane-bounded compartment in which endogenous cellular material is sequestered\_ known as autophagosome in yeast." [ISBN

1765 Pathogen[ Q2Q067] interacts with 10 human partners:{Q7Z3C6;Q9BXW4;Q6ZNE5;Q8IXH6;P60520;Q8IZQ1;Q9Y4P8;Q676U5;Q9H1Y0;Q96A56}

1766 Pathogen[ P0C214] interacts with 11 human partners:{P60520;Q9BXW4;Q676U5;Q8IZQ1;Q6ZNE5;Q9Y4P8;Q8IXH6;Q9H1Y0;Q96A56;Q9H492;Q7Z3C6}

1767 Pathogen[ P03346] interacts with 15 human partners:{O95166;Q7Z3C6;Q8IZQ1;P60520;Q96A56;Q6ZNE5;Q9H0R8;Q9C0C7;Q9H492;Q14596;Q9BXW4;Q9H1Y0;Q8IXH6;Q676U5;Q9Y4P8}

1768 Pathogen[ Q85601] interacts with 13 human partners:{Q9H492;O95166;Q9H0R8;Q14596;Q7Z3C6;Q9BXW4;Q9Y4P8;Q9H1Y0;Q676U5;Q96A56;P60520;Q8IZQ1;Q8IXH6}

1769 Pathogen[ P14079] interacts with 13 human partners:{Q96A56;O95166;Q8IXH6;Q9Y4P8;Q9H492;Q14596;Q7Z3C6;Q9H1Y0;Q6ZNE5;P60520;Q9H0R8;Q676U5;Q9BXW4}

1770 Pathogen[ P03383] interacts with 8 human partners:{Q96A56;Q7Z3C6;Q9H1Y0;Q8IXH6;Q8IZQ1;Q676U5;Q9Y4P8;Q6ZNE5}

1771 Pathogen[ P03410] interacts with 14 human partners:{Q8IXH6;Q9H1Y0;P60520;Q9Y4P8;Q14596;O95166;Q9H0R8;Q9H492;Q9BXW4;Q676U5;Q96A56;Q6ZNE5;Q7Z3C6;Q8IZQ1}

1772 Pathogen[ P14075] interacts with 8 human partners:{Q6ZNE5;Q9H1Y0;Q8IZQ1;Q676U5;Q9Y4P8;Q8IXH6;Q96A56;Q7Z3C6}

1773 Pathogen[ P0C206] interacts with 15 human partners:{Q7Z3C6;Q8IXH6;Q9C0C7;Q9BXW4;Q9H492;Q6ZNE5;Q96A56;Q14596;Q9Y4P8;Q8IZQ1;Q9H1Y0;P60520;Q9H0R8;Q676U5;O95166}

1774 Pathogen[ P03363] interacts with 14 human partners:{Q9H492;Q9BXW4;P60520;Q9H0R8;Q9C0C7;Q96A56;Q7Z3C6;Q6ZNE5;Q9Y4P8;Q8IZQ1;Q676U5;O95166;Q8IXH6;Q9H1Y0}

1775 [Cluster 162]GO:0000176+C cellular\_component [name] nuclear exosome (RNase complex) [def] "Complex of 3'-5' exoribonucleases found in the nucleus." [PMID

1776 Pathogen[ Q2Q067] interacts with 4 human partners:{Q99547;Q9Y2L1;Q06265;Q13901}

1777 Pathogen[ P0C214] interacts with 4 human partners:{Q9Y2L1;Q13901;Q99547;Q06265}

1778 Pathogen[ P03346] interacts with 5 human

1779 Pathogen[ Q85601] interacts with 4 human partners: {Q99547;Q9Y2L1;Q13901;Q06265}

1780 Pathogen[ P14079] interacts with 4 human partners: {Q13901;Q9Y2L1;Q99547;Q06265}

1781 Pathogen[ P03383] interacts with 4 human partners: {Q06265;Q9Y2L1;Q99547;Q13901}

1782 Pathogen[ P03410] interacts with 4 human partners: {Q9Y2L1;Q06265;Q99547;Q13901}

1783 Pathogen[ P14075] interacts with 4 human partners: {Q13901;Q9Y2L1;Q99547;Q06265}

1784 Pathogen[ P0C206] interacts with 4 human partners: {Q99547;Q06265;Q13901;Q9Y2L1}

1785 Pathogen[ P03363] interacts with 4 human partners: {Q99547;Q13901;Q9Y2L1;Q9NQT5}

1786 [Cluster 163]GO:0030914+C cellular\_component [name] STAGA complex [def] "A large multiprotein complex that possesses histone acetyltransferase and is involved in regulation of transcription. The composition is similar to that of the SAGA complex\_ for example, the human complex contains the transcription-transformation cofactor TRRAP, hGCN5L acetylase, novel human ADA-like and SPT-like cofactors, and a subset of TAFs." [PMID]

1787 Pathogen[ Q2Q067] interacts with 13 human partners: {Q9Y4A5;Q16594;O75486;Q9H0E3;Q12962;Q86TJ2;O75529;O75528;Q92830;Q16514;Q9Y6J9;O94864;Q96BN2}

1788 Pathogen[ P0C214] interacts with 13 human partners: {O75486;O75528;Q9Y6J9;Q12962;Q96BN2;Q86TJ2;O94864;Q16594;Q16514;O75529;Q9Y4A5;Q92830;Q9H0E3}

1789 Pathogen[ P03346] interacts with 13 human partners: {Q9Y6J9;O75486;Q9H0E3;Q92830;Q96BN2;O94864;O75528;Q9Y4A5;O75529;Q16514;Q12962;Q86TJ2;Q16594}

1790 Pathogen[ Q85601] interacts with 13 human partners: {O94864;O75528;Q9H0E3;Q9Y4A5;Q16594;Q9Y6J9;Q92830;O75529;Q16514;Q96BN2;Q12962;O75486;Q86TJ2}

1791 Pathogen[ P14079] interacts with 13 human partners: {Q9H0E3;Q9Y4A5;Q9Y6J9;O75528;Q16594;Q92830;O75529;O94864;Q96BN2;Q12962;Q16514;O75486;Q86TJ2}

1792 Pathogen[ P03383] interacts with 12 human partners: {Q9Y6J9;O75528;O75486;Q9Y4A5;O94864;Q96BN2;O75529;Q16594;Q92830;Q16514;Q12962;Q9H0E3}

1793 Pathogen[ P03410] interacts with 13 human partners: {Q92830;Q12962;O75528;Q86TJ2;O75486;Q9H0E3;Q96BN2;Q9Y4A5;Q16514;O94864;Q9Y6J9;Q16594;O75529}

1794 Pathogen[ P14075] interacts with 12 human partners: {Q9Y6J9;Q12962;Q9Y4A5;Q96BN2;Q16594;Q9H0E3;O94864;O75528;Q16514;O75486;O75529;Q92830}

1795 Pathogen[ P0C206] interacts with 13 human partners: {O75486;O75528;Q92830;Q16514;O94864;Q9Y6J9;O75529;Q9H0E3;Q86TJ2;Q9Y4A5;Q96BN2;Q12962;Q16594}

1796 Pathogen[ P03363] interacts with 13 human partners: {Q16514;O94864;Q12962;O75529;Q96BN2;Q92830;Q9Y4A5;O75486;Q9H0E3;Q9Y6J9;O75528;Q86TJ2;Q16594}

1797 [Cluster 164]GO:0097361+C

1798 Pathogen[ Q2Q067] interacts with 2 human partners: {Q96T76;Q9Y3D0}

1799 Pathogen[ P0C214] interacts with 3 human partners: {Q9H6Q4;Q9Y3D0;Q96T76}

1800 Pathogen[ P03346] interacts with 2 human partners: {Q9Y3D0;Q96T76}

1801 Pathogen[ Q85601] interacts with 3 human partners: {Q96T76;Q9Y3D0;Q9H6Q4}

1802 Pathogen[ P14079] interacts with 3 human partners: {Q9Y3D0;Q9H6Q4;Q96T76}

1803 Pathogen[ P03383] interacts with 3 human partners: {Q96T76;Q9Y3D0;Q9H6Q4}

1804 Pathogen[ P03410] interacts with 3 human partners: {Q96T76;Q9H6Q4;Q9Y3D0}

1805 Pathogen[ P14075] interacts with 2 human partners: {Q96T76;Q9Y3D0}

1806 Pathogen[ P0C206] interacts with 3 human partners: {Q9Y3D0;Q96T76;Q9H6Q4}

1807 Pathogen[ P03363] interacts with 2 human partners: {Q9Y3D0;Q96T76}

1808 [Cluster 165]GO:0030877+C cellular\_component [name] beta-catenin destruction complex [def] "A cytoplasmic protein complex containing glycogen synthase kinase-3-beta (GSK-3-beta), the adenomatous polyposis coli protein (APC), and the scaffolding protein axin, among others\_ phosphorylates beta-catenin, targets it for degradation by the proteasome." [PMID]

1809 Pathogen[ Q2Q067] interacts with 2 human partners: {Q9NYF0;Q9HB71}

1810 Pathogen[ P0C214] interacts with 2 human partners: {Q9NYF0;Q9HB71}

1811 Pathogen[ P03346] interacts with 3 human partners: {Q9HB71;Q8IUQ4;Q9NYF0}

1812 Pathogen[ Q85601] interacts with 2 human partners: {Q9NYF0;Q9HB71}

1813 Pathogen[ P14079] interacts with 2 human partners: {Q9HB71;Q9NYF0}

1814 Pathogen[ P03383] interacts with 2 human partners: {Q9HB71;Q9NYF0}

1815 Pathogen[ P03410] interacts with 2 human partners: {Q9HB71;Q9NYF0}

1816 Pathogen[ P14075] interacts with 2 human partners: {Q9NYF0;Q9HB71}

1817 Pathogen[ P0C206] interacts with 3 human partners: {Q9HB71;Q8IUQ4;Q9NYF0}

1818 Pathogen[ P03363] interacts with 2 human partners: {Q9HB71;Q9NYF0}

1819 [Cluster 166]GO:0005871+C cellular\_component [name] kinesin complex [def] "Any complex that includes a dimer of molecules from the kinesin superfamily, a group of related proteins that contain an extended region of predicted alpha-helical coiled coil in the main chain that likely produces dimerization. The native complexes of several kinesin family members have also been shown to contain additional peptides, often designated light chains as all of the noncatalytic subunits that are currently known are

smaller than the chain that contains the motor unit. Kinesin complexes generally possess a force-generating enzymatic activity, or motor, which converts the free energy of the gamma phosphate bond of ATP into mechanical work." [GOC

1820 Pathogen[ Q2Q067] interacts with 6 human partners:{P62258;Q9H0B6;Q02241;Q07866;Q9NRI5;Q92845}

1821 Pathogen[ P0C214] interacts with 5 human partners:{Q07866;Q9NRI5;Q02241;Q9H0B6;Q92845}

1822 Pathogen[ P03346] interacts with 9 human partners:{Q9NRI5;Q9NSK0;Q12840;P62258;Q6P597;Q02241;Q92845;Q9H0B6;Q07866}

1823 Pathogen[ Q85601] interacts with 9 human partners:{Q02241;Q12840;Q6P597;P62258;Q92845;Q9NRI5;Q9GZM8;Q07866;Q9H0B6}

1824 Pathogen[ P14079] interacts with 12 human partners:{Q07866;Q12840;Q02241;Q9NRI5;Q99661;O60282;P62258;Q9GZM8;Q9NSK0;Q92845;Q9H0B6;Q6P597}

1825 Pathogen[ P03383] interacts with 6 human partners:{Q02241;Q9NRI5;Q9H0B6;Q07866;Q92845;P62258}

1826 Pathogen[ P03410] interacts with 12 human partners:{P62258;Q07866;Q9H0B6;Q9GZM8;O60282;Q9NSK0;Q92845;Q12840;Q6P597;Q9NRI5;P33176;Q02241}

1827 Pathogen[ P14075] interacts with 6 human partners:{Q02241;Q92845;Q9NRI5;Q07866;Q9H0B6;P62258}

1828 Pathogen[ P0C206] interacts with 10 human partners:{Q92845;Q6P597;Q02241;Q9GZM8;Q9H0B6;P62258;Q9NRI5;Q12840;Q9NSK0;Q07866}

1829 Pathogen[ P03363] interacts with 10 human partners:{Q92845;P62258;P33176;Q02241;Q07866;O60282;Q9H0B6;Q9NSK0;Q9NRI5;Q12840}

1830 [Cluster 167]GO:0072372+C cellular\_component [name] primary cilium [def] "A cilium found on many different cell types that is typically present in a single copy per cell. A primary cilium may have a variable array of axonemal microtubules and may or may not contain molecular motors." [GOC

1831 Pathogen[ Q2Q067] interacts with 1 human partners:{Q9BYV8}

1832 Pathogen[ P0C214] interacts with 1 human partners:{Q9BYV8}

1833 Pathogen[ P03346] interacts with 3 human partners:{Q8N157;Q9BYV8;P36405}

1834 Pathogen[ Q85601] interacts with 2 human partners:{P36405;Q9BYV8}

1835 Pathogen[ P14079] interacts with 4 human partners:{Q8N157;P36405;A0AVF1;Q9BYV8}

1836 Pathogen[ P03383] interacts with 1 human partners:{Q9BYV8}

1837 Pathogen[ P03410] interacts with 5 human partners:{A0AVF1;P36405;Q8TCX1;Q9BYV8;Q8N157}

1838 Pathogen[ P14075] interacts with 1 human partners:{Q9BYV8}

1839 Pathogen[ P0C206] interacts with 3 human partners:{Q8N157;Q9BYV8;P36405}

1840 Pathogen[ P03363] interacts with 2 human partners:{Q9BYV8;Q8N157}

1841 [Cluster 168]GO:0000779+C cellular\_component [name] condensed chromosome, centromeric region [def] "The region of a condensed chromosome that includes the centromere and associated proteins, including the kinetochore. In monocentric chromosomes, this region corresponds to a single area of the chromosome, whereas in holocentric chromosomes, it is evenly distributed along the chromosome." [GOC

1842 Pathogen[ Q2Q067] interacts with 2 human partners:{Q13185;Q5FBB7}

1843 Pathogen[ P0C214] interacts with 2 human partners:{Q13185;Q5FBB7}

1844 Pathogen[ P03346] interacts with 2 human partners:{Q5FBB7;Q13185}

1845 Pathogen[ Q85601] interacts with 2 human partners:{Q13185;Q5FBB7}

1846 Pathogen[ P14079] interacts with 2 human partners:{Q5FBB7;Q13185}

1847 Pathogen[ P03383] interacts with 2 human partners:{Q5FBB7;Q13185}

1848 Pathogen[ P03410] interacts with 2 human partners:{Q13185;Q5FBB7}

1849 Pathogen[ P14075] interacts with 2 human partners:{Q13185;Q5FBB7}

1850 Pathogen[ P0C206] interacts with 2 human partners:{Q5FBB7;Q13185}

1851 Pathogen[ P03363] interacts with 2 human partners:{Q13185;Q5FBB7}

1852 [Cluster 169]GO:0005667+C cellular\_component [name] transcription factor complex [def] "A protein complex, distinct from RNA polymerase, that associates with DNA at promoters or at cis-acting regulatory sequences, by direct binding or by interaction with other DNA-binding polypeptides or complexes, and regulates transcription." [GOC

1853 Pathogen[ Q2Q067] interacts with 128 human partners:{Q9UKI9;P27540;P25490;Q6VMQ6;P01100;Q9Y4A5;Q9Y5Q3;Q03052;O75461;A0AVK6;Q9HBZ2;P15884;Q99081;Q9Y2D1;Q5VTD9;O00470;P06400;Q8WYA1;Q01094;Q9UKV0;Q08999;P14921;P36402;P46937;Q13485;P35680;P48380;Q9Y606;Q15562;Q6P1K2;Q7Z6R9;Q9HD15;Q04206;Q96AV8;Q99594;O94776;A6NFD8;P15976;Q96ST3;O15350;Q14934;P20265;P15172;Q15561;Q9ULK4;Q08050;Q96IF1;O43524;P53999;Q9ULW3;P55347;Q99504;P35548;Q99743;Q14186;P40426;Q15699;P25791;Q9Y6Y0;P12755;P84022;O00716;Q92769;O15105;P14859;Q8IZ40;Q9GZV5;O43541;O43679;P09874;Q6P2C8;Q16254;O15198;Q9NVC6;Q8WVJ9;Q15327;Q96H20;Q15329;P35869;Q92993;Q8IX07;Q9UPW6;P12956;Q15796;Q02080;Q8N9N2;P78337;Q9HBH7;Q13363;Q9NQ33;P28749;P20823;O75360;O43186;Q14686;P22415;Q9UMQ3;P19484;Q14209;P17096;Q04724;O43513;Q96PK6;Q9NPF71;Q92793;Q86U70;Q01860;P18848;P24941;Q14188;Q02577;Q03060;P11802;P15923;O60422;Q99717;O75376;Q99814;P40425;P22736;Q9UI36;Q15797;P40424;P49715;P31260;Q14693;Q9BXJ9;Q3C1V8}

1854 Pathogen[ P0C214] interacts with 119 human partners:{P40424;Q92993;O00470;Q03052;O15198;Q15327;Q16254;A0AVK6;P35869;Q13363;O75461;P55347;Q8N9N2;P78337;Q6VMQ6;Q08999;P14921;O43186;Q9HD15;P19484;Q99081;Q7Z6R9;Q5H9I0;P15884;O15350;Q02080;P01100;P11802;Q99743;Q92793;Q9HBH7;P53999;P46937;P84022;P17096;P15172;Q9GZV5;Q04206;Q9NVC6;Q9Y5Q3;Q9UKI9;O00716;Q04724;Q14686;Q6P1K2;Q5VTD9;Q9HBZ2;P

- 20265;Q15561;Q01094;P18848;Q14186;P15923;P25791;Q9Y6Y0;O94776;Q86U70;O43513;Q8IZ40;Q13485;Q92769;O15105;Q15329;Q9UKV0;O43679;P24941;O75376;Q15796;Q99594;Q9BXJ9;Q99504;Q9NP71;O43541;Q96PK6;Q9Y2D1;Q8WYA1;Q8IX07;P12755;Q14934;Q9UI36;Q6P2C8;Q9Y4A5;O75360;P36402;P05412;Q9UMQ3;Q8WVJ9;P28749;Q02577;Q03060;P40425;Q99814;Q96ST3;Q9ULW3;Q99717;P27540;Q9UPW6;Q96H20;P48380;P22415;Q15797;P16220;Q15562;Q9Y606;Q9ULK4;Q9NQ33;Q15699;P14859;Q14209;Q01860;Q3C1V8;Q14188;P06400;P35548;P12956;P09874;P18846;Q14693;Q96AV8}
- 1855 Pathogen[ P03346] interacts with 166 human  
partners: {Q99081;P85037;Q3C1V8;Q9Y606;Q96ST3;P05412;Q15562;P46937;P31260;P52954;Q86U70;Q6QHK4;P12956;P58012;P78337;Q7RTS3;Q3KNW1;A6NFD8;Q9UPW6;P16220;Q08999;Q03052;P19484;P36402;Q9ULW3;P35548;P31270;Q15329;Q9NP62;Q99594;Q8NFW5;P06400;P40426;Q9HBH7;Q15797;Q14188;Q9GZV5;Q96HZ4;Q9UKI9;Q15911;Q9HD15;P25490;P24941;P14859;P48380;P15923;P15172;Q15796;Q15327;Q04206;Q8IZ40;O94776;Q96IF1;Q92826;P15173;Q08050;Q14209;Q9Y5Q3;Q9NQ33;Q96AV8;O43186;Q9Y2D1;P27540;Q99717;P20823;O15350;O15105;Q16254;O00409;Q01094;P49715;P17096;Q01860;Q96H20;O00151;O15198;P11802;P20265;Q15561;Q14934;Q15699;Q9NP71;Q14186;P18848;O00327;P14921;P84022;P25791;Q9Y6Y0;O43513;P17542;Q9HCS4;O43541;P22736;P15976;P53999;Q9Y4A5;Q6VMQ6;Q6P2C8;Q92769;Q9UBG7;Q04724;P40425;Q6N069;O00470;O43679;Q8WVJ9;P84550;Q9BXJ9;P35680;Q15475;Q8IX07;Q99814;Q12778;Q01167;Q5H9I0;O75376;P98177;Q9HBZ2;Q5VTD9;P09874;P28749;Q9UKV0;Q9NVC6;P55347;O75461;Q9UBR4;O60422;Q99593;Q13363;Q02080;P61968;P40424;Q03060;Q13485;Q8WYA1;O75360;O15516;Q92993;O75398;Q92793;P35869;Q9ULK4;Q9UI36;O75593;Q99504;A0AVK6;O43524;P56915;Q02577;Q6P1K2;Q8N9N2;P01100;Q96PK6;Q9UMQ3;Q99743;O00716;Q7Z6R9;P15884;P18846;P35452;Q8IUM7;P22415;Q14693;Q14686;Q9UJU5}
- 1856 Pathogen[ Q85601] interacts with 138 human  
partners: {Q9ULW3;O15198;Q6N069;Q9UKV0;P09874;O75360;Q96PK6;P17096;P61968;Q9UPW6;Q08999;P15976;O94776;Q96H20;P19484;P15172;Q04724;P14921;Q03052;Q9ULK4;O75398;Q86U70;Q15329;Q9Y606;P06400;O43541;Q15797;Q7Z6R9;P18848;P14859;Q9Y4A5;O15516;Q8WYA1;Q99504;Q14188;P25490;O00327;Q9GZV5;O00151;P18846;Q9NQ33;Q99814;P27540;P53999;Q13363;P78337;Q99743;Q9NP71;Q02080;P12755;Q9Y5Q3;Q9UBG7;P11802;P01100;Q14934;P22415;Q14686;P31260;Q14186;P40424;P25791;Q9Y6Y0;O75461;Q9UMQ3;Q9HD15;Q92769;A6NFD8;P16220;Q99717;Q15699;Q04206;O43679;P40425;Q9UI36;Q3C1V8;Q02577;Q15562;Q99594;P22736;Q9BXJ9;P35548;P35680;P05412;Q15327;Q9HBH7;Q8IX07;Q9UKI9;O75376;O00470;Q16254;Q14209;P15923;Q9HBZ2;P36402;Q5H9I0;P28749;Q96IF1;P84022;P49715;Q9Y2D1;P55347;O60422;Q5VTD9;Q8N9N2;P46937;Q08050;Q6P2C8;P35869;O15105;O15350;Q99081;P40426;Q92993;Q8IZ40;Q92793;P48380;Q9HCS4;Q6VMQ6;A0AVK6;P20823;Q13485;Q6P1K2;P24941;Q01860;Q03060;O00716;Q96AV8;Q9NVC6;O43513;Q15561;Q01094;P15884;Q8WVJ9;Q15796;P12956;P20265;Q14693;Q96ST3}
- 1857 Pathogen[ P14079] interacts with 113 human  
partners: {Q9UPW6;Q8N9N2;O43513;Q99743;P09874;Q9Y4A5;P12755;Q9Y5Q3;Q15561;P35869;Q99814;Q9GZV5;Q96H20;P14859;Q14693;P28749;P78337;Q14186;Q15911;P53999;P35680;P20265;Q96ST3;P55347;Q16254;O43679;Q92793;Q9BXJ9;Q86U70;O15198;Q15329;Q99594;Q15699;P17096;Q03060;P48380;Q6P2C8;Q9ULK4;Q8WVJ9;Q9NVC6;Q5H9I0;Q14209;Q9UKV0;P22736;P15976;P19484;P46937;O00151;O75461;P15923;Q15797;O15350;P36402;Q3C1V8;P12956;Q9ULW3;Q6VMQ6;Q01860;Q5VTD9;Q92769;O00716;Q96IF1;Q9NQ33;P49715;Q14934;P25791;P27540;Q9HD15;Q9HBH7;O75360;Q9Y6Y0;Q8IX07;Q15327;Q9UI36;Q9UMQ3;O43541;Q9Y606;Q7Z6R9;Q04724;O75376;Q02577;Q96AV8;Q15562;Q9UKI9;P15884;Q99504;Q6N069;Q9HBZ2;Q03052;Q99081;A0AVK6;P05412;Q8IZ40;P25490;P28360;O15105;Q8WYA1;O00470;O94776;Q01094;A6NFD8;Q02080;P01100;Q9NP71;Q14188;Q8IUM7;Q14686;Q96PK6;Q92993;Q6P1K2;Q08999;Q9UBG7;P22415}
- 1858 Pathogen[ P03383] interacts with 107 human  
partners: {Q15329;Q02577;O15198;Q99504;O00470;Q15561;Q02080;Q13485;O00716;Q9UPW6;Q14209;P17096;Q9UKI9;P16220;P27540;Q15562;Q5H9I0;Q08999;O94776;P15172;Q01094;P14921;O75376;Q8WVJ9;Q9ULK4;Q9Y5Q3;Q96H20;P19484;Q86U70;P40424;P14859;Q9Y4A5;O75360;P53999;Q9UMQ3;Q14686;P48380;Q6VMQ6;O75461;P15923;P15923;Q9ULW3;Q01860;Q15797;P18846;Q92993;Q04724;P78337;P11802;P06400;Q9NP71;P55347;Q14934;O15105;Q14186;Q6P2C8;Q9Y606;P84022;P25791;Q9Y6Y0;Q9HD15;Q96PK6;Q9BXJ9;P35548;P24941;Q92769;Q99717;P09874;O43679;Q9HBH7;Q99081;Q16254;O43541;Q8IZ40;O15350;Q9NQ33;P36402;P28749;Q15327;Q14188;P01100;Q9UKV0;O43186;Q15796;Q99594;Q6P1K2;Q04206;Q96ST3;P18848;Q9NVC6;Q9Y2D1;Q9UI36;Q15699;P20265;Q96AV8;P35869;P46937;Q9GZV5;Q3C1V8;Q03060;A0AVK6;P40425;Q13363;Q92793;P12956;P22415;Q14693;P05412}
- 1859 Pathogen[ P03410] interacts with 126 human  
partners: {P84022;Q99594;Q99743;Q9UKV0;P40426;Q04206;Q9UI36;Q96AV8;O75461;P53999;O00470;Q96PK6;Q15329;Q8WVJ9;P12755;Q9UMQ3;Q99814;Q01860;P25791;Q14686;P18848;P36402;Q9Y2D1;P14859;Q9NVC6;Q99717;P15884;Q5H9I0;Q16254;Q3C1V8;O43679;O15198;Q04724;Q9Y6Y0;P17096;A6NFD8;Q03060;Q8N9N2;Q08999;P06400;P19484;O75376;P15923;Q03052;Q9UPW6;Q14188;Q96ST3;P25490;P01100;P18846;Q14693;Q6VMQ6;Q9GZV5;Q9HBZ2;Q96IF1;Q9Y5Q3;P27540;Q99081;O00716;P12956;P35548;Q92793;Q8IX07;Q9ULK4;Q6N069;Q15561;Q92769;O43513;Q9Y4A5;P24941;P11802;Q6P1K2;Q9HBH7;Q15797;Q86U70;Q9NP71;P48380;P22415;Q13485;P22736;Q14186;P09874;P16220;P46937;Q6P2C8;Q15699;Q9504;P05412;O43541;Q9NQ33;Q7Z6R9;P28749;Q9UKI9;Q9Y606;P55347;Q9ULW3;O94776;Q9HCS4;Q01094;P35680;Q02577;O15350;Q8IZ40;O00151;O75360;Q14209;Q9HD15;Q02080;P20265;Q5VTD9;Q96H20;P40424;Q15796;Q92993;O60422;Q15562;Q14934;P15976;A0AVK6;P78337;P14921;Q8WYA1;Q9UBG7;Q9BXJ9}
- 1860 Pathogen[ P14075] interacts with 109 human  
partners: {Q9NQ33;Q96ST3;P35869;Q9GZV5;Q02577;Q86U70;Q99504;P12956;Q04206;P78337;P24941;P40424;Q08999;P05412;P11802;P40425;Q9Y2D1;P14859;Q9BXJ9;Q15562;O00470;O43541;Q14686;Q01860;P48380;P35548;Q15561;P15172;P17096;Q15327;Q9Y606;Q08050;O43186;P19484;P20265;O94776;Q02080;Q99717;Q9Y4A5;Q9UKV0;O00716;Q15796;P15923;Q14209;Q8WVJ9;Q92993;Q96H20;O75376;P27540;P55347;Q13485;Q9NP71;Q14186;P25791;Q9Y6Y0;Q9UPW6;Q9HBH7;Q96PK6;O15350;Q16254;Q92769;Q9Y5Q3;O43679;Q6VMQ6;Q14934;O15198;Q99594;Q9ULW3;P53999;P18848;O75360;Q9UMQ3;Q01094;O15105;P14921;P36402;P06400;Q96AV8;Q3C1V8;P28749;Q9ULK4;P01100;Q6P2C8;Q92793;P15884;Q9NVC6;Q9UI36;Q15699;P46937;Q03060;Q04724;P16220;Q6P1K2;Q13363;Q9UKI9;Q1532

- 9;P22415;P84022;Q99081;Q14188;O43513;O75461;A0AVK6;Q9HD15;Q8IZ40;P09874;P18846;Q5H9I0;Q14693}
- 1861 Pathogen[ P0C206 ] interacts with 144 human  
partners: {O43679;P46937;P84022;O43541;Q14188;Q92769;Q03060;Q15329;Q8N9N2;Q9Y2D1;Q96ST3;Q6VMQ6;Q9NP71;P40425;Q99504;Q9Y5Q3;P14921;Q15911;P16220;P35869;P09874;P25490;Q96AV8;Q01860;Q96IF1;Q15327;O00470;Q99717;Q9UMQ3;P05412;Q9UKV0;A6NFD8;Q6P2C8;Q14186;P49715;O94776;Q9HCS4;P19484;Q92993;P18846;P48380;O00716;P15976;Q9HD15;P22736;Q15699;Q15796;Q8WVJ9;Q96HZ4;Q16254;P40424;P28749;Q6N069;P12755;O75360;Q92793;Q7Z6R9;Q9GZV5;O43513;Q08999;Q9Y6Y0;Q8IZ40;O15105;O00327;Q6P1K2;P78337;Q14209;Q02080;Q99743;O15516;P22415;P40426;P53999;Q99081;Q9Y4A5;Q9ULW3;Q96H20;P35680;P35548;P01100;Q04206;Q9UPW6;Q9UKI9;P15923;Q96PK6;Q01094;Q14686;O00151;A0AVK6;P15884;P20823;Q3C1V8;Q03052;Q9NQ33;Q15562;O75376;Q9HBH7;Q13485;P25791;Q8WYA1;Q04724;Q14934;P17096;Q9Y606;Q08050;Q15797;Q9ULK4;Q8IX07;P20265;O15350;Q5H9I0;P27540;Q9NVC6;P15172;Q5VTD9;Q86U70;Q9UBR4;Q99594;O75398;Q99814;Q8IUM7;O15198;P84550;P61968;Q13363;Q02577;Q9BXJ9;Q14693;P12956;Q9UI36;O75461;P24941;P36402;P18848;O60422;Q9UBG7;P11802;Q9NP62;Q15561;P31260;Q9HBZ2;P14859;P06400;P55347}
- 1862 Pathogen[ P03363 ] interacts with 141 human  
partners: {Q9Y6Y0;Q15911;Q86U70;Q5VTD9;Q15699;P12956;Q8IUM7;P18848;Q9ULW3;O75461;Q8NFW5;Q8N9N2;Q6N069;Q6VMQ6;Q6P1K2;O75360;Q04206;P27540;Q3C1V8;P36402;Q15562;O60422;Q9Y606;Q9HD15;Q7RTS3;Q9HBH7;P25490;Q96HZ4;Q9UKI9;O75376;Q16254;P16220;Q9Y2D1;Q02080;Q9NQ33;P14921;P35548;Q9HBZ2;O43679;O15105;P24941;Q15797;Q04724;Q9HCS4;P55347;Q5H9I0;Q14686;P06400;Q15327;Q96H20;Q99743;O00409;P28749;P35869;Q96PK6;Q96IF1;P40425;P25791;O43524;P15923;Q08050;P46937;Q9UI36;P14859;P56915;Q9GZV5;Q08999;P17096;P18846;Q01094;Q8WYA1;Q9UKV0;Q9NVC6;O00327;O43186;P31260;Q96ST3;O43541;Q99504;Q8IZ40;P20265;Q15796;P84022;A0AVK6;Q01167;Q7Z6R9;Q92826;O00470;Q14209;P22415;Q99814;P53999;Q92793;Q13485;Q9Y4A5;Q14186;P19484;P84550;Q14188;P15884;O75398;P05412;P40424;Q96AV8;Q14934;P40426;P09874;P35452;Q9NP71;Q13363;Q9UBG7;Q9ULK4;Q9UMQ3;P11802;Q99081;P48380;O00716;Q9UJU5;Q6P2C8;P78337;P15172;O43513;Q15561;Q99717;Q9UPW6;O15198;Q99594;Q15329;Q3KNW1;Q9Y5Q3;Q8WVJ9;Q92993;Q01860;Q9BXJ9;Q03060;Q03052;O94776;Q02577;A6NFD8;P01100;Q6QHK4}
- 1863 [Cluster 170]GO:0014069+C cellular\_component [name] postsynaptic density [def] "The post synaptic density is a region that lies adjacent to the cytoplasmic face of the postsynaptic membrane at excitatory synapse. It forms a disc that consists of a range of proteins with different functions, some of which contact the cytoplasmic domains of ion channels in the postsynaptic membrane. The proteins making up the disc include receptors, and structural proteins linked to the actin cytoskeleton. They also include signalling machinery, such as protein kinases and phosphatases." [GOC
- 1864 Pathogen[ Q2Q067 ] interacts with 23 human  
partners: {P63104;O95886;Q8N3V7;Q9NSC5;Q15596;Q9H0F6;Q9P1A6;Q96EV8;O14910;Q86UL8;Q12959;Q9UQB3;P78352;Q9UPX8;Q92796;O60299;Q9NZU7;P50570;Q9NRI5;Q9BVN2;Q9Y250;Q9NUP9;O14490}
- 1865 Pathogen[ P0C214 ] interacts with 22 human  
partners: {O14490;O14910;Q9UPX8;Q9NRI5;Q92796;P62166;Q9H0F6;Q9P1A6;O60299;Q9NSC5;Q9Y250;P78352;Q9UQB3;O95886;Q9NZU7;Q96EV8;Q12959;Q9HD26;Q9BVN2;P50570;Q15596;Q8N3V7}
- 1866 Pathogen[ P03346 ] interacts with 35 human  
partners: {Q9NSC5;Q9NRI5;Q8N3V7;O14490;P50570;Q96A65;P78352;Q9NZU7;O75970;O43815;Q9H0F6;Q92796;Q9UQB3;Q9P021;Q9NUP9;Q86UL8;Q15596;Q96EV8;Q9HD26;Q9Y250;O95886;Q12929;P62166;O60299;Q9HAP6;P63104;Q15700;Q9BVN2;Q9C0H9;Q9UPX8;P0C2W1;Q9NRD5;O14910;Q9P1A6;Q12959}
- 1867 Pathogen[ Q85601 ] interacts with 27 human  
partners: {O14490;Q9Y250;P63104;Q9UPX8;Q9NZU7;Q9NUP9;O14910;Q96A65;Q86UL8;Q9P1A6;Q9BVN2;O43815;Q9H0F6;Q15596;Q9UQB3;Q96EV8;Q9HD26;Q8N3V7;P50570;P78352;Q92796;Q12959;Q9NSC5;Q9NRI5;O95886;P62166;O60299}
- 1868 Pathogen[ P14079 ] interacts with 34 human  
partners: {Q12929;Q15596;Q9BVN2;Q15700;P24588;O43815;Q9UQB3;Q9Y250;Q9NRI5;Q9C0H9;P50570;P63104;Q15078;Q9HD26;Q9NUP9;Q7Z7J9;P62166;Q8N3V7;Q9HAP6;Q9NSC5;Q86UL8;Q96A65;Q05682;Q9H0F6;O60299;O95886;Q96EV8;Q9P021;Q9P1A6;Q92796;Q9NZU7;O14490;O75970;Q9UPX8}
- 1869 Pathogen[ P03383 ] interacts with 19 human  
partners: {Q9P1A6;Q9H0F6;Q15596;Q9HD26;Q9NRI5;O95886;O60299;O14490;Q96EV8;Q9UQB3;P63104;Q9NSC5;Q92796;Q8N3V7;Q9C0H9;P78352;O14910;Q9BVN2;Q9Y250}
- 1870 Pathogen[ P03410 ] interacts with 37 human  
partners: {Q9BVN2;Q9P1A6;O14910;Q8N3V7;Q05682;Q12959;O60299;Q9NUP9;P50570;Q9NSC5;O14490;Q9HAP6;Q15700;Q9HD26;O75970;Q9NRD5;Q96A65;Q92796;Q7Z7J9;Q9NZU7;P63104;Q15596;Q9NRI5;O95886;O43815;Q9UQB3;Q9Y250;Q9UPX8;Q86UL8;Q9P021;Q9C0H9;P62166;P78352;Q96EV8;Q12929;P24588;Q9H0F6}
- 1871 Pathogen[ P14075 ] interacts with 19 human  
partners: {Q8N3V7;Q9BVN2;O95886;Q9Y250;Q9HD26;Q9NRI5;Q9UQB3;O14910;O60299;Q9NSC5;O14490;P63104;Q92796;Q9P1A6;Q96EV8;P78352;Q9C0H9;Q9H0F6;Q15596}
- 1872 Pathogen[ P0C206 ] interacts with 32 human  
partners: {Q9NUP9;P78352;Q8N3V7;P62166;Q15700;O43815;Q9P021;O95886;O60299;Q9NZU7;Q96A65;P63104;O14490;Q9NSC5;Q96EV8;Q9NRI5;Q9UPX8;O14910;Q9C0H9;Q9H0F6;Q15596;Q92796;Q86UL8;Q9UQB3;Q9NRD5;Q86YT6;Q12959;Q9HD26;Q9Y250;P50570;Q9P1A6;Q9BVN2}
- 1873 Pathogen[ P03363 ] interacts with 30 human  
partners: {Q9P021;Q12959;Q8N3V7;Q9UPX8;Q96A65;O14910;P78352;P50570;Q15700;Q15596;O75970;P63104;Q9NSC5;Q9Y250;O43815;Q9NZU7;Q12929;Q9BVN2;Q9H0F6;Q9NRI5;Q86UL8;O95886;Q9P1A6;O14490;Q92796;Q9NUP9;O60299;Q9UQB3;Q9HD26;Q9C0H9}
- 1874 [Cluster 171]GO:0000137+C cellular\_component [name] Golgi cis cisterna [def] "The Golgi cisterna closest to the endoplasmic reticulum\_ the first processing compartment through which proteins pass after export from the ER." [ISBN

1875 Pathogen[ Q2Q067] interacts with 1 human partners:{Q96P71}

1876 Pathogen[ P0C214] interacts with 1 human partners:{Q96P71}

1877 Pathogen[ P03346] interacts with 1 human partners:{Q96P71}

1878 Pathogen[ Q85601] interacts with 1 human partners:{Q96P71}

1879 Pathogen[ P14079] interacts with 2 human partners:{Q9NY59;Q96P71}

1880 Pathogen[ P03383] interacts with 1 human partners:{Q96P71}

1881 Pathogen[ P03410] interacts with 1 human partners:{Q96P71}

1882 Pathogen[ P14075] interacts with 1 human partners:{Q96P71}

1883 Pathogen[ P0C206] interacts with 1 human partners:{Q96P71}

1884 Pathogen[ P03363] interacts with 1 human partners:{Q96P71}

1885 [Cluster 172]GO:0010008+C cellular\_component [name] endosome membrane [def] "The lipid bilayer surrounding an endosome." [GOC

1886 Pathogen[ Q2Q067] interacts with 41 human partners:{Q9UH99;O75351;Q8IUC6;O60664;Q99816;Q9H1H9;Q92985;Q9NZD8;Q9UJY4;Q9BRG1;Q9UJY5;Q9NYJ8;Q8N1B4;Q96EV8;Q9UBQ0;Q7Z614;Q8NEU8;P61077;Q8N5C8;Q14653;Q5VIR6;A5D8V6;Q92562;O75843;Q9HD42;Q96H20;Q9NZZ3;Q9UK41;O75436;Q9H9H4;P0CG47;Q9NP79;P0CG48;O43318;P62987;Q9UKG1;O75674;Q8NEZ2;Q9NZ52;Q15750;P62979}

1887 Pathogen[ P0C214] interacts with 44 human partners:{O75351;Q9UJY5;Q8IUC6;Q14164;Q9NP79;Q9HD42;Q7Z614;Q9UK41;Q9UKG1;O43318;Q92562;O75843;P61077;Q9UH99;Q8N5C8;Q92985;Q08AM6;Q9UJY4;Q9NZD8;Q9BRG1;P0CG48;Q8NEU8;Q9NZ52;Q8NEZ2;Q96EV8;Q8N1B4;Q14653;P62987;Q15750;Q99816;Q9NV92;O75436;Q5VIR6;Q9UBQ0;P0CG47;Q9NZZ3;O60664;Q96H20;A5D8V6;Q96EK6;O75674;Q9H9H4;P62979;Q9NYJ8}

1888 Pathogen[ P03346] interacts with 55 human partners:{Q13596;O60664;Q5VIR6;Q86XT2;A5D8V6;Q9H6Q3;P62987;Q9HD42;Q9UH99;P0CG48;Q8NEZ2;Q99816;Q9NZD8;Q9H1H9;Q93050;Q7Z614;Q9UK41;Q9UBQ0;Q92562;Q9NV92;Q6P3W7;P61077;Q96H20;Q96FZ7;Q8N5C8;Q9NZZ3;O75843;O60493;Q8NEU8;Q96EV8;Q9NYJ8;Q9H9H4;Q9UJY4;Q8N1B4;Q5JSH3;Q9BRG1;Q15750;Q14653;P62979;O75436;Q8IUC6;Q96S99;P0CG47;Q9NP79;Q9UKG1;O75351;O14617;O60749;O43318;Q9UJY5;Q92985;O75674;Q9NZ52;Q14164;Q86Y82}

1889 Pathogen[ Q85601] interacts with 49 human partners:{Q13596;Q99816;O60664;O75843;Q96S99;Q9NP79;Q08AM6;Q15750;Q9NYJ8;Q9UJY4;Q96H20;Q8IUC6;Q5JSH3;Q8NEU8;Q9BRG1;Q93050;Q9H9H4;Q9H1H9;P0CG48;Q7Z614;Q5VIR6;Q92562;Q9UJY5;P61077;Q96FZ7;Q8N5C8;Q9UH99;Q14653;Q14164;O75351;Q9UK41;Q9H6Q3;Q96EV8;Q8N1B4;Q92985;Q9NZZ3;Q96EK6;P62979;O75436;P0CG47;Q9UKG1;Q9UBQ0;P62987;O43318;Q8NEZ2;Q9NZ52;Q9HD42;O75674;A5D8V6}

1890 Pathogen[ P14079] interacts with 62 human partners:{Q9H9H4;Q9H295;Q92562;Q8N5C8;Q9UKG1;P0CG48;Q9UJY4;Q96H20;O43187;Q14653;Q8NEU8;P61421;O60664;Q9UJY5;O60493;Q86XT2;Q8IUC6;Q92985;Q9H1K0;Q9NP79;Q14164;Q9HD42;O75674;Q15750;P62979;Q96S99;Q9H3E2;P61077;P62987;Q9NZ52;O00461;O75843;Q9Y287;Q5JSH3;Q9H1H9;A5D8V6;O60749;Q8N8Y2;Q8NEZ2;Q5VIR6;Q13596;Q9H6Q3;Q8N1B4;Q7Z614;O60831;Q96FZ7;Q93050;Q9UBQ0;Q9Y6Y9;Q96EV8;Q96EK6;O75351;Q9NV92;O14617;Q9NZZ3;O75436;Q9BRG1;Q9UH99;Q99816;P0CG47;Q99836;Q6UWI2}

1891 Pathogen[ P03383] interacts with 36 human partners:{Q9UJY4;Q14653;P62987;Q8IUC6;Q9NZD8;Q8N1B4;Q96H20;Q8NEU8;Q9NZZ3;Q9UH99;Q8NEZ2;Q99816;Q7Z614;O43318;Q96EV8;P61077;Q9H1H9;Q8N5C8;Q92985;Q9UK41;O75843;Q9UJY5;Q9H9H4;Q9BRG1;Q9HD42;O75436;P62979;P0CG47;P0CG48;O60831;Q9UBQ0;Q9NYJ8;O60664;Q5VIR6;Q15750;Q9NZ52}

1892 Pathogen[ P03410] interacts with 63 human partners:{Q92562;Q5JSH3;P0CG48;Q7Z614;Q8N8Y2;Q96S99;Q86XT2;Q9H9H4;Q13596;Q9NZ52;Q9NP79;O75351;Q9H1H9;O75674;Q9H3E2;Q15750;O75843;P61421;Q9UH99;O60749;Q14653;Q8N1B4;O43187;Q93050;Q9Y287;Q96EK6;O60664;P62979;Q9NV92;O00461;Q14617;Q9UJY5;A5D8V6;Q9UBQ0;Q99816;O43318;Q8NEZ2;Q08AM6;Q6UWI2;Q9NYJ8;Q9HD42;Q8N5C8;Q9NZZ3;Q9H1K0;O75436;Q9BRG1;Q96FZ7;Q9Y6Y9;P62987;Q8IUC6;Q8NEU8;Q5VIR6;Q92985;O60831;Q96H20;Q96EV8;Q9UKG1;P0CG47;Q9UJY4;O60493;P61077;Q5MNZ9;Q9H6Q3}

1893 Pathogen[ P14075] interacts with 42 human partners:{Q9UJY4;Q9H1H9;Q15750;Q8N1B4;Q9NP79;Q9NZ52;Q9UBQ0;Q7Z614;Q9UK41;Q8NEU8;Q9NZD8;P61077;Q8NEZ2;Q96H20;Q8N5C8;O00461;Q9H9H4;O60831;P0CG48;P62979;Q14653;O43318;Q9NZZ3;P62987;Q5VIR6;Q8IUC6;O75436;Q96EV8;Q9NV92;P0CG47;Q9UH99;O75843;Q9HD42;Q9BRG1;Q92985;Q99816;Q9Y287;Q96EK6;Q6UWI2;Q9UJY5;O60664;Q9NYJ8}

1894 Pathogen[ P0C206] interacts with 61 human partners:{Q9BRG1;P0CG48;Q9UKG1;Q8NEZ2;Q9H6Q3;Q9Y287;Q8NEU8;Q92562;O60664;Q8N5C8;Q9NV92;Q9UH99;Q9H1K0;O43318;O60493;Q9UJY4;O60831;Q13596;Q99816;Q9H1H9;Q6P3W7;Q9UK41;Q9H9H4;Q9UBQ0;O60749;Q14164;A5D8V6;Q5VIR6;Q96H20;Q9NZ52;Q9H3E2;Q96EV8;Q92985;Q9UJY5;Q86XT2;O00461;P62979;Q9NYJ8;Q96S99;Q96EK6;Q7Z614;P0CG47;Q8IUC6;O75436;O14617;O75843;Q9HD42;Q6UWI2;P61077;Q15750;Q9NP79;Q5JSH3;Q9NZZ3;Q96FZ7;P62987;Q8N1B4;O75351;O75674;Q93050;Q08AM6;Q14653}

1895 Pathogen[ P03363] interacts with 39 human partners:{Q14653;Q92985;O60664;Q9UJY4;Q8N1B4;Q9NYJ8;Q9NZ52;O75436;Q9H6Q3;Q9NZZ3;O43318;Q96H20;O60493;Q15750;O60749;O75351;Q8NEU8;Q9BRG1;Q9UK41;O75674;P62987;Q7Z614;Q9UBQ0;Q5VIR6;Q8NEZ2;O75843;Q99816;Q13596;P61077;Q9NZD8;Q9H1H9;Q9NP79;Q8N5C8;Q9H9H4;Q9UJY5;Q9UKG1;Q9HD42;Q9UH99;A5D8V6}

1896 [Cluster 173]GO:0055038+C cellular\_component [name] recycling endosome membrane [def] "The lipid bilayer surrounding a recycling endosome." [GOC

1897 Pathogen[ Q2Q067] interacts with 7 human partners:{O15126;Q7L804;O15127;Q8TAC9;O75154;Q92597;Q9BXF6}

1898 Pathogen[ P0C214] interacts with 7 human partners:{Q8TAC9;O15127;Q7L804;Q92597;O15126;Q9BXF6;O75154}



1899 Pathogen[ P03346] interacts with 9 human  
partners:{A8K0Z3;Q7L804;Q8TAC9;Q92597;O15126;Q9BXF6;Q86YS3;O75154;O15127}

1900 Pathogen[ Q85601] interacts with 8 human  
partners:{O15126;O75154;Q7L804;Q8TAC9;Q86YS3;Q9BXF6;O15127;Q92597}

1901 Pathogen[ P14079] interacts with 9 human  
partners:{Q7L804;Q6VEQ5;Q86YS3;Q92597;Q9BXF6;Q8TAC9;Q9NQA3;A8K0Z3;O75154}

1902 Pathogen[ P03383] interacts with 7 human  
partners:{Q7L804;O15126;Q8TAC9;Q92597;Q9BXF6;O15127;O75154}

1903 Pathogen[ P03410] interacts with 11 human  
partners:{Q7L804;O75154;Q8TAC9;Q86YS3;O15127;Q9BXF6;Q6VEQ5;Q92597;O15126;Q9NQA3;A8K0Z3}

1904 Pathogen[ P14075] interacts with 7 human  
partners:{O15127;O15126;Q7L804;Q9BXF6;Q8TAC9;Q92597;O75154}

1905 Pathogen[ P0C206] interacts with 9 human  
partners:{Q92597;O15127;Q9BXF6;O75154;Q6VEQ5;Q7L804;Q8TAC9;O15126;Q86YS3}

1906 Pathogen[ P03363] interacts with 6 human  
partners:{Q7L804;Q92597;O75154;Q9BXF6;O15126;O15127}

1907 [Cluster 174]GO:0030478+C cellular\_component [name] actin cap [def] "Polarized accumulation of cytoskeletal proteins (including F-actin) and regulatory proteins in a cell. An example of this is the actin cap found in *Saccharomyces cerevisiae*." [GOC]

1908 Pathogen[ Q2Q067] interacts with 1 human partners:{O00401}

1909 Pathogen[ P0C214] interacts with 1 human partners:{O00401}

1910 Pathogen[ P03346] interacts with 1 human partners:{O00401}

1911 Pathogen[ Q85601] interacts with 1 human partners:{O00401}

1912 Pathogen[ P14079] interacts with 2 human partners:{Q05682;O00401}

1913 Pathogen[ P03383] interacts with 1 human partners:{O00401}

1914 Pathogen[ P03410] interacts with 2 human partners:{Q05682;O00401}

1915 Pathogen[ P14075] interacts with 1 human partners:{O00401}

1916 Pathogen[ P0C206] interacts with 1 human partners:{O00401}

1917 Pathogen[ P03363] interacts with 1 human partners:{O00401}

1918 [Cluster 175]GO:0005853+C cellular\_component [name] eukaryotic translation elongation factor 1 complex [def] "A multisubunit nucleotide exchange complex that binds GTP and aminoacyl-tRNAs, and catalyzes their codon-dependent placement at the A-site of the ribosome. In humans, the complex is composed of four subunits, alpha, beta, delta and gamma." [GOC]

1919 Pathogen[ Q2Q067] interacts with 4 human partners:{P29692;P24534;P26641;P68104}

1920 Pathogen[ P0C214] interacts with 4 human partners:{P29692;P26641;P24534;Q05639}

1921 Pathogen[ P03346] interacts with 4 human partners:{P26641;P29692;P24534;P68104}

1922 Pathogen[ Q85601] interacts with 5 human  
partners:{P26641;P24534;P68104;P29692;Q05639}

1923 Pathogen[ P14079] interacts with 4 human partners:{P68104;P26641;P29692;P24534}

1924 Pathogen[ P03383] interacts with 4 human partners:{P24534;P26641;P68104;P29692}

1925 Pathogen[ P03410] interacts with 4 human partners:{P68104;P24534;P26641;P29692}

1926 Pathogen[ P14075] interacts with 4 human partners:{P68104;P26641;P29692;P24534}

1927 Pathogen[ P0C206] interacts with 4 human partners:{P26641;P24534;P29692;P68104}

1928 Pathogen[ P03363] interacts with 4 human partners:{P26641;P29692;P24534;P68104}

1929 [Cluster 176]GO:0005883+C cellular\_component [name] neurofilament [def] "A type of intermediate filament found in the core of neuronal axons. Neurofilaments are heteropolymers composed of three type IV polypeptides

1930 Pathogen[ Q2Q067] interacts with 8 human  
partners:{O14786;P07196;P41219;Q9P1A6;Q9H2C0;P12036;Q16352;P07197}

1931 Pathogen[ P0C214] interacts with 8 human  
partners:{O14786;P41219;Q16352;Q9P1A6;P12036;P07197;Q9H2C0;P07196}

1932 Pathogen[ P03346] interacts with 8 human  
partners:{Q16352;P07196;Q9H2C0;P07197;P12036;P41219;O14786;Q9P1A6}

1933 Pathogen[ Q85601] interacts with 8 human  
partners:{P07196;P12036;Q9P1A6;O14786;Q9H2C0;P41219;P07197;Q16352}

1934 Pathogen[ P14079] interacts with 6 human  
partners:{P41219;P12036;P07196;Q9H2C0;P07197;Q9P1A6}

1935 Pathogen[ P03383] interacts with 7 human  
partners:{Q9P1A6;Q16352;P12036;Q9H2C0;P41219;P07197;P07196}

1936 Pathogen[ P03410] interacts with 8 human  
partners:{Q9P1A6;O14786;P12036;Q16352;P07196;P41219;Q9H2C0;P07197}

1937 Pathogen[ P14075] interacts with 7 human  
partners:{Q16352;Q9H2C0;P41219;P12036;Q9P1A6;P07197;P07196}

1938 Pathogen[ P0C206] interacts with 8 human  
partners:{P07196;P41219;O14786;P12036;Q16352;Q9H2C0;Q9P1A6;P07197}

1939 Pathogen[ P03363] interacts with 8 human  
partners:{P07197;Q16352;O14786;P07196;P41219;Q9P1A6;P12036;Q9H2C0}

1940 [Cluster 177]GO:0000177+C cellular\_component [name] cytoplasmic exosome (RNase complex) [def] "Complex of 3'-5' exoribonucleases found in the cytoplasm." [PMID]

1941 Pathogen[ Q2Q067] interacts with 2 human partners:{Q9Y2V2;Q8TF46}

1942 Pathogen[ P0C214] interacts with 2 human partners:{Q9Y2V2;Q8TF46}

1943 Pathogen[ P03346] interacts with 3 human partners:{Q9Y2V2;Q9NQT5;Q8TF46}

1944 Pathogen[ Q85601] interacts with 2 human partners:{Q9Y2V2;Q8TF46}

1945 Pathogen[ P14079] interacts with 3 human partners:{Q8TF46;O00178;Q9Y2V2}

1946 Pathogen[ P03383] interacts with 1 human partners:{Q9Y2V2}

1947 Pathogen[ P03410] interacts with 3 human partners:{Q8TF46;Q9Y2V2;O00178}

1948 Pathogen[ P14075] interacts with 1 human partners:{Q9Y2V2}

1949 Pathogen[ P0C206] interacts with 2 human partners:{Q9Y2V2;Q8TF46}

1950 Pathogen[ P03363] interacts with 3 human partners:{Q9Y2V2;Q9NQT5;Q8TF46}

1951 [Cluster 178]GO:0043198+C cellular\_component [name] dendritic shaft [def] "Cylindric portion of the dendrite, directly stemming from the perikaryon, and carrying the dendritic spines." [GOC

1952 Pathogen[ Q2Q067] interacts with 1 human partners:{Q92796}

1953 Pathogen[ P0C214] interacts with 1 human partners:{Q92796}

1954 Pathogen[ P03346] interacts with 5 human partners:{O14908;Q96A65;Q92796;Q9P021;P11137}

1955 Pathogen[ Q85601] interacts with 2 human partners:{Q96A65;Q92796}

1956 Pathogen[ P14079] interacts with 6 human partners:{P24588;Q96A65;Q9P021;P11137;Q92796;O14908}

1957 Pathogen[ P03383] interacts with 1 human partners:{Q92796}

1958 Pathogen[ P03410] interacts with 6 human partners:{P11137;O14908;Q96A65;Q92796;Q9P021;P24588}

1959 Pathogen[ P14075] interacts with 1 human partners:{Q92796}

1960 Pathogen[ P0C206] interacts with 5 human partners:{Q9P021;Q96A65;P11137;O14908;Q92796}

1961 Pathogen[ P03363] interacts with 5 human partners:{Q9P021;P11137;O14908;Q96A65;Q92796}

1962 [Cluster 179]GO:0005684+C cellular\_component [name] U2-type spliceosomal complex [def] "Any spliceosomal complex that forms during the splicing of a messenger RNA primary transcript to excise an intron that has canonical consensus sequences near the 5' and 3' ends." [GOC

1963 Pathogen[ Q2Q067] interacts with 2 human partners:{Q15459;Q8WWY3}

1964 Pathogen[ P0C214] interacts with 2 human partners:{Q15459;Q8WWY3}

1965 Pathogen[ P03346] interacts with 2 human partners:{Q15459;Q8WWY3}

1966 Pathogen[ Q85601] interacts with 2 human partners:{Q15459;Q8WWY3}

1967 Pathogen[ P14079] interacts with 2 human partners:{Q8WWY3;Q15459}

1968 Pathogen[ P03383] interacts with 2 human partners:{Q15459;Q8WWY3}

1969 Pathogen[ P03410] interacts with 2 human partners:{Q8WWY3;Q15459}

1970 Pathogen[ P14075] interacts with 2 human partners:{Q15459;Q8WWY3}

1971 Pathogen[ P0C206] interacts with 2 human partners:{Q8WWY3;Q15459}

1972 Pathogen[ P03363] interacts with 2 human partners:{Q15459;Q8WWY3}

1973 [Cluster 180]GO:0035189+C cellular\_component [name] Rb-E2F complex [def] "A multiprotein complex containing a heterodimeric E2F transcription factor and a Retinoblastoma (Rb) family member. This complex is capable of repressing transcription of E2F-regulated genes in order to regulate cell cycle progression." [PMID

1974 Pathogen[ Q2Q067] interacts with 4 human partners:{P06400;Q01094;P55345;P49715}

1975 Pathogen[ P0C214] interacts with 3 human partners:{P55345;Q01094;P06400}

1976 Pathogen[ P03346] interacts with 4 human partners:{P06400;Q01094;P49715;P55345}

1977 Pathogen[ Q85601] interacts with 4 human partners:{P06400;P49715;Q01094;P55345}

1978 Pathogen[ P14079] interacts with 3 human partners:{P55345;P49715;Q01094}

1979 Pathogen[ P03383] interacts with 2 human partners:{Q01094;P06400}

1980 Pathogen[ P03410] interacts with 3 human partners:{P06400;Q01094;P55345}

1981 Pathogen[ P14075] interacts with 2 human partners:{Q01094;P06400}

1982 Pathogen[ P0C206] interacts with 4 human partners:{P49715;Q01094;P55345;P06400}

1983 Pathogen[ P03363] interacts with 2 human partners:{P06400;Q01094}

1984 [Cluster 181]GO:0005759+C cellular\_component [name] mitochondrial matrix [def] "The gel-like material, with considerable fine structure, that lies in the matrix space, or lumen, of a mitochondrion. It contains the enzymes of the tricarboxylic acid cycle and, in some organisms, the enzymes concerned with fatty acid oxidation." [GOC

1985 Pathogen[ Q2Q067] interacts with 53 human partners:{O95363;P51398;Q9ULD0;O00411;Q9H2U2;Q9HAV7;Q9H5Q4;Q16775;Q9Y6E7;P10515;P22033;P49419;P36639;P38117;Q15046;Q99551;P61604;P30084;P07954;Q9Y237;Q8TAA5;Q5T160;Q9NTG7;P22557;P21953;P13196;Q06609;Q96I59;Q07021;Q00059;Q96EH3;Q9P2R7;Q8N1Q8;Q9Y697;O43615;P04818;Q32P41;Q9UI32;O94925;Q6PI48;P40926;Q9HA77;Q9BW92;P41250;Q49AM1;A6NFY7;Q96EY1;Q16836;Q96QE5;P78537;Q8N163;O95571;P24539}

1986 Pathogen[ P0C214] interacts with 100 human partners:{Q16795;P41250;Q8N163;P30084;P49419;O00411;Q96QE5;Q05932;Q9NSE4;Q06609;Q7L3T8;Q9NVH6;O95363;Q8NCN5;P04818;Q9UGM6;P00480;P11177;Q16775;Q16740;Q9HAV7;Q86XF0;Q96I59;O75390;Q9NP81;A6NFY7;P49590;P12694;P07954;O95299;P30405;P61604;P34897;P48735;P78537;Q9UI32;Q49AM1;Q5JPH6;P40926;P22557;Q15031;P13196;P36542;O95571;O14561;Q99798;Q9P2R7;Q00059;Q9Y237;Q9UI17;P50213;P22033;Q9Y697;P51398;Q8N1Q8;O43837;P21953;Q9NTG7;O43615;P24539;O15382;P36639;Q9ULD0;P10809;Q8TAA5;Q9HA77;Q6NVY1;P38117;Q96GW9;Q9P0J1;P09622;Q32P41;Q9UL12;Q8N3J5;Q16822;O94925;Q96I99;Q5T160;P47897;Q9BW92;Q6PI48;Q16698;Q15046;P22830;Q8N159;Q16762;P10515;Q96PE7;Q9Y6E7;Q99551;Q9P2J9;P13804;Q16798;Q96EY1;Q96EH3;P36957;P51553;Q9Y2Z4;Q9H5Q4;Q6IB77}

1987 Pathogen[ P03346] interacts with 48 human partners:{O75390;Q9H2U2;Q96PE7;Q06609;Q8N163;Q8NHU6;Q16836;Q32P41;Q00059;P61604;O43615;Q8NCN5;P36639;Q9ULD0;Q07021;Q9Y697;A6NFY7;P22557;P13196;Q96EH3;Q9Y6E7;P41250;Q9HAV7;P51398;Q9UI32;P49419;Q9Y237;P24539;P78537;Q9H5Q4;P40926;O00411;Q99551;P38117;Q07820;O94925;Q96QE5;Q6PI48;Q16775;P07954;P10515;Q49AM1;Q8N1Q8;Q9NTG7;Q8TAA5;Q96EY1;O95571;P

- 30084}
- 1988 Pathogen[ Q85601] interacts with 55 human  
partners: {P30405;Q32P41;O94925;P24539;Q8TAA5;P00480;P61604;Q9Y697;P36639;Q96QE5;Q00059;Q49AM1;Q15046;Q9BW92;P13196;P21953;Q9P2R7;Q9Y6E7;Q9HA77;P07954;P41250;P51398;A6NFY7;Q5T160;Q8N1Q8;Q99551;P78537;Q9H2U2;Q9HAV7;P22033;Q96I59;O43615;Q6IB77;O95363;Q8N163;Q16836;P47897;Q6PI48;Q9H5Q4;Q9UI32;Q16775;P10515;O00411;Q9ULD0;O95571;Q07021;Q06609;Q9NTG7;Q9Y237;P30084;O15382;Q96EY1;P40926;P49419;Q8N3J5}
- 1989 Pathogen[ P14079] interacts with 83 human  
partners: {Q6P4F2;Q86XF0;P36542;O43615;Q8N159;P21953;P13196;Q96GW9;P07954;Q7L3T8;Q9BW92;Q8N163;P25705;Q15031;Q5T160;Q9Y237;P10109;Q49AM1;Q8NHU6;Q9NP81;P47897;O95363;P22557;Q96EH3;Q9NVH6;P30084;P13804;P34897;P36241;Q9P2R7;Q16740;P61604;Q9HA77;Q5JPH6;Q9H2U2;O95571;Q00059;P38117;O94925;Q15046;P36639;A6NFY7;Q6IB77;O14561;P41250;Q9UL12;Q96I59;Q9Y697;O95299;P22033;Q96PE7;Q9UI32;P22830;Q9Y2Z4;P00480;O00411;Q9UI17;Q16762;Q16775;P10515;Q9UGM6;Q9NSE4;Q8NCN5;P56381;Q9H5Q4;O15382;P51398;Q6PI48;P24539;Q9NTG7;Q06609;Q07021;O75616;P04818;P78537;Q05932;Q96EY1;Q8N1Q8;Q99551;Q9ULD0;Q16836;Q9HAV7;Q8TAA5}
- 1990 Pathogen[ P03383] interacts with 52 human  
partners: {P51398;Q06609;A6NFY7;Q9H2U2;O94925;P40926;Q8N163;P36639;Q96EH3;Q5JPH6;Q8N1Q8;Q5T160;Q15031;P61604;O43615;Q16836;Q9HAV7;Q9P2R7;Q00059;Q9NP81;Q9H5Q4;P78537;Q32P41;Q9Y697;Q9ULD0;Q16822;Q9NTG7;Q99551;Q8N159;Q96I59;Q15046;Q9Y2Z4;O95363;Q9Y6E7;P22033;Q96GW9;Q16775;Q9HA77;Q8TAA5;P10515;Q07021;Q6PI48;O00411;P41250;O95571;Q49AM1;Q7L3T8;P24539;Q96EY1;P49419;Q96QE5;Q9BW92}
- 1991 Pathogen[ P03410] interacts with 93 human  
partners: {Q32P41;Q9P2R7;P78537;P30084;Q9HA77;Q16822;Q9NTG7;O75127;Q9NSE4;P13804;Q8N3J5;Q9ULD0;Q49AM1;A6NFY7;P36542;Q9NVH6;Q9UI17;Q8N159;P36639;P25705;Q96PE7;O95299;Q9BW92;Q8NHU6;Q6IB77;P61604;Q00059;Q8TAA5;P12694;Q07021;Q7L3T8;Q6NVY1;P21953;P47897;Q6P4F2;Q9Y697;Q9H2U2;O00411;P38117;Q96EH3;O94925;Q96QE5;P56381;P00480;P22557;O95571;Q8N163;P04818;Q96I59;Q16762;P07954;O14561;Q86XF0;Q16775;O15382;P22830;Q9UL12;O43615;P41250;P49419;P55809;P24539;Q15046;Q9H5Q4;Q8N1Q8;Q5JPH6;Q16836;P40926;Q8NCN5;Q9UGM6;Q9Y2Z4;Q96GW9;P10109;Q9UI32;Q9HAV7;Q9NP81;Q16740;Q9Y237;Q05932;P13196;O95363;Q99551;P10515;Q6PI48;Q5T160;Q96EY1;P30405;P34897;P22033;O75390;Q06609;P51398;O75616}
- 1992 Pathogen[ P14075] interacts with 57 human  
partners: {Q9Y2Z4;Q00059;Q9NVH6;P78537;A6NFY7;Q9HAV7;Q9H5Q4;Q96EH3;P41250;Q07021;P61604;Q16822;P36639;Q8TAA5;Q8N159;O95363;Q8N1Q8;P40926;Q8NCN5;Q96GW9;O95571;O14561;Q8N163;Q9HA77;Q9NP81;Q32P41;P51398;Q9Y6E7;P49419;Q7L3T8;O00411;P22033;Q9NTG7;Q49AM1;Q9BW92;Q16836;Q99551;Q5T160;P10515;P24539;Q9H2U2;Q9ULD0;O94925;P38117;Q6PI48;Q96I59;Q5JPH6;Q15046;Q9NSE4;Q15031;Q96QE5;Q96EY1;Q06609;O43615;Q16775;Q9P2R7;Q9Y697}
- 1993 Pathogen[ P0C206] interacts with 83 human  
partners: {O95363;Q9NSE4;Q49AM1;Q96PE7;P78537;Q9Y2Z4;P36639;P50213;Q9ULD0;Q07021;Q6PI48;Q32P41;O15382;Q16836;P36542;Q9Y697;A6NFY7;Q9HAV7;Q9UGM6;Q8N1Q8;Q9NVH6;Q5JPH6;Q9NP81;Q16822;P21953;Q9HA77;P38117;Q9P2R7;P34897;Q96QE5;P41250;Q99551;P51398;Q8N159;O14561;Q16775;O43615;Q96EH3;P30084;P22557;Q16740;Q5T160;Q9BW92;Q6IB77;P40926;P22830;P24539;Q9H2U2;Q8TAA5;P04818;Q9UI32;Q9Y237;O94925;Q9H5Q4;O75390;P56381;Q06609;P49419;Q15031;Q99798;Q16762;P13196;Q7L3T8;Q9NTG7;P30405;P07954;Q00059;P22033;Q96EY1;Q8NCN5;Q8N3J5;P10515;Q8N163;O95571;P47897;P00480;Q9Y6E7;Q96GW9;P61604;Q96I59;Q05932;Q15046;O00411}
- 1994 Pathogen[ P03363] interacts with 45 human  
partners: {Q32P41;Q9Y6E7;Q9Y2Z4;Q16836;O00411;Q9H2U2;P49419;Q8NHU6;Q96I59;P41250;P78537;O94925;Q9ULD0;P47897;Q5JPH6;Q49AM1;Q9Y697;O95571;Q07021;A6NFY7;O43615;Q96QE5;Q6PI48;Q8N163;Q8TAA5;Q00059;O95363;Q96EH3;Q9UI32;Q9Y237;Q9BW92;P10515;P13196;Q07820;Q06609;Q7L3T8;Q9NTG7;Q15031;Q96EY1;P36639;P51398;Q5T160;Q99551;P61604;Q9H5Q4}
- 1995 [Cluster 182]GO:0032807+C cellular\_component [name] DNA ligase IV complex [def] "A eukaryotically conserved protein complex that contains DNA ligase IV and is involved in DNA repair by non-homologous end joining\_ in addition to the ligase, the complex also contains XRCC4 or a homolog, e.g. Saccharomyces Liflp." [PMID
- 1996 Pathogen[ Q2Q067] interacts with 1 human partners: {Q13426}
- 1997 Pathogen[ P0C214] interacts with 1 human partners: {Q13426}
- 1998 Pathogen[ P03346] interacts with 1 human partners: {Q13426}
- 1999 Pathogen[ Q85601] interacts with 1 human partners: {Q13426}
- 2000 Pathogen[ P14079] interacts with 2 human partners: {Q13426;P49917}
- 2001 Pathogen[ P03383] interacts with 1 human partners: {Q13426}
- 2002 Pathogen[ P03410] interacts with 1 human partners: {Q13426}
- 2003 Pathogen[ P14075] interacts with 1 human partners: {Q13426}
- 2004 Pathogen[ P0C206] interacts with 2 human partners: {P49917;Q13426}
- 2005 Pathogen[ P03363] interacts with 1 human partners: {Q13426}
- 2006 [Cluster 183]GO:0035371+C cellular\_component [name] microtubule plus end [def] "The growing (plus) end of a microtubule. In vitro, microtubules polymerize more quickly at the plus end than at the minus end. In vivo, microtubule growth occurs only at the plus end, and the plus end switches between periods of growth and shortening, a behavior known as dynamic instability." [GOC
- 2007 Pathogen[ Q2Q067] interacts with 5 human  
partners: {Q14008;Q96R06;Q9P270;Q9Y448;Q15691}
- 2008 Pathogen[ P0C214] interacts with 5 human  
partners: {Q14008;Q96R06;Q15691;Q9P270;Q9Y448}
- 2009 Pathogen[ P03346] interacts with 6 human  
partners: {Q96R06;Q15691;Q14008;P30622;Q9Y448;Q9P270}
- 2010 Pathogen[ Q85601] interacts with 6 human  
partners: {Q14008;P30622;Q96R06;Q9Y448;Q15691;Q9P270}

2011 Pathogen[ P14079] interacts with 6 human partners:{Q15691;Q96R06;Q9Y448;Q9P270;P30622;Q14008}

2012 Pathogen[ P03383] interacts with 5 human partners:{Q14008;Q15691;Q96R06;Q9Y448;Q9P270}

2013 Pathogen[ P03410] interacts with 6 human partners:{P30622;Q14008;Q96R06;Q9Y448;Q15691;Q9P270}

2014 Pathogen[ P14075] interacts with 5 human partners:{Q96R06;Q15691;Q14008;Q9P270;Q9Y448}

2015 Pathogen[ P0C206] interacts with 5 human partners:{Q14008;Q15691;Q9Y448;P30622;Q9P270}

2016 Pathogen[ P03363] interacts with 6 human partners:{Q15691;P30622;Q96R06;Q9P270;Q14008;Q9Y448}

2017 [Cluster 184]GO:0002193+C cellular\_component [name] MAML1-RBP-Jkappa- ICN1 complex [def] "A protein complex that consists of the intracellular domain of Notch1 (ICN1), the DNA-binding transcription factor RBP-Jkappa, and the transcriptional coactivator Mastermind-like-1 (MAML1)\_ the complex is involved in transcriptional activation in response to Notch-mediated signaling." [CORUM

2018 Pathogen[ Q2Q067] interacts with 2 human partners:{Q92585;Q06330}

2019 Pathogen[ P0C214] interacts with 2 human partners:{Q92585;Q06330}

2020 Pathogen[ P03346] interacts with 2 human partners:{Q06330;Q92585}

2021 Pathogen[ Q85601] interacts with 2 human partners:{Q92585;Q06330}

2022 Pathogen[ P14079] interacts with 2 human partners:{Q06330;Q92585}

2023 Pathogen[ P03383] interacts with 2 human partners:{Q06330;Q92585}

2024 Pathogen[ P03410] interacts with 2 human partners:{Q06330;Q92585}

2025 Pathogen[ P14075] interacts with 2 human partners:{Q92585;Q06330}

2026 Pathogen[ P0C206] interacts with 2 human partners:{Q06330;Q92585}

2027 Pathogen[ P03363] interacts with 2 human partners:{Q06330;Q92585}

2028 [Cluster 185]GO:0005912+C cellular\_component [name] adherens junction [def] "A cell junction at which anchoring proteins (cadherins or integrins) extend through the plasma membrane and are attached to actin filaments." [GOC

2029 Pathogen[ Q2Q067] interacts with 12 human partners:{Q9BTW9;Q14160;A6NIX2;Q96TA1;Q9P1Y5;Q9Y2D8;O15061;Q9UQB3;Q07157;Q9UGP4;Q9UDY2;Q9BX66}

2030 Pathogen[ P0C214] interacts with 13 human partners:{Q9UGP4;O15061;Q9Y2D8;Q9BTW9;Q9P1Y5;Q9BX66;Q9UQB3;A6NIX2;Q15124;Q96TA1;Q14160;Q9UDY2;Q07157}

2031 Pathogen[ P03346] interacts with 16 human partners:{Q9UGP4;Q9UDY2;Q9Y2D8;O15061;Q9P1Y5;Q9BX66;P55196;Q8TEW0;Q9UQB3;Q96TA1;Q5T2T1;Q07157;A6NIX2;Q8N157;Q14160;Q6IQ23}

2032 Pathogen[ Q85601] interacts with 14 human partners:{A6NIX2;Q9BX66;Q9UDY2;Q9P1Y5;Q9BTW9;Q6IQ23;Q9UQB3;Q96TA1;Q15124;Q9Y2D8;Q14160;Q07157;Q9UGP4;O15061}

2033 Pathogen[ P14079] interacts with 20 human partners:{Q9BTW9;Q6IQ23;Q9UDY2;Q9P266;Q9HBM0;Q07157;Q8N157;Q5T2T1;Q9UQB3;Q15124;O15061;Q8TEW0;A6NIX2;Q9P1Y5;Q9UKB5;Q96TA1;Q9Y2D8;Q9BX66;O15259;Q9UGP4}

2034 Pathogen[ P03383] interacts with 10 human partners:{Q14160;A6NIX2;O15061;Q07157;Q9UQB3;Q96TA1;Q9UGP4;Q9P1Y5;Q9Y2D8;Q9UDY2}

2035 Pathogen[ P03410] interacts with 20 human partners:{Q96TA1;Q9HBM0;O15061;O15259;Q9P1Y5;Q9UGP4;Q15124;Q14160;Q5T2T1;A6NIX2;Q9UDY2;Q07157;Q9BTW9;Q8N157;Q9P266;Q8TEW0;Q9UQB3;Q9BSN7;Q9BX66;Q6IQ23}

2036 Pathogen[ P14075] interacts with 12 human partners:{Q9P266;Q14160;Q07157;Q9UGP4;Q9Y2D8;O15061;Q96TA1;Q9UQB3;A6NIX2;Q9UDY2;Q9HBM0;Q9P1Y5}

2037 Pathogen[ P0C206] interacts with 20 human partners:{O15061;Q9UGP4;Q9BTW9;Q9P266;A6NIX2;Q96TA1;Q9UDY2;Q9Y2D8;Q15124;Q9P1Y5;Q8TEW0;Q5T2T1;P55196;Q14160;Q8N157;Q9BX66;Q07157;Q9HBM0;Q9UQB3;Q6IQ23}

2038 Pathogen[ P03363] interacts with 16 human partners:{Q9BX66;O15061;Q14160;Q9Y2D8;Q5T2T1;Q07157;Q9UGP4;Q8N157;Q9P1Y5;Q9BTW9;Q9UDY2;A6NIX2;O15259;Q96TA1;Q9UQB3;Q6IQ23}

2039 [Cluster 186]GO:0042175+C cellular\_component [name] nuclear outer membrane-endoplasmic reticulum membrane network [def] "The continuous network of membranes encompassing the nuclear outer membrane and the endoplasmic reticulum membrane." [GOC

2040 Pathogen[ Q2Q067] interacts with 1 human partners:{Q8TAT6}

2041 Pathogen[ P0C214] interacts with 1 human partners:{Q8TAT6}

2042 Pathogen[ P03346] interacts with 1 human partners:{Q8TAT6}

2043 Pathogen[ Q85601] interacts with 1 human partners:{Q8TAT6}

2044 Pathogen[ P14079] interacts with 2 human partners:{Q969M3;Q8TAT6}

2045 Pathogen[ P03383] interacts with 1 human partners:{Q8TAT6}

2046 Pathogen[ P03410] interacts with 2 human partners:{Q969M3;Q8TAT6}

2047 Pathogen[ P14075] interacts with 1 human partners:{Q8TAT6}

2048 Pathogen[ P0C206] interacts with 2 human partners:{Q8TAT6;Q969M3}

2049 Pathogen[ P03363] interacts with 1 human partners:{Q8TAT6}

2050 [Cluster 187]GO:0005769+C cellular\_component [name] early endosome [def] "A membrane-bounded organelle that receives incoming material from primary endocytic vesicles that have been generated by clathrin-dependent and clathrin-independent endocytosis\_ vesicles fuse with the early endosome to deliver cargo for sorting into

recycling or degradation pathways." [GOC  
2051 Pathogen[ Q2Q067] interacts with 23 human partners:{Q9P2Y5;O75351;Q63HQ0;O60296;O60784;Q99816;Q5VYK3;O43752;Q6ICB4;Q96L92;Q9H9C1;Q9HD42;Q9Y4E1;O60291;Q9Y3E7;Q9UPV9;Q9Y3C5;O60759;O75382;O14964;Q9BVN2;P49754;Q15276}  
2052 Pathogen[ P0C214] interacts with 24 human partners:{Q6ICB4;P49754;O75351;Q9UPV9;O60759;Q9Y4E1;Q9HD42;Q5VYK3;Q641Q2;O14964;Q9Y3C5;O60296;Q96L92;P10809;O43752;Q9P2Y5;Q9Y3E7;O60784;Q99816;O60291;Q9BVN2;Q5SNT6;Q9H9C1;Q63HQ0}  
2053 Pathogen[ P03346] interacts with 39 human partners:{Q13596;O75382;O43752;O95405;Q15036;Q9P253;Q92622;Q9Y3C5;Q9HD42;P49754;O60759;Q99816;O60296;O95630;Q4V328;O60784;A8K0Z3;Q9BUN8;Q14694;Q7Z3T8;Q9Y3E7;O60493;Q8N4B1;Q96L92;Q9UPV9;Q96AX1;Q5VYK3;Q8IUQ4;O60291;Q9UJ41;Q9Y4E1;Q9H9C1;O75351;O14964;Q9BVN2;Q9P2Y5;Q6ICB4;Q63HQ0;Q15276}  
2054 Pathogen[ Q85601] interacts with 26 human partners:{Q13596;Q5VYK3;Q99816;Q63HQ0;Q9P253;Q9P2Y5;Q9Y3C5;Q15036;O60759;Q9BVN2;P49754;Q9UPV9;Q9UJ41;Q9H9C1;O43752;Q96L92;O60291;O60296;O75351;Q6ICB4;O14964;O95630;O75382;Q9Y3E7;Q9HD42;O60784}  
2055 Pathogen[ P14079] interacts with 48 human partners:{Q15036;Q9Y4E1;P61421;Q9BVN2;Q9H9C1;O60493;Q63HQ0;Q15276;Q6VEQ5;O95405;Q9HD42;Q9UJ41;O60759;Q9GZP9;O60784;Q96L92;Q5VYK3;Q9H5N1;Q9H269;Q9BUN8;Q9NQA3;Q15075;Q641Q2;Q8N4B1;Q96AX1;Q8N8Q9;Q8N8Y2;Q9P253;Q13596;Q5SRD0;O60296;Q9NQ60;Q7Z3T8;Q6ICB4;A8K0Z3;Q4V328;O43752;Q9Y3E7;Q9Y3C5;O75351;P49754;Q7RTP0;Q99816;Q92622;Q9P2Y5;O75382;Q6UWI2;Q5SNT6}  
2056 Pathogen[ P03383] interacts with 19 human partners:{Q5VYK3;Q9Y3E7;Q9BUN8;Q9H9C1;Q99816;Q9Y4E1;P49754;Q4V328;Q96L92;O60296;Q9UPV9;Q9HD42;O60784;Q9P2Y5;O43752;O14964;Q63HQ0;Q15276;Q9BVN2}  
2057 Pathogen[ P03410] interacts with 49 human partners:{Q9BVN2;Q5SNT6;O95405;Q96L92;Q8N8Y2;Q9P2Y5;Q9UJ41;Q9NQ60;Q13596;Q8N4B1;O75351;O75382;P61421;Q5VYK3;Q9GZP9;Q9P253;O60759;Q99816;Q9Y3E7;Q6UWI2;Q9UPV9;Q9BUN8;Q9Y3C5;Q9HD42;Q641Q2;Q15049;Q15036;O60784;Q9Y4E1;P49754;Q6VEQ5;O60296;Q6ICB4;Q5SRD0;Q63HQ0;O43752;Q8N8Q9;Q9H9C1;O60291;Q7RTP0;Q9H5N1;Q4V328;Q9H269;Q9NQA3;Q7Z3T8;O60493;A8K0Z3;Q15276;Q96AX1}  
2058 Pathogen[ P14075] interacts with 21 human partners:{Q9P2Y5;O43752;Q9BVN2;O60296;Q9H9C1;Q4V328;Q9UPV9;Q9Y3E7;O14964;P49754;Q63HQ0;Q9BUN8;Q9HD42;Q99816;Q641Q2;Q6UWI2;Q9Y4E1;O60784;Q96L92;Q15276;Q5VYK3}  
2059 Pathogen[ P0C206] interacts with 45 human partners:{O14964;Q96L92;Q63HQ0;O60291;Q9P2Y5;O60784;Q641Q2;Q9Y3E7;O60759;O75382;O43752;P49754;Q8IWB7;Q8IUQ4;O95630;O60493;Q6ICB4;Q13596;Q99816;Q9Y4E1;Q15036;Q9UPV9;Q92622;Q7Z3T8;Q6VEQ5;O60296;Q9BUN8;Q9GZP9;O95405;Q96AX1;Q5SNT6;Q9UJ41;Q9H5N1;Q5VYK3;Q8N4B1;Q9P253;Q4V328;Q9HD42;Q6UWI2;O75351;Q9BW19;Q9H9C1;Q9Y3C5;Q15276;Q9BVN2}  
2060 Pathogen[ P03363] interacts with 30 human partners:{P49754;Q9UPV9;Q9P2Y5;Q9H9C1;Q6ICB4;O60291;Q9Y3C5;Q63HQ0;Q96L92;O60784;Q8N4B1;O60493;O60296;Q9UJ41;O75351;O95405;Q9Y4E1;Q92622;Q9Y3E7;O14964;O75382;Q9BVN2;Q96NW4;Q99816;Q13596;O60759;O43752;Q15276;Q5VYK3;Q9HD42}  
2061 [Cluster 188]GO:0030658+C cellular\_component [name] transport vesicle membrane [def] "The lipid bilayer surrounding a transport vesicle." [GOC  
2062 Pathogen[ Q2Q067] interacts with 2 human partners:{Q05084;Q13425}  
2063 Pathogen[ P0C214] interacts with 2 human partners:{Q13425;Q05084}  
2064 Pathogen[ P03346] interacts with 3 human partners:{Q13425;Q05084;P49755}  
2065 Pathogen[ Q85601] interacts with 2 human partners:{Q13425;Q05084}  
2066 Pathogen[ P14079] interacts with 3 human partners:{Q05084;P49755;Q0VAF6}  
2067 Pathogen[ P03383] interacts with 2 human partners:{Q05084;Q13425}  
2068 Pathogen[ P03410] interacts with 4 human partners:{P10645;Q13425;Q05084;Q0VAF6}  
2069 Pathogen[ P14075] interacts with 2 human partners:{Q13425;Q05084}  
2070 Pathogen[ P0C206] interacts with 3 human partners:{P49755;Q13425;Q05084}  
2071 Pathogen[ P03363] interacts with 2 human partners:{Q13425;Q05084}  
2072 [Cluster 189]GO:0008328+C cellular\_component [name] ionotropic glutamate receptor complex [def] "A multimeric assembly of four or five subunits which form a structure with an extracellular N-terminus and a large loop that together form the ligand binding domain. The C-terminus is intracellular. The ionotropic glutamate receptor complex itself acts as a ligand-gated ion channel\_ on binding glutamate, charged ions pass through a channel in the center of the receptor complex." [http  
2073 Pathogen[ Q2Q067] interacts with 2 human partners:{P78352;Q9UPX8}  
2074 Pathogen[ P0C214] interacts with 2 human partners:{Q9UPX8;P78352}  
2075 Pathogen[ P03346] interacts with 2 human partners:{P78352;Q9UPX8}  
2076 Pathogen[ Q85601] interacts with 2 human partners:{Q9UPX8;P78352}  
2077 Pathogen[ P14079] interacts with 2 human partners:{B4DS77;Q9UPX8}  
2078 Pathogen[ P03383] interacts with 1 human partners:{P78352}  
2079 Pathogen[ P03410] interacts with 3 human partners:{B4DS77;Q9UPX8;P78352}  
2080 Pathogen[ P14075] interacts with 1 human partners:{P78352}  
2081 Pathogen[ P0C206] interacts with 2 human partners:{P78352;Q9UPX8}  
2082 Pathogen[ P03363] interacts with 2 human partners:{Q9UPX8;P78352}  
2083 [Cluster 190]GO:0042734+C cellular\_component [name] presynaptic membrane [def] "A specialized area of membrane of the axon terminal that faces the plasma membrane of the neuron or muscle fiber with which the axon terminal establishes a synaptic junction\_ many

synaptic junctions exhibit structural presynaptic characteristics, such as conical, electron-dense internal protrusions, that distinguish it from the remainder of the axon plasma membrane." [GOC

2084 Pathogen[ Q2Q067] interacts with 6 human  
partners:{Q8IUD2;O00213;Q14160;Q9Y6H5;P15407;O15083}

2085 Pathogen[ P0C214] interacts with 6 human  
partners:{O00213;O15083;P15407;Q9Y6H5;Q14160;Q8IUD2}

2086 Pathogen[ P03346] interacts with 12 human  
partners:{O00213;Q6ZWB6;Q8IUD2;O15083;Q68DU8;Q9Y6H5;P15407;Q13492;Q96CX2;Q14160;P0C2W1;Q9NRD5}

2087 Pathogen[ Q85601] interacts with 7 human  
partners:{O00213;P15407;O15083;Q14160;Q96CX2;Q9Y6H5;Q8IUD2}

2088 Pathogen[ P14079] interacts with 8 human  
partners:{Q13492;Q9Y6H5;O00213;Q8IUD2;Q68DU8;O15083;P15407;Q96CX2}

2089 Pathogen[ P03383] interacts with 6 human  
partners:{O00213;Q14160;P15407;Q9Y6H5;Q8IUD2;O15083}

2090 Pathogen[ P03410] interacts with 11 human  
partners:{Q9Y6H5;Q68DU8;O00213;Q14160;Q6ZWB6;Q13492;Q9NRD5;Q8IUD2;Q96CX2;P15407;O15083}

2091 Pathogen[ P14075] interacts with 6 human  
partners:{O00213;Q9Y6H5;O15083;Q14160;Q8IUD2;P15407}

2092 Pathogen[ P0C206] interacts with 8 human  
partners:{P15407;Q96CX2;Q8IUD2;O00213;O15083;Q14160;Q9NRD5;Q9Y6H5}

2093 Pathogen[ P03363] interacts with 7 human  
partners:{Q9Y6H5;O00213;Q14160;P15407;O15083;Q96JB8;Q8IUD2}

2094 [Cluster 191]GO:0035631+C cellular\_component [name] CD40 receptor complex [def] "A protein complex that contains at least CD40 (a cell surface receptor of the tumour necrosis factor receptor (TNFR) superfamily), and other signaling molecules." [GOC

2095 Pathogen[ Q2Q067] interacts with 7 human  
partners:{Q9NR28;Q12933;Q13114;O14920;O00463;Q13490;O15111}

2096 Pathogen[ P0C214] interacts with 7 human  
partners:{O15111;Q13490;Q12933;Q13114;O00463;Q9NR28;O14920}

2097 Pathogen[ P03346] interacts with 7 human  
partners:{O00463;O15111;Q9NR28;Q13114;Q96EP0;Q13490;O14920}

2098 Pathogen[ Q85601] interacts with 7 human  
partners:{Q13490;O00463;O15111;Q9NR28;Q13114;Q12933;O14920}

2099 Pathogen[ P14079] interacts with 6 human  
partners:{O00463;Q96EP0;Q9NR28;Q12933;Q13114;Q13490}

2100 Pathogen[ P03383] interacts with 6 human  
partners:{O14920;O15111;Q13490;Q12933;Q9NR28;Q13114}

2101 Pathogen[ P03410] interacts with 7 human  
partners:{O14920;Q9NR28;O15111;Q13490;O00463;Q12933;Q13114}

2102 Pathogen[ P14075] interacts with 6 human  
partners:{O15111;Q9NR28;O14920;Q13490;Q12933;Q13114}

2103 Pathogen[ P0C206] interacts with 8 human  
partners:{O14920;Q13114;Q9NR28;Q12933;Q96EP0;O15111;O00463;Q13490}

2104 Pathogen[ P03363] interacts with 8 human  
partners:{Q13490;O14920;Q96EP0;O15111;Q12933;O00463;Q9NR28;Q13114}

2105 [Cluster 192]GO:0016469+C cellular\_component [name] proton-transporting two-sector ATPase complex [def] "A large protein complex that catalyzes the synthesis or hydrolysis of ATP by a rotational mechanism, coupled to the transport of protons across a membrane. The complex comprises a membrane sector (F0, V0, or A0) that carries out proton transport and a cytoplasmic compartment sector (F1, V1, or A1) that catalyzes ATP synthesis or hydrolysis. Two major types have been characterized

2106 Pathogen[ Q2Q067] interacts with 1 human partners:{P36543}

2107 Pathogen[ P0C214] interacts with 2 human partners:{Q16864;P36543}

2108 Pathogen[ P03346] interacts with 3 human partners:{P21283;P36543;Q16864}

2109 Pathogen[ Q85601] interacts with 1 human partners:{P36543}

2110 Pathogen[ P14079] interacts with 2 human partners:{P36543;Q16864}

2111 Pathogen[ P03383] interacts with 1 human partners:{P36543}

2112 Pathogen[ P03410] interacts with 2 human partners:{Q16864;P36543}

2113 Pathogen[ P14075] interacts with 1 human partners:{P36543}

2114 Pathogen[ P0C206] interacts with 2 human partners:{P36543;Q16864}

2115 Pathogen[ P03363] interacts with 1 human partners:{P36543}

2116 [Cluster 193]GO:0030016+C cellular\_component [name] myofibril [def] "The contractile element of skeletal and cardiac muscle\_ a long, highly organized bundle of actin, myosin, and other proteins that contracts by a sliding filament mechanism." [ISBN

2117 Pathogen[ Q2Q067] interacts with 8 human  
partners:{Q9UKX2;P15172;Q8N0Z2;P11532;P60900;Q15327;Q5VU43;P12883}

2118 Pathogen[ P0C214] interacts with 15 human  
partners:{Q15327;Q8N0Z2;Q9UKX2;Q9Y2K3;P11055;P15172;P11532;Q5VU43;P13535;P12882;P12883;P13533;P60900;Q9Y623;P63261}

2119 Pathogen[ P03346] interacts with 12 human  
partners:{A8MU46;Q8N0Z2;Q8WXH0;Q5BKY1;P15172;Q15327;P28289;P60900;Q9UKX2;P11532;Q5VU43;P10916}

2120 Pathogen[ Q85601] interacts with 15 human

2121 partners:{P60900;P15172;P13533;P11532;Q9UKX2;Q9Y2K3;P12882;P63261;P11055;Q15327;P12883;Q5VU43;P13535;Q8N0Z2;Q9Y623}  
Pathogen[ P14079] interacts with 13 human

2122 partners:{P63261;P11532;P10916;Q9UKX2;P60900;P28289;Q8WXH0;Q15327;P12883;Q8N0Z2;Q05682;Q5BKY1;Q5VU43}  
Pathogen[ P03383] interacts with 8 human

2123 partners:{P60900;P15172;Q5VU43;Q9UKX2;P11532;Q8N0Z2;P12883;Q15327}  
Pathogen[ P03410] interacts with 17 human

2124 partners:{Q9UKX2;P10916;P60900;Q05682;P11532;Q5BKY1;P28289;Q15327;A8MU46;P12882;Q5VU43;P12883;P63261;P13533;Q8N0Z2;P13535;Q8WXH0}  
Pathogen[ P14075] interacts with 7 human

2125 partners:{P11532;Q5VU43;Q9UKX2;P60900;P15172;Q15327;Q8N0Z2}  
Pathogen[ P0C206] interacts with 16 human

2126 partners:{P13533;Q9Y623;Q15327;P60900;P11055;Q5BKY1;P12883;P63261;P12882;Q5VU43;Q9UKX2;Q8WXH0;P15172;P11532;P13535;Q8N0Z2}  
Pathogen[ P03363] interacts with 11 human

2127 partners:{Q9UKX2;Q5BKY1;Q5VU43;Q15327;Q8N0Z2;P11532;P28289;P63261;A8MU46;P15172;P10916}  
[Cluster 194]GO:0035097+C cellular\_component [name] histone methyltransferase complex [def] "A multimeric complex that is able to catalyze the addition of methyl groups to histone proteins." [GOC]

2128 Pathogen[ Q2Q067] interacts with 10 human

2129 partners:{Q6ZW49;Q9C005;Q9UKV0;Q9P0U4;O14686;Q9BTK6;O00255;Q14686;P45973;Q9UBL3}  
Pathogen[ P0C214] interacts with 6 human

2130 partners:{Q14686;Q6ZW49;Q9C005;Q9UKV0;P45973;O00255}  
Pathogen[ P03346] interacts with 11 human

2131 partners:{P45973;Q9C005;Q9BTK6;Q15291;Q9UBL3;Q9P0U4;O00255;O14686;Q9UKV0;Q6ZW49;Q14686}  
Pathogen[ Q85601] interacts with 9 human

2132 partners:{Q9UKV0;O14686;Q14686;Q9UBL3;Q9P0U4;Q9C005;P45973;O00255;Q6ZW49}  
Pathogen[ P14079] interacts with 9 human

2133 partners:{Q9C005;Q9UBL3;Q9BTK6;Q9UKV0;P45973;Q6ZW49;Q9P0U4;O00255;Q14686}  
Pathogen[ P03383] interacts with 7 human

2134 partners:{Q9BTK6;Q14686;Q6ZW49;P45973;Q9C005;O00255;Q9UKV0}  
Pathogen[ P03410] interacts with 8 human

2135 partners:{Q9UKV0;Q9P0U4;Q14686;P45973;Q9C005;Q9BTK6;O00255;Q6ZW49}  
Pathogen[ P14075] interacts with 7 human

2136 partners:{Q14686;Q6ZW49;P45973;Q9UKV0;O00255;Q9C005;Q9BTK6}  
Pathogen[ P0C206] interacts with 10 human

2137 partners:{Q9P0U4;Q9C005;P45973;Q6ZW49;O00255;Q9UKV0;O14686;Q9BTK6;Q14686;Q9UBL3}  
Pathogen[ P03363] interacts with 12 human

2138 partners:{Q9BTK6;Q15291;P45973;Q9UBL3;Q9P0U4;O15047;Q14686;Q9C005;Q9UKV0;Q9UPS6;Q6ZW49;O14686}  
[Cluster 195]GO:0042383+C cellular\_component [name] sarcolemma [def] "The outer membrane of a muscle cell, consisting of the plasma membrane, a covering basement membrane (about 100 nm thick and sometimes common to more than one fiber), and the associated loose network of collagen fibers." [ISBN]

2139 Pathogen[ Q2Q067] interacts with 11 human

2140 partners:{P09917;Q14315;Q13884;Q96EV8;P08727;Q9H7C4;Q12959;P11532;A2IDD5;P14672;P17661}  
Pathogen[ P0C214] interacts with 13 human

2141 partners:{Q9H7C4;P09917;Q13884;Q14315;P11532;Q15124;Q96EV8;Q12959;P08727;A2IDD5;P14672;P18054;P17661}  
Pathogen[ P03346] interacts with 15 human

2142 partners:{Q14315;P08727;Q13884;Q15149;P18054;Q13424;P09917;P17661;Q96EV8;Q9H7C4;A2IDD5;P11532;P14672;Q9UBF9;Q12959}  
Pathogen[ Q85601] interacts with 12 human

2143 partners:{Q13884;P17661;P09917;P11532;Q15124;Q96EV8;Q14315;Q12959;A2IDD5;P08727;P14672;Q9H7C4}  
Pathogen[ P14079] interacts with 21 human

2144 partners:{P04083;Q9H7C4;P11532;P14672;Q16585;Q9UBF9;Q15124;Q14118;Q13424;Q15149;Q92629;P08758;Q16586;Q14315;Q13326;P09917;A2IDD5;Q96LD1;Q96EV8;P17661;P08727}  
Pathogen[ P03383] interacts with 8 human

2145 partners:{P08727;Q13884;P17661;Q96EV8;P11532;Q9H7C4;A2IDD5;P14672}  
Pathogen[ P03410] interacts with 19 human

2146 partners:{Q9UBF9;P17661;Q12959;P11532;Q15124;Q16585;Q13884;Q9H7C4;A2IDD5;Q14315;Q14118;P09917;Q92629;Q13326;Q13424;Q15149;P08727;Q96EV8;Q96LD1}  
Pathogen[ P14075] interacts with 8 human

2147 partners:{P11532;Q13884;P08727;P17661;Q9H7C4;A2IDD5;Q96EV8;P14672}  
Pathogen[ P0C206] interacts with 13 human

2148 partners:{P17661;P09917;Q14315;P08727;A2IDD5;Q15124;Q13884;Q96EV8;Q9H7C4;P14672;P11532;Q13424;Q12959}  
Pathogen[ P03363] interacts with 12 human

2149 partners:{Q12959;A2IDD5;Q9UBF9;Q9H7C4;P08727;Q15149;P11532;P17661;Q13884;P14672;Q14315;Q13424}  
[Cluster 196]GO:0045111+C cellular\_component [name] intermediate filament cytoskeleton

[def] "Cytoskeletal structure made from intermediate filaments, typically organized in the cytosol as an extended system that stretches from the nuclear envelope to the plasma membrane. Some intermediate filaments run parallel to the cell surface, while others traverse the cytosol\_ together they form an internal framework that helps support the shape and resilience of the cell." [ISBN

2150 Pathogen[ Q2Q067] interacts with 27 human partners:{Q9Y473;P35908;O75832;Q9NSB2;Q9UHR5;Q8IZH2;P51531;O76013;Q9Y3D9;Q6H8Q1;Q14934;Q9H668;Q13769;Q9Y295;Q12873;Q9UGK8;Q92540;O75410;Q0VG06;Q08752;O15182;Q2M2I5;P08670;Q86Z20;Q01546;Q8NFH5;Q9UHB4}

2151 Pathogen[ P0C214] interacts with 26 human partners:{Q2M2I5;O76013;Q8NFH5;Q9Y3D9;Q9Y473;Q13769;Q12873;Q9Y295;Q9NSB2;Q92540;P35908;Q86Z20;Q8IZH2;O75832;Q9UHR5;P08670;Q0VG06;Q14934;O75410;Q9UHB4;Q9UGK8;Q9H668;Q6H8Q1;Q08752;P51531;Q01546}

2152 Pathogen[ P03346] interacts with 34 human partners:{Q86Z20;Q96NL6;Q9UBK8;P09651;Q9UHR5;Q14149;O75410;Q9UHB4;Q15149;Q0VG06;Q8NFH5;Q13769;Q6H8Q1;Q8IZH2;P35908;Q14934;O75832;Q9Y3D9;Q2M2I5;Q14694;Q9Y295;Q9NSB2;Q08752;Q9H668;Q92540;P08670;Q9UGK8;Q12873;O15182;P51531;Q9Y473;Q01546;O76013;Q6ZJW1}

2153 Pathogen[ Q85601] interacts with 29 human partners:{Q9UHB4;O76013;Q86Z20;O15182;Q13769;Q92540;P08670;O75832;Q6ZJW1;Q2M2I5;Q9Y3D9;Q6H8Q1;Q14149;Q8IZH2;P51531;Q08752;Q14934;Q9Y295;Q01546;Q9H668;Q12873;Q8NFH5;Q9UGK8;P35908;Q9Y473;Q0VG06;Q9UHR5;O75410;Q9NSB2}

2154 Pathogen[ P14079] interacts with 35 human partners:{Q8NFH5;Q9UHB4;Q9H668;P35908;Q96NL6;Q08752;Q9UGK8;Q92540;Q86Z20;P51531;O75832;Q99442;P50990;Q01546;Q12873;Q13769;Q14149;Q15149;Q8IZH2;Q2M2I5;Q14934;Q0VG06;Q9Y473;P48681;Q86X24;Q9UHR5;O76013;Q6H8Q1;O75410;P08670;O15182;Q6ZJW1;Q9NSB2;Q9Y295;Q9Y3D9}

2155 Pathogen[ P03383] interacts with 23 human partners:{Q9NSB2;P08670;Q9UHB4;Q13769;Q9UHR5;Q9Y295;O75410;Q8NFH5;Q2M2I5;Q08752;O75832;Q14934;Q9Y3D9;Q12873;Q01546;P51531;P35908;Q9UGK8;Q92540;Q86Z20;Q9Y473;Q0VG06;O76013}

2156 Pathogen[ P03410] interacts with 33 human partners:{Q92540;Q12873;Q99442;Q86Z20;Q08752;Q6ZJW1;Q14149;O15182;Q6H8Q1;Q9H668;Q9Y295;Q96NL6;Q8IZH2;P35908;P50990;Q9UGK8;Q8NFH5;Q2M2I5;O75410;Q13769;O76013;Q9UHB4;P08670;P51531;Q9Y3D9;Q01546;Q9NSB2;Q15149;Q14934;Q0VG06;O75832;Q9Y473;Q9UHR5}

2157 Pathogen[ P14075] interacts with 24 human partners:{Q08752;Q9Y3D9;Q9Y295;O75832;Q13769;O75410;Q9UHR5;Q9NSB2;Q9UHB4;Q86Z20;P35908;O76013;P51531;Q14934;P08670;Q9UGK8;Q9Y473;Q0VG06;Q92540;Q12873;Q01546;Q8NFH5;Q2M2I5;Q9H668}

2158 Pathogen[ P0C206] interacts with 30 human partners:{O15182;Q9NSB2;Q96NL6;Q9Y295;O75832;Q8NFH5;Q86Z20;Q8IZH2;Q6ZJW1;Q08752;P51531;Q9UHR5;Q2M2I5;Q9UGK8;Q9H668;Q0VG06;Q13769;O75410;O76013;Q14149;Q01546;Q9Y3D9;Q14934;P08670;Q9Y473;Q9UHB4;Q92540;P35908;Q6H8Q1;Q12873}

2159 Pathogen[ P03363] interacts with 29 human partners:{O75410;Q9UGK8;Q9UHB4;Q86Z20;P09651;Q13769;Q08752;Q9Y295;P35908;O76013;Q15149;Q9UHR5;Q9H668;Q6H8Q1;P08670;Q9Y3D9;Q9NSB2;Q6ZJW1;O15182;Q92540;Q14934;Q12873;Q0VG06;Q01546;P51531;Q8NFH5;Q9Y473;Q2M2I5;Q8IZH2}

2160 [Cluster 197]GO:0070688+C cellular\_component [name] MLL5-L complex [def] "A protein complex that can methylate lysine-4 of histone H3 and plays an essential role in retinoic-acid-induced granulopoiesis. MLL5 is the catalytic methyltransferase subunit, and the complex also contains serine/threonine kinase 38 (STK38), protein phosphatase 1 catalytic subunits, the host cell factor-1 N-terminal subunit, beta-actin, and O-GlcNAc transferase\_ the human genes encoding the subunits are MLL5, STK38, PPP1CA, PPP1CB, PPP1CC, HCFC1, ACTB and OGT, respectively." [GOC

2161 Pathogen[ Q2Q067] interacts with 5 human partners:{Q8IZD2;P62140;P51610;P36873;P62136}

2162 Pathogen[ P0C214] interacts with 6 human partners:{P60709;P51610;P62140;P62136;P36873;Q8IZD2}

2163 Pathogen[ P03346] interacts with 6 human partners:{P62136;P51610;P60709;P36873;P62140;Q8IZD2}

2164 Pathogen[ Q85601] interacts with 6 human partners:{P51610;P60709;P62136;P36873;P62140;Q8IZD2}

2165 Pathogen[ P14079] interacts with 5 human partners:{P36873;P62136;P51610;P62140;P60709}

2166 Pathogen[ P03383] interacts with 4 human partners:{P62140;P36873;P62136;P51610}

2167 Pathogen[ P03410] interacts with 5 human partners:{P51610;P62136;P62140;P36873;P60709}

2168 Pathogen[ P14075] interacts with 4 human partners:{P51610;P62140;P36873;P62136}

2169 Pathogen[ P0C206] interacts with 6 human partners:{P60709;P51610;P62140;P36873;P62136;Q8IZD2}

2170 Pathogen[ P03363] interacts with 5 human partners:{P62136;P36873;P60709;P62140;P51610}

2171 [Cluster 198]GO:0016234+C cellular\_component [name] inclusion body [def] "A discrete intracellular part formed of aggregated molecules such as proteins or other biopolymers." [GOC

2172 Pathogen[ Q2Q067] interacts with 3 human partners:{P08107;P35573;P13807}

2173 Pathogen[ P0C214] interacts with 3 human partners:{P35573;P08107;P13807}

2174 Pathogen[ P03346] interacts with 4 human partners:{P08107;P13807;P25686;P35573}



2175 Pathogen[ Q85601] interacts with 3 human partners: {P08107;P13807;P35573}

2176 Pathogen[ P14079] interacts with 4 human partners: {P13807;Q9UL15;P08107;P35573}

2177 Pathogen[ P03383] interacts with 3 human partners: {P08107;P13807;P35573}

2178 Pathogen[ P03410] interacts with 5 human partners: {P35573;P25686;P08107;P13807;Q9UL15}

2179 Pathogen[ P14075] interacts with 3 human partners: {P35573;P08107;P13807}

2180 Pathogen[ P0C206] interacts with 3 human partners: {P13807;P08107;P35573}

2181 Pathogen[ P03363] interacts with 3 human partners: {P13807;P08107;P35573}

2182 [Cluster 199]GO:0035327+C cellular\_component [name] transcriptionally active chromatin [def] "The ordered and organized complex of DNA and protein that forms regions of the chromosome that are being actively transcribed." [GOC

2183 Pathogen[ Q2Q067] interacts with 6 human partners: {Q9NQT4;Q6PD62;Q9GZS3;Q9NPD3;O75475;Q6PGP7}

2184 Pathogen[ P0C214] interacts with 6 human partners: {Q6PGP7;Q9NPD3;O75475;Q6PD62;Q9NQT4;Q9GZS3}

2185 Pathogen[ P03346] interacts with 7 human partners: {Q6PD62;O75475;Q6PGP7;Q9NQT5;Q9GZS3;Q9NQT4;Q9NPD3}

2186 Pathogen[ Q85601] interacts with 6 human partners: {Q6PD62;Q9NPD3;Q9GZS3;Q9NQT4;Q6PGP7;O75475}

2187 Pathogen[ P14079] interacts with 6 human partners: {Q6PGP7;O75475;Q9NQT4;Q9NPD3;Q9GZS3;Q6PD62}

2188 Pathogen[ P03383] interacts with 6 human partners: {Q6PD62;Q6PGP7;Q9NPD3;Q9NQT4;O75475;Q9GZS3}

2189 Pathogen[ P03410] interacts with 6 human partners: {Q6PGP7;Q6PD62;Q9GZS3;Q9NQT4;Q9NPD3;O75475}

2190 Pathogen[ P14075] interacts with 6 human partners: {O75475;Q9NPD3;Q6PGP7;Q9NQT4;Q6PD62;Q9GZS3}

2191 Pathogen[ P0C206] interacts with 6 human partners: {Q6PD62;Q9NPD3;Q6PGP7;O75475;Q9GZS3;Q9NQT4}

2192 Pathogen[ P03363] interacts with 7 human partners: {Q9NQT4;Q9GZS3;O75475;Q9NPD3;Q6PGP7;Q9NQT5;Q6PD62}

2193 [Cluster 200]GO:0005641+C cellular\_component [name] nuclear envelope lumen [def] "The region between the two lipid bilayers of the nuclear envelope\_ 20-40 nm wide." [GOC

2194 Pathogen[ Q2Q067] interacts with 2 human partners: {P09917;Q9HB71}

2195 Pathogen[ P0C214] interacts with 2 human partners: {P09917;Q9HB71}

2196 Pathogen[ P03346] interacts with 2 human partners: {Q9HB71;P09917}

2197 Pathogen[ Q85601] interacts with 2 human partners: {P09917;Q9HB71}

2198 Pathogen[ P14079] interacts with 2 human partners: {Q9HB71;P09917}

2199 Pathogen[ P03383] interacts with 1 human partners: {Q9HB71}

2200 Pathogen[ P03410] interacts with 2 human partners: {Q9HB71;P09917}

2201 Pathogen[ P14075] interacts with 1 human partners: {Q9HB71}

2202 Pathogen[ P0C206] interacts with 2 human partners: {Q9HB71;P09917}

2203 Pathogen[ P03363] interacts with 1 human partners: {Q9HB71}

2204 [Cluster 201]GO:0032584+C cellular\_component [name] growth cone membrane [def] "The portion of the plasma membrane surrounding a growth cone." [GOC

2205 Pathogen[ Q2Q067] interacts with 1 human partners: {Q9UPT5}

2206 Pathogen[ P0C214] interacts with 1 human partners: {Q9UPT5}

2207 Pathogen[ P03346] interacts with 2 human partners: {Q9UPT5;Q96A65}

2208 Pathogen[ Q85601] interacts with 3 human partners: {Q9UPT5;Q96A65;P17677}

2209 Pathogen[ P14079] interacts with 3 human partners: {P17677;Q9UPT5;Q96A65}

2210 Pathogen[ P03383] interacts with 1 human partners: {Q9UPT5}

2211 Pathogen[ P03410] interacts with 3 human partners: {Q9UPT5;Q96A65;P17677}

2212 Pathogen[ P14075] interacts with 1 human partners: {Q9UPT5}

2213 Pathogen[ P0C206] interacts with 3 human partners: {P17677;Q96A65;Q9UPT5}

2214 Pathogen[ P03363] interacts with 2 human partners: {Q96A65;Q9UPT5}

2215 [Cluster 202]GO:0008623+C cellular\_component [name] chromatin accessibility complex [def] "A multisubunit complex that uses ATP to increase the general accessibility of DNA in chromatin. Unlike other known chromatin remodeling complexes, CHRAC can also function during chromatin assembly\_ it uses ATP to convert irregular chromatin into a regular array of nucleosomes with even spacing." [GOC

2216 Pathogen[ Q2Q067] interacts with 1 human partners: {Q9NRL2}

2217 Pathogen[ P0C214] interacts with 1 human partners: {Q9NRL2}

2218 Pathogen[ P03346] interacts with 1 human partners: {Q9NRL2}

2219 Pathogen[ Q85601] interacts with 1 human partners: {Q9NRL2}

2220 Pathogen[ P14079] interacts with 2 human partners: {Q9NRG0;Q9NRL2}

2221 Pathogen[ P03383] interacts with 1 human partners: {Q9NRL2}

2222 Pathogen[ P03410] interacts with 2 human partners: {Q9NRG0;Q9NRL2}

2223 Pathogen[ P14075] interacts with 1 human partners: {Q9NRL2}

2224 Pathogen[ P0C206] interacts with 1 human partners: {Q9NRL2}

2225 Pathogen[ P03363] interacts with 1 human partners: {Q9NRL2}

2226 [Cluster 203]GO:0000781+C cellular\_component [name] chromosome, telomeric region [def] "The terminal region of a linear chromosome that includes the telomeric DNA repeats and associated proteins." [GOC

2227 Pathogen[ Q2Q067] interacts with 31 human partners: {Q9Y4R8;Q8IY18;Q12888;Q92889;Q9H2K2;P49959;Q9NYB0;Q15554;Q5UIP0;P54274;Q9BSI4;O14757;Q9H668;O60934;Q86US8;O96017;Q8N140;Q96AP0;O14746;Q96BK5;Q15185;O76064;Q2NKJ3

2228 ;O75943;Q9H816;O95271;Q96MG7;Q96MF7;P24941;Q86WV5;Q9NXX6}  
Pathogen[ P0C214] interacts with 29 human  
partners:{Q8IY18;Q96BK5;O14746;Q5UIP0;P49959;Q9H816;Q9NXX6;Q92889;Q9BSI4;Q15554;Q86WV5;Q86US8;O96017;Q9Y4R8;Q96MF7;Q96MG7;P24941;Q9H2K2;O75943;Q9NYB0;Q12888;Q9H668;O14757;O95271;Q15185;O76064;P54274;Q8N140;Q2NKJ3}

2229 Pathogen[ P03346] interacts with 33 human  
partners:{Q12888;Q9BSI4;Q96AP0;O76064;Q96MF7;O96017;Q86US8;Q86WV5;Q15554;P54274;P24941;Q96MG7;Q15185;O14757;Q8WV22;O75943;Q9H2K2;Q8N140;Q9Y4R8;Q9H668;O14746;Q9NUX5;Q96BK5;Q9NYB0;Q5UIP0;P49959;O60934;Q92889;O95271;Q8IY18;Q9H816;Q9NXX6;Q2NKJ3}

2230 Pathogen[ Q85601] interacts with 30 human  
partners:{Q9Y4R8;O96017;Q86WV5;Q8IY18;Q15554;Q96MG7;Q2NKJ3;P49959;Q12888;Q92889;O14757;O75943;Q9H2K2;Q8N140;O76064;Q96BK5;Q9H668;Q5UIP0;Q15185;Q86US8;O14746;Q9NYB0;O95271;Q9H816;Q9NXX6;Q8WV22;P24941;P54274;Q96MF7;O60934}

2231 Pathogen[ P14079] interacts with 28 human  
partners:{Q9H668;P54274;O14746;Q96MF7;Q9NUX5;Q86WV5;O95271;Q9BSI4;Q86US8;Q9H2K2;O60934;O75943;Q9NYB0;Q15185;Q92889;Q8N140;Q8NAM6;Q15554;Q9Y4R8;Q8IY18;Q96BK5;Q96MG7;Q12888;Q5UIP0;Q2NKJ3;Q9H816;Q9NXX6;Q96AP0}

2232 Pathogen[ P03383] interacts with 22 human  
partners:{Q12888;O14757;Q9NXX6;Q5UIP0;Q9NYB0;Q15554;Q96BK5;Q9Y4R8;Q96MF7;Q9H816;P24941;Q86US8;Q9BSI4;O14746;Q15185;Q8N140;Q96MG7;O95271;Q86WV5;Q2NKJ3;P54274;O96017}

2233 Pathogen[ P03410] interacts with 31 human  
partners:{P49959;Q9NUX5;Q9H816;O75943;Q9Y4R8;Q15554;Q96AP0;O14746;P54274;Q9H668;Q92889;Q9BSI4;Q9NXX6;Q96MF7;Q96MG7;Q86WV5;P24941;O95271;Q15185;O96017;O14757;Q12888;Q86US8;Q8IY18;Q8N140;Q9H2K2;Q96BK5;Q5UIP0;Q2NKJ3;Q9NYB0;O60934}

2234 Pathogen[ P14075] interacts with 24 human  
partners:{Q24941;O14746;Q15554;Q9BSI4;Q8N140;Q2NKJ3;Q96AP0;Q15185;Q96BK5;P54274;Q86US8;O96017;Q86WV5;Q9H816;Q9NXX6;Q9Y4R8;Q12888;Q5UIP0;Q96MF7;O95271;Q96MG7;O14757;Q9NYB0;Q9H668}

2235 Pathogen[ P0C206] interacts with 32 human  
partners:{O95271;Q8N140;Q2NKJ3;Q8WV22;P49959;Q5UIP0;Q96AP0;O96017;Q86WV5;Q15554;O60934;Q15185;Q96MG7;Q9BSI4;Q9H668;Q9H816;Q96BK5;O75943;P54274;Q12888;Q86US8;Q92889;Q96MF7;Q9Y4R8;Q9NYB0;Q9NUX5;O76064;Q8IY18;P24941;Q9H2K2;Q9NXX6;O14746}

2236 Pathogen[ P03363] interacts with 30 human  
partners:{Q9H816;Q9NXX6;Q9Y4R8;Q15554;Q96BK5;Q86US8;Q9NYB0;Q8N140;Q92889;Q86WV5;O14746;P24941;Q9BSI4;Q9H2K2;Q96AP0;O96017;P54274;Q9H668;Q5UIP0;O95271;Q9NUX5;Q15185;Q2NKJ3;Q8WV22;Q96MG7;O75943;Q8IY18;Q96MF7;Q12888;O14757}

2237 [Cluster 204]GO:0019898+C cellular\_component [name] extrinsic to membrane [def] "Loosely bound to one surface of a membrane, but not integrated into the hydrophobic region." [GOC

2238 Pathogen[ Q2Q067] interacts with 7 human  
partners:{P04156;Q9Y2J2;Q9UL45;Q96N16;Q9BZE9;P11171;Q8IZQ1}

2239 Pathogen[ P0C214] interacts with 6 human  
partners:{Q9BZE9;Q8IZQ1;Q9UL45;P04156;P11171;Q96N16}

2240 Pathogen[ P03346] interacts with 12 human  
partners:{Q9HCS5;Q96N16;Q8IZQ1;Q9H329;P26038;Q9BZE9;P11171;O43491;Q9Y2J2;Q9UL45;P04156;Q9Y2J0}

2241 Pathogen[ Q85601] interacts with 6 human  
partners:{Q9Y2J2;P11171;Q9BZE9;Q8IZQ1;P04156;Q96N16}

2242 Pathogen[ P14079] interacts with 9 human  
partners:{Q9Y2J2;P11171;P04156;Q9BZE9;P26038;Q96N16;Q9UL45;Q99445;P35241}

2243 Pathogen[ P03383] interacts with 4 human partners:{P04156;Q9BZE9;Q96N16;Q8IZQ1}

2244 Pathogen[ P03410] interacts with 13 human  
partners:{Q9BZE9;Q9Y2J0;Q9H329;Q99445;Q96N16;Q9UL45;P11171;P26038;O43491;Q9Y2J2;P04156;P35241;Q8IZQ1}

2245 Pathogen[ P14075] interacts with 6 human  
partners:{Q9Y2J2;Q96N16;Q8IZQ1;P04156;P11171;Q9BZE9}

2246 Pathogen[ P0C206] interacts with 10 human  
partners:{Q9UL45;P04156;Q9Y2J0;Q96N16;Q9BZE9;Q8IZQ1;Q99445;O43491;Q9Y2J2;P11171}

2247 Pathogen[ P03363] interacts with 9 human  
partners:{P04156;Q9HCS5;P11171;Q9BZE9;O43491;Q8IZQ1;Q9H329;Q96N16;Q9Y2J2}

2248 [Cluster 205]GO:0005844+C cellular\_component [name] polysome [def] "Several ribosomes bound to one mRNA." [ISBN

2249 Pathogen[ Q2Q067] interacts with 12 human  
partners:{P05198;P62701;P22090;Q9Y295;P27797;Q9Y2T7;P60900;P25786;Q9UKV8;P16989;Q99700;Q9UL18}

2250 Pathogen[ P0C214] interacts with 15 human  
partners:{P51114;P22090;P16989;Q9Y295;P62701;Q99700;Q9Y2T7;P13639;O95278;P25786;Q9UKV8;P05198;P27797;P60900;Q9UL18}

2251 Pathogen[ P03346] interacts with 15 human  
partners:{Q9UL18;Q96J94;P16989;Q99700;Q9Y295;P60900;P25786;Q9UKV8;P27797;P62701;Q9Y2T7;P22090;P51114;O95278;P05198}

2252 Pathogen[ Q85601] interacts with 14 human  
partners:{P60900;Q9Y2T7;Q9UL18;P62701;P27797;O95278;Q9Y295;P25786;Q9UKV8;P05198;P22090;P16989;Q99700;P51114}

2253 Pathogen[ P14079] interacts with 11 human  
partners:{Q9UKV8;Q9UL18;Q99700;P05198;P22090;Q9Y2T7;P60900;P16989;P13639;P62701;Q9Y29

5}

2254 Pathogen[ P03383] interacts with 12 human partners:{P16989;Q9UL18;P60900;Q9Y295;Q99700;Q9Y2T7;P05198;P25786;Q9UKV8;P22090;P62701;P27797}

2255 Pathogen[ P03410] interacts with 14 human partners:{Q99700;Q9UKV8;P25786;P16989;P60900;Q9UL18;P22090;P13639;Q9Y295;P62701;P51114;Q9Y2T7;P05198;P27797}

2256 Pathogen[ P14075] interacts with 12 human partners:{P22090;P16989;Q9Y295;P60900;P05198;Q9Y2T7;P27797;P25786;Q9UKV8;Q9UL18;Q99700;P62701}

2257 Pathogen[ P0C206] interacts with 14 human partners:{Q9Y295;P27797;P25786;P60900;Q9UKV8;P51114;P05198;P16989;Q99700;P62701;P22090;O95278;Q9Y2T7;Q9UL18}

2258 Pathogen[ P03363] interacts with 14 human partners:{O43347;Q9Y295;Q9UKV8;P05198;P22090;Q92904;P27797;P51114;Q9UL18;Q96J94;P16989;Q99700;Q9Y2T7;P62701}

2259 [Cluster 206]GO:0005967+C cellular\_component [name] mitochondrial pyruvate dehydrogenase complex [def] "Complex that carries out the oxidative decarboxylation of pyruvate to form acetyl-CoA in eukaryotes\_ includes subunits possessing three catalytic activities

2260 Pathogen[ Q2Q067] interacts with 1 human partners:{P10515}

2261 Pathogen[ P0C214] interacts with 1 human partners:{P10515}

2262 Pathogen[ P03346] interacts with 1 human partners:{P10515}

2263 Pathogen[ Q85601] interacts with 1 human partners:{P10515}

2264 Pathogen[ P14079] interacts with 1 human partners:{P10515}

2265 Pathogen[ P03383] interacts with 1 human partners:{P10515}

2266 Pathogen[ P03410] interacts with 1 human partners:{P10515}

2267 Pathogen[ P14075] interacts with 1 human partners:{P10515}

2268 Pathogen[ P0C206] interacts with 1 human partners:{P10515}

2269 Pathogen[ P03363] interacts with 1 human partners:{P10515}

2270 [Cluster 207]GO:0031012+C cellular\_component [name] extracellular matrix [def] "A structure lying external to one or more cells, which provides structural support for cells or tissues\_ may be completely external to the cell (as in animals) or be part of the cell (as in plants)." [GOC

2271 Pathogen[ Q2Q067] interacts with 2 human partners:{P27797;O15162}

2272 Pathogen[ P0C214] interacts with 6 human partners:{P08294;P05121;O15162;P07093;P10909;P27797}

2273 Pathogen[ P03346] interacts with 3 human partners:{Q9NZU5;P27797;O15162}

2274 Pathogen[ Q85601] interacts with 5 human partners:{Q9NZU5;P27797;P05121;O15162;P07093}

2275 Pathogen[ P14079] interacts with 7 human partners:{O15162;P10909;Q9NZU5;Q96JX3;P03973;O43294;Q92896}

2276 Pathogen[ P03383] interacts with 2 human partners:{O15162;P27797}

2277 Pathogen[ P03410] interacts with 8 human partners:{P05121;O43294;Q9BQB4;Q92896;O15162;Q96JX3;P10909;P27797}

2278 Pathogen[ P14075] interacts with 2 human partners:{O15162;P27797}

2279 Pathogen[ P0C206] interacts with 6 human partners:{P27797;P10909;O43294;O15162;P05121;Q9NZU5}

2280 Pathogen[ P03363] interacts with 2 human partners:{Q9NZU5;P27797}

2281 [Cluster 208]GO:0016235+C cellular\_component [name] aggresome [def] "An inclusion body formed by dynein-dependent retrograde transport of an aggregated protein on microtubules." [PMID

2282 Pathogen[ Q2Q067] interacts with 7 human partners:{O60260;Q96EY5;Q9Y6J0;P08107;Q9H0A6;Q9NTM9;O15205}

2283 Pathogen[ P0C214] interacts with 9 human partners:{Q9GZZ9;Q9H0A6;Q9NTM9;Q96EY5;O15205;P10909;O60260;P08107;Q9Y6J0}

2284 Pathogen[ P03346] interacts with 10 human partners:{P08107;Q14149;Q9NTM9;Q9H0A6;Q8NFT6;O94972;Q9Y6J0;O15205;O60260;Q96EY5}

2285 Pathogen[ Q85601] interacts with 8 human partners:{P08107;Q9Y6J0;Q9H0A6;Q8NFT6;Q14149;O15205;O60260;Q96EY5}

2286 Pathogen[ P14079] interacts with 12 human partners:{O60260;Q96EY5;Q9H0A6;Q9NTM9;Q99442;P10909;P50990;Q14149;O15205;P08107;Q8NFT6;Q9Y6J0}

2287 Pathogen[ P03383] interacts with 4 human partners:{P08107;O60260;O15205;Q96EY5}

2288 Pathogen[ P03410] interacts with 12 human partners:{Q9Y6J0;O15205;Q99442;Q14149;Q9NTM9;Q8NFT6;O60260;P50990;P08107;Q96EY5;Q9H0A6;P10909}

2289 Pathogen[ P14075] interacts with 5 human partners:{Q96EY5;Q9NTM9;P08107;O60260;O15205}

2290 Pathogen[ P0C206] interacts with 10 human partners:{Q8NFT6;O15205;Q9Y6J0;Q9H0A6;Q14149;O60260;P10909;P08107;Q96EY5;Q9NTM9}

2291 Pathogen[ P03363] interacts with 7 human partners:{Q9Y6J0;O15205;O94972;P08107;Q96EY5;Q9H0A6;Q9NTM9}

2292 [Cluster 209]GO:0031428+C cellular\_component [name] box C/D snoRNP complex [def] "A ribonucleoprotein complex containing small nucleolar RNA of the box C/D type that can carry out ribose-2'-O-methylation of target RNAs." [ISBN

2293 Pathogen[ Q2Q067] interacts with 4 human partners: {P55769;P22087;O00567;Q9Y2X3}

2294 Pathogen[ P0C214] interacts with 4 human partners: {O00567;P22087;P55769;Q9Y2X3}

2295 Pathogen[ P03346] interacts with 4 human partners: {O00567;Q9Y2X3;P55769;P22087}

2296 Pathogen[ Q85601] interacts with 4 human partners: {P55769;O00567;P22087;Q9Y2X3}

2297 Pathogen[ P14079] interacts with 4 human partners: {Q9Y2X3;P22087;O00567;P55769}

2298 Pathogen[ P03383] interacts with 4 human partners: {O00567;Q9Y2X3;P55769;P22087}

2299 Pathogen[ P03410] interacts with 4 human partners: {P22087;P55769;Q9Y2X3;O00567}

2300 Pathogen[ P14075] interacts with 4 human partners: {O00567;P55769;P22087;Q9Y2X3}

2301 Pathogen[ P0C206] interacts with 4 human partners: {P55769;O00567;Q9Y2X3;P22087}

2302 Pathogen[ P03363] interacts with 4 human partners: {Q9Y2X3;O00567;P22087;P55769}

2303 [Cluster 210]GO:0016529+cellular\_component [name] sarcoplasmic reticulum [def] "A fine reticular network of membrane-limited elements that pervades the sarcoplasm of a muscle cell\_ continuous over large portions of the cell and with the nuclear envelope\_ that part of the endoplasmic reticulum specialized for calcium release, uptake and storage." [GOC

2304 Pathogen[ Q2Q067] interacts with 9 human partners: {Q9P0M2;P35573;P27797;P26678;Q9BVC6;A2IDD5;O00165;P23297;Q13023}

2305 Pathogen[ P0C214] interacts with 10 human partners: {P16157;Q13023;Q9P0M2;P35573;O00165;P27797;Q9BVC6;A2IDD5;P26678;P23297}

2306 Pathogen[ P03346] interacts with 12 human partners: {Q9P0M2;P23297;P26678;Q8WXH0;Q13023;P35573;P16157;Q9Y6F6;P27797;Q9BVC6;O00165;A2IDD5}

2307 Pathogen[ Q85601] interacts with 8 human partners: {P16157;O00165;P27797;P23297;P35573;Q9P0M2;A2IDD5;Q13023}

2308 Pathogen[ P14079] interacts with 15 human partners: {Q9BVC6;Q13023;Q9P0M2;O00165;P16157;P23327;O00631;P35573;Q8WXH0;P23297;A2IDD5;P26678;Q9Y6F6;Q96MG2;Q9H6F2}

2309 Pathogen[ P03383] interacts with 8 human partners: {P23297;Q13023;P35573;O00165;Q9BVC6;P26678;A2IDD5;P27797}

2310 Pathogen[ P03410] interacts with 16 human partners: {Q9BVC6;P16157;O00165;P35573;Q9Y6F6;P23327;A2IDD5;Q9P0M2;Q9H6F2;P26678;Q13023;P23297;O00631;Q8WXH0;Q96MG2;P27797}

2311 Pathogen[ P14075] interacts with 10 human partners: {Q9BVC6;Q9Y6F6;P23327;P26678;P27797;P35573;A2IDD5;O00165;P23297;Q13023}

2312 Pathogen[ P0C206] interacts with 13 human partners: {P27797;Q13023;A2IDD5;P16157;O00165;Q9P0M2;Q9BVC6;Q9Y6F6;P23327;Q8WXH0;P26678;P23297;P35573}

2313 Pathogen[ P03363] interacts with 9 human partners: {A2IDD5;P16157;Q9P0M2;P27797;Q13023;Q9Y6F6;O00165;P35573;P23297}

2314 [Cluster 211]GO:0031410+cellular\_component [name] cytoplasmic vesicle [def] "A vesicle formed of membrane or protein, found in the cytoplasm of a cell." [GOC

2315 Pathogen[ Q2Q067] interacts with 72 human partners: {Q7Z3C6;Q96J02;Q9H3C7;Q96N21;O14786;Q9Y6Q5;Q10567;P56377;O75340;O43747;Q8IY63;Q96B97;O00291;Q92572;Q6RW13;O14579;P55735;O43516;P53675;O95295;P30793;Q96JI7;Q9P299;P53990;Q5VYK3;Q9BXW4;P36956;Q96EV8;P48444;P52594;Q8TCI5;Q96PC3;O15049;Q8IXH6;Q6ICB4;P61923;P60520;Q8NFW9;Q05084;Q9UBF2;Q96LB3;Q9H9C1;Q9BPZ7;Q00610;P61966;O14641;Q9UKJ5;Q12904;O75843;Q14677;Q8TD16;Q9Y2J4;Q53G59;Q9BXS5;Q8TAC9;P53618;Q8WV24;Q13425;P09497;O00161;O00165;P35606;Q96NA2;Q9Y678;Q9BVN2;P09496;Q9P0V3;O75969;Q13367;Q15276;Q96A56;Q9NX95}

2316 Pathogen[ P0C214] interacts with 79 human partners: {Q9BPZ7;P60520;Q6ICB4;P53990;Q8NFW9;Q96J02;P61923;P55735;O14786;Q12904;Q9P299;Q6RW13;Q9H201;Q96JI7;Q9Y2J4;P59780;Q9P0V3;Q9UKJ5;Q96N21;O95295;Q8TAC9;Q9UM54;O14579;P62166;Q13367;P53618;P35606;Q9BXW4;Q5VYK3;P48444;Q96NA2;Q8TCI5;O75340;Q9H3C7;O75843;Q9BY43;O15049;Q10567;O43516;O75969;P30793;Q92572;P53675;Q8IVI9;Q13425;Q9UBF2;Q53G59;O00165;O14641;P56377;Q96PC3;Q8TD16;Q9NX95;Q96EV8;Q8IXH6;O43747;Q96G01;Q9Y6Q5;Q9BVN2;P10909;P09497;P61966;Q8IY63;P09496;Q96A56;Q05084;P52594;Q8WV24;Q9H9C1;Q96LB3;Q9Y678;O15524;Q9H492;Q9BXS5;O00161;O00291;Q96B97;Q14677;Q7Z3C6}

2317 Pathogen[ P03346] interacts with 113 human partners: {O95166;Q13425;Q6P3S1;Q96G01;P21283;Q96J02;P61966;P55735;Q96B97;O15524;Q96N21;Q7Z3C6;Q8WV24;Q9H2H0;Q15036;P36956;O43516;Q9H6Q3;Q8IVI9;O95295;O43747;O75969;Q92572;P60520;Q12772;Q92543;Q9BPZ7;Q96JI7;P56377;Q96A56;Q9Y6D5;P59780;Q8IV53;Q9BXS5;Q9H3S7;O75970;Q96NA2;Q9Y678;Q9NX95;P53618;C9J3V5;Q9NVA1;Q93050;Q9P299;O14579;Q05084;O00291;Q9UKJ5;Q6P3W7;P09496;Q9H0R8;Q8IY63;Q9NRS6;Q10567;O00161;Q12904;O75843;P48444;P20340;O75340;Q8N4B1;Q8TAC9;O15049;O14641;Q9P0V3;Q9UNH7;Q96EV8;Q9C0C7;P52594;Q9UBF2;Q96PC3;Q5VYK3;Q9H492;Q8TD16;P53675;P61923;Q6Q0C0;Q9Y2J4;Q96LB3;P62166;P30622;Q8NFW9;Q9H201;Q13492;O00165;P09497;Q9BY43;Q969F2;Q14596;Q13367;P10768;Q9H9C1;Q9BXW4;Q8TCI5;Q86YS3;Q9BVN2;Q9UI14;Q6RW13;P49755;Q9Y6Q5;Q8IXH6;Q6ICB4;P35606;Q9ULU8;Q9H3C7;Q14677;Q00610;Q15363;O14786;O75146;Q15276;Q9UBP0;P53990}

2318 Pathogen[ Q85601] interacts with 91 human partners: {Q13367;Q9H492;Q5VYK3;Q96J02;Q8NFW9;P53675;O75843;Q96LB3;P48444;Q00610;P09496;P10768;Q8WV24;O00165;O14579;Q8IY63;O95295;Q8TAC9;O95166;Q9UBP0;O75969;Q86YS3;Q15036;Q9BXS5;Q9BPZ7;Q9H3C7;P56377;Q9P299;Q93050;Q9H0R8;P30622;Q14596;Q9BVN2;Q12772;O43747;P61923;P52594;Q10567;O14786;Q9H9C1;P30793;Q7Z3C6;Q8TCI5;O43516;Q14677;Q9BXW4;O15049;Q9BY43;Q9H6Q3;O14641;Q96EV8;Q9UBF2;P36956;Q9Y678;P53990;Q6ICB4;Q96G01;Q9UKJ5;Q13425;P55735;Q96N21;Q8IVI9;Q8TD16;Q96B97;Q6RW13;Q9Y2J4;Q96JI7;Q96A56;Q9H201;O75340;Q96PC3;P53618;P60520;P09497;Q8IXH6;O00291;Q9P0V3;Q92572;Q9UM54;P61966;P59780;Q53G59;Q96NA2;Q9Y6

2319 Q5;Q9NX95;P35606;Q6Q0C0;P62166;Q9UNH7;O00161;Q05084}  
 Pathogen[ P14079] interacts with 122 human  
 partners: {Q13492;Q96A56;O43516;O95166;Q96JI7;Q96NA2;Q8NEB7;Q6P3S1;Q9UNH7;Q969M3;P61923;Q8IXH6;Q9Y6Q5;Q15036;P61966;O00291;Q05084;Q9BXS5;O75146;Q8WV24;Q3ZAQ7;Q00610;Q86VI1;Q9BVN2;Q9NX95;Q9H9C1;Q9UKJ5;Q9H492;O14641;Q9HBM0;P35606;Q9BY43;Q9BT56;O00165;Q14677;Q10567;Q9Y6D5;Q9ULU8;Q6RWL3;Q15276;Q99932;P56377;Q9Y678;C9J3V5;P59780;Q9UI14;P52594;Q86YS3;Q9NRS6;P10909;Q14596;Q9Y2J4;Q96B97;Q9UM54;Q9H3C7;Q7Z3C6;Q5VYK3;P30793;Q9P0V3;Q92572;Q15363;O75843;Q12772;Q8IVI9;P60520;Q9NPB0;Q8NFW9;Q8NC96;Q8TAC9;Q8IV53;P49755;Q9P299;Q53FP2;Q5VXU3;O75340;O15049;Q9NVZ3;Q8TCI5;Q8N4B1;Q9UBF2;P62166;Q9H0R8;P09497;O43612;Q8TF30;Q96J02;O95295;Q5T0D9;Q9H6Q3;Q96G01;P48444;Q9NQ60;Q6PJW8;Q13367;Q6ICB4;Q93050;O43747;O14579;P55735;Q96AW1;P53675;Q92543;Q9NVA1;Q96EV8;Q6UW49;Q12904;Q53G59;Q96LB3;Q9BPZ7;Q96PC3;O75969;P36956;Q9BXW4;Q8TD16;O43761;P53990;Q8IY63;P09496;P30622;O75970;Q0VAF6;Q9H201}

2320 Pathogen[ P03383] interacts with 54 human  
 partners: {Q6RWL3;P56377;Q96N21;Q12904;Q96A56;Q7Z3C6;Q00610;O14579;Q92572;Q96JI7;P55735;P53618;Q9Y678;O95295;P53990;Q8TAC9;Q5VYK3;Q9BPZ7;Q10567;Q9NX95;Q9H9C1;O00165;P53675;Q96EV8;Q8IXH6;O43516;Q8TCI5;Q05084;O00291;Q9Y2J4;O75843;O14641;Q53G59;O43747;C9J3V5;Q9UBF2;Q96LB3;Q8IY63;Q9UKJ5;Q13367;Q14677;Q9P0V3;O00161;Q9BXS5;O15049;P09497;Q9H3C7;Q8WV24;O75969;P52594;Q96NA2;Q15276;Q13425;Q9BVN2}

2321 Pathogen[ P03410] interacts with 131 human  
 partners: {Q00610;Q9BVN2;O14786;Q8IXH6;Q8NC96;P09496;Q9Y6Q5;Q9BT56;O00203;Q674R7;Q96PC3;P36956;Q53G59;Q9HBM0;P10768;Q969F2;Q8NEB7;P52594;P30622;Q9BXS5;Q8TAC9;O43612;Q9NQ60;Q9Y2J4;Q8N4B1;Q9NVZ3;Q9P299;O43747;O43516;O75843;Q9P0V3;P60520;O00165;P48444;Q96AW1;Q9BPZ7;P10645;Q9NPB0;Q10567;P35606;Q13425;Q92572;Q8IVI9;Q5VYK3;O75969;Q6UW49;Q93050;Q9BY43;O14579;O00291;O15049;Q96N21;P30793;Q8TD16;Q8TF30;O75146;Q14596;Q05084;O43761;Q8NFW9;P53990;Q12904;O95295;Q9UNH7;O95166;Q9UM54;Q86YS3;O60333;Q0VAF6;O75970;Q13492;Q8WV24;Q14677;Q9H0R8;Q969M3;Q9H492;Q12772;Q9Y678;Q9BXW4;Q9H3C7;P09497;Q6PJW8;C9J3V5;Q15049;Q15363;Q15036;Q96G01;Q9UKJ5;Q9H201;Q9ULU8;P53618;P61923;Q9Y6D5;Q6P3S1;Q9NRS6;Q6ICB4;Q6RWL3;Q8TCI5;Q96JI7;Q96A56;Q99932;Q5T0D9;Q96B97;Q9H9C1;O75340;Q5VXU3;Q9NVA1;P59780;Q86VI1;P55735;P53675;Q13367;Q96LB3;Q96NA2;P62166;Q7Z3C6;P61966;Q8IY63;Q8IV53;Q9UI14;O00161;P56377;Q96EV8;Q92543;Q9NX95;Q15276;P10909;Q5MNZ9;Q9UBF2;Q9H6Q3;O14641}

2322 Pathogen[ P14075] interacts with 60 human  
 partners: {Q9P0V3;Q9NVA1;P09497;Q96N21;Q99932;P09496;P53990;O95295;Q9BVN2;P53675;Q13425;Q9UBF2;Q53G59;Q96NA2;Q9H9C1;Q5T0D9;Q96JI7;Q8IY63;P55735;Q8WV24;C9J3V5;O43516;O00291;O75969;Q9BPZ7;Q9Y2J4;O14641;Q96LB3;Q12904;P53618;Q14677;Q8TCI5;O43747;Q92572;Q8IXH6;P52594;O00161;Q05084;Q9Y678;Q96EV8;O75843;Q8TAC9;P56377;Q9HBM0;Q9H3C7;Q9BXS5;Q6RWL3;P30793;Q9NX95;Q9UKJ5;O15049;O00165;Q10567;Q96A56;Q00610;Q13367;Q7Z3C6;Q15276;Q5VYK3;O14579}

2323 Pathogen[ P0C206] interacts with 119 human  
 partners: {Q8TCI5;Q8TF30;Q7Z3C6;O75340;Q9BT56;Q8IXH6;O14579;Q9Y678;P53675;Q9UM54;Q9C0C7;Q96N21;Q9H201;Q9BXW4;Q9Y6Q5;O00291;Q9UBP0;Q92572;Q9H6Q3;Q969F2;Q9UNH7;Q8NC96;P53618;Q9P299;O43747;O43516;P62166;Q10567;Q9NRS6;Q5VXU3;Q8IY63;Q9H492;Q96B97;Q96JI7;Q8NFW9;P61966;Q9H2H0;Q96J02;P49755;Q6ICB4;Q00610;P55735;Q9UKJ5;P36956;O15524;P10768;P30622;P30793;Q96A56;Q14596;Q15036;Q6P3W7;Q9UI14;P09496;O14786;Q9NX95;O00161;P59780;Q5T0D9;Q6PJW8;Q9ULU8;Q9BXS5;Q9NVA1;Q6RWL3;O00165;Q969M3;Q13425;P09497;Q9Y6D5;P35606;Q96EV8;O15049;P53990;Q86VI1;Q9Y2J4;O75969;Q96LB3;P48444;P10909;Q9BPZ7;P60520;O95295;Q14677;Q5VYK3;Q9H0R8;Q9BY43;Q9UBF2;Q9P0V3;Q8N4B1;Q8IV53;O75843;Q96NA2;C9J3V5;Q99932;Q15363;Q8TAC9;Q53G59;Q96PC3;Q9HBM0;Q9H3C7;Q86YS3;Q86YT6;Q8TD16;Q9H9C1;Q12772;Q8IVI9;O95166;Q6Q0C0;Q13367;Q05084;Q15276;Q12904;P56377;Q93050;Q6P3S1;P61923;Q96G01;Q8WV24;Q9BVN2}

2324 Pathogen[ P03363] interacts with 80 human  
 partners: {Q9H201;Q9UNH7;Q9H3S7;Q8IVI9;Q9H9C1;O15524;Q13367;Q6ICB4;Q9P0V3;Q92543;O43747;C9J3V5;O75340;O14786;P48444;Q9H492;Q96B97;Q8NFW9;Q8WV24;Q9Y678;Q9BXW4;O15049;Q8TCI5;P10768;Q9H6Q3;Q96RU3;Q00610;Q96JI7;Q8IY63;O14579;P53618;O75970;P60520;Q8N4B1;Q9BXS5;Q9P299;P61923;Q13425;Q9Y2J4;Q92572;Q9H0R8;Q9C0C7;P30622;Q96A56;Q14677;Q7Z3C6;Q05084;Q53G59;O95295;Q9BVN2;P35606;O75969;Q6P3S1;Q96NA2;Q9UKJ5;Q9UBF2;Q9H3C7;O75843;O43516;O75146;O60333;O00165;P52594;O00161;O14641;P09497;Q96LB3;Q8TD16;P53675;O95166;Q96N21;P55735;Q8IXH6;Q8IV53;O00291;Q15276;Q10567;Q5VYK3;Q9NX95;P53990}

2325 [Cluster 212]GO:0031838+C cellular\_component [name] haptoglobin-hemoglobin complex  
 [def] "A protein complex formed by the stable binding of a haptoglobin to hemoglobin."  
 [GOC]

2326 Pathogen[ Q2Q067] interacts with 2 human partners: {P68871;P69905}

2327 Pathogen[ P0C214] interacts with 2 human partners: {P69905;P68871}

2328 Pathogen[ P03346] interacts with 2 human partners: {P69905;P68871}

2329 Pathogen[ Q85601] interacts with 2 human partners: {P69905;P68871}

2330 Pathogen[ P14079] interacts with 2 human partners: {P69905;P68871}

2331 Pathogen[ P03383] interacts with 2 human partners: {P69905;P68871}

2332 Pathogen[ P03410] interacts with 2 human partners: {P68871;P69905}

2333 Pathogen[ P14075] interacts with 2 human partners: {P68871;P69905}

2334 Pathogen[ P0C206] interacts with 2 human partners: {P68871;P69905}

2335 Pathogen[ P03363] interacts with 2 human partners: {P69905;P68871}

2336 [Cluster 213]GO:0031981+C cellular\_component [name] nuclear lumen [def] "The volume enclosed by the nuclear inner membrane." [GOC]

2337 Pathogen[ Q2Q067] interacts with 2 human partners: {Q5VWP3;Q9UHQ1}

2338 Pathogen[ P0C214] interacts with 2 human partners: {Q9UHQ1;Q5VWP3}

2339 Pathogen[ P03346] interacts with 3 human partners: {Q5VWP3;Q8WXH0;Q9UHQ1}

2340 Pathogen[ Q85601] interacts with 2 human partners: {Q5VWP3;Q9UHQ1}

2341 Pathogen[ P14079] interacts with 3 human partners:{Q9UHQ1;Q5VWP3;Q8WXH0}

2342 Pathogen[ P03383] interacts with 1 human partners:{Q9UHQ1}

2343 Pathogen[ P03410] interacts with 3 human partners:{Q9UHQ1;Q5VWP3;Q8WXH0}

2344 Pathogen[ P14075] interacts with 2 human partners:{Q5VWP3;Q9UHQ1}

2345 Pathogen[ P0C206] interacts with 3 human partners:{Q9UHQ1;Q8WXH0;Q5VWP3}

2346 Pathogen[ P03363] interacts with 2 human partners:{Q9UHQ1;Q5VWP3}

2347 [Cluster 214]GO:0000228+C cellular\_component [name] nuclear chromosome [def] "A chromosome found in the nucleus of a eukaryotic cell." [GOC

2348 Pathogen[ Q2Q067] interacts with 16 human partners:{Q9BY41;Q9NYB0;Q14549;O96006;P11387;O95347;P11388;Q969G3;Q15021;Q96BK5;P46100;O60216;Q9NRL2;Q86U86;Q12824;O15392}

2349 Pathogen[ P0C214] interacts with 17 human partners:{Q96BK5;Q9NRL2;Q12824;P20585;O96006;O95347;Q969G3;P46100;P11388;P11387;O15392;P05412;Q9NYB0;Q86U86;O60216;Q15021;Q9BY41}

2350 Pathogen[ P03346] interacts with 22 human partners:{P05412;Q99811;O96006;P46100;O15392;P11388;O95347;Q12824;Q86U86;Q9NRL2;Q15021;P20585;Q9BY41;Q96BK5;Q9NYB0;Q9Y2Y4;Q969G3;O60216;Q14549;P35452;P11387;Q9HBU1}

2351 Pathogen[ Q85601] interacts with 19 human partners:{O95347;Q9BY41;Q14549;Q9Y2Y4;O15392;O60216;P11387;Q969G3;Q96BK5;P20585;P05412;P11388;Q9NRL2;O96006;Q86U86;Q9NYB0;Q12824;P46100;Q15021}

2352 Pathogen[ P14079] interacts with 18 human partners:{P11388;P20585;Q9Y2Y4;Q9NRL2;Q86U86;O15392;O60216;P46100;Q14549;O95347;Q9BY41;Q9NYB0;Q96BK5;Q12824;P52701;P05412;Q15021;O96006}

2353 Pathogen[ P03383] interacts with 14 human partners:{Q86U86;Q12824;Q9NYB0;O96006;Q96BK5;O95347;P11387;O60216;P46100;Q969G3;Q9BY41;Q9NRL2;Q15021;P05412}

2354 Pathogen[ P03410] interacts with 20 human partners:{O15392;O96006;P20585;Q9BY41;Q14549;Q86U86;O60216;O95347;P52701;Q969G3;Q9NRL2;P11387;P46100;P05412;P11388;Q9Y2Y4;Q96BK5;Q9NYB0;Q12824;Q15021}

2355 Pathogen[ P14075] interacts with 13 human partners:{Q9BY41;P11387;P05412;Q9NRL2;O95347;Q96BK5;P46100;Q86U86;Q12824;O60216;O96006;Q15021;Q9NYB0}

2356 Pathogen[ P0C206] interacts with 20 human partners:{O60216;P52701;P05412;P46100;Q15021;Q9NRL2;Q12824;Q96BK5;Q86U86;O95347;O96006;O15392;Q9NYB0;Q969G3;P20585;P11388;Q9BY41;P11387;Q14549;Q9Y2Y4}

2357 Pathogen[ P03363] interacts with 21 human partners:{Q99592;Q15021;Q9NRL2;Q9BY41;P11387;Q96BK5;O95347;Q9NYB0;P46100;P20585;Q14549;Q969G3;O96006;Q86U86;Q9Y2Y4;P05412;P35452;Q99811;Q12824;Q9HBU1;O60216}

2358 [Cluster 215]GO:0035267+C cellular\_component [name] NuA4 histone acetyltransferase complex [def] "A complex having histone acetylase activity on chromatin, as well as ATPase, DNA helicase and structural DNA binding activities. The complex is thought to be involved in double-strand DNA break repair. Subunits of the human complex include HTATIP/TIP60, TRRAP, RUVBL1, BUVBL2, beta-actin and BAF53/ACTL6A. In yeast, the complex has 13 subunits, including the catalytic subunit Esa1 (homologous to human Tip60)." [GOC

2359 Pathogen[ Q2Q067] interacts with 11 human partners:{Q9Y4A5;Q9NXR8;Q9NPF5;Q52LR7;O96019;Q9HAF1;Q92993;Q9UBU8;O95619;Q9H2F5;Q9H0E9}

2360 Pathogen[ P0C214] interacts with 11 human partners:{Q92993;P60709;Q52LR7;Q9H2F5;O95619;Q9HAF1;Q9UBU8;Q9Y4A5;Q9H0E9;O96019;Q9NPF5}

2361 Pathogen[ P03346] interacts with 12 human partners:{Q52LR7;P60709;Q9H0E9;O96019;Q9Y4A5;Q9UBU8;Q9H2F5;O95619;Q9HAF1;Q92993;Q9NXR8;Q9NPF5}

2362 Pathogen[ Q85601] interacts with 12 human partners:{O95619;Q9H2F5;Q52LR7;Q9HAF1;Q9Y4A5;Q9H0E9;Q9UBU8;O96019;P60709;Q92993;Q9NXR8;Q9NPF5}

2363 Pathogen[ P14079] interacts with 10 human partners:{Q9Y4A5;Q9UBU8;Q52LR7;Q9HAF1;Q9H0E9;Q9NPF5;P60709;Q9H2F5;O95619;Q92993}

2364 Pathogen[ P03383] interacts with 10 human partners:{O96019;Q52LR7;Q9Y4A5;Q9H2F5;Q9UBU8;Q92993;Q9H0E9;Q9NPF5;Q9HAF1;O95619}

2365 Pathogen[ P03410] interacts with 11 human partners:{O95619;Q52LR7;O96019;Q9NPF5;Q9UBU8;Q9H2F5;Q9Y4A5;Q9NXR8;Q9H0E9;Q92993;P60709}

2366 Pathogen[ P14075] interacts with 9 human partners:{Q9H2F5;Q9UBU8;Q52LR7;O95619;Q9Y4A5;Q92993;Q9NPF5;O96019;Q9HAF1}

2367 Pathogen[ P0C206] interacts with 12 human partners:{P60709;Q9H2F5;Q9NPF5;Q9UBU8;Q52LR7;Q92993;Q9NXR8;O96019;Q9Y4A5;O95619;Q9HAF1;Q9H0E9}

2368 Pathogen[ P03363] interacts with 11 human partners:{Q9NPF5;O95619;P60709;Q9H2F5;Q52LR7;Q9HAF1;Q9UBU8;O96019;Q9Y4A5;Q9H0E9;Q92993}

2369 [Cluster 216]GO:0000939+C cellular\_component [name] condensed chromosome inner kinetochore [def] "The region of a condensed chromosome kinetochore closest to centromeric DNA\_ in mammals the CREST antigens (CENP proteins) are found in this layer\_ this layer may help define underlying centromeric chromatin structure and position of the kinetochore on the chromosome." [GOC

2370 Pathogen[ Q2Q067] interacts with 2 human partners: {P49450;Q13416}

2371 Pathogen[ P0C214] interacts with 2 human partners: {P49450;Q13416}

2372 Pathogen[ P03346] interacts with 2 human partners: {P49450;Q13416}

2373 Pathogen[ Q85601] interacts with 2 human partners: {P49450;Q13416}

2374 Pathogen[ P14079] interacts with 2 human partners: {Q13416;P49450}

2375 Pathogen[ P03383] interacts with 1 human partners: {Q13416}

2376 Pathogen[ P03410] interacts with 2 human partners: {Q13416;P49450}

2377 Pathogen[ P14075] interacts with 1 human partners: {Q13416}

2378 Pathogen[ P0C206] interacts with 2 human partners: {Q13416;P49450}

2379 Pathogen[ P03363] interacts with 2 human partners: {Q13416;P49450}

2380 [Cluster 217]GO:0045202+C cellular\_component [name] synapse [def] "The junction between a nerve fiber of one neuron and another neuron or muscle fiber or glial cell\_ the site of interneuronal communication. As the nerve fiber approaches the synapse it enlarges into a specialized structure, the presynaptic nerve ending, which contains mitochondria and synaptic vesicles. At the tip of the nerve ending is the presynaptic membrane\_ facing it, and separated from it by a minute cleft (the synaptic cleft) is a specialized area of membrane on the receiving cell, known as the postsynaptic membrane. In response to the arrival of nerve impulses, the presynaptic nerve ending secretes molecules of neurotransmitters into the synaptic cleft. These diffuse across the cleft and transmit the signal to the postsynaptic membrane." [ISBN

2381 Pathogen[ Q2Q067] interacts with 48 human partners: {O00213;P07737;Q96B97;O95886;Q8N3V7;Q9NSC5;O95295;Q92870;Q9P1A6;Q13884;Q8IZP0;Q96EV8;O14910;P63279;Q86UL8;P63165;Q12959;Q9NYF0;O95721;P11532;Q8NFW9;P78352;Q05084;Q96F07;Q9Y6N9;Q9UPX8;Q92796;P46939;Q9C0D0;Q9Y6X2;O60299;Q9NZU7;P50570;Q9UQF2;Q86WG3;Q8TAC9;Q9NRI5;Q13425;O00161;Q9UPA5;Q9BVN2;Q9Y296;Q66K74;Q9Y250;O15083;Q96EY1;Q9NUP9;O14490}

2382 Pathogen[ P0C214] interacts with 48 human partners: {Q8NFW9;Q9Y6X2;O14490;O00213;O15083;O14910;Q8IZP0;Q9UPX8;Q9NRI5;O95295;Q92796;Q8TAC9;P62166;Q9Y6N9;Q96F07;Q9UPU9;P63279;Q9P1A6;O60299;O95721;Q9Y296;Q9NSC5;Q13884;Q9Y250;P11532;P78352;Q13425;P63165;Q9Y2H0;P46939;O95886;Q9NZU7;Q96EV8;Q12959;Q9UQF2;Q9HD26;Q9C0D0;Q9BVN2;P50570;Q05084;Q86WG3;Q8N3V7;Q9NYF0;O00161;Q96B97;Q96EY1;Q92870;Q66K74}

2383 Pathogen[ P03346] interacts with 70 human partners: {Q13425;Q9Y6N9;Q9NSC5;Q9NRI5;Q8N3V7;O14490;O00213;Q96B97;P50570;Q96A65;Q96F07;O95295;P78352;Q8IZP0;Q13884;Q6ZWB6;Q9NZU7;Q9Y6D5;O75970;Q66K74;P63279;Q6XZF7;Q05084;P46939;O15083;Q92870;Q9Y215;Q92796;Q68DU8;O00161;Q9P021;Q9Y2H0;Q8TAC9;Q9NUP9;Q86UL8;Q96EV8;Q9HD26;Q9Y296;Q9Y4G6;O95721;P63165;Q9Y250;O95886;Q9C0D0;P62166;O60299;Q8NFW9;Q9HAP6;Q9NYF0;Q15700;Q9UQF2;P11532;Q9BVN2;Q9UI14;P07737;P56545;Q96CX2;Q9C0H9;Q9Y6X2;Q9ULU8;Q9Y2J0;Q9UPX8;P0C2W1;Q96EY1;Q9NRD5;O14910;Q86WG3;Q9P1A6;Q9UPA5;Q12959}

2384 Pathogen[ Q85601] interacts with 54 human partners: {O14490;Q9Y250;O00213;Q8NFW9;Q9UPX8;Q9NZU7;Q9NUP9;O14910;Q96A65;Q13884;Q96F07;O95295;Q8TAC9;Q9Y6X2;Q86UL8;Q9NYF0;Q9P1A6;Q9BVN2;Q66K74;O15083;P11532;Q9Y296;P63279;Q9UQF2;P07737;Q96EV8;Q9HD26;Q9Y6N9;Q9UPA5;Q8N3V7;P46939;Q13425;P50570;Q96B97;P78352;Q92796;Q9C0D0;Q12959;Q86WG3;P63165;Q9NSC5;Q92870;Q9NRI5;Q96CX2;O95886;Q8IZP0;P17677;Q9UPU9;P62166;O00161;Q96EY1;Q05084;O95721;O60299}

2385 Pathogen[ P14079] interacts with 74 human partners: {Q9Y296;O14810;O43759;Q6XZF7;Q05084;P63279;P17677;Q8TB68;Q86WG3;Q9C0D0;P11532;Q9BVN2;Q9Y6X2;Q15700;Q9UQF2;Q66K74;Q9Y6D5;Q9ULU8;Q9UPU9;Q9Y250;Q9UPA5;P07737;Q9UI14;Q8IZP0;Q9NRI5;O00213;Q96B97;P63165;Q14118;Q9Y4G6;Q9C0H9;Q9Y2H0;P46939;P50570;P35611;B4DS77;Q9HD26;Q9NUP9;O95721;Q6PUV4;Q7Z7J9;Q8NFW9;Q8TAC9;P62166;Q8N3V7;Q68DU8;Q9HAP6;O43612;Q9NSC5;O15083;O95295;Q5T0D9;Q96F07;Q8WVH0;Q86UL8;Q96A65;Q9Y6N9;Q96CX2;O60299;O95886;Q7Z7G2;Q96EV8;Q9P021;Q9P1A6;Q92796;Q9Y4J8;O43761;Q96EY1;Q9NZU7;O14490;O75970;Q9NYF0;Q92870;Q9UPX8}

2386 Pathogen[ P03383] interacts with 37 human partners: {O00213;Q9P1A6;Q13884;O95295;Q9HD26;Q9NRI5;Q86WG3;Q8TAC9;O95886;O60299;O14490;Q9Y296;Q9UQF2;P07737;P46939;Q96EV8;Q92870;Q05084;Q96F07;P63165;Q9Y6X2;P11532;Q9NSC5;Q9NYF0;Q92796;Q8N3V7;O00161;O15083;Q9C0H9;P78352;Q9Y2H0;Q96EY1;O14910;P63279;Q13425;Q9BVN2;Q9Y250}

2387 Pathogen[ P03410] interacts with 84 human partners: {Q9BVN2;Q9P1A6;O14910;Q8N3V7;Q8TAC9;O43612;Q9Y2J0;P63165;Q12959;Q9C0D0;O43759;O60299;O14810;P11532;Q9Y2H0;Q86WG3;Q13425;Q68DU8;Q9Y6X2;O00213;Q8TB68;Q9NUP9;P50570;Q9NSC5;O14490;Q8WVH0;Q05084;O43761;Q8NFW9;Q13884;Q9HAP6;Q15700;O95295;Q6ZWB6;Q9HD26;O75970;Q9NRD5;Q7Z7G2;Q96CX2;Q9UPA5;Q96A65;Q9UPU9;Q9Y6N9;P46939;Q92796;Q6XZF7;Q9ULU8;Q9Y6D5;Q7Z7J9;Q14118;Q9Y4G6;Q9NZU7;Q6PUV4;Q9NYF0;Q8IZP0;Q66K74;Q9NRI5;B4DS77;P63279;Q5T0D9;P17677;Q96B97;O95886;Q9Y296;Q9Y250;Q9UPX8;Q86UL8;Q96F07;Q9P021;Q9UQF2;Q9C0H9;O95721;P62166;P78352;P07737;Q9UI14;O00161;P35611;Q96EV8;Q96EY1;Q9Y215;Q9Y4J8;O15083;Q92870}

2388 Pathogen[ P14075] interacts with 39 human partners: {Q96F07;O00213;P63165;Q86WG3;P11532;Q8N3V7;Q13884;O15083;O95295;Q9BVN2;Q13425;O95886;Q92870;Q9Y250;Q9HD26;P63279;Q5T0D9;Q9NRI5;P07737;O14910;O60299;Q9NSC5;P46939;O14490;Q92796;O00161;Q05084;Q9P1A6;Q96EV8;P78352;Q8TAC9;Q9Y2H0;Q9C0H9;Q9UPA5;Q9Y296;Q9NYF0;Q9UQF2;Q9Y6X2;Q96EY1}

2389 Pathogen[ P0C206] interacts with 68 human partners: {P46939;Q9NUP9;P78352;Q9Y296;Q96F07;P17677;Q8N3V7;P62166;Q15700;O43759;O95721;Q9Y6N9;Q9UPA5;Q9Y2J0;Q96CX2;Q96B97;Q9P021;Q8NFW9;O95886;O60299;Q9UQF2;Q9NZU7;Q96A65;Q9C0D0;Q9UI14;Q9Y6X2;Q66K74;O00161;Q5T0D9;O00213;Q9Y2H0;Q9Y4J8;Q13884;O14490;Q9ULU8;

Q7Z7G2;Q9NSC5;O15083;Q9UPU9;Q8IZP0;Q13425;Q9Y6D5;Q96EV8;Q9NRI5;Q6PUV4;Q9UPX8;Q92870;O14910;O95295;Q9C0H9;Q9NYF0;Q6XZF7;Q92796;P63165;P11532;Q86UL8;P07737;Q8TAC9;Q86WG3;Q96EY1;Q9NRD5;Q12959;Q9HD26;Q9Y250;Q05084;P50570;Q9P1A6;Q9BVN2}

2390 Pathogen[ P03363] interacts with 60 human partners: {Q9P021;Q9Y6N9;Q12959;Q8IZP0;Q8N3V7;P46939;P36575;Q66K74;O00213;Q9UQF2;Q9UPX8;Q96B97;Q8NFW9;Q96A65;O14910;P78352;P50570;P56545;Q96F07;Q9C0D0;Q9NYF0;Q15700;O75970;Q7L576;Q9NVA2;Q9Y4G6;Q13425;Q9Y6X2;Q9NSC5;P63165;Q86WG3;Q9UPU9;Q9Y250;Q6XZF7;O95721;P11532;Q92870;Q05084;Q9Y215;Q9NZU7;P63279;Q13884;O95295;Q9BVN2;Q9UPA5;O15083;Q9NRI5;Q86UL8;O95886;Q9Y296;Q9P1A6;O14490;Q92796;O00161;Q9NUP9;O60299;Q96EY1;Q9HD26;P07737;Q9C0H9}

2391 [Cluster 218]GO:0031618+C cellular\_component [name] nuclear centromeric heterochromatin [def] "A region of heterochromatin located near the centromere of a chromosome in the nucleus." [GOC

2392 Pathogen[ Q2Q067] interacts with 3 human partners: {Q13185;P42695;P45973}

2393 Pathogen[ P0C214] interacts with 3 human partners: {P42695;Q13185;P45973}

2394 Pathogen[ P03346] interacts with 3 human partners: {P45973;P42695;Q13185}

2395 Pathogen[ Q85601] interacts with 3 human partners: {P42695;P45973;Q13185}

2396 Pathogen[ P14079] interacts with 3 human partners: {P45973;Q13185;P42695}

2397 Pathogen[ P03383] interacts with 2 human partners: {Q13185;P45973}

2398 Pathogen[ P03410] interacts with 3 human partners: {P42695;P45973;Q13185}

2399 Pathogen[ P14075] interacts with 2 human partners: {P45973;Q13185}

2400 Pathogen[ P0C206] interacts with 3 human partners: {P45973;P42695;Q13185}

2401 Pathogen[ P03363] interacts with 3 human partners: {P45973;Q13185;P42695}

2402 [Cluster 219]GO:0005847+C cellular\_component [name] mRNA cleavage and polyadenylation specificity factor complex [def] "A multisubunit complex that binds to the canonical AAUAAA hexamer and to U-rich upstream sequence elements on the pre-mRNA, thereby stimulating the otherwise weakly active and nonspecific polymerase to elongate efficiently RNAs containing a poly(A) signal." [PMID

2403 Pathogen[ Q2Q067] interacts with 6 human partners: {P33240;O95639;Q6UN15;Q10570;Q9P2I0;Q9UKF6}

2404 Pathogen[ P0C214] interacts with 6 human partners: {Q9UKF6;Q10570;Q9P2I0;P33240;O95639;Q6UN15}

2405 Pathogen[ P03346] interacts with 6 human partners: {O95639;Q9UKF6;Q6UN15;Q9P2I0;Q10570;P33240}

2406 Pathogen[ Q85601] interacts with 6 human partners: {Q10570;Q9P2I0;O95639;Q6UN15;Q9UKF6;P33240}

2407 Pathogen[ P14079] interacts with 6 human partners: {Q9UKF6;Q10570;P33240;O95639;Q6UN15;Q9P2I0}

2408 Pathogen[ P03383] interacts with 5 human partners: {Q10570;Q9UKF6;P33240;Q9P2I0;Q6UN15}

2409 Pathogen[ P03410] interacts with 6 human partners: {O95639;Q10570;Q6UN15;Q9P2I0;P33240;Q9UKF6}

2410 Pathogen[ P14075] interacts with 5 human partners: {Q9P2I0;Q6UN15;P33240;Q9UKF6;Q10570}

2411 Pathogen[ P0C206] interacts with 6 human partners: {P33240;Q9UKF6;Q6UN15;Q9P2I0;O95639;Q10570}

2412 Pathogen[ P03363] interacts with 5 human partners: {Q9P2I0;Q10570;Q6UN15;Q9UKF6;P33240}

2413 [Cluster 220]GO:0000153+C cellular\_component [name] cytoplasmic ubiquitin ligase complex [def] "A ubiquitin ligase complex found in the cytoplasm." [GOC

2414 Pathogen[ Q2Q067] interacts with 1 human partners: {Q9NT62}

2415 Pathogen[ P0C214] interacts with 1 human partners: {Q9NT62}

2416 Pathogen[ P03346] interacts with 1 human partners: {Q9NT62}

2417 Pathogen[ Q85601] interacts with 1 human partners: {Q9NT62}

2418 Pathogen[ P14079] interacts with 1 human partners: {Q9NT62}

2419 Pathogen[ P03383] interacts with 1 human partners: {Q9NT62}

2420 Pathogen[ P03410] interacts with 1 human partners: {Q9NT62}

2421 Pathogen[ P14075] interacts with 1 human partners: {Q9NT62}

2422 Pathogen[ P0C206] interacts with 1 human partners: {Q9NT62}

2423 Pathogen[ P03363] interacts with 1 human partners: {Q9NT62}

2424 [Cluster 221]GO:0030027+C cellular\_component [name] lamellipodium [def] "A thin sheetlike process extended by the leading edge of a crawling fibroblast\_ contains a dense meshwork of actin filaments." [ISBN

2425 Pathogen[ Q2Q067] interacts with 21 human partners: {P22392;O00213;P31749;Q7Z6J0;Q8WX93;Q8IY63;Q92870;Q14511;Q8IZP0;O00401;Q92558;Q96QF0;Q96IF1;O14713;P06396;Q9NVD7;Q15833;P63000;O00165;P61586;O60716}

2426 Pathogen[ P0C214] interacts with 23 human partners: {Q15833;Q9UI08;O00213;P63000;Q7Z6J0;Q8IZP0;O60716;P61586;P06396;Q9NZI8;O00165;Q14511;Q92558;Q8IY63;O00401;Q96GD0;Q9NVD7;P22392;Q5VZK9;Q96QF0;O14713;Q92870;P31749}

2427 Pathogen[ P03346] interacts with 29 human partners: {Q15833;O00213;Q8WX93;Q14511;O60716;Q7Z6J0;Q8IZP0;Q14247;Q9NZI8;Q96IF1;Q8IZE3;Q9UI08;Q92870;Q8IY63;P31749;Q92558;Q9UI47;O14713;O15145;P22392;Q9NVD7;O00165;P06396;O00401;P63000;Q9P2A4;Q5VZK9;Q96QF0;P61586}

2428 Pathogen[ Q85601] interacts with 22 human partners: {O00401;O00213;Q8WX93;Q9NVD7;P31749;P06396;O00165;Q92558;Q15833;Q8IY63;O1471



2429 3;P63000;O60716;Q7Z6J0;Q5VZK9;P22392;P61586;Q96IF1;Q92870;Q8IZP0;Q14511;Q96QF0}  
 Pathogen[ P14079] interacts with 31 human  
 partners:{P31751;P09327;Q8IZ21;Q92558;Q9UI47;P47756;Q8WX93;O00165;Q8IZP0;O00213;Q14118;P50552;Q96GD0;O15145;Q15833;P22392;Q96IF1;P61158;Q96QF0;Q9P2A4;P61586;Q14247;O14713;P49023;Q9NVD7;O60716;Q8IY63;P35241;Q92870;O00401;Q9UI08}

2430 Pathogen[ P03383] interacts with 15 human  
 partners:{O60716;O00213;Q96QF0;O14713;P31749;P22392;P63000;O00165;Q92558;Q92870;O00401;P61586;Q14511;Q8IY63;P06396}

2431 Pathogen[ P03410] interacts with 33 human  
 partners:{Q15833;Q9UI08;Q8IZE3;P47756;P63000;Q8IZ21;P06396;O00165;Q92558;O14713;O60716;O15145;O00401;P31749;Q9P2A4;Q96IF1;Q96GD0;P50552;Q14511;P61586;Q7Z6J0;Q14118;Q8IZP0;Q96QF0;Q9UI47;Q9NVD7;Q14247;P35241;Q5VZK9;Q8IY63;Q8WX93;Q92870}

2432 Pathogen[ P14075] interacts with 15 human  
 partners:{O00213;Q14511;O14713;Q92870;Q8IY63;P31749;O00401;P06396;P61586;P63000;Q96QF0;Q92558;O60716;O00165;P22392}

2433 Pathogen[ P0C206] interacts with 27 human  
 partners:{O60716;P06396;P31749;P47756;Q7Z6J0;P22392;Q9NVD7;Q96IF1;Q8IY63;O14713;Q8WX93;Q9UI08;Q9UI47;O15145;P61586;O00213;Q96QF0;O00165;P63000;Q8IZP0;Q5VZK9;Q92558;Q92870;O00401;Q96GD0;Q15833;Q14511}

2434 Pathogen[ P03363] interacts with 29 human  
 partners:{Q8IZP0;Q9UI47;Q14247;O00213;Q5VZK9;Q8IY63;O14713;Q92558;P63000;Q7L576;Q96IF1;P06396;Q9UI08;Q9NZI8;P31749;Q14511;Q92870;Q8WX93;Q12923;Q7Z6J0;O00401;Q8IZE3;O00165;Q9NVD7;O60716;O15145;Q9P2A4;Q96QF0;Q15833}

2435 [Cluster 222]GO:0031597+C cellular\_component [name] cytosolic proteasome complex [def]  
 "A proteasome complex found in the cytosol of a cell." [GOC]

2436 Pathogen[ Q2Q067] interacts with 1 human partners:{Q9NRR5}

2437 Pathogen[ P0C214] interacts with 1 human partners:{Q9NRR5}

2438 Pathogen[ P03346] interacts with 1 human partners:{Q9NRR5}

2439 Pathogen[ Q85601] interacts with 1 human partners:{Q9NRR5}

2440 Pathogen[ P14079] interacts with 1 human partners:{Q9NRR5}

2441 Pathogen[ P03383] interacts with 1 human partners:{Q9NRR5}

2442 Pathogen[ P03410] interacts with 1 human partners:{Q9NRR5}

2443 Pathogen[ P14075] interacts with 1 human partners:{Q9NRR5}

2444 Pathogen[ P0C206] interacts with 1 human partners:{Q9NRR5}

2445 Pathogen[ P03363] interacts with 1 human partners:{Q9NRR5}

2446 [Cluster 223]GO:0019005+C cellular\_component [name] SCF ubiquitin ligase complex [def]  
 "A ubiquitin ligase complex in which a cullin from the Cull1 subfamily and a RING domain protein form the catalytic core\_ substrate specificity is conferred by a Skp1 adaptor and an F-box protein. SCF complexes are involved in targeting proteins for degradation by the proteasome. The best characterized complexes are those from yeast and mammals (with core subunits named Cdc53/Cull1, Rbx1/Hrt1/Roc1)." [PMID]

2447 Pathogen[ Q2Q067] interacts with 16 human  
 partners:{P19474;Q9UJT9;Q9Y297;P41002;Q9H4M3;Q13616;Q8NI29;Q9UKT7;Q13309;Q969H0;Q8TCJ0;Q9NRD1;Q96EF6;P63208;Q9UKT5;P62877}

2448 Pathogen[ P0C214] interacts with 19 human  
 partners:{Q9UKA1;P19474;P41002;Q13309;P63208;Q8NI29;Q9NRD1;Q9Y297;P62877;Q9UKT7;Q13616;Q969H0;Q9H469;Q8TCJ0;Q9UJT9;Q96EF6;Q5XUX0;Q9H4M3;Q9UKT5}

2449 Pathogen[ P03346] interacts with 21 human  
 partners:{Q9UKT7;Q9H469;Q13616;Q9UJT9;Q969U6;P41002;Q9UKA1;P62877;Q8TCJ0;Q8NI29;Q13309;Q9UKT5;Q9H4M3;Q9NRD1;P63208;Q96EF6;P19474;Q9Y297;Q969H0;Q8N3Y1;Q5XUX0}

2450 Pathogen[ Q85601] interacts with 18 human  
 partners:{Q9H4M3;Q13309;Q969H0;P62877;Q13616;P41002;Q9UKA1;Q8N3Y1;Q9UKT7;P63208;Q8NI29;Q9H469;Q9UJT9;Q96EF6;P19474;Q8TCJ0;Q9UKT5;Q9NRD1}

2451 Pathogen[ P14079] interacts with 18 human  
 partners:{Q5XUX0;Q8NI29;Q9UKT5;Q969H0;Q13309;Q8N3Y1;Q8TCJ0;P62877;Q96EF6;P19474;P41002;Q9H4M3;Q9UKT7;Q9NRD1;P63208;Q9UJT9;Q13616;Q8NCQ5}

2452 Pathogen[ P03383] interacts with 15 human  
 partners:{P41002;Q13616;P19474;Q8NI29;P63208;Q9UKT7;Q9UKT5;Q8TCJ0;Q969H0;P62877;Q13309;Q9NRD1;Q96EF6;Q9H4M3;Q5XUX0}

2453 Pathogen[ P03410] interacts with 19 human  
 partners:{Q9H469;Q9UKT7;Q9H4M3;Q9NRD1;Q8TCJ0;Q9UKT5;Q5XUX0;P41002;P63208;Q13309;Q969H0;P62877;Q8NI29;Q969U6;Q13616;Q8NCQ5;Q8N3Y1;Q9UJT9;Q96EF6}

2454 Pathogen[ P14075] interacts with 15 human  
 partners:{Q9UKT7;Q9UKT5;Q96EF6;P63208;Q8TCJ0;P19474;Q13309;Q8NI29;Q9H4M3;Q9NRD1;P41002;Q13616;Q969H0;Q5XUX0;P62877}

2455 Pathogen[ P0C206] interacts with 20 human  
 partners:{Q9UJT9;P62877;Q13309;Q9H4M3;Q9UKA1;Q969H0;Q13616;Q8TCJ0;Q8N3Y1;Q9NRD1;Q9UKT7;P63208;Q8NI29;Q5XUX0;Q9H469;Q96EF6;Q9UKT5;P41002;Q969U6;P19474}

2456 Pathogen[ P03363] interacts with 20 human  
 partners:{Q8NI29;Q13309;Q9UJT9;P41002;Q9H4M3;Q96EF6;Q13616;P62877;Q9UKT5;P19474;Q969H0;Q9UKA1;Q8TCJ0;Q969U6;Q9UKT7;Q5XUX0;Q9NRD1;P63208;Q9H469;Q8N3Y1}

2457 [Cluster 224]GO:0005664+C cellular\_component [name] nuclear origin of replication recognition complex [def]  
 "A multisubunit complex that is located at the replication origins of a chromosome in the nucleus." [GOC]

2458 Pathogen[ Q2Q067] interacts with 5 human  
 partners:{Q13415;Q9UBD5;O43913;Q9Y5N6;Q13416}

2459 Pathogen[ P0C214] interacts with 5 human partners:{O43913;Q9Y5N6;Q13416;Q9UBD5;Q13415}

2460 Pathogen[ P03346] interacts with 6 human partners:{Q9Y5N6;Q9UBD5;Q13415;Q13416;O43929;O43913}

2461 Pathogen[ Q85601] interacts with 5 human partners:{O43913;Q13415;Q9Y5N6;Q9UBD5;Q13416}

2462 Pathogen[ P14079] interacts with 7 human partners:{Q13416;Q13415;Q9Y5N6;O43913;Q9BWE0;Q9UBD5;O43929}

2463 Pathogen[ P03383] interacts with 4 human partners:{Q9UBD5;O43913;Q9Y5N6;Q13416}

2464 Pathogen[ P03410] interacts with 7 human partners:{Q9BWE0;O43929;Q13416;Q9Y5N6;O43913;Q9UBD5;Q13415}

2465 Pathogen[ P14075] interacts with 4 human partners:{Q9Y5N6;Q9UBD5;O43913;Q13416}

2466 Pathogen[ P0C206] interacts with 5 human partners:{O43913;Q9UBD5;Q13416;Q9Y5N6;Q13415}

2467 Pathogen[ P03363] interacts with 5 human partners:{Q13416;Q13415;Q9UBD5;Q9Y5N6;O43913}

2468 [Cluster 225]GO:0070937+C cellular\_component [name] CRD-mediated mRNA stability complex [def] "A protein complex that binds to, and promotes stabilization of, mRNA molecules containing the coding region instability determinant (CRD). In human, IGF2BP1 and at least four additional proteins

2469 Pathogen[ Q2Q067] interacts with 4 human partners:{P67809;O60506;Q08211;Q00839}

2470 Pathogen[ P0C214] interacts with 5 human partners:{P67809;Q9NZI8;O60506;Q08211;Q00839}

2471 Pathogen[ P03346] interacts with 5 human partners:{O60506;Q9NZI8;Q00839;Q08211;P67809}

2472 Pathogen[ Q85601] interacts with 4 human partners:{O60506;Q08211;P67809;Q00839}

2473 Pathogen[ P14079] interacts with 4 human partners:{P67809;Q08211;Q00839;O60506}

2474 Pathogen[ P03383] interacts with 2 human partners:{P67809;Q00839}

2475 Pathogen[ P03410] interacts with 4 human partners:{Q00839;P67809;O60506;Q08211}

2476 Pathogen[ P14075] interacts with 2 human partners:{Q00839;P67809}

2477 Pathogen[ P0C206] interacts with 4 human partners:{P67809;Q08211;O60506;Q00839}

2478 Pathogen[ P03363] interacts with 5 human partners:{Q9NZI8;O60506;Q00839;Q08211;P67809}

2479 [Cluster 226]GO:0042587+C cellular\_component [name] glycogen granule [def] "Cytoplasmic bead-like structures of animal cells, visible by electron microscope. Each granule is a functional unit with the biosynthesis and catabolism of glycogen being catalyzed by enzymes bound to the granule surface." [GOC

2480 Pathogen[ Q2Q067] interacts with 3 human partners:{P62140;P62136;Q9UQK1}

2481 Pathogen[ P0C214] interacts with 5 human partners:{P62140;O95685;P62136;Q9UQK1;Q9H7J1}

2482 Pathogen[ P03346] interacts with 5 human partners:{P62136;Q9UQK1;O95685;Q9H7J1;P62140}

2483 Pathogen[ Q85601] interacts with 3 human partners:{Q9UQK1;P62136;P62140}

2484 Pathogen[ P14079] interacts with 5 human partners:{Q9H7J1;P62136;O95685;P62140;Q9UQK1}

2485 Pathogen[ P03383] interacts with 4 human partners:{P62140;Q9UQK1;P62136;Q9H7J1}

2486 Pathogen[ P03410] interacts with 5 human partners:{P62136;O95685;Q9H7J1;P62140;Q9UQK1}

2487 Pathogen[ P14075] interacts with 5 human partners:{P62140;Q9UQK1;P62136;O95685;Q9H7J1}

2488 Pathogen[ P0C206] interacts with 5 human partners:{Q9UQK1;P62140;O95685;Q9H7J1;P62136}

2489 Pathogen[ P03363] interacts with 3 human partners:{P62136;P62140;Q9UQK1}

2490 [Cluster 227]GO:0043231+C cellular\_component [name] intracellular membrane-bounded organelle [def] "Organized structure of distinctive morphology and function, bounded by a single or double lipid bilayer membrane and occurring within the cell. Includes the nucleus, mitochondria, plastids, vacuoles, and vesicles. Excludes the plasma membrane." [GOC

2491 Pathogen[ Q2Q067] interacts with 121 human partners:{Q86W56;P04156;Q8TAF3;Q92585;Q9Y6K5;Q9UPN9;Q92681;O60664;Q13875;Q05066;O95391;Q8TD31;O00291;Q13887;Q7Z5K2;Q6RW13;Q8IZD4;Q9BRV8;P67809;Q12982;P82979;P51531;P41970;Q9Y244;Q8WV92;Q01196;O14929;P38117;Q6P1M3;Q5T1C6;O60506;O14662;Q14814;Q9UBP6;Q96AQ6;O00204;Q96EY5;Q6NZI2;Q9UNA4;P49789;Q15542;Q7L804;P52594;P41218;Q9H668;Q8N5D0;Q9Y3Y2;Q86TB9;Q13769;Q8WUY3;P57721;Q9Y5L0;Q9BQG0;O75886;Q9UBC3;Q9BY77;Q13137;O15127;P54253;Q9BTC8;Q9BTP7;P11171;P51948;Q13330;Q15437;A5D8V6;Q15643;P56279;P53992;Q674X7;Q8TBZ0;Q8ND56;P56282;P50750;Q9NWT8;Q9NZM5;O75170;Q96BK5;Q92733;P82970;Q9BRS8;Q99996;Q96JE7;Q8NFD5;Q9NRA8;Q92785;P37198;Q9NQ33;Q96QK1;Q9H9L3;Q9BVW5;Q86V15;Q9UGK3;Q14686;Q8N1V2;Q6ULP2;Q8N987;P25205;O75154;Q13895;Q9ULZ2;P61758;O14964;Q9P1Z2;Q9H9L7;Q96RE7;Q16537;Q86YV9;Q9Y2W1;Q9Y535;Q9BXF6;A2A288;O15111;Q8NFH5;Q53QV2;O60671;Q9NRR3;Q8TC71;Q14194;Q8NEZ2;Q6P2E9}

2492 Pathogen[ P0C214] interacts with 128 human partners:{P41970;Q9BY77;Q9NRR3;Q8N1V2;P82979;Q9Y5L0;Q96BK5;Q9GZZ9;Q92585;Q16537;Q13887;Q8ND56;P11413;O15111;Q13330;Q8NFH5;Q8TBZ0;Q8TD31;Q8WUY3;Q6P2E9;Q6RW13;P53992;Q8N5D0;P57721;Q9BRV8;P49789;P54253;P61758;Q13769;P50750;Q96QK1;Q92560;P62166;Q9Y6K5;O14929;Q9BQG0;P67809;Q6P1M3;Q9BVW5;P29728;Q9Y244;P41218;O14964;Q6NZI2;O75886;Q86YV9;O15127;Q86W56;Q13875;Q14194;Q9NZI8;Q92733;Q14686;Q9NWT8;Q15542;P25205;Q7L804;Q53QV2;Q14814;Q1

- 3137;Q92681;Q674X7;A2A288;Q96EY5;P37198;P51948;Q08AM6;Q9BRS8;Q9UNA4;Q12982;Q15437;Q8TAF3;Q15643;Q86TB9;P10809;Q9H9L3;O00204;Q8NEZ2;Q9BXF6;P82970;P38117;Q9ULZ2;Q9BTC8;Q96AQ6;Q9UBP6;O60671;Q7Z5K2;Q9NZM5;Q9Y535;P04156;P10909;Q13895;O60506;Q6ULP2;O60664;Q9H668;Q86V15;Q5T1C6;A5D8V6;P52594;Q8TC71;Q9P1Z2;Q99996;P35520;Q95391;Q8NFD5;P51531;Q96JE7;Q9Y2W1;Q96RE7;P56282;Q9UPN9;Q9NQ33;Q9Y3Y2;P56279;Q92785;O00291;Q14966;P11171;Q9UGK3;P36957;Q75154;Q9BTP7;P55072;Q8IZD4;O75170;Q9NRA8;Q9H9L7}
- 2493 Pathogen[ P03346] interacts with 159 human  
partners: {Q92681;Q13596;O00204;O60664;Q9UPN9;Q86YV9;Q92585;P56279;Q15542;Q9Y3Y2;Q96QK1;Q8ND56;Q13895;Q92560;O15111;A2A288;Q14814;Q9BQG0;P06401;Q15036;A5D8V6;Q9H9L3;Q7Z5K2;Q05066;Q8TC71;Q8NFD5;Q9NRR3;Q9NZM5;Q9Y3C1;O95391;Q96AQ6;Q9UNA4;Q9BRV8;Q9ULZ2;Q6P1M3;O60506;P56282;Q9NZI8;O75886;Q8NEZ2;O75170;P49789;Q12981;P82979;Q9UBC3;Q93050;Q9NQ33;Q8NFH5;Q96RE7;Q8TAF3;Q13769;P37198;O00291;P55072;Q86V15;Q6NZI2;Q9NWT8;Q9BTP7;Q8TD31;P41218;Q13813;Q9C029;Q13137;Q9C0H6;P25205;Q8NFT6;Q86TB9;Q15643;P11171;Q7Z3T8;Q14863;P10144;Q8IYM9;Q7L804;Q8N5D0;Q15020;Q8TBZ0;P67809;Q9UNH7;Q15437;Q96JE7;Q9BY77;Q9UGK3;Q9P1Z2;Q9H668;Q8TD86;Q6P2E9;P52594;Q8WV92;P42566;Q9H9L7;Q13875;P50750;Q96BK5;Q9Y535;Q13330;Q6DN90;P82970;P38117;Q01167;Q13887;Q9UBP6;Q53QV2;Q6Q0C0;P62166;Q14966;Q92733;Q8WUY3;Q13492;Q96KC8;Q16537;Q8N357;Q99996;Q86W56;Q9Y244;P41970;Q9UGL1;Q6ULP2;P56589;P04156;Q9Y5L0;Q9BXF6;Q01196;O14964;O60671;O60749;Q674X7;P54253;Q8IZD4;Q9NRA8;Q6RW13;O15516;O75154;O43933;P51531;Q12982;Q14194;Q9BZR9;Q9Y2W1;O94901;Q8N987;Q9BTC8;Q96EY5;Q9BVW5;P61758;Q9BRS8;O14662;P51948;P53992;Q9Y6K5;Q92785;O14929;Q15363;O15127;Q9NUK0;Q14686;Q5U5Q3;P57721}
- 2494 Pathogen[ Q85601] interacts with 135 human  
partners: {Q13596;Q96QK1;P10144;O60664;Q9UPN9;Q92585;Q15542;Q9Y3Y2;Q15643;Q6P2E9;Q9ULZ2;Q08AM6;Q9BTP7;O75154;Q7L804;Q9BQG0;Q14194;P50750;P49789;Q86V15;Q13769;O60506;P56282;Q96JE7;Q92733;Q56279;O15111;Q8WV92;Q14966;Q9Y535;O95391;Q15036;Q92560;Q14814;Q6P1M3;Q93050;Q12982;Q8NFT6;Q9UBP6;P41970;Q15516;Q12981;P61758;Q9BZR9;Q9NQ33;Q9BRS8;P11171;P51948;P52594;Q9Y244;O75886;Q9NWT8;Q86YV9;Q86TB9;P82979;P51531;Q7Z5K2;Q13137;Q9NRR3;Q14686;Q9BY77;Q9Y6K5;Q92785;Q16537;Q92681;Q8N1V2;P25205;Q9UGK3;O14929;Q9BXF6;Q15437;A2A288;O75170;Q96BK5;Q8N6T3;Q9H668;P41218;Q8NFD5;Q8IYM9;Q13330;Q8IZD4;P82970;P67809;Q6RW13;Q8NFH5;Q53QV2;O14964;Q8TAF3;Q9BTC8;O00204;Q9H9L3;O60671;Q99996;O43933;Q8WUY3;Q9NZM5;Q6NZI2;Q6ULP2;Q96RE7;O15127;P04156;Q9NRA8;Q8TD86;O00291;Q674X7;P54253;Q9P1Z2;P57721;Q13875;Q13895;Q8NEZ2;Q9H9L7;Q6Q0C0;Q9Y2W1;O94901;Q96EY5;Q9Y5L0;P62166;Q9C0H6;Q9UNH7;Q5T1C6;Q14662;Q9UNA4;Q96AQ6;Q8N5D0;Q13887;P53992;Q86W56;Q9BRV8;Q8TD31;Q9BVW5;Q9UBC3;Q8ND56;Q8TBZ0;A5D8V6}
- 2495 Pathogen[ P14079] interacts with 158 human  
partners: {O60671;Q8NFH5;Q96QK1;O75886;Q13492;O95070;Q9H668;Q86YV9;P41218;Q7L804;Q9UNH7;Q12982;Q96EY5;Q15036;O00291;Q6ULP2;Q8IZD4;Q16873;Q8N5D0;Q06413;Q9UNA4;Q86V15;Q99996;Q92681;Q9NWT8;P29728;Q9NRR3;Q9NZM5;P57721;P11171;P56589;O60664;Q8ND56;Q16537;P67809;P82979;P39656;P04156;Q9H1K0;Q9BT56;Q9NZ45;Q6RW13;O94901;Q8N987;Q13330;Q86TB9;P42566;Q9UGK3;Q14966;P51531;O43813;P52594;Q92785;P10909;P53992;Q9Y3Y2;Q6P2E9;P61758;P54253;Q9BY77;Q96JE7;Q15363;Q9Y244;Q13769;Q9H9L7;Q9H8M9;P82970;P27544;Q8N357;Q9ULZ2;P38117;Q9UBC3;Q9Y287;Q13875;O14929;Q9BXF6;Q9UPN9;Q9Y3C1;Q9NQ33;O00264;Q92560;Q9Y6K5;Q5T1C6;P56282;Q9BQG0;Q6IAA8;Q9BRS8;Q8WUY3;Q9H9L3;P62166;Q12981;A5D8V6;Q8NFD5;O60749;O60506;Q96AQ6;Q8NEZ2;P37198;Q14194;Q13316;O14662;Q8TD31;Q13596;Q9BTC8;P10620;Q13137;Q96RE7;Q8N1V2;Q8TBZ0;Q96S66;Q7Z3T8;Q14814;Q6NZI2;Q93050;Q9NUK0;Q9C0H6;Q86W56;Q96BK5;Q8WV92;Q9BTP7;O75154;P56279;Q6UX65;Q13895;Q9BRV8;A2A288;Q6DN90;Q8TAF3;Q96JY0;P49789;Q7Z5K2;Q13813;Q9Y5L0;Q9P1Z2;Q92585;Q9NRA8;P25205;P10144;Q14686;Q15542;P41970;Q9Y2W1;Q8NFT6;Q6UWI2;Q53QV2;Q8TC71;Q9Y535;O95391;Q6P1M3;Q674X7;Q15643;O75170;P50750;Q92733;Q9BVW5;P51948}
- 2496 Pathogen[ P03383] interacts with 102 human  
partners: {Q92681;Q9BQG0;Q7L804;Q92585;Q6RW13;O60671;Q9BVW5;Q9BTC8;Q9Y244;P51948;Q8WUY3;P49789;Q8TAF3;P04156;Q6NZI2;Q13769;Q9UPN9;Q13875;O15111;Q9Y535;Q96AQ6;Q8NFH5;P25205;Q14686;Q6P1M3;Q9UBP6;Q9NWT8;O75886;Q15542;Q9H9L7;Q96BK5;Q92733;Q8NEZ2;Q9NZM5;Q14814;Q86V15;Q13330;Q8TD31;Q9BRS8;A2A288;P41218;Q13895;P56282;Q13137;Q15643;O00291;Q86W56;O14929;Q53QV2;Q15437;Q9BXF6;Q9ULZ2;Q16537;Q9NRR3;Q9H9L3;P57721;P50750;Q8ND56;P51531;Q9UGK3;Q9NQ33;Q86TB9;P82970;Q86YV9;P82979;Q96RE7;Q9BY77;Q9Y6K5;Q8IZD4;Q9BRV8;P54253;O15127;Q96QK1;Q96JE7;Q8TC71;P41970;Q6ULP2;P53992;Q9NRA8;Q99996;Q92785;Q8NFD5;P37198;Q9Y2W1;O60664;Q9Y5L0;O14964;P67809;Q9Y3Y2;P61758;P56279;Q5T1C6;P52594;O75170;Q96EY5;Q8N5D0;O95391;O75154;Q9BTP7;Q9P1Z2;Q7Z5K2;Q6P2E9}
- 2497 Pathogen[ P03410] interacts with 156 human  
partners: {Q96AQ6;Q9Y2W1;Q9NZM5;Q9BT56;Q7L804;Q6NZI2;O75154;P25205;Q13137;Q9UGK3;P10144;P52594;P56279;Q9C0H6;Q8TD31;O14929;P29728;P82970;Q13596;Q99996;Q8TD86;Q8N1V2;P53992;P41218;Q9UBP6;O15111;Q9ULZ2;Q14686;Q9Y3C1;O60749;Q7Z5K2;Q14814;Q9NRR3;Q9UNA4;Q9BVW5;Q8NFT6;Q9BTC8;Q9NRA8;P57721;O14662;Q93050;O00204;Q96QK1;A2A288;Q6P1M3;Q9H668;Q92785;Q9Y287;P82979;P27544;O00291;P56282;Q9BTP7;O60664;P38117;Q8NFD5;Q13895;Q92585;Q9Y535;A5D8V6;Q9UNH7;Q8N987;Q9P1Z2;P50750;P11171;P67809;Q13492;Q8IZD4;Q14966;Q16537;Q8NEZ2;Q9Y5L0;Q53QV2;Q08AM6;P49789;Q6P2E9;Q6UWI2;Q15437;O00264;Q86YV9;Q5T1C6;Q8N357;Q13330;Q9H9L7;Q8NFH5;Q674X7;Q16873;P61758;Q9NWT8;Q6UX65;O15127;Q8WV92;Q15363;Q9BXF6;Q15036;Q8TAF3;Q9H1K0;P04156;Q8TC71;O60671;O75170;Q96JE7;Q8N5D0;Q9Y244;Q13769;Q9BQG0;Q6RW13;Q9NQ33;Q9Y3Y2;Q86W56;Q9UBC3;O94901;P51948;Q13875;P51531;Q6IAA8;Q9Y6K5;Q96S66;Q15643;Q8ND56;Q86TB9;Q9BY77;Q12982;Q6ULP2;Q15542;P41970;O60506;Q96RE7;P56589;Q96EY5;Q96BK5;Q14194;Q15283;P54253;Q12981;P39656;P62166;Q86V15;Q13813;Q9NZ45;P42566;Q9BRV8;Q92681;Q9NQ33;Q9BRS8;Q92733;Q7Z3T8;Q9H9L3;O75886;Q8TBZ0;O95070;Q9UPN9;O95391;P10909;Q8WUY3;Q13316}
- 2498 Pathogen[ P14075] interacts with 108 human  
partners: {Q9NQ33;Q6P2E9;P82979;Q96AQ6;Q92585;Q15643;P54253;Q9BRV8;Q96EY5;O15111;Q96JE7;Q92681;Q8TD31;Q15542;O75886;Q13769;Q8N5D0;Q9Y3Y2;O15127;Q14686;O95391;P41218;Q6P1M3

- ;P04156;Q16537;Q9Y244;P50750;O60671;O75170;Q9BTP7;Q8WUY3;O14929;Q5T1C6;P53992;Q8NEZ2;Q9BVW5;P56279;Q92785;Q13875;Q13137;O00291;Q96BK5;Q8TAF3;Q6NZI2;P57721;Q8IZD4;Q9BQG0;Q99996;O14964;Q9UGK3;Q8TBZ0;Q15437;Q96RE7;Q7L804;P25205;Q7Z5K2;Q9NWT8;Q9UPN9;Q86TB9;P51531;Q9Y535;Q9NZM5;Q86YV9;P37198;Q9Y6K5;P82970;P67809;Q9P1Z2;Q9BRS8;Q9UBP6;P61758;Q9NRR3;P52594;Q8TC71;Q9H9L3;Q9ULZ2;Q9BXP6;Q13330;P49789;Q6ULP2;P38117;Q9Y5L0;Q53QV2;Q8NFD5;Q86W56;O75154;Q9NRA8;P41970;P56282;Q6RW13;Q9Y287;Q9Y2W1;Q9H9L7;Q86V15;Q14814;Q6UWI2;Q92733;Q8NFH5;Q9BTC8;P11171;Q8ND56;O60664;Q9BY77;P51948;A2A288;Q9H668;Q96QK1;Q13895}
- 2499 Pathogen[ P0C206] interacts with 161 human partners: {Q9BT56;O14964;O14662;Q13875;Q12982;Q13887;P10144;P67809;Q86V15;O43933;O15127;Q9Y5L0;Q15437;Q8TAF3;Q8NEZ2;Q86TB9;P06401;Q8N6T3;Q9UBP6;Q8NFH5;Q9UPN9;O00291;Q9NZM5;Q16537;Q8TC71;Q8ND56;P50750;Q8TD86;Q9UNH7;P04156;Q9BXP6;Q9Y287;P39656;P62166;Q92681;Q9BTP7;Q9UNA4;O60664;O75170;Q14966;Q92733;O75154;P25205;Q05066;P51531;P56589;Q8TD31;Q9Y6K5;Q9H1K0;Q9BY77;Q9C0H6;Q9NRR3;Q9H9L3;Q8TBZ0;Q13137;A2A288;Q9BRS8;O95070;Q7Z5K2;P29728;Q9Y3C1;Q8NFT6;Q13895;P38117;Q13316;Q9H9L7;Q13596;Q9H668;P41970;Q9P1Z2;Q96BK5;Q99996;Q13330;P41218;Q15036;O94901;Q9Y535;P57721;Q13769;Q96S66;Q92785;Q9UGK3;Q8IZD4;O60749;Q7Z3T8;P82970;Q86W56;O15516;A5D8V6;Q6ULP2;O60506;Q6RW13;Q9BQG0;Q9BZR9;Q9BVW5;O14929;O00264;Q6P2E9;Q8N357;Q53QV2;Q96JE7;P49789;Q6NZI2;Q96AQ6;Q14686;O00204;O15111;Q9NWT8;Q5T1C6;Q9Y2W1;P10909;Q9NQ33;Q9BRV8;P55072;Q15542;Q8N1V2;Q14194;Q12981;P42566;O60671;Q8IYM9;P56282;P61758;Q8N987;Q14863;Q9ULZ2;Q674X7;Q14814;Q8NFD5;Q6UWI2;Q96QK1;Q9UBC3;Q7L804;P56279;P53992;Q15363;Q8N5D0;O75886;Q86YV9;O95391;Q9NUK0;Q8WV92;Q15643;Q8WUY3;Q9Y244;Q9C029;Q86YT6;Q96RE7;Q9Y3Y2;Q92560;Q6P1M3;Q6Q0C0;Q96EY5;Q92585;Q93050;P11171;Q9NRA8;Q9BTC8;P51948;Q08AM6;P54253}
- 2500 Pathogen[ P03363] interacts with 132 human partners: {Q15020;Q53QV2;Q9Y6K5;Q9UGK3;Q9Y535;Q9NWT8;Q96RE7;O43933;Q9UNH7;O60664;Q9BZR9;Q7L804;Q9NRA8;Q16537;O95391;Q8TAF3;Q5U5Q3;Q8N5D0;Q14194;Q99996;A2A288;O75886;Q96BK5;Q9BTP7;Q8TBZ0;Q14863;O75170;P25205;P41218;P56279;Q8N1V2;Q96QK1;O15111;Q6P2E9;P82970;Q9BQG0;O60671;Q13769;Q9Y3Y2;Q9Y3C1;Q9BRV8;Q86V15;Q9NQ33;Q9UPN9;P04156;Q14686;Q8IZD4;Q8WUY3;P10144;Q13895;O60749;Q92560;Q05066;Q9UBP6;Q9BTC8;Q8TC71;Q6P1M3;Q9ULZ2;Q6ULP2;Q9BY77;Q14814;Q6NZI2;Q9P1Z2;Q9BVW5;O96JY0;Q9H668;Q96AQ6;Q14966;Q8TD86;P11171;Q9H9L3;P57721;Q01167;O00204;Q15542;Q9H9L7;O14929;Q674X7;P54253;P49789;P61758;Q6NZI2;Q9Y5L0;O14964;Q96EY5;O75154;P82979;Q9BRS8;Q9C0H6;Q9UBE0;Q9BXP6;Q13875;Q8WV92;Q92681;Q8ND56;Q86TB9;Q8NEZ2;P50750;O14662;Q92733;O60506;O94901;P53992;Q86W56;Q9NRR3;Q6DN90;Q13596;O15127;Q9Y244;Q9UNA4;Q13330;P41970;Q8NFD5;P52594;P37198;P51531;Q7Z5K2;Q9UBC3;Q13813;Q13137;Q8N987;Q8NFH5;Q15643;Q8TD31;Q12982;O00291;Q9NZM5;Q92585;P67809;Q9NUK0;Q92785;A5D8V6}
- 2501 [Cluster 228]GO:0005882+C cellular\_component [name] intermediate filament [def] "A cytoskeletal structure that forms a distinct elongated structure, characteristically 10 nm in diameter, that occurs in the cytoplasm of eukaryotic cells. Intermediate filaments form a fibrous system, composed of chemically heterogeneous subunits and involved in mechanically integrating the various components of the cytoplasmic space. Intermediate filaments may be divided into five chemically distinct classes
- 2502 Pathogen[ Q2Q067] interacts with 163 human partners: {P19012;A8MTY7;Q3MIV0;Q3LI58;P22392;P35908;P02538;Q9BYQ7;Q9BYQ6;P60331;P02545;Q9BYQ2;Q3LI54;P20700;Q7Z4W3;Q3LHN0;Q9NSB2;Q9BYR5;Q3LI63;P07196;Q9BYQ8;Q3SYF9;P60413;P41219;Q3LI64;Q9BYP9;Q15323;P08779;I6L9F6;P60371;Q6A162;P08729;P78385;Q8IUC1;Q7Z3Z0;P60409;Q9BYR9;O76013;Q3LI68;Q99456;Q3LI67;Q9BYR0;Q8N1N4;Q6L8G5;P60372;P13646;P56537;A8MUX0;Q7RTS7;P59991;Q6L8H1;Q9H307;P14136;Q3LI83;Q9BYQ5;A6NCN2;Q6L8G9;Q9NSB4;Q03252;A8MXZ3;Q14532;Q7Z3Y9;P15924;Q7Z3Y7;Q3LI81;Q3LI73;P60370;Q6L8H4;Q6PEX3;Q9BYQ3;A1A580;P12035;P08727;P60369;Q9NZQ3;Q9C075;Q3LI70;Q9H7C4;O95678;O15061;P04264;Q3LI60;Q8N1A0;Q3LI76;Q86Y46;Q9BYR6;Q3LI62;P05787;Q04695;P35527;P60410;P60014;Q14533;Q8NEH6;Q8IUC0;Q7Z3Y8;Q3LI72;P60368;Q9BYR4;Q8IUC2;Q9BYQ9;P78386;Q14525;Q9BYP8;P59990;P48668;P0C7H8;Q6L8G4;Q3SY84;Q701N2;Q9BYR8;O43790;P60412;O76009;P12036;Q3LI61;Q14CN4;O76014;P13645;P19013;Q9BYQ0;A8MX34;P13647;Q8N9Z9;Q6L8G8;O76015;P0C5Y4;Q6KB66;Q3LI59;Q3LHN2;Q2M2I5;Q3SY46;Q9BYR3;P08670;P60411;Q9BYS1;Q9BYR7;P04259;Q8IUC3;Q9BYU5;P02533;Q01546;Q9BYQ4;P35900;Q3LHN1;P26371;Q16352;Q9BQG6;O76011;P05783;Q7Z794;Q3LI66;Q5XKE5;Q6L8H2;P07197;Q701N4;Q9BYR2;Q8IUB9;Q9BYT5;Q6A163;A8MVA2;Q92764;P17661}
- 2503 Pathogen[ P0C214] interacts with 155 human partners: {Q9H7C4;Q14CN4;Q3LI64;O76011;P08729;Q3LI81;Q14532;Q2M2I5;P60014;P12035;O76013;Q8IUC1;O15061;P60369;P05783;P35527;Q3LHN0;Q86Y46;Q7Z3Y8;P02538;P04264;A8MVA2;Q3SYF9;P13646;P02533;Q7Z3Y7;Q9BYQ5;Q9BYP8;Q6L8H1;O76015;A8MTY7;Q9BYR7;Q9BYR5;P60371;Q3LI54;P60410;Q6L8G4;Q8NEH6;Q7Z794;P15924;Q9BYR8;P60412;Q9BQG6;Q9BYQ2;Q3LI83;O95678;P41219;Q16352;Q9NSB2;Q9BYQ8;Q3SY84;Q3LI66;Q13515;Q3LI70;Q9H307;P05787;P14136;Q9BYQ9;Q3LI76;P20700;P60411;P35908;Q9BYR0;P60331;Q9BYQ3;Q5XKE5;Q3LI60;P08779;P78386;Q701N2;Q8N1A0;P48668;Q14533;Q9BYQ4;Q3LI58;Q03252;Q3LI72;Q04695;Q9BYR3;P60409;Q3LI62;P59990;P78385;Q8N1N4;P08670;Q3LI67;A6NCN2;Q9BYR2;Q6L8G9;P0C5Y4;Q9BYQ0;Q3LI63;P60372;P19012;Q3LHN2;P04259;I6L9F6;Q9C075;P60413;Q8N9Z9;P08727;P59991;Q9BYQ7;Q99456;Q15323;P12036;Q6A162;Q6PEX3;P60370;O76009;Q9NZQ3;P13647;Q7RTS7;Q9BYR4;Q6KB66;P07197;Q7Z3Z0;P22392;P02545;Q6L8G5;Q9BYS1;Q7Z3Y9;Q01546;Q3MIV0;Q8IUB9;P19013;Q9BYQ6;Q8IUC3;A8MXZ3;O43790;Q6L8H4;Q6A163;Q3LI59;P56537;Q3LI68;P26371;Q6L8G8;O76014;Q92764;P07196;Q3LHN1;Q701N4;Q3LI61;Q6L8H2;A1A580;Q8IUC2;Q9NSB4;Q9BYR6;P13645;Q9BYP9;Q3LI73;P35900;Q7Z4W3;P17661;Q14525}
- 2504 Pathogen[ P03346] interacts with 171 human partners: {Q3LI63;P13646;Q6KB66;P15924;Q8N1N4;Q9BYR9;P19012;P08729;Q8IUC2;P02538;Q6L8H1;Q86Y46;Q6L8G8;Q9C075;Q3SY84;Q16352;Q14525;Q3LI62;Q6L8G5;P07196;Q6PEX3;P05783;Q7Z3Y8;P60369;Q9BYU5;P08779;Q3LI64;Q9BYR2;P08727;Q3SYF9;Q15323;Q13515;A8MX34;P35527;Q9BYR0;P20700;Q9BYT5;Q9BYQ8;Q7Z3Z0;Q3LI66;Q5XKE5;Q3LI67;Q9BYQ2;Q52LG2;Q9NSB4;Q9BQG6;A8MXZ3;Q9H307;P05787;O76009;O95678;P19013;P56537;O15061;P14136;P60329;Q13835;P48668;Q14532;Q8

- IUC1;P78386;P60409;O76014;A6NCN2;Q3SY46;P59990;A8MVA2;Q9BYQ6;Q9BYQ3;P0C7H8;P02545;Q0D2I5;P60014;P35908;Q3LI58;Q7Z794;P07197;Q9BYQ0;P60411;Q3LI77;Q3LHN0;Q6L8G9;P12036;Q2M2I5;Q04695;Q9NSB2;Q3LI81;P17661;Q6L8G4;Q7Z3Y9;P02533;Q8N9Z9;Q701N2;Q8IUB9;Q9BYQ5;Q7Z4W3;Q9NZQ3;P60370;A8MUX0;Q3LI73;O43790;P13645;Q3LHN1;Q9BYR4;P60368;P41219;Q9BYQ7;Q14533;Q3LI76;Q9BYR8;P12035;A8MTY7;Q9BYP8;Q8N1A0;Q76011;P22392;Q9BYP9;Q3LI72;Q3LI59;Q3MIV0;P30622;P60328;P59991;P08670;Q03252;Q7RTS7;Q9H7C4;P06015;P60412;P35900;I6L9F6;A1A580;P26371;Q7Z3Y7;P0C5Y4;P13647;P60331;Q9BYR5;Q3LI68;Q8IUC3;Q6A163;P60410;Q6L8H2;Q99456;Q3LHN2;Q6A162;Q3LI70;P04259;P04264;Q9BYR3;Q14CN4;Q9BYS1;Q3LI83;Q3LI60;Q01546;Q9BYR6;Q8TDZ2;Q92764;P60371;Q8IUC0;P78385;Q9BYQ9;Q6L8H4;Q9BYQ4;Q8NEH6;Q701N4;Q3LI54;Q9BYR7;P60372;P60413;O76013}
- 2505 Pathogen[ Q85601] interacts with 126 human partners: {P13646;Q8N1N4;P20700;P08729;P02538;Q14525;P78386;P02545;O76013;P02533;Q3LI76;Q9BYR3;P60369;Q9NSB4;P60368;Q5XKE5;P08779;Q3SY84;P17661;P60331;P07196;Q3LHN0;Q9H307;Q9BYQ6;P08670;P05787;P12036;Q9BYQ8;Q3LI81;Q9BYR8;P19013;Q3LI73;O76009;Q14533;Q7Z3Y8;P30622;Q2M2I5;O95678;P56537;P14136;Q03252;Q9BYR5;Q9BYP9;P04259;P59990;Q9NZQ3;Q7Z3Y9;Q9BYQ3;P60372;Q9BYR2;Q9BYR0;Q6A162;Q7Z3Y7;P60412;P15924;Q7Z794;Q13515;Q14CN4;Q9BYQ0;P60411;Q92764;Q7Z3Z0;Q04695;P60371;P05783;P04264;Q01546;P60370;O43790;P59991;P19012;P48668;Q9C075;P13645;A8MTY7;Q7RTS7;P12035;A8MVA2;P41219;Q15323;P60410;Q9BYQ9;P22392;Q8IUC3;Q9BQ66;Q0D2I5;Q9BYQ7;A1A580;P78385;P08727;P07197;O76011;I6L9F6;Q9BYR7;Q8IUC1;P13647;A6NCN2;Q14532;P35527;Q8N9Z9;Q9BYR4;Q6A163;P35908;Q6PEX3;O76015;P35900;Q9BYQ5;P60014;Q8NEH6;Q16352;Q99456;Q3LI83;Q9BYQ2;Q9BYR6;Q3LI68;Q8N1A0;Q9BYQ4;Q9NSB2;Q86Y46;Q8IUC2;P60413;Q9H7C4;O76014;P60409;Q6KB66;O15061}
- 2506 Pathogen[ P14079] interacts with 170 human partners: {Q14525;Q8IUC0;A8MUX0;Q3LI67;Q3LI70;P48668;P60409;P35900;Q8NEH6;Q3LHN0;Q3SY84;P60014;P60413;P08779;Q9BYR8;P35908;Q7Z794;Q9BYQ4;Q9H7C4;Q9BQ66;P41219;P59990;Q3LI60;Q8TDZ2;Q14532;Q9BYR2;Q3MIV0;Q99456;Q9BYR9;P0C5Y4;Q9BYR6;P0C7H8;Q7Z3Z0;Q701N2;O76011;P56537;Q9BYQ9;P15924;Q9BYQ3;Q9NSB4;Q0D2I5;Q13835;P12036;Q9BYR3;Q6L8H2;Q7RTS7;Q3LI63;Q9BYS1;P13646;Q52LG2;Q8IUC3;A6NCN2;Q9BYQ2;P26371;P08729;P60410;Q6L8H4;Q15323;Q01546;P35527;Q3LI59;Q9BYU5;Q9BYR7;Q04695;Q3SYF9;Q9BYP9;Q9H307;Q8N1A0;Q3LI66;P07196;Q03252;P02533;Q8IUG1;O15061;P60369;P60370;Q3SY46;Q9C075;P14136;Q3LI83;Q3LI61;P78385;P13645;Q7Z3Y9;Q6A162;O75690;Q8N1N4;Q7Z3Y8;A8MTY7;P22392;P20930;Q9NZQ3;P60331;Q2M2I5;P07197;Q8IUC1;P60372;Q92764;Q7Z3Y7;P48681;Q6A163;Q3LI62;P60328;Q86Y46;A8MX34;Q3LI81;O76013;Q6KB66;A8MXZ3;O76015;P78386;Q14533;Q8IUB9;Q9BYQ7;A8MVA2;O76014;P60329;Q5XKE5;Q9BYR4;Q14CN4;P05783;Q6L8G5;Q8IUC2;Q6L8G9;Q3LI72;Q3LI77;P20700;Q3LI64;Q701N4;P60371;Q3LI54;A1A580;Q07627;Q6L8H1;P60411;Q3LHN2;Q6L8G4;Q9BYR5;Q3LI57;Q13515;Q3LHN1;Q9BYQ6;P08670;P04264;Q8N9Z9;O43790;Q9BYR0;O95678;P17661;P04259;P02545;Q3LI73;Q9BYP8;Q6L8G8;Q9BYQ0;Q3LI76;Q7Z4W3;Q3LI68;P08727;Q9NSB2;P12035;Q9BYT5;Q9BYQ8;O76009;P60368;Q9BYQ5;P13647;P30622;P59991;Q3LI58;P60412}
- 2507 Pathogen[ P03383] interacts with 167 human partners: {O95678;P02545;A8MVA2;P15924;Q9BYQ7;P60371;P08729;Q8N1N4;Q86Y46;Q7Z4W3;Q16352;P02533;P19013;P08727;Q9BYR3;Q8IUC1;Q52LG2;Q13515;Q9NSB4;Q9NSB2;Q9BYR2;P26371;P0C7H8;Q9C075;Q3SYF9;Q8N1A0;P60409;P08670;Q14CN4;P60331;P17661;Q3MIV0;A8MX34;Q5XKE5;Q9BYP8;P12036;Q3LI70;Q99456;Q7Z3Z0;Q9BYQ9;P56537;Q3LI60;Q3SY46;Q9BYR4;Q3LHN2;Q6A162;P22392;Q9BYR6;Q2M2I5;A8MUX0;P60368;Q8IUC3;Q6L8G5;P14136;P13645;P59991;O76011;Q7Z3Y8;O76014;Q9BYT5;P05783;O15061;Q3LI76;Q3LI73;A1A580;Q9BYP9;Q9BYR7;Q9BYQ3;Q6L8G9;Q6L8G4;P24525;P78386;P60014;Q14533;P35527;P08779;Q9BQ66;P41219;P05787;Q04695;P20700;P60412;A8MTY7;Q9NZQ3;P60372;P59990;Q8IUC0;P60410;Q01546;Q7Z794;Q9BYR8;Q9BYR5;Q9BYQ8;Q3LI54;P12035;P60370;Q3LHN1;P07197;Q8IUB9;P02538;P60411;P07196;Q3LI63;Q07627;Q9BYQ0;Q9BYQ5;Q3LI72;Q3LI62;Q3SY84;P04264;P48668;Q15323;A8MXZ3;P35908;Q9H307;Q9BYQ4;Q9H7C4;Q3LI81;Q9BYR9;Q3LI61;P13647;Q03252;Q6L8H1;Q3LI66;O76015;P78385;Q3LI64;Q6L8H2;Q3LI67;Q3LI59;O76009;Q9BYR0;Q8IUC2;P13646;P04259;P19012;Q9BYS1;Q6A163;Q7RTS7;Q92764;Q6PEX3;Q8N9Z9;Q6KB66;A6NCN2;P60369;P0C5Y4;Q9BYU5;Q3LI68;Q14532;Q8IUG1;Q3LHN0;Q701N2;Q6L8H4;Q3LI58;Q7Z3Y9;P60413;Q3LI83;I6L9F6;Q701N4;Q9BYQ2;Q6L8G8;Q7Z3Y7;P35900;O43790;O76013;Q8NEH6;Q9BYQ6}
- 2508 Pathogen[ P03410] interacts with 173 human partners: {P78385;P13645;P13646;P60371;Q9BYR7;A1A580;O75690;Q14CN4;P02533;P15924;Q9BYQ5;Q3SYF9;O76011;Q15323;Q3LHN0;Q6A163;Q14525;P12036;P30622;Q9BYQ2;Q8N1N4;Q9BYQ9;P17661;Q701N2;Q9BYQ6;Q9BYQ8;Q9BYU5;Q3LI60;P60328;O15061;Q9BYT5;Q8IUB9;Q8IUC2;P04264;Q3LI54;Q8TDZ2;Q9BYR5;P12035;A8MUX0;Q3LI70;Q7Z3Z0;P60412;Q16352;P35527;Q9BYR0;Q3LI83;P19013;Q701N4;Q14533;A6NCN2;P20700;Q13515;Q3LI62;P60409;P60370;Q9BYQ7;Q8N1A0;O95678;Q92764;P05787;Q3SY84;Q9NZQ3;Q6L8G5;Q9BYR2;O76015;Q7Z794;P48668;Q13835;Q6L8G8;Q6A162;Q3LI72;P02538;Q9NSB4;Q3LI61;Q3LI68;A8MXZ3;P07196;P60014;Q9H7C4;Q9BYR4;Q9BQ66;P41219;P08779;P20930;Q8NEH6;Q3MIV0;P59991;Q8IUC1;Q8N9Z9;P35908;Q6L8G9;Q3LI59;P60368;Q03252;Q3LHN1;Q6L8H2;Q9BYP9;P60369;P60329;Q9BYQ3;P02545;Q14532;Q52LG2;Q3LI73;Q9C075;Q6L8H4;P78386;Q9BYQ4;Q2M2I5;A8MVA2;Q7RTS7;P04259;Q3LI76;Q04695;Q5XKE5;O76013;P08670;Q7Z4W3;P60413;O43790;Q0D2I5;Q9BYR8;Q3SY46;P26371;Q8IUG1;Q99456;Q01546;P35900;Q3LI66;P14136;Q07627;Q7Z3Y8;P0C7H8;Q8IUC0;Q6L8H1;Q9BYP8;Q86Y46;Q6KB66;P59990;Q9NSB2;Q9BYR3;P08729;P60411;Q3LI81;P60410;Q9BYS1;P13647;Q3LI64;Q6L8G4;Q9BYR6;P56537;P60331;A8MX34;I6L9F6;O76014;P08727;A8MTY7;P05783;Q3LHN2;Q9BYR9;P60372;Q3LI67;Q3LI63;Q7Z3Y9;Q9BYQ0;Q3LI77;O76009;P07197;Q9H307;Q3LI58;Q7Z3Y7;Q8IUC3;P0C5Y4}
- 2509 Pathogen[ P14075] interacts with 168 human partners: {Q6L8G5;P60331;Q9H307;Q6L8G4;Q92764;P48668;P59990;O76014;Q7Z3Z0;A8MX34;P08729;P0C7H8;Q9NZQ3;Q16352;Q7Z3Y9;Q7Z3Y7;Q3LI59;Q6L8H2;Q3LI54;P56537;Q9BYQ2;Q6L8G8;Q8IUC3;Q9BYR0;P05783;P08727;Q3SYF9;Q9BYQ7;Q3LI61;Q9C075;Q07627;Q3LI66;P60411;Q3LI81;Q6L8H4;Q3LI76;Q3LI68;Q8IUC1;Q9NSB4;Q9BYU5;Q3LHN1;P20700;Q3LI60;Q9NSB2;Q3LI73;O43790;P17661;P14136;Q13515;Q6L8G9;P0C5Y4;Q6L8H1;P19012;Q9BYQ8;Q9BYP9;Q3LI58;P13645;P12035;A1A580;O15061;A6NCN2;A8MVA2;P78385;Q9BYQ3;Q9BYQ9;Q6PEX3;Q86Y46;Q6A163;Q9BYR9;Q9H7C4;Q9BYR6;P41

219;Q9BYR8;P60368;Q7Z4W3;P60371;Q3LI64;A8MTY7;P12036;Q15323;P02545;Q9BYQ5;Q04695;Q8IUC0;Q9BYR3;P35908;Q9BYQ4;Q7Z3Y8;Q14532;P26371;O76013;P08779;P04264;P13646;Q9BYR5;Q5XKE5;P60370;Q9BQ66;Q9BYT5;Q3SY46;Q701N2;Q3LI72;Q3LI63;P04259;P60410;A8MUX0;Q99456;O76015;P60412;A8MXZ3;Q52LG2;Q3MIV0;Q3LI67;P60328;P08670;P78386;Q9BYQ0;P60369;O76009;P07197;Q7RTS7;P13647;Q8IUG1;Q3LHN2;Q14533;P60409;Q3LI70;I6L9F6;Q9BYR4;P60014;P07196;Q7Z794;O95678;O76011;P35900;Q9BYR7;P60372;Q9BYP8;Q9BYR2;Q14525;P59991;Q14CN4;Q9BYS1;Q8N1N4;Q8IUC2;P02538;P60413;P35527;Q3LI62;Q01546;P02533;Q6A162;Q8N9Z9;Q6KKB66;Q3SY84;P22392;P19013;Q8NEH6;Q701N4;Q03252;Q2M2I5;O75690;Q9BYQ6;P05787;Q8IUB9;P15924;Q3LI83;Q3LHN0}

2510 Pathogen[ P0C206] interacts with 173 human partners: {Q9BQ66;Q9BYR7;Q6L8H2;Q6L8G4;Q3LI73;P05787;Q9NSB2;Q14525;P60368;Q3LI70;Q7Z3Y9;P59991;P17661;P08779;P07196;P35527;Q6A162;P78385;O15061;Q07627;Q3LI77;P02538;P22392;Q8NEH6;Q9BYQ3;Q7Z4W3;Q3SY46;P60371;Q9BYP8;Q9BYP9;P08727;P41219;Q13515;Q9BYQ0;Q3LI54;P60409;P60413;P04264;Q3LHN2;Q2M2I5;P13645;Q3LI83;Q3SYF9;Q9BYR4;Q9H307;P08729;O75690;P60410;Q3LHN0;P19012;A1A580;I6L9F6;Q6KKB66;Q7Z794;Q3LI67;P78386;Q9BYR6;O95678;Q3LI64;Q14533;P30622;Q9BYQ7;Q9BYQ6;Q03252;Q9BYQ2;Q7Z3Z0;Q3LI58;Q3LI81;O76014;Q9C075;Q14532;Q3LI72;O76013;P19013;P12036;Q701N2;Q0D2I5;Q3LI66;A8MX34;P13647;Q6A163;Q13835;Q8N9Z9;Q3LI68;O76011;Q6L8G8;Q8IUC3;Q6L8G9;P60331;P48668;P14136;P60372;P0C5Y4;P60411;P05783;Q8IUC1;Q14CN4;Q01546;P56537;P26371;O76009;Q7Z3Y8;Q701N4;P60014;Q7Z3Y7;Q3LI59;Q9BYR3;P15924;Q9BYR0;Q9H7C4;Q9BYS1;O76015;P02545;Q9BYR5;Q5XKE5;Q6L8G5;Q9BYQ5;Q9BYR9;P59990;Q8IUB9;P20700;Q8IUC0;Q9BYU5;Q3LI60;Q8N1N4;Q9BYQ9;Q3SY84;Q3LI62;Q3LI76;Q6L8H1;Q9NSB4;P08670;Q3LI61;P0C7H8;P04259;Q16352;Q8N1A0;Q7RTS7;A8MVA2;Q52LG2;Q9BYR8;Q15323;P12035;P60412;A8MUX0;Q8TDZ2;Q9BYQ4;P02533;Q3LI63;Q3MIV0;Q86Y46;Q9BYR2;A8MXZ3;P13646;Q3LHN1;Q6L8H4;P35900;Q9BYT5;Q99456;P60369;Q8IUG1;P35908;Q9NZQ3;Q9BYQ8;Q04695;O43790;P60370;Q92764;Q8IUC2;P07197;A8MTY7;Q6PEX3;A6NCN2}

2511 Pathogen[ P03363] interacts with 169 human partners: {P78385;P05783;Q6L8H2;Q3LI72;Q52LG2;P02533;Q9BYR9;Q8N9Z9;P08779;P60370;Q701N2;P02538;A8MUX0;Q13835;P07197;Q14533;Q9BYR6;P13645;Q14525;Q16352;Q3LI81;O15061;P0C5Y4;A8MTY7;P02545;P60411;Q9BYR7;A8MXZ3;Q92764;P60412;Q3LI68;Q3SY46;Q3LI76;Q9BYR3;Q9BYQ6;Q3LI77;Q7RTS7;O76014;P60369;Q86Y46;Q3LI62;Q9BYT5;P60372;P20700;P60368;Q3SY84;P59991;Q3LI83;Q8IUB9;Q3SYF9;Q3LI70;Q99456;Q8IUC3;P59990;P60409;Q8NEH6;Q9H307;A6NCN2;P60328;O76009;Q3LI66;Q6L8G8;O76011;Q3LHN1;Q9BYU5;Q9BYP8;P48668;Q7Z3Y8;Q9BYP9;Q15323;Q6L8H1;P05787;Q7Z3Y9;P15924;P35908;Q3LHN0;Q9H7C4;Q6L8G5;Q9BYQ9;P60331;Q9BYP9;Q3MIV0;Q03252;Q9C075;P35900;Q6A162;P07196;P08727;P30622;Q3LI60;P60014;Q9BYR5;P60329;O43790;Q7Z4W3;Q8IUC1;O76013;A1A580;P13647;Q0D2I5;Q14532;P04259;Q14CN4;Q3LI59;P35527;O95678;I6L9F6;Q6L8G9;Q6A163;P08670;P17661;P56537;Q9BYR8;P14136;Q6PEX3;Q9BYR2;A8MVA2;Q3LI64;Q9NSB2;Q3LI58;Q3LHN2;Q9BYQ2;Q9BYR0;P08729;P41219;Q8IUC0;Q3LI67;Q701N4;P60413;Q3LI54;Q3LI61;Q7Z3Z0;Q7Z3Y7;Q9BYS1;Q9BYQ0;Q9NZQ3;P12035;Q9BYQ3;Q3LI73;P78386;P0C7H8;P19013;Q6L8G4;P13646;O76015;P12036;Q6KKB66;Q01546;Q9BYR4;Q8IUC2;Q6L8H4;P60410;Q8N1N4;P04264;P26371;Q9BYQ4;Q5XKE5;Q7Z794;Q2M2I5;Q9BYQ8;Q9NSB4;Q8N1A0;Q13515;A8MX34;Q04695;P60371;Q3LI63;Q9BYQ5}

2512 [Cluster 229]GO:0032996+C cellular\_component [name] Bcl3-Bcl10 complex [def] "A protein complex containing Bcl3 and Bcl10, which forms when Akt1 is activated by TNF-alpha to phosphorylate Bcl10\_ the Bcl3-Bcl10 complex is translocated to the nucleus." [PMID]

2513 Pathogen[ Q2Q067] interacts with 1 human partners: {P20749}

2514 Pathogen[ P0C214] interacts with 1 human partners: {P20749}

2515 Pathogen[ P03346] interacts with 1 human partners: {P20749}

2516 Pathogen[ Q85601] interacts with 1 human partners: {P20749}

2517 Pathogen[ P14079] interacts with 1 human partners: {P20749}

2518 Pathogen[ P03383] interacts with 1 human partners: {P20749}

2519 Pathogen[ P03410] interacts with 1 human partners: {P20749}

2520 Pathogen[ P14075] interacts with 1 human partners: {P20749}

2521 Pathogen[ P0C206] interacts with 1 human partners: {P20749}

2522 Pathogen[ P03363] interacts with 1 human partners: {P20749}

2523 [Cluster 230]GO:0031515+C cellular\_component [name] tRNA (m1A) methyltransferase complex [def] "A protein complex involved in the catalysis of the formation of the modified nucleotide 1-methyladenosine (m1A) in tRNA. In yeast, it is a heterotetramer of two subunits, Gcd10p and Gcd14p, while in bacteria and archaea it is a homotetramer." [PMID]

2524 Pathogen[ Q2Q067] interacts with 2 human partners: {Q96FX7;Q9BVS5}

2525 Pathogen[ P0C214] interacts with 2 human partners: {Q96FX7;Q9BVS5}

2526 Pathogen[ P03346] interacts with 2 human partners: {Q96FX7;Q9BVS5}

2527 Pathogen[ Q85601] interacts with 2 human partners: {Q9BVS5;Q96FX7}

2528 Pathogen[ P14079] interacts with 2 human partners: {Q9BVS5;Q96FX7}

2529 Pathogen[ P03383] interacts with 2 human partners: {Q9BVS5;Q96FX7}

2530 Pathogen[ P03410] interacts with 2 human partners: {Q96FX7;Q9BVS5}

2531 Pathogen[ P14075] interacts with 2 human partners: {Q9BVS5;Q96FX7}

2532 Pathogen[ P0C206] interacts with 2 human partners: {Q96FX7;Q9BVS5}

2533 Pathogen[ P03363] interacts with 2 human partners: {Q96FX7;Q9BVS5}

2534 [Cluster 231]GO:0005826+C cellular\_component [name] actomyosin contractile ring [def] "A cytoskeletal structure composed of actin filaments and myosin that forms beneath the plasma membrane of many cells, including animal cells and yeast cells, in a plane perpendicular to the axis of the spindle, i.e. the cell division plane. Ring contraction is associated with centripetal growth of the membrane that divides the cytoplasm of the two daughter cells. In animal cells, the contractile ring is located inside the plasma membrane at the location of the cleavage furrow. In budding fungal cells, e.g. mitotic S.

cerevisiae cells, the contractile ring forms beneath the plasma membrane at the mother-bud neck before mitosis." [GOC

2535 Pathogen[ Q2Q067] interacts with 3 human partners: {Q9NQW6;Q9UKX2;P35579}

2536 Pathogen[ P0C214] interacts with 2 human partners: {Q9UKX2;Q7L5Y9}

2537 Pathogen[ P03346] interacts with 3 human partners: {Q9NQW6;P35579;Q9UKX2}

2538 Pathogen[ Q85601] interacts with 4 human partners: {Q9NQW6;P35579;Q7L5Y9;Q9UKX2}

2539 Pathogen[ P14079] interacts with 4 human partners: {Q9NQW6;P35579;Q7L5Y9;Q9UKX2}

2540 Pathogen[ P03383] interacts with 2 human partners: {Q9UKX2;P35579}

2541 Pathogen[ P03410] interacts with 4 human partners: {Q9UKX2;P35579;Q9NQW6;Q7L5Y9}

2542 Pathogen[ P14075] interacts with 3 human partners: {Q9UKX2;Q7L5Y9;P35579}

2543 Pathogen[ P0C206] interacts with 4 human partners: {Q9NQW6;Q7L5Y9;P35579;Q9UKX2}

2544 Pathogen[ P03363] interacts with 3 human partners: {P35579;Q9NQW6;Q9UKX2}

2545 [Cluster 232]GO:0005770+C cellular\_component [name] late endosome [def] "A prelysosomal endocytic organelle differentiated from early endosomes by lower luminal pH and different protein composition. Late endosomes are more spherical than early endosomes and are mostly juxtannuclear, being concentrated near the microtubule organizing center." [PMID

2546 Pathogen[ Q2Q067] interacts with 15 human partners: {Q7Z3C6;Q9P2Y5;O75351;Q63HQ0;Q99816;Q5VYK3;Q9H267;Q9H9C1;Q9H0R1;Q9Y3E7;Q9NUS5;Q96NA2;Q86VN1;P49754;Q13501}

2547 Pathogen[ P0C214] interacts with 17 human partners: {P49754;O75351;Q5VYK3;Q9NUS5;Q96NA2;Q9H0R1;Q13501;Q9BZQ4;Q9P2Y5;Q9Y3E7;Q99816;Q9H9C1;Q96EK6;Q63HQ0;Q9H492;Q86VN1;Q7Z3C6}

2548 Pathogen[ P03346] interacts with 23 human partners: {Q7Z3C6;Q92622;Q9H6Q3;P49754;Q9H0R1;Q96NA2;Q99816;Q86VN1;Q9BXW6;Q9BUN8;Q9Y3E7;Q96AX1;Q5VYK3;Q9H492;Q9NUS5;Q14596;Q9H9C1;O75351;Q70J99;Q9P2Y5;Q63HQ0;Q9H267;Q13501}

2549 Pathogen[ Q85601] interacts with 19 human partners: {Q9H492;Q5VYK3;Q99816;Q63HQ0;Q9P2Y5;Q9NUS5;Q14596;Q86VN1;P49754;Q9H9C1;Q9H267;Q7Z3C6;O75351;Q9H6Q3;Q96EK6;Q96NA2;Q9Y3E7;Q9H0R1;Q13501}

2550 Pathogen[ P14079] interacts with 28 human partners: {Q9BXW6;Q96NA2;Q86VN1;Q9Y2Q5;Q9H9C1;Q9H492;Q63HQ0;Q14596;Q9GZP9;Q7Z3C6;Q5VYK3;Q9H269;Q9BUN8;Q9BZQ4;Q96AX1;Q9H6Q3;Q13501;Q9H0R1;Q9Y3E7;Q96EK6;O75351;P49754;Q9NUS5;Q99816;Q92622;Q9P2Y5;Q6UWI2;Q9H267}

2551 Pathogen[ P03383] interacts with 13 human partners: {Q7Z3C6;Q5VYK3;Q9Y3E7;Q9BUN8;Q9H9C1;Q99816;Q9NUS5;P49754;Q13501;Q9P2Y5;Q63HQ0;Q86VN1;Q96NA2}

2552 Pathogen[ P03410] interacts with 29 human partners: {Q9Y2Q5;Q9H267;Q9P2Y5;Q9NUS5;O75351;Q70J99;Q5VYK3;Q13501;Q96EK6;Q9GZP9;Q86VN1;Q14596;Q99816;Q9Y3E7;Q6UWI2;Q9H492;Q9BUN8;P49754;Q9H0R1;Q63HQ0;Q9H9C1;Q96NA2;Q7Z3C6;Q9H269;Q9BZQ4;Q9BRK5;Q9BXW6;Q96AX1;Q9H6Q3}

2553 Pathogen[ P14075] interacts with 15 human partners: {Q9P2Y5;Q86VN1;Q96NA2;Q9H9C1;Q9Y3E7;P49754;Q63HQ0;Q9BUN8;Q99816;Q96EK6;Q6UWI2;Q9NUS5;Q13501;Q7Z3C6;Q5VYK3}

2554 Pathogen[ P0C206] interacts with 26 human partners: {Q7Z3C6;Q13501;Q63HQ0;Q9P2Y5;Q9H6Q3;Q9Y3E7;Q9H492;Q9H0R1;P49754;Q86VN1;Q99816;Q14596;Q92622;Q9BUN8;Q9GZP9;Q9BZQ4;Q96AX1;Q96EK6;Q5VYK3;Q9BXW6;Q96NA2;Q6UWI2;O75351;Q9H9C1;Q9H267;Q9NUS5}

2555 Pathogen[ P03363] interacts with 18 human partners: {P49754;Q9P2Y5;Q9H9C1;Q63HQ0;Q9H492;Q9H6Q3;Q9NUS5;O75351;Q92622;Q9H0R1;Q86VN1;Q9BXW6;Q9H267;Q7Z3C6;Q9Y3E7;Q96NA2;Q99816;Q5VYK3}

2556 [Cluster 233]GO:0031429+C cellular\_component [name] box H/ACA snoRNP complex [def] "A box H/ACA RNP complex that is located in the nucleolus." [GOC

2557 Pathogen[ Q2Q067] interacts with 1 human partners: {Q9NY12}

2558 Pathogen[ P0C214] interacts with 1 human partners: {Q9NY12}

2559 Pathogen[ P03346] interacts with 1 human partners: {Q9NY12}

2560 Pathogen[ Q85601] interacts with 1 human partners: {Q9NY12}

2561 Pathogen[ P14079] interacts with 1 human partners: {Q9NY12}

2562 Pathogen[ P03383] interacts with 1 human partners: {Q9NY12}

2563 Pathogen[ P03410] interacts with 1 human partners: {Q9NY12}

2564 Pathogen[ P14075] interacts with 1 human partners: {Q9NY12}

2565 Pathogen[ P0C206] interacts with 1 human partners: {Q9NY12}

2566 Pathogen[ P03363] interacts with 1 human partners: {Q9NY12}

2567 [Cluster 234]GO:0000262+C cellular\_component [name] mitochondrial chromosome [def] "A chromosome found in the mitochondrion of a eukaryotic cell." [GOC

2568 Pathogen[ Q2Q067] interacts with 1 human partners: {Q9UHN1}

2569 Pathogen[ P0C214] interacts with 1 human partners: {Q9UHN1}

2570 Pathogen[ P03346] interacts with 1 human partners: {Q9UHN1}

2571 Pathogen[ Q85601] interacts with 1 human partners: {Q9UHN1}

2572 Pathogen[ P14079] interacts with 1 human partners: {Q9UHN1}

2573 Pathogen[ P03383] interacts with 1 human partners: {Q9UHN1}

2574 Pathogen[ P03410] interacts with 1 human partners: {Q9UHN1}

2575 Pathogen[ P14075] interacts with 1 human partners: {Q9UHN1}

2576 Pathogen[ P0C206] interacts with 1 human partners: {Q9UHN1}

2577 Pathogen[ P03363] interacts with 1 human partners: {Q9UHN1}

2578 [Cluster 235]GO:0042788+C cellular\_component [name] polysomal ribosome [def] "A

ribosome bound to mRNA that forms part of a polysome." [GOC

2579 Pathogen[ Q2Q067] interacts with 4 human partners: {Q06787;P62424;Q8NE71;Q7Z417}

2580 Pathogen[ P0C214] interacts with 4 human partners: {Q06787;Q7Z417;Q8NE71;P62424}

2581 Pathogen[ P03346] interacts with 5 human partners: {Q06787;P62424;P51843;Q7Z417;Q8NE71}

2582 Pathogen[ Q85601] interacts with 4 human partners: {Q06787;P62424;Q8NE71;Q7Z417}

2583 Pathogen[ P14079] interacts with 4 human partners: {Q7Z417;P62424;Q8NE71;Q06787}

2584 Pathogen[ P03383] interacts with 4 human partners: {Q7Z417;Q8NE71;P62424;Q06787}

2585 Pathogen[ P03410] interacts with 4 human partners: {Q8NE71;P62424;Q06787;Q7Z417}

2586 Pathogen[ P14075] interacts with 4 human partners: {Q7Z417;Q8NE71;Q06787;P62424}

2587 Pathogen[ P0C206] interacts with 4 human partners: {Q06787;Q7Z417;Q8NE71;P62424}

2588 Pathogen[ P03363] interacts with 4 human partners: {Q06787;Q8NE71;P62424;Q7Z417}

2589 [Cluster 236]GO:0005768+C cellular\_component [name] endosome [def] "A membrane-bounded organelle to which materials ingested by endocytosis are delivered." [ISBN

2590 Pathogen[ Q2Q067] interacts with 91 human partners: {Q92783;Q7Z3C6;Q9P2Y5;Q9UL45;P46108;Q9UH99;O75351;Q7LBR1;O15126;Q63HQ0;O60664;O60296;Q9H444;Q56VL3;Q99816;Q13829;Q9H1H9;Q8WV92;Q9NZD8;Q5VYK3;Q9UJY4;Q9BRG1;Q9NX40;P36543;Q9UJY5;Q96EY5;Q8N1B4;Q96EV8;Q9UBQ0;Q7L804;Q7Z614;Q8NEU8;Q9H267;P61077;O75886;Q6ICB4;O15127;Q96L92;Q9H9C1;Q9HCC9;Q5VIR6;A5D8V6;Q92562;Q13114;O75843;Q9HD42;Q9UIL1;Q9UQN3;Q9UN37;Q96H20;Q9H0R1;Q9H7P6;Q9Y2J4;Q9NZZ3;Q9Y4E1;O60291;Q9UK41;Q9H4A6;Q8TAC9;Q9Y3E7;O75436;Q96QK1;Q9H9H4;Q96CF2;Q9UPV9;Q9Y3C5;O60759;Q9H0A6;Q9NR09;Q9NP79;O75791;O75382;O75154;O43633;O14964;Q9NUS5;P24941;Q96NA2;Q9UKG1;Q86YV9;Q9BVN2;P14672;P46527;Q9BXF6;Q86VN1;O75674;Q13501;Q8NEZ2;Q9NZ52;Q15276;O75901}

2591 Pathogen[ P0C214] interacts with 94 human partners: {Q6ICB4;Q9H0A6;Q9H4A6;Q96CF2;O75351;Q9UPV9;Q9Y2J4;P62993;Q9UJY5;O60759;Q13829;Q9Y4E1;Q96QK1;Q8TAC9;Q9NP79;Q9H444;Q9HD42;Q5VYK3;P46527;Q9NUS5;Q96NA2;Q641Q2;O14964;O75886;Q86YV9;O15127;Q9Y3C5;P36543;O60296;Q9UQN3;Q7Z614;Q9UK41;Q9H0R1;Q9UKG1;Q92562;O75843;P61077;Q9UH99;Q7L804;Q13501;Q9BY43;Q9H7P6;Q7LBR1;P11168;Q96EY5;Q08AM6;Q9UJY4;Q9NZD8;Q9HCC9;O15126;Q9BRG1;O75901;Q96L92;Q56VL3;Q8NEU8;Q9UL45;P24941;Q9UIL1;Q9NZ52;Q8NEZ2;Q9BXF6;Q96EV8;Q8N1B4;Q9P2Y5;Q9Y3E7;Q99816;Q9NV92;O75436;O60291;Q5VIR6;Q13114;Q9BVN2;Q9UBQ0;Q9NZZ3;Q5SNT6;Q9NR09;O60664;Q96H20;A5D8V6;Q9UN37;Q9H9C1;Q9UN37;Q9H9C1;Q92783;O43633;O75674;Q9H9H4;P46108;Q63HQ0;P14672;Q86VN1;O75154;Q7Z3C6;Q9NX40}

2592 Pathogen[ P03346] interacts with 130 human partners: {Q13596;Q56VL3;O75382;O60664;Q86YV9;Q5VIR6;Q86XT2;Q96QK1;O95405;Q7Z3C6;Q96A65;Q15036;A5D8V6;Q9P253;Q92622;O75901;Q9UIL1;Q9Y3C5;Q9HD42;Q9H4A6;P24941;Q9UH99;Q9Y6D5;O60759;O75886;Q8NEZ2;Q9H3S7;Q96T51;Q9H0R1;Q96NA2;Q9NX40;P36543;Q99816;Q9NZD8;Q9H1H9;Q86VN1;O60296;O95630;P62993;Q7Z614;Q9UK41;Q9UBQ0;Q92562;Q13114;Q9NV92;Q6P3W7;Q13829;Q4V328;Q96AX9;A8K0Z3;P61077;Q96H20;Q96FZ7;Q93045;Q9H0A6;Q96CF2;Q9NZZ3;Q9BXW6;Q14694;O75843;Q7Z3T8;Q9Y3E7;Q7L804;O60493;Q8NEU8;Q8N4B1;Q8TAC9;Q96L92;Q9UNH7;Q96EV8;O43633;Q9UPV9;Q9H444;Q96AX1;Q8WV92;Q9H9H4;P42566;Q9UJY4;Q8N1B4;Q9Y5X2;Q5VYK3;Q5JSH3;Q9NUS5;Q9BRG1;O15126;Q9Y2J4;Q9UL45;P46108;P30622;Q9UQN3;O75436;O60291;Q9UJ41;Q9Y5H1;Q96S99;Q9BY43;Q92783;O95219;Q9NP79;Q9UKG1;Q9H9C1;Q9NR09;O75351;Q9BXF6;O14964;Q86YS3;Q9BVN2;O60749;Q7LBR1;Q70J99;Q9UJY5;O75154;O75674;Q9P2Y5;Q6ICB4;Q63HQ0;P46527;P14672;Q96EY5;Q9NZ52;Q9H7P6;Q9H267;Q9HCC9;Q9UN37;Q86Y82;Q15276;Q13501;Q9UBP0;O15127;O75791}

2593 Pathogen[ Q85601] interacts with 105 human partners: {Q13596;Q96QK1;Q5VYK3;Q99816;O60664;Q63HQ0;O15126;O75843;Q96S99;P11168;Q9NP79;Q08AM6;P62993;Q9UQN3;O75154;Q96A65;Q9H7P6;Q7L804;Q9UJY4;Q96H20;Q5JSH3;Q9P253;Q8TAC9;Q9P2Y5;Q9UBP0;Q9Y3C5;Q8WV92;Q86YS3;Q15036;Q8NEU8;Q9NUS5;Q9BRG1;Q9H0A6;P30622;O60759;Q96T51;Q9BVN2;Q9H9H4;Q86VN1;Q9H1H9;P46108;O43633;Q7Z614;Q5VIR6;Q7LBR1;Q92562;Q9UPV9;Q9UJ41;Q13114;O75886;Q9UJY5;P61077;Q96FZ7;Q9H9C1;Q86YV9;Q9H267;Q7Z3C6;Q96CF2;Q96L92;O60291;O60296;Q9UH99;O75351;Q9UK41;Q9BY43;Q9BXF6;Q96EV8;Q9HCC9;Q9H444;Q6ICB4;Q8N1B4;Q92783;Q9NZZ3;Q9Y2J4;O14964;O95630;Q96EK6;Q9H4A6;O75382;O75436;O75901;Q9UKG1;Q9UBQ0;O15127;Q9NR09;Q9NX40;Q96NA2;Q13829;Q8NEZ2;Q9NZ52;Q9UIL1;P14672;Q96EY5;Q9UNH7;Q9UN37;P24941;Q9Y3E7;Q9HD42;Q9H0R1;Q13501;P46527;O75674;O75791;P36543;A5D8V6}

2594 Pathogen[ P14079] interacts with 143 human partners: {P36543;Q9BXW6;Q96QK1;Q9H9H4;O75886;Q86YV9;Q7L804;Q96NA2;Q9H295;Q86VN1;Q9UNH7;Q92562;Q96CF2;Q96EY5;Q15036;Q9Y4E1;Q9UKG1;Q9H0A6;Q8NEV8;Q9UJY4;Q96H20;Q9Y2Q5;Q8NEU8;Q9BVN2;O60664;Q9H9C1;Q9UJY5;O60493;Q6BDI9;Q86XT2;Q9H1K0;Q9BY43;Q63HQ0;P27352;P14672;Q9Y6D5;Q9NP79;Q15276;Q9H7P6;P42566;Q6VEQ5;Q92783;Q92M389;O95405;Q7LBR1;Q9HD42;O75674;Q9UIL1;Q86YS3;Q9HCC9;Q9UHA4;Q9Y2J4;Q9UJ41;O60759;Q96S99;Q96L92;Q7Z3C6;Q9H3E2;Q5VYK3;Q96NT0;P61077;Q9H5N1;Q9H269;Q9NZ52;O00461;Q9NR09;O75843;Q93045;O75791;Q9Y287;Q9NX40;Q9Y5X2;Q9BXF6;Q96T51;Q8TAC9;Q9UL45;Q9NQA3;O43633;Q86T03;Q15075;Q641Q2;Q5JSH3;Q6IAA8;Q8N4B1;Q96AX1;Q8N8Q9;Q9H1H9;A5D8V6;O60749;Q8N8Y2;Q9P253;Q8NEZ2;Q5VIR6;Q8WU20;Q13596;Q13501;Q8N1B4;Q9UN37;Q7Z614;O60831;Q96FZ7;O60296;Q9PNUM4;Q96A65;Q7Z3T8;Q6ICB4;Q9H0R1;P62993;A8K0Z3;Q9UBQ0;Q4V328;Q9Y3E7;P46527;Q96AW1;Q8WV92;O75154;Q9Y3C5;Q96EV8;Q96EK6;O75351;Q9NV92;Q13829;Q9NUS5;Q9NZZ3;O75436;Q9H444;Q9BRG1;Q9UH99;Q7RTP0;Q99816;Q9H4A6;Q92622;Q9P2Y5;Q56VL3;O75382;O75901;Q6UWI2;P46108;Q5SNT6;Q9H267;Q13114;Q9UQN3;P30622}

2595 Pathogen[ P03383] interacts with 76 human partners: {Q56VL3;Q9UJY4;Q7L804;O15126;Q7Z3C6;O75791;Q9NZD8;Q8N1B4;Q96H20;Q8TAC9;Q9H7P6;Q5VYK3;Q9Y3E7;Q8NEU8;Q9NZZ3;Q9UH99;Q9H9C1;O75886;Q8NEZ2;Q99816;Q7Z614;Q9Y4E1;Q9NUS5;Q96EV8;Q9UIL1;Q4V328;P61077;Q9H1H9;P11168;O75901;Q96L92;O60296;Q9Y2J4;Q9UK41;Q7LBR1;O75843;O43633;P46527;P24941;Q9UJY5;Q9BXF6;Q9H444;Q9UPV9;Q9H9H4;Q9NX40;Q86YV9;Q9BRG1;Q9H4A6;Q9HD42;Q13501;Q92783;O75436;Q9P2Y5;O15127;Q96QK1;Q9NR09;O60831;P36543;Q13829;Q9UBQ0;P14672;O60664;O14964;Q63HQ0;Q86VN1;Q9UN37;Q13114;Q96EY5;O75154;Q9UQN3;Q96NA2;Q15276;Q5VIR6;Q9BVN2;Q9HCC9;Q9NZ52}

2596 Pathogen[ P03410] interacts with 148 human



partners: {Q9BVN2; Q5SNT6; Q92562; Q9Y2Q5; Q5JSH3; Q7L804; O75154; P46527; Q13829; Q9H267; O95405; O43633; Q7Z614; P30622; Q96L92; Q8N8Y2; Q9P2Y5; Q9UJ41; Q96S99; Q8TAC9; Q9H7P6; Q86XT2; Q86T03; Q9H9H4; Q13596; Q9Y2J4; Q56VL3; Q9NZ52; Q8N4B1; Q9NP79; Q9NUS5; O75351; Q9H1H9; O75674; O75382; Q70J99; Q9H3E2; O75843; Q9UH99; O60749; Q96AW1; Q8N1B4; P11168; Q5VYK3; Q2M389; Q13501; Q92783; Q9BY43; Q96QK1; Q9Y287; Q96EK6; Q86VN1; Q9P253; O60664; Q9H4A6; Q9NV92; O00461; Q9UHA4; Q9UJY5; Q9HCC9; Q9UL45; O60759; O95219; A5D8V6; Q9UBQ0; Q9UNH7; Q99816; Q9NR09; Q86YS3; Q9Y3E7; Q8NEZ2; Q9UQN3; Q08AM6; Q6UWI2; Q8NEV8; Q9UJL1; Q9UPV9; Q86YV9; Q9Y3C5; P24941; Q9HD42; Q9UN37; Q96A65; Q641Q2; O15127; Q15049; Q8WV92; Q9BXF6; Q15036; Q9H444; Q9NZZ3; Q9Y4E1; Q9H1K0; O75436; Q9Y6D5; Q9BRG1; Q6VEQ5; Q96FZ7; Q9H0R1; O60296; Q6ICB4; Q96T51; Q6IAA8; P46108; Q63HQ0; O75901; Q8N8Q9; Q8NEU8; Q9H9C1; O60291; Q7RTP0; Q96EY5; Q8WU20; Q5VIR6; Q9NX40; Q9H5N1; Q96NA2; Q4V328; O60831; Q7Z3C6; Q96H20; O15126; Q96CF2; P27352; P62993; Q9H269; P42566; Q7LBR1; Q9NQA3; Q9H0A6; Q6BDI9; Q96EV8; Q9UKG1; Q93045; P36543; Q7Z3T8; O75886; Q9UJY4; O60493; Q9BXW6; A8K0Z3; Q13114; P61077; Q15276; O75791; Q9Y5X2; Q5MNZ9; Q96AX1}

2597 Pathogen[ P14075] interacts with 82 human partners: {Q9P2Y5; Q56VL3; Q9UJY4; Q96EY5; Q9H1H9; P24941; Q8N1B4; O75886; O75791; O15127; Q7LBR1; Q9H444; Q9BVN2; Q92783; Q9NP79; Q9NZ52; Q9UBQ0; Q86VN1; Q96NA2; O60296; Q7Z614; Q9UK41; Q9H9C1; Q8NEU8; O15126; Q9NZD8; Q4V328; O75901; P61077; Q8NEZ2; Q96H20; Q9UPV9; P46527; Q9Y3E7; O00461; Q9H9H4; O60831; Q9Y2J4; Q9HCC9; O14964; Q7L804; Q9UQN3; Q63HQ0; Q86YV9; Q9NZZ3; Q13114; Q9UJL1; Q9NX40; Q5VIR6; O75436; Q96EV8; Q9NV92; Q9BXF6; Q9H7P6; Q9UH99; Q9NR09; O75843; Q8TAC9; Q9HD42; Q9BRG1; P11168; O75154; Q99816; Q13829; Q9Y287; Q96EK6; P14672; Q641Q2; Q9H4A6; Q6UWI2; Q9Y4E1; Q9NUS5; Q9UJY5; Q13501; Q7Z3C6; O60664; Q9UN37; Q96L92; Q15276; Q5VYK3; Q96QK1; P36543}

2598 Pathogen[ P0C206] interacts with 142 human partners: {Q7Z3C6; O14964; Q9BRG1; Q96AX9; Q96L92; Q13501; Q13829; Q63HQ0; O60291; O15127; Q9UKG1; Q9UN37; Q9H4A6; P36543; Q8NEZ2; Q9P2Y5; Q9H444; Q9UHA4; Q7LBR1; Q9UL45; Q9UBP0; Q13114; Q641Q2; Q9Y3E7; Q9UNH7; Q9HCC9; Q9BXF6; Q9Y287; O60759; Q8NEU8; Q92562; O60664; O75154; Q9NV92; O75382; Q9UH99; Q9H0R1; Q9H1K0; Q9UJL1; Q9NX40; Q8IWB7; O95630; Q9UQN3; Q96T51; Q86VN1; O60493; Q6ICB4; Q2M389; Q9UJY4; O60831; Q13596; Q99816; Q92783; Q9Y4E1; Q9H1H9; P30622; Q96A65; Q15036; Q9UPV9; Q6P3W7; O75791; P62993; Q9UK41; Q9H9H4; Q56VL3; Q9UBQ0; P11168; Q9H7P6; Q92622; O60749; Q7Z3T8; Q6VEQ5; A5D8V6; Q9H0A6; Q93045; Q9NR09; Q5VIR6; Q8WU20; Q96H20; Q9NZ52; Q9Y6D5; Q9H3E2; Q96EV8; Q9UJY5; Q86XT2; O00461; O60296; O95405; Q9Y2J4; P46527; O43633; Q96AX1; Q96S99; Q5SNT6; Q96EK6; Q7Z614; Q96CF2; Q9UJ41; Q9H5N1; Q5VYK3; Q9BY43; P42566; O75436; Q8N4B1; Q9BXW6; P14672; Q9P253; Q4V328; O75843; Q9HD42; Q96NA2; Q6UWI2; P61077; P46108; Q9NP79; Q96QK1; Q5JSH3; Q9NZZ3; Q7L804; Q96FZ7; O75886; Q8N1B4; Q86YV9; O75351; Q8TAC9; O15126; Q8WV92; Q86YS3; Q9BW19; Q86T03; O75674; P24941; Q6BDI9; Q9H9C1; O75901; Q9H267; Q9Y3C5; Q15276; Q96EY5; Q9NUS5; Q08AM6; Q9BVN2}

2599 Pathogen[ P03363] interacts with 98 human partners: {Q9HCC9; Q9UPV9; Q9UNH7; O60664; Q9H3S7; Q7L804; Q9P2Y5; Q9H9C1; Q6ICB4; P36543; O60291; Q9UJY4; Q9Y3C5; O75886; Q63HQ0; Q96L92; Q8N1B4; Q9H444; O95219; Q92783; Q96QK1; Q96A65; Q9NZ52; O75436; Q9NUS5; Q9NZZ3; P24941; Q9H4A6; O75791; Q8N4B1; Q96H20; O60493; Q96T51; Q93045; O60296; O60749; Q9UJ41; O75351; Q9Y2J4; Q8NEU8; O95405; Q9Y4E1; P30622; Q9UN37; Q92622; Q9H0R1; Q9NR09; Q86VN1; Q9BXW6; Q9BRG1; Q9H267; O75901; Q7Z3C6; Q9UK41; O75674; Q9Y3E7; Q7LBR1; P46108; O14964; Q96EY5; O75154; Q7Z614; O75382; Q9BXF6; Q9UBQ0; Q13829; Q5VIR6; Q8WV92; Q9BVN2; O15126; Q9H0A6; Q8NEZ2; Q13114; Q9UJL1; P14672; Q96NA2; O75843; Q99816; Q13596; O60759; O15127; P61077; Q9UQN3; Q9NZD8; Q9H7P6; Q9H1H9; Q9NP79; Q9H9H4; Q9UJY5; Q9UKG1; Q15276; Q5VYK3; Q9NX40; Q9HD42; Q96AX9; Q9UH99; Q96CF2; A5D8V6}

2600 [Cluster 237]GO:0016342+C cellular\_component [name] catenin complex [def] "Complex of peripheral cytoplasmic proteins (alpha-, beta- and gamma-catenin) that interact with the cytoplasmic region of uvomorulin/E-cadherin to connect it to the actin cytoskeleton." [ISBN

2601 Pathogen[ Q2Q067] interacts with 2 human partners: {O15105; O95996}

2602 Pathogen[ P0C214] interacts with 1 human partners: {O15105}

2603 Pathogen[ P03346] interacts with 2 human partners: {O15105; O95996}

2604 Pathogen[ Q85601] interacts with 2 human partners: {O95996; O15105}

2605 Pathogen[ P14079] interacts with 2 human partners: {O95996; O15105}

2606 Pathogen[ P03383] interacts with 1 human partners: {O15105}

2607 Pathogen[ P03410] interacts with 2 human partners: {O95996; O15105}

2608 Pathogen[ P14075] interacts with 1 human partners: {O15105}

2609 Pathogen[ P0C206] interacts with 2 human partners: {O95996; O15105}

2610 Pathogen[ P03363] interacts with 2 human partners: {O95996; O15105}

2611 [Cluster 238]GO:0005657+C cellular\_component [name] replication fork [def] "The Y-shaped region of a replicating DNA molecule, resulting from the separation of the DNA strands and in which the synthesis of new strands takes place. Also includes associated protein complexes." [GOC

2612 Pathogen[ Q2Q067] interacts with 9 human partners: {Q12888; Q9NPF5; P41182; Q96T88; O14757; P63146; P26358; O60934; Q92769}

2613 Pathogen[ P0C214] interacts with 8 human partners: {Q96T88; P26358; Q92769; P41182; Q12888; O14757; P63146; Q9NPF5}

2614 Pathogen[ P03346] interacts with 10 human partners: {Q12888; Q9NS91; O14757; P26358; P63146; Q92769; P41182; O60934; Q96T88; Q9NPF5}

2615 Pathogen[ Q85601] interacts with 10 human partners: {P63146; P26358; Q12888; O14757; Q92769; Q96T88; P41182; Q9NS91; Q9NPF5; O60934}

2616 Pathogen[ P14079] interacts with 7 human partners: {O60934; P41182; Q9NPF5; Q92769; P26358; Q12888; P63146}

2617 Pathogen[ P03383] interacts with 6 human partners: {Q12888; O14757; Q9NPF5; Q92769; P63146; P26358}

2618 Pathogen[ P03410] interacts with 8 human partners: {Q9NPF5; P26358; Q92769; P63146; O14757; P41182; Q12888; O60934}

2619 Pathogen[ P14075] interacts with 6 human partners:{P26358;Q9NPF5;Q92769;Q12888;P63146;O14757}

2620 Pathogen[ P0C206] interacts with 9 human partners:{Q92769;Q9NPF5;P41182;O60934;P26358;Q9NS91;Q12888;Q96T88;P63146}

2621 Pathogen[ P03363] interacts with 7 human partners:{Q9NPF5;P63146;P26358;Q96T88;Q9NS91;Q12888;O14757}

2622 [Cluster 239]GO:0044445+C cellular\_component [name] cytosolic part [def] "Any constituent part of cytosol, that part of the cytoplasm that does not contain membranous or particulate subcellular components." [GOC]

2623 Pathogen[ Q2Q067] interacts with 2 human partners:{Q96B36;O00170}

2624 Pathogen[ P0C214] interacts with 2 human partners:{O00170;Q96B36}

2625 Pathogen[ P03346] interacts with 4 human partners:{O14908;O00170;Q96B36;O94972}

2626 Pathogen[ Q85601] interacts with 2 human partners:{Q96B36;O00170}

2627 Pathogen[ P14079] interacts with 3 human partners:{O00170;Q96B36;O14908}

2628 Pathogen[ P03383] interacts with 2 human partners:{O00170;Q96B36}

2629 Pathogen[ P03410] interacts with 3 human partners:{O14908;Q96B36;O00170}

2630 Pathogen[ P14075] interacts with 2 human partners:{Q96B36;O00170}

2631 Pathogen[ P0C206] interacts with 3 human partners:{Q96B36;O14908;O00170}

2632 Pathogen[ P03363] interacts with 4 human partners:{O94972;Q96B36;O14908;O00170}

2633 [Cluster 240]GO:0005795+C cellular\_component [name] Golgi stack [def] "The set of thin, flattened membrane-bounded compartments, called cisternae, that form the central portion of the Golgi complex. The stack usually comprises cis, medial, and trans cisternae\_ the cis- and trans-Golgi networks are not considered part of the stack." [GOC]

2634 Pathogen[ Q2Q067] interacts with 4 human partners:{Q05084;Q14746;Q9Y296;O75674}

2635 Pathogen[ P0C214] interacts with 4 human partners:{Q14746;Q9Y296;Q05084;O75674}

2636 Pathogen[ P03346] interacts with 8 human partners:{Q14746;Q14789;Q6XZF7;Q05084;Q9Y296;Q9HC24;O75674;Q9HBF4}

2637 Pathogen[ Q85601] interacts with 5 human partners:{Q14746;Q9HBF4;Q9Y296;Q05084;O75674}

2638 Pathogen[ P14079] interacts with 8 human partners:{Q9Y296;Q14789;Q14746;Q6XZF7;Q05084;Q9HC24;O75674;Q9HBF4}

2639 Pathogen[ P03383] interacts with 3 human partners:{Q14746;Q9Y296;Q05084}

2640 Pathogen[ P03410] interacts with 8 human partners:{Q9HC24;O75674;Q05084;Q14789;Q6XZF7;Q14746;Q9HBF4;Q9Y296}

2641 Pathogen[ P14075] interacts with 4 human partners:{Q14746;Q14789;Q05084;Q9Y296}

2642 Pathogen[ P0C206] interacts with 9 human partners:{Q14789;Q9Y296;Q14746;Q9HC24;Q6XZF7;O75674;Q9HBF4;Q05084;Q99986}

2643 Pathogen[ P03363] interacts with 6 human partners:{Q14789;Q14746;Q6XZF7;O75674;Q05084;Q9Y296}

2644 [Cluster 241]GO:0000800+C cellular\_component [name] lateral element [def] "A proteinaceous core found between sister chromatids during meiotic prophase." [GOC]

2645 Pathogen[ Q2Q067] interacts with 2 human partners:{Q06609;Q9BX26}

2646 Pathogen[ P0C214] interacts with 2 human partners:{Q06609;Q9BX26}

2647 Pathogen[ P03346] interacts with 2 human partners:{Q06609;Q9BX26}

2648 Pathogen[ Q85601] interacts with 2 human partners:{Q9BX26;Q06609}

2649 Pathogen[ P14079] interacts with 3 human partners:{Q9BX26;Q9UQE7;Q06609}

2650 Pathogen[ P03383] interacts with 2 human partners:{Q06609;Q9BX26}

2651 Pathogen[ P03410] interacts with 3 human partners:{Q9UQE7;Q9BX26;Q06609}

2652 Pathogen[ P14075] interacts with 2 human partners:{Q9BX26;Q06609}

2653 Pathogen[ P0C206] interacts with 3 human partners:{Q9BX26;Q9UQE7;Q06609}

2654 Pathogen[ P03363] interacts with 2 human partners:{Q06609;Q9BX26}

2655 [Cluster 242]GO:0005688+C cellular\_component [name] U6 snRNP [def] "A ribonucleoprotein complex that contains small nuclear RNA U6." [GOC]

2656 Pathogen[ Q2Q067] interacts with 2 human partners:{Q13838;Q9Y4Z0}

2657 Pathogen[ P0C214] interacts with 2 human partners:{Q9Y4Z0;Q13838}

2658 Pathogen[ P03346] interacts with 2 human partners:{Q9Y4Z0;Q13838}

2659 Pathogen[ Q85601] interacts with 2 human partners:{Q9Y4Z0;Q13838}

2660 Pathogen[ P14079] interacts with 2 human partners:{Q13838;Q9Y4Z0}

2661 Pathogen[ P03383] interacts with 2 human partners:{Q13838;Q9Y4Z0}

2662 Pathogen[ P03410] interacts with 2 human partners:{Q13838;Q9Y4Z0}

2663 Pathogen[ P14075] interacts with 2 human partners:{Q9Y4Z0;Q13838}

2664 Pathogen[ P0C206] interacts with 2 human partners:{Q9Y4Z0;Q13838}

2665 Pathogen[ P03363] interacts with 2 human partners:{Q9Y4Z0;Q13838}

2666 [Cluster 243]GO:0008275+C cellular\_component [name] gamma-tubulin small complex [def] "A complex usually comprising two gamma-tubulin molecules and two conserved non-tubulin proteins. Some gamma-tubulin small complexes are thought to be the repeating unit making up the core of the gamma-tubulin ring complex." [PMID]

2667 Pathogen[ Q2Q067] interacts with 1 human partners:{Q9HC77}

2668 Pathogen[ P0C214] interacts with 1 human partners:{Q9HC77}

2669 Pathogen[ P03346] interacts with 1 human partners:{Q9HC77}

2670 Pathogen[ Q85601] interacts with 1 human partners:{Q9HC77}

2671 Pathogen[ P14079] interacts with 1 human partners:{Q9HC77}

2672 Pathogen[ P03383] interacts with 1 human partners:{Q9HC77}

2673 Pathogen[ P03410] interacts with 1 human partners:{Q9HC77}

2674 Pathogen[ P14075] interacts with 1 human partners:{Q9HC77}

2675 Pathogen[ P0C206] interacts with 1 human partners:{Q9HC77}

2676 Pathogen[ P03363] interacts with 1 human partners:{Q9HC77}

2677 [Cluster 244]GO:0045120+ cellular\_component [name] pronucleus [def] "The nucleus of either the ovum or the spermatozoon following fertilization. Thus, in the fertilized ovum, there are two pronuclei, one originating from the ovum, the other from the spermatozoon that brought about fertilization\_ they approach each other, but do not fuse until just before the first cleavage, when each pronucleus loses its membrane to release its contents." [ISBN

2678 Pathogen[ Q2Q067] interacts with 9 human partners:{P49454;P20226;P14866;Q15910;Q00613;P56279;Q15021;O75530;P20823}

2679 Pathogen[ P0C214] interacts with 8 human partners:{Q00613;O75530;Q15910;P20226;P49454;P56279;P14866;Q15021}

2680 Pathogen[ P03346] interacts with 9 human partners:{P56279;P14866;Q00613;O75530;P20823;P20226;Q15021;Q15910;P49454}

2681 Pathogen[ Q85601] interacts with 9 human partners:{P49454;P56279;Q00613;O75530;P14866;Q15910;P20823;Q15021;P20226}

2682 Pathogen[ P14079] interacts with 7 human partners:{P14866;Q00613;O75530;P49454;Q15910;P56279;Q15021}

2683 Pathogen[ P03383] interacts with 8 human partners:{P49454;P14866;P20226;Q00613;Q15910;P56279;Q15021;O75530}

2684 Pathogen[ P03410] interacts with 8 human partners:{Q00613;P56279;P20226;P14866;P49454;Q15910;Q15021;O75530}

2685 Pathogen[ P14075] interacts with 8 human partners:{P14866;Q00613;Q15910;P20226;P56279;P49454;Q15021;O75530}

2686 Pathogen[ P0C206] interacts with 9 human partners:{O75530;P20226;Q00613;P14866;Q15021;P49454;Q15910;P20823;P56279}

2687 Pathogen[ P03363] interacts with 8 human partners:{P49454;Q15021;P56279;P14866;Q15910;O75530;P20226;Q00613}

2688 [Cluster 245]GO:0030665+ cellular\_component [name] clathrin coated vesicle membrane [def] "The lipid bilayer surrounding a clathrin-coated vesicle." [GOC

2689 Pathogen[ Q2Q067] interacts with 6 human partners:{Q9Y6Q5;Q10567;O43747;O00291;Q9BXS5;Q13367}

2690 Pathogen[ P0C214] interacts with 7 human partners:{Q9UM54;Q13367;Q10567;O43747;Q9Y6Q5;Q9BXS5;O00291}

2691 Pathogen[ P03346] interacts with 7 human partners:{O43747;Q9BXS5;O00291;Q10567;Q13367;Q9Y6Q5;O75146}

2692 Pathogen[ Q85601] interacts with 7 human partners:{Q13367;Q9BXS5;O43747;Q10567;O00291;Q9UM54;Q9Y6Q5}

2693 Pathogen[ P14079] interacts with 10 human partners:{Q9Y6Q5;O00291;Q9BXS5;O75146;Q10567;Q9UM54;Q8NC96;Q9NVZ3;Q13367;O43747}

2694 Pathogen[ P03383] interacts with 5 human partners:{Q10567;O00291;O43747;Q13367;Q9BXS5}

2695 Pathogen[ P03410] interacts with 11 human partners:{Q8NC96;Q9Y6Q5;O00203;Q9BXS5;Q9NVZ3;O43747;Q10567;O00291;O75146;Q9UM54;Q13367}

2696 Pathogen[ P14075] interacts with 5 human partners:{O00291;O43747;Q9BXS5;Q10567;Q13367}

2697 Pathogen[ P0C206] interacts with 8 human partners:{Q9UM54;Q9Y6Q5;O00291;Q8NC96;O43747;Q10567;Q9BXS5;Q13367}

2698 Pathogen[ P03363] interacts with 6 human partners:{Q13367;O43747;Q9BXS5;O75146;O00291;Q10567}

2699 [Cluster 246]GO:0000791+ cellular\_component [name] euchromatin [def] "A dispersed and relatively uncompact form of chromatin." [GOC

2700 Pathogen[ Q2Q067] interacts with 2 human partners:{Q96T88;Q9Y6K1}

2701 Pathogen[ P0C214] interacts with 2 human partners:{Q9Y6K1;Q96T88}

2702 Pathogen[ P03346] interacts with 2 human partners:{Q9Y6K1;Q96T88}

2703 Pathogen[ Q85601] interacts with 2 human partners:{Q9Y6K1;Q96T88}

2704 Pathogen[ P14079] interacts with 1 human partners:{Q9Y6K1}

2705 Pathogen[ P03383] interacts with 1 human partners:{Q9Y6K1}

2706 Pathogen[ P03410] interacts with 1 human partners:{Q9Y6K1}

2707 Pathogen[ P14075] interacts with 1 human partners:{Q9Y6K1}

2708 Pathogen[ P0C206] interacts with 2 human partners:{Q9Y6K1;Q96T88}

2709 Pathogen[ P03363] interacts with 2 human partners:{Q9Y6K1;Q96T88}

2710 [Cluster 247]GO:0031298+ cellular\_component [name] replication fork protection complex [def] "A protein complex conserved in eukaryotes and associated with the replication fork\_ the complex stabilizes stalled replication forks and is thought to be involved in coordinating leading- and lagging-strand synthesis and in replication checkpoint signaling." [PMID

2711 Pathogen[ Q2Q067] interacts with 1 human partners:{P11387}

2712 Pathogen[ P0C214] interacts with 1 human partners:{P11387}

2713 Pathogen[ P03346] interacts with 1 human partners:{P11387}

2714 Pathogen[ Q85601] interacts with 1 human partners:{P11387}

2715 Pathogen[ P14079] interacts with 1 human partners:{Q969P6}

2716 Pathogen[ P03383] interacts with 1 human partners:{P11387}

2717 Pathogen[ P03410] interacts with 1 human partners:{P11387}

2718 Pathogen[ P14075] interacts with 1 human partners:{P11387}

2719 Pathogen[ P0C206] interacts with 1 human partners:{P11387}

2720 Pathogen[ P03363] interacts with 1 human partners:{P11387}  
2721 [Cluster 248]GO:0031966+C cellular\_component [name] mitochondrial membrane [def]  
"Either of the lipid bilayers that surround the mitochondrion and form the mitochondrial  
envelope." [GOC  
2722 Pathogen[ Q2Q067] interacts with 15 human  
partners:{Q96TC7;P55957;Q9P032;Q9UMX3;O75489;P49901;P26678;O43678;Q92843;Q9P0J0;Q9UQF  
2;Q86WG3;Q12983;Q9UBX3;Q9BXF6}  
2723 Pathogen[ P0C214] interacts with 22 human  
partners:{Q16795;O43678;P49901;P56556;P55957;Q96TC7;O14561;Q9UBX3;Q9P0J0;Q9NSK7;Q9UMX  
3;Q9BXF6;Q9UQF2;Q12983;Q92843;P10909;O75489;Q86WG3;P55210;Q9H902;Q9P032;P26678}  
2724 Pathogen[ P03346] interacts with 17 human  
partners:{Q9P032;O75489;Q9UBX3;P26678;O43678;P55957;Q96TC7;Q12983;Q92843;Q9H902;Q9UQF  
2;P55210;Q9BXF6;Q9UMX3;Q9P0J0;P49901;Q86WG3}  
2725 Pathogen[ Q85601] interacts with 15 human  
partners:{Q9P0J0;Q9UBX3;O43678;Q9UMX3;Q9NSK7;Q9UQF2;Q9BXF6;Q92843;P55957;Q9H902;Q86WG  
3;Q12983;Q96TC7;Q9P032;P55210}  
2726 Pathogen[ P14079] interacts with 42 human  
partners:{P04083;Q5RI15;P56556;Q86WG3;O95139;Q12887;Q9NSK7;P56378;Q13323;Q9UQF2;Q96I3  
6;Q9BXX5;Q15070;P10909;Q7Z4Y8;Q7Z434;Q9BVV7;P03928;Q9BXF6;P55210;O43678;O14561;Q9P0J0  
;Q12983;Q9P0S9;Q9UMX3;Q96KJ9;O75489;P03923;Q9P032;P03897;O15239;Q9Y2R0;P26678;Q9GZY4;  
Q96TC7;Q9H902;P03901;P03886;P55957;P49901;Q92843}  
2727 Pathogen[ P03383] interacts with 13 human  
partners:{Q96TC7;Q86WG3;O43678;P55957;O75489;Q9UMX3;Q9UQF2;Q12983;Q9BXF6;P49901;P2667  
8;Q9P0J0;Q9P032}  
2728 Pathogen[ P03410] interacts with 39 human  
partners:{Q96TC7;P56556;Q96KJ9;P49901;Q9Y2R0;Q12983;Q9H902;O43678;P56378;Q9NSK7;Q86WG  
3;Q9GZY4;Q92843;O15239;Q9UBX3;Q7Z434;P55957;P03886;Q9UMX3;O14561;Q96I36;P26678;P03928  
;Q9BXF6;O75489;P03897;Q9P0S9;Q15070;P03901;Q9UQF2;Q9P0J0;P03923;Q9P032;Q12887;Q96IX5;  
Q7Z4Y8;Q13323;P10909;P55210}  
2729 Pathogen[ P14075] interacts with 16 human  
partners:{Q86WG3;Q12983;P55957;Q9UMX3;Q96TC7;Q15070;O14561;O43678;P56378;P26678;Q9BXF  
6;O75489;Q9P032;P49901;Q9P0J0;Q9UQF2}  
2730 Pathogen[ P0C206] interacts with 23 human  
partners:{Q96TC7;Q9P032;Q9BXF6;P49901;Q9UMX3;Q9UBX3;Q9UQF2;O14561;Q12983;Q92843;Q1507  
0;P10909;Q9P0J0;O43678;O75489;Q9BXX5;P26678;Q86WG3;P55210;Q9H902;P56556;P55957;Q9NSK7  
}  
2731 Pathogen[ P03363] interacts with 12 human  
partners:{P55957;Q9H902;Q9UQF2;Q96TC7;Q9P032;Q86WG3;Q9P0J0;Q92843;Q9BXF6;P55210;P4990  
1;Q9UMX3}  
2732 [Cluster 249]GO:0048500+C cellular\_component [name] signal recognition particle [def]  
"A complex of protein and RNA which facilitates translocation of proteins across  
membranes." [GOC  
2733 Pathogen[ Q2Q067] interacts with 2 human partners:{P49458;P09132}  
2734 Pathogen[ P0C214] interacts with 2 human partners:{P49458;P09132}  
2735 Pathogen[ P03346] interacts with 2 human partners:{P49458;P09132}  
2736 Pathogen[ Q85601] interacts with 1 human partners:{P09132}  
2737 Pathogen[ P14079] interacts with 2 human partners:{P09132;P49458}  
2738 Pathogen[ P03383] interacts with 2 human partners:{P49458;P09132}  
2739 Pathogen[ P03410] interacts with 2 human partners:{P09132;P49458}  
2740 Pathogen[ P14075] interacts with 2 human partners:{P09132;P49458}  
2741 Pathogen[ P0C206] interacts with 2 human partners:{P09132;P49458}  
2742 Pathogen[ P03363] interacts with 2 human partners:{P09132;P49458}  
2743 [Cluster 250]GO:0071818+C cellular\_component [name] BAT3 complex [def] "An ER membrane  
insertion complex that acts by facilitating tail-anchored protein capture by ASNA1/TRC40.  
In mammals the complex contains Bat3, TRC35 and Ubl4A." [GOC  
2744 Pathogen[ Q2Q067] interacts with 2 human partners:{Q7L5D6;P11441}  
2745 Pathogen[ P0C214] interacts with 3 human partners:{P46379;P11441;Q7L5D6}  
2746 Pathogen[ P03346] interacts with 3 human partners:{Q7L5D6;P11441;P46379}  
2747 Pathogen[ Q85601] interacts with 3 human partners:{P46379;Q7L5D6;P11441}  
2748 Pathogen[ P14079] interacts with 2 human partners:{Q7L5D6;P11441}  
2749 Pathogen[ P03383] interacts with 2 human partners:{Q7L5D6;P11441}  
2750 Pathogen[ P03410] interacts with 2 human partners:{Q7L5D6;P11441}  
2751 Pathogen[ P14075] interacts with 2 human partners:{P11441;Q7L5D6}  
2752 Pathogen[ P0C206] interacts with 3 human partners:{P11441;Q7L5D6;P46379}  
2753 Pathogen[ P03363] interacts with 3 human partners:{P46379;P11441;Q7L5D6}  
2754 [Cluster 251]GO:0043293+C cellular\_component [name] apoptosome [def] "A multisubunit  
protein complex involved in the activation of apoptosis. In mammals it is typically  
composed of seven Apaf-1 subunits bound to cytochrome c and caspase-9. A similar complex  
to promote apoptosis is formed from homologous gene products in other eukaryotic  
organisms." [PMID  
2755 Pathogen[ Q2Q067] interacts with 1 human partners:{Q9BZF9}  
2756 Pathogen[ P0C214] interacts with 2 human partners:{Q9BZF9;O14727}  
2757 Pathogen[ P03346] interacts with 3 human partners:{P55211;Q9BZF9;O14727}  
2758 Pathogen[ Q85601] interacts with 1 human partners:{Q9BZF9}  
2759 Pathogen[ P14079] interacts with 1 human partners:{Q9BZF9}  
2760 Pathogen[ P03383] interacts with 1 human partners:{Q9BZF9}

2761 Pathogen[ P03410] interacts with 1 human partners:{Q9BZF9}

2762 Pathogen[ P14075] interacts with 1 human partners:{Q9BZF9}

2763 Pathogen[ P0C206] interacts with 1 human partners:{Q9BZF9}

2764 Pathogen[ P03363] interacts with 1 human partners:{Q9BZF9}

2765 [Cluster 252]GO:0031466+C cellular\_component [name] Cul5-RING ubiquitin ligase complex [def] "A ubiquitin ligase complex in which a cullin from the Cul5 subfamily and a RING domain protein form the catalytic core\_ substrate specificity is conferred by an elongin-BC adaptor and a SOCS/BC box protein." [PMID

2766 Pathogen[ Q2Q067] interacts with 3 human partners:{Q93034;Q15370;P62877}

2767 Pathogen[ P0C214] interacts with 3 human partners:{Q93034;Q15370;P62877}

2768 Pathogen[ P03346] interacts with 3 human partners:{Q15370;Q93034;P62877}

2769 Pathogen[ Q85601] interacts with 3 human partners:{Q15370;P62877;Q93034}

2770 Pathogen[ P14079] interacts with 3 human partners:{P62877;Q93034;Q15370}

2771 Pathogen[ P03383] interacts with 3 human partners:{Q93034;P62877;Q15370}

2772 Pathogen[ P03410] interacts with 3 human partners:{Q15370;P62877;Q93034}

2773 Pathogen[ P14075] interacts with 3 human partners:{Q93034;Q15370;P62877}

2774 Pathogen[ P0C206] interacts with 3 human partners:{P62877;Q15370;Q93034}

2775 Pathogen[ P03363] interacts with 3 human partners:{Q15370;P62877;Q93034}

2776 [Cluster 253]GO:0005683+C cellular\_component [name] U7 snRNP [def] "A ribonucleoprotein complex that contains the U7 snRNA and is required for the 3'-end processing of replication-dependent histone pre-mRNAs." [PMID

2777 Pathogen[ Q2Q067] interacts with 7 human partners:{P83369;P62318;P62304;P14678;P62306;P62308;Q969L4}

2778 Pathogen[ P0C214] interacts with 7 human partners:{P83369;P14678;P62306;Q969L4;P62308;P62318;P62304}

2779 Pathogen[ P03346] interacts with 7 human partners:{P62304;P62318;P83369;P62306;P14678;Q969L4;P62308}

2780 Pathogen[ Q85601] interacts with 7 human partners:{P62304;Q969L4;P14678;P62306;P62318;P83369;P62308}

2781 Pathogen[ P14079] interacts with 7 human partners:{P83369;P62306;P14678;P62308;P62304;Q969L4;P62318}

2782 Pathogen[ P03383] interacts with 7 human partners:{Q969L4;P62318;P62304;P14678;P62308;P83369;P62306}

2783 Pathogen[ P03410] interacts with 7 human partners:{P62304;P62306;P62308;P14678;P83369;Q969L4;P62318}

2784 Pathogen[ P14075] interacts with 7 human partners:{P62304;P62306;P62308;P62318;P83369;P14678;Q969L4}

2785 Pathogen[ P0C206] interacts with 7 human partners:{P14678;P62304;P83369;P62318;P62306;P62308;Q969L4}

2786 Pathogen[ P03363] interacts with 7 human partners:{P62318;P62304;P62306;P83369;Q969L4;P62308;P14678}

2787 [Cluster 254]GO:0051233+C cellular\_component [name] spindle midzone [def] "The area in the center of the spindle where the spindle microtubules from opposite poles overlap." [GOC

2788 Pathogen[ Q2Q067] interacts with 5 human partners:{Q99741;Q99569;Q7Z7K6;Q9Y5B0;P60953}

2789 Pathogen[ P0C214] interacts with 4 human partners:{P60953;Q7Z7K6;Q9Y5B0;Q99741}

2790 Pathogen[ P03346] interacts with 5 human partners:{Q99569;P60953;Q9Y5B0;Q7Z7K6;Q99741}

2791 Pathogen[ Q85601] interacts with 5 human partners:{Q99569;Q7Z7K6;Q9Y5B0;P60953;Q99741}

2792 Pathogen[ P14079] interacts with 4 human partners:{Q9Y5B0;Q99741;Q99569;Q7Z7K6}

2793 Pathogen[ P03383] interacts with 4 human partners:{P60953;Q7Z7K6;Q9Y5B0;Q99741}

2794 Pathogen[ P03410] interacts with 5 human partners:{Q7Z7K6;Q9Y5B0;P60953;Q99569;Q99741}

2795 Pathogen[ P14075] interacts with 4 human partners:{P60953;Q9Y5B0;Q7Z7K6;Q99741}

2796 Pathogen[ P0C206] interacts with 5 human partners:{Q99741;Q9Y5B0;Q99569;Q7Z7K6;P60953}

2797 Pathogen[ P03363] interacts with 5 human partners:{Q7Z7K6;Q9Y5B0;Q99569;Q99741;P60953}

2798 [Cluster 255]GO:0000808+C cellular\_component [name] origin recognition complex [def] "A multisubunit complex that is located at the replication origins of a chromosome." [GOC

2799 Pathogen[ Q2Q067] interacts with 5 human partners:{Q13415;Q9UBD5;O43913;Q9Y5N6;Q13416}

2800 Pathogen[ P0C214] interacts with 5 human partners:{O43913;Q9Y5N6;Q13416;Q9UBD5;Q13415}

2801 Pathogen[ P03346] interacts with 6 human partners:{Q9Y5N6;Q9UBD5;Q13415;Q13416;O43929;O43913}

2802 Pathogen[ Q85601] interacts with 5 human partners:{O43913;Q13415;Q9Y5N6;Q9UBD5;Q13416}

2803 Pathogen[ P14079] interacts with 6 human partners:{Q13416;Q13415;Q9Y5N6;O43913;Q9UBD5;O43929}

2804 Pathogen[ P03383] interacts with 4 human partners:{Q9UBD5;O43913;Q9Y5N6;Q13416}

2805 Pathogen[ P03410] interacts with 6 human partners:{O43929;Q13416;Q9Y5N6;O43913;Q9UBD5;Q13415}

2806 Pathogen[ P14075] interacts with 4 human partners:{Q9Y5N6;Q9UBD5;O43913;Q13416}

2807 Pathogen[ P0C206] interacts with 5 human  
partners:{O43913;Q9UBD5;Q13416;Q9Y5N6;Q13415}

2808 Pathogen[ P03363] interacts with 5 human  
partners:{Q13416;Q13415;Q9UBD5;Q9Y5N6;O43913}

2809 [Cluster 256]GO:0080008+C cellular\_component [name] CUL4 RING ubiquitin ligase complex [def] "A ubiquitin ligase complex in which a cullin from the Cul4 family and a RING domain protein form the catalytic core\_ substrate specificity is conferred by an adaptor protein." [PMID

2810 Pathogen[ Q2Q067] interacts with 6 human  
partners:{Q5TAQ9;Q16531;Q8TEB1;Q13619;P61962;Q9NXF7}

2811 Pathogen[ P0C214] interacts with 7 human  
partners:{Q13619;Q9NXF7;P61962;Q5TAQ9;Q16531;Q9NV06;Q8TEB1}

2812 Pathogen[ P03346] interacts with 11 human  
partners:{Q5T6F0;Q969U6;Q16531;Q58WW2;P61962;Q9NV06;Q5TAQ9;Q9NXF7;Q13619;Q5H9S7;Q8TEB1}

2813 Pathogen[ Q85601] interacts with 7 human  
partners:{P61962;Q16531;Q5TAQ9;Q8TEB1;Q9NXF7;Q9NV06;Q13619}

2814 Pathogen[ P14079] interacts with 9 human  
partners:{Q5TAQ9;Q9NXF7;Q16531;Q9NV06;Q5H9S7;P61962;Q5T6F0;Q8TEB1;Q13619}

2815 Pathogen[ P03383] interacts with 3 human partners:{Q9NXF7;P61962;Q16531}

2816 Pathogen[ P03410] interacts with 10 human  
partners:{Q9NV06;Q5H9S7;Q8TEB1;P61962;Q5T6F0;Q16531;Q969U6;Q13619;Q5TAQ9;Q9NXF7}

2817 Pathogen[ P14075] interacts with 4 human partners:{Q16531;Q5H9S7;Q9NXF7;P61962}

2818 Pathogen[ P0C206] interacts with 10 human  
partners:{Q8TEB1;Q16531;Q13619;Q9NV06;Q5TAQ9;P61962;Q5H9S7;Q9NXF7;Q5T6F0;Q969U6}

2819 Pathogen[ P03363] interacts with 10 human  
partners:{Q16531;Q5TAQ9;Q9NXF7;Q13619;Q5T6F0;Q8TEB1;P61962;Q969U6;Q58WW2;Q9NV06}

2820 [Cluster 257]GO:0034399+C cellular\_component [name] nuclear periphery [def] "The portion of the nuclear lumen proximal to the inner nuclear membrane." [GOC

2821 Pathogen[ Q2Q067] interacts with 3 human partners:{P17544;O75475;P23497}

2822 Pathogen[ P0C214] interacts with 3 human partners:{P17544;O75475;P23497}

2823 Pathogen[ P03346] interacts with 4 human partners:{O75475;P17544;P11137;P23497}

2824 Pathogen[ Q85601] interacts with 2 human partners:{P17544;O75475}

2825 Pathogen[ P14079] interacts with 5 human  
partners:{O75475;P23497;P17544;P11137;P10636}

2826 Pathogen[ P03383] interacts with 3 human partners:{P17544;O75475;P23497}

2827 Pathogen[ P03410] interacts with 4 human partners:{P11137;P17544;P10636;O75475}

2828 Pathogen[ P14075] interacts with 3 human partners:{P23497;O75475;P17544}

2829 Pathogen[ P0C206] interacts with 4 human partners:{P17544;P10636;O75475;P11137}

2830 Pathogen[ P03363] interacts with 4 human partners:{P11137;O75475;P23497;P17544}

2831 [Cluster 258]GO:0016010+C cellular\_component [name] dystrophin-associated glycoprotein complex [def] "A multiprotein complex that forms a strong mechanical link between the cytoskeleton and extracellular matrix\_ typical of, but not confined to, muscle cells. The complex is composed of transmembrane, cytoplasmic, and extracellular proteins, including dystrophin, sarcoglycans, dystroglycan, dystrobrevins, syntrophins, sarcospan, caveolin-3, and NO synthase." [PMID

2832 Pathogen[ Q2Q067] interacts with 6 human  
partners:{Q13884;P08727;P11532;P46939;Q13425;Q9HCI5}

2833 Pathogen[ P0C214] interacts with 7 human  
partners:{Q13884;P11532;Q15124;Q13425;P46939;P08727;Q9HCI5}

2834 Pathogen[ P03346] interacts with 6 human  
partners:{Q13425;P08727;Q13884;P46939;P11532;Q9HCI5}

2835 Pathogen[ Q85601] interacts with 7 human  
partners:{Q13884;P11532;Q15124;P46939;Q13425;P08727;Q9HCI5}

2836 Pathogen[ P14079] interacts with 9 human  
partners:{P11532;Q16585;Q15124;Q14118;Q9HCI5;P46939;Q92629;Q16586;P08727}

2837 Pathogen[ P03383] interacts with 6 human  
partners:{P08727;Q13884;P46939;P11532;Q9HCI5;Q13425}

2838 Pathogen[ P03410] interacts with 10 human  
partners:{P11532;Q13425;Q15124;Q16585;Q13884;P46939;Q14118;Q9HCI5;Q92629;P08727}

2839 Pathogen[ P14075] interacts with 6 human  
partners:{P11532;Q13884;P08727;Q13425;P46939;Q9HCI5}

2840 Pathogen[ P0C206] interacts with 7 human  
partners:{P46939;P08727;Q15124;Q13884;Q13425;P11532;Q9HCI5}

2841 Pathogen[ P03363] interacts with 6 human  
partners:{P46939;Q13425;P08727;P11532;Q13884;Q9HCI5}

2842 [Cluster 259]GO:0015630+C cellular\_component [name] microtubule cytoskeleton [def] "The part of the cytoskeleton (the internal framework of a cell) composed of microtubules and associated proteins." [GOC

2843 Pathogen[ Q2Q067] interacts with 50 human  
partners:{Q09FC8;P30153;P31749;Q14008;Q7Z5K2;O43663;Q15046;Q8WWK9;Q86XR8;P61970;P19387;O75347;P02511;Q9P270;P67775;Q01892;A6NKF1;Q8WYQ5;P12004;Q15003;P78317;Q7Z7K6;Q14498;Q6PGN9;P15621;Q95067;O15265;P04406;P78396;Q86TC9;P13984;Q9ULW0;O75665;Q3B726;Q7L266;Q96BD8;O75410;Q9NS23;Q9UPA5;Q14244;Q9UGJ1;P06132;Q99689;Q9BVN2;Q92597;O14978;P27816;Q9NPA3;Q5T0J7;O60477}

2844 Pathogen[ P0C214] interacts with 51 human

partners: {P06132; Q14008; O75347; P30153; Q9NS23; Q99698; Q15003; Q7L266; P02511; Q9NPA3; P34897; O60477; P78317; Q9UGJ1; P27816; Q6PGN9; Q92597; O14613; Q96BD8; Q14244; Q86TC9; Q86XR8; P78396; Q9ULW0; O43663; O95067; Q3B726; Q99689; P67775; Q01892; Q7Z7K6; P13984; O75665; Q7Z5K2; O75410; P15621; Q9BVN2; A6NKF1; O15265; O14978; Q8WWK9; Q96BT7; P19387; Q15046; Q9P270; P61970; Q14498; Q8WYQ5; P04406; Q09FC8; P31749}

2845 Pathogen[ P03346] interacts with 62 human partners: {O15265; Q86TC9; P12004; P46063; O75592; P78396; Q99698; P04406; Q86XR8; Q7Z5K2; O75410; Q99689; Q7L266; O14978; Q14498; Q99426; P67775; O14613; O95067; Q09FC8; P15621; O75347; Q13813; P30153; Q9C0H6; Q15555; O75665; Q9ULW0; P02511; P13984; A6NKF1; Q92597; P31749; O60477; Q14008; Q9UGJ1; Q6PGN9; Q7Z7K6; P06132; P78317; P30622; Q96BT7; P27816; Q14244; Q8WWK9; Q9BVN2; Q6GQQ9; Q96KN3; P61970; O43663; Q9P270; Q01892; Q15003; Q5T0J7; Q96BD8; Q9NS23; P19387; Q9NPA3; Q3B726; Q9UPA5; Q9UBP0; Q8WYQ5}

2846 Pathogen[ Q85601] interacts with 55 human partners: {Q86TC9; P78317; P15621; Q6PGN9; P27816; P31749; Q7Z7K6; Q01892; Q14008; Q8WWK9; O15265; Q14244; Q9UBP0; Q7L266; O14978; P30622; Q09FC8; Q9BVN2; P30153; P61970; Q15046; Q9NS23; Q9ULW0; A6NKF1; O43663; Q7Z5K2; Q8WYQ5; Q86XR8; Q15555; O75665; P13984; Q9UGJ1; Q3B726; P02511; O75347; Q9UPA5; Q96BD8; O14613; P78396; Q9BVA0; Q9NPA3; P06132; Q99689; P67775; P19387; P12004; Q92597; P04406; O95067; Q9P270; Q9C0H6; Q15003; Q14498; O75410; Q99698}

2847 Pathogen[ P14079] interacts with 65 human partners: {P61970; O14613; Q9NS23; Q9NPA3; P19387; Q9BVN2; P78396; P02511; Q9UGJ1; Q5T0J7; Q9UPA5; O43813; Q95067; P68363; Q14244; Q9ULW0; P34897; Q92597; Q15003; Q14498; Q9Y4R7; Q7L266; O60477; Q86TC9; A6PVC2; Q01892; P06132; Q99661; O43663; Q99689; Q15046; Q99426; Q7Z4L9; Q15555; Q3B726; O14978; A6NKF1; Q9H0I2; Q6PGN9; Q8WWK9; Q9P270; P13984; Q9C0H6; O75410; Q8WYQ5; P78317; O15265; P12004; O75347; O75665; P30153; Q86XR8; P15621; Q99698; Q7Z5K2; Q13813; Q96BD8; Q9BVA0; Q9H3Q1; P27816; Q09FC8; Q7Z7K6; P30622; Q14008; P04406}

2848 Pathogen[ P03383] interacts with 45 human partners: {Q14244; Q86XR8; Q96BD8; Q14008; Q8WWK9; P31749; O75410; Q99689; P02511; Q8WYQ5; P30153; P78317; P67775; Q7Z7K6; Q92597; P15621; P78396; A6NKF1; Q6PGN9; Q7L266; Q15003; O14978; Q01892; P27816; P19387; P06132; P13984; O75347; O15265; Q5T0J7; Q15046; P04406; O95067; Q09FC8; Q9ULW0; P61970; O43663; Q9P270; O75665; Q9NPA3; O60477; Q7Z5K2; Q3B726; Q9BVN2; Q14498}

2849 Pathogen[ P03410] interacts with 65 human partners: {Q9BVN2; O75665; Q9Y4R7; P19387; Q9C0H6; Q7L266; P30622; P15621; P27816; Q7Z5K2; Q7Z4L9; Q8WWK9; Q14008; Q9NS23; O95067; P31749; Q15003; P06132; Q9H3Q1; Q09FC8; Q8WYQ5; Q5T0J7; Q7Z7K6; P78396; Q15555; Q9H0I2; Q9UPA5; O14613; P78317; P02511; Q9BVA1; Q15046; O75410; P04406; O75347; P30153; Q3B726; Q9ULW0; P68363; Q99698; O14978; P13984; Q14498; O15265; Q92597; Q6PGN9; A6NKF1; Q9P270; Q96BD8; O60477; A6PVC2; Q99426; P67775; Q13813; Q14244; P12004; Q9NPA3; Q86TC9; P34897; Q9UGJ1; Q9BVA0; Q01892; O43663; P61970; Q99689}

2850 Pathogen[ P14075] interacts with 47 human partners: {P13984; O95067; O15265; P06132; O43663; O75347; O75410; P61970; Q9BVN2; P19387; Q96BD8; P78396; Q9ULW0; P31749; Q3B726; P04406; Q86XR8; Q7L266; Q01892; Q7Z5K2; Q9NPA3; Q5T0J7; O14613; P78317; O14978; P02511; P67775; P30153; O60477; Q7Z7K6; A6NKF1; P15621; Q6PGN9; Q8WWK9; Q09FC8; O75665; Q92597; Q15003; Q14008; Q9UPA5; Q15046; Q9P270; P27816; Q14498; Q14244; Q8WYQ5; Q99689}

2851 Pathogen[ P0C206] interacts with 61 human partners: {Q92597; Q9NPA3; Q86XR8; Q9BVA0; Q86TC9; P31749; Q14008; Q9UBP0; P30153; Q9ULW0; Q9UPA5; O60477; Q9C0H6; O14613; Q7Z5K2; O15265; Q99698; P15621; P34897; Q6PGN9; P67775; P30622; P78317; Q3B726; P13984; Q9UGJ1; Q14244; Q15003; Q99689; O75410; Q99426; P27816; Q96BD8; A6NKF1; P19387; Q7Z7K6; O43663; P04406; Q6GQQ9; O75665; Q09FC8; P78396; O95067; Q9P270; Q16181; Q15555; Q7L266; O75347; P02511; Q9NS23; Q8WYQ5; Q14498; Q01892; Q8WWK9; Q5T0J7; P61970; P06132; O14978; Q15046; Q9BVN2; P12004}

2852 Pathogen[ P03363] interacts with 61 human partners: {O75410; A6NKF1; Q86TC9; O75347; Q7Z7K6; Q14244; O14978; P13984; Q6GQQ9; P61970; Q96BD8; Q8WWK9; P19387; Q01892; Q9ULW0; Q92597; Q96BT7; P15621; P68363; P78317; P06132; Q3B726; Q13748; Q6PGN9; P30622; Q8IYM1; Q7L266; P27816; O95067; Q96KN3; P46063; Q99698; Q99426; P31749; P78396; O60477; P04406; O15265; O14613; Q9P270; Q5T0J7; Q9C0H6; Q9NS23; Q9BVN2; Q9UPA5; Q9UGJ1; Q09FC8; Q86XR8; Q14008; Q14498; O43663; Q9NPA3; P30153; Q7Z5K2; Q13813; Q8WYQ5; P67775; Q15003; Q15555; O75665; Q99689}

2853 [Cluster 260]GO:0035869+C cellular\_component [name] ciliary transition zone [def] "A region of the cilium between the basal body and proximal segment that is characterized by Y-shaped assemblages that connect axonemal microtubules to the ciliary membrane. The ciliary transition zone appears to function as a gate that controls ciliary membrane composition." [GOC

2854 Pathogen[ Q2Q067] interacts with 3 human partners: {Q9NXB0; A6NIH7; Q96GV9}

2855 Pathogen[ P0C214] interacts with 3 human partners: {Q96GV9; Q9NXB0; A6NIH7}

2856 Pathogen[ P03346] interacts with 3 human partners: {Q96GV9; Q9NXB0; A6NIH7}

2857 Pathogen[ Q85601] interacts with 3 human partners: {Q9NXB0; A6NIH7; Q96GV9}

2858 Pathogen[ P14079] interacts with 8 human partners: {Q9P0N5; A6NIH7; Q96Q45; Q9UPM9; Q9P2K1; Q9NXB0; Q6IQ19; Q96GV9}

2859 Pathogen[ P03383] interacts with 3 human partners: {Q9NXB0; A6NIH7; Q96GV9}

2860 Pathogen[ P03410] interacts with 8 human partners: {Q96Q45; A6NIH7; Q6IQ19; Q9P0N5; Q9P2K1; Q9UPM9; Q96GV9; Q9NXB0}

2861 Pathogen[ P14075] interacts with 4 human partners: {Q96GV9; Q9NXB0; Q6IQ19; A6NIH7}

2862 Pathogen[ P0C206] interacts with 6 human partners: {Q9UPM9; Q9P2K1; Q96GV9; Q6IQ19; A6NIH7; Q9NXB0}

2863 Pathogen[ P03363] interacts with 5 human partners: {Q9P2K1; Q6IQ19; A6NIH7; Q96GV9; Q9NXB0}

2864 [Cluster 261]GO:0031213+C cellular\_component [name] RSF complex [def] "A chromatin

remodeling complex that mediates nucleosome deposition and generates regularly spaced nucleosome arrays. In humans, the complex is composed of the ATPase hSNF2H and the HBXAP protein (RSF-1)." [PMID

2865 Pathogen[ Q2Q067] interacts with 1 human partners:{Q96T23}

2866 Pathogen[ P0C214] interacts with 2 human partners:{O60264;Q96T23}

2867 Pathogen[ P03346] interacts with 2 human partners:{O60264;Q96T23}

2868 Pathogen[ Q85601] interacts with 2 human partners:{Q96T23;O60264}

2869 Pathogen[ P14079] interacts with 2 human partners:{Q96T23;O60264}

2870 Pathogen[ P03383] interacts with 1 human partners:{Q96T23}

2871 Pathogen[ P03410] interacts with 2 human partners:{Q96T23;O60264}

2872 Pathogen[ P14075] interacts with 1 human partners:{Q96T23}

2873 Pathogen[ P0C206] interacts with 2 human partners:{Q96T23;O60264}

2874 Pathogen[ P03363] interacts with 2 human partners:{O60264;Q96T23}

2875 [Cluster 262]GO:0032449+C cellular\_component [name] CBM complex [def] "A protein complex comprising Carmal, Bcl10 and MALT1\_ plays a role in signal transduction during NF-kappaB activation." [PMID

2876 Pathogen[ Q2Q067] interacts with 2 human partners:{Q9UDY8;O95999}

2877 Pathogen[ P0C214] interacts with 2 human partners:{Q9UDY8;O95999}

2878 Pathogen[ P03346] interacts with 3 human partners:{Q9UDY8;Q9BWT7;O95999}

2879 Pathogen[ Q85601] interacts with 2 human partners:{Q9UDY8;O95999}

2880 Pathogen[ P14079] interacts with 1 human partners:{O95999}

2881 Pathogen[ P03383] interacts with 1 human partners:{O95999}

2882 Pathogen[ P03410] interacts with 2 human partners:{O95999;Q9BWT7}

2883 Pathogen[ P14075] interacts with 1 human partners:{O95999}

2884 Pathogen[ P0C206] interacts with 3 human partners:{Q9UDY8;O95999;Q9BWT7}

2885 Pathogen[ P03363] interacts with 1 human partners:{Q9BWT7}

2886 [Cluster 263]GO:0005942+C cellular\_component [name] phosphatidylinositol 3-kinase complex [def] "A complex containing a heterodimer of a catalytic subunit and a regulatory (adaptor) subunit of any phosphatidylinositol 3-kinase (PI3K)." [GOC

2887 Pathogen[ Q2Q067] interacts with 2 human partners:{Q8WYR1;P27986}

2888 Pathogen[ P0C214] interacts with 2 human partners:{Q8WYR1;P27986}

2889 Pathogen[ P03346] interacts with 2 human partners:{Q8WYR1;P27986}

2890 Pathogen[ Q85601] interacts with 2 human partners:{P27986;Q8WYR1}

2891 Pathogen[ P14079] interacts with 1 human partners:{Q8WYR1}

2892 Pathogen[ P03383] interacts with 2 human partners:{P27986;Q8WYR1}

2893 Pathogen[ P03410] interacts with 2 human partners:{P27986;Q8WYR1}

2894 Pathogen[ P14075] interacts with 2 human partners:{Q8WYR1;P27986}

2895 Pathogen[ P0C206] interacts with 2 human partners:{P27986;Q8WYR1}

2896 Pathogen[ P03363] interacts with 2 human partners:{Q8WYR1;P27986}

2897 [Cluster 264]GO:0001669+C cellular\_component [name] acrosomal vesicle [def] "A structure in the head of a spermatozoon that contains acid hydrolases, and is concerned with the breakdown of the outer membrane of the ovum during fertilization. It lies just beneath the plasma membrane and is derived from the lysosome." [ISBN

2898 Pathogen[ Q2Q067] interacts with 4 human partners:{P27797;Q96LC9;Q8NG31;O75969}

2899 Pathogen[ P0C214] interacts with 4 human partners:{Q96LC9;O75969;Q8NG31;P27797}

2900 Pathogen[ P03346] interacts with 5 human partners:{Q96LC9;O75969;C9J3V5;P27797;Q8NG31}

2901 Pathogen[ Q85601] interacts with 4 human partners:{Q96LC9;O75969;Q8NG31;P27797}

2902 Pathogen[ P14079] interacts with 11 human partners:{Q8NEB7;Q96KW9;Q9HBM0;Q99932;C9J3V5;Q8NG31;Q96KX2;Q96LC9;Q8NA54;Q6UW49;O75969}

2903 Pathogen[ P03383] interacts with 5 human partners:{Q96LC9;C9J3V5;Q8NG31;O75969;P27797}

2904 Pathogen[ P03410] interacts with 12 human partners:{Q96KX2;Q8NA54;Q9HBM0;Q96KW9;Q8NEB7;Q8NG31;Q96LC9;O75969;Q6UW49;C9J3V5;Q99932;P27797}

2905 Pathogen[ P14075] interacts with 7 human partners:{Q99932;Q96LC9;C9J3V5;O75969;P27797;Q9HBM0;Q8NG31}

2906 Pathogen[ P0C206] interacts with 8 human partners:{P27797;Q96LC9;Q8NA54;O75969;C9J3V5;Q99932;Q9HBM0;Q8NG31}

2907 Pathogen[ P03363] interacts with 5 human partners:{C9J3V5;Q96LC9;P27797;Q8NG31;O75969}

2908 [Cluster 265]GO:0031931+C cellular\_component [name] TORC1 complex [def] "A protein complex that contains at least TOR (target of rapamycin) and Raptor (regulatory-associated protein of TOR), or orthologs of, in complex with other signaling components. Mediates the phosphorylation and activation of S6K. In Saccharomyces, the complex contains Kog1p, Lst8p, Tco89p, and either Tor1p or Tor2p." [GOC

2909 Pathogen[ Q2Q067] interacts with 1 human partners:{Q96B36}

2910 Pathogen[ P0C214] interacts with 1 human partners:{Q96B36}

2911 Pathogen[ P03346] interacts with 1 human partners:{Q96B36}

2912 Pathogen[ Q85601] interacts with 1 human partners:{Q96B36}

2913 Pathogen[ P14079] interacts with 1 human partners:{Q96B36}

2914 Pathogen[ P03383] interacts with 1 human partners:{Q96B36}

2915 Pathogen[ P03410] interacts with 1 human partners:{Q96B36}

2916 Pathogen[ P14075] interacts with 1 human partners:{Q96B36}

2917 Pathogen[ P0C206] interacts with 1 human partners:{Q96B36}



2918 Pathogen[ P03363] interacts with 1 human partners:{Q96B36}

2919 [Cluster 266]GO:000801+C cellular\_component [name] central element [def] "A structural unit of the synaptonemal complex found between the lateral elements." [GOC

2920 Pathogen[ Q2Q067] interacts with 4 human partners:{Q9NQS7;Q8IYF3;A1L190;Q6PIF2}

2921 Pathogen[ P0C214] interacts with 3 human partners:{A1L190;Q9NQS7;Q8IYF3}

2922 Pathogen[ P03346] interacts with 5 human partners:{Q8IYF3;Q9NQS7;Q6PIF2;A1L190;Q8N0S2}

2923 Pathogen[ Q85601] interacts with 4 human partners:{Q8IYF3;Q9NQS7;Q6PIF2;A1L190}

2924 Pathogen[ P14079] interacts with 4 human partners:{Q6PIF2;Q9NQS7;Q8IYF3;A1L190}

2925 Pathogen[ P03383] interacts with 3 human partners:{Q9NQS7;Q8IYF3;A1L190}

2926 Pathogen[ P03410] interacts with 5 human partners:{Q6PIF2;A1L190;Q8IYF3;Q8N0S2;Q9NQS7}

2927 Pathogen[ P14075] interacts with 3 human partners:{Q9NQS7;A1L190;Q8IYF3}

2928 Pathogen[ P0C206] interacts with 5 human partners:{A1L190;Q8N0S2;Q8IYF3;Q9NQS7;Q6PIF2}

2929 Pathogen[ P03363] interacts with 3 human partners:{Q6PIF2;Q9NQS7;A1L190}

2930 [Cluster 267]GO:0016281+C cellular\_component [name] eukaryotic translation initiation factor 4F complex [def] "The eukaryotic translation initiation factor 4F complex is composed of eIF4E, eIF4A and eIF4G\_ it is involved in the recognition of the mRNA cap, ATP-dependent unwinding of the 5'-terminal secondary structure and recruitment of the mRNA to the ribosome." [GOC

2931 Pathogen[ Q2Q067] interacts with 8 human partners:{P23588;Q14240;P78344;O60516;Q04637;P06730;P60842;Q15056}

2932 Pathogen[ P0C214] interacts with 8 human partners:{P60842;P23588;P78344;O60516;Q15056;Q14240;Q04637;P06730}

2933 Pathogen[ P03346] interacts with 8 human partners:{P06730;P78344;Q15056;P60842;Q14240;P23588;Q04637;O60516}

2934 Pathogen[ Q85601] interacts with 7 human partners:{P06730;Q14240;P23588;Q04637;O60516;P78344;P60842}

2935 Pathogen[ P14079] interacts with 9 human partners:{P60842;Q15056;P06730;O43432;Q14240;P78344;P23588;O60516;Q04637}

2936 Pathogen[ P03383] interacts with 5 human partners:{P23588;P06730;P78344;Q04637;O60516}

2937 Pathogen[ P03410] interacts with 9 human partners:{P06730;O43432;Q15056;P60842;Q04637;O60516;P78344;P23588;Q14240}

2938 Pathogen[ P14075] interacts with 5 human partners:{P23588;O60516;P78344;P06730;Q04637}

2939 Pathogen[ P0C206] interacts with 7 human partners:{P06730;Q14240;P23588;P78344;Q04637;P60842;O60516}

2940 Pathogen[ P03363] interacts with 8 human partners:{Q15056;P23588;Q14240;P60842;P78344;P06730;O60516;Q04637}

2941 [Cluster 268]GO:0031143+C cellular\_component [name] pseudopodium [def] "A temporary protrusion or retractile process of a cell, associated with flowing movements of the protoplasm, and serving for locomotion and feeding." [ISBN

2942 Pathogen[ Q2Q067] interacts with 1 human partners:{Q9NP98}

2943 Pathogen[ P0C214] interacts with 1 human partners:{Q9NP98}

2944 Pathogen[ P03346] interacts with 3 human partners:{O75112;O60662;Q9NP98}

2945 Pathogen[ Q85601] interacts with 2 human partners:{O75112;Q9NP98}

2946 Pathogen[ P14079] interacts with 2 human partners:{O75112;Q9NP98}

2947 Pathogen[ P03383] interacts with 1 human partners:{Q9NP98}

2948 Pathogen[ P03410] interacts with 2 human partners:{Q9NP98;O75112}

2949 Pathogen[ P14075] interacts with 1 human partners:{Q9NP98}

2950 Pathogen[ P0C206] interacts with 2 human partners:{Q9NP98;O75112}

2951 Pathogen[ P03363] interacts with 3 human partners:{O75112;Q9NP98;O60662}

2952 [Cluster 269]GO:0030863+C cellular\_component [name] cortical cytoskeleton [def] "The portion of the cytoskeleton that lies just beneath the plasma membrane." [GOC

2953 Pathogen[ Q2Q067] interacts with 4 human partners:{Q01082;P78352;P11171;P35579}

2954 Pathogen[ P0C214] interacts with 5 human partners:{P60709;P16157;Q01082;P78352;P11171}

2955 Pathogen[ P03346] interacts with 12 human partners:{P02549;P11277;P35579;P78352;P60709;Q08495;P28289;P16157;P16452;Q13813;Q01082;P11171}

2956 Pathogen[ Q85601] interacts with 6 human partners:{P16157;P35579;P11171;Q01082;P60709;P78352}

2957 Pathogen[ P14079] interacts with 13 human partners:{P16452;P35579;Q08495;P11171;Q01082;P47756;P16157;P28289;Q96KX2;P60709;P11277;Q13813;P02549}

2958 Pathogen[ P03383] interacts with 2 human partners:{P35579;P78352}

2959 Pathogen[ P03410] interacts with 14 human partners:{Q96KX2;P47756;P16157;P28289;P16452;P35579;P02549;P11171;Q08495;Q01082;P78352;Q13813;P11277;P60709}

2960 Pathogen[ P14075] interacts with 3 human partners:{P35579;P78352;P11171}

2961 Pathogen[ P0C206] interacts with 10 human partners:{Q01082;P60709;P78352;P47756;P16157;P16452;P35579;Q08495;P11277;P11171}

2962 Pathogen[ P03363] interacts with 12 human partners:{P11277;P02549;P60709;P16157;P35579;Q01082;P78352;Q08495;P11171;P28289;P16452}

2;Q13813]

2963 [Cluster 270]GO:0033588+C cellular\_component [name] Elongator holoenzyme complex [def] "A heterohexameric protein complex that is involved in modification of wobble nucleosides in tRNA, and exerts direct effects on transcriptional elongation and exocytosis. The complex can associate physically with hyperphosphorylated RNA polymerase II\_ it contains two discrete heterotrimeric subcomplexes." [GOC

2964 Pathogen[ Q2Q067] interacts with 6 human  
partners:{Q9H9T3;Q0PNE2;O95163;Q8TE02;Q6IA86;Q96EB1}

2965 Pathogen[ P0C214] interacts with 6 human  
partners:{Q6IA86;Q0PNE2;Q8TE02;Q9H9T3;Q96EB1;O95163}

2966 Pathogen[ P03346] interacts with 6 human  
partners:{Q0PNE2;O95163;Q9H9T3;Q8TE02;Q6IA86;Q96EB1}

2967 Pathogen[ Q85601] interacts with 6 human  
partners:{Q9H9T3;Q0PNE2;Q8TE02;Q96EB1;Q6IA86;O95163}

2968 Pathogen[ P14079] interacts with 6 human  
partners:{Q6IA86;O95163;Q96EB1;Q8TE02;Q9H9T3;Q0PNE2}

2969 Pathogen[ P03383] interacts with 6 human  
partners:{O95163;Q0PNE2;Q96EB1;Q8TE02;Q6IA86;Q9H9T3}

2970 Pathogen[ P03410] interacts with 6 human  
partners:{Q0PNE2;Q9H9T3;Q96EB1;O95163;Q8TE02;Q6IA86}

2971 Pathogen[ P14075] interacts with 6 human  
partners:{Q96EB1;Q6IA86;Q8TE02;O95163;Q9H9T3;Q0PNE2}

2972 Pathogen[ P0C206] interacts with 6 human  
partners:{Q9H9T3;Q6IA86;O95163;Q0PNE2;Q8TE02;Q96EB1}

2973 Pathogen[ P03363] interacts with 6 human  
partners:{Q6IA86;Q8TE02;Q96EB1;O95163;Q0PNE2;Q9H9T3}

2974 [Cluster 271]GO:0030663+C cellular\_component [name] COPI coated vesicle membrane [def] "The lipid bilayer surrounding a COPI-coated vesicle." [GOC

2975 Pathogen[ Q2Q067] interacts with 8 human  
partners:{O14579;Q9P299;P48444;P61923;Q9UBF2;P53618;P35606;Q9Y678}

2976 Pathogen[ P0C214] interacts with 8 human  
partners:{P61923;Q9P299;O14579;P53618;P35606;P48444;Q9UBF2;Q9Y678}

2977 Pathogen[ P03346] interacts with 9 human  
partners:{Q9Y678;P53618;Q9P299;O14579;P48444;Q9UBF2;P61923;P35606;Q15363}

2978 Pathogen[ Q85601] interacts with 8 human  
partners:{P48444;O14579;Q9P299;P61923;Q9UBF2;Q9Y678;P53618;P35606}

2979 Pathogen[ P14079] interacts with 8 human  
partners:{P61923;P35606;Q9Y678;Q15363;Q9P299;Q9UBF2;P48444;O14579}

2980 Pathogen[ P03383] interacts with 4 human partners:{O14579;P53618;Q9Y678;Q9UBF2}

2981 Pathogen[ P03410] interacts with 9 human  
partners:{Q9P299;P48444;P35606;O14579;Q9Y678;Q15363;P53618;P61923;Q9UBF2}

2982 Pathogen[ P14075] interacts with 4 human partners:{Q9UBF2;P53618;Q9Y678;O14579}

2983 Pathogen[ P0C206] interacts with 9 human  
partners:{O14579;Q9Y678;P53618;Q9P299;P35606;P48444;Q9UBF2;Q15363;P61923}

2984 Pathogen[ P03363] interacts with 8 human  
partners:{P48444;Q9Y678;O14579;P53618;Q9P299;P61923;P35606;Q9UBF2}

2985 [Cluster 272]GO:0000776+C cellular\_component [name] kinetochore [def] "A multisubunit complex that is located at the centromeric region of DNA and provides an attachment point for the spindle microtubules." [GOC

2986 Pathogen[ Q2Q067] interacts with 75 human  
partners:{P49454;Q96EE3;Q96H22;P52948;Q71F23;Q12769;Q12888;Q13352;Q7Z460;O14974;P55735;Q96R06;Q6P1K2;Q9HBM1;O75935;Q5EE01;Q8WYP5;Q9H3R5;Q5FBB7;P49450;Q13257;Q8N2Z9;A8MT69;Q03188;Q9NXR1;Q96ST3;O43684;Q8NBT2;Q8NFH4;P12270;Q9NQS7;Q14203;Q9Y448;O43264;O14980;Q7Z7K6;Q92674;Q9BW27;Q96BT3;Q13561;Q92831;Q9BZD4;Q9NSP4;O75177;P36873;P55854;P50748;Q96JM3;Q96BK5;Q9H410;Q8NFH3;O75122;Q8IX90;Q8NG31;Q9Y6D9;Q86U86;P57740;Q96BD8;Q9H900;Q96IY1;Q96IK1;Q8WUM0;Q14683;Q9BU64;O95229;P45973;O14777;Q562F6;P51808;Q9H081;Q8WVK7;Q9Y2Z0;O15392;Q96EA4;O14576}

2987 Pathogen[ P0C214] interacts with 73 human  
partners:{Q9H081;O43684;Q96BK5;P55735;Q13257;O75935;Q96BT3;O43264;Q14203;Q96EA4;Q96R06;P57740;Q5EE01;Q8WYP5;P50748;O95229;Q96EE3;Q8NBT2;P51808;Q6P1K2;P46060;Q562F6;P55854;P49450;O14974;Q8N2Z9;Q03188;O75122;Q92674;O14980;Q9BW27;Q96BD8;Q9HBM1;Q9Y2Z0;Q13352;Q8NFH3;Q7Z7K6;Q9H410;O15392;Q9H3R5;Q8IX90;Q14683;Q92831;Q8NG31;O14576;Q86U86;Q7Z460;P36873;Q9H900;Q5FBB7;Q96ST3;Q96JM3;Q9NQS7;P45973;Q12888;Q9NSP4;P12270;Q71F23;Q8NFH4;Q9NXR1;Q96IY1;P49454;Q9Y448;Q13561;O75177;Q9BZD4;Q8WUM0;Q9Y6D9;P52948;Q9BU64;Q12769;Q8WVK7;O14777}

2988 Pathogen[ P03346] interacts with 81 human  
partners:{Q12888;Q9Y6D9;Q8N2Z9;Q96ST3;P55735;Q5FBB7;Q8NFH4;Q8WUM0;P45973;O95229;Q9Y2Z0;P12270;O14576;Q12769;O15392;O43684;Q96EE3;Q9BS16;Q92674;A8MT69;O75935;Q96R06;P51808;P57740;Q5EE01;Q8WYP5;Q14141;O43264;Q9NXR1;P55854;Q96IY1;Q86U86;Q92831;Q96IK1;Q14203;Q8NFH3;O14777;Q9BW27;O14980;Q96EA4;P46060;Q14683;Q15019;P36873;Q96BK5;Q9NQS7;Q562F6;Q7Z7K6;Q9H081;Q8NBT2;Q9HBM1;Q96JM3;Q9H410;P30622;O75122;Q9BU64;Q03188;Q8IX90;P50748;Q9H7Z6;P49450;Q9Y448;Q7Z460;Q8NG31;Q9H3R5;O14974;Q9NSP4;Q96H22;Q6P1K2;Q96BD8;Q9BZD4;Q96BT3;Q71F23;Q13352;Q8WVK7;Q13257;P49454;Q9H900;O75177;Q13561;P52948}

2989 Pathogen[ Q85601] interacts with 78 human  
partners:{Q8NBT2;P49454;Q96JM3;O95229;Q7Z7K6;Q8NFH4;Q8NFH3;Q03188;P51808;Q9H900;P46060;Q96EE3;Q9Y2Z0;Q9NQS7;Q12769;Q9H081;Q96IK1;Q96BT3;O75935;P57740;Q5EE01;Q8WYP5;P30622}

- ;Q8WUM0;Q71F23;O43264;Q9H7Z6;Q8NG31;O15392;Q92831;Q9H3R5;Q14203;Q96EA4;P12270;Q96R06;Q12888;Q13257;Q92674;O75122;Q9BW27;Q13352;Q9Y448;Q562F6;Q9BU64;Q96BK5;Q14683;Q9BZD4;P45973;P36873;Q96BD8;Q9Y6D9;A8MT69;P55735;P52948;O14576;P49450;Q8N2Z9;Q9H410;P55854;O14980;Q8IX90;P50748;Q8WVK7;Q96IY1;O14974;Q7Z460;Q86U86;Q9NXR1;Q6P1K2;Q9GZM8;O14777;O43684;Q9HBM1;Q5FBB7;P51955;O75177;Q13561;Q96ST3}
- 2990 Pathogen[ P14079] interacts with 78 human partners: {Q96IY1;Q03188;Q9BW27;Q5EE01;Q7Z460;P51808;Q8IX90;Q96BT3;Q9HBM1;Q96R06;P36873;P57740;Q96ST3;O95229;Q8NBT2;O14974;Q9BZD4;Q86U86;O15392;P46060;Q8NG31;Q9H900;Q9Y448;Q5FBB7;Q9H410;P45973;Q96IK1;Q9NSP4;Q99661;Q71F23;Q8WUM0;P51955;P12270;Q8WYP5;Q8N2Z9;Q13257;Q96EA4;Q562F6;Q8WVK7;P49450;Q96JM3;Q96H22;Q8NFB3;P55854;Q96EE3;Q13561;O43264;A8MT69;Q9H3R5;Q9GZM8;Q8NFB4;Q9NQS7;Q92674;Q96BK5;P55735;P49454;Q9BU64;Q9NXR1;P50748;Q12888;Q12769;Q96BD8;O75122;Q14683;Q13352;O75935;Q9Y2Z0;O14777;O75177;Q14203;O43684;Q7Z7K6;P30622;Q6P1K2;P52948;Q9H081;Q8WVJ2}
- 2991 Pathogen[ P03383] interacts with 65 human partners: {Q14683;Q86U86;Q96EE3;Q13257;Q8WUM0;Q9NQS7;Q03188;P49454;Q92831;Q12888;Q8N2Z9;Q8NFB4;Q7Z460;Q96BD8;Q8NBT2;P51808;Q9H900;P55735;O43264;P12270;Q5FBB7;P52948;Q14203;P57740;Q5EE01;Q8WYP5;Q96BK5;Q96H22;O75177;Q7Z7K6;Q13352;Q96EA4;Q96BT3;Q12769;Q96R06;P36873;Q71F23;O95229;Q9BW27;P45973;Q9BU64;O14980;O43684;P55854;Q9BZD4;Q8WVK7;A8MT69;Q562F6;O75935;Q9HBM1;Q9H410;Q9H081;Q8IX90;Q96IY1;Q8NG31;Q6P1K2;Q9Y448;Q96ST3;Q13561;O14777;Q92674;Q9H3R5;Q8NFB3;Q9Y6D9;P50748}
- 2992 Pathogen[ P03410] interacts with 79 human partners: {Q03188;Q9Y6G9;Q92831;Q8IX90;Q7Z460;O15392;Q9BW27;Q8WVJ2;P55854;P51808;Q9NSP4;Q9H3R5;O43684;Q96H22;P30622;Q96JM3;Q13561;Q9Y2Z0;Q9NXR1;Q9H410;Q8NG31;Q9GZM8;Q86U86;Q8NFB4;Q96BT3;P52948;P50748;P45973;Q562F6;Q92674;Q96R06;Q96ST3;O75177;Q5EE01;O43264;Q7Z7K6;P49454;Q96EA4;Q96IY1;O14576;Q9Y448;P12270;Q6P1K2;Q71F23;Q14683;Q9BZD4;O14974;Q8WVK7;P36873;Q9HBM1;Q96EE3;O75935;Q12888;Q8NBT2;P49450;Q5FBB7;Q8WUM0;A8MT69;Q9H900;O95229;Q9H081;Q96BK5;Q96BD8;P57740;P55735;Q12769;Q8WYP5;O75122;Q8NFB3;Q13352;P46060;O14980;O14777;Q14203;Q9BU64;Q8N2Z9;Q13257;Q9NQS7;Q96IK1}
- 2993 Pathogen[ P14075] interacts with 66 human partners: {A8MT69;Q96ST3;Q14683;Q9Y6D9;Q9H081;Q92831;Q562F6;Q9NQS7;Q96R06;Q92674;P51808;Q8WVK7;P57740;Q5EE01;Q8WYP5;Q7Z460;Q13561;Q96IY1;Q13257;Q96H22;O43684;P45973;Q96BD8;P12270;O14777;P55854;P55735;P36873;O95229;Q8N2Z9;Q96BK5;Q9H3R5;O14980;Q9BW27;Q9BU64;Q96EA4;O75935;Q86U86;Q96EE3;Q96BT3;Q5FBB7;Q9H410;Q8IX90;Q7Z7K6;Q8NFB3;Q9H900;P50748;Q12769;Q12888;Q9HBM1;Q6P1K2;Q14203;Q13352;Q8WUM0;O43264;Q03188;Q8NG31;P49454;Q96IK1;Q71F23;Q8NFB4;Q9Y448;Q8NBT2;Q9BZD4;P52948;O75177}
- 2994 Pathogen[ P0C206] interacts with 81 human partners: {Q96EE3;Q9HBM1;Q8WYP5;Q9Y2Z0;P45973;Q9NSP4;Q96ST3;O14576;Q9H900;Q15019;Q9Y6D9;P51955;Q9H081;O14777;O75177;Q9Y448;Q9BZD4;P55735;Q9H410;P57740;P49454;Q96BK5;P30622;Q86U86;Q13257;Q92831;Q9BU64;Q14141;Q9GZM8;Q8IX90;O14974;O75122;Q92674;Q8WUM0;Q5EE01;P46060;Q6P1K2;Q8NBT2;Q96BD8;Q9H3R5;Q12888;P55854;P49450;P51808;Q14683;Q96IY1;Q9Y6G9;Q7Z7K6;Q96BT3;Q13352;Q5FBB7;Q96JM3;O15392;Q96H22;Q13561;Q8NFB4;Q562F6;Q9NXR1;Q96EA4;Q8N2Z9;Q16181;Q12769;O43684;Q7Z460;Q9NQS7;Q14203;O75935;Q8NFB3;P36873;P50748;Q96IK1;Q71F23;O43264;Q8NG31;Q8WVK7;Q9BW27;A8MT69;Q03188;Q9H7Z6;P12270;O95229}
- 2995 Pathogen[ P03363] interacts with 74 human partners: {Q96EA4;Q9BZD4;P46060;Q96IK1;P49454;Q96IY1;Q6P1K2;Q7Z7K6;Q9Y6D9;P12270;Q9H081;P36873;Q92674;Q8NFB4;O95229;Q96BD8;Q96BK5;Q92831;Q8WYP5;Q13561;Q8NFB3;P45973;O14980;Q12769;O43264;Q8NBT2;Q8N2Z9;Q8WVK7;Q9H410;P50748;Q14807;Q8IX90;Q5FBB7;Q9H900;Q5EE01;Q8WUM0;Q96JM3;P30622;Q96R06;O43684;P49450;Q9NQS7;Q96ST3;Q9NSP4;O75935;Q9HBM1;Q7Z460;Q86U86;Q03188;Q8NG31;Q9Y2Z0;Q13257;Q71F23;P51808;O14974;P57740;Q96BT3;Q9H3R5;P52948;O14777;Q9Y448;Q562F6;Q9NXR1;Q14141;Q13352;P55735;Q14683;Q14203;O14576;Q9BW27;P55854;Q12888;O75177;A8MT69}
- 2996 [Cluster 273]GO:0010494+C cellular\_component [name] cytoplasmic stress granule [def] "A dense aggregation in the cytosol composed of proteins and RNAs that appear when the cell is under stress." [GOC]
- 2997 Pathogen[ Q2Q067] interacts with 14 human partners: {P05198;Q9NR56;P67809;O95793;P26196;Q13310;Q8ND56;Q9H9Z2;Q92499;Q8TB72;Q99700;P26651;P06730;P11940}
- 2998 Pathogen[ P0C214] interacts with 16 human partners: {Q13310;Q8TB72;P26196;Q8ND56;Q9NR56;P67809;P11940;Q9NZI8;Q99700;Q9H9Z2;P26651;Q92499;O95793;P05198;Q14011;P06730}
- 2999 Pathogen[ P03346] interacts with 17 human partners: {Q8ND56;P06730;Q14011;Q9NZI8;P11940;Q8TB72;O95793;Q9BWF3;Q92499;Q99700;P67809;P26196;Q13310;Q9H9Z2;P26651;Q9NR56;P05198}
- 3000 Pathogen[ Q85601] interacts with 14 human partners: {P06730;Q13310;O95793;Q9NR56;Q92499;P26651;P11940;Q8TB72;P67809;P26196;P05198;Q9H9Z2;Q99700;Q8ND56}
- 3001 Pathogen[ P14079] interacts with 15 human partners: {O95793;P06730;Q8ND56;P67809;Q99700;Q13310;P05198;Q14444;Q9NR56;Q9H9Z2;Q8TB72;P11940;P26196;Q92499;Q14011}
- 3002 Pathogen[ P03383] interacts with 13 human partners: {Q9H9Z2;Q99700;Q9NR56;Q8TB72;P26196;P11940;P06730;P05198;Q8ND56;P26651;Q13310;Q92499;P67809}
- 3003 Pathogen[ P03410] interacts with 14 human partners: {Q99700;P11940;P06730;Q9NR56;P26651;P67809;Q92499;Q14011;Q8ND56;O95793;Q9H9Z2;Q8TB72;Q13310;P05198}
- 3004 Pathogen[ P14075] interacts with 13 human

partners:{Q8TB72;P26196;P26651;Q9H9Z2;P06730;P05198;Q92499;P11940;Q13310;Q9NR56;P67809;Q99700;Q8ND56}  
 3005 Pathogen[ P0C206] interacts with 15 human  
 partners:{P67809;P26651;Q8ND56;Q9NR56;Q14011;P26196;Q8TB72;P06730;Q9H9Z2;P05198;Q13310;Q99700;Q95793;Q92499;P11940}  
 3006 Pathogen[ P03363] interacts with 17 human  
 partners:{Q8TB72;Q95793;P11940;Q9NR56;Q9BWF3;P05198;Q9NZI8;Q13310;Q92499;Q9H9Z2;Q14011;P26196;Q8ND56;P26651;Q99700;P06730;P67809}  
 3007 [Cluster 274]GO:0000346+C cellular\_component [name] transcription export complex [def] "The transcription export (TREX) complex couples transcription elongation by RNA polymerase II to mRNA export. The complex associates with the polymerase and travels with it along the length of the transcribed gene. TREX is composed of the THO transcription elongation complex as well as other proteins that couple THO to mRNA export proteins. The TREX complex is known to be found in a wide range of eukaryotes, including *S. cerevisiae* and metazoans." [GOC  
 3008 Pathogen[ Q2Q067] interacts with 6 human  
 partners:{Q96FV9;Q13838;Q6I9Y2;Q13769;Q86V81;Q8NI27}  
 3009 Pathogen[ P0C214] interacts with 6 human  
 partners:{Q96FV9;Q86V81;Q13769;Q8NI27;Q13838;Q6I9Y2}  
 3010 Pathogen[ P03346] interacts with 7 human  
 partners:{Q96FV9;Q13769;Q86V81;Q96J01;Q13838;Q8NI27;Q6I9Y2}  
 3011 Pathogen[ Q85601] interacts with 6 human  
 partners:{Q13769;Q86V81;Q96FV9;Q13838;Q8NI27;Q6I9Y2}  
 3012 Pathogen[ P14079] interacts with 6 human  
 partners:{Q8NI27;Q13838;Q96FV9;Q13769;Q6I9Y2;Q86V81}  
 3013 Pathogen[ P03383] interacts with 6 human  
 partners:{Q8NI27;Q13769;Q13838;Q96FV9;Q86V81;Q6I9Y2}  
 3014 Pathogen[ P03410] interacts with 6 human  
 partners:{Q13838;Q8NI27;Q96FV9;Q86V81;Q13769;Q6I9Y2}  
 3015 Pathogen[ P14075] interacts with 6 human  
 partners:{Q86V81;Q13769;Q8NI27;Q6I9Y2;Q96FV9;Q13838}  
 3016 Pathogen[ P0C206] interacts with 6 human  
 partners:{Q8NI27;Q13769;Q96FV9;Q13838;Q6I9Y2;Q86V81}  
 3017 Pathogen[ P03363] interacts with 7 human  
 partners:{Q96J01;Q13769;Q8NI27;Q96FV9;Q86V81;Q13838;Q6I9Y2}  
 3018 [Cluster 275]GO:0001533+C cellular\_component [name] cornified envelope [def] "An insoluble protein structure formed under the plasma membrane of cornifying epithelial cells." [PMID  
 3019 Pathogen[ Q2Q067] interacts with 8 human  
 partners:{P35321;P23490;Q5T752;P15924;P22528;P22531;Q674X7;P07476}  
 3020 Pathogen[ P0C214] interacts with 8 human  
 partners:{P35321;Q5T752;P07476;P22735;P15924;P23490;Q674X7;P22531}  
 3021 Pathogen[ P03346] interacts with 16 human  
 partners:{P15924;P35321;P35325;Q95171;P35326;P07476;Q9BYE4;Q9BYD5;Q96RM1;P22531;Q5T752;P23490;P22532;P22528;Q674X7;P22735}  
 3022 Pathogen[ Q85601] interacts with 6 human  
 partners:{P35321;P15924;P22531;Q674X7;P23490;Q95171}  
 3023 Pathogen[ P14079] interacts with 18 human  
 partners:{P04083;P22528;P22531;P35326;P22735;P07476;P15924;Q9BYE4;Q96RM1;Q9BYD5;Q5T752;P35321;P35325;P23490;Q95171;Q92817;P22532;Q674X7}  
 3024 Pathogen[ P03383] interacts with 11 human  
 partners:{P23490;P15924;Q9BYE4;P35321;Q5T752;Q96RM1;P22531;P07476;P22532;P22528;P35325}  
 3025 Pathogen[ P03410] interacts with 18 human  
 partners:{P23490;P15924;P22531;P35325;P22528;Q9BYE4;P35321;Q95171;Q674X7;Q96RM1;P22532;P35326;Q92817;Q15517;Q9BYD5;Q5T752;P07476;P22735}  
 3026 Pathogen[ P14075] interacts with 11 human  
 partners:{P35321;P22532;P35325;P23490;Q5T752;Q96RM1;P22531;P22528;Q9BYE4;P07476;P15924}  
 3027 Pathogen[ P0C206] interacts with 16 human  
 partners:{Q9BYE4;P35325;P22531;Q96RM1;Q9BYD5;P35326;P23490;Q5T752;P35321;P15924;P22532;Q674X7;P22735;P07476;Q95171;P22528}  
 3028 Pathogen[ P03363] interacts with 16 human  
 partners:{P22531;P22532;P35321;Q9BYE4;P23490;P35326;P15924;Q96RM1;Q5T752;Q9BYD5;P35325;P22528;Q674X7;Q95171;P07476;Q92817}  
 3029 [Cluster 276]GO:0031461+C cellular\_component [name] cullin-RING ubiquitin ligase complex [def] "Any ubiquitin ligase complex in which the catalytic core consists of a member of the cullin family and a RING domain protein\_ the core is associated with one or more additional proteins that confer substrate specificity." [PMID  
 3030 Pathogen[ Q2Q067] interacts with 8 human  
 partners:{Q93034;Q13616;Q13618;Q13620;Q13619;Q9UJX6;Q13617;Q14999}  
 3031 Pathogen[ P0C214] interacts with 9 human  
 partners:{Q9UJX6;Q13619;Q13617;Q13620;Q86Y37;Q13618;Q93034;Q14999;Q13616}  
 3032 Pathogen[ P03346] interacts with 10 human  
 partners:{Q13616;Q13618;Q93034;Q13620;Q9UJX6;Q8IWT3;Q86Y37;Q13619;Q14999;Q13617}  
 3033 Pathogen[ Q85601] interacts with 9 human

3034 partners:{Q9UJX6;Q13616;Q86Y37;Q14999;Q13620;Q13618;Q13619;Q93034;Q13617}  
Pathogen[ P14079] interacts with 9 human

3035 partners:{Q13620;Q13618;Q93034;Q9UJX6;Q13617;Q13616;Q86Y37;Q14999;Q13619}  
Pathogen[ P03383] interacts with 7 human

3036 partners:{Q13616;Q9UJX6;Q93034;Q13618;Q13617;Q14999;Q13620}  
Pathogen[ P03410] interacts with 8 human

3037 partners:{Q13620;Q13618;Q86Y37;Q13616;Q13619;Q13617;Q93034;Q9UJX6}  
Pathogen[ P14075] interacts with 7 human

3038 partners:{Q93034;Q13618;Q13620;Q9UJX6;Q14999;Q13616;Q13617}  
Pathogen[ P0C206] interacts with 10 human

3039 partners:{Q86Y37;Q13616;Q13620;Q14999;Q13619;Q13617;Q13618;Q9UJX6;Q93034;Q8IWT3}  
Pathogen[ P03363] interacts with 9 human

3040 partners:{Q13618;Q13617;Q9UJX6;Q13619;Q13616;Q14999;Q13620;Q8IWT3;Q93034}  
[Cluster 277]GO:0032839+C cellular\_component [name] dendrite cytoplasm [def] "All of the contents of a dendrite, excluding the surrounding plasma membrane." [GOC

3041 Pathogen[ Q2Q067] interacts with 1 human partners:{P78352}  
3042 Pathogen[ P0C214] interacts with 1 human partners:{P78352}  
3043 Pathogen[ P03346] interacts with 2 human partners:{P78352;Q9H0R8}  
3044 Pathogen[ Q85601] interacts with 2 human partners:{Q9H0R8;P78352}  
3045 Pathogen[ P14079] interacts with 1 human partners:{Q9H0R8}  
3046 Pathogen[ P03383] interacts with 1 human partners:{P78352}  
3047 Pathogen[ P03410] interacts with 2 human partners:{Q9H0R8;P78352}  
3048 Pathogen[ P14075] interacts with 1 human partners:{P78352}  
3049 Pathogen[ P0C206] interacts with 2 human partners:{P78352;Q9H0R8}  
3050 Pathogen[ P03363] interacts with 2 human partners:{P78352;Q9H0R8}

3051 [Cluster 278]GO:0030136+C cellular\_component [name] clathrin-coated vesicle [def] "A vesicle with a coat formed of clathrin connected to the membrane via one of the clathrin adaptor complexes." [GOC

3052 Pathogen[ Q2Q067] interacts with 13 human  
partners:{O43747;O00291;Q8WXE9;P53675;Q9UJY4;O43752;Q6ICB4;Q00610;O14641;Q14677;P09496;P14672;Q9P0V3}

3053 Pathogen[ P0C214] interacts with 14 human  
partners:{Q6ICB4;Q9H201;Q9P0V3;P53675;Q9UJY4;O14641;O43752;Q9BQI5;O43747;Q8WXE9;P09496;P14672;O00291;Q14677}

3054 Pathogen[ P03346] interacts with 22 human  
partners:{Q6P3S1;O43752;O43747;Q8IV53;O00291;Q6P3W7;P09496;Q8WXE9;Q8N4B1;O14641;Q9P0V3;P42566;Q9UJY4;P53675;Q9H201;Q13492;Q6ICB4;Q9BQI5;P14672;Q14677;Q00610;O75146}

3055 Pathogen[ Q85601] interacts with 14 human  
partners:{P53675;Q00610;P09496;Q9UJY4;Q8WXE9;O43747;O43752;Q14677;O14641;Q6ICB4;Q9H201;O00291;Q9P0V3;P14672}

3056 Pathogen[ P14079] interacts with 22 human  
partners:{Q13492;Q6P3S1;O00291;O75146;Q00610;Q9UJY4;Q13021;O14641;P14672;Q14677;P42566;Q9P0V3;Q8IV53;Q9BQI5;Q8N4B1;Q6ICB4;Q8WXE9;O43747;O43752;P53675;P09496;Q9H201}

3057 Pathogen[ P03383] interacts with 12 human  
partners:{Q9UJY4;Q00610;Q8WXE9;P53675;O00291;O14641;O43747;Q9BQI5;Q14677;Q9P0V3;O43752;P14672}

3058 Pathogen[ P03410] interacts with 24 human  
partners:{Q00610;P09496;Q8N4B1;Q0JRZ9;O43747;Q9P0V3;O00291;O75146;Q8WXE9;Q13492;Q14677;Q15049;Q9H201;Q6P3S1;Q6ICB4;Q9BQI5;O43752;P53675;Q8IV53;P42566;Q9UJY4;Q5MNZ9;Q13021;O14641}

3059 Pathogen[ P14075] interacts with 13 human  
partners:{Q9BQI5;Q9P0V3;Q9UJY4;P09496;O43752;P53675;O00291;O14641;Q8WXE9;Q14677;O43747;P14672;Q00610}

3060 Pathogen[ P0C206] interacts with 20 human  
partners:{P53675;Q9H201;O00291;O43747;O43752;Q8WXE9;Q6ICB4;Q9UJY4;Q00610;Q13021;Q6P3W7;P09496;Q9BQI5;Q14677;P42566;Q9P0V3;Q8N4B1;P14672;Q8IV53;Q6P3S1}

3061 Pathogen[ P03363] interacts with 18 human  
partners:{Q9H201;Q8WXE9;Q6ICB4;Q9P0V3;O43747;Q9UJY4;Q00610;Q8N4B1;Q14677;Q6P3S1;P14672;O75146;Q9BQI5;O14641;O43752;P53675;Q8IV53;O00291}

3062 [Cluster 279]GO:0005720+C cellular\_component [name] nuclear heterochromatin [def] "A condensed form of chromatin, occurring in the nucleus during interphase, that stains strongly with basophilic dyes. The DNA of heterochromatin is typically replicated at a later stage in the cell-division cycle than euchromatin." [ISBN

3063 Pathogen[ Q2Q067] interacts with 13 human  
partners:{Q13185;Q9Y6K1;Q9UJW3;Q9UBC3;Q99549;P17987;P46100;O75475;Q96PU4;Q01826;P45973;Q9H5I1;P83916}

3064 Pathogen[ P0C214] interacts with 12 human  
partners:{Q9H5I1;P83916;Q96PU4;Q9Y6K1;Q99549;P46100;Q13185;O75475;Q01826;P45973;P17987;Q9UJW3}

3065 Pathogen[ P03346] interacts with 16 human  
partners:{Q13263;Q9Y6K1;P45973;P46100;Q9NU63;O75475;Q9UBC3;Q99549;P83916;Q96PU4;Q9H5I1;Q9NQ94;Q13185;Q01826;Q9UJW3;P17987}

3066 Pathogen[ Q85601] interacts with 15 human  
partners:{Q9H5I1;P83916;Q9UJW3;Q96PU4;Q99549;P17987;P13263;P45973;Q9Y6K1;Q01826;Q13185;O75475;Q9NU63;P46100;Q9UBC3}

3067 Pathogen[ P14079] interacts with 14 human

partners:{Q9Y6K1;Q99549;O75475;Q01826;Q9NU63;Q9NQ94;Q9H5I1;P46100;P45973;Q13185;Q9UBC3;Q9UJW3;P17987;P83916}  
 3068 Pathogen[ P03383] interacts with 11 human  
 partners:{Q9UJW3;Q01826;Q96PU4;P83916;P46100;Q99549;Q13185;P45973;Q9Y6K1;O75475;Q9H5I1}

3069 Pathogen[ P03410] interacts with 13 human  
 partners:{P17987;Q99549;P45973;Q9H5I1;Q01826;P46100;Q13185;Q9UBC3;P83916;Q9UJW3;O75475;Q9Y6K1;Q9NU63}

3070 Pathogen[ P14075] interacts with 11 human  
 partners:{Q9Y6K1;O75475;Q96PU4;Q9UJW3;P45973;Q01826;P46100;Q9H5I1;Q13185;Q99549;P83916}

3071 Pathogen[ P0C206] interacts with 15 human  
 partners:{P45973;Q9Y6K1;Q13263;P46100;P17987;O75475;P83916;Q9H5I1;Q13185;Q01826;Q9UBC3;Q99549;Q9NU63;Q96PU4;Q9UJW3}

3072 Pathogen[ P03363] interacts with 14 human  
 partners:{P83916;Q9H5I1;P45973;Q01826;O75475;Q9Y6K1;Q13185;P46100;Q99549;P17987;Q9UJW3;Q96PU4;Q9UBC3;Q9NQ94}

3073 [Cluster 280]GO:0005885+C cellular\_component [name] Arp2/3 protein complex [def] "A stable protein complex that contains two actin-related proteins, Arp2 and Arp3, and five novel proteins (ARPC1-5), and functions in the nucleation of branched actin filaments." [GOC]

3074 Pathogen[ Q2Q067] interacts with 2 human partners:{O15511;P59998}  
 3075 Pathogen[ P0C214] interacts with 3 human partners:{P59998;O15144;O15511}  
 3076 Pathogen[ P03346] interacts with 4 human partners:{O15511;O15144;P59998;O15145}  
 3077 Pathogen[ Q85601] interacts with 3 human partners:{O15511;P59998;O15144}  
 3078 Pathogen[ P14079] interacts with 5 human  
 partners:{O15145;O15511;P61158;P59998;O15144}

3079 Pathogen[ P03383] interacts with 2 human partners:{O15511;P59998}  
 3080 Pathogen[ P03410] interacts with 4 human partners:{O15511;O15145;P59998;O15144}  
 3081 Pathogen[ P14075] interacts with 2 human partners:{O15511;P59998}  
 3082 Pathogen[ P0C206] interacts with 4 human partners:{O15511;P59998;O15145;O15144}  
 3083 Pathogen[ P03363] interacts with 5 human  
 partners:{O15144;P59998;O15143;O15145;O15511}

3084 [Cluster 281]GO:0005638+C cellular\_component [name] lamin filament [def] "Any of a group of intermediate-filament proteins that form the fibrous matrix on the inner surface of the nuclear envelope. They are classified as lamins A, B and C." [ISBN]

3085 Pathogen[ Q2Q067] interacts with 4 human partners:{P02545;P20700;P56537;Q9UHQ1}  
 3086 Pathogen[ P0C214] interacts with 4 human partners:{P20700;Q9UHQ1;P02545;P56537}  
 3087 Pathogen[ P03346] interacts with 4 human partners:{P20700;P56537;P02545;Q9UHQ1}  
 3088 Pathogen[ Q85601] interacts with 4 human partners:{P20700;P02545;P56537;Q9UHQ1}  
 3089 Pathogen[ P14079] interacts with 4 human partners:{Q9UHQ1;P56537;P20700;P02545}  
 3090 Pathogen[ P03383] interacts with 4 human partners:{P02545;P56537;Q9UHQ1;P20700}  
 3091 Pathogen[ P03410] interacts with 4 human partners:{P20700;Q9UHQ1;P02545;P56537}  
 3092 Pathogen[ P14075] interacts with 4 human partners:{P56537;P20700;P02545;Q9UHQ1}  
 3093 Pathogen[ P0C206] interacts with 4 human partners:{Q9UHQ1;P56537;P02545;P20700}  
 3094 Pathogen[ P03363] interacts with 4 human partners:{P02545;P20700;Q9UHQ1;P56537}

3095 [Cluster 282]GO:0019861+C cellular\_component [name] flagellum [def] "Long whiplike or feathery structures borne either singly or in groups by the motile cells of many bacteria and unicellular eukaryotes and by the motile male gametes of many eukaryotic organisms, which propel the cell through a liquid medium." [SP\_KW]

3096 Pathogen[ Q2Q067] interacts with 5 human  
 partners:{Q8WW24;Q5BJF6;O14556;P00338;Q6Q759}

3097 Pathogen[ P0C214] interacts with 7 human  
 partners:{Q8WW24;O14556;P14618;Q96KC9;P09622;Q5BJF6;Q6Q759}

3098 Pathogen[ P03346] interacts with 8 human  
 partners:{Q9UIF3;O14556;Q8N0X2;Q9Y4P9;Q5BJF6;P00338;Q6Q759;Q8WW24}

3099 Pathogen[ Q85601] interacts with 6 human  
 partners:{Q6Q759;Q5BJF6;Q8WW24;O14556;P14618;P00338}

3100 Pathogen[ P14079] interacts with 13 human  
 partners:{Q9Y4P9;Q5JQC9;P00338;Q8N0X2;Q6Q759;O75952;Q5BJF6;Q5H9T9;Q8IW40;Q8WW24;Q9UIF3;Q9BZX4;Q96KC9}

3101 Pathogen[ P03383] interacts with 6 human  
 partners:{P00338;O14556;Q8WW24;Q5BJF6;Q6Q759;Q9Y4P9}

3102 Pathogen[ P03410] interacts with 14 human  
 partners:{Q96KC9;Q6Q759;O14556;Q9Y4P9;Q8N0X2;Q5JQC9;Q9BZX4;Q9UIF3;O75952;Q9NPE6;P00338;Q5BJF6;Q8IW40;Q5H9T9}

3103 Pathogen[ P14075] interacts with 6 human  
 partners:{Q6Q759;Q96KC9;Q5BJF6;Q9Y4P9;P00338;O14556}

3104 Pathogen[ P0C206] interacts with 13 human  
 partners:{Q96KC9;O75952;Q5BJF6;Q5JQC9;Q9UIF3;Q9Y4P9;Q5H9T9;O14556;Q6Q759;P00338;Q8IW40;P14618;Q8WW24}

3105 Pathogen[ P03363] interacts with 9 human  
 partners:{Q5BJF6;Q8N0X2;Q9Y4P9;Q8IYM1;Q8IW40;Q9UIF3;O14556;Q6Q759;Q8WW24}

3106 [Cluster 283]GO:0016023+C cellular\_component [name] cytoplasmic membrane-bounded vesicle [def] "A membrane-bounded vesicle found in the cytoplasm of the cell." [GOC]

3107 Pathogen[ Q2Q067] interacts with 22 human

3108 partners:{Q9NQG7;Q9H3C7;Q96N21;O43516;P53990;Q5VYK3;P52594;O00401;Q14457;Q8TCI5;Q96LB3;Q9H9C1;Q9BPZ7;O14641;Q9UKJ5;Q96CV9;P63000;O00165;Q9BVN2;P09496;Q15276;Q9NX95}  
Pathogen[ P0C214] interacts with 25 human

3109 partners:{Q14457;Q9BPZ7;Q9NQG7;P53990;P63000;Q9H4I8;Q9UKJ5;Q96N21;Q9UM54;Q5VYK3;Q8TCI5;Q9H3C7;O43516;Q8IVI9;O00165;O14641;Q9NX95;Q96CV9;Q9BVN2;O00401;P09496;P52594;Q9H9C1;Q96LB3;O15524}  
Pathogen[ P03346] interacts with 38 human

3110 partners:{Q9NQG7;O15524;Q96N21;O14908;Q9H2H0;Q15036;O43516;Q9H6Q3;Q8IVI9;Q9BPZ7;Q9Y6D5;Q9H3S7;Q9NX95;Q9NVA1;Q14457;Q9UKJ5;P09496;Q9H4I8;Q96CV9;O14641;P52594;Q5VYK3;Q6Q0C0;Q96LB3;O00165;Q969F2;P10768;Q9H9C1;Q8TCI5;Q86YS3;Q9BVN2;P54257;O00401;Q9H3C7;P63000;Q9BTT0;Q15276;P53990}  
Pathogen[ Q85601] interacts with 29 human

3111 partners:{Q14457;Q9NQG7;Q5VYK3;O00401;Q96CV9;Q96LB3;P09496;P10768;O00165;Q86YS3;Q15036;Q9BPZ7;Q9H3C7;P63000;Q9BVN2;Q9BTT0;P52594;Q9H9C1;Q8TCI5;O43516;Q9H6Q3;O14641;P53990;Q9UKJ5;Q96N21;Q8IVI9;Q9UM54;Q9NX95;Q6Q0C0}  
Pathogen[ P14079] interacts with 39 human

3112 partners:{Q9NQG7;O43516;Q15036;P54257;Q9BVN2;Q9NX95;Q9H9C1;Q9UKJ5;Q13021;O75781;O14641;O00165;Q9Y6D5;Q15276;Q92902;P52594;Q86YS3;Q9UM54;Q9H3C7;Q5VYK3;Q969N2;Q8IVI9;Q9BTT0;P20930;Q53FP2;Q5VXU3;Q8TCI5;O43612;Q9H6Q3;Q9NVA1;Q96LB3;Q9BPZ7;Q14457;O14908;Q8NA61;Q96CV9;P53990;P09496;O00401}  
Pathogen[ P03383] interacts with 21 human

3113 partners:{Q14457;Q9NQG7;Q96N21;P53990;Q5VYK3;Q9BPZ7;Q9NX95;Q9H9C1;P63000;O00165;O43516;Q8TCI5;O00401;O14641;Q96LB3;Q9UKJ5;Q96CV9;Q9H3C7;P52594;Q15276;Q9BVN2}  
Pathogen[ P03410] interacts with 44 human

3114 partners:{Q9BVN2;Q9NQG7;P09496;O75781;P10768;Q969F2;Q8NA61;P52594;O43612;P63000;Q92902;O43516;O00165;Q9BPZ7;P10645;Q14457;Q8IVI9;Q5VYK3;O00401;O14908;Q96N21;P53990;P20930;Q9UM54;Q86YS3;O60333;Q96CV9;Q9H3C7;Q15036;Q9UKJ5;Q9Y6D5;Q9BTT0;P54257;Q8TCI5;Q969N2;Q9H9C1;Q5VXU3;Q9NVA1;Q96LB3;Q9NX95;Q15276;Q13021;Q9H6Q3;O14641}  
Pathogen[ P14075] interacts with 23 human

3115 partners:{Q14457;Q9NQG7;Q9NVA1;Q96N21;P09496;P53990;Q9BVN2;Q9H9C1;O43516;Q9BPZ7;O00401;O14641;Q96LB3;Q8TCI5;P63000;P52594;Q96CV9;Q9H3C7;Q9NX95;Q9UKJ5;O00165;Q15276;Q5VYK3}  
Pathogen[ P0C206] interacts with 37 human

3116 partners:{Q8TCI5;Q9NQG7;Q9UM54;Q96N21;Q9H6Q3;Q969F2;O43516;Q5VXU3;Q96CV9;Q9H2H0;Q14457;Q9UKJ5;Q13021;O15524;P10768;Q9BTT0;Q15036;P09496;Q9NX95;Q9NVA1;O00165;Q9H4I8;P63000;Q9Y6D5;P53990;O14908;Q96LB3;Q9BPZ7;O00401;Q5VYK3;Q9H3C7;Q86YS3;Q9H9C1;Q8IVI9;Q6Q0C0;Q15276;Q9BVN2}  
Pathogen[ P03363] interacts with 32 human

3117 partners:{Q9NQG7;Q9H3S7;O14908;Q96CV9;Q8IVI9;Q9H9C1;O15524;Q14457;Q8TCI5;P10768;Q9H6Q3;Q96RU3;P63000;Q9H4I8;Q92902;P54257;Q9BVN2;O00401;Q9UKJ5;Q9H3C7;O43516;O60333;O00165;P52594;O14641;Q96LB3;Q96N21;Q15276;Q5VYK3;Q9BTT0;Q9NX95;P53990}  
[Cluster 284]GO:0002102+C cellular\_component [name] podosome [def] "An actin-rich adhesion structure characterized by formation upon cell substrate contact and localization at the substrate-attached part of the cell, contain an F-actin-rich core surrounded by a ring structure containing proteins such as vinculin and talin, and have a diameter of 0.5 mm." [PMID]

3118 Pathogen[ Q2Q067] interacts with 1 human partners:{O60711}

3119 Pathogen[ P0C214] interacts with 1 human partners:{O60711}

3120 Pathogen[ P03346] interacts with 2 human partners:{Q5TCZ1;O60711}

3121 Pathogen[ Q85601] interacts with 1 human partners:{O60711}

3122 Pathogen[ P14079] interacts with 4 human partners:{O95425;O60711;P61158;Q5TCZ1}

3123 Pathogen[ P03383] interacts with 1 human partners:{O60711}

3124 Pathogen[ P03410] interacts with 3 human partners:{O60711;O95425;Q5TCZ1}

3125 Pathogen[ P14075] interacts with 1 human partners:{O60711}

3126 Pathogen[ P0C206] interacts with 2 human partners:{Q5TCZ1;O60711}

3127 Pathogen[ P03363] interacts with 2 human partners:{Q5TCZ1;O60711}

3128 [Cluster 285]GO:0030864+C cellular\_component [name] cortical actin cytoskeleton [def] "The portion of the actin cytoskeleton, comprising filamentous actin and associated proteins, that lies just beneath the plasma membrane." [GOC]

3129 Pathogen[ Q2Q067] interacts with 3 human partners:{P23528;P54840;Q9H204}

3130 Pathogen[ P0C214] interacts with 2 human partners:{Q9H204;P54840}

3131 Pathogen[ P03346] interacts with 4 human partners:{Q14847;P54840;P23528;Q9H204}

3132 Pathogen[ Q85601] interacts with 3 human partners:{P54840;P23528;Q9H204}

3133 Pathogen[ P14079] interacts with 6 human partners:{Q9H204;Q01518;Q14847;P23528;Q9NS86;P54840}

3134 Pathogen[ P03383] interacts with 3 human partners:{Q9H204;P54840;P23528}

3135 Pathogen[ P03410] interacts with 6 human partners:{Q9NS86;P54840;Q9H204;Q14847;Q01518;P23528}

3136 Pathogen[ P14075] interacts with 3 human partners:{P54840;P23528;Q9H204}

3137 Pathogen[ P0C206] interacts with 4 human partners:{P54840;Q9H204;Q9NS86;P23528}

3138 Pathogen[ P03363] interacts with 4 human partners:{Q14847;P54840;P23528;Q9H204}

3139 [Cluster 286]GO:0071817+C cellular\_component [name] MMXD complex [def] "A protein complex that contains the proteins MMS19, MIP18 and XPD, localizes to mitotic spindle during mitosis, and is required for proper chromosome segregation." [GOC]

3140 Pathogen[ Q2Q067] interacts with 2 human partners:{Q96T76;Q9Y3D0}

3141 Pathogen[ P0C214] interacts with 2 human partners:{Q9Y3D0;Q96T76}

3142 Pathogen[ P03346] interacts with 2 human partners: {Q9Y3D0;Q96T76}

3143 Pathogen[ Q85601] interacts with 2 human partners: {Q96T76;Q9Y3D0}

3144 Pathogen[ P14079] interacts with 2 human partners: {Q9Y3D0;Q96T76}

3145 Pathogen[ P03383] interacts with 2 human partners: {Q96T76;Q9Y3D0}

3146 Pathogen[ P03410] interacts with 3 human partners: {Q96T76;P05141;Q9Y3D0}

3147 Pathogen[ P14075] interacts with 2 human partners: {Q96T76;Q9Y3D0}

3148 Pathogen[ P0C206] interacts with 2 human partners: {Q9Y3D0;Q96T76}

3149 Pathogen[ P03363] interacts with 2 human partners: {Q9Y3D0;Q96T76}

3150 [Cluster 287]GO:0097169+C cellular\_component [name] AIM2 inflammasome complex [def] "A protein complex that consists of AIM2, ASC, and caspase-1. AIM2 is a member of the HN-200 protein family that appears to be the sensor of cytosolic double-stranded DNA." [GOC]

3151 Pathogen[ Q2Q067] interacts with 1 human partners: {O14862}

3152 Pathogen[ P0C214] interacts with 1 human partners: {O14862}

3153 Pathogen[ P03346] interacts with 1 human partners: {O14862}

3154 Pathogen[ Q85601] interacts with 1 human partners: {O14862}

3155 Pathogen[ P14079] interacts with 1 human partners: {O14862}

3156 Pathogen[ P03383] interacts with 1 human partners: {O14862}

3157 Pathogen[ P03410] interacts with 1 human partners: {O14862}

3158 Pathogen[ P14075] interacts with 1 human partners: {O14862}

3159 Pathogen[ P0C206] interacts with 1 human partners: {O14862}

3160 Pathogen[ P03363] interacts with 1 human partners: {O14862}

3161 [Cluster 288]GO:0000151+C cellular\_component [name] ubiquitin ligase complex [def] "A protein complex that includes a ubiquitin-protein ligase and other proteins that may confer substrate specificity on the complex." [PMID]

3162 Pathogen[ Q2Q067] interacts with 32 human partners: {Q9HAU4;Q13356;Q8IYW8;Q9HC52;Q9UJT9;P51965;Q9Y3I1;Q86VP6;Q99728;Q9Y4X5;Q96PM5;P61088;P35226;Q99496;Q5VTR2;Q9UKT7;O76064;Q9Y3C5;O75150;Q8TCJ0;Q9UNE7;Q14139;Q96GG9;P68036;Q9NXX8;Q9UKA2;Q86XK2;Q13404;Q9Y2Z0;Q9UMS4;Q06587;Q9UKT5}

3163 Pathogen[ P0C214] interacts with 38 human partners: {Q9UKA1;P35226;Q8IYW8;Q9Y3I1;Q96PM5;Q9HAU4;Q99728;Q13404;Q9Y3C5;Q9NXX8;O00308;P51965;Q9UKT7;Q9H0M0;Q9UMS4;Q9UKA2;Q06587;Q9Y2Z0;Q14139;Q13356;Q99496;O94952;Q86XK2;O75150;Q95155;Q9Y4X5;Q5VTR2;Q8IYW5;Q8TCJ0;Q9UNE7;O76064;Q9UJT9;Q86VP6;Q9HC52;P61088;Q8IYW7;Q9UKT5;Q96GG9}

3164 Pathogen[ P03346] interacts with 39 human partners: {Q9UKA2;Q9UKT7;O76064;Q9HAU4;Q9Y2Z0;P68036;O75150;Q5VTR2;O95155;Q9UJT9;Q9Y3C5;Q99728;P35226;Q9UMS4;Q9HC52;Q96PM5;Q96GG9;Q86XK2;Q9NXX8;Q13404;P61088;Q9UKA1;Q8TCJ0;Q14139;P51965;Q9UKT5;Q9UNE7;Q6Q0C0;Q99496;Q13356;Q8IYW5;O94952;Q8IYW8;Q86VP6;Q9H0M0;Q9Y4X5;Q06587;Q9Y3I1;O00308}

3165 Pathogen[ Q85601] interacts with 38 human partners: {Q14139;Q9Y3I1;Q9HAU4;Q9Y2Z0;Q8IYW7;Q9Y3C5;Q9UMS4;Q9UKA2;Q96PM5;Q99728;Q86VP6;Q86XK2;O95155;P68036;Q13404;Q9UKA1;Q9UKT7;Q9NXX8;O76064;P51965;Q9UJT9;Q99496;Q13356;Q8IYW5;O75150;Q5VTR2;P35226;O94952;P61088;Q6Q0C0;Q8TCJ0;Q9UKT5;Q9UNE7;Q06587;Q9HC52;Q9Y4X5;Q96GG9;Q8IYW8}

3166 Pathogen[ P14079] interacts with 27 human partners: {Q96GG9;Q9UKT5;P51965;Q8IYW8;P68036;Q13404;Q9HC52;Q8TCJ0;Q86XK2;Q9HAU4;Q8IYW7;Q99496;Q9UMS4;Q13356;Q5VTR2;O94952;Q14139;P35226;Q9UKT7;Q9Y3C5;Q9UKA2;Q9UJT9;Q86VP6;Q9Y3I1;Q9Y2Z0;Q9NXX8;Q06587}

3167 Pathogen[ P03383] interacts with 24 human partners: {Q9Y3I1;Q13356;Q14139;P51965;Q8IYW8;Q96GG9;Q9HC52;Q06587;Q86XK2;Q9UKT7;P61088;Q9NXX8;Q13404;Q9UKT5;Q86VP6;Q96PM5;Q8TCJ0;Q99496;Q5VTR2;P68036;O94952;O75150;Q9UMS4;P35226}

3168 Pathogen[ P03410] interacts with 30 human partners: {Q8IYW8;Q9UKT7;Q99496;Q9Y2Z0;Q8TCJ0;P51965;Q9Y3I1;Q9NXX8;Q9UKT5;Q5VTR2;Q8IYW7;P68036;P61088;Q13356;Q9UNE7;O75150;Q9Y3C5;Q86XK2;Q9Y4X5;Q86VP6;Q9UKA2;Q9UMS4;Q06587;Q14139;Q13404;Q9UJT9;O94952;Q96GG9;P35226;Q9HC52}

3169 Pathogen[ P14075] interacts with 23 human partners: {Q5VTR2;Q96PM5;P68036;P61088;Q9UKT7;Q14139;P51965;Q9Y3I1;Q9UKT5;Q06587;Q96GG9;Q8TCJ0;O75150;Q86VP6;Q9HC52;Q9UMS4;Q99496;O94952;Q13404;P35226;Q86XK2;Q9NXX8;Q8IYW8}

3170 Pathogen[ P0C206] interacts with 39 human partners: {Q9UJT9;Q9UMS4;Q9Y2Z0;Q9HC52;Q8IYW5;O00308;Q9HAU4;P68036;Q86XK2;P35226;Q9UKA1;Q96GG9;Q9UKA2;O94952;O95155;Q8TCJ0;Q5VTR2;Q9Y4X5;P51965;Q9UKT7;P61088;Q8IYW7;Q9UNE7;Q14139;Q06587;Q99728;Q8IYW8;Q13356;Q9NXX8;Q96PM5;Q9Y3I1;Q13404;O76064;Q86VP6;Q9UKT5;O75150;Q9Y3C5;Q6Q0C0;Q99496}

3171 Pathogen[ P03363] interacts with 38 human partners: {Q14139;P51965;Q96GG9;Q9HAU4;Q9Y3C5;Q9UJT9;Q7Z569;Q9HC52;Q13356;O95155;Q5VTR2;Q99496;Q8IYW5;O75150;P61088;Q9UKA2;Q9Y3I1;O94952;Q9Y4X5;Q9UKT5;P35226;Q9UNE7;Q96PM5;Q9Y2Z0;Q9UKA1;Q9NXX8;Q86XK2;O00308;Q8TCJ0;Q86VP6;Q8IYW8;Q06587;Q99728;Q13404;Q9UMS4;Q9H0M0;Q9UKT7;P68036}

3172 [Cluster 289]GO:0035102+C cellular\_component [name] PRC1 complex [def] "An insect multiprotein complex containing the products of many of the Polycomb Group genes including Polycomb, Posterior sex combs, polyhomeotic and Sex comb on midleg. The Polycomb Group proteins are required for stable long-term maintenance of transcriptionally repressed states and the PRC1 complex directly antagonizes ATP-dependent remodeling of nucleosomal arrays." [GOC]



3173 Pathogen[ Q2Q067] interacts with 10 human partners: {Q9BYE7;Q8IXK0;Q9HC52;O00257;O95931;P35227;P35226;Q99496;Q14781;Q06587}

3174 Pathogen[ P0C214] interacts with 10 human partners: {P35226;P35227;Q8IXK0;O95931;Q06587;Q9BYE7;O00257;Q99496;Q14781;Q9HC52}

3175 Pathogen[ P03346] interacts with 11 human partners: {Q14781;P35226;Q9HC52;O95931;P35227;Q9BYE7;O00257;Q99496;P78364;Q8IXK0;Q06587}

3176 Pathogen[ Q85601] interacts with 11 human partners: {Q8IXK0;O95931;P78364;Q9BYE7;Q99496;P35226;O00257;Q06587;Q9HC52;P35227;Q14781}

3177 Pathogen[ P14079] interacts with 11 human partners: {Q9HC52;O95931;P78364;Q99496;O00257;Q14781;Q9BYE7;Q8IXK0;P35226;P35227;Q06587}

3178 Pathogen[ P03383] interacts with 9 human partners: {P35227;O00257;Q9HC52;Q06587;O95931;Q9BYE7;Q99496;P35226;Q14781}

3179 Pathogen[ P03410] interacts with 11 human partners: {Q8IXK0;Q99496;Q9BYE7;O95931;P35227;Q06587;O00257;Q14781;P35226;P78364;Q9HC52}

3180 Pathogen[ P14075] interacts with 9 human partners: {Q14781;O95931;Q9BYE7;O00257;Q06587;Q9HC52;Q99496;P35226;P35227}

3181 Pathogen[ P0C206] interacts with 11 human partners: {Q9HC52;P78364;P35226;Q14781;Q9BYE7;Q06587;O95931;Q8IXK0;O00257;Q99496;P35227}

3182 Pathogen[ P03363] interacts with 10 human partners: {P35227;Q14781;Q9HC52;Q99496;Q8IXK0;P35226;O95931;Q06587;O00257;Q9BYE7}

3183 [Cluster 290]GO:0005744+C cellular\_component [name] mitochondrial inner membrane presequence translocase complex [def] "The protein transport machinery of the mitochondrial inner membrane that contains three essential Tim proteins

3184 Pathogen[ Q2Q067] interacts with 4 human partners: {Q9BRJ2;P62072;O43615;O14925}

3185 Pathogen[ P0C214] interacts with 5 human partners: {P62072;O14925;O43615;Q3ZCQ8;Q9BRJ2}

3186 Pathogen[ P03346] interacts with 5 human partners: {O14925;O43615;P62072;Q3ZCQ8;Q9BRJ2}

3187 Pathogen[ Q85601] interacts with 5 human partners: {O14925;P62072;Q3ZCQ8;Q9BRJ2;O43615}

3188 Pathogen[ P14079] interacts with 7 human partners: {Q3ZCQ8;O43615;P62072;Q9BRJ2;O14925;Q99595;Q5SRD1}

3189 Pathogen[ P03383] interacts with 4 human partners: {P62072;Q9BRJ2;O14925;O43615}

3190 Pathogen[ P03410] interacts with 7 human partners: {Q5SRD1;P62072;O14925;Q99595;Q3ZCQ8;Q9BRJ2;O43615}

3191 Pathogen[ P14075] interacts with 4 human partners: {O14925;Q9BRJ2;P62072;O43615}

3192 Pathogen[ P0C206] interacts with 6 human partners: {Q5SRD1;Q9BRJ2;O43615;Q3ZCQ8;O14925;P62072}

3193 Pathogen[ P03363] interacts with 4 human partners: {O14925;Q3ZCQ8;Q9BRJ2;O43615}

3194 [Cluster 291]GO:0070274+C cellular\_component [name] RES complex [def] "A protein complex that is required for efficient splicing, and prevents leakage of unspliced pre-mRNAs from the nucleus (named for pre-mRNA RETention and Splicing). In Saccharomyces, the complex consists of Ist3p, Bud13p, and Pml1p." [PMID

3195 Pathogen[ Q2Q067] interacts with 1 human partners: {Q9BRD0}

3196 Pathogen[ P0C214] interacts with 1 human partners: {Q9BRD0}

3197 Pathogen[ P03346] interacts with 1 human partners: {Q9BRD0}

3198 Pathogen[ Q85601] interacts with 1 human partners: {Q9BRD0}

3199 Pathogen[ P14079] interacts with 1 human partners: {Q9BRD0}

3200 Pathogen[ P03383] interacts with 1 human partners: {Q9BRD0}

3201 Pathogen[ P03410] interacts with 1 human partners: {Q9BRD0}

3202 Pathogen[ P14075] interacts with 1 human partners: {Q9BRD0}

3203 Pathogen[ P0C206] interacts with 1 human partners: {Q9BRD0}

3204 Pathogen[ P03363] interacts with 1 human partners: {Q9BRD0}

3205 [Cluster 292]GO:0000815+C cellular\_component [name] ESCRT III complex [def] "An endosomal sorting complex required for transport. Consists of two soluble subcomplexes of highly charged coiled-coil proteins and is required for sorting and/or concentration of multivesicular body (MVB) cargoes." [GOC

3206 Pathogen[ Q2Q067] interacts with 2 human partners: {Q9UN37;Q8WUX9}

3207 Pathogen[ P0C214] interacts with 2 human partners: {Q8WUX9;Q9UN37}

3208 Pathogen[ P03346] interacts with 2 human partners: {Q9UN37;Q8WUX9}

3209 Pathogen[ Q85601] interacts with 2 human partners: {Q8WUX9;Q9UN37}

3210 Pathogen[ P14079] interacts with 2 human partners: {Q8WUX9;Q9UN37}

3211 Pathogen[ P03383] interacts with 2 human partners: {Q8WUX9;Q9UN37}

3212 Pathogen[ P03410] interacts with 2 human partners: {Q8WUX9;Q9UN37}

3213 Pathogen[ P14075] interacts with 2 human partners: {Q8WUX9;Q9UN37}

3214 Pathogen[ P0C206] interacts with 2 human partners: {Q8WUX9;Q9UN37}

3215 Pathogen[ P03363] interacts with 2 human partners: {Q9UN37;Q8WUX9}

3216 [Cluster 293]GO:0032391+C cellular\_component [name] photoreceptor connecting cilium [def] "A nonmotile primary cilium that has a 9+0 microtubule array and forms the portion of the axoneme traversing the boundary between the photoreceptor inner and outer segments." [PMID

3217 Pathogen[ Q2Q067] interacts with 8 human partners:{Q12798;Q9NS56;Q3B820;O15078;Q15051;P41208;Q9NWB7;O15182}

3218 Pathogen[ P0C214] interacts with 7 human partners:{Q9NWB7;O15078;Q15051;Q9NS56;Q12798;P41208;Q3B820}

3219 Pathogen[ P03346] interacts with 12 human partners:{Q9HBG6;Q15051;Q8TAM2;P41208;Q9NS56;Q9NWB7;Q3B820;P36405;Q12798;O15182;O15078;Q8IWN7}

3220 Pathogen[ Q85601] interacts with 9 human partners:{Q9NS56;P36405;O15182;Q12798;Q9NWB7;O15078;Q15051;Q3B820;P41208}

3221 Pathogen[ P14079] interacts with 15 human partners:{Q9NWB7;Q8IWN7;P56715;P36405;Q15814;Q12798;Q8TAM2;Q9NS56;P41208;Q9Y366;Q3B820;Q15051;O15078;O15182;O15259}

3222 Pathogen[ P03383] interacts with 6 human partners:{Q15051;Q9NWB7;P41208;Q12798;O15078;Q3B820}

3223 Pathogen[ P03410] interacts with 16 human partners:{Q3B820;O15259;Q96RY7;Q8TAM2;P36405;O15182;Q12798;Q15814;Q9Y366;Q9NWB7;O15078;Q15051;Q9HBG6;Q8IWN7;P41208;P56715}

3224 Pathogen[ P14075] interacts with 6 human partners:{Q15051;Q12798;O15078;Q9NWB7;P41208;Q3B820}

3225 Pathogen[ P0C206] interacts with 13 human partners:{O15182;Q9NS56;P56715;Q8TAM2;Q15814;Q8IWN7;Q9NWB7;O15078;P36405;Q3B820;P41208;Q12798;Q15051}

3226 Pathogen[ P03363] interacts with 13 human partners:{Q15051;P56715;Q8TAM2;Q3B820;O15078;P41208;Q9NWB7;Q12798;Q15814;Q9HBG6;O15182;Q8IWN7;O15259}

3227 [Cluster 294]GO:0000788+C cellular\_component [name] nuclear nucleosome [def] "A complex comprised of DNA wound around a multisubunit core and associated proteins, which forms the primary packing unit of DNA in the nucleus into higher order structures." [GOC

3228 Pathogen[ Q2Q067] interacts with 3 human partners:{Q99549;Q15306;P15923}

3229 Pathogen[ P0C214] interacts with 3 human partners:{P15923;Q99549;Q15306}

3230 Pathogen[ P03346] interacts with 3 human partners:{P15923;Q15306;Q99549}

3231 Pathogen[ Q85601] interacts with 3 human partners:{Q15306;Q99549;P15923}

3232 Pathogen[ P14079] interacts with 3 human partners:{Q99549;P15923;Q15306}

3233 Pathogen[ P03383] interacts with 3 human partners:{P15923;Q15306;Q99549}

3234 Pathogen[ P03410] interacts with 3 human partners:{Q99549;P15923;Q15306}

3235 Pathogen[ P14075] interacts with 3 human partners:{P15923;Q15306;Q99549}

3236 Pathogen[ P0C206] interacts with 3 human partners:{Q15306;P15923;Q99549}

3237 Pathogen[ P03363] interacts with 3 human partners:{Q15306;P15923;Q99549}

3238 [Cluster 295]GO:0036064+C cellular\_component [name] cilium basal body [def] "A membrane-tethered derivative of the centriole, and the site of assembly and remodelling of the cilium. As well as anchoring the cilium, the basal body is thought to provide a selective gateway regulating the entry of ciliary proteins and vesicles by intraflagellar transport." [PMID

3239 Pathogen[ Q2Q067] interacts with 4 human partners:{Q9NS56;Q3B820;Q86YF9;Q9BYV8}

3240 Pathogen[ P0C214] interacts with 4 human partners:{Q9NS56;Q9BYV8;Q3B820;Q86YF9}

3241 Pathogen[ P03346] interacts with 5 human partners:{Q86YF9;Q9NS56;Q8N841;Q3B820;Q9BYV8}

3242 Pathogen[ Q85601] interacts with 4 human partners:{Q9NS56;Q9BYV8;Q3B820;Q86YF9}

3243 Pathogen[ P14079] interacts with 7 human partners:{Q8IYY4;Q8N841;Q9NS56;Q3B820;Q86YF9;Q9BYV8;Q6IQ19}

3244 Pathogen[ P03383] interacts with 3 human partners:{Q9BYV8;Q86YF9;Q3B820}

3245 Pathogen[ P03410] interacts with 6 human partners:{Q3B820;Q96RY7;Q9BYV8;Q86YF9;Q6IQ19;Q8N841}

3246 Pathogen[ P14075] interacts with 4 human partners:{Q9BYV8;Q6IQ19;Q86YF9;Q3B820}

3247 Pathogen[ P0C206] interacts with 6 human partners:{Q9NS56;Q86YF9;Q6IQ19;Q8N841;Q9BYV8;Q3B820}

3248 Pathogen[ P03363] interacts with 5 human partners:{Q9BYV8;Q3B820;Q6IQ19;Q8N841;Q86YF9}

3249 [Cluster 296]GO:0033011+C cellular\_component [name] perinuclear theca [def] "A condensed cytoplasmic structure that covers the nucleus of mammalian spermatozoa except for a narrow zone around the insertion of the tail. It shows two distinct regions, a subacrosomal layer and, continuing caudally beyond the acrosomic system, the postacrosomal sheath. The perinuclear theca has been considered a cytoskeletal scaffold responsible for maintaining the overall architecture of the mature sperm head however, recent studies indicate that the bulk of its constituent proteins are not traditional cytoskeletal proteins but rather a variety of cytosolic proteins." [PMID

3250 Pathogen[ Q2Q067] interacts with 1 human partners:{Q6ICG8}

3251 Pathogen[ P0C214] interacts with 1 human partners:{Q6ICG8}

3252 Pathogen[ P03346] interacts with 1 human partners:{Q6ICG8}

3253 Pathogen[ Q85601] interacts with 1 human partners:{Q6ICG8}

3254 Pathogen[ P14079] interacts with 1 human partners:{Q6ICG8}

3255 Pathogen[ P03383] interacts with 1 human partners:{Q6ICG8}

3256 Pathogen[ P03410] interacts with 1 human partners:{Q6ICG8}

3257 Pathogen[ P14075] interacts with 1 human partners:{Q6ICG8}

3258 Pathogen[ P0C206] interacts with 1 human partners:{Q6ICG8}

3259 Pathogen[ P03363] interacts with 1 human partners:{Q6ICG8}

3260 [Cluster 297]GO:0000164+C cellular\_component [name] protein phosphatase type 1 complex [def] "A protein complex that possesses magnesium-dependent protein serine/threonine phosphatase (AMD phosphatase) activity, and consists of a catalytic subunit and one or more regulatory subunits that dictates the phosphatase's substrate specificity, function, and activity." [GOC  
3261 Pathogen[ Q2Q067] interacts with 2 human partners:{P62140;P62136}  
3262 Pathogen[ P0C214] interacts with 3 human partners:{P62140;Q5SWA1;P62136}  
3263 Pathogen[ P03346] interacts with 4 human partners:{P62136;Q5SWA1;Q9UQ13;P62140}  
3264 Pathogen[ Q85601] interacts with 3 human partners:{Q5SWA1;P62136;P62140}  
3265 Pathogen[ P14079] interacts with 3 human partners:{Q5SWA1;P62136;P62140}  
3266 Pathogen[ P03383] interacts with 3 human partners:{P62140;Q5SWA1;P62136}  
3267 Pathogen[ P03410] interacts with 3 human partners:{P62136;P62140;Q5SWA1}  
3268 Pathogen[ P14075] interacts with 3 human partners:{Q5SWA1;P62140;P62136}  
3269 Pathogen[ P0C206] interacts with 3 human partners:{Q5SWA1;P62140;P62136}  
3270 Pathogen[ P03363] interacts with 3 human partners:{P62136;P62140;Q9UQ13}  
3271 [Cluster 298]GO:0031090+C cellular\_component [name] organelle membrane [def] "The lipid bilayer surrounding an organelle." [GOC  
3272 Pathogen[ Q2Q067] interacts with 3 human partners:{Q9Y244;Q9BXW4;Q86YV9}  
3273 Pathogen[ P0C214] interacts with 5 human partners:{Q9BXW4;Q9Y244;Q86YV9;Q08AM6;Q9H492}  
3274 Pathogen[ P03346] interacts with 5 human partners:{Q86YV9;Q9H492;Q96KC8;Q9Y244;Q9BXW4}  
3275 Pathogen[ Q85601] interacts with 5 human partners:{Q9H492;Q08AM6;Q9Y244;Q86YV9;Q9BXW4}  
3276 Pathogen[ P14079] interacts with 6 human partners:{Q86YV9;Q9H492;Q9Y244;O00519;O00264;Q9BXW4}  
3277 Pathogen[ P03383] interacts with 2 human partners:{Q9Y244;Q86YV9}  
3278 Pathogen[ P03410] interacts with 7 human partners:{O00519;Q08AM6;Q9H492;O00264;Q86YV9;Q9BXW4;Q9Y244}  
3279 Pathogen[ P14075] interacts with 2 human partners:{Q9Y244;Q86YV9}  
3280 Pathogen[ P0C206] interacts with 6 human partners:{Q9BXW4;Q9H492;O00264;Q86YV9;Q9Y244;Q08AM6}  
3281 Pathogen[ P03363] interacts with 3 human partners:{Q9H492;Q9BXW4;Q9Y244}  
3282 [Cluster 299]GO:0035086+C cellular\_component [name] flagellar axoneme [def] "The bundle of microtubules and associated proteins that forms the core of flagellar in eukaryotic cells and is responsible for their movements." [GOC  
3283 Pathogen[ Q2Q067] interacts with 3 human partners:{Q8WW24;Q96M29;Q6Q759}  
3284 Pathogen[ P0C214] interacts with 3 human partners:{Q8WW24;Q96M29;Q6Q759}  
3285 Pathogen[ P03346] interacts with 5 human partners:{Q9UIF3;Q96M29;Q8N0X2;Q6Q759;Q8WW24}  
3286 Pathogen[ Q85601] interacts with 4 human partners:{Q6Q759;Q9BXF9;Q8WW24;Q96M29}  
3287 Pathogen[ P14079] interacts with 7 human partners:{Q8N0X2;Q9BXF9;Q6Q759;Q96M29;Q8WW24;Q969V4;Q9UIF3}  
3288 Pathogen[ P03383] interacts with 3 human partners:{Q96M29;Q8WW24;Q6Q759}  
3289 Pathogen[ P03410] interacts with 7 human partners:{Q6Q759;Q9BXF9;Q8N0X2;Q9UIF3;Q9NPE6;Q969V4;Q96M29}  
3290 Pathogen[ P14075] interacts with 2 human partners:{Q6Q759;Q96M29}  
3291 Pathogen[ P0C206] interacts with 5 human partners:{Q9UIF3;Q9BXF9;Q96M29;Q6Q759;Q8WW24}  
3292 Pathogen[ P03363] interacts with 7 human partners:{Q8N0X2;Q969V4;Q96M29;Q9BXF9;Q9UIF3;Q6Q759;Q8WW24}  
3293 [Cluster 300]GO:0001750+C cellular\_component [name] photoreceptor outer segment [def] "The outer segment of a vertebrate photoreceptor that contains discs of photoreceptive membranes." [ISBN  
3294 Pathogen[ Q2Q067] interacts with 4 human partners:{Q8NFW9;Q9Y6N9;P20823;Q15051}  
3295 Pathogen[ P0C214] interacts with 3 human partners:{Q8NFW9;Q15051;Q9Y6N9}  
3296 Pathogen[ P03346] interacts with 6 human partners:{Q9Y6N9;P20823;Q15051;Q8NFW9;Q8IWN7;Q92834}  
3297 Pathogen[ Q85601] interacts with 5 human partners:{Q8NFW9;Q92834;Q9Y6N9;Q15051;P20823}  
3298 Pathogen[ P14079] interacts with 7 human partners:{Q92834;Q8IWN7;P56715;Q8NFW9;Q9Y6N9;Q15051;A6NGG8}  
3299 Pathogen[ P03383] interacts with 1 human partners:{Q15051}  
3300 Pathogen[ P03410] interacts with 7 human partners:{Q8NFW9;A6NGG8;Q9Y6N9;Q92834;Q15051;Q8IWN7;P56715}  
3301 Pathogen[ P14075] interacts with 1 human partners:{Q15051}  
3302 Pathogen[ P0C206] interacts with 8 human partners:{P56715;Q9Y6N9;Q8NFW9;Q8IWN7;P20823;A6NGG8;Q15051;Q92834}  
3303 Pathogen[ P03363] interacts with 7 human partners:{Q9Y6N9;Q15051;P36575;P56715;Q8NFW9;Q92834;Q8IWN7}  
3304 [Cluster 301]GO:0035370+C cellular\_component [name] UBC13-UEV1A complex [def] "A heterodimeric ubiquitin conjugating enzyme complex that catalyzes assembly of K63-linked polyubiquitin chains and is involved in NF-kappaB activation. In humans at least, the complex comprises the ubiquitin-conjugating enzyme UBC13 and ubiquitin-conjugating enzyme variant 1A (UEV1A)." [GOC  
3305 Pathogen[ Q2Q067] interacts with 2 human partners:{P61088;Q13404}

3306 Pathogen[ P0C214] interacts with 2 human partners:{Q13404;P61088}

3307 Pathogen[ P03346] interacts with 2 human partners:{Q13404;P61088}

3308 Pathogen[ Q85601] interacts with 2 human partners:{Q13404;P61088}

3309 Pathogen[ P14079] interacts with 1 human partners:{Q13404}

3310 Pathogen[ P03383] interacts with 2 human partners:{P61088;Q13404}

3311 Pathogen[ P03410] interacts with 2 human partners:{P61088;Q13404}

3312 Pathogen[ P14075] interacts with 2 human partners:{P61088;Q13404}

3313 Pathogen[ P0C206] interacts with 2 human partners:{P61088;Q13404}

3314 Pathogen[ P03363] interacts with 2 human partners:{P61088;Q13404}

3315 [Cluster 302]GO:0044295+C cellular\_component [name] axonal growth cone [def] "The migrating motile tip of a growing nerve cell axon." [GOC

3316 Pathogen[ Q2Q067] interacts with 1 human partners:{Q9UQF2}

3317 Pathogen[ P0C214] interacts with 1 human partners:{Q9UQF2}

3318 Pathogen[ P03346] interacts with 1 human partners:{Q9UQF2}

3319 Pathogen[ Q85601] interacts with 1 human partners:{Q9UQF2}

3320 Pathogen[ P14079] interacts with 1 human partners:{Q9UQF2}

3321 Pathogen[ P03383] interacts with 1 human partners:{Q9UQF2}

3322 Pathogen[ P03410] interacts with 1 human partners:{Q9UQF2}

3323 Pathogen[ P14075] interacts with 1 human partners:{Q9UQF2}

3324 Pathogen[ P0C206] interacts with 1 human partners:{Q9UQF2}

3325 Pathogen[ P03363] interacts with 1 human partners:{Q9UQF2}

3326 [Cluster 303]GO:0005677+C cellular\_component [name] chromatin silencing complex [def] "Any protein complex that mediates changes in chromatin structure that result in transcriptional silencing." [GOC

3327 Pathogen[ Q2Q067] interacts with 5 human partners:{O43463;Q8IXJ6;O43159;Q8TBE0;Q9UIF9}

3328 Pathogen[ P0C214] interacts with 6 human partners:{O43159;O43463;Q8TBE0;Q9UIF9;O60264;Q8IXJ6}

3329 Pathogen[ P03346] interacts with 6 human partners:{O43159;Q8IXJ6;O43463;O60264;Q9UIF9;Q8TBE0}

3330 Pathogen[ Q85601] interacts with 6 human partners:{Q9UIF9;Q8TBE0;O43159;O43463;Q8IXJ6;O60264}

3331 Pathogen[ P14079] interacts with 5 human partners:{Q9UIF9;O60264;Q8IXJ6;O43159;Q8TBE0}

3332 Pathogen[ P03383] interacts with 4 human partners:{O43463;O43159;Q9UIF9;Q8TBE0}

3333 Pathogen[ P03410] interacts with 6 human partners:{Q8IXJ6;O43159;Q8TBE0;Q9UIF9;O43463;O60264}

3334 Pathogen[ P14075] interacts with 4 human partners:{Q9UIF9;Q8TBE0;O43159;O43463}

3335 Pathogen[ P0C206] interacts with 6 human partners:{O43159;O43463;Q9UIF9;Q8IXJ6;Q8TBE0;O60264}

3336 Pathogen[ P03363] interacts with 5 human partners:{O60264;Q9UIF9;O43159;O43463;Q8TBE0}

3337 [Cluster 304]GO:0001739+C cellular\_component [name] sex chromatin [def] "A condensed mass of compacted chromatin that represents an inactivated X chromosome." [ISBN

3338 Pathogen[ Q2Q067] interacts with 5 human partners:{Q15022;P35227;O75530;Q99496;Q06587}

3339 Pathogen[ P0C214] interacts with 5 human partners:{P35227;Q15022;O75530;Q06587;Q99496}

3340 Pathogen[ P03346] interacts with 6 human partners:{O75530;P35227;Q15022;Q99496;P78364;Q06587}

3341 Pathogen[ Q85601] interacts with 6 human partners:{Q15022;P78364;O75530;Q99496;Q06587;P35227}

3342 Pathogen[ P14079] interacts with 6 human partners:{P78364;Q99496;O75530;P35227;Q15022;Q06587}

3343 Pathogen[ P03383] interacts with 5 human partners:{P35227;Q06587;Q15022;Q99496;O75530}

3344 Pathogen[ P03410] interacts with 6 human partners:{Q99496;P35227;Q06587;P78364;Q15022;O75530}

3345 Pathogen[ P14075] interacts with 5 human partners:{Q06587;Q99496;Q15022;P35227;O75530}

3346 Pathogen[ P0C206] interacts with 6 human partners:{O75530;P78364;Q06587;Q15022;Q99496;P35227}

3347 Pathogen[ P03363] interacts with 5 human partners:{P35227;Q15022;Q99496;O75530;Q06587}

3348 [Cluster 305]GO:0030892+C cellular\_component [name] mitotic cohesin complex [def] "A cohesin complex that mediates sister chromatid cohesion during mitosis\_ has a subunit composition distinct from that of the meiotic cohesin complex." [GOC

3349 Pathogen[ Q2Q067] interacts with 2 human partners:{Q5FBB7;Q562F6}

3350 Pathogen[ P0C214] interacts with 2 human partners:{Q562F6;Q5FBB7}

3351 Pathogen[ P03346] interacts with 2 human partners:{Q5FBB7;Q562F6}

3352 Pathogen[ Q85601] interacts with 2 human partners:{Q562F6;Q5FBB7}

3353 Pathogen[ P14079] interacts with 2 human partners:{Q5FBB7;Q562F6}

3354 Pathogen[ P03383] interacts with 2 human partners:{Q5FBB7;Q562F6}

3355 Pathogen[ P03410] interacts with 2 human partners:{Q562F6;Q5FBB7}

3356 Pathogen[ P14075] interacts with 2 human partners:{Q562F6;Q5FBB7}

3357 Pathogen[ P0C206] interacts with 2 human partners:{Q5FBB7;Q562F6}

3358 Pathogen[ P03363] interacts with 2 human partners:{Q5FBB7;Q562F6}

3359 [Cluster 306]GO:0000796+C cellular\_component [name] condensin complex [def] "A multisubunit protein complex that plays a central role in chromosome condensation." [GOC]

3360 Pathogen[ Q2Q067] interacts with 4 human partners:{Q95347;Q15003;Q15021;Q9BPX3}

3361 Pathogen[ P0C214] interacts with 4 human partners:{Q9BPX3;Q15003;Q95347;Q15021}

3362 Pathogen[ P03346] interacts with 4 human partners:{Q95347;Q9BPX3;Q15021;Q15003}

3363 Pathogen[ Q85601] interacts with 4 human partners:{Q95347;Q9BPX3;Q15003;Q15021}

3364 Pathogen[ P14079] interacts with 4 human partners:{Q15003;Q95347;Q9BPX3;Q15021}

3365 Pathogen[ P03383] interacts with 4 human partners:{Q95347;Q15003;Q9BPX3;Q15021}

3366 Pathogen[ P03410] interacts with 4 human partners:{Q15003;Q95347;Q9BPX3;Q15021}

3367 Pathogen[ P14075] interacts with 4 human partners:{Q95347;Q15003;Q9BPX3;Q15021}

3368 Pathogen[ P0C206] interacts with 5 human partners:{Q9BPX3;Q15021;Q15003;Q95347;Q9NTJ3}

3369 Pathogen[ P03363] interacts with 4 human partners:{Q15021;Q95347;Q9BPX3;Q15003}

3370 [Cluster 307]GO:0001725+C cellular\_component [name] stress fiber [def] "A contractile actin filament bundle that consists of short actin filaments with alternating polarity, cross-linked by alpha-actinin and possibly other actin bundling proteins, and with myosin present in a periodic distribution along the fiber." [PMID]

3371 Pathogen[ Q2Q067] interacts with 5 human partners:{Q9Y613;Q8N3V7;P12883;P35579;Q9BX66}

3372 Pathogen[ P0C214] interacts with 12 human partners:{P68133;O00159;Q9BX66;Q9Y613;P35580;Q15124;Q16658;P12883;Q7Z406;P13533;Q8N3V7;P35749}

3373 Pathogen[ P03346] interacts with 9 human partners:{Q8N3V7;Q96AC1;Q9Y613;P35579;Q15942;Q9BX66;O76041;Q16658;Q9UHD8}

3374 Pathogen[ Q85601] interacts with 13 human partners:{P68133;P13533;Q9Y613;P35579;Q9BX66;O00159;Q15124;Q7Z406;Q8N3V7;Q15942;P35749;P12883;P35580}

3375 Pathogen[ P14079] interacts with 13 human partners:{P35579;Q16658;Q9NR12;Q15124;Q9Y613;Q96AC1;Q8N3V7;O76041;P12883;Q99439;Q9BX66;P68133;Q15942}

3376 Pathogen[ P03383] interacts with 5 human partners:{Q9Y613;P12883;P35580;P35579;Q8N3V7}

3377 Pathogen[ P03410] interacts with 15 human partners:{Q16658;Q8N3V7;O76041;O00159;P35579;Q15124;Q15942;Q99439;Q9Y613;P12883;P68133;Q9UHD8;P35580;P13533;Q9BX66}

3378 Pathogen[ P14075] interacts with 3 human partners:{Q8N3V7;Q9Y613;P35579}

3379 Pathogen[ P0C206] interacts with 15 human partners:{P13533;Q8N3V7;Q15124;O76041;P68133;P12883;Q16658;O00159;Q15942;P35749;P35579;Q9BX66;Q9Y613;Q16181;P35580}

3380 Pathogen[ P03363] interacts with 14 human partners:{Q8N3V7;Q9BX66;P35579;P68133;Q9Y613;Q8NHY3;Q9NVA2;Q8IYM1;Q9UHD8;Q96AC1;O76041;Q9NR12;Q16658;Q15942}

3381 [Cluster 308]GO:0044292+C cellular\_component [name] dendrite terminus [def] "A structure at the distal end of a dendrite adapted to carry out a specific function, e.g. dendriole." [GOC]

3382 Pathogen[ Q2Q067] interacts with 2 human partners:{Q8IY31;Q9NWB7}

3383 Pathogen[ P0C214] interacts with 2 human partners:{Q9NWB7;Q8IY31}

3384 Pathogen[ P03346] interacts with 2 human partners:{Q8IY31;Q9NWB7}

3385 Pathogen[ Q85601] interacts with 2 human partners:{Q9NWB7;Q8IY31}

3386 Pathogen[ P14079] interacts with 3 human partners:{Q9NWB7;Q8IY31;Q9Y366}

3387 Pathogen[ P03383] interacts with 2 human partners:{Q9NWB7;Q8IY31}

3388 Pathogen[ P03410] interacts with 3 human partners:{Q9Y366;Q8IY31;Q9NWB7}

3389 Pathogen[ P14075] interacts with 2 human partners:{Q8IY31;Q9NWB7}

3390 Pathogen[ P0C206] interacts with 2 human partners:{Q8IY31;Q9NWB7}

3391 Pathogen[ P03363] interacts with 2 human partners:{Q9NWB7;Q8IY31}

3392 [Cluster 309]GO:0000942+C cellular\_component [name] condensed nuclear chromosome outer kinetochore [def] "The region of a condensed nuclear chromosome kinetochore most external to centromeric DNA\_ this outer region mediates kinetochore-microtubule interactions." [GOC]

3393 Pathogen[ Q2Q067] interacts with 2 human partners:{P14635;O14777}

3394 Pathogen[ P0C214] interacts with 2 human partners:{P14635;O14777}

3395 Pathogen[ P03346] interacts with 2 human partners:{O14777;P14635}

3396 Pathogen[ Q85601] interacts with 2 human partners:{P14635;O14777}

3397 Pathogen[ P14079] interacts with 2 human partners:{P14635;O14777}

3398 Pathogen[ P03383] interacts with 2 human partners:{P14635;O14777}

3399 Pathogen[ P03410] interacts with 2 human partners:{P14635;O14777}

3400 Pathogen[ P14075] interacts with 2 human partners:{P14635;O14777}

3401 Pathogen[ P0C206] interacts with 2 human partners:{O14777;P14635}

3402 Pathogen[ P03363] interacts with 1 human partners:{O14777}

3403 [Cluster 310]GO:0001772+C cellular\_component [name] immunological synapse [def] "An area of close contact between a lymphocyte (T-, B-, or natural killer cell) and a target cell formed through the clustering of particular signaling and adhesion molecules and their associated membrane rafts on both the lymphocyte and the target cell and facilitating activation of the lymphocyte, transfer of membrane from the target cell to the lymphocyte, and in some situations killing of the target cell through release of

secretory granules and/or death-pathway ligand-receptor interaction." [GOC  
3404 Pathogen[ Q2Q067] interacts with 3 human partners:{O95999;Q12959;P35579}  
3405 Pathogen[ P0C214] interacts with 3 human partners:{P52565;O95999;Q12959}  
3406 Pathogen[ P03346] interacts with 6 human  
partners:{P35579;Q6UWF3;P52565;O95999;P10144;Q12959}  
3407 Pathogen[ Q85601] interacts with 5 human  
partners:{P10144;P35579;P52565;Q12959;O95999}  
3408 Pathogen[ P14079] interacts with 6 human  
partners:{P52565;P35579;O95999;Q6UWF3;O43561;P10144}  
3409 Pathogen[ P03383] interacts with 3 human partners:{Q6UWF3;O95999;P35579}  
3410 Pathogen[ P03410] interacts with 7 human  
partners:{P10144;Q12959;O43561;P35579;O95999;Q6UWF3;P52565}  
3411 Pathogen[ P14075] interacts with 3 human partners:{P35579;O95999;Q6UWF3}  
3412 Pathogen[ P0C206] interacts with 6 human  
partners:{P10144;P52565;O95999;Q6UWF3;P35579;Q12959}  
3413 Pathogen[ P03363] interacts with 5 human  
partners:{Q12959;P52565;P35579;Q6UWF3;P10144}  
3414 [Cluster 311]GO:0035748+C cellular\_component [name] myelin sheath abaxonal region  
[def] "The region of the myelin sheath furthest from the axon." [GOC  
3415 Pathogen[ Q2Q067] interacts with 2 human partners:{Q14160;Q12959}  
3416 Pathogen[ P0C214] interacts with 2 human partners:{Q12959;Q14160}  
3417 Pathogen[ P03346] interacts with 3 human partners:{Q96A65;Q14160;Q12959}  
3418 Pathogen[ Q85601] interacts with 3 human partners:{Q96A65;Q14160;Q12959}  
3419 Pathogen[ P14079] interacts with 1 human partners:{Q96A65}  
3420 Pathogen[ P03383] interacts with 1 human partners:{Q14160}  
3421 Pathogen[ P03410] interacts with 3 human partners:{Q12959;Q14160;Q96A65}  
3422 Pathogen[ P14075] interacts with 1 human partners:{Q14160}  
3423 Pathogen[ P0C206] interacts with 3 human partners:{Q96A65;Q14160;Q12959}  
3424 Pathogen[ P03363] interacts with 3 human partners:{Q12959;Q96A65;Q14160}  
3425 [Cluster 312]GO:0030141+C cellular\_component [name] secretory granule [def] "A  
small subcellular vesicle, surrounded by a membrane, that is formed from the Golgi  
apparatus and contains a highly concentrated protein destined for secretion. Secretory  
granules move towards the periphery of the cell and upon stimulation, their membranes  
fuse with the cell membrane, and their protein load is exteriorized. Processing of the  
contained protein may take place in secretory granules." [GOC  
3426 Pathogen[ Q2Q067] interacts with 4 human partners:{Q15833;P60953;O14964;P41250}  
3427 Pathogen[ P0C214] interacts with 6 human  
partners:{P41250;Q15833;O95633;O14964;P60953;P10809}  
3428 Pathogen[ P03346] interacts with 7 human  
partners:{Q15833;P60953;P41250;P51587;O14964;Q9Y2J0;O95633}  
3429 Pathogen[ Q85601] interacts with 5 human  
partners:{Q15833;P41250;O14964;P60953;P51587}  
3430 Pathogen[ P14079] interacts with 13 human  
partners:{Q86VI1;P04279;Q02383;P05408;P20396;P13498;P51587;Q9NS71;Q15833;P41250;Q9GZZ  
8;O43612;P05060}  
3431 Pathogen[ P03383] interacts with 3 human partners:{P60953;P41250;O14964}  
3432 Pathogen[ P03410] interacts with 15 human  
partners:{Q15833;O43612;Q9Y2J0;Q9GZZ8;P10645;P05060;Q9NS71;P51587;Q02383;P05408;P4125  
0;P60953;P04279;Q86VI1;P20396}  
3433 Pathogen[ P14075] interacts with 6 human  
partners:{P60953;P41250;P05060;O14964;Q9GZZ8;Q9NS71}  
3434 Pathogen[ P0C206] interacts with 10 human  
partners:{O14964;O95633;P51587;Q9Y2J0;P41250;P05060;Q86VI1;P60953;P20396;Q15833}  
3435 Pathogen[ P03363] interacts with 5 human  
partners:{P41250;O14964;P05060;P60953;Q15833}  
3436 [Cluster 313]GO:0043186+C cellular\_component [name] P granule [def] "A small  
cytoplasmic, non-membranous RNA/protein complex aggregates in the primordial germ cells  
of many higher eukaryotes." [GOC  
3437 Pathogen[ Q2Q067] interacts with 2 human partners:{Q9Y2V2;Q5T8I9}  
3438 Pathogen[ P0C214] interacts with 2 human partners:{Q9Y2V2;Q5T8I9}  
3439 Pathogen[ P03346] interacts with 4 human partners:{Q5T8I9;Q9Y2V2;Q8NHU6;Q96J94}  
3440 Pathogen[ Q85601] interacts with 2 human partners:{Q5T8I9;Q9Y2V2}  
3441 Pathogen[ P14079] interacts with 3 human partners:{Q8NHU6;Q96JY0;Q9Y2V2}  
3442 Pathogen[ P03383] interacts with 2 human partners:{Q5T8I9;Q9Y2V2}  
3443 Pathogen[ P03410] interacts with 3 human partners:{Q8NHU6;Q5T8I9;Q9Y2V2}  
3444 Pathogen[ P14075] interacts with 2 human partners:{Q9Y2V2;Q5T8I9}  
3445 Pathogen[ P0C206] interacts with 2 human partners:{Q9Y2V2;Q5T8I9}  
3446 Pathogen[ P03363] interacts with 6 human  
partners:{Q8NHU6;Q7Z3Z4;Q9Y2V2;Q5T8I9;Q96JY0;Q96J94}  
3447 [Cluster 314]GO:0005682+C cellular\_component [name] U5 snRNP [def] "A  
ribonucleoprotein complex that contains small nuclear RNA U5." [GOC  
3448 Pathogen[ Q2Q067] interacts with 4 human partners:{O95400;Q96DI7;O94906;Q6P2Q9}  
3449 Pathogen[ P0C214] interacts with 4 human partners:{O95400;Q6P2Q9;O94906;Q96DI7}  
3450 Pathogen[ P03346] interacts with 6 human  
partners:{O95400;O94906;Q9BUQ8;O75643;Q6P2Q9;Q96DI7}  
3451 Pathogen[ Q85601] interacts with 4 human partners:{O94906;Q96DI7;O95400;Q6P2Q9}

3452 Pathogen[ P14079] interacts with 3 human partners:{094906;Q6P2Q9;O95400}

3453 Pathogen[ P03383] interacts with 4 human partners:{Q6P2Q9;O95400;O94906;Q96DI7}

3454 Pathogen[ P03410] interacts with 3 human partners:{094906;O95400;Q6P2Q9}

3455 Pathogen[ P14075] interacts with 4 human partners:{O95400;O94906;Q96DI7;Q6P2Q9}

3456 Pathogen[ P0C206] interacts with 4 human partners:{O95400;Q6P2Q9;O94906;Q96DI7}

3457 Pathogen[ P03363] interacts with 5 human partners:{075643;O95400;Q6P2Q9;O94906;Q96DI7}

3458 [Cluster 315]GO:0030849+C cellular\_component [name] autosome [def] "Any chromosome other than a sex chromosome." [GOC]

3459 Pathogen[ Q2Q067] interacts with 1 human partners:{075182}

3460 Pathogen[ P0C214] interacts with 1 human partners:{075182}

3461 Pathogen[ P03346] interacts with 1 human partners:{075182}

3462 Pathogen[ Q85601] interacts with 1 human partners:{075182}

3463 Pathogen[ P14079] interacts with 2 human partners:{075182;Q96JY0}

3464 Pathogen[ P03383] interacts with 1 human partners:{075182}

3465 Pathogen[ P03410] interacts with 1 human partners:{075182}

3466 Pathogen[ P14075] interacts with 1 human partners:{075182}

3467 Pathogen[ P0C206] interacts with 1 human partners:{075182}

3468 Pathogen[ P03363] interacts with 2 human partners:{Q96JY0;075182}

3469 [Cluster 316]GO:0042827+C cellular\_component [name] platelet dense granule [def] "Electron-dense granule occurring in blood platelets that stores and secretes adenosine nucleotides and serotonin. They contain a highly condensed core consisting of serotonin, histamine, calcium, magnesium, ATP, ADP, pyrophosphate and membrane lysosomal proteins." [GOC]

3470 Pathogen[ Q2Q067] interacts with 1 human partners:{Q9NQG7}

3471 Pathogen[ P0C214] interacts with 1 human partners:{Q9NQG7}

3472 Pathogen[ P03346] interacts with 1 human partners:{Q9NQG7}

3473 Pathogen[ Q85601] interacts with 1 human partners:{Q9NQG7}

3474 Pathogen[ P14079] interacts with 1 human partners:{Q9NQG7}

3475 Pathogen[ P03383] interacts with 1 human partners:{Q9NQG7}

3476 Pathogen[ P03410] interacts with 1 human partners:{Q9NQG7}

3477 Pathogen[ P14075] interacts with 1 human partners:{Q9NQG7}

3478 Pathogen[ P0C206] interacts with 1 human partners:{Q9NQG7}

3479 Pathogen[ P03363] interacts with 1 human partners:{Q9NQG7}

3480 [Cluster 317]GO:0030123+C cellular\_component [name] AP-3 adaptor complex [def] "A heterotetrameric AP-type membrane coat adaptor complex that consists of beta3, delta, mu3 and sigma3 subunits and is found associated with endosomal membranes. AP-3 does not appear to associate with clathrin in all organisms. In at least humans, the AP-3 complex can be heterogeneric due to the existence of multiple subunit isoforms encoded by different genes (beta3A and beta3B, mu3A and mu3B, and sigma3A and sigma3B)." [GOC]

3481 Pathogen[ Q2Q067] interacts with 1 human partners:{Q92572}

3482 Pathogen[ P0C214] interacts with 2 human partners:{P59780;Q92572}

3483 Pathogen[ P03346] interacts with 2 human partners:{Q92572;P59780}

3484 Pathogen[ Q85601] interacts with 2 human partners:{Q92572;P59780}

3485 Pathogen[ P14079] interacts with 2 human partners:{P59780;Q92572}

3486 Pathogen[ P03383] interacts with 1 human partners:{Q92572}

3487 Pathogen[ P03410] interacts with 2 human partners:{Q92572;P59780}

3488 Pathogen[ P14075] interacts with 1 human partners:{Q92572}

3489 Pathogen[ P0C206] interacts with 2 human partners:{Q92572;P59780}

3490 Pathogen[ P03363] interacts with 1 human partners:{Q92572}

3491 [Cluster 318]GO:0031465+C cellular\_component [name] Cul4B-RING ubiquitin ligase complex [def] "A ubiquitin ligase complex in which a cullin from the Cul4B subfamily and a RING domain protein form the catalytic core\_ substrate specificity is conferred by unknown subunits." [PMID]

3492 Pathogen[ Q2Q067] interacts with 4 human partners:{Q9NZJ0;Q16531;Q13620;P62877}

3493 Pathogen[ P0C214] interacts with 4 human partners:{Q13620;P62877;Q9NZJ0;Q16531}

3494 Pathogen[ P03346] interacts with 4 human partners:{Q9NZJ0;Q16531;Q13620;P62877}

3495 Pathogen[ Q85601] interacts with 4 human partners:{Q16531;P62877;Q9NZJ0;Q13620}

3496 Pathogen[ P14079] interacts with 4 human partners:{Q13620;Q16531;P62877;Q9NZJ0}

3497 Pathogen[ P03383] interacts with 4 human partners:{Q9NZJ0;P62877;Q16531;Q13620}

3498 Pathogen[ P03410] interacts with 4 human partners:{Q13620;P62877;Q16531;Q9NZJ0}

3499 Pathogen[ P14075] interacts with 4 human partners:{Q13620;Q16531;Q9NZJ0;P62877}

3500 Pathogen[ P0C206] interacts with 4 human partners:{P62877;Q16531;Q13620;Q9NZJ0}

3501 Pathogen[ P03363] interacts with 4 human partners:{Q16531;P62877;Q13620;Q9NZJ0}

3502 [Cluster 319]GO:0005678+C cellular\_component [name] chromatin assembly complex [def] "Any protein complex that acts in the formation of nucleosomes or higher order chromatin structure." [GOC]

3503 Pathogen[ Q2Q067] interacts with 8 human partners:{Q9Y3T9;Q13111;Q99457;Q9ULW6;Q13112;Q8WUU5;Q99733;P55209}

3504 Pathogen[ P0C214] interacts with 6 human partners:{Q9Y3T9;Q13112;Q13111;Q99457;Q99733;Q9ULW6}

3505 Pathogen[ P03346] interacts with 8 human partners:{Q99733;Q99457;Q8WUU5;Q13111;Q9Y3T9;Q13112;P55209;Q9ULW6}

3506 Pathogen[ Q85601] interacts with 8 human partners:{Q99733;Q13112;Q99457;Q8WUU5;Q9Y3T9;Q13111;P55209;Q9ULW6}

3507 Pathogen[ P14079] interacts with 8 human partners:{Q99733;Q13112;Q99457;Q8WUU5;Q9Y3T9;Q13111;P55209;Q9ULW6}

3508 partners:{Q99733;Q13112;Q13111;Q9Y3T9;P55209;Q8WUU5;Q9ULW6;Q99457}  
Pathogen[ P03383] interacts with 7 human

3509 partners:{Q99457;P55209;Q9Y3T9;Q99733;Q13111;Q13112;Q9ULW6}  
Pathogen[ P03410] interacts with 8 human

3510 partners:{Q99457;Q99733;Q8WUU5;Q9Y3T9;Q13111;Q13112;P55209;Q9ULW6}  
Pathogen[ P14075] interacts with 7 human

3511 partners:{Q99457;Q13111;P55209;Q99733;Q9Y3T9;Q13112;Q9ULW6}  
Pathogen[ P0C206] interacts with 8 human

3512 partners:{Q13112;Q99733;Q8WUU5;Q13111;Q99457;Q9ULW6;P55209;Q9Y3T9}  
Pathogen[ P03363] interacts with 8 human

3513 partners:{Q13112;Q13111;Q99733;Q99457;P55209;Q9Y3T9;Q9ULW6;Q8WUU5}  
[Cluster 320]GO:0071564+C cellular\_component [name] npBAF complex [def] "A SWI/SNF-type complex that is found in neural stem or progenitor cells, and in human contains actin and proteins encoded by the ARID1A/BAF250A or ARID1B/BAF250B, SMARCD1/BAF60A, SMARCD3/BAF60C, SMARCA2/BRM/BAF190B, SMARCA4/BRG1/BAF190A, SMARCB1/BAF47, SMARCC1/BAF155, SMARCE1/BAF57, SMARCC2/BAF170, PHF10/BAF45A, ACTL6A/BAF53A genes. The npBAF complex is essential for the self-renewal/proliferative capacity of the multipotent neural stem cells." [GOC

3514 Pathogen[ Q2Q067] interacts with 12 human  
partners:{Q92922;O96019;P51531;Q8WUB8;Q969G3;O14497;P51532;Q96GM5;Q12824;Q8TAQ2;Q9HBD4;Q6STE5}

3515 Pathogen[ P0C214] interacts with 12 human  
partners:{Q12824;O14497;Q9HBD4;Q6STE5;Q8TAQ2;Q92922;Q969G3;Q8WUB8;P51531;Q96GM5;O96019;P51532}

3516 Pathogen[ P03346] interacts with 12 human  
partners:{Q9HBD4;Q96GM5;P51532;Q12824;O96019;Q6STE5;O14497;Q969G3;Q92922;Q8WUB8;P51531;Q8TAQ2}

3517 Pathogen[ Q85601] interacts with 12 human  
partners:{Q6STE5;O14497;O96019;Q8WUB8;P51531;Q96GM5;P51532;Q969G3;Q9HBD4;Q92922;Q12824;Q8TAQ2}

3518 Pathogen[ P14079] interacts with 9 human  
partners:{Q6STE5;Q92922;P51532;P51531;O14497;Q8TAQ2;Q96GM5;Q8WUB8;Q12824}

3519 Pathogen[ P03383] interacts with 11 human  
partners:{O14497;Q9HBD4;O96019;Q12824;Q6STE5;Q96GM5;Q969G3;P51531;Q8TAQ2;P51532;Q92922}

3520 Pathogen[ P03410] interacts with 12 human  
partners:{Q8WUB8;Q96GM5;O14497;O96019;Q969G3;Q92922;P51532;P51531;Q8TAQ2;Q6STE5;Q12824;Q9HBD4}

3521 Pathogen[ P14075] interacts with 10 human  
partners:{Q9HBD4;Q96GM5;P51532;Q92922;O14497;O96019;P51531;Q8TAQ2;Q12824;Q6STE5}

3522 Pathogen[ P0C206] interacts with 12 human  
partners:{P51532;P51531;Q6STE5;Q92922;Q12824;Q8TAQ2;O14497;O96019;Q8WUB8;Q96GM5;Q969G3;Q9HBD4}

3523 Pathogen[ P03363] interacts with 11 human  
partners:{Q6STE5;Q8TAQ2;P51532;O14497;O96019;Q969G3;Q9HBD4;Q96GM5;P51531;Q92922;Q12824}

3524 [Cluster 321]GO:0000421+C cellular\_component [name] autophagic vacuole membrane [def] "The lipid bilayer surrounding an autophagic vacuole, a double-membrane-bounded vesicle in which endogenous cellular material is sequestered." [GOC

3525 Pathogen[ Q2Q067] interacts with 5 human  
partners:{Q7Z3C6;Q9BXW4;P60520;Q9Y4P8;Q676U5}

3526 Pathogen[ P0C214] interacts with 6 human  
partners:{P60520;Q9BXW4;Q676U5;Q9Y4P8;Q9H492;Q7Z3C6}

3527 Pathogen[ P03346] interacts with 7 human  
partners:{O95166;Q7Z3C6;P60520;Q9H492;Q9BXW4;Q676U5;Q9Y4P8}

3528 Pathogen[ Q85601] interacts with 7 human  
partners:{Q9H492;O95166;Q7Z3C6;Q9BXW4;Q9Y4P8;Q676U5;P60520}

3529 Pathogen[ P14079] interacts with 8 human  
partners:{O95166;Q9Y4P8;Q9H492;Q7Z3C6;Q96GC9;P60520;Q676U5;Q9BXW4}

3530 Pathogen[ P03383] interacts with 3 human partners:{Q7Z3C6;Q676U5;Q9Y4P8}

3531 Pathogen[ P03410] interacts with 10 human  
partners:{Q674R7;Q96GC9;P60520;Q9Y4P8;O95166;Q9H492;Q9BXW4;Q676U5;Q7Z3C6;Q5MNZ9}

3532 Pathogen[ P14075] interacts with 3 human partners:{Q676U5;Q9Y4P8;Q7Z3C6}

3533 Pathogen[ P0C206] interacts with 7 human  
partners:{Q7Z3C6;Q9BXW4;Q9H492;Q9Y4P8;P60520;Q676U5;O95166}

3534 Pathogen[ P03363] interacts with 7 human  
partners:{Q9H492;Q9BXW4;P60520;Q7Z3C6;Q9Y4P8;Q676U5;O95166}

3535 [Cluster 322]GO:0030017+C cellular\_component [name] sarcomere [def] "The repeating unit of a myofibril in a muscle cell, composed of an array of overlapping thick and thin filaments between two adjacent Z discs." [ISBN

3536 Pathogen[ Q2Q067] interacts with 8 human  
partners:{Q9UKX2;Q8NF91;Q8N0Z2;P60900;Q86TC9;P12883;Q5JVS0;Q9NPC6}

3537 Pathogen[ P0C214] interacts with 13 human  
partners:{P68133;Q8N0Z2;Q5JVS0;Q9UKX2;Q9NPC6;Q8NF91;P49257;Q86TC9;P19429;P12883;P13533;P60900;Q9Y623}

3538 Pathogen[ P03346] interacts with 10 human



3539 partners:{Q86TC9;Q8N0Z2;P49257;P60900;Q5JVS0;Q9UKX2;Q8NF91;Q5BXX8;P10916;Q9NPC6}  
Pathogen[ Q85601] interacts with 12 human

3540 partners:{Q86TC9;P60900;P68133;Q5JVS0;P13533;Q9NPC6;Q9UKX2;P49257;P12883;Q8N0Z2;Q8NF91;Q9Y623}  
Pathogen[ P14079] interacts with 14 human

3541 partners:{Q5JVS0;P49257;P19429;P10916;Q9NPC6;Q9UKX2;Q86TC9;P68032;P60900;P12883;Q8N0Z2;Q8NF91;O15273;P68133}  
Pathogen[ P03383] interacts with 6 human

3542 partners:{Q5JVS0;P60900;Q9UKX2;Q8N0Z2;P12883;Q9NPC6}  
Pathogen[ P03410] interacts with 14 human

3543 partners:{Q9UKX2;P10916;P49257;P19429;P60900;Q9NPC6;O15273;Q5JVS0;P12883;P68133;P13533;Q8N0Z2;Q86TC9;Q8NF91}  
Pathogen[ P14075] interacts with 5 human

3544 partners:{Q9NPC6;Q9UKX2;P60900;Q8N0Z2;Q5JVS0}  
Pathogen[ P0C206] interacts with 14 human

3545 partners:{Q86TC9;P13533;Q9Y623;P19429;P60900;P68133;Q8NF91;P12883;Q5JVS0;P49257;Q9UKX2;Q9NPC6;Q5BXX8;Q8N0Z2}  
Pathogen[ P03363] interacts with 10 human

3546 partners:{Q86TC9;Q8NF91;Q9UKX2;P68133;Q8N0Z2;Q5JVS0;Q5BXX8;Q9NPC6;P19429;P10916}  
[Cluster 323]GO:0042995+C cellular\_component [name] cell projection [def] "A  
prolongation or process extending from a cell, e.g. a flagellum or axon." [GOC

3547 Pathogen[ Q2Q067] interacts with 66 human  
partners:{Q8WW24;O15511;O00213;O75161;Q5TD94;Q9Y613;Q7Z6J0;Q8WX93;Q63HK5;Q9NPB6;Q14678;Q8N3V7;Q9UBB6;Q5T1C6;Q14511;Q8IZP0;P14136;Q9H5P4;P38935;Q5BJF6;Q8IY31;P0C7T5;P23528;Q96QF0;Q8IX03;O60711;Q99608;Q9BYV8;O43236;Q9NXB0;Q9BV20;O15078;O94850;Q86VQ0;O75665;Q96NB1;O75122;Q86WG3;Q9UN36;Q9NP98;P59998;Q717R9;A6NIH7;P80723;P60953;Q9NWB7;P63000;Q3SYG4;P78347;Q99689;P08670;Q9BPU9;Q66K74;Q9Y252;Q96M29;P27815;Q15691;Q9Y250;Q6Q759;Q9NRR3;O94763;Q96GV9;A8MTZ0;Q8IYI6;Q9BV73;Q00534}

3548 Pathogen[ P0C214] interacts with 75 human  
partners:{Q9NWB7;Q9NRR3;O15078;Q9UI08;O00213;Q9UBB6;Q8IX03;O75161;P63000;Q7Z6J0;Q8IZP0;Q8IY31;O00159;P27815;Q9UM54;Q96GV9;Q9BYV8;Q8WW24;Q14678;Q9UPU9;Q63HK5;Q9NP98;P60953;P14136;A0MZ66;Q99608;Q9Y613;Q15691;Q9NZI8;Q8NEJ9;P38935;Q9Y250;O75122;Q00534;Q9NPB6;Q9H5P4;Q9NXB0;Q96KC9;Q9BPU9;P0C7T5;P78347;Q16658;P08670;Q99689;Q3SYG4;P59998;O60711;O94850;Q9Y252;Q14511;A8MTZ0;Q9HD26;O75665;Q9BV73;A6NIH7;Q5BJF6;O15144;P80723;O76083;Q96GD0;Q5T1C6;Q86WG3;Q8N3V7;Q5TD94;O94763;O43236;Q8IYI6;Q96QF0;Q9UN36;Q96M29;Q96NB1;Q66K74;Q9BV20;Q6Q759;O15511}

3549 Pathogen[ P03346] interacts with 110 human  
partners:{Q8IYI6;Q8N3V7;O00213;Q99828;Q86VQ0;P38935;Q9NQC8;Q9Y283;Q8WX93;O75112;Q14678;Q14511;P0C7T5;Q9H5P4;O15511;O15144;Q9BV20;Q9Y613;Q7Z6J0;Q6ZW61;Q9BPU9;Q8IY31;Q9NRR3;Q6TFL4;Q8IZP0;Q96GV9;O94763;Q14247;Q15691;P78347;Q99689;P80723;Q68CZ1;Q9UIF3;Q9Y6D5;Q9NZI8;A8MTZ0;Q9H3S7;O75970;Q5TD94;Q66K74;Q9HBB6;P14136;Q9NPB6;Q96M29;Q63HK5;Q8IX03;P60953;Q8IZE3;Q9UI08;Q9Y5K6;Q96KN7;O60662;P26038;Q9Y664;Q93045;Q8TAM2;O75161;P59998;Q9NXB0;O75665;Q8NEJ9;O43236;Q9P021;Q92625;Q9NWB7;Q9HD26;Q8N841;Q15019;P27815;Q3SYG4;Q9Y250;O15145;Q8N0X2;Q9Y4P9;O94850;Q5BJF6;Q8N157;P30622;O75122;Q9BYV8;P08670;Q99608;P36405;Q717R9;A6NIH7;Q16658;Q9UBB6;Q00534;Q14CM0;P23528;O15078;Q5TCZ1;Q9C0H9;Q9Y252;Q9UN36;Q6Q759;Q8IWN7;O75386;O60711;P63000;Q8WW24;Q9NSI8;Q86WG3;Q92834;Q96NB1;Q6EMB2;Q96QF0;Q9NP98;Q9BV73}

3550 Pathogen[ Q85601] interacts with 77 human  
partners:{Q8IYI6;Q9Y250;O00213;O75161;O15511;Q8WX93;Q9H5P4;O75112;P36405;Q6Q759;Q9UN36;Q9Y5K6;A8MTZ0;Q9Y613;P08670;P38935;Q9Y283;Q5TD94;Q9NWB7;P27815;P30622;P63000;Q66K74;P14136;O15078;Q92834;Q5BJF6;Q99608;P80723;P59998;O96015;Q9BXF9;P0C7T5;Q9NRR3;O75122;Q7Z6J0;O60711;Q8WW24;Q9NXB0;O00159;O75665;Q9BV73;Q96M29;Q9HD26;Q14678;Q15691;Q8N3V7;Q86VQ0;Q9BYV8;Q99689;Q9NPB6;Q3SYG4;Q9Y252;Q86WG3;Q9BPU9;P60953;A6NIH7;O94763;Q9UM54;P23528;Q00534;Q8IZP0;Q9BV20;P17677;Q9NP98;Q63HK5;Q8IX03;Q9UPU9;Q14511;Q5T1C6;P78347;O15144;Q96GV9;Q8IY31;O43236;Q96NB1;Q96QF0}

3551 Pathogen[ P14079] interacts with 159 human  
partners:{P04083;Q15691;Q9H1X1;Q9P0N5;O75112;Q9Y4P9;Q4G0U5;O75161;O95425;Q8N4P2;P09327;Q9Y664;Q8N307;P17677;Q5JQC9;Q86WG3;Q8IZ21;Q9NWB7;O95876;Q8IY31;Q9NRR3;Q9NPI0;A6NIH7;O43597;Q16658;O75781;Q96GX1;Q86WT1;Q8N0X2;Q9BV20;Q8N157;Q8WX93;Q66K74;Q68CZ1;Q9Y6D5;Q9UPU9;Q96Q45;P26038;Q92834;A0MZ66;Q8NFJ9;Q9Y250;Q717R9;Q9BXF9;Q6Q759;Q8IZP0;Q8N3I7;O00213;Q9BV73;Q9Y4F9;P57679;Q9NP98;Q96M29;Q9UM54;Q86UK5;Q14444;Q99828;O60711;Q9C0H9;Q9Y4R7;Q99608;Q8IWN7;P50552;Q96GD0;Q9Y613;Q9GZS0;Q5TD94;P02686;Q7RTU9;O94763;Q8IWN7;O15145;B4DS77;Q9HD26;O15511;P14136;P56715;A6PVC2;P36405;O95868;Q93045;O75952;P08758;A0AVF1;Q5BJF6;Q9UPM9;Q99689;Q8IX03;Q9NP74;P23528;Q9UBB6;Q5H9T9;Q8NBT0;O60610;Q9UI46;P61158;Q5T1C6;Q9NZ72;Q8TAM2;Q96QF0;Q8N3V7;Q8N841;Q9BPU9;Q14247;Q8TCU4;Q9P2L0;Q8IW40;Q4KMQ1;Q8WW24;Q9UFE4;O75366;Q969V4;Q8IYI6;Q9Y5K6;Q8TC44;P27815;Q9Y283;Q63HK5;O15078;Q6EMB2;Q9UIF3;Q9P2K1;P59998;Q9NQC8;P38935;Q9P021;A6NNG8;P08670;Q9H5P4;P80723;O75665;Q6ZW61;Q3SYG4;Q9NPB6;Q96KC9;Q8NEJ9;O96015;P78347;Q86VQ0;O75122;Q9UN36;Q5TCZ1;Q14678;O15259;A8MTZ0;Q9NXB0;Q9BYV8;P0C7T5;Q6IQ19;O15144;O94850;Q96KN7;O43236;P30622;O75970;Q96NB1;P10636;Q9UI08;Q96GV9}

3552 Pathogen[ P03383] interacts with 60 human  
partners:{O00213;Q9UBB6;Q14678;Q9NWB7;P0C7T5;Q15691;Q96QF0;Q8IY31;P08670;O15511;P78347;Q9HD26;Q99608;Q86WG3;O43236;Q99689;P60953;Q9BV73;A8MTZ0;P63000;Q5TD94;P14136;Q96M29;Q8IYI6;Q9UN36;Q00534;Q9Y613;Q96NB1;O94763;P59998;Q9NXB0;Q86VQ0;O15078;Q9NRR3;Q14511;O60711;Q9NPB6;Q8WW24;Q9BYV8;O94850;Q5BJF6;Q3SYG4;Q9BV20;Q8IX03;Q9Y252;Q717R9;Q6Q759;O75161;A6NIH7;P80723;P38935;Q8N3V7;P23528;Q9Y4P9;Q9C0H9;O75665;Q5T1C6;Q96GV9;Q9NP98;Q9

- Y250}
- 3553 Pathogen[ P03410] interacts with 162 human  
partners: {O60711;O15511;Q14CM0;O75665;O75781;Q717R9;Q9Y4R7;Q86VQ0;O94763;Q96KC9;Q6Q759;Q9UI08;Q16658;Q96NB1;P30622;Q8IZE3;Q9H5P4;Q8NFB9;Q8N3V7;O60610;O43597;P0C7T5;Q00534;Q9Y4P9;P63000;Q9BXF9;Q9NP98;Q8IZ21;Q9UI46;O15259;Q8IX03;Q3SYG4;Q6ZW61;Q8N0X2;Q96RY7;Q96Q45;Q2686;Q99608;Q8TAM2;Q9NRR3;Q8NBT0;Q96KN7;Q5JQC9;A0AVF1;P36405;Q8N307;Q86WG3;O15145;Q5TD94;O00159;P59998;O75161;Q8TCU4;O00213;Q9UIF3;Q9Y283;Q8TCX1;Q9H1X1;Q8NEJ9;O94850;Q9BYV8;A0MZ66;Q9UFE4;Q9BV20;A8MTZ0;A6NIH7;Q9Y5K6;Q9HD26;Q96GX1;O75952;Q96GD0;Q9UM54;O95425;O75970;P38935;Q99828;P50552;Q6IQ19;Q14511;Q9UN36;Q15691;P26038;O43236;Q9NP10;Q9NPE6;Q8N4P2;Q5T1C6;Q9BPU9;Q7Z6J0;Q8IY31;A6NGG8;Q9NWB7;Q7RTU9;Q9UPU9;Q9UBB6;Q8N157;Q9P0N5;Q9Y613;O15078;Q8N3I7;Q9P2K1;Q9UPM9;Q92834;O95876;Q9Y6D5;Q5BJF6;Q8IZP0;Q66K74;P08670;Q14678;P10636;Q4G0U5;Q96QF0;P60953;O95868;Q8TC44;Q8IW40;B4DS77;O75112;Q9HBG6;Q9NZ72;P17677;Q9NPB6;P80723;P14136;Q96GV9;Q9Y250;Q9NXB0;Q8IWZ6;O15144;Q14247;Q5H9T9;P78347;Q9NQC8;Q63HK5;Q9P021;Q5TCZ1;Q9C0H9;P23528;Q9P2L0;Q9Y664;Q9NP74;Q8N841;Q68CZ1;A6PVC2;Q8IWN7;Q9GZS0;O75122;Q969V4;P56715;Q96M29;Q9BV73;P27815;Q9BRK5;Q8WX93;Q93045;Q8IYI6;Q6EMB2;O96015;Q4KMQ1;Q86UK5;Q99689}
- 3554 Pathogen[ P14075] interacts with 65 human  
partners: {P60953;Q3SYG4;O00213;Q14511;Q8NEJ9;Q86WG3;Q9BYV8;Q6Q759;Q99608;Q8N3V7;Q6ZW61;O43236;Q5TD94;Q96GV9;P80723;Q9Y252;P38935;Q8IY31;Q9BV20;Q00534;P0C7T5;P14136;Q9Y250;Q86VQ0;Q9HD26;P78347;Q5T1C6;Q9Y613;O94763;O15511;P23528;Q9NXB0;Q96KC9;O15078;Q5BJF6;O75161;Q9NP98;Q6IQ19;Q96NB1;Q15691;Q9BV73;Q9UN36;Q9Y4P9;Q9BPU9;Q9NWB7;Q9UBB6;Q9NRR3;P08670;P63000;Q96QF0;Q717R9;A6NIH7;O60711;Q8IYI6;Q14678;O75665;Q9NPB6;Q96M29;P59998;Q9C0H9;A8MTZ0;O94850;Q4KMQ1;Q8IX03;Q99689}
- 3555 Pathogen[ P0C206] interacts with 126 human  
partners: {Q9BPU9;Q9NQC8;O15511;Q96KC9;O75952;Q9UM54;Q6ZW61;Q99828;P38935;P56715;P17677;Q5BJF6;Q7Z6J0;Q9BV20;Q15019;Q5JQC9;Q5TD94;Q8N3V7;Q9UPM9;Q3SYG4;Q8TAM2;O75161;Q8IY31;Q8TCU4;Q9P021;Q9P2K1;Q15691;Q9NRR3;Q9H5P4;Q14678;P59998;Q9UIF3;O94850;Q86VQ0;Q8WX93;Q9NP98;Q96GV9;Q9UI08;Q5TCZ1;Q8N3I7;P0C7T5;O15145;P30622;P10636;O43236;Q66K74;Q9Y283;Q96KN7;Q63HK5;Q8NEJ9;Q99689;O75122;O00213;Q96QF0;P27815;P78347;Q717R9;Q9Y4P9;Q5H9T9;Q9UFE4;Q93045;P63000;Q16658;Q8IWN7;Q9UPU9;Q8IZP0;O75112;P14136;Q9Y6D5;P80723;O00159;Q9NWB7;Q6IQ19;Q9NZ72;O15078;Q5T1C6;Q9H1X1;Q8N841;Q8N157;Q9NPB6;Q9BYV8;Q99608;Q9UBB6;A0MZ66;Q92625;Q9BV73;O43597;P60953;Q9C0H9;A6NGG8;O75665;O15144;P36405;A6NIH7;Q8IYI6;Q9BXF9;Q9Y5K6;Q8NFB9;Q9Y613;Q96GD0;Q4KMQ1;Q96M29;Q16181;Q9UN36;P08670;O60711;Q6Q759;Q9NXB0;Q86WG3;Q9Y252;Q96NB1;P23528;O95876;A8MTZ0;Q9HD26;Q92834;Q6EMB2;Q9Y250;O96015;O95868;Q14511;Q8IW40;Q8IX03;Q8WW24;O94763;Q00534}
- 3556 Pathogen[ P03363] interacts with 123 human  
partners: {Q9P021;Q5BJF6;Q9Y252;Q8IZP0;P0C7T5;Q8N3V7;Q9NSI8;O75161;Q8N0X2;Q9H3S7;P56715;Q9UBB6;Q6EMB2;Q86VQ0;Q66K74;Q8TAM2;Q9BYV8;Q14247;O15078;Q9GZS0;Q8NBT0;O75112;Q969V4;O00213;Q8IYI6;Q9P2K1;Q15691;Q9H1X1;Q9UN36;Q14CM0;Q9NPB6;Q9Y613;Q96M29;Q9NP98;Q9Y4P9;Q9H5P4;Q5TD94;Q99828;O75970;P63000;Q7L576;P27815;Q9NVA2;Q93045;O94850;Q99608;Q9NWB7;Q5TCZ1;Q00534;O15144;A8MTZ0;P30622;Q8IYM1;Q717R9;P59998;Q9BXF9;Q8N157;Q3SYG4;Q86WG3;Q8IY31;Q9UPU9;Q9Y250;Q9UI08;Q9NZI8;Q14511;Q6IQ19;O94763;Q9BPU9;P08670;Q9HBG6;P14136;Q8N841;Q9Y283;P23528;Q8WX93;Q96NB1;Q6ZW61;Q8IW40;A6NIH7;Q9BV20;Q12923;Q92625;Q9UIF3;Q96GV9;Q63HK5;Q7Z6J0;Q6TFL4;Q92834;Q8IWN7;Q9NRR3;O75386;P80723;Q9C004;Q8IZE3;O15259;Q9Y664;O60662;Q9UI46;Q8IX03;Q8NFB9;Q9NXB0;Q6Q759;Q16658;P60953;Q8NEJ9;Q14678;P78347;Q9Y5K6;O43236;Q9HD26;P38935;Q9BV73;O15145;O60711;Q9NQC8;Q8TC44;Q8WW24;O15511;Q96KN7;Q96QF0;O75665;Q99689;Q9C0H9}
- 3557 [Cluster 324]GO:0016585+C cellular\_component [name] chromatin remodeling complex [def]  
"Any complex that mediates dynamic changes in eukaryotic chromatin." [GOC
- 3558 Pathogen[ Q2Q067] interacts with 8 human  
partners: {O96019;O94776;Q92831;Q96GM5;Q12824;Q9Y294;Q9UIF9;P28370}
- 3559 Pathogen[ P0C214] interacts with 9 human  
partners: {Q12824;Q9UIF9;P28370;O94776;O60264;Q9Y294;Q92831;Q96GM5;O96019}
- 3560 Pathogen[ P03346] interacts with 9 human  
partners: {Q96GM5;O94776;Q12824;Q92831;O96019;O60264;Q9UIF9;P28370;Q9Y294}
- 3561 Pathogen[ Q85601] interacts with 9 human  
partners: {O94776;Q9UIF9;Q9Y294;O96019;Q92831;Q96GM5;P28370;O60264;Q12824}
- 3562 Pathogen[ P14079] interacts with 8 human  
partners: {P28370;Q9UIF9;Q96GM5;O60264;Q12824;Q96JY0;Q9Y294;O94776}
- 3563 Pathogen[ P03383] interacts with 8 human  
partners: {Q92831;O96019;Q12824;O94776;P28370;Q96GM5;Q9Y294;Q9UIF9}
- 3564 Pathogen[ P03410] interacts with 9 human  
partners: {Q92831;Q96GM5;O96019;Q9Y294;O94776;Q9UIF9;O60264;Q12824;P28370}
- 3565 Pathogen[ P14075] interacts with 8 human  
partners: {Q96GM5;Q92831;O94776;O96019;Q9UIF9;P28370;Q12824;Q9Y294}
- 3566 Pathogen[ P0C206] interacts with 10 human  
partners: {O94776;Q12824;Q92831;O96019;Q9UIF9;P28370;Q9Y294;Q96GM5;Q9UIG0;O60264}
- 3567 Pathogen[ P03363] interacts with 10 human  
partners: {Q92831;Q9Y294;O60264;O96019;Q9UIF9;Q96JY0;P28370;Q96GM5;Q12824;O94776}
- 3568 [Cluster 325]GO:0000783+C cellular\_component [name] nuclear telomere cap complex [def]  
"A complex of DNA and protein located at the end of a linear chromosome in the nucleus that protects and stabilizes a linear chromosome." [GOC
- 3569 Pathogen[ Q2Q067] interacts with 8 human  
partners: {Q9NYB0;Q15554;P54274;Q9BSI4;Q96AP0;O14746;P12956;P13010}
- 3570 Pathogen[ P0C214] interacts with 7 human  
partners: {O14746;P13010;Q9BSI4;Q15554;Q9NYB0;P12956;P54274}

3571 Pathogen[ P03346] interacts with 9 human  
partners:{Q9BSI4;Q96AP0;P12956;Q15554;P54274;P13010;O14746;Q9NUX5;Q9NYB0}

3572 Pathogen[ Q85601] interacts with 6 human  
partners:{Q15554;O14746;Q9NYB0;P54274;P13010;P12956}

3573 Pathogen[ P14079] interacts with 9 human  
partners:{P54274;O14746;Q9NUX5;P13010;Q9BSI4;P12956;Q9NYB0;Q15554;Q96AP0}

3574 Pathogen[ P03383] interacts with 7 human  
partners:{P13010;Q9NYB0;Q15554;Q9BSI4;O14746;P54274;P12956}

3575 Pathogen[ P03410] interacts with 9 human  
partners:{Q9NUX5;Q15554;Q96AP0;O14746;P54274;Q9BSI4;P12956;P13010;Q9NYB0}

3576 Pathogen[ P14075] interacts with 8 human  
partners:{P12956;O14746;Q15554;Q9BSI4;Q96AP0;P54274;P13010;Q9NYB0}

3577 Pathogen[ P0C206] interacts with 9 human  
partners:{P13010;Q96AP0;Q15554;Q9BSI4;P54274;Q9NYB0;Q9NUX5;P12956;O14746}

3578 Pathogen[ P03363] interacts with 9 human  
partners:{P12956;Q15554;P13010;Q9NYB0;O14746;Q9BSI4;Q96AP0;P54274;Q9NUX5}

3579 [Cluster 326]GO:0043034+C cellular\_component [name] costamere [def] "Regular periodic sub membranous arrays of vinculin in skeletal and cardiac muscle cells, these arrays link Z-discs to the sarcolemma and are associated with links to extracellular matrix." [GOC

3580 Pathogen[ Q2Q067] interacts with 4 human partners:{Q14315;P08727;O15061;P11532}

3581 Pathogen[ P0C214] interacts with 6 human  
partners:{P51114;O15061;Q14315;P11532;Q15124;P08727}

3582 Pathogen[ P03346] interacts with 7 human  
partners:{Q14315;P08727;Q9UHP9;Q15149;O15061;P11532;P51114}

3583 Pathogen[ Q85601] interacts with 6 human  
partners:{P11532;Q15124;Q14315;P08727;P51114;O15061}

3584 Pathogen[ P14079] interacts with 9 human  
partners:{O95425;P11532;Q9UHP9;Q15124;Q14118;O15061;Q15149;Q14315;P08727}

3585 Pathogen[ P03383] interacts with 3 human partners:{P08727;O15061;P11532}

3586 Pathogen[ P03410] interacts with 10 human  
partners:{Q9UHP9;O15061;P11532;Q15124;O95425;Q14315;Q14118;P51114;Q15149;P08727}

3587 Pathogen[ P14075] interacts with 4 human partners:{P11532;P08727;Q9UHP9;O15061}

3588 Pathogen[ P0C206] interacts with 7 human  
partners:{Q9UHP9;O15061;Q14315;P08727;Q15124;P51114;P11532}

3589 Pathogen[ P03363] interacts with 7 human  
partners:{Q9UHP9;O15061;P08727;Q15149;P11532;P51114;Q14315}

3590 [Cluster 327]GO:0044306+C cellular\_component [name] neuron projection terminus [def] "The specialized, terminal region of a neuron projection such as an axon or a dendrite." [GOC

3591 Pathogen[ Q2Q067] interacts with 3 human partners:{P11532;P78352;Q9UPA5}

3592 Pathogen[ P0C214] interacts with 3 human partners:{O95633;P11532;P78352}

3593 Pathogen[ P03346] interacts with 4 human partners:{P78352;P11532;O95633;Q9UPA5}

3594 Pathogen[ Q85601] interacts with 3 human partners:{P11532;Q9UPA5;P78352}

3595 Pathogen[ P14079] interacts with 2 human partners:{P11532;Q9UPA5}

3596 Pathogen[ P03383] interacts with 2 human partners:{P11532;P78352}

3597 Pathogen[ P03410] interacts with 3 human partners:{P11532;Q9UPA5;P78352}

3598 Pathogen[ P14075] interacts with 3 human partners:{P11532;P78352;Q9UPA5}

3599 Pathogen[ P0C206] interacts with 4 human partners:{P78352;O95633;Q9UPA5;P11532}

3600 Pathogen[ P03363] interacts with 3 human partners:{P78352;P11532;Q9UPA5}

3601 [Cluster 328]GO:0030133+C cellular\_component [name] transport vesicle [def] "Any of the vesicles of the constitutive secretory pathway, which carry cargo from the endoplasmic reticulum to the Golgi, between Golgi cisternae, or to destinations within or outside the cell." [GOC

3602 Pathogen[ Q2Q067] interacts with 9 human  
partners:{Q9UL45;Q63HQ0;Q92572;O43493;Q6QNY0;Q8TDH9;Q8NFW9;Q12904;O75843}

3603 Pathogen[ P0C214] interacts with 9 human  
partners:{Q8NFW9;Q12904;O43493;Q8TDH9;O75843;Q6QNY0;Q92572;Q9UL45;Q63HQ0}

3604 Pathogen[ P03346] interacts with 10 human  
partners:{Q92572;Q6QNY0;Q9H8W4;Q12904;O75843;Q9UL45;Q8NFW9;O43493;Q8TDH9;Q63HQ0}

3605 Pathogen[ Q85601] interacts with 7 human  
partners:{Q63HQ0;Q6QNY0;O43493;Q8NFW9;O75843;Q92572;Q8TDH9}

3606 Pathogen[ P14079] interacts with 19 human  
partners:{Q9H8W4;Q86VI1;Q6QNY0;Q63HQ0;Q9BT56;Q92572;O75843;Q8NFW9;Q9UL45;Q969E2;Q8TDH9;Q8WW43;Q6P JW8;Q9BWQ6;Q9UKR5;O43493;Q9H0V1;Q12904;Q9GZM5}

3607 Pathogen[ P03383] interacts with 7 human  
partners:{Q6QNY0;Q12904;Q92572;Q8TDH9;O43493;O75843;Q63HQ0}

3608 Pathogen[ P03410] interacts with 17 human  
partners:{Q9BT56;Q6QNY0;O75843;Q969E2;Q92572;Q8NFW9;Q12904;Q9UL45;Q9H0V1;Q6P JW8;Q9H8W4;Q8WW43;Q63HQ0;Q86VI1;O43493;Q8TDH9;Q9BWQ6}

3609 Pathogen[ P14075] interacts with 7 human  
partners:{O43493;Q12904;Q63HQ0;Q6QNY0;Q92572;Q8TDH9;O75843}

3610 Pathogen[ P0C206] interacts with 14 human  
partners:{Q9BT56;Q63HQ0;Q9UL45;Q92572;O43493;Q8NFW9;Q8TDH9;Q969E2;Q6P JW8;Q86VI1;O75843;Q6QNY0;Q9H8W4;Q12904}

3611 Pathogen[ P03363] interacts with 8 human

3612 partners:{043493;Q63HQ0;Q8NFW9;Q92572;075843;Q9H8W4;Q8TDH9;Q6QNY0}  
 [Cluster 329]GO:0005675+cellular\_component [name] holo TFIIF complex [def] "A complex that contains kinase activity directed towards the C-terminal Domain (CTD) of the largest subunit of RNA polymerase II and is essential for initiation at RNA polymerase II promoters in vitro. In *S. cerevisiae*, it is composed of the 5-subunit core (Rad3p, Tfb1p, Tfb2p, Ssl1p and Tfb4p), Ssl2p, and TFIIF (Kin28p, Ccl1p, and Tfb3p). All of the subunits have equivalents in humans

3613 Pathogen[ Q2Q067] interacts with 9 human  
 partners:{Q13889;P32780;Q92759;P51948;P50613;Q96T76;Q13888;P28715;P51946}

3614 Pathogen[ P0C214] interacts with 8 human  
 partners:{P51946;P50613;P28715;P51948;P32780;Q13888;Q92759;Q96T76}

3615 Pathogen[ P03346] interacts with 8 human  
 partners:{P28715;Q13888;Q13889;P51946;Q92759;P51948;P32780;Q96T76}

3616 Pathogen[ Q85601] interacts with 9 human  
 partners:{P51946;Q96T76;Q13888;P51948;P28715;Q92759;P32780;P50613;P19447}

3617 Pathogen[ P14079] interacts with 10 human  
 partners:{P28715;P51946;Q13889;P50613;Q13888;Q92759;P32780;Q96T76;P19447;P51948}

3618 Pathogen[ P03383] interacts with 7 human  
 partners:{Q96T76;P51948;Q13888;P50613;P51946;Q92759;P32780}

3619 Pathogen[ P03410] interacts with 10 human  
 partners:{Q96T76;Q13889;P51946;P28715;P50613;P19447;P51948;Q13888;P32780;Q92759}

3620 Pathogen[ P14075] interacts with 8 human  
 partners:{Q92759;P50613;Q13889;P51946;P32780;Q96T76;P51948;Q13888}

3621 Pathogen[ P0C206] interacts with 10 human  
 partners:{P28715;P19447;Q13888;P50613;Q92759;P32780;Q96T76;Q13889;P51946;P51948}

3622 Pathogen[ P03363] interacts with 5 human  
 partners:{Q13888;P32780;Q92759;P51946;Q96T76}

3623 [Cluster 330]GO:0046581+cellular\_component [name] intercellular canaliculus [def] "An extremely narrow tubular channel located between adjacent cells. An instance of this is the secretory canaliculi occurring between adjacent parietal cells in the gastric mucosa of vertebrates." [ISBN

3624 Pathogen[ Q2Q067] interacts with 2 human partners:{Q86UE4;Q07157}

3625 Pathogen[ P0C214] interacts with 2 human partners:{Q86UE4;Q07157}

3626 Pathogen[ P03346] interacts with 2 human partners:{Q86UE4;Q07157}

3627 Pathogen[ Q85601] interacts with 2 human partners:{Q86UE4;Q07157}

3628 Pathogen[ P14079] interacts with 2 human partners:{Q07157;Q86UE4}

3629 Pathogen[ P03383] interacts with 2 human partners:{Q86UE4;Q07157}

3630 Pathogen[ P03410] interacts with 2 human partners:{Q07157;Q86UE4}

3631 Pathogen[ P14075] interacts with 2 human partners:{Q07157;Q86UE4}

3632 Pathogen[ P0C206] interacts with 2 human partners:{Q07157;Q86UE4}

3633 Pathogen[ P03363] interacts with 2 human partners:{Q86UE4;Q07157}

3634 [Cluster 331]GO:0048471+cellular\_component [name] perinuclear region of cytoplasm [def] "Cytoplasm situated near, or occurring around, the nucleus." [GOC

3635 Pathogen[ Q2Q067] interacts with 149 human  
 partners:{P49454;P07438;P22392;O00213;Q8WXX9;O15234;P02545;Q9BZE4;Q9Y6D6;Q7Z6J0;P63104;Q9UII4;P39687;Q13875;O43747;Q8NEF9;Q8NI35;Q8NCR6;Q8IVG9;Q9H2K2;P49959;O95684;Q96QA5;Q12982;O95295;Q6VY07;P54259;Q5SQN1;O60260;Q9UDY8;Q93083;Q8TD23;Q9UJG1;Q01105;O75935;P08133;P20749;Q5T752;P05062;Q13625;O43752;Q13257;O95999;Q99933;Q15633;Q96S55;P08107;Q8IX12;Q96SN8;P42704;P26447;Q6VVB1;P13640;O43542;Q86UE4;Q9H267;Q06609;Q9BZE9;Q9UBB4;Q12962;Q86UL8;P27695;Q8IX03;O43399;O60711;Q9HAU5;P27797;Q9H7C4;Q12959;O43502;Q15004;Q13137;O94811;Q8NFW9;P04732;Q05084;O43310;Q96F07;P35527;P04733;P51959;Q9UNN5;Q9UL33;Q15437;Q12834;P53992;O95486;O43715;P06396;O75190;Q9NWT6;O94855;P0DI81;P0DI82;P50613;Q96CV9;Q9UN37;Q14677;P04406;Q9Y605;Q92993;Q16890;Q9NZU7;Q7Z7C8;P80294;P62879;Q9UQF2;Q8WY41;Q9UN36;Q9UPY8;O95996;A2IDD5;Q9Y2M5;P31946;Q8TB72;O95831;P04731;P25205;O95487;Q99700;Q14244;O96018;Q70IA6;Q9BZF9;P13682;P55327;P80297;Q8NC51;Q92597;P14672;Q66K74;Q9NRR5;Q9UMX0;O75376;P27815;P05783;Q9HCI5;Q13023;Q86YD1;Q15436;Q15056;P02795;Q9Y3A3;O14576;O75821;Q9Y224;Q9BV73;Q9UHB4;P14625}

3636 Pathogen[ P0C214] interacts with 166 human  
 partners:{Q9H7C4;Q92993;Q8TB72;Q9UKA1;Q8NFW9;O00213;O15234;Q8IX03;Q13257;O75935;P27695;Q7Z6J0;P14625;Q8IX12;Q06609;Q5T752;P05783;Q86YD1;P35527;O95633;Q9H4I8;Q96S55;P49959;Q8NCR6;Q9H201;P53992;Q8NI35;O95684;Q9NRR5;O94811;Q9UBB4;Q13625;O95295;P27815;P50613;O75190;Q9UM54;P51959;Q8TD23;Q8WXX9;Q13023;Q96SN8;Q9UDY8;P62166;O15056;P08133;P29728;Q96F07;Q7Z7C8;O75821;P42704;O43715;Q12962;Q15056;Q16613;Q70IA6;O96018;P06396;Q8NFU3;Q13875;Q9HAU5;P46060;Q15436;P13640;Q5T447;Q16890;Q86UE4;Q01105;Q99700;P25205;P05062;Q8IWE4;P80297;Q5SQN1;Q9BZE9;Q15633;Q13137;Q92597;Q9Y224;Q9HBL8;O95487;Q8NEF9;O43542;Q14244;Q99933;Q9UNN5;P04732;Q12982;Q15437;O95999;Q9Y2M5;Q6VY07;O43310;Q96QA5;Q12834;Q9UII4;P20749;O43502;P02795;O75376;P0DI81;P04733;O60711;Q9NZU7;Q15004;Q96CV9;O43752;P62879;P13682;Q12959;Q9H2K2;Q9UQF2;Q07343;P26447;O43747;Q8WY41;Q9UPY8;Q9NV92;Q96G01;P10909;O14576;P27797;P07438;Q9BV73;Q9UHB4;Q9HCI5;A2IDD5;P55327;Q9Y6D6;P80294;Q8NC51;Q86WV6;P04731;Q9BZF9;O60260;O76083;P13533;Q93083;Q05084;P22392;Q9UN37;Q9Y3A3;Q9BZE4;P02545;Q9UJG1;Q9Y605;P31946;P49454;P08107;P14672;Q99704;P39687;Q9UL33;Q9UN36;P04406;Q9UMX0;O95486;Q6VVB1;Q14677;Q66K74;P0DI82;P54259;O94855;O43399;Q9NWT6;P16278}

3637 Pathogen[ P03346] interacts with 207 human  
 partners:{P08107;Q96G01;O00213;O15234;O43752;Q96HJ5;Q9UBB4;Q8NC51;Q86UU5;Q8IX12;O14576;Q06609;P04406;O75112;Q86YD1;P05783;Q99598;O95684;Q12840;P59103;Q86UE4;O75190;P55327;Q9BZE4;P35527;P14625;Q96F07;Q7Z6J0;O95295;O43502;O43747;O94875;Q8NEF9;Q8TD23;Q5SQN1;

- 075935;Q9UHB4;Q01105;Q9UDY8;Q70IA6;Q7Z7C8;Q15004;Q9NRR5;Q9NZU7;Q96FS4;Q15633;Q9Y6D5;Q27J81;Q9UII4;P04732;Q8NCR6;Q66K74;Q8IVG9;Q13023;Q15056;Q9UMX0;Q8IX03;P06703;Q05084;P80294;Q9NV92;O75821;Q6P3W7;Q8IWE4;Q5T447;P02545;Q9BZE9;Q8WWX9;Q8TB72;Q12834;Q9Y664;P62879;Q93045;Q94855;Q95999;Q15056;Q9UKA1;Q13137;P07438;Q6UW56;P25205;P16278;Q8NI35;P04733;Q9Y6D6;Q9Y6F6;Q9H2K2;Q99700;Q16890;Q9H4I8;P13640;Q93083;P08133;Q96CV9;Q9Y224;Q15436;Q96S55;Q16667;Q9UNN5;P80297;Q9UL33;Q00221;Q86UL8;Q8N339;Q92597;Q15437;Q94972;Q9Y3A3;P46060;Q5T752;Q96SN8;Q15019;P27815;P42704;O75569;Q96AX1;P48059;Q13875;P0DI81;O43542;Q5JSH3;O75604;Q96QA5;Q99704;O96018;Q13625;Q9HAU5;Q8NFU3;P39687;P22392;O75376;O95831;Q12962;P26447;P49959;O94811;O95996;Q6VVB1;P62166;O95486;Q8WY41;P27797;Q8NFW9;Q9H201;Q9BUZ4;Q13492;Q08AE8;P20749;P0DI82;Q9ULV0;O60260;Q9BWF2;O43310;Q9H7C4;P31946;P02795;Q96S99;P63104;A2IDD5;Q92832;Q14244;Q9UJG1;P04731;Q9BZF9;O95487;P13682;P05062;Q9UHD8;P51959;P06396;P27695;Q9NWT6;Q92993;Q96JE9;O43399;P54257;Q9HBL8;Q9Y2M5;Q9Y605;Q9UPY8;Q12982;Q9UN36;Q9Y2R2;P14672;O43715;Q14677;Q6VY07;O60711;Q9H267;O14965;O95633;Q9HBF4;Q9NRD5;P53992;Q9UJG1;P54259;P58546;Q13257;P49454;Q99933;O75146;Q9UN37;Q9UBP0;Q9HCI5;Q86XN8;Q12959;Q9BV73}
- 3638 Pathogen[ Q85601] interacts with 165 human partners: {P54259;Q16890;P49454;O00213;O15234;Q86WV6;O43715;P63104;Q8NFW9;Q96CV9;P80294;Q8NC51;Q9UHB4;P08107;Q9NZU7;O43502;P02545;Q96S99;P62879;P31946;P26447;P06396;O95831;O75112;Q15004;O95684;P46060;O75190;Q9UN36;Q9UL33;Q9BZE4;Q5JSH3;P13682;P13533;O95487;Q9UBB4;Q96F07;Q9NRR5;P04732;O95295;Q14244;Q9UBP0;Q93083;Q8TD23;P39687;Q96SN8;Q7Z7C8;O75935;Q01105;Q9UDY8;Q9BZF9;Q86UL8;Q9HBF4;P27815;Q12982;Q9NWT6;P07438;Q9HBL8;Q66K74;Q16613;O43747;Q8IX12;P55145;P27797;P49959;P51959;P02795;P05062;Q15436;Q9BZE9;O43542;Q12834;Q9UJG1;Q13257;Q9H267;Q12840;O43752;O43399;Q9UKA1;Q13137;Q14677;O14965;Q8NI35;Q7Z6J0;Q9H2K2;O60711;Q8N339;Q9HAU5;Q9UNN5;O94811;P05783;P80297;Q70IA6;P25205;Q15437;Q99933;Q9BV73;Q9Y3A3;Q6VY07;Q9NQC7;P04733;Q96G01;Q8TB72;P0DI81;P42704;O14576;O96018;Q13625;O75376;P22392;Q86UE4;P50613;Q9H201;Q6VVB1;Q15633;O95486;Q8WY41;P48059;O95996;P0DI82;O60260;Q9BWF2;Q8NEF9;Q12959;A2IDD5;Q96S55;P14625;P08133;Q12962;Q9Y6D6;P35527;P04731;Q9Y2M5;Q5SQN1;Q92597;P04406;Q8IWE4;Q9UM54;Q92993;Q8WWX9;O95999;Q13023;Q13875;Q9UPY8;O94855;Q8IX03;O43310;P14672;P62166;Q06609;Q9UN37;Q99700;P27695;O75821;Q9Y224;P20749;P53992;Q05084;Q9UJG1;Q9UMX0;Q9Y605;Q9H7C4;P13640;Q86YD1;Q9HCI5}
- 3639 Pathogen[ P14079] interacts with 190 human partners: {Q6VY07;Q9UHB4;Q13492;O75112;P51959;P80297;O60260;Q01105;Q8IX12;Q8WWX9;Q9UL33;Q93083;P16278;Q12982;Q16890;Q8TD23;P55327;Q9UPY8;Q05084;Q15056;Q9Y664;Q8WY41;O75146;Q5JQC9;P54257;P29728;Q9H7C4;P02795;O75821;Q99704;O95999;O95487;O95684;Q8N339;Q99700;P59103;Q13023;Q12840;Q9UMX0;Q9UJG1;Q70IA6;Q66K74;Q9BWF2;P14672;Q14677;Q8IVG9;P24588;Q9BZE9;Q9Y6D5;P80294;P07438;O94855;P42704;P46060;Q8NFU3;O00213;Q9BV73;Q14244;P10909;O75569;P53992;Q9H2K2;O43715;Q96S99;Q13625;Q9UM54;O75190;P35527;Q92597;O60711;Q6ZMK1;Q9HCI5;Q9BUZ4;Q8TB72;Q5SQN1;Q16613;Q9BZE4;P63104;Q15078;Q9NRR5;O75503;P50613;Q86UU5;Q5T752;Q08AE8;O95831;Q9NQC7;Q9Y3A3;Q93045;Q13875;Q9UNN5;Q8NFW9;Q8IX03;Q8NC51;P22392;Q969L2;Q12962;Q96HJ5;Q9UL15;O96018;Q9UBB4;P31946;Q8NI35;Q86WV6;Q9NWT6;Q96WV6;Q96S55;Q5JSH3;Q9Y6D6;Q99933;O95996;Q92832;P08107;Q9NZ72;P13640;Q13257;Q96AX1;P62166;O94811;O43310;Q9UJG1;Q9Y2M5;O00221;P26447;P27695;O43612;Q9HAU5;Q86UE4;O95295;A2IDD5;Q96F07;O43502;Q13137;P05783;Q96G01;Q96JE9;Q9UN37;Q86UL8;P14625;P04731;P27815;P20749;Q9BZF9;Q8TCY5;O43747;O43752;O75376;Q9Y605;P54259;Q2TAA8;P49454;P04732;Q99598;Q9NV92;Q9Y6F6;P0DI82;P06703;O43399;Q15004;P0DI81;P04733;O14576;O95486;Q96JY0;P13682;Q9HBF4;P02545;P48059;Q06609;Q9UN36;O14965;O75935;Q9Y224;Q9NQC7;O15234;Q96SN8;Q8NEF9;P25205;Q96CV9;Q86YD1;Q9NZU7;O43542;P39687;Q8NCR6;Q9H267;Q92993;Q27J81;P04406;Q9H201;Q8IWE4}
- 3640 Pathogen[ P03383] interacts with 129 human partners: {Q14244;P08107;P02545;O96018;Q13257;O00213;P49454;O15234;P62879;Q86UU5;Q06609;P04733;P80294;Q01105;Q9NWT6;Q93083;Q5T752;P13640;O95684;Q86UE4;O75376;O95487;Q9UBB4;Q9UHB4;P31946;O95295;Q9UL33;Q13875;Q8TD23;Q13023;Q96SN8;Q99700;O94811;Q9BZF9;Q15004;P25205;P20749;Q6VY07;Q9BV73;O43399;P22392;O95831;Q9BZE9;P80297;Q16613;Q9BZE4;O95486;Q8TB72;Q9Y6D6;Q9UN36;Q92993;Q9UJG1;Q96S55;P05783;Q92597;Q13625;P02795;O75190;Q15436;Q8IWE4;Q12834;P35527;Q13137;Q05084;P50613;P39687;O60260;P63104;Q9HAU5;Q9UNN5;O43747;Q15437;P51959;Q96F07;O94855;O43715;O60711;P0DI82;Q9UMX0;Q8NEF9;P55145;P0DI81;P04406;P14625;O75935;Q9UJG1;O95999;Q8IX12;Q8WY41;P04732;O14965;Q99933;Q8IX03;Q9HCI5;Q9H7C4;A2IDD5;Q14677;P53992;Q9NRR5;P42704;O43752;P04731;Q9Y2M5;Q12962;O43310;O43542;P27695;Q96CV9;P14672;Q9Y3A3;Q8NC51;P07438;Q8NCR6;Q9UN37;P08133;Q16890;O75821;Q9UPY8;Q8IVG9;Q9Y605;Q96QA5;Q9Y224;Q86YD1;P54259;P13682;Q15633;Q8WWX9;P27797;P06396}
- 3641 Pathogen[ P03410] interacts with 203 human partners: {O60711;Q99700;P26447;O95684;Q99933;P20749;P0DI82;O43399;P49959;Q5JSH3;O96018;Q96HJ5;P25205;Q13137;Q9BZE9;Q9H267;Q9UNN5;Q27J81;O15234;Q8IX12;Q15633;P13682;Q9NWT6;Q96S99;P07438;O43612;P29728;Q8IWE4;Q9NRR5;O94855;P80297;Q9UJG1;P53992;Q08AE8;Q8IX03;P04733;O43747;Q12962;Q8NCR6;P06396;Q12959;Q9ULV0;O43542;Q9Y224;Q9Y605;Q9UL33;P35527;Q96SN8;O94811;P14625;Q5JQC9;Q5SQN1;Q8N339;Q9Y6F6;P16278;P39687;O00213;Q96S55;Q8NI35;P13640;Q01105;Q15004;Q9HAU5;O60260;O75376;Q8IVG9;Q96JE9;P05062;Q9NV92;Q12840;O75146;Q05084;P50613;Q92832;Q8NFW9;P06703;Q9HBL8;Q9H7C4;O75569;Q9BWF2;P49454;O75503;O95295;Q6ZMK1;O14965;Q9UM54;A2IDD5;Q9UMX0;O43715;P0DI81;Q13492;Q15436;P08133;O14576;Q14677;Q15437;O95999;Q9UN36;P04731;O95996;Q15437;O43502;P51959;P08107;Q7Z6J0;O75190;Q9UN37;Q15056;Q86UE4;O43310;Q99704;Q16613;Q9NQC7;Q96CV9;P02795;Q9Y3A3;P02545;Q93083;O95486;P42704;Q15049;Q96G01;Q9H201;Q9Y6D6;P55327;Q13023;O95831;Q9Y6D5;Q8WWX9;Q9UL15;O75935;Q9UPY8;Q9UHD8;Q9NZU7;Q66K74;P48059;P04406;Q99598;Q9UHB4;Q8NFU3;P54257;Q12834;P63104;Q13875;O75821;Q9HBF4;Q9BZF9;P27695;Q9HCI5;Q70IA6;Q12982;O75112;P54259;Q9NZ72;O43752;Q16890;Q86WV6;P33176;P13533;Q96QA5;Q92597;Q86UL8;Q96F07;Q9H2K2;P80294;Q92805;Q9UJG1;Q8TD23;Q15283;Q8NEF9;Q8WY41;Q86UU5;Q9UBB4;Q9Y664;P62166;Q13625;Q6VY07;Q92993;Q14244;Q969L2;Q8TB72;P04732;P62879;P05783;Q9BV73;P27815;P59103;Q93045;Q9BZE4;P24588;O00221;Q9Y2M5}

- 3642 Pathogen[ P14075] interacts with 133 human  
partners: {P42704; Q96F07; Q99933; O00213; O15234; Q8TB72; Q96HJ5; Q12962; O94811; P55327; Q86YD1; P05783; O96018; O95684; P04733; P80297; O95295; Q86UE4; O43752; Q9Y224; P27695; P51959; Q8TD23; P62879; Q96JE9; P08133; P50613; Q9Y6F6; Q8NC51; Q13257; Q8WWX9; Q16613; O75821; Q96QA5; Q96SN8; Q8IVG9; Q7Z7C8; P39687; Q8IX12; Q9UHB4; Q9Y6D6; Q01105; Q9UJG1; P53992; Q9UBB4; Q92993; O75376; Q9H7C4; Q13875; Q13137; Q86UU5; P07438; O95487; P02545; Q9UPY8; P04406; Q5T752; Q9UNN5; Q8NEF9; O75935; Q15437; Q93083; P13640; P25205; O14965; O95831; Q16890; P0DI81; Q9BV73; P27797; Q14677; Q9UN36; P63104; P06396; O43747; Q9NWT6; Q9HAU5; P80294; Q15436; Q9NRR5; Q9Y3A3; O95999; O43542; Q13625; Q15633; Q8WY41; O75190; Q9BZE4; O43310; P02795; Q05084; A2IDD5; Q9NV92; P08107; O43715; Q96CV9; O60711; P04731; Q9BZF9; P54259; P31946; Q92597; Q99700; Q8NCR6; O94855; Q9UL33; Q96S55; Q9Y2M5; P59103; Q9Y605; P04732; P14625; O43399; O60260; P14672; P49454; P35527; O95486; Q9UQF2; Q15004; Q12834; P22392; Q6VY07; Q06609; Q9HCI5; P0DI82; P20749; Q14244; Q9UN37; Q9UMX0; Q9BZE9; Q8IX03; Q13023}
- 3643 Pathogen[ P0C206] interacts with 205 human  
partners: {P27695; Q9NQC7; O43542; Q9UNN5; O43502; Q13875; Q12982; Q92597; Q9Y224; Q9Y3A3; P07438; P13640; P05062; P0DI82; Q15437; Q9UN37; Q9UM54; P06396; P39687; Q8NEF9; P26447; P35527; Q96SN8; Q9H201; O00221; Q96F07; P27797; P49959; Q9UBB4; O14576; P13682; Q9UBP0; Q7Z6J0; O95684; Q8WWX9; P62879; Q15019; P13533; Q5JQC9; Q9UDY8; O43747; O95633; O94855; P62166; P22392; Q96HJ5; Q5SQN1; Q13023; Q9NV92; P25205; Q9Y6D6; Q99933; P04732; Q96CV9; Q13625; Q9UMX0; Q6ZMK1; O43752; Q99598; Q96JE9; O75604; Q9UKA1; A2IDD5; O94811; Q8NFW9; O95999; Q13137; Q8NCR6; Q16890; Q6UW56; P55327; Q27J81; P29728; Q8IWE4; Q92993; Q86WV6; P49454; Q8TB72; Q9UQF2; Q9NZU7; Q9Y2R2; O95996; P04733; Q13257; Q8WY41; P55145; Q6P3W7; Q9BZE9; Q9UJG1; Q66K74; P31946; O43399; P54259; Q14244; P80294; O00213; O43715; P46060; P63104; Q9BUZ4; Q9Y605; P27815; Q5T752; Q93083; Q9NRR5; Q9NWT6; P08133; Q6VY07; Q9UPY8; O96018; Q93045; P50613; Q9H4I8; O95486; Q99700; O95831; O75112; Q9Y6D5; P51959; P04731; P48059; Q8TD23; Q8IVG9; O95487; Q9Y6F6; O60260; Q9NZ72; P05783; Q8NI35; P04406; Q96AX1; P10909; O15234; Q96S55; P08107; Q96S99; Q86XN8; O75376; Q9BV73; Q9NQX7; Q12840; Q15633; O95295; Q9BZE4; Q14677; Q99704; Q9HAU5; Q8IX12; P06703; Q9H7C4; P20749; P02545; P16278; Q86YD1; P14672; Q86UE4; Q06609; P42704; Q9BWF2; Q7Z7C8; Q9Y2M5; Q9UL33; Q12962; Q9UN36; Q92832; Q5JSH3; Q96QA5; P59103; P53992; Q86UU5; Q86UL8; O75821; O14965; Q9UHB4; Q8N339; Q9BZF9; P02795; O75935; O43310; O60711; Q16613; Q9NRR5; Q15004; Q01105; Q9HCI5; Q12959; Q9H2K2; Q8NC51; Q6VVB1; Q6VVB1; Q9H267; Q9HBL8; Q12834; Q05084; Q08AE8; Q8IX03; Q969L2; P80297; P0DI81; O75190; Q70IA6; P14625; Q96G01; Q8NFU3; Q15436}
- 3644 Pathogen[ P03363] interacts with 181 human  
partners: {P80294; Q9UNN5; Q08AE8; P05783; O75190; P80297; P62879; Q12959; O43399; P13682; Q8TB72; Q8NFU3; P46060; O94972; P49454; Q9H201; Q9BWF2; Q14244; A2IDD5; Q86YD1; Q96CV9; Q99598; O95996; Q66K74; P02795; Q8NC51; P26447; Q9UHB4; O00221; O43310; P02545; O43747; P33176; Q9Y2R2; O94811; P54259; P0DI81; Q99704; O75112; P25205; O00213; Q9UQF2; P13640; O75604; Q8NFW9; Q6UW56; O95684; Q15056; Q92597; Q13625; P31946; O75376; Q9UN36; P42704; Q9UMX0; Q16667; Q9UL33; Q9BZE4; Q9Y605; Q15436; Q96F07; P04732; Q6VVB1; O95486; Q8N302; Q86UE4; Q8WY41; Q15633; Q9H2K2; Q7L576; P27815; O94875; Q93045; P39687; Q6VY07; P0DI82; Q9H7C4; P06396; Q12962; Q9BZF9; P63104; P20749; Q969L2; Q9NRR5; Q8NEF9; Q8NCR6; Q92832; P08133; Q9UPY8; Q9H4I8; Q9UN37; Q8IYML; Q5T752; Q96QA5; P08107; Q96HJ5; Q9Y2M5; Q86UU5; Q9H267; Q14677; Q96JY0; P35527; P27797; Q9HBL8; P04731; Q9UBB4; Q7Z7C8; O15056; Q15004; Q5SQN1; Q9HAU5; O75935; Q05084; P04406; Q9NZU7; Q9UHD8; Q13257; Q9UKA1; Q9BZE9; O43542; P54257; Q96S55; O95295; Q8IWX8; Q13023; Q13875; P07438; Q8NI35; Q8TD23; P51959; Q16890; Q8IX12; Q7Z6J0; Q9HCI5; P14672; Q86UL8; Q8IVG9; P53992; P04733; O95487; Q9Y6F6; Q06609; Q27J81; O75146; Q9Y224; Q12834; Q9Y664; Q9Y3A3; Q99700; O75821; Q8IX03; Q93083; Q9Y6D6; Q9BUZ4; Q01105; Q9UJG1; O43752; Q13137; O43715; O96018; Q99933; Q12982; P55327; Q9UII4; Q70IA6; Q92993; Q8WWX9; Q9BV73; Q96FS4; Q9H3U1; O94855; O14576; O60711; Q12840; Q5T447; Q96JE9; O75569; O43502; O95831; Q96SN8; O15234}
- 3645 [Cluster 332]GO:0030131+C cellular\_component [name] clathrin adaptor complex [def] "A membrane coat adaptor complex that links clathrin to a membrane." [GOC
- 3646 Pathogen[ Q2Q067] interacts with 18 human  
partners: {O94973; Q9Y6Q5; Q10567; O43747; O95782; Q8WXE9; Q9UJY4; Q9UJY5; P48444; O00189; P63010; Q96CW1; P53677; O75843; Q9Y2T2; Q9H0R1; Q9BXS5; Q9NZ52}
- 3647 Pathogen[ P0C214] interacts with 19 human  
partners: {Q96CW1; Q9UJY5; Q9Y2T2; O00189; P48444; Q9Y6Q2; Q9H0R1; O75843; P63010; Q10567; Q9UJY4; P53677; Q9NZ52; O43747; O94973; Q9Y6Q5; Q8WXE9; O95782; Q9BXS5}
- 3648 Pathogen[ P03346] interacts with 20 human  
partners: {Q9Y6B7; P63010; O43747; Q9BXS5; Q9H0R1; O95782; O00189; Q10567; O75843; P48444; Q9Y6Q2; Q8WXE9; Q96CW1; Q9UJY4; Q9UJY5; Q9Y6Q5; O94973; Q9NZ52; P53677; Q9Y2T2}
- 3649 Pathogen[ Q85601] interacts with 20 human  
partners: {O75843; P48444; Q9Y2T2; Q9UJY4; Q96CW1; Q9BXS5; Q8WXE9; O43747; Q10567; Q9UJY5; Q9Y6Q2; O94973; Q9Y6B7; P53677; P63010; Q9Y6Q5; Q9NZ52; Q9H0R1; O00189; O95782}
- 3650 Pathogen[ P14079] interacts with 20 human  
partners: {Q96CW1; Q9Y6Q5; Q9BXS5; Q9UJY4; Q9UJY5; Q10567; Q9Y2T2; Q9Y6B7; O00189; Q9NZ52; O75843; O95782; P63010; P53677; O94973; P48444; Q9H0R1; Q8WXE9; O43747; Q9Y6Q2}
- 3651 Pathogen[ P03383] interacts with 15 human  
partners: {Q96CW1; Q9UJY4; Q8WXE9; Q10567; O00189; P53677; O75843; Q9Y2T2; P63010; O43747; Q9UJY5; O95782; Q9BXS5; O94973; Q9NZ52}
- 3652 Pathogen[ P03410] interacts with 19 human  
partners: {Q9Y6Q5; O95782; Q96CW1; Q9BXS5; Q9NZ52; O43747; O75843; P48444; Q10567; Q9UJY5; Q9Y6B7; Q8WXE9; Q9Y2T2; Q9H0R1; P53677; P63010; O94973; Q9Y6Q2; Q9UJY4}
- 3653 Pathogen[ P14075] interacts with 14 human  
partners: {Q9UJY4; O94973; Q96CW1; Q9Y2T2; Q9NZ52; O00189; Q8WXE9; O95782; O43747; P63010; O75843; Q9BXS5; Q10567; Q9UJY5}
- 3654 Pathogen[ P0C206] interacts with 20 human

partners:{P63010;Q9Y6B7;O94973;Q9Y6Q5;Q9Y6Q2;O43747;Q10567;Q9H0R1;Q8WXE9;Q9UJY4;Q9Y2T2;P53677;Q9BXS5;Q9NZ52;Q9UJY5;Q96CW1;P48444;O95782;O75843;O00189}  
 3655 Pathogen[ P03363] interacts with 18 human  
 partners:{Q9Y2T2;Q8WXE9;O43747;Q9UJY4;P48444;P53677;Q9NZ52;Q9Y6B7;Q9BXS5;O94973;Q9H0R1;P63010;O00189;O95782;O75843;Q9UJY5;Q10567;Q96CW1}  
 3656 [Cluster 333]GO:0030126+C cellular\_component [name] COPI vesicle coat [def] "One of two multimeric complexes that forms a membrane vesicle coat. The mammalian COPI subunits are called alpha-, beta-, beta'-, gamma-, delta-, epsilon- and zeta-COP. Vesicles with COPI coats are found associated with Golgi membranes at steady state." [GOC  
 3657 Pathogen[ Q2Q067] interacts with 8 human  
 partners:{O14579;Q9P299;P48444;P61923;Q9UBF2;P53618;P35606;Q9Y678}  
 3658 Pathogen[ P0C214] interacts with 8 human  
 partners:{P61923;Q9P299;O14579;P53618;P35606;P48444;Q9UBF2;Q9Y678}  
 3659 Pathogen[ P03346] interacts with 10 human  
 partners:{Q9Y678;P53618;Q9P299;O14579;P48444;Q9UPM8;Q9UBF2;P61923;Q96KG9;P35606}  
 3660 Pathogen[ Q85601] interacts with 10 human  
 partners:{P48444;O14579;Q9P299;P61923;Q9UPM8;Q9UBF2;Q9Y678;P53618;Q96KG9;P35606}  
 3661 Pathogen[ P14079] interacts with 9 human  
 partners:{P61923;P35606;Q9UPM8;Q9Y678;Q9P299;Q9UBF2;P48444;O14579;Q96KG9}  
 3662 Pathogen[ P03383] interacts with 4 human partners:{O14579;P53618;Q9Y678;Q9UBF2}  
 3663 Pathogen[ P03410] interacts with 10 human  
 partners:{Q9UPM8;Q9P299;P48444;P35606;O14579;Q96KG9;Q9Y678;P53618;P61923;Q9UBF2}  
 3664 Pathogen[ P14075] interacts with 4 human partners:{Q9UBF2;P53618;Q9Y678;O14579}  
 3665 Pathogen[ P0C206] interacts with 10 human  
 partners:{O14579;Q9Y678;P53618;Q9P299;Q96KG9;Q9UPM8;P35606;P48444;Q9UBF2;P61923}  
 3666 Pathogen[ P03363] interacts with 10 human  
 partners:{P48444;Q9Y678;O14579;P53618;Q9P299;P61923;Q96KG9;P35606;Q9UBF2;Q9UPM8}  
 3667 [Cluster 334]GO:0031616+C cellular\_component [name] spindle pole centrosome [def] "A centrosome from which one pole of a mitotic or meiotic spindle is organized." [GOC  
 3668 Pathogen[ Q2Q067] interacts with 3 human partners:{Q15398;P06748;Q9NXR1}  
 3669 Pathogen[ P0C214] interacts with 3 human partners:{P06748;Q15398;Q9NXR1}  
 3670 Pathogen[ P03346] interacts with 5 human  
 partners:{P06748;Q9NXR1;Q15398;Q9NVR7;O14965}  
 3671 Pathogen[ Q85601] interacts with 4 human partners:{Q15398;O14965;P06748;Q9NXR1}  
 3672 Pathogen[ P14079] interacts with 5 human  
 partners:{Q9NVR7;P06748;Q9NXR1;O14965;Q15398}  
 3673 Pathogen[ P03383] interacts with 2 human partners:{P06748;O14965}  
 3674 Pathogen[ P03410] interacts with 5 human  
 partners:{Q9NXR1;Q15398;P06748;O14965;Q9NVR7}  
 3675 Pathogen[ P14075] interacts with 2 human partners:{O14965;P06748}  
 3676 Pathogen[ P0C206] interacts with 5 human  
 partners:{Q9NVR7;Q9NXR1;P06748;O14965;Q15398}  
 3677 Pathogen[ P03363] interacts with 4 human partners:{Q15398;P06748;Q9NVR7;Q9NXR1}  
 3678 [Cluster 335]GO:0044444+C cellular\_component [name] cytoplasmic part [def] "Any constituent part of the cytoplasm, all of the contents of a cell excluding the plasma membrane and nucleus, but including other subcellular structures." [GOC  
 3679 Pathogen[ Q2Q067] interacts with 7 human  
 partners:{Q5T752;P36956;O14862;Q9Y6K9;Q15327;Q8IZQ1;Q9Y2M5}  
 3680 Pathogen[ P0C214] interacts with 6 human  
 partners:{Q15327;Q5T752;Q9Y6K9;Q8IZQ1;Q9Y2M5;O14862}  
 3681 Pathogen[ P03346] interacts with 8 human  
 partners:{Q9Y6K9;P43378;P36956;Q8IZQ1;Q15327;Q5T752;Q9Y2M5;O14862}  
 3682 Pathogen[ Q85601] interacts with 6 human  
 partners:{Q9Y6K9;P36956;O14862;Q15327;Q8IZQ1;Q9Y2M5}  
 3683 Pathogen[ P14079] interacts with 8 human  
 partners:{Q96BJ3;Q5T752;Q8N661;Q9Y6K9;Q9Y2M5;Q15327;O14862;P36956}  
 3684 Pathogen[ P03383] interacts with 7 human  
 partners:{O14862;Q9Y6K9;Q5T752;Q8IZQ1;Q15327;Q9Y2M5;Q96BJ3}  
 3685 Pathogen[ P03410] interacts with 9 human  
 partners:{P36956;Q8N661;O14862;Q15327;Q96BJ3;Q9Y6K9;Q9Y2M5;Q5T752;Q8IZQ1}  
 3686 Pathogen[ P14075] interacts with 8 human  
 partners:{Q15327;Q8IZQ1;Q96BJ3;Q5T752;O14862;Q9Y6K9;Q9Y2M5;Q8N661}  
 3687 Pathogen[ P0C206] interacts with 9 human  
 partners:{Q9Y6K9;O14862;Q15327;Q8N661;P36956;Q8IZQ1;Q5T752;Q96BJ3;Q9Y2M5}  
 3688 Pathogen[ P03363] interacts with 7 human  
 partners:{P43378;Q9Y6K9;Q15327;Q5T752;Q9Y2M5;O14862;Q8IZQ1}  
 3689 [Cluster 336]GO:0031315+C cellular\_component [name] extrinsic to mitochondrial outer membrane [def] "Loosely bound to one surface of the mitochondrial outer membrane, but not integrated into the hydrophobic region." [GOC  
 3690 Pathogen[ Q2Q067] interacts with 1 human partners:{P56693}  
 3691 Pathogen[ P0C214] interacts with 2 human partners:{O15056;P56693}  
 3692 Pathogen[ P03346] interacts with 2 human partners:{P56693;O15056}  
 3693 Pathogen[ Q85601] interacts with 1 human partners:{P56693}  
 3694 Pathogen[ P14079] interacts with 1 human partners:{P56693}  
 3695 Pathogen[ P03383] interacts with 1 human partners:{P56693}  
 3696 Pathogen[ P03410] interacts with 1 human partners:{P56693}

3697 Pathogen[ P14075] interacts with 1 human partners:{P56693}

3698 Pathogen[ P0C206] interacts with 1 human partners:{P56693}

3699 Pathogen[ P03363] interacts with 2 human partners:{P56693;O15056}

3700 [Cluster 337]GO:0005802+C cellular\_component [name] trans-Golgi network [def] "The network of interconnected tubular and cisternal structures located at the side of the Golgi apparatus distal to the endoplasmic reticulum, from which secretory vesicles emerge. The trans-Golgi network is important in the later stages of protein secretion where it is thought to play a key role in the sorting and targeting of secreted proteins to the correct destination." [GOC

3701 Pathogen[ Q2Q067] interacts with 26 human partners:{Q9BSU1;Q9Y6D6;O15126;O43747;O43493;Q9C005;P53675;Q5VYK3;Q9UJY4;O43752;Q14457;Q8TCI5;P63010;Q9BUX1;Q6ICB4;Q9Y3M2;Q9UIL1;Q96CV9;Q8IWIJ2;Q13439;O75122;Q9H4A6;Q9NR09;P09497;Q99700;Q9NZ52}

3702 Pathogen[ P0C214] interacts with 29 human partners:{Q14457;Q9BSU1;Q6ICB4;Q8IWIJ2;P08294;Q9H4A6;Q5VYK3;Q8TCI5;O43493;Q99700;P63010;O75122;P53675;Q9UJY4;O15126;Q9Y3M2;Q9BUX1;Q9BZQ4;Q9C005;Q9UIL1;Q9NZ52;Q96CV9;O43752;O43747;Q96G01;Q13439;P09497;Q9Y6D6;Q9NR09}

3703 Pathogen[ P03346] interacts with 37 human partners:{Q13439;Q5JU85;Q96G01;Q9BSU1;O43752;Q15438;Q9Y6B7;Q9BUX1;Q9C005;P63010;Q9Y3M2;O43747;Q9UIL1;Q9H4A6;Q9Y6D5;Q14457;Q9Y6D6;Q99700;Q96CV9;P20340;Q7Z3U7;Q8N4B1;Q9UJY4;Q5VYK3;P53675;Q6DN90;O15126;O75122;Q9UPP2;P09497;Q9NR09;Q8TCI5;O43493;Q6ICB4;Q9NZ52;Q8IWIJ2;Q9NWB1}

3704 Pathogen[ Q85601] interacts with 28 human partners:{Q14457;Q9BSU1;Q5VYK3;Q8IWIJ2;O15126;O43493;Q96CV9;P53675;Q9BUX1;Q9UJY4;Q9Y3M2;Q13439;O43747;O43752;Q8TCI5;O75122;Q9C005;Q6ICB4;Q96G01;Q9H4A6;Q9Y6B7;P09497;Q9NR09;Q9Y6D6;P63010;Q9NZ52;Q9UIL1;Q99700}

3705 Pathogen[ P14079] interacts with 39 human partners:{Q16655;Q9UPP2;Q9C005;Q9UJY4;Q9NYV7;Q9NXE4;Q99700;Q9BSU1;Q9Y6D5;Q9Y6B7;Q9UIL1;Q13439;Q5VYK3;Q9NZ52;Q9NR09;Q9BZQ4;Q9Y6D6;Q8TCI5;Q8N4B1;A4D1B5;P09497;Q8IWIJ2;P63010;Q96G01;Q6PJW8;Q6ICB4;Q9Y3M2;O43747;O43752;P53675;O43493;Q9NWB1;Q6DN90;Q14457;Q9BUX1;O75122;Q9H4A6;Q15438;Q96CV9}

3706 Pathogen[ P03383] interacts with 24 human partners:{Q14457;Q9BSU1;Q9UJY4;Q8IWIJ2;O15126;Q9BUX1;Q13439;Q5VYK3;Q99700;Q9Y6D6;P53675;O43493;Q9UIL1;Q8TCI5;P63010;O43747;Q9C005;Q9Y3M2;Q9H4A6;Q9NR09;O43752;Q96CV9;P09497;Q9NZ52}

3707 Pathogen[ P03410] interacts with 41 human partners:{Q99700;Q9NWB1;A4D1B5;Q9NZ52;Q8N4B1;O43747;Q9Y3M2;Q16655;Q9BUX1;Q14457;Q5VYK3;Q9H4A6;Q9Y6B7;Q9NXE4;Q9C005;Q9NR09;Q9UIL1;Q9BSU1;Q96CV9;Q9UPP2;P09497;Q6PJW8;Q96G01;Q9Y6D6;Q9Y6D5;Q6ICB4;Q15438;P63010;Q8TCI5;O43752;Q92805;P53675;Q13439;O43493;Q7Z3U7;O15126;O75122;Q9BZQ4;Q8IWIJ2;Q9UJY4;Q5MNNZ9}

3708 Pathogen[ P14075] interacts with 25 human partners:{Q14457;Q9BSU1;P09497;Q9UJY4;O43752;P53675;Q9NZ52;O15126;Q9Y6D6;Q16655;O43493;Q9C005;Q8IWIJ2;Q8TCI5;O43747;Q9BUX1;Q9UIL1;P63010;Q13439;Q9NR09;Q96CV9;Q99700;Q9Y3M2;Q9H4A6;Q5VYK3}

3709 Pathogen[ P0C206] interacts with 34 human partners:{Q13439;Q8TCI5;P63010;Q16655;Q9C005;P53675;Q9Y6B7;Q9H4A6;Q9BSU1;Q9BUX1;O43747;Q9Y6D6;Q96CV9;O43752;O43493;Q9UIL1;Q14457;Q6ICB4;Q9UJY4;O75122;Q6PJW8;Q9NR09;Q99700;Q9NZ52;P09497;Q9Y6D5;A4D1B5;Q9BZQ4;Q5VYK3;Q8N4B1;Q9UPP2;O15126;Q8IWIJ2;Q96G01}

3710 Pathogen[ P03363] interacts with 32 human partners:{Q9BSU1;O43493;Q15438;Q96CV9;Q6ICB4;O43747;Q9UJY4;Q14457;Q9UPP2;Q13439;Q9NZ52;Q8TCI5;Q9BUX1;Q9Y3M2;Q9Y6B7;Q9H4A6;Q8N4B1;Q9C005;Q9NR09;P63010;Q9NWB1;Q5JU85;Q8IWIJ2;O15126;Q9UIL1;Q6DN90;Q99700;Q9Y6D6;P09497;O43752;P53675;Q5VYK3}

3711 [Cluster 338]GO:0005884+C cellular\_component [name] actin filament [def] "A filamentous structure formed of a two-stranded helical polymer of the protein actin and associated proteins. Actin filaments are a major component of the contractile apparatus of skeletal muscle and the microfilaments of the cytoskeleton of eukaryotic cells. The filaments, comprising polymerized globular actin molecules, appear as flexible structures with a diameter of 5-9 nm. They are organized into a variety of linear bundles, two-dimensional networks, and three dimensional gels. In the cytoskeleton they are most highly concentrated in the cortex of the cell just beneath the plasma membrane." [GOC

3712 Pathogen[ Q2Q067] interacts with 5 human partners:{Q8WX93;O43516;O95996;Q96IZ0;Q96EY1}

3713 Pathogen[ P0C214] interacts with 4 human partners:{P68133;Q96IZ0;O43516;Q96EY1}

3714 Pathogen[ P03346] interacts with 6 human partners:{Q8WX93;Q9P253;O43516;Q96IZ0;O95996;Q96EY1}

3715 Pathogen[ Q85601] interacts with 7 human partners:{Q96IZ0;Q8WX93;P68133;Q9P253;O43516;O95996;Q96EY1}

3716 Pathogen[ P14079] interacts with 13 human partners:{O43516;Q8WX93;Q9H269;P68032;P61158;O95996;Q96IZ0;Q9P253;O43903;Q05682;P68133;Q96EY1;Q6JBY9}

3717 Pathogen[ P03383] interacts with 3 human partners:{Q96IZ0;O43516;Q96EY1}

3718 Pathogen[ P03410] interacts with 11 human partners:{O43903;O43516;Q05682;Q9P253;O95996;Q96IZ0;P68133;Q6JBY9;Q9H269;Q8WX93;Q96EY1}

3719 Pathogen[ P14075] interacts with 4 human partners:{Q96IZ0;Q6JBY9;O43516;Q96EY1}

3720 Pathogen[ P0C206] interacts with 8 human



3721 partners:{Q6JBY9;Q96IZ0;O43516;Q8WX93;O95996;P68133;Q9P253;Q96EY1}  
 Pathogen[ P03363] interacts with 6 human

3722 [Cluster 339]GO:0048786+C cellular\_component [name] presynaptic active zone [def] "A specialized region of the plasma membrane and cell cortex of a presynaptic neuron encompasses a region of the plasma membrane where synaptic vesicles dock and fuse, synaptic vesicles, and a specialized cortical cytoskeletal matrix." [GOC

3723 Pathogen[ Q2Q067] interacts with 3 human partners:{Q15596;Q9UHK0;Q9UPA5}  
 3724 Pathogen[ P0C214] interacts with 2 human partners:{Q9UHK0;Q15596}  
 3725 Pathogen[ P03346] interacts with 3 human partners:{Q15596;Q9UHK0;Q9UPA5}  
 3726 Pathogen[ Q85601] interacts with 3 human partners:{Q15596;Q9UPA5;Q9UHK0}  
 3727 Pathogen[ P14079] interacts with 3 human partners:{Q15596;Q9UPA5;Q9UHK0}  
 3728 Pathogen[ P03383] interacts with 2 human partners:{Q15596;Q9UHK0}  
 3729 Pathogen[ P03410] interacts with 3 human partners:{Q9UHK0;Q9UPA5;Q15596}  
 3730 Pathogen[ P14075] interacts with 3 human partners:{Q9UHK0;Q9UPA5;Q15596}  
 3731 Pathogen[ P0C206] interacts with 3 human partners:{Q9UPA5;Q9UHK0;Q15596}  
 3732 Pathogen[ P03363] interacts with 3 human partners:{Q9UHK0;Q15596;Q9UPA5}

3733 [Cluster 340]GO:0008043+C cellular\_component [name] intracellular ferritin complex [def] "A ferritin complex located in the cell. Intracellular ferritin complexes contain 24 subunits, in a mixture of L (light) chains and H (heavy) chains." [GOC

3734 Pathogen[ Q2Q067] interacts with 1 human partners:{P02792}  
 3735 Pathogen[ P0C214] interacts with 2 human partners:{P02794;P02792}  
 3736 Pathogen[ P03346] interacts with 2 human partners:{P02792;P02794}  
 3737 Pathogen[ Q85601] interacts with 2 human partners:{P02792;P02794}  
 3738 Pathogen[ P14079] interacts with 1 human partners:{P02794}  
 3739 Pathogen[ P03383] interacts with 1 human partners:{P02794}  
 3740 Pathogen[ P03410] interacts with 2 human partners:{P02794;P02792}  
 3741 Pathogen[ P14075] interacts with 1 human partners:{P02794}  
 3742 Pathogen[ P0C206] interacts with 2 human partners:{P02794;P02792}  
 3743 Pathogen[ P03363] interacts with 1 human partners:{P02794}

3744 [Cluster 341]GO:0016021+C cellular\_component [name] integral to membrane [def] "Penetrating at least one phospholipid bilayer of a membrane. May also refer to the state of being buried in the bilayer with no exposure outside the bilayer. When used to describe a protein, indicates that all or part of the peptide sequence is embedded in the membrane." [GOC

3745 Pathogen[ Q2Q067] interacts with 75 human  
 partners:{Q7Z3C6;Q96TC7;Q8NG57;Q9UH99;P50402;O14786;Q96HA1;O15126;Q8N9R8;Q9H5J4;O43493;P42167;Q6RW13;Q8IYF1;Q86XL3;Q96JI7;Q9UJG1;Q96DC7;A8CG34;A8MVW5;O60238;O43752;O14662;P18850;P36956;P53801;Q5BJF2;Q8NF91;Q86UE4;P11166;Q15629;Q8N9A8;O75381;Q9BW60;Q96G23;O15162;O95159;O75396;O15127;Q9GZR5;Q9BVI4;Q15388;P26678;Q8TEM1;Q9GZY8;O76095;Q9HD36;Q68CJ9;Q9NR77;O00198;Q9BVC6;Q9P0J0;Q6P9B9;Q14739;Q8TAC9;O95476;A1L3X0;Q9BVT8;Q12983;Q9HB03;O15155;O14925;Q9P0U1;P40855;Q9BQE4;Q14241;Q9UBX3;Q96E16;A6NLF2;P14672;Q9P2W9;Q99717;Q96A26;Q15797;Q9NX95}

3746 Pathogen[ P0C214] interacts with 89 human  
 partners:{O00198;Q9UM00;Q9HA82;P18850;Q8N9A8;Q14739;Q9NXB9;O14786;Q99643;O14681;Q8N2H4;Q15388;Q6RW13;Q13505;Q75NE6;Q96JI7;Q8NG57;Q8TEM1;Q8TAC9;P40855;A8MVW5;Q9Y512;Q9GZR5;Q9BVI4;Q68CJ9;O43493;O75381;O15127;A6NLF2;Q96TC7;Q86UE4;A8CG34;Q9HB03;Q96DC7;P11166;Q9UH99;Q9UBX3;Q9NYP7;O95298;P11168;O14925;Q8NF91;Q8TDB4;P49257;A1L3X0;Q8N9R8;O15126;Q9P0J0;O15162;P50402;Q9NSK7;Q86XL3;Q9HD36;Q96G23;Q9BVT8;Q9NX95;Q9NR77;O95202;O43752;Q5JTH9;Q12983;O95476;Q9NV92;Q15629;Q9BVC6;O60238;Q3ZCQ8;O14521;O75396;Q9UJG1;Q99717;Q86WV6;Q9BW60;Q9P0U1;Q8IYF1;Q15797;Q9UJG1;Q9BQE4;Q9H902;P14672;P26678;Q9GZY8;Q9H3K2;O15155;Q7Z3C6;Q9P2W9;Q96E16;Q14241;Q96HA1}

3747 Pathogen[ P03346] interacts with 144 human  
 partners:{Q8TEM1;Q9BW60;O14925;Q6P9B9;Q9H0H0;Q3YBM2;O43752;Q96HJ5;O95159;Q14739;Q7Z3C6;Q3SY89;Q9P2W9;Q8NBJ4;Q9NS69;Q86UE4;Q96BA8;P36956;Q6P1Q0;Q96DC7;Q9UBX3;Q9H3K2;Q15797;Q70SY1;Q12772;O60238;P26678;Q96JI7;Q8IYW1;P49257;Q8WXH0;A8MVW5;P17152;Q15629;Q14789;Q9UH99;Q9P0U1;Q969X5;Q96A26;Q6UWF3;Q96B42;Q96E16;Q9NX95;Q12981;Q9BVT8;Q13190;Q96C03;Q93050;Q9P2Y4;O75396;Q96TC7;Q99717;Q9BQQ7;Q6ISU1;Q9NV92;Q12983;Q9UID3;Q53HI1;Q8TDB4;Q9BVI4;Q5BJF2;P18850;O75381;P48553;Q9Y3P8;Q9BTX1;Q9H902;Q6ZPB5;Q6UW56;O00299;Q9Y6F6;Q9BUN8;Q8TAC9;Q9H5J4;Q8N2H4;Q9Y512;Q16891;Q96G23;Q8N9A8;Q2LD37;O00198;Q15041;Q9NR77;Q9HB03;P11166;O15126;Q07820;O95833;Q6ZMZ3;P50402;O95476;Q9BVC6;Q96KC8;Q68CJ9;Q5JRA6;Q8N357;Q9HCU5;Q3ZCQ8;A6NDV4;A8CG34;A6NLF2;P56589;Q15388;Q8IYF1;Q8NG57;Q9HC24;P53801;Q8WUY8;P40855;Q5H9S7;Q9UI14;O43493;Q6RW13;Q96HA1;Q86XL3;Q15035;O76095;Q9P0J0;Q8TEY5;P49755;O95202;Q8NF91;P14672;O94901;P62952;Q96011;Q14C87;O15155;Q9GZY8;Q9HD36;O14662;P42167;Q96DX8;Q8N9R8;Q9UJG1;Q00765;Q15363;O14786;Q9BVK6;Q86Y82;Q14241;Q9UBP0;O15127;O15162}

3748 Pathogen[ Q85601] interacts with 86 human  
 partners:{Q8TEM1;O14925;Q68CJ9;Q86WV6;O15126;O43493;Q9P0J0;P11168;Q15388;Q8N2H4;A1L3X0;O75396;Q9HD36;Q8N9R8;Q15629;A8CG34;Q96DC7;Q8TAC9;Q9UBP0;Q9UBX3;Q15797;A8MVW5;O15155;Q14241;Q9UJG1;Q93050;Q8TDB4;Q12981;Q12772;Q9NSK7;O14786;Q9P2W9;O00198;Q7Z3C6;O43752;Q8NG57;Q9UH99;Q86XL3;Q9Y512;Q9BW60;P11166;Q9UM00;Q9H5J4;P36956;P49257;Q99717;Q15035;Q96G23;Q8N9A8;A6NLF2;O95159;Q3ZCQ8;Q9NR77;P18850;Q9H902;Q9HB03;Q6RW13;Q86UE4;Q96JI7;O95476;P50402;O76095;Q12983;O15127;Q96TC7;Q9GZR5;Q13505;O15162;Q96HA1;Q9NX95;O75381;Q9BVT8;Q8NF91;P14672;O94901;Q8IYF1;O60238;Q9GZY8;Q96E16;Q9BVI4;O14662;Q9UID3;Q9UJG1;P40855;Q14739;Q9BQE4}

3749 Pathogen[ P14079] interacts with 880 human  
 partners:{Q5VV42;Q96DC7;Q5SRI9;Q15629;Q8IV31;Q16655;O94923;F5H4A9;Q8N6M3;A8MZ97;Q8IYW

9;Q5TGZ0;Q9BQD7;Q3SXP7;O43292;Q8NEQ5;P0CG08;Q9Y5Y5;Q7Z4L0;Q8NBV4;Q5RI15;Q9H1C7;Q9UDX5;Q9BW72;Q9NUR3;O95070;O95159;Q8N1Y9;O75192;Q9PON5;Q3ZCQ8;Q9NRQ2;O43674;Q14CX5;O75324;Q96G79;A5PLL7;P13164;Q9H061;O43677;P0C6T2;Q96JI7;Q8N4H5;Q14789;Q8N3T6;Q3MIW9;Q14C87;Q6ZVE7;Q5T2E6;Q9Y5U4;Q96HA1;Q9H295;Q9NQG1;B1AL88;O95415;Q96HA9;Q6IEE8;O43759;Q969M3;C9JVW0;P49257;P57088;P0C874;Q9BTD3;O15162;O95169;Q8NAN2;A8MV81;Q14242;Q7Z3J2;Q9B7P3;P56134;C9JDP6;E2RYF6;Q16873;Q86VE9;Q8NW7;P17152;Q8B268;P60468;Q3ZAQ7;Q8IXB3;O14828;Q14241;P40855;Q0VDE8;Q9H799;P49069;Q6PP77;Q96N68;Q53RY4;Q9BU23;A6NKL6;O14668;O43505;Q7Z7N9;Q14761;Q5T2J5;O75072;Q9NYV7;Q9BQE4;Q5T292;Q9UID3;Q1HG44;Q9NPI0;Q5VSG8;Q4LDR2;A1L3X0;P61570;Q96A33;Q96JN2;O95139;Q6NUJ2;Q24JP5;Q8NCQ3;Q12887;Q9Y519;Q6UX01;Q8N112;Q8N755;Q9P055;Q8NFM7;Q96ER9;Q86WI0;Q6ZVK1;Q8NBQ7;Q6NVV3;Q5T5W8;Q96S52;Q2VYF4;P56589;O43736;Q1HG43;Q96DZ9;Q8N6L1;Q68CJ9;P20292;Q5T6L9;Q6UWF5;Q96GQ5;Q6UX68;Q9BV87;Q9BRL7;Q9NKE4;Q0D2K0;P09912;Q86VI4;P56750;Q9NX95;Q13505;P0C7N4;Q5VTT2;Q96RQ1;Q9NWF4;Q6GV28;A6NDV4;Q96DS6;Q8WWF3;Q9BVC6;Q86VY9;O15258;Q15155;Q96CP7;Q68DH5;Q9NSK7;Q5T4T1;Q8N1W0;Q13021;Q96GX1;P56378;Q86W33;Q9NPF8;P39656;Q8WVX3;Q92542;Q08722;Q13323;Q3B7S5;Q9NZ42;Q9HBM0;O76095;A6NM45;P84157;Q3MIR4;Q8N2C7;Q9P0U1;Q92545;Q7Z388;Q5GH72;Q9NZ45;A6NLE4;Q4G0N0;Q9P2Y4;P14672;Q9BX73;O00400;Q6ZPB5;Q9BVK6;A8CG34;Q15041;Q2T9K0;Q9UKH3;Q902F9;O95167;Q6RW13;Q96Q45;O94901;Q5SWH9;Q9NUB4;Q6ZT21;P57054;Q24JQ0;P00395;Q96GL9;Q8N9S7;Q6ISU1;Q8WWA1;A6NLO5;P00403;Q8NE00;Q9HC24;Q96I36;Q9BXX5;P49788;Q96K49;P43307;Q96DD7;Q8NG57;Q629K1;Q2PZ11;Q8TEM1;Q8IW70;Q16585;Q9NXL6;Q8WV48;Q8NE01;Q8N9A8;Q16891;Q9BXS4;Q5GH76;Q6UWF3;Q5JRV8;Q6NXN4;Q15070;Q8WV83;Q96N19;Q96DZ7;Q9BUB7;Q6P1Q0;Q9HA82;Q96KA5;Q587I9;Q9H9K5;Q9UI14;Q14D33;Q9P1Z9;Q6P9B9;Q8NE86;Q9BSA9;O60895;Q99442;Q9BT22;A1A5B4;Q96Q80;Q14739;A8MVW5;Q9BSK0;Q86Y39;Q9BRB3;Q9H0R3;A6NJY4;P04844;Q5VUD6;Q8WUH6;P81408;P57679;Q9NV29;Q6UWW9;Q9Y2B2;Q9GZP9;O71037;Q86UK5;Q15526;Q4G0I0;Q8IXX5;Q86XL3;O94777;B4DJY2;Q5R3K3;P57738;P0C7Q5;Q14118;Q7Z3C6;Q9HOC3;O15155;Q9NXX5;O75352;Q0P670;O94905;P11166;Q9NXX94;Q5BJF2;Q15797;Q6ZRR5;Q8N326;Q969N2;Q9HBV2;Q5T1Q4;Q96NT5;P62952;Q5SNT2;Q9HB03;O14925;Q5H9R4;Q9BRQ5;Q9NS69;P0C7Q6;A6NFC5;Q9NQ90;Q5QFB9;P61550;Q9H2X8;Q9NRC5;O14683;Q71RC9;Q5XG99;Q96JX3;O00501;B9EJG8;Q9H665;Q6ZSS7;P58511;P33947;Q9P2X0;A2RUG3;Q7Z434;O96005;Q8NEA5;Q9BVV7;O00461;Q9BVI4;A6PVL3;Q15363;Q15388;Q8N292;Q9NPR9;Q9H841;O75069;Q2LD37;Q9BVT8;Q9BUN8;Q9UHJ9;Q15012;Q9H813;Q96HH6;Q5JPE7;O75396;Q6ZSJ9;Q12772;Q5W0B7;A6NDP7;P24390;Q9WY22;Q96HH4;Q9HD87;Q9NQX5;B4DS77;Q9UL01;Q9H8M9;Q8NHS1;Q8N4L1;O75503;Q8N0W7;Q9NV12;Q03V5L5;Q8N6I4;Q5VYP0;Q8IVJ8;P27544;A6NDX4;Q9Y5F9;Q7Z5M5;Q9NXX5;Q9NXX5;Q8N205;Q8N337;Q9NY21;Q6PH9;A6NGA9;Q9Y6I8;Q9UBU6;Q92629;Q96D05;P48230;P54826;Q8N6F1;Q5U3C3;Q9P0I2;Q8NFR3;Q8N609;Q96GC9;Q8NCG7;Q8LUX1;Q2M385;Q7RTS6;Q96LL3;Q16586;Q8N614;O96011;Q8ND61;Q9Y287;Q6P2H8;Q8NBR0;A6NCI5;Q7L0L9;Q9NPN0;Q8N661;Q14DG7;P03928;Q8NBJ4;Q9H0A3;Q9Y2Y6;Q9BVK8;Q86UW1;P30408;A6NLF2;Q96384;A6NGB7;Q8N114;P42167;Q5RGS2;Q5JTV8;O00519;Q9NWD8;Q6ICL7;O75425;Q969L02;Q9GZU3;Q6N075;Q6UXU6;Q8TAC9;Q9BVL1;O00631;A6NML5;Q9UK28;Q96HJ5;A6NKF7;Q969E2;Q969X5;Q3SY89;Q5H9S7;Q9UN42;Q96EX1;Q8N201;A6NKG6;O75915;P49755;O43676;Q9NXX0;Q86XJ0;Q9H6D3;O75787;Q12912;Q86WV6;Q86T03;Q53FP2;O75949;O00264;Q6ZP80;Q9Y6X1;Q9BQ49;P69849;Q96G23;Q9NW97;Q9BZ97;B2RFX0;Q9BVW6;Q5GH73;P55808;A6NDL88;Q6ZQQ2;Q8NC54;Q9HD36;O75477;P0C7U9;Q9BYT9;Q96SN7;Q9HAB3;Q5HYL7;Q4VXA5;Q8NC56;Q4ADV7;Q96J86;A8MVW0;O95866;Q6ZNB6;Q9BVV8;Q5JRA6;Q7Z5S9;Q8N2U0;Q9HC47;Q9NS64;Q5VZ72;Q8IZA0;Q8NBT3;Q12981;Q9H720;A2A2V5;O00559;Q8N8Q9;Q9NZ43;Q8NBN3;P00156;Q9BTV4;Q8WXH0;Q8WZ55;Q5VVP1;Q96ES6;Q96RV3;Q00LT1;Q6ZMZ3;Q9UJG1;O95292;Q7Z412;Q8WVVE6;Q96B33;P09669;Q96145;Q13326;P46695;Q9P0J0;Q8IVP5;Q5GH77;O14653;Q6ZMB5;Q9BQA9;Q9Y512;Q9BQJ4;Q12767;Q96HV5;Q9Y5U8;Q96B96;Q9Y693;Q6ZW34;Q8WUY8;Q6P1S2;O14836;Q53H11;Q12983;P51811;Q9P0S9;Q75NE6;Q6P499;Q96N35;P60059;B2RUZ9;Q9Y284;Q969W0;Q15035;Q8NDB6;Q9NWR8;Q96A26;Q7Z5B4;P0DJ07;Q9BZL3;Q9H6X4;Q66K66;Q9NPL8;Q86UE4;Q92982;Q9H354;Q9NX77;O14662;O14569;Q8IX19;P61803;P10620;Q69YG0;B7ZAQ6;F2Z333;Q9H490;Q96LD1;Q8TDB4;Q8IYJ0;Q9H6L5;A6NH52;Q96GE9;Q8N2H4;Q96FB5;Q9H0H0;A6NFA0;Q8WW43;O42043;Q86V85;Q96BM0;Q8N6L7;Q8I WV1;Q6UX71;O60831;Q8IWD5;Q8NA58;Q5VZI3;Q99595;P18850;Q4ZIN3;Q96S66;Q96HP8;Q6ZUX7;Q9NUM4;Q9NQ60;Q6PJW8;Q8N682;Q96PS6;Q9BWK6;A6NKF9;Q9UKR5;Q5JTH9;Q902F8;Q8N9M5;Q8TAZ6;Q5BJD5;Q8WV19;Q2WJG8;Q8WVW7;Q93050;A6NFX4;Q9H3K2;A0PJX8;C9JH25;Q86WC4;A5D6W6;Q6P9G4;P60602;Q5T7R7;Q9Y5Z9;Q6PEX7;Q8NDZ6;Q8TCY5;P03923;Q8N8J7;P0DJ93;Q8N9R8;Q6GMR7;Q6ZU69;Q9UM00;O43752;A0PK05;A8MVS5;C9JI98;O95563;P24310;Q9NVM1;O15260;Q96AN5;O00198;Q92896;Q9UKB5;O95476;Q8N6S5;O43561;P03897;Q9NVV5;Q9HBU9;Q96BY9;Q8N511;Q9Y3P4;Q96AW1;Q8IYF1;P15954;B8ZZ34;Q9BSE2;Q96M19;Q96SA4;Q8IWB4;O75204;P15941;Q69YZ2;Q9Y384;Q9GZR5;Q15011;O14521;Q96DX8;Q9NRP0;P60606;Q6UE05;Q8NCS4;P61567;Q6UWH6;O75381;Q9H0V9;O15239;Q9GZY8;O43493;P0DI80;Q8NBD8;Q96AA3;Q9HC07;Q5SRD1;Q16625;Q9NS93;Q00765;Q9Y2R0;Q9H0V1;Q6UX65;P26678;Q6ZN68;Q9NV92;P61566;Q9Y6F6;Q9NWW5;P48553;Q8N4K4;Q8N8D7;Q96F05;Q969W9;Q5FWE3;Q8N1N2;A2RRL7;Q8WVI0;Q96A57;Q5J8M3;P61165;Q9H2L4;Q53S58;Q5VUB5;P50402;Q8NPF1;Q7L4S7;Q96SK2;Q8TBQ9;Q7Z3B0;C9JQI7;Q9NWS6;Q9GZY4;Q96KF7;Q8IYS2;Q96B42;Q9BWB0;Q9UH99;Q6UXV1;Q7RTP0;Q8TF08;Q9H7X2;P53801;Q96AQ2;Q0VDI3;Q8N6K0;Q96FX8;Q86UP9;Q6IEE7;Q86XT9;Q9P2W9;O60238;Q96HE8;Q6UXD1;Q6PEY1;Q5T9Z0;Q5T6X4;Q8TBF5;Q6ZS62;Q3KNT9;Q96TC7;Q8NFB8;Q69YW2;Q8TEF2;Q86TY3;Q8TBP5;Q8IY50;Q17RQ9;Q6ZUB0;Q5JRM2;Q6UWH4;Q9NXXF1;Q86VR2;Q8N7S6;Q96EA16;Q6PIZ9;Q9NXX6;Q9NR77;Q9BQQ7;Q8N808;P36956;A6NGB0;Q4VC39;Q9H902;Q8N4C9;Q8N912;Q96HA4;Q9NUN5;A6NLC4;Q6UWD8;Q13145;A2RUT3;O14523;P51571;Q8TDI8;Q9NQ40;Q8WZ71;O14681;Q96C03;O95473;Q9NV96;P03901;Q8N8D0;Q9H300;P03886;Q5SSG8;O43761;Q13113;A6NFR6;P0C7T8;Q8WY98;Q8WV15;Q3YBM2;Q9BZW4;Q6ZPD9;Q8N111;A6NCS1;Q86UB9;O95202;Q86UQ5;Q9H5J4;Q12893;Q8IXM6;Q6UWI2;P0C2S0;Q8IVY1;Q9UBM8;Q96PB1;Q9Y2B1;Q5VU36;Q9BXT1;Q8N7C4;Q96S06;Q15849;Q8N8F7;Q5J8X5;Q96A59;Q6AZZ7;Q3MUY2;Q8N766;Q9NX78;Q5JX71;Q9BRR3;Q8NFR9;Q3B7T3;Q1AE85;O14524;Q9H6F2;Q9Y3P8;A6NGC4;Q8N0U2;Q96NF6;Q63HM2;Q9NPA0;Q96LZ7;Q9NV64;Q6NW34;O95298;Q8IU68;A0PJW6;P40305;P46977;Q8N138;Q9Y2G1;Q96KR6;Q9UBK5;Q9UPX6;A2RU67;Q9BSE4;Q5VW36;Q86TL2;Q9GZM5;Q9GZY6;A0ZSE6;O43731;O15503;Q8N852;Q9BSR8;Q96FM1}

3750

Pathogen[{P03383}] interacts with 80 human partners: {Q68CJ9;Q6RW13;O15126;Q7Z3C6;Q96TC7;Q96JI7;Q86UE4;Q96HA9;Q9BSK0;O15162;Q8TDB4;A8CG34;Q3YBM2;Q9BW60;Q8TAC9;Q9GZR5;Q9BUN8;O14925;Q9H5J4;A8MVW5;Q9UH99;Q9NXX95;Q96A26;Q15797;Q8TEM1;O43493;Q12983;Q8N2H4;Q6ZPB5;P11168;Q75NE6;Q14C87;Q96E16;Q15629;Q9BVC6;

060238;Q9BQE4;Q9NVV5;A1L3X0;Q9BVI4;Q15388;Q99717;075381;Q6P9B9;Q9HB03;Q6UWF3;P53801;Q9BTX1;Q5BJF2;Q9NR77;P26678;Q9UJG1;Q9POU1;P50402;P17152;Q9BVT8;O15127;Q96HA1;Q8N9A8;P11169;O00198;O43752;Q8WUY8;P62952;Q9UM00;O14681;O60831;Q96C03;P18850;O76095;Q9P0J0;P14672;Q9GZY8;Q8N9R8;Q14241;Q96DC7;P40855;P22732;Q9Y3P8;Q13505}

3751 Pathogen { P03410 } interacts with 128 human partners: { A6NL05;Q8N4H5;Q9H354;075192;A1L3X0;P69849;Q8TDI8;Q96HP8;Q9HC07;O14786;Q86UP9;Q96LZ7;Q5JTH9;O95168;Q9NQ90;Q53S58;Q9HC24;Q9NXF1;O43674;O75949;Q8NBR0;O14569;A0PJX8;Q5SRD1;O95292;P84157;Q96TC7;A4FU28;Q9HC47;Q86VE9;P49069;Q4G0N0;O95563;Q96DS6;Q9UBK5;Q9H6X4;Q96HJ5;O71037;Q674R7;Q9Y512;Q0D2K0;Q15041;Q9NPR9;Q6IEE7;Q68CJ9;O00519;Q71RC9;P36956;Q8ND61;Q9HBM0;Q9BW72;A6NFA0;Q7L0L9;Q12767;Q9H0C3;P61165;Q86XT9;P22732;Q9NQG1;Q6N075;Q6P9G4;Q95W0B7;Q12893;Q9BUB7;Q9BZ97;Q96B33;P61550;Q3SY89;P61565;Q9Y2R0;Q8NCS4;A5D6W6;Q969W9;O14681;Q8IYW9;Q9UKH3;Q5GH73;Q8WWF3;O14828;Q8N8D7;Q9BVI4;Q8N2C7;A6PVL3;A6NH52;Q86WI0;Q9NV12;Q9GZR5;Q96DZ9;Q14739;Q5VZ72;Q14C87;Q5T7R7;Q96GC9;Q8NCG7;Q8TF08;Q8N511;Q6PEY1;Q9NZ43;Q9H0V9;Q8NBN3;Q5VSG8;Q9H1C7;Q8NHS1;C9JH25;Q5GH77;Q9NX77;Q96KF7;Q13190;Q99442;Q8TAZ6;Q69384;Q12983;Q3V5L5;Q8N6I4;Q15388;O75787;Q8N7P3;Q8N6L1;Q5VUB5;Q9H5Q3;Q8N1Y9;Q8NBT3;Q86TY3;Q9BRV3;Q8TAC9;Q96NF6;Q8WZ55;Q9H902;Q5SSG8;Q9GZY8;Q86T03;Q96F05;Q9BVC6;Q9NPA0;Q9NQ60;O60896;Q6UXV1;P60468;Q7Z5B4;Q96FM1;P49257;Q8TBQ9;Q96A57;P20963;Q3B7T3;Q6UE05;Q6PIZ9;O95473;Q6UX68;Q9NW97;P60059;Q96CP7;Q6UX71;P11166;O60895;Q1HG43;Q9BQA9;Q86TL2;Q96ER9;O96005;Q9NWW5;Q96N19;Q9UJG1;P2Z333;Q969X5;Q8N661;Q5GH72;Q96N68;Q86W33;Q9H5J4;P56378;Q17RQ9;Q96GE9;P61567;Q13445;P0C7Q5;Q8N1W0;B7ZAQ6;Q86UW1;O43736;Q902F9;Q9NS93;Q96B42;Q6ZMZ3;P15954;Q8N8J7;Q8N292;Q96SA4;Q8WY22;A8MVW0;Q6UXD1;Q9NVV5;P15941;Q9Y2B2;Q9BU23;O00198;Q8N4C9;Q8N138;Q567V2;Q6ISU1;Q8IVJ8;Q6UWW9;P0DI80;Q14242;P0C2S0;Q96A33;Q8IYT2;Q9UH99;Q5T4T1;P48553;Q16655;Q13505;Q2T9K0;Q7Z7N9;Q9NSK7;O00400;Q5VW36;Q96Q45;Q8WW34;O94905;Q5JXX7;P0C6T2;Q8WWA1;Q147U7;Q9Y228;Q8WV15;P05141;O43759;Q9HBL7;O43561;Q99717;Q96AW1;B9EJG8;Q9NRQ2;Q9BSE2;Q5TZJ5;Q6P1Q0;Q9Y5Y5;Q9Y3P4;Q9NBP0;Q9Y5U4;Q9H9K5;Q9H841;Q9BV81;Q96HH4;P11168;Q9NUB4;O00501;Q6IEE8;O75324;Q969E2;Q8IWW1;Q9BSK0;Q5JRM2;Q9HAB3;Q6NKN4;A6NC51;Q92545;O96011;P33947;Q9Y6F6;Q53RY4;Q9H813;Q13145;Q5SNT2;P59646;Q9NX00;Q9P2W9;Q9NQG6;Q9GZY4;Q9NS64;A2RRL7;Q9NPL8;P09912;Q8N2U0;O14662;Q93050;Q9HD36;Q8IYS2;P58511;P0C7N4;Q8N114;Q9Y5Z9;Q96N35;O94777;Q96Q80;Q68DH5;Q5T5W8;Q8N6F1;Q96SN7;Q8TB68;Q2PZI1;O95167;Q9Y287;Q9NS69;Q9HD87;Q5T292;P40855;Q8N0U2;A6NDV4;Q1HG44;Q9H6L5;Q96J86;Q96AN3;P27544;Q6PEX7;Q6ZS62;Q9Y2B1;Q9UBU5;Q3SXP7;Q9GZP9;A8MVW5;Q24JG5;O75381;Q9NQ40;Q9BTD3;A6NGB0;Q9P055;P57738;Q6UWF5;O15239;Q9UPX6;Q9H7X2;Q86VI4;Q8WZ71;Q86VY9;Q8NDZ6;Q7Z3B0;Q96HA1;Q1AE95;Q9HBV2;Q8IV31;Q9Y3E0;Q8N808;Q14DG7;Q8N2H4;Q13113;A6NDP7;Q8NG57;Q9NV92;Q9NVM1;Q96S52;Q9UBX3;Q5VUD6;C9JQI7;P56747;A6NGC4;O00461;Q16617;O43761;Q9BQE4;Q86UQ5;Q16585;Q8N609;Q9BV87;A6NNC1;O15258;Q7Z434;Q9NRY6;Q8N912;Q9BZL3;Q9NXXE4;Q8N6M3;Q5VYP0;Q9BVV8;Q2M385;Q96G23;O75069;Q6UWD8;Q8TCG1;Q8N112;P81408;O00559;Q6PP77;Q9NZ42;P0C7T8;O95249;Q8N6S5;Q8NEW7;A6NN79;Q9P1Z9;O75503;Q5HYL7;Q9BQJ4;Q9BSE4;Q9H2X8;Q5SRI9;Q8IX19;O14925;Q92896;Q99595;Q96GX1;O15162;Q8WV48;Q9H0V1;Q8N111;Q13336;Q5SWH9;Q53HI1;Q63HM2;Q96KT7;Q9UJH9;Q902F8;Q8N1N2;Q8N128;Q9NWD8;A6NKF7;Q4VXA5;Q9GZU3;Q8NE86;Q8N201;Q8N614;Q0P670;A0ZSE6;O95866;Q96A59;Q8N766;Q9Y3P8;Q9BTV4;Q5GH76;Q96LL3;Q9BVK6;Q8IYF1;Q9H0H0;Q8N205;Q9H6F2;B6SEH8;P43307;A6NJY4;Q9Y6X1;Q9NRRX5;P03886;Q9GZY6;Q6P2H8;Q5H9S7;Q9NUN5;Q6NUJ2;O14523;Q6UWI2;O75396;Q96BY9;P61570;O95298;Q9NWS6;Q96FX8;C9JDP6;P0DJ07;A0PK05;Q969M3;O75915;Q8NA58;O75438;Q9NPI0;A6NFC5;Q96E16;Q8NEQ5;Q8NBD8;Q3ZCQ8;Q96HH6;Q9BQ49;O00264;Q9NPE6;Q9Y2G1;P0CG08;Q7L4S7;Q9BUN8;Q3B7S5;C9JVV0;Q96RQ1;B2RXF0;Q96JN2;Q9HA82;Q9NV29;Q8N357;Q96GL9;Q8NC54;A6NCI5;P00156;Q9UK28;Q8IY50;Q12772;A6NLLX4;O15155;Q68G75;Q75NE6;Q96JX3;Q86WC4;Q5VU36;Q9BW60;A8MV81;Q96I36;Q8N9S7;P60602;Q14D33;A0PJW6;Q96M19;Q86UE4;Q9BSR8;Q5JX71;Q16873;Q66K66;A8MZ97;Q9NQX7;O14836;Q96A26;Q15629;Q08722;Q9P0N5;Q15797;P62952;Q96KR6;Q6PJT8;Q14789;Q6ZUB0;Q6UX65;Q8TEM1;O15127;Q15049;P26678;P49788;Q5U3C3;P03928;Q9NZG7;O75204;Q15363;Q9Y2Y6;Q5T2E6;P42167;Q9Y284;Q8N4K4;Q8IW70;Q5H9R4;Q9Y6I8;Q8N8D0;Q12912;Q9NWF4;Q8N9R8;Q9UN42;Q15849;O95415;Q9BRB3;Q86Y39;Q9BSA9;Q9BUN64;Q5RGS2;A8MVW5;Q5TGY1;Q8WWB7;Q8N6K0;Q2VYF4;Q6UWH6;Q6UWF3;Q7Z5M5;Q14118;Q9BYT9;B4DJY2;Q9BT22;P48230;P61566;Q96S06;A2A2V5;P0C7Q6;Q96HA9;Q96FB5;Q5T6L9;Q9Y5U8;Q8N3T6;Q6RW13;P04844;P50402;Q00765;Q69YW2;B2RUZ4;Q6GV28;Q16625;P09669;O95476;Q6ZQ2;Q9HCU5;P24390;O94901;P54826;Q96KA5;Q96643;Q8N8F7;Q96S66;Q6ZW34;Q2M3R5;O42043;P03897;O43677;O75477;Q0VDE8;Q8TB5;Q8WVX3;Q6NVV3;Q96DZ7;Q6ZU69;Q9BQ07;Q8TEF2;Q8IZA0;O95169;Q96JI7;Q6ZP80;Q2LD37;F5H4A9;Q9HB03;Q96PS6;Q9P0S9;B4DS77;Q96D96;A6NLE4;Q6ZSS7;Q6ZPB5;Q8NBJ4;P57088;Q969N2;Q9Y5U9;Q9NV96;Q96ES6;Q8IYJ0;Q969W0;Q8WW43;Q8N4L1;Q6ZNB6;Q00LT1;O14521;Q96HV5;P0C7U9;Q92542;Q69YZ2;Q6UWH4;Q5T9Z0;O43752;Q9H799;Q8N8Q9;Q9UBY8;P24310;O95159;A8CG34;A6NKL6;Q86WV6;Q9P0U1;Q8N7C4;Q587I9;Q9NYZ1;P60606;Q96G79;P46695;A6NML5;P00403;Q8IXB3;A6NLF2;Q15011;O14653;Q9NUR3;Q8IWB4;Q8NC56;Q3YBM2;A6NGB7;O43676;Q9BVK8;A6NM45;A8MVW5;Q8IVY1;O75352;Q7RTP0;Q6ZVK1;Q86VR2;Q6UXU6;O00631;P56589;Q6ZN68;Q96DX8;Q14CX5;O76095;Q9H3K2;Q92629;Q96AQ2;P17152;Q9NX94;Q15035;Q15070;A4D0T7;Q9BXS4;P03901;Q5FWE3;Q629K1;Q8NE00;Q8WVE6;Q96C03;Q9UL01;Q9P0J0;Q9P0I2;O43731;P56750;Q13326;Q9Y693;P03923;Q9NP84;Q6GMR7;P55808;Q8IU99;Q6ZVE7;O14524;Q16891;Q5JTV8;Q8TDB4;Q8NFQ8;O15260;Q12981;Q9BRR3;Q9NWR8;E2RYF6;O43493;O60831;Q6ZUX7;O75425;P39656;Q96SK2;Q5T6X4;Q9HOR3;Q86UB9;Q7Z3C6;P20292;Q8N9A8;Q96D05;O95202;A6NKF9;Q8N852;Q8IXU6;Q5VVP1;O15503;P51811;Q9UM00;Q7Z388;Q9NQX5;Q9H490;Q8IVP5;Q12887;Q4ADV7;P40305;O15126;A2RUT3;Q8WV19;O95562;Q5BJF2;Q8IXM6;Q96IX5;Q969L2;Q3KNT9;Q9BSN7;O14609;Q14761;B1AL88;Q9NR77;Q9BZW4;Q14241;P61803;Q8WUY8;Q9NZ45;C9JI98;P18850;Q8WXH0;Q8NFM7;Q8NFR9;Q9P2X0;Q5J8X5;Q9UI14;Q8IXX5;Q6TCL7;Q96B96;Q6AZY7;Q96B96;Q9BWX6;Q4LDR2;Q96HS1;Q8N6L7;Q8IWD5;Q86XL3;Q9UID3;Q8NHY0;Q2WGT8;A2RUG3;Q15012;Q6P9B9;Q9BTX1;O95471;Q9N2J8;O14683;Q9BRQ5;Q9BVW6;Q5QFB9;Q86V85;Q5JRA6;Q8N7S6;O60238;P56134;O95070;Q9NX95;Q9BVT8;Q96PB1;Q8NEA5;O43505;Q9NRQ5;Q96LD1;Q8NFR3;Q8NBNV4;Q9HBU9;Q13323;Q8WVI0;Q96DC7;Q9H665;Q86UK5;A6NGA9;Q6P499;Q13021;Q3MIW9;Q3MIR4;Q8N0W7;Q9BRL7;Q96BM0;Q6NW34;Q16635;Q8NF91;Q8NCQ3;P53801;Q96HE8}

3752 Pathogen { P14075 } interacts with 148 human partners: { O43674;P11169;A6NFC5;Q92545;Q9P0U1;Q9BQE4;O14925;Q13505;P53801;Q96HJ5;Q9H5J

- 4;Q12983;O94777;P62952;Q8ND61;Q9BVC6;Q9BW60;Q8NBJ4;Q96FX8;Q5SRI9;O14681;Q9NRQ5;Q8I WV1;Q8N9A8;Q9BVT8;Q8N2H4;Q96A26;Q96J86;O43677;Q86UE4;O76095;Q8N9R8;O43752;Q96HP8;O15127;Q2LD37;P40855;O15162;A8CG34;Q96C03;Q14C87;Q15388;A8MVW5;Q14241;Q9Y6F6;Q9NS64;Q8N6L1;Q96TC7;Q15070;P22732;Q9HB03;Q75NE6;O95159;Q99717;Q86VI4;Q15629;Q9GZY8;O15126;Q86TL2;Q9UJG1;P50402;Q96JI7;Q96AQ2;O75381;O95298;O00461;Q9BTX1;A1L3X0;P17152;Q96HA1;O60831;Q16655;O43493;P56378;Q96D05;P60602;O43505;Q9Y512;Q3YBM2;Q9NVML;B2RUZ4;P26678;Q9UJH9;Q8NC54;Q8TEM1;O14523;O60238;Q96HA9;Q9BTD3;Q9BUN8;Q8IXM6;Q9NR77;Q8WUY8;Q9Y3P8;Q1HG44;Q96DC7;Q9NV29;Q9UK28;Q6UWF3;Q8WVI0;Q9GZR5;Q68CJ9;Q8TDB4;Q14789;P0DJ07;Q0VDE8;Q6ZPB5;Q5H9S7;Q9NV92;P58511;Q8N6M3;Q9BVI4;Q9UH99;Q8TAC9;O75192;Q9HBM0;P11168;Q15011;P40305;Q8NE00;Q969W0;Q6P9B9;Q53HI1;Q9NVV5;Q6RW13;Q9Y287;Q9BUB7;Q9NX95;P14672;P42167;Q6UWI2;Q9P0J0;P54826;Q8WY22;Q9NS69;O75477;Q96E16;Q8N661;P81408;Q7Z3C6;O00198;O43676;Q9UM00;Q9BSK0;P55808;P18850;Q5BJF2;Q9Y5U8}
- 3753 Pathogen[ P0C206] interacts with 295 human partners: {Q5BJF2;Q7Z3C6;Q96TC7;Q96A33;Q6UXU6;O14662;Q2LD37;Q8IVJ8;O75477;Q14789;Q8NG57;Q5SRI9;Q9BVK6;Q16655;O15127;Q69384;Q96D05;P50402;Q68DH5;Q587I9;Q9BVI4;Q9UM00;Q96G23;O75192;Q96DC7;Q6IEE7;O14828;P40305;Q14739;Q8IXM6;Q9NQ90;Q8NC54;O75396;Q9NWS6;Q96HA9;Q9UBP0;Q9NZ42;P57088;Q9Y5U8;Q9Y287;O14524;Q9NVV5;P39656;Q9HD36;Q9UJH9;O14653;Q8N6L7;P18850;O43759;Q96HJ5;Q96FX8;Q7Z5B4;Q5JTH9;Q86XL3;O14521;Q9NV92;O75381;O15258;P56589;O95202;Q9HB03;Q9UH99;O43752;O75787;O43493;Q0VDE8;Q96DX8;Q96JI7;A5D6W6;Q8NE86;Q9H6L5;Q8N2C7;Q8I WV1;Q99717;Q6P1Q0;Q8IYF1;Q9NS64;Q96HA1;O95070;Q75NE6;Q8N661;B2RUZ4;Q96JN2;P49755;Q6UW56;Q5JRA6;Q9BUB7;P48553;Q5H9R4;Q9Y5Z9;O60831;A6NLF2;O94777;Q15035;Q9UBX3;P36956;Q13021;Q86WV6;Q16891;Q92542;Q9H0H0;Q6ZNB6;Q96A26;Q8NFR3;Q969E2;P11166;Q1HG44;O95476;Q14241;O94901;Q8N912;Q9P2Y4;Q9Y512;Q9UI14;Q9UJG1;P53801;Q8NBJ4;Q5SRD1;Q9H5J4;Q9NR77;O14786;O95298;A6NDV4;O75069;Q8NC56;Q9UL01;Q9NX95;Q9H3K2;Q96S66;Q8N2H4;O95292;O60238;Q96SN7;P11168;Q3ZCQ8;Q6ZMZ3;O14681;Q12983;Q8TEM1;A8MVW5;Q1HG43;Q8N6M3;Q9UK28;Q8WWB7;Q8NF91;Q6PJW8;Q9Y3P8;Q9BQE4;A2RUG3;Q15041;Q15070;Q6UWF3;O15155;Q9NVML;Q9HA82;A8MZ97;Q969M3;Q9NS69;Q6ZVE7;Q53HI1;Q3YBM2;O00264;Q9BVC6;Q969W0;Q9UKH3;Q8N357;P40855;P33947;Q15011;O00461;P24390;P49257;Q9Y6F6;A6NFC5;Q9BTX1;Q9BQA9;O00198;P61570;Q8WUY8;O94905;Q9BUN8;Q9GZP9;Q8N9R8;Q3SY89;Q9P0U1;Q9Y2B2;Q96HP8;O14925;Q6UWH4;P17152;Q9H665;Q13505;Q12893;Q8N205;Q15388;O43736;P61565;A6NH52;Q9NQX7;Q96B42;Q6ISU1;Q96E16;Q9P0J0;Q9NPR9;Q5VVP1;O43731;O96011;P0CG08;Q12981;O15162;Q15797;Q9UID3;O15260;A6NNCL1;P20292;Q8WXH0;Q9HC24;Q969X5;Q5H9S7;Q8NFBQ8;P14672;Q9BVT8;Q86UE4;Q15629;Q9GZR5;Q8NA58;Q00765;Q9BXX5;Q15849;Q6ZPB5;Q5T6X4;Q96RQ1;P26678;Q9UN42;Q6UWI2;Q9GZY8;Q9BQQ7;A8CG34;Q6P9B9;Q15363;Q12912;P42167;Q9Y5U9;Q9BSK0;Q9NYZ1;Q8WY22;Q6PEY1;Q8TAC9;P54826;Q96ER9;Q9NPL8;Q8ND61;O14609;O15126;Q9Y6I8;Q9HBM0;Q86T03;O95159;Q14DG7;P62952;Q8N4H5;Q14C87;O43674;P60602;Q12772;Q9H902;Q9BTV4;Q86WC4;Q9P2W9;Q96S06;Q96C03;Q9BQJ4;Q8NBV4;Q0P670;Q9GZU3;Q969L2;Q8N201;O75425;Q93050;Q9NSK7;Q902F8;O76095;O43505;Q86UB9;Q68CJ9;A1L3X0;Q96LZ7;Q9Y284;B7ZAQ6;Q9BRL7;Q9BW60;Q8TDB4;Q8TAZ6;Q8N9A8}
- 3754 Pathogen[ P03363] interacts with 99 human partners: {O75069;Q9Y3P8;Q14789;P62952;Q9UID3;O43493;Q9BQQ7;O43736;Q8NF91;Q9H5J4;Q9H902;Q6ZMZ3;P53801;Q0VDE8;Q9BVT8;Q8NG57;Q8N9A8;O14786;Q6UWF3;Q8IYF1;Q2LD37;P42167;Q96DX8;Q6UW56;Q15388;O14925;P18850;Q14C87;A8CG34;Q96DC7;Q15041;Q96JI7;Q15797;Q3ZCQ8;Q86UE4;O95476;Q3SY89;Q9NR77;O00198;Q96TC7;Q3YBM2;Q9P2W9;Q9NVV5;Q9HD36;Q969L2;A8MVW5;Q96HJ5;Q14241;Q9P0J0;Q15035;Q7Z3C6;Q9P0U1;Q96E16;O75381;Q96C03;Q68CJ9;Q96HA1;Q8TCG1;Q6P9B9;Q9Y512;P50402;O76095;Q6ZPB5;P40855;Q9H0H0;Q7Z7M0;Q9BTX1;Q8N9R8;O15126;O14662;Q6ISU1;Q07820;Q5BJF2;P14672;O94901;Q96SN7;Q96G23;Q9H3K2;Q9Y6F6;O15127;Q14739;Q9NS69;P48553;Q9UJG1;O43752;Q00765;A6NLF2;Q99717;O60238;Q86XL3;Q9BVI4;O95833;P11166;Q96B42;Q9P2Y4;Q9BSK0;Q9UH99;Q9GZY8;Q9NX95}
- 3755 [Cluster 342]GO:0070652+C cellular\_component [name] HAUS complex [def] "A protein complex that localizes to interphase centrosomes and to mitotic spindle tubules and regulates mitotic spindle assembly and centrosome integrity\_ in human, the complex consists of eight subunits, some of which are homologous to subunits of the Drosophila Augmin complex." [PMID
- 3756 Pathogen[ Q2Q067] interacts with 8 human partners: {Q7Z4H7;O94927;Q9NVX0;Q99871;Q9BT25;Q9H6D7;Q96CS2;Q68CZ6}
- 3757 Pathogen[ P0C214] interacts with 8 human partners: {O94927;Q7Z4H7;Q96CS2;Q9BT25;Q99871;Q9H6D7;Q68CZ6;Q9NVX0}
- 3758 Pathogen[ P03346] interacts with 8 human partners: {Q9BT25;Q9H6D7;Q99871;Q7Z4H7;Q9NVX0;Q68CZ6;Q96CS2;O94927}
- 3759 Pathogen[ Q85601] interacts with 8 human partners: {Q9H6D7;Q9BT25;Q99871;Q7Z4H7;Q9NVX0;O94927;Q96CS2;Q68CZ6}
- 3760 Pathogen[ P14079] interacts with 8 human partners: {Q99871;Q9NVX0;Q9H6D7;Q7Z4H7;Q9BT25;Q68CZ6;O94927;Q96CS2}
- 3761 Pathogen[ P03383] interacts with 8 human partners: {Q9NVX0;Q7Z4H7;Q99871;Q96CS2;O94927;Q68CZ6;Q9BT25;Q9H6D7}
- 3762 Pathogen[ P03410] interacts with 8 human partners: {Q9H6D7;Q68CZ6;Q96CS2;Q9NVX0;O94927;Q99871;Q9BT25;Q7Z4H7}
- 3763 Pathogen[ P14075] interacts with 8 human partners: {Q99871;Q7Z4H7;Q68CZ6;Q9BT25;Q96CS2;Q9NVX0;O94927;Q9H6D7}
- 3764 Pathogen[ P0C206] interacts with 8 human partners: {Q9BT25;Q9NVX0;Q96CS2;Q7Z4H7;O94927;Q9H6D7;Q99871;Q68CZ6}
- 3765 Pathogen[ P03363] interacts with 8 human partners: {Q9H6D7;Q9BT25;Q68CZ6;O94927;Q9NVX0;Q96CS2;Q99871;Q7Z4H7}
- 3766 [Cluster 343]GO:0005742+C cellular\_component [name] mitochondrial outer membrane translocase complex [def] "A large complex of the mitochondrial outer membrane that mediates transport of proteins into all mitochondrial compartments." [PMID

3767 Pathogen[ Q2Q067] interacts with 2 human partners: {Q15388;Q9P0U1}

3768 Pathogen[ P0C214] interacts with 2 human partners: {Q15388;Q9P0U1}

3769 Pathogen[ P03346] interacts with 3 human partners: {Q9NS69;Q9P0U1;Q15388}

3770 Pathogen[ Q85601] interacts with 1 human partners: {Q15388}

3771 Pathogen[ P14079] interacts with 4 human partners: {Q8N4H5;Q9P0U1;Q9NS69;Q15388}

3772 Pathogen[ P03383] interacts with 2 human partners: {Q15388;Q9P0U1}

3773 Pathogen[ P03410] interacts with 4 human partners: {Q8N4H5;Q15388;Q9NS69;Q9P0U1}

3774 Pathogen[ P14075] interacts with 3 human partners: {Q9P0U1;Q15388;Q9NS69}

3775 Pathogen[ P0C206] interacts with 4 human partners: {Q9NS69;Q9P0U1;Q15388;Q8N4H5}

3776 Pathogen[ P03363] interacts with 3 human partners: {Q15388;Q9P0U1;Q9NS69}

3777 [Cluster 344]GO:0000777+C cellular\_component [name] condensed chromosome kinetochore [def] "A multisubunit complex that is located at the centromeric region of a condensed chromosome and provides an attachment point for the spindle microtubules." [GOC

3778 Pathogen[ Q2Q067] interacts with 62 human partners: {P49454;Q96EE3;Q96H22;Q71F23;Q12888;Q13352;Q7Z460;Q96R06;Q6P1K2;Q9HBM1;O75935;Q5EE01;Q8WYP5;Q9H3R5;Q5FBB7;P49450;Q13257;Q8N2Z9;A8MT69;Q03188;Q9NXR1;O43684;Q8NBT2;Q8NFH4;P12270;Q9NQS7;Q9Y448;O43264;Q7Z7K6;Q9BW27;Q96BT3;Q9BZD4;Q9NSP4;O75177;P36873;P50748;Q96JM3;Q96BK5;Q9H410;Q8NFH3;O75122;Q8IX90;Q8NG31;Q9Y6D9;P57740;Q96BD8;Q9H900;Q96IY1;Q96IK1;Q8WUM0;Q14683;Q9BU64;O95229;O14777;Q562F6;Q8NCD3;P51808;Q9H081;Q8WVK7;O15392;Q96EA4;O14576}

3779 Pathogen[ P0C214] interacts with 60 human partners: {Q9H081;O43684;Q96BK5;Q13257;O75935;Q96BT3;O43264;Q96EA4;Q96R06;P57740;Q5EE01;Q8WYP5;P50748;O95229;Q96EE3;Q8NBT2;P51808;Q6P1K2;P46060;Q562F6;P49450;Q8N2Z9;Q03188;Q8NCD3;O75122;Q9BW27;Q96BD8;Q9HBM1;Q13352;Q8NFH3;Q7Z7K6;Q9H410;O15392;Q9H3R5;Q8IX90;Q14683;Q8NG31;O14576;Q7Z460;P36873;Q9H900;Q5FBB7;Q96JM3;Q9NQS7;Q12888;Q9NSP4;P12270;Q71F23;Q8NFH4;Q9NXR1;Q96IY1;P49454;Q9Y448;O75177;Q9BZD4;Q8WUM0;Q9Y6D9;Q9BU64;Q8WVK7;O14777}

3780 Pathogen[ P03346] interacts with 66 human partners: {Q12888;Q9Y6D9;Q8N2Z9;Q5FBB7;Q8NFH4;Q8WUM0;O95229;P12270;O14576;O15392;O43684;Q96EE3;Q9BS16;A8MT69;O75935;Q96R06;P51808;P57740;Q5EE01;Q8WYP5;Q14141;O43264;Q9NXR1;Q96IY1;Q96IK1;Q8NFH3;Q8NCD3;O14777;Q9BW27;Q96EA4;P46060;Q14683;Q15019;P36873;Q96BK5;Q9NQS7;Q562F6;Q7Z7K6;Q9H081;Q8NBT2;Q9HBM1;Q96JM3;Q9H410;O75122;Q9BU64;Q03188;Q8IX90;P50748;P49450;Q9Y448;Q7Z460;Q8NG31;Q9H3R5;Q9NSP4;Q96H22;Q6P1K2;Q96BD8;Q9BZD4;Q96BT3;Q71F23;Q13352;Q8WVK7;Q13257;P49454;Q9H900;O75177}

3781 Pathogen[ Q85601] interacts with 63 human partners: {Q8NBT2;P49454;Q96JM3;O95229;Q7Z7K6;Q8NFH4;Q8NFH3;Q03188;P51808;Q9H900;P46060;Q96EE3;Q9NQS7;Q9H081;Q96IK1;Q96BT3;O75935;P57740;Q5EE01;Q8WYP5;Q8WUM0;Q71F23;O43264;Q8NG31;O15392;Q9H3R5;Q96EA4;P12270;Q96R06;Q8NCD3;Q12888;Q13257;O75122;Q9BW27;Q13352;Q9Y448;Q562F6;Q9BU64;Q96BK5;Q14683;Q9BZD4;P36873;Q96BD8;Q9Y6D9;A8MT69;O14576;P49450;Q8N2Z9;Q9H410;Q8IX90;P50748;Q8WVK7;Q96IY1;Q7Z460;Q9NXR1;Q6P1K2;Q9GZM8;O14777;O43684;Q9HBM1;Q5FBB7;P51955;O75177}

3782 Pathogen[ P14079] interacts with 66 human partners: {Q96IY1;Q03188;Q9BW27;Q5EE01;Q7Z460;P51808;Q8IX90;Q96BT3;Q9HBM1;Q96R06;P36873;P57740;O95229;Q8NBT2;Q9BZD4;O15392;P46060;Q8NG31;Q9H900;Q9Y448;Q5FBB7;Q9H410;Q96IK1;Q9NSP4;Q99661;Q71F23;Q8WUM0;P51955;P12270;Q8WYP5;Q8N2Z9;Q13257;Q96EA4;Q562F6;Q8WVK7;P49450;Q96JM3;Q96H22;Q8NFH3;Q96EE3;O43264;A8MT69;Q9H3R5;Q9GZM8;Q8NFH4;Q9NQS7;Q8NCD3;Q96BK5;P49454;Q9BU64;O14576;Q9NXR1;P50748;Q12888;Q96BD8;O75122;Q14683;Q13352;O75935;O14777;O75177;O43684;Q7Z7K6;Q6P1K2;Q9H081;Q8WVJ2}

3783 Pathogen[ P03383] interacts with 54 human partners: {Q14683;Q96EE3;Q13257;Q8WUM0;Q9NQS7;Q03188;P49454;Q12888;Q8N2Z9;Q8NFH4;Q7Z460;Q96BD8;Q8NBT2;P51808;Q9H900;O43264;P12270;Q5FBB7;P57740;Q5EE01;Q8WYP5;Q96BK5;Q96H22;O75177;Q7Z7K6;Q13352;Q96EA4;Q96BT3;Q96R06;P36873;Q71F23;O95229;Q9BW27;Q9BU64;O43684;Q9BZD4;Q8WVK7;A8MT69;Q562F6;O75935;Q9HBM1;Q9H410;Q9H081;Q8IX90;Q96IY1;Q8NCD3;Q8NG31;Q6P1K2;Q9Y448;O14777;Q9H3R5;Q8NFH3;Q9Y6D9;P50748}

3784 Pathogen[ P03410] interacts with 65 human partners: {Q03188;Q9Y6G9;Q8IX90;Q7Z460;O15392;Q9BW27;Q8WVJ2;P51808;Q9NSP4;Q9H3R5;O43684;Q96H22;Q96JM3;Q9NXR1;Q9H410;Q8NG31;Q9GZM8;Q8NFH4;Q96BT3;P50748;Q562F6;Q96R06;Q8NCD3;O75177;Q5EE01;O43264;Q7Z7K6;P49454;Q96EA4;Q96IY1;O14576;Q9Y448;P12270;Q6P1K2;Q71F23;Q14683;Q9BZD4;Q8WVK7;P36873;Q9HBM1;Q96EE3;O75935;Q12888;Q8NBT2;P49450;Q5FBB7;Q8WUM0;A8MT69;Q9H900;O95229;Q9H081;Q96BK5;Q96BD8;P57740;Q8WYP5;O75122;Q8NFH3;Q13352;P46060;O14777;Q9BU64;Q8N2Z9;Q13257;Q9NQS7;Q96IK1}

3785 Pathogen[ P14075] interacts with 55 human partners: {A8MT69;Q14683;Q9Y6D9;Q9H081;Q562F6;Q9NQS7;Q96R06;P51808;Q8WVK7;P57740;Q5EE01;Q8WYP5;Q7Z460;Q96IY1;Q13257;Q96H22;O43684;Q96BD8;P12270;O14777;P36873;O95229;Q8N2Z9;Q96BK5;Q9H3R5;Q9BW27;Q9BU64;Q96EA4;O75935;Q96EE3;Q96BT3;Q5FBB7;Q9H410;Q8IX90;Q7Z7K6;Q8NFH3;Q9H900;Q8NCD3;P50748;Q12888;Q9HBM1;Q6P1K2;Q13352;Q8WUM0;O43264;Q03188;Q8NG31;P49454;Q96IK1;Q71F23;Q8NFH4;Q9Y448;Q8NBT2;Q9BZD4;O75177}

3786 Pathogen[ P0C206] interacts with 68 human partners: {Q96EE3;Q9HBM1;Q8WYP5;Q9NSP4;O14576;Q9H900;Q15019;Q9Y6D9;P51955;Q9H081;O14777;O75177;Q9Y448;Q9BZD4;Q9H410;P57740;P49454;Q96BK5;Q13257;Q9BU64;Q14141;Q9GZM8;Q8IX90;O75122;Q8WUM0;Q5EE01;P46060;Q6P1K2;Q8NBT2;Q96BD8;Q9H3R5;Q12888;P49450;Q8NCD3;P51808;Q14683;Q96IY1;Q9Y6G9;Q7Z7K6;Q96BT3;Q13352;Q5FBB7;Q96JM3;O15392;Q96H22;Q8NFH4;Q562F6;Q9NXR1;Q96EA4;Q8N2Z9;Q16181;O43684;Q7Z460;Q9NQS7;O75935;Q8NFH3;P36873;P50748;Q96IK1;Q71F23;O43264;Q8NG31;Q8WVK7;Q9BW27;A8MT69;Q03188;P12270;O95229}

3787 Pathogen[ P03363] interacts with 59 human partners: {Q96EA4;Q9BZD4;P46060;Q96IK1;P49454;Q96IY1;Q6P1K2;Q7Z7K6;Q9Y6D9;P12270;Q9H08

1;P36873;Q8NFH4;O95229;Q96BD8;Q96BK5;Q8WYP5;Q8NFH3;O43264;Q8NBT2;Q8N2Z9;Q8WVK7;Q9H410  
;P50748;Q8IX90;Q5FBB7;Q9H900;Q5EE01;Q8WUM0;Q96JM3;Q96R06;O43684;P49450;Q9NQS7;Q9NSP4;  
O75935;Q9HBM1;Q7Z460;Q03188;Q8NG31;Q13257;Q8NCD3;Q71F23;P51808;P57740;Q96BT3;Q9H3R5;O  
14777;Q9Y448;Q562F6;Q9NXX1;Q14141;Q13352;Q14683;O14576;Q9BW27;Q12888;O75177;A8MT69}

3788 [Cluster 345]GO:0072559+C cellular\_component [name] NLRP3 inflammasome complex [def]  
"A protein complex that consists of three components, NLRP3 (NALP3), PYCARD and  
caspase-1. It is activated upon exposure to whole pathogens, as well as a number of  
structurally diverse pathogen- and danger-associated molecular patterns (PAMPs and DAMPs)  
and environmental irritants. Whole pathogens demonstrated to activate the NLRP3  
inflammasome complex include the fungi *Candida albicans* and *Saccharomyces cerevisiae*,  
bacteria that produce pore-forming toxins, including *Listeria monocytogenes* and  
*Staphylococcus aureus*, and viruses such as Sendai virus, adenovirus, and influenza  
virus." [GOC

3789 Pathogen[ Q2Q067] interacts with 1 human partners:{Q9Y2G2}  
3790 Pathogen[ P0C214] interacts with 1 human partners:{Q9Y2G2}  
3791 Pathogen[ P03346] interacts with 1 human partners:{Q9Y2G2}  
3792 Pathogen[ Q85601] interacts with 1 human partners:{Q9Y2G2}  
3793 Pathogen[ P14079] interacts with 1 human partners:{Q9Y2G2}  
3794 Pathogen[ P03383] interacts with 1 human partners:{Q9Y2G2}  
3795 Pathogen[ P03410] interacts with 1 human partners:{Q9Y2G2}  
3796 Pathogen[ P14075] interacts with 1 human partners:{Q9Y2G2}  
3797 Pathogen[ P0C206] interacts with 1 human partners:{Q9Y2G2}  
3798 Pathogen[ P03363] interacts with 1 human partners:{Q9Y2G2}

3799 [Cluster 346]GO:0005749+C cellular\_component [name] mitochondrial respiratory chain  
complex II [def] "A protein complex located in the mitochondrial inner membrane that  
forms part of the mitochondrial respiratory chain. Contains the four polypeptide subunits  
of succinate dehydrogenase, flavin-adenine dinucleotide and iron-sulfur. Catalyzes the  
oxidation of succinate by ubiquinone. Connects the TCA cycle with the respiratory chain."  
[GOC

3800 Pathogen[ Q2Q067] interacts with 2 human partners:{P31040;P21912}  
3801 Pathogen[ P0C214] interacts with 3 human partners:{Q99643;O14521;P21912}  
3802 Pathogen[ P03346] interacts with 2 human partners:{P31040;P21912}  
3803 Pathogen[ Q85601] interacts with 2 human partners:{P21912;P31040}  
3804 Pathogen[ P14079] interacts with 3 human partners:{P31040;O14521;P21912}  
3805 Pathogen[ P03383] interacts with 1 human partners:{P31040}  
3806 Pathogen[ P03410] interacts with 4 human partners:{P31040;P21912;Q99643;O14521}  
3807 Pathogen[ P14075] interacts with 1 human partners:{P31040}  
3808 Pathogen[ P0C206] interacts with 3 human partners:{O14521;P31040;P21912}  
3809 Pathogen[ P03363] interacts with 1 human partners:{P31040}

3810 [Cluster 347]GO:0005575+C cellular\_component [name] cellular\_component [def] "The  
part of a cell or its extracellular environment in which a gene product is located. A  
gene product may be located in one or more parts of a cell and its location may be as  
specific as a particular macromolecular complex, that is, a stable, persistent  
association of macromolecules that function together." [GOC

3811 Pathogen[ Q2Q067] interacts with 143 human  
partners:{Q9HD33;O95671;P53370;Q9NYP9;Q99865;Q14657;Q96S65;A5PL33;O75474;P59022;Q9GZW  
5;Q9NSB2;Q6XD76;Q5SRH9;Q53EQ6;Q8N0Y7;O00193;P09913;O43734;Q9NSC5;Q9ULD5;Q0PNE2;Q86VX2  
;Q96BZ8;Q9NZV7;P57060;Q9UKJ3;Q9BXM0;P49419;O60829;A6NNW6;O76013;Q8NDF8;Q9UKY7;A3KN83;  
Q9BZV1;Q9H322;O15453;P56555;Q9Y5R5;P53672;Q4LE39;Q9Y2G9;Q9NSB4;Q9BY42;Q8NBR6;Q2QGD7;Q  
86V97;Q5T280;Q7RTU5;Q96NJ6;O95416;O95394;Q9BZE9;Q9NZP6;Q14669;O43583;Q9H6Y2;Q9BU89;Q9  
BZE7;Q2TAL8;Q63HK3;Q9UII5;Q12800;Q9NWX4;Q9BZW7;Q9H2W6;Q9UPX8;Q96A73;Q13495;Q6IQ32;Q9B  
TE7;Q9UKZ1;P43358;P50221;Q9UKJ5;O60826;Q96NG5;O14530;Q9HB07;Q9BUW7;Q92529;Q99618;Q68D  
10;Q9Y592;Q13951;O75920;Q4VC05;Q8N0V3;Q12980;P15259;Q9NRY5;Q9H0A9;O15370;Q0VDD7;Q9Y6Z  
5;Q8WWQ0;Q8IZX4;O75564;Q70EK8;Q9Y4K1;Q99619;O76042;Q9NR09;Q9H9J2;O60290;Q96Q35;Q9H0U9  
;Q9UBL0;Q9BQ65;Q5TEC3;Q8WVZ9;P0C7X2;Q12894;Q9BWF9;Q92670;Q96FN9;Q8N5J2;P13994;Q96M91;  
P43359;O14512;Q9BYS1;Q5T7W7;Q9HCM9;P27469;Q8WVK2;Q8ND04;Q9P0V3;Q14602;Q7Z794;Q01534;Q  
9Y608;Q969T9;Q9Y651;Q9H0N5;Q9NYP3;P43360;O14879;Q9Y5P3;O14490;Q96JB5;Q9NQR4}

3812 Pathogen[ P0C214] interacts with 183 human  
partners:{Q9HD33;P27469;Q6IQ32;O14490;O95671;P49419;Q9NXT2;Q96S65;Q14264;Q8N573;Q9H9J  
2;Q9BQ65;O76013;Q12894;P53672;Q8WUX2;Q9H6Y2;Q9BU89;Q63HK3;Q9Y2G9;Q9ULD5;Q9H4I8;Q9UPX8  
;P09913;Q53EQ6;O15194;Q8NDF8;P15259;Q9UJJ7;Q9P0V3;Q96M91;O14879;Q99865;P43360;O60826;  
Q9UKJ5;O60739;P43358;Q7Z794;P11844;O60829;P53370;Q12800;Q5SRH9;O14513;Q8N5J2;Q9BTE6;Q  
9NSB2;Q969T9;Q8NBR6;Q9BXM0;O14530;Q9Y315;Q53S33;Q96A73;Q5JVF3;Q0VDD7;Q92529;Q96NG5;Q8  
WVZ9;Q9NSC5;Q9H0A9;Q8NEY3;Q9NYP3;Q7RTU5;Q9UII5;O76042;Q13057;P55789;Q96C11;Q9NZP6;Q01  
534;Q9BZV1;O60290;O75564;Q9Y5P3;Q9UKJ3;Q9BZE9;Q86V97;Q9BY42;Q70EK8;Q9H0N5;Q9H3H1;Q146  
96;Q9Y6Z5;P00374;Q8WVK2;O43734;Q9NRY5;A6NNW6;P57060;O95416;Q12980;Q9NQR4;Q8IYX8;Q9HB0  
7;O15453;Q9GZW5;Q9NYP9;Q8WWQ0;Q68D10;Q8ND04;Q5JTJ3;Q6GMV2;Q9BUW7;Q9BZE7;A2RTX5;Q99618  
;Q14019;Q2QGD7;Q9BZW7;Q9Y608;Q3SYA9;Q0PNE2;Q99619;Q9UHY7;Q9H322;Q2M3D2;Q9HCM9;A3KN83;  
O00193;Q4LE39;P13994;P43359;Q8IZX4;Q9Y4X0;Q9H5X1;Q9BTE7;P59022;Q6XD76;O75920;Q9H8M2;Q  
14669;Q8N2G8;O75474;P0C7X2;O95394;Q9H0U9;Q9UBL0;Q8N0Y7;Q9UKZ1;Q9NR09;Q9UKY7;Q9BW92;Q9  
NZV7;Q5TEC3;Q9H2W6;Q8N0V3;Q14602;P50221;Q9NWX4;Q86VX2;P56555;Q5T7W7;Q5T280;Q9Y651;Q96  
NJ6;O14512;Q8NB25;Q96FN9;P17812;Q9BYS1;O15370;Q14657;Q8IZ73;Q96Q35;Q8WV07;P61081;P527  
46;Q96BZ8;Q86U38;Q13495;Q4VC05;O43583;Q96JB5;Q9BVG4;Q2TAL8;Q9Y5R5;Q9Y4K1;Q9NSB4;Q1395  
1;Q92670;Q9Y592}

3813 Pathogen[ P03346] interacts with 220 human  
partners:{Q9NSC5;Q96NG5;O60739;O14490;Q9H7Z3;Q96S65;Q9NZR4;Q01534;O75564;Q8N573;Q96A7

- 3;Q96NJ6;Q9NZV7;A3KN83;P50221;Q9BQE9;Q9UKY7;O15522;Q9HCS5;Q9ULD5;Q9H0A9;Q96JP2;Q2QGD7;Q9H2Z4;O15370;Q8NFV4;O14633;Q70EK8;Q4VC05;Q96G27;A6NNW6;P57060;Q86VX2;Q9UKZ1;Q96Q35;Q9GZW5;Q2TAL8;P27469;Q9BY42;Q9UBI9;O43734;O60290;Q5T280;O15225;Q5T7W7;Q9Y5M1;Q96BZ8;Q9P2W1;Q8WV07;P43360;Q9NSB4;Q0PNE2;Q8NHX4;O95177;O75474;Q9Y6Z2;Q9BZV1;Q969T9;P56555;Q9P2F5;Q14141;Q66250;O95671;Q9GZL8;O00193;Q9BXM0;Q9HCK0;Q9H2W6;Q9NWW4;P0C7X2;Q96BR9;Q8ND04;Q15847;Q7RTU5;Q92670;Q9Y5R5;Q9UKJ5;Q6XD76;Q9BZE7;Q8IYX8;O15194;Q4V328;Q9NZP6;P09565;Q9BZE9;P22103;Q9UKJ3;Q9Y592;P53370;P20132;O14530;Q9HB31;Q9HAU0;Q7Z794;Q9BQ65;Q8WVK2;O43583;Q6UW56;Q9Y608;Q68D10;A6NF36;Q9BZ29;Q14153;Q9NQR4;Q9H4I8;P07316;Q14264;Q9NSB2;Q13166;P49419;Q8N0Y7;Q9P0V3;Q9Y4H4;P13985;P52746;Q12894;Q9UBL0;Q8N5J2;Q13951;O60826;Q9Y2G9;Q9H322;O14879;Q8N0V3;Q9BUW7;Q9BZD3;Q6IQ32;Q8WWQ0;Q9HCM9;Q9NZT2;Q9BTE7;Q96JB5;Q14669;Q99619;Q9HD33;Q9Y4P9;Q9H6Y2;Q12800;Q9H8M2;Q9BVG4;P13994;Q9NRY5;O15453;Q9UHY7;Q53EQ6;Q8WVZ9;Q13495;Q63HK3;Q2M3D2;Q9H0U9;O75920;Q9Y5P3;Q5SRH9;Q96M91;A5PL33;Q8NDF8;P01358;Q9UHD1;Q8TE68;Q4LE39;Q9Y6Z5;P02728;Q9BTY7;O95394;P01858;Q9NYP3;Q0VDD7;O43763;Q9NR09;Q9UII5;P15259;Q14019;Q9BU89;Q15527;Q8NEY3;Q12980;P09913;Q9BXM8;Q7Z3D6;Q9Y651;P59022;Q13401;Q8IZX4;Q9Y4K1;O96002;Q10571;Q8NI36;O14512;O60829;Q9BZW7;Q9BYS1;P43358;Q96FN9;Q8TAU0;Q5JTJ3;Q92529;Q8WXX7;O76042;Q9H0N5;Q9NYP9;Q14602;Q6FIF0;Q99865;Q9UPX8;O43900;Q8NBR6;Q3SYA9;Q14657;P53672;Q5TEC3;Q9HB07;Q99618;O95416;P58546;Q8N2G8;P43359;Q9H9J2;O76013;Q86V97;Q8WU76}
- 3814 Pathogen[ Q85601] interacts with 145 human partners: {Q53EQ6;O14530;O14490;Q9Y608;Q63HK3;Q96S65;Q4LE39;Q96A73;P09913;Q9UPX8;Q13495;Q9H8M2;Q9GZW5;O76013;P53672;Q9NSB4;Q9UHD1;Q8N0V3;Q9ULD5;Q96JP2;Q9H0N5;O14879;O95671;P57060;O15194;Q9UKZ1;O60290;Q8N5J2;Q9Y6Z5;Q9H2W6;P59022;Q13951;Q9Y651;Q0VDD7;Q01534;P56555;Q12894;Q9NY30;Q969T9;Q12800;Q9BXM0;Q96NG5;P0C7X2;Q2QGD7;Q9UII5;P55145;Q5SRH9;Q14669;Q9UJJ7;Q7RTU5;P27469;Q9NRY5;Q9BW92;Q9H6Y2;Q9NZV7;Q9BZV1;Q9BZE9;Q9NZP6;O75474;P15259;Q8IZX4;P53370;Q9HAU0;Q9Y592;O15370;P52746;Q7Z794;Q6IQ32;Q9H0A9;Q8NEY3;P43360;Q9NR04;Q5T280;Q96JB5;Q8WVZ9;Q9H322;Q9UKJ3;Q9UBL0;Q14657;Q8WV07;Q9NYP9;O95416;Q0PNE2;Q99618;A2RTX5;Q8WWQ0;Q70EK8;Q9UKJ5;Q2TAL8;Q96NJ6;Q92529;Q86V97;Q9Y4K1;Q8ND04;P13994;Q2M3D2;O75920;Q8NDF8;Q6GMV2;Q9HD33;Q9UKY7;O95394;O00193;Q9NSC5;Q8NBR6;O15453;Q9NR09;P11844;Q9UHY7;A3KN83;O60826;Q96Q35;Q9Y5R5;Q92670;P50221;Q9P0V3;Q86VX2;Q8N0Y7;Q8N2G8;O14512;Q9BY42;P43358;Q9H9J2;O76042;P43359;Q9BTE7;Q14602;Q9BU89;O43583;Q9H0U9;O43900;O75564;Q14264;Q5TEC3;Q9HB07;Q9NSB2;Q9Y2G9;P49419;Q96M91;Q99619;Q96FN9;Q9HCM9;Q8IYX8;Q6XD76;Q9BZW7}
- 3815 Pathogen[ P14079] interacts with 293 human partners: {O15255;Q5VV42;Q9H0U9;Q96M91;A8MUM7;O15442;O15194;A6NF36;Q9GZN8;Q9BZP3;Q9BQ08;O75556;P00375;P15259;P07316;Q9BUV8;Q9Y4P9;Q12894;Q8N573;Q8NEY3;O76087;Q8N3T6;Q96FN9;Q8NEB7;P09565;O15225;Q9BTD3;Q9P2X8;P27469;Q9GZL8;Q86V97;O95416;Q8IZX4;P02728;O60826;O15370;Q9BTE6;Q8NHX4;Q7Z794;Q9BW92;Q86U38;Q14236;Q9H8M2;O14990;Q01534;Q96A33;O60739;Q24JP5;P11844;A3KN83;Q8NBR6;P20132;Q8N6L1;P17812;Q4VC05;Q9UKJ5;Q9HB07;Q15155;P43360;O15453;O60290;Q5TEC3;O00193;P56378;Q5T7W7;Q6XD76;Q9BY42;A8MXV4;Q2QGD7;Q9BUW7;P13985;Q92564;P43359;Q92545;Q6GMV2;Q13166;Q9NSB4;Q9Y5R5;P52746;Q14696;Q14696;Q96A73;Q63HK3;Q9NZV6;Q9BZE9;Q9UKZ1;Q8N5J2;Q9Y315;Q9BZD3;Q9BYS1;Q70EK8;Q14264;Q8NE00;Q12980;Q01804;A2RTX5;Q969T9;Q4LE39;A6NNW6;Q8WWQ0;Q96C11;Q15527;Q6NTE8;Q96CP2;Q9BQ65;Q9Y6Z2;Q9NV29;Q9BZV1;Q8N0V3;O43900;Q10571;Q9UIG4;Q96G27;Q86YL5;Q96NG5;Q9Y4H4;Q96BJ3;Q8IVB5;Q9NRQ5;Q3SYA9;Q9P0V3;P58511;Q9BTE7;Q9HCM9;Q96S65;Q9H5X1;Q9Y6Z5;Q8NB25;Q69YN2;O14513;P09913;Q9BVV7;Q9BXM8;Q99618;O95671;Q9NR09;Q9Y592;Q5SRH9;O95394;Q9NS71;Q8IZ73;Q9UJ55;P53673;P0C7X2;Q8WUX2;Q9ULD5;Q9UBL0;Q92670;Q86VX2;Q9H0N5;Q99865;O14633;Q8WVZ9;Q9BQE9;Q9P0I2;Q9HAU0;Q9H790;Q96Q35;Q8IUX1;Q9BXM0;P22103;Q9H7Z3;Q14657;Q14DG7;Q13066;Q9UBI9;Q9BU89;Q5T6V5;Q9BVG4;Q0VDD7;Q9UEE9;Q9Y6Z4;Q9NQA3;Q9H2W6;Q9Y5P3;Q53FP2;Q8ND04;Q8IYQ7;O14530;Q9BYS1;O60829;Q13057;Q9NRY5;Q9H1M4;O95177;Q9UKJ3;Q9NZT2;Q8N2G8;Q9NYP8;P53370;Q8WV07;Q8N1H7;Q9NZP6;Q9P2X3;Q9NY30;Q9NYP3;O76013;Q15847;Q9Y4X0;O43583;Q5JTJ3;Q14153;Q8N1D0;Q9Y5U8;P55789;Q2TAL8;Q5JVF3;O96002;Q68D10;P60059;Q9NSC5;Q9NYP9;Q9NRT5;P59022;Q12800;P01358;Q8WVK2;Q9NUM4;A4D263;Q9H9J2;O75920;Q9GZW5;P43358;O14512;Q9H0A9;P30039;Q9BTY7;Q96SZ6;Q9UJJ7;Q5T011;Q9UKY7;Q9UII5;P59020;Q4V328;Q14602;Q5T750;Q9HD33;Q8WXX7;P53672;A5PL33;Q9NZV7;Q96JB5;Q6NUV6;Q5SRD1;Q9Y4K1;Q0PNE2;Q6IQ32;Q9UHD1;Q9H3H1;P13994;Q9H478;Q9P2F5;Q96AQ2;Q92529;P57060;O75474;P56555;Q8IYX8;O14879;Q9Y236;Q9UBP8;O76042;Q13951;Q96BK1;O14523;Q9NSB2;Q06250;O43734;Q9NQR4;Q9Y5M1;Q8N0Y7;O14490;Q99619;Q9NWW4;Q9Y2G9;Q9Y608;P50221;Q14019;Q2M3D2;Q96NJ6;P01858;Q13296;Q9NUG4;Q53EQ6;Q9H322;Q5T280;O96001;Q86TL2;Q9UPX8;P43362;Q13495;Q9BZW7}
- 3816 Pathogen[ P03383] interacts with 189 human partners: {Q0VDD7;O14879;O76087;P43359;Q8N5J2;O75920;Q9H7Z3;Q63HK3;Q96S65;Q8NBR6;Q9BZE7;Q8ND04;Q12894;Q9Y6Z5;A6NNW6;Q9GZW5;Q9NZV7;Q9NSB4;P27469;Q9NSB2;P11844;Q13166;Q96M91;P53370;P02728;Q96G27;Q4VC05;Q9Y5R5;Q9GZN8;Q92670;Q3SYA9;Q9H6Y2;Q96BZ8;Q96A73;O43734;O60290;Q9H2W6;Q8N0V3;Q9BQ65;Q5SRH9;A3KN83;Q8NEY3;O95177;Q9NYP9;O75474;Q0PNE2;Q9BZV1;Q969T9;Q9ULD5;Q9BZE9;Q9P2F5;Q9BZW7;O00193;Q06250;Q9BXM0;O14490;Q8NDF8;Q8IZX4;Q9GZL8;O60826;Q96JB5;Q9NWW4;Q9Y592;P0C7X2;Q15847;O14990;Q7RTU5;Q9BXM8;Q9BTY7;Q4V328;Q6IQ32;Q9NZP6;O96002;Q99618;Q9UKJ3;P01358;P13985;P09913;Q9Y6Z2;Q13495;O14530;P52746;P43360;Q9BTE6;Q9H0A9;Q8NHX4;Q9Y4K1;Q53EQ6;Q96FN9;Q8WVZ9;Q13951;Q5JTJ3;Q9BQE9;Q7Z794;Q13066;P53672;P43358;Q9Y5M1;Q9H322;Q9BUW7;Q14696;Q9HD33;A2RTX5;P55145;A5PL33;Q14657;A6NF36;Q9HCM9;Q9Y5P7;Q86V97;Q68D10;O14513;Q2TAL8;Q9HB07;Q12800;Q9BVG4;P13994;Q9NRY5;O15453;Q8N0Y7;O15370;Q9UKY7;Q9H0U9;Q12980;Q9Y4H4;Q5T7W7;O60829;Q9NQR4;Q8WVK2;Q14264;O76042;Q9NSC5;Q9UKJ5;O14633;Q4LE39;Q5T280;Q96Q35;Q14153;A4D263;O95394;Q5TEC3;Q9NYP3;Q9H0N5;P56555;Q96NJ6;Q15527;Q8WWQ0;Q9P0V3;Q9H9J2;Q9NR09;Q9UII5;P22103;Q99865;O43583;Q9BU89;O95671;Q14602;Q9UKZ1;Q53S33;Q9Y2G9;P50221;Q86VX2;Q01534;Q70EK8;O14512;Q96BJ3;Q9BY42;Q9BYS1;Q9NYP8;Q2QGD7;O15225;Q9BTE7;Q9Y4P9;Q2M3D2;Q8WXX7;Q9Y608;O75564;P59022;P57060;Q9UBL0;P15259;P49419;Q5T6V5;Q99619;Q96NG5;O76013;Q9UBI9;Q8WV07;Q9BW92}
- 3817 Pathogen[ P03410] interacts with 288 human



partners: {P30039; Q2M3D2; Q0PNE2; Q5SRD1; A6NF36; P13994; Q9HB07; Q8IZ73; Q8IZX4; Q9H6K1; Q92529; Q9BZE9; Q92564; Q9UBL0; Q9BU89; Q9Y315; Q9HD33; A4D263; Q9Y6Z5; Q8NEB7; Q9BTE7; O15255; Q8WUX2; Q13296; P59022; Q3SYA9; Q4VC05; Q8WXX7; Q8N5J2; Q9HCM9; Q969T9; P01858; Q9BTE6; Q9H0U9; Q13495; Q8N6L1; Q6PJE2; Q96002; Q9Y2G9; Q96M91; Q9BQE9; Q99618; P60059; Q9Y4P9; Q9BXM0; Q76087; Q9GZL8; Q86TL2; Q96CP2; Q15527; Q9UJ55; Q96C11; P56378; Q76042; Q13057; Q92670; P17812; Q9BZD3; Q9BUW7; Q8N7X4; Q9UII5; Q14264; Q8WV07; Q9NY30; Q9BW92; Q10571; Q69YN2; A3KN83; Q96A33; P50221; Q14019; Q14153; Q9BVG4; Q9P0V3; P00374; Q5T6V5; Q9BZP3; Q12800; Q9HAU0; Q9P2F5; Q9BZE7; P11844; P57060; Q75474; Q9BY42; Q5T750; Q8WVZ9; Q53EQ6; Q9UBI9; P13985; Q92545; Q01534; Q14657; Q9BYI3; Q9NRY5; Q9NYP9; Q9H5X1; Q15847; Q9H478; Q9UHD1; P43359; Q9P2X8; Q9NZV7; P58511; Q9BUV8; Q9NYP8; P20132; Q86V97; Q9UEE9; Q7Z794; Q0VDD7; O43583; O15225; Q9NSC5; Q12980; Q24JP5; Q99865; O14530; Q9BTD3; Q9H3H1; O14490; Q6GMV2; Q14DG7; Q5JTT3; O00193; Q9NSB4; Q9H322; Q86VX2; Q4LE39; Q8IYX8; Q9H9J2; Q9Y4X0; P02812; Q9NS71; P52746; O60826; Q8WU76; Q5TEC3; Q9UJJ7; Q9BZV1; Q96BJ3; Q96JB5; Q9Y5P3; Q9H8M2; Q6XD76; Q8NHX4; Q9Y592; Q9Y5M1; Q9ULD5; Q5SRH9; Q9UBP8; Q9NR09; Q9H790; O95158; Q9Y4H4; Q5T7W7; Q9Y6Z4; A5PL33; Q9NQR4; Q6IQ32; Q99619; Q8WVK2; O14523; Q9Y608; Q8WWQ0; Q68D10; Q96G27; P43362; O60739; Q5T280; Q9BXM8; P53370; Q9NV29; P27469; O14513; Q9UKZ1; Q9NWX4; Q96BZ8; O14633; O43734; P56555; Q5JVJF3; Q9UIG4; Q9P2X3; Q14602; Q96S65; Q9NZT2; P49419; Q06250; Q8N2G8; Q8NEY3; Q8N0Y7; Q9UKJ5; P15259; Q13066; P02728; A8MXV4; O14990; P43365; P87889; Q9Y5U8; Q8N3T6; Q9H7Z3; O76013; Q9Y334; Q9BZW7; Q9UKY7; Q9Y4K1; Q8ND04; P09565; Q9NYP3; Q70EK8; Q7Z3D6; Q9BTY7; Q9Y6Z2; P09913; Q13951; Q9H0A9; O75920; O95671; Q8NBR6; P01358; Q9GZN8; Q96NG5; Q2QGD7; P07316; Q7RTU5; Q9H2W6; Q9H0N5; Q9UPX8; P43360; Q9NUG4; Q8N1D0; O15442; O14512; O15453; Q96Q35; Q63HK3; Q96AQ2; Q96001; Q6NVU6; Q9NSB2; Q8NE80; Q9P0I2; P43358; Q9BQ65; O75564; O15370; Q14696; O60829; O14879; Q86YL5; Q96JP2; Q9BYS1; A2RTX5; Q4V328; Q2TAL8; P55789; Q8N0V3; O95416; Q8IXU6; O95394; Q13166; P0C7X2; A6NNW6; Q9UKJ3; Q9NRT5; Q86U38; Q9NQA3; O95177; Q96A73; Q14236; Q8N573; P22103; O60290; Q9GZW5; Q9NZP6; O15194; Q8NB25; Q9H6Y2; P53672; Q96FN9; Q9NQR5; Q12894; Q53S33; Q9BQ08; Q96NJ6; O43900}

3818 Pathogen[ P14075] interacts with 233 human

partners: {P53673; Q9P0V3; Q92545; O14530; Q96S65; O75564; Q14602; Q06250; P59022; Q9NQR4; Q14264; Q8WV07; Q8NEY3; Q9UKJ3; Q9H322; Q9NRQ5; Q9Y5R5; P09913; Q8WWQ0; Q99865; Q13951; P0C7X2; Q8N0V3; Q9H0A9; Q13495; Q5T6V5; Q9H3H1; Q96NJ6; Q12800; P01358; Q8NDF8; Q4LE39; Q13166; Q9BZD3; Q9NYP3; Q9UKZ1; Q13296; Q96BZ8; Q99619; Q10571; Q9GZW5; Q9P2X8; Q9BXM0; Q9BY42; Q96002; Q9Y6Z5; P53672; O76087; Q2M3D2; Q5T750; Q68D10; Q9NSB4; Q9Y6Z4; O95177; P13985; Q96M91; Q8N6L1; Q5JTT3; Q14153; Q9NYP8; Q969T9; Q9NSB2; Q9NRT5; Q9HD33; Q9Y4K1; Q53EQ6; Q96FN9; Q5SRH9; P11844; O15453; Q9BVG4; P02728; Q9H2W6; Q9P2X3; A8MXV4; A3KN83; Q96JB5; Q7RTU5; Q12980; Q9H9J2; O43734; Q86TL2; Q9H6Y2; Q4V328; Q13057; Q9NZP6; P43358; A6NF36; Q96AQ2; Q9UBI9; P43359; Q9BYI3; Q9H478; Q70EK8; P22103; Q86V97; Q9HCM9; Q96BJ3; Q9Y5P3; Q9ULD5; O15225; O43583; Q15847; Q9BU89; Q9H6K1; A5PL33; Q9Y315; Q3SYA9; Q5TEC3; Q9NRY5; P56378; Q9BTE6; P49419; O75920; Q92670; O75556; Q9NZV7; Q2TAL8; O76013; O60739; P52746; Q9H0N5; P50221; Q9HB07; Q13066; Q9BQ65; Q9BZP3; Q9NSC5; Q9BUW7; O14523; A2RTX5; Q9H7Z3; O15370; Q9BW92; Q14696; Q96C11; O95671; Q9NYP9; Q9BTD3; Q9Y608; Q5T7W7; Q14657; Q96Q35; A6NNW6; P57060; O15255; Q8NDX9; Q9UJJ7; P56555; O75474; Q9Y4P9; O14490; O60290; P13994; Q01534; P01858; Q8WVZ9; O15442; Q9NWX4; Q86VX2; Q9P2F5; Q9UIG4; Q9Y5M1; Q9H0U9; Q9GZL8; Q8NBR6; Q6IQ32; Q9NV29; P55789; Q9Y2G9; P53370; O60826; Q6NVU6; O14879; P02812; Q96A73; Q9BZE7; Q9UEE9; Q9H6Y2; A4D263; O95394; P58511; P15259; Q9BTY7; Q9NR09; Q8N5J2; Q4VC05; P27469; Q9BZW7; Q8NE00; O76042; Q9NS71; Q7Z794; Q8WVK2; Q8NHX4; Q9BQE9; Q9Y6Z2; Q12894; Q9BZV1; Q99618; O14512; Q9BYS1; Q96NG5; Q9Y592; Q9UII5; Q8WXX7; Q2QGD7; Q9BTE7; O14633; Q9BXM8; P43360; Q96G27; Q9UKJ5; Q63HK3; Q53S33; Q9Y4H4; Q0VDD7; O60829; Q8ND04; Q5T280; O14513; Q9UBL0; Q0PNE2; Q8N0Y7; P09565; Q15527; O00193; Q9GZN8; O14990; Q9BZE9; Q8IZX4; Q6GMV2; Q9Y5U8}

3819 Pathogen[ P0C206] interacts with 270 human

partners: {Q96A33; O60829; Q9Y5M1; Q8N0V3; Q9NZV6; Q9NSB2; Q96002; O95081; Q2M3D2; Q8NB25; Q14657; Q9GZW5; Q14019; Q9Y4H4; Q63HK3; P01358; Q99865; Q0VDD7; Q96S65; Q9H790; P55789; O14530; A8MXV4; Q9GZL8; Q86U38; P43358; Q9UII5; O75474; Q9Y5U8; Q9NZT2; Q9NY30; Q9P2X8; Q9HAU0; Q9UJ55; P57060; Q8N2G8; P01858; Q9BQ65; Q6XD76; Q9BTE7; Q13057; Q8NBR6; Q9Y315; O60826; Q99619; Q9UEE9; Q14602; O95394; P50221; Q13951; A2RTX5; Q9Y4K1; Q8WXX7; Q9BZP3; O00193; Q9Y6Z5; Q96A73; O14879; Q99618; Q3SYA9; Q9NYP9; P53673; Q53EQ6; Q6UW56; Q92670; O43734; Q9BZE7; Q9H6Y2; P09565; Q9Y6Z4; P56555; P43360; Q7Z794; Q96Q35; Q13066; Q9UKJ5; O95671; Q96G27; Q9UBL0; Q9BQE9; Q9HB07; Q9BZW7; Q9NRY5; Q9Y592; Q5JTT3; A6NNW6; Q86VX2; Q86YL5; Q96BZ8; P43359; Q8IZ73; Q5JVJF3; Q4VC05; Q9H6K1; Q14669; O14633; P55145; Q14141; Q8WWQ0; Q9BZE9; Q8IZX4; Q7Z3D6; P02728; Q13495; Q9UKJ3; Q5SRD1; Q9Y4X0; Q96JB5; Q9HD33; Q9UJJ7; Q01534; P22103; O75920; A5PL33; A4D263; Q9H8M2; Q9Y608; Q9H0A9; P43362; O76013; Q9BTY7; P20132; Q13166; Q8WV07; O14490; Q5T280; Q8ND04; Q5T7W7; Q9Y4P9; Q2TAL8; Q13296; P11844; O76087; Q9NR09; Q9H4I8; Q9BUV8; O75564; Q12980; Q9NSC5; Q9BZV1; Q9H322; Q92564; Q9NZV7; O43900; Q96BR9; Q7RTU5; Q9UHY7; Q8WVZ9; Q9BTE6; Q5TEC3; P53370; Q6IQ32; Q96BJ3; Q96JP2; O60739; Q4LE39; Q8IYX8; Q9Y5R5; P09913; Q9NQR4; O15225; Q0PNE2; O95416; Q8NDF8; P59022; P13994; Q9H7Z3; P30039; Q8N1D0; Q8WU76; Q9UPX8; Q9BW92; Q5T6V5; Q8N0Y7; Q9P2F5; Q5VWZ2; Q9BXM0; Q9UKZ1; O15453; Q9NYP8; Q9H0U9; Q9ULD5; Q9Y5P3; O15370; Q9H2W6; Q9H3H1; Q14264; Q9BUW7; Q96C11; Q9BVG4; Q9BYS1; Q8N5J2; Q96M91; P07316; Q9P0V3; Q9HCM9; Q9BY42; P53672; Q96NJ6; P0C7X2; Q9UHD1; Q9GZN8; Q2QGD7; Q96FN9; Q9Y2G9; P27469; Q8N573; Q8NEY3; Q4V328; O15255; P49419; Q8WUX2; Q15847; Q9H9J2; Q53S33; Q9NZP6; O15194; P52746; Q14696; Q9NSB4; O43583; Q9H0N5; Q5SRH9; Q92529; O14512; A6NF36; Q969T9; Q8TAU0; Q8NHX4; Q06250; P87889; O14513; Q9P2X3; O95177; A3KN83; Q9BU89; Q9BXM8; Q9UBI9; Q96CP2; Q14153; Q14DG7; Q5T750; Q8WVK2; Q68D10; O43763; O15442; Q9BYI3; Q9NYP3; Q9Y6Z2; Q9H5X1; O14990; Q9BZD3; Q12800; P13985; O76042; Q9UKY7; Q9NWX4; Q9HCK0; Q96NG5; Q10571; O60290; Q6GMV2; P15259; Q9NRT5; Q86V97; Q12894; Q15527; Q70EK8; Q9Y651; Q01804}

3820 Pathogen[ P03363] interacts with 211 human

partners: {Q8IZX4; O15370; Q86VX2; Q9HAU0; O60829; Q9H7Z3; O60739; P13994; P43360; Q9Y592; Q9NYP9; P49419; Q14264; Q96S65; Q9NZR4; Q9BXM0; Q9NYP3; Q0VDD7; Q8WWQ0; O75474; P10265; Q8WXX7; Q8N5J2; Q8N0V3; Q9P0V3; A2RTX5; Q9H8M2; Q9Y4H4; Q4VC05; P07316; Q8ND04; Q96NJ6; P61081; Q14657; P53672; P02728; Q9GZL8; O43763; Q9UPX8; Q969T9; P09913; Q9UBI9; Q6UW56; Q96JP2; Q9H0N5; Q8TE68; P59022; Q53EQ6; Q10571; Q9Y5M1; Q2M3D2; O95671; Q4LE39; Q8N2G8; Q8WU76; Q9H9J2; Q9Y5P3; P57060; Q9BXM8; Q9Y4P9; Q9HCK0; Q5VWZ2; Q9UKZ1; P01858; Q9H322; O00193; Q9NWX4; P11844; Q9BQE9; O14879; Q9GZW5; P01



358;Q9BTE7;Q9HD33;Q9HCS5;Q9NZV7;Q14019;P50221;O75920;Q13495;Q12800;Q92529;A4D263;Q9Y608;A6NF36;Q13951;P43358;Q9Y2G9;Q9H0U9;Q06250;Q3SYA9;A3KN83;Q14602;P22103;A6NNW6;Q14669;Q9NSC5;Q9H4I8;Q68D10;O76013;Q9BZD3;Q9ULD5;O96002;Q9NR09;Q9BZP3;Q96BZ8;Q12894;Q9BTE6;Q8NEY3;O15453;O60826;Q9Y5R5;Q8NDF8;Q8N0Y7;Q9H2W6;Q9BZV1;O14633;Q63HK3;Q6XD76;Q15847;Q9Y4K1;Q9Y6Z5;Q99619;O75564;Q9H2Z4;Q8NBR6;P13985;Q9NSB2;Q9BZE9;Q9HB31;Q9BQ65;Q8WVZ9;Q9BTY7;Q99618;O14530;Q86V97;Q7Z7M0;Q6FIF0;Q96M91;Q0PNE2;Q5T280;Q96NG5;Q01534;Q9BUW7;Q9Y651;Q7RTU5;Q9BYS1;Q92670;P27469;Q9BW92;Q9UBL0;O76042;Q2QGD7;Q8WV07;Q9HCM9;O43583;Q9UKJ5;Q9H0A9;Q8IYX8;Q6IQ32;O43900;Q96G27;Q9BZW7;Q9BY42;Q5T7W7;Q8WVK2;Q9NZP6;Q9UKY7;Q9Y6Z2;O14490;Q2TAL8;O95416;Q5TEC3;O14512;Q9UKJ3;Q9HB07;Q96FN9;Q8TAU0;Q9H6Y2;O60290;Q9NRY5;P0C7X2;Q9NZT2;Q14141;O15225;P43359;Q12980;Q96BR9;Q96JB5;O15522;O43734;Q7Z794;Q9BVG4;Q15527;Q99865;P56555;Q9BZE7;Q96A73;Q5SRH9;P15259;P52746;Q9UII5;Q9NSB4;Q14153;Q9NQR4;A5PL33;Q9Y315;Q13166;Q13401;P53370;Q96Q35}

3821 [Cluster 348]GO:0035253+C cellular\_component [name] ciliary rootlet [def] "A cytoskeleton-like structure, originating from the basal body at the proximal end of a cilium, and extending proximally toward the cell nucleus. Rootlets are typically 80-100 nm in diameter and contain cross striae distributed at regular intervals of approximately 55-70 nm." [PMID

3822 Pathogen[ Q2Q067] interacts with 2 human partners:{Q9H0B6;Q5TZA2}

3823 Pathogen[ P0C214] interacts with 2 human partners:{Q9H0B6;Q5TZA2}

3824 Pathogen[ P03346] interacts with 4 human partners:{Q12840;Q6P597;Q5TZA2;Q9H0B6}

3825 Pathogen[ Q85601] interacts with 4 human partners:{Q12840;Q6P597;Q5TZA2;Q9H0B6}

3826 Pathogen[ P14079] interacts with 5 human partners:{Q5TZA2;Q12840;O60282;Q9H0B6;Q6P597}

3827 Pathogen[ P03383] interacts with 2 human partners:{Q9H0B6;Q5TZA2}

3828 Pathogen[ P03410] interacts with 6 human partners:{Q9H0B6;O60282;Q12840;Q6P597;Q5TZA2;P33176}

3829 Pathogen[ P14075] interacts with 2 human partners:{Q5TZA2;Q9H0B6}

3830 Pathogen[ P0C206] interacts with 4 human partners:{Q5TZA2;Q6P597;Q9H0B6;Q12840}

3831 Pathogen[ P03363] interacts with 5 human partners:{P33176;O60282;Q5TZA2;Q9H0B6;Q12840}

3832 [Cluster 349]GO:0000502+C cellular\_component [name] proteasome complex [def] "A large multisubunit complex which catalyzes protein degradation. This complex consists of the barrel shaped proteasome core complex and one or two associated proteins or complexes that act in regulating entry into or exit from the core." [GOC

3833 Pathogen[ Q2Q067] interacts with 48 human partners:{Q9Y5K5;Q99460;O75832;P48556;P40306;P55036;O00231;P51665;Q9BRP4;Q15386;P28072;Q9Y244;Q5VYK3;A5LHX3;Q13200;P54727;P25787;Q06323;P04792;P28065;P54725;O14818;Q04323;P60896;Q14997;P60900;Q9UL46;P61289;P28062;Q9UNM6;P25788;Q92530;P25786;Q16401;O00232;Q16186;P28074;P25789;P20618;Q05086;P28070;P28066;Q99436;Q8TAA3;O43242;P49721;P49720;Q9UMX0}

3834 Pathogen[ P0C214] interacts with 51 human partners:{Q05086;Q14997;P51665;P25789;P55036;P28062;A5LHX3;P28065;Q16186;O14818;O43242;Q5VYK3;P04792;P54725;Q9Y244;P48556;P40306;Q13200;O00232;Q9Y5K5;Q99460;P28066;O75832;P49720;P28074;Q9UL46;Q15386;P25788;Q04323;Q9UNM6;O00231;Q06323;P25786;P28072;P54727;Q8TAA3;Q99436;P25787;P35998;P60900;Q9BRP4;Q92530;Q15008;Q9UMX0;P28070;P20618;Q8IYW7;P49721;Q16401;P55072;P17980}

3835 Pathogen[ P03346] interacts with 51 human partners:{P25787;P28070;P25789;P55036;Q99460;Q9UL46;P28072;P25788;P28074;P49721;O14818;Q99436;Q16401;A5LHX3;P25686;P28062;Q9UMX0;O43396;Q15386;P20618;O00232;P55072;O75832;P49720;P28065;P60900;Q5VYK3;P25786;O00231;P54727;P61289;P28066;Q9UNM6;Q04323;Q8TAA3;Q9Y244;P54725;Q14997;Q13200;P48556;Q05086;P51665;Q16186;Q06323;P60896;Q92530;O43242;Q9Y5K5;P04792;P40306;Q9BRP4}

3836 Pathogen[ Q85601] interacts with 44 human partners:{Q5VYK3;P28066;Q9UNM6;P60900;P55036;P25787;P61289;Q8IYW7;P25788;O75832;Q9BRP4;Q15386;Q9Y244;P25789;P20618;P54727;Q04323;P40306;P49720;P54725;P28062;P49721;Q9Y5K5;P25786;P28072;Q13200;P28065;Q99436;P28070;Q8TAA3;Q9UL46;Q99460;O00231;P04792;P48556;Q05086;P28074;Q92530;A5LHX3;Q06323;O14818;Q16401;Q9UMX0;Q16186}

3837 Pathogen[ P14079] interacts with 48 human partners:{Q9BRP4;P28065;Q99436;P62333;P48556;P40306;Q9UMX0;P55036;P28074;O00232;P49720;O00487;Q16186;P25787;O75832;A5LHX3;P35998;Q5VYK3;P61289;Q8IYW7;P51665;P20618;Q9Y244;Q8TAA3;Q14997;Q9Y5K5;P28062;P60900;Q9UNM6;Q99460;O14818;P49721;Q92530;Q06323;P62191;Q15008;P43686;O43242;P25788;O00231;P28066;Q9UL46;P04792;P54727;Q16401;P17980;P28072;Q04323}

3838 Pathogen[ P03383] interacts with 42 human partners:{P55036;Q9Y244;P25789;P60900;Q5VYK3;P40306;Q9BRP4;P49721;Q06323;Q04323;P04792;Q14997;P20618;O75832;P54725;Q9UMX0;Q9UL46;Q9UNM6;P25786;Q99460;Q9Y5K5;P28072;P54727;Q13200;P28065;P28066;Q16401;O00231;P28074;Q92530;P49720;Q8TAA3;P61289;P28062;P60896;P48556;O14818;Q99436;Q16186;P28070;P25787;P25788}

3839 Pathogen[ P03410] interacts with 50 human partners:{P28070;P55036;P25786;Q15008;Q16401;P60900;Q14997;P35998;Q99460;O00232;Q5VYK3;P25686;Q8TAA3;P04792;P48556;P49721;Q8IYW7;Q04323;A5LHX3;P54725;Q99436;P40306;Q06323;Q9UMX0;Q13200;P25787;P60896;P28062;P51665;O14818;Q9Y244;O00231;Q9UNM6;P25789;P49720;Q9Y5K5;Q16186;Q9BRP4;P28072;P25788;P28066;P28065;O43242;P17980;O75832;P20618;Q9UL46;P28074;P61289;P54727}

3840 Pathogen[ P14075] interacts with 41 human partners:{P55036;P25788;P28066;Q06323;O75832;Q16186;Q8TAA3;P60900;Q9UL46;P49720;Q9Y24

4;P04792;Q13200;P48556;Q16401;P28070;Q04323;P49721;O00231;Q92530;P28062;P28074;P28065;P54727;P25786;O14818;P28072;P60896;Q14997;P25787;P54725;P20618;Q9UNM6;Q9BRP4;P61289;P40306;Q99436;Q9Y5K5;Q9UMX0;Q5VYK3;P25789}

3841 Pathogen[ P0C206] interacts with 49 human partners: {P61289;Q99436;P28062;Q9UNM6;P54725;O75832;P40306;P28065;Q14997;Q16186;P55036;P25786;P25788;Q04323;P25787;Q06323;Q9UMX0;P49720;Q05086;O00232;P60900;P04792;O43242;A5LHX3;Q9Y5K5;Q15386;P25789;P20618;Q8IWW7;Q13200;Q8TAA3;P28070;Q99460;P54727;P28066;O14818;P55072;Q5VYK3;P28072;P28074;Q9BRP4;Q92530;P49721;Q9UL46;Q9Y244;P60896;P48556;Q16401;O00231}

3842 Pathogen[ P03363] interacts with 16 human partners: {Q16186;Q9Y5K5;Q04323;P54727;P60896;Q92530;Q9UMX0;P61289;Q05086;O43396;P54725;Q15386;Q9Y244;P04792;Q5VYK3;Q9BRP4}

3843 [Cluster 350]GO:0005578+C cellular\_component [name] proteinaceous extracellular matrix [def] "A layer consisting mainly of proteins (especially collagen) and glycosaminoglycans (mostly as proteoglycans) that forms a sheet underlying or overlying cells such as endothelial and epithelial cells. The proteins are secreted by cells in the vicinity. An example of this component is found in *Mus musculus*." [GOC

3844 Pathogen[ Q2Q067] interacts with 4 human partners: {P01009;P27797;Q9UBB9;Q14129}

3845 Pathogen[ P0C214] interacts with 3 human partners: {Q14129;P27797;Q9UBB9}

3846 Pathogen[ P03346] interacts with 3 human partners: {Q14129;P27797;P01009}

3847 Pathogen[ Q85601] interacts with 4 human partners: {P27797;Q9UBB9;P01009;Q14129}

3848 Pathogen[ P14079] interacts with 6 human partners: {P15502;Q14129;P55081;Q9NQ76;Q9UBB9;Q13316}

3849 Pathogen[ P03383] interacts with 5 human partners: {Q14129;P01009;Q9UBB9;P15502;P27797}

3850 Pathogen[ P03410] interacts with 8 human partners: {Q14129;Q9UBB9;P15502;Q9NQ76;Q9NRM1;P01009;Q13316;P27797}

3851 Pathogen[ P14075] interacts with 5 human partners: {Q14129;P01009;Q9UBB9;P27797;P15502}

3852 Pathogen[ P0C206] interacts with 6 human partners: {P27797;P15502;Q13316;P01009;Q9UBB9;Q14129}

3853 Pathogen[ P03363] interacts with 2 human partners: {P27797;Q14129}

3854 [Cluster 351]GO:0016528+C cellular\_component [name] sarcoplasm [def] "The cytoplasm of a muscle cell\_ includes the sarcoplasmic reticulum." [ISBN

3855 Pathogen[ Q2Q067] interacts with 3 human partners: {Q96EV8;P05413;O60936}

3856 Pathogen[ P0C214] interacts with 3 human partners: {P05413;Q96EV8;O60936}

3857 Pathogen[ P03346] interacts with 4 human partners: {P05413;Q15149;Q96EV8;O60936}

3858 Pathogen[ Q85601] interacts with 3 human partners: {P05413;O60936;Q96EV8}

3859 Pathogen[ P14079] interacts with 4 human partners: {P05413;Q15149;O60936;Q96EV8}

3860 Pathogen[ P03383] interacts with 2 human partners: {O60936;Q96EV8}

3861 Pathogen[ P03410] interacts with 4 human partners: {P05413;O60936;Q15149;Q96EV8}

3862 Pathogen[ P14075] interacts with 2 human partners: {Q96EV8;O60936}

3863 Pathogen[ P0C206] interacts with 3 human partners: {P05413;O60936;Q96EV8}

3864 Pathogen[ P03363] interacts with 3 human partners: {Q15149;P05413;O60936}

3865 [Cluster 352]GO:0031083+C cellular\_component [name] BLOC-1 complex [def] "A protein complex required for the biogenesis of specialized organelles of the endosomal-lysosomal system, such as melanosomes and platelet dense granules. Many of the protein subunits are conserved between mouse and human\_ the mouse complex contains the Pallidin, Muted, Cappuccino, Dysbindin, Snapin, BLOS1, BLOS2, AND BLOS3 proteins." [PMID

3866 Pathogen[ Q2Q067] interacts with 10 human partners: {Q9UL45;Q9BQD3;O95295;Q5SQN1;Q9NUP1;Q6QNY0;Q96EV8;Q8TDH9;Q6QNY1;P78537}

3867 Pathogen[ P0C214] interacts with 10 human partners: {O95295;Q9BQD3;P78537;Q8TDH9;Q6QNY0;Q5SQN1;Q9UL45;Q96EV8;Q9NUP1;Q6QNY1}

3868 Pathogen[ P03346] interacts with 11 human partners: {O95295;Q5SQN1;Q6QNY0;P78537;Q96EV8;Q6QNY1;Q9UL45;Q8TDH9;Q9BQD3;Q9NUP1;Q86Y82}

3869 Pathogen[ Q85601] interacts with 9 human partners: {Q6QNY0;Q9NUP1;Q9BQD3;O95295;P78537;Q96EV8;Q5SQN1;Q6QNY1;Q8TDH9}

3870 Pathogen[ P14079] interacts with 10 human partners: {Q6QNY0;Q5SQN1;Q9UL45;Q9BQD3;Q8TDH9;O95295;Q96EV8;Q9NUP1;Q6QNY1;P78537}

3871 Pathogen[ P03383] interacts with 8 human partners: {Q6QNY0;Q9BQD3;O95295;Q8TDH9;P78537;Q9NUP1;Q96EV8;Q6QNY1}

3872 Pathogen[ P03410] interacts with 10 human partners: {Q9NUP1;P78537;Q6QNY1;Q6QNY0;Q5SQN1;Q9UL45;O95295;Q9BQD3;Q8TDH9;Q96EV8}

3873 Pathogen[ P14075] interacts with 8 human partners: {P78537;O95295;Q9BQD3;Q6QNY1;Q6QNY0;Q9NUP1;Q8TDH9;Q96EV8}

3874 Pathogen[ P0C206] interacts with 10 human partners: {P78537;Q9UL45;Q5SQN1;Q6QNY1;Q8TDH9;Q96EV8;O95295;Q9BQD3;Q9NUP1;Q6QNY0}

3875 Pathogen[ P03363] interacts with 8 human partners: {P78537;Q9BQD3;Q5SQN1;Q6QNY1;O95295;Q8TDH9;Q6QNY0;Q9NUP1}

3876 [Cluster 353]GO:0031464+C cellular\_component [name] Cul4A-RING ubiquitin ligase complex [def] "A ubiquitin ligase complex in which a cullin from the Cul4A subfamily and a RING domain protein form the catalytic core\_ substrate specificity is conferred by an adaptor protein." [PMID

3877 Pathogen[ Q2Q067] interacts with 7 human partners: {Q9NZJ0;Q8TEL6;Q16531;Q13216;Q13619;Q96SW2;P62877}

3878 Pathogen[ P0C214] interacts with 7 human  
partners:{Q13619;P62877;Q13216;Q96SW2;Q9NZJ0;Q8TEL6;Q16531}

3879 Pathogen[ P03346] interacts with 7 human  
partners:{Q9NZJ0;Q16531;Q96SW2;P62877;Q13216;Q13619;Q8TEL6}

3880 Pathogen[ Q85601] interacts with 7 human  
partners:{Q16531;Q13216;P62877;Q96SW2;Q9NZJ0;Q13619;Q8TEL6}

3881 Pathogen[ P14079] interacts with 7 human  
partners:{Q8TEL6;Q16531;Q13216;P62877;Q9NZJ0;Q96SW2;Q13619}

3882 Pathogen[ P03383] interacts with 6 human  
partners:{Q9NZJ0;Q13216;Q96SW2;Q8TEL6;P62877;Q16531}

3883 Pathogen[ P03410] interacts with 7 human  
partners:{Q96SW2;Q8TEL6;P62877;Q16531;Q13216;Q13619;Q9NZJ0}

3884 Pathogen[ P14075] interacts with 6 human  
partners:{Q13216;Q8TEL6;Q96SW2;Q16531;Q9NZJ0;P62877}

3885 Pathogen[ P0C206] interacts with 7 human  
partners:{P62877;Q16531;Q13216;Q13619;Q96SW2;Q8TEL6;Q9NZJ0}

3886 Pathogen[ P03363] interacts with 7 human  
partners:{Q16531;Q13619;P62877;Q96SW2;Q13216;Q9NZJ0;Q8TEL6}

3887 [Cluster 354]GO:0005886+c cellular\_component [name] plasma membrane [def] "The membrane surrounding a cell that separates the cell from its external environment. It consists of a phospholipid bilayer and associated proteins." [ISBN

3888 Pathogen[ Q2Q067] interacts with 300 human  
partners:{Q9BTW9;P04156;Q01844;Q8TCS8;Q9Y2J2;Q01082;P25490;Q96J02;P46108;O00213;Q9Y6X8;Q16236;O94973;P31749;O00186;O14786;Q9H910;Q96KQ4;Q9HAU4;Q5D1E8;Q9Y5V3;Q92681;Q96KN1;Q9Y3F4;Q13033;Q96QU8;O95782;Q14315;O60296;Q8NI35;Q14160;Q9NPB6;Q96B97;O43493;P30419;Q8IZH2;P21980;O43663;P41220;Q14678;P40763;Q8N1N5;Q9BYG5;O43159;O95886;Q8N3V7;Q9NSC5;Q8IWW8;Q99816;Q96ST8;Q9BZQ8;Q92797;O96019;Q9UDY8;Q96JI7;Q9BXM0;O60437;Q9C086;Q5VZE5;Q460N5;Q15046;P05062;Q8IV36;Q5T1C6;Q9NYJ8;P63167;Q8N6F7;O43752;Q6UUUV9;Q9P1A6;Q13884;O95999;P56945;P07900;Q96EV8;Q6NZI2;P49789;Q86WV1;Q8N7J2;Q9H307;Q9HCH5;P29966;Q96CN9;Q7L804;P02511;O00401;P67775;O14910;Q5JTC6;P04792;Q7Z614;Q13415;Q5BJF2;P15924;O14907;Q96KP1;Q9NZC7;Q9NV11;Q9NR22;P63010;Q9BV57;P54105;Q5EBL4;P37802;P11166;Q86UL8;P61077;O95049;P23528;O00170;Q9UHD9;Q99871;Q7Z2W4;Q8IXQ5;Q8IX03;P11142;A6NDB9;Q99569;Q8N5C8;O60711;Q96IF1;Q96CW1;Q07021;Q99549;Q12959;P63146;O43745;O15162;O95721;Q9UDY4;Q13469;Q8N0Z2;P04264;O94811;P11532;Q29RF7;Q07157;Q6X4W1;P17987;P20073;P78352;Q9UJMJ3;Q15047;Q5H9F3;P11171;Q9BPZ7;O00401;P67870;Q9YBN9;Q9UPX8;Q96DB2;Q00610;P84022;Q9HB19;Q92796;Q16222;O14641;Q6P9F0;P46939;P25063;Q96FQ6;Q14232;Q9UKJ5;Q8TBZ0;O15105;Q7RTS9;P29474;Q9Y2N7;Q99732;P08865;Q96JB2;Q96LC9;Q9UDY2;Q00587;Q9BUL8;Q02410;Q99550;Q9Y6G3;O43918;Q9NVD7;Q8TF46;O95810;P04406;Q8TD16;Q5TCQ9;Q9Y4E1;O60291;Q5TB80;O60299;Q15599;Q9P278;O94850;Q9UK41;O95232;Q9NZU7;P50570;O60303;P16333;P62879;O75122;Q9H4A6;Q8TAC9;Q5TZA2;Q96RU7;Q9NRI5;P78395;Q99962;Q02952;Q68DX3;Q16186;Q12968;P53618;Q8WV24;P52630;Q95996;P25963;P0CG47;Q9UGK3;Q06744;Q717R9;O75150;P13647;Q9UKT9;Q5HYK7;Q96IY1;Q13642;O95817;O00161;P80723;Q9NS23;Q15833;P0CG48;P60953;P40926;O43318;Q495M9;Q6ZVN8;P27986;Q14244;Q86WJ1;Q9BQE4;Q93052;P18848;P63000;P35579;Q96FJ2;Q3SYG4;P49006;O14512;P62987;Q9BX66;Q99689;P08670;Q9BVN2;Q9UPT5;Q8NC51;Q96IZ0;Q92597;P09496;Q9BYG4;P14672;P06733;Q8ND76;Q12816;P51808;Q9NVV4;P27816;Q86WH2;P27815;P61586;Q92556;P22681;P60510;Q9Y250;Q00987;Q9BTE3;Q9HCI5;Q86YD1;Q8NFH5;Q6MZT1;Q96FF9;Q96EY1;Q9NRR3;Q8NFG4;P43355;P23508;Q9BT92;Q8IYI6;Q7Z699;O00422;Q9H2G4;Q9ULD2;Q96M11;Q9NUP9;O14490;Q9H1J1;O60716;O95429;P62979}

3889 Pathogen[ P0C214] interacts with 334 human  
partners:{P22681;Q6X4W1;Q9BPZ7;O00170;P29474;Q96CW1;Q15833;Q9NRR3;Q96J02;O14490;O00213;Q8ND76;Q9UDY4;Q9P278;Q8IX03;Q8IWW8;P41220;O14910;P49006;Q8WV28;Q68DX3;P63000;O95817;O14786;Q9HAU4;Q29RF7;P29966;O95810;Q9Y5V3;Q13469;Q8N0Z2;Q9H4A6;Q15047;Q8NFH5;Q13620;Q8N6F7;Q8TBZ0;Q86YD1;P49368;P16157;P04264;Q9UPX8;Q9NRR8;P56945;Q8NI35;Q9UI12;Q9NRI5;Q96J17;Q96IZ0;P62993;P49789;Q9NS23;Q16186;O00159;O43159;O60716;Q7Z699;P02511;O94811;Q9UKJ5;Q9UPT5;P53396;Q96DB2;Q5TCQ9;Q96LC9;P27815;Q00987;Q16222;Q9Y4E1;Q92796;Q8TAC9;Q9UM54;Q460N5;P15924;Q9BTW9;Q9C086;Q495M9;Q9UDY8;Q15599;Q9BV57;P62166;P53618;O94921;Q9Y6N9;Q92797;Q8IV36;P61586;Q13033;P04792;P84022;O00186;Q8NFG4;Q9BX66;O14907;Q14678;Q9UJMJ3;Q13515;Q5H9F3;Q9BXM0;P17026;Q9H307;P60953;Q12816;Q9HCH5;Q6NZI2;Q5HYK7;Q9P1A6;O60299;O43493;O43745;O95721;Q9BUL8;Q14232;O60296;P78395;P68402;O60437;Q9NSC5;Q9H910;P51808;P08865;Q7Z614;P05121;Q9NZI8;Q9UK41;Q13884;Q9Y6I3;Q99962;P40926;O75330;O60551;Q01844;O43318;Q96FF9;O95232;O95049;P43355;Q9H0M0;Q7Z2W4;P05062;Q8TF46;Q01082;P27816;P61077;P11166;Q7L804;Q96QU8;Q9NZC7;Q9BT92;Q9Y250;Q96CN9;P60510;Q14315;Q9BTE3;P11532;Q9HCE7;Q8IZH2;Q8N5C8;P78352;Q96ST8;Q14696;Q9HB19;P63010;Q13642;Q12968;Q9Y2N7;P11168;P18848;Q6P9F0;O75122;Q92681;Q86WH2;Q92597;Q99732;Q9NPB6;P35580;Q8IVI9;P14618;O14613;Q9H8T0;Q14244;P09104;Q99549;O15162;Q9BZQ8;P0CG48;O14641;Q5VZE5;Q9Y2H0;Q6MZT1;O00422;O95999;P46939;Q9UQC2;Q96MP8;Q92556;Q93100;O15105;P08670;Q7RTS9;O43663;Q9NV11;Q8TCS8;Q99689;O95278;Q3SYG4;Q9ULD2;P42574;Q9Y6G3;O95886;P30043;Q99550;Q96M11;P67775;Q6UUUV9;P25963;Q96KN1;Q9Y6X8;O95429;O60711;Q96KQ4;Q8TD16;P06733;Q9NZU7;P01008;Q96EV8;P25063;Q9Y3F4;Q5EBL4;O43752;Q9BRT3;P62879;O94850;Q12959;Q9H2G4;Q99871;Q14160;Q8IXQ5;Q9UDY2;O43918;Q9HD26;Q9BQI5;P62987;P16333;Q9UKT9;Q99816;Q86WV1;Q96RU7;O60291;O94973;Q6ZVN8;P04156;P05120;Q96JB3;Q9BYG5;Q9HCI5;Q02410;P0CG47;P21980;Q96FJ2;Q96Q06;O75150;P13647;Q8N7J2;Q8NC51;Q86WV6;P17987;P80723;P30419;P40763;O00401;O76083;P09496;Q96GD0;P23508;P50570;Q5T1C6;O95782;Q9NVD7;Q8WV24;Q96FQ6;Q8N3V7;P67870;O14512;Q9BQE4;P46108;Q15046;Q9BWX1;Q96IY1;P62979;Q07157;P52630;Q16762;P53680;Q5D1E8;Q9NVV4;P14672;P20073;Q96JB2;Q5TB80;P27986;Q17RV6;Q8IYI6;P46020;Q7L5Y9;Q5JTC6;O00161;Q9UHD9;P04406;Q9NY33;Q86WJ1;O96019;Q9NYJ8;Q96B97;Q96EY1;P63146;P11171;P31749;Q9BYG4;Q9Y3B8;Q9NR22;Q5TZA2;Q9UGK3;P36957;P80303;Q8N944;P63167;Q13415;Q16236;P11142;Q9NVN3;Q96NN9;Q9H1J1}

- 3890 Pathogen[ P03346] interacts with 405 human partners: {O95166; Q9Y6N9; O60437; Q92681; P37802; Q9NSC5; Q8IYI6; P15924; Q15833; P54105; Q9NRI5; P21283; Q86UT5; Q96CN9; P21980; Q96J02; Q8N3V7; O14490; O00213; Q969H4; Q99828; Q8ND76; Q9NWT1; Q96FJ2; O43752; Q8N0Z2; Q15438; Q96NL6; Q96B97; Q8NC51; Q86UR1; P50570; Q9HAU4; Q9UPT5; Q6ZVN8; Q6X4W1; Q96MP8; Q9UHD9; Q9NVI1; Q96FQ6; Q14315; P80303; P04406; P07900; Q86YD1; Q14678; Q9UDY2; Q9HB19; Q8WV24; Q96A65; Q96RT1; Q68DX3; O75150; O43918; P43355; Q96FF9; P29474; Q8N1N5; Q96JB2; Q96M11; P63010; Q99569; O60716; Q13515; Q13449; Q29RF7; Q99871; Q9UKS6; Q96LC9; Q9H6Q3; Q9H4E7; P23508; Q96DB2; Q8IVI9; O95171; P11277; P20073; P62987; Q9UKT9; Q96KQ4; P25963; P35579; P78352; Q8N6F7; Q9NRR3; P53680; Q8N7J2; Q9C086; Q5TCQ9; Q9BV57; Q13884; Q9UDY8; P51808; Q9BPZ7; Q96JI7; Q6ZWB6; Q13322; Q8IWW1; Q9H4A6; Q99689; Q8WXH0; Q99962; Q96QU8; O43159; P25490; Q9NZU7; Q5VZE5; P80723; Q8IV36; Q8IXQ5; Q15149; P0CG48; Q9H307; Q9NZI8; Q9H2G4; O75970; Q5H9F3; P17026; P49789; Q95782; O00170; Q99816; P53618; Q9UQC2; Q9HCH5; Q07021; Q16222; Q13835; P11142; Q8NFG4; Q9NPNB6; Q96IF1; Q00587; Q8IX03; P60953; Q6MZT1; O60296; Q9BXM0; Q99767; Q93050; O95630; P62993; P06703; P42574; Q96IY1; Q9NZW5; Q7Z614; Q15942; Q8NFH5; Q9UK41; P67775; O14613; O15105; Q9Y5K6; Q9BX66; Q969G9; O00192; O75330; O60662; P55196; Q9UKJ5; Q9P278; P09496; P46939; Q6NZI2; Q9BT92; Q9BUQ8; P16157; P26038; Q02410; P61077; Q5BJF2; O00186; Q00987; Q8TEW0; P62879; Q13620; P16452; Q12816; Q8IYJ3; Q95999; P06733; Q8IZH2; O00422; Q92796; Q8N5C8; A6NDB9; Q13424; Q96ST8; Q16236; Q9Y3P8; Q8TAM2; Q9BRT3; Q6UW56; Q5TB80; Q68DU8; O00299; P16333; Q9H910; Q8NI35; O60303; Q01082; P18848; O00161; P84022; Q12968; P11171; Q14232; Q96IZ0; O95232; O96019; Q9H8T0; P08865; Q8N3R9; P02511; Q7L804; P56945; Q15599; Q9Y2H0; Q96I34; Q8TAC9; Q9NUP9; Q13033; O14641; Q86UL8; Q8TBZ0; Q92597; Q13469; P31749; Q96EV8; P78395; Q9BZQ8; Q9Y3F4; Q9NYJ8; Q9HD26; Q9BYG5; P63146; Q13938; Q15019; P27815; Q9Y4G6; Q7RTS9; Q9NZC7; Q9UGK3; Q9Y2N7; Q8TCS8; O95817; Q96CW1; O43491; O95721; P42566; P48059; Q9UKA4; Q3SYG4; Q9NVV4; Q9Y250; P49368; Q9NR22; Q6UUU9; O95886; Q9Y6X8; O14907; Q02952; Q5D1E8; P40926; Q8TD16; O95049; Q07157; Q13415; Q9BYG4; P11166; Q969K4; Q9ULD2; O00522; O95810; Q6Q0C0; O94850; Q9Y2J2; O75554; Q9Y5V3; Q5EBL4; P46108; O94811; O95996; Q13642; P62166; Q9Y6G3; O75122; O60299; P29966; P62979; Q9HAP6; Q9NVD7; Q96T49; P08670; Q96RU7; P27816; O60291; Q9BUZ4; Q92797; Q9HBT1; Q9Y4E1; P36405; Q9NVN3; P14317; A6NDV4; P0CG47; Q14244; Q8IWW8; Q969F2; P49006; Q717R9; Q15047; Q15700; P13647; Q5TZA2; Q5HYK7; Q99550; Q6ZN30; Q99549; P04156; P06744; P11532; P63167; Q9BVN2; P22681; P25063; Q9UI14; Q9UDY4; O43493; P05062; Q8WV28; Q96CX2; Q14160; P67870; Q9H0M0; Q6P9F0; Q16186; O94921; Q7ND76; P23528; Q9Y6I3; Q7Z699; P41220; O43318; Q13283; P49755; Q01844; Q9C0H9; O14512; P04264; Q93052; Q86T24; O95429; P28290; O95278; Q86WJ1; Q460N5; O43663; Q86WH2; O00401; P52630; Q9BQI5; P14672; O94973; P40763; O75386; Q9UPX8; P0C2W1; Q9BWX1; Q92556; Q86WV1; Q96KN1; Q9BUL8; O60711; Q9NS23; P63000; Q495M9; Q9NP85; Q8TF46; Q96EY1; Q9NRD5; Q00610; P04792; Q9BTE3; Q14910; Q96KP1; P60510; O14786; P27986; Q9P1A6; O43745; Q96JB3; Q5JTC6; Q9HCI5; Q9UBF9; Q7Z2W4; P61586; Q12959; Q9H1J1; Q9UJM3; Q99732; P17987; O15162}
- 3891 Pathogen[ Q85601] interacts with 341 human partners: {Q99569; P37802; Q8IYI6; Q96IZ0; Q96FQ6; O00401; Q99816; Q96CN9; Q96J02; Q9NZC7; O14490; Q9Y250; O00186; O00213; Q86WV6; Q96LC9; O43493; Q8NC51; Q96DB2; Q9UPX8; P27816; Q9NZU7; P22681; P62899; P11168; Q9HAU4; Q9UPT5; Q9Y2J2; Q96JB3; Q6X4W1; P16157; Q9NVD7; Q00610; P31749; Q16236; P62973; Q9BTE3; Q9NUP9; P09496; P63146; Q9NR22; O14910; P51808; P36405; Q8WV24; Q96A65; Q13884; Q7L804; Q9NYJ8; Q6UUU9; Q96RT1; Q9UQC2; P49789; Q17RY6; Q5HYK7; O60437; Q9Y5K6; Q9Y2N7; Q96CW1; Q15833; Q99871; Q9BYG5; P23508; Q8TAC9; O95049; Q9H307; O95166; P41220; Q14244; P08670; P35579; Q96MP8; Q9BX66; Q9BUL8; Q96Q06; Q9C086; Q9UDY8; P16333; Q9BPZ7; O75330; Q99962; Q86UL8; P18848; P40763; Q8IV36; Q8ND76; Q8NFG4; Q93050; Q9UDY2; P27815; Q13415; Q9P1A6; Q7L5Y9; Q93052; P63000; Q9BVN2; Q9BXM0; P17026; P80303; Q7Z2W4; Q9BTW9; P25490; Q9HCH5; Q13642; P06733; O43159; P11532; P46108; Q99767; O96019; P06744; Q15046; P0CG48; Q7Z614; P11171; Q13469; P49006; Q9NS23; Q01082; Q99549; P17987; O60551; Q9BT92; P05062; Q9UHD9; O14786; Q29RF7; P80723; O95278; Q9BV57; O43745; P61077; O96015; Q9BZQ8; P27986; Q8IZH2; O43663; O43752; Q8N5C8; P52630; Q96ST8; O00170; P15924; O60291; O60716; Q9NRR3; O75122; Q16222; Q13515; Q86WV1; Q8NI35; Q96KQ4; Q6MZT1; O60296; Q6P9F0; Q9Y6G3; O60711; Q12968; O00159; Q8N6F7; Q9H8T0; Q9UK41; Q92681; P56945; P11166; Q94811; O95233; Q9H6Q3; O95810; Q9UGK3; O14641; Q9NVI1; P14618; P04264; Q96EV8; Q5VZE5; Q8IXQ5; Q9HD26; Q96QU8; Q9NQC7; Q8N6T3; Q7RTS9; P02511; Q8TCS8; Q9Y5V3; Q14678; Q9Y6N9; P21980; Q68DX3; P11142; Q96M11; Q8N3V7; P46939; Q9UKJ5; Q9HB21; P50570; Q15942; Q9Y6X8; P54105; O14907; Q8IVI9; Q8TD16; Q96B97; Q9Y3F4; O14613; Q14160; P78352; Q5TB80; O94921; Q99550; P53680; Q9BVA0; Q5TCQ9; Q12816; Q8NFH5; Q92796; Q99689; Q9UDY4; Q9NPNB6; Q13033; P05121; P61586; P13315; Q96J02; P07900; Q5JTC6; O95630; P29966; Q9H4A6; P67775; P62979; O94973; P48059; P29474; Q3SYG4; Q96RU7; Q07157; P20073; O95996; Q92797; Q5H9F3; O75150; Q96IF1; P84022; Q9BWF2; P53618; P05120; Q12959; P01008; Q96IY1; P14317; P0CG47; Q9UJM3; P60953; Q9NSC5; P60510; Q9NRI5; Q6NZI2; P13647; Q5TZA2; Q9HB19; P04156; P04792; O15105; Q02410; Q86WJ1; P35580; Q9Y6I3; P63010; Q92597; Q9H2G4; Q96CX2; Q7Z699; P67870; P04406; O15162; P62987; Q9UM54; O95886; Q13620; P23528; Q9BWX1; O95999; Q9NVV4; Q15047; O43318; O00422; O14512; P30419; Q8N0Z2; Q8N7J2; Q99732; Q460N5; P17677; Q6Q0C0; Q8IX03; Q86WH2; P43355; Q00987; P14672; Q96KP1; Q9H910; O95429; P62166; Q07021; O95171; P08865; Q9P278; Q96FF9; O95817; Q5T1C6; P78395; Q14232; Q96KN1; O00161; P63167; Q6ZN30; Q8TF46; Q96EY1; Q9UKT9; Q495M9; O43918; P40926; Q9ULD2; O95721; Q01844; Q16186; Q5D1E8; Q15599; Q86YD1; Q5EBL4; Q9BQE4; Q8IWW8; Q9HCI5; O60299; O95782; Q9BYG4; Q9H1J1; Q8TBZ0; P25963}
- 3892 Pathogen[ P14079] interacts with 556 human partners: {O15255; P31751; P04083; Q5EBL4; Q8NFH5; Q9NY59; Q02952; Q9UKA4; Q96CW1; Q8N944; Q9BXL7; Q9NRQ2; P16452; O00422; Q9Y2J2; P35579; Q96IY1; P13164; Q9BTW9; O95166; P62333; Q7L804; Q96JI7; O95425; Q68DX3; Q9H295; P37802; Q5TZA2; Q8IXS6; Q9Y3B8; Q96JB3; P27216; Q8N6Q3; O15162; Q9NR22; Q9Y4E1; O14613; Q5D1E8; Q8N5C8; Q14242; Q86WV1; Q8N307; P11142; Q8N7P3; C9JDP6; P17677; Q8TB68; Q8IVK1; Q8WV24; P0CG48; Q6PP77; Q00610; O95876; Q15047; Q16222; P52630; O43745; Q14761; Q92681; Q9BQE4; Q9NS23; O43187; Q9NRR3; Q96NL6; P11532; Q01518; P53779; Q9BYG5; P61570; P51808; Q6ZVN8; P25705; P11171; Q6UX01; Q96DB2; Q9UDY2; O95999; Q8IWW8; Q8NFM7; Q9BVN2; Q13415; Q7Z2W4; Q8NBQ7; Q1HG43; Q03597; Q51700; Q9Y2N7; Q01082; P09912; P56750; O95817; Q96FJ2; Q8TAF9; Q9UKJ5; Q9NVD7; A6NDV4; Q9UJM3; Q9Y6I3; Q96G30; Q14210; Q13021; O75781; P20396; Q9UKS6; P13498; Q9NP84; O14641; Q13620; Q92542; Q08722; P02511; Q9NZ42; P15924; Q9NRR8; Q9HBM0; P04156; Q9H1K0; Q86UT5; A6NM45; Q99871;

Q8IYJ3;Q00170;Q13033;Q07157;Q96LB4;Q99549;A6NLE4;Q9H1J1;P49006;Q9BWF2;Q96FF9;Q6P9F0;Q93052;Q02410;Q14696;P14672;Q92556;Q95429;P24588;Q13835;Q9UKH3;Q902F9;P16298;Q9BW04;Q9H910;P26038;Q9UKY0;P42566;P40123;P21980;Q9UGK3;Q8NFJ9;Q9Y6G3;Q9UDY4;Q16585;Q8NE01;Q6ZUJ8;Q95867;Q9H8T0;Q9Y250;Q717R9;Q93100;Q16186;Q96ST8;Q9HCH5;Q9UI14;Q8NI32;O60303;Q12816;P31358;Q9UBF9;Q9NRI5;Q8N3I7;O00213;O60895;Q14244;P06744;Q9NP85;Q9BSK0;Q969X0;Q8ND76;Q9BY14;Q9BUL8;Q9Y3F4;O60437;P57679;P16157;Q8N7J2;Q7L5Y9;Q12968;Q96B97;P41220;P62979;O71037;O14907;Q9UM54;Q86UK5;Q8N1N5;Q8TF46;Q92579;Q9UPT5;Q99828;Q9BTE3;O60711;Q14118;Q9NRX5;Q9HAU4;Q13424;Q6UX82;O94905;P11166;Q496H8;Q9Y4G6;Q5B5F2;Q9C0H9;P06733;P61077;Q96NT5;Q0VD83;Q9NQ90;P61550;Q9H307;Q9HCI5;Q9BUZ4;Q9Y2H0;P62987;O00501;Q9H665;P50552;P46939;Q9NPD7;Q96GD0;Q96KP1;P50570;Q86WH2;Q6UXB3;Q9HB19;A6NDB9;P02686;P35611;Q00987;Q8N292;Q92797;Q96I34;Q96RT1;Q9NVI1;Q15078;Q8IWX6;Q8TEW0;Q17RY6;Q6X4W1;B4DS77;O00186;P80303;Q9HD26;Q6NZY7;Q9H8M9;Q15149;Q9NUP9;O95721;Q5H9F3;Q9NQX7;Q15833;Q8IVI9;P36405;O95868;Q92629;P08758;Q9Y5V3;P54826;Q8N6F1;Q7Z699;O43663;Q8IZH2;Q13642;Q96GC9;Q8NCG7;Q9BXM0;Q7Z7J9;Q16586;Q14315;Q9Y287;Q8NHG7;Q8NBR0;O95782;Q99689;Q15046;Q86UW1;Q96HD9;Q69384;P17026;Q8IX03;Q8NC51;Q969L2;Q9NZC7;Q99732;Q8NC96;Q8TAC9;Q6UWN0;Q96IF1;P23528;Q8WV28;P29966;P49755;Q8IV36;Q8NI35;Q86WV6;O95049;Q5VXU3;Q9H2G4;O94772;P23508;O60610;Q9BYI3;P55808;Q15599;Q15075;Q9BRT3;Q9BQI5;P17987;O95996;Q9HAB3;Q5T1C6;Q9NVZ3;P16333;Q9BYG4;Q9NY33;O95866;Q6IAA8;Q8TAM2;Q99569;Q8NFG4;P25063;Q86WJ1;Q5VZ72;O95164;P62166;O94811;O00559;Q9NVV4;Q8N8Q9;Q99445;Q8N3V7;Q68DU8;Q96T49;Q8WXH0;O60551;Q8WZ55;Q96IZ0;P30419;P61586;P07900;Q96B33;Q9HAP6;Q13326;Q8WU20;Q5GH77;Q9BQJ4;Q6NSX1;Q9NV70;O95171;Q96KN1;P63010;Q5BLV9;Q96Q06;Q9NSC5;P11277;Q96J02;Q9NX77;Q5HYK7;Q9H6Q3;Q7RTS9;Q9NZ20;Q8N3R9;Q5VZE5;Q6MZT1;Q969H4;Q9H490;Q16236;O94973;Q96LD1;Q8WVH0;Q8N2G4;Q8N8A4;Q8WW43;O42043;Q8IWW1;Q96RU7;Q7Z614;Q8TBZ0;Q6ZVT0;Q5TB80;Q9ULD2;Q8N0Z2;Q86UL8;O60296;Q00587;Q86Y91;Q9NQ60;Q16762;Q6PJW8;Q96A65;Q8IYI6;Q9Y5K6;Q902F8;Q6NZI2;Q8N9M5;Q9Y6N9;P27815;Q93050;Q96LC9;O14512;P62993;O95810;Q05682;Q8N6F7;O43918;Q99541;P20073;Q8TCY5;P28290;O43159;P63167;O43752;P60510;Q9BT92;Q495M9;Q9HB21;Q9Y6Y9;Q96CX2;O95232;Q9UKB5;P67870;O60299;O43687;Q9UI12;O43561;P08865;Q14699;Q13515;P78395;O95886;O75204;P15941;Q96EV8;P61567;Q9NS86;P08670;O43493;Q96MP8;Q9P1A6;P49023;Q16625;Q9NS93;P49773;P04264;P80723;P61566;Q52LD8;Q96JB2;Q8N8D7;Q13469;P06703;Q969W9;Q92796;Q3SYG4;Q53GL0;Q29RF7;Q14232;Q9NPNB6;Q9H6S1;P04792;Q96KQ4;Q9UHD9;Q9UEY8;Q9BPZ7;O96015;O75330;P49368;Q7RTP0;P49789;Q96FX8;Q99816;Q9BX66;P25490;Q86XT9;Q96QU8;O15105;Q5JTC6;P54105;P48059;Q9BVA8;O75122;Q9Y6X8;Q07021;P0CG47;Q9H4A6;Q6PIZ9;Q9NVD7;Q9Y239;Q9UQC2;Q14678;Q9NQ7;P43355;Q9BZQ8;Q96M11;Q13145;Q9Y4J8;Q9NQ40;P63146;Q9NZW5;Q9NZB2;O60716;Q9NVN3;Q15438;P53680;Q8TD16;Q5SSG8;Q9BV57;Q96EY1;Q99836;Q86YD1;Q96B86;Q96CN9;Q8IWB1;Q6UWI2;O94850;P27816;Q8TCS8;Q9NZU7;P35241;O14490;Q9BWX1;Q15849;P46108;Q3MUY2;P09496;Q99550;P46020;Q15390;Q99767;O00522;Q9Y3P8;P49917;P13647;Q9UKT9;O75970;Q99962;P10636;Q9UBK5;O00401;P04406;Q9UPX8;Q9GZM5;Q15942;Q9GZY6}

3893 Pathogen[ P03383] interacts with 256 human partners: {Q14244;Q17RY6;Q92681;Q96CW1;P15924;Q9NVV4;O60716;P27986;Q7L804;O00213;Q96LC9;P62879;P56945;Q9P1A6;Q15047;O96019;Q00610;P29474;P40926;A6NDB9;Q14678;Q13469;P62987;Q13515;Q96JI7;P51808;Q14160;Q13884;Q5VZE5;Q6UUV9;P53618;P54105;Q9BSK0;P08670;P49789;P04156;Q5HYK7;Q6NZI2;O15162;Q96FJ2;P41220;Q9HD26;Q9NRI5;Q8IWW8;Q8TAC9;P31749;Q9BPZ7;Q9UJM3;Q9C086;O95886;O94811;O60299;Q99689;Q8NFH5;P60953;Q96KQ4;Q9BTE3;Q8IV36;P02511;O00186;Q86WV1;P25063;Q6MZT1;Q5D1E8;Q92797;P49006;Q86WH2;Q96IZ0;P63000;P52630;Q96JB2;Q9BXM0;O14490;O00170;Q99816;Q9HCH5;Q8N1N5;Q8IYI6;Q8TCS8;P04792;P67775;Q7Z614;Q9Y4E1;P07900;O43493;Q92597;Q96KP1;Q6X4W1;Q9P278;P46939;O43318;Q96EV8;Q9Y6G3;O95049;Q96CN9;Q9BV57;P61077;Q07157;P11168;Q8NHG7;Q9BZQ8;O43159;Q8N5C8;Q8NFG4;O00401;Q99871;Q5TZA2;O15105;Q99549;Q5TB80;P01008;O60296;P06744;P27816;Q9NVI1;P84022;Q9H8T0;Q9UK41;Q96KN1;Q6P9F0;Q6ZVN8;P61586;O14641;Q9BQE4;Q12816;Q9UHD9;P63010;Q9UDY4;P08865;Q9NR22;Q9BYG5;Q9NRR3;Q7RTS9;O00422;O60711;Q15046;Q9Y2N7;P78395;Q9Y5V3;Q14696;Q8N6F7;Q8N7J2;Q99732;Q9BQI5;Q9NPNB6;P04406;Q12968;O43745;P29966;Q9Y6X8;Q9BT92;Q9UGK3;P11532;Q5JTC6;O95782;Q5B5F2;Q9Y3F4;P11142;P25963;Q8ND76;Q8N0Z2;O95810;O94921;O94850;O95999;Q9H4A6;Q5TCQ9;P04264;O43918;Q29RF7;Q16236;P35580;Q3SYG4;Q96RU7;Q96FF9;Q96IY1;Q5H9F3;Q9H307;Q9NSC5;Q8IX03;O95232;P67870;Q96ST8;Q9UKJ5;Q9HCI5;Q5EBL4;P37802;Q9H2G4;P62979;P0CG47;Q9BUL8;Q14232;Q717R9;P13647;P23508;Q7021;Q9H910;Q96QU8;P11169;Q68DX3;O43752;P80723;Q9UKT9;O14907;Q02410;P0CG48;P35579;P21980;Q92796;Q8N3V7;P63146;P23528;Q13033;Q00587;O43663;P18848;Q01844;O00161;O14512;Q13642;Q9UPT5;Q9NYJ8;Q96Q06;O60437;P14672;P16333;P06733;O75150;O94973;P63167;Q8NC51;Q9C0H9;Q8WV24;P20073;Q02952;Q5T1C6;Q9HB19;P78352;Q16186;Q9Y2H0;Q96EY1;O14910;O95429;P60510;Q86YD1;Q9UDY2;Q9BVN2;Q96M11;P43355;P22732;Q7Z2W4;Q9Y3P8;Q13620;Q9Y250;Q9H1J1;Q9BYG4}

3894 Pathogen[ P03410] interacts with 592 human partners: {Q6MZT1;O60711;Q9UDY4;P84022;Q00610;Q9BVN2;Q8IWW8;Q9P1A6;Q9BRT3;Q9Y6G9;O14786;Q8NC96;Q96M11;P09496;Q9NQ90;Q8NBR0;Q9UQC2;Q86Y91;Q96JB3;Q9HCH5;Q86UT5;Q9NS86;Q29RF7;Q7L804;Q9UBK5;O75781;Q717R9;Q96HD9;Q6NZI2;O95782;O71037;P17987;Q96CW1;Q9HBM0;P27986;Q969F2;O14910;Q8IWB1;P05121;Q86XT9;P22732;O75330;Q7RTS9;P49368;P0CG48;P15924;Q96B33;P61550;P61565;Q9UGK3;P51808;Q6NSX1;O15255;Q969W9;Q5HYK7;Q9UKH3;Q8N8D7;Q9Y3B8;Q8TCS8;Q96RT1;Q15833;P80303;Q5VZ72;Q96GC9;Q8NCG7;Q7Z614;P06744;Q5BIV9;Q86WV1;Q9UEY8;Q9Y239;Q9UPT5;Q8NFG4;Q5GH77;Q8N6Q3;Q9NX77;Q9NVI1;Q69384;Q15047;Q9UBF9;Q9UKA4;P53680;Q8NFJ9;Q8N7P3;Q96G30;Q8N3V7;P27816;Q6ZVT0;Q9BRV3;Q96JB2;O60610;O43597;Q8TAC9;Q8WZ55;Q5SSG8;Q9NQ60;O60896;Q96B86;P20963;Q6PIZ9;Q9BXM0;P63000;Q7Z699;Q9Y6I3;Q8N1N5;P11166;P49006;Q9NPD7;O60895;Q1HG43;Q15390;O60551;Q9NVZ3;P25705;P60510;Q12968;P04264;Q99549;P61567;Q13445;P54105;Q86UW1;Q902F9;Q9NS93;Q8IX03;Q0JZR9;O96019;Q8N292;Q3SYG4;P46020;P41220;Q495M9;Q13620;P16157;Q9UHD9;O95867;P15941;P18848;Q14242;Q05682;Q12959;Q9BUL8;Q9Y2N7;Q8IV36;Q96QU8;O94905;Q9BWX1;Q8N6F7;O60299;Q9HBL7;Q96LC9;Q43561;P02686;Q6P9F0;P11532;Q16222;Q9NZC7;Q8TAM2;Q8IXQ5;Q5TCQ9;Q9NRQ2;Q9BPZ7;Q9NRR3;Q96Q06;O43187;Q496H8;O94811;Q16236;Q9BTE3;Q14210;Q8TF46;Q9NZW5;P11168;O00501;Q8IWW1;Q8WV28;O60716;P06733;Q9Y2H0;Q9BSK0;P36405;Q9HAB3;Q8N307;Q8IVI9;O43918;O00401;O00159;Q68DU8;Q13515;Q9BYI3;Q99732;Q13145;Q07021}

;Q99445;Q9NS23;P43355;Q5H9F3;Q9H8T0;P09912;P11142;Q93050;P31749;P16452;Q99767;P35579;P04792;Q14232;O00213;P30419;Q8N6F1;P63167;Q8TB68;Q9Y287;Q9H6S1;Q9NUP9;P50570;P07900;Q00587;P31358;P16333;A6NDV4;Q8NI35;Q9NSC5;Q13835;Q9Y3F4;Q6UUU9;Q9NQ40;Q969X0;Q9HB21;O14490;Q8WVH0;Q14160;Q96KQ4;P05062;Q94850;Q9NRP85;Q6NZY7;Q8TD16;P62979;Q9BY14;Q9H4A6;O43159;Q9NVV4;Q969H4;O95817;Q96KN1;Q9NVN3;P56747;Q16617;Q9NR22;P33241;Q9H1J1;Q9BQE4;Q96T49;Q16585;P25490;Q02410;Q9H910;Q9NR9Y;Q13884;P06703;O60303;P23508;Q8TCG1;O95171;O00559;Q6PP77;Q9NZ42;Q9BWF2;Q9HAP6;Q15700;Q969K4;Q96134;Q9Y5K6;Q9BQJ4;Q6ZWB6;Q9HD26;P08865;P37802;Q96IF1;O95166;O15162;P11171;Q96NL6;P40123;Q96GD0;Q13336;Q99816;Q9UM54;Q15599;Q902F8;O95425;Q8IZH2;O43318;Q9UKT9;O75970;Q93100;Q92556;O95866;Q9Y3P8;Q9UDY2;Q96IY1;Q93052;Q8WV24;Q96MP8;P29474;Q9NRD5;Q99828;Q9BT92;Q9NRX5;O75150;P50552;Q14315;Q9GZY6;P4789;P17026;Q6UWI2;O95999;P61570;Q9UKS6;P49773;Q96FX8;C9JDP6;Q6ZVN8;P26038;O95996;Q92797;Q6ZUJ8;Q8TAG9;O43491;Q96CX2;Q5T1C6;P61586;Q15942;P78395;Q9BXL7;P25063;Q07157;O00170;Q9BTW9;Q16762;Q86UR1;Q9NYJ8;Q96D71;O95429;Q7Z2W4;Q9ULD2;Q9UKY0;O14613;Q5TZA2;Q96A65;Q5D1E8;Q8NFH5;Q9Y2J2;Q9BW04;P02511;Q9Y6N9;Q9NQX7;P46939;Q92796;Q99550;Q08722;Q13033;Q6PJW8;Q8N5C8;Q969G9;Q15049;O75204;P63146;O14907;Q9UI12;Q96LB4;Q6UWN0;Q96IZ0;Q8N3I7;Q9UKJ5;Q9NWF4;Q15849;Q9Y4E1;Q9H1K0;Q8IYJ3;P04156;O95876;Q9BVA1;Q96ST8;P53618;Q9Y6X8;Q7Z7J9;Q15046;Q9Y6G3;Q52LD8;Q14118;Q8N2G4;Q9Y4G6;Q13469;Q9NZ20;Q9NZU7;P87889;Q86WH2;O95810;P61566;O60296;Q13642;P48059;O00522;P04406;Q9BQI5;Q15438;Q5JTC6;P08670;Q86WJ1;Q14678;Q16625;O95232;O15105;P10636;Q5VZE5;P54826;Q96RU7;Q6IAA8;P63010;O42043;Q9Y6Y9;P60953;P40926;P35580;Q9NRI5;Q8IVK1;P28290;Q9Y5V3;Q14699;O95868;P20073;Q96JI7;P46108;P52630;P62987;Q96KPL;P56945;P53779;B4DS77;A6NLE4;Q8IXS6;Q9HCI5;Q9BZR6;Q5TB80;Q8WW43;P17677;Q92542;Q96B97;Q8TEW0;O95886;Q6X4W1;O43752;Q9NRP6;Q0VD83;Q8N8Q9;P80723;Q16186;Q99962;Q86WV6;Q9Y250;Q9NVD7;Q12816;Q92597;Q01082;O60291;Q9NV70;Q8N0Z2;P21980;Q9UPX8;Q8IWX6;A6NM45;O43687;Q86YD1;Q460N5;Q8N7J2;Q86UL8;Q7RTP0;Q6UXB3;Q00987;Q96FF9;P35241;Q02952;Q53GL0;O14512;Q9BZQ8;Q92629;Q8NI32;Q5VXU3;Q9HB19;O43745;O00422;Q8WU20;Q9C0H9;Q99871;P56750;Q01518;Q13326;P23528;Q9NP84;P27105;P55808;Q8IU99;P25963;Q13424;Q14696;Q9NY33;O00186;O95721;P67870;Q15149;O43493;P62166;P13647;Q13449;Q68DX3;P78352;P67775;Q9H490;Q9H2G4;O94772;Q5BJF2;P62993;Q14244;Q9BV57;Q969L2;Q9NZB2;Q9C086;Q9BSN7;Q14761;P40763;O75122;A6NDB9;Q5EBL4;Q7L5Y9;P42566;O95164;Q8WXH0;Q8NFM7;Q6UX82;P62879;Q9UI14;O00161;Q8ND76;Q92681;P27815;O94973;Q9BRK5;P35611;Q9NRR8;Q96EV8;Q9P278;Q96EY1;O75348;P11277;O60437;P29966;O95471;POCG47;Q9N2J8;Q9BX66;Q9UJM3;P24588;Q8IYI6;Q8TBZ0;Q8N8A4;Q8NC24;Q8N3R9;Q8N944;Q9BVA0;P61077;Q9Y4J8;O96015;Q96LD1;Q9BYG5;Q8NHG7;O43663;Q9H665;Q86UK5;Q9H307;Q13021;Q9H6Q3;O95049;Q99569;Q13415;O14641;Q96DB2;Q99689;P20396;Q16635}

3895 Pathogen[ P14075] interacts with 281 human partners: {P60953;Q5BIV9;P11169;Q9H307;Q9BQI5;Q92797;P52630;P06733;Q99871;Q3SYG4;Q9BQE4;P29474;Q96M11;O00213;P43355;Q52LD8;O95049;Q68DX3;P54105;Q02410;O94811;O95232;Q96JB2;P11532;Q9Y2J2;Q92681;P11142;Q9Y3F4;Q9NVI1;Q96FX8;P09496;Q86YD1;Q96KQ4;Q6P9F0;Q8IWW1;Q9BUL8;Q8N3V7;P49006;Q13884;P06744;O43663;O94973;Q07021;Q5VZE5;Q8NFG4;Q96CW1;O00186;Q9NR22;Q14160;P08865;Q16186;Q07157;P78395;O43752;P62879;O15162;Q9BXM0;Q9C086;Q9BV57;Q9BVN2;P80723;P51808;Q96KP1;Q12816;Q6X4W1;Q9NVV4;Q5H9F3;Q8IV36;P60510;O95886;Q93100;Q8NC51;O43918;O00422;Q01844;Q96IY1;Q15047;Q9Y2N7;P41220;P04156;Q9BYG4;Q13620;Q9HCH5;Q13515;Q6MZT1;Q5HYK7;Q7L5Y9;Q9Y250;P22732;Q9HD26;O60296;P04792;P40926;Q7Z614;Q9UK41;Q5TZA2;Q5TQC9;Q5T1C6;Q9UDY4;Q9NZB2;Q96ST8;P20073;Q96LC9;Q9BT92;Q96JI7;Q9H2G4;P25963;Q17RY6;P61077;Q13642;Q8N0Z2;Q96IZ0;Q9BYI3;Q9NRI5;Q96FF9;Q8WV24;Q8N5C8;Q15390;Q00587;P23528;Q8IVK1;P16333;Q9BTE3;Q86WV1;P07900;Q6NZI2;Q9BP27;Q8N1N5;O96019;O43493;P31749;Q9H910;O95810;P0CG48;P04406;Q02952;P62979;Q8N7J2;O00401;Q9H8T0;Q6ZVN8;O00170;Q96FJ2;Q9UGK3;O14641;Q8TBZ0;Q9UHD9;Q14232;P29966;Q8NHG7;Q9BZQ8;O14910;Q13469;O60299;Q9UJM3;P04264;Q7L804;P37802;Q7RTS9;P53618;Q9NSC5;P46939;Q86WH2;Q99732;P67870;Q14696;O95782;O43318;O75150;Q5TB80;Q6UUU9;Q9UKT9;P27986;Q9Y6X8;O14907;O15255;O43745;O14613;P62987;O14490;Q9Y3P8;Q9HB19;P35579;O60303;P18848;Q99549;Q92796;P61586;Q5D1E8;O15105;O95999;P02511;Q5JTC6;Q9NRR3;P67775;P08670;P63000;Q7Z2W4;Q96RU7;O00161;P63010;Q5EBL4;Q8TCS8;Q96Q06;Q96QU8;P23508;Q29RF7;O43159;Q9P1A6;Q96EV8;POCG47;P49789;Q9UDY2;Q717R9;P78352;P13647;Q96KN1;Q8TAC9;Q8ND76;Q9HBM0;O60711;Q9BYG5;P11168;Q8IYI6;Q14678;Q9Y2H0;Q92597;P63146;Q9NRP6;A6NDB9;P84022;P21980;Q99816;O60437;Q96H8;Q16236;O14512;Q9C0H9;O75330;Q9Y287;O60716;P28290;Q15046;O94921;Q9Y5V3;P14672;Q9UKJ5;Q13033;Q9NRR8;Q9H4A6;P27816;Q6UWI2;P54826;Q9P278;P63167;Q96CN9;Q12968;O94850;Q9Y4E1;Q8NFH5;Q96EY1;Q00610;P11171;Q8N6F7;Q8N944;Q9HCI5;O95429;P56945;Q9Y6G3;Q14244;Q9BSK0;P55808;Q8IX03;Q5BJF2;Q8IWW8;P25063;Q9UPT5;P15924;Q99689;Q9H1J1;Q9NYJ8}

3896 Pathogen[ P0C206] interacts with 465 human partners: {P05BJF2;Q9NQC7;P06733;P84022;Q92597;Q6ZVT0;P53680;Q9BZQ8;P63010;O60716;P46939;Q9NUP9;Q86WH2;Q8IXQ5;POCG48;Q96NL6;Q6MZT1;Q01082;O60291;Q9BTE3;P05062;Q69384;Q9Y3F4;Q9HB19;O43159;Q9UM54;P78352;Q9BVA0;Q9H4A6;Q96FT1;Q9UDY4;O94973;P17026;Q92556;Q99828;Q9NQ90;P31749;Q8N6T3;P17677;Q13469;P01008;Q8NFH5;Q93100;Q96IZ0;Q16222;Q96ST8;Q7RTS9;Q8IZH2;Q8TCS8;Q9NZ42;Q9H6Q3;P62879;Q969F2;Q16186;Q15019;Q9Y2N7;Q8N3V7;Q9BT92;Q13642;P04156;Q8NC96;Q9HAU4;Q9UDY8;P53618;Q9Y287;Q3SYG4;P62166;Q92681;Q8TAM2;Q15700;O95810;Q5EBL4;P25490;Q07021;O95164;Q96FX8;P78395;O95721;Q8N944;Q8N5C8;Q96KN1;P30419;O95049;Q9Y6N9;P54105;Q5VXU3;Q9NRR8;Q9NVD7;Q14315;A6NDB9;Q5TZA2;Q96IF1;P08865;Q13515;P14317;Q96CX2;Q8NHG7;O43752;Q96B97;Q96DB2;O95232;Q9H8T0;Q9BTW9;Q14232;O43493;P63167;O94811;Q96JI7;Q9H1K0;Q5TQC9;Q9NRR3;O95999;Q8IWW1;P21980;P04264;O14613;Q14678;P25963;Q95630;Q8TBZ0;Q9Y5V3;O95867;Q460N5;Q96J02;P80303;Q96QU8;Q9H307;Q9P278;Q29RF7;Q96KP1;O94850;Q9BYG5;O43318;P49755;Q6UW56;O95886;Q00610;Q9UDY2;Q96JB2;Q99550;P43355;Q01844;Q99962;P04792;Q6ZN30;Q9UKJ5;Q13021;Q99816;Q12968;Q14699;Q86WV6;Q92542;P17987;O60299;Q8N3I7;Q9Y4E1;P67775;Q96KQ4;P11166;Q9NZU7;Q9Y6G3;O95996;P10636;Q96A65;Q96LC9;Q9Y6X8;P27986;Q13620;Q9UI14;O00422;P62993;Q96RU7;P09496;Q8N6F7;Q9NVI1;Q9UK41;O14786;A6NDV4;P61586;Q14244;Q9C086;Q86UT5;Q9BW04;O14907;Q96FF9;O00161;O43918;Q99689;P46020;O75122;O60437;Q86Y91;Q96JB3;Q8N3R9;O00213;O15105;Q92797;Q8TEW0;Q9Y2H0;P11168;Q99767;Q15599;Q9Y4J8;Q9UGK3;O96019;

Q6UUV9;Q13884;Q9BUZ4;Q8IYJ3;P16157;P27816;Q1HG43;P27815;P06744;Q96T49;P49917;O14490;Q8IV36;Q717R9;Q6PJW8;Q9Y3P8;Q9BQE4;P25063;P13647;Q7L5Y9;Q5HYK7;Q96M11;P22681;P63000;Q9NSC5;Q13835;Q8WU20;O95429;P80723;O75330;P07900;P51808;Q9UPT5;P55196;O00159;Q96EV8;Q9UKH3;Q8N7J2;Q99445;Q5H9F3;P48059;Q17RY6;Q14160;P28290;Q99569;P49789;Q6NZI2;Q96IY1;Q495M9;Q9UI12;Q49006;Q86WV1;Q9Y3B8;Q96CW1;Q15942;Q9Y6G9;Q5D1E8;Q9NY33;O60296;O43491;Q6ZVN8;P61570;P94905;Q12816;Q9NRI5;O95278;P62979;P16452;Q5T1C6;P67870;Q8NI35;O43663;P04406;Q9UPX8;Q5VZE5;P40926;Q9ULD2;Q6P9F0;Q9BUL8;Q9NPB6;P35579;Q9BPZ7;O00401;Q9NYJ8;Q9Y6I3;Q9H665;P42574;Q9BXM0;Q9BV57;Q9BQI5;Q6X4W1;Q9NVV4;P61565;P37802;Q9H2G4;O14910;P40763;O43597;Q9NQX7;Q8N1N5;Q9UKY0;P60953;Q8IYW8;Q7Z614;Q8IVK1;Q9NR22;Q9C0H9;Q9HB21;O95782;Q8NFG4;P0CG47;O60551;P16333;P36405;Q96MP8;Q8IYI6;P29474;Q9BX66;Q9UJM3;P15924;O15162;P06703;P42566;Q9NPD7;Q9Y5K6;Q07157;Q02952;Q8NFI9;Q86WJ1;P49368;Q8WXH0;Q9NZC7;Q86YD1;Q99871;P05121;O95817;Q16236;Q13415;P14672;Q96CN9;P11277;Q96GD0;Q9UKT9;Q9BWF2;P56945;Q9H910;O15255;Q15849;Q8ND76;Q96B86;Q6UWI2;O60303;Q16181;P61077;Q15047;Q14696;P46108;Q92796;Q7L804;O00170;P08670;P60510;P11532;Q9NV70;P62987;Q86UL8;Q13033;Q16762;Q9BSK0;Q00987;P02511;Q9NS86;Q9HCH5;P41220;Q7Z2W4;O14512;Q15390;Q9NS23;P20396;Q8TAC9;Q13424;P54826;P87889;O60711;Q96Q06;Q9HBM0;Q969H4;Q99549;Q96EY1;P35580;P23528;Q15833;Q9UQC2;Q9NRD5;Q68DX3;Q8N0Z2;Q8TF46;P20073;O95876;Q86YT6;Q8TD16;Q9HCI5;O43745;Q5BIV9;P18848;P11142;Q12959;Q99732;Q8NC51;Q9NP85;Q9NVN3;Q9HD26;O75150;Q5TB80;Q9BYI3;Q9H4E7;Q9Y250;Q93052;O96015;Q9UHD9;O95868;Q9H6S1;Q7Z699;Q8IVT9;O94921;Q9NZB2;Q96FQ6;O95166;P52630;Q6Q0C0;O95171;Q9Y2J2;Q9BYG4;Q9BQJ4;P50570;Q8TAG9;P29966;Q9BRT3;Q8IX03;Q969L2;O00522;Q9P1A6;Q9BWX1;Q9UKS6;P14618;Q969G9;Q9UKA4;Q93050;P11171;Q902F8;O00186;Q5JTC6;P23508;P63146;Q15046;Q8WV24;Q9BVN2;Q9H1J1;Q00587;Q02410}

3897 Pathogen[ P03363] interacts with 331 human partners: {Q8NF67;Q16236;P22681;Q9Y6N9;P62879;Q9Y3P8;Q9BUL8;Q12959;P52630;Q9UGK3;Q9NVI1;P18848;Q16186;P29474;Q8N3V7;Q9Y3F4;O43493;Q9NVV4;P46939;O14907;O95049;Q96IY1;Q96RT1;Q9BWF2;Q5JTC6;P08865;Q13835;Q14244;Q99962;Q9BXM0;Q86YD1;P11277;P07900;P63167;Q7L804;P06744;Q15438;Q16222;O95996;Q7RTS9;Q8TAM2;Q8NC51;Q8IVI9;Q9BX66;Q86UR1;Q9HAU4;O60291;P16157;P35579;O14786;O94811;Q96IZ0;Q96T49;Q9BZQ8;Q9BTE3;Q8TBZ0;Q02952;Q86WV1;Q96LC9;O95232;P25963;O60437;O00213;Q8IYI6;Q9UPX8;Q96B97;P37802;O60303;Q8WV24;Q13283;Q96A65;Q9N2W5;O14910;Q9UBF9;Q6UW56;Q01082;Q9NYJ8;P06733;Q7Z2W4;Q14160;P78352;Q92597;P25490;Q99550;Q9Y6X8;P05075;Q8ND76;Q969G9;Q8WV28;Q9H6Q3;Q9W307;Q13033;Q9NPB6;Q5EBL4;Q96RU3;Q00610;Q00587;Q96JI7;P78395;O43318;Q15700;O15105;P04156;P63146;Q99828;Q96KQ4;Q9H4A6;P53618;Q99569;O75970;P23508;Q8N1N5;Q9BYG4;P63000;Q07157;P27815;P20073;Q93052;Q9Y4G6;O94973;Q92797;O75150;Q8N0Z2;Q96IF1;O95817;P15924;O60296;O94850;Q9C086;Q07021;P54105;Q5TZA2;Q969L2;Q9Y4E1;Q96QU8;Q99549;Q9NSC5;Q969H4;P27816;Q8IV36;Q717R9;Q7Z699;Q8IXQ5;O96019;P13647;P135YG4;Q13415;Q15149;Q9Y250;Q9NZI8;Q9NR22;O95721;Q9H2G4;P31749;Q9Y6G3;Q96KP1;P16333;P11532;O00522;Q02410;Q5TCQ9;P28290;Q99732;P08670;Q9UK41;Q8N3R9;Q8NFG4;Q9BTW9;Q9Y2N7;P11171;P63010;Q96ST8;P84022;P17987;P04406;Q9NZU7;Q13620;O14613;Q9BT92;Q92556;Q96I34;Q86UT5;Q8TCG1;Q6ZVN8;O95171;P49789;P62987;P23528;P46108;Q9H8T0;Q9BV57;Q6UUV9;Q6NZI2;P60510;Q9UDY2;Q13884;Q99871;Q9HB19;O00186;P41220;Q495M9;P29966;Q9BYG5;P51808;O00422;Q29RF7;Q7Z614;Q9NS23;P14317;Q13469;O95782;Q9UKS6;Q01844;O43491;Q12923;Q8NI35;Q92681;Q9BVN2;P56945;Q460N5;Q12968;Q9Y5V3;Q6P9F0;Q86WH2;O00401;Q15599;Q9NRI5;O43159;Q5BJF2;Q9HCI5;P14672;Q9UKJ5;Q86UL8;Q5D1E8;Q9UKT9;Q9NRR3;Q13642;O75386;P80723;O95886;Q99816;P67870;Q9C004;O43745;P61077;Q8IYW8;O43918;Q9P1A6;Q9UJM3;O14490;Q9P278;Q96FF9;Q9H910;O60662;Q9HCH5;Q96KN1;P16452;Q92796;O14512;Q9NVV7;Q5HYK7;Q9H0M0;O00192;O00161;Q96M11;O43663;Q8IX03;Q8N5C8;Q9BUZ4;Q8NFI9;Q9NUP9;O95429;Q9BQI5;Q8TF46;P43355;Q86WJ1;Q99719;O60299;P04264;Q96EY1;P49006;O95810;O14641;O43752;Q9ULD2;Q8TD16;Q8NFI5;P60953;O60716;O00170;Q15047;Q5TB80;P27986;O95166;P67775;Q96FJ2;Q14678;Q6MZT1;Q9Y5K6;P04792;Q99767;A6NDB9;Q9HD26;Q9Y2J2;Q5VZE5;P11166;Q14315;Q8IZH2;Q9BSK0;Q15942;O60711;Q96MP8;Q5H9F3;P11142;Q96CN9;Q13515;Q9UPT5;Q13424;Q9UHD9;P49368;Q68DX3;Q96CW1;Q15833;Q8N7J2;Q99689;Q9C0H9;Q9H1J1;Q9UQC2;Q12816;Q96JB2}

3898 [Cluster 355]GO:0005746+C cellular\_component [name] mitochondrial respiratory chain [def] "The protein complexes that form the mitochondrial electron transport system (the respiratory chain), associated with the inner mitochondrial membrane. The respiratory chain complexes transfer electrons from an electron donor to an electron acceptor and are associated with a proton pump to create a transmembrane electrochemical gradient." [GOC  
 3899 Pathogen[ Q2Q067] interacts with 1 human partners: {Q9P0J0}  
 3900 Pathogen[ P0C214] interacts with 1 human partners: {Q9P0J0}  
 3901 Pathogen[ P03346] interacts with 1 human partners: {Q9P0J0}  
 3902 Pathogen[ Q85601] interacts with 1 human partners: {Q9P0J0}  
 3903 Pathogen[ P14079] interacts with 10 human partners: {O60397;Q15070;P14927;Q15526;P07919;Q14548;Q9P0J0;P24310;Q8TF08;P14406}  
 3904 Pathogen[ P03383] interacts with 1 human partners: {Q9P0J0}  
 3905 Pathogen[ P03410] interacts with 9 human partners: {Q8TF08;O14548;P07919;O60397;P14927;P24310;Q15070;Q9P0J0;P14406}  
 3906 Pathogen[ P14075] interacts with 3 human partners: {Q15070;P14406;Q9P0J0}  
 3907 Pathogen[ P0C206] interacts with 3 human partners: {P14406;Q15070;Q9P0J0}  
 3908 Pathogen[ P03363] interacts with 1 human partners: {Q9P0J0}

3909 [Cluster 356]GO:0030891+C cellular\_component [name] VCB complex [def] "A protein complex that possesses ubiquitin ligase activity\_ the complex is usually pentameric\_ for example, in mammals the subunits are pVHL, elongin B, elongin C, cullin-2 (Cul2), and Rbx1." [GOC  
 3910 Pathogen[ Q2Q067] interacts with 2 human partners: {Q6RSH7;P62877}  
 3911 Pathogen[ P0C214] interacts with 2 human partners: {P62877;Q6RSH7}  
 3912 Pathogen[ P03346] interacts with 2 human partners: {Q6RSH7;P62877}  
 3913 Pathogen[ Q85601] interacts with 2 human partners: {P62877;Q6RSH7}



3914 Pathogen[ P14079] interacts with 3 human partners: {P62877;Q6RSH7;Q9BR09}

3915 Pathogen[ P03383] interacts with 2 human partners: {Q6RSH7;P62877}

3916 Pathogen[ P03410] interacts with 3 human partners: {Q9BR09;P62877;Q6RSH7}

3917 Pathogen[ P14075] interacts with 2 human partners: {Q6RSH7;P62877}

3918 Pathogen[ P0C206] interacts with 3 human partners: {P62877;Q6RSH7;Q9BR09}

3919 Pathogen[ P03363] interacts with 3 human partners: {Q9BR09;Q6RSH7;P62877}

3920 [Cluster 357]GO:0030496+C cellular\_component [name] midbody [def] "A thin cytoplasmic bridge formed between daughter cells at the end of cytokinesis. The midbody forms where the contractile ring constricts, and may persist for some time before finally breaking to complete cytokinesis." [ISBN

3921 Pathogen[ Q2Q067] interacts with 38 human partners: {P49454;P50995;Q9Y2Y0;Q9Y3S2;Q9NS56;Q9H1H9;O75935;A8MVW5;Q6NXT1;P11166;Q68DK2;Q9NQS7;Q99569;Q6PGN9;O76095;P36873;Q9Y5B0;Q9C0F1;Q9UN37;P50570;Q02241;Q53EZ4;O76064;Q9Y3E7;Q14145;Q9UPY8;Q13526;Q9NR09;Q8IZT6;Q6DKK2;P60953;O75154;P61586;Q8TAP9;O15392;Q9BRK4;P14625;O60716}

3922 Pathogen[ P0C214] interacts with 37 human partners: {Q8TAP9;O75935;P14625;Q02241;Q9BRK4;O60716;Q6DKK2;Q9NS56;Q14145;P31150;Q13526;A8MVW5;P61586;P60953;P11166;Q9C0F1;Q6PGN9;P35580;Q53EZ4;Q6NXT1;Q9Y3E7;O15392;Q9UPY8;P36873;Q9Y2Y0;Q9Y5B0;Q9NQS7;Q9NR09;Q96GD0;Q68DK2;P50570;Q9UN37;P49454;Q8IZT6;O76064;P50995;O75154}

3923 Pathogen[ P03346] interacts with 48 human partners: {P50570;O76064;O15392;Q99569;O60716;P14625;O75935;A8MVW5;Q14141;Q9H1H9;P60953;Q9Y3S2;Q13526;Q9C0F1;Q9BRK4;Q9Y5B0;Q9NS56;Q9Y3E7;P31150;Q15019;P36873;Q53EZ4;Q9NQS7;Q6PGN9;P11166;P50995;Q68DK2;Q02241;Q8TAP9;P36405;Q9NR09;Q9P2J3;Q8IZT6;Q86YS3;Q9Y2Y0;Q9H8V3;Q14145;O75154;O76095;Q9UPY8;Q6NXT1;P84090;O14965;Q6DKK2;P49454;Q9UN37;Q9UBP0;P61586}

3924 Pathogen[ Q85601] interacts with 47 human partners: {Q53EZ4;Q99569;P49454;Q6PGN9;Q9NS56;O75154;Q02241;P36405;P31150;Q9NQS7;Q9UBP0;P50995;Q86YS3;O75935;A8MVW5;Q9Y2Y0;Q9H1H9;Q6NXT1;O15392;Q8IZT6;Q14145;Q8TAP9;O60716;O14965;O76064;P11166;Q13526;Q9Y5B0;Q9NQC7;P36873;Q9C0F1;Q9BRK4;Q6DKK2;P50570;Q9BVA0;P61586;Q68DK2;Q9P2J3;O76095;P60953;P14625;Q9NR09;P35580;Q9UPY8;Q9UN37;Q9Y3E7;P51955}

3925 Pathogen[ P14079] interacts with 47 human partners: {Q9UPY8;Q68DK2;P31150;Q9Y5B0;P50995;P36873;O76095;Q02241;Q9Y2Y0;O15392;Q86YS3;A8MVW5;P11166;Q96GD0;P50570;Q9NR09;P36405;Q6NXT1;P51955;Q14145;Q99569;Q9H1H9;P61586;Q9H8V3;Q9NS56;P84090;Q9C0F1;Q6DKK2;Q9UN37;Q6PGN9;P14625;Q8TAP9;Q9NQS7;Q9Y3E7;Q96FC9;P49454;O75154;Q13526;Q9BVA0;O14965;Q9BRK4;O75935;Q9NQC7;O60716;Q9Y3S2;Q8IZT6;Q53EZ4}

3926 Pathogen[ P03383] interacts with 32 human partners: {Q9BRK4;Q9Y2Y0;Q9NQS7;O60716;P49454;P50995;Q68DK2;Q02241;Q9Y3E7;P60953;A8MVW5;Q9C0F1;Q9H1H9;P36873;Q6PGN9;P61586;Q6DKK2;P14625;O75935;P35580;O14965;Q14145;Q9NR09;Q9Y5B0;O76095;P84090;Q9UN37;Q53EZ4;Q9UPY8;O75154;Q13526;Q8TAP9}

3927 Pathogen[ P03410] interacts with 46 human partners: {O15392;O75154;P50995;P11166;Q9H1H9;Q6NXT1;Q13526;P14625;O60716;P36405;P84090;P50570;Q6DKK2;Q8TAP9;Q8IZT6;P49454;O14965;Q96GD0;Q9P2J3;Q9NR09;Q86YS3;Q9Y3E7;P61586;Q9Y3S2;Q9UN37;P36873;A8MVW5;O75935;Q9UPY8;Q53EZ4;Q9Y5B0;P60953;P35580;Q96FC9;O76095;Q9H8V3;Q6PGN9;P31150;Q9C0F1;Q9Y2Y0;Q14145;Q68DK2;Q9BVA0;Q02241;Q99569;Q9NQS7}

3928 Pathogen[ P14075] interacts with 32 human partners: {P60953;Q9H1H9;Q02241;O76095;Q9NQS7;Q9Y5B0;A8MVW5;Q9Y2Y0;P36873;Q9Y3E7;P50995;Q68DK2;Q9UPY8;Q9C0F1;O75935;Q13526;O14965;Q9Y3S2;P61586;Q53EZ4;Q9BRK4;Q6PGN9;Q9NR09;O75154;Q8TAP9;O60716;P14625;P49454;P84090;Q14145;Q6DKK2;Q9UN37}

3929 Pathogen[ P0C206] interacts with 52 human partners: {Q9NQC7;Q9Y3S2;Q6NXT1;O60716;Q68DK2;Q9NS56;Q9UN37;Q9BVA0;Q9UBP0;Q13526;Q15019;Q9Y3E7;P51955;O75154;P50995;Q8IZT6;Q6PGN9;P49454;Q9H1H9;P11166;Q14141;Q02241;Q14145;P61586;Q6DKK2;A8MVW5;Q9Y5B0;Q9UPY8;Q9NR09;Q99569;Q9P2J3;Q9H8V3;O15392;P60953;P31150;P36405;Q96GD0;Q8TAP9;Q16181;P84090;Q9Y2Y0;O14965;Q9C0F1;Q9NQS7;O75935;P36873;O76064;P35580;Q86YS3;P50570;O76095;P14625}

3930 Pathogen[ P03363] interacts with 36 human partners: {P49454;Q9Y5B0;Q14145;P36873;Q9BRK4;P31150;Q6NXT1;P50570;Q02241;Q13526;Q68DK2;Q99569;P50995;Q6PGN9;A8MVW5;Q9UPY8;Q9UN37;Q8IYM1;Q53EZ4;Q6DKK2;Q9NR09;Q9NQS7;O75935;Q9Y3E7;O76095;O75154;Q9P2J3;Q9C0F1;Q9Y2Y0;Q9H1H9;Q14141;P60953;O60716;Q8IZT6;P11166;Q8TAP9}

3931 [Cluster 358]GO:0031265+C cellular\_component [name] CD95 death-inducing signaling complex [def] "A protein complex formed upon binding of Fas/CD95/APO-1 to its ligand. The complex includes FADD/Mort1, procaspase-8/10 and c-FLIP in addition to the ligand-bound receptor." [PMID

3932 Pathogen[ Q2Q067] interacts with 3 human partners: {Q13158;Q14790;Q9UNN5}

3933 Pathogen[ P0C214] interacts with 3 human partners: {Q13158;Q9UNN5;Q14790}

3934 Pathogen[ P03346] interacts with 3 human partners: {Q13158;Q9UNN5;Q14790}

3935 Pathogen[ Q85601] interacts with 3 human partners: {Q13158;Q14790;Q9UNN5}

3936 Pathogen[ P14079] interacts with 3 human partners: {Q14790;Q9UNN5;Q13158}

3937 Pathogen[ P03383] interacts with 2 human partners: {Q13158;Q9UNN5}

3938 Pathogen[ P03410] interacts with 2 human partners: {Q9UNN5;Q13158}

3939 Pathogen[ P14075] interacts with 2 human partners: {Q9UNN5;Q13158}

3940 Pathogen[ P0C206] interacts with 3 human partners: {Q9UNN5;Q13158;Q14790}

3941 Pathogen[ P03363] interacts with 2 human partners: {Q9UNN5;Q13158}

3942 [Cluster 359]GO:0005697+C cellular\_component [name] telomerase holoenzyme complex [def] "Telomerase is a ribonucleoprotein enzyme complex, with a minimal catalytic core



composed of a catalytic reverse transcriptase subunit and an RNA subunit that provides the template for telomeric DNA addition. In vivo, the holoenzyme complex often contains additional subunits." [PMID

3943 Pathogen[ Q2Q067] interacts with 5 human partners:{Q86US8;O60832;O14746;Q15185;Q9BUR4}

3944 Pathogen[ P0C214] interacts with 5 human partners:{O14746;Q9BUR4;Q86US8;O60832;Q15185}

3945 Pathogen[ P03346] interacts with 5 human partners:{Q86US8;Q15185;O60832;Q9BUR4;O14746}

3946 Pathogen[ Q85601] interacts with 5 human partners:{Q9BUR4;Q15185;Q86US8;O14746;O60832}

3947 Pathogen[ P14079] interacts with 5 human partners:{O14746;O60832;Q86US8;Q9BUR4;Q15185}

3948 Pathogen[ P03383] interacts with 5 human partners:{Q9BUR4;Q86US8;O14746;Q15185;O60832}

3949 Pathogen[ P03410] interacts with 5 human partners:{O14746;O60832;Q15185;Q86US8;Q9BUR4}

3950 Pathogen[ P14075] interacts with 5 human partners:{O14746;Q15185;Q86US8;Q9BUR4;O60832}

3951 Pathogen[ P0C206] interacts with 5 human partners:{Q15185;Q86US8;O60832;Q9BUR4;O14746}

3952 Pathogen[ P03363] interacts with 5 human partners:{O60832;Q9BUR4;Q86US8;O14746;Q15185}

3953 [Cluster 360]GO:0071942+C cellular\_component [name] XPC complex [def] "A nucleotide-excision repair complex that is involved in damage sensing during global genome nucleotide excision repair (GG-NER). It is part of the pre-incision (or initial recognition) complex bound to sites of DNA damage. In human, it is composed of XPC, RAD23B and CETN2." [PMID

3954 Pathogen[ Q2Q067] interacts with 3 human partners:{P54727;P41208;Q01831}

3955 Pathogen[ P0C214] interacts with 3 human partners:{P54727;P41208;Q01831}

3956 Pathogen[ P03346] interacts with 3 human partners:{P41208;Q01831;P54727}

3957 Pathogen[ Q85601] interacts with 3 human partners:{Q01831;P54727;P41208}

3958 Pathogen[ P14079] interacts with 3 human partners:{P41208;Q01831;P54727}

3959 Pathogen[ P03383] interacts with 3 human partners:{P41208;Q01831;P54727}

3960 Pathogen[ P03410] interacts with 3 human partners:{Q01831;P41208;P54727}

3961 Pathogen[ P14075] interacts with 3 human partners:{Q01831;P54727;P41208}

3962 Pathogen[ P0C206] interacts with 3 human partners:{Q01831;P54727;P41208}

3963 Pathogen[ P03363] interacts with 3 human partners:{P54727;Q01831;P41208}

3964 [Cluster 361]GO:0030529+C cellular\_component [name] ribonucleoprotein complex [def] "A macromolecular complex containing both protein and RNA molecules." [GOC

3965 Pathogen[ Q2Q067] interacts with 273 human partners:{Q5JNZ5;Q8N5N7;P51398;Q9HD33;Q9H583;P61313;P83369;Q12905;P62701;Q8NHW5;P82921;Q9BYD6;Q86U42;O15234;Q13084;C9JE40;P49458;Q9BZE1;P47914;P82933;P07910;P62312;Q9Y333;P46779;Q96EL2;Q9BYD1;Q4U2R6;P55769;Q9UQ80;P22087;P82912;Q59GN2;P82932;Q9Y3B7;P52272;Q02543;P14866;P26373;Q9Y676;O75394;Q96A35;P62750;P62273;P67809;P55795;Q9Y2R9;P62318;Q13405;Q96GC5;Q9HCK5;Q6NVV1;P19474;Q8WWY3;P82930;P15880;P40429;Q9BYN8;P09132;Q9NWU5;Q9UHX1;P46782;Q9BRJ2;Q9NV31;P10155;P35268;O43390;Q92552;Q9HD15;Q15696;P22090;P46778;Q9UK45;P82663;Q14103;O60506;Q9BYC8;O00566;P62888;Q9Y3D9;P32969;P62277;Q13601;P57723;P06748;P62241;Q96G21;Q9P0M9;P62244;P05387;Q5T653;Q9NVS2;P62861;P08107;P42766;A6NHQ2;Q96HR8;P05386;Q9Y291;P11308;Q9P0J6;P38935;Q9NPE3;Q96N16;Q6P1L8;Q969Q0;O95793;P62269;P08579;Q9NP92;Q9Y6G3;P52597;Q6P161;O14746;P14678;P62424;P62917;P62829;O15116;P46783;Q9BRS8;Q9BYD3;P09661;P36578;Q9UKV8;P62857;Q15366;Q8WVV9;P19338;P37198;Q9BYD2;O95777;Q92499;Q9Y3D5;P62847;Q14764;P09012;P49207;P23396;Q09161;Q9H0U6;Q9BUJ2;P63173;Q12789;P18621;Q9NY12;P82675;Q9H9J2;P16989;Q9NRX2;P62316;Q86TS9;Q99700;Q96PK6;Q8TCC3;Q9UKF6;P39019;Q14493;P82664;Q9UL18;P61353;Q96L21;Q9UKK3;P62266;P42677;Q9Y3U8;Q9H0G5;P62306;P63220;P62841;P83881;P62987;P49406;Q9P015;P22626;P50914;P46776;Q9H7H0;Q96DV4;P11940;P82909;P63162;P62854;P62308;P09001;P62753;P05388;Q8N983;P18124;P62851;Q00839;P25398;A6NKH3;Q96QE5;Q9Y4Z0;Q9NQ50;P62910;Q92901;P46781;P82673;P09234;Q9BYC9;P62310;P27635;Q92665;Q969L4;P61513;O95478;Q13064;Q9Y4Y9;P62945;Q71UM5;Q9NX20;P62979}

3966 Pathogen[ P0C214] interacts with 281 human partners:{Q9HD33;P62861;Q13310;P84098;Q96A35;P61247;P49406;Q9Y399;P62312;Q8N5N7;Q8NHW5;P82930;O15234;O15116;Q13405;Q9Y3D5;P60709;P62316;Q9BYD2;Q96QE5;P11308;Q96EL2;Q9BYD1;P83369;Q9H9J2;Q09161;P15880;Q8ND56;P62081;P42766;Q9NV31;P19474;P62913;P22090;Q13469;P16989;Q9NPE3;O14746;P82912;Q92901;P62249;Q9Y3D9;O95478;P62899;Q96DV4;P38159;Q9UKF6;C9JE40;P62854;P39019;P62263;P82675;P57721;P0C6E6;Q9H0U6;Q9NYK5;Q16540;Q6P161;Q9Y676;Q86TS9;P62273;Q9NP92;P06748;P23396;P18077;Q9HD15;O15235;P05388;P62847;Q9BYD3;Q96GC5;Q9NX20;P14678;Q14764;P62829;P26373;P62306;Q969L4;Q9H7H0;A6NHQ2;P27635;P46778;P67809;Q6P5R6;Q4U2R6;Q5JNZ5;Q6P2Q9;Q9NWU5;Q12906;Q8IXM3;Q96EH5;P61513;Q7Z2W9;P83881;Q96G21;O75394;P22087;Q5T653;P62701;Q71UM5;P49207;P11940;Q12905;P63220;P08865;Q9Y2Q9;Q9NIX8;P32969;Q02543;P62266;P38935;P09001;Q9NY12;P62308;Q9Y4Z0;Q9UK45;Q969Q0;P08579;O43390;Q15366;P82664;Q13064;P82914;Q12789;Q99700;Q16630;P62277;Q9Y4Y9;Q8N983;P50914;Q92665;P46779;P

55795;Q9Y333;Q59GN2;P52272;P40429;Q9P0J6;P62314;P07910;Q14493;P47914;Q8TCC3;Q9UHX1;Q9Y2T7;Q15696;P63173;P13639;O14980;P37198;P08621;Q13084;P46783;P51398;Q14103;P62310;Q9BQ48;P82663;P55769;P82921;P62280;Q14137;Q9UNX3;Q9BRS8;Q9Y3U8;Q9BYN8;Q6P1L8;P30050;Q9BX40;P62753;P62910;P62891;Q8TD47;P52597;P82909;Q9NZE8;Q9H9G7;Q9Y6G3;P62269;P63162;Q9BUJ2;Q9H0G5;P62318;Q9NQ50;P46781;Q9Y291;Q96PK6;Q9Y2R9;A6NKH3;Q9BYC9;P61254;O95777;Q9UKV8;P62841;P62244;Q9NP64;Q9NRX2;P62987;Q7Z7F7;O60832;P31943;Q9Y2R5;Q92499;P62304;Q97020;P42677;P62945;Q6NVV1;P09012;O95793;Q9P0M9;P46776;Q9BQC6;O60506;P52815;P62241;P46777;P82932;Q9UHK3;P83731;P09661;Q96L21;P35268;Q9HCK5;Q9UHB9;P62424;Q08211;P60866;Q9H2W6;Q9BYC8;P62857;Q00839;P49458;P09234;P61313;P08708;Q9P015;O00566;Q13601;Q9UQ80;P05387;P25398;P22626;Q9BZE1;Q9Y3B7;P61927;P62750;P62979;P82673;P05386;P09132;P08107;P62851;Q86U42;P19338;Q15365;P46782;P82933;P18124;Q8WVV9;P82650;Q9UL18;P10155;P61353;Q9H583;Q9BYD6;P14866;P36578;Q9NV06;Q9BRJ2;Q92552;Q9Y3D3;P18621;O60783;Q8WVY3;P62906;Q96HR8;P11142;Q02878;Q9NVS2;Q96N16}

3967 Pathogen[ P03346] interacts with 299 human partners: {P08107;Q9NQ39;Q96A35;Q9NVS2;P05387;Q9Y399;P51991;Q8NHW5;P46779;P82930;Q86U42;O15234;P61978;Q8ND56;Q96EL2;P38935;Q9BYD1;Q09161;P63173;Q5JNZ5;P62917;O75394;Q9NP64;P62249;P62913;Q15366;P49406;Q9P0J6;Q8N983;P62861;P82912;P62277;Q02878;Q12905;P82933;P09651;Q96EL3;Q6P161;P06748;Q96N16;Q59GN2;P14866;Q14764;P62280;P39023;Q8NHW6;P62304;Q9UKF6;O95777;Q9UQ80;P62987;P61927;Q9UNX3;P62857;Q9H0U6;Q8TCC3;Q9BX40;A6NHQ2;Q9Y4Y9;Q8IXM3;P08579;Q9H9G7;P55795;Q4G0J3;Q9UL18;P46778;Q8WVV9;P49207;Q9HD15;Q6P5R6;O60506;P62266;Q9NZI8;Q9UKK3;Q9BYC8;P60709;P61254;Q9BQC6;Q07910;Q71UM5;Q12906;P11142;Q9H583;A8MW D9;P08621;Q5T653;Q96G21;P11940;P31943;Q00839;O60832;Q9H2W6;Q92552;P62424;P16989;P62273;P19338;Q9BYD2;Q9BUJ2;P83731;P60866;P49458;Q08211;P0CW22;P37198;P62899;Q969Q0;O43390;P82909;O43818;Q9BYC9;P22626;Q6NVV1;Q9Y333;P35268;P09132;O00566;O95793;P09001;P62891;P08708;Q8TD47;Q14103;P46782;P61353;P51398;Q92879;Q9H0G5;P62854;Q9NV06;Q14493;Q9Y3D9;Q9Y3U8;P82650;Q9HCK5;P62318;Q92499;Q99700;P47914;P10155;P11308;O14980;Q9Y2R5;P08865;Q96L21;Q9NX24;P63162;Q6DKI1;Q9NRX2;Q7Z7F7;O15235;Q13469;P61313;P67809;P25398;Q13084;P83369;Q9Y4Z0;P82914;O60783;Q9NV31;P61513;Q9NZE8;P62306;A6NKH3;P05388;O14746;Q9Y2R9;P62269;Q6P1L8;Q02543;P42766;P62081;Q9NQ50;P55769;P61247;Q9BYD3;Q13064;Q9HD33;Q9NWU5;Q96DV4;P18621;Q9Y676;P46781;P31942;P82921;P84098;P15880;O15116;Q9UKV8;P50914;Q9Y6G3;Q8WVY3;P62829;P62979;Q6P2Q9;Q9Y3D5;P39019;P09012;Q9BYD6;Q9Y3D3;Q9H7H0;P62314;P23396;P52272;Q4U2R6;P42677;P62750;Q96EH5;P62701;Q9BQC6;Q9Y2T7;P30050;Q9NP92;P14678;P62910;P36578;Q12789;Q86TS9;P19474;Q9BRJ2;Q9BZE1;P82675;Q14137;P62847;Q13405;Q9UHB9;P62851;Q96QE5;Q8N5N7;Q13310;P22090;Q9NPE3;P22087;P46777;P82663;P52815;Q07020;P62263;P38159;P62866;P62841;P83881;Q969L4;P62316;Q9UHX1;Q13601;P82932;P05386;Q9NY12;P18077;Q15696;Q32P51;Q7Z2W9;Q99729;P46776;P62241;Q96HR8;Q9BRS8;P52597;Q9Y291;O95478;P09234;P62308;Q9BYN8;P62312;Q96PK6;P62753;P62945;P57723;P62310;Q9UK45;P09661;Q15365;Q92901;P32969;P26373;P18124;Q16630;P40429;P27635;Q9P015;Q7Z7H8;P46783;Q9Y3B7;C9JE40;P82673;Q96GC5;P62906;Q9H9J2;Q92665;Q9P0M9;P62244;Q9NX20;P62888;P0C6E6;P57721;P63220;Q9Y2Q9}

3968 Pathogen[ Q85601] interacts with 268 human partners: {P46783;P32969;Q9NV31;P61513;Q8NHW5;P26373;O15234;P61978;P09234;P62857;P52815;Q13064;P62244;P09001;Q9Y2T7;Q9BQC6;Q96EL2;Q9BYD1;P62913;P08107;Q96PK6;P62854;P82930;P82912;P62081;O43390;Q6P5R6;P61353;Q96A35;P62891;P46776;P82933;Q9UQ80;P18077;P61313;Q9Y2R5;Q9Y3D5;P49406;P05388;Q9HCK5;Q9NP92;A6NKH3;Q9Y3B7;Q4U2R6;P62304;O60506;Q96HR8;P63173;P38935;Q9H0U6;Q13310;Q9NX20;Q8TCC3;Q14103;P82921;O15116;A6NHQ2;Q92665;C9JE40;Q9H2W6;P23396;P62273;Q9UL18;P46778;P10155;P62829;P30050;P62753;O95793;P27635;P22626;Q9UHX1;Q9UKK3;Q9BYC8;Q9BYC9;P82932;P15880;Q9BQ48;Q9P0M9;P83881;Q07020;P39019;P08621;Q5T653;Q96G21;Q96QE5;Q969L4;Q9Y3U8;Q71UM5;Q14764;Q9BYN8;P62701;P62241;P82675;P62424;Q9BRS8;Q92552;P19338;Q9Y3D9;Q13469;Q9BUJ2;P83731;P55795;Q9BYD2;P62899;Q92499;P62945;Q9UK45;Q08211;P62316;P55769;Q9H7H0;P62263;Q9P015;P62861;Q02878;Q9BYD6;Q09161;P39023;P60709;P61254;P14678;Q9Y2R9;Q13405;P51398;Q9H0G5;Q9Y3D3;P49207;P11940;Q96GC5;Q9Y291;P62910;Q9Y6G3;Q9NRX2;Q8N983;P82909;P62310;O15235;Q9H9G7;P62249;P62280;Q9NP64;P62314;P62306;P47914;Q9HD15;P84098;Q96L21;Q7Z7F7;Q13084;P08708;P63162;Q9Y4Z0;Q12906;O75394;P62318;P42766;Q9NZE8;P52597;P11142;Q9NVS2;P62269;P62312;Q9Y2Q9;Q9BYD3;Q9NWU5;Q8N5N7;P67809;P18621;Q9Y676;P05387;Q9NYK5;P83369;Q9BRJ2;P06748;O00566;Q9UNX3;Q9BX40;Q9UKV8;P62277;O95478;P35268;Q8WVY3;Q13601;O14980;P62979;P62847;Q9HD33;O95777;P42677;P63220;Q96EH5;P14866;Q6P2Q9;O14746;Q8IXM3;Q12789;Q86TS9;Q00839;Q9BZE1;Q12905;P46782;Q9NQ50;Q9UHB9;O60783;P46779;Q9NV06;P62750;Q9NPE3;P22087;P62851;P62841;Q96DV4;P62308;P62987;P38159;P82663;P22090;Q15696;Q9Y333;Q15365;P19474;P82664;P61927;P57721;P36578;Q9H9J2;P05386;Q9NY12;Q86U42;P31943;P82914;P08865;Q14137;Q9Y399;P61247;P16989;Q9H583;Q99700;Q9UKF6;Q9P0J6;P09132;Q14493;Q5JNZ5;O60832;P46777;P09661;P62917;Q96N16;Q92901;Q15366;Q6P161;P18124;P46781;P11308;Q6NVV1;P25398;P60866;Q02543;P62906;P50914;P62266;P40429;Q8ND56;P62888;Q6P1L8;Q9Y4Y9}

3969 Pathogen[ P14079] interacts with 283 human partners: {Q9NQ39;Q9Y3U8;Q9BQC6;P27635;Q8IXM3;P52815;P84098;P46779;A6NKH3;Q9BYD6;Q92552;Q9Y333;Q7Z7F7;O14746;Q9NQ50;Q9UKV8;P26373;Q8WVV9;Q4U2R6;P09132;P10155;P57723;P23396;P11142;Q6NVV1;Q9NV31;O95793;Q9NPE3;P40429;Q9UL18;Q9H9G7;P57721;P18621;Q9H0U6;P83881;Q6P161;Q8ND56;Q9UKF6;Q14103;P67809;Q8TCC3;Q99700;Q9UNX3;P82664;P46781;P83731;C9JE40;P61513;Q9UK45;P62753;P82933;Q9BQ48;O60832;P39023;P62273;Q9Y2R9;Q9BYD2;Q9BYC9;Q9HCK5;P25398;Q9BUJ2;Q12906;Q9BRJ2;Q8NHW6;Q9Y6G3;Q9NRX2;P18077;Q9Y291;P14866;Q16540;P46783;P07910;Q13310;P61254;P50914;Q7Z2W9;O15116;P62312;P62979;A6NHQ2;Q96HR8;Q6P2Q9;P62841;P18124;P62314;P42766;Q08211;Q9UHX1;Q9UKK3;P62266;Q9Y2R5;P46782;Q00839;P62987;P22087;Q96N16;Q5JNZ5;O60783;P11308;Q8WVY3;P62241;P83369;Q9Y3D3;P32969;P22090;P62306;Q9P0M9;P62829;P14678;P60866;Q12905;P19338;Q9Y2T7;P62854;Q07020;P39019;Q13084;P55795;Q9BZE1;P63220;O00566;Q9NV06;P49207;Q96L21;P62244;P82921;Q9NP64;P82650;P16989;P09001;Q96A35;P62263;Q02543;P19474;P62424;Q92901;P62277;Q9H2W6;P11940;P62750;P62910;Q86TS9;Q9H583;P6

3173;Q9Y4Z0;P49458;Q6DKI1;Q96GC5;P46776;Q9BYD3;Q9NY12;P08107;P82912;P08621;P08708;Q9BRS8;Q9HD15;Q86U42;Q92665;Q9Y2Q9;P36578;Q8N5N7;Q16630;P62308;P0CW22;Q9BYD1;O60506;Q15696;P09012;P60709;P13639;P37198;Q71UM5;Q15366;Q9BYC8;P62304;O15235;P62906;P62316;P47914;P62280;Q6P5R6;P62310;P06748;Q9H0G5;Q969L4;P62899;Q15365;Q9NP92;Q9BYN8;Q13405;Q95478;Q13601;P61353;P62081;P62945;Q13064;Q96EL3;Q9NX20;P46777;P42677;Q9H9J2;P30050;Q9P015;P61978;Q12789;P31943;P15880;Q14764;Q59GN2;O75394;Q7Z7H8;Q14493;P62891;Q95777;P82909;Q9H7H0;P82675;Q92499;Q9NZE8;Q9HD33;P62888;P08865;P55769;P82673;Q9BX40;P38935;Q14137;P61927;P52597;O43390;P62917;P09234;Q9Y3B7;Q96G21;Q9P0J6;P46778;P62249;Q13469;Q9Y676;P82930;Q96DV4;P09661;Q969Q0;P05386;P35268;P62913;P51398;Q8N983;Q9NVS2;P05387;P61247;P62318;Q9NYK5;Q9UQ80;P62269;Q9Y4Y9;P62701;Q9UHB9;P61313;O15234;Q5T653;P82663;Q8TD47;Q96EL2;Q96PK6;P62851;Q6P1L8;P0C6E6;Q09161;P05388;P22626;P38159;Q96EH5;Q9Y3D5;P62857;P62861;Q9Y3D9;P82914;Q8NHW5;P49406;P63162}

3970 Pathogen[ P03383] interacts with 263 human partners: {P08107;P42766;P51398;P36578;P05388;P62266;Q95478;P16989;Q8NHW5;P39019;Q13601;P19474;P26373;O15234;P09661;Q96EL2;Q9BYD1;P62913;Q9BX40;P62945;Q15366;P06748;P62854;Q969L4;P82930;P40429;P82912;Q9BYD2;O43390;Q96A35;Q13469;P62987;P62891;P25398;P19338;Q13084;Q9NP64;Q9UL18;P62280;P82664;P62318;Q07020;P49458;P62312;P62750;P22626;Q9BRJ2;P14866;P05387;Q9BQ48;P62249;P62888;P62899;P61927;A6NKH3;P46777;P46779;P49207;Q9P0J6;P55795;P62316;Q9NX20;Q99700;P83731;P62424;Q9H2W6;P49406;P18124;P82933;P46778;Q92901;P62753;P62304;Q9BQC6;P42677;Q9NWU5;P61247;Q9BYC9;Q6P2Q9;Q9Y4Y9;Q5JNZ5;P83881;Q9HCK5;P09001;P63162;Q9BYD3;P47914;Q5T653;Q9POM9;Q71UM5;Q9Y2R9;P61978;P11940;P31943;Q9NPE3;P62917;Q9NP92;P82914;Q13405;P62273;Q9UNX3;Q9BZE1;Q96L21;P09132;Q13064;Q969Q0;Q92665;Q9UKF6;Q9NRX2;Q9BRS8;P30050;P10155;P84098;Q9Y2T7;P38159;Q9Y6G3;O75394;Q96G21;P32969;Q9BYN8;Q9NVS2;Q09161;P82675;P62277;Q92552;Q9BYD6;P18077;Q6P1L8;P63173;Q9Y3D9;Q95777;O60783;P62081;Q9UHX1;Q9Y2Q9;P11308;Q9HD15;P62314;Q96PK6;Q9H583;P62310;Q96N16;Q9Y2R5;Q9Y3B7;Q9NV31;P61313;O14980;P08865;Q8WVV9;P82909;P82663;P62851;Q14493;P46782;Q14103;Q9HD33;Q9NZE8;O14764;P62269;Q9P015;P57721;P63220;Q02543;P62244;P14678;Q02878;Q8ND56;Q9NY12;Q9Y333;Q9Y3D5;P11142;Q86TS9;P82921;P62910;Q15365;P27635;Q9UKV8;Q12905;Q8IXM3;Q96HR8;P62857;Q12906;P82932;P09012;P62906;Q9Y4Z0;P46783;Q9H7H0;Q9Y3U8;P60866;P52815;Q9UK45;Q9UKK3;P61254;Q9UQ80;P62979;Q9BUJ2;P62241;C9JE40;Q7Z7F7;P46781;Q8WWY3;Q96EH5;Q9H9J2;P82650;P39023;Q9NQ50;P55769;Q9UHB9;Q8TCC3;Q13310;P38935;P62841;P62308;Q6NVV1;P22090;Q12789;Q92499;P37198;P62701;P62829;O15116;Q9H0G5;P83369;Q9Y676;P62263;P62847;P35268;Q4U2R6;P05386;P50914;O15235;Q86U42;Q9Y291;P22087;P67809;Q14137;Q9Y399;P09234;P62861;Q00839;P18621;P08621;P46776;Q96GC5;Q14764;P52597;P15880;O60832;P23396;Q8N5N7;Q8N983;Q9Y3D3;P61513;Q9H9G7;Q59GN2;Q96QE5;O00566;Q9BYC8;P62306;Q9H0U6;P08708;P61353}

3971 Pathogen[ P03410] interacts with 291 human partners: {Q99700;Q9Y2Q9;P62861;P05386;A8MWD9;Q8NHW5;P22087;Q9Y399;Q7Z7F7;Q02543;P61247;P62241;Q00839;P62829;P49207;P26373;P82663;Q9Y4Y9;Q9HD33;P61513;Q9NP64;P82909;Q14103;P62304;P62899;O15234;Q9P015;Q96PK6;P0CW22;Q9POM9;Q9UKV8;Q9UHB9;Q8WWY3;P62244;Q9H7H0;Q15696;P62913;P61978;Q8TCC3;Q16540;Q02878;Q9NX20;Q92901;P22626;P11940;P16989;Q9BUJ2;P15880;Q9NV06;P62306;P46777;P46776;O14764;P62841;P82675;Q5JNZ5;P30050;Q9NQ39;P62310;Q9UL18;P05388;Q96G21;Q8N983;O15235;Q9UQ80;Q95777;P46781;P18124;Q8NHU6;Q96A35;Q14493;Q9H0G5;P57723;P49406;Q15365;Q92665;Q9BYD2;Q9Y333;P62269;A6NHQ2;Q07020;P57721;P63220;P55769;P62910;P62650;P62847;Q59GN2;P62906;P11142;Q9P0J6;P52815;Q9NP92;P23396;P18621;P62266;Q9NWU5;O60832;Q96N16;Q15366;P62249;P62308;P14678;P63173;P62316;P50914;Q969Q0;Q96DV4;P06748;Q14137;P62280;Q96EH5;Q9BQC6;Q9NYK5;Q9BYN8;Q6DKI1;Q9H9G7;P22090;P13639;Q9BYD6;P61313;P62979;Q9Y3D5;Q9H9J2;P14866;Q9BYD3;P09012;P62701;Q8WVV9;P62750;O60783;P82664;Q96QE5;P08621;P08865;Q96L21;P67809;Q9UNX3;P62277;Q9NX24;Q9Y676;P36578;Q9BYD1;P18077;P07910;P08579;P25398;P38935;O43818;Q92552;Q14764;P61927;P84098;Q4U2R6;P62854;Q96EL3;P62273;Q9NRX2;P09132;Q9BYC8;P0C6E6;Q8N5N7;P52597;P08107;P62081;P62081;Q8TD47;P31943;Q92499;P62314;P83369;Q6NVV1;Q9BRJ2;Q12905;Q9Y3U8;Q9UHX1;Q13084;P09661;Q6P1L8;Q9Y291;Q9NY12;Q9HCK5;Q12789;Q13064;P19338;P52272;P08708;Q9Y2R9;P46782;P32969;Q9Y6G3;Q9BQ48;Q9NQ50;Q8IXM3;Q13469;P82673;Q5T653;P82912;P09234;P46779;P27635;Q96EL2;Q9NZE8;Q969L4;Q9Y4Z0;Q9UKF6;P62987;Q8ND56;Q9Y3D9;Q7Z2W9;Q9NPE3;Q86TS9;P62857;Q95793;Q9BYC9;Q96HR8;P62263;Q9UKK3;P62424;P62888;O60506;P61254;Q09161;Q9H2W6;P46778;A6NKH3;P62945;P05387;Q13601;P42766;Q95478;Q6P2Q9;Q9NV31;O15116;P09001;P39019;P62312;P47914;P82933;Q16630;Q86U42;P40429;Q9Y2T7;Q9HD15;P49458;P39023;P55795;Q9H583;P11308;Q6P161;P82914;P62917;P62851;Q7Z7H8;P82921;Q9NVS2;P83731;P82930;P38159;P35268;Q08211;Q9Y2R5;P61353;Q9UK45;Q13310;P63162;P62891;Q12906;Q9BRS8;P62753;Q6P5R6;Q13405;P60709;Q71UM5;O00566;O14980;Q9BZE1;C9JE40;Q9BX40;Q75394;P83881;Q9H0U6;P60866;O43390;P51398;P42677;Q9Y3D3;P10155;Q96GC5;Q9Y3B7;P62318}

3972 Pathogen[ P14075] interacts with 263 human partners: {P42766;P22626;O00566;Q15366;Q12789;Q9H7H0;P49207;O15234;P09132;P62857;P62304;P52815;P46781;Q9BRJ2;P63220;P32969;P14866;Q96EL2;Q9UK45;Q9BYD1;Q9BYD6;Q09161;Q9H583;P62316;Q9NRX2;Q9BYD2;Q14764;P42677;P19338;P62913;P82921;P22090;Q9POM9;Q9NYK5;P11142;Q02878;P82912;Q96L21;P16989;Q9Y3D9;P62277;O14764;P08621;Q96GC5;Q9Y2Q9;P62851;Q9HCK5;Q14103;Q59GN2;P08865;Q13064;P62244;P49406;Q9BQC6;Q9Y2R5;Q9NX20;P08708;Q9H9G7;Q14493;Q9UHX1;Q96N16;Q9Y4Z0;P61254;P46778;O75394;Q12905;P09234;P38159;P38935;Q9BX40;P05388;Q9Y3D3;Q9HD33;P83881;P82650;Q95777;Q5T653;P46777;Q6P1L8;Q9Y3U8;P31943;Q9Y3U8;P62249;P63162;Q12906;Q9H2W6;Q13601;Q8N5N7;P62306;P62081;Q9H9J2;P62308;P62750;P18621;Q969Q0;Q9Y3D5;O43390;Q02543;Q9BYC9;P18124;Q9UNX3;P25398;Q9BQ48;Q9BZE1;Q13084;Q96HR8;P62312;P82909;Q9Y3B7;P51398;Q9Y2R9;Q13405;Q9Y676;Q92499;P11940;P10155;O14980;P63173;Q15365;Q00839;Q9NWU5;P30050;P57721;O15235;P62979;Q13310;Q9Y399;Q9NPE3;P83731;P49458;P84098;P62318;Q8N983;P83369;O15116;Q8TCC3;P55769;P61247;O60783;P62753;P46782;P62891;Q13469;Q96PK6;Q9Y2T7;P62861;Q96A35;Q9BUJ2;P18077;P82664;Q9NV31;P46779;Q92665;P62917;P39023;Q9NZE8;P50914;Q6NVV1;P62269;P62847;P62910;P62273;Q9P015;Q6P2Q9;Q86TS9;P37198;P40429;Q9NQ50;P82663;P233

- 96;P19474;P22087;P62241;Q9Y291;P15880;P11308;P82930;P62987;P67809;Q9BRS8;P06748;P82914;P09661;Q9UKV8;P62841;Q9Y333;P36578;Q5JNZ5;P61978;P62266;P82932;O60832;Q96G21;Q9UQ80;P61513;P09012;P61313;P27635;P14678;P62888;Q9H0U6;Q92901;Q95478;Q8IXM3;P08107;P35268;Q9BYN8;Q14137;Q9UHB9;P62945;Q9NP64;P46776;Q96EH5;P09001;Q9BYD3;Q9UL18;Q99700;P46783;Q7Z7H8;Q4U2R6;P62701;Q9NP92;Q9BYC8;Q9H0G5;P62899;P52597;P82933;P47914;P62906;P62314;Q7Z7F7;Q9Y4Y9;P05386;Q9UKF6;Q9NY12;Q8WVV9;Q86U42;P61353;P39019;Q92552;P62424;P62829;P62280;Q96QE5;Q9P0J6;Q9HD15;Q07020;C9JE40;Q8WWY3;P62263;Q969L4;P62854;P60866;Q8ND56;P82675;P26373;P05387;Q9Y6G3;A6NKH3;P62310;Q9NVS2;Q9UKK3;Q71UM5;P61927}
- 3973 Pathogen[ P0C206] interacts with 279 human partners: {Q9BUJ2;Q8N5N7;Q6P1L8;P09132;P40429;P61313;Q9NPE3;Q6P161;Q96A35;P67809;Q9Y291;Q9Y3D5;A6NHQ2;Q9Y399;P60709;Q9UKF6;Q8NHW5;Q13601;Q96G21;Q14103;Q96L21;P27635;P14678;Q95478;Q9HCK5;P82930;Q15365;P18124;Q8IXM3;Q96EL3;Q7Z2W9;P38935;P62854;Q9H0U6;Q13469;Q12905;Q96EL2;P49207;Q9BQ48;Q8ND56;Q15696;Q9BX40;P62081;Q9Y3D3;Q14137;Q09161;Q9P015;P30050;Q9NY12;P55769;O60783;P82914;Q13084;P62241;Q4U2R6;P62304;P62244;P50914;Q9BYC8;P08865;Q08211;P62750;P18621;P09012;P46781;P62266;Q02543;P14866;C9JE40;Q92665;Q7Z7H8;P61978;P63162;Q9Y676;P09001;Q07020;Q9P0M9;P83881;P46778;Q9BRS8;P19338;P62263;P62273;Q86U42;Q8WVV9;P62314;P62316;Q43390;Q02878;Q9P0J6;Q9UKV8;Q9NWU5;Q5T653;P82673;Q9NRX2;P62280;Q96QE5;P22626;P49406;Q6P5R6;Q9H0G5;Q9HD15;P62857;P62851;Q9BYN8;Q9Y6G3;P62910;Q9Y4Y9;Q96N16;Q9UHX1;P46782;Q9NZE8;Q9Y4Z0;P61247;P11308;P57721;P83369;P51398;Q9HD33;P18077;Q95777;Q9H583;Q9BRJ2;P62913;P61927;Q9Y333;P61353;P62888;Q6NVV1;Q13064;Q75394;P82664;P36578;Q96GC5;Q9NVS2;Q9UK45;P62861;P38159;O60506;Q13310;Q9BYC8;P35268;P23396;P39023;Q9UKK3;Q99700;Q9Y2R9;P32969;Q13405;P82909;P52597;P62701;Q16630;P05386;Q9Y3B7;Q86TS9;P22090;Q9NV06;Q9BYD6;P84098;P62945;Q9BYD2;P10155;P26373;Q71UM5;Q96PK6;Q8TCC3;P46777;P05388;P62979;Q6P2Q9;Q95793;P62318;O15234;P62899;P08107;P82933;Q92552;P83731;Q9Y3D9;P82663;P82675;Q8WWY3;P55795;P39019;Q92901;P05387;O60832;P46783;P42766;P60866;Q9NP92;P62306;Q96HR8;P62841;Q15366;Q9H2W6;Q9NV31;Q9H9G7;Q9UNX3;Q9BZE1;P82650;Q969Q0;P61513;Q9Y2Q9;P49458;P22087;A6NKH3;Q9BYD1;Q9NQ50;P62277;Q9UHB9;Q9NP64;P0C6E6;P46776;Q9H9J2;Q8N983;P62906;P62312;Q9H7H0;Q9UQ80;P63173;P06748;P82932;Q9NYK5;P09661;P62987;Q9Y2R5;P62308;P62891;P62269;P62753;P08621;P46779;P63220;P62310;Q5JNZ5;Q92499;P15880;Q9NX20;Q00839;Q9Y2T7;Q96EH5;P25398;P08708;Q14493;P611940;Q7Z7F7;P47914;O15235;Q9BQC6;P09234;Q12906;Q12789;P62847;P31943;P61254;Q96DV4;P82912;O15116;O00566;O14746;Q14764;P42677;P62829;Q9UL18;Q969L4;P52815;P19474;Q9BYD3;P62249;P62424;P82921;Q59GN2;Q6DKI1;Q9Y3U8;P62917}
- 3974 Pathogen[ P03363] interacts with 301 human partners: {O95777;O60832;P62913;Q9NX24;P82650;P62314;Q9Y2R5;Q9BYD2;A8MWD9;P09132;P18621;P05386;Q13151;Q9Y4Y9;Q8NHW5;P63162;Q9Y4Z0;P62750;Q15366;P23396;P42677;P19338;Q9H7H0;P63173;P08865;Q96GC5;P62847;P18077;P82664;P05387;Q96EL2;P84098;P42766;Q8NHW6;Q9NZE8;P60709;P62249;P52597;Q9BYD1;P82921;P05388;P36578;P09012;P49406;P62753;P62312;P62081;A6NKH3;P62910;Q8IXM3;P51991;Q95478;P14866;P61513;Q46776;Q9HD15;Q92879;Q13405;O14980;Q9BYD3;P82914;Q9H0G5;P61254;Q9P0J6;P62273;Q9H9G7;Q9UHB9;P09651;P32969;Q92901;P08579;Q8N5N7;P46778;Q95793;Q9NVS2;Q9NY12;Q9Y3D5;P61927;O75526;P82930;Q9Y2Q9;P57723;Q9HCK5;P62891;P52815;P62318;Q6P5R6;Q9NV31;Q59GN2;Q9UKV8;P61353;Q16630;Q96EL3;Q4G0J3;Q9H9J2;Q96A35;P62304;Q6P2Q9;O14746;Q9BZE1;P09234;P08708;Q9NQ50;P15880;P11940;Q96L21;Q86U42;Q8WWY3;Q13601;Q32P51;Q7Z7F7;Q8TCC3;Q9UQ80;P06748;Q96DV4;Q9H0U6;Q96PK6;Q99729;Q9HD33;Q43818;P62306;Q9BX40;O15116;Q9Y3B7;P26373;P52272;P83369;Q4U2R6;P83881;P19689;Q96EH5;Q9BRJ2;Q9NWU5;P22090;Q9Y333;P62861;P62841;P62316;Q9UNX3;P10155;O75394;P30050;P82912;P62829;P38159;Q12906;P11308;P08107;P82663;P46782;P35268;Q9NRX2;P31943;Q9NZI8;Q6P161;Q9UKK3;Q9Y6G3;Q96QE5;Q92552;Q9BYC8;P46781;P50914;Q9H2W6;P19474;Q9NP64;Q13310;Q9NPE3;Q9P0M9;Q9Y2R9;P22087;P07910;P63220;P57721;P31942;Q9Y3D9;P61313;Q92499;P39019;Q9NX20;Q9UHX1;Q14137;O00566;P08621;P46779;Q5T653;Q02543;P14866;Q96G21;P62987;Q8N983;O60783;Q12905;P25398;Q9NP92;P22626;P09001;P82675;O60812;Q5JNZ5;Q9BRS8;Q15365;P82933;Q13469;Q14103;P83731;P62851;P62280;P55795;Q71UM5;Q92665;Q9H583;Q9Y3U8;P62888;P49458;Q9UL18;Q8ND56;P62310;Q9UKM9;Q969Q0;Q9Y676;P62244;P62277;O60506;P62906;Q96E39;Q9UK45;P62266;P61978;P62945;P49207;P62241;Q969L4;P05455;Q9BQC6;P62424;P55769;P60866;P61247;Q12789;P16989;Q9P015;Q9Y3D3;Q00839;Q13084;P62308;P62899;Q9UKF6;P62857;P62857;Q99700;Q99700;P82909;Q6NVV1;O43390;Q07020;P0C6E6;P39023;P82932;Q14493;Q9NQ39;Q9BQ48;P37198;Q86TS9;P14678;P62854;P09661;Q9Y399;Q08211;O15235;P62917;Q7Z2W9;Q96N16;Q14764;Q9BUJ2;P51398;Q9BYC9;Q9Y2T7;P18124;Q9NV06;P40429;P27635;P62263;Q15696;Q96HR8;P47914;Q9Y291;P38935;P62701;Q9BYN8;Q8WVV9;Q8TD47;P11142;Q9BYD6;P62269;P67809;Q09161;P46783;A6NHQ2;O15234;Q6P1L8;Q6DKI1}
- 3975 [Cluster 362]GO:0000974+C cellular\_component [name] Prp19 complex [def] "A protein complex consisting of Prp19 and associated proteins that is involved in the transition from the precatalytic spliceosome to the activated form that catalyzes step 1 of splicing, and which remains associated with the spliceosome through the second catalytic step. It is widely conserved, found in both yeast and mammals, though the exact composition varies. In *S. cerevisiae*, it contains Prp19p, Ntc20p, Snt309p, Isy1p, Syf2p, Cwc2p, Prp46p, Clf1p, Cef1p, and Syf1p." [GOC
- 3976 Pathogen[ Q2Q067] interacts with 4 human partners: {P11142;Q9UMS4;Q99459;Q8WYA6}
- 3977 Pathogen[ P0C214] interacts with 4 human partners: {Q9UMS4;Q99459;Q8WYA6;P11142}
- 3978 Pathogen[ P03346] interacts with 4 human partners: {Q9UMS4;P11142;Q8WYA6;Q99459}
- 3979 Pathogen[ Q85601] interacts with 4 human partners: {Q9UMS4;Q8WYA6;P11142;Q99459}
- 3980 Pathogen[ P14079] interacts with 4 human partners: {Q99459;P11142;Q9UMS4;Q8WYA6}
- 3981 Pathogen[ P03383] interacts with 4 human partners: {Q99459;P11142;Q8WYA6;Q9UMS4}
- 3982 Pathogen[ P03410] interacts with 4 human partners: {P11142;Q8WYA6;Q99459;Q9UMS4}
- 3983 Pathogen[ P14075] interacts with 4 human partners: {P11142;Q99459;Q9UMS4;Q8WYA6}
- 3984 Pathogen[ P0C206] interacts with 4 human partners: {Q9UMS4;Q8WYA6;Q99459;P11142}
- 3985 Pathogen[ P03363] interacts with 4 human partners: {Q8WYA6;Q9UMS4;Q99459;P11142}

3986 [Cluster 363]GO:0031514+C cellular\_component [name] motile cilium [def] "A cilium which has a variable arrangement of axonemal microtubules, contains molecular motors, and beats with a characteristic whip-like pattern that promotes cell motility or transport of fluids and other cells across a cell surface. Motile cilia are typically found in multiple copies on epithelial cells that line the luminal ducts of various tissues. Motile cilia may also function as sensory organelles." [GOC

3987 Pathogen[ Q2Q067] interacts with 3 human partners:{Q5TD94;Q96C74;Q96NB1}

3988 Pathogen[ P0C214] interacts with 3 human partners:{Q5TD94;Q96C74;Q96NB1}

3989 Pathogen[ P03346] interacts with 3 human partners:{Q5TD94;Q96C74;Q96NB1}

3990 Pathogen[ Q85601] interacts with 3 human partners:{Q5TD94;Q96C74;Q96NB1}

3991 Pathogen[ P14079] interacts with 6 human partners:{Q9H1X1;Q5TD94;O75952;O15259;Q96C74;Q96NB1}

3992 Pathogen[ P03383] interacts with 3 human partners:{Q5TD94;Q96NB1;Q96C74}

3993 Pathogen[ P03410] interacts with 5 human partners:{Q96NB1;O15259;Q5TD94;Q9H1X1;O75952}

3994 Pathogen[ P14075] interacts with 3 human partners:{Q5TD94;Q96NB1;Q96C74}

3995 Pathogen[ P0C206] interacts with 5 human partners:{O75952;Q5TD94;Q96C74;Q9H1X1;Q96NB1}

3996 Pathogen[ P03363] interacts with 5 human partners:{Q9H1X1;Q5TD94;Q96C74;Q96NB1;O15259}

3997 [Cluster 364]GO:0000806+C cellular\_component [name] Y chromosome [def] "The sex chromosome present in males of species in which the male is the heterogametic sex\_ generally, the sex chromosome that pairs with the X chromosome in the heterogametic sex. The Y chromosome is absent from the cells of females and present in one copy in the somatic cells of males." [GOC

3998 Pathogen[ Q2Q067] interacts with 2 human partners:{O75182;P24941}

3999 Pathogen[ P0C214] interacts with 2 human partners:{P24941;O75182}

4000 Pathogen[ P03346] interacts with 2 human partners:{P24941;O75182}

4001 Pathogen[ Q85601] interacts with 2 human partners:{O75182;P24941}

4002 Pathogen[ P14079] interacts with 1 human partners:{O75182}

4003 Pathogen[ P03383] interacts with 2 human partners:{O75182;P24941}

4004 Pathogen[ P03410] interacts with 2 human partners:{O75182;P24941}

4005 Pathogen[ P14075] interacts with 2 human partners:{P24941;O75182}

4006 Pathogen[ P0C206] interacts with 2 human partners:{P24941;O75182}

4007 Pathogen[ P03363] interacts with 2 human partners:{P24941;O75182}

4008 [Cluster 365]GO:0005923+C cellular\_component [name] tight junction [def] "An occluding cell-cell junction that is composed of a branching network of sealing strands that completely encircles the apical end of each cell in an epithelial sheet\_ the outer leaflets of the two interacting plasma membranes are seen to be tightly apposed where sealing strands are present. Each sealing strand is composed of a long row of transmembrane adhesion proteins embedded in each of the two interacting plasma membranes." [GOC

4009 Pathogen[ Q2Q067] interacts with 25 human partners:{Q9BTW9;O75161;Q8NI35;Q8IY63;Q9NPB6;Q9BYG5;Q9P2M7;Q8N3V7;Q9NR48;Q92797;Q5JTD0;Q9NPG3;A6NKD9;O14910;Q86UE4;Q86UL8;O95049;Q12959;Q07157;Q9UDY2;Q9Y2J4;Q5TCQ9;Q68DX3;Q9BYG4;Q9NUP9}

4010 Pathogen[ P0C214] interacts with 23 human partners:{Q5JTD0;O14910;O75161;Q68DX3;Q8NI35;Q9Y2J4;Q5TCQ9;Q9BTW9;Q92797;Q86UE4;O95049;Q9NPB6;Q12959;Q9UDY2;Q9P2M7;Q9BYG5;Q9NR48;Q8IY63;A6NKD9;Q8N3V7;Q07157;Q9BYG4;Q9NPG3}

4011 Pathogen[ P03346] interacts with 34 human partners:{A6NKD9;Q9NPG3;Q8N3V7;Q15438;Q9UDY2;Q68DX3;Q86UE4;Q5TCQ9;Q68CZ1;O75970;O43815;Q9NPB6;Q8TEW0;Q5JTD0;Q8IY63;Q8NI35;O75161;Q8N3R9;Q9NUP9;Q86UL8;Q9BYG5;Q5T2T1;O95049;Q07157;Q9BYG4;Q9Y2J4;Q9HAP6;Q9BUZ4;Q92797;Q9H8V3;Q9NR48;O14910;Q9P2M7;Q12959}

4012 Pathogen[ Q85601] interacts with 26 human partners:{O75161;Q9NUP9;O14910;Q9NPG3;Q9BYG5;Q8IY63;O95049;Q9NR48;Q86UL8;Q9UDY2;O43815;Q9BTW9;Q8NI35;Q68DX3;Q8N3V7;Q5JTD0;Q5TCQ9;Q9NPB6;Q9Y2J4;Q86UE4;Q07157;Q92797;A6NKD9;Q12959;Q9P2M7;Q9BYG4}

4013 Pathogen[ P14079] interacts with 42 human partners:{Q5JTD0;O75161;Q9BTW9;Q68DX3;Q8N7P3;C9JDP6;Q9BYG5;Q9UDY2;P56750;A6NM45;Q07157;Q5T2T1;Q68CZ1;O43815;A6NKD9;Q9Y2J4;A6NFC5;Q9BUZ4;O00501;Q92797;Q8TEW0;Q9NUP9;Q8N6F1;Q8NI35;O95049;Q9NPG3;Q9BYG4;Q8N3V7;Q96B33;Q9H8V3;Q9HAP6;Q86UE4;Q8N3R9;Q9P2M7;Q86UL8;Q16625;Q9NPB6;O15259;Q15438;Q8IY63;Q96A59;O75970}

4014 Pathogen[ P03383] interacts with 19 human partners:{Q86UE4;A6NKD9;Q5JTD0;Q92797;O95049;Q07157;Q9Y2J4;Q9BYG5;Q9NPB6;Q9P2M7;Q9NPG3;Q8IY63;Q5TCQ9;O75161;Q68DX3;Q8N3V7;O14910;Q9UDY2;Q9BYG4}

4015 Pathogen[ P03410] interacts with 48 human partners:{O14910;Q96B33;A6NKD9;Q8N7P3;Q8TEW8;Q9Y2J4;O15259;Q12959;Q0VF96;Q5TCQ9;O00501;O75161;Q8N6F1;Q9NUP9;Q8NI35;Q9NPG3;P56747;Q9HAP6;Q5T2T1;O75970;Q96A59;Q9UDY2;C9JDP6;Q92797;A6NFC5;Q07157;Q9BTW9;Q86UE4;Q5JTD0;Q15438;Q16625;Q8TEW0;O43815;Q9NPB6;Q9P2M7;A6NM45;Q86UL8;Q9H8V3;P56750;Q68CZ1;Q68DX3;Q8IY63;O95471;Q9BYG4;Q8N3R9;Q9BYG5;O95049}

4016 Pathogen[ P14075] interacts with 20 human partners:{Q92797;A6NFC5;O95049;Q68DX3;Q8N3V7;Q07157;Q86UE4;Q9BYG4;Q5TCQ9;Q5JTD0;Q8IY63;Q9Y2J4;O75161;O14910;Q9UDY2;A6NKD9;Q9BYG5;Q9NPB6;Q9P2M7;Q9NPG3}

4017 Pathogen[ P0C206] interacts with 32 human

partners:{A6NKD9;Q9NUP9;Q8N3V7;O43815;O75161;O95049;Q8IY63;Q9BTW9;Q5TCQ9;Q9BYG5;Q9UDY2;Q5JTD0;Q8N3R9;Q9NPG3;Q92797;Q8TEW0;Q9BUZ4;Q5T2T1;Q9NR48;A6NFC5;Q9Y2J4;Q8NI35;Q9NPB6;Q9H8V3;O14910;Q07157;Q86UE4;Q9P2M7;Q86UL8;Q68DX3;Q12959;Q9BYG4}

4018 Pathogen[ P03363] interacts with 33 human

partners:{Q12959;Q8N3V7;O95049;O75161;Q15438;A6NKD9;O14910;Q5JTD0;Q9NPG3;Q9NPB6;Q8IY63;Q5T2T1;Q86UE4;O75970;Q9BYG4;Q07157;Q92797;Q9Y2J4;Q5TCQ9;O43815;Q8N3R9;Q9BTW9;Q9UDY2;Q9BYG5;Q9NR48;Q8NI35;Q86UL8;O15259;Q9BUZ4;Q9NUP9;Q9P2Q2;Q9P2M7;Q68DX3}

4019 [Cluster 366]GO:0000795+C cellular\_component [name] synaptonemal complex [def] "A proteinaceous scaffold found between homologous chromosomes during meiosis." [GOC

4020 Pathogen[ Q2Q067] interacts with 8 human

partners:{Q7Z5K2;Q9UHC1;P63279;P11388;Q9NQS7;Q9UJ98;Q6PIF2;Q9BX26}

4021 Pathogen[ P0C214] interacts with 8 human

partners:{Q9UJ98;P63279;Q9UHC1;P11388;Q9BX26;Q7Z5K2;Q9NQS7;P40692}

4022 Pathogen[ P03346] interacts with 10 human

partners:{Q7Z5K2;P11388;Q9BX26;P63279;Q9UHC1;Q9UJ98;Q9NQS7;Q6PIF2;Q8N0S2;Q92791}

4023 Pathogen[ Q85601] interacts with 9 human

partners:{Q9NQS7;Q9BX26;P63279;Q7Z5K2;Q9UJ98;P11388;Q6PIF2;Q9UHC1;P40692}

4024 Pathogen[ P14079] interacts with 12 human

partners:{O43196;P11388;P63279;Q9BXU0;P40692;Q9UHC1;Q6PIF2;Q9UJ98;Q92791;Q9BX26;Q9NQS7;Q7Z5K2}

4025 Pathogen[ P03383] interacts with 6 human

partners:{Q9NQS7;Q9UJ98;Q9UHC1;P63279;Q7Z5K2;Q9BX26}

4026 Pathogen[ P03410] interacts with 13 human

partners:{P40692;Q9BXU0;Q7Z5K2;Q92791;Q9BX26;Q9UJ98;O43196;P11388;P63279;Q6PIF2;Q9UHC1;Q8N0S2;Q9NQS7}

4027 Pathogen[ P14075] interacts with 6 human

partners:{Q9NQS7;Q9BX26;P63279;Q9UJ98;Q9UHC1;Q7Z5K2}

4028 Pathogen[ P0C206] interacts with 11 human

partners:{P40692;Q7Z5K2;Q92791;Q9UHC1;Q9UJ98;Q9BX26;Q8N0S2;Q9BXU0;P11388;Q9NQS7;Q6PIF2}

4029 Pathogen[ P03363] interacts with 8 human

partners:{Q9UJ98;Q9UHC1;Q92791;Q6PIF2;Q9NQS7;P63279;Q7Z5K2;Q9BX26}

4030 [Cluster 367]GO:0031093+C cellular\_component [name] platelet alpha granule lumen [def] "The volume enclosed by the membrane of the platelet alpha granule." [GOC

4031 Pathogen[ Q2Q067] interacts with 3 human partners:{P01009;P62328;P08697}

4032 Pathogen[ P0C214] interacts with 5 human

partners:{P08697;P05121;P10124;P10909;P62328}

4033 Pathogen[ P03346] interacts with 2 human partners:{P62328;P01009}

4034 Pathogen[ Q85601] interacts with 4 human partners:{P08697;P01009;P05121;P62328}

4035 Pathogen[ P14079] interacts with 3 human partners:{P10909;P62328;P10124}

4036 Pathogen[ P03383] interacts with 4 human partners:{P62328;P08697;P01009;P10124}

4037 Pathogen[ P03410] interacts with 6 human

partners:{P05121;P62328;P10124;P08697;P01009;P10909}

4038 Pathogen[ P14075] interacts with 4 human partners:{P62328;P01009;P08697;P10124}

4039 Pathogen[ P0C206] interacts with 6 human

partners:{P62328;P01009;P10909;P05121;P10124;P08697}

4040 Pathogen[ P03363] interacts with 1 human partners:{P62328}

4041 [Cluster 368]GO:0005663+C cellular\_component [name] DNA replication factor C complex [def] "A complex of five polypeptides in eukaryotes, and two in prokaryotes, that loads the DNA polymerase processivity factor proliferating cell nuclear antigen (PCNA) onto DNA, thereby permitting processive DNA synthesis catalyzed by DNA polymerase." [PMID

4042 Pathogen[ Q2Q067] interacts with 2 human partners:{P12004;P35251}

4043 Pathogen[ P0C214] interacts with 1 human partners:{P35251}

4044 Pathogen[ P03346] interacts with 5 human

partners:{P12004;P35250;P35249;P35251;P40937}

4045 Pathogen[ Q85601] interacts with 2 human partners:{P35251;P12004}

4046 Pathogen[ P14079] interacts with 4 human partners:{P40937;P35250;P35251;P12004}

4047 Pathogen[ P03383] interacts with 1 human partners:{P35251}

4048 Pathogen[ P03410] interacts with 4 human partners:{P35251;P35250;P40937;P12004}

4049 Pathogen[ P14075] interacts with 1 human partners:{P35251}

4050 Pathogen[ P0C206] interacts with 2 human partners:{P35251;P12004}

4051 Pathogen[ P03363] interacts with 1 human partners:{P35251}

4052 [Cluster 369]GO:0032797+C cellular\_component [name] SMN complex [def] "A protein complex that contains the survival motor neuron (SMN) protein and at least eight additional integral components, including the Gemin2-8 and Unrip proteins\_ the complex is found in the cytoplasm and in nuclear Gems, and is involved in spliceosomal snRNP assembly in the cytoplasm and in pre-mRNA splicing in the nucleus." [PMID

4053 Pathogen[ Q2Q067] interacts with 3 human partners:{P38935;Q9NWZ8;Q9H840}

4054 Pathogen[ P0C214] interacts with 3 human partners:{P38935;Q9H840;Q9NWZ8}

4055 Pathogen[ P03346] interacts with 3 human partners:{P38935;Q9NWZ8;Q9H840}

4056 Pathogen[ Q85601] interacts with 3 human partners:{P38935;Q9NWZ8;Q9H840}

4057 Pathogen[ P14079] interacts with 3 human partners:{Q9H840;Q9NWZ8;P38935}

4058 Pathogen[ P03383] interacts with 3 human partners:{Q9H840;P38935;Q9NWZ8}

4059 Pathogen[ P03410] interacts with 3 human partners:{Q9H840;P38935;Q9NWZ8}

4060 Pathogen[ P14075] interacts with 3 human partners:{P38935;Q9H840;Q9NWZ8}

4061 Pathogen[ P0C206] interacts with 3 human partners:{P38935;Q9H840;Q9NWZ8}

4062 Pathogen[ P03363] interacts with 3 human partners:{Q9NWX8;Q9H840;P38935}

4063 [Cluster 370]GO:0042581+C cellular\_component [name] specific granule [def] "Granule with a membranous, tubular internal structure, found primarily in mature neutrophil cells. Most are released into the extracellular fluid. Specific granules contain lactoferrin, lysozyme, vitamin B12 binding protein and elastase." [GOC

4064 Pathogen[ Q2Q067] interacts with 4 human partners:{P50995;O00186;Q00161;Q15833}

4065 Pathogen[ P0C214] interacts with 4 human partners:{Q15833;O00186;P50995;O00161}

4066 Pathogen[ P03346] interacts with 4 human partners:{Q15833;O00186;O00161;P50995}

4067 Pathogen[ Q85601] interacts with 4 human partners:{O00186;Q15833;P50995;O00161}

4068 Pathogen[ P14079] interacts with 3 human partners:{P50995;O00186;Q15833}

4069 Pathogen[ P03383] interacts with 3 human partners:{P50995;O00186;O00161}

4070 Pathogen[ P03410] interacts with 4 human partners:{Q15833;P50995;O00186;O00161}

4071 Pathogen[ P14075] interacts with 3 human partners:{O00186;P50995;O00161}

4072 Pathogen[ P0C206] interacts with 4 human partners:{P50995;O00161;Q15833;O00186}

4073 Pathogen[ P03363] interacts with 4 human partners:{P50995;O00186;O00161;Q15833}

4074 [Cluster 371]GO:0060076+C cellular\_component [name] excitatory synapse [def] "A synapse in which an action potential in the presynaptic cell increases the probability of an action potential occurring in the postsynaptic cell." [GOC

4075 Pathogen[ Q2Q067] interacts with 1 human partners:{P78352}

4076 Pathogen[ P0C214] interacts with 1 human partners:{P78352}

4077 Pathogen[ P03346] interacts with 1 human partners:{P78352}

4078 Pathogen[ Q85601] interacts with 1 human partners:{P78352}

4079 Pathogen[ P14079] interacts with 1 human partners:{P61158}

4080 Pathogen[ P03383] interacts with 1 human partners:{P78352}

4081 Pathogen[ P03410] interacts with 1 human partners:{P78352}

4082 Pathogen[ P14075] interacts with 1 human partners:{P78352}

4083 Pathogen[ P0C206] interacts with 1 human partners:{P78352}

4084 Pathogen[ P03363] interacts with 1 human partners:{P78352}

4085 [Cluster 372]GO:0000214+C cellular\_component [name] tRNA-intron endonuclease complex [def] "A protein complex that catalyzes the endonucleolytic cleavage of pre-tRNA, producing 5'-hydroxyl and 2',3'-cyclic phosphate termini, and specifically removing the intron." [EC

4086 Pathogen[ Q2Q067] interacts with 2 human partners:{Q8NCE0;Q9BSV6}

4087 Pathogen[ P0C214] interacts with 2 human partners:{Q9BSV6;Q8NCE0}

4088 Pathogen[ P03346] interacts with 2 human partners:{Q9BSV6;Q8NCE0}

4089 Pathogen[ Q85601] interacts with 2 human partners:{Q9BSV6;Q8NCE0}

4090 Pathogen[ P14079] interacts with 2 human partners:{Q9BSV6;Q8NCE0}

4091 Pathogen[ P03383] interacts with 2 human partners:{Q8NCE0;Q9BSV6}

4092 Pathogen[ P03410] interacts with 2 human partners:{Q9BSV6;Q8NCE0}

4093 Pathogen[ P14075] interacts with 2 human partners:{Q9BSV6;Q8NCE0}

4094 Pathogen[ P0C206] interacts with 2 human partners:{Q9BSV6;Q8NCE0}

4095 Pathogen[ P03363] interacts with 2 human partners:{Q9BSV6;Q8NCE0}

4096 [Cluster 373]GO:0005887+C cellular\_component [name] integral to plasma membrane [def] "Penetrating at least one phospholipid bilayer of a plasma membrane. May also refer to the state of being buried in the bilayer with no exposure outside the bilayer." [GOC

4097 Pathogen[ Q2Q067] interacts with 9 human partners:{P52272;P14373;O75323;O15162;O76095;Q16186;P35232;P14672;Q12816}

4098 Pathogen[ P0C214] interacts with 10 human partners:{Q16186;Q12816;P52272;P11168;O15162;P14373;P35232;P14672;Q7L5Y9;O75323}

4099 Pathogen[ P03346] interacts with 15 human partners:{Q9Y2B0;Q8NBJ4;P14373;P17152;Q15942;Q12816;Q9Y3P8;O75323;P52272;P35232;Q16186;O76095;P14672;Q9NP85;O15162}

4100 Pathogen[ Q85601] interacts with 11 human partners:{P11168;P14373;Q7L5Y9;Q15942;Q12816;O75323;O76095;P35232;O15162;P14672;Q16186}

4101 Pathogen[ P14079] interacts with 44 human partners:{Q16655;Q9H295;O15162;Q14242;P14373;P17152;Q9NWF4;O75781;Q92542;Q08722;Q9NZ42;O76095;P14672;O00400;Q16585;Q16186;Q92902;O43813;Q12816;P31358;P35232;O60895;Q9NP85;Q7L5Y9;Q14444;O96005;O75323;Q8NBJ4;P30408;Q9UN42;Q12912;P55808;Q9HAB3;Q8WZ55;Q8WU20;O14836;P15941;Q9Y2B0;Q96FX8;Q6PIZ9;Q9NQ40;Q9Y2B1;Q9Y3P8;Q15942}

4102 Pathogen[ P03383] interacts with 10 human partners:{O75323;O15162;P11168;Q12816;P35232;P17152;O76095;P14672;Q16186;Q9Y3P8}

4103 Pathogen[ P03410] interacts with 47 human partners:{O75781;Q8WZ55;O60896;Q6PIZ9;O60895;O96005;Q92902;P15941;Q14242;Q16655;O00400;P05141;Q9HBL7;P11168;Q9HAB3;P31358;Q9Y2B1;Q9NQ40;Q9NP85;Q16617;Q16585;Q9NZ42;O15162;Q13336;Q9Y3P8;Q96FX8;O75323;Q15942;O14836;Q08722;Q9NZG7;Q12912;Q9NWF4;Q9UN42;P52272;Q8NBJ4;Q92542;Q16186;Q12816;O76095;P17152;Q8WU20;Q9Y2B0;P27105;P55808;P35232;Q7L5Y9}

4104 Pathogen[ P14075] interacts with 15 human partners:{Q8NBJ4;Q96FX8;O75323;Q16186;O76095;O15162;Q12816;Q7L5Y9;P35232;P17152;Q16655;Q9Y3P8;P11168;P14672;P55808}

4105 Pathogen[ P0C206] interacts with 22 human partners:{Q16655;Q9NZ42;Q16186;Q96FX8;Q92542;Q8NBJ4;P11168;Q9Y3P8;Q7L5Y9;Q8WU20;P35232;Q15942;Q12816;P17152;O15162;P14672;Q9UN42;Q12912;P14373;Q9NP85;O75323;O76095}

4106 Pathogen[ P03363] interacts with 11 human partners:{Q9Y3P8;Q16186;P14373;P52272;Q92902;O75323;O76095;P14672;P35232;Q15942;Q12816}

4107 [Cluster 374]GO:0005741+C cellular\_component [name] mitochondrial outer membrane [def]  
 "The outer, i.e. cytoplasm-facing, lipid bilayer of the mitochondrial envelope." [GOC

4108 Pathogen[ Q2Q067] interacts with 21 human  
 partners:{Q96TC7;P55957;Q9BXH1;Q96B49;P19367;O60238;Q13794;Q14790;Q92558;P32189;Q15388;Q5HYI7;Q9GZY8;P36873;Q96LC9;Q9HAP2;Q00005;Q12983;Q9P0U1;Q9BXF6;Q8TC71}

4109 Pathogen[ P0C214] interacts with 31 human  
 partners:{Q14410;Q14409;Q15388;Q00005;Q13505;Q92934;Q96LC9;Q9Y512;P55957;P32189;Q96TC7;Q8WXG1;Q13057;Q13794;Q9BXH1;Q8TDB4;Q9BUK6;P19367;Q9BXF6;Q12983;Q92558;O60238;P36873;Q86WV6;Q96B49;Q9P0U1;Q8TC71;Q5HYI7;Q9GZY8;Q9HAP2;Q14790}

4110 Pathogen[ P03346] interacts with 31 human  
 partners:{Q00005;Q9NS69;Q6P1Q0;Q96LC9;Q8TC71;O60238;Q9BUK6;P55957;Q9P0U1;P19367;Q96C03;Q96TC7;Q12983;Q8TDB4;Q9Y371;Q86UT6;Q9Y512;P36873;Q92558;Q9HAP2;Q96B49;Q8N0X7;Q07820;Q14790;Q15388;P32189;Q9BXF6;Q5HYI7;Q9BXH1;Q9GZY8;Q13794}

4111 Pathogen[ Q85601] interacts with 24 human  
 partners:{Q86WV6;Q96LC9;Q9BXH1;Q15388;Q92558;Q00005;Q14790;Q8TDB4;P32189;Q9Y512;Q9BXF6;P36873;P55957;Q9HAP2;Q8N0X7;Q12983;Q9BUK6;Q5HYI7;Q96TC7;Q13505;O60238;Q9GZY8;Q13794;P19367}

4112 Pathogen[ P14079] interacts with 47 human  
 partners:{O75324;Q8N4H5;Q5HYI7;F7VJQ1;Q13505;P36873;Q92558;Q14410;Q9P0U1;Q9NZ45;Q9BUK6;Q96B49;P32189;Q6P1Q0;Q9HAP2;Q9Y371;Q14409;Q9NS69;Q9BXH1;Q7Z434;Q15388;O75431;Q8WY22;Q14790;Q00005;Q9BXF6;Q92934;Q86WV6;Q13057;Q13794;Q8IVP5;Q9Y512;Q12983;Q8N0X7;P10620;Q8TDB4;Q86UT6;Q96LC9;Q9GZY8;O60238;Q96TC7;Q96C03;Q8TC71;P55957;Q7Z5L4;Q8WXG1;P40305}

4113 Pathogen[ P03383] interacts with 23 human  
 partners:{Q96LC9;Q96TC7;Q8TDB4;P19367;Q00005;P55957;Q12983;Q92558;Q96B49;P36873;O60238;Q15388;Q9BXF6;Q5HYI7;Q9P0U1;Q8TC71;P32189;Q9HAP2;Q96C03;Q13794;Q9BXH1;Q9GZY8;Q13505}

4114 Pathogen[ P03410] interacts with 46 human  
 partners:{Q8N4H5;Q96TC7;Q9Y512;Q8N0X7;Q96B49;Q12983;Q15388;Q9GZY8;Q13057;Q9BXH1;Q8WY22;Q13505;Q96LC9;Q14410;Q6P1Q0;Q92558;O75324;Q9NQ6;Q92934;Q9NS69;Q13794;Q8WXG1;Q7Z434;P55957;Q9BUK6;Q86UT6;Q5HYI7;Q9BXF6;Q9Y371;Q8TC71;P36873;Q14409;F7VJQ1;Q9HAP2;Q00005;Q86WV6;Q9P0U1;P32189;Q96C03;Q8TDB4;Q8IVP5;P40305;Q9NZ45;Q96HS1;O60238;O75431}

4115 Pathogen[ P14075] interacts with 29 human  
 partners:{Q9P0U1;Q13505;Q12983;Q00005;P55957;Q9HAP2;Q96B49;Q96C03;Q15388;P32189;Q96TC7;F7VJQ1;P19367;Q9GZY8;Q96LC9;Q13057;P36873;Q5HYI7;Q9Y512;Q9BXH1;O60238;Q13794;Q8TC71;Q8TDB4;Q9BXF6;Q92558;P40305;Q8WY22;Q9NS69}

4116 Pathogen[ P0C206] interacts with 37 human  
 partners:{Q96TC7;Q8N0X7;P40305;Q8TC71;Q9BXF6;Q96B49;Q13057;Q6P1Q0;Q9BUK6;Q5HYI7;Q86WV6;Q9BXH1;P19367;P32189;Q96LC9;Q9Y512;Q92934;O60238;Q12983;Q9NS69;Q9HAP2;F7VJQ1;Q9P0U1;Q14790;Q92558;Q13505;Q15388;Q9GZY8;Q8WY22;P36873;Q8WXG1;Q00005;Q8N4H5;Q96C03;P55957;Q13794;Q8TDB4}

4117 Pathogen[ P03363] interacts with 21 human  
 partners:{P55957;P36873;Q96LC9;Q13794;Q00005;Q15388;Q8N0X7;Q92558;Q9HAP2;Q96TC7;Q8TC71;Q9P0U1;Q96C03;Q9Y512;Q9BXF6;Q5HYI7;Q07820;Q9BXH1;Q9NS69;O60238;Q9GZY8}

4118 [Cluster 375]GO:0005798+C cellular\_component [name] Golgi-associated vesicle [def]  
 "Any vesicle associated with the Golgi complex and involved in mediating transport within the Golgi or between the Golgi and other parts of the cell." [GOC

4119 Pathogen[ Q2Q067] interacts with 7 human  
 partners:{Q9UBF2;Q9H9H5;Q9UKJ5;O75843;P53618;Q9Y678;P49754}

4120 Pathogen[ P0C214] interacts with 7 human  
 partners:{P49754;Q9UKJ5;P53618;O75843;Q9UBF2;Q9H9H5;Q9Y678}

4121 Pathogen[ P03346] interacts with 7 human  
 partners:{P49754;Q9Y678;P53618;Q9UKJ5;O75843;Q9H9H5;Q9UBF2}

4122 Pathogen[ Q85601] interacts with 7 human  
 partners:{O75843;P49754;Q9H9H5;Q9UBF2;Q9Y678;Q9UKJ5;P53618}

4123 Pathogen[ P14079] interacts with 6 human  
 partners:{Q9UKJ5;Q9Y678;Q9H9H5;O75843;Q9UBF2;P49754}

4124 Pathogen[ P03383] interacts with 7 human  
 partners:{P53618;Q9Y678;P49754;Q9H9H5;O75843;Q9UBF2;Q9UKJ5}

4125 Pathogen[ P03410] interacts with 7 human  
 partners:{O75843;Q9H9H5;Q9Y678;Q9UKJ5;P53618;P49754;Q9UBF2}

4126 Pathogen[ P14075] interacts with 7 human  
 partners:{Q9UBF2;Q9H9H5;P49754;P53618;Q9Y678;O75843;Q9UKJ5}

4127 Pathogen[ P0C206] interacts with 7 human  
 partners:{Q9Y678;P53618;P49754;Q9UKJ5;Q9UBF2;O75843;Q9H9H5}

4128 Pathogen[ P03363] interacts with 7 human  
 partners:{P49754;Q9Y678;P53618;Q9UKJ5;Q9UBF2;O75843;Q9H9H5}

4129 [Cluster 376]GO:0032993+C cellular\_component [name] protein-DNA complex [def] "A macromolecular complex containing both protein and DNA molecules." [GOC

4130 Pathogen[ Q2Q067] interacts with 2 human partners:{P08047;O15370}

4131 Pathogen[ P0C214] interacts with 2 human partners:{O15370;P08047}

4132 Pathogen[ P03346] interacts with 3 human partners:{O15370;P31270;P08047}

4133 Pathogen[ Q85601] interacts with 2 human partners:{P08047;O15370}

4134 Pathogen[ P14079] interacts with 1 human partners:{O15370}

4135 Pathogen[ P03383] interacts with 2 human partners:{P08047;O15370}

4136 Pathogen[ P03410] interacts with 2 human partners:{P08047;O15370}

4137 Pathogen[ P14075] interacts with 2 human partners:{O15370;P08047}



4138 Pathogen[ P0C206] interacts with 2 human partners:{P08047;O15370}

4139 Pathogen[ P03363] interacts with 2 human partners:{O15370;P08047}

4140 [Cluster 377]GO:0044424+C cellular\_component [name] intracellular part [def] "Any constituent part of the living contents of a cell\_ the matter contained within (but not including) the plasma membrane, usually taken to exclude large vacuoles and masses of secretory or ingested material. In eukaryotes it includes the nucleus and cytoplasm." [GOC]

4141 Pathogen[ Q2Q067] interacts with 3 human partners:{Q13562;Q9Y4Z2;O43918}

4142 Pathogen[ P0C214] interacts with 1 human partners:{O43918}

4143 Pathogen[ P03346] interacts with 6 human partners:{Q9Y4Z2;O43918;P78426;O95096;Q13562;P49335}

4144 Pathogen[ Q85601] interacts with 3 human partners:{Q9Y4Z2;Q13562;O43918}

4145 Pathogen[ P14079] interacts with 1 human partners:{O43918}

4146 Pathogen[ P03383] interacts with 1 human partners:{O43918}

4147 Pathogen[ P03410] interacts with 1 human partners:{O43918}

4148 Pathogen[ P14075] interacts with 1 human partners:{O43918}

4149 Pathogen[ P0C206] interacts with 3 human partners:{Q9Y4Z2;O43918;Q13562}

4150 Pathogen[ P03363] interacts with 3 human partners:{Q9Y4Z2;P49335;O43918}

4151 [Cluster 378]GO:0014704+C cellular\_component [name] intercalated disc [def] "A complex cell-cell junction at which myofibrils terminate in cardiomyocytes\_ mediates mechanical and electrochemical integration between individual cardiomyocytes. The intercalated disc contains regions of tight mechanical attachment (fasciae adherentes and desmosomes) and electrical coupling (gap junctions) between adjacent cells." [GOC]

4152 Pathogen[ Q2Q067] interacts with 3 human partners:{P15924;Q9HD47;Q04917}

4153 Pathogen[ P0C214] interacts with 5 human partners:{Q04917;P15924;Q15124;P12882;Q9HD47}

4154 Pathogen[ P03346] interacts with 3 human partners:{P15924;Q9HD47;Q04917}

4155 Pathogen[ Q85601] interacts with 5 human partners:{Q9HD47;Q04917;P15924;P12882;Q15124}

4156 Pathogen[ P14079] interacts with 6 human partners:{P15924;Q15124;Q04917;P08758;Q702N8;Q9HD47}

4157 Pathogen[ P03383] interacts with 2 human partners:{P15924;Q9HD47}

4158 Pathogen[ P03410] interacts with 6 human partners:{P15924;Q702N8;Q04917;Q9HD47;Q15124;P12882}

4159 Pathogen[ P14075] interacts with 2 human partners:{Q9HD47;P15924}

4160 Pathogen[ P0C206] interacts with 5 human partners:{Q04917;Q15124;Q9HD47;P12882;P15924}

4161 Pathogen[ P03363] interacts with 3 human partners:{Q9HD47;P15924;Q04917}

4162 [Cluster 379]GO:0035145+C cellular\_component [name] exon-exon junction complex [def] "A multi-subunit complex deposited by the spliceosome upstream of messenger RNA exon-exon junctions. The exon-exon junction complex provides a binding platform for factors involved in mRNA export and nonsense-mediated mRNA decay." [PMID]

4163 Pathogen[ Q2Q067] interacts with 10 human partners:{Q92900;O15234;P61326;P38919;Q9BZI7;Q9BRP8;Q9HAU5;Q9BY77;Q9Y5S9;Q9H1J1}

4164 Pathogen[ P0C214] interacts with 11 human partners:{Q9BY77;Q9BZI7;O15234;Q9BRP8;Q9Y5S9;Q92900;Q9HAU5;P61326;P38919;Q15287;Q9H1J1}

4165 Pathogen[ P03346] interacts with 11 human partners:{Q9Y5S9;Q9BZI7;O15234;P38919;Q9BY77;P61326;Q9HAU5;Q15287;Q9BRP8;Q92900;Q9H1J1}

4166 Pathogen[ Q85601] interacts with 11 human partners:{Q9BZI7;O15234;P61326;Q15287;Q9BRP8;P38919;Q9BY77;Q9HAU5;Q92900;Q9Y5S9;Q9H1J1}

4167 Pathogen[ P14079] interacts with 10 human partners:{Q15287;Q9H1J1;Q9Y5S9;Q9BY77;P61326;Q9BZI7;Q9BRP8;Q9HAU5;Q92900;O15234}

4168 Pathogen[ P03383] interacts with 11 human partners:{O15234;Q15287;Q9Y5S9;P61326;P38919;Q9HAU5;Q9BY77;Q92900;Q9BRP8;Q9BZI7;Q9H1J1}

4169 Pathogen[ P03410] interacts with 11 human partners:{P61326;O15234;Q92900;Q15287;Q9Y5S9;Q9HAU5;Q9H1J1;Q9BZI7;P38919;Q9BY77;Q9BRP8}

4170 Pathogen[ P14075] interacts with 11 human partners:{O15234;Q92900;Q9BRP8;P61326;Q15287;Q9HAU5;Q9Y5S9;P38919;Q9BY77;Q9BZI7;Q9H1J1}

4171 Pathogen[ P0C206] interacts with 11 human partners:{Q15287;Q9BZI7;P61326;Q9BY77;O15234;Q9HAU5;Q92900;P38919;Q9Y5S9;Q9BRP8;Q9H1J1}

4172 Pathogen[ P03363] interacts with 11 human partners:{P38919;Q92900;Q9BRP8;P61326;Q15287;Q9BY77;Q9HAU5;Q9BZI7;Q9Y5S9;Q9H1J1;O15234}

4173 [Cluster 380]GO:0005828+C cellular\_component [name] kinetochore microtubule [def] "Any of the spindle microtubules that attach to the kinetochores of chromosomes by their plus ends, and maneuver the chromosomes during mitotic or meiotic chromosome segregation." [ISBN]

4174 Pathogen[ Q2Q067] interacts with 4 human partners:{Q7Z460;O43264;P50748;O75122}

4175 Pathogen[ P0C214] interacts with 4 human partners:{O43264;P50748;O75122;Q7Z460}

4176 Pathogen[ P03346] interacts with 4 human partners: {O43264;O75122;P50748;Q7Z460}

4177 Pathogen[ Q85601] interacts with 4 human partners: {O43264;O75122;P50748;Q7Z460}

4178 Pathogen[ P14079] interacts with 4 human partners: {Q7Z460;O43264;P50748;O75122}

4179 Pathogen[ P03383] interacts with 3 human partners: {Q7Z460;O43264;P50748}

4180 Pathogen[ P03410] interacts with 4 human partners: {Q7Z460;P50748;O43264;O75122}

4181 Pathogen[ P14075] interacts with 3 human partners: {Q7Z460;P50748;O43264}

4182 Pathogen[ P0C206] interacts with 4 human partners: {O75122;Q7Z460;P50748;O43264}

4183 Pathogen[ P03363] interacts with 3 human partners: {O43264;P50748;Q7Z460}

4184 [Cluster 381]GO:0045098+C cellular\_component [name] type III intermediate filament [def] "A type of intermediate filament, typically made up of one or more of the proteins vimentin, desmin, glial fibrillary acidic protein (GFAP), and peripherin. Unlike the keratins, the type III proteins can form both homo- and heteropolymeric IF filaments." [ISBN

4185 Pathogen[ Q2Q067] interacts with 2 human partners: {P41219;P17661}

4186 Pathogen[ P0C214] interacts with 3 human partners: {O95045;P41219;P17661}

4187 Pathogen[ P03346] interacts with 2 human partners: {P17661;P41219}

4188 Pathogen[ Q85601] interacts with 3 human partners: {P17661;O95045;P41219}

4189 Pathogen[ P14079] interacts with 3 human partners: {P41219;O95045;P17661}

4190 Pathogen[ P03383] interacts with 2 human partners: {P17661;P41219}

4191 Pathogen[ P03410] interacts with 3 human partners: {O95045;P17661;P41219}

4192 Pathogen[ P14075] interacts with 3 human partners: {P17661;O95045;P41219}

4193 Pathogen[ P0C206] interacts with 3 human partners: {P17661;P41219;O95045}

4194 Pathogen[ P03363] interacts with 2 human partners: {P17661;P41219}

4195 [Cluster 382]GO:0005685+C cellular\_component [name] U1 snRNP [def] "A ribonucleoprotein complex that contains small nuclear RNA U1." [GOC

4196 Pathogen[ Q2Q067] interacts with 1 human partners: {P09234}

4197 Pathogen[ P0C214] interacts with 1 human partners: {P09234}

4198 Pathogen[ P03346] interacts with 1 human partners: {P09234}

4199 Pathogen[ Q85601] interacts with 1 human partners: {P09234}

4200 Pathogen[ P14079] interacts with 1 human partners: {P09234}

4201 Pathogen[ P03383] interacts with 1 human partners: {P09234}

4202 Pathogen[ P03410] interacts with 1 human partners: {P09234}

4203 Pathogen[ P14075] interacts with 1 human partners: {P09234}

4204 Pathogen[ P0C206] interacts with 1 human partners: {P09234}

4205 Pathogen[ P03363] interacts with 1 human partners: {P09234}

4206 [Cluster 383]GO:0005654+C cellular\_component [name] nucleoplasm [def] "That part of the nuclear content other than the chromosomes or the nucleolus." [GOC

4207 Pathogen[ Q2Q067] interacts with 697 human partners: {Q13562;Q9Y253;Q14974;O43290;Q13573;O95602;P83369;Q15054;Q15573;Q9Y6X3;Q8NHY2;P33240;Q99460;P27540;P17544;P52434;Q92750;P01100;P83876;Q92585;Q8N187;O95639;Q96FV9;Q04864;Q9NYP9;O75832;Q86U42;P48556;P54252;P18754;Q96H22;P02545;P07910;P31749;P52948;Q71F23;O15525;P40306;P50995;Q8IZL2;Q9Y333;Q9BVP2;Q9UPN9;Q9HAW0;Q9Y3C7;P55036;P10827;P20700;P20226;Q04726;Q96HR3;Q9HAU4;P24385;P55769;Q16594;Q9Y266;O75925;P63104;P39687;Q13033;P55265;P49790;Q99638;Q86WQ0;Q13487;Q92664;Q9GZL7;Q12888;P52272;Q92889;Q14980;O00267;P06400;Q9HB96;P61326;Q9NPJ6;O75494;O00231;P14866;O00233;Q9UJX3;Q9UJX5;P27694;P49959;Q15459;Q01094;Q8WW38;Q13427;Q08999;P40763;Q9NXV6;Q9NYB0;Q13889;Q13352;P01106;Q6NS38;Q16666;P46937;Q16533;Q9Y3T9;P38432;P67809;O95402;Q13485;P10589;P62837;P51665;Q9P0U4;Q9Y2L1;P55795;Q01130;P13056;Q6IPU0;P62318;P62826;Q8IVN3;Q99741;Q96GY3;P62508;Q92797;Q15596;Q15554;P10828;Q15562;P15880;P28072;P61024;O95243;P18847;P51531;Q9NPG3;P18887;Q8N684;Q9Y5Q8;O00762;P13349;O96004;Q92985;O95400;O43390;Q9H211;Q9NRR4;Q9BRG1;P33316;Q13435;Q01105;P23490;P19388;O00273;O75081;Q5SXM2;P54274;Q96DI7;P52435;O14929;Q9BSI4;O43172;P49116;Q9UIF7;Q7Z2E3;Q04206;P11387;Q8WYP5;Q9BXL5;Q9H944;Q9H3R5;Q9HAN9;P62140;Q8WTR7;Q13547;Q6P126;Q9BTT4;P14373;Q14103;O60506;Q9NZI5;Q93074;Q9UBU9;Q5TKA1;P35244;P49450;P18850;P32780;Q99594;A6H8Y1;P14316;Q9UBU7;O15379;P18615;Q9UKN8;Q14192;Q6NZI2;Q96EZ8;Q9UNA4;P06748;P30876;O14757;P19387;Q9UER7;P15976;Q9BWX5;O75586;Q66LE6;Q15542;Q6MZIP7;Q13200;Q96ST3;P61218;Q92759;P35638;O75448;Q92945;P54727;P25787;Q04727;O60244;P52657;Q6ZNA4;Q8IX12;Q06323;O75683;Q7Z3B4;P42704;O75362;Q9UBZ9;Q86YC2;O75971;P49005;Q13415;Q16531;O00541;Q07955;Q9BWJ5;Q9NYG5;P08047;P11473;Q13156;Q00978;P30304;Q9BZI7;O75182;Q8NDT2;Q13342;Q16629;Q9H1A4;Q9H9Y6;Q9Y262;P12270;P51965;O60563;Q8WYQ5;O15084;Q9NVI1;Q00597;Q8N726;O75531;P15172;Q06609;O94906;P28702;O43148;Q15561;P31943;P11388;P28065;Q12962;Q9NZP6;Q14669;Q09028;O14818;P61077;P22674;P14635;B2RXF5;Q8N6T7;P63165;O15304;Q9BRP8;Q10570;Q9Y248;Q12996;Q9ULK4;P27695;P62314;P08621;P61978;Q9UKL0;P29084;Q13112;Q9UJX2;Q14137;P12004;O43524;Q14181;O43502;Q96G25;P06746;Q9BUI4;Q92994;Q14691;P38159;P52747;Q9Y3A5;Q9Y5P8;P62487;Q9UHI6;P78317;Q96CJ1;P23769;P62304;P29372;P54253;O14980;P55199;P84103;Q8NB91;Q9BYK8;Q8IYB3;P30307;Q05048;Q14186;Q92674;O75717;O75582;O94913;O15131;Q9UM13;Q86WX3;P40337;Q14498;P05787;Q9BTP7;Q969S8;Q96F24;Q9Y6Y0;Q86V81;Q8IWX8;Q96BD5;Q9ULX9;P51948;P31350;Q92831;P60900;Q9UL46;Q14653;O60934;P61289;O43482;O96017;Q15370;O60832;P12755;Q9UBD5;Q14978;P84022;P55212;P10914;P15927;A9QM74;Q06787;Q9NPD8;O00716;Q12834;P36873;P51668;P57081;P28347;Q92541;Q05519;Q9BVC3;P26368;Q92769;P28062;Q96D46;O00255;O15105;Q06330;O75496;Q6P2Q9;Q7LG56;P14859;Q15543;Q9UHV7;P56282;P24864;Q9GZV5;P49848;Q9NPI8;Q9H116;P50750;Q9UNM6;Q9Y2N7;Q96DE0;Q9Y5B0;Q9UDY2;Q15544;Q8WXE1;Q96AP0;P25788;Q96Q89;Q8WXD5;Q08211;O00268;P09874;P60228;Q6P2C8;Q13426;P08579;Q9HCU8;P62136;Q96PU5;O75419;Q13616;Q16254;P52597;Q92530;Q9UKX7;Q06K0P9;Q96Q83;P50613;O15198;O14746;P23246;Q9NV6;P14678;Q9Y5S9;Q15327;Q15329;P25786;Q01081;O75533;Q9GZN2;Q96RS0;Q8TFQ6;Q16514;P78396;P82970;Q16621;Q8IX07;O60907;Q9P2I0;P10599;O15527;O00505;Q03468;P57678;Q8NHZ8;Q9P0J0;P13984;P55055;Q13243;P09661;P38936;P12956;Q15796;O75475;P20248;Q9NVU0;Q15369;Q02241;

060216;P39748;Q15366;Q96KS0;O96020;Q16401;Q6WBX8;P62875;Q9HAV4;Q3L8U1;Q04725;P24928;P19338;Q9H6W3;Q96T23;O43809;Q9UKV3;O00232;Q15029;Q13309;Q13216;Q15466;P19838;O15318;P43351;O60675;P28749;Q8NG31;P09012;O75943;P78549;Q15583;P23193;Q9UM11;Q7L590;Q9Y383;P17861;Q9H6Z9;Q9UJX4;O43913;Q09161;P28074;P25789;Q15572;P52630;O00629;Q9H501;P15336;Q9Y2X0;Q8IXH7;Q13526;P12757;P35813;Q9BUJ2;Q9UKT4;Q9H3P2;P0CG47;Q12983;Q13569;Q7RTV0;P08235;Q14686;P04818;Q9BZK7;Q9UI95;Q9Y5N6;Q969H0;Q12789;Q13416;Q9UKN5;P52292;P52298;P52655;Q9Y618;Q14209;O95619;P20618;P45984;P42771;P17096;Q04724;P35269;Q15427;P11474;Q12824;O43513;Q0VG06;Q00653;Q8N488;P0CG48;P29083;P25205;P35251;Q86YI8;Q14676;P62316;P49336;O60583;P24863;Q9NP71;P16455;Q9UKF6;P28070;Q01831;Q14493;Q92793;Q01860;P18848;P28066;Q14683;Q8WVM7;Q01826;P63272;P21675;P30305;P53803;Q9H2F5;Q15007;Q99436;P24941;Q96MU7;Q96RN5;Q9BQA5;P13010;Q14241;O43592;Q9BU64;Q9BRT9;O60508;Q9UJX6;P62306;P35232;Q9H840;Q15652;P62841;Q8NE71;Q9Y5B9;P62987;Q92466;Q53T94;O43242;P45973;Q14188;Q93075;Q16576;Q6STE5;P30260;P49721;P11802;P23497;Q71SY5;Q9Y535;P46527;P49720;P15923;P35637;Q99717;Q8NCD3;P22626;Q8N3U4;O15287;O75376;Q13042;Q9UK39;Q16637;Q9Y468;Q8WXF1;Q99814;P49711;P35658;Q9Y250;P83916;P05423;Q9NVV9;P17480;Q9HAW4;P62308;Q00987;Q9UMS4;O14595;O14893;Q96JK9;Q96QD9;O14802;Q66K89;Q8IYD8;P52294;Q12874;P42224;O60671;O15360;P22736;Q86X55;P63208;Q0839;Q13617;Q15361;Q9HCS7;Q15759;Q9NYV6;Q16829;Q15797;Q9H1D9;P23409;P62877;Q9P0W2;Q13501;Q13105;Q9Y2S0;Q53HV7;Q9H814;Q02078;Q9BXP5;Q6P0N0;Q13888;Q969L4;O15160;Q9H2G4;O60921;P18146;P28715;Q52LA3;Q15428;Q9NW38;Q92966;Q9BXW9;O76075;P51946;Q8WX92;Q00403;Q08945;P33076;P23025;P51003;Q14397;O75691;P62979}

4208

Pathogen[ POC214] interacts with 698 human partners: {P43351;Q12996;Q9BZI7;O75683;O00268;Q9UJX6;O95243;P51665;P60228;P18850;O15198;Q16637;O15287;Q96FV9;Q92585;Q9Y3T9;Q15007;P20248;P51946;P24863;Q8WX92;Q9UKN5;Q96CJ1;Q13617;A9QM74;P26368;Q15327;A6H8Y1;P62316;Q16254;P25789;Q9HCS7;O75691;Q00653;P27695;P35813;Q00597;P83369;P38432;Q09161;Q8IX12;P15880;P55036;O14595;Q06609;P30307;Q04727;Q6P0N0;Q9HAU4;Q06787;Q13573;P04818;O43172;P11474;O14746;Q71SY5;P35637;Q13156;P31350;O94913;Q9Y5Q8;P62140;P28062;Q13547;Q9HAN9;P49959;Q12824;O00762;P38159;Q9UKF6;P12757;P30876;P28065;Q08999;Q9BRP8;P19838;Q92664;Q9Y262;O75925;Q8WXE1;Q02241;Q15573;Q9H9Y6;O75586;P15336;Q969S8;Q9BUI4;P52657;Q92889;P13010;Q8IZL2;P06746;O43913;P54253;P21675;O00159;P53803;P84103;Q15361;Q9NVU0;Q86V81;Q9BSI4;Q96F24;Q9Y5S9;P51003;P52655;P06748;O60508;Q6K0P9;P35269;Q15554;P50750;P26599;Q7L590;Q00987;O00267;P33316;P50613;O95400;P55212;Q13309;Q9H814;Q13112;Q9Y2L1;P33076;Q9Y2X0;P29084;P23025;Q9UM54;O14818;O60907;P13349;P14678;P83916;O75496;Q15029;O00541;Q16621;P62306;P01100;Q969L4;Q96D46;Q93074;P52435;P55265;P17275;Q92750;P11802;O75362;O14929;P67678;O43242;Q13526;Q53HV7;Q8WYP5;P23769;Q92793;Q9UJX5;Q96KS0;Q92797;P67809;P61024;Q9GZL7;P46937;Q86WX3;Q6PI26;Q13033;Q05048;Q9UBZ9;P63208;Q6P2Q9;P84022;P23246;Q9UKN8;P17096;Q9BWX5;Q8IWX8;Q9NZI5;Q9H1D9;P15172;Q15428;P46527;Q16533;Q9GZV5;Q9H501;P42704;P17544;Q96BD5;Q00403;Q96HR3;Q04206;Q9NVC6;Q3L8U1;Q6STE5;Q12962;Q66LE6;P05787;P42224;Q02386;P48556;Q9Y2S0;P28347;Q6NZI2;P10914;P61218;Q9HAV4;Q16666;Q13427;Q8NHY2;Q5SXM2;Q9UKX7;P40306;Q6IPU0;Q06330;P35251;P14635;Q15370;O00716;Q10570;Q8N726;Q6WBX8;P20700;P24388;Q04724;Q14676;Q9BTT4;P49005;Q8WXD5;Q9UBU7;Q13200;Q9UJX2;Q9Y468;Q9Y3D8;Q14686;Q9HAW4;O60244;Q00978;P62877;P62308;Q9Y266;Q9HCU8;Q9UI95;Q9H2F5;O43148;P08579;P38936;O43390;Q92541;Q16594;O00232;Q9Y5N6;Q15366;O15131;P05423;Q8N684;Q12789;P51965;Q01105;P78317;Q15542;O94906;Q9Y248;O95619;P25205;Q09028;P23490;Q9NZP6;Q9UMS4;P61077;Q07955;P49450;P18615;Q9Y250;Q9H944;Q9BYK8;Q9UK39;Q13216;Q14980;Q02078;Q9HCE7;Q13501;Q15561;O60921;P55795;Q9Y3C7;Q9Y333;Q99460;P13056;P52298;P28066;P28715;Q01094;O75832;Q8NCD3;Q9Y2N7;P18848;P00374;Q92966;P62487;O43482;O00273;Q96RN5;Q14566;P62314;P07910;Q14493;Q8IYB3;Q92674;O43809;Q8NE71;Q9HB96;P49790;Q96Q89;Q14186;P49116;Q92985;O14980;Q9H1A4;Q9H6Z9;P08621;Q13487;Q13426;P15923;Q6NS38;P52294;Q04726;P51948;Q8WXF1;Q9Y6Y0;Q14103;Q9NVV9;Q9UER7;O96017;Q14978;P49720;P63165;P49336;P28074;Q9P0W2;Q8N488;P17861;P55769;Q14137;Q9P0J0;P61326;Q8TEQ6;P18887;Q9BRG1;P0CG48;Q9UL46;O43513;Q9UNA4;Q9UKL0;P78396;Q9NYP9;Q92994;Q6MZP7;Q7Z2E3;P57081;Q13485;Q9H6W3;Q9UIF7;Q8NHZ8;Q15369;P35658;Q15572;P18847;Q92769;Q12834;O15105;P55199;O60583;Q13243;Q13352;O43592;Q15427;P63272;Q15544;P83876;Q14691;Q9P210;P49848;Q15329;P52597;Q8WW38;Q15652;Q9NVI1;P15927;P25788;O43502;P62136;P24941;P40337;Q05519;Q7RTV0;Q0VG06;P42574;P17480;Q16576;Q9BVC3;O75376;Q9UNM6;Q9ULX9;Q9BUJ2;Q15459;O00231;O60264;Q15796;P42771;Q9UH16;Q14192;O15318;O75717;P62318;O15525;P22674;Q99594;P35244;O15360;Q9NRR4;Q9Y5B9;Q06323;Q9NP71;P11388;P30305;O15379;P25786;Q01081;Q96JK9;O75533;Q96RS0;Q8N6T7;Q96DI7;O75475;Q16829;Q9NYV6;P33240;Q16514;O95251;Q9H211;P82970;Q13616;Q9NW08;Q8IX07;Q8WTP8;P12755;P23921;P62875;Q86YI8;P13984;P20226;Q93075;Q969H0;Q9H2G4;Q12874;P28072;Q14653;O00505;Q6P2C8;O75494;O75531;P54727;O75943;Q9UDY2;Q6ZNA4;Q14397;P32780;O95639;P16455;P62841;Q9H840;P11387;Q15287;P24928;Q86YC2;P52747;O75582;Q9UHV7;P62987;Q9NPI8;P62826;Q12983;O60671;O60832;P31943;O60563;P23497;Q9NXV6;P05412;P62304;Q14669;Q9NYB0;O00442;Q9H3R5;P49711;Q01826;O15160;Q9BXW9;P28749;P09012;Q14683;Q92831;O75419;Q9Y535;O75448;P18146;Q8N3U4;Q8WTR7;Q8N187;Q99436;O95602;Q8WVM7;Q8NG31;P24864;Q9UJX4;Q01831;Q96T23;Q15759;Q8IVN3;Q04725;P39748;O60506;P0CG47;P25787;Q99814;P36873;Q9BZK7;O14893;Q15054;Q96ST3;Q13416;P10599;Q9Y5B0;Q13888;Q9Y6X3;P09661;P45973;O43290;Q12888;Q9UJX3;P45984;P78549;Q99717;P29372;P52434;Q08945;Q8IXH7;Q04864;Q08211;P40763;O96004;P27540;P52292;P12270;P27694;Q8NDT2;O75971;Q71F23;Q9HAW0;Q9UKV3;Q13435;Q86X55;Q14974;Q00839;Q52LA3;P5TKA1;P35998;P60900;Q53T94;Q9H3P2;Q96MU7;Q9Y5P8;Q92945;Q14011;Q13342;Q9BQA5;P02545;P19387;Q96QD9;P22626;P10828;P23193;Q15596;Q15797;O00233;Q9UM11;P19388;O15527;Q15543;P51668;P16220;Q13569;P14373;O14757;P35232;Q92466;P55210;Q7LG56;Q15562;Q99638;Q96G25;Q9Y383;Q9ULK4;P51531;P62979;P52630;P30260;Q9Y3A5;Q86U42;Q96EZ8;P19338;P18754;Q96Q83;Q9BYG3;Q9Y618;P62508;P30304;P50995;Q9NPD8;P56282;Q9UPN9;Q15365;Q14498;Q8WYQ5;P39687;Q92530;P14859;Q9YZB4;Q9NYG5;Q16531;Q15008;Q15304;Q9Y253;Q14209;Q01860;O60216;Q86WQ0;Q66K89;Q9UBD5;Q8IYD8;P01106;Q9UM13;O95402;O60675;P14316;O76075;O75081;Q03468;O14802;Q14188;Q9NPI6;Q13105;P28070;P06400;Q92759;P08047;Q14966;Q9UKT4;P12956;O00255;P52948;Q16629;P31749;Q9BXP5;P54252;P14

866;Q9NQV7;P35638;P20618;P29083;Q15466;Q9BU64;Q96PU5;Q9UBU9;Q9NW38;P54274;O00629;P09874;P49721;Q9BVP2;Q99741;Q16401;P18846;Q9BTP7;O96020;O75182;Q96DE0;Q01130;P17980;Q13415;Q14181;O15084;Q9H116;Q13042;Q14241;Q9NPG3;Q9BRT9}

4209 Pathogen[ P03346] interacts with 771 human partners: {O60921;Q9NVU0;Q12888;Q06330;Q9BSI4;Q9NPG3;Q66LE6;Q9Y5S9;P62136;Q96FV9;O95400;Q969S8;Q9BZI7;P25787;Q96AP0;O75691;Q96ST3;Q9UPN9;P12004;Q9Y253;Q8NB91;Q15427;P05412;P51991;O95637;Q92585;Q96CJ1;Q96GY3;Q12874;Q15542;Q99828;Q16621;Q86U42;Q96MU7;P61978;P28070;Q15562;P46937;Q13487;Q13263;Q15370;O43172;P78396;P45984;Q02078;O00629;Q02386;Q16666;Q09161;P10827;P35813;P11473;P25789;P28715;P55036;Q8WXF1;Q15788;P45973;Q8IX12;Q9HAU4;Q15366;Q9NQV7;P52434;Q9HAV4;Q06787;O95402;P12270;P12956;O43290;Q9NVI1;P24385;Q9N PJ6;Q7L2Z9;O60907;Q9HCU8;Q06609;P18847;Q08170;Q8IYB3;Q9UDY2;Q96PU5;Q95Q8;O96017;Q8IX H7;P14373;Q9H116;P16220;P09651;Q08999;O75362;Q9UKL0;Q99460;Q9UM11;Q8N3U4;P06401;Q7RTV 0;P55265;P06748;Q13616;P12757;O75586;P14866;P15336;Q9BS16;Q9UL46;Q9P0W2;O75531;Q8N187 ;P35638;Q8WW38;P07148;P52747;P08235;P62304;P11388;P83876;Q15329;O43502;Q9UKX7;Q9UKF6 ;P28347;Q15554;O00541;P62987;O15379;P27694;P20700;Q14011;P28072;Q99594;Q92674;Q71SY5;P 48443;P06400;O75717;P25788;Q9Y5N6;Q14691;Q14149;P13349;P28074;Q15797;Q14188;Q9GZV5;P4 9721;Q96EZ8;O60563;Q9BW5;Q01105;Q9UNA4;P08579;P07992;Q8NH2;P55795;P17275;O96020;Q9U BD5;P54274;P49116;Q15466;P24863;P35244;Q8WXH0;P14316;Q4G0J3;O14818;P05423;Q6WBX8;P493 36;Q15007;P17861;Q8WYP5;Q9BRT9;O15360;P23769;Q9UBZ9;P35250;Q96HR3;Q15583;Q99436;O1530 4;P24941;Q13426;Q9GZL7;O75971;Q9UMS4;Q15573;Q6PI26;P14859;P30304;Q14498;Q16531;Q13156 ;Q9H814;O60506;P23246;Q13888;Q6M2P7;P56282;P15923;P0CG48;P05787;P15172;Q9H2G4;Q8WXD5 ;Q15796;O75475;Q9H3P2;P13010;Q16401;Q15327;Q93074;P53803;P23409;O14757;Q9H9Y6;Q04206;P 33076;Q9UBU7;P07910;P24864;Q0VG06;Q9Y383;Q8N684;P13056;P61218;Q9UM13;O00268;O60244;P2 8062;P08621;P15173;Q14209;Q13242;P18754;Q8WTR7;P31943;P10588;Q00839;O60832;Q12824;O43 482;P42574;Q9NYG5;O00505;Q13247;P27540;Q9UIF7;Q86WQ0;Q9BTT4;P49005;Q9NZI5;Q6P0N0;P193 38;Q99717;Q92831;Q99638;O15105;P26599;Q9BUJ2;Q92945;Q13526;Q16254;Q00978;P29084;Q0486 4;Q08211;P61024;P20618;O43316;P42771;P63272;Q9UI95;P35658;P52298;Q9HAN9;O00232;Q15652 ;O43390;P55212;Q9HCS7;Q16629;Q12983;P22626;Q01094;Q6NZI2;O94906;P51668;Q9BUQ8;Q9Y333 ;Q9UJX9;P17096;Q66K89;Q07955;P02545;Q01860;Q9NZP6;Q92750;O75182;P61077;Q13427;Q9BTP7;Q 08945;Q9NXV6;P62826;Q00987;Q12834;O15198;P30305;Q53T94;Q8NCD3;Q9UKV3;Q14980;P08047;Q9 BXP5;Q13889;P11802;P20226;Q05048;Q9H501;P18850;P17480;Q16637;P52756;Q9Y5P8;Q96G25;O75 943;Q15561;Q86W54;Q14103;O75832;Q8IVN3;Q9BWF3;Q9Y5B0;O15318;Q9UKN8;Q7Z333;O00233;O960 04;P62487;P01106;Q9UJX6;Q14566;O75448;P62877;P51843;P25205;Q9Y266;O43592;P19388;Q1449 3;O75925;P28702;P35637;Q9NP71;O60583;Q14186;P62318;P18848;Q53HV7;Q9HAW4;Q06710;P84022 ;O43148;Q14676;Q04726;Q9Y6Y0;Q86V81;O43513;O14980;Q14978;P31350;O60508;Q7LG56;Q8NDT2 ;Q96F24;P13984;P22736;P17706;Q9Y3C7;P51003;P60228;P15976;Q13033;O95096;Q9GZN2;O75643;P 31749;P67809;P14635;Q9P0U4;Q15596;Q03468;O00255;P83369;O15287;Q13042;P10914;Q86U44;P5 1965;Q13309;O15315;Q9UJX5;Q15361;Q6P2C8;Q13435;Q01831;Q92769;P49720;O95251;P28065;Q13 342;Q14683;Q14192;P2RXF5;Q96DE0;P52435;Q9H1D9;Q04725;P49848;Q8WUA4;Q9Y248;P42704;O151 31;P23490;Q9Y2N7;P36873;O60264;Q13547;Q09028;O00762;Q6STE5;P51587;Q9UJX2;P6230 6;Q8WXE1;P51946;O15160;O14746;Q9UHI6;P63165;Q9NXX5;P29372;P60900;Q9Y250;P52657;P50750 ;O94913;Q9Y535;P49711;P20248;A9QM74;P17544;Q9Y2L1;Q9Y5B9;P33992;Q9BXL5;P26368;Q14669 ;Q96QD9;Q9UER7;Q96Q89;P55769;P25786;O75683;Q01081;O00231;P62837;O75533;Q13415;P36954;Q 96RS0;Q12875;Q8TEQ6;Q9Y6X3;Q9UKT4;Q16514;Q9Y3D8;P82970;Q9Y3T9;Q9NYB0;Q8IX07;Q99814;Q1 2778;Q16695;Q6T23;Q9Y5Q9;P61326;Q86WX3;Q9BRG1;Q16576;P15927;P42224;Q9Y2Y4;O75582;P39 687;Q16533;P54727;Q13105;Q92541;Q6ZNA4;P15880;Q86YC2;Q8N6T7;Q15459;O75376;Q9UJX3;P981 77;Q9BWJ5;P35249;Q8NHZ8;Q07820;P63208;Q12962;Q9NPD8;Q9BUI4;Q13216;P61289;P78317;P4995 9;O95718;Q9Y468;Q14653;O00267;Q9H896;P50995;Q14181;Q14966;P09874;O75469;Q16829;Q9BYG3 ;Q9H1A4;Q96Q83;Q9BU64;P62979;P28066;Q9UNM6;Q92994;O43809;P40337;Q6P2Q9;Q02241;Q96DI7 ;Q8WVM7;P33991;P78549;P43351;Q8WX92;P28749;P09012;P84103;Q92759;O95619;Q14397;Q9H944;Q 92797;O60934;Q8IWX8;Q9UK39;P18887;P62314;P55199;O15525;Q96BD5;O95602;P52272;Q92889;Q9 UJX4;Q15287;O76075;P21675;Q05519;P30876;P63104;Q15369;Q00597;P35269;Q9BXW9;Q15759;Q9N VC6;Q01130;P49450;Q9NYV6;P14678;P0CG47;Q96KS0;Q13569;Q9BZK7;Q9UGN5;Q04727;Q9UBU9;Q5TK A1;Q12789;O95243;Q13416;P62508;P10828;Q8NE71;P52292;P51858;Q14137;Q9NRR4;Q99593;O1508 4;P11474;P83916;P10599;Q8IYD8;P57678;P49790;Q72E3;P35232;Q13200;Q86X55;P48556;Q9P2I0 ;P55210;Q9BVC3;P23025;P19838;O60671;Q86YI8;P23497;Q13485;P35251;O14893;Q6IPU0;P24928 ;P62140;P38432;P23193;P27695;P51665;P54253;Q9NPI8;Q9BYK8;P38936;P29083;O94782;Q8NG31;Q 9BRP8;P18146;Q9Y2X0;Q13573;Q00403;Q13243;Q92793;Q92985;P39748;P51531;Q9P0J0;P38159;Q8 N488;P62841;Q969L4;Q9H6W3;Q92466;O00482;Q15029;P62316;Q06323;Q9NW38;Q3L8U1;Q13112;Q8N 726;O60675;Q9ULK4;Q01101;P30260;O75419;Q5SXM2;Q9Y618;O75593;Q13562;P46527;P52630;O155 27;Q9NYP9;Q9H3R5;Q92966;P40763;P35398;P40937;Q99741;O43524;P06746;Q969H0;Q7L590;P5265 5;Q92530;Q9H211;P52597;Q7Z3B4;Q93075;Q96H22;Q9NQ94;O75494;O43929;Q92664;O14595;Q9UKN5 ;Q13285;Q6K0P9;Q9NVV9;O60216;P01100;P62308;P51948;Q10570;O43242;Q12996;P22674;Q15544 ;O14802;O00716;P55294;P57081;P32780;Q96D46;O75081;Q9UHV7;Q96RN5;Q15393;P09661;Q52LA3;O 43913;Q01826;P55055;Q15365;P18615;Q71F23;A6H8Y1;P33240;O14929;Q9H6Z9;Q13352;P40306;Q9 Y2S0;P62875;Q15054;P19387;P30307;Q96JK9;O00273;Q9BVP2;Q8IZL2;Q9Y3A5;Q9Y262;P18846;Q00 653;O75496;P54252;Q14241;P11387;Q13501;Q9H840;Q15428;Q8WYQ5;Q9BQA5;Q9HAW0;Q14686;Q149 74;Q16594;P33316;Q15543;Q15572;P52948;Q13617;P10589}

4210 Pathogen[ Q85601] interacts with 702 human partners: {P43351;Q9UJX2;P51946;O95619;P01106;P18146;P52657;P28066;P17480;Q969S8;Q9BZI 7;Q9UNM6;O15198;Q9UPN9;P22674;O75182;P78317;P60900;Q9Y250;Q9Y2X0;P20700;Q14978;Q92585 ;Q96CJ1;Q15542;Q92664;O75496;O75971;Q52LA3;Q96MU7;P61978;O43913;Q13487;P36954;O15527 ;Q15370;Q9HCS7;Q9H2F5;P63104;Q02078;Q96JK9;O00629;Q16666;P09874;Q13309;P11473;O95602;P 55036;P83916;Q9P0J0;Q9H6Z9;O43502;P02545;O15315;P33076;Q9HAU4;Q9NQV7;Q9HAV4;P14373;O4 3316;O43148;Q7L590;Q9UJX6;P23025;P31749;O00541;P24385;P14316;Q9BTP7;P17096;Q9Y383;O43 390;Q02241;Q8IYB3;Q01831;O96017;Q9H1D9;O60563;Q9P0W2;Q9BW5;Q15466;Q86X55;Q08999;P159

76;Q969H0;Q8IYD8;P25787;Q7RTV0;Q8WXE1;Q92994;Q13243;P50750;O75691;P15172;Q04724;Q96BD5;P18887;Q9ULK4;Q9Y2N7;Q9NPG3;Q3L8U1;Q9BXW9;Q6STE5;Q05048;P61289;P62304;O95251;Q15329;Q8WW38;Q16531;Q01130;Q02386;Q15554;O60506;Q9UI95;Q9UBU9;P56282;Q86WX3;Q16621;P06400;Q06330;P05787;P25788;O60907;P13349;P39687;Q96T23;P50995;Q14103;Q14966;Q9Y535;Q15797;Q13888;P16455;Q01105;Q9BUI4;Q13112;Q9UKT4;Q13216;Q8N684;Q13573;Q9Y2Y1;Q9H116;P62877;Q9UHV7;Q15459;P40337;Q9BRG1;P35244;Q8NHZ8;P49336;Q15007;Q8WYP5;Q9UKN5;Q15015;Q01507;P40763;Q13426;P28702;Q14241;Q9UMS4;Q06787;O60583;Q6PT126;P14859;Q9UDY2;Q9Y468;P23769;Q13415;Q9NPI8;Q9H1A4;Q15573;Q9Y2Y4;P61326;Q9Y5N6;P22626;P62826;Q15287;Q9Y3A5;Q16829;Q9H3P2;Q9UER7;P12757;Q71F23;Q13616;P15880;P53803;Q14188;Q96G25;Q9NRR4;Q9Y2S0;P61218;Q9Y618;O00268;O94913;Q8IX12;P08621;P33316;Q8NG31;Q15583;Q969L4;Q96PU5;O95243;Q8WXF1;Q9GZV5;Q9UBU7;Q9Y248;Q9Y5B9;P18846;Q9UBD5;Q14669;Q99814;P49959;P27540;P0CG48;P49005;P30304;O75448;Q9HAW0;Q86V81;P19338;Q92831;Q9H3R5;Q9BUJ2;P55795;O75494;Q00978;Q66LE6;Q9Y3C7;O76075;P51948;P61024;P18615;Q9NPD8;O60216;Q8WVM7;Q16594;P12270;P05423;Q16629;Q15596;Q9BRP8;Q14149;O96004;Q08211;P62316;Q15054;O94906;P51668;P31350;Q9HAN9;O15525;Q07955;Q9NP71;P55055;Q04864;P49711;P55769;Q9NZP6;Q9NVU0;P61077;Q13427;P27694;Q00597;Q12834;P12755;Q9Y2L1;Q8NCD3;Q09161;Q14974;Q8WX92;P10914;P08047;Q96DI7;Q12888;Q9H6W3;P11802;P54252;Q9H501;Q9UKN8;Q9H9Y6;P52630;Q92889;P51531;Q9H944;O14757;Q13562;P14678;P01100;Q15572;O75943;Q92674;Q86W54;P25789;Q13263;P28715;P11387;Q8IVN3;Q96FV9;O00233;P62487;Q86WQ0;Q14566;O96020;P30305;Q14686;Q9BRT9;Q8WYQ5;Q9Y266;Q5SXM2;P19388;Q9BVC3;P29084;P60228;P23409;P35637;P10599;Q14186;Q50T94;Q9Y5Q8;Q04725;Q96Q89;Q14653;P38432;P20618;O15131;Q92541;Q03468;Q13352;Q04726;Q9P004;Q9Y6Y0;Q9HB96;Q9H814;Q9NVV9;Q6GRN5;P30307;O00159;Q13435;P62314;P13984;Q7LG56;P63208;Q8NDT2;Q96F24;Q96D46;P62306;Q8N726;O60508;Q8TEQ6;P25205;P54727;Q9NVI1;P40306;O14929;P14635;Q9UKV3;P15927;Q92759;Q9HAW4;O95402;Q13042;Q9BXP5;Q9UJX5;P32780;P51965;P18847;P62136;Q9NYP9;Q9BU64;Q13526;Q9Y5B0;Q92769;P49720;Q14683;Q96KS0;Q96DE0;P16220;Q99717;P52435;Q04206;P45973;P49848;Q16576;P62318;P36873;Q9UM13;Q04727;Q15029;P52597;P28062;P57081;Q9UBZ9;Q14192;Q9UHI6;P49721;Q71SY5;Q53HV7;P42704;Q10570;Q9NYG5;Q9P2I0;Q15562;P35269;O60921;A9QM74;Q99594;P22736;Q9Y262;P52948;P20248;Q96QD9;O00273;P35251;P25786;Q9UKX7;Q01081;P05412;Q8IZL2;P11388;Q96RS0;P29083;P49450;Q92985;Q15327;Q16514;Q05519;P28347;P82970;Q14691;O00255;P67809;P78396;Q8IX07;P18850;A6H8Y1;Q01826;P42771;Q9BYK8;O75376;P42224;O00762;Q86YI8;Q15369;O75582;P83369;P06748;P28072;Q16254;P08235;O75717;Q9NWX8;Q86YC2;Q8NGT7;Q00403;Q9UJX3;Q13200;Q13033;Q14209;Q13569;P11474;P50613;P15923;P10827;O43290;P28065;O00267;Q14181;Q09028;P23193;O14980;P62979;P55265;Q99436;O15360;P17544;P28070;P28749;P84103;Q9NW08;P55199;Q8NE71;P35658;Q6NS38;Q9HCU8;Q14397;Q8N3U4;Q92797;Q14980;O00482;Q9UK39;Q9BQA5;P84022;Q9Y3T9;Q9UJX4;O95400;Q9UM11;P14866;P62837;Q9UL46;Q6P2Q9;O14746;Q99460;O00231;O95639;Q06671;Q15759;Q9NYV6;P0CG47;P83876;P63165;P45984;Q96Q83;Q12983;Q8IXH7;Q9BZK7;Q6ZNA4;Q5TKA1;Q12789;Q9UIF7;Q13416;P62508;O15379;Q8N187;Q6NZI2;O15287;Q00839;P52292;Q08945;Q9UGN5;Q92750;P18754;P21675;Q9GZL7;O15084;P46937;Q6P2C8;Q12962;Q13156;Q6WBX8;P19387;Q92966;Q7Z2E3;P35232;Q16533;P63272;P48556;Q9GZN2;O15105;P06746;P12004;P52655;Q13342;Q92945;O14893;Q13547;Q9BTT4;P49116;Q66K89;P62841;Q9H2G4;P24928;O75362;P62140;P28074;P62308;P52298;Q92530;P54253;P38936;P30876;P62987;P38159;P13056;P33992;Q9UM54;P52434;P55212;Q00653;Q15543;Q0VG06;Q9NYB0;P23246;P26368;Q15652;P15336;P10828;Q9Y333;Q92793;Q15365;P39748;Q8N488;P51003;Q15361;O60264;P78549;Q92466;O75475;O75586;O00505;P19447;P35813;Q06323;O60675;P30260;O15160;O75419;P17275;Q86U42;Q16637;Q96EZ8;Q00987;O75531;P31943;P19838;O43592;Q12824;Q99741;P23490;B2RXP5;O43172;Q6P0N0;Q06609;Q14137;Q9UKL0;O60244;Q9H211;Q13485;Q96HR3;O14818;Q7Z3B4;Q93075;Q8WTR7;O75925;O43482;O14595;Q8NHY2;Q6K0P9;Q93074;O75683;Q9Y253;P24941;Q9UNA4;Q14498;P27695;Q9NZI5;Q9Y6X3;Q9UKF6;P52294;Q9BVP2;P17861;P49790;Q01860;Q15544;O14802;Q14676;O00716;Q14493;O60832;Q13105;P52747;O15318;Q9NPI6;Q99638;P09661;P15187;Q9NXV6;Q9ULX9;Q16401;Q9NVC6;O43513;P33240;Q15561;Q15366;Q01094;P62875;P54274;Q6MZP7;Q12874;O43809;P55210;Q9Y5S9;P13010;Q9Y5P8;P12956;P15226;Q9BWT5;Q13501;Q8WXD5;P46527;Q9H840;O75081;P35638;P29372;P24864;O60934;Q96ST3;Q13617;P10589}

4211 Pathogen[ P14079] interacts with 716 human partners: {P31751;O60671;Q9Y2S0;O43809;Q92664;Q5SXM2;Q14980;P28065;O15379;Q6P0N0;Q99436;P00374;Q9Y5B9;Q04725;P54274;P62875;O60244;P11388;Q96MU7;Q9Y333;O95402;Q01105;Q8IX12;P62333;P13056;Q9Y2X0;O43513;O15315;O14746;Q13416;Q15007;O00442;P55199;Q9BRT9;P57678;P62508;P33076;P09874;Q15287;Q96T23;P48556;O76075;Q08945;P51965;Q96RS0;Q8WTR7;P12755;P55055;Q7L590;Q9UIF7;Q92994;Q9BYK8;Q15561;Q9Y2Y4;Q9BZK7;P41238;Q15573;P14373;Q9BVP2;Q8TEQ6;Q02078;Q99814;Q9NYV6;Q14241;P0CG48;Q06413;Q9BWX5;Q6STE5;Q9UNA4;Q8NB91;O75419;O43482;Q15596;P28715;P52630;O94906;P30307;Q14566;Q9GZV5;Q9NUX5;P14859;Q9UKT4;O60508;P35637;Q969H0;P53779;P28749;P13349;Q14653;P19387;O75691;P52747;Q9Y5B0;P35269;Q14186;P49336;P51946;Q9UDY2;Q13415;Q16594;Q13309;O14893;P23409;Q14192;P52564;Q8IXH7;O75362;Q9Y2N7;P35398;Q9UKF6;Q9UKN8;P78396;Q9Y5N6;Q14103;P67809;Q8IYD8;Q9UGN5;P50995;P24864;P62487;Q9NW08;O15304;Q96CJ1;P36873;Q52LA3;Q92966;P11473;Q075533;P40937;P13010;Q96ST3;Q230306;O75582;Q96JK9;Q16254;P10828;Q92541;Q16829;Q9UJX3;Q9BSI4;P08235;Q10570;P52434;P49285;O60832;P52298;P55036;P35658;Q92793;Q13033;P28074;Q6WBX8;O00232;Q12874;Q9Y468;Q9NVV9;Q86WQ0;Q9NPI8;Q969S8;Q9H1A4;Q13243;Q15583;Q9Y5S9;O43592;Q9NPD8;Q02241;Q9UJX5;O75475;Q16531;P49005;O15198;Q9BUJ2;Q96HR3;O15514;Q15329;P33240;Q9GZL7;Q99594;O43913;P54252;P28347;P17096;P30876;Q14691;P11474;Q96F24;O95251;P52294;Q9H211;Q00597;P61218;Q8WXE1;P26368;Q6P2C8;Q9Y376;Q9NXV6;O60675;P29372;P83876;Q01826;O60907;Q9H3P2;P49720;Q9ULK4;O00487;Q9Y250;Q13487;P62136;P25787;P51587;O60216;Q14966;Q6ZNA4;Q9NVC6;P51531;P42704;Q14209;O75832;Q9GZN2;P14866;Q8N726;Q9Y266;P23246;P07910;Q9UBU9;O96004;P22736;Q13573;Q9H840;Q6K0P9;Q13105;Q9Y383;P15976;P35232;Q9HCU8;Q96D46;Q8IZL2;Q9Y5Q9;Q8NG31;Q9UBZ9;O94913;O95639;Q13112;Q13216;Q15029;P16455;Q13889;Q9BXW9;P53803;Q6IPU0;Q9Y3A5;A6H8Y1;Q13427;P62979;P46937;P18615;Q86YC2;Q9UM54;O00233;O60934;Q6P2Q9;P23010;P31350;Q15526;P62841;P62316;P54253;Q13156;Q14498;Q9HCS7;Q15797;Q15427;P33316;P61077;Q08211;P10827;P57081;P61289;P23025;P29084;P23497;

P30304;Q05048;Q15652;Q9NQ94;Q00839;P62877;P62987;Q16576;Q15572;O43290;Q7LG56;P55212;O95718;Q96FV9;P83369;P51665;Q15459;Q9UKX7;P20618;Q00987;P45984;Q92797;P63104;P62306;Q86U44;Q9NVI1;Q9NYG5;P35813;O75448;P14678;O95400;Q14149;Q8IYB3;P45973;P19338;Q06330;O43148;P45983;Q99741;P82970;Q8N3U4;Q16629;P50613;Q9H6W3;P40337;Q13888;P17480;P26599;Q15054;P55795;P12956;Q9BWJ5;Q9P0W2;Q9Y3T9;Q9HAW4;P61326;P35250;Q16637;Q71F23;Q6MZIP7;P19388;P51668;P14635;Q8NHZ8;Q00403;Q9UMS4;Q9UK39;O75943;O75586;P12270;Q00165;O14929;Q15543;P28062;P60900;Q96BD5;Q9UPN9;O00482;Q16644;Q9UKV3;Q12962;Q9UER7;P55265;P17544;Q8WYP5;Q92769;Q9UBD5;Q9BZI7;O00716;Q9UM11;Q96Q89;Q9UHV7;Q8N6T7;Q9BUI4;Q9H2G4;P55210;Q96RN5;Q0VG06;P05423;Q05519;P38936;Q15759;Q9UM13;Q7RTV0;Q9BRP8;Q6NS38;O75469;Q9NPG3;P24863;P08621;P49848;Q13042;Q92945;Q8N684;Q9UNM6;O15160;O95243;P56282;Q8NE71;P27540;Q8IVN3;P52435;P63272;Q66K89;Q14974;P18887;P35251;Q9H6Z9;Q9BVC3;P17275;Q66LE6;P62140;P49450;Q86V81;P15336;Q9NRR4;Q92750;Q86U42;Q99460;Q9Y5Q8;Q96H22;Q9NZIP6;P28702;P62308;Q8WXH0;P23490;Q9NYB0;O60506;Q9H944;Q15370;Q15788;Q92759;Q9Y6Y0;P09012;Q9HAW0;O14818;Q9P0J0;Q92889;Q8IX07;Q15366;Q9Y248;Q9NZI5;P27695;Q12983;P49721;P62304;Q15428;Q9UKL0;Q9Y2Y1;Q9Y2L1;O60264;Q9NPP6;Q9ULX9;Q15327;Q92530;P49790;P62316;Q93075;P35638;Q9NYP9;Q07955;Q9H2F5;P49642;Q16621;A9QM74;P06748;P01106;Q9Y262;O00505;Q86YI8;O43502;Q13501;Q14181;Q969L4;O43929;Q9H3R5;P52657;Q16533;Q15365;Q9P0U4;Q04726;Q9HAN9;Q9UJX6;P42224;O75531;Q13617;P33992;P10588;P18850;Q8WX92;Q15554;P20700;P32780;O75081;Q53HV7;Q71SY5;Q8N488;Q6NZI2;Q04724;P20248;P61978;P06746;Q12789;P15927;P31943;Q14676;Q9BT43;O75925;P15880;Q01081;Q9BTT4;Q9Y253;B2RXF5;P23193;O15525;Q96AZ6;P13984;Q9BYG3;P38432;Q14493;P30260;Q06323;Q9NVU0;Q8NCD3;P10599;P27694;Q86WX3;Q00978;Q6PI26;P62191;Q7Z3B4;O75182;Q8WYQ5;O75376;O60583;P78317;Q06787;Q92674;Q96FC9;O00541;Q99638;Q9H96;P46527;Q9Y6X3;P62837;Q14011;Q9UQE7;Q15562;P55769;Q13164;Q03468;Q9BTP7;Q92466;Q9NQV7;Q14137;P12004;P12757;P52597;O43390;Q14397;Q02386;Q9HAV4;O00762;O95602;P30305;Q9BXL5;Q9BU64;Q15008;P24928;Q15369;Q12824;P43686;P10589;Q93074;P51003;Q01831;O43242;P62826;P25788;P63208;Q12996;P49116;P09661;Q8N187;Q9UKN5;O14802;O00231;Q13616;O15318;P28066;P05412;P83916;Q9Y5P35;Q15466;Q13569;Q9UL46;Q9BRG1;O96020;Q12888;O15084;O95235;Q13526;P02545;Q15361;Q09028;Q96QD9;Q9BXP5;O43172;Q16514;O95619;P52756;O75494;Q9H1D9;Q53T94;P35244;O15105;Q06609;Q14683;O00267;Q9NW38;P62318;P0CG47;P54727;Q5TKA1;Q96Q83;P36954;Q7Z2E3;Q96GY3;Q01094;Q13352;Q7L2Z9;Q96G25;Q92585;O00255;Q96KS0;O75971;P04818;P01100;O75683;Q9NP71;Q96EZ8;Q14188;Q23769;O75717;O15360;P14316;O00629;P25205;P52292;Q16401;Q13426;Q9UJX4;Q8WXD5;Q14686;Q15542;Q8NDT2;O60921;P49711;P17980;O75496;Q96DE0;P18754;O15131;Q04727;Q8WUA4;Q8WW38;P07992;P28072;P19447;Q9Y535;P39687;Q9H501;Q96AP0;Q9UBU7;Q09161;P22626;P07305;P10914;P22674;P84103;P29083;Q13342;Q8IWZ8;P49917;P21675;O00268;Q16666;P39748;P38159;Q9H116;P52948;P13693;Q14978;Q3L8U1;Q9H9Y6;Q9P2I0;Q08999;P50750;O00273;P42771;Q8NHY2;P43351;P61024;P51948;Q8WTP8;Q9H814}

4212 Pathogen[ P03383] interacts with 628 human partners: {P43351;Q9Y618;Q14683;O95402;Q13573;Q7Z2E3;P02545;P23490;Q06330;Q15329;P30307;P53803;Q8NHZ8;Q9NRR4;Q90928;Q9UKN8;O15198;Q13616;O75182;P62140;Q9Y253;Q14978;Q9UBU9;Q2585;Q07955;P50995;P55199;P10914;O75925;P14316;Q15561;Q9Y2L1;P09661;Q92831;Q9UBD5;Q12888;O14757;Q15287;Q06609;Q96JK9;O75582;Q05048;O95602;Q01105;O60671;P06746;P55036;P61024;Q13485;Q15369;P63272;Q6IPU0;Q14653;O75494;Q04864;P33076;O00716;Q15366;P08047;P51003;Q9H3P2;Q9NYV6;P06748;O43148;P13010;Q14209;P29084;Q969L4;P55212;P17096;P16220;Q9HC8;P27540;Q15562;O43390;Q02241;Q15544;Q8N3U4;P62987;P17544;Q8N6T7;Q12824;P35269;Q13216;P83876;P19338;P51948;Q9NYG5;Q9H840;Q00653;Q15459;P62318;Q08999;P23075;P51965;O43290;Q9UJX6;Q9H944;P40337;P25789;Q8WXE1;P49711;P22626;P60900;Q15596;P15172;Q01094;P14866;Q9NYB0;Q15029;O75376;Q15572;Q6NZI2;Q9ULK4;Q96F24;P12270;P01106;O43172;Q8WW38;Q96CJ1;P60228;Q13487;O95251;Q7L590;Q96MU7;O15304;Q04727;Q15554;Q96GY3;O00541;Q9HCS7;O15527;Q9UPN9;Q8NE71;Q9UI95;Q13888;Q14181;P49116;Q9Y5S9;O75362;Q9HAW0;P14859;P23193;P52948;P27694;O60244;P31749;Q96BD5;P55795;Q53HV7;O60907;P62316;Q9BXW9;Q9Y535;P22674;Q9H9Y6;P40306;Q96DE0;O00233;P18847;Q92966;P25205;Q86X55;P17861;Q8WYP5;Q8IZL2;Q01826;Q14686;Q6STE5;Q96FV9;Q06787;Q10570;P52655;Q6PI26;P62304;P30304;P23769;Q92797;Q6MZIP7;Q9NYP9;Q8WYQ5;Q9Y262;P61326;Q9UHI6;Q9H2F5;Q8WXD5;Q15542;P52630;P35638;O00762;P15923;Q6P2Q9;O95400;P49721;Q06323;Q9UK39;Q96G25;Q12874;Q6ZNA4;Q5TKA1;P52434;P24385;P61218;Q9Y6X3;P26368;Q13243;Q9UKT4;Q01860;P78317;Q08945;Q15797;Q96H22;Q9H1A4;P10599;P61978;Q8WXF1;O75691;P11387;P18846;P31943;P63208;O00505;P49005;Q86V81;Q9NPP6;Q96T23;Q13352;Q13435;Q00978;Q96KS0;P35813;P20618;Q04724;Q9H6W3;O60216;Q9Y5Q8;Q13042;O75683;Q9H1D9;Q93074;Q9Y248;Q9UKF6;Q01831;O00267;P38432;P14635;Q12983;P11802;P06400;P18146;O94906;P31350;Q66K89;O15525;P78396;P38159;Q9NP71;Q96D46;Q9NZIP6;Q9NVU0;O60921;A9QM74;P61077;Q96HR3;Q00403;P36873;P62826;O43913;Q09161;Q9BXL5;Q16629;P83916;Q6WBX8;Q71F23;Q9Y3T9;P20226;Q8IVN3;P62136;Q12834;Q9Y5P8;P56282;O75832;P52657;Q96RN5;O75448;O96004;P62487;Q14397;Q86WQ0;P29372;P11473;O15105;Q8N684;O94913;Q8IYB3;P11474;Q16533;P49336;O95243;Q9HAN9;Q16594;Q92985;Q14186;Q06P2C8;P54252;Q8IXH7;Q16637;Q13427;Q16621;Q9NVI1;P15927;P45973;P84022;Q9BU64;Q92994;Q04726;O75081;P52292;P52747;Q9Y6Y0;P19387;P33240;P62314;Q9NVV9;P05787;Q15361;O60563;P84103;Q92945;Q15652;P50613;P13984;P39687;O00273;P63104;P20700;Q9UM13;Q9Y3C7;Q8TEQ6;Q13105;O14893;Q8N488;O14929;Q9Y5N6;P28347;P35637;P51946;P24928;Q9UKV3;Q14192;P46527;Q03468;O14980;Q9HAW4;Q01130;O15287;Q9HAV4;Q9BQA5;Q9Y383;P24941;Q13426;P18754;Q92769;Q13342;Q99717;P09874;P23025;Q14493;Q04725;P49848;Q9Y2N7;Q9BSI4;Q14103;Q9UM11;Q9H501;Q9H6Z9;Q96QD9;Q15466;Q16254;P57081;Q9UL46;O14746;P63165;P28702;Q9UNM6;P50750;O75971;P14678;Q9UKN5;Q9Y333;P51531;P35244;O15379;O00268;Q9UER7;Q96Q89;P25786;Q99460;Q01081;Q9BRT9;P62837;Q15759;Q96RS0;O96020;Q16514;Q52LA3;P82970;O00255;O75475;Q16666;Q86WX3;Q9BRG1;Q9NPG3;Q86YI8;P28072;O15084;P54727;Q9UBZ9;Q15365;Q14974;Q92759;Q13200;Q15054;Q13569;Q9P0W2;Q9Y266;Q15573;Q9Y3A5;P35232;Q6K0P9;P28065;Q13501;Q9HB96;Q8IX12;Q969H0;P42771;P28062;O15131;Q13547;O43809;P52298;P28749;P09012;Q9UKL0;Q15007;P35658;Q14980;Q3L8U1;Q71SY5;P54253;P23497;Q9H116;O75419;Q13617;Q15327;Q99638;Q9UJX4;Q14188;Q9H2G4;Q16401;P01100;Q8NCD3;Q05519;P62979;Q8NG31;Q92750;O00231;Q00597;P0CG47;A6H8Y1;Q9BUJ2;P62875;Q

15796;Q99594;P21675;Q9BZK7;Q92541;Q13416;Q9UJX5;P62877;P52435;Q13309;Q9GZL7;Q04206;P55265;Q8WTR7;O15360;P57678;O15318;P55769;P45984;P42704;Q9P2I0;Q9Y5B0;Q86YC2;Q8NDT2;Q15370;P12757;P0CG48;Q12962;O60675;Q9NPD8;P33316;Q96ST3;Q9BTT4;Q14691;P28074;Q9BXP5;P62841;P18887;P62308;P27695;Q92530;P23246;P19388;P49720;Q16531;Q9UHV7;Q96Q83;P61289;Q6P0N0;P29083;P24863;Q13156;Q8N187;Q13033;O43592;Q12789;P15336;P10828;Q9NXV6;Q9NZI5;Q9UKX7;P18848;Q9UJX2;Q9NVC6;P18850;P62508;Q14676;O95619;Q8NHY2;P83369;Q92466;P30876;Q95586;P28062;Q9NW38;Q9P0J0;P24864;P30260;Q92674;Q5SXM2;P17275;Q86U42;Q96EZ8;P17480;P48556;Q9H3R5;P19838;O00629;Q9NPI8;O14818;Q9BVC3;P67809;Q14137;Q9UJX3;P46937;Q14241;Q7Z3B4;P13056;Q9GZV5;Q9ULX9;O60583;Q00839;Q99436;P52294;Q13112;Q9BVP2;Q9Y5B9;P08621;Q9BYK8;P49790;O14802;Q9Y2X0;P32780;Q9H211;P52597;P15880;O60832;Q9BTP7;P20248;P18615;O43482;P28070;Q9UMS4;Q16576;Q92793;O75531;Q7RTV0;Q13526;P54274;Q9BRP8;Q02078;Q0VVG06;Q969S8;Q8WX92;P51668;Q9UDY2;Q9Y468;O75496;Q99741;P12956;Q9BWJ5;Q9H814;Q53T94;Q8N726;P25787;P62306;O96017;P35251;P25788;Q9BZI7;Q15543;Q9Y250;Q14498;Q8WVM7;P05412;Q96DI7}

4213

Pathogen[ P03410] interacts with 738 human

partners: {Q9HAW0;P84022;Q99594;Q9UKT4;P83876;Q14397;Q92831;Q8NHY2;Q04206;O60583;Q08945;Q7Z3B4;P23025;P42771;P28070;P49959;P23409;O95619;Q9H6W3;Q9Y2L1;Q6NZI2;B2RXF5;Q92945;P18887;P23246;P19838;Q96Q89;P46527;Q00839;P52655;P35244;P25205;Q9NUX5;Q15427;Q8WTP8;Q9UI95;O75925;P55036;Q96RS0;O43929;Q9BWJ5;Q6ZNA4;P23490;Q15572;Q8WXD5;O60675;Q01081;P10599;P31350;Q9UK39;P0CG48;O95639;Q52LA3;O14893;Q16666;P35638;P26368;Q9H3R5;Q10570;Q14974;P61326;O75683;A9QM74;P19387;Q14103;P62304;P35813;Q96T23;Q8IX12;Q13889;O00505;Q8NE71;Q96H22;O60508;P17861;Q15329;Q9Y5Q9;P18615;P36954;Q9NV11;Q9BT43;Q9H3P2;O00268;Q12983;Q12996;P50995;O00442;Q15029;O75943;Q8WTR7;P61978;Q9H1A4;O14929;Q04864;Q92994;Q9NVV9;Q9UKX7;Q05048;Q14181;O96004;Q15543;P25786;Q16629;Q13416;Q15652;Q9H840;Q04726;Q8IYD8;P12755;Q15554;Q96G25;P82970;Q66K89;Q15008;Q96KS0;Q96AP0;P22626;Q16401;Q9P0U4;Q8N726;Q8NG31;P18847;Q9H6Z9;P01106;Q9BUJ2;P63165;O95251;Q92750;P07992;P15880;Q99814;O00267;Q9Y5B9;P62306;P63272;Q06330;O15315;O14746;Q9BXP5;P62841;P52294;Q01860;Q96F24;P48558;Q6IPU0;Q15287;P60900;P54274;O75419;O96020;Q12962;Q9BQA5;P21675;Q9BXW9;Q9UQE7;Q14149;P29083;Q14686;P18848;P35998;P51965;Q13526;Q15393;Q9Y2N7;Q99460;Q9BYK8;Q9Y5S9;Q8N6T7;Q6PI26;P00374;Q9UJX4;Q8NB91;Q9NYG5;Q14493;P14859;O75582;Q9NVC6;Q99717;P52948;P41238;O00233;O76075;P35637;Q14653;P51946;Q9UNA4;Q16254;Q8TEQ6;Q9UM13;Q15365;Q6WBX8;Q14978;Q9NPJ6;P62136;Q9Y333;Q9P0W2;Q8WXE1;O00232;O75182;O15198;P20700;O00273;Q00159;Q9NYP9;Q86X55;Q8NHZ8;Q04724;P55769;Q9NZI5;P05787;Q13501;P22674;Q9Y6Y0;P39687;P31749;P17096;Q9HAW4;Q9NXV6;P06746;P45973;P48556;P30876;Q86WQ0;P26599;P49721;Q92674;P54252;O60832;Q92889;Q93075;Q08999;Q9Y468;Q9H211;P20226;Q96MU7;Q15366;Q15370;Q01105;P10828;Q9Y5Q8;A6H8Y1;Q5TKAL;P62308;P14678;Q96Q83;P62316;Q9Y3T9;P39748;P06748;P06400;Q14137;Q9BSI4;Q9H116;P56282;O75376;Q9BTP7;Q9GZL7;P43351;Q15327;P23193;Q03468;P55265;P15923;Q8WYQ5;Q9Y3C7;P62979;P28715;Q9NPG3;Q6NS38;P78549;P62508;Q6P0N0;P52657;Q8NCD3;Q92466;Q14188;Q96ST3;O15514;Q9BRT9;O60216;P50613;P14866;Q9NRR4;Q99436;O15318;P09012;Q92585;Q01831;Q8WW38;Q9Y535;Q92541;P01100;P18846;Q53HV7;Q9BZI7;Q96FV9;P38432;P33992;Q96QD9;P17544;Q16576;Q9GZV5;P11473;P51003;Q9HF5;P78396;P08621;O95243;O43809;Q7Z2E3;P50750;P43036;P27540;P67809;Q9NYV6;Q9UM54;P33316;Q06323;O60563;O00716;O15525;Q16829;Q9HCS7;O94906;Q8IZL2;Q15583;Q9UBZ9;P12956;P24385;Q9UDY2;P07910;P08579;P55199;Q96JK9;Q92793;P63208;Q14966;Q969S8;P35251;Q15573;Q13200;Q99828;P49790;Q8IX07;Q05519;Q8IXH7;Q9ULK4;Q9H814;O95402;Q8WX92;Q15561;Q9UKV3;P25787;Q14980;Q9NQV7;P29084;Q90928;O15084;Q9NW08;Q15369;Q9UER7;P14635;Q9UM11;P12270;P38936;Q92769;O43513;Q02386;Q9BWX5;Q13042;O43172;Q96GY3;Q13342;P52435;Q92797;Q13309;P62826;O00629;O95602;O94913;O43502;P62140;Q969H0;O15287;Q9UKN5;Q07955;P52597;P35658;P52298;Q16514;P28347;Q16637;Q9NPI8;P04818;P30304;P24941;Q9P2I0;P31943;P17275;Q99638;Q00597;O15527;P62314;Q16621;Q9Y253;P49848;P83369;Q8IVN3;Q8N187;Q9UGN5;P04553;P51587;O43482;P11802;O75362;P78317;O75531;O15379;Q9BYG3;P33240;Q9UBU7;P53803;P02545;Q13569;P28062;Q13033;Q15797;Q71F23;Q96AZ6;Q01826;P42704;Q13112;Q9NP71;Q15428;P16455;P151665;P62877;P19447;P11387;Q14683;P09661;Q8WXF1;Q13485;Q13156;P10914;Q96DE0;Q9ULX9;Q15459;P22736;Q04727;Q14186;O75533;P13693;Q9Y2S0;Q8NDT2;Q86V81;P62875;P05423;Q15054;Q9BVC3;P28702;Q12789;P19338;P52272;Q6K0P9;P09874;P16220;Q15466;Q00403;Q9BXL5;O14818;P12757;O96017;Q9UBU9;P36873;Q9BTT4;O14757;O60671;P51668;Q9BRG1;P46937;Q6P2C8;Q14118;Q86WX3;Q9UJX5;P35269;Q9HB96;Q8N3U4;O60921;Q14011;Q8IYB3;Q16594;P61218;Q16531;P13349;Q13426;P05412;Q8N488;P49336;Q7L590;P20248;O15360;Q9Y2Y1;O95400;Q12888;Q96HR3;P49711;Q96CJ1;O00231;Q9UNM6;Q12834;O15105;P30260;Q9HAN9;P11388;P63104;Q15596;Q13216;P51948;O15160;P51531;P24863;Q9Y5B0;P49450;P28749;P25789;Q15544;P49720;Q13888;O60244;Q01130;Q96D46;Q9Y2Y4;Q9UHV7;Q9BVP2;Q13616;Q969L4;P11474;P45984;Q92664;P57081;Q9UJX3;Q9Y248;Q9UKF6;P52434;P23769;Q9NPD8;Q96EZ8;P52630;Q3L8U1;P62987;O75081;P53779;P27695;Q13547;O00762;O75496;Q01094;O75717;Q7RTV0;P49116;P57678;O00541;Q53T94;Q9UMS4;P13010;P13984;P10589;Q92966;P61024;Q02078;P83916;Q15542;Q8N684;P62487;Q9H1D9;Q8WVM7;Q9BZK7;Q9Y383;Q9GZN2;Q14498;Q6MZP7;Q9Y250;P08047;P49005;P27694;O60506;Q96FC9;Q13487;Q09161;Q9Y266;Q00653;Q13617;P28072;O43148;Q14676;Q9NVU0;Q00987;P15927;Q9Y2X0;Q14691;O75475;Q06787;Q6P2Q9;Q66LE6;P35250;Q93074;P18754;P84103;Q13105;Q9P0J0;Q86U44;O75691;P14316;Q96BD5;Q9UKL0;Q14209;Q86U42;Q6STE5;Q9Y5N6;Q9NW38;P54253;Q15361;P30305;Q9H944;Q9Y618;Q92985;O43290;P55795;O60264;P25788;P35232;P18146;Q9NYB0;Q8WUA4;Q9Y262;Q12824;P52292;Q9HAV4;O43913;P40937;Q9H501;Q13243;O43592;Q12874;Q14566;Q13427;Q9UKN8;O00255;Q9H2G4;P38159;Q15796;P55212;Q8IWX8;P60228;Q9Y3A5;Q5SXM2;P23921;P08235;P15336;Q9UHI6;P19388;P28066;Q15562;O15131;Q08211;P24864;P12004;Q8WXP5;Q14241;P40763;P32780;Q9UBD5;Q86YC2;P18850;Q8WXH0;O75971;O60907;P33076;P28065;O14802;O43242;Q00978;O75448;Q96RN5;P30307;Q14192;Q9UJX6;Q16533;P15976;P29372;Q7LG56;P0CG47;Q92759;O60934;Q9BUI4;Q13352;Q9NZP6;P17980;Q9UPN9;Q9UIF7;Q7L2Z9;Q0VVG06;O75832;O14980;P20618;P40337;P49642;Q9HCU8;Q9Y5P8;P61077;Q13573;P62837;Q06609;O75586;Q9UL46;Q02241;Q9BU64;P28074;P61289;P55210;Q9H9Y6;P52747;P17480;Q13435;O43390;Q04725;O75494;P13056;Q15007;Q13415;O15304;Q99741;Q9BRP8;Q86YI8;Q71SY5;P54727;P62318}

4214

Pathogen[ P14075] interacts with 631 human



partners: {Q04727;P43351;Q9NVU0;P42704;Q3L8U1;Q92797;P52630;Q9Y5P8;P11387;P17480;P49336;Q7Z2E3;P52292;Q8NB91;Q96ST3;P51003;P22626;Q16576;Q92585;Q15572;O15131;Q8TEQ6;Q6IPU0;Q15366;Q12789;P63165;Q9HB96;Q8N6T7;P62304;Q9GZV5;P54253;Q05519;Q9NXV6;P14866;Q12962;Q09161;Q12983;P35813;P62316;Q9H814;P55036;Q8WXF1;P25788;P13984;Q9Y266;P19338;Q9H211;Q9NPJ6;P23497;P23246;Q92759;Q8N187;Q9H2F5;Q96KS0;P12956;Q13042;Q9NVI1;Q96D46;Q8WDX5;Q16533;Q00273;P24863;P31350;Q13105;P29066;O15360;Q04206;O43809;P21675;Q9P2I0;Q96DE0;P20491;Q13573;Q969S8;Q9UBZ9;Q14683;Q92866;P55265;Q08999;P52657;O14746;P08621;P23205;Q8WXE1;Q02241;P05412;Q9BXL5;Q15542;Q8N488;Q04725;P18615;P11802;Q06323;O75832;P11474;Q15575;Q9BQA5;Q14103;Q86V81;O75475;P61024;Q9NYV6;Q13243;P62837;P14859;Q92831;P52747;Q15554;P10828;Q9BSI4;Q96Q83;Q9UKT4;P60900;P17861;Q08945;Q9Y6X3;Q15562;P27695;P28347;Q8WVM7;P30876;Q9BRP8;P14635;Q96HR3;P61326;P38432;Q9UML1;Q86WX3;O00233;Q9UKN5;Q01831;Q86YC2;Q14686;Q14493;O75582;Q92674;Q9UL46;P57678;Q53T94;Q9H116;P17275;Q9Y5N6;Q00403;Q15459;O75362;P55212;P49720;O60563;Q9Y5B0;Q8WYP5;P29083;O75971;P23769;Q9UKL0;P50613;Q14241;Q9GZL7;Q52LA3;P18847;Q01860;Q9UBD5;Q6P126;Q9Y468;P38159;Q9NPI8;Q92945;O15527;Q15652;O75419;P20700;Q15561;Q53HV7;P15172;Q15428;O00541;P17096;Q15327;P51965;P18146;Q96EZ8;O60675;P06746;P29084;O95619;Q9Y2N7;P42771;P33076;O00629;P19388;O95400;Q01130;O75925;P61218;P35638;P50750;O60583;Q9UIF7;Q92994;Q9H840;Q9Y250;O60671;Q9ULX9;Q96H22;O43172;Q9UKX7;Q9BTP7;P31943;Q13216;P23490;P39687;Q5SXM2;Q15544;P49005;P45973;Q93075;Q9HAW0;Q99717;Q13200;O75448;P48556;P19387;P62140;O00716;P62306;Q16401;O75494;Q00978;Q8WW38;Q8IX12;P20226;P15336;O14929;P62308;P15927;Q9UI95;P35658;O96020;Q16666;P12270;O43390;Q15796;Q01105;Q9HAV4;O15304;P28070;P15923;Q96AP0;O94906;Q14691;Q9H2G4;Q14209;Q9NZP6;O75182;Q13547;Q9UJX2;Q6K0P9;P61077;Q16594;P49721;P13056;Q9Y2L1;P01106;Q92750;Q9UKV3;A6H8Y1;P36873;Q9Y618;Q15029;O75081;O95402;Q9Y248;P54252;O00231;O75376;Q01826;P46527;Q16637;P27540;P62136;Q9NW38;O75586;P78396;Q9UJX6;O43592;O00505;Q9BTT4;P12757;Q9NPD8;P62487;Q03468;Q8NHZ8;Q96QD9;Q96DI7;Q92530;Q96004;Q13485;P35232;Q99638;O00255;P63208;Q93074;Q9BVC3;Q5TKA1;O75691;Q9H3R5;Q8WTR7;Q9NP71;Q13156;Q14186;Q6NZI2;Q09028;O14980;P60228;Q15365;Q00839;P49116;P50995;Q9HAW4;P35244;P54274;Q92541;P52294;Q04726;Q9UHI6;P31749;Q9Y6Y0;P02545;P0CG48;P62979;Q6ZNA4;Q13435;O00762;Q9Y253;P57081;Q9BU64;Q9Y3C7;Q14653;P62318;P28062;P83369;Q15370;Q12874;O75683;P22674;P55769;P28074;P23193;P33240;Q9UJX5;Q9UHV7;Q14676;Q96017;Q13889;Q16254;Q13526;Q92769;P25205;P28065;Q9BUJ2;Q05048;Q9Y5B9;P49848;Q86X55;Q6MZP7;Q9H1D9;Q15287;Q9H944;Q9UPN9;Q15007;P24928;Q96MU7;Q9NYP9;P51531;Q9Y535;Q15573;P35269;O15198;P11473;Q99594;O60244;Q96CJ1;Q6P2Q9;P54727;Q9H6W3;P26368;P20248;P35251;Q9UK39;P52655;P25786;Q01081;Q16531;P15880;Q96RS0;Q8NE71;P62826;O14818;Q15054;Q16514;O95251;P82970;P62987;P67809;Q13309;O60907;Q06787;P63104;P06748;Q86YI8;Q96BD5;P28072;P78317;P18848;Q9NRR4;Q9UMS4;Q96JK9;P09661;Q8IYB3;Q01094;Q9BWJ5;P62841;Q9Y333;Q13487;Q8NH Y2;P61978;O15105;Q14397;P30304;P06400;P83916;P33316;Q9BRT9;Q9Y5Q8;O15287;Q02078;Q13426;O60832;Q9Y262;O43913;P27694;Q12824;P14316;Q06330;Q9H9Y6;P51946;P28749;P32780;P09012;P55199;O15379;Q66K89;Q9ULK4;P01100;O60921;O00268;P14678;Q8NDT2;O15525;O95602;Q9UJX4;Q9HCS7;Q9Y3T9;Q6P2C8;Q13342;Q9NZI5;P0CG47;A9QM74;Q8NCD3;P49711;Q9Y383;P25787;Q9BZK7;Q96T23;Q92793;Q9UDY2;P28702;Q9NVC6;Q13416;Q9Y5S9;P18754;Q14137;O95243;P46937;Q9UKN8;Q9BRG1;Q96RN5;P35637;Q15466;P19838;Q04724;Q99741;Q96F24;P83876;Q12888;Q00653;Q13427;P16220;Q15361;P84103;P20618;Q9HCU8;Q9H1A4;P24385;Q9BXP5;O43148;Q9H3P2;P13010;Q9UBU9;Q15329;Q8IVN3;Q14974;P56282;Q92985;Q0VG06;P84022;Q9HAN9;P49790;Q9UER7;Q13352;Q16621;P62875;P52597;Q13569;Q8IXH7;Q9H501;Q9UNM6;O14893;Q92466;Q6STE5;Q13616;O75496;Q71SY5;Q00597;P62314;Q13112;Q8IZL2;Q8N684;Q9UM13;P10914;Q96G25;Q14181;Q14980;Q96FV9;P40337;P17544;O43290;P30260;P61289;Q9UKF6;Q8NG31;Q7L590;Q9UJX3;O43482;O00267;Q86U42;P40306;Q14188;P51668;Q9NYG5;Q969H0;P29372;Q13617;Q6P0N0;Q15369;O43513;Q99436;Q13033;Q16629;P52434;Q96Q89;Q7Z3B4;P30307;Q6WBX8;Q9P0J0;Q71F23;Q9NVV9;O60216;Q86WQ0;P63272;O15084;Q9BXW9;Q10570;Q14192;Q9BYK8;O14802;P62508;O14757;Q12834;Q14978;Q969L4;O15318;Q9P0W2;Q06609;Q13501;Q8N726;P09874;Q9Y2X0;P62877;Q14498;Q15596;O94913;P18887;Q96GY3;Q96VP2;P18846;Q07955;P52948;P51948;Q04864;Q8N3U4;P52298;P18850;Q9H6Z9;O75531;Q9NYB0;Q8WX92;P05787;P52435;P53803;Q15543;Q8WYQ5;P25789;P24864;P10599;Q9BZI7;P45984;Q9NPG3;Q7RTV0;Q13888;Q9Y3A5;P08047}

4215 Pathogen[ P0C206 ] interacts with 746 human

partners: {P27695;P33316;Q02386;Q9BUJ2;P61289;Q13112;Q9Y253;Q9BRG1;P46937;Q8WXE1;Q9Y468;O43502;P84022;Q15287;Q9NPI8;Q99436;P28062;P10588;Q96RS0;O75683;P05787;O60216;P24863;Q9UNM6;Q53T94;P67809;Q14188;Q9UMS4;Q96PU5;P10914;P33240;Q13501;Q92769;P0CG48;Q8WYP5;O15131;Q9BXL5;Q9P0U4;P62875;P62877;Q9NPD8;P83876;Q8IXH7;Q96Q83;Q15329;Q9UKF6;P28715;Q14103;P13010;Q8N187;P49336;Q9UM54;P14678;Q6K0P9;O60508;Q15466;O75832;Q9BZI7;Q6IPU0;O15360;P45973;P35398;P23193;Q15365;Q96HR3;P61024;P49790;Q9BYG3;Q96ST3;P39687;Q07955;Q9H2F5;P26368;P52298;Q99828;Q16514;P55265;P06401;P31749;O95251;P40306;Q06330;Q9NP71;O75496;P49959;P28065;Q15543;Q9H840;Q96Q89;Q9UJX3;Q9NZI5;P49848;Q9UPN9;P61326;Q01081;Q96AP0;P35251;Q9HAW0;O43592;P36954;Q02078;P55036;Q13263;Q9Y3D8;Q8N726;Q13526;Q15361;P50750;O95602;P30307;Q9Y2N7;Q96KS0;O96017;Q9BT43;Q13309;P20226;Q14137;Q09161;Q9HAU4;Q9BVP2;Q15544;P25786;P55769;P16220;P17275;Q06787;Q9BTP7;O15527;Q8WDX5;P17544;O75925;Q8WUA4;P09874;P25788;Q86YC2;Q9Y248;Q9UNA4;Q9HCU8;P18754;P18850;Q14966;Q7L2Z9;O75419;Q92664;Q13156;O60907;O94913;P25205;P62304;O75582;P25787;P51587;Q05519;Q8IYB3;A9QM74;P45984;Q01860;Q9UJX5;Q15531;Q7Z3B4;O43913;Q08211;Q6NS38;Q9UJX2;Q6ZNA4;Q9GZL7;Q15554;O7517;Q06323;P09012;Q15327;P52657;P50995;Q9UKL0;Q86X55;O60934;O76075;A6H8Y1;O00629;Q9HB96;O75469;Q66LE6;O75081;Q96JK9;O75533;P14866;P52655;Q8IYD8;O00255;Q8TEQ6;Q8WTR7;Q04726;P49720;P61978;Q99717;P19388;Q6STE5;P61218;Q14974;P05412;Q8N684;Q8WW38;O00268;Q9NXV6;Q9NW08;Q14011;P55212;O00505;Q03468;P23409;Q9Y383;Q9NYP9;O75586;Q16666;P15336;P19338;O00232;Q969H0;Q6WBX8;P06746;Q13243;Q12874;Q16629;Q92541;Q04727;Q86U42;Q15572;P55055;Q9UER7;P62314;Q6P2C8;P62316;P20248;O43390;P60900;Q9Y3C7;Q96T23;Q96DE0;Q9BUI4;Q9UDY2;P62837;Q9Y5B9;P42771;Q13342;Q13547;Q14186;P13056;Q16531;Q9BSI4;Q7LG56;Q13416;P30305;O75494;P62826;Q04725;P51003;Q12824;P18846;P49005;P22626;O15318;O15525;Q13616;O00716;P1597



6;P49642;O43809;P49116;P22736;Q5TKA1;P29084;Q9UHV7;P78317;O43242;Q15796;Q99741;P54252;Q13487;Q16829;Q92831;Q9BQA5;O96020;Q0VVG06;Q14669;P33076;Q9BU64;P30260;Q14241;O00482;Q13216;Q02241;Q9Y6X3;Q8NB91;Q9BRT9;Q16254;Q9Y5Q9;O94762;Q9HAV4;Q9P2I0;P28749;P13984;Q9Y535;Q9Y5Q8;O75943;Q53HV7;Q9NVI1;P18146;P07992;P83369;P12755;O75971;O75475;O43290;Q96004;P19447;Q92793;P17861;Q96EZ8;P10589;Q8N6T7;Q9GZV5;O43513;Q9BWX5;Q08999;Q99638;P25789;Q9Y6Y0;Q9Y333;Q96D46;Q9NQV7;P30291;P51965;Q8IVN3;P23246;Q92674;Q5SXM2;Q9BYK8;Q9GZ N2;Q13435;Q9UKT4;P54274;Q9NPG3;O15105;Q92797;O75531;P23490;P63104;Q9H1A4;P43351;O95718;P05423;Q9NVU0;P60228;P53803;Q12983;Q13569;Q9H814;Q14209;Q92750;Q52LA3;Q9UKX7;Q9H3R5;P82970;Q93075;Q12888;Q13617;P19838;P49917;O15514;Q15054;Q9NYG5;P35269;P10828;Q96FV9;P62508;Q9Y5B0;P19387;Q6PI26;Q9UJX4;Q7Z333;Q13888;P38159;Q05048;Q96RN5;Q15007;O15287;O60506;Q9UGN5;Q9P0W2;Q9UQE7;P83916;Q95402;P50613;P49450;O95400;Q8NHY2;O95619;P20618;Q13573;Q9UKN5;Q9BJW5;P12757;O14929;Q14181;P63208;Q8IZL2;Q9UBU7;P35232;Q13200;Q9UBU9;O15379;Q96CJ1;P08047;P18615;P52597;Q13427;Q8NCD3;P28070;P13349;Q9Y2S0;P29083;Q8N488;Q13426;Q14691;O00159;Q9UKN8;Q14683;Q9H944;Q92985;Q14149;Q8WXF1;Q9NJP6;Q14676;O15315;P49711;P57081;Q6NZI2;P01100;Q04206;Q92889;Q99460;Q9H6W3;Q01831;P15923;Q9H211;Q01094;Q14686;P35637;Q6MZF7;Q96F24;P62979;P28347;Q96MU7;Q9Y5N6;Q6P2Q9;Q92759;P46527;P62318;P54727;Q13352;Q7RTV0;Q15370;O14893;P49916;P28066;P38936;Q9UM11;O60921;Q12996;Q04864;O00762;Q9NRR4;O43482;Q9Y2L1;P42574;Q9BZK7;Q15562;O75376;P55795;O00267;Q16533;O60832;O14818;Q9H2G4;Q6P0N0;P40763;Q15573;Q13485;Q9H3P2;Q9UBZ9;Q8IWZ8;P52435;Q71SY5;Q9BXP5;Q86WQ0;Q9BTT4;P62306;Q04818;Q9H116;P62487;O43172;Q9P0J0;P62841;Q15652;Q15366;O00541;P62140;Q9UJX6;P32780;Q04724;P0CG47;Q8NE71;Q96H22;Q15542;Q92966;Q9HAN9;P17096;Q13562;P23769;Q9NYB0;O60244;Q00978;P28072;Q8IX12;P30304;Q86YI8;Q15797;Q86W54;O75691;Q9ULK4;O95639;P84103;P18847;Q8IX07;Q96QD9;P02545;Q13889;Q9UK39;Q8WXH0;P78396;Q9Y3A5;Q9H6Z9;O75362;Q00653;P28702;Q15596;O60671;Q8WX92;Q16576;P56282;Q16621;Q13415;Q01826;Q8N3U4;Q00597;P27540;Q9NVC6;P15172;P20700;Q06609;P28074;P42704;Q14397;O94906;Q92994;P27694;P52747;Q14192;Q9H501;Q09028;O75448;P11388;P11474;Q9NWX5;Q92530;Q9UHI6;P15927;Q12962;P01106;P24928;Q9NZP6;P61077;P49721;O14595;P06748;P55199;Q99594;P14635;Q92945;B2RXF5;Q96DI7;Q92466;Q99814;O15198;P63165;P09661;O15084;P11387;P62987;Q13033;O60583;Q9Y2X0;P41238;Q16637;P14373;Q9BWX9;P62308;Q00987;P10599;Q14980;P39748;P35244;Q9UM13;P08621;Q00403;Q01130;O60675;O14802;Q9UL46;Q66K89;P52294;Q13105;P36873;Q13042;P42224;Q969S8;Q9Y2Y1;Q9H9Y6;O60563;P15880;Q96G25;Q8WYQ5;P12956;Q9HAW4;Q00839;P55210;Q14498;O43148;Q71F23;Q14493;P24864;Q9HCS7;Q9Y5P8;Q01105;P24941;Q15369;Q15788;Q08945;Q15759;Q9NYV6;Q9H1D9;P16455;Q7Z2E3;Q93074;P51668;Q9Y3T9;Q15459;Q14566;P18848;O15304;Q8WVM7;Q8NG31;O00273;Q9Y266;P29372;O00233;P52292;P38432;Q9Y618;P11802;P14316;O95243;P48556;Q9Y250;Q9BVC3;P22674;P11473;P17480;P35658;Q12789;P23025;Q9UIF7;P52630;Q9Y262;Q16401;P31943;P08235;O43316;Q9UI95;P52434;P35638;P17706;P18887;Q99640;Q86WX3;Q15561;O15160;Q8NHZ8;O75182;P33992;P62136;Q92585;Q9NVV9;Q15428;Q9Y5S9;Q86V81;Q9NW38;Q9UKV3;P10827;Q96GY3;O14746;P21675;Q96BD5;P14859;O00231;P51946;P35813;O60264;Q9ULX9;P63272;Q14978;P40337;Q15583;P31350;P12270;Q969L4;P51948;Q9BRP8;P48443;P24385;P54253;Q8NDT2;Q10570;Q16594;Q14653;Q3L8U1;Q9Y2Y4;P12004;P06400;Q7L590;Q15029;P30876;P78549;P57678}

4216

Pathogen[ P03363] interacts with 658 human partners: {Q96D46;Q9UJX2;O60832;Q13112;Q9Y6Y0;P17706;O75717;Q9NYG5;Q14653;Q14978;P62314;P51858;P52630;O95619;P12956;O94762;Q9NW38;Q96RS0;P18887;Q9NVI1;Q9Y5P8;Q9Y535;Q9GZN2;P18848;Q14691;Q13105;Q06787;Q13309;O75081;Q3L8U1;Q13151;Q13042;Q9BXP5;Q8WUA4;Q6P0N0;Q7Z3B4;P10828;P51965;Q15366;Q13427;O00273;Q92885;P19338;P62136;Q9NYP9;O15287;P23246;P29083;P29084;P27694;Q9UGN5;Q9HAW4;Q13487;Q9P2I0;Q9Y5B0;Q7Z333;O15527;Q15370;Q15466;P54727;O15360;Q9GZL7;Q10570;Q04206;P27540;P49848;Q9Y383;P12270;O75683;O75643;P18146;P49116;P19388;P36873;Q52LA3;P24864;Q02386;Q92674;P83916;Q13435;P33316;Q6STE5;Q9BWX9;Q00597;P13984;P02545;O00762;Q9Y468;O95400;P52597;O60563;Q9HAU4;Q96HR3;Q9HAV4;Q9H9Y6;P14373;Q9UHI6;Q15554;Q9NVV9;P09012;Q71SY5;P55199;P11387;Q9UKV3;Q96MU7;Q8WX92;P62140;Q9BTP7;P24863;Q92530;Q14397;Q9UKN5;Q08170;Q8N187;Q15562;P30876;A9QM74;Q93075;Q09028;P13010;Q92831;Q8WYP5;Q86WQ0;Q9HAN9;P51991;P12757;Q9HCS7;P62508;Q01831;P20248;Q96GY3;P25205;Q13888;Q9BXL5;P18847;P45973;P14866;Q05048;Q15393;Q14980;Q9Y266;Q06330;P32780;O14980;P20700;Q16531;Q5TKA1;Q92759;P35637;O75533;Q6MZF7;P19387;O15379;Q9H2F5;P23490;O15304;Q9NVU0;O00505;P61218;Q16514;P09651;P28347;P08579;Q15459;P82970;Q9H1D9;Q969S8;Q9BZK7;Q9NYB0;Q9Y253;P18850;Q9H6Z9;P51946;Q9Y5Q9;Q01826;Q7RTV0;O75376;O60671;O60907;Q16629;P42704;Q9Y3A5;Q92889;P62318;P78317;Q16254;P11474;P16220;P35251;Q86WX3;P23025;Q9NPG3;Q8NHZ8;Q13033;Q13342;Q96JK9;O43316;Q02241;O95602;Q16621;Q9P0U4;Q9UJX3;Q8N488;Q66K89;P24928;Q04726;Q13617;O75475;Q4G0J3;P54252;Q9UER7;Q15427;Q9UPN9;P61289;O00268;Q9BVC3;P62304;P49005;Q9UKX7;O15105;Q01130;Q6P2Q9;O00267;O14746;P24941;Q15797;Q86U44;Q14181;P35244;Q04724;Q9BSI4;Q9UJX5;Q15596;Q9UBU9;Q99828;P15880;Q86U42;Q15369;Q13526;O14893;Q14686;Q16695;P15927;Q9BWF3;P23497;P30260;P06400;P40337;Q15327;Q15652;Q96FV9;P01106;P05787;A6H8Y1;O75691;Q04727;Q92620;Q9BRP8;P06748;O00629;O94913;P28749;P17275;Q96AP0;Q9UJX6;P13349;Q8IXH7;P39687;P49711;P50995;Q92797;P18615;P61326;Q8IWZ8;Q9UK39;Q66LB6;Q9UM11;Q6ZNA4;P52657;P33992;P62306;Q05519;P10588;P35269;P11473;Q16666;P52272;P83369;Q96BD5;Q9UJX4;O96017;Q96QD9;Q15029;O60264;Q15287;P57678;P30304;P29372;Q12962;Q8N684;O43524;P15923;P15336;P63104;Q96T23;Q9Y3B4;Q00403;P55212;Q9BJW5;Q9Y333;P62841;P62316;Q13242;Q96Q83;Q9HCU8;Q14669;P46937;Q16576;Q13426;P28702;Q8IYB3;Q13416;O60583;Q6PI26;P14859;O43809;Q13616;Q53T94;Q16829;Q96020;P63165;P38159;Q00653;Q15544;P26368;Q13415;P62877;Q9Y5B9;P08235;Q6K0P9;Q96PU5;Q92945;P17480;Q9Y250;Q14241;Q12874;Q15717;Q9GZV5;Q8N6T7;Q13156;P49450;P31943;Q08999;Q9BRG1;O43172;P05423;Q9NYV6;Q9P0J0;Q9H2G4;P31749;O15318;Q7Z2E3;P17096;P54274;P14316;P51003;Q9H3P2;P18846;Q01094;Q9Y3D8;P06746;Q9NVC6;Q99741;P61024;O15525;Q96DE0;Q96ST3;O76075;P78396;Q14966;Q13243;P17861;Q9H211;Q8WVM7;Q96RN5;Q8IYD8;Q8WXD5;Q86V81;Q9Y2N7;Q9BQA5;Q9UHV7;O75586;Q15796;P07910;P57081;P84022;Q9Y2L1;Q9UKT4;Q9NZI5;O96004;Q9H1A4;Q9Y618;P49336;Q9UI95;O43290;Q14011;P35638;Q15542;Q969H0;Q9UIF7;P10914;O14929;Q13573;P52298;O43148;P35658;P54253;Q14137;P08621;Q9BYK8;P55265;Q8NG31;Q9H8

40;Q9NRR4;Q15583;P62987;P35398;O75925;Q14209;O95243;Q8NCD3;Q14974;Q92664;Q92966;Q6WBX8;Q96EZ8;Q9Y3T9;Q6NZI2;Q13547;Q92750;Q9UDY2;Q9NUX5;P49790;P22626;P19838;Q99814;Q71F23;P83876;Q93074;Q92793;O75971;Q15365;Q16533;O75448;P26599;P62487;P51668;Q9BYG3;P24385;Q99638;Q15361;P21675;P60228;P33076;Q14103;Q9BWX5;P23193;Q92466;O75496;P55795;Q13569;Q00978;P20226;Q96F24;Q9UM13;P52655;Q9Y2Y4;Q04725;O75362;P43351;Q13485;Q9BTT4;Q8N726;Q95402;Q9NPD8;P23409;Q03468;P63272;P50752;Q08945;Q14186;Q8IX12;O15131;O60921;Q92541;Q07820;Q07955;Q14188;O75531;O60506;Q9NRP6;Q01081;Q8NE71;P35232;Q9BVP2;Q9BZI7;P61978;P05412;Q9H3R5;Q15054;O94906;Q9H116;Q969L4;Q13247;Q15428;Q96CJ1;Q5SXM2;O60675;B2RXF5;Q7L590;Q04864;P55769;P52948;Q06609;Q9HNB96;Q8N3U4;Q9UKL0;O60244;Q9NZP6;Q9Y262;P61077;Q96Q89;P55210;Q12789;Q8TEQ6;Q9UNA4;Q00839;Q15573;Q12834;P09874;P62308;Q9NP71;Q16637;Q8WTR7;Q9UKF6;Q8NHY2;Q8WW38;P84103;O43482;Q9UMS4;Q14498;Q13216;Q9NPI8;Q9ULK4;P08047;O15084;P62837;Q9Y6X3;P11802;Q0VG06;Q9H501;P22674;Q9UKN8;Q14676;O43390;O00716;Q9Y248;Q8WXF1;Q01105;Q14493;Q9UBD5;P51531;P18754;P14678;Q15543;P53803;P17544;P52435;Q9UBZ9;P30307;Q15572;O75943;Q9P0W2;Q86W54;P09661;P62826;Q08211;P52434;O43592;P52292;Q8IVN3;Q9ULX9;Q6P2C8;O95251;Q13352;P15172;O43513;Q9BUJ2;P33240;Q15561;O00541;Q9Y5N6;Q99717;Q96G25;Q9BRT9;Q8WYQ5;P10589;P63208;O15198;P13056;Q99594;Q15329;Q14683;Q9NXV6;Q9Y5Q8;O75182;Q8IZL2;Q15007;Q9Y2S0;Q01860;Q9Y5S9;Q9H814;Q12824;P42771;Q53HV7;Q86X55;P38432;Q9H944;Q12996;O75419;Q12888;Q92585;Q8WXL1;O75494;Q9NQ94;P67809;O14595;Q96DI7;Q86YC2;O15160;P52747;O60508;O60216;Q09161;O43502;Q16594;O15315;P01100;P52294;O14757;O43913;Q14192;Q8NDT2;O0482;P52756;Q02078;Q9Y3C7}

4217 [Cluster 384]GO:0005743+cellular\_component [name] mitochondrial inner membrane [def] "The inner, i.e. lumen-facing, lipid bilayer of the mitochondrial envelope. It is highly folded to form cristae." [GOC

4218 Pathogen[ Q2Q067] interacts with 41 human partners: {O43920;Q56VL3;P31040;Q9BRQ6;O14618;P56181;O75489;O76031;P13073;Q8TAA5;Q330K2;P22557;O96000;O95178;Q9BU61;O43678;O60220;Q9Y5J6;O75251;O75306;P99999;Q9P0J0;P21912;Q9NX63;P62072;E9PQ53;P54098;Q9Y5J7;O43615;P04818;Q9BPW8;O95831;Q99623;Q6DKK2;Q9NRX2;O14925;P40926;P35232;Q9UBX3;Q16836;P24539}

4219 Pathogen[ P0C214] interacts with 81 human partners: {P50440;Q16795;O75306;Q05932;O43678;P22695;Q99643;P04818;P00480;P56556;Q13505;Q86XF0;P54098;Q6DKK2;P28331;Q9BU61;O43920;Q96MF6;O60220;O95299;P17568;P30405;Q9Y512;P34897;Q99623;P48735;P40939;Q99807;P40926;P22557;P36542;Q8WXG1;Q16718;P62072;P53701;O14561;Q9UBX3;O76031;P23786;O95298;O14925;P99999;P12074;Q96KC9;Q9P0J0;O43615;P24539;Q56VL3;Q9NX63;Q86WU2;Q9Y5J9;P10809;Q9Y5J6;P13073;Q8TAA5;O14618;O95202;Q9NRX2;O96000;E9PQ53;Q99766;O95182;O75489;Q3ZCQ8;Q9Y5J7;O14521;P42765;O75251;Q9UI09;P36551;P35232;P22830;Q16762;Q9BRQ6;P21912;Q9H3K2;P56181;O95178;Q9BPW8;Q330K2;Q96NN9}

4220 Pathogen[ P03346] interacts with 53 human partners: {Q56VL3;O14925;Q9BU61;P31040;P56181;Q9NS69;P54098;Q16836;O75489;Q9Y3D7;Q9UBX3;O95714;Q9H3K2;O43678;O95178;O43615;P17152;Q9Y5J7;Q86WU2;Q9BRQ6;P23786;P22557;P21912;O76031;O14618;P99999;Q9Y5J6;Q9NRX2;P24539;O43920;P13073;O60220;Q9Y512;Q16891;P40926;P62072;O95831;E9PQ53;Q9BPW8;Q3ZCQ8;O75251;Q99623;P42765;P35232;O96000;O75306;Q9NX63;Q9P0J0;O95202;Q330K2;Q9UBZ4;Q8TAA5;Q6DKK2}

4221 Pathogen[ Q85601] interacts with 42 human partners: {Q9UBZ4;O14925;P30405;Q9P0J0;P99999;P24539;O95831;Q8TAA5;P00480;Q9UBX3;O95714;O75306;P62072;Q9Y5J9;Q330K2;Q9Y5J6;P21912;O60220;Q9Y5J7;Q9BRQ6;O43678;P56181;Q99623;O96000;Q9Y512;Q9NRX2;P54098;O43920;Q6DKK2;P31040;Q3ZCQ8;O43615;E9PQ53;Q99766;Q16836;Q9NX63;P35232;O76031;Q9BU61;Q13505;O14618;P40926}

4222 Pathogen[ P14079] interacts with 142 human partners: {Q5TGZ0;P56181;P22695;Q7Z4L0;Q9UDX5;Q86XF0;Q3ZCQ8;Q99623;P36542;O43674;O43615;O60397;O43677;O43181;Q9BRQ6;O95169;Q99807;P56134;P56556;P17152;Q9Y3D7;P13073;O95139;P25705;P12074;Q2VYF4;P62072;Q330K2;Q13505;Q9UBZ4;O96000;O95167;O75306;P00395;P00403;P17568;P56385;P10606;Q9NRX2;Q16891;Q9UDW1;Q5VTU8;Q15070;P22557;Q9BUB7;P14927;Q8NE86;P35232;Q86Y39;Q02221;Q9Y5J7;P34897;O95182;Q32NB8;Q15526;P07919;O14925;Q9NS69;Q6P2C0;O14949;P14854;Q9BPW8;P20674;O95831;O75880;Q8NC60;Q86WU2;P03928;P31040;O14548;O43676;O43678;Q9H8M1;P51970;O95178;O75251;O14561;Q9UJZ1;Q9UI09;P00156;O95299;E9PQ53;P09669;Q9P0J0;Q9Y512;Q9Y5U8;Q96MF6;Q99766;P22830;Q9Y3A0;P10620;Q6DKK2;Q96KJ9;P00480;O75964;Q99595;Q16762;O75489;Q8N442;Q9H3K2;P60602;P03923;O60220;O95563;P24310;Q16718;P03897;P56381;P15954;O14521;O43920;O15239;Q5SRD1;P54098;O76031;Q96KC9;P36551;Q8TF08;P50440;P99999;O43819;P24539;O75616;O00483;P53701;Q9Y5J9;P04818;O14618;P14406;Q56VL3;P03901;Q9H300;P03886;Q05932;Q9Y5L4;O95202;Q9BU61;O95298;Q8WXG1;Q16836;Q8TAA5;P21912}

4223 Pathogen[ P03383] interacts with 39 human partners: {Q56VL3;P13073;Q9Y5J7;Q330K2;P40926;O75251;Q9NX63;P62072;Q9BU61;P31040;O96000;O43678;O14925;O43920;Q9BRQ6;O43615;Q16836;O75489;O95831;O60220;Q9NRX2;O75306;O95178;P54098;Q9Y5J6;Q6DKK2;P99999;P35232;Q8TAA5;E9PQ53;P17152;O76031;Q9P0J0;Q9Y5J9;P56181;P24539;Q9BPW8;Q99623;Q13505}

4224 Pathogen[ P03410] interacts with 148 human partners: {O95168;O43674;Q5SRD1;O95563;Q9Y5L4;Q9Y512;P56556;Q96KJ9;Q02221;Q96KC9;Q9BUB7;P17568;P62072;Q8TF08;Q99766;Q9Y3A0;O95178;P36542;O75380;O43678;Q56VL3;P25705;O75251;O14548;P15954;O95299;Q9Y5J7;P51970;Q6P2C0;O43920;Q9UI09;Q13505;P05141;O96000;Q8TAA5;P07919;P20674;O95167;Q9NS69;P56385;Q6DKK2;O15239;Q9Y6M9;P23786;O60397;Q9UBX3;Q8NC60;P36551;Q8WXG1;P42765;P13073;Q8N442;O14925;Q99595;P56381;P00480;P22695;Q8NE86;P22557;O76031;Q9UBZ4;Q9H8M1;P03886;O00483;Q99623;O95298;Q9BU61;Q5VTU8;O75438;Q9NRX2;Q9UDW1;Q3ZCQ8;E9PQ53;P56181;P04818;P00156;Q16762;O14561;Q86XF0;P14927;P60602;P22830;P53701;O43615;P31040;P03928;Q9Y3D7;O75489;P24539;Q86Y39;O95831;Q2VYF4;P21912;Q9UJZ1;Q9Y5U8;O75964;P99999;Q9NX63;P09669;Q16836;Q9Y5J6;Q99643;P03897;O43677;P40926;Q9Y5J9;O95169;Q330K2;Q9BPW8;O43181;O14521;Q16718;P24310;O75306;O60220;P00403;Q9BRQ6;O43676;O14949;P14854;

Q9H3K2;P17152;Q99807;Q15070;P03901;Q9P0J0;P03923;O14618;Q16891;Q96MF6;P35232;O95202;Q05932;P50440;P54098;O75880;P18859;P30405;P34897;P56134;P10606;O43819;P12074;O95182;O75616;Q16635;P14406;Q86WU2}

4225 Pathogen[ P14075] interacts with 57 human partners: {O43674;O14925;Q56VL3;Q13505;P56181;Q9NRX2;P54098;Q9Y5J9;Q9NX63;P62072;O96000;O95182;O43677;Q8TAA5;P13073;Q15070;P40926;P31040;O43920;O75306;O14561;O76031;O95298;O43678;P35232;P17152;Q96KC9;Q96MF6;Q9BU61;P60602;Q9Y512;P14406;P99999;Q99623;O95831;Q330K2;O75251;Q16836;O60220;Q99766;P24539;E9PQ53;Q9BRQ6;Q9Y5J7;P56385;O75489;Q9BUB7;O95178;P50440;Q9P0J0;Q9Y5J6;Q9BPW8;Q9NS69;O43615;Q6DKK2;O43676;Q9Y5U8}

4226 Pathogen[ P0C206] interacts with 97 human partners: {Q6P2C0;Q9UJZ1;P99999;P56181;Q96KC9;Q9Y5L4;Q9Y5J6;P53701;O75251;Q99766;Q9UDW1;Q9Y5U8;O43920;Q9BU61;Q330K2;O14521;O75306;P12074;Q96MF6;O95202;P14406;Q16836;P36542;Q8NE86;Q99623;O95182;O60220;P36551;Q9BUB7;Q86WU2;P54098;Q9Y5J9;P34897;Q9UBX3;Q9UBZ4;Q9NRX2;Q16891;Q9UI09;Q9Y512;Q9Y5J7;P23786;Q5SRD1;O95298;P22695;O14561;Q56VL3;Q9H3K2;O43615;Q3ZCQ8;Q6DKK2;Q9NX63;O00483;Q15070;Q9Y3D7;P17568;O95831;Q9NS69;P35232;O95178;P22557;P50440;Q99807;O14618;P13073;P40926;P22830;O14925;P31040;P24539;P17152;Q8TAA5;Q9Y3A0;Q13505;P04818;Q9P0J0;P62072;O43678;O75489;P56381;E9PQ53;Q16762;O76031;P30405;P21912;Q9BRQ6;Q8WXG1;Q9H8M1;O96000;O43674;P56385;O95714;P60602;P00480;P56556;Q02221;Q05932;Q9BPW8}

4227 Pathogen[ P03363] interacts with 27 human partners: {Q16836;Q99623;P31040;Q330K2;P99999;O14925;Q3ZCQ8;P54098;O43615;Q6DKK2;Q9NRX2;Q9P0J0;Q9Y5J7;Q9BRQ6;Q8TAA5;Q9Y512;O76031;O95714;P35232;O14618;Q9BU61;Q9H3K2;O96000;Q9NX63;Q9NS69;P56181;O95831}

4228 [Cluster 385]GO:0005680+C cellular\_component [name] anaphase-promoting complex [def] "A ubiquitin ligase complex that degrades mitotic cyclins and anaphase inhibitory protein, thereby triggering sister chromatid separation and exit from mitosis. Substrate recognition by APC occurs through degradation signals, the most common of which is termed the D-box degradation motif, originally discovered in cyclin B." [GOC]

4229 Pathogen[ Q2Q067] interacts with 19 human partners: {Q9UJX3;Q9UJX5;O00762;Q9NYG5;Q9H1A4;Q9UJX2;Q9UM13;Q96DE5;Q12834;Q8NHZ8;Q9UM11;Q9UJX4;Q9UI95;Q9UJX6;P60006;P30260;Q13042;Q9BS18;Q14999}

4230 Pathogen[ P0C214] interacts with 20 human partners: {Q9UJX6;Q16763;Q9BS18;O00762;Q9UJX5;Q14999;Q9UJX2;Q9UI95;Q9H1A4;Q8NHZ8;Q12834;Q9UJX4;P60006;Q9UJX3;Q9UM11;P30260;Q9NYG5;Q9UM13;Q96DE5;Q13042}

4231 Pathogen[ P03346] interacts with 19 human partners: {P60006;Q9UM11;Q9BS18;Q9UM13;Q9NYG5;Q9UI95;Q12834;Q9UJX6;Q96DE5;Q13042;Q9UJX5;O00762;Q9UJX2;Q9UJX3;Q8NHZ8;Q9H1A4;Q9UJX4;Q14999;P30260}

4232 Pathogen[ Q85601] interacts with 20 human partners: {Q9UJX2;Q96DE5;Q9UJX6;Q16763;Q9UI95;Q9BS18;Q8NHZ8;P60006;Q9H1A4;Q12834;Q13042;Q9UJX5;Q9UM13;Q9NYG5;O00762;Q9UJX3;Q9UJX4;Q9UM11;Q14999;P30260}

4233 Pathogen[ P14079] interacts with 16 human partners: {Q9UJX3;Q9H1A4;Q9UJX5;P60006;Q9NYG5;Q8NHZ8;Q9UM11;Q9UM13;Q13042;Q96DE5;Q9UJX6;P30260;O00762;Q9UJX4;Q14999;Q9BS18}

4234 Pathogen[ P03383] interacts with 19 human partners: {Q8NHZ8;Q96DE5;Q9NYG5;Q9UJX6;Q9UI95;O00762;Q9H1A4;Q13042;Q12834;P60006;Q9UM13;Q9UM11;Q9BS18;Q9UJX4;Q9UJX5;Q9UJX2;P30260;Q9UJX3;Q14999}

4235 Pathogen[ P03410] interacts with 17 human partners: {Q9BS18;Q9UI95;Q9H1A4;Q9UJX4;Q9NYG5;Q9UM13;Q8NHZ8;Q9UM11;Q13042;Q96DE5;Q9UJX5;Q12834;P30260;Q9UJX3;O00762;P60006;Q9UJX6}

4236 Pathogen[ P14075] interacts with 19 human partners: {Q9BS18;P60006;Q13042;Q9UM11;Q9UI95;Q9UJX2;Q9UJX6;Q8NHZ8;Q14999;Q96DE5;O00762;Q9UJX5;Q9UJX4;Q9H1A4;Q9UM13;P30260;Q9UJX3;Q9NYG5;Q12834}

4237 Pathogen[ P0C206] interacts with 20 human partners: {Q16763;Q9UJX3;Q9UJX5;Q9UJX2;P30260;Q9BS18;Q14999;Q9H1A4;Q9NYG5;Q9UJX4;Q9UM11;O00762;Q9UJX6;Q96DE5;P60006;Q9UM13;Q13042;Q12834;Q9UI95;Q8NHZ8}

4238 Pathogen[ P03363] interacts with 19 human partners: {Q9UJX2;Q9NYG5;Q13042;O00762;Q96DE5;Q8NHZ8;Q9UJX3;Q9UJX5;P30260;Q9UJX6;Q9UM11;Q9BS18;Q9UJX4;P60006;Q14999;Q9H1A4;Q9UI95;Q9UM13;Q12834}

4239 [Cluster 386]GO:0071821+C cellular\_component [name] FANCM-MHF complex [def] "A protein complex contains the proteins FANCM and MHF, or their orthologs, plays an essential role in DNA remodeling, protects replication forks, and is conserved in eukaryotes." [GOC]

4240 Pathogen[ Q2Q067] interacts with 3 human partners: {Q8N2Z9;A8MT69;Q8IYD8}

4241 Pathogen[ P0C214] interacts with 2 human partners: {Q8N2Z9;Q8IYD8}

4242 Pathogen[ P03346] interacts with 3 human partners: {Q8N2Z9;A8MT69;Q8IYD8}

4243 Pathogen[ Q85601] interacts with 3 human partners: {Q8IYD8;A8MT69;Q8N2Z9}

4244 Pathogen[ P14079] interacts with 3 human partners: {Q8IYD8;Q8N2Z9;A8MT69}

4245 Pathogen[ P03383] interacts with 2 human partners: {Q8N2Z9;A8MT69}

4246 Pathogen[ P03410] interacts with 3 human partners: {Q8IYD8;A8MT69;Q8N2Z9}

4247 Pathogen[ P14075] interacts with 2 human partners: {A8MT69;Q8N2Z9}

4248 Pathogen[ P0C206] interacts with 3 human partners: {Q8IYD8;Q8N2Z9;A8MT69}

4249 Pathogen[ P03363] interacts with 3 human partners: {Q8N2Z9;Q8IYD8;A8MT69}

4250 [Cluster 387]GO:0022626+C cellular\_component [name] cytosolic ribosome [def] "A ribosome located in the cytosol." [GOC]

4251 Pathogen[ Q2Q067] interacts with 2 human partners: {P26373;Q9UHK0}

4252 Pathogen[ P0C214] interacts with 2 human partners: {P26373;Q9UHK0}

4253 Pathogen[ P03346] interacts with 2 human partners: {Q9UHK0;P26373}

4254 Pathogen[ Q85601] interacts with 2 human partners: {P26373;Q9UHK0}

4255 Pathogen[ P14079] interacts with 2 human partners: {P26373;Q9UHK0}

4256 Pathogen[ P03383] interacts with 2 human partners: {P26373;Q9UHK0}

4257 Pathogen[ P03410] interacts with 2 human partners: {P26373;Q9UHK0}

4258 Pathogen[ P14075] interacts with 2 human partners: {Q9UHK0;P26373}

4259 Pathogen[ P0C206] interacts with 2 human partners: {Q9UHK0;P26373}

4260 Pathogen[ P03363] interacts with 2 human partners: {Q9UHK0;P26373}

4261 [Cluster 388]GO:0034098+C cellular\_component [name] Cdc48p-Npl4p-Ufd1p AAA ATPase complex [def] "A multiprotein ATPase complex required for the efficient dislocation of ER-luminal degradation substrates, and their subsequent proteolysis by the proteasome. In budding yeast, this complex includes Cdc48p, Npl4p and Ufd1p proteins." [PMID

4262 Pathogen[ Q2Q067] interacts with 4 human partners: {Q96CS3;Q04323;Q9UNN5;O94888}

4263 Pathogen[ P0C214] interacts with 4 human partners: {O94888;Q9UNN5;Q04323;Q96CS3}

4264 Pathogen[ P03346] interacts with 4 human partners: {O94888;Q96CS3;Q9UNN5;Q04323}

4265 Pathogen[ Q85601] interacts with 4 human partners: {Q96CS3;O94888;Q9UNN5;Q04323}

4266 Pathogen[ P14079] interacts with 4 human partners: {O94888;Q96CS3;Q9UNN5;Q04323}

4267 Pathogen[ P03383] interacts with 4 human partners: {Q04323;O94888;Q9UNN5;Q96CS3}

4268 Pathogen[ P03410] interacts with 4 human partners: {Q9UNN5;Q04323;Q96CS3;O94888}

4269 Pathogen[ P14075] interacts with 4 human partners: {Q96CS3;O94888;Q04323;Q9UNN5}

4270 Pathogen[ P0C206] interacts with 4 human partners: {Q9UNN5;Q04323;O94888;Q96CS3}

4271 Pathogen[ P03363] interacts with 4 human partners: {Q9UNN5;Q04323;O94888;Q96CS3}

4272 [Cluster 389]GO:0097196+C cellular\_component [name] Shu complex [def] "A protein complex involved in error-free DNA post-replication repair (PRR). In *Saccharomyces cerevisiae* the complex contains Csm2p, Psy3p, Shulp, and Shu2p." [GOC

4273 Pathogen[ Q2Q067] interacts with 2 human partners: {Q6NVH7;Q19AV6}

4274 Pathogen[ P0C214] interacts with 2 human partners: {Q6NVH7;Q19AV6}

4275 Pathogen[ P03346] interacts with 2 human partners: {Q19AV6;Q6NVH7}

4276 Pathogen[ Q85601] interacts with 2 human partners: {Q19AV6;Q6NVH7}

4277 Pathogen[ P14079] interacts with 2 human partners: {Q6NVH7;Q19AV6}

4278 Pathogen[ P03383] interacts with 2 human partners: {Q6NVH7;Q19AV6}

4279 Pathogen[ P03410] interacts with 2 human partners: {Q19AV6;Q6NVH7}

4280 Pathogen[ P14075] interacts with 2 human partners: {Q19AV6;Q6NVH7}

4281 Pathogen[ P0C206] interacts with 2 human partners: {Q19AV6;Q6NVH7}

4282 Pathogen[ P03363] interacts with 2 human partners: {Q19AV6;Q6NVH7}

4283 [Cluster 390]GO:0070969+C cellular\_component [name] ULK1-ATG13-FIP200 complex [def] "A protein complex that is essential for mammalian autophagy, and consists of at least 3 proteins

4284 Pathogen[ Q2Q067] interacts with 2 human partners: {Q8TDY2;O75143}

4285 Pathogen[ P0C214] interacts with 2 human partners: {Q8TDY2;O75143}

4286 Pathogen[ P03346] interacts with 2 human partners: {O75143;Q8TDY2}

4287 Pathogen[ Q85601] interacts with 2 human partners: {O75143;Q8TDY2}

4288 Pathogen[ P14079] interacts with 2 human partners: {Q8TDY2;O75143}

4289 Pathogen[ P03383] interacts with 2 human partners: {O75143;Q8TDY2}

4290 Pathogen[ P03410] interacts with 2 human partners: {O75143;Q8TDY2}

4291 Pathogen[ P14075] interacts with 2 human partners: {O75143;Q8TDY2}

4292 Pathogen[ P0C206] interacts with 2 human partners: {Q8TDY2;O75143}

4293 Pathogen[ P03363] interacts with 2 human partners: {O75143;Q8TDY2}

4294 [Cluster 391]GO:0005932+C cellular\_component [name] microtubule basal body [def] "A short cylindrical array of microtubules and associated proteins found at the base of a eukaryotic cilium or flagellum that is similar in structure to a centriole. The basal body serves as a nucleation site for axoneme growth." [GOC

4295 Pathogen[ Q2Q067] interacts with 17 human partners: {O75161;Q8TCI5;Q8IY31;Q96QF0;Q9Y3M2;Q9BYV8;Q9NXB0;O15078;Q86VQ0;O75665;Q96NB1;Q717R9;P41208;Q9NWB7;O15182;Q9BPU9;Q9BV73}

4296 Pathogen[ P0C214] interacts with 14 human partners: {Q9NWB7;O15078;O75161;Q8IY31;Q9BYV8;Q8TCI5;Q9NXB0;Q9BPU9;Q9Y3M2;P41208;O75665;Q9BV73;Q96QF0;Q96NB1}

4297 Pathogen[ P03346] interacts with 26 human partners: {Q86VQ0;Q9NQC8;Q9Y3M2;Q9BPU9;Q8IY31;Q68CZ1;Q9H3S7;Q9HBG6;Q8TAM2;P41208;O75161;Q9NXB0;O75665;Q9NWB7;Q8N841;Q8N157;Q9BYV8;Q717R9;Q8TCI5;O15182;O15078;Q92834;Q96NB1;Q6EMB2;Q96QF0;Q9BV73}

4298 Pathogen[ Q85601] interacts with 17 human partners: {O75161;O15182;Q9Y3M2;Q9NWB7;O15078;Q92834;Q8TCI5;Q9NXB0;O75665;Q9BV73;Q86VQ0;Q9BYV8;Q9BPU9;Q8IY31;Q96NB1;Q96QF0;P41208}

4299 Pathogen[ P14079] interacts with 38 human partners: {Q9PON5;O75161;Q9NWB7;Q8IY31;Q96GX1;Q8N157;Q68CZ1;Q92834;Q717R9;Q8N3I7;Q9BV73;P57679;Q86UK5;A6PVL3;Q9UPM9;Q8NBT0;Q8TCI5;Q8TAM2;Q96QF0;Q4AC94;Q8N841;Q9BPU9;Q8TCU4;Q9P2L0;P41208;Q8TC44;Q9Y3M2;O15078;Q6EMB2;Q9P2K1;Q9NQC8;O15182;O75665;Q86VQ0;Q9NXB0;Q9BYV8;Q6IQ19;Q96NB1}

4300 Pathogen[ P03383] interacts with 15 human partners: {Q9NWB7;Q96QF0;Q8IY31;P41208;Q9BV73;Q8TCI5;Q96NB1;Q9NXB0;Q86VQ0;O15078;Q9BYV8;Q9Y3M2;Q717R9;O75161;O75665}

4301 Pathogen[ P03410] interacts with 40 human partners: {O75665;Q717R9;Q86VQ0;A6PVL3;Q96NB1;Q96RY7;Q9Y3M2;Q4AC94;Q8TAM2;Q8NBT0;O15182;O75161;Q8TCU4;Q8TCX1;Q9BYV8;Q96GX1;Q6IQ19;Q9BPU9;Q8IY31;Q9NWB7;Q8N157;Q9PON5;O15078}

;Q8N3I7;Q9P2K1;Q9UPM9;Q92834;Q96QF0;Q8TC44;Q8TCI5;Q9HBG6;Q9NXB0;Q9NQC8;Q9P2L0;Q8N841;Q68CZ1;P41208;Q9BV73;Q6EMB2;Q86UK5}

4302 Pathogen[ P14075] interacts with 17 human partners:{Q9BYV8;Q8IY31;Q86VQ0;Q9NXB0;O15078;O75161;Q6IQ19;Q96NB1;Q9BV73;Q9BPU9;Q8TCI5;Q9NWB7;P41208;Q96QF0;Q717R9;O75665;Q9Y3M2}

4303 Pathogen[ P0C206] interacts with 27 human partners:{Q9BPU9;Q8TCI5;Q9NQC8;O15182;Q9UPM9;Q8TAM2;O75161;Q8IY31;Q8TCU4;Q9P2K1;Q86VQ0;Q8N3I7;Q96QF0;Q717R9;Q9NWB7;Q6IQ19;O15078;Q8N841;Q8N157;Q9BYV8;Q9BV73;O75665;P41208;Q9NXB0;Q96NB1;Q92834;Q6EMB2}

4304 Pathogen[ P03363] interacts with 29 human partners:{O75161;Q9H3S7;Q6EMB2;Q86VQ0;Q8TAM2;Q9BYV8;O15078;Q8NBT0;Q9P2K1;Q8TCI5;Q9Y3M2;P41208;Q9NWB7;Q717R9;Q8N157;Q8IY31;Q6IQ19;Q9BPU9;Q9HBG6;Q8N841;Q96NB1;O15182;Q92834;Q9NXB0;Q9BV73;Q9NQC8;Q8TC44;Q96QF0;O75665}

4305 [Cluster 392]GO:0031594+C cellular\_component [name] neuromuscular junction [def] "The junction between the axon of a motor neuron and a muscle fiber. In response to the arrival of action potentials, the presynaptic button releases molecules of neurotransmitters into the synaptic cleft. These diffuse across the cleft and transmit the signal to the postsynaptic membrane of the muscle fiber, leading to a post-synaptic potential responsible of the muscle contraction." [GOC

4306 Pathogen[ Q2Q067] interacts with 9 human partners:{P56524;Q9H7C4;Q12959;P46939;Q53G26;P35579;P07197;Q96EY1;P17661}

4307 Pathogen[ P0C214] interacts with 10 human partners:{Q9H7C4;P56524;P35580;P46939;P07093;Q53G26;Q12959;P07197;Q96EY1;P17661}

4308 Pathogen[ P03346] interacts with 9 human partners:{P35579;P56524;P46939;P07197;P17661;Q53G26;Q9H7C4;Q96EY1;Q12959}

4309 Pathogen[ Q85601] interacts with 11 human partners:{P17661;P35579;Q53G26;P46939;Q12959;P07197;P56524;P35580;P07093;Q96EY1;Q9H7C4}

4310 Pathogen[ P14079] interacts with 9 human partners:{P35579;Q9H7C4;P46939;Q15078;P07197;P17661;P56524;O43761;Q96EY1}

4311 Pathogen[ P03383] interacts with 9 human partners:{P17661;P46939;P07197;P35580;Q9H7C4;P56524;P35579;Q96EY1;Q53G26}

4312 Pathogen[ P03410] interacts with 11 human partners:{Q53G26;P17661;Q12959;P35579;O43761;Q9H7C4;P56524;P46939;P35580;Q96EY1;P07197}

4313 Pathogen[ P14075] interacts with 8 human partners:{P56524;P17661;Q53G26;Q9H7C4;P46939;P35579;P07197;Q96EY1}

4314 Pathogen[ P0C206] interacts with 10 human partners:{P46939;P17661;Q53G26;P35579;Q9H7C4;P56524;Q96EY1;P35580;Q12959;P07197}

4315 Pathogen[ P03363] interacts with 8 human partners:{Q12959;P46939;P07197;P35579;Q53G26;Q9H7C4;P17661;Q96EY1}

4316 [Cluster 393]GO:0031264+C cellular\_component [name] death-inducing signaling complex [def] "A protein complex formed by the association of signaling proteins with a death receptor upon ligand binding. The complex includes procaspases and death domain-containing proteins in addition to the ligand-bound receptor." [PMID

4317 Pathogen[ Q2Q067] interacts with 3 human partners:{O15519;Q13158;Q14790}

4318 Pathogen[ P0C214] interacts with 3 human partners:{Q13158;O15519;Q14790}

4319 Pathogen[ P03346] interacts with 3 human partners:{Q13158;O15519;Q14790}

4320 Pathogen[ Q85601] interacts with 3 human partners:{Q13158;Q14790;O15519}

4321 Pathogen[ P14079] interacts with 3 human partners:{O15519;Q14790;Q13158}

4322 Pathogen[ P03383] interacts with 1 human partners:{Q13158}

4323 Pathogen[ P03410] interacts with 2 human partners:{O15519;Q13158}

4324 Pathogen[ P14075] interacts with 1 human partners:{Q13158}

4325 Pathogen[ P0C206] interacts with 3 human partners:{Q13158;O15519;Q14790}

4326 Pathogen[ P03363] interacts with 2 human partners:{O15519;Q13158}

4327 [Cluster 394]GO:0000805+C cellular\_component [name] X chromosome [def] "The sex chromosome present in both sexes of species in which the male is the heterogametic sex. Two copies of the X chromosome are present in each somatic cell of females and one copy is present in males." [GOC

4328 Pathogen[ Q2Q067] interacts with 2 human partners:{O75182;P24941}

4329 Pathogen[ P0C214] interacts with 2 human partners:{P24941;O75182}

4330 Pathogen[ P03346] interacts with 2 human partners:{P24941;O75182}

4331 Pathogen[ Q85601] interacts with 2 human partners:{O75182;P24941}

4332 Pathogen[ P14079] interacts with 1 human partners:{O75182}

4333 Pathogen[ P03383] interacts with 2 human partners:{O75182;P24941}

4334 Pathogen[ P03410] interacts with 2 human partners:{O75182;P24941}

4335 Pathogen[ P14075] interacts with 2 human partners:{P24941;O75182}

4336 Pathogen[ P0C206] interacts with 2 human partners:{P24941;O75182}

4337 Pathogen[ P03363] interacts with 2 human partners:{P24941;O75182}

4338 [Cluster 395]GO:0005690+C cellular\_component [name] U4atac snRNP [def] "A ribonucleoprotein complex that contains small nuclear RNA U4atac." [GOC

4339 Pathogen[ Q2Q067] interacts with 1 human partners:{Q8WWY3}

4340 Pathogen[ P0C214] interacts with 1 human partners:{Q8WWY3}

4341 Pathogen[ P03346] interacts with 1 human partners:{Q8WWY3}

4342 Pathogen[ Q85601] interacts with 1 human partners:{Q8WWY3}

4343 Pathogen[ P14079] interacts with 1 human partners:{Q8WWY3}

4344 Pathogen[ P03383] interacts with 1 human partners:{Q8WWY3}

4345 Pathogen[ P03410] interacts with 1 human partners:{Q8WWY3}

4346 Pathogen[ P14075] interacts with 1 human partners:{Q8WWY3}

4347 Pathogen[ P0C206] interacts with 1 human partners:{Q8WWY3}

4348 Pathogen[ P03363] interacts with 1 human partners:{Q8WWY3}

4349 [Cluster 396]GO:0017053+C cellular\_component [name] transcriptional repressor complex [def] "A protein complex that possesses activity that prevents or downregulates transcription." [GOC

4350 Pathogen[ Q2Q067] interacts with 37 human partners:{P56524;P29374;Q9HAZ2;Q01664;Q99708;Q9NZL3;Q05516;Q9NVW2;Q99684;O15379;P15976;Q96ST3;Q02447;Q96T58;Q53H80;Q9UKL0;Q5TB30;Q9UHI6;P12755;Q969G3;Q92769;Q13127;Q8IX07;O60907;Q13363;P41162;Q96QT6;Q9BZK7;P31946;Q13901;Q9Y618;Q8TAQ2;Q9GZX5;P45973;O75376;Q13227;Q8N108}

4351 Pathogen[ P0C214] interacts with 36 human partners:{Q96T58;Q13363;Q5TB30;O60907;Q96QT6;Q99708;P56524;Q53H80;Q13901;Q8TAQ2;Q9GZX5;Q969G3;Q9UKL0;Q9NVW2;Q92769;Q8N108;Q9HAZ2;O75376;Q9UHI6;O15379;Q8IX07;P12755;Q13127;Q13227;P05412;Q02447;Q9BZK7;Q96ST3;P45973;Q99684;P41162;P31946;Q9NZL3;Q9Y618;Q01664;Q05516}

4352 Pathogen[ P03346] interacts with 41 human partners:{Q96ST3;P05412;P45973;O60907;P29374;Q9UKL0;O15379;Q99626;Q99708;P56524;Q96QT6;Q53H80;Q5TB30;P41162;Q13227;P15976;Q99684;Q92769;Q86VZ6;Q9UHI6;Q8IX07;O75376;Q96T58;Q05516;Q969G3;P31946;Q8N108;Q9BZK7;P51858;Q13363;Q9GZX5;P56545;Q9NZL3;Q9HAZ2;Q9Y618;Q8TAQ2;Q02447;Q01664;Q13901;Q9NVW2;Q13127}

4353 Pathogen[ Q85601] interacts with 37 human partners:{P31946;Q13127;P15976;Q96QT6;O60907;Q99708;Q9Y618;Q5TB30;Q13363;P41162;P12755;Q53H80;Q9GZX5;Q969G3;Q13901;Q92769;P45973;Q9NZL3;Q9UHI6;P05412;Q8IX07;O75376;Q8N108;Q96T58;Q02447;Q99684;Q05516;Q9BZK7;P56524;O15379;Q8TAQ2;Q9UKL0;Q01664;Q13227;Q9NVW2;Q9HAZ2;Q96ST3}

4354 Pathogen[ P14079] interacts with 35 human partners:{O15379;Q9HAZ2;Q53H80;P12755;Q9BZK7;Q8N108;Q96ST3;Q13901;Q86VZ6;Q9GZX5;Q99684;O60907;Q02447;P15976;Q8TAQ2;Q9UHI6;P45973;Q9NZL3;Q96QT6;Q92769;P29374;P31946;Q99708;Q01664;Q8IX07;Q5TB30;Q9UKL0;Q13227;O75376;P41162;P05412;P56524;Q13127;Q96T58}

4355 Pathogen[ P03383] interacts with 32 human partners:{Q9Y618;O75376;P31946;O60907;Q9UHI6;Q96QT6;Q05516;Q9GZX5;P41162;Q01664;Q9HAZ2;Q53H80;P45973;Q02447;Q92769;O15379;Q8TAQ2;Q96T58;Q99684;Q9UKL0;Q99708;Q8N108;Q9BZK7;P56524;Q13227;Q96ST3;Q9NZL3;Q13363;Q13901;Q13127;P05412}

4356 Pathogen[ P03410] interacts with 35 human partners:{Q96QT6;Q5TB30;Q13227;P29374;Q9NZL3;Q99708;P41162;Q9HAZ2;P12755;Q02447;P45973;O75376;Q99684;Q96ST3;Q96T58;Q13127;Q8IX07;Q969G3;Q92769;O15379;P56524;Q53H80;Q9GZX5;P05412;Q8N108;Q13901;Q01664;Q8TAQ2;Q9BZK7;Q9UKL0;Q9Y618;Q9UHI6;O60907;P15976;P31946}

4357 Pathogen[ P14075] interacts with 31 human partners:{Q9NZL3;Q96ST3;Q96QT6;P05412;Q13901;Q9UKL0;Q96T58;P56524;Q53H80;P45973;Q9Y618;O75376;Q9HAZ2;P41162;Q9UHI6;Q8N108;Q01664;Q99684;Q92769;Q8TAQ2;O60907;Q13227;O15379;Q02447;Q9BZK7;Q13127;Q05516;P31946;Q13363;Q9GZX5;Q99708}

4358 Pathogen[ P0C206] interacts with 39 human partners:{Q86VZ6;Q92769;P45973;Q96ST3;Q9HAZ2;Q13127;Q9NVW2;Q99708;O60907;Q05516;Q9UKL0;P29374;P05412;P15976;Q8TAQ2;P12755;Q9NZL3;P31946;P41162;O15379;Q02447;Q13901;Q9BZK7;O75376;Q9GZX5;Q96T58;Q99684;Q01664;Q5TB30;Q8IX07;Q969G3;Q9UHI6;Q96QT6;P56524;Q13363;Q53H80;Q13227;Q9Y618;Q8N108}

4359 Pathogen[ P03363] interacts with 37 human partners:{P51858;Q96QT6;Q99684;P29374;Q96T58;Q9NZL3;Q99626;Q13227;Q9UHI6;Q02447;P45973;Q8TAQ2;O15379;Q9BZK7;P31946;O75376;O60907;P56545;Q13901;Q86VZ6;Q13127;Q99708;Q969G3;Q96ST3;Q8N108;Q9Y618;Q5TB30;P41162;P05412;Q9UKL0;Q9NVW2;Q13363;Q53H80;Q05516;Q9GZX5;Q01664;Q9HAZ2}

4360 [Cluster 397]GO:0070820+C cellular\_component [name] tertiary granule [def] "A secretory granule that contains cathepsin and gelatinase and is readily exocytosed upon cell activation\_ found primarily in mature neutrophil cells." [GOC

4361 Pathogen[ Q2Q067] interacts with 2 human partners:{O00186;Q15833}

4362 Pathogen[ P0C214] interacts with 2 human partners:{Q15833;O00186}

4363 Pathogen[ P03346] interacts with 2 human partners:{Q15833;O00186}

4364 Pathogen[ Q85601] interacts with 2 human partners:{O00186;Q15833}

4365 Pathogen[ P14079] interacts with 2 human partners:{O00186;Q15833}

4366 Pathogen[ P03383] interacts with 1 human partners:{O00186}

4367 Pathogen[ P03410] interacts with 2 human partners:{Q15833;O00186}

4368 Pathogen[ P14075] interacts with 1 human partners:{O00186}

4369 Pathogen[ P0C206] interacts with 2 human partners:{Q15833;O00186}

4370 Pathogen[ P03363] interacts with 2 human partners:{O00186;Q15833}

4371 [Cluster 398]GO:0001534+C cellular\_component [name] radial spoke [def] "Protein complex that links the outer microtubule doublet of the ciliary or flagellum axoneme with the sheath that surrounds the central pair of microtubules. Composed of a stalk that attaches to each doublet microtubule and a globular structure (spoke head) that projects toward the central pair of microtubules." [ISBN

4372 Pathogen[ Q2Q067] interacts with 1 human partners:{Q5TD94}

4373 Pathogen[ P0C214] interacts with 1 human partners:{Q5TD94}

4374 Pathogen[ P03346] interacts with 1 human partners:{Q5TD94}

4375 Pathogen[ Q85601] interacts with 1 human partners:{Q5TD94}

4376 Pathogen[ P14079] interacts with 1 human partners:{Q5TD94}

4377 Pathogen[ P03383] interacts with 1 human partners:{Q5TD94}

4378 Pathogen[ P03410] interacts with 1 human partners:{Q5TD94}

4379 Pathogen[ P14075] interacts with 1 human partners:{Q5TD94}

4380 Pathogen[ P0C206] interacts with 1 human partners:{Q5TD94}

4381 Pathogen[ P03363] interacts with 1 human partners:{Q5TD94}

4382 [Cluster 399]GO:0030981+C cellular\_component [name] cortical microtubule cytoskeleton [def] "The portion of the microtubule cytoskeleton that lies just beneath the plasma membrane." [GOC

4383 Pathogen[ Q2Q067] interacts with 2 human partners:{Q7Z460;Q15691}

4384 Pathogen[ P0C214] interacts with 2 human partners:{Q15691;Q7Z460}

4385 Pathogen[ P03346] interacts with 2 human partners:{Q15691;Q7Z460}

4386 Pathogen[ Q85601] interacts with 2 human partners:{Q15691;Q7Z460}

4387 Pathogen[ P14079] interacts with 2 human partners:{Q15691;Q7Z460}

4388 Pathogen[ P03383] interacts with 2 human partners:{Q7Z460;Q15691}

4389 Pathogen[ P03410] interacts with 2 human partners:{Q7Z460;Q15691}

4390 Pathogen[ P14075] interacts with 2 human partners:{Q7Z460;Q15691}

4391 Pathogen[ P0C206] interacts with 2 human partners:{Q15691;Q7Z460}

4392 Pathogen[ P03363] interacts with 2 human partners:{Q15691;Q7Z460}

4393 [Cluster 400]GO:0016323+C cellular\_component [name] basolateral plasma membrane [def] "The region of the plasma membrane that includes the basal end and sides of the cell. Often used in reference to animal polarized epithelial membranes, where the basal membrane is the part attached to the extracellular matrix, or in plant cells, where the basal membrane is defined with respect to the zygotic axis." [GOC

4394 Pathogen[ Q2Q067] interacts with 13 human partners:{O00186;O95782;Q14160;P08238;O14910;P15924;P11166;Q12959;Q07157;Q68DX3;Q6ZVN8;Q14244;Q9NUP9}

4395 Pathogen[ P0C214] interacts with 13 human partners:{O14910;Q68DX3;P16157;P15924;O00186;P11166;P11168;Q14244;Q12959;Q14160;Q6ZVN8;O95782;Q07157}

4396 Pathogen[ P03346] interacts with 19 human partners:{P15924;Q6ZVN8;Q96RT1;Q68DX3;O95782;P16157;P26038;Q5EBL8;O00186;Q9NUP9;Q07157;P11166;Q9HAP6;Q14244;Q969F2;Q14160;P08238;O14910;Q12959}

4397 Pathogen[ Q85601] interacts with 15 human partners:{O00186;P11168;P16157;Q9NUP9;O14910;Q96RT1;Q14244;P15924;P11166;Q68DX3;P08238;Q14160;Q07157;Q12959;O95782}

4398 Pathogen[ P14079] interacts with 22 human partners:{P04083;Q68DX3;Q8N307;Q6ZVN8;O75781;P15924;Q07157;P24588;P26038;Q14244;P16157;P11166;Q96RT1;O00186;Q9NUP9;Q8N6F1;O95782;P08238;Q8WZ55;Q9HAP6;Q9UKB5;Q9Y239}

4399 Pathogen[ P03383] interacts with 11 human partners:{Q14244;P15924;Q14160;O00186;Q07157;P11168;Q6ZVN8;O95782;Q68DX3;P08238;O14910}

4400 Pathogen[ P03410] interacts with 27 human partners:{O75781;O95782;Q969F2;O14910;P15924;Q96RT1;Q9Y239;Q8WZ55;P11166;P08238;P16157;Q12959;P11168;Q8N307;Q8N6F1;Q9NUP9;P55157;Q14160;Q9HAP6;Q6ZVN8;P26038;Q07157;Q15049;O00186;Q68DX3;Q14244;P24588}

4401 Pathogen[ P14075] interacts with 11 human partners:{Q68DX3;O00186;Q14160;Q07157;P08238;Q6ZVN8;O14910;O95782;P11168;Q14244;P15924}

4402 Pathogen[ P0C206] interacts with 17 human partners:{Q9NUP9;Q96RT1;Q969F2;P11166;Q14244;P11168;P16157;P08238;Q14160;Q6ZVN8;O14910;O95782;P15924;Q07157;Q68DX3;Q12959;O00186}

4403 Pathogen[ P03363] interacts with 15 human partners:{Q12959;Q96RT1;Q14244;P16157;O14910;Q14160;Q07157;P15924;Q6ZVN8;O00186;O95782;Q9NUP9;P08238;P11166;Q68DX3}

4404 [Cluster 401]GO:0030672+C cellular\_component [name] synaptic vesicle membrane [def] "The lipid bilayer surrounding a synaptic vesicle." [GOC

4405 Pathogen[ Q2Q067] interacts with 5 human partners:{Q9BSU1;O95295;Q96EV8;Q05084;Q8TAC9}

4406 Pathogen[ P0C214] interacts with 5 human partners:{Q9BSU1;O95295;Q8TAC9;Q96EV8;Q05084}

4407 Pathogen[ P03346] interacts with 6 human partners:{Q9BSU1;O95295;Q05084;Q8TAC9;Q96EV8;Q9Y2J0}

4408 Pathogen[ Q85601] interacts with 5 human partners:{Q9BSU1;O95295;Q8TAC9;Q96EV8;Q05084}

4409 Pathogen[ P14079] interacts with 6 human partners:{O43759;Q05084;Q9BSU1;Q8TAC9;O95295;Q96EV8}

4410 Pathogen[ P03383] interacts with 5 human partners:{Q9BSU1;O95295;Q8TAC9;Q96EV8;Q05084}

4411 Pathogen[ P03410] interacts with 7 human partners:{Q8TAC9;Q9Y2J0;O43759;Q05084;O95295;Q9BSU1;Q96EV8}

4412 Pathogen[ P14075] interacts with 5 human partners:{Q9BSU1;O95295;Q05084;Q96EV8;Q8TAC9}

4413 Pathogen[ P0C206] interacts with 7 human partners:{Q9BSU1;O43759;Q9Y2J0;Q96EV8;O95295;Q8TAC9;Q05084}

4414 Pathogen[ P03363] interacts with 3 human partners:{Q9BSU1;Q05084;O95295}

4415 [Cluster 402]GO:0000242+C cellular\_component [name] pericentriolar material [def] "A network of small fibers that surrounds the centrioles in cells\_ contains the microtubule nucleating activity of the centrosome." [GOC

4416 Pathogen[ Q2Q067] interacts with 7 human partners:{Q9H2K2;Q96SN8;P17987;Q99996;O95271;Q86VS8;Q15154}

4417 Pathogen[ P0C214] interacts with 7 human partners:{Q15154;Q96SN8;Q86VS8;Q9H2K2;P17987;Q99996;O95271}

4418 Pathogen[ P03346] interacts with 8 human partners:{Q86VS8;Q15154;Q9H2K2;Q96SN8;Q99996;Q96PY6;O95271;P17987}

4419 Pathogen[ Q85601] interacts with 8 human partners:{Q15154;Q86VS8;Q96PY6;Q96SN8;P17987;Q9H2K2;Q99996;O95271}

4420 Pathogen[ P14079] interacts with 7 human partners:{Q99996;O95271;Q86VS8;Q9H2K2;P17987;Q15154;Q96SN8}

4421 Pathogen[ P03383] interacts with 6 human partners:{Q96SN8;Q15154;Q86VS8;Q96PY6;Q99996;O95271}

4422 Pathogen[ P03410] interacts with 7 human partners:{P17987;Q99996;Q15154;Q96SN8;Q86VS8;O95271;Q9H2K2}

4423 Pathogen[ P14075] interacts with 6 human partners:{Q96SN8;Q99996;Q15154;Q96PY6;Q86VS8;O95271}

4424 Pathogen[ P0C206] interacts with 8 human partners:{Q95271;Q96SN8;Q96PY6;Q99996;P17987;Q86VS8;Q15154;Q9H2K2}

4425 Pathogen[ P03363] interacts with 7 human partners:{Q86VS8;Q99996;Q9H2K2;P17987;O95271;Q15154;Q96SN8}

4426 [Cluster 403]GO:0043235+C cellular\_component [name] receptor complex [def] "Any protein complex that undergoes combination with a hormone, neurotransmitter, drug or intracellular messenger to initiate a change in cell function." [GOC

4427 Pathogen[ Q2Q067] interacts with 3 human partners:{O14786;P84022;Q15628}

4428 Pathogen[ P0C214] interacts with 3 human partners:{O14786;Q15628;P84022}

4429 Pathogen[ P03346] interacts with 6 human partners:{Q6ZWB6;Q68DU8;P84022;Q15628;Q96CX2;O14786}

4430 Pathogen[ Q85601] interacts with 4 human partners:{O14786;Q15628;P84022;Q96CX2}

4431 Pathogen[ P14079] interacts with 4 human partners:{O60895;Q68DU8;Q96CX2;Q15628}

4432 Pathogen[ P03383] interacts with 2 human partners:{P84022;Q15628}

4433 Pathogen[ P03410] interacts with 8 human partners:{P84022;O14786;O60895;Q68DU8;Q6ZWB6;Q15628;Q96CX2}

4434 Pathogen[ P14075] interacts with 2 human partners:{Q15628;P84022}

4435 Pathogen[ P0C206] interacts with 4 human partners:{P84022;Q96CX2;O14786;Q15628}

4436 Pathogen[ P03363] interacts with 3 human partners:{O14786;P84022;Q15628}

4437 [Cluster 404]GO:0035085+C cellular\_component [name] cilium axoneme [def] "The bundle of microtubules and associated proteins that forms the core of cilia in eukaryotic cells and is responsible for their movements." [GOC

4438 Pathogen[ Q2Q067] interacts with 6 human partners:{Q8WW24;Q5TD94;Q86VQ0;Q717R9;Q9BPU9;Q96M29}

4439 Pathogen[ P0C214] interacts with 4 human partners:{Q8WW24;Q9BPU9;Q5TD94;Q96M29}

4440 Pathogen[ P03346] interacts with 11 human partners:{Q86VQ0;Q9BPU9;Q68CZ1;Q9UIF3;Q5TD94;Q96M29;Q8N0X2;Q9Y4P9;Q717R9;Q8IWN7;Q8WW24}

4441 Pathogen[ Q85601] interacts with 7 human partners:{Q5TD94;O96015;Q9BFX9;Q8WW24;Q96M29;Q86VQ0;Q9BPU9}

4442 Pathogen[ P14079] interacts with 28 human partners:{Q9H1X1;Q9Y4P9;Q95876;Q8N0X2;Q68CZ1;Q717R9;Q9BFX9;Q96M29;Q9Y4R7;Q8IWN7;Q9GZS0;Q5TD94;P56715;A6PVC2;Q9UPM9;Q9UI46;Q9BPU9;Q9P2L0;Q8IW40;Q8WW24;Q9UFE4;Q969V4;Q9UIF3;O96015;Q86VQ0;O15259;Q6IQ19;P10636}

4443 Pathogen[ P03383] interacts with 6 human partners:{Q5TD94;Q96M29;Q86VQ0;Q8WW24;Q717R9;Q9Y4P9}

4444 Pathogen[ P03410] interacts with 29 human partners:{Q717R9;Q9Y4R7;Q86VQ0;Q9Y4P9;Q9BFX9;Q9UI46;O15259;Q8N0X2;Q96RY7;Q5TD94;Q9UIF3;Q8TCX1;Q9H1X1;Q9UFE4;Q6IQ19;Q9BPU9;Q9UPM9;Q95876;P10636;Q8IW40;Q9P2L0;Q68CZ1;A6PVC2;Q8IWN7;Q9GZS0;Q969V4;P56715;Q96M29;O96015}

4445 Pathogen[ P14075] interacts with 7 human partners:{Q5TD94;Q86VQ0;Q6IQ19;Q9Y4P9;Q9BPU9;Q717R9;Q96M29}

4446 Pathogen[ P0C206] interacts with 20 human partners:{Q9BPU9;P56715;Q5TD94;Q9UPM9;Q9UIF3;Q86VQ0;P10636;Q717R9;Q9Y4P9;Q9UFE4;Q8IWN7;Q6IQ19;Q9H1X1;Q9BFX9;Q96M29;Q16181;Q95876;O96015;Q8IW40;Q8WW24}

4447 Pathogen[ P03363] interacts with 19 human partners:{Q8N0X2;P56715;Q86VQ0;Q9GZS0;Q969V4;Q9H1X1;Q96M29;Q9Y4P9;Q5TD94;Q717R9;Q9BFX9;Q6IQ19;Q9BPU9;Q8IW40;Q9UIF3;Q8IWN7;O15259;Q9UI46;Q8WW24}

4448 [Cluster 405]GO:0005783+C cellular\_component [name] endoplasmic reticulum [def] "The irregular network of unit membranes, visible only by electron microscopy, that occurs in the cytoplasm of many eukaryotic cells. The membranes form a complex meshwork of tubular channels, which are often expanded into slitlike cavities called cisternae. The ER takes two forms, rough (or granular), with ribosomes adhering to the outer surface, and smooth (with no ribosomes attached)." [ISBN

4449 Pathogen[ Q2Q067] interacts with 125 human partners:{P04156;O15027;P50402;Q8WWX9;P62633;Q9UMS5;Q96HA1;O75340;P39687;Q9H5J4;O95433;Q15293;Q6RW13;Q8N1N5;P09913;P55735;Q86XL3;O60260;Q9NUL3;O75807;O75865;Q9Y244;Q96P71



;Q5VYK3;Q01105;A8CG34;Q6ZNE5;O43639;O60238;O60506;P22061;P60604;Q15006;Q8IUR0;P18850;O43617;O00204;Q8IZP0;P36956;Q86SZ2;Q96EV8;Q6NZI2;Q8WU03;P08107;Q6VVB1;Q5BJF2;P63241;O95793;Q8N3S3;Q96CS3;Q86UE4;Q15629;Q92575;Q96AQ7;Q9UBS4;P27695;Q9BW60;P27797;Q96G23;Q12959;O43264;Q14CS0;O75396;Q9GZR5;Q9UBS3;Q9UHB9;P40337;Q8TEM1;Q15050;Q9UL33;Q92539;Q15437;P56279;P53992;Q8TAT6;Q92562;O95486;Q12904;O94855;A4D0V7;P0DI81;O14656;P0DI82;Q68CJ9;Q6IS14;Q9BVC6;O94850;Q96JE7;P16333;O95456;Q9UQF2;O94874;O95476;Q14145;A1L3X0;P21399;Q8WU39;Q6NUQ1;Q9HB03;P08235;Q8WV99;Q969H0;O15155;O95487;Q96D15;Q9BQE4;O00165;Q92845;Q9GZV4;P55327;Q86YV9;Q9Y296;P23284;Q9P2W9;Q9NRR5;Q96DZ1;Q9UMX0;Q86VP3;Q15436;Q14442;Q96HY6;Q13501;P27635;Q14693;P14625}

4450 Pathogen[ P0C214] interacts with 153 human partners: {Q6NUQ1;Q9UM00;Q9HA82;P18850;P55735;O75865;Q9NXB9;P27695;P14625;Q6IS14;Q12904;O14681;Q8IZP0;O95456;P09913;Q6RW13;P53992;O43264;Q9NRR5;Q9GZV4;Q8TEM1;Q8WVX9;O75807;Q14145;P27635;O43865;Q5VYK3;P29728;Q15397;Q9GZR5;Q9Y244;O14656;Q68CJ9;Q6NZI2;Q86YV9;P23284;Q9Y296;Q15050;Q9UBS3;O43617;O75340;Q86SQ9;P63241;Q15436;Q96Q05;Q86UE4;Q86VP3;Q8IUR0;Q8WXG1;O43639;Q9UBS4;Q01105;Q92562;A8CG34;O94874;Q9Y2G5;Q9HB03;Q9H089;P22061;Q13501;Q9NYP7;Q14696;Q8N3S3;Q8TAT6;O43681;O95487;Q92539;P49257;Q08AM6;A1L3X0;O00165;P50402;Q6ZNE5;Q15437;Q8NBJ7;Q9NUL3;Q86XL3;Q9UMS5;Q96G23;Q8WU03;P40337;O95278;P0DI81;O00204;Q96CS3;Q96P71;Q96EV8;O94850;Q8WV99;Q969H0;Q12959;Q96D15;Q9UQF2;Q92845;P16333;P62633;O95476;Q9NV92;Q8N2G8;O95793;P04156;P10909;Q15629;P27797;Q9BVC6;P68543;O60238;O60506;P55327;Q15006;O75396;Q9UHQ9;Q96DZ1;Q86WV6;Q9UHB9;Q9BW60;O60260;Q8WU39;O76083;Q9NWZ5;Q5T215;Q92575;Q9BQE4;Q15293;A4D0V7;Q96AQ7;Q96JE7;P21399;P08107;Q9H902;P39687;Q9UL33;P56279;Q14CS0;O15155;Q9UMX0;O15027;O95433;O95486;Q6VVB1;O60613;P80303;P0DI82;Q86SZ2;Q9P2W9;P55072;Q9H0P0;O94855;P13667;Q14693;P60604;Q96NN9;Q96HA1}

4451 Pathogen[ P03346] interacts with 170 human partners: {Q8TEM1;P08107;Q9BW60;O00204;Q86YV9;P56279;P55735;Q99828;O95456;Q9Y2B0;Q9UBS3;Q15050;Q9UMS5;P22061;Q9P2W9;O15027;P80303;Q9Y5R8;P29373;Q96HY6;Q86UE4;Q96BA8;Q96P71;Q8N1N5;P62633;Q9GZV4;P55327;O43639;P36956;P14625;P08235;Q96DZ1;Q96CS3;O14656;Q99784;Q8IZP0;Q70SY1;Q12772;O60238;Q01105;P49257;Q8WV99;Q9NRR5;Q15629;O60506;Q49MI3;Q27J81;O75865;Q969X5;Q86SZ2;Q8WU03;Q12981;O43264;Q9NUL3;Q13190;Q9UMX0;O75396;Q13438;Q9H173;P13667;Q92562;Q96AQ7;P63241;Q86SQ9;Q9NV92;P55072;Q6NZI2;Q5BJF2;Q8WVX9;O95793;O94855;O95433;Q6IS14;P18850;Q6ZNE5;Q9H0R8;Q9H902;Q14CS0;Q92575;P16333;Q6NUQ1;Q9BUN8;Q12904;Q96D15;Q15436;O75340;P17706;P60604;Q9UL33;Q5T215;Q92539;Q96EV8;Q15437;Q8N3S3;Q9H5J4;Q9Y296;Q96JE7;Q96Q05;Q8WU39;Q8N5I3;Q96G23;P0DI81;Q5VYK3;Q15041;Q9HB03;P39687;O94850;Q15006;Q8IUR0;Q6VVB1;P50402;O95486;P27797;O95476;P40337;Q9BVC6;Q96KC8;O00165;Q68CJ9;P0DI82;A4D0V7;O60260;Q5JRA6;Q9UBS4;Q9HCU5;Q8TAT6;A6NDV4;Q9Y244;A8CG34;P56589;Q9UQF2;P04156;Q9UHB9;O95487;Q14442;P09913;Q92845;P27695;Q6RW13;O43865;Q96HA1;Q86XL3;Q14145;Q15397;Q8TEY5;P49755;P21399;Q15293;O95278;Q8IWF2;Q969H0;O15155;O94874;Q9NQ94;O75807;Q86VP3;Q9HBF4;P53992;Q15363;Q9NWZ5;Q8N2G8;P27635;Q9BVK6;O43617;Q13501;Q9UBP0;P23284;Q14693;Q12959;P68543}

4452 Pathogen[ Q85601] interacts with 139 human partners: {Q8TEM1;Q5VYK3;Q68CJ9;Q86WV6;Q92575;P62633;P09913;P08107;O15027;Q08AM6;Q6NUQ1;Q969H0;A1L3X0;O00165;O75396;Q9GZV4;Q9UBS3;Q9UL33;Q15629;Q15293;O95487;P21399;A8CG34;Q9NRR5;O60506;Q96CS3;Q96JE7;Q9UBP0;P56279;P39687;Q01105;P16333;Q15006;P40337;O95433;Q9HBF4;O15155;Q8N3S3;Q9UHQ9;O95793;Q9H0R8;P27635;O60613;O43865;Q9UBS4;P80303;Q8WU03;Q12981;O43264;Q12772;P55145;Q9Y296;P27797;Q92562;Q96AQ7;P63241;Q86SQ9;Q9Y244;Q96D15;O43639;Q9P2W9;Q15436;Q9H089;O95278;O43617;Q14145;Q86YV9;Q9UQF2;Q15397;O43681;Q5T215;Q86XL3;Q9BW60;Q9UM00;Q96EV8;Q15437;Q9H5J4;P36956;P49257;Q8N6T3;Q96Q05;Q15050;Q96G23;P23284;P0DI81;P55735;O14656;Q9UMS5;P18850;Q9H902;Q9HB03;Q6RW13;Q8WV99;P08235;Q86UE4;O95456;P22061;Q6VVB1;O75340;O95486;O95476;P50402;O00204;Q9NUL3;P0DI82;O60260;Q12959;P14625;Q92845;Q6NZI2;P04156;Q9UHB9;Q9GZR5;Q9H0P0;Q96P71;O75865;Q8WVX9;Q96HA1;Q8IZP0;Q8N2G8;O94855;O75807;P60604;O60238;O94874;Q14257;P27695;Q8TAT6;Q92539;Q86VP3;P53992;Q9UMX0;Q86SZ2;Q13501;Q6IS14;Q9BQE4;Q14693;Q14CS0;Q8IUR0}

4453 Pathogen[ P14079] interacts with 301 human partners: {Q15629;Q16655;Q8N6M3;P27635;Q6NUQ1;O43292;Q9Y5Y5;Q8NBV4;Q9Y296;O95070;Q86YV9;Q14CS0;A5PLL7;O60260;Q01105;Q15293;Q9H0P0;Q9Y5U4;Q8WVX9;Q96HA1;Q9H295;Q92562;Q9UL33;Q969M3;P49257;P55327;O15027;O95169;Q86SZ2;Q8N4B5;Q16873;Q86VE9;P60468;Q3ZAQ7;Q8WU39;Q96P71;O95793;P49069;Q9NUQ7;Q9BU23;O75072;Q14442;Q9NYV7;Q9BQE4;P29728;Q8WV99;Q1HG44;Q969H0;Q14693;A1L3X0;Q96A33;Q24JP5;Q9P055;O95487;Q8NBQ7;Q96S52;P56589;Q9BT09;Q68CJ9;P20292;Q9BRL7;Q9NXC4;P30040;Q96RQ1;A6NDV4;Q9BVC6;Q96G30;Q8IVL6;Q9UBS3;Q15006;Q6IS14;Q96CS3;P39656;Q92542;P08235;Q9NZ42;P04156;Q9UMX0;Q96HY6;Q9UQF2;P21399;Q14696;P20933;O00165;O00400;Q9BVK6;A8CG34;Q15397;Q15041;Q9UBS4;Q6RW13;Q96D15;P60604;P57054;O94874;O75865;P43307;Q629K1;Q8TEM1;O75807;Q9NWZ5;P49184;O94855;Q9HA82;Q8IZP0;O60613;O95433;Q99442;Q9BT22;Q96Q80;P10909;Q15050;P53992;P04844;Q5VUD6;Q8N5I3;Q86SQ9;Q9Y2B2;Q9GZP9;Q32NB8;Q8N1N5;Q86XL3;O94777;Q99828;Q9H0C3;O15155;Q9NRR5;O75352;O94905;Q5VYK3;Q5BJF2;Q96DZ1;Q969N2;Q9HB03;A6NFC5;Q5QFB9;Q9NQ94;Q92539;Q96JX3;Q96JE7;Q8TUR0;Q9NYU1;P33947;Q9P2X0;P09913;Q15363;Q9BUN8;Q6ZNE5;Q9UHQ9;Q9Y244;Q5JPE7;O75396;Q9NRR5;Q12772;Q9H488;P24390;Q9UL01;P80303;Q9HBM9;Q8N3S3;O75503;P40337;P27544;O43865;Q9Y5U9;Q8NFR3;Q8N609;Q96GC9;O14656;Q8NHG7;Q5T215;Q9Y2Y6;Q9BVK8;Q86WV6;Q14145;Q8N114;Q9NYU2;Q96AQ7;Q8IUH2;O43681;Q969X5;Q86VP3;O75915;P49755;Q12912;Q86WV6;O00264;Q9Y6X1;Q96G23;O75340;Q9Y6D0;O75477;Q9NUL3;P08107;P16333;O95866;Q5JRA6;Q8N2G8;Q12981;Q9NZ43;Q9BTV4;O60506;Q8NBJ7;Q8TAT6;O95292;Q9H0R8;P58512;Q96Q05;P27695;O43264;O43612;P60059;P68543;Q969W0;Q8NBK3;Q7Z5B4;Q86UE4;P10620;Q13501;Q9H490;Q7L775;Q9H6L5;P63241;P18850;Q96S66;P14625;Q9Y5R8;Q9UKR5;Q6NZI2;Q9UKI3;A4D0V7;Q99541;A5D6W6;O43639;Q9UNW1;Q9Y5Z9;Q8TCY5;O95456;Q9UM00;Q9UMZ5;O15260;O95476;P55735;Q96BY9;Q9Y3E0;Q9GZR5;Q96EV8;Q15011;P62633;Q9H0V9;Q8NBL1;P56279;Q9NV92;Q9NW5;P0DI82;Q96MG2;Q12904;P0DI81;P50402;P23284;O95486;Q92845;Q9HBF4;Q9BW60;Q9Y2B0;Q9P2W9;Q9Y2G5;O60238;Q8TBF5;Q8NFO8;Q92575;Q9UHB9;P36956;O43617;Q5NDL2;Q9H902;Q9H496;Q8WUF8

- 4454 ;P51571;Q9GZV4;O14681;Q9NV96;Q9H5J4;Q96B86;O94850;Q96S06;Q9UMS5;P39687;Q6AZY7;Q3MUY2;Q9H089;Q27J81;Q13438;Q8IU68;Q8WXG1;P46977;Q8N138;O43731;O15503;Q9BSR8;Q96FM1}  
Pathogen[ P03383] interacts with 110 human  
partners: {P08107;Q68CJ9;Q6RW13;Q01105;Q12904;Q9Y244;Q8WV99;P55735;O95433;Q86UE4;P40337;P04156;Q6NZI2;A4D0V7;Q9NWZ5;O95487;O43264;O60613;Q9UL33;A8CG34;Q9BW60;Q96DZ1;Q9GZR5;Q5VYK3;Q9BUN8;Q9H5J4;Q96AQ7;Q9GZV4;Q9UMS5;Q96P71;O95486;Q8N1N5;O00165;Q9Y296;Q9UQF2;Q8TEM1;Q15050;P63241;Q96EV8;Q15436;Q8NHG7;P09913;Q9UBS4;Q15006;Q8IURO;Q9UBS3;Q15629;Q9BVC6;O60238;P39687;O60260;P60604;Q9BQE4;Q15437;O94855;A1L3X0;Q8N3S3;O43617;O75865;Q8TAT6;Q86VP3;P0DI82;Q14696;Q9UMX0;Q96CS3;P55145;Q9HB03;P0DI81;Q8N4B5;P14625;Q8WU39;Q5B JF2;Q86YV9;P22061;P27635;O94850;Q13501;O15027;P50402;Q969H0;Q96HY6;P62633;Q96HA1;Q14145;Q96JE7;Q8WU03;P23284;P53992;Q1NRR5;Q9UHB9;O75807;Q92845;O95456;Q9UM00;O14681;P27695;Q6NUQ1;P18850;Q9NUL3;P16333;Q14CS0;P56279;O94874;Q92539;Q86SZ2;Q6ZNE5;Q92575;Q8WXX9;P27797;Q14693}
- 4455 Pathogen[ P03410] interacts with 292 human  
partners: {A1L3X0;Q8WV99;P0DI82;Q92562;O95292;Q86VE9;P49069;Q9H496;Q7L775;Q6NZI2;Q15041;Q68CJ9;P36956;Q86SZ2;Q9H0C3;Q15293;A5D6W6;O75865;O14681;Q27J81;Q14257;P56279;O60613;Q9GZR5;P80303;P49184;Q96GC9;Q96HY6;Q9NZ43;Q9H0V9;Q15050;Q96D15;Q9UHB9;Q13190;Q99442;Q96G30;Q8NBJ7;Q9H902;O43612;Q9BVC6;Q96B86;P60468;Q7Z5B4;Q96FM1;P49257;Q86VP3;P60059;P29728;Q8N1N5;Q9NRR5;O94855;Q9NWW5;Q969X5;Q9H5J4;Q13445;Q86UW1;P53992;O14656;Q9Y2B2;Q9BU23;Q9BT09;Q8N138;Q96A33;Q96AQ7;Q12959;Q16655;O00400;P13667;O94905;O43639;Q9UL33;O00165;P68543;Q9Y5Y5;Q9Y5U4;P30040;P14625;Q9UMS5;Q5T215;Q5VYK3;Q92845;P33947;Q9NWZ5;Q9P2W9;O95456;Q13501;P39687;O00204;Q8N114;Q9Y5Z9;O94777;Q96Q80;Q8N3S3;P16333;A6NDV4;Q1HG44;Q9H6L5;Q01105;P27544;Q9GZP9;Q24JP5;Q9UBS3;P55157;O60260;Q9P055;Q14442;Q96HA1;Q9UKI3;Q9Y3E0;Q6NUQ1;O94850;Q9NV92;Q96S52;Q5VUD6;Q9Y5R8;Q9BQE4;Q8N609;Q8WXG1;Q9NXE4;Q12904;Q8N6M3;Q96G23;O43264;Q14693;Q92575;Q9NZ42;O75503;Q15006;A4D0V7;Q9UJH9;Q9UMX0;O95866;P0DI81;Q9BTV4;Q15436;Q9BVK6;Q99828;P43307;Q9Y6X1;Q9NRR5;Q08AM6;O75396;Q96BY9;P21399;P58512;Q9H0R8;Q969M3;Q15437;O75915;A6NFC5;Q8IURO;O00264;Q969H0;Q9NYU1;Q9BUN8;Q86YV9;Q96RQ1;P08107;Q9HA82;Q12772;O15155;Q96JX3;Q86SQ9;Q9BW60;Q86UE4;Q9BSR8;Q16873;Q15629;Q14CS0;O95486;Q8TEM1;Q15049;Q15363;Q9Y2Y6;Q8N2G8;Q12912;P55327;Q9H089;P04156;Q8WXX9;Q9H173;Q96JE7;Q8WU39;Q9Y244;O75807;Q9BT22;Q8IZP0;Q96S06;Q8N5I3;Q6RW13;P04844;P50402;Q9NUL3;O95476;Q9HCU5;P24390;P27635;Q96S66;P09913;O75477;Q9HBF4;O95169;Q9HBO3;Q9UBS4;P27695;Q96Q05;Q9Y6D0;Q15397;Q96CS3;Q9BZR6;Q9H0P0;Q969N2;Q9Y5U9;Q9NV96;Q969W0;O95793;P20933;Q92542;Q9Y296;Q9UNW1;P23284;P63241;Q9UBY8;A8CG34;Q86WV6;O15027;O94874;Q6ZNE5;O60506;Q15011;Q9BVK8;O75352;P60604;P56589;O75340;Q8WU03;Q96DZ1;Q629K1;Q9UQF2;Q9Y2B0;Q9UL01;O43731;Q9GZV4;Q96P71;Q8IU99;P55735;Q14696;Q8NFQ8;O15260;Q12981;O95433;O43617;P39656;P62633;Q9Y2G5;P20292;Q9H488;O15503;Q9UM00;Q14145;Q92539;Q9H490;P22061;Q5BJF2;P08235;O43681;P18850;Q9P2X0;Q8TAT6;Q13438;Q6AZY7;O43865;Q96EV8;Q86XL3;Q5QFB9;Q5JRA6;O60238;O95070;O95994;Q8N4B5;P40337;O95487;Q8NFR3;Q8NBV4;Q8NHG7;P10909;Q9NYU2;Q9BRL7;Q6IS14;Q96MG2;Q9NZV5;P27797}
- 4456 Pathogen[ P14075] interacts with 124 human  
partners: {A6NFC5;P60604;Q9BQE4;Q9UBS3;O43617;Q96CS3;Q8TAT6;Q9H5J4;O94777;Q9BVC6;Q96JE7;Q6ZNE5;P55327;Q9BW60;P58512;O14681;Q14442;P09913;Q8WU39;Q15006;Q9NUL3;P23284;O94874;Q9NWZ5;Q8N4B5;Q86UE4;Q92845;P27695;Q9UMS5;A8CG34;Q6NUQ1;P62633;Q86SZ2;Q8WXX9;P04156;Q9Y244;Q9HB03;O95433;Q9GZV4;P39687;O15027;Q15629;P63241;Q01105;P53992;P50402;P55735;Q8WU03;P56279;Q96AQ7;Q8WV99;A1L3X0;P16333;Q96HA1;Q6NZI2;Q8N1N5;Q16655;Q86VP3;O75865;O95487;Q92539;O60613;Q15437;Q8NHG7;Q9UJH9;Q12904;O95456;Q8TEM1;Q8IURO;Q14696;P0DI81;O60238;P27797;Q9Y6D0;Q14CS0;Q9BUN8;Q86YV9;O75807;Q92575;Q9Y2G5;Q1HG44;Q15436;Q9NRR5;P22061;Q9GZR5;Q68CJ9;P27635;Q96EV8;Q9NV92;P08107;Q8N6M3;Q9UHB9;Q96HY6;Q15011;Q969W0;O94855;Q96DZ1;Q9UBS4;Q9UL33;Q6RW13;Q8N3S3;Q15050;O43264;P40337;P14625;Q9Y296;O60260;Q969H0;O95486;O00165;Q9UQF2;O75477;O94850;Q14145;Q13501;P0DI82;Q9UM00;Q96P71;Q9UMX0;P18850;Q5BJF2;Q5VYK3;Q14693;A4D0V7}
- 4457 Pathogen[ P0C206] interacts with 225 human  
partners: {P27695;Q96P71;Q5BJF2;O75340;Q96A33;Q8NBJ7;O75477;Q9BVK6;Q13501;Q96HY6;Q92539;Q16655;P0DI82;Q15437;P50402;Q92575;P27635;Q9UM00;Q9GZV4;Q96G23;Q96D15;Q6IS14;P39687;Q9Y296;Q99828;Q8N6T3;P27797;O75865;Q14CS0;Q9UMS5;O75396;Q15397;Q92845;Q9UBP0;Q9NZ42;Q8WXX9;P04156;O94855;P39656;Q9UJH9;Q6NUQ1;Q92562;P22061;P18850;Q7Z5B4;Q86XL3;Q9NV92;P56589;Q8N2G8;Q9HB03;O75807;Q9UMX0;O43681;Q8NHG7;A5D6W6;Q9H6L5;Q9UBS4;Q96HA1;P80303;O95070;Q14442;O94850;P49755;P55327;Q5JRA6;Q969H0;Q27J81;P29728;Q9Y5Z9;P55735;Q6ZNE5;P68543;O94777;Q8TAT6;P36956;P29373;Q96DZ1;Q9H496;Q9NWZ5;P58512;Q86WV6;O60613;Q92542;Q8NFR3;Q15050;Q9UQF2;Q1HG44;O43865;O95476;P55145;Q14145;Q9H5J4;Q7L775;P62633;A6NDV4;Q9UL01;Q96S66;O95292;O60238;O14681;Q8TEM1;Q8N6M3;Q9H089;Q9BQE4;Q15041;Q9NRR5;O60506;O15155;P60604;Q6RW13;O00165;Q96Q05;Q9HA82;O95486;Q969M3;Q8IZP0;O00264;Q9BVC6;Q86SZ2;Q96EV8;Q8N4B5;Q969W0;P33947;Q15011;Q96JE7;Q6NZI2;O14656;P24390;P49257;Q86VP3;O95487;P09913;A6NFC5;O94874;O60260;Q15293;O00204;O94905;Q9H0P0;Q9BUN8;O95278;Q9GZP9;Q9Y2B2;P23284;O95793;Q15006;P10909;Q9NUL3;Q96AQ7;P08107;Q8WU03;Q8N1N5;P55072;Q8IURO;O43617;P16333;O43731;Q5VYK3;Q8WU39;Q9H0R8;Q12981;P63241;Q5T215;A4D0V7;O15260;P20292;Q8N3S3;Q9Y6D0;Q969X5;Q8NFQ8;Q86UE4;Q15629;Q9GZR5;Q9UHB9;Q9UBS3;Q13438;Q96RQ1;Q96B86;Q9UL33;Q14696;A8CG34;O95456;P56279;P53992;Q8WV99;Q15363;Q12912;Q14257;Q9Y5R8;Q9Y5U9;Q86YV9;Q8WXG1;Q14693;Q9Y244;O15027;Q96CS3;O43264;Q01105;O43639;Q12959;Q86SQ9;Q6VVB1;Q9HBF4;Q12772;Q9H902;Q9BTV4;Q9Y2G5;P13667;P08235;Q9P2W9;Q96S06;P17706;Q8NBV4;P21399;Q99640;Q12904;P0DI81;Q68CJ9;A1L3X0;P40337;P14625;Q08AM6;Q9BRL7;Q9BW60;Q15436}
- 4458 Pathogen[ P03363] interacts with 105 human  
partners: {P17706;Q12959;P23284;Q92845;Q8IZP0;Q9GZV4;Q96AQ7;Q9H5J4;Q9H902;P60604;Q9NWZ5;Q14CS0;Q14145;Q15050;Q92575;Q96DZ1;Q9UMS5;O75340;P0DI81;Q92539;P62633;Q9UQF2;P56279;Q96HY6;P09913;Q9UHB9;P18850;O95793;O43264;Q9NUL3;Q9UMX0;Q6NUQ1;Q9UBS3;Q9UL33;Q15436;Q8N2G8;O95456;A8CG34;Q15041;P04156;Q6VVB1;O95486;Q86UE4;Q99828;O43639;Q96CS3;O95476;Q

8N1N5;P40337;P39687;P0DI82;O94850;Q9P2W9;Q9H0R8;Q96D15;Q9NRR5;Q8TAT6;Q96P71;P29373;Q15293;Q8N3S3;P08107;P08235;O95433;P16333;P27797;Q6ZNE5;Q9UBS4;O00204;Q68CJ9;Q96HA1;Q969H0;Q6NZI2;O75807;O43865;P50402;Q8IWX8;Q13438;P63241;Q5BJF2;O60506;Q96G23;P53992;Q8WU39;O95487;Q9Y296;Q27J81;Q9Y244;O00165;O43617;Q61S14;Q01105;Q49MI3;O94874;Q8WV99;O60238;P27635;Q86XL3;P55735;Q15006;P55327;Q8WXX9;O94855;Q5VYK3;Q9NQ94

4459 [Cluster 406]GO:0031091+C cellular\_component [name] platelet alpha granule [def] "A secretory organelle found in blood platelets, which is unique in that it exhibits further compartmentalization and acquires its protein content via two distinct mechanisms

4460 Pathogen[ Q2Q067] interacts with 2 human partners:{000186;Q9H267}

4461 Pathogen[ P0C214] interacts with 2 human partners:{000186;P07093}

4462 Pathogen[ P03346] interacts with 2 human partners:{000186;Q9H267}

4463 Pathogen[ Q85601] interacts with 3 human partners:{000186;Q9H267;P07093}

4464 Pathogen[ P14079] interacts with 2 human partners:{000186;Q9H267}

4465 Pathogen[ P03383] interacts with 1 human partners:{000186}

4466 Pathogen[ P03410] interacts with 2 human partners:{Q9H267;000186}

4467 Pathogen[ P14075] interacts with 1 human partners:{000186}

4468 Pathogen[ P0C206] interacts with 2 human partners:{Q9H267;000186}

4469 Pathogen[ P03363] interacts with 2 human partners:{Q9H267;000186}

4470 [Cluster 407]GO:0044451+C cellular\_component [name] nucleoplasm part [def] "Any constituent part of the nucleoplasm, that part of the nuclear content other than the chromosomes or the nucleolus." [GOC

4471 Pathogen[ Q2Q067] interacts with 2 human partners:{075683;Q86U70}

4472 Pathogen[ P0C214] interacts with 2 human partners:{075683;Q86U70}

4473 Pathogen[ P03346] interacts with 2 human partners:{Q86U70;075683}

4474 Pathogen[ Q85601] interacts with 2 human partners:{Q86U70;075683}

4475 Pathogen[ P14079] interacts with 2 human partners:{Q86U70;075683}

4476 Pathogen[ P03383] interacts with 2 human partners:{Q86U70;075683}

4477 Pathogen[ P03410] interacts with 2 human partners:{075683;Q86U70}

4478 Pathogen[ P14075] interacts with 2 human partners:{Q86U70;075683}

4479 Pathogen[ P0C206] interacts with 2 human partners:{075683;Q86U70}

4480 Pathogen[ P03363] interacts with 2 human partners:{Q86U70;075683}

4481 [Cluster 408]GO:0043204+C cellular\_component [name] perikaryon [def] "The portion of the cell soma (cell body) that excludes the nucleus." [GOC

4482 Pathogen[ Q2Q067] interacts with 6 human partners:{Q8N3V7;P11387;Q9UQB3;Q99608;P62136;O94850}

4483 Pathogen[ P0C214] interacts with 8 human partners:{Q99608;Q9NPG2;Q9UQB3;P09104;P62136;O94850;P11387;Q8N3V7}

4484 Pathogen[ P03346] interacts with 9 human partners:{P62136;Q8N3V7;Q6TFL4;Q92886;Q9NPG2;Q9UQB3;O94850;Q99608;P11387}

4485 Pathogen[ Q85601] interacts with 6 human partners:{Q99608;P11387;Q9UQB3;P62136;Q8N3V7;Q9NPG2}

4486 Pathogen[ P14079] interacts with 6 human partners:{Q9NPG2;Q9UQB3;P62136;Q99608;Q8N3V7;O94850}

4487 Pathogen[ P03383] interacts with 6 human partners:{Q99608;P11387;P62136;Q9UQB3;O94850;Q8N3V7}

4488 Pathogen[ P03410] interacts with 7 human partners:{Q8N3V7;Q99608;P62136;O94850;P11387;Q9NPG2;Q9UQB3}

4489 Pathogen[ P14075] interacts with 6 human partners:{P11387;Q99608;Q8N3V7;P62136;Q9UQB3;O94850}

4490 Pathogen[ P0C206] interacts with 7 human partners:{Q8N3V7;O94850;Q9NPG2;Q99608;P11387;Q9UQB3;P62136}

4491 Pathogen[ P03363] interacts with 8 human partners:{Q92886;Q8N3V7;P62136;P11387;O94850;Q99608;Q6TFL4;Q9UQB3}

4492 [Cluster 409]GO:0032039+C cellular\_component [name] integrator complex [def] "A protein complex that stably associates with the C-terminus of RNA polymerase II and mediates 3'-end processing of small nuclear RNAs generated by RNA polymerase II." [PMID

4493 Pathogen[ Q2Q067] interacts with 10 human partners:{Q9NVH2;Q96HW7;Q9NV88;Q9NVR2;Q96CB8;P60896;Q6P9B9;Q68E01;Q75QN2;Q9UL03}

4494 Pathogen[ P0C214] interacts with 8 human partners:{Q9NVH2;Q68E01;Q96HW7;Q75QN2;Q9NV88;Q96CB8;Q9NVR2;Q9UL03}

4495 Pathogen[ P03346] interacts with 11 human partners:{Q6P9B9;Q9H0H0;Q96HW7;Q75QN2;Q68E01;Q9NVH2;Q9NV88;Q96CB8;P60896;Q9UL03;Q9NVR2}

4496 Pathogen[ Q85601] interacts with 7 human partners:{Q96CB8;Q68E01;Q75QN2;Q9NVR2;Q9NV88;Q9UL03;Q96HW7}

4497 Pathogen[ P14079] interacts with 11 human partners:{Q9NV88;Q96CB8;Q9NVR2;Q75QN2;Q6P9B9;Q9NVH2;Q8N201;Q68E01;Q9H0H0;Q9UL03;Q96HW7}

4498 Pathogen[ P03383] interacts with 10 human partners:{Q68E01;Q75QN2;Q6P9B9;Q9NV88;Q96HW7;Q96CB8;P60896;Q9UL03;Q9NVH2;Q9NVR2}

4499 Pathogen[ P03410] interacts with 12 human partners:{Q9NVR2;Q96CB8;Q9UL03;Q8N201;Q9H0H0;P60896;Q9NV88;Q9NVH2;Q96HW7;Q68E01;Q75QN2;Q6P9B9}

4500 Pathogen[ P14075] interacts with 10 human partners:{Q75QN2;Q68E01;Q9NVR2;Q96HW7;Q9NVH2;P60896;Q6P9B9;Q9UL03;Q9NV88;Q96CB8}

4501 Pathogen[ P0C206] interacts with 12 human

4502 partners:{Q68E01;Q9NV88;Q9NVH2;Q9UL03;Q9H0H0;Q96HW7;Q96CB8;Q75QN2;Q9NVR2;Q6P9B9;P60896;Q8N201}  
Pathogen[ P03363] interacts with 11 human  
partners:{Q9NVR2;P60896;Q96HW7;Q75QN2;Q9UL03;Q6P9B9;Q9NVH2;Q9H0H0;Q68E01;Q9NV88;Q96CB8}

4503 [Cluster 410]GO:0042622+C cellular\_component [name] photoreceptor outer segment membrane [def] "The membrane surrounding the outer segment of a vertebrate photoreceptor." [GOC  
4504 Pathogen[ Q2Q067] interacts with 1 human partners:{P41219}  
4505 Pathogen[ P0C214] interacts with 1 human partners:{P41219}  
4506 Pathogen[ P03346] interacts with 1 human partners:{P41219}  
4507 Pathogen[ Q85601] interacts with 1 human partners:{P41219}  
4508 Pathogen[ P14079] interacts with 1 human partners:{P41219}  
4509 Pathogen[ P03383] interacts with 1 human partners:{P41219}  
4510 Pathogen[ P03410] interacts with 1 human partners:{P41219}  
4511 Pathogen[ P14075] interacts with 1 human partners:{P41219}  
4512 Pathogen[ P0C206] interacts with 1 human partners:{P41219}  
4513 Pathogen[ P03363] interacts with 1 human partners:{P41219}

4514 [Cluster 411]GO:0032592+C cellular\_component [name] integral to mitochondrial membrane [def] "Located such that some or all of the gene product itself penetrates at least one phospholipid bilayer of a mitochondrial membrane. May also refer to the state of being buried in the bilayer with no exposure outside the bilayer." [GOC  
4515 Pathogen[ Q2Q067] interacts with 2 human partners:{P55957;Q9GZY8}  
4516 Pathogen[ P0C214] interacts with 2 human partners:{P55957;Q9GZY8}  
4517 Pathogen[ P03346] interacts with 2 human partners:{P55957;Q9GZY8}  
4518 Pathogen[ Q85601] interacts with 2 human partners:{P55957;Q9GZY8}  
4519 Pathogen[ P14079] interacts with 4 human partners:{Q15070;Q9BUB7;Q9GZY8;P55957}  
4520 Pathogen[ P03383] interacts with 2 human partners:{P55957;Q9GZY8}  
4521 Pathogen[ P03410] interacts with 4 human partners:{Q9BUB7;Q9GZY8;P55957;Q15070}  
4522 Pathogen[ P14075] interacts with 4 human partners:{P55957;Q15070;Q9GZY8;Q9BUB7}  
4523 Pathogen[ P0C206] interacts with 4 human partners:{Q9BUB7;Q15070;Q9GZY8;P55957}  
4524 Pathogen[ P03363] interacts with 2 human partners:{P55957;Q9GZY8}

4525 [Cluster 412]GO:0000940+C cellular\_component [name] condensed chromosome outer kinetochore [def] "The region of a condensed chromosome kinetochore most external to centromeric DNA; this outer region mediates kinetochore-microtubule interactions." [GOC  
4526 Pathogen[ Q2Q067] interacts with 7 human  
partners:{P49454;Q8IX90;Q96BD8;Q8WUM0;Q92793;Q8WVK7;Q96EA4}  
4527 Pathogen[ P0C214] interacts with 7 human  
partners:{Q96EA4;Q92793;Q96BD8;Q8IX90;P49454;Q8WUM0;Q8WVK7}  
4528 Pathogen[ P03346] interacts with 7 human  
partners:{Q8WUM0;Q96EA4;Q8IX90;Q92793;Q96BD8;Q8WVK7;P49454}  
4529 Pathogen[ Q85601] interacts with 7 human  
partners:{P49454;Q8WUM0;Q96EA4;Q96BD8;Q8IX90;Q8WVK7;Q92793}  
4530 Pathogen[ P14079] interacts with 7 human  
partners:{Q8IX90;Q92793;Q8WUM0;Q96EA4;Q8WVK7;P49454;Q96BD8}  
4531 Pathogen[ P03383] interacts with 7 human  
partners:{Q8WUM0;P49454;Q96BD8;Q96EA4;Q8WVK7;Q8IX90;Q92793}  
4532 Pathogen[ P03410] interacts with 7 human  
partners:{Q8IX90;P49454;Q96EA4;Q92793;Q8WVK7;Q8WUM0;Q96BD8}  
4533 Pathogen[ P14075] interacts with 7 human  
partners:{Q8WVK7;Q96BD8;Q96EA4;Q8IX90;Q92793;Q8WUM0;P49454}  
4534 Pathogen[ P0C206] interacts with 7 human  
partners:{P49454;Q8IX90;Q92793;Q8WUM0;Q96BD8;Q96EA4;Q8WVK7}  
4535 Pathogen[ P03363] interacts with 7 human  
partners:{Q96EA4;P49454;Q96BD8;Q8WVK7;Q8IX90;Q8WUM0;Q92793}

4536 [Cluster 413]GO:0030688+C cellular\_component [name] preribosome, small subunit precursor [def] "A preribosomal complex consisting of 20S pre-rRNA, ribosomal proteins including late-associating small subunit proteins, and associated proteins\_ a precursor of the eukaryotic cytoplasmic small ribosomal subunit." [PMID  
4537 Pathogen[ Q2Q067] interacts with 3 human partners:{P56182;Q14684;O75691}  
4538 Pathogen[ P0C214] interacts with 3 human partners:{O75691;Q14684;P56182}  
4539 Pathogen[ P03346] interacts with 3 human partners:{O75691;P56182;Q14684}  
4540 Pathogen[ Q85601] interacts with 3 human partners:{O75691;Q14684;P56182}  
4541 Pathogen[ P14079] interacts with 3 human partners:{O75691;P56182;Q14684}  
4542 Pathogen[ P03383] interacts with 3 human partners:{O75691;Q14684;P56182}  
4543 Pathogen[ P03410] interacts with 3 human partners:{Q14684;P56182;O75691}  
4544 Pathogen[ P14075] interacts with 3 human partners:{P56182;O75691;Q14684}  
4545 Pathogen[ P0C206] interacts with 3 human partners:{P56182;O75691;Q14684}  
4546 Pathogen[ P03363] interacts with 3 human partners:{P56182;O75691;Q14684}

4547 [Cluster 414]GO:0005854+C cellular\_component [name] nascent polypeptide-associated complex [def] "A heterodimeric protein complex that can reversibly bind to ribosomes, and is located in direct proximity to newly synthesized polypeptide chains as they emerge from the ribosome." [PMID  
4548 Pathogen[ Q2Q067] interacts with 1 human partners:{Q13765}  
4549 Pathogen[ P0C214] interacts with 1 human partners:{Q13765}  
4550 Pathogen[ P03346] interacts with 1 human partners:{Q13765}

4551 Pathogen[ Q85601] interacts with 1 human partners:{Q13765}

4552 Pathogen[ P14079] interacts with 1 human partners:{Q13765}

4553 Pathogen[ P03383] interacts with 1 human partners:{Q13765}

4554 Pathogen[ P03410] interacts with 1 human partners:{Q13765}

4555 Pathogen[ P14075] interacts with 1 human partners:{Q13765}

4556 Pathogen[ P0C206] interacts with 1 human partners:{Q13765}

4557 Pathogen[ P03363] interacts with 1 human partners:{Q13765}

4558 [Cluster 415]GO:0000307+C cellular\_component [name] cyclin-dependent protein kinase holoenzyme complex [def] "Cyclin-dependent protein kinases (CDKs) are heterodimeric enzymes that contain a kinase catalytic subunit associated with a regulatory cyclin partner." [GOC

4559 Pathogen[ Q2Q067] interacts with 8 human partners:{P30281;P24385;P30279;P24864;P38936;P24941;P11802;Q00534}

4560 Pathogen[ P0C214] interacts with 8 human partners:{P11802;P24385;P38936;Q00534;P30281;P24941;P24864;P30279}

4561 Pathogen[ P03346] interacts with 8 human partners:{P30281;P24385;P30279;P24941;P24864;P11802;Q00534;P38936}

4562 Pathogen[ Q85601] interacts with 8 human partners:{P30281;P24385;P11802;P30279;P38936;Q00534;P24941;P24864}

4563 Pathogen[ P14079] interacts with 2 human partners:{P24864;P38936}

4564 Pathogen[ P03383] interacts with 7 human partners:{P24385;Q00534;P11802;P30279;P24941;P24864;P30281}

4565 Pathogen[ P03410] interacts with 8 human partners:{P30279;Q00534;P24385;P38936;P24941;P11802;P30281;P24864}

4566 Pathogen[ P14075] interacts with 7 human partners:{P24941;P11802;P30281;P30279;Q00534;P24385;P24864}

4567 Pathogen[ P0C206] interacts with 8 human partners:{P30279;P38936;P24864;P24941;P11802;P24385;Q00534;P30281}

4568 Pathogen[ P03363] interacts with 7 human partners:{P24864;P30279;P24941;Q00534;P24385;P11802;P30281}

4569 [Cluster 416]GO:0035985+C cellular\_component [name] senescence-associated heterochromatin focus [def] "A transcriptionally-silent heterochromatin structure present in senescent cells. Contains the condensed chromatin of one chromosome and is enriched for histone modifications. Thought to repress expression of proliferation-promoting genes." [GOC

4570 Pathogen[ Q2Q067] interacts with 2 human partners:{P42771;P17096}

4571 Pathogen[ P0C214] interacts with 2 human partners:{P17096;P42771}

4572 Pathogen[ P03346] interacts with 2 human partners:{P42771;P17096}

4573 Pathogen[ Q85601] interacts with 2 human partners:{P17096;P42771}

4574 Pathogen[ P14079] interacts with 2 human partners:{P17096;P42771}

4575 Pathogen[ P03383] interacts with 2 human partners:{P17096;P42771}

4576 Pathogen[ P03410] interacts with 2 human partners:{P42771;P17096}

4577 Pathogen[ P14075] interacts with 2 human partners:{P17096;P42771}

4578 Pathogen[ P0C206] interacts with 2 human partners:{P42771;P17096}

4579 Pathogen[ P03363] interacts with 2 human partners:{P17096;P42771}

4580 [Cluster 417]GO:0008385+C cellular\_component [name] IkappaB kinase complex [def] "A protein serine/threonine kinase that phosphorylates IkappaB, thereby targeting this for proteasomal degradation and allowing the nuclear translocation of kB. Composed of alpha, beta and gamma subunits, the latter not having kinase activity but presumed to play a regulatory role." [GOC

4581 Pathogen[ Q2Q067] interacts with 7 human partners:{Q8IUD2;Q8WXC3;Q9Y6K9;O14920;O43318;O15111;Q96EY1}

4582 Pathogen[ P0C214] interacts with 7 human partners:{O15111;Q9Y6K9;O43318;Q8WXC3;Q8IUD2;O14920;Q96EY1}

4583 Pathogen[ P03346] interacts with 7 human partners:{Q9Y6K9;O15111;Q8IUD2;Q8WXC3;O14920;O43318;Q96EY1}

4584 Pathogen[ Q85601] interacts with 7 human partners:{O15111;Q9Y6K9;O14920;Q8WXC3;O43318;Q8IUD2;Q96EY1}

4585 Pathogen[ P14079] interacts with 4 human partners:{Q8WXC3;Q8IUD2;Q9Y6K9;Q96EY1}

4586 Pathogen[ P03383] interacts with 7 human partners:{Q9Y6K9;O14920;O15111;O43318;Q8WXC3;Q8IUD2;Q96EY1}

4587 Pathogen[ P03410] interacts with 7 human partners:{O14920;O15111;O43318;Q8IUD2;Q8WXC3;Q9Y6K9;Q96EY1}

4588 Pathogen[ P14075] interacts with 7 human partners:{O15111;Q8IUD2;O14920;Q8WXC3;O43318;Q9Y6K9;Q96EY1}

4589 Pathogen[ P0C206] interacts with 7 human partners:{O14920;Q9Y6K9;O43318;Q8IUD2;O15111;Q96EY1;Q8WXC3}

4590 Pathogen[ P03363] interacts with 7 human partners:{O14920;O15111;Q9Y6K9;O43318;Q8WXC3;Q96EY1;Q8IUD2}

4591 [Cluster 418]GO:0005876+C cellular\_component [name] spindle microtubule [def] "Any microtubule that is part of a mitotic or meiotic spindle\_ anchored at one spindle pole." [ISBN

4592 Pathogen[ Q2Q067] interacts with 21 human partners:{Q14980;O43663;Q7Z460;Q96R06;Q969S2;O15379;P06746;Q6PGN9;O60907;O00139;Q8IX90;Q96BD8;Q9BZK7;Q9BXS6;Q92845;Q9UKK3;P30260;O75376;Q13042;Q8WVK7;O15392}

4593 Pathogen[ P0C214] interacts with 20 human

4594 partners:{P06746;O60907;Q96R06;Q9BXS6;O00139;Q14980;Q6PGN9;Q96BD8;O43663;O75376;O15379;Q92845;O15392;Q8IX90;Q7Z460;Q9UUKK3;Q9BZK7;P30260;Q8WVK7;Q13042}  
Pathogen[ P03346] interacts with 23 human

4595 partners:{Q9BXS6;O60907;O15392;O15379;Q96R06;O00139;Q9UUKK3;Q14980;Q969S2;Q13042;Q6PGN9;O75376;Q8IX90;P36405;Q9BZK7;Q7Z460;Q92845;P30260;O43663;P06746;Q96BD8;O14965;Q8WVK7}  
Pathogen[ Q85601] interacts with 23 human

4596 partners:{Q6PGN9;P36405;Q969S2;O60907;Q9UUKK3;Q9BXS6;O15392;Q96R06;O43663;O14965;Q13042;Q96BD8;O75376;Q8IX90;Q14980;Q8WVK7;Q9BZK7;Q92845;O15379;P06746;Q7Z460;P30260;O00139}  
Pathogen[ P14079] interacts with 24 human

4597 partners:{Q14980;O15379;Q9BZK7;Q7Z460;Q8IX90;Q96R06;O15392;O60907;Q9UUKK3;Q9BXS6;O15066;P36405;O43663;Q13042;O00139;Q8WVK7;Q969S2;Q6PGN9;P06746;P30260;O75376;Q92845;Q96BD8;O14965}  
Pathogen[ P03383] interacts with 19 human

4598 partners:{Q7Z460;P06746;Q96BD8;O75376;O60907;Q9BXS6;Q13042;Q96R06;Q6PGN9;Q8WVK7;O15379;O14965;Q8IX90;Q14980;Q9UUKK3;Q9BZK7;Q92845;O43663;P30260}  
Pathogen[ P03410] interacts with 23 human

4599 partners:{Q8IX90;Q7Z460;O15392;O00139;P36405;Q92845;P06746;O75376;Q96R06;Q9BXS6;O14965;Q14980;Q13042;O15379;Q8WVK7;P30260;Q9BZK7;Q9UUKK3;Q969S2;Q6PGN9;Q96BD8;O60907;O43663}  
Pathogen[ P14075] interacts with 20 human

4600 partners:{Q13042;O43663;Q92845;Q96R06;Q8WVK7;Q7Z460;P06746;Q9BXS6;Q96BD8;O75376;O00139;O14965;O60907;Q8IX90;O15379;Q6PGN9;Q9BZK7;Q14980;P30260;Q9UUKK3}  
Pathogen[ P0C206] interacts with 22 human

4601 partners:{Q92845;O60907;P06746;Q6PGN9;P30260;Q8IX90;Q96BD8;Q9UUKK3;O15379;O43663;Q9BZK7;O75376;O15392;O00139;P36405;Q969S2;Q9BXS6;O14965;Q14980;Q7Z460;Q13042;Q8WVK7}  
Pathogen[ P03363] interacts with 21 human

4602 partners:{Q92845;Q13042;Q96BD8;Q14980;O15379;Q9BZK7;O75376;O60907;Q8WVK7;Q9BXS6;P30260;Q8IX90;Q6PGN9;Q96R06;Q9UUKK3;P06746;Q7Z460;O15066;O43663;O00139;Q969S2}  
[Cluster 419]GO:0031513+C cellular\_component [name] nonmotile primary cilium [def] "A primary cilium which contains a variable array of axonemal microtubules but does not contain molecular motors. Nonmotile primary cilia are found on many different cell types and function as sensory organelles that concentrate and organize sensory signaling molecules." [GOC

4603 Pathogen[ Q2Q067] interacts with 1 human partners:{Q15154}  
4604 Pathogen[ P0C214] interacts with 1 human partners:{Q15154}  
4605 Pathogen[ P03346] interacts with 2 human partners:{Q15154;Q8N157}  
4606 Pathogen[ Q85601] interacts with 1 human partners:{Q15154}  
4607 Pathogen[ P14079] interacts with 2 human partners:{Q8N157;Q15154}  
4608 Pathogen[ P03383] interacts with 1 human partners:{Q15154}  
4609 Pathogen[ P03410] interacts with 2 human partners:{Q15154;Q8N157}  
4610 Pathogen[ P14075] interacts with 1 human partners:{Q15154}  
4611 Pathogen[ P0C206] interacts with 2 human partners:{Q8N157;Q15154}  
4612 Pathogen[ P03363] interacts with 2 human partners:{Q8N157;Q15154}

4613 [Cluster 420]GO:0005782+C cellular\_component [name] peroxisomal matrix [def] "The volume contained within the membranes of a peroxisome\_ in many cells the matrix contains a crystalloid core largely composed of urate oxidase." [GOC

4614 Pathogen[ Q2Q067] interacts with 1 human partners:{O14734}  
4615 Pathogen[ P0C214] interacts with 3 human partners:{O75874;O14832;O14734}  
4616 Pathogen[ P03346] interacts with 3 human partners:{P07148;O14734;P50542}  
4617 Pathogen[ Q85601] interacts with 1 human partners:{O14734}  
4618 Pathogen[ P14079] interacts with 3 human partners:{P50542;O14832;O14734}  
4619 Pathogen[ P03383] interacts with 1 human partners:{O14734}  
4620 Pathogen[ P03410] interacts with 3 human partners:{O14734;O14832;P50542}  
4621 Pathogen[ P14075] interacts with 2 human partners:{O14734;O14832}  
4622 Pathogen[ P0C206] interacts with 3 human partners:{O14832;P50542;O14734}  
4623 Pathogen[ P03363] interacts with 1 human partners:{O14734}

4624 [Cluster 421]GO:0031932+C cellular\_component [name] TORC2 complex [def] "A protein complex that contains at least TOR (target of rapamycin) and Rictor (rapamycin-insensitive companion of TOR), or orthologs of, in complex with other signaling components. Mediates the phosphorylation and activation of PKB (also called AKT). In Saccharomyces, the complex contains Avolp, Avo2p, Tsc1lp, Lst8p, Bit6lp, Slm1p, Slm2p, and Tor2p." [GOC

4625 Pathogen[ Q2Q067] interacts with 2 human partners:{P62750;Q6R327}  
4626 Pathogen[ P0C214] interacts with 2 human partners:{Q6R327;P62750}  
4627 Pathogen[ P03346] interacts with 2 human partners:{P62750;Q6R327}  
4628 Pathogen[ Q85601] interacts with 1 human partners:{P62750}  
4629 Pathogen[ P14079] interacts with 2 human partners:{Q6R327;P62750}  
4630 Pathogen[ P03383] interacts with 1 human partners:{P62750}  
4631 Pathogen[ P03410] interacts with 2 human partners:{P62750;Q6R327}  
4632 Pathogen[ P14075] interacts with 2 human partners:{P62750;Q6R327}  
4633 Pathogen[ P0C206] interacts with 2 human partners:{P62750;Q6R327}  
4634 Pathogen[ P03363] interacts with 2 human partners:{P62750;Q6R327}

4635 [Cluster 422]GO:0005642+C cellular\_component [name] annulate lamellae [def] "Stacks of endoplasmic reticulum (ER) membranes containing a high density of nuclear pores,

thought to form from excess nuclear membrane components, that have been described in a number of different cells. Annulate lamellar membranes are continuous with and embedded within the ER." [PMID

4636 Pathogen[ Q2Q067] interacts with 2 human partners:{P63241;O14980}

4637 Pathogen[ P0C214] interacts with 2 human partners:{P63241;O14980}

4638 Pathogen[ P03346] interacts with 2 human partners:{P63241;O14980}

4639 Pathogen[ Q85601] interacts with 2 human partners:{P63241;O14980}

4640 Pathogen[ P14079] interacts with 1 human partners:{P63241}

4641 Pathogen[ P03383] interacts with 2 human partners:{P63241;O14980}

4642 Pathogen[ P03410] interacts with 2 human partners:{P63241;O14980}

4643 Pathogen[ P14075] interacts with 2 human partners:{P63241;O14980}

4644 Pathogen[ P0C206] interacts with 1 human partners:{P63241}

4645 Pathogen[ P03363] interacts with 2 human partners:{O14980;P63241}

4646 [Cluster 423]GO:0016592+C cellular\_component [name] mediator complex [def] "A protein complex that interacts with the carboxy-terminal domain of the largest subunit of RNA polymerase II and plays an active role in transducing the signal from a transcription factor to the transcriptional machinery. The mediator complex is required for activation of transcription of most protein-coding genes, but can also act as a transcriptional corepressor. The Saccharomyces complex contains several identifiable subcomplexes

4647 Pathogen[ Q2Q067] interacts with 30 human partners:{Q9BUE0;Q9Y3C7;Q96HR3;Q9NPJ6;O95402;Q9H944;Q9BTT4;Q93074;Q15528;O75586;O75448;O60244;Q9P086;Q9ULK4;Q96G25;Q9UHV7;Q9NWA0;A0JLT2;Q9NVC6;Q13503;Q86YW9;Q9NX70;Q9Y2X0;O43513;P49336;Q96PK6;P24863;Q96RN5;Q9Y2W1;Q71F56}

4648 Pathogen[ P0C214] interacts with 30 human partners:{P24863;O75586;Q9P086;Q9Y2X0;Q93074;Q9BUE0;Q9NX70;Q9NWA0;Q96HR3;Q9NVC6;Q9BTT4;O60244;Q9H944;Q9Y3C7;Q96RN5;Q15528;A0JLT2;Q71F56;P49336;O43513;Q86YW9;Q96PK6;Q9UHV7;O75448;Q13503;Q96G25;Q9ULK4;Q9Y2W1;O95402;Q9NPJ6}

4649 Pathogen[ P03346] interacts with 30 human partners:{O95402;Q9NPJ6;Q9NX70;O75586;P24863;P49336;Q96HR3;Q86YW9;Q71F56;Q93074;O60244;Q9BTT4;Q9P086;Q96G25;O75448;Q15528;O43513;Q9Y3C7;A0JLT2;Q9H944;Q9NVC6;Q9Y2X0;Q13503;Q9ULK4;Q9Y2W1;Q9NWA0;Q96PK6;Q9UHV7;Q96RN5;Q9BUE0}

4650 Pathogen[ Q85601] interacts with 30 human partners:{Q9Y2X0;Q9BUE0;Q96PK6;Q9ULK4;Q9UHV7;P49336;Q96G25;Q71F56;O75448;Q9Y3C7;Q9H944;Q13503;Q96RN5;O95402;Q15528;Q9NX70;A0JLT2;Q9BTT4;Q9NWA0;Q86YW9;P24863;O75586;Q9Y2W1;O60244;Q96HR3;Q93074;Q9NPJ6;Q9NVC6;O43513;Q9P086}

4651 Pathogen[ P14079] interacts with 30 human partners:{O60244;O95402;Q9Y2X0;O43513;Q71F56;P49336;Q9BUE0;Q9NX70;Q15528;Q96HR3;Q9Y3C7;Q9ULK4;Q9NVC6;A0JLT2;Q9P086;Q9NWA0;O75448;Q86YW9;O75586;Q9UHV7;Q96RN5;P24863;Q9H944;Q9NPJ6;Q9BTT4;Q13503;Q93074;Q96G25;Q9Y2W1;Q96PK6}

4652 Pathogen[ P03383] interacts with 29 human partners:{O95402;Q9H944;Q9ULK4;Q86YW9;O60244;Q96G25;Q9NPJ6;Q93074;Q96HR3;Q96RN5;O75448;P49336;Q96PK6;Q9Y3C7;Q71F56;Q15528;Q9NX70;Q9P086;A0JLT2;Q9BTT4;Q9UHV7;P24863;Q9NVC6;O75586;Q9Y2W1;Q9NWA0;Q9Y2X0;Q9BUE0;Q13503}

4653 Pathogen[ P03410] interacts with 30 human partners:{Q71F56;Q9Y2W1;Q96PK6;Q96G25;Q13503;Q86YW9;Q9NVC6;Q9NPJ6;Q9NWA0;Q9Y3C7;Q9ULK4;O95402;O43513;Q9BTT4;P49336;Q96HR3;Q9P086;A0JLT2;P24863;O60244;Q9UHV7;Q9Y2X0;Q93074;Q9H944;Q9BUE0;Q9NX70;O75448;Q96RN5;O75586;Q15528}

4654 Pathogen[ P14075] interacts with 30 human partners:{P49336;Q9NPJ6;P24863;Q15528;Q9NX70;Q96HR3;Q71F56;Q9P086;O75448;Q9NWA0;Q86YW9;O95402;O75586;Q9BTT4;Q93074;Q9Y3C7;Q9UHV7;Q96PK6;Q9H944;O60244;A0JLT2;Q9ULK4;Q9NVC6;Q96RN5;Q13503;Q96G25;Q9Y2W1;O43513;Q9Y2X0;Q9BUE0}

4655 Pathogen[ P0C206] interacts with 30 human partners:{Q9BUE0;P24863;P49336;Q96HR3;Q9P086;O75586;Q9Y3C7;Q86YW9;Q9UHV7;Q9NX70;O43513;Q96RN5;O95402;Q9H944;Q9NPJ6;Q96PK6;Q9Y2W1;Q9BTT4;O60244;Q9ULK4;Q9NVC6;O75448;Q9NWA0;Q71F56;Q13503;Q9Y2X0;A0JLT2;Q96G25;Q93074;Q15528}

4656 Pathogen[ P03363] interacts with 28 human partners:{Q15528;Q13503;Q96HR3;P24863;Q9NX70;Q96PK6;Q9NWA0;Q9BUE0;Q9NVC6;Q71F56;Q96RN5;Q9UHV7;A0JLT2;O75586;P49336;Q93074;O75448;Q9BTT4;O95402;Q9NPJ6;O60244;Q9P086;Q9ULK4;Q86YW9;O43513;Q96G25;Q9H944;Q9Y3C7}

4657 [Cluster 424]GO:0044224+C cellular\_component [name] juxtaparanode region of axon [def] "A region of an axon near a node of Ranvier that is between the paranode and internode regions." [GOC

4658 Pathogen[ Q2Q067] interacts with 2 human partners:{Q9Y2J2;P78352}

4659 Pathogen[ P0C214] interacts with 1 human partners:{P78352}

4660 Pathogen[ P03346] interacts with 3 human partners:{P78352;Q9Y2J2;Q15700}

4661 Pathogen[ Q85601] interacts with 2 human partners:{Q9Y2J2;P78352}

4662 Pathogen[ P14079] interacts with 2 human partners:{Q9Y2J2;Q15700}

4663 Pathogen[ P03383] interacts with 1 human partners:{P78352}

4664 Pathogen[ P03410] interacts with 3 human partners:{Q15700;Q9Y2J2;P78352}

4665 Pathogen[ P14075] interacts with 2 human partners:{Q9Y2J2;P78352}

4666 Pathogen[ P0C206] interacts with 3 human partners:{P78352;Q15700;Q9Y2J2}

4667 Pathogen[ P03363] interacts with 3 human partners:{P78352;Q15700;Q9Y2J2}

4668 [Cluster 425]GO:0042555+C cellular\_component [name] MCM complex [def] "A hexameric protein complex required for the initiation and regulation of DNA replication." [GOC

4669 Pathogen[ Q2Q067] interacts with 4 human partners:{Q96HA7;P25205;Q6ZRQ5;Q9BTE3}

4670 Pathogen[ P0C214] interacts with 5 human

4671 partners:{Q6ZRQ5;P25205;Q9BTE3;Q14566;Q96HA7}  
Pathogen[ P03346] interacts with 7 human

4672 partners:{Q96HA7;Q6ZRQ5;Q14566;P25205;P33992;P33991;Q9BTE3}  
Pathogen[ Q85601] interacts with 6 human

4673 partners:{Q96HA7;Q9BTE3;Q6ZRQ5;Q14566;P25205;P33992}  
Pathogen[ P14079] interacts with 6 human

4674 partners:{Q14566;Q9BTE3;Q96HA7;P33992;Q6ZRQ5;P25205}  
Pathogen[ P03383] interacts with 4 human partners:{P25205;Q9BTE3;Q6ZRQ5;Q96HA7}

4675 Pathogen[ P03410] interacts with 6 human  
partners:{P25205;Q9BTE3;P33992;Q14566;Q96HA7;Q6ZRQ5}

4676 Pathogen[ P14075] interacts with 4 human partners:{Q6ZRQ5;Q9BTE3;Q96HA7;P25205}

4677 Pathogen[ P0C206] interacts with 6 human  
partners:{Q96HA7;Q9BTE3;P25205;Q6ZRQ5;Q14566;P33992}

4678 Pathogen[ P03363] interacts with 5 human  
partners:{Q9BTE3;P25205;P33992;Q96HA7;Q6ZRQ5}

4679 [Cluster 426]GO:0031253+C cellular\_component [name] cell projection membrane [def]  
"The portion of the plasma membrane surrounding a cell surface projection." [GOC

4680 Pathogen[ Q2Q067] interacts with 2 human partners:{Q12959;Q15691}

4681 Pathogen[ P0C214] interacts with 2 human partners:{Q15691;Q12959}

4682 Pathogen[ P03346] interacts with 2 human partners:{Q15691;Q12959}

4683 Pathogen[ Q85601] interacts with 2 human partners:{Q15691;Q12959}

4684 Pathogen[ P14079] interacts with 1 human partners:{Q15691}

4685 Pathogen[ P03383] interacts with 1 human partners:{Q15691}

4686 Pathogen[ P03410] interacts with 2 human partners:{Q12959;Q15691}

4687 Pathogen[ P14075] interacts with 1 human partners:{Q15691}

4688 Pathogen[ P0C206] interacts with 2 human partners:{Q15691;Q12959}

4689 Pathogen[ P03363] interacts with 2 human partners:{Q12959;Q15691}

4690 [Cluster 427]GO:0030479+C cellular\_component [name] actin cortical patch [def] "A  
discrete actin-containing structure found at the plasma membrane in cells, at sites of  
endocytosis\_ formed of networks of branched actin filaments that lie just beneath the  
plasma membrane and assemble, move, and disassemble rapidly. An example of this is the  
actin cortical patch found in *Saccharomyces cerevisiae*." [GOC

4691 Pathogen[ Q2Q067] interacts with 1 human partners:{Q96QF0}

4692 Pathogen[ P0C214] interacts with 1 human partners:{Q96QF0}

4693 Pathogen[ P03346] interacts with 1 human partners:{Q96QF0}

4694 Pathogen[ Q85601] interacts with 1 human partners:{Q96QF0}

4695 Pathogen[ P14079] interacts with 1 human partners:{Q96QF0}

4696 Pathogen[ P03383] interacts with 1 human partners:{Q96QF0}

4697 Pathogen[ P03410] interacts with 1 human partners:{Q96QF0}

4698 Pathogen[ P14075] interacts with 1 human partners:{Q96QF0}

4699 Pathogen[ P0C206] interacts with 1 human partners:{Q96QF0}

4700 Pathogen[ P03363] interacts with 1 human partners:{Q96QF0}

4701 [Cluster 428]GO:0000932+C cellular\_component [name] cytoplasmic mRNA processing body  
[def] "A focus in the cytoplasm where mRNAs may become inactivated by decapping or some  
other mechanism. mRNA processing and binding proteins are localized to these foci." [GOC

4702 Pathogen[ Q2Q067] interacts with 30 human  
partners:{Q92900;C9JE40;Q8IU60;Q9NPI6;A5YKK6;Q9HCK5;P19474;Q96F86;A6NIX2;P11387;Q7517  
5;Q86TB9;P26196;Q96IF1;Q9UIV1;Q9UGP4;Q8ND56;Q9Y2V2;Q9H9G7;Q9H9Z2;Q9UKV8;Q9BX70;Q9H0C5  
;Q9C035;Q9HCE1;Q92600;Q9NPJ4;Q9UL18;P06730;Q6P2E9}

4703 Pathogen[ P0C214] interacts with 31 human  
partners:{Q9UGP4;P26196;Q8ND56;P19474;Q6P2E9;C9JE40;Q9NPI6;Q92900;Q9C035;Q9Y2V2;Q9NPJ  
4;Q9HCE1;Q9UIV1;Q9UPQ9;A6NIX2;A5YKK6;Q9H9G7;Q86TB9;Q8NDV7;Q9H9Z2;Q8IU60;Q9UKV8;P11387  
;Q9BX70;Q9HCK5;Q92600;P06730;Q75175;Q96F86;Q9UL18;Q9H0C5}

4704 Pathogen[ P03346] interacts with 34 human  
partners:{Q8ND56;P06730;Q9UGP4;Q9NPI6;Q9UIV1;Q75175;Q9Y2V2;Q9H9G7;Q9UL18;Q9C035;Q96IF  
1;A5YKK6;Q9NPJ4;Q8IU60;Q9HCK5;Q86TB9;Q6P2E9;A6NIX2;Q9UKV8;Q9BX70;P19474;P26196;Q9H9Z2  
;Q6ZN04;Q9UPQ9;Q9HCE1;Q92900;A1L020;Q96F86;C9JE40;Q96KE9;P11387;Q92600;Q9H0C5}

4705 Pathogen[ Q85601] interacts with 32 human  
partners:{Q9HCE1;Q6P2E9;Q9NPI6;Q9HCK5;P06730;A6NIX2;C9JE40;Q9UL18;Q9UIV1;A1L020;Q9260  
0;Q86TB9;P11387;Q9H9G7;A5YKK6;Q9Y2V2;Q9NPJ4;Q9UKV8;Q9H0C5;Q9C035;Q9BX70;P26196;Q96IF1  
;Q9UGP4;Q96F86;P19474;Q9UPQ9;Q92900;Q75175;Q9H9Z2;Q8IU60;Q8ND56}

4706 Pathogen[ P14079] interacts with 33 human  
partners:{Q9UKV8;Q92600;Q9UL18;Q9H9G7;P06730;Q9C035;Q8ND56;Q8IU60;C9JE40;Q9NPI6;Q9HCE  
1;Q9HCK5;Q86TB9;Q6P2E9;Q14444;A5YKK6;Q9H9Z2;A1L020;P19474;Q96IF1;P26196;Q96F86;A6NIX2  
;Q75175;Q9UIV1;Q92900;Q9BX70;Q9NPJ4;Q9Y2V2;Q9UGP4;Q9UPQ9;Q8NDV7;Q9H0C5}

4707 Pathogen[ P03383] interacts with 30 human  
partners:{P19474;Q9H9Z2;Q9UL18;Q8IU60;Q9H0C5;Q9UPQ9;A6NIX2;Q9HCK5;P11387;P26196;P0673  
0;Q9C035;Q9UGP4;Q9NPI6;A5YKK6;Q8ND56;Q9UIV1;Q86TB9;Q92600;Q9UKV8;Q9BX70;C9JE40;Q96F86  
;Q9Y2V2;Q9HCE1;Q75175;Q92900;Q9NPJ4;Q9H9G7;Q6P2E9}

4708 Pathogen[ P03410] interacts with 31 human  
partners:{Q8IU60;Q9UPQ9;Q9UKV8;Q9NPJ4;Q92900;Q9UL18;P06730;Q9NPI6;Q9UGP4;A1L020;Q8NDV  
7;Q9BX70;Q9Y2V2;Q9H9G7;Q9UIV1;Q96IF1;A6NIX2;Q9C035;Q96F86;Q6P2E9;Q9HCE1;Q9H0C5;P11387  
;Q9HCK5;Q75175;Q8ND56;Q86TB9;Q9H9Z2;Q92600;A5YKK6;C9JE40}

4709 Pathogen[ P14075] interacts with 30 human  
partners:{Q6P2E9;P11387;Q92900;Q9HCK5;Q9NPJ4;Q9H9G7;P26196;Q92600;Q9UGP4;Q9H9Z2;Q9HCE  
1;Q9Y2V2;Q75175;P06730;Q9NPI6;Q8IU60;Q9UPQ9;Q86TB9;P19474;A6NIX2;Q9C035;Q9UKV8;Q9BX70



4710 ;Q9H0C5;Q9UL18;Q9UIV1;A5YKK6;Q96F86;C9JE40;Q8ND56}  
 Pathogen[ P0C206] interacts with 34 human  
 partners:{Q9HCK5;Q9NPJ4;Q86TB9;Q8ND56;Q9UGP4;Q96IF1;Q9UIV1;Q9Y2V2;C9JE40;A6NIX2;P2619  
 6;O75175;Q9UPQ9;Q9NPI6;Q9UKV8;Q9BX70;Q8NDV7;P06730;Q9HCE1;Q9H9Z2;Q6ZN04;Q6P2E9;Q96F86  
 ;A5YKK6;Q9C035;Q92600;Q9H0C5;Q9H9G7;Q92900;A1L020;P11387;Q8IU60;Q9UL18;P19474}

4711 Pathogen[ P03363] interacts with 34 human  
 partners:{Q92900;P11387;Q9Y2V2;A5YKK6;Q6P2E9;Q9H9G7;Q9H0C5;Q9HCK5;Q9UKV8;Q9BX70;Q9NPJ  
 4;A1L020;Q8NDV7;Q96IF1;C9JE40;Q9UGP4;Q96F86;P19474;Q9HCE1;Q96KE9;Q9H9Z2;P26196;Q9C035  
 ;Q92600;Q9UPQ9;Q9UL18;Q8ND56;O75175;Q9UIV1;Q86TB9;A6NIX2;P06730;Q9NPI6;Q8IU60}

4712 [Cluster 429]GO:0031225+C cellular\_component [name] anchored to membrane [def]  
 "Tethered to a membrane by a covalently attached anchor, such as a lipid group, that is  
 embedded in the membrane. When used to describe a protein, indicates that none of the  
 peptide sequence is embedded in the membrane." [GOC

4713 Pathogen[ Q2Q067] interacts with 3 human partners:{P04156;P25063;Q6ZVN8}  
 4714 Pathogen[ P0C214] interacts with 4 human partners:{P25063;Q6ZVN8;P04156;Q17RY6}  
 4715 Pathogen[ P03346] interacts with 4 human partners:{Q6ZVN8;Q13449;P04156;P25063}  
 4716 Pathogen[ Q85601] interacts with 2 human partners:{Q17RY6;P04156}  
 4717 Pathogen[ P14079] interacts with 23 human  
 partners:{Q8N6Q3;Q6ZVN8;Q14210;P04156;Q9UKY0;O95867;Q8NI32;P31358;Q9BY14;Q6UX82;Q496H  
 8;Q9NPD7;Q6UXB3;Q17RY6;O95868;P54826;Q6UWN0;O94772;P25063;Q99445;Q5BIV9;Q8N2G4;Q96B86  
 }

4718 Pathogen[ P03383] interacts with 4 human partners:{Q17RY6;P04156;P25063;Q6ZVN8}  
 4719 Pathogen[ P03410] interacts with 24 human  
 partners:{Q5BIV9;Q8N6Q3;Q96B86;Q9NPD7;O95867;Q496H8;Q14210;Q99445;P31358;Q9BY14;Q6ZVN  
 8;P25063;Q9UKY0;Q6UWN0;P04156;Q8N2G4;P54826;O95868;Q9BZR6;Q6UXB3;Q8NI32;Q13449;O94772  
 ;Q6UX82}

4720 Pathogen[ P14075] interacts with 7 human  
 partners:{Q5BIV9;P04156;Q17RY6;Q6ZVN8;Q496H8;P54826;P25063}  
 4721 Pathogen[ P0C206] interacts with 12 human  
 partners:{P04156;O95867;P25063;Q99445;Q17RY6;Q6ZVN8;Q9UKY0;Q9NPD7;Q96B86;P54826;Q5BIV  
 9;O95868}

4722 Pathogen[ P03363] interacts with 2 human partners:{P04156;Q6ZVN8}  
 4723 [Cluster 430]GO:0043240+C cellular\_component [name] Fanconi anaemia nuclear complex  
 [def] "A protein complex composed of the Fanconi anaemia (FA) proteins including A, C, E,  
 G and F (FANCA-F). Functions in the activation of the downstream protein FANCD2 by  
 monoubiquitylation, and is essential for protection against chromosome breakage." [GOC

4724 Pathogen[ Q2Q067] interacts with 12 human  
 partners:{Q9HB96;Q8N2Z9;A8MT69;Q00597;Q8NB91;Q9BTP7;Q9NPI8;O15287;Q8IYD8;O15360;Q9NW3  
 8;Q6NZ36}

4725 Pathogen[ P0C214] interacts with 10 human  
 partners:{O15287;Q00597;Q6NZ36;Q8N2Z9;Q9HB96;O15360;Q9NPI8;Q8IYD8;Q9NW38;Q9BTP7}

4726 Pathogen[ P03346] interacts with 12 human  
 partners:{Q8N2Z9;Q8NB91;A8MT69;O15360;Q9BTP7;Q6NZ36;O15287;Q9HB96;Q00597;Q8IYD8;Q9NPI  
 8;Q9NW38}

4727 Pathogen[ Q85601] interacts with 11 human  
 partners:{Q9BTP7;Q8IYD8;Q6NZ36;Q9NPI8;Q00597;Q9HB96;A8MT69;Q9NW38;Q8N2Z9;O15360;O1528  
 7}

4728 Pathogen[ P14079] interacts with 11 human  
 partners:{Q8NB91;Q8IYD8;Q9NPI8;Q00597;Q6NZ36;Q8N2Z9;A8MT69;Q9HB96;Q9BTP7;Q9NW38;O1536  
 0}

4729 Pathogen[ P03383] interacts with 9 human  
 partners:{Q8N2Z9;O15287;A8MT69;Q9HB96;Q00597;O15360;Q9NW38;Q9NPI8;Q9BTP7}

4730 Pathogen[ P03410] interacts with 12 human  
 partners:{Q8IYD8;Q8NB91;Q9BTP7;O15287;Q9NPI8;Q00597;Q9HB96;O15360;A8MT69;Q6NZ36;Q9NW3  
 8;Q8N2Z9}

4731 Pathogen[ P14075] interacts with 10 human  
 partners:{A8MT69;Q8NB91;Q9HB96;O15360;Q9NPI8;Q9BTP7;Q9NW38;Q8N2Z9;O15287;Q00597}

4732 Pathogen[ P0C206] interacts with 12 human  
 partners:{Q9NPI8;O15360;Q9BTP7;Q6NZ36;Q9HB96;Q8IYD8;Q8NB91;O15287;Q00597;Q8N2Z9;A8MT6  
 9;Q9NW38}

4733 Pathogen[ P03363] interacts with 12 human  
 partners:{Q9NW38;O15287;O15360;Q00597;Q9BTP7;Q8N2Z9;Q6NZ36;Q8NB91;Q8IYD8;Q9HB96;Q9NPI  
 8;A8MT69}

4734 [Cluster 431]GO:0016605+C cellular\_component [name] PML body [def] "A class of nuclear  
 body\_ they react against SP100 auto-antibodies (PML, promyelocytic leukemia)\_ cells  
 typically contain 10-30 PML bodies per nucleus\_ alterations in the localization of PML  
 bodies occurs after viral infection." [GOC

4735 Pathogen[ Q2Q067] interacts with 51 human  
 partners:{Q93009;O75427;Q9NS56;Q86UA6;Q8IY18;P06400;P27694;Q01130;P13056;Q9NPG3;Q0551  
 6;P14373;Q9UER7;P54198;Q02447;P63279;Q92547;O95551;Q86TB9;O75928;Q06609;P63165;Q8IXH6  
 ;P78317;O96017;P12755;P15927;Q96EP1;P50750;Q9UBW7;P60228;O14746;Q16621;P61244;Q9NRA8;  
 Q99607;Q5VWP3;P12757;Q13569;Q9Y2M5;Q9HC62;O75113;Q96MF7;Q01826;P45973;P23497;Q9Y252;Q  
 9NVV9;Q8NG50;Q8N2W9;Q96A56}

4736 Pathogen[ P0C214] interacts with 52 human  
 partners:{O95551;Q8IY18;P60228;P54198;P61244;Q06609;O14746;P12757;Q14164;P50750;Q9NS5  
 6;Q8N2W9;Q16621;P63279;Q99607;P78317;P13056;Q9NVV9;Q9UER7;O96017;P63165;Q96MF7;Q9Y2M5

4737 Pathogen[ P03346] interacts with 56 human partners: {P15927;Q86TB9;Q93009;Q9UBW7;Q8IXH6;P12755;Q9Y252;P23497;Q01826;Q02447;Q5VWP3;P45973;O75113;Q9HC62;P27694;Q96A56;Q92547;Q86UA6;Q13569;P14373;Q8NG50;P06400;Q05516;Q96EP1;Q01130;O75928;Q9NRA8;Q9NPG3;O75427}

4738 Pathogen[ Q85601] interacts with 54 human partners: {P78317;P54198;Q9NS56;P14373;O75928;O96017;Q93009;P50750;Q92547;Q9NPG3;Q8IY18;Q01130;Q16621;P06400;Q86UA6;Q9HC62;Q6PCD5;Q9UER7;P12757;Q9BZR9;Q8N2W9;Q14149;P63279;P27694;P12755;Q5VWP3;Q86TB9;Q9UBW7;Q8NG50;P60228;Q14164;Q9NVV9;P15927;P45973;O75427;Q01826;Q13569;Q96A56;Q02447;Q05516;P61244;Q99607;Q9Y252;O14746;P63165;Q8IXH6;O75113;Q9NRA8;Q9Y2M5;P13056;Q96EP1;Q06609;O95551;Q96MF7}

4739 Pathogen[ P14079] interacts with 49 human partners: {Q96A56;Q8N2W9;P13056;O14746;Q8IXH6;P12755;P63279;P14373;Q96MF7;O75928;Q99607;Q9NVV9;Q8NG50;Q86TB9;Q14164;Q01826;P54198;Q05516;Q02447;Q13472;Q5VWP3;P63165;Q9UBW7;P23497;Q14149;P45973;Q9HC62;Q9UER7;O75427;Q9NPG3;Q86UA6;Q9Y2M5;Q9NS56;O95551;Q16621;P15927;Q92547;Q96AZ6;P27694;P78317;Q8IY18;P12757;O95361;Q13569;Q06609;P61244;Q9NRA8;O75113;P50750}

4740 Pathogen[ P03383] interacts with 44 human partners: {Q86UA6;Q06609;Q96A56;Q99607;P60228;P27694;Q01826;P78317;Q05516;Q8N2W9;Q96MF7;P06400;Q9UBW7;Q8IXH6;O75427;Q16621;P15927;P45973;Q9NVV9;Q02447;Q01130;O14746;P63165;P50750;Q9UER7;Q86TB9;Q9NPG3;Q13569;P23497;Q9Y252;Q9HC62;O75113;Q9NRA8;Q9Y2M5;P12757;O95551;Q96EP1;Q92547;P61244;P13056;P63279;O96017;O75928}

4741 Pathogen[ P03410] interacts with 48 human partners: {Q8IXH6;P54198;Q9NVV9;P12755;Q02447;P63165;O14746;Q14149;O75427;Q86UA6;Q9NRA8;Q8NG50;O75928;Q8N2W9;P45973;P06400;Q99607;Q9NPG3;P61244;Q96MF7;P50750;O95551;Q13472;Q9HC62;Q9UER7;Q16621;P78317;Q13569;Q96AZ6;Q01826;P12757;O96017;Q92547;Q01130;Q96A56;Q86TB9;Q8IY18;P63279;O75113;P27694;Q9UBW7;P15927;P60228;Q5VWP3;Q96EP1;Q9Y2M5;Q06609;P13056}

4742 Pathogen[ P14075] interacts with 45 human partners: {P63165;Q99607;P23497;O14746;Q9Y252;P61244;Q01130;P50750;P45973;Q5VWP3;Q8N2W9;P15927;P63279;P54198;P13056;Q01826;P12757;P60228;O96017;Q9HC62;Q86TB9;O75928;P78317;P06400;Q8IXH6;P27694;Q02447;O75113;Q05516;Q86UA6;Q9NRA8;Q9UER7;Q16621;Q9Y2M5;Q96MF7;Q13569;Q92547;O75427;Q9NVV9;Q9UBW7;Q96A56;Q06609;Q96EP1;O95551;Q9NPG3}

4743 Pathogen[ P0C206] interacts with 53 human partners: {Q9UBW7;Q8IXH6;Q9NS56;Q6PCD5;P45973;Q86TB9;P50750;O96017;Q96EP1;Q05516;Q8N2W9;Q9HC62;P54198;Q9UER7;P13056;Q93009;P78317;Q96A56;P12755;O75427;Q9NPG3;P60228;Q13569;Q14164;Q9BZR9;O75113;P12757;Q14149;O95361;Q02447;O95551;Q96MF7;P61244;Q16621;Q01826;Q06609;P27694;Q9Y2M5;P15927;P63165;P14373;Q01130;Q92547;Q9Y252;Q8IY18;Q13472;Q99607;Q8NG50;Q5VWP3;Q9NVV9;O14746;Q9NRA8;P06400}

4744 Pathogen[ P03363] interacts with 51 human partners: {Q92547;Q9Y252;Q96EP1;P27694;P54198;Q9BZR9;Q9NRA8;Q8NG50;P14373;Q9NVV9;Q02447;P12757;P45973;Q01826;Q99607;P78317;Q9NPG3;Q16621;Q9UER7;Q01130;O14746;P15927;P23497;P06400;P61244;Q86UA6;O96017;Q96A56;P63165;O75113;Q9Y2M5;Q9HC62;Q13472;Q6PCD5;P63279;P60228;Q13569;Q9UBW7;Q86TB9;P50750;O95551;Q06609;O75427;Q5VWP3;Q8N2W9;Q8IY18;Q05516;Q96MF7;P13056;Q8IXH6;O75928}

4745 [Cluster 432]GO:0012507+C cellular\_component [name] ER to Golgi transport vesicle membrane [def] "The lipid bilayer surrounding a vesicle transporting substances from the endoplasmic reticulum to the Golgi." [GOC

4746 Pathogen[ Q2Q067] interacts with 7 human partners: {P55735;P36956;P53992;O95486;O94855;O95487;Q15436}

4747 Pathogen[ P0C214] interacts with 7 human partners: {P55735;P53992;Q15436;O95487;P49257;O95486;O94855}

4748 Pathogen[ P03346] interacts with 9 human partners: {P55735;P36956;Q12772;P49257;O94855;Q15436;O95486;O95487;P53992}

4749 Pathogen[ Q85601] interacts with 9 human partners: {O95487;Q12772;Q15436;P36956;P49257;P55735;O95486;O94855;P53992}

4750 Pathogen[ P14079] interacts with 9 human partners: {P49257;Q3ZAQ7;O95487;O94855;P53992;Q12772;P55735;O95486;P36956}

4751 Pathogen[ P03383] interacts with 6 human partners: {P55735;O95487;O95486;Q15436;O94855;P53992}

4752 Pathogen[ P03410] interacts with 9 human partners: {P36956;P49257;O94855;P53992;Q15436;Q12772;O95486;P55735;O95487}

4753 Pathogen[ P14075] interacts with 6 human partners: {P53992;P55735;O95487;Q15436;O94855;O95486}

4754 Pathogen[ P0C206] interacts with 9 human partners: {O94855;P55735;P36956;O95486;P49257;O95487;P53992;Q12772;Q15436}

4755 Pathogen[ P03363] interacts with 6 human partners: {Q15436;O95486;P53992;O95487;P55735;O94855}

4756 [Cluster 433]GO:0005739+C cellular\_component [name] mitochondrion [def] "A semiautonomous, self replicating organelle that occurs in varying numbers, shapes, and sizes in the cytoplasm of virtually all eukaryotic cells. It is notably the site of tissue respiration." [ISBN

4757 Pathogen[ Q2Q067 ] interacts with 465 human partners: {O95363;Q8N5N7;P51398;Q96TC7;Q9HD33;Q9H583;Q8TCS8;P30153;Q9BRT2;Q15054;Q9ULD0;O14734;P22392;Q9HBH1;P53370;P82921;O95639;Q9GZT8;Q9BYD6;Q9NXW9;O00411;Q9Y2S7;Q13084;P10746;Q9H2U2;Q9BZE1;Q9H3J6;P82933;P35754;Q9Y305;Q9NRP2;Q9NWS8;Q9Y2X0;O43920;Q5U5X0;Q96CB9;O60239;Q96EL2;Q9BYD1;P17029;Q99747;Q4U2R6;Q9NR28;P55957;Q99417;Q94591;P07195;P63104;Q9Y3F4;Q13875;Q9NNTK1;P82912;Q9BSH4;O60296;P82932;Q63HK5;Q9HAV7;Q9Y3B7;Q9UHB7;Q9P032;Q8IVG9;Q9UMX3;P21980;Q9Y676;P41220;O75394;Q56VL3;Q9H5Q4;Q96A35;Q08209;P31040;P62258;Q96JZ2;Q16775;Q6IE81;Q7KZF4;Q96DX5;P53804;P38646;Q9HCN2;Q9NVN8;Q9Y2R9;Q86TX2;Q93015;Q8WVM0;Q13405;Q9Y606;Q96GC5;Q99497;P82930;O60260;Q9BYN8;Q9BXH1;Q9BUL9;Q9BRQ6;P09132;Q9Y6E7;Q6P1X6;Q9NWU5;P10515;P41970;Q7Z7A3;P22033;Q9BRJ2;Q96B49;O00167;P49419;O60437;P36639;Q5TCL2;P56181;Q9BRG1;P33316;Q96CM4;Q92552;P19367;Q8NF64;O60543;P38117;Q9NZI6;Q9UIF7;Q15046;O75489;Q9NX40;P36543;Q99551;O75896;Q5CZC0;P61604;Q96C86;P30084;Q5T1C6;P82663;P07954;O60238;Q05195;P08238;P63167;Q8N6F7;Q9BYC8;Q9UGC7;O60930;Q15006;Q9Y3D9;O75208;Q9H6T0;O76031;Q86Y79;P18615;Q8IWL3;Q99933;Q6NZI2;Q96S55;Q8WU03;Q9P0M9;Q96I23;P58557;Q9UL16;O75570;Q9Y237;P62244;P13073;P02511;Q9Y2Z2;Q5T653;Q9NVS2;Q9NQE9;P08107;Q8TA A5;P67775;P51610;P42704;Q7L0Y3;Q96AB3;Q330K2;Q5T160;Q9Y291;P17040;P17482;Q9P0J6;Q9NTG7;Q96DP5;P15924;Q13794;P22557;Q96EK5;P21953;Q6P1L8;Q9BV47;Q14790;P13196;Q92558;Q9NZC7;Q5TYM5;O43542;Q06609;O43248;P57721;Q96I59;Q9Y3E5;O96000;O43776;Q9NX18;P32189;Q8IXM3;Q9Y3D3;O15304;Q9Y2R5;P27695;O75323;Q96DB5;O43823;Q9BQ48;O95178;Q06830;Q9H3L0;Q96CW1;Q07021;Q00059;O43502;Q9Y399;Q15004;Q9H4B0;Q9Y2Q9;P59047;Q15388;Q96C00;Q9UII2;P49901;Q5HYI7;P26678;Q9BQ70;Q9UG56;P40337;O15235;O43236;P52758;Q9H2W6;Q6GPH4;Q96EH3;P60900;Q96BW9;Q16143;Q9GZY8;P34896;Q9HD34;P62263;Q9BU61;Q9BSH5;O43678;Q00610;O76095;P62906;Q63ZY3;P82650;Q9BQC6;Q8N5M1;P52815;P56277;P09972;O14862;O60220;P36873;Q9Y5J6;Q92843;Q9P2R6;Q9NQ9P4;P82914;Q2VPK5;Q96IL0;Q96E11;Q8WWC4;O43715;Q7Z7F7;Q13114;Q7LG56;Q9UMS0;Q9HB07;Q16719;Q96E29;Q9NZE8;Q9NWT8;Q8TAE8;A2AJT9;Q12906;Q9HAP2;Q9HD36;O60783;P42575;Q6RSH7;Q9NP92;Q9Y6G3;Q9UQN3;O75251;Q96Q83;P50613;Q9UHV9;O75306;Q6P161;Q00005;P9BQ95;Q96BK5;P57772;Q9Y6H1;Q9NR77;O00198;P99999;P10599;O15527;Q9BYD3;Q9P0J0;Q9NZJ4;Q8N0V3;P21912;Q14739;Q9P2R7;P39748;Q8N1Q8;Q96BP2;Q53G26;Q9BUK0;Q7Z4T9;Q9NX63;Q7Z2X4;Q9UQF2;Q9H4A6;Q9BYD2;Q6P444;Q86WG3;P78316;P12036;Q9Y3D5;P62072;E9PQ53;Q9BQ69;P19838;Q9NRI5;Q9Y697;Q9NNW7;A8K5M9;O95865;P78549;P54098;Q9Y5J7;P54136;Q9H0U6;Q9UPV9;Q9Y6D9;Q7L592;P21399;P28838;O43615;Q9H6G3;Q12983;P04818;Q9BPW8;Q32P41;Q9UI32;P13647;P82675;Q9H9J2;Q9UI43;Q13901;P45984;Q8N490;O95831;Q8TC76;Q99623;O94925;Q6DKK2;A1L188;O43325;Q6PI48;Q9UHN1;Q9NRX2;O14925;Q9P0U1;P40926;Q8N7H5;Q86TS9;Q9ULZ2;Q9HA77;Q8TCC3;P00338;Q7Z6M4;Q7Z4H3;P43897;Q9BW92;Q03393;O00165;P41250;P82664;P14324;Q9Y375;Q49AM1;Q9BQ52;Q9BZF9;Q96NA2;P35232;Q8WYQ3;Q9UBX3;Q99689;P55771;Q9H974;Q8WWR8;P59942;O43402;Q14154;Q9Y3B9;Q9HCM9;P49406;Q04373;P13051;Q9P015;Q9BXF6;P27469;Q9BRX0;A6NFY7;O15287;Q9NVV4;Q9H7H0;P61586;Q96CM3;Q96PG8;Q96DV4;P82909;Q5T1J5;Q9HC16;Q96A26;P09001;Q86VP3;Q8N983;Q9UBY9;Q96EY1;Q16836;Q6ZN17;O94763;Q8TC71;Q9Y255;Q14442;Q96QE5;O95153;P78537;Q16526;O60936;Q9NQ50;O43708;O95571;O15446;Q9BT92;Q9H0N5;P48200;P82673;Q9BYC9;O14879;Q92665;Q9H0E9;Q9UMY1;Q9ULD2;Q96T21;Q9H1K1;Q9C002;P24539;Q9NX20;Q9NQR4}

4758 Pathogen[ P0C214 ] interacts with 622 human partners: {P41970;Q9HD33;Q9BSH5;O00198;Q8WWR8;P27469;P50440;Q16795;P41250;Q96BW9;Q96CW1;Q14410;Q96A35;P49406;Q9NRP2;P02794;Q9UHB7;Q9HBH1;Q9Y399;Q96BK5;O15287;P30084;Q8N5N7;Q96T66;P35754;O75608;Q9BUK0;P82930;P48728;P49419;O75306;Q13907;Q13405;Q9UGC7;Q14739;Q9Y3D5;P09417;Q05195;P41220;Q9H6T0;P08294;Q6ZN17;Q9HBK9;Q9BYD2;O00411;Q96QE5;P27695;Q8N573;Q9BUL9;O60239;Q96EL2;Q05932;Q9BYD1;Q9H9J2;O75874;Q9NSE4;Q96C86;O43678;Q5XKP0;Q06609;Q7L3T8;Q9Y2S7;Q9NVH6;Q969Z0;O95363;P22695;Q99643;Q8N5N5;Q14409;P04818;Q99832;Q9C002;P51610;Q9H4A6;Q9UGM6;O75896;Q8N6F7;O95153;P82912;Q9Y3D9;Q99747;Q15388;P49901;Q9H4I8;P00480;Q9BV47;Q96S55;P11177;Q96DV4;Q16775;P56556;Q8NF64;P28838;Q9NRR8;Q00005;Q13505;Q16740;P62263;Q9HAV7;Q86Y79;P19838;P82675;P57721;Q86XF0;Q9NR15;P30153;Q7Z4H3;Q9UPV9;Q9H0U6;Q96I59;Q9NYK5;O75390;Q16540;Q6P1X6;P54098;O14879;Q7L0Y3;Q9NP81;P57772;Q6P161;P02511;Q9NWS8;Q9Y676;Q6DKK2;P53396;Q92934;Q86TS9;A6NFY7;O60543;Q93015;Q9NP92;Q86U90;Q9Y255;O15235;P33316;P50613;P28331;Q9NNTK1;Q9BU61;O43920;P49590;P12694;Q9BYD3;Q96GC5;Q96MF6;Q9NX20;P15924;O00167;P07954;O60220;Q86W8;Q8N183;O95299;Q96BP2;P17568;Q5JTZ9;P53370;Q9H7H0;Q9Y305;Q9Y6H1;P30405;P61604;Q9UBY9;Q86TX2;Q9NHW7;P61586;Q4U2R6;O15446;A1L188;Q7Z4T9;Q9Y375;Q9NWU5;Q12906;Q9BRX8;Q9Y512;Q8IXM3;P29728;P34897;Q96DP5;Q9P2R6;P55957;Q99623;P17029;P42704;P12277;O43715;Q96NA2;Q99417;Q7Z2W9;P48735;Q63HK5;Q7L2E3;Q8TCD5;O43402;Q9H3L0;O75394;O75208;Q6NZI2;P78537;Q9UI32;P17482;Q9Y2Z2;Q5T653;Q49AM1;Q9HA92;P36543;Q99497;O60296;Q96IL0;P48200;Q8NFU3;O60437;P40939;Q9NX18;Q9UQN3;Q13875;Q9Y2Q9;Q5JPH6;Q7Z2X4;O43776;Q13901;Q99807;Q8WV60;Q4926;P09001;P32189;P22557;Q7KZF4;Q15031;Q9BXR0;Q86UY8;Q96TC7;Q9NWT8;P13196;P36542;Q8IWL3;Q7L592;P82664;Q7Z6M4;P78316;P49591;P82914;Q86VP3;Q8WGX1;Q16718;P55789;Q9Y3E5;Q96JZ2;O43248;Q8N983;Q06830;P62072;O95571;P53701;P18615;Q9NZC7;Q13794;Q9BT92;O14561;Q99798;Q9P2R7;Q9UBX3;Q92665;O76031;P10746;Q9UJ68;P23786;Q00059;Q9H0N5;P50747;Q14197;Q9H3H1;Q9BXH1;Q9H1K1;O95298;Q9GZT8;Q9N2J4;Q9NPG2;Q9Y237;Q9HC16;O14925;Q9UHV9;Q9P0J6;Q03393;Q9UI17;Q96DX5;Q9UMS0;Q8TCC3;Q13011;Q9UII2;P50213;A4D1E9;Q16881;P22033;Q9BQ70;Q13084;P56192;P14618;Q9Y697;P99999;P12074;P51398;Q8TDB4;Q8WWC4;Q8N1Q8;O43542;Q96KC9;Q2VPK5;P43897;Q9NQR4;Q9BQ48;P82663;O43837;O00165;O95865;P21953;Q9HB07;P34896;P56277;Q9NTG7;Q99933;P82921;Q9P0J0;O14832;Q9BRG1;O75570;Q9BQ52;Q9NSK7;Q9BYN8;Q6P587;Q6P1L8;O43615;Q86XE5;P24539;Q9UIF7;Q56VL3;O00154;Q5JTJ3;Q9BWD1;Q9NX63;Q08209;Q9HD36;Q5SW24;Q9UMX3;Q86WU2;Q8N490;Q8TAE8;Q9BUK6;Q9Y5J9;Q8WU03;P82909;Q8TCS8;O43502;Q96E29;Q9NZE8;O43823;O15382;P40337;Q9NXG0;P53804;Q99689;P38646;P58557;Q9ULD2;P42574;Q9UI43;Q8N7H5;Q9Y6G3;P36639;P19367;Q96AB3;Q49AN0;Q9ULD0;P67775;P10809;Q9Y5J6;Q96T21;O60930;Q9NRF8;Q9UMY1;P14324;Q9UQ50;Q9H3J6;Q9HCN2;Q9Y291;Q9Y2R9;Q96DB5;Q53G26;Q15004;Q96CM4;Q8TC76;P13073;Q5T440;Q8TAA5;Q9BXF6;Q9Y3F4;Q9HA77;Q9NR77;Q9HCM9;Q9Y3B9;Q6NVY1;O95202;P38117;Q8N5M1;Q9H4B0;Q9ULZ2;Q96GW9;Q9UG56;Q9BYC9;Q9NXW9;Q5SZD4;Q5TC12;P09972;Q7Z7A3;Q9UQF2;P17040;O95639;Q9H0E9;Q6GPH4;Q9P0J1;Q96C00;O94903;P62244;Q9NR

X2;Q9BRT2;P09622;Q9BZ23;Q12983;Q92558;Q7Z7F7;O96000;Q92843;Q6IE81;Q9Y2R5;Q32P41;Q6IPR1;Q96E11;Q6P444;Q9NV92;E9PQ53;Q9NQE9;Q9BQ69;Q99766;P12036;O95182;Q9NZI6;Q53H82;Q9P0M9;Q9UL12;Q13114;P10909;Q8N3J5;O75489;Q16822;O94925;Q16526;Q5T1J5;O60238;P39748;Q9BQC6;Q3ZCQ8;P52815;Q9Y5J7;O14521;P36873;P82932;Q14154;P21980;Q96I99;Q15006;O14734;Q15054;P10599;Q9Y2Y0;Q9BQ95;P13647;P42765;O75251;Q16143;Q9UI09;P45984;Q5T160;P78549;Q86WV6;Q969I3;Q9BW92;A6NK58;O43325;Q6PI48;O14862;Q9BZF9;O60260;Q8WVM0;Q9H2W6;Q9BYC8;Q8N4Q1;Q9H2K0;Q8N0V3;Q9NVN8;Q6GYQ0;Q9H0B3;P52758;Q9NPJ3;Q96B49;Q5U5X0;Q5T1C6;Q16698;P35998;P60900;Q9HD34;Q9P015;P22392;Q9P0U1;Q8TC71;Q5CZC0;Q86WG3;Q6IN84;O43708;O15527;P16220;P36551;O94763;P35232;P26640;Q9BZE1;Q9Y3B7;Q9H974;Q15046;Q5HYI7;Q6L8Q7;Q9NQP4;Q7LG56;P22830;Q9Y606;Q8N159;Q9Y3D2;Q9NR28;P82673;P59942;Q16762;Q9BRQ6;Q14061;P48163;P21912;P09132;P21399;P08107;Q04837;Q5EBM0;P10515;Q9H902;Q9NVV4;Q5ST30;Q96Q83;O43236;Q9H032;Q8N3R3;Q8WYQ3;Q96PE7;Q96CB9;P26678;Q9GZY8;Q9H3K2;Q96CM3;Q5HYK3;Q9Y6E7;P31939;P82933;O15304;P59047;O75323;P56181;P82650;O95178;Q9BSH4;P11586;Q99551;Q9P2J9;P13804;Q16798;Q96EY1;P42575;Q9Y6D9;Q63ZY3;Q9H583;Q9Y3B8;Q9BYD6;Q96EH3;O60936;P13051;P07195;P36957;P51553;Q16719;Q9Y2Z4;Q9BRJ2;Q9HAP2;Q92552;Q9Y3D3;P30566;A2AJT9;P36404;Q8WW59;P63167;Q9H5Q4;Q9H0P0;O60783;Q9BPW8;P62906;Q6RSH7;Q330K2;Q9NX40;Q9NS39;Q9UHN1;Q6IB77;Q14790;Q96NN9;P55771;P21695;Q9NZL9;Q9NVS2;A8K5M9}

4759

Pathogen[ P03346] interacts with 547 human

partners: {O43402;O75390;P08107;O60437;Q56VL3;Q06945;Q9Y606;P15924;Q96A35;Q9Y6D9;Q9NRI5;O14925;P21980;Q96AB3;P59047;Q9NVS2;Q9H8H1;Q9Y399;Q6P444;O95639;Q9GZT8;P82930;Q9H2U2;P09972;Q96PE7;Q8WYQ3;Q9UGC7;Q9BU61;Q6RSH7;O75608;P45984;O60239;Q96EL2;Q9BYD1;Q8N573;Q14739;P31040;P56181;O75394;Q00005;P49406;Q9P0J6;Q96CM4;Q8N983;P82912;Q06609;Q96C00;P83111;Q5CZC0;Q9NQZ5;Q9P032;Q9NS69;Q8N4Q1;P16220;P82933;Q96EL3;Q6P161;Q96BP2;P59103;Q9BYG8;Q96C86;Q8NFV4;P54098;Q16836;Q8TAE8;P57772;Q6P1Q0;O75489;O00167;Q93015;A2AJT9;Q9NQE9;O43502;P52758;Q9H3J6;Q32P41;O60930;Q9Y3D7;Q8TC71;Q9UBX3;Q9NTK1;Q9H3K2;Q9NR28;Q9UHV9;Q8N6F7;Q9H0U6;Q9UJ72;Q96IL0;Q8TCC3;Q8WWC4;P27469;Q00059;O60238;Q8IXM3;Q9NZL9;O94763;P26678;Q15911;Q9BUK6;Q9ULZ2;P42575;Q9H4A6;Q99689;O43678;Q9NZI6;Q8WXH0;O95178;Q15004;Q9NS39;Q5BKY1;P61604;P62258;O43615;Q6P1X6;Q9NQP4;O15304;P17152;Q9NS18;P55957;P51610;Q49AN0;Q9NXG0;Q9P0U1;Q7Z4T9;Q9H1K1;Q8N5C5;Q8N5M1;Q96A26;Q9BYC8;Q96NA2;P19367;Q9NX40;Q9Y5J7;P58557;P36543;Q9UMS0;Q9BQ48;P10746;Q8WU03;Q12981;P36639;Q7L2E3;Q8IVG9;Q86WU2;Q9BRQ6;P23786;Q9NX18;Q9ULD0;Q12906;Q07021;Q8WW59;P02794;Q9UHN1;Q9H583;Q9Y2Z2;Q63HK5;Q5T653;Q9NVA1;Q9BQP7;Q9NPG2;O60296;Q96C03;Q96T21;P42574;Q96TC7;Q9H2W6;Q16526;Q8IZY5;Q86TX2;Q9UIF7;Q92552;P67775;O43776;Q9BYD2;Q9H4B0;Q7Z2X4;O95153;Q9Y697;A6NFY7;Q9NZJ4;P22557;Q9NXW9;P13196;Q96FC7;Q9H0B3;Q9HD34;P82909;Q96EH3;Q13114;Q9NV92;Q5TYM5;Q12983;Q75208;Q9BYC9;Q6NZI2;Q9BT92;Q03393;Q9BUQ8;Q8NF64;Q9Y3E5;Q9BUL9;Q92843;Q05896;Q9NWT8;Q5T440;Q8TDB4;P09132;P09001;Q9Y6E7;Q9Y255;Q9BV47;P21912;Q9H0E9;O76031;Q9Y371;P30153;Q8N1F1;Q8N490;Q5TC12;P53370;P20132;Q9H902;P41250;Q86Y79;Q9HAV7;Q99417;P51398;Q9UI32;Q96DX5;Q9UHB7;P38646;Q9Y3D9;P82650;O75570;Q9UII2;P99999;Q9BQ70;P12036;Q9NQ4;Q9H4I8;Q9Y5J6;Q6IPR1;P49419;P43897;Q9Y2R5;Q9Y237;P02511;Q7LG56;Q42326;Q96DP5;Q96S55;Q9P0K7;Q9UBY9;Q86UT6;Q9Y2S7;Q9NRX2;P0C7Q2;Q7Z4H3;Q7Z7F7;Q9Y6H1;P24539;O15235;P78537;Q13084;O43920;O15287;Q9BWD1;Q9Y3F4;Q9Y2W6;P13073;Q9P2R6;Q9UPV9;Q9NRP2;Q7KZF4;P82914;O60783;Q86UV5;Q5U4N7;Q9NZC7;O14879;P48728;P42704;Q8N0V3;O60220;Q9Y512;P36873;Q8TCS8;P13051;Q16891;Q96CW1;Q96E11;Q96E29;Q9NZE8;Q92558;Q8TD19;P78316;Q9Y2R9;Q9NVV4;Q9HAP2;Q13875;Q8TC76;Q9HCM9;Q7Z7A3;P60900;Q6P1L8;Q96BK5;Q9Y305;O43542;P36404;P14324;Q9NQ50;Q9H5Q4;P14926;P17029;Q9BYD3;P54136;Q9HD33;Q9NWU5;O00198;Q7L592;P48200;Q96B49;Q9NR77;Q96DV4;Q16143;Q95865;O00411;Q9Y676;Q9BRG1;Q9H6T0;Q99551;Q9Y375;Q53G26;P82921;P38117;Q16719;Q8NFU3;Q9H2C2;P62072;Q9GZT3;Q9ULD2;P22392;Q07820;O95831;Q15006;Q96EK5;Q05195;Q99497;Q6GYQ0;Q9Y6G3;P00338;O43708;Q6IE81;Q9UQN3;Q96Q83;P40337;Q9Y3D5;E9PQ53;Q9BPW8;Q9BQ69;P78549;Q7Z6M4;O75323;O15446;O00165;Q9BYD6;Q969Q5;Q9Y3D3;Q9H7H0;O60260;Q06830;Q96JZ2;Q4U2R6;Q8WVM0;O60936;Q63ZY3;O94925;Q9BQC6;Q9NP92;P63104;Q5T1J5;P14317;Q14790;Q9BXR0;Q9UMY1;Q3ZCQ8;A6NDV4;P07195;O75251;Q96DB5;Q96PG8;O14734;P35754;Q99623;Q6IN84;Q9BRT2;Q6GPH4;P41970;Q86TS9;P42765;P13647;Q9BRJ2;Q9BZE1;P82675;Q9H974;Q15388;Q9Y4U1;Q9UQF2;P32189;P50542;O43427;Q8WWR8;A8K5M9;Q9Y5Z4;P10599;Q13405;Q96C01;P35232;Q5SZD4;Q9C002;Q96QE5;O43325;Q6PI48;Q96GJ1;Q9BXF6;Q5HYK3;Q9BZF9;Q9UG56;P19838;Q8N5N7;O96000;P63167;Q5HYI7;Q9H2K0;Q14442;Q6ZSR3;Q9NWS8;Q7L0Y3;P17040;Q7Z3D6;O75306;P27695;Q9NX63;Q5XKP0;Q9Y2Y0;Q9UMX3;P82663;P52815;P41220;Q86WW8;P62263;P39748;O76095;Q96BW9;Q9P0J0;P82664;P53804;Q16775;P07954;Q08209;P21399;P82932;Q86X76;Q2VPK5;P59942;Q9BUK0;P10515;Q5JTT3;Q86U90;Q04837;Q9Y3B9;Q9H0N5;O95202;Q330K2;Q9UL16;O15527;Q9UI43;O96011;Q49AM1;O43715;Q7Z2W9;Q96I23;Q8N1Q8;P49901;O60543;Q9BXH1;Q9NVN8;Q9UBZ4;Q9BQ52;Q9GZY8;O14862;Q9NTG7;Q9Y291;Q96CM3;Q8TAA5;Q9HD36;P08238;Q9BYN8;Q9BSH4;O43823;Q9HB07;Q86VP3;P56277;Q14154;Q8IWL3;Q96EY1;Q9NRD5;Q00610;Q9HBK9;O43248;Q5U5X0;P18615;Q9BQ95;A1L188;Q86WG3;Q8N7H5;Q6DKK2;Q13901;O95571;Q15054;Q9P015;Q7Z7H8;Q99933;Q13794;Q99747;Q9Y3B7;Q6ZLN17;P82673;P17482;Q96CB9;Q96CC5;P62906;Q9H9J2;P30084;Q92665;Q9P0M9;P62244;Q9BSH5;Q9NPJ3;P61586;Q9NNW7;Q9NX20;P33316;Q9H3L0;P55771;P57721;Q9Y2Q9}

4760

Pathogen[ Q85601] interacts with 463 human

partners: {Q9UBZ4;Q9P2R6;O14925;Q9BRT2;P30405;P60900;Q9NZC7;Q99497;Q9H8H1;Q9BUL9;Q32P41;Q9BQ52;Q86WV6;A8K5M9;P52815;O15527;O43715;P62244;P09001;P63104;Q9UMY1;Q9BQC6;O60239;Q96EL2;Q5SZD4;Q9BXR0;Q9BYD1;P54136;Q9ULZ2;P17040;Q9NRP2;P08107;Q9P0J0;O43502;O94925;Q9BSH4;Q9BXH1;Q00610;P82930;Q7Z4H3;P99999;P24539;Q6ZLN17;P82912;Q9UQN3;O95831;O43708;Q96A35;Q9UG56;Q8TAA5;Q15388;Q9Y2S7;Q9NQP4;Q9C002;Q8N0V3;Q7Z6M4;Q15004;P82933;Q9H0N5;Q96BP2;Q9Y2R5;O00165;Q9Y3D5;P49406;O60437;Q92558;Q9HD36;Q9NP92;Q96CW1;Q9Y3B7;P13051;O14879;P57772;Q7Z4T9;P21399;O95153;Q4U2R6;Q93015;P00480;P41220;Q6GPH4;Q9Y606;Q9UBX3;O75306;P12036;P52758;Q9H0U6;Q9NX20;Q8TCC3;Q96E11;P82921;Q00005;O43248;Q53G26;P62072;Q16719;P10746;Q92665;Q9H2W6;Q9BQ95;Q9HC16;Q15006;Q14790;Q99417;P40337;O43370;Q9BRG1;Q9BZF9;Q9Y5J9;Q330K2;Q9Y5J6;Q96T21;P61604;Q86TX2;Q8WV60;O15304;Q05195;Q49AN0;Q9Y697;P21912;Q8TDB4;Q5XKP0;P41970;Q9UHV9;Q9H0E9;Q9Y2Y0;Q969Z0;O60220;Q9BYC8;P48200;Q9BYC9;Q9Y5J7;P82932;Q

9UMS0;Q9BQ48;Q8WU03;Q9P0M9;Q12981;P36639;Q7L2E3;O60936;Q9BRQ6;P30153;Q9Y2Z2;P33316;Q5T653;Q5U5X0;Q96QE5;Q00059;Q9NR28;Q9H974;Q49AM1;Q9BYN8;P82675;Q15046;Q92552;O43678;O43776;Q9Y3D9;Q7Z2X4;A2AJT9;Q9UMX3;Q96DX5;Q2VPK5;Q9UPV9;P56181;Q9BYD2;P27469;P18615;Q9BW92;P13196;P21953;Q7KZF4;Q9BT92;Q9NSK7;Q9HD34;Q13114;P32189;Q15054;Q9Y3E5;Q96BW9;Q9NWT8;Q9H7H0;Q9P2R7;O43542;P51610;P62263;Q9P015;O00198;Q9BYD6;Q9Y6E7;Q9HA77;Q9UQF2;Q9BV47;Q9Y6H1;Q99623;P53370;Q08209;P07954;P55771;Q96C86;Q9NXW9;Q5TC12;Q9Y2R9;O14734;P15924;P41250;Q13405;O96000;P56277;P51398;Q9H0B3;A6NFX7;Q9Y3D3;Q5T160;O75570;P10599;O60296;Q9UII2;Q96GC5;Q9Y291;Q9Y512;Q9BQ70;Q9NQR4;Q9Y6G3;Q9Y305;Q9NRX2;Q14154;Q8N983;P82909;Q9H3J6;O15235;Q8N6F7;Q9BUK0;Q7LG56;Q8N1Q8;Q99551;Q13901;Q9Y375;Q9UBY9;P54098;Q7Z7F7;Q96CM4;P78537;Q9BXF6;P34896;Q9UI43;P14618;Q13084;O43920;Q9H2U2;Q99933;O60543;Q12906;Q96BK5;P62258;P42575;Q86Y79;P16220;O75394;P36873;P02511;Q8TCS8;Q96E29;Q9NZE8;P09972;P21980;Q6DKK2;Q9NVS2;Q96AB3;P08238;Q8TC76;Q92843;P42704;Q7Z7A3;Q63ZY3;Q9Y6D9;Q9NX18;P14324;P55957;Q9Y2Q9;Q86UY8;O14862;P17029;Q9BYD3;Q9NWU5;P31040;Q3ZCQ8;Q9HAV7;Q9UGC7;Q9Y3F4;P22033;Q9NR77;Q8N5N7;Q96IL0;Q9Y676;Q9H902;Q9HAP2;Q9NYK5;Q9BSH5;Q9NTK1;Q9NXG0;Q9BRJ2;Q14061;Q96I59;P22392;P82650;Q99689;P61586;P50613;O43615;Q6IE81;Q6IB77;Q9H4A6;P43897;P6775;O43402;E9PQ53;Q9BQ69;Q9NZI6;O75323;O15446;Q9HD33;O95363;O60260;Q06830;Q9NPG2;Q96JZ2;Q99766;O76095;Q6RSH7;Q5T1J5;P14317;O95639;Q86WG3;P45984;P07195;Q8IXM3;Q96Q83;Q12983;Q96S55;P35754;Q9BUK6;Q9UIF7;Q86TS9;Q9NRI5;Q6NZI2;O15287;A4D1E9;P13647;Q9BZE1;P38646;Q8BWC4;Q9NQ50;Q16836;Q9NX63;P35232;O60783;O43325;Q6PI48;O76031;O94763;Q9UHB7;Q5HYI7;O43823;Q9BU61;Q96TC7;Q9NZJ4;Q9NWS8;Q9H5Q4;Q7L0Y3;Q96C00;Q9BWD1;Q96DV4;Q9H0P0;Q13505;Q6IPR1;Q99303;O60930;Q8WVM0;P82663;Q9NVV4;Q8IWL3;P39748;Q9NX40;Q9H1K1;P82664;P53804;Q9UI32;Q96NA2;Q16775;P78549;P57721;Q13875;Q16526;P59942;Q9H9J2;P10515;O00167;Q63HK5;Q04837;Q9Y3B9;O00411;Q9ULD0;P58557;O95571;P82914;O60238;Q9P032;P02794;Q9GZY8;P19838;Q07021;Q9NVN8;Q06609;Q9Y399;Q9NTG7;Q5CZC0;Q96CM3;Q9UHN1;Q5T1C6;Q9H583;P00338;Q9Y237;P27695;Q13907;Q9P0J6;Q9HB07;Q86VP3;P30084;Q8TAE8;P09132;P63167;O15382;Q96EY1;Q8N5M1;Q969I3;Q8NFB4;P40926;Q9ULD2;Q6P161;Q96DB5;Q8N7H5;P49419;Q14739;Q6L8Q7;Q13794;Q99747;Q9NQE9;O43236;P17482;Q96CB9;Q9HCM9;P62906;Q8N490;P78316;O95865;Q8N3J5;Q16143;P19367;Q5SW24;P36543;P59047;Q6P1L8}

4761

Pathogen { P14079 } interacts with 785 human

partners: { P31751;P36543;P28838;Q8N6M3;Q6P4F2;Q9BQC6;Q5TGZ0;P56181;Q8IXM3;P22695;Q4VC31;Q96C00;Q7Z4L0;P52815;Q9H3L0;Q5RI15;Q9UDX5;Q86XF0;Q04837;Q9BYD6;Q96CW1;Q3ZCQ8;Q99623;P52758;P36542;O43674;O43615;O75324;Q92552;Q8N5M1;Q8N573;Q7Z7F7;O60260;Q9H061;Q8N159;O60397;P30042;Q9BQ95;P53804;O43677;Q8N4H5;O14773;Q6P587;Q9H0P0;Q96NA2;Q9NQ50;Q9Y3E5;P49753;P15502;Q9Y3B8;Q5HYI7;O43181;Q9NPG2;Q9P0P8;Q4U2R6;Q9BRQ6;O95169;P09132;Q96C01;P27469;Q99807;P21953;Q9BUK0;P13196;Q96GW9;Q9UIF7;Q7Z7K0;P55039;P56134;P55039;P56556;P07954;P17152;Q9Y3D7;Q9Y375;Q9Y4U1;Q86WG3;Q9BRT2;Q00610;Q5TYM5;P13073;Q9NYY8;Q9UI43;O75879;Q5T1J5;Q5EBM0;Q7L3T8;Q96AB3;Q9BW92;O43716;Q8N490;Q14442;Q9H0R6;Q9NWT8;Q9HC36;Q96FC7;P29728;Q96E11;Q16526;Q7L592;P53779;Q9H4K7;Q96JN2;O95139;Q9NZJ4;P25705;Q12887;P57721;Q9Y255;P54136;Q9Y305;P14621;Q9H2K0;Q96ER9;P12074;P00338;Q2VYF4;Q9H0U6;Q96SZ5;P62072;Q6MZQ0;P20132;Q6P161;Q330K2;Q15911;Q9NTK1;Q8TCD5;O75896;P09912;Q8N3Z3;Q15031;P23434;Q13505;Q5SW24;Q8TCC3;A6NDV4;Q86YH6;Q5T160;Q9HB07;Q9Y237;O15304;P82664;P31939;Q9NSK7;P36873;Q96CM3;P10109;P59103;O15446;Q15006;Q6UWS5;P56378;Q9NXW9;O60543;Q92558;P13498;Q49AM1;Q86Y79;Q9Y5Z4;Q13907;A8MXV4;P82933;Q14410;Q13323;Q6YFQ2;P02511;Q9BQ48;P15924;Q9NRR8;O76095;Q9UBZ4;Q9UQF2;Q9P0U1;P57772;Q9NZ45;P21399;P48728;Q49AN0;O43823;Q7L2E3;O00165;Q9Y2R9;Q8N3R3;Q96HJ9;Q9BYD2;Q8WYQ3;Q5ST30;Q9BYC9;Q8IWL3;Q8IVG9;P55771;P12036;Q13901;O96000;O95167;Q8WV74;Q6P444;Q9UII2;Q12906;Q9BRJ2;Q9NXG0;Q9NP81;Q96BW9;Q9H1K1;Q4G0N4;Q9H3J6;O75306;Q9BUK6;P00395;Q9Y2Y0;Q9Y2Z2;O95363;P00403;Q6P1X6;P49591;Q96I36;P21980;Q9BXX5;Q99497;P17568;P56385;P10606;Q9Y6G3;Q5BKU9;Q96B49;Q9NRX2;Q9Y291;A8K5M9;A4D1E9;Q6ZSR3;O75570;P09972;Q16891;Q9UDW1;Q5VTU8;Q15070;P22557;P32189;Q9HC16;P42704;Q8IZ13;Q9BUB7;Q6P1Q0;Q86U28;Q16540;O95153;Q16143;Q9HAP2;P14927;Q96PG8;Q8NHF3;O75208;Q8N6F7;Q8N6E;Q96EH3;Q9BUE6;Q9BSH4;P35232;Q9NVH6;P30084;O43708;Q9BRX8;Q7Z2W9;Q9C002;Q14739;Q9UHV9;Q5SZD4;Q9UPW5;P13804;Q86Y39;Q96C86;P46199;P10909;P56278;Q02221;Q9NS39;O95639;Q9Y3F4;O60437;Q9Y5J7;Q9Y4F9;P10746;P34897;Q53R41;Q9NQP4;Q99747;P41220;Q5TC12;Q8N0V3;P18615;O95182;O43715;Q32P41;Q32NB8;Q15526;P9P2R7;Q969I3;Q96E29;O15527;Q9Y371;P35998;P07919;P78549;Q9NZL9;Q8BWC4;Q14409;O75352;P14324;O75608;P33316;Q6IE81;Q9Y6H1;O95822;O14925;Q9NS69;Q16740;Q9NQZ5;Q14249;Q9Y2R5;P59942;P51610;Q9UL16;Q7L8L6;Q96JX3;Q9BXH1;Q6L8Q7;Q8N1F1;O94903;Q9HCM9;Q7Z4Y8;Q7LG56;P61604;O60783;Q9HA77;Q7Z434;Q14CZ7;Q9NJP3;O14949;Q9BVV7;P07195;Q9UHB7;P14854;Q15388;P45984;Q9Y3D3;P63104;Q9Y3B1;Q9NRF8;Q9P0M9;Q9BPW8;O43776;Q5JPH6;O94763;O75431;Q9H0E9;Q14061;Q8WY22;Q8N0X4;P43897;Q96RP9;O75648;Q8WTZ4;O75323;O43427;P45983;P20674;P50613;Q8IZY5;Q9H2U2;Q9H0N5;P40337;O95831;Q9UG56;Q13084;O95571;Q15054;Q8WV60;Q9NWS8;Q9BZE1;Q00059;Q9ULZ2;Q96BP2;Q96T21;P50542;O75880;O60239;P54803;Q8NCF0;P38117;P62244;O96011;P82921;Q13875;P35754;Q9UMS0;Q86WU2;Q9NNW7;Q14790;Q99689;Q9BZ23;Q9NX40;O94925;P03928;Q9H6T0;Q15046;P60900;P82650;Q00005;Q9BXF6;P09001;P22392;Q9Y2S7;Q96A35;Q9NVC7;Q86U90;P62263;Q16719;P36639;P36639;A6NFX7;Q9NX09;P31040;Q9BXR0;P56277;Q96IL0;Q8IVS8;Q9H2W6;Q86VP3;Q92934;O14548;Q86TS9;Q96EK5;Q9H583;Q13766;Q9NX00;Q86WV6;Q96GC5;Q9BSH5;A1L188;Q9NZI6;O43678;Q96S55;Q6IB77;Q9H8M1;O14832;P08238;Q9BYD3;Q9HD36;Q99933;P08107;P82912;Q5T1C6;Q2VPK5;P58557;P51970;O14734;Q96JZ2;O95178;O75251;O14561;Q9P2R6;P17029;Q9HBH1;P41250;Q9HC38;Q9UJZ1;Q9UI09;Q9UL12;Q86TX2;Q12981;Q96I59;Q9BV47;Q9Y697;P53370;P23665;P78316;Q9NVV4;Q9Y2Q9;P48200;P00156;Q8N5N7;Q9NR28;O95299;P26640;Q8WXH0;E9PQ53;Q9BYD1;P61586;Q8N945;Q6GPH4;O43325;Q93015;P09669;Q9BUL9;P56192;Q99417;Q13794;P22033;Q9P0J0;Q8IVP5;Q5JTJ3;Q9Y512;Q96PE7;Q9Y5U8;Q9HA92;Q9BYC8;P55789;Q86UY8;Q96MF6;O60936;P27695;Q12983;Q9NX18;Q9P0S9;Q9BQ52;O15235;Q9UMX3;P62906;Q9UI32;Q99766;P22830;Q9NWX6;Q96A26;P0DJ07;Q96DX5;Q9NPL8;Q969Z0;Q969S9;Q14154;P62258;Q9UGC7;Q9WWR8;Q9Y3A0;P02794;Q9HBK9;P10620;O43502;Q6DKK2;O43402;Q8N4Q1;Q9Y2Z4;Q6IN84;Q5SXM8;Q8TDB4;Q96KJ9;Q8TAE8;Q9Y3D2;O14862;Q9NP92;Q9Y606;Q9BYN8;Q13405;Q96DB5;P00480;O75964;O00411;Q9UI17;Q99595;Q9ULD2;O60296;Q9HAC7;Q16762;Q16775;Q96EL3;Q05195;O75489;Q9NX20;Q8N442;Q9H9J2;Q5

VUM1;Q9NRP2;A2AJT9;Q6NZI2;Q9P015;Q63ZY3;Q86UT6;Q9Y5R4;Q9H3K2;Q5CZC0;Q9H4B0;P10515;Q8N6F7;O75394;Q9BZF9;Q7Z7H8;Q7Z6M4;P0C7Q2;P60602;Q9Y5Z9;P38646;Q7Z4T9;Q96CB9;Q9BQP7;P03923;P10599;Q6RSH7;O60220;P63167;P82909;Q9UGM6;Q9H7H0;Q96GJ1;P82675;Q8TC76;O95563;P24310;Q9BT92;Q63HK5;Q96AN5;O00198;Q16718;Q9NZE8;Q96BK5;Q9P032;Q9BT30;Q9HD33;Q9H0B3;P03897;Q9NSE4;Q8NCN5;Q5BKY1;P56381;P15954;P82673;Q9H3H2;Q9BQ70;Q5XKP0;Q6IPR1;Q9NVA1;O14521;O43920;Q7KZF4;O15239;Q9GZY8;Q9Y3B7;P21695;Q5HCN2;Q5SRD1;Q96Q11;Q9Y2R0;P26678;Q9P0J6;Q9H5Q4;Q9NV92;P30153;P43686;O15091;P42575;Q9Y234;P54098;Q03393;Q8WV10;Q9Y3B9;Q9Y676;P17040;P82930;Q96DV4;Q15004;O76031;O00167;Q9BXW7;Q14197;Q9H3H1;Q96N28;Q5U4N7;Q5U5X0;Q86X67;Q9H6S1;O15382;Q96KC9;Q9BRG1;Q9GZY4;P36551;Q7Z2X4;P51398;O60930;Q9UHN1;Q8TF08;Q6PI48;P50440;P99999;Q8N983;Q96FX8;Q9NVS2;Q5T440;Q9UMY1;O60238;O43819;Q86XE5;Q7Z7A3;P24539;Q96TC7;Q9NTG7;Q06609;Q07021;Q9NYK5;Q96Q83;Q9H4A6;Q9NR77;O75616;O14879;Q9H902;O00483;Q969P6;P53701;Q9Y5J9;A6NK58;P83111;Q9UBY9;Q8N7H5;P04818;Q5HYK3;Q9UJ68;Q5T653;Q96C03;P14406;Q56VL3;P03901;Q08209;Q9H974;P82663;Q9H300;P03886;P78537;Q7L0Y3;P59047;Q05932;Q96I23;Q9NQR4;Q9Y5L4;P41970;Q96EL2;Q96EY1;Q6ZNI17;O95202;Q96DP5;Q9NQE9;Q6P1L8;Q8TCS8;Q86WW8;Q8TC71;Q9H6K4;Q8N1Q8;O43542;Q9P0K7;P49411;Q15390;Q9NVT9;Q9NRP4;Q8N183;P13051;O43236;O95865;Q9BU61;Q99551;Q13114;P55957;Q9UQN3;P13647;P39748;P49901;Q96LZ7;P34896;Q9BYG8;Q9ULD0;O95298;A0PJW6;Q7Z5L4;Q8WXG1;P40305;Q8WVM0;Q16836;Q9Y3D5;Q9BWH2;Q9HAV7;Q92843;Q96CM4;Q9Y3D9;P82914;Q8TAA5;Q9HD34;P21912;Q7Z4H3;Q6ICL3;P49406}

4762 Pathogen[ P03383] interacts with 433 human partners: {Q96BW9;O75323;P08107;Q96CW1;O14879;Q56VL3;P15924;Q9NVV4;Q9Y2Y0;P51398;P13073;P02794;Q9UHN1;Q9HBH1;Q9Y5J7;Q9BUK0;Q9Y2S7;Q330K2;Q9H3J6;Q9UHV9;Q9H974;Q06609;Q5TC12;A6NFY7;Q96EL2;Q9BYD1;Q9H2U2;Q9BYG8;O14862;Q96I23;Q96TC7;Q9NTK1;O94925;Q9BSH4;Q00610;P40926;P82930;O95865;Q9Y305;P53804;O60543;P16220;P82912;O00167;Q9BYD2;O75251;Q96A35;Q9NVN8;Q9H4B0;P27469;P56277;Q9NX63;Q13084;O75896;P82664;Q9NWS8;P40337;P53370;P62072;Q8TD19;Q9BRJ2;P60900;P36639;Q9BQ48;P55771;Q9H1K1;Q6NZI2;Q96EH3;P17029;P38646;P57772;Q7Z4T9;Q8TDB4;Q9BU61;P19367;Q93015;Q7L592;P41220;P00338;O15304;P00338;O15527;Q9NR15;Q86WG3;Q9P2R6;Q7Z7A3;Q13875;Q9P0J6;P12036;P31040;O43236;Q9NX20;Q5JPH6;P34896;O96000;Q8N1Q8;Q00005;P17482;Q9H2W6;Q5T160;Q9NRP2;P49406;Q8NOV3;Q86U90;O43678;Q15031;Q99689;Q9BZF9;Q15004;O14925;P82933;O43920;Q9BRQ6;P61604;O43615;Q16836;Q6ZNI17;P55957;Q5CZC0;Q9HAV7;P02511;O75489;Q9BQC6;Q9P2R7;P22392;Q00059;Q9NP81;Q9GZT8;Q9UMY1;Q9UMX3;Q9NWT8;Q9BQ95;P09972;Q9NWU5;O95831;Q96BK5;P48200;Q5U5X0;Q96A26;Q9BYC9;P28838;O60936;O43402;Q9NX18;P09001;O00165;Q9H5Q4;Q8TCS8;P30153;Q9Y2Z2;Q9BYD3;Q5T653;Q9P0M9;Q9Y2R9;P10599;P67775;Q96T21;Q9UI43;Q9UQF2;Q9NRP2;P82914;Q13405;O14734;O60220;Q96DX5;Q96S55;Q9BZE1;Q7L0Y3;Q9NQ4;P09132;Q9Y2665;P78537;Q9NRX2;Q5TYM5;Q12983;Q32P41;Q6RSH7;O75306;Q92558;Q9Y3E5;Q9Y697;O95178;Q96G58;Q75394;Q96DB5;Q96B49;Q9BQ52;Q96920;P36873;Q9BYN8;Q9NVS2;Q9ULD0;Q9H0E9;P82675;P52758;Q16719;Q15006;Q92552;O75570;Q9BYD6;Q16822;Q9HD34;P51610;Q6P1L8;Q9Y3D9;O60296;Q9UII2;Q9Y606;O94763;Q5U4N7;O60783;Q9BQ70;Q96PG8;Q96AB3;Q9Y2Q9;O60238;Q9H583;Q99747;Q9NTG7;Q9Y2R5;P50613;O60260;Q99551;Q9H6T0;Q8NF64;P63104;P54098;P07195;Q8WWC4;Q9Y5J6;P61586;Q9Y3B7;Q8N159;Q9Y6H1;O15287;Q5JTTJ3;P17040;Q96I59;Q05195;P82909;P82663;Q6P1X6;Q15388;Q9BXF6;Q7KZF4;Q9ULZ2;O43715;Q9UPV9;P49901;Q86VP3;Q15046;Q8N6F7;Q96E29;Q9Y3B9;Q9HD33;Q9NZE8;A2AJT9;Q99417;Q5HYI7;Q6DKK2;Q9H2K0;P78316;Q9P015;P57721;Q9HCM9;Q96BP2;P62244;Q9Y2Z4;O95363;P14324;Q9BT92;Q9Y6E7;Q9NX40;Q9UGC7;P99999;Q9Y3F4;Q9Y3D5;P22033;Q9NR77;Q9UMS0;P26678;Q9HB07;Q9BRG1;Q96GW9;Q86TS9;Q9Y375;P82921;Q9HCN2;A8K5M9;Q9BXR0;Q8WVM0;Q15054;Q8IWL3;Q8IXM3;P35232;Q9H4A6;Q9BZ23;Q16775;Q9HA77;Q9P0U1;Q9BSH5;Q8TAA5;P43897;Q9NQR4;E9PQ53;Q9BQ69;Q12906;Q99933;Q9UHB7;P82932;P17152;Q8WYQ3;Q9NZI6;P62906;Q9H7H0;P52815;Q96C86;Q96EK5;Q7Z6M4;Q9H3L0;Q86Y79;P10515;Q5T1J5;Q96DP5;P58557;Q9H0N5;Q8WU03;Q8TC71;Q7Z7F7;O75208;P41970;O95153;P13647;Q9H9J2;Q63ZY3;Q96E11;P32189;P82650;Q07021;O43776;Q8WWR8;Q9NQ50;O60930;P45984;P42704;O43325;Q6PI48;O00198;O76031;Q8TCC3;Q9UBY9;P33316;Q6ZSR3;O43542;O00411;P21980;Q9HAP2;P27695;Q96Q83;Q96C03;A1L188;Q8TAE8;Q13794;P41250;P36543;Q8N5M1;O76095;Q6IE81;Q9BXH1;Q9Y676;P62263;Q9BUL9;Q9P0J0;Q4U2R6;P13051;Q2VPK5;P59942;P54136;Q8N490;Q04837;O15235;Q5EBM0;Q9Y291;O60437;O95571;Q9P032;P63167;Q9GZY8;P19838;Q9Y5J9;P49591;Q49AM1;Q9Y399;O15446;Q96CM3;Q9NR28;P62258;Q5T1C6;P56181;Q7L3T8;P08238;P24539;Q13114;Q96GC5;Q14154;Q8N5N7;Q8N983;Q96EY1;Q969I3;Q9Y3D3;P18615;Q8IVG9;Q9BPW8;P15502;Q8N7H5;P49419;Q13901;Q96QE5;Q9UQN3;Q96NA2;Q99623;Q9BYC8;Q53G26;Q8N1F1;A4D1E9;Q9H0U6;Q6P444;Q9Y6D9;Q5SZD4;Q9BW92;Q13505;Q16526}

4763 Pathogen[ P03410] interacts with 812 human partners: {Q32P41;Q8N4H5;Q00610;Q9Y305;P54803;Q9H4K7;Q99933;O75648;Q7L592;Q96LZ7;Q9Y2Q9;Q9Y2W6;O95168;Q8IVS8;P62258;O43674;Q5SRD1;Q96DP5;Q96T21;Q96TC7;Q9NVN8;Q9BUK0;Q9P2R7;P59942;Q9HD34;Q9NVT9;O95563;Q96EK5;Q96Q11;P78537;Q9Y5L4;Q6NZI2;Q9Y2S7;Q9HB07;Q9Y399;Q7Z7F7;Q9Y512;P19838;P30084;Q96CW1;Q5TC12;P51610;Q9HA77;Q16822;O94763;P56556;P82663;Q96KJ9;Q9HD33;Q9P0P8;P02794;Q02221;Q9NTG7;Q9UL16;P10599;Q96KC9;O75127;Q9BUB7;P49901;P15924;O95639;Q9Y2R0;Q99832;P82909;Q4GON4;Q96AB3;Q7L8L6;P17568;O43402;A1L188;Q9HBK9;Q8N1F1;Q9Y3B8;Q5SXM8;Q8TCS8;P62072;Q9NSE4;P78316;P56192;Q96B49;Q14739;Q6L8Q7;Q9P015;Q14061;Q8TF08;P13804;Q8N3J5;Q9HCM9;P17482;Q9P0M9;P12036;Q9Y3B1;P17040;Q99497;Q9H974;Q99766;P18615;P35754;Q53G26;Q53R41;P62244;Q93015;Q9H7H0;Q12983;Q15388;Q9Y3A0;Q9NYY8;Q8TC76;Q9ULD0;Q9HC36;Q9H902;Q9UPW5;Q9GZY8;Q8WYQ3;Q5BKU9;Q96DB5;Q8TCC3;Q16540;P38646;O95178;Q49AM1;Q86VP3;A6NFY7;P36542;P29728;Q9NVH6;Q9H6K4;Q9P2R6;Q08209;Q9NX20;O75879;Q6TCL3;O75380;Q9UI17;Q96ER9;Q8N159;O43678;P08238;Q9NRF8;Q56VL3;Q5T440;Q15390;Q5ST30;P36639;Q9Y2Z2;Q5CZC0;P25705;Q9NXW9;P56378;Q9HBH1;P82675;Q04837;O75251;Q8WV60;Q9NR28;Q9NR2;O14548;Q96PE7;Q9BXH1;P15954;P60900;O43427;Q13011;Q8WY22;O95299;P41220;Q9BW92;Q8N983;Q5U5X0;O15235;Q9Y5J7;Q9ULZ2;Q96IL0;O00198;Q567V2;P42575;P51970;P35998;O43920;Q9UI09;Q86U90;Q9Y255;O43542;Q13505;Q9NSK7;Q9BXW7;P54136;Q96A35;Q96DX5;Q8N6F7;P05141;O96000;Q9B2K0;Q9HBL7;O00165;Q6IB77;Q7Z4T9;Q96CB9;Q96RP9;Q86WW8;Q16719;Q14410;Q9NZC7;Q9BP444;Q9BWH2;P61604;O14862;Q6P1Q0;Q86Y79;P49406;Q92558;P46199;Q92665;O75324;Q00059;Q96Y26;Q8TAA5;P12694;Q9NRP3;Q5BKY1;Q86WG3;P07919;Q9BQ52;O96011;O43325;Q9H4B0;Q07021;Q9NX00;P57721;Q7L3T8;O43776;Q8IZ13;Q9H3L0;Q9NQ66;Q9GZY4;Q16143;P82650;Q9NPL8;P20674;P09912;P62906;O95

865;Q9P0J6;Q9HD36;Q92843;P52815;Q9Y5Z9;Q9NP92;P59047;Q92934;Q969S9;P63167;P20132;O95167;Q9NS69;Q9NWU5;Q6NVY1;Q9H6S1;P56385;Q9HC38;Q96S55;Q7Z7A3;Q6ZSR3;A6NDV4;Q96AN5;Q5SZD4;O60239;Q6IPR1;Q15004;P21953;Q13794;Q96Q83;Q96DV4;P39748;Q9Y3F4;Q969I3;Q6DKK2;Q6P4F2;Q9NU23;Q9H3H1;Q9Y697;Q9BQC6;Q53H82;O60260;Q9NYK5;O15239;Q9BYN8;Q8IVG9;Q6YFQ2;Q14442;Q9H2U2;P30042;Q8WWC4;Q86X76;O00411;Q9BYD6;Q5JTTJ3;Q9Y6M9;Q9H4A6;Q9NV92;P38117;Q9NVV4;P23786;P78549;O60397;Q9Y3D5;Q9H9J2;Q9UBX3;Q8NC60;P07195;P50613;Q96BW9;Q9BYD3;Q96EH3;P28838;P56278;P36551;O94925;Q9H1K1;A6NKS8;Q8WXG1;Q7Z434;Q6IPM2;Q8N490;Q9N3R3;Q8N6M3;P55957;Q9BRT2;P42765;P13073;Q96EY7;O60930;O60783;Q7Z7K0;P82664;Q96E11;Q8N442;Q9NRP4;Q96QE5;Q15006;Q9UJ72;Q8N7H5;O14925;P49591;O43708;Q96CM3;Q96FC7;Q99595;P56381;Q9UII2;P10746;Q6GPH4;P33316;Q9UHB7;Q9HC16;O60333;P00480;P22695;Q9BUK6;Q9Y676;Q8NE86;Q9BYD1;O43715;P17029;P22557;O75600;O95571;O76031;Q9UBZ4;Q86UT6;O14734;O00154;Q9NQR4;O60936;Q9NRD5;Q9UJ68;Q92552;Q9BT92;Q9H8M1;Q9Y234;P09972;Q9UQN3;Q9Y3D2;P03886;Q4U2R6;O00483;Q99623;Q9NZJ4;P15502;O95298;P21399;Q96FX8;P0DJ07;Q9BU61;O43236;Q5VTU8;Q96EL3;O75438;Q7Z2X4;Q9NRX2;Q9UDW1;Q3ZCQ8;O43502;P09132;Q9BYC8;E9PQ53;O75323;Q9UPV9;Q96CM4;Q8N5N7;Q5T1C6;P56181;P53370;O15287;P61586;Q96C00;P08107;Q96JN2;O75608;Q9BSH5;Q86UY8;P04818;Q9BUL9;P27469;P00156;Q96I59;Q96I23;Q6IN84;Q5SW24;O15527;Q9UMX3;Q16762;Q96JX3;P07954;O14561;Q9ULD2;Q96I36;Q86XF0;P14927;P60602;P00338;A0PJW6;Q16775;Q9UMS0;Q9BRJ2;Q9HA92;P02511;O15382;P22830;Q9UL12;P53701;P23434;P48728;Q8IWL3;Q9NWT8;P30566;Q96A26;Q5VUM1;Q9UGC7;O43615;Q9BYC2;Q96HJ9;P42704;P31040;Q13084;Q5HYI7;P26678;P03928;Q9BXF6;P41250;Q14197;Q6P1L8;Q8N0X4;Q9Y291;Q9HCN2;Q9Y3D7;P49419;Q9Y3B9;P58509;Q7L2E3;O75489;P24539;Q9Y371;Q2VPK5;Q15054;Q96N28;Q9Y6H1;Q9NTK1;Q86Y39;Q16526;Q8TC71;Q9Y2R9;P16220;O95831;A8MXV4;Q5EBM0;P36873;Q5TYM5;Q2VYF4;Q9H0R6;Q15046;Q9H5Q4;Q9Y6G3;Q9BRG1;P31939;Q9BQ48;Q9NQ50;Q8IXM3;Q6P1X6;Q86XE5;Q49AN0;A2AJT9;P21912;P55771;O14832;Q96GJ1;P82673;Q9Y375;Q5T653;P82912;Q8N945;Q9UJZ1;O60296;Q9Y5U8;O75964;Q9BZ23;P99999;Q9NX63;Q14409;Q8NFU3;Q8N1Q8;Q9H3J6;Q9NQZ5;P09669;Q5JPH6;Q16836;P63104;Q8TCD5;Q9Y5J6;Q9NQP4;Q13875;Q9BQ69;Q96EL2;Q9HAP2;Q7Z4H3;Q6RSH7;Q9NZE8;Q99643;Q9Y3E5;Q7Z3D6;Q9Y606;Q9BT30;Q86TX2;P57772;Q9UMY1;Q13901;Q9BYG8;P03897;O43677;P40926;Q9NRI5;O15091;Q9Y5J9;Q9BQ95;Q8WVM0;A4D1E9;P45984;P50542;Q96C01;P30153;Q9BZF9;Q8NKN5;Q9H6T0;O95169;Q9UI43;Q5XKP0;Q00005;Q330K2;Q9BPW8;Q9NPG2;Q9UGM6;Q9NQE9;Q9P0S9;Q9Y3D9;P53779;P27695;Q7Z2W9;Q9Y2Z4;Q9H0P0;O00167;Q9Y5Z4;Q86TS9;O43181;P26640;Q9BYC9;O14521;Q9BQP7;Q96BP2;Q96GW9;Q16718;Q14CZ7;Q9UHV9;P41970;Q9UBY7;Q9NZI6;P62263;P24310;Q7KZF4;Q86WV6;O75306;Q9P0U1;Q13907;A8K5M9;O60220;O60543;Q8WV74;P00403;O15446;Q9H2W6;P10109;Q96JZ2;Q9H0N5;Q86U28;P21980;Q9BRQ6;P52758;O43676;O14949;Q99417;P83111;Q9UI32;P56277;O75352;P13051;Q9HAV7;P49753;P48200;P14854;O76095;Q9H3K2;Q96BK5;P17152;Q6ZNI7;Q99807;Q15070;Q8WU03;Q9NVA1;Q63HK5;Q9NX18;Q8N5M1;P32189;Q9BQ70;P09001;P03901;Q9UQF2;Q96C03;Q9P0J0;P82933;Q9NP81;P03923;O95153;Q9NXG0;Q9P032;Q9NX40;Q8N183;Q16891;O14879;Q9H583;Q8TDB4;Q12981;Q96MF6;Q96NA2;P35232;Q96CX6;Q96PG8;P53804;Q6P161;P55789;P13647;Q16740;Q96E29;O95202;Q63ZY3;Q9Y2Y0;P82914;O75570;Q8N0V3;Q7Z7H8;P67775;Q14154;P82921;Q9NVS2;O43823;Q8IZY5;Q8IVP5;P82930;Q12887;Q4VC31;P40305;Q9H0E9;Q6UWS5;Q5U4N7;Q9Y237;Q05932;Q9BSH4;Q9UHN1;Q9BRX8;P50440;Q96IX5;Q9NR77;P0C7Q2;Q9NWS8;Q9Y2R5;Q03393;Q86YH6;P54098;Q9NWX6;Q8WV59;P14621;Q969Z0;Q9NZ45;Q9NX09;P13196;Q8WXH0;Q86X67;O75880;O95333;Q99551;Q9UBY9;P10515;Q6PI48;Q9UG56;P58557;Q9BV47;Q5T160;Q5T1J5;Q12906;Q5HYK3;Q96HS1;Q8NF64;Q9NRR8;O94903;O75896;Q8N4Q1;P18859;Q9C002;Q9Y5R4;Q96EY1;Q9NZL9;Q99747;P59103;O60437;P30405;Q8N573;Q6IE81;Q7LG56;Q06830;P34897;P36543;Q96SZ5;Q6P587;P34896;O60238;O95822;Q8N3Z3;P56134;O75208;Q13405;O95994;Q8WWR8;Q9UIF7;P49411;Q13114;Q9P0K7;P40337;P14324;Q9Y4U1;P22033;O75390;P10606;Q9BZL1;Q05195;Q06609;O43819;Q7Z4Y8;P43897;Q13323;P10909;Q8WVI0;O75394;P12074;P21695;Q9H0U6;Q8WTZ4;P51398;O95182;Q7Z6M4;O75431;Q9BUE6;Q6MZQ0;Q9Y3D3;O15304;Q99689;Q96GC5;Q7L0Y3;O75616;Q16635;Q9NNW7;P14406;Q9Y3B7;Q86WU2}

Pathogen[ P14075] interacts with 499 human partners: {Q9Y2Z4;O43674;Q8N490;Q9H974;P42704;Q00059;P13051;Q86WW8;P53804;P17029;Q9NVH6;Q9P0U1;P54136;P78537;Q99933;Q9H8H1;O14925;Q9NVA1;Q9H7H0;P09132;Q9NQE9;Q56VL3;Q9UGC7;Q13505;P52815;Q9BRJ2;Q5HYK3;A6NFY7;Q9HAV7;Q7L592;O43402;O60239;Q96EL2;Q5SZD4;Q86WG3;Q9BYD1;Q9H5Q4;Q9BYD6;Q12983;Q9H583;P56181;Q9NRX2;Q16719;Q9BYD2;P54098;Q00005;Q9GZT8;Q9Y375;Q9Y5J9;P82921;Q9NQR4;Q9UBY9;Q9P0M9;Q9NYK5;P55957;Q9HAP2;Q9Y3F4;Q96B49;Q6P1X6;Q96FX8;P58557;P82912;Q63ZY3;P17482;Q96EH3;Q14442;Q9BUK0;Q9Y2S7;Q969Z0;Q9NX63;Q9UMS0;Q8N0V3;Q9Y3D9;P41250;Q15006;Q9Y6D9;O75323;Q96GC5;Q9Y2Q9;P62072;Q07021;Q9H3H1;P18615;Q96A26;O96000;Q96CW1;Q9UMX3;O75648;P57772;O95182;Q93015;Q96BW9;O43236;O43677;Q96Q83;O76095;P60900;Q7L0Y3;Q86XE5;P34896;Q9HD34;P27695;O43427;P62244;P49406;Q9BQC6;Q96PG8;Q9Y2R5;Q9NX20;Q96E11;Q6IN84;Q8IVS8;Q96C03;Q13901;Q15388;P32189;A4D1E9;Q9NVV4;Q9P2R6;Q8WWR8;Q9UL16;P50613;P61604;Q9NX18;Q16822;O75394;P36639;Q8TAA5;P51610;Q9Y2Y0;Q5JTTJ3;O15527;Q9NVN8;Q9Y606;Q99747;O60930;Q9BXR0;A8K5M9;Q9NRP2;Q9Y3D3;Q8N159;Q96TC7;Q96T21;Q9EH33;P41220;Q6RSH7;O14734;P82650;P13073;Q15070;P19367;Q9UIF7;Q9Y2Z2;Q96NA2;O95363;Q5T653;Q5T440;Q6P1L8;O60296;Q8N1Q8;P40926;Q8IVG9;Q12906;Q9H2W6;Q86U90;Q8NKN5;Q8N5N7;Q6P444;Q53G26;A8MXV4;Q8N5M1;O00167;A2AJT9;Q9H9J2;Q9GZY8;Q5T1C6;Q9Y3D5;Q9NWS8;P31040;O94903;Q5TYM5;Q8WWC4;Q9UMY1;P08238;O15304;Q9BYC9;O43920;Q9BT92;Q9Y6H1;Q9Y3E5;Q9BQ48;Q96CB9;O75306;P38646;Q05195;O94763;Q96GW9;O95571;P07195;Q9BZE1;Q13084;O14561;Q8WU03;P78316;Q9NRI5;Q9HA77;Q86Y79;P36873;Q9UI43;Q9NP81;Q9UHV9;Q9UPV9;O76031;Q9Y255;P17040;P82909;Q9Y3B7;Q32P41;Q9HCN2;P51398;Q5HYI7;Q15390;A1L188;Q9HCM9;O95298;Q9Y2R9;Q9BSH5;Q13875;Q13405;Q9Y676;Q8N1F1;Q96DX5;O43678;Q96BK5;P35232;Q8N7H5;P17152;Q9Y6E7;Q9NR28;Q9UII2;Q6NZI2;Q9BYO7;Q86VP3;P12036;Q9NWU5;Q6IE81;P56378;Q9H2K0;P57721;Q96I23;O15235;Q96KC9;P49419;Q96MF6;P43897;Q9Y399;Q9H6K4;Q9BU61;P60602;Q9Y512;P14406;Q8N983;Q7L3T8;O00411;P99999;Q8TCC3;O95865;Q9UHB7;Q9BSH4;P22033;O75208;Q2VPK5;P56192;P26678;Q96BP2;O60783;Q9H0N5;Q9NTG7;Q9HB07;Q96A35;O14862;Q6ZNI7;P82664;Q99623;Q96AB3;Q92665;O95831;Q9NWT8;Q9BQ52;Q9UQN3;P55771;Q96E29;Q9NZE8;Q49AM1;O60543;Q9BYG8;Q330K2;Q9BW92;O75251;Q9BXH1;O43776;O60238;Q7Z7A3;Q14154;Q16836;Q9P015;Q8WYQ3;P02794;Q9Y3B9;P14324;Q86TS9;Q9NQ50;P82663;O60220;Q9Y291;Q15054;P82930;Q9NQP4;Q9NR77;P63104;Q99417;Q13114;Q99551;P82914;Q5T160;Q96DB5;P15502;P61586;Q9NU23;P10515;Q9BQ95;P48728;Q13794;P33316;O43542;P02511;P82932;Q9BZ23;Q5TC

4764



12;Q99766;O15287;P55789;P24539;Q9NNTK1;Q9NX40;P67775;Q9H2U2;P30153;E9PQ53;P53370;Q9C002;Q9BQ69;Q9H3J6;Q8WVI0;Q9ULD0;Q9NZI6;O14879;O75896;Q8TC71;Q9BRQ6;Q8TDB4;P0DJ07;Q5U4N7;O94925;Q8TCS8;Q9UHN1;P00338;Q9ULZ2;Q5T1J5;Q9H0U6;Q9NV92;Q9BXF6;Q7Z4T9;Q8IXM3;P09972;P08107;O14832;Q8N6M3;Q9BYN8;P13647;Q16526;P38117;Q5U5X0;Q96C86;Q5CZC0;Q9BRG1;Q969I3;O43715;O43325;Q6PI48;Q9Y5J7;Q9BZF9;Q9UG56;P19838;P09001;P27469;Q9BYD3;Q6ZSR3;P16220;Q92558;P40305;Q6IE59;Q7KZF4;P56385;P56277;P52758;P41970;Q7Z7H8;Q8WVM0;P48200;Q4U2R6;P21980;Q5XKP0;Q9NP92;O60437;Q9H4B0;Q96S55;Q9BYC8;Q5JPH6;O60936;P82933;P49103;O75489;O95153;P62906;Q9BUB7;O43823;Q15046;Q8IZY5;Q7Z7F7;Q9BUL9;P59942;P40337;Q14061;Q04837;Q5EBM0;O60260;O15446;P28838;Q9NXW9;Q9P032;O95178;Q92552;P49901;Q9NSE4;Q9NRR8;Q9H4A6;Q96CM3;O00165;Q15031;P50440;Q9P0J0;Q9Y5J6;Q9UQF2;P63167;Q96QE5;Q8IWL3;P49591;Q8WY22;Q15004;Q9P0J6;Q9BPW8;O75570;Q8TAE8;Q9NS69;Q9Y305;P62263;P22392;Q96EY1;Q00610;Q96DP5;Q8NF67;Q8NF64;P82675;Q06609;O43615;O00198;Q16775;Q6DKK2;Q9H1K1;O43676;Q8TC76;Q9H3L0;Q9Y6G3;Q6MZQ0;Q7Z6M4;Q9NVS2;Q9P2R7;P62258;Q96EK5;Q9Y697;P15924;P10599;Q99689;Q9H6T0;P36543;P45984;Q8TD19;Q9Y5U8}

4765

Pathogen{ P0C206} interacts with 688 human

partners: [P27695;Q9Y234;O95363;P33316;O43542;Q96TC7;Q8N5N7;Q9H1K1;Q9BRG1;Q8TAE8;Q6P1L8;O43502;Q13875;P09132;Q9UJZ1;Q8N0V3;P99999;Q9BUL9;Q6P161;Q9NSE4;P07195;Q96A35;P56181;Q8N5M1;Q9Y291;Q9NPJ3;Q96KC9;Q6ICL3;Q9Y5L4;Q9Y3D5;P10746;Q96Q83;Q9Y3F4;Q9Y399;Q05195;Q9NQE9;Q49AM1;Q96DB5;Q7Z7K0;Q9Y5J6;Q7Z2X4;P82930;Q9H4A6;P53701;Q5XKP0;Q96PG8;Q96PE7;P36543;Q9UHN1;O00167;Q9UI43;P40305;Q7Z6M4;Q14739;Q8IXM3;Q96EL3;Q7Z2W9;P55789;P78537;Q9HA92;Q9H0U6;Q9H0U6;Q8WV60;Q9Y2Z4;Q9NS18;P36639;Q9NVN8;A8MXV4;Q5U5X0;Q96CB9;Q9P032;Q96DX5;Q9BV47;Q53H82;P50213;O75251;Q96EL2;Q15911;Q5U4N7;Q99766;P56278;Q8TCS8;Q9UMY1;Q13114;Q9BQ48;Q96C86;Q8TC71;Q9NZL9;Q9UDW1;Q9BRT2;Q9HD34;Q9NR28;Q9Y5U8;Q9Y3D3;Q9BT92;Q9P015;O43920;Q9BXF6;P16220;P30153;Q9HD36;Q9Y6D9;O15527;O14862;O43427;Q9H4B0;P22392;O60783;Q96I23;Q9ULD0;Q9BU61;Q96B49;P82914;Q9UGC7;P02794;Q330K2;Q07021;Q13084;Q96FX8;Q5T1J5;P15502;O43402;Q6PI48;Q4U2R6;O14521;Q9NRR8;Q9NV92;P62244;Q99933;O75306;P12074;P45984;Q32P41;Q96GJ1;Q9BYC8;Q96MF6;P49901;O95202;Q5ST30;P14317;O15382;O75608;P14406;Q16836;P63167;P36542;Q9UMX3;Q8NE86;Q9BQP7;Q92665;Q53G26;Q7Z7H8;Q9UHB7;Q9NX40;P21980;Q99623;Q9Y6H1;Q9Y697;A6NFY7;Q9Y676;Q6P1Q0;Q9HAV7;P09001;Q9BUK6;Q9UQN3;Q9P0M9;O14832;O95182;P28838;Q7Z4H3;Q5EBM0;Q14442;O14879;Q9Y2Z2;Q9NXW9;Q9NS39;P59942;Q9UGM6;Q8N1Q8;O60220;Q96BP2;Q9NVH6;P62777;Q96JN2;P36551;P62263;Q5JPH6;Q9NP81;Q9NZJ4;Q9BUB7;P29728;Q96CM4;Q16822;Q7KZF4;P54098;Q00610;Q86U28;Q5BKU9;P60900;Q96C00;Q8IZY5;Q9Y5Z9;P21953;P53804;Q9Y5J9;Q9HA77;Q9P0J6;P38117;Q9P2R7;Q9NWU5;Q5T653;P34897;Q7LG56;Q9UBX3;P35754;Q9UBZ4;Q9Y4U1;Q86TX2;Q6P1X6;P82673;P41970;Q5HYI7;Q9NRR2;Q86WV6;Q16891;Q9HB07;Q96QE5;O75896;Q96BK5;Q9BXH1;P55771;Q5JTJ3;P31939;Q9BZ23;P41250;P49406;Q8TD19;Q9UI09;Q96A26;P14621;Q99497;P67775;Q9H3J6;Q9UQF2;Q8IZ13;Q6P444;Q9BYN8;P19367;P50542;P78316;Q8WVM0;Q9Y6G3;Q969I3;Q5CZC0;P32189;P26640;Q8WVC4;A1L188;Q9UPV9;P38646;Q9BQ69;Q9Y512;Q96E29;P83111;Q99551;Q7Z3D6;O43236;O95153;Q8N4Q1;Q9NNW7;Q9Y5J7;P49591;Q9NZE8;P23786;Q8N6F7;Q5SRD1;Q9H6K4;P48200;Q9P2R6;Q95865;P57721;Q9NR77;O95298;P30042;P51398;Q9HD33;A6NDV4;P61586;Q9UHV9;P22695;O43776;Q8N159;Q9H583;O15091;Q63HK5;O14561;Q9BRJ2;Q92934;Q16775;Q56VL3;Q5SW24;Q99C002;Q6ZN17;P17029;Q9H3K2;Q99689;Q9NQZ5;Q9NPG2;O60437;O60930;Q6MZQ0;O60238;O43615;O43715;O75394;P63104;Q3ZCQ8;P82664;P20132;Q6DKK2;P43897;P12036;Q9HBK9;Q12983;O43248;Q96GC5;Q9NX63;Q9NVS2;Q8N6M3;Q96EH3;Q93015;O60936;Q5BKY1;Q6P587;P14324;P30084;P19838;Q16526;Q15054;Q92843;O00483;Q96JZ2;Q8WV59;Q2VPK5;Q15070;P08238;Q13907;Q7Z4T9;P13647;O15287;Q8N7H5;Q9NVAl;Q16719;Q8NF64;P50613;Q9BYC9;O00165;Q9H4I8;Q8WYQ3;Q9Y3D7;Q6RSH7;P17568;P59047;Q7L0Y3;P62258;Q86XE5;Q8N490;Q9Y2R9;Q9Y255;O95831;Q9NS69;Q13405;P82909;P35232;O43708;Q9Y305;P17482;P18615;P51610;Q9HAP2;Q9H974;Q9Y3B7;P53370;O95178;P34896;P22557;O60239;Q86TS9;Q96EK5;Q6NZI2;P50440;Q9H2K0;Q9BYD6;Q86VP3;Q8IVG9;Q9Y3B8;O60260;Q9BYD2;Q9UG56;Q9Y3D2;Q8TCD5;Q9NQR4;Q16740;Q96CW1;Q6ZSR3;O00198;Q9Y3B9;Q9UJ68;Q8TCC3;Q5SXM8;Q969Z0;O60296;Q99807;Q9H0P0;Q9NRI5;O14734;Q5TYM5;Q9NWT8;P13073;P58557;Q9P0U1;P57772;Q5T1C6;Q5T160;O15446;Q14790;Q92558;Q9BW92;Q6IB77;Q15006;P40926;Q9ULD2;P10909;P22830;Q16143;O14925;P49916;Q13901;O94903;Q96S55;P31040;P08107;P24539;P82933;Q9UL16;Q9H2U2;Q9HCN2;P17152;Q8TAA5;Q9BWD1;Q92552;Q9Y3D9;Q9Y3A0;P42574;Q13505;P82663;P82675;Q8TC76;Q9Y375;Q9NVV4;Q15388;Q6IN84;Q8WU03;Q96AB3;P56192;Q8N3R3;Q9NP92;P23434;P04818;Q6L8Q7;Q9P0J0;Q9UI32;Q9BSH5;Q9H2W6;Q9H3H1;A4D1E9;Q99747;Q9Y606;Q5T440;Q96E11;O96011;P62017;P15924;Q12981;Q63ZY3;Q9H6T0;O43678;Q96N28;Q9HC38;Q6IE81;Q9Y237;Q9BZEL;Q9NZI6;P54136;Q8WWR8;O43823;O95639;O94925;O75489;P82650;P09972;Q9H5Q4;Q14154;Q8WXH0;Q9HCM9;Q9NXG0;Q9NU23;O75390;Q9Y2Q9;Q04837;Q9NZC7;Q9BYG8;Q86Y79;Q99417;Q86U90;P56381;Q03393;Q9BYD1;O75208;Q9ULZ2;Q9NQ50;Q06609;P17040;P42704;P27469;Q9BXR0;Q8N573;P42575;Q9Y3E5;Q9BKK5;Q96NA2;P49419;Q9HC16;Q08209;Q8N1F1;Q15031;Q14197;O43325;P26678;Q9H9J2;Q9GZY8;Q8N983;P62906;Q86X67;Q9NX18;Q9H7H0;Q9BUK0;Q8IWL3;Q96C01;P82932;Q9H0N5;P59103;Q9NYK5;Q9UPW5;Q99798;E9PQ53;Q9Y2R5;Q16762;P13196;Q9Y3B1;Q9Y2Y0;O60543;Q8WY22;Q7L3T8;P02511;P10599;P39748;Q9BSH4;P41220;O75570;Q15390;Q9HBH1;O76031;Q9NTG7;Q9BZF9;Q49AN0;Q96ER9;Q9UJ72;Q9NPL8;A6NK58;P30405;P07954;P21912;Q00059;Q06830;Q86WG3;P36873;Q9BRQ6;Q5S2D4;Q9NRP2;Q8WXG1;Q5TC12;P52758;P13051;P22033;Q9UMS0;Q9H8M1;Q96EY1;Q6GPH4;Q8NBN5;A8K5M9;Q9NX20;Q00005;P00338;Q9BQ52;Q8IVS8;Q9NRD5;Q8N3J5;Q15004;P10515;Q14061;O96000;Q9BQ95;Q14249;Q8N4H5;O15304;Q96DP5;Q86UY8;Q8N945;O43674;P56385;Q96ILO;Q9NYY8;P48728;Q7L2E3;A2AJT9;Q7Z7F7;O95571;Q96CM3;Q86WW8;O15235;Q9BQC6;P60602;Q12906;Q9H6S1;Q9H902;Q9BRX8;Q9UII2;P00480;Q9UIF7;Q9NQF4;Q5HYK3;Q9H0E9;Q9H3L0;P56556;Q9NNTK1;Q9Y6E7;Q02221;Q96C03;Q96DV4;Q9BQ70;Q9H0B3;P82912;P21399;Q7L592;O75323;Q96GW9;P55957;P14618;O94763;Q9Y2S7;Q9NSK7;Q86X76;P61604;Q7Z7A3;Q96T21;O76095;P40337;Q13794;Q96LZ7;Q96I59;Q9BUE6;Q9UBY9;Q6IPR1;Q05932;P52815;Q9BYD3;Q8NFU3;Q15046;Q96BW9;O00411;Q8WTZ4;P82921;Q9BPW8;Q8TDB4;Q7L8L6;P78549}

4766

Pathogen{ P03363} interacts with 400 human

partners: [Q8NF67;Q6IE81;Q32P41;Q9UBY9;Q15911;Q9Y6E7;O14734;Q9Y2Z4;P82650;A8K5M9;Q9NPJ3;Q16836;P43897;P52758;O00411;Q9Y2R5;Q6ZN17;Q8NFU3;Q9BYD2;P09132;Q9NWT8;Q9NVN8;Q9BRT2;Q9H2U2;P62258;P55957;Q9Y3F4;Q9NVV4;O60543;Q9UL16;Q9H7H0;Q96DB5;P49419;O15287;Q9H902;



Q99623;Q96GC5;Q9UPV9;P31040;O15527;P55771;Q9Y6D9;P63167;Q86Y79;O75570;P82664;Q9BQ95;Q96EL2;Q9BXR0;P36873;Q96C01;Q8N0V3;P33316;Q9UHB7;Q9NZE8;Q9UMS0;Q9NZJ4;Q9NXG0;Q9BYD1;P36543;P82921;Q96FC7;Q330K2;P49406;Q9Y375;Q8N5M1;P99999;Q9NS39;Q9UHV9;Q96BK5;Q9UMY1;Q96JZ2;Q9NNW7;Q969Q5;Q63ZY3;Q9BSH4;Q96159;Q8IXM3;Q9Y2W6;O60437;Q9UQF2;Q9Y606;Q13794;Q13405;Q96AB3;Q9Y5R4;Q9BYD3;Q00005;P41250;P82914;O15304;Q7L592;Q9P0J6;Q15388;P78537;O14925;Q9H0N5;Q8N5N7;Q9GZT8;Q96BP2;O94925;Q9ULD0;Q9BYG8;Q9NVS2;Q9Y3D5;P82930;P09972;Q14154;Q9Y2Q9;Q9BWD1;P42704;P52815;P16220;Q96I23;P13051;Q13901;P48200;Q5BKX1;Q8IZY5;O95153;Q96EL3;Q9H9J2;Q5JPH6;Q00610;Q96A35;O43776;Q99417;Q9BZE1;Q3ZCQ8;Q8IVS8;O15446;Q9NQ50;Q92558;O43248;Q49AM1;Q9H4A6;Q9HAP2;P40337;Q7Z7F7;Q8TCC3;Q9Y697;Q9BQ69;Q96T21;Q96E29;Q7KZF4;O14879;Q96DV4;Q9H0U6;O95571;Q93015;Q9NR77;P57772;Q7Z4H3;Q9HD33;P18615;O00198;P54098;Q96TC7;Q9HCN2;P35754;Q5TYM5;Q7Z7A3;P15924;O60296;Q9Y3B7;Q53G26;Q07021;Q4U2R6;P17029;P48728;Q96BW9;Q9BZF9;P63104;Q9BRJ2;Q6RSH7;Q9HBK9;Q9HD36;A6NFY7;Q9NWU5;O43615;Q9P032;Q96Q83;Q9NX18;O75394;P54136;O75208;Q9H4I8;Q8TC71;Q9P0K7;P82912;Q9NUL7;Q49AN0;Q2VPK5;Q9ULZ2;Q12906;P13647;P08107;Q6DKK2;Q9H974;Q86WG3;P82663;Q9GZT3;Q9NRX2;Q8WW59;Q9NR28;Q9BRG1;Q9P0J0;Q6P161;Q9NZI6;Q9Y6G3;Q96QE5;Q6PI48;Q8TAE8;Q92552;Q9BYC8;Q9BSH5;O94763;Q9H2W6;P38646;Q9Y5J7;Q9P0U1;Q92843;Q15004;Q9P0M9;Q9Y2R9;Q96C03;P57721;Q9BRQ6;Q7L0Y3;Q96C00;Q9Y3D9;Q9BT92;Q9NX20;Q9UIF7;O75323;Q96EK5;Q5T653;Q8TAA5;Q9BUK0;P59047;Q8N983;Q7Z7H8;Q00059;O95363;O60783;Q9Y512;Q6NZI2;Q5TC12;Q7Z4T9;O43542;Q9NP92;Q96EH3;P19838;Q9Y6H1;O76031;P09001;Q8IWL3;P82675;Q96S55;P41220;O76095;P14317;Q9Y5Z4;Q9H1K1;O60936;P82933;Q9H3J6;Q9UI32;Q9BXF6;O14862;Q13875;Q92665;Q9H583;Q16526;O60239;Q9Y237;Q5HYI7;Q8WVM0;P27469;Q05195;P17482;O95865;O43402;Q9BW92;P10515;O00167;Q9NQE9;P13196;Q63HK5;Q8TC76;Q04837;Q9Y676;Q9Y3B9;Q07820;Q9NRI5;P53804;Q13114;P49591;P62244;Q9HCM9;P62906;Q96NA2;Q8IVG9;P35232;Q15054;Q96DX5;Q9BU61;Q9Y3E5;Q9C002;Q9BQC6;O60930;Q9H3K2;O43325;Q06609;Q7L3T8;O96000;Q9NTG7;Q14739;Q96CM3;Q9UHN1;O60333;Q7L2E3;O00165;Q9P015;Q15031;Q9Y3D3;Q13084;Q9UQN3;P78316;P41970;Q9Y2Y0;Q9BV47;P82909;Q9NQP4;Q9HB07;Q9BXH1;Q9NX63;P12036;Q9NS69;Q5T1J5;P82932;Q5CZC0;Q9BQ48;Q86T59;Q96C86;P30153;Q9P2R6;Q96EY1;P36639;P17040;Q9Y399;O15235;P49901;Q9UI43;Q8NF64;Q7Z2W9;Q9ULD2;O43715;O43708;P51398;Q9BYC9;P08238;O60238;Q8N7H5;Q5T160;P67775;Q9H6T0;Q96E11;P62263;Q9H0E9;Q9UMX3;Q99933;Q15006;Q99747;O43236;Q9Y2S7;Q9Y291;P02794;Q9BUL9;Q16143;Q9BYN8;Q9BQ70;Q99551;Q9NQR4;P58557;Q9BYD6;Q9NX40;P61604;Q9HD34;P51610;P56181;Q96CW1;O43502;O95831;Q99689;Q9GZY8;Q9H5Q4;Q9UGC7;Q6P1L8;P53370}

- 4767 [Cluster 434]GO:0044464+C cellular\_component [name] cell part [def] "Any constituent part of a cell, the basic structural and functional unit of all organisms." [GOC]
  - 4768 Pathogen[ Q2Q067] interacts with 1 human partners: {P14136}
  - 4769 Pathogen[ P0C214] interacts with 1 human partners: {P14136}
  - 4770 Pathogen[ P03346] interacts with 1 human partners: {P14136}
  - 4771 Pathogen[ Q85601] interacts with 1 human partners: {P14136}
  - 4772 Pathogen[ P14079] interacts with 1 human partners: {P14136}
  - 4773 Pathogen[ P03383] interacts with 1 human partners: {P14136}
  - 4774 Pathogen[ P03410] interacts with 1 human partners: {P14136}
  - 4775 Pathogen[ P14075] interacts with 1 human partners: {P14136}
  - 4776 Pathogen[ P0C206] interacts with 1 human partners: {P14136}
  - 4777 Pathogen[ P03363] interacts with 2 human partners: {Q92904;P14136}
- 4778 [Cluster 435]GO:0005925+C cellular\_component [name] focal adhesion [def] "Small region on the surface of a cell that anchors the cell to the extracellular matrix and that forms a point of termination of actin filaments." [ISBN]
  - 4779 Pathogen[ Q2Q067] interacts with 31 human partners: {Q68CZ2;Q8NHY2;Q8WX93;Q96B97;Q9BRV8;Q8IZW8;Q9UKX2;Q14511;Q8TF68;P14316;P56945;Q14192;Q9NY61;Q8ND90;Q86TP1;Q96AQ7;O60711;Q9HBL0;Q96IF1;O94811;Q9UGP4;Q15654;Q9NVD7;O95232;P12883;Q14145;A6NLJ0;O60504;Q14676;Q93052;Q9BX66}
  - 4780 Pathogen[ P0C214] interacts with 36 human partners: {Q9UGP4;Q9UI08;Q9UKX2;P56945;Q9BRV8;O94811;Q14145;Q9BX66;Q8NHY2;Q14676;Q9NY61;O95232;Q68CZ2;Q8TF68;Q15124;P13535;Q86TP1;Q15654;P12882;Q14192;O60711;Q14511;P12883;Q9HBL0;Q96JB3;O15144;O60504;P13533;Q9Y623;Q9NVD7;Q96AQ7;P98171;P14316;Q96B97;A6NLJ0;Q8ND90}
  - 4781 Pathogen[ P03346] interacts with 43 human partners: {Q96AC1;Q96B97;Q8WX93;Q9UGP4;Q14511;P98171;Q8IZW8;O15144;Q9BRV8;Q8NHY2;Q8WXH0;P14316;Q15149;Q96IF1;Q15942;Q9UI08;Q9BX66;Q68CZ2;Q96AQ7;P26038;Q8TF68;Q14676;Q14847;O95232;P56945;Q14192;Q9Y4G6;P48059;Q9HBL0;Q9NY61;O94811;Q9NVD7;Q8ND90;Q9UKX2;O60504;Q14145;Q9C0H9;Q93052;Q15654;A6NLJ0;O60711;Q96JB3;Q86TP1}
  - 4782 Pathogen[ Q85601] interacts with 40 human partners: {Q8WX93;Q8ND90;Q96JB3;Q9NVD7;P14316;P13533;Q9NY61;Q68CZ2;Q9BX66;Q15654;A6NLJ0;Q93052;Q96AQ7;Q14145;Q9UKX2;O60711;Q86TP1;P56945;O94811;O95232;P12882;Q15124;Q8IZW8;Q14192;Q15942;Q96B97;P12883;P48059;Q8TF68;Q96IF1;Q9UGP4;O60504;P13535;Q9HBL0;Q14511;Q8NHY2;Q9Y623;Q14676;Q9BRV8;O15144}
  - 4783 Pathogen[ P14079] interacts with 53 human partners: {Q96JB3;Q96KR4;Q14192;Q8IZW8;Q9NY61;Q9NR12;P98171;O15231;Q8WX93;Q93052;P26038;A6NLJ0;O60504;Q96B97;Q9UKX2;Q14847;Q15124;O60711;Q14118;Q9Y4G6;Q9C0H9;P50552;Q8TF68;Q9HBL0;Q15149;Q14145;Q8ND90;Q96AQ7;Q96IF1;Q68CZ2;O94811;O00559;Q96AC1;Q8WXH0;O43294;P12883;Q14676;O95232;P49023;Q9BRV8;Q9BX66;P48059;Q9NVD7;P14316;O15144;P35241;Q9UGP4;P49917;Q9UI08;Q5VW36;Q8NHY2;Q15942}
  - 4784 Pathogen[ P03383] interacts with 22 human partners: {Q9NY61;P56945;P14316;O94811;Q96AQ7;Q15654;A6NLJ0;Q14192;Q9UGP4;Q14511;O60711;Q9UKX2;P12883;Q8ND90;Q9BRV8;O95232;Q14145;Q86TP1;O60504;Q14676;Q8NHY2;Q9C0H9}
  - 4785 Pathogen[ P03410] interacts with 55 human

partners: {O60711; Q8NHY2; Q96JB3; Q9UI08; Q9UKX2; Q8TF68; P98171; A6NLJ0; Q96AQ7; Q9UGP4; Q5VW36; O94811; Q9NY61; O43294; Q15124; Q86TP1; O15231; O00559; Q15654; Q96IF1; Q8IZW8; Q93052; Q96KR4; P50552; Q14511; P12882; Q68CZ2; P26038; Q15942; Q14847; Q9HBL0; P12883; Q14118; Q9Y4G6; P48059; O60504; Q95232; P56945; Q96B97; Q8ND90; Q9NVD7; P13533; O15144; Q14676; P35241; Q9C0H9; P14316; Q15149; Q14145; P13535; Q8WXH0; Q9BRV8; Q8WX93; Q14192; Q9BX66}

4786 Pathogen[ P14075] interacts with 21 human partners: {Q14511; A6NLJ0; Q9BRV8; O94811; O95232; Q9UKX2; Q9NY61; Q9UGP4; Q8ND90; Q96AQ7; Q14676; Q8NHY2; Q15654; P14316; O60711; O60504; Q9C0H9; Q14192; Q14145; P56945; Q86TP1}

4787 Pathogen[ P0C206] interacts with 47 human partners: {Q9HBL0; Q86TP1; O60504; Q96KR4; P13533; Q9Y623; Q9UGP4; Q9NVD7; Q96IF1; Q96B97; O95232; O94811; Q8WX93; Q8IZW8; Q15654; Q9UI08; Q14145; Q15124; Q96JB3; P49917; P12883; Q8NHY2; P48059; Q14676; Q15942; Q8ND90; P12882; Q96AQ7; O43294; Q9BRV8; Q9UKX2; Q9C0H9; P98171; O15144; Q9BX66; Q8WXH0; P56945; Q14192; A6NLJ0; Q8TF68; O60711; Q9NY61; P13535; Q68CZ2; P14316; Q93052; Q14511}

4788 Pathogen[ P03363] interacts with 40 human partners: {Q15654; Q96AQ7; Q14145; Q9BX66; O94811; O95232; Q9UKX2; Q96B97; Q14847; Q9BRV8; P98171; Q14807; Q93052; Q9Y4G6; Q96IF1; Q9UGP4; O15144; Q9NY61; Q15149; Q9UI08; Q14511; P14316; Q8TF68; Q8IZW8; A6NLJ0; Q8WX93; Q8ND90; Q68CZ2; Q9HBL0; P56945; Q8NHY2; Q96AC1; Q9NVD7; Q14676; Q9NR12; Q86TP1; Q15942; O60711; Q9C0H9; Q14192}

4789 [Cluster 436]GO:0000152+C cellular\_component [name] nuclear ubiquitin ligase complex [def] "A ubiquitin ligase complex found in the nucleus." [GOC]

4790 Pathogen[ Q2Q067] interacts with 1 human partners: {Q9NXR7}

4791 Pathogen[ P0C214] interacts with 1 human partners: {Q9NXR7}

4792 Pathogen[ P03346] interacts with 1 human partners: {Q9NXR7}

4793 Pathogen[ Q85601] interacts with 1 human partners: {Q9NXR7}

4794 Pathogen[ P14079] interacts with 1 human partners: {Q9NXR7}

4795 Pathogen[ P03383] interacts with 1 human partners: {Q9NXR7}

4796 Pathogen[ P03410] interacts with 1 human partners: {Q9NXR7}

4797 Pathogen[ P14075] interacts with 1 human partners: {Q9NXR7}

4798 Pathogen[ P0C206] interacts with 1 human partners: {Q9NXR7}

4799 Pathogen[ P03363] interacts with 1 human partners: {Q9NXR7}

4800 [Cluster 437]GO:0000407+C cellular\_component [name] pre-autophagosomal structure [def] "A punctate structure localized in the vicinity of the vacuole that is required for the formation of autophagosomes." [GOC]

4801 Pathogen[ Q2Q067] interacts with 4 human partners: {Q9BSB4; Q8TDY2; O75143; Q13501}

4802 Pathogen[ P0C214] interacts with 4 human partners: {Q9BSB4; Q8TDY2; Q13501; O75143}

4803 Pathogen[ P03346] interacts with 5 human partners: {O75143; Q9BSB4; Q8TDY2; Q14596; Q13501}

4804 Pathogen[ Q85601] interacts with 5 human partners: {O75143; Q9BSB4; Q14596; Q8TDY2; Q13501}

4805 Pathogen[ P14079] interacts with 6 human partners: {Q8TDY2; Q14596; O75143; Q9BSB4; Q96GC9; Q13501}

4806 Pathogen[ P03383] interacts with 4 human partners: {O75143; Q8TDY2; Q13501; Q9BSB4}

4807 Pathogen[ P03410] interacts with 7 human partners: {Q96GC9; Q9BSB4; O75143; Q8TDY2; Q13501; Q14596; Q5MNZ9}

4808 Pathogen[ P14075] interacts with 4 human partners: {Q9BSB4; O75143; Q8TDY2; Q13501}

4809 Pathogen[ P0C206] interacts with 5 human partners: {Q9BSB4; Q13501; Q14596; Q8TDY2; O75143}

4810 Pathogen[ P03363] interacts with 3 human partners: {O75143; Q9BSB4; Q8TDY2}

4811 [Cluster 438]GO:0005694+C cellular\_component [name] chromosome [def] "A structure composed of a very long molecule of DNA and associated proteins (e.g. histones) that carries hereditary information." [ISBN]

4812 Pathogen[ Q2Q067] interacts with 154 human partners: {P49454; P30153; Q2YD98; Q9Y4R8; O43463; Q96EE3; Q9NYP9; Q9NVH2; Q96H22; Q71F23; Q9Y3S2; Q8IY18; Q12888; Q14980; Q7Z5K2; Q9H2K2; Q9NYB0; Q13352; Q7Z460; Q9NR48; Q6IPU0; Q15554; Q96R06; Q6P1K2; Q9HBM1; Q5UIP0; O75478; O75935; Q5EE01; P54274; Q9BSI4; P11387; Q8WYP5; Q9H3R5; Q9UIS9; Q5FBB7; O00566; P49450; O95347; Q13257; Q8N2Z9; A8MT69; Q03188; Q9UER7; Q15172; Q9NXR1; Q53HL2; P67775; O43684; Q8NBT2; Q9H981; Q9H668; Q92547; Q9H6R4; Q8TBE0; Q9P258; O00541; Q8NFH4; P12270; O75531; Q9BSD3; P11388; Q9NQS7; Q9Y448; O43264; Q15003; P62714; Q7Z7K6; Q92674; Q96KR1; Q15047; Q9BW27; Q96BT3; Q9BZD4; O60934; O43482; Q86US8; Q9NSP4; Q8N140; O75177; P36873; Q15021; P50748; P0CW71; Q96JM3; Q86Y97; Q96AP0; Q7Z3K3; O14746; Q96BK5; O75530; Q9H410; Q8NFH3; P12956; Q9BT49; O60216; Q9C0C2; Q99496; A1L190; Q9UJ98; O75122; O76064; Q2NKJ3; Q8IX90; Q8NG31; Q9H816; Q9Y6D9; P57740; Q96BD8; Q9H900; O95271; Q96MG7; Q96IY1; Q96IK1; P17096; P42166; P46013; Q14676; Q9BXS6; Q8WUM0; Q96MF7; Q14683; Q8WVM7; P13010; Q9BU64; O95229; Q9Y5B9; P45973; O14777; Q562F6; Q9BPX3; Q8NCD3; Q8N3U4; P51808; Q86WV5; Q9H5I1; Q9H081; Q7Z6E9; P49711; Q9NXX6; Q96FF9; O15392; Q96EA4; Q9P0W2; P07199; O15446; Q96DN6; O14576; Q6P0N0; Q7Z6E9; O96028; Q8WTS6; Q6NZ36; Q08945}

4813 Pathogen[ P0C214] interacts with 156 human partners: {Q9H081; Q9BPX3; Q8IY18; O43684; Q7Z3K3; Q96BK5; Q13257; O75935; Q9NVH2; Q9H5I1; Q6P0N0; P42166; Q15047; O14746; Q96BT3; Q9BT49; Q5UIP0; Q9H816; Q96KR1; Q53HL2; O43264; A1L190; P30153; Q9NXX6; P13010; Q15003; Q9BSI4; Q15554; O75478; Q96EA4; Q9C0C2; O75530; O00541; Q96R06; Q9BXS6; P57740; Q5EE01; Q8WYP5; P50748; Q9UJ98; O15446; Q15172; P17096; Q6NZ36; O95229; Q96EE3; Q6IPU0; Q8NBT2; Q96DN6; Q9H6R4; P51808; Q14676; P07199; Q6P1K2; O43463; P46060; Q562F6; Q8TBE0; Q96FF9; O95347; P49450; Q14980; P62714; Q8N2Z9; Q03188; Q9UIS9; Q8NCD3; O75122; O43482; Q86WV5; Q86US8; Q92674; A4D1E9; Q9BW27; Q9UER7; Q96BD8; Q9P0W2; Q7Z6E9; Q9HBM1; Q9P258; Q9NYP9; Q9Y4R8; Q96MF7; P0CW71; Q13352; Q96MG7; P67775; Q8NFH3; Q9Y5B9; P11388; Q7Z7K6; Q86Y97; O75531; Q9H2K2; Q9BSD3; P11387; Q99496; Q9H410; O15392; Q9NYB0; Q9H3R5; P49711; Q7Z5K2; Q8IX90; Q14683; Q8N3U4; Q8WVM7; Q8NG31; O14576; Q7Z460; Q9NPC3; P36873; Q9H900; Q5FBB7; Q96JM3; Q9NQS7; P45973; Q12888; Q8N7B1; Q9NR48;



- 3463;Q5UIP0;Q96BD8;Q6NZ36;P57740;A1L190;Q9BPX3;Q2NKJ3;Q9NYB0;P67775;Q9P258;Q8WYP5;O75122;Q8NFH3;O60934;Q13352;P46060;Q7L229;O00566;Q8N7B1;O14777;Q9BU64;Q15021;Q8N2Z9;O75530;Q8N0S2;Q13257;Q9NQS7;Q96IK1}
- 4819 Pathogen[ P14075] interacts with 139 human partners: {A8MT69;P11387;O00566;Q6IPU0;P12956;Q14683;Q96KR1;Q9Y6D9;O14746;Q9H081;Q9H6R4;Q562F6;Q15554;Q9BSI4;Q08945;Q9NQS7;Q8N140;Q8WVM7;P07199;Q2NKJ3;Q96R06;Q92674;P51808;Q8WVK7;P57740;Q5EE01;A4D1E9;Q8WYP5;Q7Z460;O00541;P17096;Q96IY1;Q13257;Q15047;A1L190;Q9BXS6;Q9NQR1;Q96H22;O43684;P45973;Q9BT49;Q96BD8;P12270;Q96AP0;O14777;Q96FF9;P36873;O95229;O95347;Q8N2Z9;Q96BK5;Q9H3R5;Q9UJ98;Q9BW27;P54274;Q9H5I1;O75478;Q86US8;Q9BU64;Q96EA4;Q9P258;O75935;Q8N7B1;Q14676;P0CW71;Q2YD98;Q7Z5K2;Q9Y5B9;Q9NVH2;Q9UIS9;Q86WV5;Q9NYP9;Q96EE3;Q9H816;Q8TBE0;Q96BT3;Q9Y3S2;Q5FBB7;Q99496;Q9H410;P62714;Q9NXX6;P67775;P30153;Q8IX90;Q7Z7K6;Q8NFH3;Q86Y97;Q9H900;Q9Y4R8;Q53HL2;Q8NCD3;P49711;P50748;O43463;Q12888;Q9H981;Q9HBM1;Q5UIP0;Q6P1K2;P13010;Q15003;Q9UER7;Q96DN6;Q13352;Q96MF7;Q8WUM0;Q9C0C2;O43264;O95271;Q14980;Q03188;Q7Z3K3;Q8NG31;O43482;Q9BSD3;P49454;O15446;Q6P0N0;Q96IK1;Q92547;Q9BPX3;P46013;Q71F23;Q8NFH4;Q9Y448;O60216;Q96MG7;Q8NBT2;Q9BZD4;Q9P0W2;Q15021;Q8WTS6;O75530;O75177;Q8N3U4;O75531;Q9NYB0;Q9H668}
- 4820 Pathogen[ P0C206] interacts with 184 human partners: {O95271;Q9Y3S2;Q96EE3;Q9HBM1;Q2YD98;O60216;Q9BPX3;Q8WYP5;Q8N140;O75530;Q2NKJ3;P13010;Q6IPU0;P45973;Q9BYG3;Q9NSP4;Q8WV22;O14576;Q5UIP0;Q9H900;Q96AP0;Q15019;Q9H981;P30153;Q9Y6D9;Q7L2Z9;A1L190;P51955;Q9BT49;Q86WV5;Q15554;Q6NZ36;Q15172;O60934;P40692;Q9H081;O14777;O43463;P46013;Q8N0S6;O75177;Q7Z5K2;Q92791;Q9Y448;Q9NYP9;Q15021;Q9UER7;Q9BZD4;Q96MG7;Q9NVH2;Q9Y5B9;Q9BSI4;Q9NPC3;Q9P267;Q9H410;Q9H668;Q9UJ98;Q9H816;P57740;P49454;Q96BK5;P67775;Q13257;Q9BU64;Q14141;Q9GZM8;Q8IX90;Q96FF9;Q15003;Q9NQV7;O75122;Q9H6R4;Q92674;Q8WUM0;Q5EE01;P54274;O75531;P46060;Q6P1K2;Q8NBT2;Q96BD8;Q9H3R5;Q12888;Q86US8;O15516;Q9P0W2;Q9UQE7;Q86Y97;Q9UIS9;P49450;O95347;P42166;Q6IBW4;Q9NR48;Q8NCD3;P51808;Q14683;Q96KR1;Q14676;P49711;Q96IY1;Q9NQR1;Q9Y6G9;Q7Z7K6;Q96BT3;O96028;Q7Z3K3;Q8WTS6;O15446;Q13352;Q5FBB7;P49916;P62714;Q53HL2;O43482;Q96MF7;Q96JM3;Q9H5I1;O75478;Q96FI4;O15392;Q6P0N0;Q9Y4R8;P0CW71;Q8N0S2;Q8TBE0;Q9P258;O00541;Q96H22;Q9C0C2;P17096;A4D1E9;Q9NYB0;Q8NFH4;Q562F6;P07199;Q13362;Q8N3U4;P10412;Q9NXR1;Q96EA4;P11388;Q9NUX5;Q8N2Z9;Q16181;Q15047;Q9BXS6;P11387;O43684;Q14980;Q7Z460;Q7Z6E9;Q9NQS7;O75935;Q8NFH3;Q92547;P36873;O76064;Q8IY18;P50748;Q96IK1;P12956;Q71F23;O43264;Q08945;Q8WVM7;Q9NTJ3;Q8NG31;Q9H2K2;Q8N7B1;Q13472;Q96DN6;Q8WVK7;Q99496;Q9NXX6;Q9BW27;Q9BSD3;A8MT69;Q03188;O00566;O14746;Q9H7Z6;P12270;O95229}
- 4821 Pathogen[ P03363] interacts with 162 human partners: {Q9BSD3;Q92547;Q9H816;Q96EA4;P12956;Q9BZD4;Q8IZA3;P46060;Q9UJ98;Q96IK1;P49454;Q6P0N0;Q96IY1;Q6P1K2;Q9NYP9;Q7Z7K6;Q9Y6D9;P62714;P12270;Q9H081;Q9H981;P36873;Q92674;Q8NFH4;Q15021;Q9NXX6;O95229;Q9Y4R8;Q15554;Q9H5I1;Q96BD8;P11387;Q96BK5;Q13362;P13010;Q8WYP5;O95347;Q8NFH3;P45973;Q14980;Q86US8;Q7Z6E9;Q9NYB0;O43264;Q8NBT2;Q2YD98;Q8N140;Q96FI4;Q92791;Q9NPC3;Q86WV5;Q8N2Z9;Q9P258;Q9UER7;Q99496;Q53HL2;Q8WVK7;Q9BXS6;O75530;Q9H410;O14746;P50748;O15047;O15446;Q9BSI4;Q16695;Q9H2K2;Q8IX90;Q96AP0;P49711;Q5FBB7;P07199;Q9H900;Q6NZ36;Q5EE01;Q8WUM0;Q96JM3;Q8N7B1;Q96R06;O43684;Q9Y5B9;P49450;P17096;P54274;Q9C0C2;Q9NQS7;Q13472;Q9H668;Q9NSP4;Q8WVM7;P10412;O75935;Q9HBM1;Q5UIP0;Q7Z460;O95271;Q9BPX3;O00566;Q03188;Q8NG31;Q13257;Q8NCD3;Q9UPS6;Q9NVH2;Q9NUX5;Q7Z3K3;Q71F23;P51808;P0CW71;P57740;Q9BYG3;Q9NR48;O96028;Q96BT3;Q15172;Q2NKJ3;Q08945;O43463;O75531;Q9P267;Q9H3R5;Q9BT49;Q8WV22;Q9H6R4;Q8N3U4;O14777;Q9NQR1;Q96DN6;Q96MG7;Q9Y448;O43482;Q96FF9;O75478;P46013;Q562F6;Q14676;Q96KR1;Q9NXR1;Q14141;P30153;Q8WTS6;Q7Z5K2;Q9P0W2;Q8IY18;Q13352;O00541;Q15047;Q96MF7;Q86Y97;P67775;Q8TBE0;Q14683;P42166;Q15003;O14576;Q9BW27;Q12888;O75177;A8MT69;A1L190;O60216;Q9UIS9}
- 4822 [Cluster 439]GO:0030057+C cellular\_component [name] desmosome [def] "A cell-cell junction in which
- 4823 Pathogen[ Q2Q067] interacts with 5 human partners: {O60437;Q9H307;P15924;Q99569;Q674X7}
- 4824 Pathogen[ P0C214] interacts with 4 human partners: {P15924;Q9H307;O60437;Q674X7}
- 4825 Pathogen[ P03346] interacts with 6 human partners: {O60437;P15924;Q99569;Q9H307;Q13835;Q674X7}
- 4826 Pathogen[ Q85601] interacts with 5 human partners: {Q99569;O60437;Q9H307;P15924;Q674X7}
- 4827 Pathogen[ P14079] interacts with 8 human partners: {P15924;Q13835;O60437;Q9H307;Q99569;Q92817;Q96FX8;Q674X7}
- 4828 Pathogen[ P03383] interacts with 3 human partners: {P15924;Q9H307;O60437}
- 4829 Pathogen[ P03410] interacts with 9 human partners: {P15924;Q13835;Q96FX8;Q674X7;Q92817;Q15517;O60437;Q9H307;Q99569}
- 4830 Pathogen[ P14075] interacts with 4 human partners: {Q9H307;Q96FX8;O60437;P15924}
- 4831 Pathogen[ P0C206] interacts with 7 human partners: {Q96FX8;Q9H307;O60437;Q13835;Q99569;P15924;Q674X7}
- 4832 Pathogen[ P03363] interacts with 7 human partners: {Q13835;O60437;Q9H307;Q99569;P15924;Q674X7;Q92817}
- 4833 [Cluster 440]GO:0005916+C cellular\_component [name] fascia adherens [def] "A cell-cell junction that contains the transmembrane protein N-cadherin, which interacts with identical molecules from neighboring cells to form a tight mechanical intercellular link\_ forms a large portion of the intercalated disc, the structure at which myofibrils terminate in cardiomyocytes." [GOC
- 4834 Pathogen[ Q2Q067] interacts with 2 human partners: {P15924;P17661}
- 4835 Pathogen[ P0C214] interacts with 2 human partners: {P15924;P17661}
- 4836 Pathogen[ P03346] interacts with 5 human partners: {P15924;Q13813;P17661;Q9Y4G6;Q9UI47}

4837 Pathogen[ Q85601] interacts with 2 human partners:{P17661;P15924}

4838 Pathogen[ P14079] interacts with 6 human partners:{Q9UI47;P15924;Q9Y4G6;Q702N8;P17661;Q13813}

4839 Pathogen[ P03383] interacts with 2 human partners:{P15924;P17661}

4840 Pathogen[ P03410] interacts with 6 human partners:{P15924;P17661;Q702N8;Q9Y4G6;Q9UI47;Q13813}

4841 Pathogen[ P14075] interacts with 2 human partners:{P17661;P15924}

4842 Pathogen[ P0C206] interacts with 3 human partners:{P17661;Q9UI47;P15924}

4843 Pathogen[ P03363] interacts with 5 human partners:{Q9UI47;Q9Y4G6;P15924;P17661;Q13813}

4844 [Cluster 441]GO:0033276+C cellular\_component [name] transcription factor TFTC complex [def] "A protein complex that does not contain either a TATA-binding protein (TBP) or a TBP-like factor, but is composed of several TAFIIs and other proteins, including a histone acetyltransferase. This complex is able to nucleate transcription initiation by RNA polymerase II, can mediate transcriptional activation, and has histone acetyltransferase activity." [PMID]

4845 Pathogen[ Q2Q067] interacts with 14 human partners:{Q9Y4A5;Q16594;O75486;Q15542;Q12962;O75529;Q6P1X5;O75528;P49848;O00268;Q92830;Q16514;Q15545;Q9HBM6}

4846 Pathogen[ P0C214] interacts with 14 human partners:{O00268;O75486;O75528;Q12962;Q15545;Q16594;Q15542;Q9HBM6;P49848;Q6P1X5;Q16514;O75529;Q9Y4A5;Q92830}

4847 Pathogen[ P03346] interacts with 14 human partners:{Q15542;O75486;O00268;Q92830;O75528;Q9Y4A5;O75529;P49848;Q9HBM6;Q6P1X5;Q16514;Q12962;Q15545;Q16594}

4848 Pathogen[ Q85601] interacts with 14 human partners:{Q15542;O75528;Q9Y4A5;Q15545;O00268;Q16594;Q9HBM6;Q92830;O75529;P49848;Q6P1X5;Q16514;Q12962;O75486}

4849 Pathogen[ P14079] interacts with 14 human partners:{Q9Y4A5;O75528;Q16594;Q92830;O75529;Q6P1X5;Q12962;P49848;Q16514;O75486;Q15542;O00268;Q9HBM6;Q15545}

4850 Pathogen[ P03383] interacts with 14 human partners:{O75528;O75486;Q9Y4A5;Q15542;Q9HBM6;O75529;Q16594;Q92830;P49848;O00268;Q16514;Q6P1X5;Q12962;Q15545}

4851 Pathogen[ P03410] interacts with 14 human partners:{Q92830;O00268;Q12962;O75528;O75486;Q9HBM6;Q9Y4A5;Q16514;P49848;Q6P1X5;Q16514;Q15542;O75529;Q15545}

4852 Pathogen[ P14075] interacts with 14 human partners:{Q12962;Q15542;Q6P1X5;Q9Y4A5;Q16594;O75528;P49848;Q16514;Q15545;O00268;O75486;O75529;Q92830;Q9HBM6}

4853 Pathogen[ P0C206] interacts with 14 human partners:{O75486;O75528;Q92830;Q15545;Q16514;P49848;O00268;O75529;Q9Y4A5;Q15542;Q6P1X5;Q9HBM6;Q12962;Q16594}

4854 Pathogen[ P03363] interacts with 14 human partners:{P49848;Q16514;Q15545;O00268;Q12962;O75529;Q92830;Q15542;Q9HBM6;Q9Y4A5;O75486;Q6P1X5;O75528;Q16594}

4855 [Cluster 442]GO:0005856+C cellular\_component [name] cytoskeleton [def] "Any of the various filamentous elements that form the internal framework of cells, and typically remain after treatment of the cells with mild detergent to remove membrane constituents and soluble components of the cytoplasm. The term embraces intermediate filaments, microfilaments, microtubules, the microtrabecular lattice, and other structures characterized by a polymeric filamentous nature and long-range order within the cell. The various elements of the cytoskeleton not only serve in the maintenance of cellular shape but also have roles in other cellular functions, including cellular movement, cell division, endocytosis, and movement of organelles." [GOC]

4856 Pathogen[ Q2Q067] interacts with 372 human partners:{Q3KQU3;P49454;Q8WW24;Q96TC7;Q15511;Q12798;Q9Y2J2;Q5SZL2;Q01082;Q8IXJ6;Q9BTV5;O75161;Q5TD94;Q96GE4;Q15013;Q6P2H3;P50995;Q14008;Q9Y2Y0;Q9H4X1;Q9Y613;Q9Y615;Q7Z4H7;P78559;Q9Y266;P07737;Q15398;Q96RT8;Q70YC5;P63172;Q9P209;Q8WX93;Q14315;Q9NQW6;Q96B97;O00291;Q8NCR6;Q14980;P35080;O43663;Q95684;Q7Z460;Q8IZW8;Q8TF09;O14639;Q8N3V7;P63313;Q9UJT2;O43516;O43189;Q96ST8;Q92797;Q96R06;Q9H1H9;O14604;O43805;Q14204;Q5SW79;Q8N137;Q8N0Z3;O94927;O60437;Q5UIP0;Q5VYK3;Q9UJW0;O75935;P78406;Q7Z7A1;Q32MZ4;P54274;Q9NZJ0;Q9BXW4;Q8WWK9;A8MVW5;Q8NHV4;Q6P1N0;Q14511;P63167;Q01201;Q9P1Y5;Q5FBB7;Q13884;Q13257;Q86XR8;Q9BZV1;Q96AQ6;Q8IZP0;Q96EY5;Q9UJT9;Q9HC77;Q9UPV0;P06748;Q14757;Q9UNH5;Q9NVX0;O75347;Q6P582;Q9NXR1;O00423;P29966;Q13432;A8K8P3;Q9Y237;Q9C099;Q9P270;Q53HL2;O00401;Q96SN8;P67775;Q96K30;P42704;P04792;Q92547;Q9P258;O95359;Q08AD1;Q1MSJ5;P15924;Q8NF91;Q96N16;Q14790;A6NKF1;Q92558;Q5BJF6;Q8IY31;Q2M2Z5;O95198;Q5JTW2;P60673;P54105;Q9NP97;Q8TF74;P14635;Q9BYD9;P23528;Q9NYZ3;Q99871;Q96QF0;Q68DK2;Q8TEP8;Q96DB5;Q9NQS7;Q14203;Q99569;Q9HBL0;Q96IF1;Q8N336;Q76KD6;O15061;Q9Y448;Q8N0Z2;P0CG35;Q13137;O43264;P04264;Q9Y3A5;O94811;Q9UHI6;P11532;P62081;Q8WUM4;P62714;Q7Z7K6;P17987;Q9H2C0;Q9C0D2;P62328;Q9BYV8;Q9BW27;O43236;Q08J23;Q8NHQ1;Q9Y6Y0;P11171;Q9NXB0;Q6PGN9;Q13561;Q66GS9;Q6IN85;Q9Y6N9;Q8WWW0;Q9H9H5;Q15654;O43303;Q92624;Q8TES7;O76095;Q96RT7;P46939;P09972;Q12834;Q15643;P54840;P41002;Q8N3F8;P0CG34;Q674X7;Q9UBK9;Q5MIZ7;P50748;P06396;Q9BQ89;Q96JM3;Q9BSJ2;Q5JR59;P29474;P50991;Q9BT25;Q96Q89;Q13233;O15265;Q00587;Q9BR76;P42025;Q9H6D7;Q9C0F1;Q53HC0;Q99550;Q96MT8;Q15078;Q9NVD7;P50613;Q12873;P04406;Q00005;Q8TD16;Q99615;Q5VU43;Q13045;Q5TB80;Q1W6H9;O60299;A6NK89;Q9H0B6;Q99996;Q8WUW1;Q9ULW0;Q9NZU7;P50570;Q02241;Q86VQ0;O75

665;Q9C0C2;O00139;Q9H4H8;Q53EZ4;Q96NB1;O60308;Q8N8E3;P37198;Q08AG7;O94986;Q86X95;O75122;Q5TZA2;Q07866;Q9NRI5;Q8IX90;Q02952;Q68DX3;Q15051;P23258;Q9H816;Q8IWC1;Q9UPY8;Q5T5Y3;Q14839;Q6UVJ0;Q9Y6D9;O95996;P59998;P42768;Q9UKT4;Q96T76;Q96BD8;Q6QNY1;Q9UI95;Q9Y3D0;O95271;Q717R9;Q96JN8;Q8NA72;O75410;P41208;Q9NR09;Q96IK1;Q15628;Q8IZT6;Q86SQ7;Q8TC76;Q13425;Q6DKK2;P80723;Q9NS23;Q9UPA5;P60953;O60504;O75154;Q9NWB7;Q13409;Q495M9;O15182;Q6NZG4;Q9BXS6;Q14244;Q9NY27;Q9H204;P18848;Q9UGJ1;P35579;O95613;Q96FJ2;Q49MG5;P30305;Q3SYG4;Q9BZF9;P24941;Q9UKK3;Q8N4C6;Q9BX66;Q99689;P08670;Q9BVN2;Q8TDR0;Q9H7T9;Q9BPU9;Q86VS8;Q92597;Q66K74;Q15834;Q9UH77;Q96CS2;P51808;Q9Y281;P27816;Q86WH2;Q96M29;Q13042;P61586;Q92556;Q15691;Q8WVK7;P60510;Q8TAP9;Q8IW35;Q96ED9;Q9UMS4;O15083;Q15154;Q6Q759;P07197;Q9NPA3;Q9NRR3;O15392;Q96EA4;Q96JJ3;Q68CZ6;Q14194;Q9BT92;O14576;Q9BRK4;Q9Y224;Q5VT06;Q7Z6E9;Q9ULD2;Q15650;Q9BV73;Q8N9B5;Q96CW5;Q9NX95;P17661;Q8TAP6}

4857 Pathogen[ P0C214] interacts with 383 human partners: {Q9NWB7;P29474;Q9NRR3;Q5SZL2;O15078;Q07866;P35080;Q5MIZ7;Q9UI08;O94927;Q8TAP9;O15083;P60709;Q13257;O75935;Q9Y615;O75161;Q9H4X1;Q68DX3;O43805;P62081;P29966;P68133;Q9BSJ2;Q6NZ67;Q15154;Q8N0Z2;O15061;Q8IZP0;Q8IY31;Q08AD1;Q14008;Q5UIP0;P49368;O95198;Q1MSJ5;O94986;Q8WWW0;P16157;Q8NCR6;P04264;Q9H816;Q92624;Q9NRR8;Q53HL2;Q00005;O43264;O75347;O95684;Q15628;Q9NRI5;Q15013;P41002;Q9UJW0;Q02241;Q9NS23;Q15051;Q9BRK4;Q96ED9;P48643;O94811;Q6DKK2;Q14203;Q9Y281;Q7Z4H7;Q12873;P06748;Q9P209;Q8NHQ1;P50613;Q5SW79;Q9UJP4;P15924;Q9NY27;Q96EA4;Q9C0C2;Q9P1Y5;Q53HC0;Q96SN8;Q495M9;Q8TF09;Q96R06;Q8NA72;Q9BX66;Q9NPA3;P78406;A8K8P3;P63313;Q9C099;P50748;A8MVW5;Q9Y6N9;Q8NHV4;Q92797;Q7Z7A1;P61586;Q9BXW4;Q5VYK3;P04792;Q9BYV8;Q8WW24;Q9BX66;P23258;P42704;Q9HC77;Q5JTW2;Q13515;O14639;P60953;O00423;Q96MT8;Q14204;O60299;P14635;Q32MZ4;Q9Y613;P06396;O60437;P51808;O00139;Q96CW5;Q14194;Q15691;Q13884;P0CG35;P46060;Q96TC7;Q9Y266;Q9UI95;P52565;Q9BYD9;Q9BTE1;Q8N336;Q99615;Q96RT7;Q9UGJ1;Q5JR59;Q01082;P27816;Q9UMS4;Q9BZV1;O95359;Q9BT92;P60510;Q96CS2;Q14315;Q14980;Q8TEP8;P11532;Q9UPV0;Q9C0F1;Q9H0B6;P62714;Q6PGN9;Q96ST8;O43303;Q8IWS5;Q76KD6;Q9Y237;O43516;Q13137;P18848;O75122;Q86WH2;Q674X7;Q92597;Q86VS8;Q15834;Q13045;P0CG34;Q13233;Q96EY5;Q96Q89;Q12798;Q8IVI9;Q01201;Q8NF91;P37198;Q8TF74;Q9Y224;Q15124;Q9BW27;Q13425;O14613;Q9Y6Y0;Q5VU43;Q9NXB0;Q96BD8;Q66GS9;Q8TDR0;Q7Z6E9;Q8IYX8;Q9H9H5;Q14244;Q9BPU9;O14604;Q9UJT2;Q9P258;Q86XR8;Q15398;O43189;Q08J23;Q9BT25;P46939;Q16658;Q92556;Q12834;Q9ULW0;Q9NZJ0;P08670;O43663;Q15643;Q53EZ4;Q96LK0;P24941;Q9NXG0;Q99689;Q15654;Q3SYG4;Q9ULD2;Q14019;Q99550;P67775;Q9UHI6;Q6P2H3;P59998;Q96K30;P30305;Q5T5Y3;Q8TD16;Q8TAP6;Q9NZU7;Q96DB5;Q96RT8;Q8TC76;Q9NX95;Q9UNH5;P62736;Q7Z7K6;P78559;Q8TES7;Q15650;Q8WUW1;Q99871;Q96AQ6;Q1W6H9;Q14511;P09972;P41208;Q6IN85;Q92558;O75665;O15392;Q2M2Z5;Q8N9B5;Q9H6D7;Q9UPY8;O75410;Q9HBL0;Q8IX90;P42025;Q9H204;Q9H9E1;Q96G01;Q8IWC1;Q9BVN2;P63172;O14576;Q3KQU3;Q7Z460;Q9BV73;P54840;Q9V2M9;Q9NYZ3;P60673;Q9UKK3;A6NKF1;Q96FJ2;Q5FBB7;Q8IXJ6;Q9BTV5;Q9Y2Y0;O00399;Q96JM3;Q9NQS7;Q9NR09;O15265;Q68CZ6;Q9NPF7;Q5BJF6;P17987;Q8N0Z3;Q8WVK9;O15144;P80723;Q9BZF9;O00401;O60504;Q86SQ7;Q5VT06;Q96GD0;Q68DK2;P07197;Q6P1N0;Q92614;P50570;Q9NVD7;Q9Y3D0;Q92547;O95613;P50991;Q99996;Q8N4C6;Q8N3V7;Q9BK20;Q13409;Q6QNY1;Q5TD94;O14757;Q08AG7;Q9NXR1;O95271;Q8N3F8;P42768;P49454;Q9Y3A5;Q9UBK9;Q9NVX0;Q9P270;P63261;Q6P582;Q96JJ3;O60308;Q95Y22;O43236;Q8IZT6;Q9Y448;P50995;Q13561;Q5TB80;Q96QF0;Q9UJT9;Q9C0D2;Q7L5Y9;Q9H492;Q96M29;Q9H7T9;A6NKR8;Q86X95;P04406;Q6UVJ0;Q9BQ89;Q70YC5;Q9UH77;O00291;Q96B97;Q9UKT4;P11171;Q9Y6D9;Q96NB1;Q14839;Q5TZA2;P62328;Q8N8E3;Q49MG5;Q96T76;Q96JN8;Q66K74;P54274;O75154;Q13432;Q9BR76;Q8WVK7;P36404;P63167;Q6Q759;O15511;Q14790;Q13042;P17661;Q96N16;Q8N137;Q8WUM4}

4858 Pathogen[ P03346] interacts with 509 human partners: {O95166;Q13425;Q08J23;Q9Y6N9;O60437;Q9NZJ0;Q96G01;P15924;Q5T5Y3;P54105;Q5SZL2;Q6P582;Q9Y6D9;Q9NRI5;O15265;Q8N3V7;Q96AC1;Q15058;Q99615;Q5T6F0;P09972;Q7Z7A1;Q9BT25;Q5FBB7;Q96FJ2;Q8TDG2;Q9BXS6;Q9H6D7;Q8N0Z2;Q9H4X1;Q86VQ0;Q96B97;Q9Y281;Q9NQC8;P50570;P02549;Q9NSK0;Q9UJW0;Q00005;Q6NZ67;Q9Y283;O14576;Q8WX93;Q01201;Q14315;P04406;O75112;Q15834;Q9NQW6;Q86XR8;Q14511;Q9HCS5;Q8N8E3;Q8N9B5;Q5JTW2;O15392;Q86VS8;Q68DX3;O95613;O95684;Q12840;Q9UH77;O14639;P06748;Q96N16;P29474;Q8IZW8;O15511;Q5JR59;Q2M2Z5;Q99569;Q13515;P23258;Q99871;O15144;Q96RT8;O43516;Q9Y613;Q8IVI9;Q7Z4H7;Q9BPU9;P11277;O43379;Q8IY31;Q9UJT9;P42768;Q5MIZ7;O95714;P35579;Q8WYJ6;P62736;Q9NRR3;Q8IZP0;Q92614;O75410;Q15154;O75935;Q96R06;Q96AQ6;O00139;Q13884;Q15013;P51808;Q8N137;Q14247;P78406;O60308;Q15691;Q32MZ4;P0CG34;P54274;Q99689;Q8WXH0;A8MVW5;Q08A81;Q5BKY1;Q8NHV4;Q96K30;Q9NZU7;P80723;P24941;Q9NY27;Q68CZ1;Q9UIF3;Q9UMS4;Q9NXG0;Q9Y6D5;O95359;Q15149;Q8NA72;Q8TDY3;Q9BZV1;Q9UKK3;Q9H3S7;Q9H329;Q8NCR6;Q9HC77;Q9NQY0;P60709;Q5TD94;Q99426;O14757;Q66K74;Q9HBG6;Q14141;Q9NX95;O43264;O14682;Q9NXR1;O15061;Q53HL2;Q9P209;Q9H1H9;Q8IXJ6;Q96M29;Q96IF1;Q00587;P60953;Q9H2C0;Q9BR76;Q96TC7;Q9P1Y5;Q15942;P28289;P62714;P67775;Q9P258;Q14204;Q6XZF7;Q96IK1;O14613;Q9UI08;Q14203;Q9Y5K6;Q9BX66;Q96CW5;P37198;Q53HC0;P41002;Q9UI95;P52565;O60662;Q70YC5;Q96JJ3;O00291;Q9BTE1;Q8IYX8;P46939;Q9BQ89;Q9BT92;P16157;Q9C0F1;P26038;Q96LK0;Q2V2M9;Q8N0Z3;O00151;O43805;Q8TEW0;Q12834;P30305;Q8TF09;Q8WUW1;Q8TC94;Q15051;O15083;Q9BT04;Q14980;Q8TEP8;P16452;Q6P2H3;O75347;Q9H0R8;Q13813;Q69YQ0;Q13424;Q96ST8;Q13432;Q9BRK4;Q6NKC8;Q76KD6;Q8TAM2;Q13137;Q9C0H6;Q15555;Q6P1N0;Q5TB80;Q9Y266;P41208;P07197;Q01082;A6NKR8;Q9C0D2;O75161;P18848;P59998;Q9BW27;Q15643;Q9H9E1;Q14847;Q9Y6Y0;P11171;Q9NXB0;Q9NVX0;Q66GS9;Q9Y224;O75665;Q9ULW0;Q9Y237;P17661;Q9H9H5;O43236;Q8N960;Q96EA4;Q15398;Q9P0K7;A6NKF1;O00423;Q8IW35;Q92597;P60673;P14635;O43189;Q86SQ7;Q13042;O94986;P46060;P35080;Q6QNY1;Q9NWB7;Q92599;Q7Z6E9;Q96SN8;Q8N841;Q15019;Q9Y4G6;P42704;P50991;P58107;Q9H9H5;Q6ZP65;Q14008;O43491;Q9ZGN1;Q92558;Q9UJT2;Q5VT06;Q9UKA4;Q3SYG4;Q9UHI6;Q9UI47;O60447;Q9HBL0;Q68CZ6;Q8TC76;Q9UGJ1;P49368;Q5VYK3;Q6P597;O15145;P62081;Q96K30;Q8IZS6;P36404;Q9H492;O95198;Q9BTV5;Q53EZ4;Q9NQS7;Q02952;Q8N0X2;Q96Q89;Q8TD16;Q3KQU3;Q8TAP6;Q9Y614;Q9NVR7;Q9UKT4;Q9Y4P9;P78559;P42025;Q6PGN9;O00399;Q7Z7K6;Q6ZU80;Q13233;O14604;Q9ULD2;P63172;O00522;Q5BJF6;Q9Y2J2;P11137;Q5T124;Q5UIP0;Q9H4H8;O94811;Q8N157;Q9C0C2;O95996;Q66JM3;P50995;Q9Y5Y2;P30622;O75122;O60299;P29966;Q15628;Q68DK2;Q9NVD7;Q02241;Q9C099;Q9BYV8;Q8TAP9;P08670;P27816;Q9BUZ4;Q8IX90;Q08AE8;Q8N3F8;Q92797;Q8IWC1;Q92547;Q9Y2I6;Q8WWW0;P50748;P36405;Q96ED9;Q8TF74;Q14790;P54840;P63313;Q8TDR0;Q99996;Q13409;

Q96PY6;Q96DB5;Q14244;Q96CS2;Q8NHQ1;O95271;P62328;Q717R9;Q9NYZ3;Q5TZA2;Q99550;Q9NR09;Q9BXW4;Q14019;Q6IN85;Q12798;Q9Y448;Q16658;Q8WWK9;P11532;Q9BZF9;O60504;Q12873;P63167;Q8IZT6;Q9BVN2;Q96KG9;Q9BSJ2;Q9Y6F1;Q08AG7;P0CG35;Q7Z460;P07737;Q9UHD8;P06396;Q8TES7;Q674X7;Q9Y2Y0;Q14CM0;Q96JN8;O95613;O15182;P23528;O15078;Q96GE4;Q96RT7;Q9H8V3;Q13045;O94927;Q49MP5;Q96JE9;P54257;O75154;Q8N4C6;Q076095;Q9C0H9;Q86X95;P04264;Q5VU43;Q9UPY8;Q14194;Q9UJP4;Q6Q759;O43663;Q86WH2;O00401;Q9H816;Q9P270;Q96FT9;Q8NF91;Q15654;Q96EY5;A8K8P3;Q16204;Q8IWN7;Q1MSJ5;Q9UBK9;Q92624;Q9H204;Q92556;P10916;Q9Y615;Q6ZU15;Q8WUM4;Q96BD8;Q8TDZ2;Q9NS23;O14965;Q9NP97;Q1W6H9;Q495M9;Q8WW24;Q6UVJ0;Q5SW79;Q76N32;Q9Y3D0;P04792;Q15650;P60510;Q96T76;Q92834;Q6DKK2;O75506;Q6IQ23;Q8WVK7;Q13257;Q9UNH5;Q9H0B6;P49454;Q9NPA3;Q9UJC3;O43303;Q9Y3A5;Q9H568;Q96NB1;O75146;Q07866;Q14839;Q96M02;Q9BYD9;Q9UPA5;Q6EMB2;Q9Y573;Q9UBF0;Q9H7T9;Q9UBF9;Q9UPV0;Q96MT8;Q96QF0;Q13561;P61586;O00444;P17987;Q9BV73}

4859 Pathogen[ Q85601] interacts with 434 human

partners: {Q53E24;Q99569;Q9H492;Q8NHQ1;Q5VYK3;Q5SZL2;P61163;O00401;Q7Z6E9;O14639;P49454;Q96M02;O75161;O15511;Q96JM3;Q6PGN9;Q9H7T9;Q15643;Q13409;Q8WX93;Q8N137;Q96T76;Q9H4X1;Q92614;P27816;Q9NZU7;Q9UJW0;P68133;Q9Y2J2;P16157;Q9NVD7;Q9NP97;Q8TDR0;Q7Z7K6;P06396;P62081;O75154;O75112;Q6UVJ0;Q15834;Q02241;Q9NQW6;O94986;Q15154;P51808;P36405;Q8N8E3;Q15398;Q13884;Q86VS8;Q96JP2;O95684;Q14008;Q6IN85;Q8WWK9;P46060;Q14194;Q6Q759;O15265;Q92547;P62714;O60437;Q92558;Q2M2Z5;Q9Y5K6;P17661;Q9H6D7;Q9BT25;Q2V2M9;O15182;Q99871;Q9NSQ7;Q9Y3D0;Q96RT8;Q9Y613;Q8TDY3;O95166;Q9UI95;Q5MIZ7;Q14244;Q9UBP0;O95714;P08670;P35579;Q96PY6;Q12798;Q8WWW0;Q9P258;Q96IK1;P50995;Q9BX66;Q6NZ67;Q96SN8;Q00005;Q9Y283;O75935;Q5TD94;Q7Z4H7;Q9UKT4;P78406;O60308;Q14790;Q9BZF9;Q9NVX0;A8MVW5;P18848;Q15654;Q8NHV4;Q9NWB7;Q9NY27;Q9UMS4;P35080;Q9H0R8;Q8TF74;P30622;Q49MG5;Q9BYD9;Q9Y2Y0;Q9P1Y5;Q9UKK3;Q7L5Y9;Q9Y3A5;Q9HC77;Q9BVN2;Q9NZJ0;Q66K74;O43264;Q14204;Q53HL2;Q9P209;Q9BXS6;Q13045;Q9H1H9;O15083;Q9C099;Q6IQ23;P11532;Q8IZS6;O15078;O00151;O15392;P11171;Q92834;Q5BJF6;Q9Y2I6;Q9NS23;Q14203;Q6ZP65;Q01082;P17987;Q96CW5;Q96EA4;Q53HC0;Q9ULW0;P41002;P52565;P0CG34;Q9BT92;Q96JJ3;Q8IZT6;P63172;O43303;Q9BTE1;Q9BZV1;Q6P2H3;Q8WUW1;Q9BQ89;Q9BR76;A6NKF1;P80723;Q96R06;P59998;Q9UJP4;Q96FI4;Q12834;Q8TC94;Q5JTW2;O96015;Q8TEP8;Q13257;Q12840;O43663;P07737;P60709;P23258;Q8TAP9;O14757;Q96ST8;P15924;Q76KD6;Q9BXF9;O43516;Q13137;Q9NRR3;O75122;Q9UNH5;Q13515;P30305;O14965;Q9Y266;Q9BAD1;Q9UPV0;Q9BXW4;Q86XR8;Q96G2C0;Q96Q89;Q96LK0;Q9BSJ2;Q9BW27;Q9Y6F1;Q92644;Q8WW24;Q9Y6Y0;Q9NXX0;Q15650;Q15555;Q6959;Q6P597;Q86SQ7;O75665;P50991;Q9H9H5;Q15013;O00423;Q9Y448;Q76N32;O94811;Q9UGJ1;P14635;Q8TES7;Q8IXJ6;P04264;Q15124;Q13042;Q9BV73;Q96M29;Q8IZW8;Q9NQ7;P63261;Q08J23;P42768;Q96G01;Q12873;Q9Y6N9;Q5VT06;Q9C0F1;Q9BRK4;P09972;Q6DKK2;Q68DX3;Q9UHI6;Q15691;O75347;O60447;Q9UPA5;Q15058;Q8N3V7;P46939;Q15051;Q8TC76;P42704;Q13425;Q96MT8;Q96BD8;Q9Y6D9;Q9UJT9;P50570;Q5T5Y3;Q15942;Q1MSJ5;Q5UIP0;Q9BW30;P54105;O14576;Q8IVI9;Q86VQ0;Q8TD16;Q3KQU3;Q96B97;Q9BYV8;Q7Z7A1;Q9Y281;Q99615;O14613;A6NK89;Q5TB80;Q9NYZ3;Q99550;O00399;P60673;Q9NXG0;Q9BVA0;Q9NPA3;Q01201;Q8IW35;P06748;Q99689;P61586;Q14315;P50613;Q9H4H8;O94927;Q2M2Z4;Q9C0C2;Q69YQ0;P29966;Q68DK2;P67775;P29474;Q3SYG4;Q15628;Q8TDG2;Q8IX90;O99596;Q92797;Q14980;Q96IF1;Q8IWC1;Q5JR59;P50748;Q8TAP6;Q9Y615;Q8WVK7;O76095;Q16204;Q99996;Q9BPU9;P07197;Q8WYJ6;Q5VU43;Q96CS2;P60953;P60510;P62328;Q9BTV5;Q9NRI5;Q5TZA2;O43189;Q9NR09;Q8WUM4;P04792;Q9Y5Y2;Q13432;Q7Z460;O60504;Q5SW79;P54840;P0CG35;Q96KG9;O00291;Q96TC7;Q08AG7;Q9H9E1;Q92597;Q8N3F8;P78559;Q674X7;Q13233;P04406;Q96JN8;O95613;P23528;Q8N0Z3;O43379;Q8N4C6;Q8IZP0;P48643;Q9HBL0;Q9NXR1;Q8N0Z2;O95271;Q9UPY8;Q9BT04;Q9NXX95;Q96K30;Q6P582;Q86WH2;Q9H816;Q9UH77;Q9UBK9;Q9P270;Q8NF91;Q96EY5;A8K8P3;Q96ED9;Q9C0H6;Q14511;Q6P1N0;Q9C0D2;Q9H204;Q8N9B5;Q9GZM8;Q6QNY1;Q9Y237;P24941;Q8TF09;P62736;P42025;Q1W6H9;Q96AQ6;P63167;Q07866;O14604;O00139;O75410;Q9Y224;Q9H0B6;Q9UJT2;Q495M9;Q9ULD2;Q96N16;Q68CZ6;Q96DB5;O15144;Q5FBB7;Q86X95;P51955;O43805;O95198;P54274;Q8IY31;Q8NA72;O43236;Q96NB1;Q14839;O95359;Q8IYX8;Q96RT7;O60299;Q96QF0;Q13561;O15061;P41208;P63313}

4860 Pathogen[ P14079] interacts with 590 human

partners: {Q02952;Q15691;Q9UKA4;Q14980;Q9H1X1;Q9H204;Q8TF09;Q2M2Z5;O43516;Q9P0N5;O75112;P52565;P54274;P16452;Q9Y4P9;Q9BZ68;Q9NQW6;O75161;Q8NA72;Q9Y2J2;P35579;Q9H7T9;P48643;Q8TC94;O95166;Q9BW27;O95425;Q68DX3;Q5TZA2;P09327;Q96K30;Q9UPY8;Q6XZF7;Q96EY5;O14613;O00291;P63261;Q9Y614;Q9BTV5;O75146;Q6UVJ0;Q5JQC9;Q3KQU3;Q5T124;A6NL28;P63172;P54257;Q9NWB7;O95876;Q68DK2;Q08AD1;Q99996;Q9H939;Q8IY31;Q9UJC3;Q9NS23;P0CG34;Q6IQ23;Q9NPA3;Q9UKT4;Q9NRR3;Q8TEP8;P11532;Q7Z460;P51808;Q8IX90;O15553;P11171;Q6ZMV9;Q8TDZ2;Q9BVN2;Q07866;O95684;Q9P209;O95359;Q9H4H8;Q8WWL2;P07951;P52564;Q96R06;O43597;Q92614;Q01082;O95271;Q9NXX95;Q96FJ2;P50995;Q8IZW8;Q86VS8;Q9Y237;Q16658;Q96GE4;Q8N9B5;Q9H492;Q96GX1;Q92558;Q9NR12;Q9NZ32;A6NK89;Q12840;Q9UI47;P15924;Q9NRR8;Q8N0X2;O94986;O76095;O15231;P47756;Q99871;Q96ED9;Q15013;Q8N157;Q8WX93;Q66K74;O14604;Q9NYZ3;Q92556;Q9UGJ1;Q68CZ1;O14639;Q02241;P50991;Q8N336;Q9Y6D5;Q9NVX0;Q14204;Q9NXG0;P26038;Q5JTW2;Q92834;Q9Y2Y0;Q70YC5;Q66GS9;O15392;Q16585;P09972;Q717R9;Q9BFX5;Q9UPA5;Q1MSJ5;P07737;Q96ST8;P42704;Q9Y266;Q8N8E3;P46060;Q9BXF9;Q6Q759;Q92624;O95922;Q9UBF9;Q8IZP0;Q9NRI5;Q6P582;Q8N3I7;Q7Z4S6;P10916;Q641N0;P68363;Q9BV73;Q14244;Q9NY27;A8MVW5;P35080;Q32MZ4;Q9BSK0;Q1W6H9;Q9Y615;Q9ULW0;O60437;Q8N3F8;Q9Y3D0;Q13045;P50990;Q9Y4F9;O60504;P57679;P16157;O95954;Q7L5Y9;Q9Y3A5;Q96B97;Q8TF74;Q14847;O00423;Q9BZV1;Q15124;Q9NVR7;O00399;A8K8P3;O00151;Q96M29;Q86UK5;Q8TAP6;P60673;Q9UJW0;Q96JJ3;Q92597;Q76KD6;Q76N32;Q9UHI6;Q9Y448;Q9H9H5;O43379;Q14118;Q13424;Q69YQ0;Q9Y4G6;Q5VYK3;Q9C0H9;Q9UKK3;Q1Y4R7;Q96BJ8;Q6ZU80;Q9BUZ4;Q8IWN7;Q9BXS6;Q96N16;P50552;Q5FBB7;P46939;Q96GD0;Q96LK0;Q12873;Q9Y613;Q9GZS0;P50570;Q86WH2;Q01201;Q5TD94;Q9NP97;Q8N960;Q9NR09;P35611;Q9UKI2;Q92797;O95198;Q5SZL2;Q08AG7;O15061;P10911;Q8TEW0;O75506;O15145;Q9HBL0;Q16204;Q96M02;Q6NZY7;Q15149;Q96IK1;O15511;Q9H9E1;P68032;O15066;P50613;Q8TDY3;Q9BTE1;Q08AE8;P56715;A6PVC2;Q43189;P78559;Q9NQ7;Q8LVI9;P36405;Q9C0C2;Q92629;O75952;Q99661;O43663;Q8WYJ6;Q5BJF6;Q7Z6E9;Q5MIZ7;Q15814;Q16586;P14635;Q9UMS4;Q14315;Q9H2C0;Q9UPM9;P51955;Q14790;Q9689;Q8NHV4;Q9H2D6;O00519;Q00005;Q9Y6U3;Q2M3G4;Q8N4C6;Q9BQ89;Q96IF1;P23528;Q96Q89;P29966;Q5VT06;Q8NBT0;Q86XW9;P07197;Q8WUM4;Q14093;O60610;Q9UI46;P28289;Q05BV3;Q99426;O60282;Q7Z4L9;Q8IWC1;Q96RT8;P61158;P17987;O95996;Q1



2798;Q13042;O00139;Q15555;Q15058;P63267;P41002;Q13257;P62328;Q96EA4;Q8TAM2;Q99569;Q96QF0;Q9UJZ1;Q8WVK7;P23258;Q96JM3;O94811;Q9H1H9;Q96AC1;Q8N3V7;Q9UBK9;Q96RT7;Q9H6D7;Q8WXH0;P35663;P61586;O43294;Q9Y5Y2;Q9Y6Y0;P60709;Q9H8V3;Q8N841;Q08J23;Q96AQ6;Q13326;P37198;Q96FI4;Q9H0R8;Q9BPU9;A6NKF1;Q9P258;Q15834;O43903;Q14247;Q13409;Q13561;Q8TCU4;O43264;Q9P2L0;Q96FG2;Q14194;Q49MG5;Q9BR76;Q9Y281;P11277;Q95SW79;O15083;Q92817;Q9Y4F5;Q8N0Z3;P06748;Q9BSJ2;Q62P65;O43303;Q8NEM0;Q9C0F1;Q9NZ20;Q9C099;Q6DKK2;Q13137;Q96LD1;P61163;Q9GZM8;Q8WW24;Q96G01;Q5T5Y3;Q9UFE4;Q96JE9;O75366;Q96DB5;P0CG35;Q6PGN9;Q8IXJ6;Q5TB80;Q9UH77;Q9ULD2;Q8N0Z2;Q53HL2;Q68CL5;Q00587;Q969V4;P62081;Q8WWK9;Q86Y91;Q8TAP9;Q86SQ7;Q6IN85;P41208;Q9Y5K6;Q13432;Q8TC44;Q9Y6N9;Q5T7B8;Q9NQS7;Q8TES7;Q14839;Q92547;Q9P270;Q05682;Q9BZF9;Q8TDR0;P78406;O95613;Q9Y283;Q9C0H6;Q15051;O75410;P63167;Q9P1Y5;Q8TC76;Q6ZMW3;P60510;Q9BT92;O15078;Q495M9;Q6EMB2;Q9BW30;Q9UIF3;O15265;O60299;Q8WUW1;Q5BKY1;Q9P2K1;Q99439;Q13515;P42025;P59998;Q7Z4H7;P49454;Q9NQ8;Q9NZJ0;Q8N137;O75154;Q9BT25;P08670;O15182;Q99615;O75347;Q6P2H3;P30305;Q8NHQ1;P49023;Q6NZ67;Q5JR59;Q9UJP4;P49773;P04264;P11137;Q68CZ6;Q9NSK0;P80723;O75665;Q2V2M9;P58107;Q15154;Q9UJT9;Q3SYG4;O14576;Q8NF91;Q8IZS6;Q15650;Q86XR8;P04792;Q9NXR1;P50748;Q9UEY8;Q9GZN1;O96015;P17661;O95235;P49368;Q5T6F0;Q9BX66;P54840;Q9BY60;Q9Y2I6;Q13813;Q96TC7;Q5UIP0;P54105;Q96BD8;Q86VQ0;Q9BVA0;O75122;Q32P44;O14965;P02549;Q9H0B6;Q9UPY6;Q9NVD7;Q9Y573;Q9BRK4;Q8IYX8;Q6QNY1;O75935;Q86X95;Q9H568;Q9C0D2;Q9Y224;Q9NQ7;Q9HC77;P63313;Q15628;Q9H3Q1;O15259;Q96FT9;Q8IW35;Q9H816;Q9BXW4;Q96SN8;Q8WWW0;P68133;Q8TD16;Q9NXB0;Q96T76;Q9BYV8;Q8TDG2;Q6IQ19;Q9Y6F1;Q8NHR9;Q14203;O15144;Q9UJT2;Q8IZT6;P27816;Q9NZU7;P35241;Q9P0K7;Q9UNH5;O60308;O43805;Q674X7;Q53EZ4;Q99550;Q14019;Q7Z7A1;Q8NCR6;Q15643;O00522;O43236;Q6P597;O94927;Q7Z7K6;Q5VU43;P30622;Q96LZ7;Q96CW5;Q9UPV0;Q9BYD9;P42768;Q96NB1;P10636;O00401;Q96KG9;Q14008;Q9UI08;P04406;Q8WVJ2;Q9NSN8;Q9BT04;Q9BYX7;Q15942;Q15398;Q8IUZ0;Q96CS2}

4861

Pathogen[ P03383] interacts with 307 human

partners: {Q14244;Q7Z7A1;Q9BRK4;Q13257;P15924;P41002;Q9Y2Y0;Q9NQS7;Q8TC76;P49454;P50995;Q8TF74;Q8N0Z3;Q86XR8;Q5JR59;Q32M24;O14757;Q96T76;Q9H4X1;Q7Z460;Q14839;Q6UVJ0;Q9Y281;P35080;Q9UJW0;Q9BSJ2;Q96TC7;P06748;Q1MSJ5;Q96BD8;P29474;Q68DK2;Q15051;Q02241;O94986;Q13515;Q9NWB7;Q14008;P51808;Q9NZJ0;Q15691;Q13884;Q13233;Q96QF0;O95684;Q8IY31;Q5UIP0;Q8WWK9;O14639;P54105;Q9BSK0;P08670;Q15013;O15511;P17661;Q9NVX0;Q15650;O43264;Q5FBB7;Q96FJ2;Q9NRI5;Q9UI95;Q8TDR0;Q9P258;O43236;Q5VYK3;P42025;Q9BXS6;P63172;Q14203;Q6NZ67;Q96SN8;Q00005;O75410;Q7Z4H7;Q96AQ6;P78406;O94811;O60299;Q99689;Q9BZF9;Q96CW5;O43303;P60953;A8MVW5;P41208;Q8NHV4;P62328;Q9NX95;Q9BV73;P62714;Q92797;Q9H204;Q86WH2;Q9UHI6;Q9BZV1;P09972;Q9HC77;Q5TD94;Q12798;Q3KQU3;P63313;Q9H0B6;Q96M29;Q9UKT4;P04792;Q9C0C2;P67775;Q9H2C0;O43189;Q96K30;Q7Z7K6;Q92597;O15061;Q96EA4;Q13042;P07737;Q13432;P14635;Q9Y3D0;Q5VT06;Q96MT8;P46939;Q08AG7;Q92558;Q9R06;Q9BQ89;Q96DB5;Q9C0F1;Q15654;Q8TES7;A6NKF1;Q9H1H9;A8K8P3;Q8TEP8;Q5VU43;Q12834;Q6P1N0;Q76KD6;Q6PGN9;O43516;Q13137;O60308;O00401;Q99871;Q15643;Q5TZA2;Q9Y613;Q96NB1;O00291;Q5TB80;Q12873;Q96CS2;Q2M2Z5;Q9H816;P27816;Q53HL2;P59998;O94927;P62081;Q9BW27;Q9Y6Y0;Q9NXB0;Q66GS9;Q96N16;Q86SQ7;P50613;Q9H9H5;Q86VQ0;O75347;P61586;O15265;O15078;P24941;Q9NRR3;Q9NP97;Q9UNH5;Q14511;Q9P1Y5;P07192;Q9UJT2;Q08J23;Q6DKK2;Q9UH77;Q68CZ6;P04406;P0CG35;Q15154;Q01201;Q70YC5;P29966;Q9BT92;Q99615;P42768;Q8WVK7;P11532;Q8WW24;Q96Q89;Q9BYV8;Q9BT25;Q86VS8;Q9NYZ3;O75935;Q07866;Q8N0Z2;Q5BJF6;Q96ED9;Q9H4H8;Q6IN85;Q9Y266;Q9Y3A5;P04264;Q5MIZ7;O14965;Q3SYG4;Q15628;Q8IX90;Q14980;Q96ST8;Q5T5Y3;Q8IWCL;Q6P582;Q9UKK3;Q9UPV0;Q8TAP6;Q9NY27;Q96PY6;Q9P209;Q717R9;Q6Q759;Q075161;Q9NR09;Q08AD1;Q8N9B5;Q68DX3;Q9Y448;Q8N137;P42704;Q8WUM4;P80723;Q9H6D7;O60504;Q5SW79;Q99996;P54840;P35579;P78559;Q8N3V7;Q8TF09;Q8NA72;P23528;Q9ULW0;O95613;Q13561;Q9C099;Q13045;Q9H7T9;Q00587;O43663;Q49MG5;P37198;P18848;Q8N4C6;O76095;Q92547;Q86X95;Q6P2H3;Q8N8E3;O95271;Q92624;O15083;Q9UBK9;Q9P270;O60437;Q9Y4P9;P63167;Q9C0H9;Q8NCR6;Q9C0D2;O75665;Q02952;Q9BT04;Q15834;O14604;Q96EY5;A6NKR8;Q9NPA3;Q53EZ4;Q9UPY8;Q53HC0;O75154;P60510;Q9Y615;Q9UMS4;P54274;Q9Y224;Q8NHQ1;Q13425;Q9BVN2;Q8TAP9;Q1W6H9;P06396;Q9Y6D9;P0CG34;Q6QNY1;Q8IW35;P50748}

4862

Pathogen[ P03410] interacts with 601 human

partners: {Q15650;O15511;Q9UJT2;Q96AQ6;Q9BVN2;Q9UKT4;Q96M02;Q9Y6G9;O95684;Q96LZ7;Q14CM0;Q8IX90;O75665;Q7Z460;P62714;Q86Y91;Q14204;Q9UH77;Q96TC7;O15392;Q8NHR9;Q8IXJ6;Q9Y573;Q9BW27;Q717R9;Q8IZS6;Q9Y4R7;Q96Q89;O00519;P17987;Q8WVJ2;O75154;Q86VQ0;Q8N960;Q9H4X1;Q13137;Q96FI4;Q5JR59;Q9UI95;Q6NYC8;Q6ZMW3;Q12873;Q8IWCL;Q68CL5;P49368;Q9UJZ3;P15924;P51808;Q96T76;Q15058;O95359;Q6Q759;P11137;Q08AD1;Q9C0H6;Q9UPY6;P62736;Q9UI08;A6NL28;Q16658;Q9UEY8;Q07866;P48643;Q96NB1;Q13409;P62328;P30622;Q8TDG2;Q9H6D7;Q9Y614;Q6QNY1;Q8TEP8;Q96JM3;P35080;Q9H816;O43903;Q2M3G4;Q5MIZ7;Q9UBF9;Q9UKA4;P50995;P10916;Q8TC76;Q9NP97;Q13561;P47756;Q8N3V7;P27816;P17661;O60610;O43597;Q9H0B6;Q96DB5;Q9Y2I6;O00139;O43303;Q66GS9;O15061;Q9NXR1;Q9Y4P9;Q15398;Q9HC77;Q8TF09;Q9H7T9;Q99996;Q96LK0;Q9BXF9;Q9Y615;P54840;Q9GZM8;Q9H329;Q15154;Q9UI46;P60510;Q53HL2;P04264;Q9NZ32;P54105;O15259;Q96K30;Q32P44;Q9H1H9;Q08AE8;Q3SYG4;Q8TDZ2;P54274;Q495M9;Q96FT9;O43516;P16157;Q7Z7A1;P0CG35;Q8IUZ0;Q8NCR6;P18848;Q8N0X2;Q92614;Q96RY7;P06396;Q05682;P0CG34;Q14019;Q9P1Y5;O60282;Q6UVJ0;Q9Y224;O60299;Q7Z4S6;Q15013;Q7Z4L9;P11532;Q9C0C2;Q8TAM2;Q8WWK9;Q14008;Q96SN8;Q9NRR3;Q8NBT0;O94811;Q92558;O95954;Q9GZN1;Q5JQC9;Q9BSK0;P58107;P36405;O15182;Q5BKY1;Q13425;P28289;P63172;Q8IVI9;O15145;Q5VYK3;Q9NSK0;O00401;Q5TD94;P50748;Q13515;Q9NS23;O14639;P59998;Q9H939;O43294;Q9Y6Y0;Q9C0D2;O00399;P16452;Q69YQ0;P35579;P04792;Q9UKI2;Q15124;O75161;Q8TCU4;P78406;P63167;Q12798;Q9P209;P42768;P50570;Q00587;Q9UJW0;Q96N16;Q8N137;Q86VS8;Q9UIF3;Q9Y283;Q15814;O00291;Q32M24;Q8N336;Q9NYZ3;P06748;Q8TCX1;Q9UBK9;Q6DKK2;Q9Y5Y2;Q9H1X1;Q9UNH5;Q9Y6U3;Q9H987;Q13233;Q96R06;Q9H3Q1;Q96JE9;Q6ZU15;Q13045;Q6NKY1;Q99615;Q9BXS6;Q8TD16;Q9NQW6;Q12840;Q8TAP9;Q6P597;Q8IYX8;P02549;O75146;Q9BYV8;P50613;Q68CZ6;Q9H204;P61163;Q16585;Q01201;Q96CS2;Q9UFE4;P41002;Q9Y6F1;Q9BTV5;Q13884;O43264;O15231;Q9BZV1;Q8WUW1;Q8IZT6;Q7Z7K6;P49454;Q9NQY0;Q9Y5K6;O14965;Q96EA4;Q15654;Q96IF1;Q96GX1;O75952;O95166;P11171;Q96FG2;Q96GD0;Q5T5Y3;O43805;Q9NR09;Q15628;O95425;Q8NHV4;O60308;O60333;P60673;Q92624;Q8N0Z3;Q9BT04;Q9BYD9;Q92556;Q8IZW8;P29474;Q8N3F8;O14576;Q9H9H5;Q9BT92;Q9Y448;P09972;O94986;P50552;Q14315;Q14980;Q6IQ19;Q8TAP6;Q6ZMV9;P14635;P07951;P



49773;Q15555;Q14511;Q6P2H3;Q96KG9;Q15691;Q13042;Q9NVR7;Q9H0R8;P26038;O43236;O95996;Q92797;Q9H492;P35663;O43491;Q9NPE6;P50990;Q9BW30;Q9BPU9;P61586;Q5SZL2;Q15942;Q9BZ68;Q96GE4;P62081;Q8IY31;Q99439;Q9NYL9;Q96ED9;Q9BPX5;P24941;Q9NWB7;Q9UPA5;Q9ULD2;O14613;Q5TZ A2;Q95271;O14604;Q9Y2J2;Q9BTE1;Q674X7;O95198;Q9BXW4;Q9Y6N9;Q5VU43;P46939;Q9NVX0;Q8N157;Q99550;Q9P0N5;P42704;Q96BJ8;Q14847;A6NK89;Q9HBL0;Q9Y613;O43379;O15078;O75506;Q96G01;Q6IN85;Q8N3I7;Q9P2K1;O60447;Q8WVK7;Q9UPM9;Q6XZF7;Q92834;O95876;Q8WYJ6;Q15834;Q9BVA1;Q96ST8;Q8N4C6;Q86SQ7;A8MVW5;Q9Y6D5;O14757;Q9BR76;Q14118;P68133;O75410;Q9Y4G6;Q8WWW0;Q5T6F0;Q5BJF6;O75935;Q9UPY8;Q14093;Q9NZ20;Q9UHD8;Q9NZU7;Q53EZ4;Q6ZU80;Q86WH2;Q2V2M9;Q8IZP0;Q66K74;Q9UJZ1;O60504;Q9BQ89;Q9Y281;Q9BSJ2;O00522;Q86X95;P04406;Q8WWL2;O94927;Q15051;P08670;P54257;Q12834;Q92547;P78559;P10636;Q3KQU3;Q8NA72;Q8IW35;Q9H568;Q96JN8;Q5FB B7;Q8TC94;Q15643;Q08J23;Q96QF0;P60953;P42025;O75347;Q9NRI5;Q96RT8;Q9BZF9;Q8TC44;O43189;Q00005;P23258;Q8N9B5;Q9ULW0;P68363;Q2M2Z5;Q5TB80;Q9UMS4;Q9UI47;O75112;Q9HGB6;Q08AG7;Q9BY60;Q1MSJ5;Q96B97;Q8TEW0;Q9H2C0;P80723;Q9UPV0;O95922;Q9UKK3;Q16204;P63261;P33176;Q9NVD7;Q9NXB0;O15265;Q92597;Q01082;Q9Y266;Q8N0Z2;Q86XW9;O15144;Q14247;Q6NZ67;Q9UJP4;Q6ZP65;P35241;Q02952;Q96EY5;O76095;Q92629;Q9C099;Q9NQC8;Q14194;Q96CW5;Q5UIP0;Q9H8V3;O0151;Q9C0H9;Q6PGN9;A6NKF1;Q9P270;Q99871;Q96BD8;Q9BZ67;Q8TDR0;Q13326;P23528;P27105;Q9N XG0;Q76N32;Q13424;P30305;O00423;Q96JP2;Q9UJT9;Q96RT7;Q15149;Q9Y4F5;Q9P2L0;Q9H4H8;Q5SW 79;Q8N841;Q68CZ1;A6PVC2;O95613;Q13432;Q99426;Q9C0F1;Q9Y2Y0;Q8TES7;Q68DX3;P52565;P67775;Q9Y3D0;Q8IWN7;Q9GZS0;Q6P582;Q13813;Q9P258;Q9Y3A5;Q9Y237;Q1W6H9;P41208;Q14839;Q9UHI6;Q8WUM4;Q14244;Q68DK2;Q92817;P63313;Q8TDY3;O75122;Q969V4;P07737;Q7L5Y9;P56715;Q8WXH0;Q96M29;Q9BV73;Q76KD6;Q96JJ3;Q9BT25;P35611;Q9NRR8;Q9NPA3;Q8WX93;Q49MG5;P11277;O60437;Q9H2D6;P29966;Q05BV3;Q8TF74;Q9BX66;Q0VAK6;Q70YC5;Q6P1N0;Q9H9E1;Q7Z4H7;Q9UGJ1;O43237;Q6 EMB2;Q5JTW2;P46060;A8K8P3;Q6IQ23;Q9NY27;Q5T7B8;P60709;Q9NX95;Q9BVA0;Q9P0K7;Q8N8E3;P50991;P07197;O96015;Q14203;Q5QJ74;Q96LD1;Q8NEM0;Q02241;O43663;O15083;Q86UK5;Q5VT06;Q13257;Q99569;Q9NQ57;Q9NZJ0;Q96IK1;Q99689;Q5T124;Q8N9F1}

4863 Pathogen[ P14075] interacts with 319 human partners: {P60953;P42704;Q92797;Q96MT8;Q99871;Q3SYG4;P29474;Q96AQ6;Q14511;P0CG34;Q15643;Q68DX3;P54105;O43303;Q9H4X1;Q9NPP9;Q9BYV8;O94811;Q96EY5;Q6Q759;P11532;Q00005;Q9Y266;Q86X95;Q9Y2J2;Q6NZ67;Q13042;Q9H1H9;O15265;Q8N3V7;P24941;Q9H2C0;Q1W6H9;Q13884;O95684;Q6P582;Q9Y6D9;Q15051;Q02241;O43663;O15083;O75347;Q5VT06;Q5VU43;Q7Z4H7;O75410;O43236;P62328;Q5TD94;Q99615;O60308;Q49MG5;O76095;Q9UKT4;Q9NQ57;Q9Y224;Q9H7T9;A6NK89;P14635;Q5 MIZ7;Q96R06;Q01201;Q96N16;Q9BVN2;P80723;P51808;Q8WVK7;P78406;Q08AG7;Q8WUM4;Q96JE9;Q13425;Q86SQ7;A8MVW5;P50613;Q8NHV4;Q7Z460;P78559;P60510;Q14839;P42768;Q13561;Q9Y2Y0;Q8IY 31;A8K8P3;Q13257;Q68CZ6;Q9HC77;Q96TC7;Q8N336;P17661;Q13515;Q9BXS6;Q7L5Y9;Q9BT04;Q86VQ 0;P04792;Q96SN8;Q6UVJ0;Q8TF09;Q5TZA2;Q12798;P62081;Q8NHQ1;O15061;Q96BD8;Q9Y613;Q9UI95;P053HC0;P63172;P54840;Q96ST8;P63313;Q9BT92;Q9BT25;Q96GE4;O15511;Q8N0Z2;Q9NRI5;Q8TEP8;P07737;Q5JR59;Q00587;Q92624;P23528;Q76KD6;O43516;Q13137;O00291;Q9UPV0;Q9ULW0;Q9H204;P 50995;Q68DK2;Q9BW27;P54274;Q9UHI6;Q9Y6Y0;Q9NXB0;Q9UPY8;P04406;Q66GS9;Q02952;Q9C0F1;Q9 9996;O00401;Q9NY27;O15078;Q9H9H5;O14604;Q96EA4;Q15013;Q5SW79;Q8TDR0;O00139;Q5BJF6;Q6I N85;Q96FJ2;Q9P258;O75935;Q8TES7;P29966;O75161;Q86XR8;Q6IQ19;O60299;Q15650;P04264;Q9UB K9;O14965;Q96NB1;Q96K30;Q9NPA3;Q15834;Q3KQU3;Q6QNY1;P46939;Q86WH2;Q15691;O43189;Q9BV7 3;Q5TB80;Q6P2H3;Q5T5Y3;P37198;Q6NYC8;Q8N137;Q9H816;Q9C099;Q8TAP6;Q8TF74;Q96CS2;O14613;Q9Y4P9;Q9BPU9;P06396;Q9UH77;P35579;P06748;Q96DB5;Q5FBB7;P0CG35;P18848;Q9UMS4;O14639;P 61586;Q9H4H8;Q9NWB7;Q15654;O94986;P62714;Q9NRR3;P41208;Q15628;P67775;P08670;Q15154;Q 8IX90;Q7Z7K6;A6NKF1;Q8IWC1;Q9BQ89;Q53EZ4;Q9BR4;Q53HL2;Q6PGN9;P07197;Q9NVX0;P09972;Q9 6QF0;Q717R9;P50748;Q9NR09;P35080;Q96PY6;Q32MZ4;Q8WVK9;Q9BZF9;O60504;O94927;O75665;Q5U IP0;Q92558;Q92597;Q86VS8;Q8NCR6;O75154;O95613;Q9P209;Q14203;Q96M29;P59998;O60437;Q9BZ V1;Q07866;Q14008;Q8N4C6;P41002;Q9C0C2;Q08J23;Q9H0B6;Q9NYZ3;Q9C0H9;O43264;Q8TAP9;Q9NZJ 0;O95271;Q13233;Q9UPA5;Q9NX95;Q9UJW0;Q14980;Q1MSJ5;Q8N8E3;Q9P270;P49454;Q13432;Q9BSJ2;Q96IK1;Q92547;Q12873;Q9UNH5;Q9H6D7;Q9NRR8;Q9C0D2;Q96Q89;P27816;Q8N9B5;Q6P1N0;Q7Z7A1;Q9P1Y5;Q9Y448;P63167;P42025;Q70YC5;Q9Y281;O14757;Q12834;Q96CW5;P11171;Q2M2Z5;Q9UJT2;Q 96T76;Q13045;Q6DKK2;Q8TC76;Q96ED9;Q8NA72;Q8N0Z3;Q14244;Q9BSK0;Q8IW35;Q9UKK3;Q5VYK3;Q9 Y3D0;P15924;Q99689;Q08AD1;Q9Y3A5}

4864 Pathogen[ P0C206] interacts with 523 human partners: {O95271;Q9BPU9;Q9NQC7;Q96TC7;Q5JTW2;Q5SW79;O14604;Q8TC94;Q9NQC8;O15511;P0CG3 5;Q92597;Q9Y224;Q9UJT9;Q9UJZ1;O15182;Q9NPA3;Q68DK2;P0CG34;P48643;Q8N137;Q86XR8;Q9HBL0;P46939;Q08J23;Q9UMS4;Q86WH2;Q01082;Q14019;O75952;Q96M02;Q8N8E3;P60709;O95359;O94986;P17661;Q96DB5;P06396;Q9BVA0;Q5SZL2;Q92556;Q96SN8;P56715;Q9C099;Q9NPP9;Q9BXW4;Q9HC77;Q 9H7T9;Q86SQ7;Q14008;O14576;Q96Q89;Q13432;Q9H4X1;Q5UIP0;O60504;P60673;Q96ST8;P47756;O0 0291;O15061;Q9UBP0;Q5BJF6;O95684;Q15019;Q9BTE1;Q5JQC9;P62081;Q5TD94;Q8N3V7;Q9UPM9;Q9B T92;O43516;Q3SYG4;Q9Y6D9;Q8TAM2;Q8NA72;P62736;Q6IN85;Q9BR76;O75161;Q9ULW0;Q96RT7;Q08A D1;Q8IY31;P51955;Q9Y6N9;O75154;P54105;Q9NRR8;Q9BT04;Q9NVD7;Q14315;Q9C0D2;Q5TZA2;Q6P2H 3;Q96IF1;Q9UPA5;Q9NQW6;Q8TCU4;Q9BTV5;Q96CW5;Q13515;P50995;Q9H492;Q96B97;Q96JE9;P62328;Q2V2M9;Q9P2K1;P52565;Q99615;Q9BQ89;P63167;Q15691;O94811;Q9C0H6;Q9NRR3;Q13045;P04264;Q9NZ32;O14613;Q13137;P78559;P59998;Q8NCR6;Q5T5Y3;Q9UIF3;Q9Y614;Q9Y448;Q9BT25;Q96K30;O 15265;Q86VQ0;Q8WX93;Q96PY6;Q8IZW8;Q15654;O00444;Q8TF09;Q6QNY1;Q6P597;Q9NVR7;Q6UVJ0;Q9 H9E1;Q9Y5Y2;A8K8P3;Q9UPV0;Q99550;Q96JN8;Q6ZP65;P04792;Q8IZT6;P50991;P30305;Q9H816;Q5J R59;Q6PGN9;P49454;Q9UI08;Q99996;P17987;Q9UI47;Q01201;O60299;Q8N3I7;Q9H1H9;P67775;O151 45;P30622;Q9NZU7;Q96KG9;O43237;O95996;P10636;Q13257;Q14141;Q02241;Q14141;Q02241;Q13233;Q9GZM8;Q96N1 6;Q13409;Q8N9B5;O43236;P50461;Q8IX90;Q9UGJ1;Q66K74;Q15814;Q86VS8;Q9Y283;Q15124;Q9Y6F1;Q86XW9;Q92624;Q5T124;Q96ED9;P61586;Q9P1Y5;Q8TEP8;Q9NVX0;P61163;Q8IWC1;Q14244;O60308;Q9NX95;Q69YQ0;Q9UJP4;Q9Y6Y0;Q14839;Q99689;O75122;O60437;Q68CL5;P68133;Q86Y91;O95954;Q 9UJT2;Q8TAP6;O75440;Q99426;Q9UKT4;P54274;Q32MZ4;Q92797;Q8TEW0;P54840;P46060;Q96QF0;Q6 DKK2;Q6ZU15;Q13884;Q6ZU80;Q9BUZ4;P16157;P11137;O60447;Q8WUW1;A8MVW5;P27816;Q96BD8;Q5B KY1;A6NKF1;Q8WYJ6;Q2M2Z5;Q14204;Q9H0B6;Q717R9;Q8NF91;Q86X95;Q9UNH5;Q9H568;Q9Y4P9;Q6P1 N0;Q15650;O43379;Q9UFE4;Q8TF74;Q9Y3D0;Q7L5Y9;Q9UPY8;Q9UJW0;P50613;Q9NR09;O95613;Q9UKK

3;O15083;Q16658;Q9BZV1;Q8IWN7;P35080;Q8IZP0;Q13425;O75112;Q9Y6D5;P80723;P51808;O95922;Q9NWB7;P63261;Q6IQ19;Q96LK0;Q99569;Q96JP2;Q495M9;Q8IYX8;Q16204;Q96AQ6;Q8TDG2;Q15942;Q9Y6G9;Q7Z7K6;O43491;O00151;O15078;Q9NRI5;Q8WWW0;Q8IZS6;P16452;Q15834;Q96JJ3;Q66GS9;Q9H1X1;Q8N841;Q96CS2;O43663;P04406;Q8LW35;Q14790;Q92558;Q7Z4H7;Q5FBB7;Q9ULD2;Q2M3G4;Q5VT06;A6NK89;Q8N157;Q9BYV8;P35579;O00401;O94927;P62714;Q5VU43;O43294;Q9NY27;Q15628;Q53HL2;Q92614;Q9HJM3;Q49MG5;Q8TC76;Q9BV73;Q9NHV4;Q96FI4;O00399;O15392;O43597;Q12840;P60953;Q9NSK0;P23258;O00139;Q8IXU6;Q9NZJ0;Q9C0H9;Q9P258;Q9NQY0;O75665;O15144;Q9C0C2;Q8N336;Q13561;Q96T76;Q76N32;P36405;Q5VYK3;P29474;Q8WUM4;Q15013;Q9BX66;Q14194;Q9H0R8;P15924;Q53HC0;Q9Y237;Q6P582;Q9BXF9;Q9Y5K6;Q02952;P09972;Q7Z7A1;P49368;Q8WXH0;Q9NXG0;Q9H6D7;Q9Y613;Q15058;Q9Y3A5;Q99871;P41208;Q8WWW2;P11277;Q95198;Q96GD0;Q5T6F0;P63313;P78406;Q674X7;Q9H204;P42704;Q8N0Z3;Q8TDY3;Q9NXL1;Q9P270;Q96EA4;Q5MIZ7;O14639;Q6XZF7;Q6NYC8;P35663;Q9UHI6;Q8TAP9;Q96M29;Q9UBK9;Q16181;Q15555;Q70YC5;Q9P209;Q12798;P06748;P14635;Q9BYD9;Q9UJC3;P08670;P60510;Q9BXS6;P11532;Q1MSJ5;Q9NYZ3;O75347;Q9Y2Y0;Q9BSK0;O14965;Q14980;O43805;Q8N4C6;P42768;P07737;Q96MT8;Q7Z460;Q9C0F1;Q7Z6E9;Q9NS23;Q9BZF9;Q13424;Q9NQS7;Q14203;O75935;Q15154;Q6Q759;Q92547;Q9NXB0;P63172;Q3KQU3;Q13042;Q8NHQ1;Q15643;Q8TDZ2;P50748;Q15398;Q96IK1;O00423;Q96NB1;Q9BW19;Q96FT9;O43189;P23528;Q00005;P42025;Q15051;Q68DX3;Q8N0Z2;O95876;O43264;Q6IQ23;P24941;Q08AG7;Q8WWW9;Q8TD16;Q9BSJ2;Q68CZ6;Q9UH77;P18848;Q8N3F8;Q9Y615;Q9Y266;P41002;Q92834;Q6EMB2;Q5TB80;O95714;O96015;Q9H2C0;Q8N960;Q8IVI9;Q14511;O95166;Q12834;Q8WVK7;Q9Y2J2;Q9UI95;Q08AE8;P50570;Q6NZ67;P29966;Q9BW27;Q9BW30;Q96EY5;O00522;Q8WW24;Q9UKA4;P11171;Q12873;Q99986;O76095;Q07866;Q96LZ7;Q9H4H8;Q96GE4;Q9Y216;Q1W6H9;Q96G01;Q76KD6;Q9BY60;Q9Y281;P07197;Q9BVN2;Q8TDR0;Q9H9H5;O43303;Q00587;Q8TES7}

4865 Pathogen[ P03363] interacts with 556 human partners: {Q8TDR0;Q86X95;Q9BQ89;Q5BJF6;Q6ZMW3;Q9Y6N9;Q15654;Q08AE8;Q9Y6Y0;Q92547;O75410;Q9H816;Q9Y614;Q96EA4;Q86VS8;Q32MZ4;Q99615;Q5SZL2;A6NKF1;Q9Y2I6;P18848;Q9UDT6;Q15834;P11137;Q8IZP0;P29474;P46060;O75347;Q15051;Q8N3V7;Q96IK1;Q9H2D6;P46939;Q13042;P49454;O75161;Q8N0X2;Q96DB5;Q8NF91;Q7Z7K6;P07197;Q14244;Q7Z7A1;Q9H3S7;A8K8P3;P11277;Q9Y6D9;P56715;Q2M3G4;P63167;Q9HC77;Q6EMB2;Q9UNH5;Q96ED9;Q08J23;Q9H987;P62714;Q9H4X1;Q86VQ0;O95996;A6NL28;Q66K74;Q9UI47;Q76N32;Q8TAM2;P52565;Q9BYV8;Q8IVI9;Q9BX66;Q2VIQ3;O15061;Q5VT06;P02549;O14682;P60709;Q9NXG0;Q9UPY6;P35080;P33176;P0CG35;P78559;Q9BRK4;P16157;Q14194;P35579;Q9UHI6;Q99996;Q14247;O94811;Q96MT8;Q96BD8;P60673;O15078;Q9H492;Q9UJT9;Q02952;Q8NHV4;Q9GZS0;P62081;O43805;O60308;Q8NBT0;Q9Y3D0;Q1MSJ5;O75112;Q969V4;Q9NQW6;Q9BR76;Q66GS9;Q13561;P62328;O60437;Q8WWW9;O43303;Q14980;Q9Y266;Q96B97;P63313;Q9P2K1;Q00005;Q9BXW4;Q9UBF9;Q15691;Q96JP2;Q01082;O95684;Q9P582;P62736;Q14093;Q9UJW0;Q9Z6E9;Q9ULW0;Q14847;Q9H7T9;Q13045;Q92597;O43264;Q8TES7;Q99550;Q9H1X1;Q8NHQ1;O00399;O95922;Q9HC35;P09972;P50570;O60447;O95613;Q8NHR9;P42704;Q15398;O94986;P68363;Q9BPX5;Q9Y3A5;Q96FT4;O94967;Q14204;Q14CM0;P42768;Q9H6D7;Q02241;Q5BKY1;Q9P258;Q96K30;Q9BT25;P68133;Q9H4H8;Q96R03;Q9C099;Q53HL2;Q9Y613;Q00587;Q5VU43;Q8WVK7;Q8TAP6;Q9BXS6;Q96M02;Q96M29;P24941;Q8NHY3;P50748;Q96LK0;Q9Y4P9;Q96JN8;Q14839;Q8N336;Q5TD94;P41208;Q92558;Q49MG5;O75506;Q9UBK9;Q68DK2;Q9P209;Q7Z4S6;Q99569;Q96GE4;Q07866;Q14870;P06748;Q8WYJ6;Q8IX90;O00423;P41002;O43189;Q9NVA2;Q9Y4G6;P50995;Q92797;Q8N0Z2;Q96TC7;Q5FBB7;Q96IF1;Q9HCS5;Q8TEP8;Q13425;Q14019;P15924;Q8IWC1;Q6ZP65;P50991;Q6ZMV9;P54105;P06396;Q9NWB7;Q5JR59;Q8IZS6;O60282;P10911;Q9BZF9;Q5TZA2;Q8TDY3;Q13748;Q9HOR8;Q8NCR6;Q16204;Q5JTW2;O15144;P61163;Q6PGN9;A8MFW5;Q9BW30;Q9HOB6;Q96JM3;P30622;Q9UPY8;Q8IYM1;P27816;Q53HC0;Q717R9;Q9P0K7;Q96R06;Q5T6V0;Q5T124;Q53E24;P59998;Q68CZ6;Q8TF09;Q9BXF9;Q12798;Q9NZ32;Q92599;Q66T76;Q8N157;O94927;Q6DKK2;Q3SYG4;Q8WUM4;Q9NR09;P63172;Q15149;Q8IY31;Q9P1Y5;Q9UI08;Q9NSK0;Q99426;Q6XZF7;Q9UKK3;Q14511;P54274;Q9C0C2;Q13432;Q6IQ19;Q9NQS7;P11532;O00522;Q96RT8;Q9NVX0;Q32P44;Q9NZR1;Q9BPU9;Q9H939;P08670;Q96AQ6;Q9BZV1;P17661;Q15814;Q9H8G6;P11171;Q96KG9;Q96ST8;O75935;Q08AG7;Q5T7B8;Q5UIP0;P17987;Q9H9E1;P04406;Q9NZU7;O15265;Q7Z460;O14613;Q9UKT4;O95271;Q9BT92;Q8LZW8;Q9UHD8;Q92556;Q9UI95;Q8N841;Q9NYZ3;Q92624;Q5QJ74;Q674X7;Q6QNY1;Q2V2M9;Q96PQ7;O15143;P54840;Q9BT04;Q9Y615;Q6P2H3;Q6IN85;P0CG34;Q8WUW1;Q13257;O95198;Q9Y283;P23528;Q8WX93;Q9Y4F5;Q8N0Z3;Q9NVR7;Q86XW9;P60510;O43379;Q96NB1;Q96CS2;Q9P270;Q13884;P54257;P42025;Q99871;Q13409;Q495M9;P29966;Q96EY5;P51808;Q6ZU80;O76095;O75154;O15066;Q9C0H6;Q9NS23;P28289;Q9UPV0;Q92614;Q0VAK6;Q9GZNL;Q9HBL0;Q01201;O43491;Q15628;Q9BY60;Q12923;Q9BVN2;Q9NY27;Q9UPA5;Q9Y237;Q15013;Q8IWI3;Q9UIF3;O15182;Q96RT7;O95714;Q76KD6;O15083;Q9UJP4;Q8TC76;Q8IUZ0;Q86WH2;Q8TC94;O00401;A6NK89;Q68CL5;Q9NRI5;Q9UH77;Q70YC5;Q96JJ3;P63261;Q8WWW0;Q9UGJ1;Q9NQY0;Q9BTE1;Q9C0F1;Q9NYL9;Q8IYX8;P78406;Q92834;Q9Y5Y2;Q8IWN7;Q9NRR3;Q12873;P80723;O95359;O43516;Q6ZU15;Q15058;Q9H568;Q6P1N0;Q86XR8;O15259;Q9BYD9;Q96Q89;Q9H204;O75146;Q9Y224;O60333;Q12834;Q14008;Q96FT9;Q9Y2Y0;Q9Y448;Q9UMS4;Q8NA72;Q96AC1;O60662;Q9H1H9;Q8N4C6;P16452;Q8N8E3;Q9NVD7;Q9UI46;Q9NP97;Q1W6H9;O43663;Q9H2C0;Q9NPA3;Q9BUZ4;Q9NXL1;Q9NXB0;Q9C0D2;O14604;Q14141;P23258;O00139;P37198;Q9H329;Q99719;O60299;P04264;Q6NZ67;Q9NZJ0;Q8N3F8;Q86SQ7;Q6Q759;Q6NYC8;Q9NR12;Q13813;Q9ULD2;Q13137;Q96N16;O43237;Q9UJT2;Q8TD16;Q7Z4H7;Q5MIZ7;Q16658;P60953;Q05BV3;Q8TDG2;P48643;Q8WWW2;Q9P2Q2;Q5T890;Q15154;Q5TB80;Q15643;Q8TF74;O95166;P67775;Q92817;Q6IQ23;Q96FJ2;Q8IZT6;Q14203;Q9Y5K6;Q8N9B5;Q13233;P04792;Q2M225;O43236;Q9BSJ2;Q9NSN8;Q9Y2J2;Q9BFT5;Q14315;P35663;Q9BV73;Q9BSK0;Q15942;O00291;O15145;O14576;P58107;Q9BW27;Q8NEM0;Q9Y6F1;Q9NQC8;Q5VYK3;Q9Y573;Q12840;Q8TC44;Q8WW24;P07737;O14639;Q15555;Q96JE9;Q15650;Q13515;P10916;O15511;Q13424;Q3KQU3;Q8TAP9;P49368;Q68DX3;Q6UVJ0;O75665;Q99689;Q96CW5;Q69YQ0;Q96SN8;Q08AD1;Q9C0H9;Q3KQU0;Q9H9H5;O14757;Q8N137;Q9NX95;Q8N960;Q5T5Y3;Q5SW79;Q9Y281;Q9UJC3}

4866 [Cluster 443]GO:0042645+ cellular\_component [name] mitochondrial nucleoid [def]  
 "The region of a mitochondrion to which the DNA is confined." [GOC

4867 Pathogen[ Q2Q067] interacts with 17 human partners: {Q9BRT2;O00411;Q9Y2S7;Q9H5Q4;P38646;Q8WVM0;Q99551;O76031;P42704;Q00059;Q53G26;P54098;Q9UHN1;Q49AM1;Q04837;Q96EY1;Q96QE5}

4868 Pathogen[ P0C214] interacts with 20 human partners: {O00411;Q96QE5;Q9Y2S7;P54098;P34897;P42704;Q7L2E3;Q49AM1;P40939;O76031;Q0005

4869 9;P38646;Q53G26;Q9BRT2;Q8WVM0;Q04837;Q99551;Q96EY1;Q9H5Q4;Q9UHN1}  
 Pathogen[ P03346] interacts with 18 human  
 partners:{P54098;Q00059;Q7L2E3;Q9UHN1;O76031;P38646;Q9Y2S7;P42704;Q9H5Q4;O00411;Q99551;Q53G26;Q8WVM0;Q9BRT2;Q96QE5;Q04837;Q49AM1;Q96EY1}

4870 Pathogen[ Q85601] interacts with 18 human  
 partners:{Q9BRT2;Q9Y2S7;Q53G26;Q7L2E3;Q96QE5;Q00059;Q49AM1;Q99551;P54098;P42704;P38646;O76031;Q9H5Q4;Q8WVM0;Q04837;O00411;Q9UHN1;Q96EY1}

4871 Pathogen[ P14079] interacts with 19 human  
 partners:{Q04837;Q9BRT2;Q49AM1;Q7L2E3;P42704;P34897;Q00059;Q9Y2S7;O00411;P38646;Q9H5Q4;P54098;O76031;Q9UHN1;Q969P6;Q96EY1;P49411;Q99551;Q8WVM0}

4872 Pathogen[ P03383] interacts with 16 human  
 partners:{Q9UHN1;Q9Y2S7;P38646;Q00059;Q9H5Q4;Q99551;P54098;Q8WVM0;P42704;O76031;O00411;Q04837;Q49AM1;Q96EY1;Q96QE5;Q53G26}

4873 Pathogen[ P03410] interacts with 21 human  
 partners:{Q9Y2S7;Q53G26;P38646;Q49AM1;Q04837;P05141;Q00059;O00411;Q9BRT2;Q96QE5;O76031;P42704;Q7L2E3;Q9H5Q4;Q8WVM0;Q9UHN1;P54098;Q99551;Q96EY1;P34897;P49411}

4874 Pathogen[ P14075] interacts with 16 human  
 partners:{P42704;Q00059;Q9H5Q4;P54098;Q9Y2S7;Q53G26;P38646;O76031;O00411;Q49AM1;Q99551;Q9UHN1;Q8WVM0;Q04837;Q96QE5;Q96EY1}

4875 Pathogen[ P0C206] interacts with 19 human  
 partners:{Q49AM1;Q9UHN1;Q9BRT2;Q53G26;P54098;P34897;Q96QE5;Q8WVM0;P38646;Q99551;Q9H5Q4;Q04837;P42704;O76031;Q00059;Q96EY1;Q7L2E3;Q9Y2S7;O00411}

4876 Pathogen[ P03363] interacts with 19 human  
 partners:{O00411;Q9BRT2;P42704;Q49AM1;P54098;Q53G26;Q9NUL7;Q96QE5;P38646;Q00059;O76031;Q8WVM0;Q04837;Q9UHN1;Q7L2E3;Q96EY1;Q9Y2S7;Q99551;Q9H5Q4}

4877 [Cluster 444]GO:0031523+C cellular\_component [name] Myb complex [def] "A multisubunit complex consisting of Myb and other proteins that regulates site specific DNA replication, gene amplification and transcriptional repression." [PMID  
 4878 Pathogen[ Q2Q067] interacts with 1 human partners:{P10244}  
 4879 Pathogen[ P0C214] interacts with 1 human partners:{P10244}  
 4880 Pathogen[ P03346] interacts with 1 human partners:{P10244}  
 4881 Pathogen[ Q85601] interacts with 1 human partners:{P10244}  
 4882 Pathogen[ P14079] interacts with 1 human partners:{P10244}  
 4883 Pathogen[ P03383] interacts with 1 human partners:{P10244}  
 4884 Pathogen[ P03410] interacts with 1 human partners:{P10244}  
 4885 Pathogen[ P14075] interacts with 1 human partners:{P10244}  
 4886 Pathogen[ P0C206] interacts with 1 human partners:{P10244}  
 4887 Pathogen[ P03363] interacts with 1 human partners:{P10244}

4888 [Cluster 445]GO:0005788+C cellular\_component [name] endoplasmic reticulum lumen [def] "The volume enclosed by the membranes of the endoplasmic reticulum." [ISBN  
 4889 Pathogen[ Q2Q067] interacts with 10 human  
 partners:{Q15293;Q9UBS4;P27797;O14656;Q8WU39;Q96D15;P23284;Q96DZ1;Q86VP3;P14625}

4890 Pathogen[ P0C214] interacts with 13 human  
 partners:{P14625;O14656;P23284;Q86VP3;Q9UBS4;Q8NBJ7;Q96D15;P27797;Q96DZ1;Q8WU39;Q15293;O60613;P13667}

4891 Pathogen[ P03346] interacts with 15 human  
 partners:{P14625;Q96DZ1;O14656;Q99784;Q13438;Q9H173;P13667;Q96D15;Q8WU39;P27797;Q9UBS4;Q15293;Q8IWF2;Q86VP3;P23284}

4892 Pathogen[ Q85601] interacts with 10 human  
 partners:{Q15293;O60613;Q9UBS4;P27797;Q96D15;P23284;O14656;P14625;Q14257;Q86VP3}

4893 Pathogen[ P14079] interacts with 23 human  
 partners:{Q15293;Q8WU39;Q9BT09;P30040;Q8IVL6;Q9UBS4;Q96D15;O60613;Q96DZ1;Q9NYU1;O14656;Q9NYU2;Q86VP3;Q8NBJ7;Q969H8;Q8NBK3;P14625;Q9UNW1;Q8NBL1;Q9NWW5;P23284;Q5NDL2;Q13438}

4894 Pathogen[ P03383] interacts with 8 human  
 partners:{O60613;Q96DZ1;Q9UBS4;Q86VP3;P14625;Q8WU39;P23284;P27797}

4895 Pathogen[ P03410] interacts with 23 human  
 partners:{Q15293;Q14257;O60613;Q96D15;Q8NBJ7;Q86VP3;Q9NWW5;O14656;Q9BT09;P13667;P30040;P14625;P55157;Q9NYU1;Q9H173;Q8WU39;Q9UBS4;Q9UNW1;P23284;Q96DZ1;Q13438;Q9NYU2;P27797}

4896 Pathogen[ P14075] interacts with 8 human  
 partners:{Q8WU39;P23284;Q86VP3;O60613;P27797;Q96DZ1;Q9UBS4;P14625}

4897 Pathogen[ P0C206] interacts with 15 human  
 partners:{Q8NBJ7;Q96D15;P27797;Q9UBS4;Q96DZ1;O60613;O14656;Q86VP3;Q15293;P23284;Q8WU39;Q13438;Q14257;P13667;P14625}

4898 Pathogen[ P03363] interacts with 8 human  
 partners:{P23284;Q96DZ1;Q96D15;Q15293;P27797;Q9UBS4;Q13438;Q8WU39}

4899 [Cluster 446]GO:0032133+C cellular\_component [name] chromosome passenger complex [def] "A eukaryotically conserved protein complex that localizes to kinetochores in early mitosis, the spindle mid-zone in anaphase B and to the telophase midbody. It has been proposed that the passenger complex coordinates various events based on its location to different structures during the course of mitosis. Complex members include the BIR-domain-containing protein Survivin, Aurora B kinase, INCENP and Borealin." [GOC  
 4900 Pathogen[ Q2Q067] interacts with 2 human partners:{Q53HL2;O15392}  
 4901 Pathogen[ P0C214] interacts with 2 human partners:{Q53HL2;O15392}  
 4902 Pathogen[ P03346] interacts with 2 human partners:{O15392;Q53HL2}

- 4903 Pathogen[ Q85601] interacts with 2 human partners: {Q53HL2;O15392}  
4904 Pathogen[ P14079] interacts with 2 human partners: {O15392;Q53HL2}  
4905 Pathogen[ P03383] interacts with 1 human partners: {Q53HL2}  
4906 Pathogen[ P03410] interacts with 2 human partners: {O15392;Q53HL2}  
4907 Pathogen[ P14075] interacts with 1 human partners: {Q53HL2}  
4908 Pathogen[ POC206] interacts with 2 human partners: {Q53HL2;O15392}  
4909 Pathogen[ P03363] interacts with 1 human partners: {Q53HL2}  
4910 [Cluster 447]GO:0045095+C cellular\_component [name] keratin filament [def] "A filament composed of acidic and basic keratins (types I and II), typically expressed in epithelial cells. The keratins are the most diverse classes of IF proteins, with a large number of keratin isoforms being expressed. Each type of epithelium always expresses a characteristic combination of type I and type II keratins." [ISBN  
4911 Pathogen[ Q2Q067] interacts with 89 human partners: {A8MTY7;P35908;P02538;Q9BYQ7;Q9BYQ6;P60331;Q9BYQ2;Q9NSB2;Q9BYR5;Q9BYQ8;P60413;Q9BYP9;P60371;P08729;P78385;Q8IUC1;P60409;Q9BYR9;Q9BYR0;Q8N1N4;Q6L8G5;P60372;P13646;A8MUX0;Q7RTS7;P59991;Q6L8H1;Q3LI83;Q9BYQ5;A6NCN2;Q6L8G9;Q9NSB4;A8MXZ3;P60370;Q6L8H4;Q9BYQ3;P12035;P60369;O95678;P04264;Q86Y46;Q9BYR6;P05787;P35527;P60410;Q8TES7;P60014;Q14533;P60368;Q9BYR4;Q9BYQ9;P78386;P59990;P48668;P0C7H8;Q6L8G4;Q3SY84;Q701N2;Q9BYR8;O43790;P60412;Q14CN4;P13645;P19013;Q9BYQ0;P13647;Q6L8G8;P0C5Y4;Q6KB66;Q9BYR3;P60411;Q9BYS1;Q9BYR7;P04259;Q9BYU5;P02533;Q01546;Q9BYQ4;P26371;Q9BQ66;P05783;Q7Z794;Q5XKE5;Q6L8H2;Q701N4;Q9BT92;Q9BYR2;Q9BYT5;A8MVA2}  
4912 Pathogen[ P0C214] interacts with 83 human partners: {Q14CN4;P08729;P60014;P12035;Q8IUC1;P60369;P05783;P35527;Q86Y46;P02538;P04264;A8MVA2;P13646;P02533;Q9BYQ5;Q6L8H1;A8MTY7;Q9BYR7;Q9BYR5;P60371;P60410;Q6L8G4;Q7Z794;Q9BYR8;P60412;Q9BQ66;Q9BYQ2;Q3LI83;O95678;Q9NSB2;Q9BYQ8;Q3SY84;P05787;Q9BYQ9;P60411;P35908;Q9BYR0;P60331;Q9BYQ3;Q5XKE5;P78386;Q9BT92;Q701N2;P48668;Q14533;Q9BYQ4;Q9BYR3;P60409;P59990;P78385;Q8N1N4;A6NCN2;Q9BYR2;Q6L8G9;P0C5Y4;Q9BYQ0;P60372;P04259;Q8TES7;P60413;P59991;Q9BYQ7;P60370;P13647;Q7RTS7;Q9BYR4;Q6KB66;Q6L8G5;Q9BYS1;Q01546;P19013;Q9BYQ6;A8MXZ3;O43790;Q6L8H4;P26371;Q6L8G8;Q701N4;Q6L8H2;Q9NSB4;Q9BYR6;P13645;Q9BYP9}  
4913 Pathogen[ P03346] interacts with 91 human partners: {P13646;Q6KB66;Q8N1N4;Q9BYR9;P08729;P02538;Q6L8H1;Q86Y46;Q6L8G8;Q3SY84;Q6L8G5;P05783;P60369;Q9BYU5;Q9BYR2;P35527;Q9BYR0;Q9BYT5;Q9BYQ8;Q5XKE5;Q9BYQ2;Q9NSB4;Q9BQ66;A8MXZ3;P05787;O95678;P19013;P60329;P48668;Q8IUC1;P78386;P60409;A6NCN2;P59990;A8MVA2;Q9BYQ6;Q9BYQ3;Q9BT92;P0C7H8;P60014;P35908;Q7Z794;Q9BYQ0;P60411;Q6L8G9;Q9NSB2;Q6L8G4;P02533;Q701N2;Q9BYQ5;P60370;A8MUX0;O43790;P13645;Q9BYR4;P60368;Q9BYQ7;Q14533;Q9BYR8;P12035;A8MTY7;Q9BYP9;P60328;P59991;Q7RTS7;P60412;P26371;P0C5Y4;P13647;P60331;Q9BYR5;P60410;Q6L8H2;Q8TES7;P04259;P04264;Q9BYR3;Q14CN4;Q9BYS1;Q3LI83;Q01546;Q9BYR6;P60371;P78385;Q9BYQ9;Q6L8H4;Q9BYQ4;Q701N4;Q9BYR7;P60372;P60413}  
4914 Pathogen[ Q85601] interacts with 71 human partners: {P13646;Q8N1N4;P08729;P02538;P78386;P02533;Q9BYR3;P60369;Q9NSB4;P60368;Q5XKE5;Q3SY84;P60331;Q9BYQ6;P05787;Q9BYQ8;Q9BYR8;P19013;Q14533;O95678;Q9BYR5;Q9BYP9;P04259;P59990;Q9BT92;Q9BYQ3;P60372;Q9BYR2;Q9BYR0;P60412;Q7Z794;Q14CN4;Q9BYQ0;P60411;P60371;P05783;Q8TES7;P04264;Q01546;P60370;O43790;P59991;P48668;P13645;A8MTY7;Q7RTS7;P12035;A8MVA2;P60410;Q9BYQ9;Q9BQ66;Q9BYQ7;P78385;Q9BYR7;Q8IUC1;P13647;A6NCN2;P35527;Q9BYR4;P35908;Q9BYP9;P60014;Q3LI83;Q9BYQ2;Q9BYR6;Q9BYQ4;Q9NSB2;Q86Y46;P60413;P60409;Q6KB66}  
4915 Pathogen[ P14079] interacts with 91 human partners: {A8MUX0;P48668;P60409;Q3SY84;P60014;P60413;Q9BYR8;P35908;Q7Z794;Q9BYQ4;Q9BQ66;P59990;Q9BYR2;Q9BYR9;P0C5Y4;Q9BYR6;P0C7H8;Q701N2;Q9BYQ9;Q9BYQ3;Q9NSB4;Q9BYR3;Q6L8H2;Q7RTS7;Q9BYS1;P13646;A6NCN2;Q9BYQ2;P26371;P08729;P60410;Q6L8H4;Q01546;P35527;Q9BYU5;Q9BYR7;Q9BYP9;P02533;Q8IUG1;P60369;P60370;Q3LI83;P78385;P13645;O75690;Q8N1N4;A8MTY7;P60331;Q8IUC1;P60372;P60328;Q86Y46;Q6KB66;A8MXZ3;P78386;Q14533;Q9BYQ7;A8MVA2;P60329;Q5XKE5;Q9BYR4;Q14CN4;P05783;Q6L8G5;Q6L8G9;Q701N4;P60371;Q8TES7;Q07627;Q6L8H1;P60411;Q9BT92;Q6L8G4;Q9BYR5;Q9BYQ6;P04264;O43790;Q9BYR0;O95678;P04259;Q6L8G8;Q9BYQ0;Q9NSB2;P12035;Q9BYT5;Q9BYQ8;P60368;Q9BYQ5;P13647;P59991;P60412}  
4916 Pathogen[ P03383] interacts with 91 human partners: {O95678;A8MVA2;Q9BYQ7;P60371;P08729;Q8N1N4;Q86Y46;P02533;P19013;Q9BYR3;Q8IUC1;Q9NSB4;Q9NSB2;Q9BYR2;P26371;P0C7H8;P60409;Q14CN4;P60331;Q5XKE5;Q9BYQ9;Q9BYR4;Q9BYR6;A8MUX0;P60368;Q6L8G5;P13645;P59991;Q9BYT5;P05783;Q9BYP9;Q9BYR7;Q9BYQ3;Q6L8G9;Q6L8G4;P78386;Q8TES7;P60014;Q14533;P35527;Q9BQ66;P05787;P60412;A8MTY7;P60372;P59990;P60410;Q01546;Q7Z794;Q9BYR8;Q9BYR5;Q9BYQ8;P12035;P60370;P02538;Q9BT92;P60411;Q07627;Q9BYQ0;Q9BYQ5;Q3SY84;P04264;P48668;A8MXZ3;P35908;Q9BYQ4;Q9BYR9;P13647;Q6L8H1;P78385;Q6L8H2;Q9BYR0;P13646;P04259;Q9BYS1;Q7RTS7;Q6KB66;A6NCN2;P60369;P0C5Y4;Q9BYU5;Q8IUG1;Q701N2;Q6L8H4;P60413;Q3LI83;Q701N4;Q9BYQ2;Q6L8G8;O43790;Q9BYQ6}  
4917 Pathogen[ P03410] interacts with 94 human partners: {P78385;P13645;P13646;P60371;Q9BYR7;O75690;Q14CN4;P02533;Q9BYQ5;Q9BYQ2;Q8N1N4;Q9BYQ9;Q701N2;Q9BYQ6;Q9BYQ8;Q9BYU5;P60328;Q9BYT5;P04264;Q9BYR5;P12035;A8MUX0;P60412;P35527;Q9BYR0;Q3LI83;P19013;Q701N4;Q14533;A6NCN2;P60409;P60370;Q9BYQ7;O95678;P05787;Q3SY84;Q6L8G5;Q9BYR2;Q7Z794;P48668;Q6L8G8;P02538;Q9NSB4;A8MXZ3;P60014;Q9BYR4;Q9BQ66;P59991;Q9BT92;Q8IUC1;P35908;Q6L8G9;P60368;Q6L8H2;Q9BYP9;P60369;P60329;Q9BYQ3;Q6L8H4;P78386;Q9BYQ4;A8MVA2;Q7RTS7;P04259;Q5XKE5;P60413;O43790;Q9BYR8;P26371;Q8IUG1;Q01546;Q07627;P0C7H8;Q6L8H1;Q86Y46;Q6KB66;P59990;Q9NSB2;Q9BYR3;P08729;P60411;P60410;Q9BYS1;P13647;Q6L8G4;Q8TES7;Q9BYR6;P60331;A8MTY7;P05783;Q9BYR9;P60372;Q9BYQ0;P0C5Y4}  
4918 Pathogen[ P14075] interacts with 93 human partners: {Q6L8G5;P60331;Q6L8G4;P48668;P59990;P08729;P0C7H8;Q6L8H2;Q9BYQ2;Q6L8G8;Q9BYR0;P05783;Q9BYQ7;Q07627;P60411;Q6L8H4;Q8IUC1;Q9NSB4;Q9BYU5;Q9NSB2;O43790;Q6L8G9;P0C5Y4;Q6L8H1;Q9BYQ8;Q9BYP9;P13645;P12035;A6NCN2;A8MVA2;P78385;Q9BYQ3;Q9BT92;Q9BYQ9;Q86Y46;

Q9BYR9;Q9BYR6;Q9BYR8;P60368;P60371;A8MTY7;Q9BYQ5;Q9BYR3;P35908;Q9BYQ4;P26371;Q8TES7;P04264;P13646;Q9BYR5;Q5XKE5;P60370;Q9BQ66;Q9BYT5;Q701N2;P04259;P60410;A8MUX0;P60412;A8MXZ3;P60328;P78386;Q9BYQ0;P60369;Q7RTS7;P13647;Q8IUG1;Q14533;P60409;Q9BYR4;P60014;Q7Z794;Q95678;Q9BYR7;P60372;Q9BYR2;P59991;Q14CN4;Q9BYS1;Q8N1N4;P02538;P60413;P35527;Q01546;P02533;Q6KB66;Q3SY84;P19013;Q701N4;O75690;Q9BYQ6;P05787;Q3LI83}

4919 Pathogen[ POC206] interacts with 92 human partners: {Q9BQ66;Q9BYR7;Q6L8H2;Q6L8G4;P05787;Q9NSB2;P60368;P59991;P35527;P78385;Q07627;P02538;Q9BT92;Q9BYQ3;P60371;Q9BYP9;Q9BYQ0;P60409;P60413;P04264;P13645;Q3LI83;Q9BYR4;P08729;O75690;P60410;Q6KB66;Q7Z794;P78386;Q9BYR6;Q95678;Q14533;Q9BYQ7;Q9BYQ6;Q9BYQ2;P19013;Q701N2;P13647;Q6L8G8;Q6L8G9;P60331;P48668;P60372;P0C5Y4;P60411;P05783;Q8IUC1;Q14CN4;Q01546;P26371;Q701N4;P60014;Q9BYR3;Q9BYR0;Q9BYS1;Q9BYR5;Q5XKE5;Q6L8G5;Q9BYQ5;Q9BYR9;P59990;Q9BYU5;Q8N1N4;Q9BYQ9;Q3SY84;Q6L8H1;Q9NSB4;P0C7H8;P04259;Q7RTS7;A8MVA2;Q9BYR8;P12035;P60412;A8MUX0;Q9BYQ4;P02533;Q86Y46;Q9BYR2;A8MXZ3;P13646;Q6L8H4;Q9BYT5;P60369;Q8IUG1;P35908;Q9BYQ8;O43790;P60370;A8MTY7;Q8TES7;A6NCN2}

4920 Pathogen[ P03363] interacts with 91 human partners: {P78385;P05783;Q6L8H2;P02533;Q9BYR9;P60370;Q701N2;P02538;A8MUX0;Q14533;Q9BYR6;P13645;P0C5Y4;A8MTY7;P60411;Q9BYR7;A8MXZ3;P60412;Q9BYR3;Q9BYQ6;Q7RTS7;P60369;Q86Y46;Q9BYT5;P60372;P60368;Q3SY84;P59991;Q3LI83;Q8TES7;P59990;P60409;A6NCN2;P60328;Q6L8G8;Q9BYU5;Q9BQ66;P48668;Q9BYQ7;Q6L8H1;P05787;P35908;Q6L8G5;Q9BYQ9;P60331;Q9BYP9;P60014;Q9BYR5;P60329;O43790;Q8IUC1;P13647;P04259;Q14CN4;P35527;O95678;Q6L8G9;Q9BYR8;Q9BYR2;A8MVA2;Q9BT92;Q9NSB2;Q9BYQ2;Q9BYR0;P08729;Q701N4;P60413;Q9BYS1;Q9BYQ0;P12035;Q9BYQ3;P78386;P0C7H8;P19013;Q6L8G4;P13646;Q6KB66;Q01546;Q9BYR4;Q6L8H4;P60410;Q8N1N4;P04264;P26371;Q9BYQ4;Q5XKE5;Q7Z794;Q9BYQ8;Q9NSB4;P60371;Q9BYQ5}

4921 [Cluster 448]GO:0001674+C cellular\_component [name] female germ cell nucleus [def]  
"The nucleus of the female germ cell, a reproductive cell in females." [CL

4922 Pathogen[ Q2Q067] interacts with 1 human partners: {P38432}

4923 Pathogen[ POC214] interacts with 1 human partners: {P38432}

4924 Pathogen[ P03346] interacts with 1 human partners: {P38432}

4925 Pathogen[ Q85601] interacts with 1 human partners: {P38432}

4926 Pathogen[ P14079] interacts with 2 human partners: {Q8IZA3;P38432}

4927 Pathogen[ P03383] interacts with 1 human partners: {P38432}

4928 Pathogen[ P03410] interacts with 1 human partners: {P38432}

4929 Pathogen[ P14075] interacts with 1 human partners: {P38432}

4930 Pathogen[ POC206] interacts with 1 human partners: {P38432}

4931 Pathogen[ P03363] interacts with 2 human partners: {Q8IZA3;P38432}

4932 [Cluster 449]GO:0000127+C cellular\_component [name] transcription factor TFIIIC complex [def] "A heterotrimeric transcription factor complex that is involved in regulating transcription from RNA polymerase III (Pol III) promoters. TFIIIC contains three conserved subunits that associate with the proximal Pol III promoter element, and additional subunits that associate with sequence elements downstream of the promoter and are more diverged among species. It also functions as a boundary element to partition genome content into distinct domains outside Pol III promoter regions." [GOC

4933 Pathogen[ Q2Q067] interacts with 4 human partners: {Q9Y5Q8;Q9UKN8;Q12789;Q969F1}

4934 Pathogen[ POC214] interacts with 4 human partners: {Q9Y5Q8;Q9UKN8;Q12789;Q969F1}

4935 Pathogen[ P03346] interacts with 6 human partners: {Q9Y5Q8;Q9UKN8;Q8WUA4;Q9Y5Q9;Q969F1;Q12789}

4936 Pathogen[ Q85601] interacts with 4 human partners: {Q9UKN8;Q9Y5Q8;Q12789;Q969F1}

4937 Pathogen[ P14079] interacts with 6 human partners: {Q9UKN8;Q9Y5Q9;Q969F1;Q9Y5Q8;Q12789;Q8WUA4}

4938 Pathogen[ P03383] interacts with 4 human partners: {Q9UKN8;Q969F1;Q9Y5Q8;Q12789}

4939 Pathogen[ P03410] interacts with 6 human partners: {Q9Y5Q9;Q969F1;Q9Y5Q8;Q12789;Q8WUA4;Q9UKN8}

4940 Pathogen[ P14075] interacts with 4 human partners: {Q969F1;Q12789;Q9Y5Q8;Q9UKN8}

4941 Pathogen[ POC206] interacts with 6 human partners: {Q969F1;Q8WUA4;Q9Y5Q9;Q9Y5Q8;Q9UKN8;Q12789}

4942 Pathogen[ P03363] interacts with 6 human partners: {Q969F1;Q8WUA4;Q9Y5Q9;Q12789;Q9UKN8;Q9Y5Q8}

4943 [Cluster 450]GO:0005726+C cellular\_component [name] perichromatin fibrils [def]  
"Structures of variable diameter visible in the nucleoplasm by electron microscopy, mainly observed near the border of condensed chromatin. The fibrils are enriched in RNA, and are believed to be sites of pre-mRNA splicing and polyadenylation representing the in situ form of nascent transcripts." [PMID

4944 Pathogen[ Q2Q067] interacts with 3 human partners: {Q9UHK0;O15164;Q9HBD4}

4945 Pathogen[ POC214] interacts with 3 human partners: {Q9HBD4;Q9UHK0;O15164}

4946 Pathogen[ P03346] interacts with 3 human partners: {Q9HBD4;Q9UHK0;O15164}

4947 Pathogen[ Q85601] interacts with 3 human partners: {O15164;Q9UHK0;Q9HBD4}

4948 Pathogen[ P14079] interacts with 2 human partners: {O15164;Q9UHK0}

4949 Pathogen[ P03383] interacts with 2 human partners: {Q9HBD4;Q9UHK0}

4950 Pathogen[ P03410] interacts with 2 human partners: {Q9UHK0;Q9HBD4}

4951 Pathogen[ P14075] interacts with 2 human partners: {Q9HBD4;Q9UHK0}

4952 Pathogen[ POC206] interacts with 3 human partners: {Q9UHK0;O15164;Q9HBD4}

4953 Pathogen[ P03363] interacts with 2 human partners: {Q9UHK0;Q9HBD4}

4954 [Cluster 451]GO:0030425+C cellular\_component [name] dendrite [def] "A neuron projection that has a short, tapering, often branched, morphology, receives and integrates signals from other neurons or from sensory stimuli, and conducts a nerve impulse towards the axon or the cell body. In most neurons, the impulse is conveyed from

dendrites to axon via the cell body, but in some types of unipolar neuron, the impulse does not travel via the cell body." [GOC

4955 Pathogen[ Q2Q067] interacts with 34 human  
partners: {Q9BSU1;P09917;Q13033;Q9H2P0;Q15596;Q9UBB6;Q9H0F6;Q9P1A6;P63279;P63241;P0C7T5;Q00577;Q9UBB4;P63165;Q04323;Q05084;P51959;Q9Y6X2;O94850;P61244;Q9NZJ4;Q9NZU7;Q9UQF2;Q86WG3;Q12983;Q9UPA5;P30047;Q99689;Q9Y296;Q66K74;Q9HCI5;P42224;O94763;Q14194}

4956 Pathogen[ P0C214] interacts with 40 human  
partners: {Q9BSU1;Q9Y6X2;Q9UBB6;P05937;P09917;P61244;Q9UBB4;P51959;P62166;Q13033;Q9UPU9;Q9H0F6;P63279;P42224;Q9P1A6;Q9Y296;Q14194;Q9NZI8;Q8NEJ9;P63241;Q9NZJ4;P63165;Q00577;P0C7T5;Q9Y2H0;Q99689;Q04323;Q9NZU7;O94850;Q9UQF2;Q9HD26;Q12983;Q9HCI5;Q05084;Q86WG3;Q15596;O94763;P30047;Q66K74;Q9H2P0}

4957 Pathogen[ P03346] interacts with 50 human  
partners: {Q9BSU1;Q9UBB4;P0C7T5;Q9H2P0;Q00577;Q12772;O94763;Q99689;Q9NZU7;Q9Y6D5;Q9NZI8;O75970;Q66K74;P63279;Q05084;Q9NZJ4;P63241;Q9H0F6;P05937;Q12983;P30047;P09917;Q8NEJ9;Q9P021;Q9Y2H0;Q13033;Q15596;Q9HD26;Q9Y296;P63165;P84550;P42224;O94850;P11137;P62166;P61244;Q04323;Q15700;Q9UQF2;Q9UBB6;P51959;P54257;Q9C0H9;Q9Y6X2;Q14194;Q9NRD5;Q86WG3;Q9P1A6;Q9UPA5;Q9HCI5}

4958 Pathogen[ Q85601] interacts with 36 human  
partners: {Q9BSU1;Q9NZU7;Q14194;P09917;Q9UBB4;Q9Y6X2;Q9P1A6;Q66K74;Q12772;Q9Y296;P63241;Q9H0F6;P51959;Q15596;P63279;P30047;Q9UQF2;P0C7T5;Q00577;Q04323;Q9HD26;Q9UPA5;Q9H2P0;P42224;Q99689;Q13033;P61244;Q86WG3;P63165;Q12983;O94763;Q9NZJ4;Q9UPU9;P62166;Q05084;Q9HCI5}

4959 Pathogen[ P14079] interacts with 59 human  
partners: {Q9Y296;O14810;P51959;P05937;Q05084;P63279;Q86WG3;P54257;Q15596;Q9NZJ4;Q8NBQ7;Q9Y6X2;Q15700;O75781;P13498;Q9BSU1;Q9UQF2;Q13033;Q66K74;Q9Y6D5;Q9UPU9;Q9UPA5;Q9H2P0;Q14444;P63165;Q9C0H9;Q9HCI5;Q9Y2H0;P35611;Q15078;O94763;Q12772;Q9HD26;Q6PUV4;Q7Z7J9;Q99689;Q9NP74;Q9UBB6;Q9UBB4;P62166;Q12983;Q14194;P09917;Q00577;P42224;P63241;Q05682;Q9H0F6;Q9P021;Q9P1A6;P11137;Q8NEJ9;P61244;P0C7T5;P30047;O94850;Q9NZU7;Q04323;O75970}

4960 Pathogen[ P03383] interacts with 29 human  
partners: {Q9BSU1;Q9P1A6;Q9UBB6;Q9H0F6;P0C7T5;Q15596;Q9UBB4;Q9HD26;Q86WG3;Q99689;Q04323;Q9Y296;Q9UQF2;P63241;Q12983;Q05084;O94763;P51959;P63165;Q9Y6X2;O94850;Q9HCI5;Q00577;Q13033;P61244;Q9C0H9;P30047;Q9Y2H0;P63279}

4961 Pathogen[ P03410] interacts with 54 human  
partners: {Q9P1A6;O75781;P30047;O94763;P11137;Q12983;P0C7T5;P63165;Q05682;O14810;Q9Y2H0;Q86WG3;Q9Y6X2;Q04323;Q8NEJ9;O94850;Q05084;Q00577;P61244;Q15700;Q9HD26;O75970;Q9NRD5;Q9NZJ4;P51959;Q12772;Q9BSU1;Q9UPA5;Q9UPU9;P05937;Q9UBB6;Q13033;Q9Y6D5;Q7Z7J9;Q9NZU7;Q6PUV4;Q66K74;P54257;Q15596;Q9HCI5;P63279;Q9Y296;P63241;P09917;Q14194;Q9P021;Q9UQF2;Q9C0H9;Q9UBB4;P62166;Q9NP74;P35611;Q9H0F6;Q99689}

4962 Pathogen[ P14075] interacts with 31 human  
partners: {Q9BSU1;P63165;Q8NEJ9;Q86WG3;Q12983;P51959;P61244;P0C7T5;Q9HD26;P63241;P63279;Q9UBB4;Q04323;O94763;P30047;Q9UBB6;Q05084;Q9P1A6;Q00577;Q9Y2H0;Q9C0H9;Q9UPA5;Q9Y296;Q13033;Q9UQF2;Q9Y6X2;Q9H0F6;O94850;Q9HCI5;Q15596;Q99689}

4963 Pathogen[ P0C206] interacts with 47 human  
partners: {P09917;Q9Y296;Q9UBB4;Q9BSU1;P62166;Q15700;Q04323;Q9UPA5;Q9P021;O94850;Q9NZJ4;P0C7T5;Q9UQF2;Q9NZU7;Q9Y6X2;Q66K74;P30047;Q8NEJ9;Q99689;Q9Y2H0;Q12983;P11137;Q9UPU9;Q9Y6D5;P51959;Q6PUV4;Q9UBB6;P61244;Q9C0H9;Q14194;P63241;Q9H0F6;Q15596;P84550;P63165;Q9H2P0;Q13033;Q86WG3;P42224;Q9NRD5;Q9HCI5;Q9HD26;Q12772;Q05084;Q9P1A6;O94763;Q00577}

4964 Pathogen[ P03363] interacts with 43 human  
partners: {Q9P021;Q9BSU1;P11137;P0C7T5;Q04323;Q9UBB6;Q66K74;Q9NZJ4;Q14194;Q9UQF2;Q9H2P0;Q13033;Q15700;Q15596;O75970;P61244;O94850;Q9Y6X2;P63165;Q86WG3;Q9UPU9;Q9NZI8;Q9UBB4;O94763;Q05084;Q9NZU7;P63279;P54257;Q9UPA5;P63241;Q9H0F6;P51959;P84550;Q9HCI5;Q9Y296;Q9P1A6;P30047;Q00577;Q8NEJ9;Q9HD26;P05937;Q99689;Q9C0H9}

4965 [Cluster 452]GO:0005637+cellular\_component [name] nuclear inner membrane [def]  
"The inner, i.e. lumen-facing, lipid bilayer of the nuclear envelope." [GOC

4966 Pathogen[ Q2Q067] interacts with 11 human  
partners: {Q9UH99;P50402;Q13185;P20700;P42167;Q03252;P42704;Q9NZP6;P84022;Q14739;Q15797}

4967 Pathogen[ P0C214] interacts with 11 human  
partners: {Q14739;P84022;P42704;P20700;Q9NZP6;Q9UH99;Q03252;P50402;Q13185;P43243;Q15797}

4968 Pathogen[ P03346] interacts with 14 human  
partners: {Q14739;P20700;Q15797;P43243;Q9UH99;Q53HI1;Q9NZP6;P84022;P42704;P50402;Q03252;O94901;P42167;Q13185}

4969 Pathogen[ Q85601] interacts with 11 human  
partners: {P20700;Q15797;Q03252;Q9NZP6;Q9UH99;P42704;Q13185;P50402;P84022;O94901;Q14739}

4970 Pathogen[ P14079] interacts with 19 human  
partners: {O94901;P42704;Q14739;Q15797;Q5SNT2;Q03252;P43243;Q13185;P42167;Q5JTV8;Q9UN42;Q8NC56;Q9NZP6;Q9BTV4;Q53HI1;P20700;P50402;Q9UH99;Q8IXM6}

4971 Pathogen[ P03383] interacts with 9 human  
partners: {Q9UH99;Q15797;Q9NZP6;Q13185;P84022;P20700;P50402;Q03252;P42704}

4972 Pathogen[ P03410] interacts with 20 human  
partners: {P84022;Q14739;Q9UH99;P20700;Q5SNT2;Q53HI1;Q9BTV4;P43243;Q03252;Q15797;P42704;P42167;Q9UN42;Q13185;P50402;O94901;Q8NC56;Q5JTV8;Q8IXM6;Q9NZP6}

4973 Pathogen[ P14075] interacts with 11 human  
partners: {P42704;P20700;P50402;Q9NZP6;Q13185;Q8IXM6;Q9UH99;P84022;Q53HI1;P42167;Q03252}

2}  
4974 Pathogen[ P0C206] interacts with 18 human partners:{P84022;P50402;Q14739;Q8IXM6;Q9UH99;Q03252;O94901;Q8NC56;Q53HI1;Q15797;P43243;Q13185;P20700;P42704;Q9UN42;Q9NZP6;P42167;Q9BTV4}  
4975 Pathogen[ P03363] interacts with 13 human partners:{P20700;P42167;P42704;Q15797;Q13185;Q03252;P84022;P43243;P50402;O94901;Q9NZP6;Q14739;Q9UH99}  
4976 [Cluster 453]GO:0070695+C cellular\_component [name] FHF complex [def] "A protein complex that is composed of AKTIP/FTS, FAM160A2/p107FHIP, and one or more members of the Hook family of proteins, HOOK1, HOOK2, and HOOK3. The complex is thought to promote vesicle trafficking and/or fusion, and associates with the homotypic vesicular sorting complex (the HOPS complex)." [GOC  
4977 Pathogen[ Q2Q067] interacts with 4 human partners:{Q8N612;Q9H8T0;Q86VS8;Q96ED9}  
4978 Pathogen[ P0C214] interacts with 4 human partners:{Q96ED9;Q8N612;Q86VS8;Q9H8T0}  
4979 Pathogen[ P03346] interacts with 5 human partners:{Q86VS8;Q8N612;Q9H8T0;Q96ED9;Q9UJC3}  
4980 Pathogen[ Q85601] interacts with 4 human partners:{Q86VS8;Q8N612;Q9H8T0;Q96ED9}  
4981 Pathogen[ P14079] interacts with 5 human partners:{Q9UJC3;Q86VS8;Q96ED9;Q9H8T0;Q8N612}  
4982 Pathogen[ P03383] interacts with 4 human partners:{Q8N612;Q9H8T0;Q86VS8;Q96ED9}  
4983 Pathogen[ P03410] interacts with 5 human partners:{Q9UJC3;Q9H8T0;Q86VS8;Q96ED9;Q8N612}  
4984 Pathogen[ P14075] interacts with 4 human partners:{Q8N612;Q9H8T0;Q86VS8;Q96ED9}  
4985 Pathogen[ P0C206] interacts with 5 human partners:{Q9H8T0;Q86VS8;Q96ED9;Q8N612;Q9UJC3}  
4986 Pathogen[ P03363] interacts with 5 human partners:{Q86VS8;Q96ED9;Q9H8T0;Q8N612;Q9UJC3}  
4987 [Cluster 454]GO:0034993+C cellular\_component [name] SUN-KASH complex [def] "A protein complex that spans the nuclear outer and inner membranes, thereby linking the major cytoplasmic cytoskeleton elements to the nuclear lumen\_ the complex is conserved in eukaryotes and contains proteins with SUN and KASH domains." [GOC  
4988 Pathogen[ Q2Q067] interacts with 2 human partners:{Q9UH99;Q8NF91}  
4989 Pathogen[ P0C214] interacts with 2 human partners:{Q9UH99;Q8NF91}  
4990 Pathogen[ P03346] interacts with 5 human partners:{Q8WXH0;Q9UH99;Q6ZMZ3;Q8NF91;O94901}  
4991 Pathogen[ Q85601] interacts with 3 human partners:{Q9UH99;Q8NF91;O94901}  
4992 Pathogen[ P14079] interacts with 5 human partners:{O94901;Q8WXH0;Q6ZMZ3;Q8NF91;Q9UH99}  
4993 Pathogen[ P03383] interacts with 1 human partners:{Q9UH99}  
4994 Pathogen[ P03410] interacts with 5 human partners:{Q6ZMZ3;Q9UH99;O94901;Q8WXH0;Q8NF91}  
4995 Pathogen[ P14075] interacts with 1 human partners:{Q9UH99}  
4996 Pathogen[ P0C206] interacts with 5 human partners:{Q9UH99;O94901;Q6ZMZ3;Q8NF91;Q8WXH0}  
4997 Pathogen[ P03363] interacts with 4 human partners:{Q8NF91;Q6ZMZ3;O94901;Q9UH99}  
4998 [Cluster 455]GO:0043033+C cellular\_component [name] isoamylase complex [def] "A protein complex whose composition varies amongst species\_ in rice it probably exists in a homo-tetramer to homo-hexamer form and in Gram-negative bacteria as a dimer. Functions in the hydrolysis of alpha-(1,6)-D-glucosidic branch linkages." [GOC  
4999 Pathogen[ Q2Q067] interacts with 1 human partners:{P35573}  
5000 Pathogen[ P0C214] interacts with 1 human partners:{P35573}  
5001 Pathogen[ P03346] interacts with 1 human partners:{P35573}  
5002 Pathogen[ Q85601] interacts with 1 human partners:{P35573}  
5003 Pathogen[ P14079] interacts with 1 human partners:{P35573}  
5004 Pathogen[ P03383] interacts with 1 human partners:{P35573}  
5005 Pathogen[ P03410] interacts with 1 human partners:{P35573}  
5006 Pathogen[ P14075] interacts with 1 human partners:{P35573}  
5007 Pathogen[ P0C206] interacts with 1 human partners:{P35573}  
5008 Pathogen[ P03363] interacts with 1 human partners:{P35573}  
5009 [Cluster 456]GO:0000109+C cellular\_component [name] nucleotide-excision repair complex [def] "Any complex formed of proteins that act in nucleotide-excision repair." [PMID  
5010 Pathogen[ Q2Q067] interacts with 2 human partners:{Q92889;Q13216}  
5011 Pathogen[ P0C214] interacts with 2 human partners:{Q92889;Q13216}  
5012 Pathogen[ P03346] interacts with 3 human partners:{P07992;Q13216;Q92889}  
5013 Pathogen[ Q85601] interacts with 2 human partners:{Q13216;Q92889}  
5014 Pathogen[ P14079] interacts with 3 human partners:{Q13216;Q92889;P07992}  
5015 Pathogen[ P03383] interacts with 1 human partners:{Q13216}  
5016 Pathogen[ P03410] interacts with 3 human partners:{P07992;Q92889;Q13216}  
5017 Pathogen[ P14075] interacts with 1 human partners:{Q13216}  
5018 Pathogen[ P0C206] interacts with 3 human partners:{Q13216;P07992;Q92889}  
5019 Pathogen[ P03363] interacts with 2 human partners:{Q92889;Q13216}  
5020 [Cluster 457]GO:0005765+C cellular\_component [name] lysosomal membrane [def] "The lipid bilayer surrounding the lysosome and separating its contents from the cell cytoplasm." [GOC  
5021 Pathogen[ Q2Q067] interacts with 14 human partners:{Q9Y6Q5;Q10567;P56377;O43747;Q9H267;Q96PC3;Q96CW1;P61966;Q99732;Q9H0R1;Q9BXS

5:Q9NUS5;Q96NA2;P78537}  
5022 Pathogen[ P0C214] interacts with 13 human  
partners:{Q96CW1;Q9NUS5;Q96NA2;P78537;Q9H0R1;Q10567;Q99732;P56377;Q96PC3;O43747;Q9Y6Q5;P61966;Q9BXS5}  
5023 Pathogen[ P03346] interacts with 19 human  
partners:{P61966;Q9P253;O43747;P56377;Q9BXS5;Q9H0R1;Q96NA2;Q9BXW6;Q10567;P78537;Q96CW1;Q96AX1;Q96PC3;Q9NUS5;Q8N357;Q96S99;Q9Y6Q5;Q9H267;Q99732}  
5024 Pathogen[ Q85601] interacts with 16 human  
partners:{Q96S99;Q96CW1;Q9P253;Q9BXS5;Q9NUS5;P56377;O43747;Q10567;Q9H267;P78537;Q96PC3;P61966;Q96NA2;Q9Y6Q5;Q99732;Q9H0R1}  
5025 Pathogen[ P14079] interacts with 35 human  
partners:{Q9BXW6;Q96CW1;Q96NA2;Q9Y6Q5;P61966;Q9BXS5;Q9Y2Q5;P86790;Q92542;Q10567;P56377;P86791;Q96S99;Q9H269;Q9H8M9;O75503;Q9NQX7;Q8N357;Q99732;Q86T03;Q6IAA8;Q96AX1;Q9P253;Q9NUM4;Q8N682;Q8WVB7;Q9H0R1;Q86WC4;O43747;Q6UX65;Q9NUS5;Q96PC3;Q9NUN5;P78537;Q9H267}  
5026 Pathogen[ P03383] interacts with 9 human  
partners:{Q96CW1;P56377;Q10567;Q9NUS5;P78537;O43747;Q99732;Q9BXS5;Q96NA2}  
5027 Pathogen[ P03410] interacts with 32 human  
partners:{Q9Y6Q5;Q9Y2Q5;P78537;Q96PC3;Q96CW1;Q9H267;Q9BXS5;Q96S99;Q86T03;Q9NUS5;O43747;Q10567;Q99732;Q9P253;P86791;O75503;Q9NUN5;Q8N357;Q86WC4;Q9NQX7;Q6UX65;Q8WVB7;Q9H0R1;P86790;Q6IAA8;Q92542;Q96NA2;P61966;Q9H269;P56377;Q9BXW6;Q96AX1}  
5028 Pathogen[ P14075] interacts with 9 human  
partners:{P78537;Q96CW1;Q96NA2;Q99732;O43747;P56377;Q9BXS5;Q10567;Q9NUS5}  
5029 Pathogen[ P0C206] interacts with 24 human  
partners:{P78537;Q9Y6Q5;O43747;Q10567;Q9H0R1;P61966;Q92542;Q8WVB7;Q9BXS5;Q8N357;Q96CW1;Q96AX1;Q96S99;Q9NQX7;Q9BXW6;Q9P253;Q96NA2;Q96PC3;Q86T03;Q99732;Q9H267;Q86WC4;P56377;Q9NUS5}  
5030 Pathogen[ P03363] interacts with 11 human  
partners:{O43747;P78537;Q9NUS5;Q9BXS5;Q9H0R1;Q9BXW6;Q9H267;Q99732;Q96NA2;Q10567;Q96CW1}  
5031 [Cluster 458]GO:0043005+C cellular\_component [name] neuron projection [def] "A  
prolongation or process extending from a nerve cell, e.g. an axon or dendrite." [GOC  
5032 Pathogen[ Q2Q067] interacts with 30 human  
partners:{Q96B97;Q95295;Q9UBB6;Q8IZP0;Q96EV8;Q9UER7;O14910;P26447;Q13158;Q14790;Q86UL8;P11142;O95721;P78352;Q9HB71;Q9BZW7;Q96F07;Q9UPX8;P62136;Q9H0B6;P53041;Q9UQF2;Q86WG3;P35813;O75150;O00161;Q9UPA5;P60953;O15083;Q9NUP9}  
5033 Pathogen[ P0C214] interacts with 32 human  
partners:{O15083;Q9UBB6;O14910;P05937;P35813;Q8IZP0;Q9UPX8;O95295;Q13158;Q96F07;Q9UPU9;P60953;O95721;Q9H0B6;P78352;P35580;Q9UER7;O00154;P62136;Q9BZW7;Q96EV8;P53041;Q9UQF2;P26447;P10909;O75150;Q86WG3;O00161;Q9HB71;Q96B97;P11142;Q14790}  
5034 Pathogen[ P03346] interacts with 39 human  
partners:{P62136;Q96B97;P35813;Q96A65;O75150;Q12840;Q96F07;O95295;Q13158;P78352;Q8IZP0;O75970;P11142;P60953;P05937;O15083;O00161;Q9HB71;Q92625;Q9NUP9;Q86UL8;Q96EV8;O95721;Q6P597;Q9UER7;P53041;P11137;P26447;Q9HAP6;Q14790;Q9UQF2;Q9UBB6;P54257;Q9BZW7;Q9UPX8;O14910;Q86WG3;Q9H0B6;Q9UPA5}  
5035 Pathogen[ Q85601] interacts with 34 human  
partners:{Q9UPX8;P26447;Q9NUP9;O14910;Q96A65;Q96F07;O95295;Q13158;Q14790;Q86UL8;Q9UER7;O15083;Q9UQF2;Q12840;Q6P597;Q96EV8;P62136;P11142;Q9UPA5;Q96B97;P78352;P53041;O75150;Q86WG3;P60953;P35580;Q8IZP0;P35813;Q9UPU9;Q9HB71;O00161;Q9H0B6;O95721;Q9BZW7}  
5036 Pathogen[ P14079] interacts with 40 human  
partners:{Q8WWM9;P05937;P11142;Q86WG3;P54257;P53041;Q12840;Q9UQF2;Q9UPU9;Q9UPA5;P62136;Q8IZP0;P10909;Q96B97;P35813;Q9NUP9;Q9HB71;O95721;Q7Z7J9;Q14790;Q9UER7;Q9UBB6;O60282;Q9NZ72;Q9HAP6;P26447;O15083;O95295;Q96F07;O75366;Q86UL8;Q96A65;Q13158;Q96EV8;P11137;Q9H0B6;Q6P597;O75970;Q9UPX8;Q9BZW7}  
5037 Pathogen[ P03383] interacts with 22 human  
partners:{Q9UBB6;O95295;Q86WG3;P60953;Q9BZW7;Q9H0B6;Q9UQF2;P35813;Q13158;Q96EV8;P62136;Q9HB71;Q96F07;Q9UER7;P11142;P53041;P35580;O00161;O15083;O75150;P78352;O14910}  
5038 Pathogen[ P03410] interacts with 47 human  
partners:{P26447;O14910;Q9HB71;P11137;P35813;Q9H0B6;O60282;P62136;Q86WG3;P11142;Q9NUP9;Q12840;Q6P597;Q13158;Q9HAP6;O95295;Q8WWM9;O60333;O75970;O00154;O75150;Q9UER7;Q9UPA5;Q96A65;Q9UPU9;P05937;Q9UBB6;P53041;Q7Z7J9;Q8IZP0;Q9BZW7;P54257;P60953;P35580;Q9NZ72;Q96B97;P33176;Q9UPX8;Q86UL8;Q96F07;Q9UQF2;O95721;P78352;O00161;Q96EV8;P10909;O15083}  
5039 Pathogen[ P14075] interacts with 22 human  
partners:{P60953;Q96F07;Q86WG3;P35813;P11142;O15083;O95295;P62136;O14910;O75150;Q13158;P53041;Q9UBB6;O00161;Q96EV8;P78352;Q9BZW7;Q9UER7;Q9H0B6;Q9UPA5;Q9UQF2;Q9HB71}  
5040 Pathogen[ P0C206] interacts with 40 human  
partners:{Q9NUP9;Q9HB71;P78352;P26447;Q96F07;O95721;Q9UPA5;Q96B97;P53041;Q9UER7;Q6P597;Q13158;Q9BZW7;Q9UQF2;Q96A65;O00161;P11137;Q9H0B6;O15083;Q9UPU9;Q8IZP0;Q96EV8;Q9NZ72;Q9UPX8;Q14790;P10909;Q9UBB6;Q92625;O14910;Q12840;P60953;O95295;Q86UL8;Q86WG3;P35580;P11142;O75150;Q8WWM9;P62136;P35813}  
5041 Pathogen[ P03363] interacts with 41 human  
partners:{P11137;Q8IZP0;P62136;Q9UBB6;P26447;P33176;Q9HB71;Q9UQF2;Q9UPX8;Q96B97;Q96A65;O14910;P78352;P53041;Q96F07;Q9UER7;Q13158;O75970;Q7L576;O75150;O60282;Q9H0B6;Q86WG3;Q9UPU9;O95721;Q9NZR1;P54257;O95295;Q12923;Q9UPA5;Q92625;O15083;Q86UL8;Q9BZW7;O60333;O00161;Q9NUP9;P60953;Q12840;P11142;P05937}  
5042 [Cluster 459]GO:0030122+C cellular\_component [name] AP-2 adaptor complex [def] "A  
heterotetrameric AP-type membrane coat adaptor complex that consists of alpha, beta2, mu2



and sigma2 subunits, and links clathrin to the membrane surface of a vesicle\_ vesicles with AP-2-containing coats are normally found primarily near the plasma membrane, on endocytic vesicles. In at least humans, the AP-2 complex can be heterogeneric due to the existence of multiple subunit isoforms encoded by different alpha genes (alphaA and alphaC)." [GOC

5043 Pathogen[ Q2Q067] interacts with 2 human partners:{094973;095782}

5044 Pathogen[ P0C214] interacts with 4 human partners:{Q9BQI5;094973;095782;P53680}

5045 Pathogen[ P03346] interacts with 6 human partners:{P53680;095782;P42566;Q13492;Q9BQI5;094973}

5046 Pathogen[ Q85601] interacts with 3 human partners:{P53680;094973;095782}

5047 Pathogen[ P14079] interacts with 6 human partners:{Q13492;P42566;095782;Q9BQI5;094973;P53680}

5048 Pathogen[ P03383] interacts with 3 human partners:{Q9BQI5;095782;094973}

5049 Pathogen[ P03410] interacts with 6 human partners:{095782;P53680;Q13492;Q9BQI5;P42566;094973}

5050 Pathogen[ P14075] interacts with 3 human partners:{Q9BQI5;094973;095782}

5051 Pathogen[ P0C206] interacts with 5 human partners:{P53680;094973;Q9BQI5;095782;P42566}

5052 Pathogen[ P03363] interacts with 3 human partners:{094973;095782;Q9BQI5}

5053 [Cluster 460]GO:0022627+C cellular\_component [name] cytosolic small ribosomal subunit [def] "The small subunit of a ribosome located in the cytosol." [GOC

5054 Pathogen[ Q2Q067] interacts with 35 human partners:{P62701;P62273;Q9Y2R9;P15880;P46782;P22090;P62277;P62241;P62244;P62861;P62081;P61247;P62249;P62280;P62263;P60866;P08708;P08865;P62269;P46783;P62857;P69905;P62847;P23396;P39019;P62266;P42677;P63220;P62841;P62854;P62753;P62851;P25398;P46781;P62979}

5055 Pathogen[ P0C214] interacts with 35 human partners:{P62861;P61247;P15880;P62081;P22090;P62249;P62854;P39019;P62263;P62273;P23396;P62847;P69905;P62701;P63220;P08865;P62266;P62277;P46783;P62280;P62753;P62269;P46781;Q9Y2R9;P62841;P62244;P42677;P62241;P60866;P62857;P08708;P25398;P62979;P62851;P46782}

5056 Pathogen[ P03346] interacts with 35 human partners:{P62249;P62861;P62277;P62280;P62857;P62266;P62273;P60866;P69905;P08708;P46782;P62854;P08865;P25398;Q9Y2R9;P62269;P62081;P61247;P46781;P15880;P62979;P39019;P23396;P42677;P62701;P62847;P62851;P22090;P62263;P62841;P62241;P62753;P46783;P62244;P63220}

5057 Pathogen[ Q85601] interacts with 35 human partners:{P46783;P69905;P62857;P62244;P62854;P62081;P23396;P62273;P62753;P15880;P39019;P62701;P62241;P62263;P62861;Q9Y2R9;P62249;P62280;P08708;P62269;P62277;P62979;P62847;P42677;P63220;P46782;P62851;P62841;P22090;P08865;P61247;P46781;P25398;P60866;P62266}

5058 Pathogen[ P14079] interacts with 35 human partners:{P23396;P46781;P62847;P62753;P62273;Q9Y2R9;P25398;P46783;P69905;P62979;P62841;P62266;P46782;P62241;P22090;P60866;P62854;P39019;P63220;P62244;P62263;P62277;P08708;P62280;P62081;P42677;P15880;P08865;P62249;P61247;P62269;P62701;P62851;P62857;P62861}

5059 Pathogen[ P03383] interacts with 35 human partners:{P62266;P39019;P62854;P25398;P62280;P62249;P62753;P69905;P42677;P61247;Q9Y2R9;P62273;P62277;P62081;P08865;P62851;P46782;P62269;P63220;P62244;P62857;P46783;P60866;P62979;P62241;P46781;P62841;P22090;P62701;P62263;P62847;P62861;P15880;P23396;P08708}

5060 Pathogen[ P03410] interacts with 35 human partners:{P62861;P61247;P62241;P62244;P15880;P62841;P46781;P62269;P63220;P62847;P23396;P62266;P62249;P62280;P22090;P62979;P62701;P08865;P62277;P25398;P62854;P62273;P62081;P46783;P08708;Q9Y2R9;P46782;P62857;P62263;P39019;P69905;P62851;P62753;P60866;P42677}

5061 Pathogen[ P14075] interacts with 35 human partners:{P62857;P46781;P63220;P42677;P22090;P62277;P62851;P08865;P62244;P08708;P62249;P62081;P25398;Q9Y2R9;P62979;P61247;P62753;P46782;P62861;P62269;P62847;P62273;P23396;P62241;P15880;P62841;P62266;P46783;P62701;P39019;P62280;P62263;P62854;P60866;P69905}

5062 Pathogen[ P0C206] interacts with 35 human partners:{P62854;P62081;P62241;P62244;P08865;P46781;P62266;P62263;P62273;P62280;P62857;P62851;P46782;P61247;P69905;P62861;P23396;Q9Y2R9;P62701;P22090;P62979;P39019;P46783;P60866;P62841;P62277;P62269;P62753;P63220;P15880;P25398;P08708;P62847;P42677;P62249}

5063 Pathogen[ P03363] interacts with 34 human partners:{P69905;P23396;P42677;P08865;P62847;P62249;P62753;P62081;P62273;P08708;P15880;P22090;P62861;P62841;P46782;P46781;Q9Y2R9;P63220;P39019;P25398;P62851;P62280;P62244;P62277;P62266;P62241;P60866;P61247;P62857;P62854;P62263;P62701;P62269;P46783}

5064 [Cluster 461]GO:0005761+C cellular\_component [name] mitochondrial ribosome [def] "A ribosome found in the mitochondrion of a eukaryotic cell\_ contains a characteristic set of proteins distinct from those of cytosolic ribosomes." [GOC

5065 Pathogen[ Q2Q067] interacts with 21 human partners:{P51398;Q9HD33;Q13084;Q9BZE1;Q9BYD1;Q4U2R6;Q9Y3B7;Q13405;Q96GC5;Q9BYC8;Q9BQ48;O15235;P82650;Q9BQC6;Q9NZE8;O60783;Q9BYD2;Q9H0U6;Q8N983;Q9NQ50;Q9BYC9}

5066 Pathogen[ P0C214] interacts with 22 human partners:{Q9HD33;Q13405;Q9BYD2;Q9BYD1;Q9H0U6;Q9NYK5;O15235;Q96GC5;Q4U2R6;Q8N983;Q13084;P51398;Q9BQ48;Q9NZE8;Q9NQ50;Q9BYC9;Q9BQC6;Q9BYC8;Q9BZE1;Q9Y3B7;P82650;O60783}

5067 Pathogen[ P03346] interacts with 21 human partners:{Q9BYD1;Q8N983;Q9H0U6;Q9BYC8;Q9BQ48;Q9BYD2;Q9BYC9;P51398;P82650;O15235;Q13084;O60783;Q9NZE8;Q9NQ50;Q9HD33;Q4U2R6;Q9BQC6;Q9BZE1;Q13405;Q9Y3B7;Q96GC5}

5068 Pathogen[ Q85601] interacts with 22 human partners:{Q9BQC6;Q9BYD1;Q9Y3B7;Q4U2R6;Q9H0U6;Q9BYC8;Q9BYC9;Q9BQ48;Q9BYD2;Q13405;P51398;Q96GC5;Q8N983;O15235;Q13084;Q9NZE8;Q9NYK5;P82650;Q9HD33;Q9BZE1;Q9NQ50;O60783}

5069 Pathogen[ P14079] interacts with 22 human partners:{Q9BQC6;Q9NQ50;Q4U2R6;Q9H0U6;Q9BQ48;Q9BYD2;Q9BYC9;O60783;Q13084;Q9BZE1;P82650;Q96GC5;Q9BYD1;Q9BYC8;O15235;Q13405;Q9NZE8;Q9HD33;Q9Y3B7;P51398;Q8N983;Q9NYK5}

5070 Pathogen[ P03383] interacts with 21 human partners:{P51398;Q9BYD1;Q9BYD2;Q13084;Q9BQ48;Q9BQC6;Q9BYC9;Q13405;Q9BZE1;O60783;Q9Y3B7;Q9HD33;Q9NZE8;P82650;Q9NQ50;Q4U2R6;O15235;Q96GC5;Q8N983;Q9BYC8;Q9H0U6}

5071 Pathogen[ P03410] interacts with 22 human partners:{Q9HD33;Q8N983;O15235;Q9BYD2;P82650;Q9BQC6;Q9NYK5;O60783;Q9BYD1;Q4U2R6;Q9BYC8;Q13084;Q9BQ48;Q9NQ50;Q9NZE8;Q9BYC9;Q13405;Q9BZE1;Q9H0U6;P51398;Q96GC5;Q9Y3B7}

5072 Pathogen[ P14075] interacts with 22 human partners:{Q9BYD1;Q9BYD2;Q9NYK5;Q96GC5;Q9BQC6;Q9HD33;P82650;Q9BYC9;Q9BQ48;Q9BZE1;Q13084;Q9Y3B7;P51398;Q13405;O15235;Q8N983;O60783;Q9NZE8;Q9NQ50;Q9H0U6;Q4U2R6;Q9BYC8}

5073 Pathogen[ P0C206] interacts with 22 human partners:{Q9H0U6;Q9BQ48;O60783;Q13084;Q4U2R6;Q9BYC8;Q9NZE8;P51398;Q9HD33;Q96GC5;Q9BYC9;Q13405;Q9Y3B7;Q9BYD2;Q9BZE1;P82650;Q9BYD1;Q9NQ50;Q8N983;Q9NYK5;O15235;Q9BQC6}

5074 Pathogen[ P03363] interacts with 21 human partners:{P82650;Q9BYD2;Q96GC5;Q9NZE8;Q9BYD1;Q13405;Q9BZE1;Q9NQ50;Q9H0U6;Q9HD33;Q9Y3B7;Q4U2R6;Q9BYC8;Q8N983;O60783;Q9BQC6;Q13084;Q9BQ48;O15235;P51398;Q9BYC9}

5075 [Cluster 462]GO:0005736+C cellular\_component [name] DNA-directed RNA polymerase I complex [def] "RNA polymerase I, one of three nuclear DNA-directed RNA polymerases found in all eukaryotes, is a multisubunit complex typically it produces rRNAs. Two large subunits comprise the most conserved portion including the catalytic site and share similarity with other eukaryotic and bacterial multisubunit RNA polymerases. The remainder of the complex is composed of smaller subunits (generally ten or more), some of which are also found in RNA polymerase III and others of which are also found in RNA polymerases II and III. Although the core is competent to mediate ribonucleic acid synthesis, it requires additional factors to select the appropriate template." [GOC

5076 Pathogen[ Q2Q067] interacts with 4 human partners:{O95602;Q9H9Y6;O15446;O15160}

5077 Pathogen[ P0C214] interacts with 4 human partners:{Q9H9Y6;O15446;O15160;O95602}

5078 Pathogen[ P03346] interacts with 4 human partners:{Q9H9Y6;O15160;O15446;O95602}

5079 Pathogen[ Q85601] interacts with 4 human partners:{O95602;Q9H9Y6;O15446;O15160}

5080 Pathogen[ P14079] interacts with 4 human partners:{O15446;O15160;O95602;Q9H9Y6}

5081 Pathogen[ P03383] interacts with 3 human partners:{O95602;Q9H9Y6;O15446}

5082 Pathogen[ P03410] interacts with 4 human partners:{O95602;O15160;O15446;Q9H9Y6}

5083 Pathogen[ P14075] interacts with 3 human partners:{Q9H9Y6;O95602;O15446}

5084 Pathogen[ P0C206] interacts with 4 human partners:{O95602;O15446;Q9H9Y6;O15160}

5085 Pathogen[ P03363] interacts with 4 human partners:{Q9H9Y6;O95602;O15446;O15160}

5086 [Cluster 463]GO:0008274+C cellular\_component [name] gamma-tubulin ring complex [def] "A multiprotein complex composed of gamma-tubulin and other non-tubulin proteins that forms a flexible open ring structure thought to be the unit of nucleation at the minus end of a microtubule." [GOC

5087 Pathogen[ Q2Q067] interacts with 6 human partners:{Q96RT8;Q6P582;Q96RT7;Q08AG7;Q6NZ67;Q9UGJ1}

5088 Pathogen[ P0C214] interacts with 6 human partners:{Q6NZ67;Q96RT7;Q9UGJ1;Q96RT8;Q08AG7;Q6P582}

5089 Pathogen[ P03346] interacts with 6 human partners:{Q6P582;Q6NZ67;Q96RT8;Q9UGJ1;Q08AG7;Q96RT7}

5090 Pathogen[ Q85601] interacts with 6 human partners:{Q96RT8;Q6NZ67;Q9UGJ1;Q08AG7;Q6P582;Q96RT7}

5091 Pathogen[ P14079] interacts with 6 human partners:{Q9UGJ1;Q6P582;Q08AG7;Q96RT8;Q96RT7;Q6NZ67}

5092 Pathogen[ P03383] interacts with 3 human partners:{Q6NZ67;Q08AG7;Q6P582}

5093 Pathogen[ P03410] interacts with 6 human partners:{Q96RT8;Q08AG7;Q6NZ67;Q96RT7;Q6P582;Q9UGJ1}

5094 Pathogen[ P14075] interacts with 3 human partners:{Q6NZ67;Q6P582;Q08AG7}

5095 Pathogen[ P0C206] interacts with 5 human partners:{Q96RT7;Q9UGJ1;Q6P582;Q08AG7;Q6NZ67}

5096 Pathogen[ P03363] interacts with 6 human partners:{Q6P582;Q96RT8;Q08AG7;Q96RT7;Q9UGJ1;Q6NZ67}

5097 [Cluster 464]GO:0005814+C cellular\_component [name] centriole [def] "A cellular organelle, found close to the nucleus in many eukaryotic cells, consisting of a small cylinder with microtubular walls, 300-500 nm long and 150-250 nm in diameter. It contains nine short, parallel, peripheral microtubular fibrils, each fibril consisting of one complete microtubule fused to two incomplete microtubules. Cells usually have two centrioles, lying at right angles to each other. At division, each pair of centrioles generates another pair and the twin pairs form the pole of the mitotic spindle." [ISBN

5098 Pathogen[ Q2Q067] interacts with 38 human partners:{Q12798;Q9NS56;Q9UJT2;Q5SW79;Q8N137;Q8N0Z3;Q9HC77;Q9UPV0;A8K8P3;Q86YF9;Q9C099;Q5BJF6;Q8IY31;P11388;Q8TEP8;Q9BYV8;Q66GS9;O43303;Q8TES7;P41002;Q53HC0;Q99550;O75665;Q53EZ4;O60308;Q5TZA2;Q6UVJ0;Q96JN8;Q8NA72;P41208;Q86SQ7;O15182;O95613;Q8N4C6;O15392;Q9BV73;Q96CW5;Q8TAP6}

5099 Pathogen[ P0C214] interacts with 39 human partners:{Q8IY31;P41002;Q5SW79;Q9NS56;Q53HC0;Q8NA72;A8K8P3;Q9C099;Q9BYV8;Q9HC77;Q96CW5;Q8TEP8;Q9UPV0;O43303;Q12798;Q66GS9;Q9UJT2;Q53EZ4;Q96LK0;Q9NXG0;Q99550;P11388;Q8TAP6;Q8TES7;P41208;O75665;O15392;Q9BV73;Q5BJF6;Q8N0Z3;Q86SQ7;O95613;Q8N4C6;Q86YF9;O60308;Q6UVJ0;Q5TZA2;Q96JN8;Q8N137}

5100 Pathogen[ P03346] interacts with 45 human partners: {O15392;P11388;Q8IY31;O95714;Q8N137;O60308;Q9NXG0;Q8NA72;Q9HC77;Q96CW5;Q53HC0;P41002;Q96LK0;Q8N0Z3;Q8TEP8;Q86YF9;P41208;Q9NS56;Q66GS9;O75665;Q86SQ7;Q9UJT2;Q53EZ4;Q8TAP6;Q6ZU80;Q5BJF6;Q8N157;Q9C099;Q9BYV8;Q5TZA2;Q99550;Q12798;Q9Y6F1;Q8TES7;Q96JN8;O95613;O15182;Q8N4C6;A8K8P3;Q6UVJ0;Q5SW79;O43303;Q9UPV0;O00444;Q9BV73}

5101 Pathogen[ Q85601] interacts with 42 human partners: {Q53EZ4;Q8N137;Q9NS56;Q6UVJ0;O15182;O95714;Q12798;O60308;Q9HC77;Q9C099;O15392;Q5BJF6;Q96CW5;Q53HC0;P41002;O43303;Q8TEP8;Q9UPV0;Q96LK0;Q9Y6F1;Q66GS9;Q86SQ7;O75665;Q8TES7;Q9BV73;Q9BYV8;P11388;Q99550;Q9NXG0;Q8TAP6;Q5TZA2;Q5SW79;Q96JN8;O95613;Q8N0Z3;Q8N4C6;A8K8P3;Q9UJT2;Q8IY31;Q86YF9;Q8NA72;P41208}

5102 Pathogen[ P14079] interacts with 48 human partners: {P11388;Q8NA72;Q5TZA2;Q6UVJ0;Q8IY31;Q8TEP8;Q8N157;Q9NXG0;Q66GS9;O15392;Q9BV73;O95954;A8K8P3;Q8TAP6;Q8IYY4;Q6ZU80;Q96LK0;Q5BJF6;Q8N4C6;Q8NBT0;Q12798;P41002;Q8TCU4;Q9NS56;Q5SW79;Q8N0Z3;O43303;Q9NZ20;Q9C099;Q86SQ7;P41208;Q8TC44;Q8TES7;O95613;Q86YF9;Q8N137;O15182;O75665;Q9HC77;Q9BYV8;Q6IQ19;Q9Y6F1;Q9UJT2;O60308;Q53EZ4;Q99550;Q96CW5;Q9UPV0}

5103 Pathogen[ P03383] interacts with 32 human partners: {P41002;Q8N0Z3;Q6UVJ0;Q8IY31;Q96CW5;O43303;P41208;Q9BV73;Q9HC77;Q12798;Q8TES7;A8K8P3;Q8TEP8;O60308;Q5TZA2;Q66GS9;Q86SQ7;Q9UJT2;Q9BYV8;Q5BJF6;Q9UPV0;Q8TAP6;Q86YF9;Q8N137;Q5SW79;Q8NA72;O95613;Q9C099;Q8N4C6;O75665;Q53EZ4;Q53HC0}

5104 Pathogen[ P03410] interacts with 47 human partners: {Q9UJT2;O75665;O15392;Q8TEP8;O43303;Q66GS9;Q9HC77;Q96LK0;Q6UVJ0;Q8NBT0;O95954;O15182;Q8TCU4;Q12798;Q8N137;Q9BYV8;P41002;Q9Y6F1;O60308;Q8N0Z3;Q86YF9;Q6IQ19;Q8TAP6;Q8IY31;Q5TZA2;Q8N157;Q99550;Q8N4C6;Q86SQ7;Q5BJF6;Q9NZ20;Q53EZ4;Q6ZU80;Q8NA72;P11388;Q96JN8;Q8TC44;Q9UPV0;Q9C099;Q96CW5;Q9NXG0;Q5SW79;O95613;Q8TES7;P41208;Q9BV73;A8K8P3}

5105 Pathogen[ P14075] interacts with 33 human partners: {O43303;Q9BYV8;O60308;Q86SQ7;Q8IY31;A8K8P3;Q9HC77;Q6UVJ0;Q5TZA2;Q12798;Q53HC0;Q8TEP8;Q9UPV0;Q66GS9;Q5SW79;Q5BJF6;Q8TES7;Q6IQ19;Q9BV73;Q8N137;Q9C099;Q8TAP6;P41208;Q53EZ4;O75665;O95613;Q8N4C6;P41002;Q86YF9;Q96CW5;Q9UJT2;Q8NA72;Q8N0Z3}

5106 Pathogen[ P0C206] interacts with 47 human partners: {Q5SW79;O15182;Q8N137;Q9NS56;Q9C099;Q9HC77;Q86SQ7;Q5BJF6;Q8NA72;Q8IY31;Q86YF9;Q5TZA2;Q8TCU4;Q96CW5;O00444;Q6UVJ0;A8K8P3;Q9UPV0;Q99550;Q96JN8;Q9Y6F1;Q8TEP8;O60308;O95954;Q9UJT2;Q8TAP6;Q6ZU80;O95613;Q6IQ19;Q96LK0;Q66GS9;Q8N157;Q9BYV8;Q9BV73;O15392;O75665;Q53HC0;Q9NXG0;P41208;Q8N0Z3;P11388;Q12798;Q8N4C6;P41002;O95714;O43303;Q8TES7}

5107 Pathogen[ P03363] interacts with 44 human partners: {Q5BJF6;A8K8P3;Q9HC77;Q9BYV8;Q9NXG0;O60308;Q8NBT0;Q66GS9;O43303;Q8TES7;Q99550;O95613;Q9C099;Q8TAP6;Q96LK0;Q96JN8;P41208;P41002;Q8TEP8;Q5TZA2;Q53HC0;Q53EZ4;Q12798;Q8N157;Q8IY31;Q6IQ19;Q8N0Z3;Q6ZU80;Q9UPV0;O15182;O95714;Q8NA72;Q8N4C6;Q86YF9;Q86SQ7;Q9UJT2;Q9BV73;Q9Y6F1;Q8TC44;Q6UVJ0;O75665;Q96CW5;Q8N137;Q5SW79}

5108 [Cluster 465]GO:0031463+ cellular\_component [name] Cul3-RING ubiquitin ligase complex [def] "A ubiquitin ligase complex in which a cullin from the Cul3 subfamily and a RING domain protein form the catalytic core\_ substrate specificity is conferred by a BTB-domain-containing protein." [PMID]

5109 Pathogen[ Q2Q067] interacts with 8 human partners: {Q13829;Q8IXQ5;Q53G59;Q13618;Q9Y2M5;Q9H3F6;Q9UH77;P62877}

5110 Pathogen[ P0C214] interacts with 10 human partners: {Q13829;Q9UJP4;Q13618;P62877;Q53G59;Q9Y2M5;Q8WZ19;Q8IXQ5;Q9H3F6;Q9UH77}

5111 Pathogen[ P03346] interacts with 12 human partners: {Q53GT1;Q9P2N7;Q8WZ19;Q9UH77;Q8IXQ5;Q13618;Q13829;P62877;Q9P2J3;Q9H3F6;Q9Y2M5;Q9UJP4}

5112 Pathogen[ Q85601] interacts with 11 human partners: {Q8WZ19;P62877;Q9UJP4;Q8IXQ5;Q9P2J3;Q9Y2M5;Q13618;Q9H3F6;Q53G59;Q13829;Q9UH77}

5113 Pathogen[ P14079] interacts with 8 human partners: {Q13618;P62877;Q9Y2M5;Q9UH77;Q9UJP4;Q13829;Q53G59;Q9H3F6}

5114 Pathogen[ P03383] interacts with 7 human partners: {Q13618;Q53G59;Q9UH77;P62877;Q9Y2M5;Q9H3F6;Q13829}

5115 Pathogen[ P03410] interacts with 11 human partners: {Q9UH77;Q53G59;Q13829;Q8IXQ5;Q8WZ19;Q9P2J3;Q9H3F6;Q13618;P62877;Q9UJP4;Q9Y2M5}

5116 Pathogen[ P14075] interacts with 7 human partners: {Q13618;Q53G59;Q9UH77;Q9H3F6;Q9Y2M5;Q13829;P62877}

5117 Pathogen[ P0C206] interacts with 12 human partners: {Q9P2N7;Q8IXQ5;Q13829;P62877;Q9UJP4;Q8WZ19;Q13618;Q9P2J3;Q9H3F6;Q9Y2M5;Q53G59;Q9UH77}

5118 Pathogen[ P03363] interacts with 13 human partners: {Q9P2N7;Q13618;Q8IXQ5;P62877;Q9Y2M5;Q53G59;Q9H3F6;Q13829;Q9P2J3;Q9UJP4;Q9UH77;Q53GT1;Q8WZ19}

5119 [Cluster 466]GO:0005796+ cellular\_component [name] Golgi lumen [def] "The volume enclosed by the membranes of any cisterna or subcompartment of the Golgi apparatus, including the cis- and trans-Golgi networks." [GOC]

5120 Pathogen[ Q2Q067] interacts with 2 human partners: {Q9H2G9;Q13356}

5121 Pathogen[ P0C214] interacts with 2 human partners: {Q13356;Q9H2G9}

5122 Pathogen[ P03346] interacts with 2 human partners: {Q9H2G9;Q13356}

5123 Pathogen[ Q85601] interacts with 2 human partners: {Q13356;Q9H2G9}

5124 Pathogen[ P14079] interacts with 10 human

5125 partners:{Q8N307;P60022;O00461;Q9H2G9;O15263;Q13356;Q8TAX7;P15941;Q5SSG8;P81534}  
 Pathogen[ P03383] interacts with 2 human partners:{Q13356;Q9H2G9}

5126 Pathogen[ P03410] interacts with 12 human  
 partners:{Q9H2G9;Q5SSG8;P15941;Q8N307;P60022;Q8TAX7;O00461;Q13356;Q96DR8;Q9BRK5;P8153  
 4;O15263}

5127 Pathogen[ P14075] interacts with 3 human partners:{Q9H2G9;O00461;Q8TAX7}

5128 Pathogen[ P0C206] interacts with 4 human partners:{O00461;Q13356;Q9H2G9;Q8TAX7}

5129 Pathogen[ P03363] interacts with 2 human partners:{Q13356;Q9H2G9}

5130 [Cluster 467]GO:0008537+C cellular\_component [name] proteasome activator complex [def]  
 "A multisubunit complex that activates the hydrolysis of small nonubiquitinated peptides  
 by binding to the proteasome core complex." [GOC]

5131 Pathogen[ Q2Q067] interacts with 3 human partners:{Q06323;Q9UL46;P61289}

5132 Pathogen[ P0C214] interacts with 2 human partners:{Q9UL46;Q06323}

5133 Pathogen[ P03346] interacts with 3 human partners:{Q9UL46;P61289;Q06323}

5134 Pathogen[ Q85601] interacts with 3 human partners:{P61289;Q9UL46;Q06323}

5135 Pathogen[ P14079] interacts with 3 human partners:{P61289;Q06323;Q9UL46}

5136 Pathogen[ P03383] interacts with 3 human partners:{Q06323;Q9UL46;P61289}

5137 Pathogen[ P03410] interacts with 3 human partners:{Q06323;Q9UL46;P61289}

5138 Pathogen[ P14075] interacts with 3 human partners:{Q06323;Q9UL46;P61289}

5139 Pathogen[ P0C206] interacts with 3 human partners:{P61289;Q06323;Q9UL46}

5140 Pathogen[ P03363] interacts with 1 human partners:{P61289}

5141 [Cluster 468]GO:0005791+C cellular\_component [name] rough endoplasmic reticulum [def]  
 "The rough (or granular) endoplasmic reticulum (ER) has ribosomes adhering to the outer  
 surface\_ the ribosomes are the site of translation of the mRNA for those proteins which  
 are either to be retained within the cisternae (ER-resident proteins), the proteins of  
 the lysosomes, or the proteins destined for export from the cell. Glycoproteins undergo  
 their initial glycosylation within the cisternae." [ISBN]

5142 Pathogen[ Q2Q067] interacts with 3 human partners:{Q15596;Q5BJF2;O95793}

5143 Pathogen[ P0C214] interacts with 2 human partners:{O95793;Q15596}

5144 Pathogen[ P03346] interacts with 3 human partners:{Q5BJF2;O95793;Q15596}

5145 Pathogen[ Q85601] interacts with 2 human partners:{O95793;Q15596}

5146 Pathogen[ P14079] interacts with 5 human  
 partners:{O95793;Q15596;Q99442;Q5BJF2;O43612}

5147 Pathogen[ P03383] interacts with 2 human partners:{Q15596;Q5BJF2}

5148 Pathogen[ P03410] interacts with 6 human  
 partners:{Q99442;O43612;P55157;Q15596;O95793;Q5BJF2}

5149 Pathogen[ P14075] interacts with 2 human partners:{Q15596;Q5BJF2}

5150 Pathogen[ P0C206] interacts with 3 human partners:{Q5BJF2;O95793;Q15596}

5151 Pathogen[ P03363] interacts with 3 human partners:{O95793;Q15596;Q5BJF2}

5152 [Cluster 469]GO:0030670+C cellular\_component [name] phagocytic vesicle membrane [def]  
 "The lipid bilayer surrounding a phagocytic vesicle." [GOC]

5153 Pathogen[ Q2Q067] interacts with 1 human partners:{Q96NA2}

5154 Pathogen[ P0C214] interacts with 1 human partners:{Q96NA2}

5155 Pathogen[ P03346] interacts with 2 human partners:{Q96NA2;Q93050}

5156 Pathogen[ Q85601] interacts with 2 human partners:{Q93050;Q96NA2}

5157 Pathogen[ P14079] interacts with 5 human  
 partners:{Q96NA2;P61421;P13498;Q8N8Y2;Q93050}

5158 Pathogen[ P03383] interacts with 1 human partners:{Q96NA2}

5159 Pathogen[ P03410] interacts with 4 human partners:{Q8N8Y2;P61421;Q93050;Q96NA2}

5160 Pathogen[ P14075] interacts with 1 human partners:{Q96NA2}

5161 Pathogen[ P0C206] interacts with 2 human partners:{Q96NA2;Q93050}

5162 Pathogen[ P03363] interacts with 1 human partners:{Q96NA2}

5163 [Cluster 470]GO:0012506+C cellular\_component [name] vesicle membrane [def] "The lipid  
 bilayer surrounding any membrane-bounded vesicle in the cell." [GOC]

5164 Pathogen[ Q2Q067] interacts with 6 human  
 partners:{O43639;Q9BZE9;P16333;P42768;Q9UKG1;P14672}

5165 Pathogen[ P0C214] interacts with 8 human  
 partners:{P62993;Q9UM54;Q9UKG1;O43639;Q9BZE9;P16333;P42768;P14672}

5166 Pathogen[ P03346] interacts with 8 human  
 partners:{O14908;O43639;P42768;P62993;Q9BZE9;P16333;Q9UKG1;P14672}

5167 Pathogen[ Q85601] interacts with 8 human  
 partners:{P62993;P16333;O43639;Q9BZE9;P42768;Q9UKG1;Q9UM54;P14672}

5168 Pathogen[ P14079] interacts with 9 human  
 partners:{Q9UKG1;P14672;Q9BZE9;Q9UM54;P16333;P62993;O43639;O14908;P42768}

5169 Pathogen[ P03383] interacts with 4 human partners:{Q9BZE9;P42768;P14672;P16333}

5170 Pathogen[ P03410] interacts with 8 human  
 partners:{Q9BZE9;O43639;O14908;P42768;P16333;Q9UM54;P62993;Q9UKG1}

5171 Pathogen[ P14075] interacts with 4 human partners:{P42768;P16333;P14672;Q9BZE9}

5172 Pathogen[ P0C206] interacts with 9 human  
 partners:{Q9UKG1;Q9UM54;Q9BZE9;P62993;O14908;P16333;P14672;P42768;O43639}

5173 Pathogen[ P03363] interacts with 7 human  
 partners:{O14908;P42768;O43639;P16333;Q9BZE9;P14672;Q9UKG1}

5174 [Cluster 471]GO:0070776+C cellular\_component [name] MOZ/MORF histone acetyltransferase  
 complex [def] "A histone acetyltransferase complex that has histone H3 acetyltransferase  
 and coactivator activities. Subunits of the human complex include MYST3/MOZ, MYST4/MORF,  
 ING5, EAF6 and one of BRPF1, BRD1/BRPF2 and BRPF3." [PMID]

5175 Pathogen[ Q2Q067] interacts with 2 human partners: {Q8WYH8;Q9HAF1}

5176 Pathogen[ P0C214] interacts with 2 human partners: {Q9HAF1;Q8WYH8}

5177 Pathogen[ P03346] interacts with 4 human partners: {Q8WYB5;Q8WYH8;Q92794;Q9HAF1}

5178 Pathogen[ Q85601] interacts with 2 human partners: {Q9HAF1;Q8WYH8}

5179 Pathogen[ P14079] interacts with 2 human partners: {Q9HAF1;Q8WYH8}

5180 Pathogen[ P03383] interacts with 2 human partners: {Q8WYH8;Q9HAF1}

5181 Pathogen[ P03410] interacts with 1 human partners: {Q8WYH8}

5182 Pathogen[ P14075] interacts with 2 human partners: {Q9HAF1;Q8WYH8}

5183 Pathogen[ P0C206] interacts with 2 human partners: {Q8WYH8;Q9HAF1}

5184 Pathogen[ P03363] interacts with 2 human partners: {Q9HAF1;Q8WYH8}

5185 [Cluster 472]GO:0044459+C cellular\_component [name] plasma membrane part [def] "Any constituent part of the plasma membrane, the membrane surrounding a cell that separates the cell from its external environment. It consists of a phospholipid bilayer and associated proteins." [GOC

5186 Pathogen[ Q2Q067] interacts with 2 human partners: {P09497;P14625}

5187 Pathogen[ P0C214] interacts with 3 human partners: {P14625;P10809;P09497}

5188 Pathogen[ P03346] interacts with 2 human partners: {P14625;P09497}

5189 Pathogen[ Q85601] interacts with 2 human partners: {P09497;P14625}

5190 Pathogen[ P14079] interacts with 2 human partners: {P09497;P14625}

5191 Pathogen[ P03383] interacts with 2 human partners: {P14625;P09497}

5192 Pathogen[ P03410] interacts with 2 human partners: {P14625;P09497}

5193 Pathogen[ P14075] interacts with 2 human partners: {P09497;P14625}

5194 Pathogen[ P0C206] interacts with 2 human partners: {P09497;P14625}

5195 Pathogen[ P03363] interacts with 1 human partners: {P09497}

5196 [Cluster 473]GO:0031595+C cellular\_component [name] nuclear proteasome complex [def] "A proteasome found in the nucleus of a cell." [GOC

5197 Pathogen[ Q2Q067] interacts with 1 human partners: {Q9NRR5}

5198 Pathogen[ P0C214] interacts with 1 human partners: {Q9NRR5}

5199 Pathogen[ P03346] interacts with 1 human partners: {Q9NRR5}

5200 Pathogen[ Q85601] interacts with 1 human partners: {Q9NRR5}

5201 Pathogen[ P14079] interacts with 1 human partners: {Q9NRR5}

5202 Pathogen[ P03383] interacts with 1 human partners: {Q9NRR5}

5203 Pathogen[ P03410] interacts with 1 human partners: {Q9NRR5}

5204 Pathogen[ P14075] interacts with 1 human partners: {Q9NRR5}

5205 Pathogen[ P0C206] interacts with 1 human partners: {Q9NRR5}

5206 Pathogen[ P03363] interacts with 1 human partners: {Q9NRR5}

5207 [Cluster 474]GO:0016607+C cellular\_component [name] nuclear speck [def] "A discrete extra-nucleolar subnuclear domain, 20-50 in number, in which splicing factors are seen to be localized by immunofluorescence microscopy." [http

5208 Pathogen[ Q2Q067] interacts with 106 human partners: {Q8NHY2;O00213;Q92585;Q96FV9;O15234;Q8IZL2;Q12837;Q8IZD2;O75925;Q9NS56;Q05066;O95391;P61326;O75494;Q13427;Q8TF01;O75940;Q9BWG6;Q16666;O43447;Q6PD62;Q9P0U4;Q01130;Q15233;Q8WWY3;Q8WTT2;O95400;P49750;Q05516;O00257;O43172;P38919;Q9UIS9;Q9UBU9;Q9H307;Q96JC9;P08107;Q86YP4;Q13838;Q07955;Q86TB9;O75928;Q9ULJ6;O75400;O94906;Q6PJT7;P49756;P63165;P27695;P08621;Q12972;Q9Y3M2;Q9BY77;Q96CJ1;P55199;P84103;Q8IYB3;Q14997;Q14498;Q86V81;P51816;Q8N5M1;Q96IZ7;P36873;Q6P2Q9;Q96PM5;Q9UBB9;Q6K0P9;Q9Y5S9;Q01081;O75533;O1527;Q13243;Q9BT49;O95232;Q9NRA8;Q96S94;Q86X95;Q9UKV3;Q15029;Q9Y383;Q5HYJ3;Q9UQ35;Q13526;Q7RTV0;P80723;O43395;Q9H0G5;P50222;Q9H040;Q9Y2W2;Q02040;P18583;Q14331;Q8WXF1;Q9UMS4;Q96GM8;Q96JK9;Q96QD9;Q99459;Q12874;Q06587;Q9BTA9;O43660;Q03112;Q9UK58}

5209 Pathogen[ P0C214] interacts with 107 human partners: {Q9BY77;Q14997;Q96S94;Q96GM8;Q9Y2W2;Q96FV9;O00213;Q92585;Q96CJ1;O15234;P27695;Q96PM5;Q9H040;Q14331;O43172;Q9BT49;O75925;Q8IZL2;P84103;Q86V81;Q9Y5S9;Q6K0P9;O95400;Q8WTT2;Q9NS56;Q03112;Q15029;Q9P2N5;Q13526;Q15233;Q6P2Q9;Q9H307;Q6PJT7;Q16666;Q13427;Q8NHY2;Q9ULJ6;O43395;O95232;O94906;Q9UK58;Q9UMS4;Q96IZ7;Q07955;Q9BWG6;Q9UIS9;Q8IYB3;P18583;Q12837;P49750;P08621;Q8WXF1;P63165;Q06587;Q99459;P61326;Q9Y3M2;P38919;Q86YP4;P55199;Q13243;P50222;O00257;Q7RTV0;Q86TB9;Q9H0G5;P51816;Q01081;Q96JK9;O75533;Q8N5M1;O75940;Q12874;O75494;Q15287;O43447;Q3ZCQ8;P36873;Q9UQ35;Q8TF01;P80723;Q12972;Q9BTA9;Q9UKV3;Q96QD9;O15527;O95391;Q02040;Q9Y383;P08107;Q96JC9;Q13838;Q6PD62;Q14498;Q86X95;O43660;O75400;Q9UBB9;P49756;Q14966;Q05516;Q9UBU9;Q8IZD2;Q01130;Q8WWY3;O75928;Q9NRA8}

5210 Pathogen[ P03346] interacts with 122 human partners: {P08107;Q9Y5S9;Q96FV9;O95400;Q9BZE0;Q6PD62;O00213;Q92585;Q96CJ1;Q12874;O15234;O43172;Q16666;Q8WXF1;Q08170;Q8IYB3;Q5HYJ3;Q96S94;O43447;Q99633;Q7RTV0;Q05066;Q9Y3M2;Q8WTT2;Q9P2N5;O95391;O75400;Q12837;Q8NHY2;P80723;Q9UMS4;Q14498;Q9H307;Q8N5M1;Q96PM5;P49750;P38919;Q9Y383;O75940;P18583;P08621;O00257;Q13526;Q86Z02;O94906;Q07955;Q9ULJ6;Q13427;Q9BWG6;Q9UKV3;Q92766;Q9BWF3;Q9H0G5;O75925;P50222;Q9BT49;Q86TB9;Q9NS56;Q86V81;O95232;Q9UIS9;Q8IYM9;Q15020;O43660;Q9P0U4;Q86U44;Q86YP4;Q9BY77;P36873;Q03112;Q9H040;P49756;P63165;Q96QD9;Q01081;O75533;Q9UK58;Q96JC9;P61326;Q13838;Q96GM8;O75554;Q14966;Q99459;Q8WWY3;Q6P2Q9;P84103;Q9UQ35;Q05516;P55199;Q15233;Q15287;Q01130;Q3ZCQ8;Q9UBU9;Q14997;Q9BZJ0;P27695;Q02040;Q9NRA8;Q13243;Q96IZ7;Q86X95;Q15029;O75928;O15527;Q9Y2W2;O75494;Q6PJT7;Q6K0P9;Q12972;Q06587;P51816;Q8IZD2;Q86XP3;Q96JK9;Q8IZL2;Q9BTA9;Q6NHY9;Q14331;Q8TF01;O43395}

5211 Pathogen[ Q85601] interacts with 104 human partners: {Q6PD62;O00213;Q92585;Q96CJ1;O15234;P49756;O15527;Q96JK9;Q16666;P08107;Q9BT49;Q9NS56;O75928;Q9Y383;Q9Y2W2;Q8IYB3;Q7RTV0;Q13243;Q9H040;Q9Y3M2;Q9UK58;Q01130;Q9H307;Q9UBU9;Q14331;Q8WTT2;Q9P2N5;Q14966;O95391;O75400;Q8TF01;Q03112;Q9UMS4;P61326;Q96PM5;Q15287;Q9BTA9;P08621;Q8WXF1;Q86V81;O75494;O75940;O94906;Q07955;P80723;Q13427;Q9UBB9;Q

- 86TB9;P38919;Q96FV9;Q9BY77;Q9H0G5;Q6PJT7;P50222;Q9P0U4;Q96JC9;Q9UIS9;O95232;Q9UKV3;Q13838;Q86YP4;Q13526;P36873;Q12972;Q15029;Q8IYM9;Q96QD9;Q96GM8;Q99459;Q01081;Q8IZL2;Q9UQ35;Q3ZCQ8;O43395;Q8WWY3;Q96S94;P84103;P55199;Q05516;Q15233;O95400;Q6P2Q9;Q96IZ7;P63165;O43447;P18583;Q9NRA8;O43660;O00257;Q12837;O43172;O75925;Q8NHY2;Q6K0P9;Q06587;Q14498;P27695;Q8IZD2;Q8N5M1;Q9ULJ6;Q86X95;Q12874;Q9Y5S9;P49750}
- 5212 Pathogen[ P14079] interacts with 107 human partners: {Q3ZCQ8;Q8N5M1;Q99459;O43447;Q14004;P55199;Q15287;Q9UIS9;Q06413;O75400;O94906;Q9Y2W2;Q99633;O75928;Q8TF01;Q96CJ1;P36873;O75533;Q96JK9;Q96JC9;Q12874;Q9BTA9;Q13243;Q9Y5S9;Q9H040;Q6PJT7;Q86TB9;Q8WTT2;Q96S94;Q14966;Q05516;Q9UBU9;Q13838;Q6K0P9;O00213;Q9Y383;Q9BWG6;Q8IZL2;Q15029;Q13427;Q5HYJ3;Q86YP4;Q6P2Q9;O15527;P63165;Q14498;Q12837;Q6PD62;Q9H307;Q9BY77;Q8WWY3;Q96FV9;Q86U44;O95400;Q8IYB3;O75940;P61326;Q14997;P49756;Q9UMS4;O00257;Q9UK58;Q02040;Q9UKV3;Q7RTV0;P08107;P08621;Q9UQ35;Q86V81;Q96IZ7;Q9UBB9;P27695;Q9NS56;Q07955;Q9H0G5;Q9P0U4;Q12972;Q9Y3M2;O75925;Q01081;P49750;Q14331;O95232;Q96GM8;P80723;Q9P2N5;P51816;Q9BT49;Q13526;Q96QD9;O43172;O75494;Q15233;Q9ULJ6;P18583;Q86X95;Q92585;Q9NRA8;O43395;O15234;Q9BZE0;P50222;O95391;P84103;Q16666;Q8NHY2;Q06587}
- 5213 Pathogen[ P03383] interacts with 101 human partners: {P08107;Q9NYV4;O00213;Q9UBU9;Q92585;Q07955;P55199;O75925;O15234;Q15287;Q96JK9;Q9UK58;Q6PJT7;O75494;Q8TF01;Q02040;Q96IZ7;Q9BTA9;Q15029;O43172;Q86YP4;Q96CJ1;Q6PD62;Q13838;O15527;Q9Y5S9;Q8WTT2;Q8IZL2;O00257;Q96FV9;Q12972;P50222;P61326;Q06587;Q6P2Q9;P38919;O95400;Q12874;Q13243;Q14997;Q8WXF1;Q14331;P51816;O75400;Q99459;Q05516;Q86V81;Q9Y2W2;O94906;P49756;P36873;O43447;O43395;Q8IYB3;Q03112;Q13427;P18583;P84103;Q9H040;Q9UKV3;Q01130;Q9Y383;Q96QD9;P49756;P63165;Q12837;Q96PM5;Q01081;Q86TB9;Q9Y3M2;Q16666;Q9BY77;Q96GM8;Q6K0P9;Q9BWG6;Q9H307;O95232;Q8WWY3;Q9UQ35;P80723;Q9NRA8;Q15233;P27695;Q96JC9;Q9UBB9;Q5HYJ3;Q8N5M1;Q9H0G5;Q86X95;Q8NHY2;Q9ULJ6;P08621;Q9BT49;O95391;Q9UMS4;Q7RTV0;Q13526;O75940;Q9UIS9;O75928;Q14498}
- 5214 Pathogen[ P03410] interacts with 107 human partners: {P49750;Q13838;Q8NHY2;Q8WTT2;Q5HYJ3;Q9H040;O75925;Q01081;Q03112;Q16666;P61326;O15234;Q8WWY3;Q15029;Q6PD62;Q9P0U4;Q15233;Q6PJT7;P63165;Q15287;Q14997;P50222;Q9Y3M2;Q13526;Q9Y5S9;Q9H0G5;Q9NRA8;O75928;O00213;Q99633;Q9BWG6;Q86YP4;Q9BT49;Q9UBB9;Q9ULJ6;Q96IZ7;Q8TF01;Q9P2N5;Q92585;Q96FV9;Q96QD9;Q9UQ35;P08621;O94906;Q8IZL2;Q9Y2W2;P55199;Q96JK9;Q14966;P49756;Q96JC9;Q9UKV3;Q99459;O75400;O43172;Q96GM8;Q3ZCQ8;Q07955;P08107;O15527;O43660;O43395;Q8WXF1;O75533;Q86V81;Q6K0P9;Q9UBU9;P18583;P36873;Q96S94;Q8IYB3;P38919;Q86X95;O95400;Q96CJ1;O95232;Q01130;Q9BTA9;Q9UIS9;P27695;Q86TB9;Q9BY77;Q7RTV0;Q9UMS4;Q12972;P80723;Q9Y383;Q14498;Q06587;P51816;Q6P2Q9;Q8N5M1;P84103;O00257;Q86U44;Q9UK58;Q12837;O75940;Q13243;Q12874;Q13427;O43447;O95391;Q9H307;O75494;Q14331;Q02040}
- 5215 Pathogen[ P14075] interacts with 101 human partners: {Q9H307;O00213;Q92585;O15234;P63165;Q96GM8;O95232;Q96PM5;Q8WXF1;Q86X95;P51816;P08621;Q86V81;Q13243;O43395;P49756;P27695;Q8WTT2;Q6PJT7;P61326;O95391;P80723;O15527;Q12837;Q96IZ7;Q8TF01;O95400;P49750;Q01130;O75925;O43172;Q02040;Q8N5M1;Q9H040;O75494;Q9BT49;Q16666;Q9UQ35;O94906;Q6K0P9;Q9UKV3;P36873;Q15029;O75400;Q99459;Q96QD9;O00257;Q06587;Q96JC9;Q9Y2W2;Q12874;Q13526;Q9UBB9;Q6PD62;Q15287;Q9UIS9;Q86TB9;Q9BTA9;Q96CJ1;Q6P2Q9;O75928;Q01081;Q9UMS4;Q96JK9;Q8IYB3;Q8NHY2;Q03112;Q15233;Q14997;P55199;O43447;Q9UK58;Q9Y383;P08107;Q9Y5S9;Q05516;Q13427;P84103;Q9ULJ6;Q9NRA8;Q9UBU9;Q5HYJ3;Q9Y3M2;Q9H0G5;Q12972;Q14331;Q8IZL2;P38919;Q96FV9;Q13838;Q9NYV4;P18583;Q8WWY3;P50222;Q14498;Q9BWG6;Q9BY77;Q86YP4;Q07955;Q7RTV0}
- 5216 Pathogen[ P0C206] interacts with 110 human partners: {P27695;Q15287;Q9UMS4;Q8N5M1;Q9NS56;Q9BZE0;Q9P2N5;Q9P0U4;Q6K0P9;Q6PD62;Q07955;Q86TB9;Q14997;P61326;Q01081;Q8TF01;Q13526;P18583;O15527;O75925;Q14966;Q9BT49;Q05066;Q5HYJ3;Q15233;Q8IYB3;Q05516;Q8WTT2;O95232;Q96JK9;Q9BY77;O75533;O75940;P51816;Q9H307;Q9ULJ6;Q9Y383;Q16666;Q13243;Q12874;O75494;Q96S94;Q86YP4;Q02040;Q9H0G5;Q9UBB9;Q12837;Q9UQ35;O00213;Q3ZCQ8;Q9BWG6;Q9UK58;Q86X95;Q96FV9;Q03112;Q9UIS9;O95400;Q8NHY2;Q13838;Q8IZL2;Q9UBU9;Q96CJ1;P80723;Q13427;Q6PJT7;Q8WXF1;Q06587;O43395;Q6P2Q9;Q7RTV0;O15234;P08107;P49750;Q8WWY3;Q9BTA9;O43172;Q99459;O43447;Q96JC9;Q96IZ7;P84103;O75400;Q96QD9;Q8IYM9;Q96PM5;O94906;P49756;P55199;Q14331;Q12972;P63165;O43660;P38919;O00257;Q96GM8;O95391;Q9Y2W2;P08621;Q01130;P36873;Q9H040;Q14498;Q92585;Q8IZD2;Q9Y5S9;Q86V81;Q9UKV3;Q9NRA8;Q15029;P50222}
- 5217 Pathogen[ P03363] interacts with 117 human partners: {Q86X95;Q96S94;Q15020;O75940;Q15233;O43395;Q96JC9;Q6NHY9;Q13427;Q8WTT2;Q96IZ7;Q9Y2W2;Q92766;O15527;P38919;Q9NRA8;Q9Y383;P36873;Q12972;O95391;O95400;Q86YP4;Q8N5M1;P55199;Q9UKV3;Q08170;O95232;Q14331;Q03112;O00213;Q96GM8;O75533;Q9H0G5;Q7RTV0;Q9H307;Q96JK9;Q9P0U4;Q9Y3M2;Q01130;Q6P2Q9;Q8TF01;Q86U44;Q3ZCQ8;O15047;P49756;Q9UBU9;Q8WWY3;Q13526;Q9BWF3;Q96FV9;O43447;Q9P2N5;P61326;Q16666;Q96QD9;Q15029;Q15287;O75400;Q9UK58;Q05066;Q8IYB3;P63165;P18583;Q9BY77;P08107;Q6K0P9;Q12874;O43172;Q14966;Q13243;Q86V81;Q9H040;P49750;Q96PM5;Q13838;Q02040;P08621;O75925;Q9UPS6;P50222;Q86XP3;Q86TB9;Q07955;O43660;P51816;Q01081;O94906;Q9BT49;Q96CJ1;P80723;Q9ULJ6;Q5HYJ3;Q8NHY2;P84103;Q06587;Q9UMS4;Q14498;Q99633;Q8WXF1;Q99459;Q05516;Q12837;Q9UQ35;O00257;Q9BTA9;Q8IZL2;Q9BZE0;Q9Y5S9;Q9BWG6;Q92585;Q9BZJ0;O75494;Q6PJT7;O75928;Q6PD62;Q9UIS9;O15234}
- 5218 [Cluster 475]GO:0072357+C cellular\_component [name] PTW/PP1 phosphatase complex [def] "A protein serine/threonine phosphatase complex that contains a catalytic subunits (PPP1CA, PPP1CB or PPP1CC) and the regulatory subunits PPP1R10 (PNUTS), TOX4 and WDR82, and plays a role in the control of chromatin structure and cell cycle progression during the transition from mitosis into interphase." [GOC
- 5219 Pathogen[ Q2Q067] interacts with 6 human partners: {O14974;P62140;O94842;Q96QC0;P36873;P62136}
- 5220 Pathogen[ P0C214] interacts with 6 human partners: {P62140;O94842;O14974;P62136;P36873;Q96QC0}

5221 Pathogen[ P03346] interacts with 6 human partners:{P62136;Q96QC0;O94842;P36873;P62140;O14974}

5222 Pathogen[ Q85601] interacts with 6 human partners:{P62136;P36873;Q96QC0;O14974;P62140;O94842}

5223 Pathogen[ P14079] interacts with 6 human partners:{Q96QC0;P36873;O14974;P62136;P62140;O94842}

5224 Pathogen[ P03383] interacts with 5 human partners:{P62140;P36873;P62136;O94842;Q96QC0}

5225 Pathogen[ P03410] interacts with 6 human partners:{Q96QC0;P62136;P62140;O94842;O14974;P36873}

5226 Pathogen[ P14075] interacts with 5 human partners:{Q96QC0;P62140;P36873;P62136;O94842}

5227 Pathogen[ P0C206] interacts with 6 human partners:{O94842;O14974;P62140;Q96QC0;P36873;P62136}

5228 Pathogen[ P03363] interacts with 6 human partners:{P62136;P36873;P62140;Q96QC0;O14974;O94842}

5229 [Cluster 476]GO:0043025+C cellular\_component [name] neuronal cell body [def] "The portion of a neuron that includes the nucleus, but excludes all cell projections such as axons and dendrites." [GOC

5230 Pathogen[ Q2Q067] interacts with 24 human partners:{O14786;Q13033;P41219;Q9H2P0;O95886;Q15596;Q9UBB6;P51610;P63241;Q00577;Q9UBB4;Q04323;P11142;Q9Y6H5;P51959;Q92796;P62136;P53041;Q9NZU7;P60953;P78347;Q66K74;Q14194;Q9H814}

5231 Pathogen[ P0C214] interacts with 33 human partners:{Q9UBB6;P05937;O14786;P51610;Q9UBB4;Q9H814;Q92796;Q9UM54;P51959;P41219;Q13033;P60953;Q14194;P63241;Q9HCE7;P35580;Q9Y6H5;Q00577;P09104;Q9Y2H0;P78347;P62136;Q04323;O95886;P07093;Q9NZU7;P53041;O15305;Q15596;Q05639;Q66K74;Q9H2P0;P11142}

5232 Pathogen[ P03346] interacts with 35 human partners:{P62136;Q9UBB4;P0CAP2;Q96A65;Q9H2P0;Q00577;P78347;Q9NZU7;P51610;Q9H814;O43815;Q66K74;P11142;Q92886;P60953;P63241;P05937;Q92796;Q9P021;Q9Y2H0;Q13033;Q15596;P41219;O95886;P84550;Q9Y6H5;P53041;P11137;Q9ULV0;Q04323;Q15700;Q9UBB6;P51959;Q14194;O14786}

5233 Pathogen[ Q85601] interacts with 30 human partners:{Q9NZU7;Q96A65;Q14194;Q9UBB4;O43815;Q66K74;P63241;P51959;Q15596;O14786;P51610;Q00577;Q9H814;Q04323;P62136;P11142;Q9H2P0;P41219;P53041;Q9BVA0;Q92796;Q13033;P60953;P35580;Q9Y6H5;Q9UM54;O95886;P07093;P78347;Q05639}

5234 Pathogen[ P14079] interacts with 46 human partners:{Q8WWM9;O14810;P51959;P05937;P11142;Q15596;O15305;P53041;P41219;Q15700;P13498;Q13033;Q66K74;P24588;Q9Y6H5;O43815;P62136;Q9H2P0;Q9UM54;P51610;Q9Y2H0;Q9H269;P02686;A6PVL3;Q15078;Q6PUV4;Q7Z7J9;Q9UBB6;Q9UBB4;Q14194;Q00577;P63241;Q96A65;Q05682;P47874;Q0ZLH3;O95886;Q9P021;P11137;Q92796;P78347;Q9BVA0;P0CAP2;Q9NZU7;Q04323;Q9H814}

5235 Pathogen[ P03383] interacts with 22 human partners:{Q9UBB6;Q15596;Q9UBB4;P78347;P0CAP2;O95886;P60953;Q04323;P63241;P62136;P51610;P41219;P51959;P11142;P53041;P35580;Q00577;Q92796;Q9Y6H5;Q13033;Q9Y2H0;Q9H814}

5236 Pathogen[ P03410] interacts with 47 human partners:{O14786;P51610;Q9Y6H5;A6PVL3;P11137;Q05682;Q9ULV0;O14810;P02686;P62136;Q9Y2H0;P11142;Q04323;Q00577;Q0ZLH3;Q15700;P41219;Q8WWM9;Q9UM54;Q9H814;P51959;Q96A65;P05937;Q9UBB6;Q92796;Q13033;P0CAP2;P53041;Q7Z7J9;Q9NZU7;Q6PUV4;Q66K74;O15305;Q15596;P60953;P35580;O95886;O43815;P63241;P78347;Q14194;Q9P021;Q9UBB4;Q9H269;P47874;P24588;Q9BVA0}

5237 Pathogen[ P14075] interacts with 21 human partners:{P60953;Q9H814;P11142;P0CAP2;Q9Y6H5;P51959;O95886;P51610;P78347;P63241;Q9UBB4;Q04323;P62136;P41219;P53041;Q92796;Q9UBB6;Q00577;Q9Y2H0;Q13033;Q15596}

5238 Pathogen[ P0C206] interacts with 37 human partners:{Q9UM54;Q9BVA0;Q9UBB4;Q15700;O43815;Q04323;P41219;Q9P021;P53041;O95886;Q9NZU7;Q96A65;Q66K74;O14786;Q9Y2H0;P11137;Q9H814;P78347;P51959;P51610;Q6PUV4;Q9UBB6;P60953;Q14194;P63241;Q15596;Q92796;P84550;Q9H2P0;Q13033;P35580;P0CAP2;P11142;Q9Y6H5;Q8WWM9;P62136;Q00577}

5239 Pathogen[ P03363] interacts with 33 human partners:{Q9P021;Q92886;P11137;Q9Y6H5;P62136;Q04323;Q9UBB6;Q66K74;Q14194;O14786;Q9H2P0;Q96A65;P53041;Q13033;Q15700;Q15596;Q9UBB4;O43815;Q9NZU7;P41219;P63241;P51959;P84550;P0CAP2;O95886;Q92796;Q00577;P60953;P78347;Q9H814;P11142;P51610;P05937}

5240 [Cluster 477]GO:0005778+C cellular\_component [name] peroxisomal membrane [def] "The lipid bilayer surrounding a peroxisome." [GOC

5241 Pathogen[ Q2Q067] interacts with 4 human partners:{A5YKK6;O75381;Q9NR77;P40855}

5242 Pathogen[ P0C214] interacts with 5 human partners:{P40855;O75381;Q99614;A5YKK6;Q9NR77}

5243 Pathogen[ P03346] interacts with 9 human partners:{A5YKK6;O75381;Q9NR77;P56589;P50542;P40855;O43933;O96011;Q99614}

5244 Pathogen[ Q85601] interacts with 5 human partners:{A5YKK6;Q9NR77;O43933;O75381;P40855}

5245 Pathogen[ P14079] interacts with 16 human partners:{Q9Y5Y5;O75192;Q96HA9;P40855;P56589;A5YKK6;Q7Z434;Q99614;Q9Y6I8;P50542;O96011;Q53FP2;Q7Z412;P10620;O75381;Q9NR77}

5246 Pathogen[ P03383] interacts with 5 human partners:{Q96HA9;O75381;A5YKK6;Q9NR77;P40855}

5247 Pathogen[ P03410] interacts with 13 human partners:{O75192;Q99614;Q9Y5Y5;O96011;P40855;O75381;Q7Z434;Q9Y6I8;Q96HA9;P50542;P5658

9;A5YKK6;Q9NR77}

5248 Pathogen[ P14075] interacts with 6 human partners:{P40855;O75381;Q96HA9;Q9NR77;O75192;A5YKK6}

5249 Pathogen[ P0C206] interacts with 12 human partners:{O43933;O75192;Q96HA9;O75381;P56589;P50542;Q9NR77;P40855;A5YKK6;O96011;Q99614;Q9Y6I8}

5250 Pathogen[ P03363] interacts with 6 human partners:{O43933;A5YKK6;Q9NR77;O75381;P40855;Q99614}

5251 [Cluster 478]GO:0000159+C cellular\_component [name] protein phosphatase type 2A complex [def] "A protein complex that has protein serine/threonine phosphatase activity that is polycation-stimulated (PCS), being directly stimulated by protamine, polylysine, or histone H1\_ it constitutes a subclass of several enzymes activated by different histones and polylysine, and consists of catalytic, scaffolding, and regulatory subunits. The catalytic and scaffolding subunits form the core enzyme, and the holoenzyme also includes the regulatory subunit." [GOC

5252 Pathogen[ Q2Q067] interacts with 15 human partners:{P30153;Q13033;P63151;Q66LE6;Q15172;P67775;Q15173;Q9Y5P8;P62714;Q9NRL3;Q00005;P99999;Q15257;Q16537;Q14738}

5253 Pathogen[ P0C214] interacts with 15 human partners:{Q16537;Q00005;P30153;Q13033;Q15172;Q66LE6;Q15257;P62714;Q15173;P99999;P63151;P67775;Q14738;Q9Y5P8;Q9NRL3}

5254 Pathogen[ P03346] interacts with 19 human partners:{Q15172;Q66LE6;Q00005;Q13362;Q15257;O43815;P62714;P67775;Q969G9;P30153;Q9Y5P8;P99999;Q13033;Q06190;Q14738;Q16537;Q15173;Q9NRL3;P63151}

5255 Pathogen[ Q85601] interacts with 16 human partners:{Q9NRL3;P99999;P62714;P63151;Q00005;O43815;Q14738;P30153;Q15172;Q15173;Q66LE6;Q16537;Q13033;P67775;Q15257;Q9Y5P8}

5256 Pathogen[ P14079] interacts with 15 human partners:{Q13362;Q14738;Q15173;Q16537;Q13033;Q15172;O43815;P63151;Q9NRL3;Q00005;Q66LE6;Q06190;P30153;Q9Y5P8;P99999}

5257 Pathogen[ P03383] interacts with 12 human partners:{Q15173;Q15257;Q00005;P62714;Q14738;P30153;P67775;Q9Y5P8;Q16537;P99999;Q9NRL3;Q13033}

5258 Pathogen[ P03410] interacts with 19 human partners:{P62714;Q9NRL3;Q15172;Q15173;Q15257;P63151;Q06190;Q16537;Q13033;Q969G9;P99999;Q14738;P30153;Q00005;O43815;Q13362;Q66LE6;P67775;Q9Y5P8}

5259 Pathogen[ P14075] interacts with 12 human partners:{Q9Y5P8;Q15257;Q00005;Q16537;P99999;Q9NRL3;Q14738;Q15173;P62714;P67775;P30153;Q13033}

5260 Pathogen[ P0C206] interacts with 19 human partners:{P99999;Q06190;Q16537;P30153;O43815;Q15172;Q66LE6;Q15173;P63151;P67775;Q14738;Q9NRL3;P62714;Q13362;Q13033;Q00005;Q9Y5P8;Q15257;Q969G9}

5261 Pathogen[ P03363] interacts with 19 human partners:{Q9Y5P8;P62714;Q16537;P99999;Q13362;Q00005;Q14738;Q06190;Q969G9;Q13033;Q66LE6;P63151;O43815;Q15173;Q9NRL3;Q15172;Q15257;P30153;P67775}

5262 [Cluster 479]GO:0060170+C cellular\_component [name] cilium membrane [def] "The portion of the plasma membrane surrounding a cilium." [GOC

5263 Pathogen[ Q2Q067] interacts with 4 human partners:{Q9UPX8;Q717R9;P09497;Q3SYG4}

5264 Pathogen[ P0C214] interacts with 3 human partners:{Q9UPX8;Q3SYG4;P09497}

5265 Pathogen[ P03346] interacts with 7 human partners:{Q8TAM2;Q15019;P42566;Q3SYG4;P09497;Q717R9;Q9UPX8}

5266 Pathogen[ Q85601] interacts with 3 human partners:{Q9UPX8;Q3SYG4;P09497}

5267 Pathogen[ P14079] interacts with 11 human partners:{P42566;Q8NFIJ9;Q717R9;Q8N3I7;P57679;Q86UK5;Q8IWZ6;Q8TAM2;P09497;Q3SYG4;Q9UPX8}

5268 Pathogen[ P03383] interacts with 3 human partners:{Q3SYG4;Q717R9;P09497}

5269 Pathogen[ P03410] interacts with 10 human partners:{Q717R9;Q8NFIJ9;Q3SYG4;Q8TAM2;P09497;Q8N3I7;Q9UPX8;Q8IWZ6;P42566;Q86UK5}

5270 Pathogen[ P14075] interacts with 3 human partners:{Q3SYG4;P09497;Q717R9}

5271 Pathogen[ P0C206] interacts with 9 human partners:{Q15019;Q3SYG4;Q8TAM2;Q8N3I7;Q717R9;P09497;Q9UPX8;P42566;Q8NFIJ9}

5272 Pathogen[ P03363] interacts with 6 human partners:{Q8TAM2;Q9UPX8;Q717R9;Q3SYG4;Q8NFIJ9;P09497}

5273 [Cluster 480]GO:0001940+C cellular\_component [name] male pronucleus [def] "The pronucleus originating from the spermatozoa that was involved in fertilization." [GOC

5274 Pathogen[ Q2Q067] interacts with 4 human partners:{P20226;Q5UIP0;P20248;P83916}

5275 Pathogen[ P0C214] interacts with 4 human partners:{P20248;Q5UIP0;P83916;P20226}

5276 Pathogen[ P03346] interacts with 5 human partners:{Q6W0C5;P20226;P20248;Q5UIP0;P83916}

5277 Pathogen[ Q85601] interacts with 4 human partners:{P83916;Q5UIP0;P20248;P20226}

5278 Pathogen[ P14079] interacts with 4 human partners:{P20248;Q6W0C5;P83916;Q5UIP0}

5279 Pathogen[ P03383] interacts with 4 human partners:{Q5UIP0;P83916;P20226;P20248}

5280 Pathogen[ P03410] interacts with 5 human partners:{P20226;P20248;P83916;Q5UIP0;Q6W0C5}

5281 Pathogen[ P14075] interacts with 4 human partners:{P20226;P20248;P83916;Q5UIP0}

5282 Pathogen[ P0C206] interacts with 5 human



5283 partners:{Q5UIP0;P20226;P20248;P83916;Q6W0C5}  
Pathogen[ P03363] interacts with 5 human  
partners:{P83916;P20248;Q5UIP0;P20226;Q6W0C5}

5284 [Cluster 481]GO:0043296+C cellular\_component [name] apical junction complex [def] "A functional unit located near the cell apex at the points of contact between epithelial cells, which in vertebrates is composed of the tight junction, the zonula adherens, and desmosomes and in invertebrates is composed of the subapical complex (SAC), the zonula adherens and the septate junction. Functions in the regulation of cell polarity, tissue integrity and intercellular adhesion and permeability." [GOC

5285 Pathogen[ Q2Q067] interacts with 5 human  
partners:{Q9P2M7;A6NKD9;Q07157;Q8TES7;P61586}

5286 Pathogen[ P0C214] interacts with 5 human  
partners:{P61586;Q8TES7;Q9P2M7;A6NKD9;Q07157}

5287 Pathogen[ P03346] interacts with 5 human  
partners:{A6NKD9;Q07157;Q8TES7;Q9P2M7;P61586}

5288 Pathogen[ Q85601] interacts with 5 human  
partners:{Q8TES7;P61586;Q07157;A6NKD9;Q9P2M7}

5289 Pathogen[ P14079] interacts with 6 human  
partners:{Q07157;A6NKD9;Q8N6F1;P61586;Q9P2M7;Q8TES7}

5290 Pathogen[ P03383] interacts with 5 human  
partners:{A6NKD9;Q8TES7;Q07157;P61586;Q9P2M7}

5291 Pathogen[ P03410] interacts with 7 human  
partners:{A6NKD9;Q0VF96;Q8N6F1;P61586;Q07157;Q9P2M7;Q8TES7}

5292 Pathogen[ P14075] interacts with 5 human  
partners:{Q07157;Q8TES7;P61586;A6NKD9;Q9P2M7}

5293 Pathogen[ P0C206] interacts with 5 human  
partners:{A6NKD9;P61586;Q07157;Q9P2M7;Q8TES7}

5294 Pathogen[ P03363] interacts with 4 human partners:{A6NKD9;Q8TES7;Q07157;Q9P2M7}

5295 [Cluster 482]GO:0009898+C cellular\_component [name] internal side of plasma membrane [def] "The side of the plasma membrane that faces the cytoplasm." [GOC

5296 Pathogen[ Q2Q067] interacts with 12 human  
partners:{Q9NR28;P41220;P23490;Q12933;Q9BZE9;Q99569;Q12959;Q13114;O14920;O00463;Q13490;O15111}

5297 Pathogen[ P0C214] interacts with 13 human  
partners:{P41220;P11413;O15111;Q13490;P23490;Q9BZE9;Q15124;Q12933;Q12959;Q13114;O00463;Q9NR28;O14920}

5298 Pathogen[ P03346] interacts with 15 human  
partners:{O00463;O15111;Q99569;Q9NR28;Q13114;P26038;Q9BZE9;Q96EP0;P23490;Q13490;O14920;P41220;Q9Y2R2;P24666;Q12959}

5299 Pathogen[ Q85601] interacts with 13 human  
partners:{Q99569;Q13490;O00463;P41220;O15111;Q9NR28;Q13114;Q9BZE9;Q15124;Q12933;O14920;Q12959;P23490}

5300 Pathogen[ P14079] interacts with 12 human  
partners:{O00463;Q9BZE9;P26038;Q96EP0;P41220;Q15124;Q99569;Q9NR28;P23490;Q12933;Q13114;Q13490}

5301 Pathogen[ P03383] interacts with 9 human  
partners:{P23490;O14920;P41220;O15111;Q13490;Q9BZE9;Q12933;Q9NR28;Q13114}

5302 Pathogen[ P03410] interacts with 15 human  
partners:{Q9BZE9;P23490;O14920;Q9NR28;P41220;O15111;Q12959;Q13490;Q15124;P26038;O00463;Q12933;P24666;Q13114;Q99569}

5303 Pathogen[ P14075] interacts with 9 human  
partners:{O15111;P41220;P23490;Q9NR28;O14920;Q13490;Q12933;Q13114;Q9BZE9}

5304 Pathogen[ P0C206] interacts with 16 human  
partners:{O14920;Q13114;Q9NR28;Q12933;Q9Y2R2;Q9BZE9;Q15124;P23490;P24666;Q96EP0;Q99569;O15111;O00463;P41220;Q12959;Q13490}

5305 Pathogen[ P03363] interacts with 15 human  
partners:{Q12959;Q13490;O14920;Q9Y2R2;Q96EP0;O15111;P23490;Q12933;O00463;Q99569;Q9NR28;Q9BZE9;P41220;Q13114;P24666}

5306 [Cluster 483]GO:0033553+C cellular\_component [name] rDNA heterochromatin [def] "A region of heterochromatin located at the rDNA repeats in a chromosome." [GOC

5307 Pathogen[ Q2Q067] interacts with 3 human partners:{O43463;O43159;Q9UIF9}

5308 Pathogen[ P0C214] interacts with 3 human partners:{O43159;O43463;Q9UIF9}

5309 Pathogen[ P03346] interacts with 3 human partners:{O43159;O43463;Q9UIF9}

5310 Pathogen[ Q85601] interacts with 3 human partners:{Q9UIF9;O43159;O43463}

5311 Pathogen[ P14079] interacts with 2 human partners:{Q9UIF9;O43159}

5312 Pathogen[ P03383] interacts with 3 human partners:{O43463;O43159;Q9UIF9}

5313 Pathogen[ P03410] interacts with 3 human partners:{O43159;Q9UIF9;O43463}

5314 Pathogen[ P14075] interacts with 3 human partners:{Q9UIF9;O43159;O43463}

5315 Pathogen[ P0C206] interacts with 3 human partners:{O43159;O43463;Q9UIF9}

5316 Pathogen[ P03363] interacts with 3 human partners:{Q9UIF9;O43159;O43463}

5317 [Cluster 484]GO:0042382+C cellular\_component [name] paraspeckles [def] "Discrete subnuclear bodies in the interchromatin nucleoplasmic space, often located adjacent to nuclear specks. 10-20 paraspeckles are typically found in human cell nuclei." [GOC

5318 Pathogen[ Q2Q067] interacts with 6 human  
partners:{P52272;Q15233;Q16630;P23246;O43809;Q8WXF1}

5319 Pathogen[ P0C214] interacts with 6 human

5320 Pathogen[ P03346] interacts with 6 human partners: {Q15233;P23246;Q16630;P52272;O43809;Q8WXF1}

5321 Pathogen[ Q85601] interacts with 4 human partners: {Q8WXF1;Q15233;P23246;O43809}

5322 Pathogen[ P14079] interacts with 4 human partners: {O43809;P23246;Q16630;Q15233}

5323 Pathogen[ P03383] interacts with 4 human partners: {Q8WXF1;O43809;Q15233;P23246}

5324 Pathogen[ P03410] interacts with 6 human partners: {P23246;Q15233;O43809;Q8WXF1;P52272;Q16630}

5325 Pathogen[ P14075] interacts with 4 human partners: {Q8WXF1;P23246;O43809;Q15233}

5326 Pathogen[ P0C206] interacts with 5 human partners: {Q15233;O43809;P23246;Q16630;Q8WXF1}

5327 Pathogen[ P03363] interacts with 6 human partners: {Q15233;P23246;Q16630;P52272;O43809;Q8WXF1}

5328 [Cluster 485]GO:0030134+C cellular\_component [name] ER to Golgi transport vesicle [def] "A vesicle that mediates transport from the endoplasmic reticulum to the Golgi complex\_ bears a coat formed of the COPII coat complex proteins\_ such vesicles found associated with endoplasmic reticulum (ER) membranes at steady state, and are involved in ER to Golgi (anterograde) vesicle transport." [GOC]

5329 Pathogen[ Q2Q067] interacts with 2 human partners: {Q5VYK3;Q53G59}

5330 Pathogen[ P0C214] interacts with 2 human partners: {Q5VYK3;Q53G59}

5331 Pathogen[ P03346] interacts with 1 human partners: {Q5VYK3}

5332 Pathogen[ Q85601] interacts with 2 human partners: {Q5VYK3;Q53G59}

5333 Pathogen[ P14079] interacts with 4 human partners: {Q969M3;Q5VYK3;Q9H0V9;Q53G59}

5334 Pathogen[ P03383] interacts with 2 human partners: {Q5VYK3;Q53G59}

5335 Pathogen[ P03410] interacts with 4 human partners: {Q53G59;Q9H0V9;Q5VYK3;Q969M3}

5336 Pathogen[ P14075] interacts with 2 human partners: {Q53G59;Q5VYK3}

5337 Pathogen[ P0C206] interacts with 3 human partners: {Q969M3;Q5VYK3;Q53G59}

5338 Pathogen[ P03363] interacts with 2 human partners: {Q53G59;Q5VYK3}

5339 [Cluster 486]GO:0042582+C cellular\_component [name] azurophil granule [def] "Primary lysosomal granule found in neutrophil granulocytes. Contains a wide range of hydrolytic enzymes and is released into the extracellular fluid." [GOC]

5340 Pathogen[ Q2Q067] interacts with 3 human partners: {P50995;O00161;Q15833}

5341 Pathogen[ P0C214] interacts with 3 human partners: {Q15833;P50995;O00161}

5342 Pathogen[ P03346] interacts with 3 human partners: {Q15833;O00161;P50995}

5343 Pathogen[ Q85601] interacts with 3 human partners: {Q15833;P50995;O00161}

5344 Pathogen[ P14079] interacts with 2 human partners: {P50995;Q15833}

5345 Pathogen[ P03383] interacts with 2 human partners: {P50995;O00161}

5346 Pathogen[ P03410] interacts with 3 human partners: {Q15833;P50995;O00161}

5347 Pathogen[ P14075] interacts with 2 human partners: {P50995;O00161}

5348 Pathogen[ P0C206] interacts with 3 human partners: {P50995;O00161;Q15833}

5349 Pathogen[ P03363] interacts with 3 human partners: {P50995;O00161;Q15833}

5350 [Cluster 487]GO:0043564+C cellular\_component [name] Ku70 [def] "Heterodimeric protein complex composed of a 70 kDa and a 80 kDa subunit, binds DNA through a channel formed by the heterodimer. Functions in DNA double stranded break repair, chromosome maintenance, transcription regulation, V(D)J recombination, and activation of DNA-PK." [PMID]

5351 Pathogen[ Q2Q067] interacts with 2 human partners: {P12956;P13010}

5352 Pathogen[ P0C214] interacts with 2 human partners: {P13010;P12956}

5353 Pathogen[ P03346] interacts with 2 human partners: {P12956;P13010}

5354 Pathogen[ Q85601] interacts with 2 human partners: {P13010;P12956}

5355 Pathogen[ P14079] interacts with 2 human partners: {P13010;P12956}

5356 Pathogen[ P03383] interacts with 2 human partners: {P13010;P12956}

5357 Pathogen[ P03410] interacts with 2 human partners: {P12956;P13010}

5358 Pathogen[ P14075] interacts with 2 human partners: {P12956;P13010}

5359 Pathogen[ P0C206] interacts with 2 human partners: {P13010;P12956}

5360 Pathogen[ P03363] interacts with 2 human partners: {P12956;P13010}

5361 [Cluster 488]GO:0033018+C cellular\_component [name] sarcoplasmic reticulum lumen [def] "The volume enclosed by the membranes of the sarcoplasmic reticulum." [GOC]

5362 Pathogen[ Q2Q067] interacts with 1 human partners: {P27797}

5363 Pathogen[ P0C214] interacts with 1 human partners: {P27797}

5364 Pathogen[ P03346] interacts with 1 human partners: {P27797}

5365 Pathogen[ Q85601] interacts with 1 human partners: {P27797}

5366 Pathogen[ P14079] interacts with 1 human partners: {P23327}

5367 Pathogen[ P03383] interacts with 1 human partners: {P27797}

5368 Pathogen[ P03410] interacts with 2 human partners: {P23327;P27797}

5369 Pathogen[ P14075] interacts with 2 human partners: {P23327;P27797}

5370 Pathogen[ P0C206] interacts with 2 human partners: {P27797;P23327}

5371 Pathogen[ P03363] interacts with 1 human partners: {P27797}

5372 [Cluster 489]GO:0001939+C cellular\_component [name] female pronucleus [def] "The pronucleus originating from the ovum that is being fertilized." [GOC]

5373 Pathogen[ Q2Q067] interacts with 6 human partners: {P20226;Q5UIP0;P11166;O43823;P20248;P83916}

5374 Pathogen[ P0C214] interacts with 6 human partners: {P20248;Q5UIP0;P83916;P11166;O43823;P20226}

5375 Pathogen[ P03346] interacts with 7 human partners: {Q6W0C5;P20226;P20248;P11166;Q5UIP0;P83916;O43823}

5376 Pathogen[ Q85601] interacts with 6 human partners: {Q6W0C5;P20226;P20248;P11166;Q5UIP0;P83916;O43823}

5377 partners:{P83916;P11166;Q5UIP0;P20248;O43823;P20226}  
Pathogen[ P14079] interacts with 6 human

5378 partners:{O43823;P11166;P20248;Q6W0C5;P83916;Q5UIP0}  
Pathogen[ P03383] interacts with 4 human partners:{Q5UIP0;P83916;P20226;P20248}

5379 Pathogen[ P03410] interacts with 7 human  
partners:{P11166;P20226;P20248;P83916;Q5UIP0;O43823;Q6W0C5}

5380 Pathogen[ P14075] interacts with 5 human  
partners:{P20226;P20248;P83916;Q5UIP0;O43823}

5381 Pathogen[ P0C206] interacts with 7 human  
partners:{Q5UIP0;P20226;P20248;P11166;P83916;O43823;Q6W0C5}

5382 Pathogen[ P03363] interacts with 6 human  
partners:{P83916;P20248;Q5UIP0;P20226;P11166;Q6W0C5}

5383 [Cluster 490]GO:0033256+C cellular\_component [name] I-kappaB/NF-kappaB complex [def] "A protein complex containing an I-kappaB protein and one or more copies of an NF-kappaB protein\_ mediates regulation of NF-kappaB activity by I-kappaB." [GOC]

5384 Pathogen[ Q2Q067] interacts with 3 human partners:{P19838;P25963;Q96EY1}  
5385 Pathogen[ P0C214] interacts with 3 human partners:{P19838;P25963;Q96EY1}  
5386 Pathogen[ P03346] interacts with 3 human partners:{P25963;P19838;Q96EY1}  
5387 Pathogen[ Q85601] interacts with 3 human partners:{P19838;Q96EY1;P25963}  
5388 Pathogen[ P14079] interacts with 1 human partners:{Q96EY1}  
5389 Pathogen[ P03383] interacts with 3 human partners:{P25963;P19838;Q96EY1}  
5390 Pathogen[ P03410] interacts with 3 human partners:{P19838;P25963;Q96EY1}  
5391 Pathogen[ P14075] interacts with 3 human partners:{P25963;P19838;Q96EY1}  
5392 Pathogen[ P0C206] interacts with 3 human partners:{P25963;P19838;Q96EY1}  
5393 Pathogen[ P03363] interacts with 3 human partners:{P25963;P19838;Q96EY1}

5394 [Cluster 491]GO:0005921+C cellular\_component [name] gap junction [def] "A cell-cell junction that is composed of an array of small channels that permit small molecules to pass from one cell to another. At gap junctions, the membranes of two adjacent cells are separated by a uniform narrow gap of about 2-4 nm that is spanned by channel-forming proteins called connexins, which form hexagonal tubes called connexons." [GOC]

5395 Pathogen[ Q2Q067] interacts with 2 human partners:{Q07157;P16989}  
5396 Pathogen[ P0C214] interacts with 2 human partners:{P16989;Q07157}  
5397 Pathogen[ P03346] interacts with 3 human partners:{P16989;Q69YQ0;Q07157}  
5398 Pathogen[ Q85601] interacts with 3 human partners:{Q69YQ0;Q07157;P16989}  
5399 Pathogen[ P14079] interacts with 3 human partners:{Q07157;Q69YQ0;P16989}  
5400 Pathogen[ P03383] interacts with 2 human partners:{P16989;Q07157}  
5401 Pathogen[ P03410] interacts with 3 human partners:{P16989;Q69YQ0;Q07157}  
5402 Pathogen[ P14075] interacts with 2 human partners:{P16989;Q07157}  
5403 Pathogen[ P0C206] interacts with 3 human partners:{Q69YQ0;P16989;Q07157}  
5404 Pathogen[ P03363] interacts with 3 human partners:{Q07157;P16989;Q69YQ0}

5405 [Cluster 492]GO:0030117+C cellular\_component [name] membrane coat [def] "Any of several different proteinaceous coats that can associate with membranes. Membrane coats include those formed by clathrin plus an adaptor complex, the COPI and COPII complexes, and possibly others. They are found associated with membranes on many vesicles as well as other membrane features such as pits and perhaps tubules." [GOC]

5406 Pathogen[ Q2Q067] interacts with 17 human  
partners:{O94973;Q10567;P56377;O43747;O95782;Q92572;P63010;Q96PC3;P61923;Q9UBF2;Q00610;P61966;O75843;P53618;P35606;Q9Y678;Q13367}

5407 Pathogen[ P0C214] interacts with 18 human  
partners:{P61923;P59780;Q13367;P53618;P35606;O75843;P63010;Q10567;Q92572;Q9UBF2;P56377;Q96PC3;O43747;O94973;P61966;O95782;P53680;Q9Y678}

5408 Pathogen[ P03346] interacts with 22 human  
partners:{P61966;Q9Y6B7;P63010;O43747;Q92572;P53680;P56377;P59780;Q9Y678;O95782;P53618;Q10567;O75843;Q9UPM8;Q9UBF2;Q96PC3;P61923;Q13367;O14617;P35606;O94973;Q00610}

5409 Pathogen[ Q85601] interacts with 21 human  
partners:{Q13367;O75843;Q00610;P56377;O43747;P61923;Q9UPM8;Q10567;Q9UBF2;Q9Y678;P53680;O94973;Q96PC3;P53618;Q9Y6B7;P63010;Q92572;P61966;P59780;P35606;O95782}

5410 Pathogen[ P14079] interacts with 21 human  
partners:{P61923;P61966;Q00610;P35606;Q9UPM8;Q10567;P56377;Q9Y678;Q9Y6B7;P59780;Q92572;O75843;O95782;Q9UBF2;P63010;O94973;Q13367;O43747;O14617;Q96PC3;P53680}

5411 Pathogen[ P03383] interacts with 13 human  
partners:{P56377;Q00610;Q92572;P53618;Q9Y678;Q10567;O75843;P63010;O43747;O95782;Q9UBF2;Q13367;O94973}

5412 Pathogen[ P03410] interacts with 23 human  
partners:{Q00610;Q9UPM8;O00203;O95782;Q96PC3;P53680;O43747;O75843;Q10567;P35606;Q92572;O14617;Q9Y6B7;Q9Y678;P53618;P61923;P63010;P59780;Q13367;P61966;O94973;P56377;Q9UBF2}

5413 Pathogen[ P14075] interacts with 13 human  
partners:{O94973;Q9UBF2;P53618;O95782;O43747;Q92572;P63010;Q9Y678;O75843;P56377;Q10567;Q00610;Q13367}

5414 Pathogen[ P0C206] interacts with 22 human  
partners:{P53680;P63010;Q9Y678;Q9Y6B7;O94973;Q92572;P53618;O43747;Q10567;P61966;Q00610;P59780;Q9UPM8;P35606;O95782;Q9UBF2;O14617;O75843;Q96PC3;Q13367;P56377;P61923}

5415 Pathogen[ P03363] interacts with 16 human  
partners:{Q13367;O43747;Q9Y678;Q00610;Q9Y6B7;P53618;O94973;P61923;Q92572;P63010;O95782;P35606;Q9UBF2;O75843;Q10567;Q9UPM8}

5416 [Cluster 493]GO:0033178+C cellular\_component [name] proton-transporting two-sector ATPase complex, catalytic domain [def] "A protein complex that forms part of a proton-transporting two-sector ATPase complex and catalyzes ATP hydrolysis or synthesis. The catalytic domain (F1, V1, or A1) comprises a hexameric catalytic core and a central stalk, and is peripherally associated with the membrane when the two-sector ATPase is assembled." [GOC

5417 Pathogen[ Q2Q067] interacts with 1 human partners:{P36543}

5418 Pathogen[ P0C214] interacts with 2 human partners:{Q16864;P36543}

5419 Pathogen[ P03346] interacts with 2 human partners:{P36543;Q16864}

5420 Pathogen[ Q85601] interacts with 1 human partners:{P36543}

5421 Pathogen[ P14079] interacts with 3 human partners:{P36543;P25705;Q16864}

5422 Pathogen[ P03383] interacts with 1 human partners:{P36543}

5423 Pathogen[ P03410] interacts with 3 human partners:{P25705;Q16864;P36543}

5424 Pathogen[ P14075] interacts with 1 human partners:{P36543}

5425 Pathogen[ P0C206] interacts with 2 human partners:{P36543;Q16864}

5426 Pathogen[ P03363] interacts with 1 human partners:{P36543}

5427 [Cluster 494]GO:0043189+C cellular\_component [name] H4/H2A histone acetyltransferase complex [def] "A multisubunit complex that catalyzes the acetylation of histones H4 and H2A." [GOC

5428 Pathogen[ Q2Q067] interacts with 1 human partners:{Q9NV56}

5429 Pathogen[ P0C214] interacts with 1 human partners:{Q9NV56}

5430 Pathogen[ P03346] interacts with 1 human partners:{Q9NV56}

5431 Pathogen[ Q85601] interacts with 1 human partners:{Q9NV56}

5432 Pathogen[ P14079] interacts with 1 human partners:{Q9NV56}

5433 Pathogen[ P03383] interacts with 1 human partners:{Q9NV56}

5434 Pathogen[ P03410] interacts with 1 human partners:{Q9NV56}

5435 Pathogen[ P14075] interacts with 1 human partners:{Q9NV56}

5436 Pathogen[ P0C206] interacts with 1 human partners:{Q9NV56}

5437 Pathogen[ P03363] interacts with 1 human partners:{Q9NV56}

5438 [Cluster 495]GO:0045211+C cellular\_component [name] postsynaptic membrane [def] "A specialized area of membrane facing the presynaptic membrane on the tip of the nerve ending and separated from it by a minute cleft (the synaptic cleft). Neurotransmitters across the synaptic cleft and transmit the signal to the postsynaptic membrane." [ISBN

5439 Pathogen[ Q2Q067] interacts with 25 human partners:{O00213;Q14160;O95886;Q8N3V7;Q9NSC5;Q9P1A6;Q96EV8;O14910;Q8NF91;Q12959;P11532;P78352;Q9UPX8;P46939;O60299;Q9NZU7;P50570;Q53G26;Q9NRI5;Q9BVN2;Q9Y250;Q9HCI5;Q96EY1;Q9NUP9;O14490}

5440 Pathogen[ P0C214] interacts with 26 human partners:{O14490;O00213;O14910;Q9UPX8;Q9NRI5;P62166;Q9P1A6;O60299;Q9NSC5;Q9Y250;P11532;P78352;Q8NF91;P46939;O95886;Q9NZU7;Q53G26;Q96EV8;Q12959;Q14160;Q9HD26;Q9BVN2;Q9HCI5;P50570;Q8N3V7;Q96EY1}

5441 Pathogen[ P03346] interacts with 39 human partners:{Q9NSC5;Q9NRI5;Q8N3V7;O14490;O00213;P50570;P78352;Q6ZWB6;Q9NZU7;O75970;O43815;P46939;Q13424;Q68DU8;Q9NUP9;Q96EV8;Q9HD26;Q9Y250;O95886;Q53G26;P62166;O60299;Q9HAP6;Q13492;Q9UPP2;Q15700;P11532;Q9BVN2;Q96CX2;Q14160;Q9C0H9;Q8NF91;Q9UPX8;P0C2W1;Q96EY1;O14910;Q9P1A6;Q9HCI5;Q12959}

5442 Pathogen[ Q85601] interacts with 29 human partners:{O14490;Q9Y250;O00213;Q9UPX8;Q9NZU7;Q9NUP9;O14910;Q53G26;Q9P1A6;Q9BVN2;O43815;P11532;Q96EV8;Q9HD26;Q8N3V7;P46939;P50570;Q14160;P78352;Q12959;Q9NSC5;Q9NRI5;Q96CX2;O95886;Q8NF91;P62166;Q96EY1;Q9HCI5;O60299}

5443 Pathogen[ P14079] interacts with 35 human partners:{Q13492;Q9UPP2;Q8TB68;P11532;Q9BVN2;Q15700;O43815;Q9Y250;Q9NRI5;O00213;Q14118;Q13424;Q9C0H9;Q9HCI5;P46939;P50570;Q9HD26;Q9NUP9;Q7Z7J9;P62166;Q8N3V7;Q68DU8;Q9HAP6;Q9NSC5;Q96CX2;O60299;O95886;Q96EV8;Q9P1A6;Q8NF91;Q96EY1;Q9NZU7;O14490;O75970;Q9UPX8}

5444 Pathogen[ P03383] interacts with 21 human partners:{O00213;Q9P1A6;Q14160;Q9HD26;Q9NRI5;O95886;O60299;O14490;P46939;Q96EV8;P11532;Q9NSC5;Q9HCI5;Q8N3V7;Q9C0H9;P78352;Q96EY1;O14910;Q53G26;Q9BVN2;Q9Y250}

5445 Pathogen[ P03410] interacts with 41 human partners:{Q9BVN2;Q9P1A6;O14910;Q53G26;Q8N3V7;Q12959;O60299;P11532;Q68DU8;O00213;Q8TB68;Q9NUP9;P50570;Q9NSC5;O14490;Q14160;Q9HAP6;Q15700;Q6ZWB6;Q9HD26;O75970;Q13492;Q96CX2;P46939;Q9UPP2;Q7Z7J9;Q14118;Q9NZU7;Q9NRI5;Q9HCI5;O95886;O43815;Q9Y250;Q9UPX8;Q9C0H9;Q13424;P62166;P78352;Q96EV8;Q96EY1;Q8NF91}

5446 Pathogen[ P14075] interacts with 21 human partners:{O00213;P11532;Q8N3V7;Q14160;Q9BVN2;O95886;Q9Y250;Q9HD26;Q53G26;Q9NRI5;O14910;O60299;Q9NSC5;P46939;O14490;Q9P1A6;Q96EV8;P78352;Q9C0H9;Q96EY1;Q9HCI5}

5447 Pathogen[ P0C206] interacts with 33 human partners:{P46939;Q9NUP9;P78352;Q8N3V7;P62166;Q15700;O43815;Q96CX2;Q53G26;O95886;O60299;Q9NZU7;O00213;O14490;Q8NF91;Q9NSC5;Q96EV8;Q14160;Q9NRI5;Q9UPX8;O14910;Q9C0H9;Q9UPP2;P11532;Q13424;Q96EY1;Q9HCI5;Q12959;Q9HD26;Q9Y250;P50570;Q9P1A6;Q9BVN2}

5448 Pathogen[ P03363] interacts with 31 human partners:{Q12959;Q8N3V7;P46939;Q8NF91;O00213;Q9UPP2;Q9UPX8;O14910;Q14160;P78352;P50570;Q15700;O75970;Q53G26;Q9NSC5;Q9Y250;P11532;O43815;Q9NZU7;Q9BVN2;Q9NRI5;Q9HCI5;O95886;Q9P1A6;O14490;Q9NUP9;O60299;Q96EY1;Q9HD26;Q13424;Q9C0H9}

5449 [Cluster 496]GO:0030286+C cellular\_component [name] dynein complex [def] "Any of several large complexes that contain two or three dynein heavy chains and several light chains, and have microtubule motor activity." [ISBN

5450 Pathogen[ Q2Q067] interacts with 11 human partners: {P63172;Q8TF09;Q14204;P63167;Q9NP97;Q14203;Q13561;Q13409;Q96FJ2;P51808;O14576}

5451 Pathogen[ P0C214] interacts with 12 human partners: {Q14203;O14645;Q8TF09;Q14204;P51808;P63172;O14576;Q96FJ2;Q9NP97;Q13409;Q13561;P63167}

5452 Pathogen[ P03346] interacts with 13 human partners: {Q96FJ2;O14576;P51808;Q14204;Q14203;Q8TF09;Q8IZS6;P63172;Q13409;O14645;P63167;Q9NP97;Q13561}

5453 Pathogen[ Q85601] interacts with 13 human partners: {Q13409;Q9NP97;P51808;Q14204;Q8IZS6;Q14203;P63172;O96015;O14576;O14645;Q8TF09;P63167;Q13561}

5454 Pathogen[ P14079] interacts with 16 human partners: {Q8TF09;P63172;P51808;Q96FJ2;Q14204;Q9GZS0;Q9NP97;Q9UI46;Q13409;Q13561;O14645;P63167;O14576;Q8IZS6;O96015;Q14203}

5455 Pathogen[ P03383] interacts with 8 human partners: {P51808;Q96FJ2;P63172;Q14203;Q9NP97;Q8TF09;Q13561;P63167}

5456 Pathogen[ P03410] interacts with 18 human partners: {Q9Y6G9;Q14204;Q8IZS6;P51808;Q13409;Q9NP97;Q13561;Q8TF09;Q9UI46;P63172;P63167;Q8TCX1;O14576;O14645;Q9GZS0;O43237;O96015;Q14203}

5457 Pathogen[ P14075] interacts with 8 human partners: {Q9NP97;P51808;Q13561;Q8TF09;P63172;Q96FJ2;Q14203;P63167}

5458 Pathogen[ P0C206] interacts with 15 human partners: {O14645;Q9NP97;O14576;P63167;Q8TF09;O43237;Q13409;Q14204;P51808;Q9Y6G9;Q8IZS6;Q13561;Q14203;P63172;O96015}

5459 Pathogen[ P03363] interacts with 16 human partners: {P63167;Q9GZS0;Q13561;Q14204;Q8IZS6;Q8TF09;P63172;O14645;Q13409;P51808;Q9UI46;Q9NP97;O43237;Q96FJ2;Q14203;O14576}

5460 [Cluster 497]GO:0046540+C cellular\_component [name] U4/U6 x U5 tri-snRNP complex [def] "A ribonucleoprotein complex formed by the association of the U4/U6 and U5 small nuclear ribonucleoproteins." [PMID

5461 Pathogen[ Q2Q067] interacts with 4 human partners: {O43447;Q8WWY3;O95400;O94906}

5462 Pathogen[ P0C214] interacts with 4 human partners: {O95400;O94906;O43447;Q8WWY3}

5463 Pathogen[ P03346] interacts with 4 human partners: {O95400;O43447;O94906;Q8WWY3}

5464 Pathogen[ Q85601] interacts with 4 human partners: {O94906;Q8WWY3;O95400;O43447}

5465 Pathogen[ P14079] interacts with 4 human partners: {O43447;O94906;Q8WWY3;O95400}

5466 Pathogen[ P03383] interacts with 4 human partners: {O95400;O94906;O43447;Q8WWY3}

5467 Pathogen[ P03410] interacts with 4 human partners: {Q8WWY3;O94906;O95400;O43447}

5468 Pathogen[ P14075] interacts with 4 human partners: {O95400;O94906;O43447;Q8WWY3}

5469 Pathogen[ P0C206] interacts with 4 human partners: {O95400;Q8WWY3;O43447;O94906}

5470 Pathogen[ P03363] interacts with 4 human partners: {O95400;Q8WWY3;O43447;O94906}

5471 [Cluster 498]GO:0001673+C cellular\_component [name] male germ cell nucleus [def] "The nucleus of a male germ cell, a reproductive cell in males." [CL

5472 Pathogen[ Q2Q067] interacts with 7 human partners: {Q9Y615;P27694;Q15554;Q9UHC1;Q92547;Q9BYD9}

5473 Pathogen[ P0C214] interacts with 7 human partners: {Q9Y615;Q15554;Q9BYD9;Q9UHC1;P27694;Q92547;P40692}

5474 Pathogen[ P03346] interacts with 7 human partners: {Q15554;P27694;Q9UHC1;Q9UL49;Q92547;Q9Y615;Q9BYD9}

5475 Pathogen[ Q85601] interacts with 7 human partners: {Q92547;Q15554;Q9BYD9;P27694;Q9Y615;Q9UHC1;P40692}

5476 Pathogen[ P14079] interacts with 8 human partners: {P40692;Q9UHC1;Q9Y615;Q9UL49;Q15554;Q92547;P27694;Q9BYD9}

5477 Pathogen[ P03383] interacts with 6 human partners: {Q15554;Q9UL49;P27694;Q9UHC1;Q92547;Q9Y615}

5478 Pathogen[ P03410] interacts with 8 human partners: {P40692;Q15554;Q9Y615;Q9UL49;Q9BYD9;Q92547;P27694;Q9UHC1}

5479 Pathogen[ P14075] interacts with 5 human partners: {Q15554;Q9UHC1;Q9UL49;P27694;Q92547}

5480 Pathogen[ P0C206] interacts with 8 human partners: {Q15554;P40692;Q9UL49;Q9UHC1;P27694;Q9BYD9;Q92547;Q9Y615}

5481 Pathogen[ P03363] interacts with 7 human partners: {Q92547;P27694;Q15554;Q9UHC1;Q9Y615;Q9BYD9;Q9UL49}

5482 [Cluster 499]GO:0032044+C cellular\_component [name] DSIF complex [def] "A heterodimeric protein complex formed of Spt4 and Spt5 proteins which is expressed in eukaryotes from yeast to man. DSIF is an inhibitory elongation factor that promotes RNA polymerase II transcriptional pausing, but can also stimulate transcriptional elongation under certain conditions, and may play a role in RNA processing via its physical association with mRNA capping enzymes." [PMID

5483 Pathogen[ Q2Q067] interacts with 2 human partners: {O00267;P63272}

5484 Pathogen[ P0C214] interacts with 2 human partners: {O00267;P63272}

5485 Pathogen[ P03346] interacts with 2 human partners: {P63272;O00267}

5486 Pathogen[ Q85601] interacts with 2 human partners: {O00267;P63272}

5487 Pathogen[ P14079] interacts with 2 human partners: {P63272;O00267}

5488 Pathogen[ P03383] interacts with 2 human partners: {P63272;O00267}

5489 Pathogen[ P03410] interacts with 2 human partners: {O00267;P63272}

- 5490 Pathogen[ P14075] interacts with 2 human partners:{000267;P63272}
- 5491 Pathogen[ P0C206] interacts with 2 human partners:{000267;P63272}
- 5492 Pathogen[ P03363] interacts with 2 human partners:{000267;P63272}
- 5493 [Cluster 500]GO:0005813+cellular\_component [name] centrosome [def] "A structure comprised of a core structure (in most organisms, a pair of centrioles) and peripheral material from which a microtubule-based structure, such as a spindle apparatus, is organized. Centrosomes occur close to the nucleus during interphase in many eukaryotic cells, though in animal cells it changes continually during the cell-division cycle."  
[GOC]
- 5494 Pathogen[ Q2Q067] interacts with 210 human partners:{Q12798;Q5SZL2;Q8NH2;P22392;O75161;Q16236;Q96GE4;Q71F23;Q6P2H3;Q14008;Q9Y2Y0;Q9H4X1;Q99417;Q7Z4H7;Q96RT8;Q9P209;Q8NCE0;O95684;Q7Z460;Q13485;O14974;Q14674;Q96ST8;Q9H1H9;Q9BUL9;Q9HAF1;O43805;Q14204;Q5SW79;Q8N137;Q8N0Z3;O94927;Q5VYK3;Q9UJW0;O75935;Q7Z7A1;Q9NZJ0;Q8WVK9;A8MVW5;Q8NHV4;Q86SE9;P63167;Q3B820;Q5FBB7;Q86XR8;Q9H6T0;Q9UJT9;Q9HC77;Q9UPV0;P06748;O14757;Q9UNH5;Q9NVX0;Q6P582;Q9NXR1;P29966;Q13432;Q9NY61;Q9C099;Q9P270;Q96SN8;Q96HR8;Q96K30;Q9BVV6;Q15560;Q1MSJ5;Q14790;A6NKF1;Q5BJF6;Q8IY31;Q2M2Z5;Q5JTW2;Q9NP97;Q8IYA6;P14635;Q99871;Q96QF0;Q68DK2;Q8TEP8;P27695;Q96DB5;Q14203;Q76KD6;P17987;Q99608;Q9C0D2;Q9BYV8;Q14498;Q96LB3;Q8NHQ1;Q9BSU3;Q9NXXB0;Q13561;Q66GS9;O43303;Q8WXW3;O76095;Q96RT7;Q12834;Q96GC6;Q15468;Q9UBK9;Q9UMS0;P24864;O95067;Q9BSJ2;Q969Q6;Q5JR59;P50991;Q9Y5B0;Q9Y6R9;Q9BT25;Q96Q89;Q08211;P42025;Q9H6D7;Q9C0F1;O75419;Q99550;Q96MT8;O15078;Q8TF46;Q12873;P25786;Q5VU43;Q9NRG9;Q13045;Q49A88;Q5TB80;Q99996;Q9BUN5;P40925;Q02241;O75665;O75164;O00139;Q53EZ4;Q96NB1;Q92785;Q8N8E3;O43809;Q08AG7;O94986;Q5TZA2;Q9UN36;Q9NRI5;Q14145;Q15051;P23258;Q9H816;Q8IWC1;Q14839;Q6UVJ0;Q9Y6D9;Q96BD8;Q6QNY1;O75638;Q8NA72;P41208;Q9BPX1;Q86SQ7;Q6DKK2;Q96MB7;P25205;O75154;Q13409;O15182;Q6NZ67;Q9NY27;Q9UGJ1;O95613;Q96FJ2;Q92845;P30305;P43487;P24941;Q8N4C6;Q8WXS3;Q9BX66;Q99689;Q9H7T9;P30260;Q9BPU9;Q86VS8;Q9UH90;Q92597;Q9BPX3;Q9Y535;O00463;Q15834;Q9BXF6;Q96CS2;Q13042;Q15691;P60510;Q8TAP9;Q8IW35;Q96ED9;Q15154;Q68CZ6;Q8NEZ2;Q9BT92;Q9H2G4;Q5VT06;Q9BV73;Q96M11;Q96CW5;P35237;Q8TAP6;Q9NQR4}
- 5495 Pathogen[ P0C214] interacts with 211 human partners:{Q9Y6R9;Q5SZL2;O15078;Q9BPX3;O94927;Q8TAP9;Q9H6T0;O75935;P35237;O75161;Q9H4X1;P27695;Q9BUL9;O43805;P11413;P29966;Q9BSJ2;Q6NZ67;Q15154;Q8IY31;Q14008;Q1MSJ5;O94986;Q86SE9;Q9H816;Q9BR77;O95684;Q9NRI5;Q9UJW0;Q02241;Q969Q6;Q15051;Q9UH90;Q96ED9;P48643;Q6DKK2;Q14203;Q7Z4H7;Q12873;P06748;Q9P209;Q8NHQ1;P43487;Q5SW79;Q9NY27;Q96SN8;Q8NA72;Q14145;Q9C099;A8MVW5;Q8NHV4;Q7Z7A1;Q5VYK3;Q9BYV8;Q9BSU3;Q9BX66;P23258;Q9HC77;Q5JTW2;Q99417;Q96MT8;Q14204;Q8NH2;Q99608;P14635;O75164;O00139;Q96CW5;Q15691;Q9Y61;Q15560;Q9TE1;Q96RT7;Q9UGJ1;P25205;Q5JR59;Q8TF46;Q9BT92;O14974;P60510;Q96CS2;Q8TEP8;Q9UPV0;Q9C0F1;Q96ST8;O43303;Q8IW35;Q76KD6;Q96MB7;Q92597;Q86VS8;Q15834;Q9UMS0;O43809;Q13045;Q96Q89;Q12798;Q9HAF1;Q5VU43;Q9NXXB0;Q96BD8;Q66GS9;Q9NQR4;Q9BPU9;Q8WXW3;Q86XR8;Q9BT25;Q9NRG9;Q13485;Q12834;Q9NZJ0;Q15468;Q53EZ4;O95067;P24941;Q9NXXG0;Q99689;Q99550;Q96M11;Q9BPX1;Q6P2H3;Q96GC6;Q96K30;P30305;P25786;Q8TAP6;Q8NEZ2;Q96DB5;Q96RT8;Q9UNH5;Q9BUL9;Q8N0Z3;Q43805;Q12834;P30305;Q15051;Q8TEP8;Q6P2H3;Q96ST8;Q13432;Q16236;Q76KD6;Q9Y5B0;Q8TAM2;Q99417;Q5TB80;P25205;P41208;Q9C0D2;O75161;Q9NQR4;Q86SE9;Q9NXXB0;Q9NVX0;Q66GS9;O75665;Q8N960;A6NKF1;Q8WXW3;Q8IW35;Q2KHM9;Q92597;Q9BPX3;P14635;Q86SQ7;Q13042;O94986;Q6QNY1;Q96SN8;O75164;P50991;Q6ZP65;Q14008;P51587;Q5VT06;Q9Y6R9;Q9BQI6;Q68CZ6;Q9UGJ1;Q5VYK3;Q9Y535;Q9NY61;Q96K30;P36404;Q53EZ4;Q96Q89;O75604;P25786;Q8TAP6;P42025;O00399;Q9H6T0;P22392;Q5BJF6;Q96LB3;Q3YEC7;Q969Q6;Q8N157;Q3B820;P30622;P29966;Q68DK2;O43809;Q02241;Q9C099;Q9BYV8;Q8TAP9;Q9UH90;Q99608;Q8IWC1;P36405;Q9NVN3;Q96ED9;Q14790;Q99996;Q13409;Q96PY6;Q96DB5;O75638;Q96CS2;Q8NHQ1;Q5TZA2;Q99550;Q12798;Q8WVK9;Q9BXF6;Q12873;P63167;Q13485;Q9BSJ2;Q08AG7;Q7Z460;Q92845;P27695;Q9HAF1;Q9Y2Y0;O95613;O15182;O15078;Q96GE4;Q96RT7;Q13045;O94927;Q14145;O75154;Q8N4C6;O76095;P40925;Q5VU43;Q9UN36;Q8WXS3;P30260;O75419;Q9H816;Q9P270;Q96GC6;O14974;Q15468;Q96HR8;Q1MSJ5;Q14674;Q9UBK9;Q96BD8;O14965;Q9NP97;Q6UVJ0;Q5SW79;Q8TF46;Q76N32;Q96MB7;Q92785;Q71F23;P60510;Q92834;Q6DKK2;Q6IQ23;Q9UNH5;O43303;Q9BVV6;Q96NB1;Q14839;Q8NCE0;Q96M02;Q6EMB2;Q9H7T9;Q9UPV0;Q9BUN5;Q96MT8;Q96QF0;Q13561;O00444;P17987;Q9BV73}
- 5496 Pathogen[ P03346] interacts with 242 human partners:{Q9NZJ0;Q5SZL2;Q6P582;Q9Y6D9;Q9NRI5;Q0P6D6;O00463;Q5T6F0;Q7Z7A1;Q9BT25;Q5FBB7;Q96FJ2;Q9H6D7;Q9H4X1;Q96NL6;Q9UJW0;Q6NZ67;Q15834;Q8IYA6;Q86XR8;Q8N8E3;Q9BR77;Q5JTW2;Q86VS8;O95684;Q9BSU3;P06748;Q96M11;Q5JR59;Q2M2Z5;P23258;Q99871;Q96RT8;Q7Z4H7;Q9BPU9;Q8IY31;Q9UJT9;Q9ULJ1;Q15154;Q9NRG9;O75935;O00139;Q8N137;Q8NH2;Q9BPX1;Q15691;Q99689;P43487;A8MVW5;Q8NHV4;P24941;Q9NY27;Q68CZ1;Q9NXXG0;Q14498;P35237;Q8NA72;Q8NEZ2;Q9H2G4;Q49A88;Q9HC77;Q9UMS0;O14757;Q9NXR1;Q9P255;P24864;Q9P209;Q9H1H9;Q15560;Q14204;Q14203;Q9BX66;Q96CW5;Q08211;O95067;O60662;Q9BT61;Q9BT92;Q9C0F1;Q9BUL9;Q8N0Z3;Q43805;Q12834;P30305;Q15051;Q8TEP8;Q6P2H3;Q96ST8;Q13432;Q16236;Q76KD6;Q9Y5B0;Q8TAM2;Q99417;Q5TB80;P25205;P41208;Q9C0D2;O75161;Q9NQR4;Q86SE9;Q9NXXB0;Q9NVX0;Q66GS9;O75665;Q8N960;A6NKF1;Q8WXW3;Q8IW35;Q2KHM9;Q92597;Q9BPX3;P14635;Q86SQ7;Q13042;O94986;Q6QNY1;Q96SN8;O75164;P50991;Q6ZP65;Q14008;P51587;Q5VT06;Q9Y6R9;Q9BQI6;Q68CZ6;Q9UGJ1;Q5VYK3;Q9Y535;Q9NY61;Q96K30;P36404;Q53EZ4;Q96Q89;O75604;P25786;Q8TAP6;P42025;O00399;Q9H6T0;P22392;Q5BJF6;Q96LB3;Q3YEC7;Q969Q6;Q8N157;Q3B820;P30622;P29966;Q68DK2;O43809;Q02241;Q9C099;Q9BYV8;Q8TAP9;Q9UH90;Q99608;Q8IWC1;P36405;Q9NVN3;Q96ED9;Q14790;Q99996;Q13409;Q96PY6;Q96DB5;O75638;Q96CS2;Q8NHQ1;Q5TZA2;Q99550;Q12798;Q8WVK9;Q9BXF6;Q12873;P63167;Q13485;Q9BSJ2;Q08AG7;Q7Z460;Q92845;P27695;Q9HAF1;Q9Y2Y0;O95613;O15182;O15078;Q96GE4;Q96RT7;Q13045;O94927;Q14145;O75154;Q8N4C6;O76095;P40925;Q5VU43;Q9UN36;Q8WXS3;P30260;O75419;Q9H816;Q9P270;Q96GC6;O14974;Q15468;Q96HR8;Q1MSJ5;Q14674;Q9UBK9;Q96BD8;O14965;Q9NP97;Q6UVJ0;Q5SW79;Q8TF46;Q76N32;Q96MB7;Q92785;Q71F23;P60510;Q92834;Q6DKK2;Q6IQ23;Q9UNH5;O43303;Q9BVV6;Q96NB1;Q14839;Q8NCE0;Q96M02;Q6EMB2;Q9H7T9;Q9UPV0;Q9BUN5;Q96MT8;Q96QF0;Q13561;O00444;P17987;Q9BV73}
- 5497 Pathogen[ Q85601] interacts with 222 human partners:{Q53EZ4;Q8NHQ1;Q5VYK3;Q5SZL2;P61163;Q9BUL9;Q96M02;O75161;Q9H7T9;Q13409;Q8N137;Q9H4X1;Q9UJW0;Q96LB3;Q9NP97;Q16236;O75154;Q6UVJ0;Q15834;Q02241;O94986;Q15154;P36405;Q8N8E3;Q9BR77;Q86VS8;O95684;Q14008;Q8WVK9;Q9UN36;Q2M2Z5;Q9H6D7;Q9BT25;O15182;Q99871;Q96RT8;Q9NY61;O00463;Q96HR8;Q96PY6;Q12798;Q9BX66;Q9Y535;Q6NZ67;Q96SN8;Q9HAF1;O75935;Q7Z4H7;Q9BPX1;Q14790;Q99417;P43487;Q9NRG9;Q9NVX0;A8MVW5;Q8NHV4;Q9NY27;P30622;Q9Y2Y0;Q71F23;Q9HC77;Q9NZJ0;Q9UMS0;Q14204;Q9P209;Q13045;Q9H1H9;Q9C099;Q6IQ23;O15078;Q92834;Q5B

JF6;Q14203;Q14674;Q6ZP65;P17987;Q96CW5;Q86SE9;Q15560;Q9BT92;Q99608;O43303;Q9BTE1;Q6P2H3;Q08211;A6NKF1;P35237;Q14145;Q12834;Q5JTW2;Q8TEP8;P23258;Q8TAP9;O14757;Q96ST8;Q76KD6;Q9UNH5;P30305;O14965;Q9UPV0;Q86XR8;Q9BPX3;Q96Q89;Q9BSJ2;Q9NQR4;Q9NXB0;Q66GS9;Q86SQ7;O75665;Q92785;P50991;Q76N32;Q8WXW3;P25205;Q9ULJ1;Q9UGJ1;Q9BXF6;P14635;Q13042;Q9BV73;Q96MB7;Q9Y5B0;Q12873;Q5VT06;Q9C0F1;Q6DKK2;Q15691;Q96M11;Q15051;Q96MT8;Q96BD8;Q9Y6D9;Q9UJT9;Q1MSJ5;Q96GC6;P25786;Q9BYV8;Q7Z7A1;Q5TB80;Q99550;O00399;Q9NXG0;Q9BVA0;Q8IW35;P06748;P22392;Q99689;O94927;Q3B820;Q8IYA6;P29966;Q68DK2;Q9BSU3;P40925;Q8IWC1;Q5JR59;Q8TAP6;O76095;Q99996;Q9BPU9;Q5VU43;O75638;Q96CS2;P60510;Q92845;Q9NRI5;Q5TZA2;O14974;O75164;Q13432;Q7Z460;Q5SW79;Q08AG7;Q92597;Q9H2G4;O95613;Q8N0Z3;O95067;Q8N4C6;P48643;Q9NXR1;Q96K30;Q8WXS3;Q8NEZ2;P30260;O75419;Q6P582;Q9H816;Q9UBK9;Q9P270;Q96ED9;Q13485;Q9C0D2;Q9GZM8;Q6QNY1;Q8NHY2;P24941;Q14498;Q969Q6;P42025;P27695;P63167;O00139;Q8TF46;P51587;Q68CZ6;Q96DB5;Q5FBB7;P51955;O43805;Q8IY31;Q8NA72;O43809;Q96NB1;Q14839;Q8NCE0;Q96RT7;Q96QF0;Q13561;P24864;P41208;Q9UH90}

5498 Pathogen[ P14079] interacts with 247 human partners: {O43809;Q15691;Q8WYA0;Q2M2Z5;Q15560;O95070;O00463;O75161;Q8NA72;Q9H7T9;P48643;O94830;P35237;Q5TZA2;Q96K30;Q8WXW3;Q6UVJ0;O75419;Q68DK2;Q99996;Q8IY31;Q6IQ23;Q96NL6;Q8TEP8;Q8WXS3;Q7Z460;Q9Y5B0;O95684;Q9P209;Q9Y6A5;Q96FJ2;P24864;Q86VS8;Q96GE4;Q9NY61;O94986;O76095;Q99871;Q96ED9;Q8N157;Q49A88;Q9UGJ1;Q68CZ1;Q02241;P50991;O14974;Q9NVX0;Q14204;Q9NXG0;Q5JTW2;Q92834;Q9Y2Y0;Q66GS9;Q9BR77;P51587;Q1MSJ5;Q96ST8;Q8N8E3;O95067;Q9NRI5;Q6P582;Q9BV73;Q92785;Q9NY27;A8MVW5;Q14674;Q9HAF1;Q13045;P50990;O00399;Q96HR8;Q8TAP6;Q9UJW0;Q8TF46;Q92597;Q76KD6;Q8NCE0;Q76N32;Q9BVV6;Q14498;Q5VYK3;Q9BQI6;Q08211;Q99608;Q5FBB7;Q12873;Q9NP97;Q8N960;Q9BSU3;Q5SZL2;Q08AG7;Q8IWX6;Q96MB7;Q96M02;O15066;Q9BTE1;P36405;Q9BUN5;Q5BJF6;Q71F23;Q0P6D6;P14635;Q9UPM9;P51955;Q9UMS0;Q14790;Q99689;Q8NHV4;Q9H6T0;Q14145;Q9BXF6;P22392;Q8N4C6;Q9UH90;Q96Q89;P29966;Q5VT06;Q8NBT0;Q2KHM9;Q9H2G4;Q7Z4L9;Q8IWC1;Q96RT8;P17987;Q12798;Q13042;O00139;Q8TAM2;Q96QF0;Q9ULJ1;P23258;Q4AC94;Q9H1H9;Q9UBK9;Q96RT7;Q9H6D7;Q15468;Q9BUL9;Q8NEZ2;Q99417;Q9BPU9;A6NKF1;Q15834;Q13409;P27695;Q13561;Q8TCU4;Q9P2L0;Q15042;Q5SW79;Q8N0Z3;P06748;Q9BSJ2;Q6ZP65;O43303;Q9C0F1;Q9C099;Q6DKK2;Q16236;P61163;Q9GZM8;Q96DB5;Q5TB80;Q8WKK9;Q8TAP9;Q86SQ7;P41208;Q13432;Q8TC44;Q14839;Q9P270;Q3B820;Q9BPX3;P30260;O95613;Q969Q6;Q15051;P63167;P60510;Q9BT92;O15078;Q6EMB2;Q9UJW0;Q7Z4H7;Q9NZJ0;Q8N137;O75154;Q9BT25;O15182;Q6P2H3;P30305;Q8NHQ1;Q96Q11;Q6NZM7;Q5JR59;O75638;Q68CZ6;O75665;Q15154;Q9UJT9;Q92845;Q9NXR1;Q96XR8;Q92845;Q96N33;P40925;Q5T6F0;Q9Y6R9;Q9BX66;Q8IYA6;Q96BD8;Q9BVA0;Q9UN36;O14965;Q6QNY1;O75935;Q9P2S5;Q9C0D2;Q9HC77;Q96M11;Q9NRG9;Q8IW35;Q9H816;Q96SN8;Q9NVN3;P25205;Q9NXB0;Q9NQR4;Q9BYV8;Q6IQ19;Q14203;Q9Y535;Q9UNH5;O43805;Q53EZ4;Q99550;Q7Z7A1;Q86SE9;O94927;Q5VU43;P30622;Q96CW5;Q96GC6;Q9UPV0;Q96NB1;Q14008;Q8NHY2;Q96CS2}

5499 Pathogen[ P03383] interacts with 186 human partners: {Q7Z7A1;Q9Y6R9;Q9Y2Y0;Q9NY61;Q8N0Z3;Q86XR8;Q5JR59;Q9BVV6;O14757;Q9H4X1;Q7Z460;Q14839;Q6UVJ0;Q13485;Q969Q6;Q9UJW0;Q9BSJ2;P06748;Q1MSJ5;Q96BD8;Q68DK2;Q15051;Q02241;Q8WXS3;O94986;Q14008;Q9NZJ0;Q15691;Q96QF0;O95684;Q8IY31;Q8WKK9;Q9BUN5;Q9NVX0;Q49A88;Q5FBB7;Q96FJ2;Q96MB7;Q9NRI5;Q99608;Q5VYK3;P42025;Q9Y535;Q14203;Q6NZ67;Q96SN8;Q7Z4H7;Q99689;Q96CW5;O43303;P25205;A8MVW5;P41208;Q8NHV4;Q9BV73;P22392;P40925;Q9HC77;Q15468;Q8NCE0;Q12798;Q8NEZ2;O75638;Q9UN36;Q96K30;Q92597;Q15560;Q13042;Q13432;P14635;Q5VT06;Q96MT8;Q08AG7;Q96DB5;Q9C0F1;A6NKF1;O75164;Q9H1H9;Q9BSU3;Q8TEP8;Q71F23;Q5VU43;Q12834;Q76KD6;Q99871;Q5TZA2;Q96NB1;Q5TB80;Q12873;Q96CS2;Q2M2Z5;Q9H816;O94927;Q86SE9;Q9NXB0;Q66GS9;Q86SQ7;Q8IYA6;Q9H6T0;Q14674;P43487;Q8WXW3;O15078;P24941;Q9BPU9;Q9UNH5;Q99417;Q6DKK2;Q68CZ6;Q15154;O95067;P29966;Q9BT92;Q96Q89;P25786;Q9BYV8;Q9BT25;Q86VS8;Q9UMS0;O75935;Q5BJF6;Q96ED9;Q96LB3;Q96HR8;Q16236;Q9NQR4;O43809;O14965;Q96ST8;Q8IWC1;O75419;Q6P582;Q96GC6;Q9UPV0;Q9H2G4;Q8TAP6;Q14145;Q9NY27;Q96PY6;Q9P209;P35237;Q9NRG9;O75161;Q3B820;Q8N137;Q9Y5B0;Q9H6D7;Q5SW79;Q99996;Q92845;Q92785;P27695;Q9HAF1;Q8NA72;O95613;Q13561;Q9C099;Q13045;Q9H7T9;Q8N4C6;O76095;Q6P2H3;Q8NHY2;Q8N8E3;Q9BUL9;P24864;P30260;Q9UBK9;Q9P270;P63167;Q9C0D2;O75665;Q15834;Q53EZ4;O75154;Q9BPX3;P60510;Q8NHQ1;Q96M11;Q8TAP9;Q9Y6D9;Q6QNY1;Q8IW35;Q9BPX1;Q14498}

5500 Pathogen[ P03410] interacts with 249 human partners: {Q3B820;Q96M02;Q9Y6G9;O95684;Q96M11;Q8NHY2;O75665;Q7Z460;Q14204;Q9BSU3;Q96Q11;Q96Q89;P17987;O75154;Q8N960;Q9H4X1;P25205;Q5JR59;Q12873;Q8IWC1;O75638;P48643;Q96NB1;Q13409;P30622;Q9H6D7;Q6QNY1;Q8TEP8;Q9H816;Q9BPX1;Q9NP97;Q13561;Q96DB5;O00139;O43303;Q96MB7;P25786;Q66GS9;Q969Q6;Q9NXR1;Q9HC77;Q9H7T9;Q99996;Q9GZM8;Q15154;P60510;Q96K30;Q9H1H9;O75419;Q7Z7A1;Q6UVJ0;Q4AC94;Q7Z4L9;Q99608;Q8TAM2;Q8WKK9;Q14008;Q96SN8;Q8NBT0;Q16236;Q8TF46;Q15468;Q9P2S5;P36405;O15182;Q9Y6R9;Q9NY61;Q5VYK3;Q92845;Q8IYA6;Q86SE9;Q96GC6;O95067;Q9C0D2;O00399;O75161;Q8NCE0;P63167;Q12798;Q9P209;Q92785;Q9UJW0;Q8N137;Q86VS8;Q9Y6A5;P06748;Q9UBK9;Q6DKK2;Q9UNH5;Q9BVV6;Q13045;Q8TAP9;Q9BYV8;Q9NVN3;Q68CZ6;Q14674;P61163;Q9Y535;Q96CS2;Q15560;O14965;O43809;Q96NL6;O43805;Q8NHV4;Q8N0Z3;Q9NQR4;Q2KHM9;Q8NEZ2;Q9BT92;O94986;Q6IQ19;Q8WXW3;Q8TAP6;P14635;Q9UN36;Q6P2H3;Q15691;Q13042;P50990;Q9BPU9;Q9BQI6;Q5SZL2;Q96GE4;Q8IY31;Q9BUL9;Q96ED9;P24941;O00463;Q5TZA2;Q9BR77;P51587;Q9BTE1;Q9UMS0;Q5VU43;Q9NVX0;Q8N157;Q99550;P43487;Q71F23;Q8WYA0;Q9BXF6;Q13485;O15078;O14974;Q9UPM9;Q92834;O94830;Q15834;Q96ST8;Q8N4C6;Q86SQ7;A8MVW5;O14757;Q5T6F0;Q5BJF6;O75935;Q9BUN5;Q53EZ4;Q9BSJ2;O94927;Q15051;Q12834;P30260;Q8NA72;Q8IW35;Q9Y5B0;Q5FBB7;Q96QF0;P42025;Q9NRI5;Q49A88;Q96RT8;Q8TC44;Q9H6T0;P23258;P27695;Q2M2Z5;Q5TB80;Q08AG7;Q1MSJ5;Q96HR8;Q9UPV0;Q14498;Q9NXB0;Q92597;Q8IWX6;Q99417;Q6NZ67;Q6ZP65;O76095;Q9ULJ1;P40925;Q9C099;Q96CW5;A6NKF1;Q9P270;Q99871;Q96BD8;Q9NXG0;Q76N32;P30305;Q8NCE0;Q9UJT9;Q9BPX3;Q96RT7;Q96LB3;Q9P2L0;Q5SW79;Q68CZ1;O75164;O95613;Q13432;Q9C0F1;Q9Y2Y0;Q14145;Q9H2G4;Q6P582;P35237;Q9NRG9;P41208;Q14839;Q68DK2;Q08211;P24864;Q8WXS3;Q9BV73;Q76KD6;Q15042;Q9BT25;P29966;Q9BX66;Q7Z4H7;Q9UGJ1;O43237;Q6EMB2;Q5JTW2;O95070;Q6IQ23;Q9NY27;Q9BVA0;Q8N8E3;P50991;Q0P6D6;Q14203;Q02241;Q5VT06;Q9NZJ0;Q99689}

5501 Pathogen[ P14075] interacts with 190 human partners: {Q9Y6R9;Q96MT8;Q99871;Q96M11;P40925;O43303;Q9H4X1;Q9NP97;Q9BYV8;Q99608;Q86SE

9;Q9NQR4;Q6NZ67;Q13042;O43809;Q9H1H9;O95067;P24941;Q9UMS0;O95684;Q6P582;Q9Y6D9;Q15051;Q02241;Q5VT06;Q5VU43;Q7Z4H7;O76095;Q92845;P27695;Q9H7T9;P14635;Q08AG7;P43487;Q9Y5B0;Q86SQ7;A8MVW5;Q8NHV4;Q7Z460;Q9NY61;P60510;Q14839;Q13561;Q9Y2Y0;Q9BSU3;Q8IY31;O75419;Q49A88;Q68CZ6;Q9HC77;Q96SN8;Q6UVJ0;Q5TZA2;Q12798;Q8NHQ1;Q96BD8;Q15560;Q96ST8;Q9BT92;Q9H2G4;Q9BT25;Q96GE4;Q8NEZ2;O75638;Q9NRI5;Q96HR8;Q8TEP8;Q5JR59;Q92785;Q9BUN5;Q9BVV6;Q76KD6;Q13485;Q9UPV0;Q969Q6;Q96MB7;Q68DK2;Q9NXB0;Q8WXS3;Q66GS9;Q9C0F1;Q99996;Q9NY27;Q15078;Q8NCE0;Q5SW79;O00139;Q5BJF6;Q8WXW3;Q96FJ2;Q2KHM9;O75935;Q9HAF1;P29966;O75161;Q96LB3;Q86XR8;Q6IQ19;Q9UBK9;P25205;O14965;Q96NB1;Q96K30;Q15834;Q6QNY1;Q15691;Q9BV73;Q5TB80;Q9Y535;Q6P2H3;Q9UN36;Q8N137;Q9H816;Q9C099;P25786;Q8TAP6;Q96CS2;Q9BPU9;Q99417;P06748;Q96DB5;Q5FBB7;Q8NHY2;O94986;P41208;Q8IYA6;Q15154;A6NKF1;Q8IWC1;Q53EZ4;Q9BXF6;Q9NVX0;Q96QF0;Q14674;Q15468;Q96PY6;Q8WVK9;Q96GC6;O94927;O75665;Q92597;Q86VS8;O75154;O95613;Q9P209;Q14203;Q14008;Q8N4C6;Q16236;Q8TAP9;Q9NZJ0;Q9UJW0;Q9BUL9;Q1MSJ5;P30260;Q8N8E3;Q9P270;Q13432;Q9BSJ2;Q9NRG9;Q12873;Q9UNH5;Q9BPX3;Q9H6D7;Q9C0D2;Q96Q89;Q7Z7A1;Q71F23;P63167;P42025;P35237;O14757;Q12834;Q96CW5;P22392;Q2M2Z5;Q14145;Q14498;Q13045;Q6DKK2;O75164;Q96ED9;Q8NA72;Q8N0Z3;Q8IW35;Q5VYK3;P24864;Q99689;Q9H6T0;Q3B820}

5502 Pathogen[ P0C206] interacts with 248 human partners: {P27695;Q9BPU9;Q5JTW2;Q5SW79;Q8WXW3;Q92597;Q9UJT9;O15182;Q68DK2;Q9BUL9;P48643;Q8N137;Q86XR8;Q9BPX3;Q96NL6;Q15468;Q96M02;Q8N8E3;O94986;Q96DB5;Q9BVA0;Q5SZL2;Q8NEZ2;Q96SN8;Q9C099;Q9NP97;Q9HC77;Q9H7T9;Q86SQ7;Q14008;Q96Q89;Q13432;Q9H4X1;Q9NRG9;Q96ST8;Q92845;Q5BJF6;O95684;Q9Y6R9;Q9BTE1;Q9UPM9;Q9BT92;Q9BXF6;P25786;Q9Y6D9;Q8TAM2;Q8NA72;Q9BVV6;P22392;O75161;Q96RT7;Q8IY31;O75419;P51955;O75154;P25205;P51587;Q9C0D2;Q5TZA2;Q6P2H3;O75638;Q8TCU4;Q08211;Q96CW5;O75604;P63167;Q15691;Q9BR77;Q13045;O95070;Q9UH90;Q9BT25;Q96K30;Q96PY6;O00444;Q6QNY1;Q6UVJ0;Q9UPV0;Q99550;Q6ZP65;Q96MB7;P50991;P30305;P35237;Q9H816;Q5JR59;Q2KHM9;Q0P6D6;Q99996;Q8WYA0;P17987;O43809;Q9H1H9;P30622;O43237;Q9BQI6;P30260;Q02241;Q9GZM8;Q13409;Q14145;Q9UGJ1;Q9Y535;Q86VS8;Q96ED9;Q8TEP8;Q9NVX0;P61163;Q8IWC1;O14974;Q14839;Q99689;Q8TAP6;Q969Q6;Q92785;Q96QF0;Q6DKK2;A8MVW5;Q9BPX1;Q96BD8;A6NKF1;Q2M2Z5;Q14204;Q86SE9;Q9UNH5;Q9Y5B0;Q96M11;Q9UJW0;O95613;Q15560;Q8NHY2;Q9BUN5;P43487;Q9Y6A5;Q6IQ19;Q9NQR4;Q9Y6G9;P40925;O15078;Q9NRI5;Q15834;Q66GS9;Q96LB3;Q96CS2;Q8IW35;Q14790;Q7Z4H7;Q5FBB7;Q5VT06;Q8N157;Q9BYV8;Q99608;Q96GC6;O94927;Q5VU43;Q9HAF1;Q9NY27;Q9BV73;Q8NHV4;O00399;Q9H2G4;Q13485;P23258;O00139;O00463;Q9NZJ0;Q96HR8;O75665;Q13561;Q76N32;P36405;Q5VYK3;Q9BX66;Q9H6T0;Q6P582;Q14674;Q3B820;Q7Z7A1;Q9NXG0;Q9H6D7;Q99871;P41208;Q99417;Q49A88;Q16236;Q9BSU3;O75164;Q5T6F0;Q8N0Z3;O94830;Q8WXS3;O95067;Q9NXR1;Q9P270;Q8TAP9;Q9UBK9;Q8IYA6;Q9P209;Q9UN36;Q12798;P06748;P14635;Q8NCE0;P60510;Q1MSJ5;Q9Y2Y0;O14965;O43805;Q8N4C6;Q96MT8;Q7Z460;Q9C0F1;Q14203;O75935;Q15154;Q9NXB0;Q13042;Q8NHQ1;Q96NB1;Q9NY61;P42025;Q15051;Q14498;Q71F23;Q8TF46;Q6IQ23;P24864;P24941;Q08AG7;Q86YT6;Q8WVK9;Q9BSJ2;Q68CZ6;Q9ULJ1;Q9NVN3;Q92834;Q6EMB2;Q5TB80;Q8N960;Q12834;Q6NZ67;P29966;Q12873;O76095;Q96GE4;Q76KD6;O43303}

5503 Pathogen[ P03363] interacts with 232 human partners: {Q5BJF6;Q16236;Q9H816;Q8WXW3;Q86VS8;Q92845;Q9Y535;Q5SZL2;A6NKF1;Q15834;Q15051;Q13042;O75638;Q8IYA6;O75161;Q96DB5;Q9Y5B0;Q7Z7A1;Q9Y6D9;P63167;Q9HC77;Q6EMB2;Q9UNH5;Q14145;Q96ED9;Q9H4X1;P35237;Q76N32;Q8TAM2;Q15468;Q9BYV8;Q969Q6;Q9BX66;P24864;Q3B820;Q5VT06;Q9UMS0;Q9NXG0;Q99996;Q96MT8;Q96BD8;O15078;Q9UJT9;Q8NHV4;O43805;P40925;Q8NBT0;Q1MSJ5;Q66GS9;Q13561;P25205;Q8WVK9;O43303;O75604;Q15691;O95684;Q6P582;Q9UJW0;Q86SE9;Q9H7T9;Q13045;Q92597;Q99550;Q8NHQ1;O00463;O00399;O95613;Q9UN36;O94986;Q14204;Q9H6D7;Q02241;Q96K30;Q9BT25;O75164;Q9C099;Q5VU43;Q8TAP6;Q96MB7;Q96M02;P24941;Q96GC6;Q14839;P41208;Q9UBK9;Q68DK2;Q9P209;Q8WXS3;P30260;Q0P6D6;Q49A88;Q96GE4;P06748;Q9HAF1;Q5FBB7;Q8TEP8;Q8IWC1;Q6ZP65;P50991;Q99608;Q9BQI6;Q5JR59;Q5TZA2;Q9BPX1;Q9NRG9;Q5JTW2;P61163;Q9BSU3;A8MVW5;P30622;Q9NY61;Q5T6F0;Q53EZ4;Q68CZ6;O43809;O95067;Q12798;Q8N157;O94927;Q6DKK2;Q9P2S5;Q8IY31;Q9H2G4;Q13432;Q6IQ19;P43487;Q96RT8;Q9BVV6;Q9NVX0;Q9BPU9;Q9UH90;Q96ST8;O75935;Q08AG7;P17987;Q7Z460;Q9BPX3;Q9BT92;Q6QNY1;Q6P2H3;Q8N0Z3;P60510;Q14674;Q96NB1;Q96CS2;Q9P270;P42025;Q71F23;Q99871;Q13409;P29966;O76095;O75154;O15066;O14974;Q9UPV0;Q9BXF6;Q9NY27;Q8IW35;Q13485;O15182;Q96RT7;Q76KD6;Q8NEZ2;Q9NRI5;Q9UGJ1;Q9BTE1;Q9C0F1;Q92834;Q12873;Q86XR8;Q96Q89;Q12834;Q14008;Q9Y2Y0;Q8NHY2;Q8NA72;Q14498;O60662;Q9H1H9;Q8N4C6;Q8N8E3;Q96M11;Q9NP97;Q15560;Q9NXR1;Q9NXB0;Q9C0D2;P23258;O00139;Q8TF46;Q6NZ67;Q9NZJ0;Q2KHM9;Q86SQ7;Q9Y6R9;Q08211;Q96LB3;O43237;Q7Z4H7;P48643;Q15154;Q5TB80;Q6IQ23;Q9H6T0;Q96FJ2;Q14203;Q96HR8;Q2M2Z5;Q9BSJ2;Q8NCE0;Q9BUL9;Q9BV73;Q9NQR4;O75419;Q5VYK3;Q8TC44;Q3YEC7;Q9BUN5;Q96QF0;Q8TAP9;Q6UVJ0;O75665;Q99689;Q96CW5;Q92785;Q96SN8;O14757;Q8N137;Q8N960;Q5SW79}

5504 [Cluster 501]GO:0032798+C cellular\_component [name] Swi5-Sfr1 complex [def] "A conserved DNA recombinase mediator complex that contains two Swi5 monomers and one Sfr1 monomer in Schizosaccharomyces, or orthologs thereof (e.g. Sae3p and Mei5p in Saccharomyces)." [PMID

- 5505 Pathogen[ Q2Q067] interacts with 2 human partners: {Q1ZZU3;Q86XK3}
- 5506 Pathogen[ P0C214] interacts with 2 human partners: {Q1ZZU3;Q86XK3}
- 5507 Pathogen[ P03346] interacts with 2 human partners: {Q86XK3;Q1ZZU3}
- 5508 Pathogen[ Q85601] interacts with 2 human partners: {Q1ZZU3;Q86XK3}
- 5509 Pathogen[ P14079] interacts with 2 human partners: {Q1ZZU3;Q86XK3}
- 5510 Pathogen[ P03383] interacts with 2 human partners: {Q86XK3;Q1ZZU3}
- 5511 Pathogen[ P03410] interacts with 2 human partners: {Q1ZZU3;Q86XK3}
- 5512 Pathogen[ P14075] interacts with 2 human partners: {Q1ZZU3;Q86XK3}
- 5513 Pathogen[ P0C206] interacts with 2 human partners: {Q86XK3;Q1ZZU3}
- 5514 Pathogen[ P03363] interacts with 2 human partners: {Q1ZZU3;Q86XK3}

5515 [Cluster 502]GO:0030893+C cellular\_component [name] meiotic cohesin complex [def] "A cohesin complex that mediates sister chromatid cohesion during meiosis\_has a subunit composition distinct from that of the mitotic cohesin complex." [GOC

- 5516 Pathogen[ Q2Q067] interacts with 2 human partners: {Q9UJ98;Q14683}



5517 Pathogen[ P0C214] interacts with 2 human partners:{Q9UJ98;Q14683}

5518 Pathogen[ P03346] interacts with 2 human partners:{Q9UJ98;Q14683}

5519 Pathogen[ Q85601] interacts with 2 human partners:{Q9UJ98;Q14683}

5520 Pathogen[ P14079] interacts with 3 human partners:{Q9UJ98;Q9UQE7;Q14683}

5521 Pathogen[ P03383] interacts with 2 human partners:{Q14683;Q9UJ98}

5522 Pathogen[ P03410] interacts with 3 human partners:{Q9UQE7;Q14683;Q9UJ98}

5523 Pathogen[ P14075] interacts with 2 human partners:{Q14683;Q9UJ98}

5524 Pathogen[ P0C206] interacts with 3 human partners:{Q9UJ98;Q9UQE7;Q14683}

5525 Pathogen[ P03363] interacts with 2 human partners:{Q9UJ98;Q14683}

5526 [Cluster 503]GO:0016602+C cellular\_component [name] CCAAT-binding factor complex [def]  
 "A heteromeric transcription factor complex that binds to the CCAAT-box upstream of promoters\_in Saccharomyces it activates the transcription of genes in response to growth in a nonfermentable carbon source\_ consists of four known subunits

5527 Pathogen[ Q2Q067] interacts with 4 human partners:{P23511;P25208;Q9H160;Q13952}

5528 Pathogen[ P0C214] interacts with 4 human partners:{Q13952;P25208;Q9H160;P23511}

5529 Pathogen[ P03346] interacts with 4 human partners:{P23511;P25208;Q13952;Q9H160}

5530 Pathogen[ Q85601] interacts with 4 human partners:{P25208;Q13952;P23511;Q9H160}

5531 Pathogen[ P14079] interacts with 3 human partners:{Q13952;P23511;Q9H160}

5532 Pathogen[ P03383] interacts with 4 human partners:{P23511;P25208;Q13952;Q9H160}

5533 Pathogen[ P03410] interacts with 4 human partners:{P23511;P25208;Q9H160;Q13952}

5534 Pathogen[ P14075] interacts with 4 human partners:{P25208;Q13952;P23511;Q9H160}

5535 Pathogen[ P0C206] interacts with 4 human partners:{Q9H160;P23511;Q13952;P25208}

5536 Pathogen[ P03363] interacts with 4 human partners:{Q9H160;Q13952;P25208;P23511}

5537 [Cluster 504]GO:0032588+C cellular\_component [name] trans-Golgi network membrane [def]  
 "The lipid bilayer surrounding any of the compartments that make up the trans-Golgi network." [GOC

5538 Pathogen[ Q2Q067] interacts with 13 human partners:{Q9Y6Q5;Q10567;P56377;O43747;Q9H1H9;O43752;Q96PC3;O15127;Q00610;P61966;Q9BXS5;Q8TAC9;P09496}

5539 Pathogen[ P0C214] interacts with 11 human partners:{Q8TAC9;O15127;Q10567;P56377;Q96PC3;O43752;O43747;Q9Y6Q5;P61966;P09496;Q9BXS5}

5540 Pathogen[ P03346] interacts with 13 human partners:{P61966;O43752;O43747;P56377;Q9BXS5;Q9H1H9;P09496;Q10567;Q8TAC9;Q96PC3;Q9Y6Q5;Q00610;O15127}

5541 Pathogen[ Q85601] interacts with 13 human partners:{Q00610;P09496;Q8TAC9;Q9BXS5;P56377;O43747;Q9H1H9;Q10567;O43752;Q96PC3;O15127;P61966;Q9Y6Q5}

5542 Pathogen[ P14079] interacts with 12 human partners:{Q9Y6Q5;P61966;Q9BXS5;Q00610;Q10567;P56377;Q8TAC9;Q9H1H9;O43747;O43752;Q96PC3;P09496}

5543 Pathogen[ P03383] interacts with 9 human partners:{P56377;Q00610;Q8TAC9;Q10567;Q9H1H9;O43747;O15127;O43752;Q9BXS5}

5544 Pathogen[ P03410] interacts with 13 human partners:{Q00610;P09496;Q9Y6Q5;Q96PC3;Q9BXS5;Q8TAC9;Q9H1H9;O43747;Q10567;O15127;O43752;P61966;P56377}

5545 Pathogen[ P14075] interacts with 10 human partners:{P09496;Q9H1H9;O43752;O15127;O43747;Q8TAC9;P56377;Q9BXS5;Q10567;Q00610}

5546 Pathogen[ P0C206] interacts with 13 human partners:{O15127;Q9Y6Q5;O43747;Q10567;O43752;P61966;Q00610;Q9H1H9;P09496;Q9BXS5;Q8TAC9;Q96PC3;P56377}

5547 Pathogen[ P03363] interacts with 7 human partners:{O43747;Q00610;Q9BXS5;O15127;Q9H1H9;O43752;Q10567}

5548 [Cluster 505]GO:0005881+C cellular\_component [name] cytoplasmic microtubule [def]  
 "Any microtubule in the cytoplasm of a cell." [GOC

5549 Pathogen[ Q2Q067] interacts with 12 human partners:{Q6VN20;Q7Z460;Q8WWK9;Q9NYZ3;Q15532;Q9BSJ2;Q5JR59;O75122;Q9UPY8;O95996;Q15691;O15392}

5550 Pathogen[ P0C214] interacts with 13 human partners:{Q9BSJ2;O15056;Q15691;Q5JR59;O75122;Q15532;O15392;Q9UPY8;Q96G01;Q7Z460;Q9NYZ3;Q8WWK9;Q6VN20}

5551 Pathogen[ P03346] interacts with 16 human partners:{Q96G01;O15392;Q5JR59;Q15691;O15056;Q15532;Q6VN20;O95996;P30622;O75122;P36405;Q9NYZ3;Q8WWK9;Q9BSJ2;Q7Z460;Q9UPY8}

5552 Pathogen[ Q85601] interacts with 16 human partners:{Q15532;P36405;Q8WWK9;P30622;O15392;Q6VN20;O75122;Q9BSJ2;Q9NQC7;Q96G01;Q15691;Q9NYZ3;O95996;Q5JR59;Q7Z460;Q9UPY8}

5553 Pathogen[ P14079] interacts with 18 human partners:{Q15691;Q6VN20;Q9UPY8;Q15532;Q7Z460;Q9NYZ3;O15392;P68363;P36405;Q99661;O95996;Q9BSJ2;Q96G01;Q8WWK9;Q5JR59;O75122;Q9NQC7;P30622}

5554 Pathogen[ P03383] interacts with 8 human partners:{Q5JR59;Q7Z460;Q9BSJ2;Q15691;Q8WWK9;Q15532;Q9NYZ3;Q9UPY8}

5555 Pathogen[ P03410] interacts with 17 human partners:{Q7Z460;O15392;Q5JR59;P30622;Q8WWK9;P36405;Q9NYZ3;Q8TCX1;Q6VN20;Q15691;O95996;Q96G01;Q9UPY8;Q9BSJ2;P68363;Q15532;O75122}

5556 Pathogen[ P14075] interacts with 8 human

5557 Pathogen[ P0C206] interacts with 16 human partners:{Q15532;Q7Z460;Q5JR59;Q9UPY8;Q15691;Q8WWK9;Q9NYZ3;Q9BSJ2}

5558 Pathogen[ P03363] interacts with 14 human partners:{Q9UDT6;Q95996;Q8WWK9;Q15691;P68363;Q15532;Q5JR59;P30622;Q9UPY8;O15392;P36405;Q9NYZ3;Q7Z460;Q8WWK9;Q9BSJ2;Q96G01}

5559 [Cluster 506]GO:0030137+C cellular\_component [name] COPI-coated vesicle [def] "A vesicle with a coat formed of the COPI coat complex proteins. COPI-coated vesicles are found associated with Golgi membranes at steady state, are involved in Golgi to endoplasmic reticulum (retrograde) vesicle transport, and possibly also in intra-Golgi transport." [GOC

5560 Pathogen[ Q2Q067] interacts with 4 human partners:{O14579;Q6VY07;P53618;Q13367}

5561 Pathogen[ P0C214] interacts with 4 human partners:{O14579;Q13367;P53618;Q6VY07}

5562 Pathogen[ P03346] interacts with 6 human partners:{P53618;O14579;Q13367;P49755;Q6VY07;Q15363}

5563 Pathogen[ Q85601] interacts with 4 human partners:{Q13367;O14579;Q6VY07;P53618}

5564 Pathogen[ P14079] interacts with 5 human partners:{Q6VY07;Q15363;P49755;Q13367;O14579}

5565 Pathogen[ P03383] interacts with 4 human partners:{O14579;P53618;Q6VY07;Q13367}

5566 Pathogen[ P03410] interacts with 5 human partners:{O14579;Q15363;P53618;Q13367;Q6VY07}

5567 Pathogen[ P14075] interacts with 4 human partners:{P53618;Q6VY07;Q13367;O14579}

5568 Pathogen[ P0C206] interacts with 6 human partners:{O14579;P53618;P49755;Q6VY07;Q15363;Q13367}

5569 Pathogen[ P03363] interacts with 4 human partners:{Q13367;O14579;P53618;Q6VY07}

5570 [Cluster 507]GO:0031672+C cellular\_component [name] A band [def] "The dark-staining region of a sarcomere, in which myosin thick filaments are present\_ the center is traversed by the paler H zone, which in turn contains the M line." [ISBN

5571 Pathogen[ Q2Q067] interacts with 2 human partners:{Q9UKX2;Q92831}

5572 Pathogen[ P0C214] interacts with 3 human partners:{Q9UKX2;P12882;Q92831}

5573 Pathogen[ P03346] interacts with 2 human partners:{Q92831;Q9UKX2}

5574 Pathogen[ Q85601] interacts with 3 human partners:{Q92831;Q9UKX2;P12882}

5575 Pathogen[ P14079] interacts with 1 human partners:{Q9UKX2}

5576 Pathogen[ P03383] interacts with 2 human partners:{Q92831;Q9UKX2}

5577 Pathogen[ P03410] interacts with 3 human partners:{Q92831;Q9UKX2;P12882}

5578 Pathogen[ P14075] interacts with 2 human partners:{Q92831;Q9UKX2}

5579 Pathogen[ P0C206] interacts with 3 human partners:{Q92831;P12882;Q9UKX2}

5580 Pathogen[ P03363] interacts with 2 human partners:{Q92831;Q9UKX2}

5581 [Cluster 508]GO:0005793+C cellular\_component [name] endoplasmic reticulum-Golgi intermediate compartment [def] "A complex system of membrane-bounded compartments located between endoplasmic reticulum (ER) and the Golgi complex, with a distinctive membrane protein composition\_ involved in ER-to-Golgi transport." [GOC

5582 Pathogen[ Q2Q067] interacts with 5 human partners:{P53990;Q5VYK3;Q08378;O75396;P53618}

5583 Pathogen[ P0C214] interacts with 9 human partners:{P53990;P53618;Q5VYK3;Q08378;P49257;O75396;Q92614;Q96EK6;P80303}

5584 Pathogen[ P03346] interacts with 14 human partners:{P80303;Q92614;P49257;Q14789;Q969X5;P53618;Q08378;O75396;Q5VYK3;Q96KG9;P49755;Q15363;Q9BVK6;P53990}

5585 Pathogen[ Q85601] interacts with 10 human partners:{Q5VYK3;Q92614;O75396;P80303;Q08378;P49257;P53990;Q96EK6;P53618;Q96KG9}

5586 Pathogen[ P14079] interacts with 22 human partners:{Q95070;Q14789;P49257;Q92614;Q8WVT3;Q9BVK6;Q08378;Q5VYK3;Q9NYU1;Q15363;O75396;P24390;P80303;Q9NYU2;Q969X5;P49755;Q969H8;Q8TF30;O15260;Q96EK6;P53990;Q96KG9}

5587 Pathogen[ P03383] interacts with 3 human partners:{P53618;P53990;Q5VYK3}

5588 Pathogen[ P03410] interacts with 23 human partners:{P80303;P49257;Q969X5;Q13445;Q92614;Q5VYK3;Q08378;Q96EK6;Q8TF30;P53990;Q9BVK6;O75396;Q96KG9;Q9NYU1;Q14789;Q15363;P53618;P24390;Q9UBY8;O15260;Q8WVT3;Q95070;Q9NYU2}

5589 Pathogen[ P14075] interacts with 5 human partners:{P53990;P53618;Q14789;Q96EK6;Q5VYK3}

5590 Pathogen[ P0C206] interacts with 19 human partners:{Q8TF30;Q14789;Q9BVK6;O75396;P53618;P80303;Q95070;P49755;Q96KG9;P53990;P24390;P49257;Q08378;Q92614;Q96EK6;Q5VYK3;O15260;Q969X5;Q15363}

5591 Pathogen[ P03363] interacts with 7 human partners:{Q14789;P53618;Q96KG9;Q08378;Q92614;Q5VYK3;P53990}

5592 [Cluster 509]GO:0000308+C cellular\_component [name] cytoplasmic cyclin-dependent protein kinase holoenzyme complex [def] "Cyclin-dependent protein kinase (CDK) complex found in the cytoplasm." [GOC

5593 Pathogen[ Q2Q067] interacts with 1 human partners:{Q8ND76}

5594 Pathogen[ P0C214] interacts with 2 human partners:{Q8ND76;O94921}

5595 Pathogen[ P03346] interacts with 2 human partners:{Q8ND76;O94921}

5596 Pathogen[ Q85601] interacts with 2 human partners:{Q8ND76;O94921}

5597 Pathogen[ P14079] interacts with 1 human partners:{Q8ND76}

5598 Pathogen[ P03383] interacts with 2 human partners:{Q8ND76;O94921}

5599 Pathogen[ P03410] interacts with 1 human partners:{Q8ND76}

5600 Pathogen[ P14075] interacts with 2 human partners:{Q8ND76;O94921}

5601 Pathogen[ P0C206] interacts with 2 human partners:{Q8ND76;O94921}

5602 Pathogen[ P03363] interacts with 1 human partners:{Q8ND76}

5603 [Cluster 510]GO:0070044+C cellular\_component [name] synaptobrevin  
2-SNAP-25-syntaxin-1a complex [def] "A SNARE complex that contains synaptobrevin 2 (VAMP2), SNAP-25, and syntaxin 1a (or orthologs thereof)." [PMID

5604 Pathogen[ Q2Q067] interacts with 1 human partners:{P54920}

5605 Pathogen[ P0C214] interacts with 1 human partners:{P54920}

5606 Pathogen[ P03346] interacts with 2 human partners:{Q9H115;P54920}

5607 Pathogen[ Q85601] interacts with 1 human partners:{P54920}

5608 Pathogen[ P14079] interacts with 2 human partners:{Q9H115;P54920}

5609 Pathogen[ P03383] interacts with 1 human partners:{P54920}

5610 Pathogen[ P03410] interacts with 2 human partners:{Q9H115;P54920}

5611 Pathogen[ P14075] interacts with 1 human partners:{P54920}

5612 Pathogen[ P0C206] interacts with 1 human partners:{P54920}

5613 Pathogen[ P03363] interacts with 1 human partners:{P54920}

5614 [Cluster 511]GO:0030127+C cellular\_component [name] COPII vesicle coat [def] "One of two multimeric complexes that forms a membrane vesicle coat. COPII is best characterized in *S. cerevisiae*, where the subunits are called Sarlp, Sec13p, Sec31p, Sec23p, and Sec24p. Vesicles with COPII coats are found associated with endoplasmic reticulum (ER) membranes at steady state." [GOC

5615 Pathogen[ Q2Q067] interacts with 6 human partners:{Q15437;P53992;O95486;O94855;O95487;Q15436}

5616 Pathogen[ P0C214] interacts with 6 human partners:{P53992;Q15436;O95487;Q15437;O95486;O94855}

5617 Pathogen[ P03346] interacts with 6 human partners:{O94855;Q15436;Q15437;O95486;O95487;P53992}

5618 Pathogen[ Q85601] interacts with 6 human partners:{O95487;Q15436;Q15437;O95486;O94855;P53992}

5619 Pathogen[ P14079] interacts with 5 human partners:{Q3ZAQ7;O95487;O94855;P53992;O95486}

5620 Pathogen[ P03383] interacts with 6 human partners:{O95487;O95486;Q15436;Q15437;O94855;P53992}

5621 Pathogen[ P03410] interacts with 6 human partners:{O94855;P53992;Q15436;Q15437;O95486;O95487}

5622 Pathogen[ P14075] interacts with 6 human partners:{P53992;O95487;Q15437;Q15436;O94855;O95486}

5623 Pathogen[ P0C206] interacts with 6 human partners:{Q15437;O94855;O95486;O95487;P53992;Q15436}

5624 Pathogen[ P03363] interacts with 5 human partners:{Q15436;O95486;P53992;O95487;O94855}

5625 [Cluster 512]GO:0005622+C cellular\_component [name] intracellular [def] "The living contents of a cell\_ the matter contained within (but not including) the plasma membrane, usually taken to exclude large vacuoles and masses of secretory or ingested material. In eukaryotes it includes the nucleus and cytoplasm." [ISBN

5626 Pathogen[ Q2Q067] interacts with 797 human partners:{Q5JN25;E7ETH6;Q0D2J5;Q12901;Q9HC78;Q09FC8;Q9H4I2;Q01844;Q9UM63;O15014;Q96SQ5;Q9Y473;P61313;Q14526;Q9Y5K5;Q8WV37;Q8N859;P52742;Q9BRH9;Q9Y4R8;Q96N77;C9JN71;Q7RTT3;P17544;Q13118;P25490;Q96J02;Q03989;P62701;Q9UK13;P35789;Q6V9R5;Q8NA42;Q9Y6X8;Q8NHW5;Q9BTV5;P82921;O43167;Q2M218;Q9BYD6;Q9UJN7;Q03923;Q8WV44;Q9UEG4;Q9BUG6;A6NDX5;P47914;P82933;Q8NEM1;Q9UC06;O75155;P98182;Q9NRF9;P46779;Q9H7X3;Q9UPN9;Q9Y6D6;Q9UK11;P17029;P52738;Q9ULX6;A8MTY0;Q9H7R0;Q9PE6;Q8IZ26;Q9BRR0;A6NJL1;O43361;Q9HAU4;Q9Y462;P24385;Q96NI8;Q92922;Q6NUN9;Q9UII4;Q9UJL9;Q70YC5;O60304;P55265;P24278;P49790;P82912;Q8NEP9;Q59GN2;Q9H063;Q6ZQV5;Q9HBE1;Q63HK5;Q8N0Y2;Q92664;Q5VTD9;Q15928;Q96K75;Q13887;Q8TA94;O60784;Q8IZH2;P29374;P26373;Q86YE8;Q08AN1;Q9Y676;P49792;P58317;O75394;Q8WW38;Q6ZMY9;Q8N8Z8;Q9NXV6;Q96A35;P62750;Q6ZS27;A6NP11;Q9UL59;O15226;Q8N4W9;Q9H2P0;P10073;Q9HAZ2;Q9NPJ8;Q14690;O60481;P62273;Q13485;A6NGD5;Q5SXM1;O43734;Q6IV72;A8MVS1;Q8N2I2;Q6ECI4;Q9UC07;Q9H9D4;Q9Y2R9;Q6ZT77;Q9UHF7;Q9ULD5;P51508;Q14590;Q15386;Q13405;Q9NTW7;Q9Y2Y9;Q96NG8;Q96GC5;Q6ZN06;P41182;Q9Y2X9;P19474;Q9H5H4;P15880;Q9NUL3;Q8NBB4;Q96H40;P49910;Q9POM2;Q9NWU5;Q9NZV7;Q32MQ0;Q6P2D0;Q9HCL3;P46782;Q6U7Q0;Q9UKJ3;Q8TD23;Q9H0F6;Q96SK3;Q96IT1;Q147U1;Q15697;Q96LW1;Q9NZL3;P35268;Q7L2R6;P08151;Q99676;Q9NRR4;Q9UJY4;Q96SL8;P37275;O00273;Q8IWI8;Q05081;Q05516;Q05481;Q02930;Q8NCK3;Q8NDW4;O60543;O75820;P22090;P10074;Q7Z2E3;O60315;Q9UJY5;P46778;Q9P0L1;Q9ULV3;Q14119;Q9H4Z2;Q6P9A1;Q96PQ6;Q8N782;Q96NL3;P26641;Q8WTR7;Q9NYJ8;P08238;Q8TAW3;P51815;P14373;Q9UJY1;O00712;Q8TF20;Q9UBU9;Q6ZR52;Q99684;P52741;Q9UDV7;P62888;Q53FT3;Q8TF68;Q3KQV3;Q92990;Q9P255;Q8IZP0;P32969;Q8NC26;O95999;O43296;Q9H4T2;P61970;P62277;O14709;C9JBD0;Q08ER8;Q5T5D7;P07900;Q9NQX1;Q15633;Q6ZMW2;Q9UNA4;Q4LE39;P62241;Q2M3W8;O15535;Q9POM9;Q7RTT5;O14628;Q8TBC5;Q15025;P62244;P05387;Q6ZS03;Q02447;P52653;Q99909;Q86YF9;Q9NSV2;Q2M1K9;P62861;P42766;P17030;P17031;Q7Z34O;Q86UE3;P04792;O75362;Q16670;Q96N95;Q9Y5A6;Q8TF47;P05386;P17036;Q9ULJ3;P17040;Q2QGD7;P17010;O95625;P17038;Q9P0J6;Q9UK12;P08047;Q8TC21;Q96C28;P30304;Q7RTT6;Q15022;O43829;P16415;Q86Y25;P0CG00;Q969Q0;O95793;Q7Z6Z7;Q8N184;Q96NJ6;Q9UNX3;Q504Q3;Q8WYQ5;Q13129;Q9H7S9;Q7Z3V5;Q3SXZ3;O94906;Q9UFB7;Q6IQ21;Q13398;Q53GI3;Q96MR9;Q14134;Q96BV0;A8MT65;A6NK53;Q14669;P11166;Q9BUY5;B2RXF5;P23528;Q8N3J9;Q9Y2P0;Q9Y3D3;Q9Y2H8;Q96AQ7;P52743;Q9Y2R5;Q499Z4;Q12996;P18077;Q15937;P62891;P27695;Q9GZR2;Q9UHK0;Q68EA5;P11142;O75381;O43823;Q8N5C8;Q9BQ48;Q9UJX2;Q68DY1;Q5TB30;Q7RTV3;P27797;Q9HCG1;P61927;Q6P280;O95678;Q9Y39

9;P60520;Q8TAU3;P39023;Q9UL58;P52747;Q96SR6;Q14929;Q5T619;P62081;P61247;Q14593;Q15929;Q8TB69;P61254;Q15072;Q15935;Q96C00;P62249;Q9BYK8;P30307;Q8IVP9;Q63HK3;Q9UII5;Q8NE65;A8MUV8;Q96KR1;Q9P243;Q9ULM2;Q14938;P62280;Q96N38;A8MWA4;Q5SVQ8;O15235;A8MQ14;Q96CX3;P17032;Q6P9G9;Q52M93;P15621;Q14585;Q9NQX6;P17022;Q68DI1;P51504;Q9UKY1;Q8N8C0;Q9Y2D9;Q96SZ4;P56270;Q6IQ32;A2RRD8;B4DXR9;Q6NX45;P62263;P17098;O75437;Q8NF99;Q13360;P84022;P60866;O14641;P62006;Q99856;Q6P9A3;B1APH4;Q9UL33;P52815;P41227;Q66K41;P10375;Q8N3C0;O75528;Q9Y6K9;Q96GC6;Q76KX8;Q9H0W8;A6NHJ4;Q01658;Q8N895;Q96N22;A8MXY4;Q8N141;P82914;Q02878;P46777;Q03924;Q8TAT6;Q96LX8;Q5JNZ3;O14497;Q9Y2Q1;P62899;O15105;Q6PK81;Q96NG5;Q96RL7;A6NNF4;Q13127;Q9P2J8;O95780;P08708;Q96JM3;O43541;Q6PF04;Q9BR84;Q9H116;Q96EH5;P08865;Q9NZE8;P11161;Q07020;P62913;Q12906;Q9NZM5;O15265;O60783;Q08211;Q8NI51;P62269;P42575;P15622;P0DI81;Q96K62;Q7Z3K3;Q96PU5;Q3KP31;Q5JVG8;O43830;P0DI82;Q9UQN3;Q49A33;O15198;P25208;O15164;Q3SY52;P78560;B4DX44;Q8NI08;Q9UFF9;P62917;Q8N988;P59923;Q14865;Q969J2;Q5VUA4;Q9NYT6;Q494X3;A6NM28;Q9Y2L8;Q8IYB9;Q8IX07;O76021;Q32M78;O60225;O14771;Q9NQZ8;P0CH99;Q8NFD5;Q8N823;P17041;Q8N9K5;Q9UIH9;Q9BSG1;P0CJ79;Q3MJ62;Q969S3;Q15796;Q8N7M2;O60765;Q8NB50;Q3ZCT1;P62857;Q5HYK9;O95218;Q8N9Z0;Q92785;Q2VY69;P51523;Q9BYD2;Q9H963;Q9NYW8;Q9Y3D5;Q5BKZ1;Q9BYN7;Q96GE5;Q86UP8;P62847;Q8N720;P51786;Q9HCZ1;Q8NB42;P43268;P49207;Q9HBT7;Q9C035;Q86VP1;Q9H9L3;P23396;Q8TBZ5;Q9HAH1;Q9Y2P7;Q6P3V2;O75346;Q14588;Q9H0U6;Q9UKD2;Q6ZMV8;P15336;Q14592;Q6AZW8;Q6NSZ9;P28838;Q86V15;P28698;Q6ZNG0;Q8N9F8;P0C7V5;P17021;Q9UID6;Q14872;Q9UDV6;P63173;A4D1E1;P18621;Q5CZA5;Q96HQ0;Q9UKN5;Q9UNY5;Q9H4D5;Q9H707;Q9NSJ1;Q9UKT9;P82675;Q9C000;P41208;Q9NR09;Q9H9J2;B4DU55;Q6PG37;O60290;O75373;Q9BYX4;Q8IW36;Q96CS4;Q49AA0;Q9GZU2;Q9UKK6;Q86TJ5;Q8LVC4;Q8N488;Q9UK10;Q9NRX2;A8MUZ8;P60953;O75382;Q96SE7;P46013;Q7L945;Q8NDQ6;Q13106;Q86XF7;Q5TEC3;Q9UHD4;O95125;P58304;Q68CP9;Q9GZN7;P27986;Q16385;P17019;Q05086;P0CG31;P43897;Q9Y2G2;P39019;P0C7X2;Q9Y2G7;Q8IYX0;Q9UJW7;Q9NSC2;P63000;Q92670;P82664;P52736;P61353;Q96NJ3;Q86XN6;Q96L21;P30305;Q9GZX5;Q9H8G1;Q96MN9;Q9BQA5;P17025;P62266;P42677;Q9Y3U8;A6NK75;P63220;Q15652;O60869;Q8N587;Q8N7Q3;Q7Z398;P83881;Q8N611;P13682;Q8IYI8;Q86V71;P52744;Q9UGR2;Q9BWU0;A6NN14;Q96JL9;P0CB33;Q6ZNH5;Q9NWS9;P60006;Q3ZCX4;Q9BX82;Q9HCM9;P49406;Q9P0T4;Q8IY57;Q5HY98;Q8NEK5;Q13952;O43309;O14978;P35637;Q6ZNF7;Q99717;Q9H7R5;Q12857;Q9C0F3;P21673;O60870;P02533;Q8N972;Q13490;Q9H0M5;Q9UL40;P50914;P46776;Q9Y281;P18583;Q6ZNO8;Q8NHY6;Q8TBZ8;Q16384;P61586;Q9UIE0;Q68DY9;Q5VIY5;P0CG24;O75290;Q8WXB4;P49711;P62854;Q00987;P49247;Q9BWM5;Q8TF32;P09001;P62753;Q16600;Q2M3X9;P52737;O14893;Q9UQJ1;Q8TAF7;P05388;Q8N7K0;Q15776;Q66K89;Q08AG5;Q12874;A6NKF2;Q86W11;P51522;A6NEJ1;O75674;O15392;Q96PM9;Q96BR6;Q96IR2;P25398;Q969W8;Q6ZNA1;A6NKH3;Q9HCS7;O95201;O43345;Q8TDD2;Q15797;Q5FWF6;O60936;Q8N393;Q8NAP3;Q96ND8;Q96LW9;P62910;Q3MIS6;Q9UL36;Q8TAQ5;Q92901;Q13105;Q9NV72;Q6ZNG1;Q8IYN0;P46781;Q9NZ52;Q96JC4;O15015;Q9BYC9;Q9UPG8;P27635;Q9Y2A4;P21506;Q14584;Q9Y6R6;Q86XU0;P17014;Q6ZMS7;P17023;Q8NDP4;P18146;P61513;Q03112;Q15428;P17028;O76075;P15822;Q03936;P17024;Q71UM5;A8K8V0;P98168;Q7Z3I7;Q03938;P17661;Q8TF39;O60224;P08651;P62979}

5627

Pathogen[ P0C214] interacts with 920 human

partners: {P62861;Q86UD4;Q05086;A6NDX5;Q6ZNS5;P60520;Q5BKZ1;Q6NX49;Q6PDB4;Q12996;P84098;Q92618;Q06732;Q96A35;Q8NEK5;Q9NQZ8;Q14526;P61247;P49406;O15198;Q96J02;Q8NI51;Q03989;Q6IQ32;Q7Z3K3;Q96C28;Q9Y399;Q8NHW5;Q96MU6;Q9P255;Q9UKN5;Q96RE9;Q8N1G1;Q13405;Q969S3;Q9Y3D5;Q7Z2F6;A8MUV8;O43296;Q8WV28;Q9BYD2;Q8TBZ8;Q8IZC7;O75467;Q9HCS7;Q6ZN11;Q96LW9;Q9UID6;P27695;P05937;Q6ZNA1;Q9H9J2;P63000;Q9P0T4;P35789;Q8NDQ6;Q13887;P15880;P17032;P62081;P42766;Q14593;Q15697;A6NGD5;A8MVS1;Q9HCZ1;P30307;P19474;Q02930;P56270;P62913;O43829;Q9HAU4;Q15022;P22090;Q9NPP4;P51508;Q7Z398;O75528;A8MQ14;Q8IZP0;P52743;P35637;Q13952;Q9Y6K9;Q17R26;P82912;Q92901;P62249;Q9P0L1;P17010;Q63HK3;Q9ULD5;A8K8V0;Q9UHF7;Q8WV44;P62899;O43830;Q9BS34;Q9Y2A4;Q14865;P0CI00;Q14872;Q8N7Q3;Q13490;Q8IYN0;Q14929;Q96KR1;P28838;P17023;Q9BX82;P62854;Q9Y2D9;Q14591;Q9Y5A6;P39019;Q6ZNS5;P62263;P51814;Q5T5D7;Q05481;P82675;A6NHJ4;Q96SQ5;Q92664;P0CB33;P41227;Q9UL59;P52744;Q6ZNH5;O14497;P0C6E6;Q9H0U6;P02533;Q5JVG8;Q8IYW8;Q8NC26;Q9UJY5;P15336;Q9Y473;Q96LW1;A6NP11;Q16540;Q96I27;O15535;Q8TD17;Q6PG37;Q9NTW7;Q8TF45;Q9Y676;O75820;Q9BWM5;Q8TAQ5;Q9Y281;P52742;Q5TB30;P01011;O60543;P62273;Q14587;Q9NPC7;Q86UE3;Q9UIH9;P23396;P18077;Q8TBC5;P25208;Q00987;O15235;Q9GZU2;Q8NDP4;Q96CX3;Q96NJ3;P52738;P05388;Q5JVG2;P0CG31;Q96K62;P62847;Q96BR6;Q9HBE1;Q8NCA9;Q96GC5;Q7L2R6;O76021;Q8TD23;Q9P2F9;Q9C035;Q8N587;Q99856;Q8TAU3;Q14119;Q03112;Q9UJN7;P17019;Q13015;Q8NOY2;Q8IVP9;Q9UC06;C9JN71;Q504Q3;P26373;Q68DY1;Q5MCW4;Q16384;Q99676;Q8NCK3;Q92560;P55265;O95678;Q8N823;Q9UNY5;Q8NEP9;Q08AN1;P17022;P27635;O75362;Q9NUA8;Q9H6B1;O60224;P46778;Q9P0M2;Q16587;Q7Z7K2;Q969W8;Q499Z4;Q6P5R6;P61586;Q96GE5;O95625;Q86XU0;Q5JNZ5;Q8TF20;O43167;P04792;Q6P9A1;P84022;Q9NWU5;O75437;Q12906;Q6PK81;Q6P1L6;Q9UL58;Q96EH5;O95125;Q5TYW1;Q15428;Q86PF04;Q86WZ6;Q9UK11;Q86YE8;Q9NR11;Q96CS4;O14709;P17029;P17544;Q9Y2Y9;Q96SR6;Q5JUW0;Q8NAP3;Q9UK13;P61513;Q9UL40;Q9H0F6;P17026;Q96MN9;Q96SK3;Q9NW07;Q7Z2W9;Q5HY98;Q2M1K9;Q63HK5;O75123;P83881;Q2M3W8;Q9UHK0;P60953;Q02386;O75394;Q15973;Q3MJ62;P37275;Q3KP31;Q8NI08;Q8N8C0;Q9NPP8;Q15928;P49792;O75381;Q9UPG8;Q96K58;Q9BYX4;A8MT65;Q5T653;Q96JC4;P62701;Q71UM5;P49207;P98168;Q7Z3I7;P63220;Q8IZ26;Q8N9F8;P17024;Q9Y2Q1;Q6ZR52;P26641;O14771;Q12901;Q96NG5;Q96N77;P24385;Q96SE7;Q9UQN3;P08865;Q6ZMS7;P32969;Q6ZN19;P62266;P17038;Q9UJX2;Q9UC07;Q494X3;Q14938;Q96MR9;Q9Y2P0;Q96K75;P09001;Q9UII5;O00308;Q4V348;Q96SZ4;Q9H063;Q6IV72;Q8N141;P51786;Q9BY31;Q969Q0;Q01844;Q96BV0;A6NEJ1;Q5SVQ8;Q8N883;Q5T447;Q8N6I1;Q3SXZ3;Q9GZX5;P82664;Q9NXT0;P51523;P82914;Q9H4I2;Q147U1;Q9BSK1;P24278;P17031;P15170;Q9HCX3;Q16385;P62277;O94906;Q9H0M0;Q9Y3Z3;Q5VTD9;Q13398;Q53GI3;Q9HBT8;Q99909;P50914;O60290;P11166;P17030;Q03936;Q96NL3;Q8TF68;Q9UKJ3;Q9BYK8;Q9Y5K5;Q7RTT4;Q86XN6;Q53FT3;Q9HCE7;Q8IZH2;Q7RTT5;P46779;Q8N5C8;Q8N3C0;O95201;Q8TC21;P28698;Q15633;Q9NWS9;Q92922;Q9BWU0;P15622;Q6ECI4;Q6ZSS3;Q9BRR0;Q59GN2;Q6ZNO8;Q8N859;Q13129;Q9HC78;B1APH4;Q9UL36;O00273;Q9ULJ3;Q9P0J6;P98170;O43734;Q9Y6R6;Q49AA0;Q60870;P47914;Q8TAT6;O00712;P49790;Q9Y2340;Q6ZNG1;P18583;P63173;Q96IT1;O60765;Q06730;Q9UJU3;Q8N184;Q86Y25;B4DXR9;O75373;Q7Z3H8;Q15929;P43897;Q8N4W9;Q9BQ48;A8MXY4;Q9UJY4;O95071;Q96PE6;Q3ZCX4;Q68DI1;O60225;Q8N488;Q9H5H4;Q6P280;Q5VUA4;Q16600;P17014;Q8N9K5;P82921;Q8NF99;P62280;Q9UHD4;Q9UJW7;Q8TBZ5;Q49A33;P09104;Q8N2I2;O75290;Q9UNX3;Q96JF6;

O14641;Q9UKK6;Q6P9A3;Q6AW86;Q9Y3U8;Q9UNA4;Q86VP1;Q6ZMW2;Q15386;Q8TF47;Q9Y4R8;Q6DD87;P51504;Q7Z2E3;Q96N95;O95999;Q8TF39;Q6P2D0;Q13485;P62753;P62910;P62891;Q9C0F3;Q9H7X3;Q96N22;Q9NUL3;Q9NYT6;Q03924;Q5FWF6;Q9NYW8;Q08AG5;Q86TJ5;O15105;Q9H8G1;Q86UP8;Q9UII4;Q8TD47;Q9HAZ2;Q8N7M2;P17028;Q9P2J8;Q95780;P0CH99;P98169;Q3MIS6;Q8WW38;Q15652;B4DU55;Q9NX6;P51815;Q6ZSD7;Q9NZE8;P51522;Q8N393;O43823;O15060;Q9BUG6;Q6ZMY9;O15014;E7ETH6;Q14019;P62269;Q2QGD7;O15226;Q96N58;P0DI81;P17020;Q15025;Q76KX8;Q15796;Q9NZ52;Q9NSC2;Q969J2;Q9ULM2;Q9H9L3;Q86V71;Q9Y3M9;P17027;Q86UQ0;Q96RL7;Q96GC6;P41182;Q9Y6X8;Q6P9G9;Q03923;Q9NRR4;Q8N972;P17098;Q8IV48;Q6ZT77;P21506;P46781;O43541;P30305;Q8IYB9;Q9Y2R9;P43268;Q9Y2G2;Q14690;Q9NRF9;O95251;P17035;Q9HCM9;P0C7X5;Q8IX07;Q9ULX6;Q8WTP8;Q9UJL9;Q6U7Q0;A4D1E1;A6NKH3;Q13127;Q4LE39;Q8NDW4;Q9BSG1;Q9BYC9;O75155;Q2VY69;O75346;A2RRD8;Q6ZNG0;Q15072;P13682;P61254;Q86W11;Q12874;Q6NSZ9;A8MWA4;Q5SXM1;Q96ND8;Q9H4T2;P41208;P17040;Q6V9R5;Q9Y2X9;P58317;Q9UDV6;Q96C00;P10074;O94903;Q68EA5;P62244;P52747;Q8IYX0;Q9NRX2;O60784;Q8N9Z0;Q9NV72;Q5VIY5;Q9Y462;Q9UEG4;Q15935;Q9UKT9;P36508;P43243;Q7L945;O43345;O15392;Q9Y2R5;Q9NXV6;Q9Y2G7;Q07020;P17041;Q8NB50;Q14669;Q96HQ0;Q6NX45;P49711;Q13106;Q02447;Q12857;Q9NZM5;P42677;Q8N8Z8;O95793;P17021;Q9P0M9;P18146;P46776;Q96JL9;P0C7X2;Q8WTR7;P0CG00;O15164;P15621;Q0D2J5;P0CJ78;Q66K41;Q8IVC4;Q96MX3;Q14584;Q3SY52;Q9NQX1;P27797;A6NK75;Q6ZNO6;Q9GZR2;P57071;Q6IQ21;Q96JB3;Q9UKD2;Q14592;P17036;O43309;P17039;Q9NX65;P52815;Q8TAF7;P98182;P0C7V5;Q9UDV7;P62241;P46777;Q8NB42;Q01658;Q96H40;O14893;Q52M93;Q8N8L2;A6NNF4;Q9BTV5;P60006;Q96SL8;P11161;Q6ZRF7;Q9UJW8;Q96JM3;Q9Y6D6;Q96L21;Q6ZMV8;Q5T619;Q9NR09;O15265;Q96PQ6;Q7RTT3;Q9UFF9;P35268;Q9NSD4;Q7Z6Z7;Q8NHY6;Q8IW36;Q14585;Q95717;O14978;P16415;Q6ZQV5;Q9UIE0;Q2M218;P78560;P46013;Q8N7K0;Q9HCG1;Q8N211;Q9NZV7;Q5TEC3;O60293;P60866;Q9H9D4;A8MUZ8;Q0VGE8;C9JBD0;Q08ER8;O95218;Q7RTT6;P62857;P49910;Q9BR84;Q9GZN7;Q86V15;Q8TB69;Q6GYQ0;Q9H707;Q96N38;Q9HBT7;Q68CP9;P08151;Q92804;Q9UFB7;O14727;A6NM28;P61313;Q99684;P08708;Q9HCL3;Q6NUN9;Q9P243;Q9BSN8;Q9BUY5;Q8N3J9;P21673;Q9BQA5;P08651;A6NFI3;Q15776;Q9BYN7;Q9UM63;Q8N782;P05387;P25398;Q7RTV3;Q8N1W2;Q9H7R0;Q15797;P52736;Q9H0W8;Q13360;Q96NJ6;O60869;P14373;Q9H4D5;Q3KQV3;P26640;P17017;O75674;O14628;Q9BV97;Q5F1R6;Q8NFD5;Q3ZCT1;Q8NA42;A6NKF2;Q86YF9;Q96H86;O60315;P61927;Q8N895;P62750;P62979;Q32M78;Q96AQ7;P05386;P0CJ79;Q96NG8;Q9UQR1;Q6P3V2;Q6ZSB9;Q6AZW8;P61970;Q14590;Q9NZL3;Q86XF7;P98171;Q96CA5;P30304;Q96EG3;Q9H963;Q9UPN9;P27986;P46782;Q9UJY1;Q9BS31;Q5EBL2;Q8WYQ5;Q9UL33;Q8NE65;Q5CZA5;P15822;Q96LX8;Q8WV37;P52746;Q9H0M5;Q9NSJ1;Q9UK12;Q9Y2T3;Q9ULV3;Q96N20;P82933;Q8WXB4;Q9Y2P7;Q9ULD9;Q9Y2L8;Q2M218;P523X9;P49247;Q66K89;Q96NI9;Q96N25;O43361;Q8NEM1;O76075;O75081;Q70YC5;A6NK53;O60304;Q9H7R5;Q9NYJ8;Q13105;P08047;Q09FC8;Q14966;Q8IYI8;Q8TA94;Q05516;P42575;Q96PM9;B4DX44;P52737;Q8TF50;P61353;Q9Y3B8;Q9BYD6;P0CG24;Q68DY9;A6NJL1;Q9NQV7;O60936;Q5HYK9;Q9HAH1;Q14588;Q96PU5;Q7Z3V5;P0DI82;A8MTY0;Q9UBU9;Q9UK10;Q8TDD2;Q9H7S9;Q8TAW3;Q5JN23;O15015;Q6N79;P17025;Q15937;Q9Y3D3;P18621;P10073;P36404;P52740;Q5EBM4;Q9H2P0;Q8IY57;Q86T29;Q8NB44;O60783;O94892;Q16670;Q32M60;Q7L3S4;P62906;Q92670;P11142;P52741;Q9NS39;Q96IR2;Q8N988;Q9H116;Q9C000;Q02878;Q8TF32;Q8N8J6;P59923;Q9NZL9;Q03938;P17661;O60481;Q9NVS2;Q3KNS6;Q8N720;A6NN14;Q9BRH9;Q9UGR2}

5628 Pathogen { P03346 } interacts with h121 human partners { Q86UQ0;E7ETH6;Q96T92;Q5F1R6;A6NK53;Q5JU85;O15014;Q7Z3K3;Q3KNS6;O75382;Q96NG5;Q5JVG2;Q96A35;Q9Y3Z3;Q969S3;Q13886;O15265;P08048;Q9BZE0;Q5JUW0;Q12901;Q05481;O95201;Q9NWS9;Q9UPN9;Q9Y6K9;Q96J02;Q7Z398;Q8NI51;O76021;Q03989;Q9NVS2;P05387;Q9Y399;Q9UKS7;Q96N20;Q8NHW5;Q9Y467;P17097;Q9H0H0;P46779;Q12874;Q96LW1;P57071;Q5T5D7;Q7Z7K2;Q9HBT8;Q9UHF7;Q13263;Q494X3;A8MXY4;Q9NQX6;Q504Q3;Q9NR83;P98182;Q15438;Q8TF39;Q9P0M2;Q02386;Q9NQX1;Q8N4W9;P49910;P63173;Q3MJ62;Q5JNZ5;Q9Y281;O94892;P62917;A6NGD5;O75394;O15535;Q8IZM8;Q92560;P62249;Q9NPA5;P62913;Q9HAU4;Q9NQV7;A2RRD8;Q6P1L6;P0CG31;Q9HAH1;P49406;Q08AN1;Q9H8N7;Q96NJ6;O95625;Q49A33;Q9BRR0;C9JN71;Q6ZRF7;Q96C55;P24385;Q7Z340;Q5T1R4;Q96MR9;Q9P0J6;Q8WV37;Q9NZV7;P62861;P82912;Q96C00;P07900;Q15928;Q7RTS1;P62277;Q02878;Q9BWM5;Q96PU5;Q14591;Q96612;P29374;Q9BUY5;Q9UEG4;P60006;P36508;Q9Y2P0;A6NN14;Q8NCA9;P14373;Q52M93;Q9H116;Q7RTS3;P49247;Q32MQ0;Q8NAF0;Q3KNN1;Q8IVW6;Q15916;Q9ULDS;Q96KR1;Q9GZR2;O15392;O60765;Q9BV97;P82933;P98171;Q96NS5;Q8IZC7;Q9UKD2;Q9UQR1;P56270;P17039;Q2QGD7;O75362;Q8IX06;Q9Y2P7;Q8NAP8;Q5HYK9;Q9UL59;Q9H0M5;P55265;O43167;Q16384;Q9Y4X4;P17098;Q86V71;O14901;Q8NCC26;Q96NJ3;Q59GN2;Q13489;P15336;Q96HQ0;Q9NU63;Q9H9L3;Q13129;Q9H8W5;Q2M218;P62280;P39023;P52739;O15209;Q9UGR2;P0CJ78;Q8N141;Q7Z3V5;Q9H2P0;Q6ZT77;Q9UL58;Q8NKN2;Q8N8W3;Q8WW38;Q6ZQV5;P52747;Q9Y2L8;Q3KQV3;O43296;Q9BXA9;Q9HXA9;Q8TAQ5;Q9Y5W3;Q96K75;O43309;P61927;Q5FWF6;Q9ULM2;Q6ZSB9;Q9UNX3;Q7Z3I7;Q9UKT9;Q9P0T4;Q12857;Q06732;Q96H40;Q8NFD5;Q92990;O95714;Q8N7M2;O75123;Q96IQ9;Q14590;P0CH99;Q96K62;P62857;Q9NW07;Q6V9R5;P35789;P52740;Q9NR11;P60520;Q9BYM8;Q8TD23;Q9H0U6;Q08AG5;Q8IZP0;Q969W8;Q9NZM5;Q15797;Q96SZ4;Q96MU6;O60315;O43734;O60290;P17027;Q5MCW4;Q9UNA4;Q9NZL9;P51786;Q03936;Q96JG9;Q15911;O75159;Q2M1K9;Q86T29;A8MUV8;Q147U1;Q8TD17;Q14587;P52738;Q9NQV6;Q8TF45;P0CB33;Q9UJQ4;P42575;Q8N680;Q9NS39;A8MVS1;P24278;P43243;P46778;Q96KM6;Q8NEP9;Q14872;Q8NE65;P49207;Q5VIY5;P25490;Q5H9K5;Q96FS4;O14978;Q15633;Q6P5R6;Q6P280;Q9NSC2;Q5T0B9;P30304;O43313;Q8N393;P25208;Q96I27;Q8TF20;Q9Y6D5;Q8NF99;P52741;Q9C0A1;Q86YE8;Q6ZMY9;P62266;O75820;Q8WXX3;Q15796;Q86WZ6;Q9UII4;Q8IZ20;Q9BWT7;Q9UK11;O43298;O14709;Q6NX45;O95678;O00712;O75335;Q3SY52;P26641;Q9UJY1;P17026;Q99856;P17022;P61254;Q9BQ48;Q8TBC5;Q5HY98;Q68DI1;Q12802;Q86UE3;Q71UM5;Q9H9D4;P98170;Q3MIS6;Q8N9K5;Q8N895;P52737;Q12906;Q7L3S4;P28698;Q6ZMS7;Q9ULJ3;P11142;P18583;Q96CS4;Q9POL1;Q9NUL3;Q9C035;Q63HK5;Q5TB30;Q5T653;Q17R26;P60953;P52742;Q9UDV7;Q9C0D4;Q8WTR7;P15622;Q8NDQ6;Q9P2Y4;Q9HCK0;Q8IVC4;Q8TA94;Q9C0F3;Q6PG37;Q9NX65;Q9NYH9;Q8TF32;A8MQ14;Q86UD4;Q96SE7;Q9HCG1;P58304;P21673;P52773;Q15386;Q9P2F9;Q8TAF7;Q99717;P0C7X2;Q6XZF7;Q9Y3M9;Q96BR9;P17038;Q9BYD2;Q9H4Q3;A6NK75;Q9H609;Q96N38;O15105;O75626;Q9NTW7;P60866;Q14586;Q7RTT6;Q96AQ7;Q08211;P0CW22;P17014;Q92670;Q8N587;P10074;Q9UM63;P62899;Q9H0F6;P0CI00;Q8NB42;O60224;Q9NV72;Q969Q0;Q86VK4;Q3SXZ3;O00192;Q9NR33;A6NEJ1;Q15652;Q96BV0;Q9H165;P05937;Q96VFC8;Q8N859;Q70YC5;P52743;O15090;Q9HCS7;Q8NBB4;Q03923;Q9NRF9;Q8NCP5;Q9BYC9;Q9UJW8;Q86V15;Q9BY31;Q9NUA8;P17032;O94906;Q8N2I2;Q13398;Q66K89;Q53GI3;P35268;Q8N554;Q5T447;A6NJL1;P17025;O60784;P15621;P17010;O43345;Q6P9A1;P59817;A8MT65;Q9HCX3;Q6EKJ0;Q9NYW8;Q9NXV6;Q13351;Q00987;P0CG40;O15198;Q0VGE8;P30305

;Q8N7K0;Q9UKJ3;Q9H4T2;O95793;Q8NDX6;P09001;Q9NSD4;Q66K41;Q9ULX6;Q499Z4;Q8N3C0;Q6P9G9;P62891;P08047;Q9H582;P08708;O95999;Q96LW9;Q8TF68;Q9HC78;Q8IZH2;Q9H5H4;Q8N9F8;Q92766;Q86YF9;Q96JM2;Q8N5C8;Q8TDD2;P98168;Q9H963;Q9H0R8;Q9UK10;Q14119;O95600;Q8N8E2;Q96CX3;A8MUZ8;P52736;Q8TDW5;P52756;Q14919;P98169;O75381;Q13424;O75155;Q14592;Q8TD47;Q9C029;P46782;O60225;O15060;Q14526;Q16650;P61353;P17036;Q6ZNMH5;Q6ZMW2;Q9ZCX4;Q8TBZ5;Q9BS34;Q9UL40;P0CJ79;P78560;B4DX44;Q96MN9;P41208;O60870;Q62854;Q9Y3U8;Q6ZNA1;P35637;P21506;P51508;Q9Y330;Q9UK13;Q9BXW6;Q8N0Y2;Q8N8Z8;P04080;Q9Y6D6;Q96JL9;Q9P243;Q8IYI8;Q8ND82;Q96EP0;P47914;Q9P215;P84022;O14628;Q86Y25;Q9H063;Q8N1W2;Q96DT7;Q8IYX0;Q8NHY6;Q9BRH9;P43897;Q9Y2R5;P08865;O60481;Q6ZLN1;P17661;Q8NB15;Q6ECI4;Q9UNY5;Q8IYM9;Q96L21;Q8N1G0;O43829;Q9H7R5;Q9NPP4;Q8TF47;O43541;Q9NQS1;Q5EBM4;Q15020;A8MWA4;Q15929;Q9UL33;Q9UL36;Q9NXT0;Q5JT82;Q9NRX2;P41227;O43670;O95125;O14641;Q9BR84;P02533;Q6P9A3;Q7RTT4;Q6ZMV8;Q96PE6;Q5JVG8;O15235;P61313;Q96F45;P25398;Q9UNH7;Q02446;O75528;O94972;O95863;Q969G2;P52746;Q15072;Q9Y4R8;Q9NYJ8;P16415;Q6AW86;Q9H7X3;Q96N22;Q9NQZ8;Q8IYW8;Q68EA5;Q9UDV6;Q86UA1;Q15022;Q9H4I2;Q03924;Q9BX82;Q06730;Q99684;P17031;Q8N8J6;O95251;Q8N883;Q9UK12;Q15973;P82914;Q9H8G1;B2RXF5;Q9UPQ4;Q5JNZ3;O60783;Q13118;Q8TBZ8;Q9P2J8;O95780;Q9UHK0;Q3KP31;Q6ZLN7;P52744;O75569;O75541;Q03112;P61513;O75373;P08651;P17041;Q9NZE8;Q9UJX2;Q6IQ32;Q86VZ6;Q2M3W8;Q7RRT3;Q08ER8;Q02086;A6NKH3;P05388;Q5SVQ8;Q14593;O14497;Q96BR6;O43361;Q8TCN5;Q9Y2R9;Q96RL7;Q7Z4V0;O60447;P62269;Q9HCM9;P0DI81;B4DU55;O60304;Q14585;Q92784;Q96N77;Q6IQ21;Q15025;Q6ZS27;Q9Y6I7;Q9UJY4;Q9H8Y5;O75840;Q8N7Q3;P49711;Q01954;A4D1E1;P51815;P42766;P62081;P17544;Q9Y6X8;P36404;O95361;Q9GZN7;A6NNF4;Q9BTV5;Q9H7S9;Q8TAW3;Q8NA42;Q96C28;Q96N95;Q14669;B4DXR9;O75346;P37275;P61247;Q7L2R6;P17029;Q8N611;Q99909;Q9NNU5;Q6DD87;Q6PF04;Q6DN90;Q8NEM1;Q86XN6;Q9BU19;P10073;P18621;Q8IX07;Q9C040;Q8TC21;Q9Y676;Q9BUG6;P46781;A6NKF2;P11166;P17035;Q96NG8;Q9Y2Y4;Q9Y462;P82921;Q9HCZ1;Q9HCE3;P17021;Q6ZNO6;P84098;Q63HK3;Q13887;Q13105;Q8NDW4;Q5SXM1;P15880;Q8N8C0;Q96NI8;Q6N043;B1APH4;Q96SK3;Q6BEB4;Q86YH2;Q4V348;P11137;C9JBD0;P17030;Q13015;O60293;Q7RRT5;Q16385;Q3YEC7;P50914;Q9H5J0;Q8N9Z0;O60281;Q3ZCT1;Q5TYW1;Q96JM3;Q9H707;Q5VTD9;Q96EG3;Q6GYQ0;Q14966;Q8NB50;Q14865;Q9Y6R6;Q9NQ03;Q9UQN3;Q9HBE1;Q15935;Q9Y2G7;P62979;P27797;P41182;Q9BYX4;Q9Y3D5;Q76KX8;Q8IYB9;Q9NRM2;P17028;Q13492;P39019;P17020;A6NP11;Q05516;Q9BYD6;Q9BWW7;Q8N720;Q5T619;O43870;P17017;Q9Y3D3;P0DI82;P22336;Q86XU0;Q9UPP2;Q13952;Q96ME7;Q6ZSS3;Q6PDB4;Q9C0G0;P42677;Q5VV41;Q9H4D5;Q14584;O60936;O76075;P36405;P62750;Q96EH5;P10072;Q4LE39;P62701;P11161;O15151;Q8TB69;Q96JF6;P55211;P17023;Q15937;Q9Y2D9;Q8TAT6;Q49AA0;O75437;P62910;Q17R98;P0C7V5;Q92922;Q6P2D0;O95218;O14771;Q9UBU9;Q96SL8;Q6U7Q0;P19474;Q9UGL1;Q9UBR4;Q86XF7;Q9HBT7;Q8NAP3;O15015;Q9NSJ1;Q8TF50;P82675;Q9Y2K1;Q9BYN7;Q01658;Q9NRR4;Q9GZU2;Q96MM3;Q9NR09;Q96PQ6;Q6ZLN30;Q9UII5;P51504;Q14019;Q9HA38;Q8IW36;P62847;Q9BZJ0;Q05215;Q9P255;Q9GZX5;Q13405;Q9UK33;P49790;Q13490;Q7Z2E3;Q9H4Q4;Q9ULT8;Q96ND8;A6NDX5;O15226;Q9BSK1;Q8N9Z2;P58317;Q9H0W8;Q13485;P22090;P13682;P46013;Q2M3X9;O14893;Q9Y5A6;O14617;A8MTY0;Q96LX8;Q05086;Q9UFB7;Q7L945;P17040;P51522;Q9UKY1;Q9UPG8;Q8WV28;P59923;Q9H5V7;Q96N13;P27695;Q9HCL3;Q5TC79;Q9H0M0;P0C7X5;Q96IT1;Q9UC06;Q13029;Q9BYK8;Q13401;P46777;P23528;Q9Y2X9;Q969J2;Q16600;Q9H8V3;P18146;Q9UUFF9;Q9Y2G2;P61970;Q8N782;Q9BS31;P52815;P43268;Q86UZ6;Q8NI08;Q9UKK6;Q07020;Q8IYNO;Q9UJY5;P62263;Q9UID6;Q13283;Q15697;Q6ZS7;Q01844;Q6NUN9;P82664;Q8N488;Q13360;O60869;Q5T7W0;O75467;Q9NZZL3;P83881;Q96H86;Q15776;Q9Y6Q3;P51523;O75674;Q86T24;Q8NEK5;Q9Y2A4;Q02930;Q14588;Q6AZW8;O95071;Q8IY57;O75290;Q9HAZ2;Q9BWU0;Q01101;P17019;Q8NCK3;Q6IV72;P05386;Q86UP8;Q16587;Q6P3V2;Q8IZ26;Q9UIE0;Q8N988;Q8TD94;P18077;Q96GC6;Q96CA5;Q68CP9;Q9BSG1;Q6AHZ1;Q7Z2W9;Q9BXX1;Q9UJU3;P46776;P62241;Q68DY9;Q9Y473;Q96CK0;O60543;Q86UP3;Q9UJN7;Q8NEA6;Q5EBL2;O00110;Q3SY56;Q0D2J5;P16670;Q9UBZ4;Q14690;Q9Y2H8;Q96RE9;Q92804;Q9ULV3;Q9NZ52;Q8N3J9;Q8IVP9;Q9BSN8;Q5CZA5;Q7RTV3;Q9NQ94;Q92664;Q7Z6Z7;Q9NYT6;Q8WXB4;O14727;Q9UKN5;P15822;A6NM28;P0CG00;P08238;Q02447;Q96N58;Q6ZNG1;Q6NX49;P62753;Q5TEC3;O43823;P63000;Q9P2A4;Q99676;Q96SR6;Q12996;Q96DX7;Q9Y5K5;Q6ZNO8;Q86VP1;Q9UHD4;O15164;O75081;Q9UIH9;Q96PM9;P04792;Q92618;Q92785;Q9UC07;Q14929;Q8TAU3;Q9Y2Y9;Q96SQ5;Q6NSZ9;Q92901;P32969;P26373;Q14938;Q9H4Z2;Q13106;P17024;Q9UJL9;P31629;Q9UJW7;Q7Z2F6;P51814;Q6ZR52;Q9NJP8;P27986;Q32M78;Q9Y4E5;Q9P1Z0;P27635;P30307;Q6ZLN55;Q96JC4;Q7Z7H8;Q2TB10;Q86W11;Q14134;Q2VY69;O00273;Q8TB45;Q8N184;O15062;Q8N8L2;Q53FT3;P0CG24;Q96MX3;O00488;Q96GC5;A8K8V0;Q6ZLN19;Q13127;Q96JB3;P62906;Q9H9J2;Q6ZNG0;Q9Y2Q1;Q9H7R0;Q68DY1;Q15428;A6NHJ4;P49792;Q9P0M9;Q9GZV8;Q8WV44;Q8NDP4;P62244;Q8WYQ5;O00308;Q96IR2;Q5BKZ1;Q9BQA5;Q6PK81;Q9C000;P08151;P61586;Q5VUA4;P62888;P0C6E6;Q96GE5;P63220;Q96K58;Q03938;Q9NPC7;Q92610;A6NFI3}

5629

Pathogen[ Q85601] interacts with 935 human

partners: {Q9UQR1;Q9HCZ1;Q8N8C0;Q9UJX2;Q9ULM2;Q9HCG1;Q9UBZ4;P32969;Q3KNS6;Q92618;P18146;A4D1E1;Q494X3;O75373;Q8N1G0;P08048;O95625;Q6NX45;O15198;Q9UPN9;P61513;Q96J02;Q8NI51;Q03989;O60225;Q8NHW5;P17097;P51786;Q969J2;Q8N9K5;Q32M78;P28698;Q8IZC7;Q92664;P15621;Q63HK3;P26373;Q96JM3;P0CG00;P51815;Q9UHF7;P62857;P52815;Q6ZR52;Q9NQX6;Q9HCS7;P08151;Q9Y4R8;P62244;Q86W11;P09001;Q8NA42;Q14929;Q4LE39;Q8TF39;Q9HBT8;Q9UPG8;O60481;Q14593;P62913;P17040;Q6ZLN11;Q2VY69;Q53FT3;Q3MJ62;Q8N8720;Q86XU0;Q96SZ4;Q9UNY5;P25208;Q14586;O15535;Q9NPA5;Q9UJW8;Q9HAU4;Q8NBB4;Q9NJV7;Q96JB3;A6NHJ4;Q9ULJ3;Q13127;P14373;Q9H707;P62854;Q2M3X9;O75528;Q96MX3;Q6V9R5;Q5EBL2;C9JN71;Q86VP1;P02533;P24385;Q13490;Q7Z340;Q8WV37;P82912;Q9UQN3;Q96SR6;Q5JNZ3;P62081;Q96ND8;Q6PG37;Q96K62;Q6P5R6;P61353;Q96A35;Q5TYW1;A6NFI3;P62891;Q9UC07;P46776;Q96CS4;P17028;P51522;Q8N7M2;Q969W8;Q9NUA8;Q8TDD2;A6NKF7;P36405;P0CB33;Q9ULD5;P21506;Q8WV44;P82933;P18077;Q12901;P56270;Q9NYJ8;Q9H8G1;Q3SXZ3;Q9UJY4;P61313;Q9UL59;Q9Y2R5;Q9Y3D5;Q7L945;O15265;Q9C0G0;Q16384;P49406;P05388;P17019;Q96NG8;Q5HY98;Q9UL33;Q6P1L6;Q8N8L2;Q6ZN57;Q96BR6;Q6ZMS7;Q96HQ0;Q96JM2;P17661;A6NKH3;P13682;P08651;Q9UGR2;Q86V15;Q96JF6;P17032;Q6PF04;Q9UL58;P17036;Q6DD87;Q9HCL3;O15151;Q9Y2L8;O95251;Q8WW38;Q8TAQ5;Q02386;Q86YB8;Q9H0W8;Q9BYN7;Q8NAP3;Q9HBT7;Q9UBU9;Q5FWF6;Q32MQ0;Q12857;Q8IYNO;O95714;Q7Z398;P17020;Q96BV0;Q13360;P63173;Q9H7S9;B4DXR9;O43541;Q96LX8;B1APH4;O60290;Q8TD23;Q8N8J6;Q9H0U6;A8MWA4;Q9BR84;Q6ZNG0;Q9Y2Y9;Q14966;Q15797;P15622;Q96H40;Q2M3W8;P82921;O60315;Q14587;A2RRD8;Q8NHY6;P17027;A8MUV8;Q9NR11;Q03936;Q08AG5;Q9H116;Q2M1K9;Q92560;Q6ZLN79;Q9NWS9;Q8N680;P23396;Q7RRT3;P15822;P62273;A8MVS1;P46778;Q1

4872;Q8NDW4;Q9UKN5;Q6NSZ9;Q9UDV6;Q13129;O14978;Q03112;P60006;P17030;P62753;O95793;Q9H0R8;P52740;Q96KM6;Q6ZMY9;Q8TF20;Q9BUG6;P27635;Q9Y2Y4;Q9NR83;O15015;Q9H609;O75437;Q13106;Q9Y2X9;Q86WZ6;Q6NUN9;Q9UJW7;Q9BS31;B4DU55;Q8IVP9;O14709;O95678;P63000;Q96SQ5;Q6ZNG1;Q3KP31;Q09FC8;Q9BYC9;Q86V71;P01011;Q52M93;Q96H86;P15880;P17026;P17022;Q9H4D5;Q9BQ48;Q92610;Q9P0M9;Q8TAW3;Q96KR1;Q9H0M5;P52744;Q2M218;O60936;P83881;P25490;Q8IZ26;Q907020;P98170;Q6ZN55;Q8N895;Q9NRR4;Q9BX82;Q6NG5;P0C7X2;Q9Y2G2;Q9NPF8;Q8NF99;Q9Y2L7;P37019;Q2QGD7;Q8NDP4;Q86XN6;P26641;Q14588;Q9UII5;Q7Z2F6;Q5TB30;Q5T653;Q9H4T2;Q96JC4;Q9Y3U8;Q96PU5;Q71UM5;Q8TBZ8;Q14592;A6NK53;P61970;Q9NQZ8;O14497;Q14591;Q14669;P58317;P62701;Q9C0F3;O15392;P62241;P82675;Q8TF32;P27797;Q15776;A8MQ14;O15226;Q3MIS6;Q3KQV3;O75290;Q96SE7;B4DX44;P21673;P30304;Q15386;Q9P2F9;Q9Y3M9;P17038;Q9P255;Q14690;A6NM28;Q6PK81;Q6ZNO6;O76075;P17031;Q96AQ7;Q8LWY8;P17014;Q96MU6;Q5T1R4;Q9BYD2;O15164;P10074;Q9UHD4;P62899;Q9H0F6;Q8NEP9;Q9NV72;Q49A33;Q9UJN7;Q9UFF9;A6NEJ1;Q9HAH1;Q16385;Q08AN1;Q9NZV7;Q03923;P52736;Q8N823;P17024;P17017;Q08211;O94906;O60304;Q9UJY5;Q9Y2D9;P59923;Q8N2I2;P49247;Q13398;Q53GI3;Q9UK11;Q86UD4;P17010;P49711;Q9UID6;O43345;Q9UIH9;Q8TAF7;Q13952;Q8N184;Q9BUY5;Q8TF47;Q9UJL9;Q504Q3;Q8IYI8;Q9NYW8;A8MXY4;P62263;P62861;O95125;Q02878;Q9BYD6;Q66K41;Q499Z4;Q9H7R0;P08047;Q9NRF9;P27986;Q9HC78;Q8IZH2;Q8N9F8;Q6IQ21;Q8N5C8;Q01954;O95201;P39023;Q5VIY5;P61254;Q9BWU0;Q16587;O75155;Q9Y2R9;Q15022;Q05481;Q8N6I1;Q13263;Q68DI1;P52746;O15060;Q13405;Q14526;Q6IQ32;O75820;Q8NEA6;Q3ZCX4;Q9Y6R6;Q8TF50;P0CJ79;Q9GZX5;P30305;O43361;Q9NW07;Q8WYQ5;Q9H4I2;O60870;P36508;Q9Y3D3;Q8TC21;P49207;Q7Z3K3;P35637;Q9UK12;Q9NX65;Q8NDQ6;P51508;Q96GC5;Q9UK13;Q6ZNO8;P62910;Q9GZU2;Q8NBF1;Q9Y6K9;Q969S3;Q8N1W2;Q9NXX2;Q9NQX1;O15235;A6NGD5;P41227;P30307;P62249;A6NJL1;P62280;Q8NEK5;Q8N4W9;Q92785;Q96N38;Q8N587;P52742;Q02930;Q16600;Q9Y5A6;Q9P0T4;Q9H7R5;P15170;Q9UKK6;P11166;Q5JUW0;P17098;Q96MN9;P47914;Q9P0L1;Q8NB42;P84098;Q96L21;Q9UL36;Q15928;O14641;Q9ULX6;Q96MR9;Q6P9A3;Q5MCW4;Q96N20;P08708;Q9UKJ3;P0CH99;Q9BRR0;Q9UM63;P16415;O60543;Q9H7X3;Q96N22;Q12906;Q9Y2G7;Q9UL40;Q9UDV7;Q03924;Q9Y2A4;Q96CX3;Q8N859;P42575;Q15973;O60765;Q9UPQ4;Q99717;Q9UKD2;Q92804;Q9P2J8;O95780;P52738;Q14708;Q14701;O75394;Q9NZL3;P42766;Q9NZE8;P98169;Q9H8N7;Q96T92;Q08ER8;O15014;Q5SVQ8;P11142;Q9H6B1;Q96N58;E7ETH6;Q9NVS2;Q8NFD5;O60447;P62269;Q9NXT0;P08238;P0DI81;Q17R26;Q8IYM9;Q15025;Q7Z3V5;Q5JVG2;Q5T5D7;Q6P3V2;Q8N7Q3;Q96NJ6;Q8IYX0;Q14585;Q9HA38;Q9Y6X8;Q0VGE8;Q9Y5K5;Q96LW1;O14771;Q96GC6;Q86XF7;Q6ZT77;Q96N95;O75346;Q9BYX4;O60281;O00273;P17029;Q9H2P0;Q99909;Q9NWU5;Q9Y281;A6NPF11;Q15929;Q8NEM1;P35789;Q6ZNA1;P18621;Q8IX07;Q9Y676;Q14590;P05387;Q6U7Q0;Q9BYK8;A6NKF2;Q9UC06;Q99612;Q9H5H4;Q8N883;Q6ZRF7;Q9Y462;Q8NCA9;Q7Z7K2;Q14865;Q9UNX3;Q01658;P17023;Q96NI8;Q96F45;O43829;Q9H063;P0CI00;Q8TD17;Q9GZR2;Q96SK3;P62277;P61586;Q3SY52;Q4V348;Q96NJ3;C9JBD0;Q13015;O43830;Q8TA94;O60293;Q86T29;Q13118;Q8N9Z0;P58304;Q3ZCT1;Q5HYK9;P07900;P35268;Q96EG3;Q15633;Q9UCV3;Q9UHK0;Q02447;Q8NE65;Q96N77;Q68EA5;P43897;Q99684;P62979;P55265;O43309;P62847;Q9C0C5;Q8TF68;O75382;P17544;Q9NUL3;Q05516;Q6ZS27;Q9NTW7;Q9H9L3;Q7L2R6;P0DI82;P51504;Q9BQA5;P84022;Q6ZN19;Q9P0M2;Q0D2J5;Q6ZSS3;P60520;P42677;Q7RTT5;P63220;Q14584;Q96EH5;Q8TF45;P10072;Q6ZQV5;Q8TB69;Q96RE9;O43296;Q15937;Q49AA0;Q8N782;P0C7V5;Q6ZSB9;P37275;O95218;Q9NZM5;Q9UK10;Q8IYB9;Q86TJ5;Q5EBM4;P60953;Q9NPC7;Q9BTV5;Q9Y2H8;Q5VTD9;A8MT65;P18583;P52737;Q8N8Z8;Q9Y2P0;Q9NR09;P46782;Q6P9G9;Q7Z6Z7;Q8IW36;Q9BRH9;Q06732;P04792;Q7Z2E3;Q9Y6D6;O60783;O15105;Q6ZMW2;A6NDX5;P46779;Q9BSK1;P0CG31;Q8N972;Q7RTT6;O94892;Q7L3S4;P62750;O43823;Q92670;P46013;O14893;Q96C00;A8MTY0;Q05086;Q9UFB7;Q66K89;Q6ECI4;Q5T619;Q9UKY1;O75362;O75626;P49792;Q96NL3;Q96JL9;Q96IT1;Q96SL8;Q9Y473;Q9P243;O94903;Q8N850;A6NNF4;P17025;P23528;Q6P280;Q8NCN2;P24278;Q7Z3I7;P22090;O60224;Q9NSC2;Q86UQ0;O95999;Q96C28;O00712;P43268;Q15652;P15336;P51814;Q8N3J9;P41182;A8NUZ8;P57018;Q9N71;P19474;Q5CZA5;Q14119;Q8IZP0;Q9UJU3;Q9Y2P7;Q8N488;P82664;O60869;O75467;Q9Y6Q3;Q5BKZ1;P51523;P61927;Q5SXM1;Q6PDB4;Q8N8E2;Q6AZW8;O95071;Q8IY57;O75381;Q76KX8;Q9H9J2;A6NN14;Q6IV72;P05386;Q9NZ52;Q63HK5;Q68DY9;Q9H963;Q7Z7L9;A8K8V0;Q8N141;Q9UIE0;Q5VUA4;Q6ZMV8;Q96I27;Q00987;Q92922;Q8NCK3;Q9BS34;P82914;Q96CA5;Q8TBZ5;Q9BSG1;Q15935;O75123;O76021;P0C7X5;B2RFX5;Q9BV97;P08865;Q6AW86;O14628;Q9Y399;P0CG24;Q13485;Q8N0Y2;P61247;Q96PQ6;Q9NSJ1;Q9UNH7;Q8WTR7;Q86UE3;Q9BSN8;Q8WXB4;Q06730;Q7RTV3;Q8TBC5;Q9BY31;Q9UNA4;P27695;Q8NC26;Q8TAT6;Q6NX49;P11161;Q9P0J6;Q5TEC3;Q86Y25;O43167;Q99676;Q9NU63;Q9UEG4;Q96PE6;P49790;Q6ZN30;Q9BWM5;Q5JNZ5;P52743;Q96K75;Q15072;P46777;Q13105;P52747;Q9UJY1;Q13887;Q9UKT9;Q96PM9;P17035;Q9NXV6;P62917;Q8TAU3;Q9NSD4;Q92901;O60784;Q14938;Q5JVG8;Q01844;P98182;Q9ULD9;Q99856;P78560;P46781;P25398;Q8N7K0;Q86YF9;P60866;P17039;Q12874;Q6P280;Q8N393;Q9HCX3;Q6ZNH5;Q6P9A1;Q15796;Q8NI08;Q86UP8;Q96LW9;Q9HCM9;Q9ULV3;P62906;Q16670;P10073;P50914;Q9Y2Q1;Q68DY1;P49910;P62266;Q8N988;Q9NYT6;O75081;Q9HBE1;P52741;O75674;Q96IR2;Q8N3C0;P17021;P98168;P0CJ78;P62888;P41208;Q96GE5;Q5F1R6;Q9HAZ2;Q9H9D4;Q96K58;Q03938;P17041}

5630

Pathogen[ P14079] interacts with 1061 human

partners: {Q969J2;Q15916;P28838;Q9BWM5;Q9BXW6;P98168;P59894;O60225;Q8IYX0;Q8NHY6;Q9Y3U8;Q9NV72;P27635;Q92664;Q14585;Q6AW86;P15622;P52738;Q96C00;Q13952;Q9UJN7;P52815;P84098;P46779;Q9UQR1;Q0D2J5;Q96CS4;Q9UK12;Q9BXU3;A6NKH3;Q13492;Q9BYD6;Q9NSD4;Q32MQ0;Q7Z2T5;Q9HBT8;P52741;Q8IZC7;Q9BXL7;Q9NQX1;P05937;Q3SY52;Q8IV48;P51504;Q8N9Z0;Q8N895;P17098;P08151;O15164;Q75123;Q9HAZ2;O75467;Q68DY9;Q9UL40;Q9H7R0;Q06730;P26373;Q53GI3;O75346;Q9UNH7;Q9ULD9;Q9GZU0;Q9HBT7;Q9UL33;Q8TAT5;Q9Y3B8;Q96JB3;Q5MCW4;A8MTY0;P52742;Q8TD23;Q5HYK9;Q96IR2;O76075;P61970;P41227;Q6ZXF7;Q9UPP2;Q8WTR7;Q9UL36;A6NEJ1;Q8N8L2;P0CG31;P23396;Q5T1R4;O60293;Q8N5C8;P11142;Q6ZVM7;A8K8V0;Q9BYK8;Q9BTV5;Q9UDV6;Q8WXB4;Q9Y2Y4;P14373;Q8N123;Q9UC06;Q9Y2G7;O95125;Q7Z340;Q9UK13;Q8NDQ6;O95793;Q8NDP4;Q9UNA4;Q8IZ21;Q9BYX4;P0C7V5;Q86V15;P10072;Q8N141;O94906;Q96K62;Q9UJW7;P30307;Q96H86;P21506;Q9UNQV6;Q13106;Q7Z7K2;Q9UJY4;O14771;Q9Y6Q3;C9JBD0;Q8TF50;Q96MU6;P10073;Q96DX7;Q7Z7L9;P35637;Q9ULV3;Q9UNY5;Q9NZM5;A6NK53;Q9UL59;Q8N587;Q6ZNA1;O15553;Q8N9F8;O75437;P52747;Q9C035;Q15776;Q6ZNG9;Q13118;O75528;Q86UQ0;Q6ZNG0;P08048;P17019;O95999;Q6ZMY9;Q9UKF7;P18621;O60481;Q3ZCX4;Q6ZT77;O15535;Q9UPR6;Q9GZU2;O14893;Q9HCG1;P17035;Q9Y2P0;Q9H0W6;P83881;O75626;Q9Y2Y9;Q6P9G9;Q8TA94;O43309;Q14938;Q9H4D5;Q15911;O75362;P17010;Q9Y2Q1;Q9H0W8;P0CB33;A1A519;Q9BR84;Q9BWU0;Q9NUJ7;Q8N782;Q9NUA8;Q9ULX6;Q9UNX3;P82664;P46781;Q9UJY5;Q9UFB7



;Q7RTT3;P17022;P05408;Q9H0M5;Q3KP31;P17041;O60290;Q8N393;P61513;Q5TEC3;P62847;Q5T0B9;O60543;Q99676;Q9NRG0;A8MT65;Q8NCP5;Q08AN1;O14641;Q8NB42;P62753;Q9NPJ8;P82933;Q2QGD7;P98171;Q32M78;Q6PDB4;Q9BQ48;P17039;Q9H1K0;Q5EBM4;Q9P0M2;Q92804;Q9UBZ4;P0CH99;Q6NUN9;P51522;Q9ULM2;Q5JVG8;A6NHJ4;P26641;P39023;Q12874;Q9H0Y0;P62273;Q9NTW7;O75290;O43823;Q9P2Y4;P52746;Q6ZN57;Q9Y2R9;Q9BYD2;Q13129;Q9BYC9;Q63HK3;Q7Z3K3;Q6ZR52;P25398;Q9Y6D5;Q8NDH3;O15198;Q8NEK5;P04080;Q12906;Q8IYB9;Q9H707;Q96SR6;Q96PM9;Q9C000;P52737;P35789;P51815;Q86VZ6;Q14591;Q92922;Q70YC5;Q6ZRF7;Q8TBZ8;O95251;Q96EP0;Q8NCA9;A8MUW8;P17024;Q9P255;Q14592;Q9GZX5;Q3MJ62;Q9NSJ1;Q96NG8;Q9NXV6;Q6ZN79;P49247;Q14865;Q99684;O15392;Q92610;Q96N20;Q9NRX2;P18077;Q9UID6;Q68DI1;Q9UJK9;Q8NOY2;Q8N720;Q14966;Q9H7X3;P58304;Q96SE7;Q5VIY5;O43167;Q05516;Q4LE39;Q16540;P0CG23;Q8NI08;Q9UBU9;Q9Y5A6;O75674;Q9GZR2;Q99856;Q76KX8;Q8IZP0;Q9BWE0;P61254;Q02447;Q8N317;Q13105;P50914;Q5T5D7;Q3MIS6;Q9BYN7;Q96G61;Q7Z2W9;Q8NC26;Q92785;A1A5B4;Q9NR83;Q9P2J8;Q9P0L1;O14497;P46199;O75569;Q9NS39;O60281;Q8WJ9;Q8N859;Q9UK11;Q8N7M2;Q96K83;Q6PG37;Q8N883;Q03923;Q15025;Q96NI8;Q9H2P0;Q6ZMS7;Q8IYI8;P62979;Q06732;Q5SVQ8;O43829;Q96MR9;Q6ZN55;O60869;Q6P2D0;A6NKF2;Q9Y2P7;O60784;Q96NL3;Q3SXZ3;A6NGD5;Q96SZ4;Q96RE9;Q9NZL9;Q9BQA5;Q96NG5;Q9P215;Q7L3S4;Q9HAU4;Q9UHK0;Q13424;O60870;O43830;Q96LX8;Q8IYY4;P11166;Q9HCS7;P42766;Q9Y2T3;Q15797;Q16600;O43298;Q8TBC5;O60678;Q08211;Q7RTT4;O75155;Q16385;Q9NYW8;Q9NU63;Q96JM2;Q96JC4;Q6ZN06;Q03989;P62266;P30304;Q86TJ5;P52744;P57071;Q8IYW8;Q15652;Q9NQZ8;Q9Y2R5;P60006;Q3KQV3;Q9NQ94;P17027;Q6EKJ0;P46782;O94892;Q99612;P02533;Q16670;O94903;Q5JNZ5;Q15072;O60315;Q9HCM9;Q49AA0;Q9BQ50;O60783;Q03938;Q96MN9;Q8TF32;Q9BV97;Q9NZ52;Q14588;A6NP11;P62241;Q86V71;Q3KNS6;Q9NR09;Q00987;Q6BEB4;A4D1E1;Q9Y3D3;P32969;Q96ND8;P08651;P22090;Q9NWS9;Q9P0M9;P0CI00;Q9BRR0;P51814;P43243;A8MUZ8;P28698;Q8TF68;Q96GE5;Q96BV0;P10911;Q9UL58;Q9UKY1;Q92990;P0C7X2;P60866;Q8TCN5;Q96JF6;P43897;Q96RP9;Q9ULD5;Q9UC07;Q8NBB4;Q12802;Q6V9R5;A8K0R7;Q8N1G1;Q8TAW3;Q92670;P62854;Q6ZRR9;Q5BKZ1;Q15929;Q07020;P39019;O15060;Q86Y25;Q6ZN19;P36405;Q5VV52;B4DU55;Q9NZL3;P08758;Q03924;Q8NCN2;Q96N22;P63220;P41182;Q86UE3;Q8NAP3;Q8IZH2;P10074;Q96RL7;Q9UPG8;Q96CX3;Q9NRF9;Q3ZCT1;P17097;Q86UP8;P49207;Q9Y5K5;P58317;Q96EG3;Q96L21;P62244;A6NK75;Q9P2F9;Q03936;P82921;Q147U1;Q08ER8;P60520;Q9BX82;Q9NXT0;Q8TF39;Q53FT3;O75373;Q9Y3Z3;Q5VTD9;B1APH4;Q05481;P17026;Q9UIH9;A6NN14;Q9UPN9;Q9HCE3;P11161;P09001;Q08AG5;Q96A35;Q96K75;Q86YE8;P62263;Q8N972;Q9H963;Q6DD87;P19474;P55265;Q92901;P17544;P62277;Q9NX09;Q96AQ7;Q8IY57;Q6ZMV8;Q5SXM1;Q9NYH9;Q9H4T2;P23528;P29374;Q8NCK3;P62750;Q8WV28;Q8TF20;P62910;P63173;P17032;Q7RTS1;Q02930;Q8N823;Q8N8J6;P96GC5;O14709;Q9NR11;Q6U7Q0;Q92560;Q8N680;P46776;Q9Y6K9;Q6P280;Q68EA5;O43345;Q15075;P08238;Q9Y473;Q9GZN7;Q9NUL3;Q9Y6D6;P17017;P0CG40;P82912;O76021;P48681;P51508;Q16587;P0C7X5;Q9NVZ3;O75820;Q6ZS27;Q2M1K9;C9JN71;Q9H4Z2;P08708;Q66K89;P17031;Q9UEG4;Q9UKJ3;P17029;Q96SK3;P17021;Q6ZTB2;P16415;Q9NYT6;Q9H9L3;O95164;P15336;Q14593;Q9NRR4;O95785;Q96JM3;Q9P2A4;Q96NC0;Q8IVP9;Q16384;Q96LW9;P51523;Q15697;Q8N212;Q9UUK6;P52743;P24278;Q9BYM8;Q9Y3M9;P17020;Q8NFD5;P26640;O14978;Q8WV37;P0CW22;Q9Y6R6;Q4V348;P61586;P07900;O43294;Q9UK10;Q9P243;Q8TAT6;Q9Y2X9;Q8TF45;Q8NDX6;Q86XU0;Q9UFF9;Q9UJQ4;Q8TB69;Q13360;Q9H8V3;P49910;Q8N4W9;Q86W11;P18522;Q71UM5;P51786;Q14134;Q5JVG2;Q9BX69;Q9H0R8;Q8IX07;Q9UJW8;Q7RTT5;Q7RTT6;Q2M3X9;Q8TBZ5;P56270;O60936;Q5TB30;O00110;P27695;Q8NA42;Q9UJY1;Q15428;Q6ZMW2;O75335;Q7Z3V5;Q13351;Q99909;Q96T92;Q92618;O15235;Q8NEP9;Q96B70;Q49A33;P62906;Q2VY69;Q96B54;Q9Y281;Q14586;Q96NJ3;Q8NAM6;Q9HC78;P49790;P47914;P62280;Q8IVC4;Q9C0F3;Q6P5R6;A8MVS1;Q96J02;Q9HA38;O43296;Q9NQ03;Q9UDV7;Q15973;Q9H8Y5;Q9UIE0;Q6P3V2;Q6P1L6;Q86VK4;P62899;Q8NDW4;Q0VGE8;Q8NFP9;P98169;P17025;Q13398;O43541;Q494X3;Q9Y4X4;Q9H0H0;Q9BS34;Q9RTV3;Q13405;Q96SL8;Q5VUA4;Q86UD4;Q7Z570;O00488;P17038;Q6ECI4;Q8N3J9;Q569K4;Q8N1G0;Q96JL9;P61353;P62081;Q86XF7;Q5HY98;A6NDX5;Q6P9A3;Q9Y2A4;O75081;Q86UZ6;Q9Y2K1;O43361;P41208;P46777;Q8N488;P42677;Q9H9J2;Q9BUY5;Q9H7R5;Q8N9M5;Q9HCX3;Q9Y2G2;Q6PK81;Q9BS31;C9JLR9;Q14872;Q8TDD2;Q6ZS3;P15880;P0CJ78;Q68DY1;B2RFX5;Q9H8N7;B4DX44;Q9Y5W3;Q5TYW1;Q59GN2;O75394;Q96PE6;Q96AZ6;Q8N554;Q7Z7H8;Q9BSK1;P62891;Q9UII5;Q8TB45;Q9Y4R8;Q96KR1;Q2M218;Q86WZ6;Q96PQ6;Q8IYN0;Q9H0F6;B4DXR9;Q96MX3;P82675;Q8WY5;Q9H582;A8MXY4;A8MWA4;Q6AZW8;Q86YF9;Q63HK5;A8MYV0;Q7Z2F6;Q96F45;Q5T619;Q8N9K5;Q96KM6;Q96SQ5;Q9NZE8;Q9HCZ1;O15265;Q9Y2H8;P17014;O43687;Q96C55;Q15928;P62888;Q8IW36;P08865;Q6ZNH5;Q14590;Q9NPA5;Q14584;Q8N988;P36508;Q9H0K4;Q9BRH9;Q9H8G1;Q9NQV7;Q9NZV7;P61927;Q9Y5V0;Q9HAH1;O15015;P62917;Q02386;O75381;O15226;Q8IZ20;Q96N38;P0CG00;Q68CP9;P30305;Q96Q11;Q9P0J6;P11137;Q8NEA6;Q8N184;P46778;Q9NCP7;P62249;Q96K58;O95201;Q9H7S9;P0DI82;Q5EBL2;Q96BR6;Q6PF04;P42575;O14617;Q9BUG6;Q9C0G0;Q499Z4;Q9Y676;Q7L945;P17040;O95361;Q6IQ32;P98182;Q6DN90;Q9GZV8;P0DI81;Q12996;Q8TD17;Q969Q0;Q9UKN5;Q9Y2L8;P05386;O95600;P35268;Q14929;O95678;Q96N77;Q12901;Q6NX45;P13682;P04792;Q86XN6;A6NJL1;Q9BSG1;Q8N1W2;P17661;P62913;P15621;Q9H609;Q9UJU3;Q5F1R6;Q8IXS8;Q13127;Q13015;Q52M93;Q6ZQV5;Q6ZNG1;Q96DT7;Q96IT1;Q9NVS2;P25490;Q9UM63;P05387;P52756;Q2M3W8;Q9UKD2;P61247;Q5JWU0;Q8WV44;Q9H4I2;P52740;O43313;O15105;Q7Z3I7;Q96HQ0;A6NFI3;O14901;Q8NB50;Q9Y6X8;P52736;Q6P9A1;Q15935;Q9NX65;O95780;P62269;P21673;O15151;Q6ZMS4;P62701;P18583;Q9Y239;Q7Z2E3;P17030;Q12857;Q9H5H4;O75616;Q504Q3;O60765;Q8N8C0;Q8N6I1;Q15940;Q9NW07;Q8NE65;P10075;P61313;Q8N7Q3;O95625;O95218;Q5T653;Q96H40;P0CG24;Q15438;Q01658;Q969S3;Q9NZJ9;Q9NR33;O43734;Q9NQX6;Q9BZE0;O75382;Q9HBE1;Q9H9D4;Q8TD47;Q9H063;Q5FWF6;Q9UHF7;P49711;Q9NQN1;Q15022;Q96N95;Q8TC21;O60304;P17023;Q9UHD4;Q99836;Q969W8;Q9Y462;Q9BY31;Q8WW38;Q9HCL3;Q8TAU3;P0C6E6;P37275;Q8NEM1;Q3SY56;Q9UGR2;Q9BU19;B7Z6K7;P49411;P05388;A8MQ14;Q14587;Q6ZSB9;Q09FC8;O14628;Q9NSC2;Q14019;Q8N7K0;Q8N8E2;Q8NI51;Q6IV72;Q8NBF1;A6NM28;Q96N58;Q9ULJ3;Q7Z398;Q96NJ6;Q02446;O60224;Q8TF47;Q14690;O15014;Q9UQN3;Q86X10;Q8IZ26;Q5CZA5;Q9E127;Q9H116;Q9UKT9;Q6IQ21;Q6NX49;Q96GC6;Q96EH5;Q9UJL9;Q5JNZ3;Q6ZN11;O00273;A8MT70;Q13490;O00712;Q9Y3D5;Q8NAF0;Q9Y2D9;Q14119;Q9NPP4;P17028;Q8WVJ2;P62857;Q8TAQ5;P62861;Q8TAF7;P0CJ79;E7ETH6;Q5VV41;Q96C28;P46013;Q9GZY6;H3BQB6;Q66K41;P82914;Q86T29;Q8NHW5;Q6NSZ9;Q8WTP8;Q17R26;Q9H6B1;P49406}

Pathogen{ P03383} interacts with 614 human partners: [Q969W8;Q96LX8;Q9UQR1;O95678;O14628;Q7Z2E3;O43167;P42766;P30307;Q9H7R0;Q9UJY4;Q9NRR4;P27986;O15198;Q8NI51;Q5FWF6;P05388;Q5JVG8;P62266;A6NNF4;Q9UBU9;Q8NHW5;Q15935;P39019;Q8NBB4;P19474;P26373;Q9NYW8;Q63HK3;Q96BR6;P49792;O95625;Q96SK3;Q9Y281;P62913;



Q6ZN08;O14497;Q13485;P02533;Q96SZ4;Q9BSG1;Q9UK10;A6NK75;P08047;P62854;O75528;Q9BR84;O60543;Q9H0F6;Q9NZV7;Q9H7R5;P82912;Q9Y2P7;Q9BYD2;Q9Y6K9;Q49A33;Q96A35;P17544;P56270;P62891;P25398;Q32MQ0;Q9H4I2;Q9HBE1;P62280;O60765;P82664;A8MVS1;Q07020;Q9H8G1;Q8N6I1;A8MWA4;P62750;P49711;Q9H4D5;P17022;Q86V71;Q96GE5;Q9H5H4;Q96SL8;Q96RL7;Q5HY98;Q3KP31;P05387;Q9BQ48;Q15937;P62249;Q15072;Q14526;P17029;P17661;P0CG00;P62888;Q9H4T2;P62899;Q9HCL3;Q8WW38;O75437;O95251;P61927;A8MXY4;Q9UL33;Q9H0W8;Q96NI8;Q9HCS7;A6NKH3;Q9UPN9;P41227;P46777;Q92670;O75362;P51815;P46779;Q8N7M2;Q9BRR0;Q9GZN7;P49207;Q13360;A8MTY0;Q9P0J6;Q8TD23;Q05481;Q9Y2Y9;Q96H40;Q2M3W8;Q8N4W9;O43734;O60290;Q6ZN06;Q6ECI4;Q6P3V2;P49406;P60953;P82933;Q9UK13;P51508;P46778;O95218;P41208;P46013;Q9BYN7;Q8N3J9;Q13490;P52744;B4DX44;Q8NEP9;Q92901;P62753;P30304;Q5CZA5;Q8TF20;Q8WYQ5;Q76KX8;Q96AQ7;P42677;P37275;Q8NDQ6;Q9NWU5;Q9NL58;Q9ULD5;O14709;P63000;P61247;O00712;Q9BYC9;Q3MJ62;Q9BWU0;Q96KR1;Q5JNZ5;O75155;P28838;Q12901;Q9C0F3;A4D1E1;O60936;P83881;P35789;Q9NZM5;Q86VP1;Q9UFF9;Q12874;P24385;Q8NA42;Q6P9G9;P17019;P09001;Q6IQ21;P26641;Q96N20;Q9Y2Q1;P47914;Q5T653;P04792;Q15797;Q9P0M9;Q71UM5;Q9Y2R9;Q9Y6D6;Q96N95;Q03923;Q8N988;P62917;Q86V15;Q3MIS6;Q96SE7;Q86XF7;Q05516;P82914;P28698;Q9GZX5;P49247;Q9Y4R8;Q13405;P62273;Q8TB69;P0C7X2;Q9P0L1;P17038;P07900;Q14690;P15621;A6NK53;Q86YE8;Q9UNX3;Q8WV37;Q9HAH1;Q96L21;P51504;Q8N587;Q9UHD4;Q6ZR52;Q969Q0;P59923;P17098;Q9NRX2;Q9NQX1;Q15022;B4DU55;Q6NSZ9;P0CI00;Q16385;P18146;O94906;Q9NTW7;P84098;Q13398;Q66K89;Q53GI3;Q9UK11;Q49AA0;Q6IQ32;Q8TAF7;O75394;Q8IYI8;Q14872;P32969;Q9UKJ3;Q9Y2L8;Q9NVS2;P17014;Q14588;P25208;Q7Z3V5;Q96LW9;A8MUV8;A8K8V0;Q8TF47;Q8N5C8;O95201;P82675;Q9HAZ2;Q8651;Q9HCG1;P52746;Q499Z4;A6NDX5;Q7L2R6;P62277;P78560;Q9BYD6;P18077;O15105;O60870;P63173;Q5VUA4;Q6ZNA1;Q03112;O14978;Q13952;O15015;P60006;Q8IYX0;Q8NB50;O60783;P62081;Q9H963;Q96MR9;P84022;P98168;B4DXR9;Q8N895;O75081;P52747;Q15928;P18583;A6NGD5;Q96ND8;Q9UDV6;Q9C035;Q9UID6;A6NJL1;Q8NEM1;Q9NV72;Q5JNZ3;Q9Y2R5;Q96N38;Q15652;Q12857;P17010;Q9UHK0;Q9UNY5;Q32M78;O00273;Q96MN9;Q02447;Q9H063;Q7RTT5;Q13105;O14893;Q8N488;P61586;O95125;O14641;Q08AN1;P35637;O15265;P61313;Q13015;P08865;Q9GZU2;Q9BQA5;P17040;O75290;P52742;Q9UJY5;P17032;P0CH99;Q96N22;Q8N859;Q9Y2G7;P17036;P24278;Q96LW1;Q6PG37;O43345;Q9BX82;Q52M93;Q68CP9;A6NHJ4;Q99717;Q8TAT6;Q9P2J8;O95780;O60304;P46782;P0DI82;Q7Z3K3;Q9H9L3;Q6ZNG1;Q9NZE8;Q9NSC2;A6NKF2;O75381;O15014;O43541;P52743;P62269;Q8NF99;O60225;Q9HCM9;P0DI81;Q9ULJ3;Q15025;P63220;Q6IV72;P62244;Q70YC5;Q15697;Q22878;Q8N7K0;Q86UE3;Q68DY1;Q9Y6X8;Q9UKN5;P15822;C9JBD0;Q5VIY5;Q9Y3D5;P10074;P10073;P11142;Q6U7Q0;Q96C28;A8MUY8;Q9Y5K5;Q03936;P82921;Q9Y462;Q15929;Q9H7S9;Q8NE65;P62910;Q8N8C0;P27635;O43829;Q96IT1;Q3ZCT1;Q8N9Z0;O95999;Q8N972;O60784;Q8TF32;Q68EA5;P43897;P62857;Q99684;Q9Y2G2;Q9ULX6;P52737;Q96IR2;Q12906;A6NN14;Q6ZMS7;P62906;Q5SVQ8;Q16670;A6NP11;Q9Y3U8;Q9H116;P60866;P52815;Q96GC6;Q9H9D4;O15535;P61254;Q494X3;Q86XN6;Q9UC06;Q4LE39;P43268;P11161;P62979;Q8N0Y2;Q5HYK9;Q8N782;P0C7V5;Q5TEC3;Q15916;P62241;Q86YF9;Q6P280;Q6ZMY9;P46781;Q53FT3;O43309;Q96EH5;Q9HBT7;Q96NJ6;Q8NAP3;A8MT65;Q9PFC8;Q9P255;Q99909;Q8IWY8;Q9H9J2;Q9NR09;Q9UII5;P51522;Q7RTV3;P39023;P49910;P55265;Q9Y2D9;Q8IW36;Q8WTR7;Q6NUN9;Q8IY57;Q96SR6;Q9UKT9;Q9UJY1;O14771;P52736;Q7RTT6;Q9UM63;Q9Y5A6;Q8IYN0;Q92785;P27695;Q99676;B1APH4;C9JN71;Q9UC07;P51786;P23528;Q969J2;Q8TAQ5;Q9Y2X9;P22090;Q8NFD5;P61970;Q92922;Q66K41;Q92900;P15336;Q9NXV6;Q99856;Q9UJX2;P62701;Q2M1K9;O60481;Q01844;O60869;Q9NZL3;Q15776;Q9Y676;Q5SXM1;P62263;P62847;Q9Y2A4;Q02930;Q08ER8;P35268;Q86W11;P05386;Q08AG5;Q9NUL3;P50914;Q2QGD7;O15235;Q9NYJ8;Q14585;P51523;Q8N720;Q6ZN79;Q8N7Q3;Q8N141;Q8TA94;P17028;Q9UL40;Q9Y399;Q96PQ6;Q9NSJ1;Q01658;Q9BUY5;Q6P9A1;Q9UHF7;Q8WXB4;P62861;P08238;Q8NC26;P18621;Q6V9R5;P21673;O75346;Q9BYK8;P49790;P46776;Q96GC5;Q9NQS1;P15880;P23396;Q16384;Q8NHY6;P16415;Q9Y3D3;Q9Y6R6;Q9Y473;O15226;Q9BUG6;P61513;P98182;Q9ULD9;Q59GN2;Q9NPJ8;Q6ZMV8;Q8N823;Q9UQN3;Q8TF39;Q2VY69;P13682;Q8NI08;Q13127;Q15633;Q9ULV3;Q6ZQV5;Q9UKK6;Q96NG5;Q14593;Q9P0T4;O76021;Q969S3;P27797;Q9H0U6;P08708;P52741;Q8NB42;Q5BKZ1;P0CB33;Q9NZ52;P61353;Q03938;Q8IYB9;Q13129}

5632

Pathogen{ P03410} interacts with 1037 human

partners: [Q9NSD4;Q96EG3;P84022;Q9Y2P7;Q9HCG1;Q7RTT6;Q96NI8;A8K8V0;Q6AW86;Q5CZA5;Q9H0Y0;Q9H0M5;Q9BWE0;Q9UHF7;P0DI82;P08048;O14771;P62861;Q9Y2L8;Q9HC78;Q8N1W2;Q96JB3;O60224;P05386;Q6ZNG0;O14901;Q6ZNA1;O15392;P17031;Q9NZM5;Q5HY98;Q5TB30;Q8NHW5;O43309;Q6ECI4;Q96RE9;Q6V9R5;Q5JVG2;Q96Q11;O60281;Q8NBF1;Q14588;Q96BR6;Q5EBM4;O75290;B2RXF5;Q9Y399;Q9BYN7;Q5JNZ3;Q8TAU3;Q8IYN0;P61247;O75335;P62241;Q8WVJ2;Q9NYW8;P0C7V5;Q96RL7;P49207;Q8WXJ9;Q8WTP8;P26373;P27986;P61513;P0C7X5;Q9HAH1;Q5T619;P02533;Q03112;Q6ZMY9;O95218;A6NN14;Q32M78;E7ETH6;Q9Y2Y9;P29374;Q13106;Q8N9Z0;O14893;Q8NDW4;Q9NZL3;Q9Y2G2;Q9UFF9;Q9UDV7;Q14593;Q6ZVM7;Q14526;Q9GZR2;Q9UK13;Q9Y3B8;Q8N8E2;Q96N58;Q2M3W8;O60293;Q8N8Z8;P11137;P62899;P16415;Q96N22;Q13360;Q15697;O75373;O95780;A8K0R7;Q5VUA4;P0CJ79;Q8N7Q3;Q9HCM9;Q14929;Q8TF68;P0CW22;Q9POM9;Q9Y239;Q8N3C0;Q15633;P0CH99;P17040;Q8TCN5;Q96H86;P15621;Q9NPA5;P37275;Q8NI08;P62244;P13682;Q96JM3;Q9H4T2;Q8N587;Q9UL59;P36508;Q91296;P58317;Q96C28;Q8N7M2;Q96N38;Q9BRH9;Q86XF7;Q3MJ62;P98169;A6NDX5;P62913;P17661;Q8WTR7;Q96CS4;Q92804;P78560;Q8IV48;Q9UDV6;Q9HAZ2;Q99676;Q16540;P15822;Q9H7R0;O15151;P52738;Q9HBT8;Q9Y4R8;Q15973;P52740;Q15652;Q9NV72;Q02878;Q8NDH3;Q76KX8;Q5T0B9;Q66K89;P63000;Q92901;Q96SZ4;Q9BQ50;P11166;P98182;Q8TDD2;P08238;Q8N680;Q9H9D4;Q96SQ5;Q9H4I2;Q96JL9;Q8TDW5;Q9NZ52;Q02447;Q8IZZ1;Q9NVZ3;O95251;Q13015;P15880;Q16600;P46777;O95125;O60481;P46776;Q06730;P98171;P82675;Q92670;Q5JNZ5;O15060;Q9BSG1;Q569K4;Q8N8C0;P0CG23;Q6AZW8;Q6ZMW2;Q6P3V2;O14497;Q9UC06;Q9UII5;A6NFI3;Q15776;Q8NB50;Q8WV44;O75674;Q9UHD4;Q9C0G0;O75382;Q9Y6Q3;P10073;Q0D2J5;P05388;P46013;Q9BQA5;Q9GZU2;Q3ZCX4;Q03989;O15235;Q14938;Q8TAW3;Q9NQX6;Q8N4W9;P42575;Q9UHK0;Q96KR1;Q8TAQ5;Q8N611;Q96AQ7;P46781;Q14019;Q8TD17;Q8N3J9;Q3KP31;Q9BYK8;Q96N77;P60520;Q6PG37;Q8N8C2;O75528;Q96A35;Q8IYB9;C9JLR9;Q9NR11;Q9UL33;P35789;Q99717;Q8NF99;Q6ZRR9;Q8IYX0;Q96RP9;Q7L2R6;O76075;Q96K62;Q96PQ6;P35637;Q86WZ6;Q9UPG8;Q6ZN11;Q9NYT6;Q92610;Q8NBB4;Q9UNA4;Q12857;Q8TF50;P49406;P17017;Q8TF45;Q9UKK9;Q5VIY5;Q969S3;Q96ND8;P46199;Q13490;O60870;Q8IYI8;Q9UPQ4;Q8IW36;Q9BYD2;P24278;Q8WV28;Q2M218;Q6P2D3;P36405;Q9BYX4;Q08ER8;O15198;Q8TF39;Q5WFF6;Q9UK11;Q17R26;Q8NHP7;A8MT65;P62269;O00270;A6NHJ4;Q9ULJ3;P0CB33;Q9NXT0;Q9BU19;Q96JM2;Q9ULD9;Q07020;Q96LX8;Q9UIH9;Q86XU0;P63220;Q2VY69;Q9H4Z2;Q6IQ21;P62910;O95678;Q96GC6;P62847;Q59GN2;O43294;Q9NPC7;P62906;Q86UQ0;O43

830;Q9NYH9;Q9C0F3;P11142;Q9P0J6;Q2M1K9;Q9NZV7;P57071;Q0VGE8;Q9H963;Q96N95;Q6NSZ9;P52815;Q9Y2K1;P04792;P23396;Q7RTS1;O75437;Q6ZSB9;Q9NXV6;Q9UL58;O14709;P18621;Q96K75;Q92785;Q9H8Y5;Q8N720;P62266;Q9NWU5;P52741;P07900;Q9H063;Q53FT3;Q9NPP4;P62249;Q9C000;Q6NX45;Q9NRG0;Q9UJL9;Q9NSJ1;Q6PF04;P63173;P50914;Q969Q0;Q94892;O75381;P62280;Q9Y3M9;Q5F1R6;A6NM28;Q9UJY1;Q9H116;Q03923;Q6PK81;Q96EH5;Q9P243;Q9HCL3;Q15025;O00110;Q68DY1;Q9P2A4;Q9H7X3;Q99684;Q9UIE0;Q53GI3;Q8NB42;P55265;O60304;Q6U7Q0;P22090;Q09FC8;Q60732;Q9Z1N9;P17025;Q9BYD6;Q52M93;P61313;Q8WYQ5;P62979;Q8TAT5;Q9UKF7;Q9NWS9;Q4LE39;Q8NEM1;Q9Y3D5;Q9H9J2;P51523;Q8NFD5;Q6ZN55;Q6ZT77;Q7Z2F6;O14617;Q96HQ0;Q5H9K5;Q9UJY5;Q9NRR4;P28838;O00712;P62701;Q8WW38;P25490;Q96LW1;P52746;Q86VP1;O15226;Q6IV72;P17036;Q9BTV5;Q8TCC21;H3BQB6;Q9NTW7;P51508;Q3MIS6;Q9H707;Q96SR6;Q5TEC3;B4DXR9;Q8NEP9;P62750;O75569;Q5JUW0;P17544;Q5SVQ8;Q16670;O60783;Q5EBL2;P82664;P17010;Q8N1G0;Q9UQR1;Q9GZV8;Q14587;Q96PE6;Q15928;Q9BRR0;Q9UNH7;Q9NZJ9;P08865;Q8TAF7;Q96L21;Q8N8L2;Q96NG8;Q86T29;Q7Z2E3;Q9ULD5;Q9H4D5;Q02930;Q9Y2T3;Q96MN9;P10072;O15535;Q9UNX3;Q9NR09;Q6ZN06;Q96BV0;Q14590;Q9UK10;Q9BUG6;P62277;Q8IZH2;Q13127;Q8WXB4;P17022;Q96GE5;Q5SXM1;Q9UKT9;P08651;Q9HCS7;Q6ZMS7;Q9Y2X9;O94906;Q6ZMS4;Q08AN1;Q9Y676;P17029;Q7L3S4;Q8IVP9;P18077;Q9C035;Q8N823;P24385;P0DI81;Q7Z340;Q9UBZ4;Q8TB69;Q13492;Q96H40;P41227;Q9P0M2;Q8NEK5;Q7RTT5;Q3KQV3;P17098;P25398;Q14966;Q8TBZ5;Q9H0H0;O60936;Q86YF9;Q9BWM5;P49790;Q6NUN9;Q8IX07;Q8IY57;A8MWA4;Q9Y2Q1;Q3KNS6;Q9UQN3;P51814;Q6IQ32;P10074;Q9GZY6;P61927;Q6ZNH5;Q9UL40;P84098;Q9NQV7;Q9BV97;P62854;P17026;O95999;Q9BS31;Q6EKJ0;Q9HCE3;Q02386;Q8NEA6;P0CG31;P43243;Q9UK12;Q9H0R8;P52737;Q96I27;Q7Z398;Q8WXX3;O60225;P62273;Q9NRX2;Q8N972;Q96B70;Q7Z3I7;Q6ZN79;P15170;Q6P9G9;P0C6E6;Q6PDB4;Q969W8;P17028;Q8N883;Q49A33;Q8NCK3;Q9UKN5;P61586;P17019;Q96C00;Q8NAP3;Q9UNY5;Q03924;P62081;Q9BXL7;Q32MQ0;Q68DY9;P17030;Q9BS34;P52743;Q9P0L1;P30304;Q8TD47;Q13129;Q9ULV3;Q92990;P52736;A6NGD5;Q9UGR2;Q9NYJ8;P0CI00;P25208;P51815;A6NK53;Q14872;O75362;Q9UJW8;Q96K83;P05937;Q5HYK9;Q9BWU0;O43734;Q8IXS8;P17014;C9JN71;P0CG24;Q68EA5;Q96SE7;Q9UPP2;Q8NA42;Q9Y3U8;Q6P280;Q15797;Q92922;Q96AZ6;P17024;Q5VV41;Q8N5C8;Q9H609;Q9L7K0;Q5T5D7;Q14119;P43268;Q15428;Q8IX06;Q6GS27;Q9P215;P17020;Q99909;P05408;Q01658;Q9UXL6;Q13485;Q9BUY5;Q96IR2;Q96B54;Q13952;Q8IZ26;Q8N3I7;Q969J2;O60784;Q96MX3;Q9H7R5;O60447;Q9BY31;Q6XZF7;Q8NE65;Q9Y6D6;Q9Y5V0;Q9NRF9;Q147U1;Q9H1K0;Q9UM63;Q8N1G1;P08708;Q9Y2R9;P46782;P32969;Q96SK3;P21506;Q7RTV3;O43296;Q9UBU9;Q6P1L6;P18583;Q9UKD2;Q9Y6D5;Q9Y6X8;P17032;O15014;P17027;Q9NQV6;Q3SY52;Q14585;A8MUV8;Q9BQ48;Q9GZX5;Q13118;P49910;Q92618;Q86KN6;Q5VV52;P21673;P51786;B1APH4;P41182;P0CG00;Q5T653;O15015;Q9HBT7;P13398;P82912;Q5JVG8;O75346;O95785;Q8IZP0;Q6ZRF7;Q9NR33;Q5BKZ1;Q9Y281;O43541;Q96MR9;Q8N488;A2RRD8;Q96F45;Q9NW07;Q15438;P49711;Q9Y6R6;A8MT70;Q6ZTB9;Q9H6B1;Q8N988;Q9NUL3;P98168;Q5MCW4;Q86V71;O15105;Q95625;P46779;O14628;P27635;Q8NI51;Q7Z7K2;P59894;Q9NZE8;Q9H8N7;Q96IT1;B4DX44;Q9NPJ6;Q9ULM2;P60953;A8MYV0;Q9Y2Y4;Q8WV37;Q9H0K4;Q8NC26;Q92664;A6NJL1;Q9UC07;Q9HA38;Q14586;Q15940;O75081;Q66K41;P27695;Q8NCA9;Q7Z2W9;Q9P2F9;Q9UJN7;O60869;A6NEJ1;P28698;Q7Z7L9;P17035;A8MUZ8;O14978;Q9Y5K5;P59923;P62857;P26640;Q9Y2H8;O95793;Q9BYC9;P56270;Q9P2J8;Q5TYW1;A8MQ14;Q96NG5;Q7Z3K3;Q2QG7;Q6ZSS3;P62263;Q6ZN08;Q9H8G1;Q9Y2P0;Q9Y462;Q3SXZ3;Q86UE3;O60543;P08047;P62888;Q8TB45;Q9P255;P61254;P17039;C9JBD0;O15265;Q99856;P46778;A6NKH3;Q9UJU3;Q43687;Q494X3;P05387;Q8TBC5;A6NK75;Q8N9K5;O95201;A6NP11;Q9H7S9;A8MTY0;Q8TF20;A1A519;Q00987;Q9NX65;P42766;Q16384;Q9NQZ8;Q68CP9;O75626;Q8TF32;Q86UD4;Q63HK3;Q15937;Q6P9A3;O43829;P60006;Q63HK5;O75123;Q8N8J6;Q7RTT4;P26641;Q3ZCT1;Q8N782;Q96LW9;Q6ZQV5;P09001;Q8TF47;Q12901;P39019;Q9H8V3;P47914;Q14584;Q8N141;Q13105;Q49AA0;Q6ZN57;P82933;Q8TD23;Q15929;P17041;P23528;Q15283;Q9Y6K9;Q9H0W8;Q13424;Q96MU6;P30305;Q9Y3Z3;Q96N20;Q6DD87;A6NKF2;O60765;P39023;Q86YE8;Q8NDP4;Q8TA94;Q9NSC2;Q9BR84;Q9UID6;Q03936;P18146;Q9BX69;Q96K58;O76021;P17021;P15622;P52744;P51522;P17023;O75820;Q8N895;Q5VTD9;Q96JC4;Q8TBZ8;Q14865;P82914;Q96NJ3;Q05481;Q9BWT7;P62917;Q8N859;Q9BX82;Q12874;Q7Z7H8;Q7L945;P82921;Q9NVS2;Q14592;Q9GZU0;Q6P9A1;Q96JF6;Q86V15;O43823;Q96CX3;A8MXY4;Q96NS5;Q15796;P10075;P0C7X2;Q9UJQ4;Q9UL36;P41208;P15336;Q9UEG4;Q9NQX1;P11161;Q8N2I2;P35268;Q08211;P0CJ78;A8MV51;Q9Y2R5;Q9NU63;A6NNF4;Q68D11;Q8N123;Q50432;Q6NDQ6;Q9Y2D9;Q9UKY1;P61353;B4DU55;Q9NX09;Q96SL8;Q9UKJ3;O95164;Q4V348;O75467;P62891;Q8TAT6;Q9Y5A6;Q96G61;A1A5B4;Q9BXU3;Q9NQS1;Q6ZMV8;Q12906;Q9UPR6;Q14591;O43345;O94903;Q9HCZ1;P30307;Q6ZNG1;Q9Y2G7;O43167;P49247;Q9UKK6;Q9NZL9;Q96PM9;Q15072;Q86UP8;Q70YC5;Q9NUA8;Q86TJ5;Q9Y2A4;P52742;Q9UJW7;Q9H9L3;Q6ZR52;P17038;P62753;O60290;Q7RTT3;Q6P5R6;Q15022;P17097;Q9UJY4;Q9BXW6;Q13405;Q9UPN9;Q71UM5;Q8NHV6;Q9H5H4;Q7Z3V5;P49411;Q6ZNG9;Q86W11;Q86Y25;Q499Z4;Q9HBE1;Q8N393;Q2M3X9;P49792;Q9GZN7;Q8N184;P43897;Q9Y473;O75394;P52747;Q96NJ6;P83881;Q8IVC4;Q9NQ88;Q9HCX3;Q9H0U6;Q14690;P60866;A4D1E1;P01011;Q9H0F6;P51504;B7Z6K7;Q8N9F8;O75155;Q96NL3;O14641;P42677;Q9Y3D3;P61970;Q8IYW8;Q8IZC7;Q8N0Y2;Q16587;Q96GC5;Q08AG5;Q9UFB7;Q15935;Q03938;Q16385;Q6NX49;O75616;P27797;Q9BSK1}

5633

Pathogen[ P14075] interacts with 576 human

partners: {P60953;Q0D2J5;Q9NZL3;Q9C0F3;Q494X3;P17029;Q96RL7;Q68DY1;Q9NTW7;P78560;P42766;Q7Z2E3;Q8NI51;Q9NSC2;P49207;Q8TAQ5;P51815;Q92990;P62857;P52815;P46781;Q969S3;Q8TAT6;P63220;Q15929;Q6V9R5;Q7RTT5;Q9UJY4;O76021;P32969;Q9NXV6;Q9BYD6;P60006;Q9NRX2;Q53FT3;Q9BYD2;Q14690;P42677;Q9Y5A6;Q969J2;P62913;Q9UHD4;P82921;A8MTY0;P22090;Q96GE5;Q9P0M9;Q9GZU2;P41227;P11142;Q02878;O00273;B4DXR9;Q8N141;Q13105;P82912;Q6ZN08;Q9H4I2;Q9UKJ3;O15265;Q9UM63;Q96L21;C9JLR9;P51523;Q14526;P52737;P0C7X2;Q9NV72;Q96KR1;P62277;P55265;Q9UQR1;Q8NEM1;Q9NUL3;Q96GC5;Q8NC26;Q16385;Q8N488;Q96NJ6;Q5BKZ1;Q14938;Q2M3W8;Q9BQA5;Q59GN2;Q15928;Q4LE39;Q8IY57;Q14593;P08865;P0CI00;A6NHJ4;O60481;P52747;P61970;Q8NA42;Q14588;Q86XF7;Q15697;Q8NB50;O60765;Q8NBB4;Q6ZNG1;P27695;Q9Y2A4;P62244;Q6U7Q0;P49406;Q9Y2R5;Q12901;Q8TD23;P25208;P0CB33;P08708;P52736;Q96MR9;O43541;Q15937;Q96S24;Q9UKN5;Q01658;Q9H7R5;Q9H116;Q7L2R6;O75362;Q6NUN9;P61254;P43268;P46778;Q9UID6;Q9Y2G7;P59923;O75394;Q6P9A1;P28698;Q8N782;Q9H7R0;Q96SL8;Q9HBT7;Q15652;O15015;Q96C28;P11161;Q6ZQV5;Q15428;Q96ND8;P49792;Q9UK11;P17036;Q01844;O14709;P05388;P18146;Q13015;Q9NYW8;P26641;Q9Y3D3;Q16384;O95625;Q9NZ52;Q6ECI4;P83881;P17661;Q9NPJ8;Q92922;O15226;Q3MIS6;Q9HAH1;P17019;P15822;O95218;A8MT65;Q5T653;P46777;Q96IT1;Q9Y3U8;P04792;O43167;P62249;Q12906;Q8TAF7;Q99717;Q9UJY1;P62081;Q8WW38;P15336;Q9H9J2;Q9UL58;O43734;P62750;P18621;Q969Q0;Q9Y3D5;Q9BRR0

;Q9Y6D6;O94903;Q15796;Q08AN1;Q96N95;P0CH99;Q8NHY6;P08238;Q03936;Q9BYC9;Q6ZMV8;Q9UNX3;O94906;P25398;Q13398;Q53GI3;Q86W11;Q9BQ48;Q8N7Q3;Q14585;Q13952;Q9ULJ3;Q9UJX2;Q99856;O14497;O75290;O75081;Q9Y2Q1;P17040;Q8N5C8;Q92785;Q16670;Q96AQ7;Q8WV37;Q9HAZ2;O75381;Q9HCM9;P23528;Q9Y2R9;Q7RTV3;C9JBD0;Q13405;Q9Y676;Q9ULD5;Q96NI8;P17098;Q96MN9;Q13485;Q9UHK0;A8MUZ8;O60870;P07900;Q8WTR7;P24278;A4D1E1;Q86XN6;Q5TEC3;P63173;Q8IYI8;Q12857;Q9NWU5;Q9HCL3;Q5VIY5;O15235;Q5VUA4;P62979;P43897;Q9Y399;Q92670;Q8TA94;P84098;Q9NQX1;Q9NZV7;Q86VP1;A6NGD5;O14641;Q12874;Q13490;Q05481;Q9UNY5;O75528;P52746;P61247;Q8N4W9;O60783;Q9POL1;Q99909;Q9BUY5;P62753;P46782;Q32M78;P62891;Q96N22;Q8IXS8;P62861;P52742;Q8N7M2;Q99684;Q9BYN7;Q8N3J9;Q9HCG1;Q96A35;Q9H8G1;P18077;Q9H963;P82664;Q9NQS1;O95780;Q68CP9;P46779;Q8NDQ6;P62917;Q9ULX6;Q9Y2D9;Q9UQN3;P39023;Q9NZE8;Q9H9D4;P51504;P52744;O60543;Q15014;Q9UPN9;P50914;Q8NAP3;Q9UHF7;P62269;P62847;Q6PG37;P62910;P0DI81;P62273;Q8N6I1;O15025;P27797;Q9NZM5;Q8IYX0;Q9UKT9;P0CG00;P27986;O15198;Q9Y6X8;Q6IV72;Q8N587;Q8N895;Q96IR2;P23396;P19474;P62241;P15880;O95251;O14628;O60290;Q9BR84;Q8NB42;Q9C035;Q8IYB9;Q9H063;P82914;Q3ZCT1;Q9NRR4;A6NKF2;Q6ZN79;O14978;P61586;Q5JNZ5;P08651;O15105;O95999;P62266;Q9Y2L8;P30304;A8MWA4;Q8N9Z0;Q66K41;Q9BSG1;Q6IQ32;Q15935;Q03112;Q15633;P52743;Q8N988;A8MUV8;A8MVS1;P41208;P17028;P63000;P61513;Q9UK10;Q66K89;Q6ZMS7;P61313;P98168;Q8NFP9;Q9H9L3;P27635;A8K8V0;P17010;Q14134;Q02447;P62888;Q86YE8;Q9HCS7;Q9Y4R8;Q96BR6;Q5HY98;Q9Y2X9;P15621;Q9UFF9;Q49AA0;Q9H0U6;Q92901;P98182;P0C7V5;P49711;Q96LW9;Q96H40;Q32MQ0;O00712;Q96N20;P35268;Q8TF47;Q9NR09;Q96PQ6;P49247;Q6P9G9;Q13127;Q8IW36;Q3MJ62;Q9Y2P7;Q9UDV6;Q8TF39;Q05516;P35637;Q15022;P46776;Q6ZN06;Q96GC6;Q96EH5;P09001;P10074;Q7RTT6;Q9H0W8;Q8NFD5;Q9UL40;Q13129;Q09FC8;P56270;P35789;O60304;Q96N38;P17022;Q9RTT3;Q9Y6K9;Q969W8;P24385;Q49A33;O95678;Q9Y473;Q8TB69;Q96LW1;Q03923;Q9UBU9;Q7Z7H8;Q9GZN7;O95125;P62701;P84022;Q86V71;Q8NI08;P49790;Q9UL33;Q9H7S9;O43309;P62899;Q8N720;P37275;O60936;P82933;Q13360;O60869;P47914;P21673;A6NKS5;O14893;P62906;Q2M1K9;O43823;Q9UK13;Q9H4D5;Q96NG5;O71515;P17544;A1A519;P05386;Q7Z3K3;Q9UII5;Q2QGD7;Q6ZMY9;Q9BX82;P61353;B4DX44;Q8N859;P39019;P28838;Q9GZK5;Q86V15;Q5FWF6;P49910;Q96N77;O60225;Q9GZU0;P46013;Q9NY02;Q63HK3;P30307;Q9ULV3;Q86YF9;Q8WXB4;Q9UKK6;Q9ULD9;P62280;P02533;Q8NE65;Q70YC5;Q9P0J6;Q9H0F6;Q14872;Q68EA5;P18583;Q15776;O75437;Q9BYK8;Q9Y462;Q07020;Q02930;P10073;Q5JVG8;O43829;Q9Y281;Q9BWU0;P62263;Q8NEP9;Q08AG5;P62854;P60866;Q8IYW8;C9JN71;Q9UJY5;P82675;O95201;Q76KX8;Q9Y2Y9;P26373;Q8N823;Q8N972;P0DI82;O60784;P05387;O75346;A6NP11;Q8N7K0;A6NKH3;Q6P280;B1APH4;Q9NVS2;Q8TF32;Q9Y5K5;Q9Y6R6;Q15072;Q9Y2G2;Q3KFP31;O14771;Q9BUG6;Q8WYQ5;Q9HBE1;P52741;Q9UC07;Q71UM5;Q03938;Q9NYJ8;P61927;P08047}

5634

Pathogen[ P0C206] interacts with 1051 human partners: {Q9UID6;P27695;Q02386;Q8N9K5;Q5VUA4;Q9NUA8;O43829;Q8N720;O00488;P28698;Q6NUN9;Q15072;Q9C000;Q13887;P84022;Q9NQX1;Q3KNS6;Q86W11;Q9UFF9;Q9Y2X9;P61313;Q96JL9;A8K8V0;Q9UK12;O43541;Q6P9A3;B1APH4;Q86VZ6;Q96A35;Q86V15;Q969W8;Q16385;Q96PU5;O14628;P08048;Q9BZE0;Q9H5H4;O43309;O95201;Q9BSN8;Q14019;Q8TC21;Q9Y3M9;Q9Y3D5;P0DI82;Q8N988;P98168;Q96SE7;P0CB33;O75528;Q14587;Q96JC4;Q9Y399;Q8NHW5;O60481;Q96L21;P27635;Q96BV0;Q9NQV6;P17661;Q32MQ0;Q63HK3;Q7Z3I7;Q96NI8;Q9UJN7;Q96N22;Q504Q3;A8MX4;Q9BUY5;Q96MM3;Q14588;Q7Z398;P49790;Q03924;Q9BUG6;P17026;Q7Z2W9;Q96IR2;Q7Z2F6;Q6IV72;P55265;Q5JNZ5;Q9GZU2;Q5T5D7;O95251;P62854;Q8N883;Q96CS4;P27797;Q9Y2G2;Q9H0U6;Q9NYT6;Q9Y6Q3;P98182;Q9H0K4;Q8NB50;Q9NRF9;Q9UJQ4;Q9HAZ2;Q8N9F8;Q13127;O95780;P13682;Q9Y6K9;Q9UPN9;Q8IYN0;Q05481;Q15911;P49207;Q3SY56;Q0VGE8;Q8IZH2;Q9NZM5;Q6PF04;Q8NKN2;Q9BQ48;Q08AG5;B4DU55;Q6NX49;Q9UC06;Q9NZL9;O60784;O75123;Q147U1;Q14586;Q96PE6;Q9GZN7;Q13263;Q9UKK6;Q9UII5;Q8N6I1;P52741;P30307;A6NGD5;B7Z6K7;Q9H4I2;Q9UNH7;P62081;Q9Y3D3;O00308;P11161;Q8IYX0;P17031;Q9HAU4;Q86VK4;P18583;A2RRD8;Q9NW07;P10074;Q9NR33;Q9UK13;Q96SL8;P17544;Q96DT7;P0C7X5;Q9UDV7;P25490;O43313;O75290;P15622;Q8N9Z0;Q9NSD4;O60783;Q02446;Q86UP8;Q8N8Z8;P08651;Q9UNA4;Q9HE1;P82914;Q9UJL9;Q14966;Q96F45;P49910;O95164;Q9P243;Q14690;Q92664;Q6ZSB9;O60225;Q86YF9;Q8N5C8;Q96N95;Q8TB69;Q49AA0;P62241;Q9NSC2;Q96I27;O75381;Q9UC07;Q9NR11;Q9Y6D6;Q9Y2Y9;Q15697;P62244;Q5CZA5;Q86VP1;Q5FLR6;P50914;Q7Z7K2;O75382;P41182;P17024;Q05516;Q6V9R5;P08865;P52743;Q08211;P41227;P62750;Q9UJX2;Q9BTV5;Q9H7R0;Q9BS31;P18621;Q9UHK0;Q96K75;Q9NQZ8;Q9NR83;Q7L3S4;Q9NXT0;Q8IV48;P46781;P78560;O76075;P52737;P62266;P59923;Q8WXB4;Q9UK33;Q8IYI8;O75081;Q9H1K0;Q9P2F9;P29374;Q9Y2Q1;Q9UL58;Q9H9L3;Q9Y2D9;O95999;Q9BU19;Q8WTR7;Q7Z7H8;Q99717;P17019;Q5VIY5;Q6ZHF7;O60870;Q9Y676;Q9NPA5;O95600;Q5T1R4;Q8WW38;P09001;Q8N8E2;P46013;O43670;Q05086;A6NHJ4;Q6EXF7;O94892;Q9H4T2;C9JLR9;Q9NXV6;Q9UJX2;Q86T29;Q07020;Q96J02;Q9P0M9;Q9BWU0;P83881;Q9UM63;Q6ZS27;P46778;Q9Y2P0;Q96SK3;Q96MX3;A6NP11;Q3MIS6;P28838;Q9UL59;Q8N1G0;Q8NI51;Q9Y462;Q9NS39;Q6ZMY9;P10073;O15265;Q68EA5;Q96JF6;Q7RTT3;Q3SY52;Q9HCX3;Q8N680;P15336;Q6PDB4;Q86UD4;Q6ECI4;P62263;Q9UJW8;Q12901;Q969J2;P52738;Q9UIH9;Q12874;P62273;Q9UJY4;P17027;P51508;Q92670;Q8N7M2;O60765;Q9P215;Q5SXM1;O43734;P43268;Q9HCG1;O75467;Q9BS34;Q96C00;Q92922;Q02878;P15621;O75626;Q9P0J6;Q9NWU5;Q8N7K0;Q569K4;Q9ULJ3;P51522;Q99909;Q5T653;Q8N0Y2;Q8TAF7;Q01844;P04792;P17023;Q96KM6;Q6ZN30;Q8TAT6;Q03936;Q9UBZ4;Q13398;P10072;P98170;P30305;O15164;C9JN71;Q7RTV3;Q14591;Q96T92;C9JBD0;Q9NEX0;O75437;Q9NRX2;Q14590;P62280;E7ETH6;O95678;Q68DY1;A1A519;Q2VY69;P49406;P26641;Q8N6Q5;Q8N06;Q9H0H0;Q6P5R6;A6NNF4;Q8N3I7;Q86UE3;Q9ULX6;Q5EBM4;P62857;P11166;A8MQ14;Q15796;P62910;A8MUZ8;Q5TYW1;Q8WV37;Q96H40;Q9Y2G7;Q9BRH9;Q9BQA5;Q3MJ62;Q5BK21;Q14669;O15226;P26640;Q9NX65;O95125;Q9Y6X8;P27986;Q8N3J9;P52740;Q8N1G1;Q9P2Y4;A8MT70;Q6P2D0;Q14938;Q96K62;P46782;Q76KX8;Q9ULD9;Q8N123;Q86TJ5;B4DXR9;Q9NZE8;Q969G2;Q9UKJ3;P61247;Q7Z340;Q9BWM5;P10075;Q9UJU3;Q9Y5K5;Q96SQ5;P18146;Q9NZL3;Q8NEA6;Q8NEK5;Q15386;P17025;P61586;Q8N2I2;Q9HBT7;Q3KQV3;Q5JVG2;Q16587;P18077;Q9NYH9;A6NJL1;Q06730;A8MTY0;Q32M78;P0CH99;Q6NSZ9;O75346;Q63HK5;Q12857;Q9NPC7;Q6P280;Q8IZC7;P62913;Q8N393;Q8N895;P61927;Q96N58;Q6P1L6;P17022;Q9BSG1;Q9NPJ8;Q6ZMW2;Q9UJY1;P61353;P17029;Q8NDX6;Q9NQV7;Q9HBT8;P62888;Q6ZMV8;Q6ZN57;Q9H7S9;P57071;O60304;Q03989;A6NEJ1;Q5JUW0;Q9HCZ1;Q9UK11;Q96JB3;Q05215;Q9BYK8;Q16670;P21673;Q92785;H3BQB6;Q15916;Q5H9K5;O15105;Q8NDW4;Q9NWS9;O75394;Q9NQ03;Q86LX8;Q9UIE0;Q92610;P82664;Q13952;P49792;Q15025;O14497;Q9UPQ4;Q9H609;P43897;P0C7V5;Q9P2J8;Q96N20;Q92784;P17021;P11137;O60447;Q96GC5;O43345;O15151;Q9NVS2;Q8NFP9;O60936;Q8N823;Q49A33;P62861;Q969S3;Q6U7Q0;O43298;Q8NI08;P36508;Q96PQ6;Q14919;Q99612;A6NKS

3;Q6AW86;Q9H4D5;Q6ZT77;Q9BXU3;Q8TA94;P08238;Q96N77;Q9NSJ1;A6NKF2;Q03112;O00712;O43361;Q8TF20;Q9ULV3;P17035;Q9BYC9;Q9NR09;P17010;P35268;Q8NAF0;P23396;P39023;P63000;Q96EP0;Q86UQ0;Q8NHY6;Q8IW36;Q92990;Q9H0W8;Q9UNY5;Q499Z4;Q9UKN5;Q15973;Q9Y2R9;Q8IZP0;P32969;Q8NC26;Q13405;Q52M93;O43296;Q86WZ6;Q9NZ52;Q8TF47;Q8IZ20;Q9C0F3;Q13015;Q9UBU9;O00110;Q9Y6D5;P52742;P08047;Q9UEG4;P24278;A6NFI3;Q076021;P62701;P07900;Q9NZV7;Q8N972;Q9UK10;Q9P0M2;Q8N488;Q96MN9;Q8M141;Q9UHF7;Q9H582;P05386;Q96KR1;Q14593;Q5TEC3;Q6IQ32;Q9UJY5;Q01658;Q08ER8;P17032;P49711;Q8TD23;Q9HC78;P22090;Q4LE39;P16415;Q9BYD6;Q5HY98;Q9Y2L8;P84098;Q9Y3B8;Q8TAT5;P17017;Q9BYD2;Q9P0L1;P52744;P26373;Q71UM5;Q8TF50;Q3ZCT1;Q9UQR1;P35637;Q9H4Z2;Q7Z3K3;O95361;Q96CX3;Q9BR84;Q9H963;P46777;P05388;P62979;P17020;Q9BWT7;Q96NL3;Q8NCA9;P17039;Q8TBC5;Q02447;Q8TF32;Q6ZSS3;P35789;Q95793;Q8N554;Q9H8N7;P17030;Q96IT1;Q9HCL3;O14771;Q8N7Q3;Q8IVC4;Q68DY9;P0CJ79;Q9Y4X4;A6NKF7;Q14893;Q9HML3;Q96HQ0;Q02930;O94903;P62899;P17028;Q96GC6;P51523;Q7L2R6;Q12996;Q96AQ7;P82933;Q8N8J6;O43167;P58317;Q6P9G9;O43294;Q9NYJ8;Q8NBF1;Q96NJ3;Q9NRR4;O60281;Q9HA38;Q6ZQV5;Q96JM3;Q9H8V3;P82675;Q96MU6;Q9BYN7;Q9H165;Q7Z3V5;Q9Y6R6;Q9GZX5;Q8N782;Q6ZNG1;P39019;Q92901;P05387;Q92804;Q86XU0;Q06732;Q6ZR52;O15392;Q5MCW4;Q14872;Q9C035;Q5FWF6;Q9UDV6;Q15937;Q6P9A1;P60520;Q13485;Q86UZ6;Q9Y4R8;Q8TAQ5;P25208;Q9Y5A6;Q9H707;P42766;Q8IWY8;Q15633;Q13129;P60953;Q8TF45;P60866;O15535;Q13489;Q8TF39;Q9BSK1;Q15022;Q5HYK9;Q9H116;Q2M1K9;O14709;P98171;Q15652;O60869;Q9684;Q9ULD5;Q8N8L2;O75373;Q8N587;Q96N38;Q9BY31;Q8N4W9;Q8IXS8;Q96MR9;A6NM28;Q16384;P36405;Q14592;Q86V71;Q03923;Q8NDH3;Q9Y2P7;Q9HOR8;Q0D2J5;Q7Z7L9;P30304;O60315;Q8IZ26;Q8NA42;Q15797;Q13422;Q9UNX3;Q09FC8;Q8NDQ6;Q5TB30;P43243;Q8N859;Q9UHD4;Q9H0F6;P51786;Q15928;Q95218;O43823;Q8IX07;Q9BX82;Q86Y25;Q9UL36;Q96BR6;Q9BRR0;Q969Q0;O60293;P61513;A6NDX5;Q9HCM9;Q96C28;Q8IY57;Q9UPP2;Q96NJ6;P0C7X2;O75362;P98169;Q6IQ21;Q9HCE3;P41208;Q99676;P37275;Q8IYM9;O60678;Q9BXW6;Q4V348;P0CG31;Q9H7X3;Q6PK81;Q9UPG8;Q6ZN11;A6NKH3;Q9NQX6;Q96LW9;O14617;O14901;Q96CA5;Q2QGD7;Q8NEM1;Q6ZN79;P17097;P17040;Q3SXZ3;O95625;P62277;Q9UKD2;O94906;Q8NDP4;Q2M3X9;A4D1E1;P42575;Q9UKT9;Q5VTD9;P52747;P0C6E6;Q53GI3;Q9H0M5;Q14134;Q9C0G0;Q5EBL2;P46776;Q9UBR4;P51814;Q6XZF7;Q8NFD5;Q9H9J2;P51815;P21506;A8MT65;Q9UL33;Q96H86;P62906;Q70YC5;Q8WV44;Q8TBZ8;Q9NYW8;P52746;P63173;Q9ULM2;Q3ZCX4;P0CG24;B2RXF5;P01011;Q8NBB4;Q9H8W5;Q14584;P60006;Q6DD87;O15198;Q14585;Q96K83;Q9P0T4;Q7Z6Z7;O15015;Q17R26;Q14865;Q8N184;Q9H2P0;Q9Y2R5;Q9BYX4;Q14526;O75335;Q7RTT5;Q9NV72;Q96GE5;Q9UFB7;O60543;P14373;Q6AZW8;Q00987;Q13106;Q9Y473;P62891;Q6NX45;P49247;P22269;Q8NCP5;Q6ZNX5;Q5T619;Q9GZV8;Q96SZ4;Q9GZ87;Q8TF68;Q08AN1;Q86XN6;P62753;Q9H6B1;Q8TCN5;P08151;Q13118;Q15929;Q13424;Q5JVG8;Q6ZN55;P46779;Q5VV52;Q9NTW7;Q6ZNG0;P17038;Q9BYM8;A6NN14;P15822;Q8NB42;Q15776;Q66K89;Q8NCK3;Q68DI1;Q6PG37;Q13105;P63220;P0CG00;P52736;A8MVS1;Q3JNZ5;Q96K58;Q9UGR2;P15880;B4DX44;Q8WYQ5;Q96RE9;Q494X3;Q7RTT6;Q96PM9;Q14119;P17014;P23528;Q9NU63;Q92618;Q96EH5;Q8NEP9;Q96ME7;Q9C029;Q8TAU3;P25398;Q8IYB9;Q6ZNA1;P08708;O75674;Q15935;Q96B54;Q7L945;Q9HCS7;Q9UL40;O75820;Q96SR6;Q8TDD2;O95071;P02533;Q7Z2E3;Q2M218;Q14929;Q8TD17;P11142;Q9NRM2;Q53FT3;P61970;Q96ND8;O00273;Q96LW1;Q9NQS1;P47914;Q6EKJ0;O95714;Q6P3V2;O15235;Q92560;Q12906;Q8NAP3;Q9P255;Q8TAW3;P62847;Q9Y2A4;O14978;Q9H8G1;Q66K41;A8MWA4;Q6ZNO8;Q9BV97;P61254;Q8IVP9;P0CJ78;A8MUV8;P51504;Q99856;P58304;P82912;Q96RL7;Q3KP31;O60224;Q6ZMS7;Q96EG3;Q5SVQ8;P17098;Q8N3C0;Q9UJW7;P0C100;Q5T0B9;Q16600;P17041;Q9HCK0;Q96NG5;Q96JM2;O15014;Q15428;O60290;Q96NG8;Q7RTT4;P0DI81;P42677;Q9UKY1;P17036;Q68CP9;Q8TBZ5;Q8N1W2;Q01954;Q9Y2H8;Q9H063;Q9Y2K1;P52815;P24385;Q13360;P19474;O15060;Q9Y281;P62249;Q2M3W8;Q86YE8;P82921;Q59GN2;Q9Y2Y4;Q9H7R5;Q9H9D4;Q6ZNI9;Q13490;Q03938;Q9Y3U8;Q8N8C0;O43830;Q9HAH1;P62917;O75155;P56270}

5635

Pathogen[ P03363] interacts with 1007 human

partners: {A2RRD8;Q53FT3;Q86TJ5;Q49AA0;Q9NQX1;Q16587;Q9UJX2;Q7RTS1;Q86VP1;Q504Q3;Q5JUW0;Q15020;P62913;Q86XU0;Q15911;Q9Y5A6;Q9P0L1;Q8NB42;A8MQ14;Q5VTD9;P41227;O75123;Q9C0F3;Q9BQ50;Q8NHY6;Q5T0B9;P13682;O75820;Q3KNS6;Q99684;A4D1E1;Q03923;P43897;P02533;Q6P9A3;Q8NCK3;Q9Y2R5;Q13490;Q6ZMY9;P35789;O14901;O75373;Q5SVQ8;P98168;Q9H8N7;Q9BYD2;P11137;P08048;O75335;P18621;Q13105;A6NKF2;Q8IZP0;O75159;O75081;P17027;P0CH99;P05386;Q5VUA4;Q9NSD4;Q03989;Q8N9F8;O94972;Q86V71;Q6IQ21;Q8NHW5;Q99592;Q8N1G0;Q9H963;Q9UJQ4;Q99909;P62750;Q969J2;Q8N988;O00273;Q9UHF7;P29374;P23396;Q8N2I2;Q96LW1;P28698;Q8IZC7;O60543;Q9H4D5;P42677;Q8NE65;Q96AQ7;Q96N22;Q9NQZ8;P63173;Q6DD87;P08865;Q8TAQ5;Q86UA1;Q92766;Q03924;Q8WXX3;Q6ZNA1;Q96GC5;Q9UNH7;Q14929;Q9Y5K5;Q9NQX6;Q7Z340;Q14938;B4DU55;Q8N859;P07900;O14978;Q6ZNO6;Q86W11;P62847;Q8NA42;Q14865;Q96NS5;P18077;Q8TB45;Q9N2L3;Q9NQS1;P15438;P82664;Q9Y2D9;Q8NAP3;P17021;P17010;Q8IVP9;O43296;O14771;P05387;O95780;Q86VK4;A6NKF7;P52738;Q9NUA8;Q6NSZ9;Q12901;O60481;P18146;Q13360;O00712;Q6ECI4;P84098;P42766;Q6P2D0;Q8NEK5;Q02386;Q5VV41;Q96JC4;O60315;Q02930;O60224;Q9NZE8;P98169;Q9P2J8;P62249;Q86UP3;Q9C000;Q9HAU4;Q96T92;P0CG31;Q99676;Q3ZCT1;Q96V95;P82921;Q9C0A1;Q14526;P05388;A6NHJ4;Q9Y4R8;Q96MX3;Q9UJY4;P61970;P14373;Q9H707;Q96NG8;Q9UC06;Q96SE7;P49406;Q9BRR0;P0DI81;P08151;Q7L3S4;Q9H7S9;Q96K62;Q9NS39;Q96JF6;Q14590;P62753;Q86UE3;P17098;Q08AN1;Q15928;Q8WV37;Q7Z398;Q68EA5;O15015;Q9UKN5;Q96SR6;Q96EP0;Q9ULM2;Q02447;P08651;P62081;Q96ND8;A6NKH3;Q8N3J9;Q9ULJ3;P62910;Q15022;Q13952;Q92990;Q6PG37;O43167;Q6ZR52;Q9HCS7;Q5EBL2;P0CG00;Q96NJ6;Q03112;Q9UEG4;Q9HAH1;Q9BWW7;Q6NX49;Q9Y2P0;P61513;P46776;O75346;O60281;Q9HBT8;Q9UPP2;Q9NRF9;Q13405;P37275;Q969W8;Q8TDD2;Q8NDW4;P35637;Q13283;Q9BU19;Q9ULT8;Q9H2P0;Q9NX65;P82914;Q7RTV3;Q8N720;Q9GZR2;O95600;Q96LX8;P61254;Q9P0J6;P62273;O60784;Q99856;P17024;Q15929;Q6ZQV5;P32969;Q7RTS3;Q92901;Q9NYJ8;Q9P243;Q494X3;Q9NZ52;Q3SXZ3;P46778;Q96MR9;Q95793;Q8NCP5;Q5HYK9;Q5T1R4;Q9UL59;P25490;Q9NVS2;Q6EKJ0;Q9NUL3;O95201;Q9Y3D5;P61927;Q9P215;O60765;Q5T5D7;Q16384;Q9Y6X8;Q8NDQ6;Q9HCL3;O14497;O60447;Q8TCN5;Q8N883;P62891;Q9Y462;E7ETH6;P15621;Q8NBB4;Q6P9A1;P17030;Q9UC07;Q8N8C0;Q9UL33;Q08AG5;P52815;Q0D2J5;Q15776;A6NGD5;Q9Y2L8;Q96HQ0;Q8WV28;Q9UHK0;Q96MU6;Q68DI1;Q5JVG2;Q5SXM1;Q8WV44;Q9UDV7;A8MTY0;Q3KP31;P17031;Q8N680;Q6P5R6;Q5JT82;Q9Y6K9;Q8NKN2;Q9H063;P58304;Q99612;Q59GN2;Q8N141;Q96V15;Q9UJY1;Q6ZNI5;Q8N488;P61353;Q9N9J7;Q66K89;Q8IVW6;Q4LE39;P98171;O75437;Q76KX8;Q13015;Q9UL40;O60293;O15151;Q5F1R6;Q9H9J2;Q96A35;Q9UPN9;Q8N9Z0;Q9Y467;Q6NUN9;Q9UK11;Q3KQV3;O15105;Q96PQ6;Q8N782;Q5TYW1;Q9Y2A4;Q8IWY8;Q96GC6;Q15797;Q7RTT5;Q9UM63;Q9HCK0;Q9NPC7;Q9Y2K1;Q96EG3;P08708;Q6ZMV8;P36508;Q6BEB4;Q9Y2H8;P51522;O43309;P16415;Q9HCZ1;

P43268;Q9UBU9;Q9NSJ1;Q9BX82;Q9UJW7;Q14588;P41208;P17028;Q8NEA6;P15880;Q8IZ26;Q96N20;Q96L21;Q9Y2X9;Q14893;P59923;P60520;Q96MM3;P17041;Q9NWS9;Q9HCX3;Q15633;Q86YE8;Q96BV0;Q9BUG6;Q15652;Q6ZNH5;P63000;Q9Y4X4;P0CG24;Q8NI51;Q96I27;Q14593;P17019;Q7Z7K2;B4DXR9;Q9H5H4;Q05086;Q9UNY5;Q9Y6I7;B1LAPH4;Q9C040;Q9H0U6;P21673;P49711;Q9NTW7;Q7L2R6;Q8TBC5;P0DI82;Q9NZV7;Q9UK10;Q00488;Q8NCA9;Q14019;Q9P0M2;Q86VZ6;P26373;Q13127;Q8IY57;Q9Y2Y9;A6NNF4;Q9C0G0;Q7Z6Z7;P0C7X5;P17029;Q96BR6;Q6P1L6;Q5BKZ1;A6NK53;Q6IV72;P83881;P51786;Q96EH5;Q8TF45;P30304;P10072;O76021;P10911;Q03936;Q9NQ03;Q96RE9;Q6ZNI9;P15336;Q2M1K9;Q9HOR8;P17023;Q14690;Q86T29;Q9BSN8;Q8NAF0;Q96DT7;Q15937;Q92560;Q8TAT6;Q9NWU5;P22090;P15822;P0C7V5;A8MUZ8;P62861;Q2VY69;Q9UNX3;Q96JM2;A6NEJ1;O43830;O95218;Q96JM3;C9JN71;Q96LW9;Q8IYB9;Q14669;Q6ZNG9;O75394;O15226;Q8TF39;Q9BS31;Q13129;Q8N972;Q14872;Q9H0W8;P82912;Q9BYN7;Q98N58;Q9H4T2;P60006;Q14119;Q8N393;Q12906;P18583;P52737;Q96IR2;Q9UPG8;Q8N8Z8;Q8TF20;Q9ULD5;P26641;Q9GZU2;Q9NR09;P46782;Q96PU5;P35268;Q9NRX2;P51504;P21506;P24278;Q9HBT7;Q8IW36;Q12874;Q9BXW6;Q6XZF7;Q9P255;Q32MQ0;P17039;Q6PF04;Q8TAF7;Q96H40;Q5VIY5;Q9UDV6;Q5JNZ3;Q86WZ6;Q7Z2E3;Q96C28;P17032;Q8IZ20;Q9BXX1;Q9BWT7;Q9H609;Q13489;Q9UJU3;Q8N1G1;A6NDX5;Q9NXT0;P27797;O14709;Q6NX45;O95678;Q9H4Z2;P46781;P51814;P50914;Q9BSK1;P19474;Q14134;Q16670;P52736;O75155;O76075;Q5CZA5;Q8N7M2;O43541;Q9UGR2;Q9Y6Q3;P17022;O60870;Q14966;P17661;O75381;P17036;Q63HK3;Q14919;Q9Y3M9;Q9POM9;Q9Y2R9;Q86UP8;Q9BQA5;P52744;Q96SK3;Q2M218;Q15796;Q9H9L3;O75674;Q9NPJ8;P63220;P84022;Q96C00;O15265;P98170;Q6U7Q0;Q96PE6;Q8N895;Q5T619;Q9BRH9;Q8IVC4;Q7RTT3;Q9UKY1;Q8NI08;Q8TF68;Q6ZM57;P61313;P39019;P49792;Q96N77;Q6ZNG0;Q86XN6;Q9C035;Q9Y2G7;Q6ZN08;Q96IT1;Q92618;Q9BYK8;P55265;P46779;Q5T653;P46777;Q9NRR4;Q06732;Q9H0M5;Q7Z7H8;P43243;Q92664;Q8NEP9;P17025;P23528;Q7Z3I7;Q9H582;Q9UK13;Q14592;Q96CX3;P51508;O60783;Q8N184;Q6ZSB9;Q8N7K0;P0CB33;Q9BUY5;Q9H7R0;Q14591;Q86UQ0;Q14584;Q9Y2G2;Q9BS34;Q8N8L2;Q96SL8;Q9ULV3;P25398;Q9Y3Z3;Q9UKK6;P49790;A8MUV8;P78560;Q8IX06;Q7Z3K3;O95071;P09001;P82675;Q6ZMW2;O43345;Q96SZ4;Q86Y25;Q5JNZ5;B4DX44;P57071;Q6ZNG1;Q01954;Q15697;Q6ZN79;O95125;Q8N823;Q9H0H0;Q7RTT4;O75382;Q15386;O60936;Q6ZSS3;P82933;Q8NC26;O60869;P24385;Q14585;P52740;P51523;Q14587;P2280;P56270;Q9NPA5;Q01844;Q96NG5;O00308;Q71UM5;Q9Y3U8;P62888;P49910;Q6AZW8;Q5JU85;Q5TB30;P17014;Q96GE5;Q9Y2Y4;O75362;Q92670;Q9UL58;Q13485;Q15072;P10074;Q92804;Q9H0F6;Q8TD23;Q9Y6R6;O95714;Q96RL7;Q9UJN7;Q969Q0;P98182;Q6ZS27;Q63HK5;Q5HY98;O60225;A8K8V0;Q9Y676;Q9UQR1;Q2QGD7;Q8IYN0;Q8TB69;Q16385;Q96JL9;Q70YC5;Q9NYT6;P17020;P62244;P62277;Q3MIS6;Q9BR84;Q9HCM9;P62906;Q8TF47;Q15025;A6NP11;Q7Z5H3;Q3SY52;O43361;Q96CA5;Q9H7X3;Q9BSG1;Q09FC8;Q9UK12;Q15973;P62266;Q9BYX4;Q86XF7;Q96MN9;Q6IQ32;P17017;Q96K58;O94906;Q9H116;O60304;Q8TAU3;P49207;C9JBD0;P62241;Q5H9K5;Q15428;Q13398;Q9UKT9;Q53GI3;Q7Z2F6;Q86UD4;B2RFX5;Q9UKF7;Q147U1;Q9NR11;P58317;Q6DN90;Q9UKD2;Q6AW86;Q8IYX0;P60866;Q6P280;Q8NDP4;P61247;Q7L945;Q5EBM4;Q9UNA4;Q8TC21;A8MXY4;Q8NB50;Q9UFF9;Q52M93;Q9Y3D3;Q8N9K5;Q66K41;Q96N95;Q6WXB4;Q9UQN3;P52741;P62899;Q9NR33;Q8WTR7;Q9HCG1;P62857;Q9Y2Q1;Q8WW38;Q499Z4;Q9BY31;Q8NFD5;Q96NJ3;Q68DY9;Q02878;P52743;Q8TAW3;P08047;Q9NPP4;Q5TEC3;A8MVS1;P46013;Q9UKJ3;Q9H0M0;O00192;Q9HC78;Q2M3X9;P15622;Q86YF9;Q8N5C8;O60290;Q9Y6D6;Q96KR1;O75626;P0C7X2;P52742;Q07020;Q6ZRF7;P0C6E6;Q9H9D4;Q6P3V2;Q2M3W8;Q5MCW4;P39023;Q15935;A6NFI3;O43298;Q9BWM5;Q9BQ48;O43829;Q8N1W2;Q01658;Q9BWU0;Q8N8J6;Q8N587;Q92922;Q9NUQ6;Q9UL36;P17544;Q8IYI8;P30307;P17040;O94892;Q0VGE8;Q9HCE3;Q96BR9;Q05481;P62854;P0CJ78;O15060;Q8N6I1;Q96PM9;Q68CP9;Q9Y399;Q08211;O95625;O14641;Q9P2F9;O15235;Q96K75;Q9UJY5;Q5FWF6;O43734;P62917;Q7Z2W9;Q9UIH9;Q9NXW8;O95251;P51815;Q9UID6;Q96CS4;Q3MJ62;Q05516;A6NJL1;Q3ZCX4;Q8TBZ5;A8MT65;P60953;Q13106;Q9GZX5;Q99717;Q9BYC9;Q8TF50;P08238;P17038;P0CJ79;Q6P9G9;P25208;Q12857;Q96NI8;Q8TF32;Q6ZMS7;Q9P0T4;Q8WYQ5;Q9H4I2;P27986;Q32M78;Q9BV97;Q969S3;P27635;O15198;P62263;Q96NL3;Q9Y473;Q9GZN7;Q17R26;Q8NEM1;Q3KNW1;Q9NXV6;P04792;P52746;Q9ULX6;Q05215;Q9UII4;P47914;Q9UII5;Q9BZE0;Q9BTV5;P62701;P11166;Q9P2Y4;Q08ER8;Q4V348;Q9UJL9;Q96FS4;Q8IZH2;Q49A33;Q9NV72;Q96N38;Q06730;Q9UIE0;Q9H8G1;Q12996;Q02446;Q9UJW8;O14628;Q8NBF1;A6NN14;Q8TD47;O75528;Q9NZM5;P11142;Q68DY1;Q9BYD6;Q5T447;Q7Z3V5;Q8N7Q3;Q9BZJ0;Q8TBZ8;P10073;Q8NF99;O75290;P62269;Q3YEC7;O75569;Q9NQ94;P05937;Q9NR83;O15535;Q6ZT77;A8MWA4;Q8N3C0;Q9P2A4;O75467;Q13424;P52747;Q13118;Q96SQ5;P17035;Q8N0Y2;Q8N4W9;A6NM28;Q92785;Q6PK81;Q13401;Q9UFB7;Q9HAZ2;Q96H86;Q8TA94;Q5JVG8;Q03938;Q7RTT6;Q16600;P11161;Q9Y2P7;P52756;Q9Y281;Q9H7R5}

5636 [Cluster 513]GO:0005825+C cellular\_component [name] half bridge of spindle pole body [def] "Structure adjacent to the plaques of the spindle pole body." [ISBN

5637 Pathogen[ Q2Q067] interacts with 3 human partners:{Q53HL2;O75154;Q96EK4}

5638 Pathogen[ P0C214] interacts with 3 human partners:{Q53HL2;Q96EK4;O75154}

5639 Pathogen[ P03346] interacts with 4 human partners:{Q96EK4;Q53HL2;Q9H4Z3;O75154}

5640 Pathogen[ Q85601] interacts with 3 human partners:{O75154;Q96EK4;Q53HL2}

5641 Pathogen[ P14079] interacts with 4 human partners:{Q9H4Z3;Q53HL2;Q96EK4;O75154}

5642 Pathogen[ P03383] interacts with 3 human partners:{Q96EK4;Q53HL2;O75154}

5643 Pathogen[ P03410] interacts with 4 human partners:{O75154;Q53HL2;Q96EK4;Q9H4Z3}

5644 Pathogen[ P14075] interacts with 3 human partners:{Q53HL2;O75154;Q96EK4}

5645 Pathogen[ P0C206] interacts with 4 human partners:{O75154;Q9H4Z3;Q53HL2;Q96EK4}

5646 Pathogen[ P03363] interacts with 3 human partners:{Q96EK4;Q53HL2;O75154}

5647 [Cluster 514]GO:0048188+C cellular\_component [name] Set1C/COMPASS complex [def] "A conserved protein complex that catalyzes methylation of histone H3. In Saccharomyces the complex contains Shglp, Sdclp, Swd1p, Swd2p, Swd3p, Sp1lp, Bre2p, and the trithorax-related Setlp\_ in mammals it contains the catalytic subunit (SETD1A or SETD1B), WDR5, WDR82, RBBP5, ASH2L/ASH2, CXXC1/CFP1, HCF1 and DPY30." [PMID

5648 Pathogen[ Q2Q067] interacts with 4 human partners:{Q9C005;Q9P0U4;P51610;Q9UBL3}

5649 Pathogen[ P0C214] interacts with 2 human partners:{P51610;Q9C005}

5650 Pathogen[ P03346] interacts with 5 human partners:{Q9C005;Q15291;P51610;Q9UBL3;Q9P0U4}

5651 Pathogen[ Q85601] interacts with 4 human partners:{P51610;Q9UBL3;Q9P0U4;Q9C005}

5652 Pathogen[ P14079] interacts with 4 human partners:{Q9C005;Q9UBL3;P51610;Q9P0U4}

5653 Pathogen[ P03383] interacts with 2 human partners: {P51610;Q9C005}

5654 Pathogen[ P03410] interacts with 3 human partners: {P51610;Q9P0U4;Q9C005}

5655 Pathogen[ P14075] interacts with 2 human partners: {P51610;Q9C005}

5656 Pathogen[ P0C206] interacts with 4 human partners: {Q9P0U4;Q9C005;P51610;Q9UBL3}

5657 Pathogen[ P03363] interacts with 7 human partners: {Q15291;Q9UBL3;Q9P0U4;O15047;Q9C005;Q9UPS6;P51610}

5658 [Cluster 515]GO:0000790+C cellular\_component [name] nuclear chromatin [def] "The ordered and organized complex of DNA, protein, and sometimes RNA, that forms the chromosome in the nucleus." [GOC

5659 Pathogen[ Q2Q067] interacts with 41 human partners: {P18754;P49959;Q9UNSL1;P48380;O14813;Q9HC52;P51531;Q96T88;O00273;Q7Z2E3;O95931;P54198;P17676;P11831;P15172;P35227;Q96QC0;P61978;P63146;Q92769;O14497;Q9BQ90;O95644;P51532;Q7Z3K3;O60885;Q9BVW5;Q13761;P49459;Q9P1Z2;Q92793;Q86U70;Q8IY92;Q6STE5;P42226;O75376;Q8IXJ9;Q96FF9;Q02078;P17947;O76075}

5660 Pathogen[ P0C214] interacts with 42 human partners: {P54198;Q7Z3K3;O14813;Q13761;P35227;P49959;O14497;P42226;Q92793;Q9BVW5;P15172;P17947;P11831;O95931;Q6STE5;P49459;Q96FF9;P17676;Q96T88;Q02078;O00273;Q8IXJ9;Q86U70;Q7Z2E3;Q92769;Q9UNSL1;O75376;P05412;O60885;P48380;Q8IY92;Q9P1Z2;O95644;P16220;P51531;P18754;O76075;Q9HC52;P63146;Q96QC0;P51532;Q9BQ90}

5661 Pathogen[ P03346] interacts with 49 human partners: {Q7Z3K3;P05412;P61978;Q02078;Q86U70;Q15788;O14813;P16220;Q9H2W2;Q96FF9;P17676;P11831;Q96QC0;P51532;P48380;Q9HC52;P15172;Q9UNSL1;O95931;P35227;P42226;P18754;P49459;O95644;Q13351;Q9BQ90;Q86SE8;P17542;P63146;Q92769;Q9P1Z2;Q6STE5;Q13761;O14497;O75376;P49959;Q9NQ03;O76075;O60885;P17947;Q7Z2E3;Q8IXJ9;Q92793;P51531;Q8IY92;Q9BVW5;P54198;Q96T88;O00273}

5662 Pathogen[ Q85601] interacts with 44 human partners: {P61978;P54198;P11831;Q02078;P17676;P63146;O14813;P15172;Q6STE5;Q86U70;Q86SE8;O95931;Q8IXJ9;O14497;P49959;O76075;O95644;P51531;Q7Z3K3;P51532;Q8IY92;Q9BQ90;Q92769;P16220;P42226;O00273;P05412;Q96T88;O75376;P49459;O60885;Q96QC0;P18754;P17947;Q7Z2E3;Q92793;P48380;Q9P1Z2;Q96FF9;Q9HC52;Q9BVW5;P35227;Q13761;Q9UNSL1}

5663 Pathogen[ P14079] interacts with 43 human partners: {Q9BQ90;O76075;Q02078;Q6STE5;Q96QC0;Q8IXJ9;Q92793;Q9HC52;Q96FF9;Q7Z3K3;Q86U70;P48380;P51532;O95644;O95931;P54198;P51531;O14497;P42226;Q92769;P49459;Q15788;Q13351;Q9NQ03;P61978;P35227;O75376;Q96FC9;O60885;P15941;Q13761;P52701;P05412;O14813;Q9UNSL1;Q9P1Z2;Q7Z2E3;P63146;P18754;P07305;Q8IY92;O00273;Q9BVW5}

5664 Pathogen[ P03383] interacts with 39 human partners: {P35227;Q9UNSL1;Q8IXJ9;Q7Z2E3;Q13761;P11831;O14497;Q9BVW5;P16220;P15172;O75376;Q86U70;O95644;Q6STE5;P48380;Q9HC52;O95931;P42226;P61978;O00273;P18754;Q92769;P17676;Q7Z3K3;P51531;Q96FF9;Q8IY92;O60885;Q96QC0;P49459;P51532;P63146;P54198;Q9BQ90;P17947;Q9P1Z2;Q92793;Q02078;P05412}

5665 Pathogen[ P03410] interacts with 45 human partners: {O14813;P49959;Q86SE8;P11831;P54198;Q96QC0;P61978;O60885;P17676;P17947;O14497;P15941;O76075;Q9BVW5;O95931;O00273;P49459;O75376;P35227;Q7Z2E3;O95644;Q9P1Z2;Q92793;P52701;Q92769;Q8IY92;Q8IXJ9;Q86U70;P63146;P48380;P16220;P51532;P05412;P42226;P51531;Q13761;Q9UNSL1;Q02078;Q7Z3K3;Q96FC9;Q96FF9;P18754;Q6STE5;Q9BQ90;Q9HC52}

5666 Pathogen[ P14075] interacts with 39 human partners: {Q7Z2E3;Q86U70;O00273;Q8IXJ9;P05412;P42226;P11831;Q96QC0;P51532;P49459;P48380;P15172;O95931;P54198;Q96FF9;O14497;Q9BVW5;O75376;Q92769;P51531;Q9HC52;P17947;Q9P1Z2;P61978;Q02078;O60885;Q92793;Q9UNSL1;P18754;P16220;P63146;P17676;Q6STE5;Q7Z3K3;Q8IY92;O95644;P35227;Q9BQ90;Q13761}

5667 Pathogen[ P0C206] interacts with 47 human partners: {Q9UNSL1;Q92769;P49959;Q9HC52;P51532;Q02078;P16220;P18754;P52701;P51531;O76075;P61978;Q6STE5;P05412;P54198;Q9P1Z2;P48380;Q92793;Q96FF9;Q9NQ03;O14497;Q8IXJ9;Q9BVW5;P17676;O14813;P49459;O60885;Q96T88;O95931;Q7Z3K3;P17947;Q86SE8;O75376;P11831;Q9BQ90;P42226;P15172;Q96QC0;Q86U70;O95644;Q8IY92;Q15788;Q7Z2E3;O00273;Q13761;P63146;P35227}

5668 Pathogen[ P03363] interacts with 44 human partners: {Q86U70;Q8IXJ9;O00273;P54198;P17676;P49459;Q6STE5;P35227;Q9HC52;Q96QC0;P17947;P51532;Q9H2W2;O14497;O75376;P16220;P63146;P42226;Q9NQ03;O60885;Q9BQ90;P11831;Q7Z2E3;Q9P1Z2;Q9BVW5;O76075;O95931;Q9UNSL1;Q7Z3K3;Q8IY92;Q92793;O95644;Q96T88;P61978;P05412;Q86SE8;Q96FF9;P48380;Q13761;P51531;P18754;P15172;O14813;Q02078}

5669 [Cluster 516]GO:0045171+C cellular\_component [name] intercellular bridge [def] "A direct link between the cytoplasms of sister cells that allows cells to communicate with one another. Germline intercellular bridges facilitate the passage of cytoplasmic components between cells during development. Intercellular bridges have also been found connecting somatic cells." [PMID

5670 Pathogen[ Q2Q067] interacts with 3 human partners: {Q02241;Q53EZ4;O95613}

5671 Pathogen[ P0C214] interacts with 3 human partners: {Q02241;Q53EZ4;O95613}

5672 Pathogen[ P03346] interacts with 3 human partners: {Q53EZ4;Q02241;O95613}

5673 Pathogen[ Q85601] interacts with 3 human partners: {Q53EZ4;Q02241;O95613}

5674 Pathogen[ P14079] interacts with 3 human partners: {Q02241;O95613;Q53EZ4}

5675 Pathogen[ P03383] interacts with 3 human partners: {Q02241;O95613;Q53EZ4}

5676 Pathogen[ P03410] interacts with 3 human partners: {Q53EZ4;O95613;Q02241}

5677 Pathogen[ P14075] interacts with 3 human partners: {Q02241;Q53EZ4;O95613}

5678 Pathogen[ P0C206] interacts with 2 human partners: {Q02241;O95613}

5679 Pathogen[ P03363] interacts with 3 human partners: {O95613;Q02241;Q53EZ4}

5680 [Cluster 517]GO:0030904+C cellular\_component [name] retromer complex [def] "A

conserved multimeric membrane-associated complex involved in retrograde transport from endosomes to the Golgi apparatus. For example, the budding yeast retromer comprises Vps35p, Vps29p, Vps26p, Vps5p, and Vps17p." [PMID

5681 Pathogen[ Q2Q067] interacts with 3 human partners:{Q4G0F5;O14972;O75436}

5682 Pathogen[ P0C214] interacts with 3 human partners:{O75436;O14972;Q4G0F5}

5683 Pathogen[ P03346] interacts with 4 human partners:{Q4G0F5;O14972;Q9Y5X2;O75436}

5684 Pathogen[ Q85601] interacts with 3 human partners:{O14972;Q4G0F5;O75436}

5685 Pathogen[ P14079] interacts with 4 human partners:{Q4G0F5;Q9Y5X2;O14972;O75436}

5686 Pathogen[ P03383] interacts with 2 human partners:{O14972;O75436}

5687 Pathogen[ P03410] interacts with 4 human partners:{O14972;O75436;Q4G0F5;Q9Y5X2}

5688 Pathogen[ P14075] interacts with 2 human partners:{O75436;O14972}

5689 Pathogen[ P0C206] interacts with 3 human partners:{Q4G0F5;O14972;O75436}

5690 Pathogen[ P03363] interacts with 3 human partners:{O75436;O14972;Q4G0F5}

5691 [Cluster 518]GO:0044299+cellular\_component [name] C-fiber [def] "The axon of a dorsal root ganglion cell that are responsive to pain and temperature. C-fibers are small in diameter (0.2-1.5 um) and unmyelinated." [NIF\_Subcellular

5692 Pathogen[ Q2Q067] interacts with 1 human partners:{P41219}

5693 Pathogen[ P0C214] interacts with 1 human partners:{P41219}

5694 Pathogen[ P03346] interacts with 1 human partners:{P41219}

5695 Pathogen[ Q85601] interacts with 1 human partners:{P41219}

5696 Pathogen[ P14079] interacts with 1 human partners:{P41219}

5697 Pathogen[ P03383] interacts with 1 human partners:{P41219}

5698 Pathogen[ P03410] interacts with 1 human partners:{P41219}

5699 Pathogen[ P14075] interacts with 1 human partners:{P41219}

5700 Pathogen[ P0C206] interacts with 1 human partners:{P41219}

5701 Pathogen[ P03363] interacts with 1 human partners:{P41219}

5702 [Cluster 519]GO:0000123+cellular\_component [name] histone acetyltransferase complex [def] "A protein complex that possesses histone acetyltransferase activity." [GOC

5703 Pathogen[ Q2Q067] interacts with 8 human partners:{Q6IE81;Q96EZ8;Q9UNL4;P51610;Q92831;Q7Z3B3;Q92830;Q92793}

5704 Pathogen[ P0C214] interacts with 9 human partners:{P51610;Q92793;Q9UNL4;O95251;Q4LE28;Q6IE81;Q92831;Q92830;Q96EZ8}

5705 Pathogen[ P03346] interacts with 12 human partners:{Q9UNL4;Q96EZ8;P51610;Q92831;Q4LE28;Q92830;Q7Z3B3;O95251;Q6IE81;Q9H7Z6;Q92793;A0AUZ9}

5706 Pathogen[ Q85601] interacts with 10 human partners:{O95251;Q9H7Z6;Q9UNL4;Q92831;P51610;Q92830;Q6IE81;Q4LE28;Q92793;Q96EZ8}

5707 Pathogen[ P14079] interacts with 11 human partners:{A0AUZ9;Q92830;Q92793;O95251;Q9UNL4;Q6IE81;P51610;Q7Z3B3;Q9P2N6;Q96EZ8;Q9H9L4}

5708 Pathogen[ P03383] interacts with 9 human partners:{Q92831;O95251;Q4LE28;Q9UNL4;P51610;Q92830;Q6IE81;Q96EZ8;Q92793}

5709 Pathogen[ P03410] interacts with 13 human partners:{Q92830;Q92831;Q9P2N6;P51610;O95251;Q9UNL4;Q9H9L4;Q92793;A0AUZ9;Q4LE28;Q96EZ8;Q7Z3B3;Q6IE81}

5710 Pathogen[ P14075] interacts with 11 human partners:{Q92831;P51610;Q7Z3B3;Q96EZ8;A0AUZ9;Q6IE81;Q4LE28;O95251;Q9UNL4;Q92793;Q92830}

5711 Pathogen[ P0C206] interacts with 14 human partners:{Q92830;O95251;Q9H9L4;Q92831;Q92793;Q96EZ8;A0AUZ9;P51610;Q6IE81;Q9P2N6;Q7Z3B3;Q9UNL4;Q9H7Z6;Q4LE28}

5712 Pathogen[ P03363] interacts with 10 human partners:{Q6IE81;Q4LE28;Q92831;Q9UNL4;Q92830;Q7Z3B3;Q96EZ8;Q92793;O95251;P51610}

5713 [Cluster 520]GO:0005911+cellular\_component [name] cell-cell junction [def] "A cell junction that forms a connection between two cells\_ excludes direct cytoplasmic junctions such as ring canals." [GOC

5714 Pathogen[ Q2Q067] interacts with 14 human partners:{Q9Y2J2;O75161;Q14160;Q9H307;P11166;Q99569;Q96IF1;Q12959;Q07157;Q5TCQ9;Q86SQ7;Q86U70;Q9NUP9;O60716}

5715 Pathogen[ P0C214] interacts with 10 human partners:{O75161;O60716;Q5TCQ9;Q9H307;P11166;Q86U70;Q12959;Q14160;Q86SQ7;Q07157}

5716 Pathogen[ P03346] interacts with 24 human partners:{Q969H4;Q86U70;Q99569;O60716;Q5TCQ9;Q68CZ1;Q9H307;Q96IF1;P55196;Q8TEW0;O75161;Q9NUP9;Q86SQ7;Q9Y4G6;Q07157;P11166;O00522;Q9Y2J2;Q8N157;Q9HAP6;Q14160;Q9H8V3;Q9NP85;Q12959}

5717 Pathogen[ Q85601] interacts with 14 human partners:{Q99569;O75161;Q9Y2J2;Q9NUP9;Q86U70;Q9H307;O60716;Q86SQ7;P11166;Q14160;Q5TCQ9;Q07157;Q96IF1;Q12959}

5718 Pathogen[ P14079] interacts with 28 human partners:{O75161;Q9Y2J2;Q9P266;Q07157;Q8N157;Q68CZ1;Q86U70;Q9NP85;P11166;Q9Y4G6;Q9H307;O00501;Q8TEW0;Q9NUP9;Q16586;Q96IF1;Q99569;Q9H8V3;Q9HAP6;Q9BQJ4;Q969H4;Q86SQ7;Q99439;Q16625;Q9UEY8;O15259;O60716;O00522}

5719 Pathogen[ P03383] interacts with 8 human partners:{O60716;Q14160;Q86U70;Q07157;Q86SQ7;Q5TCQ9;Q9H307;O75161}

5720 Pathogen[ P03410] interacts with 32 human partners:{Q9UEY8;P11166;O15259;Q12959;Q5TCQ9;O00501;O60716;O75161;Q9NUP9;Q14160;Q9NP8



5;Q969H4;Q9HAP6;Q9BQJ4;Q96IF1;Q99439;Q07157;Q9Y2J2;Q8N157;Q86U70;Q15049;Q9P266;Q86SQ7;Q9Y4G6;O00522;Q16625;Q8TEW0;Q9H8V3;Q68CZ1;Q15517;Q9H307;Q99569}

5721 Pathogen[ P14075 ] interacts with 10 human partners:{Q9H307;Q9P266;Q86U70;Q9Y2J2;Q14160;Q07157;Q86SQ7;Q5TCQ9;O75161;O60716}

5722 Pathogen[ P0C206 ] interacts with 23 human partners:{O60716;Q9NUP9;Q86SQ7;O75161;Q96IF1;Q5TCQ9;Q9P266;Q9H307;P11166;Q8TEW0;P55196;Q14160;Q99569;Q8N157;Q9H8V3;Q07157;Q86U70;Q969H4;Q12959;Q9NP85;Q9Y2J2;Q9BQJ4;O00522}

5723 Pathogen[ P03363 ] interacts with 19 human partners:{Q86U70;Q12959;O75161;Q14160;Q9H307;Q99569;Q07157;Q9Y4G6;Q96IF1;Q969H4;Q8N157;O00522;Q5TCQ9;O15259;Q9NUP9;Q86SQ7;O60716;Q9Y2J2;P11166}

5724 [Cluster 521]GO:0019907+C cellular\_component [name] cyclin-dependent protein kinase activating kinase holoenzyme complex [def] "A protein complex that phosphorylates cyclin-dependent kinases such as Cdc2 on Thr161 (or an equivalent residue)\_ contains a catalytic subunit and a regulatory subunit, and some examples also include an assembly factor." [GOC]

5725 Pathogen[ Q2Q067 ] interacts with 2 human partners:{Q9UHX1;P51946}

5726 Pathogen[ P0C214 ] interacts with 3 human partners:{P51946;Q9UHX1;P10809}

5727 Pathogen[ P03346 ] interacts with 2 human partners:{P51946;Q9UHX1}

5728 Pathogen[ Q85601 ] interacts with 2 human partners:{P51946;Q9UHX1}

5729 Pathogen[ P14079 ] interacts with 2 human partners:{P51946;Q9UHX1}

5730 Pathogen[ P03383 ] interacts with 2 human partners:{Q9UHX1;P51946}

5731 Pathogen[ P03410 ] interacts with 2 human partners:{P51946;Q9UHX1}

5732 Pathogen[ P14075 ] interacts with 2 human partners:{Q9UHX1;P51946}

5733 Pathogen[ P0C206 ] interacts with 2 human partners:{Q9UHX1;P51946}

5734 Pathogen[ P03363 ] interacts with 2 human partners:{P51946;Q9UHX1}

5735 [Cluster 522]GO:0030880+C cellular\_component [name] RNA polymerase complex [def] "Any complex that possesses RNA polymerase activity\_ generally comprises a catalytic subunit and one or more additional subunits." [GOC]

5736 Pathogen[ Q2Q067 ] interacts with 1 human partners:{P61218}

5737 Pathogen[ P0C214 ] interacts with 1 human partners:{P61218}

5738 Pathogen[ P03346 ] interacts with 1 human partners:{P61218}

5739 Pathogen[ Q85601 ] interacts with 1 human partners:{P61218}

5740 Pathogen[ P14079 ] interacts with 1 human partners:{P61218}

5741 Pathogen[ P03383 ] interacts with 1 human partners:{P61218}

5742 Pathogen[ P03410 ] interacts with 1 human partners:{P61218}

5743 Pathogen[ P14075 ] interacts with 1 human partners:{P61218}

5744 Pathogen[ P0C206 ] interacts with 1 human partners:{P61218}

5745 Pathogen[ P03363 ] interacts with 1 human partners:{P61218}

5746 [Cluster 523]GO:0045179+C cellular\_component [name] apical cortex [def] "The region that lies just beneath the plasma membrane on the apical edge of a cell." [GOC]

5747 Pathogen[ Q2Q067 ] interacts with 2 human partners:{P59047;Q9BT92}

5748 Pathogen[ P0C214 ] interacts with 2 human partners:{Q9BT92;P59047}

5749 Pathogen[ P03346 ] interacts with 3 human partners:{P59047;P07148;Q9BT92}

5750 Pathogen[ Q85601 ] interacts with 2 human partners:{Q9BT92;P59047}

5751 Pathogen[ P14079 ] interacts with 4 human partners:{Q587J8;P81172;Q9BT92;P59047}

5752 Pathogen[ P03383 ] interacts with 1 human partners:{Q9BT92}

5753 Pathogen[ P03410 ] interacts with 4 human partners:{P59047;Q9BT92;P81172;Q587J8}

5754 Pathogen[ P14075 ] interacts with 1 human partners:{Q9BT92}

5755 Pathogen[ P0C206 ] interacts with 2 human partners:{Q9BT92;P59047}

5756 Pathogen[ P03363 ] interacts with 2 human partners:{Q9BT92;P59047}

5757 [Cluster 524]GO:0005687+C cellular\_component [name] U4 snRNP [def] "A ribonucleoprotein complex that contains small nuclear RNA U4." [GOC]

5758 Pathogen[ Q2Q067 ] interacts with 2 human partners:{Q8WWY3;Q13838}

5759 Pathogen[ P0C214 ] interacts with 2 human partners:{Q13838;Q8WWY3}

5760 Pathogen[ P03346 ] interacts with 2 human partners:{Q13838;Q8WWY3}

5761 Pathogen[ Q85601 ] interacts with 2 human partners:{Q13838;Q8WWY3}

5762 Pathogen[ P14079 ] interacts with 2 human partners:{Q13838;Q8WWY3}

5763 Pathogen[ P03383 ] interacts with 2 human partners:{Q13838;Q8WWY3}

5764 Pathogen[ P03410 ] interacts with 2 human partners:{Q13838;Q8WWY3}

5765 Pathogen[ P14075 ] interacts with 2 human partners:{Q13838;Q8WWY3}

5766 Pathogen[ P0C206 ] interacts with 2 human partners:{Q13838;Q8WWY3}

5767 Pathogen[ P03363 ] interacts with 2 human partners:{Q8WWY3;Q13838}

5768 [Cluster 525]GO:0015629+C cellular\_component [name] actin cytoskeleton [def] "The part of the cytoskeleton (the internal framework of a cell) composed of actin and associated proteins. Includes actin cytoskeleton-associated complexes." [GOC]

5769 Pathogen[ Q2Q067 ] interacts with 50 human partners:{O15511;O75832;P07737;Q9NQW6;P35080;P30419;P27694;O14639;Q8N3V7;P55795;Q9H1B4;O43516;Q15697;Q14192;Q9P2B4;Q15542;Q6H8Q1;P29966;O00401;O15117;Q92558;O95198;P60673;P36871;P31943;Q13469;Q8N0Z2;Q8NFW9;P06396;Q9Y5B0;Q96LC9;Q00587;Q9BR76;O43918;Q9NVD7;Q9UMS6;Q16621;Q5TZA2;Q9NP98;Q9Y6D9;P42768;Q9Y2M5;Q495M9;O00165;P35579;P35606;Q9UL03;Q9BPX3;Q96DV4;Q9NPC6}

5770 Pathogen[ P0C214 ] interacts with 56 human partners:{P35080;Q9BPX3;Q8NFW9;O15117;Q15697;P29966;P68133;Q13469;Q8N0Z2;O95198;Q96DV4;Q96LC9;Q495M9;Q16621;Q16587;P35606;Q9UMS6;Q9NPC6;O14639;Q9NP98;P06396;Q15542;P55795;O75832;O43516;Q9H1B4;P36871;O00165;P26639;Q9Y2M5;Q16658;Q14192;Q86SG2;P62736;Q9P2B4;



- 5771 O43918;Q92558;P31943;P60673;Q9Y5B0;O15144;P30419;O00401;Q96GD0;P27694;Q6H8Q1;Q9NVD7;Q8N3V7;P42768;P63261;Q9UL03;Q7L5Y9;Q9Y6D9;Q5TZA2;Q9BR76;O15511}  
Pathogen[ P03346] interacts with 75 human  
partners: {O95166;Q9Y6D9;Q8N3V7;Q15542;Q16621;Q8N0Z2;P02549;Q9NQW6;O14639;O43918;O15511;Q86SG2;O15144;O43516;Q96LC9;P11277;P42768;P27694;P35579;O94875;P62736;Q9UMS6;P55795;Q00587;P31943;Q9BR76;Q08495;Q9Y5K6;Q6H8Q1;P36871;Q9H1B4;Q9Y664;O75832;Q9Y5B0;Q13469;Q9BPX3;P60673;P35080;Q14192;Q15019;Q9Y4G6;Q92558;Q9UI47;O15145;O95198;Q9Y614;Q96DV4;Q9P2B4;Q9H4Z3;P29966;Q8NFW9;Q9NVD7;O00165;Q5TZA2;Q16658;P07737;Q9UHD8;P06396;Q96KN3;P54257;O15117;Q9Y2M5;Q15697;Q9C0H9;P35606;Q16587;O00401;Q9UL03;P10916;Q495M9;Q96M02;Q9Y573;Q9UBF9;Q9NP98;Q9NPC6}
- 5772 Pathogen[ Q85601] interacts with 60 human  
partners: {O00401;O14639;Q96M02;O15511;Q15542;Q96LC9;Q8NFW9;P68133;Q9NVD7;P06396;P26639;Q9NQW6;O00165;Q86SG2;Q92558;Q9Y5K6;O95166;Q16621;P35579;O75832;P35080;Q9UMS6;Q7L5Y9;Q13469;P55795;Q6H8Q1;Q9BR76;Q9H1B4;P27694;P07737;Q9NPC6;Q16587;O43516;Q9BPX3;O15117;Q9Y5B0;P63261;P42768;P36871;Q14192;Q8N3V7;Q9Y6D9;Q9P2B4;P60673;P29966;Q5TZA2;Q9Y2M5;Q96DV4;Q15697;P30419;Q8N0Z2;Q9NP98;P35606;Q9UL03;P31943;P62736;Q495M9;O43918;O15144;O95198}
- 5773 Pathogen[ P14079] interacts with 89 human  
partners: {O43516;Q9NQW6;P35579;O95166;O95425;P26639;Q5TZA2;Q08495;P63261;Q9Y614;Q9Y664;P54257;Q9Y5B0;Q14192;Q16658;Q92558;Q9NR12;Q9UI47;P35606;P47756;O00165;O14639;P07737;O75832;Q9UBF9;P10916;Q9NPC6;P35080;Q86SG2;Q7L5Y9;Q9NP98;Q9H1B4;P60673;Q9Y4G6;Q9C0H9;P50552;Q96GD0;Q9UKI2;O95198;O15145;Q96M02;O15511;P68032;Q9NQT6;P55795;O15117;Q9H2D6;Q8NFW9;P29966;P61158;Q16587;O15195;Q15697;Q8N3V7;P30419;Q9Y2M5;Q9BR76;P11277;Q6H8Q1;Q16621;O75366;Q9H4Z3;Q8N0Z2;Q00587;Q8N5W9;Q9Y5K6;Q9UL03;P31943;Q96LC9;Q05682;O43918;Q9BPX3;P27694;Q495M9;Q9P2B4;Q13469;Q96DV4;P02549;Q9NVD7;Q9Y573;P36871;Q9H3Q1;P68133;Q15542;Q8NHR9;O15144;P42768;O00401;Q9UMS6}
- 5774 Pathogen[ P03383] interacts with 38 human  
partners: {Q9H1B4;Q96LC9;P35080;Q13469;O14639;O15511;P27694;P55795;Q9UMS6;Q15542;O00165;P31943;P07737;O15117;Q92558;O75832;O43516;O00401;Q5TZA2;Q16621;Q14192;P29966;Q15697;P42768;Q8N0Z2;O43918;Q9Y5B0;Q9Y2M5;P35579;Q8N3V7;Q00587;Q9NPC6;Q9UL03;Q9C0H9;Q9BPX3;P06396;Q9Y6D9;Q9NP98}
- 5775 Pathogen[ P03410] interacts with 88 human  
partners: {O15511;Q96M02;Q8NHR9;Q9Y573;Q9UMS6;Q15697;P62736;Q16658;Q9Y614;P35080;Q9UBF9;P10916;P47756;Q8N3V7;P36871;Q9UL03;Q9NP98;Q9P2B4;Q495M9;O43516;P06396;Q05682;Q0VF96;O00165;Q96LC9;Q92558;P35606;O15145;Q6H8Q1;O43918;O00401;O14639;P35579;Q9UKI2;P30419;P42768;Q00587;Q96DV4;Q9H3Q1;Q9NQW6;P02549;P33241;Q8NFW9;Q9NPC6;Q9Y5K6;O95166;Q96GD0;O95425;P60673;P50552;P26639;P31943;Q16621;Q5TZA2;Q8N5W9;O95198;Q08495;Q9BR76;Q9H4Z3;P68133;Q9Y4G6;Q9H1B4;Q13469;Q9UHD8;Q86SG2;P54257;O15117;Q9Y5B0;Q9UI47;Q15542;P63261;Q9NVD7;P27694;Q8N0Z2;O15144;Q9C0H9;P55795;Q9BPX3;Q9Y664;P07737;Q7L5Y9;Q14192;P11277;Q9H2D6;P29966;Q9Y2M5;O75832;Q16587}
- 5776 Pathogen[ P14075] interacts with 40 human  
partners: {Q8N3V7;Q9NPC6;Q8N5W9;Q9Y6D9;Q15542;O75832;Q15697;Q9Y5B0;P42768;O43918;O15117;Q7L5Y9;P31943;Q5TZA2;Q96LC9;O15511;Q8N0Z2;P07737;Q00587;O43516;O00401;P29966;Q9NP98;Q13469;P06396;P35579;O14639;P27694;P26639;P35080;Q92558;Q9UMS6;Q16621;Q9H1B4;Q9Y2M5;Q9C0H9;Q9UL03;Q9BPX3;O00165;Q14192}
- 5777 Pathogen[ P0C206] interacts with 74 human  
partners: {O15511;Q9BPX3;Q9P2B4;Q96M02;P06396;O75832;Q13469;P60673;P47756;Q15019;Q8N3V7;O43516;Q9Y6D9;P62736;Q9BR76;P30419;Q9NVD7;Q15697;Q5TZA2;Q9NQW6;Q8NFW9;Q9UMS6;Q9Y614;Q9NP98;Q9UL03;Q9UI47;O15145;Q96LC9;Q16587;O43918;P68133;Q9Y5B0;Q7L5Y9;O00165;Q16658;P35080;Q86SG2;P35606;P63261;Q495M9;Q92558;Q9H1B4;P35579;O00401;Q9H4Z3;P55795;Q9C0H9;O15144;Q15542;Q9Y5K6;Q08495;Q16621;P26639;P11277;O95198;Q96GD0;P27694;Q14192;O14639;Q9Y2M5;Q16181;Q8N5W9;P42768;P07737;O15117;Q9NPC6;Q8N0Z2;O95166;P31943;Q96DV4;P29966;Q6H8Q1;P36871;Q00587}
- 5778 Pathogen[ P03363] interacts with 77 human  
partners: {Q16587;Q9Y614;Q8N3V7;Q9H2D6;P27694;Q9Y5B0;P11277;Q9Y6D9;Q9UI47;P02549;P35080;P35579;P60673;Q96LC9;Q9NQW6;Q9BR76;Q8NFW9;Q9UBF9;P62736;Q8NHR9;P42768;Q16621;P68133;Q00587;Q9UL03;Q96M02;Q9NP98;Q92558;O94875;Q96DV4;Q9Y4G6;Q08495;Q8N0Z2;P06396;Q5TZA2;O15117;O15144;Q96KN3;Q9Y2M5;P31943;Q6H8Q1;Q9BPX3;Q9UHD8;Q86SG2;Q15542;O15143;O95198;P54257;Q495M9;P29966;Q15697;Q13469;P55795;P35606;O00401;P63261;Q9UMS6;O43516;O43918;O00165;Q9Y664;Q9NVD7;Q9NPC6;Q9NR12;Q9P2B4;Q16658;O95166;Q9Y5K6;O15145;Q9H1B4;Q9Y573;P07737;O14639;P10916;O15511;Q9C0H9;Q14192}
- 5779 [Cluster 526]GO:0043292+C cellular\_component [name] contractile fiber [def]  
"Fibers, composed of actin, myosin, and associated proteins, found in cells of smooth or striated muscle." [GOC]
- 5780 Pathogen[ Q2Q067] interacts with 5 human  
partners: {O14974;P02511;P04792;P12883;P17661}
- 5781 Pathogen[ P0C214] interacts with 8 human  
partners: {P02511;P11055;P04792;O14974;P19429;P12883;P13533;P17661}
- 5782 Pathogen[ P03346] interacts with 7 human  
partners: {A8MU46;Q9UHP9;Q15149;P17661;P02511;O14974;P04792}
- 5783 Pathogen[ Q85601] interacts with 7 human  
partners: {P17661;P13533;P02511;P11055;P12883;P04792;O14974}
- 5784 Pathogen[ P14079] interacts with 9 human  
partners: {P19429;P02511;Q9UHP9;O14974;Q15078;Q15149;P12883;P04792;P17661}
- 5785 Pathogen[ P03383] interacts with 4 human partners: {P17661;P02511;P04792;P12883}
- 5786 Pathogen[ P03410] interacts with 10 human

5787 Pathogen[ P14075] interacts with 4 human partners: {Q9UHP9;P17661;P04792;P02511}

5788 Pathogen[ P0C206] interacts with 9 human partners: {Q9UHP9;P17661;P13533;P19429;P04792;P11055;O14974;P12883;P02511}

5789 Pathogen[ P03363] interacts with 7 human partners: {Q9UHP9;Q15149;P17661;O14974;A8MU46;P19429;P04792}

5790 [Cluster 527]GO:0005859+C cellular\_component [name] muscle myosin complex [def] "A filament of myosin found in a muscle cell of any type." [GOC]

5791 Pathogen[ Q2Q067] interacts with 2 human partners: {Q9UKX2;P12883}

5792 Pathogen[ P0C214] interacts with 8 human partners: {Q9UKX2;P14649;P13535;P12882;P12883;P13533;Q9Y623;P35749}

5793 Pathogen[ P03346] interacts with 2 human partners: {P14649;Q9UKX2}

5794 Pathogen[ Q85601] interacts with 8 human partners: {P13533;P14649;Q9UKX2;P12882;P35749;P12883;P13535;Q9Y623}

5795 Pathogen[ P14079] interacts with 3 human partners: {Q9UKX2;P14649;P12883}

5796 Pathogen[ P03383] interacts with 2 human partners: {Q9UKX2;P12883}

5797 Pathogen[ P03410] interacts with 6 human partners: {Q9UKX2;P12882;P12883;P14649;P13533;P13535}

5798 Pathogen[ P14075] interacts with 1 human partners: {Q9UKX2}

5799 Pathogen[ P0C206] interacts with 8 human partners: {P13533;Q9Y623;P14649;P12883;P12882;P35749;Q9UKX2;P13535}

5800 Pathogen[ P03363] interacts with 2 human partners: {P14649;Q9UKX2}

5801 [Cluster 528]GO:0044431+C cellular\_component [name] Golgi apparatus part [def] "Any constituent part of the Golgi apparatus, a compound membranous cytoplasmic organelle of eukaryotic cells, consisting of flattened, ribosome-free vesicles arranged in a more or less regular stack." [GOC]

5802 Pathogen[ Q2Q067] interacts with 6 human partners: {O43747;Q9UJY4;Q9UJY5;O75843;Q9NZ52;Q13367}

5803 Pathogen[ P0C214] interacts with 6 human partners: {Q9UJY5;Q13367;O75843;Q9UJY4;Q9NZ52;O43747}

5804 Pathogen[ P03346] interacts with 6 human partners: {O43747;O75843;Q9UJY4;Q13367;Q9UJY5;Q9NZ52}

5805 Pathogen[ Q85601] interacts with 6 human partners: {Q13367;O75843;Q9UJY4;O43747;Q9UJY5;Q9NZ52}

5806 Pathogen[ P14079] interacts with 6 human partners: {Q9UJY4;Q9UJY5;Q9NZ52;O75843;Q13367;O43747}

5807 Pathogen[ P03383] interacts with 6 human partners: {Q9UJY4;O75843;O43747;Q9UJY5;Q13367;Q9NZ52}

5808 Pathogen[ P03410] interacts with 6 human partners: {Q9NZ52;O43747;O75843;Q9UJY5;Q13367;Q9UJY4}

5809 Pathogen[ P14075] interacts with 6 human partners: {Q9UJY4;Q9NZ52;O43747;O75843;Q9UJY5;Q13367}

5810 Pathogen[ P0C206] interacts with 6 human partners: {O43747;Q9UJY4;Q9NZ52;Q9UJY5;O75843;Q13367}

5811 Pathogen[ P03363] interacts with 6 human partners: {Q13367;O43747;Q9UJY4;Q9NZ52;O75843;Q9UJY5}

5812 [Cluster 529]GO:0070545+C cellular\_component [name] PeBoW complex [def] "A protein complex that is involved in coordinating ribosome biogenesis with cell cycle progression. In human, it is composed of Pes1, Bop1, and WDR12\_ in Saccharomyces the proteins are known as Nop7p, Erbl1 and Ytml1 respectively." [GOC]

5813 Pathogen[ Q2Q067] interacts with 3 human partners: {Q9GZL7;O00541;Q14137}

5814 Pathogen[ P0C214] interacts with 3 human partners: {O00541;Q9GZL7;Q14137}

5815 Pathogen[ P03346] interacts with 3 human partners: {O00541;Q9GZL7;Q14137}

5816 Pathogen[ Q85601] interacts with 3 human partners: {O00541;Q9GZL7;Q14137}

5817 Pathogen[ P14079] interacts with 3 human partners: {Q9GZL7;O00541;Q14137}

5818 Pathogen[ P03383] interacts with 3 human partners: {O00541;Q9GZL7;Q14137}

5819 Pathogen[ P03410] interacts with 3 human partners: {Q14137;Q9GZL7;O00541}

5820 Pathogen[ P14075] interacts with 3 human partners: {Q9GZL7;O00541;Q14137}

5821 Pathogen[ P0C206] interacts with 3 human partners: {Q14137;Q9GZL7;O00541}

5822 Pathogen[ P03363] interacts with 3 human partners: {Q9GZL7;Q14137;O00541}

5823 [Cluster 530]GO:0005652+C cellular\_component [name] nuclear lamina [def] "The fibrous, electron-dense layer lying on the nucleoplasmic side of the inner membrane of a cell nucleus, composed of lamin filaments. The polypeptides of the lamina are thought to be concerned in the dissolution of the nuclear envelope and its re-formation during mitosis. The lamina is composed of lamin A and lamin C filaments cross-linked into an orthogonal lattice, which is attached via lamin B to the inner nuclear membrane through interactions with a lamin B receptor, an IFAP, in the membrane." [ISBN]

5824 Pathogen[ Q2Q067] interacts with 3 human partners: {P02545;Q03252;Q9UHQ1}

5825 Pathogen[ P0C214] interacts with 4 human partners: {P50747;Q9UHQ1;Q03252;P02545}

5826 Pathogen[ P03346] interacts with 3 human partners: {P02545;Q03252;Q9UHQ1}

5827 Pathogen[ Q85601] interacts with 3 human partners: {P02545;Q03252;Q9UHQ1}

5828 Pathogen[ P14079] interacts with 3 human partners: {Q9UHQ1;Q03252;P02545}

5829 Pathogen[ P03383] interacts with 3 human partners: {P02545;Q9UHQ1;Q03252}

5830 Pathogen[ P03410] interacts with 3 human partners: {Q9UHQ1;Q03252;P02545}

5831 Pathogen[ P14075] interacts with 3 human partners: {P02545;Q9UHQ1;Q03252}

5832 Pathogen[ P0C206] interacts with 3 human partners: {Q9UHQ1;Q03252;P02545}

5833 Pathogen[ P03363] interacts with 3 human partners:{P02545;Q03252;Q9UHQ1}

5834 [Cluster 531]GO:0005869+C cellular\_component [name] dynactin complex [def] "A 20S multiprotein assembly of total mass about 1.2 MDa that activates dynein-based activity in vivo. A large structural component of the complex is an actin-like 40 nm filament composed of actin-related protein, to which other components attach." [ISBN

5835 Pathogen[ Q2Q067] interacts with 3 human partners:{075935;Q13561;P42025}

5836 Pathogen[ P0C214] interacts with 4 human partners:{075935;P42025;O00399;Q13561}

5837 Pathogen[ P03346] interacts with 4 human partners:{075935;P42025;O00399;Q13561}

5838 Pathogen[ Q85601] interacts with 5 human partners:{P61163;075935;O00399;P42025;Q13561}

5839 Pathogen[ P14079] interacts with 6 human partners:{Q9NZ32;O00399;Q13561;P61163;P42025;075935}

5840 Pathogen[ P03383] interacts with 3 human partners:{P42025;075935;Q13561}

5841 Pathogen[ P03410] interacts with 6 human partners:{Q13561;Q9NZ32;O00399;P61163;075935;P42025}

5842 Pathogen[ P14075] interacts with 3 human partners:{Q13561;075935;P42025}

5843 Pathogen[ P0C206] interacts with 6 human partners:{Q9NZ32;P61163;O00399;Q13561;075935;P42025}

5844 Pathogen[ P03363] interacts with 6 human partners:{Q13561;O00399;P61163;Q9NZ32;075935;P42025}

5845 [Cluster 532]GO:0044428+C cellular\_component [name] nuclear part [def] "Any constituent part of the nucleus, a membrane-bounded organelle of eukaryotic cells in which chromosomes are housed and replicated." [GOC

5846 Pathogen[ Q2Q067] interacts with 4 human partners:{Q13573;P12755;075376;Q14207}

5847 Pathogen[ P0C214] interacts with 4 human partners:{Q13573;Q14207;075376;P12755}

5848 Pathogen[ P03346] interacts with 4 human partners:{Q14207;075376;Q13573;Q8NEA6}

5849 Pathogen[ Q85601] interacts with 5 human partners:{Q13573;P12755;Q8NEA6;075376;Q14207}

5850 Pathogen[ P14079] interacts with 5 human partners:{P12755;Q14207;Q13573;075376;Q8NEA6}

5851 Pathogen[ P03383] interacts with 3 human partners:{Q13573;075376;Q14207}

5852 Pathogen[ P03410] interacts with 5 human partners:{P12755;Q14207;075376;Q8NEA6;Q13573}

5853 Pathogen[ P14075] interacts with 3 human partners:{Q14207;Q13573;075376}

5854 Pathogen[ P0C206] interacts with 5 human partners:{P12755;Q8NEA6;Q13573;075376;Q14207}

5855 Pathogen[ P03363] interacts with 4 human partners:{075376;Q8NEA6;Q13573;Q14207}

5856 [Cluster 533]GO:0005658+C cellular\_component [name] alpha DNA polymerase [def] "A complex of four polypeptides, comprising large and small DNA polymerase alpha subunits and two primase subunits, which catalyzes the synthesis of an RNA primer on the lagging strand of replicating DNA\_ the smaller of the two primase subunits alone can catalyze oligoribonucleotide synthesis." [GOC

5857 Pathogen[ Q2Q067] interacts with 2 human partners:{Q14181;P25205}

5858 Pathogen[ P0C214] interacts with 2 human partners:{P25205;Q14181}

5859 Pathogen[ P03346] interacts with 2 human partners:{P25205;Q14181}

5860 Pathogen[ Q85601] interacts with 2 human partners:{P25205;Q14181}

5861 Pathogen[ P14079] interacts with 3 human partners:{P49642;Q14181;P25205}

5862 Pathogen[ P03383] interacts with 2 human partners:{Q14181;P25205}

5863 Pathogen[ P03410] interacts with 3 human partners:{P25205;Q14181;P49642}

5864 Pathogen[ P14075] interacts with 2 human partners:{P25205;Q14181}

5865 Pathogen[ P0C206] interacts with 3 human partners:{P25205;P49642;Q14181}

5866 Pathogen[ P03363] interacts with 2 human partners:{P25205;Q14181}

5867 [Cluster 534]GO:0030532+C cellular\_component [name] small nuclear ribonucleoprotein complex [def] "A complex composed of RNA of the small nuclear RNA (snRNA) class and protein, found in the nucleus of a eukaryotic cell. These are typically named after the snRNA(s) they contain, e.g. U1 snRNP or U4/U6 snRNP. Many, but not all, of these complexes are involved in splicing of nuclear mRNAs." [GOC

5868 Pathogen[ Q2Q067] interacts with 16 human partners:{P62312;Q9Y6D6;095391;P62318;P62314;P62304;P14678;Q96RS0;P57678;P09661;P62316;P62306;P63162;P62308;Q9Y4Z0;Q15428}

5869 Pathogen[ P0C214] interacts with 16 human partners:{P62312;P62316;P14678;P62306;P57678;Q15428;P62308;Q9Y4Z0;P62314;P63162;P62318;Q96RS0;P62304;Q9Y6D6;P09661;095391}

5870 Pathogen[ P03346] interacts with 18 human partners:{P62304;095391;043818;P62318;Q9Y6D6;P63162;Q9Y4Z0;P62306;Q96RS0;P62314;P14678;P57678;P62316;P62308;P62312;Q15393;P09661;Q15428}

5871 Pathogen[ Q85601] interacts with 14 human partners:{P62304;095391;P62316;P14678;P62314;P62306;P63162;Q9Y4Z0;P62318;P62312;Q96RS0;Q9Y6D6;P62308;P09661}

5872 Pathogen[ P14079] interacts with 16 human partners:{P57678;Q96RS0;P62312;P62314;P62306;P14678;Q9Y4Z0;Q9Y6D6;P62308;P62304;Q15428;P62316;P09661;P62318;095391;P63162}

5873 Pathogen[ P03383] interacts with 15 human partners:{P09661;P62318;P62312;P62304;P63162;Q9Y6D6;P62314;P14678;Q96RS0;Q9Y4Z0;P57678;P62308;095391;P62306}

5874 Pathogen[ P03410] interacts with 18 human

5875 partners:{Q96RS0;P62304;P62306;Q15393;P62308;P14678;P62316;O43818;P62314;Q15428;P09661;Q9Y6D6;Q9Y4Z0;P57678;P62312;P63162;O95391;P62318}  
 Pathogen[ P14075] interacts with 16 human

5876 partners:{P62304;P62316;P57678;O95391;Q9Y4Z0;Q15428;P63162;P62306;P62308;Q9Y6D6;P62312;P62318;Q96RS0;P09661;P14678;P62314}  
 Pathogen[ P0C206] interacts with 16 human

5877 partners:{Q96RS0;P14678;P62304;Q9Y6D6;P63162;P62314;P62316;Q9Y4Z0;P62318;P62306;P62312;P09661;P62308;O95391;Q15428;P57678}  
 Pathogen[ P03363] interacts with 18 human

5878 partners:{P62314;Q96RS0;P63162;Q9Y4Z0;O95391;P62312;Q15393;P62318;P62304;O43818;P62306;P57678;P62316;Q15428;P62308;Q9Y6D6;P14678;P09661}  
 [Cluster 535]GO:0030669+C cellular\_component [name] clathrin-coated endocytic vesicle membrane [def] "The lipid bilayer surrounding a clathrin-coated endocytic vesicle."  
 [GOC]

5879 Pathogen[ Q2Q067] interacts with 5 human  
 partners:{P63010;Q96CW1;Q00610;Q99962;P09496}

5880 Pathogen[ P0C214] interacts with 5 human  
 partners:{Q96CW1;Q99962;P63010;P09496;P53680}

5881 Pathogen[ P03346] interacts with 6 human  
 partners:{P63010;P53680;Q99962;P09496;Q96CW1;Q00610}

5882 Pathogen[ Q85601] interacts with 6 human  
 partners:{Q00610;P09496;Q96CW1;Q99962;P53680;P63010}

5883 Pathogen[ P14079] interacts with 6 human  
 partners:{Q96CW1;Q00610;P63010;P53680;P09496;Q99962}

5884 Pathogen[ P03383] interacts with 3 human partners:{Q96CW1;Q00610;P63010}

5885 Pathogen[ P03410] interacts with 6 human  
 partners:{Q00610;P09496;Q96CW1;P53680;P63010;Q99962}

5886 Pathogen[ P14075] interacts with 4 human partners:{P09496;Q96CW1;P63010;Q00610}

5887 Pathogen[ P0C206] interacts with 6 human  
 partners:{P53680;P63010;Q00610;Q99962;P09496;Q96CW1}

5888 Pathogen[ P03363] interacts with 4 human partners:{Q99962;Q00610;P63010;Q96CW1}

5889 [Cluster 536]GO:0005730+C cellular\_component [name] nucleolus [def] "A small, dense body one or more of which are present in the nucleus of eukaryotic cells. It is rich in RNA and protein, is not bounded by a limiting membrane, and is not seen during mitosis. Its prime function is the transcription of the nucleolar DNA into 45S ribosomal-precursor RNA, the processing of this RNA into 5.8S, 18S, and 28S components of ribosomal RNA, and the association of these components with 5S RNA and proteins synthesized outside the nucleolus. This association results in the formation of ribonucleoprotein precursors\_ these pass into the cytoplasm and mature into the 40S and 60S subunits of the ribosome."  
 [ISBN]

5890 Pathogen[ Q2Q067] interacts with 1035 human  
 partners:{Q86W56;P04156;P51398;Q9HC78;Q09FC8;Q9Y253;Q9H4I2;Q9NZ81;P78346;Q9Y473;Q9H583;O43290;Q13573;Q9BU02;Q14526;Q8WV37;Q9NWS1;O43365;O95602;Q15054;Q9UKI9;Q96N77;Q8NHY2;Q9BZZ5;Q12905;Q9UPP1;Q8WZ33;P33240;Q01082;O75525;P52434;Q92750;P01100;Q03989;O60524;Q9HB65;Q9Y6X8;Q6FI81;Q92585;Q8N187;Q9H2G9;Q8WVX9;O95639;Q9Y3A2;Q96FV9;Q9UHL9;Q6UN15;Q86U42;P48556;Q15234;Q9Y4A5;Q9H321;Q5TD94;Q6P387;P18754;Q96S65;O43364;Q8NEM1;Q6P2H3;Q9BZE4;Q96GA3;Q14258;Q9BSJ6;Q8IX15;Q9H4X1;O00186;Q9H008;Q9BVP2;Q9UPN9;Q9Y3S2;Q9Y6D6;O00410;Q9NQT4;P07741;Q96KQ4;Q5D1E8;Q9Y324;P55769;Q7Z4H7;Q92681;P56182;Q96NB3;Q92922;Q63HQ0;Q9UL41;Q96QU8;Q13875;Q9UQ80;Q13356;P22087;P55265;P49790;Q99638;Q8WVC0;Q8TAD8;Q5TAP6;O95391;Q86UA6;Q9Y2D1;Q9GZL7;Q9BSF8;Q9UHB7;P52272;O75818;Q6PJP8;Q8WV54;Q9UHR5;Q13887;Q14980;Q9NVU7;O00267;O43493;Q9H9T3;Q9NPJ6;Q8NCE0;Q7Z5K2;Q99547;O43663;P27694;Q9C005;P49959;P41220;Q15459;Q99575;Q13427;Q08999;P40763;Q9NXV6;Q9UBQ5;Q9Y3E1;Q8WWL7;Q08209;O15226;P61579;P06454;Q13352;P01106;Q9H2P0;Q13148;Q7Z6B0;O14503;O43159;Q16666;Q9UKX2;O71511;Q9Y3T9;Q14690;P38432;Q13485;Q9Y2B5;Q96DX5;Q9HAJ7;Q6ECI4;P46087;P35680;Q9NX58;P53804;P38646;Q81WV8;Q9Y2L1;P55795;Q9NR48;Q9NVN8;Q8IXK0;Q8WVX9;Q9H1B4;Q99816;Q9BZQ8;Q92797;Q9BQA1;O95295;Q9BSW2;Q9Y606;Q15233;Q13829;Q9NXZ1;P41182;Q9Y2X9;P19474;Q15554;Q96AE4;Q9GZS3;P15880;Q96R06;Q8IZU1;P30793;O94818;Q9NUL3;Q9HC52;Q9UDY8;P55197;Q5JTD0;Q06265;Q9BUL9;Q9GZS1;P0DI83;Q96JI7;P82979;P09132;Q15326;O95243;P18847;Q9UHX1;P49427;Q14684;Q8TEV9;P51531;P08729;P41970;Q9HAF1;Q8WTT2;Q8WVX8;Q9Y244;Q9NV31;P10155;Q9H6J7;P61457;Q15697;O96004;O43390;Q9C086;P15121;Q01196;Q00613;P56181;Q9NRR4;Q5VZE5;Q13435;Q86U00;Q5T8A7;P37275;P19367;O75081;Q8NF64;Q5EE01;Q9Y6K1;Q96DI7;O14929;O00257;Q2NL82;O43172;Q9NZI6;P49116;P10074;Q7Z2E3;O60315;P11387;Q14119;Q96C86;P30279;Q13868;P62140;Q9UKY7;Q13547;Q6PI26;Q9NP66;Q9UP83;Q05195;Q14103;O00712;Q6UUV9;Q9HB58;O00534;P52741;Q5TKAL;O00566;O14662;Q14814;P39880;Q86XR8;Q9UBP6;Q8TF68;Q9BZV1;P61573;Q9H6T0;P32969;O76031;P14316;Q96EY5;O94776;O75486;P0CG30;P62277;Q99567;P18615;Q9H1Z4;Q13601;P56537;Q9UPV0;Q92800;Q96EZ8;Q96S55;P06748;P30876;Q9UNH5;P19387;Q9NVX0;Q9UER7;P15976;Q96G21;Q9H307;O75347;Q15542;Q6H8Q1;Q69383;Q4VC44;Q03933;Q8TDN6;O94842;Q96ST3;Q5T7V8;P61218;Q9Y237;Q7L804;Q9NY61;Q9Y6J0;Q9NVR2;Q92945;P54727;Q9UFW8;Q7L5N1;Q6ISB3;Q08378;Q9NQE9;Q14152;Q96T58;Q9C099;Q86YP4;Q5HL2;Q6ZNA4;P42766;A6NHQ2;P41218;O43684;O75683;P51610;Q9NUQ6;Q504T8;Q7L0Y3;Q9H668;Q96FX2;Q9Y3Y2;Q9H6R4;Q8ND90;P17036;P49005;Q13415;Q9ULR0;D6RGH6;P17040;Q15560;Q9P258;O95359;O95551;Q9H320;P17482;O00541;P17010;O95625;Q9Y3B2;Q6I9Y2;Q8WU90;Q9NPD3;Q96MH2;Q9UDW3;Q9NYF8;P08047;Q8NF91;O15355;Q92905;Q9NPE3;Q13769;Q8NDT2;Q13342;Q16629;P35573;Q9BSM1;Q8NHM5;Q9BQ15;Q9H9Y6;Q14790;Q9Y262;Q8N5F7;P13196;Q7Z6Z7;O75400;O60563;Q9UHA3;Q9GZR1;Q8WYQ5;Q8WUN7;Q8N726;Q9BUE4;Q9BV57;O43248;Q5TAX3;P57721;O43148;Q6PJT7;Q8NBZ0;P31943;Q5EBL4;P11388;Q92979;A6NK53;Q9H788;Q9Y5L0;Q9NX18;P28069;P49756;Q15424;P78545;O00170;Q8N6T7;P09629;Q92575;Q9BQG0;Q9NQ55;Q9BRP8;Q99871;Q99627;Q96GN5;Q12996;O758

86;Q00444;Q86XI2;Q6ZVD7;Q9H6Y2;P27695;Q15723;Q9UBC3;Q8IXQ5;Q15744;Q9GZR2;Q08050;Q9UHK0;Q13541;Q5TID7;P11142;O75607;P61978;O43823;Q16630;O95163;Q9BQ67;Q14765;Q1ED39;Q13287;Q13112;Q8WVY7;Q7RTV3;Q12972;Q14137;P12004;Q9UQL6;Q14181;P53999;Q8N336;Q99549;Q9ULW3;Q5RKY6;Q9BUI4;Q9BY77;O15162;O95721;Q9UDY4;P39023;Q13469;Q5U623;Q13137;Q9Y3A5;O60287;O15127;Q9UQ73;P62081;P61247;Q9BSV6;Q96CJ1;P23769;Q8NEY8;Q29RF7;P54253;Q96L92;Q9UBS3;O94992;Q14980;Q9UHB9;Q13428;Q9BVI4;Q95K17;Q15072;Q15935;Q7Z7K6;P59047;P17987;Q96C00;Q8N1G2;P51826;O75717;O60828;Q05084;Q96KR1;Q15047;Q9NP64;Q9BQ70;Q86WX3;Q9BTC8;Q5H9F3;Q14498;Q92748;Q9Y6H5;O43236;Q08J23;Q9BTP7;Q8IWS0;Q8NHQ1;Q9BSU3;Q86V81;Q8IWX8;P61576;P19532;P52758;O75618;Q9Y221;Q9UBW8;P15621;Q15050;Q9H8T0;Q16143;O60934;Q96T37;Q9H9Y2;Q15306;Q9UKD1;P62263;Q86US8;O60832;P61572;Q9UBF6;Q9UPN7;Q14978;P61571;Q9NZ63;Q969G3;Q16222;P55212;P31949;Q6P9F0;P50221;P46939;P41252;P15927;Q06787;Q13330;Q15024;O14862;O75528;Q6ZU65;P53992;P36873;Q96GC6;Q96FQ6;Q15021;Q9P2R6;Q92541;P46777;Q674X7;Q05519;Q8TBZ0;Q5MIZ7;O14497;Q96D46;O00255;O43251;Q06330;Q7LG56;O75190;Q15543;Q96PM5;Q86UW9;P56282;P24864;Q9GZV5;Q13127;Q96JM3;Q9BSJ2;Q6NZY4;Q9H8M7;P28324;Q9H116;Q53EL6;Q9H869;Q16719;P29474;P50991;P78345;P50750;O43598;Q96JB2;Q96DE0;Q9Y5B0;Q6P4R8;Q8IZU0;Q9Y603;Q9NWT8;P62913;Q12906;Q9NZM5;Q9UL42;Q96Q89;O15265;Q08211;O00268;P09874;Q6P2C8;Q9H4L7;Q53GL7;Q7Z3K3;P62136;Q5JVG8;Q99848;P52597;Q68CJ9;O43918;P61236;P15408;O14746;Q12873;P86452;Q9NX46;Q9UNX4;Q9Y5S9;Q9BQ95;Q96EU6;Q9UGK8;Q9H467;P35226;Q9Y4W2;P35869;Q9H160;P25786;Q9NTI5;Q01081;Q99615;Q96BK5;Q8N3X1;Q8TC84;Q9NRG9;Q9BV86;Q13045;P62829;Q92733;Q5VUA4;Q6UB98;Q9BVJ6;O00567;Q15185;P82970;Q9NRY2;Q16621;P46783;Q92993;Q9BRS8;O76021;Q5TB80;Q6IA86;O15527;Q9H9Z2;Q9BVC6;Q8TEA8;Q9P278;Q03468;Q6UUV7;P61574;P57678;P25685;P61244;Q8NFD5;Q9UIH9;Q13243;Q8IY85;Q9ULW0;Q969S3;O60765;O95232;O75475;Q8IWX3;P36578;Q9NVU0;Q3ZCT1;O60303;O60216;P39748;Q9NSI6;Q7Z7C8;Q9Y2P8;Q15366;O75164;Q96BP2;P12883;Q9HAV4;P78337;Q99496;O00472;Q5VTR2;O75312;Q92785;P24928;Q969H6;P19338;Q9H6W3;Q7Z2X4;Q13363;O94986;P51523;Q9UKV3;Q96HA7;Q15014;Q15029;O94874;Q92499;P78316;Q96NS1;Q9UJC5;Q3B726;Q9BYN7;Q9UN36;Q15257;Q9NWF9;Q9NQ33;P62847;Q8N720;P19838;Q96RU7;P81274;O94805;Q14145;O43299;Q68DK7;Q8NG31;P43268;O75943;P23193;Q16186;Q9ULW8;Q13228;Q9UM11;Q7L590;Q9C035;Q9H9L3;Q8IWC1;Q86UD0;Q9BVT8;Q86VM9;Q12968;A6NLL0;Q7L266;P54136;Q8WV24;Q6PJJG2;Q9UKD2;Q9H501;Q13620;Q8WW01;P15336;O60885;Q8N9W8;Q9HCG8;Q9UQT35;Q9BVW5;P28838;Q86V15;Q9UKT4;Q9H503;P40121;P04053;Q9UGK3;Q9Y2M5;Q14686;P06744;Q96QT6;Q9BZK7;Q9Y3D0;O75934;Q15545;Q14872;Q969H0;A4D1E1;Q12789;Q03111;Q99590;Q9NS73;Q6VBT8;O75150;Q9NY12;Q6ULP2;Q5HYK7;Q96IY1;P52298;Q9UI43;Q13901;Q96NY9;O75113;Q9Y618;Q9H0U9;P42771;Q9H6Z4;Q8N987;Q9GZU2;Q12824;Q9Y2X3;O00161;Q0VG06;Q00653;Q9UPA5;O75791;P25205;O75154;Q96EK4;Q13895;P46013;P40926;Q9H7B2;Q14676;P61575;Q8N7H5;O43395;Q9ULZ2;Q96AY2;Q96PU4;Q969V6;Q8TED0;Q99700;Q96PK6;Q9UIF9;P58304;Q9Y4P8;Q14146;Q9BXS6;Q9H9L7;Q8TAQ2;Q86WJ1;P39019;Q96RE7;Q70IA6;Q9NY27;Q9M204;Q69YH5;Q9NWZ8;Q6IEG0;P28066;Q9BT78;Q5C9A2;P0CG29;Q14683;Q8N3Z6;P14324;Q49MG5;P21675;Q9BRU9;Q9GZX5;Q3SYG4;Q96SW2;Q9H3F6;Q15007;Q9BQA5;P13010;Q9H875;P78347;Q9UKA2;Q9Y3U8;O60869;P61962;Q9UBX3;Q8WXS3;Q8TC56;Q8N6I1;P06132;Q53T94;P45973;Q9BX66;Q9UNQ2;Q96E16;Q9H8H0;Q562F6;Q5T4T6;Q7Z6J9;Q9NTM9;Q9UGY1;O95453;P30260;Q9Y3B9;Q86XK2;P49721;P42226;Q8IY57;Q9Y2W1;P11802;Q9UH90;Q15637;Q9UL03;P23497;O95707;P78371;Q9Y421;Q9Y692;Q9Y535;Q969X6;Q8WXI9;P14653;O14978;P35637;Q8NCD3;P22626;Q12857;Q9C0F3;P02533;Q0VD86;Q9UL40;Q9NVV4;P18583;Q9NNX9;Q9Y468;Q92917;Q15651;Q9Y222;Q14331;Q3T8J9;Q9UMX1;Q8WXF1;Q8WXB4;P49711;A2A288;O15111;Q9Y250;Q53ET0;Q8IWX3;P17480;Q92841;O43324;Q00987;P05783;Q96GM8;P62753;Q9BTE3;Q9NTK5;Q6PI98;Q96JK9;Q9UQR1;P61578;Q9NY74;Q8N668;Q96HI0;Q8IUF8;O14802;Q9H7D7;Q8NHF5;Q15776;Q6Q759;Q53QV2;Q7LBC6;Q99459;Q12874;P42224;O60671;Q96IU4;O75132;Q8WYA6;P49918;Q96FF9;Q16836;Q6ZNI7;Q9NRR3;P62851;Q96PM9;Q9Y255;Q06587;Q9UI36;Q14442;Q9H0I3;Q15361;Q9NYV6;O60936;Q9H633;Q9BXY0;Q8NAP3;Q12830;Q8NEZ2;O95571;O15446;P46781;P54821;Q53HV7;Q96DN6;Q9P1T7;Q8IY81;Q7Z699;O00422;Q06546;P40424;Q13367;Q96B26;Q9BUR4;Q9H0E9;Q8NG50;P53567;Q8N108;Q5QJE6;Q9Y224;Q9H2G4;Q5VT06;O60921;Q9UMY1;Q7Z6E9;Q15650;Q76FK4;O96028;O95478;Q96QA6;P32519;Q8WX92;Q03936;Q96M11;Q9H6F5;Q8N2W9;Q08945;Q5TBB1;Q9H1J1;Q6P2E9;Q14999;P51003;O75691;O95429;Q9NRC8}

5891 Pathogen[ P0C214] interacts with 1084 human partners: {P41970;Q9BQ67;Q9Y2B5;P40424;Q9BY77;P06132;P61236;Q92993;Q12996;O75683;O95551;O00170;O00268;P29474;Q6NZY4;Q9BVJ6;Q9NRR3;P53567;O95243;Q6RFH5;Q14526;Q9Y3E1;P82979;P61247;O43684;Q5MIZ7;Q9Y5L0;Q96GM8;Q03989;Q9HAJ7;D6RGH6;Q7Z3K3;P51114;Q9UHB7;Q96BK5;Q96FV9;P08729;Q92585;Q14527;Q9Y3T9;Q15007;Q9UHL9;Q8WX92;Q9H832;Q9UDY4;Q96CJ1;O15234;Q9P278;P35226;Q8N1G1;Q969S3;Q96NS1;P0DI83;Q8IWX8;Q96S65;Q96QA6;Q86XI2;Q5JTD0;Q05195;O75818;P41220;Q9H6T0;Q6ZNI7;Q96GA3;Q9BU02;O00534;Q9H633;Q9H4X1;O75691;Q00653;P27695;Q9BXY0;Q8N573;Q9BUL9;O43365;Q9ULR0;Q9UGY1;P38432;O75486;Q96PM5;Q13887;Q96C86;P15880;Q96T58;Q96HI0;P61244;P62081;P42766;Q15697;Q9N3V1;P19474;Q9H875;P62913;Q29RF7;O15111;Q8WXF8;Q00613;Q9BSJ2;P35869;Q13469;Q15024;Q06787;Q13573;Q14331;O43172;P51610;Q9H6Y2;O75528;Q9NPE3;Q15047;Q13330;Q8NHF5;O14746;Q9H788;Q13620;P35637;Q8TBZ0;Q06546;P62140;Q13363;Q4VC44;P05783;Q9UKX2;P17010;O95478;Q6P2E9;O75934;O94986;O95453;Q15651;Q96S55;Q9BSF8;Q13547;Q8TEA8;P78337;P49959;Q12824;Q14872;Q8IXK0;Q96KR1;Q6IEG0;Q8NFB6;P28838;Q53HL2;P30876;P53992;P39019;P62263;O75347;Q08999;Q9BRP8;P19838;Q6UUV7;P46087;O94842;P57721;Q9H079;Q9Y262;P78371;Q96JI7;Q9H9Y6;O14497;Q9NXZ1;P02533;Q5JVG8;P15336;Q9UFW8;Q9BUI4;Q9Y473;P13010;P54253;Q9NQ55;Q9UH90;Q969H6;Q7L0Y3;Q16186;P21675;Q7L266;O00159;Q15361;O43159;Q7Z699;Q9NVU0;Q86V81;P48643;Q9BSM1;Q14164;P53396;Q9UDW3;Q9UNX4;Q9Y5S9;P07741;P61571;P51003;Q7Z4H7;Q8TC56;P81274;Q13769;Q12873;O95295;P06748;Q13829;Q15554;P50750;P26599;Q8NHQ1;Q9UIH9;Q9Y255;Q7L590;Q00987;Q96FX2;Q9GZU2;O00267;Q16222;Q92841;Q3T8J9;P55212;O75190;Q8TAD8;Q13112;P40121;Q15014;P49427;Q9Y2L1;Q9H6J7;Q2NL82;P62847;O75618;Q8WTT2;P42226;O76021;Q9H0S4;Q9C035;Q9NY27;Q8N2W9;Q14119;Q8WXX9;P62829;P41252;Q15029;Q14765;Q9C086;P0CG30;O00541;Q8N5F7;Q9UDY8;Q16621;Q96R06;P01100;Q14152;Q9P2N5;Q9BV57;Q9BXS6;Q14145;Q96Q46;Q96BP2;Q92560;P55265;P17275;Q92750;Q96EU6;Q5EE01;Q13367;P11802;A6NHQ2;Q99567;O14929;P57678;P32519;Q9C099;P61572;P34932;Q9Y3B2;Q9BQ60;Q53HV7;Q15233;P23769;Q16587;Q504T8;Q15637;Q96NY9;Q92797;P15408;Q9GZL7;O15446;P53999;Q86WX3;Q6PI26;O95625;P61457;

Q96QT6;O00186;Q12906;O00567;Q9BVW5;P29401;Q5U623;Q8IWZ8;P61962;P61573;Q9BSU3;P78345;Q15397;Q9Y244;Q9P2R6;Q9BX66;Q96PU4;Q9GZV5;Q7Z7C8;Q9Y6K1;Q5TBB1;Q9H501;P41218;Q8NAP3;Q9UL40;Q5H9F3;Q53EL6;P17026;Q9UNQ2;Q9BVI4;Q9H307;Q9UHK0;Q96G21;P42224;O75607;P48556;P37275;Q68CJ9;Q6PJT7;P61218;Q5HYK7;Q70IA6;Q9NZ81;Q9HAV4;Q16666;Q13427;P17482;O43493;Q95721;Q8NH05;Q15270;O75886;O43395;P22087;O15127;Q6ISB3;Q9UKI9;Q08378;Q9H869;Q96W56;Q06330;Q12905;Q15257;Q15050;Q9NSI6;Q8N726;Q9UBS3;Q9R668;Q5RKY6;Q9NUQ6;P68402;Q96DN6;Q96N77;O75164;P61575;P40939;Q9NX18;Q9H6R4;O75151;Q9BUR4;Q13875;Q14676;P49005;Q14999;Q9NZI8;P32969;Q9NNX9;Q9H4L7;Q7Z2X4;Q9UL41;Q13901;Q92733;Q9Y468;Q9Y3D8;Q14686;Q15545;Q99547;P40926;P16083;Q9NY12;Q562F6;Q9NY61;Q9NWT8;Q8TAQ2;Q69YH5;P35573;Q15560;P13196;O43148;O60287;Q6IA86;O43390;Q92541;Q8N6I1;Q15366;Q96FF9;O95232;Q9GZX5;Q9UKD1;P78316;P51523;Q86UE4;Q9H4I2;Q8IZU0;Q12789;O60524;Q99700;Q13057;Q16630;Q15542;P62277;Q9H503;Q8N336;Q99615;Q03933;P25205;O94874;P86452;Q8TDN6;Q01082;O43248;Q9NWF9;Q9BZV1;O95571;P18615;Q7L804;Q96QU8;O95359;Q13428;Q9Y250;Q03936;Q5QJE6;O60828;Q8TF68;Q9BSV6;Q9BTE3;Q9BRU9;Q14980;Q53QV2;Q8WUN7;Q9UBX3;O14503;Q9UPV0;O76031;Q9BT78;O60921;P55795;P23786;O95707;O75525;P15121;Q14258;Q9GZS1;Q6PJP8;Q92922;Q8IXF0;Q86UD0;Q6ECI4;Q8IW35;O43299;O75312;P52298;P52272;P28066;Q9Y421;Q9HC78;Q9Y237;Q12968;Q14814;Q9H467;Q8NCD3;Q13137;Q9Y2P8;Q9H7D7;Q6P9F0;Q92681;Q99575;Q14566;Q674X7;Q96DX5;Q53GL7;A2A288;P30793;Q86US8;Q969G3;Q9H1B4;O00712;O75817;Q13045;Q9UHX1;Q9NTM9;P49790;Q96EY5;O43681;Q96Q89;Q9UKA2;P18583;Q9UIF9;Q6PI98;P49116;A4D1E9;Q16881;Q9UHR5;O14980;Q8NF91;Q9HAF1;Q9NPD3;Q9BQ70;Q53ET0;Q9Y224;O60765;Q9Y6H5;P46783;Q9HBL8;Q8IWS0;Q8WXF1;O75132;P61398;Q96MH2;Q14103;Q9UER7;O94776;Q14978;Q92905;Q9Y221;Q96AY2;Q9UL42;Q9H8T0;Q7Z6E9;Q06587;Q9H0A0;Q5VUA4;P55769;Q99459;Q14137;Q99549;O15162;P49918;Q92979;P13535;Q8IWZ3;Q9BRS8;Q9BZQ8;Q13356;Q9Y324;Q9UHA3;P61576;Q9Y3U8;Q9H321;Q9P258;Q86XR8;Q96L92;Q5VZE5;P51826;Q08J23;Q9NRX1;P14653;O00422;Q7Z2E3;Q9NRG9;P78347;P46939;Q86YP4;Q96SW2;Q13485;Q9H6W3;P62753;Q9Y2M5;Q9Y4P8;Q9C0F3;P61574;Q9NVP1;P55197;Q9BWD1;Q9NUL3;Q9H8M7;Q92917;Q969X6;Q08209;P18847;Q8NEY8;Q9ULW0;Q13243;Q9C005;Q13352;Q8N108;Q99590;O43663;P28324;Q6P4R8;P52597;O00257;P15927;Q9H8H0;Q9H160;Q9H2G9;Q3B726;Q9ULW8;P62136;O43823;Q05519;P53804;Q9Y603;Q76FK4;Q0VG06;Q8WVY7;Q3SYG4;P38646;Q8WXI9;P42574;Q9UI43;P17480;Q8N7H5;P19367;Q9NVU7;O15226;Q9BZZ5;Q9Y4W2;P30043;Q96M11;Q15459;Q99848;O60264;P19532;P42771;P61579;P12882;Q9H9L3;Q6UUV9;O75717;Q6P2H3;Q9UMY1;Q7Z6B0;Q8IY85;O43598;Q96GC6;P41182;Q9Y6X8;O95429;P14324;Q9NRR4;Q86SG2;Q9NS73;P11388;Q9BVT8;Q8IV48;Q8IY81;P46781;P61578;Q96K4;Q13868;P25786;Q8NEZ2;Q01081;Q96PK6;Q9P1T7;Q96JK9;P43268;Q9Y2D1;Q5T4T6;Q8N6T7;Q96DI7;O75475;Q14690;O43324;Q9NYV6;Q9UNH5;P33240;O95251;P82970;Q5EBL4;Q7Z7K6;Q9Y3B9;Q8WTP8;Q9H9Z2;A4D1E1;Q13127;Q9ULZ2;Q15650;P28069;Q15072;Q969H0;Q9H2G4;Q99871;Q9BTC8;Q15424;Q12874;Q9UI36;Q9UBP6;Q6P2C8;Q8IXQ5;Q9H7B2;P54727;Q9BSJ6;O75943;Q86UU0;Q6ZNA4;Q9Y4A5;Q8TED0;Q5JTH9;P17040;Q96NB3;O95639;Q9H0E9;Q952AP6;Q8WVC0;Q9Y2X9;P11387;P12883;Q96C00;P10074;Q8WXS3;P24928;O43918;Q99496;Q9NP64;P09622;Q6ZU65;Q15935;Q9H9T3;P39880;P43243;O60671;O60832;P31943;O60563;P23497;O94992;Q99816;Q5T8A7;Q9NXV6;Q92499;Q8WU90;Q96I25;P49711;Q9NQE9;Q7Z5K2;Q12857;Q69383;Q9NZM5;Q96RU7;Q9NZI6;P06454;Q14683;Q9Y535;Q9H204;Q8N187;Q96IU4;P15621;Q8IWC1;Q95602;Q8NG31;P24864;P30279;Q9NZ63;P04156;Q5T7V8;Q8WY54;Q8TC84;Q6UB98;P31949;Q9BVC6;Q9GZR2;O60885;Q96JB3;Q9UKD2;Q13895;P17036;P39748;Q2V2M9;P04053;P36873;Q86XK2;P46777;Q6P387;Q6PJT2;Q9BZK7;Q9HCG8;Q9H0U9;Q9GZR1;Q9BSW2;Q96GN5;Q9UP83;Q15054;Q13615;Q96ST3;P09629;Q9H9Y2;Q9HB58;Q9Y5B0;Q9NVR2;Q9BQ95;O75150;Q96JM3;Q6ULP2;Q9Y6D6;P45973;Q9UQ35;Q96AE4;O15265;Q9UGK8;O43290;Q16143;Q9UKY7;Q7Z6Z7;O75113;Q14684;Q9ULW3;Q03111;Q14978;P56182;P17987;Q9UHB9;Q9NR48;Q8N1G2;P52434;Q08945;P46013;Q969V6;O14862;Q8WXE9;Q08211;P40763;Q8WZ33;O96004;Q12972;Q8WYA6;Q9H668;Q96BT7;P13533;O00472;Q5VT06;Q86V15;Q9NVN8;P50221;P27694;Q8NDT2;Q9UK73;P52758;Q8WWL7;Q9UPW6;Q92804;Q9UKV3;Q13435;O14727;Q9H0I3;Q16698;Q9H008;Q5TKA1;P35998;Q53T94;P78545;Q9Y623;Q6H8Q1;Q05084;Q9NWS1;Q9H320;Q92945;Q13342;Q92575;Q9Y3D0;Q9BZE4;Q8IUF8;Q8WV24;Q86UA6;O00566;Q9HB65;Q9BQA5;Q15576;Q13601;Q9BYN7;P19387;Q9UQ80;P50991;Q9H3F6;Q9NRC8;Q13148;P22626;Q7RTV3;P23193;P35200;O75919;Q9UM11;Q96FQ6;Q9NY74;O15527;Q9UBQ5;Q15543;Q5C9Z4;P16220;Q5TD94;O43251;O60869;Q13228;Q99627;Q14146;O95391;Q8NFD5;Q3ZCT1;Q92800;Q7LG56;Q6FI81;Q9Y606;Q99638;O60315;Q9BWX1;Q63HQ0;Q96IY1;P51531;O94818;Q5VTR2;O94805;Q9UBW8;P30260;Q06265;P09132;Q9UPN7;Q9Y3A5;Q15326;Q5EBM0;Q9UQR1;P62851;Q8IX15;Q9Y2W1;Q96RE7;Q5D1E8;Q92748;Q86U42;Q9NVX0;Q9UL03;Q96E8Z;Q1ED39;Q9NVV4;Q9NWZ8;P19338;P18754;Q96JB2;Q9NTI5;Q9BYG3;O43236;P98171;Q9Y618;Q15185;Q96EK4;P56282;Q5TB80;Q9UN39;Q14498;Q9NP66;Q8WYQ5;Q17RY6;O95163;Q96HA7;Q9NTK5;P78346;P56537;Q8NG50;Q9NQ33;Q8WV37;Q13287;Q9UN36;O15042;Q9H6Z4;Q8WW01;Q5TID7;Q9Y3Y2;Q9UMX1;Q9Y692;O00161;Q8WXB4;Q9Y253;P59047;Q9NQ4;O60216;P56181;Q86UW9;Q9NY33;P01106;Q92785;O75400;Q8N9W8;P14316;Q86WJ1;Q8NEM1;P10155;Q75081;Q03468;O14802;A6NK53;Q9UBF6;Q8TEV9;Q7LBC6;Q9NPJ6;Q9UQL6;Q7L5N1;Q9UPP1;Q8IZU1;Q9BV86;Q96T37;P08047;Q09FC8;P49756;Q14966;A6NLJ0;Q9UKT4;Q9HC52;Q96B26;Q9GZS3;O00255;Q12830;Q8ND90;Q96PM9;Q16629;Q8NCE0;Q9NRY2;Q8N3X1;Q9Y2X3;Q9H583;Q9Y3B8;P36578;O60936;Q15021;Q9NV06;Q9UGK3;Q0VD86;Q49MG5;Q9BQ15;Q8NBZ0;P51553;Q9Y6J0;Q16719;O75154;P09874;P49721;Q9NX46;Q6UN15;Q9BVP2;Q7Z6J9;Q9NYF8;Q6I9Y2;Q8N3Z6;Q13541;Q9P1U0;Q9BTP7;P55072;Q9H2P0;Q5I751;Q15723;Q96DE0;Q9UJC5;Q13415;Q14181;Q5TAX3;Q68DK7;O96028;Q9H1Z4;P11142;Q96E16;P82Y47;Q9NS39;Q6Q759;Q16773;Q14790;Q9H116;Q9H9L7;Q15306;Q86VM9;Q9H1J1;P25685;P0CG29;Q9Y222;Q9Y3A2;Q8N720;Q8NHM5}

5892

Pathogen[ P03346] interacts with 1203 human

partners: {Q08J23;O60921;Q9BVJ6;Q9NVU0;Q15723;A6NK53;Q92681;Q06330;Q7Z3K3;P85037;Q06945;Q9Y606;Q9Y5S9;P62136;Q96FV9;Q969S3;O15265;O75691;Q96ST3;Q9UPN9;P12004;P54821;O76021;Q9UKA2;Q9Y253;P59047;Q03989;Q96AC1;P51991;O95639;P08729;Q92585;Q96CJ1;Q12874;Q12830;Q15542;Q9UHL9;Q99615;Q9Y3A2;Q5RKY6;Q16621;P46063;Q86U42;Q4VC44;O15234;Q9NWT1;P61978;Q96S65;Q9ULR0;Q9Y3Y2;O15042;Q1ED39;Q9BXS6;P50135;Q96GA3;O43172;Q9UBS3;Q15050;Q9H4X1;Q5TID7;Q9Y6K1;Q9GZR1;Q16666;Q8N573;P16083;Q86UW9;Q8WXA3;Q9HB65;Q86UU5;P56181;Q8WXF1;P28324;Q13895;Q9NZ74;P45973;Q9NP64;Q92560;P62913;O15111;P86452;Q15366;Q53ET0;P52434;Q15061;Q9HAV4;Q06787;Q96HA7;A2A288;O95625;P78346;Q9H2G9;O43290;Q92979;Q9NPJ6;P61579;Q96FQ6;Q8WV37;P50221;P18847;Q96C00;Q9NQ55;Q9Y324;P30279;P29373;Q13228;P05783;Q96EK4;P62277





6;Q8WXS3;Q9UI36;Q9H9S0;Q6Q759;Q9NQZ2;Q9BZR9;P30260;O43663;Q16587;Q9UPN7;Q9NYF8;Q9Y3B9;Q9NY12;Q9Y618;Q9Y2W1;Q9UL03;Q8NF91;O15527;Q9UL41;Q9UI43;Q96GC6;P06454;Q8N987;Q9H1Z4;Q9BTC8;P40763;Q96EY5;Q99729;Q9Y473;Q969H0;Q9BQ67;Q7L590;Q8N3Z6;Q9BVW5;Q9NVN8;Q69383;Q9H320;Q8TAQ2;Q9BRS8;O94874;Q14690;Q9Y5J1;O14862;P52597;Q8TAD8;A6NLJ0;Q9H204;Q9BWV1;Q92804;O95478;Q9UMX1;Q7RTV3;Q6PJT7;Q86UD0;Q7Z6Z7;Q8WXB4;O14727;O14662;Q9NQ4;Q12972;Q06587;O60216;Q9H160;Q8TED0;P01100;Q96PK6;Q9NZ63;Q8IWA0;P62753;O43823;Q9NP37;Q9UL42;Q12996;Q9BSV6;O14802;Q9UBF6;Q14164;Q9NRC8;Q96D46;Q9UQL6;Q7L5N1;Q00444;Q96T37;Q86XP3;O75081;Q53EL6;Q9UIH9;Q9Y3D0;Q96PM9;P53992;Q92785;Q9BTE3;Q9UK73;Q9GZS1;O43248;Q9Y4W2;P31949;Q15650;P18615;P32969;O60524;Q9BQ95;P33240;Q9H8H0;Q8IY85;O14929;Q9H0I3;Q9H008;Q9Y4P8;Q8NH75;Q13352;Q13901;Q16630;O95571;Q13868;Q15054;Q9H9Y2;P19387;Q9NCH5;Q9UKD1;Q96JK9;Q9UHA3;P46783;Q9BVP2;Q6ZNL7;Q9Y3A5;Q9NX46;Q9Y262;Q00653;Q9NVR2;Q8NCE0;P17482;Q6I9Y2;Q96NS1;O00488;Q13127;Q96JB3;Q92791;Q3B726;Q9UPA5;Q9P1U0;P11387;Q9UJC5;Q9Y2B5;Q9H4L7;Q68CQ4;O15127;Q9NXZ1;Q5C9Z4;Q76FK4;O96028;Q9UPV0;Q6IEG0;Q9H079;Q8WYQ5;O75791;O43719;Q9BQA5;Q14686;Q14331;Q15319;Q5VUA4;Q15543;Q9H1J1;P57721;O00444;Q6ZJW1;O43395;P17987;O15162;Q9H321;Q9H6R4}

5893

Pathogen[ Q85601] interacts with 1080 human

partners: {Q9UQR1;Q13367;Q8NHQ1;P46783;P32969;Q9NV31;Q8IXK0;P01106;Q9P2R6;A4D1E1;P28066;P17480;Q96FQ6;Q8N1G0;Q9ULW3;Q68CJ9;O95625;Q99816;Q7Z6E9;Q9UGY1;Q9UPN9;Q63HQ0;Q96MH2;Q9Y250;Q03989;O00186;Q14978;Q9BUL9;P08729;Q15637;Q92585;Q9NRC8;Q96CJ1;Q15014;Q15542;Q9UHL9;Q5RKY6;P15621;Q9NWS1;P09629;Q96JM3;Q4VC44;O15234;P49756;P61978;Q9BRU9;Q96S65;Q9ULR0;Q9Y3Y2;O15527;Q6P2E9;O43598;O43493;Q96GA3;P46087;Q5T7V8;Q9BQA1;Q9H4X1;Q9UMY1;Q8ND90;Q9P1U0;Q96JK9;Q9NTK5;Q92575;Q16666;P09874;P54136;O43324;P62913;Q9ULZ2;P17040;Q9ULW8;O95602;Q8N720;O00534;Q96S99;Q96JB3;Q53ET0;Q9NPD3;Q9HAV4;Q96PK6;Q13127;O43316;O43148;Q96HA7;Q8N1G2;Q7L590;P78346;O75528;O00541;Q9BTE3;P02533;Q7Z7K6;Q8N3Z6;P14316;Q9BTP7;Q6ZNL7;Q8WV37;P62081;O75154;Q9Y324;Q9H0S4;O43390;Q99575;Q8WVC0;Q96EK4;Q92917;Q14765;O94986;Q9BSF8;Q14258;O60563;P36405;Q8WV24;Q9P2K5;Q9UPW6;Q9UQ80;Q7L804;Q08999;P15976;Q969H0;Q9BQG0;Q96BP2;Q6UUV9;O94776;Q5C9Z4;Q6Q759;Q86SG2;P61962;O15265;Q13243;P50750;Q9UBQ5;O75691;Q17RY6;O75190;Q9UN36;Q5HYK7;P0CG29;Q9UBS3;Q9BZE4;Q9H320;Q9Y5K6;P86452;Q9UQL6;Q9UIF9;P13533;Q86VM9;Q86V15;O75151;Q2V2M9;Q99547;Q9H321;Q8WUN7;Q99871;Q9Y3D0;P17036;Q06546;O95251;Q9NY61;Q9Y603;Q13769;O95295;Q9P2D0;Q9H307;Q15554;Q9NAP7;Q8NAP3;P41220;Q5MIZ7;P56282;Q9Y606;Q86WX3;Q12857;Q16621;Q9UBX3;Q14331;P49427;Q06330;Q969V6;Q92733;Q92979;Q96PY6;Q9Y4W2;Q96QT6;Q8WTT2;O75312;P52758;P53567;Q9P258;Q9H7D7;O15111;Q9P2N5;Q14103;Q9BX66;P81274;Q14966;Q9Y535;Q13148;Q969X6;Q9H8M7;Q96EU6;O95391;A6NHQ2;P14653;Q9C086;O43248;O60315;Q9UP83;Q8N5F7;Q7Z7C8;Q93933;Q9UHA1;Q16719;Q8TEA8;Q5TD94;Q9BUI4;Q9BU02;Q7Z4H7;Q9Y6J0;Q13112;Q9H467;Q9H9T3;Q9UDY8;Q9UKT4;Q9BQ95;O75400;Q03936;Q13573;Q9H116;Q86SE8;Q14790;Q92560;P0CG30;Q5EE01;Q15459;Q15424;P51826;Q96SW2;Q14684;Q9NR48;Q9NRG9;Q86UA6;Q9NVX0;Q9BUR4;Q15007;Q14872;Q8TC84;P10155;P62829;Q9H9Y2;Q8WVY7;Q14814;P40763;Q05195;Q7L266;Q9NY27;O14978;Q06787;P28069;P62753;Q9UKA2;P32519;Q6PI26;Q93050;Q9Y468;Q9BVJ6;Q9Y4A5;Q96KM6;Q9UBP6;Q1ED39;Q6ZJW1;Q13868;P23769;P41970;Q49MG5;Q13415;Q9H0E9;A6NLJ0;Q9UBW8;P22626;O15516;P78545;P61573;Q9UL41;Q9Y2X9;Q9UHX1;Q6PM5;Q96PU4;Q9Y3A5;Q9UER7;Q9Y3A2;Q9HBL8;Q5TID7;Q969H6;Q9NVR2;Q09FC8;Q15545;P15880;P17026;Q8TDN6;Q9BZZ5;Q9BV86;P56537;Q86UU0;Q96KR1;Q8N9W8;Q15723;O60936;Q53HL2;O43364;Q9NRR4;Q8WXE9;Q96JB2;Q9BXS6;Q96IU4;Q8WYA6;P61218;Q13045;Q9Y618;O00268;P39019;Q96AY2;O14503;Q9Y3E1;Q9C099;Q9H079;O43299;Q6ISB3;Q8NG31;Q08378;Q96G21;Q86UD0;O43159;Q9Y3U8;Q9UNX4;O95243;Q9BQ15;Q15306;Q86XF1;Q6ISB3;A6NK53;Q9BZR9;O14497;Q9NUQ6;Q9NWF9;Q9NQ33;Q9C0F3;Q9C0F3;P49959;Q15776;Q86XK2;O15226;P53999;Q13363;Q9BRS8;P49005;D6RGH6;Q86V81;P19338;Q13469;Q7Z2X4;Q96DX5;Q14690;Q01082;P55795;Q6FI81;Q99549;P17987;P56181;Q8N2W9;P19532;P10074;Q9ULW0;P78337;P18615;O60216;P25685;Q92499;Q15560;P13196;Q9Y244;Q9H6Y2;Q8WZ33;Q16629;O75934;P06454;O00472;Q8N3X1;Q9H6Z4;Q9NRY2;Q9BRP8;Q6H8Q1;Q9BZV1;Q6P2H3;Q14149;O96004;Q9Y692;O75886;Q9NTI5;Q08211;Q15054;Q9GZS1;Q29RF7;Q96FX2;Q00613;Q15651;P17010;P49711;P55769;Q9UIH9;Q9R06;Q9H008;Q9H1B4;Q9BSV6;Q9NVU0;Q9NWT8;Q9BV57;Q13427;P27694;P51610;Q14145;P62263;Q9NQ55;Q9UHA3;Q13541;Q9NZ81;Q9GZS3;Q9Y2L1;Q12830;Q8NCD3;O75607;P30793;Q8WX92;P08047;Q96DI7;Q9H6W3;P11802;Q9BZQ8;Q9HC78;O43663;Q9H501;Q9H0I3;Q08209;Q9H9Y6;P82979;O95707;P39023;Q96NY9;Q9UFW8;Q96C86;P51531;Q96QA6;P01100;Q16587;Q96L92;Q7Z5K2;O75943;Q9H869;Q9RW54;Q8N611;O00170;Q8NG50;Q9BSJ6;P11387;Q15397;Q14526;Q9NS73;Q5U623;Q13137;Q96F79;Q9NRR3;Q16222;Q9UNH5;Q8N6H7;P51398;Q14566;Q9GZX5;Q14686;Q8WYQ5;Q9BY77;Q9H4I2;Q9NP66;Q9UPV0;Q8NBZ0;O75817;O75818;Q6PJT7;Q7Z3K3;P35637;Q96KQ4;O43681;Q53T94;Q86XR8;Q9UKX2;P40424;Q96Q89;Q14164;Q6P9F0;P38432;Q9BQ70;Q9BSJ2;Q9GZU2;Q92541;Q03468;Q13352;Q969S3;Q8IWS0;P61576;Q12968;Q86UW9;Q15650;O15355;Q6PI98;Q9H7B2;Q9Y221;O00159;Q13435;Q9NP64;Q8TED0;Q9Y2B5;Q9H8T0;Q92785;Q6PJG2;Q8IXF0;P50991;Q9UK73;Q7LG56;Q92681;P78364;Q8NNT2;Q969G3;Q13901;Q96D46;Q8N726;P35573;Q9BSM1;P05783;O95232;Q70IA6;P25205;P54727;P12882;Q5TAX3;Q9UGK3;Q9H788;Q13428;Q562F6;O14929;Q3B726;Q9UI43;Q9UKV3;P15927;Q68DK7;A2A288;Q9Y4P8;Q8TC56;P18847;Q5VZE5;Q8IXQ5;P62136;Q9NXZ1;Q12906;Q96BK5;Q9UL40;Q9NQT4;Q86YP4;Q96QU8;Q9Y5B0;Q9UBF6;Q9NVP1;Q69383;Q14683;Q9C005;Q96DE0;P40121;O60765;P16220;Q9UPQ4;Q9UKD2;Q9Y3B2;Q9HJ23;Q92804;Q8WXI9;P45973;P42226;Q9H875;O95453;P36873;Q12972;P42766;Q15050;Q9H668;Q15029;Q12873;Q9NRX1;Q5VT06;Q9NWZ8;P52597;Q76FK4;P11142;Q6NZY4;Q9UI36;Q96M11;Q9NVX2;O75347;P41218;P49721;Q8NFD5;Q9UPA5;P46939;Q92905;Q53HV7;Q9HB21;Q6P4R8;Q9H4L7;Q99848;Q8NHM5;Q9HB58;Q13330;O75618;P30279;O60921;Q13228;Q9NSI6;Q9HA38;Q9Y262;Q9NX18;Q9Y6X8;Q9Y222;P14324;Q15744;Q9Y2P8;Q96GC6;Q15024;Q96GM8;Q8WXF8;Q9Y6K1;Q99459;P25786;Q01081;P35680;O14862;Q9H2P0;P11388;Q9UQ35;Q9BXY0;Q8IZU1;P61571;Q05519;Q8NEM1;Q99615;P82970;P61579;O00255;Q5TB80;Q9UKI9;Q8N668;Q8IZU0;P42771;Q5JTD0;P42224;O94818;Q8IW35;Q9UPP1;P06748;Q8N108;O00566;P06132;O75717;Q8NFH5;Q53QV2;Q53EL6;P15121;Q9BT78;Q8N6T7;Q9UDY4;Q9GZR2;Q9UDW3;Q86UE4;P61572;P62277;Q99590;P12883;O43395;Q99496;Q13356;Q96JI7;O43290;P58304;Q3ZCT1;O00267;Q14181;O95478;Q9UHK0;Q96T88;O95630;O75132;O94992;P23193;P07741;Q9BTC8;Q8IY81;Q5T8A7;Q96N77;Q13601;O14980;Q06265;Q96GN5;P55265;Q15185;Q8WU90;P61575;Q9BSU3;P62847;P29474;Q9C035;Q8TF68;Q7Z6J9;Q7Z6B0;Q3SYG4;Q96RU7;Q14146;Q9NZI6;O15446;Q9NUL3;Q9BQ67;Q



9H9L3;Q92797;Q14980;Q5H9F3;Q75150;Q14152;Q86US8;P61244;Q9BQA5;Q9Y3T9;Q8IWC1;P78345;Q15233;Q5VTR2;Q9H2G9;Q9UM11;Q8WY54;Q9Y2D1;Q6IA86;O60287;O60885;Q15326;O14746;Q96Y1;Q96DN6;O95639;Q9UKY7;O60671;Q9NYV6;P04053;P31949;P49918;P37275;O43933;Q99567;Q96S55;Q9BZK7;Q9NZM5;Q8IY85;Q6ZNA4;Q5TKA1;Q9UPN7;Q12789;Q99627;Q8N187;A4D1E9;Q08945;P18583;Q6ULP2;Q9UGN5;Q14999;Q9H832;Q96AE4;Q92750;Q12905;Q96RE7;P18754;P38646;P21675;Q151127;Q8TEV9;Q9GZL7;Q9UGK8;P04156;Q08050;Q6P2C8;Q8TAD8;P34932;Q12627;Q75113;Q6UN15;Q9H6J7;P61574;Q16836;P19387;O75164;Q6RFH5;O75486;Q7Z2E3;Q9UHB9;Q9Y6D6;P35869;P48556;Q6ZU65;Q9H1Z4;P35226;Q6PJP8;Q96T37;Q9NV06;O76031;Q8IWX3;P12004;Q86WJ1;Q9UHB7;Q96HI0;Q6UUV7;Q9Y2M5;Q504T8;Q13342;Q9NY74;Q9NPE3;Q9NNX9;O00567;O43823;Q8TD86;P22087;P62851;P46013;Q8NEY8;Q92945;Q13547;P50221;Q7L0Y3;Q96C00;P49116;Q6ECI4;Q9BWD1;Q9NZ63;Q9H2G4;P24928;P62140;Q9Y6H5;Q7Z699;Q674X7;P61236;P52298;P54253;P0DI83;Q9HB65;P30876;Q86XI2;Q9Y473;O15162;Q0VD86;Q5QJE6;Q13620;P52434;Q8NCN2;P78371;P55212;O43365;Q9BWX1;Q00653;Q15543;Q0VG06;Q92993;Q8WWX9;O00712;P43268;Q9H3F6;P56182;P15336;Q9NVV4;P41182;Q8WW01;P41252;O60524;Q9P1T7;Q15047;Q8IUF8;O00422;Q9HCG8;O75525;P39880;Q3T8J9;Q9HAJ7;P13535;P39748;Q15697;P19474;P61578;Q14119;Q96NB3;P48643;O60869;P53804;P51003;Q15361;O60264;Q6P387;Q92800;Q496M5;P51523;P57721;O75475;Q13875;Q9BYG7;P36578;O60828;O00257;Q8IY57;Q7LBC6;Q14527;Q13895;Q8WXS3;Q9UJC5;Q96NS1;Q13829;Q8NEZ2;Q9H9L7;O94805;P30260;Q9H633;P17275;Q9Y3B9;Q9NY12;Q15257;Q9Y2W1;O95163;Q9H160;Q5VUA4;Q86U42;Q9BVT8;Q9UL03;Q96EZ8;Q00987;Q92922;Q8NF91;O95571;O94842;P31943;P19838;Q96EY5;O95429;Q9Y5L0;Q9H0U9;Q12824;Q15935;O76021;Q9C0H6;Q9H6R4;Q9H9Z2;O43172;Q9NVN8;Q8TAQ2;Q14137;Q96E16;O94874;Q13485;P61247;Q9BVI4;Q9H204;Q13111;Q9P278;Q96FF9;Q9UMX1;Q9H583;Q9Y2X3;Q8WXB4;O14662;P78347;Q8NH2;O75683;Q9UHR5;Q7RTV3;Q06587;Q9Y237;Q9GZR1;Q9Y253;Q99700;Q14498;Q9Y623;P27695;Q9BVP2;Q53GL7;Q9UL42;O00161;Q6I9Y2;P49790;O14802;Q14676;P09132;O43684;Q96B26;Q7L5N1;O60832;Q00444;Q15072;P46777;P28324;Q9Y224;Q6UB98;Q9NPNJ6;Q13887;Q96PM9;Q99638;P53992;Q05084;P51587;P61457;Q86W56;Q9NV6;O95551;Q9BSW2;Q8NF64;O43918;P40926;Q9BSC4;P33240;Q15021;Q5JVG8;O95721;Q15366;Q69YH5;Q9HC52;Q8N7H5;P46781;Q16186;P51955;P15408;Q9NYF8;P55197;O00410;Q8IX15;Q12874;Q5D1E8;Q9NQE9;O43236;Q9NX46;Q9Y5S9;P51114;Q9BVW5;Q8NCE0;P13010;P17482;Q9H503;Q2NL82;Q13287;Q5EBL4;O95359;P78316;Q9UBC3;Q16143;Q9NVU7;Q5TBB1;Q8IWX8;Q92748;O96028;Q6IEG0;Q5T4T6;O75081;P52741;O75791;Q8WWL7;P24864;P19367;O60934;Q9UNQ2;P59047;Q9H1J1;Q96ST3;Q8TBZ0;Q9UH90}

5894

Pathogen[ P14079] interacts with 1084 human

partners: {Q9H0U9;Q5EBL4;Q13228;Q9UQL6;O60671;Q15637;Q9NZ81;Q8NFH5;P28838;Q3T8J9;Q9BXW6;Q5JTD0;Q9Y3U8;P56181;Q96C00;Q9UKA4;Q14980;Q9BYG7;Q9UQR1;O75886;Q9UPW6;Q9H204;Q15560;Q8N2W9;Q8N2741;Q96FX2;Q9H668;Q8IZU0;P52758;Q9H320;Q8IV48;O00422;P78346;P11388;Q99459;P41218;Q9N573;Q96IY1;Q68DK7;Q15014;P48643;P62333;Q9BQ95;P53804;Q8TEA8;Q7L804;Q96J17;O14746;Q5XKL5;Q92979;Q9NWS1;Q15007;Q9UL40;Q8WWX9;Q9BQ15;P57678;Q8WZ3;Q9Y3B8;Q99627;Q96I25;P09874;Q96JB3;Q9Y4A5;Q9H0S4;P48556;O75618;Q08945;O15162;P09132;P10155;Q9UPP2;O75151;Q96EY5;Q9Y3B2;Q6UB98;Q7L590;P13196;Q5D1E8;Q6ULP2;Q05084;Q8WUN7;Q5EE01;Q9H0I3;P11142;Q9HAJ7;Q8WXB4;Q9BZK7;O75934;O43364;Q9NV31;Q9BVP2;P35869;Q96T37;Q8WV24;Q969X6;O75817;Q9NYV6;Q06413;Q9NSI6;Q9NPE3;Q9UI43;O75400;Q5EBM0;Q15047;Q86V15;Q16222;Q8IZU1;Q9C005;Q14566;Q14442;Q9Y2X3;Q92681;Q9GZV5;Q9NWT8;Q06546;Q9UKT4;Q9NRR3;P35637;Q9UL42;Q8WXS3;Q969H0;O60828;P78337;D6RGH6;Q6ZVD7;Q9NZM5;A6NK53;Q96NY9;Q9H321;Q92917;P19387;O75691;Q9UGK8;Q9Y3A2;O95139;Q9C035;Q9Y5B0;P57721;Q15776;Q9Y255;Q9UHA3;O75528;P54136;Q9H869;Q9Y4P8;Q13148;Q8IWX8;Q2NL82;Q96ER9;Q9NVU7;Q13415;Q9Y6K1;O95359;P61576;Q9GZU2;Q9H0A0;P56589;O75312;Q9NVR2;Q96R06;Q96HI0;P17010;Q68CJ9;Q15723;Q9UBW8;Q01082;P53567;Q9UKD1;Q14103;Q9UGN5;P53999;Q9UPN7;P24864;Q8N108;Q9Y237;Q9BVC6;Q99700;Q14146;Q9UNQ2;Q96CJ1;P46781;P36873;Q9NPN6;P82979;Q9UBS3;P35680;O15446;Q6IA86;Q9NY61;P62847;P13010;Q96ST3;Q15024;Q96JK9;Q92541;P62753;Q9UBF6;P16083;Q13620;P56537;Q9BRU9;P98171;P52434;O60832;P52298;P04156;Q94986;Q92804;Q99871;Q63HQ0;O00170;Q9HC52;Q5JVG8;Q70IA6;Q9BT56;Q99549;P50135;P39023;Q9H1J1;Q12874;P61457;Q96FF9;Q6P9F0;O43823;Q9Y468;Q99829;Q69YH5;Q9H4L7;O95429;Q13243;Q8N1G2;Q15397;P39880;O60524;Q9Y5S9;Q9GZS1;Q7Z3K3;Q13835;Q13901;O75475;P50991;Q8NG50;Q8N336;P49005;Q6PJT7;Q9UL41;Q9BSW2;Q6NZY4;Q9NVX0;P04080;Q12906;Q96PM9;P33240;P31949;Q9BSV6;Q9GZL7;P26038;Q9NX46;Q8N987;Q13330;A6NLJ0;Q9Y6H5;O94874;P30876;Q92922;Q96NB3;O95251;Q14164;Q9BV86;Q9UGK3;P61218;Q9GZX5;Q8WTT2;Q6P2C8;Q9NXV6;Q8TED0;Q9UDY4;Q9NTM9;O43598;P61579;Q8TEV9;Q9H8H0;Q8IXF0;O95163;A4D1E9;Q9H008;Q9UMX1;Q9H008;Q9NQT0;Q9Y250;Q13428;Q9UPA5;Q16186;P62136;P0DI83;P51587;O60216;Q8N720;Q14966;Q6ZNA4;P29401;Q8IX15;Q13868;Q8IWX3;P58304;Q9UNX4;Q6IEG0;P51531;Q8N726;P46783;Q86US8;Q16143;O60287;Q9UFW8;Q9NPD3;Q8NBZ0;O96004;Q92748;Q13573;Q9GZR2;Q6Q759;Q92800;P78371;Q08378;O60303;Q8WW01;Q5T8A7;Q9H503;P15976;P08729;Q9BYN7;P06744;Q96D46;Q9GZS3;Q92785;Q86XK2;Q9NY27;Q8NG31;Q6P387;Q9NRS6;O14497;Q96C86;Q15050;Q86SG2;Q9NS39;P53992;O95639;Q9ULW0;Q9HAF1;Q4VC44;P32519;Q13112;Q9Y3D0;Q15029;Q9H6F5;Q13045;Q8NHM5;Q8TAQ2;Q12968;Q9Y3A5;Q9UKX2;P41220;Q9BZV1;Q13427;Q9H2P0;Q9H1B4;P18615;Q9UGY1;Q86YP4;A6NHQ2;O60869;Q96S99;Q9Y3Y2;Q9NUQ6;O60934;O75190;Q8TDN6;P49918;Q6P2E9;Q8NCE0;O15527;Q96L92;Q9BTE3;P35998;Q9BQA5;Q15306;Q9UHK0;P54253;P14324;Q14498;O95707;P42766;Q14258;P30793;Q969V6;Q03933;Q08211;P25685;Q14765;Q9H9Z2;Q5TAP6;Q9UHX1;O95453;Q8IY81;Q6ISB3;Q96AY2;Q03989;P23497;Q9NQ90;Q9H307;P51610;Q9BY77;Q6PJJ2;Q15744;P09629;P22087;Q9BXS6;P02533;Q15072;O60315;O43290;P46939;P55197;Q7LG56;Q9BVJ6;Q96S65;P55212;Q7L266;Q12873;P40121;Q03111;Q96FV9;Q5TD94;Q15459;Q9H6J7;O00461;Q9BVI4;Q8WVY7;Q13541;Q9UHB7;Q6FI81;Q9NTI5;O00567;Q00987;Q92797;Q9Y421;Q9BSU3;A4D1E1;Q9BVT8;Q9BZE4;P32969;Q9NYF8;O00534;Q9Y244;Q9ULW8;P43243;Q15061;P28768;Q8TF68;P28069;Q6PI98;Q9NNX9;Q17RY6;Q13769;Q9H0E9;Q14149;Q12905;Q9BUR4;Q9ULR0;Q9H2G9;P45973;Q9Y3E1;Q9H9L7;P19338;P42226;Q06330;Q8WU90;O00186;Q9NWZ8;O43148;Q8N1G1;Q8N0W7;Q9UK73;P82970;Q16629;Q9H6W3;Q86U55;Q9H6R4;O95721;Q5H9F3;Q15651;P78364;Q00613;P39019;Q8N357;P17480;P26599;Q8IY85;P36405;O95571;Q15054;Q8WY54;P55795;O75952;Q9ULZ2;P61572;P61236;Q96QT6;Q9Y3T9;P06132;Q9ULW3;O94805;Q6I9Y2;Q96BP2;Q8NCN2;Q7Z699;P41182;O43663;Q7Z6E9;O00566;Q8NAP3;Q9NV06;Q96GA3;P10074;Q5MIZ7;Q96AE4;O75791;Q3ZCT1;Q5TAX3;Q9P1U0;Q99496;P49756;Q9UBC3;Q03936;Q14692;Q13875;P51955;Q13356;O75943;O00257;Q9H7D7;Q14790;O14929;Q9H6T0;Q96HA7;

Q15543;Q9NP64;P19532;Q14145;Q9BXY0;Q9BSF8;P17026;Q9UIH9;Q9UPN9;Q9H9T3;Q8NF64;Q9NWF9;P62263;Q9UKV3;Q9Y3C1;Q9UER7;Q8ND90;P19474;P55265;Q16719;A6NGB9;P62277;Q9UH90;O43681;Q8N9W8;Q9H467;Q8IY57;O00410;Q9NYH9;Q9UM11;Q96Q89;Q5H9S7;Q9H583;Q5VT06;Q9BQA1;Q5VTR2;Q9UPP1;O94818;Q5TID7;Q8N6T7;Q9BUI4;Q9NQ33;O00264;Q9H2G4;Q8WVCO;Q9BQ67;Q0VG06;Q9NZI6;P56182;Q96S55;P61573;Q05519;Q5RKV6;Q92560;P41252;Q9Y473;Q9NUL3;Q8IWC1;Q9BRP8;Q9Y6D6;Q9NQZ2;Q9NY12;P17987;Q76021;Q99567;Q13057;Q16587;P61571;Q92945;Q9UQ35;O95243;P56282;Q9NY33;Q9BQ00;Q3B726;Q9UIF9;O75525;Q12830;Q7Z6J9;Q9P2R6;Q68CQ4;Q9BRS8;Q562F3;P17275;Q86UW9;P62140;Q9H9L3;Q86UD0;Q86WJ1;Q86V81;P15336;Q9NRR4;Q92750;P46087;Q86U42;Q96JM3;Q99575;Q8IXK0;P35573;Q9UP83;Q15424;P78316;Q9NVV4;P51523;Q15697;Q9Y2B5;Q96AC1;P36578;Q16630;Q9NRX1;P06454;Q8NFD5;O14978;Q8TAD8;Q8WU37;Q9HB58;Q86UA6;Q9UHR5;Q92791;Q9Y2X9;Q8TC56;Q9Y2M5;Q15185;Q9Y4W2;Q8WLL7;Q08J23;Q9BUL9;Q8NEZ2;Q14684;Q15366;Q9P258;O60936;P27695;Q9NX18;P49721;Q92905;Q9UHL9;Q5C9Z4;Q9BU02;Q8N668;Q9H633;O94992;Q9NY74;Q15042;Q49MG5;Q9NX58;Q9Y2L1;Q9Y603;O60264;Q9HC78;Q9NPJ6;Q8IWA0;O43365;P49790;Q96DX5;Q9UI36;Q86UE4;Q9C0F3;Q86UU0;Q5RL73;Q9HA38;O95551;O95295;Q9Y324;Q6HBQ1;P61574;Q16621;P61962;P06748;P01106;Q9BSJ2;Q13316;O14662;P12883;Q5HYK7;Q9Y262;Q9BTC8;O00472;Q9C099;Q5VZE5;Q14181;Q9H0W7;Q9H6Z4;Q13137;Q9NTK5;P05783;Q9Y692;Q00444;O14862;Q96RE7;Q9Y606;Q12972;Q0VD86;Q7RTV3;O95478;P42224;Q6P4R8;Q5VUA4;Q96RU7;O00488;Q96QA6;Q6ECI4;Q8TBZ0;Q9H4Z3;Q99848;Q8N1G0;Q13601;Q5QJE6;P35226;Q5TB80;Q8WX92;Q9BT78;Q53HL2;P62081;Q15554;Q96IU4;Q86Y91;O75081;Q9BSJ6;Q53HV7;Q05195;P46777;Q96DN6;Q14814;Q96EK4;Q9Y5K6;Q5JTH9;Q13367;Q8TAZ6;P61978;Q14872;Q9UL03;Q12789;P15927;Q7L5N1;P31943;Q9BSC4;Q14676;Q93050;P15880;Q9H9Y2;Q01081;Q9Y253;Q8TC84;P49427;P23193;Q9H875;O43918;O75818;Q9BYG3;P38432;Q8WXE9;P30260;O43299;Q86VM9;P38646;Q9UKY7;Q9NVU0;Q9HCG8;Q8NCD3;Q9C0H6;P27694;Q8TD86;Q86WX3;O43159;Q96KR1;Q6PI26;Q9H079;P62191;Q14331;Q8WYQ5;Q86XI2;O15042;Q06787;Q96KM6;Q86W56;Q92499;Q9HB21;P04053;Q96FC9;Q96B26;Q96BK5;O95232;O15265;O00541;Q99638;Q9P1T7;Q8WXF8;O75132;Q9UKI9;O75607;Q1ED39;P55769;P78545;O60885;Q53GL7;Q03468;Q7Z4H7;Q9BQ70;Q9NZ63;Q9BTP7;O75154;Q96GM8;Q14137;P12004;P52597;O43390;Q9NRY2;P81274;Q8N3X1;Q9H1Z4;O43493;Q9HAV4;Q8LWS0;O15226;Q99615;O95602;O75347;Q96G21;Q6P2H3;Q8NHQ1;P24928;Q13829;Q9Y2P8;Q9P2N5;Q13895;Q9HB65;Q12824;P43686;A2A288;P78345;Q96JB2;Q13469;Q2V2M9;Q9UKA2;P51003;O14503;Q9Y3B9;P17040;Q6DN90;Q12996;P49116;O76031;Q3SYG4;Q8N187;O14802;Q9H7B2;Q5T4T6;Q96SW2;Q6PJP8;Q8NF91;P28066;Q15650;Q29RF7;Q96N77;Q96JY0;Q86XR8;Q96KQ4;Q5U623;P62913;P15621;Q7Z2X4;Q15361;P51398;Q15021;Q13127;Q92WJ1;Q9GZRL1;Q96FX8;Q99816;Q9BX66;Q9NRC8;O43172;Q96QU8;Q9UMY1;P52756;Q9UKD2;O15355;Q9UBQ5;P61247;Q53T94;Q9H4I2;Q15233;Q7Z5K2;Q9NVX2;Q99547;Q9Y221;Q9BZZ5;P78347;Q9UDW3;Q92575;Q9Y6X8;Q14683;O00267;Q9UN36;Q9NVP1;P54727;Q9UQ80;Q15935;Q5TKA1;Q9Y5L0;Q9NXF1;Q96MH2;O94776;Q9UJC5;Q8WYA6;Q96E16;P61578;Q13287;Q6UN15;P18583;P51826;Q7Z2E3;Q12857;Q9UHB9;Q13352;Q969P6;Q9Y224;P86452;Q92585;O60765;O75486;O00255;P61575;Q8N6I1;P15408;P61244;Q9BZQ8;Q8N7H5;Q96M11;Q06265;Q9NRC9;Q9H8M7;Q8TW35;P01100;O43395;O95625;O75683;O15234;Q96EZ8;P23769;O75717;Q08209;Q6ZU65;P14316;Q5T7V8;Q969S3;P25205;Q14152;Q7L0Y3;P59047;Q8N3Z6;Q9Y3S2;Q9BV57;Q14686;Q15542;Q8NND2;P41970;Q14999;O60921;P49711;O94842;Q15326;Q8NEY8;Q9Y2W1;Q96DE0;P18754;Q96GN5;Q96PK6;Q6ZN17;Q9P2D0;P07741;Q9H3F6;O43324;Q9NQE9;P62851;Q9H788;O43684;P07922;P37275;Q8NEM1;Q53QV2;Q9BSM1;Q9Y535;Q9BWX1;Q69NS1;O95391;Q9UNH5;Q9H501;Q674X7;Q09FC8;P50221;P22626;Q9H160;O43236;Q13342;Q9Y3P8;Q8IWX8;Q92993;Q14690;P49917;Q9Y222;Q7Z7K6;P21675;O00268;Q16666;P39748;Q9NS73;Q9H116;O75113;Q9NQ55;Q14978;Q96GC6;Q96T58;Q53EL6;Q9H9Y6;Q9UPV0;Q7LBC6;Q08999;P50750;Q9Y6J0;Q16836;Q15545;O00712;Q7Z6B0;P42771;Q69383;Q92733;Q14119;Q96EU6;Q9BVW5;Q8NHY2;P46013;Q06587;Q8N5F7;Q8WXP8;Q9NXX1;Q5TBB1}

5895

Pathogen[ P03383] interacts with 919 human

partners: {Q9UQR1;Q17RY6;Q96MH2;Q86UA6;Q9Y618;Q14683;P78345;Q13573;Q92681;Q9H1B4;Q7Z2E3;Q06330;Q8N9W8;Q9NYV4;P42766;Q13228;Q15723;Q9NVV4;Q9NRR4;P51398;Q68CJ9;P36578;Q9BQG0;Q8IX15;P62140;Q9Y253;Q06265;Q7L804;Q5JVG8;O95478;Q14978;P08729;Q9NY61;Q92585;Q15935;P39019;P15014;Q13601;Q12830;Q9UHL9;P19474;O15234;P14316;Q9Y2L1;Q96S65;Q86XR8;Q96GA3;Q99547;Q86UU5;Q8WZ33;Q53EL6;Q15047;Q9BQA1;Q9H4X1;O95625;Q96JK9;Q86UW9;P62913;O14497;O95602;O60671;Q6PJT7;Q13485;P02533;Q9Y324;P61574;Q9BSJ2;Q9BVW5;Q86XI2;O14862;P0DI83;O95163;O75791;Q15366;P08047;Q9UPW6;P51003;Q9NYV6;Q9BTC8;P06748;O43148;P13010;P29474;P40926;O75528;P55212;P53804;Q9UKI9;Q9Y244;P16220;Q9BVJ6;Q9NWS1;Q9H0S4;O43390;Q9Y2P8;P28069;Q8WXS3;Q9H8H0;Q8TAD8;O94986;Q13469;Q9H9Z2;Q9BSF8;Q12824;Q8N6T7;Q12824;Q9NVN8;Q96J17;Q7Z6B0;Q9UP83;P61572;P19338;O60287;Q9H4I2;O00472;Q9NP64;Q00653;Q15459;O00567;O60765;Q13356;Q08999;Q5VZE5;O94805;Q8N6I1;Q6UUUV9;Q86UE4;P06454;O43290;O94776;Q3T8J9;P49711;Q0VD86;P22626;Q6P4R8;Q9BSJ6;P04156;Q5HYK7;Q9H869;Q15029;Q15072;O75486;Q9BU02;Q14526;Q9UQL6;Q9NXZ1;P38646;Q9NVX0;Q5TAP6;Q15650;O15162;Q9UBQ5;Q5TID7;P61571;Q03111;Q969H6;P01106;Q9UK73;O43172;Q86YF4;Q96CJ1;P19367;Q9H633;Q15257;O95251;Q13769;Q96GN5;Q9UHR5;Q7L590;P40424;O95295;O00534;P41220;P78347;Q15554;Q9UKD1;O00541;O15527;Q9UPN9;Q9ULR0;Q8IWX8;Q14181;P46777;P49116;Q9P2R6;Q9Y5S9;Q99575;P23193;Q9NTK5;Q13875;Q8N668;P49427;Q8WXE9;Q9NP66;P27694;Q9Y4A5;Q8WTT2;P55795;Q96FX2;Q53HV7;Q9P258;O43236;Q9H6Y2;O15111;Q9BXS6;Q9Y535;P56537;Q9C086;Q99700;Q8N5F7;P17482;Q9H9Y6;Q6ECI4;P53999;Q7Z4H7;Q96DE0;Q75618;Q92905;Q5EE01;Q96SW2;Q8WLL7;P18847;Q8NFH5;Q9BUR4;P25205;Q9UBW8;Q7Z6J9;Q96KQ4;P46013;Q9BYN7;Q5JTD0;Q9NS73;O00257;Q16836;Q6ZN17;Q9BTE3;Q14686;Q96FV9;Q06787;Q12972;P62753;Q6PI26;O00186;Q9UBP6;P23769;Q5D1E8;Q9H503;Q92797;Q8WYQ5;Q9Y262;Q92841;Q9H204;Q9UMY1;Q9NWT8;P37275;Q9BZV1;Q075886;Q9BQ95;P61573;Q96N77;Q9HC52;Q96PU4;Q06587;Q15542;Q9H9L7;Q96BK5;P61247;O00712;Q92733;D6RGH6;O43365;Q9UNQ2;Q5TD94;Q96JB2;Q9ULW3;Q9NQ55;Q9ULW3;Q9NQP8;Q6PJP8;Q11446;Q9BZZ5;Q8NCE0;Q96KR1;P28838;Q9C0F3;A4D1E1;P49721;O60936;Q8NEZ2;O00170;Q9NZM5;Q99816;Q9NX18;Q9BZE4;Q12874;Q6ZNA4;Q5TKA1;P52434;Q6PJG2;P61218;Q13243;O14503;P35573;Q9UKT4;O43598;Q96QT6;Q14814;Q9Y2B5;Q86XK2;Q6ISB3;Q08945;P42226;P61978;Q8WXF1;Q9Y6D6;Q9UN36;O75691;P11387;Q9NUQ6;Q14331;Q14152;Q9GZS1;P31943;Q9NPE3;Q92993;Q86V15;Q9UI43;O75400;Q99459;O75151;Q969V6;P61575;P49005;Q9GZX5;Q86V18;Q15306;Q5U623;Q9NPJ6;Q15651;Q7Z7K6;Q14690;Q96DX5;Q96S55;P05783;Q9H6R4;Q13352;Q13435;Q15050;O43493;Q13330;P61457;Q969X6;P15621;A6NK53;Q8WV37;Q7L0Y3;Q9ULW8;Q8N2W9;O43324;Q6NZY4;P15408;Q9H6W3;P78337;Q9H321;Q96EK4

;P09132;O60216;Q15560;O75683;O00267;P38432;Q14684;Q9P278;Q9Y3D0;Q9BRS8;Q6PI98;Q86UU0;Q5VT06;Q9Y3B2;Q9Y692;P11802;P46939;O75190;P10155;Q8IZU1;A2A288;Q96D46;Q96R06;Q9Y3A2;Q9NX46;Q9NVU0;O60921;Q9BV57;Q14872;O75164;P36873;Q96G21;Q9BSU3;Q9HAJ7;P32969;P30279;P41218;Q16629;Q9HB65;Q5TAX3;Q9H0E9;Q9BZQ8;Q9Y3T9;O43159;Q8IUF8;Q6ZVD7;P62136;Q99567;O95707;Q13895;P52758;Q16719;P56282;Q96L92;Q13287;Q504T8;Q9H6J7;Q13137;P62277;Q96004;Q99871;Q7L266;Q52084;Q15326;O43395;P51610;Q96E16;Q9BSM1;Q5VUA4;Q9UBS3;Q75817;Q99549;Q86UD0;O14978;O95243;Q9H8M7;Q2NL82;Q5TB80;Q12873;Q13428;Q9BSV6;Q6P2C8;Q9Y606;P06744;Q53HL2;Q68DK7;Q13427;Q16621;P15927;Q9BQ70;P62081;P86452;O75607;Q9BVC6;Q1ED39;P45973;Q9UHX1;Q9H160;Q8IWS0;O75081;P19387;P33240;P81274;Q96PK6;Q9H583;Q15361;P18583;O60563;Q9H7B2;Q9BT78;Q9C035;Q9Y221;Q8WVCO;P06132;Q8NEM1;Q5QJE6;Q9H8T0;Q92945;Q12857;P17010;Q9UHK0;Q6P9F0;Q9H6T0;Q96G3;Q86W56;Q8NF64;O75347;Q9NNX9;Q96HI0;Q8N3Z6;Q9Y6K1;P28324;A6NLJ0;Q6UVV7;Q9NV31;Q96QA6;Q9H0I3;O14929;Q13541;P35637;Q9BSW2;O15265;Q9UDY4;P24928;Q9UKV3;Q53QV2;Q03468;O14980;Q9GZU2;Q9HAV4;Q9BQA5;P17040;Q9NPD3;O43684;Q05195;Q8TC56;O94818;Q9BVI4;P62851;Q86US8;P17036;P18754;Q9NQ4;Q8IY81;Q9ULZ2;Q9UBF6;Q96AY2;Q13342;Q9NRR3;Q9C005;Q99590;Q9UNH5;P09874;O00422;Q9UKX2;Q14103;Q9UM11;Q7Z3K3;Q9H9L3;Q9NYF8;Q9H501;Q9Y3B9;Q53GL7;Q08J23;O14746;P78316;P49756;P57721;P50750;Q99848;Q96BP2;Q9H467;Q12968;Q9UFW8;Q9NZ81;Q96PM5;Q15697;Q9UGY1;Q9NSI6;Q8NBZ0;Q9Y6X8;P14324;Q9NY12;P51531;O75818;Q99615;O0268;Q9UGK3;Q9NQ33;Q9UER7;Q96Q89;O60828;P25786;Q01081;O94842;Q8IZU0;Q96DN6;Q15185;Q9UIF9;Q562F6;P10074;P82970;Q00613;O00255;O75475;P11142;Q16666;Q9H788;Q86WX3;Q03936;P82979;Q96RE7;P1962;Q96B26;Q9NRY2;P54727;Q9BY77;Q7L5N1;Q96GM8;O15355;Q12905;Q15054;Q9UKY7;Q9H0U9;Q6IEG0;P12883;O43299;Q3ZCT1;Q99496;Q8TAQ2;Q9Y3A5;O43918;Q5MLZ7;Q29RF7;Q96NS1;O94992;P07741;Q5T8A7;Q969H0;P42771;Q96T58;Q9H832;Q9NY74;P28066;Q13547;P52298;Q5VTR2;P78371;Q12906;Q3SYG4;Q9UHB7;Q96RU7;Q9NZI6;P46087;Q92748;Q15007;Q9BRU9;Q96FF9;Q96IY1;P46783;Q8ND90;Q14980;Q5H9F3;Q9H307;P54253;O75525;Q9Y3U8;O95232;P23497;Q9H116;Q8IWC1;Q5RKV6;Q9BVT8;Q96C86;Q96GC6;Q5EBL4;Q99638;O15127;Q9UPV0;Q9H2G4;Q8WY54;P01100;Q5T7V8;P43268;Q8WXF8;Q8NCD3;Q9UQ80;Q05519;O60885;Q8NG31;Q92750;Q14145;P39880;Q8N108;P61579;Q9NY27;P49918;O60524;Q8N3X1;Q9H6Z4;Q96PY6;Q9Y4P8;P21675;Q96NB3;Q9BZK7;Q92541;Q13367;Q9UPN7;P46781;P41970;Q6Q759;Q9NRG9;P32519;Q9UQ35;Q8NAP3;Q09FC8;Q96AE4;Q6ULP2;Q9GZL7;Q9UGK8;Q7RTV3;Q9Y2X3;P39023;P53992;O75113;P55265;Q96QU8;Q9BQ15;P78545;P56182;P57678;P55769;Q8IY57;Q8WXI9;Q9UHB9;Q6ZU65;Q9Y222;Q9Y5B0;O76031;P53567;Q8NDT2;P521M5;Q96EU6;Q92979;Q15233;Q9H320;Q96ST3;Q14258;Q96HA7;Q92785;P50221;Q9Y6H5;Q69383;P27695;P61236;O95551;Q9UL42;Q9HAF1;Q13148;Q9ULW0;Q8WU90;Q15424;Q9C099;P55197;Q9Y2X9;Q9P1T7;Q8NFD5;Q8N187;O75132;Q13045;Q92922;Q9H3F6;O43663;Q49MG5;Q12789;P15336;Q9NXV6;Q92499;P62829;O00161;O60869;Q14676;Q6P2H3;Q6P387;Q8NHY2;Q15776;P30876;P62263;P62847;Q9BUL9;P09629;P24864;Q15545;Q9NTI5;Q9NWZ8;Q7LBC6;P41252;Q9Y2D1;Q9UI36;Q9UJC5;Q53ET0;Q13829;P51136;P30260;Q9NL3;Q8TDM6;P17275;Q5EBM0;Q9Y2W1;O95453;Q86U42;Q9UL03;Q96EZ8;Q9GZS3;O95571;P17480;Q5T4T6;Q9UL41;P61576;P51523;O75150;Q8N720;P48556;Q9NWF9;P61244;P19838;Q9Y5L0;Q9Y421;P35869;Q8IWX3;P22087;Q5TBB1;Q9H079;Q8WV24;Q9H875;Q9UL40;Q15637;Q14137;Q99627;Q9HCG8;Q9Y3Y2;Q63HQ0;Q961578;Q9Y603;O15446;Q6UN15;Q8WYA6;Q9GZV5;P78346;Q9UMX1;Q6IA86;Q8WXB4;Q06546;P56181;Q92917;Q13868;Q9UHP1;Q9NZ63;Q16186;O94874;Q13112;Q9BVP2;Q9H0A0;Q619Y2;P49790;O14802;Q96EY5;P52597;P15880;O60832;P19532;O95391;O75312;O75154;Q4VC44;Q15024;Q9BTP7;Q9Y4W2;Q69YH5;Q9H9T3;P18615;O95429;Q9Y473;Q8N7H5;Q15021;O15226;P51826;O75934;Q13363;Q8WW01;Q13901;Q9BRP8;O00566;Q6FI81;Q9Y224;Q0VVG06;Q8NHQ1;O00410;P35226;Q8N1G2;Q92800;Q9GZR1;Q9NRC8;Q9WX92;Q92575;Q9NVR2;Q14999;Q9Y468;Q7Z5K2;Q13127;Q3B726;Q8TEA8;Q96M11;Q53T94;Q8N726;Q9NWU7;A4D1E9;Q8WXX9;Q5C9Z4;O76021;Q969S3;Q8TEV9;P52741;Q8IWE3;Q9Y3P8;Q13620;Q9H008;Q8NEY8;Q15543;Q9Y250;Q9H1J1;Q96NY9;Q14498;Q6P2E9;Q03933;Q96DI7}

5896

Pathogen[ P03410] interacts with 1117 human

partners: {Q9UDY4;Q15650;Q86UW9;Q99567;O60287;Q9UKT4;Q8IWW8;Q99700;Q9BZZ5;Q00613;Q96M11;Q8NHY2;Q5JTH9;Q8WTT2;Q99848;Q9NQ90;Q9BSM1;Q96QT6;Q9Y2W1;Q08945;Q9H875;P28069;Q92917;Q86Y91;Q9HC78;Q96JB3;Q9NVN8;O00472;Q6UVV7;Q9NRM5;Q29RF7;Q9NVN2;P42771;P61576;Q9UI36;Q6ECI4;Q9BT56;Q9BSU3;Q9UHP1;P49959;Q86SE8;Q9H6W3;Q7L804;Q9UNX4;Q9Y2L1;Q8WXF8;Q96FX2;P22087;Q9BYN7;Q92945;Q8IZU0;O75934;Q9HAJ7;P61247;P19838;Q68CJ9;Q96Q89;P17987;O75154;Q9ULR0;Q9H4X1;P53999;P62829;P25205;P51610;Q13137;Q8WTP8;Q5T4T6;Q8IWX3;Q13829;P61578;Q9Y6J0;Q9NNX9;Q96GN5;Q8IXK0;Q9H2G9;Q6ZNA4;Q12873;Q8IWC1;Q9UDW3;Q9UL41;P02533;Q01081;Q9Y6H5;Q8I9F0;O15355;O95639;Q9UGK3;Q9NP64;Q9BU02;Q16666;Q5HYK7;Q14526;Q9GZR2;O95359;Q6Q759;Q9H869;Q9Y3B8;Q9BVI4;Q8WXA3;Q9H4L7;O75683;Q8WVCO;P19387;Q14103;P78316;P06454;Q9C0H6;Q15697;O15234;O15042;Q96PK6;Q99496;Q5VUA4;P0CG30;Q86VM9;O43684;Q9UKX2;P17482;Q7Z6J9;Q8TF68;P06744;Q7L266;P78346;P17040;P48643;Q15050;Q9UHB9;P15621;P18615;Q8TEA8;A6NGB9;P37275;Q15637;Q96L92;Q13190;P30279;Q8TAZ6;Q96JM3;Q9H0U9;Q9NZ81;Q8WUN7;O00268;Q96AY2;Q15047;Q6PI98;Q12996;Q5MIZ7;Q9UKA4;Q15029;Q96S99;Q96SW2;O75943;Q15014;P62913;Q96JB2;Q92804;P61978;Q8IV48;Q9UP83;Q96NB3;O14929;Q9BQ15;Q9BVC6;Q9UGY1;O60885;P38646;Q14181;Q96004;Q15543;P25786;Q16629;Q14684;P78345;Q15554;P82970;Q9P2R6;P07741;Q08209;Q9UL03;Q7Z699;P22626;Q8TD86;Q96ER9;Q8N726;Q15233;Q8NG31;Q504T8;Q9H4I2;P18847;P61106;Q9NVP1;Q6PJT7;P49427;Q95251;Q92750;P07992;P15880;Q9NV06;O00267;Q53HL2;Q12968;P46777;Q06330;O14746;Q99575;Q99549;P98171;Q13057;Q6ZJW1;P24928;P53992;P41218;O14497;A6NLJ0;Q53GL7;Q6IEG0;Q15776;Q3SYG4;Q9UKD1;Q9UBP6;P41220;P46013;Q9BQA5;Q96G21;P21675;Q9GZU2;Q13620;Q9BYG7;Q03989;P09629;Q14149;O15111;Q9ULZ2;Q9NQZ2;Q6NZY4;Q14686;Q9NWF9;P25685;Q9UQ85;Q9H0A0;Q5TAX3;Q9UHK0;Q96KR1;P35998;Q8N6I1;Q14692;P46781;P50221;Q9Y3C1;Q9Y2D1;Q9Y255;Q6PJG2;Q9NS73;Q9Y224;Q9Y5S9;Q96QU8;Q96N77;Q8N6T7;Q7Z5K2;Q6PI26;O75528;Q8NCN2;Q06265;P04053;P54136;Q9NTR5;P53567;Q96DX5;Q9BWX1;Q8N3X1;Q9NTM9;Q9UHL9;Q76FK4;Q8WXI9;Q14814;P78545;Q16719;Q6P9F0;Q16222;Q8WWL7;Q8IXQ5;P35637;O14862;Q15257;Q9NRR3;Q8WY54;P28324;Q9BVW5;Q5RKV6;Q12857;D6RGH6;Q8IWA0;Q9BTE3;Q12830;Q969S3;Q14978;Q9H0I3;Q9NPF6;Q9BTC8;Q9UPQ4;P62136;Q92905;Q7Z6B0;Q86UA6;P36405;Q9NXZ1;Q9H6J7;Q99627;Q9P2K5;Q9NY61;Q6ZVD7;Q8NG50;Q6H8Q1;A6NHQ2;O43918;Q5TD94;P35573;O00159;Q5C9Z4;Q9Y692;Q14765;Q13868;Q08378;P57721;Q9UIH9;P55769;Q5H9F3;Q96GC6;Q16143;Q9H8T0;P62847;Q96HI0;Q96T37;P51826;Q8NEY8;Q9NYH9;Q9C0F3;P11142;O14662;Q93050;Q9NRX1;P59047;A2A288;Q96DN6;Q9NXV6;O43299;Q8N2W9;Q9H668;P4597

3;P48556;Q562F6;P30876;P26599;Q9Y2B5;Q92785;P49721;Q8N720;O60832;P52741;P19532;Q5VTR2;Q9BQA1;Q08999;Q9Y468;Q96S55;P82979;Q8TDN6;Q15366;Q9GZR1;Q86YP4;O60524;Q92791;Q15651;Q5TKA1;Q9Y3T9;P31949;Q13835;P39748;Q8N336;P06748;Q14137;Q6UUUV9;Q9UBS3;P06132;Q9H116;Q9H9T3;P56282;Q9UNH5;Q9HB21;Q9BTP7;Q9H0S4;Q9GZL7;Q96R06;Q14442;Q96KQ4;P32519;P23193;P30793;Q03468;Q9E829;Q9Y4P8;P55265;Q9BT78;Q6UB98;Q90FC8;Q4VC44;Q13045;Q69383;Q8WYQ5;Q99615;Q9BXS6;Q1ED39;Q9UPW6;Q9BSV6;O43159;Q9NVV4;Q8TAD8;P23786;Q92748;Q8NEM1;Q9UBX3;Q8NC D3;P51523;Q8IWS0;Q96ST3;O00461;Q05084;Q8NFD5;Q13541;O60216;Q15306;Q9H1J1;Q9P2N5;Q9H204;Q03933;Q14152;Q96EK4;Q5H9K5;Q14258;Q5TAP6;Q9NRR4;P28838;O00712;Q7LBC6;Q13895;Q92585;Q96T58;Q9Y535;Q92541;P01100;Q53HV7;Q5QJE6;P61244;Q15424;O15226;Q15560;Q9H7B2;Q5EE01;P17036;Q96FV9;Q6P387;P38432;P15408;Q53ET0;O60303;Q9HBL8;Q8WXE9;Q9Y2X3;Q9NP66;Q9UQ35;Q9BZV1;P0CG29;Q75486;Q92575;Q9C005;Q9ZS3;Q7Z7K6;P17010;Q969K4;Q8N1G0;Q9Y5K6;Q9GZV5;Q9UQR1;Q9UQL6;O95295;P51003;Q5RL73;Q9BRU9;Q9Y603;Q8TC56;Q13148;Q8N7H5;O95243;Q969V6;Q6RFH5;Q7Z2E3;Q8N987;O75952;O15162;P50750;Q13356;Q9NX58;Q9UBF6;Q92979;Q9H1Z4;Q92800;Q8WYA6;Q9NYV6;Q99816;Q9UHB7;O75151;P62277;O60563;Q13127;Q8WXB4;Q9NX24;Q9Y2X9;Q7L5N1;P36578;P61573;O95571;Q9UNQ2;O76031;Q9C035;Q9Y3P8;Q9Y4W2;Q9H3F6;Q96IY1;Q96JK9;Q8WZ33;O95551;Q8WV24;Q14966;O00567;Q95707;P29474;P49756;O60936;Q8NEZ2;Q96B26;Q9Y5L0;P49790;Q8IY85;Q05519;O43818;Q8IY57;Q53QV2;Q13287;Q9BSJ6;O75150;Q8WX92;O94986;P10074;Q9UKV3;Q5H9S7;Q14980;Q969G3;Q9UL40;P61571;P61236;Q9P1T7;Q9UER7;O95453;P17026;Q6P2E9;Q99459;Q9NQ55;Q9UM11;O75400;Q9UN36;Q6P2H3;Q96FX8;P12882;Q9Y4A5;O94805;P43243;O43172;P26038;Q13342;O43236;Q92797;Q7Z2X4;Q96E16;O95602;Q96GM8;P62140;P09132;O43491;O94842;O00264;Q9UGK8;Q969H0;Q6UN15;P56181;P52597;Q96C00;Q8NAB3;O75132;Q9Y3S2;P52298;Q9H9Y2;P62081;P46783;Q86XK2;Q6PJP8;Q8N357;Q9H6F5;P61574;O75190;Q9BUL9;O75525;P31943;P17275;Q99638;O00170;O15527;Q92499;Q13330;Q16621;Q9Y253;Q9UPA5;O95429;Q8N187;Q9UGN5;Q9H9L7;O95163;A6NK53;Q5D1E8;Q5TBA7;Q8NFH5;P51587;Q14872;P11802;Q86UE4;Q6ISB3;Q9BSF8;Q9H6R4;Q674X7;Q15024;Q96NS1;Q9BYG3;Q12905;P46939;Q9NZ63;P33240;Q9NY74;Q9NWT8;Q9NVX0;Q8N1G2;O75818;Q96NY9;Q9UPP2;Q9NTI5;Q9H321;Q9Y3U8;P16083;Q9UHX1;Q92922;Q6P4R8;Q13112;O15127;Q9H160;O43395;Q14119;P43268;Q15326;Q96S65;P11387;Q14683;Q8WXF1;Q5T7V8;Q13485;P12883;Q96DE0;Q9NY12;Q9Y3B9;Q15185;Q15459;Q68CQ4;Q8NDT2;Q86V81;Q9GZS1;Q15054;Q8TC84;Q69YH5;Q12789;Q9Y6D6;P19338;Q9P1U0;P52272;Q8N1G1;P04156;P09874;Q53EL6;Q9H788;P16220;Q9NVU7;P32969;Q7RTV3;Q5EBM0;P18583;P36873;P86452;Q9UKD2;Q9Y6X8;Q8WXX9;O60671;Q148Z3;O43364;Q6P2C8;Q9GZX5;Q86WX3;P81274;P61962;O43324;Q9Y244;Q9H1B4;Q13469;Q9NRS6;P41182;Q13769;O60921;P61572;Q9BQ0;Q9NQ24;P61218;Q5JVG8;Q2V2M9;Q9H008;Q5JTD0;O00534;Q9BSJ2;P39880;Q7L590;Q3T8J9;Q9NQ33;Q0VD86;Q9Y3Y2;P49711;Q96CJ1;Q9UKY7;Q86W56;Q9Y222;Q86SG2;Q86WJ1;Q9NUL3;Q6FI81;Q9UK73;O95232;O95625;O60828;P56182;Q16836;P30260;P42226;P51114;Q86US8;Q5VZE5;P11388;Q9UBC3;Q8N108;Q13875;Q8IW35;Q96RU7;P51531;Q86UD0;Q9UKA2;Q9Y5B0;Q99547;Q9NSI6;Q9UKI9;Q9Y606;Q9Y3E1;Q9UMY1;Q08T23;Q13901;Q9UJC5;Q96D46;P46087;P40926;O75347;Q9BVP2;Q9BQ95;A4D1E9;Q9ULW3;P52434;Q9HA38;Q9H6T0;P23769;Q96JI7;Q6I9Y2;Q9UI43;Q96EZ8;Q3B726;Q9ULW0;Q9H467;O75081;P41252;Q9NQE9;O94776;P27695;Q13547;Q15397;Q9NPE3;O75717;P35680;Q5TB80;O60869;Q9BY77;Q70IA6;P49116;P57678;Q9BVJ6;O00541;Q53T94;Q8TAQ2;P13010;Q9BUR4;O14978;Q96EU6;P78371;Q9NWS1;Q63HQ0;P57QA6;Q6ULP2;Q9H8M7;Q12972;Q13428;Q9UIF9;Q96BP2;Q8IZU1;Q8WVY7;O75113;Q15542;Q9NUQ6;Q9UBW8;Q7Z3K3;P41970;O94818;Q16186;Q9NZI6;Q9H9Z2;P62263;Q9UPV0;Q9BZK7;Q99590;Q14498;Q8ND90;O94874;Q9Y250;P08047;Q06587;P49005;P27694;P13533;Q96FC9;Q8IY81;O15446;P55197;O15265;Q01082;Q00653;Q9H7D7;Q9BV86;P52758;O43148;Q96RE7;Q9UFW8;Q9NYF8;Q9Y324;Q9NPD3;Q14676;Q9NVU0;Q9BSC4;Q9NX46;Q00987;Q13601;Q96FF9;P42766;Q5U623;P56589;Q13228;P15927;Q5TID7;Q96EY5;P49918;Q9BZQ8;O75475;Q06787;Q96BK5;O95478;Q9C099;P78347;Q6ZN17;O00410;Q9Y3A2;Q9NV31;Q9H8H0;Q3ZCT1;Q9NX18;Q9BQ70;P18754;O00422;Q5TBB1;Q9NRC8;P39019;Q14146;Q969H6;O00257;P08729;Q99871;O75691;P14316;Q16630;Q86U42;O75618;Q8N3Z6;P54253;Q15744;Q15361;Q9Y618;Q8NCE0;O43290;Q9NY33;O60765;O00186;P39023;P55795;Q9H583;Q9Y2P8;O60264;Q8TEV9;Q9P2D0;Q9H320;O95721;Q13367;Q86UU5;Q9NVX2;O43493;Q9Y6K1;Q03936;Q86XI2;Q96C86;Q9H633;P53804;Q8IX15;O76021;O75164;Q9Y262;Q12824;Q9HAV4;P35226;Q9H501;Q13243;Q96GA3;Q2NL82;P62851;Q12874;Q6IA86;Q9UHA3;Q14566;Q14145;Q9Y3D0;Q13427;P40121;P56537;O00255;P78364;Q86V15;O43823;P40424;Q8TED0;Q9H2G4;Q6ZU65;P13535;Q9H0E9;P55212;Q8IWX8;P61579;Q9P258;Q293A5;Q9Y237;Q9NRC9;P15336;Q92993;Q15723;Q9H6Z4;P28066;Q9BV57;Q9Y5J1;Q9C086;Q08211;P24864;P12004;O43681;P40763;Q8WXS3;Q96AE4;Q5EBL4;P13196;O75817;Q9UMX1;P50135;Q96HA7;O94992;P05783;O00161;P61575;Q8N668;Q15042;Q9Y221;Q92681;O14802;Q12906;Q9Y421;Q8NFB4;Q9BRS8;Q8WU90;Q86UU0;Q969X6;Q9H079;P0DI83;Q92733;Q9P278;Q49MG5;O43365;P15976;Q96PM9;Q8N573;Q5XKL5;Q7LG56;Q15072;O75312;Q9BZE4;Q9BX66;Q9UL42;Q9BXY0;Q7Z4H7;O60934;Q9NRY2;Q9H9L3;Q9BUI4;O43598;Q06546;Q96IU4;Q9Y2M5;P62753;Q13352;O75886;Q96I25;Q9UBQ5;Q15545;Q8TBZ0;Q9HB58;Q9BXW6;Q9NY27;Q9UPN9;Q0VG06;Q9BVT8;O00566;Q9H6Y2;Q9BQ67;Q9HC52;O14980;O95391;P78337;P14324;P50991;Q9HB65;Q03111;Q9UPN7;Q13573;Q05195;Q15061;Q96MH2;Q15021;O43663;Q9H9Y6;Q9Y473;O75791;Q9ULW8;Q9H503;Q9UHR5;P17480;Q13435;Q8N9W8;Q14690;Q68DK7;Q12788;O43390;P51398;A4D1E1;Q9H307;Q8WW01;Q15007;Q5VT06;Q8NBZ0;Q14331;Q13415;O75607;Q8N0W7;Q13316;Q9HCG8;Q9Y3B2;P61457;P10155;Q16587;Q7L0Y3;Q9BRP8;Q9H0W7;Q15935;Q8NF91;Q9NWZ8;P54727}

5897

Pathogen[ P14075] interacts with 936 human

partners: {Q96QA6;Q9NVU0;Q9H307;Q14146;Q9H6Z4;Q9NQ33;P28069;O95453;Q69383;Q92797;Q9C0F3;Q5VTR2;Q86UU0;Q6P2E9;P53804;P11387;Q6P4R8;Q9BZZ5;P17480;Q99871;Q3SYG4;Q9UBS3;P29474;P82979;P42766;Q7Z2E3;P54136;Q15257;Q96M11;Q96ST3;P51003;P22626;O00566;P08729;Q92585;A6NLU0;Q15366;Q12789;P61575;Q9UHL9;Q9UK73;P35869;Q8IZU1;Q3T8J9;Q8N1G2;O15234;P09132;Q9NQE9;Q8N6T7;Q96S65;Q9GZV5;P46781;Q969S3;Q96GM8;Q96GA3;P54253;Q05519;Q9H788;O76021;P32969;Q9NXV6;Q9H4X1;Q9UGY1;P06454;Q9H2G9;Q9H583;O95232;Q96JB2;Q8TAD8;Q96EY5;P56181;Q96PM5;Q16719;Q6Q759;Q8WXF1;Q14690;Q9BSV6;P19338;Q9Y6K1;P62913;Q9NPT6;O15111;Q9BVC6;Q00613;Q9GZU2;P23497;Q92681;Q8N187;P56537;P11142;O00534;Q96D46;Q8N3Z6;Q96FX8;P28066;Q9BBSW2;P21675;P17482;Q96KQ4;Q9H4I2;Q6P9F0;Q14442;O15265;P06132;Q9BSF8;P51523;P78337;Q96DE0;P81274;Q13573;Q9Y6H5;Q9GZS1;P40424;Q14526;Q8N9W8;P05783;Q14683;Q96KR1;Q9HAJ7;P62277;Q96QT6;P55265;Q9UQR1;Q8NEM1;Q08999;P06744;Q7Z6J9;Q9NXZ1;O14746;O75607;Q9NUL3;Q8WU90;Q

5T4T6;O43663;Q9BVT8;O75347;P62851;Q15542;Q92979;P18615;P11802;P42226;Q2NL82;O94874;Q5VZE5;Q9Y2D1;Q9H6R4;Q5VT06;Q9BQA5;Q14103;O75886;Q86V81;Q9H6F5;O75475;Q9H079;Q9NVV6;O00186;Q13243;Q8IY57;Q9BQA1;O60828;P61576;Q16186;Q7Z4H7;Q9UKX2;Q562F6;Q13769;O95295;O43236;O43395;Q15554;P49756;Q5TD94;Q99615;P78545;Q86UE4;Q49MG5;Q9UKT4;Q15697;O75791;Q9NPD3;Q15014;O60765;Q7L0Y3;Q08945;P49427;Q9Y224;P27695;Q8IWX3;Q8WTT2;Q9Y3Y2;P30876;Q9H0S4;Q1BRP8;P53567;O15127;Q9UHR5;P61579;Q6PJT7;O15162;P38432;Q9UM11;Q86WX3;O43598;Q9BT78;Q5MIZ7;Q9C086;Q8N5F7;Q14686;Q9H7B2;Q96R06;Q9UHX1;P57678;Q9BV57;O95391;Q96MH2;Q6ZU65;Q5T8A7;Q53T94;Q9H116;P17275;Q9NVR2;Q9H6J7;P30279;Q13901;Q5EE01;Q15459;P61572;P55212;Q06546;O94818;O60563;A4D1E9;P43268;Q9NVV4;Q9P2R6;Q9Y5B0;Q86XI2;Q6UN15;P23769;P61244;Q9NSI6;Q13287;Q9NX18;Q96T58;P41218;Q5H9F3;Q9H467;Q12905;Q9GZL7;P18847;Q8WVC0;Q9UPP1;Q6PI26;Q9NY61;Q9Y468;Q9BQ15;Q9NX46;Q03933;Q92945;P51610;O15527;Q9BSU3;P61573;Q9NVN8;Q53HV7;O00541;Q9Y606;Q96PU4;Q9NTM9;O43918;P17036;Q92917;O00422;Q96IY1;Q08050;Q9H9Z2;P41252;Q96EZ8;Q15047;O75312;Q9P1T7;O95625;Q6ECI4;Q6IA86;Q8N336;P42771;P41220;Q7LBC6;Q8WWW9;P04156;Q92922;O15226;Q13620;Q9H321;Q9Y603;O94776;Q5TBB1;Q9BXS6;Q9Y244;P61218;Q5HYK7;P50750;P19367;Q6ISB3;Q8TEA8;P46777;Q9Y250;O60671;O43172;O43684;Q9BTP7;Q9Y3U8;Q53ET0;P56182;P78347;Q9NUQ6;P31943;P40926;Q7Z7C8;Q12906;Q92800;Q13601;Q5TAX3;Q9BSJ6;P49005;P78371;P45973;Q9NNX9;Q9UFW8;P48556;P19387;P62140;Q9Y4A5;Q8IY81;P62081;Q8N668;P15336;Q8N2W9;Q8NHQ1;O14929;O00567;P15927;Q15560;Q9Y6D6;Q16666;O43390;Q9H6Y2;Q9HAV4;Q9UMY1;Q9UDY4;Q03936;Q9UQ35;Q13148;P15408;P53992;Q9HCG8;Q96J17;Q9NZ63;Q5JTD0;Q9H2G4;Q9NYF8;Q13057;Q9NVU7;Q17RY6;Q9BRU9;O43365;P38646;Q13547;Q9ULR0;Q9BXY0;Q05195;P49721;O95571;Q8NEZ2;Q9HOA0;Q9Y2L1;Q8ND90;P01106;Q92750;P39880;P78310;Q92933;Q15185;Q9UKV3;Q96FV3;P36873;Q9Y618;O14497;Q9UI43;Q13868;Q15029;O75081;P61574;Q8WV24;O75400;O14503;O75132;Q9BVW5;O76031;Q9Y255;P17040;Q92748;Q92785;Q9Y4P8;Q504T8;Q8WV37;P51398;Q69YH5;P62136;O00461;Q9UPN7;Q7RTV3;Q13875;Q99459;Q13137;Q8TEV9;Q03468;Q86UU5;Q96DI7;O00257;Q96DX5;O96004;Q9BTE3;Q96BK5;Q13485;O94992;Q9UHK0;Q99638;O00255;Q8N7H5;Q9UPV0;P09629;O75817;Q5TKA1;Q9NQ4;O75691;Q96SW2;Q92499;P10155;A4D1E1;Q9ULW0;Q96HI0;Q14999;O14980;Q9NFK5;Q86VM9;Q9H204;Q9BQ70;P49116;Q9NWS1;Q12857;Q9NWF9;Q8WW01;Q92541;Q6ZVD7;O43493;Q8NBZ0;Q8IWS0;Q06587;Q3B726;P57721;Q8WXS3;Q86US8;Q9BQG0;Q9Y221;Q5VUA4;Q6I9Y2;P28324;Q6ZNA4;Q8N108;Q9Y692;Q13435;Q9Y253;Q9H8T0;Q9NY27;Q8NCE0;Q9Y2P8;Q15326;P61236;O75618;Q9NPE3;P32519;Q9UP83;O00170;P49918;Q9UPW6;Q96HA7;Q9UGK3;Q12874;Q60287;Q8TBZ0;Q9P258;O75683;P55769;Q9UHB7;Q9HAF1;P23193;P33240;Q9BZQ8;Q96RE7;O75528;Q7Z6B0;Q12830;Q12830;P61247;Q96BP2;P62753;Q86XR8;Q14676;P50221;Q13469;Q7L266;Q15650;Q96PK6;Q14684;Q6PI98;Q9BYN7;Q7L804;O14862;P25205;Q7Z5K2;Q6NZY4;Q9C005;P61571;Q6ZN17;O75525;Q15424;Q9NV31;Q15637;Q9NWT8;P39023;P86452;Q96NY9;P46939;Q9UNQ2;Q9UPN9;Q8WXE9;Q8WVL7;Q15007;O00472;P24928;Q8NAP3;P62847;Q63HQ0;Q9H320;Q9Y421;Q8NEI1;Q5T7V8;O75150;Q15723;Q99848;P51531;Q5TB80;Q16836;Q9Y535;Q6P2H3;Q9NZM5;Q6UUV9;Q8NEY8;Q8TC56;Q8IZU0;Q5TID7;Q9Y6X8;Q96CJ1;Q9Y3B9;Q9H008;P14324;Q5RKV6;Q9NZ81;Q9HC52;Q9ULW3;P54727;Q9UN36;Q9H6W3;Q9C099;P53999;P19474;Q8WXF8;P22087;P25786;Q01081;Q15306;Q92575;Q96GN5;O00410;Q969X6;P15880;Q9UIF9;Q9UKD1;P78345;Q15054;P46087;O95251;Q5QJE6;P82970;Q8TAQ2;P78346;Q8IX15;Q06787;Q9Y3P8;Q9C035;Q9Y3S2;Q9BRS8;P06748;Q6PJG2;Q3ZCT1;Q15545;O60303;P61457;P35573;P55197;Q9UBP6;Q53EL6;Q9NRR4;Q99549;Q96B26;Q9H8H0;Q96JKT9;Q9ULW8;Q969V6;O14978;Q5D1E8;Q14258;P36578;Q9BUR4;Q8NHY2;Q9H0U9;P61978;Q9BQ95;Q9GZS3;Q99496;Q96EU6;Q9NWZ8;Q15935;Q9Y4W2;O94986;Q9NP66;O60832;Q9Y262;Q9NRR3;Q9H9Y2;P27694;Q12824;P14316;Q13228;Q06330;Q15233;Q9Y324;Q9H9Y6;O94805;Q96G21;Q9UQ80;Q96RU7;Q9NZI6;O00161;O95163;Q68CT9;Q7Z7K6;Q9H9L3;P01100;O60921;P17010;O00268;Q8NND2;Q8IWC1;O95602;Q9Y222;O75190;Q6H633;Q5EBL4;Q8WY54;Q9BE14;Q96QU8;O60885;Q53HL2;Q9Y2X9;P15621;Q9H9T3;Q05084;Q29RF7;Q9Y3T9;Q9ULZ2;Q5H9S7;Q6P2C8;Q9UKY7;O43159;Q13342;Q13330;O95478;Q8NCD3;Q9UL42;Q9NVX0;Q6P387;P49711;Q13428;Q9BZK7;Q99547;Q5C9Z4;O00712;Q8WZ33;Q7L5N1;Q8WYA6;Q92841;Q9Y5S9;Q9UI36;Q9BVI4;Q6ULP2;Q6UUV7;P18754;Q14137;Q9UGK8;O95243;Q96C86;Q13127;O75113;Q86UD0;P35226;Q96PY6;Q99590;O75486;Q9UHB9;Q99567;Q9NP64;P35637;Q9Y5L0;O60524;Q9NRC8;P19838;Q96AY2;Q86XK2;Q9UQL6;Q53QV2;Q8LUF8;Q96GC6;P10074;Q86UA6;Q8NFD5;Q9NYF5;Q9UL40;Q09FC8;Q15024;Q00653;Q13427;P16220;Q0VD86;Q15361;O75934;Q99700;Q13363;Q9UKI9;O43148;P0DI83;Q86W56;O75154;Q9HB65;Q9Y473;P52758;P13010;P61962;P46783;P41970;P56282;Q96NS1;Q0VG06;P07741;Q9H3F6;P49790;Q9UER7;Q99816;Q96DN6;Q13352;Q16621;Q96S55;Q9H1B4;Q9BZV1;Q12972;P52597;Q8N720;Q15050;Q9Y2M5;O43324;P37275;P30793;O60936;O60869;Q08J23;Q6FI81;Q13829;Q9H501;A6NK53;O94842;Q1ED39;Q14331;Q13112;Q9H0I3;O43823;Q9BVJ6;Q9UPA5;Q9BUL9;Q8TDN6;Q14181;Q14980;Q6IEG0;Q96FV9;Q9UBQ5;Q9BU02;O43290;P30260;Q9Y3A2;Q9NY12;Q7Z3K3;Q8NG31;Q7L590;Q92905;O00267;Q5EBM0;Q9Y2W1;Q9H160;Q86U42;Q9NTI5;Q68DK7;Q9UL03;O95707;Q9NQ55;Q969H0;O15446;P39019;P28838;Q9GZX5;Q9H9L7;Q9NX58;Q6PJP8;Q86V15;Q9BSJ2;D6RGH6;Q9NVV4;Q96N77;Q9NRG9;Q12873;O75151;Q16629;Q9UNH5;P52434;Q06265;Q96EK4;Q9BSM1;Q96AE4;P46013;Q8WXI9;O15355;Q99627;Q96Q89;Q96FX2;Q14814;Q03111;Q9UBW8;Q9UMX1;O75818;Q9Y2X3;Q8WXB4;P62829;P02533;O60216;Q9P278;Q92733;Q12968;Q9NS73;Q9Y3B2;Q9NRY2;P19532;Q14872;P18583;Q15776;Q13541;O14802;Q9UBF6;Q5JVG8;Q8NFH5;Q9BTC8;Q96E16;Q8N3X1;P62263;Q5U623;Q14978;Q9Y2B5;Q14145;Q8NF64;Q15651;Q8N726;P51826;Q13367;Q15021;P09874;Q96NB3;Q14498;Q13045;P61578;O95429;O75164;Q9H875;Q99575;Q86UW9;Q5JGL7;Q4VC44;Q14152;Q9BVP2;Q9BY77;Q86Y41;Q9GZR1;Q9H503;Q96L92;Q15072;P52298;A2A288;Q9UJCS;O43299;Q8IW35;Q8IWW8;Q8WX92;Q9ULP4;O95551;Q9H8M7;Q9Y3D0;Q9H668;Q15543;Q8WYQ5;P52741;P24864;Q9H869;Q969H6;Q9H6T0;Q9H1J1;Q5TAP6;Q13895;Q9Y3A5;P08047}

5898

Pathogen { P0C206 } interacts with 1179 human partners: [P27695;Q96HA7;Q5VUA4;O43598;Q8N720;Q6IEG0;Q13112;O00488;Q9Y3S2;Q9BT56;Q15072;P61572;Q6PJG2;Q9Y253;Q9Y468;O14662;Q15723;Q13875;P09132;Q13887;Q3T8J9;Q9Y224;O75486;Q9NZ63;Q9BZQ8;Q9Y2X9;Q9H0S4;Q9H8H0;P53567;O75683;O60216;Q9NPE3;Q9NX58;Q9BUL9;P48643;P31949;Q86XR8;Q99848;P46939;Q53T94;Q08J23;Q96L92;Q86V15;O43324;P56181;Q9H4L7;Q9P1U0;Q8IX15;P33240;Q8IXQ5;Q9Y3E1;Q13829;Q13541;Q63HQ0;Q01082;Q9P2N5;Q8WVL7;O43933;Q9C005;Q15127;Q9BTE3;A6NHQ2;Q9Y5L0;O75528;O75952;Q65195;Q9NQE9;Q13601;Q92575;Q96T37;O95309;O96G21;O94986;O43159;Q14103;P13010;Q8N187;Q00444;Q9NX46;Q496M5;O95478;Q9BVI4;Q9Y2D1;Q7Z2X4;Q9UHL9;O75934;Q8WU90;Q96AY2;P45973;P23193;O94842;Q9UDY4;Q06546;Q8NEZ2;P49790;Q9BYG

3;Q96ST3;Q9HB65;Q15545;Q9UI43;P17026;P52298;Q96S65;P55265;Q9NQ90;O95453;P61576;Q9Y324  
;P06401;Q9GZU2;O95251;Q9Y6K1;Q96GA3;Q9C099;Q06330;Q13469;P49959;Q68DK7;Q9BSV6;Q9NS18;  
Q6UB98;Q15543;Q9UBP6;Q9NVN8;Q96Q89;Q8NFH5;Q86UW9;Q9BQ15;Q12905;Q9H4X1;Q96DX5;Q9HC52;Q  
13127;Q9NRG9;Q9BSF8;Q16222;Q96EU6;Q15397;Q9UPN9;Q9BYG7;Q01081;Q9NSI6;P81274;Q9NZM5;Q9  
BQA1;Q9UMY1;Q8NCN2;Q86UU0;Q8WXX9;Q6FI81;Q96C86;Q16186;Q9BV86;Q9Y3D8;Q8N726;Q15361;P50  
750;Q15019;Q8N611;P52741;O95602;P13533;Q8TD86;Q9H6F5;Q9H4I2;P78364;P62081;Q5TD94;Q141  
37;P04156;O43365;Q9UDY8;Q9BVP2;P25786;Q9NY12;Q8WY54;P18583;P55769;P12220;P17275;P1007  
4;Q06787;O75607;Q9UL42;Q3SYG4;Q92681;Q9BTP7;P35869;O15527;O14862;P40121;Q14692;Q9UMX1  
;Q9H6J7;Q8TAD8;P09874;Q15744;Q5EBL4;Q9NVU7;Q6ZJW1;Q9BZZ5;Q9Y623;Q9ULW0;Q9UK73;P18754;  
Q9UL41;Q96HI0;Q8IUF8;Q14966;Q92733;Q14690;Q8WUN7;Q9NPD3;Q86XK2;P41252;Q96FX8;Q9NRS6;O  
95721;P51955;Q5JTH9;Q14258;Q6UN15;Q9H9T3;Q5RKV6;O75154;P25205;Q9Y6D6;Q15697;Q8N3X1;P5  
1587;Q05519;Q15233;Q8IY85;P51531;P56589;Q6P2H3;P41182;Q9UPA5;Q13868;Q13615;P54821;Q08  
211;Q9H869;Q13228;Q6ZNA4;Q9GZL7;Q15554;O75717;O43681;Q9UHK0;Q8WTT2;Q8IV48;P46781;P302  
79;Q00613;P35226;O75818;Q9UHR5;Q6PJP8;O60934;Q16836;O95232;Q9H8T0;Q2V2M9;O43493;Q9961  
5;Q13057;Q8WXB4;Q8IWA0;Q96JI7;O75081;Q96JK9;Q9BY77;Q8WXI9;P34932;Q9C0H6;Q9NRR3;O00255  
;Q9H9L3;Q13045;Q9UHB7;Q8WXE9;P61978;Q03933;Q9H1Z4;Q6P387;P61218;O95630;P46013;O00567;  
O43670;Q15185;Q8N2W9;Q8TBZ0;O00268;Q14146;Q9NXV6;Q9UPP1;Q13137;Q6PI98;A2A288;P50221;Q  
9BRS8;Q96MH2;Q6ZVD7;P28838;P55212;Q9UH90;Q9NWF9;Q6IA86;Q7Z5K2;Q5EBM0;Q8N1G0;Q14442;Q9  
2791;Q96QU8;Q9H307;Q1ED39;Q9NS39;Q9P278;P08729;Q29RF7;Q15637;Q03468;Q8WZ33;Q53GL7;Q96  
BP2;O15265;Q15021;Q96PY6;O60828;Q16666;P15336;P19338;Q6ECI4;O00444;P62263;Q969H0;Q9H3  
20;Q9UIH9;Q9UFW8;Q13243;Q12874;Q16629;Q92541;Q86U42;Q92800;Q9Y2B5;Q9UER7;Q9Y3C1;O6076  
5;Q7LBC6;Q6P2C8;O43390;Q8IWZ3;O75618;P43268;Q96DE0;Q96C00;Q92922;Q9BUI4;Q96JB2;Q13895  
;Q15306;P15621;P53804;P42771;Q9H6Y2;Q0VD86;Q13342;Q13316;Q9UPV0;Q13547;Q7LG56;Q96KM6;  
Q9UBX3;Q03936;O94776;Q9UKA2;Q9UGK8;Q9H9L7;P29373;Q9H503;P50991;Q9H668;Q7RTV3;O60524;Q  
99816;P41970;Q12968;P51003;Q92993;Q8NBZ0;D6RGH6;Q12824;P49005;P22626;Q9UL03;Q96BK5;Q8  
6YP4;P17987;Q13330;P15976;Q99829;Q9HOI3;Q13287;P49116;P41218;Q96B26;Q15050;Q96RQ4;Q9H  
B58;Q8IZU1;Q9BSC4;Q15014;P62851;P30793;Q5TKA1;P19367;O94818;Q8TDN6;P19532;P78316;Q96Q  
A6;Q5JTD0;Q8TAQ2;Q15326;Q9Y603;Q8WV37;Q8N9W8;Q9BQA5;Q9Y4P8;P49427;Q3B726;Q0VG06;O1522  
6;P30260;Q5VTR2;Q9H160;O75791;Q9Y6X8;P38646;Q8N1G1;O00410;Q8TC84;Q13620;O00422;Q9UHX1  
;Q96RU7;O43236;O94762;Q9HAV4;P40424;Q14145;O43299;P23786;P61247;Q9Y535;Q9UBW8;Q9P2R6;  
P57721;Q15269;O75943;Q53HV7;Q9NRY2;Q03111;P07992;Q8WYA6;O75475;P51398;O43290;O96004;Q  
9UBF6;Q16587;Q9NVX0;Q969H6;P14653;Q96EZ8;Q9NYH9;Q8IWC1;Q8N6T7;Q9C086;Q9GZV5;Q9H583;Q1  
3769;O95163;Q12857;Q9Y421;P0CG29;Q08999;P62913;Q99638;P0DI83;Q9UNQ2;P32519;Q96FF9;O75  
151;Q6ZN17;O00161;Q9NVX2;Q96D46;O43918;Q9H6R4;Q8Y9Y1;Q14999;Q03989;Q96JB3;Q92785;Q134  
35;Q9UQ35;Q9UKT4;Q5EE01;P51114;O15355;Q99547;Q9H9K5;Q92797;Q8TEV9;Q9H9Z2;Q15061;Q9Y2X  
3;P78337;O14497;Q9UPQ4;Q9UGK3;Q9NVU0;P36578;Q6UUV9;O43248;Q15651;Q92750;Q96NS1;O60936  
;P06744;P78347;Q9GZR1;P82970;P14324;Q96NY9;Q969S3;P19838;Q96NB3;Q8IWS0;Q86US8;Q86W56;  
Q14164;Q96SW2;P49917;Q8NF91;Q15054;Q969V6;Q92979;P12883;O15516;Q9NZ81;Q9Y3P8;Q9NYP8;A  
6NK53;Q9Y6J0;Q13428;Q6ZN04;Q9UNH5;Q96FV9;Q9Y5J1;Q9Y5B0;Q15650;P19387;Q6PI26;Q9UP83;Q9  
H788;P04053;Q7333;Q96N77;Q86XI2;P53999;Q6ULP2;Q15007;P19010;Q9Y6U5;Q9Y3D0;Q5HYK7;Q8N  
7H5;Q16719;Q5XKL5;Q96M11;Q8NF64;Q5QJE6;Q9BQG0;Q92917;Q9BZR9;P17010;Q9Y4A5;Q9GZS3;P590  
47;Q9BVW5;P39023;Q5T8A7;O75113;Q15560;Q8WXA3;Q7L0Y3;Q13835;Q8NHY2;Q13573;Q9ULW3;Q969X  
6;Q9BZV1;Q6RFH5;Q99700;P32969;Q9Y255;Q06265;O14929;Q14181;O95429;O94992;Q9C0F3;Q9NR48  
;Q96CJ1;P08047;Q9NP66;P17482;P18615;P52597;O76021;Q13427;Q8NCD3;Q16630;P51610;Q86SG2;  
O00264;Q9BVC6;P55196;O00159;Q9P2K5;Q8WXF8;Q6PJT7;Q14683;Q6P2E9;P61575;Q96KR1;Q8N357;Q  
53QV2;O60885;Q5H9F3;O95707;Q14149;Q8WXF1;Q17RY6;Q9NPP6;O00461;Q14676;P35680;P49711;Q9  
HC78;Q96IY1;P61571;P01100;Q06587;Q9NV06;P86452;Q9UPW6;Q9Y3B8;O94874;Q8IZU0;O75817;P10  
155;Q8TED0;Q9H6W3;Q9UKI9;Q8ND90;Q5DLE8;Q96PK6;Q3ZCT1;Q9UIF9;Q14152;Q9Y3B9;Q9NY33;Q146  
86;Q7Z7K6;P12882;Q9UQR1;P35637;O43491;O96028;Q7Z3K3;Q9Y692;O43395;O15111;P46777;Q9NRX  
1;Q9NWT8;Q76FK4;Q99590;P78345;P05783;Q9BRU9;Q8WVC0;O95551;P28324;O15446;Q9NVP1;O43663  
;Q9Y2W1;Q8IW35;Q9BT78;Q14790;P54727;Q6NZY4;Q15024;Q13352;Q7Z4H7;Q5VZE5;P40926;O15234;  
P78545;Q6P9F0;Q5VT06;Q16143;Q08378;Q9H1B4;Q9NUL3;Q13901;Q8NHM5;P28066;Q9UM11;Q96S55;Q  
96GC6;O60921;Q9NQ33;P51523;Q12996;Q5C9Z4;P56182;P56537;Q9H4Z3;Q4VC44;Q9HAF1;Q9BWD1;Q9  
NY27;Q9Y222;Q96S99;Q53HL2;Q9NRR4;Q86SE8;Q9UKX2;Q9HA38;Q9Y2L1;P42574;Q96JM3;Q9BZK7;Q92  
625;Q9BV57;Q49MG5;Q9BYN7;Q9NUQ6;Q92841;Q9Y2P8;Q9GZX5;P55795;O00267;P39019;Q5TBB1;Q9NV  
V4;P51826;Q5TAX3;Q92804;Q15424;Q9BSM1;Q9H3F6;O60832;Q53EL6;P46783;Q9NRC8;Q9H2G4;Q1487  
2;Q9C035;P40763;Q13485;P42766;P61244;Q9H008;Q8IWZ8;P55072;Q8IWW8;Q9NTI5;Q9BUR4;P61962  
;O95295;Q9NTK5;Q96E16;Q9BZE4;Q9ULR0;Q9H116;Q9HB21;Q9H6Z4;Q13148;Q8N5F7;O43172;P98171;  
Q9P258;Q14527;Q96T58;O60869;Q9H0U9;Q15366;O00541;Q99567;Q99627;P62140;Q13356;Q99459;O  
60287;Q9Y3B2;Q15542;P61457;Q8N336;O00472;Q9HCG8;Q9H875;P36405;P23769;Q9H2G9;A4D1E9;P2  
9474;Q9Y606;Q9BX66;Q9BQ67;Q08050;Q9NV31;O15162;P46087;Q9H7B2;Q6ZU65;Q9H6T0;O60315;P61  
574;Q9Y237;Q09FC8;Q86W54;P43243;Q562F6;Q9NZI6;O75691;P54136;Q5T4T6;Q9GZS1;O43823;Q9Y5  
K6;Q95639;P18847;O75400;Q9NVR2;Q7Z6J9;Q53ET0;Q86WJ1;Q8IXK0;Q69YH5;P42226;Q8IY57;A6NGB  
9;Q6ISB3;Q9H9S7;Q9H7D7;Q9Y3A5;Q9UPP2;Q99871;Q00653;Q8WW01;P37275;O60671;Q8WX92;Q9BXW6  
;P06454;Q5HNP7;Q9UKD1;P56282;Q9BSU3;P22087;Q16621;Q13415;Q9H832;Q9BVT8;Q96FX2;O75164;  
Q86UE4;Q68CQ4;P07741;Q99575;Q8N987;Q9ULZ2;Q8NEM1;Q674X7;P17040;Q9H204;Q96PM5;Q969G3;O  
95625;P62277;Q9UKD2;Q9UHB9;Q9UBS3;Q8N573;P25685;P27694;A4D1E1;Q8WXS3;Q9NP64;Q9H9S0;O4  
3364;Q9H501;Q86UD0;Q5MIZ7;Q08209;Q9BR61;Q9H9Y2;Q14814;P11388;Q14765;Q9HAJ7;Q7Z7C8;Q8N  
FD5;Q9Y2M5;P15927;Q9UHA3;O60303;P01106;P24928;Q16181;Q9NX18;Q96AE4;P15121;Q9UQ80;Q150  
47;P49721;Q9UN36;Q504T8;O15042;P06748;A6NLJ0;Q9UBC3;P49756;Q14331;Q92945;Q9NY74;Q1297  
2;Q5TID7;Q8NCE0;Q96QT6;Q9H321;Q7L804;O00170;Q96DI7;Q9H8W5;Q7L266;P39880;P09629;Q7Z6Z7  
;P53992;Q9BXS6;Q9NQ55;P11387;O43684;Q86UU5;Q9NQ74;Q9H2P0;O75347;Q14526;P13196;O75886;  
O00257;P28069;Q9ULW8;Q00987;Q9Y473;Q14980;Q13363;P39748;P41220;Q9GZR2;Q96GM8;Q96TF8;P  
62753;O75525;O76031;Q7Z6E9;O95391;Q7Z6B0;Q8N668;Q7L5N1;Q9P2D0;Q5JVG8;Q9Y221;Q96ER9;Q8  
6VM9;O14802;Q9NQZ2;Q15776;Q6Q759;Q8N6H7;Q2NL82;P0CG30;P36873;P42224;Q96IU4;Q6VB84;Q9B  
SW2;P52758;Q9H9Y6;Q92499;Q8NHQ1;Q99549;O60563;Q9BXY0;Q9BSJ6;P15880;Q9Y244;Q8WYQ5;P551

97;Q9NY61;Q96PM9;Q9BU02;Q14119;P78346;P13535;Q14498;Q9C029;Q9UI36;O43148;P61579;Q15935;P24864;Q9UL40;Q08945;Q9NYV6;Q8TEA8;Q9BSJ2;Q9UNX4;Q9BQ95;Q6UUV7;Q9UDW3;P02533;O75312;Q7Z2E3;Q9Y3T9;Q9H633;Q15459;Q14566;P11142;Q96EK4;P50135;Q9NXZ1;Q9NTJ3;Q6P4R8;Q8NG31;Q96RE7;Q8NEY8;Q8N1G2;Q9Y3A2;Q96GN5;Q9Y3Y2;Q12830;P06132;Q9H8M7;Q9Y4W2;P38432;Q95571;O75150;Q95TB80;Q9Y618;P11802;P61578;Q5U623;P14316;Q95243;P48556;Q9H4E7;Q15257;Q9Y250;P15408;Q92560;Q12906;P17480;Q96DN6;Q8NAP3;Q8IY81;Q9P1T7;Q7Z699;Q12789;O00534;Q5TAP6;P62847;Q9Y6H5;Q9NS73;Q8TC56;Q96FQ6;P78371;Q9Y262;O14978;Q9HBL8;Q9NNX9;Q9H0A0;P31943;Q13367;Q9H0E9;O43316;Q8NG50;Q6I9Y2;Q05084;Q9H467;P52434;P58304;Q9BQ70;Q99496;O94805;Q8N108;Q9UKY7;Q86WX3;Q96PU4;Q69383;Q96EY5;Q9UJC5;Q9BWX1;P62136;Q92585;Q9UKA4;Q9UGY1;Q6H8Q1;Q92748;Q93050;Q9Y5S9;Q86V81;Q12873;Q99986;Q9UKV3;O00566;Q9NTM9;O14746;Q14684;Q9NWX8;P21675;Q9H079;O75190;O60264;O00186;Q68CJ9;Q70IA6;Q14978;P62829;P17036;Q9BTC8;Q9BRP8;P61236;P54253;P19474;Q8NDT2;P29401;Q5T7V8;Q8WV24;Q8WVY7;Q9H1J1;P16083;P12004;Q92905;Q9BVJ6;Q8IXF0;Q7L590;Q15029;Q8TAZ6;P61573;Q9Y3U8;P35573;Q9UQL6;P49918;Q9NWS1;P30876;O75132;Q9UBQ5;P57678}

5899

Pathogen { P03363 } interacts with 1095 human

partners [ Q96B26;Q96D46;Q16587;O60832;Q13112;Q9NWF9;P62913;O75717;P61236;Q9UNQ2;P05783;Q9NX24;O75190;Q9Y2B5;Q9NQT4;Q9H160;P49918;Q14146;Q14978;Q9Y6J0;Q53QV2;Q9Y3P8;Q9C0F3;Q92979;O94762;Q16836;Q96QT6;Q9UGK3;Q9UFW8;Q9H875;A4D1E1;Q15233;P52758;P02533;Q9NVR2;Q9Y535;Q99615;Q9UKD1;Q99829;O43395;Q9BZZ5;Q6ZNL7;Q9ULW3;Q16186;Q69YH5;P09132;Q9Y3E1;Q9BUR4;Q9NWT8;Q06787;P29474;O75081;Q75347;Q9NVN8;Q68DK7;Q9H832;Q9Y6H5;Q13151;Q5VUA4;O43493;Q9NVV4;P46939;Q03989;Q96RE7;Q14765;Q12830;Q5RKY6;Q96LY1;Q8N1G0;Q92917;Q15366;Q13427;Q8WWL7;Q9BVJ6;Q8WTT2;Q9UL42;Q9UHL9;Q53ET0;Q9UGK8;P19338;P62136;Q9NXZ1;Q8NF91;Q9GZS3;Q9NWH9;Q7Z7K6;Q13835;Q96T58;P27694;Q86UA1;O43933;Q9UGN5;O94818;O15355;Q9BRU9;Q96S65;Q9Y5B0;Q7Z333;O15527;Q9BZR9;P41252;O14978;Q96GA3;P54727;Q96EU6;P46087;Q7L804;P62847;Q9Y2X3;P06744;Q9GZL7;Q6P387;Q9UNH5;Q14145;Q8NAP3;P17010;Q08J23;Q15050;Q16222;Q9H4X1;Q9BQ95;O75683;Q92575;P06454;O75643;Q5C9Z4;P49116;O00712;Q8NG50;Q9BX66;Q8WXE9;O95453;P36873;Q2VIQ3;Q9BVT8;Q6ECI4;Q12972;P42766;P24864;Q9NQ55;Q13367;Q13148;Q5VT06;O60315;Q13435;Q8WZ33;Q9UHB7;O95391;Q969X6;Q13428;Q9BSV6;Q15021;Q9Y468;Q9UP83;P52597;O60563;Q9H321;Q3ZCT1;Q9NWI3;Q9Y4W2;P53567;Q14526;Q9HAV4;Q9H9Y6;Q15554;Q6NZY4;Q96IU4;Q9UMX1;P36578;O75607;Q5TID7;A2A288;Q86YP4;O75886;Q9BZQ8;Q63HQ0;Q9H7D7;P86452;Q96L92;Q5T7V8;Q9NS39;Q9BTE3;P11387;Q9UKV3;Q9H4L7;P62753;Q99848;O94992;Q8WX92;Q96BK5;P62140;Q9BTP7;Q6IA86;Q9H869;Q5TBB1;Q8TBZ0;Q9UMY1;Q8WV37;O43365;P62081;Q8N187;Q06546;Q9Y324;Q9Y3D0;O95232;O75618;P30876;P30279;Q13228;P0CG30;Q99575;Q14331;P13010;Q03933;Q8WVC0;Q96EK4;P51991;O95478;Q6ZU65;Q15744;Q9H9Y2;O75817;Q9HC52;P25205;Q14258;P41218;Q9Y606;Q15014;P18847;P45973;Q9UKX2;Q86XI2;Q5U623;Q13356;Q15024;Q9UFP2;O75132;Q14980;Q9NVU7;P37275;Q06330;Q99547;O14980;Q86US8;Q8TAQ2;Q96GM8;P56182;Q5TKA1;Q8IWA0;Q9NWX8;P35637;O00410;O60303;Q8WV24;P19387;O15111;Q9Y3B2;Q9H2P0;Q7RTV3;Q8N720;Q9GZR2;P50135;Q69383;Q9NVU0;Q6P2E9;Q9UHB9;P61218;Q9BV86;P09651;P32969;Q01082;Q9NZ63;Q15459;P82970;Q7Z6E9;Q9BQ00;Q9H8M7;Q9BZK7;Q8N1G2;Q9Y253;Q96BP2;Q9ULW0;O75818;Q13045;Q9NY12;Q9NUL3;Q9UKI9;Q95T4T6;Q8NHQ1;O60765;Q96BT7;O75526;Q9Y6X8;Q9UBQ5;O14497;Q9BWD1;O60671;Q96GN5;Q5JTD0;Q9P2D0;Q9UJC5;Q9UNTK5;Q9UN36;Q16629;Q6PJG2;Q9Y2P8;O94986;P15621;Q15545;Q9Y3A5;Q9UBS3;Q96I25;Q13769;Q9BZE4;P31949;Q9ULW8;Q9Y3Y2;Q92791;O00567;Q15776;P06132;P16220;Q8WYA6;Q9UHK0;Q9Y3C1;Q9Y2D1;Q86WX3;Q9UBF6;Q9H307;Q9H7B2;Q14152;Q13342;Q53EL6;Q96JK9;Q9NV31;O43316;Q9BT78;Q8NXC2;Q13901;O95602;Q16621;P58304;Q9UDY4;Q86V15;Q9P258;Q5VTR2;P24928;Q9UL41;P98171;Q16630;Q9UQL6;O75475;Q9UL40;Q9NQ33;O75164;Q5EBL4;Q9UER7;Q9Y496;Q9C099;Q9H1Z4;Q53HL2;P07741;Q9UPN9;P0DI83;O00268;Q96JI7;Q9Y6K1;Q8TC56;Q6FI81;Q9BXS6;Q9Y603;P49005;Q9H865;Q9UL03;Q8IXK0;Q15306;Q0VD86;O00267;O14746;Q96GC6;Q9H467;P04156;Q9GZS1;Q969V6;Q14181;O15047;O15446;P49756;Q8N336;Q5TD94;P43268;Q86UE4;O75312;O43248;P15880;Q49MG5;Q9Y2X9;Q96KQ4;Q86U42;Q13601;Q9BSJ6;P51826;O75791;Q14686;P15927;Q8WXS3;Q9BWF3;P23497;P30260;P49427;Q9UGY1;Q8IUF8;Q8WU90;P61575;Q96FV9;P01106;Q6UN15;Q9UQ80;Q9NPD3;O75691;Q9H0S4;Q9BRP8;P06748;Q9H079;Q9HAF1;P35869;P17275;P42226;Q96PK6;O95571;Q99729;Q3B726;Q504T8;Q9C005;P49711;Q9BQ67;Q9P2N5;Q92797;P18615;O43818;O75150;Q8IWZ8;P81274;Q9UNX4;Q9UM11;Q6ZNA4;Q8N668;P61244;O00488;P14653;Q05519;O95707;P50221;Q13895;Q8IWC1;Q13127;Q8IY57;Q9C086;Q8NEY8;Q16666;P50991;Q8N3Z6;Q86UA6;P52272;Q6ZVD7;Q7Z6Z7;Q15029;Q9H633;O60264;Q9UPN7;P57678;A6NK53;Q9BQA1;Q9H320;O76021;Q8IWX3;O75400;Q03936;Q5VV67;O60287;P15336;O60885;Q15326;Q14684;Q14690;Q9UKA2;Q5EE01;P61578;Q92560;Q15424;Q9BXY0;Q9P1T7;P55212;Q9NRG9;P32519;P04053;Q8IZU1;Q9BSF8;Q9H0U9;Q14562;Q9BSU3;Q8WXI9;P61457;Q13242;Q96QU8;Q99549;Q9UBP6;Q8TC84;Q99567;Q9BTC8;P10155;Q96JM3;Q08050;Q8IY85;Q9NX18;P29373;O15226;P54136;Q9NY61;Q9NX46;Q7LD266;Q14872;Q9NNX9;Q7Z699;Q9NUL7;Q96FX2;Q96R06;Q9BYN7;P28069;Q8IXQ5;Q9UI36;Q6PI26;Q9UDW3;P62829;Q9ULZ2;Q9NVX2;Q14119;Q53T94;O43684;Q00444;Q12906;P18583;Q9NS16;Q6ULP2;Q00653;Q14999;Q9Y5J1;Q96AE4;Q9BY77;Q9BSM1;Q03111;Q92841;Q3SYG4;Q5XKL5;Q8IX15;Q13415;Q9GZU2;P46063;Q92945;Q99627;P17480;P34932;Q9Y250;Q9NZ81;Q9BQ15;O75113;Q8N5F7;Q12874;Q8Y81;Q8WUN7;Q9Y2M5;Q9GZV5;Q9BXW6;Q14814;Q8N6T7;Q9UPN6;P61571;Q6VB84;P78545;P31943;Q9NZI8;Q08999;Q86UU5;O43172;Q9NYV6;O95721;Q9H2G4;Q9NZI6;Q7Z2E3;Q9ULR0;P14316;P51003;Q14527;Q9UHR5;Q9BVW5;Q9UIF9;Q96JY0;Q3T8J9;P35226;Q8N1G1;Q9Y3D8;Q9HBL8;P0CC29;Q96G3;P46781;Q9H668;Q9NVX0;Q6H8Q1;Q86UW9;Q15637;P38646;P19474;Q9BSW2;Q9NP64;Q96DE0;Q7L5N1;Q8WVY7;Q96ST3;Q9UH90;Q7Z7C8;Q9BZV1;Q14966;Q96E16;P17036;Q8TD86;Q9NPE3;Q13243;P56537;Q86V81;Q9BQA5;P22087;Q15723;Q9H9L3;Q8IZU0;Q5TAP6;Q8N108;P57721;Q05084;Q01167;P17987;Q7L0Y3;Q96C00;O15265;Q13620;Q9Y2L1;Q9H6F5;O75934;Q9UKT4;O95163;Q68CJ9;Q86UD0;P31942;Q8TF68;O96004;A6NLJ0;Q9Y618;Q8IXF0;Q92499;P39019;Q96AY2;Q9H9Z2;O43290;Q96N77;Q9H788;Q86SG2;Q15542;Q96PM5;Q9H9L7;Q969H0;O94805;O14929;Q674X7;Q13573;P52298;Q2V2M9;Q9C035;O43148;P54253;Q9UHX1;Q14137;O00566;Q96NS1;Q6ISB3;Q2NL82;P55265;Q8NG31;Q6P2H3;Q08378;P46777;Q96G21;Q9NRR4;Q9NYF8;P59047;Q86UU0;O95243;Q5QJE6;Q8NCD3;P51114;P43243;Q8ND90;Q9UPS6;Q6ZWJ1;Q9H503;Q9H8T0;P54821;Q9H008;Q96EZ8;Q9Y3T9;Q9BV57;Q6UUV9;Q12905;Q13547;Q9NUQ6;Q13868;Q92750;Q9P2K5;Q9H3F6;Q96T37;Q9Y4P8;P49790;P08729;P22626;P19838;Q7Z3K3;Q8TEV9;O76031;Q99871;Q9Y5L0;P61572;Q6PJP8;O00186;Q96SW2;Q96S55;P41220;Q96EY5;Q86XK2;Q9Y692;P53999;O0



0422;Q29RF7;Q5TAX3;O75154;P82979;Q9BRS8;Q9C0H6;O95295;Q15651;Q15697;Q15185;D6RGH6;Q68  
 CQ4;P61574;P26599;O60936;Q9UPV0;O60869;Q9BYG3;Q92748;Q9UBE0;Q13469;Q99638;Q15361;P216  
 75;Q9NR48;Q13829;Q14103;Q6I9Y2;P51523;O96028;P23193;P62851;O14862;Q9H2G9;O43491;P5579  
 5;Q13875;Q9BYG7;Q9H583;Q9Y3U8;Q9H0I3;Q92681;Q9NY27;Q9UPA5;Q9NX58;Q9Y237;Q8IW35;Q13485  
 ;Q96HI0;Q15072;Q8N726;P10074;Q92804;Q86XP3;Q92625;Q9NQ5;Q12968;Q05195;P17482;Q03468;  
 Q9Y4A5;Q8NEZ2;P25685;P50750;Q08945;Q9NQE9;P13196;Q5T8A7;O60921;Q15269;O14662;Q6P9F0;Q  
 9UQR1;Q9Y3B9;Q15257;Q92541;O43159;Q8TAD8;P53804;O95551;Q92733;P62277;Q9NPNJ6;Q8N3X1;Q9  
 H6Z4;Q01081;O94842;P78371;Q969H6;Q09FC8;Q9BVP2;P61978;Q9NTI5;P40424;Q15054;Q9H116;P53  
 992;P78345;Q96DX5;Q9HCG8;Q5D1E8;Q13247;Q5H9K5;Q00613;Q86W56;Q9NRR3;Q96CJ1;Q12873;Q7L5  
 90;Q9H6R4;Q9HAJ7;O95359;O60524;P19532;Q6DN90;Q99816;P55769;Q9UKD2;Q8TEA8;Q86XR8;P6157  
 9;O15127;Q9Y262;Q9Y244;P61247;Q8IUV8;Q96Q89;Q9UKY7;O75486;Q9H204;Q12789;Q9Y224;Q4VC44  
 ;O43918;Q9Y3A2;Q96DN6;P09629;Q9NVP1;P61962;P55197;Q9UHA3;P09874;Q13330;Q8WXB4;P78316;  
 P52741;P41970;Q8NHY2;Q13363;Q86SE8;Q06587;Q9GZR1;Q99700;Q9P278;Q96FF9;Q8NFD5;Q14498;Q  
 96AC1;O43364;Q03828;O60662;P08047;P78346;Q7Z6J9;P11802;P46013;O00472;Q5HYK7;Q9HC78;O0  
 0161;Q96M11;Q13541;Q0VG06;O43663;Q9H501;Q7Z6B0;Q562F6;Q9H6Y2;Q15560;Q14676;Q9Y6D6;Q8I  
 WS0;O43390;Q9BU02;Q9H6J7;Q96KR1;P39023;Q15935;Q96PU4;Q96NY9;Q8WXF1;O95429;Q96C86;P515  
 31;Q9BR61;P18754;Q92922;Q86WJ1;Q96QA6;Q9NWS1;Q15543;Q9P2R6;Q6UUV7;P17040;Q13287;Q7Z5K  
 2;Q9H8H0;O60828;Q49MI3;Q8N2W9;O75943;P35573;O94874;Q86W54;Q8N6I1;Q96PM9;Q6Q759;Q08211  
 ;O95625;P52434;Q92800;Q9UBC3;Q9UI43;Q9H9T3;Q8NF64;P39880;Q99590;Q9UK73;Q9NS73;Q9H9S0;  
 Q13137;O15042;Q9UIH9;Q6P2C8;O95251;Q99459;Q13352;P78337;Q7Z4H7;Q96MH2;Q5MIZ7;Q96HA7;P  
 51398;Q8WXF8;P33240;Q8N987;Q8NFH5;Q8N9W8;Q9GZX5;O00541;Q9UQ35;P48643;O00170;O43598;Q9  
 UPW6;O00257;Q15047;Q12857;Q5TB80;Q96NB3;Q8N7H5;Q9NRC8;Q8WYQ5;O75525;Q9H4I2;P40121;Q9N  
 V06;Q9NP66;Q76FK4;Q969S3;P15408;Q6RFH5;Q9H6T0;Q8NBZ0;P62263;Q9Y473;Q9NTM9;O43324;Q8NE  
 M1;Q9H0E9;Q14683;Q9NXV6;P78347;Q9UBW8;Q9Y5K6;Q9BVI4;O43236;Q9BSJ2;Q15007;Q5VZE5;Q70IA  
 6;Q92993;Q1ED39;Q9Y5S9;Q8WXX9;Q8NCEO;Q9BUL9;Q16143;Q12824;P42771;Q53HV7;P38432;Q9BQ70  
 ;Q12996;Q92905;Q9H1B4;Q5H9F3;O43251;Q6P4R8;Q15061;O14503;O75528;Q9NZM5;P11142;Q9NRY2;  
 Q92585;P61573;Q9Y222;P61576;Q15650;Q8WY54;Q9NRX1;Q6IEG0;Q9Y421;P51610;Q96DI7;O94776;Q  
 9NY74;O43719;Q6PJT7;Q9Y221;P56181;P28324;Q6UB98;O60216;Q8TDN6;Q8TED0;O43299;P46783;Q9  
 2785;A6NHQ2;Q15319;Q9BSC4;Q86VM9;Q9H1J1;Q6PI98;P01100;Q5JVG8;P42285;O15234;O00534;Q8N  
 DT2;P52756;Q53GL7;Q96JB2}

5900 [Cluster 537]GO:0035101+C cellular\_component [name] FACT complex [def] "An abundant  
 nuclear complex, which was originally identified in mammalian systems as a factor  
 required for transcription elongation on chromatin templates. The FACT complex has been  
 shown to destabilize the interaction between the H2A/H2B dimer and the H3/H4 tetramer of  
 the nucleosome, thus reorganizing the structure of the nucleosome. In this way, the FACT  
 complex may play a role in DNA replication and other processes that traverse the  
 chromatin, as well as in transcription elongation. FACT is composed of two proteins that  
 are evolutionarily conserved in all eukaryotes and homologous to mammalian Spt16 and  
 SSRP1. In metazoans, the SSRP1 homolog contains an HMG domain\_ however in fungi and  
 protists, it does not. For example, in *S. cerevisiae* the Pob3 protein is homologous to  
 SSRP1, but lacks the HMG chromatin binding domain. Instead, the yFACT complex of Spt16p  
 and Pob3p, binds to nucleosomes where multiple copies of the HMG-domain containing  
 protein Nhp6p have already bound, but Nhp6p does not form a stable complex with the  
 Spt16p/Pob3p heterodimer." [GOC

- 5901 Pathogen[ Q2Q067] interacts with 2 human partners:{Q96HA7;Q6ZRQ5}
- 5902 Pathogen[ P0C214] interacts with 2 human partners:{Q6ZRQ5;Q96HA7}
- 5903 Pathogen[ P03346] interacts with 2 human partners:{Q96HA7;Q6ZRQ5}
- 5904 Pathogen[ Q85601] interacts with 2 human partners:{Q96HA7;Q6ZRQ5}
- 5905 Pathogen[ P14079] interacts with 2 human partners:{Q96HA7;Q6ZRQ5}
- 5906 Pathogen[ P03383] interacts with 2 human partners:{Q6ZRQ5;Q96HA7}
- 5907 Pathogen[ P03410] interacts with 2 human partners:{Q96HA7;Q6ZRQ5}
- 5908 Pathogen[ P14075] interacts with 2 human partners:{Q6ZRQ5;Q96HA7}
- 5909 Pathogen[ P0C206] interacts with 2 human partners:{Q96HA7;Q6ZRQ5}
- 5910 Pathogen[ P03363] interacts with 2 human partners:{Q96HA7;Q6ZRQ5}

5911 [Cluster 538]GO:0012510+C cellular\_component [name] trans-Golgi network transport  
 vesicle membrane [def] "The lipid bilayer surrounding a vesicle transporting  
 substances between the trans-Golgi network and other parts of the cell." [GOC

- 5912 Pathogen[ Q2Q067] interacts with 1 human partners:{075901}
- 5913 Pathogen[ P0C214] interacts with 1 human partners:{075901}
- 5914 Pathogen[ P03346] interacts with 1 human partners:{075901}
- 5915 Pathogen[ Q85601] interacts with 1 human partners:{075901}
- 5916 Pathogen[ P14079] interacts with 1 human partners:{075901}
- 5917 Pathogen[ P03383] interacts with 1 human partners:{075901}
- 5918 Pathogen[ P03410] interacts with 1 human partners:{075901}
- 5919 Pathogen[ P14075] interacts with 1 human partners:{075901}
- 5920 Pathogen[ P0C206] interacts with 1 human partners:{075901}
- 5921 Pathogen[ P03363] interacts with 1 human partners:{075901}

5922 [Cluster 539]GO:0030677+C cellular\_component [name] ribonuclease P complex [def] "A  
 ribonucleoprotein complex that catalyzes cleavage of the leader sequence of precursor  
 tRNAs (pre-tRNAs), generating the mature 5' end of tRNAs." [GOC

- 5923 Pathogen[ Q2Q067] interacts with 1 human partners:{095707}
- 5924 Pathogen[ P0C214] interacts with 1 human partners:{095707}
- 5925 Pathogen[ P03346] interacts with 1 human partners:{095707}
- 5926 Pathogen[ Q85601] interacts with 1 human partners:{095707}
- 5927 Pathogen[ P14079] interacts with 1 human partners:{095707}
- 5928 Pathogen[ P03383] interacts with 1 human partners:{095707}



5929 Pathogen[ P03410] interacts with 1 human partners:{095707}

5930 Pathogen[ P14075] interacts with 1 human partners:{095707}

5931 Pathogen[ P0C206] interacts with 1 human partners:{095707}

5932 Pathogen[ P03363] interacts with 1 human partners:{095707}

5933 [Cluster 540]GO:0016581+C cellular\_component [name] NuRD complex [def] "An approximately 2 Mda multi-subunit complex that exhibits ATP-dependent chromatin remodeling activity in addition to histone deacetylase (HDAC) activity, and has been shown to establish transcriptional repression of a number of target genes in vertebrates, invertebrates and fungi. Amongst its subunits, the NuRD complex contains histone deacetylases, histone binding proteins and Mi-2-like proteins." [PMID

5934 Pathogen[ Q2Q067] interacts with 13 human partners:{Q13547;O94776;Q86YP4;Q8NEU8;Q09028;Q13330;Q92769;Q12873;Q14839;O95983;Q9NSC2;Q9UKG1;Q16576}

5935 Pathogen[ P0C214] interacts with 13 human partners:{Q13330;Q13547;Q12873;Q9UKG1;Q09028;O94776;O95983;Q86YP4;Q8NEU8;Q92769;Q16576;Q9NSC2;Q14839}

5936 Pathogen[ P03346] interacts with 14 human partners:{Q9Y467;O95983;Q9NSC2;O94776;Q8NEU8;Q86YP4;Q92769;Q13547;Q09028;Q13330;Q16576;Q9UKG1;Q12873;Q14839}

5937 Pathogen[ Q85601] interacts with 13 human partners:{O94776;Q8NEU8;O95983;Q86YP4;Q92769;Q16576;Q12873;Q13330;Q09028;Q9UKG1;Q13547;Q9NSC2;Q14839}

5938 Pathogen[ P14079] interacts with 12 human partners:{Q9UKG1;Q8NEU8;Q13330;Q86YP4;Q16576;Q12873;Q92769;O95983;Q14839;Q09028;O94776;Q9NSC2}

5939 Pathogen[ P03383] interacts with 12 human partners:{Q09028;Q14839;O94776;Q86YP4;Q8NEU8;Q13330;Q12873;Q92769;Q9NSC2;Q13547;O95983;Q16576}

5940 Pathogen[ P03410] interacts with 13 human partners:{Q12873;Q86YP4;Q16576;Q09028;Q92769;Q13330;O95983;O94776;Q13547;Q8NEU8;Q9NSC2;Q14839;Q9UKG1}

5941 Pathogen[ P14075] interacts with 12 human partners:{Q9NSC2;Q16576;Q14839;O94776;Q8NEU8;Q13547;Q09028;O95983;Q92769;Q13330;Q12873;Q86YP4}

5942 Pathogen[ P0C206] interacts with 13 human partners:{Q92769;Q9UKG1;Q8NEU8;Q9NSC2;O95983;Q13547;O94776;Q86YP4;Q13330;Q14839;Q16576;Q09028;Q12873}

5943 Pathogen[ P03363] interacts with 12 human partners:{Q86YP4;Q09028;Q9Y467;Q14839;Q8NEU8;Q16576;O95983;Q13547;Q12873;Q13330;Q9UKG1;O94776}

5944 [Cluster 541]GO:0005758+C cellular\_component [name] mitochondrial intermembrane space [def] "The region between the inner and outer lipid bilayers of the mitochondrial envelope." [GOC

5945 Pathogen[ Q2Q067] interacts with 14 human partners:{Q8TCS8;Q9Y2Y0;O43920;Q9NR28;O60220;Q9Y5J6;P99999;Q9H4A6;P62072;Q9Y5J7;O95831;O14925;Q9H3M7;P78537}

5946 Pathogen[ P0C214] interacts with 23 human partners:{P50440;Q9H4A6;P28331;Q9H3M7;O43920;O60220;P17568;P34897;P78537;P55789;P62072;O14925;P99999;Q8TCS8;Q9Y5J6;Q9BZ23;Q9Y5J7;Q9Y2Y0;Q8N4Q1;P36551;Q9NR28;Q14061;P36404}

5947 Pathogen[ P03346] interacts with 16 human partners:{O14925;Q8N4Q1;Q9NR28;Q9H4A6;Q9Y5J7;P99999;Q9Y5J6;P78537;O43920;O60220;Q8TCS8;P36404;P62072;O95831;Q9Y2Y0;Q9H3M7}

5948 Pathogen[ Q85601] interacts with 15 human partners:{O14925;P99999;O95831;P62072;Q9Y5J6;Q9Y2Y0;O60220;Q9Y5J7;Q9NR28;P78537;O43920;Q8TCS8;Q14061;Q9H4A6;Q9H3M7}

5949 Pathogen[ P14079] interacts with 25 human partners:{P62072;Q6YFQ2;Q9Y2Y0;P17568;Q9Y5J7;P34897;O14925;P14854;Q14061;O95831;Q9BZ23;P51970;Q9NR28;P55789;Q8N4Q1;O60220;Q9H3M7;O43920;P36551;P50440;P99999;Q9H4A6;P78537;Q8TCS8;Q9NRP4}

5950 Pathogen[ P03383] interacts with 15 human partners:{Q9Y2Y0;Q9Y5J7;P62072;O14925;O43920;O95831;Q8TCS8;O60220;P78537;Q9Y5J6;P99999;Q9H4A6;Q9BZ23;Q9H3M7;Q9NR28}

5951 Pathogen[ P03410] interacts with 26 human partners:{P78537;P17568;Q8TCS8;P62072;Q14061;Q9NR28;Q9Y5J7;P51970;O43920;Q9H3M7;Q6YFQ2;Q9H4A6;P36551;Q9NRP4;O14925;O95831;Q9BZ23;P99999;Q9Y5J6;O60220;P14854;P55789;Q9Y2Y0;P50440;Q8N4Q1;P34897}

5952 Pathogen[ P14075] interacts with 18 human partners:{P78537;O14925;P62072;Q9Y2Y0;O43920;Q9NR28;P99999;O95831;O60220;Q9H3M7;Q9BZ23;P55789;Q8TCS8;Q9Y5J7;Q14061;Q9H4A6;P50440;Q9Y5J6}

5953 Pathogen[ P0C206] interacts with 22 human partners:{P99999;Q9Y5J6;Q9H4A6;P55789;P78537;Q8TCS8;Q9NR28;O43920;O60220;P36551;P34897;Q9BZ23;Q8N4Q1;Q9Y5J7;P17568;O95831;P50440;O14925;P62072;Q9H3M7;Q9Y2Y0;Q14061}

5954 Pathogen[ P03363] interacts with 9 human partners:{P99999;P78537;O14925;Q9H3M7;Q9H4A6;Q9NR28;Q9Y5J7;Q9Y2Y0;O95831}

5955 [Cluster 542]GO:0030132+C cellular\_component [name] clathrin coat of coated pit [def]

"The coat found on coated pits and the coated vesicles derived from coated pits\_ comprises clathrin and the AP-2 adaptor complex." [GOC

5956 Pathogen[ Q2Q067] interacts with 5 human partners:{P53675;Q96CW1;Q00610;P09497;P09496}

5957 Pathogen[ P0C214] interacts with 4 human partners:{Q96CW1;P53675;P09497;P09496}

5958 Pathogen[ P03346] interacts with 6 human partners:{P09496;Q96CW1;P53675;Q13492;P09497;Q00610}

5959 Pathogen[ Q85601] interacts with 5 human partners:{P53675;Q00610;P09496;Q96CW1;P09497}

5960 Pathogen[ P14079] interacts with 6 human partners:{Q13492;Q96CW1;Q00610;P09497;P53675;P09496}

5961 Pathogen[ P03383] interacts with 4 human partners:{Q96CW1;Q00610;P53675;P09497}

5962 Pathogen[ P03410] interacts with 6 human partners:{Q00610;P09496;Q96CW1;Q13492;P09497;P53675}

5963 Pathogen[ P14075] interacts with 5 human partners:{P09497;P09496;Q96CW1;P53675;Q00610}

5964 Pathogen[ P0C206] interacts with 5 human partners:{P53675;Q00610;P09496;P09497;Q96CW1}

5965 Pathogen[ P03363] interacts with 4 human partners:{Q00610;P09497;P53675;Q96CW1}

5966 [Cluster 543]GO:0005850+C cellular\_component [name] eukaryotic translation initiation factor 2 complex [def] "Complex of three heterogeneous polypeptide chains, that form a ternary complex with initiator methionyl-tRNA and GTP. This ternary complex binds to free 40S subunit, which subsequently binds the 5' end of mRNA." [PMID

5967 Pathogen[ Q2Q067] interacts with 4 human partners:{P05198;Q9BY44;Q14232;P20042}

5968 Pathogen[ P0C214] interacts with 4 human partners:{Q9BY44;Q14232;P05198;P20042}

5969 Pathogen[ P03346] interacts with 4 human partners:{Q14232;Q9BY44;P20042;P05198}

5970 Pathogen[ Q85601] interacts with 4 human partners:{Q9BY44;P20042;P05198;Q14232}

5971 Pathogen[ P14079] interacts with 4 human partners:{P20042;Q9BY44;P05198;Q14232}

5972 Pathogen[ P03383] interacts with 4 human partners:{Q9BY44;P20042;P05198;Q14232}

5973 Pathogen[ P03410] interacts with 4 human partners:{P20042;Q14232;Q9BY44;P05198}

5974 Pathogen[ P14075] interacts with 4 human partners:{P20042;P05198;Q14232;Q9BY44}

5975 Pathogen[ P0C206] interacts with 4 human partners:{P20042;Q14232;P05198;Q9BY44}

5976 Pathogen[ P03363] interacts with 3 human partners:{Q9BY44;P05198;P20042}

5977 [Cluster 544]GO:0005673+C cellular\_component [name] transcription factor TFIIE complex [def] "A transcription factor which in humans consists of a complex of two alpha and two beta chains. Recruits TFIIH to the initiation complex and helps activate both RNA polymerase II and TFIIH." [GOC

5978 Pathogen[ Q2Q067] interacts with 1 human partners:{P29084}

5979 Pathogen[ P0C214] interacts with 1 human partners:{P29084}

5980 Pathogen[ P03346] interacts with 1 human partners:{P29084}

5981 Pathogen[ Q85601] interacts with 1 human partners:{P29084}

5982 Pathogen[ P14079] interacts with 1 human partners:{P29084}

5983 Pathogen[ P03383] interacts with 1 human partners:{P29084}

5984 Pathogen[ P03410] interacts with 1 human partners:{P29084}

5985 Pathogen[ P14075] interacts with 1 human partners:{P29084}

5986 Pathogen[ P0C206] interacts with 1 human partners:{P29084}

5987 Pathogen[ P03363] interacts with 1 human partners:{P29084}

5988 [Cluster 545]GO:0005852+C cellular\_component [name] eukaryotic translation initiation factor 3 complex [def] "A complex of several polypeptides that plays at least two important roles in protein synthesis

5989 Pathogen[ Q2Q067] interacts with 13 human partners:{Q7L2H7;Q99613;O00303;Q9UBQ5;Q14152;Q92905;Q9Y262;P60228;O75822;O15371;O75821;O15372;Q13347}

5990 Pathogen[ P0C214] interacts with 15 human partners:{P60228;Q9Y262;O15372;Q14152;Q99613;O75821;O00303;Q92905;Q7L2H7;O75822;P55884;B5ME19;Q9UBQ5;O15371;Q13347}

5991 Pathogen[ P03346] interacts with 15 human partners:{B5ME19;Q9UBQ5;Q13347;P55884;Q14152;O75821;O00303;P60228;Q7L2H7;Q99613;Q92905;O75822;O15371;O15372;Q9Y262}

5992 Pathogen[ Q85601] interacts with 14 human partners:{Q99613;Q9UBQ5;O00303;O15371;B5ME19;P60228;Q92905;Q9Y262;Q7L2H7;Q13347;O75822;Q14152;O15372;O75821}

5993 Pathogen[ P14079] interacts with 14 human partners:{Q7L2H7;O00303;O75821;O15371;B5ME19;O75822;Q99613;Q92905;Q9Y262;Q13347;Q9UBQ5;Q14152;O15372;P55884}

5994 Pathogen[ P03383] interacts with 12 human partners:{O15371;Q9UBQ5;P60228;Q92905;Q9Y262;Q14152;Q7L2H7;Q99613;O75822;Q13347;O15372;O75821}

5995 Pathogen[ P03410] interacts with 15 human partners:{O75822;B5ME19;O15372;Q92905;Q7L2H7;Q99613;Q14152;P55884;O15371;O00303;O75821;Q13347;Q9Y262;P60228;Q9UBQ5}

5996 Pathogen[ P14075] interacts with 12 human partners:{O15372;Q7L2H7;Q99613;O75821;O15371;P60228;Q9Y262;Q13347;O75822;Q9UBQ5;Q92905;Q14152}

5997 Pathogen[ P0C206] interacts with 14 human partners:{Q7L2H7;Q99613;P60228;B5ME19;Q14152;O15371;O75821;Q13347;O00303;Q9Y262;O15372;O75822;Q9UBQ5;Q92905;Q14152}

2;O75822;Q92905;Q9UBQ5}

5998 Pathogen[ P03363] interacts with 15 human partners:{O15371;Q13347;Q9UBQ5;Q14152;O15372;Q7L2H7;B5ME19;P60228;Q9Y262;O75821;P55884;Q92905;O75822;Q99613;O00303}

5999 [Cluster 546]GO:0005915+C cellular\_component [name] zonula adherens [def] "A cell-cell adherens junction which forms a continuous belt near the apex of epithelial cells." [ISBN

6000 Pathogen[ Q2Q067] interacts with 2 human partners:{Q9P1Y5;Q9BX66}

6001 Pathogen[ P0C214] interacts with 2 human partners:{Q9P1Y5;Q9BX66}

6002 Pathogen[ P03346] interacts with 3 human partners:{Q9P1Y5;Q9BX66;Q6IQ23}

6003 Pathogen[ Q85601] interacts with 3 human partners:{Q9BX66;Q9P1Y5;Q6IQ23}

6004 Pathogen[ P14079] interacts with 3 human partners:{Q6IQ23;Q9P1Y5;Q9BX66}

6005 Pathogen[ P03383] interacts with 1 human partners:{Q9P1Y5}

6006 Pathogen[ P03410] interacts with 3 human partners:{Q9P1Y5;Q9BX66;Q6IQ23}

6007 Pathogen[ P14075] interacts with 1 human partners:{Q9P1Y5}

6008 Pathogen[ P0C206] interacts with 3 human partners:{Q9P1Y5;Q9BX66;Q6IQ23}

6009 Pathogen[ P03363] interacts with 3 human partners:{Q9BX66;Q9P1Y5;Q6IQ23}

6010 [Cluster 547]GO:0005762+C cellular\_component [name] mitochondrial large ribosomal subunit [def] "The larger of the two subunits of a mitochondrial ribosome. Two sites on the ribosomal large subunit are involved in translation

6011 Pathogen[ Q2Q067] interacts with 12 human partners:{Q96CB9;Q96EL2;Q9BYD1;Q4U2R6;Q9P0M9;Q9P0J6;Q8IXM3;P52815;Q7Z7F7;Q86TS9;Q7Z6M4;P09001}

6012 Pathogen[ P0C214] interacts with 14 human partners:{Q96EL2;Q9BYD1;Q16540;Q86TS9;Q4U2R6;Q8IXM3;P09001;Q7Z6M4;Q14197;Q9P0J6;Q7Z7F7;Q9P0M9;P52815;Q96CB9}

6013 Pathogen[ P03346] interacts with 13 human partners:{Q96EL2;Q9BYD1;Q9P0J6;Q8IXM3;P09001;Q7Z7F7;Q7Z6M4;Q4U2R6;Q86TS9;P52815;Q7Z7H8;Q96CB9;Q9P0M9}

6014 Pathogen[ Q85601] interacts with 12 human partners:{P52815;P09001;Q96EL2;Q9BYD1;Q7Z6M4;Q4U2R6;Q9P0M9;Q7Z7F7;Q8IXM3;Q86TS9;Q9P0J6;Q96CB9}

6015 Pathogen[ P14079] interacts with 15 human partners:{Q8IXM3;P52815;Q7Z7F7;Q4U2R6;Q16540;Q9P0M9;P09001;Q86TS9;Q9BYD1;Q7Z7H8;Q7Z6M4;Q96CB9;Q9P0J6;Q14197;Q96EL2}

6016 Pathogen[ P03383] interacts with 12 human partners:{Q96EL2;Q9BYD1;Q9P0J6;P09001;Q9P0M9;Q86TS9;Q8IXM3;P52815;Q7Z6M4;Q7Z7F7;Q96CB9;Q4U2R6}

6017 Pathogen[ P03410] interacts with 15 human partners:{Q7Z7F7;Q9P0M9;Q16540;Q96CB9;Q9P0J6;P52815;Q9BYD1;Q4U2R6;Q14197;Q8IXM3;Q96EL2;Q86TS9;P09001;Q7Z7H8;Q7Z6M4}

6018 Pathogen[ P14075] interacts with 13 human partners:{P52815;Q96EL2;Q9BYD1;Q9P0M9;Q96CB9;Q86TS9;Q8IXM3;P09001;Q7Z7H8;Q4U2R6;Q7Z7F7;Q9P0J6;Q7Z6M4}

6019 Pathogen[ P0C206] interacts with 14 human partners:{Q7Z6M4;Q8IXM3;Q96CB9;Q96EL2;Q4U2R6;Q7Z7H8;P09001;Q9P0M9;Q9P0J6;Q86TS9;Q9BYD1;Q14197;Q7Z7F7;P52815}

6020 Pathogen[ P03363] interacts with 11 human partners:{Q96EL2;Q9BYD1;Q8IXM3;Q9P0J6;P52815;Q7Z7F7;Q4U2R6;Q9P0M9;Q7Z7H8;P09001;Q86TS9}

6021 [Cluster 548]GO:0070552+C cellular\_component [name] BRISC complex [def] "A protein complex that contains the FAM175B/ABRO1, BRCC3/BRCC36, BRE/BRCC45 and MERIT40/NBA1 proteins, and specifically cleaves K63-linked polyubiquitin chains." [GOC

6022 Pathogen[ Q2Q067] interacts with 2 human partners:{Q9NWX8;Q9NXX7}

6023 Pathogen[ P0C214] interacts with 2 human partners:{Q9NWX8;Q9NXX7}

6024 Pathogen[ P03346] interacts with 2 human partners:{Q9NXX7;Q9NWX8}

6025 Pathogen[ Q85601] interacts with 2 human partners:{Q9NWX8;Q9NXX7}

6026 Pathogen[ P14079] interacts with 3 human partners:{Q15018;Q9NXX7;Q9NWX8}

6027 Pathogen[ P03383] interacts with 2 human partners:{Q9NWX8;Q9NXX7}

6028 Pathogen[ P03410] interacts with 3 human partners:{Q9NXX7;Q9NWX8;Q15018}

6029 Pathogen[ P14075] interacts with 2 human partners:{Q9NWX8;Q9NXX7}

6030 Pathogen[ P0C206] interacts with 3 human partners:{Q9NWX8;Q15018;Q9NXX7}

6031 Pathogen[ P03363] interacts with 2 human partners:{Q9NWX8;Q9NXX7}

6032 [Cluster 549]GO:0008622+C cellular\_component [name] epsilon DNA polymerase complex [def] "A heterotetrameric DNA polymerase complex that catalyzes processive DNA synthesis in the absence of PCNA, but is further stimulated in the presence of PCNA. The complex contains a large catalytic subunit and three small subunits, and is best characterized in *Saccharomyces*, in which the subunits are named Pol2p, Dpb2p, Dpb3p, and Dpb4p. Some evidence suggests that DNA polymerase epsilon is the leading strand polymerase\_ it is also involved in nucleotide-excision repair and mismatch repair." [PMID

6033 Pathogen[ Q2Q067] interacts with 2 human partners:{Q9NRF9;P56282}

6034 Pathogen[ P0C214] interacts with 2 human partners:{Q9NRF9;P56282}

6035 Pathogen[ P03346] interacts with 3 human partners:{P56282;Q9NR33;Q9NRF9}

6036 Pathogen[ Q85601] interacts with 2 human partners:{P56282;Q9NRF9}

6037 Pathogen[ P14079] interacts with 4 human partners:{Q9NRG0;Q9NRF9;P56282;Q9NR33}

6038 Pathogen[ P03383] interacts with 1 human partners:{P56282}

6039 Pathogen[ P03410] interacts with 4 human partners: {Q9NRG0;P56282;Q9NRF9;Q9NR33}

6040 Pathogen[ P14075] interacts with 1 human partners: {P56282}

6041 Pathogen[ P0C206] interacts with 3 human partners: {Q9NRF9;Q9NR33;P56282}

6042 Pathogen[ P03363] interacts with 2 human partners: {Q9NRF9;Q9NR33}

6043 [Cluster 550]GO:0000015+C cellular\_component [name] phosphopyruvate hydratase complex [def] "A multimeric enzyme complex, usually a dimer or an octamer, that catalyzes the conversion of 2-phospho-D-glycerate to phosphoenolpyruvate and water." [GOC

6044 Pathogen[ Q2Q067] interacts with 3 human partners: {P13929;A6NNW6;P06733}

6045 Pathogen[ P0C214] interacts with 4 human partners: {P13929;A6NNW6;P09104;P06733}

6046 Pathogen[ P03346] interacts with 3 human partners: {A6NNW6;P13929;P06733}

6047 Pathogen[ Q85601] interacts with 2 human partners: {P06733;P13929}

6048 Pathogen[ P14079] interacts with 3 human partners: {A6NNW6;P06733;P13929}

6049 Pathogen[ P03383] interacts with 2 human partners: {A6NNW6;P06733}

6050 Pathogen[ P03410] interacts with 3 human partners: {P06733;P13929;A6NNW6}

6051 Pathogen[ P14075] interacts with 2 human partners: {P06733;A6NNW6}

6052 Pathogen[ P0C206] interacts with 3 human partners: {P06733;A6NNW6;P13929}

6053 Pathogen[ P03363] interacts with 2 human partners: {P06733;A6NNW6}

6054 [Cluster 551]GO:0031592+C cellular\_component [name] centrosomal corona [def] "An amorphous structure surrounding the core of the centrosome, from which microtubules are nucleated\_ contains gamma-tubulin." [GOC

6055 Pathogen[ Q2Q067] interacts with 1 human partners: {Q7Z460}

6056 Pathogen[ P0C214] interacts with 1 human partners: {Q7Z460}

6057 Pathogen[ P03346] interacts with 1 human partners: {Q7Z460}

6058 Pathogen[ Q85601] interacts with 1 human partners: {Q7Z460}

6059 Pathogen[ P14079] interacts with 1 human partners: {Q7Z460}

6060 Pathogen[ P03383] interacts with 1 human partners: {Q7Z460}

6061 Pathogen[ P03410] interacts with 1 human partners: {Q7Z460}

6062 Pathogen[ P14075] interacts with 1 human partners: {Q7Z460}

6063 Pathogen[ P0C206] interacts with 1 human partners: {Q7Z460}

6064 Pathogen[ P03363] interacts with 1 human partners: {Q7Z460}

6065 [Cluster 552]GO:0032585+C cellular\_component [name] multivesicular body membrane [def] "The lipid bilayer surrounding a multivesicular body." [GOC

6066 Pathogen[ Q2Q067] interacts with 1 human partners: {O14964}

6067 Pathogen[ P0C214] interacts with 2 human partners: {O14964;Q9NV92}

6068 Pathogen[ P03346] interacts with 2 human partners: {Q9NV92;O14964}

6069 Pathogen[ Q85601] interacts with 1 human partners: {O14964}

6070 Pathogen[ P14079] interacts with 1 human partners: {Q9NV92}

6071 Pathogen[ P03383] interacts with 1 human partners: {O14964}

6072 Pathogen[ P03410] interacts with 1 human partners: {Q9NV92}

6073 Pathogen[ P14075] interacts with 2 human partners: {O14964;Q9NV92}

6074 Pathogen[ P0C206] interacts with 2 human partners: {O14964;Q9NV92}

6075 Pathogen[ P03363] interacts with 1 human partners: {O14964}

6076 [Cluster 553]GO:0033596+C cellular\_component [name] TSC1-TSC2 complex [def] "A heterodimeric protein complex consisting of tuberin and hamartin\_ its formation may regulate hamartin homomultimer formation. The complex acts as a GTPase activating protein (GAP) for the small GTPase (Rheb), and inhibits the TOR signaling pathway." [PMID

6077 Pathogen[ Q2Q067] interacts with 1 human partners: {P07196}

6078 Pathogen[ P0C214] interacts with 1 human partners: {P07196}

6079 Pathogen[ P03346] interacts with 1 human partners: {P07196}

6080 Pathogen[ Q85601] interacts with 1 human partners: {P07196}

6081 Pathogen[ P14079] interacts with 1 human partners: {P07196}

6082 Pathogen[ P03383] interacts with 1 human partners: {P07196}

6083 Pathogen[ P03410] interacts with 1 human partners: {P07196}

6084 Pathogen[ P14075] interacts with 1 human partners: {P07196}

6085 Pathogen[ P0C206] interacts with 1 human partners: {P07196}

6086 Pathogen[ P03363] interacts with 1 human partners: {P07196}

6087 [Cluster 554]GO:0005902+C cellular\_component [name] microvillus [def] "Thin cylindrical membrane-covered projections on the surface of an animal cell containing a core bundle of actin filaments. Present in especially large numbers on the absorptive surface of intestinal cells." [ISBN

6088 Pathogen[ Q2Q067] interacts with 2 human partners: {P36543;Q9NZC7}

6089 Pathogen[ P0C214] interacts with 4 human partners: {O00159;Q9UM54;P36543;Q9NZC7}

6090 Pathogen[ P03346] interacts with 3 human partners: {P36543;P26038;Q9NZC7}

6091 Pathogen[ Q85601] interacts with 4 human partners: {Q9NZC7;O00159;Q9UM54;P36543}

6092 Pathogen[ P14079] interacts with 7 human partners: {P36543;P09327;P27352;P26038;Q9UM54;Q9NZC7;P35241}

6093 Pathogen[ P03383] interacts with 1 human partners: {P36543}

6094 Pathogen[ P03410] interacts with 7 human partners: {Q9NZC7;O00159;Q9UM54;P26038;P35241;P27352;P36543}

6095 Pathogen[ P14075] interacts with 1 human partners: {P36543}

6096 Pathogen[ P0C206] interacts with 4 human partners: {Q9UM54;P36543;O00159;Q9NZC7}

6097 Pathogen[ P03363] interacts with 1 human partners: {P36543}

6098 [Cluster 555]GO:0016591+C cellular\_component [name] DNA-directed RNA polymerase II, holoenzyme [def] "Large protein complex composed of the RNA polymerase core complex and a variety of other proteins including transcription factor complexes TFIIA, D, E, F, and H which are required for promoter recognition, and the Mediator subcomplex. Catalyzes the

```

synthesis of eukaryotic pre-mRNA." [GOC
6099 Pathogen[ Q2Q067] interacts with 9 human
partners:{Q9H9T3;O95163;Q8IXW5;Q9NQG5;Q6IA86;P24863;Q96EB1;P28715;P51946}
6100 Pathogen[ P0C214] interacts with 10 human
partners:{P51946;P24863;Q9UM54;Q8IXW5;Q6IA86;P28715;Q9NQG5;Q9H9T3;Q96EB1;O95163}
6101 Pathogen[ P03346] interacts with 11 human
partners:{P28715;Q9NQG5;P0CAP2;Q8IXW5;P24863;O95163;Q9H9T3;Q9BZD3;P51946;Q6IA86;Q96EB
1}
6102 Pathogen[ Q85601] interacts with 10 human
partners:{P51946;Q9H9T3;Q9NQG5;P28715;Q8IXW5;Q96EB1;Q6IA86;P24863;Q9UM54;O95163}
6103 Pathogen[ P14079] interacts with 14 human
partners:{P28715;P51946;Q6IA86;Q9BZD3;O95163;Q96EB1;Q9UM54;Q8IXW5;Q9H9T3;P24863;Q96P1
6;Q5VT52;Q9NQG5;P0CAP2}
6104 Pathogen[ P03383] interacts with 9 human
partners:{O95163;P0CAP2;Q8IXW5;Q9NQG5;Q96EB1;P51946;P24863;Q6IA86;Q9H9T3}
6105 Pathogen[ P03410] interacts with 14 human
partners:{Q9NQG5;Q5VT52;Q9BZD3;P51946;Q96P16;Q9H9T3;Q96EB1;P28715;Q9UM54;O95163;P0CAP
2;P24863;Q8IXW5;Q6IA86}
6106 Pathogen[ P14075] interacts with 10 human
partners:{Q96EB1;Q8IXW5;P24863;P0CAP2;Q9BZD3;Q9NQG5;Q6IA86;P51946;O95163;Q9H9T3}
6107 Pathogen[ P0C206] interacts with 14 human
partners:{P24863;Q8IXW5;P28715;Q9UM54;Q9H9T3;Q6IA86;Q9NQG5;O94762;O95163;Q96EB1;P0CAP
2;Q9BZD3;Q5VT52;P51946}
6108 Pathogen[ P03363] interacts with 11 human
partners:{O94762;Q6IA86;P24863;P51946;Q8IXW5;Q9BZD3;Q9NQG5;Q96EB1;O95163;P0CAP2;Q9H9T
3}
6109 [Cluster 556]GO:0031252+C cellular_component [name] cell leading edge [def] "The
area of a motile cell closest to the direction of movement." [GOC
6110 Pathogen[ Q2Q067] interacts with 9 human
partners:{P63104;Q14160;P54259;Q9HD15;Q8IZP0;Q14203;P35579;P08670;Q8N9B5}
6111 Pathogen[ P0C214] interacts with 8 human
partners:{Q8IZP0;Q14203;Q9HD15;P08670;Q14160;Q8N9B5;O15144;P54259}
6112 Pathogen[ P03346] interacts with 10 human
partners:{Q8N9B5;O15144;P35579;Q8IZP0;Q9HD15;Q14203;P08670;P63104;Q14160;P54259}
6113 Pathogen[ Q85601] interacts with 11 human
partners:{P54259;P63104;P08670;P35579;Q14203;Q9HD15;Q14160;Q8IZP0;Q8N9B5;Q9GZM8;O1514
4}
6114 Pathogen[ P14079] interacts with 12 human
partners:{P35579;Q8N9B5;Q8IZP0;P63104;P61158;Q9HD15;Q9GZM8;P54259;P08670;P49023;Q1420
3;O15144}
6115 Pathogen[ P03383] interacts with 8 human
partners:{Q14160;P08670;Q14203;Q9HD15;P63104;Q8N9B5;P35579;P54259}
6116 Pathogen[ P03410] interacts with 11 human
partners:{Q9GZM8;P35579;Q14160;Q8IZP0;P08670;P63104;Q8N9B5;P54259;O15144;Q9HD15;Q1420
3}
6117 Pathogen[ P14075] interacts with 8 human
partners:{Q14160;P63104;P35579;P08670;P54259;Q14203;Q8N9B5;Q9HD15}
6118 Pathogen[ P0C206] interacts with 11 human
partners:{Q9HD15;Q9GZM8;Q8N9B5;P54259;P63104;Q8IZP0;Q14160;P35579;O15144;P08670;Q1420
3}
6119 Pathogen[ P03363] interacts with 10 human
partners:{Q8IZP0;P35579;P54259;Q9HD15;Q14160;P63104;O15144;P08670;Q14203;Q8N9B5}
6120 [Cluster 557]GO:0071944+C cellular_component [name] cell periphery [def] "The part
of a cell encompassing the cell cortex, the plasma membrane, and any external
encapsulating structures." [GOC
6121 Pathogen[ Q2Q067] interacts with 5 human
partners:{P08727;Q04695;Q9H6U6;P60953;P02533}
6122 Pathogen[ P0C214] interacts with 6 human
partners:{Q8TE04;P02533;P60953;Q04695;Q9H6U6;P08727}
6123 Pathogen[ P03346] interacts with 6 human
partners:{P08727;P60953;Q04695;P02533;Q969F2;Q9H6U6}
6124 Pathogen[ Q85601] interacts with 5 human
partners:{P02533;Q04695;Q9H6U6;P08727;P60953}
6125 Pathogen[ P14079] interacts with 6 human
partners:{Q8TE04;Q04695;P02533;Q9H6U6;P63267;P08727}
6126 Pathogen[ P03383] interacts with 5 human
partners:{P02533;Q9H6U6;P08727;P60953;Q04695}
6127 Pathogen[ P03410] interacts with 7 human
partners:{Q969F2;P02533;Q8TE04;Q04695;P60953;P08727;Q9H6U6}
6128 Pathogen[ P14075] interacts with 6 human
partners:{P60953;P08727;Q04695;Q8TE04;Q9H6U6;P02533}
6129 Pathogen[ P0C206] interacts with 7 human
partners:{Q969F2;P08727;Q8TE04;Q9H6U6;P60953;P02533;Q04695}
6130 Pathogen[ P03363] interacts with 5 human
partners:{P02533;Q9H6U6;P08727;P60953;Q04695}
6131 [Cluster 558]GO:0005712+C cellular_component [name] chiasma [def] "A connection

```

formed between chromatids, visible during meiosis, thought to be the point of the interchange involved in crossing-over." [ISBN

6132 Pathogen[ Q2Q067] interacts with 1 human partners:{Q9UHC1}

6133 Pathogen[ P0C214] interacts with 2 human partners:{Q9UHC1;P40692}

6134 Pathogen[ P03346] interacts with 1 human partners:{Q9UHC1}

6135 Pathogen[ Q85601] interacts with 2 human partners:{Q9UHC1;P40692}

6136 Pathogen[ P14079] interacts with 2 human partners:{P40692;Q9UHC1}

6137 Pathogen[ P03383] interacts with 1 human partners:{Q9UHC1}

6138 Pathogen[ P03410] interacts with 2 human partners:{P40692;Q9UHC1}

6139 Pathogen[ P14075] interacts with 1 human partners:{Q9UHC1}

6140 Pathogen[ P0C206] interacts with 2 human partners:{P40692;Q9UHC1}

6141 Pathogen[ P03363] interacts with 1 human partners:{Q9UHC1}

6142 [Cluster 559]GO:0031080+C cellular\_component [name] Nup107-160 complex [def] "A subcomplex of the nuclear pore complex (NPC) involved in mRNA export and NPC assembly. Contains conserved nucleoporins and other proteins\_ for example, the Saccharomyces complex contains Nup84p, Nup85p, Nup120p, Nup145p-C, Seh1p, Sec13p, and Nup133p." [PMID

6143 Pathogen[ Q2Q067] interacts with 10 human partners:{Q96EE3;P52948;Q12769;P55735;Q8WYP5;Q8NFH4;Q9BW27;Q8NFH3;P57740;Q8WUM0}

6144 Pathogen[ P0C214] interacts with 10 human partners:{P55735;P57740;Q8WYP5;Q96EE3;Q9BW27;Q8NFH3;Q8NFH4;Q8WUM0;P52948;Q12769}

6145 Pathogen[ P03346] interacts with 10 human partners:{P55735;Q8NFH4;Q8WUM0;Q12769;Q96EE3;P57740;Q8WYP5;Q8NFH3;Q9BW27;P52948}

6146 Pathogen[ Q85601] interacts with 10 human partners:{Q8NFH4;Q8NFH3;Q96EE3;Q12769;P57740;Q8WYP5;Q8WUM0;Q9BW27;P55735;P52948}

6147 Pathogen[ P14079] interacts with 10 human partners:{Q9BW27;P57740;Q8WUM0;Q8WYP5;Q8NFH3;Q96EE3;Q8NFH4;P55735;Q12769;P52948}

6148 Pathogen[ P03383] interacts with 10 human partners:{Q96EE3;Q8WUM0;Q8NFH4;P55735;P52948;P57740;Q8WYP5;Q12769;Q9BW27;Q8NFH3}

6149 Pathogen[ P03410] interacts with 10 human partners:{Q9BW27;Q8NFH4;P52948;Q96EE3;Q8WUM0;P57740;P55735;Q12769;Q8WYP5;Q8NFH3}

6150 Pathogen[ P14075] interacts with 10 human partners:{P57740;Q8WYP5;P55735;Q9BW27;Q96EE3;Q8NFH3;Q12769;Q8WUM0;Q8NFH4;P52948}

6151 Pathogen[ P0C206] interacts with 9 human partners:{Q96EE3;Q8WYP5;P55735;P57740;Q8WUM0;Q8NFH4;Q12769;Q8NFH3;Q9BW27}

6152 Pathogen[ P03363] interacts with 9 human partners:{Q8NFH4;Q8WYP5;Q8NFH3;Q12769;Q8WUM0;P57740;P52948;P55735;Q9BW27}

6153 [Cluster 560]GO:0071778+C cellular\_component [name] WINAC complex [def] "A SWI/SNF-type complex that directly interacts with the vitamin D receptor (VDR) through the Williams syndrome transcription factor (WSTF), and mediates the recruitment of unliganded VDR to VDR target sites in promoters. The WINAC complex contains at least 13 subunits, including WSTF, several SWI/SNF components, and DNA replication-related factors." [GOC

6154 Pathogen[ Q2Q067] interacts with 4 human partners:{Q92922;P51531;Q13111;P51532}

6155 Pathogen[ P0C214] interacts with 4 human partners:{Q13111;Q92922;P51531;P51532}

6156 Pathogen[ P03346] interacts with 4 human partners:{P51532;Q13111;Q92922;P51531}

6157 Pathogen[ Q85601] interacts with 4 human partners:{P51531;P51532;Q13111;Q92922}

6158 Pathogen[ P14079] interacts with 4 human partners:{Q92922;P51532;P51531;Q13111}

6159 Pathogen[ P03383] interacts with 4 human partners:{Q13111;P51531;P51532;Q92922}

6160 Pathogen[ P03410] interacts with 4 human partners:{Q13111;Q92922;P51532;P51531}

6161 Pathogen[ P14075] interacts with 4 human partners:{P51532;Q92922;Q13111;P51531}

6162 Pathogen[ P0C206] interacts with 5 human partners:{P51532;P51531;Q13111;Q92922;Q9UIG0}

6163 Pathogen[ P03363] interacts with 4 human partners:{Q13111;P51532;P51531;Q92922}

6164 [Cluster 561]GO:0030018+C cellular\_component [name] Z disc [def] "Platelike region of a muscle sarcomere to which the plus ends of actin filaments are attached." [GOC

6165 Pathogen[ Q2Q067] interacts with 16 human partners:{Q8WX93;Q14315;Q08209;Q14192;P02511;P04792;P08727;Q9H7C4;Q8TDC0;P11532;O75190;Q9UMS6;Q86TC9;P12883;Q9NPC6;P17661}

6166 Pathogen[ P0C214] interacts with 17 human partners:{Q9H7C4;P02511;O75190;P04792;Q9UMS6;Q9NPC6;Q14315;P11532;Q15124;Q86TC9;Q08209;Q8TDC0;Q14192;P12883;P08727;P13533;P17661}

6167 Pathogen[ P03346] interacts with 24 human partners:{Q86TC9;Q8WX93;Q14315;O75112;P08727;O75190;O94875;Q9UMS6;Q8WXH0;Q8TDC0;Q13813;O76041;P17661;P02511;Q14192;O76003;Q86VF2;Q9H7C4;P11532;Q08209;Q5BKX8;P04792;Q9UBF9;Q9NPC6}

6168 Pathogen[ Q85601] interacts with 20 human partners:{Q86TC9;Q8WX93;O75112;O75190;P17661;P13533;Q9UMS6;P11532;Q08209;Q9NPC6;O76003;Q15124;P02511;Q14192;P12883;Q14315;P08727;P04792;Q8TDC0;Q9H7C4}

6169 Pathogen[ P14079] interacts with 25 human partners:{O75112;Q5JQC9;Q9H7C4;P11532;Q14192;P02511;Q8WX93;Q9UBF9;Q9NPC6;Q15124;O75190;Q86TC9;Q14315;Q8WXH0;O76041;P12883;O76003;P04792;P17661;Q13813;P08727;O15273;Q08209;Q8TDC0;Q9UMS6}

6170 Pathogen[ P03383] interacts with 12 human partners:{P08727;P17661;Q9UMS6;P02511;P04792;Q8TDC0;O75190;Q14192;P11532;P12883;Q9H7C4;Q9NPC6}

6171 Pathogen[ P03410] interacts with 26 human

partners: {Q9UMS6;Q9UBF9;P17661;O76003;Q08209;O76041;P11532;Q5JQC9;P04792;Q15124;Q9NPC6;O15273;Q9H7C4;Q14315;O75190;Q8TDC0;P02511;P12883;O75112;P13533;Q13813;Q8WXH0;P08727;Q8WX93;Q14192;Q86TC9}

6172 Pathogen[ P14075] interacts with 11 human  
partners: {P11532;Q9NPC6;P08727;P17661;Q8TDC0;P04792;Q9H7C4;P02511;O75190;Q9UMS6;Q14192}

6173 Pathogen[ P0C206] interacts with 26 human  
partners: {P17661;Q86TC9;P13533;Q5JQC9;Q14315;P08727;Q9UMS6;Q8WX93;P04792;P50461;Q15124;O76041;P12883;O75112;O76003;Q9H7C4;Q8WXH0;Q14192;Q08209;Q86VF2;P11532;P02511;Q9NPC6;Q8TDC0;Q5BXX8;O75190}

6174 Pathogen[ P03363] interacts with 21 human  
partners: {O75190;Q86TC9;O75112;Q86VF2;O76003;Q9UBF9;O94875;Q9H7C4;Q8TDC0;P08727;P11532;P17661;Q8WX93;Q9UMS6;Q5BXX8;O76041;Q9NPC6;Q13813;P04792;Q14315;Q14192}

6175 [Cluster 562]GO:0005634+C cellular\_component [name] nucleus [def] "A membrane-bounded organelle of eukaryotic cells in which chromosomes are housed and replicated. In most cells, the nucleus contains all of the cell's chromosomes except the organellar chromosomes, and is the site of RNA synthesis and processing. In some species, or in specialized cell types, RNA metabolism or DNA replication may be absent." [GOC

6176 Pathogen[ Q2Q067] interacts with 3391 human  
partners: {Q86W56;P04156;P61580;Q96S95;E7ETH6;O95376;Q13562;Q0D2J5;Q5VSL9;Q12901;O95411;P05204;O60806;P51398;P49454;Q9HC78;Q09FC8;Q96E15;Q9Y253;Q9H4I2;Q01844;Q9NZ81;Q9UNP9;Q9UM63;O15014;Q92900;P05198;Q96SQ5;Q96TC7;Q14974;P78346;Q9BUE0;Q9Y473;Q9BYE7;Q9H583;Q66PJ3;O43290;Q13573;Q9BU02;P07438;Q14526;Q9Y5K5;P30153;Q8WV37;Q9BRT2;Q9NWS1;Q9UNN4;Q8N859;O43365;O95602;P83369;P52742;Q15054;Q15573;Q9BRH9;Q9UKI9;Q9UI26;Q9Y4R8;Q8NG57;Q96N77;Q9NWB6;Q9Y6X3;C9JN71;Q8NHY2;Q14151;Q9BZZ5;Q12905;O43463;Q9UPP1;Q7RTT3;Q96EE3;Q9NWX4;Q9NZI7;Q8TAF3;Q8WZ33;P33240;Q01082;P27540;P17544;O75525;Q9BWC9;P30281;Q13118;P25490;Q33E94;Q6VMQ6;P52434;Q8NCF5;Q92750;P01100;Q96J02;Q9H3C7;P83876;Q96D70;Q03989;P22392;P46108;Q9UK13;P35789;P53370;Q9UH99;O60524;P50402;Q6V9R5;Q8NA42;O00213;Q9HB65;Q9Y6X8;Q6FI81;Q92585;O75351;Q9BTV5;Q96HA8;Q92988;O00425;Q8N187;Q9H2G9;Q8WWX9;O95639;Q9Y3A2;Q96FV9;O43167;Q2M218;Q04864;P81877;Q8TA86;Q9UHL9;Q9NYP9;Q9UJN7;Q9NXW9;Q96MW7;Q8N831;O75832;P0C1Z6;Q16236;Q03923;Q6UN15;Q9Y2S7;Q9Y2M0;O60684;Q86U42;P48556;O15234;Q9Y4A5;Q8WV44;P09917;Q9UEG4;Q9H321;P62633;Q9NVH2;Q5TD94;P54252;Q8IWL8;Q6P387;Q9BUG6;C9JE40;P18754;Q96S65;Q96H22;A6NDX5;Q15013;P02545;O43364;Q6VN20;Q8IU60;P07910;P31749;Q8NEM1;P52948;Q92890;P35754;Q71F23;O15525;Q6P2H3;P40306;Q13185;Q6NVH7;Q9UC06;Q9BZE4;Q96GA3;Q14258;P50995;Q95583;Q2KHR2;Q9ULX3;Q6ZN28;P62312;Q93034;O75155;Q8IZL2;P98182;Q9Y2Y0;P42773;Q9Y333;Q8IX15;Q9NRF9;Q9UNS2;Q12769;Q9H4X1;Q12837;Q96SD1;Q8WUQ7;Q8N2M8;O00186;Q9H7X3;Q9H008;Q9H910;Q8TF63;O14744;Q9BVP2;Q9Y6K5;Q9UPN9;Q9Y5Q3;Q9Y3S2;Q9Y6D6;Q03052;O75461;Q9Y613;O00410;P56524;Q93009;Q9UK11;Q9BY41;P17029;Q12796;Q9BW66;P52738;Q9ULX6;Q9NR56;Q10587;A8MTY0;Q9HAW0;Q9Y3C7;Q9NQT4;A0AVK6;Q15631;Q8N228;Q9UMS5;Q96D98;Q9H7R0;Q96PE6;Q8IZD2;A6NFQ7;Q95F02;Q9H3H9;Q8IZ26;P07741;Q7Z353;P60002;Q9HBZ2;Q9BRR0;Q6ZW49;Q96HW7;Q5VUQ0;Q96HA1;Q9UPR3;P10827;Q8WWY6;A6NJL1;P04198;Q9Y615;P15884;Q96A49;P20700;P20226;Q9NVM4;Q04726;Q96HR3;Q96KQ4;O43361;Q9HAU4;Q5D1E8;A9UHW6;P10243;Q9Y462;Q9Y324;P24385;Q99417;P55769;Q7L5A3;P09067;Q7Z4H7;Q96NI8;Q9GZW5;Q92681;Q5JXB2;Q16594;O75340;Q9Y266;P56182;Q9UGU0;Q9GZP8;Q96NB3;O75925;O95273;Q92922;Q6NUN9;P63104;P07737;Q8N9R8;Q9UII4;Q9Y3F4;P39687;Q13033;P55895;Q9UJL9;Q15398;Q9UL41;Q96Q08;Q13875;Q13536;Q9NS56;O60304;Q9BRU2;P22087;P55265;P23511;Q7Z2Z1;P24278;P49790;Q8NEP9;Q99638;Q9H063;Q96E14;Q9Y5A7;Q8WVC0;Q05066;Q8NEF9;Q8WX93;Q6ZQV5;Q9HBE1;Q06416;O60296;Q8TAD8;Q9NXR8;Q86WQ0;Q13487;Q63HK5;Q5TAP6;O95391;P0CJ88;Q9NQW6;Q9BUP3;Q8TD31;Q6ICB0;Q86UA6;Q99081;Q8N0Y2;Q9Y2D1;Q92664;Q5VTD9;Q9GZL7;Q15928;Q9NPB6;Q9BSF8;Q8IY18;Q96K75;Q9Y3Q8;Q9H7N4;Q9UHB7;Q12888;Q9H175;O00512;Q6XD76;O00291;Q8WW12;O00470;Q8NCR6;P52272;Q9UBX2;O75818;Q6PJP8;Q8WY54;Q92889;Q9UHR5;Q13887;Q14980;Q9NVU7;O00267;Q96RK1;P06400;Q8TA94;Q9HB96;P61326;O43493;Q6ZN32;Q9H9T3;Q9NPJ6;O75494;O00231;Q8WYA1;Q9UMX3;Q0D2K3;Q8NCE0;Q7L9L4;Q96I24;P14866;Q7Z5K2;P29374;Q99547;O00233;P42167;Q9NPF5;Q9UJX3;Q9UJX5;Q86YE8;Q9H2K2;O43663;P27694;P51825;Q08AN1;Q9C005;P49959;P41220;Q8NEM7;Q15459;P49792;Q01094;P58317;Q8IYF1;Q9UKV0;Q14678;Q8WW38;Q99575;Q9Y4B6;Q13427;O95684;Q08999;Q6ZMY9;P40763;Q8WYH8;P78424;Q8N8Z8;P14921;Q9NXV6;Q5VZB9;Q8TF01;Q9UBQ5;P23610;P62750;Q6ZS27;Q9Y3E1;Q8WWL7;Q9NYB0;Q9P127;Q08209;A6NP11;Q9UL59;Q96LA8;O15226;Q9NS26;P61579;Q8IZD4;P06454;Q8N4W9;Q53EQ6;Q64ET8;Q13889;Q96NT1;Q13352;P01106;Q8N1N5;Q9H2P0;Q13148;Q7Z6B0;O95257;Q6NS38;P10073;A6NK39;Q52LR7;Q96JZ2;Q9BYG5;O75940;O14503;Q9HAZ2;P36402;O43159;Q7Z589;Q9BWG6;Q12872;Q16666;P46937;Q9UKX2;Q15910;Q9NR55;Q9NPJ8;Q16533;O43447;O75151;Q9Y3T9;Q14690;O60481;P38432;Q6IE81;Q7KZF4;P67809;O95402;Q6PD62;Q13485;A6NGD5;Q9Y2B5;Q96DX5;Q5SXM1;Q01543;O00287;Q6IV72;A8MVS1;Q9UNS1;Q9HAJ7;P10589;Q8N2I2;Q7Z6K1;Q6ECI4;Q9UC07;P46087;P35680;Q9NX58;P53804;P38646;Q14549;Q8IUV8;P55735;Q9P0U4;Q9H9D4;Q12986;Q9Y2L1;P55795;A6NJ64;Q9NR48;Q9Y3C4;Q5VWQ0;Q01130;Q9UI56;P31274;O95997;P13056;Q14674;Q9NPI6;Q9NVN8;Q8N0Z6;Q9H2T7;O75694;Q8IXK0;Q9C0F0;Q6IPU0;P31268;Q6ZT77;Q8IUE1;Q9H1B4;Q9UHF7;P62318;P62826;O43189;Q99816;Q8LVN3;Q99741;P62508;Q9BZQ8;Q6XQN6;Q92797;Q6P1J9;Q9ULD5;P51508;Q9BQA1;Q9UBB5;Q14590;Q9Y3V2;Q15386;Q15596;P48380;O14813;Q9BSW2;Q9NTW7;Q9Y606;Q16656;Q9Y2Y9;Q96NG8;P35712;Q6ZNO6;Q15233;Q13829;Q95751;Q9NXZ1;P41182;Q9Y2X9;P19474;Q15554;P54259;Q8WWY3;Q9H5H4;Q99497;P10828;Q96AE4;Q12988;Q15562;Q9GZS3;Q96R06;Q8IZU1;O60260;P30793;O94818;Q9NUL3;Q460N3;O96019;Q9HC52;Q01664;Q9UDY8;P55197;Q5JTD0;Q8NBB4;Q06265;Q9BUL9;O00570;P28072;Q9GZS1;Q8N3X6;Q7Z4G1;P0DI83;Q96JI7;P82979;Q9UBB6;P09132;Q96H40;P49910;Q9P0M2;Q8N5U6;Q15326;Q9NZV7;Q96TS3;Q86UQ8;O95243;P18847;Q9UHX1;P49427;Q14684;P0CJ87;Q8TEV9;P51531;Q5VTL8;Q9NPG3;Q99708;P088729;Q9N9N5;P18887;Q32MQ0;P49716;Q8WYR4;P41970;P57076;Q8N684;Q9HAF1;Q6P2D0;Q9HCL3;O43805;Q6U7Q0;Q93083;Q8WTT2;Q13111;Q8WXF8;A6NIX2;Q9Y5Q8;Q86VY4;Q8TDY3;Q96W11;Q9NQ87;Q9Y244;Q5PSV4;P13349;Q9UJG1;Q9NV31;P10155;Q96DC7;Q9H6J7;Q96SK3;P61457;Q96IT1;Q147U1;Q15697;O43255;Q9BQS6;Q96LW1;Q96P71;Q9NZL3;Q6VUC0;O96004;Q92985;O95400;Q9Y6M1;Q6P1K

2;O43390;Q9HBM1;Q15059;Q8WXU2;Q9UL49;Q7Z6R9;Q8HWS3;Q7L2R6;O00167;Q9NZD8;Q9BXM0;P49419  
;P08151;Q9BZE3;O60437;Q9C086;P15121;Q5UIP0;Q15653;P49750;P36639;O96006;Q01196;Q00613;  
Q9H211;O14618;P56181;O43439;Q5VYK3;Q96TA1;Q99676;Q9NRR4;Q5VZE5;O75478;Q16082;Q9BRG1;P  
33316;Q96CM4;Q13435;Q01105;Q86UU0;Q96T88;Q9UJW0;Q13772;P23490;P78406;P19388;Q5T8A7;Q9  
6SL8;P05813;P37275;Q70Z53;O00273;Q8HWY8;P19367;Q94140;O75081;Q5SXM2;Q05516;Q32MZ4;P20  
749;Q8NF64;Q5E481;Q02930;Q9HD15;P54274;Q9Y6K1;Q96DI7;P52435;Q12765;Q9NVW2;Q8NC  
K3;Q9BW71;Q460N5;Q8NDW4;O14929;Q15696;O00257;Q8NDF8;Q2NL82;O60543;Q9BSI4;O75820;Q9NZJ  
0;O43172;Q9NZI6;P49116;Q9UIF7;Q7Z7J5;P10074;Q15046;A8CG34;Q7Z2E3;Q9HCD5;O60315;Q04206  
;Q9UM82;P11387;Q8WYP5;Q9BXL5;Q9P0L1;Q9ULV3;Q9H944;P42695;P12980;Q99457;Q9H3R5;Q9UK45;  
Q14119;Q9BPZ2;P50548;Q9H4Z2;Q96C86;Q00994;P30279;Q92870;P05062;Q6P9A1;Q13868;Q9NWD9;Q  
96MA1;Q16633;Q9ULV5;Q9HAN9;O94829;P62140;Q8IXT2;Q96PQ6;Q86SE9;Q9UHC1;Q8N782;Q969S2;Q9  
6NL3;Q6NXT1;Q96B36;O60238;Q96B01;Q4W5G0;Q13625;Q8WTR7;Q6PIN0;Q13547;Q6PI26;A8MV65;Q9N  
P66;Q14511;Q9UP83;Q05195;Q8TAW3;Q96AV8;P38919;Q9BTT4;Q9BXX3;P63167;P51815;P14373;Q5VW  
X1;Q9UJY1;Q14103;Q9UIS9;P55345;O60506;A5LHX3;O00712;Q9NZI5;Q99990;Q93074;Q8TF20;Q0120  
1;Q6UUV9;Q9HB58;Q9UBU9;Q6ZR52;O00534;O60930;Q15528;Q99684;P52741;Q5TKA1;Q9UDV7;Q5FBB7  
;P35244;O00566;P49450;Q15006;Q53FT3;Q14814;P39880;O95347;Q13257;Q86XR8;P18850;Q9NV88;  
Q9UBP6;Q8TF68;Q3KQV3;P50549;P32780;Q99594;Q9H777;Q9BZV1;Q86WB0;Q96AQ6;Q8N2Z9;O94983;Q  
8IUE0;P61573;O00204;Q9P255;Q8IZP0;Q9H6T0;A6H8Y1;O76031;Q8NC26;P17483;O95999;P14316;Q9  
6EY5;A8MT69;O43296;P58004;Q6R2W3;Q76L83;O94776;Q9H4T2;Q9UBU7;O15379;O75486;O15266;P36  
956;P0CG30;P62277;Q99567;Q8N1F7;P18615;Q9C0E2;A6NFD8;O95948;O14709;Q99933;P41134;P411  
61;Q08ER8;P0C7M4;Q9H1Z4;Q13601;O60535;Q9BQ77;Q9UKN8;Q14192;Q5T5D7;Q96EV8;P56537;Q9BWW  
4;Q13123;Q9H171;Q9NQX1;Q9UPV0;Q7Z5D8;Q03188;Q9Y5R5;P05114;Q92800;O60318;Q6NZI2;Q96EZ8  
;Q15633;Q96S55;Q6ZMW2;Q9UNA4;Q9H825;P06748;P30876;Q107X0;O14757;Q9UNH5;P49789;Q9NVW8;  
O95503;P19387;Q8N699;Q4LE39;Q9NVX0;Q9UER7;O00148;Q86WV1;Q16520;P15976;O95931;Q9UNL4;Q  
9BWX5;Q96G21;Q8N8U2;Q9H307;Q5T3J3;O75586;Q8N196;Q9HJC9;Q9H0E3;O60356;Q62M3W8;Q15542;Q1  
5172;O14686;O15535;Q6MZP7;Q6S96;Q6H8Q1;Q69383;Q7RTT5;Q4VC44;Q03933;Q8TDN6;P28356;Q9H  
CH5;Q92754;O94842;Q9HC44;Q96ST3;O14628;P58557;Q8TBC5;Q15025;Q5T7V8;Q9UL16;P61218;Q96R  
K0;Q8N8G2;Q9Y237;O15350;Q6ZSS3;Q92759;Q6ZRS2;Q9BTK6;P13073;P35638;Q7L804;Q9NY61;Q8TDY  
2;O75448;Q96AH0;Q9Y6J0;Q9NVR2;Q92945;P54727;Q9UFW8;Q9NPI1;Q03252;P02511;Q96ST2;P57075  
;P54198;Q9H5F2;Q9UK76;Q7L5N1;Q6ISB3;Q8TDR4;Q08378;Q02447;P25787;Q99909;P52594;Q86YF9;  
Q9NQE9;Q9NSD4;Q16534;Q14152;Q2M1K9;Q04727;Q96T58;Q8WY36;P08107;Q9C099;Q8N1L9;O60244;Q  
9H5P4;Q86YP4;Q96SC8;Q9Y3Y4;Q53HL2;P52657;Q6ZNA4;O14896;Q9Y534;A6NHQ2;P41218;O00401;P6  
7775;O43684;Q8NBT2;O75683;Q8NAV1;Q8WUF5;Q96HR8;P17030;P51610;Q14934;Q9H981;Q86WP2;Q9N  
UQ6;Q504T8;Q7Z3B4;Q96K30;P17031;Q8TBK2;Q7Z340;P42704;A6NLC8;Q7L0Y3;Q86UE3;Q53TQ3;P090  
86;Q5JTC6;P04792;P26447;Q9H668;P63279;O75362;Q8N5D0;Q96FX2;Q96AB3;Q16670;Q96N95;Q9Y5A  
6;Q9UBZ9;Q92547;Q9Y3Y2;Q8TF47;Q86YC2;Q9NQ29;O75971;Q330K2;O75175;Q9H6R4;Q8ND90;P17036  
;P49005;Q7Z614;O15117;P53801;O94993;Q13838;Q9ULJ3;Q13415;O14776;Q9ULR0;Q86V48;Q8TBE0;  
Q6VVB1;D6RGH6;O95990;P17040;Q96P70;Q15560;Q9P258;P17676;Q2QGD7;Q16531;O95359;O95551;Q  
9H320;P17482;Q9P086;O00541;P17010;O95625;P11308;Q53H80;P17038;Q56P42;Q9Y3B2;Q8N5Y2;Q0  
7955;Q9BWJ5;Q92B4;Q9Y4Z2;Q9UK12;Q6I9Y2;Q96LT7;Q8WU90;Q9NPD3;Q96MH2;Q8WYN3;Q9UDW3;P38  
935;Q8NDY6;E9PGG2;Q9NYG5;Q86TB9;Q96CB8;Q5BJF2;Q9NYF8;P08047;Q8NFH4;Q8NEU8;Q8TC21;P114  
73;Q13156;Q7RTU5;Q00978;O00458;Q8NAV2;Q99471;Q63HM1;Q9UHJ3;Q8NF91;Q96C28;O75928;P3030  
4;O15355;O14907;Q92905;Q7RTT6;Q9NPE3;Q9BZI7;Q96RJ6;O75182;Q13769;Q13794;Q8NDT2;P63241  
;Q13342;Q9NY87;Q16629;Q9H1A4;Q9ULJ6;Q15022;O43829;P16415;P35573;Q9BSM1;Q8NHM5;Q5VVH5;  
Q86Y25;Q9BQ15;Q9H9Y6;Q9Y2D8;Q01892;Q9B477;P0CG00;Q14790;Q8N5F7;Q96BW1;Q96JS3;Q8N3S3;P  
13196;Q92973;P12270;Q7Z6Z7;Q6PIJ6;O75400;Q14749;P09017;Q8N184;Q9NZC7;Q96NJ6;P51965;P2  
2670;O60563;Q504Q3;Q8WUB8;O95416;Q9Y3I1;Q9BRA0;Q8TCI5;Q9UHA3;Q9GZR1;Q8WYQ5;Q8WUN7;O15  
084;P13640;Q9NV11;Q00597;O43542;Q13129;Q9H7S9;Q8N726;Q86UE4;P11831;P60174;P20265;O755  
31;Q7Z3V5;Q9NR22;P60673;Q8WUY3;P15172;Q06609;P0C7T5;Q9H147;Q3SXZ3;Q86VP6;Q9BV57;O4324  
8;O94906;Q6NT76;P0CL83;Q5TAX3;Q156A1;P57721;Q9H9Q4;Q14CW9;P28702;O43148;Q9UBF7;Q6IQ21  
;Q00577;P48552;P54105;Q13398;Q53GI3;Q9ULW6;Q8IU81;Q9BSD3;Q96PT3;Q96MR9;P48378;Q86TP1;  
P80217;Q6PJT7;Q15561;Q8NBZ0;P31943;Q96BV0;O75446;Q8IZL8;Q5EBL4;Q96LW7;Q96BF6;P11388;Q  
9UJW3;P28065;P35227;Q92979;P54725;A8MT65;A6NK53;Q99873;Q12962;Q9H788;Q9Y295;Q9NZP6;Q1  
4669;Q9Y5L0;Q86TJ2;P28069;Q9BUY5;Q86UL8;Q09028;O14818;O60663;P22674;O14972;Q9UKW6;P14  
635;Q9P2T0;Q96QC0;P58005;P49756;Q9BYD9;O95049;Q15424;P78545;B2RXF5;Q9BQI9;Q7KZ85;P235  
28;O00170;Q8N3J9;Q8N6T7;Q9Y2P0;P09629;Q92575;O15069;P63165;Q9NS37;Q9UHD9;Q9BQG0;Q9Y2H  
8;Q9NQ55;O15304;Q9BRP8;Q9UQR0;Q96AQ7;P52743;Q96QF0;Q99627;P58340;Q96GN5;Q499Z4;Q8N9A8  
;Q10570;Q04323;P54845;Q9Y248;Q12996;O75886;Q9NZQ3;Q8IXH6;Q9UND3;Q9UBS4;P42568;Q15937;  
Q9BV90;Q9Y2A0;Q9Y4A8;B3EWF7;Q9BXG8;Q9ULK4;Q00444;Q86XI2;Q6ZVD7;Q9H6Y2;Q7Z2W4;P27695;Q  
15723;Q9UBC3;P62314;Q86Y26;P08621;Q8IXQ5;Q15044;Q9GZR2;Q8N7G0;Q8IX03;Q08050;Q9UHK0;P3  
1948;Q13541;Q68EA5;Q5TID7;Q9Y2K5;P11142;O75381;O75607;Q9NQS7;O15405;P61978;O43823;Q16  
630;Q9Y5B6;O95163;P62324;Q9UKL0;Q8IZT9;O60711;Q9BQ67;Q14765;Q9HAU5;Q9Y5Z7;Q1ED39;Q068  
30;Q13287;Q96IF1;P29084;Q13112;Q8WVY7;Q68DY1;Q5TB30;Q8IXW5;Q7RTV3;Q12972;Q14137;P2779  
7;P12004;Q9UQL6;Q8N5P1;Q07021;Q8TAK5;Q9Y3M2;O43524;Q14181;P53999;Q8N336;Q96G23;Q99549  
;Q9HCG1;Q12959;O43502;P63146;O43593;Q9Y297;Q96G25;Q9ULW3;P06746;O43745;Q6P280;Q9NYF0;  
Q9NRG4;Q5RKV6;O75884;Q8WXC3;Q5PRF9;Q9BUI4;Q9BY77;Q99966;Q9NS25;O15162;O95721;Q9UDY4;O  
95159;Q8TAU3;P39023;Q9Y448;Q9UQB3;Q92994;Q8N5J4;Q14691;Q9UL58;P24522;P38159;Q13469;Q9  
UMX2;Q95G23;P52747;Q15004;Q13137;O43264;Q9Y3A5;Q9Y5P8;P78412;O60287;Q14CS0;Q96SR6;P0C  
860;Q1ZZU3;Q15003;P55347;Q9NZH4;O94811;P62487;O15127;Q9UBF1;Q9UHI6;A6NLL8;Q9UK73;Q5TH  
R3;P78317;P11532;Q14929;Q99504;Q5T619;P62081;P61247;Q9BSV6;Q96CJ1;P23769;Q8NEY8;P6230  
4;P29372;Q29RF7;P54253;P62714;Q96L92;Q14593;Q9UBS3;Q15929;O94992;O14980;P35548;P55199  
;O75391;Q9UHB9;Q4G112;Q9UIV1;Q8TB69;Q13428;Q9BVI4;P84103;Q99743;O75817;P20719;Q5T6S3;  
Q15072;Q07157;Q6X4W1;Q15935;Q7Z7K6;P59047;P17987;Q8NB91;P15036;Q96C00;Q8N1G2;Q9BYK8;Q  
8IYB3;Q5H9R7;P30307;Q8IVP9;Q6W2J9;Q50548;P20073;P51826;Q14186;Q63HK3;Q92674;Q99608;Q5  
TA31;P40426;O75717;Q59GR2;Q15699;Q9UII5;Q12800;A8MZ59;Q15532;Q9UJM3;Q9GZY1;O60828;Q8N  
E65;P04732;O75582;Q05084;A8MUV8;O94913;O15131;Q96KR1;Q9P243;Q9ULM2;Q15047;Q9HB71;Q6NT



89;Q14938;O75529;Q9NP64;Q9BQ70;Q9UG56;Q96N38;Q14997;A8MWA4;P62328;Q9UGP4;Q86WX3;P40337;Q5SVQ8;Q99750;Q9BW27;Q9BTC8;Q9Y6P5;Q5H9F3;A8MQ14;Q14498;P56693;Q92748;Q9Y6H5;Q9BZW7;P05787;Q96LB3;A4GXA9;O14787;O43236;Q96BT3;Q08J23;Q8N7R0;Q96CX3;Q9BTP7;Q8IWS0;Q8NHQ1;Q969S8;O14867;P25791;Q9BSU3;Q96F24;Q9Y6Y0;P17032;Q86V81;P11171;P48788;Q99728;Q8LWZ8;Q9H8E8;Q9Y1576;P19532;P52758;Q96BD5;Q253S7;Q609G9;P26358;Q9ULX9;P51948;Q9Y2T7;Q52M93;O75618;Q9Y221;Q9UBW8;P15621;Q6GPH4;Q92B31;P60900;Q92782;Q8TEM1;Q14585;Q14106;Q146N5;O47111;Q9NQX6;Q96MT3;P17022;Q9H5J8;Q9BP27;Q15050;Q16143;Q07666;Q9BZD4;Q99576;Q14653;Q68DI1;P51504;P67870;Q8TEX9;O60934;P04733;Q9UKY1;P34896;Q96T37;P61289;Q9H9Y2;O75505;Q8N8C0;Q13495;Q9Y2D9;Q96DE5;Q96SZ4;Q15654;Q96DB2;Q9HD34;P56270;Q96DF8;Q61Q32;Q659A1;A2RRD8;Q15306;B4DXR9;Q9UKD1;Q6NX45;P51816;Q9BXY8;O43482;Q86US8;O96017;P51959;Q15370;P17098;Q9BU61;O60832;O75437;Q8NF99;P12755;Q9UNN5;O14948;Q5MJ68;P61572;Q13360;Q9UBD5;Q9UBF6;Q92624;Q9UPN7;Q86UB2;Q14978;Q96S59;P84022;Q9HB19;P61571;Q5MJ70;Q9NZ63;Q969G3;Q8WYR1;Q16222;O14641;P78414;Q9NXV2;Q99856;Q6P9A3;Q9NSP4;P55212;P31949;Q69YI7;Q6P9F0;P50221;B1APH4;Q6P1X5;P46939;Q9BQ83;P10914;P41252;Q92539;P15927;Q9ULM3;A9QM74;Q86T82;Q06787;P41227;Q8N140;Q66K41;Q9NZH5;Q96JM7;P0C7X5;Q8IYH5;Q13330;Q8TEE9;Q15024;Q8N3C0;Q9NPD8;Q7Z3B3;Q8NEH6;O00716;P0CJ89;Q96IZ7;O60284;O14862;Q13310;P55060;A5D8V6;Q15643;O75177;O75528;Q6ZU65;Q8WUU5;P16383;Q9NQ31;P56279;P41002;P53992;Q9Y6K9;O95628;P36873;P0CJ90;Q96GC6;Q96RY5;P57081;Q92925;Q76KX8;Q96FQ6;Q00056;A6NHJ4;Q2TAK8;Q9NUW8;Q8NCU7;Q15021;Q9P2R6;Q01658;Q6NSW7;P28347;Q96ES7;Q8N895;Q96N22;Q92541;A8MXY4;Q8N141;Q9NQP4;P31276;P46777;P25440;Q674X7;Q05519;Q9BVC3;O15499;Q13924;Q8TBZ0;Q9BXL8;Q8TAT6;Q96LX8;Q9UBK9;P26368;Q5MIZ7;Q96QU4;P50748;Q92769;P28062;Q12904;Q9BVL2;Q5JNZ3;Q96EP1;P0CW71;O14497;Q03701;Q9Y2Q1;Q96D46;Q9H091;O00255;O15105;Q6PK81;Q96NG5;O43251;Q06330;O75496;Q6P2Q9;Q7LG56;P14859;O75190;Q15543;Q9UMS0;Q9UHV7;Q8IZ40;Q96PM5;Q86UW9;Q7Z3K6;P56282;A6NNF4;O95644;P24864;Q9GZV5;Q96EK7;O75444;Q13127;Q9P2J8;O95780;Q7RTS9;Q5TBC7;P54278;Q9HB07;O95067;P49848;Q9UQ84;Q96JM3;Q9BSJ2;O43541;Q969Q6;Q6PF04;Q9NSA3;Q9HCU9;Q9NWA0;Q6NZY4;Q9H8M7;Q9HD42;P12525;Q14135;P28324;Q9NP18;Q2M1V0;Q9BR84;Q9NQG5;Q9BV20;Q9H116;Q53EL6;O00625;Q9H869;Q16719;P29474;Q86Y97;Q9Y6X2;P50991;P78345;P50750;O43598;Q9Y2N7;P08865;Q96JB2;Q9UBB9;Q9UBW7;Q96DE0;Q9ULH7;P11161;Q9Y5B0;Q9NWT6;Q6P4R8;Q9UDY2;Q15544;Q9NTX7;Q8IZU0;Q9Y603;Q9NWT8;P62913;Q8TAE8;Q12906;Q8WXE1;Q96AP0;Q9NZM5;Q9HAP2;P25788;Q9UN79;Q9UL42;Q9HD36;Q96Q89;O15265;Q969U7;Q9HD40;Q05BQ5;Q719H9;P82094;Q8WXD5;Q08211;P48382;O43679;Q99733;A6NDR6;O00268;P09874;P51532;Q8NI51;A0JLT2;P60228;P42575;Q6P2C8;Q13426;P15622;Q8NA77;Q9UBSH7;P0DI81;O14656;Q9H4L7;P57077;Q9H6U6;Q53GL7;Q96K62;P08579;Q02410;Q9HCU8;Q7Z3K3;P62136;Q96PU5;Q3KP31;Q5JVJ8;O75419;Q99550;O43830;Q99848;P0DI82;Q16254;P62380;P52597;Q68CJ9;Q9UQN3;O43918;O15078;P41212;P61236;Q9UKX7;Q9HD47;Q6K0P9;Q96Q83;P0CJ86;Q9NVD7;Q49A33;P50613;Q9UHV9;Q8IW19;P15408;O15198;P48634;A6NCL1;Q15742;O14746;Q8TAD1;P23246;Q6IS14;Q12873;Q9NUC6;P86452;Q9NX46;Q9UNX4;P14678;Q9Y5S9;Q8IWT2;P25208;Q969P5;Q8WVJ9;Q15327;Q96H20;Q9ULU4;Q92830;Q8TC05;P04406;O15164;Q9GZX7;Q9BQ95;Q3SY52;Q96EU6;Q9UGK8;P78560;Q9H467;P61088;P57055;Q13506;P35226;B4DX44;Q15329;Q9Y4W2;P35869;Q9H160;Q9HB75;Q8NI08;P25786;Q9NTI5;Q9UFF9;Q01081;Q99615;Q96BK5;Q8N3X1;O75530;O75533;Q5TCQ9;Q5VU43;Q9N988;P57772;P59923;Q9Y6B2;Q8TC84;Q9BQY4;Q96QR8;Q14865;Q9GZN2;P0CJ85;Q96RS0;Q8TEQ6;Q9NRG9;Q9YV86;Q13045;Q9UMS6;Q9NZZ3;Q92733;Q9Y605;Q8TE02;Q9BRX2;Q969J2;Q16514;Q5VUA4;Q6UB98;Q9NYT6;Q9BVJ6;Q8NHW3;P78396;Q96FX7;Q13951;O00567;P20962;Q15185;Q494X3;O15116;Q96GM5;Q6NSI3;A6NM28;Q86TC9;P82970;Q9Y2L8;Q8IYB9;P46100;Q9NRY2;Q9BY27;Q16621;Q9H410;P46783;Q92993;P25815;Q8IX07;Q9BR88;O76021;O60291;Q5TB80;O60907;Q6UWZ7;Q9P2I0;P99999;Q6IA86;P10599;Q8TCY9;Q32M78;O15527;Q9H9Z2;O60225;Q8NFH3;Q9BVC6;O00505;Q15599;P14651;Q9UIA9;Q9P278;Q72465;P50749;P53805;P53041;Q03468;Q6UUU7;O75030;O94850;P61574;O14771;P57678;Q9UPW6;Q9NQZ8;P0CH99;P25685;P61244;Q8NHZ8;Q8NFD5;Q8WUI4;Q9P0J0;Q8N823;P17041;P13984;Q9NZJ4;Q6P9B9;Q8N9K5;P55055;Q9UIH9;Q13243;Q8IY85;Q9ULW0;P09661;P38936;Q9BSG1;Q13618;P0CJ79;Q3MJ62;Q969S3;P12956;Q15796;Q8N7M2;Q9BT49;O60765;Q8NB50;O95232;O75475;P20248;Q8IWZ3;P36578;Q9H0W9;Q9NVU0;Q9NZU7;Q14739;Q6PGP7;Q15369;Q3ZCT1;Q02241;Q02080;O60303;Q8N344;Q68E01;O60216;Q9UKV8;P39748;O75665;Q9NSI6;Q9C0C2;Q9NRL2;O00321;Q7Z7C8;Q9Y2P8;Q15366;Q96KS0;O96020;O75164;Q8WVV9;Q5HYK9;Q96BP2;O96007;Q9NRA8;Q9UBU8;P12883;P62875;Q9HAV4;P16333;P78337;Q02556;Q5TAB7;Q99496;Q3L8U1;P12524;Q96QF7;P23760;O00472;Q04725;Q53G26;Q5VTR2;O95218;P15259;Q96NB1;Q8N9Z0;P80294;Q96S94;Q99543;Q9HBH7;O14593;O75312;Q92785;O14770;Q96JN0;P24928;Q9YV69;P50453;Q969H6;Q9Y6J9;Q99607;A1L190;P19338;Q9NX63;Q9UJ98;Q7Z591;P37198;Q96FA3;Q9H6W3;P19419;Q86VE0;A6NF01;Q96T23;Q7Z2X4;Q13363;P49639;P61956;O43809;Q8N7U7;O94986;Q86X95;Q9UQF2;P51523;Q5VWP3;Q9UKV3;Q13503;Q96HA7;Q86YW9;Q15014;O95777;Q8NFJ8;Q15029;O94874;Q9H963;Q58F21;Q92499;Q8NI27;P78316;O15370;Q99687;Q9UKT7;Q969R5;Q9NYW8;Q96NS1;O76064;P41162;Q9NX70;Q92621;Q86TG7;O95476;Q15819;Q5BKZ1;Q9UJC5;Q3B726;Q9BYN7;Q9UN36;Q9NFP8;Q9UK99;Q96GE5;Q15257;Q9NWF9;Q9NQ33;Q86UB8;P62847;Q13216;P09016;Q8WWQ0;Q2NKJ3;Q8N720;P51786;Q9BWT1;O43812;Q15466;P19838;Q8IZX4;Q96RU7;P81274;O75564;Q9H4S2;Q02833;O94805;A8K0S8;Q9Y697;O15318;Q14764;Q14145;O43299;P43351;P78395;O60675;A6NGY1;P28749;Q68DK7;Q8NG31;O15397;Q9HCZ1;Q8NB42;P09012;P43268;P20823;Q56P03;Q96NM4;Q8TDB6;O75943;P78549;Q15583;P23193;Q16186;Q9ULW8;Q13228;Q5360;Q9UM11;A6NJG6;Q9HBT7;Q7L590;Q9C035;Q13144;Q13155;Q9H816;O95373;Q9H9L3;Q9Y383;P17861;P23396;Q8IWC1;Q9H6Z9;Q07687;Q8TBZ5;Q86UD0;Q9HAH1;Q9BVT8;P61201;Q9H1B7;Q7RTU4;Q9UJX4;Q8N371;Q86VM9;Q9Y2P7;O43913;Q09161;Q6P3V2;Q12968;P28074;O75346;A6NLI0;Q7L266;Q9H009;P54136;P25789;Q15572;Q14588;Q8WV24;Q6PJG2;O14529;Q92540;P52630;Q9P013;O43791;O00629;O60248;Q9UKD2;Q9H501;Q14839;Q9UBC1;Q13620;Q6ZMV8;Q9Y543;O15504;Q9UPV9;Q9Y6D9;Q8W01;P15336;O60885;Q5HYJ3;Q9Y2X0;O95073;Q8N9W8;Q14592;Q8IXH7;Q9HCG8;Q9UQ35;Q13526;O94864;Q6AZW8;Q6NSZ9;Q9BVV5;P12757;P28838;P35813;Q8N1K5;Q9BUJ2;Q86V15;Q9UKT4;P28698;Q9H3P2;Q8NFZ5;Q9BYV9;Q6ZNG0;P25963;Q8N9F8;P0CG47;Q9H503;Q9P2K3;P40121;P04053;Q9UGK3;P0C7V5;P20290;O43186;Q12983;P17021;Q13569;Q86U86;Q7RTV0;Q9Y2M5;P08235;Q14686;Q9UNY4;P57740;P06744;O95983;Q96T76;Q8N998;Q96QT6;P04818;Q9BZK7;Q6QNY1;Q9UI95;Q9Y3D0;Q9HC62;O75934;Q9NW01;O14920;Q9Y5N6;Q15545;Q9NV56;Q9UID6;Q14872;Q969H0;Q9UDV6;Q3KNV8;Q15170;O95271;A4D1E1;Q12789;Q9NZN8;Q5CZA5;Q03111;P31946;Q9Y3C5;Q96HQ0;Q99590;Q32P41;Q13416;Q9UKN5;Q9BXN6;Q9UNY5;P22415;Q9H4D5;Q9NS73;P10244;Q9H707;Q96

MG7;Q6VB84;O75150;Q9UM07;Q06455;Q13761;Q9NSJ1;Q9NY12;Q6ULP2;O75410;Q9UKT9;Q9C000;P41208;P52292;Q8N929;Q9UMQ3;Q5HYK7;Q5JVS0;Q96IY1;Q5SVZ6;P52298;Q3YBR2;P52655;Q8TCJ0;Q9UI43;P19484;O14646;Q13901;Q96NY9;P0CG12;P16989;O95238;B4DU55;Q6PG37;P31314;O60290;Q86XK3;O75373;O75113;Q9BYX4;Q9Y618;Q8IW36;Q14209;O95619;P20618;Q19AV6;Q05BW5;Q96CS4;P45984;Q15628;Q9H0U9;Q13642;Q49AA0;P43356;Q9HBM6;P42771;Q8N490;Q8IZT6;P17096;P14652;Q04724;P48147;O95831;Q9ULG1;P48595;P35269;Q6PIF2;Q8TE85;Q15427;Q9H6Z4;Q8TC76;P11473;Q99623;Q8TUR6;Q8N987;Q9GZU2;Q9UKK6;Q86TJ5;Q12824;Q15714;Q9Y2X3;O00161;P80723;O43513;O43325;Q9NS23;Q6PI48;Q0VG06;Q00653;Q8IVC4;Q9Y5J3;Q8N488;Q96MB7;P0CG48;Q9UK10;P42166;A8MUZ8;Q9UPA5;P29083;P04731;O75791;Q8N8D1;Q9BZE2;P25205;Q9NY43;O60504;O75154;Q96EK4;P07315;Q96SE7;P40855;Q13895;P35251;Q9HCK8;P46013;P47974;Q86YI8;P40926;Q9H7B2;Q9BQ65;Q14676;P62316;Q7RTU0;P61575;Q8N7H5;P47928;Q9UJA5;Q7L945;Q8NDQ6;Q92600;O75764;Q13106;O43395;P49336;Q9GZT9;Q9ULZ2;Q86XF7;Q5TEC3;Q96AY2;Q9UIL8;Q9Y294;P61758;Q96PU4;Q9H4B6;Q969V6;Q8TED0;Q9P016;Q5T230;Q99700;O95125;Q9P1Z2;Q96PK6;Q9UIF9;P58304;O60583;Q9Y4P8;Q68CP9;O14737;Q9GZT9;Q8IXT1;P24863;Q9H808;P27986;Q14146;Q16385;O94916;P17019;Q05086;Q9BXS6;P0CG31;Q9NP71;P16455;Q9UKF6;P28070;P43897;Q9NPJ4;Q8N693;Q9Y2G2;Q9H9L7;O60682;Q9BYH8;Q8TAQ2;Q86WJ1;Q01831;P39019;P0C7X2;Q14493;Q96RE7;Q8WUM0;Q92793;Q86U70;Q8WYK2;Q9Y2G7;Q14582;Q8IYX0;Q70IA6;Q9NY27;Q93052;Q01860;Q9H204;P18848;Q69YH5;Q5TGS1;Q9UJW7;Q9NWZ8;Q6IEG0;Q96MF7;Q9NSC2;P28066;P68036;O00165;Q92670;Q6ZRQ5;Q9BT78;Q5C9Z4;P0CG29;P35579;Q9P287;Q8IXQ6;Q14683;Q8WVM7;P52736;Q8N3Z6;Q01826;P63272;Q96N33;P14324;Q86XN6;Q8N5L8;Q49MG5;Q96L21;P21675;Q9BRU9;P30305;O14519;Q9GZX5;Q3SYG4;Q86WI3;P43487;Q9NP87;P53803;Q9H8G1;Q9H9A7;Q96SW2;Q9H3F6;Q9H2F5;Q15007;Q9GZU8;Q96M99;Q9BQ52;Q99436;Q15853;Q9GZV4;Q9BZF9;P24941;Q96MU7;Q9NPA8;Q96RN5;Q8TAA3;Q9BQA5;P13010;Q8IY92;Q9H875;Q14241;Q9NUQ3;P78347;Q9UKA2;P17025;P30047;O43592;Q9H489;Q9UKK3;P49321;P07320;P84101;Q9BU64;Q9BRT9;P42677;O60508;A6NK75;Q9H0G5;Q9UJX6;Q8WUX9;P62306;P35232;Q9UBD0;Q9H840;Q15652;P62841;O60869;P61962;O60518;Q9HBD4;O14512;Q8NE71;Q8TDP1;O95229;Q9UBX3;Q8N587;Q8WXS3;Q9Y5B9;Q8TC56;Q8N7Q3;Q9Y678;Q7Z398;Q8N6I1;P06132;P62987;Q75QN2;Q92466;P13682;Q8IYI8;P26651;Q86V71;Q04743;Q53T94;Q09666;P61583;P45973;Q8TEK3;P52744;Q9BX66;Q14188;Q9UGR2;Q02577;Q9BWU0;Q86Y01;Q93075;A6NN14;Q96JL9;P55771;Q9UNQ2;P28370;Q96E16;O14777;Q9UKG1;Q9H8H0;P50222;Q9NVM9;Q16576;Q562F6;P0CB33;Q5T4T6;Q6ZNH5;Q9H040;Q9BVN2;Q9NWS9;Q3ZCX4;Q9BX82;Q03060;O75953;Q9Y2W2;Q7Z6J9;Q9NTM9;Q01850;O43402;Q9UGY1;Q9UBL3;Q6STE5;O95453;P30260;Q6PI77;Q9BZG8;Q9Y3B9;Q86XK2;Q13404;P49721;O14558;P42226;P49406;Q9P0T4;P80297;B2CW77;Q8IY57;Q96PT4;Q95VW9;Q9BPU9;Q5H9L2;Q8NC51;Q5HY98;Q9Y316;Q6B0B8;P13051;O75792;Q9Y2W1;P11802;Q16612;Q9UIF8;Q96IZ0;Q9UH90;Q92597;Q15637;Q9UL03;P23497;O95707;A6NLF2;P02489;A6NJ46;P78371;Q8NA19;Q8NEK5;Q9Y421;Q9Y692;P55198;Q71SY5;Q6XYB7;Q9BPX3;Q9Y535;Q66K74;Q969X6;Q9Y252;P46527;Q8WXI9;P14653;P49720;Q13952;P15923;P10242;Q8NB12;O43309;O14978;O60422;P35637;Q9NRR5;Q162N79;Q99717;P06733;Q15834;Q9H299;Q8TDN4;P15407;Q9Y675;Q8NCD3;Q9H7R5;Q02040;Q22626;Q12857;Q9CF3;Q9BXR0;Q69YN4;O60870;Q9BTL3;P02533;Q8N972;Q6ZYL4;P11172;Q8ND76;Q13568;Q0VD86;Q3B7T1;Q13490;Q12816;Q9H0M5;Q9UL40;Q9UHQ1;Q9UMX0;Q8N3U4;Q96BN2;P51808;Q6PJG6;Q7L190;Q13765;Q9BWH6;Q9Y281;O15287;Q9NVV4;Q8NDN9;Q6IPX3;Q8BWK2;P18583;Q7Z417;O75376;Q6ZN08;Q13042;P57086;Q8NHY6;Q9NNX9;Q9UK39;Q8TBZ8;Q16384;P27815;P61586;Q86VN1;Q9UIE0;Q86WV5;Q16637;Q9Y468;Q92917;Q15651;Q9Y222;Q8IXJ9;Q8BDY9;P11940;Q5VIY5;P0CG24;Q14331;O75290;Q96AJ1;Q3T8J9;Q9H5I1;Q9UMX1;P22681;Q9H081;O95905;Q8WXF1;Q9NP77;Q99814;Q6P1K8;Q9H7E2;Q8WXB4;P60510;Q8IYL3;Q14689;P49711;P40425;A2A288;Q9GZQ3;Q8N5A5;Q9H3M7;O15111;Q93062;Q969E4;P35658;P63162;Q9Y250;O75368;Q16649;P83916;P05423;Q9NVV9;Q53ET0;Q8TAP9;Q8I135;Q9P0V3;P17480;Q96KF2;Q92841;Q9HAW4;P23297;O43324;Q9Y2Z0;P62308;Q00987;P05783;Q9HC16;Q9UMS4;Q0VG99;Q9BWM5;Q7Z4H9;Q9BS18;Q8TF32;Q96GM8;Q13867;P62753;Q9BTE3;Q16600;Q2M3X9;Q14602;P08397;Q9NTK5;O14595;P52737;O14893;Q6PI98;Q9NR46;Q6ZV50;Q96JK9;Q9HCI5;Q9BX26;Q14781;Q9UQR1;P61578;Q9NY74;Q9NXX6;Q8N668;Q96HI0;Q96QD9;Q8TAF7;P05388;Q8N7K0;Q13023;Q9H9F9;Q8IUF8;Q8NEZ5;Q14207;O14802;Q9H7D7;Q86YD1;Q8NFH5;Q15776;Q6MZT1;Q66K89;Q8IYD8;Q9P031;Q6Q759;Q08AG5;Q14129;Q53QV2;P52294;Q7LBC6;Q99459;P35711;Q9UBY9;O14599;Q12874;P42224;O60671;O95190;Q96IU4;O75132;A6NKF2;Q86W11;Q8WYA6;O15360;P49918;P51522;Q96FF9;Q9NXR7;P22736;P32929;Q9NPA3;Q96EY1;Q16836;Q6ZN17;A6NEJ1;Q9NRR3;Q86X55;O94763;Q8NFG4;O00479;Q9UN30;O15205;Q13227;O15392;Q7RTU3;Q96PM9;Q96BR6;Q9Y255;Q8IYN2;Q01534;Q00839;Q96IR2;Q6RFH8;Q06587;Q9UI36;Q9ULM6;Q9Y6Y1;P55209;Q969W8;Q96RL1;Q14442;Q6ZNA1;A7MD48;Q9H0I3;Q15361;P43355;Q9HC57;O95201;Q96EA4;O43345;Q15759;Q9NVL6;Q9NQ92;Q8TDD2;P62937;Q9BTA9;Q15797;Q9H1D9;Q5FWF6;Q16526;Q9Y4Z0;O60936;Q8N393;Q9H633;P23409;P62877;O43660;Q9BXY0;Q9P0W2;P23508;Q8N163;P07199;Q8WTZ3;Q9NQ50;Q8NAP3;P61960;Q96ND8;Q96LW9;Q12830;Q3MIS6;Q5T0J7;Q9UL36;Q9BT81;Q9H1E3;Q06547;P02795;Q8TAQ5;Q13501;Q8NEZ2;O95571;Q13105;Q9Y2S0;O15446;Q9NV72;Q6ZNG1;Q9Y651;Q86TU7;P68104;Q8IYN0;P54821;Q53HV7;Q9H0N5;Q9NYP3;Q96JC4;P09234;Q9H814;O15015;Q02078;Q8IYI6;Q9GZU7;Q9UPG8;Q96DN6;Q9P1T7;Q8IY81;Q9UJW9;Q9BXP5;Q7Z699;Q5T0F9;Q96LI6;P62310;O00422;Q06546;Q9Y2A4;Q6TGC4;Q07352;O75821;Q6P0N0;P21506;P40424;Q14584;Q13888;Q9Y6R6;Q13367;Q96B26;Q9BUR4;Q9H0E9;Q8NG50;P31269;Q5SRE5;Q86XU0;P53567;Q9BSH3;P17014;P49715;Q969L4;P42772;Q8N108;P43364;Q5QJE6;Q9UY224;Q6ZMS7;P17023;Q9Y242;O15160;Q8NDP4;Q6ZN01;Q9H2G4;Q96EB1;Q5VT06;O60921;P18146;Q9UMY1;P48539;P28715;Q7Z6E9;Q03112;Q15906;Q96CW6;Q9ULD2;Q15650;P17947;Q15428;Q9NW38;P17028;Q9BT21;Q76FK4;Q92966;Q9BXW9;O96028;O95478;P31260;Q8N9B5;O76075;Q96QA6;P32519;P51946;Q9UHB4;Q8WX92;P15822;Q10586;Q9UKL3;Q03936;Q00403;Q96M11;Q8WTS6;A8MSY0;P61582;Q9BXF3;Q9H1K1;Q14693;Q9H6F5;Q6N236;P61581;Q9BXJ9;Q969F1;Q8N2W9;P17024;Q7Z401;Q9C002;Q7Z5L9;O95149;Q08945;Q9Y4Y9;Q71UM5;Q00534;Q71F56;Q14738;Q96A56;Q5TBB1;A8K8V0;P98168;Q9UBS8;Q9H1J1;O60716;Q15773;P33076;Q6P2E9;Q6ZV17;Q9UK58;P23025;Q14999;P51003;Q14397;Q03938;Q8TF39;O75691;O60224;Q9Y314;O15297;Q3C1V8;P08651;O95059;O95429;Q9NRC8;P62979}

6177

Pathogen[ P0C214] interacts with 3498 human partners: {P41970;P80217;Q9BQ67;P43351;P22681;Q9Y316;Q9Y3Q8;Q9Y2B5;P40424;Q8IW19;Q9BY77;Q86UD4;P06132;Q05086;P61236;A6NDX5;Q9H147;Q9UGP4;Q6ZN55;Q6X4W1;Q9BP27;Q92993;Q5BKZ1;Q02833;Q6NX49;Q12996;O00470;Q9BZI7;O75683;Q13310;O95551;Q96B02;O00170;O00268;P29474;Q9UKW6;O94829;Q9UJX6;Q14997;Q8TEX9;Q92618;Q6NZY4;Q96S94;Q9UI26;Q9BVJ6;Q9NRR3;P53567;Q

06732;Q8NEK5;O75444;O95243;Q9H081;O15078;Q9NQZ8;Q6RFH5;Q9HA82;Q14526;Q8N163;Q9Y3E1;Q03052;P82979;P61247;Q9BPX3;Q8IY18;P60228;P49406;P18850;Q9BWW4;O15198;Q15742;O43684;Q9B W11;Q9Y6P5;Q16637;Q5MIZ7;Q9Y5L0;Q96J02;Q8NI51;Q5H9R7;P54198;Q96GM8;Q03989;Q9HAJ7;Q9Y6 X2;Q6IQ32;D6RGH6;Q9Y2W2;Q7Z3K3;P51114;Q96C28;Q9UHB7;Q96BK5;O15287;Q96FV9;Q9GZZ9;P6231 2;Q00213;Q9H8729;Q92585;Q8IWI2;Q05BW5;P35754;Q14527;Q8N371;P55735;Q96MU6;Q9P255;Q6B0B8 ;Q9Y3T9;Q9H9Q4;Q15007;Q8ND76;P20248;Q9H825;O14813;Q9UHL9;P51946;P24863;Q8WX2;Q9H832; Q8TAP9;Q9UKN5;Q96FX7;P49419;Q8N9A8;Q9UDY4;Q96CJ1;O15234;Q58F21;Q9P278;Q96RE9;P32526;Q 9UBB6;Q8NA19;A9QM74;Q13761;Q9NZT2;Q9NZN8;O15116;Q8IX03;Q8N1G1;Q969S3;Q14739;P26368;A6 NCL1;Q96NS1;P0DI83;Q8IWW8;Q96S65;Q13257;Q15327;Q56P42;Q96QA6;Q86XI2;Q5JTD0;A8MUV8;A6H 8Y1;Q05195;O75818;P41220;Q9H6T0;Q15059;Q9Y3I1;P08294;O43296;Q9Y615;Q6ZNI7;P07315;Q96G A3;P62316;Q9NS37;Q9ULX3;O60346;Q16254;Q9BU02;O00534;Q8TBZ8;P25789;Q8IZC7;Q9H633;O7546 7;Q9HCS7;Q6ZNI1;O14529;Q96A49;Q9H4X1;O75691;Q96LW9;Q9UID6;P20290;P11308;O15117;Q00653 ;P27695;Q9BXY0;Q8IXQ6;P05937;Q9BUL9;P32243;P09917;Q8N228;O43365;Q9NVH2;P35813;Q6ZNA1; Q00597;Q9ULR0;Q9UGY1;P83369;P38432;Q09161;Q9POT4;O43805;P35789;O75486;Q8NDQ6;Q9H5I1;Q 96PM5;Q13887;Q96C86;P35227;P49639;Q9BQS6;Q9BQ65;Q6IS14;Q96T58;Q96HI0;P17032;P61244;O1 4595;Q06609;P62081;Q9H040;Q12904;Q14593;Q15697;Q8WW12;Q9NV31;A6NGD5;A8MVS1;Q9Y5Z7;Q9H CZ1;P30307;P19474;P84101;Q02930;Q04727;Q9H875;Q6P0N0;P56270;Q9Y2S7;P62913;O43829;Q9HA U4;Q29RF7;P48788;Q9UK99;O15111;Q15022;A0AVK6;Q8WXF8;Q00613;Q9BSJ2;P35869;Q7L5A3;P5150 8;Q13469;Q15024;Q7Z398;Q06787;Q9UIA9;Q13573;O60663;Q9NRL2;Q5JVS0;P42166;P04818;Q14331 ;P24522;O14787;O43172;Q8WUX9;P16989;Q95260;Q14207;Q9C002;P51610;P11474;O14681;Q9H6Y2; O75528;Q9NPE3;A8MQ14;Q15047;Q13330;Q8NFH5;O14746;Q8IZP0;Q9H788;Q7L5Y5;Q96BT3;P52743;Q 99728;Q13620;P35637;P55060;Q9BRU2;Q13156;O95238;Q13952;Q9BQ83;Q8TBZ0;Q9Y6K9;Q9BT49;Q8 TD31;O94913;Q06546;Q9Y5Q8;Q8WUY3;Q96P70;P62140;A6NK39;Q13363;P28062;Q4VC44;Q5UIP0;P05 783;Q9Y6J9;O75461;Q9P0L1;Q9UKX2;Q86YD1;P17010;P61956;O95633;O95478;Q63HK3;Q9ULD5;P553 47;Q6P2E9;A8K8V0;Q9UHF7;O75934;Q8WV44;Q9Y4A8;O94986;O75764;O95453;Q9BV47;Q15651;O4383 0;A5LHX3;Q96S55;Q7Z591;Q9BSF8;Q13547;Q12988;Q9BS34;Q9Y2A4;Q14865;Q9BS18;P60002;P78337 ;Q9HAN9;Q9HCD5;P49959;Q8NCR6;Q12824;Q66PJ3;Q14872;Q53EQ6;Q8IXK0;O00148;Q8N7Q3;Q13490; Q13772;Q86SE9;P31249;P38159;Q9H816;Q92624;Q8IYNO;Q14929;Q9UKF6;Q96KR1;Q6IEG0;Q8NFB4;P 28838;P17023;Q9BX82;P12757;Q53HL2;C9JE40;Q6R2W3;Q9NWD9;Q9Y2D9;O00321;Q6VMQ6;Q9H201;Q1 4591;P30876;Q96JN0;O75351;Q9Y5A6;P53992;O43264;P28065;O15194;P39019;Q6ZNI5;Q8NDF8;Q8N 5D0;P51814;Q5T5D7;O95684;Q08999;Q9BRP8;P19838;Q05481;Q6UUUV7;P46087;P14921;Q15628;A6NH J4;ALL190;O94842;Q96SQ5;P57721;Q8WUF5;Q92664;Q9Y3C4;P0CB33;P41227;Q9UL59;Q15013;P1525 9;P30153;P78371;O75925;P52744;P41002;Q9UJW0;Q8WXE1;Q9UPV9;Q02241;Q6ZNH5;Q96JI7;Q15573 ;Q9H9Y6;Q96IZ0;O14497;Q7Z5D8;Q9NXZ1;Q52LR7;Q9NXX6;P62993;P02533;Q5JVG8;Q8N699;Q8IYW8; Q8NC26;P49789;Q9P0V3;O75586;Q8N5A5;P15336;Q9UFW8;Q969Q6;Q96BUI4;Q9N086;Q9Y473;Q 06547;Q13568;Q9NRR5;P52657;Q92889;Q96LW1;P13010;Q8IZL2;P06746;P02489;Q9NS23;Q9P016;O4 3913;A6NP11;Q5SVZ6;P54253;Q9NQ55;Q15003;Q9UH90;Q969H6;Q9H9F9;Q96I27;Q7L0Y3;Q9UIL8;Q96 S95;Q6UX04;Q16186;P21675;Q7L266;O15535;O00159;P53803;Q9H175;P84103;Q15361;Q96QR8;Q8TD 17;Q6PG37;P46379;O43159;Q8N0Z6;Q6PJG6;O60716;Q7Z699;Q9NPI6;Q9NVU0;Q53TQ3;Q86V81;Q96LI 6;P57772;Q9NTW7;P02511;Q8TF45;Q9BSI4;O94811;O43186;P48552;Q9BWC5;Q9BSM1;Q8NG57;P62380 ;Q16656;Q14164;Q9C0F0;P61758;O75820;Q96F24;Q9BPZ2;Q5VTL8;P53396;Q9BWM5;Q8TAQ5;Q9Y281; P31314;Q9UDW3;Q9UNX4;P52742;Q13625;Q9Y5S9;Q5TB30;P07741;Q96DB2;P61571;P01011;O60543;P 51003;Q7Z4H7;Q8TC56;P81274;Q13769;Q14587;Q5TCQ9;Q12873;P15407;Q9NPC7;P51825;P52655;P0 6748;Q06508;O95628;Q13829;Q8WYN3;Q6K0P9;P35269;Q15554;P50750;Q86UE3;Q659A1;P26599;Q8N HQ1;Q9UIH9;P23396;P27815;Q92900;O00458;Q9Y255;Q9H1E3;Q7L590;Q9HD15;Q8TBC5;P19484;P252 08;Q2TAK8;Q99081;Q00987;Q96FX2;Q9GZU2;Q9GZV4;Q8NDP4;O00267;Q96CX3;P33316;Q96NJ3;Q8N69 3;Q16222;P52738;P50613;P43487;Q92841;P05388;O95400;Q3T8J9;P55212;Q8TEM1;Q9H3M7;O75190 ;Q8TAD8;Q9H814;Q7KZ85;Q8TC05;Q9BU61;Q13112;Q9H171;P40121;Q15014;P49427;Q9Y2L1;P33076; Q9Y2X0;Q09666;Q9H6J7;Q96RK0;P29084;Q5JVG2;Q7Z465;P0CG31;P23025;Q2NL82;Q7Z6R9;Q9BW71;Q 9NR56;Q96K62;P62847;O75618;Q96BR6;Q9HBE1;Q8NCA9;Q8WTT2;Q8NEH6;P42226;Q5H9I0;Q9UM54;Q7 L2R6;Q460N5;P51959;Q7RTU4;P15884;O76021;Q96EI5;Q8NHW3;Q9H0S4;Q9NS56;O75478;Q8TD23;O14 818;O60907;Q9P2F9;O15350;P13349;P40855;Q9C035;Q8N587;P14678;Q99856;Q9NY27;Q14764;Q8TA U3;Q96EA4;Q9C0C2;O00167;Q8N2W9;Q14119;Q14CW9;Q03112;Q9UJN7;Q86UB2;Q9Y2D8;P17019;Q9BWH 6;Q8WWWX9;Q9BQ87;Q8N0Y2;Q8IVP9;Q9UC06;P83916;C9JN71;Q504Q3;O75530;P61580;Q96BW1;Q02080 ;Q13023;O75496;P41252;Q15029;Q5T230;Q14765;Q9BZE3;Q9C086;P0CG30;O00541;Q8N5F7;Q96SD1; Q68DY1;Q9UDY8;Q8NDY6;Q16621;Q96R06;Q5MCW4;P62306;Q13867;P01100;Q7Z4G1;Q969L4;Q16384;Q 14152;Q15599;Q9P2N5;Q9BV57;Q9BXS6;Q99676;Q6NT89;Q9NPA3;Q8NCK3;Q9NR55;Q14145;Q96D46;Q9 3074;P0CW01;P78406;Q96BP2;Q92560;P52435;Q86WI3;P05204;P55265;O15266;P57740;P17275;Q8N 823;Q9NVM4;Q92750;Q8N5L8;Q96EU6;Q9UNY5;Q5EE01;Q8NEP9;Q8NA77;Q13367;Q9HD42;Q08AN1;P118 02;Q9Y6K5;P17022;Q7Z417;P53370;Q12800;Q9HBD4;A6NHQ2;Q69YN4;Q6NT04;Q99567;O75362;O1492 9;P57678;Q13111;P32519;Q9NPJ4;Q9C099;Q9NUA8;P61572;Q9H6B1;P34932;O60224;Q13526;Q9Y3B2 ;Q9BQ0;Q53HV7;Q8WYP5;Q9POM2;O94921;P50748;Q99743;Q15233;P23769;Q9BRX2;Q5T6S3;Q92793; Q16587;P50548;Q96FA3;Q8WYR4;Q9UJX5;Q7Z7K2;Q99457;Q9Y5J3;Q504T8;Q9UBY9;Q969W8;Q15637;Q 96NY9;Q00994;Q96KS0;P35711;Q8IZL8;Q9UIF8;P19419;Q9HB7;P56693;Q92797;P67809;Q49924;Q9 UJ98;P15408;Q6PGP7;Q9BUE0;P61586;Q96GE5;Q9GZL7;O15446;Q9Y295;P53999;Q8N9N5;P46937;P31 483;Q86WX3;Q6PI26;Q9NX70;O95625;Q13033;P61201;Q9NWW8;Q86XU0;O60684;P61457;Q05048;P426 95;Q8NFB8;Q9BSH3;Q8N8G2;Q96QT6;Q99708;Q7Z5L9;Q9UND3;Q8TF20;Q5VYK3;Q9UBZ9;O43167;Q6P2Q 9;P04792;Q6P9A1;Q16082;P81877;P84022;Q9H1A7;O00186;O75437;Q9UMS6;P23246;Q6ZRS2;Q6ZYL4 ;Q12906;Q6PK81;Q6P1L6;O00567;Q15172;Q9UL58;Q9BWW5;P29401;P54725;Q5TBC7;Q9UKN8;P17096; Q5U623;Q86WB0;Q9BWW5;P29728;Q8IWX8;Q8NFG4;P61962;O95125;Q14689;P61573;Q9NWA0;Q9NZI5;Q 5TYW1;Q9H1D9;Q9NTX7;P15172;Q15428;Q9BSU3;Q6PF04;P78345;Q76L83;Q9BYH8;Q86WZ6;Q15397;P1 7947;P46527;Q9Y244;Q9P2R6;Q9H808;Q9H3H9;Q6NZ36;Q9BX66;P56524;Q96PU4;Q16533;O95229;Q9G ZV5;Q9UK11;Q7Z7C8;Q8N1F7;Q6W2J9;Q86YE8;Q99623;Q9NR11;Q96CS4;Q9Y6Y1;Q9Y6K1;Q5TBB1;O147 09;P17029;O14907;Q9H501;O00425;O75884;Q6NT76;Q99576;O75821;O75694;P42704;Q14678;Q5JXB 2;P17544;P41218;Q12986;P11831;Q9Y2Y9;Q96BD5;Q00403;Q15906;Q96SR6;Q8TCI5;Q8NAP3;Q9UJM3 ;Q9UK13;Q96HR3;Q96ST2;Q9UL40;Q99417;P11172;O60318;Q9UNN4;Q5H9F3;Q9BXM0;Q99990;Q53EL6;

P17026;Q96MN9;Q8NCF5;Q96SK3;Q04206;Q9UNQ2;Q96AH0;Q9NW07;Q9NVC6;Q9BVI4;Q16520;O95931;Q9UNL4;Q5HY98;Q3L8U1;Q2MLK9;Q7Z589;Q63HK5;Q8TCD5;O43402;Q6STE5;Q12962;Q9H307;O75123;O60535;Q96EE3;Q53H80;Q2M3W8;Q9NP98;P63279;Q06455;P05787;Q9Y5Q3;Q9UHK0;Q96G21;Q6XQN6;P42224;Q02386;O75607;Q15973;Q12816;Q13404;P48556;Q3MJ62;O14656;Q9HCH5;Q9H777;P42568;P37275;Q68CJ9;Q9Y2S0;P28347;Q3KP31;Q6NZI2;P10914;Q8NI08;Q6PJT7;P61218;Q5HYK7;Q70IA6;Q8N8C0;Q9NZ81;Q9HAV4;Q16666;Q96NM4;Q9NPJ8;Q13427;Q15928;P17482;O43493;Q8TDY2;Q8IXW5;O43745;O95721;Q8NHY2;P49792;P35270;Q5SXM2;O75381;O75886;Q96BN2;Q9ULJ6;Q9ULG1;O95503;Q86TJ2;Q9UPG8;Q96K58;Q9BYX4;O43395;Q13618;P57075;Q9Y5B6;P22087;O15127;A8MT65;Q9Y3C5;Q6ISB3;Q9UKI9;Q9UKX7;Q08378;P40306;Q93034;Q9H869;Q96JC4;Q86W56;Q99608;Q9GZQ3;Q71UM5;Q6IPU0;Q06330;Q99873;P11940;P98168;P05813;Q12905;P35251;Q99497;Q969T4;Q7Z3I7;Q15910;P14635;Q15370;Q15257;Q99607;O60296;Q32MZ4;O00716;Q8NBT2;Q8IZ26;Q10570;Q15050;O75030;Q9NSI6;Q8N726;Q9UBS3;Q9Y2A0;P78395;Q8N9F8;Q8N668;Q5RKY6;Q9Y613;Q9NUQ6;Q9Y2M0;P17024;Q9Y232;Q9Y2Q1;Q6ZR52;Q9NXV2;O75340;P20585;Q8NCU7;Q7L9L4;Q9NQ29;O14771;Q96DN6;Q12901;Q92540;Q96NG5;O14599;O60437;Q96N77;P20700;O75164;Q9H910;P61575;P55198;P55345;Q8N5J4;Q9H6R4;P24385;P51808;Q96SE7;O75151;Q9NVM9;Q04724;Q9BUR4;Q9UQN3;Q13875;Q14676;P08865;Q9H091;Q9BTT4;P49005;Q14999;Q7Z614;Q8WXD5;Q9UBU7;Q6ZMS7;Q9NZI8;Q9NNX9;Q86WP2;Q9H4L7;Q7Z2X4;Q6ZN19;Q9UL41;P07199;Q13901;Q92733;Q14129;P17038;Q9Y297;Q9Y468;Q9UC07;Q68E01;Q9Y3D8;Q9HAU5;Q14686;O94864;Q9NYP3;Q9Y6I3;Q99807;P31948;O95149;Q8NEJ9;Q15545;Q96EK7;P38935;Q9HAW4;A8MSY0;Q494X3;Q99547;Q14938;Q96MR9;Q9Y2P0;O60244;Q7RTU5;Q00978;Q15170;Q9GZU7;Q96K75;P40926;P16083;P62877;Q5MJ68;O96006;Q9UII5;O00308;Q6P1K2;Q15653;Q4V348;Q9NY12;O43463;Q9BT81;Q7KZF4;P63241;Q9UKG1;P46060;Q9UNSD2;Q96SZ4;A6NLF2;Q9H063;P62308;Q6IV72;Q562F6;Q96LT7;Q9NY61;Q9BXR0;P51854;Q9H489;Q8N141;Q96TC7;Q9NWT8;Q9Y4Z0;Q8TBE0;P51786;Q5VVH5;Q9BY31;Q3B7T1;Q8TAQ2;Q9Y266;Q69YH5;P35573;Q9UK45;Q01844;Q9HCU8;Q9UI95;Q15560;Q9H2F5;P13196;O43148;Q96BV0;P13640;Q6ZQR5;P08579;Q6P1K8;P38936;O60287;A6NEJ1;Q6PIJ6;Q8NAV1;Q5SVQ8;Q6IA86;O43390;Q92541;Q16594;Q8N883;Q9Y5N6;Q5T447;Q99750;Q8NEI1;Q96MT3;Q15366;Q96FF9;O15131;O95232;O95347;Q3SXZ3;Q9GZX5;P05423;Q8N684;Q9NXM0;Q9UKD1;P78316;P51523;Q86UE4;O95014;Q9P2T0;P0CV99;Q9H4I2;Q9BYD9;Q8IZU0;Q147U1;Q12789;Q9BSK1;P51965;Q9H3C7;O60524;P17676;P24278;Q96T88;P17031;Q9UBS4;O75792;Q5PSV4;A8MV65;P43355;Q01105;Q9UKT7;Q9HCX3;Q99700;Q13057;Q16630;P78317;Q15542;Q16385;P62277;Q14651;O94906;Q9H503;Q8N336;P48147;Q9H0M0;Q99615;Q9UIV1;Q9Y248;Q03933;Q9Y3Z3;Q5VTD7;Q7Z2W4;O95619;Q13398;P25205;Q537G3;P05062;A8CG34;O94874;Q90928;Q9HBT8;P86452;Q8N7U7;Q8TDN6;Q96JZ2;Q9Y4Y9;Q99909;O14776;Q01082;O43248;Q8N9N8;Q9UK58;P23490;Q9NZP6;Q01534;Q9NWF9;Q5VZB9;Q9UMS4;Q06830;O95257;Q5VSL9;Q9BZV1;O60290;Q96IZ7;Q9NUQ3;P49716;Q9H089;Q96DC7;Q6ZW49;Q10587;P32929;Q8N5U6;O95571;Q07955;P10244;Q8N344;P49450;P50749;P18615;Q9H0W9;Q96BF6;Q9BQI9;Q9BY27;P17030;Q10586;Q9UH99;Q7L804;Q96QU8;Q9Y534;Q9NZC7;Q13794;O95359;Q6VUC0;Q9BWG6;Q13428;Q9Y250;O75564;Q03936;Q5QJ86;Q96NL3;Q99798;P0C1Z6;O60828;Q8TF68;Q9H948;P60510;Q9BYK8;Q9NR46;Q9NZI7;P80297;P57086;Q9Y5K5;Q2VWA4;Q9BSV6;Q9UK39;Q9BTE3;P48382;Q9BRU9;Q9HBZ2;P20265;B3EWF7;Q13216;Q14980;Q7RTT4;Q5VWG9;Q53QV2;Q02078;Q8WUN7;Q9BW66;Q86XN6;Q9UBX3;Q53FT3;Q86Y26;O14503;P11532;O95059;Q9UPV0;Q9HCE7;Q13501;O76031;Q7RTT5;Q15561;Q969F1;P82094;Q9BT78;Q07352;P62714;Q5TAB7;O60921;Q8TDN4;P55795;Q8N3C0;Q8N2Z9;P08397;O95201;Q8TC21;Q969A4;Q96D70;Q9UJ68;P23786;O95707;P28698;O75525;Q15633;Q9NWS9;P15121;Q14258;Q9GZS1;Q9Y3C7;Q9H0N5;Q6PJP8;Q9UJ04;Q03188;Q92922;Q8IXF0;Q9BWU0;Q9H299;P15622;Q86UD0;Q6ECI4;Q5VUG0;Q8IW35;Q9UM07;Q9Y333;O43299;O75312;Q6ZSS3;Q9NSA3;Q9BRR0;Q9HBI9;Q6ZN08;Q8N859;Q9NWX4;Q9H1K1;Q13129;P52298;Q9UK76;Q8N8U2;Q13642;P13056;Q9UIS9;Q9H9A7;P52272;P28066;Q09Y421;Q99966;Q9HC78;Q9695;Q9NZJ4;Q9Y237;Q8TE85;Q9UQB3;P28715;Q96MB7;P10243;Q12968;Q01094;O75832;Q14814;Q9H467;O75446;Q8NCD3;Q86VE0;Q13137;Q9Y2P8;Q9H7D7;Q9Y2N7;Q9HC16;Q9UHQ1;B1APH4;Q9UL36;P18848;Q6P9F0;Q92966;P62487;O43482;O00273;Q9ULJ3;Q92681;Q96RN5;Q16633;Q9UHV9;Q86WV5;Q96HW7;Q9ULM6;Q99575;O14867;Q14566;Q674X7;Q8WVK2;P17535;Q92597;A6NIX2;Q13506;P62314;Q96DX5;Q3KNV8;Q8TF63;Q53GL7;A2A288;P98170;P30793;O00479;Q7Z7J5;Q86US8;P07910;Q14493;Q8IYB3;Q9Y6R6;Q49AA0;Q8N3S3;Q92754;Q92698;Q15834;Q969G3;O60870;Q92674;Q9H1B4;Q8TAT6;O43439;Q9UMS0;Q15819;Q00534;O43809;O00712;Q9NPB6;O75817;Q8NE71;Q15528;Q9HB96;Q8WY36;Q13045;Q9UHX1;Q9NTM9;Q9Y2T7;P49790;Q96EY5;O43681;Q7Z340;Q96Q89;Q9BUP3;Q9UKA2;Q6ZNG1;A6NF01;P18583;Q8IXJ9;Q15696;Q14186;Q9UIF9;Q9Y3V2;Q8IYH5;Q12837;P55895;Q6PI98;P49116;Q01201;P21127;A4D1E9;Q16881;Q9UHR5;Q92985;O14980;Q07687;Q8NF91;Q9H1A4;Q9HEZ9;P47928;Q8N831;P37198;Q9H5P4;Q9HAF1;Q9NPD3;P61960;P49750;Q9BQ70;A0JLT2;Q9BWT1;Q53ET0;P41134;Q9UKL3;Q96IT1;P08621;Q9Y224;Q13487;O60765;Q13426;Q9BW27;P15923;Q06730;Q9UJU3;Q86UQ8;Q8N184;Q71F56;Q9Y6H5;P46783;Q9UGU0;Q8N8D1;Q86Y25;Q9HBL8;Q03252;Q6NS38;P52294;B4DXR9;Q96QU4;P14618;Q04726;Q8IWS0;P51948;P25791;Q8WXF1;O75132;Q9Y6Y0;Q9Y697;O95416;P99999;Q5VU43;Q9H4B6;P51398;Q96MH2;O75373;Q8WTZ3;Q8NEF9;Q14103;Q9NVV9;P28370;P62310;Q9UER7;O94776;O96017;Q14978;Q92905;Q6TGC4;Q9Y221;Q6ICB0;Q14749;Q92539;O43542;Q96AY2;Q9Y2H8;Q15929;Q8IXT1;P43897;Q9UL42;Q07666;Q8N4W9;A8MXY4;Q14151;P49720;P63165;Q9NZD8;O95071;P49336;Q96PE6;P28074;Q3ZCX4;Q9H6U6;O00165;Q68DI1;Q9P0W2;O60225;Q7Z6E9;Q9HBM1;Q8N488;Q9HB07;Q9H5H4;Q02556;P34896;Q06587;P17861;Q8N9R8;Q00577;Q9H0A0;Q9Y2Z0;Q6P280;Q5VUA4;Q16600;P17014;Q8WYR1;Q6RFH8;Q9Y4B6;O95983;Q8N9K5;P55769;Q99933;Q99459;Q53GS7;Q8NF99;Q14137;Q9NPJ0;Q9BPU9;Q9UJW7;Q8TBZ5;Q9HBM6;P61326;Q9UNN5;Q49A33;O14948;Q9Y3M2;Q99549;O15162;Q8N2I2;O75290;P49918;Q8TEQ6;Q9BZE2;Q86U70;Q96S59;Q92979;Q9Y543;P18887;P13535;Q8IWZ3;Q96JF6;Q9BRS8;Q9BRG1;Q9BZQ8;Q96D98;Q13356;Q9GZW5;P0CG48;P46100;Q86TC9;Q9NWW0;Q9Y324;P38919;Q96RJ6;O14641;Q63HM1;Q9UKK6;Q9UHA3;P61576;Q9BQK8;Q0C7T5;Q9NWM0;Q6P9A3;Q6AW86;O43513;Q9UHC1;Q9H321;Q9P258;Q86XR8;Q9BQ52;P50402;Q9UNA4;Q9UKL0;Q96L92;Q5VZE5;Q8TDR4;P26358;O43812;P78396;Q9NYP9;Q6ZMW2;Q15386;Q9UNY4;P25440;Q15398;Q8TF47;P51826;Q96KF2;Q6MZT1;Q6NSI3;Q92994;Q9Y4R8;Q6DD87;P04732;Q9NZH5;Q96JM7;O43189;Q6P1J9;Q8TCY9;O95376;Q08J23;Q9NRX1;P14653;Q9Y6B2;P51504;Q6MZP7;O00422;Q7Z2E3;Q96N95;Q8WWQ0;Q9NRG9;O95999;Q8TF39;A6NLC8;P30281;Q9NVW2;P78347;Q8IZ40;O43721;Q96MF7;P46939;Q086YP4;Q96SW2;Q6P2D0;P57081;Q13485;Q9HEW3;P62753;Q9Y2M5;Q9Y4P8;Q13144;Q96B36;Q9ULF7;Q9C0F3;Q4W5G0;Q96LW7;Q9H7X3;Q96N22;Q8NEU8;P61574;Q8NHZ8;Q9BZQ4;Q9NVP1;Q15369;A9UHW6;P55197;Q9BWD1;Q9NUL3;P35658;Q9NYT6;Q03924;Q9H8M7;Q92917;Q15572;Q969X6;Q86YW9;Q9NX63;Q5FWF6;Q96DF8;Q08209;P18847;Q9HD36;Q9Y242;Q9NYW8

;Q08AG5;Q9BYE7;Q92769;Q6UWZ7;P0CW71;Q8NEY8;Q86TJ5;O15105;P55199;O60583;Q9ULW0;Q13243;Q9NZJ0;Q9C005;Q9H8G1;Q86UP8;Q8N6M9;Q9UPR3;Q9UH92;Q9UII4;Q9UBU8;Q8TAF3;Q13352;O43592;Q15427;Q8N108;P63272;Q15544;P20749;Q9HAZ2;P83876;Q14691;Q9P2I0;Q8N7M2;P17028;Q9P2J8;O95780;P0CH99;Q7RTS9;Q99590;P98169;Q9UMX3;Q8N3X6;P49848;O43663;Q15643;Q15329;Q8N490;Q8TAE8;P50222;P0CL83;P28324;Q3MIS6;Q6P4R8;P54577;Q9GZY1;Q9UMS5;Q6P1N9;P16383;Q9UKV0;Q9HCW9;P25297;Q86W38;Q96G23;O95067;O00257;Q15652;Q8WXC3;O60356;Q9NVI1;B4DU55;Q9NQ5;P15927;Q9H8H0;Q9H160;Q9H2G9;Q9NQX6;O43679;Q96MG7;Q12872;Q96RK1;P25788;Q3B726;Q9UNS1;O43502;P51815;Q9NPA8;Q6ZS27;Q9ULW8;P62136;O14896;P51522;A6NFF2;Q8N393;O43823;Q6ZN28;Q96TA1;P24941;O15382;O15060;P40337;Q86TP1;Q05519;P53804;Q9BUG6;Q9Y603;Q9UBS8;P49321;Q8WZ19;Q15714;O14519;Q7RTV0;Q76FK4;Q9HCK8;Q0VG06;Q15654;Q8WVY7;Q6ZMY9;O95278;O15014;P02795;Q9GZT9;Q9UN79;Q13765;Q92925;Q3SYG4;P38646;P58557;Q8WXI9;Q9ULD2;P42574;Q9UI43;Q05BQ5;P17480;Q8N7H5;E7ETH6;Q04323;P36639;P19367;Q13185;Q9NVU7;P63162;Q16576;Q9BVC3;Q2QGD7;O15226;O75376;Q9BZZ5;Q96AB3;Q70Z53;Q49AN0;Q9Y4W2;Q9Y6X9;Q96N58;P30043;P0DI81;Q99550;Q96M11;P17020;P0CW00;Q15025;Q9ULX9;P04733;Q76KX8;P67775;Q6ZNO1;Q86TB9;Q8NPH3;Q9BUJ2;Q15459;Q99848;Q9BZW7;O00231;O60264;P19532;Q15796;P48634;Q6NVH7;P42771;Q56P03;Q9NSC2;Q96I24;Q9UH16;Q9H0G5;Q69YI7;P61579;Q969J2;Q9ULM2;P51816;P12882;Q96T21;Q9H9L3;Q14192;P62324;O15318;O00204;Q6UUUV9;O60930;O75717;P41223;Q6P2H3;P62318;O43593;O15525;Q86V71;Q9UMY1;Q9Y3M9;P22674;Q7Z6B0;P17027;Q86TU7;P25963;Q86UQ0;Q8IY85;Q01543;O60381;O43598;O95411;Q96GC6;Q99687;Q99594;P41182;Q9Y6X8;P35244;O95429;Q96K30;O60711;Q6P9G9;O15360;Q03923;P14324;Q9H1B7;Q9BXJ9;Q99504;Q9NRR4;Q9Y5B9;Q9UMX2;Q86SG2;Q9NP71;Q9UQ0;Q8N972;Q9NS73;Q9NQ50;P11388;Q9BQY4;Q9BVT8;P17098;Q8IV48;Q6ZT77;Q8NI27;P21506;Q8IY81;Q93009;P61578;Q96KQ4;O43541;Q96P71;Q13868;P30305;Q8IYB9;O15379;Q9UN30;P25786;Q8NEZ2;P06733;Q01081;Q96RL1;Q9NZU7;Q9HB75;Q01892;Q96PK6;Q6P1X5;O15205;Q9P1T7;A4GXA9;Q96JK9;P43268;O75533;Q96B01;Q96KR7;Q53G26;Q15004;Q9Y2D1;Q96RS0;Q96CM4;Q5T4T6;Q9Y2G2;Q9UHY7;Q8N6T7;Q8TC76;Q96DI7;Q969U7;Q9UBW7;O75475;Q14690;O43324;Q9NRF9;P13073;Q9NYV6;Q9UNH5;Q8TE02;P33240;Q16514;O95251;Q96EV8;Q9H211;Q4LE28;Q9Y3F4;Q8IXH6;Q7RTU3;Q8WYA1;P17035;P17035;O14618;Q8NDN9;Q5EBL4;P0C7X5;Q7Z7K6;Q9NW08;Q9Y3B9;Q8IX07;Q9ULX6;Q8WTP8;Q8WXU2;P48378;Q9UJL9;Q9NV56;Q9H9Z2;P12755;Q6U7Q0;A4D1E1;O94850;Q13127;Q9ULZ2;Q14934;Q4LE39;Q9UBF1;Q8NDW4;Q9UG56;Q9BSG1;P53041;Q8IU60;Q01850;O75940;O75155;Q9NXW9;Q15650;P62875;P28069;Q2VY69;Q9Y252;O75346;Q86YI8;A2RRD8;Q96BP3;Q6ZNG0;P13984;Q15072;P20226;Q93075;Q969H0;Q96JS3;P13682;Q12959;Q9H0G5;Q9BTC8;Q96AQ6;Q15424;Q86W11;Q13227;Q12874;Q6NSZ9;Q14511;P28072;O95777;Q75QN2;Q92890;Q3YBR2;A8MWA4;Q14653;Q8IZX4;Q86Y97;O00505;Q9UI36;Q9UBP6;Q6P2C8;Q8IXQ5;Q5SXM1;O75494;O75531;Q96ND8;Q5TA31;Q9H7B2;P54727;O75529;Q6NXT1;Q9H2K2;O75943;Q9BSD3;Q86U00;Q9UDY2;Q6ZNA4;Q14397;Q9H4T2;P25815;P32780;Q9Y4A5;Q8TED0;Q5JTH9;Q9UQF2;Q9UKV8;P41208;O75360;P17040;Q96NB3;O95639;Q9H0E9;Q5TAP6;Q6GPH4;P16455;Q6V9R5;P62841;Q8N9Z9;O00512;Q8TAA3;Q8WVC0;Q9H840;O96007;Q9Y2X9;P11387;Q14140;P12883;P58317;Q9UDV6;Q96C00;P10074;Q15287;Q8WXS3;Q13536;P24928;Q86YC2;O43918;Q68EA5;Q99496;P36402;Q9NP64;Q8TAK5;P52747;Q8IYX0;Q9BRT2;O75582;P26651;P10242;Q9UHV7;Q8N9Z0;P62987;P09622;Q6XD76;O14593;Q9NPI8;Q14135;Q9NV72;P57077;Q9ULV5;P16333;Q9BXF3;P62826;Q6ZU65;Q6IN85;Q6V1Y5;Q12983;P50453;Q5THR3;Q8WUB8;Q9Y462;Q9UEG4;Q9H410;Q15935;P22670;Q9H9T3;P39880;P42773;O60806;Q9UBD0;P62633;Q9UKT9;P36508;P43243;Q7L945;O60671;Q15532;Q07343;O60832;O43345;P31943;O60563;Q9Y294;P23497;Q8IUR6;O94992;Q6IE81;P26447;Q9BX26;Q99816;O75665;O15392;Q32P41;Q5T8A7;Q9NXV6;Q92499;P43356;P05412;P62304;Q8N9B5;Q8WU90;Q9UMQ3;Q9Y2G7;P17041;O95476;Q8NB50;O95073;Q96I25;Q14669;Q9NYB0;Q96HQ0;Q8WVJ9;O00442;Q9H3R5;Q86WV1;Q6NX45;P49711;Q9NQE9;Q14781;Q9NV88;Q9HD47;Q8NFX5;Q01826;Q7Z5K2;Q13106;Q02447;Q12857;O15297;Q69383;Q8N2G8;Q9NZM5;O75410;Q96RU7;P42677;O15160;Q9H2U1;O60291;Q9BXW9;Q14738;Q9NZI6;P06454;P28749;O95273;P09012;Q14683;Q92831;O75419;Q8N8Z8;Q9Y535;P17021;O75448;Q719H9;P18146;Q8N3U4;Q16534;P05198;Q9NUU7;Q96NT1;Q8TEE9;Q9HC44;Q15631;Q96JL9;Q9H204;P0C7X2;Q8WTR7;Q8N187;Q9NS25;Q8IU81;Q96IU4;P0CG00;Q9H9E1;O15164;P58340;P15621;Q99436;Q13126;Q8IWC1;Q0D2J5;P0CJ78;O43447;Q9GZM3;O95602;Q02577;Q66K41;Q15773;Q8WVM7;Q9NPI1;Q9BVN2;Q8NG31;Q9BVG5;P39748;Q9HC15;P17039;Q02410;Q2V2M9;O60506;Q3ZCQ8;Q1ZZU3;Q9NX65;P0CG47;P04053;Q107X0;Q8TAF7;P98182;P0C7V5;Q9UDV7;P25787;Q99814;P09086;Q86TG7;P61583;Q9BTL3;Q99471;P36873;Q86XK2;P46777;Q9NZZ3;P60673;Q6P387;Q8NB42;Q9NZQ3;Q460N3;Q9UUK3;Q01658;Q6PJG2;Q9BZK7;Q9HCG8;Q12765;Q96H40;Q92830;Q15006;Q9H0U9;Q9GZR1;O14893;Q9BSW2;Q52M93;Q5FBB7;Q96GN5;O14558;Q9UP83;P61582;Q12796;Q15054;Q13615;Q9NQ31;Q96ST3;P0C860;Q13416;P09629;Q8N8L2;A6NNF4;P10599;Q9H9Y2;Q9HB58;Q9BTV5;Q59GR2;A6NG73;Q9Y2Y0;Q96SL8;Q9Y5B0;Q9Y6M1;P0CG12;P11161;Q9NVR2;Q13888;Q9BQ95;Q6ZRF7;O75150;Q9UJW8;Q96JM3;Q9Y6X3;Q6ULP2;Q15038;Q9NQS7;Q8IXM2;Q9Y6D6;Q9NZH4;Q9GZX7;P09661;Q5VWP3;Q9UHJ9;Q96L21;P45973;Q9UMR2;Q9UQ35;Q6ZMV8;Q5T619;Q92973;Q96AE4;O15265;Q96PQ6;Q9VUG8;O43290;Q7RTT3;Q16143;Q9UFR7;Q12888;Q9NSD4;Q9UJX3;Q86VY4;P23511;Q7Z6Z7;O75113;Q8NHG6;Q8IW36;P45984;Q14684;Q8WVY6;Q8TF01;Q9ULW3;Q14585;P80294;Q8NC51;P78549;Q8N7B1;Q03111;Q99717;O14978;P56182;P15036;P17987;P16415;Q6ZQV5;Q9HC62;Q9UIE0;Q2M218;Q9UHB9;Q0D2K3;O95155;Q9UI56;Q9NR48;Q8N1G2;Q9HCE5;P78560;Q96AJ1;P29372;P52434;O43325;Q08945;P46013;Q969V6;Q8IXH7;Q6PI48;O14862;Q8N7K0;Q04864;Q9HCG1;P80723;Q08211;Q9NSP4;Q9NZV7;O95905;Q9NS26;Q8IYN2;P04731;Q5TEC3;O14972;Q9BZF9;P40763;O00401;Q9HD4;A8MUZ8;O60260;Q8WZ33;Q9UQ84;O60504;Q0VGE8;Q96004;Q12972;Q8WYA6;Q9H668;Q6VNV20;Q9Y5A7;Q96BT7;P13533;Q9H5J8;Q08ER8;O00472;O95218;O95190;Q7RTT6;Q9Y675;Q9UHJ3;Q9NWB6;Q7RTU0;P27540;P49910;Q5VT06;Q9UJA5;Q9BR84;Q9GZM7;Q86V15;O95997;P52292;P12270;Q14602;Q9NWZ5;Q5MJ70;Q8TB69;Q9NVN8;P50221;Q6GYQ0;P27694;Q99543;Q9NUW8;Q8NDT2;Q9NXR7;O75971;Q9UK73;O15069;P52758;Q71F23;Q9H707;Q92600;Q96N38;Q9HBT7;Q68CP9;Q8WML7;Q9HAW0;Q9UPW6;P08151;Q9BTA9;Q92804;Q9UFB7;Q6P1N0;Q9UKV3;Q13435;O14727;O94916;P23508;Q96H20;Q86X55;Q14974;Q00839;O00625;Q9H0I3;P54278;A6NM28;P48380;Q96A56;Q86V48;Q16698;Q9ULU4;Q9H008;Q5TKA1;Q93083;Q9BV9

0;P09234;P35998;P60900;Q9HD34;A5D8V6;Q53T94;P78545;Q99684;Q9Y623;Q6H8Q1;Q5H9L4;Q05084;Q9H3P2;P50549;Q8IY92;Q9HCL3;Q9ULH7;O14770;Q6NUN9;Q9NWS1;Q9P243;Q9NVD7;Q92988;Q96MU7;Q9H320;P22392;Q9Y5P8;P52594;P41162;Q92945;Q14011;Q9H2T7;Q13342;Q92575;Q9Y3D0;Q92547;P60174;Q9P287;Q9BZE4;Q8IUF8;Q8WV24;Q9BUY5;Q86UA6;O00566;Q9HB65;Q8N3J9;Q9BQA5;P08651;A6NFI3;Q9BZG8;Q15776;P02545;Q13601;P22415;Q9BYN7;Q8IYF1;Q9UM63;P19387;Q8N782;Q9NP87;Q9UQ80;Q16612;P50991;O14646;Q9P1Z2;Q9H3F6;Q9QDC9;Q9NRC8;Q13148;Q9UBB5;Q96LB3;Q8NFH4;P22626;P10828;Q7RTV3;P23193;Q8N1W2;P35520;Q15596;Q9H7R0;Q13503;Q8WYH8;Q15797;O00233;Q86XK3;O75791;Q9UM11;P19388;Q96FQ6;Q9BVL2;Q8IYL3;Q9NY74;P52736;O15527;Q9UBQ5;P67870;O95644;Q15543;Q9Y651;Q8WUI4;Q5C9Z4;Q6QNY1;Q8TA86;P40692;P16220;Q5TD94;O43251;Q13360;Q96NJ6;Q13569;O60869;Q8NFW8;P14373;O14757;O14512;Q9H4D5;Q8TDP1;O95948;P13228;Q9P2K3;Q9UJG1;Q99627;O94763;P35232;Q8WTS6;Q3KQV3;Q14146;P23610;Q9Y605;Q9NQ92;P17017;Q9NQR1;Q92466;O95391;Q8N0S6;P55210;O14628;P53805;Q9Y3Y4;P46108;P05114;Q15046;Q8NFD5;P30047;Q3ZCT1;Q9NQP4;O95271;Q92800;Q86Y01;Q5T3J3;Q8NA42;Q7LG56;A6NKF2;Q86YF9;Q15562;Q6FI81;Q9Y606;Q99638;Q96H86;O60315;Q9BWX1;Q5VWQ0;Q96G25;Q8N895;P31946;Q02040;P62750;Q9Y383;Q96IY1;A6NGY1;Q9ULK4;O15370;P51531;P62979;Q07157;Q32M78;O94818;P52630;Q5VTR2;Q96AQ7;O94805;Q9UBW8;Q7Z6K1;Q19AV6;Q5VWX1;Q8NBL2;P30260;Q8TDB6;Q6PI77;P49454;Q06265;Q6ZN32;Q5VZK9;P09132;P0CJ79;Q9UNP9;Q96NG8;Q14106;Q9UPN7;Q9Y678;P08107;P54845;Q9Y3A5;Q96JC9;Q15326;Q5EBM0;Q9UQR1;Q6P3V2;Q8IYW5;Q8IX15;Q6ZSB9;Q9Y2W1;Q13123;Q96RE7;Q5D1E8;Q92748;Q96EB1;O15499;Q969R5;Q86U42;Q9UBK9;Q99733;Q9NVX0;Q6AAZ8;Q9UL03;Q96EZ8;Q8TCT0;Q14590;Q9H5F2;Q5SRE5;Q1E2D39;Q9NVV4;Q9NWZ8;O43255;P19338;Q9NZL3;P18754;Q96Q83;P20073;Q9Y5Y2;Q9UJ78;Q96JB2;Q9NNTI5;Q8XFX7;Q9NQ87;Q9BYG3;O43236;P98171;Q9Y618;Q96CA5;O15524;Q15185;Q13838;P62508;Q8IZT6;Q9NRG4;Q9Y448;O76064;P30304;Q96EK4;Q96EG3;Q9H963;P50995;Q92782;Q9NPD8;Q01664;P56282;Q9H7N4;Q5TB80;Q9UPN9;P27986;Q15365;Q6PD62;O75177;Q8IWL8;O95373;Q14498;Q9NY87;O75175;Q9UJY1;Q9NP66;Q9BS31;Q5EBL2;Q8WYQ5;Q9C0E2;Q17R76;P39687;Q8IYI6;Q8NE65;Q5CZA5;O95163;Q96QF0;P15822;Q96HA7;Q96LX8;P07320;Q9NTK5;Q9NYF0;P78346;P56537;Q7L190;O60284;Q8NG50;Q9NQ33;Q8WV37;Q13287;Q8N1K5;Q15699;Q9UN36;P52746;Q9H0M5;O15042;Q9H6Z4;P14859;Q9NSJ1;Q7L5Y9;Q7Z3B4;Q9UK12;Q9ULV3;Q96ES7;Q9NYG5;Q8WW01;Q96E14;Q5JTC6;Q96N20;Q5TID7;Q9Y3Y2;Q9UMX1;Q16531;Q9Y692;O14920;O15304;P23297;O00161;P56279;Q8WXB4;Q99583;Q9UBC1;Q86X95;Q9Y253;Q14209;Q93062;Q9H3M9;Q9UHD9;Q9Y2P7;P59047;O75368;Q9NQ47;P04406;Q14CS0;Q01860;Q9Y2L8;O60216;Q2M3X9;P6181;Q86WQ0;P56181;Q86UW9;Q8WVV9;P57076;Q9NY33;Q96GM5;Q9NP77;Q9UMX0;Q66K89;Q96NI8;Q86VP6;Q9UBD5;Q5TGS1;Q8IYD8;P01106;Q96RX5;Q92785;Q3C1V8;O43660;Q05639;O95402;O75400;Q8N9W8;O43361;O60675;Q9HB71;Q9BZD4;P14316;Q86WJ1;Q8NEM1;Q2KHR2;O76075;P10155;O75081;Q5TA45;O60518;O60248;Q9ULW6;Q8WUM0;Q03468;O14802;A6NKF5;Q9UBF6;P35712;O96019;Q13495;O60304;Q9ULM3;Q14188;Q9H7R5;Q8TEV9;Q7LBC6;Q9NPJ6;Q9UQL6;Q7L5N1;Q9UPP1;Q13105;Q86VNI;P41161;P28070;Q9UBB9;P06400;Q8IZU1;Q9BXY8;Q9BVB8;O75953;Q92759;P35548;Q7Z2Z1;Q96T37;P57055;P08047;O00291;Q09FC8;P49756;Q14966;A6NLJ0;Q8IYI8;Q96EY1;Q9UKT4;Q8TA94;Q05516;P42575;Q9HC52;P63146;Q96B26;Q7Z3K6;P12956;Q8HWS3;Q9GZS3;P11171;O00255;Q12830;Q8ND90;Q96PM9;Q9Y6D9;P52948;Q92870;Q6VVB1;P12980;B4DX44;Q96NB1;Q16629;P42772;P52737;Q92621;P31749;Q8NCE0;Q9NRY2;Q14839;P61581;Q8N3X1;Q8N2M8;Q8TF50;Q9BXP5;Q9Y2X3;Q9H583;Q9Y3B8;Q9BRA0;Q8N1L9;P61088;Q9NR22;P54252;P14866;P0CG24;O15397;Q68DY9;O15405;P36578;A6NJL1;Q9NQV7;Q5VZF2;Q13155;Q9NY43;O60936;Q15021;P35638;P20618;Q5HYK9;P13051;Q9NV06;Q96HA8;Q9HAH1;P62328;Q14588;P29083;P31276;O00287;Q33E94;Q9UGK3;Q0VD86;Q49MG5;Q6IPX3;Q9Y5R5;Q15466;Q96T76;Q9BU64;Q96QC0;Q96PU5;P04198;Q9BQ15;Q9H8E8;Q7Z3V5;P36957;P80303;Q66K74;Q8NBZ0;P0DI82;A8MTY0;P51553;Q9Y6J0;Q9UBU9;Q12769;Q9NW38;Q9UK10;P54274;Q8TDD2;O00629;Q7Z4H9;P0CV98;Q16719;O75154;Q9H7S9;Q8IZT9;Q9NPF5;Q8TAW3;Q9UJW9;P09874;P49721;Q5JNZ3;Q5T0F9;Q9NX46;O15015;Q6ZN79;P58004;P17025;Q96EP1;P51532;P47974;Q9HAP2;Q64ET8;Q6UN15;Q9BVP2;Q8TBK2;Q99741;Q9H981;Q15937;P18846;Q7Z6J9;Q9NYF8;O94993;P43364;Q6I9Y2;Q8N3Z6;Q8N140;P23760;Q6S9J6;Q13541;Q8IZD2;Q9P1U0;P54259;P10073;Q9BTP7;P36404;Q8WW59;P52740;O96020;Q5EBM4;P55072;P63167;Q13951;Q9H2P0;Q96LA8;Q9H0E3;Q8IY57;Q86T29;Q15723;O75182;Q96DE0;Q01130;Q9UJCS;P17980;Q8NBB4;O94892;O00570;Q9UJW3;Q16670;Q32MQ0;Q96CW6;Q13415;Q14181;Q5TAX3;Q9BXG8;Q8WWY3;O75928;Q8TEK3;Q7L3S4;Q9BV20;Q68DK7;O96028;Q6RSH7;Q16236;Q92670;Q8IZD4;Q96HR8;P48595;Q330K2;O94983;Q9H1Z4;A6NKD2;P11142;Q96E16;P52741;Q9NS39;O15084;Q14693;Q6Q759;Q96IR2;Q16773;Q9NRA8;Q8N988;Q96DE5;Q14790;Q9H116;Q9C000;Q96N9N;P55771;Q13042;O14777;Q9BY41;Q2NKK3;Q8TF32;Q8N8J6;P31269;Q9H9L7;Q15306;P59923;Q5H9L2;Q9NWT6;Q14241;Q9NPG3;Q86VX9;O14737;Q9H1J1;Q96MW7;P25685;P41212;Q9BRT9;Q96AV8;Q9NZL9;P0CG29;Q03398;Q4G112;O60481;Q03701;Q9Y314;Q9Y222;Q99502;Q9Y3A2;Q3KNS6;Q8N720;Q8NHM5;A6NN14;Q9BRH9;Q9UGR2;Q14674;Q96HA1}

6178

Pathogen[ P03346] interacts with 4273 human

partners: {O43402;Q15172;Q8TEM1;Q08J23;Q6PCB5;O60921;P08107;Q86UQ0;Q9HCE5;Q9BVJ6;E7ETH6;Q9UPR3;Q96T92;Q9NVU0;Q15723;A6NKF5;O60437;Q6R2W3;Q92681;Q12888;O75179;Q5JU85;P31271;Q06330;B2CW77;O15014;Q9NVM9;Q8TEX9;Q99081;Q9BSI4;A8MU46;Q7Z3K3;Q15773;Q9NZJ0;P85037;Q9NPG3;Q3C1V8;Q8IYI6;Q06945;P0CL83;Q9Y606;P10244;Q6S9J6;Q3KNS6;P53805;Q14781;Q9Y5S9;Q8NEA9;Q62136;Q9UI26;Q96NG5;O00204;P54105;Q5JVG2;Q9NPC8;Q96FX7;Q96FV9;Q9Y6D9;Q9Y3Z3;O95400;Q969S3;Q13886;Q969S8;Q9BZI7;O15265;Q9Y6Y1;P08048;P25787;Q9BZE0;Q9NS91;Q12901;P30281;Q86TC9;Q05481;Q9Y6J9;Q96AP0;Q9Y6X9;Q8N7U7;P31249;Q8N2Z9;Q6PD62;Q7KZ85;P0C860;O95201;Q9NWS9;O75691;Q96ST3;Q9UPN9;Q9Y6K9;Q9Y2A0;P12004;Q6P9B9;P49716;P54821;Q96J02;Q7Z398;Q8N151;O76021;Q9UKA2;O75995;Q96AB3;Q9Y253;Q96D70;Q9BXU7;P59047;Q03989;Q8NB91;Q9NS26;Q96AC1;Q15427;P47902;Q15058;P05412;Q9UKS7;Q96N20;P51991;O00213;O95639;P08729;Q9Y467;Q92585;P17097;Q9H0H0;Q96CJ1;Q3YBM2;P56279;Q3KNW3;Q12874;Q7Z7K2;Q12830;P78424;Q9NZU5;Q15542;Q9UHL9;Q96LW1;O75603;Q99615;Q9Y3A2;Q5RKV6;Q8IY22;P55735;Q99828;P49639;Q16621;P46063;Q8ND76;P57071;Q5T5D7;Q86U42;Q5FBB7;O75592;Q4VC44;O15234;Q7Z7K2;Q9NWT1;Q96MU7;Q9NQ92;P61978;Q99742;Q86V48;P28070;Q9HBT8;P15863;Q8TA86;Q15562;Q9UKT7;Q6T4R5;Q9UHF7;P46937;Q96S65;Q13487;Q9ULR0;Q13263;Q9NZR4;Q96RK0;Q494X3;Q9Y3Y2;Q01534;A8MXY4;O15042;Q1ED39;Q9BXS6;P35453;Q9NQX6;Q9BU61;Q15370;Q504Q3;Q9ULM6;Q9P267;Q96P70;Q9Y4Z2;O75362;P50135;P31260;Q9NR83;Q96QR8;Q5TD97;Q96DF8;P12524;Q96GA3;O43172;Q7Z4G1;O75564;Q9ULX3;P78396;O60346;Q6RSH7;Q9UBS3;P98182;Q8NFH4;Q9NRZ9;Q14320;Q15050;P45984;Q93009;Q8WUM0;Q9H4X1;P

50219;Q5TID7;Q8TF39;Q9Y6K1;Q9P0M2;P09086;Q02078;O00629;O95159;Q9GZR1;Q96KR7;Q9BRX5;Q02386;P38935;Q16666;Q9NQX1;P16083;P52954;Q86UW9;Q8NC51;Q96ES7;Q14739;Q09161;Q8WXA3;P10827;Q9UMS5;Q8N4W9;Q9H9P5;Q9HB65;E9PGG2;Q969U7;P35813;P49910;P0CJ88;P11473;Q86U70;O15524;Q3MJ62;P31268;Q9Y281;P56181;P25789;Q9NQC8;P28715;Q7Z5Q5;Q8WXF1;O94892;Q15788;P28324;Q13895;Q16082;P23511;Q9NY74;O15397;Q9HBD4;Q6NT189;Q12988;P45973;A6NGD5;Q9UJW0;O15535;Q8IZM8;Q9NP64;Q92560;O76064;Q9NPA5;P55198;P62913;Q9BTC0;Q9HAU4;Q9Y657;Q3SY89;O15111;P86452;Q15366;Q9NQV7;O95229;Q99811;A2RRD8;Q6X4W1;Q6P1L6;Q7L5A3;Q53ET0;P52434;Q6QHK4;P0CG31;Q9HAH1;Q15061;Q9HAV4;Q06787;Q9Y283;Q99687;P49406;O95402;Q08AN1;Q9Y2Z0;Q9NY87;O95677;Q96HA7;Q9H8N7;Q96NJ6;Q96HW7;A2A288;P12270;O95625;P12956;Q49A33;P78346;Q14207;Q9H2G9;Q9BRR0;Q8IUE1;O43290;Q9NZH4;Q9UHD9;P55273;C9JN71;Q9NVI1;Q8WX93;Q6PJJ6;Q99966;Q92979;Q6ZRF7;Q96C55;P24385;Q7Z2Z1;Q9NPJ6;Q9UGP4;Q7L2Z9;P61579;Q7Z340;Q01201;Q9BRU2;Q5T1R4;Q9H765;Q8N7R0;Q9P031;Q96MR9;Q96FQ6;O60907;Q96CM4;Q9HCU8;Q8WV37;Q9NZV7;Q8WVZ3;Q9UD57;Q6ICB0;P50221;P80303;O96006;Q06609;P04406;P18847;Q08170;Q8IV13;Q9NQG5;Q96C00;Q8N1L9;Q13362;Q9NQ55;Q9Y324;Q96S95;Q6P2D8;Q9BV90;Q15928;Q86YD1;Q8N163;Q96MF7;P30279;Q15834;P29373;Q5XG87;Q8N8G2;Q13228;Q8IYB3;P05783;P57055;Q9NPI6;P61582;Q14135;O14813;Q8WZ19;Q14678;Q9H091;Q96EK4;Q5HYJ3;Q9NQW6;Q96PU8;Q7RTS1;P62277;Q9UDY2;Q9NNU2;Q9BWM5;O95149;Q96PU5;Q6TGC4;Q14591;Q99612;P29374;P68036;Q9BUY5;Q99873;Q9UEG4;Q7Z591;P58012;Q9BSF8;Q14258;Q9Y5Q8;Q9HB19;O95551;P0CAP2;Q14814;P78337;O96017;Q8IXH7;Q99598;P36508;Q9BXF3;Q93062;Q96S94;Q9Y2P0;A6NN14;Q6ZQ05;Q9NX70;Q8NCA9;Q8WY54;O75446;Q86XR8;Q8IXM2;P14373;Q14511;O15522;Q8WYB5;Q96SD1;Q52M93;Q9H116;Q9UP83;Q7RTS3;Q12905;P25685;Q32MQ0;Q9UBK8;Q01538;Q12769;Q9BWT6;Q8NAF0;Q8WV24;Q3KNW1;A6NFD8;Q8IUV6;Q15916;Q9P2K5;Q9ULD5;Q96KR1;P46100;Q8N9B5;Q6PCD5;Q9GZR2;Q96GM5;Q9UPW6;A6NJ46;Q9H2T7;Q9C005;Q96RT1;Q659A1;O00567;P16220;O15392;O60765;O43684;P98171;Q8IZC7;Q5TAP6;Q9UKD2;P09651;Q9UQR1;O75150;O43447;O95684;Q08999;P56270;P17039;Q2QGD7;Q99633;P61581;O75362;Q9UJL0;O00479;Q8IX06;B2RD01;Q9BQG0;Q96BP2;Q9Y2P7;Q9UM11;Q9H3M9;Q96BU1;Q8N6M9;P23610;Q8N8B7;Q8NAP8;Q86UE4;Q9H2W2;Q86US8;O60248;Q96EE3;Q5HYK9;Q8N3U4;P06401;Q9UL59;Q8IWI9;O43918;O60287;Q9H0M5;P43355;Q96FF9;Q96BA8;P17676;Q7RTV0;P55265;Q96P71;Q9H2Z4;Q03052;Q9UIV1;O43167;P78414;Q16384;Q9BSU3;P06748;Q99567;Q99543;Q9Y4X4;P19484;P17098;Q9UBQ5;P29474;Q86V71;O15370;Q52LR7;O14901;Q9UNL4;Q8IZT9;P0C7T5;Q8N1N5;Q8NC26;P12757;Q96C86;Q96NJ3;Q96JB2;O75190;P36402;Q9ULW3;O75175;Q9NWF9;O75586;P62633;Q96M11;Q13489;P14866;Q9H5P4;P15336;Q9UIF8;Q9GZV4;Q14764;Q9BTK6;Q5VWP3;Q9BS16;Q92800;Q5MJ70;Q99607;Q9BTL3;Q86Y97;Q9BZE4;O60716;Q9BSD3;Q9NRR1;Q9BQY4;Q9P0W2;Q96HQ0;O14787;Q05925;Q9NU63;O75531;Q86WV5;O14737;A5D8V6;Q9H9L3;Q13129;Q1KMD3;Q8TCY9;P78415;Q9BSC4;Q9BYG7;Q9UFM2;Q9H8W5;Q2M218;P39023;P36956;P52739;Q7Z5K2;O15209;Q05066;Q9UGR2;P0CJ78;Q16836;Q8N187;Q3B8N5;Q8N141;Q7Z4H9;Q86SG2;Q96DN6;Q8WYH8;Q8TAE8;P57772;Q5VTR2;Q8WYR1;O60688;Q7Z3V5;Q9H2P0;Q8IU81;Q03828;Q9Y3M2;Q29RF7;Q107X0;Q16656;Q9C0F0;Q00613;Q9P016;Q6ZT77;Q9UL58;Q8NCN2;Q96DC7;P35638;Q9BQA1;P35548;Q02535;Q9BV20;Q8N823;Q8WW38;Q6ZQV5;Q9H4E7;Q9Y613;P07148;P52747;Q9H633;O43598;Q9BYU1;P23508;O00167;Q9Y2L8;Q96DB2;P07320;P08235;Q8TAK5;Q06547;P62304;O95155;Q9HD90;Q7Z4H7;Q9H305;O75530;P11831;P11388;P31270;P38376;Q15329;Q9UHR5;Q3KQV3;Q9NQE9;O43296;O43502;Q9UKX7;Q9Y5Z7;P52758;Q9BPW9;Q9NV56;Q0VD86;Q8TAQ5;Q9BS18;O95376;P20073;O43379;Q9BXX9;Q86TJ5;Q0V699;Q99627;O95751;Q32P41;P28347;Q9Y5W3;O95777;Q15554;P84101;Q9H7E2;O00541;O00458;O60930;Q96QC0;Q9UQ80;Q8IUE0;P62987;Q96K75;O43309;O15379;Q5FWF6;Q9ULM2;Q460N3;P27694;Q5MIZ7;Q9NP62;Q6ZSB9;P20700;Q7Z3I7;P02489;Q9UKT9;Q14011;Q96KQ4;P28072;Q9H503;P25815;Q9P0T4;Q12857;Q99594;Q06732;Q9BUP3;Q92674;Q96H40;Q9NQR1;Q8NFD5;Q9UBX3;Q9BX26;Q99471;Q7Z5D8;Q71SY5;Q8N3X6;O75694;O95714;P21127;Q8N668;Q8NFW5;Q9UJ04;P49427;P23297;P48443;Q8LXW5;P06400;P0CJ87;Q8N7M2;O75123;P48378;Q9Y3C5;Q4G112;P25963;Q96IQ9;O75717;Q14590;Q7Z465;Q9HD42;P0CH99;A6NLC8;P35579;P61956;P40426;Q14774;Q9UHP9;P0CB47;Q96I25;Q9Y6M1;Q9UHV9;Q96K62;Q9H788;Q9NW07;O00425;P25788;Q8WTT2;Q6V9R5;P35789;Q9GZW5;O75312;Q9Y5N6;Q8WU90;Q9UM82;O94875;Q8NEF9;Q8NEZ5;P52740;O14656;Q14691;Q9HBH7;Q9NR11;Q9BSH3;Q9NRR3;A8MT69;Q8TD23;Q9H171;Q15291;O95260;Q08AG5;Q9GZP8;P51532;Q9Y2D8;Q14149;P13349;Q99728;Q9C0E2;Q9B2M5;O43711;Q9H147;Q00577;Q8IZP0;P35226;P54845;Q969W8;Q9NZM5;P28074;Q9UMR2;Q56P03;Q13148;Q15797;Q70SY1;Q86XK3;Q9Y3C1;Q14188;Q9GZV5;O60393;P50549;Q969X6;Q7LBC6;P49721;Q12772;Q96SZ4;O95391;A6NHQ2;Q96E28;Q96MU6;Q8NFX5;Q9BZE3;Q92841;Q9C086;O60315;Q13541;Q9UMS6;O75410;O60563;Q9NRR9;Q4L180;Q15653;Q8WXF8;Q9BWX5;P48382;Q03933;O60290;Q9Y4Y9;O60238;Q9H7B2;Q9P1K8;Q96R06;P17027;Q9Y3Q8;Q9UHB4;Q5MCW4;Q96AQ6;Q01105;Q5TCC9;Q9H1A7;Q9UN44;Q9NZL9;Q9BVF7;Q96HZ4;P51786;Q15038;Q15013;Q9UKI9;Q9H467;Q9UDY8;P51808;Q99626;P08579;O94763;P07992;Q6ZU65;O75400;P78406;Q12837;Q8NHY2;Q03936;Q9H9F9;Q96JG9;Q00056;Q56P42;Q69YH5;Q15911;P57740;P55795;P56182;Q2M1K9;P17275;P78347;Q9BPZ7;Q32MZ4;Q96JI7;O96020;Q86T29;A8MUV8;P82094;O95628;Q99733;Q147U1;Q5EE01;Q6UX04;Q9UBD5;Q8TD17;P54274;P61578;Q14587;Q9P2D0;P52738;Q70IA6;Q9NQV6;Q8TF45;P49116;Q9ULZ2;P0CB33;Q15466;Q9UJQ4;P42575;Q96L66;Q8N680;Q6XYB7;P24863;Q8TF42;P35244;Q7Z7C8;Q9NZI6;Q9UIU6;Q8WXH0;P14316;Q4G0J3;Q15004;Q9UNW9;Q9NS39;O14818;Q8N699;P43487;P05423;Q9UK59;Q9Y3Y4;A8MVS1;P24278;Q8TBK2;Q9P2W1;P43243;P49336;Q15007;Q8WYN3;Q7Z6J9;P17861;Q8WYP5;Q8WVV9;Q96KM6;Q9BRT9;Q8NEP9;O15360;P23769;Q96QU8;Q14872;Q5TBB1;P35UB9;Q99708;Q8TC84;O43159;Q8NE65;Q9NSI6;Q96LT7;Q5VIY5;P5BKY1;Q9HD15;Q14527;Q53GL7;P35250;Q99457;Q9ULG1;Q96HR3;Q8N693;Q8WV12;P25490;P0CG12;P0C7M4;Q9NRR5;Q8N336;Q15583;Q9NQP4;Q99436;Q8N5U6;O15304;P19419;O95983;Q9H4S2;Q9NZU7;Q5VZE5;Q7L266;Q9UBF1;Q96A56;Q5H9K5;Q9UMX2;P80723;P24941;Q15637;Q96FS4;Q9NS18;Q9NY27;O14978;Q8NA19;Q13426;Q96IU4;Q15633;Q9Y483;Q9GZL7;O75971;P51610;Q9UMS4;Q49AN0;Q8IXQ5;O75505;Q15573;P0DJD3;Q9UH99;Q6PI26;P55895;P14859;Q6P280;Q9NSC2;Q5T0B9;O75486;P30304;Q8IZU0;O43313;P48380;Q9BZE2;Q8IYA7;Q8N393;Q14498;Q16531;P25208;Q13156;P50548;Q9H814;Q9BVL2;P62937;Q8IWI9;Q96AH0;O60506;P23246;Q96I27;Q8TF20;Q13888;Q49MI3;Q8NF99;P42772;Q92925;Q5XKL5;O95359;Q8IX15;Q27J81;Q6MZP7;P52741;Q9NR55;Q8TD26;P56282;P55197;Q96MG7;Q9C0A1;P20264;Q8WZ33;Q86YE8;P15923;P0CG48;P78371;Q5QJE6;Q8TEK3;Q13618;Q9H307;Q8NXY6;Q6ZMY9;Q86WB0;Q6VB84;Q9H1K1;P78413;Q9NZ18;Q9BZV1;Q58WW2;O75886;O75820;Q96WP2;P61573;P05787;P25800;Q9HC52;P15712;Q8NEZ2;Q9H2G4;Q70Z53;Q8WXD5;Q15796;Q9UKK3;Q9H3S7;Q86WZ6;Q15257;P41225;P56693;Q9UII4;Q96PM5;O75475;P49750;Q15185;O14744;Q9BW11;P23760;Q8IZ20;P56524;Q6NSW7;P15408;Q9UL68;



Q9H3P2;Q9UK11;Q8N1F7;Q9NTM9;P17535;Q9NUW8;P13010;P04732;Q86YW9;Q8IYH5;O43298;Q15327;O14709;P19622;Q6NX45;Q156A1;Q9UNS1;Q7Z3G6;O00410;Q8NCR6;O00712;P05114;Q5PSV4;Q3SY52;A5LHX3;Q04743;Q969H6;Q71F56;P19367;Q15906;O00287;P15121;Q92858;Q9UJY1;Q93074;Q53GS7;Q63HML1;P58557;Q5TD94;Q96QT6;Q8IVF2;O60318;Q9NPI1;P31276;Q5H9F3;Q95707;P17026;Q99856;Q9UMS0;P49789;O43255;P53803;P17022;P23409;Q96B42;O14757;Q66K74;A6NFQ7;Q96E16;Q8N5A5;Q7Z7J5;Q9ULH7;Q8TBC5;O95347;Q9Y678;Q9H9Y6;P38919;P0C7H9;P56537;Q16520;Q95931;Q12986;Q5HY98;O43264;P35227;Q86TG7;Q7Z589;Q04206;Q2TAK8;P36639;Q8IZ40;Q5T3J3;Q68DL1;P33076;Q8N9W8;Q9UBU7;P07910;O14682;Q9HAJ7;Q12802;Q86UE3;Q53H80;Q71UM5;P51826;Q9NXTX7;Q8TAK6;Q9H9D4;O00170;Q6W0C5;P23786;P0CJ85;Q99816;P24864;Q96RS6;Q53HL2;P98170;Q0VG06;Q9NZD8;Q3MIS6;Q8N9K5;Q8N895;P52737;Q96BP3;Q9HCH5;Q9Y383;O95238;Q8N684;Q12906;Q9NXV2;Q7L3S4;O95163;O94776;P28698;Q6ZMS7;Q07021;Q9ULJ3;P13056;Q9NQ69;Q9BVT8;O00321;Q16222;Q5T4T6;Q9UN30;Q13835;Q6PJJG2;P61218;P11142;A8MSY0;Q01850;O00268;P52951;P31948;Q8WW59;P82979;Q13023;O60806;Q9P2T0;Q92886;P41161;O75940;Q8TDY2;P18583;P56177;Q96CS4;Q8NFG4;Q9NPB6;Q9P0L1;Q9NUL3;P60174;O60244;Q9C035;Q9BYW2;P28062;Q9H583;Q96IF1;Q9H4W6;A8MWD9;Q9ULM3;Q13190;Q92826;Q04741;P57075;P08621;Q6ISB3;Q86VN1;Q63HK5;Q5TB30;P15173;Q08378;Q9NX01;Q08050;Q96G21;Q9BPY8;Q5JSS6;Q9H8E8;P11940;Q9UMX0;Q8IX03;Q9UNX4;Q9Y2U9;Q14209;P12525;P42226;Q13242;P0DI83;P52742;Q6UN15;Q8WV22;Q9UDV7;Q9H825;Q6MZT1;Q8IUR6;P18754;Q9C0D4;Q9BYE7;Q15306;Q8WTR7;O60296;Q96RL1;P31943;Q9Y5Q3;Q14129;Q9NVP1;P15622;Q9BXM0;Q96T21;Q8NDQ6;Q9UBC3;Q7Z6K1;Q08495;Q75QN2;Q93050;Q9P2Y4;P23759;Q9NUQ6;O95630;P62993;P10588;Q96QS3;Q9HCK0;Q8IVC4;Q00839;O60832;Q9H7D7;Q96AE4;O43396;Q12824;Q9NQL3;P14652;P63279;Q96AV8;O43482;Q8TA94;Q9C0F3;Q6PG37;P06703;P42574;Q96IY1;Q96TC7;Q7L9L4;Q9NYG5;O43186;Q9NXG5;O43162;O00505;P0C7I0;Q13247;Q9NYH9;Q8TF32;O00257;Q9Y2D1;P27540;Q8N5J4;A8MQ14;Q86XK2;Q9NP08;Q86UD4;P58340;Q96SE7;Q86U86;Q9UIF7;Q96AY2;Q969V6;Q9BUR4;Q9HCG1;Q86WQ0;Q9BTT4;P49005;Q7Z614;Q9NZI5;Q15942;P58304;Q6P0N0;Q8NFH5;D6RGH6;P16989;P26358;P28289;Q15386;A6NJT0;Q8WWZ8;P62714;Q15560;P67775;Q9P258;P19338;Q9P2F9;Q8TAF7;Q9UBL3;Q99717;P0C7X2;O14646;Q92748;P20823;Q9H0E3;Q9Y3M9;Q96BR9;P17038;Q92688;Q92831;Q9H4Q3;P25440;Q99638;P0CJ89;Q02575;Q96RE7;A6NK75;Q9H609;O15350;P49918;Q7Z2X4;Q96N38;O15105;P26599;O75626;Q9NTW7;Q6NT04;Q9Y697;Q9BUJ2;Q8NDY6;Q99502;Q9Y3S2;Q9BSM1;Q96EK7;Q9UBX0;Q8TAF3;Q9Y534;Q92945;Q9BX66;Q9BYE0;Q9H0W9;O60682;Q13526;Q13287;Q9NRL2;Q14586;Q16254;Q7RTU5;Q00978;Q00994;Q6PI98;Q05084;Q9NZJ4;P29084;Q86XI2;Q04864;Q7RTT6;Q96AQ7;Q08211;Q13769;Q8NFW8;Q96B26;P17014;P35573;P63241;O60902;Q75030;Q13610;Q92670;Q9NXW9;P37198;P20618;Q8TDM4;Q6ZNB5;Q9Y5R5;Q8N587;P10074;O43316;Q9UM63;Q9BXY8;Q14749;P55060;Q5VWH5;Q8NB42;Q8NFH3;P80294;O60224;Q9NV72;P14653;P41002;P42771;P63272;O95067;Q86VK4;Q3SXZ3;O00192;Q9NR33;Q8TE85;Q9UI95;Q8N5F7;Q92698;P35658;Q13196;O00570;P52298;O00409;P31269;Q9HAN9;Q14152;O94842;Q5TA31;A6NEJ1;Q6PIJ6;Q15269;Q96RJ6;Q15652;O43390;Q96BV0;A6NK39;Q9H165;P05937;Q09FC8;P05212;A2RU54;Q8N859;O60662;Q68E01;P52743;Q9NRF2;Q9HD34;P13378;O15090;Q9HCS7;Q86Z02;Q16629;P17483;Q9NB84;P42166;Q9Y4B6;O00472;O75151;O14972;P55196;O75821;Q03923;Q9NRF9;Q8TEE9;Q8N3X1;O75764;O43818;O00291;Q96E15;Q12983;Q9P278;O95644;Q8NCP5;Q6H8Q1;P55072;Q6XD76;P22626;Q6IBW4;Q9UJW8;Q86V15;Q9BYH8;Q969P5;P49321;Q9Y3B2;O15194;Q01094;Q9BY31;P46939;Q13829;Q2VWA4;Q6GNZ12;Q9NUA8;P17032;O94906;Q86T82;P49715;Q9BUQ8;Q9NPJ4;Q8NAV2;Q8N2I2;Q9Y333;Q9ULX9;P17096;Q13398;Q66K89;Q53GI3;Q92754;Q8NF64;P26038;Q9HD47;Q07955;Q8N554;P41252;Q9BWG4;Q5T447;A6NJL1;P17025;O43463;Q9BR61;Q9Y5J3;O15055;P15621;P31274;Q9UBC0;P17010;Q16342;O43345;Q6P9A1;Q15059;P59817;Q9BUL9;P02545;Q9H1B4;Q53H11;A8MT65;Q01860;P61571;Q9NZP6;Q92750;Q9HXC3;Q02410;Q9ULJ6;O75182;Q6EKJ0;Q8NWT8;Q64ET8;Q13427;Q8N8U2;Q96SQ7;Q95997;Q2V2M9;Q96H20;Q9BTP7;O14867;Q9BVI4;P09132;Q08945;Q9H3H9;Q9UIA9;Q9NYW8;P20719;Q9NXV6;Q8TD31;Q93034;Q13351;O43805;Q5BJF2;Q9BQI9;Q8WWX9;O00186;P62826;Q00987;P61962;Q9BWG6;O00566;P0CG40;O15198;Q0VGE8;Q9NZ81;Q9Y664;O75444;P30305;Q96FA3;Q8N7K0;Q9BT78;Q6PGP7;Q96A49;Q9H4T2;Q53T94;Q8NCD3;P78426;Q8NDX6;Q9NS25;Q9NSD4;Q86SE8;Q9P086;Q9UKV3;Q9Y255;Q66K41;P0C1Z6;Q9ULX6;Q499Z4;Q8N3C0;Q13404;Q13620;P0CJ90;P30047;Q6P9G9;O15534;A7MD48;Q9BV47;Q69YN4;B3EWF7;Q14980;Q9P013;P08047;Q9BQW3;Q9BXP5;Q92870;Q9H582;P12980;Q13889;Q9H0E9;Q12816;Q86Y26;O14503;P11802;O95999;Q15853;Q96LW9;Q6P2H3;Q8TF68;P06733;P20226;Q9H5F2;O76031;Q9HC78;P41218;O00422;Q05048;P20265;Q9H5H4;Q9NRG4;Q8N9F8;Q92766;Q86YF9;Q9H501;Q7Z6B0;Q96JM2;Q6IS14;Q8TDD2;P98168;Q96MT3;Q9Y316;P18850;Q9H963;Q15024;P17480;Q9UK10;Q3B7T1;Q9H869;P22670;Q7Z5L9;Q8WY36;Q9NZN8;Q14119;O95600;Q8IX01;Q96NY9;P61088;Q8N8E2;Q96CX3;Q16637;Q9UFW8;Q9UNQ2;A8MUZ8;O95453;P52736;Q6XQN6;Q9H5J8;Q9NX58;P52756;Q14919;P30153;Q03111;Q9H2U1;Q9BY27;Q5VUG0;P98169;O75381;Q8N490;P57076;P61572;Q9Y5P8;O75155;Q13098;P53370;Q5SRE5;O43593;Q96G25;Q14592;Q16236;O75943;Q15561;Q6NZ36;Q14934;Q86W54;Q9H9A7;Q8WXC3;Q14103;O75832;Q9BXT1;Q8IVN3;O14618;Q9BWF3;Q9Y5B0;Q5JTD0;Q9C029;Q9UQB3;Q9HB31;O60225;O15060;O15318;O60663;Q14526;Q96SW2;Q9UKN8;Q5U623;Q9BQ65;Q16650;Q13137;Q14CS0;Q9Y222;Q7Z333;O43680;Q15532;Q9C0H6;Q92575;Q99417;Q9UHC1;Q8N0Z6;P07438;O00233;Q66004;P62487;P17036;O15069;P61960;Q8WVL7;Q6ZNH5;P51398;P01106;O43364;Q6ZMW2;Q8IU60;Q3ZCX4;Q8TBZ5;Q4LE28;O60518;Q9Y675;Q5T230;Q9UJX6;Q9BS34;Q9UL40;P41162;Q13155;Q14566;P0CJ79;Q8WVK2;P78560;P45381;Q6P1N0;B4DX44;O75448;P62877;Q96DX5;Q03701;P51843;Q92527;Q6UW56;Q5TB80;Q92879;Q9Y421;Q96MN9;Q9NZZ3;Q9BWW4;O00299;Q9UHB7;P25205;Q9Y266;P16333;Q969S2;Q9H0G5;P41208;O60870;O43592;Q8NFT6;Q9UHP3;Q9NV06;Q5H9R7;P19388;Q9NP66;Q14493;P38646;Q9HC44;O75925;Q9H910;Q8NBF1;O43365;O75817;Q9BXX3;Q15528;Q6ZNA1;Q9Y2X3;O60303;Q01082;Q92621;Q15699;P28702;P35637;Q96A72;Q8IWL8;Q9NSA3;Q9UL49;Q9NP71;Q3T8J9;O60583;Q8TCT0;P21506;P28358;Q14186;P50222;O14777;P51508;Q07666;P62318;Q9NVH2;Q92830;Q9Y330;Q9UK13;Q2TAY7;Q9BXW6;Q8N0Y2;Q92499;Q9Y5B6;P04733;Q8N8Z8;Q5MJ68;Q86VM9;Q96BN2;P0CG30;Q9BT49;P18848;P04800;Q9Y6D6;Q96B36;Q14582;Q9GZM3;Q2M1V0;Q96JL9;Q53HV7;Q9P243;Q8IYI8;P99999;O00327;Q8ND82;Q9H2K2;Q58F21;Q99700;Q9BQ70;Q7Z4V5;Q09666;Q9UKL3;Q15170;Q86TB9;Q14151;P14921;Q9HAW4;Q9NWW0;Q9BW27;P10155;O00161;Q06710;Q92794;P13640;Q9NS56;P07316;Q9P215;Q93083;P84022;O43148;Q15643;Q15742;O14628;Q86Y25;Q8HWS3;Q14676;Q12904;P11308;Q04726;Q9H063;Q12968;Q86SE9;Q9H671;Q96QU4;Q8N1W2;P04733;Q8N8Z8;Q5MJ68;Q86VM9;Q96BN2;P0CG30;Q9BT49;P18848;P04800;Q9Y6D6;Q96B36;Q14582;Q9GZM3;Q2M1V0;Q96JL9;Q53HV7;Q9P243;Q8IYI8;P99999;O00327;Q8ND82;Q9H2K2;Q58F21;Q99700;Q9BQ70;Q7Z4V5;Q09666;Q9UKL3;Q15170;Q86TB9;Q14151;P14921;Q9HAW4;Q9NWW0;Q9BW27;P10155;O00161;Q06710;Q92794;P13640;Q9NS56;P07316;Q9P215;Q93083;P84022;O43148;Q15643;Q15742;O14628;Q86Y25;Q8HWS3;Q14676;Q12904;P11308;Q04726;Q9H063;Q12968;Q86SE9;Q9H671;Q96QU4;Q8N1W2;P04733;Q8N8Z8;Q5MJ68;Q86VM9;Q96BN2;P0CG30;Q9BT49;P18848;P04800;Q9Y6D6;Q96B36;Q14582;Q9GZM3;Q2M1V0;Q96JL9;Q53HV7;Q9P243;Q8IYI8;P99999;O00327;Q8ND82;Q9H2K2;Q58F21;Q99700;Q9BQ70;Q7Z4V5;Q09666;Q9UKL3;Q15170;Q86TB9;Q14151;P14921;Q9HAW4;Q9NWW0;Q9BW27;P10155;O00161;Q06710;Q92794;P13640;Q9NS56;P07316;Q9P215;Q93083;P84022;O43148;Q15643;Q15742;O14628;Q86Y25;Q8HWS3;Q14676;Q12904;P11308;Q04726;Q9H063;Q12968;Q86SE9;Q9H671;Q96QU4;Q8N1W2;P04733;Q8N8Z8;Q5MJ68;Q86VM9;Q96BN2;P0CG30;Q9BT49;P18848;P04800;Q9Y6D6;Q96B36;Q14582;Q9GZM3;Q2M1V0;Q96JL9;Q53HV7;Q9P243;Q8IYI8;P99999;O00327;Q8ND82;Q9H2K2;Q58F21;Q99700;Q9BQ70;Q7Z4V5;Q09666;Q9UKL3;Q15170;Q86TB9;Q14151;P14921;Q9HAW4;Q9NWW0;Q9BW27;P10155;O00161;Q06710;Q92794;P13640;Q9NS56;P07316;Q9P215;Q93083;P84022;O43148;Q15643;Q15742;O14628;Q86Y25;Q8HWS3;Q14676;Q12904;P11308;Q04726;Q9H063;Q12968;Q86SE9;Q9H671;Q96QU4;Q8N1W2;P04733;Q8N8Z8;Q5MJ68;Q86VM9;Q96BN2;P0CG30;Q9BT49;P18848;P04800;Q9Y6D6;Q96B36;Q14582;Q9GZM3;Q2M1V0;Q96JL9;Q53HV7;Q9P243;Q8IYI8;P99999;O00327;Q8ND82;Q9H2K2;Q58F21;Q99700;Q9BQ70;Q7Z4V5;Q09666;Q9UKL3;Q15170;Q86TB9;Q14151;P14921;Q9HAW4;Q9NWW0;Q9BW27;P10155;O00161;Q06710;Q92794;P13640;Q9NS56;P07316;Q9P215;Q93083;P84022;O43148;Q15643;Q15742;O14628;Q86Y25;Q8HWS3;Q14676;Q12904;P11308;Q04726;Q9H063;Q12968;Q86SE9;Q9H671;Q96QU4;Q8N1W2;P04733;Q8N8Z8;Q5MJ68;Q86VM9;Q96BN2;P0CG30;Q9BT49;P18848;P04800;Q9Y6D6;Q96B36;Q14582;Q9GZM3;Q2M1V0;Q96JL9;Q53HV7;Q9P243;Q8IYI8;P99999;O00327;Q8ND82;Q9H2K2;Q58F21;Q99700;Q9BQ70;Q7Z4V5;Q09666;Q9UKL3;Q15170;Q86TB9;Q14151;P14921;Q9HAW4;Q9NWW0;Q9BW27;P10155;O00161;Q06710;Q92794;P13640;Q9NS56;P07316;Q9P215;Q93083;P84022;O43148;Q15643;Q15742;O14628;Q86Y25;Q8HWS3;Q14676;Q12904;P11308;Q04726;Q9H063;Q12968;Q86SE9;Q9H671;Q96QU4;Q8N1W2;P04733;Q8N8Z8;Q5MJ68;Q86VM9;Q96BN2;P0CG30;Q9BT49;P18848;P04800;Q9Y6D6;Q96B36;Q14582;Q9GZM3;Q2M1V0;Q96JL9;Q53HV7;Q9P243;Q8IYI8;P99999;O00327;Q8ND82;Q9H2K2;Q58F21;Q99700;Q9BQ70;Q7Z4V5;Q09666;Q9UKL3;Q15170;Q86TB9;Q14151;P14921;Q9HAW4;Q9NWW0;Q9BW27;P10155;O00161;Q06710;Q92794;P13640;Q9NS56;P07316;Q9P215;Q93083;P84022;O43148;Q15643;Q15742;O14628;Q86Y25;Q8HWS3;Q14676;Q12904;P11308;Q04726;Q9H063;Q12968;Q86SE9;Q9H671;Q96QU4;Q8N1W2;P04733;Q8N8Z8;Q5MJ68;Q86VM9;Q96BN2;P0CG30;Q9BT49;P18848;P04800;Q9Y6D6;Q96B36;Q14582;Q9GZM3;Q2M1V0;Q96JL9;Q53HV7;Q9P243;Q8IYI8;P99999;O00327;Q8ND82;Q9H2K2;Q58F21;Q99700;Q9BQ70;Q7Z4V5;Q09666;Q9UKL3;Q15170;Q86TB9;Q14151;P14921;Q9HAW4;Q9NWW0;Q9BW27;P10155;O00161;Q06710;Q92794;P13640;Q9NS56;P07316;Q9P215;Q93083;P84022;O43148;Q15643;Q15742;O14628;Q86Y25;Q8HWS3;Q14676;Q12904;P11308;Q04726;Q9H063;Q12968;Q86SE9;Q9H671;Q96QU4;Q8N1W2;P04733;Q8N8Z8;Q5MJ68;Q86VM9;Q96BN2;P0CG30;Q9BT49;P18848;P04800;Q9Y6D6;Q96B36;Q14582;Q9GZM3;Q2M1V0;Q96JL9;Q53HV7;Q9P243;Q8IYI8;P99999;O00327;Q8ND82;Q9H2K2;Q58F21;Q99700;Q9BQ70;Q7Z4V5;Q09666;Q9UKL3;Q15170;Q86TB9;Q14151;P14921;Q9HAW4;Q9NWW0;Q9BW27;P10155;O00161;Q06710;Q92794;P13640;Q9NS56;P07316;Q9P215;Q93083;P84022;O43148;Q15643;Q15742;O14628;Q86Y25;Q8HWS3;Q14676;Q12904;P11308;Q04726;Q9H063;Q12968;Q86SE9;Q9H671;Q96QU4;Q8N1W2;P04733;Q8N8Z8;Q5MJ68;Q86VM9;Q96BN2;P0CG30;Q9BT49;P18848;P04800;Q9Y6D6;Q96B36;Q14582;Q9GZM3;Q2M1V0;Q96JL9;Q53HV7;Q9P243;Q8IYI8;P99999;O00327;Q8ND82;Q9H2K2;Q58F21;Q99700;Q9BQ70;Q7Z4V5;Q09666;Q9UKL3;Q15170;Q86TB9;Q14151;P14921;Q9HAW4;Q9NWW0;Q9BW27;P10155;O00161;Q06710;Q92794;P13640;Q9NS56;P07316;Q9P215;Q93083;P84022;O43148;Q15643;Q15742;O14628;Q86Y25;Q8HWS3;Q14676;Q12904;P11308;Q04726;Q9H063;Q12968;Q86SE9;Q9H671;Q96QU4;Q8N1W2;P04733;Q8N8Z8;Q5MJ68;Q86VM9;Q96BN2;P0CG30;Q9BT49;P18848;P04800;Q9Y6D6;Q96B36;Q14582;Q9GZM3;Q2M1V0;Q96JL9;Q53HV7;Q9P243;Q8IYI8;P99999;O00327;Q8ND82;Q9H2K2;Q58F21;Q99700;Q9BQ70;Q7Z4V5;Q09666;Q9UKL3;Q15170;Q86TB9;Q14151;P14921;Q9HAW4;Q9NWW0;Q9BW27;P10155;O00161;Q06710;Q92794;P13640;Q9NS56;P07316;Q9P215;Q93083;P84022;O43148;Q15643;Q15742;O14628;Q86Y25;Q8HWS3;Q14676;Q12904;P11308;Q04726;Q9H063;Q12968;Q86SE9;Q9H671;Q96QU4;Q8N1W2;P04733;Q8N8Z8;Q5MJ68;Q86VM9;Q96BN2;P0CG30;Q9BT49;P18848;P04800;Q9Y6D6;Q96B36;Q14582;Q9GZM3;Q2M1V0;Q96JL9;Q53HV7;Q9P243;Q8IYI8;P99999;O00327;Q8ND82;Q9H2K2;Q58F21;Q99700;Q9BQ70;Q7Z4V5;Q09666;Q9UKL3;Q15170;Q86TB9;Q14151;P14921;Q9HAW4;Q9NWW0;Q9BW27;P10155;O00161;Q06710;Q92794;P13640;Q9NS56;P07316;Q9P215;Q93083;P84022;O43148;Q15643;Q15742;O14628;Q86Y25;Q8HWS3;Q14676;Q12904;P11308;Q04726;Q9H063;Q12968;Q86SE9;Q9H671;Q96QU4;Q8N1W2;P04733;Q8N8Z8;Q5MJ68;Q86VM9;Q96BN2;P0CG30;Q9BT49;P18848;P04800;Q9Y6D6;Q96B36;Q14582;Q9GZM3;Q2M1V0;Q96JL9;Q53HV7;Q9P243;Q8IYI8;P99999;O00327;Q8ND82;Q9H2K2;Q58F21;Q99700;Q9BQ70;Q7Z4V5;Q09666;Q9UKL3;Q15170;Q86TB9;Q14151;P14921;Q9HAW4;Q9NWW0;Q9BW27;P10155;O00161;Q06710;Q92794;P13640;Q9NS56;P07316;Q9P215;Q93083;P84022;O43148;Q15643;Q15742;O14628;Q86Y25;Q8HWS3;Q14676;Q12904;P11308;Q04726;Q9H063;Q12968;Q86SE9;Q9H671;Q96QU4;Q8N1W2;P04733;Q8N8Z8;Q5MJ68;Q86VM9;Q96BN2;P0CG30;Q9BT49;P18848;P04800;Q9Y6D6;Q96B36;Q14582;Q9GZM3;Q2M1V0;Q96JL9;Q53HV7;Q9P243;Q8IYI8;P99999;O00327;Q8ND82;Q9H2K2;Q58F21;Q99700;Q9BQ70;Q7Z4V5;Q09666;Q9UKL3;Q15170;Q86TB9;Q14151;P14921;Q9HAW4;Q9NWW0;Q9BW27;P10155;O00161;Q06710;Q92794;P13640;Q9NS56;P07316;Q9P215;Q93083;P84022;O43148;Q15643;Q15742;O14628;Q86Y25;Q8HWS3;Q14676;Q12904;P11308;Q04726;Q9H063;Q12968;Q86SE9;Q9H671;Q96QU4;Q8N1W2;P04733;Q8N8Z8;Q5MJ68;Q86VM9;Q96BN2;P0CG30;Q9BT49;P18848;P04800;Q9Y6D6;Q96B36;Q14582;Q9GZM3;Q2M1V0;Q96JL9;Q53HV7;Q9P243;Q8IYI8;P99999;O00327;Q8ND82;Q9H2K2;Q58F21;Q99700;Q9BQ70;Q7Z4V5;Q09666;Q9UKL3;Q15170;Q86TB9;Q14151;P14921;Q9HAW4;Q9NWW0;Q9BW27;P10155;O00161;Q06710;Q92794;P13640;Q9NS56;P07316;Q9P215;Q93083;P84022;O43148;Q15643;Q15742;O14628;Q86Y25;Q8HWS3;Q14676;Q12904;P11308;Q04726;Q9H063;Q12968;Q86SE9;Q9H671;Q96QU4;Q8N1W2;P04733;Q8N8Z8;Q5MJ68;Q86VM9;Q96BN2;P0CG30;Q9BT49;P18848;P04800;Q9Y6D6;Q96B36;Q14582;Q9GZM3;Q2M1V0;Q96JL9;Q53HV7;Q9P243;Q8IYI8;P99999;O00327;Q8ND82;Q9H2K2;Q58F21;Q99700;Q9BQ70;Q7Z4V5;Q09666;Q9UKL3;Q15170;Q86TB9;Q14151;P14921;Q9HAW4;Q9NWW0;Q9BW27;P10155;O00161;Q06710;Q92794;P13640;Q9NS56;P07316;Q9P215;Q93083;P84022;O43148;Q15643;Q15742;O14628;Q86Y25;Q8HWS3;Q14676;Q12904;P11308;Q04726;Q9H063;Q12968;Q86SE9;Q9H671;Q96QU4;Q8N1W2;P04733;Q8N8Z8;Q5MJ68;Q86VM9;Q96BN2;P0CG30;Q9BT49;P18848;P04800;Q9Y6D6;Q96B36;Q14582;Q9GZM3;Q2M1V0;Q96JL9;Q53HV7;Q9P243;Q8IYI8;P99999;O00327;Q8ND82;Q9H2K2;Q58F21;Q99700;Q9BQ70;Q7Z4V5;Q09666;Q9UKL3;Q15170;Q86TB9;Q14151



;Q9BYV9;Q8WUU5;Q14863;O75665;Q92973;Q9ULW0;Q8NEJ9;P10144;P10242;Q9NNTK5;P08865;O60481;  
Q9UI15;Q9UIS9;Q6ZLN11;Q9Y237;O95231;A6NDE4;Q8IXF0;Q9C0J9;Q8NB15;P02511;P51784;Q6ECI4;P  
61236;Q9UNY5;Q9H175;Q8IYM9;Q9UK76;Q7LG56;O43236;Q496M5;A9UHW6;Q13227;Q8N140;Q7L804;Q9  
6EA4;Q96L21;Q9Y2P8;Q8NDT2;Q96F24;P13984;Q8N1G0;O43829;Q13609;Q9H7R5;Q8TF47;O43541;O75  
391;Q8N5D0;Q8WYA6;Q15599;Q96TA1;Q96S55;Q9GZU7;Q9NXX7;Q15398;O75340;Q99990;Q9UNN5;P227  
36;Q9UBY9;Q5EBM4;O14948;Q15020;P17706;Q9Y2S7;Q92625;Q8NEU8;A8MWA4;Q9Y3C7;P51003;P8029  
7;Q9NX24;P31624;P0CL85;Q6VUC0;Q15929;Q96S59;Q9UL36;Q9NXT0;P43364;Q5J7C2;Q8IW35;P41223  
;P41227;Q5TAX3;O94864;P60228;Q7Z3B3;Q96D98;Q96EU6;O00534;Q5THR3;Q6UB98;Q96J01;Q9ULU4;  
Q9GZU8;P15976;O43670;O95125;O15266;Q8WVB3;Q13033;Q5VTL8;O14641;O95096;Q9P0V3;Q9BR84;Q  
86UL8;Q9Y5A7;P02533;Q6P9A3;Q8TBZ0;Q8N339;Q7RTT4;O75934;Q6ZMV8;Q969R5;Q96PE6;P53999;O4  
3660;Q9Y3C4;Q5JVG8;Q92597;Q15646;Q96L92;Q13466;O75478;Q9GZN2;Q9BXP3;P81274;O75884;Q15  
631;Q92539;P60673;O75643;Q06546;P31749;P67809;P14635;O43189;Q96F45;Q9P0U4;Q86VY4;Q8N9  
Z9;Q15596;Q9NZH5;Q96JM7;Q9BRU9;O60381;Q9UNH7;Q03468;O00255;Q96EV8;Q9H9T3;Q02446;Q8IZU  
3;Q9UJ98;O75528;P78395;O60519;P83369;O15287;Q13042;Q9Y4A5;Q9BZQ8;Q9BWD1;P19532;Q9Y3F4  
;P17481;O95863;Q969G2;P10914;Q6VMQ6;Q96PT4;P52746;P13073;Q8WTS6;Q96GD3;Q8N5Y2;Q86U44;  
P49640;Q9BQ15;O94986;Q15072;P51965;Q9Y4Z0;Q86VE0;Q9UJV8;O75529;O94818;P31483;Q9Y4R8;P  
46060;O15315;Q9HCG8;Q6QNY1;Q8NEM7;Q8N3S3;P16415;Q02556;Q15021;Q9NZQ3;Q4W5G0;Q6AW86;Q9  
H7X3;O60479;Q96N22;Q9UJX5;Q15361;Q9NQZ8;Q8IYW8;Q68EA5;O95948;Q9UDV6;P62380;Q6P2C8;P41  
134;Q59GR2;Q9BYG5;Q33E94;Q86UA1;Q15022;Q9P2R6;Q5TBC7;Q9H4I2;Q03924;Q7Z6E9;Q13951;Q9BX  
82;Q6ZYL4;Q86YP4;P63146;Q9UPV9;Q06730;Q13435;Q99684;Q01831;Q13938;Q8WVC0;Q7KZF4;Q9276  
9;P17031;O95373;Q8N5L8;P0CW71;P49720;Q8N8J6;O95251;Q8N883;P28065;Q9UK12;Q15973;Q13342  
;Q14683;Q14192;O95990;Q6ZN32;Q9H8G1;B2RXF5;Q96DE0;P40121;Q15019;Q9UPQ4;Q9BY77;Q9BQ87;  
Q9NWS1;Q9UBU8;Q9HB75;P52435;Q86WI3;Q6VN20;Q9NUQ3;Q5JNZ3;Q9UBG7;P27815;Q8WWL7;Q8WXI9;Q  
86UV5;Q9H1D9;Q13118;O00512;Q8TBZ8;P61574;Q04725;Q9P2J8;O95780;Q7RTS9;Q9NZC7;P49848;Q8  
WUA4;O75164;Q9Y248;P42704;O15131;Q6IPX3;P23490;Q9UHK0;Q3KP31;O15499;Q9UGK3;Q6ZN79;O95  
076;Q9Y2N7;Q9HCU9;P52744;Q9UNN4;Q9Y650;P36873;Q8IXT2;Q14146;O60264;P50991;Q9P122;Q135  
47;Q09028;P13051;O75541;Q9H668;Q03112;Q9NV31;O75373;Q8IXQ6;P08651;P17041;Q9H040;O4349  
1;Q6STE5;O43324;P51587;Q99576;O95721;Q04724;P46379;Q8TD86;Q96G23;P20585;Q6P2E9;Q8N9A8  
;O60284;Q9HBM6;Q6IQ32;Q5VT06;Q9NWZ8;Q9Y242;P40425;Q86VZ6;P52594;P62306;Q8WWQ0;Q2M3W8;  
Q7RTT3;Q08ER8;Q5SVZ6;Q9HCK8;Q02086;Q13761;P05388;Q8WXE1;Q5SVQ8;Q14593;Q9GZT9;O14497;O  
14599;Q9UN79;Q8TD19;P51946;P46087;P0CL84;Q3SYG4;O15160;Q96BR6;O14746;Q13506;Q6N069;Q9  
UHI6;O43361;Q6NZY4;Q8TCN5;P78316;P49756;Q05BQ5;P63165;O00470;Q9BQI6;P28356;Q9H9L7;O43  
679;Q7Z4V0;Q96GN5;Q9NUX5;Q9NVV4;Q9HAP2;O60447;Q9NVU7;P47974;Q13875;P09017;P29372;Q9BZ  
Z5;Q8TC76;Q16534;Q8WVJ9;P0DI81;P60900;Q9Y250;B4DU55;Q9NZC4;P55345;O60304;Q14585;Q9278  
4;Q9BY41;Q96N77;Q9NZT2;Q6IQ21;Q15025;Q6ZS27;P52657;P50750;Q02548;Q9Y8R2;Q99848;O95905  
;O94913;Q9NS73;Q96BK5;O15297;Q5VYK3;Q9NR22;O75840;Q14738;Q9Y535;Q9H808;Q96B01;Q99750;  
P51161;Q9NVM4;P32929;Q9NVX2;Q5JUK2;Q8N7Q3;Q9BXN6;P49711;Q6UUV9;Q13330;Q8WXU2;Q8TC56;O  
94805;Q01954;O75618;Q5VZF2;P20248;A4D1E1;P51815;Q6P1X5;A9QM74;A6NCL1;P62081;O43542;P1  
7544;Q9Y2L1;Q9NY61;Q96K30;Q9Y5B9;P09629;P33992;Q5VWX1;Q8NG50;Q9Y6X8;P36404;Q9GZN7;A6N  
NF4;P51825;Q9NWY4;P14324;P84550;Q15744;P61580;Q9Y247;Q9BTV5;Q9H7S9;Q8TAW3;O75818;O149  
07;Q5VWQ0;Q8NA42;Q9BXL5;Q9NQ57;Q9NQ50;Q8NB12;Q9NQ31;Q8TC05;P26368;Q96C28;Q8N0X2;Q9BXJ  
9;Q96N95;Q14669;A6NGY1;Q9H299;Q5D1E8;Q96BW1;B4DXR9;Q9NTI5;O75346;O14896;Q96QD9;Q9UER7  
;P40926;Q96Q89;Q13111;P37275;O95049;O75604;P55769;Q9H981;P25786;O15205;O75683;P61247;  
Q01081;P35680;Q07157;O00231;Q7L2R6;P17029;Q9NV88;Q8N6I1;O75533;P54136;Q2LD37;Q66PJ3;Q  
13415;P36954;Q9NQ87;Q9Y2G4;O95273;P31273;Q16649;Q99909;Q9UK58;Q96RS0;Q9H2F5;Q8TEQ6;A6  
NIX2;Q96E14;Q9Y6X3;Q6DD87;Q9UKT4;Q8IZU1;Q9BWH6;Q8TE02;Q16514;Q9UIF9;Q9Y3D8;Q6PF04;Q8I  
UQ4;Q6DN90;Q8NEM1;Q86XN6;Q9UGU5;Q15475;Q562F6;O14627;P82970;Q53TQ3;Q9BU19;Q96BF6;Q9Y3  
T9;Q8N1G2;Q9NYB0;Q96JC9;Q96KF2;O43439;Q969E4;P10073;Q9H6Y2;Q8IX07;O75771;Q99814;Q1614  
3;Q12778;Q16695;Q5M775;Q96T23;Q12800;O43791;Q8TC21;Q9Y5Q9;Q9BUG6;Q9Y6H5;P61326;Q19AV6  
;P10243;Q68DK7;Q86WX3;Q9BRG1;Q13625;A0JLT2;Q16576;Q7Z7K6;Q13123;Q13838;Q9H6T0;O14717;  
P53041;A6NKF2;Q9HD40;P31942;Q9UNY4;P50749;P15927;P42224;P17035;Q8N9N5;Q53G26;Q9HAU5;Q  
7Z401;Q9UHY7;O95411;Q96NG8;Q53EQ6;Q9Y2Y4;Q13428;Q9Y462;Q8WUI4;Q9H081;Q9HCZ1;Q9BXL8;O1  
4686;Q9HCE3;Q9H777;O75582;Q16719;P17021;Q9UBC1;P39687;Q8NFF8;Q9UPT1;A5PLL1;Q9Y5R6;Q16  
533;P35659;Q9H829;Q9ULW8;Q6ZN06;Q13495;O43251;Q8NBT2;Q9GZT3;Q9NQT5;Q9UBX2;P06132;Q011  
67;Q63HK3;Q9ULD2;P54727;Q13887;Q9H4Z3;Q13105;Q9HBM1;Q9UBP6;Q92541;Q5H9I0;P16383;Q6ZNA  
4;Q8N196;Q8NDW4;Q5SXM1;Q53QV2;Q9NQ29;A6NI15;Q96GM8;P22392;Q8N8C0;Q96NI8;Q86YC2;O15116  
;Q8N6T7;Q5TGS1;Q8TEV9;Q6N043;Q8WVY7;Q15459;Q9BW66;Q9UKV8;O75376;B1APH4;Q9UJX3;P98177;  
O94850;Q9UDW3;Q96SK3;Q9BWJ5;Q17R31;Q6BEB4;Q86YH2;Q9H0U9;P35249;Q9UBD0;Q8NHZ8;Q86UA6;Q  
99590;Q4V348;P09016;P50539;Q92540;A8MV65;O94983;O96007;Q96LB3;O75554;Q07820;P17030;O9  
5833;Q5T5M9;Q9UNP9;Q5UIP0;Q6PIF2;Q5EEL4;O95831;Q12962;Q15006;Q9HBZ2;P0CG29;Q7RTT5;Q6Z  
MZ3;Q9NPD8;Q99496;Q13356;Q9BUI4;Q13216;Q07352;Q16385;P61289;Q3YEC7;P26447;Q8N831;Q96Q  
F7;Q9H875;Q9H5J0;Q9NWB6;P78317;O14979;P49959;O95718;Q8N9Z0;P46108;Q9Y468;Q969Q6;Q0641  
6;O14593;P78367;O94811;Q8WUF5;O60281;Q9C0C2;P0CG13;Q3ZCT1;Q05195;P50453;Q14653;Q5TYW1  
;O00267;Q99497;Q8NCF5;P78411;Q9BWT1;Q96JM3;Q9HB96;Q8N2W9;P50995;Q9H410;Q14181;Q9H707;  
Q8IYW5;Q9ULZ0;P42773;Q5VTD9;Q13642;P42695;Q14190;Q96EG3;Q6VVB1;Q14684;Q9UBS8;Q5VW67;Q  
6GYQ0;Q9HCD5;Q14966;Q6ZRS2;Q9Y5Y2;Q8NB50;Q8NBZ0;P42285;P09874;Q14865;P35713;Q15910;Q9  
6T58;Q6IE81;Q9Y6R6;Q15014;Q2NL82;Q9NWV8;Q96NU1;O75132;O75469;Q9NWH9;Q9BYG3;O94993;Q9N  
Q03;Q9UQN3;Q9H1A4;P50402;Q8IY81;Q15628;Q96Q83;Q99575;Q9HBE1;P78364;Q13568;Q99459;Q8WW  
Y3;Q9BU64;P43356;P09630;Q15935;P15407;Q86VF2;Q9Y2G7;P62979;Q8N9N8;P27797;P28066;O9547  
6;P41182;Q92994;P0CB48;O43809;P40337;Q6P2Q9;A6NNA5;Q9BYX4;Q96RY5;Q9NVD7;Q76KX8;Q96BT7  
;Q02241;Q92733;Q8WUY3;Q9C099;Q96DI7;Q9H201;Q8N5P1;Q9BVC6;Q96T49;Q8IYB9;Q8TAP9;Q9GZS3;  
Q8WVW7;Q8IYL3;P60002;Q96RU7;Q9NRM2;Q8NDF8;Q14562;Q92905;P33991;Q03188;O60291;Q9BUZ4;P  
78549;A8K0S8;P17028;Q13492;Q16633;P43351;Q8WX92;P28749;P39019;Q96KC8;P17020;Q9H6J7;Q9  
UH90;P09012;A6NDR6;P84103;P10412;O95475;Q8N344;Q9UQ35;O15446;O00165;P04198;Q92759;A6N  
P11;Q68CJ9;Q05516;Q8N371;P31267;O95619;Q9BWW7;Q9NUU7;Q9Y3E1;P07315;Q14397;Q96RK1;P207  
49;Q9H944;Q8N720;Q8ND90;Q92797;Q13867;Q03252;Q96MA1;Q5T619;O60934;O43830;O95926;Q2KHR

2;P17017;Q8IWZ8;Q9UK39;Q9UM07;P0DI82;P61244;P18887;P62314;P55199;P23396;Q96SC8;Q92481;Q99608;O60260;Q06830;Q9NYF0;Q8IWC1;Q86XU0;P78345;Q9UPP2;Q13952;Q6ZNO1;O15525;Q96ME7;Q96BD5;O95602;Q6ZSS3;Q15233;P52272;P80217;Q8N357;Q13516;Q6ZVD7;P61201;Q5PRF9;Q96JZ2;Q9HB21;Q9C0G0;Q92889;Q9UJX4;P42677;Q96LW7;Q9UQ13;Q04323;Q92547;Q9H4D5;Q9H9Q2;Q15287;Q8TF63;Q14584;Q9H009;O60936;Q9H2C1;Q969G3;P50748;O76075;P36405;P62750;P10072;P31946;Q4LE39;Q5T7V8;Q8TAA3;P21675;Q9Y2T7;P11161;P35712;Q55519;Q5JVS0;Q8NA77;Q96HA8;Q9BU02;O15151;Q8TB69;Q6IAA6;P02795;Q7Z417;Q96S99;Q9NPP3;O60885;P30876;Q15326;Q9UBS4;Q96JF6;P63104;Q15369;O95073;Q9HCU5;Q9UKV0;Q6ZV50;P55211;Q9H7Z6;P32242;Q00597;P35269;O75607;Q9BXW9;Q8N108;P17023;Q15937;P14317;Q9Y2D9;Q14790;Q8TAT6;Q504T8;Q9BXR0;Q9UMY1;Q49AA0;Q15759;Q9NVC6;Q01130;P32519;P49450;Q3ZCQ8;Q9NYV6;O75437;P55347;P14678;A6NDV4;P0CG47;Q9HC62;Q17R98;P04053;Q9H1E3;Q9H0S4;P0C7V5;Q9UQ84;Q9H9Q4;Q96KS0;Q92832;Q15435;Q9BQS6;Q96PY6;Q13569;Q92922;P42568;Q8IWW8;Q9NYP3;P45985;Q6P387;Q6P2D0;P36578;O95218;Q86W56;Q14106;Q96NB3;Q9BZK7;P35754;Q99623;O14771;Q9Y244;Q9UGN5;Q96CB8;Q969F1;Q04727;Q8TDR4;Q9UBU9;Q13367;Q96SL8;Q8NEY8;Q8WYR4;Q9BRT2;P48539;Q8NHQ1;Q5TKA1;O95271;Q12789;O95243;Q6GPH4;Q9H6F5;A6NMT0;Q69YI7;Q6U7Q0;B2RXH2;O75461;P62328;Q9UKG1;P54725;P54278;P41970;Q13416;Q96JS3;P62508;P19474;Q9HB58;A8CG34;P10828;Q8TDN6;Q9UGL1;Q9UBR4;Q6NVH7;P48634;Q86XF7;Q8NE71;Q15047;O60422;Q9HBT7;A8MTQ0;Q8NAP3;P10768;O15015;Q9NSJ1;P52292;Q8TF50;Q6ULP2;Q14999;A6NLF2;P28069;P56589;P51858;O43763;Q9Y2K1;Q5VSL9;Q9BYN7;Q7L190;P17947;Q9Y543;Q5HYK7;Q99550;Q14137;Q01658;Q9NRR4;Q9UGU0;Q9UQF2;Q99929;Q9GZU2;Q05BW5;Q9GZZ0;Q96MM3;Q99593;Q9UND3;Q96PQ6;Q9UGK8;Q12765;Q6ZN30;Q9UII5;P15259;Q96MW7;O15084;Q99549;Q9NRY2;A1L190;P04156;P11474;Q5XKR4;O75351;P51504;O15355;P34932;Q9BR11;Q10586;Q9HA38;O43427;Q5T8A7;O75113;Q13363;P83916;Q6IN85;Q8IW36;Q02080;P62847;Q13536;Q96NM4;Q8N7G0;P78412;P10599;Q14997;Q8IYD8;Q9BZJ0;Q9UKX2;Q05215;Q9P255;P57678;Q8IYF1;Q9GZX5;Q9Y6B2;Q9UK33;P48552;P48147;A9YTQ3;Q8NG57;Q6RFH5;P49790;Q13490;O60684;P28370;Q86VP6;Q9Y448;O75333;Q7Z2E3;O94992;Q9UHB9;Q9UI56;P35232;Q96MH2;Q86X55;P48556;Q9P2I0;O60356;P40424;Q9H4Q4;Q9ULT8;Q9C002;Q12788;Q96ND8;P05813;P61575;O43325;P55210;Q6PI48;Q9BVC3;P06744;A6NDX5;Q9Y5L0;Q76L83;Q6P4R8;O60535;Q01196;P04731;P23025;P11532;Q9BZF9;Q9UG56;P41212;Q8TCI5;O15226;P19838;Q8IYZ3;Q9BSK1;P53801;O60671;Q9UH73;O60504;Q9BV86;Q8WUY8;Q12873;Q03060;Q9BSW2;Q6PJP8;O00625;Q96HI0;Q99547;P63167;P40855;Q13310;Q8N972;Q8N0S2;Q5H9S7;Q9UBB6;Q6UUV7;Q86YI8;P58317;Q8IZT6;Q9UJH3;Q7RTU0;P23497;Q9UK99;Q8NDN9;Q9UJA5;P56178;Q13485;Q9NPE3;Q8IXJ9;Q9NNX9;Q9BVN2;Q00534;Q0D2K3;Q5JXB2;P35251;Q9H6Z4;Q14442;Q96PU4;P22087;Q9H4B6;Q96KX9;P22681;P20962;P13682;Q9BSJ2;P46013;P24855;Q2M3X9;Q15270;Q9Y6F1;Q8NAV1;Q8WYA1;Q9P2D1;O14893;Q9Y5A6;P07199;Q8IXT1;Q7L5Y6;O75360;O43812;Q7L0Y3;P31314;A8MTY0;Q92917;Q96LX8;Q05086;Q9UFB7;Q9UDY4;Q6IPU0;O43493;Q9Y232;Q9BQ83;Q7L945;Q8TBE0;P05062;P07737;Q94916;P17040;P56545;P51522;Q9UPG8;P53567;P59923;Q15424;Q9Y651;Q9H489;P51513;P24928;Q9H5V7;P62140;P51959;P38432;P23193;Q7Z5J4;Q96F92;Q96NL3;O14920;P27695;Q674X7;Q96M63;P67870;Q5H9L4;P54253;Q9HCL3;Q5TC79;Q8TDB6;Q7Z3K6;Q9H0M0;Q6P9F0;P0C7X5;Q02040;Q96IT1;P61457;Q9UC06;Q9NPI8;Q13029;Q9BYK8;Q96NT1;Q9HAF1;Q16186;Q9HBM7;Q8IZD4;Q5TAB7;Q9Y2Y0;Q8WUN7;O94921;Q8IXK0;P11172;P38936;Q9NRA8;P46777;A6NJ64;Q86UU0;Q9Y6P5;Q8TD10;Q9C0J8;Q9NWT6;Q9UMX3;A6NLW8;Q9P287;P23528;Q96IS3;Q9UBW8;Q9UNS2;Q9BXY0;Q9Y6I3;Q8IZX4;P81877;Q9Y2X9;Q06265;Q6GQQ9;Q96KN3;P29083;O94782;P20290;O15516;Q8NG31;O15078;Q9P1T7;Q8NHM5;Q9BRP8;Q969J2;Q16600;P07741;Q9H8V3;P18146;Q8N998;P51114;Q92993;Q96QA6;Q9UFF9;Q9Y2G2;Q8WUB8;Q8N782;Q9BS31;Q9NP87;P43268;Q13045;Q9BZG8;Q86UZ6;Q8NI08;Q9H3F6;Q9Y2X0;Q96HA1;Q49MG5;Q9UH92;Q9UKK6;Q96LI6;Q13573;Q14145;Q8IZL8;Q00403;Q9HBL8;Q8WW01;Q9NQL9;Q7Z699;Q15397;Q9H7N4;Q6RFH8;Q9H9Z2;P41220;Q75398;Q13243;Q7Z353;Q8IUF8;Q8IYN0;Q99583;O00148;Q92793;O43299;Q8NI36;O75525;P39880;Q9Y603;P61576;O75154;Q9UID6;Q9UGY1;O15117;Q9Y2M5;Q92985;Q15651;Q13283;P39748;Q15697;Q96IZ7;O95257;O43933;P62324;P51531;Q9P0J0;Q8TEY5;Q9NR48;Q6ZNO4;P38159;Q6ZNS7;Q01844;Q6NUN9;Q8N488;Q13360;P62841;O60869;Q9UKW6;Q9Y458;P53804;Q6FI81;Q86X95;P35869;O14512;Q5T6S3;Q5T7W0;Q96DT0;Q8TDP1;P78545;Q6NSI3;O75467;Q14CW9;Q9NZL3;Q9Y605;Q969L4;Q9H6W3;Q9Y6X2;Q13503;Q9NP77;Q93052;Q7RTU3;Q96H86;Q15776;Q9Y6Q3;Q92466;P51523;O00482;Q8N0S6;Q15029;O94829;P62316;Q86T24;O14558;Q9H5I1;Q9UHX1;P61583;Q9HAK2;Q5VZB9;Q9Y252;O95429;Q08209;Q9NW38;O60828;Q8NEK5;Q14765;Q9Y2A4;Q02930;Q5VU43;Q86Y01;Q14588;Q15545;Q13601;Q8IXH6;Q6AZW8;Q3L8U1;Q13112;Q9BZW7;O95071;Q8IY57;P56645;O95278;Q9H112;Q86WJ1;Q460N5;Q8N726;O60675;Q8IY92;O75290;Q9ULK4;Q9UN36;Q9HAZ2;Q9BWU0;Q01101;P26651;Q9ULV5;Q8WXS3;Q9UI36;Q8TAAU0;Q9H9S0;O43543;Q8IY18;Q6Q759;Q9NQZ3;P17019;Q8NCK3;Q9BZR9;Q9Y2R2;Q6IV72;P30260;P29558;O43663;Q6PI77;Q86UP8;Q16587;Q6P3V2;O75419;Q5VWG9;Q6NT76;Q10587;Q5SXM2;Q9UPN7;Q8IZ26;P61925;Q92900;Q9NYF8;Q9Y3B9;Q9NY12;O00401;Q9Y618;O75593;Q9H0N5;Q9Y2W1;Q9H816;Q9UIE0;Q13562;Q99504;Q8N988;A1L020;Q8TD94;O75928;Q6UWZ7;P46527;Q9UL03;Q13395;P52630;Q13394;Q330K2;Q8N2M8;Q8NF91;Q9UL16;O15527;Q9UL41;O94901;Q9UI43;Q13144;Q96GC6;Q9NYP9;Q01892;Q15696;Q14602;P06454;Q8N987;P35711;Q15003;Q96CA5;Q68CP9;Q9H1Z4;Q9BSG1;P55209;A0AVK6;Q9H3R5;Q9Y2M0;Q9Y2W2;Q15654;Q32P51;Q9BTC8;Q9BZ11;Q86UB2;Q16612;Q92966;P40763;Q96EY5;Q6AHZ1;P35398;Q9Y4A0;Q99729;Q9Y297;Q9BXX1;Q9UJU3;Q9Y2B4;Q9BRX2;Q8NHW3;P32243;Q9GZY1;Q66AJ1;P40937;Q9H3C7;Q99741;Q68DY9;O43524;Q96JN0;A6NF01;P06746;Q9Y473;Q96CK0;Q969H0;O75386;P24666;Q9BQ67;O60543;Q1ZZU3;Q86UP3;O95059;Q5T0J7;Q9UJN7;Q7L590;Q8NEA6;Q8NZ36;Q8N8D1;P52655;Q96HR8;Q5EBL2;O00110;Q9BVW5;Q13765;Q9NVN8;Q69383;Q9H320;Q8TAQ2;P61758;Q3SY56;Q9BRS8;O14519;Q0D2J5;Q14674;Q16670;Q9UBZ4;Q9BQ52;Q6NXT1;Q9H211;O94874;Q14690;Q9NR46;Q6ZN28;Q9UBK9;Q8N1K5;Q9Y5J1;Q8WUQ7;O14862;Q92624;P52597;Q9NSP4;Q8TAD8;A6NLJ0;Q9H204;Q9Y2H8;Q68G74;Q96RE9;Q9BWX1;Q7Z3B4;Q92804;Q9NPA8;Q9ULV3;O95478;Q93075;Q9NQZ3;Q8N3J9;P09234;Q96EB1;Q9Y294;P56915;Q8IVP9;Q96H22;Q86WV1;Q9UMX1;Q5CZA5;Q7RTV3;Q9NQ94;Q75494;Q9BXG8;Q6PJT7;Q02577;Q86UD0;O43929;Q6P1K2;Q92664;Q8NI27;Q7Z6Z7;Q9Y615;Q9NYT6;Q8WXB4;Q9HD36;Q9NS37;O14727;O95343;O14595;Q9UKN5;Q8N7B1;Q13285;Q9GZQ3;P15822;A6NM28;Q6KOP9;Q96AB6;O75368;P0CG00;Q9NQ4;P42167;Q12972;P05204;Q06587;Q9Y311;Q9NWA0;Q9Y3V2;Q9NVV9;O60216;Q17RP2;O75953;Q9H160;Q8TED0;Q02447;Q96N58;P01100;Q96NK8;P48788;P62308;Q9UBB5;Q9H6U6;P62312;Q96PK6;Q9UIW0;Q9NZ63;Q9H3M7;Q8IWA0;P54277;Q6ZNG1;Q9UMQ3;Q6NX49;Q86UQ8;P62753;Q5TEC3;P49335;O60711;Q9NS23;Q01664;O43823;P51948;Q9HB07;Q10570;Q9NPD3;Q92890;O14965;Q9UL42;Q9NY43;Q99676;Q9BZD4;P53539;A6NJG6;Q96SR6;Q13185;Q12996;Q9BSV6;A4GX

A9;Q99743;P22674;P15036;P51816;Q9ULW6;Q15544;O14802;Q9UBF6;Q9Y5K5;A6NCW7;Q12796;Q6ZN08;O00716;P09067;Q9UUL8;Q14164;P52294;P57081;P32780;Q9NRC8;Q96D46;Q8IZD2;P62995;P17509;Q9Y586;Q9UQL6;Q13772;P62310;O15164;P58005;Q7L5N1;Q00444;Q96T37;Q9UK45;Q86XP3;O75081;Q96MB7;Q95633;Q96EY1;Q8N9U0;Q9UHV7;Q96RN5;Q15393;Q53EL6;Q9Y6X0;Q9NR56;Q9UIH9;O95416;Q9Y3D0;Q8N9R8;Q96PM9;Q96BT3;O95503;P53992;P04792;P09661;O14529;Q9Y6K5;Q92618;Q92785;Q96I24;Q9BTE3;Q9UC07;P0CJ86;Q14929;O43913;Q9UJG1;Q8NEH6;Q02833;Q01826;P55055;Q9UK73;A8M59;Q9GZS1;P54198;Q15365;O43248;Q9BRX9;Q9Y4W2;Q6W2J9;P31949;Q8TAU3;P952Y9;Q9BT81;Q96IK5;Q96SQ5;P54259;O15405;Q15650;Q6P1J9;Q6NSZ9;P18615;Q96LA8;Q8WYK2;Q71F23;A6H8Y1;O60524;Q9BQ95;Q14938;P33240;P60510;Q9NXR8;Q9H4Z2;Q9H8H0;Q13106;Q8IY85;P17024;Q9BUE0;Q96PT3;O14929;Q9H0I3;P58546;Q14549;Q96T88;Q9UJL9;Q9H1B7;P31629;Q9NSI8;Q15714;Q9H008;O14770;Q9NWZ5;Q9H6Z9;Q9UJW7;Q9Y4P8;Q96T76;Q8N7H5;Q9NI27;Q13352;Q8N2G8;P51814;Q6ZR52;Q9NPJ8;Q9H0E7;P40306;A6NG73;Q5VZK9;Q13901;Q96ST2;Q16630;O95571;P27986;Q9UHQ1;O75506;Q9Y2S0;Q32M78;Q9Y4E5;P62875;Q13868;Q15054;Q9P1Z0;Q6IQ23;Q9H9Y2;P19387;Q9NVW2;Q9BTT0;P68104;Q13257;Q9UNH5;Q7Z6R9;Q01543;Q9UKD1;P30307;Q6ZW49;Q6ZN55;Q9BWC9;Q96JC4;Q96JK9;P49454;Q8TAD1;Q9NPA3;Q2TB10;Q99933;Q9UHA3;Q9UJW9;Q86W11;Q5T0F9;P15884;P46783;P14651;Q2VY69;Q7RTU4;Q13794;Q96EP1;O95190;O00273;Q9BVP2;O14776;O43745;O15504;Q6ZN17;Q8IZL2;Q9Y3A5;O94900;Q9NX46;C9JE40;Q8IWI2;Q96NB1;P18846;Q00653;Q9NVR2;Q9NWD9;Q8N184;P35452;Q14839;Q8NCE0;O15062;Q9BYD9;Q8N8L2;O75496;P17482;Q53FT3;Q6I9Y2;Q96NS1;P54252;P0CG24;Q96MX3;O00488;Q8IUM7;Q8WUX9;A8K8V0;Q6ZN19;Q6ZNG2;Q13127;Q96JB3;Q92791;Q14689;Q14241;Q3B726;Q9HCC6;Q5JTC6;Q6ZNG0;Q9UPA5;Q6EMB2;P57077;P58004;P24522;Q9P1U0;Q92782;Q9Y2Q1;P47928;P11387;Q13501;Q9YJCS;Q8N1L0;Q9Y2B5;Q96MN5;Q6IQ16;Q9H7R0;Q9H4L7;Q68CQ4;Q68DY1;Q9UJW3;Q9UBP0;Q96CW6;O15127;Q9NXZ1;Q86TJ2;Q9H840;Q9HCI5;Q8NHV9;Q15428;O75177;A6NHJ4;Q5C9Z4;Q92600;P22415;Q76FK4;P49792;Q9BRA0;O96028;Q8N228;Q9HBU1;Q9UPV0;Q6IEG0;Q9Y4A8;Q9GZV8;Q8IY51;Q9BTA9;Q9NUK0;Q8WV44;Q8NDP4;Q8IYN2;Q86XN8;Q8WYQ5;Q6NWX9;O00308;O75791;Q96IR2;O43719;Q8N9B4;Q9NXX6;Q9Y2K5;Q96QF0;Q14693;Q5BKZ1;Q14140;Q9BQA5;O75792;Q6PK81;Q7Z2W4;P48595;Q9P2K3;Q9NP98;Q9HAW0;Q9C000;P08151;Q6B0B8;Q14686;P57086;Q06455;P61586;Q9NPF5;Q12959;Q14974;Q86TP1;Q9UJ78;Q92988;Q12872;Q9NWB1;Q96SF7;Q14331;Q16594;Q15319;Q5VUA4;Q9UBW7;P33316;Q15543;Q99581;Q96GE5;Q9P127;P55771;Q8TF01;Q9H1J1;Q5U5Q3;Q9UJU5;P57721;Q9UJM3;Q9UQR0;Q96K58;Q5TA45;Q03938;O00444;Q15572;Q9H2A3;P05198;P52948;Q9Y314;Q9NPC7;Q6ZWJ1;Q86TU7;Q92610;Q15819;Q5H9L2;O43395;P17987;O15162;Q2NKK3;A6NFI3;A6NFF2;P10589;Q8NCU7;Q9H321;Q9H6R4}

6179 Pathogen[ Q85601] interacts with 3596 human partners: {Q5T230;P43351;Q53EQ6;Q9UQR1;Q9HCZ1;Q8TEM1;Q8N8C0;Q9Y534;Q13367;Q5SVZ6;Q5TA45;Q3YBR2;Q03701;Q6R2W3;Q96RK1;Q9UJL2;Q8NHQ1;Q9HCG1;Q9UBZ4;P54259;Q9NVM9;Q8NBT2;A6NFF2;Q9UNN4;P51946;Q8IYI6;P46783;Q9NV31;O95619;P0CL83;Q8IXK0;P10144;P01106;Q9P2R6;Q3KNS6;Q16612;Q92618;P18146;A4D1E1;Q494X3;Q5VYK3;P52657;Q9UI26;P10243;P28066;Q96IZ0;P17480;Q96FQ6;O75373;Q8N3X6;Q8N1G0;Q969S8;O00401;Q9BZI7;Q9ULW3;Q68CJ9;Q8N196;P08048;Q969E4;Q9H5I1;O95625;Q99816;P30281;Q86TC9;Q7Z6E9;Q8IYN2;Q6NX45;Q6PD62;O15198;Q9UGY1;Q9UPN9;Q9BRT2;P22674;O75182;Q96J02;P78317;P60900;Q8NI51;Q99543;Q96MH2;Q9NZC7;Q6N069;Q8IXT2;Q9Y250;Q33989;Q99497;P49454;O60225;Q9Y2X0;P20700;O00186;Q6UX04;Q14978;Q9UB9;O00213;P08729;Q15637;Q92585;Q8IWI2;Q5SRE5;P17097;Q9NRC8;P51786;Q96CJ1;Q15014;Q8TE85;Q32P41;Q15532;Q969J2;Q8N9K5;P78424;Q9NZU5;Q15542;Q9UHL9;Q32M78;P28698;Q8IZC7;Q92664;O00458;Q5RKY6;O75496;P49639;P15621;Q9NWS1;Q96BW1;O75971;P09629;Q63HK3;Q96JM3;Q4VC44;O15234;Q9BQ52;P49756;Q96MU7;P61978;P09234;O43913;Q6PJG6;P0CG00;Q96CB8;P51815;Q9Y2M0;Q9UHF7;P02489;Q9BRU9;Q9Y5T5;Q96S65;Q13487;P36954;Q9ULR0;Q9Y3Z2;P54198;Q6ZR52;Q15643;O15527;Q8N5Y2;Q9NXX6;Q15370;Q6P2E9;Q9Y3I1;O43598;Q7Z5D8;Q64ET8;Q9HCS7;Q9UKV0;Q96QR8;P08151;P60174;Q9H2F5;Q9Y4R8;O43493;Q96GA3;P46087;Q86W11;Q9ULX3;O60346;Q8NA42;P11831;Q8WX93;Q9Y2T7;Q5T7V8;Q14929;P07315;Q9H7E2;Q96T76;Q4LE39;Q9BQA1;Q15853;Q9BWC9;P63104;Q9H4X1;Q9UMY1;Q8TF39;Q9HBT8;Q9UPG8;Q8ND90;O14896;Q02078;Q9P1U0;Q96JK9;O00629;P17676;P15036;Q9NTK5;Q92575;Q9BXR0;Q16666;P80294;P09874;Q8NC51;P54136;O43324;O60481;Q14593;P62913;Q96DB2;P62633;Q9BUE0;Q9ULZ2;O75360;P17040;Q9ULW8;Q6ZN11;Q9UHB4;P11473;O95602;Q2VY69;Q53FT3;Q3MJ62;O94864;P08107;Q8N720;Q86XU0;O00534;Q06455;A6NGY1;Q96SZ4;Q56P03;P83916;Q9NZU7;Q9UNY5;P25208;Q9P0J0;Q14586;Q96MA1;P22681;Q9UJW0;Q9H6Z9;O14529;O15535;O43502;O15499;P02545;Q96S99;Q9NPA5;O15315;Q9UJW8;P33076;Q9HAU4;Q9BT49;Q13495;Q8NBB4;P31946;Q9NQV7;O95229;Q6VUC0;Q96JB3;Q6X4L1;Q9UKL3;Q96DE5;Q53ET0;A6NHJ4;Q9NPD3;Q9H4V4;Q96PK6;Q9UJTA9;Q9ULJ3;Q13127;Q9NS56;Q99733;Q9NVD7;P14373;O43316;Q9NY87;Q96LB3;Q9H707;O43148;Q96HA7;P26447;Q2M3X9;Q8N1G2;Q7L590;Q9UJX6;P78346;Q9GZW5;Q8IUE1;O75528;P23025;Q9NZH4;P55273;Q96MX3;P31749;Q16236;Q6V9R5;Q5EBL2;C9JN71;P99999;P62993;O75928;O00541;Q9BTE3;P02533;P24385;Q53TQ3;Q7Z2Z1;Q13490;Q7Z7K6;Q8TDB6;Q8N3Z6;Q7Z340;Q9BRU2;P14316;Q9BTP7;Q6ZN17;P17096;Q9Y383;Q9H0E7;Q8WV37;Q9Y2W2;Q9UQN3;Q96SR6;Q5JN23;A6NK39;P62081;Q96ND8;O75154;Q95831;Q9H544;Q9H5F2;P41134;Q9Y324;Q6P2D8;P63146;Q6PG37;Q9H0S4;O43390;Q96K62;Q15834;Q8N8G2;Q99575;Q02241;Q8IYB3;P10768;Q9NPI6;P61582;O14813;Q15038;Q8WVC0;Q8WZ19;Q9Y4Z2;Q8NHF4;Q96EK4;Q96RL1;Q92917;Q9NQW6;Q5JVS0;Q9BZE2;Q14765;Q01831;Q5TYW1;O94986;O95149;Q9UG56;A6NFI3;Q9Y2S7;Q7Z591;Q9NQP4;Q9BSF8;Q8N228;Q9NR22;Q14258;Q8N7B1;O96017;Q07666;Q8NFH3;Q9UC07;Q9BXF3;Q03188;Q96CS4;Q9H1D9;Q14689;Q92754;Q02556;P17028;P51522;O60563;P42568;P15808;Q9C002;Q8N7M2;Q9P0W2;Q969W8;Q9NUA8;Q8TDD2;Q9BWX5;A6NK75;P36405;Q96NT1;Q01538;Q6ZYL4;P0CB33;Q8WV24;Q99687;Q9P2K5;Q93009;Q9ULD5;P09086;P21506;Q15398;Q6XYB7;Q15466;Q01892;Q96BP3;Q8N371;Q9UPW6;A6NJ46;Q86X55;Q8WV44;Q15004;O15534;Q96AH0;Q8IUR6;Q9UQ80;Q7L804;P50539;Q12901;O95684;Q08999;P56270;Q9H0N5;O95347;Q9H8G1;Q8IYL3;P15976;Q969H0;Q9BQ60;Q3SXZ3;Q8IYD8;Q6IN85;Q96SC8;Q96BP2;Q6UUV9;P25787;P46060;Q9BY41;Q9BWH6;Q96EE3;Q9UL59;O94776;Q5C9Z4;Q2KHR2;Q9UQ84;Q6Q759;O00165;Q7RTV0;Q7L945;Q8WXE1;Q92994;Q86SG2;P61962;O15265;Q96H20;Q96RT1;Q9C0G0;Q16384;Q8TBK2;P49406;P05388;P19484;Q13243;P50750;Q9UBQ5;P17019;O75691;Q52LR7;Q96NG8;Q9Y2Z0;Q14202;Q9HD47;P15172;P49789;Q14674;Q17RY6;O75190;Q9N36;O95059;Q92547;Q9H040;Q5HYK7;P62714;Q5HY98;Q9GZV4;P0CG29;A6NNA5;Q96BD5;P14921;Q6B0B8;P18887;Q969S2;Q9ULV5;Q9UBS3;O60437;Q9BZE4;Q6P1L6;Q9H320;Q03052;Q8N8L2;Q6ZN57;Q96BR6;Q9ULK4;Q6NZ36;Q6ZMS7;Q96HQ0;Q9HD36;Q96JM2;Q8N9R8;Q9Y2N7;Q86WV5;Q9NPG3;P86452;Q9UQL6;Q8NB12;P13682}

;P09917;P13051;P08651;Q9H489;Q9UGR2;Q3B7T1;Q9UIF9;Q3L8U1;Q7Z713;P13533;Q86VM9;Q86V15;  
P57772;Q9BXW9;Q6STE5;O75151;Q96JF6;Q8TBE0;Q2V2M9;Q99547;Q5PSV4;O75398;Q9H321;Q8WUN7;P  
17032;Q9Y3M2;Q16656;Q9C0F0;Q9NQS7;A8CG34;Q8IY18;Q6PF04;P48634;Q9UL58;Q9Y3D0;P60002;Q9  
6DC7;P17036;Q6DD87;Q9HCL3;O15151;Q14CW9;Q9NRR5;Q9BYG5;P04732;Q9BW71;Q86U70;Q9Y613;Q06  
546;Q14599;Q05048;P23508;P61289;Q9Y2L8;Q9P2D1;P50548;P62304;Q9GZU7;Q95251;Q9NY61;Q9Y6  
03;Q96P70;Q13749;Q15329;Q8WW38;Q16531;Q12769;Q9UK58;P56645;Q01130;Q9P2D0;Q8TC05;Q8TAQ  
5;A6NIX2;O95049;Q02386;Q0VG99;Q86YE8;Q9H307;P43364;Q15554;Q9UJW3;Q9BYN7;Q8NAP3;O60506  
;O15194;Q6P1J9;Q14549;Q9HBT7;P41220;Q9UI95;Q92540;Q9UBU9;Q5FWF6;Q5MIZ7;Q6GPH4;P56282;  
Q96HR8;P51161;A6NDR6;Q32MQ0;Q9Y606;Q86WX3;Q9UBP0;Q12857;Q16621;Q9NQRL1;Q9UBX3;Q8IYN0;Q  
93083;Q99471;Q19AV6;Q14331;O95714;Q7Z398;Q9H081;P49427;P17020;P06400;P0CJ87;Q06330;P4  
8378;Q9Y3C5;Q969V6;Q96BV0;Q92733;Q7Z465;Q13360;P05787;P35579;Q92979;Q96PY6;Q9HD40;Q9Y  
4W2;Q8N7R0;Q68E01;Q96QT6;Q96BF6;P25788;Q9H7S9;Q8WTT2;B4DXR9;O75312;P52758;P56279;Q9UI  
L8;O43541;P38935;O95677;P53567;Q96LX8;Q9P258;B1APH4;O60290;Q8TD23;Q8N8J6;O60907;P1334  
9;Q13310;P39687;Q9H7D7;A8MWA4;Q96T23;P50995;Q9BR84;Q6ZNG0;Q9Y2Y9;O15111;P12980;Q9P2N5  
;Q12796;Q14103;Q9BX66;P54845;P81274;Q14966;Q9Y535;Q13148;Q15797;P15622;Q15773;Q9Y294;  
P50549;Q96H40;Q969X6;Q9H8M7;Q2M3W8;Q96EU6;O95391;Q13888;O15116;A6NHQ2;P14653;Q8N7U7;Q  
9Y283;Q7Z6R9;Q9BZE3;Q9C086;O43248;O60315;Q96BT3;Q53G26;Q9UP83;Q8N5F7;P16455;Q9BS18;Q7  
Z7C8;Q14587;Q03933;Q9HAF1;Q13155;A2RRD8;Q16719;Q8NDY6;Q9H0E3;Q8NHY6;P17027;Q9Y3Q8;Q5T  
D94;Q01105;Q9BU14;Q9UM07;Q9BU02;Q7Z4H7;C9JE40;Q9Y6J0;Q13112;Q9H467;Q9H9T3;Q9UDY8;Q9UK  
T4;Q9BQ95;A8MUJ8;Q9HC16;P16333;Q15006;Q8NEU8;Q9NR11;Q13216;Q8N684;O75400;P78406;Q9Y6X  
2;Q03936;Q08AG5;Q9H9F9;Q13573;Q56P42;Q9Y2Y1;P57740;Q9H116;Q13951;Q2MLK9;Q9BPZ7;Q86SE8  
;Q8TF01;Q14790;Q92560;P62877;Q99417;Q9UHV7;P0CG30;Q5EE01;P43487;Q92925;Q53GS7;Q6ZN79;  
Q15459;Q9Y651;Q15424;P51826;Q96SW2;Q17R31;Q99966;Q9NWS9;P0CW01;Q9H3C7;Q8N680;P40337;O  
75030;Q14684;P23396;Q7RTT3;Q9NR48;Q9BRG1;Q9NRG9;P35244;Q86UA6;P15822;Q9BZF9;Q9NVX0;Q0  
7352;Q8NHZ8;Q9BUR4;Q330K2;A8MVS1;Q33E94;P15407;Q8N7G0;P49336;Q15007;Q8WPT21;Q8WYP5;Q96  
EK7;Q14872;Q86UL8;Q8NDW4;Q9UKN5;Q99708;Q8TC84;P18848;P10155;Q96LT7;Q6NSZ9;A4GXA9;Q9HC  
62;Q15654;Q9H9Y2;Q5H9L4;Q8WVY7;Q99457;O75832;Q14814;Q13506;Q9UDV6;Q13129;O15304;P1941  
9;P40763;Q05195;Q7L266;Q8N3S3;Q9NY27;O14978;Q13426;P28702;Q14241;Q03112;Q9UMS4;Q8ND76  
;Q9UJH9;Q06787;Q49AN0;Q9Y697;Q8NFG4;P28069;O60583;P17030;P62753;Q75QN2;Q9UKA2;P32519;  
Q6P126;P14859;Q93050;Q9UDY2;Q9Y468;Q9BVJ6;Q9NUQ2;Q9Y4A5;P61201;O60663;P27815;Q01534;P  
52740;P11172;Q96KM6;P61956;Q8NFT6;Q8NFT6;Q1ED39;Q6ZJW1;Q13868;Q6ZMY9;Q8TF20;P23760;Q6  
NVH7;Q86TU7;P41970;Q9BUG6;P42772;Q6PCD5;Q9HC44;Q9H825;Q49MG5;Q13415;Q9Y6P5;Q9NPI8;Q9H  
1A4;Q9UHV9;Q96MG7;Q15573;Q9BYD9;Q46ON3;Q9Y2Y4;P61326;Q9NVM4;Q9H0E9;Q9Y2Y0;A6NLJ0;Q9NY  
F0;Q9UBW8;Q9Y5N6;Q9NWT6;O95789;P22626;P62826;Q9NR83;Q86WB0;O15015;Q9H609;O15516;P7854  
5;Q9UMS6;Q86WP2;O75437;Q1ZZU3;P61573;P62324;Q13106;Q9UL41;P07438;Q9Y2X9;Q9UHX1;Q9UKK3  
;Q86WZ6;Q6NUN9;Q9UJW7;Q9Y242;Q96PM5;Q7L5Y9;Q15287;Q12800;Q96PU4;Q8WUM0;Q9BS31;Q9Y3A5;  
Q9H3P2;B4DU55;Q8N1F7;Q93052;Q8WYA1;Q9UER7;Q8IVP9;P12757;Q8IYH5;O00148;Q9Y3A2;O14709;Q  
71F23;Q9HBL8;Q5TID7;Q96SQ5;Q99728;Q6ZNG1;Q3KP31;Q969H6;Q9NVR2;Q96PT3;Q09FC8;Q9H3M9;Q9  
UBS4;Q96IS3;Q5VWX1;Q86V71;P01011;Q9BVN2;Q52M93;Q15545;O60318;Q9NZJ0;Q6TGC4;Q9BXM0;Q96  
H86;P17026;Q8IZL8;Q9UMS0;P53803;P17022;Q66K74;Q9H4D5;Q8TDN6;P80305;Q8TAN5;O60284;P463  
79;Q92610;Q9BTA9;Q9BZZ5;Q9ULH7;Q7Z2W4;Q9BV86;O14686;Q8TAW3;Q8N8U2;P56537;Q86UU0;Q96KR  
1;Q16520;O95931;Q9UBU8;Q2NKT3;Q9UMR2;O43264;P42695;Q99504;Q9H0M5;P52744;Q14188;Q2TAK8  
;P36639;Q2M218;Q14738;Q8N9W8;Q15723;Q12772;Q9HTZ6;O60936;Q9GZX7;P25490;Q8IZ26;Q53HL2;  
Q96G25;P98170;Q6ZN55;Q86VN1;Q9UNL4;Q6IPX3;Q8N895;Q8IXJ9;Q96ES7;Q9HCH5;O43364;Q9NRR4;Q  
9BX82;Q71F56;Q9Y2S0;Q96NG5;O00327;Q96YB2;Q9BXS6;Q5VWQ0;P0C7X2;Q96IU4;P30153;Q9Y2G2;Q9  
NPJ8;Q8WYA6;P61218;Q5VTL8;Q8NFP9;Q13045;P24522;Q9Y618;O00268;O94913;P31948;P39019;Q96  
AY2;Q2QGD7;Q9Y6X9;O75792;O14503;Q7RTU4;Q8TDY2;Q15172;Q8NDP4;Q03252;Q9BSH3;Q13642;Q86X  
N6;Q9Y3E1;P35712;Q9C099;Q10587;Q9UIV1;P57075;Q14588;P06733;O43299;P08621;Q6ISB3;Q9UII  
5;P33316;Q8NG31;Q5TB30;Q6IQ23;Q08378;Q9UGM21;Q15583;Q86UD0;O43159;Q9H4T2;Q969L4;Q96JC4  
;Q9GZQ3;Q96PU5;Q9UNX4;P11532;O95243;Q71UM5;P10242;Q96S95;Q9P013;Q9B013;Q969T4;Q8TBZ8;  
Q6NXT1;Q15306;Q8WXF1;P46108;Q14592;Q9GZV5;P61758;A6NFP7;Q9UBU7;Q86VP6;A6NK53;O15078;Q  
9NQZ8;Q9Y248;Q9BZR9;O14497;Q14591;Q14764;P0CV98;Q9Y5B9;O96019;Q9NUQ6;P18846;Q14135;A1  
L020;Q9UBD5;Q8N1L9;Q14669;Q9NWF9;Q14106;Q96B36;P58317;Q9NQ33;Q9UGP5;Q9C0F3;P06744;Q99  
814;O15392;P47974;Q86WI3;Q8TF32;P27797;P16383;Q15046;P49959;P27540;Q15776;A8MQ14;Q86X  
K2;Q02833;O15226;Q3MIS6;Q3KQV3;O75299;Q9NR56;Q8N8D1;P53999;Q96SE7;Q13363;P0CG48;B4DX4  
4;Q9BRS8;P49005;Q7Z614;D6RGH6;P30304;O75448;P11171;P26358;Q9HAW0;Q15386;Q8IUE0;Q86V81  
;Q8NA19;P19338;Q9P2F9;Q6NSI3;O14646;Q9Y3M9;P17038;Q13469;O95155;Q9P255;Q92831;O14519;  
Q7Z2X4;Q9H3R5;Q9BUJ2;Q9NS23;Q96FX7;Q9UMX3;Q14674;Q96DX5;Q14690;Q01082;A6NM28;P55795;Q  
6FI81;O75494;Q6PK81;Q9H0W9;O60682;Q9BTT0;Q96B02;Q99549;Q7RTU5;Q9BW66;Q00978;P17987;P0  
7199;Q6ZN06;Q9Y3C7;O76075;P17031;Q96AQ7;Q8IYW8;Q9UPV9;Q15653;P17014;P51948;P56181;Q9N  
ZN8;O75940;P63241;Q96MU6;Q8N2W9;Q96EA4;Q5T1R4;P23297;Q8TDN4;P19532;Q9NZQ3;O15164;P100  
74;Q9ULW0;P78337;P18615;Q8NEP9;Q5VVH5;Q9NPD8;P52594;P51959;Q9NV72;Q49A33;P41002;P5074  
9;O60216;Q9UJN7;P25685;Q92499;Q86SE9;Q15560;O43439;Q92698;P13196;Q15742;Q8WVM7;Q9UFF9  
;Q9Y244;Q6P1K8;Q13144;Q5TA31;A6NEJ1;Q6PIJ6;Q16594;P02795;P12270;Q86VD1;Q9H6Y2;Q9BX26;  
Q7KZ24;P42166;Q6NT76;Q9HAH1;Q16385;Q8WZ33;Q08AN1;P05062;Q9NZV7;Q9HD34;P05423;Q16629;O  
75934;Q99743;Q9UHD9;P06454;Q8IZT6;Q15596;Q9Y4B6;O00472;Q5VSL9;O14972;Q03923;Q8N3X1;O4  
3791;Q9H6Z4;P52736;O95983;Q9NRY2;Q99608;O95503;O95644;Q9BRP8;Q8N823;Q6H8Q1;Q9BZV1;Q92  
782;Q6P2H3;Q9UK45;P17024;Q14149;O96004;P17017;Q15714;P49321;Q5VUG0;Q9Y692;O75886;O147  
44;Q2VWA4;Q9NT15;Q08211;P62316;Q15054;Q9GZS1;O94906;P41162;P48147;O60304;Q29RF7;Q1740  
1;Q9Y2D9;Q8WXU2;P59923;Q8N2I2;Q96FX2;Q00613;Q86V48;Q13398;Q9HAN9;Q53GI3;Q9UK11;O15525  
;Q13867;P68036;O15405;Q07955;Q86UD4;O43463;P80723;Q15651;Q9NPF71;P55055;Q04864;P20290;  
P17010;P49711;Q9UID6;P55769;O43345;Q9UIH9;Q8TAF7;Q96R06;Q15059;Q13952;Q9H008;Q9H1B4;Q  
8N184;Q9BSV6;Q92600;P0CW00;Q9NZP6;O75694;Q9H089;Q9BUY5;Q8TF47;Q9NVU0;O95278;Q9C0E2;Q9  
NWT8;Q9BV57;Q8WYR4;O43745;Q13427;Q9UJL9;P63279;Q504Q3;Q9H777;P27694;O14776;Q6ZCQ5;Q8I  
YI8;O43542;Q9NYW8;Q8WUB8;P51610;O75953;Q14145;Q00597;Q96FI4;A8MX4;Q9NWB6;Q9UBB9;Q020  
80;P15259;Q9BQI9;Q9NQ55;P12755;Q9UHA3;Q13541;Q9NZ81;Q9GZS3;Q96FA3;Q9Y2L1;O95125;Q9ULU

4;Q12830;Q5VWP3;Q8NCD3;Q9Y5Q3;Q9NS25;Q75607;Q09161;P30793;Q66K41;P0C1Z6;Q8IZX4;Q499Z4;O15504;O95273;Q13404;Q14974;P30047;Q9H7R0;Q9UQF2;Q9BV47;Q9UBG7;Q9Y6F9;Q8WX92;P10914;Q9NQG5;Q6VN20;P08047;Q5VWG9;Q96DI7;Q12888;Q9NRF9;Q969R5;Q8N6M9;Q99623;Q86Y26;Q9H6W3;P11802;Q9BZQ8;Q8WUX9;Q13257;O60806;P27986;Q9HC78;Q86TB9;Q9UM82;Q94829;P53370;Q8N9F8;Q6IQ21;P54252;Q9UH92;O43663;Q9H501;P07737;Q9UKN8;Q9H0I3;Q96MT3;Q08209;Q9H9Y6;Q01954;O95201;P52630;P82979;Q96D70;P80217;P55771;O95707;P39023;Q5VVIY5;Q96NY9;Q92889;Q9UBW7;P38919;Q9UFW8;Q6XQJ6;Q96C86;Q9BWU0;Q8TAP9;Q5H9L2;P51531;Q9H944;O14757;P26651;Q13526;P14678;Q96AJ1;Q96QA6;P01100;Q9NXW9;Q16587;Q9NP77;Q8NG57;O75155;Q96L92;Q9P2K3;Q7Z5K2;Q9HBM6;Q15572;Q15022;Q7Z589;O75943;Q05481;Q92674;Q9H869;Q05BW5;Q14934;Q86W54;Q8N6I1;O15370;P25789;O00170;Q13263;P28715;O60291;Q8NG50;P11387;Q68DI1;Q53H80;Q8IVN3;Q8NHW3;Q63HM1;Q8TC15;P52746;P41212;Q9UQB3;Q9GZY1;O15060;Q86VY4;Q15397;Q14526;P0C7T5;Q9NS73;Q5U623;Q13137;Q8N831;Q6IQ32;Q8N0Z6;O60716;Q96FV9;Q96GM5;O75820;P22415;O00233;Q9P267;Q9NRR3;P62487;Q16222;Q9UNH5;P51398;Q8NEA6;Q86WQ0;Q3ZCX4;O60518;Q9Y675;Q9Y6R6;Q8TF50;Q14566;P0CJ79;Q96020;Q9H9A7;Q9GZX5;P30305;Q16633;Q14686;Q9BQY4;Q9UBL3;O43361;O14965;Q9BRT9;Q9NW07;Q8WYQ5;Q92688;Q9BY77;Q9H4I2;Q9Y266;Q9H0G5;Q5SXM2;O60870;Q13503;P36508;P19388;Q9NP66;Q8TC21;Q9BVC3;Q9UPV0;P29084;Q9BWT1;Q8NBZ0;Q86WV1;P60228;O75817;Q9UMX2;O75818;Q6PJT7;P31260;Q7Z3K3;P23409;P35637;Q8IWL8;Q96KQ4;Q9UK12;O43681;Q6MZT1;P10599;P11940;Q9NX65;O60296;Q14186;P50222;Q53T94;Q8NDQ6;P51508;Q9Y5Q8;Q86XR8;Q9Y6B2;Q8WYN3;Q92830;Q9UKX2;Q9UH99;Q9BPX3;Q9UK13;O75444;Q04725;Q9Y316;Q8NFFJ8;P40424;Q96TA1;Q96Q89;Q14653;Q14164;Q9Y6M1;Q13123;Q9H2K2;Q6P9F0;Q00577;P38432;Q9BQ70;Q26618;Q6ZN08;Q09666;Q9BSJ2;Q15170;Q14151;Q9GZU2;O15131;Q9UKT7;Q9BW27;Q9Y6F1;P49716;P92624;Q92541;P12524;Q9NBF1;Q03468;O60711;Q13352;Q9Y6K9;Q969S3;Q04726;P0CJ88;Q9P0U4;Q8IWS0;Q96QU4;Q8N1W2;P25791;O15117;Q9Y6Y0;P61576;Q12968;Q8N339;Q86UW9;Q9HB96;Q15650;P17535;Q9NQX1;O15355;P51532;Q9H814;Q8WWY6;Q9NVV9;Q96JC9;Q9Y295;P62310;P48788;O75461;Q9H808;Q6PI98;A6NGD5;Q9H7B2;Q9H981;Q86TP1;P41227;Q9Y221;Q96RN5;Q8WTZ3;P30307;A6NJL1;O00159;O75351;Q13435;Q9BYV9;Q9NP64;Q8TED0;Q9Y2B5;O75665;Q8NEK5;Q8N4W9;Q9Y6K5;Q5XG87;Q92785;Q96N38;P62314;Q6PJT2;Q6ICB0;Q8N587;Q9YIS9;Q8N344;Q8IXF0;Q9H171;P50991;Q9BXY8;P13984;P52742;Q02930;Q9H175;Q9UK73;Q7LG56;Q16600;Q9UMQ3;Q9UBX0;Q92681;Q8N140;Q9Y5A6;A6NJJ6;P78364;Q8NDT2;Q96F24;Q15013;Q9P0T4;Q9BTC0;Q9H7R5;Q9UKK6;Q969G3;O76064;Q13901;Q96D46;Q9Y448;Q13098;P62306;Q9HAU5;Q8N726;Q9UNN5;Q9UBY9;O14948;Q96JN0;O94811;Q9BPZ2;P35573;P17098;Q9BSM1;Q96MN9;P05783;Q95232;P80297;Q701A6;Q9P0L1;O60508;Q9GZT9;Q9HD15;Q14582;Q8NB42;Q8TEQ6;Q96L21;Q9ULX3;Q96S59;Q9H1A7;P25205;Q12988;P54727;P12882;Q15928;Q5TAX3;Q96D98;Q8IY92;Q9UGK3;Q8N1K5;Q9H788;O15266;Q92621;O14641;Q13428;Q04323;P23511;Q9ULX6;Q9NVI1;Q96MR9;Q6P9A3;P40306;Q562F6;O14929;P0CJ90;Q96CM4;O95260;Q9Y4I5;Q8WW12;Q969U7;Q3B726;Q5MCW4;P34896;Q9UI43;P0CJ89;P14618;P14635;Q9UKV3;P15927;Q96N20;Q9NZH5;Q96JM7;Q8IU81;Q68DK7;Q9UJ04;Q92759;Q96EV8;Q9HAW4;O95402;O95373;Q4L180;Q8NFX5;POCH99;Q7Z3K6;Q9UJ98;Q9BRR0;Q13042;Q9BXP5;Q9UJX5;Q16649;P32780;A2A288;Q99933;P55060;Q15528;Q8WTS6;Q9Y4P8;Q92973;P51965;Q8TC56;P63162;Q9Y4Z0;P58340;Q9UM63;O75529;Q99873;P16415;P18847;Q9Y2D8;O60543;Q4W5G0;Q5VZE5;Q9H7X3;Q96N22;Q8IXQ5;P62136;Q95948;Q9NYP9;Q9NXZ1;Q12906;Q9BU64;Q96BK5;Q912G7;Q9UL40;P36956;Q5TGS1;Q9NQT4;Q9UDV7;Q5VZK9;Q13828;Q5TBC7;Q03924;Q86YP4;Q96QU8;Q13526;O95416;Q96MB7;Q9UKW6;Q9UAA9;P35711;Q9H8E8;Q9Y5B0;Q92769;A6NFD8;Q9UBF6;Q96CX3;P49720;Q9UBF1;Q9NVP1;Q69383;Q8N859;P42575;Q15973;Q14683;Q96KS0;Q9C005;Q96DE0;P40121;Q9Y678;O60765;P16220;Q9UPQ4;Q99717;Q9BQ87;Q15699;P52435;Q9UKD2;Q9Y3B2;O14920;Q08J23;Q92804;Q04206;O15069;Q8WXI9;Q9BZD4;P45973;Q8TF63;P42226;Q9P2J8;O95780;Q7RTS9;P49848;P52738;O60535;Q96SD1;Q16576;Q9ULM3;P04733;Q147U1;O95628;Q8IXM2;Q9HCU9;Q9NZL3;Q9H875;O95453;P62318;P36873;Q8TEX9;P02511;Q9WXC3;Q12972;Q04727;Q9Y6Y1;Q15050;Q9H668;Q15029;P54725;Q12873;O43679;Q8IXQ6;Q99502;Q14678;Q6SJ96;Q9NRX1;Q99576;Q96NM4;P98169;Q96G23;P20585;Q8N9A8;Q5VT06;Q9H8N7;Q9NWZ8;P40425;Q8NAV1;P52597;P28062;Q96T92;Q9NWW0;Q8WY36;Q8WWQ0;P57081;Q08ER8;Q9UBZ9;Q76FK4;O15014;Q5SVQ8;Q9NS26;Q9UN79;Q13765;Q14192;P11142;Q9UHI6;Q9H6B1;Q6NZY4;Q9UI36;Q05BQ5;Q96M11;Q96N58;Q9NVX2;Q3C1V8;E7ETH6;P41218;P49721;Q8NFD5;A6NLC8;O60447;Q96AB3;Q95190;Q71SY5;Q9NXT0;Q9UPA5;Q15058;P46939;Q8TC76;Q92905;P0DI81;Q8IYM9;Q53HV7;P42704;P68104;O60248;Q7KZ85;A6NLF2;Q02577;Q15025;Q9HB21;Q6P4R8;Q10570;Q9H4L7;Q9Y6D9;Q99848;P62312;Q7Z3V5;O15297;A8MT69;Q5JVG2;Q9NUU7;Q5T5D7;Q6P3V2;Q9NYG5;Q9P2I0;Q96B01;Q8NHM5;Q99750;Q8N7Q3;Q9HB58;Q96NJ6;Q13330;Q8IYX0;Q15562;P35269;P55735;Q15942;O75618;P30279;O60921;Q5UIP0;Q13228;Q8TA86;Q6P1X5;A9QM74;Q96RK0;Q9P031;Q99594;P22736;Q01543;Q14585;Q9NSI6;Q9HA38;P52948;Q9Y6X8;Q0VGE8;P54105;Q9Y222;Q9Y5K5;P51825;P14324;Q15744;P20248;A6NF01;Q13772;Q96LW1;O14907;Q6UWZ7;Q9Y2P8;O14771;Q9NQ31;Q96GC6;Q86XF7;Q9BWW4;Q9BXX9;Q6ZT77;Q96N95;Q9BZG8;P35548;P25815;Q9NWW8;O75346;Q9BYX4;O60281;O75530;Q15024;Q96QD9;Q8NA77;Q96GM8;Q8WXF8;O00273;P35251;Q9Y6K1;Q5VZB9;Q99459;P25786;O15205;Q6ZV50;Q9UKX7;Q01081;P35680;Q9H3H9;Q8IZD4;O14862;P05412;Q8IZL2;Q9Y543;P17029;Q9NPJ4;O95159;Q6ZRS2;Q9H2P0;Q9Y4A8;Q99909;P11388;Q96RS0;Q9UQ35;Q96T88;P29083;Q9UML6;Q76L83;Q9Y281;P49450;Q92985;A6NP11;Q15327;Q3ZCQ8;Q9BXY0;Q8IZU1;Q8TE02;Q16514;Q15929;P61571;Q9BYE7;Q05519;Q8NEM1;P28347;Q9Y3F4;Q9UBT6;O95257;Q99615;O14656;P82970;Q70Z53;P61579;Q14691;Q9HBH7;O00255;P35789;Q9UMS5;Q5TB80;Q6ZNA1;P67809;P78396;Q8IX07;P18850;A6H8Y1;A8MSY0;Q01826;Q9NUW8;Q14590;Q9UKI9;Q8NI27;Q6U7Q0;Q8IXW5;Q9HAP2;Q9NQ29;O94921;Q99550;Q8N668;Q13625;P10244;Q8IZU0;P42771;Q9BYK8;P53041;A6NKF2;Q9UC06;P57086;O75376;P60673;Q5JTD0;Q99612;O00470;P42224;Q9H5H4;Q8N883;Q8N9N5;O00425;O94818;Q9NXT7;Q9NPA3;Q96EB1;Q6ZRF7;Q9Y462;Q86YI8;Q01201;Q8IW35;Q15369;Q13185;O75582;P83369;Q9UPP1;Q8NCA9;P06748;Q5TCC9;P28072;Q8N108;Q16254;O00566;P06132;P08235;A5PLL1;Q7Z7K2;Q14865;O43711;Q6NZ32;Q9NZC3;Q12816;Q9H7N4;Q9NRL2;O75717;Q8NFH5;Q53QV2;Q9UN30;A9YTQ3;Q01658;Q9NW38;P22392;Q53EL6;P17023;Q96N18;Q86YC2;P15121;Q9NV88;Q96F45;Q9BT78;Q3KNV8;Q8N6T7;O43829;Q9H063;Q00403;Q9UDY4;Q9NPB6;Q8TD17;Q9UKV8;Q8N2Z9;Q9UJX3;Q9GZ2;Q9UDW3;Q96SK3;Q9ULG1;Q86UE4;P61572;O14787;Q13033;P62277;P61586;P57077;Q14209;Q99590;Q3SY52;Q4V348;Q9HB75;Q13569;O00512;A8MV65;O94983;Q96007;Q96NJ3;P12883;P11474;O43830;Q8TA94;Q56613;O00479;Q6PIF2;P15923;Q86T29;Q9HBZ2;O95905;O43395;Q99496;Q13356;P36402;Q8N5J4;Q13118;Q96JI7;Q8N9Z0;Q32MZ4;O14593;P10827;Q8WUF5;Q9C0C2;O75884;O43290;Q5MJ68;P58304;Q3ZCT1;O43812;P50453;Q9UHJ3;Q5HYK9;P28065;O00267;Q96A56;Q8TAF3;P22670;Q8N5

L8;Q9H6U6;Q9H410;Q14181;Q96ST2;Q8IYW5;P32243;O95478;P42773;O14867;Q9H201;Q96EG3;Q6VVB  
1;Q15633;P48382;Q6ZW49;Q2M1V0;Q8IVC4;Q5JTC6;Q9UHK0;O75340;Q96T58;Q6IE81;Q8N693;Q02447  
;O95630;O75132;Q09028;P56693;O94993;O75446;O94992;P23193;P07741;Q9BTC8;Q8IY81;Q8NE65;  
Q5TA7;Q96N77;Q68EA5;P43897;Q8WWY3;Q8N5U6;Q8WU5;Q13601;O14980;Q5H9I0;P67775;Q99684;Q  
06265;P38305;P0C7M4;P62979;O43402;O95476;O95751;P50402;Q8IW19;Q96GN5;P55265;Q14207;Q1  
5185;Q96RY5;Q8WU90;P61575;O43309;Q99436;Q9BSU3;Q8TEK3;P62847;Q12872;P29474;Q9C035;O15  
360;Q8TF68;O00204;Q7Z6J9;Q7Z6B0;Q99583;Q3SYG4;Q96RU7;Q8NDF8;Q15628;Q14146;Q07157;Q8N5  
P1;P17544;Q0D2K3;A8K0S8;Q96S94;Q9NZI6;P28070;P28749;Q9HBD4;P20073;P84103;Q9NW08;P5519  
9;Q8NE71;P35658;O15446;Q6NS38;Q9NUL3;Q05516;P31249;Q9HCU8;Q14397;Q6ZS27;Q9NTW7;Q9BQ67  
;Q8N3U4;Q9H9L3;Q92797;Q7L2R6;Q86T82;Q14980;Q5H9F3;O75150;O00482;Q9UK39;Q14152;Q96IF1;  
P0D182;Q86US8;P61244;P51504;Q86Y97;Q9BQA5;P05198;Q9NX70;P84022;Q9Y3T9;O95376;O60260;P  
61580;Q06830;Q8IWC1;Q6ZLN9;Q9P0M2;P78345;Q6ZLN0;Q0D2J5;Q99607;Q9NPI1;Q6ZSS3;Q15233;Q9  
BY27;O95777;Q96JZ2;Q9UJX4;P42677;Q7RTT5;O95400;Q5VTR2;Q9HCK8;Q9H2G9;P31271;Q9BXC8;Q9U  
M11;Q5THR3;Q9H9Q2;Q86VE0;Q9Y252;Q14584;P49715;Q9H009;Q6NT89;Q9UIF8;P50748;Q9BTL3;Q8WY  
54;Q8TF45;Q16082;P10072;Q9Y615;Q06547;Q8TAA3;P14866;Q8NEF9;O15055;Q6ZQV5;Q9Y2D1;Q1295  
9;Q8TB69;Q6IA86;Q96RE9;O60287;Q9UGP4;Q9NPC3;O60885;Q15326;Q6P2Q9;O14746;Q9P2T0;Q9Y5Z7  
;O43296;Q96IY1;Q6RSH7;Q5T6S3;O00231;Q96DN6;Q15937;P14317;O95639;O60671;Q49AA0;Q15759;  
Q96IZ7;Q9UNS2;Q15906;Q9NYV6;P41161;P55347;P0CG47;Q8WYH8;P04053;Q9BPU9;P83876;P31949;Q  
96QC0;P63165;P45984;Q8N782;P49918;P0C7V5;Q9UGU0;Q6ZSB9;Q5VU43;P37275;Q96Q83;Q9UJM3;Q9  
BYH8;O43933;Q8WUY3;Q96RJ6;Q12983;Q99567;Q4G163;Q95218;Q96S55;Q8IXH7;Q9BZK7;Q9UPR3;P35  
754;P56524;P61581;Q9NZM5;Q9UK10;Q8IYB9;Q86TJ5;Q8IY85;Q5EBM4;Q6ZNA4;O43447;P60510;Q8IX  
H6;Q5TKA1;Q9UPN7;Q12789;Q9UIF7;P84101;Q99627;P62328;Q9UKG1;Q8N163;Q92870;P54278;P3127  
4;Q13416;P62508;Q9NPC7;Q9BTV5;Q9Y2H8;O15379;A6NKD2;O60422;Q5VTD9;Q8N187;A8MT65;Q6NZI2  
;O15287;A4D1E9;Q00839;P52292;Q08945;P18583;P52737;Q6ULP2;Q9UGN5;Q14999;Q9H832;Q96AE4;  
Q8N8Z8;Q92750;Q7Z6K1;Q9Y2P0;Q12905;Q96RE7;P18754;Q7L190;P17947;O43189;P38646;P21675;O  
15127;Q15910;Q9HB19;Q9NX01;Q8TEV9;Q9GZL7;Q9UGK8;Q12765;Q2TAY7;Q96MW7;O15084;P04156;Q9  
6BN2;P46937;Q08050;Q6P2C8;Q6P9G9;Q9NPA8;Q8TAD8;P34932;Q9UHC1;Q9UBS8;Q7Z6Z7;O75113;Q8I  
W36;Q9UHY7;Q12962;Q13156;Q6UN15;Q9BRH9;Q06732;Q9H6J7;Q4LE28;Q9NQ50;P25440;P61574;Q168  
36;P19387;Q92966;P04792;O75164;Q86TG7;Q6RFH5;Q6ZLN28;O75486;P28370;Q7Z2E3;P08397;Q9UHB  
9;Q9NX63;P82094;P35232;Q9Y6D6;Q9Y5Y2;Q16533;Q8WYR1;P35869;P63272;P48556;O60356;Q9GZN2  
;Q6ZU05;Q9H1Z4;P35226;O15105;Q6PJP8;O43325;Q6ZMN2;Q6PI48;Q16534;A6NDX5;Q8N9Z9;Q96T37;  
P06746;Q92890;P48595;O15397;P04731;P21127;Q9NV06;O76031;Q01850;A0JLT2;Q8IWZ3;Q02410;O  
94763;P12004;Q9BSK1;Q86WJ1;Q9UK76;O60504;Q9UHB7;Q7L9L4;O00625;P0CG31;Q96HI0;P52655;Q8  
N972;Q9UUV7;Q9NRA8;Q7RTT6;Q9Y2M5;Q504T8;Q9UHC5;Q13342;Q7RTU0;O94892;Q9UK99;A9UHW6;Q8N  
DN9;Q6UJA5;P62750;Q9NY74;Q9Y5R5;Q9BW11;Q9NPE3;Q107X0;Q9NNX9;O00567;O43823;Q96E  
I5;Q8TD86;Q92670;O96006;Q5JXB2;O15350;P22087;Q9Y6I3;Q96KG9;Q99990;O00291;P46013;Q9BU6  
1;Q8NEY8;Q96TC7;Q9UBX2;Q92945;O14893;Q9NZJ4;Q9NRG4;Q13547;P43356;Q00994;P50221;Q99081  
;Q7L0Y3;Q96C00;Q9H9E1;P31314;Q9BTT4;A8MTY0;P49116;Q9NWA0;Q05086;O75764;Q9UFB7;Q92597;  
Q9BQ83;Q9H2T7;Q66K89;Q6ECI4;Q5T619;O94916;P14651;Q9BWD1;Q9UKY1;Q9NZ63;Q43660;Q7ED26;P  
62841;Q9H2G4;Q86YW9;P24928;O75362;P62140;P28074;O75626;P49792;Q9Y6H5;O96NL3;Q92699;P6  
2308;Q86U86;P24863;Q96P71;Q674X7;P61236;P52298;Q96JL9;Q9P0V3;P67870;P57055;P54253;P0D  
I83;Q9HB65;P38936;Q96IT1;P30876;Q86XI2;Q96SL8;Q9Y473;O00570;Q9P243;O60930;Q8NB50;Q5TA  
B7;Q9Y5A7;P04406;O15162;P62987;P38159;Q0VD86;Q14140;A6NNF4;P13056;P33992;P48552;Q5QJE  
6;Q9UM54;Q9P287;Q13620;P17025;P23528;Q00534;P52434;P40426;Q6P280;Q8NCN2;P24278;Q7Z4G1  
;Q7Z3I7;P55198;Q13618;P78371;P20962;P55212;Q7Z7J5;Q13111;O00287;O43365;Q9BWX1;Q00653;  
Q15543;Q0VG06;O60224;Q9NSC2;O95067;Q9NYB0;Q15696;Q9HCE5;Q96EP1;Q9BVL2;Q92993;Q86UQ0;Q  
8WWX9;O95999;Q96C28;O00712;O43379;Q9NP87;P43268;P23246;P26368;Q9H3F6;Q15652;P56182;Q9  
6HA1;Q96LI6;P15336;P51814;P10828;Q9NVV4;Q8N3J9;P41182;Q8NEH6;P04198;Q6NSW7;Q8WW01;Q9Y  
333;Q41252;O60524;Q9P1T7;Q6RFH8;Q8IZ40;Q15047;Q8TAK5;Q8IUF8;Q9NS37;O00422;Q9H299;Q927  
93;Q9HCG8;O75525;A8MUZ8;P39880;P05114;P57071;Q125365;Q3T8J9;Q9HAJ7;A5LHX3;P13535;P3974  
8;Q59GR2;Q15697;P31276;P19474;P61578;Q6PGP7;Q9H1K1;Q5CZA5;Q14119;Q8IZP0;Q9UJU3;Q96NB3  
;Q8WUI4;Q8N2G8;Q9Y2P7;P40692;Q8N488;Q9BQS6;Q9BQW3;Q9BV20;P61583;O60869;P48380;P53804;  
P51003;Q9P1Z2;O14512;Q8TDP1;Q9H1E3;Q15361;O75467;Q66PJ3;Q9HCS4;O60264;Q13023;Q6P387;Q  
92800;Q496M5;O43593;Q7RTU3;Q9Y6Q3;P78549;Q5BKZ1;Q92466;P51523;P57721;Q9NV56;Q96LW7;O7  
5475;O75586;O14558;Q5SXM1;P0CG12;Q6VMQ6;Q13875;Q9BYG7;Q9UQR0;P36578;O60828;O95271;Q86  
Y01;P61088;Q5T3J3;Q16526;Q8N8E2;Q6AZW8;O00505;Q96K30;Q06416;O95071;Q9NXV2;O00257;Q8IY  
57;Q9UHQ1;Q8IZT9;P19447;P35813;Q7LBC6;O75381;Q4G112;Q14527;Q460N5;Q13895;Q14129;O6067  
5;Q9NP98;O43255;Q8WXS3;Q9UJC5;Q96NS1;Q76KX8;Q13829;Q96JS3;Q8NEZ2;Q9H9L7;O94805;A6NN14  
;Q6IV72;P30260;O15160;Q6PI77;O00167;Q7Z5L9;Q9NXR8;O14618;Q63HK5;O75419;Q68DY9;Q9Y3C4;  
Q9H963;Q8IX03;Q9H633;Q92900;Q7Z7L9;P17275;A8K8V0;Q9Y3B9;Q9NY12;Q8N141;Q15257;Q9Y2W1;Q  
9H816;Q9UIE0;P43355;O95163;Q9H160;Q5VUA4;Q86U42;Q9UBK9;Q16637;P0CV99;Q9BVT8;Q9UL03;Q9  
6EZ8;P58557;Q6ZMV8;Q96I27;Q00987;Q92922;Q8N2M8;Q8NF91;O75531;O95571;O94901;Q8NCK3;Q9B  
S34;O94842;P31943;Q8TCJ0;Q14602;Q96CA5;Q8IYF1;Q8TBZ5;O60238;Q9BSG1;P55209;A0AVK6;Q96H  
A8;Q9BXX3;Q9NX06;O95073;O60684;Q86UB2;Q68CP9;P19838;Q9H910;Q96EY5;O95429;P20823;Q9NSA  
3;Q9Y5L0;Q9H0U9;O43592;Q9BRX2;Q12824;Q8TDR4;Q99741;Q15935;O75123;Q13568;O76021;Q9C0H6  
;P0C7X5;P12525;Q8WV22;Q07021;P23490;B2RXF5;O75175;Q9H6R4;Q9H9Z2;Q9UND3;Q12837;O43172;  
Q7Z417;Q9NVN8;Q14511;Q8TAQ2;P08865;Q6P0N0;Q06609;Q14137;Q6P1N0;Q6AW86;Q9UKL0;O60244;Q  
9H211;Q96E16;O14628;P0CG24;O94874;Q9NR46;Q13485;Q8NS0Y2;P62380;Q9GZM3;P61247;Q9BVI4;Q8  
6XK3;Q9Y5B6;Q9H204;Q96HR3;Q15003;Q96P06;O14818;Q9NSJ1;Q7Z3B4;Q03111;Q9P278;Q93075;Q9U  
NH7;Q8WTR7;Q86UE3;Q96A49;P62937;O75925;O14737;Q8N9B5;Q96E14;Q96FF9;P16989;Q9UMX1;Q9H5  
83;P78395;Q9Y2X3;O43482;Q6P1K2;Q8WXB4;O75564;Q9BUP3;O14595;Q06730;Q6QNY1;P78347;Q8NH  
2;Q6K0P9;Q93074;O75683;Q9UHR5;Q7RTV3;Q5H9R7;Q06587;Q9Y237;Q9GZR1;Q9Y253;P24941;Q9H091  
;Q99700;O75391;Q8TBC5;Q9BY31;Q9UNA4;Q14498;Q9UBD0;Q9HB71;Q9Y623;Q9UBB5;Q969Q6;Q9HD42;  
P27695;Q05639;O75478;Q8NC26;Q9H3M7;Q9NZI5;Q8TAT6;Q6NX49;P11161;Q9Y6X3;Q9UKF6;Q5TEFC3;  
P52294;Q9H4S2;Q01664;Q86Y25;Q5PRF9;Q9BVP2;Q53GL7;Q9HB07;Q92539;O43167;Q9UL42;O00161;Q9  
NY43;Q99676;Q9NU63;Q58F21;Q9UEG4;P53539;P17861;Q9Y3Y4;Q6I9Y2;Q96HW7;O75821;O14777;Q8T

AE8;P31269;Q96PE6;P49790;Q01860;Q15544;O14802;Q14676;Q9UNY4;Q03060;Q96AQ6;P09132;O00716;Q9BR11;O43684;P63167;Q6ZLN30;O15382;Q9BWM5;Q8IZD2;Q14493;P46100;P52743;Q9NXR7;Q9H5J8;Q96K75;Q13227;Q96B26;Q7L5N1;O60832;Q00444;O75410;Q15072;P55895;Q8N5D0;P46777;Q14749;P07320;Q13105;Q9HBM1;P52747;P28324;Q9Y3V2;Q8TEE9;Q9Y224;Q96EY1;Q9UJY1;O15318;Q6UB98;Q9NPJ6;Q13887;P20749;Q9UKT9;Q9H4B6;Q96PM9;Q99638;P53992;P17035;Q05084;P09661;Q8NCF5;P15587;Q96I24;P61457;Q86W56;Q9NXV6;O95551;Q9BSW2;Q8NF64;Q9UJG1;O43918;Q15631;P40926;Q7Z353;Q96AV8;Q9ULD2;Q9ULX9;Q07687;Q8TA53;Q9BT81;Q9NSD4;Q8HWS3;Q9BSC4;Q9NVC6;Q8WYK2;Q14938;O43513;P33240;Q15561;Q15021;A6NCL1;Q5JVG8;Q9ULJ6;P81877;O95721;Q01844;Q15366;Q69YH5;P98182;Q99856;Q9H1B7;Q01094;Q9HC52;Q9UMX0;O14770;P23760;Q9Y605;Q8N7H5;Q9NZI7;P78560;P49419;Q16186;Q5FBB7;A6NG73;Q86X95;P0CJ86;P40855;P62875;P11308;P51955;P15408;O43805;O95997;Q93034;Q9NYF8;A6NLW8;Q9NVW2;P54274;Q9NR55;P55197;Q8TD31;Q8NCCY6;Q9NUQ3;Q6MZP7;Q9Y5J3;Q8N7K0;Q86YF9;O00410;Q96LA8;Q8IX15;P13640;P17039;Q96DF8;Q12874;Q14739;Q9UJW9;Q5T0F9;P15884;Q5D1E8;Q6P2D0;Q15599;Q8WVJ9;Q13794;Q86YD1;Q9H9Q4;O43809;Q9NQE9;O43236;Q8N393;Q9HCX3;Q9NX46;Q6ZNH5;Q96NB1;P55210;Q9NWD9;Q9Y5S9;Q6P9A1;P51114;Q15796;Q14839;Q9BVM5;Q8NCE0;Q8NI08;P13010;P17482;Q9H503;Q5VZF2;Q9Y5P8;Q2NL82;Q13287;Q86UP8;P12956;Q96LW9;P20226;P20265;Q5EBL4;Q9BWS5;O95359;Q10586;Q9ULV3;Q16670;P10073;Q8N490;O00321;P78316;Q9ULW6;Q719H9;O95238;Q9Y2Q1;P0CJ85;P47928;Q9UBC3;Q13501;Q6IS14;Q16143;Q9P086;P05204;Q8WDX5;P46527;Q68DY1;Q9NVU7;Q5TBB1;P0C860;Q8IWW8;Q96CW6;P49910;Q86TJ2;Q9H840;Q9HCI5;O75177;Q96MF7;Q6W2J9;Q8N988;Q92748;Q9NYT6;P55345;Q9BRA0;O96028;A1L190;Q6IEG0;Q9NS91;Q5T4T6;Q95081;P49750;Q8IU60;Q9HBE1;P52741;O75791;Q96IR2;Q8N3C0;Q96QF0;Q8NEZ5;Q14693;P17021;Q969P5;P35227;Q9UBC1;P35638;P32929;P29372;Q12986;Q8WWL7;P98168;Q13761;P24864;P19367;Q9NPF5;Q96RS6;Q9UJ78;Q5MJ70;Q92988;P0CJ78;Q6XD76;O60934;P41208;Q969F1;Q9UNQ2;Q96GE5;P59047;Q9H1J1;Q9HAZ2;Q14781;Q9BZW7;Q14CS0;Q8NCU7;Q96ST3;Q9H9D4;Q96K58;Q03938;Q93062;Q075505;Q9UN51;Q8TBZ0;Q9UH90;P25963;Q9Y314;Q15819;P17041;Q9Y4Y9;O60381;Q9H2U1;A5D8V6;Q69YI7;P05813;P10589}

6180

Pathogen[ P14079] interacts with 3795 human

partners: {P31751;Q969J2;P04083;Q96DC7;Q9H0U9;O14776;Q5EBL4;Q13228;Q9UQL6;O60671;P51854;Q96JN0;Q9Y2S0;Q15637;Q15916;Q9NZ81;Q8NFH5;O00625;P28838;Q96SC8;Q3T8J9;Q9BWM5;Q9BXW6;P98168;O43809;Q5JTD0;O60225;P07199;Q8IYX0;Q96NU1;Q8NHY6;Q6P1N9;Q9NV72;P56181;Q92664;Q8N9N8;Q14585;Q6AW86;P48552;O95373;P15622;P52738;Q96EK7;Q96C00;Q7Z5D8;Q5SXM2;Q14980;Q13952;O60284;Q9UJN7;Q9BYG7;O15194;Q9UQR1;P28065;O15379;Q8NBV4;O75886;Q0D2J5;Q96CS4;P07320;Q9UPW6;Q9UK12;Q9H204;Q6P0N0;Q9UHB4;Q13492;Q9NSD4;Q15560;Q99436;Q96A56;P15259;O95159;Q9Y5B9;Q8N2W9;P07316;Q32MQ0;Q9HBT8;Q96AB6;P52741;Q9HAK2;Q5THR3;Q9BW11;Q12986;O14519;Q96FX2;Q8IZC7;Q3ZCQ8;Q04725;Q6VNV2;P51959;P35711;Q9H668;Q8IZU0;Q9BPZ2;Q99623;Q9N9QX1;P54274;P25758;P05937;Q3SY52;E9PGG2;Q96ST2;Q9H320;Q9NQW6;Q9NR46;P62875;Q8IV48;Q14CS0;Q8N831;P80297;Q13772;P51504;Q9H0E3;O00422;Q13362;Q8N9Z0;P78346;O60244;P11388;O15069;Q8N895;P35579;Q96MU7;Q99459;Q9Y333;P41218;Q96IY1;Q9NPI1;O95402;Q68DK7;O60260;P17098;Q15014;Q01105;O43447;P08151;Q8N8B7;P15036;Q03188;Q5JVS0;Q9GZM3;Q8N7U7;P62333;Q9BQ95;P13056;P53804;O15164;Q8NEM7;Q9Y2X0;Q8IXQ6;Q7L804;Q9BW27;O43513;Q9HWK2;Q9BRX2;Q96JI7;P0CJ89;O75123;Q14004;O15315;Q8IWL8;O14746;Q13416;Q5XKL5;Q92979;Q9HAZ2;O14867;O95425;P0CJ88;P0CL85;O75467;Q68DY9;Q9NWS1;P25800;Q9GZT9;Q15007;O00442;Q6PGP7;P20585;P55199;Q9UL40;Q9BRT9;Q8NCY6;Q9NQ50;O95628;P61581;P0C7M4;P10243;Q9H7R0;Q8WWW9;Q9UKV8;Q99743;Q96HA1;Q06730;Q9BQ15;Q53GI3;O75346;P60002;P57678;Q86VN1;Q9UNH7;P16383;P62508;Q6T4R5;Q8WZ33;P33076;Q9HBT7;P05114;Q8TAT5;Q93083;P57076;A9UHW6;Q4G112;B3EWF7;Q9Y3B8;Q99627;Q96I25;P09874;Q96JB3;Q8WVV9;P05813;Q15287;Q9Y4A5;Q9BQK8;Q5MCW4;Q9H0S4;Q96RJ6;Q96J30;A8MTY0;P52742;Q96T23;Q8TD23;Q8TDR4;P48556;Q8IXH6;Q5HYK9;Q6XYB7;Q9BQS6;O75618;Q96IR2;O76075;Q08945;Q96LW7;Q13506;P51965;O15162;P41227;P09132;P10155;Q5TA31;Q05BQ5;Q9UPP2;Q96RS0;O75151;Q8WTR7;P31948;Q99807;Q53H80;Q9UL36;Q9NV88;Q8WXC3;Q96EY5;P12755;Q9Y3B2;P55055;A6NEJ1;Q5MJ70;Q8N8L2;P0CG31;Q6UB98;Q9NR22;P23396;Q7L590;Q5T1R4;P13196;Q8NEH6;Q5D1E8;Q9ULG1;O00291;O95416;Q08495;Q6ULP2;Q05084;Q15038;Q9ULF7;Q8WUN7;Q92994;Q8IZD4;Q5EE01;Q86WV1;Q9Y664;Q9H0I3;P11142;Q86WP2;P10412;A8K8V0;Q10587;Q9HAJ7;Q9Y5Q3;O60381;Q9BYK8;Q9BTV5;P57077;Q9UDV6;Q9NWB6;Q8WXB4;P63279;Q16873;Q15561;Q9Y2Y4;Q9BZK7;Q71F56;Q15573;Q8IZX4;P14373;Q9UKG1;O75934;Q15532;O43364;Q9NV31;Q96LW1;Q9UC06;Q9BVP2;P35869;P57086;Q96T37;Q8WV24;Q969X6;Q8TEQ6;Q02078;Q9Y2G7;O95125;Q99814;Q7Z340;Q9UK13;Q075817;Q9NVY6;Q9UIS9;Q14241;Q8N5D0;Q96P01;Q8NDQ6;Q96B01;P0CG48;Q06413;Q40855;Q0VDE8;Q9BWX5;Q9BRT2;Q13609;Q8NDP4;Q6STE5;Q9NSI6;Q9UNA4;Q8N196;Q99502;Q8NB91;Q5QGS0;Q9NPE3;P13073;Q76L83;Q9NUQ7;Q8IUE1;O75419;O15370;Q9UI43;Q8N693;O43482;Q8N8G2;Q9BYX4;O75400;Q14738;Q5EBM0;Q15596;Q6ICB0;Q15047;P0C7V5;Q86V15;P10072;Q8N141;Q16222;Q8IZU1;P28715;Q92600;P52630;Q96MF7;O94906;Q96K62;Q9C005;Q9UJW7;P30307;Q14566;Q96H86;O43745;P21506;Q9NQV6;Q96AB3;Q9BZE2;Q107X0;Q13106;Q7Z7K2;Q8N490;Q96CB8;O14771;Q9Y6Q3;O75072;Q14442;P20962;Q9Y2X3;Q6PCB5;Q92681;Q9GZV5;Q9NWT8;Q9NWX5;Q9NS23;Q9BT81;Q96H20;Q06546;P14859;Q5VWQ0;P29728;P53041;P02795;Q9Y6J9;Q6IQ23;Q9NPA3;Q8TF50;Q96MU6;Q9UKT4;A6NJ64;Q9NRR3;Q9Y2W2;Q96QC0;P10073;Q7Z7L9;O75821;O60508;Q16526;Q8N163;P35637;Q96PT4;Q9UL42;Q5VZF2;A8K0S8;Q9HC44;Q6NT04;Q8WXS3;Q969H0;P11532;P62324;P53779;Q14693;O60828;Q9UBU8;Q9ULV3;P28749;Q9Y316;P61201;P78337;D6RGH6;Q6ZVD7;O43422;Q96LA8;Q9BYG5;P13349;Q01534;Q9UNY5;Q16649;Q14653;Q9NZM5;Q8NEU8;Q99633;A6NK53;Q9UL59;Q96NY9;Q8N587;P51808;Q9H321;Q8WY36;Q6PIJ6;Q6ZNA1;Q86WV5;Q7Z4H9;Q13765;Q92917;O15553;P19387;O75691;Q5H9L4;Q9UGK8;Q9Y3A2;Q96BT3;Q8N9F8;O75437;O95139;P52747;Q9NJZ4;Q9C035;A5PLL1;O75928;Q9UHQ1;Q9Y5B0;Q52LR7;P35269;P57721;Q15776;Q56P03;Q14186;Q13118;P61583;P11171;Q9H009;Q9Y255;Q9UHA3;Q75528;P54136;Q86UQ0;Q9GZQ3;P49336;Q6ZNG0;Q9H869;Q9Y4P8;Q96DB2;Q13148;P51946;Q9UDY2;P08048;Q9NRG4;P17019;O95999;Q8IWW8;Q6ZMY9;Q15853;Q2NL82;O00321;Q96P70;O15297;Q96ER9;Q9NVU7;Q9BVN2;O60481;Q13415;Q7Z2W4;Q9HBM1;Q9UM82;Q3ZCX4;P68036;O95684;Q9Y6K1;Q6ZT77;O15535;O95359;Q8IXJ9;Q16594;Q9C0B1;P61576;Q9GZU2;Q8IZA3;O14893;Q9Y6X2;Q9H0A0;Q8N339;P56589;Q9HCG1;P17035;P23409;Q14192;A6NCL1;Q9BQI9;Q99581;Q92830;Q9Y2P0;Q9H3M9;O75312;Q9H5J8;Q8N0S6;Q9BWH6;Q9NVR2;O75626;O75368;Q969E4;P52564;Q8IXH7;Q9Y2Y9;Q96R06;Q6P9G9;Q8TA94;O43309;Q14938;Q330K2;Q9H4D5;Q15911;Q96QR8;O75362;Q5JXB2;Q96HI0;Q8TCD5;P17010;Q68CJ9;Q15723;Q9UGP5;P20292;Q9Y2N7;B2RD01;Q9Y2Q



1;P35398;Q9UKF6;Q9UKN8;Q9UBW8;Q01082;Q5T3J3;P0CB33;P78396;Q95271;Q14896;Q8NFW8;P53567;Q9UKD1;Q9Y5N6;Q9BR84;Q14103;P67809;Q8TF01;Q7LFL8;Q8IYD8;P80217;Q9UGN5;P47974;Q8N8D1;Q9BWU0;Q96RQ1;P68104;P53999;Q9UPN7;P50995;Q15714;Q8NDN9;Q96LI6;A6NDV4;P24864;Q8IU60;Q8N108;P62487;P10244;Q9HBO7;Q9Y237;Q9BVC6;Q8N782;Q99700;Q95503;P49842;Q9UJM3;Q9NW08;Q14146;Q9NUA8;Q9ULX6;O43439;Q7Z6K1;O15304;Q95789;Q8TDY2;Q9BUE0;Q9UHQ2;Q5SVZ6;Q96CJ1;P36873;Q9NP66;Q9NUX70;Q9UFB7;Q7RTT3;P17022;P82979;Q92966;P11473;Q9H0M5;Q9Y6I3;P57740;Q3KP31;Q8N9B5;P17041;Q9UBL3;Q99873;C9JE40;Q9H9Q4;Q9UBS3;Q8N1F7;O60290;Q8N393;P41223;P20396;P35680;O60682;O75533;O15446;P20265;P40937;Q8IXT2;Q6IA86;Q15006;Q5TEC3;Q9NY61;P62847;Q5T0B9;P13010;Q96ST3;Q8WUF5;Q13023;Q9NXW9;Q15819;O60543;Q6IS14;Q15024;Q99676;Q9NRG0;P40306;Q92782;P55347;P09086;P31941;Q9NQ31;Q96RK0;A8MT65;O75582;Q96JK9;Q8NCP5;Q16254;Q9UK45;Q95229;Q08AN1;A6NJG6;O14641;Q6XD76;Q8NB42;P10828;Q92541;Q14151;P62753;O43679;Q5VVH5;Q8TE85;Q96JC9;Q9NPJ8;Q58F21;Q9BYH8;Q9UBF6;Q8NBT2;Q9NVM4;P16083;Q13620;P56537;Q9BRU9;Q9UJX3;Q2QGD7;Q9BSI4;P08235;Q10570;P98171;P52434;P02511;P48634;Q92985;Q32M78;Q9UNY4;P17039;Q13404;Q8IYN2;O60832;Q9HBM0;P52298;P04156;Q9UMX0;Q8N0X2;P35658;O94986;Q9UHP9;Q5EBM4;P40692;Q9P0M2;Q9NPI6;Q92804;Q14207;Q9Y314;Q9UBZ4;Q9UQF2;Q9BV20;Q5T230;Q96DF8;Q13098;P0CH99;Q92793;O00170;Q6NUN9;Q13033;P51522;P28074;Q9ULM2;Q99733;Q9HC52;Q9NRL2;Q5JVG8;P12524;Q15172;Q07157;Q9Y675;Q9UBB5;Q5PSV4;Q9H171;Q70IA6;Q13618;Q9BT56;P57772;A6NHJ4;Q9BWC9;Q15013;O95948;Q99549;P61582;P50135;Q16633;Q9UNS2;Q9Y5R5;P39023;Q9H1J1;Q9BXJ9;Q8WX93;Q66K74;Q15528;Q12874;Q9BWT6;P28370;Q9NTW7;P61457;Q49AN0;O75290;Q99607;Q96TF9;Q9UI56;Q6P9F0;O43823;Q9Y586;Q9P2Y4;P52746;Q6ZN57;Q93052;Q02410;Q9Y468;Q9BTA9;Q96D T0;Q9NV99;Q99829;Q86WQ0;O75792;Q9P016;Q9NPI8;O00165;A8MSY0;O75564;Q69YH5;Q13129;Q9H4L7;A6NF01;Q75QN2;Q969S8;Q9H1A4;O95429;Q13243;Q8N1G2;Q14CW9;Q63HK3;Q9NZV6;A8CG34;Q9H8E8;Q15397;Q9H777;P39880;Q15583;O60524;Q9UMX2;Q9Y5S9;Q9H040;Q9GZS1;Q7Z3K3;Q96DU7;O43592;P55771;Q13835;Q8WUI4;Q6ZR52;Q13901;Q9NPD8;Q02241;Q9UJX5;P48382;O15405;O75475;P50991;Q16531;Q8NG50;Q8N336;P49005;Q6PJT7;Q9UBS4;Q86U70;O15198;Q9BUJ2;Q9UL41;Q9BSW2;Q6NZY4;Q9BXL8;Q8NEK5;Q63HM1;Q9NVX0;Q8N5A5;Q7Z3K6;O94901;Q9UQR0;P48147;Q96HR3;P04080;Q12906;Q2VWA4;Q8IYB9;Q9H707;Q96SR6;Q96PM9;O15514;Q9C000;Q9H910;Q15329;Q9NQ29;Q16656;P33240;Q99576;P31949;Q9BSV6;Q9GZL7;P26038;Q99594;Q9NX46;Q8N987;P52737;O43913;P35789;Q9H1K1;Q9NWX4;P0CJ86;P51815;Q6IBW4;Q15699;P54252;Q13330;A6NLJ0;Q86VZ6;Q9Y6H5;O94874;Q6ZNB5;P28347;Q86TB9;P17096;P30876;Q14691;Q8IY22;Q14591;B2CW77;Q03060;P11474;Q92922;Q96F24;Q9Y240;Q92621;Q96NB3;Q6ZN32;Q6ZRF7;Q8TBZ8;O95251;P48380;Q14320;O95990;Q9BZD4;P52294;P51532;Q9H211;Q00597;Q5XG87;Q8NCA9;O60518;A8MUV8;Q14164;Q9Y678;Q9BV86;Q9UQB3;Q6UWZ7;Q96NM4;O95644;Q9BXX5;Q9UGK3;P61218;P17024;Q99497;Q8WYR1;Q9P255;Q9UNL4;Q14592;Q9BTK6;Q9BRA0;Q9GZX5;Q8WXE1;Q15742;Q3MJ62;Q7Z417;P54278;Q15170;Q9P013;Q8WTT2;P26368;Q6P2C8;Q9NSJ1;Q86U86;Q92540;Q96NG8;Q01538;Q9Y3C7;O14646;Q9NXV6;P98005;Q6ZN79;Q5T0J7;Q96S94;Q6PI77;Q14865;Q8TED0;O60676;Q8NG57;O60688;Q9UDY4;P29372;P59684;Q8TEML;O15392;Q86TP1;Q9NTM9;Q92610;P83876;O43598;Q01826;Q96N20;O60907;P61579;Q8TEV9;Q9H3P2;Q9H8H0;Q8IXF0;P49720;P35712;Q9UID6;O95163;O75529;Q5T0F9;Q93062;A4D1E9;Q9ULK4;Q13536;Q86TU7;Q9H008;Q9UMX1;Q8WVJ9;Q61PX3;Q95190;Q95931;Q68DI1;Q9NQT4;Q9Y250;Q13428;Q13487;Q8N9A8;Q9NWZ5;Q9UPA5;Q16186;P62136;P11172;Q7L5Y6;P25787;Q00994;P0D183;Q92698;P51587;O60216;Q8N0Y2;Q8N720;P80294;O60684;P07438;Q14966;Q6ZNA4;P29401;Q8IX15;Q9NVC6;O75179;P07737;Q99966;Q13868;Q8IWZ3;Q8NI27;P54198;Q9H7X3;P58304;Q9HC16;Q9UNX4;Q5H9I0;Q9UHC1;Q6IEG0;P51531;P42704;Q96SE7;Q14209;Q9UKV0;O43813;O75832;Q9GZN2;Q9HCH5;Q5VIY5;O43167;P14866;Q8N726;Q9Y266;A8MZ59;Q05516;Q4LE39;Q9HA82;P23246;Q8TAK5;O75446;P46783;P46060;Q86US8;Q16143;Q9HAP2;Q12988;P07910;Q8NI08;Q9UBU9;Q9Y5A6;O60287;Q9UFW8;Q9NPD3;Q13310;Q8NBZ0;O96004;Q92748;Q8IYL3;P22736;P52594;Q8TCJ0;Q9HD42;Q13838;Q13573;Q9GZR2;Q6Q759;P57075;Q99856;Q92800;Q9H305;Q14106;O95067;P78371;Q08378;O60303;Q92624;Q9NVM9;Q76KX8;P05198;Q6NZ36;Q9P2T0;Q12816;Q9H840;Q96D70;Q8IZP0;Q9BWE0;Q02447;O43812;Q8WW01;Q6K0P9;Q6P9B9;Q5T8A7;Q13105;Q969P5;O00213;Q5MJ68;Q9Y383;Q13394;Q9H503;P15976;P08729;Q9H5D7;P35232;Q9BWG6;Q9BWT1;A0JLT2;Q8TEE9;Q6P1N0;Q3MLS6;Q9BYN7;Q6ZRS2;O60346;P06744;Q9HCU8;Q96D46;Q9P086;Q9C002;Q9PWQ6;Q9GZS3;Q8NC26;Q92785;Q8IZL2;Q86XK2;Q9NY27;Q9NR83;Q9Y5Q9;Q8NG31;Q9P2J8;P53805;Q14739;Q6P387;Q9P0L1;Q9UHV9;Q32MZ4;Q9BSK0;Q9UPW5;Q15059;O14497;P29144;Q96C86;Q9UBZ9;P10909;Q9UBC1;O94913;Q15050;Q9BWG4;Q8ND76;A5LHX3;Q86SG2;O15116;Q9NS39;Q8N344;P53992;O95639;P04844;Q9HZK2;Q96EB1;Q14674;Q86UQ8;Q9Y615;Q9Y3F4;Q9ULW0;O60433;Q8NAV2;Q9HAF1;Q14VC44;Q9NY43;O60281;P32519;Q13112;Q13216;P62312;Q9Y3D0;Q15029;Q8N859;P16455;Q9H6F5;Q13045;Q13889;Q8NHM5;Q9UK11;O60504;Q9BQ65;Q9BXW9;Q8TAQ2;Q8N7M2;P53803;O95905;Q96K83;Q6IPU0;Q13472;P19484;Q13111;Q9GZU8;Q6PG37;Q7L5Y9;Q8N883;Q12968;Q03923;Q9Y3A5;Q15025;P62937;Q9NP98;Q9UKX2;Q9NQP4;P41220;Q9NVH2;A6H8Y1;Q9BZV1;Q13427;Q96NI8;Q9H2P0;Q6ZMS7;Q9H1B4;Q9NZU5;Q8IYI8;Q14129;P62979;Q5VWP3;Q06732;P46937;Q5SVQ8;O43829;P18615;Q5HYJ3;Q86YC2;Q9UGY1;Q96MR9;O14907;Q6ZNS5;Q86YP4;A6NHQ2;O60869;Q96HR8;Q6P2D0;Q32P41;Q96S99;A6NKF2;Q13625;Q96UM5;Q9Y2P7;Q9Y3Y2;Q86UK5;Q8N1N5;O00233;O94864;Q9NUQ6;P41161;Q96NL3;O60934;P60673;O75190;Q8TDN6;Q6P2Q9;Q9UJW0;Q12796;Q9BSD3;P49918;Q9Y3Q8;Q6P2E9;P62841;Q92597;Q8NCE0;O15527;Q96L92;P61758;Q3SXZ3;Q15003;P63165;Q99828;P62380;Q9H3C7;Q9UHI6;Q9BTE3;Q96A49;A6NGD5;Q9Y448;Q7Z591;Q7Z4G1;O43379;P35998;O60711;Q14118;Q96SZ4;Q96RE9;P78549;Q9NZL9;Q9BQA5;Q9H147;Q96NG5;Q9P215;Q7L3S4;O75461;P31271;Q9UBW7;P15923;Q15306;Q9NR56;Q9NS37;Q9HAU4;P48443;Q9UHK0;O60870;O43830;P62314;Q96LX8;P54253;P14324;Q13156;Q14498;O95707;Q9ULM3;Q9HCS7;Q9H9A7;Q06547;Q5VYK3;Q5BJF2;Q9NUQ3;Q14258;Q8N7G0;Q15797;Q9BQI6;P06733;Q16600;Q9H299;O43298;P30793;Q9H9Q2;P02489;Q8TBC5;Q969V6;Q15427;P33316;Q03933;Q9NWA0;Q08211;P25685;Q14765;Q7R TT4;O75155;Q9H9Z2;Q5TAP6;Q96BN2;Q16385;Q9NYH6;Q9NU63;Q6IE81;P10827;Q9H175;Q12837;Q9UHX1;P57081;Q9UKK3;Q96AH0;Q5SNT2;P61289;A6NFF2;Q6PD62;O95453;Q96JM2;Q96JC4;Q8IY81;Q6ZN06;Q6ISB3;Q96AY2;P23025;P29084;Q7Z465;Q03989;P23497;Q5JSS6;P30304;Q86TJ5;Q99608;P61956;P52744;P57071;Q8IYW8;Q9NQ90;Q05048;Q15652;Q9NQZ8;Q8NA19;Q3KQV3;Q9NQ94;Q96HA8;Q9H307;P17027;O95149;P51610;Q6EKJ0;P54845;Q9UL16;Q92890;Q92539;Q9HCI5;Q9BUZ4;O15350;Q00839;Q9BY77;P62817;Q6PJG2;Q15744;P09629;O94892;P62987;Q16576;Q719H9;Q03252;Q9P0V3;Q9UILL8;Q99612;P22087;Q9BXS6;P42568;P02533;Q8WXU2;Q16670;Q15072;O60315;Q9H1A7;Q15572;O43290;Q5FBB7;P46939;Q6PIF2;P55197;Q9H410;Q7LG56;Q9BVJ6;Q9Y4I5;Q96S65;P55212;Q49AA0;Q6PJG6;Q9BQ



50;Q7L266;P36402;Q03938;Q96MN9;Q12873;P40121;Q96FA3;Q03111;A1L020;Q8TF32;P11308;Q9Y613;Q9HCE5;Q13144;Q9H5I1;P55273;O95059;O95718;Q14588;A6NP11;Q8WVY3;Q96FV9;P83369;A4GXA9;Q01201;Q9HB19;Q5TD94;P0CW71;Q15459;Q9H6J7;Q86V71;O00461;Q9UKX7;Q3KNS6;Q9BVI4;Q8WVY7;Q13541;Q9UHB7;P35611;Q6F81;P20618;Q9NTI5;O00567;Q9NWD9;Q00987;Q6BEB4;Q9BUP3;P45984;P55198;Q92797;Q9Y421;Q96RY5;Q2TAK8;Q2BSU3;A4D1E1;P25815;Q2LD37;Q9BVT8;Q9BZE4;P0CL83;P63104;Q96ND8;Q9B7T1;Q6NVH7;P08651;Q2TAY7;Q96RT1;Q9NYF8;Q9H808;P46100;P62306;Q9UHJ9;Q9NWS9;O00534;Q86U44;Q9Y244;Q9ULW8;Q9BRR0;P51814;P43243;Q9NV11;A8MUZ8;Q15061;Q96E13;Q15078;P28698;O94763;Q9NYG5;Q8TF68;Q96GE5;P35813;P28069;O75448;Q9BVL2;Q6PI98;Q96BV0;P51825;Q9NRR5;P14678;Q9NNX9;Q96MB7;O96007;Q12772;O75506;O95073;Q9Y6P5;Q17RY6;Q9UL58;Q13769;Q8TAA3;Q9UKY1;P31276;Q9HOE9;P0CJ90;Q86UB2;Q8IXW5;Q99687;P0C7X2;O95400;Q14149;Q8IYB3;Q12905;P43356;Q8TCN5;Q9BUR4;Q96JF6;P43897;Q9ULD5;Q9UC07;Q9ULR0;Q8NBB4;Q6W2J9;Q9H2G9;P45973;Q6NT76;Q86TC9;Q9Y3E1;Q9H9L7;Q6P1X5;Q12802;P19338;P42226;Q6X4W1;Q06330;O15504;Q6V9R5;Q8WU90;O00186;P80303;Q9NWZ8;Q8N3S3;O43427;O43148;Q8N1G1;Q9H9E1;P82094;P45983;Q99741;Q9UK73;Q9HB71;P82970;Q8TAW3;Q96NT1;Q92670;Q8IXT1;Q9NPC3;Q8N3U4;Q16629;P50613;Q9H6W3;Q9NZC4;Q9Y2T7;Q9H0N5;Q9H981;Q9H6R4;Q9P2D1;Q8TD26;O95721;Q9NZI7;P40337;Q3C1V8;Q15631;Q9Y247;Q5H9F3;Q9Y5Z7;Q5BKZ1;O95831;Q9GZX7;O43189;Q15651;Q13888;Q96CW6;Q15929;P78364;Q9UG56;Q00613;P39019;Q01892;Q9UKL3;Q7L9L4;O15060;Q86Y25;Q8N205;Q14202;Q8N357;P17480;Q99583;Q96KR7;P26599;Q6ZN19;Q8IY85;P36405;Q8TE02;O95571;Q99543;Q9NSP4;Q5VV52;Q8HWS3;B4DU55;Q96MW7;Q9NZL3;Q15054;Q9BTT0;Q8TDN4;Q8WY54;P55795;Q9BXG8;Q13568;O75940;Q9UJW9;Q7KZ85;Q9C0C2;P12956;O75952;Q9ULZ2;P61572;Q9NWU2;P61236;Q9H4W6;Q9BWJ5;P55345;O15117;Q96Q6;Q9P0W2;Q9Y3T9;P06132;Q9ULW3;Q96D98;Q9HAW4;Q9Y534;O94805;Q14744;Q99661;Q8N9S5;Q6NX T1;Q96LT7;Q6I9Y2;Q96BP2;P61580;Q03924;Q8NCN2;Q96T21;Q96N22;Q8N6F1;Q9BQW3;Q7Z699;P61326;P41182;O43663;P31274;Q7Z6E9;Q86UE3;Q9GZY1;O00566;Q8NAP3;Q9UL49;Q460N3;Q9NV06;P12525;Q01543;P35250;Q8N5J4;Q9NUW8;Q96GA3;P10074;P0CJ87;Q5MIZ7;Q8WW12;Q9NXR7;Q16637;Q9UPG8;Q71F23;Q96CX3;Q66Y01;Q8WUM0;Q6MZP7;Q14997;Q96AE4;Q14549;O75791;Q9NRF9;Q13642;Q9BSH3;Q3ZCT1;Q9BXM0;P17097;Q8N5U6;O14656;Q86UP8;Q5TAX3;Q9P1U0;Q15906;Q13185;Q9Y5K5;Q99496;Q96BUI;Q6VMQ6;P19388;P58317;Q5VWX1;Q96EG3;O95926;P49756;Q96L21;Q9UBC3;A6NK75;P14635;Q8N HZ8;Q14749;Q9P2F9;Q00403;Q9UMS4;Q03936;Q9BZE3;Q14692;Q9Y287;Q9UK39;Q9HC62;Q147U1;Q86Y W9;Q08ER8;Q13875;P51955;P35754;Q9UMS0;Q13356;O75943;Q9H7N4;O00257;O75586;Q9H7D7;Q8TA8 6;Q14790;Q14781;P12270;P55209;Q9H6U6;Q9UNN5;Q9UJ98;Q9UK58;Q53GS7;Q9BX82;Q9NXT0;Q151860;O14929;O00512;Q9H2D6;O75530;Q9UND3;Q9H6T0;A7MD48;Q15046;Q8TF39;Q53FT3;Q96HA7;Q07373;Q9Y3Z3;Q15543;Q6ZYL4;Q66PJ3;P28062;O75764;Q5VTD9;A6NLF2;P57055;P60900;Q9NP64;P19532;B 1APH4;Q05481;Q14145;Q8N114;P42167;Q9ULX3;Q5JTV8;Q9BXY0;Q9BSF8;P17026;Q8IX03;Q96BD5;P1 6989;Q8NC51;Q02040;Q56P42;Q9UIH9;A6NN14;P12980;Q9UPN9;Q9H0W9;Q9HCE3;P11161;P22392;O00 482;Q9Y2S7;Q08AG5;Q8N5Y2;Q9H9T3;Q9UJ33;Q8NF64;Q9NZC7;Q9NWF9;Q9NV56;Q16644;O94829;Q96K 75;O60318;Q86YB8;Q8N972;Q9UKV3;Q9Y3C1;Q969R5;Q12962;Q9NZQ3;Q9H963;Q96D87;Q9UER7;Q8ND9 0;P19474;Q9ULH7;P55265;Q16719;P36639;P17544;Q9NPF5;Q8WYP5;Q6RFH8;Q9BR11;P62277;Q96AQ7 ;Q9UH90;O95238;Q92769;Q9UBD5;Q9BXR0;O43681;Q9BXX3;Q8N9W8;Q96I24;Q9BZ17;Q9H467;O00716; Q8IY57;Q96IF1;Q6ZMV8;A8MV65;O95347;Q9BW66;Q5SXM1;O00410;O14737;Q9NYH9;Q9H4T2;P23528;Q 9UM11;P11940;Q3SY89;P29374;Q8NCK3;Q9BZ04;O43711;P62750;Q8LZU3;Q7Z5Q5;Q96Q89;Q5H9S7;Q9 UN42;Q9UBB6;Q8TF20;Q8NCU7;Q6XQN6;Q8N201;Q9UHV7;Q9H583;Q5VT06;Q9BQA1;Q4G163;Q5VTR2;Q9U PP1;O94818;Q9Y4Z0;P17032;Q5TID7;P31946;Q7RTS1;Q8N6T7;O60248;Q9BUI4;Q02930;Q8NFZ5;Q8TE K3;Q9NQ33;Q99708;Q969U7;O95049;O00264;Q9H2G4;Q8WVC0;Q9NWT6;P55210;Q8N823;P49715;Q96G2 3;Q8N8J6;Q9BWW4;Q9BQ67;O60663;O14709;O15266;Q14934;Q96RN5;Q9NR11;P23508;Q0VG06;Q9BXY8 ;Q07666;P05423;Q9NZI6;A6NFQ7;P56182;Q96S55;P28289;Q6U7Q0;P61573;Q05159;O75340;Q5RKY6; Q92560;P38936;P41252;Q15759;Q9H1E3;O15205;Q8N680;Q8WTZ3;Q15599;Q9Y6K9;Q6P280;Q5PRF9;Q 68EA5;O43345;Q7RTV0;Q7Z5L9;Q9Y473;Q9GZN7;Q9HD36;Q9NUL3;P84101;Q8IWC1;Q9BRP8;Q9Y6K5;Q6 NS38;O75469;Q969F1;Q9Y6D6;Q9NQZ2;P17017;Q9NY12;P17987;Q9NPG3;P31269;Q99933;Q92832;O60 502;P08107;P0CG40;P24863;Q3KRA9;P25791;P08621;P45985;P08397;O76021;P49848;Q9UI26;Q130 42;Q99567;Q13057;P51508;Q16587;Q9H1B7;Q15773;P0C7X5;P61571;Q8NC56;Q92945;Q9NWW8;O7582 0;Q6ZS27;O14558;Q2M1K9;Q8N684;Q9UQ35;O15160;Q13867;Q8N6M9;O95243;P16333;P58557;P56282 ;Q8NE71;Q15058;Q9NY33;Q96JM7;P27540;Q9BQG0;Q8TCI5;P61960;C9JN71;Q8IVN3;P0CG12;Q9H4Z2; P13640;Q86X24;Q96DE5;P52435;Q93034;Q6ZNB6;Q3B726;Q9UIF9;Q96JZ2;P63272;O75525;Q9BXF3;Q 8WUX9;Q12830;Q66K89;P41002;Q8N2Z9;P17031;Q7Z6J9;Q9UEG4;Q9Y478;Q13257;P62328;Q14974;Q9 6EA4;P18887;P55060;Q9P2R6;P50549;Q92973;A6NLW8;P17029;Q68CQ4;Q9BYE4;Q9BRS8;Q96SK3;Q7L 190;P22670;Q8NFG4;Q9NQR1;Q8NB12;P35251;Q562F6;Q8WUY3;Q9H6Z9;Q9Y5J3;Q6NSI3;Q9H4B6;Q9BV C3;A6NIX2;Q96QF0;P17275;P17021;P16415;Q86UW9;Q9NZT2;P62140;Q9NYT6;Q9H9L3;P49450;Q86UD 0;Q86WJ1;Q99990;Q86V81;Q8N2G8;Q9NY87;P15336;Q14593;Q96BF6;Q9NRR4;Q19AV6;Q92750;P45381 ;Q9HD15;P46087;Q9ULZ0;Q86U42;O95785;Q6R2W3;Q96JM3;Q99575;Q96NC0;Q8IXK0;Q15452;Q9H8V3; P24855;O94811;Q8IVP9;Q16384;P35573;Q96GM5;Q9BV47;Q9Y697;Q96IZ7;Q9UP83;Q15424;Q96LW9;P 53370;P78316;Q9NVV4;Q8NHW3;P51523;Q8NDL9;P24522;P0C1Z6;Q15697;Q8N2I2;O00148;Q9Y2B5;Q9 6AC1;Q9UKK6;Q96H22;Q9NZP6;P36578;Q9UBK9;P28702;Q969S2;P52743;P24278;Q9BTV4;P04198;Q16 630;A5D8V6;Q9Y3C4;Q9Y3M9;Q9UBF1;Q6ZW49;Q9BY41;Q9NXX1;P62308;P17020;Q96T49;P06454;Q8NF D5;Q8WXH0;O14978;P23490;Q8TAD8;Q8WB37;Q9BQY4;Q9Y4A0;Q9Y3Y4;O75175;O75953;Q8NFH3;Q9Y6R 6;Q02833;Q9NYB0;Q9NYP3;Q96IZ0;Q8WUB8;Q9HB58;Q4V348;Q86UA6;Q9UHR5;P61586;O60506;Q9H944 ;Q92791;O75360;O43294;Q15370;Q6ZMZ3;Q9Y4B6;Q9UK10;Q15696;Q6GPH4;Q9P243;Q8TAT6;Q9Y2X9; P05204;Q8TF45;Q9UJG1;Q8NXX6;Q9Y5Y2;Q8TC56;Q9Y2M5;Q15788;O43325;Q96EE3;Q86XU0;Q5TGS1;Q 9UBB9;Q92759;Q9Y6Y0;Q9UFF9;Q9UJQ4;P09012;Q15185;Q8TB69;Q9Y4W2;Q13360;Q9H8V3;P49910;A9 YTQ3;Q8WWL7;Q9HAW0;Q08J23;P26358;Q9VZB9;Q9BUL9;Q9UK99;Q9Y6M1;Q8N4W9;Q96AQ6;Q9HCD5;Q9U NN4;Q01664;Q7Z3B3;Q86W11;Q8NEZ2;Q8N8U2;P50749;P37198;Q99417;Q96FI4;Q9HCK8;O14818;Q9UJ A5;Q13794;Q70Z53;Q9P0J0;O00570;P26447;P15822;Q71UM5;P51786;Q14684;Q92889;Q5JVG2;Q8IX0 7;P31249;Q9Y3V2;Q9BPU9;Q9UJW8;Q14689;Q7RTT5;Q7RTT6;Q15366;O95983;Q68E01;Q9P258;Q9Y248 ;Q2M3X9;Q8TBZ5;Q15834;Q9NS26;Q9NZI5;Q8WUY8;Q9NS25;Q9BTL3;P56270;O60936;Q5TB30;O00110; P27695;Q35HI1;Q12983;Q16082;Q8NA42;P49721;Q92905;Q9UJY1;P62304;Q15428;Q9P2K3;Q6ZMW2;O 43264;Q9UHL9;Q7Z3V5;Q13351;Q99909;P78424;Q96RK1;Q9UBD0;Q8IWI2;Q9NX01;Q5C9Z4;Q156A1;Q9 6T92;Q9BU02;Q8N668;Q92618;Q9H633;O94992;Q9NY74;Q15042;Q9BQ52;Q49MG5;Q9UMX3;Q8NEP9;Q17

RP2;Q49A33;Q9NX58;Q9UKL0;Q9Y2Y1;Q9BYV9;P32929;Q86VD1;Q7Z7J5;Q96MA1;P48788;Q9Y2M0;P09917;Q9H091;Q1ZZU3;Q9HAU5;Q9Y2L1;Q2VY69;Q9Y281;Q96AJ1;A8MT69;Q96PT3;Q14586;Q9NXV2;O15397;Q96RL1;Q9Y603;Q8N140;Q96NJ3;Q8NA77;Q8NAM6;Q9NS56;O60264;Q9HC78;Q9NPJ6;Q8IWA0;Q9ULX9;Q15327;O43365;P49790;O00287;P62316;Q6ZN28;Q14135;Q96DX5;P50539;Q93075;Q13227;Q8IVC4;Q9UI36;Q86UE4;Q9C0F3;Q86UU0;A8MVS1;Q5RL73;Q9UMQ3;P62310;P35638;Q96Y6X0;Q96J02;Q9HA38;O95551;Q9NYP9;P21127;Q07955;Q96ES7;Q8WWY6;Q9Y324;Q9H2F5;O43296;Q9NQ03;Q6H801;Q9C0F0;Q9UDV7;O14593;P23297;Q9NP77;P61574;Q16621;Q9GZP8;A9QM74;Q92754;P61962;Q03701;P06748;P01106;Q9BSJ2;Q13316;Q8N699;Q8TD31;Q9ULU4;P12883;Q5HYK7;Q9H0G5;Q15973;P50453;Q6SJ96;Q9BTC8;O00472;Q7RTS9;P10620;O00505;Q9C099;Q86YI8;O43502;O75444;Q13501;Q5VZE5;Q9NSU2;O43402;Q14181;Q6M2T1;Q9UIE0;Q6P3V2;P54277;Q6P1L6;Q7Z3G6;Q969L4;Q9H6Z4;Q13137;Q9UH92;O43929;Q86VK4;Q9NTK5;P56645;Q8NDW4;Q0VGE8;Q6NT89;Q12765;Q9H3R5;P52657;P05783;Q8NF99;P56693;P58004;Q16236;P98169;Q16533;Q9Y692;P17025;Q13398;Q00444;Q8TAE8;O43541;Q15365;Q00577;O95997;Q9P0U4;O14862;Q04726;Q96RE7;Q8WUQ7;Q9HAN9;Q9Y606;Q9UJX6;Q12972;Q494X3;Q9NP87;Q9Y4X4;Q12800;Q86WB0;Q8TDP1;Q7RTU0;Q9P031;Q0VD86;Q9H0H0;Q9BS34;Q7RTV3;Q6ZV50;Q8WWK2;O95478;Q96SL8;P42224;Q9HCU9;Q6P4R8;Q5VUA4;Q86UD4;O75531;Q9BZG8;Q8TEX9;P33992;Q8N0Z6;Q96RU7;Q7Z614;O00488;Q96QA6;P17038;Q6ECI4;Q8N3J9;O43543;Q8TBZ0;Q9H4Z3;P10588;Q8N3X6;Q569K4;Q99848;Q8N1G0;Q13601;Q5QJE6;Q9BX26;Q8NA58;P63241;Q96JL9;P35226;Q5TB80;Q9ULD2;P18850;Q8IZL8;P32243;Q96S66;Q86UL8;Q8WX92;O60296;Q9BT78;Q53HL2;P62081;Q86VE0;Q3KNV8;Q86XF7;Q8NAV1;Q15554;Q7Z6R9;Q5WQ07;Q5HY98;A6NDX5;P20700;Q6P9A3;Q9UIV1;Q96IU4;P41212;Q9Y2A4;P32780;Q86Y91;O75081;Q8TAP9;Q86UZ6;P50548;Q53HV7;Q8N5P1;Q9Y2K1;Q8N1L9;Q04743;Q6IN85;Q05195;Q9BXN6;Q9BW71;Q71SY5;O43361;P41208;P46777;Q96DN6;Q5TD97;Q8N488;Q07687;P04731;P42677;Q8IYI6;O14770;Q14814;Q96EK4;Q5JTH9;Q86Y26;Q0D2K3;P81877;Q9BUY5;Q6NZI2;Q86TG7;Q9HR5;Q9HCX3;Q9Y2G2;Q13367;Q6PK81;Q9BS31;Q9GZW5;Q04724;Q9UJ04;Q8TAZ6;P20248;P61978;Q14872;Q8NHF4;Q9UL03;P06746;Q8TDD2;Q12789;Q8IUE0;Q9NQS7;P35227;P15927;Q7L5N1;Q9H7E2;P27815;P31943;Q6ZSS3;Q9BSC4;Q14676;Q14839;P23610;Q8WWB7;Q9Y3M2;Q93050;P20749;O75925;Q96RS6;P0CJ78;Q01850;Q68DY1;Q92547;Q14764;Q9HY22;Q9NUK0;Q01081;Q9BTT4;Q9Y253;B2RXF5;Q8TC84;O14512;P35659;P62993;Q9H8N7;B4DX44;P49427;P23193;Q9H875;Q9Y5W3;Q5TYW1;O15525;O43918;Q96PE6;Q99541;Q96AZ6;Q96S95;P13984;O75818;P49750;Q9BYG3;Q9BPX3;P25440;O00458;Q9BZF9;P47874;Q8N554;Q7L5A3;P38432;Q9BSK1;Q14493;P78406;P30260;Q9UN79;P20073;O43299;Q9Y5Z9;O75293;Q96VM9;P38646;Q13503;Q9UII5;Q7Z401;P15407;Q2KHR2;Q969Q6;Q9Y4R8;Q9NVU0;Q06455;Q8N9U0;Q9HCG8;Q8IXM2;Q96SD1;Q9BQ87;Q8NCD3;P10599;Q9Y283;Q9C0H6;P27694;Q6RSH7;Q8N5L9;Q9UBS8;Q8TD86;Q8N9R8;Q86WX3;Q8NEZ5;O43159;O75410;P63167;Q96KR1;Q00978;Q3YBR2;Q6PI26;Q2M218;Q86WZ6;P62191;Q96PQ6;O95777;Q8IYN0;Q14331;Q7Z3B4;B4DXR9;Q96IS3;Q96MX3;O75182;Q14602;Q8TC76;Q8WYQ5;Q9H582;O75376;Q9Y605;A8MY4;O43791;P60510;P54259;Q86XI2;Q9UK76;O14529;Q92900;A8MWA4;Q6AZW8;O15042;P0C860;Q6YF9;Q8TC05;Q63HK5;O60583;O15078;P78317;O75478;Q09666;Q96F45;Q06787;Q8IY18;Q5T619;Q8N9K5;Q96KMG;Q86W56;Q6EMB2;Q6TGC4;Q92499;Q66SQ5;Q9HB21;Q92674;P04053;Q96FC9;Q9UKT7;Q96B26;Q96BK5;Q9HCZ1;O95232;O15265;Q9Y2H8;P17014;Q9H5F2;O00541;Q8TBK2;P67870;O95476;Q99638;Q9BT30;Q02577;Q9HB96;A6NNA5;Q96C55;Q9NWW0;Q15928;Q8IAW36;P46527;Q9P1T7;Q9Y6X3;P08865;O14787;Q9UIA9;P55735;Q6ZNH5;Q14590;Q8WXF8;Q96AV8;Q9NPA5;Q14584;Q14011;P41162;Q9UQE7;Q13155;Q15562;Q8N1K5;O75132;Q8N988;Q9UKI9;Q8N371;Q5BKY1;O75607;Q15493;Q9UPR3;P36508;P15884;Q1ED39;Q8IYF1;P78414;Q5TA45;Q99504;Q6N069;Q96QU4;P55769;Q9NR55;Q9H3M7;Q9P127;P78545;O60885;Q13164;P41134;Q53GL7;O14972;Q9BRH9;Q03468;P78395;Q7Z4H7;P49454;Q96B36;Q9NQ08;Q9BQ70;Q9NZJ0;Q9NZ63;Q9BTP7;Q9H8G1;O75154;Q92466;Q96GM8;P15941;Q9NQV7;O75884;Q9NZV7;P38935;Q14137;Q9HBZ2;P12004;Q9Y3C5;P12757;A6NG73;Q96EV8;P42166;P48378;Q9HAH1;O14948;P52597;P62633;O43390;Q14397;Q9Y2O0;O15015;P04732;Q9Y2B4;Q5VUG0;Q9NRY2;Q7KZF4;P09234;Q02386;Q99598;P81274;Q8N3X1;Q8N2M8;O75381;Q96MG7;Q9H1Z4;P49321;Q9NS86;O43493;Q9HAV4;Q8IWS0;Q9H5P4;O15226;Q5VSL9;Q6W0C5;Q8IZ20;Q99615;Q96N38;O95602;P0CG00;Q96G21;Q6P2H3;Q15910;Q68CP9;P30305;Q12872;Q9BXL5;Q8NHQ1;P56279;Q9BU64;Q9NZH4;O75351;Q9NQ87;Q13761;Q02556;P49773;O60356;P24928;Q96TA1;Q8IU81;Q8N7B1;Q03052;Q13829;Q9Y2P8;P80723;Q9ULM6;Q13395;P42773;Q8NEA6;O75665;P30153;Q8N9Z9;Q8N184;Q15369;Q9P2N5;Q13895;Q9NPC7;Q96K58;O95201;Q9NWB1;Q69YI7;Q7Z4V5;Q9H7S9;Q9HB65;P0DI82;Q12824;P43686;P10589;Q5EBL2;A2A288;P51816;P78345;Q99471;Q96BR6;Q96JB2;Q86WI3;Q6PF04;P42575;Q12904;Q13469;Q2V2M9;P06703;Q9NZZ3;Q9UKA2;Q96KF2;Q93074;Q9BUG6;O00425;Q99081;P51003;Q9C0G0;Q8TDW3;Q01831;Q86V48;Q6B0B8;Q49924;O14503;Q9Y3B9;P62826;P25788;Q7L945;P17040;Q9P2N6;Q8T100;Q6IQ32;P98182;Q86VY4;Q6DM90;P43364;Q9GZV8;Q15004;Q7Z353;Q8TAF3;P0DI81;Q12996;P49116;Q9BQ83;P07315;Q8TD17;P09661;O76031;O00167;P04733;O95260;Q8NCF5;Q3SYG4;Q8N187;Q9UKN5;O14802;A0AVK6;Q9NPJ4;Q8WYN3;Q9NZN8;O00231;Q9H7B2;O95273;Q5T4T6;Q9Y2L8;O00479;O75505;P50402;A6NK39;O15055;P52701;Q9BT49;Q96SW2;Q6PJP8;Q8NF91;O15318;P28066;Q53GL0;O95600;P05412;Q14929;Q6UX04;Q15650;P83916;Q29RF7;Q96N77;Q9Y5P8;Q15466;Q12901;Q9WUU5;Q96JY0;Q9NPP6;Q6NXX45;Q13569;Q86VP6;Q9Y294;Q86XR8;P13682;P04792;O15382;Q86XN6;Q96KQ4;Q9BRG1;A6NJL1;Q9Y6B2;Q9Y2D8;Q96LB3;P50748;O96020;Q9UHD9;Q9BSG1;Q12888;Q8N1W2;Q8NEJ9;Q9BPZ7;Q96B42;Q5U623;Q9H3H9;O15499;Q8IZ40;O15084;P62913;Q12769;P15621;Q9HD40;Q13526;Q9H609;Q9Y6X9;Q9UHJ3;Q9UH99;P10242;Q9Y4A8;Q6P1J9;Q9UM07;Q9UJU3;Q7Z2X4;P02545;P56524;Q6P1K8;Q15361;O14813;P51398;Q7RTU3;O60930;Q15021;Q6PI48;Q96S59;Q13127;P53801;P99999;Q6ZWJ1;Q9Y426;Q9GZR1;Q09028;O75030;O95411;P49789;Q52M93;Q9H2T7;P49716;Q6ZQV5;Q96QD9;Q96FX8;Q06416;Q6ZNG1;Q9BXP5;Q99816;Q96DT7;Q96IT1;Q8WYR4;Q9BX66;Q9NRC8;P25490;O43172;Q9UM63;Q16514;P49639;O95619;Q96QU8;Q9UMY1;P52756;Q5TAB7;O60238;Q16534;Q2M3W8;O75494;Q9UKD2;Q9UBX2;O15335;Q9UBQ5;Q9H1D9;P61247;Q6ZRO5;Q8WV44;Q53T94;Q9H4I2;Q15233;Q7Z5K2;P28360;P52740;O43313;Q9NVX2;Q99547;Q96TC7;Q8NFC8;P35244;Q5UIP0;Q9Y221;O15105;Q9BZZ5;Q14140;P78347;Q5JTC6;Q9UDW3;Q7Z3I7;Q96E14;Q69YN4;Q96HQ0;A6NGY1;P54105;Q92575;Q8IZT9;A6NFI3;Q06609;O14901;Q92988;Q8NB50;Q9Y3I1;Q8WYA1;Q9Y6X8;Q07021;O00470;Q14683;O00267;Q9NW38;P62318;P0CG47;Q9H489;Q9UN36;P52736;Q9NVF1;P54727;O14965;Q9UQ80;Q6P9A1;Q15935;Q5TKA1;Q14582;Q9NX65;O95780;Q9Y5L0;Q96Q83;Q9NXF1;O95257;Q9ULJ6;Q96MH2;O94776;O15151;Q9UJC5;Q8WYA6;Q96E16;Q9UNSL1;Q9Y4Y9;Q9P1Z2;P61578;Q9NVD7;Q13287;Q7Z2Z1;Q9UJ78;Q2NKJ3;Q6UN15;P18583;P36954;P51826;O96006;Q7Z2E3;P17030;Q12857;Q9UHB9;Q9H5H4;P36956;Q9ULV5;Q53TQ3;Q9Y5A7;Q6QNY1;O43151;Q01094;Q13352;Q16612;Q86X95;Q9Y5B6;Q504Q3;A6NFD8;A6NDR6;Q7L2Z9;Q14678;Q9

6MT3;Q96G25;Q9Y224;P86452;Q92585;O60765;Q8N228;Q7RTU4;O75486;Q9Y2Z0;O00255;P61575;Q8N8C0;Q96KS0;Q8N611;P15408;Q9UBY9;P43355;P61244;Q17R31;Q13951;Q9BZQ8;Q8N7H5;Q9NWO7;Q9NRA8;O75971;Q8TF63;Q15628;Q96M11;Q5SRE5;P04818;O14618;Q02080;Q06265;Q9NRG9;Q9H8M7;Q8IW35;Q9GZV4;P01100;Q9UJ68;Q8NE65;Q9P267;P10075;O43395;Q5TBC7;Q9UBT6;Q9BRU2;P78412;P63146;Q9H816;Q8N7Q3;O95625;O95218;Q96FX7;O75683;Q9NP71;Q16342;O15234;P0CL84;P42695;Q96EZ8;O75694;O14599;Q14188;Q10586;Q8IUM7;P23769;O60716;Q8WVB3;O14681;O75717;P23511;Q96Y27;Q9BTC0;Q8NEF9;Q96H40;Q9P287;O15360;Q9HB75;Q08209;Q6ZU65;P14316;Q9NXX6;O00629;P0CG24;Q5T7V8;Q9H300;Q01658;O43593;Q969S3;P25205;Q9NR33;P52292;Q9NQG5;Q14152;Q9NQX6;Q7L0Y3;Q9BZE0;P0CAP2;Q13426;P59047;Q4W5G0;Q9HBE1;Q9UKW6;Q9UQ84;P10144;P48595;Q96BP3;Q9UJX4;Q7Z589;Q5H9R7;Q9H9D4;Q96T76;Q8N3Z6;Q8WXD5;Q9ULW6;Q9Y3S2;Q9BV57;Q14686;Q15542;Q8NDT2;Q9H063;Q5VWG9;Q5FWF6;Q9UHF7;P41970;Q14999;O60921;P49711;O94842;Q9H9L4;P17980;Q92688;Q15022;O75496;P0C7T5;Q15326;Q8NEY8;Q9Y2W1;Q96DE0;Q3YBM2;P18754;Q9Y6F1;Q9NPA8;Q96N95;Q96GN5;Q8TC21;Q9NQ92;O15131;Q96EY1;O60304;O14777;Q96PK6;P50222;Q9BS18;P17023;O94993;Q8NFF8;Q6ZNI7;Q9C0E2;Q9P2D0;Q04727;O75177;Q969W8;Q86TJ2;P07741;Q8WUA4;Q86YD1;Q8WYH8;Q16520;Q9NZH5;Q9H3F6;O43324;Q9Y462;P30047;Q8NFT6;Q9BY31;Q9H9F9;Q9UGU0;Q9BRX5;Q8IY51;Q12893;Q8IXM6;Q8WW38;Q6UWI2;P47928;P48539;Q9NQE9;O94850;Q8IZT6;Q9HCL3;Q9H788;O43684;Q8TAU3;P07992;Q9NZU7;Q9BTX1;P37275;Q8NEM1;Q07352;Q9UGP4;Q53QV2;Q92925;P28072;Q9BSM1;Q04323;P19447;Q3SY56;Q9UMS5;Q9Y535;Q9BWX1;Q96NS1;O95751;Q9UGR2;O43542;Q8WTS6;Q8TAD1;Q86XK3;O95391;Q9Y657;Q9UNH5;P39687;Q9BU19;Q9H501;Q96AP0;Q9UBU7;P46108;Q09161;P05388;O43805;A8MQ14;P17535;Q14587;Q674X7;Q6ZSB9;Q09FC8;P31483;O14628;P50221;Q9NSC2;P0CJ85;Q99550;P22626;Q8N7K0;Q9UFM2;Q8N8E2;Q8NI51;P07305;Q61V72;Q8NCR6;Q5H9L2;Q15643;Q8NBF1;A6NM28;Q5VTL8;Q96N58;Q9H6F2;P13051;P10914;P22674;Q9H160;O43236;P84103;Q9UN30;Q9ULJ3;Q7Z398;P29083;Q96NJ6;Q13342;Q86SE9;Q8IWZ8;Q8IY92;Q9UK59;O15534;Q6NSW7;Q02446;P61925;Q92993;Q8TCY9;P19419;O60224;Q8TF47;Q14690;P49917;Q9Y222;Q9BU61;O15014;Q7Z7K6;Q9H089;Q27J81;Q9UQN3;P21675;Q9Y2K5;O00268;Q5VU43;Q16666;Q8IUR6;Q9HBM6;Q659A1;P39748;P14651;P38159;Q8IZ26;Q9NS73;Q9UIF8;Q5CZA5;Q96I27;Q9H116;Q6P1K2;Q9UKT9;P58340;Q64ET8;Q96BW1;P52948;O75113;P34896;Q9NQ55;Q6IQ21;Q6NX49;Q14978;Q3L8U1;P0CG13;Q99750;Q96GC6;Q96T58;Q53EL6;Q9UJL9;Q7Z713;Q5JNZ3;Q9H9Y6;Q9P2I0;Q9UPV0;Q7LBC6;Q08999;Q9UJV8;Q96QF7;Q96JS3;Q96HW7;Q8NDY6;Q6ZNI1;Q9BYD9;Q9UBG7;Q9NYF0;P50750;Q9H081;P20290;Q6NLT6S3;Q9Y6J0;O00273;Q53EQ6;Q8TBE0;Q6VUC0;Q16836;Q15545;Q13490;O00712;Q7Z6B0;Q92870;A6NLC8;Q9GNB1;P42771;Q9Y295;Q69383;Q99457;Q9Y2G1;Q8N7R0;Q8NAF0;Q9Y2D9;P10636;O00401;Q96K99;Q96ZU7;Q92733;Q14119;P17028;P04406;Q8N998;Q9H201;P23760;Q96EU6;Q9NSN8;Q9BVW5;Q8TAQ5;Q8NH2;Q96CM4;Q8TAF7;Q15942;P0CJ79;E7ETH6;A1L190;Q96C28;P46013;Q15398;O94916;Q06587;Q8NSF7;Q66K41;P22415;P43351;Q86T29;Q15653;Q8WXI9;Q13495;P51948;Q8IW19;Q9HD34;Q6NSZ9;Q8WTP8;Q9UMS6;Q9NXZ1;Q13123;Q9H814;Q96LM6;Q5TBB1;Q9HD47;Q9H6B1;O75391;P49406;O94983;P63162;Q9BZW7}

6181 Pathogen{P03383} interacts with 2816 human partners: {Q969W8;Q96LX8;P43351;Q9UQR1;Q17RY6;P35227;Q96MH2;Q86UA6;P08107;Q9Y618;Q7Z7J5;Q14683;O14628;Q9BVL2;O95402;P78345;Q86U86;Q9UNS1;Q13573;Q92681;Q8IXJ9;Q9H1B4;Q7Z2E3;P02545;Q96EE3;P23490;Q06330;O15504;Q8N9W8;O14519;Q13761;O43167;Q9UNV4;Q9VSL9;Q13257;Q13228;Q15329;P15723;P41002;P10244;Q16612;A6NG73;P30307;Q8WUM0;Q9NVV4;Q9H7R0;Q02577;Q9UI26;Q9Y2Y0;P53803;Q8NHZ8;Q9NRR4;P51398;Q68CJ9;P48378;P36578;Q9NQS7;Q9BQG0;O60716;Q09028;Q9Y6J9;Q9HD47;P13073;Q8WTZ3;Q9UKN8;P27986;P0C860;Q8N2M8;O15198;Q8IX15;Q99504;Q03188;O75182;Q8NI51;P62140;O00470;Q719H9;Q9Y253;Q06265;Q8TC76;Q5FWF6;Q12872;Q7L804;P05388;Q5JVG8;O95478;Q14978;A6NNF4;O00213;P16989;Q9UBU9;P08729;Q9NY61;Q92585;Q8IWJ2;Q15935;P39019;Q07955;Q15014;P49454;P50995;Q13601;P55199;Q12830;Q9UHL9;Q8NBB4;O00458;P19474;P10914;O75925;Q9NQ31;O14737;Q9NYW8;O15234;P84101;Q63HK3;Q5TAB7;Q6PJG6;Q8TA86;P14316;Q15561;Q9Y2L1;Q96S65;Q8N344;O15266;P09661;Q92831;Q9Y2S7;Q8IXT1;Q9Y3I1;Q86XR8;Q330K2;Q9UBD5;Q5JVS0;Q92621;Q9UHV9;Q96GA3;Q12888;Q96BR6;Q32MZ4;Q99547;Q9ULX3;P11831;P49792;O14757;Q15287;Q8WZ33;Q8N2Z9;Q8NHF4;Q53EL6;Q15047;Q96T76;Q9BQA1;Q9H4X1;Q7Z417;Q06609;O95625;Q9UH92;P04733;Q9UBB6;Q96SK3;Q14839;Q96JK9;P15036;Q0D2K3;Q9Y281;Q8WU99;O75582;P62913;Q6ZN08;Q8NI27;Q05048;Q8WWY6;P80294;Q9Y3V2;O14497;P35712;P50549;O95602;Q01105;O60671;Q9UK58;P06746;Q6PJT7;Q02080;Q13485;Q969Q6;Q9UJW0;Q9Y4B6;Q6P1J9;P02533;Q96SZ4;Q56P03;Q12904;P15369;Q9HBD4;Q9Y324;P61574;P63272;Q9NQ92;Q6IPU0;Q9BSG1;Q14653;Q5SVZ6;Q9BSJ2;O75494;P20290;Q9UK10;Q9BVW5;Q86XI2;Q06455;Q04864;Q96A56;O14862;A6NK75;P0DI83;Q95163;P33076;Q64ET8;Q96TC7;O00716;Q86WP2;O75791;Q15366;P08047;Q9UPW6;Q9H6U6;Q8HWS3;Q9UKL3;Q7L5A3;O96019;A6NK39;Q9NWT6;P51003;Q9H3P2;Q9UIA9;Q9NYV6;Q9BTC8;P06748;Q68E01;O43148;P13010;Q9UML3;Q14209;P25815;P29084;P29474;Q969L4;Q96ES7;P40926;Q9GZW5;O75528;P55212;Q99607;Q9BR84;P53804;O60543;P17096;Q9BPZ2;O75478;Q9BRU2;Q9UKI9;Q9NXX6;O15397;Q9Y244;P16220;Q9NZV7;Q9HCU8;Q9H7R5;Q9BVJ6;P27540;Q9NWS1;Q96DE5;O00167;Q15562;Q9Y2P7;Q8N1L9;Q8NCF5;Q7Z6K1;Q9H0S4;O43390;Q9Y2P8;P28069;Q02241;P54278;Q8NBT2;Q9Y6K9;Q49A33;Q8WXS3;Q93083;Q15544;Q14678;Q8TF01;Q9H8H0;Q8N3U4;Q8TAD8;Q6ZYL4;O94986;Q8IWL8;Q13469;Q9H9Z2;Q7Z591;P62987;Q9BSF8;P17544;P56270;Q8N6T7;Q8IUR6;Q9NPA8;Q12824;Q9NVN8;Q16633;P35269;Q96J17;P0C7T5;Q9H777;P51808;Q7Z6B0;Q86VY4;Q8TAK5;Q9NZJ0;Q13216;P32243;Q9UP83;Q9HD40;P61572;P62324;Q32MQ0;P83876;Q9NX63;Q96AJ1;A6NF01;Q5H9I0;P19338;P51948;Q02040;O60287;Q9H4I2;O00472;Q9NP64;P13640;Q9NYG5;Q9H840;Q9HBE1;Q00653;Q8WUY3;Q15459;O00567;O60765;P62318;Q96IZ7;P55735;Q13356;Q96QF0;O95684;Q08999;A8MVS1;Q5VZE5;Q9H8G1;Q8IYL3;O94805;Q14129;Q9UNP9;O94829;Q8IU60;Q8N6I1;Q9BTA9;Q93075;Q5UIP0;P51965;P25440;Q6UUV9;Q86UE4;P06454;A8MWA4;O43290;O60248;Q9UJX6;Q9H944;O94776;Q3T8J9;P40337;P62312;P25789;P62750;Q9NZD8;Q5VTL8;Q8WXE1;P49711;Q9H4D5;Q0VD86;P54105;Q8WUX9;Q9BSK0;P53370;P17022;P22626;P0CL83;Q107X0;Q14106;Q86V71;Q8TD19;Q8N163;Q9Y678;Q52LR7;P60900;Q15596;Q6P4R8;P15172;Q01094;P49789;Q96GE5;Q9H5H4;Q8TAF3;Q96SL8;Q15013;P04156;Q5HYK7;P14866;P36639;Q5HY98;Q3KP31;Q9NYB0;Q9H869;Q9BTK6;P14921;Q15937;Q15029;P55771;Q15072;O75376;Q8WVJ9;Q15572;Q9H1K1;O75486;Q6NZI2;Q96KF2;Q9BU2;Q9ULK4;Q14526;Q9UQL6;P17029;Q9NXZ1;Q07687;P38646;Q9NVX0;P58340;Q96F24;Q9Y5Q3;Q96NT1;P0CG00;Q5TAP6;Q96H20;Q96RL1;Q9H981;Q9H4T2;Q9NWZ5;P57772;O00287;Q15650;O15162;Q96JS3;Q5PSV4;Q9UHB4;P19484;Q9UBQ5;Q16656;Q5TID7;O43264;Q9C0F0;P61571;P12270;Q03111;O14920;P31946;Q9Y5R5;O75792;O95503;Q5FBB7;Q969H6;Q9HCL3;P01106;Q9BU61;Q9UK73;O4

3172;Q9Y675;Q8WW38;O75437;Q86YP4;Q96CJ1;Q86U70;Q6PD62;Q96MB7;P19367;Q9H633;P60228;Q15257;Q06547;Q13487;O95251;Q13769;Q96GN5;Q9UHR5;Q7L590;P40424;O00534;A8MXY4;Q8TC05;Q96MU7;A6NIX2;P41220;Q12986;O15304;Q13838;P78347;Q04727;Q6NT76;Q7Z5L9;Q6NVH7;Q15554;Q9UKD1;Q9UJW3;Q9H7E2;Q96NI8;O00541;Q9HCS7;O15527;A8CG34;Q3YBM2;Q9UPN9;P41227;Q8NE71;Q99608;Q9UI95;Q9ULR0;Q13888;Q8IUV8;Q14181;Q96006;P46777;P49116;Q9P2R6;Q9Y5S9;Q9NT670;Q99575;Q5XJB2;Q9Y5B6;P23511;P05204;O75362;Q9UL49;P51819;Q9HAW0;P14859;P23193;Q9NTK5;Q13875;Q8N668;Q9UKW6;P49427;P23297;Q19AV6;Q8N7M2;Q86Y8W;P52948;Q9BRR0;Q9GZM7;Q7Z465;Q13360;O00570;A6NLC8;Q9NP66;P61956;P27694;A8MTY0;Q9Y4A5;O60244;Q9BWW4;Q8WTT2;Q7Z3K6;P31749;Q96BD5;Q969F1;P55795;Q9NRG4;Q96FX2;Q53HV7;Q9P258;O43236;Q9H6Y2;Q5VYK3;Q8TD23;Q05481;Q9BPZ7;Q60907;Q53TQ3;P62316;Q13023;O43791;Q9Y295;Q9Y2Y9;O15111;P55198;Q9BXS6;P34896;Q9BXW9;P48382;O75360;A9UHW6;Q9Y535;Q96H40;Q2M3W8;P22674;Q93034;Q8N4W9;P56537;Q9UJM3;Q9C086;O43463;Q99700;Q9UMS6;O75410;Q8N5F7;P17482;O60290;O94864;Q6ZN06;Q9H9Y6;A4GXA9;Q6ECI4;P53999;Q7Z4H7;Q9NV56;P40306;Q96DE0;Q9UJ98;Q15038;P31948;Q96AQ6;Q9UMQ3;P78406;O95644;Q6P3V2;P0CAP2;O75618;P57740;Q92905;P49406;Q9UHC1;Q9NUQ3;Q5EE01;O00233;Q96SW2;Q9BQ65;O14972;Q8WWL7;Q4LE28;O94811;P18847;Q92966;Q9NR56;Q9BZF9;Q8NEU8;Q15004;Q8NFH5;Q96P70;Q99576;Q9BUR4;P25205;Q9UBW8;Q9UK13;Q86X55;Q7Z6J9;P17861;Q9UBC1;P51508;Q8WYP5;O95218;Q9NZZ3;Q96KQ4;P41208;P46013;Q8IZL2;Q01826;P22670;Q5H9L4;P20749;Q96BP3;Q99457;Q9BYN7;Q5JTD0;Q9NS73;O00257;Q8IW19;Q8N3J9;P62328;Q13490;Q16836;P19419;Q6ZN17;P52744;Q9BTE3;Q9BWT1;Q14686;Q6STE5;P28370;B4DX44;Q96FV9;Q9UBS8;Q8NEP9;Q06787;Q12972;Q10570;P62753;P02511;Q9UH99;P52655;Q6PI26;Q96B01;O00186;Q86WV1;P62304;P30304;Q9H9Q4;P61201;P48380;Q15714;Q6MZT1;P62937;Q96LI6;Q9UBP6;P62714;Q5CZA5;Q8TF0;P23769;P50222;Q5D1E8;P22392;Q9H503;Q92797;Q9H825;Q6MZP7;Q9NYP9;Q8WYQ5;Q76KX8;Q92841;Q9H204;Q9NVM9;Q96AQ7;P61326;Q9BQS6;Q9GZV4;Q9UHI6;Q9UMX1;Q9UMX3;Q9NWT8;P42677;Q96IZ0;Q86WB0;P37275;Q9BZV1;Q8NDQ6;O75886;Q9Y3Q8;Q9BQ95;Q96MT3;P61573;Q9NQ87;P31276;Q96N77;O95831;Q9HC52;Q9UL58;Q9H2F5;Q70Z53;Q8WXD5;Q9ULD5;Q9UMS5;O75030;Q9ULU4;P80297;Q96PU4;Q06587;Q8N1F7;Q15542;Q9BZW7;Q9H9L7;P24522;Q6RFH8;O94983;Q96BK5;O14709;Q15742;P61247;O00712;Q92733;D6RGH6;Q6VMQ6;P52630;P35638;Q8IXW5;O75461;O43365;Q63HM1;Q9UNQ2;Q5TD94;O60318;Q9HBM6;Q96JB2;Q9BXM0;Q9NS26;P15923;Q6P2Q9;Q8IZL8;Q3MJ62;Q9ULW3;Q9NQ55;Q9BUW0;Q9H2G9;Q5H9L2;Q9NS25;P53805;Q6PJP8;Q14146;Q9BZZ5;Q8NCE0;P61582;O95347;P38919;Q96KR1;Q16520;O95931;Q9UBU8;Q9Y4Y9;Q86Y97;Q86TG7;O75155;P28838;Q12901;Q14738;O95400;Q9C0F3;A4D1E1;P49721;O60936;Q15532;Q8NEZ2;Q9NTX7;O43402;O00170;Q9UK39;Q8NDF8;P35789;Q9NZM5;Q99816;Q96G25;Q9BZE4;Q96P71;Q9UNL4;Q6IPX3;Q9UFF9;Q12874;O14646;Q9HCH5;Q6ZNA4;Q5TKA1;O95059;P52434;P24385;Q6PJJ2;P61218;A8MSY0;Q9Y6X3;Q01850;P26368;Q13243;Q8N1N5;Q04323;Q8NA42;O14503;P35573;Q8TDY2;Q6P9G9;P17019;P63162;O00165;Q9UKT4;Q8IYI6;O43598;Q96QT6;P30153;Q10Q21;Q14814;Q9BRX2;Q96N20;Q9Y2Q1;Q01860;Q9Y2B5;Q86XK2;Q6ISB3;P78317;Q8IZX4;Q08945;Q8WYH8;P04792;Q9C0C2;Q13536;Q9GZQ3;Q96BN2;Q15797;Q71UM5;Q8TAD1;P42226;Q15773;Q96H22;Q9P013;Q14997;Q9H1A4;P10599;P67775;P61978;Q9BYE7;Q8WXF1;Q9Y6D6;Q9UN36;O75691;Q96T21;Q96N95;P11387;Q9P2K3;O75177;Q75QN2;Q03923;Q96RKL1;Q9NUQ6;Q8N988;Q8WYN3;Q14331;P18846;O43189;O15405;Q96B36;P11940;P51816;Q14152;Q9GZS1;P31943;Q9NPE3;O00505;Q92993;Q86V15;Q9UI43;Q9UQF2;O75400;Q3MIS6;Q99459;O75151;Q96SE7;Q969V6;P49321;P61575;P49005;Q7Z614;Q86XF7;Q05516;Q96K30;P28696;Q9GZX5;Q9Y4R8;P12980;Q8N693;Q8TB69;Q07352;Q86V81;Q8TEM1;Q86VE0;Q15306;Q5U623;P0CG12;P0C7X2;O15297;Q9P0L1;Q9NPJ6;Q15651;P17038;Q6ZW49;Q92782;Q7Z7K6;Q14690;Q96T23;Q96DX5;Q96S55;P05783;Q86TU7;Q9H6R4;Q13352;Q13435;Q15050;O43493;Q7RTU5;Q92597;Q00978;Q13330;P61457;Q969X6;Q53GS7;P15621;Q00534;A6NK53;Q96KS0;Q15631;Q15653;Q86YE8;Q8WV37;Q9HAH1;Q7L0Y3;P63241;Q96L21;Q9ULW8;Q8N2W9;Q96EA4;Q9Y2W2;P35813;P20618;O43324;Q6NZY4;Q9NQP4;P51504;Q04724;Q8N587;Q9H7N4;P15408;Q9H6W3;P78337;Q9H321;Q8NAV1;Q5VVH5;Q6ZR52;Q96EK4;P09132;O60216;Q8NAV2;Q9UKT7;Q9Y5Q8;Q8TE85;Q15560;Q8TD31;Q96MF7;Q5VWQ0;Q6P1K8;Q13625;Q13042;Q6PIJ6;O75683;Q9H1D9;Q93074;P02795;Q9Y248;P07737;Q8N5U6;P59923;P17098;Q13155;Q9UKF6;Q9H175;Q01831;O00321;O15117;P55209;O00267;Q9NQX1;P38432;Q9Y2A0;Q14684;Q6X4W1;P14635;Q15022;B4DU55;Q12983;Q9P278;Q9BZE2;Q9Y3D0;Q6NSZ9;Q9BRS8;Q6P198;Q32P41;Q86UU0;Q5VT06;Q5VUG0;Q9Y3B2;Q9Y692;Q16385;P11802;P06400;P46939;O14744;O75190;P18146;Q6RSH7;O94906;P41162;P48147;P10155;Q96EV8;Q9NTW7;P49750;Q13398;Q66K89;Q53GI3;Q9UK11;Q8WW12;O15525;Q9H9F9;Q96BT3;Q9UBB5;Q9Y697;Q13618;Q8IZU1;P78396;Q9Y2T7;P38159;Q9NP71;A2A288;Q49AA0;Q9NQ29;Q96D46;Q12769;Q6IQ32;Q8TAF7;Q9BR06;Q9Y3A2;Q9NZP6;O60535;Q01664;Q9NX46;O95049;Q9NVU0;O60921;Q9UK76;P31249;A9QML4;Q9BV57;Q92870;Q15654;P21127;Q8IYI8;Q96HR3;Q9BQ52;Q14872;O75164;Q69YN4;Q01403;P36873;Q96G21;Q9BQI9;P62826;P55347;Q9BSU3;Q9HAJ7;Q07157;O43913;Q6PGP7;Q9BW71;Q9Y2L8;P30279;Q09161;O95628;O43447;Q9BXL5;P41218;Q16629;P17014;Q14588;P83916;Q9HB65;P25208;Q14CW9;Q8IXQ6;Q8N228;B3EWF7;Q7Z3V5;Q9NQG5;Q5VWG9;Q5TAX3;Q9H0E9;Q86Y26;Q9BZQ8;Q71F23;Q96LW9;P61581;Q9Y3T9;P20226;A6NJ64;O43159;Q8IUF8;A8MUV8;A8K8V0;Q8IVN3;Q9UBS4;Q96EB1;Q8TF47;Q33E94;Q5VU43;Q6ZVD7;P62136;Q99567;Q9UBW7;O95201;Q96D70;Q9UPR3;O95707;P61088;Q8IXH6;Q8NFG4;Q8IZT9;Q13895;P52758;Q9HC44;Q9HAZ2;Q6P1N0;Q16719;Q5VWX1;O14770;Q9Y5P8;P56282;Q96L92;Q66PJ3;Q9NZH4;Q6W2J9;Q7Z589;Q9UQR0;P57077;Q4G112;Q13495;Q9H9A7;Q13287;P08651;O75832;Q9HCG1;P52657;Q53H80;P52746;Q15006;Q504T8;Q9UQB3;Q14934;Q9H6J7;Q8TCI5;Q13137;Q13506;Q499Z4;Q8N831;Q96RN5;A6NDX5;Q7L2R6;Q99733;O75448;P62277;Q96GM5;Q8N8G2;O00401;O96004;Q8WTS6;P62487;O15069;O75529;Q14397;Q7L266;Q86WQ0;Q15643;P46100;Q05084;Q9Y613;Q13144;Q15326;Q9Y5A7;P29372;P78560;P11473;O15105;Q96NB1;Q15003;Q8N684;Q9HD34;O14558;O43395;P51610;Q6ZQR5;Q12796;Q96E16;Q9BSM1;O60870;O94913;Q8IYB3;Q5VUA4;P41161;P11474;Q9UBS3;O75817;Q16533;Q6ZNA1;Q99549;Q86UD0;Q03112;P49336;O14978;O00291;O95243;Q9H8M7;Q9HAN9;Q2NL82;Q9NSA3;Q13952;Q16594;Q5TB80;Q01892;O15015;Q12873;Q92985;O60296;Q14186;Q13428;Q99BSV6;Q6P2C8;Q9Y606;Q8IYX0;Q9H816;Q8N1K5;P06744;P54252;Q9GZP8;Q53HL2;Q8IXH7;Q9H3H9;Q68DK7;Q9Y316;Q16637;O94763;Q13427;Q8NB50;Q16621;Q9NVI1;O95777;Q7L9L4;P54845;P15927;Q9BQ70;Q13185;P62081;P86452;O75607;A7MD48;O95229;Q9BVC6;Q9H963;Q1ED39;Q9BW27;P45973;Q96MR9;P49639;Q9UHX1;P55060;P84022;Q9BU64;Q96AB3;Q98168;B4DXR9;Q9UHQ1;Q92994;Q9H160;Q04726;Q8LWS0;Q8N895;Q86SE9;O75081;P25911;P52292;P52747;Q9Y6Y0;P19387;P33240;Q9HB71;Q15928;P11308;Q9HD15;P81274;P62314;Q9H489;Q96PK6;O60238;Q9NVV9;Q9H583;P62310;P05787;Q9H808;Q15361;P18583;O60563;A6NGD5;Q96ND8;Q9UDV6;Q9H7B2;Q9BT78;Q9C035;Q7Z2Z1;Q9Y221;Q8WVC0;Q

00994;Q53EQ6;P61580;Q13111;P84103;Q9UID6;A6NJL1;P06132;Q6ZN28;Q8NEM1;Q96A49;Q9NV72;Q5  
QJE6;Q5JNZ3;Q96N38;Q92945;Q15652;Q12857;P17010;P50613;Q9UHK0;Q9BXY8;P13984;Q9UNY5;Q32  
M78;Q8N9N5;Q9P031;P39687;Q60260;P42772;Q6P9F0;P20962;Q9H6T0;Q969G3;Q9BXJ9;Q9H2T7;Q96T  
A1;Q00273;Q86W56;Q9Y6B2;Q8NF64;P63104;P20700;Q9HAU5;P35548;Q9UNN5;Q14948;Q99873;Q1467  
4;Q96MN9;Q02447;Q9H063;Q9Y3C7;P43487;Q9NNX9;Q6VUC0;P80217;Q8TEQ6;Q96S59;Q96HI0;Q8N3Z6  
;Q9Y6K1;Q7RTT5;Q13105;Q14893;P28324;Q96D98;A6NLJ0;Q8N488;Q9H040;Q9H0W9;Q99990;Q71F56;  
P61586;Q95125;Q9H147;Q92973;Q14641;Q6UUV7;Q9NV31;Q96QA6;Q9H0I3;Q13951;Q9H8E8;P48595;Q  
12816;Q14896;Q14929;Q9UHD9;Q9Y5N6;Q13541;Q9ULV5;Q9NZQ3;Q08AN1;P28347;P35637;P51946;Q9  
BSW2;Q15265;Q9UDY4;Q15819;P24928;Q9UKV3;Q53QV2;Q13123;Q9NZH5;Q96JM7;P48539;Q14192;P46  
527;Q03468;Q14980;Q9NPF5;Q9HAW4;P08865;Q5TA31;P42568;Q01130;Q8WVV9;Q9GZU2;P51959;Q152  
87;Q9HAV4;Q9BQA5;P17040;Q96BW1;Q9GZU7;Q75290;Q9NPD3;Q15528;Q43684;Q05195;P52742;Q8TC5  
6;Q9Y383;Q15078;Q9NWX4;P24941;Q94818;Q13568;Q9BVI4;P17032;P0CH99;Q96N22;Q99687;Q8N859  
;Q9NR22;Q13426;Q9Y294;Q75884;Q86US8;Q9Y2G7;P17036;Q9BYG5;P24278;P18754;Q9NQT4;Q13404;  
Q96LW1;Q6PG37;Q12765;Q43345;Q9BX82;Q8IY81;Q8N3S3;Q7KZF4;Q92769;Q6ICB0;Q9ULZ2;Q6TGC4;Q  
52M93;Q9UBF6;P0CW71;Q76L83;P51825;Q9H171;Q96AY2;Q68CP9;Q13342;Q92830;Q9NRR3;Q6ZN32;A6  
NHJ4;Q9C005;Q9BY27;Q86UB2;Q00625;Q9UPV9;Q99717;Q99590;Q9NXV2;Q06663;Q8TAT6;Q9UNH5;Q9U  
GP4;P17676;P09874;Q9NPI6;Q14511;P23025;Q9BZD4;Q14493;Q04725;Q9P2J8;Q95780;Q7RTS9;P498  
48;Q00422;Q60304;Q60711;Q5T0J7;Q9UKX2;Q15046;Q9Y2N7;Q9HCU9;Q9BSI4;Q13867;P0DI82;P7839  
5;Q14103;Q8WXC3;Q9UM11;Q7Z3K3;Q9H9L3;Q9NYF8;Q65J96;P54725;Q43679;Q43711;Q9H501;Q9UMX0  
;Q6ZNG1;Q9HBH7;Q99081;Q9ULH7;Q9Y3B9;Q9UM07;Q8NEF9;Q8N3X6;Q99417;Q9H6Z9;Q96QD9;Q95376;  
Q9NX70;Q53GL7;Q2TAK8;Q9NSC2;Q15466;Q16254;Q5MMJ8;A6NKF2;P57081;Q75381;Q08J23;Q15014;Q  
43541;P60002;Q9UN79;P52743;Q13765;Q14746;P78316;P49756;Q05BQ5;P63165;Q95149;P15407;Q6  
P9B9;Q9Y2K5;Q8NF99;Q9Y6X2;Q95190;Q60225;P57721;P28702;P0DI81;Q9NY87;P68104;Q9ULJ3;Q9G  
ZY1;Q15025;Q95411;Q9HCD5;Q6IV72;Q9BS18;P50750;P05198;Q99848;Q8N5A5;Q9NPB6;Q96BP2;P044  
06;Q7L190;Q99471;Q86VP6;Q9H467;Q75971;Q12837;Q12968;Q9UFW8;Q43745;Q9NZ81;Q01201;Q9506  
7;Q96PM5;Q8TCJ0;P35711;Q15697;Q9UGY1;P14678;Q8N7K0;Q01543;Q86UE3;Q9NSI6;Q8NBZ0;Q68DY1  
;Q9Y6X8;P14324;Q9NY12;Q9UKN5;Q8IZ40;Q9Y333;P51531;Q75818;Q156A1;Q99615;Q9UNN4;P35244;  
P15822;Q15379;P53801;Q00268;Q15350;Q9UIV1;Q9UGK3;P11532;Q9NQ33;Q9UER7;Q96Q89;Q60828;Q  
5JTC6;P25786;Q6ZV50;Q01081;Q00479;P55895;A8MT69;Q9BRT9;Q94842;Q15759;Q9BTX1;Q96RS0;Q8  
IZU0;Q96020;Q60DN6;Q5VIY5;Q15185;Q9UM69;P99999;Q8TE02;Q16514;Q9UIF9;Q86TB9;Q5BJF2;Q9Y  
3F4;Q562F6;P10074;P82970;Q00613;Q9UM50;Q8TEE9;Q9C0E2;Q00255;P10073;Q5H9R7;Q9HB  
07;Q75475;Q12800;P11142;Q16666;P0C1Z6;Q96HA8;Q6U7Q0;Q7Z5D8;Q9H788;Q86WX3;Q9BRG1;P2596  
3;Q96C28;Q92600;P53041;A8MUZ8;Q9Y5K5;Q03936;Q9NPG3;Q07666;Q86V48;Q86Y18;P82979;Q96RE7  
;Q8TDN4;Q8N140;P61962;Q9Y2M0;Q9Y462;P28072;Q43255;Q15929;Q96B26;Q9NRY2;Q8ND76;Q15084;  
Q9H7S9;P54727;Q9BY77;Q14787;Q8NE65;Q9HBM1;Q96E15;Q9UBZ9;Q7L5N1;Q15370;Q96GM8;Q8N8C0;Q  
15365;Q9N988;Q6P1X5;Q15355;Q43829;Q14974;Q9BXR0;Q94921;Q9UKV3;Q92579;P50749;Q14776;P4  
8788;Q94850;Q9ULM6;Q12905;Q15054;Q9H0U9;Q92925;Q13569;Q6IEG0;Q00512;Q96007;Q96LB3;P12  
883;Q9P0W2;Q9UJG1;Q96IT1;P31269;Q43299;Q9Y6K5;Q6IN85;Q9Y266;Q3ZCT1;Q99496;P36402;Q8TA  
Q2;Q8N5J4;P58004;Q15573;Q9Y3A5;Q02833;P35232;Q96E14;Q7Z4H9;Q8N9Z0;Q9UBF1;Q014593;Q8TDR  
4;Q96HR8;Q95999;Q99543;Q9HD42;Q6K0P9;P50453;Q5TCQ9;Q9UHJ3;P28065;Q13501;Q8N972;Q9P016  
;Q43918;Q9HB96;Q9H410;Q96FX7;Q5MIZ7;Q29RF7;Q8IZD4;Q96NS1;P41212;Q9NVV8;Q16236;Q94992;  
Q8TF32;P07741;Q68EA5;Q5SRE5;P50402;Q15170;Q5T8A7;P57076;P43897;Q969H0;Q58F21;P42771;Q  
96JN0;Q96T58;Q9H832;Q99684;Q9NY74;Q9Y2G2;Q8WVK2;Q8WUF5;P04732;P28066;P31314;Q15131;Q9  
5751;Q13547;P26651;Q15853;Q43809;Q14207;P52298;Q9ULX6;Q9UI56;Q5VTR2;P78371;Q9U2T0;P52  
737;Q8WUQ7;Q96IR2;Q14965;Q12906;Q99333;Q99583;Q3SYG4;Q9Y3C4;Q9Y3B9;Q8TCY9;Q156  
28;Q9H081;A6NN14;Q9BY41;Q75446;Q6ZMS7;Q9NZI6;P28749;Q09666;P46087;Q92748;P09012;Q9UKL  
0;Q15007;P35658;Q9BRU9;Q5SVQ8;Q96FF9;Q16670;A6NP11;Q9BWG6;Q9Y4Z0;Q96IY1;Q8IY92;P46783  
;Q8ND90;Q14980;Q9BV20;Q5H9F3;Q3L8U1;Q9H307;Q715Y5;Q16082;Q9NZN8;Q8IX03;P54253;Q75525;  
Q99708;Q95232;P10242;P67870;P23497;Q9H116;Q9Y252;Q8IWC1;Q75419;Q9UK45;Q95RKV6;Q9BVT8;Q  
9P086;Q96C86;Q86WI3;Q96GC6;Q15327;Q9HCI5;Q9H9D4;Q5EBL4;Q99638;Q9UJX4;Q15535;Q9UKH3;Q9  
5238;Q15127;Q9HCK8;Q14188;Q8TF63;Q9H009;Q9UPV0;Q9H2G4;P62633;Q494X3;Q8WY54;P01100;P04  
198;Q86XN6;Q9UC06;Q4LE39;Q5T7V8;P43268;Q8WXF8;Q8NCD3;Q2KHR2;P11161;Q9UQ80;Q05519;Q959  
83;Q8NA77;P05114;P62979;Q8N0Y2;Q60885;Q8NG31;Q92750;Q92754;Q00231;Q96HA1;Q9UKV0;Q4318  
6;Q00597;Q14145;P39880;Q8N108;P23760;P61579;Q9UIF8;Q5HYK9;Q86XK3;Q9NY27;Q15906;Q9NYF0  
;P0CG47;Q9NZI7;A6H8Y1;Q96QC0;Q8N782;P49918;P0C7V5;Q99750;Q99750;Q06024;Q96BU2;Q96H77;Q8N3X1;  
P62875;Q9H6Z4;Q96PY6;P58557;Q9Y4P8;Q96RK0;Q5TEC3;Q15796;Q99594;Q9NYP3;P21675;Q9H0N5;Q  
96MG7;Q15059;Q96NB3;Q9BZK7;P56524;Q9BUP3;Q96CB8;C9JE40;Q92541;Q86YF9;Q13367;Q96FA3;Q6  
P280;Q9UPN7;A1L190;Q6ZMY9;Q9NUW8;Q8WWY3;Q53FT3;Q86TP1;P41970;Q13416;Q6Q759;Q43309;Q9N  
RG9;P48634;P32519;Q9UQ35;Q00577;Q9HBT7;Q96NJ6;P68036;Q8NAP3;A8MT65;Q99FC8;Q96PK2;Q96A  
E4;Q8N9A8;Q6ULP2;Q8WWQ0;Q03252;Q9UJX5;P62877;Q9P0V3;Q9Y4A8;P23508;Q9P255;Q99909;Q8IYW  
8;P52435;Q15910;Q9UND3;Q9GZL7;Q9UGK8;Q5T230;Q9UII5;P51522;Q9H3M7;Q8N9B5;Q9NRL2;Q04206  
;Q7RTV3;Q9Y2X3;Q9HC62;P39023;P53992;Q10586;Q95997;Q75113;Q07021;P49910;P55265;Q9Y2D9;  
Q9H910;Q8IW36;Q96QU8;P17535;Q8WTR7;Q15360;Q9BQ15;P78545;P56182;P57678;Q9NQ50;Q6NUN9;P  
08397;Q15318;Q9NRR5;Q9NY43;P55769;Q8IY57;Q60930;Q8WXI9;Q9Y448;Q9UHB9;P45984;P82094;P5  
1532;Q96SR6;Q14602;Q9BW66;Q8WYR1;P42704;Q9BTL3;Q9P2I0;Q96S95;Q6ZUH6;Q9NWB6;Q43325;Q02  
556;Q6PI48;A6NGY1;Q9Y222;P04731;Q8WUY8;Q9Y5B0;Q76031;A0JLT2;P80723;Q96QU4;P53567;Q9UK  
T9;Q60504;Q9NPI1;Q60518;Q9UJY1;Q14771;Q86YC2;Q8NDT2;Q14907;Q9NRA8;Q15370;P52736;Q7RTT  
6;Q9Y2M5;Q96RY5;Q96EU6;Q9H3M9;Q02410;Q92979;Q15233;Q9UJA5;Q9UM63;P12757;Q9UBY9;Q13227  
;Q13772;P0CG48;Q12962;Q60675;Q95373;P35579;Q969E4;Q9NPD8;Q9H320;P33316;Q96ST3;Q13310;  
Q43542;P38935;Q9Y5A6;P07199;P43356;Q9BTT4;Q14691;Q8TBE0;P28074;Q14258;Q6R2W3;Q96HA7;Q  
9BXP5;Q9HAP2;Q8IYN0;Q14151;P62841;Q96DF8;Q92785;P50221;Q9H1B7;P18887;Q00425;Q9Y6H5;Q6  
9383;Q14681;P62308;Q9NR46;P50548;Q8NTU7;P27695;P61236;Q95551;Q99676;P63146;B1APH4;C9J  
N71;P57086;Q96JC9;Q9UL42;Q9UC07;P23246;Q9HAF1;P07320;P51786;P19388;P23528;P49720;Q015  
34;Q96J92;Q5TGS1;Q8N371;Q16531;Q14140;Q13148;Q9ULW0;Q9UBB9;Q8TAAQ5;P48552;Q8WU90;Q9UHV  
7;Q96Q83;Q9P287;Q8TAA3;Q15424;P61289;Q9C099;Q14777;P55197;Q9BSD3;Q9Y2X9;Q6P0N0;P29083  
;P24863;Q5HYJ3;Q9P1T7;Q969R5;Q8TAE8;Q13156;Q8NFD5;Q96EP1;Q8N187;Q13033;Q75132;Q13045;

Q92922;Q66K41;Q9H3F6;O43592;O43663;Q8TEK3;Q49MG5;Q12789;P15336;Q13794;P10828;Q9NXV6;Q8TBK2;Q9NZI5;Q92540;P16383;Q92499;Q99856;Q9NS37;P47928;P37198;Q9UKX7;P18848;Q9NVC6;Q2M1K9;P18850;O60481;Q8WXU2;Q8WUI4;P11172;P62508;Q01844;Q92547;O15116;O00161;P61583;O60869;Q14676;Q9H0G5;Q86X95;O14512;Q9UNS2;Q8TDP1;Q9H1E3;Q6P2H3;Q9Y534;Q6NSI3;Q9NZL3;P23610;O95619;Q9BXG8;Q6P387;Q8N196;Q8NHY2;P83369;Q6IE81;Q15776;Q92466;P30876;O75586;Q5SXM1;Q3YBR2;P28062;P62847;Q9BUL9;P09629;Q9NW38;Q9P0J0;O95271;Q9Y2A4;Q92930;P24864;Q9ER8;Q86Y01;Q15545;Q5T3J3;Q9NTI5;Q9BXF3;Q6ZN01;Q9NWZ8;Q969U7;Q7LBC6;P30281;P41252;Q9Y2D8;Q9H5J8;P13051;Q13642;Q9Y2D1;Q9UI36;Q9UJC5;Q53ET0;Q13829;P54136;P10243;Q15699;Q86W11;P30260;Q8NEZ5;Q6PI77;Q86WV5;Q92624;Q08AG5;Q8N490;Q9NUL3;Q8TDM6;Q92674;Q5SXM2;Q2QGD7;P17275;Q9UM82;Q5EBM0;P20265;O95273;Q9Y2W1;O95453;Q86U42;Q9UBK9;O75444;Q9UL03;Q96EZ8;Q9GZS3;O60437;O95571;P17480;Q5T4T6;Q9UL41;P61576;Q14585;P51523;Q96AH0;Q8N5L8;P16333;P06733;O75150;Q8N720;Q8N9Z9;P48556;Q9NWF9;Q9H3R5;Q14135;O95073;P63167;Q8NC51;P61244;P19838;P07438;Q96AV8;Q9Y5L0;O00629;Q9Y421;Q96QR8;A8MV65;P35869;Q6ZN79;Q9BWC9;Q9H3C7;Q8IWZ3;Q9ULJ6;P05813;Q8N9R8;Q8N7Q3;Q8N141;Q8TA94;Q9NPI8;Q14CS0;P56693;Q1ZZU3;P22087;O14818;Q5TBB1;P17028;Q9BVC3;P67809;Q8N8D1;O75175;Q8WV24;Q8NCR6;Q9H875;Q9UBD0;Q16534;Q9UL40;Q15637;O14599;Q14137;P07315;O15205;Q99627;Q9HCG8;Q9Y3Y2;Q9UJX3;P20073;P46937;P61578;Q9Y603;O15446;O75665;Q14241;P61758;Q96PQ6;Q9NSJ1;Q7Z3B4;Q6UN15;P56279;Q8WYA6;P09234;P13056;Q01658;Q9GZV5;Q9BUY5;Q9ULX9;P78346;Q9UMX1;Q86VN1;Q6P9A1;Q9HB19;Q6IA86;O60583;P54198;Q9UHF7;Q8WXB4;O75564;O43439;Q15834;Q92900;Q9NVH2;Q06546;O75368;Q9H5I1;P56181;Q9NWA0;Q3CV18;Q9H091;O75391;O75953;Q92917;P30047;Q13868;Q00839;Q92988;Q99436;P43364;Q9UFP1;Q3KNV8;Q8NC26;Q9NZ63;Q86UQ8;Q16186;P52294;P52954;O94874;Q5PRF9;Q13112;Q9BVP2;Q92539;Q92890;Q9Y5B9;P08621;Q2NKJ3;Q9H0A0;Q9NQR1;Q6V9R5;Q9Y3Y4;Q6I9Y2;O75346;Q9BT49;Q96DC7;Q9BYK8;P49790;O14802;O95990;Q9UNY4;Q03060;Q9Y2X0;O75821;Q14764;P26358;Q96EY5;P32780;Q8NFZ5;O75694;Q9H211;Q9NPA3;Q8NND9;P52597;Q9NXR7;O60832;P23396;Q16384;Q14749;Q96EY1;P19532;Q8N5D0;P15259;B2CW77;O95391;O75312;Q9H4B6;Q9NHY6;P16415;Q3B7T1;Q9Y6R6;O75154;Q4VC44;Q9BQ83;P15024;P17947;Q9BTP7;Q9UN30;Q9NPJ4;Q59922;Q6UWZ7;Q9Y4W2;Q963279;Q69YH5;P20248;Q9H9T3;P18615;Q96LA8;O43482;O95429;Q9Y473;A0AVK6;Q9BPX3;P60510;Q7Z4G1;Q8N7H5;P28070;Q15021;O15226;Q9BUG6;P51826;P81877;Q9Y615;Q9BUE0;P98182;O75934;Q9P1Z2;P40425;Q9Y605;Q9UMS4;Q13363;O95257;Q9NJP8;Q16576;Q8WW01;P49419;Q6ZMV8;Q92793;Q13901;Q96ST2;Q8N823;O75531;P40855;Q7RTV4;Q96LT7;Q9UQN3;Q8TF39;Q13526;P54274;Q9BRP8;Q9BZG8;O00566;Q02078;P61960;Q6FI81;Q9Y224;Q0VG06;Q8NFH3;Q8NHQ1;O00410;P35226;Q99623;Q8N132;Q92800;Q9GZR1;Q969S8;Q9UJW9;Q5T0F9;P14651;Q9NRC8;Q2VY69;Q8WX92;O75940;Q6NT89;Q86YD1;P54259;Q92575;Q9BWH6;Q53G26;Q9UDY2;P13682;Q9NVR2;Q14999;Q9UIS9;Q8NI08;Q9Y468;O75496;P57055;Q99741;Q7Z5K2;P12956;Q9BWF5;Q13127;Q15633;Q9ULV3;Q05530;Q3B726;Q9NWD9;Q6ZQV5;O00148;Q9ULW6;Q9BVN2;Q9UKK6;Q96M11;Q8TAP9;P43355;Q96NG5;Q9H814;Q53T94;Q14593;Q8N726;P25787;Q9NEV7;Q9P0T4;Q96CW6;A4D1E9;Q8WXX9;Q5C9Z4;P62306;P22415;O76021;Q969S3;Q9HB75;P27797;Q8TEU9;O96017;O95905;Q8NEH6;Q8IYN2;Q13503;P52741;Q8NB42;Q14693;Q5BKZ1;Q9Y6D9;P35251;Q7Z2W4;Q6QNY1;P25788;Q96LW7;Q9H0E3;P0CB33;Q8IW35;Q9BQY4;Q13620;Q9NP98;Q5MJ70;Q9BX26;Q9H008;Q8NEY8;O75928;Q9BZI7;Q15543;Q9Y250;Q9H1J1;P50748;Q96NY9;Q14781;Q14498;Q8NCU7;Q8WVM7;Q6P2E9;O60356;Q9H5F2;Q03938;Q93062;Q03933;P05412;Q9Y314;Q96DI7;Q16526;Q8IYB9;Q7KZ85;Q69YI7;Q13129}

6182 Pathogen[ P03410] interacts with 3852 human partners: {Q96RL1;Q6MZT1;Q9NSD4;Q32P41;O60711;Q9UDY4;Q15650;Q96EG3;Q86UW9;Q9HAW0;P84022;Q92830;Q9A2P7;Q96QF7;Q96AJ1;Q14202;Q03188;Q8WUQ7;O75505;Q99567;O60287;Q9BWH6;Q96LI6;Q9HCG1;Q96AQ6;Q9BVN2;Q9H3H9;Q7RTT6;Q99594;Q9UKT4;Q8IYW8;Q96NI8;Q99700;O14813;Q9BS18;P26447;A8K8V0;Q6AW86;Q9NQG5;Q5CZA5;Q71F56;P83876;Q2KHR2;Q14397;P49750;O95684;P57086;Q9H0M5;Q99933;Q8IXH6;Q99743;Q92540;Q3KRA9;Q92831;Q9BZZ5;Q13838;Q00613;P20749;Q96M11;Q9Y5J3;Q8NHY2;Q9BQK8;Q5JTH9;Q8WTT2;Q9BWE0;Q9UKV0;Q99848;Q9NQ90;Q9UHF7;O75665;Q9BSM1;P40426;Q4G163;Q96QT6;P0DI82;Q04206;O60583;Q9Y2W1;Q13536;Q08945;Q9NXF1;P08048;Q9H875;P62714;O14771;P28069;Q92917;Q9BZI1;Q86Y91;Q9Y2L8;P49321;Q96T21;Q96TC7;Q9HC78;Q5TA45;Q9H3M9;Q9ULU4;Q8N1W2;Q96JB3;Q5HYJ3;O60224;Q9HCH5;Q7L5A3;Q9NVN8;Q6ZNG0;O14901;O00472;Q6ZNA1;A8MWD9;O15392;Q9NS86;P35712;Q9H305;Q6UUV7;P17031;P22670;Q9NZM5;Q29RF7;Q5HY98;Q5TB30;Q9NVR2;Q7Z3B4;Q5SVZ6;Q9HD34;P23025;P42771;P61576;O43309;Q9UI36;Q6ECI4;Q9UI56;Q9BT56;Q9H9Q2;Q8IU60;Q15714;Q9BSU3;Q9UPP1;P28070;P49959;Q96RE9;Q86SE8;Q96BF6;Q8TF63;P23409;O95619;Q6V9R5;Q9BW27;Q5JVG2;Q9H6W3;P11831;O60281;Q7L804;Q9UNX4;Q8NBF1;O43439;Q9N44;Q9Y2L1;Q9NS37;Q8N5L8;Q14588;Q8WXF8;Q9P2N6;Q96FX2;P40692;Q6NZI2;Q96BR6;Q9Y2S7;Q9H981;Q5EBM4;Q9HB07;P22087;O75290;B2RFX5;Q9BYN7;P0CJ87;P30047;Q92945;Q9GZP8;Q17R31;Q96AV8;Q8IZU0;P18887;Q5JNZ3;Q13227;O75934;P23246;Q8TAU3;Q8IYN0;Q8IZX4;Q9HAJ7;P82094;P61247;P19838;Q68CJ9;Q96Q89;P17987;Q5QGS0;Q96TA1;P36956;O75154;P46527;Q9NIW8;P0C7V5;Q00839;Q9ULR0;Q9H4X1;P52655;P35244;O75461;P53999;Q99457;P25205;Q9NUX5;P51610;Q9HBM0;Q86WB0;Q15427;Q9H040;P10768;Q13137;Q8WTP8;Q5T4T6;Q96FI4;Q9UKT7;O94763;Q8IWZ3;Q13829;Q9UI95;Q9UHP9;P61578;P60002;Q9UNN4;P27986;Q9NZN8;Q9Y6J0;Q9NXX9;Q96PT3;Q8WYH8;P48539;O75925;Q96GN5;Q8IXK0;Q96RS0;O43929;Q9H2G9;Q9HB71;Q9BWF5;Q9Y4Y9;Q6ZNA4;Q9UMS6;Q12873;Q99733;P23490;Q15572;P0C7X8;Q8IWC1;Q96ST2;Q9UDW3;Q8WXD5;Q9HAH1;O60675;Q6ZN01;Q5T619;Q9UL41;P02533;O00512;Q01011;Q9UL16;Q7RTS9;P10599;Q03112;Q9UK39;Q12893;Q6ZMY9;P0CG48;Q6PGP7;O15205;Q9Y6H5;Q96NM4;O95218;Q8WXU2;Q8IXF0;O15355;O95639;Q3SY89;A6NN14;Q32M78;E7ETH6;Q13394;Q9UNY4;Q9UGK3;Q9NPP6;P51808;Q9Y2Y9;Q9NXR7;P29374;Q9Y675;Q9NZH5;Q14129;Q9NSP4;Q13106;P51161;Q8N9Z0;Q96DU7;O14893;Q8N5J4;Q96AB3;Q8NDW4;Q96T76;Q9NZL3;Q9BU02;Q16666;Q15058;Q9Y2G2;O14681;Q5HYK7;Q9YF7;Q99708;Q9UDV7;Q14593;O43402;Q9UNN5;Q27J81;P10144;P52594;P35638;O1920;Q14526;Q9GZR2;P26368;P68104;O95359;O95238;Q9H3R5;Q10570;Q6Q759;Q59GR2;Q9H869;Q02833;Q9UK13;Q9Y3B8;Q8N8E2;Q9BVI4;O00470;Q96N58;Q2M3W8;Q14974;Q13155;P56279;Q8WXA3;P61326;Q8N8Z8;Q9H4L7;Q9HB75;O75683;A9QM74;Q8WVC0;P19387;Q14103;O96006;P62304;P20585;Q96RT1;P16415;Q96N22;P35813;Q13772;Q8TC05;P78316;Q96LA8;Q13360;Q8N7R0;P06454;Q9NX01;Q8N7G0;Q9COH6;P80303;Q14739;Q15697;Q96BW1;O15234;O15042;Q9H825;Q8N0S6;Q96T23;Q9H147;Q13889;Q6PCB5;Q8WYK2;O00505;O75373;Q9NV56;Q96PK6;Q8TD31;Q99496;P48634;Q9H5J8;Q9P2T0;O95780;Q5VUA4;P0CG30;Q86VM9;O43684;A6NF01;Q9UKX2;P0CJ79;Q8N7Q3;Q7Z614;Q14929;Q9BY41;P17482;Q7Z

6J9;Q8TF68;Q05BW5;P06744;Q96NU1;Q8NE71;Q9Y534;P54198;Q96H22;O60508;Q86WV1;P17861;Q15329;Q15038;Q6W229;O75293;P07315;Q14749;Q7L266;P78346;Q9UKV8;Q8N3C0;Q9Y5Q9;Q15633;P0CH99;P17040;Q99497;Q8NFG4;Q8TD10;O14599;O95628;Q96NB1;Q8TCN5;Q15050;P61925;Q9UHB9;P62328;O95503;Q96QC0;Q96H86;Q8WWY3;P15621;P08397;P18615;P35754;Q9NPA5;Q8WYR1;Q6QNY1;Q53G26;P37275;Q15637;Q93062;Q96L92;Q9HCE5;Q8NI08;P36954;Q13190;Q9NVI1;Q5TAB7;P30279;P13682;Q8TAZ6;P41162;Q96JM3;Q9H0U9;Q9H4T2;Q9NZ81;Q9H3P2;Q8N587;Q8WUN7;Q9UL59;Q96AB6;Q9NPF4;O0268;Q96AY2;Q12983;Q8NFFZ5;Q15047;Q9NWT6;Q9H816;Q6PI98;P36508;Q5VWG9;Q12996;P58317;Q5MIZ7;Q96C28;Q3KNV8;Q8IYH5;Q8N7M2;Q96N38;P50995;Q9BRH9;O00442;Q15029;Q96S99;Q5VUG0;Q9BQS6;Q9H5P4;Q52LR7;Q9UJ04;Q96SW2;Q86XF7;Q13495;Q15696;Q16520;Q3MJ62;P98169;Q8TC76;O75943;Q15014;A6NDX5;Q5T5M9;P62913;Q96CB8;Q8WTTZ3;Q8WTR7;Q9BRV3;Q96JB2;Q96CS4;Q8WVJ9;Q92804;P61978;P0C7T5;P78560;O60535;Q9UK99;Q8IV48;Q9UDV6;Q9UP83;P07438;Q9H1A4;Q96NB3;Q9UPW5;O14929;Q04864;P61583;Q9NWB1;Q9HAZ2;Q99676;Q9BQ15;Q92994;Q9BVC6;Q9NVV9;Q9UGY1;Q9UKX7;Q15773;O60885;Q9GZM3;P15822;Q8NA19;O95990;Q9Y2Z0;Q9H7R0;O15151;Q05048;P38646;P52738;Q14181;O14896;Q96MB7;O96004;Q9BSD3;P31274;Q9HBT8;Q00534;Q92698;Q9NSA3;Q15543;Q9BWW4;P25786;Q16629;Q13416;Q9Y4R8;P19419;Q9NR46;Q15973;P52740;Q969Q6;Q15652;Q9H840;Q04726;P42772;Q8IYD8;P12755;Q14684;P78345;B3EWF7;P29728;Q15554;Q96G25;Q9NV72;Q15398;Q6PD62;P31276;Q6IPX3;P82970;Q9BXM0;Q14549;Q9P2R6;P07741;Q8N3X6;Q76KX8;Q9UN79;Q5T0B9;Q9NWW8;Q66K89;Q08209;Q9UL03;P17676;P23511;Q7Z699;Q96KS0;Q9Y6I3;Q9H410;Q96SZ4;Q92900;Q9BQ50;Q8WUB8;Q96AP0;Q8N1N5;P22626;Q9P016;Q5T230;Q9P0U4;P98182;Q107X0;Q8TD86;Q9NRR5;Q8TDD2;Q96ER9;Q8N228;Q9H726;Q9BYV9;Q9Y615;O60806;P50707;Q15233;Q8IY22;Q8NG31;Q8N680;Q8N699;P80297;P11940;Q9H9D4;Q504T8;Q96SQ5;A4GXA9;Q9NPF8;Q9UMQ3;O94916;P36639;Q9H4I2;Q96JL9;P18847;Q9H6Z9;Q9UJG1;P01106;Q02447;P16989;Q9NVP1;Q9BUJ2;Q6PJT7;P49427;P63165;O95251;Q92750;P07992;Q99814;Q9BTL3;Q9NV06;Q8NI27;Q9NXW9;O00267;P17947;Q9Y5B9;P0C860;P62306;Q16600;P63272;P60510;Q53HL2;Q12968;P46777;O95125;Q06330;O15315;O60481;Q99502;O14746;Q9BXP5;Q99575;Q99549;Q06730;P98171;P62841;P52294;Q13057;Q92670;Q86U86;O15060;Q96GM5;Q9BSG1;O14948;Q6ZJW1;Q569K4;Q9NWD9;P54105;Q8NFH4;Q17RP2;O60682;Q8N8C0;Q01860;Q8N344;Q96F24;Q96AZW8;Q96K30;Q4L180;Q6ZMW2;O75351;Q6P3V2;P24928;Q6IPU0;P53992;P41218;Q96B42;Q6ZMZ3;O14497;O14656;A6NLJ0;Q15287;Q53GL7;Q8IX03;Q9UC06;Q8N8G2;Q8TCJ0;Q9UII5;Q6IEG0;A6NFI3;Q15776;P60900;Q8NB50;Q9UM07;Q8WV44;O96019;Q3SYG4;P54274;Q9UKD1;P54845;O43427;P62310;P04733;P55060;Q5T320;Q9UBP6;Q9C0G0;O75419;P25791;O96020;Q9Y6Q3;Q15172;Q96S59;Q9ULH7;P10073;Q8IUE0;P41220;A9YTQ3;Q0D2J5;P05388;Q9BFX3;P46013;Q86P12;Q12962;Q9BQA5;Q9Y316;Q96G21;Q9UBT6;P21675;Q9BXW9;Q9GZU2;Q9Y4I5;Q9BYE7;Q14997;Q13620;Q9BYG7;P41212;Q3ZCX4;Q03989;Q9UQE7;P09629;Q14149;O15111;Q9ULZ2;P29083;Q9NQZ2;Q6NZY4;Q9UHD9;P15941;Q14686;Q14938;Q8TAW3;Q9NQ87;Q9ULM6;Q9NQX6;Q12765;Q8N4W9;Q9NWF9;Q96BT3;Q13098;Q8NCR6;P18848;Q8N0X2;Q1ZZU3;P42575;P25685;Q9UPR3;Q9UQ80;Q9H0A0;P36402;Q5H9L2;Q5TAXR1;Q9UHK0;Q96KR1;P35998;P50222;O60502;Q8TAAQ5;Q659Y7;Q9UJ78;Q9Y3M2;O95777;Q9NVM9;Q6NXT1;Q6T4R5;P51965;Q8N6I1;Q96FA3;Q9NPI6;Q96AQ7;Q9H1A7;Q14692;Q9H1E3;Q96S95;Q13526;Q15393;Q12959;P54277;P50221;Q9Y3C1;Q9Y2N7;Q13503;O15266;Q9Y2D1;Q13609;Q8WUU5;Q9UH99;O75446;Q9Y255;Q6PJJ2;Q9UGP4;O43542;Q8TD17;Q9NS73;O15069;Q8N3J9;Q9NWW0;Q3KP31;Q9Y2B4;Q9BYK8;Q9Y224;Q9Y5S9;Q7L190;Q96QU8;Q96N77;Q8N6T7;Q9P0V3;Q6PG37;Q7Z5K2;Q8NCCN2;Q9Y3C4;Q6PI26;O75528;Q06265;Q9UJX4;P14651;P04053;Q7KZ85;P54136;Q8NB91;Q9NTR5;P10242;Q8IYB9;P53567;Q9UIF8;Q9NYG5;Q9NPF5;Q96DX5;Q9BWT1;Q86YW9;Q9BWX1;Q9NR11;Q5SRE5;Q8N3X1;Q9Y605;Q69YI7;A1L020;O15405;O14646;Q96BP3;Q92688;Q9H0W9;P24522;Q9NMT9;P48147;Q9UHL9;Q14493;Q15013;O00165;Q19AV6;P35789;P14859;O95751;O75582;Q96P70;Q9NVC6;Q9GZU7;Q76FK4;Q99717;Q8WXI9;Q9H0G5;P52948;Q12800;Q8NF99;Q14814;P78545;Q99608;Q8IYX0;Q9UL49;Q9Y3I1;Q5VZF2;Q8N9N5;Q6719;Q7L2R6;Q6P9F0;Q9NPF2;Q6P1E9;Q16222;O00233;Q9C0C2;Q8WWL7;O76075;Q8N998;O75030;Q96K62;Q9NZC7;Q96PQ6;O15504;Q8IXQ5;P35637;Q8TEE9;Q53TQ3;Q5TCQ9;Q86WZ6;Q9UPG8;P15884;O14862;O75792;Q6ZN11;Q15257;Q9NYT6;Q7Z5L9;Q9UJV8;Q14653;P51946;Q9Y6X9;O75444;Q9BFP7;Q14207;Q5VSL9;P32929;Q92610;Q8NBB4;Q9NRR3;Q8TEK3;Q9NNU2;Q8WY54;P28324;Q9UNA4;Q9BVW5;Q5RKV6;Q12857;Q5H9I0;Q8TF50;P57055;P49406;Q16254;P17017;Q8TEQ6;Q8TF45;O94811;Q16612;Q8TCY9;Q15365;Q16236;D6RGH6;Q8LWA0;Q9BTE3;Q9NPF3;Q3C1V8;Q9P287;Q12830;Q8NFT6;Q2M1V0;Q5VIY5;Q969S3;Q9BZE3;Q9BRA0;Q96ND8;Q14978;Q9H0I3;Q9NPF6;Q9BTC8;P0CL85;Q13490;O60870;Q8IYI8;Q9UPQ4;Q8WZ19;Q9UNL4;Q8IW36;P62136;Q92905;P24278;Q7Z6B0;Q53EQ6;Q86UA6;O95931;Q9Y333;Q2M218;O60716;P06733;Q9Y543;Q6P2D0;Q9P0W2;Q8WXE1;Q9UMS9;Q4G112;O43679;Q9NRA8;Q9BSK0;O75182;P42695;Q8WTS6;Q6PJG6;P36405;Q9BYX4;Q13867;Q14CW9;Q08ER8;Q8N339;O15198;Q8TF39;Q5FWF6;Q9NXZ1;Q9H6J7;Q96F27;Q9P2K5;Q9NYN1;Q9UK11;Q5BKY1;Q9ULG1;A8MT65;Q9Y586;Q6ZVD7;P28289;O95273;Q8NG50;Q9H9L4;P23610;Q5VYK3;Q8TDY2;Q6H8Q1;A6NHQ2;Q9BQ52;Q01534;P20700;Q96RS6;Q7Z465;Q9UBU8;O00273;O43918;O00401;Q5TD94;O43325;P35573;O00159;P55273;A6NHJ4;Q9ULJ3;P50748;Q5C9Z4;Q9NVM4;P0CB33;Q9NXT0;Q9NYP9;P31249;Q9BWG4;Q9BU19;Q86SE9;Q9Y6X2;Q96JM2;Q9Y692;Q9UFM2;Q14765;Q5SNT2;P57075;Q86X55;Q460N3;Q13868;Q07021;Q8NHZ8;O00148;Q9NS23;Q96LX8;Q08378;Q9NR56;P43355;P57721;Q9NWX5;Q9UIH9;Q86XU0;P62380;Q2TAK8;Q04724;P55769;Q2VY69;Q9H4Z2;Q6IQ21;Q8IZT9;Q9NZI5;P05787;Q5H9F3;Q9UBB5;Q96GC6;P12525;Q14689;Q6NSW7;Q16143;O75928;Q13501;P62847;O43294;P22674;Q96HI0;Q9NPC7;Q9BXN6;Q96T37;O95067;P51826;Q86UQ0;O43830;Q8NEY8;Q9BRU2;Q9NYH9;Q9C0F3;Q9Y6Y0;P11142;Q9HD47;O75694;Q93050;P39687;Q9HD36;Q2M1K9;Q9NZV7;P78414;P57071;Q9NXX1;Q8TA3;Q6ZYL4;Q96CW6;O00204;P45381;P41134;Q86TJ2;P11172;P31749;Q0VGE8;P17096;Q9H963;Q96N95;Q9Y5A7;Q9UBX2;Q8N114;P35579;Q6NSZ9;Q9NZQ3;Q9Y2K1;Q9Y5Z9;P04792;P59047;Q9HAW4;Q7L9L4;Q9Y3Q8;A2A288;Q969F1;P23396;Q9H3M7;Q9UK76;Q7RTS1;P10412;Q15003;O75437;Q96DN6;Q6ZSB9;O00213;Q8N3S3;P55895;Q99687;Q9NXV6;O43299;Q8N2W9;Q9UL58;P78406;P06746;O14709;Q9H668;Q8N6F1;A6NFD8;P45973;P48556;Q99633;Q562F6;P30876;P63167;Q03060;Q9NWA0;Q86WQ0;P26599;Q96K75;Q9Y2B5;Q9NPF7;P0CJ85;Q92785;Q7L5Y6;P49721;Q8N720;Q9Y287;Q92674;Q15653;O95260;O95190;P54252;P40855;O60832;P52741;Q659A1;Q92889;P19532;Q9BPZ2;Q5VTR2;Q9H063;Q9BQA1;Q93075;Q08999;P10243;Q5THR3;Q9Y468;A6NJG6;A6NNA5;Q9P211;Q53FT3;Q96S55;P16333;A6NDV4;Q9UJW0;Q8TAD1;P20226;P82979;O75953;Q8TDN6;Q96MU7;Q9P013;Q15366;Q9BWG6;Q9GZR1;Q15370;Q86YP4;Q86TP1;P13640;Q01105;Q9UK59;O95948;Q86VE0;P10828;Q9C000;Q6NX45;Q9Y5Q8;Q5TA31;O00321;O60524;A6H8Y1;Q92791;Q3B7T1;Q15651;Q9NRG0;Q9H175;Q15004;Q15906;Q5TKA1;Q9UJL9;Q13794;Q9NSJ1;Q9Y283;Q6PF04;P62308;Q9BT49;P50749;P14678;Q96Q83;P61581;O00291;P62316;Q9Y3T9;O7



5764;P31949;O94892;Q32MZ4;Q9HAU5;Q9UBB9;Q13835;P39748;Q8N336;P06748;Q9Y3F4;O75368;Q9U  
BK9;O75381;P48378;Q6PIJ6;P06400;Q5VWX1;Q9BXY8;Q9ULJ6;Q16633;Q86VN1;Q14137;Q96I27;Q8TF  
01;Q6UUV9;Q6NVH7;Q9UBS3;Q9BSI4;P06132;Q9Y3M9;A6NM28;Q9UJY1;Q9H116;Q03923;Q9Y5Y2;Q6PK8  
1;P19484;Q9H9T3;P56282;Q9HC44;Q9Y697;O60260;Q9ULM3;O75376;Q9P243;Q9UNH5;Q86UQ8;P31314  
;Q9HCL3;P49716;Q15025;O00110;Q68DY1;Q04323;Q06547;Q9NSU2;Q9HB21;P68036;Q8NEJ9;Q96ES7;  
Q9UBF1;Q9H7X3;Q7Z713;Q9BTP7;Q9H0S4;Q9GZL7;P61088;Q9H808;Q15059;Q9BR06;Q14442;Q96KQ4;Q  
96SD1;O14972;Q99684;P43351;Q15327;O95997;P32519;Q9BYH8;Q8N7U7;Q96HAL;Q9UIE0;P23193;P3  
0793;Q53GI3;Q03468;Q99829;Q8NB42;Q9Y4P8;Q6XQN6;P55265;O60304;Q9BQ83;Q9BT78;A5LHX3;Q6U  
7Q0;P15923;P26651;Q6UB98;P05062;Q09FC8;Q06732;Q6ZLN19;Q99607;Q4VC44;P17025;Q03052;Q130  
45;P0CJ90;Q52M93;O94850;Q69383;Q8WYQ5;Q9NXX6;Q9UIV1;Q9Y3C7;Q99615;Q9BXS6;Q5MJ68;P6297  
9;Q1ED39;Q96EB1;Q8TBK2;P54725;Q9UPW6;P28715;Q8TAT5;Q8NG57;Q9NPG3;Q9NQW6;Q9NWS9;Q6NS38  
;Q9BSV6;P43364;Q8TAP9;O43159;Q9NVV4;Q8TAD8;P23786;P78549;P35227;P62508;Q4LE39;Q92748;  
Q8NEM1;Q8TDP1;Q8TEX9;Q9UBX3;Q6P0N0;P0C1Z6;Q86WP2;P52657;Q8NCD3;Q92466;P51523;Q8IWS0;Q  
14188;Q96ST3;O00461;Q05084;Q8NFD5;Q9H171;Q9NR22;Q6ZLN55;O15514;Q9UJW9;Q9BRT9;Q6ZT77;Q1  
3541;Q9Y295;O60216;Q15306;Q13568;P50613;Q96HQ0;O75177;Q9H1J1;P14866;O15055;A8MU46;Q9P  
2N5;Q9H204;Q03933;Q5H9R7;Q14152;Q96EK4;Q14674;Q5VZB9;Q5H9K5;Q14258;Q96SC8;Q96T49;Q5TA  
P6;Q9NRR4;O60688;Q99436;Q92832;P28838;Q8NAV1;O00712;O15318;Q7LBC6;P9012;Q13895;Q9258  
5;Q01831;Q15819;Q9UKW6;Q96T58;Q8WW38;Q9Y535;Q92541;Q01201;P25490;P01100;P18846;Q0D2K3  
;Q96LW1;Q53HV7;Q02410;P52746;Q5QJE6;Q00577;Q8WVV9;Q9H1K1;P61244;Q7RTU4;P41002;Q56P42;  
Q9BV20;P07320;Q9BZI7;Q15424;Q9H910;Q9H009;Q6P2D8;O15226;Q07666;Q15560;Q7Z4V5;Q9Y6F1;Q  
9H7B2;Q5EE01;Q6IV72;P17036;Q96FV9;Q5T0J7;Q8N490;Q9BTV5;Q8TC21;Q12904;Q6P387;P38432;A6  
NFQ7;Q8N1K5;P15408;Q53ET0;P06703;O60303;Q9HBL8;A8K0S8;Q9NTW7;O60663;Q96G23;P51508;Q3M  
IS6;Q9H707;P23508;P33992;Q7Z401;Q9BRT2;Q96SR6;Q5TEC3;Q9Y2X3;Q9NP66;Q96QD9;Q9UQ35;B4DX  
R9;O43264;Q8NEP9;Q14693;Q6VMQ6;Q9BZV1;Q8N1F7;Q156A1;P62750;P0CG29;P13073;O75486;Q9257  
5;Q8WUI4;P17544;Q96MF7;Q5SVQ8;Q16670;P35659;Q9C005;Q8IZT6;Q6ZV50;Q16576;O60381;O60930  
;P50549;Q9GZS3;Q5EBL2;Q7Z7K6;P25815;P49454;P17010;Q8N1G0;Q9GZV5;Q969U7;Q9H0E3;Q5JXB2;  
Q9UQR1;P11473;Q9UQL6;Q02556;Q96MG7;P51825;Q96D70;O95347;P51003;Q6XD76;Q9H2F5;Q9HBZ2;Q  
5RL73;Q96A49;Q9H7N4;P78396;Q9BRU9;Q9GZV8;A5D8V6;Q9BW11;Q15006;O14965;Q96EA4;Q9Y603;Q1  
5654;Q8TC56;Q13148;Q14587;Q96PE6;Q15928;Q8N7H5;Q9BRR0;P08621;A8MV65;Q05BQ5;Q9UNH7;O95  
243;Q8NDY4;Q92925;Q6ZNG2;A6NJ46;P08865;Q8TAF7;Q969V6;Q96L21;Q6RFH5;Q8N8L2;O43809;Q96N  
G8;Q86T29;Q7Z2E3;Q9ULD5;O95644;Q9BQY4;P58340;Q9GZT9;Q8NCF5;Q7RTU5;Q96IF1;Q8N98  
7;O75952;O15162;Q02930;Q9P1Z2;Q6RFH8;Q96MA1;P50750;O95789;Q96MN9;P11171;Q13356;P10072  
;P40306;Q9P127;Q9NX58;Q8N831;Q9UBF6;Q5VWQ0;Q00994;Q92979;Q9Y5Q3;Q9HLZ4;Q92800;P26358;  
P27540;Q15535;P67809;Q6GPH4;Q8WYA6;Q86WI3;Q53HI1;Q9UNYV6;Q86WV5;Q99081;Q9Y2G4;O43805;Q  
99816;Q9GZY1;O00625;Q9UM54;P33316;Q15599;Q6ZN06;Q9UHB7;Q96BV0;Q14590;O75151;Q9UHJ9;Q9  
6B36;Q15628;Q9HCL6;Q9UK10;Q9BUG6;O95425;P62277;Q5T0F9;O60563;Q13127;Q8WXB4;Q9NXH2;P17  
022;Q96GE5;Q5SXM1;Q8NEH6;O00716;Q9UKT9;O15525;Q7Z5Q5;P25800;P08651;P60673;Q92624;Q9HC  
S7;Q6ZMS7;Q9Y2X9;O94906;Q8IZL2;Q15583;Q7L5N1;Q08AN1;P36578;Q9UGP5;Q9UMX0;Q8N201;P4116  
1;P61573;Q17029;Q7L3S4;Q8IVP9;Q9UBZ9;Q9UMR2;A6NIX2;O75600;Q8WYR4;O95571;Q92988;Q9BYD9  
;Q9NS25;P27725;Q9UNQ2;Q9UJA5;P12956;Q6VN20;O76031;Q9NPA8;Q9C035;Q8N823;Q12986;P24385;  
Q9UDY2;Q99990;Q9Y2W2;Q8WWY6;P0DI81;Q9BTV4;P07910;Q9Y4W2;Q9H3F6;Q7Z340;Q9UBZ4;Q8TB69;Q  
5H9L4;P42166;Q13492;P08579;Q96IY1;P55199;Q96JK9;Q8WZ33;Q07687;Q6ZRS2;Q96H40;O95551;P4  
1227;Q99471;P35548;Q13618;Q9P0M2;Q8NEK5;Q8IZD4;Q7RTT5;Q93052;Q6R2W3;Q3KQV3;Q9P031;Q8W  
V24;Q9BWT6;P17098;Q8WUX9;Q92793;O95905;Q14966;Q13472;Q969S8;Q6B0B8;O00567;Q8TBZ5;P389  
35;O95707;P29474;Q8IYF1;Q9H0H0;P32511;P49756;Q9BR11;Q86Y01;Q8N205;Q9H6F2;O60936;Q719H  
9;Q8NEZ2;Q15573;Q86YF9;Q96B26;Q96JC9;Q5T6S3;Q63HM1;Q99828;Q8NDN9;Q9BWM5;Q9Y5L0;P49790  
;Q8IY85;Q6NUN9;Q8IX07;Q05519;Q9UJ68;O43818;Q8IXH7;Q8TE85;Q8IY57;Q9ULK4;P41223;Q53QV2;  
Q13287;Q9Y448;A8MWA4;Q9H814;O95402;Q14764;Q6N069;Q9Y2Q1;O75150;Q3KNS6;Q9UQN3;P48382;Q  
8WX92;P51814;Q6IQ32;O94986;Q9Y6P5;P10074;Q15561;P62937;Q9UKV3;Q5H9S7;P10244;P25787;Q1  
4980;P52701;P15036;Q96DT0;O00570;Q969G3;Q6ZNH5;Q9UL40;Q8WVK2;Q9HC62;P49789;Q8IU81;O15  
297;Q9NQV7;P29084;A9UHW6;Q09028;Q9UM82;O15084;Q9BTK6;Q96BN2;P61571;Q9NW08;Q15369;Q996  
23;P61236;Q9P1T7;Q9UER7;O95453;Q2TAY7;P17026;Q9NZJ4;P14635;Q6P2E9;Q6UWI2;Q69YN4;Q0153  
8;Q96KR7;A8MZ59;O95999;Q92782;Q8IXM2;P49773;Q9BX26;Q9BS31;Q99459;Q9NQ55;Q9UM11;Q14511  
;O75400;Q16649;P12270;Q8WWQ0;Q9HBM6;P38936;Q6ICB0;Q6EKJ0;Q9UN36;Q9UIL8;Q6P2H3;Q92769;  
Q9HCB3;O43513;Q96FX8;Q02386;Q8NEA6;P12882;Q9Y4A5;Q96KG9;Q9NRL2;Q9BWK5;O94805;O0CG31;P  
43243;Q9BU61;P04731;Q96JM7;Q13042;O43172;Q9UK12;Q8N9Z9;P52737;P26038;P0CG13;Q96I27;Q7  
Z398;Q9BSH3;Q13342;O43236;Q9Y6B2;P52435;P45985;Q8NA58;Q8N5A5;Q92797;Q9NUU7;Q5TGS1;P62  
826;Q9H489;Q7Z2X4;O60225;O00629;Q96E16;Q8IY92;O95602;O60684;P17535;O94913;Q96GM8;O145  
58;Q8N972;Q3ZCQ8;A6NLC8;Q4W5G0;Q9UHQ1;O43502;P62140;P09132;O43491;Q9Y294;O94842;P0248  
9;Q7Z3I7;Q6ZNT9;O00264;Q15170;Q9P2D1;Q6P9G9;Q8WYN3;Q8N163;Q9UGK8;Q9Y2G1;Q2VWA4;Q9UPV9  
;Q969H0;Q969W8;P51959;Q96CM4;P17028;Q8N883;Q8WWZ8;Q49A33;Q8NCK3;Q6SJ96;Q6UN15;P56181;  
P53370;Q9BPU9;O15287;Q9UKN5;P61586;P17019;A6NLW8;Q9BQI6;Q07955;Q15942;P52597;Q96C00;P  
53805;Q9BWC9;Q8NAP3;Q9UNY5;Q03924;Q96RQ1;O75132;P35658;P08107;Q9Y3S2;P52298;Q9H9Y2;P6  
2081;Q9Y3C5;Q13395;Q16514;P28347;Q9HA82;Q16637;P46783;Q9H9F9;Q86XK2;Q9NPI8;P78395;Q9P  
JP8;Q7Z353;Q32MQ0;Q8N357;Q9H6F5;Q68DY9;P61574;Q03252;P17030;O75190;Q9BS34;P04818;Q9BU  
L9;Q8IXQ6;P52743;Q9P0L1;P30304;Q9UBS8;P24941;Q9P2I0;O75525;Q07157;Q8NEZ5;P31943;Q96QU  
4;Q969P5;P17275;Q99638;O00170;Q13129;Q00597;O15527;Q9NQRL1;Q92499;Q12772;Q969E4;P62314  
;Q13330;Q9UMX3;Q9ULV3;Q16621;Q9Y253;Q7Z591;P0CW71;P49848;P52736;O43660;Q92973;Q9UPA5;  
A6NGD5;Q9UGR2;B2UCW77;Q9HD42;Q9UHJ3;Q6NT04;Q9UBC1;O95429;Q96LT7;O14787;A6NGY1;P83369;P  
0CJ89;Q7Z2W4;Q9ULD2;Q8IVN3;Q9Y5Z7;Q9BRX2;Q8TAK5;P25208;Q8N187;Q9BXX3;P62324;Q96AH0;Q9  
UGN5;P51815;O96007;Q9NXR8;Q9H9L7;P04553;O95163;A6NK53;O95271;Q9BQW3;Q5D1E8;Q5T8A7;Q9Y  
678;Q8NFH5;P51587;O43482;Q14872;P11802;O75362;Q9UJW8;Q96K83;Q86UE4;Q86Y26;P56645;Q6P1  
K2;Q75ISB3;Q96BU1;P78317;Q9BSF8;Q9UMS0;Q9H6R4;Q8WY36;Q674X7;P05937;Q5HYK9;Q9BUW0;O9482  
9;O75531;Q16873;Q02511;P55198;O15382;Q15024;Q96NS1;O15379;P56524;Q9BYG3;Q9HBH7;Q5VU43  
;Q13111;P61758;P17014;Q12905;Q8IXJ9;C9JN71;Q86VY4;Q9UBB6;P0CG24;P46939;Q9NZ63;P33240;  
Q8IZU3;Q9UND3;Q9NY74;Q9NWT8;Q16082;P02795;Q9NVX0;Q68EA5;Q96SE7;Q5JVS0;Q99550;Q8N1G2;Q



9NV88;Q9UBU7;O75818;Q7Z4G1;Q9UNS2;Q96NY9;Q9H5I1;Q12988;Q9UPP2;Q9NTI5;P53803;P02545;Q13569;Q8NA42;Q9H321;P43487;P28062;Q13033;Q9Y3V2;Q93083;Q14CS0;P16083;Q9H3C7;Q9UHX1;Q6P280;Q15797;Q71F23;Q92922;Q6P1X5;Q96AZ6;P17024;Q6P4R8;Q01826;P42704;Q14140;Q9H609;Q13112;Q8TEM1;Q9Y6X0;O15127;Q8N7K0;Q86U70;Q5T5D7;Q9H160;Q9NPF7;O43395;Q14119;P43268;Q15428;Q8IX06;Q8XS27;Q15326;Q14602;P31269;Q96S65;O15534;P16455;Q08495;O95983;P62877;P19447;Q8N9U0;Q8IW19;Q12796;P63146;Q9P215;Q9Y613;P11387;P17020;Q14683;Q99909;O14907;P42167;Q01658;P09661;P47928;P48380;P22415;Q8WXF1;Q9ULX6;Q5T7V8;O43379;Q13485;P12883;Q13156;Q9NZT2;Q96I24;Q3YBR2;O15078;Q9NUW8;P10914;Q96DE0;Q9NY12;Q9BUY5;P49419;Q8N2G8;O75506;Q96IR2;Q9ULX9;O94864;Q9Y3B9;O60356;Q99583;P61580;Q15185;Q15459;Q68CQ4;Q13952;P22736;Q6IN85;Q96IZ0;Q04727;Q8IWL8;Q8IZ26;Q9H299;Q14186;Q9BUP3;Q8IXT1;Q96EK7;O75533;Q14106;Q969J2;Q96DE5;Q9Y2S0;Q8NDD2;Q86V81;Q9BZD4;Q9HA7;Q8TAF3;Q8TBE0;Q8N9R8;Q96MX3;P62875;Q9H7R5;O14776;P05423;O60447;Q9GZS1;Q15054;Q8IYN2;Q9BY31;Q9UN42;Q9HCK8;Q8TC84;Q9BVC3;Q9NZZ3;Q8NE65;P31483;Q69YH5;Q76L83;Q9ULX3;Q86VP6;P28702;Q12789;Q9H201;Q9Y6D6;P19338;Q13023;Q9H089;Q9P1U0;Q9NRF9;Q147U1;P52272;Q6K0P9;Q9UM63;Q8N1G1;P04156;P09874;Q53EL6;Q16526;Q9BTC0;P15259;Q8N5P1;Q9H788;Q5PRF9;P16220;Q15466;Q9NVU7;Q96SK3;Q15834;P56693;Q00403;P0CAP2;P21506;Q9NUQ3;O95831;Q7RTV3;Q9BXL5;O14818;P12757;O96017;O43296;Q9H1B7;Q5EBM0;Q9UBU9;Q6P1L6;Q9H777;P84101;P18583;P36873;P86452;Q9HBM1;Q5XG87;Q9UKD2;Q96S94;Q9BTT4;Q9Y6X8;Q8WWX9;Q9BZE2;P17032;P53041;Q8WWB7;O15014;Q96EE3;O14757;Q15046;O60671;P17027;P47974;Q9H7E2;Q9NQV6;Q3SY52;Q14585;Q9BRG1;A8MUV8;Q8NPF8;Q9UJ98;Q53H80;P46937;P78412;Q8N196;P20290;Q06455;Q6P1J9;Q9H4Z3;O43364;Q6NP2C8;Q9NQ50;Q14118;Q9GZX5;Q13118;Q15699;O75410;Q86WX3;P81274;P49910;P46100;Q9UJX5;Q6NSI3;Q9AN0;P35269;Q92618;Q14320;Q9Y6J9;P61962;P55771;P42568;O43324;Q86XN6;Q13185;Q8N5D0;Q5VV52;Q8NEM7;Q9Y244;Q9HB96;P51786;Q9GZX7;Q9NY87;O75175;Q9H1B4;Q13469;B1APH4;Q6UWZ7;Q15910;P41182;Q8N3U4;Q13769;O60921;Q99504;P61572;Q14011;Q8IYB3;P51532;Q9NZU7;P0CG00;O15015;Q9HBT7;P38919;Q16594;Q9BQ0;Q15853;Q9NQ92;Q9NQ4;Q7Z2Z1;Q8NXY6;P61218;Q13398;Q5JVG8;Q16531;Q2V2M9;Q9NYF0;O75346;O95785;P48788;P13349;Q9H008;Q5JTD0;Q8IZP0;O00534;Q6ZRF7;Q9NR33;Q13610;Q5BKZ1;Q66K74;O60296;Q13426;Q4LE28;Q13642;O60504;Q9Y281;Q9BSJ2;P05412;Q8IUR6;Q86X95;O43541;Q96MR9;Q8N488;P04406;Q99598;P49336;P50453;P39880;P49639;Q7L590;Q3T8J9;Q9NQ33;P20248;P04844;P99999;Q0VD86;P50402;O15360;P20962;A2RRD8;Q9UNW9;Q9Y2Y1;O95400;Q9NX63;Q8N8B7;Q10586;Q12888;Q6XYB7;Q9Y3Y2;Q96F45;P31948;Q96HR3;Q8IVF2;Q9NW07;Q9BT07;P49711;Q9UHB4;A6NDR6;Q5TBC7;Q7Z4H9;Q5JTC6;Q9Y6R6;Q9BZW7;Q6UX04;Q96CJ1;O00231;Q9NQ29;Q86W56;Q9H6B1;Q9Y222;Q5BKZ1;P05813;Q8N988;Q86SG2;Q86WJ1;Q14678;Q9NUL3;Q6FI81;P09234;Q99576;O43151;P98168;Q5MCW4;P30281;Q9UKL3;Q9UK73;Q86V71;Q8NBT2;O95232;Q92547;Q6TGC4;P80217;O15105;O95625;O60828;Q8WW12;P56182;O95476;Q16836;O43422;P30260;P42226;P51114;P10636;Q86U58;O14628;Q9HAN9;Q5VZE5;Q7Z6R9;Q09666;Q9HCU5;P11388;P63104;Q9NYP3;Q9UBC3;Q94901;Q15596;Q13216;Q9P086;O15117;Q8TCD5;P61201;Q8N108;Q9NQ4;P51948;Q8NI51;Q13875;O15160;Q96JN0;Q8IW35;Q96RU7;Q7Z7K2;A0JLT2;P51531;Q8IYL3;Q86UD0;Q9HAP2;Q9UKA2;P24863;Q9Y5B0;Q6RSH7;Q99547;P49450;Q9Y6K5;P28749;Q9BW71;Q8TE02;Q8N1L9;Q9NSI6;P25789;Q9UKI9;Q5FBB7;Q15544;Q96S66;Q9H8N7;Q9Y606;Q9BT30;Q6VUC0;Q9Y3E1;P24666;P51854;P49720;P12980;Q10CJ88;P58005;Q96IT1;P57772;B4DX44;Q15643;Q9UMY1;Q08J23;Q9NPF8;Q13901;Q9H2T7;Q9ULM2;Q13888;P50539;O60318;Q96QF0;Q86TG7;P55347;O60244;Q8TDR4;Q9UJC5;Q8IUE1;O00479;Q01130;Q96D46;P46087;A6NG73;Q9Y2Y4;P40926;Q9UHV7;Q14738;Q15742;Q9BVP2;Q8WV37;Q9BQ95;Q8NC26;P32243;Q13951;Q0VDE8;Q8NCU7;Q969L4;A4D1E9;Q9Y4Z0;P11474;P45984;Q92664;O75821;P0CJ86;Q9HD40;Q96RK0;P30153;A6NJL1;Q96FX7;P57081;Q9UC07;Q9UJX3;Q9Y248;Q9ULW3;P0CG12;O14593;Q9UKF6;Q9BZF9;P52434;Q9HA38;Q8TCI5;Q9H6T0;P20073;P23769;Q6ZNB5;Q13761;P31941;Q96JI7;Q6I9Y2;Q9UI43;Q2LD37;O60346;Q9NPD8;Q96EZ8;O43189;Q14586;P46108;Q3B726;Q9BTA9;P52630;Q3L8U1;P62987;Q330K2;Q9UIS9;Q8N9B5;Q9ULW0;Q9H467;O75081;Q9UBS4;P41252;Q66K41;Q9NQE9;Q8NHW3;Q9UNS1;P53779;O94776;Q9HCS4;P27695;Q8NCA9;O00425;Q13547;Q9HCI5;Q01664;Q15397;Q9C0F0;O75496;Q9P2F9;Q9NVH2;Q96A56;Q86TB9;Q9UJN7;Q8WUM0;Q01094;Q9NPE3;O75717;Q9Y426;P35680;Q5TB80;O60869;Q9BY77;Q96RK1;A6NEJ1;P23297;Q9BZG8;Q7RTV0;Q70IA6;O00167;Q14151;P28698;Q7Z7L9;P49116;B2RD01;Q8NB12;Q8WVB3;P17035;P57678;A8MUK39;O0287;Q9BVJ6;O00541;Q53T94;Q9UMS4;Q8TAQ2;Q8IY18;P13010;Q9BUR4;Q8WXC3;O14978;O43543;Q9Y5K5;Q96EU6;P59923;P63279;Q9BQI9;Q9H8E8;P13984;Q96IS3;Q8NA77;P54259;P10589;P0CL84;P78371;Q9NWS1;Q56P03;Q9Y2H8;Q86VD1;A7MD48;Q6ZNB6;Q8N9N8;Q92966;Q96QA6;Q6ULP2;P56270;Q9H8M7;Q02577;O95411;Q9P2J8;Q10587;Q12972;Q61582;Q13428;Q9Y6Y1;Q02078;Q9UIF9;Q96BP2;Q9BRX5;Q6PIF2;P83916;Q86XK3;Q5TYW1;Q8IZU1;Q6X4W1;Q8WVY7;O75113;Q15542;A8MT69;Q8N684;A6NK39;Q9NUQ6;P55209;Q9NPB6;Q16534;A8MQ14;P63241;Q6IBW4;O15350;Q96NG5;A6NJ64;Q9UBW8;Q7Z3K3;P07199;Q96HR8;Q9UHV9;Q9UNP9;P41970;Q2QGD7;Q6ZSS3;P80723;Q8N140;O94818;Q16186;Q9NZI6;P62487;Q9H1D9;Q9H9Z2;Q96E14;Q9UPV0;Q6ZN08;Q8WVM7;P07316;Q9BZK7;Q8N8U2;O95159;Q99590;Q9H091;Q15631;Q9Y383;A8CG34;O14519;Q9H8G1;Q7KZF4;Q9QZN2;P05204;Q9Y2P0;Q14498;Q8NEU8;Q9UKK3;Q8ND90;Q969S2;P09917;O43812;Q9UQB3;Q9Y462;Q13362;Q6MZP7;O94874;Q86V48;Q3SXZ3;Q9Y250;Q86UE3;Q9NVD7;O60543;Q12816;Q7RTU5;P08047;Q06587;P49005;P27694;P50548;Q9Y3Y4;P13533;O60506;Q96FC9;Q9P255;A6NLF2;Q13487;Q8IY81;Q12872;Q09161;O60248;O15446;P55197;P17039;O15265;Q92597;Q01082;Q96JZ2;P23760;Q9Y266;Q9Y657;O43711;O60291;Q99856;Q9UBD0;Q9H0N5;Q8IZ40;Q00653;Q9H7D7;Q9BV86;Q8NC56;Q92600;P52758;Q3YBM2;P51816;P28072;Q9UBW7;O95229;P54278;O43148;Q96RE7;Q99417;Q8N0Z6;Q9UJ3;Q8NFW8;Q9UFW8;Q86YD1;Q96A72;Q494X3;Q9H081;Q460N5;Q5MJ70;Q8TBC5;A6NK75;Q8N9K5;Q9NYF8;Q86UL8;O95201;P61960;A6NP11;Q16656;Q9Y324;Q9NPD3;Q14676;Q9NVU0;Q9P267;P13051;Q9H7S9;A8MTY0;Q9BSC4;Q8TF20;Q9NX46;Q00987;Q8IZL8;Q13601;Q9NX65;Q96FF9;Q5U623;Q16384;Q8TCE9;Q9NQZ8;P56589;Q9UJW3;Q53GL0;Q13228;P15927;O14512;Q9H2K2;Q68CP9;Q13404;O75626;Q5TID7;Q96DF8;Q9Y2X0;Q96EY5;O75340;P49918;Q8TF32;Q5VZK9;Q86UD4;Q14691;P12524;Q63HK3;Q06416;Q9BZQ8;O75475;Q06787;Q15937;O75478;P58004;Q96BK5;Q6P9A3;O95478;O43829;Q9C099;P78347;O43463;Q6ZN17;Q99807;Q9HB19;O00410;Q9NQC8;Q9Y3A2;Q6P2Q9;Q9NV31;Q96RY5;Q9Y4A0;Q9H8H0;O14744;P80294;Q9H4B6;Q63HK5;O75123;O95073;Q8N8J6;Q7RTT4;Q8N693;Q3ZCT1;P35250;Q8N782;Q93074;O15116;Q9UI26;Q8IXW5;Q96LW9;O43745;Q9BQ70;Q6ZQV5;Q8TF47;P18754;Q9ULV5;O00422;Q9NWB6;Q5TBB1;P84103;Q5UIP0;P15407;Q12901;Q9NRC8;P39019;E9PGG2;Q9H8V3;P62312;Q9UH92;O43791;Q14584;Q14146;Q8N141;Q9Y4A8;Q9UQF2;Q13123;Q9NP87;Q969H6;O00257;Q13105;Q9UQ84;Q49AA0;Q6ZN57;Q03701;Q9H4W6;P08729;Q9C0B1;Q9P0J0;Q8TD26;

Q86U44;O75691;P14316;Q96BD5;Q6NZ36;Q6ZN28;O75360;O95257;Q8TD23;A8MSY0;Q9Y2M0;Q9UKL0;Q9UQR0;Q15929;P17041;Q14209;P23528;Q16630;Q9BQ65;O75564;Q9Y6K9;Q9GZV4;Q86U42;O75618;Q6STE5;Q9NZI7;Q9Y5N6;Q14781;Q96P71;O75529;Q9NW38;Q8N3Z6;P25963;Q9Y2T7;P57740;P55735;P54253;O14618;Q96HW7;Q9HD15;Q9BV90;O15370;Q15744;Q5JTV8;Q15361;Q96MU6;Q14582;O94993;P30305;Q9Y3Z3;Q9H944;Q9Y618;Q02080;A1L190;Q9Y2985;Q8NCE0;Q96N20;P20265;Q6DD87;O43290;A6NKF2;Q9NY33;O60765;O00186;Q96QR8;P39023;Q86YE8;P55795;Q7RTU3;Q9H583;Q7Z6K1;Q9Y2P8;Q9Y2P8;Q8NFQ8;Q9UK58;O60264;Q8NEF9;Q8TEV9;Q9P2D0;Q9H320;P25788;Q12837;Q8NDP4;O95721;Q8TA94;Q13367;P67870;Q8IY51;Q9BPX3;P11308;Q9NVX2;Q9NSC2;Q96LB3;O94983;Q8N371;Q9Y314;O43493;Q99543;Q9NY43;Q9Y664;Q2NKKJ3;Q9BR84;P35232;Q9UID6;Q9Y6K1;Q03936;Q5VTL8;Q13765;Q86XI2;Q96C86;O75940;Q9BUE0;P18146;Q9H633;Q9NZH4;Q9NYB0;Q96K58;P53804;Q8N5U6;Q8IX15;O76021;P17021;Q6P177;P57076;O75164;P15622;P62633;P52744;P51522;P17023;O75820;Q12769;Q9GZQ3;Q8N895;Q8WUA4;Q01850;Q9H5F2;Q5VTD9;Q12824;P52292;Q9Y2A0;Q9ULZ0;Q9HAV4;P35226;O43913;P40937;Q96H20;Q96JC4;Q9H501;Q96MT3;P20292;Q96EI5;Q9Y247;Q8TBZ8;Q8N9A8;Q8NAV2;Q96JS3;Q9BT81;Q14865;Q13243;Q9NX70;Q9Y2Y0;Q96NJ3;O95416;Q05481;Q96B01;Q96GA3;O43592;Q2NLL8;P16383;Q8N859;Q9BX82;Q12874;Q9HBD4;Q6IA86;Q9UHA3;P67775;Q14566;Q14145;Q7L945;Q9Y3D0;Q33E94;Q92539;Q14592;Q13427;Q96MW7;P40121;P48552;Q13625;P56537;Q6P9A1;Q9UKN8;O00255;P78364;Q96JF6;Q86V15;O43823;O14867;P40424;Q96CX3;Q8TED0;A8MXY4;Q9H2G4;Q9UIA9;P78424;Q6ZU65;P13535;P38159;Q04743;Q9H0E9;Q15796;P55212;P10075;P0C7X2;Q9UJQ4;Q8IWX8;P60228;A5PLL1;Q8TA86;Q96LM6;Q15532;P61579;Q9P258;Q9UL36;Q9Y3A5;Q9Y237;Q5SXM2;Q5BJF2;Q8IXM6;Q9NRG9;P41208;Q14839;P08235;P62993;P15336;Q9UEG4;Q9NQX1;P11161;Q9Y4B6;Q9UHI6;Q92993;Q15723;Q9H6Z4;Q9BXL8;P19388;P28066;O43447;P81877;Q9NR55;O60422;Q15562;Q8TDN4;Q9BV57;Q5VW7;Q9Y521;Q8N2I2;Q96PT4;Q15493;O15131;Q9C086;Q08211;P24864;P0CJ78;P12004;A8MVS1;Q8WYP5;Q8N5Y2;Q14241;Q64ET8;O43681;P40763;Q8WUY8;P32780;Q8WXS3;P61956;Q9NU63;Q8NHF3;A6NNF4;Q68DI1;Q9UBD5;Q504Q3;O43361;Q96AE4;Q8WW59;Q9BZQ4;Q9UMX2;Q8NDQ6;Q9Y2D9;Q5EBL4;Q9UKY1;B4DU55;P04732;P13196;Q075817;Q68E01;Q9UK45;Q9UN30;P07737;Q58F21;Q96SL8;Q86YC2;Q9UMX1;P50135;Q7L5Y9;P42773;Q9UGU0;P18850;Q9ULW6;Q75QN2;Q13310;Q9HCD5;Q8WXH0;Q93034;O75179;Q96W0C5;P63162;O75391;Q96HA7;O75971;O94992;Q4V348;Q9UBY9;O75467;O60907;Q969R5;P05783;Q8TAT6;P33076;O00161;P61575;P43356;Q9Y5A6;Q6PI48;Q8N668;Q9UG56;Q6ZN32;P28065;Q8ND76;Q15042;Q9Y221;Q9BVL2;P58557;Q9BV47;Q92681;Q14934;Q92890;O14802;Q8N8D1;P27815;Q6ZMV8;Q12906;Q9Y5B6;Q9Y2K5;P35611;Q9Y421;P04198;Q00978;P47874;Q14591;Q8N6F4;Q9BRS8;O43345;Q8WU90;Q8VUU0;Q8IXT2;Q969X6;Q9HCZ1;O75448;P0DI83;Q96EV8;Q96RNS;P30307;Q9NPA3;Q6ZNG1;Q92733;Q5VW5;Q8WX93;Q7Z3B3;Q6NTF7;Q9C002;Q6ZW49;Q99750;Q14192;Q9UJX6;Q9P278;Q9Y2G7;Q96EP1;Q9BQ87;Q96EY1;O15397;Q49MG5;O43365;O43167;Q96D98;Q9UKK6;Q16533;P15976;Q6P9B9;P05114;Q9NZL9;Q9UKG1;O60437;Q96PM9;P29372;Q9H2D6;Q9BTX1;O14770;Q6IE81;Q5XKL5;Q6P1K8;Q7LG56;Q9GZU8;Q86TC9;Q15072;Q86UP8;O75312;P0CG47;Q9BZE4;Q9BX66;Q06830;Q5JSS6;Q07352;Q9NUA8;Q86TJ5;A6NFF2;Q92759;Q9Y2A4;Q8IWIJ2;Q9UJM3;Q6P1N0;Q9UL42;O60518;Q9BXY0;Q9H9E1;Q7Z4H7;P52742;Q92621;O60934;O00458;Q9UJW7;Q9NRY2;P24855;Q9C0E2;Q8IYI6;Q6NT89;P34896;Q9H9L3;Q70Z53;Q9BUI4;O60238;Q6ZR52;O43598;Q96NT1;A6NCL1;P17038;P0C7M4;O75884;Q06546;Q96IU4;Q9Y2M5;P62753;O14737;O60290;Q7RTT3;Q13352;Q6EMB2;O75886;Q15022;Q96KF2;Q9GZW5;Q9NZP6;O15194;P17097;A0AVK6;Q96I25;Q9UBQ5;Q15545;Q9NPI1;Q8TBZ0;Q9HB58;P46060;Q14135;Q8NC51;Q8N6M9;Q6IQ23;Q9BXW6;Q9NY27;P17980;Q7Z5D8;Q86TU7;Q9UPN9;O43593;P0CL83;Q71UM5;Q99873;Q8NHY6;Q9UIF7;Q7L2Z9;Q9H5H4;Q0VG06;Q9BVT8;Q7Z3V5;O00566;P31946;Q9H6Y2;Q9BQ67;Q9NS26;O75832;Q9HC52;Q9UHC1;Q8N7B1;O14980;P20618;O95391;Q01543;Q86W11;P78337;P40337;Q9HCU8;Q92754;P14324;Q9H9Q4;Q86Y25;Q499Z4;P28370;P50991;Q9HB65;Q9HBE1;Q9Y5P8;Q8N393;P48595;Q13506;Q2M3X9;Q03111;O14777;Q9UPN7;Q13573;O95373;C9JE40;O60284;Q05195;P49792;Q06609;Q15061;Q9GZV6;Q01892;Q8NBV4;Q9BYG5;Q96MH2;Q8N184;Q8HWS3;O75586;P43897;Q02241;P55345;Q9BU64;Q9NQ31;P28074;P14921;P10909;O95059;Q15021;O43663;Q7Z417;Q8WYA1;Q8N2Z9;P61289;O75530;P55210;Q96RJ6;Q9H9Y6;Q9Y473;O75791;Q9ULW8;Q8N0S2;P52747;Q96DC7;Q96NJ6;Q9H503;Q9UHR5;Q8IVC4;P17480;Q9HCX3;Q9Y6M1;Q13435;Q8N9W8;Q14690;Q8WUY3;Q86UK5;Q68DK7;Q12788;O43390;P51398;Q04725;O95149;A4D1E1;P01011;Q7Z589;Q9BW66;P51504;Q9H307;Q8N9P8;O75494;P13056;Q8WW01;Q5PSV4;Q15107;O75155;Q5VT06;Q9NRG4;Q8NBZ0;O95049;Q96NL3;Q13257;Q14331;Q9NQS7;Q9NZJ0;Q13415;O75607;O14641;Q9H6U6;Q13144;Q9UBG7;Q15528;Q96DB2;Q13316;P42677;Q9HCG8;O15304;Q9BXJ9;Q9Y3B2;Q96LW7;Q8IWIY8;Q9BXG8;Q99741;P20396;P61457;Q6IS14;Q8N2M8;Q8IZC7;P10155;Q8N0Y2;Q16587;O15499;Q08AG5;Q7L0Y3;Q9UFB7;Q8WUF5;Q9BRP8;Q15935;Q53GS7;Q03938;Q99966;Q86YI8;Q16385;Q6NX49;Q8NF91;Q9NXV2;P05198;P27797;P25440;Q9BSK1;Q9NWZ8;Q71SY5;Q02040;Q9H2U1;P54727;P53801;O14529;Q6ZQR5;P62318;Q92870}

6183

Pathogen[ P14075] interacts with 2826 human partners: {Q04727;P43351;Q8N490;Q96QA6;P49321;Q9NVU0;Q9H307;Q14146;Q16633;Q9H6Z4;Q9NQ33;P28069;P42704;Q8N196;Q96EB1;Q3L8U1;Q5VWX1;Q0D2J5;O95453;Q9NZL3;Q69383;Q92797;Q9C0F3;Q9P0V3;P13051;P52630;O75953;Q5VTR2;Q96F51;Q86UU0;Q6P2E9;P53804;Q14781;Q494X3;A8MT69;Q9BY41;Q9Y5P8;P11387;Q9UI26;Q9UN30;Q6P4R8;Q9BZZ5;P17480;P17029;P49336;P06733;P05204;Q68DY1;Q9NTW7;P78560;Q15059;O15297;Q3SYG4;Q9UBS3;P29474;P82979;Q5H9L2;Q96AQ6;Q7Z2E3;P54136;Q15257;Q8NI51;P52292;Q96M11;Q8NB91;A6NLC8;Q99933;Q9Y6J9;Q96ST3;P51003;Q9NSC2;P22626;O00566;O00213;P08729;Q16576;Q14511;Q92585;Q15572;A8MV65;O15131;A6NLI9;Q8TEQ6;Q6IPU0;Q15366;Q12789;P84101;P61575;P43355;Q9BS18;O14646;Q9UHL9;Q9UK73;P35869;Q8IZU1;Q3T8J9;Q9BUP3;Q15819;Q09666;O60663;Q8N1G2;O15234;Q8TAD1;P09132;Q9NQE9;Q8TAQ5;Q9BQS6;P63165;Q9HB96;Q8N6T7;P51815;Q96S65;P62304;Q9GZV5;P51825;O95049;Q96QR8;Q15643;Q969S3;Q96GM8;Q9C0E2;Q8TAT6;P61580;Q15929;P53801;Q99607;Q8IXW5;Q14129;Q6V9R5;Q3KNV8;Q96GA3;P54105;Q7RTT5;Q02410;Q9NZQ3;O75564;Q9ULX3;P54253;Q05519;Q9H788;O76021;P61960;Q9NXV6;Q96E14;Q8TDR4;Q8NEJ9;Q9H4X1;Q9UGY1;Q14602;O43402;P14866;Q9UK45;P06454;Q12962;Q9H2G9;Q09161;Q12983;O94811;P35813;Q02577;Q9H583;P62316;O95232;Q96MT3;Q96JB2;Q8TAD8;Q9GZY1;Q96EY5;P56181;Q86U70;Q9H814;Q96PM5;Q53FT3;Q16719;Q6Q759;Q6RFH8;Q8WXF1;P25788;Q9Y5B6;Q14764;P11532;Q14690;Q9BSV6;P42677;O75391;P13984;Q99608;Q9Y266;Q86X95;Q13155;Q9Y5A6;P19338;Q9Y56K1;Q969J2;P62913;Q9H175;Q86SE9;P35659;Q9H211;Q9NPP6;Q8N9N5;Q92900;O15111;A8MTY0;Q9Y04;Q9UBY9;Q7L5A3;Q96GE5;Q9BVC6;Q6ZN32;Q00613;Q9GZU2;Q5SVZ6;Q01850;P23497;Q92681;P23246;Q92759;P41227;Q9HAP2;Q8N187;Q9H2F5;Q96KS0;Q99990;P12956;P56537;Q14207;P50548;Q13042;Q7

Z2Z1;P11142;Q9BWH6;Q9Y3F4;O00534;Q9NVI1;Q96D46;Q8IXT1;Q8WXD5;Q16533;Q8N3Z6;Q9BRU2;Q96  
FX8;O00273;B4DXR9;P24863;Q9GZT9;Q86V48;Q8N141;Q13105;P28066;P58557;P07320;P55198;O153  
60;Q04206;Q9BSW2;Q156A1;O43809;P21675;Q6ZN08;P17482;O14681;Q86YD1;Q96KQ4;Q9H4I2;Q6P9F  
0;Q9P2I0;Q9NWB6;Q969R5;Q9Y5R5;Q14442;O95067;Q75QN2;Q15528;O15265;Q9UM63;Q8N5L8;P06132  
;Q96L21;Q9Y2S7;Q7Z591;Q9BSF8;Q9NX63;P0CAP2;P51523;P78337;Q9BQ83;Q166DE0;O00512;P24941;  
P81274;Q13573;Q8WWQ0;Q9Y6H5;Q8N9A8;Q9GZS1;Q5TGS1;Q9HBD4;P40424;Q14526;Q969S8;Q9N9W8;P  
51816;Q9UBZ9;Q13951;P16989;P52737;O15069;P0C7X2;Q9UMS0;Q99687;P05783;O75030;Q9NV72;Q1  
4683;Q96KR1;Q9HAJ7;Q96GM5;O60248;Q9UBU8;Q92966;P62277;P25440;Q96QT6;P55265;Q9UQR1;Q8N  
EM1;O95684;Q08999;P06744;Q7Z6J9;Q8TD31;Q8N5J4;Q15006;Q9NX70;Q9NXZ1;Q8N371;P52657;Q8IX  
J9;Q9Y6D9;O14746;P08621;O75607;P23025;Q96J53;Q9NUL3;Q8WU90;Q9UK76;Q8WXE1;Q02241;Q2TAK  
8;Q5T4T6;Q96LW7;Q9UBF1;O43663;Q9NR46;Q9Y295;Q9BVT8;Q52LR7;Q8IXQ6;P68036;Q8NC26;Q13495  
;Q9UPR3;Q9NPI1;P05412;Q16385;Q9BXL5;Q15542;Q07021;Q8N488;Q92979;Q04725;P04733;P18615;  
Q9NXTX7;Q96NJ6;Q86WI3;Q5MJ70;P11802;P42226;O95503;Q5BKZ1;P40425;Q2NL82;O94874;Q12800;Q  
5VZ5;O75832;Q14938;P11474;Q9HB75;Q93034;Q8NFG4;Q9Y2D1;Q2M3W8;Q9H081;P68104;Q01543;Q9  
UMX3;Q9H6R4;Q9UQR0;Q8NDF8;Q5VT06;Q9NWZ5;Q9UM07;Q15759;Q9BQA5;Q14103;Q6ZN01;Q9BPZ2;O75  
886;Q9ULM6;Q15928;Q86V81;Q9H6F5;P57772;P62324;O75475;Q8WYR1;A6NG73;Q9NYV6;Q4LE39;O001  
86;Q9NR22;Q13243;Q16656;Q8IY57;Q9C0F0;Q14593;Q96P70;P08865;Q9BQA1;P14859;Q13618;O6082  
8;P61576;P22670;Q5VU43;Q9UM82;Q92831;Q16186;A6NHJ4;Q7Z4H7;Q9UKX2;P80297;P11831;Q562F6  
;O60481;Q13769;O75410;P52747;P11172;Q8TAA3;Q8N5D0;O43236;Q9Y3C4;O43395;P62328;Q9BWW4;  
Q15554;Q9NYP3;Q15906;Q8N1L9;Q9NPI4;P10828;Q9BXJ9;Q96QC0;Q9BSI4;P49756;Q13506;Q5TD94;Q  
07157;Q8NA42;Q99615;P78545;Q86UE4;Q14588;A6NGY1;P78395;Q96Q83;Q49MG5;Q92782;Q9H2T7;Q8  
N9R8;O14787;Q9UKT4;Q86XF7;Q15697;O75791;Q8NB50;Q9NPD3;Q8TC05;P60900;P17861;Q15014;O60  
765;Q7L0Y3;Q8NBB4;Q08945;P49427;P34896;Q9NQS7;Q9Y6X3;Q15562;Q6ZNG1;Q7Z465;Q9HD34;Q9Y2  
24;O00470;P27695;Q9Y2A4;Q8N140;O43427;Q8IWX3;P51532;Q68E01;Q6U7Q0;P28347;Q8WVMT;Q8WTT  
2;P51959;Q9Y3Y2;P30876;Q9H0S4;Q9BRP8;P49406;Q15532;Q9UMS5;P53567;Q9GZW5;Q12901;Q9UNY4  
;Q8TD23;O15127;Q2LD37;Q9UHR5;P40855;Q07666;P61579;P14635;Q9GZP8;Q9GZU8;Q8N699;Q96HR3;  
Q76L83;Q6PJT7;P61326;P25208;O15162;P38432;Q56P03;P0CB33;Q9UM11;Q86WX3;O43598;O00233;P  
52736;Q96MR9;O43541;P07199;Q15937;Q96S24;Q9BT78;Q5MIZ7;Q9BXM0;Q9UKN5;Q9C086;Q01831;Q9  
NWW8;A8CG34;Q9UHP9;Q8N5F7;Q86YC2;Q2NJK3;Q14686;Q0D2K3;Q9H7B2;Q96R06;Q14493;O75582;Q9U  
HX1;P10088;Q01201;Q92674;Q01658;P57678;Q9BV57;Q9BVN2;O95391;P80723;P51808;O75444;Q96M  
H2;Q6ZU65;Q9Y420;P78406;Q5T8A7;Q9H7R5;Q53T94;P57740;Q9H116;P17275;Q9Y5N6;Q9NVR2;Q9Y4A  
8;Q9H6J7;Q00403;P30281;Q6ZYL4;P30279;Q8WUX9;Q7L2R6;P82094;Q13901;Q5EE01;P43487;Q15459  
;Q9UJH3;P61572;P57086;Q8TE85;Q12816;Q96HW7;Q71F56;O75362;P55212;Q6X4W1;O75446;Q06546;  
P0C1Z6;O94818;Q6NUN9;P49720;Q9UKT7;O60563;Q8NAV2;Q9Y252;A4D1E9;O14776;Q9Y3Y4;P43268;Q  
9NVV4;Q9P2R6;Q9Y5B0;Q86XI2;Q8WYP5;P29083;O75971;Q6UN15;P23769;Q9NRL2;Q9UL16;P61244;Q9  
UKL0;Q9NSI6;Q9UID6;P50613;Q8WW12;Q13287;Q9Y2G7;P59923;Q99457;Q96T58;P41218;Q9BX24;P19  
419;Q5H9F3;P41212;Q9H467;P26651;Q12905;Q14241;Q9GZL7;Q92600;Q6P9A1;P18847;Q8WVC0;Q018  
60;Q9UPP1;Q9UBD5;Q9BRX2;P36639;Q6ZW49;Q86TU7;P28698;Q9ULU4;Q6PI26;Q9NY61;Q9Y468;P6120  
1;Q8N782;P09C44;Q9BQ15;P38159;Q9H7R0;Q9NX46;P38935;Q96SL8;P60510;Q9UGP4;Q14839;Q9UBD0  
;Q03933;Q9HC24;Q9NPI8;P48380;Q5TAB7;Q92945;Q53GS7;P51610;P62633;Q9Y2Y0;Q33E94;O15527;  
Q9BSU3;Q9HBT7;Q92973;Q15652;O75419;Q86WB0;O15015;P35548;P20700;Q96C28;P11161;Q8NC51;Q  
12837;Q15561;Q6ZQV5;Q7Z3B3;P61573;Q9NVN8;Q53HV7;P15172;Q15428;Q6PGP7;Q96ND8;Q6P1X5;O0  
0541;P49792;Q9Y2D8;P17096;Q15327;Q9Y606;P56524;Q96PU4;P05813;Q00994;Q9BV20;Q9UK11;Q8N  
1F7;Q9NTM9;O43918;P17036;Q92917;O00422;P51965;Q01844;Q96IZ7;O14709;P05388;Q96IY1;Q080  
50;Q15714;Q13257;Q9H9Z2;Q8TF01;O43186;Q5PSV4;P18146;O60930;P41252;Q9UJW3;Q9BXR0;Q9NYW  
8;Q00534;P19484;Q9NQG5;O95257;Q96EZ8;P0C7T5;Q15047;O75312;Q16384;Q9P1T7;O60675;O95625  
;P06746;Q96TC7;Q99576;Q14320;P29084;Q96T21;Q969U7;P80217;O95619;A1L190;Q96RK0;Q16520;  
O95931;Q6ECI4;Q6IA86;Q86VE0;Q9Y2N7;Q8N336;P42771;P41220;Q7LBC6;P20265;P33076;Q6RSH7;Q  
8WWX9;Q9UH92;Q53H80;P04156;O00629;Q9NPI8;Q92922;O15226;Q86VN1;Q8NDN9;Q13620;P19388;Q3  
MIS6;Q7KZ85;Q92870;Q9H321;Q9Y603;Q9HCH5;O95400;P49750;P48634;Q9P086;O94776;B2CWT7;Q6M  
ZT1;Q01130;O75925;Q5TBB1;Q9BXS6;Q9HAH1;Q9Y244;P10244;P61218;Q5HYK7;Q9NQR1;Q6ZRQ5;P170  
19;Q96RK1;P35638;Q719H9;Q8TDY2;P13073;P50750;P15822;O15117;P19367;O75821;O95218;O9577  
7;O60583;P42568;Q9UIF7;Q92994;Q7L5Y9;Q53EQ6;P31249;Q9Y2A0;Q9UNP9;A8MT65;Q6ISB3;O000287  
;P47928;P46777;Q9H840;O95997;Q9Y250;Q7Z4G1;Q02080;O60671;Q9GZQ3;Q9ULX9;Q96H22;O43172;  
Q9NQ31;Q93062;Q9H825;Q15910;Q96IT1;Q9UKX7;O43684;O60296;Q9GZV4;P57076;Q9BTP7;P04792;Q  
53ET0;P56182;P78347;Q92988;O43167;Q9NUQ6;P31943;P40926;Q9BZG8;P63162;Q7Z7C8;Q92890;Q1  
6082;Q12906;Q92800;Q13216;P23490;Q8WUY3;Q99543;Q13601;O15397;Q9H7N4;P39687;O75175;Q5T  
AX3;O00625;Q5SXM2;Q15544;Q9H091;P49005;Q8WUF5;Q7Z614;P78371;P45973;O95159;Q93075;Q9HA  
W0;Q02040;Q86UB2;Q9NXX9;Q53G26;Q9UFW8;Q8TAF7;Q99717;P08397;O75448;Q5VWP3;Q9UYJ1;Q96BU  
1;P48556;P19387;Q5H9R7;P62140;O00167;Q9Y4A5;Q9UKV0;O00716;P62306;P56693;Q8IY81;Q9H040  
;Q9NPI6;P62081;Q5TBC7;O75494;Q7RTU5;Q9BW66;Q00978;Q8WW38;Q8N668;P20226;Q5TCQ9;Q9BT49;  
P15336;P04198;Q13111;Q15653;Q8NEU8;P63241;Q8N2W9;Q8NHQ1;O14929;P48595;Q9UL58;Q9NXR7;P  
62308;P62750;O00567;Q9UBB5;Q5VVH5;Q8WVY6;Q92754;Q9UHB4;Q9NZI7;Q8IU60;P15927;Q9NZD8;Q9  
Y613;Q9UI95;Q15560;P35658;Q9NZN8;P63279;Q6PIJ6;O96020;Q9BRR0;Q9Y6D6;P10242;Q9BTP2;Q16666;P12  
270;O43390;Q9H6Y2;O94983;Q15796;Q96BN2;Q01105;Q08AN1;Q96N95;Q9UJG1;P5M048;Q9Y311;Q9NW  
A0;Q9NQ87;Q9HAV4;Q9UMY1;Q96KF2;P0CH99;Q9UDY4;Q8NHY6;O15304;Q03936;P28070;Q8TBK2;A6NF0  
1;Q9UQ35;Q13148;P15923;Q6ZMV8;Q66PJ3;Q96AP0;P15408;O94906;P53992;P20073;P58004;Q9HCG8  
;P50402;Q14691;Q6PJG6;Q13398;Q53GI3;Q86W11;Q96JI7;Q8N7Q3;Q9NZ63;Q5JTD0;Q9P016;Q9H2G4;  
Q9NYF8;Q14585;Q7Z3K6;Q12872;Q86YW9;Q13057;Q14209;Q9NVU7;Q13952;P25963;Q9ULJ3;Q17RY6;Q  
9BYE7;Q9BRU9;O43365;O14777;Q9NWD9;Q9NZP6;Q92621;O75182;P38646;Q13547;Q9ULR0;Q6KOP9;Q0  
4323;Q13642;Q99856;O00570;Q9BXY0;Q05195;Q16594;P54198;O94763;P49721;O95571;P26358;Q8N  
EZ2;Q6S96;Q9HOA0;Q9BQI9;Q8IYN2;P20962;Q96IZ0;P13056;Q9Y2L1;Q8ND90;P55735;P01106;Q927  
50;P39880;Q8WVJ9;A9UHW6;P78316;Q92993;Q15185;Q9UKV3;Q96H20;Q8N163;A6H8Y1;Q96FF9;Q8NFZ  
5;P53805;P36873;Q9Y618;O14497;Q9UI43;B3EWF7;Q96HR8;O95229;O75290;Q5VWG9;Q13868;Q9UHV9  
;Q15029;O75081;P61574;O95402;Q07687;P05198;Q8WV24;O95347;Q86Y26;O75400;O14503;O75132;  
Q9UPV9;Q9BVW5;O76031;Q9Y255;P56279;P62312;Q9Y2Q1;P17040;Q9Y248;P54252;P31269;O00231;P

07737;075376;Q92748;Q9Y316;Q01826;Q4G112;P46527;Q96D70;Q92785;Q9Y4P8;Q32P41;Q504T8;Q16670;Q96AQ7;Q8WV37;Q8TEE9;Q9HAZ2;Q96TA1;Q16637;P27540;Q6UWZ7;P51398;O43255;O75381;Q69YH5;A6NJ64;Q9Y2B4;Q5VUG0;Q92624;P23528;P62136;P55347;Q9NW38;O75586;Q3YBR2;Q9H0E3;O75940;Q8NI27;O00461;Q9UPN7;P78396;Q9UJX6;Q7RTV3;O43592;Q9BTXL;Q8N5A5;O00505;Q13875;Q9UQB3;Q99459;Q9BTT4;Q8N2Z9;Q02556;Q13137;P12757;Q8TEV9;Q9NPD8;P62487;Q6ICB0;Q9Y2M0;Q9NMU3;Q03468;Q9ULD5;Q8NHZ8;P35711;Q96QD9;P41162;P57077;Q96DI7;P07438;O00257;P55209;Q96DX5;O96004;Q96NI8;Q96HA8;P16333;Q13568;P17098;Q96MN9;Q9BTE3;O00291;Q96BK5;Q13485;P35232;O94992;Q9UHK0;A8MUZ8;Q9NXV2;Q99638;Q8NA77;O60870;O00255;Q9H777;Q8N7H5;Q9UPV0;Q86WV1;P09629;Q93074;Q9BVC3;O75817;Q5TKA1;P61582;O94864;Q9NQT4;Q6P1J9;O75691;Q96SW2;Q8TAF3;Q9H3R5;Q8WTR7;Q9NP71;Q13156;Q92499;P11940;P24278;P10155;A4D1E1;Q14186;Q96HA1;Q6NZI2;Q86XN6;Q09028;Q9BPZ7;Q10586;Q9NPF5;Q969Q6;P15036;Q9ULW0;Q5TEC3;Q96HI0;Q14999;O14980;P60228;Q9NTK5;Q86VM9;Q96MB7;Q15365;Q9H204;Q96B36;Q00839;O14920;Q8IYI8;Q15853;Q9H9Q4;Q8N1N5;Q8N5U6;Q9BQ70;P49116;Q9NWS1;Q12857;O95628;Q9UKL3;Q9UJ98;Q9NWF9;P58005;P50995;O96019;Q9HAW4;Q8WW01;Q9BW27;Q6T4R5;P46100;P35244;P54274;Q9BXL8;Q9HCL3;Q92541;Q6ZVD7;O43493;Q8NBZ0;P52294;Q6IE81;Q04726;O14770;Q8IWS0;Q9UHI6;P25791;Q06587;Q5VIY5;P31749;Q9Y6Y0;Q9H511;Q9H4B6;Q3B726;Q9H910;P57721;P02545;Q19AV6;O75478;P0CG48;Q15631;Q8WXS3;Q96JC9;Q8N7U7;P04406;Q86US8;Q8IZD4;Q9BQG0;Q9Y221;Q9NY43;Q5VUA4;Q6I9Y2;Q92539;Q96DE5;P62979;Q9ULV5;P28324;P49419;Q12986;Q6ZNA4;Q8N108;Q9Y692;Q13435;P43897;Q96S95;Q9Y253;O00401;Q9NY27;O15078;Q96A49;Q8NCE0;Q8N344;P57081;Q13310;Q92670;Q9H5J8;Q9Y2P8;Q15326;P61236;O75618;Q14CW9;Q9NPE3;Q8TA94;Q107X0;Q9BU64;Q8N8D1;Q9BU61;Q96EA4;Q15013;Q9BXY8;Q9Y2W2;Q9Y3C7;Q96BW1;Q9NQX1;Q9NZV7;P32519;Q9UP83;Q4LE28;Q9UNN5;Q6IN85;O14948;O00170;Q3YBM2;Q8NEF9;P49918;Q14653;A6NGD5;P62318;Q96S59;Q9Y5A7;Q9UPW6;P28062;Q06455;Q96HA7;Q9UGK3;P83369;Q96D98;Q8N1K5;Q15370;Q8NCF5;O15116;O14641;Q06547;Q01664;Q7Z6K1;Q9H8B7;Q5VSL9;Q9UBC1;P99999;Q12874;O60287;Q8TBZ0;Q13490;Q9P258;O75683;Q14106;P22674;O95983;Q53TQ3;P55769;Q9UHD9;P28074;O14744;P54845;Q9UHB7;Q9HAF1;P23193;Q58F21;A6NK39;Q9NZH5;Q96JM7;Q9NR56;Q05481;Q96LA8;Q96LB3;P33240;Q9HD40;Q9BZQ8;Q96RE7;Q9UJX5;Q9UHV7;Q9UNY5;O75528;Q96DF8;Q7Z6B0;Q12830;P52746;Q93083;Q8N7B1;P61247;Q8N4W9;Q96BP2;Q9P0L1;Q99909;Q9BUY5;Q99873;O14519;P62753;Q8N228;Q86XR8;Q9H0N5;Q9NP98;Q9Y6B2;Q14676;P50221;Q32M78;Q13469;Q7L266;O96017;Q96N22;Q15650;P13640;Q9UJM3;Q96PK6;Q9Y2T7;Q9UHC1;O95373;Q6W2J9;Q9H8B07;Q13889;O15350;P52742;Q16254;Q9H8E8;Q9UL49;Q8N7M2;Q13526;Q99684;Q14684;Q9UBK9;Q6PI98;Q8N693;Q9BYN7;Q8N3J9;Q15038;Q92769;Q9UJH9;Q7L804;Q9HCC1;Q01892;Q12904;Q86U86;P0CW17;O14862;P25205;Q7Z5K2;P28065;P0C860;P48378;Q6NZY4;O95990;Q9C005;P61571;O60518;Q9H8G1;Q9BUJ2;Q63HM1;Q6ZNL7;Q96RY5;O14965;Q05048;O75525;Q96NB1;Q9H963;Q96K30;Q9Y5B9;Q9NPA3;Q9NSA3;Q69YN4;Q99623;Q8TEM1;Q9BQ65;Q9Y5Q3;O95780;Q7RTS9;Q9NVH2;Q15834;P49848;Q15424;Q9NV31;Q68CP9;Q8NDQ6;Q96AB3;Q86X55;Q6IPX3;P35712;O95831;Q9HCU9;Q13185;Q9UBB9;Q6MCP7;Q3B7T1;Q8WXC3;Q15637;Q99ULX6;Q9Y2D9;Q9NWT8;Q9BQ52;Q9UQN3;O43679;P39023;P86452;Q9NQ29;Q9H1D9;P55771;Q6WMQ6;Q6QNY1;Q9UND3;Q6PD62;Q9H9D4;Q96NY9;Q15287;Q9UIS9;P46939;P51504;Q7Z5L9;Q9H944;P52744;Q9HC62;Q9BTK6;O60543;Q9HCK8;Q9UNQ2;O15014;Q9UPN9;Q8WWL7;Q9UN79;Q15007;O15370;O00472;Q5JVS0;Q13765;P24928;Q8NAP3;Q86WV5;Q05BQ5;P61956;Q9UHF7;P67870;P62847;Q6PG37;Q330K2;Q99733;Q8IW19;Q9H320;Q8TCJ0;Q9Y421;P0DI81;O60238;O43189;P0CG12;Q8N6I1;Q86TB9;Q5T7V8;Q9ULM3;Q15025;Q96ST2;Q96MU7;Q9NYP9;P27797;Q9H5F2;O75150;Q15723;Q99848;Q9NS25;P51531;Q9BTA9;Q5TB80;P30047;Q14738;Q5T0J7;Q16836;Q9Y535;Q9H808;Q6P2H3;Q9NZM5;Q14934;Q9BXN6;Q96AJ1;Q6UUV9;Q15573;Q8NEY8;Q8IYX0;Q9UKT9;Q8TC56;Q8IZT9;P0CG00;P35269;Q9NPA8;P27986;O15198;P11473;Q14CS0;Q99594;Q8IZU0;Q5TID7;Q659A1;Q86VP6;O60244;Q96EE3;Q9Y6X8;Q96CJ1;Q9Y3B9;Q9H008;Q6P2Q9;P14324;O14558;Q5RKY6;Q9NZ81;P49842;O75928;Q8IWJ2;Q9HC52;Q9ULW2;Q92925;P37198;P54727;Q9UN36;Q9H6W3;Q9NQ50;Q6IV72;Q8N587;Q5VWQ0;Q8N895;Q9H816;Q96FA3;Q96IR2;P26368;Q7Z417;P23396;Q9C099;P48382;O14907;P20248;P53999;P19474;Q8WXF8;P22087;P35251;Q9Y6K5;Q9UK39;P52655;Q7Z4H9;P25786;Q01081;Q15306;Q16531;Q8IXM6;Q92575;Q96GN5;O43745;O00410;Q969X6;Q5SRE5;O15405;P17947;Q9UIF9;Q9UKD1;Q96RS0;Q8NE71;P78345;P62826;O14818;Q15054;Q99750;A6NIX2;Q8TBE0;P11308;Q9NZZ3;Q8TE02;P46087;Q16514;O95251;Q6R2Z3;Q96BT3;Q9NQP4;Q5QJE6;P82970;Q8TAQ2;P62987;O14628;Q14151;P78346;P67809;Q8IX15;Q8WUY8;O60907;O60290;Q06787;Q9BPU9;P63104;Q9P1Z2;Q9BR84;Q99417;Q8NB42;Q9C035;Q8IYB9;Q8TCI5;Q9HB19;Q9Y3S2;Q9NW T6;Q9UIA9;A0JLT2;O00458;Q9BRS8;Q9HD47;P53041;P21127;P35579;Q96DC7;Q9P031;Q9H063;Q01534;Q8NEZ5;Q9HAU5;P06748;Q6PJG2;Q86YI8;Q3ZCT1;Q15545;Q96BD5;P23511;O60303;P61457;Q9H3M7;P57055;Q13227;P35573;P28072;P55197;P78317;Q5FBB7;P18848;O75360;O43711;Q9UBP6;Q53EL6;P80294;Q9NRR4;Q9UMQ3;Q9H147;Q99549;Q96B26;Q13123;A6NKF2;O14737;Q9H8H0;Q9UMS4;Q96JK9;Q9ULW8;Q969V6;P09661;O60356;Q8IYB3;Q01094;Q6ZN79;Q9UKV8;Q9BTL3;O14978;P28370;Q9BJW5;Q8TA86;P61586;Q5D1E8;Q9NRR5;Q14258;Q13536;P62841;Q15773;Q96AH0;Q9Y333;O96007;P36578;Q9BUR4;Q13487;Q8NHY2;P08651;Q9H0U9;P43364;P61978;O15105;P14921;Q8NAV1;O95999;Q9BQ95;Q9GZS3;Q14397;Q99496;P36402;Q9Y2L8;P30304;Q8N831;P06400;Q13794;P83916;Q07352;P33316;O43542;A8MWA4;Q9BRT9;Q8N9Z0;Q96EU6;O14593;Q9NWZ8;P02511;Q66K41;Q9BSG1;P50453;Q9Y5Q8;Q6IQ32;Q15935;Q13625;Q9H6U6;O15287;Q9H410;Q96AV8;O95149;Q13867;Q15654;Q03112;Q02078;Q13426;Q15633;Q9UBB6;Q9Y4W2;O94986;Q9NPF6;P52743;P62714;Q5JTC6;Q8N988;Q9BZE2;P61758;O60832;Q6ZN28;A8MUV8;O43913;A8MVS1;Q9NRR3;Q8IXH6;P41208;P17028;Q9H9Y2;P27694;Q12824;P14316;P50549;Q15628;Q13228;O14896;Q9NXX6;Q15742;P43356;Q06330;Q15233;Q9Y324;Q9UIF8;P67775;Q8NEM7;Q5H9L4;Q9H9Y6;O94805;O95073;O94829;Q96G21;P30153;P51946;P53370;Q9C002;Q3C1V8;Q9NS26;Q14997;Q9UQ80;Q7Z2W4;Q8IYL3;Q969E4;Q96RU7;P52594;Q9NV56;Q9NZI6;Q6PCB5;P28749;P32780;O00161;Q95163;P90012;Q9Y6P5;P55199;O15379;Q9UK10;Q66K89;Q68CJ9;Q6ZMS7;P98168;Q8NF99;Q7Z7K6;Q9H9L3;Q9ULK4;Q8TEK3;P01100;A8K8V0;Q8NFH3;O60921;P17010;Q7MD48;Q86Y97;Q9GZV7;O00268;P14678;Q8NDT2;Q9UNL4;Q02447;Q8IWC1;Q9UNN4;O15525;O95602;O75792;Q9Y222;O95059;Q5PRF9;Q9UJX4;O43447;Q6B0B8;O75190;Q9H633;Q9H009;Q5EBL4;Q9UHQ1;Q0VDE8;Q8WY54;Q9Y534;Q9BZE4;Q86YE8;Q9HCS7;Q96QU8;Q9Y4R8;P23508;Q96BR6;P02795;Q5HY98;O60885;Q53HL2;P20290;Q9Y2X9;P15621;O95751;Q9UFF9;Q9H9T3;Q9H7E2;Q05084;Q229F7;Q6ZV50;Q9UK58;Q9Y3T9;Q9ULZ2;Q9Y678;Q9P2T0;Q5H9S7;Q6P2C8;Q49AA0;O43159;P24522;Q13342;Q7L190;Q96EV8;Q9NZI5;P0CG47;Q9UNS2;Q9H1E3;P62937;P98182;P0C7V5;Q13330;Q96B01;A9QM74;P61583;Q8IWL8;O95478;P42772;O15504;Q9BXG8;Q8NCD3;Q5T230;Q9UL42;Q9NVX0;P12980;Q6P387;P49711;Q9Y383;P49789;P25787;Q13428;

Q96LW9;Q9BZK7;P15259;Q96H40;Q96T23;Q00577;Q99547;Q32MQ0;Q9BWC9;Q5C9Z4;Q96QF0;O00712;Q96N20;Q8WZ33;Q92793;Q9UDY2;P08107;Q96L16;P28702;P15884;Q69YI7;Q7L5N1;P54725;Q9NVC6;Q9UN51;Q13416;P0CL83;Q8WYA6;Q9UKW6;Q92841;P50748;Q9Y5S9;Q9UI36;Q9BVI4;Q13772;O43463;Q6U LP2;O95376;Q8TF63;Q9UH99;Q6UUV7;Q14674;Q16526;Q8TF47;P18754;Q13404;Q14137;P16383;Q96P Q6;Q9UGK8;Q15699;Q95243;Q96C86;P46937;Q6P9G9;Q9ND76;Q13127;Q9UBS8;O75113;Q86UD0;Q8IW3 6;P35226;Q96PY6;Q9Y294;Q9H3M9;Q9HD42;P31314;Q9UKN8;Q32MZ4;Q3MJ62;Q9BRG1;Q9Y2P7;Q96RN5 ;P48552;Q99590;Q9UDV6;O75486;P61581;Q13503;Q8TF39;Q9UHB9;Q6TGC4;O43439;P31276;Q99567; Q05516;Q9NP64;O43325;P35637;Q6PI48;Q9Y5L0;Q9HBM0;O60524;Q15022;O60711;O75884;Q9NRC8;Q 9BYG5;P04731;Q9BZF9;Q9UG56;Q15466;Q8N998;P19838;Q9H9F9;Q96AY2;Q86XK2;O60504;Q727J5;Q9 UQL6;Q12769;P60002;Q03060;Q04724;Q9H3C7;Q53QV2;Q6ZN06;Q99741;Q96F24;Q8IUF8;Q96GC6;P10 074;Q7RTT6;Q86UA6;Q9HCD5;Q9Y3Q8;Q14749;Q96FX7;Q8NFD5;Q8IYI6;P48788;Q9UJA5;Q9NY74;Q9UL 40;O95273;P83876;Q12888;Q13129;Q96EI5;Q09FC8;Q9H981;P54259;Q9BZW7;Q14678;O75665;Q1502 4;P56270;Q99502;P35789;O15266;Q00653;Q13427;O60304;Q96N38;Q9HBM1;P16220;Q5UIP0;Q0VD86 ;Q15361;P31946;O43791;P17022;O75934;Q92597;P84103;P54278;P20618;Q7RTT3;Q9HCU8;Q9H1A4; Q7KZF4;Q6P1K2;Q99700;Q8NCR6;Q9Y6K9;Q969W8;P24385;Q9BXP5;Q49A33;Q13363;P63146;Q9UKI9;O 43148;Q8WVK2;P0DI83;Q86W56;O75154;Q9HB65;Q5TA31;Q9H3P2;Q9Y473;P52758;Q6P9B9;Q9ULJ6;Q8 TB69;Q9NPN6;Q96LW1;P13010;P61962;Q9NRA8;Q03923;Q9UBU9;P46783;P41970;Q15329;Q9P287;Q8I VN3;Q14974;O75529;Q9GZN7;P81877;O95125;P56282;P22415;Q96NS1;Q9UBS4;Q86WP2;Q92985;Q9UM S6;Q0VG06;P07741;P84022;Q9BVL2;Q86V71;Q6NVH7;Q5HYJ3;Q13144;Q15003;Q9HAN9;Q8N3X6;Q8NI0 8;Q9H3F6;Q9H3H9;Q53HI1;P25815;P49790;Q86VY4;Q9UER7;Q99816;O60437;Q96DN6;P15407;Q13352 ;Q8IZL8;Q16621;Q9Y3M2;Q96S55;Q9H1B4;Q9H7S9;Q9BZV1;P23760;Q9H0G5;O43309;P62875;Q02833; O14599;Q12972;Q99583;O00479;P52597;Q8N3S3;Q8N720;Q8N2M8;Q7L9L4;Q15050;Q9Y2M5;O00425;P 17676;O43324;P37275;P30793;P41002;Q96MF7;Q8WUM0;Q8WUI4;Q9C0C2;A8MSY0;Q16236;O60936;Q9 NNY4;Q64ET8;Q13360;Q13569;O60869;Q08J23;O14512;Q8TDP1;Q8WYH8;Q8IXH7;Q6FI81;Q13829;Q9H 501;P23610;Q9Y605;Q96JN0;Q6NT89;Q9BXF3;Q8WYZ3;A6NK53;Q7Z589;O14893;Q86UQ8;Q92466;Q2M1 K9;O43264;Q6STB5;Q8TAP9;O75496;O94842;Q71SY5;Q9Y287;Q9NZJ0;Q1ED39;O60716;Q14331;Q0059 7;P62314;O95271;Q13112;Q8IZL2;Q9H0I3;Q86Y01;Q1ZZU3;Q5T3J3;O43823;Q9BVJ6;Q9UPA5;P04732 ;P38919;Q9UK13;Q15046;Q8N684;Q9UJW0;P10914;Q96G25;Q6XQN6;Q9BUL9;Q8WUQ7;Q9H4D5;Q8TDN6; Q14181;Q14980;Q9Y4Y9;O94921;Q96NG5;Q6IEG0;Q96FV9;Q9UBQ5;Q9UIV1;Q9UQ88;O75155;Q9BW71;Q 9BU02;P40337;P17544;Q2KHR2;O43290;Q03188;P32060;Q6PI77;P61289;Q9UKF6;Q9Y3A2;Q9NY12;Q7 Z3K3;Q96E37;Q8NG51;Q7L590;Q9UJX3;Q99081;Q92905;O43482;Q9UII5;Q9NVM9;O00267;Q8TDM4;Q9B SD3;Q9H1B7;Q5EBM0;Q8WVV9;Q2QGD7;Q9Y2W1;Q13838;Q9H160;Q86U42;Q6ZMY9;Q9NTI5;Q68DK7;Q70Z 53;Q9UL03;P55895;O95707;Q9NYF0;P40306;Q9NQ55;P07315;P17535;Q9BX82;Q14188;Q9NYG5;O6026 0;Q969H0;P31948;P49454;O15446;B4DX44;Q9H9A7;Q8N859;P29372;P39019;Q6NSI3;P28838;Q92830 ;Q9GZX5;Q9NXW9;Q9H9L7;O15205;Q9NX58;Q6PVN0;Q6PJP8;Q86V15;Q9BSJ2;Q15369;D6RGH6;Q99708; O43513;Q5FWF6;Q99436;Q92540;P49910;Q9NY40;Q96N74;Q96N77;P42167;Q92547;O75694;Q9NRG9;Q12765;Q 12873;O75151;Q13033;Q16629;Q9UNH5;O60225;P52434;Q06265;Q96EK4;Q9BSM1;Q96AE4;Q9BPX3;P3 2243;P46013;Q8N0Y2;Q8WXI9;O15355;Q63HK3;Q99627;Q96Q89;Q86XK3;Q8WYN3;Q8IUR6;Q7Z3B4;P30 307;Q96FX2;Q14014;Q03111;Q9ULV3;Q9BWT1;Q86YF9;Q9N9B5;Q9UBW8;O00165;Q6PF1N0;Q9UMX1;Q96R L1;Q6UWI2;Q9P0J0;O75818;Q9NRG4;Q9Y2X3;Q71F23;Q86LT7;Q99471;Q6P1K8;Q8WPH4;Q8WXB4;Q9NS3 7;Q9UKK6;Q9UQF2;O14972;Q9P013;Q12796;Q9Y6X2;O75368;Q9Y448;O75461;P02533;Q5VTL8;Q9NVV9 ;O60216;Q96NT1;Q86WQ0;Q9P278;P63167;Q8TCY9;P63272;Q92733;Q12968;Q8NE65;Q9NS73;Q15170; Q9Y3B2;Q15004;O15084;Q9HB71;Q9NRY2;Q9UBW7;P19532;Q8N9Z9;Q9BXW9;Q8IY92;Q6NT76;Q96MG7;Q 14872;Q9NV88;Q86EA5;P55060;Q8NBT2;Q9BZD4;Q7Z5D8;P18583;Q15776;Q10570;Q14192;Q9NZH4;A0 AVK6;Q13541;Q8TAE8;Q9HD15;Q8HWS3;O75437;Q9BYK8;Q9ULW6;Q96A56;O14802;Q9UBF6;Q9N92;Q9U I56;Q9Y462;Q9H0W9;Q02930;P10073;O95411;C9JE40;O00148;Q8WWY3;O94850;Q5JVG8;Q8NFH5;P625 08;O43829;Q9Y281;Q8WXU2;Q9BWU0;O14757;Q9H171;Q9BTC8;Q96E16;Q8N3X1;Q8NEP9;Q5U623;Q9NUW 8;P22392;Q14978;Q9Y3V2;Q96EY1;Q969L4;O96006;O15318;Q9P2K3;Q9Y2B5;Q08AG5;P50222;Q96QU4 ;Q9P0W2;P11171;Q96CB8;Q8IYW8;Q8IZ40;C9JN71;Q14145;Q8NF64;Q8NEH6;O95644;Q9BQY4;Q15651; O95201;Q76KX8;Q9Y2Y9;Q06609;Q13501;Q8N862;Q8N726;P51826;P50749;Q13367;Q15021;Q9H503;Q86TG 7;Q9Y2X0;Q8N823;P62877;Q9HCI5;Q8N972;P0DI82;Q96NB3;Q14498;P35227;Q96T76;Q13045;P61578;O9 5429;O75346;Q6VUC0;Q9H1K1;O75164;Q9H875;Q99575;Q15596;Q03252;Q9BWG6;Q86UW9;P20749;Q8T C76;Q53GL7;A6NP11;O94913;Q4VC44;Q96P71;Q14152;P18887;Q8N7K0;O95905;Q9UJW9;Q5T0F9;P232 97;Q9BUE0;Q6P280;P62310;Q96EP1;O95190;Q9BVP2;B1APH4;Q9BY77;Q86YP4;O60535;Q9GZR1;Q8TF3 2;P18846;Q9Y5K5;Q9ULH7;Q07955;Q14135;P52948;P51948;Q8WTS6;Q9UMX0;O75530;Q9H503;Q86TG7 ;Q96L92;Q9BY27;Q9Y6R6;Q04864;Q15072;P48539;Q9BSK0;Q9NY87;Q9Y2G2;O75177;A4GXA9;Q8N3U4; P52298;O00321;Q8TAK5;P18850;Q9Y2K5;A2A288;Q8IX03;Q9UJC5;Q5H9I0;Q9H6Z9;O43299;Q8IW35;Q 5BJF2;Q8IWW8;Q96CW6;O75531;Q9UKK3;Q9NYB0;Q8WX92;Q5VYK3;Q8IZX4;Q9UL41;Q9Y4B6;P58340;Q9 Y697;O95551;P05787;P52435;Q3KP31;O14771;P10243;Q9H8M7;Q9Y3D0;Q9BUG6;Q9H668;P53803;Q15 543;Q8WYQ5;Q9HBE1;P52741;Q13023;Q14693;Q9Y675;Q14140;Q9UC07;P25789;Q86TP1;Q13761;P248 64;Q9H869;P10599;Q969H6;Q71UM5;Q9H6T0;Q9HBM6;P05114;Q9BZI7;Q9H1J1;Q5TAP6;Q16534;P4598 4;Q03938;Q8TD19;Q9Y314;Q13895;Q9NPG3;Q7RTV0;Q13888;Q9Y3A5;P08047;Q8NCU7}

6184

Pathogen {P0C206} interacts with 4057 human partners: {Q9UID6;P27695;P33316;Q02386;Q96P71;Q9UBW7;Q9BUJ2;Q99990;Q96HA7;Q8HWS3;Q8N9K 5;Q8TE85;O95217;Q5VUA4;Q76L83;Q5BJF2;Q9BPU9;Q9UNS1;O75293;P61289;Q8TCI5;Q53GS7;O43598 ;Q9NUA8;Q4L180;O43829;Q8N720;Q6IEG0;O43679;O43542;Q96TC7;Q9NY87;O75340;Q13112;P06733; O00488;Q9Y3S2;Q9UNN5;P28698;Q9H1K1;Q6NUN9;A9UHW6;Q9BT56;Q15072;P61572;Q9C000;Q92688;Q 96EE3;Q6PJG2;Q8IW03;Q9Y253;Q9HBM1;Q6NXT1;Q86VD1;Q9UNP9;Q9BRG1;Q9NQC8;P46937;Q8WXE1;Q9 Y468;Q8TAE8;Q15723;O43502;Q13875;P09132;Q13887;Q02833;P84022;Q15287;Q9BUE0;Q9NPI8;Q92 597;Q3T8J9;Q9Y224;Q2LD37;Q9BWH6;O75486;Q9NZ63;Q8IXH6;Q9HCU9;Q9NQX1;Q969U7;Q3KNS6;Q86W 11;Q9UFF9;Q9BZQ8;Q9Y2X9;Q12872;Q96JL9;Q9H0S4;O60716;Q9H8H0;Q14320;P53567;Q9P016;A8K8V 0;Q99436;Q5PRF9;P28062;Q9NPA3;P10144;Q86Y01;Q07687;P10588;Q96RS0;Q9UK12;Q8NA77;Q9BV90 ;Q8N371;Q96NT1;O75683;P05787;O43541;Q9BW71;O60216;P24863;P99999;Q9NPE3;Q9NX58;P62324; Q9Y232;Q6P9A3;Q952621;Q9BUL9;Q8NG57;P31949;Q9H765;Q9NZV6;Q86XR8;Q99848;Q8WUF5;P0CJ87;Q 15435;B1APH4;Q86VZ6;Q969F1;Q9BPX3;P46939;Q9P031;Q53T94;P67809;Q08J23;Q9NQ87;Q14188;Q9 6L92;Q86V15;Q969W8;Q9UJV8;O43324;Q9UMS4;P56181;Q9H4L7;Q9P1U0;Q8IX15;Q16385;Q96PU5;O14

628;P10914;P33240;Q8IXQ5;Q9Y3E1;Q13501;Q13829;Q92769;Q13541;P0CG48;P54278;Q8WYP5;Q92539;P08048;Q9NS56;P60002;P07438;Q9BZE0;P13640;Q6MZT1;Q01082;Q9P2N5;Q6IPX3;O15131;P78424;Q9BXL5;O60291;Q9H5H4;Q96AJ1;Q9P0U4;Q9GZW5;Q16649;Q8WWL7;O43933;Q99733;P58340;Q8IXW5;O43309;Q6ZNB5;Q9C005;O15127;Q8N140;P62875;Q9HB71;Q03060;Q5XG87;Q9NZH5;O95201;Q96JM7;Q9UHP9;Q86TP1;Q9NR46;Q9Y2Z0;Q9BTE3;Q8TC21;P62877;Q9Y3M9;P05062;O95273;P0DI82;Q9UN30;Q9NPD8;A6NDR6;A6NHQ2;O75530;Q9Y5L0;Q8N988;P57076;Q9UKG1;P98168;Q96SE7;Q9Y678;P0CB33;Q8TUR6;O75528;P83876;Q14587;P53805;Q8LXH7;Q8NAV1;O75952;O00148;Q96JC4;Q2NKJ3;P51854;Q96Q83;Q7Z353;Q9Y3F4;Q8WUX9;Q15270;Q05195;P16383;Q19AV6;Q9HCK8;Q15329;P50402;Q9NQE9;Q9UKF6;Q13601;Q92575;Q96T37;O95359;O60481;Q96G21;O94986;Q9Y2M0;Q9HB19;P28715;O43159;Q14103;P13010;Q8N187;Q96L21;Q00444;P49336;Q96BV0;P0CJ90;Q9NX46;Q9UM54;Q12988;Q9NQV6;P14678;Q496M5;P31483;O95478;Q9Y295;Q32MQ0;P54725;P9BVI4;Q9Y2D1;Q63HK3;Q6K0P9;O60508;Q7Z2X4;Q9GZV4;P0CG12;Q7Z3I7;Q8TA86;Q9UHL9;Q8TAF3;Q96NI8;Q15466;Q6PCD5;Q9UJN7;Q96G23;O75934;Q6PD62;Q8WU90;O75832;Q9BZI7;Q96N22;Q504Q3;A8MX4;Q96AY2;Q9BUY5;Q96RY5;Q8N9N5;Q6IPU0;O15360;P45973;Q96RT1;Q13568;Q96MM3;P35398;P23193;Q17RS7;Q92830;O94842;Q9UDY4;Q96RK0;Q96AB6;Q15365;P09917;Q14588;O00167;Q96HR3;Q7Z398;Q06546;Q8NEZ2;Q96DC7;P49790;Q9BYG3;Q9NSP4;Q96ST3;Q9HB65;Q8WWY6;Q6IS14;P39687;Q9NPJ4;Q03924;Q15545;Q8WV22;Q07955;Q9UI43;O95149;Q8NA19;Q8NEF9;Q9H2F5;O43711;Q86TB9;O14920;Q14739;Q9BUG6;P17026;P26447;P26368;P52298;Q96S65;Q99828;P31269;P31314;Q96IR2;Q9H201;Q7RTU3;Q16514;Q8IXM6;Q9GZM3;Q6IV72;Q9BXL8;P55265;Q6VMQ6;Q9NQ90;Q15493;O95453;P55198;P61576;P38935;Q5JNZ3;Q9Y324;P06401;Q86TC9;Q03701;Q06455;Q9GZU2;P31749;Q5T5D7;Q92890;O95251;Q9Y6K1;O14867;Q12796;Q8N883;Q96CS4;P27797;P40306;Q7Z3K6;Q9UBC1;O60393;Q01538;Q9Y2G2;Q14CS0;Q9NPF5;Q9UHQ1;Q96GA3;Q9C099;Q5SRE5;Q68E01;Q06330;Q13469;Q9UMS5;Q8TD26;Q9NP71;O75496;Q9H299;P49959;Q9ULX3;Q7Z7J5;P28065;P40425;Q68DK7;Q9BSV6;Q9NYT6;Q9NS18;Q14997;Q9UH92;Q6UB98;Q9H305;P36639;Q15543;Q9UBU8;Q9Y6Q3;P98182;Q99504;Q9UBP6;Q9H840;Q9NUQ3;Q8N3X6;Q9Y2A0;Q9NVN8;Q9BUP3;Q96Q89;O95260;Q8NFH5;Q86UW9;Q8NB50;Q9GZQ3;Q9NRF9;Q9UJQ4;Q9HAZ2;Q7Z4G1;Q9BQ15;Q12905;Q9H4X1;Q8TDN4;Q96DX5;O00512;Q9HC52;Q8N9F8;P61581;Q8WW12;Q96IZ0;Q5UIP0;Q13127;Q9NRP9;Q9BSF8;Q9RUX3;Q9NZI5;O60504;O95780;P60673;Q16222;P13682;Q9BV47;Q8TF63;Q7RTS9;Q96EU6;Q9NUU7;P49848;Q15397;Q9Y6K9;Q9UPN9;Q9Y5Q3;Q8IYN0;P61326;P14921;Q05481;Q9UQ84;Q15911;Q8N228;Q9BYG7;P24522;Q01081;Q9NY43;Q96AP0;Q3SY56;Q9NSU2;Q9NSI6;Q8TF01;Q0VGE8;P51532;P26651;P81274;Q06416;Q9NPI1;O00291;Q9NZM5;Q9NV88;Q9BQ1;P35251;P60174;Q6PF04;Q9UBP0;Q9UMY1;Q8NLM2;Q9NSA3;O95684;Q9HAW0;Q9Y4A8;Q96UU0;Q9Y242;Q08AG5;Q5BMJ68;Q8WWX9;Q9NS25;Q6F181;Q9ULM3;Q9NR55;O43592;Q96C86;O43791;B4DU55;Q9NVW2;O43255;Q6NX49;Q9UC06;Q9NZL9;Q8TAK5;Q9BV20;Q9GZU7;Q16186;P36954;Q9BV86;O75123;Q02078;Q147U1;Q14586;O15266;Q99708;Q9P086;Q96PE6;Q9GZN7;A6NNA5;Q13263;Q9UKK6;Q9Y3D8;Q8N726;Q9BRT2;Q13526;Q15361;Q9UII5;P50750;Q15696;Q15019;Q5TGS1;O94864;Q8N6I1;P52741;O95602;P30307;Q9Y2N7;P43356;Q9H981;Q96KS0;Q5VUG0;A6NGD5;Q8IYW5;Q86Y26;O95376;P13533;Q9HD34;Q8TD86;O96017;Q9H6F5;Q9H4I2;Q8WUU5;Q9UNH7;P15407;A6NFF2;P78364;Q8N699;P62081;P20226;P12525;Q5TD94;O00308;Q14137;Q13642;P11161;P04156;Q8IYX0;Q9UBB5;O43365;P17031;Q09161;Q9BXY8;Q9HAU4;Q86VK4;Q9NZT2;Q9UDY8;Q96MT3;Q04743;Q9BVP2;Q15544;Q9VSL9;Q6XQN6;P25786;Q9H9Q2;P05114;Q9Y287;Q9NY12;Q8WY54;P18583;A2RRD8;P55769;P16220;Q9NW07;Q9Y5T5;Q8NEU8;P17275;Q9Y5R6;O14948;Q9GZT9;O60518;O95633;P09067;Q9UN79;P10074;Q06787;O75884;O75607;P30153;Q9UL42;Q9NR33;Q3SYG4;O14737;Q9HD36;Q92681;Q9Y6D9;Q9UBT6;Q9UK13;Q5JXB2;Q5T3J3;O43151;Q9BTP7;Q9UHJ9;O43422;Q8NI27;Q9BRA0;P35869;O15527;O14862;Q86WI3;P40121;Q96SL8;Q8WXD5;Q14692;P17544;O75030;Q9H5F2;Q9UMX1;Q96DT7;Q17R31;Q9H6J7;Q9UGU0;P0C7X5;Q8TAD8;O75925;Q8WUA4;P09874;Q15744;Q6ZW49;P25788;O43427;Q6IN85;Q86YC2;P20290;Q5EBL4;Q9NVU7;Q5H9R7;Q9UDV7;P51161;Q25WJ1;P22392;P29144;Q9Y248;P25490;Q9BZZ5;O43313;Q8IY51;Q9Y623;O75290;P15622;Q8NEH6;P68036;Q8N9Z0;Q9NSD4;Q8NDL9;Q02446;Q86UP8;Q8N8Z8;P08651;Q9ULW0;Q9UNA4;Q9BU61;Q04323;Q7L5A3;O75444;Q9UK73;Q9HBE1;Q9UJL9;Q9HCU8;P18754;P18850;Q9UL41;Q96HI0;Q330K2;Q8TUF8;Q07021;Q14966;Q96F45;P49910;Q8NCF5;Q7L2Z9;O75419;Q9UNY4;Q92733;Q8IWL8;Q9P243;Q14690;Q8WUN7;Q9NPD3;Q86XK2;Q92664;A1L190;A5PLL1;Q6ZSB9;O60225;Q41252;Q9BRU2;Q96FX8;Q13156;P78395;Q86YF9;Q95721;P51955;Q13023;Q8N7R0;Q5JTH9;O60907;Q56P42;Q56P03;O43402;Q8WYH8;Q96N95;O95049;Q7L5Y6;Q8TB69;Q9BT49;O43812;Q14258;Q6W2J9;Q6PI48;O94913;Q49AA0;P41212;Q9UGP4;Q6UN15;Q9H9T3;Q5RKV6;Q7L190;Q9NSC2;O75154;Q96127;P54105;P48382;Q96BP3;Q99873;P25205;O75381;P62304;P52701;Q9UC07;Q05066;Q9NR11;Q9Y6D6;Q96BW1;O75582;Q9Y2Y9;Q9NVD7;Q15697;Q8N3X1;O14744;Q96EP1;Q5HYJ3;P25787;Q99933;Q5CZ65;P51587;P78414;Q05519;Q15233;P04732;P48634;Q8IYB3;A6NCL1;Q8IYB3;A9QM74;Q96AV8;P45984;Q01860;Q32P41;Q9H7E2;Q7Z7K2;Q9Y4Z2;Q9UJX5;P51531;P56589;Q6P2H3;Q8N2G8;Q9H091;Q3KRA9;Q96IF1;P41182;P17024;Q05516;Q7Z3B4;O43913;Q9UPA5;Q9NXV2;Q6V9R5;Q13868;Q9NQW6;Q13615;Q9NZN8;Q8TD31;P08865;P52743;P54821;Q8N1K5;Q08211;Q86WV5;Q6NS38;Q9UIV1;Q9H869;Q13228;P41227;P62750;Q6ZNA4;Q9BTV5;P49639;Q9GZL7;Q15554;Q9H7R0;Q9BS31;Q13625;O75717;Q9UMX0;Q99583;O433681;Q96B36;Q969P5;P05204;P14317;Q2VWA4;P09012;P62380;Q9UHK0;Q96K75;Q9UQR0;Q9H1E3;Q9NQZ8;Q15327;P52657;Q9NR83;P50995;Q7L3S4;Q8WTT2;Q7Z5Q5;Q9H7N4;Q6NZ36;Q9UH99;Q15172;Q9NXT0;Q8TC05;Q8IV48;Q9BQ65;Q9UKL3;O15382;Q99598;P48147;Q6XD76;O14529;P30279;P78560;O95983;P62328;Q00613;O00470;P35226;Q13111;Q9UKL0;Q9UBX2;O75818;Q96DB2;Q9UHR5;Q9NRG4;Q6PJP8;Q86X55;O60934;O76075;A6H8Y1;Q02548;O00629;O75604;O60684;P52737;Q16836;O95232;Q9Y4I5;Q9HB96;Q2V2M9;O43493;Q0VDB8;O75469;Q99615;Q6ZN32;Q9NR56;P63167;P59923;Q8N5L8;Q13057;Q8WXB4;Q9UK33;Q15170;Q9Y6K5;Q8IWA0;Q8IYI8;Q9UMX3;O94811;Q96JI7;O75081;Q96JK9;Q9P2F9;Q9BY77;Q8WXI9;O75533;Q5TCQ9;P14866;P34932;Q9C0H6;C9JE40;Q9NRR3;P29374;Q9Y2Q1;P52655;Q96QR8;Q8IYD8;O00255;Q9UL58;Q9H9L3;O95997;P40692;Q9H081;Q9Y2D9;O95999;Q9BU19;Q8TEQ6;Q9H7B4;Q53G26;Q8WTR7;Q13045;Q04726;Q9UHB7;Q9UMS6;Q99623;P49720;P61978;Q03933;Q99717;Q9H1Z4;Q9Y697;Q9UMQ3;P17019;Q8IWB7;Q5VIY5;P63162;P19388;Q6ZRF7;O60870;Q6P387;Q14602;Q7Z4H9;Q9NPA5;Q6STE5;Q9UBS4;P61218;Q9H5P4;Q14974;P05412;O95600;O14777;Q8IY22;Q9NWU2;Q05BQ5;Q9P2D1;Q5T1R4;Q8IYH5;O15534;Q8IUQ4;Q8IYF1;O75940;Q8N684;Q9UKV0;Q14678;Q8WW38;P46100;O43463;P25963;Q8N8E2;O95630;P46013;Q13394;Q8N0S6;O00567;O43670;Q05086;Q15185;A6NHJ4;Q8N2W9;Q86XF7;Q8TBZ0;O94892;Q6NSI3;Q66P33;Q9HC62;Q9H4T2;O00268;P78411;O95059;Q14146;Q96HA1;Q9NXV6;Q460N5;A6NIX2;Q9UPP1;Q9Y3Y4;Q9HD40;Q9UQN3;Q86T29;Q9C0J9;Q9NW08;Q96J02;Q13137;P19419;Q6PI98;Q9BWU0;Q9NWB6;A2A288;P50221;Q96PU8;Q9UM63;P80303;Q6ZS27;Q9

Y2P0;Q9BRS8;Q96MH2;Q13951;Q9Y2K5;P54198;Q9UL49;Q8N8U2;Q6ZVD7;Q86VY4;Q14011;Q96SK3;Q8WYK2;O75177;Q96MX3;Q8N8U2;A6NP11;Q3MS56;P28838;Q15038;P55212;P51816;Q9UL59;Q9NUW8;Q96LA8;Q9UH90;Q9NWF9;Q6IA86;P10242;Q7Z5K2;Q8NCR6;Q5EBM0;Q8N1G0;O75764;Q9666;Q14442;P42695;Q92791;Q96QU8;Q8NI51;Q9H307;O00505;Q9NXW9;Q9Y448;Q9Y462;Q1ED39;P14651;Q92988;Q8N196;Q9NS39;Q0D2K3;Q9P278;Q16342;P08729;P50749;O15499;Q6ZMY9;Q29RF7;P53041;Q9ULJ6;Q15637;P10073;Q03468;Q96K30;Q8N8U2;Q8WZ33;Q52LR7;Q53GL7;Q94850;Q96BP2;O15265;Q8EA5;Q9BYG5;P23409;Q96JF6;Q9UK59;Q9BPZ2;Q7RTT3;Q3SY52;Q9Y383;Q9HCX3;Q9NYP9;A6NFD8;Q9Y5Z7;Q8N680;Q8WX93;Q86VN1;O75175;Q15021;Q96PY6;O75586;Q9UBC0;O60828;Q15654;Q96P70;Q16666;P15336;P19338;Q9HC44;P12980;Q86UD4;Q6ECI4;O00444;Q9NP98;Q53EQ6;P0CJ86;Q96TA1;Q9UJW8;Q6UW56;Q9NZJ4;Q9NQG5;P26358;Q969H0;Q27J81;Q9H320;Q13536;Q12901;Q969J2;Q86TU7;P06746;P29728;P52738;Q8N7G0;Q15653;Q96CM4;Q9UIH9;Q9UFW8;Q13243;Q12874;Q16629;Q7KZF4;Q92541;Q04727;Q96NUI;Q86U42;Q92800;Q15572;Q15631;P55055;P17027;Q8WV9;Q9Y2B5;P51508;P57086;Q92670;Q9Y2G4;Q9UER7;Q9H6U6;Q6QNY1;Q9Y3C1;Q8NFT6;Q8N7M2;O60765;Q9BZD4;Q9NPI6;Q7LBC6;P62314;Q6ZRS2;Q6P2C8;P62316;P20248;Q9P215;O96007;Q5SXM1;O43390;Q8IWX3;Q8IXT1;P60900;O75618;O00625;Q9Y3C7;P43268;Q96T23;P61201;Q9UHC1;Q96DE0;Q96MG7;Q9UBD5;Q9HCG1;O75467;Q9BS34;Q96C00;Q92922;O15397;Q9BUI4;Q9UDY2;O60318;Q96JB2;Q13895;Q9H9E1;Q15306;Q9Y5Z9;P15621;O75626;P53804;Q9NVH2;Q9Y5B9;Q9NS91;P42771;Q9H6Y2;P55735;Q9VD86;A6NLF2;Q9Y5Y2;Q9UKV8;Q9P2K3;Q8N7K0;O94829;Q569K4;Q13342;Q9ULJ3;P51522;Q13316;P17535;Q99909;Q9NRL2;Q9UPV0;Q13547;Q96LM6;Q99550;P43355;Q8N0Y2;Q8TAF7;Q01844;Q14186;P13056;P04792;Q8IZT6;Q96SD1;Q16531;Q9BSI4;P17023;Q9NPC3;Q7LG56;Q9P267;Q13416;Q96KM6;P49715;Q9H410;Q8N0Z6;Q6ZN30;Q9UBX3;Q8TAT6;Q9C0F0;P35754;Q03936;Q9BQ87;O94776;Q9UBK4;P31268;P36956;Q9UKA2;Q13398;Q9UGK8;Q9H9L7;P07320;P17483;Q14140;P10072;P29373;P42772;Q9HCS4;Q96MB7;Q9H503;P98170;P50991;P30305;O15164;Q93009;Q9H668;O75494;P19484;Q9UJ98;C9JN71;Q9UM07;Q9H9L4;Q7RTV3;Q14591;Q5VWQ0;O60524;Q96T92;P62826;P12524;Q9H816;Q99816;Q8IXQ6;P0CL83;P41970;Q9NWZ5;Q9NQX0;Q86VE0;P20962;O75437;Q04725;Q9Y3Q8;Q9P1Z2;Q12968;P56693;Q14590;P51003;O95905;O15524;Q9P287;O95155;Q92993;Q8NBZ0;E7ETH6;P57740;O15205;Q96S94;Q6R2W3;P58004;D6RGH6;Q12824;P49454;P18846;Q9HB07;P48380;P49005;P0CJ89;Q9BZW7;Q68DY1;O14770;P22626;Q9UL03;P49321;Q96BK5;O15318;Q86YP4;P55771;Q2VY69;P50453;O15525;P49406;P54845;Q9Y6J9;Q8NE65;Q07666;P17987;Q8TD19;Q6ZN06;Q9UNN4;Q9H0H0;O00716;Q6ZNB6;O95751;Q8N9N8;Q13330;P15976;Q6PGP7;Q02040;Q9BTL3;P10768;Q01201;A6NNF4;Q86UE3;Q99497;O75529;Q92925;P61956;O43809;Q95829;Q9BQ56;Q9H0I3;Q86XK3;P0C7T5;Q13287;P49116;Q9ULX6;P67775;O00458;P41218;Q96B26;Q15232;Q6ICB0;Q15050;Q9UQF2;Q9H0G5;Q96KQ4;Q5EBM4;Q9HB58;Q9HD15;O14686;Q8IZU1;Q9BSC4;P22736;Q15910;Q86YW9;Q15014;Q8WY36;P30793;Q86U86;Q5TKA1;Q9NZU7;P19367;O94818;P29084;A8MQ14;Q9NZI7;Q460N3;Q9UHV7;Q8TDN6;P19532;Q10587;Q8N5U6;Q96KG9;P41223;Q9Y2R2;P78317;P78316;Q99471;Q96QA6;P81877;Q15699;Q5JTD0;O00321;Q15796;A8MUZ8;Q9Y586;P04733;P10636;P0CVP9;Q9UBB9;Q99741;Q96A56;O95238;Q9BTT0;Q8TAQ2;Q13257;P54252;Q15326;Q13487;Q5TYW1;Q96E14;Q9Y603;Q8WV37;P61582;Q96H40;Q8N9W8;Q9BX26;Q92973;Q00994;Q8IZU3;Q9Y2G7;Q9NXR8;Q92831;Q9H0E7;Q5T5M9;Q96IS3;Q9BRH9;Q9BQA5;O96020;Q86TG7;Q3MJ62;O95476;Q9Y4P8;Q86UQ8;Q5BKZ1;Q8TCTJ0;Q9Y3V2;P49427;Q3B726;Q0VGO6;Q14669;P33076;O15226;Q9NX65;Q9BU64;Q9BQI6;P30260;Q8WVJ9;Q5VTR2;Q9H160;P24855;Q14241;P80217;O00482;Q8WHTZ3;Q13216;Q9UPV9;O95125;P57055;Q96HZ4;Q03252;O94901;O75791;Q9Y6X8;Q02241;Q13123;P27986;Q8N3J9;P52740;P38646;Q8N1G1;Q14781;Q9P2Y4;O00410;Q9Y6X9;Q8WWQ0;Q9Y6X3;Q9H808;Q9Y4Y9;Q8NB91;Q8TC84;Q9BRT9;Q6P2D0;Q13620;Q8IZL8;Q8IZX4;Q14938;O00422;Q9UHX1;P62993;Q16254;Q9BW66;Q96K62;Q9UJG1;Q96RU7;O60284;P53801;Q8N9B5;Q9Y5Q9;O43236;Q2TAY7;O94762;O95628;Q76KX8;Q9Y6X2;Q86TJ5;A5LHX3;P07315;Q9HAV4;P40424;Q8WUQ7;Q9P2I0;Q14738;Q14145;O43299;Q9Y2D8;P50461;B4DXR9;Q13495;P23786;P28749;P13984;Q5TA31;Q969G2;Q9Y4Z0;A4GXA9;Q66K74;P61247;Q9Y535;P0CJ85;Q9Y5Q8;O15405;P11308;Q9UBW8;Q9Y283;Q9P2R6;Q7Z340;Q96NM4;Q9UGP5;P57721;Q9BWM5;P10075;Q8TDB6;Q15269;O75943;Q9UJU3;Q53HV7;Q9NRY2;Q9NVI1;Q9Y5K5;Q03111;Q9Y6F1;Q96SQ5;P18146;P07992;Q6N069;Q92624;P83369;P62633;P12755;Q9NZL3;Q96MA1;O75360;O75971;Q8NEA6;Q8NEK5;Q6VUC0;Q8WYA6;Q15386;O75475;P51398;O43290;P17025;O96004;A6NDV4;P61586;Q8N2I2;P19447;Q9UHV9;P31946;Q9BYE0;Q9HBT7;Q92793;Q3KQV3;Q5JVG2;Q9UBF6;Q16587;Q13144;Q9NVX0;Q8NC56;Q969H6;P25815;Q7Z6R9;P14653;P17861;Q8N2M8;Q96EZ8;Q2KHR2;Q9NYH9;Q8IWC1;Q01534;Q96LW7;A6NJL1;P54259;P10589;Q9BT81;Q8N6T7;Q92754;Q06730;O95777;Q9BZE3;Q9C086;Q9GZV5;Q9H583;Q9NX70;A8MTY0;Q32M78;P0CH99;Q13769;Q15773;O43513;Q6NSZ0;Q86V48;Q9BWX5;O75346;Q96DU7;O95163;Q63HK5;Q12857;Q9NPC7;Q9Y421;A8MV65;P0CG29;Q9P280;Q6P1K8;Q8IZC7;Q9Y316;Q9H0E3;Q08999;P62913;Q99638;Q9C002;Q9Y675;Q14135;Q9H5J8;Q8N393;P30047;Q8NEJ9;Q8N895;P0DI83;P25789;Q96N58;Q13867;Q9UNQ2;P32519;O14907;O14519;Q6P1L6;P17022;Q9BSG1;Q96FF9;Q9Y5B6;Q9NPP8;Q6ZMW2;Q9Y6Y0;O75151;Q6ZN17;P23610;Q9BS18;Q9Y333;O00161;O60356;O60248;Q9BZE2;Q9NQ29;Q15853;Q9NVX2;Q9UJY1;P17029;Q8NDX6;B3EWF7;Q96D46;Q15003;Q96QF7;Q9NQV7;Q14839;Q9HBT8;Q15742;P30291;O43918;P51965;Q6ZN28;Q96S66;Q6ZMV8;P41134;Q8IVN3;Q6ZN57;P23246;Q72053;Q9H7S9;Q96KF2;P57071;Q02556;Q9H6R4;Q12837;O60437;P14652;O60304;Q86Y91;Q14999;Q03989;Q92674;A6NEJ1;O14599;Q9UM82;Q9HCZ1;O14593;Q92782;Q9UK11;Q96JB3;Q05215;O00570;O95073;Q8WUM0;Q5SXM2;P80294;Q9BYK8;Q6TGC4;Q16670;O75410;A8MZ59;Q969Q6;Q9BY27;Q9GZN2;Q7Z3G6;Q92785;Q13435;Q9UQ35;Q9UKT4;P23511;Q5EE01;O14787;O60930;Q9HCD5;P51114;O15355;P54274;Q15916;Q6PJG6;P42773;Q99547;O00213;Q5H9K5;O60238;Q9NPG3;Q32MZ4;Q8IZ40;O15105;Q92797;Q9Y247;P54277;Q8NDW4;Q8TEV9;A6NKD2;Q9NWS9;O75531;O00327;P23490;O14646;Q13610;P46060;Q8TCY9;P63104;Q6P1K2;Q9H1A4;Q3ZCQ8;Q9NQ03;Q9BYV9;Q96QF0;Q15599;Q9H9Z2;P24666;Q15061;Q9BYE7;P43351;Q96LX8;Q9H825;Q9UIE0;Q92610;Q13952;O95718;Q9Y2X3;P49792;P78337;Q6ZMZ3;Q15025;O14497;Q9UPQ4;P11172;P51825;Q9UGK3;Q9H609;O14681;Q8IZD4;P43897;P05423;Q9NVU0;P0C7V5;Q9P2J8;Q9H0W9;P36578;P60228;O96019;P53803;Q6UUV9;Q96N20;Q6ZNG2;Q9BWG6;A6NGY1;Q92784;Q12983;Q13569;P17021;O43248;Q8NBT2;O60682;Q8TEM1;Q9BUZ4;P0CL85;P49640;Q9BR11;Q8N8B7;O60447;Q9H814;Q14202;Q14209;Q9NX63;Q96QU4;Q15651;P41162;O43345;Q9Y605;O15151;P0C1Z6;Q86TJ2;Q92750;Q8NFP9;P27815;Q9BTK6;Q8WYR4;Q9UK58;Q96NS1;Q9UKT7;O60936;Q8N823;Q5BKY1;Q96DF8;Q5VZB9;P06744;Q02080;P78347;Q9NWW0;Q99457;Q9UKX7;Q9H3R5;P61088;Q9GZR1;Q9UK45;Q49A33;P82970;P14324;P05198;Q3KNV8;Q96NY9;Q93075;Q12888;Q9HD47;Q969S3;Q16656;P19838;Q96T49;Q9H089;Q96NB3;Q8IWS0;Q7Z591;Q86US8;P0C860;Q6U7Q0;Q99743;Q86W56;Q9H4S2;Q16633;Q14164;Q8WWB7;O43298;Q8NI08;Q96SW2;P49917;P36508;Q



16526;O15514;Q16082;Q8IXT2;Q8NF91;Q15054;Q969V6;Q9NYG5;Q96PQ6;Q92979;Q99581;Q14919;Q86SE9;Q9H9Q4;Q99612;Q96FX7;P12883;P35269;O15516;Q9NZ81;Q9NYF8;A6NK53;Q7Z5J4;Q9BXN6;Q6AW86;Q86X95;P10828;Q9Y6J0;Q13428;Q96JZ2;Q6ZN04;P22415;Q9UNH5;Q9H4D5;Q96FV9;Q6ZT77;P62508;P10244;P05813;Q9Y5J1;Q8N6M9;Q9Y5B0;Q8WW59;Q6P1N0;Q15650;P19387;O43379;Q6PI26;P35711;Q9UP83;Q8TA94;Q9ULV5;Q9H788;Q9UJX4;P40426;P04053;Q7Z333;Q13888;Q93083;Q96N77;P38159;Q9NSJ1;Q86XI2;Q9NRR5;Q05048;A6NKF2;Q6VN20;O75446;Q03112;Q9NWT6;A5D8V6;P53999;Q9ULW6;Q6ULP2;Q96RN5;Q15007;Q8WZL9;O15287;O60506;P09086;O00712;Q9UGN5;Q9BXF5;O43361;Q8TF20;Q9GZX7;Q9ULV3;Q96LT7;Q9P0W2;Q9Y3D0;Q7L5Y9;Q99081;Q5HYK7;P56645;Q96HA8;Q8N7H5;P17035;Q9UQE7;Q16719;Q5XKL5;Q96M11;Q8NF64;Q5JVS0;Q9UJW0;P22681;Q13310;P83916;O95402;Q5QJ6;P50613;O00165;Q9BQG0;Q68G74;Q86Y97;Q13618;Q92917;Q9BZR9;Q9H147;Q9UIS9;P49450;Q9HA82;P17010;Q9Y4A5;Q6RSH7;O14972;Q6XYB7;O75564;Q9GZS3;Q9NVM4;P16989;O95400;O95347;Q8IXJ9;A6NFK7;P59047;Q8N344;Q8NAF0;P23396;Q9BVW5;P39023;Q5T8A7;O75113;Q15560;Q8WXA3;O95257;Q9H3M9;Q7L0Y3;Q14106;P42166;Q86UQ0;Q13835;Q8NHY6;Q8IW36;Q96HW7;P50549;Q9UKK3;Q9UNY5;Q8NHY2;O95619;P20618;Q9Y543;Q13573;Q9ULW3;Q9BWT1;Q49924;P32243;Q969X6;Q9UKN5;Q9BZV1;Q6RFH5;Q9BWW5;P17676;Q99700;P78413;Q86WP2;O94993;Q8N9Z9;O95990;Q13838;Q15973;Q8N490;Q6IBW4;Q8WVB3;P12757;Q8IZP0;Q9Y255;Q8NC26;O95831;Q06265;O14929;Q9ULG1;Q52M93;P43487;O43296;Q14181;Q9BXG8;Q86WZ6;Q96H20;A6NJ46;O95429;O94992;Q8TF47;O14813;Q9UI56;Q9ULU4;Q8IZL2;Q9UBU7;P35232;Q8IZ20;Q9C0F3;Q05BW5;Q9NR48;Q9UBU9;O15379;O00110;Q8TAA3;Q9GZY1;Q96CJ1;Q53HI1;Q9BXX3;P52742;P08047;Q9UEG4;Q9NP66;P17482;P24278;Q14CW9;P18615;P51959;A6NFI3;P52597;O76021;P80723;Q9BWW4;Q13427;O95373;Q5VZK9;Q8NCD3;P28070;Q9Y5J3;Q6PJN0;P13349;Q3YBM2;Q16630;Q9Y2S0;Q9NZV7;P51808;Q8N972;Q9UK10;Q12986;P29083;P04731;P51610;Q9P0M2;Q86SG2;Q8N488;Q13426;O75391;Q8N8D1;O00264;Q9BVC6;P55196;Q14691;O75694;O00159;Q9UKN8;A6NKG6;Q96MN9;Q9P2K5;Q96BR9;Q8WXF8;Q6PJT7;Q14683;Q8N141;Q9UHF7;Q6P2E9;Q96EV8;Q7RTU5;Q9UHY7;Q9HAP2;Q15906;Q9H944;Q9H582;P61575;Q9H171;Q96KR1;Q14593;Q9H175;Q92985;Q8N357;Q9P013;P40855;Q7RTU4;Q5TEC3;P53370;Q6RFH8;Q6IQ32;Q53QV2;O60885;Q5H9F3;Q8N5P1;O95707;Q9UBS8;Q14149;Q8WXF1;O95190;Q8WUI4;Q01658;Q17RY6;P34896;Q107X0;Q08ER8;Q9NPJ6;Q99543;O00461;P45381;Q14676;P17032;Q9UJH3;P35680;Q7RTU0;P49789;Q96T88;O15315;P49711;Q9NWV8;P35548;P57081;Q8TD23;Q9HC78;Q6NZI2;Q96IY1;P61571;P01100;O14656;Q8N7U7;Q9H2C1;Q04206;Q06587;Q9NV06;Q4LE39;P16415;P86452;Q5VVH5;O75505;Q9Y5R5;O95931;Q9NQR1;P32929;Q5HY98;Q9UPW6;Q92889;Q9Y2L8;Q8TEX9;P25800;Q86WV1;Q96AQ6;Q9Y3B8;Q7Z589;Q9H4B6;Q8TAT5;O94874;O60260;P17017;Q9UIF8;Q8IZU0;Q9BTC0;Q9UG56;O75817;P10155;O75792;Q8TDP1;Q8TED0;Q9H6W3;Q8TCD5;Q9UKT9;Q01831;Q7KZ85;P0CJ88;O60535;Q9P0L1;P52744;P15923;Q9BTX1;Q9H211;Q15942;Q71UM5;Q8TF50;Q8ND90;Q5D1E8;Q96RS6;Q96PK6;Q01094;Q3ZCT1;Q9BQK8;Q9UIF9;Q14152;Q9Y3B9;Q9NY33;Q14686;Q7Z7K6;Q9UJ68;Q12882;Q96BT3;O00204;Q9UQR1;P35637;O60296;O43491;Q9H4Z2;Q6MZP7;Q99807;Q8WUY8;O96028;Q7Z3K3;A0AVK6;Q96CX3;P15884;O15078;Q9BR84;Q9Y692;Q12816;O96006;Q96F24;O43395;O15111;Q8WTS6;Q9H963;P20823;O14618;Q99728;P46777;O95278;P05388;Q9NRR1;Q9NWT8;O94166;O95416;Q76FK4;P62979;P50539;P28347;Q8NDF8;P13073;P17020;Q99590;P78345;P53539;Q96NL3;Q8N9R8;Q96MU7;Q6T4R5;Q8NCA9;P58557;Q3SY89;Q9NS37;P17039;Q8TBC5;Q7Z417;Q02447;Q8TF32;Q9Y5N6;Q9Y6X0;Q06547;Q15834;Q8N693;Q6P2Q9;P05783;P57772;Q5T230;Q3C1V8;Q9BRU9;P67870;Q6ZSS3;Q92759;P35789;Q8WVC0;P55273;P46527;O95551;Q9BZQ4;P28324;Q03052;O15446;Q96L33;Q9NVP1;Q8TDY2;O43663;Q9Y2W1;P04406;Q8IW35;P62318;Q8N554;P04198;Q5H9L2;Q9BT78;Q9H8N7;P17030;Q14790;P54727;Q6NZY4;Q5H9L4;Q15024;Q14582;Q13352;Q96IT1;Q9HCL3;O14771;Q7Z4H7;Q5TA45;Q96ST2;Q8N7Q3;Q8IVC4;Q15006;Q68DY9;P0CJ79;Q9UJ04;Q7RTV0;Q5FBB7;Q9Y4X4;P57075;Q6PCB5;Q15370;Q5VZE5;P40926;Q9ULD2;A6NKF5;P10909;O15234;O14893;P78545;Q6P9F0;Q64ET8;Q5VT06;Q16143;Q08378;Q6P1M9;P49916;Q9H1B4;Q9NUL3;Q13609;P17947;Q96HQ0;Q02930;Q8TDR4;Q13901;A6NK39;Q92870;Q16534;Q8NHM5;P28066;Q9NPB6;Q7Z713;P17028;P38936;Q9NQ92;Q5VWG9;Q9UM11;Q96S55;Q99608;Q86T82;Q96GC6;O60921;Q9NQ33;P51523;Q7L2R6;Q8NHW3;Q12996;Q5C9Z4;Q96AQ7;P08107;A6NLW8;P35579;Q9BPZ7;O00401;Q9UL16;A6NF01;Q9UBB6;Q15819;Q8N8J6;P56182;P56537;Q04864;Q969T4;Q8N1L9;O43167;Q9H4Z3;Q4VC44;P58317;Q6P9G9;P49750;P62714;Q5VU43;Q9HAF1;Q9BWD1;O43294;Q96DT0;P55895;Q9NY27;Q9Y6I3;Q15628;Q9Y222;Q8NBF1;Q96S99;Q53HL2;O15069;Q659A1;Q6GQQ9;Q96NJ3;Q9NRR4;Q96A49;Q86SE8;O60281;O43482;Q9UKX2;Q9HA38;Q6ZQV5;Q96MF7;Q8N998;Q9Y2L1;Q96ES7;P42574;Q96JM3;Q9BXM0;Q9BZK7;Q86XN8;Q9H5I1;Q92625;Q15562;Q9BV57;Q9BZG8;O75376;Q9HCE5;Q12893;P42568;Q9H8V3;Q49MG5;Q96MU6;Q8WWY3;Q8TCT7;Q9BYN7;Q9H165;Q7Z3V5;Q9HBH7;Q9NUQ6;Q92841;Q9Y2P8;Q9Y6R6;Q9GZX5;Q8N205;Q8N782;Q6X4W1;Q96ZNG1;P55795;O00267;Q9XP87;P39019;Q16533;Q16612;Q5TBB1;Q9NVV4;P51826;Q5TAX3;Q92804;Q9H9A7;Q15424;Q9BQY4;Q86XU0;O60381;A6NLC8;Q06732;Q9BSM1;Q9H3F6;Q6ZR52;O60832;Q53EL6;O14818;O75478;P46783;Q96FI4;Q9NRC8;Q9H2G4;P15036;O15392;Q5MCW4;Q14872;O14896;Q7Z465;Q9C035;Q6P0N0;Q9GZU8;Q5FWF6;P40763;P22670;Q15573;P31941;Q9UDV6;Q15937;Q6P9A1;Q9H2T7;Q96AB3;Q13485;Q86UZ6;Q9H3P2;Q9BTA9;Q9Y4R8;Q9BZ11;Q8N1N5;Q8TAQ5;P25208;Q9UBZ9;Q9Y5A6;Q9H707;Q96B42;P55209;P61244;Q8IY8;P0C7M4;Q9UPR3;Q9H008;Q15633;P61960;Q8IWS8;P55072;Q8N5J4;Q13129;Q8TF45;Q8IWW8;Q9H489;P23760;Q9NTI5;Q9BUR4;P25791;Q9Y657;P52435;Q92600;Q71SY5;Q9BXP5;P61962;P0CW71;Q8TAD1;Q86WQ0;Q8N0S2;Q9BTT4;P25440;O15535;Q7Z614;Q9NTK5;Q12765;Q96E16;Q9BYH8;Q13489;Q8TF39;Q96BU1;Q9NZH4;Q9NRR2;Q9NX01;Q9NZJ0;O14776;Q9BBSK1;P62306;Q8WYA1;Q9BZE4;Q9ULR0;Q15022;Q5HYK9;P04818;Q8TBE0;Q9H116;Q9HB21;P24877;Q2M1K9;Q9HB75;Q96HR8;Q9H6Z4;P28370;O14709;Q13148;Q8N5F7;O43172;P98171;Q9P258;P62585;Q9P0J0;Q96CB8;Q14527;Q156A1;Q96T58;P62841;Q15652;O60869;Q9H0U9;Q15366;O00541;Q99567;Q99627;Q8NFG4;P62140;O75665;Q9UJX6;P32780;Q04724;P0CG47;Q8NE71;Q13356;Q96H22;Q99459;Q99684;O60287;Q9Y3B2;Q9ULD5;Q15542;Q8N8L2;Q9C0C2;Q92966;P61457;O75373;Q8N587;Q9HAN9;Q9HAU5;Q96N38;Q14934;Q8N336;P16333;Q9BY31;Q9BT76;Q8N4W9;O43447;P55060;O00472;P17096;Q96MR9;Q33E94;O95411;O15370;P61580;A6NM28;Q9HCG8;Q6NTF7;Q75QN2;Q9UJ78;Q9H875;Q13562;E9PGG2;Q16384;P36405;Q14592;Q8TE02;P23769;Q8IXM2;Q9H2G9;Q9Y6B2;A4D1E9;Q9NYB0;Q8NFH4;Q86V71;Q03923;Q96RK1;Q5VYK3;P61583;Q8IYI6;P29474;Q9Y2P7;Q8TEK3;Q15013;Q9Y606;Q9BX66;Q5TAB7;P11831;Q9BQ67;Q9UJM3;Q9BWG4;Q08050;O60244;Q00978;P20872;Q13098;Q9NV31;O15162;P46087;P06703;Q63HM1;Q9H7B2;Q6ZU65;Q9H009;Q0D2J5;Q59GR2;Q9UHP3;Q5THR3;Q7Z7L9;O75368;Q9H6T0;P30304;Q96JC9;Q86YI8;O60315;Q9I0X5;Q8IZ26;Q16520;P61574;Q9NS26;Q96IZ7;Q6IE81;Q8NA42;Q15797;Q969S2;Q13422;P63241;Q01664;Q9Y237;Q99966;Q99FC8;Q8NDQ6;Q5TB30;Q86W54;P43243;Q8N859;Q9Y294;Q562F6;Q9NZI6;O75691;P54136;Q9H9F9;



Q5T4T6;Q9UK76;Q6NSW7;Q99502;P51786;Q15928;Q9GZS1;O95218;P20749;Q6NT89;O43823;Q9ULK4;O  
 95639;P84103;Q14674;Q07157;P18847;O75400;Q8IX07;Q9NVR2;Q9BX82;Q86Y25;Q96QD9;Q9UL36;O7  
 5953;Q4G112;Q9UJA5;P02545;Q96BR6;Q6S96;P07316;Q13889;Q719H9;Q7Z6J9;Q01850;Q53ET0;Q9P  
 0V3;Q9BRR0;Q9UBL3;Q86WJ1;Q8IXK0;Q6P177;P07199;A6NDX5;Q9UK39;P20292;Q96FA3;Q8WXH0;Q69Y  
 H5;Q96YS3;Q6N3S3;P49716;Q6P2D8;P42226;Q7Z5D8;B2CW77;Q86UB2;Q96C28;Q6ZRQ5;P78396;Q0849  
 5;Q8IY57;Q8ISB3;Q9BQW3;Q5TD97;Q9UPN7;Q9UKW6;Q9H7D7;P35659;Q96D98;Q6P1J6;Q92900;Q9H3M7  
 ;Q9BW11;Q9Y613;Q15058;Q9Y3A5;Q9NZC7;Q9UPP2;Q96NJ6;P0C7X2;Q9H6Z9;O75362;Q86YD1;P98169;  
 Q00653;Q6IQ21;Q9HCE3;Q13362;P28702;Q13155;P41208;Q9Y3C4;Q8WW01;Q99676;Q15596;P37275;O  
 60671;Q969R5;Q99417;Q9H777;Q8WX92;Q8IYM9;Q8WUB8;Q15059;Q16576;Q9BXW6;P06454;Q5H9S7;P3  
 5712;Q13185;A6NG73;Q16236;Q4V348;Q9UKD1;P56282;Q9BSU3;P0CG31;P20265;O15055;P22087;P31  
 271;O15350;Q96GM5;Q9H7X3;P10243;Q16621;Q6PK81;Q13415;Q9UPG8;Q01826;Q6ZN11;Q9H832;Q7Z2  
 Z1;Q8NFQ8;Q8N3U4;P61758;Q00597;P48378;Q99687;Q9NQX6;Q9BVT8;O43543;Q9H2U1;Q6UWZ7;Q96FX  
 2;Q9NRZ9;Q86WB0;Q9HBM6;O75164;Q86UE4;Q68CQ4;Q5H9I0;P07741;Q99575;Q8NCY6;Q9Y2B4;Q96LW9  
 ;P0CG13;O00287;Q8N987;O14901;Q9NYF0;Q96CA5;P27540;Q14863;Q8NB12;Q2QGD7;Q5PSV4;Q9ULZ2;  
 Q8NEM1;Q6ZN79;P48595;P17097;Q9NVC6;P15172;P78406;Q9NWX4;P20700;Q9NQ50;Q06609;Q674X7;P  
 17040;P28074;Q96E15;Q9H204;Q8TBK2;Q3SXZ3;Q14129;Q14151;P42704;Q96PM5;Q96G3;Q8NA58;O9  
 5625;P62277;P10412;Q14397;Q13772;Q9BXR0;Q9HBD4;Q9UKD2;O94906;Q96EB1;Q96QC0;Q9UHB9;P57  
 077;Q9UBS3;Q92994;Q8NDP4;Q7L9L4;Q2M3X9;P25685;P27694;A7MD48;P20585;A4D1E1;P42575;Q9UK  
 T9;Q8WXS3;O95067;Q5VTD9;A1L020;Q9NPF4;P52747;Q9H910;Q9H9S0;Q53GI3;Q86U70;Q9H0M5;Q96EA  
 4;Q9HD42;O43364;Q14192;Q14749;Q9BXX5;Q9H501;Q9O928;Q86UD0;P49419;O60346;Q5MIZ7;Q96BN2  
 ;Q9HC16;Q08209;O75448;P21127;Q9BR61;Q9H9Y2;Q86VF2;Q9C0G0;Q5EBL2;Q14814;Q69YN4;Q96BF6;  
 Q96DE5;P31274;P11388;Q14765;Q96RQ1;Q9NWA0;Q9HAJ7;Q9UBR4;O43325;P51814;O60663;Q7Z7C8;Q  
 8ND76;P11474;Q8NFD5;Q9NUX5;Q8NDN9;Q9Y2M5;Q9UN42;P84101;P51815;Q6W0C5;P21506;A8MT65;Q9  
 UHI6;P15927;Q9UHA3;Q6UWI2;Q8TAP9;Q12962;Q9UK99;Q96H86;O60303;P01106;Q9P2T0;P0CW01;Q71  
 F56;P24928;Q9NZP6;Q8N2Z9;Q9UBK9;P62312;Q8N831;O15194;Q6ZYL4;Q16181;O15504;Q8IWL9;Q8IZ  
 T9;Q96AE4;Q8WV44;Q07352;Q8NCU7;P15121;Q8TBZ8;Q9UQ80;Q9YD80;Q15047;P49721;Q9UN36;Q504T  
 8;P52746;Q96LI6;O15042;Q92832;P46108;A8CG34;Q9ULM2;Q3ZCX4;O14595;Q58F21;Q9Y6P5;P06748  
 ;Q9ULA9;Q9NZZ3;Q9H0N5;Q6P9B9;A6NLJ0;Q9UBC3;Q9C0E2;P49756;P55199;Q99594;O75398;P0CG24;  
 Q14331;Q12769;P14635;Q9BYD9;A6NJ64;Q93034;Q92945;Q9NY74;Q12972;B2RXF5;Q9BQI9;Q5TID7;P  
 01011;Q9NZC4;Q8NCE0;Q96QT6;Q8NBB4;Q9H321;Q7L804;O00170;Q96DI7;Q9H8W5;Q14584;Q92466;Q6  
 DD87;Q7L266;Q9UMR1;Q99814;Q9BY41;P39880;Q8IUM7;Q13503;O15198;Q96SC8;Q14585;Q96  
 K83;P84550;P09629;Q9UPW5;Q9P0T4;P56279;Q7Z6Z7;O15015;P53992;P60510;Q14689;P63165;O956  
 44;Q9BXS6;Q6B0B8;Q9P127;P09661;O15084;O75179;Q9NQ55;P55345;P11532;P11387;O43684;Q9979  
 8;Q2TAK8;O43660;Q9Y483;B2RD01;Q14549;P62987;Q14865;Q8N184;Q9NQ4;Q9H2P0;Q9NV56;Q86UL8  
 ;P56524;P42167;Q9BYX4;Q8NFW8;Q13033;O60583;Q8WXU2;O43439;Q9Y3I1;Q13404;P38919;Q14526;  
 Q7RTT5;Q9UNV7;Q96GE5;Q9Y2X0;P13196;P28356;Q8NSD0;O75821;Q7Z6K1;Q9UFB7;O75886;O00257;Q  
 9Y2Y0;O60543;Q9BWC9;Q9BSK0;P28069;Q6NVH7;Q16637;Q9UND3;P14373;Q96S59;A9YTQ3;P23297;Q6  
 AZW8;Q9BXW9;Q9ULW8;P48788;P62308;Q00987;Q13106;O14965;P02511;P10599;Q9Y473;Q14980;Q6N  
 X45;Q93062;Q13363;Q9NS86;P39748;Q9Y4B6;Q8NCP5;Q9UHB4;O43805;Q6ZNH5;Q5T619;P61925;Q9HC  
 H5;P41220;Q9GZ2;Q96SZ4;Q9GZR2;P35244;P07737;Q5SVZ5;Q96GM8;Q7Z2W4;Q8TF68;Q08AN1;Q86XN  
 6;P62753;Q96I24;O14512;O75525;P08397;Q9H6B1;Q9NV9M;Q02577;O76031;Q7Z6E9;P20719;Q96B01  
 ;O75351;Q9NTX7;Q9NS23;O95391;Q8N339;Q8TCN5;Q7Z6B0;P08151;Q9BZF9;P20396;Q9Y2W2;Q13118;  
 Q8TAU0;Q15929;Q8N668;P08621;Q7L5N1;Q8IU81;P02795;Q9P2D0;P48552;Q49AN0;Q5JVG8;Q9NUK0;Q  
 9Y221;Q96ER9;P48539;Q6ZN55;Q9NQS7;Q5VV52;Q9BQ83;Q9NTW7;Q6ZNG0;P17038;Q00403;Q8NEZ5;Q0  
 1130;A6NN14;O15117;Q8TEE9;O60675;Q86VM9;O14802;Q9NQZ2;P15822;Q8NB42;Q15776;Q66K89;O60  
 711;P31948;Q6Q759;Q96PT4;Q8NCK3;Q96B02;O14558;Q8NFH3;Q92547;P52294;Q68DI1;Q6PG37;O152  
 97;Q2NL82;Q3YBR2;Q13105;Q06830;P41161;A0JLT2;P0CG30;P36873;Q13042;P0CG00;A8K0S8;Q9Y25  
 2;P31249;Q42224;P62310;P47928;Q969S8;P02489;P58005;Q9H1B7;Q96IU4;Q9H4W6;Q9UK53;Q9Y2Y1  
 ;P52736;Q9H040;A8MVS1;P50548;Q6VB84;O76064;Q9UBX0;Q9HBM0;Q96MW7;Q9BSW2;Q96L163;P52758;  
 Q9HY6;P13051;Q99576;Q92540;Q92499;Q8NHQ1;Q8IY18;Q9UMS0;Q9BXJ9;Q99549;Q15643;P50748;O  
 60563;Q15398;Q96EY1;Q14693;Q9BXY0;Q8WUY3;Q9Y6M1;Q9H3C7;O43593;Q96K58;Q9UGR2;Q6GPH4;O0  
 0479;Q53H80;B4DX44;Q96G25;Q9Y244;Q8WYQ5;Q96RE9;P12956;P55197;Q96NB1;Q494X3;Q8IY92;Q9P  
 2N6;Q9HAW4;Q13227;Q9HAK2;Q7RTT6;Q9BW19;Q9NY61;O43189;Q96PM9;Q9BU02;Q14119;P17014;P235  
 28;Q9NU63;Q00839;Q9Y2T7;P78346;Q9NZU5;P46379;P13535;Q92618;P55210;Q14498;Q8NEP9;Q9PBQ5  
 2;Q8NAV2;Q96ME7;P0CAP2;O95159;Q9ULM6;Q9C029;Q9UL36;Q93148;Q8TAU3;O43148;Q9UQB3;Q9NPA8  
 ;Q9Y6Y1;P61579;Q86VP6;O94983;Q71F23;Q8IYB9;Q96D70;Q6ZNA1;P20073;Q6NT76;Q6NT04;Q14493;  
 O75461;Q15935;Q15004;O43264;Q7L945;Q6IQ23;P24864;Q7Z3B3;Q9HCS7;Q9Y5P8;Q01105;P09016;Q  
 9UL40;Q01892;P24941;P78412;Q15369;Q15788;Q08945;Q15759;Q9NYV6;O75820;Q9Y5A7;Q96SR6;Q8  
 TDD2;Q9BSJ2;Q5T0J7;P62937;Q1ZZU3;Q9HCI5;Q9H1D9;Q9UNX4;Q13765;O43745;Q5TBC7;O95071;Q9B  
 Q95;Q6UUV7;Q9UBF1;Q9UDW3;P16455;P02533;O75312;Q7Z2E3;Q2M218;Q93074;Q9Y3T9;P36402;Q9H6  
 33;Q8N163;Q15459;Q14929;Q8TD17;P11940;Q14566;P18848;O15304;P11142;Q12959;Q8WVM7;Q0VG9  
 9;Q9NQ31;Q5VZF2;Q9NRM2;Q96EK4;Q8WVK2;P50135;Q9NXZ1;Q96KR7;Q9NTJ3;Q53FT3;Q6P4R8;Q969E4  
 ;Q8IUE0;Q8NG31;Q8N5A5;Q96RE7;Q9Y615;Q9H2K2;O60422;Q96EK7;Q8NEY8;Q96ND8;Q8N1G2;Q9UBD0;  
 Q9Y3A2;Q96GN5;Q9Y3Y2;Q7Z401;Q12830;O00273;Q9BRX2;P06132;Q9UBG7;Q15714;Q8NC51;Q96LW1;Q  
 9Y266;P0CL84;P41102;Q8IU60;O60806;Q6VVB1;Q6EMB2;Q9H8M7;O43763;Q8N7B1;P29372;Q9Y467;O0  
 0233;P52292;P38432;Q99750;O95571;Q8N5Y2;O75150;Q5TB80;Q9Y618;Q6EKJ0;P11802;O95789;Q9U  
 IL8;P61578;O95714;Q5U623;Q13472;Q6P3V2;P68104;P14316;O95243;Q5T6S3;Q15528;P48556;Q015  
 43;Q9H4E7;Q6P1J9;Q15257;Q9NYP3;Q9Y250;P09234;Q2M1V0;P15408;Q92560;Q12906;Q9BVC3;Q9305  
 2;Q99607;P22674;Q8IYL3;P11473;Q9Y534;P17480;Q96DN6;Q8NAP3;Q13761;Q8IY81;Q9P1T7;Q9P255  
 ;Q8TAW3;P35658;Q9UHD9;Q9UJW9;Q5VWX1;Q7Z699;Q12772;Q5T0F9;Q12789;P23025;Q9H3H9;O00534;  
 O94921;Q8WYN3;Q9BTV4;Q5TAP6;Q14511;P62847;Q9Y6H5;Q9UIF7;Q9NS73;P47974;Q8TC56;Q96RJ6;Q  
 96FQ6;Q9Y2A4;P52630;P78371;O14978;Q9H8G1;Q66K41;Q9HBL8;Q9NQP4;A8MWA4;Q7Z5L9;Q9BRX5;Q9  
 NNX9;Q9H0A0;Q6ZN08;P31943;Q12800;Q9Y3C5;Q8IHW2;Q9BX63;Q8IVP9;Q13367;Q8N235;Q69YI7;Q9H  
 O9;P0CJ78;O43316;Q5VTL8;Q8NG50;Q4W5G0;Q6I9Y2;Q05084;A8MUV8;Q5MJ70;O95677;Q9H467;P515  
 04;Q99856;Q9UI95;Q9BSH3;P52434;P58304;Q9BQ70;P35638;Q9NP62;Q99496;O94805;Q3B7T1;P1770  
 6;Q9NXX6;Q8N108;Q3KP31;O15116;Q8NBV4;P18887;O60224;Q6ZMS7;Q99640;Q86WX3;Q96EG3;P0CW00

;Q15561;Q5SVQ8;Q9ULH7;P17098;P82094;Q9BW27;O15160;Q14207;Q96PU4;Q8N3C0;Q92698;Q8NHZ8;Q69383;Q6ZNO1;Q8IX03;Q9BSD3;A8MT69;Q9EY5;O75182;P33992;Q9UJW7;Q5VWP3;P31260;Q03188;Q9UJC5;Q9BWX1;Q5T0B9;O60688;Q9H1A7;Q16600;P17041;Q12904;P14618;P62136;Q9HCK0;Q8N201;Q9UJW3;Q96NG5;Q9UNL4;Q92585;Q9UGY1;Q8N8G2;Q94763;Q9BVL2;Q96CW6;Q9NVV9;Q9Y2S7;Q96JM2;Q6H8Q1;Q92748;O15014;Q15428;Q93050;Q8IZD2;Q9Y5S9;Q9NZQ3;Q86V81;Q9NW38;P11171;Q12873;Q99986;Q60290;Q9UKV3;P10827;O00566;Q9UI26;Q9HBZ2;Q96T21;Q9NTM9;O14746;P0CV99;Q96NG8;Q14684;Q9H7Z6;Q9UIG0;Q9NWZ8;P21675;Q53TQ3;Q96BD5;P14859;Q9UNS2;P56177;Q4LE28;O00231;P51946;Q8IUE1;P15259;P35813;Q9GZP8;Q96AH0;Q14764;Q10586;P80297;Q7RTT4;P0DI81;O75190;O60264;Q9ULX9;O00186;P63272;Q68CJ9;P42677;Q9NXR7;Q5JTC6;Q70IA6;Q14978;A8MSY0;P40337;Q13794;Q15583;Q9NP77;Q9UKY1;P12270;P17036;Q9NRA8;Q68CP9;Q9UBY9;Q9BTC8;Q969L4;O95503;Q5JSS6;P51948;Q9BRP8;P23508;P61236;Q8TBZ5;P48443;Q8N1W2;Q01954;Q13506;Q9Y2H8;Q9H063;P31276;P63146;Q9Y2K1;P24385;Q13360;O00425;O95229;P54253;P19474;Q8NDT2;Q9NWD9;P29401;Q15046;Q8WC3;O15060;P35227;Q10570;Q5T7V8;Q6PIF2;Q9Y281;Q00534;Q16594;Q8WV24;Q14653;Q2M3W8;Q8WVY7;Q86YE8;Q96PT3;Q9BVN2;Q3L8U1;Q9H1J1;P16083;Q9Y2Y4;Q9H7R5;P12004;Q92905;P30281;P06400;Q9H9D4;Q9BVJ6;Q8IXF0;Q7L590;Q6ZLN9;Q13490;Q8NDY6;Q00577;Q15029;Q03938;Q02410;Q8TAZ6;P55347;Q9H2A3;P61573;Q9Y314;Q8N8C0;P35573;O43830;Q9UQL6;P49918;Q9NWS1;Q8WYR1;Q8N9A8;P30876;P78549;O75132;Q9HAH1;Q96S95;Q9UBQ5;Q6ZV50;Q9Y651;O75155;Q9UMX2;O95948;Q6UX04;P50222;P56270;P57678}

6185

Pathogen[ P03363] interacts with 3874 human

partners: {Q1KMD3;A2RRD8;Q9NWX4;Q53FT3;P80294;Q719H9;Q8IZX4;Q96B26;Q86TJ5;Q49AA0;Q86X95;Q61E81;Q96D46;Q6XQN6;Q9Y316;O95376;Q92886;Q16236;Q9BSD3;Q9NQX1;Q16587;O95777;P22681;Q9NPF5;P56179;Q5TGS1;O60832;Q96ST2;Q15654;Q7RTS1;Q9UNN5;Q32P41;P46379;Q3YBR2;Q9UBY9;Q96S94;Q13112;Q9NWF9;Q504Q3;Q9Y6Y0;Q86VE0;O15370;Q15020;Q92547;O75940;P17706;P62913;O75717;P61236;O75179;Q8IXM2;Q9UNQ2;Q86XU0;P05783;Q9NX24;Q8TAK6;O75190;O75410;Q9H816;Q9Y2B5;Q15911;Q9Y5A6;Q9NQ4;Q9NYG5;Q9H160;P80297;P49918;Q9POL1;Q14653;Q96EA4;O95926;Q14146;Q8NB42;Q14978;Q9Y6J0;Q86U70;A6NFF2;P43364;A8MQ14;Q9UNN4;Q53QV2;Q9NR55;Q9Y6H5;Q5VT9;P62314;Q12959;P41227;O75123;Q15699;P51858;Q9C0F3;Q92979;P52630;Q9BQ50;A6NGY1;O95619;P12956;Q9UBC0;Q8NHY6;O95990;O94762;Q16836;Q5T0B9;O75953;Q96QT6;P13682;Q6S96;O75820;Q969F1;Q3KNS6;Q9UGK3;Q8TEE9;Q86Y01;Q9NW38;Q9UFW8;O15266;Q99684;Q96RS0;O14787;P18887;Q06547;Q16342;P31273;O43812;Q9H875;A4D1E1;Q03923;Q32MZ4;Q9BX63;Q15233;Q8IUM7;P43897;Q15528;P52758;Q9NV11;Q9Y5P8;P02533;Q9NVR2;Q9Y535;Q6P9A3;Q99615;Q9UKD1;Q8NCK3;Q68455;Q13490;Q99829;Q6ZMY9;P17535;P35789;O14901;O43395;A8MSY0;O75373;Q9BZZ5;Q9Y252;Q5SVQ8;Q6ZLN17;P98168;Q9GZM2;Q9H8N7;P18848;Q9U1W0;Q8N8G2;Q8TDB6;Q9ULW3;Q16186;O14744;O95751;Q69YH5;Q15834;P08048;Q9H9A7;O75461;Q8IXJ9;Q8TC05;Q14691;O15205;A8MWD9;P09132;Q9N93E1;Q9Z6J9;Q86TC9;Q9BUR4;Q13105;A6NKF2;Q9NWT8;Q9BZD4;Q06787;P35453;Q8IWA3;Q8IWL9;Q8N9Z9;Q8I9PC;Q9NZH5;P29474;P46060;Q96JM7;O75081;Q9NVN8;Q8NFW5;Q8IZT9;Q68DK7;Q9H832;Q01850;Q9BRT2;Q5SVZ6;P0C7T5;P17027;P49716;P0CH99;Q3L8U1;Q9Y6H5;Q13151;Q9UJ98;Q9Y3F4;Q5VUA4;Q6N069;O43493;Q6NWX9;Q9H2D6;Q9NVV4;P46939;Q9NSD4;Q03989;Q13595;Q16082;Q8N9F8;Q13042;Q9HD40;O14907;Q96RE7;Q9Y4Y9;Q86V71;Q6IQ21;Q9BXP5;Q16649;P49454;Q96EP1;Q8WUA4;Q6VMQ6;Q14765;Q9H201;Q12830;Q5RKY6;Q8NFV8;Q8N5U6;Q53GS7;O95049;Q6P0N0;Q9BZE2;Q96IY1;Q9H5Y2;Q7Z3B4;Q99592;Q8N1G0;Q92973;Q9GZV4;P10828;Q9H963;Q92917;P51965;Q9UJQ4;P63162;Q9Y4Z0;Q99909;P62750;Q15366;Q969J2;Q9BSH3;Q9Y4Z2;Q13427;Q9Y5B6;Q8N988;Q96RT1;Q4W5G0;Q9NSI8;Q8WWL7;Q9BVJ6;O00273;Q07666;Q96B36;Q9UHF7;P29374;Q6P1K2;Q8WTT2;P23396;Q9UL42;Q9H825;Q8N2I2;Q9UHL9;Q96LW1;P28698;Q53ET0;Q8IZC7;O60543;O75368;Q96IE7;Q92985;Q9H4D5;P42677;Q9UL16;Q8NE65;Q9BUP3;Q9UGK8;P19338;Q8N0X2;Q96AQ7;Q96N22;Q5JTC6;Q9NQZ8;P62380;P62136;Q9Y2W2;O95948;Q9NYP9;Q9NXZ1;P49419;Q8NF91;O15287;Q96J01;Q6DD87;Q9GZS3;Q9UHP9;Q9NWH9;Q95GR2;P19622;P08865;P23246;Q99623;P29083;Q7Z7K6;P29084;Q13835;Q8TAQ5;Q9GZU8;Q96NU1;Q96T58;P27694;P62937;Q86UA1;Q92766;P0CL84;Q03924;Q6ZNA1;O43933;Q9UGN5;O94818;Q6ZYL4;Q9UPV9;Q9HAW4;O15355;Q9GZY1;Q9UNH7;P47902;Q9BRU9;Q96S65;P35711;Q13487;Q9NZR4;Q9H8E8;Q9P2I0;Q96I24;Q9BXM0;Q96RJ6;P54198;Q14929;Q8NDY6;Q9Y5B0;Q9UH92;P78415;Q9Y5K5;Q7Z333;Q6XYB7;O15527;P0CJ87;Q9H3S7;Q9NQX6;Q86YD1;Q9NYP3;P0CJ88;P38919;Q15370;Q9BYU1;P09067;P12525;P55771;Q9BZR9;Q7Z340;Q14938;B4DU55;Q9H091;P41223;Q8N859;Q92925;Q19AV6;Q9NWZ5;P0DJD3;Q15466;O75360;P41252;Q8TF42;Q9Y5J3;Q96DF8;O14978;Q14CS0;Q9Y6X0;Q6ZNO6;Q96GA3;Q04323;Q9Y6D9;Q4LE28;P63167;P54727;Q96EU6;P46087;Q6ZMZ3;P53801;Q7L804;Q86W11;Q9ULX3;P62847;Q9Y2X3;Q9UNW9;Q8NA42;Q14865;Q9UBB6;Q13503;O15360;Q9NZL3;P06744;O60684;Q9H299;Q9GZL7;Q6EMB2;Q6P387;Q9UNH5;P31274;Q14145;Q9Y2D9;Q8NAP3;P17021;Q9GZM3;Q10570;O14920;P17010;Q08J23;P62714;Q15050;Q8IVP9;Q5SRE5;O43296;O14529;Q8WWQ0;Q04206;Q15853;O14771;Q16222;Q9H4X1;Q9BQ95;Q8NAV2;Q99598;Q9NRA8;Q7Z591;O95780;O14896;P27540;Q66K74;Q7RTS9;Q86VK4;O60356;P49848;P02795;Q9Y383;Q86WB0;Q8WYR1;A6NKF5;P17676;P12270;P52738;Q9H081;O75683;Q92575;Q9BXR0;Q5T5M9;P06454;O75643;Q9NUA8;Q6NSZ9;Q5C9Z4;Q8NC51;Q12901;P26447;O60481;P18146;Q5JUK2;Q13360;P49116;Q969Q6;Q0VDE8;O00712;Q969U7;Q9H981;O95628;Q9ULG1;Q9HCU9;Q8NG50;Q9BX66;P0CJ86;P19388;O95453;Q9H9P5;P36873;Q2VIQ3;Q9BVT8;Q6ECI4;Q9UBX2;Q9UHB4;Q12972;Q6P2D0;O75764;P24864;Q8NEK5;Q02386;P51784;O15524;Q9NQ55;Q13367;Q13148;Q5VT06;Q96JS3;Q96JC4;Q8IXQ6;O60315;Q6P1K8;Q12872;Q92674;P83916;Q13435;P33316;Q8NFH4;Q8WZ33;O95411;Q6STE5;Q02930;Q9UHB7;Q5PRF9;Q9BXW9;O95391;O60224;Q9P0V3;Q00597;Q8NG57;Q99576;Q969X6;Q13428;O14682;Q8TAF3;Q9UND3;Q9BSV6;P98169;Q9UMS0;O75391;P13984;P02545;Q7Z3Z4;Q8N9A8;Q9P2J8;Q9NZJ4;Q15021;Q86UP3;P49321;Q9UJW8;Q9Y468;Q9H175;Q6NT04;Q9UP83;P35227;O95400;P52597;Q5U5Q3;Q9C000;Q7Z353;O60563;Q9HAU4;Q96T92;Q9NXX6;Q9H321;P0C931;Q99676;Q3ZCT1;P21127;Q92900;Q6V9R5;Q9BT6;Q6HR3;Q9NWL3;O95229;Q9H9Q2;Q9Y4W2;O60291;P48539;Q99626;Q6GQQ9;Q14582;Q9NRL2;Q13227;P53567;P48382;Q8N5D0;Q9C0A1;Q96DE5;Q14526;P05388;A6NHJ4;Q9UMS5;Q8N7R0;Q58F21;O60535;Q9HAV4;Q9Y4R8;Q9UN79;Q9H9Y6;P58004;Q9Y2R2;Q96MX3;Q9NZU5;Q9BYV9;Q9HB71;P35579;Q8IU81;P14373;Q13516;Q9UHI6;Q15554;Q9UJ04;Q6NZY4;Q96IU4;O75340;Q14781;Q9NY87;Q9H707;P56177;Q2KHR2;Q93C1V8;Q96NG8;Q9NVV9;Q9UMX1;P36402;P36578;O75607;Q5TID7;Q9UC06;Q78424;Q96SE7;Q9Y3C5;P00122;O94811;Q96HW7;A2A288;P12524;Q96IZ0;Q7L5Y5;Q96T49;Q330K2;Q6Y4P4;P49606;O75886;Q9BZQ8;P0CB48;P54259;Q96LW7;Q9BRR0;Q8IUE1;P78412;Q99543;P0DI81;P08151;Q7L3S4;Q8NEZ5;Q9H5I1;P0CB47;Q9H7D7;P55199;Q9H7S9;Q96K62;P86452;P99999;Q96L92;Q9BY41;Q5T7V8;Q9NS3

9;Q9BTE3;P11387;P53539;Q99742;P07316;O95059;Q96JF6;Q9UKV3;Q14590;Q96MU7;P60673;Q969E4;Q9H5F2;Q9H4L7;P62753;Q7Z2Z1;O15078;Q9UHV9;Q92539;Q7L190;Q99848;O94992;Q86UE3;Q9BRU2;P62312;Q8WX92;Q96BK5;P17098;P62140;Q9BTP7;Q6IA86;P24863;Q69YI7;Q9GZP8;Q9H869;Q08AN1;Q5TBBL;Q14397;Q8TBZ0;P31267;Q86V48;Q9UMY1;Q15928;Q9UHP3;Q9NWW0;Q14863;Q8WV37;Q96JZ2;Q7Z398;O43365;Q68EA5;Q96AB6;Q9H765;Q86WV1;O15015;Q9UKN5;Q96SR6;P62633;Q9ULM2;P61201;Q02447;P08651;P62081;Q96ND8;O43805;Q08170;Q8N3J9;Q8UN187;Q9ULJ3;Q15022;Q13362;Q06546;Q15562;Q9Y324;A8MTQ0;Q13952;O60306;Q9Y3D0;Q6P2D8;P50539;O95232;Q6PG37;Q9Y2K5;Q9BV90;P58340;O75618;Q96MT3;P30876;Q0VG99;P30279;Q13228;A9QM74;Q93075;A9UHW6;Q96LA8;P0CG30;Q9Y2M0;Q99575;O43167;Q6ZR52;Q14331;Q09028;P13010;Q02556;Q92831;Q03933;Q8WVP5;Q8WVC0;Q86WQ0;Q96EK4;Q96RL1;P25963;Q8IX01;O60422;Q9HAN9;Q9UKW6;P51991;Q9NQW6;Q96LI6;Q15291;P12757;Q9HCS7;O95478;P62508;Q6ZU65;P14651;Q15744;Q5EBL2;Q01831;P20248;Q9H9Y2;O75817;P0CG00;Q9HC52;Q8NEM7;Q96NJ6;P62328;Q86VF2;Q8WW12;P25205;Q03112;Q13888;Q9UEG4;O60663;Q8N998;Q9NS37;Q6UX04;O60437;O00213;Q14258;Q96QC0;Q9HAH1;Q9BXL5;Q6UWZ7;Q96RY5;Q8IYI6;Q9UQF2;P41218;Q8N7U7;Q9Y606;Q15014;O43347;Q9BWW7;O95347;P56279;Q75QN2;Q6NX49;P18847;Q8NFH3;P45973;Q13794;Q99929;P14866;Q05048;Q9Y2P0;Q9UKX2;Q96BW1;Q9HD15;Q15170;Q86XI2;Q5U623;Q075346;P13640;Q5VZK9;O60281;Q13356;Q15024;Q9HBT8;Q10586;Q15393;P23610;Q9UPP2;Q9NRF9;Q6ZV50;O75132;O43763;Q92879;Q14980;Q13111;Q9NVU7;P37275;Q9Y266;O75604;Q9GZQ3;Q06330;P32780;Q969W8;Q99547;Q9BRX5;Q96AB3;O14980;Q8TDD2;Q86US8;Q8TAQ2;P20700;Q8IYF1;P0CJ89;Q16531;Q3KINV8;Q96GM8;P56182;Q8NDW4;Q5TKA1;Q8TWA0;Q9NWZ8;Q9Y4A8;Q92759;P35637;P28356;Q12769;O00410;O60303;O75533;Q6MZP7;Q8WV24;P23760;P19387;Q13283;Q2LD37;Q6ZRS2;Q9BU19;Q9UQ87;Q9ULT8;P42167;O15111;Q9Y3B2;P09086;Q9H2P0;Q9NX65;P17947;Q7RTV3;Q8N720;Q64ET8;O15379;Q9H2F5;P23490;Q9Y678;Q9H0G5;Q01892;P78413;Q9GZR2;O15304;Q96BP3;O95600;Q99750;Q96LX8;Q9H2T7;P50135;Q69383;Q6NXT1;Q9NVU0;Q9NR46;Q6UW56;Q6P2E9;Q13618;Q9UHC1;O00505;Q9UHB9;P51532;Q99856;Q96AH0;P61218;Q16514;Q9BV86;P17024;Q15929;P20719;O95155;P09651;Q9NX01;Q6ZQV5;Q7RTS3;Q9BWG4;Q01082;P28347;Q14738;O95684;Q8TE02;O95257;Q56P03;P31271;P08579;Q0D2K3;P06733;Q9NZ63;Q9H0N5;Q7Z2W4;Q9P243;Q494X3;Q15459;Q8IZL8;P82970;Q9H1D9;Q9UJW0;Q7Z6E9;Q9BQG0;Q3SXZ3;Q969S8;Q9H8M7;Q9BZK7;Q8N1G2;Q9NYB0;Q9HBH7;Q8IY67;Q8NHW3;Q9NX70;Q9Y253;Q96BP2;Q9ULW0;Q86SE9;O43439;O75818;Q96BU1;Q9NUU7;Q8N8B7;P04198;Q96MR9;P61583;P18850;Q9H2W2;Q9H6Z9;P51946;Q8NCP5;Q9H7E2;Q70Z53;Q13045;Q9BXL8;Q6IPX3;Q5HYK9;Q92597;Q5T1R4;Q8N9U0;Q9UL59;P25490;Q9Y5Q9;Q6EKJ0;O43264;Q01826;Q99733;Q9NY12;Q12988;P53805;Q8IYH5;Q8TCI5;Q9NUL3;O95201;O14558;Q96HZ4;Q9UKI9;Q5T4T6;Q99550;Q9P215;Q8NHQ1;O60765;Q8NBT2;Q13625;Q5T5D7;Q96BT7;O75526;Q7Z4V5;P17481;Q16384;Q9Y6X8;Q8NDQ6;Q9HCL3;Q7RTV0;P53041;Q9UBL3;Q8N140;Q9UBQ5;Q5VUG0;O14497;P31946;Q52LR7;Q9BWD1;O75376;O60447;O60671;Q96GN5;Q8TCN5;Q5JTD0;Q9P2D0;O60907;Q9UJC5;P29558;Q9H6U6;Q9UPR3;Q8N883;Q8N9N5;Q16520;Q53EQ6;Q9NTK5;O00425;Q9UN36;Q16629;Q01543;Q7Z589;P42704;Q6PJG2;Q15398;Q9Y2P8;O94986;Q9Y462;E7ETH6;Q9HCD5;Q15910;P15621;Q8NBB4;Q6P9A1;Q7Z6K1;Q15545;Q9UMX0;O60902;Q9Y3A5;Q9NXT7;A6NF01;Q96FI4;Q96P70;P17030;Q6NT89;Q92889;Q9UC07;Q8ND76;Q99607;Q9UBS3;Q96I25;Q8N8C0;Q9C0J9;O95905;Q13568;Q13769;Q9H3M7;Q9BZE4;P35659;P31949;Q9ULW8;Q9Y657;Q08AG5;Q9Y3Y2;Q92791;O00567;P62318;P78317;Q9NPC3;O75884;P10768;Q0D2J5;Q15776;Q9Y294;Q16254;Q9UBF1;P06132;Q8NEH6;P11474;P56545;P16220;A6NGD5;B2CW77;Q9Y2L8;Q96HQ0;Q9H1E3;Q8WYA6;Q9UHK0;P35251;Q96MU6;Q9Y3C1;Q9Y2D1;Q86WX3;P78414;Q9Y295;Q68DI1;P23025;Q9Y605;Q5JVG2;Q5SXM1;Q8N196;Q86WV5;Q9607;Q9NPG3;Q8N8D1;Q8NHZ8;Q9UBF6;Q8WV44;Q9UDV7;O94864;A8MTY0;Q3KP31;Q9H307;Q13033;P17031;Q9NXV2;Q9H7B2;Q96QU4;Q14152;Q13342;Q53EL6;Q8WWY6;Q8N680;P13051;Q96JK9;Q5JT82;Q9NV31;O43316;Q9M168;Q9Y6K9;Q9BT78;Q8NCN2;Q02241;Q13901;O95602;Q16621;Q9UJ03;P58304;Q3B7T1;Q99612;Q9P0U4;Q8N141;Q7Z713;Q9UDY4;Q9NPB6;Q02080;Q86V15;Q9UKV8;Q9UJY1;Q8N2Z9;Q5BKY1;Q1ZZU3;Q9P258;Q9UJX3;Q6ZN55;Q5VTR2;P80217;Q96K30;Q8N488;Q8TA86;Q9NW07;Q66K89;Q9BRX9;Q8N1K5;Q8IVW6;Q4LE39;P57077;P24928;Q9Y2D8;Q96QR8;Q9Y3M2;Q13536;Q8N2G8;Q9UL41;Q15631;P98171;O75437;P19419;Q9C0F0;O94983;Q16630;A8CG34;Q76KX8;Q9UQL6;Q04726;O75475;Q96DC7;Q9UL40;Q9NQ33;Q96SC8;Q4G0J3;P14921;P54252;O75164;Q9NYF0;Q5EBL4;Q9UER7;P35548;Q9HBZ2;Q8IWL8;Q96D70;O15151;Q15427;P61580;Q99496;Q8TEK3;Q9C099;Q9H1Z4;Q53HL2;Q156A1;Q9BW71;Q460N3;P07741;Q9Y613;Q9UPN9;P0DI83;O43422;Q5VU43;P61289;O00268;Q96JI7;Q9BVC3;Q9Y6K1;Q15532;P50548;P62304;Q96IS3;Q9NZZ3;Q8N9Z0;O43679;Q8TC56;Q6FI81;P04732;O14593;Q9BXS6;Q9Y467;Q9Y603;O75530;Q6NUN9;Q9UK11;P49005;P78395;Q8WUW5;Q96MB7;Q9HB65;Q3KQV3;P11172;Q9UL03;Q9UKX7;O15069;O15105;Q8IXK0;Q96PQ6;Q15306;Q01130;Q0VD86;P50453;Q8N782;Q8TD10;Q9H410;Q6P209;Q5TYW1;O00267;O14746;Q9Y2A4;Q8IWX8;P24941;P78411;P78411;Q99417;Q96JN0;Q96GC6;Q9NP98;Q9H467;P50748;Q6NT76;Q8N5L8;Q15797;Q7RTT5;Q8TF01;P04156;Q9C0E2;O95073;Q9UM63;Q9GZS1;Q969V6;Q86U44;Q14181;Q9Y6M1;Q8IYW5;P32243;Q9HCK0;Q9NPC7;Q3ZCQ8;O15047;Q9Y2K1;P09234;O14867;O14948;O15446;O60479;Q96EG3;Q6ZMV8;Q6VVB1;Q9NPJ4;P35244;P36508;P63146;Q6BEB4;Q7Z3K6;O95231;O60381;Q9Y2H8;Q9H5P4;Q04724;Q9BSI4;Q9NQ50;P51522;Q9UJX5;Q15596;P49756;O43309;Q13765;Q9BP22;Q14839;Q8N336;Q8N693;Q5TD94;P16415;Q9HCE1;Q9HCS4;P43268;Q86UE4;Q9UBU9;Q9NSJ1;Q9BX82;Q9UJW7;Q14588;Q99828;P55347;P41208;P17028;O75312;O43248;Q8NEA6;Q49MG5;E9P GG2;Q9Y3Y4;Q8IZ26;Q96N20;P51161;O75506;P11940;Q96L21;Q9Y2X9;Q9UBK9;Q96KQ4;Q86U42;Q9NR56;Q8WWY3;P25815;Q15369;Q13526;O14893;Q13601;P51826;P49639;Q5H9I0;O75791;P19883;Q9HC44;Q14686;Q8IZD4;P59923;Q16695;P15927;Q8TBK2;Q99471;Q8IXW5;Q5TBC7;P23508;Q96MM3;P17041;Q9NWS9;Q8WXS3;O95476;Q8N127;Q9BWF3;Q32P51;Q9Y5R6;P23497;P30260;P49427;A6NLC8;Q9UGY1;Q8N1N5;P06400;Q9HAP2;P40337;Q15327;A1L020;P57086;P48378;Q8IUF8;Q9HXC3;Q8WU90;Q14689;P61575;Q15633;Q86YE8;Q96H20;Q13185;Q96BV0;Q96NT1;Q9BUG6;Q9Y697;Q8WUY3;Q3SY89;Q15652;Q96FV9;P17483;P01106;Q6ZNH5;Q9NS26;P05787;Q5JXB2;Q9Y4X4;Q8N1L9;P0CG24;Q8NI51;Q6UN15;Q7L5A3;Q9UQ80;Q96I27;Q96T21;O14717;Q9NZM8;Q9H2K2;Q14593;Q96BF6;P10144;Q9H4S2;Q9NPD3;Q99743;P17019;Q07157;A6H8Y1;O75691;Q7Z7K2;B4DXR9;A8K0S8;Q04727;Q96KF2;Q14807;O00409;Q92620;Q9H0S4;Q7KZF4;Q12986;Q9BRP8;P06748;Q9H5H4;O00629;O94913;Q9P031;Q05086;Q8WYK2;P28749;P41002;Q9UNY5;P27815;Q9HD47;O94875;Q63HM1;Q9H489;A6NDR6;Q9GZW5;O43189;P20073;P0CJ90;Q92890;B1APH4;Q9HAF1;O43447;Q9UNY4;P35869;O95260;P17275;Q93052;P42226;Q96AP0;Q9UJX6;P13349;Q96PK6;O95571;Q8IXH7;P17509;P31249;Q99729;Q3B726;Q504T8;Q9C005;P39687;Q96PU8;P49711;P57772;P50995;Q96RK1;Q9NTW7;Q9BQ67;Q9P2N5;Q92797;Q7L2R6;P18615;O94900;Q08495;O43818;P61326;P56645;O75150;Q8TBC5;Q96TC7;A6NK39;P54845;Q8IWX8;P81274;Q5FBB7;Q9BYE0;P487

88;Q9UK39;Q96IF1;Q9UNX4;Q15773;Q9UM11;Q6ZNA4;P0DI82;P52657;Q9NZV7;Q8N668;P35754;Q9UK10;P61244;O00488;Q8NCA9;O00321;P07199;P33992;Q9P0M2;P62306;P05198;Q86VZ6;P46100;O15116;Q7KZ85;O60296;Q9UN30;P14653;Q05519;O95707;Q9UNL4;P50221;Q13895;Q8IWC1;P10588;O94850;Q13127;Q96PT4;P35269;Q8IY57;Q9BZE3;Q9H0W9;Q9Y2Y9;Q9C086;P11473;Q8NEY8;Q53G26;Q16666;O75792;P50991;Q8N3Z6;Q9BS18;Q86UA6;P52272;A6NNF4;Q07021;P54105;Q13155;P40425;Q3YBM2;P6ZVD7;P83369;Q96BD5;Q9C0G0;Q13495;Q99608;Q9UJX4;Q6ZN17;Q7Z6Z7;Q96QD9;P0C7X5;Q17029;Q9BXN6;Q15029;Q9Y3Q8;Q9NX07;Q9H633;O60264;Q15287;P61088;Q12800;Q15435;P25791;O75351;Q9BQI6;Q9UPN7;Q9H1A7;Q9UM07;Q96BR6;P57678;Q6P1L6;Q5BKZ1;A6NK53;Q6IV72;Q9BTL3;Q9BQA1;C9JF40;P51786;Q8TF45;P30304;Q9H320;P10072;P29372;B3EWF7;Q8NEU8;O76021;Q96QF7;Q12962;Q8IWX3;Q8N684;Q9BXF3;Q9NZN9;O75400;Q9Y6X2;Q03936;Q9BZF9;Q9H9F9;Q9NQ03;Q5VV67;Q6NZ36;O43524;Q03252;O14599;Q56P42;P15923;Q96RE9;O60287;Q9UGP4;Q6ZN19;P15336;O60885;Q15326;Q8NDN9;Q9UD57;Q13951;P63104;Q2M1K9;Q6PGP7;Q96T23;Q9H305;Q9Y3B4;Q9P2T0;Q14684;P17023;Q14690;Q86T29;Q9UK58;Q00534;P20749;Q6RSH7;Q9UKA2;Q5EE01;Q9HD36;Q13867;Q9ULM6;Q00403;Q8NAF0;Q96DT7;P61578;Q13609;Q15937;Q92560;Q9NRR5;O15499;Q8TAT6;Q15424;O15117;Q8NEF9;Q15653;Q8TE85;Q9ULU4;Q9BXY0;Q9HB75;P0CL85;Q9P1T7;Q96P71;P55212;Q9BWJ5;O75446;Q9NRG9;Q8NCR6;Q92904;P32519;P15822;Q14140;Q07352;P04053;Q9H112;P48552;Q9Y3I1;Q9UBU8;Q8IZU1;P0C7V5;Q9BSF8;Q9Y333;Q8WY36;Q9H0U9;Q14562;O43593;A8MUZ8;Q92832;Q2M1V0;Q05066;Q8N228;Q9NVM4;Q9BSU3;Q8N7G0;Q8N6M9;Q2VY69;P62841;Q9Y5Z7;P62316;Q8WXI9;Q8WUM0;P61457;Q13242;Q5JSS6;Q9BVL2;Q96Q83;Q96QU8;Q96JM2;Q96J87;A6NEJ1;Q99549;Q9UBP6;Q99708;O43830;Q8TC84;Q99567;Q14602;Q9BTC8;O75529;O95218;P10155;Q96JM3;C9JN71;Q08050;Q96LW9;P13378;Q92688;Q9HCU8;Q99457;Q9NSA3;Q8IYB9;P20585;P07320;Q14669;P0CJ85;Q8IY85;P11831;Q8TDR4;Q8WYN3;P29373;O15226;P54136;Q8TF39;Q9BS31;Q4L180;Q9NY61;Q9Y3V2;Q13129;Q9NX46;Q9HCK8;Q8N972;P84101;Q96MA1;P46937;Q7L266;Q96A56;Q14872;Q8N3S3;Q16576;P56693;Q9NNX9;Q8WUQ7;Q13426;P28702;Q9BPY8;Q8IYB3;Q86XK3;Q7Z699;Q13416;Q9NUL7;Q96FX2;Q9NWA0;Q8N7B1;Q96R06;Q9BYN7;P20264;P28069;Q8IXQ5;P61960;Q96N58;Q9ULZ0;Q9UI36;O60583;O96019;Q9H4T2;Q49AN0;Q6PI26;Q9UDW3;P14859;Q9P127;P28358;O43809;Q9BUE0;Q9ULZ2;Q9NVX2;Q14119;Q53T94;O43684;O95067;Q8NB91;Q6ZNG2;O96020;Q8N393;P63165;Q00444;P56915;P38159;Q12906;P18583;Q9NSI6;Q8N5P1;P57076;P52737;Q6ULP2;Q00653;Q14999;Q15544;Q96T76;Q9Y5J1;Q96AE4;P11308;Q9BY77;P08107;Q96IR2;Q9UPG8;Q9BSM1;Q8N8Z8;A8MZ59;Q8TF20;Q03111;Q6PIF2;Q92841;Q9ULD5;P26368;Q9NRG4;Q3SYG4;P42772;Q5XKL5;Q659A1;Q8IX15;O95238;Q9H7N4;P81877;Q13415;P62877;Q9GZU2;Q9GZZ0;Q96FA3;O75030;Q96KN3;Q9Y5B9;P08251;Q86VN1;Q17RP2;P46063;Q9GZT3;Q6K0P9;Q96PU5;Q8TAD1;Q92945;Q96BN2;Q99627;P51504;P17480;P34932;Q9Y250;Q9NZ81;Q6P1J9;Q9BQ15;Q9BQS6;P21506;Q6ZN32;Q14241;Q8WW59;O75113;Q8N5F7;P24278;Q9Y3C4;Q9HBT7;Q8LW36;Q12874;Q8IYN2;Q15717;Q8IY81;Q8WUN7;Q9Y2M5;Q9GZV5;Q9BXW6;Q14814;Q8N6T7;Q13156;Q9UPN6;A6NJT0;Q9NZC4;P20962;P61571;P54278;P49450;Q6VB84;P78545;P31943;Q9P255;Q13506;Q9NZI8;Q08999;Q9BRG1;Q86WP2;O43172;P05423;Q9NYV6;Q9P0J0;Q9NR22;Q14549;Q9UK99;Q9NWX8;Q9BX46;Q32MQ0;POCG13;Q9BW66;P17039;P62324;O95721;Q8IXT2;Q6PF04;Q8TAF7;Q96H40;Q9H2G4;P31749;Q92830;Q6T4R5;O15318;Q5VIY5;Q9UDV6;Q9UUK3;Q5JNZ3;Q9NZI6;Q86WZ6;Q14511;Q9BQ87;Q7Z2E3;Q96C28;Q96E14;P17032;P17096;Q9P1Z2;Q9H808;Q8NB12;Q9ULR0;O14979;P54274;Q9C0C2;Q8IZ20;Q9BXX1;Q96PJ3;Q96NM4;Q9H609;P55209;Q13489;Q9UJU3;P14316;Q96EK7;P51003;Q14527;P32242;Q9H3P2;Q9UHR5;P18846;Q9BVM5;Q01094;Q8WYA1;Q8NA77;Q9UIF9;Q96JY0;Q3T8J9;P35226;P16333;Q86WI3;Q9Y5R5;Q6PI48;Q9NQS7;Q8TAE8;Q8NDF8;O75444;Q8N1G1;A6NDX5;O00148;Q9NXT0;Q9UKV0;Q9Y3D8;P06746;P43487;Q9NVC6;P27797;P14652;O14709;O75505;Q6NX45;Q9NP08;Q99741;Q9HC62;Q9HBL8;Q13472;P04731;Q6ZNB5;Q5VSL9;POCG29;Q8IY51;P61925;Q5JVS0;P11532;Q86VY4;Q969G3;O00327;O43186;Q9H4Z2;Q9H668;Q9BWH6;P51814;Q02410;O94763;Q7Z4H9;Q6PCD5;Q71F56;Q9BSK1;Q9UIF8;O15525;Q9NVX0;Q6H8Q1;O60688;Q86UW9;Q15637;P38646;P31260;Q13123;P19474;Q9BSW2;Q9NP64;Q96DE0;Q5VWX1;Q9NQG5;Q7L5N1;Q5TCQ9;Q96LT9;Q13310;Q16670;P52736;O75155;Q86T82;A6NMT0;Q8WVY7;Q96ST3;Q9HBD4;O60318;O76075;Q9BPU9;P0C1Z6;Q6TGC4;Q9UHQ1;Q7Z5Q5;Q13395;Q5CZA5;Q8N7M2;P78396;Q9UH90;O00512;Q7Z7C8;Q5T230;Q06416;Q96AQ6;O43541;Q14749;Q9UGR2;Q9Y6Q3;Q7RTU0;Q96EB1;P17022;O60870;Q96FX7;Q9BZV1;Q6B0B8;Q14966;Q96E16;Q8N5A5;Q9NP11;O75381;Q8TEX9;P17036;Q9BWL1;Q8TD86;Q9NPE3;Q13243;Q9ULH7;Q14320;Q63HK3;Q92870;Q15004;Q9NSP4;P17861;Q4G112;Q14919;Q9H147;Q9H211;Q5VVH5;Q9Y3M9;Q8WVM7;P56537;Q96RN5;Q8IYD8;O95931;Q8WXD5;Q5MJ70;Q86UP8;O96006;Q86V81;P54277;Q8NFG4;Q9Y2N7;P41134;Q9BQA5;Q99504;Q9UHV7;P52744;P22087;P11171;Q7Z3B3;Q96KG9;Q9UNS1;Q96SK3;Q8IZ40;Q2M218;A0JLT2;O75586;P10412;P20265;Q9H040;Q9HAU5;Q15796;O95983;Q15723;P07910;P31268;Q9H9L3;Q6XD76;Q15270;P57081;Q9NWB1;Q9UKL3;Q8NAV1;Q8IZU0;Q5TAP6;Q9NUW8;Q8N108;Q9NPJ8;P57721;P84022;Q05084;Q9HBM1;Q5UIP0;A0AVK6;Q7L5Y6;Q01167;P17987;Q7L0Y3;Q96C00;Q8WXC3;Q9H9E1;A6NCL1;P04406;Q9NZU7;P31314;Q6PCB5;Q8N5J4;O15265;Q13620;P98170;Q7Z6R9;Q9Y2L1;Q9H6F5;Q6U7Q0;Q96PE6;Q16656;Q8N2M8;P41161;Q8N895;Q8N163;O75934;Q92782;Q9BQ83;P49750;P48634;O00204;Q9UKT4;O95163;Q68CJ9;Q5T619;O94916;Q86UD0;Q8TCY9;Q9NZI7;Q9BRH9;Q9HCC6;Q8IVC4;Q8WW01;O95271;P31942;Q7RRT3;Q7Z465;Q9UKY1;Q8NI08;P47928;O75564;P10244;Q9BFX3;Q8TF68;Q9NZI5;Q6ZN57;O96004;Q9H1A4;Q96HA1;Q9H2Z4;P26358;A6NLJ0;P24522;Q9Y618;Q8IXF0;Q92499;P49336;Q9UI95;Q00056;P31948;P39019;Q96AY2;P49792;Q9H9Z2;O43290;Q96N77;Q14011;Q9H788;Q86SG2;P35638;Q86U86;Q15542;Q96PM5;Q96E24;Q15742;Q9H9L7;Q969H0;Q12796;O94805;Q8TDY2;Q9UIF7;P10914;O14929;Q674X7;Q13573;Q6QNY1;Q6ZNG0;P52298;Q2V2M9;Q13838;Q86XN6;Q9C035;O43148;Q9Y2G7;P35658;Q6ZN08;P54253;Q6P9B9;Q9UHX1;Q14137;Q92826;Q02040;O00566;Q96IT1;P57075;Q92618;Q9Y615;Q96NS1;O00479;P08621;Q6ISB3;Q9BYK8;Q03188;Q2NL82;P55265;Q8NG31;O00470;Q6P2H3;Q6IN85;P49789;Q08378;Q14106;Q9NPA8;Q5TAB7;Q8WXU2;P46777;Q05925;Q9H840;Q96G21;Q9NRR4;Q15583;Q9H9Q4;Q9NYF8;Q06732;P59047;P62987;Q9UNS2;P57055;P35398;Q9BQW3;Q9Y2Z0;Q13257;Q9H0M5;O75925;P0C860;A6NJ64;Q86UU0;Q14209;Q9Y6P5;O95243;Q92600;Q5QJBE6;Q5XKR4;Q8NCD3;Q9Y283;P51114;P43243;Q14974;Q92664;Q8NEP9;Q96S95;P17025;P23528;Q9BWT1;Q969T4;Q7Z3I7;P50549;Q92966;Q33E94;Q9H582;Q9UK13;Q8WX93;P55198;P46108;Q14592;Q8ND90;P15407;Q96CX3;Q9UPS6;P51508;P22415;Q6ZWL1;Q8N184;Q9H503;P20290;P61758;O00287;A6NFQ7;P63279;Q9NVH2;P54821;Q96NK8;Q6ZSB9;Q9H008;Q8N7K0;A9YTQ3;P0CB33;Q96EZ8;Q9Y3T9;Q9BUY5;Q9H7R0;Q9BV57;Q14591;Q6UUV9;Q6NZI2;Q9HCE5;Q12905;Q13547;P60510;Q86UQ0;P23750;Q14584;Q9NUQ6;Q9Y2G2;Q9BS34;Q13868;Q00994;O43379;Q8N8L2;Q9NP87;Q92750;Q96SL8;Q9P2K5;Q9ULV3;Q9UM82;Q9BY27;Q9Y3Z3;O43542;O75694;Q14674;Q9UDY2;Q9H3F6;Q96T37;Q9Y4P8;Q96NB1;Q9NUX5;Q8WYR4;Q8N

CU7;Q9UKK6;P49790;O43396;A8MUV8;P08729;Q9HB31;P78560;Q9Y2A0;P22626;P19838;Q9BQ65;Q76L83;Q8IX06;Q7Z3K3;Q8TEV9;O95071;Q7L9L4;O76031;Q5T0J7;Q99814;Q71F23;Q6NSW7;Q9Y5L0;Q14129;P61572;Q9HB19;P83876;Q8N0Z6;Q6PJP8;Q6ZMW2;Q8IY92;Q93074;O00186;O43345;Q6RFH8;Q96SW2;Q96S55;A8MV65;Q9UBS8;P41220;Q8TAK5;Q96SZ4;Q86UQ8;Q9UJA5;Q8IY22;Q96EY5;Q86XK2;Q02833;P09016;Q9Y692;Q9BYG5;P51808;P53999;O00422;Q029RF7;Q92793;Q86Y25;P05114;Q5TAX3;Q16633;O60812;P50402;B4DX44;P57071;O75154;O05971;P82979;Q9BS8;Q15365;P0CW71;Q9C0H6;P54725;Q9BXU7;Q7Z614;Q15651;Q9NS23;Q6ZNG1;Q01954;Q15697;Q15185;P31276;Q16533;Q9H1B7;D6R6H6;P14317;Q6ZN79;O95125;Q9H1K1;Q68CQ4;P61574;O75448;P40855;Q6ZN28;P26599;Q8N823;Q9H0H0;Q7RTT4;P62487;P28289;Q15386;O60936;Q6ZSS3;Q9UPV0;Q8NC26;P57740;P50222;Q9UI56;O60869;Q9BYG3;Q92748;Q96HA8;Q9UBE0;P24385;Q13469;Q99638;Q15361;P21675;Q9NR48;P60228;Q13829;Q14585;O14646;P33076;Q14CW9;P52740;Q92988;Q91103;Q6I9Y2;Q13023;Q8IWI9;P51523;O96028;Q9BWX5;P23193;Q9UMR2;Q14587;Q9H4B6;Q2TAK8;Q01201;P56270;O14862;Q969P5;Q92466;Q9BXT1;Q9NPA5;P35712;Q99990;Q9NV56;Q9H2G9;Q01844;O94829;O43491;O60393;P42695;Q96NG5;O75496;Q15628;P55795;Q8N9R8;Q8NEA9;Q13569;Q13875;Q01534;O00308;Q9BV20;Q9BYG7;Q9UQR0;O60682;O43711;Q71UM5;Q9HBM6;Q9H583;Q96BT3;P07438;Q9Y651;Q96LT7;Q12923;Q7RTU5;Q00978;Q9P2K3;P10242;Q96R56;Q9H0I3;P20226;Q5THR3;Q9UHJ3;Q92681;Q96F24;Q16526;Q9H171;Q8WUI4;P49910;Q6AZW8;Q3B8N5;Q9BVN2;Q9UQ13;P52655;Q9NY27;Q5JU85;Q5TB30;P17014;Q9UPA5;Q9NX58;Q9UK76;Q96GE5;Q9Y2Y4;Q9Y237;Q04725;Q7RTU4;Q8IWI2;P63241;Q5H9L2;O75362;Q92670;Q15013;Q15172;Q8IW35;Q8TDN4;Q9UL58;P43351;Q13485;O75175;Q9NXR7;Q8NA19;Q460N5;Q9BTT4;Q9NZQ3;Q96HI0;Q15072;Q8N726;P62310;O95076;O95402;P10074;Q96RK0;Q92804;Q9UBW7;Q86XP3;Q92625;Q2NJK3;Q9NQT5;Q12968;Q05195;P26651;Q9ULV5;P17482;Q9NPD8;P52951;P49335;Q9UIV1;Q8TD23;O60806;Q9Y6R6;Q96TB9;P51959;O95714;P23409;Q03468;Q9UKM9;Q9Y4A5;Q8NEZ2;P50749;P63272;Q9UJN7;P25685;O43402;O95319;P50750;Q6PI77;O00167;P78367;Q08945;Q9NQE9;P13196;O00570;Q14186;P98182;P31269;Q6ZS27;Q63HK5;Q6ZNO1;Q8TC76;O15131;Q5T8A7;O60921;Q5TA31;Q6PIJ6;Q9NVM9;Q15269;Q5HY98;Q6IQ16;P12980;O60225;A8K8V0;Q6P9F0;Q09666;P19484;Q9UQR1;Q2QGD7;Q9Y3B9;Q99687;Q8IYN0;O00401;Q8TD26;Q15257;P84550;Q92541;Q8TB69;Q07820;Q15599;Q16385;Q96JL9;Q07955;O00625;Q9C056;O43159;Q8TAD8;P53804;Q9NYT6;O95551;O43660;Q5BJF2;O14737;Q5VTL8;P17020;Q9HCI5;P07315;O43463;Q14188;Q92733;P51816;P62277;O75531;O60506;Q9NPJ6;Q3MIS6;Q9Y483;Q8N3X1;Q9BR84;Q9H6Z4;A5PLL1;O94901;P15884;P41162;Q96E39;Q92540;O75398;Q01081;Q8TF47;O94842;Q15025;Q5VZF2;Q95644;A6NP11;Q7Z5H3;Q8TCJ0;Q3SY52;Q96A72;A6NIX2;P78371;P25440;Q9UMS6;Q96T88;O43361;A6NLW8;Q8IUR6;Q9UK45;Q96CA5;Q969H6;Q8NE71;Q9H7X3;Q9BSG1;Q9P267;Q99FC8;Q9UK12;Q9BQY4;Q86UL8;Q15714;P35232;Q15973;Q9BYX4;Q9BZI1;Q96QS3;Q9BVP2;P78406;Q9BZI7;Q86UB2;O94993;P61978;Q86XF7;Q8IUE0;P05412;Q96MN9;Q61Q32;P17017;Q2VWA4;Q9H3R5;Q9NTI5;Q96K58;P40424;Q15054;Q96AV8;Q96G23;O94906;Q9BT49;Q9H116;Q9BRX2;P53992;P78345;O14618;Q96DX5;O60304;Q9Y5Y2;Q8TAU3;O15055;P0CAP2;Q96AJ1;Q9H3C7;Q7Z401;Q9HCG8;Q04741;Q5D1E8;Q969L4;Q13247;Q9BU61;A2RU54;Q5H9K5;Q15428;Q00613;Q86W56;Q6PJG6;Q13398;Q9UKT9;Q96LM6;Q53GI3;Q9UMQ2;Q9NR3;Q13642;O75386;O15405;P04733;Q96CJ1;Q5SXM2;O60675;Q86VP6;O75771;Q8WV22;Q86UD4;Q14934;Q12873;B2RFX5;Q7L590;Q9C002;P80723;Q9H6R4;Q9HAJ7;Q8IYL3;P05455;P42568;P28370;Q147U1;P0C7M4;Q9NR11;O60930;Q9BZW7;Q99581;Q9UI26;P58317;O95359;Q04864;O60524;P19532;Q6D9N0;Q8WVB3;Q99816;Q9UFM2;Q9NUQ3;P55769;P67870;Q15058;O43325;O95373;Q9UKD2;Q9UJW3;Q15059;P52948;Q5SZQ8;Q06609;O14519;Q9HB96;Q6P1N0;Q8WVK2;Q8N3U4;Q6AW86;Q9UKL0;Q8IYX0;O60244;Q6VN20;O14777;Q9NZP6;Q9NQR1;Q5VZB9;Q27J81;P0CG12;Q9ULJ6;P47974;Q86XR8;P61579;A6NDE4;Q6P280;O15127;Q8NDP4;Q8NFJ8;Q9Y244;P61247;Q14739;O43745;Q6NVH7;Q9BYD9;Q8IYW8;Q96Q89;Q5HYJ3;Q95997;O75486;Q7L945;Q9H204;P55210;Q9NVW2;Q12789;Q5EBM4;Q8TEQ6;Q9Y6B2;Q16612;Q9NQ92;O14776;Q9Y224;Q5T3J3;Q4VC44;Q9H0E3;Q13144;Q9BWW4;P58005;Q9NQZ3;O43918;Q9Y3A2;Q96DN6;Q9UNA4;P61956;P09629;Q8TC21;A8MXY4;Q93034;O00165;P55895;P16989;Q8NB50;Q9NVP1;Q9BQI9;Q9BZG8;Q9UFF9;Q52M93;P02489;Q00839;Q15573;Q8N9K5;Q9Y543;P61962;P55197;P40426;Q9UHA3;Q66K41;Q96N95;P09874;P35452;Q9Y664;Q13330;P62308;P9NNQ31;Q8WXB4;Q96SQ7;Q9NF71;Q96A49;O95343;Q7Z4G1;Q9UQN3;Q02548;Q8IYA7;Q9UJM3;P78316;P52741;O14972;P41970;Q9NR33;Q8N699;Q9P013;Q16637;Q9GZU7;Q8WTR7;Q14207;Q12765;Q9HCG1;Q9UKF6;Q96MG7;Q5VWP3;Q9Y2Y0;Q8NHY2;Q9NZD8;Q9NS25;P24855;Q13363;Q9Y2Q1;Q8WW38;Q9Y534;Q86SE8;Q9Y448;P84103;Q06587;Q9GZR1;Q9P086;Q99728;O43482;Q499Z4;O15504;Q99700;O95273;Q9P278;Q13404;Q96FF9;Q9BY31;Q9UMS4;P30047;Q8NFD5;Q96NJ3;Q14498;O95416;Q96S59;Q8NFZ5;P42773;A7MD48;Q13216;O75478;P16383;Q68DY9;P52743;Q9BV47;Q8TAW3;Q9UBG7;Q96AC1;Q9H910;Q9NPI8;Q96GM5;O43364;Q9ULK4;Q03828;O60662;P08047;Q53TQ3;P52594;O60248;O15084;Q96ES7;Q9HCS5;Q6ZW49;Q8WTF3;P78346;Q9NQ29;Q9UMQ3;Q99633;Q9NQP4;Q9Y6X3;Q68E01;P31483;Q5TEC3;O14512;O15297;Q7Z6J9;Q86Y26;P11802;A8MVS1;P46013;Q9H2U1;O00472;Q9NVD7;Q9NV88;Q6IS14;Q9HB07;Q5HYK7;Q96PT3;Q99081;Q9H0M0;O00192;Q9HC78;O00161;Q9NY43;Q8TAU0;Q96M11;P55060;Q9NX63;P51513;Q9UKT7;P82094;Q2M3X9;P15622;Q13541;O75821;Q0VG06;A4GXA9;Q86YW9;O43663;Q86YF9;Q9H501;Q9H009;Q7Z6B0;Q562F6;Q8IX03;P22674;Q9H6Y2;O60290;Q9UKN8;Q93083;Q15560;Q6W2J9;Q8WZ19;Q96KR7;Q14676;Q9Y6D6;Q8IWS0;O43390;Q9ULM3;Q9BU02;Q9NPA3;Q9BUZ4;P48380;Q9H6J7;Q96KR1;O75626;O00716;Q03701;P0C7X2;Q13761;Q9NZT2;P52742;Q6ZRF7;Q8N6W0;Q9Y6Y1;Q9H9D4;Q6P3V2;Q9Y248;Q2M3W8;Q5MCW4;Q7Z7J5;P39023;Q15935;Q96PU4;Q96EI5;Q96NY9;Q8WXF1;A6NFI3;O43298;Q01105;Q9BWM5;P61581;P62995;Q14493;Q96TA1;O95429;P0CL83;P37198;O43829;Q8N1W2;Q01658;Q96C86;O43255;Q9UBD5;Q9BWU0;O60284;Q107X0;P51531;O95475;P30153;Q9BR61;Q9Y4B6;Q8N8J6;Q8N587;P18754;Q92922;P14678;P43355;Q8WTS6;Q9NQV6;Q86WJ1;Q16560;Q96QA6;Q9NWS1;Q15543;Q9UL36;P53803;P17544;Q9P2R6;P52435;Q9UBZ9;Q00577;Q6UUUV7;Q8IYI8;P30307;Q96EY1;P36639;P09630;Q96D98;P17040;Q13287;O94892;Q7Z5K2;Q9H8H0;Q0VGE8;Q9HCE3;O60828;Q49MI3;Q9NZJ7;Q15572;Q96BR9;Q8N2W9;P30281;O75943;Q99811;Q05481;Q9P0W2;P35573;Q96CB8;O94874;P0CJ78;O15060;Q86W54;Q8N611;Q96PM9;Q7Z5L9;Q6Q759;Q68CP9;O95503;P09661;P62826;Q08211;O95625;P52434;Q92800;A8MU46;O14641;P05204;Q8NHV9;O43592;Q9NS91;Q9UBC3;P52292;Q16534;Q9P2F9;Q8IVN3;P48595;P41212;Q96K75;Q8N1F7;Q9UI43;Q9UB3;P09017;Q9UJU5;Q9P287;Q9H9T3;O15522;Q5FWF6;Q9UJG1;Q8NF64;P39880;Q99590;Q53H80;Q9UK73;Q9ULD2;Q9NS73;Q9H9S0;Q9ULX9;Q13137;Q9Y2B4;Q07687;O15042;Q96LB3;Q9UIH9;Q6P2C8;Q8IY18;Q9BT81;Q9NYW8;A6NJG6;Q92621;Q8HWS3;O95251;Q99459;Q13352;P78337;P51815;Q15172;Q7Z4H7;Q14764;Q9UID6;Q96MH2;Q96CS4;Q3MJ62;Q05516;Q5MIZ7;Q12837;A6NJL1;Q96HA7;Q7Z417;O43513;Q9BUJ2;P51398;O15534;Q8WXF8;P33240;Q8N987;Q3ZCX4;Q8TBZ5;Q15561;Q8NFH5;O60518;A8MT65;Q9

Y675;Q8N9W8;P50219;Q13106;Q9GZX5;A6NLF2;Q6ICB0;O00541;Q9Y5N6;Q99717;Q8TF50;O60238;Q9UBC1;Q96G25;Q9UQ35;P17038;P0CJ79;Q5H9L4;Q6P9G9;O60716;P25208;P43356;Q9BRT9;Q6R2W3;O00170;O43598;Q9UPW6;O00257;Q5T890;Q15047;P24666;Q12857;Q96NI8;Q5TB80;Q96NB3;Q8TF32;Q6NSI3;Q9BXX3;Q6ZM57;Q9BYH8;Q9Y2T7;Q9P0T4;Q9UBD0;Q8N7H5;Q5VWQ0;Q9NRC8;Q8WQ5;P60002;O75525;Q15643;Q9H4I2;Q9BTA9;Q58WW2;P40121;Q9H3H9;Q969S2;Q8TDP1;Q8NEJ9;Q9NWB6;P51825;P15N0V6;P27986;Q96MF7;Q5H9R7;Q9NP66;Q76FK4;Q32M78;Q86Y97;P67775;P10589;Q6P1X5;Q969S3;P5408;Q6RFH5;Q6IQ23;Q9H6T0;O15198;Q8NBZ0;Q9BWT6;Q8TBEO;Q96NL3;Q9Y473;P13056;Q8TD31;Q8NXY6;Q9BTD8;P61582;Q8WYH8;Q9GZN7;Q99594;Q14678;Q8NCF5;Q9NTM9;O43324;Q9BWC9;Q5VWG9;Q5PSV4;Q8IZU3;Q9Y247;P15259;Q8NEM1;Q15329;Q9H0E9;Q8IZT6;O95149;Q9UMX3;Q9ULW6;Q99933;Q9UL49;Q99583;P55735;Q14683;Q3KNW1;Q9NPC8;Q9NXV6;Q6MZT1;P78347;Q9UJW9;Q9Y5Q3;Q5T0F9;Q9UBW8;Q8N9B5;P04792;Q15696;Q01664;Q8IXH6;Q96HR8;Q8WVJ9;Q15006;P52746;Q9ULX6;Q9Y5Q8;Q9BVI4;O75182;Q9HJC3;A6NNA5;Q05215;Q9UII4;Q9BYE7;O43236;Q9BSJ2;Q86TP1;Q8IZL2;Q9Y2S7;P15036;Q9NPI6;Q9UII5;O95833;Q15007;Q9NSN8;A6NG73;P42166;Q9BZE0;Q8TF63;Q5VZE5;Q9UKG1;Q70IA6;Q9BTV5;Q92993;P38935;Q9Y6J9;Q1ED39;Q9NWD9;Q96B42;Q9Y2S0;Q01860;Q9Y5S9;Q6ZRQ5;Q8WXX9;Q8NCE0;Q9P2Y4;Q9BXJ9;Q8N831;Q15003;P31275;O14813;Q9H814;Q08ER8;Q9BUL9;Q16143;Q12824;Q8N3X6;P42771;Q53HV7;Q86TG7;Q8WVV9;Q03060;Q4V348;Q9UJL9;O14627;Q86X55;Q96FS4;Q9H3U1;Q9BSK0;P38432;Q9BQ70;Q49A33;P23297;Q9NV72;Q8WUX9;Q96N38;Q15942;Q9BXG8;O00291;Q06730;Q9UIE0;Q14151;Q03052;Q9H8G1;Q9H944;O60711;Q12996;Q92905;Q02446;Q9H1B4;Q9BW27;Q9Y6F1;Q9UJW8;Q9NQC8;Q2TAY7;O75419;P68104;Q5H9F3;Q5VYK3;Q9BX26;O95190;Q9BWG6;Q9UIA9;O14628;O43251;Q8NBF1;Q6P4R8;Q15061;A6NN14;O14503;Q9UNP9;O14686;Q10587;Q96MN5;O75528;Q9NZM5;P11142;Q9NRY2;Q9HBUL;P58557;A6NJ46;Q68DY1;Q12888;Q15906;Q92585;P10243;P61573;Q92698;P07737;Q96CW6;Q5T447;P22670;Q99873;Q86TJ2;Q96B01;Q8WXE1;Q7Z3V5;Q9Y222;O75177;P61576;Q8N7Q3;A8MT69;O43791;Q9BZJ0;O95789;Q8TBZ8;O75494;Q15650;P10073;Q8WY54;Q8NF99;Q14135;O75290;Q9HD42;Q9BRA0;Q7Z5D8;Q15038;A1L190;Q3YEC7;Q9NRX1;Q04743;B2RD01;Q6IEG0;Q9Y2G4;Q9HD34;Q9Y421;Q9NQ94;P51610;P67809;P05937;Q9NUK0;O14595;Q8IU60;Q96DI7;Q69YN4;O94776;Q9NR83;Q86YC2;O15535;Q6ZT77;Q9NZH4;Q9Y5A7;Q9NY74;A8MWA4;Q13098;O15397;O43719;Q8N3C0;O75467;Q6PJT7;Q96QF0;O15160;Q9UHD9;P52747;Q9NP77;Q9Y221;P56181;O75928;O60508;P68036;Q6PD62;Q8TAP9;P28324;Q8N344;Q13118;Q96SQ5;Q9UH99;P23511;Q6UB98;P17035;Q9BTT0;O60216;Q09161;Q8WUU5;O43502;Q96MW7;O95831;Q6W0C5;Q8TDN6;Q8TED0;O43299;O75665;Q8N0Y2;Q05BW5;Q8N4W9;P46783;A6NM28;Q92785;Q9P016;Q9UBB5;Q02577;Q92754;A6NHQ2;Q9NWU2;Q7RTU3;A6NFD8;Q9UI15;Q9UIS9;Q16594;Q15319;Q6VUC0;Q8N9N8;Q6PK81;Q9BSC4;Q86VM9;Q9H1J1;Q9H5J8;Q6PI98;Q9UFB7;Q9HAZ2;O15315;P01100;Q96H86;P52294;Q8TA94;Q5JVG8;Q9UBX0;Q5TA45;Q03938;P42285;Q7RTT6;O15234;O14757;Q16600;O43913;Q9H2A3;Q8IXT1;O00534;Q9Y314;P49640;P53370;Q8N8U2;Q12816;Q15819;Q14192;Q6QHK4;P11161;Q8NDT2;Q9Y2P7;O00482;A5D8V6;P52756;Q9Y281;Q9BXY8;P05813;Q53GL7;Q9H7R5;Q02078;Q96JB2;Q9Y3C7}

- 6186 [Cluster 563]GO:0070469+C cellular\_component [name] respiratory chain [def] "The protein complexes that form the electron transport system (the respiratory chain), associated with a cell membrane, usually the plasma membrane (in prokaryotes) or the inner mitochondrial membrane (on eukaryotes). The respiratory chain complexes transfer electrons from an electron donor to an electron acceptor and are associated with a proton pump to create a transmembrane electrochemical gradient." [GOC
- 6187 Pathogen[ Q2Q067] interacts with 11 human partners: {O43920;P56181;O75489;O96000;O95178;O43678;O75251;O75306;P99999;Q9P0J0;E9PQ53}
- 6188 Pathogen[ P0C214] interacts with 22 human partners: {Q16795;O75306;O43678;P22695;P56556;P28331;O43920;O95299;P17568;Q16718;O14561;O95298;P99999;Q9P0J0;O96000;E9PQ53;O95182;O75489;O75251;Q9UI09;P56181;O95178}
- 6189 Pathogen[ P03346] interacts with 11 human partners: {P56181;O75489;O43678;O95178;P99999;O43920;E9PQ53;O75251;O96000;O75306;Q9P0J0}
- 6190 Pathogen[ Q85601] interacts with 8 human partners: {Q9P0J0;P99999;O75306;O43678;P56181;O96000;O43920;E9PQ53}
- 6191 Pathogen[ P14079] interacts with 42 human partners: {P56181;P22695;O43674;O43677;O43181;O95169;P56556;O95139;O96000;O95167;O75306;P00395;P00403;P17568;Q9UDW1;P14927;Q86Y39;O95182;P07919;O14949;O43676;O43678;P51970;O95178;O75251;O14561;Q9UI09;P00156;O95299;E9PQ53;Q9P0J0;O75489;P03923;Q16718;P03897;O43920;O15239;P99999;O00483;P03901;P03886;O95298}
- 6192 Pathogen[ P03383] interacts with 11 human partners: {O75251;O96000;O43678;O43920;O75489;O75306;O95178;P99999;E9PQ53;Q9P0J0;P56181}
- 6193 Pathogen[ P03410] interacts with 44 human partners: {O95168;O43674;P56556;P17568;O95178;O75380;O43678;O75251;O95299;P51970;O43920;Q9UI09;O96000;P07919;O95167;O15239;Q9Y6M9;P22695;P03886;O00483;O95298;O75438;Q9UDW1;E9PQ53;P56181;P00156;O14561;P14927;O75489;Q86Y39;P99999;P03897;O43677;O95169;O43181;Q16718;O75306;P00403;O43676;O14949;P03901;Q9P0J0;P03923;O95182}
- 6194 Pathogen[ P14075] interacts with 17 human partners: {O43674;P56181;O96000;O95182;O43677;O43920;O75306;O14561;O95298;O43678;P99999;O75251;E9PQ53;O75489;O95178;Q9P0J0;O43676}
- 6195 Pathogen[ P0C206] interacts with 21 human partners: {P99999;P56181;O75251;Q9UDW1;O43920;O75306;O95182;Q9UI09;O95298;P22695;O14561;O00483;P17568;O95178;Q9P0J0;O43678;O75489;E9PQ53;O96000;O43674;P56556}
- 6196 Pathogen[ P03363] interacts with 4 human partners: {P99999;Q9P0J0;O96000;P56181}
- 6197 [Cluster 564]GO:0000172+C cellular\_component [name] ribonuclease MRP complex [def] "A ribonucleoprotein complex that contains an RNA molecule of the snoRNA family, and cleaves the rRNA precursor as part of rRNA transcript processing. It also has other roles
- 6198 Pathogen[ Q2Q067] interacts with 2 human partners: {Q99575;O95707}

6199 Pathogen[ P0C214] interacts with 2 human partners: {095707;Q99575}

6200 Pathogen[ P03346] interacts with 2 human partners: {095707;Q99575}

6201 Pathogen[ Q85601] interacts with 2 human partners: {Q99575;095707}

6202 Pathogen[ P14079] interacts with 2 human partners: {095707;Q99575}

6203 Pathogen[ P03383] interacts with 2 human partners: {Q99575;095707}

6204 Pathogen[ P03410] interacts with 2 human partners: {Q99575;095707}

6205 Pathogen[ P14075] interacts with 2 human partners: {095707;Q99575}

6206 Pathogen[ P0C206] interacts with 2 human partners: {095707;Q99575}

6207 Pathogen[ P03363] interacts with 2 human partners: {Q99575;095707}

6208 [Cluster 565]GO:0005819+C cellular\_component [name] spindle [def] "The array of microtubules and associated molecules that forms between opposite poles of a eukaryotic cell during mitosis or meiosis and serves to move the duplicated chromosomes apart." [ISBN

6209 Pathogen[ Q2Q067] interacts with 97 human partners: {Q3KQU3;P49454;Q96TC7;P50402;Q15013;P31749;Q13185;P50995;Q9Y2Y0;Q7Z4H7;Q15398;P63172;Q14980;P06400;O43663;P01106;Q7Z460;P53675;Q99741;Q96R06;Q5SW79;Q8N0Z3;O94927;Q5UIP0;O75935;P54274;Q8WVK9;A8MVW5;Q14511;Q9UNH5;Q9NVX0;Q6P582;Q9NXR1;Q9Y237;Q53HL2;P04792;Q9P258;Q1MSJ5;A6NKF1;Q99871;Q96DB5;Q9NQS7;Q99569;O43264;Q9Y3A5;Q7Z7K6;Q9BW27;Q08J23;Q6PGN9;Q00610;O76095;Q12834;P50748;Q96JM3;Q9Y5B0;Q9BT25;Q96Q89;Q9H6D7;Q96BK5;Q5TB80;Q9ULW0;Q02241;O00139;Q9H4H8;Q08AG7;O75122;Q8IX90;Q8IWC1;Q9Y6D9;Q9UKT4;Q96T76;Q96BD8;Q9UI95;Q9Y3D0;Q8IZT6;Q8IZT6;P0953;Q6NZ67;Q9BXS6;P35579;Q49MG5;Q9UUK3;P30260;Q66K74;Q96CS2;Q13042;Q15691;Q8WVK7;P83916;Q9UMS4;Q66K89;O15392;Q68CZ6;Q14194;Q5VT06;Q9ULD2;Q96CW5}

6210 Pathogen[ P0C214] interacts with 95 human partners: {Q96BK5;O94927;O75935;Q6NZ67;Q5UIP0;Q1MSJ5;Q53HL2;O43264;Q15013;Q02241;Q9NS23;Q7Z4H7;Q5SW79;Q9UJP4;P83916;Q96R06;Q9BXS6;P50748;A8MVW5;P04792;P60953;O00139;Q96CW5;Q14194;Q15691;Q96TC7;Q9UI95;Q9UMS4;Q96CS2;Q14980;Q6PGN9;Q9Y237;O75122;P53675;P35580;Q96Q89;Q9BW27;Q96BD8;Q9P258;P50402;Q15398;Q08J23;Q9BT25;Q12834;Q9ULW0;O43663;Q9ULD2;Q13185;Q96DB5;Q9UNH5;Q7Z7K6;Q99871;Q14511;O15392;Q9H6D7;Q8IX90;Q8IWC1;P63172;Q3KQU3;Q7Z460;Q9UUK3;A6NKF1;Q9Y2Y0;Q9Y5B0;Q96JM3;Q9NQS7;Q68CZ6;Q8N0Z3;Q8WVK9;Q5VT06;Q9Y3D0;Q08AG7;Q9NXR1;P30260;P49454;Q9Y3A5;Q9NVX0;Q6P582;Q8IZT6;P50995;Q5TB80;Q7L5Y9;Q66K89;P01106;P06400;Q9UKT4;Q9Y6D9;P31749;Q49MG5;Q96T76;Q66K74;P54274;Q99741;Q8WVK7;Q13042}

6211 Pathogen[ P03346] interacts with 110 human partners: {Q08J23;Q6P582;Q9Y6D9;Q15058;Q9BT25;Q9BXS6;Q9H6D7;Q9Y657;Q6NZ67;Q9Y283;Q14511;O15392;Q99569;Q99871;Q7Z4H7;P06400;P35579;O75935;Q96R06;O00139;Q15013;Q15691;P54274;A8MVW5;Q9UMS4;Q9UUK3;Q66K74;Q14141;O43264;Q9NXR1;Q53HL2;P60953;Q96TC7;Q9P258;Q96CW5;Q9UI95;Q66K89;Q8N0Z3;Q8TEW0;Q12834;Q14980;Q69YQ0;Q9Y5B0;P01106;Q5TB80;Q9BW27;Q9NVX0;Q9ULW0;Q9Y237;Q15398;A6NKF1;P31749;Q13042;Q15019;Q5VT06;O60447;Q68CZ6;Q96BK5;Q9NQS7;Q96Q89;Q3KQU3;P53675;Q9UKT4;Q6PGN9;Q7Z7K6;Q9ULD2;P63172;Q5UIP0;Q9H4H8;Q96JM3;P50995;O75122;P50402;Q02241;Q8IX90;Q8IWC1;P50748;P36405;Q96DB5;Q96CS2;Q83916;Q8WVK9;Q8IZT6;Q08AG7;Q7Z460;Q9Y2Y0;Q9H8V3;O94927;Q49MG5;O76095;Q14194;Q9UJP4;P30260;O43663;Q99741;Q1MSJ5;Q96BD8;Q9NS23;O14965;Q13185;Q5SW79;Q00610;Q9Y3D0;P04792;Q96T76;Q8WVK7;Q9UNH5;P49454;Q9Y3A5;Q9UBP0}

6212 Pathogen[ Q85601] interacts with 108 human partners: {Q99569;P01106;P49454;Q96JM3;Q6PGN9;Q96T76;P53675;P83916;Q00610;P31749;Q7Z7K6;Q02241;P36405;Q15398;Q8WVK9;Q14194;Q9H6D7;Q9BT25;Q99871;Q9NQS7;Q9Y3D0;Q9UI95;Q9UBP0;P06400;P35579;Q9P258;P50995;Q6NZ67;Q9Y283;O75935;Q7Z4H7;Q9UKT4;Q9NVX0;A8MVW5;Q9UMS4;Q49MG5;Q9Y2Y0;Q9UUK3;Q7L5Y9;Q9Y3A5;Q66K74;O43264;Q53HL2;Q9BXS6;O15392;Q9NS23;Q96CW5;Q9ULW0;Q8IZT6;P63172;A6NKF1;Q96R06;Q9UJP4;Q12834;O43663;O75122;Q9UNH5;O14965;Q96Q89;Q9BW27;Q15013;Q13042;Q96BK5;Q9Y5B0;Q08J23;Q5VT06;Q15691;O60447;Q15058;Q96BD8;Q9Y6D9;Q1MSJ5;Q5UIP0;Q3KQU3;Q5TB80;Q13185;Q9H4H8;O94927;Q69YQ0;P50402;Q8IX90;Q14980;Q8IWC1;P50748;Q8WVK7;O76095;Q96CS2;P60953;P04792;Q7Z460;Q5SW79;P35580;Q96TC7;Q08AG7;Q66K89;Q8N0Z3;Q9NXR1;P30260;Q6P582;Q99741;Q14511;Q9GZM8;Q9Y237;O00139;Q9ULD2;Q68CZ6;Q96DB5;P54274}

6213 Pathogen[ P14079] interacts with 104 human partners: {Q15691;Q14980;P54274;P35579;Q9BW27;Q3KQU3;Q00610;P63172;Q9NS23;Q9UKT4;Q7Z460;Q8IX90;Q9Y5B0;Q9H4H8;Q96R06;P50995;Q9Y237;O76095;Q99871;Q15013;Q66K74;Q02241;Q9NVX0;Q9Y2Y0;O15392;Q1MSJ5;Q6P582;A8MVW5;Q9ULW0;Q9Y3D0;Q7L5Y9;Q9Y3A5;Q69YQ0;Q9UUK3;Q9BXS6;Q08AG7;Q8TEW0;Q99741;P36405;O43663;Q13185;Q9UMS4;Q96Q89;Q5VT06;Q8IWC1;Q13042;O00139;Q15058;Q66K89;Q99569;Q8WVK7;Q96JM3;Q9H6D7;Q9H8V3;Q08J23;A6NKF1;Q9P258;O43264;Q14194;Q49MG5;Q5SW79;Q8N0Z3;P01106;Q9GZM8;Q96DB5;Q6PGN9;Q5TB80;Q9ULD2;Q53HL2;Q8WVK9;Q9NQS7;P30260;Q9Y283;Q96BK5;Q7Z4H7;P49454;P53675;Q9BT25;Q6NZ67;Q9UJP4;Q68CZ6;P50402;P83916;P04792;Q9NXR1;P50748;O95235;Q96TC7;Q5UIP0;Q96BD8;O75122;O14965;O75935;Q96T76;Q6IQ19;Q8IZT6;Q9Y657;Q9UNH5;O94927;Q7Z7K6;Q96LZ7;Q96CW5;Q15398;Q96CS2}

6214 Pathogen[ P03383] interacts with 86 human partners: {Q9Y2Y0;Q9NQS7;P49454;P50995;Q8N0Z3;Q96T76;Q7Z460;Q96TC7;Q1MSJ5;Q96BD8;Q00610;Q02241;Q15691;Q5UIP0;Q8WVK9;Q15013;Q9NVX0;O43264;P01106;Q9UI95;P31749;Q9P258;Q9BXS6;P63172;Q6NZ67;Q7Z4H7;Q96CW5;P60953;A8MVW5;Q96BK5;Q3KQU3;Q9UKT4;P04792;P53675;Q7Z7K6;Q13042;Q9Y3D0;Q5VT06;P06400;Q08AG7;Q66K89;Q96R06;Q96DB5;A6NKF1;P83916;Q12834;Q6PGN9;Q99871;Q5TB80;Q96CS2;Q53HL2;O94927;Q13185;Q9BW27;Q9UNH5;Q14511;Q08J23;Q68CZ6;Q8WVK7;Q96Q89;Q9BT25;O75935;Q9H4H8;Q9Y3A5;P50402;P35580;O14965;Q8IX90;Q14980;Q8IWC1;Q6P582;Q9UUK3;Q9Y5B0;Q9H6D7;Q5SW79;P35579;Q9ULW0;O43663;Q49MG5;O76095;P30260;Q9UMS4;P54274;Q99741;Q9Y6D9;P50748}

6215 Pathogen[ P03410] interacts with 111 human partners: {Q00610;Q9UKT4;Q96LZ7;Q8IX90;Q7Z460;Q96TC7;O15392;Q9BW27;Q96Q89;Q9UI95;Q8IWC1;Q96T76;Q15058;Q9H6D7;Q96JM3;P50995;Q96DB5;O00139;Q9NXR1;Q15398;Q66K89;Q9GZM8;P01106}



;Q53HL2;P54274;Q15013;Q8WWK9;P36405;P63172;P50748;Q9NS23;P31749;Q69YQ0;P35579;P04792;Q9Y283;P06400;Q9UNH5;Q96R06;Q9BXS6;Q68CZ6;Q96CS2;O43264;Q8IZT6;Q7Z7K6;P49454;O14965;Q8N0Z3;Q14980;Q6IQ19;Q14511;Q15691;Q13042;Q9ULD2;Q9NVX0;O60447;Q8WVK7;A8MVW5;Q13185;O75935;Q66K74;Q94927;P50402;Q12834;P30260;Q3KQU3;Q9Y5B0;Q08J23;P60953;P35580;Q9ULW0;Q5TB80;Q9UMS4;Q08AG7;Q1MSJ5;Q8TEW0;P83916;Q9UUK3;Q9Y657;Q6NZ67;Q9UJP4;O76095;Q96BK5;Q14194;Q96CW5;Q9UIP0;Q9H8V3;Q6PGN9;A6NKF1;Q99871;Q96BD8;P53675;Q9H4H8;Q5SW79;Q9Y2Y0;Q9Y3D0;Q6P258;Q9P258;Q9Y3A5;Q9Y237;O75122;Q7L5Y9;Q9BT25;Q49MG5;Q7Z4H7;Q02241;O43663;Q5VT06;Q99569;Q9NQS7;Q99741}

6216 Pathogen[ P14075] interacts with 88 human partners: {P60953;Q99871;Q14511;Q6NZ67;Q13042;Q6P582;Q9Y6D9;Q02241;O43663;Q5VT06;Q7Z4H7;Q49MG5;O76095;Q9UKT4;Q9NQS7;Q96R06;Q8WVK7;Q08AG7;P53675;Q9Y5B0;A8MVW5;Q7Z460;Q9Y2Y0;Q68CZ6;Q96TC7;Q9BXS6;Q7L5Y9;P04792;Q96BD8;Q9UI95;P63172;P50402;Q9BT25;P01106;Q96BK5;Q9ULW0;P50995;Q9BW27;P54274;P31749;Q15013;Q5SW79;O00139;Q9P258;O75935;Q6IQ19;O14965;Q13185;Q3KQU3;Q15691;Q5TB80;Q96CS2;P35579;Q96DB5;Q9UMS4;Q9H4H8;P06400;P83916;Q8IX90;Q66K89;Q7Z7K6;A6NKF1;Q8IWC1;Q53HL2;Q6PGN9;Q9NVX0;P50748;Q8WWK9;Q99741;O94927;Q5UIP0;Q08J23;O43264;Q14980;Q1MSJ5;P30260;P49454;Q9UNH5;Q9H6D7;Q96Q89;Q12834;Q96CW5;Q00610;Q96T76;Q8N0Z3;Q9UUK3;Q9Y3D0;Q9Y3A5}

6217 Pathogen[ P0C206] interacts with 117 human partners: {Q96TC7;Q5SW79;Q08J23;Q9UMS4;P53675;P50402;Q96DB5;P31749;Q96Q89;Q5UIP0;Q9UBP0;Q15019;Q9Y6D9;Q9ULW0;Q96CW5;P50995;Q15691;Q9BT25;Q00610;P04792;Q8IZT6;Q6PGN9;P49454;Q96BK5;Q99741;P30260;Q14141;Q02241;Q9GZM8;Q8IX90;Q66K74;Q9Y283;Q9NVX0;Q8IWC1;Q69YQ0;Q9UJP4;O75122;Q9UKT4;P54274;Q8TEW0;O60447;A8MVW5;Q96BD8;A6NKF1;Q9UNH5;Q9Y5B0;Q9Y3D0;Q7L5Y9;P83916;Q9UUK3;Q6IQ19;Q99569;Q7Z7K6;Q96CS2;O43663;Q7Z4H7;Q9ULD2;Q5VT06;P35579;O94927;Q53HL2;Q96JM3;Q9H8V3;Q49MG5;O15392;P60953;O00139;Q9Y657;Q9P258;Q96T76;P36405;Q15013;Q14194;Q9Y237;Q6P582;Q9H6D7;Q15058;Q9Y3A5;Q99871;Q13185;Q8N0Z3;Q9NXR1;P01106;Q16181;Q9BXS6;Q1MSJ5;Q9Y2Y0;O14965;Q14980;Q7Z460;Q9NS23;Q9NQS7;O75935;Q66K89;P63172;Q3KQU3;Q13042;P50748;Q15398;P35580;Q9BW19;O43264;Q08AG7;Q8WWK9;Q68CZ6;Q5TB80;Q14511;Q12834;Q8WVK7;Q9UI95;Q6NZ67;Q9BW27;Q99986;O76095;Q96LZ7;Q9H4H8;P06400}

6218 Pathogen[ P03363] interacts with 105 human partners: {A6NKF1;Q13042;P49454;Q96DB5;Q7Z7K6;Q9Y5B0;Q9Y6D9;Q9UNH5;Q08J23;Q66K74;Q5VT06;P83916;Q14194;P35579;Q96BD8;Q96BK5;Q9Y3D0;Q1MSJ5;Q8WWK9;Q14980;Q15691;Q6P582;Q9ULW0;O43264;O60447;Q15398;Q9Y3A5;Q9Y657;Q9H6D7;Q02241;Q9P258;Q9BT25;Q66K89;Q9H4H8;Q53HL2;Q00610;Q8WVK7;Q9BXS6;P50748;Q49MG5;Q99569;P30260;P06400;Q13185;P01106;Q14807;Q8IX90;P50995;Q96TC7;Q8IWC1;Q6PGN9;A8MVW5;Q96JM3;Q8IYML1;Q96R06;Q68CZ6;Q96T76;O94927;P63172;P31749;Q9UUK3;Q14511;P54274;Q6IQ19;Q9NQS7;Q99741;Q9NVX0;O75935;Q08AG7;Q5UIP0;Q7Z460;Q9UKT4;Q9UI95;Q9Y283;Q8N0Z3;Q96CS2;Q99871;P50402;O76095;Q9NS23;Q9Y237;Q15013;Q9UJP4;Q15058;Q96Q89;Q12834;Q9Y2Y0;Q9UMS4;O43663;Q9NXR1;Q14141;O00139;Q6NZ67;Q9ULD2;Q7Z4H7;P60953;P53675;Q5TB80;Q8IZT6;P04792;Q9BW27;Q96CW5;Q69YQ0;Q3KQU3;Q5SW79}

6219 [Cluster 566]GO:0000938+C cellular\_component [name] GARP complex [def] "A quatrefoil tethering complex required for retrograde traffic from the early endosome back to the late Golgi and biogenesis of cytoplasmic vesicles." [GOC

6220 Pathogen[ Q2Q067] interacts with 2 human partners: {Q5VIR6;Q9P1Q0}

6221 Pathogen[ P0C214] interacts with 2 human partners: {Q5VIR6;Q9P1Q0}

6222 Pathogen[ P03346] interacts with 3 human partners: {Q5VIR6;Q9UID3;Q9P1Q0}

6223 Pathogen[ Q85601] interacts with 3 human partners: {Q5VIR6;Q9P1Q0;Q9UID3}

6224 Pathogen[ P14079] interacts with 3 human partners: {Q9UID3;Q9P1Q0;Q5VIR6}

6225 Pathogen[ P03383] interacts with 2 human partners: {Q9P1Q0;Q5VIR6}

6226 Pathogen[ P03410] interacts with 3 human partners: {Q9P1Q0;Q5VIR6;Q9UID3}

6227 Pathogen[ P14075] interacts with 2 human partners: {Q5VIR6;Q9P1Q0}

6228 Pathogen[ P0C206] interacts with 3 human partners: {Q9P1Q0;Q5VIR6;Q9UID3}

6229 Pathogen[ P03363] interacts with 3 human partners: {Q9UID3;Q9P1Q0;Q5VIR6}

6230 [Cluster 567]GO:0005737+C cellular\_component [name] cytoplasm [def] "All of the contents of a cell excluding the plasma membrane and nucleus, but including other subcellular structures." [ISBN

6231 Pathogen[ Q2Q067] interacts with 2267 human partners: {Q3KQU3;Q9BTW9;Q92783;O95363;Q86W56;P04156;Q96S95;Q7Z3C6;O95376;Q13562;Q5VSL9;P05204;P49454;Q09FC8;Q9Y253;Q8WW24;Q9H4I2;Q01844;Q92900;P05198;Q96TC7;O15511;Q14974;Q7L2H7;Q9Y473;O43290;Q8TCS8;Q9BU02;Q9NQG7;P07438;Q14526;Q9Y5K5;P30153;Q8WV37;Q9BRT2;Q9NWS1;Q12798;Q9UKI9;Q9UI26;Q9Y4R8;Q96N77;Q9Y2J2;Q5SZL2;Q9UBW5;Q4G0F5;Q8NH2;Q14151;Q9BZ55;Q9P2Y5;Q12905;O95671;Q9NNW5;Q8TAF3;Q8IUD2;Q8WZ33;Q01082;P27540;P17544;P30281;Q9BZL4;P52434;Q8NCF5;Q92750;Q96J02;Q9H3C7;Q8IXJ6;Q99613;Q9UL45;P62701;P22392;P46108;P53370;O60524;Q8NA42;O00213;Q9Y6X8;Q6FI81;Q8NHW5;O75351;Q9BTV5;Q96HA8;P35908;O00425;O75161;Q9H2G9;Q8WWX9;Q9Y3A2;Q96FV9;Q9ULR5;Q9GZT8;Q04864;P81877;Q9UHL9;Q9NYP9;Q9NXW9;O75832;P0C1Z6;Q16236;O60684;Q86U42;P48556;O15234;Q8WV44;P09917;Q13084;P26633;Q5TD94;Q9H2U2;Q96N21;P54252;Q8IWL8;Q6P387;C9JE40;P18754;P49458;Q96GE4;Q15013;P23381;P02545;Q6VN20;Q8IU60;P31749;Q92890;P35754;Q71F23;Q7LBR1;Q6P2H3;P40306;Q9BZE4;Q96GA3;Q9BQY9;Q14258;P50995;Q6ZN28;P62312;Q93034;Q14008;Q9Y2Y0;P42773;Q9UNS2;Q9H4X1;P46779;O00186;Q9H008;Q9H910;O14744;Q9Y6K5;O60239;P35321;Q9Y6D6;Q9Y613;O00410;P56524;Q93009;Q9BY41;Q9ULX6;Q9NRS6;Q9H0C8;Q9NQT4;Q96NU7;Q15631;P55036;Q99502;P07741;Q9HBZ2;Q9NRP3;P10827;Q9Y615;Q9P219;O75663;P20226;Q9NVN4;Q96KQ4;Q9HAU4;Q5D1E8;A9UHW6;P55957;P24385;Q99417;Q7Z6J0;Q9Y5V3;Q7Z4H7;P78559;Q3BBV2;O75340;O00303;Q9Y266;P49591;Q96NB3;O95273;P07195;Q6NUN9;Q63HQ0;P63104;Q96KN1;P07737;Q8N9R8;Q9UII4;Q9Y3F4;P39687;Q13033;Q15398;Q96QU8;O60664;Q13875;Q9UQ80;Q96RT8;Q70YC5;O43747;P55265;P63172;Q9Y4P1;P24278;P49790;Q9UD71;Q99638;Q9P209;O15519;Q9H063;Q96E14;Q05066;Q8NEF9;Q8WX93;Q14315;O60296;O60841;Q8TAD8;A6NGQ2;Q9H444;Q16589;O95391;Q9BY44;Q9NQW6;Q8NI35;Q9BUP3;Q8TD31;Q6ICB0;Q86UA6;Q86XZ4;Q9Y2D1;Q96C74;Q8IY63;Q14160;Q9NPB6;Q9BSF8;O95433;Q9Y3Q8;Q12888;O00512;Q96LI5;Q96B97;O00291;Q8NC



R6;Q8WY54;Q14980;P35080;Q96RK1;P61326;O60784;Q6NUP7;Q8IVG9;Q9H9T3;P30419;O75534;O75494;O00231;Q8WYA1;Q9UMX3;Q8IZH2;Q8NCEO;Q7L9L4;Q8TWE5;Q96I24;Q8WW33;P14866;Q7Z5K2;Q99547;Q9NPF5;P21980;Q9H2K2;O43663;P27694;P41220;Q01094;Q9UKV0;Q14678;Q8WW38;Q9Y4B6;Q13427;O95684;Q08999;Q96LR2;P40763;Q9UBQ5;Q9Y3E1;Q0VDF9;Q9NYB0;Q08209;Q9NS26;P61579;Q8TZD4;P06454;Q9BRV8;Q13352;O14579;Q8N1N5;Q9H2P0;P62258;A6NK39;O75145;Q96JZ2;Q9BYG5;Q7Z460;O75940;O43159;Q8IZW8;Q16666;P46937;Q9UKX2;Q8IVM0;Q9NPJ8;O43447;Q16775;O60481;Q6IE81;Q7ZF4;Q96QA5;Q92636;P62273;P67809;Q12982;Q13485;P13929;P09913;Q8TF09;Q9Y2B5;Q96DX5;Q9BRA2;O75334;Q9Y285;Q6IV72;O14639;Q8N3V7;P63313;Q9NSC5;O14974;P38646;Q9Y2L1;P55795;Q9NR48;Q9Y3C4;Q9UI56;O95997;Q14674;Q9NPI6;Q8N0Z6;Q9H2T7;Q8WXE9;Q86TX2;Q9H1B4;Q86XL3;Q9UJT2;O43516;P62318;P62826;O43189;Q99816;Q96ST8;Q99741;Q9BZQ8;Q6XQN6;Q92797;Q9BQA1;Q9UBB5;Q93015;A6NDD8;Q8TF40;Q9Y3V2;A5YKK6;Q15386;Q15596;O95295;Q9BSW2;Q16656;Q9HCK5;Q13829;P19474;Q15554;P54259;Q99497;Q5SQN1;Q12988;Q9GZS3;Q96R06;O60260;P30793;Q9NUL3;Q9H074;Q9H1H9;Q9UDY8;P55197;Q06265;Q9NUP1;P28072;Q9GZS1;Q7Z4G1;Q96JI7;Q9UBB6;P09132;Q9P0M2;Q8N5U6;O14604;Q9ULC6;Q15326;Q9P299;O95243;P49427;P08729;Q96F86;Q8WYR4;Q9HAF1;O43805;Q6U7Q0;Q93083;Q14204;Q7Z7A3;Q5SW79;A6NIX2;Q8N137;Q9NQ87;Q9Y244;Q6PD74;Q9UJG1;Q7Z3Z0;Q9H0F6;P10155;Q96DC7;P61457;Q15697;O43255;Q9BQS6;Q96P71;Q9Y2J8;O96004;Q8N0Z3;Q92985;O95400;P35268;Q8TBY8;Q9Y6M1;O94927;O43390;Q8WXU2;O00167;Q9NZZ8;O75794;Q9BXM0;P49419;P08151;Q969F9;O60437;Q9C086;P15121;Q5UIP0;Q15653;P36639;Q00613;O14618;Q5VYK3;Q96TA1;Q5VZE5;Q16082;Q9BRG1;Q13077;Q01105;Q9P0W5;Q9UJW0;O75935;P23490;P78406;Q6P3W6;Q96SL8;P08133;P05813;Q9V275;O00273;Q14140;Q7Z7A1;Q12815;Q32MZ4;P20749;Q9HD15;P54274;Q9Y6K1;Q96DI7;Q12765;Q9NVW2;O00743;Q460N5;Q9NRN7;O14929;O00257;Q8NDF8;O60543;Q9NZJ0;Q9NZI6;P10074;Q9BXW4;Q15046;Q8WWK9;Q7Z2E3;O60315;Q04206;P36543;Q9UM82;P49770;P11387;Q15181;Q8WYP5;O95336;A8MVW5;P61981;Q5T752;P61604;P50502;Q96C86;Q00994;Q8NHV4;P30279;P05062;Q13868;Q12933;Q9NWD9;Q6ZNE5;O43639;O94829;Q8IV36;P62140;Q9UKY7;Q9Y3B6;Q6P1M3;Q9NSD9;Q969S2;Q5T1C6;P82663;P07954;Q6NXT1;Q96B36;Q13625;Q6P1N0;Q9NYJ8;Q13547;Q6PI26;Q14511;Q9UP83;Q05195;P08238;P38919;P63167;P14373;Q8N6F7;Q9UJY1;Q14103;P78358;P55345;O60506;A5LHX3;P22061;Q9NZI5;Q9UGC7;Q01201;P34949;Q6UUU9;Q9UBU9;Q9BSB4;Q7Z6G3;O60930;Q5H9J7;Q15528;Q9P1Y5;Q5FBB7;P35244;O14662;P62888;Q15006;Q53FT3;Q13884;P39880;O95347;Q8N9V7;Q13257;Q86XR8;Q9UBP6;Q6QNY0;O43617;Q9BZV1;Q96AQ6;Q8WUH2;Q5JY77;P61573;O00204;Q8IZP0;Q9H6T0;P32969;O95999;Q96EY5;P80004;O15379;P36956;P0CG30;P61970;Q9C0E2;Q8IWL3;P56945;Q99933;P41134;Q9UJT9;Q9H1Z4;Q13601;O60535;Q14192;P07900;Q96EV8;P56537;Q9H171;P57723;P50616;Q9HC77;Q9UPV0;Q03188;P05114;O60318;Q9BWK5;Q6NZI2;Q96EZ8;Q15633;Q9H825;P06748;Q107X0;O14757;Q9UNH5;P49789;Q9NWW8;P19387;Q4LE39;Q9NVX0;Q9UER7;P62241;O00148;Q86WV1;Q9H307;Q8N660;P40222;O75347;Q6P582;Q8N196;Q66LE6;Q15172;Q16626;Q9NXR1;P14136;Q6S9J6;Q6H8Q1;Q69383;O00423;Q4V C44;Q03933;Q9HCH5;P29966;Q13432;Q96CN9;A8K8P3;Q15025;Q9UBQ0;Q5T7V8;O75570;Q8N8G2;Q9Y237;P62244;O15350;Q5SXJ2;Q9NY61;Q8TDY2;Q9Y6J0;Q9NVR2;Q96GX9;P92945;P48444;P54727;Q9NPI1;P02511;P57075;Q7L5N1;Q6ISB3;Q08378;P25787;Q86YF9;Q9NQE9;P37837;Q14152;P08107;Q9C099;Q9P270;Q53HL2;Q6ZNA4;O14896;Q8IX12;P42766;Q06323;Q9Y534;Q8TAA5;P41218;O00401;Q96SN8;P67775;Q8WUF5;Q66HR8;P51610;O60927;Q14934;Q86WP2;Q9NUQ6;Q9ULQ0;Q7Z3B4;Q96K30;Q14457;P42704;P09086;Q5JTC6;P04792;P63279;Q96FX2;Q96A33;Q96N95;Q92547;Q13158;Q330K2;P05386;Q5T160;O75175;Q8ND90;Q7Z614;O15117;P53801;Q13838;Q13415;Q96P70;Q9P258;P17676;Q16531;O95359;O95551;P11308;Q92837;Q56P42;Q9Y3B2;Q49B96;Q7L1Q6;Q07955;Q08AD1;Q9Y2B4;Q9Y4Z2;Q9NTG7;Q6I9Y2;Q96LT7;Q8WU90;Q1MSJ5;Q9NPD3;Q96MH2;Q9UDW3;Q9NVK5;P38935;Q9NYG5;Q86TB9;Q5BJF2;Q9NYF8;P08047;Q8NEU8;Q00978;P15924;Q99471;Q63HM1;Q8NFI3;Q7Z3Y7;Q8NF91;P30304;O15355;O14907;Q92905;Q9BZI7;Q96N16;O75182;Q13769;P63241;Q13342;Q9NY87;Q9UL76;P35573;O5VVH5;Q9H9Y6;Q01892;Q9BV47;Q14790;Q969Q0;A6NP61;Q9Y262;O95848;Q8N5F7;Q96BW1;O95793;P13196;Q92973;A6NKF1;P12270;Q7Z6Z7;Q92558;Q6PIJ6;Q14749;Q9NZC7;Q96CS3;Q5BJF6;Q504Q3;Q9Y3I1;Q9BRAO;Q8TCI5;Q8TY31;Q9BQC3;Q9GZR1;Q8WYQ5;Q5TYM5;Q8WUN7;P13640;P05413;Q00597;O43542;Q9H7S9;Q2M2Z5;Q86UE4;P11831;O95198;O75531;Q95JTW2;Q9NR22;P60673;Q8WUY3;Q9H267;P15172;Q06609;Q9BV57;O43248;Q6NT76;Q5TAX3;P57721;Q96I59;Q00577;O15049;P54105;Q3BBV1;Q86TP1;Q6PJT7;P36871;P31943;Q14134;Q8IZL8;Q5EBL4;Q9UBB4;O43776;P11388;Q9NP97;Q9UJW3;P28065;Q92979;Q99873;Q12962;Q9H788;Q9Y295;Q14669;Q9Y5L0;Q8TF74;P11166;Q9NX18;P28069;P32189;Q86UL8;O14818;Q9UKW6;P14635;P49756;Q9BYD9;P78545;B2RXP5;Q9BQI9;P23528;P26196;O00170;P09629;Q92575;O15069;P63165;Q9UHD9;Q9BQG0;Q9NQ55;O15304;Q9BRP8;Q96AQ7;Q9NYZ3;Q99871;Q96QF0;Q99627;P58340;Q96GN5;Q9BUX1;Q8N9A8;Q04323;O75886;Q8IXH6;Q9UBS4;Q96A04;Q9BXX8;Q68DK2;Q8TEP8;Q6ZVD7;Q9H6Y2;Q7Z2W4;P27695;Q15723;Q9UBC3;P62314;Q86Y26;Q8IXQ5;Q8IX03;Q08050;P31948;Q13541;O43399;P11142;Q96DB5;Q9NQS7;Q14203;P61978;A6NDB9;Q99569;Q96B67;O95163;P62324;O60711;Q9BQ67;Q14765;Q9HAU5;Q9Y5Z7;Q9HBL0;P22528;Q06830;Q13287;Q96IF1;P29084;Q13112;Q8IXW5;Q7RTV3;Q12972;P27797;P12004;Q9UQL6;Q9H7C4;Q07021;O43524;Q14181;Q8TDC0;Q16851;Q8N336;Q99549;P61923;Q12959;O43502;P63146;Q9Y297;P06746;O43745;Q9NYF0;Q9NRG4;Q5RKY6;O75884;Q8WXC3;Q5PRF9;Q76KD6;Q9BY77;Q99966;Q9ULE6;Q9NS25;O95721;Q9UDY4;P39023;Q15173;O15061;Q9Y448;Q9UQB3;Q14691;Q13469;Q8N0Z2;Q9UMX2;P0CG35;Q5U623;Q13137;O43264;Q9Y3A5;Q14CS0;Q15003;P55347;Q9NZH4;O94811;Q9UBF1;Q9UHI6;Q9UKC9;Q9UK73;P78317;P11532;Q99504;P62081;P61247;Q8NEY8;Q8WUM4;Q8NFW9;P54253;P62714;Q96L92;Q9UBS3;O94992;O14980;P35548;Q86T75;Q9UHB9;Q9UIV1;Q13428;Q99743;Q9UI10;Q15072;Q07157;Q15935;Q7Z7K6;P59047;P17987;Q8N1G2;Q5H9R7;P30307;Q9GZZ1;Q9H2C0;P49901;Q99608;Q5TA31;P78352;O75717;Q86Y13;Q9C0D2;Q9UJM3;Q9GZY1;O60828;P04732;O75582;O14508;A2RU30;Q05084;O15131;Q96KR1;Q9P243;Q15047;Q9HB71;Q9BQ70;O43310;P62328;O00471;Q9UBF2;Q9BYV8;Q9UGP4;Q86WX3;P40337;Q99750;Q9BW27;Q9BTC8;O43768;Q5H9F3;Q96M53;P56693;Q92748;Q9Y6H5;Q9BZW7;P05787;Q96LB3;O14778;O43236;Q9H9C1;Q08J23;Q8NHQ1;Q969S8;A6NH11;Q9BSU3;Q96F24;Q9Y6Y0;Q86V81;P11171;Q99728;Q9NXB0;Q9H8E8;Q6PGN9;Q2M3C7;P61576;P19532;P52758;Q53GS7;Q04695;P51948;Q13561;Q9Y2T7;Q96G03;P31350;Q66GS9;Q96F07;O75618;Q9UBW8;P15621;Q6GPH4;Q96EH3;P60900;Q92782;Q14106;Q61N85;Q96MT3;Q9H8T0;Q16143;Q99576;Q14653;Q9UBC9;Q9GZY8;P67870;Q9Y6N9;Q8TEX9;P04733;Q9UPX8;Q8WWW0;Q9H9H5;P34896;P61289;Q96A73;Q96DE5;Q15654;Q15306;Q9UKD1;Q9BXY8;Q86US8;O60832;Q8NF99;P12755;Q9UNN5;Q9Y4X5;Q5MJ68;P61572;O43303;Q8N1I0;Q9UBF6;Q92624;Q9UPN7;Q96C90;Q8N1E6;Q8TES7;Q86UB2;Q9HCC9;Q14978;Q96S59;P84022;Q9HB19;P61571;Q92796;Q9NZ63;O76095;Q96RT7;Q8WYR1;Q16

222;P60866;O14641;Q63ZY3;Q9NXV2;Q99856;Q9NSP4;P55212;P31949;Q6P9F0;P46939;Q9C0D0;Q9UL33;P10914;P41252;Q92539;A9QM74;Q06787;P41227;Q8N140;Q9NZH5;Q15102;Q13330;Q8TEE9;Q15024;Q8N3C0;Q5T1N1;P09972;Q96IZ7;O14862;Q13310;Q12834;P55060;Q15643;P54840;P56279;P41002;P53992;Q9Y6K9;O95628;P36873;Q96GC6;P51668;P57081;Q96FQ6;Q9NUW8;Q14232;Q15021;Q15468;Q8N3F8;P0CG34;Q9NQF4;Q2VPK5;P22531;Q7Z3Y8;P46777;P25440;Q674X7;Q8TBZ0;Q8TAT6;Q9BVC4;P55854;Q9UBK9;Q95486;Q5MIZ7;P50748;Q92769;P28062;O43715;Q12904;Q8TBB1;Q9NRL3;Q96D46;Q9H091;O00255;O15105;Q8ND56;O43251;Q13114;Q06330;P15559;O14713;O75496;Q7LG56;P06396;Q9BQ90;O75190;Q9NR50;Q9UMS0;Q96PM5;Q86UW9;O95644;P24864;Q9GZV5;P09467;O75444;Q13127;Q7RTS9;P49848;Q9BQ89;Q96JM3;Q9BSJ2;O43541;Q969Q6;P41567;Q5TI25;Q9NSA3;Q9HCU9;Q5JR59;Q9HD42;Q9Y2V2;P28324;Q9BV20;Q53EL6;O00625;Q9H869;Q16719;P29474;Q9Y6X2;P50991;P50750;O43598;Q9Y2N7;P08865;Q9H2J4;Q96JB2;Q9UBB9;P11161;Q9NWT6;Q07020;Q96LC9;Q9UDY2;Q9NTX7;Q9H9G7;Q12906;Q9BT25;Q9HAP2;P25788;O94855;Q96Q89;Q13233;O15265;Q9HD40;P82094;Q8WXD5;Q08211;Q99733;O00268;Q00587;Q8NI51;P62269;P60228;P42575;Q6P2C8;Q9BR76;P42025;Q9H6D7;P0DI81;Q9C0F1;O14656;Q9H6U6;Q53GL7;Q9BUL8;Q7Z3K3;P62136;Q53HC0;Q96PU5;O75170;O75419;Q99618;Q99550;Q2NL98;P13807;Q96MT8;Q9UIL1;P0DI82;P62380;P52597;Q92530;Q68CJ9;Q9UQN3;O43918;O15078;Q9HD47;Q96Q83;Q9NVD7;P50613;Q9UHV9;P07814;Q8IWL9;O15198;P48634;Q8TF46;O14746;Q8TAD1;P23246;Q6IS14;Q12873;Q9NX46;P14678;Q96CV9;Q9UN37;Q9Y5S9;Q8IWIJ2;Q14677;Q969P5;P49354;O95810;Q8WVJ9;Q15327;Q96H20;P04406;O15164;Q9GZX7;Q00005;Q9BQ95;Q9UGK8;P78560;Q9H467;P61088;P35226;Q9H0R1;Q9Y4W2;P35869;Q8TD16;Q9HBT5;P25786;Q9UFF9;P62917;Q99615;Q96BK5;Q5VU43;P57772;Q9Y6B2;Q8TC84;Q8N8R7;Q16543;Q13439;Q9NVR5;Q13094;O95397;Q96RS0;Q8TEQ6;Q9NRG9;Q9BV86;Q13045;Q9Y4L5;Q9UMS6;P62829;Q9NZZ3;Q9Y605;Q8TE02;Q9BRX2;Q9P2M1;Q5VUA4;Q6UB98;O00567;Q15185;O15116;Q86TC9;Q9NR77;Q9BSQ5;Q16621;P56211;Q9H410;P46783;Q92993;P25815;Q8IYD1;Q8IX07;Q96DG6;Q9BRS8;O60291;Q5TB80;Q1W6H9;Q6IA86;P10599;Q8TCY9;Q9H9Z2;Q9BVC6;O00505;O60299;Q15599;Q9UIA9;A6NK89;Q8TEA8;Q9P278;Q9H0B6;P50749;P53805;P53041;Q6UUV7;O94850;Q99996;P61574;Q16890;P57678;Q9UPW6;P25685;P61244;Q8WUW1;Q8WUI4;Q9P0J0;Q9NZJ4;P62495;P55055;Q13243;Q8IY85;Q9UK41;Q9ULW0;P38936;P40925;Q969S3;P12956;Q15796;P20248;Q8IWIJ3;P36578;Q9NZU7;Q6PGP7;Q3ZCT1;P50570;Q02241;Q8N9N2;Q9UKV8;Q86VQ0;O75665;Q9NSI6;Q9C0C2;Q7Z7C8;Q15366;O75164;Q96BY2;O00139;Q96BP2;O96007;Q9NRA8;P12883;Q9HAV4;P16333;P78337;Q9H4H8;Q3L8U1;Q53EZ4;P09914;P13489;Q96NB1;P80294;Q99543;Q9HBT7;O14593;O75312;O60308;Q92785;Q1Z5D6;P50453;Q7Z4T9;Q8N8E3;P19338;Q9NX63;P37198;Q7Z2X4;Q13363;Q9H0A8;O95456;Q8WTA4;Q08AG7;P62879;O94986;Q86X95;Q9UQF2;Q9UKV3;O75122;Q9H4A6;Q96HA7;Q86WG3;Q96PI1;Q15029;O94874;Q92499;Q9UKT7;Q5TZA2;Q8WY41;Q86TG7;O95476;Q15819;Q9UN36;Q9BYZ2;Q15257;Q9NWF9;P62847;Q07866;Q96IV0;Q8N720;Q15466;P19838;Q9BX70;O75143;P81274;Q9Y3E7;O75436;Q9NR15;Q075822;Q96QK1;Q9Y697;Q14764;Q9NNW7;Q14145;O43299;Q8IX90;Q99962;O15397;P20823;Q56P03;Q8IZQ1;Q02952;Q68DX3;Q15051;O95865;Q8TDB6;O43504;Q9H0C5;Q16186;Q9UFN0;Q9ULW8;Q96NL8;Q13228;Q9UM11;Q7L590;Q9C035;Q13144;P23258;Q13155;Q9H816;O95373;Q96CF2;P23396;Q8IWC1;Q9H6Z9;Q86UD0;Q9BVT8;P13645;P61201;O43913;Q09161;Q12968;P28074;P53618;Q7L266;Q9H009;P54136;P25789;Q93008;Q8WV24;Q92540;P52630;Q9UPY8;O00629;O60248;Q9HCE1;Q5T5Y3;Q14839;Q6UVJ0;Q9UPV9;Q9Y6D9;O60885;O95996;Q8N9W8;P59998;Q9HCG8;P21399;Q13526;Q9BVW5;P12757;Q8WU39;P28838;Q8N1K5;P42768;Q86V15;Q9UKT4;A2IDD5;Q6NUQ1;Q8NFFZ5;P25963;Q99619;P0CG47;Q9H503;P40121;P04053;Q9UGK3;Q12983;Q86UW6;Q9Y2M5;Q9BPZ3;O60573;P08235;Q9UNY4;P06744;O95983;Q96T76;Q8N998;Q96BD8;Q04917;P04818;Q6QNY1;Q9UI95;Q9Y3D0;Q9HC62;Q9NWW0;O14920;Q15545;Q969H0;P11441;P27348;Q8N1V2;O95271;A4D1E1;Q7Z5W3;Q9NZN8;Q03111;P31946;Q9Y3C5;Q717R9;Q32P41;Q96JN8;Q9UKN5;Q9BXN6;O60759;Q8BT72;Q9H4D5;Q8NA72;Q9NS73;Q8N3L3;Q96MG7;O75150;Q9UM79;Q13761;Q6ULP2;P13647;O75410;Q9UKT9;Q9C000;P41208;P52292;Q9H0A6;Q8N9Z9;Q5HYK7;Q5JVS0;Q96IY1;P52298;Q9NR09;P19484;O14646;Q13901;P16989;Q9BXP1;Q9BYX4;Q9BRP1;Q96IK1;P20618;Q96Q35;P45984;Q15628;Q9H0U9;Q13642;P42771;Q8N490;Q8IZT6;Q9NP79;O95817;Q9UNE7;P48147;O95831;P48595;Q86SQ7;Q9H6Z4;Q8TC76;Q13425;Q99623;Q14139;Q8IUR6;Q8N987;O60763;Q9GZU2;Q9UKK6;O94925;Q6DKK2;Q15714;Q9Y2X3;P80723;Q9UBL0;Q9NS23;Q6PI48;Q0VG06;Q00653;Q9UHN1;Q9Y5J3;Q15833;Q8N488;Q96MB7;P0CG48;Q9UPA5;P04731;O75791;P60951;P60952;P25205;O60504;O75154;Q96EK4;P07315;O14556;Q9NWB7;P40855;Q08752;Q13895;P46013;P47974;Q13409;P61575;O43318;P47928;Q8NDQ6;Q92600;Q495M9;O43395;Q9GZT9;Q9ULZ2;O95487;Q9HA77;P61758;Q9H4B6;Q969V6;Q8TED0;Q99700;O15182;Q6NZ67;O14964;Q9P1Z2;P58304;Q9Y4P8;P00338;O43765;O14737;Q8IXT1;Q9NUS5;Q9H808;P27986;Q5T2W1;Q05086;Q9BXS6;Q9NP71;P28070;Q9NPJ4;Q8N693;Q9Y2G2;Q14244;Q86WJ1;Q01831;Q52MB2;Q92844;Q14493;Q96E77;O96018;Q9BQE4;Q92793;Q9BW92;Q70IA6;Q92734;Q9NY27;Q93052;Q01860;Q9H204;P18848;Q69YH5;O94817;Q9NWZ8;Q6IEG0;Q9NSC2;P28066;P68036;P63000;Q9BZR8;Q5T749;Q03393;O00165;Q5T8I9;Q2M2I5;P41250;Q9BT78;Q9UGJ1;P0CG29;P35579;Q8IXQ6;O95613;Q9UL18;P35606;Q14683;Q96FJ2;Q8N3Z6;O75800;P14324;O15371;Q04637;Q49MG5;P30305;Q9NXX8;Q96FN9;O14519;Q3SYG4;Q9Y375;Q86WI3;P43487;Q96SW2;Q9H3F6;Q99436;Q9GZV4;Q9BZF9;P24941;Q96RN5;Q8TAA3;P13010;Q9NUQ3;P78347;Q9UKA2;P49006;P30047;O43592;Q9UKK3;P49321;P07320;Q9BRT9;Q8N4C6;Q9Y3U8;Q8WUX9;Q9NRD1;P35232;P63220;Q9UBD0;Q9H840;O60869;P61962;O60518;O14512;Q8NE71;O95229;Q8WXS3;Q8TC56;Q9Y678;P83881;P06132;P62987;P26651;Q9H4A5;P06730;P45973;P07476;Q9BX66;Q15121;Q99689;P55327;P08670;Q9BVU0;Q86Y01;P51116;Q96E16;Q9UKG1;P50222;Q16537;Q86YV9;Q9NVM9;Q9H974;Q676U5;Q96A44;Q9BVN2;Q8TDR0;Q9Y2W2;Q9NTM9;Q01850;O43402;P49589;Q9H7T9;Q6STB5;O95453;P30260;Q6P177;Q9BZG8;Q86XK2;Q13404;P49721;O14558;Q9HCM9;P42226;P80297;Q8IY57;Q9BPU9;Q9UPT5;Q8NC51;Q86VS8;P11802;Q16612;Q96IZ0;Q9UH90;Q92597;P23497;P02489;P78371;Q9BYG4;Q9Y692;Q9BXP3;P14672;Q66K74;Q5UE93;Q9Y252;Q86Z20;P46527;P14653;P49720;O00463;P15923;Q8NB12;O14978;P35637;Q9NRR5;Q99717;P06733;Q15834;P51580;Q9H299;Q8TDN4;Q9BXF6;Q8NCD3;P22626;Q9UH77;Q9C0F3;Q9BXR0;P78318;P21673;O60870;P02533;Q96CS2;P11172;Q13568;Q0VD86;Q13490;Q12816;Q9UL40;Q9UMX0;P51808;Q13765;P50914;Q9Y281;Q9BUH8;O15287;Q9NVV4;Q8NDN9;P50452;P27816;Q9ULC4;Q7Z417;Q86WH2;Q96M29;O75376;Q13042;P35900;P27815;P61586;Q86VNI;Q92556;Q16637;Q15651;Q9Y222;Q96DV4;P11940;Q15691;Q9UMX1;P22681;O95905;Q8WXF1;Q9NP77;Q99814;Q8WVK7;Q9H7E2;Q8WXB4;P60510;A2A288;Q9NT62;Q9H3M7;O15111;Q93062;Q9Y250;O75368;Q53ET0;Q8TAP9;Q8IWI35;Q9BRJ7;P23297;Q96ED9;O43324;Q9Y2Z0;Q00987;P05783;Q9HC16;Q9UMS4;Q9P2J5;Q13867;P62753;Q9BTE3;Q14602;P08397;Q9NTK5;O14893;O15083;Q9NR46;Q9HCI5;P61578;Q9NY74;Q8N668;P05388;Q13023;Q9H9F9;Q8IUF8;Q8NEZ5;Q9

H7D7;Q86YD1;Q15776;Q6MZT1;Q66K89;Q15154;Q6Q759;Q53QV2;P52294;Q99459;Q9UBY9;P42224;Q96IU4;O75132;A6NKF2;O15360;P49918;Q96FF9;P07197;Q9NXR7;P32929;Q9NPA3;Q96EY1;Q16836;Q6ZN17;Q9NRR3;Q86X55;O94763;Q8NFG4;Q8TC71;O75674;O15205;O15392;P62851;Q96PM9;Q9BTM9;Q01534;Q00839;Q06587;Q9UI36;Q9ULM6;P25398;Q9Y6Y1;P07864;Q14442;Q15056;Q9HOI3;P43355;Q8IWE2;Q96EA4;Q15759;Q66JJ3;O95153;Q8TDD2;Q96GV9;Q16829;Q9UKT5;P62937;Q15797;P78537;Q16526;Q68CZ6;O60936;P62877;Q9H1Y0;A8MTZ0;P23508;Q14194;Q8N163;P61960;Q12830;O43708;Q9BT81;P02795;Q13501;Q8NEZ2;O95571;O15446;Q9Y3A3;Q9BT92;P68104;P46781;P48200;Q9H814;Q9NBD4;Q8IYI6;Q9P1T7;Q9BXP5;Q7Z699;Q96LI6;O14576;P14868;O00422;Q6TGC4;O14879;Q07352;O75821;Q9BRK4;P40424;Q13367;Q96B26;Q9BUR4;Q8NG50;Q16548;Q15276;P42772;Q8N108;P43364;Q9Y224;Q8IUD6;Q9NPC6;Q8NFH8;O15372;Q13347;Q9H2G4;Q9UPZ3;Q96EB1;Q5VT06;O60921;P18146;Q7Z6E9;Q96CW6;Q9ULD2;Q15650;P41214;Q9BV73;Q9NW38;Q76FK4;O96028;Q8N9B5;O76075;P32519;O60477;Q9UHB4;Q8WX92;P15822;Q9UKL3;Q96M11;A8MSY0;Q9H1K1;Q14693;Q96CW5;Q9BXJ9;Q8N2W9;Q7Z5L9;Q95149;Q08945;Q00534;Q14738;Q96A56;Q9UBS8;Q9H1J1;O60716;Q15773;Q6P2E9;Q9NX95;Q14999;P51003;P17661;O75691;Q9Y314;P35237;Q3C1V8;Q8TAP6;O95429;Q9NRC8;Q9NQR4;P62979}

6232

Pathogen{ P0C214} interacts with 2514 human

partners: {Q9Y536;Q9NWB7;Q9BQ67;P22681;A6NP61;Q9Y3Q8;Q9Y2B5;P40424;Q8IW19;Q9BY77;P50440;P06132;Q05086;Q14457;P41250;Q9UGP4;Q9H7C4;Q92993;Q9BZI7;Q13310;O95551;Q9NQG7;O00170;O00268;P29474;Q9UKW6;O94829;Q8TEX9;O43768;Q15833;Q9UI26;Q14410;Q6NUQ1;Q9NRR3;Q5SZL2;Q9UBW5;Q8N1V2;Q9BZL4;O75444;O95243;Q8TB72;O15078;Q07866;Q14526;Q8N163;P35080;Q9Y3E1;Q9UKA1;P61247;Q9BXP3;P60228;Q9BTM9;Q96P26;O15198;Q8NFW9;Q16637;Q5MIZ7;Q9Y5L0;Q96J02;Q8NI51;Q5H9R7;Q9UI08;P61923;Q9Y6X2;Q9Y2W2;Q7Z3K3;P51114;Q96B67;Q96BK5;O15287;Q96FV9;Q9GZZ9;P62312;O00213;P08729;Q9BUH8;Q8NHW5;Q8IWJ2;P35754;O75608;O94927;P20248;Q96NL8;Q9H825;Q9UHL9;O95671;P48728;P49354;Q8WX92;Q9H832;Q8TAP9;Q9UKN5;P49419;Q8N9A8;Q9UDY4;O15083;O15234;Q9P278;P35226;Q58FG0;Q9UBB6;A9QM74;Q13761;Q9NZZ2;Q9NZN8;O15116;Q8IX03;Q969S3;Q9UGC7;P09417;P60709;Q13257;Q15327;Q56P42;Q05195;P41220;Q9H6T0;O75935;Q9Y3I1;P08294;P49006;Q9Y615;Q969F9;Q6ZNI7;P07315;Q16543;Q9HBR9;Q8WV28;Q96GA3;P35237;Q2M2I5;O60346;O75161;Q9BU02;P49589;P52209;P25789;Q9H4X1;Q8N9V7;O75691;P11308;O15117;Q00653;P27695;Q8IXQ6;P05937;P32243;O60239;P09917;P35321;Q05932;Q68DX3;Q00597;P63000;Q09161;Q16537;O75874;O43805;Q7Z6J0;Q8NDQ6;Q96PM5;Q9NSE4;Q9H0A6;Q96C86;O95817;P26196;Q9BQS6;Q8IX12;Q6IS14;Q8ND56;P55036;P61244;Q9ULE6;Q06609;Q75663;P62081;P42766;P11413;Q12904;Q15697;Q9Y5Z7;Q9UI10;P30307;P19474;Q14CX7;Q7L3T8;Q9HAU6;P29966;O15111;P68133;O95810;Q9NPP4;Q00613;Q9BSJ2;Q6NZ67;P35869;Q9Y5V3;Q13469;Q15024;O95363;Q15154;Q06787;Q9UIA9;O95045;Q8NCN5;Q96M53;Q8N0Z2;Q14409;Q9BVC4;Q5JVS0;P04818;Q99832;O14787;Q9P299;Q8WUX9;P16989;O95260;O15061;Q8N335;P51610;O14681;Q9H4A6;Q9H6Y2;Q9UGM6;Q58FF7;O60841;Q15047;Q13330;Q5T752;Q96CF2;O14746;Q8IZP0;Q8IY31;Q9H788;Q99728;P35637;P55060;Q8N6F7;O95153;Q08AD1;Q8TBZ0;Q9Y6K9;P31350;Q8WU3;Q8WU3;Q96P70;P62140;O95456;A6NKC39;Q13363;P28062;Q14008;Q4VC44;Q5UIP0;P05783;P13489;Q9UKX2;Q86YD1;Q9H0A8;P55347;Q9Y376;Q6P2E9;P49368;P49901;Q9H4I8;P09914;Q8N9N2;P00480;O95198;Q1MSJ5;Q8WV44;O94986;O95453;Q9BV47;Q15651;A5LHX3;Q9BSF8;Q13547;Q12988;Q8TEA8;Q8WWW0;Q8NFI3;P78337;Q7Z3Y8;Q12815;P35558;P16157;Q8NCR6;Q9UPX8;P09913;Q8TE04;Q96DV4;O00148;Q13490;Q9H816;Q92624;Q16775;P49902;Q96KR1;Q6IEG0;P28838;Q9NRR8;P12757;Q53HL2;C9JE40;Q00005;Q9NWD9;P78318;P07864;P56945;Q9H201;O75351;P53992;O43264;Q8NI35;P28065;O96033;Q8NDF8;O75347;O95684;Q08999;Q9BRP8;P19838;Q6UUU7;Q15628;P57721;P49770;Q8WUF5;Q9Y3C4;Q9NRI5;Q9Y262;P41227;Q15013;P30153;P78371;P41002;Q9UJW0;Q9BSB4;Q96IV0;Q9UPV9;Q02241;Q9BRV8;Q96JI7;Q9H9Y6;Q96IZ0;Q5SXJ2;P62993;P20533;Q96BY2;P49789;Q9BY44;Q96I59;Q7Z3Y7;Q969Q6;Q969S8;Q7Z6G3;Q9Y473;Q13568;P13010;P06746;P02489;Q9NS23;O43913;Q15051;Q99698;P54253;Q9NQ55;Q15003;Q9UH90;O14879;Q6ZS17;Q9H9F9;Q9BRA2;Q96S95;Q9NP81;Q16186;Q7L266;O00159;Q9BRK4;A2BFH1;P12081;P46379;O43159;Q8N0Z6;O60716;Q7Z699;Q9NPF6;Q96ED9;P07476;Q86V81;Q96LI6;P57772;P02511;Q04917;O60759;P48643;Q9Y2K3;O94811;Q9UBB4;Q96A44;P62380;Q16656;Q14164;P61758;Q9UPT5;Q96F24;Q6DKK2;Q14203;P53396;Q9Y281;Q92934;Q9UDW3;P23381;Q96N21;Q13625;Q9Y5S9;P07741;P61571;O60543;P51003;Q93015;P27348;Q7Z4H7;Q8TC56;O14645;P62273;P81274;Q13769;Q8WTW4;Q12873;O95295;P06748;Q9P209;O95628;Q96LC9;Q13829;Q15554;P50750;Q8NHQ1;P23396;P27815;Q92900;Q7L590;Q9HD15;P19484;Q00987;Q96FX2;Q9GZU2;Q9GZV4;Q8N693;Q16222;P50613;P43487;P05388;O95400;P55212;Q9H3M7;O75190;Q8TAD8;Q9H814;Q13112;P40171;P40121;Q92796;P49427;O15372;Q9Y2L1;P29084;P49590;Q9NR56;Q96QK1;P07814;P62847;O75618;Q96C90;P42226;Q5H9I0;Q9UM54;Q460N5;Q13158;Q5SW79;P36952;O14818;O14579;Q9UJP4;O15350;P40855;Q9C035;Q9NP79;P15924;P14678;Q99856;Q9NY27;Q14764;Q96EA4;Q9C0C2;O00167;Q8N2W9;Q86UB2;Q9BTW9;Q8WXX9;Q9P1Y5;Q9Y285;O60927;P62829;Q504Q3;Q96BWL1;Q13023;O75496;Q9H444;Q9Y2V2;Q53HC0;P41252;Q96SN8;P07954;Q15029;Q14765;Q9C086;P0CG30;Q495M9;Q8N5F7;Q9UDY8;Q86UW6;Q8TF09;Q16621;Q96R06;Q8NA72;Q13867;Q7Z4G1;Q9H227;Q14152;Q15599;Q96GV9;Q9P2N5;Q9BV57;Q9BXS6;Q9NPA3;Q14145;Q96D46;P0CW01;P11055;P78406;Q96BP2;Q92560;A6NH11;Q86WI3;P05204;Q9BSQ5;P55265;Q5JTT9;Q9NVM4;Q92750;P62166;Q13367;Q9HD42;Q9Y4P1;P11802;Q9Y6K5;Q7Z417;P53370;A8K8P3;P63313;O15056;O14929;P57678;Q3BBV2;P32519;Q9NPJ4;P08133;P31150;Q9C099;P61572;P53618;P34932;Q9BQC3;Q13526;Q9Y3B2;Q9BQGO;Q8WYQ5;Q9P0M2;O94921;P50748;A8MVW5;Q99743;Q9BRX2;Q92793;Q9Y6N9;P51580;Q8WYR4;Q9BTE6;P61604;Q9Y5J3;Q8N5X7;Q9UBY9;Q00994;Q8NHV4;Q86TX2;Q8IZL8;Q9HBH7;P56693;Q92797;P67809;Q9NNW7;A6NMX2;Q8IV36;Q7Z7A1;Q99613;Q6PGP7;P61586;Q9NVR5;Q6P1M3;O15446;Q9Y295;P46937;P31483;P40261;Q86WX3;Q6PI26;Q13033;P61201;Q9NWX8;O60684;P61457;Q7Z4T9;Q9H2J4;P35606;Q9Y375;Q8N8G2;Q9BXW4;Q7Z5L9;Q5VYK3;P40472;Q16082;P81877;P84022;P48594;O00186;Q9UMS6;P23246;Q12906;Q9BRX8;Q9ULP0;Q9Y512;P48444;O00567;Q15172;Q9BVW5;Q9BYV8;Q8WW24;Q5T749;P29728;Q8NFG4;P61962;P61573;Q9NZI5;Q9NTX7;P15172;Q9BSU3;P46527;Q9Y244;Q9H808;Q9BX66;P56524;O95229;Q96F07;Q9GZV5;Q7Z7C8;P55957;Q99623;P23258;Q9NUS5;Q9Y6Y1;Q9Y6K1;O14907;O00425;O75884;Q6NT76;Q99576;O75821;P42704;Q14678;P12277;P17544;P41218;O43715;P11831;Q8TCI5;Q9UJMS3;Q9HC77;Q9UPU9;Q9NUL40;Q5JTW2;Q9H0F6;Q99417;Q13515;P11172;Q58FGL1;O60318;Q5H9F3;Q9BXM0;Q53EL6;Q8IUD6;Q8NCF5;Q04206;Q9NPC6;O14639;Q8N1E6;Q9Y315;Q3L8U1;Q7L2E3;Q8TCD5;O43402;Q6STE5;Q96GX9;Q12962;Q9H307;Q66LE6;O60535;P83881;Q15121;Q9Y3B6;Q15056;O14964;P63279;P05787;Q16613;Q6XQN6;P60953;P42224;Q676U5;P14136;O00423;Q12816;Q13404;P48556;O14656;Q86WD7;Q9

HCH5;Q96MT8;P37275;Q68CJ9;Q96A73;Q6NIZI;P10914;Q14204;Q6PJT7;Q92734;P78537;Q5HYK7;Q70IA6;Q9HAV4;Q16666;Q9NPJ8;Q13427;O60299;Q8TDY2;Q8IXW5;O43745;O95721;Q8NHY2;P35270;O75886;Q9ULJ6;Q9GZZ1;O96018;Q86YV9;Q9BYX4;O43395;Q8NG27;P57075;Q9Y3C5;Q6ISB3;Q9UKI9;Q9BUL8;Q08378;P40306;Q93034;Q9H869;Q86W56;P62701;Q9HA92;Q99608;P36543;Q06330;Q99873;P11940;P05813;Q912905;Q99497;Q969T4;P14635;Q14232;P63220;Q15257;O60296;Q32MZ4;A2RU30;Q9NSI6;Q3BBV0;Q9UBS3;Q9Y6Q2;Q5RKY6;P48200;Q9Y613;Q9NUQ6;Q9NRD1;O43617;Q9NXV2;O79340;P68402;P06396;Q7L9L4;Q92540;Q8NFU3;O60437;Q96N77;Q9NSC5;O75164;Q9H910;P61575;P40939;O60477;P05413;P55345;Q9NX18;P24385;P51808;O00139;Q9NVM9;Q9BUR4;Q9UQN3;Q13875;P08865;Q9H091;Q14999;Q7Z614;Q96CW5;Q8WXD5;Q14194;Q15691;Q9NZI8;P32969;Q9UK41;Q13884;Q86WP2;Q5JPH6;Q7Z2X4;P35908;O43776;Q9Y3R4;Q13901;Q6ZMR3;Q9Y297;Q8NEY3;Q9HAU5;Q9NXX8;Q9Y6I3;P31948;Q99962;O95149;Q8NEJ9;Q15545;P38935;A8MSY0;O95396;Q7L3B6;P0CG35;Q99547;Q9H0R1;Q00978;Q86Z20;P16083;P62877;Q5MJ68;P32189;Q9NPB8;O75330;O60551;Q49B96;O00308;Q15653;O75794;Q9BT81;Q7KZF4;P63241;Q9UKG1;P46060;Q9UNS2;Q9H063;Q15031;Q6IV72;Q96LT7;Q9NY61;Q9BXR0;O14556;P51854;Q96TC7;Q5VVH5;Q13094;Q9Y266;Q96Q05;Q69YH5;Q8IWE5;P35573;Q969Q0;Q01844;Q9UI95;O43318;P14868;P13196;P52565;P13640;P29508;P38936;Q6PIJ6;Q6IA86;O43390;Q5T447;Q99750;Q96MT3;Q15366;Q9Y2S2;Q96FF9;O15131;O95347;Q8IWL3;Q16890;Q9UKD1;P49591;Q86UE4;P0CV99;Q9H4I2;Q9BYD9;Q86XZ4;Q9HCE1;Q9H3C7;O60524;P17676;O43639;Q9BTE1;P24278;Q9UBS4;Q9UD71;Q9BFP3;P43355;Q01105;Q9BXD5;Q9UKT7;Q99700;Q13057;P55789;P78317;Q9H503;Q8N336;P48147;Q9HOM0;Q99615;Q9UIV1;Q03933;Q96RT7;Q9UGJ1;Q7Z2W4;P25205;P05062;O94874;Q5JR59;Q8TF46;P55854;Q93008;Q96JZ2;Q01082;O43248;P27816;P23490;Q01534;Q9NWF9;Q9UMS4;Q06830;P50914;Q5VSL9;Q9BZV1;Q96IZ7;Q9NUQ3;Q9H089;Q96DC7;Q9UPQ9;P32929;Q8N5U6;O95571;Q07955;P11166;P50749;Q9BQI9;Q96QU8;Q9Y534;Q9NZC7;O95359;Q9BT92;Q13428;Q9Y250;Q6QNY0;Q8TBF2;Q96CN9;P0C1Z6;O60828;O14974;P60510;Q5T2W1;Q9NR46;Q96CS2;Q14315;P80297;P22061;Q5SQN1;Q9Y5K5;Q2VWA4;Q9BTE3;O75800;Q9HBZ2;Q14980;Q2NL98;Q53QV2;Q8WUN7;Q8TEP8;Q53FT3;Q86Y26;P11532;Q9UPV0;Q9HCE7;Q9COF1;Q13501;Q8IZH2;O15519;P82094;Q9BT78;P46779;Q9H0B6;Q07352;P62714;O95989;O60921;Q8TDN4;O60825;P55795;Q8N3C0;Q16548;P08397;Q6PGN9;Q9P0R6;Q96RN5;Q86P3W6;Q15633;P78352;Q96ST8;P15121;Q14258;Q9GZS1;P50747;Q03188;Q8IXF0;Q9BWU0;Q9H3H1;O43303;Q9H299;Q86UD0;Q15102;Q8IWX3;O95397;Q9UM07;O43299;O75312;Q9NSA3;Q9HB19;Q9H1K1;O95298;O15049;P52298;Q13642;Q9GZT8;Q76KD6;P28066;Q99966;Q969P5;Q9NZJ4;Q9NPG2;Q9Y237;Q9UQB3;O00303;Q96MB7;Q12968;Q01094;O75832;Q9H467;Q9ULQ0;O43516;Q13921;Q8NCD3;Q13137;Q9H7D7;Q9UN7;P45877;Q9HC16;P11168;P18848;Q6P9F0;O75120;O00273;P71399;Q96RN5;Q86P3W6;P78352;Q9UHV9;Q9ULM6;Q03393;Q674X7;Q92597;A6NIX2;Q9UI17;P62314;Q96DX5;Q53GL7;A2A288;P98170;P30793;Q86US8;Q96G03;Q86VS8;Q14493;Q15834;O60870;Q9H1B4;Q8TAT6;Q8TF40;Q9UMS0;Q15819;P37837;Q00534;Q9NPB6;P09467;Q8NE71;Q15528;Q13045;P0CG34;Q9NTM9;Q13233;Q9Y2T7;Q92844;P49790;P35580;O75635;Q96EY5;O43681;Q96Q89;Q12798;Q9BUP3;Q9UKA2;Q8IVI9;P56211;Q9Y3V2;P13639;Q01201;P21127;Q16881;Q92985;O14980;Q9H6Z9;P47928;P37198;Q9HAF1;Q9NPD3;Q00536;P61960;Q9ULC6;P36871;Q9BQ70;Q8IZQ1;Q53ET0;P41134;Q9UKL3;Q8TF74;Q9Y224;O75143;Q15124;Q13084;Q9BW27;Q15173;P15923;P56192;Q9Y6H5;P46783;Q13425;Q9HBL8;P52294;Q16831;P14618;O14613;Q9UBF2;P51948;Q8WXF1;O75132;Q9Y6Y0;Q5JY77;Q9Y697;O95487;Q5VU43;Q9H4B6;Q9NXB0;Q96MH2;Q2M3C7;Q8NEF9;P61086;Q9NZD4;Q14103;Q9UER7;Q04695;O14531;Q14978;Q96BD8;Q92905;Q6TGC4;Q96GS9;Q6ICB0;Q14749;Q92539;O43542;Q7Z5W3;Q96KC9;Q2VPK5;Q8IXT1;Q9NQR4;Q8TDR0;Q14151;Q9H8T0;P49720;P63165;Q9NZD8;P82663;O95071;P28074;Q9H6U6;O00165;Q8N3L3;Q7Z6E9;Q8IYX8;O95865;Q8N488;P34896;Q9H9H5;Q06587;Q8N9R8;Q00577;P26639;Q9Y2Z0;Q9HCC9;Q5VUA4;Q9NR50;Q14244;Q8WYR1;Q9Y4B6;Q9NTG7;O95983;Q99933;Q99459;Q53GS7;Q8NF99;Q9P0J0;Q9BPU9;P61326;Q9UNN5;P09104;A5YKK6;Q99549;Q14139;O14604;P49918;Q16851;Q8TEQ6;Q96S59;Q92979;P13535;Q8IWX2;Q9BRS8;Q9BRG1;Q9BZQ8;P0CG48;Q86TC9;Q9NWW0;P38919;O14641;Q9UJT2;Q63HM1;O75570;Q9BUX1;Q9UKK6;P61576;Q9NWM0;Q9Y3U8;Q9P258;Q86XR8;Q96L92;Q5VZE5;Q6P587;Q9NYP9;Q15386;Q9UNY4;P25440;Q15398;Q6MZT1;O95336;Q9H074;Q52MB2;Q9Y4R8;P04732;Q9NZH5;O43189;Q12982;Q6ZNE5;Q8TCY9;O95376;Q08J23;Q9BT25;P14653;Q9Y6B2;O00422;Q7Z2E3;Q96N95;Q9NRG9;O95999;Q12933;P30281;Q9NVW2;P78347;O75145;P46939;Q96SW2;P57081;Q13485;P62753;Q9Y2M5;Q9Y4P8;Q13144;Q96B36;Q9C0F3;O00154;Q8NEU8;P61574;Q9UQC2;P22531;Q9BZQ4;A9UHW6;P55197;Q9BWD1;Q9NUL3;Q16658;Q86XL3;Q9NX63;O43310;Q08209;Q96MP8;Q96QA5;Q92556;Q92769;Q12834;Q8NEY8;O15105;Q14671;Q9ULW0;Q13243;Q9NZJ0;Q8IYL2;Q15468;P08670;Q8N6M9;Q9UPR3;Q9UH92;O94817;Q9UII4;Q8TAF3;Q7L2H7;Q13352;O43592;Q8N108;P20749;Q14691;Q7RTS9;Q9UMX3;P49848;O43663;Q15643;Q8N490;P50022;Q53EZ4;Q9BUK6;P28324;P54577;Q9GZY1;Q9UKV0;Q9HCU9;P52597;Q8WV38;O00257;Q8WXC3;Q9UL45;Q9H0E2;Q8TCS8;Q9H2G9;Q8IVM0;Q5T8I9;Q96LK0;Q96MG7;Q96RK1;P25788;O43502;Q9ULW8;P62136;O14896;A2RTX5;Q9H9G7;P62495;Q6ZN28;Q96TA1;P24941;O15382;O75334;P40337;Q86TP1;Q9NXG0;Q9UBS8;P49321;Q15714;O14519;Q99689;Q8TDC0;Q76FK4;Q0VG06;Q15654;O95278;P02795;Q9GZT9;Q13765;Q9UIL1;Q3SYG4;P38646;Q9ULD2;P42574;Q99618;Q04323;Q14019;P50616;P36639;P62269;O75376;Q9BZZ5;Q96AB3;Q49AN0;Q9Y4W2;Q9Y6X9;P30043;P0DI81;Q99550;Q96M11;P19429;P0CGW0;Q15025;P04733;P67775;Q5UE93;Q86TB9;P10809;Q9BZW7;O00231;P41567;Q9BXP1;P19532;Q15796;P48634;P42771;Q56P03;Q9NSC2;Q96I24;Q9UHI6;P61579;Q9P0W5;P12882;P11441;Q14192;P62324;O00204;Q6UUV9;Q60930;O75717;Q6P2H3;P62318;Q8NDV7;Q96CS3;Q9BRP1;P25963;Q96KN1;Q8IY85;O43598;P5998;Q96GC6;Q9Y6X8;P35244;O95429;Q96K30;O60711;O15360;P14324;Q9BXJ9;Q99504;Q06323;Q9UMX2;Q86SG2;Q9NP71;Q9NS73;P11388;Q9BVT8;Q8IV48;P46781;Q93009;P61578;Q96KQ4;O43541;Q96P71;Q13868;P30305;Q7L1Q6;Q5T5Y3;Q8TD16;O15379;P25786;Q8TAP6;Q8NEZ2;P06733;Q9NZU7;Q9HB75;Q01892;Q96DB5;O15205;Q9P1T7;Q96RT8;Q99619;O14508;Q9Y2D1;Q96RS0;Q9Y2G2;Q9UHY7;Q8TC76;Q96DI7;Q16829;O43324;Q9NX95;Q5T440;Q9UNH5;Q8TE02;Q8TAA5;Q9P2M1;Q9UKC9;Q9BXF6;Q96EV8;Q9Y3F4;Q8IXH6;Q8WYA1;Q9HA77;P62736;Q9NR77;Q9HCM9;O14618;Q8TBB1;Q8NDN9;Q5EBL4;Q7Z7K6;Q8IYD1;Q8IX07;Q96CV9;Q9ULX6;Q58FF6;P78559;Q8WXU2;Q8TES7;Q9BRT3;P49588;Q9H9Z2;P12755;Q6U7Q0;A4D1E1;P62879;O94850;Q13127;Q9ULZ2;Q96GW9;Q14934;Q4LE39;Q9UBF1;P23921;P53041;Q8IU60;Q01850;O75940;Q9NXW9;Q15650;P28069;P30740;O60763;Q96P63;Q8WUW1;Q9Y252;Q15072;P20226;Q969H0;Q12959;Q9H2G4;Q99871;Q9BTC8;Q96D03;Q96AQ6;Q1W6H9;Q14511;P28072;Q92890;Q141160;O75534;Q14653;Q9NVK5;O00505;Q9UI36;Q9UBP6;Q6P2C8;Q8IXQ5;Q9P2Y5;O75494;P09972;O75531;Q5TA31;P54727;Q6NXT1;Q9H2K2;Q9UDY2;Q6ZNA4;P25815;Q7Z7A3;Q8TED0;Q9UQF2;Q9UKV8;P41208;Q7L5D6;Q96NB3;P51116;Q6GPH4;Q8N9Z9;O00512;Q8TAA3;Q9H840;O96007;P11387;Q14140;P12883;P

10074;Q15287;Q8WXS3;O43918;O94903;A8MTZ0;Q9Y3E7;P62244;Q9HD26;Q9C0D0;Q9BRT2;O75582;P26651;O60784;Q9BQI5;P62987;P09622;O14593;Q8N0U4;P16333;P62826;Q6IN85;Q9BZ23;Q12983;P50453;Q9H410;Q15935;Q9H9T3;P39880;P42773;Q6NUP7;Q9UBD0;Q96LR2;P62633;Q9UKT9;Q92558;P54687;Q07343;Q04637;O60832;P31943;Q96A04;P23497;Q8LUR6;O94992;Q6IE81;Q99816;O75665;O15392;Q32P41;Q9N2Z5;O43747;Q92499;Q9H1Y0;Q9N9B5;Q8WU90;Q07020;Q8WY41;Q9H6D7;O95476;Q9UPY8;Q14669;Q9NYB0;Q9WVJ9;Q86WV1;Q9NV92;Q8NQE9;Q9HD47;Q8NFX5;Q7Z5K2;Q69383;Q9BX70;O75410;Q9HBL0;Q9Y2J8;O75436;Q9H2U1;O60291;O75822;Q14738;Q9NZI6;P06454;Q8IX90;O95273;Q14683;O75419;P42025;O95793;P18146;P05198;O43504;Q9NUU7;Q8TEE9;Q15631;Q9H204;Q9UL12;Q9H4A5;Q8IXQ9;Q9NS25;Q96IU4;P07327;Q9H9E1;O15164;P58340;P15621;Q99436;Q13126;Q8IWC1;Q13114;O43447;Q15773;Q9NPI1;Q9BVN2;P24864;Q5PRF9;Q8N196;P30279;Q9NZ63;P04156;P10909;P63172;Q01831;Q9H9Q2;Q9H009;P05120;Q9UBQ0;Q5T7V8;Q9H469;Q5FBB7;O14576;O94925;P27797;Q8TC84;P07438;Q3KQU3;Q13439;Q6UB98;Q9H7E2;P31949;Q8IWE2;Q7Z460;Q9BVC6;Q15759;O60885;Q9UM82;P34949;Q9UFN0;Q9BV73;Q16526;Q9UHB4;Q13895;Q9BYG5;P54840;P61981;Q9HCI5;Q2V2M9;O60506;A2IDD5;P0CG47;Q8N1L0;P04053;Q107X0;P25787;Q9NYZ3;P55327;Q99814;P09086;Q86TG7;P62241;Q99471;P36873;Q86XK2;P46777;Q9NZZ3;P60673;P21980;Q6P387;Q9UKK3;Q9HCG8;Q12765;A6NKF1;Q15006;Q9H0U9;Q96FJ2;Q58FF8;Q9GZRL1;O14893;Q9BSW2;Q9H469;Q5FBB7;Q96GN5;O14558;Q9UP83;Q8IXJ6;Q13615;P23526;Q9UBL0;P55884;P09629;Q96NU7;Q86Y13;P10599;Q9BTV5;A6NG73;Q9Y2Y0;Q96SL8;Q8WW33;Q9NUP1;Q9Y6M1;P11161;Q9NVR2;O00399;Q9BQ95;Q96Q06;O75150;Q96JM3;Q6ULP2;P13647;Q15038;Q9NQS7;Q9Y6D6;Q9NZH4;Q9GZX7;P45973;Q9UMR2;Q92973;Q9NR09;O15265;Q7Z406;Q9UGK8;O43290;Q16143;Q9UI09;Q9UFF9;P35268;O15305;Q12888;Q9UKY7;Q7Z6Z7;Q86CZ6;Q9NP97;P45984;Q9HCK5;Q5T160;P80294;Q8NC51;Q5BJF6;Q03111;Q99717;P47897;O60664;Q86WV6;O14978;P17987;Q9HC62;Q9UHB9;O95155;Q9UI56;Q9BW92;A6NK58;Q9NR48;Q8N0Z3;Q8N1G2;Q8WVK9;O15144;P78560;Q5T1N1;P52434;Q08945;P46013;Q969V6;Q6PI48;O14862;Q04864;P80723;Q8WXE9;Q08211;Q9NSP4;Q6PD74;O95905;Q9NS26;P04731;Q9BZF9;Q8IY63;P30419;P60866;P40763;O00401;O60260;Q8WZ33;Q8WU39;O60504;O96004;Q12972;Q6VN20;Q96BT7;Q9UIV8;Q86SQ7;O76083;P13533;P27540;Q8IYB7;Q5VT06;Q86V15;O95997;P52292;Q15274;P12270;O00743;Q14602;Q9NWZ5;Q96GD0;Q6GYQ0;P27694;Q99543;Q9NUW8;Q9NXR7;Q68DK2;Q9UK73;Q5D0E6;O15069;P52758;Q71F23;Q9NPJ3;O95848;Q92600;Q9HD40;Q9UPW6;P08151;Q92804;P07197;Q6P1N0;Q9UKV3;Q92614;O14727;P23508;Q9BRJ7;Q96H20;Q86X55;Q14974;Q00839;P50570;P49458;O00625;Q7Z3Z0;Q9H0I3;Q96A56;Q5T1C6;Q16698;Q9H008;Q93083;P35998;P60900;P78545;Q15181;Q9Y623;A6NDD8;Q6H8Q1;P04424;Q5H9L4;Q9Y4L5;Q05084;Q08752;Q6NUN9;Q9NWS1;Q9P243;Q9NVD7;P22392;Q92945;Q14011;Q9NNW5;Q9HTL7;Q13342;Q9UN37;Q92575;Q9Y3A3;Q9Y3D0;Q92547;Q9BZE4;O95613;Q8IUF8;Q8WV24;Q86UA6;Q8TC71;B5ME19;Q92636;P21673;Q9BZG8;Q15776;P02545;Q13601;Q9H9C1;P19387;Q9UQ80;Q16612;P50991;Q86WG3;O14646;P25398;Q9PLZ2;Q99996;Q9H3F6;Q9NRC8;Q9NYB5;Q96LB3;P22626;Q7RTV3;Q5H9J7;P35520;Q15596;Q15797;O43708;O75791;Q9UM11;Q96FQ6;Q9UB74;Q8N4C6;Q8N3V7;Q9UBQ5;Q9H2C0;P6780;O95644;Q96P15;Q13409;Q8NFB8;Q8WUI4;Q6QNY1;Q9BQY9;P51668;Q5TD94;O43251;O60869;P36551;P14373;O14757;O14512;Q92783;Q9H4D5;Q13228;Q9NSD9;Q9UJG1;Q99627;O94763;P35232;Q9NRN7;Q9BYZ2;Q9Y605;O00463;P26640;Q96LI5;O95391;Q9P219;O75674;P55210;Q08AG7;Q96FN9;Q9BQE4;P53805;Q9H974;P46108;Q9NXR1;P05114;Q15046;Q9BWK5;Q9H0C8;P30047;Q3ZCT1;Q9NQ14;O95271;Q96C74;Q86Y01;Q8NA42;Q7LG56;A6NKF2;Q86YF9;Q6FI81;Q8TB08;Q99638;Q9BZL1;O60315;Q9BWX1;Q9Y4X5;Q8N3F8;P31946;Q63H00;Q14568;Q96IY1;P62979;Q9NR28;Q07157;P52630;Q96AQ7;Q9UBW8;P42768;Q8NB12;Q3BBV1;P30260;Q8TDB6;Q6PI77;P05386;P49454;Q14061;Q06265;P48163;Q8IUD2;Q5VZK9;P09132;P21399;Q14106;Q9UPN7;Q9Y678;P08107;Q9Y3A5;Q15326;P62851;Q96RE7;Q5D1E8;Q92748;Q96EB1;Q86U42;Q9UBK9;Q99733;Q9NVX0;Q9P270;Q382261;P61970;Q96EZ8;Q9H902;P50452;Q40222;Q9NVV4;Q6P582;Q9NWX8;P06730;O43255;P19327;Q5ST30;Q9NT62;P18754;P14672;Q8N660;Q96JJ3;Q96Q83;O60308;Q9Y5Y2;Q9UNE7;Q9NQ87;Q9BYG3;O43236;P98171;Q96CA5;O15524;Q15185;Q13838;Q8IZT6;Q9NRG4;Q5TI25;Q9Y448;P30304;Q96EK4;Q8WUH2;P50995;Q92782;Q96Q35;Q13561;Q99704;Q5TB80;P27986;Q15365;O43765;Q8IWL8;O95373;Q9NY87;P43490;O75175;Q9UJY1;Q8WYQ5;Q9C0E2;Q17RY6;P59282;P39687;Q92530;Q9UL33;Q9ULC4;Q8IYI6;O95163;Q9GZY8;Q96QF0;P15822;Q96HA7;P07320;Q9NTK5;Q9NYF0;Q9UJT9;P56537;Q9UBC9;Q8NG50;Q9C0D2;Q8WV37;Q13287;Q8N1K5;Q9UN36;Q9H6Z4;Q7L5Y9;Q7Z3B4;Q9H492;P13807;Q9NYG5;Q96M29;Q96E14;Q5JTC6;Q9UMX1;Q16531;Q9H7T9;Q9Y692;P15559;O14920;O15304;P23297;P56279;Q8WXB4;Q9ULR5;A6NK89;Q86X95;Q9Y253;Q93062;Q9UHD9;P59047;O75368;Q9NQ4;P04406;Q14CS0;Q92837;Q01860;Q6UVJ0;Q86UW9;Q9NY33;Q9NP77;Q9UMX0;Q66K89;O14713;Q92785;Q3C1V8;Q05639;P11586;Q8N9W8;Q96F86;P00558;Q9HB71;Q9BQ89;Q86WJ1;Q9UL18;O76075;P10155;Q5TA45;Q70YC5;O60518;O60248;Q9UBF6;O95433;Q9UH77;Q9UQL6;Q7L5N1;Q9NYJ8;O95486;Q86V11;P28070;Q9UBB9;Q9BXY8;Q9BV86;P35548;P08047;O00291;Q96B97;Q09FC8;P49756;Q14966;Q96EY1;Q9UKT4;P42575;P63146;Q96B26;P12956;Q9GZS3;P11171;O00255;Q12830;Q8ND90;Q96PM9;Q9Y6D9;Q96DG6;Q5VTE0;Q96NBL;P42772;P31749;Q8NCE0;Q9BYG4;Q14839;Q9BXP5;Q63ZY3;Q9Y2X3;Q9BRA0;P61088;Q9NR22;Q8N8R7;P54252;Q96EH3;P14866;O15397;P36578;Q5VZF2;Q13155;O60936;Q15021;P20618;Q4G0F5;Q5TZ2;Q96HA8;P62328;Q8N8E3;Q14677;Q06520;Q9UGK3;Q0V486;Q49MG5;Q15466;Q96T76;P07195;Q96JN8;Q96PU5;Q9H8E8;P36957;P80303;Q66K74;P0DI82;Q9Y6J0;Q9UBU9;Q9NW38;P54274;Q8TDD2;O00629;P0CV98;Q16719;O75154;Q9H7S9;Q8IYW7;Q9NPF5;Q13432;Q9Y2Z4;P49721;Q9NX46;Q9BR76;P58004;P47974;Q9HAP2;Q9BQ90;Q99741;Q86T75;Q8WVK7;O15371;Q7Z3C6;Q9NYF8;P30566;P30502;Q0VDF9;P43364;Q6I9Y2;Q8N3Z6;Q8N140;Q9UPZ3;Q6SJJ9;Q13541;P54259;P36404;P55072;P63167;Q9H2P0;Q9H0P0;Q8IY57;P18054;Q15723;O75182;O00471;P17980;Q9UJW3;Q96CW6;Q13415;Q14181;Q5TAX3;P13645;Q9BXG8;Q9BV20;Q13347;O96028;Q16236;O94855;Q8IZD4;Q96HR8;O75170;P48595;Q330K2;Q9H1Z4;Q9UKT5;O60573;A6NKD2;P11142;Q96E16;Q9NVN3;Q9NS39;Q9UKT8;Q14693;Q6Q759;Q16773;Q9NRA8;O43399;Q9UHN1;O15511;Q96DE5;Q14790;Q9C000;Q96NN9;Q96PI1;P35900;Q13042;Q9BY41;Q9P2J5;Q16589;Q15306;Q9H0C5;Q9NWT6;O14737;Q9H1J1;Q9NRL3;P21695;P25685;Q9BRT9;P0CG29;Q3I5F7;Q9BZR8;P17661;O60481;Q9Y314;Q9Y222;Q99502;Q9Y3A2;Q8N720;Q96N16;P41214;Q8N137;Q14674;Q8WUM4}

6233 Pathogen[ P03346] interacts with 2860 human partners: {O95166;O43402;Q13439;Q86VQ1;Q15172;Q13425;Q08J23;O60921;P08107;Q9UPR3;Q6PRD7;Q96T92;Q9Y6N9;Q15723;O60437;Q12888;Q13596;O75179;Q6P3S1;Q5JU85;Q06330;Q9NVM9;Q8TEX9;A8MU46;Q9NSC5;Q7Z3K3;Q15773;Q9NZJ0;Q3C1V8;Q8IYI6;Q06945;Q66LE6;P59282;Q9NQG7;P15924;Q6SJJ9;P53805;Q5T5Y3;O75382;Q15833;Q13588;Q9Y5S9;P62136;Q9UI26;O00204;P54105;Q5SZL2;Q

9UBW5;Q96FV9;Q6P582;Q9Y6D9;Q9NRI5;O95400;Q9H0A8;P21283;Q969S3;Q969S8;Q9H4A5;Q9BZI7;O1  
 5265;P41567;Q9Y6Y1;Q86UT5;P25787;Q9BZE0;O60664;P30281;Q86TC9;Q96CN9;Q9BTM9;Q9Y6X9;P21  
 980;O75691;Q9Y6K9;P12004;Q86YV9;Q96J02;Q8NI51;Q8N3V7;Q9UKA2;O75995;Q96AB3;Q9Y253;P590  
 47;P23381;Q9NS26;Q96AC1;Q15058;Q4G0F5;Q96A04;O00213;P08729;Q8NHW5;P46779;Q9ULC6;Q9ULR  
 5;Q969H4;Q96279;Q13077;Q7Z713;Q12830;Q9NZU5;Q9UHL9;Q9GZT8;Q99615;Q9Y3A2;O00463;Q5TF0  
 ;Q5RKY6;Q9H2U2;P09972;Q8IY22;Q99828;Q7Z7A1;P43378;Q16621;Q9BT25;Q96U42;Q95FBB7;Q4VC44;  
 O15234;Q9NRX4;P61978;P28070;Q96FJ2;Q9UC77;Q9UKT7;O95456;Q9Y238;P46937;Q9H0C8;Q01534;Q  
 8TDG2;O60443;Q9BXS6;Q504Q3;Q9ULM6;Q9H6D7;O00743;Q96P70;Q16589;Q9Y4Z2;P50135;Q8N0Z2;Q9  
 NR83;Q96QK1;Q96GA3;Q7Z4G1;Q06520;O60346;Q96HJ5;Q9UBS3;O95405;Q15438;Q86Z20;Q9UBB4;Q99  
 698;O75608;B5ME19;P45984;Q00536;Q93009;Q9H4X1;Q9BZL1;Q8ND56;Q9Y6K1;Q9P0M2;Q86VQ0;Q96N  
 L6;P09086;O00629;O60239;Q9GZR1;P38935;P35321;Q9BZL1;Q86B97;Q16666;Q96A73;P16083;Q86UW  
 9;Q8NC51;Q2NL98;Q09161;P10827;P22061;Q9H9P5;O15524;Q86UU5;Q9Y281;P25789;Q9NQC8;P55036  
 ;Q96N21;Q86UR1;Q8WXF1;P50570;P02549;P28324;P06730;P62917;Q13895;Q9NSK0;Q16082;Q9NY74;  
 O15397;Q12988;P45973;Q9UJW0;P13807;Q00005;Q8IX12;O14908;Q92560;Q7Z3C6;Q9BTC0;Q9HAU4;Q  
 9UPT5;O15111;Q15366;O95229;Q6NZ67;Q53ET0;Q96LR2;P52434;Q9HAV4;Q06787;Q9Y283;Q8IZD9;Q9  
 Y2Z0;Q9NY87;O95677;Q96HA7;Q9H8N7;Q96MP8;P35325;A2A288;P12270;P12956;Q9H2G9;O43290;Q9N  
 ZH4;Q9UHD9;P55273;O14576;Q8WX93;Q99966;Q92979;P24385;Q9UGP4;P61579;A2RU30;Q9BPZ3;Q012  
 01;Q5T1R4;Q9H765;Q96FQ6;Q9Y4P1;Q8WV37;Q9NSV4;Q14315;Q9H469;Q6ICB0;P80303;Q06609;P0440  
 6;P50452;O75112;Q9NQ55;Q96S95;P07900;P13489;Q6P2D8;Q86YD1;Q8N163;P30279;Q15834;P29373  
 ;Q8N8G2;Q13228;P83111;Q9NRN7;P05783;Q9NPI6;Q5T2W1;Q14678;Q9H091;Q96EK4;Q9NQW6;Q96PU8;  
 Q9UDY2;Q9UKY7;O95149;Q96PU5;Q6TGC4;Q99612;P68036;Q7Z3Y8;Q99873;Q9BSF8;Q14258;Q8N0U4;Q  
 9HB19;O95551;P78337;Q99598;Q93062;O95397;Q9H9R9;Q8WY54;Q86XR8;P14373;Q14511;Q9UP83;Q7  
 RTS3;Q8TF40;Q12905;O00471;P25685;Q9UBK8;Q9HCS5;Q14671;Q8N8E3;Q8WV24;Q16626;Q96KR1;Q8N  
 2Y8;Q96A65;Q9BUX1;Q8N9B5;Q6PCD5;Q5JTW2;Q9UPW6;Q9H2T7;Q96RT1;O00567;O15392;Q86V58;P981  
 71;Q68DX3;Q96JP2;P09651;Q6P2S7;O75150;O43447;O95684;Q08999;Q8TEA8;Q12840;Q5T8I9;Q8IX0  
 6;Q9BQG0;Q92734;Q9NX02;Q96BP2;Q9UM11;Q8N6M9;Q9UH77;Q86UE4;O14639;Q86US8;O60248;P06401  
 ;Q9BYG8;Q8IW19;O43918;P43355;Q96D03;Q96FF9;P17676;P55265;Q96P71;Q9UIV1;Q9BSU3;P06748;  
 Q96N16;Q99543;P19484;Q9UBQ5;P29474;Q9H2H0;Q8N1N5;P12757;Q96C86;Q96JB2;O75190;O75175;Q  
 9NWF9;P62633;Q96M11;Q8IZW8;Q13489;Q15036;P14866;P05413;Q9GZV4;Q14764;O15511;Q693B1;P5  
 5327;Q5JR59;Q9BZE4;Q2M2Z5;P23526;Q99569;O60716;O14787;O43639;Q8IXQ9;O75531;Q9BRA2;O14  
 737;Q9Y2V2;Q8TCY9;Q9Y6R7;P78415;Q13515;Q9H8W5;Q8NFB8;P39023;P36956;Q8NHU6;Q7Z5K2;P232  
 58;Q05066;Q16836;Q86SG2;P57772;Q8WYR1;Q9H2P0;P50502;Q107X0;Q16656;Q99871;Q8IZQ1;Q0061  
 3;O15144;Q96F07;Q96DC7;Q9BQA1;Q9UKS6;P35548;Q02535;Q96RT8;O43516;Q96LC9;Q9BV20;Q8WW38  
 ;Q9H6Q3;Q9H4E7;Q9Y613;P07148;Q7Z6J0;O43598;P23508;O00167;P07320;P08235;Q8IVI9;Q93015;  
 O95155;Q7Z4H7;P11831;P11388;P31270;Q95171;Q9NQE9;O95295;O43502;Q9Y5Z7;P52758;Q96A44;Q  
 9BPUP;Q0V486;P11277;O95376;O43379;Q93008;Q99627;Q32P41;Q15554;Q8IY31;P13929;Q9H7E2;Q9  
 UJT9;O43747;O60930;P42768;Q9UQ80;P62987;O15379;Q6ZUV0;P27694;Q5MIZ7;Q8TC71;Q96CS3;P02  
 489;Q9UKT9;Q14011;Q96KQ4;P28072;Q9H503;P25815;Q9BUP3;Q13158;Q9BRP1;Q99471;O95714;P211  
 27;Q8N668;Q9UILL;P49427;P23297;Q8IXW5;Q9Y3C5;P25963;O75717;Q9NR28;Q9HD42;P35579;Q9ULP  
 0;Q9UHP9;P0CB47;Q9Y6M1;Q9UHV9;P78352;Q9H788;O75143;O00425;P25788;Q96Q35;Q8N6F7;O75312  
 ;Q8WU90;Q9UM82;Q12815;Q8WYJ6;O94875;P62736;O95336;Q8NEF9;Q8NEZ5;Q9BVC4;O14656;Q14691;  
 Q9HBH7;P35326;Q9NRR3;Q9H171;O95260;Q99728;Q9C0E2;Q5SQN1;Q9P2N5;Q6TFL4;Q00577;Q96M53;Q  
 8IZP0;P35226;Q14CX7;P28074;Q9UMR2;Q56P03;Q92614;Q15797;Q9GZV5;P49721;Q7Z3Z0;Q12772;O9  
 5391;Q96EZ8;Q8NFZ5;Q9C086;O60315;Q9Y2J8;Q13541;Q9UMS6;O75410;Q15154;Q9NRG9;Q4L180;Q15  
 653;Q03933;O75935;Q96R06;Q9Y3Q8;Q9UH84;Q96AQ6;Q01105;Q13347;Q96GV9;Q9BV57;O00139;Q138  
 84;Q15038;Q15013;Q9UKI9;Q9H467;O60268;Q9UDY8;P51808;O94763;Q8N137;P07992;Q9BRV8;P0781  
 4;Q14247;O60841;P78406;Q8NHY2;Q9UFN0;Q9H9G7;Q9H9F9;O60308;Q56P42;Q69YH5;Q9BPX1;Q15691  
 ;P55795;P78347;Q9BUK6;Q32MZ4;Q96J17;P82094;Q8IUD6;O95628;Q99733;P0CG34;Q13322;P54274;  
 P61578;Q9UBV8;Q9P2D0;Q70IA6;Q9ULZ2;Q8IWW1;Q15466;P42575;Q9H4A6;Q99689;Q8TF42;Q9NZ09;P  
 35244;Q9NZD4;Q7Z7C8;Q9NZI6;Q8WXH0;Q99962;Q4G0J3;Q9NS39;O14818;Q9UL18;P43487;P51510;P2  
 4278;Q8WYP5;Q9BRT9;A8MVW5;O15360;Q08AD1;Q96QU8;Q8TC84;O43159;Q9NSI6;Q96LT7;Q9HD15;Q53  
 GL7;P61604;P62258;Q8IYL2;Q8N5X7;Q8N693;Q8NHV4;Q9NRR5;Q8N336;Q9NQP4;O95848;Q99436;Q8N5  
 U6;Q6ZS17;O15304;O95983;Q9NZU7;Q5VZB5;Q7L266;Q9UBF1;Q96A56;Q9UMX2;P80723;P24941;Q96FS  
 4;Q8IV36;Q9NY27;O14978;Q68CZ1;P55957;Q96IU4;Q15633;Q9Y483;Q5T749;Q9UIF3;P51610;Q9UMS4  
 ;Q9NVR5;Q6P1M3;Q49AN0;Q8IXQ5;Q9NXG0;Q6P126;Q969U6;Q9NSC2;P30304;Q16531;Q9H814;  
 P62937;O60506;P23246;Q49MI3;Q9Y6D5;Q8NF99;P42772;O95359;P35237;Q27J81;P55197;Q96MG7;Q  
 15149;Q8WZ33;Q8NA72;P15923;P0CG48;Q8TDY3;P78371;O60759;Q9H307;Q9H1K1;Q9NZI8;Q9BVZ1;O7  
 5886;Q86WP2;P61573;P05787;Q9BQY9;A8MTZ0;Q8IUD2;Q8IV53;P15172;Q8NEZ2;Q9H2G4;Q8NCC5;Q8W  
 XD5;Q15796;Q9UKK3;Q9H3S7;Q15257;P56693;Q9UII4;Q96PM5;Q15185;O14744;Q9BWT7;P56524;O759  
 70;Q9UPT9;Q9H329;Q9NUW8;P13010;P04732;Q15327;Q96T51;Q96T51;Q9H0R1;O00310;Q8N6F6;Q8N9W  
 5;P05114;O75335;A5LHX3;O75534;Q9ULE6;P15121;Q9HC77;Q9NQY0;O75170;P60709;Q9UJY1;Q53GS7  
 ;P78358;Q63HML;Q5TD94;Q99426;O60318;Q9NPI1;Q5H9F3;P36543;Q9NVK5;O43815;Q99856;Q9UMS0;  
 P49789;O43255;Q96B42;O14757;Q66K74;Q96E16;O95347;Q9HBG6;Q9Y678;Q9H9Y6;P38919;P27348;P  
 56537;Q14141;Q9NX95;Q12981;Q86WG5;O60573;O43264;Q86TG7;P62495;Q04206;P18054;Q8N660;P3  
 6639;Q7L2E3;Q8N9W8;Q8IVG9;O14682;Q12802;Q9BSB4;Q49B96;P07476;Q9NNTX7;O00170;Q6W0C5;Q9N  
 XR1;Q9P2S5;Q99816;P24864;O15061;Q9NX18;Q96RS6;Q53HL2;P53618;P14136;Q9UQC2;Q9UKT8;P981  
 70;Q0VG06;Q9NZD8;Q9P209;Q9HCH5;Q12906;Q9NXV2;O95163;Q07021;Q9BVT8;Q16222;P11142;A8MSY  
 0;Q01850;O00268;P31948;O95671;Q9H1H9;Q8IXJ6;Q13023;Q96J94;O75940;Q8TDY2;C9J3V5;Q9UHN1  
 ;Q8NFG4;Q9NPB6;Q9NUL3;Q15056;Q96M29;Q9C035;P28062;Q96IF1;Q8WXTW4;Q9BYE4;P57075;  
 Q6ISB3;Q86VN1;Q00587;Q08378;P55854;Q08050;Q9H8E8;P11940;Q9UMX0;Q8IX03;P60953;P42226;Q  
 9H825;Q6MZT1;Q8IUR6;P18754;Q15306;Q9H2C0;Q9NPG2;O60296;P31943;Q9NT62;Q9BR76;Q9BXM0;Q8  
 NDQ6;Q9UBC3;Q08495;Q93050;Q96NU7;Q9NUQ6;O95630;P62993;Q14457;Q00839;O60832;Q9H7D7;O43  
 396;P63279;Q9C0F3;P06703;P42574;Q96IY1;Q96TC7;Q7L9L4;Q9NYG5;Q16526;O00505;Q8IZY5;Q9NR  
 J4;O00257;Q9Y2D1;P27540;Q86XK2;Q9P1Y5;Q86TX2;P58340;Q99666;Q969V6;Q96UR4;Q7Z614;Q9NZI  
 5;Q15942;P58304;P21673;P16989;P62273;Q96NL8;P28289;Q15386;Q9UK41;P62714;P67775;Q9P258  
 ;P19338;O43776;P55884;Q14204;Q6P3W6;Q7L5D6;Q99717;Q8IZE3;O14646;Q92748;P20823;Q6XZF7;

Q9P299;P15559;Q92688;Q9UBQ0;P25440;Q99638;Q96IK1;Q96RE7;O14613;O15350;P49918;Q7Z2X4;O95153;Q9NXX8;O15105;O75626;Q9Y697;Q9UI08;Q14203;P60866;Q99502;Q8TAF3;P09467;Q9Y5K6;Q9Y534;O14579;Q92945;Q9BX66;Q13526;Q13287;Q00978;Q00994;P49458;Q96CW5;Q05084;Q9NZJ4;P29084;Q04864;Q96AQ7;Q08211;Q13769;Q96B26;P35573;P63241;Q3I5F7;Q9NXW9;P37198;P20618;Q8TDN4;Q9H213;Q253HC0;Q9BQQ7;P10074;Q9BXY8;Q14749;Q9H0F6;P55060;Q5VVH5;P80294;P14653;P41002;Q969G9;P42771;Q5T1N1;Q969Q0;Q8WUH2;O00192;Q9UI95;Q8NF5F7;P13196;P52298;P52565;Q9Y376;Q14152;Q5TA31;Q6PIJ6;Q15269;O75330;Q96FC7;Q9UBC9;Q9NXH3;O43390;A6NKK39;Q9H165;P05937;Q09FC8;P55212;O60662;Q70YC5;Q9NRF2;Q96JJ3;Q86Z02;Q96EH3;Q13114;Q96DG6;Q9NV92;Q5TYM5;Q9Y4B6;P55196;Q96C90;O75821;Q8TEE9;Q96BY2;Q58A44;O00291;Q12983;Q9P278;P56211;O95644;Q6H8Q1;P55072;Q9BTE1;P22626;Q8TDC0;Q9H0E2;Q9BWK5;Q86V15;Q6P3W7;Q8IYX8;Q5JY77;Q969P5;P49321;Q9Y3B2;Q01094;P36871;P46939;Q13829;Q2VVA4;Q9BQ89;Q6NZI2;Q9BZL4;Q9BT92;Q03393;P51668;A5YKK6;Q9NPF4;P16157;Q66K89;Q9C0F1;P26038;P35268;Q9HD47;Q07955;P41252;Q5T447;O60784;Q9BR61;Q9Y5J3;O15055;Q96AX9;P15621;Q01469;Q16342;P02545;Q9H1B4;Q96LK0;Q01860;P61571;Q92750;Q9ULJ6;O75182;Q04917;Q5T440;Q13427;O95997;Q2V2M9;Q96H20;P09132;Q08945;Q9UIA9;Q8N0Z3;Q8TD31;Q93034;O00151;O43805;Q5BJF2;Q9BQI9;Q8WXX9;O00186;O14508;P62826;Q8TB72;Q00987;Q8TEW0;P61962;Q12834;A5A3E0;O15519;O15198;Q9Y664;O75444;P30305;P62879;Q9BT78;Q6PGP7;Q6QNY0;Q8IYB7;Q9BQ90;O95793;Q8TF09;Q8WUW1;Q8NCD3;Q8TC94;Q9NS25;Q9UKV3;P0C1Z6;Q9ULX6;Q15051;Q8N3C0;Q13404;O15083;Q9BT04;P30047;Q93045;O15534;Q9BV47;O94855;Q14980;P08047;Q9BXP5;Q8TBY8;Q5TAG4;Q8TEP8;P16452;Q9BYD5;Q12816;O95433;Q86Y26;P11802;O95999;Q6P2H3;P06733;P20226;Q8IZH2;P41218;O00422;Q9NRG4;Q92766;Q86YF9;Q6IS14;Q92796;Q8TDD2;Q96MT3;A6NDB9;Q15024;Q6ZNE5;O75347;Q9H0R8;Q13813;O00303;Q9H869;Q9P2W6;Q7Z5L9;Q9Y5L9;Q9NZN8;Q9Y371;O15056;P61088;Q16637;O95453;P35908;Q6XQN6;P37837;O43768;P30153;Q8NFI3;Q03111;Q9H2U1;Q9H0A6;Q9P219;Q13424;Q8N490;P61572;Q9UKA1;Q13098;P53370;P20132;Q96ST8;Q13432;Q16236;Q14934;Q86W54;Q9BRK4;Q8N1E6;Q8WXC3;Q9Y3P8;Q96MG8;Q6NXC8;Q14103;Q76KD6;O75832;O14618;Q9BWF3;Q9H0J2;Q9C029;Q9UQB3;P41250;Q8TAM2;Q14526;Q96SW2;Q5U623;Q13137;Q14CS0;Q9Y222;Q7Z333;Q9C0H6;Q92575;Q99417;Q8N0Z6;P07438;Q8IY63;O96004;O15069;P61960;Q8IU60;O60518;Q5TA50;Q9UL40;Q13155;Q9BRT3;Q15555;P78560;P45381;Q6P1N0;P62877;Q96DX5;P51843;Q5TB80;Q92879;Q96CF2;Q96B67;Q9NZZ3;O00299;P25205;Q9Y266;P16333;Q969S2;P41208;O60870;Q9NRS6;O43592;P16278;Q9UHP3;Q5H9R7;P07197;Q14493;P38646;Q9H910;Q9Y3U8;Q15528;Q8NI35;Q9Y2X3;Q10182;P15537;O75635;Q8IWL8;Q9NSA3;O75570;Q9CHK5;Q9NPF71;Q8TCB0;P50222;Q96M43;Q14139;P62318;Q2TAY7;Q9BXW6;A6NKK89;Q92499;P04733;Q9C0D2;Q5MJ68;O75161;P0CG30;P18848;P04080;Q9Y6D6;P59998;Q96B36;Q9Y6F6;Q9P243;O00327;Q9H2K2;Q99700;Q9BQ70;Q16890;Q6NUQ1;Q9UKL3;Q86TB9;Q14151;Q2M215;Q9NQR4;Q9H4I8;Q96EP0;Q9NWW0;Q9BW27;P10155;P13640;Q8NAA4;P07316;Q96PI1;Q93083;P84022;Q15643;Q12904;P11308;Q9H063;Q9HB71;Q9H9E1;Q14694;Q14847;Q9Y6Y0;P08133;Q12968;Q86V81;P11171;Q9NXB0;O14980;Q2M3C7;Q8IWE2;Q9NVX0;O76041;Q9Y295;P09917;P49354;P48444;Q14232;Q04695;Q96Z0;Q96DE5;Q9BRC7;Q14978;Q96CV9;Q7Z3T8;P31350;Q66GS9;P51116;Q9Y6Q2;Q9Y285;Q9Y224;P49419;Q9Y692;O75665;Q92973;Q9ULW0;Q8NEJ9;Q9H8T0;P10144;Q9NTK5;P08865;O60481;Q9Y237;P17661;Q8IXF0;Q8N3R9;P02511;P51784;Q8IYM9;Q8WXE0;Q9H9H5;Q9Y3E7;Q7LG56;Q8WXE9;O43236;Q496M5;A9UHW6;Q8N140;Q8N960;O14556;Q96EA4;Q96F24;P56945;Q9NPP4;O43541;Q9P021;Q15599;Q96TA1;O60493;Q9NXR7;Q15398;O75340;Q9P0K7;Q16667;Q9UNN5;Q9UBY9;Q15020;A6NKF1;O00423;Q08752;P17706;Q92625;Q8NEU8;P51003;Q16851;P80297;Q96QG7;Q9UL33;Q96S59;P43364;Q8IW35;P41227;Q96RM1;Q5TAX3;P60228;Q2KHM9;Q6UB98;O15049;P0C7Q2;Q8WVB3;Q13033;O14641;O00221;Q7Z624;Q86UL8;P02533;Q8TBZ0;Q8N339;Q9Y3C4;Q92597;Q15646;Q96L92;Q13469;Q9BXP3;P81274;P78537;O75884;Q15631;Q92539;P60673;P31749;Q15102;P67809;Q9H074;P14635;Q152MB2;O43189;P25398;O14531;Q8N9Z9;Q13084;Q15596;O75663;Q9NZH5;Q9UNH5;O00255;Q96E78;Q9H9T3;O60477;Q86SQ7;O94972;O15287;Q13042;Q9BZQ8;O75363;Q9Y4H4;Q9BWD1;P19532;Q9Y3F4;O95863;P10914;Q5TI25;Q9Y2W6;Q8IWF6;O94986;Q15072;Q9UBL0;P31483;Q9Y4R8;Q9Y3A3;P46060;P35080;Q9NYJ8;Q9HCG8;Q6QNY1;Q9NWB7;Q15021;Q9UD71;Q92599;Q9P2J5;P62380;P22531;Q6P2C8;Q9HD26;P41134;Q9BYG5;Q9H4I2;Q5T752;Q7Z6E9;Q9P0W5;P63146;Q9UPV9;Q01831;Q13938;Q7KZF4;Q96SN8;Q92769;O95373;Q8N841;P49720;Q9H444;P31150;P28065;Q6PD74;Q13342;Q14683;Q14192;B2RKF5;P13645;P40121;Q15019;Q9UPQ4;Q9BY77;Q96Q05;Q9UKT5;Q9NWS1;Q9HB75;P11441;Q86WI3;Q6VN20;Q9NUQ3;P27815;Q86UV5;Q969F9;Q9Y4G6;O00512;P61574;Q7RTS9;Q9NZC7;P49848;O14879;Q9UNE7;O75164;P48728;P42704;O15131;P23490;Q8WU39;Q9UGK3;Q13094;Q9Y2N7;Q9HCU9;Q9Y512;Q9Y6J0;P36873;O75569;P50091;Q9P1Z2;Q13547;Q8TCS8;P58107;Q95817;Q9H939;Q9ZP65;Q6NUP7;Q3BBV2;Q8IXQ6;Q14008;Q9C0C7;O43491;Q6STE5;O43324;P51587;Q99576;O95721;Q9GZN1;P46379;Q8TD86;Q92558;Q6P2E9;Q8N9A8;Q9UJT2;Q5VT06;Q9NWX8;Q9UBF2;Q96A00;Q13761;P42566;P05388;Q9GZT9;Q9UKA4;Q8TD19;P63302;Q3SYG4;O14746;Q6N069;Q9UHI6;P49756;P63165;Q96GN5;Q9NVV4;Q9HAP2;P50616;Q9UI47;O60447;P62269;Q9HBL0;P47974;Q13875;Q9BZZ5;Q68CZ6;Q8TC76;Q8WVJ9;Q9HCM9;Q7Z7A3;P0DI81;P60900;Q9Y250;P55345;Q9BY41;A6NH11;Q96N77;Q9NZT2;Q9UGJ1;Q15025;Q8N9V7;O14713;P50750;O60927;P49368;Q8IWT3;O95905;Q9NS5;Q96BK5;Q5VYK3;Q9NR22;Q14738;Q7L1Q6;Q9H808;Q99750;P51161;Q9NVM4;P32929;Q5JUK2;Q9BXN6;Q6UUV9;Q6P597;Q13330;Q8WXU2;Q8TC56;O15145;Q8N3L3;Q01954;O75618;Q5VZF2;P20248;A4D1E1;P42766;A9QM74;P62081;O43542;P17544;Q9Y2L1;Q9NY61;Q15121;Q96K30;P09629;Q8IZS6;Q92837;Q8NG50;Q9Y6X8;P36404;Q9H492;O95361;P14324;P84550;O95198;Q9BTV5;Q9H7S9;P22532;Q7L2H7;Q53EZ4;O14907;Q5JSH3;Q8NA42;Q9NQS7;Q02952;Q8NB12;Q5SXJ2;Q8N0X2;Q9BXJ9;Q96N95;Q14669;Q9H299;Q5D1E8;Q96BW1;O14896;Q9UER7;Q96Q89;P37275;Q8TD16;Q3KQU3;O75604;Q96QA5;P25786;O15205;P61247;Q8TAP6;Q99704;Q07157;O00231;O76003;P54136;Q13415;Q16543;Q9NQ87;Q99619;Q9NRD1;Q9Y2G4;O95273;P49770;Q96RS0;Q8TEQ6;Q9Y614;Q9NVR7;P48200;A6NIX2;Q96E14;Q9UKT4;Q8TE02;Q9NUS5;Q9P2M1;Q8IUQ4;Q6DN90;Q9BYG4;Q15041;Q9NR77;A6NPF61;Q96DV4;Q8N1G2;Q9NYB0;Q9Y4P9;Q9H6Y2;Q8IYD1;Q8IX07;Q99814;Q16143;Q12778;P78559;O95865;P61923;Q9C040;O96018;Q6ZUI0;P42025;A6NDD8;Q9Y6H5;Q6PGN9;P46781;P61326;Q86WX3;O00399;Q9BRG1;Q13625;Q7Z7K6;Q13838;Q9H6T0;P53041;A6NKF2;Q9HD40;Q6ZU80;Q9UNY4;P50749;Q13233;P42224;P11166;Q9Y375;Q9HAU5;Q9UHY7;Q13428;Q8WUI4;Q86UW6;Q8N1V2;O14604;O75582;Q16719;Q8NFU3;P39687;A5PLL1;Q9ULW8;O43251;Q969K4;Q9NQ25;P06132;Q9ULD2;P54727;Q9UBP6;Q5H9I0;Q6ZNA4;Q8N196;P63172;O00522;Q53QV2;Q8N0X7;P22397;O75131;O95810;O15116;Q5VYS4;Q9UKV8;O75376;Q9H094;P14868;P98177;O94850;Q9UDW3;Q5BJF6;Q9H0U9;Q9UBD0;Q9Y2J2;Q86UA6;P11137;Q9UL45;Q92540;Q5T124;O96007;Q96LB3;Q07820;Q9C0D0;O95833;Q5UIP0;Q9Y5V3;Q5EBL4;O95831



;Q12962;Q15006;Q9HBZ2;Q9H4H8;P0CG29;Q07352;P61289;Q3YEC7;P50914;P78317;O14979;O60763;P46108;Q969Q6;O14593;O94811;Q8WUF5;Q8N157;Q9C0C2;O95996;Q9BZR8;Q3ZCT1;Q05195;P50453;Q14653;Q99497;Q8NCF5;O94929;Q96JM3;Q8N2W9;P50995;Q9H410;Q14181;Q0VDF9;Q9ULZ0;Q8TBB1;P42773;Q13642;Q9UBS8;P62166;Q6GYQ0;P49589;Q14966;P00338;O43708;Q9Y5Y2;P30622;O75122;Q6IE81;Q9NWV8;O75132;Q16829;Q9BYG3;Q9UQN3;O60299;P29966;Q15628;Q96Q83;Q13568;Q99459;P62829;Q68DK2;Q15935;O95486;Q86VF2;P62979;Q8WY41;P27797;P28066;O95476;Q8NFW9;P40337;Q9BYX4;Q9NVD7;P61981;O43765;Q99613;Q96BT7;Q02241;Q8WUY3;Q9C099;Q96DI7;Q9BXY8;Q9H201;Q9BVC6;Q8N8R7;Q8TAP9;Q9GZS3;P08670;Q9BX70;Q8NDF8;Q92905;O75436;P27816;Q03188;O60291;Q9BUZ4;O75822;Q9BQC3;Q8IX90;Q8WX92;Q08AE8;Q9UH90;O15446;Q8N3F8;O00165;Q68CJ9;O43504;Q9NUU7;Q9Y3E1;P07315;Q3BBV0;Q96RK1;P20749;Q9H425;Q8N720;Q8ND90;Q92797;Q13867;Q969Q5;Q9UM07;P0DI82;Q16537;P61244;P62314;P23396;Q9608;O60260;Q06830;Q9NYF0;Q8IWC1;Q96G03;Q9BY44;Q9U0PP2;Q9BWF2;Q9UJ41;Q8TE68;Q8N357;Q7Z6J8;Q13516;Q6ZVD7;P61201;Q3BBV1;Q5PRF9;Q96JZ2;Q9HB21;Q9UQ13;Q04323;Q92547;Q9Y2I6;Q5VV41;Q5K131;Q8WWW0;Q9H4D5;Q9H9Q2;Q15287;Q9H009;O60936;Q8IUI8;Q63ZY3;O43310;P50748;O76075;Q9H7C4;O94925;P36405;P31946;Q4LE39;Q5T7V8;P62701;Q8TAA3;Q9NVN3;Q9Y2T7;P11161;Q5JVS0;Q96HA8;Q96ED9;Q9BU02;Q6IA86;P02795;Q7Z417;Q96S99;O60885;Q15326;Q9UBS4;Q96P63;P63104;Q8TF74;Q9UKV0;Q00597;Q8N108;P14317;Q14790;Q8TAT6;P54840;Q9BXR0;P63313;Q15759;Q15181;A2IDD5;P32519;P55347;P14678;A6NDV4;P0CG47;Q9HC62;Q8TDR0;Q99996;Q13409;P04053;P35900;P07195;Q92832;Q15435;Q9BQS6;Q96PY6;Q96DB5;Q14244;P45985;Q6P387;Q96C74;P36578;Q86W56;Q14106;Q96NB3;P35754;Q969F2;Q92783;Q99623;Q9Y244;Q96CS2;Q14596;Q9UBU9;Q13367;Q96SL8;P49006;Q8NEY8;Q8WYR4;Q9BRT2;Q8NHQ1;O95271;O95243;Q6GPH4;O95219;Q6U7Q0;Q9NP79;P62328;Q9UKG1;Q717R9;Q7Z3Y7;Q9NYZ3;P19474;Q8NEC4;P48634;Q8NE71;Q15047;P34949;P10768;Q16548;P52292;Q15700;Q6ULP2;P13647;Q14999;P26196;P28069;P51858;Q9H9C1;O43763;Q5VSL9;Q5TZA2;Q5HYK7;Q99550;Q9H974;Q9UQF2;Q99929;Q9GZU2;Q96MM3;Q9NR09;Q99593;Q9UGK8;Q12765;Q6ZN30;Q99549;P04156;P32189;Q9BXW4;O75351;Q8TBZ2;O15355;Q14019;P34932;P50542;P22528;Q13363;Q6IN85;Q9NTU4;P62847;Q9Y5Z4;Q86XZ4;P10599;Q9BZJ0;Q9UKX2;Q12798;O75145;P57678;Q9Y6B2;Q8N635;P48147;A9YTK3;P49790;Q13490;Q14442;Q9Y448;Q7Z2E3;Q96C01;Q16658;O94992;Q9UHB9;Q9UI56;P35232;Q9H1Y0;Q96MH2;Q86X55;Q8NEY3;Q8WWK9;P48556;P40424;Q9ULT8;P62851;P05813;P61575;P55210;Q6PI48;P06744;Q9Y5L0;Q92636;Q9BXF6;O60535;P04731;O14964;P11532;Q9Y536;Q9BZF9;Q8TCI5;P19838;Q8IWX3;O95050;P53801;Q5UE93;O60504;Q9BV86;O14645;Q12873;Q9BSW2;O00625;Q99547;P63167;P40855;Q13310;Q9UBB6;Q6UUW7;Q8IZT6;P23497;Q8NDN9;P56178;Q13485;Q9BVN2;Q00534;O95487;Q9Y4L5;Q9H6Z4;Q14442;Q9H4B6;Q96K69;P22681;Q9BSJ2;P46013;Q04637;Q9Y6F1;Q8WYA1;Q08AG7;O14893;P0CG35;O14617;P09913;Q8IXT1;Q92616;Q96FW1;Q9UI14;Q7Z460;Q05086;Q9UDY4;P05062;O60749;P07737;Q9H7C9;Q8WV28;Q9UHD8;P62140;Q7Z5J4;Q96FX2;Q14160;Q9GZZ1;O14920;P06396;Q96IV0;Q8WW33;P27695;Q8TES7;Q674X7;Q9NX63;P67870;Q5H9L4;Q7LBR1;P54253;Q8TDB6;Q70J99;Q9H0M0;Q6P9F0;P61457;Q9HAF1;Q16186;Q8IZD4;Q9Y2Y0;Q8WUN7;A6NMX2;O94921;P11172;P38936;Q9NRA8;P46777;P0C2Y1;Q96JN8;Q9NWT6;Q9UMX3;O95613;O15182;P82663;P23528;Q9UBW8;Q9UNS2;Q9Y6I3;P81877;Q06265;Q6GQ9;Q96KN3;O15516;O75334;O15078;Q96GE4;Q9P1T7;Q9BRP8;Q96RT7;P07741;Q9H8V3;P18146;Q8N998;P51114;Q92993;Q9UFF9;Q9Y2G2;Q61970;Q13045;Q5TCZ1;Q9BZG8;O15371;O94927;Q9H3F6;Q49MG5;Q96JE9;Q9UH92;Q03399;Q9U0KK6;Q86XL3;Q96LL6;Q14145;Q8IZL8;Q9HBL8;Q7Z699;Q99222;P41220;Q12243;Q96JN8;Q13243;O70720;O43318;Q8IUF8;O00148;Q92793;O43299;P39880;P61576;O75154;O15117;Q9Y2M5;Q92985;Q8N4C6;Q15651;Q13283;Q15697;Q96IZ7;O76095;O43933;P62324;Q9P0J0;Q96L03;Q9BUH8;Q7Z5W3;Q9NR48;Q6ZN04;Q01844;Q6NUN9;Q8N488;O60869;Q9UKW6;O75153;Q9C0H9;Q6FI81;Q86X95;P35869;O14512;Q9UPQ9;P40925;Q16775;P78545;Q9Y4X5;P83881;Q9Y605;Q9Y6X2;Q9NP77;Q33052;P07954;Q8WVI7;Q15776;O00482;O75674;Q15029;O94829;Q86T24;Q5H9J7;O14558;Q9P2Y5;Q06323;Q9H0H3;P09914;Q9Y252;O95429;Q08209;Q9NW38;O60828;Q14765;P28290;Q5VU43;Q86Y01;Q9UPY8;Q12982;Q15545;Q13601;Q8IXH6;P21399;Q3L8U1;Q13112;Q9BZW7;P41214;Q9Y6R0;O95071;Q8IY57;P56645;O95278;Q9H112;Q676U5;Q86WJ1;Q96BD6;Q63HQ0;Q14194;Q460N5;Q9UJP4;Q9UN36;Q9BWU0;P35606;Q86X76;P26651;Q2VPK5;Q8WXS3;Q9UI36;Q96FN9;Q6Q759;Q9BZR9;Q9Y2R2;Q6IV72;P30260;O43663;Q6PI77;P05386;O75419;Q6NT76;Q9UPN7;Q6WQI6;Q9HCE1;P61925;Q92900;Q86WH2;Q9NYF8;O00401;Q15173;Q9H816;P40222;Q13562;Q99504;A1L020;O75800;Q9P270;P46527;P52630;Q96FT9;Q9BQI5;Q330K2;Q8NF91;P14672;Q13144;Q96GC6;Q9NYP9;Q01892;Q96P15;Q14602;P06454;Q6FIF0;Q8N987;Q15003;Q96CA5;Q9H1Z4;Q9Y2W2;Q15654;Q32P51;Q9BTC8;Q86UB2;Q9NV79;Q16612;O94817;Q8N1I0;O43715;P40763;O14974;Q96EY5;Q8NG27;Q99729;Q9Y297;Q15468;Q9Y2B4;Q9BRX2;A8K8P3;P32243;Q16204;Q9GZY1;P49901;Q96HC7;Q98741;P62241;O43524;Q9Y3B6;Q9UKC9;Q8IWN7;P06746;Q14677;A6NC98;Q9Y473;Q969H0;O75386;P24666;Q9UPX8;Q9BQ67;O60543;Q7L590;Q8N3Z6;Q96HR8;Q9BVW5;Q13765;Q8TAX9;Q69383;Q1MSJ5;P61758;Q9BRS8;O14519;Q92530;Q14674;Q9UBZ4;Q6NXT1;Q9UJL4;Q9GZY8;P0C5W0;Q7Z6G3;O94874;Q9NR46;Q6ZN28;Q9UBK9;Q8N1K5;O14862;Q92624;P52597;Q9NTG7;Q9NSP4;Q8TAD8;Q9H204;Q9BWX1;Q7Z3B4;Q92804;Q9NR50;Q92556;Q9NQZ3;Q3BBW0;Q5BKX8;Q96EB1;Q8TAA5;P10916;Q86WV1;Q9UMX1;Q7RTV3;Q9NQ94;O75494;Q9H2J4;Q9BXG8;Q6PJT7;Q86UD0;Q7Z6Z7;Q9Y615;Q8WXB4;O14727;Q9UKN5;O14662;P15822;Q8N9N2;Q9NUP1;Q96AB6;O75368;Q9NQ4;Q12972;P05204;Q06587;Q9Y3I1;Q6ZU15;Q9Y3V2;P08238;Q8TED0;Q8WUM4;Q9UBB5;Q9H6U6;P62312;Q96BD8;Q9UIW0;Q9NZ63;Q9H3M7;Q96KN1;Q96DX8;Q9BUL8;P62753;Q8TDZ2;O60711;Q9NS23;O15372;P63000;Q9H267;P51948;Q9P2A4;Q9NPD3;Q92890;O14965;Q96F86;Q96LI5;Q99618;Q9NP97;Q1W6H9;Q99743;Q495M9;Q86T75;Q9UBF6;Q9Y5K5;Q8WW24;Q14164;Q6UVJ0;P52294;P57081;P57723;Q9NRC8;Q96D46;Q5SW79;Q9UQL6;O15164;A2BFH1;Q7L5N1;Q8TF46;Q8IWL3;Q86XP3;Q76N32;Q96MB7;Q96EY1;Q96RN5;Q53EL6;Q9NRD5;Q9NR56;P78318;Q9Y3D0;Q8N9R8;Q96PM9;P53992;P04792;Q9Y6K5;Q92785;Q96I24;Q9BTE3;P40261;A0AVT1;O43913;Q9HBK9;Q9UJG1;P55055;Q9UK73;Q9GZS1;Q9UPZ3;Q15365;O43248;Q9BRX9;Q9Y4W2;P31949;Q9BT81;P54259;Q9HC C9;Q15650;A6NGQ2;Q71F23;Q5VWK0;P32969;O60524;Q9BQ95;P60510;Q8IY85;O14929;Q8TDQ7;Q9H0I3;P58546;Q96GX9;Q9NRL3;Q9NSI8;Q15714;Q9H008;Q86WG3;Q9NWZ5;Q9H6Z9;Q9Y4P8;Q96T76;Q9UI10;Q13352;Q13136;Q92834;Q9NPJ8;Q6DKK2;P40306;A6NG73;Q5VZK9;Q13901;O95571;P27986;Q13868;Q6IQ23;Q86Y13;P19387;Q9NVW2;Q9BTT0;P68104;Q8WVK7;Q13257;Q9UNH5;Q9H0B6;Q9UKD1;P30307;Q7L3B6;P49454;Q8TAD1;Q9NPA3;Q99933;Q9UJC3;P46783;Q43303;Q14134;Q96D09;O00273;O43745;Q92844;Q6ZN17;Q9Y3A5;Q9NX46;C9JE40;Q9H568;Q9Y262;Q8IWX2;Q96NB1;Q00653;Q9NVR2;Q9NWD9;O75146;Q07866;Q14839;Q9UN37;Q8NCE0;Q96M02;Q9BYD9;O75496;Q53FT3;Q6I9Y2;O43617;P54252;Q8WUX9;Q13127;Q15276;Q5JTC6;Q9UPA5;Q6EMB2;P58004;Q92782;Q96KE9;Q9Y573;P47928;P11387;Q1350



6234

1;Q9Y2B5;Q9UJW3;Q9UBP0;Q96CW6;Q9H7T9;Q9H840;Q9HCI5;Q9NNW5;Q9P0R6;Q9BSQ5;Q92600;Q9BYZ2;Q76FK4;O95379;Q9UBF9;Q9BRA0;O96028;Q9H0C5;Q9UPV0;Q6IEG0;Q8IWE5;Q9NNUK0;Q8WV44;P62244;Q86XN8;Q8WYQ5;O00308;O75791;Q96MT8;Q96QF0;Q14693;Q13561;Q14140;O75794;Q7Z2W4;P48595;Q9NPJ3;Q9C000;P08151;P61586;Q9NPF5;Q12959;Q14974;Q86TP1;Q9NWB1;Q9NNW7;Q5VUA4;P62888;Q9H1J1;Q5U5Q3;P57721;Q9UJM3;P63220;Q9NPC6;Q5TA45;O00444;P05198;Q9Y314;Q969T7;Q6ZJW1;Q15819;O43395;P17987;Q9BV73}

Pathogen[ Q85601] interacts with 2471 human

partners: {Q53EZ4;Q14139;Q9Y534;Q13367;Q5TA45;Q14457;Q99569;Q96RK1;Q9H492;Q13596;Q8NHQ1;Q9UBZ4;P54259;Q9NVM9;Q8IYI6;Q16890;P46783;Q96QK1;P32969;P10144;Q9NQG7;Q16612;P18146;A4D1E1;Q5VYK3;Q9UI26;P28066;Q96IZ0;Q5SZL2;Q96FQ6;Q9UBW5;Q9HCE1;P61163;Q969S8;O00401;Q9H4A5;Q9BZI7;Q68CJ9;Q8N196;Q99816;O60664;P30281;Q86TC9;Q7Z6E9;Q96CN9;O14639;O15198;O43765;Q9BRT2;O75182;Q96J02;P78317;P60900;Q8NI51;Q99543;Q63HQ0;Q96MH2;Q9NZC7;Q6N069;Q9UPZ3;Q9Y250;Q99497;P61981;P49454;O00186;Q9NRL3;Q14978;O00213;P08729;Q8NHW5;Q8IWI2;Q9NRC8;Q96M02;Q6QNY0;Q9NRN7;Q32P41;O75161;Q9NZU5;O15511;Q9UHL9;Q5RKV6;Q92734;O75496;P15621;Q9NWS1;Q96BW1;P09629;Q96JM3;Q4VC44;O15234;Q6PGN9;P49756;P61978;O43913;Q9H7T9;P02489;Q9Y5T5;Q86WV6;Q15643;Q96LC9;Q6P2E9;Q9Y3I1;O43598;O43715;Q92837;Q9UKV0;Q16543;P08151;Q9Y4R8;P62244;Q13409;Q96GA3;O60346;Q8NA42;P11831;Q8WX93;Q8N137;Q9Y2T7;Q5T7V8;P07315;Q9H7E2;Q96T76;Q4LE39;Q00536;Q9BQA1;P63104;Q9H4X1;Q8NFW9;Q96CV9;Q9BZL1;Q8ND90;O14896;O00629;O60239;P17676;Q9NTK5;P35321;Q92575;Q9BXR0;Q16666;P80294;Q96A73;Q8NC51;P54136;O43324;O60481;Q9NSD9;P62633;Q9ULZ2;P09913;Q9ULW8;Q9UHB4;Q9UPX8;Q53FT3;P08107;Q8N720;P55036;P34949;Q92614;Q56P03;P27816;Q9NZU7;Q9P0J0;P22681;Q9UJW0;Q9H6Z9;O75145;P13807;O43502;P02545;Q96S99;P62879;P11168;Q9HAU4;P31946;Q9UPT5;P68133;O95229;A2BFH1;Q9Y2J2;Q9UKL3;Q96DE5;Q53ET0;Q9NPD3;Q9HAV4;O94925;Q9UIA9;Q13127;P16157;Q9NP79;Q99733;Q9NVD7;P14373;Q9NY87;Q96LB3;Q96HA7;Q8N1G2;P48444;Q7L590;Q9NP97;Q8TDR0;Q9NZH4;O75143;P55273;P31749;Q16236;P62993;Q9BTE3;P02533;P24385;Q13490;Q7Z7K6;Q8TDB6;Q8N3Z6;Q6ZN17;P06396;Q8WV37;Q9NUP1;Q9Y2W2;Q9UQN3;A6NK39;P62081;O75154;O95831;P26639;P50452;O75112;P41134;Q6UVJ0;Q6P2D8;P63146;O43390;P51116;Q15834;Q8N8G2;Q02241;P10768;Q9NPI6;Q5T2W1;Q15038;Q9Y4Z2;Q96EK4;P14868;Q9NQW6;Q9UD71;O43708;Q5JVS0;Q14765;Q01831;O94986;O95149;Q8TAA5;Q9NQP4;Q9BSF8;Q9NR22;Q14258;Q9BQC3;Q15154;Q92636;Q03188;Q6NUQ1;P51808;Q8TDD2;P36405;P31150;O00471;Q8N8E3;Q8WV24;Q93009;P09086;Q96A65;Q9BUX1;Q15398;Q9BSB4;Q15466;Q13884;Q01892;Q9UPW6;Q86X55;Q8WV44;Q86VS8;Q86Z20;Q6ZMR3;O15534;Q8IUR6;Q9UQ80;Q96J2P;O95684;Q08999;Q9NYJ8;O95347;Q14008;Q969H0;Q9BQG0;Q6IN85;Q96BP2;Q6UUUV9;P25787;Q8WWK9;Q9GZZ1;P46060;Q9BY41;Q14194;Q6Q759;O00165;Q86SG2;P61962;O15265;Q96H20;Q96RT1;Q9UQC2;Q99613;P05388;P19484;Q13243;Q50750;Q9UBQ5;O75691;Q9Y2Z0;Q9HD47;P15172;P49789;Q17RY6;O75190;Q9UN36;Q9HCK5;Q92547;Q5HYK7;P05413;P62714;Q9GZV4;P0CG29;Q969S2;Q9UBS3;O60437;Q9UL13;Q9BZE4;Q92558;Q2M2Z5;Q5JSH3;P62495;Q8N9R8;Q9Y5K6;Q5VTE9;P17661;Q9Y2N7;Q9BRA2;Q9UQL6;Q8NB12;P09917;O14879;Q15833;O14579;Q3L8U1;Q7Z713;P13533;Q86V15;O95487;P57772;Q6STE5;Q9H6D7;Q9BT25;O95671;Q2V2M9;Q99547;Q7Z4T9;Q9UBB4;P21399;O15182;O75398;Q8WUN7;A8MTZ0;P49589;Q16656;Q99871;Q9NQ57;P48634;Q9Y3D0;Q96F07;O95153;Q96DC7;Q96RT8;Q13439;Q9NR85;Q9BYG5;P04732;Q9Y613;P23508;P61289;Q69730;Q8IY63;Q93015;Q9N617;Q96P70;Q13769;Q8WW38;Q16531;O95295;P56645;Q8IWW7;Q58FF8;P00480;Q9P2D0;A6NIX2;O14713;Q8TDY3;Q9H307;P43364;Q15554;O00463;O95166;Q9UJW3;O60506;P41220;Q9UI95;Q92540;Q9UBU9;O60763;Q5MIZ7;Q6GPH4;Q96A44;Q96HR8;Q14244;Q96CS3;P51161;Q9H0C8;Q9P2Y5;Q86WX3;Q9UBP0;Q16621;Q13158;Q93083;Q99471;O95714;P49427;Q06330;Q9Y3C5;Q969V6;P08670;P05787;P35579;Q92979;Q96PY6;Q9HD40;Q9Y4W2;P25788;Q9H7S9;Q16548;O75312;P52758;P56279;O43541;P38935;O95677;O95336;Q96MP8;Q12798;Q8WWW0;Q9P258;P36952;Q96IK1;Q9P2J5;Q13310;P39687;Q9H7D7;P50995;O15111;Q9P2N5;Q14103;Q9BX66;P81274;Q14966;Q15797;Q15773;Q9BUL8;Q6NZ67;O75800;Q96Q06;O95391;O15116;P14653;Q96SN8;Q00005;Q9Y283;Q9C086;O43248;O60315;Q15036;Q9UP83;Q8N5F7;Q8N8R7;Q7Z7C8;Q03933;Q9HAF1;Q13155;Q16719;Q8TEA8;Q95935;Q9Y3Q8;Q5TD94;Q01105;Q9UM07;Q9BU02;Q7Z4H7;C9JE40;Q9Y6J0;Q13112;Q9H467;Q9H9T3;Q7UDY8;Q9UKT4;Q9BQ95;Q9HC16;P16333;Q15006;Q8NEU8;P07814;P78406;Q9Y6X2;Q96P15;Q9H9F9;O60308;Q56P42;Q9BPX1;O75330;Q14790;Q92560;P62877;Q99417;P0CG30;P43487;Q53GS7;Q9Y4P1;Q9NUS5;Q96SW2;Q99966;P0CW01;Q9H3C7;P40337;P23396;Q9NR48;Q9BRG1;Q9NRC9;P35244;Q86UA6;Q99962;P15822;Q9BZF9;P62273;Q9NVX0;Q07352;Q9ULL8;Q9BUR4;Q330K2;O95433;Q8WYP5;A8MVW5;Q86UL8;Q9UKN5;Q8TC84;P18848;P10155;Q96LT7;Q7Z3Y8;Q9HC62;Q15654;P62829;Q5H9L4;P61604;O75832;Q8N5X7;Q9PD03;Q9P0W5;Q8NHV4;Q86TX2;Q9P299;O15304;P40763;Q05195;O95989;Q9L266;Q9NWB7;Q3BBV2;Q8IV36;Q9NY27;O14978;Q9H0A6;Q96A04;Q9UMS4;Q6P1M3;P35080;Q06787;Q49AN0;Q9Y697;Q5TI25;Q8NFG4;P28069;P62753;Q9UKA2;P32519;Q6PI26;O95793;Q93050;Q9UDY2;Q9H0R8;P61201;Q8TF74;P27815;Q01534;P11172;Q12982;Q9UBP6;Q6ZJW1;Q13868;P30622;P42772;Q6PCD5;Q9H825;Q49MG5;Q13415;O60825;Q9UHV9;Q96MG7;Q9BYD9;P61326;Q9NVM4;Q9Y2Y0;Q9P1Y5;Q9NYF0;Q9UBW8;Q2M2I5;Q9NWT6;P22626;P62826;O60759;Q9NR83;O15516;P78545;Q9UMS6;Q86WP2;Q8IWE2;P61573;P62324;P07438;Q7Z5W3;Q9BXD5;Q9UKK3;Q6NUN9;Q96BY2;Q92844;Q96PM5;Q7L5Y9;Q15287;Q9Y3A5;Q16829;Q93052;Q8WYA1;Q9UER7;P12757;O00148;Q9Y3A2;Q96T51;Q71F23;Q9HBL8;Q14596;P63000;Q99728;P48200;O75534;Q9NVR2;Q09FC8;O75794;Q9Y4L5;Q9UBS4;Q9HC77;Q004637;Q16589;P23381;Q9BVN2;Q15545;O60318;Q9NZJ0;Q6TGC4;Q9BXM0;Q8IZL8;O43815;Q9UMS0;Q66K74;Q4H4D5;P80303;P46379;Q9BZZ5;Q7Z2W4;Q9BV86;P56537;Q96KRL1;Q12981;Q9UMR2;O43264;Q9BTW9;Q14204;Q99504;P37837;P36639;Q14738;Q7L2E3;Q8N9W8;Q15723;Q12772;O60936;Q9GZX7;P83881;Q15121;Q49B96;Q16613;Q53HL2;Q07020;P14136;P98170;Q86VN1;Q9P209;Q9HCH5;Q9BY44;O00327;Q8WXE9;Q96JB2;Q9BXS6;Q5T8I9;O43747;Q96IU4;P30153;Q9Y2G2;Q9NPJ8;P61923;Q8NF99;Q13045;O00268;P31948;Q9H1H9;Q9Y6X9;Q8TDY2;O15083;Q15172;Q8IX12;Q13642;Q9Y3E1;Q9Y376;Q9C099;Q8BWT4;Q9UIV1;P57075;P06733;O43299;Q6ISB3;Q6IQ23;Q08378;Q86UD0;O43159;Q9Y3U8;Q96PU5;P11532;Q95243;Q15173;Q96S95;Q9NR50;Q969T4;Q8TF40;Q9NR28;Q8IZS6;Q6NXT1;Q15306;Q8WXF1;P46108;Q9GZV5;Q9NP61;P61758;P61970;O15078;Q9BZR9;Q7Z6G3;Q14764;P0CV98;Q9H974;Q9NUQ6;O00151;A1L020;Q14669;Q9NWF9;Q14106;Q96B36;P62701;Q9C0F3;P06744;Q99814;O15392;P62241;P47974;Q86WI3;P27797;Q9ULR5;Q15046;P27540;P15776;Q86XK2;Q9NR56;Q13363;P0CG48;Q9BRS8;Q7Z614;Q8IUD6;P21673;P30304;P11171;Q15386;Q86V81;P19338;O43776;Q92834;Q7L5D6;O14646;Q5BJF6;Q13469;O95155;O14519;Q7Z2X4;O00303;Q9Y2I6;P49006;Q9NS23;Q9UMX3;Q14203;Q14674;Q96DX5;Q6ZP65;Q01082;P55795;Q6F

I81;Q7LBR1;O75494;Q9BTT0;Q99549;Q00978;P17987;Q96CW5;Q66LE6;Q2VVK5;O76075;Q96AQ7;Q9UPV9;Q15653;P51948;Q9NZN8;O75940;P63241;Q8N2W9;Q96EA4;Q5T1R4;P23297;Q8TND4;P19532;Q53HC0;O15164;P10074;Q9ULW0;P78337;Q9H0F6;Q5VVH5;O60551;Q12815;P41002;P50749;P25685;Q92499;Q9BW92;Q8WUH2;P13196;P52565;Q9UJ41;Q9UFF9;Q9Y244;Q13144;Q5TA31;Q6PII6;P0CG34;P02795;P12270;Q9H6Y2;Q7KZF4;Q9BT92;Q6NT76;Q8WZ33;P05062;Q96JJ3;O43639;Q13114;Q99743;Q9UHD9;P06454;Q8IZT6;Q15596;Q9Y4B6;P32189;Q5VSL9;Q9H6Z4;O95983;P63172;Q99608;O43303;P56211;O95644;Q9BRP8;Q9Y285;Q6H8Q1;Q9BTE1;Q9BVL1;Q92782;Q4G0F5;Q6P2H3;O96004;Q8WUW1;Q15714;Q5JY77;P49321;Q9Y692;O75886;O14744;Q2VWA4;Q9BQ89;Q08211;Q9BZL4;Q9GZS1;Q9BR76;A6NKF1;P51668;P48147;P35237;Q8WXU2;Q96FX2;P31350;Q00613;Q13867;P68036;Q07955;P49770;P80723;Q15651;Q9NP71;P55055;Q04864;Q93008;Q96R06;Q9H008;Q9H1B4;Q92600;P0CW00;Q9H089;O95278;Q04917;Q9COE2;Q96GX9;O43617;Q9BV57;Q8WYR4;O43745;P59998;Q13427;Q9UJPF4;P63279;Q504Q3;P27694;O94817;O43542;P51610;Q14145;Q00597;Q96FI4;Q9UBB9;Q7Z3Y7;Q9BQI9;O14508;Q9NQ55;Q12834;P12755;Q13541;Q9GZS3;Q9Y2L1;Q8N3L3;Q8IYB7;Q9H9C1;Q12830;Q8NCD3;Q8TC94;Q9NS25;Q09161;Q5JTW2;O96015;P30793;P0C1Z6;Q9HA77;O95273;Q13404;Q14974;P30047;Q86YV9;Q9UQF2;Q9BV47;Q8WX92;P10914;Q6VN20;P08047;Q96DI7;Q12888;Q8IWE5;Q8TEP8;Q9NNW5;Q8N6M9;Q99623;Q86Y26;P11802;Q9BZQ8;Q8WUX9;Q13257;P27986;Q9H267;Q8IZH2;Q86TB9;Q9UM82;O94829;Q12840;P53370;P54252;Q9UH92;O43663;Q7Z3C6;P07737;Q9H0I3;Q96MT3;Q08209;P07954;Q9H9Y6;Q01954;P52630;P39023;Q9UKC9;P38919;P60709;P23258;Q9NPC6;Q6XQN6;Q96C86;Q9BWU0;Q8TAP9;O14757;P26651;Q13562;Q96CF2;O43399;P14678;O15371;Q9P219;Q9NXW9;Q9NP77;Q9UKA1;Q96L92;Q7Z5K2;Q96ST8;Q08752;Q9H869;Q14934;Q86W54;P25789;O00170;Q8N1E6;P15924;O60291;Q76KD6;Q8NG50;P11387;Q63HM1;Q8TCI5;Q9UQB3;Q9GZY1;O95397;Q9BXF9;P41250;O43516;Q14526;Q9NS73;Q5U623;Q13137;Q8N0Z6;O60716;Q96FV9;Q9NRR3;O75122;Q16222;Q9UNH5;Q8N6H7;Q13515;O60518;Q9NVK5;Q9BVC4;P30305;Q8NEY3;Q14677;O14965;Q96B67;Q9BRT9;Q8WYQ5;Q92688;Q9BY77;Q9H4I2;Q9Y266;B5ME19;Q08AD1;O60870;Q5T160;Q9UPV0;P29084;Q86WV1;P60228;Q9UMX2;Q8NI35;Q9BXW4;Q6PJT7;Q16851;Q7Z3K3;Q9H2J4;P35637;Q8IWL8;O75570;Q96KQ4;O43681;Q6MZT1;P10599;P11940;O60296;P50222;Q7Z6J0;Q8NDQ6;Q86XR8;Q9Y6B2;Q9H2C0;Q9UKX2;O76003;Q9BXP3;Q86XL3;O75444;Q9Y2K3;Q9Y512;P40424;Q96TA1;Q96Q89;Q96LK0;Q14653;Q14164;Q9Y6M1;Q9H2K2;Q6P9F0;Q00577;Q9BQ70;P20618;Q9BSJ2;Q14151;Q9GZU2;Q9NQR4;O15131;Q96LI5;Q9UKT7;Q9BW27;Q9Y6F1;Q92624;Q86T75;O60711;Q13352;Q9Y6K9;Q8WV24;Q969S3;P07864;O15117;Q9Y6Y0;P61576;Q12968;Q8N339;Q86UW9;Q9NXB0;Q15650;Q2M3C7;O15355;Q9H814;Q9Z3Z0;Q9Y295;P49354;Q9H808;Q04695;Q9BRJ7;Q5D0E6;Q15555;Q9H9G7;Q86TP1;Q66GS9;P41227;Q96RN5;Q6P597;Q9NXK8;P30307;Q9BTM9;O00159;O75351;Q8N6Q7;Q86SQ7;Q8TED0;Q9Y2B5;O75665;Q9Y6K5;Q9H8T0;Q92785;P62314;Q9UK41;Q6ICB0;Q16537;Q8IXF0;Q9H171;P50991;Q9BXY8;O43768;Q9H9H5;Q9UK73;Q6P3W6;Q7LG56;Q8N140;Q96F24;Q15013;O00423;P56945;Q9BTC0;Q9UKK6;Q13901;Q96D46;Q9Y448;P11166;Q13098;Q76N32;Q9YZ375;O15049;Q9HAU5;Q9UNN5;Q9UBY9;O94811;P35573;Q8N1V2;P05783;P80297;O14556;Q70IA6;Q9GZT9;Q9HD15;Q8TEQ6;Q96S59;P25205;Q12988;P54727;P12882;O95045;Q5TAX3;Q9H6Q3;O95810;Q9UGK3;Q8N1K5;Q9H788;O14641;Q13428;Q04323;Q9ULX6;P40222;P40306;Q9UGJ1;O14929;O95260;Q9Y4I5;Q9Y6Q2;P78537;Q9BXF6;P34896;P14618;P14635;Q9UKV3;Q8TES7;Q13084;Q8IXJ6;Q9NZH5;Q15124;Q96EV8;O95373;Q9H2U2;Q4L180;Q8NFX5;Q9HCC9;Q13042;Q9BXP5;A2A288;Q99933;P55060;Q15528;Q12933;Q9Y4P8;Q92973;Q9BV73;Q8TC56;P58340;Q96M29;O75170;Q9UBL0;Q99873;Q9Y3A3;Q8IZW8;O60543;Q5VZE5;Q8IXQ5;P62136;Q9UBF2;Q9NY39;P22531;Q9HD26;Q12906;Q96BK5;Q9UL40;P36956;Q9NQ4;Q5VZK9;Q13838;Q9BQ90;Q96QU8;Q13526;Q9Y2J8;Q96MB7;Q9UKW6;Q7Z406;P13929;P62258;Q9H8E8;Q92769;Q9H444;Q9UBF6;P49720;Q9UBF1;Q69383;Q9NQ7;P42575;Q8N6T3;Q14683;P63261;P40121;Q9Y678;Q9UPQ4;Q99717;Q96Q05;Q9H469;Q9H0A8;Q9HTY0;Q9Y3B2;O14920;Q08J23;Q92804;Q04206;O15069;A5YKK6;P45973;P42768;Q99618;P42226;Q7RTS9;P49848;O60535;P04733;O95628;Q9HCU9;Q8IYL2;O95453;P62318;P36873;P36871;Q8TEX9;P02511;Q8WXC3;Q12972;P42766;Q8TCS8;Q9Y5V3;P27348;Q9Y6Y1;Q15029;Q6NUP7;Q8NFH8;Q12873;Q8IXQ6;Q99502;Q14678;Q6S96;Q99576;A2RTX5;Q8N9A8;Q9Y6N9;Q5VT06;Q9H8N7;Q9NWZ8;P52597;Q9C0F1;P28062;Q96T92;Q9BRK4;Q9NWW0;Q8TB72;O60573;P57081;Q76FK4;P09972;P21980;Q6DKK2;Q9NS26;Q68DX3;Q13765;Q14192;Q9BYZ2;P11142;Q9UHI6;P59282;Q9UI36;Q15691;Q96M11;Q3C1V8;O75347;P41218;P49721;O60447;P62269;Q96AB3;Q9UPA5;Q15058;Q8N3V7;P46939;Q15051;P08238;Q8TC76;Q92905;P0DI81;P11055;Q8IYM9;Q9BPZ3;P42704;P68104;O60248;Q7Z7A3;Q13425;Q96MT8;Q15025;Q96BD8;Q9HB21;P13645;Q9Y2V2;Q63ZY3;Q9Y6D9;Q9UJT9;P62312;P50570;Q9NUU7;Q9NYG5;Q99750;Q5T5Y3;Q13330;Q15942;Q1MSJ5;O75618;P30279;O60921;Q5UIP0;Q9BW30;Q13228;A9QM74;Q676U5;Q9NSI6;Q9Y262;Q9NX18;Q9Y6X8;P61086;P54105;Q9Y222;Q9Y5K5;P14324;P20248;O14576;P55957;Q96N21;O14907;Q96GC6;Q8IV9;Q9BXJ9;Q96N95;Q9BZG8;Q8TAX9;P35548;P25815;Q9NWV8;Q9BYX4;Q86VQ0;Q15024;Q8TD16;O00273;Q3KQU3;Q9Y6K1;Q96B97;Q99459;P25786;O15205;Q8IVM0;Q9ULC6;Q8IZD4;O14862;Q9BYV8;Q9NPJ4;Q9NQ87;Q9H2F0;P11388;Q96RS0;Q9ULM6;Q7Z7A1;Q9Y281;Q92985;Q15327;Q9UGC7;Q8TE02;Q9P2M1;P61571;Q9Y3F4;Q99615;O14656;O14613;Q9NR77;Q14160;P78352;P61579;Q14691;Q9HBH7;O00255;A6NKF8;Q5TB80;P67809;Q8IYD1;Q8IX07;O75663;A8MSY0;Q96018;Q9NUW8;A6NDD8;Q9NYZ3;Q9H902;Q9UKI9;Q6U7Q0;Q8IXW5;Q9HAP2;O94921;Q99550;Q8N668;O00399;Q13625;P42771;P53041;A6NKF2;O75376;P60673;Q99612;P42224;Q9NXG0;O00425;Q9BVA0;Q9NTX7;Q9NPA3;Q96EB1;Q01201;Q8IW35;O75582;Q14061;P06748;P28072;Q8N108;P06132;P08235;A5PLL1;Q96159;Q92783;Q9NZZ3;Q12816;Q14CX7;O75717;Q53QV2;Q8N0X7;A9YDQ3;Q9NW38;P22392;Q53EL6;P15121;Q9BT78;Q9H063;Q92796;Q99689;Q9UDY4;Q9NPB6;Q9UKV8;Q9UDW3;Q86UE4;P61572;O14787;Q13033;Q6ZS17;P61586;Q96C90;Q9P0R6;Q9NZD4;Q9HB75;O95456;O00512;O96007;Q9H074;P12843;P22061;Q14315;Q9C0D0;P50613;P15923;Q9HBZ2;O95905;Q9H4H8;O14964;O43395;Q5H9J7;Q96JI7;O94927;Q32MZ4;O14593;P10827;Q8WUF5;Q9C0C2;O75884;O43290;Q5MJ68;P58304;Q3ZCT1;P50453;P28065;P07900;Q96A56;Q69Y40;Q8TAF3;Q9H6U6;Q9H410;Q14181;P32243;Q8TBB1;P42773;P35268;Q9H201;Q15633;Q5JTC6;O75340;Q6IE81;Q8N693;O95630;O75132;P56693;O94992;P55854;P07741;P29966;Q9BTC8;Q96N77;Q9H4A6;Q8N5U6;Q13601;Q68DK2;O14980;O95486;Q5H9I0;P67775;Q06265;P53805;P62979;Q8WY41;O75334;Q9H0C5;O43402;O95476;Q7L2H7;Q8IW19;Q96GN5;P55265;Q13347;Q15185;Q8WU90;P61575;Q99436;Q9BSU3;P62847;P50616;P29474;Q5SXX2;Q9C035;O15360;O00204;Q3SYG4;O60927;Q9BX70;O75382;Q8NDF8;Q15628;O75436;Q07157;Q52MB2;P17544;O75822;Q8TDG2;Q9NZI6;P28070;Q8IX90;P09467;Q8NE71;O15446;Q9NUL3;P41567;P13489;Q9BQ67;O95996;Q92797;Q14980;P26196;Q5H9F3;O75150;O95363;O00482;Q14152;Q96IF1;P0DI82;P40925;Q86US8;P61244;Q9ULE6;P09914;P05198;P84022;O95376;O60260;Q06830;Q8IWC1;Q9P0M2;Q9NPG2;Q9BWF2;Q9NPF1;P53618;Q9NT62;Q3BBV1;Q9

6JZ2;O95400;Q9H2G9;Q9BXG8;Q9UM11;Q9H9Q2;P63220;Q9Y252;Q9H009;P05120;Q5JR59;P50748;Q8TAP6;Q8WY54;Q16082;Q9Y615;Q8TAA3;P14866;Q8NEF9;O15055;Q9Y2D1;Q12959;Q6IA86;Q9UGP4;O60885;Q15326;Q8WVK7;O76095;O14746;Q9Y5Z7;Q96IY1;O00231;P14317;Q9UKY7;Q15759;Q86WG3;Q96IZ7;A2LDD5;Q9UN52;Q16204;P55347;P0CG47;Q99996;P04053;Q9BPU9;P31949;P63165;P45984;P49918;P07197;P07195;Q8WYJ6;Q8IZQ1;Q5VU43;P37275;Q96Q83;Q9UJM3;O43933;Q8WUY3;Q12983;Q9BRP1;Q96C74;Q9UPR3;P35754;P56524;Q96CS2;Q8IY85;P60953;Q6ZNA4;O43447;Q9NSC5;P60510;Q8IXH6;Q9BUK6;Q9UPN7;Q99627;P62328;Q9UKG1;Q8N163;Q9BTV5;Q9NRI5;O15379;A6NKD2;Q6NZI2;O15287;Q00839;Q8N9N2;P52292;Q08945;Q6ULP2;P13647;Q14999;Q9H832;Q92750;Q12905;Q96RE7;P18754;Q5TZA2;Q9UBQ0;O43189;P38646;Q9HB19;Q9NR09;Q9UGK8;Q12765;Q2TAY7;P08133;P04156;P46937;Q08050;Q6P2C8;Q8TAD8;P34932;Q9UBS8;Q7Z6Z7;Q9UHY7;Q12962;P25440;P61574;Q8WUM4;Q16836;P19387;P47897;P04792;O14974;O75164;Q86TG7;Q6ZN28;Q9Y2E3;Q13077;P08397;Q9UHB9;Q9NX63;P82094;P35232;Q9Y6D6;Q9Y5Y2;Q8WYR1;P35869;Q13432;P23526;P48556;O00743;Q9HLZ4;P35226;O15105;Q6PI48;Q5T1N1;Q8N9Z9;P06746;Q92890;P48595;P46779;O15397;P04731;Q969F9;P21127;Q7Z460;Q01850;Q8IWX3;O94763;P12004;Q86WJ1;O60504;O14645;Q7L9L4;O00625;Q5SW79;Q6UUV7;Q9NRA8;Q9Y2M5;Q13342;Q96Q35;A9UHW6;Q8NDN9;Q9NY74;P30740;Q107X0;O00567;P54840;P35580;Q8TD86;P0CWL9;P0CG35;O15350;Q9Y6I3;P62851;Q96KG9;Q5SQN1;O00291;P46013;Q8NEY8;Q96TC7;Q08AG7;Q92945;O14893;Q9NZJ4;Q9NRG4;Q13547;Q00994;P35908;Q9H9E1;Q96DG6;Q05086;O75635;Q92597;Q9H2T7;Q66K89;Q9BWD1;Q9NZ63;Q9H2G4;Q8N3F8;P78559;Q96M53;P62140;P28074;O75626;Q96F86;Q96DV4;O15372;Q9Y6H5;Q9H0P0;Q7Z699;Q96P71;Q8WW33;Q674X7;P52298;P67870;Q92530;P54253;Q13233;P38936;Q96SL8;Q9Y473;Q9P243;O94903;O60930;P04406;P50502;P62987;O95848;Q0VD86;Q14140;P35900;Q9UM54;Q96JN8;O95613;P82663;P23528;Q00534;P52434;Q9BQY9;P24278;Q9BQY9;P24278;Q7Z4G1;P78371;Q8N0Z3;P55212;Q9BWX1;Q00653;Q0VG06;Q86UW6;Q9NSC2;Q9NYB0;Q92993;Q8WWX9;O95999;Q9NVR5;O43379;P23246;Q9H3F6;Q96LI6;Q9NVV4;P41252;O60524;Q9P1T7;Q8IWL3;Q15047;O43318;Q8IUUF8;O00422;Q9H299;Q92793;Q9HCG8;P39880;P05114;Q15365;Q8N4C6;P11441;A5LHX3;P13535;Q15697;P19474;P61578;Q6PGP7;Q9H1K1;Q8IZP0;Q96NB3;Q8WUI4;Q8TDC0;Q8N488;Q9BQS6;P48643;Q9BV20;Q15181;O60869;P51003;Q9P1Z2;O14512;Q9UPQ9;Q16775;Q13023;Q6P387;Q496M5;P57721;P30419;O14558;Q13875;Q9NXR1;Q8N0Z2;P36578;O60828;O95271;Q9BZR8;Q86Y01;Q9UPY8;Q9BT04;P61088;Q16526;Q9NX95;O00505;Q96K30;P41214;O95071;Q9NXV2;O00257;Q8IY57;O94855;Q460N5;Q06323;Q13895;O43255;P35606;Q8WXS3;Q13829;Q8NEZ2;Q9UKT8;Q6IV72;P30260;Q6PI77;O00167;P05386;Q9BSQ5;Q7Z5L9;O14618;O75419;Q9Y3C4;Q6P582;Q8IX03;Q92900;Q86WH2;Q15257;Q9H816;Q9UH77;P43355;O95163;Q9UPF0;Q5VUA4;Q86U42;Q9UBK9;P78358;Q16630;Q96W5;Q9P270;Q9BWK5;Q9P270;P0CV99;Q9BVT8;O43310;Q96EZ8;Q9UILL;Q00987;Q8NF91;O75531;O95571;P14672;Q8N660;Q9UPU9;P31943;Q14671;Q14602;Q96CA5;Q7L1Q6;Q96HA8;O60684;Q86UB2;Q9GZY8;Q8N1L0;P19838;Q9H910;Q8IUD2;Q9Y536;Q6PD74;Q96EY5;Q8NG27;O95429;P20823;Q14568;Q9NSA3;Q9Y5L0;Q9H0U9;O43592;Q9BRX2;A8K8P3;Q99741;Q96ED9;Q9Y3B6;P29508;P62166;Q15935;Q0VDF1;Q13568;Q9UKT5;Q9UNE7;Q9C0H6;Q10721;P23490;B2RXF5;O95171;O75175;Q9H9Z2;Q7Z417;Q14511;Q9UBC9;P08865;Q06609;Q6P1N0;Q9ULC4;Q96E16;O94874;Q9NR46;Q13485;Q9NTG7;P62380;P61247;Q9C0D2;Q9H204;Q15003;Q5UE93;Q9UHN1;O14818;Q7Z3B4;Q03111;Q9P278;Q9UNH7;P62937;O14737;Q8N9B5;Q96E14;Q96FF9;P16989;O95817;Q9UMX1;Q5T1C6;Q96LR2;Q9Y2X3;Q9UN37;P00338;Q8WXB4;Q9GZM8;Q9BUP3;O14662;Q6QNY1;P78347;Q8NHY2;Q7RTV3;Q14232;Q5H9R7;Q06587;Q9Y237;Q9GZR1;Q9Y253;P24941;Q9H091;Q99700;Q9UBD0;Q9HB71;Q9Y3E7;Q9Y623;Q8TF09;Q9UBB5;Q969Q6;P62736;P42025;Q9HD42;P27695;Q05639;Q9H3M7;Q9NZI5;Q8TAT6;Q96KN1;Q8IXQ9;P11161;P52294;Q5PRF9;Q53GL7;Q92539;Q6I9Y2;O15519;O75821;Q1W6H9;Q96QG7;P49790;Q01860;Q9UNY4;Q96AQ6;P09132;P63167;Q07866;Q6ZN30;O15382;O14604;Q14493;O00139;Q9NEX7;Q96B26;Q7L5N1;O60832;O75410;Q8TF46;Q15072;P46777;Q14749;P07320;P28324;Q9Y3V2;Q8TEER;Q9Y224;Q96EY1;Q9UJY1;Q96G03;Q9H0B6;Q6UB98;P20749;P78318;Q9UKT9;Q9H4B6;Q9UJT2;Q96PM9;Q99638;P53992;Q05084;Q8NCF5;P51587;Q96I24;P61457;Q86W56;O95551;Q9BSW2;Q495M9;Q9UJG1;O43918;Q15631;P62917;Q9ULD2;Q96N16;Q9H0R1;Q9BT81;O60784;Q9BRV8;Q15021;Q9ULJ6;P81877;Q68CZ6;O95721;Q01844;Q15366;Q69YH5;Q99856;Q01094;Q9UMX0;Q96DB5;Q9Y605;Q9UI10;Q13136;P78560;P46781;O15144;Q9Y4X5;P49419;Q16186;Q5FBB7;A6NG73;Q86X95;P40855;Q96GV9;P11308;P51955;O43805;O95997;O95198;Q93034;Q9NYF8;Q86Y13;Q9NVW2;P54274;P55197;Q99698;Q8TD31;P25398;Q9NUQ3;Q9BUH8;Q8IY31;Q9Y5J3;Q2NL98;Q86YF9;Q9ULQ0;O00410;P60866;Q9H7C4;P13640;Q8NA72;Q5D1E8;Q15599;A6NP61;Q8WVJ9;Q86YD1;Q9NQE9;O43236;Q9NX46;Q96NB1;P55210;Q9NWD9;Q9Y5S9;P51114;Q15796;Q99619;Q14839;Q9BVW5;Q8NCE0;P13010;Q9H503;Q5VZF2;Q13287;Q96FN9;P12956;P20226;Q96IV0;Q9HCM9;Q5EBL4;P45877;O95359;Q8IYX8;Q8N490;Q96P63;P50914;O95865;P47928;Q9UBC3;Q13501;Q6IS14;Q8TBY8;Q16143;Q9BE4;P05204;Q3BBV0;Q96RT7;Q8WXD5;P46527;Q96CW6;Q13094;Q9H840;Q9HCI5;Q92748;P55345;Q9BRA0;O96028;Q15102;Q6IEG0;Q8IU60;O75674;O75791;Q8N3C0;O60299;Q96QF0;Q8NEZ5;Q14693;Q13561;O15061;Q969P5;Q8ND56;P32929;Q13761;P24864;Q9NPF5;Q96RS6;Q9BYG4;P62888;P41208;Q9NRD1;P36543;P59047;Q9H1J1;Q9BZW7;Q14CS0;Q93062;Q8TBZ0;Q9UH90;P25963;P63313;Q9Y314;Q15819;Q9H2U1;P05813}

6235

Pathogen[ P14079] interacts with 2930 human partners: {P31751;P04083;Q96DC7;Q9H0U9;P36543;Q14CX7;Q5EBL4;Q13228;Q9UQL6;P51854;O00625;P28838;Q9BXW6;Q96QK1;Q9Y3U8;Q9NQG7;Q02952;Q15691;Q6NUQ1;O95373;Q9UKA4;Q14980;Q9H1X1;P46779;P28065;O15379;O75886;P07320;Q9UPW6;Q9H204;Q8TF09;Q7L2H7;Q9UHB4;Q2M2Z5;Q99436;Q96A56;Q8N2W9;P07316;Q8N9N2;O43516;Q96AB6;Q9P0N5;Q8WMM9;O75112;O14519;Q92844;Q96FX2;O14810;Q6VN20;P52565;Q9BXL7;Q96D03;Q99623;P22528;P54274;P52758;P05937;Q8TE04;P16452;A6NMX2;Q9Y4P9;Q9Y4G2;O00463;Q9NQW6;Q86YV9;Q9NR46;Q8IV48;P0CW19;Q14CS0;P80297;O00422;O75161;Q9NVR5;P11388;Q8NA72;O15069;Q49B96;Q9Y2J2;P0CJ70;P35579;Q99459;P41218;Q96IY1;Q9Y285;Q9NPI1;Q9BTW9;O60260;Q8NEY3;Q9UGV2;Q9H7T9;Q01105;P48643;Q8IX12;O43447;P08151;O94830;Q03188;Q5JVS0;Q8TC94;P0CJ74;O95166;P62333;Q9BQ95;Q8TEA8;O15164;Q8IXQ6;Q9BW27;Q9BRX2;P35237;Q96JI7;Q9UKT5;Q8IWL8;O14746;Q92979;Q6P587;O95425;Q9H0P0;Q9NWS1;Q9BWK5;Q9GZT9;Q6PGP7;P23381;Q9UL40;Q9BRT9;Q96FN9;O95628;Q68DX3;P26639;Q8WWX9;Q9H094;Q9UKV8;Q99743;P59282;Q9BZL1;P57678;Q86VNI;Q6P3S1;Q9UNH7;Q5TZA2;Q8WZ33;P09327;P05114;Q9UL33;P22531;Q93083;A9UHW6;Q99627;P05813;Q15287;Q9NPH2;Q8IWE2;P16278;Q9NPG2;Q12982;P35900;Q96K30;Q86XZ4;Q16890;P61923;P48556;Q8IXH6;P42357;Q9BQ90;Q9BQS6;P35326;O75618;P53327;Q9UPX8;O76075;Q08945;P61970;P41227;P09132;Q6XZF7;P10155;Q96C01;Q5TA31;P57723;Q9UPP2;Q96RS0;Q9NVQ4;P31948;Q96CF2;Q8WXC3;Q9UD71;Q96EY5;P12755;Q9Y3B2;P55055;Q15036;Q6UB98;Q9NR22;P23396

;Q7L590;Q5T1R4;P13196;O14613;Q5D1E8;O00291;Q96GW9;Q08495;Q6ULP2;Q9P2J5;Q05084;P63261;Q15038;Q8WUN7;Q8IZD4;Q15056;Q86WV1;Q9Y614;Q86V25;Q9Y664;Q9H0I3;Q96B67;P11142;Q6PRD7;Q86WP2;Q96KR4;Q9P2M1;Q8WY41;P55039;Q9BTV5;Q58A44;Q8WXB4;Q9NPB8;P63279;P41238;Q75146;Q12815;P14373;P07954;Q9UKG1;Q9H0A6;Q6UVJ0;P35869;Q8WV24;Q8TEQ6;Q3KQU3;Q5T124;Q99814;Q8WU39;A6NL28;Q9Y375;Q8TBY8;Q96P71;Q8NDQ6;P0CQ48;Q06413;P19429;P40855;Q95793;Q0VDE8;Q86WU3;Q9BRT2;Q8STE5;Q9NSI6;Q8N196;Q95502;Q9C0D0;Q8IZ21;P63172;Q5TYM5;Q96KP4;Q9NUQ7;Q75419;Q8N693;Q8N8G2;Q9BYX4;Q9NWB7;Q14738;Q95876;Q11596;Q68DK2;Q6ICB0;Q7L3T8;Q15047;Q86V15;Q08AD1;Q16222;Q75363;Q9ULC4;Q92600;P35908;P52630;Q9UL18;Q9BTE6;Q9NRX4;O00303;P30307;Q43745;Q99996;Q9NT62;Q9H939;Q96AB3;Q107X0;Q9BW92;Q5K131;Q9BUH8;Q8N490;Q9H9G7;Q14442;Q9Y2X3;Q8IY31;Q9UJC3;Q9GZV5;Q9BQE4;Q9NS23;Q9BT81;Q96H20;Q96FC7;O15305;P29728;Q75663;P53041;Q8WZ82;Q9H7C4;P0CG34;P02795;Q6I23;Q9UI10;P54136;Q6ZMV9;Q9H869;Q9Y4P8;Q9ULC6;Q9UDY2;Q8TEP8;P31150;Q75821;Q43768;Q16526;Q8N163;P35637;Q5VZF2;Q08752;Q8WXS3;Q969H0;P11532;Q01518;P62324;P53779;Q14693;Q60828;Q96A04;P50452;P61201;P78337;Q6ZVD7;Q9BYG5;Q01534;Q7Z460;Q14653;Q8NEU8;P51808;P06730;Q8IX90;Q6PIJ6;Q6QNY0;Q13765;O15553;P19387;Q75691;Q5H9L4;Q9UGK8;Q9Y3A2;Q99704;P40222;Q9NZJ4;Q16548;Q9C035;Q8N9W5;A5PLL1;P09914;P57721;Q15776;Q56P03;P20809;P11171;Q9H009;Q9ULQ0;Q9UI10;P54136;Q6ZMV9;Q9H869;Q9Y4P8;Q9ULC6;Q9UDY2;Q9NRG4;Q9P0R6;Q95999;Q9UKF7;Q8TDZ2;Q96P70;Q8NFM7;Q9BVN2;O60481;Q13415;Q7Z2W4;Q95487;Q9UM82;Q07866;P68036;Q95684;Q9P209;Q9Y6K1;Q8NBQ7;Q95359;P04066;P00338;P61576;Q9GZU2;Q16517;Q8IZA3;Q9H4H8;O14893;Q9Y6X2;Q92734;Q8N339;Q96IV0;Q8WWL2;Q14192;Q9BQI9;P07951;Q8N660;Q15173;Q075312;P83881;Q9NVR2;Q75626;Q75368;Q60664;Q9C0B9;P52564;O15519;P20132;Q96P26;Q96R06;Q43597;Q15700;Q52MB2;Q8ND56;Q92614;Q330K2;Q9H4D5;Q96M43;Q8TCD5;Q68CJ9;Q15723;Q9Y2N7;Q9Y6A5;Q9UBW8;Q5TAG4;Q01082;Q95271;Q14896;Q16537;Q9UKD1;Q9NX95;Q96M53;Q9H9C1;Q15031;Q14103;P67809;Q7LFL8;P47974;Q9BWU0;Q95817;Q96RQ1;P68104;Q9UPN7;Q96FJ2;P50995;Q15714;Q8NDN9;Q9GLI6;A6NDV4;P24864;Q86YH6;Q8IU60;Q5T160;P41567;Q8N108;Q8IZW8;Q86VS8;Q9Y237;Q9BVC6;Q9BY44;Q99700;Q9UJM3;Q9ULX6;O15304;Q8TDY2;P46781;P36873;Q96NUP7;Q16658;Q96GE4;P49354;Q9Y6I3;Q8N9B5;Q60493;Q99873;C9JE40;Q75781;A2RU30;Q9UBS3;Q9H492;P20396;O15446;Q6IA86;Q96GX1;Q15006;Q7L5D6;Q9NY61;Q7Z3Z0;P62847;P13010;Q8WUF5;Q13023;Q9NXW9;Q15819;Q60543;Q6IS14;Q15024;P40306;Q92782;Q92558;P55347;Q9UKS6;P09086;P31941;P13498;Q9NR12;Q96CS3;Q9NZ32;Q75582;Q95229;O14641;P07476;Q16829;Q14151;P62753;Q6WQI6;Q5VVH5;Q9Y5Z4;Q9NPJ8;Q9UBF6;Q96NU7;Q02083;Q9NVM4;P16083;Q969T7;A6NK89;Q12840;P56537;Q14410;P02235;P98171;P52434;P02511;Q9UI47;P48634;Q92985;Q9UNY4;P15924;Q13404;Q9NRR8;Q60832;P52298;P04156;Q9UMX0;Q8N0X2;P55036;Q94986;Q9UHP9;Q76095;P35606;O15231;Q86UT5;Q9P0M2;Q9NPI6;P47756;Q92804;Q9Y314;Q9UBZ4;Q9UQF2;Q99871;P52209;Q9BV20;Q63HQ0;Q13098;Q92793;Q00170;Q6NUN9;Q13033;Q9HCE1;P28074;Q96ED9;Q99733;Q15172;Q07157;Q9UBB5;Q9H171;Q70IA6;P57772;Q15013;P21399;Q99549;P50135;Q9UNS2;Q8N157;P39023;Q9H1J1;Q9BXJ9;Q8WX93;Q66K74;Q15528;P48728;P49006;Q9BWF2;Q9H0Y0;P62273;P61457;Q49AN0;O14604;Q96FF9;Q9UI56;Q6P9F0;P01225;Q7L2E3;Q93052;P14672;Q00165;A8MSY0;Q13094;Q9BYE4;Q69YH5;Q5ST30;Q9NYZ3;Q96A73;Q92556;Q969S8;P47944;Q95429;Q13243;Q00471;Q14677;Q8IWL3;Q8N1G2;Q8IVG9;Q9NZV6;Q9HCK5;Q9UGJ1;Q9HBE8;Q68CZ1;P39880;Q60524;Q9UMX2;Q9Y5S9;Q9GZS1;Q15041;P24588;Q7Z3K3;Q96DU7;P13807;Q43592;Q8WUI4;Q13901;Q726G3;Q14639;Q02241;P25398;P50991;Q16531;Q9NXH3;Q8NG50;Q8N336;Q9Y6D5;Q6PJ T7;Q9NP79;P13489;Q8NDH3;Q9UBS4;O15198;Q9BSW2;O14974;P0CJ75;Q63HM1;Q9UPU9;Q9NVX0;Q14204;P48147;P04080;Q12906;Q2VWA4;Q96PM9;Q9BW04;P62495;Q9C000;Q9NXG0;Q8NHU6;Q9H910;Q9NP81;Q8WVI7;Q16656;Q15276;Q99576;P31949;P26038;Q5JTW2;Q9NX46;Q8N987;Q43913;Q92834;Q9H1K1;Q6P3W6;P54252;Q13330;Q9Y315;Q9Y6H5;Q94874;Q86TB9;P42566;P47897;Q9BUK6;Q14691;Q8IY22;Q96LI5;Q96F24;Q9Y2Y0;Q16831;Q70YC5;Q96NB3;Q43815;Q8TDQ7;P43490;Q95363;Q96EP0;P52294;Q00597;Q60518;Q14164;Q9Y678;Q9BV86;P49591;Q9UQB3;Q95644;P21980;Q9UGK3;Q99497;Q8WYR1;Q92783;Q9BRA0;Q8N0U4;Q75800;C9J3V5;Q7Z417;Q6P2C8;Q92540;Q95405;Q8NFI9;Q14646;Q6PI77;Q66GS9;Q8TED0;Q9UDY4;O15392;Q86TP1;Q9NTM9;Q43598;A2RTX5;Q9ULP0;P61579;Q16585;Q8IXF0;P49720;Q7LBR1;Q95163;Q86Z20;Q93062;Q6ZUJ8;Q75570;Q9H008;Q9UMX1;P09972;Q8WVJ9;Q9H8T0;Q9NQ T4;Q9Y250;Q13428;Q8N9A8;Q717R9;Q9BXP5;Q9NWX5;Q9UPA5;Q16186;P62136;P21172;Q86TL0;Q3BBW0;P25787;Q00994;Q92902;P51587;Q8N720;P80294;Q1MSJ5;Q60684;P07438;Q14966;Q9NXJ5;Q6ZNA4;Q75179;P07737;Q99966;Q13868;Q8IWX3;P32189;P58304;P0CJ68;Q9HC16;Q9H773;Q94855;Q5H9I0;Q96ST8;Q6IEG0;P42704;Q9UKV0;Q43813;Q75832;Q96MI9;Q9HCH5;P14866;P14868;Q9Y266;Q96QG7;Q4L E39;P23246;Q8N8E3;Q95153;P46783;P46060;Q86US8;Q16143;Q9HAP2;A6NC42;Q12988;Q9UI14;Q9UB U9;Q9NPD3;Q13310;Q96004;Q92748;Q86XG9;Q9BXF9;Q9HD42;Q13838;Q75674;Q6Q759;P57075;Q8NFU 3;Q99856;Q14106;P78371;Q08378;Q96C23;Q8IZD9;Q92624;Q9NVM9;P05198;Q12816;Q95922;Q9H840;Q9UBF9;Q8IZP0;Q9NRI5;Q95433;Q6P582;Q60268;Q94929;Q8N3I7;Q96EH3;Q969P5;Q00213;Q7Z4S6;Q8N9V7;Q5MJ68;Q9H503;P08729;P50914;P35232;P10916;Q8TEE9;Q6P1N0;Q60895;P68363;Q9BV73;Q14244;Q9UIL1;Q43708;Q9BRX8;Q8NEL9;Q60346;P06744;Q96G61;Q96D46;Q9GZS3;Q92785;Q86XK2;Q92636;Q9NY27;Q9NR83;A6NH11;Q9NPC6;P53805;Q6P387;A8MVW5;Q9UHV9;P35080;Q32MZ4;Q9BSK0;Q9U PW5;Q9NRS6;Q969X0;P29144;Q96C86;Q9HCC9;P10909;Q14596;Q1W6H9;A5LHX3;Q75569;Q86SG2;O151 16;Q96MG8;Q9NS39;P53992;Q13439;Q9BUL8;Q9H2K2;Q96EB1;Q9UKC9;Q14674;Q9Y615;Q9Y3F4;Q9ULW 0;Q60437;Q9HAF1;Q4VC44;Q9H074;Q8N3F8;P32519;Q13112;P62312;Q9Y3D0;Q15029;Q113045;P50990;Q9Y4F9;Q8N1E6;Q95848;Q60504;P57679;P16157;Q95905;Q95954;P19484;Q7L5Y9;Q12968;Q9Y3A5;Q15025;Q96B97;P62937;Q8TF74;Q9UJ41;Q60759;Q9UKX2;Q14847;Q9NQPA4;Q00423;P41220;Q9BZV1;Q15124;Q13427;Q7Z7C7;Q9NVR7;Q9H2P0;Q9H1B4;Q9NZU5;P62979;Q00399;P46937;A8K8P3;Q9H0A8;O14907;Q60869;Q96HR8;Q00151;Q96M29;Q43715;Q32P41;Q96S99;A6NKF2;Q13625;Q9UM54;Q86UK5;Q8N 1N5;Q60784;Q04917;Q9NUQ6;Q8TAP6;P60673;Q75190;Q9UJW0;Q8TF46;Q96JJ3;Q8NFI3;Q86XL3;P499 18;Q9Y3Q8;Q6P2E9;P31350;Q9H213;Q92597;Q8IUD2;Q76KD6;Q8NCE0;Q96L92;P61758;Q96RM1;Q1500 3;Q9UPT5;Q14444;P63165;P15559;Q99828;Q76N32;P62380;Q9H3C7;Q9UHI6;Q9BTE3;Q9Y448;Q7Z6J8;Q9H9H5;Q7Z4G1;Q43379;Q9Y371;Q9BVC4;P35998;Q60711;Q14118;A5YKK6;Q7Z3C6;P56211;Q6ZMK1;P15923;Q15306;Q9NR56;Q14409;Q9Y4H4;Q9HAU4;Q13424;Q60870;P62314;P54253;Q69YQ0;P14324;Q9 94905;P11166;P05413;P42766;Q9Y4G6;Q5VYK3;Q5BJF2;Q9C0H9;Q9NUQ3;Q14258;Q15797;Q75608;P0 6733;Q9H299;P30793;Q9H9Q2;P02489;Q969V6;Q60678;Q93933;Q08211;P25685;Q14765;Q9H9Z2;Q04 695;Q6IE81;Q969N2;P10827;Q4G0F5;P57081;Q96NT5;Q9UKK3;Q95822;P61289;Q95453;Q6ISB3;Q751 43;P29084;A6NFC5;P0CJ77;Q9H1Y0;Q86UN6;P23497;Q9Y4R7;Q96BJ8;P30304;Q99608;Q6ZU80;Q9NQ9

4;Q96HA8;Q8TF40;Q9H307;O95149;A6NGQ2;P51610;Q9P2W6;Q92890;Q92539;O15371;Q9HCI5;Q9BUZ4;Q13136;O15350;Q8IWN7;Q00839;Q9BY77;Q8TB72;P62877;Q4J6C6;Q3Y452;P09629;P62987;Q9Y4P1;Q99612;Q9BXS6;P02533;Q8WXU2;Q96N16;O94903;Q9BYD5;Q15072;O60315;Q9H5N1;O43290;P50552;Q13077;Q9H269;Q5FBB7;Q9HCM9;P46939;P55197;Q9H410;Q7LG56;Q9Y4I5;P61604;Q96GD0;P55212;O01078;Q9HA77;Q96LK0;Q7L266;P06280;Q12873;P40121;Q03111;A1L020;P11308;Q8IWW7;Q9Y613;Q9B SB4;Q9GZS0;Q13144;P09913;P55273;Q5SQN1;P50571;Q086WH2;Q9NPJ3;Q96FV9;P62241;Q01201;Q16613;Q9HB19;Q5TT125;Q99618;Q5TD94;Q9NP97;Q9BZL4;A6NDB9;Q8N960;O60477;Q9NP61;P07195;Q13541;P0C2Y1;Q9NR09;Q8IYD1;P35611;Q6FI81;P20618;A6PVL3;O00567;Q9NWD9;Q00987;Q9BUP3;P45984;Q9UKI2;Q92797;Q95198;Q9BSU3;A4D1E1;Q8TBB1;P25815;Q9BVT8;Q9BZE4;P32969;P63104;Q5VYS4;Q2TAY7;Q6ZNE5;Q96RT1;Q9NYF8;Q9H808;Q9Y244;Q9ULW8;Q5SZL2;Q08AG7;O43776;A2RU49;Q15078;Q5JPH6;Q9BRJ7;P62829;O94763;Q9NYG5;Q5T749;P28069;Q9NRR5;P14678;Q8IWX6;O15061;P10911;Q9Y2J8;O60573;Q96MB7;B5ME19;Q8TEW0;O96007;Q12772;Q9NTU4;Q17RY6;Q13769;Q8TAA3;O15145;Q9HBL0;Q16204;Q86UB2;Q14061;Q8IXW5;O95400;P60866;Q9BRP1;Q5TA50;Q12905;Q9BUR4;Q96DG6;O75648;Q9H2G9;P45973;Q6NT76;Q86TC9;Q9Y3E1;Q3I5F7;Q12802;P19338;Q96M02;P42226;Q06330;Q9UBL0;Q8WU90;O00186;P80303;Q9HD26;Q6NZY7;Q9NWX8;Q15149;Q0VDF9;Q9NRL3;Q96IK1;O15511;P14136;Q8N3L3;Q9H9E1;P82094;P45983;Q99741;Q9UK73;Q9HB71;P68032;Q8IXT1;O15066;P50613;Q8IYZ5;Q86UU5;Q9H2U2;Q9Y2T7;Q5T752;O95721;Q8TDY3;Q6PUV4;P40337;Q9BTE1;Q08AE8;Q3C1V8;Q15631;Q9NR50;Q5H9F3;P56715;Q9Y5Z7;O95831;Q9GZX7;A6PVC2;O43189;Q15651;Q96CW6;Q07020;Q00613;Q01892;Q9UKL3;Q9NZ09;Q7L9L4;P78559;Q13084;Q8IVM0;Q9NQT6;Q8N357;Q8IY85;Q9BSQ5;Q15833;Q8IYI9;P36405;Q8TE02;O95571;Q99543;Q9NSP4;Q9NUG6;Q9BTT0;Q8IYB7;Q9Y3A3;Q8TDN4;Q8WY54;P55795;O96038;Q9BXC8;Q13568;O75940;P61981;Q93045;Q9C0C2;Q92629;P12956;Q92629;Q9ULZ2;P61572;P08758;Q9BZR8;P55345;O15117;P06132;Q9Y534;O14744;Q99661;Q6NXT1;Q96LT7;Q9Y5V3;Q6I9Y2;Q96BP2;Q8N6F1;P50542;Q7Z699;P63220;P61326;O43663;Q8WYJ6;Q5BJF6;Q7Z6E9;Q9GZY1;Q6ZMR3;O60239;Q8IZH2;Q9NUW8;Q96GA3;P10074;Q5MIZ7;Q15814;Q9NXR7;Q16637;Q71F23;Q86Y01;O75791;Q13642;Q96Q35;Q3ZCT1;Q9BXM0;Q8N5U6;O14656;Q5TAX3;Q16586;Q9Y5K5;P13645;P49756;P49589;P62244;Q9UBC3;P51668;A6NDD8;P14635;Q14749;Q9UMS4;Q8ND61;Q14315;Q9H2C0;Q9HC62;Q9UPM9;Q13875;P51955;P35754;Q8NBR0;Q9UMS0;O00257;Q9H7D7;Q9NNW7;Q14790;Q99689;O95379;P12270;Q9H6U6;Q9BZ23;Q9UNN5;O94925;Q8NHV4;Q8N661;Q53GS7;O75145;P45877;Q01860;O14929;O00512;Q9H2D6;P63302;Q9H6T0;Q04760;Q15046;Q53FT3;Q96HA7;P28062;P60900;Q8NFW9;Q96HD9;P19532;Q14145;Q9H425;Q9BSF8;Q7Z3Y8;Q8IX03;O00519;P16989;Q8NC51;Q9Y238;Q56P42;Q00005;Q9Y6U3;Q9BXF6;Q9UPZ3;Q9NP74;P11161;P22392;O00482;Q9H743;Q2M3C3;Q2M3C4;Q96BY2;Q8N4C6;Q9UJW3;Q9BQ89;Q96912;Q9NZC7;Q9NWF9;Q96T51;Q16644;O94829;O60318;Q9UKV3;Q12962;Q9UER7;Q8ND90;P19474;P55265;Q16719;P36639;A6NGB9;P17544;Q9NPF5;Q8WYP5;Q9NX09;Q96AQ7;Q9UH90;Q92769;Q9BXR0;O43681;Q96HJ5;Q9UL45;Q8N9W8;Q96I24;O75822;Q9BZI7;Q9H467;Q2M2I5;Q8IY57;Q96IF1;O95347;Q8IVS8;O00410;O14737;P23528;Q9UM11;P11940;Q92934;Q9BZQ4;O96018;Q96Q89;Q9WV28;Q9UBB6;P29966;Q9BY32;Q8IV53;Q9UBB4;Q6XQN6;Q15121;Q96PU9;Q9GZZ1;Q5VT06;O75915;Q9BQA1;Q9P299;Q8IV36;Q8NBT0;Q86XW9;P07197;B7ZBB8;P26196;P31946;Q9BQY9;O60248;Q12912;Q8NI35;Q86WV6;O95989;Q5JY77;Q8NPF5;Q2KHM9;Q8WUM4;Q9H2G4;O95397;Q14093;P49458;Q9NWT6;P55210;P0C5W0;Q9BQ67;O75334;Q8NFB8;Q14934;Q96QA5;Q96RN5;P23508;Q0VGO6;Q15102;Q9BXY8;O60610;Q9BPZ3;Q9UI46;Q9NZI6;P28289;Q6U7Q0;Q05BV3;Q9BYI3;P61573;O75340;Q5RKY6;Q92560;P38936;P41252;Q15759;O15205;Q99426;O60282;Q15599;Q7Z3Y7;Q9Y6K9;Q5PRF9;Q15075;P08238;Q9BRT3;Q7Z5L9;Q9Y473;Q5JSH3;Q7Z4L9;Q9NUL3;Q8IWC1;Q9BRP8;Q9Y6K5;Q96RT8;P09525;P61158;Q9BQI5;Q9Y6D6;P17987;Q99933;O95996;Q92832;Q96F86;O60502;P08107;Q12798;Q3KRA9;A5A3E0;P45985;P08397;P49848;Q9UI26;Q13042;Q13057;P48681;Q5T1C6;O00139;Q15773;P0CJ69;Q9NW72;O15049;O43765;P61571;Q92945;P35321;Q9NNW8;Q2VPE5;O14558;Q96A00;Q15555;Q13867;Q8N6M9;O95243;P16333;Q8NE71;Q15058;Q9BYG4;Q9Y3B6;Q9NY33;P27540;Q9BQG0;Q8TCI5;P61960;P13640;Q6ZUV0;Q96GX9;Q96DE5;Q93034;Q96JZ2;O75534;Q8WUX9;Q12830;P63267;Q66K89;P41002;Q9BVV8;Q13257;P62328;Q14974;Q96EA4;Q9NS64;Q8TAM2;Q86UW6;P55060;Q92973;Q99569;Q99613;P34949;Q9BRS8;Q8NFG4;Q8NB12;Q8NFP7;Q8WUY3;Q9H6Z9;Q9Y5J3;P41250;Q9H4B6;A6NIX2;Q96QF0;Q9UJZ1;Q8WVK7;Q66LE6;Q86UW9;Q9NZT2;P62140;Q86UD0;Q96WJ1;P23258;Q86V81;Q9NY87;Q9UI09;Q9UL12;Q8N5X7;Q9UBF2;Q9NZD4;Q92750;P45381;Q9HD15;Q9ULZ0;P62166;Q86U42;Q8WTW4;Q96JM3;Q9P2A4;P11686;Q9H0C8;Q9HBH7;Q86TX2;O94811;Q12981;P35325;P35573;Q96I59;Q9BV47;Q9Y697;Q96IZ7;Q9UP83;P53370;Q9NVV4;Q9H1H9;Q92616;Q8NDL9;Q969F9;P0C1Z6;Q15697;O00148;Q96KX2;P48200;Q9Y2B5;Q96AC1;Q9UKK6;Q8N3V7;Q3BBV0;P36578;Q9UBK9;Q969S2;P26428;O43310;Q9NR28;P27348;P0CJ72;Q9Y3C4;Q9UBF1;Q9BY41;P07864;Q96RT7;P06454;Q9H6D7;P26640;Q8WXH0;O14978;P23490;O60511;Q8TAD8;Q8WZ55;Q8WV37;O75175;P55854;P35663;Q9NYB0;Q96IZ0;O60749;P30419;Q86UA6;Q00LT1;Q9NRN7;P61586;O60506;P07900;O43294;Q9Y4B6;Q15468;Q6GPH4;Q9P243;Q8TAT6;P05204;Q9UJG1;O95045;Q9Y5Y2;Q8TC56;Q9Y2M5;Q9UBB9;Q2NL98;Q9Y6Y0;Q9UFF9;Q6PD74;Q93015;P60709;Q15185;P13639;Q9Y4W2;Q9H8V3;A9YTQ3;Q53GA4;Q8N841;Q5T1N1;Q08J23;Q9UBV8;P56192;Q9Y6M1;Q96AQ6;Q13326;Q8NEZ2;P50749;P37198;Q99417;Q96FI4;O14818;Q92837;Q8WU20;Q9P0J0;O00221;Q9NSD9;P15822;Q14134;O76041;Q9Y512;Q9H0R8;Q8IX07;Q9Y3V2;Q9BPU9;Q15366;O95983;A6NKF1;A2BFH1;Q9P258;Q9HA92;Q15834;P55789;O43903;Q9NS26;Q9NZI5;Q96Q05;Q14247;Q9NS25;Q13409;O60936;P27695;Q12983;Q16082;Q8NA42;Q13561;Q9NX18;Q9Y471;P49721;Q92905;Q9UJY1;Q8TCU4;O43264;O43612;Q9UHL9;O75335;P51116;Q96RK1;Q9UBD0;Q8IWX2;Q96T92;Q9BU02;Q8N668;P81172;Q9P2L0;O94992;Q9NY74;Q15042;O9A5171;Q14194;Q49MG5;Q9NVK5;Q9BR76;Q96KNI1;Q9UMX3;Q8N635;P32929;P09917;Q9H091;Q96Q06;Q9HAU5;Q9Y2L1;Q9Y281;Q9NXV2;O15397;Q9NWX6;Q8N140;Q9BQC3;Q15327;Q8TF30;Q92530;P49790;Q9NSC5;Q6ZN28;Q96DX5;P46926;Q9UI36;P11277;Q86UE4;Q9C0F3;Q5SW79;O95336;Q96J02;O95551;Q9NYP9;P21127;Q07955;O15083;O95295;Q92817;Q8IW40;Q8IXQ9;Q6H8Q1;Q8N0X7;Q9Y4F5;P49902;O14593;Q8N0Z3;P23297;Q9UFN0;Q9NP77;P61574;Q16621;Q9NV79;A9QM74;P61962;A2IDD5;P06748;Q9BSJ2;Q6ZP65;P62258;Q13316;Q9UGC7;Q96LR2;O14662;Q9UBC9;Q8TD31;O43303;P12883;Q5HYK7;Q8NEM0;Q9Y262;P50453;Q13596;Q6S9J6;Q9H6Q3;Q9HBK9;Q96F07;Q9BTC8;Q9C0F1;O76003;Q7RTS9;Q9NZ20;O00505;Q9C099;Q9BXD5;O43502;Q9H9R9;Q8N3R9;O75444;Q6DKK2;Q15181;Q13501;Q5VZE5;O43402;Q14181;Q6MZT1;Q7Z3G6;Q9H6Z4;Q13137;Q9UH92;Q969H4;Q9NTK5;P56645;Q12765;P05783;Q9Y2Z4;Q8NFF9;P56693;P58004;Q16236;Q5T2W1;Q9Y692;Q9GLD1;P61163;Q9GZM8;Q9Y3R4;O43541;Q15365;Q00577;O95997;O14862;Q16677;Q12972;Q14139;Q8WW24;Q0VD86;Q7RTV3;Q9P0W5;Q96A44;Q5T5Y3;Q9UFE4;P48444;Q96JE9;O75366;Q96DB5;Q96SL8;P42224;Q9HCU9;P00480;Q5VUA4;O75531;Q8N1V2;Q9BZG8;Q8IWX1;Q9UN37;Q8TEX9;P0CG

35;Q8N0Z6;Q7Z614;Q8TBZ0;Q6ZVT0;Q9UI17;Q6PGN9;Q13601;Q8IXJ6;P63241;Q9UBW5;Q86WG5;P35226;Q5TB80;Q9UH77;Q9ULD2;Q4ZIN3;Q8N0Z2;Q8IZL8;P32243;Q96S66;Q86UL8;Q8WX92;O60296;Q9BT78;Q53HL2;Q68CL5;Q00587;Q969V4;P62081;A6NP61;Q15554;Q8WWK9;Q9UIV1;Q96IU4;Q86Y91;Q8TAP9;Q9NQ60;Q86SQ7;Q8WWZ3;Q16775;Q6IN85;Q05195;P49915;Q9BXN6;Q96A65;P41208;P46777;Q16626;Q8N488;Q7Z3T8;P04731;O14713;Q8IYI6;O14508;P13929;Q96EK4;Q9Y5K6;Q86Y26;O14645;P81877;Q6NZI2;Q8TCG7;Q9Y2G2;Q9H4A5;Q13367;Q12933;Q8TBF2;Q13432;P17050;P20248;O60841;Q9BXI3;P61978;Q8TE44;P06746;Q8TDD2;Q9Y6N9;Q5T7B8;Q9NQS7;Q63ZY3;Q7L5N1;Q9H7E2;P27815;P31943;Q8TES7;Q14839;Q93050;P20749;P22532;Q96LC9;Q96RS6;Q01850;Q92547;Q14764;Q9HOR1;Q9P270;Q9NUK0;Q9Y253;B2RXXF5;Q8TC84;O14512;P62993;Q95810;Q05682;Q9H8N7;P49427;Q8N6F7;Q8WZ79;Q13158;O43918;Q99541;Q96S95;Q9BYG3;Q9BPX3;P25440;Q9BZF9;P47874;Q8TDR0;Q14493;P78406;Q96SZ6;Q8WXE9;P30260;Q06323;O43639;P0C7Q2;O43299;O95613;Q9Y5Z9;Q9ULR5;P38646;Q9UKY7;Q7Z4T9;Q969Q6;Q9Y4R8;Q99487;Q9HCG8;Q8TCY5;O43747;Q8NCD3;P10599;Q9Y283;Q9C0H6;P27694;Q15051;Q9UBS8;Q8TD86;Q8N9R8;P28290;Q86WX3;Q8NEZ5;O43159;O75410;P63167;Q96KR1;O95456;Q00978;Q6PI26;P62191;Q9NNW5;Q9UGM6;Q9H0F6;Q9UBQ0;Q7Z3B4;P29459;Q9P1Y5;O75182;Q14602;Q8TC76;Q6ZMW3;Q8WYQ5;P00915;O75376;Q9Y605;P60510;Q9ULE6;P54259;Q92900;Q9BT92;Q86YF9;O15078;P78317;Q06787;Q8TCB0;Q8WW33;O14579;Q9Y3E7;Q86W56;Q495M9;Q6EMB2;Q9BW30;Q6TGC4;Q92499;Q9HB21;P04053;Q9UKT7;Q9UIF3;Q96B26;Q96BK5;O15265;P67870;O95476;O60299;Q99638;Q9BT30;Q9NWW0;Q8IWE5;P62888;P46527;Q9P1T7;P08865;O14787;Q9UIA9;Q9NSE4;Q8NCN5;Q14011;Q9UQE7;Q13155;Q8N1K5;Q86T75;O75132;Q8WUW1;Q9UKI9;O15067;Q9P2K1;Q2TAA8;Q15493;Q9UPR3;Q9NRD1;Q5TA45;Q99504;Q6N069;Q13515;Q9H3M7;P78545;O60885;Q013164;P42025;P41134;P59998;Q53GL7;Q7Z4H7;P49454;Q96B36;Q9NBQ8;Q9BQ70;Q9NZJ0;O75204;Q9NZC3;Q2M3C7;Q8N137;O75154;P15941;O75884;A8MW95;P38935;Q16589;Q86SH2;Q9HBZ2;P12004;Q9Y3C5;P12757;A6NG73;Q96EV8;Q96DX8;P52597;P62633;O43390;Q9P021;P04732;Q9Y2B4;Q7KZF4;P62917;Q9BX70;Q99598;P81274;Q676U5;Q96MG7;Q9GZY8;Q9BT25;Q9H1Z4;P49321;Q9NS86;P08670;Q9HAV4;Q96MP8;Q5VSL9;Q5D0E6;O43504;O94817;Q6W0C5;O15182;Q99615;P21695;O75347;Q6P2H3;P23526;P30305;Q8IUI8;Q8NHQ1;P49023;P56279;Q9NUP1;Q9NZH4;Q6NZ67;O75351;Q9NQ87;Q13761;Q5JR59;Q9UJP4;P49773;Q96TA1;P11137;Q9NV92;Q13829;Q68CZ6;Q9NSK0;Q96G03;P80723;Q9ULM6;P42773;O75665;P30153;Q8N9Z9;Q9P2N5;Q13895;Q9NWB1;Q9Y6F6;Q9H7S9;Q9BRV8;P0DI82;P43686;A2A288;Q99471;Q96JB2;Q86WL3;P42575;Q12904;Q9NUS5;O14617;Q13469;Q2V2M9;P06703;Q9NZZ3;Q9UKA2;O00425;P58107;P51003;Q13347;Q01831;Q03393;P62826;O43399;P25788;Q15154;O95361;Q9H2M3;P09467;Q06DV4;Q6DN90;P43364;Q9UJT9;Q8TAF3;P0DI81;O75436;Q92796;Q9H7C9;P07315;Q969Q0;O00167;Q7L1Q6;P04733;O95260;Q8NCF5;Q3SYG4;Q93SH1;Q9UKN5;Q9NPJ4;O14576;Q9NZN8;O00231;O95273;Q01469;P05386;A6NK39;O15055;Q96SW2;Q8NF91;P28066;Q53GL0;P49588;P35268;Q8IZS6;O95486;Q15650;Q96N77;Q14232;Q9BRA2;Q15466;Q96YJ0;Q9NPB6;Q9H6S1;Q8IWF6;Q9BZX4;Q9H444;Q86XR8;P04424;P044792;O15382;Q96KC9;Q96KQ4;Q9BRG1;Q9NXL1;Q9Y6B2;Q96LB3;Q9BSA0;P50748;Q9UHD5;Q12888;Q9UEY8;Q9GZN1;Q86VQ1;Q8NEJ9;O96015;O75330;P17661;Q96B42;Q5U623;P15621;O95235;Q9HD40;Q13526;O75794;P41214;Q9Y679;P36551;P49368;Q9UM07;P40925;Q7Z2X4;Q99698;Q5T6F0;Q9H0E2;Q16543;P02545;P56524;Q14671;O60930;Q9UHN1;Q15021;Q6PI48;P50440;Q96S59;Q13127;P53801;Q6ZJW1;Q9GZR1;P49789;Q9H2T7;Q96FX8;Q9BXP5;Q99816;Q8WYR4;Q9BX66;Q9NRC8;P54840;Q14457;Q6P2S7;Q5W440;Q96QU8;Q8IYL2;Q9BY60;O75494;O15355;Q9Y536;P50616;Q7Z7A3;Q9BUX1;Q9UBQ5;P61247;Q8WV44;Q8WUH2;Q9H4I2;Q9Z5K2;Q9Y2I6;Q6ZUI0;Q9BSY9;Q8N8R7;Q13813;Q99547;Q96TC7;P35244;Q5UIP0;Q9NTG7;O15105;Q9BZZ5;Q14140;P78347;Q5JTC6;Q9UDW3;Q96E14;P54105;Q92575;Q96BD8;Q8N1I0;Q86VQ0;Q9BVA0;Q06609;O75122;Q9Y3I1;Q8WYA1;Q9Y6X8;Q07021;Q14683;Q9NW38;P62318;P0CG47;Q32P44;Q9UN36;P54727;O14965;Q9UQ80;Q15935;P81277;Q9Y5L0;Q96Q83;P02549;P62269;Q9H2J4;Q9ULJ6;Q96MH2;P21673;Q95TC3;Q9H0B6;Q9H4A6;Q96E16;Q9NR77;Q9P1Z2;P61578;Q9UPY6;Q9NV27;P62701;P0CJ76;Q9BYZ2;Q9Y573;Q9BQQ7;Q13287;Q9BRK4;Q9Y239;Q7Z2E3;Q8IYX8;Q9UHB9;Q15274;P36956;O43617;P36871;O14879;Q9UQC2;Q6QNY1;O43151;Q9P2Y5;Q01094;Q13352;Q16612;Q9H902;O75935;Q86X95;Q504Q3;O60443;Q9H568;Q9P2S5;Q14678;Q9C0D2;Q96MT3;Q9Y224;Q9Y2Z0;O00255;A6NK58;P83111;P61575;Q9NQC7;Q6ZS17;Q9UBY9;P43355;P61244;Q9HC77;Q9BZQ8;P63313;P51580;Q9NRA8;Q15628;Q96M11;Q9H3Q1;Q13145;O15259;Q96FT9;O14908;P04818;O14618;Q06265;Q9NRG9;Q9Y4J8;Q8IWI35;Q9GZV4;Q9UJ68;O75153;O43395;P63146;O15273;Q9H816;A8MTZ0;Q9NP71;Q9Y376;Q16342;O15234;Q9BXW4;Q9NZB2;Q96EZ8;Q96SN8;O60716;Q8WVB3;O14681;P50502;O75717;Q9BTC0;Q9NVN3;Q8NEF9;Q5UE93;O15360;Q9HB75;Q08209;O00629;Q8WWW0;Q9H974;Q5T7V8;P68133;P82663;Q3BBV2;Q15438;Q969S3;P25205;Q9NZJ9;P52292;Q14152;P78537;Q9BZE0;O75382;Q8TD16;Q96CV9;P59047;Q9UKW6;P10144;Q05932;P48595;Q9NXB0;Q5H9R7;Q96T76;Q8N3Z6;Q8WXD5;Q9NQR4;Q9BYV8;Q9BV57;Q9H063;Q8TAE6;Q96C10;Q14999;O60921;P17980;P78318;Q8TDG2;Q9NXK8;P0CJ71;Q92688;O75496;Q15326;Q6IQ19;Q8NEY8;P18754;Q9Y6F1;Q03154;Q96N95;Q96GN5;Q8NHR9;O15131;Q96EY1;P78358;P50222;P07814;Q6ZN17;Q9C0E2;Q7Z624;Q9P2D0;Q96C90;Q96PI1;Q99836;O00743;P07741;Q86YD1;Q9Y2V2;Q9NZH5;Q14203;Q9H3F6;O43324;Q8IY63;P30047;Q9H9F9;Q95050;Q5H9J7;Q9P219;O15144;Q96CN9;Q8WW38;Q6UWI2;Q5VWK0;P47928;Q9UJT2;Q9NQE9;O94850;Q8TAX9;Q8IZT6;P62851;P27816;Q9H788;P07992;Q9BTM9;Q8TCS8;Q9NZU7;P37275;P35241;Q07352;Q9UGP4;Q53QV2;Q7Z5W3;Q8TC71;Q96FW1;Q8TDC0;P28072;Q04323;Q99619;Q9BWX1;O43542;Q8TAD1;Q95391;Q9P0K7;Q9UNH5;P39687;O60308;P46108;Q09161;P05388;O43805;Q6P1M3;P11441;O60927;Q8IUD6;Q674X7;Q53EZ4;Q04637;Q09FC8;P31483;Q9NSC2;Q5SXJ2;Q99550;P22626;Q14019;Q8NI51;Q7Z7A1;Q6IV72;Q8NFR9;Q8NCR6;Q15643;O00522;Q96C74;O60763;P10914;O43236;Q13342;Q6P597;Q9Y3P8;Q9H267;O95865;O15534;P61925;Q92993;Q8TCY9;O94927;P49917;O75170;Q9Y222;Q7Z7K6;Q9H999;Q9H089;Q13114;Q27J81;P55957;Q9UQN3;Q9UPQ9;Q9NPA0;P13647;O00268;Q5VU43;Q16666;Q8IUR6;Q9BR09;P30622;Q9NS73;P49901;Q96LZ7;Q9UKT9;P58340;Q96BWL;Q96CW5;P34896;Q9NQ55;P13693;Q9BYG8;Q14978;Q3L8U1;Q99750;Q8NDV7;O95298;Q96GC6;O75970;Q53EL6;Q7Z713;Q9H9Y6;Q9UPV0;O15372;Q08999;Q9BYD9;Q9NZD2;Q9NYF0;P50750;Q9Y6J0;O00273;P42768;Q16836;Q15545;Q13490;Q96NB1;P42771;Q99962;Q9Y295;Q69383;P10636;O00401;Q96KG9;Q5T5P2;Q14008;Q9UI08;Q96D09;Q9NPP4;P04406;Q8N998;Q9H201;Q8WVJ2;Q8NBC4;Q96GV9;Q3BBV1;Q9NSN8;Q9BT04;Q9BYX7;Q9BVW5;Q9UPX8;P55884;Q8NHY2;Q9GZM5;Q15942;Q8WXI4;Q5VV41;P46013;Q15398;Q06587;Q8N5F7;Q14420;Q9H0C5;P37837;Q8IUZ0;Q7L3B6;Q15653;Q8NHW5;P51948;Q8TAA5;Q8IW19;Q9UMS6;Q9H814;Q9HD47;Q96NL8;Q9Y6Q2;Q96CS2;Q9BZW7}

6236 Pathogen[ P03383] interacts with 1983 human partners: {Q14244;Q6P3W6;Q9UD71;Q17RY6;Q7Z7A1;Q96MH2;Q86UA6;P08107;Q14683;Q9BRK4;Q1445

7;Q9H1B4;Q7Z2E3;P02545;O96018;P23490;Q06330;Q8N9W8;O14519;Q13761;Q5VSL9;P42766;Q13257;Q13228;O14879;Q15723;Q9NQG7;P15924;P41002;Q16612;A6NG73;P30307;Q9NVV4;Q9UI26;Q9Y2Y0;Q9UBW5;A6NH11;Q8WTW4;Q68CJ9;Q7L5D6;O60927;P36578;Q9NQS7;Q9BQG0;O60716;Q9HD47;Q9BYE4;P27986;O15198;Q99504;Q03188;O75182;Q8NI51;P62140;Q9Y253;Q06265;Q8TC76;Q9UHN1;P78358;P05388;Q9Y285;Q14978;O00213;P16989;Q9UBU9;Q9H8729;Q8NHW5;Q9NY61;Q8IWI2;Q15935;Q96LC9;Q07955;Q6QNY0;P49454;P50995;Q13601;Q12830;Q9UHL9;Q9BRJ7;P19474;P10914;Q8N3L3;P34949;Q8TF74;O14737;O15234;Q969F9;P62879;P56945;Q9Y2L1;Q8N0Z3;Q8IXT1;Q9Y3I1;Q86XR8;Q330K2;Q5JR59;O75794;Q5JVS0;Q16543;Q9UHV9;Q96GA3;Q12888;Q32MZ4;Q9H974;Q99547;Q86UU5;P11831;O14757;Q15287;Q8WZ33;Q53EL6;Q15047;Q96T76;Q9BQA1;Q9H4X1;Q7Z417;Q06609;Q9UH92;P04733;Q9UBB6;Q96G03;Q7Z460;Q14839;O75534;P35321;Q6UVJ0;Q9Y281;Q86UW9;O75582;P80294;P35080;Q9Y3V2;Q01105;P06746;Q6PJT7;P55036;Q96N21;Q13485;Q969Q6;Q9H2U2;Q9UJW0;Q9Y4B6;P02533;Q56P03;Q9BYG8;Q12904;Q8NFH7;P61574;Q14653;Q9BSJ2;O75494;Q9BZL4;Q9BVW5;Q04864;Q96A56;O14862;Q7Z3C6;Q9NTU4;O95163;Q96TC7;Q86WP2;O75791;Q15366;P08047;Q9UPW6;Q9H6U6;Q9UKL3;A6NK39;Q9NW T6;P51003;Q9P2J5;O94925;Q9UIA9;Q9BTC8;P06748;Q5T749;Q1MSJ5;P13010;P25815;Q96BD8;P29084;P29474;O75143;O95865;P55212;O60543;Q8TBB1;Q9H0F6;Q9UKI9;O15397;Q9Y244;P27540;Q9NWS1;O14579;Q96DE5;O00167;Q68DK2;Q8NCF5;P14868;Q8WW33;O43390;Q15051;A6NDB9;P28069;Q02241;Q9Y6K9;Q8WXS3;Q93083;Q14678;Q92844;Q5T752;Q9H0C8;Q8TAD8;O94986;Q8IWL8;Q13469;Q9H9Z2;P62987;Q9BSF8;Q13515;Q9NWB7;P17544;Q96B67;Q5TI25;Q8IUR6;P25398;Q96JI7;O95397;Q14008;P51808;Q14160;Q9NZJ0;P32243;Q9UP83;Q15691;Q9HD40;P61572;P62324;Q9NX63;Q5H9I0;P19338;Q16626;Q13884;P51948;Q13233;Q9H4I2;Q13084;P13640;Q9NYG5;Q9H840;Q00653;Q8WUY3;Q9UL18;Q96LR2;O00567;Q9H2T4;P62318;Q96IZ7;Q96QF0;O95684;Q88999;Q5VZE5;Q07020;Q9IUB0;Q8IY31;Q14139;Q5UIP0;P25440;O95433;Q6UUUV9;P49458;Q8WVK9;Q86UE4;P06454;Q9GZZ1;O14639;P53618;O43290;O60248;P40337;P62312;P25789;Q9NZD8;Q9H4D5;Q0VD86;P54105;Q8WUX9;Q9BSK0;Q5D0E6;P53370;P22626;Q9BUX1;Q107X0;Q14106;Q8TD19;Q8N163;Q9Y678;P08670;P60900;Q15596;P15172;Q10194;P49789;Q8TAF3;Q96SL8;Q15013;P04156;Q5HYK7;P14866;P36639;O15371;Q9NYB0;Q9H869;O15511;Q15029;Q15072;O75376;Q8WVJ9;Q9H1K1;Q6NZI2;Q9BU02;Q14526;Q96EH3;Q9UQL6;P17661;Q9BRA2;P38646;Q9NVX0;Q9H0C5;P58340;Q96F24;O14713;Q9P2W6;Q96H20;P62888;Q9NWZ5;O95487;P57772;Q12815;Q15650;Q7Z4T9;Q9UBB4;Q6NUP7;Q9UHB4;P19484;Q9UBQ5;P50502;Q16656;O43264;P61571;Q12270;Q03111;O14920;P31946;Q9UPQ9;Q5FBB7;Q13439;Q9UK73;Q15173;Q8WW38;Q96FJ2;Q96MB7;Q5T2W1;P60228;Q15257;Q93015;Q13769;Q96GN5;Q7L590;P40424;O95295;Q9UL33;A6NIX2;P41220;O15304;Q13838;P78347;Q6NT76;Q7Z5L9;Q9HD66;Q15554;Q9UKD1;Q9UJW3;P00338;Q9UH7E2;Q9NRI5;P41227;Q8NE71;Q99608;Q9UI95;Q14181;P46777;Q86WG3;Q7Z7A3;Q9Y5S9;Q9BYZ2;P05204;Q9NTK5;Q13875;P46779;Q8N668;Q9UKW6;P49427;P23297;P41567;Q96C90;Q8WXE9;P27694;Q9ULQ0;P31749;Q8TDR0;P55795;Q5SXJ2;Q9NRG4;Q96FX2;Q9P258;P36952;O43236;Q9H6Y2;Q5VYK3;Q9ULE6;Q13023;Q62205;Q9Y295;Q5JPH6;O15111;P07864;Q9BXS6;P34896;P63172;A9UHW6;Q14203;Q9BZL1;Q96A73;Q42N267;Q93034;Q7Z3Z0;Q96SN8;Q8IVM0;Q00005;P56537;Q9UJM3;Q9C086;Q99700;Q9UMS6;O75460;Q8N5F7;P49589;Q9Y3E7;Q9H9Y6;Q7Z4H7;P40306;Q15038;P31948;Q96AQ6;Q5T160;P78406;O95644;Q9UFN0;O75618;Q92905;Q9NUQ3;Q9UI10;Q9Y4P1;Q5JY77;Q96SW2;Q9Y3B6;O94811;Q15031;Q9NR56;O60299;Q99689;Q9BZF9;Q8NEU8;Q96P70;Q99576;Q96CW5;Q9BUR4;O43303;P25205;P60953;Q9UBW8;Q86X55;Q8WYP5;Q9NZZ3;A8MVW5;Q96KQ4;P41208;P46013;Q8NEY3;Q5H9L4;P20749;P61604;Q8IYL2;Q9NS73;O00257;Q8IWL9;Q8NHV4;P62328;Q13490;Q16836;Q6ZN17;Q9BTE3;Q6STE5;Q8IV36;P55957;Q96FV9;Q9UBS8;Q6P1M3;Q06787;Q12972;P62753;P02511;Q6PI26;O00186;Q86WV1;P30304;Q9NX95;P61201;Q9H9C1;Q15714;Q6MZT1;P62937;Q96LI6;Q9BV73;Q9UBP6;P62714;P50222;Q5D1E8;O43399;P22392;Q9H503;Q92797;P13807;P09467;Q9H825;Q9NYP9;Q9NP81;Q8WYQ5;Q8TBY8;Q9Y262;Q9HZ04;Q9GZT8;Q9NVM9;Q96AQ6;P49006;P61326;Q9BQS6;Q9GZV4;Q86WH2;Q2M2I5;Q9UHI6;Q9UMX3;Q96IZ0;P37275;Q9BZV1;Q8NDQ7;O75886;Q9Y3Q8;Q9BQ95;Q96MT3;P61573;P09972;Q9NQ87;A8MTZ0;Q96N77;O95831;Q8WXD5;P80297;Q06587;Q9BZW7;Q96BK5;P48200;P63000;P61247;P40925;A6NP61;P52630;Q9HC77;Q8IXW5;Q63HM1;Q5TD94;O60318;Q96JB2;Q9BXM0;Q9NS26;P15923;Q8IZL8;Q15468;Q9NQ55;Q9BWU0;Q9H2G9;Q9NS25;P53805;Q9BZZ5;Q8NCE0;O95347;P38919;Q12798;Q96KR1;Q86TG7;P28838;Q14738;O95400;Q00536;Q9C0F3;A4D1E1;P49721;Q06323;O60936;Q3KQU3;Q8NEZ2;P83881;Q15121;Q9NTX7;O43402;O00170;Q8NDF8;Q16613;P37837;Q99816;Q9NX18;P63313;P14136;Q9BZE4;Q96P71;Q9H0B6;Q9UFF9;O95486;Q8TB72;O14646;Q9HCH5;Q6ZNA4;Q5T8I9;P13645;P52434;Q3BBV2;P24385;A8MSY0;Q01850;Q13243;Q9HCK5;Q8N1N5;Q04323;Q8NA42;P35573;Q8TDY2;O00165;Q96M29;Q9UKT4;Q9BRP1;Q8IYI6;O43598;Q8TCS8;P30153;Q42BX2;Q01860;Q9Y2B5;Q86XK2;Q6ISB3;P78317;Q08945;P04792;Q9C0C2;O60841;Q15797;Q8TAD1;P22226;Q15773;P10599;P67775;P61978;Q8WXF1;Q9H2C0;Q9Y6D6;Q9NRM7;Q9NNT62;O75691;Q96N95;P11387;P26196;Q96RK1;Q9NUQ6;Q7Z3Y8;O43189;Q96B36;P11940;Q14152;Q9GZS1;P31943;O00505;P62917;Q92993;Q86V15;Q9UQF2;Q9ULR5;Q99459;Q58A44;Q969V6;P49321;P61575;Q7Z614;Q96K30;Q9Y4R8;Q8N693;P62273;Q07352;Q86V81;Q15306;Q5U623;Q15651;O60573;P07900;Q92782;Q9NUS5;Q7Z7K6;Q96DX5;P05783;Q13352;Q92597;Q00978;Q13330;P61457;Q53GS7;P30740;P15621;Q00534;Q15631;Q15653;Q8WV37;Q15061;Q08752;P63241;Q9ULW8;Q8N2W9;Q96EA4;Q9Y2W2;P20618;O43324;Q9H1Y0;Q9NQP4;Q96PI1;P78337;Q5VVH5;Q96EK4;P09132;Q969Q0;Q9UKT7;Q8TD31;Q13158;P78537;Q13625;Q13042;Q6PIJ6;P02795;P07737;Q8N5U6;Q13155;Q9NUP1;Q01831;O15117;Q13432;Q5TYM5;P14635;Q12983;Q9P278;Q9Y3D0;Q9BRS8;Q8TDC0;Q32P41;Q5VT06;Q9Y3B2;Q9Y692;Q96MT8;P11802;P46939;O14744;O43318;O75190;P18146;Q08AG7;P48147;P10155;Q92558;Q96E68;Q9UB11;P31350;Q66K89;Q9H9F9;Q9UBB5;Q9Y697;Q9Y2T7;Q9NP71;A2A288;Q96D46;Q96R06;O75663;Q9BQ89;Q9Y3A2;O60535;Q96DB5;Q9NX46;Q9BY44;O60921;Q96CN9;A9QM74;Q9BV57;Q9C0F1;Q15654;Q8TES7;P21127;A6NKF1;O75164;Q9H1H9;P36873;Q9BQI9;P62826;P55347;Q9BSU3;A8K8P3;Q07157;P32969;Q99618;O43913;Q6PGP7;P11168;P30279;Q8NBC4;Q09161;O95628;O43447;Q6PD74;P41218;Q8IXQ6;Q5TAX3;Q8TEP8;Q86Y26;Q9BZQ8;Q71F23;Q9H0A8;P20226;Q96A04;P09913;O43159;Q8IUF8;Q9UBS4;Q96EB1;Q5VU43;Q6ZVD7;P62136;Q9UPR3;P61088;Q8IXH6;Q8NFG4;O75800;Q12834;Q13895;P52758;Q6P1N0;Q16719;Q96GX9;Q96L92;Q9NZH4;Q13287;Q76KD6;O75832;Q3BBV1;Q6PGN9;Q15006;Q9UQB3;Q9UBC9;Q14934;O43516;Q8TCI5;Q13137;Q96RN5;Q99733;O60308;Q8N8G2;Q9BTE6;O00401;O96004;Q15069;Q99871;Q15266;Q15643;Q5TZA2;Q05084;Q9Y613;O75570;Q13144;Q15326;P78560;Q95105;Q96NB1;Q15003;O14558;O43395;P51610;Q96E16;O60870;P06730;Q5VUA4;Q9NR50;Q9UBS3;Q99549;Q86UD0;Q16851;O14978;O00291;O95243;Q9NSA3;Q5TB80;Q01892;Q12873;Q92985;O60296;Q13428;Q96CS2;Q6P2C8;Q2M2Z5;Q9H816;Q8N1K5;P06744;P54252;P27816;Q53HL2;Q16637;O94763;Q13427;P59998;Q166



21;O94927;Q96RM1;Q7L9L4;Q9BQ70;P62081;O95229;Q9BVC6;Q9BW27;P45973;P55060;P84022;Q96AB3;P52292;A6NDD8;Q9Y6Y0;P19387;Q9NXB0;Q9HB71;Q2M3C7;P11308;Q9HD15;P81274;P62314;Q8IWE2;P05787;Q9H808;Q04695;Q9BT78;Q66GS9;Q9C035;Q00994;Q9NXX8;Q9BTM9;P06132;Q6ZN28;Q9NTG7;Q96N16;Q9H8T0;Q86SQ7;Q92945;Q9UK41;Q7LBR1;P50613;Q9BXY8;Q96KN1;Q9H9H5;Q96FN9;P39687;O60260;P42772;P23381;Q6P9F0;Q86VQ0;Q9H6T0;Q49B96;Q9BXX9;Q9H2T7;Q96TA1;O00273;Q86W56;Q9Y6B2;P63104;Q5H9J7;Q9HAU5;P35548;Q9UNN5;A6NGQ2;Q99873;Q14674;Q9H063;O75347;P43487;Q14556;Q8TEQ6;Q96S59;P07195;Q8N3Z6;Q9Y6K1;Q6ZMR3;O14893;P28324;Q96A44;Q8N488;P61586;Q92973;O14641;Q6UUU7;Q9H0I3;Q9H8E8;Q9BQE4;P48595;Q12816;O14896;O14929;Q9UHD9;Q13541;P35637;Q9BSW2;O43768;O15265;Q9UDY4;Q15819;Q9UKV3;Q53QV2;Q9NZH5;Q14192;P46527;O14980;Q9NPF5;P08865;O43747;Q5TA31;Q9GZU2;O15287;Q96F07;Q9HAV4;Q96BW1;O94855;Q96I59;Q9NPD3;Q15528;Q12933;Q05195;Q8TC56;O00471;O15078;P82663;P24941;Q13568;P62851;P55854;Q9NR22;P62495;O75884;P22531;Q86US8;Q9BYG5;P24278;P18754;Q9NQ4;Q13404;Q9BXF6;Q12765;O43617;Q7KZF4;Q92769;Q9H444;Q6ICB0;Q9ULZ2;Q6TGC4;Q9UBF6;Q8N8R7;Q9H171;Q16537;Q13342;O43715;Q9NRR3;Q9N9P7;Q86UB2;O00625;Q9UPV9;Q99717;Q9UKT5;Q9NXV2;Q8TAT6;Q9UNH5;Q9UGP4;P17676;Q9NPI6;Q14511;Q14493;P49901;Q7RTS9;P49848;O00422;O60711;Q9P1Y5;Q9UKX2;Q15046;Q9Y2N7;Q9HCU9;Q13867;P0DI82;Q14103;Q8WXC3;Q8IZQ1;Q9UM11;Q9Y5V3;Q16548;P07197;Q7Z3K3;Q9NYF8;Q6S96;Q9UMX0;Q8N6F7;Q9HBH7;Q9UM07;Q8NEF9;A2RTX5;Q96CS3;Q9UJT2;Q99417;Q9H6Z9;O95376;Q53GL7;P07476;Q9NSC2;Q15466;Q5MJ68;A6NKF2;P57081;P41214;Q08J23;O43541;Q6DKK2;A5YKK6;Q13765;Q9UH77;O14746;P49756;P63165;O95149;P62269;Q8NF99;Q9Y6X2;Q68CZ6;P57721;Q9HCM9;P0DI81;Q9NY87;P68104;Q9GZY1;Q15025;P63220;Q6IV72;Q9BQI5;P50750;P05198;Q9NPB6;Q96BP2;P04406;Q99471;Q9H467;Q12968;P62244;P0CG35;Q15154;O43745;Q01201;Q70YC5;Q96PM5;P29966;Q676U5;Q15697;P14678;Q9NSI6;Q8ND56;Q9Y2Z4;Q9Y6X8;O95363;P14324;Q9BT92;Q9UKN5;Q7L2H7;Q99615;P42768;P35244;P15822;Q8WVK7;Q15379;P53801;O00268;O15350;Q9UIV1;Q9UGK3;P11532;Q8WW24;Q9UER7;Q96Q89;O60828;Q5JTC6;P25786;Q9BRT9;P07814;C9J3V5;Q9BYV8;Q15759;P49770;Q96RS0;Q9BT25;Q8WU39;Q15185;Q9UGC7;Q8TE02;Q9P2M1;Q86TB9;Q5BJF2;Q9Y3F4;P10074;Q86VS8;Q9NR77;Q00613;Q9UMS0;Q8TE9;Q9C0E2;Q8N9V7;O00255;Q9NYZ3;Q8IYD1;Q5H9R7;Q86YV9;P11142;Q9UBF2;P40222;Q16666;P0C1Z6;Q96HA8;Q6U7Q0;Q9H788;Q86WX3;Q9BRG1;P25963;Q96GW9;Q92600;P53041;Q9Y5K5;O75935;Q9Y375;Q9P0W5;Q8IWF6;Q96RE7;Q8TDN4;P22061;Q8N140;P61962;Q07866;P28072;O43255;Q96B26;Q8N0Z2;Q9H7S9;P54727;Q9BY77;O14787;Q13094;Q7L5N1;Q15365;O15355;O95810;Q14974;Q9BXR0;O94921;Q9UKV8;P50749;O94850;Q9ULM6;Q12905;Q5BJF6;Q9UKY7;Q8IWL3;Q9H0U9;P22532;Q6IEG0;Q96ED9;O00512;O96007;Q96LB3;Q9H074;P12883;Q9UJG1;O43299;Q9Y6K5;Q9H4H8;Q6IN85;Q9Y266;Q8IY63;Q3ZCT1;Q9Y2J8;P58004;Q9Y3A5;P35232;Q96E14;Q9UBF1;O14593;Q96NL8;Q96HR8;O95999;Q9H4A6;Q99543;Q9HD42;Q9BZ23;P50453;P28065;Q13501;Q9Y4H4;Q16775;O43918;Q9HA77;Q9H410;P51116;O60784;Q9MIZ7;P22528;Q8IZD4;Q8IX12;Q9NWV8;Q16236;Q8TAA5;O94992;P07741;Q969H0;Q9NQR4;P42771;Q9H832;Q9Y174;Q9Y2G2;Q8WUF5;Q8WY41;P04732;P28066;O15131;Q13547;P26651;Q92783;P35580;P52288;Q9ULX6;Q9UI56;Q8IXQ9;Q99613;P78371;P50616;O14965;Q12906;Q99633;Q3SYG4;Q9Y3C4;Q9BX70;Q8TCY9;Q15628;O75436;Q52MB2;Q9BY41;O75822;Q9NZI6;Q8IX90;P35908;Q92748;Q9UKC9;Q96FF9;O43504;P13489;Q96Y11;P46783;Q6ZS17;Q8ND90;Q14980;Q9BV20;Q5H9F3;Q9BRV8;Q3L8U1;Q9H307;Q16082;Q9NSC5;Q9NZN8;Q8IX03;P54253;Q9Y3U8;P67870;P23497;Q96ST8;Q9T5Y3;Q9Y252;Q8IWC1;P60866;Q04637;O75419;Q5RKV6;Q9BVT8;Q6P582;Q96C86;Q86WI3;Q15181;Q9P2Y5;Q96GC6;Q15327;Q9HCI5;Q5EBL4;Q99638;Q9UKK3;Q9H009;Q9UPV0;Q9H2G4;P62633;Q8TAP6;Q8WY54;Q4LE39;Q5T7V8;Q8NCD3;P11161;Q9UQ80;O95983;P05114;Q9H7C4;O43765;P62979;O60885;Q96Q35;Q92750;Q96P63;O00231;Q9UKV0;Q00597;P61981;Q14145;P39880;Q8N108;P61579;Q9NRL3;A2IDD5;Q9NY27;Q9NYF0;P0CG47;Q96QK1;P49918;Q99750;O60524;Q9H6Z4;Q96PY6;Q9Y4P8;Q15796;P62241;Q9P209;Q96MG7;Q96NB3;P56524;Q9BUL8;Q9BUP3;C9JE40;Q86YF9;Q13367;Q9UPN7;Q8TC71;P46781;Q14232;Q9NUN8;P35237;Q717R9;Q53FT3;Q86TP1;Q6Q759;Q9NRG9;P48634;P32519;Q13347;Q00577;P68036;Q09FC8;Q14677;O95153;Q8N9A8;Q6ULP2;P13647;P62877;P23508;O75161;Q63ZY3;Q9NR09;Q9UGK8;Q08AD1;P32189;Q9H3M7;Q8N9B5;Q04206;Q7RTV3;Q9Y2X3;Q9HC62;P39023;P53992;Q8TF40;O95997;P78318;Q07021;P55265;Q9H910;Q96QU8;O43776;O15360;P78545;P57678;Q6NUN9;Q80397;Q9NRR5;Q8IY57;O60930;Q68DX3;Q9Y448;Q9UHB9;P45984;P82094;O95671;Q14602;Q8N137;Q8WYR1;P42704;Q96S95;Q9UPZ3;Q6PI48;Q8WUM4;Q9Y222;P04731;P80723;Q9UKT9;Q9H6D7;Q5UE93;O60504;Q9NPI1;O60518;Q9UJY1;P50452;O14907;Q5SW79;Q9NRA8;Q9Y2M5;Q92979;Q99996;P12757;Q9UBY9;P0CG48;P54840;Q12962;O95373;O43310;P35579;Q13310;O43542;P38935;O75635;O94817;Q14691;P21980;P28074;Q92796;Q14258;O95456;Q96HA7;Q9BXP5;Q9HAP2;Q14151;Q92785;P78559;Q96M53;Q96F86;O00426;Q9Y6H5;Q8N3V7;Q69383;O14681;Q9NR46;Q8TF09;P27695;Q6NUQ1;O95551;Q92530;P63146;P23245;Q9HAF1;P07320;Q8NA72;P23528;P49720;Q01534;Q16531;Q14140;Q9ULW0;Q9UBB9;Q8WU90;Q96Q83;Q8TAA3;O95613;Q13561;P61289;Q9C099;P55197;Q96CV9;Q9P1T7;Q13033;P61970;Q9NVR5;O75132;Q13045;Q9H7T9;Q00587;Q9H3F6;O43592;O43663;Q49MG5;Q9NZI5;Q92540;Q9NRD1;Q92837;P41250;Q92499;P36543;Q99856;P47928;P37198;P18848;Q8N4C6;P62701;P11441;P62829;P56211;Q76095;O60481;Q7Z553;Q8WXU2;Q8WUI4;P11172;Q01844;Q92547;O15116;O60869;Q86X95;O14512;Q9UNS2;Q6P2H3;Q9Y534;Q9BXG8;Q6P387;Q8N196;Q8NHY2;Q8N8E3;Q6IE81;Q15776;Q9BQC3;Q9NPC6;P28062;P62847;P09629;Q9NW38;Q9P0J0;O95271;P24864;Q86Y01;Q15545;Q7L1Q6;P35268;Q9NWZ8;Q96IV0;P30281;P41252;O15049;Q8IUD2;Q2VPK5;Q13642;Q9Y2D1;Q9UI36;Q53ET0;O95989;Q13829;Q9Y2V2;Q9UBQ0;P54136;P30260;Q8NEZ5;Q6PI77;P05386;Q92624;Q9ULC6;O15083;Q8N490;Q9NUL3;P50914;Q9HCE1;Q9UPT5;Q9UM82;Q9NYJ8;O95273;Q9BWK5;O95453;Q86U42;Q9UBX9;O75444;Q9P270;Q96Q06;Q96E28;Q9GZS3;O75145;O60437;O95571;P14672;Q8N660;Q9Y4P9;P61576;Q9Y3A3;P16333;P06733;O60664;O75150;Q8N720;Q8N9Z9;P48556;Q9NWF9;P63167;Q8NC51;P61244;Q9GZY8;O00743;P19838;P07438;Q9Y5L0;O00629;P35869;Q9H3C7;Q8IWX3;Q9ULJ6;P05813;Q8N9R8;O14964;Q14CS0;P56693;Q9C0H9;Q9NSD9;O14818;P49591;P67809;O75175;Q8WV24;Q8NCR6;Q9UBD0;A2RU30;Q9UL40;P07315;Q9ULC4;O15205;Q99627;Q9N9NW5;Q9HCG8;P46937;Q63HQ0;P61578;O15446;Q9C0D2;O75665;P61758;Q7Z3B4;Q9NR28;P56279;P62258;Q9GZV5;Q02952;Q9BT04;Q9UMX1;Q86VN1;Q5T1C6;Q9HB19;Q6IA86;Q9UN37;Q8WXB4;Q15834;Q92900;Q86Z20;O75368;O75334;O14604;Q3C1V8;Q7L3T8;P08133;Q9H091;P08238;P30047;Q13868;Q00839;P78352;Q99436;Q5T1N1;P43364;Q2NL98;Q9N263;Q16186;P52294;O94874;Q16890;Q95PRF9;Q13112;O15372;Q92539;Q92890;Q96L15;P21673;Q619Y2;Q96DC7;Q13114;Q96C74;P49790;Q86T75;Q9UNY4;O75170;O75821;Q14764;Q9BPZ3;Q96EY5;Q8NFX5;A6NKR8;Q9NPA3;Q53EZ4;Q8NDN9;P25297;Q9NXR7;Q9UPY8;Q53HC0;O60832;P23396;Q9UBL0;Q8IWE5;Q14749;Q96EY1;P19532;O95391;O75312;Q9H4B6;O75



154;Q9BQ90;Q4VC44;Q15024;Q9NPJ4;Q9Y4W2;P63279;Q69YH5;P20248;Q9H9T3;Q86UW6;O95429;Q9Y473;Q8IVG9;Q9BPX3;P60510;Q7Z4G1;P28070;Q15021;P81877;Q9Y615;Q9H9G7;Q9P1Z2;Q9Y605;Q9UMS4;Q13363;Q96QA5;Q9NPJ8;P49419;Q7Z3Y7;O60477;Q92793;Q13901;O75531;P40855;Q96GV9;Q96LT7;Q9UQN3;Q13526;P54274;Q9BRP8;Q9BZG8;P35325;P61960;Q6ZNE5;Q6FI81;Q9Y224;Q0VG06;Q8NHQ1;O00410;P35226;Q99623;Q9BQY9;Q8N1G2;Q9GZR1;Q969S8;P35900;Q9NRC8;Q8WX92;O75940;Q86YD1;P54259;Q92575;P51668;Q9UDY2;Q9NVR2;Q14999;Q99619;O75496;Q99741;Q7Z5K2;P12956;Q13127;Q15276;Q15633;Q9NWD9;Q13425;Q8TEA8;O00148;Q9BVN2;Q9UUK6;Q96M11;Q8TAP9;P43355;Q1W6H9;Q9H814;Q9H4A5;P25787;Q96CW6;Q8WWX9;Q9BSQ5;Q6PRD7;Q969S3;Q96BY2;Q9HB75;P27797;O95905;P06396;Q9HCC9;Q14693;Q8WUH2;Q9Y6D9;P0CG34;Q7Z2W4;Q6QNY1;O95848;Q9BSB4;P25788;Q8IW35;Q9BPX1;Q9Y3P8;Q9H008;Q8NEY8;Q9BZI7;Q9NZD4;Q9Y250;Q9H1J1;P50748;Q9BW92;Q6P2E9;Q93062;Q03933;Q9Y314;Q96DI7;Q16526;Q9BYG4;P27348}

6237

Pathogen[ P03410] interacts with 2989 human

partners: {Q6MZT1;Q32P41;O60711;P78358;Q9UDY4;Q15650;Q86UW9;P84022;Q96LI5;O15511;Q03188;P15559;Q96LI6;Q9UJT2;Q96AQ6;Q9BVN2;Q6PD74;Q9UKT4;Q99700;Q96M02;Q9BRT3;Q9Y6G9;O95684;Q9H0Y0;Q9NQG7;P13645;Q99933;O75648;Q8IXH6;Q99743;Q92540;Q3KRA9;Q96LZ7;Q9BZZ5;Q13838;Q00613;P20749;Q96M11;Q9Y2W6;Q9Y5J3;Q8NHY2;Q9UKV0;Q9NUP1;Q8IVS8;Q9UBW5;Q8IX90;P62258;Q96FW1;O75665;Q7Z460;Q8NBC4;P0DI82;Q04206;Q08945;P62714;O43399;Q5JY77;Q8NBR0;Q9UQC2;P28069;Q86Y91;Q14204;Q9UH77;P49321;Q96TC7;Q5TA50;Q5TA45;Q9HCH5;P05386;Q86UT5;O15392;Q9NS86;Q6UUV7;Q8NHR9;Q96QG7;Q9NPH2;Q9NVR2;Q7Z3B4;Q8NHW5;P47944;Q8IXJ6;P42771;P61576;Q9UI36;Q9UI56;Q9H9Q2;Q8IU60;Q15714;Q9BSU3;P28070;Q9Y573;P63302;Q5JSH3;Q9BW27;Q96KX2;Q9H469;O96018;Q96NL8;P11831;Q5H9J7;Q9Y2L1;O75781;P49354;P78537;Q717R9;Q96HJ5;Q96FX2;Q96HD9;Q6NZI2;Q8IZS6;B2RXF5;B7ZBB8;Q9ULE6;O95045;P30047;Q9BYZ2;Q92945;Q9Y4R7;Q15274;Q9Y512;Q9UPQ9;P23246;Q15041;P82094;P61247;O75335;P19838;Q8WVI7;Q68CJ9;Q96P26;P13489;Q96Q89;O00519;P62241;Q9Y285;P17987;Q13094;Q96TA1;P36956;Q8ND61;Q8WVJ2;O75154;P46527;Q86VQ0;Q00839;Q16589;Q8N960;Q9H4X1;Q9H213;P35244;P55854;P62829;P25205;P51610;Q9HA77;P10768;Q13137;Q96FI4;O75794;Q9UKT7;Q5JR59;O94763;Q8IWX3;Q13829;Q9UI95;Q9UHP9;Q6NYC8;P0C2Y1;P61578;P27986;Q9NZN8;Q969F2;Q9Y6J0;Q9P219;Q6ZMW3;Q9UBL0;Q9H267;P82663;Q96GN5;O14960;P55036;Q96RS0;Q9H2G9;Q9HB71;O75330;Q8TDQ7;Q6ZNA4;Q9Y315;Q9UMS6;Q12873;Q99733;P23490;Q8IWC1;Q15121;Q9UDW3;Q8WXD5;Q68CL5;Q9NTG7;O75663;P02533;O00512;Q7RTS9;P10599;P31350;P49368;Q96KC9;P0CG48;Q8NFP7;Q6PGP7;O15205;Q9Y6H5;P49901;Q8WXU2;Q9UJC3;P15924;Q8IXF0;O15355;Q9UNY4;Q9NR50;Q9UGK3;P51808;Q9NXR7;Q7Z6G3;Q99832;Q9NZH5;Q9NSP4;P51161;Q96DUG7;O14893;O95405;Q96AB3;Q96T76;Q9BU02;Q16666;Q5UE93;Q8NAA4;Q15058;Q9Y2G2;O14681;Q5HYK7;Q9UFF9;Q8IWE5;O43402;Q9UNN5;Q27J81;Q9HBK9;P10144;O14920;Q14526;P68104;O95359;Q6Q759;Q9H869;A6PVL3;Q14974;Q13155;Q8TCS8;Q8N0X7;P56279;O14556;P61326;Q9HB75;A9QM74;Q9GZZ1;P19387;P11137;Q14103;Q96RT1;Q08AD1;Q15833;Q9NSE4;P06454;Q9C0H6;P80303;P56192;Q9UPY6;Q15697;Q96BW1;O15234;Q9H8T5;Q9BZL4;Q9BZL1;Q8IX12;Q14061;P22531;O00505;P62736;Q8TD31;Q96A04;P48634;Q9UI08;Q5VUA4;Q86VQ1;P0CG30;A6NL28;Q9NRL3;Q9UKX2;Q7Z614;Q16658;Q9HCM9;Q9BY41;P06744;Q8NE71;Q9Y534;Q86WV1;Q15038;P59282;Q9UEY8;Q8NFI3;P07315;Q14749;Q7L266;Q9Y239;Q9BTE6;Q9UPT5;Q9NRD1;Q9UKV8;Q8N3C0;Q15633;Q99497;Q8NFG4;Q9H974;Q07866;O95628;P48643;Q96NB1;Q13409;P04066;P61925;Q9UBC9;Q9UHB9;P62328;P30622;Q16851;P15621;Q8TDG2;P08397;Q9H6B7;P35754;Q8TEA8;Q8WYR1;Q9Y614;Q6QNY1;A6NGB9;P37275;Q93062;Q96L92;Q8TEP8;P62244;Q8IZE3;Q8N660;P30279;Q93015;O43504;Q96JM3;Q9H0U9;P35080;Q8WUN7;Q96AB6;Q9NPJ4;O00268;Q6PRD7;Q12983;Q8NFP5;Q15047;Q9NWT6;Q9H816;O43903;Q9P2Y5;Q9U41;Q2M3G4;Q5MIZ7;Q9UBF9;Q9UKA4;P50995;P10916;Q15029;Q96S99;O60841;Q9BQS6;Q9BPX1;Q96SW2;Q8NFFJ9;P49915;Q9H1Y0;P37837;Q8TC76;Q9NP97;Q13561;P47756;Q8N3V7;Q86Z20;P27816;Q6ZVT0;Q7L5D6;P17661;Q96JB2;Q8WVJ2;Q92804;P36871;P61978;O60610;O43597;P78560;O60535;Q8IV48;Q9UP83;O75822;P07438;Q8WZ55;Q9H902;Q96NB3;Q9UPW5;O14929;Q9H0B6;Q04864;Q9GZY8;Q9NWB1;Q96DB5;O43612;Q9BVC6;Q9Y2I6;O00139;Q9NPA0;Q9NQ60;Q8TEO4;O43303;Q15773;O60885;P15822;Q3BBV1;Q9Y2Z0;P50502;P38646;Q14181;O14896;Q5T2W1;Q96MB7;O96004;Q00534;Q16543;Q9NSA3;P25786;Q66GS9;Q9Y4R8;P20963;Q9NR46;Q969Q6;P35325;Q9H840;P42772;O15061;Q99618;P12755;Q9NXR1;P29728;Q9Y4P9;Q02083;Q15554;Q13398;Q8NDH3;Q9BXM0;P07741;O76003;Q9NWX8;Q66K89;Q08209;Q9HC77;Q99666;Q8TF09;P63000;P17676;Q13596;Q9BPZ3;Q7Z699;Q8IZD9;Q9Y6I3;Q9H410;Q92900;Q9H7T9;Q8N1N5;P11166;P22626;P49006;Q99996;Q96LK0;O60895;Q107X0;Q8TD86;Q9UI17;Q9BXF9;Q9NRR5;Q8TDD2;O94855;Q5SXJ2;Q9Y615;O75153;Q5VYS4;P54840;Q8IY22;Q9Y4P1;P08238;Q9GZM8;P0CJ75;P80297;Q9H329;P11940;P49589;Q5T440;Q5T30;Q96D09;P36639;Q9H4I2;Q9H629;Q9UJG1;P16989;Q8I2L1;Q5T1N1;O60151;Q6PJT7;Q8N661;A6NGQ2;P49427;P63165;Q08752;Q92750;B5ME19;O15372;P07992;Q15154;Q99814;Q8N1V2;Q9NXW9;Q9UI46;Q52MB2;P60510;Q53HL2;Q12968;Q9NP79;P46777;Q06330;O60481;Q99502;O14746;Q9BXP5;Q9NZ32;Q99549;P98171;Q9NUS5;P19429;Q9BSB4;P52294;Q13057;Q6ZJW1;Q9NWD9;P54105;O15259;Q01860;Q96F24;Q9NR28;P78318;Q96K30;Q4L180;A6NCR9;O75351;Q32P44;P05413;Q13077;Q16548;P53992;P41218;Q96B42;Q9H1H9;O14656;Q08AE8;Q15287;Q53GL7;Q8IX03;Q16517;Q8N8G2;Q9P299;Q6IEGO;Q15776;P60900;Q2NL98;Q9UM07;Q8WV44;Q3SYG4;Q8TDZ2;P54274;Q9UKD1;O75674;P04733;P55060;Q9UBP6;O75419;O75382;Q15172;Q96S59;O43747;Q04917;Q92902;P41220;Q9UL18;A9YQT3;Q495M9;P05388;Q96FT9;O76041;P46013;Q86UB2;Q12962;Q9BW92;Q9H2M3;Q9GZU2;Q9Y4I5;Q06QNY0;Q8IWF6;O43516;P16157;Q9UQE7;Q7Z7A1;P09629;O15111;Q9ULZ2;P06730;Q9UHD9;P15941;O75334;P0CG35;Q70J99;Q8WTW4;Q9NQ87;Q9ULM6;Q12765;Q9NWF9;Q8IUZ0;Q13098;Q8NCR6;P18848;Q8N0X2;P42575;P25685;Q9UPR3;Q9UQ80;Q5TAX3;P22528;Q92614;Q96KR1;P35998;P50222;O60502;A5A3E0;Q96RY7;Q49B96;Q9NVM9;Q6NXT1;P06396;Q9NPI6;Q05682;Q96AQ7;P0CG34;Q7Z3Z0;Q96S95;Q13526;P46781;Q12959;Q9UI09;Q96M43;Q15173;Q9BUL8;Q9Y2N7;Q9Y536;Q9C0D0;Q14019;Q9Y2D1;Q9P1Y5;Q12815;Q9UGP4;O60749;O43542;Q8IV36;Q9NS73;O60282;Q8NHU6;O15069;Q6UVJ0;Q6UY2B4;P49588;Q9Y224;Q9Y5S9;Q9BR09;Q16831;Q96QU8;Q96N77;Q7Z5K2;Q9Y3C4;Q6PI26;O94905;Q06265;P04053;P54136;Q53GA4;Q9NTK5;Q9NYG5;Q9NPF5;Q96DX5;O43639;Q9BWX1;Q9Y605;Q8N6F7;A1L020;Q9NXH3;O14646;O60299;Q9BYE4;O14810;Q92688;Q7Z4S6;Q8NHF8;Q9NMT9;Q9UL33;P48147;Q9UHL9;Q14493;Q15013;O00165;Q96LC9;O75582;P48444;Q96P70;P27348;Q76FK4;Q99717;Q9NVK5;Q8NFF9;Q1724L9;Q7Z4T9;P57723;P78545;Q9T608;Q9Y3I1;Q8TBB1;Q5Y2F2;P41238;Q16719;Q6P9F0;P11532;Q16222;Q14410;Q9C0C2;O76075;Q8N998;Q9NZC7;Q96P63;Q8TAM2;Q8WVK9;Q8IXQ5;Q14008;P35637;Q8TEE9;Q96SN8;P61604;O14862;Q15257;Q7Z5L9;Q14653;Q9Y6X9;O75444;Q8N3L3;Q9H773;Q5VSL9;P32929;Q9NRR3;Q96Q0

6;Q8WY54;P28324;Q9BVW5;Q5RKV6;Q5H9I0;Q8NBT0;Q8TEQ6;O94811;Q16612;Q8TCY9;Q15365;Q92558;Q16236;A6NP61;Q9BTE3;Q3CLV8;Q8TF46;O15519;Q12830;O14713;Q15468;Q969S3;O95954;Q9BRA0;Q14978;P11168;P23381;Q9H0I3;P04424;Q9GZN1;Q9BTC8;Q9P2S5;Q13490;O60870;Q9UPQ4;P62136;Q92905;Q8IWW1;P35606;P24278;Q86UA6;O75143;Q9NXX8;Q8WV28;O60716;P06733;Q8TAA5;Q5SQN1;Q9BUX1;Q5T8I9;Q9NRA8;Q9BSK0;O75182;P58107;P36405;O15182;Q9BYX4;Q13867;Q8N339;Q9NV79;O15198;Q99627;Q9NY61;Q14457;Q9NPJ3;P62269;Q6ZVD7;Q86WG3;Q13425;P28289;P63172;O95273;Q8IV19;Q8NG50;O15145;Q5VYK3;Q8TDY2;Q6H80;Q9NSK0;Q8NDV7;Q01534;Q96RS6;Q50050;O00273;O43918;O00401;Q5TD94;P35573;O00159;P55273;Q9BXD5;P50748;Q13515;Q9NVM4;Q9Y6F6;Q9BX70;Q9BYI3;P20809;Q9NYP9;Q6ZMR3;Q8NOU4;Q9Y6X2;Q96BY2;Q9Y692;Q7L1Q6;P34949;Q14765;Q13145;P57075;Q07020;Q86X55;Q13868;Q07021;O00148;Q9NS23;Q08378;Q9NR56;P43355;P57721;P16278;Q9NWX5;P63220;Q7L3T8;O14639;P62380;O43776;Q9NZI5;O95456;P05787;Q95379;Q5H9F3;Q9ULR5;Q9UBB5;Q96GC6;P59998;Q9NS64;Q9H939;Q16143;A2RU30;Q13501;Q9H8T0;Q9BZX4;P62847;O43294;Q9BXN6;P0CJ70;O14908;Q8NEY8;Q9C0F3;Q9Y6Y0;Q9UKT5;P11142;O95865;Q9HD47;Q9C0D2;O14662;Q93050;Q7L2H7;P39687;O00399;P35321;Q8TAA3;Q96CW6;O00204;Q92783;P45381;P41134;P11172;P31749;Q86UN6;P16452;Q96N95;O14579;Q69YQ0;Q96QK1;P35579;Q9Y5Z9;P04792;P59047;Q7L9L4;Q9Y3Q8;A2A288;Q9UKI2;P23396;Q9H3M7;Q15124;O75161;Q14232;Q8TCU4;Q15003;O00213;Q92934;O43299;Q8N2W9;Q96B67;P78406;P06746;Q6P1M3;P30419;Q8N6F1;P45973;P48556;P63167;Q12798;Q9Y2B5;Q9P209;Q9Y2V2;Q9NP77;P20132;P42768;Q92785;P49721;Q8N720;Q15653;Q96A00;O95260;O60268;P54252;Q8N1E6;Q7L3B6;O94929;Q9H6S1;P40855;O60832;P50570;P19532;P07900;Q00587;Q8N9N2;P02766;Q9H063;Q9BQA1;Q08999;Q53FT3;Q7Z7A3;Q9NPP4;P16333;A6NDV4;Q9UJW0;Q8TAD1;P20226;Q96N16;Q15366;Q9GZR1;Q8N137;Q92844;O60239;Q86TP1;Q8NI35;P13640;Q01105;Q86VS8;Q9C000;Q5TA31;O60524;Q15651;Q9NSC5;Q9Y6A5;Q9UIF3;Q9Y283;P50749;P14678;Q15814;Q96Q83;O00291;P50914;Q969Q0;P31949;Q96DV4;Q32MZ4;Q9HAU5;Q9UBB9;Q8N336;Q9NYZ3;Q8WUH2;P06748;Q9Y3F4;P47897;Q8TCX1;O75368;Q9UBK9;Q6PIJ6;Q9BXY8;Q9ULJ6;Q6DKK2;Q86VN1;Q96IZ7;Q6UUV9;Q9UBS3;Q969X0;P06132;Q9YUJ1;Q9Y5Y2;O15049;P19484;Q9H9T3;Q9H3H1;A6NH11;Q9H1X1;Q9Y697;O60260;Q075376;Q8IWW7;Q9P243;Q9BWK5;Q9UNH5;Q15025;Q04323;Q9P2A4;Q9Y6U3;Q9H0A8;Q9HB21;P68036;Q8NEJ9;Q9UBF1;P14868;Q7Z713;Q8IVG9;A2RU49;Q9BRA2;Q9BVC4;Q9H987;P61088;Q9H808;Q96N21;Q13233;Q96R06;Q14160;Q14442;Q96KQ4;Q9H3Q1;O60664;Q9H9G7;Q15327;O95997;P32519;Q9H2U2;Q96JE9;P30793;Q96NU7;Q9Y4P8;Q6XQN6;P55265;Q86X76;Q9BT78;A5LHX3;Q6U7Q0;P15923;P26651;Q6UB98;P05062;Q09FC8;P13639;Q6NUQ1;Q6ZU15;Q4VC44;Q13045;Q94850;Q69383;Q6NZY7;Q8WYQ5;Q9UIV1;Q99615;Q9BXS6;Q5MJ68;Q8TDL1;P62979;Q96EB1;Q9UPW6;Q99613;Q9H4A6;Q9UKF7;Q9NV92;Q9NQC6;P43364;Q12840;Q8TAP9;O43159;Q9NVV4;Q8TAD8;Q969H4;O95817;Q6P597;P0CJ71;Q4LE39;Q96KN1;Q92748;Q8IYX8;Q8TF30;P09467;P02549;Q8TEX9;O75146;Q14596;Q6ZUV0;P0C1Z6;Q86WP2;Q8NCD3;Q9BYV8;Q9NVN3;Q8TDM0;Q05084;Q9H171;Q9NR22;Q9BRT9;Q13541;P07195;Q9Y295;O14617;Q15306;Q13568;Q8IYL2;P50613;Q9H1J1;O94817;Q68CZ6;P14866;O15055;Q9BQE4;A8MU46;Q9P2N5;Q9H204;Q03933;Q5H9R7;Q14152;Q96EK4;Q14674;P61163;Q5D0E6;Q14258;Q96EH3;P41214;Q99436;Q92832;P28838;Q13895;P62701;Q9BQC3;Q01831;Q15819;Q9UKW6;Q8WW38;P36551;Q9UBV8;Q16585;Q01201;Q8TAX9;Q96CS2;O94925;Q00577;Q9H1K1;P49770;Q9UFE4;Q8N9W5;P61244;P41002;Q56P42;Q9BV20;Q9H0C8;A8MTZ0;P07320;Q9BZI7;Q9H910;Q8NFW9;Q9H009;Q6P2D8;A6NK58;Q9Y6F1;Q9HCC9;Q6IV72;Q9NPC6;Q96FV9;Q8N490;Q9BTV5;Q13884;Q8IXQ9;Q12904;Q6P387;O15273;Q8N1K5;Q53ET0;P06703;Q9UL45;P55957;Q9HBL8;Q8WXE9;Q9BVV8;Q9H9R9;P23508;Q9H7C4;Q9BRT2;Q9Y2X3;Q9UMZ2;Q13158;O43264;Q9NUG6;Q14693;O15231;Q9BZV1;Q8TCG1;Q8WUW1;O75569;P0CG29;O95171;Q92575;Q8WUI4;P17544;Q9NSD9;Q9H074;Q8IZT6;P46926;P50452;O60930;Q9BY32;Q8WXI4;Q9GZS3;Q9BWF2;Q86UW6;Q7Z7K6;P25815;P49454;Q15700;Q9NQR5;Q9NXJ5;Q969K4;Q9Y5K6;Q9GZV5;O60759;Q9UQL6;Q96MG7;O95295;O95347;P51003;Q075363;Q9NVY5;O95219;Q9HBZ2;Q6ZMK1;Q15006;O14965;P43490;Q96EA4;Q15654;Q8TC56;Q9P2J5;Q9UB00;Q5TAG4;P41567;Q9UNH7;Q9NZJ9;O95243;Q9HD26;P55884;P08865;Q969V6;Q9NRX4;P49591;O43708;Q7Z2E3;O95644;Q96FC7;P58340;Q9GZT9;Q8NCF5;Q9H4D5;Q96IF1;Q8WWM9;Q8N987;Q9ULC6;Q96GX1;O75952;O95166;Q9P1Z2;P50750;P11171;P40306;P0CJ74;P52209;Q96NL6;Q9UBF6;Q0VDF9;P61981;Q96GD0;Q00994;Q92979;Q9H1Z4;P27540;P67809;Q6GPH4;Q5T5Y3;Q86WI3;Q96D03;Q9Y2G4;O43805;Q99816;Q9GZY1;Q9ULC4;O00625;Q9NR09;Q9UM54;Q15599;Q5K131;Q96B36;Q15628;Q106323;O95425;O15371;Q8IZH2;Q13127;Q8WXB4;Q8NHV4;O60308;O60333;O43318;Q9UKT9;Q16829;P60673;Q92624;Q9Y4H4;O75970;Q9NTU4;Q8N0Z3;P00480;A2IDD5;Q13136;O95848;Q7L5N1;Q9BUK6;P36578;Q9UMX0;O43715;P61573;Q86TL0;Q9UMR2;A6NIX2;Q9BT04;Q8WYR4;O95571;Q9BYD9;Q9NS25;P12956;Q6VW20;Q92556;Q9C0B9;Q9C035;Q9UNE7;P24385;Q9Y3E7;Q9Y3P8;Q9UDY2;Q9Y2W2;P0DI81;Q9Y4W2;Q9H3F6;Q9UBZ4;Q5H9L4;Q96YL1;Q8WZ33;O95511;P41227;Q99471;P35548;Q9POM2;P0CJ76;Q9BXM3;Q8IZD4;Q8IZW8;Q93052;Q9NPB8;Q8WV24;O00154;Q96MP8;Q8WUX9;Q92793;O95905;P25398;Q9NQR4;Q14966;P08133;Q969S8;Q16537;O00567;P38935;P29474;Q8N3F8;P49756;Q86Y01;O14576;O60936;Q2KHM9;Q8NEZ2;Q9H9H5;Q86YF9;O60763;Q9Y3B6;Q96B26;Q14677;Q63HM1;Q9NRD5;Q99828;Q96KR4;Q8NDN9;Q9Y5L0;P49790;Q8IY85;Q6NUN9;Q8IX07;Q9UJ68;Q8IY57;Q53QV2;Q13287;Q9BT92;Q9Y448;P09972;Q9H814;Q14764;Q6N069;O75150;Q9UQN3;Q8WX92;O94986;P10074;O14531;P50552;P62937;Q14315;Q96F86;Q96MG8;Q9UKV3;P25787;Q14980;Q6IQ19;Q99619;Q9UL40;Q8IUD2;Q9HC62;P49789;Q2M3C7;P29084;A9UHW6;Q9UM82;P61571;Q96P15;Q99623;Q8TAP6;Q6ZMV9;Q9P1T7;Q9UER7;O95453;Q2TAY7;Q9NZJ4;P14635;Q6P2E9;Q6UWI2;P07951;O95999;Q9UKS6;Q9U2782;P49773;Q99459;Q15555;Q9NQ55;Q9UM11;Q14511;O95298;P12270;P21399;P38936;Q6ICB0;Q9UN36;Q6P2H3;Q92769;Q96FX8;P12882;Q96KG9;Q9Y376;Q15691;P04731;Q13042;Q9NVR7;Q8N9Z9;Q9H0R8;P26038;P35908;Q13342;O43236;O95996;Q9Y6B2;Q9UILL;O75915;P45985;Q86T75;O14508;Q92797;Q8N2Y8;Q9NUU7;Q6ZUJ8;P62826;Q7Z2X4;P62273;O00629;A6NFC5;P26639;Q96E16;Q9UPZ3;O60684;O14558;Q9H492;O43502;Q9P0R6;P62140;P35663;P09132;O43491;P02489;Q9BS40;Q9NPE6;P50990;Q8N163;Q9UGK8;Q2VVA4;Q9UPV9;Q969H0;Q86YV9;Q6SJ96;Q9BW30;Q5TLC6;P53370;Q9BP09;O15287;Q9UKN5;P61586;Q5SZL2;Q07955;Q15942;P52597;P53805;Q96RQ1;O75132;Q8TAE6;Q96GE4;P08107;P52298;P62081;Q9Y3C5;Q16637;P46783;Q9H9F9;Q7Z6J0;O75608;Q86XK2;Q9BXL7;Q8N357;Q8IY31;P61574;P11686;Q9BRJ7;O75534;O75190;P04818;P62495;Q9H094;Q8IXQ6;Q9NYL9;Q96ED9;P30304;Q9BFX5;Q9UBS8;P24941;Q96I59;Q07157;Q8NEZ5;P31943;Q969P5;Q99638;Q8TB8;O00170;Q00597;Q92499;Q9UNB7;Q12772;P62314;Q13330;Q9UMX3;Q16621;Q9BTW9;Q9Y253;O00463;P49848;Q8WZ82;Q92973;Q9UPA5;Q9BUH8;P07954;Q86UR1;Q9NYJ8;Q9HD42;Q96L03;O95429;Q96LT7;O14787;Q7Z2W4;Q9ULD2;O75800;Q9Y5Z7;Q8TDC0;Q9BRX2;Q9NP61;P62324;O96007;P00338;P0CJ68;O14613;Q5TZA2;Q9UN37;O95163;O95271;Q96A65;Q5D1E8;Q9Y678;P51587;Q150

56;O14604;P11802;Q9Y2J2;Q86UE4;Q86Y26;P56645;Q9BTE1;Q16775;Q9BW04;Q6ISB3;P78317;Q9BSF8;Q9UMS0;Q674X7;Q9UPU9;P05937;Q9BWU0;O94829;Q9HA92;O75531;Q8N8R7;P02511;O15382;O43310;O95198;Q15024;O15379;P56524;Q9NZ09;Q9BXW4;Q9Y6N9;Q9BYG3;Q9UL12;Q9HBB7;Q5VU43;Q99704;P61758;P48728;Q12905;Q16613;Q9UBB6;Q96CV9;Q9HCE1;Q92837;P46939;Q92796;Q9NZ63;Q8IWL3;Q9NY74;Q16082;P30566;P02795;Q9Y3A3;Q9NVX0;Q8N157;Q9JVS0;Q99550;Q8N1G2;Q7Z4G1;Q9UNS2;Q8IWE2;Q12988;Q9UGC7;Q9UPP2;Q6NUP7;P02545;Q8NA42;Q9Y3U8;P43487;P28062;Q13033;Q9Y3V2;Q93083;Q14CS0;P16083;Q9H3C7;Q15797;Q71F23;Q9ULP0;P45877;C9J3V5;O95486;Q5VV41;P42704;Q14140;Q13112;Q13084;Q96BJ8;Q9UKC9;Q969G9;Q8IUI8;Q9NP71;O43395;Q15049;Q14847;Q8IX06;A6NK89;O75145;Q9HBL0;Q15326;Q14602;O15534;Q08495;O75204;O95983;Q3BBV0;P62877;Q8IWL9;Q9Y4X5;Q7Z7C7;Q3I5F7;P63146;Q9Y613;Q9H0C5;P11387;O60927;Q9BXF6;Q14683;P41250;O14907;P47928;Q8WXF1;Q9ULX6;Q5T7V8;O43379;Q13485;P0CWL9;P12883;P13807;O15067;Q3BBW0;Q9NZT2;Q96I24;O43765;Q15036;O15078;Q9NUW8;P10914;P49419;Q96A44;Q15185;Q8NEY3;Q6IN85;Q96IZ0;Q7L2E3;Q8IWL8;Q9H299;Q9BUP3;Q12912;Q8IXT1;Q9Y371;Q8N3I7;Q9P2K1;Q676U5;O95989;Q14106;P13693;Q96DE5;Q9H444;Q9HCK5;Q86V81;Q8TAF3;P81172;O60784;O14974;Q8N9R8;Q2VVK5;O60447;Q9GZS1;Q8WVK7;Q9UPM9;Q8TC84;Q6XZF7;Q9NZ33;P31483;Q69YH5;Q92834;Q9H201;Q9Y6D6;O94830;P19338;P55327;Q13023;Q9H089;P04156;Q53EL6;Q16526;Q9BTC0;O95876;Q12933;Q8TC71;Q9H0E2;P36952;Q9H788;Q8WYJ6;Q5PRF9;Q15466;P32969;Q15834;P56693;Q9NUQ3;Q96C23;O95831;Q9BVA1;Q96ST8;Q7RTV3;O14818;P12757;P53618;Q2M2I5;Q9UBU9;Q96PI1;Q9NT62;O75436;P36873;Q8N4C6;Q86SQ7;A8MVW5;P61923;Q9Y6D5;Q9Y6X8;Q8WXX9;Q6ZUI0;P53041;Q5TYM5;O14757;Q15046;Q92734;P47974;O75170;Q9H7E2;Q9BR76;P51668;P0CJ72;Q9BRG1;Q9P0W5;P46937;Q9NZD2;Q8N196;Q6P3S1;Q86XG9;O60443;Q8WU39;Q6P2C8;Q14118;P68133;Q6ZS17;O75410;Q86WX3;P81274;Q8N9V7;Q49AN0;Q9NRR7;Q9Y4G6;Q8WWW0;P61962;Q5T6F0;O43324;Q5BJF6;Q9Y244;Q96RM1;P21673;Q9GZX7;Q9NY87;O75935;O75175;Q9H1B4;Q13469;Q9UPY8;Q14093;Q9NZ20;P0C5W0;Q9NRS6;Q13769;O60921;Q9Y375;Q99504;Q9UHD8;P61572;Q14011;O00303;Q9NZU7;Q53EZ4;Q6ZU80;P38919;Q9BQG0;Q9NQ4;Q9ULQ0;Q86WH2;Q6PUV4;Q16531;Q2V2M9;Q9NYF0;O95810;Q9H008;Q8IZP0;Q9HOR1;Q96GX9;Q66K74;Q9UJZ1;O60296;Q13642;O60504;Q9BQ89;Q9Y281;Q9BSJ2;O00522;Q8IYB7;Q8IUR6;Q86X95;Q92616;O43541;Q8N488;P04406;Q99598;Q9BZ23;P50453;Q86XZ4;P39880;Q8WWL2;O94927;Q7L590;Q9BQI5;Q04695;P20248;Q0VD86;O15360;O95400;Q9NX63;Q12888;P31948;Q14409;Q9BTT0;Q15438;P23526;Q9UHB4;Q5JTC6;Q9BZW7;Q96C90;Q15051;O00231;Q9UKY7;Q86W56;Q96G03;Q9Y222;O43768;Q8NFX3;P08670;P05813;Q86SG2;Q86WJ1;Q14678;Q9NUL3;Q6FI81;Q99576;O43151;P30281;Q9UKL3;Q9UK73;Q12834;Q92547;Q96T51;Q6TGC4;Q5JPH6;O15105;P78559;O60828;O95476;Q86SH2;Q16832;P30260;P42226;P46779;P51114;P10636;Q86US8;Q5VZE5;Q3KQU3;Q8NA72;P11388;O15305;P63104;Q9UBC3;Q15596;O15117;Q8TCD5;P61201;Q8N108;Q9NQ4;P51948;Q8NI51;Q13875;Q8IWX3;Q86UD0;Q9HAP2;Q9UKA2;Q99547;Q9P2W6;Q9Y6K5;Q8TE02;Q9H7C9;Q92636;Q9NSI6;Q96IV0;Q9H568;P25789;Q9UKI9;Q96JN8;Q5FBB7;Q96S66;Q9H8N7;Q9BT30;Q9Y3E1;P24666;P51854;P49720;Q86TX2;Q8IYD1;Q8TC94;P57772;Q15643;Q08J23;Q7Z5W3;Q9NPJ8;Q13901;Q9H2T7;O60318;Q15102;Q4G0F5;Q96QF0;Q86TG7;P55347;P60953;Q9BYG8;P42025;Q5TI25;P09913;Q96D46;P13929;O60573;Q7Z624;A6NG73;O75347;Q14738;P35580;Q9NRI5;Q969U6;Q8WV37;Q9BQ95;P32243;P0CJ73;Q0VDE8;P28290;O96033;P45984;P50542;O75821;Q9Y5V3;Q96C01;Q9HD40;P0CJ69;P30153;P57081;O14593;Q96RT8;Q9BZF9;Q8TC44;P52434;Q8IW40;Q9BQQ7;Q8NCN5;Q8TCI5;Q96T01;Q13761;P31941;Q96J17;Q6I9Y2;O60346;Q96EZ8;O43189;P46108;Q00005;P52630;Q3L8U1;Q9H610;P23258;P62987;Q330K2;Q14201;Q8N9B5;Q8ND56;Q9ULW0;Q9NPG2;Q9H467;Q9UGM6;Q9UBS4;Q6WQI6;P41252;Q9NQE9;Q9BY44;P56945;Q5T749;P53779;P27695;Q96Q05;O00425;Q13547;Q9HCI5;P68363;O75496;Q2M2Z5;Q9Y471;Q96CS3;Q96A56;Q86TB9;Q01094;O75717;Q5TB80;O60869;Q9BY77;Q96RK1;Q9Y2Z4;Q9H0P0;P23297;Q9BZG8;Q3Y452;Q70IA6;Q969N2;O00167;Q14151;Q8TCB0;Q9Y5Z4;Q8NB12;Q8WVB3;P57678;Q99698;Q9UMS4;P13010;Q9BUR4;Q8WX3;O95671;O14978;Q12982;Q9Y5K5;Q9UI47;Q8WW33;O75112;P63279;Q9BQI9;Q9H8E8;P54259;P26640;Q8N5X7;P78371;Q9NWS1;Q56P03;Q63HQ0;O95793;Q9HBG6;Q6ULP2;Q00LT1;Q9NZ72;Q08AG7;Q12972;Q9BY60;Q13428;Q9Y6Y1;Q1MSJ5;P11441;Q96BP2;Q9Y2J8;Q6P2S7;Q7Z6J8;Q96B97;Q8TEW0;Q96GW9;O43815;Q9H2C0;P35900;A6NK39;Q9NUQ6;Q9NPB6;Q86V25;P63241;O95397;Q16890;O15350;Q9UBW8;Q7Z3K3;Q96HR8;Q9UHV9;Q13347;P80723;Q8N140;Q16186;Q9H9Z2;Q96E14;Q9UPV0;P22532;P07316;Q9H091;Q15631;P14136;O95922;O14519;Q96GV9;Q7KZF4;Q99962;P05204;Q86WV6;Q8NEU8;Q9UKK3;Q8ND90;Q969S2;P09917;Q7Z3Y8;Q16204;Q9UQB3;O94874;P63261;Q9H425;Q9Y250;Q6ZNE5;P33176;Q9NVD7;O60543;Q12816;P08047;Q06587;P27694;P62888;Q9H9C1;P13533;O60506;P07864;Q09161;O60248;O15446;Q9NXB0;Q96QA5;P55197;Q14139;O15265;Q92597;Q01082;Q96JZ2;Q9Y266;O60291;Q99856;Q9UBD0;Q8N0Z2;Q00653;Q9H7D7;P21980;Q9BV86;Q9UPX8;Q92600;P52758;P28072;Q8IWX6;O95229;Q86XW9;O15144;Q96RE7;Q99417;Q14247;Q8N0Z6;P83111;Q86YD1;Q460N5;O95336;Q6NZ67;Q9P2M1;P07814;Q9Y3R4;Q9NYF8;Q86UL8;P61960;Q16656;Q9BTM9;Q9NPD3;Q9H7S9;Q96F07;Q9UJP4;Q9NX46;Q5VVK0;P48200;Q00987;Q6ZP65;P35326;Q8IZL8;Q13601;Q96FF9;P42766;Q5U623;Q969F9;P35241;Q9UJW3;Q01469;Q02952;Q53GL0;Q13228;O14512;Q9H2K2;Q13404;O75626;Q96DX8;Q96EY5;O75340;P49918;O76095;Q5VZK9;Q14691;Q96Q35;Q9BZQ8;Q06787;P40925;Q92629;P58004;Q96BK5;Q9C099;P78347;Q6ZNI7;Q9HBI9;O00410;Q9NQ8C;Q14194;Q9Y3A2;O14744;P80294;Q9H4B6;Q66LE6;Q9P021;Q9BZR8;Q8N693;Q3ZCT1;Q9NX18;O15116;Q9UI26;Q5TCZ1;Q8IXW5;O43745;P32189;Q9BQ70;Q96CW5;P18754;O00422;Q5UIP0;Q9NRC8;Q9H8V3;P62312;Q9UH92;O00151;Q8WU20;Q9UQF2;Q6P3W6;O00257;P81277;Q9C0H9;Q6PGN9;A5YKK6;A6NKF1;P23270;P08729;Q99871;Q96BD8;Q9P0J0;O75691;Q6ZN28;Q8TDR0;A8MSY0;Q9NP81;Q01518;Q13326;P23528;Q15283;Q9Y6K9;Q9GZV4;Q86U42;O75618;Q6STE5;P27105;O95153;Q04637;Q9NXG0;Q96P71;Q9NW38;P40222;Q76N32;Q8N3Z6;P25963;Q9Y2T7;P54253;O14618;Q9HD15;Q13424;P49458;P30305;O00423;Q92985;Q8NCE0;Q9H5N1;O43290;O00178;O14879;A6NKF2;Q9NY33;O00186;P39023;Q16626;P55795;Q96JP2;Q14671;Q13439;Q9UJT9;Q8NEF9;Q9P2D0;P25788;Q12981;O95721;Q13367;Q8WY41;P67870;Q9BPX3;P11308;Q14CX7;Q96RT7;Q86UU5;Q15149;Q9NSC2;Q96LB3;Q9UBB4;Q9Y4F5;O95433;Q04760;A2RTX5;Q9P2L0;Q9Y314;Q99543;Q9Y664;P35232;Q9Y238;Q9Y6K1;Q13765;Q96C86;O75940;O43617;P18146;Q9NZH4;Q9H4H8;O60477;Q9NYB0;Q5SW79;Q8N5U6;P62166;Q9NP74;Q8N841;P31150;Q6PI77;Q68CZ1;P55789;O75164;A6PVC2;P62633;P13647;Q01850;Q7Z3C6;Q15181;Q9Y262;O14645;O95613;P52292;Q9ULZ0;Q13432;Q96LR2;Q9HAV4;P35226;O43913;Q99426;Q9C0F1;Q96H20;Q96MT3;Q8N9A8;Q9BT81;Q13243;Q63ZY3;Q9Y2Y0;O75570;Q8TES7;A6NMX2;Q9BWT7;Q96GA3;P62917;Q68DX3;O43592;P78352;P52565;P62851;Q6IA86;P67775;Q14145;Q9Y3D0;Q8IWN7;Q92539;Q13427;P40121;Q13625;P56537;O00255;Q9GZS0;Q86V15;P40424;Q8IZY5;Q8TED0;Q9H2G4;Q9UIA9;P13535;Q15796;P55212;Q8IY63;Q6P

582;Q8TF40;P22061;P60228;Q96CF2;A5PLL1;Q13813;P35237;P61579;Q9P258;Q8N1I0;Q9UD71;Q9Y3A5;Q9Y237;P23921;Q5BJF2;Q05932;Q1W6H9;Q9NRG9;P41208;Q14839;P08235;P62993;Q9UHN1;P11161;Q9Y4B6;Q9UHI6;Q92993;Q8WUM4;Q15723;Q9H6Z4;A8MW95;Q9BRX8;P28066;O43447;P81877;Q14244;Q68DK2;Q92817;Q8TDN4;Q9BV57;O75635;P50440;Q969L2;Q8IV53;Q9H269;Q9NZB2;Q15493;O15131;Q9C086;P35268;Q08211;P24864;P12004;P56211;Q9NR77;Q8WYP5;P0C7Q2;P63313;Q8TB72;Q03393;Q8TDY3;Q86YH6;O43681;P40763;Q8WXS3;O75122;P09914;Q8TBF2;Q969V4;Q9NWX6;Q504Q3;Q9BZQ4;Q9UMX2;A6NDB9;Q8NDQ6;Q5EBL4;Q9BRP1;Q9NX09;P04732;P13196;P07737;Q96SL8;Q9UMX1;P50135;Q7L5Y9;P42566;P42773;P56715;O00471;Q13310;Q8WXH0;Q9BRV8;Q8NFM7;Q93034;O95363;O75179;Q8N635;Q8NFR9;Q6W0C5;Q96HA7;O94992;Q9UBY9;P62879;Q9UI14;Q96M29;P05783;Q9BV73;Q76KD6;Q8TAT6;P61575;Q96JJ3;Q96G61;Q6PI48;Q8N668;P28065;Q15042;Q9BV47;Q5T160;Q7LBR1;Q14934;Q9BQY9;Q92890;P27815;Q9BT25;Q96DG6;Q12906;Q9BRK5;P35611;Q00978;P47874;Q9BR58;Q9H0A6;Q8WU90;Q9NRR8;O94903;Q96EV8;Q96RN5;Q96M53;P30307;Q9NPA3;Q5VVH5;Q8WX93;Q6NTF7;Q86XL3;O95568;O00743;Q99750;Q14192;Q9P278;Q96EY1;O15397;Q49MG5;Q96A73;Q9UKK6;A6NC42;P11277;P05114;Q9UKG1;O60437;Q93045;Q9UFN0;Q96PM9;Q9H2D6;P30740;P51580;Q6IE81;P29966;Q7LG56;Q86TC9;Q15072;O75312;P0CG47;Q05BV3;Q8TF74;Q9BZE4;Q9BX66;Q9BYD5;Q0VAK6;Q06830;Q9H4A5;Q70YC5;Q07352;P36543;Q3BBV2;Q9BQ90;Q8IWI2;Q9UJM3;Q6P1N0;O60518;Q9H9E1;Q7Z4H7;Q9UGJ1;Q7Z3T8;P24588;Q9C0E2;Q8IYI6;Q6P587;P34896;A2BFH1;Q5T5P2;P29459;O43598;Q9Y6Q2;Q9BSQ5;O75884;O00221;Q96IU4;Q9Y2M5;P62753;O14737;O43237;Q13352;O95822;Q6EMB2;O75886;Q9UBQ5;Q15545;Q9NPI1;Q8TBZ0;Q5JTW2;O60493;P46060;Q8NC51;A8K8P3;Q8N6M9;Q6IQ23;Q9UI10;Q9BXW6;Q9BYG4;Q9NY27;P17980;Q8N3R9;Q5T7B8;P60709;Q99873;Q9NX95;Q0VG06;Q9BVT8;Q9H2J4;P31946;Q9H6Y2;Q9BQ67;Q9NS26;O75832;Q14980;P20618;O95391;Q13114;P78337;Q9BVA0;P49902;Q9P0K7;Q8N8E3;P40337;P19324;Q96FN9;Q8IVM0;P50991;P48595;Q03111;P07197;Q9Y4J8;O96015;Q8NEL9;Q9UPN7;O95373;Q14203;C9JE40;Q9NNW5;O95487;Q5QJ74;Q96LD1;Q05195;Q06609;Q8NEM0;Q15276;Q01892;Q9BYG5;Q96MH2;Q5T752;Q9BSY9;Q8IZQ1;Q02241;P55345;P28074;P10909;Q15021;O43663;Q7Z417;Q8WYA1;P61289;P55210;Q9H9Y6;Q9Y473;O75791;Q9ULW8;O15083;Q96DC7;Q5MZN9;Q9H503;P83881;P21695;Q9Y6M1;Q8N9W8;Q8WUY3;Q969T7;Q86UK5;P60866;O43390;Q9UBF2;O95149;A4D1E1;Q9H0F6;Q9H307;Q86WG5;O75494;Q5VT06;Q9NRG4;Q9H6Q3;Q13257;Q99569;Q9NQS7;Q9NZJ0;Q13415;O14641;Q9H6U6;Q13144;Q15528;Q13316;P07476;Q9HCG8;O15304;P61970;Q9BXJ9;Q9Y3B2;Q58A44;Q96IK1;Q9BXG8;Q99741;Q99689;P20396;P61457;Q6IS14;Q9NZD4;P10155;P50616;Q7Z3Y7;Q8WUF5;Q9BRP8;Q5T124;Q15935;Q53GS7;Q99966;Q16635;Q8NF91;Q9NNW7;Q9NXV2;P05198;P27797;P25440;Q9NWZ8;Q9H2U1;P54727;P53801;P0CJ77;A6NDD8;P62318}

6238 Pathogen[ P14075] interacts with 2065 human partners: {Q9Y224;P60953;Q8N490;P49321;Q9H307;Q9BQI5;Q14457;Q9H974;Q9H6Z4;P28069;P42704;Q8N196;Q96EB1;Q3L8U1;O95453;Q9P2Y5;Q969383;Q92797;Q9C0F3;P52630;Q96MT8;Q9NQG7;Q6P2E9;A6NFC5;Q9BY41;P11387;Q9UI26;Q9BZZ5;Q9UBW5;Q9P2W6;P06733;P05204;Q7Z3Z0;Q96BY2;Q96F07;P78560;Q99871;Q3SYG4;Q9BTM9;Q9BQE4;Q9UBS3;P29474;P42766;Q96AQ6;Q7Z2E3;P54136;P78537;Q15257;Q8NI51;P52292;O43617;Q96M11;Q99933;P51003;Q9NSC2;P22626;Q96PI1;O00213;P08729;Q14511;O15131;Q8TEQ6;Q15366;P61575;P43355;O14646;Q9UHL9;Q9UK73;P35869;Q9BRP1;Q9BUP3;Q15819;P40925;Q8N1G2;Q9H425;Q96GX9;O15234;Q8TAD1;P09132;Q9NQE9;Q8TB72;Q9BQS6;P63165;Q9UGC7;Q96CS3;Q9GZV5;Q9NTU4;P0CG34;P46781;Q15643;Q969S3;Q9C0E2;Q8TAT6;P63220;P53801;Q8IXW5;Q16543;Q68DX3;Q96GA3;P54105;Q96N21;Q96HJ5;P54253;Q9H788;P32969;P61960;O43303;Q96E14;Q8NEJ9;A6NDD8;Q9H4X1;Q9NP97;Q14602;O43402;P14866;O60239;P35321;Q86WG3;Q9BRV8;P06454;Q12962;Q9H2G9;Q9BYV8;Q09161;Q12983;O94811;Q96MT3;Q9ULC6;Q96JB2;Q8TAD8;Q9GZY1;Q96EY5;Q9H814;Q96PM5;Q53FT3;Q16719;P62495;Q6Q759;P55036;Q8WXF1;P25788;Q7Z3Y7;Q8ND61;Q14764;P11532;Q00005;Q99608;Q9Y266;Q8N8R7;Q86X95;Q13155;P19338;Q9GZT8;Q9Y375;Q08752;Q19900;O15111;P22532;Q9NQR4;Q99504;Q9Y2J2;Q6NZ67;Q9UBY9;Q9BVC6;O60841;Q00613;Q9GZU2;Q01850;Q6ZNE5;P23497;P55327;P55957;P23246;P41227;Q9HAP2;P12956;P56537;Q13042;P11142;Q9Y3F4;Q96IV0;Q96D46;Q8IXT1;Q8WXD5;Q8N3Z6;Q9UBC9;Q96FX8;O00273;Q9GZT9;Q15102;P31350;P28066;P07320;O15360;Q04206;Q9BSW2;Q63ZY3;Q9WH1H9;Q8IVM0;Q8NEY3;O14681;Q86YD1;Q96KQ4;Q99412;Q6P9F0;Q9P0W5;Q96EH3;Q14442;Q15528;Q8IWI1;O15265;Q9BUL8;P06132;Q8N3V7;Q9BSF8;P09913;Q9NX63;P78337;O00512;P24941;Q8WU39;P81274;Q9Y6H5;Q8N9A8;Q9H2C0;Q9GZS1;Q1W6H9;P40424;Q9NPC6;Q14526;Q969S8;Q8N9W8;P49902;P16989;O15069;Q9UMS0;P05783;P49006;Q14683;Q96KR1;P41250;Q9BSB4;Q13884;Q5D0E6;O96018;O60248;P25440;P55265;O95684;Q08999;P06744;Q6P582;Q8TD31;Q15006;Q9Y6D9;Q92844;Q15051;O14746;O15372;Q9NUL3;Q8WU90;Q02241;Q9UBF1;Q7L2H7;O43663;Q9NR46;Q9Y295;Q9BVT8;P23381;O15083;Q8IXQ6;O75347;P68036;Q9UPR3;Q9NPI1;P62851;Q07021;Q8N488;Q9H3H1;Q92979;Q6PRD7;P04733;Q9NTX7;Q86WI3;P11802;P42226;Q06323;O94874;Q5VZE5;O75832;Q9HB75;Q6NUP7;Q93034;Q8NFG4;Q9Y2D1;P68104;Q92734;Q9BRA2;Q9UMX3;Q8NDF8;Q5VT06;Q9NWZ5;Q9UM07;Q15759;Q9HCK5;Q14103;O75886;O75648;Q9UML6;Q86V81;P57772;P62324;Q8WYR1;A6NG73;P35325;Q4LE39;O00186;Q9NR22;Q13243;Q16656;Q8IY57;Q14160;Q96P70;P08865;Q9BQA1;O60828;P61576;Q5VU43;Q9UM82;Q16186;Q93015;Q7Z4H7;Q9UKX2;P80297;P11831;O60481;Q13769;O75410;P11172;O95295;Q8TAA3;O43236;Q9Y3C4;O43395;P62328;Q15554;P61970;Q9NPJ4;Q96C90;Q9BXJ9;P49756;Q5TD94;Q07157;Q8NA42;Q99615;P78545;Q86UE4;O60308;Q99619;Q96Q83;Q49MG5;A6NP61;Q92782;O76095;Q9H2T7;Q8N9R8;O14787;Q9UKT4;Q15697;O75791;Q9NPD3;P60900;Q08945;P49427;P34896;Q9NT62;Q9NQS7;O95397;Q5T749;Q9Y224;P27695;Q8N140;Q8IWI3;P62244;Q6U7Q0;O75143;Q9HT79;Q9BRP8;P40222;Q9UNY4;A6NK89;Q9H1Y0;P40855;P61579;P14635;Q6PJT7;P62879;P61326;Q7LBR1;Q12815;Q56P03;Q9UM11;Q86WX3;O43598;O43541;P47944;Q9BT78;Q5MIZ7;Q9H444;Q9H9G7;Q9BXM0;Q9UKN5;Q9C086;Q01831;Q9NWV8;Q9UHP9;Q8N5F7;Q9NSD9;O14713;Q02083;Q96R06;Q14493;O75582;P61088;Q01201;P57678;Q96GV9;Q96N16;Q9BV57;Q9BVN2;O95391;P80723;P51808;Q8WVK7;O75444;Q96MH2;P78406;P26196;Q8IVS8;Q08AG7;Q9NVR2;P30281;P30279;Q8WUX9;P28094;Q13901;P43487;Q8WUM4;Q96JE9;Q13425;P61572;Q12816;P32189;P55212;P0C1Z6;Q6NUN9;P49720;Q9UKT7;Q9Y252;Q9NVV4;Q8WYP5;Q86SQ7;A8MVW5;P08133;P61244;Q9NSI6;P50613;Q13287;Q9UBF2;P61604;Q9NX18;Q6NUQ1;Q8NHV4;P41218;Q7Z460;Q5H9F3;Q9H467;P26651;Q8IV36;Q12905;Q92600;Q6P1M3;P78559;Q01860;Q9BRX2;P36639;Q9Y6F6;Q5H9J7;Q14139;Q6PI26;Q9NY61;Q9NS64;P61201;Q8TAA5;Q9NX46;P38935;Q96SL8;P60510;Q86UW6;Q9UGP4;Q14839;Q9UBD0;Q03933;P34949;P42768;Q92AA5;Q53GS7;P51610;P62633;Q13561;Q9Y2Y0;Q9BSU3;Q92973;Q8IY31;O75419;P35548;P11161;Q8NC51;P61573;P15172;Q6PGP7;Q92783;Q15327;Q9Y4P1;P56524;P05813;Q00994;Q9BV20;Q9NTM9;O43918;Q9NP79;O00422

;Q01844;Q96IZ7;A8K8P3;P05388;Q96IY1;Q08050;Q15714;Q13257;Q9H9Z2;Q68CZ6;P18146;O60930;  
P41252;Q9UJW3;Q9BXR0;Q00534;Q9HC77;P19484;Q9HCE1;Q8IZQ1;Q96EZ8;Q15047;O75312;Q9P1T7;P  
06746;Q96TC7;Q99576;P29084;Q6IA86;Q9Y2N7;Q8N336;P42771;P41220;Q9UBQ0;Q8WWX9;Q9UH92;P8  
3881;P17661;P04156;O00629;Q9NPJ8;Q5UE93;Q8TDC0;Q16613;Q16537;Q86VNI;Q8NDN9;Q676U5;Q9B  
WK5;P14136;Q9BYG4;Q99613;O75363;Q9HCH5;Q13515;O95400;P48634;Q6MZT1;Q9BXS6;Q9Y244;Q5HY  
K7;Q9Y2V2;Q96RK1;Q8TDY2;P50750;P15822;Q16548;O15117;O75821;Q7L5Y9;Q9BT04;Q96FN9;Q6ISB  
3;Q8TEA8;P47928;O95363;P46777;Q9H840;O95997;Q9Y250;Q7Z4G1;O75170;Q86VQ0;Q5T4A0;Q96G03  
;Q96QA5;Q93062;Q8TF40;Q9H825;Q9HD26;O95433;O60296;Q9GZV4;Q96A04;Q9Y3U8;P04792;Q53ET0;  
Q96SN8;Q6UVJ0;P78347;Q9NUQ6;P31943;Q8IVG9;Q9BZG8;Q8TF09;Q7Z7C8;Q92890;Q16082;Q12906;P  
23490;Q8WUY3;Q99543;Q13601;O15397;P39687;O75175;Q5TAX3;Q8NCN5;Q9H074;O00625;Q9H091;Q8  
WUF5;Q7Z614;P78371;Q8IUD2;P45973;Q86UB2;Q9UK41;Q99717;P13645;P08397;Q9UYJ1;Q5TZA2;P620  
556;P19387;Q5HR97;P06730;Q12798;P62140;O00167;Q2NL98;Q9UKV0;P56693;Q9H9C1;Q9NP16;P620  
81;Q96FW1;O75494;Q7Z6J8;Q00978;Q8WW38;Q8N668;Q8IX12;P20226;O95045;Q9GZY8;Q15653;Q8NEU  
8;P63241;Q8N2W9;Q8NHQ1;O15061;O14929;P48595;Q9NXX7;P15559;Q5T1C6;O00567;Q9UBB5;Q5VVH5  
;Q9ULQ0;Q9UHB4;P13489;Q96LI5;Q8IU60;Q96BD8;Q969Q0;Q9NZZ8;Q9Y613;Q9UI95;Q9NZN8;P63279;  
Q6PLJ6;Q9Y6D6;Q16666;P12270;O43390;Q9H6Y2;O94903;Q15796;Q01105;Q96N95;Q9UJG1;Q53HC0;Q  
9UI10;Q5MJ68;Q9Y3I1;Q9Y2J8;Q5TYM5;Q9NQ87;Q9HAV4;Q96A00;Q9UDY4;P63172;P54840;P08238;O1  
5304;P28070;Q5JY77;Q9NZZ2;Q7Z5W3;Q9BXD5;Q96ST8;P15923;P63313;Q9UD71;O75794;P53992;P63  
302;P25398;P58004;Q9HCG8;Q96LC9;Q9BT92;Q14691;Q96JI7;Q9NZZ3;Q9H2G4;Q9NYF8;Q9UBB4;Q130  
57;Q8IY63;P25963;Q17RY6;Q9NWD9;P61981;O75182;P38646;Q13547;Q9BT25;Q04323;Q13642;Q9985  
6;Q05195;O94763;P55854;P49721;Q96GW9;O95571;Q96GE4;Q8NEZ2;O15511;Q6S296;P07195;Q9BQI9  
;Q13084;Q8N0Z2;Q96IZ0;Q9Y2L1;Q8ND90;Q92750;P39880;Q8WVJ9;Q9BYI3;A9UHW6;O00471;Q92993;  
Q15185;Q9UKV3;Q96H20;Q9NRI5;Q8N163;Q9HA77;Q96FF9;Q8NFZ5;P53805;P36873;Q96HR8;Q9NP81;O  
95229;Q13868;Q9UHV9;Q15029;Q8TEP8;P61574;P05198;Q8WV24;O95347;Q86Y26;O75132;Q9UPV9;Q9  
BVW5;O15371;P56279;P62312;P54252;O00231;P07737;O75376;Q92748;Q5JR59;P46527;Q92785;Q9Y  
4P8;Q32P41;Q96AQ7;Q8WV37;Q8TEE9;Q96TA1;Q16637;Q8WV33;P27540;O43255;Q69YH5;Q9Y3E7;Q9Y2  
B4;Q00587;Q9HCM9;Q92624;P23528;Q9H7C4;O95298;Q96A44;P62136;P55347;Q86Z20;Q9NW38;Q8WTW  
4;C9J3V5;O75940;Q9UPN7;Q76KD6;Q7RTV3;O43592;O00505;Q13875;Q9UQB3;Q99459;O43516;Q13137  
;O00743;P12757;Q6ICB0;Q9UFN0;Q9NUQ3;Q9H4A5;Q86UU5;Q96DI7;Q9H0C8;Q92530;P07438;O00257;  
Q96DX5;Q96004;Q9UKT5;Q9Y285;Q96HA8;P16333;Q13568;Q9BTE3;O00291;Q96BK5;Q13485;P35232;O  
94992;Q9NXV2;Q99638;O60870;O00255;Q9UPV0;Q86WV1;P09629;P07990;Q9NQT4;O75691;Q96SW2;Q8  
TAF3;Q9NP71;Q9NR28;Q92499;P11940;P24278;P10155;A4D1E1;Q6NZI2;Q9Y238;Q9Y315;Q9NPF5;Q96  
9Q6;Q9ULW0;Q14999;O14980;P60228;Q9NFK5;Q96MB7;Q15365;Q9H204;Q96B36;Q00839;O14920;Q8N1  
N5;Q8N5U6;Q9BQ70;Q9NWS1;O95628;Q9UKL3;Q9NWF9;P50995;Q68DK2;Q9BW27;P35244;P54274;Q6ZVD  
7;Q9HCC2;P25294;Q6IE81;Q9UHI6;Q06587;P31749;Q9Y6Y0;O95487;Q9H4B6;Q9NXB0;Q2M3C7;Q9H910  
;P57721;P02545;O95810;Q8TAE6;P0CG48;Q15631;Q8WXS3;Q9UPY8;Q04695;Q9BTE6;P04406;Q86US8;  
Q8IZD4;Q66GS9;Q9BQ0;Q02952;Q9C0F1;P35908;Q5VUA4;Q6I9Y2;Q92539;Q96DE5;Q6ZS17;P62979;Q  
5T752;P28324;Q96KC9;P49419;Q6ZNA4;Q8N108;Q9Y692;Q99996;Q96S95;Q9Y253;O00401;Q9HBT0;Q9  
NY27;O15078;Q8NCE0;P57081;Q13310;O60573;O14964;Q15326;O75618;Q9H9H5;O14604;Q107X0;Q96  
EA4;P49458;Q15013;Q5SW79;Q9BXY8;Q9Y2W2;Q96BW1;Q8TDR0;O00139;Q5BJF6;P32519;Q9UP83;Q9Y5  
12;Q8IXQ9;Q9UNN5;Q6IN85;O00170;Q8NEF9;P49918;Q14653;P62318;Q96S59;Q9UPW6;P28062;Q86T7  
5;Q96RM1;Q96HA7;Q96FJ2;Q96M53;Q9UGK3;Q2KHM9;Q8N1K5;Q8NCF5;O15116;O14641;Q7Z3Y8;Q7L3T8  
;O43768;Q9H8H7;Q5VSL9;Q8TBZ0;Q13490;Q9P258;Q14106;O95983;P51116;Q9UHD9;P28074;O75935;  
O14744;Q95865;Q14232;Q9HAF1;Q52MB2;Q8TES7;A6NK39;Q9NZH5;Q8IWE5;P29966;O75161;Q9NR56;Q  
96LB3;A6NH11;Q2VPK5;Q9HD40;Q9BZQ8;Q96RE7;P56192;Q12830;Q93083;Q12933;P61247;Q9NRL3;Q9  
6BP2;Q99873;O14519;P62753;Q9NXH3;Q86XR8;Q9Y6B2;Q6IQ19;Q9NTG7;Q13469;Q9H0A8;Q7L266;O60  
299;Q15650;P13640;Q9UJM3;P22531;Q5T1N1;Q9Y2T7;O95373;Q58A44;O15350;Q9H8E8;Q13526;Q9UB  
K9;Q8N693;Q15038;Q92769;Q01892;Q12904;O95456;O14862;P25205;Q7Z5K2;O75145;P28065;P6157  
1;O60518;Q63HM1;Q6ZN17;Q9UPQ9;O14965;Q96NB1;P11441;Q96K30;Q9NPA3;Q9NSA3;Q99623;Q7RTS9  
;Q15834;P49848;P46779;Q8NDQ6;Q96AB3;Q86X55;P62917;P53618;O95831;Q9HCU9;Q9UBB9;Q8WXC3;  
Q9ULX6;Q9NSC5;Q3KQU3;Q9UQN3;Q9H2J4;P39023;Q6QNY1;A2RTX5;P41214;Q15287;Q04637;P46939;Q  
7Z5L9;Q9HC62;O60543;P50502;Q86WH2;Q8WXE9;Q9BYG8;P50914;Q5JVS0;Q13765;Q16890;Q8TE04;Q1  
5691;P67870;P50616;P62269;P62847;Q330K2;Q9BW92;Q99733;Q8IW19;Q63HQ0;O43776;P0D181;O43  
189;O95671;P62273;Q9BV73;Q7Z7A3;Q86TB9;Q5T7V8;Q15025;Q9NYP9;P27797;O43318;O75150;Q157  
23;Q9NS25;O75663;Q5T8I9;Q5TB80;P30047;Q14738;Q16836;Q9H808;Q6P2H3;Q14934;Q9BXN6;Q5T5Y  
3;Q6UUUV9;Q8NEY8;Q9UKT9;Q8TC56;Q13158;Q92837;P27986;O15198;Q14CS0;Q14677;Q9Y6X8;Q9H008  
;P14324;O14558;Q5RKV6;Q8IWT2;Q86YV9;P37198;P54727;Q9UN36;Q6NYC8;Q96Q35;Q6IV72;Q8N137;  
Q9H816;P82663;Q7Z417;Q9BZL1;P23396;Q9C099;O14907;P20248;P19474;P62241;Q9Y6K5;P25786;Q  
8TAP6;Q15306;Q16531;Q8TF74;Q92575;P07864;Q96GN5;O43745;O00410;Q6QNY0;Q15173;Q9UKD1;Q9  
6RS0;Q8NE71;P62826;Q9UKC9;O14818;Q99750;Q14CX7;A6NIX2;P11308;Q9NZZ3;Q8TE02;Q9P2M1;O95  
336;Q9NQ4;Q96CS2;P49770;Q9NUP1;O14613;Q9NR77;P78318;P62987;Q9Y4P9;Q14151;P67809;Q8IY  
D1;Q06787;Q9BP9;P63104;Q9P1Z2;P06396;Q9UH77;Q99417;Q9Y3P8;Q9C035;Q8TCI5;A2RU30;Q9HB1  
9;O43747;Q13114;Q9NWT6;Q9UIA9;Q9BRS8;Q9HD47;P53041;P21127;P35579;P78358;Q96DC7;Q9H063  
;Q01534;P14868;Q8NEZ5;Q9HAU5;P06748;Q3ZCT1;Q5T160;Q15545;Q96DB5;P61457;Q9H3M7;Q7L1Q6;  
P35573;P28072;P55197;P78317;Q5FBB7;P0CG35;P18848;Q9P2J5;Q969F9;Q9UBP6;Q53EL6;P80294;Q  
99549;Q96B26;A6NKF2;O14737;P51580;Q9UMS4;Q9ULW8;Q969V6;Q92796;Q01094;O14639;Q9UKV8;O1  
4978;P61586;Q5D1E8;Q9NRR5;Q14258;Q9BUX1;Q15773;Q96007;P36578;Q9BUR4;P22061;Q8NHX2;Q9H  
0U9;P43364;P61978;O15105;Q9Y3A3;O95999;Q9BQ95;Q9GZS3;P50452;Q9H4H8;P48728;P30304;Q073  
52;O43542;Q9BRT9;O14593;Q9NWX8;P02511;Q9BZ23;P50453;Q9NWB7;Q15935;Q9UILL1;Q1362  
5;Q9H6U6;O15287;Q9H410;O95149;Q13867;Q15654;P55789;Q15633;Q9UBB6;Q9Y4W2;O94986;P62714  
;Q5TI25;Q5JTC6;P61758;O60832;Q6ZN28;Q9Y262;O43913;P27348;Q9UPZ3;Q9NRR3;Q8IXH6;A6NGQ2;  
P41208;P27694;Q15628;Q13228;O14896;Q06330;P67775;Q9H2U2;Q5H9L4;Q5T2W1;Q8WY41;Q9H9Y6;O  
94829;Q13347;Q08670;P22528;Q13094;P30153;Q9BQY9;P53370;Q3C1V8;Q9NS26;P63000;Q9UQ80;Q7  
Z2W4;Q9BX70;O75436;O75822;O60477;Q15154;Q9NZI6;O14879;Q8IX90;O95163;O15379;Q66K89;Q6  
CJ9;O43504;Q8NF99;Q7Z7K6;Q8TC71;A6NKF1;Q8IYL2;O60921;Q9ULE6;Q14134;O00268;P14678;Q8IW  
C1;Q96A73;Q9Y222;Q9BQ89;Q5PRF9;O43447;O75190;Q3BBV2;Q9H009;Q5EBL4;Q53EZ4;Q0VDE8;Q8WY5

4;Q9Y534;O94925;Q9BZE4;P62888;Q3BBV1;O43310;Q13439;Q8TCS8;Q96Q06;Q96QU8;Q9Y4R8;P23508;Q9BRK4;P02795;Q9UHN1;O60885;Q53HL2;P00338;P15621;O94817;Q9UFF9;Q9H9T3;Q9H7E2;Q05084;Q9ULZ2;Q9Y678;Q6P2C8;Q9NRD1;Q9UKY7;O43159;A2IDD5;Q13342;P20809;Q96EV8;Q9NZI5;Q9NV92;P0CG47;Q9UNS2;Q9BXF6;P62937;Q7Z4T9;Q6PGN9;P07197;Q13330;A9QM74;Q8IWL8;P42772;Q9BSQ5;Q9BXG8;Q8NCD3;Q9NVX0;P09972;Q6P387;P49789;Q96LR2;P25787;Q13428;Q00577;Q99547;Q8TBY8;P26639;Q96QF0;Q8WZ33;Q92793;Q9UDY2;Q9BYE4;P08107;Q96L16;Q7L5N1;Q717R9;Q9UKW6;P50748;Q9Y5S9;P35268;P78352;Q9UI36;Q6ULP2;O95376;P13647;Q8N0U4;Q6UUUV7;Q14674;Q16526;Q9Y3B6;P18754;Q13404;Q15468;Q9NR09;Q9UGK8;P35080;O95243;Q96KN1;Q96C86;P46937;Q13127;Q9UBS8;Q86UD0;P35226;Q96PY6;Q9HD42;Q9NR50;Q32MZ4;Q96B67;Q9BYZ2;Q9BRG1;Q96RN5;Q9UHB9;Q7L5D6;Q6TGC4;Q8WWK9;O43715;Q96CV9;P35637;Q6PI48;Q8N9V7;Q9Y5L0;Q9H0C5;O60524;O60711;O75884;Q9NRC8;Q9BYG5;P04731;Q8WUH2;Q9BZF9;Q15466;Q8N998;P19838;Q9H9F9;Q5SXX2;Q86XK2;O60504;Q9UQL6;Q9H3C7;Q8NBC4;Q53QV2;Q99741;P11168;Q96F24;Q8IUF8;Q96GC6;P10074;O94927;Q86UA6;Q9Y3Q8;Q14749;Q3Y452;Q8IYI6;Q9NY74;Q9UL40;O95273;Q12888;Q09FC8;Q9UL18;P54259;Q9BZW7;Q8IWE2;Q14678;O75665;Q15024;Q99502;Q00653;Q13427;Q5UIP0;Q0VDF8;P31946;Q92558;Q92597;Q96I59;P20618;Q9BQC3;Q7KZF4;P56211;Q86VS8;Q99700;Q8NCR6;Q9Y6K9;P13807;Q9GZZ1;P24385;Q9BXP5;Q13363;O94855;P63146;Q9UKI9;Q86W56;O75154;Q5TA31;Q9Y473;P52758;Q9ULJ6;Q9NPE6;P13010;P61962;Q9NRA8;Q9UBU9;P35900;P46783;P48200;Q14974;O95613;Q9P209;Q14203;P81877;Q8NFI3;Q96M29;Q9UBS4;P62701;Q86WP2;Q92985;Q9UMS6;Q0VG06;P07741;A6NDB9;P84022;P59998;Q13144;Q15003;P21980;Q9H3F6;P25815;P49790;Q9UER7;Q99816;O60437;Q13352;Q8IZL8;Q16621;Q9UL33;Q9H1B4;Q9H7S9;Q9BZV1;Q87866;Q14008;Q12972;P49589;Q99618;P52597;O75534;Q8N720;Q7L9L4;Q9L2M5;Q8N4C6;O00425;Q9BRJ7;P17676;O43324;P37275;Q9BZL4;P30793;P41002;Q5JPH6;Q8WUI4;Q9C0C2;P07476;A8MSY0;Q16236;O60936;O60869;Q08J23;Q9H0B6;Q9NYZ3;O14512;Q9C0H9;Q6FI81;Q13829;O75330;O95153;P21673;Q9Y605;O14893;O43264;Q6STE5;Q8TAP9;O75496;Q15121;Q9NZJ0;O60716;Q00597;P62314;O95271;P28290;Q13112;Q9H0I3;Q86Y01;O75800;P41567;O95848;Q13233;Q9UPA5;P04732;P38919;Q15046;Q8IZY5;Q9NX95;Q9UJW0;P10914;Q6XQN6;Q9H4D5;Q8TBB1;Q14181;Q14980;O94921;Q6IEG0;Q96FV9;Q9UBQ5;Q9UIV1;Q9UQ88;Q9BU02;P40337;Q1MSJ5;P17544;O43290;Q03188;P30260;Q6PI77;P61289;P05386;Q9Y3A2;Q14061;A8MTZ0;Q7Z3K3;Q7L590;O60927;Q92905;Q9NVM9;Q8TDN4;Q9Y5V3;Q8N8E3;Q9NNW5;Q13838;Q86U42;Q9P270;Q9NYF0;P40306;Q9NQ55;O43399;P07315;P51668;Q9NYG5;O60260;Q969H0;P14672;Q8N660;P31948;P49454;P37837;O15446;Q9NZD4;P28838;Q9NXW9;O15205;Q13432;Q86V15;Q9BSJ2;P49901;Q99436;Q92540;Q96N77;Q96IK1;Q16626;Q92547;Q9NRG9;Q12765;Q12873;Q9NSE4;Q9BPZ3;P09467;Q13033;A5YKK6;Q9UNH5;P52434;Q06265;Q96NL8;Q96EK4;Q9ULC4;O15049;Q9BXP3;P32243;P46013;Q9H6D7;O15355;Q9NRR8;Q9C0D2;Q99627;Q96Q89;O95486;Q9H4A6;Q8IUR6;P27816;Q7Z3B4;P30307;Q96FX2;Q03111;Q9BY44;Q86YF9;Q8N9B5;Q9UBW8;O00165;Q6P1N0;Q15031;Q9UMX1;P50440;Q6UWI2;Q7Z7A1;Q9P0J0;Q9NRG4;Q9Y2X3;Q71F23;Q86XZ4;Q96LT7;Q99471;Q8WXB4;Q9ULR5;Q5TA6;Q9UKK6;Q9UQF2;P62829;Q9Y6X2;O75368;Q16851;Q9P1Y5;Q9Y448;P02533;Q8NWFH8;Q9P278;Q6P3W5;P63167;Q96CN9;Q8TCY9;Q8IWL3;Q12968;P49591;P42025;Q9N591;Q9Y3B3;Q9Y3B2;Q9HB71;P19532;Q8N9Z9;Q70YC5;Q9Y4H4;Q96C74;Q6NT76;Q9H0F6;Q96MG7;P55060;Q96F86;O75570;Q15776;Q14192;Q9NZH4;Q13541;Q9HD15;P35237;Q96A56;Q9UBF6;Q9UI56;Q07020;Q8IWF6;C9JE40;O00148;O94850;Q9BNU7;Q9Y281;Q8WXU2;Q9BWU0;O14757;Q9H171;Q9BTC8;Q96E16;Q9NUS5;O14556;Q5U623;Q12834;Q96CW5;Q9NUW8;P22392;Q14978;Q9Y3V2;Q96EY1;Q8N661;Q9Y2B5;Q9UBL0;P50222;P11171;Q8N6F7;P60866;Q2M2Z5;Q14145;Q8ND56;O95644;Q15651;Q9UJT2;Q06609;Q13501;Q8N8G2;Q15181;P07814;P50749;Q13367;Q15021;P62877;Q7Z3C6;Q9HCI5;Q7Z7C7;P0DI82;Q96NB3;Q16775;O60664;O60784;Q96T76;Q13045;P61578;O95429;Q6DKK2;Q9H1K1;O75164;Q15596;Q86UW9;P20749;Q8TC76;Q53GL7;P56945;Q4VC44;Q96P71;Q9NRN7;Q14152;O43765;O95905;Q2M2I5;Q96ED9;Q8N3L3;Q8NA72;Q8N0Z3;P23297;Q9BY77;Q6PD74;O60535;Q9GZR1;O95989;Q9Y5K5;Q14244;Q9UN37;Q07955;P51948;Q9UN03;Q9H503;Q9NXX8;P62258;Q86TG7;Q96L92;Q04864;Q15072;Q9BSK0;Q9NY87;Q9Y2G2;Q15276;O75334;P52298;A2A288;Q8IX03;Q5H9I0;Q9H6Z9;O43299;Q8IW35;Q5BJF2;Q96CW6;O75531;Q9UKK3;Q9NYB0;Q8WX92;Q5VYK3;Q9BQ90;Q9Y4B6;P58340;Q9Y697;O95551;P05787;Q9Y3D0;Q8WYQ5;Q8N9W5;Q9UPT5;Q13023;Q14693;P15924;Q14140;P25789;Q86TP1;Q13761;P24864;Q9H869;P10599;Q96689;Q9H6T0;Q49B96;Q08AD1;Q96QK1;P05114;Q9BZI7;P36543;O14579;Q9H1J1;P45984;Q8TD19;Q9Y314;Q13895;Q9NYJ8;Q9Y3A5;P08047}

6239

Pathogen[ P0C206] interacts with 2966 human partners: {P27695;Q9Y536;P49589;O95363;Q96P71;Q96HA7;Q13439;O95271;Q5VUA4;Q5BJF2;Q9BPU9;P61289;Q8TCI5;Q53GS7;Q9NQC7;O43598;Q8TF30;A6NGQ2;Q7Z3C6;Q4L180;Q8N720;Q6IEG0;O43542;Q96TC7;Q9NY87;O75340;Q5JTW2;Q13112;P06733;Q9UNN5;Q9H1K1;Q6NUN9;Q5SW79;A9UHW6;Q15072;P61572;Q9C000;Q92688;O14604;Q8TC94;Q9Y253;Q6NXT1;O14964;Q9BRG1;Q9NQC8;Q16831;P46937;Q16851;O14645;O14662;Q15723;Q9UKC9;O15511;O43502;P0CJ74;Q13875;Q12982;Q7L2H7;P09132;P84022;P0CG35;Q15287;Q92597;Q9Y224;Q6ZVT0;Q9UJT9;Q9NZ63;Q8IXH6;Q9HCU9;Q9UFF9;Q9BZQ8;Q9NG7;O60716;P78358;Q99436;Q5PRF9;Q9UJZ1;O15182;P28062;Q9NPA3;Q9BSB4;P10144;Q86Y01;Q9UFN0;Q68DK2;P0CG34;Q96RS0;Q9Y3A3;P05787;O43511;Q5H9J7;Q96AX9;Q96DG6;P62324;P48643;P31949;Q9H765;Q9NZV6;Q8N137;Q86XR8;Q8WUF5;Q9NSE4;Q9UBW5;Q15435;Q4G0F5;Q9HBL0;P07195;Q9BXP3;P46939;P67809;Q08J23;Q9NQ87;Q96L92;Q86V15;O43324;Q9UMS4;O14579;Q96PU5;Q86WH2;P10914;Q8IXQ5;Q9Y3E1;Q13501;Q13829;Q92769;Q13541;P0CG48;Q8WYP5;Q96NL6;P07814;Q92539;P07438;Q9BZE0;P13640;Q6MZT1;P0CJ71;Q63HQ0;Q01082;Q9P2N5;O15131;Q9NPF3;Q9H074;Q8N0X7;O60291;O43933;Q96KC9;Q99733;P58340;Q8IXW5;Q8N140;Q9HB71;Q9NZH5;Q15468;Q9UHP9;Q86TP1;Q9NR46;Q9Y2Z0;Q14019;Q9BTE3;P62877;Q9BYE4;P05062;O95273;P0DI82;Q9Y5L0;Q0VDF9;Q5T1N1;Q9UKG1;Q9Y678;Q8IUR6;P53805;Q99613;O75952;O00148;Q9Y4H4;P51854;Q96Q83;Q9Y3F4;Q8WUX9;Q9UN37;Q96M02;Q05195;Q8N8E3;P60709;Q9NQE9;Q8NHW5;Q13601;Q92575;Q8N9N2;O95359;O60481;O94986;Q9HB19;O43159;Q14103;P13010;Q9NX46;Q9UM54;Q12988;P14678;Q9ULR5;P17661;Q496M5;P31483;Q78352;Q9Y295;Q96DB5;Q9Y2D1;Q8IZD9;P06396;Q9HCK5;Q9BVA0;Q7Z2X4;Q9GZV4;Q9UHL9;Q8TAF3;P50452;Q15466;Q6PCD5;Q9H4A6;Q8WU90;O75832;Q9BZI7;Q504Q3;O15360;P45973;Q96RT1;Q13568;Q96MM3;Q9UDY4;Q96AB6;Q15365;P36543;P09917;Q9UHN1;Q5SZL2;O00167;Q8NEZ2;Q13077;Q96DC7;P49790;Q9GZ1;Q9BYG3;Q8WXI4;Q9NSP4;Q6IS14;Q9C0C7;P39687;Q9NPF4;Q15545;P0CJ76;Q96N21;Q07955;Q95149;Q6ZMR3;Q8NEF9;Q86TB9;O14920;P52298;Q92556;Q99828;Q96SN8;Q9H201;Q6LV72;P55265;O15493;O95453;Q9P2Y5;O00221;P61576;P38935;Q96F07;P07864;P55789;P06401;Q86TC9;Q9H444;Q92844;Q9GZU2;P31749;P78537;Q8N6T3;Q92890;Q9Y6K1;P27797;Q7LBR1;P40306;Q9HA92;O75794;Q9NXH3;

Q9Y2G2;Q14CS0;Q9NPF5;Q96GA3;P56715;Q9C099;Q06330;Q13469;Q9NP71;O75496;Q9H299;Q9NP97;Q9Y2Z4;Q9BXW4;P28065;Q9HC77;Q9UBV8;Q9UH92;Q6UB98;P36639;Q9H7T9;Q86SQ7;Q14008;Q99504;Q9UBP6;Q9H840;Q9NUQ3;Q9UBB4;Q9BUP3;O14576;Q96Q89;O95260;Q9UL45;P0C5W0;Q86UW9;Q13432;Q7Z4G1;Q12905;Q9H4X1;Q8TDN4;Q96DX5;O00512;Q96IZ0;Q5UIP0;Q13127;Q9NRG9;Q9BSF8;Q9NZ15;O60504;P60673;Q16222;Q9BQC3;Q9BV47;Q96ST8;Q7RTS9;Q9NUU7;Q9BUX1;P49848;Q9Y6K9;P61326;Q9NXJ5;P47756;P78318;Q86Z20;Q8IWE5;Q9NSI6;P26651;P81274;Q8IZH2;Q9NPI1;O00291;Q9Y4L5;Q12815;Q9BQAL;Q8TCS8;O15061;O00743;Q5TI25;Q9UBP0;Q5BJF6;Q7Z6J0;Q9NSA3;O95684;Q9YUBC9;Q13114;Q96KR4;Q5MJ68;Q8WWX9;Q9NS25;Q16537;Q6FI81;Q9H6Q3;Q49B96;O43592;Q96C86;Q9NVW2;O43255;Q8TC71;Q9BV20;O60784;P62879;Q969F2;Q16186;Q9BV86;Q9Y3B6;P35325;P55036;Q9ULP0;Q8ND56;Q9UKK6;Q9BRT2;Q13526;P50750;Q8WVI7;P0CJ72;Q15019;Q8IVM0;P30307;Q9Y2N7;Q86Y26;O95376;P13533;Q9Y3E7;Q9NR28;Q9BTE1;Q8TD86;Q9H412;Q9UNH7;Q9Y6Q2;Q9BZR8;P62081;P20226;Q5TD94;Q8N3V7;Q9UPM9;Q9BT92;O00308;O75145;Q13642;P11161;P04156;Q9UBB5;Q09161;Q9BXY8;Q9HAU4;Q9NZT2;Q9UDY8;Q96MT3;P53618;Q9P299;O43747;Q5VSL9;Q6XQN6;Q9HCC9;Q9BXF6;P25786;Q9H9Q2;P05114;O60759;Q8WY54;Q9Y5T5;Q8NEU8;Q9GZT9;O60518;P10074;Q06787;O75884;O94855;P30153;O43516;Q3SYG4;O14737;P62166;Q9Y6D9;O43151;Q8TAM2;Q15700;Q9BRA0;P35869;Q9UPZ3;O14862;O95810;Q86WI3;P40121;Q8NA72;Q96SL8;Q8WXD5;P17544;Q9UMX1;P62736;Q8TAD8;Q96C90;P25788;Q61N85;Q5EBL4;Q6NUQ1;Q93008;Q5H9R7;P51161;Q6ZWI1;P22392;P29144;Q9BZZ5;Q9Y623;Q9BR76;O43815;P68036;Q8NG27;Q96G03;Q8NDL9;O75161;Q9ULW0;P22061;Q96RT7;Q04323;Q08AD1;O75444;Q96PI1;Q9UK73;Q9UGC7;P18754;Q8IY31;Q330K2;O60664;O75170;Q8IUF8;Q07021;Q14966;Q13084;Q8N635;Q8NCF5;O75419;Q9UNY4;Q96HJ5;Q8IWL8;Q9P243;O195334;Q9NTU4;Q8WUN7;Q9NPD3;Q86XK2;A5PLL1;Q5SQN1;P41252;Q96FX8;Q9NRS6;Q9NRS6;Q86YF9;Q95721;P51955;Q13023;Q96KN1;Q08752;Q56P42;P30419;Q6P03;O43402;Q96N95;Q9Y4P1;Q14258;Q6PI48;Q86XL3;Q9Y6N9;Q9UD71;Q9UGP4;Q9C0B9;Q9H9T3;P62241;Q5RKV6;Q9NSC2;O75154;P54105;Q99873;Q9NRR8;Q9NV92;P25205;Q969F9;Q9BT04;P13489;Q05066;Q9Y6D6;Q96BW1;O75582;Q9NVD7;Q15697;P62244;O14744;P25787;Q99933;P51587;Q14315;P04732;A6NDB9;P48634;Q9COD2;Q8IY85;A9QM74;P45984;P50914;Q15121;Q01860;Q32P41;Q9H7E2;Q96A04;Q9Y4Z2;Q5TZA2;O75382;Q6P2H3;Q9H091;Q3KRA9;Q96IF1;A6NC42;Q7Z3B4;O43913;Q9UPA5;P49901;Q9NXV2;Q13868;Q9NQW6;Q13615;Q9NZN8;Q8TD31;P08865;Q5ST30;Q86XZ4;Q8N1K5;O60927;P56211;Q8TCU4;Q08211;Q9UIV1;Q96CV9;Q9H869;Q13228;P41227;Q6ZNA4;Q9BTV5;Q8N1E6;Q8IY63;Q96CW5;Q13515;Q15554;Q13625;O75717;Q06323;Q9UMX0;Q43681;Q96B36;Q969P5;P05204;P14317;Q2VWA4;P62380;Q96D03;Q15327;Q9NR83;O14713;P50995;Q6ZUV0;Q9H492;Q6ZMK1;Q15172;Q8TE04;Q8IV48;Q9UKL3;O15382;Q99598;P22531;Q96LI5;P48147;Q14CX7;P46781;P30279;Q9BQY9;Q96B09;Q96JY9;P78500;O95983;P62328;Q00613;P35226;Q9H0R1;O75608;Q9NRG4;Q86X55;O76075;O00629;Q9P021;O75604;O60684;Q16836;Q9Y4T5;Q9H8T0;Q9UKA1;Q9BTW9;Q2V2M9;Q9P2K1;Q14232;Q0VDE8;P52565;Q99615;Q9BQ89;A2IDD5;Q9NR56;P63167;Q66LE6;Q13057;Q8WXB4;Q9Y6K5;Q15691;P41567;Q9UMX3;O94811;Q96DX8;O60477;P09467;Q96JI7;Q9Y2V2;Q9BY77;P14866;Q8NFW9;P34932;Q9Y315;Q9C0H6;C9JE40;Q9NR83;Q99617;O00255;Q8N0U4;Q00536;O95397;O95997;O95999;Q8IWW1;Q8TEQ6;Q9UIIL;Q9H7B4;Q9H2H0;Q13045;Q9UMS6;Q8WXE9;P21980;Q99623;P49720;P61978;Q03933;Q99717;Q9H1Z4;Q9Y697;P15559;O60870;Q6P387;Q14602;Q9NZ32;Q6STE5;O14613;Q9P2M1;Q9UBS4;Q14974;Q8IY22;Q5T1R4;O15534;Q8IYU4;Q2M2I5;Q9NS64;O75940;Q9UKV0;Q14678;Q8WW38;P0CJ75;Q8NBC4;P25963;Q9BUK6;O95630;P46013;O00567;Q05086;Q15185;Q8N2W9;Q8TBZ0;Q9HC62;O00268;Q9BSQ5;Q9Y5V3;P19429;Q460N5;A6NIX2;Q9HD40;Q9UQN3;P13645;Q9H425;Q07020;Q96J02;Q13137;Q9BWU0;A2A288;P83881;Q96PU8;P80303;Q8IYD1;Q9BRS8;Q96MH2;Q52MB2;A2RTX5;Q6ZVD7;Q8TBF2;P78559;Q14011;P59998;P28838;Q15038;P55212;Q9NUW8;Q9UH90;Q6ZUI0;Q9NWF9;Q6IA86;Q15173;Q7Z5K2;Q9NRX4;Q8NCR6;Q14442;Q5T5Y3;Q6ZS17;Q96A73;Q96QU8;Q8NI51;Q9H307;Q9UIF3;O14879;O00505;Q9NXW9;Q9Y614;Q9Y448;P26196;Q96T51;Q8N196;Q9NS39;Q9P278;Q99618;Q16342;Q9BT25;Q9UGM6;P08729;Q8N661;P50749;P33041;Q9ULJ6;Q96K30;Q8N660;Q8NFX5;Q8WZ33;Q53GL7;O94850;Q96BP2;O15265;Q9H9R9;Q9BYG5;Q86VQ0;Q9NYP9;Q16890;Q14457;O43318;Q9Y5Z7;Q8WX93;Q86VN1;O75175;O60493;Q15021;Q96PY6;A6NDD8;Q8IZW8;P36551;O60828;Q15654;Q96P70;Q16666;P19338;O00444;Q5JPH6;Q96TA1;Q9NPF1;P55327;Q9NZJ4;Q969H0;Q27J81;Q9UPQ9;P06746;P29728;Q15653;Q95848;Q13243;Q9Y2J8;Q96RM1;Q7KZF4;P62273;Q86U42;P0C2Y1;Q9BYD5;Q99698;Q15631;P55055;Q8TF09;Q9Y2B5;Q9Y2G4;Q9UER7;Q9H6U6;Q6QNY1;P00915;Q96QG7;Q9NPI6;P62314;Q6P2C8;P20248;O96007;O43390;Q6P597;Q8IWX3;Q8IXT1;P60900;O75618;O00625;Q9BRJ7;P61201;Q96MG7;Q9NVR7;Q6UVJ0;O15397;Q8IZY5;Q9UDY2;O60318;Q96JB2;Q13895;Q9H9E1;Q15306;Q9Y5Z9;O14531;Q8IUD2;P15621;O75626;P42771;Q9H6Y2;Q0VD86;Q9HA77;Q9Y5Y2;Q9UKV8;Q6ZNE5;O94829;Q13342;A8K8P3;Q13316;Q16543;Q9UPV0;Q13547;Q99550;Q96Q35;P43355;Q96JN8;Q01844;Q6ZP65;Q99962;P04792;Q8IZT6;Q16531;Q7Z624;Q7LG56;Q9H410;Q8N0Q6;Q6ZN30;O95671;Q8TAT6;P35754;Q9UBZ4;P36956;Q9UKA2;Q9UGK8;P07320;Q14140;P29373;Q86TX2;P42772;Q96MB7;Q9H503;P98170;Q7Z6G3;P50991;P62495;Q13596;P30305;O15164;Q93009;O75494;P19484;Q9UM07;P0CJ69;Q7RTV3;P35237;P49902;Q9UBL0;O60524;Q96T92;P62826;Q9H816;Q99816;Q8IUD6;Q8IXQ6;Q5JR59;Q2KHM9;Q9NWZ5;Q04760;P0CJ73;Q9Y3Q8;Q9P1Z2;Q12968;P56693;Q04917;P51003;O95905;O15524;O95155;Q92993;P27348;P43490;Q96GV9;Q86WV6;O15205;Q6PGN9;P58004;P43364;P49454;P11441;Q13158;Q8TAE6;Q9BZW7;Q9UI08;P22626;P49321;Q16589;Q9Y376;Q96BK5;Q99996;Q9BZ23;P50453;P41250;Q9BX70;P17987;Q8TD19;Q9UI09;Q9UI47;Q13330;Q12933;Q6PGP7;P34949;Q5TCZ1;P10768;Q01201;O60299;Q8N3I7;Q92783;Q99497;Q9H1H9;Q9BQS6;Q9H0I3;Q13287;Q9ULX6;P67775;Q8TB72;P41218;Q96B26;O15145;Q6ICB0;Q9UQF2;Q96KQ4;P30622;Q9HD15;P62851;P11166;P30793;P11055;Q9NZU7;P29084;P50542;Q7Z5W3;P19532;Q8N5U6;Q96KG9;Q9Y2R2;P78317;O43237;Q99471;P81877;Q15796;O95996;P04733;P10636;P0CV98;Q9UBB9;Q99741;Q96A56;Q96A65;Q9BTT0;Q13257;P54252;Q15326;Q16829;Q96E14;Q8WV37;Q8NDV7;Q8N9W8;Q92973;Q14596;Q00994;P35326;P32189;Q96LC9;Q8WY41;Q86TG7;O95476;Q9Y4P8;P49354;Q9Y3V2;P49427;Q0VG06;Q14669;Q9NNW5;P26640;Q9C0D0;P30260;Q8WVJ9;Q86XG9;O00482;Q15036;Q14141;Q9UPV9;A2BFH1;Q6P3W7;O75791;Q9Y6X8;Q02241;Q5T8I9;P27986;Q96IV0;P38646;O00410;Q9Y6X9;Q9H808;Q13233;O15519;Q9GZM8;Q8TC84;Q9BRT9;Q8NFI3;Q96N16;Q9NR50;Q9Y512;Q9UI14;Q8IZL8;Q13409;O00422;P62993;P83111;Q9UJG1;O95045;P53801;Q8N9B5;O43236;Q2TAY7;O94762;O95628;Q9Y6X2;O95153;A5LHX3;P07315;Q9HAV4;P40424;Q9NNW7;Q14738;Q14145;O43299;P50461;P49591;Q9N9X5;Q8IX90;P06730;Q5TA31;Q9UGJ1;Q96FF7;Q5T2W1;Q066K74;P36952;P61247;Q9BY32;Q15814;Q9NVK5;Q8IZQ1;P11308;Q86VS8;Q9UBW8;Q9Y283;P48200;Q9NPF61;O95865;P57721;P13807;Q8TDB6;O43504;Q15124;Q7Z3Z0;Q9NR77;Q15269;Q9UK41;Q9Y5K5;Q03111;Q9Y6F1;P18146;P07992;Q6N069;O94929;Q86XW9;Q92624;Q5T124;P62633;P12755;O95298;Q96ED9



;Q15386;O43290;O75534;O96004;A6NDV4;P61586;Q9P1Y5;Q8TEP8;Q9UHV9;P31946;O43776;Q92793;Q9UBF6;Q13144;Q9NVX0;O43399;P25815;P61163;Q92616;P14653;Q96LR2;Q9BWK5;Q96EZ8;Q8IWC1;Q01534;P54259;Q9BT81;Q14244;Q9C086;Q9GZV5;O60308;Q9Y4X5;Q13769;Q15773;Q86VQ1;Q9H4A5;P05413;Q9NX95;Q96DU7;P51580;O95163;P0CG29;Q69YQ0;Q86UT5;Q92934;Q16775;Q08999;Q99638;P30047;Q8NEJ9;P25789;Q9BW04;Q16548;Q9H0A8;Q13867;P32519;O14907;O14519;Q96FF9;Q9NPJ8;Q9UJ P4;Q9Y6Y0;Q6ZN17;O60248;O14974;Q9P0W5;Q9UJY1;Q9HCE1;Q15003;Q14839;P30291;O76041;O43918;P62888;Q8NFH8;Q6ZN28;Q9S6S6;Q99689;P41134;P23246;Q9H7S9;O75122;Q9NPG2;O60437;Q68CL5;A8MW95;P68133;Q86Y91;Q14999;O95954;O95989;Q9NZD2;Q9UM82;Q9UJT2;O14593;Q92782;P80294;Q9UBQ0;Q6TGC4;Q8TAP6;P21673;O75410;Q8N3R9;Q5SXJ2;Q969Q6;Q99426;Q7Z3G6;Q92785;Q9UKT4;O14787;O60930;P51114;O15355;P54274;P42773;Q99547;O00213;Q32MZ4;O15105;Q9NRL3;Q92797;Q8TEW0;P54840;O43715;A6NKD2;O75531;O00327;P23490;O14646;P46060;Q8TCY9;P63104;P1168;Q96QF0;Q15599;Q9Y4J8;Q9H9Z2;P24666;Q9H825;P20132;Q6DKK2;Q9Y2X3;P78337;Q6ZU15;Q15025;Q9UPQ4;P11172;Q9UGK3;O14681;Q8IZD4;Q7Z7C7;O60749;Q8TF40;P36578;P60228;Q6UUV9;Q9HBK9;P49770;Q13884;Q12983;O43248;Q6ZU80;Q9BUZ4;Q9NRD1;P16157;P11137;O60447;Q9H814;Q8WUW1;A8MVW5;Q7Z3T8;Q9NX63;Q15651;P27816;Q9Y605;Q9BFX1;Q7L3B6;Q96BD8;P0C1Z6;Q92750;Q8NF99;Q96EH3;P27815;Q93015;Q8WYR4;Q9UKT7;O60936;A6NKF1;P06744;P78347;Q9NWW0;Q9H0E2;P61088;Q5T752;Q9GZR1;Q6P587;P50502;P14324;Q9Y3R4;P05198;Q12888;Q8WYJ6;Q9HD47;Q2M2Z5;Q969S3;Q16656;P19838;O60443;Q9ULC6;Q9Y285;Q9H089;Q96NB3;O75663;Q86US8;Q6U7Q0;Q14204;Q99743;Q86W56;Q14164;Q96SW2;Q9H0B6;P49917;Q8IV36;Q16526;Q16082;Q717R9;Q8NF91;Q969V6;Q9NYG5;Q92979;O60841;Q99612;Q9NVR5;P12883;O15516;Q9Y3P8;Q9NYF8;Q7Z5J4;Q9BXN6;Q86X95;Q9Y6J0;P55854;Q13428;Q9BQE4;Q6JZ2;Q6ZN04;Q9UNH5;Q9H4D5;Q9H568;Q96FV9;Q8N3L3;P05813;Q15041;Q8N6M9;Q9Y4P9;Q6P1N0;Q15650;Q2VPK5;P19387;O43379;Q6PI26;Q9UP83;Q9H788;P08238;P04053;Q7Z333;Q93083;Q8TAX9;Q96N77;Q9NRR5;Q7Z4T9;A6NKF2;Q3I5F7;Q6VN20;Q9NWT6;Q8TCB0;Q6ULP2;P13647;Q96RN5;Q9UFE4;O15287;O60506;P09086;Q693B1;Q9GZX7;Q8TF74;P08133;Q96LT7;Q9Y3D0;Q7L5Y9;Q8N5X7;Q9H0A6;Q9HYK7;P56645;Q96HA8;P35321;Q7Z6J8;Q96C74;Q9UPY8;Q9UQE7;Q16719;Q96M11;Q5JVS0;O96018;Q9UJW0;P22681;Q93045;Q9NSD9;Q13310;P50613;O75153;Q9NR07;O00165;Q9BQ0;Q9H4I8;Q9BSY9;Q9BZR9;Q96Q05;Q9GZS3;Q9NVM4;P16989;P35268;O95400;O95347;Q8N9V7;P59047;P23396;Q9BVW5;O95613;P39023;P63000;Q14106;Q96EP0;Q9NSC5;P62258;Q9BRP1;O95486;Q9UKK3;O15083;Q8NHY2;P20618;Q16658;P32243;Q9UKN5;Q9BZV1;Q8IWN7;P17676;Q99700;Q86WP2;P35080;Q8N9Z9;Q3BBW0;Q13838;Q9UPU9;Q8N490;Q8WVB3;Q9BXL8;Q8IUV7;P12757;Q8WU20;Q8IZP0;P32969;O95831;Q06265;O14929;P43487;Q14181;Q9BXG8;Q96H20;Q13425;O95429;O94992;O75112;Q9U156;Q14139;P35232;O43708;Q9C0F3;P14136;Q9NR48;Q9UBU9;O15379;Q9H1Y0;Q5D0E6;Q8TAA3;Q9GZY1;Q9Y6D5;P08047;P24278;O14556;P52597;P80723;Q9BPZ3;Q13427;O95373;Q96M43;Q8IWE2;O75330;Q5VZK9;Q96C23;P62701;Q8NCD3;P28070;Q9Y5J3;P07900;P51808;P04731;P51610;Q9P0M2;Q86SG2;Q8N488;Q9UPT5;P35606;Q5VYS4;Q9BVC6;P55196;Q14691;O00159;Q6PJT7;Q14683;O95922;Q9Y6A5;Q6P2E9;Q96EV8;Q9UHY7;Q9HAP2;Q9H974;P61575;Q9H171;Q9BT6;P05386;P50616;Q96KR1;Q92985;Q8N357;Q9NWB7;P40855;P53370;Q53QV2;O60885;Q96FW1;Q5H9F3;Q9UBS8;O15049;Q8WXF1;P63261;Q6IQ19;Q8WUI4;Q17RY6;P34896;Q14160;P28290;Q96LK0;Q107X0;Q99543;P45381;Q99569;O60239;P49789;Q9NWB7;P35548;P57081;Q6NZI2;Q96IY1;P61571;O14656;Q96JP2;Q96F86;P50440;Q04206;Q0495M9;Q06587;Q4LE39;P49006;B5ME19;Q5VVH5;Q8IYX8;P32929;Q16204;Q9UPW6;Q8IVG9;Q8TEFX9;O95487;O14508;Q86WV1;Q96AQ6;P09913;Q9Y6F6;A6NFC5;Q8TDQ7;Q8TDG2;O60763;Q9H4B6;O94874;O60260;Q9BTC0;P10155;Q8TED0;Q8TCD5;Q9NQR4;O60268;Q9UKI9;Q01831;O60535;P15923;Q15942;Q9Y6G9;Q8ND90;Q5D1E8;Q96RS6;Q01094;Q3ZCT1;Q9NZ72;Q9P219;Q14152;Q16626;Q15102;Q9NY33;Q7Z7K6;Q9UJ68;P12882;P40925;O00204;P35637;O60296;O43491;O14908;Q96P15;O96028;P23526;P61981;Q7Z3K3;O00151;O94905;O95361;O15078;Q9H0P0;Q9Y692;Q12816;Q96F24;O43395;O15111;Q9NRI5;P20823;O14618;Q99728;P46777;O95278;P05388;Q8WWW0;Q9UI10;Q5TYM5;Q76FK4;P62979;Q8NDF8;Q9BWT7;Q8N9R8;Q8IZS6;Q7Z417;P16452;Q15834;Q8N693;P05783;Q6PUV4;O95405;P57772;Q3C1V8;Q5T1C6;P67870;Q8NI35;Q96JJ3;Q66GS9;P55273;P46527;Q9H1X1;O95551;Q8N841;Q9BZQ4;P28324;A6NMX2;B7ZBB8;O95793;Q5T160;O15446;O43768;Q96LB3;Q8TBB1;Q96CS2;Q9H2M3;Q8TDY2;O43663;P04406;Q96BY2;Q8IWX3;P62318;Q9UPX8;Q9BT78;Q9H8N7;Q14790;P48444;P54727;Q5H9L4;Q15024;Q92558;Q9BW92;Q13352;O15371;Q7Z4H7;Q5TA45;Q15006;P40222;Q02083;Q5FBB7;P57075;Q5VZE5;Q9ULD2;P10909;O15234;O14893;P78545;Q6P9F0;Q2M3G4;Q9BUL8;Q5VT06;Q6PD74;A6NKK8;Q16143;Q08378;Q8N157;Q9H1B4;Q9NUL3;Q13901;A6NKC3;P28066;Q9NPB6;Q9BYV8;Q8N9W5;O94903;O76003;Q7Z713;P38936;Q9U M11;Q99608;Q96GC6;O60921;O75635;Q96AQ7;P08107;P35579;O00401;Q9UUB6;Q9H2U2;Q15819;Q9BUH8;P56537;Q8TAA5;Q04864;Q969T4;O94927;Q4VC44;A5YKK6;P62714;Q5VU43;Q9HAF1;Q9BWD1;O43294;Q9NY27;Q9BRV8;Q9NYJ8;Q9Y6I3;Q15628;Q9Y222;Q96S99;Q53HL2;O15069;Q6GQQ9;Q92614;Q8IWF6;Q5VWZ2;Q9UKX2;Q9NPB8;Q8N998;Q9Y2L1;P42574;Q96JM3;Q6NUP7;Q9BXM0;Q86XN8;Q92625;Q9BV57;Q9BZG8;O75376;P82663;Q9H8V3;Q49MG5;Q8TC76;Q9H165;Q9BQI5;Q9HBH7;Q8WUH2;Q9BV73;Q9NUQ6;P55795;Q9Y375;P20809;P0CW19;Q16612;Q9NVV4;Q5TAX3;Q92804;Q8NHV4;Q9H3F6;O60832;Q53EL6;O14818;P46783;Q96FI4;O00399;Q9NRC8;Q9H2G4;O15392;O14896;Q9C035;Q5K131;P40763;P31941;Q86UN6;O43597;Q9H2T7;Q96AB3;Q13485;Q9Y4R8;Q8N1N5;P56192;P42766;Q12840;Q96B42;P61244;Q9NRJ4;Q9UPR3;Q9H008;Q15633;P61960;P55072;P60953;Q9NSK0;P60866;P23258;O00139;Q9BUR4;Q9BR09;Q92600;Q9BXP5;P61962;Q8TAD1;P25440;O95295;Q7Z614;Q8IXJ6;Q9NTK5;Q12765;Q96E16;O00463;Q13489;O43617;Q9NZH4;Q9NR22;Q9NZJ0;Q9C0H9;P31150;Q7Z3Y8;Q8WYA1;Q9BZE4;P04818;Q96CF2;Q7L5D6;Q9HB21;Q9HB75;Q96HR8;Q9H6Z4;Q8N5F7;P98171;Q9P258;P45985;Q7Z3Y7;Q9P0J0;Q9H0C5;Q9BRA2;O60869;Q9H0U9;Q9NQY0;Q14677;Q9UJ41;Q15366;Q99627;Q9H5N1;Q8NFG4;P62140;O75665;Q99704;P0CG47;Q8NE71;A6NH11;O60825;Q99459;O15144;Q9Y3B2;O60551;Q9C0C2;P61457;Q9HAU5;Q14934;Q9NXX8;Q8N336;P16333;Q13561;Q96T76;Q96A00;O43447;P55060;Q76N32;Q8N1V2;Q9HCG8;Q6NTF7;Q13562;P36405;Q8TE02;Q9H3H1;Q9H2G9;Q9Y6B2;Q96MP8;Q9NYB0;Q96RK1;Q5VYK3;Q8IYI6;Q8NDH3;P29474;Q8WUM4;Q15013;Q9BX66;Q5T440;P11831;Q9BQ67;Q9UJM3;Q8WU39;Q6P2S7;Q14194;Q08050;Q00978;P28072;Q9HOR8;Q13098;P15924;Q12981;Q8IX12;Q9H9G7;Q7L1Q6;P06703;Q63HM1;Q9H009;Q9UHP3;Q63ZY3;O95336;O75368;Q9H6T0;P30304;O60315;Q9H7C4;P61574;P42566;Q9NS26;Q996I27;Q6IE81;Q8NA42;Q15797;Q969S2;Q13422;P63241;Q53HC0;Q9Y237;Q99966;Q09FC8;Q8NDQ6;Q9UKT8;Q67E05;Q86W54;Q9NZI6;O75691;P54136;Q8N1I0;Q9H9F9;Q6P582;Q9BFX9;Q9H0F6;Q15274;Q96NL8;Q9BQ90;Q99502;P59282;Q9GZS1;P20749;Q9Y5K6;O94925;Q14674;Q07157;Q8IX07;Q9NVR2;O94817;P02545;Q9UBF2;P16278;Q6SJJ96;P07316;O95379;Q02952;Q01850;Q8NFJ9;Q53ET0;P22532;P0997



2;Q969Q0;Q86WJ1;A6NP61;Q3BBV2;Q7Z7A1;O75436;Q6PI77;P49368;Q8WXH0;Q69YH5;Q9HCM9;Q6P2D8;P42226;Q9NXG0;Q86UB2;Q96D09;Q08495;Q86TL0;Q8IY57;A6NGB9;Q6ISB3;Q9UPN7;Q9UKW6;Q9H6D7;Q8N8R7;Q9H7D7;Q6PIJ6;Q92900;Q9H3M7;Q9Y613;Q15058;Q9Y3A5;Q9NZC7;Q9UPP2;Q9H6Z9;O75800;P49458;Q86YD1;Q99871;Q00653;Q9BYG8;Q13155;P41208;Q9Y3C4;Q15596;Q5T5P2;P37275;Q99417;Q8WX92;Q8IYM9;O60678;Q9ULQ0;O95817;Q9BXW6;P06454;A6NG73;Q16236;Q9UKD1;Q9BSU3;Q15055;O15350;Q16621;Q13415;P26639;Q9H832;P61758;Q00597;P14672;Q9BVT8;Q9WUL2;Q9ULE6;Q8W822;Q03393;Q86UW6;Q9H2U1;Q3BBV0;Q96FX2;Q96CN9;Q5UE93;O75164;Q86UE4;Q5H9I0;P11277;P07741;Q9Y2B4;O14617;Q8N987;Q92636;Q9NYF0;Q96CA5;O95198;Q96GD0;P27540;Q5T6F0;P63313;Q8NB12;Q9ULZ2;Q9BY44;Q96FN9;Q3Y452;P48595;Q9BYZ2;Q8IV53;P15172;P78406;Q9NV79;Q06609;Q674X7;Q96P63;P28074;Q9H204;Q14151;P42704;Q96PM5;P46926;Q9BXR0;Q8N0Z3;Q96EB1;Q9UHB9;Q9UBS3;Q7L9L4;Q8NEY3;P63302;P25685;O94830;P27694;A4D1E1;P42575;Q8TDY3;Q9UKT9;Q8WXS3;A1L020;Q9NXR1;Q9P270;Q9BWF2;P56945;Q9H910;P45877;Q96EA4;Q9HD42;Q14192;Q14749;Q86UD0;P49419;O60346;Q5MIZ7;Q9HC16;Q08209;O14639;P21127;Q8TBY8;Q14134;Q9BR61;O60573;Q15031;Q86VF2;Q5JY77;Q92734;Q96DE5;P11388;Q14765;Q96RQ1;Q7Z7C8;Q6XZF7;Q6NYC8;Q8NDN9;Q9Y2M5;Q6W0C5;Q92530;P35663;Q9UHI6;Q9UL33;Q6UWI2;Q8TAP9;Q12962;Q9ULC4;P0CW01;Q9GZY8;Q96M29;Q5TA50;Q9UBK9;P62312;C9J3V5;Q16181;Q15555;Q8IWL9;P41214;Q9BQ07;Q9NX18;Q70YC5;Q8WV44;Q04637;Q07352;Q9P209;P15121;Q9UQ80;Q15047;P49721;Q9UN36;Q96LI6;Q92832;P46108;Q9NP79;Q96QK1;Q8IWL3;Q96C01;Q5JSH3;Q9NUP1;Q12798;P06748;Q9UIA9;Q9NZZ3;Q9UBC3;Q9C0E2;P49756;O75398;Q92796;P14635;Q9BYD9;O95456;Q96QA5;Q93034;Q8NFP7;Q92945;Q9NY74;Q12972;Q9UJC3;B2RFX5;Q9BQI9;Q8NCE0;Q2M3C7;O00170;Q96DI7;Q9H8W5;Q7L266;Q9UMR2;Q99814;Q9BY41;P39880;O15198;Q86V25;Q96B67;P84550;P09629;Q9UPW5;P56279;Q7Z6Z7;P53992;Q6QNY0;P08670;P60510;P63165;O95644;Q9BXS6;Q12912;Q9NT62;O75179;Q9NQ55;P55345;P11532;P11387;Q9Y483;Q86UU5;Q1MSJ5;P62987;Q9NYZ3;Q9NQT4;Q9H2P0;Q86UL8;P56524;Q9BYX4;Q13033;Q8WXU2;O75347;Q9Y3I1;Q13404;P38919;Q14526;O75335;P61086;P13196;O75821;Q13094;P41238;O75886;O00257;Q9Y2Y0;O60543;Q9BSK0;Q96C10;P28069;Q16637;P14373;Q96S59;A9YTQ3;P23297;Q9ULW8;Q7L3T8;Q00987;O14965;P02511;P10599;Q9Y473;Q14980;Q93062;Q13363;P62269;Q9P2J5;Q9NS86;Q9Y4B6;Q9UHB4;Q92837;O43805;Q8N4C6;P61925;Q9HCH5;P41220;P42768;P35244;P07737;Q7Z2W4;Q96MT8;P62753;Q96I24;O14512;Q86YV9;P08397;O75570;Q7Z460;Q9NVW9;Q9C0F1;Q7Z6E9;Q9NTG7;O75351;Q9NTX7;Q9NS23;O95391;Q8N339;P08151;Q9BZF9;P20396;Q9Y2W2;Q13424;Q8N668;Q7L5N1;O75143;P02795;Q9P2D0;Q49AN0;Q9NUK0;Q13347;P46779;Q9NQS7;Q14203;A6NK58;Q8NEZ5;O15117;Q01469;Q8TEE9;Q8ND61;P15822;P07954;O75935;Q9NZD4;Q96M5;Q15776;Q66K89;O43310;O60711;P31948;Q15154;Q6Q759;O14558;Q16613;Q92547;P52294;Q8N6H7;Q9NXB0;Q96Q06;P63172;Q06830;Q86WG3;Q3KQU3;P63220;P0CG30;P36873;Q13042;Q8IYB7;Q9Y252;P42224;P47928;Q969S8;P02489;Q96IU4;Q8IYL2;Q9BXD5;Q9NPC6;Q9BSW2;A5A3E0;Q96A44;P52758;Q9H469;Q9H9Y6;Q99576;Q92540;Q92499;Q8NHQ1;Q8TDC0;Q5BKX8;Q969H4;Q9UMS0;Q9BXJ9;Q99549;Q15643;Q8ADZ2;P50748;Q5VWK0;Q15398;Q96EY1;Q14693;Q8WUY3;Q96IK1;Q9Y6M1;Q9H3C7;O00423;Q6GPH4;Q58A44;Q9Y244;Q8WYQ5;P35580;P12956;P55197;Q96NB1;Q9BW19;Q96FT9;Q9NY61;O43189;Q6P3W6;Q8NCS5;Q96PM9;Q9BU02;P23528;Q00005;P00338;P42025;Q00839;Q15051;Q9Y2T7;Q15833;Q9NZU5;P46379;P13535;P55210;Q96CS3;Q9ULM6;Q9C029;Q9UI36;P25398;Q9UQB3;Q9UQC2;O00303;Q9H094;Q8IVS8;Q9Y6Y1;Q9NRD5;P61579;Q68DX3;Q71F23;Q8N0Z2;Q8TF46;Q6NT76;O75674;Q14493;Q15935;O95876;O43264;Q6IQ23;P24864;Q01105;Q9UL40;Q01892;P24941;Q08AG7;Q08945;Q86YT6;Q15759;Q9NZ09;Q8TEA8;Q8WWK9;Q8TDD2;Q8TD16;Q9BSJ2;Q14061;Q96MG8;O43639;Q9UKT5;P62937;O43765;Q9HCI5;Q13765;O43745;O95071;P13929;Q9BQ95;Q6UUV7;Q9UBF1;Q9UDW3;P23381;P02533;O75312;Q7Z2E3;Q68CZ6;P51668;Q8N163;P0CJ68;Q9UH77;P11940;Q9H9C1;A8MTZ0;P18848;O15304;P11142;Q12959;Q5VZF2;Q96EK4;Q8N3F8;P50135;Q9NTJ3;Q53FT3;P61970;Q96RE7;Q9Y615;Q9H2K2;Q8NEY8;Q8N1G2;Q9UBD0;Q9Y3A2;Q96GN5;Q12830;O00273;Q9BRX2;P06132;Q15714;Q8NC51;Q9Y266;P41002;Q9NVN3;Q9HD26;Q92834;Q8IU60;Q6EMB2;O43763;P48728;Q9Y4W2;Q7L2E3;P52292;Q86T75;Q99750;O95571;Q13136;O75150;Q8IXQ9;P07476;Q5TB80;P11802;P61578;O95714;P37837;Q9P0R6;Q5U623;P68104;Q9BYI3;Q8WW33;O95243;Q15528;P48556;Q9H4E7;Q15257;Q9Y250;Q92560;Q12906;Q93052;P51116;Q9Y534;Q6P1M3;O96015;Q13761;Q9P1T7;Q9UHD9;Q9H6S1;Q7Z699;Q12772;Q9H902;Q9H2C0;Q8N960;Q8LVI9;Q9BRX8;O94921;P47897;P14868;Q14511;P62847;Q9Y6H5;Q8IW40;Q86Y13;P00480;Q9NS73;P47974;Q8TC56;Q9NZB2;Q96FQ6;O95166;P52630;Q9H267;P78371;Q9Y262;O14978;Q9HBL8;Q9NQF4;Q7Z5L9;P30740;P35900;O00471;P31943;Q9Y3C5;Q12834;Q8IWI2;Q9BX63;Q8WVK7;P0CJ70;Q13367;P08235;Q5TAG4;Q8NG50;Q9BZL4;Q969T7;Q619Y2;O95171;Q05084;O95677;Q8WWM9;Q9H467;Q99856;Q96DV4;Q9Y2J2;Q9UIY5;Q9BYG4;Q969U6;P52934;P58304;Q9BQ70;Q08AE8;P50570;Q6NZ67;P17706;Q15276;Q8N108;Q9UKY7;O15116;P21399;P29966;Q99640;Q86WX3;P0CW00;Q9BVC4;P82094;O15372;Q9BW27;Q9BRT3;Q9BW30;Q8N3C0;Q69383;Q8IX03;Q969L2;Q96EY5;O75182;Q96GW9;O00522;Q03188;Q9BWX1;P55957;Q9UKS6;O95396;Q12904;P14618;P62136;Q2NL98;Q9H2J4;Q969G9;Q8WW24;Q9UJW3;Q9UKA4;Q8N8G2;O94763;Q96CW6;O75822;P35908;Q6H8Q1;Q92748;Q93050;Q9Y5S9;Q86V81;P0CJ77;Q9NW38;Q14671;P11171;Q12873;Q99986;Q9UKV3;P10827;Q86X76;P61604;Q9UI26;Q9HBZ2;Q7Z7A3;Q9P2W6;Q9NTM9;O14746;P0CV99;P36871;Q6PRD7;Q3BBV1;Q9NWX8;Q9Y238;O76095;Q9UNS2;O00231;Q07866;P47944;Q6P3S1;Q14764;P80297;P0DI81;O75190;O00186;P61923;Q68CJ9;Q04695;Q5T749;Q9NXR7;Q5JTC6;Q70IA6;Q14978;P62829;A8MSY0;P40337;Q96LZ7;Q96I59;Q9H4H8;P31350;Q9NP77;P12270;Q9UL18;Q9NRA8;Q9NRN7;Q96GE4;Q96NU7;Q9UBY9;Q9BTC8;P51948;Q9BRP8;Q9NUS5;P23508;Q01954;Q9Y2I6;Q05932;Q9H063;Q1W6H9;P63146;P24385;Q8WTW4;Q8IWT3;Q76KD6;O00425;O95229;P54253;P19474;Q3Y452;Q15020;Q92547;O75940;P17706;O75717;O75179;P05783;O75190;O75410;Q9H816;Q9Y2B5;Q9Y614;Q9NQT4;Q9NYG5;P80297;P49918;Q5T7N3;Q14653;Q96EA4;Q14978;Q9Y2Z4;Q9Y6J0;P43364;Q53QV2;Q9Y6K5;P62879;Q9Y3P8;Q9BUL8;P62314;Q12959;P41227;O43399;P51858;Q9C0F3;Q92979;Q96

6240 Pathogen[ P03363] interacts with 2805 human partners: {Q8TDR0;Q8N6F7;O60763;Q53FT3;P80294;Q96B26;A6NGQ2;Q86X95;Q6IE81;Q9BQ89;Q96D46;Q14139;Q6XQN6;O95376;Q9P021;Q5BJF6;Q16236;P22681;Q5H9J7;Q9NPF5;Q6PRD7;Q6ZMW3;Q6WQI6;O60832;Q9Y6N9;Q15654;Q9UNN5;Q32P41;P46379;Q08AE8;Q9UBY9;Q13112;Q9NWF9;Q504Q3;Q9Y6Y0;Q3Y452;Q15020;Q92547;O75940;P17706;O75717;O75179;P05783;O75190;O75410;Q9H816;Q9Y2B5;Q9Y614;Q9NQT4;Q9NYG5;P80297;P49918;Q5T7N3;Q14653;Q96EA4;Q14978;Q9Y2Z4;Q9Y6J0;P43364;Q53QV2;Q9Y6K5;P62879;Q9Y3P8;Q9BUL8;P62314;Q12959;P41227;O43399;P51858;Q9C0F3;Q92979;Q96

M53;P52630;P12956;Q14CX7;Q9NPJ3;O94762;Q9NQG7;Q16836;Q86VS8;Q96JP0;Q6S96;Q96A44;Q9UGK3;Q8TEE9;Q86Y01;Q9NW38;Q9RS0;O14787;Q16342;A4D1E1;Q32MZ4;Q9BX63;Q15528;P52758;P02533;Q9NVR2;Q99615;Q9UKD1;Q9NZ09;Q13490;Q8TB72;Q5SZL2;Q9UBW5;O43395;A8MSY0;O60927;Q9BZZ5;Q9Y252;Q6ZNI7;A6NKF1;Q9Y2I6;Q9H8N7;P18848;Q8NFU3;Q9UIW0;Q8TAX9;Q8N8G2;Q8TDB6;Q9UDT6;Q96IV0;Q16186;O14744;Q69YH5;Q15834;P11137;Q14691;O15205;P09132;Q9Y3E1;Q86TC9;Q9BUR4;O75335;A6NKF2;Q06787;Q8IZA3;Q8IW19;Q9NZ29;Q5T5P2;Q8IZP0;Q9NZH5;P29474;P46060;O75347;Q9H832;Q8N9N2;Q1850;Q9BRT2;Q9BVC4;Q9H2U2;Q15051;P62258;Q3L8U1;P55957;P05386;Q8N3V7;Q9Y6H5;Q96IK1;Q9Y3F4;Q5VUA4;Q6N069;Q9H2D6;Q9NVV4;O75363;P46939;Q16082;O94972;Q9HCC9;Q13042;Q9HD40;O14907;Q96RE7;Q9BXP5;P49454;Q14765;Q9H201;Q12830;Q5RKV6;Q8N5U6;Q53GS7;Q96IY1;Q8N2Y8;Q7Z3B4;Q8NHW5;Q92973;Q9GZV4;O15371;Q9BQQ7;Q15366;Q9NVR5;Q9Y4Z2;Q13427;Q96RT1;Q9NSI8;O00273;P27348;O75161;Q96B36;P23396;Q9H825;Q9UHL9;Q53ET0;O60543;O75368;Q96IZ7;Q92985;Q9H4D5;Q9BUP3;Q9BWF2;Q9UGK8;P19338;Q8N0X2;Q96AQ7;Q5JTC6;P62380;Q96DB5;P62136;Q9Y2W2;Q9NYP9;P49419;Q8NF91;O15287;P22531;Q9GZS3;Q9UHP9;P08865;P23246;Q9H902;Q99623;Q7Z7K6;P29084;Q9H9R9;Q96D09;P27694;P07197;P62937;Q92766;P13807;O43933;Q9UPV9;Q9Y2J8;O15355;A5A3E0;Q9GZY1;Q9UNH7;P36575;Q14244;Q99962;Q9H8E8;Q96I24;Q9BXM0;A2IDD5;Q9UH92;P78415;Q9Y5K5;O60443;Q7Z333;O60664;Q7Z7A1;Q9H3S7;Q86YD1;A6NC42;P38919;Q9BZR9;Q9H091;A8K8P3;Q16589;Q9NWZ5;P11277;Q15466;P41252;P07900;Q8TF42;Q9Y5J3;O14908;O14978;Q14CS0;Q96GA3;Q04323;Q9Y6D9;P56715;Q2M3G4;P63167;P54727;P13645;P53801;P62847;Q9Y2X3;Q9HC77;Q8NA42;Q9UBB6;O75570;P11441;O15360;P06744;O60684;Q9H299;Q15438;Q6EMB2;Q6P387;Q9UNH5;Q14145;Q96ED9;O14920;Q8RJT3;Q9H987;P62714;A2BFH1;Q04206;Q16222;Q9H4X1;Q9BQ95;Q96CV9;Q99598;P22532;P35237;Q9NRA8;Q9BR09;O15519;Q86VQ0;Q95996;P51580;O14896;A6NL28;P27540;Q66R74;Q7R7TS9;P49848;P02795;Q8WYR1;P17676;P12270;Q9UI47;Q76N32;Q5TA50;P35321;Q92575;Q9BXR0;Q8TAM2;P52565;P06454;Q15468;P59282;Q8IY21;Q8NC51;O60481;Q9NSD9;P18146;Q5JUK2;Q9BYV8;Q68DC2;Q969Q6;Q0VDE8;Q8TF40;Q9P2Y5;O95628;Q8IVI9;Q9HCU9;Q8NG50;A2RU30;Q9BX66;Q8WXE9;O95453;O95050;Q9H9P5;P36873;Q2VIQ3;Q9BY44;Q9BVT8;Q9UHB4;Q12972;Q9H9C1;O15061;Q96C01;Q7Z624;P42766;P24864;Q16851;P51784;O15524;Q9NQ55;Q13367;Q5VV41;Q8IXV7;Q16537;Q5VT06;Q3BBV2;Q86UR1;Q9P2W6;Q8IXQ6;Q8NHU6;P02549;O60315;Q8WZ33;O00221;Q6STE5;Q5PRF9;O95391;Q00597;Q99576;C9JR72;Q13428;O14682;Q8TAF3;Q9UMS0;O43310;P02545;Q7Z3Z4;A2RTX5;Q96M43;Q8N9A8;P60709;Q9NZJ4;Q15021;Q9NXG0;P49321;Q9UP83;Q5K131;O95400;P52597;Q5U5Q3;Q9C000;Q9HAU4;Q96T92;Q02083;Q3ZCT1;P21127;P36543;Q92900;O95229;Q9H9Q2;Q9Y4W2;O60291;Q6GQ09;P50502;Q96DE5;Q14526;P05388;Q8IZP2;Q9UPY6;P35080;O43747;P33176;O60535;C9J3V5;Q9HAV4;Q9Y4R8;O60841;Q9H9Y6;P58004;P0CG35;P78559;Q9Y4H4;Q9BRK4;Q9Y2R2;Q9NZU5;P16157;Q14194;Q9HB71;P35579;P61970;P14373;Q96FC7;Q13516;Q9UHI6;Q15554;Q96IU4;O75340;Q9NY87;Q99996;Q9H094;Q3C1V8;Q14247;Q9UMX1;P31150;P36578;Q9Y3C5;Q9ULR5;Q9UPZ3;Q994811;A2A288;Q96IZ0;P48444;Q330K2;O75886;Q9BZQ8;Q9HQ0;Q9ULP0;P54259;Q9Y375;Q13347;Q99543;P0DI81;P08151;Q8NEZ5;P0CB47;Q9H7D7;Q99704;Q63H90;Q96L92;Q96MT8;Q9BY41;Q5T7V8;Q9NS39;Q96BD8;P43378;Q9BTE3;P11387;P07316;Q9NVQ4;Q9UKV3;P60673;Q9Y2V2;P62753;O15078;Q9UHV9;Q92539;Q9H492;O94992;Q9UJT9;P62312;Q8WX92;Q96BK5;P62140;Q969T7;Q6IA86;Q92530;Q96DG6;Q9H869;Q8TBZ0;Q9BYE4;Q9UHP3;Q9NWW0;Q8WV37;Q96JZ2;Q02952;Q6AB6;Q9H765;Q8NHV4;Q86WV1;Q9UKN5;Q96EP0;P62633;P61201;Q9GZS0;P62081;O60268;O43805;P40925;Q9NNW7;Q969Q5;P50452;Q96LC9;Q86Y13;O60308;O75794;Q9NXH3;Q8NBT0;Q63ZY3;Q9Y3D0;Q6P2D8;P58340;Q96I59;Q1MSJ5;O75618;Q96MT3;Q8TBZ2;P30279;Q13228;A9QM74;Q69YU3;O75112;A9UHW6;P0CG30;Q969V4;P13010;Q03933;Q8WYP5;Q9H444;Q96EK4;P14868;P25963;Q9BUH8;Q9UKW6;Q9NQW6;Q96LI6;Q9UD71;P12757;Q9BR76;Q14457;Q9Y2W6;Q01831;Q66GS9;P20248;Q7Z569;O75170;Q13561;P62328;Q86VF2;P25205;Q8N998;O60437;O00213;O95568;O95219;P09914;Q14258;Q8N0U4;Q92734;Q8IYI6;Q9UQF2;P41218;Q92783;O43347;Q8WWW9;O95347;P56279;Q9BQC3;P45973;Q99929;P14866;P49589;Q9UKX2;O43303;Q96BW1;Q9HD15;Q5U623;P13640;Q5VZK9;Q15024;Q9UPP2;O75132;O43763;Q9UPX8;Q92879;Q14980;P37275;Q9Y266;Q96NG3;O75604;A5YKK6;Q06330;Q96B97;Q99547;Q96AB3;O14980;Q8TDD2;Q86US8;Q16531;Q8N1V2;O00471;P63313;O76003;Q8NFW9;Q9NWZ8;P09913;Q9P2K1;Q9UI10;P35637;O00410;Q8WV24;P19387;Q13283;Q00005;Q9NQ87;Q96QK1;Q13439;Q9ULT8;O15111;Q9Y3B2;Q96DX8;P09086;P41250;Q9H2P0;Q96A65;Q7RTV3;Q8N720;O15379;P23490;Q9Y678;Q01892;O15304;Q9BXW4;Q99750;Q86Z20;Q9H2T7;Q9UBF9;P50135;Q69383;Q6NXT1;P62273;Q9NR46;Q6P2E9;O00505;Q9H9G7;Q8IWF6;Q9UHB9;Q15691;O60784;Q8N9V7;Q99856;Q9P2M1;Q9BV86;Q96JP2;O95155;P09651;P32969;Q9H7C9;O15049;Q7RTS3;P78537;Q01082;Q14738;O95684;Q8TE02;Q56P03;Q9NYJ8;P06733;Q9NZ63;Q6P582;P62736;Q7Z2W4;Q9P243;Q8IZL8;Q14093;Q8TE68;Q5T8I9;Q14160;Q9UJW0;P78352;Q7Z6E9;Q9BQG0;Q969S8;Q8N1G2;Q9NYB0;Q9HBH7;Q8IY67;Q9Y253;Q12933;Q9GZT8;Q96BP2;Q9ULW0;Q9NUU7;Q8IYD1;O94925;Q15056;Q9H6Z9;O95793;Q14847;Q9H7T9;Q9H7E2;Q13045;Q92597;Q5T1R4;Q9BYG8;O43264;Q99733;Q12988;A6NDD8;P53805;Q8TCI5;Q9NUL3;Q9UBC9;O14558;Q8TES7;Q9UKI9;Q01469;Q99550;Q9H1X1;O95397;Q8NHQ1;O75436;O00463;O00399;Q13625;Q96BT7;O95922;Q9HC35;Q9Y6X8;Q8NDQ6;Q9BUX1;P09972;Q5SXJ2;P53041;P78358;P50570;Q8N140;Q9UBQ5;P31946;Q9BWD1;O75143;O75376;O60447;Q96GN5;Q9P2D0;O95613;Q9H0C5;Q8NHR9;P57723;Q9H6U6;Q86VQ1;Q9UPR3;Q9NTK5;O00425;Q9UN36;Q9HCK5;P42704;Q15398;O94986;P15621;P68363;Q15545;Q9UMX0;Q9BXP5;Q9Y3A5;Q9NTX7;Q6NUQ1;P49354;Q96FI4;Q96P70;O94967;Q16667;Q9UBS3;O95905;Q13568;Q9UL33;Q13769;Q9H3M7;Q14204;Q9BZE4;P31949;Q9ULW8;Q08752;O00567;P62318;P78317;O75884;P10768;Q15776;Q9UBF1;P06132;Q969G9;Q8WV28;Q9H6Q3;Q9Y2D1;Q86WX3;Q9BTM9;Q9Y295;Q9Y605;P42768;Q8N196;O96007;Q9NVK5;Q9UBF8;Q15121;Q8WV44;Q9BRV8;Q8N0X7;Q9H307;Q13033;Q9NXV2;Q14152;Q13342;Q53EL6;Q9H6D7;Q96MG8;Q5MJ68;Q9Y6K9;Q9BT78;Q02241;Q13901;Q16621;Q9H063;P58304;Q99612;P48200;Q7Z713;Q9UDY4;Q9NPB6;O00743;Q309B1;Q86V15;Q9UKV8;Q9UJY1;Q9P258;Q96K30;Q8N488;O75145;Q9BT25;Q66K89;O95671;Q9BRX9;Q8N1K5;Q96C90;Q9NSU5;P47897;Q4LE39;Q15631;P98171;P68133;Q8IZY5;O95456;Q9UQL6;A6NC98;Q96F07;Q9C0D0;O95153;Q96DC7;Q9UL40;Q4G0J3;Q9NSV4;P54252;O75164;Q9NYF0;Q5EBL4;Q9UER7;P35548;Q9HBZ2;Q8IWL8;Q9H4H8;Q96RU3;Q9C099;Q9H1Z4;Q53HL2;Q5JPH6;P07741;Q9Y613;Q15041;P13489;Q00587;Q5VU43;Q8WVK7;P61289;O00268;Q8TAP6;Q96JI7;Q8IY63;Q9Y6K1;Q9NZZ3;Q7L3B6;Q8TC56;Q6FI81;P04732;O14593;Q9BXS6;Q6NUN9;Q8WUF5;Q86T75;Q96MB7;O43318;Q15700;P11172;O15069;O15105;Q96M02;Q9BZR8;Q96M29;Q15306;Q86UW6;Q0VD86;O14579;P50453;Q9H410;O43776;Q9BX70;O14713;O14746;P24941;Q99417;Q96GC6;Q8NHY3;Q9H467;P50748;Q6NT76;Q15797;P04156;Q9C0E2;Q96LK0;Q9Y4P9;Q9GZS1;Q969V6;Q14181;Q96JN8;Q9Y6M1;P32243;Q96A04;Q8TBB1;Q8IVS8;Q5VWZ2;Q14201;O15446;Q9BSQ5;Q9NPJ4;P3

5244;P63146;Q15596;P49756;Q9BYZ2;Q13765;Q52MB2;Q95486;Q14839;Q8N302;Q8N336;Q8N693;Q5TD94;Q86UE4;Q9UBU9;Q99828;P55347;P41208;O75312;Q92558;O43639;O43248;Q96CS3;Q9NTU4;Q7Z3Y8;Q49MG5;P51161;P11940;Q9UBK9;Q96KQ4;Q86U42;Q9H4A6;Q9NR56;P25815;Q9NT62;Q13526;O14893;Q13601;P53618;Q68DK2;Q9P209;Q5H9I0;Q13158;O75791;P19883;Q8IZD4;Q7Z4S6;Q99569;O75970;Q99471;Q8IXW5;P23508;Q96MM3;Q8WY41;Q8WXS3;Q95476;Q9BWF3;Q32P51;P23497;P30260;P49427;Q8N1N5;Q9HAP2;P40337;Q15327;AL1020;Q8IUF8;Q8WU90;P61575;Q15633;Q96H20;O43765;Q9BYG4;Q9Y697;Q8WUY3;Q96FV9;Q9NS26;P63000;P05787;P23381;Q96GE4;Q8NI51;Q9UQ80;Q9NZN8;Q9H2K2;P50616;Q8IXQ9;Q9BRJ7;P10144;Q8NDV7;Q9NPD3;Q99743;Q07157;Q07866;O75691;Q14807;Q16548;Q8NFH8;Q7KZF4;Q9BRP8;P06748;Q7L576;O00629;P40222;Q96IG2;Q8WYJ6;O14879;O60493;Q05086;Q8IX90;O00423;P41002;P27815;Q9Y6R7;Q9HD47;Q904875;Q96DV4;Q63HM1;P35326;O15372;O43189;Q96T51;P36952;Q92890;Q9HAF1;O43447;Q9UNY4;Q9C40;Q6P3W6;P35869;Q9P299;O95260;Q93052;Q9NVA2;Q8TE67;Q93045;P42226;Q9Y4G6;Q9UGV2;P41567;P21673;O95571;Q93015;Q99729;P39687;O43504;Q96PU8;Q9NR77;P61923;P57772;P50995;Q96RK1;Q9BQ67;Q9P2N5;Q7L1Q6;P62495;Q92797;Q08495;P61326;P56645;O75150;Q8N0Z2;Q96TC7;A6NK39;P81274;Q5FBB7;Q96IF1;Q8IYL2;Q66LE6;Q9HCS5;Q15773;Q9UM11;Q8TEP8;Q6ZNA4;P0DI82;Q8N668;P35754;Q8IWE5;O95817;P61244;Q8NAA4;Q13425;Q5TYM5;Q14019;Q9POM2;P05198;Q7Z7A3;Q8N3H0;P15924;Q49B96;Q9BSB4;O15116;O60296;P14653;Q13895;Q8IWC1;Q6ZP65;O94850;Q13127;Q3I5F7;Q8IY57;Q9C086;P35908;O60749;Q8NEY8;Q16666;Q9UJ41;P50991;Q8N3Z6;Q8N8R7;Q86UA6;Q6ZMV9;Q07021;P54105;Q7Z6J8;Q13155;Q6ZVD7;Q3BBV1;Q8NG27;Q99608;Q7Z6Z7;Q8N9W6;Q9BXN6;Q15029;Q9Y3Q8;Q9NX07;Q15287;P61088;Q9H7C4;Q15435;P06396;Q9NWB7;O75663;O75351;Q9UPN7;Q5JR59;Q9UM07;Q8IZS6;P57678;Q6IV72;O60282;Q9BQA1;P83881;C9JE40;Q96RM1;P30304;Q96P63;Q8NEU8;Q12962;P10911;P48728;Q8LWZ3;Q9NZN9;O95405;Q9Y6X2;Q9BZF9;Q9H9F9;Q5TCZ1;O43524;Q5TZA2;Q96EX3;Q56P42;P15923;P35900;Q9UGP4;Q9BPX1;O60885;O75334;Q15326;Q8NDN9;P63104;Q9BQ90;Q8TDY3;Q8TDC0;Q6PGP7;Q13748;Q9H0R8;Q00534;P20749;Q9HBK9;Q9UKA2;Q92636;Q13867;Q969L2;Q16543;Q9ULM6;Q9UBV8;P61578;Q92560;Q9NRR5;Q8TAT6;O15117;Q5VYS4;Q8NEF9;Q15653;Q9HB75;Q9P1T7;Q96P71;P55212;Q9NRG9;Q8NCR6;Q16204;Q5JTW2;Q92904;O15144;P32519;P15822;Q6P2S7;Q14140;Q07352;Q9C0C7;P61163;P04053;Q9H112;Q9Y3I1;Q6PGN9;Q9BSF8;Q9H0U9;Q5JY77;Q92832;Q05066;Q9NVM4;Q9BSU3;Q8N6M9;Q9Y5Z7;A8MTZ0;P61457;A8MVW5;Q9NR50;Q9BW30;P08133;Q96Q83;Q9H0B6;Q96QU8;Q8N456;Q96J87;Q99549;Q9UBP6;Q8TC84;Q96E66;Q9BRP1;Q14602;Q9BTC8;Q96EW2;P10155;Q96JM3;Q08050;Q96F86;Q92688;P30622;A6NH11;Q9NSA3;P07320;Q14669;Q8N660;Q8IY85;Q9NX18;P11831;P29373;Q96D03;Q9P0W5;P54136;Q9PUY8;Q9NSC5;Q4L180;Q9NY61;Q969H4;Q9Y3V2;Q9H4I8;Q8TC71;Q9NX46;Q9UN37;Q8IYML;P46937;Q9H0A8;Q7L266;Q96A56;Q5T752;P56693;P27816;Q8IV36;Q53HC0;Q717R9;Q8IWE2;Q7Z699;Q9BYD5;Q9P0K7;Q6P1M3;P35325;Q9NUL7;Q96FX2;Q96R06;Q8NBC4;P28069;Q8IXQ5;Q8NSX7;Q5T6F0;P61960;Q9ULZ0;Q9UI36;Q5T124;Q53EZ4;P59998;Q49AN0;Q6PI26;Q9UDW3;Q9Y4X5;Q6L8C26;Q2VPK5;P62829;Q9ULZ2;Q8TF09;Q9BXF9;Q16829;Q12798;P31365;Q12906;Q9NZ32;Q9NSI6;Q6ULP2;P13647;Q00653;Q114999;Q92599;Q96QA5;Q96T76;Q5VWJ9;P11308;Q9BY77;P08107;Q8NI57;Q03111;O94927;Q6DKK2;Q9NRG4;Q3SYG4;Q9H974;P42772;Q9BPZ3;Q8WUM4;Q9H0R1;Q8WW33;P81877;Q13415;P62877;Q9GZU2;Q9NR09;Q96KN3;P08235;Q86WG3;Q86VN1;P63172;P82663;Q15149;O75635;Q9H425;Q9P2S5;Q8IY31;Q96PU5;Q8TAD1;Q9UPU9;Q92945;P35268;Q96HJ5;Q96V25;Q99627;Q9P1Y5;Q92902;P34932;Q9Y250;Q8IYB7;Q9UI08;Q9BQS6;Q99698;Q8NSF7;P24278;O75800;Q9Y3C4;Q15717;Q9NSK0;Q8WUM0;Q9Y2M5;Q9GZV5;Q99426;Q9BXW6;O95433;Q9NR28;P61571;Q6XZF7;Q8NI10;P78545;P31943;Q9NZI8;Q08999;Q9BRG1;Q86UU5;Q9BTE6;Q86WP2;Q13480;Q9P0J0;Q9NR22;Q9NWW8;Q9BX46;Q5UE93;P62324;O95721;B7ZBB8;Q9H267;Q76G19;Q9H2G4;P31749;Q9UKK3;Q9NZI6;Q14511;Q96BY2;Q7Z2E3;Q13077;Q96E14;Q9P1Z2;Q9H808;Q8NB12;O14979;P54274;Q9C0C2;Q5TI25;Q14677;Q9BWT7;Q13432;Q8NEY3;Q13588;Q13489;P51003;Q9UKT5;Q9BVF5;Q9H0C8;Q01094;Q8WY1;Q96JY0;P35226;P16333;Q86I33;Q8LZD9;Q6IQ19;Q6PI48;Q9NQS7;Q8NDF5;Q5T1N1;O75444;O00148;Q9UKV0;P06746;P43487;P27797;Q99741;Q9HC62;Q9HBL8;P04731;Q5VSL9;P0CG29;P61925;Q5JVS0;P11532;O00522;O00327;Q9UBB4;Q7Z3C6;P46781;O94763;Q96RT8;O75534;P50914;Q6PCD5;Q92837;Q6ZNE5;Q9UNE7;Q9NVX0;Q8ND23;Q6H8Q1;Q9UBS4;Q86UW9;O14645;P38646;Q32P44;P19474;Q9BSW2;Q9HCE1;Q14134;Q7L5N1;Q13310;Q9NZR1;P28290;O60318;O76075;Q9BPU9;P0C1Z6;Q6TGC4;P22528;Q9H939;Q9UH90;O00512;Q7Z7C8;P08670;Q96AQ6;O43541;Q9UK41;Q14749;O43815;Q96EB1;O60870;O95379;Q9BZV1;Q8WZ82;Q14966;Q96E16;O15056;P17661;Q15814;Q9NPI1;Q8TEX9;Q8NFI3;P02766;Q8TD86;Q13243;A6NMX2;Q9NSP4;Q9HBG6;Q5VVH5;P56537;Q96RN5;Q8N3R9;O60477;P78318;Q8WXD5;Q86WG5;Q86V81;Q8NFG4;Q9BTW9;Q9Y2N7;P41134;Q99504;P37837;P11171;Q96KG9;P05413;Q5SQN1;Q9HAU5;Q15796;O95983;Q15723;Q96ST8;O75674;O75935;P57081;Q9NWB1;Q9UKL3;Q9Y3E7;Q9NUW8;Q8N108;Q9NPJ8;Q08AG7;P63220;P57721;P84022;Q05084;Q5T7B8;Q5UIP0;Q7LBR1;P17987;Q96KE9;Q8WXC3;Q9H9E1;P04406;Q9NZU7;P14136;O15265;Q7L2H7;Q9UKT8;P98170;Q7Z460;Q9Y2L1;Q6U7Q0;Q16656;Q5TAG4;Q8N163;O14613;Q92782;P48634;O00204;Q9UKT4;O43768;O95163;Q68CJ9;Q8N3L3;Q86UD0;Q8TCY9;O95271;Q99619;P47928;Q9BPX3;Q9NZI5;Q9BT92;O96004;Q8IZW8;Q9UHD8;Q8IXF0;Q92556;Q92499;Q9UI95;P31948;Q9H9Z2;O43290;Q8N841;Q96N77;Q14011;Q9H788;Q9NYZ3;Q86SG2;Q6ZUI0;Q96PM5;Q92624;Q9H0E2;Q9Y3B6;Q969H0;Q8TDY2;P10914;Q86UT5;O14929;Q5QJ74;Q674X7;Q6QNY1;Q8TCG1;P52298;P26196;Q9NRN7;Q2V2M9;Q13838;Q9C035;Q96PQ7;O15143;P54840;P54253;Q9BQY9;O95171;Q86XG9;P57075;Q9BT04;Q9Y615;O75153;Q6ISB3;Q03188;P55265;P46779;Q6P2H3;Q6IN85;P49789;Q08378;Q14106;Q8WXU2;P0CG34;P46777;Q9H840;Q8TAA5;Q9NYF8;P59047;P62987;Q9UNS2;Q8WUW1;Q9Y2Z0;Q13257;O95243;Q92600;O95198;Q8NCD3;Q9Y283;Q9H2J4;P51114;Q14974;Q1173;Q96S95;Q96C74;P23528;Q969T4;Q8WX93;O95363;Q9ULE6;P46108;Q8ND90;Q9Y4F5;Q8N0Z3;Q6ZWJ1;Q9H503;P61758;Q9H8T0;P63279;Q9NVR7;Q9H008;Q86XZ4;A9YTQ3;Q96EZ8;Q86XW9;Q9Y512;Q9BV57;Q7Z6G3;Q9UKA1;Q6UUV9;Q6NZI2;Q12905;Q96LI5;Q13547;Q9BWK5;P60510;Q9Y376;Q9NXX8;Q9NUQ6;Q9Y2G2;Q7Z4T9;Q13868;Q00994;O43379;Q92750;Q96SL8;Q9UM82;P25398;O43542;Q14674;Q9UDY2;Q9H3F6;Q9Y4P8;Q6NBL1;Q8WYR4;Q9UKK6;P49790;Q96EH3;Q96CS2;Q9P270;O43396;Q13884;P08729;B5ME19;P78560;Q8TCB0;Q8TBY8;P22626;P19838;Q16626;Q8IX06;Q7Z3K3;Q86UN6;P42025;O95071;Q7L9L4;Q99814;Q71F23;Q8IWL3;Q99871;Q9Y5L0;Q13409;P61572;Q9HB19;O14964;Q8N0Z6;O00186;Q96SW2;Q9UBS8;P41220;Q495M9;P29966;Q8IY22;Q58A44;Q96EY5;Q86XK2;Q9Y692;Q9BYG5;P51808;Q6ZU80;O00422;Q92793;P0C5W0;Q99618;P05114;Q5TAX3;O76095;O75154;Q9BRS8;O15066;Q15365;Q9C0H6;O95295;Q7Z614;Q8N7A1;Q15651;Q9NS23;Q8TF63;Q8TF55;Q01954;Q8IWX8;O95848;Q15697;Q15185;Q9NZD4;P14317;Q9Y5Z4;Q9H1K1;O14974;P61574;P40855;Q6ZN28;P07476;Q96NL8;O75382;P28289;Q15386;Q9NUG6;O60936;Q9UPV0;P50222;P51668;Q92614;Q9BRA2;Q9UI56;O60869;Q9NRL3;Q9BYG3;Q0VAK6;Q

92748;Q96HA8;P24385;Q9UPQ9;Q13469;P49770;Q9BXF6;Q9UBQ0;Q9GZNI;Q8WTW4;Q99638;Q9NR48;P60228;Q13829;O14646;Q8IUD6;Q14103;Q6I9Y2;Q13023;O96028;Q6FFI0;Q9HBL0;Q9UMR2;Q9H4B6;P62851;Q8IW40;Q01201;O14862;Q969P5;Q9UKS6;Q9H2G9;Q01844;O94829;O43491;O75496;Q15628;P55795;Q96C92;Q8N9R8;Q96PI1;Q13875;Q9P2J5;Q01534;O00308;Q9BV20;Q92844;Q9BY60;P07438;Q96LT7;Q9Y3U8;Q12923;Q00978;P62888;Q8NI35;Q7Z3Z0;Q96RS6;P49458;O14531;Q9UL18;Q9H0I3;P20226;Q96F24;Q16526;Q9H171;Q8WUI4;O60239;Q9BVN2;Q9UQ13;Q7Z3Y7;Q8ND56;Q9NV79;Q9NY27;Q3J5U85;P56945;Q9UPA5;P41214;Q5VVK0;Q9Y237;Q8IWT2;P63241;Q15013;Q15172;Q8IW35;Q8TDN4;Q13485;O75175;Q9NXR7;Q460N5;Q15072;P10074;Q92804;Q86XP3;Q92625;Q9UIF3;Q9NQT5;Q9H0F6;O15182;P35606;Q12968;Q05195;P26651;O95865;Q9UIV1;Q9H0A6;Q86TB9;Q96RT7;O95714;Q76KD6;Q8NEZ2;P50749;O15083;P25685;Q9UJP4;Q969Q0;O43402;O95319;Q9BW92;Q8WUH2;P50750;Q16890;Q6PI77;O00167;Q96GV9;Q08945;Q9NQE9;Q9GZZ1;P13196;Q8IX12;Q8BTC76;Q92616;O15131;O60921;Q9UBL0;Q5TA31;Q6PIJ6;Q9NVM9;Q15269;O14662;Q9Y5V3;Q7Z6J0;Q8IUZ0;Q6P9F0;P19484;Q86WH2;P61981;Q8TC94;O00401;A6NK89;Q15257;Q68CL5;P84550;Q07820;Q15599;Q9NRI5;Q9UH77;Q70YC5;Q96P15;Q07955;O00625;O43159;Q8TAD8;Q6P3S1;O95551;Q96JJ3;Q13114;Q13136;Q5BJF2;Q8IZQ1;O14737;Q9UIL1;Q96NW4;Q9HCI5;P63261;P07315;Q8WWW0;P49591;O95336;P62244;Q8WUJ3;Q9UGJ1;O75531;O60506;Q9Y483;Q9H6Z4;Q9HCM9;Q6TFL4;P14672;A5PLL1;Q92540;O75398;P56211;Q15025;Q9NQY0;Q5VZF2;O95644;Q8N635;Q7Z5H3;Q9Y285;Q14671;A6NIX2;Q9BTE1;P78371;Q7Z5W3;P25440;Q9UMS6;Q5BXX8;Q9CF1;Q8IUR6;Q8NFI4;Q96CA5;Q8NE71;Q9NYL9;Q09FC8;Q86UL8;Q9UBF2;Q15714;Q8IVG9;P35232;Q8IYX8;Q9BXX4;P78406;Q9BZI7;Q86UB2;P61978;Q9Y536;Q6PD74;Q2VWA4;Q9P0R6;Q92834;P40424;Q9BZL4;Q9BRX2;P53992;O14618;Q96DX5;Q9Y5Y2;O15055;Q8IWT3;Q9Y4L5;Q9H3C7;P62241;Q9HCG8;Q5DL1E8;Q8IWN7;Q00613;Q86W56;Q9UKT9;Q9UMX2;Q9NRR3;Q13642;O75386;P04733;Q96J94;Q14934;Q2NL98;Q12873;B2RXF5;Q7L590;Q9UKF7;P80723;Q8WU39;O60930;Q9BZW7;Q9UI26;O95359;O43516;Q04864;Q6ZU15;O60524;P19532;Q6DN90;O95487;Q8WVB3;Q99816;Q9BZL1;Q9NUQ3;P67870;Q15058;O95373;Q9UJW3;Q9H568;Q9Y6F6;Q5SZQ8;Q06609;O14519;Q13596;Q6P1N0;Q8N7F7;Q9C004;Q7L3T8;Q8IZE3;Q6VNV20;Q9ULC4;Q9H213;Q27J81;Q9ULJ6;P47974;Q8TEA8;Q86XR8;Q9NTG7;P60866;Q04917;P61579;O60759;Q96GX9;O15259;Q9Y262;Q9Y244;P61247;O43745;Q9BYD9;Q96Q89;Q9UKY7;O95997;Q9H204;O60573;P55210;Q9NVW2;O75146;Q8TEQ6;Q9UHN1;Q9Y6B2;Q16612;Q9Y4P1;Q9Y224;Q96QG7;O60333;Q4VC44;Q13144;Q9NQZ3;O43918;Q9Y3A2;P09629;Q3BBW0;Q93034;Q7L2E3;O00165;P16989;Q9BQI9;Q9BZG8;Q9UUFF9;Q15031;Q2M3C7;O14508;P02489;Q00839;O43617;Q96LR2;P61962;Q12834;P55197;Q14008;Q96N95;Q9Y664;Q13084;Q96FT9;Q13330;Q8WXB4;Q9NP71;Q9NRJ4;Q7Z4G1;Q9UQN3;Q9UJM3;Q16637;Q12765;Q96MG7;Q9Y200;Q8NHY2;Q9Y3A3;Q9NZD8;Q9NS25;Q13363;Q8WWW38;Q9Y534;Q9Y448;Q06587;Q9GZR1;Q8IVM0;Q99728;Q3BBV0;Q99700;O95273;Q9P278;Q13404;Q96FF9;Q9UMS4;P30047;Q8NA72;Q96S59;Q8NPF5;P42773;Q9BV47;Q96AC1;Q9H910;O60662;Q9H1H9;P08047;O60248;Q8N4C6;Q9HCH5;Q96KN1;P16452;Q92796;Q9NQP4;Q9NPP4;P31483;Q8N8E3;O76041;O14512;Q86Y26;P11802;Q96013;Q9H2U1;Q9NVD7;Q6IS14;Q9UI46;Q5HYK7;Q96FN9;Q6P2P2;Q96U6;Q9H0M0;O00192;Q8WXF9;Q46M11;P55060;Q9NX63;Q9UKT7;P82094;Q13541;Q9NP97;O75821;Q1W6H9;Q0VG06;O43663;Q86YF9;P51116;Q9H009;Q8IX03;Q9NP79;Q9H6Y2;Q93083;Q9H2C0;Q9Y6D6;O43390;P07814;Q9BU02;Q9NPA3;Q9BUZ4;Q96KR1;Q9Y238;O75626;Q8NPF9;Q13761;Q9NZT2;Q07020;Q9NXR1;Q8N6W0;Q9Y6Y1;Q9NXX0;P39023;Q15935;Q8WXF1;Q9Y6R0;Q071105;Q9UKC9;Q9C0D2;O14604;Q14493;Q14141;Q96TA1;Q8TDM0;O95429;P23258;O00139;Q9NPC6;P37198;Q96A00;Q96C86;O43255;Q9BQI5;Q9BWS0;Q107X0;P30153;Q9BRU0;Q9Y4B6;Q8TF46;P18754;P14678;P43355;Q96JB8;Q9H329;Q96L03;Q86WJ1;Q99719;Q9NWS1;O14556;Q9P219;O60299;P17544;Q00577;Q6UUV7;Q6NZ67;P30307;Q96EY1;P36639;P49006;Q13287;Q7Z5K2;O60828;Q6ZS17;Q49MI3;Q9NZJ0;Q8N3F8;Q676U5;Q8N2W9;P30281;Q2KHM9;P35573;O94874;Q86SQ7;Q86W54;O95810;Q96PM9;Q7Z5L9;Q6Q759;Q8N1E6;P62826;Q08211;Q6NYC8;P52434;A8MU46;P63302;O14641;P05204;O43592;Q9UBC3;P52292;P48595;P49901;P19429;Q9NRD1;Q9NR12;Q9UQB3;Q9H9T3;Q9UJG1;Q9UFN0;P39880;P62917;Q13813;Q9UK73;Q9ULD2;Q9NS73;P55884;Q13137;Q9Y2B4;Q96N16;O43715;Q0VDF9;Q96LB3;Q6P2C8;O43708;O43237;Q9BT81;Q9UJT2;Q99459;Q13352;P78337;Q8TD16;P15172;Q7Z4H7;Q14764;Q96MH2;Q99666;Q5MIZ7;Q96HA7;Q7Z417;O15534;Q16658;Q8N987;O60518;P60953;Q8N9W8;Q05BV3;Q8TDG2;Q6ICB0;Q99717;P08238;Q052W1;Q96018;Q5H9L4;O60716;Q9BRT9;P48643;O00170;Q8WWL2;Q8IUD2;Q06520;O43598;Q9UPW6;O00257;Q9PQ22;Q5T890;Q15047;P24666;Q15154;Q5TB80;Q96NB3;Q15181;Q9Y2T7;Q9UBD0;Q96B67;Q969F9;Q9NRC8;Q8WYQ5;Q6NUP7;Q7L5D6;Q15643;Q9H4I2;Q9NWX5;P40121;Q969S2;Q8TF74;Q8NEJ9;P27986;O95166;Q5H9R7;Q76FK4;Q5T160;Q00536;P67775;Q92817;Q969S3;Q6IQ23;Q9H6T0;Q6QNY0;O15198;P06730;Q9Y473;Q8TD31;Q96A73;Q96N21;Q96FJ2;Q9BTD8;Q14678;Q8NCF5;Q9NMT9;O43324;Q9ULQ0;Q93008;Q86XL3;Q2M2I5;Q8IZT6;O95149;Q9UMX3;Q9NUP1;Q99933;Q14683;Q6MZT1;Q14203;P78347;Q9H069;Q9UBW8;Q9Y5K6;Q8N9B5;Q13233;P04792;Q8IXH6;A6NP61;Q96HR8;Q8WVJ9;Q12982;Q15006;Q9ULX6;Q86SH2;O75182;Q9HCJ3;Q8IV53;P55327;Q2M2Z5;Q9UII4;A6NDB9;O43236;Q9BSJ2;Q86TP1;Q9NPI6;Q9HD26;O95833;Q9NSN8;A6NG73;P0C2Y1;Q9Y2J2;Q9BZE0;Q5VZE5;Q9UKG1;Q70IA6;Q9BTV5;Q92993;P38935;P62701;P11166;Q9NWD9;Q96B42;Q01860;Q9Y5S9;Q8W WX9;O94817;Q9H074;Q8NCE0;Q9BXJ9;Q9ULC6;Q15003;Q9H814;Q14315;P35667;Q16143;P42771;Q86TG7;Q9BV73;Q86X55;Q96FS4;Q9H3U1;O94855;Q8IZH2;Q9BSK0;Q9BQ70;P23297;Q8WUX9;Q15942;Q9H469;Q9BXX8;Q5T749;O00291;Q15276;Q14151;Q693B1;O15145;O14576;O60711;Q9NQR4;Q9H1Y0;Q92905;P58107;Q96MP8;Q9H1B4;Q9BW27;Q8NEM0;Q9Y6F1;Q9NQC8;Q2TAY7;O75419;P68104;Q5H9F3;Q5VYK3;Q9Y573;Q12840;Q8TC44;Q9UIA9;O43251;Q96FW1;Q8WW24;P11142;P55854;Q12888;P61573;P07737;O14639;Q96CW6;Q13094;O75822;Q5T447;Q99873;Q9NNW5;Q12815;Q9Y222;P61576;Q96CN9;Q9BZJ0;Q15555;P61604;Q96JTE9;O75494;Q15650;Q8WY54;Q8NFF9;Q13515;Q9HD42;A0AVT1;Q9BRA0;Q15038;P62269;Q3YEC7;Q15102;Q9Y315;Q6IEG0;Q9Y2G4;Q6ZUV0;O75569;Q9NQ94;P51610;P67809;P10916;P05937;Q9NUK0;O15511;Q8IU60;Q96DI7;Q04695;Q9NR83;Q8N9W5;Q9NZH4;Q9NY74;Q13098;O15397;Q96AX9;Q9UPT5;Q8N3C0;Q9P2A4;Q13424;Q6PJT7;Q96QF0;Q9UHD9;Q9H0H3;Q9NP77;P68036;Q8TAP9;P28324;Q6UB98;P49368;Q68DX3;Q9BTT0;Q09161;Q6UVJ0;O43502;O95831;Q15833;Q8TED0;Q43299;O75665;P46783;Q99689;Q96CW5;Q92785;Q69YQ0;Q9UBB5;Q96G03;Q96B36;Q96SN8;Q08AD1;Q9C0H9;Q9GZY8;Q3KQU3;Q99613;Q04637;Q9H1J1;O00303;Q9UQC2;Q9BXD5;Q9H9H5;Q9UGC7;P52294;Q5TA45;O15234;O14757;O43913;Q8IXT1;Q8N137;Q9Y314;P53370;Q9NX95;Q12816;Q8N960;Q15819;Q5T5Y3;Q14192;Q96CF2;Q4G0F5;P11161;Q96Q35;O00482;Q8TDQ7;Q5SW79;Q9Y281;Q9BXY8;Q9UJC3;P05813;Q53GL7;Q96JB2}

6241 [Cluster 568]GO:0043234+C cellular\_component [name] protein complex [def] "Any macromolecular complex composed of two or more polypeptide subunits, which may or may not

- be identical. Protein complexes may have other associated non-protein prosthetic groups, such as nucleotides, metal ions or other small molecules." [GOC
- 6242 Pathogen[ Q2Q067] interacts with 118 human partners: {Q14974; Q9P2Y5; Q9NNW5; O00213; Q14008; Q14744; Q9Y615; Q9Y5V3; P63104; Q13033; P49790; Q95782; A6NGQ2; Q9NPB6; Q8WY54; P01106; Q9UKX2; Q13485; P30793; Q9UDY8; Q9P0M2; Q9UI30; Q00613; Q01105; P08133; P20749; Q9Y5N5; Q04206; P50502; Q12933; Q12933; Q96B36; Q13884; Q95999; P36956; Q9BWW4; Q96ST3; Q6ZRS2; Q86YF9; Q53HL2; Q6ZNA4; Q14457; Q13158; Q9Y2D8; Q14790; Q9Y311; Q8N726; P11388; Q86UL8; P31948; Q13541; P11142; O75381; Q9NQS7; P11532; P23769; P59047; P26678; P49356; P25791; P11171; P84022; Q9HB19; P46939; Q12834; P36873; Q2VPK5; O00255; O15105; P06396; Q13127; P09874; Q02410; Q9NVD7; Q9NR77; Q9H0B6; O75030; Q15796; P62879; Q13216; Q15466; P19838; P20823; Q9H0C5; P23258; Q14839; P25963; Q14686; O95983; Q969H0; P31946; O75150; Q13425; Q15833; P40855; Q9HCK8; Q9ULZ2; Q9Y4P8; Q9H808; P27986; Q92793; Q86U70; O94817; P35579; P30047; P49593; Q92466; P15923; Q9UMX0; P23297; Q00987; Q13023; Q9H0I3; Q9H1Y0; P49715; Q15750; Q15906; Q9BV73; P35237}
- 6243 Pathogen[ P0C214] interacts with 120 human partners: {Q14457; Q15833; Q9BWW4; O00213; P60709; Q9Y3I1; Q9Y615; P35237; P32243; Q00613; Q9Y5V3; Q14008; Q9UKX2; Q9Y376; Q53HL2; P19838; P62993; Q00987; Q9UM54; Q13158; P40855; Q9Y2D8; Q13023; Q9UDY8; P08133; Q9P0M2; P23769; Q92793; Q13033; P84022; Q6ZRS2; Q9H808; P23258; Q15906; Q04206; O75381; O75030; Q8N726; P06396; Q13884; Q14686; P31948; Q01105; Q9UI30; Q13216; P11532; Q9H0B6; Q9HB19; P30793; Q9NPB6; P49790; P15923; Q13425; P25791; Q2VPK5; O95983; P49356; Q86U70; O95999; Q12933; P46939; Q13485; Q9Y4P8; Q96B36; Q12834; O15105; O94817; P20749; Q9BUK6; Q9Y5N5; Q9HCK8; Q15796; P25963; P11388; P62736; Q9NR77; P62879; Q13127; Q9ULZ2; Q969H0; Q9P2Y5; Q6ZNA4; Q9HD26; Q15750; Q9H1Y0; Q8WY54; Q9BV73; Q02410; P36873; Q96ST3; O75150; Q9NQS7; P49593; Q14974; Q9H0I3; O95782; Q9NVD7; Q9NNW5; Q92466; P30047; Q86YF9; P31946; P63261; P27986; P26678; P23297; P59047; Q9UMX0; P01106; P11171; O00255; Q14839; Q15466; P09874; P50502; Q13541; P55072; P11142; Q14790; Q9H0C5}
- 6244 Pathogen[ P03346] interacts with 144 human partners: {Q13425; Q15833; Q96ST3; P59047; O00213; Q9P0M2; Q86U70; Q9NQC8; Q9HB19; Q8WY54; O75150; P36956; P23258; P50502; Q00613; P11388; P31270; P11277; Q13158; P23297; P25963; P35579; P62736; Q9Y2D8; Q13541; Q01105; Q13884; Q9UDY8; Q99626; P26678; Q9BUK6; Q9Y5N5; Q9ULZ2; Q15466; Q9UJQ4; P23769; O95983; P35237; P15923; Q15796; Q14744; Q15906; P60709; O43815; Q04206; O95782; Q53HL2; P11142; P31948; Q13023; Q9NPB6; Q9UMX0; P62993; Q14457; P20823; O15105; O75030; P49593; Q9Y376; P55072; Q9UI30; P46939; P49715; Q02410; Q00987; Q8TEW0; Q12834; P20047; O95999; Q86YF9; Q9Y371; O75381; P01106; Q9BWW4; Q96B36; P84022; P25791; P08133; P11171; P17542; P49356; Q13033; Q86UL8; O00255; Q9HD26; P36873; Q14008; P51587; Q9HCK8; Q9UKA4; Q9H808; Q9NQS7; Q9NR77; Q6ZNA4; O00522; Q15750; P11137; Q9Y5V3; Q13216; Q6ZRS2; P09874; Q9NVD7; P20749; Q9ULV0; P31946; P63104; Q14790; P56589; P50542; Q9UKX2; P49790; Q9H1Y0; P11532; P19838; P40855; Q13485; P06396; Q92793; Q92466; Q9P2Y5; Q8N726; Q2VPK5; Q9Y2J0; O96011; O94817; P23243; Q969H0; Q9Y615; Q9Y311; Q9NP85; Q9NRD5; A6NGQ2; Q9H0I3; Q9Y4P8; P27986; Q9H0B6; Q14839; Q13127; Q9NNW5; Q9H0C5; Q14686; Q14974; Q9BV73}
- 6245 Pathogen[ Q85601] interacts with 128 human partners: {Q14457; P01106; O00213; Q9Y3I1; P63104; P09874; Q9ULZ2; P62879; P31946; Q13127; Q9NVD7; P62993; P06396; Q15750; Q15466; Q13884; Q14008; Q969H0; Q15833; Q9NQS7; Q86U70; Q9P2Y5; Q13158; P35579; P49593; Q01105; Q9UDY8; Q13216; Q14790; O75030; Q86UL8; P23769; O43815; Q53HL2; Q9Y5N5; P31948; Q9Y376; P11532; Q96B36; P11171; Q2VPK5; P23297; O95983; O14744; P35237; Q00613; O94817; Q12834; Q13541; P30793; Q14974; P30047; Q9NNW5; P27986; Q9H0I3; P60709; P23258; Q14686; Q9UKX2; P25791; Q9H808; Q8N726; Q12933; Q9Y4P8; Q9BV73; Q9Y2D8; Q9HD26; P36956; P63261; Q9H1Y0; Q04206; P36873; Q9Y5V3; P11142; P46939; Q13425; Q9UI30; Q9BWW4; Q6ZRS2; P11388; Q9NR77; O00255; P49356; Q9NPB6; Q13033; P15923; P32243; Q9H0C5; O75150; P84022; Q9P0M2; Q9HCK8; P49715; Q8WY54; Q9Y615; Q15906; Q6ZNA4; Q9BUK6; Q9HB19; P08133; O15105; Q02410; P50502; Q9UM54; O95999; Q92793; Q13023; Q92466; O75381; Q00987; P19838; P20823; Q13485; P62736; P49790; Q9H0B6; P20749; P51587; Q9UMX0; P40855; P51955; Q86YF9; Q15796; Q14839; O95782; P59047; Q96ST3; P25963}
- 6246 Pathogen[ P14079] interacts with 148 human partners: {P04083; Q9UKA4; O75192; O14810; P11388; P35579; Q01105; P35237; Q96HA9; P09874; P31948; P63261; Q9H0I3; P11142; Q06413; P40855; P49593; Q969H0; P11532; P61421; P11171; Q9Y4P8; O95999; P56589; Q9Y5N5; P36873; Q96ST3; Q13023; P39656; Q9UMX0; Q9P0M2; Q92793; Q13033; Q02410; P24588; Q86U70; P16298; Q9BUK6; O43815; P51587; Q15070; Q6ZNA4; Q8N726; O00213; Q15750; P68363; Q9BV73; Q6ZRS2; Q9NP85; Q587J8; Q9Y615; Q13216; Q9UKX2; Q9UM54; Q9Y371; P15923; Q9BTE0; O94905; P30793; Q9H1Y0; A6NGQ2; P46939; Q9HB19; Q13541; Q00987; P63104; Q9H808; Q8TEW0; Q9HD26; Q00613; Q15833; Q8WY54; Q9ULZ2; O14744; Q9Y5V3; P50542; Q15906; O96011; P51955; O95782; Q14790; Q86UW1; P31946; P49715; Q9BWW4; O75477; P25791; Q2VPK5; O60256; Q9Y478; Q14974; P23258; Q8WZ55; Q9UJQ4; P60709; P49356; Q9HCK8; O95983; P49790; P11277; Q9UI30; P23297; P01106; P32243; Q86UL8; Q53HL2; Q6PJW8; Q12933; Q9NQS7; Q14839; P20749; P62993; Q13158; Q8IYM0; Q9NNW5; Q86YF9; Q96B36; Q9NQC8; Q92466; O75381; O94817; P26678; P11137; Q14558; Q15466; Q9NPB6; Q9Y2D8; Q13127; O75030; Q14457; O15105; Q9Y3I1; Q9H0B6; Q9NR77; Q9NVD7; P36956; Q9P2Y5; O00255; Q9Y4J8; Q9Y376; P23769; P50502; P59047; Q14686; P30047; O00522; Q14008; Q9H0C5}
- 6247 Pathogen[ P03383] interacts with 103 human partners: {Q14457; Q9NQS7; P27986; O00213; P62879; Q9Y3I1; Q14839; Q01105; Q13485; Q14008; Q13216; P32243; Q13884; Q96HA9; Q9H0C5; P50502; P31946; P01106; Q86U70; Q9HD26; P23297; Q9BWW4; Q13023; P31948; P20749; Q14686; Q9BV73; P23769; O75030; P15923; Q9H0B6; Q6ZNA4; Q96B36; Q9H1Y0; Q13158; P46939; O14744; P36873; Q12834; O15105; Q53HL2; P84022; P25791; Q9H808; P63104; A6NGQ2; Q9H0I3; Q13541; Q12933; Q9ULZ2; P09874; Q9UKX2; Q9Y5N5; Q9Y5V3; Q9UMX0; Q15466; O75381; Q9NPB6; P11532; O95782; Q9NR77; Q00613; O00255; P26678; P11142; P25963; Q14974; O95999; Q969H0; Q9P2Y5; Q9HCK8; Q8WY54; O95983; Q15906; Q9Y4P8; Q15796; Q86YF9; P35237; Q04206; Q02410; P35579; Q96ST3; O94817; Q13033; Q9UI30; Q92466; Q9Y2D8; Q2VPK5; O75150; P19838; Q9NNW5; Q9HB19; P08133; P30047; P49790; Q9Y615; Q92793; P40855; Q13127; Q13425; Q8N726; P06396; Q15750}
- 6248 Pathogen[ P03410] interacts with 159 human partners: {P84022; O75192; Q00613; P20749; Q04206; O95782; P30047; P19838; P36956; P27986; Q6ZNA4; Q14974; P11137; Q15833; P62736; Q9UKX2; Q9P2Y5; Q9UKA4; Q9H1Y0; Q8WZ55; Q9H0B6; P50502; Q9Y2J0

```

;Q9BWW4;Q8IYM0;Q8N726;Q9Y615;P01106;A6NGQ2;Q53HL2;Q86UW1;P49356;P25791;Q9ULZ2;Q14686;
Q15750;P06396;P61421;Q9ULV0;O94905;O14810;Q9Y3I1;P11532;O75030;Q14008;Q8WY54;Q9H0I3;Q
14457;Q13425;O96011;P11142;P35579;P59047;O00213;P40855;Q01105;Q15906;O75381;Q9H808;P3
0793;Q9Y4P8;P15923;Q9NP85;Q92466;Q96ST3;Q13541;O94817;Q02410;Q13884;Q13158;Q9UI30;Q9H
D26;P11171;Q9UM54;Q96B36;Q13127;Q9BUK6;Q9UMX0;Q6ZRS2;Q9P0M2;Q92793;P08133;Q86YF9;Q9NR
D5;P49790;O75150;O95999;Q9Y376;Q969H0;Q14558;P51587;P46939;Q13033;Q86UW0;P2667
8;O95983;Q9H0C5;Q13485;Q9Y371;Q2VPK5;Q9HCK8;Q13023;P09874;Q12933;Q15466;Q9BVA1;P36873
;O60256;O00522;Q96HA9;P31948;Q12834;O15105;P11388;P63104;Q13216;O75477;P32243;P50542;
Q9Y5V3;P23769;P23258;P68363;P23297;P49593;Q8TEW0;O43815;Q9NPB6;P63261;Q9NVD7;Q86UL8;Q
00987;P56589;Q9HB19;Q9NQC8;Q15070;O14744;P25963;Q9Y5N5;P39656;O00255;Q15796;Q9UJQ4;P3
5237;Q14839;P62993;Q9NR77;Q9BTE0;P62879;Q9BV73;Q587J8;P11277;P24588;P60709;P31946;Q9Y
4J8;Q9NNW5;Q9NQS7}
6249 Pathogen[ P14075] interacts with 107 human
partners: {Q14457;Q9P2Y5;Q96ST3;O00213;Q02410;Q86U70;P11532;Q00613;P11142;Q04206;Q1575
0;O75030;Q13884;Q9UI30;Q9UKX2;Q9BWW4;Q15906;Q9NQS7;Q9H1Y0;P40855;P62879;Q14686;Q13425
;P23769;P08133;Q14839;Q9Y2D8;Q15070;Q9HD26;Q13216;Q15796;Q01105;Q9Y3I1;P15923;P25963;
P01106;P36873;Q9Y4P8;O75381;Q13485;O00255;Q96B36;P25791;Q6ZNA4;O95983;O14744;Q2VPK5;Q
12933;P26678;Q9Y5N5;P46939;Q9HCK8;P50502;Q9BV73;Q96HA9;O95782;O75150;P30047;Q9H808;Q1
3158;P27986;Q9NR77;P63104;P06396;Q9HB19;P35579;O15105;O95999;A6NGQ2;Q8WY54;Q53HL2;O94
817;Q9ULZ2;Q92793;Q13127;O75192;Q9H0C5;Q15466;P19838;P31946;Q9NPB6;Q14974;P84022;P497
90;Q14008;P30793;Q9H0B6;Q92466;Q9H0I3;Q9Y5V3;Q9NNW5;Q969H0;P31948;Q13033;P32243;Q86YF
9;Q13541;P35237;O75477;Q12834;P11171;Q8N726;P09874;P20749;P23297;Q9UMX0;Q13023}
6250 Pathogen[ P0C206] interacts with 152 human
partners: {A6NGQ2;Q9NQC8;P84022;O75477;P46939;Q13541;Q9HCK8;P60709;Q9HB19;Q9UM54;P0639
6;Q15466;O75192;P49790;Q96ST3;Q9P2Y5;Q14008;Q9UJQ4;Q13127;Q96HA9;P62879;Q8N726;Q9UDY8
;Q8WY54;P39656;O75030;P62736;P09874;O43815;Q86YF9;P51955;Q13023;O75381;Q9NVD7;O14744;
P51587;P56589;Q9Y2J0;Q6ZNA4;Q9UMX0;Q96B36;O95983;Q00613;O00255;O95999;Q14974;P25963;Q
9BUK6;Q9Y5V3;Q14457;Q969H0;Q6ZRS2;P49715;P36956;P35237;Q13158;Q9Y376;Q12933;Q9H0I3;P3
0793;P50542;Q15796;Q9Y4P8;Q9NNW5;Q13216;P27986;Q9H808;P62993;Q9Y2D8;Q9NR77;P31946;Q92
793;P30047;P49593;Q14839;O00213;O15105;Q8TEW0;P63104;Q9Y4J8;Q13884;P11137;P50502;P198
38;Q9H0B6;Q6P0J8;Q2VPK5;Q15070;P08133;P59047;P32243;Q13425;Q9H1Y0;Q9BWW4;Q9P0M2;Q1590
6;P40855;P63261;Q04206;P15923;Q14686;O94905;P20823;Q14790;Q9NPB6;Q9UI30;P35579;Q53HL2
;Q9UKX2;Q9BV73;Q13485;P55072;Q9Y5N5;P23258;P25791;O95782;Q9H0C5;P23769;Q96011;P20749;
O94817;P11277;Q9ULZ2;Q86U70;P11388;P26678;P01106;Q15750;Q92466;P11532;Q86UL8;Q13033;Q
9Y3I1;P23297;Q00987;Q9NQS7;P31948;P36873;P49356;Q15833;Q9NRD5;Q01105;P11142;Q9Y615;Q9
NP85;Q9HD26;O75150;Q12834;O00522;Q9UKA4;P11171;Q02410}
6251 Pathogen[ P03363] interacts with 119 human
partners: {A6NGQ2;Q86U70;P62879;O14744;P11137;P46939;Q9UJQ4;Q96B36;P11277;Q15466;Q0420
6;P35237;Q9P2Y5;P36873;P60709;Q99626;P50502;P35579;P25963;Q14457;O00213;Q9UKX2;Q6ZRS2
;P62736;Q12933;P31946;Q9H0C5;P68363;Q9UMX0;Q13033;Q9NPB6;Q9Y2D8;Q53HL2;O15105;P32243;
Q14839;Q13158;Q14686;P01106;Q9NR77;O75150;Q15750;Q6ZNA4;Q13425;Q9P0M2;Q13127;P06396;P
25791;P15923;P63104;Q13748;P20749;Q9Y3I1;P08133;Q9H0B6;Q9HCK8;Q2VPK5;Q9ULZ2;O75030;Q9
H808;Q9NQS7;P11532;O00522;Q02410;Q96ST3;O43815;O75381;P11171;Q15796;O95983;P84022;P31
948;Q969H0;Q9Y615;P59047;Q14974;Q9Y376;Q9Y4P8;P49790;Q13884;P19838;Q9HB19;Q9UI30;Q927
93;Q9Y5N5;P40855;Q13023;O95782;Q92466;Q9H0I3;Q13485;Q8N726;Q9Y5V3;P63261;Q86UL8;Q0061
3;Q9BWW4;Q12834;Q14008;P09874;P30047;Q13216;Q9NVD7;Q13541;Q86YF9;Q01105;P23258;P27986
;Q9HD26;O94817;Q9BV73;P23297;Q9H1Y0;Q9NQC8;P11142;Q15906;Q9NNW5;Q8WY54;Q15833}
6252 [Cluster 569]GO:0032390+C cellular_component [name] MutLbeta complex [def] "A
heterodimer involved in the recognition of base-base and small insertion/deletion
mismatches. In human the complex consists of two subunits, MLH1 and PMS1." [GOC
6253 Pathogen[ Q2Q067] interacts with 1 human partners: {Q9UHC1}
6254 Pathogen[ P0C214] interacts with 2 human partners: {Q9UHC1;P40692}
6255 Pathogen[ P03346] interacts with 1 human partners: {Q9UHC1}
6256 Pathogen[ Q85601] interacts with 2 human partners: {Q9UHC1;P40692}
6257 Pathogen[ P14079] interacts with 2 human partners: {P40692;Q9UHC1}
6258 Pathogen[ P03383] interacts with 1 human partners: {Q9UHC1}
6259 Pathogen[ P03410] interacts with 2 human partners: {P40692;Q9UHC1}
6260 Pathogen[ P14075] interacts with 1 human partners: {Q9UHC1}
6261 Pathogen[ P0C206] interacts with 2 human partners: {P40692;Q9UHC1}
6262 Pathogen[ P03363] interacts with 1 human partners: {Q9UHC1}
6263 [Cluster 570]GO:0005615+C cellular_component [name] extracellular space [def] "That
part of a multicellular organism outside the cells proper, usually taken to be outside
the plasma membranes, and occupied by fluid." [ISBN
6264 Pathogen[ Q2Q067] interacts with 13 human
partners: {Q9Y3A2;Q9H2P0;P15121;P01009;Q13123;P27797;Q07021;Q12904;P06396;P08697;P5045
3;P06744;Q6ZVN8}
6265 Pathogen[ P0C214] interacts with 25 human
partners: {P08697;P08294;Q12904;O95633;P29622;P36952;P06396;P05121;P15121;P10124;P0554
3;P54577;P10809;P07093;P01008;P30740;P50453;Q6ZVN8;P10909;P05120;P27797;Q13123;P80303
;Q9H2P0;Q9Y3A2}
6266 Pathogen[ P03346] interacts with 18 human
partners: {Q9NZU5;Q9Y3A2;Q6ZVN8;P80303;Q9H2P0;Q99784;P15121;Q07021;Q9Y215;Q12904;Q1312
3;P50453;P27797;P51858;P01009;P06744;P06396;O95633}
6267 Pathogen[ Q85601] interacts with 20 human
partners: {Q9NZU5;P06396;P36952;Q9Y3A2;P80303;P55145;P06744;P27797;P08697;P01009;Q1312
3;Q9H2P0;P15121;P05121;P50453;P05120;P01008;P30740;P07093;Q07021}

```





6302 partners:{Q14746;P83436;Q08378;Q9Y2V7;Q8WTW3;Q9UP83;Q96MW5;Q9H9E3;Q96JB2}  
Pathogen[ P03383] interacts with 6 human

6303 partners:{Q14746;Q9H9E3;Q9UP83;P83436;Q96JB2;Q8WTW3}  
Pathogen[ P03410] interacts with 9 human

6304 partners:{Q96JB2;Q9UP83;Q9Y2V7;Q08378;Q96MW5;Q8WTW3;Q14746;P83436;Q9H9E3}  
Pathogen[ P14075] interacts with 6 human

6305 partners:{Q14746;Q96JB2;Q9H9E3;Q9UP83;P83436;Q8WTW3}  
Pathogen[ P0C206] interacts with 8 human

6306 partners:{P83436;Q9Y2V7;Q9H9E3;Q96JB2;Q14746;Q9UP83;Q8WTW3;Q08378}  
Pathogen[ P03363] interacts with 7 human

6307 partners:{Q9UP83;Q9H9E3;P83436;Q14746;Q08378;Q8WTW3;Q96JB2}  
[Cluster 574]GO:0000775+C cellular\_component [name] chromosome, centromeric region  
[def] "The region of a chromosome that includes the centromeric DNA and associated  
proteins. In monocentric chromosomes, this region corresponds to a single area of the  
chromosome, whereas in holocentric chromosomes, it is evenly distributed along the  
chromosome." [GOC

6308 Pathogen[ Q2Q067] interacts with 90 human  
partners:{P49454;P30153;O43463;Q96EE3;Q9NYP9;Q96H22;Q71F23;Q9Y3S2;Q12888;Q13352;Q7Z46  
0;Q6IPU0;Q96R06;Q6P1K2;Q9HBM1;O75935;Q5EE01;Q9Y6K1;Q8WYP5;Q9H3R5;Q5FBB7;P49450;Q13257  
;Q8N2Z9;A8MT69;Q03188;Q9UER7;Q15172;Q9NXR1;Q53HL2;P67775;O43684;Q8NBT2;Q9P258;Q8NFH4;  
P12270;Q9UBC3;Q9NQS7;Q9Y448;O43264;P62714;Q7Z7K6;Q92674;Q9BW27;Q96BT3;Q9BZD4;O43482;Q  
9NSP4;O75177;P36873;Q9BVC3;P50748;Q96JM3;Q96BK5;Q9H410;Q8NFH3;O60216;Q9UJ98;O75122;Q8  
IX90;Q8NG31;Q9Y6D9;P57740;Q96BD8;Q9H900;O95271;Q96IY1;Q96IK1;P46013;Q8WUM0;Q14683;Q8W  
VM7;Q9BU64;O95229;P45973;O14777;Q562F6;Q8NCD3;Q8N3U4;P51808;Q9H5I1;Q9H081;Q8WVK7;P497  
11;P83916;O15392;Q96EA4;P07199;O14576;Q6P0N0}

6309 Pathogen[ P0C214] interacts with 87 human  
partners:{Q9H081;O43684;Q96BK5;Q13257;O75935;Q9H5I1;Q6P0N0;Q96BT3;Q53HL2;O43264;P3015  
3;Q96EA4;P83916;Q96R06;P57740;Q5EE01;Q8WYP5;P50748;Q9UJ98;Q15172;O95229;Q9Y6K1;Q96EE3  
;Q6IPU0;Q8NBT2;P51808;P07199;Q6P1K2;O43463;P46060;Q562F6;P49450;P62714;Q8N2Z9;Q03188;  
Q8NCD3;Q75122;O43482;Q92674;Q9BW27;Q9UER7;Q96BD8;Q9HBM1;Q9P258;Q9NYP9;Q13352;Q9BVC3;P  
67775;Q8NFH3;Q7Z7K6;Q9H410;O15392;Q9H3R5;P49711;Q8IX90;Q14683;Q8N3U4;Q8WVM7;Q8NG31;O1  
4576;Q7Z460;P36873;Q9H900;Q5FBB7;Q96JM3;Q9NQS7;P45973;Q12888;P46013;Q9NSP4;P12270;Q71  
F23;Q8NFH4;Q8N0S6;Q9NXR1;O95271;Q96IY1;P49454;Q9Y448;O75177;O60216;Q9BZD4;Q8WUM0;Q9Y6  
D9;Q9BU64;Q8WVK7;O14777}

6310 Pathogen[ P03346] interacts with 98 human  
partners:{Q15172;Q12888;Q9Y6D9;Q8N2Z9;Q5FBB7;Q8NFH4;Q9NRZ9;Q8WUM0;Q9Y6K1;P45973;O9522  
9;P12270;O14576;Q7L2Z9;Q13362;O15392;O43684;Q96EE3;Q8N3U4;Q9BS16;Q92674;A8MT69;O75935  
;Q96R06;P51808;P57740;Q5EE01;Q8WYP5;Q14141;O43264;Q9NXR1;Q53HL2;Q9UBC3;O43482;Q96IY1;  
Q6P0N0;P62714;P67775;Q9P258;Q96IK1;Q9Y3S2;Q8NFH3;O43463;Q8NCD3;P30153;O14777;Q9BW27;Q  
96EA4;Q9UJ98;P46060;Q14683;Q15019;P36873;Q96BK5;P49711;Q9NQS7;Q9UER7;O562F6;Q7Z7K6;Q9  
H081;Q8NBT2;Q9HBM1;Q96JM3;Q9H410;O75122;Q9BU64;Q8WVM7;Q03188;Q8IX90;P50748;P49450;O95  
271;P83916;Q9Y448;Q9BVC3;P46013;P07199;Q7Z460;Q6IPU0;Q8NG31;Q8N0S6;Q9H5I1;Q9NYP9;Q9H3  
R5;Q9NSP4;Q96H22;Q6P1K2;O60216;Q96BD8;Q9BZD4;Q96BT3;Q71F23;Q13352;Q8WVK7;Q13257;P4945  
4;Q9H900;O75177}

6311 Pathogen[ Q85601] interacts with 89 human  
partners:{Q8NBT2;Q9H5I1;P49454;Q96JM3;P83916;O95229;Q7Z7K6;Q8NFH4;Q8NFH3;Q03188;P5180  
8;Q9H900;P46060;Q96EE3;P62714;Q9NQS7;Q9H081;Q9P258;Q96IK1;Q96BT3;O75935;P57740;Q5EE01  
;Q8WYP5;Q8WUM0;Q9UER7;Q71F23;O43264;Q53HL2;P30153;Q15172;Q8NG31;O15392;Q9H3R5;P07199;  
Q96EA4;O60216;Q8WVM7;P12270;O43463;P49711;Q96R06;Q8NCD3;Q12888;Q13257;Q92674;O75122;Q  
9BVC3;Q9BW27;Q13352;Q9Y448;Q562F6;Q9UJ98;Q9NYP9;Q9BU64;Q96BK5;Q14683;Q9BZD4;P45973;P3  
6873;Q96BD8;Q9Y6D9;A8MT69;O14576;Q9Y6K1;P49450;Q8N2Z9;Q9H410;P67775;Q8IX90;Q8N3U4;P50  
748;Q8WVK7;Q96IY1;Q7Z460;P46013;Q9NXR1;O95271;Q6P0N0;O43482;Q6P1K2;Q9GZM8;O14777;O436  
84;Q9HBM1;Q5FBB7;P51955;Q9UBC3;O75177}

6312 Pathogen[ P14079] interacts with 94 human  
partners:{P07199;Q6P0N0;Q13362;Q96IY1;Q03188;Q9BW27;Q5EE01;O43482;Q7Z460;P51808;Q8IX9  
0;Q96BT3;Q9HBM1;Q9Y6K1;Q8N0S6;Q96R06;O95271;P36873;P57740;O95229;Q8NBT2;Q15172;Q9BZD4  
;O15392;O60216;P46060;Q8NG31;Q6IPU0;Q9H900;Q9Y448;Q5FBB7;Q9H410;Q9H5I1;P45973;Q96IK1;  
Q8N3U4;Q9NSP4;Q99661;Q71F23;Q8WUM0;Q9UBC3;P51955;P12270;Q9UJ98;Q9UER7;Q8WYP5;Q8N2Z9;Q  
13257;Q96EA4;Q562F6;Q9BVC3;Q8WVK7;P49450;Q96JM3;Q96H22;Q8NFH3;Q96EE3;Q9P258;O43264;A8  
MT69;Q9NYP9;Q9H3R5;Q9GZM8;Q53HL2;Q8NFH4;Q9NQS7;Q8NCD3;Q92674;Q96BK5;Q9UQE7;P49454;Q9B  
U64;P30153;O14576;P83916;Q9NXR1;P50748;Q12888;Q96BD8;O75122;Q14683;Q13352;O75935;Q7L2  
Z9;Q9Y3S2;P49711;O14777;O75177;O43684;Q7Z7K6;Q6P1K2;Q9H081;Q8WVJ2;P46013}

6313 Pathogen[ P03383] interacts with 79 human  
partners:{Q14683;Q96EE3;Q13257;Q8WUM0;Q9NQS7;Q03188;P49454;Q12888;Q8N2Z9;Q8NFH4;Q7Z46  
0;Q6IPU0;Q96BD8;Q8NBT2;Q8N3U4;P51808;Q9H900;P49711;O43264;P12270;Q5FBB7;Q9P258;O43463  
;Q9UJ98;P57740;Q5EE01;Q8WYP5;P46013;P62714;Q9NYP9;Q96BK5;P30153;Q96H22;P67775;O75177;  
Q7Z7K6;Q13352;Q96EA4;O60216;Q96BT3;Q96R06;P36873;P83916;Q71F23;Q53HL2;O95229;Q9BW27;P  
45973;Q9BU64;Q9Y6K1;O43684;Q9BZD4;Q8WVK7;Q9UER7;A8MT69;Q562F6;O75935;Q9HBM1;Q9H410;Q9  
H081;Q8IX90;Q96IY1;Q8NCD3;Q8NG31;Q6P1K2;Q9Y448;P07199;O14777;Q6P0N0;O95271;Q92674;Q9H  
3R5;Q9BVC3;Q9H5I1;O43482;Q8NFH3;Q9Y6D9;P50748;Q8WVM7}

6314 Pathogen[ P03410] interacts with 97 human  
partners:{Q03188;Q9Y6G9;Q8IX90;Q7Z460;P62714;O15392;Q9BW27;Q8WVJ2;P51808;Q9NSP4;Q9H3R  
5;Q8N0S6;O43684;Q96H22;Q96JM3;Q9NXR1;Q9H410;Q8NG31;Q9GZM8;Q53HL2;Q8NFH4;Q6IPU0;Q15172  
;P46013;Q9UQE7;Q96BT3;P50748;Q9NYP9;P45973;Q562F6;Q92674;Q96R06;Q6P0N0;Q8NCD3;O60216;  
O75177;Q5EE01;O43264;Q7Z7K6;P49454;Q96EA4;Q96IY1;O14576;Q9Y448;Q9UER7;P12270;Q9Y3S2;O  
95271;O43482;Q6P1K2;Q9H5I1;Q71F23;Q14683;Q9BZD4;Q8WVK7;Q9BVC3;P36873;Q9HBM1;Q96EE3;Q9



UJ98;O75935;Q8N3U4;Q12888;P49711;Q8NBT2;Q9UBC3;P49450;Q5FBB7;P30153;Q8WUM0;P83916;A8MT69;P07199;Q8WVM7;Q13362;Q9H900;O95229;Q9H081;Q96BK5;O43463;Q96BD8;P57740;Q9Y6K1;P67775;Q9P258;Q8WYP5;O75122;Q8NFH3;Q13352;P46060;Q7L2Z9;O14777;Q9BU64;Q8N2Z9;Q13257;Q9NQS7;Q96IK1}

6315 Pathogen[ P14075] interacts with 81 human  
partners: {A8MT69;Q6IPU0;Q9Y6K1;Q14683;Q9Y6D9;Q9H081;Q562F6;Q9NQS7;Q8WVM7;P07199;Q96R06;Q92674;P51808;Q8WVK7;P57740;Q5EE01;Q8WYP5;Q7Z460;Q96IY1;Q13257;Q96H22;O43684;P45973;Q96BD8;P12270;O14777;P36873;O95229;Q8N2Z9;Q96BK5;Q9BVC3;Q9H3R5;Q9UJ98;Q9BW27;Q9H5I1;Q9BU64;Q96EA4;Q9P258;O75935;Q9NYP9;Q96EE3;Q96BT3;Q9Y3S2;Q5FBB7;P83916;Q9H410;P62714;P67775;P30153;Q8IX90;Q7Z7K6;Q8NFH3;Q9H900;Q53HL2;Q8NCD3;P49711;P50748;O43463;Q12888;Q9HBML;Q6P1K2;Q9UER7;Q13352;Q8WUM0;O43264;O95271;Q03188;Q8NG31;O43482;P49454;Q6P0N0;Q96IK1;P46013;Q71F23;Q8NFH4;Q9Y448;O60216;Q8NBT2;Q9BZD4;O75177;Q8N3U4}

6316 Pathogen[ P0C206] interacts with 101 human  
partners: {O95271;Q9Y3S2;Q96EE3;Q9HBML;O60216;Q8WYP5;Q6IPU0;P45973;Q9NSP4;Q9Y6K1;O14576;Q9H900;Q15019;P30153;Q9Y6D9;Q7L2Z9;P51955;Q15172;Q9H081;O14777;O43463;P46013;Q8N0S6;O75177;Q9Y448;Q9NYP9;Q9UER7;Q9BZD4;Q9H410;Q9UJ98;P57740;P49454;Q96BK5;P67775;Q13257;Q9BU64;Q14141;Q9GZM8;Q8IX90;O75122;Q92674;Q8WUM0;Q5EE01;P46060;Q6P1K2;Q8NBT2;Q96BD8;Q9H3R5;Q12888;Q9UQE7;P83916;P49450;Q8NCD3;P51808;Q14683;P49711;Q96IY1;Q9Y6G9;Q7Z7K6;Q96BT3;Q13352;Q5FBB7;P62714;Q53HL2;O43482;Q96JMJ3;Q9H5I1;O15392;Q6P0N0;Q9P258;Q96H22;Q8NFH4;Q562F6;P07199;Q13362;Q8N3U4;Q9NRZ9;Q9NXR1;Q96EA4;Q8N2Z9;Q16181;Q9UBC3;O43684;Q7Z460;Q9NQS7;O75935;Q8NFH3;P36873;P50748;Q96IK1;Q71F23;O43264;Q8WVM7;Q8NG31;Q9BVC3;Q8WVK7;Q9BW27;A8MT69;Q03188;P12270;O95229}

6317 Pathogen[ P03363] interacts with 86 human  
partners: {Q96EA4;Q9BZD4;P46060;Q9UJ98;Q96IK1;P49454;Q6P0N0;Q96IY1;Q6P1K2;Q9NYP9;Q7Z7K6;Q9Y6D9;P62714;P12270;Q9H081;P36873;Q92674;P83916;Q8NFH4;O95229;Q9H5I1;Q96BD8;Q96BK5;Q13362;Q8WYP5;Q8NFH3;P45973;O43264;Q8NBT2;Q8N2Z9;Q9P258;Q9UER7;Q53HL2;Q8WVK7;Q9BVC3;Q9Y6K1;Q9H410;P50748;Q8IX90;P49711;Q5FBB7;P07199;Q9H900;Q5EE01;Q8WUM0;Q96JMJ3;Q96R06;O43684;P49450;Q9NQS7;Q9NSP4;Q8WVM7;O75935;Q9HBML;Q7Z460;O95271;Q03188;Q8NG31;Q13257;Q8NCD3;Q71F23;P51808;P57740;Q96BT3;Q15172;O43463;Q9H3R5;Q8N3U4;O14777;Q9Y448;O43482;P46013;Q562F6;Q9NXR1;Q14141;P30153;Q9UBC3;Q13352;P67775;Q14683;O14576;Q9BW27;Q12888;O75177;A8MT69;O60216}

6318 [Cluster 575]GO:0000125+C cellular\_component [name] PCAF complex [def] "A large multiprotein complex that possesses histone acetyltransferase activity and is involved in regulation of transcription. The composition is similar to that of the SAGA complex, but includes fewer Spt and Ada proteins, and more TAFs." [PMID]

6319 Pathogen[ Q2Q067] interacts with 6 human  
partners: {Q9Y4A5;Q16594;O75478;Q12962;Q92831;Q16514}

6320 Pathogen[ P0C214] interacts with 6 human  
partners: {O75478;Q12962;Q16594;Q16514;Q9Y4A5;Q92831}

6321 Pathogen[ P03346] interacts with 6 human  
partners: {Q92831;O75478;Q9Y4A5;Q16514;Q12962;Q16594}

6322 Pathogen[ Q85601] interacts with 6 human  
partners: {Q9Y4A5;Q92831;Q16594;Q16514;Q12962;O75478}

6323 Pathogen[ P14079] interacts with 5 human  
partners: {Q9Y4A5;Q16594;Q12962;O75478;Q16514}

6324 Pathogen[ P03383] interacts with 6 human  
partners: {Q92831;O75478;Q9Y4A5;Q16594;Q16514;Q12962}

6325 Pathogen[ P03410] interacts with 6 human  
partners: {Q92831;Q12962;Q9Y4A5;Q16514;Q16594;O75478}

6326 Pathogen[ P14075] interacts with 6 human  
partners: {Q12962;Q92831;Q9Y4A5;Q16594;O75478;Q16514}

6327 Pathogen[ P0C206] interacts with 6 human  
partners: {Q16514;Q92831;Q9Y4A5;O75478;Q12962;Q16594}

6328 Pathogen[ P03363] interacts with 6 human  
partners: {Q92831;Q16514;Q12962;Q9Y4A5;O75478;Q16594}

6329 [Cluster 576]GO:0005913+C cellular\_component [name] cell-cell adherens junction [def] "An adherens junction which connects two cells to each other." [GOC]

6330 Pathogen[ Q2Q067] interacts with 9 human  
partners: {Q14160;Q9Y2D8;Q07157;O15105;Q14145;P35579;Q9BX66;Q92597;O60716}

6331 Pathogen[ P0C214] interacts with 10 human  
partners: {O60716;P22735;Q9Y2D8;Q14145;Q9BX66;Q92597;Q15124;O15105;Q14160;Q07157}

6332 Pathogen[ P03346] interacts with 13 human  
partners: {O60716;P35579;Q9Y2D8;Q15942;O15105;Q9BX66;P55196;Q8TEW0;Q92597;Q07157;Q14160;Q14145;P22735}

6333 Pathogen[ Q85601] interacts with 11 human  
partners: {P35579;Q9BX66;Q14145;O60716;Q15124;Q9Y2D8;Q15942;Q14160;Q07157;O15105;Q92597}

6334 Pathogen[ P14079] interacts with 14 human  
partners: {P35579;P22735;Q07157;Q15124;Q92597;Q14118;Q8TEW0;Q14145;Q702N8;Q9Y2D8;Q9BX66;O15105;O60716;Q15942}

6335 Pathogen[ P03383] interacts with 8 human  
partners: {O60716;Q14160;Q92597;Q07157;O15105;Q14145;P35579;Q9Y2D8}

6336 Pathogen[ P03410] interacts with 14 human  
partners: {Q702N8;O60716;P35579;Q15124;Q14160;Q15942;Q07157;Q14118;O15105;Q8TEW0;Q92597;Q14145;Q9BX66;P22735}

6337 Pathogen[ P14075] interacts with 8 human

6338 Pathogen[ P0C206] interacts with 14 human partners:{Q14160;Q07157;Q9Y2D8;P35579;O15105;Q92597;O60716;Q14145}

6339 Pathogen[ P03363] interacts with 10 human partners:{Q14145;Q9BX66;P35579;Q14160;Q92597;Q9Y2D8;O15105;Q07157;O60716;Q15942}

6340 [Cluster 577]GO:0030121+C cellular\_component [name] AP-1 adaptor complex [def] "A heterotetrameric AP-type membrane coat adaptor complex that consists of beta1, gamma, mu1 and sigma1 subunits and links clathrin to the membrane surface of a vesicle\_ vesicles with AP-1-containing coats are normally found primarily in the trans-Golgi network. In at least humans, the AP-1 complex can be heterogeneric due to the existence of multiple subunit isoforms encoded by different genes (gamma1 and gamma2, mu1A and mu1B, and sigma1A, sigma1B and sigma1C)." [GOC

6341 Pathogen[ Q2Q067] interacts with 3 human partners:{P61966;O75843;Q6ULP2}

6342 Pathogen[ P0C214] interacts with 3 human partners:{O75843;Q6ULP2;P61966}

6343 Pathogen[ P03346] interacts with 3 human partners:{P61966;O75843;Q6ULP2}

6344 Pathogen[ Q85601] interacts with 3 human partners:{O75843;Q6ULP2;P61966}

6345 Pathogen[ P14079] interacts with 3 human partners:{P61966;Q6ULP2;O75843}

6346 Pathogen[ P03383] interacts with 2 human partners:{O75843;Q6ULP2}

6347 Pathogen[ P03410] interacts with 4 human partners:{O75843;Q9UMZ2;Q6ULP2;P61966}

6348 Pathogen[ P14075] interacts with 2 human partners:{Q6ULP2;O75843}

6349 Pathogen[ P0C206] interacts with 3 human partners:{P61966;Q6ULP2;O75843}

6350 Pathogen[ P03363] interacts with 2 human partners:{Q6ULP2;O75843}

6351 [Cluster 578]GO:0030426+C cellular\_component [name] growth cone [def] "The migrating motile tip of a growing nerve cell axon or dendrite." [ISBN

6352 Pathogen[ Q2Q067] interacts with 13 human partners:{O00213;O14786;Q63HK5;Q92870;Q8IZP0;Q96EV8;P38935;Q13561;Q92796;Q9UN36;P80723;O15083;Q8IYI6}

6353 Pathogen[ P0C214] interacts with 17 human partners:{O00213;O15083;P32243;O14786;Q8IZP0;Q92796;Q63HK5;P38935;P35580;Q96EV8;P10909;Q7Z406;P80723;Q13561;Q8IYI6;Q9UN36;Q92870}

6354 Pathogen[ P03346] interacts with 18 human partners:{Q8IYI6;O00213;P38935;Q96A65;Q8IZP0;P80723;Q63HK5;Q9Y664;O15083;Q93045;Q92870;Q92796;Q96EV8;P54257;Q9UN36;P32243;O14786;Q13561}

6355 Pathogen[ Q85601] interacts with 18 human partners:{Q8IYI6;O00213;Q96A65;Q9UN36;P38935;O15083;O14786;P80723;Q96EV8;Q7Z406;Q9BVA0;Q92796;P32243;Q92870;P35580;Q8IZP0;Q63HK5;Q13561}

6356 Pathogen[ P14079] interacts with 22 human partners:{Q9Y664;P54257;Q8IZP0;O00213;P10909;Q15078;Q93045;Q9NZ72;Q13561;O15083;P32243;Q96A65;Q8IYI6;Q63HK5;P38935;Q96EV8;P80723;Q92796;Q9BVA0;Q9UN36;Q92870;P10636}

6357 Pathogen[ P03383] interacts with 12 human partners:{O00213;P32243;Q8IYI6;Q9UN36;Q96EV8;Q92870;P35580;P80723;P38935;Q92796;Q13561;O15083}

6358 Pathogen[ P03410] interacts with 23 human partners:{O14786;Q13561;O00213;P38935;Q9UN36;Q96A65;Q92796;Q8IZP0;P54257;P10636;P35580;P32243;Q9NZ72;P80723;Q63HK5;Q9Y664;Q96EV8;Q93045;Q8IYI6;Q9BVA0;P10909;O15083;Q92870}

6359 Pathogen[ P14075] interacts with 11 human partners:{O00213;O15083;P80723;P38935;Q13561;Q92870;Q9UN36;Q92796;Q96EV8;Q8IYI6;P32243}

6360 Pathogen[ P0C206] interacts with 21 human partners:{Q9BVA0;P38935;P10636;Q96A65;O14786;Q63HK5;O00213;Q93045;O15083;P32243;Q8IZP0;P80723;Q96EV8;Q9NZ72;P10909;Q92870;Q13561;Q8IYI6;Q9UN36;Q92796;P35580}

6361 Pathogen[ P03363] interacts with 18 human partners:{Q8IZP0;O14786;Q13561;O00213;Q8IYI6;Q96A65;Q9UN36;P32243;Q93045;Q9NZ72;Q92870;P54257;O15083;Q63HK5;P80723;Q9Y664;Q92796;P38935}

6362 [Cluster 579]GO:0043195+C cellular\_component [name] terminal button [def] "Terminal inflated portion of the axon, containing the specialized apparatus necessary to release neurotransmitters. The axon terminus is considered to be the whole region of thickening and the terminal button is a specialized region of it." [GOC

6363 Pathogen[ Q2Q067] interacts with 2 human partners:{P35080;Q16143}

6364 Pathogen[ P0C214] interacts with 2 human partners:{P35080;Q16143}

6365 Pathogen[ P03346] interacts with 2 human partners:{P35080;Q16143}

6366 Pathogen[ Q85601] interacts with 2 human partners:{P35080;Q16143}

6367 Pathogen[ P14079] interacts with 2 human partners:{Q16143;P35080}

6368 Pathogen[ P03383] interacts with 1 human partners:{P35080}

6369 Pathogen[ P03410] interacts with 2 human partners:{P35080;Q16143}

6370 Pathogen[ P14075] interacts with 1 human partners:{P35080}

6371 Pathogen[ P0C206] interacts with 2 human partners:{P35080;Q16143}

6372 Pathogen[ P03363] interacts with 3 human partners:{P35080;Q99719;Q16143}

6373 [Cluster 580]GO:0031430+C cellular\_component [name] M band [def] "The midline of aligned thick filaments in a sarcomere\_ location of specific proteins that link thick filaments. Depending on muscle type the M band consists of different numbers of M lines." [GOC

6374 Pathogen[ Q2Q067] interacts with 4 human partners:{Q01082;Q14192;Q15172;P06733}

6375 Pathogen[ P0C214] interacts with 5 human

6376 partners:{P16157;Q15172;Q01082;Q14192;P06733}  
Pathogen[ P03346] interacts with 8 human

6377 partners:{Q15172;A8MU46;Q9UHP9;P16157;P06733;Q01082;Q14192;Q14596}  
Pathogen[ Q85601] interacts with 6 human

6378 partners:{P16157;Q14596;Q15172;P06733;Q01082;Q14192}  
Pathogen[ P14079] interacts with 7 human

6379 partners:{Q14192;Q01082;Q9UHP9;Q15172;Q14596;P16157;P06733}  
Pathogen[ P03383] interacts with 2 human partners:{Q14192;P06733}

6380 partners:{Q9UHP9;Q15172;P16157;P06733;Q14596;A8MU46;Q01082;Q14192}  
Pathogen[ P03410] interacts with 8 human

6381 partners:{P14075} interacts with 3 human partners:{P06733;Q9UHP9;Q14192}

6382 partners:{P06733;Q01082;Q9UHP9;Q15172;Q14596;P16157;Q14192}  
Pathogen[ P0C206] interacts with 7 human

6383 partners:{Q9UHP9;P16157;Q01082;P06733;Q15172;A8MU46;Q14192}

6384 [Cluster 581]GO:0005681+C cellular\_component [name] spliceosomal complex [def] "Any of a series of ribonucleoprotein complexes that contain RNA and small nuclear ribonucleoproteins (snRNPs), and are formed sequentially during the splicing of a messenger RNA primary transcript to excise an intron." [GOC]

6385 Pathogen[ Q2Q067] interacts with 100 human  
partners:{Q9UNP9;O43290;Q13573;Q9BZZ5;P83876;P07910;Q9Y333;Q8WUQ7;P55769;Q9Y3F4;Q9H2H8;O95391;P52272;P61326;Q15459;O75940;O43447;Q01130;P62318;Q8WWY3;Q5VTL8;O43390;Q13435;Q96DI7;Q15696;O43172;P38919;O60506;Q9H307;Q8NAV1;Q13838;Q9ULR0;Q07955;Q9BWJ5;Q9UDW3;O94906;P31943;Q9BV90;P62314;P08621;P11142;P61978;Q12972;P38159;Q9UHI6;P62304;Q8IYB3;Q9Y6Y0;Q86V81;Q8IWZ8;Q96DF8;P26368;Q6P2Q9;Q6NZY4;Q9UBB9;Q8WXD5;P08579;P52597;P14678;Q9Y5S9;Q01081;O75533;Q8TEQ6;P57678;P09661;Q15029;P09012;Q9P013;Q9HCG8;Q9UQ35;Q7RTV0;Q9UNY4;O75934;Q15427;P62316;O43395;Q9NWZ8;Q6IEG0;O60508;P62306;Q9H840;Q15637;Q02040;P22626;Q16637;P11940;Q14331;P63162;P62308;Q9UMS4;O14893;Q99459;Q12874;Q8WYA6;Q00839;Q9HCS7;Q9BTA9;O43660;P62310;Q15428}

6386 Pathogen[ P0C214] interacts with 101 human  
partners:{Q6NZY4;Q16637;P26368;P62316;Q9HCS7;Q9ULR0;Q13573;Q14331;O43172;O75934;P38159;Q6IEG0;Q86V81;Q5VTL8;Q9UDW3;Q9Y5S9;O60508;P14678;Q15029;P62306;P57678;Q15637;Q6P2Q9;Q9BWJ5;Q8IWZ8;Q15428;Q9H307;O43395;P11940;Q8WXD5;P62308;P08579;Q8NAV1;O43390;O94906;Q9UMS4;Q07955;Q9H2H8;Q9Y333;P52272;Q9Y3C6;P62314;P07910;Q8IYB3;Q15696;P08621;Q9Y6Y0;P62310;P55769;Q99459;P61326;Q8TEQ6;P38919;Q9UNY4;Q96DF8;Q15427;P83876;P52597;Q7RTV0;P63162;Q9BZZ5;Q15459;Q9UHI6;P62318;Q01081;O75533;Q96DI7;Q9Y3F4;O75940;Q96BP3;Q12874;Q9H840;P31943;P62304;Q96I25;P09012;O43447;Q9P013;O60506;Q9HCG8;O14893;P09661;Q9UQ35;O43290;Q12972;Q8WYA6;Q9BTA9;Q13435;Q00839;Q9BV90;P22626;O95391;Q02040;Q9UNP9;Q9NWZ8;Q13838;O43660;Q9UBB9;Q01130;Q8WWY3;P11142}

6387 Pathogen[ P03346] interacts with 118 human  
partners:{Q9Y5S9;Q15427;P51991;Q12874;P61978;Q9ULR0;Q96DF8;O43172;O43290;Q9H2H8;Q9BV90;Q8IYB3;P09651;O43447;Q99633;Q9Y3C6;Q7RTV0;P62304;P83876;Q96I25;O95391;P08579;Q15637;Q9UMS4;O60506;Q9H307;Q8WXD5;P38919;P07910;Q96BP3;P11142;O75940;A8MWD9;P08621;Q9NX01;P11940;P31943;Q00839;O43390;Q9HCS7;P22626;O94906;Q9BUQ8;Q9Y333;Q07955;Q9P013;Q16637;P52756;P62318;Q9Y6Y0;Q86V81;O60508;Q8WYA6;P63162;Q5VTL8;O75934;O43660;O75643;Q9Y3F4;Q9HCG8;Q13435;Q9NWZ8;P62306;Q9UHI6;Q6NZY4;Q9BZZ5;P26368;P55769;Q01081;O75533;Q8TEQ6;P61326;Q13838;Q9UNY4;Q15459;Q9UDW3;Q9BWJ5;O75554;Q9UNP9;P42285;Q99459;Q8WWY3;Q6P2Q9;Q96DI7;Q14562;P09012;Q9UQ35;O95926;Q8IWZ8;P62314;P52272;Q01130;P14678;Q9BZJ0;P57678;Q8NAV1;O14893;Q02040;Q13573;P38159;Q15029;P62316;Q15696;Q32P51;Q8WUQ7;P52597;Q12972;P62308;P62310;Q15393;P09661;Q9BRX9;Q9H840;Q15428;Q6IEG0;Q9BTA9;Q14331;O43395}

6388 Pathogen[ Q85601] interacts with 90 human  
partners:{Q15637;P61978;Q9ULR0;Q9HCS7;Q9H2H8;O43390;Q8IYB3;Q96BP3;Q7RTV0;P62304;Q01130;Q9H307;O60506;Q14331;O95391;Q13573;Q15459;Q9UMS4;P61326;P22626;Q9BTA9;Q9BZZ5;Q8WYA6;Q5VTL8;P08621;Q9P013;Q86V81;O75940;O75934;P62316;O94906;Q07955;P55769;Q9UBB9;Q96DI7;P38919;P14678;P11940;Q9Y6Y0;P62310;Q13435;P62314;P62306;O60508;Q8TEQ6;P63162;Q13838;P62318;Q12972;Q15029;Q9NWZ8;Q8NAV1;P52597;P11142;Q9UHI6;Q6NZY4;Q9Y3C6;Q99459;Q01081;Q9UQ35;Q9Y3F4;Q9UDW3;O43395;O43290;Q8WWY3;Q6P2Q9;P83876;O43447;Q00839;Q9NX01;O14893;O43660;P62308;P38159;Q15696;P26368;Q9Y333;Q9HCG8;Q16637;P31943;O43172;Q9UNY4;P09661;Q96DI7;Q12874;Q9Y5S9;Q9BWJ5;Q8WXD5;Q9H840;Q6IEG0}

6389 Pathogen[ P14079] interacts with 97 human  
partners:{Q15637;Q99459;Q9Y333;O43447;P57678;Q96I25;P11142;O75934;Q8TEQ6;O94906;O60508;Q99633;O14893;O75533;Q9UNY4;Q96DF8;Q12874;Q9BTA9;Q9Y5S9;Q6NZY4;Q9P013;P26368;P83876;Q6IEG0;P07910;Q13838;Q13573;Q9H840;Q9Y3F4;Q15029;Q6P2Q9;Q9UHI6;P62314;Q9HCS7;Q15427;Q9H307;Q00839;O43290;Q8WWY3;Q15459;P62306;P14678;Q8IYB3;Q9ULR0;Q9NWZ8;O75940;Q9BWJ5;P61326;Q16637;O95926;Q9UMS4;Q02040;P11940;Q7RTV0;P08621;Q9H2H8;Q9UQ35;Q86V81;P62308;O60506;Q15696;Q9UBB9;Q9Y6Y0;P09012;P62304;Q15428;Q9NX01;P62316;P62310;Q07955;Q8WUQ7;Q12972;Q8NAV1;P61978;P31943;Q01081;Q9HCG8;Q14331;P55769;P52597;O43390;P09661;O43172;P52756;Q9BZZ5;Q9UDW3;P62318;Q8WYA6;O43395;Q96BP3;Q8WXD5;O95391;P22626;Q5VTL8;Q8IWZ8;P38159;P63162}

6390 Pathogen[ P03383] interacts with 88 human  
partners:{Q13573;Q07955;P09661;O43390;P83876;Q02040;Q9H840;Q15459;P62318;Q9UNP9;Q9BTA9;O43290;Q5VTL8;P22626;Q15029;O43172;Q13838;Q9HCS7;Q9ULR0;Q9Y5S9;P62316;Q96BP3;Q9H2H8;Q12972;P62304;P61326;Q9UHI6;Q8WXD5;Q6P2Q9;Q9BZZ5;P38919;Q12874;P26368;P63162;Q9P013;P61978;Q14331;P11940;P31943;Q99459;Q86V81;Q13435;Q6NZY4;Q8NAV1;O94906;P38159;O43447;O43395;Q8IYB3;Q16637;Q9Y6Y0;P62314;P62310;Q8TEQ6;O14893;Q01130;P14678;Q9Y333;Q01081;Q9Y3F4;P11142;Q6IEG0;Q8WUQ7;P09012;Q9H307;Q8WWY3;Q9UQ35;P57678;P55769;Q96DF8;P62308;Q9U

- BB9;Q9NWZ8;Q15637;Q9HCG8;Q8WYA6;Q00839;P08621;Q9UNY4;P52597;O95391;O75934;Q9UMS4;Q7RTV0;O75940;Q9BWJ5;P62306;Q96DI7}
- 6391 Pathogen[ P03410] interacts with 106 human  
partners: {Q8WUQ7;P83876;Q9BZZ5;Q13838;A8MWD9;O75934;Q00839;Q9ULR0;Q15427;Q9BWJ5;Q9UDW3;Q8WXD5;Q01081;Q9UNY4;O14893;P26368;P61326;P62304;Q9NX01;O60508;Q8WWY3;Q15637;Q15029;Q15696;P61978;Q9H840;P22626;P11940;P62306;Q6IEG0;P62310;Q6NZY4;Q15393;Q9Y5S9;Q96BP3;Q8TEQ6;Q9Y333;P55769;Q9Y6Y0;P11142;Q99633;Q9P013;P62308;P14678;P62316;Q9UBB9;Q9Y3F4;Q8NAV1;P09012;Q9UQ35;P08621;Q8WYA6;Q9H2H8;Q9HCS7;O94906;P07910;P08579;Q99459;O43172;Q07955;P52597;Q16637;P31943;P62314;O43660;O43395;Q15428;P09661;Q15459;O75533;Q86V81;P52272;Q8IYB3;P38919;Q01130;Q9BTA9;Q7RTV0;P57678;Q9UMS4;Q9Y3C6;Q12972;Q9UNP9;O60506;Q96DF8;Q6P2Q9;Q9BV90;O43290;Q5VTL8;O75940;Q12874;P38159;Q8IYWZ8;Q9UHI6;O43447;P63162;Q96I25;O95391;Q13573;Q13435;O43390;Q9H307;Q14331;Q9HCG8;Q9NWZ8;Q02040;P62318}
- 6392 Pathogen[ P14075] interacts with 88 human  
partners: {Q9H307;Q9BZZ5;P22626;Q8TEQ6;P62304;P62316;P11142;Q9Y3F4;Q8WXD5;Q13573;P08621;Q86V81;O43395;Q9UNY4;P61326;P57678;O95391;Q15459;P38159;Q15428;Q01130;Q9UNP9;Q9H840;O43172;P31943;P63162;Q02040;P62306;P62308;O43390;Q9UQ35;O94906;Q9HCG8;Q9ULR0;Q15029;Q16637;O75940;Q99459;Q96DI7;P11940;Q00839;Q9UHI6;Q9Y6Y0;Q13435;P62318;Q12874;P55769;Q96DF8;Q6NZY4;Q9UBB9;Q15637;Q9BTA9;Q6P2Q9;P26368;Q01081;Q9UMS4;P09661;Q8IYB3;Q9BWJ5;Q9Y333;P61978;Q8NAV1;Q9NWZ8;P09012;P14678;O43447;Q9HCS7;Q8WYA6;Q9Y5S9;P83876;O75934;Q12972;P52597;O14893;Q9H2H8;Q14331;P62314;P38919;Q8WUQ7;Q6IEG0;O43290;Q13838;Q9P013;Q5VTL8;Q8WWY3;P62310;Q07955;Q7RTV0}
- 6393 Pathogen[ P0C206] interacts with 99 human  
partners: {Q6IEG0;Q9UNP9;Q9BV90;Q9UMS4;P83876;Q8NAV1;Q9Y3F4;P14678;O60508;O75934;Q07955;P26368;Q9H840;P61326;Q01081;Q15696;P55769;Q8WXD5;Q9BZZ5;Q9UNY4;Q96BP3;P62304;Q8IYB3;P09012;O75533;Q8TEQ6;P61978;P63162;O75940;Q9H307;Q15637;Q12874;P62314;P62316;O43390;P22626;Q02040;Q9UBB9;Q8WUQ7;Q8WYA6;O43290;Q9Y6Y0;Q9Y333;Q13435;Q9UQ35;Q96DF8;P38159;O60506;Q13573;Q9BWJ5;Q9Y3C6;Q13838;P52597;Q9P013;O43395;Q6P2Q9;P62318;Q6NZY4;Q7RTV0;O14893;Q8WWY3;Q9BTA9;Q8IYWZ8;Q9NX01;P62306;Q9ULR0;O43172;Q99459;O43447;Q9HCG8;O94906;Q9UHI6;Q9H2H8;Q14331;Q12972;Q96DI7;P09661;O43660;P38919;Q16637;P62308;O95391;P08621;Q01130;P62310;Q00839;Q9HCS7;Q9UDW3;Q15459;P11940;P11142;P31943;Q5VTL8;Q15428;Q9Y5S9;Q86V81;Q9NWZ8;Q15029;P57678}
- 6394 Pathogen[ P03363] interacts with 123 human  
partners: {Q9Y6Y0;O75940;O95926;P62314;O43395;Q9BZZ5;A8MWD9;Q9Y3F4;P63162;P38919;Q96DF8;O75643;Q12972;Q13435;O95391;P52597;Q9NW13;Q9UHI6;Q6NZY4;P09012;O60306;Q9BV90;Q14331;P51991;Q9HCS7;Q15393;Q9NWZ8;O75533;Q96BP3;P09651;Q9NX01;P08579;Q15459;Q9Y3C6;Q7RTV0;Q96125;P62318;Q8WYA6;Q9H307;Q9BRX9;Q15427;P62304;Q01130;Q6P2Q9;P11940;Q8WWY3;O14893;Q32P51;Q92620;O43447;Q9UNY4;P61326;Q8IYWZ8;P62306;P52272;Q15029;P57678;Q9BWJ5;Q9Y333;Q14562;P62316;Q8WUQ7;Q8IYB3;Q9UDW3;P38159;P26368;Q12874;Q9UPN6;P31943;O43172;Q9ULR0;Q15637;Q96LT9;Q8WXD5;Q86V81;P07910;Q8NAV1;O75934;O43290;Q13573;Q13838;Q02040;P08621;Q9H840;P22626;P83876;P62310;Q9UKM9;Q07955;O43660;Q5VTL8;O60506;Q01081;P61978;O94906;Q9HCG8;Q15428;P55769;Q8TEQ6;Q00839;P62308;Q9P013;Q16637;Q9UMS4;Q99633;O43390;P14678;Q16560;P09661;Q99459;Q9UQ35;Q9BTA9;Q15696;Q9Y5S9;Q9H2H8;Q9UNP9;P11142;Q9BZJ0;Q6IEG0;Q96DI7;O60508;P42285;P52756}
- 6395 [Cluster 582]GO:0005669+C cellular\_component [name] transcription factor TFIID complex [def] "A complex composed of TATA binding protein (TBP) and TBP associated factors (TAFs)\_ the total mass is typically about 800 kDa. Most of the TAFs are conserved across species. In TATA-containing promoters for RNA polymerase II (Pol II), TFIID is believed to recognize at least two distinct elements, the TATA element and a downstream promoter element. TFIID is also involved in recognition of TATA-less Pol II promoters. Binding of TFIID to DNA is necessary but not sufficient for transcription initiation from most RNA polymerase II promoters." [GOC
- 6396 Pathogen[ Q2Q067] interacts with 18 human  
partners: {Q92750;P20226;Q16594;Q15542;Q12962;Q6P1X5;Q15543;P49848;Q15544;O00268;Q16514;Q7Z7C8;Q8IZX4;Q15545;Q9HBM6;P21675;O60869;Q5VWG9}
- 6397 Pathogen[ P0C214] interacts with 19 human  
partners: {O00268;P21675;Q92750;Q7Z7C8;Q12962;Q15545;Q16594;Q15542;Q5VWG9;Q9HBM6;Q15544;P49848;Q6P1X5;Q16514;P20226;Q8IZX4;Q5H9L4;Q15543;O60869}
- 6398 Pathogen[ P03346] interacts with 19 human  
partners: {Q15542;Q7Z7C8;O00268;Q92750;P20226;P49848;Q9HBM6;Q6P1X5;Q16514;Q12962;P21675;Q5H9L4;Q8IZX4;O60869;Q15545;Q5VWG9;Q15544;Q16594;Q15543}
- 6399 Pathogen[ Q85601] interacts with 19 human  
partners: {Q15542;Q7Z7C8;Q5H9L4;Q15545;O00268;Q16594;Q8IZX4;Q5VWG9;Q9HBM6;P49848;Q6P1X5;Q16514;Q92750;P21675;Q12962;Q15543;O60869;Q15544;P20226}
- 6400 Pathogen[ P14079] interacts with 16 human  
partners: {Q8IZX4;Q5H9L4;Q16594;O60869;Q6P1X5;Q15543;Q12962;P49848;Q92750;Q16514;Q15542;Q5VWG9;P21675;O00268;Q9HBM6;Q15545}
- 6401 Pathogen[ P03383] interacts with 18 human  
partners: {Q15544;Q5H9L4;Q15542;Q9HBM6;Q8IZX4;Q5VWG9;P20226;Q16594;P49848;O00268;Q16514;Q6P1X5;Q92750;P21675;Q12962;O60869;Q15545;Q15543}
- 6402 Pathogen[ P03410] interacts with 18 human  
partners: {Q8IZX4;O00268;Q5VWG9;Q15543;Q92750;Q12962;P21675;P20226;Q5H9L4;Q9HBM6;Q16514;P49848;Q6P1X5;Q16594;Q15544;O60869;Q15542;Q15545}
- 6403 Pathogen[ P14075] interacts with 19 human  
partners: {Q12962;P21675;Q15542;Q6P1X5;Q7Z7C8;Q15544;P20226;Q16594;Q92750;Q5VWG9;P49848;Q16514;Q15545;Q5H9L4;O00268;O60869;Q8IZX4;Q15543;Q9HBM6}
- 6404 Pathogen[ P0C206] interacts with 19 human

6405 partners:{Q15545;Q16514;Q15543;P49848;P20226;Q15544;O00268;Q8IZX4;Q92750;Q5H9L4;Q5VWG9;O60869;Q15542;Q6P1X5;Q9HBM6;Q7Z7C8;Q12962;P21675;Q16594}  
Pathogen[ P03363] interacts with 19 human

6406 partners:{Q8IZX4;P49848;Q16514;Q15545;O00268;Q12962;Q15544;Q7Z7C8;Q15542;Q92750;O60869;P21675;Q9HBM6;P20226;Q15543;Q5H9L4;Q6P1X5;Q5VWG9;Q16594}  
[Cluster 583]GO:0009434+C cellular\_component [name] microtubule-based flagellum [def] "A long, whiplike protrusion from the surface of a eukaryotic cell, whose undulations drive the cell through a liquid medium\_ similar in structure to a cilium. The flagellum is based on a 9+2 arrangement of microtubules." [GOC]

6407 Pathogen[ Q2Q067] interacts with 8 human  
partners:{Q9Y615;Q9BZW7;Q96LB3;O43236;Q96MC4;O14556;P07864;O75969}

6408 Pathogen[ P0C214] interacts with 8 human  
partners:{Q9Y615;Q96MC4;P07864;O14556;O75969;Q9BZW7;Q96LB3;O43236}

6409 Pathogen[ P03346] interacts with 10 human  
partners:{Q9NQC8;O75969;O43236;O14556;Q96MC4;Q6P597;Q9Y4P9;Q96LB3;Q9BZW7;Q9Y615}

6410 Pathogen[ Q85601] interacts with 9 human  
partners:{Q96LB3;Q96MC4;O75969;P07864;Q6P597;O14556;Q9Y615;O43236;Q9BZW7}

6411 Pathogen[ P14079] interacts with 15 human  
partners:{Q8WYA0;Q9Y4P9;Q5JQC9;Q96MC4;Q9Y615;O75952;P07864;Q9Y366;Q8NA54;Q9NQC8;Q96LB3;O75969;O43236;Q6P597;Q9BZW7}

6412 Pathogen[ P03383] interacts with 9 human  
partners:{O43236;P07864;Q9BZW7;O14556;Q96LB3;Q9Y4P9;O75969;Q9Y615;Q96MC4}

6413 Pathogen[ P03410] interacts with 17 human  
partners:{Q8NA54;O14556;Q9Y4P9;Q9Y615;Q5JQC9;O75969;Q9Y366;Q6P597;O75952;Q96MC4;O43236;Q9BYC2;Q8WYA0;Q9BZW7;P07864;Q9NQC8;Q96LB3}

6414 Pathogen[ P14075] interacts with 8 human  
partners:{O43236;O75969;Q96LB3;P07864;Q9Y4P9;Q96MC4;Q9BZW7;O14556}

6415 Pathogen[ P0C206] interacts with 15 human  
partners:{Q96MC4;Q9NQC8;O75952;P07864;Q5JQC9;Q6P597;Q9BZW7;Q8WYA0;O43236;Q9Y4P9;O14556;Q8NA54;O75969;Q96LB3;Q9Y615}

6416 Pathogen[ P03363] interacts with 9 human  
partners:{Q9Y4P9;Q96MC4;Q9Y615;O75969;Q9BZW7;O14556;Q96LB3;O43236;Q9NQC8}

6417 [Cluster 584]GO:0005747+C cellular\_component [name] mitochondrial respiratory chain complex I [def] "A protein complex located in the mitochondrial inner membrane that forms part of the mitochondrial respiratory chain. It contains about 25 different polypeptide subunits, including NADH dehydrogenase (ubiquinone), flavin mononucleotide and several different iron-sulfur clusters containing non-heme iron. The iron undergoes oxidation-reduction between Fe(II) and Fe(III), and catalyzes proton translocation linked to the oxidation of NADH by ubiquinone." [GOC]

6418 Pathogen[ Q2Q067] interacts with 10 human  
partners:{O43920;P56181;O75489;O96000;O95178;O43678;O75251;O75306;Q9P0J0;Q9Y375}

6419 Pathogen[ P0C214] interacts with 20 human  
partners:{Q16795;O75306;O43678;P56556;P28331;O43920;O95299;P17568;Q9Y375;Q16718;O14561;O95298;Q9P0J0;O96000;O95182;O75489;O75251;Q9UI09;P56181;O95178}

6420 Pathogen[ P03346] interacts with 10 human  
partners:{P56181;O75489;O43678;O95178;O43920;Q9Y375;O75251;O96000;O75306;Q9P0J0}

6421 Pathogen[ Q85601] interacts with 7 human  
partners:{Q9P0J0;O75306;O43678;P56181;O96000;Q9Y375;O43920}

6422 Pathogen[ P14079] interacts with 33 human  
partners:{P56181;O43674;O43677;O43181;O95169;P56556;Q9Y375;O95139;O96000;O95167;O75306;P17568;Q86Y39;O95182;O43676;O43678;P51970;O95178;O75251;O14561;Q9UI09;O95299;Q9P0J0;O75489;P03923;Q16718;P03897;O43920;O15239;O00483;P03901;P03886;O95298}

6423 Pathogen[ P03383] interacts with 10 human  
partners:{O75251;O96000;O43678;O43920;O75489;O75306;O95178;Q9Y375;Q9P0J0;P56181}

6424 Pathogen[ P03410] interacts with 36 human  
partners:{O95168;O43674;P56556;P17568;O95178;O75380;O43678;O75251;O95299;P51970;O43920;Q9UI09;O96000;O95167;O15239;Q9Y6M9;P03886;O00483;O95298;O75438;P56181;O14561;O75489;Q86Y39;Q9Y375;P03897;O43677;O95169;O43181;Q16718;O75306;O43676;P03901;Q9P0J0;P03923;O95182}

6425 Pathogen[ P14075] interacts with 16 human  
partners:{O43674;P56181;Q9Y375;O96000;O95182;O43677;O43920;O75306;O14561;O95298;O43678;O75251;O75489;O95178;Q9P0J0;O43676}

6426 Pathogen[ P0C206] interacts with 18 human  
partners:{P56181;O75251;O43920;O75306;O95182;Q9UI09;O95298;O14561;O00483;P17568;O95178;Q9Y375;Q9P0J0;O43678;O75489;O96000;O43674;P56556}

6427 Pathogen[ P03363] interacts with 4 human partners:{Q9Y375;Q9P0J0;O96000;P56181}

6428 [Cluster 585]GO:0005903+C cellular\_component [name] brush border [def] "Dense covering of microvilli on the apical surface of epithelial cells in tissues such as the intestine, kidney, and choroid plexus\_ the microvilli aid absorption by increasing the surface area of the cell." [GOC]

6429 Pathogen[ Q2Q067] interacts with 1 human partners:{Q92681}

6430 Pathogen[ P0C214] interacts with 3 human partners:{O00159;P11168;Q92681}

6431 Pathogen[ P03346] interacts with 4 human partners:{Q92681;Q86UT5;O14908;O00299}

6432 Pathogen[ Q85601] interacts with 3 human partners:{P11168;O00159;Q92681}

6433 Pathogen[ P14079] interacts with 3 human partners:{Q92681;Q86UT5;O14908}

6434 Pathogen[ P03383] interacts with 2 human partners:{Q92681;P11168}

6435 Pathogen[ P03410] interacts with 5 human partners:{Q86UT5;P11168;O00159;O14908;Q92681}

6436 Pathogen[ P14075] interacts with 2 human partners:{Q92681;P11168}

6437 Pathogen[ P0C206] interacts with 5 human partners:{Q92681;Q86UT5;P11168;O00159;O14908}

6438 Pathogen[ P03363] interacts with 3 human partners:{O14908;Q86UT5;Q92681}

6439 [Cluster 586]GO:0005665+C cellular\_component [name] DNA-directed RNA polymerase II, core complex [def] "RNA polymerase II, one of three nuclear DNA-directed RNA polymerases found in all eukaryotes, is a multisubunit complex\_ typically it produces mRNAs, snRNAs, and some of the snRNAs. Two large subunits comprise the most conserved portion including the catalytic site and share similarity with other eukaryotic and bacterial multisubunit RNA polymerases. The largest subunit of RNA polymerase II contains an essential carboxyl-terminal domain (CTD) composed of a variable number of heptapeptide repeats (YSPTSPS). The remainder of the complex is composed of smaller subunits (generally ten or more), some of which are also found in RNA polymerases I and III. Although the core is competent to mediate ribonucleic acid synthesis, it requires additional factors to select the appropriate template." [GOC

6440 Pathogen[ Q2Q067] interacts with 11 human partners:{P52434;Q9H5H4;P19388;P52435;P30876;P19387;P61218;P62487;P62875;P24928;O94763}

6441 Pathogen[ P0C214] interacts with 11 human partners:{P30876;P52435;P61218;P62487;Q9H5H4;P62875;P24928;P52434;P19387;P19388;O94763}

6442 Pathogen[ P03346] interacts with 12 human partners:{P52434;O94763;P61218;Q9H5H4;P62487;P19388;P52435;P36954;P30876;P24928;P62875;P19387}

6443 Pathogen[ Q85601] interacts with 12 human partners:{P36954;P61218;P62487;P19388;P52435;Q9H5H4;P19387;O94763;P24928;P30876;P52434;P62875}

6444 Pathogen[ P14079] interacts with 13 human partners:{P62875;P19387;P62487;P52434;O15514;P30876;P61218;O94763;P19388;P52435;P24928;P36954;Q9H5H4}

6445 Pathogen[ P03383] interacts with 11 human partners:{Q9H5H4;P52434;P61218;P62487;O94763;P19387;P24928;P62875;P52435;P19388;P30876}

6446 Pathogen[ P03410] interacts with 13 human partners:{O94763;P19387;P36954;P24928;P30876;O15514;P52435;P62875;P61218;P52434;P62487;P19388;Q9H5H4}

6447 Pathogen[ P14075] interacts with 10 human partners:{P30876;P19388;P61218;P19387;O94763;P62487;P24928;P62875;P52434;P52435}

6448 Pathogen[ P0C206] interacts with 13 human partners:{Q9H5H4;P62875;P36954;P19388;P61218;O15514;P19387;P52435;P62487;P24928;P52434;O94763;P30876}

6449 Pathogen[ P03363] interacts with 10 human partners:{P19388;P30876;P19387;P61218;P24928;Q9H5H4;O94763;P62487;P52435;P52434}

6450 [Cluster 587]GO:0005851+C cellular\_component [name] eukaryotic translation initiation factor 2B complex [def] "A multisubunit guanine nucleotide exchange factor which catalyzes the exchange of GDP bound to initiation factor eIF2 for GTP, generating active eIF2-GTP. In humans, it is composed of five subunits, alpha, beta, delta, gamma and epsilon." [PMID

6451 Pathogen[ Q2Q067] interacts with 6 human partners:{P05198;P49770;Q9UI10;Q14232;Q9NR50;Q13144}

6452 Pathogen[ P0C214] interacts with 6 human partners:{Q9UI10;P49770;Q14232;Q9NR50;Q13144;P05198}

6453 Pathogen[ P03346] interacts with 6 human partners:{Q14232;P49770;Q13144;Q9NR50;Q9UI10;P05198}

6454 Pathogen[ Q85601] interacts with 6 human partners:{Q9NR50;Q13144;P49770;P05198;Q14232;Q9UI10}

6455 Pathogen[ P14079] interacts with 5 human partners:{Q9UI10;P05198;Q13144;Q9NR50;Q14232}

6456 Pathogen[ P03383] interacts with 6 human partners:{Q9UI10;Q13144;Q9NR50;P05198;P49770;Q14232}

6457 Pathogen[ P03410] interacts with 6 human partners:{Q9NR50;Q14232;P49770;Q9UI10;Q13144;P05198}

6458 Pathogen[ P14075] interacts with 6 human partners:{Q9UI10;P05198;Q14232;P49770;Q9NR50;Q13144}

6459 Pathogen[ P0C206] interacts with 6 human partners:{Q14232;Q9NR50;Q13144;P49770;P05198;Q9UI10}

6460 Pathogen[ P03363] interacts with 5 human partners:{Q9UI10;P05198;Q9NR50;P49770;Q13144}

6461 [Cluster 588]GO:0070860+C cellular\_component [name] RNA polymerase I core factor complex [def] "A RNA polymerase I-specific transcription factor complex that is required for the transcription of rDNA by RNA polymerase I. In yeast the complex consists of Rrn6p, Rrn7p, and Rrn11p." [PMID

6462 Pathogen[ Q2Q067] interacts with 1 human partners:{Q53T94}

6463 Pathogen[ P0C214] interacts with 1 human partners:{Q53T94}

6464 Pathogen[ P03346] interacts with 1 human partners:{Q53T94}

6465 Pathogen[ Q85601] interacts with 1 human partners:{Q53T94}

6466 Pathogen[ P14079] interacts with 1 human partners:{Q53T94}

6467 Pathogen[ P03383] interacts with 1 human partners:{Q53T94}

6468 Pathogen[ P03410] interacts with 1 human partners:{Q53T94}

6469 Pathogen[ P14075] interacts with 1 human partners:{Q53T94}

6470 Pathogen[ P0C206] interacts with 1 human partners:{Q53T94}

6471 Pathogen[ P03363] interacts with 1 human partners:{Q53T94}

6472 [Cluster 589]GO:0031314+C cellular\_component [name] extrinsic to mitochondrial inner membrane [def] "Loosely bound to one surface of the mitochondrial inner membrane, but not integrated into the hydrophobic region." [GOC

6473 Pathogen[ Q2Q067] interacts with 1 human partners:{Q96BW9}

6474 Pathogen[ P0C214] interacts with 1 human partners:{Q96BW9}

6475 Pathogen[ P03346] interacts with 1 human partners:{Q96BW9}

6476 Pathogen[ Q85601] interacts with 1 human partners:{Q96BW9}

6477 Pathogen[ P14079] interacts with 2 human partners:{Q96BW9;Q8NC60}

6478 Pathogen[ P03383] interacts with 1 human partners:{Q96BW9}

6479 Pathogen[ P03410] interacts with 2 human partners:{Q8NC60;Q96BW9}

6480 Pathogen[ P14075] interacts with 1 human partners:{Q96BW9}

6481 Pathogen[ P0C206] interacts with 1 human partners:{Q96BW9}

6482 Pathogen[ P03363] interacts with 1 human partners:{Q96BW9}

6483 [Cluster 590]GO:0005861+C cellular\_component [name] troponin complex [def] "A complex of accessory proteins (typically troponin T, troponin I and troponin C) found associated with actin in muscle thin filaments\_ involved in calcium regulation of muscle contraction." [ISBN

6484 Pathogen[ Q2Q067] interacts with 1 human partners:{P48788}

6485 Pathogen[ P0C214] interacts with 2 human partners:{P48788;P19429}

6486 Pathogen[ P03346] interacts with 2 human partners:{P63316;P48788}

6487 Pathogen[ Q85601] interacts with 1 human partners:{P48788}

6488 Pathogen[ P14079] interacts with 4 human partners:{P13805;P19429;P19237;P48788}

6489 Pathogen[ P03383] interacts with 1 human partners:{P48788}

6490 Pathogen[ P03410] interacts with 4 human partners:{P19429;P48788;P63316;P13805}

6491 Pathogen[ P14075] interacts with 1 human partners:{P48788}

6492 Pathogen[ P0C206] interacts with 2 human partners:{P19429;P48788}

6493 Pathogen[ P03363] interacts with 2 human partners:{P48788;P19429}

6494 [Cluster 591]GO:0055087+C cellular\_component [name] Ski complex [def] "A protein complex that regulates RNA degradation by the exosome complex. In Saccharomyces the complex has a heterotetrameric stoichiometry consisting of one copy each of Ski2p and Ski3 and two copies of Ski8p." [GOC

6495 Pathogen[ Q2Q067] interacts with 2 human partners:{Q9GZS3;Q6PGP7}

6496 Pathogen[ P0C214] interacts with 2 human partners:{Q6PGP7;Q9GZS3}

6497 Pathogen[ P03346] interacts with 2 human partners:{Q6PGP7;Q9GZS3}

6498 Pathogen[ Q85601] interacts with 2 human partners:{Q9GZS3;Q6PGP7}

6499 Pathogen[ P14079] interacts with 2 human partners:{Q6PGP7;Q9GZS3}

6500 Pathogen[ P03383] interacts with 2 human partners:{Q6PGP7;Q9GZS3}

6501 Pathogen[ P03410] interacts with 2 human partners:{Q6PGP7;Q9GZS3}

6502 Pathogen[ P14075] interacts with 2 human partners:{Q6PGP7;Q9GZS3}

6503 Pathogen[ P0C206] interacts with 2 human partners:{Q6PGP7;Q9GZS3}

6504 Pathogen[ P03363] interacts with 2 human partners:{Q9GZS3;Q6PGP7}

6505 [Cluster 592]GO:0030992+C cellular\_component [name] intraflagellar transport particle B [def] "The larger subcomplex of the intraflagellar transport particle\_ characterized complexes have molecular weights around 550 kDa." [GOC

6506 Pathogen[ Q2Q067] interacts with 2 human partners:{Q8IY31;Q96LB3}

6507 Pathogen[ P0C214] interacts with 2 human partners:{Q8IY31;Q96LB3}

6508 Pathogen[ P03346] interacts with 2 human partners:{Q8IY31;Q96LB3}

6509 Pathogen[ Q85601] interacts with 2 human partners:{Q96LB3;Q8IY31}

6510 Pathogen[ P14079] interacts with 4 human partners:{Q8WYA0;Q8IY31;Q9Y366;Q96LB3}

6511 Pathogen[ P03383] interacts with 2 human partners:{Q8IY31;Q96LB3}

6512 Pathogen[ P03410] interacts with 4 human partners:{Q9Y366;Q8IY31;Q8WYA0;Q96LB3}

6513 Pathogen[ P14075] interacts with 2 human partners:{Q8IY31;Q96LB3}

6514 Pathogen[ P0C206] interacts with 3 human partners:{Q8IY31;Q8WYA0;Q96LB3}

6515 Pathogen[ P03363] interacts with 2 human partners:{Q8IY31;Q96LB3}

6516 [Cluster 593]GO:0005827+C cellular\_component [name] polar microtubule [def] "Any of the spindle microtubules that come from each pole and overlap at the spindle midzone. This interdigitating structure consisting of antiparallel microtubules is responsible for pushing the poles of the spindle apart." [ISBN

6517 Pathogen[ Q2Q067] interacts with 3 human partners:{Q13618;P23258;Q96CW5}

6518 Pathogen[ P0C214] interacts with 4 human partners:{Q9UJP4;P23258;Q13618;Q96CW5}

6519 Pathogen[ P03346] interacts with 4 human partners:{P23258;Q13618;Q96CW5;Q9UJP4}

6520 Pathogen[ Q85601] interacts with 4 human partners:{Q96CW5;Q9UJP4;P23258;Q13618}

6521 Pathogen[ P14079] interacts with 4 human partners:{Q13618;P23258;Q9UJP4;Q96CW5}

6522 Pathogen[ P03383] interacts with 2 human partners:{Q96CW5;Q13618}

6523 Pathogen[ P03410] interacts with 4 human partners:{Q13618;P23258;Q9UJP4;Q96CW5}

6524 Pathogen[ P14075] interacts with 2 human partners:{Q13618;Q96CW5}

6525 Pathogen[ P0C206] interacts with 4 human partners:{Q96CW5;Q9UJP4;Q13618;P23258}

6526 Pathogen[ P03363] interacts with 4 human partners:{Q13618;Q9UJP4;P23258;Q96CW5}

6527 [Cluster 594]GO:0030667+C cellular\_component [name] secretory granule membrane [def] "The lipid bilayer surrounding a secretory granule." [GOC  
6528 Pathogen[ Q2Q067] interacts with 2 human partners:{O60645;Q05084}  
6529 Pathogen[ P0C214] interacts with 2 human partners:{Q05084;O60645}  
6530 Pathogen[ P03346] interacts with 4 human partners:{Q05084;P26038;P49755;O60645}  
6531 Pathogen[ Q85601] interacts with 2 human partners:{O60645;Q05084}  
6532 Pathogen[ P14079] interacts with 5 human  
partners:{Q05084;P26038;O60645;P49755;Q0VAF6}  
6533 Pathogen[ P03383] interacts with 2 human partners:{Q05084;O60645}  
6534 Pathogen[ P03410] interacts with 4 human partners:{O60645;Q05084;Q0VAF6;P26038}  
6535 Pathogen[ P14075] interacts with 2 human partners:{O60645;Q05084}  
6536 Pathogen[ P0C206] interacts with 3 human partners:{O60645;P49755;Q05084}  
6537 Pathogen[ P03363] interacts with 2 human partners:{O60645;Q05084}  
6538 [Cluster 595]GO:0000145+C cellular\_component [name] exocyst [def] "A protein complex  
peripherally associated with the plasma membrane that determines where vesicles dock and  
fuse. At least eight complex components are conserved between yeast and mammals." [PMID  
6539 Pathogen[ Q2Q067] interacts with 4 human partners:{Q96KP1;Q8NFW9;Q9UPT5;Q8IYI6}  
6540 Pathogen[ P0C214] interacts with 3 human partners:{Q8NFW9;Q9UPT5;Q8IYI6}  
6541 Pathogen[ P03346] interacts with 6 human  
partners:{Q8IYI6;Q9UPT5;Q96A65;Q15019;Q8NFW9;Q96KP1}  
6542 Pathogen[ Q85601] interacts with 5 human  
partners:{Q8IYI6;Q8NFW9;Q9UPT5;Q96A65;Q96KP1}  
6543 Pathogen[ P14079] interacts with 9 human  
partners:{Q86VI1;Q8TAG9;Q9UPT5;Q96KP1;Q8NFW9;Q9NV70;Q96A65;Q8IYI6;Q9Y2D4}  
6544 Pathogen[ P03383] interacts with 3 human partners:{Q8IYI6;Q96KP1;Q9UPT5}  
6545 Pathogen[ P03410] interacts with 9 human  
partners:{Q9UPT5;Q8NFW9;Q8TAG9;Q96A65;Q96KP1;Q9Y2D4;Q9NV70;Q86VI1;Q8IYI6}  
6546 Pathogen[ P14075] interacts with 3 human partners:{Q96KP1;Q8IYI6;Q9UPT5}  
6547 Pathogen[ P0C206] interacts with 9 human  
partners:{Q15019;Q8NFW9;Q96KP1;Q96A65;Q9UPT5;Q86VI1;Q8IYI6;Q9NV70;Q8TAG9}  
6548 Pathogen[ P03363] interacts with 5 human  
partners:{Q8IYI6;Q8NFW9;Q96A65;Q96KP1;Q9UPT5}  
6549 [Cluster 596]GO:0031462+C cellular\_component [name] Cul2-RING ubiquitin ligase complex  
[def] "A ubiquitin ligase complex in which a cullin from the Cul2 subfamily and a RING  
domain protein form the catalytic core- substrate specificity is conferred by an  
elongin-BC adaptor and a SOCS/BC box protein." [PMID  
6550 Pathogen[ Q2Q067] interacts with 4 human partners:{Q15370;Q8N668;Q13617;P62877}  
6551 Pathogen[ P0C214] interacts with 4 human partners:{Q13617;Q15370;Q8N668;P62877}  
6552 Pathogen[ P03346] interacts with 4 human partners:{Q15370;Q8N668;P62877;Q13617}  
6553 Pathogen[ Q85601] interacts with 4 human partners:{Q15370;P62877;Q8N668;Q13617}  
6554 Pathogen[ P14079] interacts with 4 human partners:{P62877;Q15370;Q8N668;Q13617}  
6555 Pathogen[ P03383] interacts with 4 human partners:{Q8N668;Q13617;P62877;Q15370}  
6556 Pathogen[ P03410] interacts with 4 human partners:{Q15370;P62877;Q13617;Q8N668}  
6557 Pathogen[ P14075] interacts with 4 human partners:{Q8N668;Q15370;Q13617;P62877}  
6558 Pathogen[ P0C206] interacts with 4 human partners:{P62877;Q13617;Q15370;Q8N668}  
6559 Pathogen[ P03363] interacts with 4 human partners:{Q15370;Q13617;Q8N668;P62877}  
6560 [Cluster 597]GO:0000178+C cellular\_component [name] exosome (RNase complex) [def]  
"Complex of 3'-5' exoribonucleases." [PMID  
6561 Pathogen[ Q2Q067] interacts with 12 human  
partners:{Q9NQT4;Q99547;Q9Y2L1;Q06265;Q13868;Q9Y3B2;Q9NPD3;Q5RKV6;Q15024;Q8TF46;Q9GZX  
7;Q96B26}  
6562 Pathogen[ P0C214] interacts with 12 human  
partners:{Q15024;Q9Y2L1;Q9Y3B2;Q5RKV6;Q99547;Q8TF46;Q9NPD3;Q13868;Q9GZX7;Q06265;Q9NQT  
4;Q96B26}  
6563 Pathogen[ P03346] interacts with 13 human  
partners:{Q5RKV6;Q96B26;Q9Y3B2;Q15024;Q9Y2L1;Q9NQT5;P42285;Q99547;Q06265;Q9NQT4;Q9NPD  
3;Q8TF46;Q13868}  
6564 Pathogen[ Q85601] interacts with 12 human  
partners:{Q5RKV6;Q9NPD3;Q99547;Q13868;Q9GZX7;Q9Y2L1;Q9NQT4;Q9Y3B2;Q15024;Q06265;Q96B2  
6;Q8TF46}  
6565 Pathogen[ P14079] interacts with 12 human  
partners:{Q9Y3B2;Q15024;Q9NQT4;Q13868;Q9NPD3;Q8TF46;Q9GZX7;Q5RKV6;Q9Y2L1;Q96B26;Q9954  
7;Q06265}  
6566 Pathogen[ P03383] interacts with 10 human  
partners:{Q06265;Q9Y2L1;Q99547;Q9Y3B2;Q9NPD3;Q9NQT4;Q96B26;Q5RKV6;Q13868;Q15024}  
6567 Pathogen[ P03410] interacts with 12 human  
partners:{Q9Y2L1;Q06265;Q5RKV6;Q8TF46;Q13868;Q96B26;Q15024;Q9GZX7;Q9NQT4;Q99547;Q9NPD  
3;Q9Y3B2}  
6568 Pathogen[ P14075] interacts with 10 human  
partners:{Q9NPD3;Q9Y2L1;Q13868;Q9NQT4;Q5RKV6;Q96B26;Q99547;Q15024;Q06265;Q9Y3B2}  
6569 Pathogen[ P0C206] interacts with 12 human  
partners:{Q9NPD3;Q5RKV6;Q13868;Q96B26;Q99547;Q9GZX7;Q06265;Q15024;Q9Y2L1;Q9Y3B2;Q9NQT  
4;Q8TF46}  
6570 Pathogen[ P03363] interacts with 12 human  
partners:{Q96B26;Q9NQT4;Q5RKV6;Q15024;Q99547;Q9Y3B2;Q9NPD3;Q9Y2L1;Q13868;Q9NQT5;Q8TF4  
6;P42285}



- 6571 [Cluster 598]GO:0000922+C cellular\_component [name] spindle pole [def] "Either of the ends of a spindle, where spindle microtubules are organized\_ usually contains a microtubule organizing center and accessory molecules, spindle microtubules and astral microtubules." [GOC
- 6572 Pathogen[ Q2Q067] interacts with 58 human partners:{P49454;Q96TC7;Q12798;Q96GE4;Q6P2H3;Q14008;Q9NS56;Q96RT8;Q14980;O43663;Q96ST8;Q99741;Q96R06;Q8WWK9;Q14511;Q5FBB7;Q13257;Q96SN8;P67775;Q92547;Q1MSJ5;Q5BJF6;P14635;Q96DB5;Q14203;Q99569;Q9Y448;O43264;Q9Y3A5;P62714;Q6PGN9;Q8TES7;Q96RT7;Q12834;P50748;Q9BQ89;Q9BSJ2;Q9Y5B0;Q9BT25;Q9C0F1;Q96MT8;Q1W6H9;A6NK89;Q9ULW0;O00139;Q9H4H8;P37198;O95271;Q9NR09;Q8IZT6;Q9NS23;Q9UGJ1;P30305;Q9H7T9;Q96CS2;Q96EA4;O14576;Q96CW5}
- 6573 Pathogen[ P0C214] interacts with 57 human partners:{Q13257;Q9BSJ2;Q14008;Q1MSJ5;O43264;Q9NS23;Q14203;Q9NS56;Q96EA4;Q96SN8;Q96R06;P50748;Q96MT8;P14635;O00139;Q96CW5;P46060;Q96TC7;Q96RT7;Q9UGJ1;Q96CS2;Q14980;Q9C0F1;P62714;Q6PGN9;Q96ST8;Q12798;P37198;Q9BT25;Q12834;Q9ULW0;O43663;Q96LK0;P67775;Q6P2H3;P30305;Q96DB5;Q96RT8;Q8TES7;Q1W6H9;Q14511;O14576;Q5FBB7;Q9Y5B0;Q9NR09;Q5BJF6;Q8WWK9;Q92547;Q95271;P49454;Q9Y3A5;Q8IZT6;Q9Y448;Q9H7T9;A6NK89;Q9BQ89;Q99741}
- 6574 Pathogen[ P03346] interacts with 64 human partners:{Q9BT25;Q5FBB7;O14576;Q14511;Q99569;Q96RT8;O43379;Q96R06;O00139;O43264;Q96TC7;P62714;P67775;Q14203;Q96CW5;P37198;Q9BQ89;Q9C0F1;Q96LK0;Q12834;P30305;Q14980;Q6P2H3;Q96ST8;Q9Y5B0;A6NK89;Q9NS56;Q9ULW0;Q96EA4;P14635;P46060;Q96SN8;Q14008;Q9UGJ1;Q9NVR7;Q6PGN9;Q6ZU80;Q5BJF6;Q9H4H8;Q92547;P50748;Q96DB5;Q96CS2;Q95271;Q9NR09;Q12798;Q9Y448;Q8WWK9;Q8IZT6;Q9BSJ2;Q8TES7;Q96GE4;Q96RT7;O43663;Q99741;Q1MSJ5;Q9NS23;O14965;Q1W6H9;Q13257;P49454;Q9Y3A5;Q9H7T9;Q96MT8}
- 6575 Pathogen[ Q85601] interacts with 62 human partners:{Q99569;P49454;Q6PGN9;Q9H7T9;Q9NS56;Q14008;Q8WWK9;P46060;Q92547;P62714;Q9BT25;Q96RT8;Q12798;Q96SN8;Q9Y3A5;O43264;Q5BJF6;Q9NS23;Q14203;Q96CW5;Q96EA4;Q9ULW0;Q8IZT6;Q6P2H3;Q9BQ89;Q96R06;Q12834;Q13257;O43663;Q96ST8;P30305;O14965;Q96LK0;Q9BSJ2;Q9Y448;Q9UGJ1;P14635;Q8TES7;Q9Y5B0;Q9C0F1;Q96MT8;Q1MSJ5;O14576;A6NK89;Q9BVA0;Q9H4H8;P67775;Q14980;P50748;Q96CS2;Q9NR09;Q96TC7;O43379;Q95271;Q99741;Q14511;Q1W6H9;O00139;Q96DB5;Q5FBB7;P51955;Q96RT7}
- 6576 Pathogen[ P14079] interacts with 66 human partners:{Q14980;Q9H7T9;Q9NS23;Q9Y5B0;Q9H4H8;Q96R06;Q95271;Q96GE4;A6NK89;Q9UGJ1;Q1MSJ5;Q96ST8;P46060;Q1W6H9;Q9ULW0;Q9Y3A5;Q9NVR7;Q9Y448;O43379;Q6ZU80;Q5FBB7;Q96LK0;Q9NR09;Q99741;O43663;Q5BJF6;P14635;P51955;Q9BQ89;Q96RT8;Q12798;O00139;Q13257;Q96EA4;Q99569;Q96RT7;P37198;Q8TCU4;O43264;Q9NS56;Q9BSJ2;Q9C0F1;Q96DB5;Q6PGN9;Q8WWK9;Q8TES7;Q92547;Q96FC9;Q9UQE7;P49454;Q9BT25;Q6P2H3;P30305;O14576;P50748;Q96TC7;Q9BVA0;O14965;Q96SN8;Q14203;Q8IZT6;Q96LZ7;Q96CW5;Q14008;Q8WVJ2;Q96CS2}
- 6577 Pathogen[ P03383] interacts with 48 human partners:{Q13257;P49454;Q9BSJ2;Q96TC7;Q1MSJ5;Q14008;Q8WWK9;O43264;Q5FBB7;Q14203;Q96SN8;Q96CW5;P62714;Q12798;P67775;Q96EA4;P14635;Q96MT8;Q96R06;Q9BQ89;Q96DB5;Q9C0F1;Q8TES7;Q12834;Q6PGN9;Q96CS2;Q14511;Q9BT25;Q5BJF6;Q9H4H8;Q9Y3A5;O14965;Q14980;Q96ST8;Q9NR09;Q9Y448;Q9Y5B0;Q9ULW0;Q9H7T9;O43663;P37198;Q92547;Q6P2H3;Q95271;A6NK89;Q99741;Q1W6H9;P50748}
- 6578 Pathogen[ P03410] interacts with 68 human partners:{Q9Y6G9;Q96LZ7;P62714;Q96TC7;Q8WVJ2;Q96DB5;O00139;Q9H7T9;Q96LK0;Q9UQE7;Q8WWK9;Q14008;Q96SN8;P50748;Q9NS23;Q8TCU4;Q12798;Q96R06;Q96CS2;O43264;Q8IZT6;P49454;O14965;Q96EA4;Q9NR09;O14576;Q9Y448;Q14980;P14635;Q14511;Q6P2H3;Q9NVR7;Q96GE4;Q95271;A6NK89;O43379;Q96ST8;Q5BJF6;Q6ZU80;Q9BQ89;Q9BSJ2;Q12834;Q92547;Q9Y5B0;Q5FBB7;Q96RT8;Q9ULW0;Q1MSJ5;Q96FC9;Q96CW5;Q6PGN9;P30305;Q96RT7;Q9H4H8;Q9C0F1;Q8TES7;P67775;Q9Y3A5;Q1W6H9;Q9BT25;Q9UGJ1;P46060;Q9BVA0;Q14203;O43663;Q13257;Q99569;Q99741}
- 6579 Pathogen[ P14075] interacts with 50 human partners:{Q96MT8;Q14511;Q1W6H9;O43663;Q9H7T9;A6NK89;P14635;Q96R06;Q9Y5B0;Q13257;Q96TC7;Q96SN8;Q12798;Q96ST8;Q9BT25;Q96GE4;Q9ULW0;Q9C0F1;Q96EA4;O00139;Q5BJF6;Q8TES7;O14965;Q6P2H3;P37198;Q96CS2;Q96DB5;Q5FBB7;Q9H4H8;P62714;P67775;Q9BQ89;Q6PGN9;P50748;Q9NR09;Q8WWK9;Q99741;Q14203;Q14008;O43264;Q95271;Q14980;Q1MSJ5;P49454;Q9BSJ2;Q92547;Q9Y448;Q12834;Q96CW5;Q9Y3A5}
- 6580 Pathogen[ P0C206] interacts with 67 human partners:{Q95271;Q96TC7;Q9NS56;Q96DB5;Q9BVA0;Q96SN8;Q9H7T9;Q14008;O14576;Q96ST8;Q5BJF6;Q9ULW0;Q96RT7;P51955;Q6P2H3;Q8TCU4;Q96CW5;Q9BQ89;Q9Y448;Q9BT25;Q9NVR7;Q8IZT6;P30305;Q6PGN9;P49454;P67775;Q99741;Q13257;Q9UGJ1;P46060;Q6ZU80;Q9Y5B0;O43379;Q9UQE7;Q9NR09;Q96LK0;Q99569;Q9Y6G9;Q96CS2;O43663;Q5FBB7;A6NK89;P62714;O00139;Q9Y3A5;Q96EA4;Q12798;P14635;Q1MSJ5;O14965;Q14980;Q96MT8;Q9C0F1;Q9NS23;Q14203;Q92547;P50748;O43264;Q8WWK9;Q9BSJ2;Q14511;Q12834;Q96LZ7;Q9H4H8;Q96GE4;Q1W6H9;Q8TES7}
- 6581 Pathogen[ P03363] interacts with 60 human partners:{Q9BQ89;Q5BJF6;Q92547;Q96EA4;P46060;P49454;Q96DB5;Q9Y5B0;P62714;Q96MT8;Q1MSJ5;Q8WWK9;Q14980;Q9ULW0;Q9H7T9;O43264;Q8TES7;Q9Y3A5;Q9BT25;Q9H4H8;P50748;Q96LK0;Q99569;Q96GE4;Q96TC7;Q5FBB7;Q6PGN9;Q96R06;Q12798;Q9NR09;Q14511;Q99741;Q96RT8;Q96ST8;Q95271;Q6P2H3;Q13257;Q9NVR7;O43379;Q96CS2;Q6ZU80;Q9NS23;Q96RT7;A6NK89;Q9UGJ1;Q9C0F1;Q12834;Q14008;Q9Y448;Q1W6H9;O43663;O00139;P37198;P67775;Q8IZT6;Q14203;Q9BSJ2;O14576;Q96CW5;Q96SN8}
- 6582 [Cluster 599]GO:0030870+C cellular\_component [name] Mre11 complex [def] "Trimeric protein complex that possesses endonuclease activity\_ involved in meiotic recombination, DNA repair and checkpoint signaling. In *Saccharomyces cerevisiae*, the complex comprises Mre11p, Rad50p, and Xrs2p\_ complexes identified in other species generally contain proteins orthologous to the *Saccharomyces cerevisiae* proteins." [GOC
- 6583 Pathogen[ Q2Q067] interacts with 4 human partners:{P49959;Q9NYB0;Q15554;O60934}

6584 Pathogen[ P0C214] interacts with 3 human partners:{P49959;Q15554;Q9NYB0}

6585 Pathogen[ P03346] interacts with 4 human partners:{Q15554;Q9NYB0;P49959;O60934}

6586 Pathogen[ Q85601] interacts with 4 human partners:{Q15554;P49959;Q9NYB0;O60934}

6587 Pathogen[ P14079] interacts with 3 human partners:{O60934;Q9NYB0;Q15554}

6588 Pathogen[ P03383] interacts with 2 human partners:{Q9NYB0;Q15554}

6589 Pathogen[ P03410] interacts with 4 human partners:{P49959;Q15554;Q9NYB0;O60934}

6590 Pathogen[ P14075] interacts with 2 human partners:{Q15554;Q9NYB0}

6591 Pathogen[ P0C206] interacts with 4 human partners:{P49959;Q15554;O60934;Q9NYB0}

6592 Pathogen[ P03363] interacts with 2 human partners:{Q15554;Q9NYB0}

6593 [Cluster 600]GO:0030176+C cellular\_component [name] integral to endoplasmic reticulum membrane [def] "Penetrating at least one phospholipid bilayer of an endoplasmic reticulum membrane. May also refer to the state of being buried in the bilayer with no exposure outside the bilayer." [GOC

6594 Pathogen[ Q2Q067] interacts with 5 human partners:{Q9H5J4;Q86XL3;Q9BW60;Q9GZR5;Q9BQE4}

6595 Pathogen[ P0C214] interacts with 4 human partners:{Q9GZR5;Q86XL3;Q9BW60;Q9BQE4}

6596 Pathogen[ P03346] interacts with 5 human partners:{Q9BW60;Q12981;Q9BUN8;Q9H5J4;Q86XL3}

6597 Pathogen[ Q85601] interacts with 6 human partners:{Q12981;Q86XL3;Q9BW60;Q9H5J4;Q9GZR5;Q9BQE4}

6598 Pathogen[ P14079] interacts with 17 human partners:{Q8N6M3;Q9H295;Q9BQE4;Q96Q80;Q9GZP9;Q86XL3;O94777;Q969N2;Q9P2X0;Q9BUN8;Q12981;Q9H490;A5D6W6;Q96BY9;Q9GZR5;Q9BW60;Q9H5J4}

6599 Pathogen[ P03383] interacts with 5 human partners:{Q9BW60;Q9GZR5;Q9BUN8;Q9H5J4;Q9BQE4}

6600 Pathogen[ P03410] interacts with 16 human partners:{A5D6W6;Q9GZR5;Q9H5J4;O94777;Q96Q80;Q9GZP9;Q9BQE4;Q8N6M3;Q96BY9;Q9BUN8;Q9BW60;Q969N2;Q12981;Q9H490;Q9P2X0;Q86XL3}

6601 Pathogen[ P14075] interacts with 7 human partners:{Q9BQE4;Q9H5J4;O94777;Q9BW60;Q9BUN8;Q9GZR5;Q8N6M3}

6602 Pathogen[ P0C206] interacts with 11 human partners:{Q86XL3;A5D6W6;O94777;Q9H5J4;Q8N6M3;Q9BQE4;Q9BUN8;Q9GZP9;Q12981;Q9GZR5;Q9BW60}

6603 Pathogen[ P03363] interacts with 2 human partners:{Q9H5J4;Q86XL3}

6604 [Cluster 601]GO:0016589+C cellular\_component [name] NURF complex [def] "A four subunit ISWI-containing protein complex that facilitates nucleosome mobility and transcriptional activation in an ATP-dependent manner. In contrast to other chromatin remodeling complexes, the ATPase activity of NURF requires nucleosomes rather than free DNA or histones." [GOC

6605 Pathogen[ Q2Q067] interacts with 3 human partners:{Q09028;P28370;Q12830}

6606 Pathogen[ P0C214] interacts with 5 human partners:{Q09028;P28370;O60264;Q8IXM2;Q12830}

6607 Pathogen[ P03346] interacts with 6 human partners:{Q12830;Q8IXM2;O60264;Q09028;Q9UGU5;P28370}

6608 Pathogen[ Q85601] interacts with 5 human partners:{Q12830;Q8IXM2;Q09028;P28370;O60264}

6609 Pathogen[ P14079] interacts with 5 human partners:{P28370;Q12830;O60264;Q8IXM2;Q09028}

6610 Pathogen[ P03383] interacts with 3 human partners:{Q09028;Q12830;P28370}

6611 Pathogen[ P03410] interacts with 5 human partners:{Q12830;Q09028;Q8IXM2;O60264;P28370}

6612 Pathogen[ P14075] interacts with 3 human partners:{Q09028;Q12830;P28370}

6613 Pathogen[ P0C206] interacts with 5 human partners:{P28370;Q8IXM2;Q09028;Q12830;O60264}

6614 Pathogen[ P03363] interacts with 5 human partners:{Q8IXM2;Q12830;Q09028;O60264;P28370}

6615 [Cluster 602]GO:0097149+C cellular\_component [name] centralspindlin complex [def] "A heterotetrameric protein complex playing a key role in the formation of the central spindle in mitosis. Made up of two molecules each of a mitotic kinesin (ZEN-4 in *Caenorhabditis elegans* or MKLP1 in mammals) and of two molecules each of a GTPase activating protein (GAP) factor (CYK-4 in *Caenorhabditis elegans* or MgcRacGAP in mammals)." [GOC

6616 Pathogen[ Q2Q067] interacts with 1 human partners:{Q02241}

6617 Pathogen[ P0C214] interacts with 1 human partners:{Q02241}

6618 Pathogen[ P03346] interacts with 2 human partners:{Q02241;Q9H8V3}

6619 Pathogen[ Q85601] interacts with 1 human partners:{Q02241}

6620 Pathogen[ P14079] interacts with 2 human partners:{Q02241;Q9H8V3}

6621 Pathogen[ P03383] interacts with 1 human partners:{Q02241}

6622 Pathogen[ P03410] interacts with 2 human partners:{Q9H8V3;Q02241}

6623 Pathogen[ P14075] interacts with 1 human partners:{Q02241}

6624 Pathogen[ P0C206] interacts with 2 human partners:{Q02241;Q9H8V3}

6625 Pathogen[ P03363] interacts with 1 human partners:{Q02241}

6626 [Cluster 603]GO:0045177+C cellular\_component [name] apical part of cell [def] "The region of a polarized cell that forms a tip or is distal to a base. For example, in a polarized epithelial cell, the apical region has an exposed surface and lies opposite to the basal lamina that separates the epithelium from other tissue." [GOC

6627 Pathogen[ Q2Q067] interacts with 12 human partners:{A6NGQ2;Q8NI35;Q9NPB6;Q14980;Q9BYG5;Q07157;Q9Y6N9;O14641;P29474;P81274;Q93008;P60953}

6628 Pathogen[ P0C214] interacts with 12 human partners:{P29474;Q8NI35;P81274;Q9UM54;Q9Y6N9;P60953;Q93008;Q14980;Q9NPB6;O14641;Q9BYG5;Q07157}

6629 Pathogen[ P03346] interacts with 18 human partners:{Q9Y6N9;P21283;Q86UT5;P29474;Q93008;Q9H329;Q9NPB6;P60953;P55196;P26038;Q8TEW0;Q14980;Q8NI35;O14641;P81274;Q9BYG5;Q07157;A6NGQ2}

6630 Pathogen[ Q85601] interacts with 12 human partners:{Q9BYG5;P81274;Q93008;Q8NI35;O14641;Q9Y6N9;Q9NPB6;P29474;Q07157;Q14980;P60953;Q9UM54}

6631 Pathogen[ P14079] interacts with 17 human partners:{Q14980;Q9BYG5;O14641;Q86UT5;Q07157;P26038;Q9UM54;A6NGQ2;A6PVL3;Q8TEW0;Q8NI35;P10620;Q8N300;Q9Y6N9;P81274;Q9NPB6;P35241}

6632 Pathogen[ P03383] interacts with 9 human partners:{P29474;P60953;Q07157;P81274;A6NGQ2;O14641;Q9BYG5;Q9NPB6;Q14980}

6633 Pathogen[ P03410] interacts with 20 human partners:{Q86UT5;A6PVL3;Q9H329;A6NGQ2;Q8NI35;Q8TCX1;Q9UM54;P29474;Q14980;P26038;Q07157;Q9Y6N9;P81274;P60953;Q8TEW0;Q9NPB6;P35241;Q8N300;Q9BYG5;O14641}

6634 Pathogen[ P14075] interacts with 9 human partners:{P60953;P29474;P81274;Q07157;O14641;A6NGQ2;Q9BYG5;Q9NPB6;Q14980}

6635 Pathogen[ P0C206] interacts with 16 human partners:{A6NGQ2;Q9UM54;P81274;Q93008;Q9Y6N9;Q9BYG5;Q86UT5;Q8TEW0;P55196;Q8NI35;Q9NPB6;P60953;P29474;Q07157;Q8N300;Q14980}

6636 Pathogen[ P03363] interacts with 14 human partners:{A6NGQ2;Q9Y6N9;P29474;Q14980;Q9NPB6;Q07157;P81274;Q86UT5;Q9BYG5;Q8NI35;Q9H329;O14641;P60953;Q93008}

6637 [Cluster 604]GO:0045254+C cellular\_component [name] pyruvate dehydrogenase complex [def] "Complex that carries out the oxidative decarboxylation of pyruvate to form acetyl-CoA\_ comprises subunits possessing three catalytic activities

6638 Pathogen[ Q2Q067] interacts with 1 human partners:{P10515}

6639 Pathogen[ P0C214] interacts with 3 human partners:{P11177;P09622;P10515}

6640 Pathogen[ P03346] interacts with 1 human partners:{P10515}

6641 Pathogen[ Q85601] interacts with 1 human partners:{P10515}

6642 Pathogen[ P14079] interacts with 1 human partners:{P10515}

6643 Pathogen[ P03383] interacts with 1 human partners:{P10515}

6644 Pathogen[ P03410] interacts with 1 human partners:{P10515}

6645 Pathogen[ P14075] interacts with 1 human partners:{P10515}

6646 Pathogen[ P0C206] interacts with 1 human partners:{P10515}

6647 Pathogen[ P03363] interacts with 1 human partners:{P10515}

6648 [Cluster 605]GO:0005662+C cellular\_component [name] DNA replication factor A complex [def] "A conserved heterotrimeric complex that binds nonspecifically to single-stranded DNA and is required for multiple processes in eukaryotic DNA metabolism, including DNA replication, DNA repair, and recombination. In all eukaryotic organisms examined the complex is composed of subunits of approximately 70, 30, and 14 kDa." [PMID

6649 Pathogen[ Q2Q067] interacts with 7 human partners:{P27694;P35244;Q13156;Q00577;P15927;Q96QR8;Q96HA7}

6650 Pathogen[ P0C214] interacts with 7 human partners:{Q13156;Q96QR8;Q00577;P15927;P35244;P27694;Q96HA7}

6651 Pathogen[ P03346] interacts with 7 human partners:{Q96QR8;Q96HA7;P27694;Q00577;P35244;Q13156;P15927}

6652 Pathogen[ Q85601] interacts with 7 human partners:{Q96QR8;Q96HA7;P35244;P27694;Q00577;P15927;Q13156}

6653 Pathogen[ P14079] interacts with 7 human partners:{Q96QR8;Q13156;Q96HA7;Q00577;P15927;P27694;P35244}

6654 Pathogen[ P03383] interacts with 7 human partners:{P27694;P15927;P35244;Q00577;Q96HA7;Q13156;Q96QR8}

6655 Pathogen[ P03410] interacts with 7 human partners:{P35244;Q00577;Q13156;P27694;P15927;Q96QR8;Q96HA7}

6656 Pathogen[ P14075] interacts with 7 human partners:{Q96QR8;P15927;Q13156;P35244;Q96HA7;P27694;Q00577}

6657 Pathogen[ P0C206] interacts with 7 human partners:{Q96HA7;Q13156;Q96QR8;P27694;P15927;P35244;Q00577}

6658 Pathogen[ P03363] interacts with 7 human partners:{P27694;Q96QR8;P35244;P15927;Q13156;Q00577;Q96HA7}

6659 [Cluster 606]GO:0032580+C cellular\_component [name] Golgi cisterna membrane [def] "The lipid bilayer surrounding any of the thin, flattened compartments that form the central portion of the Golgi complex." [GOC

6660 Pathogen[ Q2Q067] interacts with 6 human partners:{Q08378;Q96JB2;Q08379;Q9H4A6;Q9H4A5;Q9Y3A3}

6661 Pathogen[ P0C214] interacts with 7 human partners:{Q9H4A6;Q08379;P62166;Q08378;Q9H4A5;Q9Y3A3;Q96JB2}

6662 Pathogen[ P03346] interacts with 8 human partners:{Q9H4A5;Q08379;Q96JB2;Q9H4A6;Q08378;Q9Y3A3;P62166;Q15363}

6663 Pathogen[ Q85601] interacts with 7 human

6664 partners:{Q9H4A5;Q96JB2;Q08378;Q9Y3A3;Q9H4A6;P62166;Q08379}  
Pathogen[ P14079] interacts with 16 human

6665 partners:{Q969M3;A6NP81;A6NC78;Q9NZ42;Q4G0N0;Q08378;A8MQT2;O00461;Q15363;Q9Y3A3;Q08379;P62166;B7ZAQ6;Q9H4A5;Q96JB2;Q9H4A6}  
Pathogen[ P03383] interacts with 5 human

6666 partners:{Q96JB2;Q9H4A6;Q9Y3A3;Q08379;Q9H4A5}  
Pathogen[ P03410] interacts with 18 human

6667 partners:{Q4G0N0;Q96JB2;B7ZAQ6;Q08378;A6NC78;A8MQT2;Q9H4A6;A6NP81;O00461;Q9NZ42;Q969M3;Q9Y3A3;Q15363;A7E2F4;Q92805;P62166;Q9H4A5;Q08379}  
Pathogen[ P14075] interacts with 6 human

6668 partners:{Q96JB2;O00461;Q9H4A5;Q08379;Q9Y3A3;Q9H4A6}  
Pathogen[ P0C206] interacts with 13 human

6669 partners:{Q9Y3A3;Q9H4A6;Q9NZ42;P62166;Q96JB2;Q9H4A5;Q969M3;O00461;Q08378;Q08379;Q15363;A6NC78;B7ZAQ6}  
Pathogen[ P03363] interacts with 5 human

6670 partners:{Q9H4A6;Q08378;Q08379;Q9Y3A3;Q96JB2}  
[Cluster 607]GO:0005832+C cellular\_component [name] chaperonin-containing T-complex [def] "A multisubunit ring-shaped complex that mediates protein folding in the cytosol without a cofactor." [GOC

6671 Pathogen[ Q2Q067] interacts with 3 human partners:{P17987;P50991;P78371}

6672 Pathogen[ P0C214] interacts with 6 human  
partners:{Q99832;P49368;P78371;P48643;P17987;P50991}

6673 Pathogen[ P03346] interacts with 4 human partners:{P78371;P50991;P49368;P17987}

6674 Pathogen[ Q85601] interacts with 4 human partners:{P17987;P50991;P78371;P48643}

6675 Pathogen[ P14079] interacts with 5 human  
partners:{P48643;P50991;P78371;P17987;P49368}

6676 Pathogen[ P03383] interacts with 1 human partners:{P78371}

6677 Pathogen[ P03410] interacts with 6 human  
partners:{P17987;P49368;Q99832;P48643;P78371;P50991}

6678 Pathogen[ P14075] interacts with 1 human partners:{P78371}

6679 Pathogen[ P0C206] interacts with 5 human  
partners:{P48643;P50991;P17987;P49368;P78371}

6680 Pathogen[ P03363] interacts with 5 human  
partners:{P50991;P17987;P78371;P48643;P49368}

6681 [Cluster 608]GO:0005635+C cellular\_component [name] nuclear envelope [def] "The double lipid bilayer enclosing the nucleus and separating its contents from the rest of the cytoplasm\_ includes the intermembrane space, a gap of width 20-40 nm (also called the perinuclear space)." [ISBN

6682 Pathogen[ Q2Q067] interacts with 63 human  
partners:{P49454;Q14974;Q96EE3;Q9UH99;P50402;P09917;P02545;P52948;Q13185;P50995;Q12769;Q96HA1;P20700;Q9BUP3;P42166;Q9H2K2;Q12982;P55735;O75694;Q86XL3;P78406;O60238;P18850;P36956;Q8N1F7;Q7Z3B4;Q8NFH4;Q8NF91;Q13342;P12270;Q92575;O14980;P20073;Q9BW27;Q8TEM1;Q9UNN5;Q8NEH6;Q9BVL2;P09874;O14656;Q9NRG9;Q8NFH3;Q14739;P37198;Q5VWP3;Q92621;O95476;Q8IZQ1;Q12983;P57740;Q8N9Z9;P42166;Q9GZN7;Q8WUM0;O00165;P43487;Q9BZF9;Q8NE71;P45973;Q13023;Q8NFH5;Q5SRE5;Q9NW38}

6683 Pathogen[ P0C214] interacts with 63 human  
partners:{P18850;P55735;Q14739;P09917;P42166;Q8NFH5;P43487;Q8TEM1;Q8NEH6;Q13023;P78406;P57740;Q8N1F7;O75694;Q96EE3;O14656;P20700;Q9UH99;Q8NE71;Q9BUP3;O14980;Q8NF91;P37198;Q8IZQ1;Q9BW27;O00165;Q9UNN5;P50402;Q12982;Q9NRG9;Q86XL3;Q13185;Q8NFH3;Q9H2K2;Q8N9Z9;Q12983;O95476;Q8N2G8;O60238;Q5VWP3;P45973;Q9BZF9;Q9GZN7;P12270;Q14974;Q13342;Q92575;P02545;Q8NFH4;Q9BVL2;P49454;Q5SRE5;P20073;P50995;Q7Z3B4;Q8WUM0;P52948;Q92621;P80303;Q12769;Q9NW38;P09874;Q96HA1}

6684 Pathogen[ P03346] interacts with 77 human  
partners:{Q8TEM1;P55735;Q8NFH4;Q8WUM0;Q14739;P45973;P12270;P80303;P0CAP2;Q12769;Q96EE3;Q5VWP3;P36956;Q8IZQ1;P20073;P20700;Q9BUP3;O75694;O14656;Q9NRG9;O60238;P78406;P57740;Q8WXH0;P43487;Q9UH99;Q9BVL2;Q8N1F7;Q12981;Q13023;P06703;Q8NFH5;Q8WWZ8;P37198;Q8NFH3;P42166;Q12983;P02545;P18850;Q5SRE5;Q92575;Q6UW56;O00299;Q92621;Q9H2K2;Q9BW27;O14980;P09917;Q9UNN5;Q8N9Z9;Q13342;Q9GZN7;Q6ZM3;P50995;P09874;P50402;O95476;O00165;Q92832;Q8NE71;Q9BZF9;P24855;Q96HA1;Q86XL3;Q9NW38;Q12982;Q8NF91;O94901;Q7Z3B4;P42166;Q13185;Q8NEH6;Q96IK5;Q8N2G8;P49454;Q14974;P52948}

6685 Pathogen[ Q85601] interacts with 65 human  
partners:{Q8TEM1;P49454;P20700;Q5SRE5;Q92575;P09874;P02545;Q8NFH4;Q8NFH3;Q96EE3;O00165;P09917;Q12769;P50995;P78406;P57740;P43487;Q9NRG9;Q9BZF9;Q12982;Q8WUM0;Q8N1F7;P80303;Q12981;P12270;P42166;O75694;Q5VWP3;Q14974;Q9UH99;Q86XL3;Q9H2K2;Q9BW27;Q9UNN5;Q92621;P36956;P45973;P55735;P52948;O14656;P18850;Q13185;Q8NFH5;Q9NW38;O14980;O95476;P50402;P20073;Q8NE71;Q8IZQ1;Q12983;Q8N9Z9;Q13342;Q9BVL2;Q96HA1;Q8NEH6;Q8N2G8;Q13023;Q8NF91;O94901;O60238;Q7Z3B4;Q9GZM8;Q9BUP3;Q14739}

6686 Pathogen[ P14079] interacts with 81 human  
partners:{Q8NFH5;Q8NBV4;Q9BW27;Q96HA1;P09874;Q12982;Q8NEH6;Q16873;P20292;P50995;P57740;Q8N1F7;Q13023;O00165;O94901;Q92621;Q8TEM1;Q14739;Q9H2K2;Q5VWP3;Q86XL3;Q6ZMK1;Q9BUP3;Q9BVL2;P45973;P80303;Q8WUM0;O14656;Q13185;P12270;Q9UNN5;Q8N114;P42166;Q5JTV8;Q9GZN7;Q92832;Q8NC56;Q8NE71;Q14974;Q8N2G8;P24855;Q12981;Q8WXH0;Q8NFH3;Q6ZM3;Q96EE3;P37198;Q12983;P09917;Q8NDB6;Q9NSU2;Q9GZM8;P18850;P20700;Q8NFH4;Q9BZF9;P78406;P20073;Q7Z3B4;O95476;P55735;P49454;P42166;Q8N9Z9;P06703;P50402;Q8NF91;Q12769;Q9UH99;P02545;O60238;Q92575;Q9NW38;P36956;Q5SRE5;Q9NRG9;O75694;P0CAP2;Q8IXM6;Q13342;P52948}

6687 Pathogen[ P03383] interacts with 52 human

partners:{Q9BVL2;P02545;Q96EE3;Q8WUM0;P49454;P50995;Q92621;Q8NFH4;P55735;P12270;Q8NE71;P52948;Q9GZN7;Q13023;P78406;P0CAP2;P57740;Q9BZF9;Q8NFH5;Q9UH99;Q8N1F7;O00165;Q8TEM1;Q12983;Q12769;Q13185;Q9BW27;P45973;O60238;P20700;Q9UNN5;P43487;O14980;Q13342;P09874;Q8IZQ1;Q14974;Q5SRE5;P50402;Q96HA1;Q9BUP3;Q9NRG9;P37198;P18850;Q9NW38;Q8N9Z9;P20073;Q7Z3B4;O75694;Q8NFH3;Q92575;Q8NEH6}

6688 Pathogen[ P03410] interacts with 84 human  
partners:{Q7Z3B4;Q9BW27;P36956;Q9UNN5;Q14974;P80303;Q14739;Q8NE71;Q12983;P50995;Q9GZM8;Q8NFH4;Q6ZMZ3;O14656;Q9UH99;Q5SRE5;O00165;P52948;P20700;O75694;Q8N114;P78406;P45973;Q9NSU2;Q96HA1;Q92832;P06703;Q8N1F7;Q92575;P49454;Q6ZMK1;Q8NEH6;P42166;P12270;Q8N9Z9;Q13342;Q8WWZ8;Q68G75;Q8NFH5;Q16873;P02545;P43487;Q8TEM1;P42167;Q8N2G8;Q9BUP3;Q13023;P09874;P0CAP2;Q96EE3;Q13185;P50402;O95476;O94901;Q9BZF9;P20073;Q8WUM0;Q12982;P09917;Q8NC56;Q9H2K2;Q9NW38;P57740;P55735;Q5JTV8;Q12981;Q12769;P20292;Q8IXM6;Q9NRG9;Q5VWP3;Q8NFH3;P18850;Q8WXH0;Q9BVL2;Q86XL3;Q92621;P24855;O60238;O14980;Q9GZN7;Q8NBV4;Q8IZQ1;Q8NF91}

6689 Pathogen[ P14075] interacts with 55 human  
partners:{Q9BUP3;Q12983;P0CAP2;P78406;P57740;P43487;P20700;Q8N1F7;Q8IZQ1;P45973;Q5VWP3;P12270;P20073;P50402;Q92621;P55735;Q9NW38;Q96HA1;O14980;P50995;Q9BW27;P02545;Q9UNN5;Q8TEM1;Q13185;O60238;Q96EE3;P37198;Q8IXM6;Q92575;Q5SRE5;Q8NE71;Q8NFH3;Q13342;Q9UH99;Q9BZF9;Q12769;Q14974;Q9GZN7;Q9BVL2;Q8WUM0;P49454;P42167;O75694;Q9NRG9;Q7Z3B4;O00165;Q8NFH4;Q8N9Z9;Q8NFH5;Q8NEH6;P09874;P52948;P18850;Q13023}

6690 Pathogen[ P0C206] interacts with 78 human  
partners:{Q9UNN5;Q96EE3;Q12982;Q92621;P50402;Q92575;P45973;P09917;Q14739;Q8IXM6;Q5SRE5;Q9BUP3;Q8NFH5;Q9NRG9;Q9NSU2;Q9GZN7;P09874;Q8NEH6;P18850;Q13023;Q86XL3;Q8N2G8;Q7Z3B4;P50995;Q9UH99;Q6ZMK1;Q14974;Q96HA1;P80303;Q6UW56;P55735;Q13342;P36956;P57740;P49454;O95476;P24855;O94901;Q9GZM8;Q8IZQ1;Q8NC56;Q8WUM0;O60238;Q6ZMZ3;Q12983;Q8TEM1;Q8NF91;O00165;P42166;Q8N9Z9;P43487;O75694;O14656;Q8NE71;Q8NFH4;Q12981;P06703;P02545;P20292;Q8WXH0;Q13185;P78406;P20700;Q92832;Q12769;P42167;Q9BZF9;Q8NFH3;P0CAP2;Q8N1F7;P20073;Q9H2K2;Q8NBV4;Q9BW27;Q5VWP3;Q9BVL2;Q9NW38;P12270}

6691 Pathogen[ P03363] interacts with 64 human  
partners:{Q9UNN5;Q9NW38;Q8N9Z9;P49454;Q7Z3B4;Q9BUP3;Q8NF91;Q6ZMZ3;Q5SRE5;P12270;Q92575;Q8NFH4;P02545;Q8NFH3;P45973;O14980;P20700;Q12769;P42167;Q6UW56;P18850;Q8NEH6;Q13342;Q8N2G8;O95476;Q13185;Q9H2K2;P20073;P50995;Q9BZF9;Q9NRG9;Q92832;Q8WUM0;Q9BVL2;P43487;Q96HA1;Q14974;O75694;P50402;P57740;Q13023;Q8IZQ1;O94901;Q8NE71;P78406;P0CAP2;P52948;Q14739;O00165;P09874;Q5VWP3;P24855;P37198;Q8N1F7;Q92621;Q8NFH5;O60238;Q9GZN7;Q86XL3;P55735;Q12982;P42166;Q9BW27;Q9UH99}

6692 [Cluster 609]GO:0070522+C cellular\_component [name] ERCC4-ERCC1 complex [def] "A heterodimeric nucleotide-excision repair complex that has endonuclease activity specific for bubble structures characteristic of certain DNA lesions. The subunits are known as XPF/ERCC4 and ERCC1 in mammals, and Rad1p and Rad10p in *S. cerevisiae*." [PMID]

6693 Pathogen[ Q2Q067] interacts with 1 human partners:{Q8IY92}

6694 Pathogen[ P0C214] interacts with 1 human partners:{Q8IY92}

6695 Pathogen[ P03346] interacts with 1 human partners:{Q8IY92}

6696 Pathogen[ Q85601] interacts with 1 human partners:{Q8IY92}

6697 Pathogen[ P14079] interacts with 1 human partners:{Q8IY92}

6698 Pathogen[ P03383] interacts with 1 human partners:{Q8IY92}

6699 Pathogen[ P03410] interacts with 1 human partners:{Q8IY92}

6700 Pathogen[ P14075] interacts with 1 human partners:{Q8IY92}

6701 Pathogen[ P0C206] interacts with 1 human partners:{Q8IY92}

6702 Pathogen[ P03363] interacts with 1 human partners:{Q8IY92}

6703 [Cluster 610]GO:0005724+C cellular\_component [name] nuclear telomeric heterochromatin [def] "Heterochromatic regions of the chromosome found at the telomeres of a chromosome in the nucleus." [GOC]

6704 Pathogen[ Q2Q067] interacts with 2 human partners:{Q8N6T7;Q9C0C2}

6705 Pathogen[ P0C214] interacts with 2 human partners:{Q9C0C2;Q8N6T7}

6706 Pathogen[ P03346] interacts with 2 human partners:{Q8N6T7;Q9C0C2}

6707 Pathogen[ Q85601] interacts with 2 human partners:{Q8N6T7;Q9C0C2}

6708 Pathogen[ P14079] interacts with 2 human partners:{Q9C0C2;Q8N6T7}

6709 Pathogen[ P03383] interacts with 2 human partners:{Q8N6T7;Q9C0C2}

6710 Pathogen[ P03410] interacts with 2 human partners:{Q8N6T7;Q9C0C2}

6711 Pathogen[ P14075] interacts with 2 human partners:{Q8N6T7;Q9C0C2}

6712 Pathogen[ P0C206] interacts with 2 human partners:{Q8N6T7;Q9C0C2}

6713 Pathogen[ P03363] interacts with 2 human partners:{Q8N6T7;Q9C0C2}

6714 [Cluster 611]GO:0031965+C cellular\_component [name] nuclear membrane [def] "Either of the lipid bilayers that surround the nucleus and form the nuclear envelope\_ excludes the intermembrane space." [GOC]

6715 Pathogen[ Q2Q067] interacts with 75 human  
partners:{Q14974;Q9UH99;P50402;P09917;P18754;P52948;Q9BZE4;Q96HA1;O75340;P49790;O75694;P30793;Q12765;Q9NZJ0;A8CG34;Q8WYP5;P30279;P14373;Q86WB0;Q9Y3D9;Q8N1F7;P15976;Q7Z3B4;P5BJF2;Q8NF91;P12270;Q86UE4;P37802;P63165;Q8N9A8;Q9UND3;Q96G23;Q9BVI4;Q9BW27;Q9BZW7;Q8NHQ1;Q8TEM1;Q96MT3;P82914;Q674X7;Q9BVL2;Q86UW9;Q9H8M7;Q9HD36;O60783;O14656;Q9UKX7;Q9UNX4;Q9NRG9;Q9BVC6;Q14739;Q99543;P37198;Q9H4A6;Q92621;O95476;Q9UM11;Q9UKD2;O15504;P40121;Q9HC62;Q95271;Q9H9L7;O00165;Q9H2F5;Q15007;Q9NUQ3;P30047;P49406;P11802;Q13023;Q8NFH5;Q15154;O96028;Q14693}

6716 Pathogen[ P0C214] interacts with 79 human  
partners:{Q9HA82;P49406;Q15007;Q8N9A8;Q14739;P09917;Q15154;O14681;Q9H4A6;Q8NFH5;Q9Y3D9;Q9UNX4;Q8NHQ1;Q8TEM1;P40121;Q9UM54;Q13023;P11802;Q8WYP5;Q9UND3;Q86WB0;Q8N1F7;O75694}

- ;Q9BVI4;O14656;Q9UKX7;O75340;P46060;Q9H2F5;Q96MT3;Q86UE4;P82914;A8CG34;Q9NUQ3;Q9UH99;Q674X7;P30793;P49790;Q8NF91;P37198;Q9BW27;P63165;O00165;P50402;Q9NRG9;Q9H8M7;Q9HD36;Q9NZJ0;Q96G23;Q9BZW7;Q5JTH9;O95476;Q9NUU7;P30279;O15504;Q9BVC6;Q9UKD2;Q12765;Q9UMR2;Q9HC62;P12270;Q99543;Q14974;Q9BZE4;Q9UM11;Q9BVL2;P14373;P30047;O95271;P18754;Q7Z3B4;Q86UW9;P52948;Q92621;O60783;Q96028;Q14693;Q9H9L7;Q96HA1}
- 6717 Pathogen[ P03346] interacts with 89 human partners: {Q8TEM1;P37802;Q9NZJ0;Q9H0H0;Q3YBM2;Q86UW9;Q14739;P49406;P12270;P30279;P14373;Q96RT1;Q9UKD2;Q9UM11;Q86UE4;Q99543;Q9BZE4;Q9UKX7;O75694;O14656;Q9UMR2;Q15154;Q9NRG9;Q9H4A6;Q8WXH0;Q15007;Q8WYP5;Q9UH99;Q9BVL2;Q86WB0;Q8N1F7;Q7Z3G6;Q96B42;Q13023;Q9UNX4;P18754;Q8NFH5;P37198;Q9BVI4;Q5BJF2;P30047;P11802;Q96MT3;Q9BTX1;O00299;Q9Y3D9;Q92621;Q9BW27;P09917;Q14863;O75340;P15976;P46060;P82914;P40121;Q9NUQ3;O60783;Q96G23;Q8N9A8;P63165;Q9H9L7;Q9H2F5;P50402;O95476;Q9BVC6;Q96KC8;O00165;Q9NUU7;Q9HC62;Q96PY6;Q8NHQ1;O95271;A8CG34;Q9UND3;Q12765;P49790;Q674X7;Q9H8M7;Q96HA1;Q9BZW7;Q8NF91;O94901;Q7Z3B4;Q9HD36;O15504;O96028;Q14693;Q14974;P52948}
- 6718 Pathogen[ Q85601] interacts with 80 human partners: {Q8TEM1;Q8NHQ1;P37802;Q99543;Q9H2F5;P14373;Q15154;P15976;P46060;O00165;Q96RT1;P49406;Q9BZE4;Q9HD36;P09917;A8CG34;Q96PY6;Q9H8M7;Q9NRG9;Q15007;Q8WYP5;Q9HC62;Q86WB0;Q8N1F7;Q9NZJ0;Q9UMR2;Q9UNX4;Q9Y3D9;P12270;O75694;P30793;O15504;Q14974;P30047;P11802;Q96MT3;Q9UH99;Q9BW27;Q86UW9;Q92621;Q8N6T3;P40121;Q9UKD2;Q96G23;Q8N9A8;Q9NUU7;P30279;P52948;Q9UKX7;O14656;Q8NFH5;Q86UE4;O75340;Q9H4A6;O95476;P50402;Q9UM11;P63165;P18754;Q12765;O60783;Q674X7;Q9UM54;Q9BVL2;Q96HA1;Q13023;O95271;Q9H9L7;Q8NF91;O94901;P82914;Q9UND3;Q9BVI4;Q7Z3B4;P49790;Q9NUQ3;Q14739;O96028;Q14693;Q9BZW7}
- 6719 Pathogen[ P14079] interacts with 93 human partners: {Q8NFH5;Q9BW27;Q15007;Q96HA1;P37802;P14373;Q14693;P20292;O95271;Q9BVC6;Q8N1F7;Q13023;O00165;A8CG34;O94901;Q92621;Q8TEM1;Q8N9A8;Q9UNX4;Q9HA82;P46060;P15976;Q14739;Q9UM54;P63165;Q5BJF2;Q9NUQ3;P30793;O60783;P40121;Q9UKX7;Q9BVI4;Q9BZE4;Q96RT1;Q9BVL2;Q9H9L7;O15504;Q99543;O14656;Q9HC62;P12270;Q9UND3;Q8N114;Q8WYP5;Q9UM11;Q8N201;Q96G23;O75340;Q9HD36;Q8NC56;Q14974;Q86UW9;Q8WXH0;P37198;P09917;P49790;Q86UE4;Q9H2F5;Q7Z3G6;Q12765;Q86WB0;Q9H0H0;Q6ZVT0;Q5JTH9;Q7Z3B4;O95476;Q9NZJ0;Q8NHQ1;Q15154;P50402;Q8NF91;Q96B42;Q9UH99;Q9UKD2;Q8NFQ8;Q9NXF1;Q9H4A6;Q96MT3;Q9NRG9;Q9H8M7;O75694;O14681;Q3YBM2;P18754;P30047;Q9BTX1;Q674X7;Q9H6F2;P52948;Q9Y3D9;P82914;P49406;Q9BZW7}
- 6720 Pathogen[ P03383] interacts with 63 human partners: {Q9BVL2;O15504;Q92621;Q86UW9;Q9NZJ0;Q86UE4;P12270;A8CG34;Q3YBM2;P52948;Q13023;P49406;Q9NUQ3;Q8NFH5;Q8WYP5;Q9UH99;Q86WB0;Q96MT3;Q9H2F5;Q8N1F7;Q9BZW7;Q9H9L7;Q9BZE4;O00165;P82914;Q8TEM1;P11802;P30279;Q9Y3D9;Q9H8M7;O60783;Q9BVC6;Q9BW27;Q9BVI4;P18754;Q12765;Q9UM11;P63165;Q15154;Q9BTX1;Q5BJF2;Q14974;Q9H4A6;Q99543;P50402;Q15007;P37802;Q96HA1;Q96PY6;Q9NRG9;Q8N9A8;Q9UND3;Q9HC62;O14681;P37198;Q9UKX7;O95271;Q7Z3B4;P30047;P49790;O75694;Q8NHQ1;Q14693}
- 6721 Pathogen[ P03410] interacts with 93 human partners: {Q86UW9;Q5JTH9;Q9NXF1;Q7Z3B4;Q9BW27;Q9UNX4;P30047;Q86WB0;O14681;Q9BVI4;Q14974;Q96RT1;Q14739;P30279;Q6ZVT0;Q9BVC6;Q9UKX7;P63165;Q15154;Q96B42;O14656;Q12765;Q9UH99;O00165;P52948;O15504;P49406;O75694;Q9HD36;Q8N114;Q96HA1;P30793;Q9H4A6;Q96G23;Q14693;Q8N1F7;O60783;Q9H2F5;P37802;Q9UM54;Q8N201;Q9UMR2;Q9H0H0;Q9H6F2;P49790;Q9HC62;Q9UM11;P12270;Q9NUU7;Q9HA82;Q9H9L7;O95271;Q8NFH5;P11802;Q86UE4;Q674X7;Q9UND3;Q8TEM1;Q13023;Q9NUQ3;Q9UKD2;P50402;Q9BZW7;O95476;O94901;Q9Y3D9;Q9H8M7;A8CG34;P09917;Q8NC56;Q3YBM2;O75340;P18754;Q8NFQ8;Q99543;Q96MT3;P20292;Q8N9A8;P82914;P40121;Q5BJF2;Q9NRG9;Q8WYP5;Q8WXH0;Q9BVL2;P15976;Q9BTX1;Q9BZE4;Q92621;P46060;Q15007;Q9NZJ0;Q8NF91}
- 6722 Pathogen[ P14075] interacts with 64 human partners: {P63165;Q96MT3;Q9BVC6;Q9H2F5;O14681;Q8N9A8;Q9Y3D9;P11802;Q86UE4;P49406;Q9UM11;A8CG34;P30279;Q8WYP5;Q86WB0;Q8N1F7;Q9UKX7;Q99543;Q8NHQ1;P12270;P50402;Q92621;Q9BTX1;Q9NUQ3;Q96HA1;Q9BW27;Q3YBM2;O60783;P37802;Q8TEM1;Q9UND3;Q9HC62;Q15007;P30047;P37198;P82914;Q15154;Q9BZE4;O15504;Q9BVI4;Q9UH99;P18754;Q96PY6;Q9BZW7;Q14974;Q9BVL2;P49790;P30793;Q9NZJ0;O95271;Q9H9L7;O75694;Q9NRG9;Q12765;Q9H4A6;Q7Z3B4;O00165;Q8NFH5;Q86UW9;P52948;Q5BJF2;Q9H8M7;Q13023;Q14693}
- 6723 Pathogen[ P0C206] interacts with 99 human partners: {O95271;Q5BJF2;O75340;Q6ZVT0;Q92621;Q8WYP5;P50402;Q9UM54;Q9BVI4;Q96G23;Q9H4A6;Q96RT1;P09917;P49790;Q9H2F5;Q14739;Q8N6T3;Q9NUQ3;Q8NFH5;Q86UW9;Q9NRG9;Q9NUU7;Q96MT3;Q9HD36;P40121;O60783;P82914;P18754;Q13023;Q5JTH9;Q7Z3B4;Q9UH99;P30279;Q14974;Q9HC62;Q96HA1;Q96PY6;Q9H9L7;Q9BZW7;P49406;Q9H0H0;P15976;P30793;O95476;O94901;O94762;Q8NC56;P30047;Q7Z3G6;P46060;O14681;Q8TEM1;Q9UKX7;Q8NF91;Q15007;O00165;Q9HA82;Q3YBM2;Q9BVC6;O75694;Q99543;O14656;Q9BTX1;O96028;Q9UM11;Q9Y3D9;P37802;Q96B42;Q12765;Q9NZJ0;Q9BZE4;P20292;Q8WXH0;Q8NFQ8;Q86WB0;Q86UE4;Q14863;Q674X7;Q9UKD2;O15504;A8CG34;Q9UMR2;P63165;Q9UND3;P14373;Q15154;Q8NHQ1;Q14693;Q8N1F7;Q86YT6;Q9UNX4;Q9H8M7;P11802;Q9BX63;Q9BW27;Q8N201;Q9BVL2;P12270;Q8N9A8}
- 6724 Pathogen[ P03363] interacts with 80 human partners: {O94762;Q9BX63;P46060;Q7Z3B4;Q96RT1;Q8NF91;Q86WB0;P12270;Q9UND3;Q8N9A8;P14373;O75340;P49406;Q99543;Q14863;Q96MT3;P30279;Q8WYP5;P37802;P82914;Q9H2F5;Q9H8M7;Q9NUU7;Q8NHQ1;Q9BZE4;A8CG34;Q9UKX7;Q86UE4;Q9H4A6;O95476;Q9UNX4;Q9UM11;Q3YBM2;Q9HD36;Q9NRG9;Q9BVL2;P63165;Q9HC62;Q86UW9;O95271;Q9Y3D9;Q96HA1;Q9H9L7;Q674X7;Q14974;O60783;O75694;P49790;P50402;Q9H0H0;Q13023;O96028;Q9UMR2;Q9BTX1;Q5BJF2;O94901;Q96G23;Q9BZW7;Q9NUQ3;Q9UKD2;P52948;Q14739;O00165;Q12765;O15504;P30047;P11802;P37198;P18754;Q9NZJ0;Q8N1F7;Q92621;Q8NFH5;Q15154;P40121;Q9BVI4;Q15007;Q96B42;Q9BW27;Q9UH99}
- 6725 [Cluster 612]GO:0032299+C cellular\_component [name] ribonuclease H2 complex [def] "A protein complex that possesses ribonuclease H activity, in which the catalytic subunit is a member of the RNase H2 (or HII) class. For example, in *Saccharomyces* the complex contains Rnh201p, Rnh202p and Rnh203p." [GOC

6726 Pathogen[ Q2Q067] interacts with 3 human partners: {Q8TDP1;O75792;Q5TBB1}

6727 Pathogen[ P0C214] interacts with 3 human partners: {Q5TBB1;O75792;Q8TDP1}

6728 Pathogen[ P03346] interacts with 3 human partners: {Q5TBB1;Q8TDP1;O75792}

6729 Pathogen[ Q85601] interacts with 3 human partners: {O75792;Q8TDP1;Q5TBB1}

6730 Pathogen[ P14079] interacts with 3 human partners: {O75792;Q8TDP1;Q5TBB1}

6731 Pathogen[ P03383] interacts with 3 human partners: {O75792;Q8TDP1;Q5TBB1}

6732 Pathogen[ P03410] interacts with 3 human partners: {O75792;Q8TDP1;Q5TBB1}

6733 Pathogen[ P14075] interacts with 3 human partners: {Q5TBB1;O75792;Q8TDP1}

6734 Pathogen[ P0C206] interacts with 3 human partners: {O75792;Q8TDP1;Q5TBB1}

6735 Pathogen[ P03363] interacts with 3 human partners: {Q5TBB1;O75792;Q8TDP1}

6736 [Cluster 613]GO:0001650+C cellular\_component [name] fibrillar center [def] "A structure found most metazoan nucleoli, but not usually found in lower eukaryotes\_ surrounded by the dense fibrillar component\_ the zone of transcription from multiple copies of the pre-rRNA genes is in the border region between these two structures." [PMID

6737 Pathogen[ Q2Q067] interacts with 2 human partners: {P63279;Q9Y262}

6738 Pathogen[ P0C214] interacts with 2 human partners: {Q9Y262;P63279}

6739 Pathogen[ P03346] interacts with 2 human partners: {P63279;Q9Y262}

6740 Pathogen[ Q85601] interacts with 2 human partners: {P63279;Q9Y262}

6741 Pathogen[ P14079] interacts with 2 human partners: {P63279;Q9Y262}

6742 Pathogen[ P03383] interacts with 2 human partners: {Q9Y262;P63279}

6743 Pathogen[ P03410] interacts with 2 human partners: {P63279;Q9Y262}

6744 Pathogen[ P14075] interacts with 2 human partners: {P63279;Q9Y262}

6745 Pathogen[ P0C206] interacts with 1 human partners: {Q9Y262}

6746 Pathogen[ P03363] interacts with 2 human partners: {P63279;Q9Y262}

6747 [Cluster 614]GO:0070419+C cellular\_component [name] nonhomologous end joining complex [def] "A protein complex that plays a role in DNA double-strand break repair via nonhomologous end joining. Such complexes typically contain a specialized DNA ligase (e.g. Lig4 in eukaryotes) and one or more proteins that bind to DNA ends." [GOC

6748 Pathogen[ Q2Q067] interacts with 4 human partners: {Q9H9Q4;Q13426;P12956;P13010}

6749 Pathogen[ P0C214] interacts with 4 human partners: {Q9H9Q4;P13010;Q13426;P12956}

6750 Pathogen[ P03346] interacts with 4 human partners: {P12956;Q13426;P13010;Q9H9Q4}

6751 Pathogen[ Q85601] interacts with 4 human partners: {Q13426;Q9H9Q4;P13010;P12956}

6752 Pathogen[ P14079] interacts with 5 human partners: {Q9H9Q4;P13010;P12956;Q13426;P49917}

6753 Pathogen[ P03383] interacts with 4 human partners: {P13010;Q9H9Q4;Q13426;P12956}

6754 Pathogen[ P03410] interacts with 4 human partners: {P12956;Q13426;P13010;Q9H9Q4}

6755 Pathogen[ P14075] interacts with 4 human partners: {P12956;Q9H9Q4;Q13426;P13010}

6756 Pathogen[ P0C206] interacts with 5 human partners: {P13010;P49917;Q9H9Q4;Q13426;P12956}

6757 Pathogen[ P03363] interacts with 4 human partners: {P12956;P13010;Q13426;Q9H9Q4}

6758 [Cluster 615]GO:0005740+C cellular\_component [name] mitochondrial envelope [def] "The double lipid bilayer enclosing the mitochondrion and separating its contents from the cell cytoplasm\_ includes the intermembrane space." [GOC

6759 Pathogen[ Q2Q067] interacts with 4 human partners: {O60543;O60238;Q15388;Q12983}

6760 Pathogen[ P0C214] interacts with 5 human partners: {Q15388;O60543;Q12983;O60238;O14521}

6761 Pathogen[ P03346] interacts with 4 human partners: {O60238;Q12983;Q15388;O60543}

6762 Pathogen[ Q85601] interacts with 4 human partners: {Q15388;O60543;Q12983;O60238}

6763 Pathogen[ P14079] interacts with 8 human partners: {O60543;Q13323;P10606;Q9UDW1;Q15388;Q12983;O14521;O60238}

6764 Pathogen[ P03383] interacts with 4 human partners: {O60543;Q12983;O60238;Q15388}

6765 Pathogen[ P03410] interacts with 8 human partners: {Q12983;Q15388;Q9UDW1;O14521;O60543;O60238;P10606;Q13323}

6766 Pathogen[ P14075] interacts with 4 human partners: {Q12983;Q15388;O60543;O60238}

6767 Pathogen[ P0C206] interacts with 6 human partners: {Q9UDW1;O14521;O60238;Q12983;Q15388;O60543}

6768 Pathogen[ P03363] interacts with 3 human partners: {O60543;Q15388;O60238}

6769 [Cluster 616]GO:0035068+C cellular\_component [name] micro-ribonucleoprotein complex [def] "A complex containing both protein and micro-RNA (miRNA) molecules. miRNAs are approximately 22 nucleotide noncoding RNAs derived from endogenous genes\_ they are processed from the stem of a longer hairpin like structure termed a pre-miRNA." [GOC

6770 Pathogen[ Q2Q067] interacts with 4 human partners: {Q9HCK5;Q9H9G7;Q9UKV8;Q9UL18}

6771 Pathogen[ P0C214] interacts with 5 human partners: {Q9H9G7;Q8NDV7;Q9UKV8;Q9HCK5;Q9UL18}

6772 Pathogen[ P03346] interacts with 4 human partners: {Q9H9G7;Q9UL18;Q9HCK5;Q9UKV8}

6773 Pathogen[ Q85601] interacts with 4 human partners: {Q9HCK5;Q9UL18;Q9H9G7;Q9UKV8}

6774 Pathogen[ P14079] interacts with 5 human partners: {Q9UKV8;Q9UL18;Q9H9G7;Q9HCK5;Q8NDV7}

6775 Pathogen[ P03383] interacts with 4 human partners: {Q9UL18;Q9HCK5;Q9UKV8;Q9H9G7}

6776 Pathogen[ P03410] interacts with 5 human partners: {Q9UKV8;Q9UL18;Q8NDV7;Q9H9G7;Q9HCK5}

6777 Pathogen[ P14075] interacts with 4 human partners: {Q9HCK5;Q9H9G7;Q9UKV8;Q9UL18}

6778 Pathogen[ P0C206] interacts with 5 human partners: {Q9HCK5;Q9UKV8;Q8NDV7;Q9H9G7;Q9UL18}

6779 Pathogen[ P03363] interacts with 5 human partners: {Q9H9G7;Q9HCK5;Q9UKV8;Q8NDV7;Q9UL18}

6780 [Cluster 617]GO:0030897+C cellular\_component [name] HOPS complex [def] "A multimeric protein complex that associates with the vacuolar membrane and is involved in homotypic vacuole fusion and vacuole protein sorting. For example, the *Saccharomyces* complex contains Vps41p, Vam6p, Pep5p, Vps16p, Pep3p, and Vps33p." [PMID

6781 Pathogen[ Q2Q067] interacts with 6 human partners:{Q9H267;Q9H9C1;Q9H8T0;Q86VS8;Q96ED9;P49754}

6782 Pathogen[ P0C214] interacts with 5 human partners:{P49754;Q96ED9;Q86VS8;Q9H8T0;Q9H9C1}

6783 Pathogen[ P03346] interacts with 9 human partners:{Q86VS8;Q9P253;P49754;Q9H8T0;Q96AX1;Q96ED9;Q9H9C1;Q9H267;Q9UJC3}

6784 Pathogen[ Q85601] interacts with 7 human partners:{Q86VS8;Q9P253;P49754;Q9H9C1;Q9H267;Q9H8T0;Q96ED9}

6785 Pathogen[ P14079] interacts with 10 human partners:{Q9UJC3;Q9H9C1;Q86VS8;Q96ED9;Q9H8T0;Q9H269;Q96AX1;Q9P253;P49754;Q9H267}

6786 Pathogen[ P03383] interacts with 5 human partners:{Q9H9C1;P49754;Q9H8T0;Q86VS8;Q96ED9}

6787 Pathogen[ P03410] interacts with 10 human partners:{Q9H267;Q9UJC3;Q9H8T0;Q86VS8;Q9P253;Q96ED9;P49754;Q9H9C1;Q9H269;Q96AX1}

6788 Pathogen[ P14075] interacts with 5 human partners:{Q9H9C1;Q9H8T0;P49754;Q86VS8;Q96ED9}

6789 Pathogen[ P0C206] interacts with 9 human partners:{Q9H8T0;P49754;Q86VS8;Q96ED9;Q96AX1;Q9P253;Q9UJC3;Q9H9C1;Q9H267}

6790 Pathogen[ P03363] interacts with 7 human partners:{P49754;Q86VS8;Q96ED9;Q9H9C1;Q9H267;Q9H8T0;Q9UJC3}

6791 [Cluster 618]GO:0061202+C cellular\_component [name] clathrin sculpted gamma-aminobutyric acid transport vesicle membrane [def] "The lipid bilayer surrounding a clathrin sculpted gamma-aminobutyric acid transport vesicle." [GOC

6792 Pathogen[ Q2Q067] interacts with 1 human partners:{P11142}

6793 Pathogen[ P0C214] interacts with 1 human partners:{P11142}

6794 Pathogen[ P03346] interacts with 1 human partners:{P11142}

6795 Pathogen[ Q85601] interacts with 1 human partners:{P11142}

6796 Pathogen[ P14079] interacts with 1 human partners:{P11142}

6797 Pathogen[ P03383] interacts with 1 human partners:{P11142}

6798 Pathogen[ P03410] interacts with 1 human partners:{P11142}

6799 Pathogen[ P14075] interacts with 1 human partners:{P11142}

6800 Pathogen[ P0C206] interacts with 1 human partners:{P11142}

6801 Pathogen[ P03363] interacts with 1 human partners:{P11142}

6802 [Cluster 619]GO:0019897+C cellular\_component [name] extrinsic to plasma membrane [def] "Loosely bound to one surface of the plasma membrane, but not integrated into the hydrophobic region." [GOC

6803 Pathogen[ Q2Q067] interacts with 4 human partners:{Q9HCH5;Q53G26;P63000;Q96EY1}

6804 Pathogen[ P0C214] interacts with 4 human partners:{P63000;Q9HCH5;Q53G26;Q96EY1}

6805 Pathogen[ P03346] interacts with 5 human partners:{Q9HCH5;Q8IYJ3;Q53G26;P63000;Q96EY1}

6806 Pathogen[ Q85601] interacts with 4 human partners:{Q53G26;P63000;Q9HCH5;Q96EY1}

6807 Pathogen[ P14079] interacts with 4 human partners:{Q8IYJ3;Q9HCH5;Q15075;Q96EY1}

6808 Pathogen[ P03383] interacts with 4 human partners:{P63000;Q9HCH5;Q96EY1;Q53G26}

6809 Pathogen[ P03410] interacts with 5 human partners:{Q9HCH5;Q53G26;P63000;Q8IYJ3;Q96EY1}

6810 Pathogen[ P14075] interacts with 4 human partners:{Q9HCH5;Q53G26;P63000;Q96EY1}

6811 Pathogen[ P0C206] interacts with 5 human partners:{Q53G26;Q8IYJ3;P63000;Q9HCH5;Q96EY1}

6812 Pathogen[ P03363] interacts with 4 human partners:{P63000;Q53G26;Q9HCH5;Q96EY1}

6813 [Cluster 620]GO:0031982+C cellular\_component [name] vesicle [def] "Any small, fluid-filled, spherical organelle enclosed by membrane or protein." [GOC

6814 Pathogen[ Q2Q067] interacts with 8 human partners:{P11166;P20073;P26678;Q13561;O75436;Q13409;P14672;O14576}

6815 Pathogen[ P0C214] interacts with 8 human partners:{P11166;O75436;O14576;Q13409;P14672;P20073;Q13561;P26678}

6816 Pathogen[ P03346] interacts with 8 human partners:{O14576;P20073;P26678;P11166;O75436;Q13409;P14672;Q13561}

6817 Pathogen[ Q85601] interacts with 7 human partners:{Q13409;P11166;O14576;O75436;P20073;P14672;Q13561}

6818 Pathogen[ P14079] interacts with 9 human partners:{P31751;P14672;P11166;Q13409;Q13561;P20073;P26678;O75436;O14576}

6819 Pathogen[ P03383] interacts with 5 human partners:{P26678;O75436;Q13561;P14672;P20073}

6820 Pathogen[ P03410] interacts with 8 human partners:{Q13409;Q13561;P11166;O14576;P26678;O75436;P20073;P33176}

6821 Pathogen[ P14075] interacts with 5 human partners:{Q13561;P20073;P26678;O75436;P14672}

6822 Pathogen[ P0C206] interacts with 8 human partners:{O14576;P11166;Q13409;Q13561;O75436;P14672;P26678;P20073}

6823 Pathogen[ P03363] interacts with 8 human partners:{P33176;Q13561;O75436;P20073;Q13409;P14672;P11166;O14576}

6824 [Cluster 621]GO:0000118+C cellular\_component [name] histone deacetylase complex [def]



"A protein complex that possesses histone deacetylase activity." [GOC]

6825 Pathogen[ Q2Q067] interacts with 27 human partners: {P56524;Q9BY41;Q9UKV0;Q9UBB5;Q13547;O94776;O15379;O60535;O75362;P48552;O75446;Q9UQL6;O43593;Q969S8;Q96BD5;Q96DB2;Q9P2R6;O60907;Q9UPW6;Q8WUI4;Q9Y6J9;Q86X95;Q9BZK7;P45973;O75376;O00422;Q03112}

6826 Pathogen[ P0C214] interacts with 27 human partners: {Q9Y6J9;Q13547;Q969S8;P48552;Q96DB2;O60907;Q03112;O75362;Q9P2R6;P56524;Q96BD5;O60535;O75446;O94776;O00422;Q9UKV0;O75376;O43593;O15379;Q9BZK7;P45973;Q9UPW6;Q9UBB5;Q8WUI4;Q86X95;Q9UQL6;Q9BY41}

6827 Pathogen[ P03346] interacts with 28 human partners: {Q969S8;Q9Y6J9;P45973;O60907;O75446;Q9UPW6;O75362;Q96DB2;O15379;P56524;O94776;O00422;O43593;P17542;Q9P2R6;Q13547;Q03112;Q9BY41;Q8WUI4;O75376;Q96BD5;Q9UKV0;Q9BZK7;P48552;O60535;Q86X95;Q9UBB5;Q9UQL6}

6828 Pathogen[ Q85601] interacts with 27 human partners: {Q9P2R6;Q969S8;Q9UKV0;Q96DB2;Q9UPW6;Q9BY41;O94776;Q96BD5;Q9UQL6;O60907;Q03112;Q9Y6J9;P45973;O60535;O75376;O75446;Q9BZK7;P56524;O15379;Q13547;O75362;P48552;O00422;Q8WUI4;O43593;Q9UBB5;Q86X95}

6829 Pathogen[ P14079] interacts with 24 human partners: {Q9UQL6;P48552;O15379;Q9UPW6;O00422;Q9BZK7;Q9Y6J9;Q96DB2;O75362;Q9UBB5;Q969S8;Q8WUI4;O60907;Q9UKV0;O75446;P45973;Q96BD5;Q9P2R6;Q9BY41;O75376;P56524;O94776;Q86X95;O43593}

6830 Pathogen[ P03383] interacts with 25 human partners: {Q9Y6J9;Q9UPW6;O94776;O75376;Q9UQL6;Q9P2R6;O75362;Q96BD5;O60907;Q9UBB5;O60535;Q03112;P45973;O00422;O15379;Q13547;Q9BY41;O75446;Q9UKV0;Q9BZK7;P56524;P48552;Q8WUI4;Q86X95;Q969S8}

6831 Pathogen[ P03410] interacts with 27 human partners: {Q9UKV0;Q03112;Q9BY41;O60535;Q9P2R6;O75446;Q9UBB5;P45973;O75376;Q9UPW6;Q8WUI4;Q9UQL6;Q969S8;O75362;O15379;P56524;Q9Y6J9;Q86X95;O94776;Q13547;Q9BZK7;O00422;Q96BD5;P48552;O60907;O43593;Q96DB2}

6832 Pathogen[ P14075] interacts with 25 human partners: {Q9BY41;Q9Y6J9;Q86X95;Q969S8;O75362;O75446;Q9P2R6;P56524;O00422;O94776;P45973;Q9UKV0;Q9UBB5;Q13547;O75376;Q9UPW6;O60907;Q96BD5;Q03112;O15379;Q9BZK7;P48552;Q9UQL6;Q8WUI4;O60535}

6833 Pathogen[ P0C206] interacts with 27 human partners: {P45973;Q9UBB5;O60907;Q96DB2;Q9UKV0;Q13547;O94776;Q9Y6J9;O00422;Q9P2R6;Q86X95;O75446;Q03112;O15379;Q8WUI4;Q9UPW6;O60535;Q9BZK7;O75376;O75362;Q9BY41;P56524;P48552;Q969S8;O43593;Q96BD5;Q9UQL6}

6834 Pathogen[ P03363] interacts with 25 human partners: {Q86X95;O60535;Q9BY41;Q03112;P45973;O15379;Q969S8;Q9BZK7;O75376;O60907;Q9UQL6;Q96BD5;O75446;P48552;O43593;Q9UKV0;Q13547;O00422;Q8WUI4;O75362;Q9P2R6;Q9UPW6;Q9Y6J9;O94776;Q9UBB5}

6835 [Cluster 622]GO:0072546+C cellular\_component [name] ER membrane protein complex [def] "A transmembrane protein complex that is involved in protein folding in the endoplasmic reticulum. In *S. cerevisiae*, it has six members

6836 Pathogen[ Q2Q067] interacts with 3 human partners: {Q9Y3B6;Q15006;O43402}

6837 Pathogen[ P0C214] interacts with 3 human partners: {O43402;Q9Y3B6;Q15006}

6838 Pathogen[ P03346] interacts with 3 human partners: {O43402;Q15006;Q9Y3B6}

6839 Pathogen[ Q85601] interacts with 3 human partners: {Q15006;O43402;Q9Y3B6}

6840 Pathogen[ P14079] interacts with 8 human partners: {Q15006;Q9P0I2;Q9BV81;Q9Y3B6;O43402;Q5J8M3;Q8N766;Q9NPA0}

6841 Pathogen[ P03383] interacts with 3 human partners: {Q9Y3B6;O43402;Q15006}

6842 Pathogen[ P03410] interacts with 7 human partners: {O43402;Q9NPA0;Q9BV81;Q15006;Q8N766;Q9Y3B6;Q9P0I2}

6843 Pathogen[ P14075] interacts with 3 human partners: {O43402;Q15006;Q9Y3B6}

6844 Pathogen[ P0C206] interacts with 3 human partners: {Q9Y3B6;O43402;Q15006}

6845 Pathogen[ P03363] interacts with 3 human partners: {Q9Y3B6;O43402;Q15006}

6846 [Cluster 623]GO:0005771+C cellular\_component [name] multivesicular body [def] "A type of late endosome in which regions of the limiting endosomal membrane invaginate to form internal vesicles. Membrane proteins that enter the internal vesicles are sequestered from the cytoplasm." [PMID]

6847 Pathogen[ Q2Q067] interacts with 3 human partners: {Q99816;Q5VYK3;P14672}

6848 Pathogen[ P0C214] interacts with 3 human partners: {Q5VYK3;Q99816;P14672}

6849 Pathogen[ P03346] interacts with 3 human partners: {Q99816;Q5VYK3;P14672}

6850 Pathogen[ Q85601] interacts with 3 human partners: {Q5VYK3;Q99816;P14672}

6851 Pathogen[ P14079] interacts with 5 human partners: {P14672;Q5VYK3;P11686;Q99816;P13693}

6852 Pathogen[ P03383] interacts with 3 human partners: {Q5VYK3;Q99816;P14672}

6853 Pathogen[ P03410] interacts with 4 human partners: {Q5VYK3;Q99816;P11686;P13693}

6854 Pathogen[ P14075] interacts with 3 human partners: {Q99816;P14672;Q5VYK3}

6855 Pathogen[ P0C206] interacts with 3 human partners: {Q99816;Q5VYK3;P14672}

6856 Pathogen[ P03363] interacts with 3 human partners: {P14672;Q99816;Q5VYK3}

6857 [Cluster 624]GO:0045335+C cellular\_component [name] phagocytic vesicle [def] "A membrane-bounded intracellular vesicle that arises from the ingestion of particulate material by phagocytosis." [GOC]

6858 Pathogen[ Q2Q067] interacts with 1 human partners: {P50995}

6859 Pathogen[ P0C214] interacts with 1 human partners: {P50995}

6860 Pathogen[ P03346] interacts with 2 human partners:{P50995;Q86Y82}

6861 Pathogen[ Q85601] interacts with 1 human partners:{P50995}

6862 Pathogen[ P14079] interacts with 1 human partners:{P50995}

6863 Pathogen[ P03383] interacts with 1 human partners:{P50995}

6864 Pathogen[ P03410] interacts with 1 human partners:{P50995}

6865 Pathogen[ P14075] interacts with 1 human partners:{P50995}

6866 Pathogen[ P0C206] interacts with 1 human partners:{P50995}

6867 Pathogen[ P03363] interacts with 1 human partners:{P50995}

6868 [Cluster 625]GO:0044300+C cellular\_component [name] cerebellar mossy fiber [def] "An axon arising from cerebellar projecting cells in the cochlea, vestibular nuclei, spinal cord, reticular formation, cerebellar nuclei and basilar pontine nuclei. Mossy fibers enter through all three cerebellar peduncles and send collaterals to the deep cerebellar nuclei, then branch in the white matter and terminate in the granule cell layer. Through this branching, a given mossy fiber can innervate several folia. Mossy fibers synapse on granule cells. The synaptic contacts are made at enlargements along the length of the mossy fiber called mossy fiber rosettes. The enlargements of the rosettes give the axons as \"mossy\" appearance in Golgi stained preparations." [NIF\_Subcellular

6869 Pathogen[ Q2Q067] interacts with 1 human partners:{000712}

6870 Pathogen[ P0C214] interacts with 1 human partners:{000712}

6871 Pathogen[ P03346] interacts with 1 human partners:{000712}

6872 Pathogen[ Q85601] interacts with 1 human partners:{000712}

6873 Pathogen[ P14079] interacts with 1 human partners:{000712}

6874 Pathogen[ P03383] interacts with 1 human partners:{000712}

6875 Pathogen[ P03410] interacts with 1 human partners:{000712}

6876 Pathogen[ P14075] interacts with 1 human partners:{000712}

6877 Pathogen[ P0C206] interacts with 1 human partners:{000712}

6878 Pathogen[ P03363] interacts with 1 human partners:{000712}

6879 [Cluster 626]GO:0015934+C cellular\_component [name] large ribosomal subunit [def] "The larger of the two subunits of a ribosome. Two sites on the ribosomal large subunit are involved in translation, namely the aminoacyl site (A site) and peptidyl site (P site)." [ISBN

6880 Pathogen[ Q2Q067] interacts with 13 human partners:{Q9BYD6;Q6NVV1;P40429;Q9NWU5;Q9BYC8;Q9UNX3;P61254;P62906;P62917;O76021;P36578;P18621;Q9P015}

6881 Pathogen[ P0C214] interacts with 12 human partners:{O76021;Q9NWU5;P40429;Q9UNX3;P61254;Q6NVV1;Q9BYC8;Q9P015;Q9BYD6;P36578;P18621;P62906}

6882 Pathogen[ P03346] interacts with 13 human partners:{O76021;P62917;Q9UNX3;Q9BYC8;P61254;Q6NVV1;Q9NWU5;P18621;Q9BYD6;P36578;P40429;Q9P015;P62906}

6883 Pathogen[ Q85601] interacts with 13 human partners:{Q9BYC8;Q9P015;Q9BYD6;P61254;Q9NWU5;P18621;Q9UNX3;P36578;O76021;P62917;Q6NVV1;P62906;P40429}

6884 Pathogen[ P14079] interacts with 12 human partners:{Q9BYD6;Q6NVV1;P40429;P18621;Q9UNX3;P61254;O76021;P36578;Q9BYC8;P62906;Q9P015;P62917}

6885 Pathogen[ P03383] interacts with 13 human partners:{P36578;P40429;Q9NWU5;P62917;Q9UNX3;Q9BYD6;Q9P015;P62906;P61254;Q6NVV1;P18621;Q9BYC8;O76021}

6886 Pathogen[ P03410] interacts with 13 human partners:{Q9P015;P62906;P18621;Q9NWU5;Q9BYD6;Q9UNX3;P36578;Q9BYC8;Q6NVV1;P61254;P40429;O76021;P62917}

6887 Pathogen[ P14075] interacts with 13 human partners:{O76021;Q9BYD6;P61254;P18621;Q9UNX3;Q9NWU5;P62917;Q6NVV1;Q9P015;P40429;P36578;Q9BYC8;P62906}

6888 Pathogen[ P0C206] interacts with 13 human partners:{P40429;Q9P015;Q9BYC8;P18621;Q9NWU5;Q6NVV1;P36578;O76021;Q9BYD6;Q9UNX3;P62906;P61254;P62917}

6889 Pathogen[ P03363] interacts with 13 human partners:{P18621;P36578;P61254;O76021;Q9NWU5;Q9UNX3;Q9BYC8;P62906;Q9P015;Q6NVV1;P62917;P40429;Q9BYD6}

6890 [Cluster 627]GO:0000138+C cellular\_component [name] Golgi trans cisterna [def] "The Golgi cisterna farthest from the endoplasmic reticulum\_ the final processing compartment through which proteins pass before exiting the Golgi apparatus\_ the compartment in which N-linked protein glycosylation is completed." [ISBN

6891 Pathogen[ Q2Q067] interacts with 2 human partners:{Q8IV36;O00189}

6892 Pathogen[ P0C214] interacts with 2 human partners:{O00189;Q8IV36}

6893 Pathogen[ P03346] interacts with 2 human partners:{Q8IV36;O00189}

6894 Pathogen[ Q85601] interacts with 2 human partners:{Q8IV36;O00189}

6895 Pathogen[ P14079] interacts with 2 human partners:{O00189;Q8IV36}

6896 Pathogen[ P03383] interacts with 2 human partners:{Q8IV36;O00189}

6897 Pathogen[ P03410] interacts with 1 human partners:{Q8IV36}

6898 Pathogen[ P14075] interacts with 2 human partners:{Q8IV36;O00189}

6899 Pathogen[ P0C206] interacts with 2 human partners:{Q8IV36;O00189}

6900 Pathogen[ P03363] interacts with 2 human partners:{Q8IV36;O00189}

6901 [Cluster 628]GO:0031901+C cellular\_component [name] early endosome membrane [def]

"The lipid bilayer surrounding an early endosome." [GOC  
6902 Pathogen[ Q2Q067] interacts with 9 human  
partners:{Q92783;Q8NEU8;O75886;Q9HCC9;Q92562;Q9Y4E1;O14964;Q9UKG1;Q86YV9}  
6903 Pathogen[ P0C214] interacts with 12 human  
partners:{Q9Y4E1;Q641Q2;O14964;O75886;Q86YV9;Q9UKG1;Q92562;Q08AM6;Q9HCC9;Q8NEU8;Q5SNT  
6;Q92783}  
6904 Pathogen[ P03346] interacts with 19 human  
partners:{Q13596;Q86YV9;O95405;O75886;Q96T51;Q92562;A8K0Z3;Q7Z3T8;Q8NEU8;Q9UNH7;P4256  
6;Q9Y5X2;Q9Y4E1;Q92783;O95219;Q9UKG1;O14964;O60749;Q9HCC9}  
6905 Pathogen[ Q85601] interacts with 12 human  
partners:{Q13596;Q08AM6;Q8NEU8;Q96T51;Q92562;O75886;Q86YV9;Q9HCC9;Q92783;O14964;Q9UKG  
1;Q9UNH7}  
6906 Pathogen[ P14079] interacts with 25 human  
partners:{O75886;Q86YV9;Q9UNH7;Q92562;Q9Y4E1;Q9UKG1;Q8NEU8;Q6BDI9;Q9H1K0;P42566;Q6VEQ  
5;Q92783;O95405;Q9HCC9;Q9Y5X2;Q96T51;Q9NQA3;Q15075;Q641Q2;O60749;Q13596;Q7Z3T8;A8K0Z3  
;Q969W9;Q5SNT6}  
6907 Pathogen[ P03383] interacts with 7 human  
partners:{Q8NEU8;O75886;Q9Y4E1;Q86YV9;Q92783;O14964;Q9HCC9}  
6908 Pathogen[ P03410] interacts with 26 human  
partners:{Q5SNT6;Q92562;O95405;Q969W9;Q13596;O60749;Q92783;Q9HCC9;O95219;Q9UNH7;Q08AM  
6;Q86YV9;Q641Q2;Q9Y4E1;Q9H1K0;Q6VEQ5;Q96T51;Q8NEU8;P42566;Q9NQA3;Q6BDI9;Q9UKG1;Q7Z3T8  
;O75886;A8K0Z3;Q9Y5X2}  
6909 Pathogen[ P14075] interacts with 8 human  
partners:{O75886;Q92783;Q8NEU8;Q9HCC9;O14964;Q86YV9;Q641Q2;Q9Y4E1}  
6910 Pathogen[ P0C206] interacts with 22 human  
partners:{O14964;Q9UKG1;Q641Q2;Q9UNH7;Q9HCC9;Q8NEU8;Q92562;Q9H1K0;Q96T51;Q13596;Q9278  
3;Q9Y4E1;O60749;Q7Z3T8;Q6VEQ5;O95405;Q5SNT6;P42566;O75886;Q86YV9;Q6BDI9;Q08AM6}  
6911 Pathogen[ P03363] interacts with 13 human  
partners:{Q9HCC9;Q9UNH7;O75886;O95219;Q92783;Q96T51;O60749;Q8NEU8;O95405;Q9Y4E1;O1496  
4;Q13596;Q9UKG1}  
6912 [Cluster 629]GO:0000347+C cellular\_component [name] THO complex [def] "The THO  
complex is a nuclear complex that is required for transcription elongation through genes  
containing tandemly repeated DNA sequences. The THO complex is also part of the TREX  
(TREX complex) that is involved in coupling transcription to export of  
mRNAs to the cytoplasm. In *S. cerevisiae*, it is composed of four subunits  
6913 Pathogen[ Q2Q067] interacts with 4 human partners:{Q96FV9;Q6I9Y2;Q13769;Q8NI27}  
6914 Pathogen[ P0C214] interacts with 4 human partners:{Q96FV9;Q13769;Q8NI27;Q6I9Y2}  
6915 Pathogen[ P03346] interacts with 4 human partners:{Q96FV9;Q13769;Q8NI27;Q6I9Y2}  
6916 Pathogen[ Q85601] interacts with 4 human partners:{Q13769;Q96FV9;Q8NI27;Q6I9Y2}  
6917 Pathogen[ P14079] interacts with 4 human partners:{Q8NI27;Q96FV9;Q13769;Q6I9Y2}  
6918 Pathogen[ P03383] interacts with 4 human partners:{Q8NI27;Q13769;Q96FV9;Q6I9Y2}  
6919 Pathogen[ P03410] interacts with 4 human partners:{Q8NI27;Q96FV9;Q13769;Q6I9Y2}  
6920 Pathogen[ P14075] interacts with 4 human partners:{Q13769;Q8NI27;Q6I9Y2;Q96FV9}  
6921 Pathogen[ P0C206] interacts with 4 human partners:{Q8NI27;Q13769;Q96FV9;Q6I9Y2}  
6922 Pathogen[ P03363] interacts with 4 human partners:{Q13769;Q8NI27;Q96FV9;Q6I9Y2}  
6923 [Cluster 630]GO:0010369+C cellular\_component [name] chromocenter [def] "A region in  
which centric, heterochromatic portions of one or more chromosomes form a compact  
structure." [PMID  
6924 Pathogen[ Q2Q067] interacts with 4 human partners:{O43482;Q9NSC2;P45973;P83916}  
6925 Pathogen[ P0C214] interacts with 4 human partners:{P83916;O43482;Q9NSC2;P45973}  
6926 Pathogen[ P03346] interacts with 5 human  
partners:{P45973;Q9NSC2;O43482;Q96GD3;P83916}  
6927 Pathogen[ Q85601] interacts with 4 human partners:{P83916;P45973;Q9NSC2;O43482}  
6928 Pathogen[ P14079] interacts with 4 human partners:{O43482;P45973;P83916;Q9NSC2}  
6929 Pathogen[ P03383] interacts with 4 human partners:{P83916;P45973;Q9NSC2;O43482}  
6930 Pathogen[ P03410] interacts with 4 human partners:{P45973;O43482;P83916;Q9NSC2}  
6931 Pathogen[ P14075] interacts with 4 human partners:{Q9NSC2;P45973;P83916;O43482}  
6932 Pathogen[ P0C206] interacts with 4 human partners:{P45973;Q9NSC2;P83916;O43482}  
6933 Pathogen[ P03363] interacts with 3 human partners:{P83916;P45973;O43482}  
6934 [Cluster 631]GO:0008280+C cellular\_component [name] cohesin core heterodimer [def]  
"The core heterodimer of a cohesin complex\_ a structure required for sister chromatid  
cohesion in eukaryotes." [GOC  
6935 Pathogen[ Q2Q067] interacts with 1 human partners:{Q14683}  
6936 Pathogen[ P0C214] interacts with 1 human partners:{Q14683}  
6937 Pathogen[ P03346] interacts with 1 human partners:{Q14683}  
6938 Pathogen[ Q85601] interacts with 1 human partners:{Q14683}  
6939 Pathogen[ P14079] interacts with 1 human partners:{Q14683}  
6940 Pathogen[ P03383] interacts with 1 human partners:{Q14683}  
6941 Pathogen[ P03410] interacts with 1 human partners:{Q14683}  
6942 Pathogen[ P14075] interacts with 1 human partners:{Q14683}  
6943 Pathogen[ P0C206] interacts with 1 human partners:{Q14683}  
6944 Pathogen[ P03363] interacts with 1 human partners:{Q14683}  
6945 [Cluster 632]GO:0033267+C cellular\_component [name] axon part [def] "A part of an  
axon, a cell projection of a neuron." [GOC  
6946 Pathogen[ Q2Q067] interacts with 3 human partners:{P62258;Q96EV8;Q9NRI5}  
6947 Pathogen[ P0C214] interacts with 3 human partners:{Q9NRI5;Q9HCE7;Q96EV8}

6948 Pathogen[ P03346] interacts with 4 human partners: {Q9NRI5;Q12840;P62258;Q96EV8}

6949 Pathogen[ Q85601] interacts with 4 human partners: {Q12840;Q96EV8;P62258;Q9NRI5}

6950 Pathogen[ P14079] interacts with 4 human partners: {Q12840;Q9NRI5;P62258;Q96EV8}

6951 Pathogen[ P03383] interacts with 3 human partners: {Q9NRI5;Q96EV8;P62258}

6952 Pathogen[ P03410] interacts with 4 human partners: {P62258;Q12840;Q9NRI5;Q96EV8}

6953 Pathogen[ P14075] interacts with 3 human partners: {Q9NRI5;Q96EV8;P62258}

6954 Pathogen[ P0C206] interacts with 4 human partners: {P62258;Q96EV8;Q9NRI5;Q12840}

6955 Pathogen[ P03363] interacts with 3 human partners: {P62258;Q9NRI5;Q12840}

6956 [Cluster 633]GO:0045323+C cellular\_component [name] interleukin-1 receptor complex [def] "A protein complex that binds interleukin-1\_ comprises an alpha and a beta subunit." [GOC]

6957 Pathogen[ Q2Q067] interacts with 1 human partners: {Q15654}

6958 Pathogen[ P0C214] interacts with 2 human partners: {Q9H0E2;Q15654}

6959 Pathogen[ P03346] interacts with 2 human partners: {Q9H0E2;Q15654}

6960 Pathogen[ Q85601] interacts with 1 human partners: {Q15654}

6961 Pathogen[ P14079] interacts with 1 human partners: {Q9H0E2}

6962 Pathogen[ P03383] interacts with 1 human partners: {Q15654}

6963 Pathogen[ P03410] interacts with 2 human partners: {Q15654;Q9H0E2}

6964 Pathogen[ P14075] interacts with 1 human partners: {Q15654}

6965 Pathogen[ P0C206] interacts with 2 human partners: {Q15654;Q9H0E2}

6966 Pathogen[ P03363] interacts with 2 human partners: {Q15654;Q9H0E2}

6967 [Cluster 634]GO:0001891+C cellular\_component [name] phagocytic cup [def] "An invagination of the cell membrane formed by an actin dependent process during phagocytosis. Following internalization it is converted into a phagosome." [PMID]

6968 Pathogen[ Q2Q067] interacts with 2 human partners: {P63000;Q9NRR3}

6969 Pathogen[ P0C214] interacts with 2 human partners: {Q9NRR3;P63000}

6970 Pathogen[ P03346] interacts with 2 human partners: {Q9NRR3;P63000}

6971 Pathogen[ Q85601] interacts with 2 human partners: {P63000;Q9NRR3}

6972 Pathogen[ P14079] interacts with 1 human partners: {Q9NRR3}

6973 Pathogen[ P03383] interacts with 2 human partners: {P63000;Q9NRR3}

6974 Pathogen[ P03410] interacts with 2 human partners: {P63000;Q9NRR3}

6975 Pathogen[ P14075] interacts with 2 human partners: {Q9NRR3;P63000}

6976 Pathogen[ P0C206] interacts with 2 human partners: {Q9NRR3;P63000}

6977 Pathogen[ P03363] interacts with 2 human partners: {P63000;Q9NRR3}

6978 [Cluster 635]GO:0000792+C cellular\_component [name] heterochromatin [def] "A compact and highly condensed form of chromatin." [GOC]

6979 Pathogen[ Q2Q067] interacts with 20 human partners: {O43463;Q9UBB5;Q9HC52;Q96T88;Q9Y6K1;O60535;O95503;Q9UER7;O95931;Q9UBC3;P26358;Q92769;Q9H4L7;P46100;O95983;Q13416;Q9NSC2;Q9HBD4;P45973;Q14781}

6980 Pathogen[ P0C214] interacts with 19 human partners: {Q9HBD4;Q9Y6K1;O95931;O60535;O95503;Q9H4L7;O43463;Q96T88;Q9UER7;O95983;P46100;P26358;Q92769;Q9NSC2;Q14781;Q13416;P45973;Q9UBB5;Q9HC52}

6981 Pathogen[ P03346] interacts with 21 human partners: {Q14781;Q9Y6K1;Q9HBD4;P45973;P46100;Q9UJQ4;O95983;Q9NSC2;Q9HC52;O95931;Q9UBC3;P26358;O43463;Q92769;Q9UER7;Q13416;O60535;Q9UBB5;O95503;Q96T88;Q9H4L7}

6982 Pathogen[ Q85601] interacts with 20 human partners: {Q9UER7;O95931;P26358;O95983;O95503;O43463;Q92769;P45973;O60535;Q9H4L7;Q9Y6K1;Q96T88;Q9HBD4;Q13416;Q9NSC2;Q9UBB5;P46100;Q9HC52;Q9UBC3;Q14781}

6983 Pathogen[ P14079] interacts with 17 human partners: {Q13416;Q9Y6K1;O95503;Q9HC52;Q9UBB5;Q9H4L7;O95931;P46100;P45973;Q9UBC3;Q14781;Q9UER7;Q92769;Q9UJQ4;P26358;O95983;Q9NSC2}

6984 Pathogen[ P03383] interacts with 17 human partners: {Q9HBD4;O95503;O43463;Q9HC52;O95931;Q9UBB5;O60535;P46100;P45973;Q9Y6K1;Q92769;Q9NSC2;Q9UER7;O95983;Q13416;P26358;Q14781}

6985 Pathogen[ P03410] interacts with 20 human partners: {Q9H4L7;O95503;O60535;Q13416;O95931;Q9UBB5;P45973;P26358;Q9UER7;Q92769;O95983;P46100;Q9UBC3;O43463;Q14781;Q9NSC2;Q9Y6K1;Q9HBD4;Q9UJQ4;Q9HC52}

6986 Pathogen[ P14075] interacts with 17 human partners: {Q14781;Q9NSC2;Q9Y6K1;Q9HBD4;O95503;O95931;P45973;Q9UBB5;P26358;P46100;O95983;Q92769;Q9HC52;Q13416;O43463;Q9UER7;O60535}

6987 Pathogen[ P0C206] interacts with 21 human partners: {Q9H4L7;Q92769;P45973;Q9Y6K1;Q9UJQ4;Q9HC52;Q9UBB5;Q9NSC2;O95983;P46100;O43463;P26358;Q9UER7;Q13416;Q14781;Q96T88;O95931;O60535;Q9HBD4;Q9UBC3;O95503}

6988 Pathogen[ P03363] interacts with 19 human partners: {Q9UJQ4;O60535;Q14781;Q9H4L7;Q9HC52;P45973;Q9UER7;Q9Y6K1;P46100;Q13416;Q9HBD4;O95931;O95983;P26358;O43463;Q96T88;O95503;Q9UBC3;Q9UBB5}

6989 [Cluster 636]GO:0042470+C cellular\_component [name] melanosome [def] "A tissue-specific, membrane-bounded cytoplasmic organelle within which melanin pigments are synthesized and stored. Melanosomes are synthesized in melanocyte cells." [GOC]

6990 Pathogen[ Q2Q067] interacts with 25 human partners: {Q9NQG7;P50995;P63104;P62258;Q7KZF4;P62826;P08133;P08238;P07900;Q9HCH5;P11166;P11142;Q06830;O75396;Q8WUM4;Q8NFW9;Q00610;P50991;P40121;P31946;P63000;P30047;P23284;P55209;P14625}

6991 Pathogen[ P0C214] interacts with 22 human partners: {Q9NQG7;Q8NFW9;P63000;P14625;P40121;P08133;Q9HCH5;P23284;Q7KZF4;Q06830;P11166;P62826;P23526;O75396;P50991;P30047;P31946;P50995;P35749;P13667;P11142;Q8WUM4}

6992 Pathogen[ P03346] interacts with 30 human  
partners: {Q9NQG7;P07900;P23526;P14625;P62258;Q9HCH5;P11142;Q93050;O75396;P13667;P62826;P30047;Q8IYJ3;P08133;Q7KZF4;P40121;P50991;P11166;P50995;Q8NFW9;Q06830;P31946;P63104;P49755;P55209;P08238;Q8WUM4;P63000;Q00610;P23284}

6993 Pathogen[ Q85601] interacts with 28 human  
partners: {Q9NQG7;P63104;Q8NFW9;P31946;Q00610;O75396;P50995;Q93050;P62826;P63000;Q9HCH5;Q7KZF4;P30047;P50991;P11166;P62258;P40121;P11142;P23284;P08238;P35749;P07900;Q06830;P14625;P08133;Q8WUM4;P23526;P55209}

6994 Pathogen[ P14079] interacts with 33 human  
partners: {Q16655;Q9NQG7;O14773;O43759;P57088;P11142;Q00610;P30040;P50995;Q92542;Q8IYJ3;P50991;Q9HCH5;P11166;P40121;P63104;O75396;P55209;Q8NFW9;P49755;P31946;Q8WUM4;P08238;P07900;P62258;P14625;Q93050;O95670;Q7KZF4;P23526;P62826;P23284;P30047}

6995 Pathogen[ P03383] interacts with 19 human  
partners: {Q9NQG7;P50995;Q00610;P31946;P63000;Q9HCH5;P07900;P55209;P62826;P63104;Q7KZF4;P14625;P11142;P23284;Q8WUM4;P62258;P08133;P08238;P30047}

6996 Pathogen[ P03410] interacts with 36 human  
partners: {Q00610;Q9NQG7;P62258;Q9HCH5;P30047;P50995;P63000;P11166;P08238;Q16655;P13667;O43759;P30040;P14625;P11142;Q93050;P07900;Q8NFW9;P08133;O75396;P62826;Q8IYJ3;O95670;P23526;P63104;P57088;Q92542;P55209;P23284;Q7KZF4;P27105;P40121;Q8WUM4;Q06830;P31946;P50991}

6997 Pathogen[ P14075] interacts with 20 human  
partners: {Q9NQG7;P11142;P23284;Q8WUM4;P08133;Q9HCH5;P08238;P55209;P07900;Q16655;P50995;P30047;P62826;P63104;P63000;P31946;Q7KZF4;P14625;Q00610;P62258}

6998 Pathogen[ P0C206] interacts with 35 human  
partners: {Q9NQG7;Q16655;O75396;P57088;P40121;O43759;P50995;Q8NFW9;P49755;Q7KZF4;Q00610;P50991;P62826;Q92542;P11166;P31946;P30047;P63104;Q8IYJ3;P08238;P08133;P63000;P62258;P07900;P23526;P23284;P35749;P55209;Q8WUM4;Q9HCH5;Q06830;P11142;P13667;Q93050;P14625}

6999 Pathogen[ P03363] interacts with 22 human  
partners: {P23284;Q9NQG7;P62258;P07900;Q8NFW9;P31946;Q00610;P63000;Q7KZF4;P50995;P50991;P63104;P08133;Q8WUM4;P55209;P30047;Q9HCH5;P62826;P08238;P40121;P11166;P11142}

7000 [Cluster 637]GO:0005732+C cellular\_component [name] small nucleolar ribonucleoprotein complex [def] "A ribonucleoprotein complex that contains an RNA molecule of the small nucleolar RNA (snoRNA) family and associated proteins. Most are involved in a step of processing of rRNA

7001 Pathogen[ Q2Q067] interacts with 6 human  
partners: {Q96DI7;O00566;Q96HR8;Q9NPE3;O00567;Q9Y2X3}

7002 Pathogen[ P0C214] interacts with 6 human  
partners: {Q9NPE3;O00567;Q96DI7;O00566;Q9Y2X3;Q96HR8}

7003 Pathogen[ P03346] interacts with 8 human  
partners: {O00567;O43818;O00566;Q9Y2X3;Q9NX24;Q96DI7;Q9NPE3;Q96HR8}

7004 Pathogen[ Q85601] interacts with 6 human  
partners: {Q96HR8;Q96DI7;O00566;Q9NPE3;O00567;Q9Y2X3}

7005 Pathogen[ P14079] interacts with 5 human  
partners: {Q9NPE3;Q9Y2X3;Q96HR8;O00567;O00566}

7006 Pathogen[ P03383] interacts with 6 human  
partners: {O00567;Q9NPE3;Q96HR8;Q9Y2X3;O00566;Q96DI7}

7007 Pathogen[ P03410] interacts with 7 human  
partners: {Q9Y2X3;Q9NX24;O00567;O43818;Q9NPE3;Q96HR8;O00566}

7008 Pathogen[ P14075] interacts with 6 human  
partners: {O00566;O00567;Q96HR8;Q96DI7;Q9NPE3;Q9Y2X3}

7009 Pathogen[ P0C206] interacts with 6 human  
partners: {Q9NPE3;O00567;Q9Y2X3;Q96HR8;Q96DI7;O00566}

7010 Pathogen[ P03363] interacts with 8 human  
partners: {Q9NX24;Q9Y2X3;O00567;O43818;Q9NPE3;O00566;Q96HR8;Q96DI7}

7011 [Cluster 638]GO:0016020+C cellular\_component [name] membrane [def] "Double layer of lipid molecules that encloses all cells, and, in eukaryotes, many organelles\_ may be a single or double lipid bilayer\_ also includes associated proteins." [GOC

7012 Pathogen[ Q2Q067] interacts with 473 human  
partners: {Q9BTW9;Q92783;P04156;Q7Z3C6;Q01844;Q96TC7;Q8TCS8;Q9NQG7;P30153;Q9Y4R8;Q4G0F5;Q8IUD2;Q01082;O15027;P30281;Q96J02;Q9UL45;P46108;Q9UH99;P50402;O00213;O75351;O75161;O94973;P09917;P31749;P52948;Q7LBR1;O43920;O00186;O14786;Q9Y6D6;Q9Y6Q5;Q99747;Q10567;Q96HA1;P20700;O15126;Q9HAU4;P55957;P24385;Q9Y5V3;P56377;Q92681;O75340;Q8N9R8;Q13033;O60664;O43747;Q9H5J4;O95782;Q14315;Q9H444;Q8NI35;Q14160;Q9NPB6;Q96B97;O00291;Q92572;O43493;O60784;P42167;Q9H2K2;Q6RW13;P41220;Q14678;Q08209;Q13352;P31040;O14579;Q8N1N5;Q7Z6B0;Q9BYG5;O95886;Q8N3V7;Q9NSC5;P55735;O75694;Q8WXE9;Q86XL3;P53675;Q99816;Q92797;O95295;Q5SQN1;Q9H1H9;Q96JI7;Q9BRQ6;Q9P0M2;Q9P299;Q9Y244;Q9UJG1;Q96B49;Q96DC7;Q8WV92;Q9NZD8;Q9BXM0;O60437;P56181;Q9UJY4;Q9BRG1;Q96CM4;P19367;O75081;Q9NZJ0;Q9NZI6;Q9BXW4;Q15046;A8CG34;O75489;Q9UJY5;A8MVW5;P30279;Q92870;Q8IV36;Q5T1C6;O60238;Q9NYJ8;Q9UP83;P14373;Q8N6F7;O43752;Q9P1A6;O14662;Q13884;P18850;P83436;Q8WUH2;O95999;Q96EY5;P36956;Q8N1F7;Q8N1B4;Q96EV8;Q6NZI2;Q86WV1;Q8N7J2;Q15172;Q9H8Y8;Q9HCH5;P29966;Q96CN9;Q9UBQ0;P13073;Q7L804;P48444;Q03252;Q08378;P67775;Q7Z3B4;Q14457;P42704;O14910;Q5JTC6;O00189;Q330K2;Q7Z614;P53801;Q9NTG7;Q5BJF2;Q8NEU8;Q8NF91;O14907;Q96N16;P63241;Q96JS3;P12270;Q86UE4;Q9NR22;Q9H267;P63010;Q9BV57;Q96PC3;O15049;Q9BZE9;O96000;Q9NZP6;P11166;P32189;Q86UL8;Q15629;P61077;O95049;P23528;Q92575;P63165;Q8N9A8;O75886;Q9UND3;Q8IX03;O75323;O75381;A6NDB9;Q99569;Q9BW60;O60711;O95178;Q96IF1;Q96CW1;Q07021;Q96G23;P61923;Q12959;P63146;O43745;O15162;O95721;Q9UDY4;O95159;O43264;P04264;O75396;O15127;Q9UKC9;P11532;Q9GZR5;Q9BVI4;Q

07157;Q6X4W1;Q15388;P49901;P78352;Q9UJM3;Q5HYI7;Q05084;P26678;Q9UBF2;P40337;Q9BW27;Q9BZW7;P11171;Q13561;Q8TEML;Q96MT3;Q9BPZ7;Q9H8T0;Q07666;Q9GZY8;Q9UPX8;Q14746;Q9BU61;Q8N1I0;O43678;Q92624;Q9HCC9;Q00610;Q9HB19;P61966;O76095;Q8WYR1;O14641;P46939;Q92539;P25063;Q5VIR6;Q15437;A5D8V6;Q15643;O60220;P53992;Q14232;Q9Y5J6;Q92843;Q9UKJ5;Q92562;O95486;Q9BVL2;Q9NRL3;O14713;O75843;Q9HD42;P29474;Q99732;P08865;Q96JB2;Q9UDY2;Q9HAP2;O94855;Q9HD36;P82094;Q00587;O14656;Q9BUL8;Q99550;Q9U1L1;Q99848;Q68CJ9;Q9UQN3;Q9UKX7;Q9NVD7;O75306;Q6IS14;Q9UN37;Q8IWX2;Q14677;O95810;Q96H20;P62424;P04406;Q00005;Q9H0R1;Q9H7P6;Q5TCQ9;Q13439;Q08379;Q9NZZ3;Q9Y4E1;Q9NR77;O60291;O00198;Q9BVC6;O60299;Q9BXS5;Q15599;O94850;Q96JE7;Q9P0J0;Q6P9B9;Q9UK41;P12956;P21912;Q9NZU7;Q14739;P50570;Q9NX63;Q9UQF2;O75122;Q9H4A6;Q8TAC9;Q92621;O95476;P54920;P62072;E9PQ53;Q9Y3E7;O75436;Q9NRI5;Q96QK1;P78395;Q99962;A1L3X0;Q8IZQ1;Q68DX3;Q16186;Q13228;Q9H9H4;Q96CF2;Q9BVT8;Q9Y5J7;P53618;Q8WV24;O15504;O95996;O43615;Q6NUQ1;Q12983;Q9HB03;P08235;P04818;Q9HC62;O14920;O95271;Q717R9;O15155;Q9NR09;Q8N490;Q9NP79;O95831;Q13425;Q99623;P09497;O60763;Q6DKK2;O00161;P80723;O14925;P60953;O75154;Q9POU1;P40855;O43318;Q495M9;O95487;O43633;O14964;Q9Y4P8;Q6ZVN8;Q9NUS5;P27986;Q5T2W1;Q14244;O75558;O96018;Q9BQE4;Q93052;Q9H204;P18848;P63000;Q9BZR8;O0165;P35606;Q8PTW3;Q3SYG4;Q96SW2;Q9GZV4;Q96NA2;Q9NUQ3;P49006;P30047;P35232;O14512;Q9UBX3;Q8WXS3;Q9Y678;Q9H4A5;Q9BX66;Q99689;Q96E16;Q9UKG1;Q86YV9;Q676U5;Q8WWR8;Q9BVN2;Q9UPT5;P11802;Q92597;P09496;Q9BYG4;P14672;Q5UE93;Q9P2W9;P06733;Q9BXF6;Q8ND76;Q9BUH8;P31689;P27815;P61586;Q86VN1;Q92556;P22681;O60888;Q9Y250;Q9P0V3;Q96A26;Q9HCI5;Q13023;P49754;Q86YD1;Q8NFH5;Q6MZT1;Q15436;Q9H9E3;Q96EY1;Q9NRR3;Q8TC71;O75674;Q96JJ3;P23508;Q8NEZ2;Q9Y3A3;Q9BT92;Q9NZ52;Q7Z699;Q9BRK4;Q13367;Q9ULD2;Q14693;Q9NUP9;O14490;P24539;O60716;Q9NX95}

7013

Pathogen[ P0C214] interacts with 558 human partners: {P22681;O00198;Q8WWR8;P50440;Q14457;Q6X4W1;Q9BPZ7;P29474;Q96CW1;Q14410;Q6NUQ1;Q9NRR3;Q9UM00;Q9HA82;P18850;Q96J02;P61923;O14490;O00213;Q9BUH8;Q8IWX2;P55735;Q8ND76;Q8N9A8;Q9UDY4;O75306;Q9NZZ2;Q8IX03;Q14739;P41220;O14910;P49006;Q8WV28;Q14746;O60346;O75161;Q9NXB9;A7E2Y1;Q16864;P09917;P49754;Q05932;Q68DX3;P63000;O14786;O43678;Q6IS14;Q9HAU4;P29966;O95810;Q9Y5V3;P22695;Q99643;Q14409;P04818;Q9P299;O14681;Q9H4A6;Q8NFH5;Q96CF2;Q8N2H4;Q8N6F7;Q86YD1;Q99747;Q15388;P49901;P16157;P04264;Q9UPX8;Q92624;P56556;Q9NRR8;Q00005;Q6RW13;Q13505;O75351;P53992;O43264;Q8NI35;Q9H9E3;Q86XF0;Q9NRI5;P30153;Q75NE6;Q96JJ7;P62993;P59780;Q9UJY5;Q9P0V3;Q16186;O00159;Q9BRK4;O60716;Q7Z699;P22735;Q08379;Q9UKJ5;Q9UPT5;Q6DKK2;Q92934;Q5TCQ9;O95295;Q86U90;P27815;Q9GZV4;Q9Y4E1;P28331;Q8TEML;Q9BU61;O43920;Q96QK1;Q8TAC9;Q9UM54;Q96MF6;O14579;P40855;Q9NP79;Q9BTW9;Q13023;Q9H444;O60220;Q495M9;Q8N183;Q15599;Q9BV57;P17568;P62166;O00189;Q13367;Q9HD42;P11802;O15056;P53618;Q9P0M2;O94921;A8MVW5;P30405;O60888;Q92797;Q8IV36;P61586;Q13033;P35606;Q9BXW4;Q9UND3;O00186;Q9Y512;P48444;Q15172;P29728;P34897;Q9GZR5;Q9Y244;Q9BX66;Q8N1F7;P55957;Q99623;Q9NUS5;O14907;O75694;P42704;Q14678;Q96NA2;Q9UJM3;Q641Q2;Q13515;Q9BXM0;Q9BVI4;P83436;O14964;P60953;Q676U5;O14656;Q86WD7;Q9HCH5;Q68CJ9;Q6NZI2;Q9P1A6;O60299;O43493;O43745;O95721;O75381;O75886;O96018;Q86YV9;P54920;O15127;Q9BUL8;Q9UKX7;Q08378;Q14232;P78395;Q9Y6Q2;O75340;O60437;Q9NSC5;P20700;Q86SQ9;P24385;Q9UQN3;P08865;Q9Z614;Q9UK41;Q13884;P30414;Q9Y6I3;Q99807;Q99962;Q9H0R1;P32189;P63241;Q9UKG1;P46060;Q15436;Q96TC7;Q01844;O43318;P36542;Q96MT3;Q8WW22;Q86UE4;O95049;Q8WXG1;Q16718;Q92562;Q9H0M0;O75843;A8CG34;Q01082;Q9NZP6;Q9HB03;P61077;Q9NUQ3;Q96DC7;P62072;P11166;P53701;Q9UH99;Q7L804;Q9BT92;Q9Y250;Q96CN9;Q5T2W1;Q14315;Q5SQN1;Q9UBX3;P11532;Q9HCE7;P82094;Q9BZE9;Q9NLP7;Q9UJ68;P23786;P78352;Q9BY43;Q9H7P6;Q9HB19;P63010;O95298;O15049;Q10567;Q7LBR1;P11168;P18848;O75122;O14925;Q92681;Q92597;Q99732;Q92572;P53675;Q9NPNB6;Q96EY5;Q8IVI9;Q9H8Y8;Q8NF91;Q8IZQ1;Q9BW27;Q13425;Q03252;O14613;Q9UBF2;O95487;P12074;Q8TDB4;Q92539;P49257;Q08AM6;Q07666;A1L3X0;Q9H8T0;P63165;Q9UJY4;Q9NZD8;O00165;Q8N9R8;Q9HCC9;Q14244;Q8WYR1;O15126;Q9NTG7;Q9P0J0;Q09104;O15162;Q9BRG1;O14641;P50402;Q9NSK7;P56377;Q9Y2H0;Q6MZT1;Q9Y4R8;Q15437;O95999;O43615;P30281;P24539;P46939;Q96SW2;Q9Y4P8;Q8NEU8;Q9UQC2;Q86XL3;Q9Y3E7;Q08209;Q96MP8;Q9HD36;Q92556;Q93100;Q9NZJ0;Q13352;Q15643;Q8N490;Q9BUK6;Q96G23;Q9Y5J9;Q9UL45;Q8TCS8;P40337;Q9NXG0;Q99689;O95278;Q9BQQ3;Q96PC3;Q9U1L1;Q3SYG4;Q9ULD2;P19367;O95886;Q99550;P67775;Q5UE93;Q99848;Q9BZW7;Q9NZ52;Q9Y5J6;Q7Z6B0;O60711;Q9BVT8;Q8NEZ2;P06733;Q9NZU7;Q96CM4;Q9NX95;P13073;Q9UKC9;Q9BXF6;Q96EV8;P25063;Q9NR77;O95202;O43752;Q9BRT3;O94850;Q8N1B4;O60763;Q96JS3;Q12959;Q14160;Q9H2K2;Q9UDY2;Q5JTH9;Q9UQF2;Q8WXS3;Q9Y3E7;Q99HD26;O60784;Q9BQI5;Q12983;O96000;Q92843;Q99816;O43747;O95476;Q86WV1;Q9NV92;E9PQ53;Q99766;O75436;O60291;O95182;Q9NZI6;Q5VIR6;O94973;Q9NUU7;Q9H204;Q6ZVN8;Q9H4A5;Q9H9E1;Q96G01;Q9Y6Q5;Q9BVN2;P30279;P04156;P10909;Q9UBQ0;Q15629;O75489;O15504;Q13439;Q9BVC6;O60238;Q9BYG5;P09497;Q9HCI5;Q3ZCQ8;Q8N1I0;Q9Y5J7;O14521;Q9NZZ3;Q9UP83;Q13615;O75396;Q96Q06;Q9Y6D6;Q5SNT6;Q9UHJ9;Q9UMR2;Q9NR09;Q9UI09;Q8N7J2;O60664;Q86WV6;Q9HC62;Q9BW60;P62424;P80723;Q8WXE9;P61966;O76083;P09496;Q8WWM7;P12270;O60884;Q96GD0;Q96B49;P23508;Q96H20;P50570;Q5T1C6;O95782;A5D8V6;Q05084;Q9NVD7;Q9POU1;Q9UN37;Q92575;Q9Y3A3;O75558;Q8WV24;Q8TC71;Q96EK6;Q9BVL2;Q8N3V7;P14373;O14512;Q92783;Q13228;Q9UJG1;P35232;O43633;O75674;Q9BQE4;Q9H9H4;P46108;Q15046;Q5HYI7;P30047;O95271;P22830;Q07157;Q9BRQ6;Q96JE7;P21912;Q8IUD2;P53680;Q9Y678;Q9H902;P14672;Q96J39;Q96JB2;Q8WUH2;Q13561;P27986;Q17RY6;P26678;Q9GZY8;P46020;Q9H3K2;Q7L5Y9;Q7Z3B4;Q9H492;Q5JTC6;O14920;Q9BXS5;O00161;P04406;O75323;P56181;O95178;O15155;O14713;O15027;O75081;Q9NYJ8;O95486;Q86VN1;O00291;Q96B97;Q96EY1;P63146;P12956;P11171;P52948;Q92870;Q92621;P31749;Q9BYG4;Q9NR22;Q4G0F5;Q14677;P80303;Q8N944;O75154;Q8PTW3;Q9HAP2;Q7Z3C6;Q9P2W9;O94855;Q330K2;Q96E16;Q14693;Q9NRL3;Q9BZR8;Q96N16;Q96HA1}

7014

Pathogen[ P03346] interacts with 690 human partners: {O95166;Q13439;Q15172;Q8TEML;Q13425;O60437;Q92681;Q13596;Q9NSC5;Q9NZJ0;Q9BW60;Q96G01;Q9NQG7;Q9NRI5;O14925;Q9H4A5;Q86UT5;O60664;P30281;Q96CN9;Q86YV9;Q6P9B9;Q96J02;Q8N3V7;O14490;Q4G0F5;O00213;Q9H0H0;Q3YBM2;Q969H4;P61966;P55735;Q99828;Q8ND76;Q5VIR6;Q86XT2;Q9BU61;O43752;Q96QK1;Q14746;O60346;Q96HJ5;O95405;Q15438;Q9P0M2;O95159;Q96B97;Q14739;P31040;P56181;Q86UR1;P50570;P02549;Q9H115;Q00005;O14908;Q7Z3C6;Q9HAU4;Q9UPT5;Q6

ZVN8;Q6X4W1;Q9Y283;Q9P2W9;Q96MP8;O15027;P12270;P12956;Q08379;P24385;Q96CM4;Q14315;P80303;P04406;Q8NBF4;Q86YD1;P30279;Q13228;Q5T2W1;Q14678;Q9UDY2;Q9HB19;P14373;Q9NS69;Q9UP83;Q8WV24;Q96RT1;Q68DX3;O60888;Q12840;Q86UE4;Q96BA8;Q96N16;P29474;Q8N1N5;Q96JB2;Q15036;Q9GZV4;P63010;Q99569;O60716;A5D8V6;Q13515;P36956;Q13449;Q8WYR1;Q6P1Q0;Q9P253;Q8IZQ1;Q96DC7;Q9UKS6;Q75489;Q9H6Q3;Q9H4E7;P23508;P08235;Q8IVI9;Q95171;Q95295;Q9UKX7;P11277;Q43747;Q9Y3D7;Q8TC71;P20700;Q9UBX3;Q9Y5K8;O75694;Q9UI11;Q9H3K2;Q9HD42;P78352;Q92572;Q96MW5;Q8N6F7;O14656;Q9NRR3;P53680;Q5SQN1;Q8N7J2;P49754;Q9UMR2;Q70SY1;Q12772;Q4L180;O60238;Q5TCQ9;Q9BV57;Q92543;Q13884;P26678;Q9BPZ7;Q9BUK6;Q96JI7;P82094;Q6ZWB6;Q9UBV8;Q9P2D0;Q8IWW1;Q9H4A6;Q99689;O43678;Q9NZI6;P49257;Q8WXH0;O95178;P56377;Q99962;A8MVW5;O43615;P17152;Q9NZU7;P80723;Q96FS4;Q8IV36;P55957;Q15629;Q14789;Q9NXG0;Q9UH99;Q9P0U1;Q9BVL2;Q9Y6D5;Q969X5;P59780;Q8WTV3;O75886;Q8IUD7;Q8NEZ2;Q9BXS5;Q96A26;O75970;Q6UWF3;Q8N1F7;Q96T51;Q7Z3G6;Q9H0R1;Q96NA2;P19367;Q9Y5J7;O43815;Q96B42;Q96E16;Q9Y678;Q9NX95;Q12981;Q86WG5;O43264;Q12802;Q95782;Q9BRQ6;P23786;Q99816;P53618;Q9UQC2;Q9UMY4;Q9NZD8;Q9HCH5;Q07021;Q9BVT8;Q9H1H9;Q13023;Q9NFB6;Q96IF1;Q13190;Q86VN1;Q00587;Q08378;Q8IX03;P60953;Q6MZT1;Q96C03;Q9BXM0;Q08495;Q93050;Q95630;P62993;Q14457;P06703;Q75396;Q96TC7;Q9NZW5;Q7Z614;Q8NFH5;P62424;P28289;Q9UK41;P67775;Q9P299;Q9UBQ0;O14613;O14579;Q9BX66;O00189;Q05084;Q92562;P63241;Q9BQQ7;Q86SQ9;Q969G9;Q8WUH2;Q6ISU1;Q9NRF2;Q96JJ3;Q9NV92;O00291;Q9UKJ5;Q12983;Q6P3W7;P09496;P46939;Q6NZI2;Q9BT92;P16157;P26038;O60784;Q53HI1;A8K0Z3;Q9NZP6;Q92843;P61077;Q8TDB4;Q96H20;Q9BZE9;Q9BVI4;Q5BJF2;O00186;Q8TEW0;Q96FZ7;P30047;Q93045;O94855;P21912;Q92870;P16452;Q8IYJ3;P11802;Q95999;P06733;Q7Z6B0;Q6IS14;Q96MT3;P18850;A6NDB9;Q9H0R8;Q13813;Q9Y371;O15056;Q8TDM5;P30153;O75381;Q13424;Q8N490;Q9BRK4;Q9Y3P8;Q9BTX1;Q9H902;Q8TAM2;Q96SW2;Q92575;Q9BRT3;Q6ZPB5;P51843;Q6UW56;Q96CF2;Q68DU8;Q9NZZ3;O00299;Q9NRS6;Q8NI35;Q01082;Q92621;Q9Y2V7;Q07666;O75161;P18848;Q9Y6D6;Q9Y6F6;Q9H2K2;Q10567;Q6NUQ1;Q9BZ29;Q9BW27;O00161;Q9BUN8;Q9Y5J6;Q15643;Q9H9E1;O75843;P11171;P09917;P48444;Q14232;Q7Z3T8;Q9Y6Q2;P20340;Q9H8T0;P08865;Q8N3R9;Q15436;Q9Y3E7;Q8WXE9;Q7L804;Q9H9E3;Q15599;Q9NQS1;O75340;Q86UT6;Q9Y2H0;Q8NEU8;Q96134;Q8TAC9;O15049;Q9NUP9;Q13033;O14641;Q9P0V3;Q86UL8;P24539;Q92597;Q92539;P31749;O43920;Q9UNH7;Q96EV8;Q15437;P78395;P13073;O43633;Q9Y4R8;Q9Y3A3;P46060;Q9NYJ8;Q9HD26;Q9H5J4;Q9BYG5;P63146;Q9Y587;Q96JE7;Q9H444;Q15019;Q8N2H4;Q9NUQ3;P27815;Q9Y4G6;P42704;O60220;Q9Y512;Q8TCS8;Q16891;Q9H939;Q96CW1;O43491;Q95721;Q96G23;Q8N9A8;Q96AX1;Q9UBF7;Q8WV92;Q9H9H4;Q9H8Y8;P42566;P48059;Q3SYG4;Q96P C3;P63165;Q9HAP2;Q9Y250;Q9NZT2;O14713;Q9UJY4;Q99848;Q8N1B4;Q9Y5X6;Q9NR22;Q5T2T1;P54920;O95886;Q8IZS6;Q9H492;O14907;Q5JSH3;Q95049;Q07157;P53675;Q2LD37;O00198;Q96B49;Q9NUS5;Q9BYG4;Q15041;Q9NR77;P61923;O96018;P31689;Q9BRG1;Q9HB03;P11166;P62072;Q9ULD2;O00522;Q95810;O15126;Q94850;Q9UL45;Q07820;Q09583;Q9Y5V3;Q95831;Q6ZMZ3;O60763;P46108;Q95996;Q9BZR8;P62166;P30622;O75122;Q9UQN3;O60299;P50402;P29966;Q95486;Q9HAP6;P40337;Q9NVD7;Q9BQQ3;E9PQ53;Q9BVC6;Q96T49;O75436;P83436;O60291;Q9BUZ4;Q13492;O75323;Q96K8C;O00165;Q68CJ9;Q9NUU7;Q92797;Q03252;Q969Q5;Q5JRA6;Q8N357;Q9HB21;Q9Y4E1;P36405;P09497;Q9HC U5;P14317;Q3ZCQ8;A6NDV4;Q9HC62;Q14244;Q9BY43;Q969F2;Q92783;Q99623;Q9Y244;Q13367;P49006;O95271;Q95219;Q9NP79;Q9UKG1;Q717R9;Q96J53;A8CG34;Q15700;P56589;Q99550;Q915388;Q9UQF2;Q9NR09;Q9UND3;P04156;P32189;Q9BXW4;O75351;Q8TB22;P50542;O43427;Q9HW8;P35232;Q9HC24;Q9BXF6;O14964;P11532;P53801;Q5UE93;Q96000;Q8WUY8;P40855;Q5H9S7;Q5HYI7;Q16864;Q86YS3;Q9BVN2;O95487;P22681;O14617;P25063;Q9UI14;Q9UDY4;O43493;O60749;Q8WV28;Q96CX2;O75306;Q14160;O14920;Q9NX63;Q7LBR1;Q70J99;Q9HOM0;Q16186;O94921;Q96D71;P23528;Q6RW13;Q9Y613;Q96HAL;Q96XL3;P22735;Q7Z699;P41220;O43318;Q9UJY5;O75154;Q13283;Q15035;O76095;O43933;Q9P0J0;Q9BUH8;Q8TEY5;P49755;Q01844;Q9C0H9;Q14512;O75558;P04264;Q93052;Q93052;Q9Y6Q5;Q08209;Q9BZW7;O95278;Q676U5;P35606;Q8WXS3;Q86U90;O95202;Q9BQI5;Q9ULU8;Q330K2;Q8NF91;P14672;O94901;P62952;Q9Y2J0;O94973;O96011;Q8N1I0;Q96EY5;Q14C87;P49901;Q9UKC9;Q14677;O75386;Q9UPX8;O15155;P0C2W1;Q9GZY8;Q92624;Q9NTG7;Q9H204;Q7Z3B4;Q92556;Q9NZ52;Q86WV1;Q9HD36;O14662;P42167;Q9H7P6;Q96DX8;Q9BUL8;O60711;P63000;Q9H267;Q945M9;Q9NP85;O75081;Q96EY1;Q00610;Q8N9R8;P53992;Q9UJG1;O14910;Q8WHCC9;Q00765;Q15363;Q9NRL3;O14786;Q9Y4P8;Q13352;Q6D KK2;P27986;Q9P1A6;Q9BVK6;Q99747;O43745;O15504;Q8IWW2;O75146;Q9UN37;Q86Y82;Q5JTC6;Q9UB P0;O15127;Q9HCI5;Q9UBF9;Q14693;Q13561;P61586;Q12959;Q9UJM3;Q99732;P52948;O15162}

Pathogen[ Q85601] interacts with 537 human partners { Q8TEM1;Q13367;Q14457;Q99569;Q9H492;Q13596;Q96QK1;Q9NQG7;O14925;Q9H4A5;Q68CJ9;Q99816;O60664;P30281;Q96CN9;P30405;Q96J02;O14490;Q9Y250;P20700;O00186;Q9NRL3;O00213;Q8IWW2;P54920;O75161;Q86WV6;Q15643;O15126;Q9Y4R8;O43493;Q14746;O60346;P53675;Q92575;Q9UPX8;O75843;Q9NZU7;Q9P0J0;P22681;P11168;Q9HAU4;Q9UPT5;Q6X4W1;P16157;Q9NP79;Q9NVD7;P14373;O15027;P48444;Q00610;Q08AM6;P31749;P62993;P24539;P24385;P31689;Q9NUP9;P09496;Q9UQN3;O75154;Q95831;P63146;Q5T2W1;Q15388;Q9NR22;Q07666;O14910;Q6NUQ1;P36405;Q8WV24;Q13884;Q8N2H4;Q9H7P6;Q7L804;Q9NYJ8;A1L3X0;P46010;Q9UJY4;O60888;Q9BQQ3;O00165;Q96H20;O75396;Q96RT1;Q9UQC2;Q17RY6;Q9GZV4;O60437;Q5JSH3;Q9HD36;Q8N9R8;Q96CW1;Q15629;P09917;O14579;Q95487;Q9P253;A8CG34;Q96DC7;Q13439;Q9BYG5;P23508;Q95295;Q8TAC9;Q9P2D0;O14713;Q95049;Q95166;Q941220;O60763;Q14244;Q96JE7;Q9UBP0;Q9UBX3;O75306;Q96MP8;Q8WV92;Q9BX66;Q86YS3;Q9BUL8;Q96Q06;Q00005;Q9Y283;Q15036;Q9UP83;P62072;Q9BXS5;Q8NEU8;Q9BPZ7;Q9NUS5;Q96SW2;P40337;Q9BRG1;P56377;Q99962;Q9Y5J9;Q330K2;Q9Y5J6;A8MVW5;Q86UL8;P18848;Q9HC62;Q9P299;O15155;Q8IV36;Q8ND76;Q9UHJ9;P21912;Q93050;Q9UDY2;Q9H0R8;P27815;Q8TDB4;P30622;Q9P1A6;O60220;Q7L5Y9;Q8N1F7;Q93052;Q96T51;P63000;Q9Y5J7;Q9BVN2;Q9NZJ0;Q9BXM0;O43815;P80303;Q12981;Q9UMR2;O43264;Q9BTW9;Q12772;Q9BRQ6;Q9H9H4;Q86VN1;Q9HCH5;Q8WXE9;Q96JB2;O43747;P30153;P61923;P83436;Q9H1H9;Q15172;Q03252;Q8WW22;P06733;Q08378;P11532;Q18ZS6;P46108;Q9NP61;O43633;O60884;P62424;Q15046;Q7Z614;O43678;P11171;Q5VIR6;P49006;P49754;Q00182;Q7LBR1;Q92562;P56181;P63241;Q86SQ9;Q8WUH2;Q9Y244;P12270;Q9BT92;Q9NSK7;Q96JJ3;Q10567;P32189;O14786;Q9P2W9;Q4G0F5;O75886;Q9UJY5;Q15436;P80723;Q9BZE9;Q9NZP6;O75694;Q95278;Q9BV57;O43745;P61077;O00198;Q96FZ7;Q8WTV3;O15504;P30047;Q86YV9;Q9UQF2;Q99623;P11802;P27986;Q9H267;Q12840;Q7Z3C6;O43752;Q96MT3;Q08209;Q9UKC9;Q96CF2;O60291;O60716;Q9NRR3;Q96000;O75122;Q8N6H7;Q13515;Q14677;Q86WV1;Q8NI35;Q9BXW4;Q6MZT1;Q9UH99;Q86XL3;Q9Y512;Q9H2K2;Q9BW27;Q92624;O60711;Q13352;O00159;O75351;Q8N6F7;Q9H8T0;Q9UK41;Q9H9E3;Q92681;Q9BW60;P11166

7015

;O15049;Q9BY43;Q9H6Q3;O95810;Q92621;O14641;Q96CM4;Q9Y6Q2;Q9BXF6;O43920;P04264;Q9UM00;Q96EV8;Q4L180;Q15437;Q9HCC9;Q9Y4P8;Q9Y3A3;Q9UBF2;Q9HD26;Q9H5J4;P36956;P49257;Q9H444;Q9NQ7;Q9Y678;O14920;Q15035;Q8TCS8;Q9Y5V3;Q96G01;Q14678;Q96G23;Q8N9A8;Q9BRK4;Q6DKK2;Q68DX3;Q8N3V7;P46939;Q9UKJ5;Q92843;P42704;Q13425;Q9HB21;Q99848;Q8N1B4;P50570;Q9NUU7;P5735;P30279;Q13228;Q676U5;P52948;P55957;O14907;Q8IVI9;Q96B97;Q9UKX7;Q95159;P31040;Q3ZCQ8;O14656;O14613;Q9NR77;Q14160;P78352;P18850;Q96018;Q9H902;Q9HAP2;O94921;Q99550;P53680;Q9HB03;Q9NXQ9;Q6RW13;Q5TCQ9;P08235;Q92783;Q9NZZ3;Q8NFH5;Q99689;Q9UDY4;Q9NPB6;Q8WMM7;Q86UE4;Q13033;P61586;Q14315;O14964;Q96JI7;O43615;P30414;Q5JTC6;O75340;O75558;O95630;Q96EK6;P29966;Q9H4A6;O95486;P67775;O95476;P50402;O94973;E9PQ53;P48059;P29474;Q96PC3;Q7Z6B0;Q3SYG4;O75436;Q07157;Q9NZI6;O75323;O95996;Q92797;Q96IF1;Q9P0M2;P53618;Q99766;P09497;Q12959;O76095;P14317;P63165;Q8IZQ1;Q9UJM3;O43933;Q12983;P60953;Q9NSC5;Q9BUK6;Q9UKG1;Q92870;Q9NRI5;Q6NZI2;Q9UBQ0;O15127;Q9HB19;Q9NR09;P04156;Q9NX63;P82094;P35232;Q9Y6D6;Q8WYR1;Q9H8Y8;Q5HYI7;Q9Y6I3;Q5SQN1;O00291;P63010;Q9BU61;Q96TC7;Q9H9E1;Q92597;Q9GZR5;Q96CX2;Q7Z699;Q13505;Q9P0V3;Q92572;P04406;O15162;Q9UM54;O95886;P23528;P61966;P59780;Q9BVL2;O95999;Q96HA1;O43318;O14512;Q96NA2;Q13023;Q9Y6Q5;O95271;Q8N7J2;Q9BZR8;Q9NX95;O94855;O75381;Q99732;P17677;P35606;Q8WXS3;Q96J53;Q8NEZ2;Q9NZ2;Q9N252;Q8IX03;Q9BVT8;Q9UILL1;Q8NF91;P14672;O94901;O60238;Q9GZY8;Q8N1I0;Q8IUD2;Q96EY5;P62166;Q07021;O95171;Q9UND3;P08865;Q96E16;Q9NTG7;Q9BVI4;Q9H204;Q5UE93;Q7Z3B4;Q9UNH7;Q5T1C6;P78395;Q9UN37;O14662;Q14232;Q9Y3E7;Q9HD42;Q92539;O00161;Q08379;Q96EY1;P53992;Q05084;Q495M9;Q9UJG1;Q9ULD2;Q96N16;Q9H0R1;O60784;O95721;Q01844;O00189;Q16186;P40855;Q9NUQ3;Q9BUH8;Q14739;Q15599;Q99747;Q86YD1;P12956;Q8N490;Q6IS14;Q9BQE4;Q9HCI5;O75081;O75674;O60299;Q14693;Q13561;O95782;P19367;Q9BYG4;Q9BZW7;A5D8V6}

7016

Pathogen[ P14079] interacts with 1546 human

partners: {O15255;P31751;Q5VV42;P04083;Q96DC7;Q5SRI9;Q5TC84;Q13228;Q15629;Q8IV31;Q16655;O94923;F5H4A9;Q8NFH5;Q8N6M3;Q9NY59;Q96QK1;A8MZ97;Q8IYW9;Q9NQG7;Q5TGZ0;Q9H9H4;P56181;Q9BQD7;Q6NUQ1;P22695;Q3SXP7;O43292;Q8NEQ5;P0CG08;Q9Y5Y5;Q7Z4L0;Q8NBV4;O75886;Q5RI15;Q9H204;Q9H1C7;Q9UDX5;Q86XF0;Q13492;Q9BW72;Q9NUR3;Q96CW1;O95070;Q8N944;O95159;Q8N1Y9;O75192;Q9P0N5;Q3ZCQ8;Q9BXL7;Q9NRQ2;Q99623;P36542;P16452;O43674;O43615;Q86YV9;Q14CX5;O75324;Q96G79;O75161;A5PLL7;P13164;Q9BTW9;Q9H061;Q9Y5K8;O60397;O95166;O43677;P0C6T2;Q7L804;Q9BW27;Q96JI7;Q8N4H5;Q14789;Q8N3T6;Q3MIW9;Q14C87;Q6ZVE7;O95425;Q14746;Q96NA2;Q5T2E6;Q9Y5U4;Q68DX3;Q53S99;Q96HA1;Q9H295;Q9NQG1;Q96VN1;Q9UNH7;Q9UNH7;B1AL88;Q92562;Q8IXS6;O95415;Q96HA9;Q6IEE8;O43759;Q5HYI7;Q969M3;C9JVV0;P49257;O43181;P27216;Q8N6Q3;P61923;P57088;P0C874;Q9BTD3;O15027;Q9BRQ6;O15162;O95169;Q8NAN2;Q99807;Q96CF2;A8MV81;Q9Y6Q5;Q96EY5;Q15036;Q9NR22;P61966;Q9Y4E1;O14613;O00291;Q8N495;Q05084;Q14242;Q86WV1;Q8N307;Q7Z3J2;Q8N7P3;Q96KR4;P56134;C9JDP6;Q9BXS5;E2RYF6;Q16873;P17677;Q86VE9;P56556;O75146;P14373;Q9UKG1;Q8N9W7;P17152;Q8TB68;P60468;Q8WV24;Q3ZQA7;Q8IXB3;Q9Y3D7;O14828;Q5VW32;P40855;Q0VDE8;Q9H799;P49069;Q6PP77;Q00610;Q96N68;P13073;Q53RY4;Q9BU23;O95876;A6NKL6;O14609;O43505;Q7Z7N9;O43745;Q9H939;Q14761;Q9BUH8;Q8N490;Q9UJY4;Q5TZJ5;O75072;Q9NYV7;Q92681;Q9BQE4;Q96H20;P83436;P29728;Q5T292;Q1HG44;Q9NRR3;Q8WXS3;Q9Y2Q5;P11532;Q01518;P53779;Q14693;Q9NPI0;Q5VSG8;Q4LDR2;Q9BYG5;Q8NEU8;A1L3X0;P61570;Q96A33;Q96JN2;Q6ZVN8;O95139;Q6NUJ2;Q24JP5;P25705;Q8NCQ3;P61421;Q12887;P11171;Q9Y519;Q6UX01;Q8N112;Q8N755;Q9Y4P8;Q9UDY2;O95999;Q9P055;Q8NFM7;Q96ER9;Q9BVN2;Q86WI0;P12074;O95487;Q6ZVK1;Q8NBQ7;Q6NVV3;Q5T5W8;P22735;Q96S52;Q2VYF4;P56589;O43736;Q1HG43;Q96DZ9;O60664;P62072;A6NP81;Q8N6L1;O43597;Q15700;Q330K2;Q68CJ9;P20292;Q5T6L9;Q6UWF5;Q96GQ5;Q6UX68;Q9BV87;Q9BRL7;Q9NXE4;Q0D2K0;Q01082;P09912;O95271;Q86VI4;P56750;Q9NX57;Q13505;P0C7N4;Q5VTT2;Q96RQ1;Q9NJK5;Q9NWF4;Q6GV28;A6NDV4;Q96DS6;Q8WWF3;Q9BVC6;Q86VY9;Q9UJM3;O15258;Q15155;Q96CP7;Q68DH5;Q9NSK7;P86790;Q5T4T1;Q9UJY5;Q8N1W0;Q9Y6I3;Q14210;Q13021;O75781;Q8N1F7;Q9H492;Q96GX1;Q13023;P56378;Q6IS14;Q86W33;Q9UKS6;P13498;Q9NP84;P39656;O14641;Q8WVX3;Q92542;Q6BDT9;Q12840;Q14410;Q08722;Q13323;Q86XT2;Q3B7S5;P08235;A6NC78;Q9NZ42;Q9NRR8;Q9HBM0;P04156;Q9H1K0;O76095;P35606;Q86UT5;A6NM45;Q9P0M2;P84157;P47756;Q9UQF2;Q3MIR4;Q9BY43;Q9BVT8;Q9P0U1;Q13033;Q92545;Q7Z388;Q15172;Q07157;Q5GH72;Q9NZ45;A6NLE4;P49006;Q4G0N0;Q93052;P14672;O00165;Q5T2T1;Q9BX73;Q92556;O00400;Q6ZPB5;Q9BVK6;Q14677;Q10567;A8CG34;Q15041;P24588;O96000;Q2T9K0;Q9UKH3;Q9BZE9;Q902F9;Q9Y6D5;O95167;Q9NP79;Q9ULU8;Q6RW13;Q96Q45;O94901;Q5SWH9;Q9NUB4;Q9NXG0;Q6ZT21;P26038;Q9H7P6;P57054;Q99932;Q24JQ0;O75306;Q9UKY0;P42566;Q9BUK6;P00395;Q96GL9;P56377;Q8N9S7;Q6ISU1;Q92621;Q8WMM1;A6NL05;O43815;P00405;Q8NE00;P40123;Q9Y678;Q9HC24;Q96I36;Q6VEQ5;Q9BXX5;Q8WYR1;Q92783;P49788;Q96K49;P43307;P17568;P56385;O95405;Q8NFJ9;Q96DD7;P10606;Q629K1;Q9UDY4;Q2PZI1;Q96B49;Q8TEM1;Q8IW70;Q16585;Q9NXL6;Q7LBR1;Q8WV48;Q8NE01;Q6ZUJ8;O95867;Q9H8T0;Q9Y250;Q8N9A8;Q16891;Q717R9;Q93100;Q9BXS4;Q16186;Q9UDW1;Q5VTU8;Q5GH76;Q6UWF3;Q5JRV8;Q6NXN4;Q15070;Q8WV83;Q96N19;P59780;P32189;O94855;O00189;P42704;O43813;Q96DZ7;Q9HCH5;Q9BUB7;Q6P1Q0;Q9HA82;Q96KA5;Q58719;P46060;Q9HAP2;Q9H9K5;Q9UI14;P14927;Q9HD42;O75674;Q14D33;Q9P1Z9;Q8NI32;Q08378;Q92624;P31358;Q9UBF9;Q9NRI5;Q6P9B9;Q8NE86;Q8N3I7;Q9BSA9;O00213;P35232;O60895;Q99442;Q14244;Q9UILL1;O60346;Q9BT22;Q9NP85;Q86YS3;A1A5B4;Q96Q80;Q14739;A8MVW5;Q9BSK0;Q9NRS6;Q86Y39;Q9HCC9;P10909;Q9BRB3;Q9H0R3;A6NJY4;Q8ND76;Q02221;Q9BY14;P86791;P53992;Q13439;Q9BUL8;P04844;Q9H2K2;Q9YUD6;Q9UKC9;O60437;Q8WUH6;Q9UHA4;Q9Y5J7;P81408;P57679;P16157;Q8N7J2;Q7L5Y9;Q96B97;Q9NV29;Q6UWW9;P34897;Q86SQ9;Q99747;P41220;Q9Y2B2;Q9GZP9;O71037;O14907;O95182;Q9UM54;Q86UK5;Q8N1N5;Q15526;O60784;Q4G0I0;Q8IXX5;Q96JJ3;Q86XL3;Q92597;Q8IUD2;O94777;B4DJY2;Q9UPT5;P63165;Q5R3K3;Q99828;P57738;P0C7Q5;Q9Y371;O60711;Q14118;P07919;Q7Z3C6;Q9H0C3;Q9H3E2;O15155;Q14409;Q9NRX5;O75352;Q0P670;Q9HAU4;Q13424;Q6UX82;O94905;P11166;Q9NX94;Q966H8;Q9Y4G6;Q5BJF2;Q9C0H9;Q9NUQ3;Q6ZRR5;P06733;P61077;Q8N326;Q969N2;Q9HBV2;Q5T1Q4;Q4G0F5;Q96NT5;P62952;Q5SNT2;Q9HB03;O14925;Q5H9R4;Q0VD83;Q9BRQ5;Q9NS69;A8MQT2;P0C7Q6;A6NFC5;Q9NQ90;Q5QFB9;P61550;Q9H2X8;Q9NRQ5;O14683;Q92539;Q9HCI5;Q9BUZ4;Q71RC9;Q5XG99;Q9Y2H0;Q96JX3;O00501;B9EJG8;Q9H665;Q96JE7;Q03252;Q9P0V3;Q96N16;Q6ZSS7;P58511;P50552;Q9H269;P46939;P33947;Q7Z4Y8;Q9NPD7;Q96GD0;Q9P2X0;Q92572;A2RUG3;Q7Z434;Q9NZ52;Q5SQN1;P50570;O96005;Q8NEA5;O14949;Q9BVV7;Q6UXB3;Q9HB19;A6NDB9;O00461;Q9UKX7;Q9BVI4;Q9NR09;P02686;P35611;A6PVL3;Q15363;Q15388;Q8N292;Q9NPR9;Q9H841;Q9UKI2;Q92797;O75843;O75069;Q2LD37;Q9BVT8;Q



9BUN8;Q96I34;O75558;Q96RT1;Q9UHJ9;Q15012;Q9H813;Q9Y244;Q96HH6;Q5JPE7;Q15078;O75396;Q9  
 BVL2;Q6ZSJ9;O75431;Q8IWX6;Q9Y2V7;P10911;Q8TEW0;Q12772;Q17RY6;Q5W0B7;Q9H488;A6NDP7;P24  
 390;Q8WY22;Q96HH4;Q12802;Q9HD87;Q9NQX5;Q6X4W1;O15504;B4DS77;Q9UL01;O00186;O75323;P803  
 03;Q9HD26;Q6NZW7;Q9H8M9;Q8NHS1;Q8N4L1;O43427;Q9NRL3;Q9H9E1;P82094;Q8N0W7;P20674;Q9NUP  
 9;Q9NV12;Q3V5L5;Q8N6I4;Q5VYP0;Q9H8Y8;O95721;Q8IVJ8;P40337;P27544;A6NDX4;O95831;Q9Y5U9  
 ;Q7Z5M5;Q9NQX7;Q8N205;Q8N357;Q9NYZ1;Q9P6H9;Q8IV19;P36405;A6NGA9;Q9Y6I8;O95868;Q9Y3A3;  
 Q9UBU6;Q93045;Q92629;P12956;Q96D05;Q9BZB8;Q9Y5V3;P48230;P54826;Q8N6F1;P50542;Q5U3C3;Q  
 7Z699;Q9P0I2;Q8NFR3;Q8N609;Q96GC9;Q8NCG7;Q8IUX1;Q9BXM0;Q7Z7J9;Q2M385;O14656;Q7RTS6;Q9  
 6LL3;Q16586;Q8NC60;Q8N614;O96011;Q8ND61;Q14315;Q9Y287;Q8NHG7;Q9HC62;Q6P2H8;Q8NBR0;O95  
 782;A6NCI5;Q7L0L9;Q99689;Q9NPB0;P12270;Q8N661;Q14DG7;P03928;Q8NBJ4;Q9H0A3;Q9UND3;Q150  
 46;Q9Y2Y6;Q8WTV3;Q9BVK8;Q86UW1;P30408;Q96HD9;Q9Y5X2;Q69384;A6NGB7;Q8N114;P42167;Q5RGS  
 2;Q5JTV8;Q8IX03;O00519;Q00005;Q9BXF6;Q9NP74;Q9NWD8;Q6ICL7;O75425;Q969L2;Q96T51;Q9GZU3  
 ;Q86U90;Q99732;Q6N075;Q8NC96;P62424;Q6UXU6;Q8TAC9;Q6UWN0;Q9BV81;O00631;A6NML5;P31040;  
 Q9UK28;Q96HJ5;Q9UL45;Q2M3R5;A6NKF7;Q9NQA3;Q96IF1;Q969E2;Q969X5;P23528;Q92934;O96018;Q  
 5H9S7;O43633;Q8WV28;Q9UN42;O14548;Q96EX1;P29966;Q8N201;A6NKG6;O75915;P49755;Q9P299;Q8  
 IV36;O43676;Q9NX00;Q86XJ0;Q9H6D3;O75787;Q12912;Q8NI35;Q86VW6;Q86T03;Q08379;Q53FP2;O95  
 049;O75949;O00264;Q5VXU3;Q6ZP80;Q9Y6X1;Q9BQ49;P69849;Q96G23;Q9NW97;Q9BZ97;O94772;P235  
 08;O60610;Q07666;B2RFX0;Q9NZI6;O43678;P28289;Q9BVW6;Q9BYI3;O75340;Q5GH73;P55808;A6NL8  
 8;Q6ZQQ2;Q9H8M1;Q15599;Q8NC54;Q15075;Q9BRT3;Q641Q2;Q5JSH3;Q9HD36;O75477;Q9BQI5;P0C7U9  
 ;Q9Y6D6;O95996;Q9BYT9;Q96SN7;Q9HAB3;Q5T1C6;O15049;Q5HYL7;Q9NVZ3;Q4VXA5;Q8NC56;Q9BYG4;  
 Q4ADV7;Q96J86;A8MW00;O95866;Q6IAA8;Q6ZNB6;O95178;Q9BVV8;Q5JRA6;Q7Z5S9;Q8N2U0;Q9HC47;Q  
 9NS64;Q8TAM2;O60888;Q99569;Q9UJZ1;P25063;Q9NZT2;Q5VZ72;O95164;Q9UI09;Q9UBF2;Q96AX1;Q8  
 IZA0;P62166;Q8NBT3;Q12981;Q9H720;A2A2V5;Q9UP83;O00559;Q8N8Q9;Q9H1H9;Q9NZ43;Q96KX2;Q8N  
 BN3;Q99445;Q8N3V7;Q68DU8;Q9NZP6;P00156;Q9BTV4;A5D8V6;Q96T49;Q8WXH0;Q8WZ55;E9PQ53;Q5VV  
 P1;O60749;Q96ES6;Q96RV3;Q00LT1;P61586;Q6ZMZ3;Q8N8Y2;Q9P253;Q9UJG1;O95292;Q7Z412;Q8WWM  
 7;Q8WV66;Q96B33;Q53GA4;P09669;Q9UBV8;Q96I45;Q9HAP6;Q13326;Q8NEZ2;Q5VIR6;P46695;Q8WU20  
 ;Q9P0J0;Q8IVP5;Q5GH77;O14653;Q6ZMB5;Q9BQA9;Q9Y512;Q9H0R8;Q9BQJ4;Q12767;Q96HV5;Q9Y5U8;  
 Q96B96;Q9Y693;O43903;Q6ZW34;Q96MF6;Q8WUY8;P09497;Q6P1S2;O14836;Q53HI1;Q12983;Q13561;P  
 51811;O43264;Q9P0S9;Q8IWX2;Q75NE6;Q6P499;O95171;Q96N35;P60059;B2RUZ4;P63010;Q9Y284;Q5  
 BIV9;Q99766;P09917;Q969W0;Q15035;Q6Q06;Q8NDB6;Q9NWR8;P22830;Q96A26;Q8TF30;Q7Z5B4;P0D  
 J07;Q9BZL3;Q9NSC5;Q9H6X4;Q66K66;Q9NPL8;P11277;Q86UE4;Q92982;Q9H354;Q9BQ33;Q96J02;O952  
 95;Q9NX77;O14662;O14569;Q8IX19;Q8WWR8;Q9H115;Q13596;Q9Y3A0;P61803;Q9H6Q3;P10620;Q9NZ2  
 0;Q8N3R9;Q69YG0;Q6DKK2;Q6MZT1;Q7Z3G6;B7ZAQ6;Q969H4;F2Z333;Q9H490;O94973;Q5T2W1;Q96LD1  
 ;Q8TDB4;Q96KJ9;Q8WVH0;Q8IYJ0;Q8N1B4;Q9H6L5;A6NH52;Q96GE9;Q8N2G4;Q8N2H4;Q96FB5;Q96G01;  
 Q9H0H0;A6NFA0;P48444;Q8N8A4;Q8WW43;Q42043;O75964;Q86V85;Q96BM0;Q8N6L7;Q8IWX1;Q9UN37;Q  
 6UX71;Q7Z614;O60811;Q8IWD5;Q99848;Q96FZ7;Q8NA58;P63241;Q5VZ13;Q99595;Q86WG5;Q9ULD2;P1  
 8850;Q4ZIN3;Q96S66;Q86UL8;Q00587;Q96HP8;Q96MW5;P20700;Q6ZUX7;Q9NUM4;O75081;Q9NQ60;Q6P  
 JW8;Q8N682;O75489;Q96PS6;Q9BWQ6;Q8N442;Q7Z3T8;O14713;A6NKF9;Q9UKR5;Q5JTH9;Q902F8;Q6NZ  
 I2;Q8N9M5;Q9H4A5;Q13367;Q8TAZ6;Q5BJD5;Q8WV19;P27815;Q2WJG8;Q86UT6;Q8WVW7;Q93050;A6NFY  
 4;Q9H3K2;Q9H0R1;O14512;P62993;O95810;Q8N6F7;A0PJX8;C9JH25;A8K0Z3;Q95414;Q86WC9;Q8WXE9  
 ;A5D6W6;Q6P9G4;P60602;Q5T7R7;Q9Y5Z9;Q6PEX7;Q9Y4R8;Q8NDZ6;Q8TCY5;P03923;O43747;Q8N8J7;  
 Q9Y283;P0DJ93;O60220;Q8N9R8;Q6GMR7;Q9UBQ0;Q7Z3B4;Q6ZU69;Q9UM00;O43752;Q9NZV5;A0PK05;A  
 8MV55;C9JI98;P31689;O95563;P24310;Q9BT92;Q9NVML;O15260;Q96AN5;O00198;O14579;Q9Y3E7;Q4  
 95M9;Q146718;Q92896;Q9HB21;Q96CX2;Q9UKB5;O95476;O60299;O43687;Q96BS5;O43561;P03897;P08  
 865;Q14699;P55735;Q9NVV5;Q9HBU9;Q96BV9;Q8N511;Q9Y3P4;P56381;Q96AW1;Q8WV92;P15954;B8Z  
 34;Q13515;Q9BSE2;Q96M19;P78395;Q96SA4;O95886;Q7Z7G2;Q8IWB4;P53675;Q9NZJ0;O75204;Q9254  
 3;Q9H9E3;O75154;P15941;A8MW95;Q69Y22;Q9Y3E0;Q9GZR5;Q96EV8;Q15011;O14521;Q96DX8;Q9NRP0  
 ;O43920;P60606;Q6UE05;Q8NCS4;P61567;Q6UWH6;O75381;Q9H0V9;O15239;Q676U5;Q9GZY8;Q9NS86;  
 O43493;Q96MP8;P0DI80;Q8NBD8;Q9P1A6;Q96AA3;Q96EK6;Q9HC07;Q5SRD1;Q16625;Q9UMY4;Q9NS93;Q  
 00765;Q9Y2R0;Q9H0V1;O75351;Q6UX65;P26678;P04264;Q6ZN68;Q9NV92;P80723;P61566;P30153;Q5  
 2LD8;Q9Y6F6;Q9NWW5;P49754;Q96MG2;Q8N4K4;Q96JB2;Q8N8D7;Q9NUS5;O14617;P06703;Q9NZZ3;Q96  
 F05;Q969W9;Q5FWE3;Q8N1N2;A2RRL7;Q8WVI0;Q96A57;O75436;Q5J8M3;Q3SYG4;P61165;Q9H2L4;Q53S  
 58;Q5VUB5;P50402;Q96SW2;Q8NFP1;Q53GL0;Q7L4S7;Q8IZS6;O95486;Q96SK2;Q14232;Q9NPB6;Q8TBQ  
 9;Q9H444;Q7Z3B0;C9JQI7;Q9BRG1;Q9NWS6;Q9GZY4;Q2TAP0;Q9UEY8;Q96KF7;Q9BPZ7;Q7Z5G4;Q8IYS2  
 ;Q96B42;Q9BWD0;Q96PC3;Q9UH99;Q6UXV1;Q7RTP1;Q8TF08;P50440;Q9H7X2;P53801;Q96AQ2;Q0VDI3;  
 Q8N6K0;Q16864;Q96FX8;Q86UP9;Q6IEE7;Q99816;Q9BX66;Q86XT9;Q9P2W9;Q14457;O60238;Q96HE8;Q  
 6UXD1;Q6PEY1;Q5T9Z0;Q8WUH2;Q5T6X4;Q8TBF5;Q6ZS62;Q8WW22;Q3KNT9;Q13813;P24539;Q96TC7;Q8  
 NFQ8;Q9NTG7;Q5JTC6;Q92575;Q8N1I0;P48059;Q69YW2;Q8TEF2;Q86TY3;O75122;Q8TBP5;Q07021;Q8I  
 Y50;Q17RQ9;Q6ZUB0;Q5JRM2;P02549;Q6UWH4;Q9NXF1;Q86VR2;Q8N7S6;Q9H4A6;Q96E16;Q6PIZ9;Q9NR  
 X6;Q9NR77;Q9NV01;Q9BQQ7;Q9BRK4;Q9Y239;Q8N8F8;P36956;O75616;A6NGB0;Q9YQC2;Q4VC39;Q1335  
 2;Q9H902;O00483;Q8N4C9;P53701;Q14678;Q8N912;Q96MT3;Q9Y5J9;Q96HA4;Q9NUN5;Q9NQC7;A6NLX4  
 ;Q6UWD8;O60884;Q9H3Q1;Q13145;O15259;O14908;P04818;A2RUT3;Q9Y4J8;O14523;P51571;Q9GZV4;  
 Q9UJ68;Q8TDI8;Q9NQ40;P63146;Q8WZ71;Q9NZW5;Q9BXW4;Q9NZB2;O75694;O60716;O14681;Q96C03;P  
 14406;O95473;Q5UBE3;Q9NV96;P03901;Q8N209;Q8N8D0;Q15438;Q9H300;P53680;Q03886;Q5SSG8;O4  
 3761;Q05932;Q13113;Q9Y5L4;Q9BV57;A6NFR6;Q8TAE6;P0C7T8;Q8WY98;P54920;Q9NQS1;Q8WV15;Q3Y  
 BM2;Q9BZW4;Q96EY1;Q6ZPD9;Q8N111;A6NC51;Q9P2D0;Q86UB9;O95202;Q86YD1;Q86UQ5;Q9H5J4;P300  
 47;Q96B86;Q12893;Q8IXM6;Q96CN9;Q8IWB1;Q6UWI2;P0C2S0;Q8IVY1;Q9UBM8;O94850;Q96PB1;Q9Y2B  
 1;Q5VU36;Q49AQ9;Q8TCS8;Q9NZU7;Q9BTX1;Q8N7C4;P35241;Q96S06;O14490;Q8TC71;Q15849;Q8NF7  
 ;Q5J8X5;Q96A59;Q6AZY7;P46108;Q3MUY2;Q8N766;Q9NX78;Q5JX71;P09496;Q9BR33;Q99550;P46020;  
 Q8NFR9;Q3B7T3;Q15643;Q1AE95;O00522;Q8N183;Q9Y587;O14524;Q9H6F2;O60763;Q5SNT6;Q9Y3P8;A  
 6NGC4;Q9H267;Q8N0U2;Q96NF6;Q9BU61;Q63HM2;P55957;Q9UQN3;Q9NPA0;P30622;P49901;Q96LZ7;Q9  
 NV64;P52948;Q6NW34;O95298;O75970;Q0VAF6;Q8IU68;A0PJW6;Q96JS3;Q7Z5L4;Q9NZD2;Q8WXG1;P40  
 305;P46977;Q7Z6B0;Q92870;Q99962;Q8N138;Q9Y2G1;Q96KR6;P10636;Q9UBK5;Q9UPX6;A2RU67;P044  
 06;Q9BSE4;Q5VW36;Q86TL2;Q9UPX8;Q92843;Q96CM4;Q9GZM5;Q9GZY6;A0ZSE6;O43731;O15503;Q8N85  
 2;Q9BSR8;P21912;Q96FM1;Q9Y6Q2;Q9BZW7}

7017

Pathogen[ P03383] interacts with 419 human

partners: {Q14244; Q17RY6; O75323; Q9BVL2; Q9BRK4; Q14457; Q92681; O96018; O15504; Q13228; Q96CW1; Q9NQG7; Q9UJY4; Q68CJ9; O60716; P13073; P27986; Q7L804; O00213; Q8IWIJ2; Q6RW13; Q9Y5J7; Q9P1A6; P56377; O15126; Q330K2; Q92621; Q14746; Q7Z3C6; Q96TC7; Q00610; P29474; Q9H9E3; Q9Y244; O14579; A6NDB9; Q8WXS3; Q14678; Q92572; Q13515; Q96JI7; Q7Z6B0; Q14160; Q9NZJ0; Q9UP83; Q9NX63; Q13884; P55735; Q86UE4; O53618; Q96HA9; P40337; Q9NZD8; Q9BJSK0; P62072; P83436; Q9Y9678; P04156; Q8N1B4; Q6NZI2; P54920; O14713; Q96H20; O95487; O15162; Q96JS3; Q43264; P12270; O14920; Q8TDB4; Q9UB61; Q13439; P19367; Q5T2W1; O95295; P41220; Q9HD26; Q9NRI5; A8CG34; Q3YBM2; Q9BW60; Q8TAC9; P52948; Q8WXE9; Q9H7P6; P31749; Q9GZR5; P31040; Q9BPZ7; Q13023; O96000; Q00005; Q9UJM3; P62424; Q9Y3E7; Q9BUN8; O95886; Q9NUQ3; Q96SW2; Q86U90; O43678; O60299; Q99689; Q8NEU8; Q10567; Q8NFH5; O14925; P60953; Q9H5J4; Q9NZZ3; A8MVW5; O43920; Q9BRQ6; O43615; Q8IV36; P55957; Q9UH99; O75489; O00186; Q86WV1; P25063; Q9NX95; Q6MZT1; Q92797; Q9H204; P49006; Q9GZV4; O75886; Q96MT3; O95831; Q9BZE9; Q8WWM7; Q8N1F7; Q9BZW7; P63000; Q96A26; Q96JB2; Q9BXM0; O14490; Q8NEZ2; Q99816; O95486; Q9HCH5; P24385; Q8N1N5; O00165; Q8TCS8; P30153; P67775; Q9Y6D6; Q9UQF2; Q7Z614; Q9Y4R8; Q8TEM1; O60220; P53675; Q9Y4E1; Q9NUS5; P49754; Q13352; O43493; Q92597; P63241; O00189; P31689; Q6X4W1; Q12983; P11802; P46939; O43318; O75306; Q96EV8; Q9UIL1; Q15436; O95178; Q8N2H4; Q9NZP6; O95049; Q96CN9; Q6ZPB5; Q9BV57; Q92870; P61077; Q96B49; Q9H1H9; Q07157; P11168; Q8WTV3; P30279; Q8NHG7; Q75NE6; Q15643; Q05084; Q14C87; Q96E16; O00291; Q15629; Q9BVC6; Q9BW27; O75081; O60238; Q99747; O75558; Q9NTG7; Q96N16; Q9H8T0; Q9UK41; Q7LBR1; O75843; P20700; O43633; Q6ZVN8; Q9Y5J6; P61586; O14641; Q9BQE4; Q9NVV5; P63010; Q9UDY4; P08865; O43747; Q15437; O94855; A1L3X0; Q9BVI4; Q9UJY5; Q9NR22; Q9BYG5; Q15388; Q9BXF6; Q9H444; Q9NRR3; P49901; O60711; Q15046; P78395; Q8IZQ1; Q9Y5V3; Q8N6F7; Q5HYI7; O75381; Q8N7J2; Q9H9H4; Q6DKK2; P63165; Q6P9B9; Q9HB03; Q99732; Q6UWF3; Q9BQ15; Q99848; Q9NPB6; P04406; O43745; P29966; Q676U5; Q9BT92; P53801; P11532; Q5JTC6; O95782; Q9BTX1; Q5BJF2; Q9NR77; P26678; Q86YV9; Q9UBF2; Q9BRG1; Q07666; Q8ND76; O95810; O94921; O94850; Q9UJG1; P35232; O95999; Q9H4A6; Q9HD42; Q5TCQ9; P04264; Q9P0U1; O15027; O60784; P50402; Q92783; E9PQ53; Q3SYG4; O75436; P17152; Q9NZI6; Q9UKC9; Q9NSC5; Q8IX03; Q9UKJ5; Q9BVT8; Q9HCI5; O15127; Q96HA1; Q9NRL3; Q96QK1; Q9Y4P8; Q9BUL8; Q96JE7; Q13367; Q8TC71; Q14232; Q717R9; Q14677; Q8N9A8; Q03252; Q9P0V3; P23508; O75161; Q9NR09; Q9UND3; P32189; Q9HC62; P53992; Q07021; Q8WWR8; P11169; Q68DX3; P82094; Q8WYR1; P42704; O00198; O43752; Q8WUY8; P80723; Q5UE93; O14907; P62952; Q9HAP2; Q9UM00; Q8N3V7; O14681; Q6NUQ1; P63146; P23528; Q13561; O60831; Q96C03; Q13033; Q00587; Q9UKX7; P18848; P18850; O76095; Q01844; O00161; O14512; Q9BXS5; Q9P0J0; O95271; Q9H8Y8; P30281; O15049; Q8IUD2; P09497; Q9UBQ0; Q92624; Q8N490; Q9UPT5; Q9NXJ8; Q96Q06; O60437; P14672; Q9Y3A3; P06733; O60664; O94973; Q9GZY8; Q9Y5Y9; Q8N9R8; O14964; Q9C0H9; Q8WV24; Q7Z3B4; Q86VN1; Q5T1C6; Q9HB19; Q9UN37; P56181; P30047; P24539; P78352; Q16186; Q92539; Q96DC7; Q96EY5; O75694; Q9NQS1; Q9Y2H0; Q96EY1; O75154; O14910; P40855; Q9UQN3; Q96NA2; Q99623; Q86YD1; Q92575; Q9UDY2; Q08379; P12956; Q5VIR6; Q13425; Q9BVN2; Q9H4A5; P22732; Q9HCC9; Q14693; Q8WUH2; Q9Y3P8; Q9NZ52; Q9Y250; Q13505; Q9BYG4; O60888}

7018

Pathogen[ P03410] interacts with 1535 human partners: {Q6MZT1; O60711; Q9UDY4; A6NL05; Q8N4H5; Q9H354; O75192; A1L3X0; Q00610; Q9BVN2; Q9P1A6; P69849; Q8TDI8; Q96HP8; Q9HC07; Q9BRT3; O14786; Q9NQG7; Q86UP9; Q96LZ7; Q8NC96; Q5JTH9; O95168; P09496; Q99848; Q9NQ90; Q53S58; Q5SNT6; Q9HC24; Q92562; Q9NXF1; O43674; O75949; Q9Y6Q5; Q8NBR0; O14569; Q9UQC2; A0PJX8; Q5SRD1; O95292; B84157; Q96TC7; A4FU28; Q9HCH5; Q86UT5; Q9NS86; Q9HC47; Q9Y2Q5; Q86VE9; Q7Z3B4; P49069; Q4G0N0; O95563; O00203; Q96DS6; Q5JSH3; Q9BW27; Q96KX2; O96018; Q7L804; Q9UBK5; O75781; Q9H6X4; Q717R9; Q96HJ5; Q9Y5L4; Q96HD9; Q6NZI2; Q8IZS6; O95782; O71037; P30047; Q674R7; Q9Y512; Q0D2K0; Q15041; Q9NRP9; P82094; Q6IEE7; Q96PC3; Q68CJ9; O00519; Q71RC9; P36956; Q8ND61; O75154; Q96CW1; Q9HBM0; Q9BW72; A6NFA0; Q7L0L9; Q12767; Q9BZE9; P27986; Q9H0C3; Q969F2; P61165; O14910; Q9H267; P56556; Q8IWB1; Q86XT9; Q96KJ9; P22732; Q9NQG1; Q6N075; Q6P9G4; Q02221; Q9NTG7; Q5W0B7; Q12893; Q9BUB7; Q9BZ97; P49901; Q96B33; P61550; P61565; Q9Y2R0; Q8NCS4; A5D6W6; O15255; O95405; Q5UE93; Q969W9; O14681; P17568; Q8IWIY9; Q9UKH3; Q5GH73; O14920; Q8WWF3; O14828; Q8N8D7; Q9BVI4; Q8N2C7; A6PVL3; A6NH52; Q86WI0; Q9NV12; Q8TCS8; P62072; Q9GZR5; Q96RT1; P80303; Q96B49; Q96DZ9; Q14739; Q5VZ72; Q14C87; O43633; Q5E7R7; Q96GC9; Q8NCG7; Q8TF08; Q9NRL3; Q8N511; Q7Z614; Q6PEY1; Q9NZ43; Q9H0V9; Q5BIV9; Q86WV1; Q9UEY8; Q8NBN3; Q9Y239; Q9UPT5; Q5VSG8; Q9H1C7; P30622; Q8NHS1; C9JH25; Q99766; Q5GH77; Q8WYR1; Q9BXS5; Q8N6Q3; Q9NX77; Q96KF7; Q13190; Q99442; P30279; Q8TAZ6; Q69384; Q12983; Q8N8Y2; Q3V5L5; O43903; Q9BQQ3; Q9UBF9; Q8N6I4; Q15388; P53680; Q96SW2; Q8NFX9; O75787; Q8N7P3; Q9Y3A0; Q8N6L1; Q5VUB5; Q13561; Q9H5Q3; P47756; Q8N3V7; Q8N1Y9; Q8NBT3; Q86TY3; Q9BRV3; Q96JB2; O60610; O43597; Q8TAC9; Q96NF6; Q9H7P6; Q9UP83; Q8WZ55; Q9H902; Q9H115; Q5SSG8; Q86XT2; Q9GZY8; Q86T03; Q96FT05; Q9BVC6; Q9NPA0; Q9NQ60; Q9UKX7; O60896; Q6UXV1; Q96B86; P60468; Q7Z5B4; Q96FM1; P49257; O95178; Q8TBQ9; Q5T2W1; Q9Y2J0; Q96A57; Q9Y4R8; P20963; Q3B7T3; Q6UE05; Q6PIZ9; O95473; Q9H9H4; Q6UX68; P36542; Q9NW97; P60059; P29728; Q96CP7; Q6UX71; Q8TEW8; Q9BXM0; Q08209; P63000; Q13596; Q7Z699; Q9Y6I3; Q8N1N5; P11166; P49006; Q9NPD7; O60895; Q1HG43; O75380; Q9BQA9; Q86TL2; Q96ER9; O94855; O43678; Q96005; Q9NWW5; Q8TDW5; Q96N19; Q9UJG1; Q9NZ52; P22333; Q969X5; Q8N661; Q9NVZ3; P63165; Q5GH72; Q96N68; P25705; Q9H5J4; Q9NP79; P56378; P04264; Q17RQ9; Q9NUS5; Q96GE9; P61567; Q13445; O15259; P0C7Q5; Q8N1W0; B7ZAQ6; Q4L180; Q86UW1; O43736; O75351; O14548; Q902F9; P53992; Q9NS93; Q96B42; Q9Y2V7; Q9H1H9; Q6ZM3; O14656; P15954; Q8IX03; Q9P299; Q8N8J7; Q0JRZ9; Q8N292; Q3SYG4; O43427; O75674; Q96SA4; P46020; Q8WY22; A8MVW0; Q15172; O43747; P41220; Q945M9; Q6UXD1; P16157; Q9Y5V7; Q9NVV5; O95867; P15941; Q70J99; Q9Y2B2; Q9BU23; Q9H3E2; O00198; Q8N4C9; P18848; Q8N138; Q567V2; Q6ISU1; Q8IVJ8; Q6UWW9; P0DI80; Q12422; O75843; P0C2S0; Q96A33; O43920; P61421; Q12959; Q9UI09; Q8IYT2; Q86U90; Q9BUL8; Q9UH99; Q5T4T1; Q16655; O60749; Q13505; Q8IV36; Q2T9K0; Q7Z7N9; Q9NSK7; O00400; Q9P0V3; Q5VW36; Q96Q45; Q8WW34; O94905; Q5JXX7; P0C6T2; Q53GA4; Q8WWA1; Q147U7; Q9Y228; Q86WV15; Q8N6F7; P05141; O96000; O43759; O60299; Q9HBL7; O00165; P48444; O43561; P52948; P02686; Q96AW1; P11532; Q14410; B9EJG8; Q8TAM2; O15504; Q5TCQ9; Q7Z5G4; Q9NRQ2; Q9BSE2; Q5TZJ5; Q8N1B4; Q9BPZ7; Q6P1Q0; Q9NRR3; Q96Q06; Q9Y5Y5; Q9Y3P4; Q496H8; P10645; Q9NPB0; Q9Y5U4; Q14210; Q9H9K5; Q10567; Q9H841; O14713; Q9BV81; Q9NZW5; Q96HH4; P11168; Q9NUB4; O00501; Q6IEE8; O75324; Q969E2; Q8IWW1; P35606; Q7Z6B0; Q8WV28; O60716; P06733; Q9Y2H0; Q5SQN1; Q9BJSK0; P36405; Q5JRM2; Q9HAB3; Q8N307; Q6DNX4; Q14457; Q13425; P28289; Q92572; Q8IVI9; P07919; A6NC51; Q92545; O96011; P20700; O00159; Q68DU8; Q13515; P33947; Q9Y6F6; Q9BYI3; Q99732; Q53RY4; Q9H813; Q13145; Q5SNT2; P59646; Q07021; Q9NX00; Q99445; Q08378; Q9P2W9; Q9NQG6; Q9GZY4; Q9NS64; Q9H939; A6NC78; Q9H8T0; A2RRL7; Q9NPL8; P20674; P09912; Q8N2U0; O14908; O75694; O14662; Q93050; Q9

HD36;Q8IYS2;Q92843;Q92783;Q9BY43;P31749;P16452;P58511;O14579;Q96QK1;P0C7N4;Q8N114;Q9Y5Z9;Q96N35;Q9UKI2;O94777;O75161;Q14232;Q96Q80;O00213;Q92934;Q68DH5;Q5T5W8;Q8N6F1;Q96SN7;Q8TB68;Q2PZ11;O95167;Q9Y287;Q9NS69;Q9HD87;Q5T292;P40855;P56385;Q9NUP9;P50570;Q00587;Q8N0U2;P31358;Q96EK6;A6NDV4;Q1HG44;Q96N16;Q9H6L5;Q96J86;Q96AN5;Q8N135;P27544;Q6PEX7;Q6ZS62;Q9NSC5;Q9Y2B1;Q9UBU6;Q9Y283;O00291;A8MQT2;Q3SXP7;Q9GZP9;A8MXV6;Q8WUH2;Q24JP5;O75381;Q6DKK0;Q86VN1;Q9NQ40;Q9BTD3;O15049;A6NGB0;Q9P055;P57738;Q96UW5;O15239;Q9UFX6;Q99HB21;O14490;Q9P253;Q9H7X2;Q86VI4;Q8WZ71;Q86VY9;Q8WVH0;Q14160;Q9H3Q1;O60664;Q8NDZ6;Q7Z3B0;Q96HA1;Q1AE95;Q9Y4P8;Q9HBV2;Q8IV31;Q9Y3E0;Q9UMY4;Q8N808;Q6NUQ1;Q14DG7;Q8N2H4;Q8WWM7;O94850;Q9NP85;Q6NZY7;Q13113;Q9BY14;A6NDP7;Q9Y6M9;P86791;Q9H4A6;Q9NV92;Q12840;Q9NVM1;P23786;Q969H4;O60397;Q96S52;Q8TF30;P02549;Q9UBX3;O75146;Q5VUD6;A6NP81;C9JQI7;P56747;A6NGC4;O00461;Q05084;Q8NC60;Q16617;Q9NR22;O43761;O14617;P33241;Q9UHA4;Q9BQE4;Q9H204;Q9UJY5;Q96T49;Q9Y587;Q86UQ5;Q9UBV8;Q16585;Q8N609;Q9BV87;A6NNC1;O15258;Q07666;Q8WXG1;Q7Z434;Q9HCC9;Q9NRY6;Q8N912;Q8N490;Q9BZL3;Q13884;Q9NXE4;Q8N6M3;P06703;Q9UL45;P55957;Q5VYP0;Q8WXE9;Q9BVV8;Q2M385;Q96G23;O75069;P23508;Q9UMZ2;O43264;Q14693;Q6UWD8;Q8TCG1;Q8N1F7;Q8N112;P81408;P13073;O95171;Q92575;O00559;Q6PP77;Q9NZ42;P0C7T8;O95249;Q9HAP6;Q15700;Q8N6S5;Q8NEW7;A6NN79;Q9P1Z9;Q5HYL7;Q96I34;Q8N442;Q9BQJ4;Q9BSE4;O95295;Q6ZWB6;O95219;A5D8V6;Q9H2X8;Q9UBQ0;Q5SR19;Q9UNH7;Q9HD26;Q8IX19;O14925;P08865;Q92896;Q96IF1;Q99595;Q96GX1;O95166;O15162;P56381;P11171;Q8WV48;Q9H0V1;Q8N111;P40123;Q96GD0;Q13336;Q5SWH9;Q53H11;Q5T2T1;Q63HM2;Q99816;Q9NR09;Q96KT7;Q9UM54;Q15599;Q9UJY9;Q902F8;O95425;Q8N1N2;Q96MW5;Q8N128;Q86YS3;Q9NWD8;O43318;A6NKF7;Q0VAF6;Q4VXA5;Q92624;O75970;P22695;Q93100;Q9GZJ3;Q9BUK6;Q8NE86;Q8N201;Q9UMR2;Q8N614;Q0P670;P12956;A0ZSE6;Q92556;O95866;Q96A59;Q8N766;P24385;Q9Y3E7;Q9Y3P8;Q9UDY2;Q9BTV4;Q13492;Q86UT6;Q9P0M2;Q15436;Q5GH76;Q93052;Q8WV24;Q96MP8;Q96LL3;Q9BVK6;P29474;Q9H0H0;Q8N205;Q9H6F2;Q8NEZ2;O60763;Q14677;Q99828;Q96KR4;B6SEH8;P43307;Q9UJ68;Q9H8Y8;Q96DR8;A6NJY4;Q9Y6X1;Q9BT92;Q9H8M1;Q9NRX5;Q9UQN3;P50552;Q14315;P03886;Q9GZY6;Q6P2H8;Q5H9S7;Q7Z7G2;Q9NUN5;Q08AM6;Q8IUD2;Q9HC62;O00483;Q96623;Q6NUJ2;O14523;Q6UWI2;O75396;O95999;Q96BY9;P61570;Q9UKS6;O95298;P12270;Q9NWS6;Q96FX8;C9JDP6;P0DJ07;Q9BU61;Q9H0R8;Q6ZVN8;P26038;A0PK05;Q969M3;O95996;Q15437;Q9UIL1;Q5VTU8;O75915;Q8NA58;O75438;Q9NPI0;Q92797;Q9NUU7;Q6ZUJ8;A6NFC5;Q96E16;Q8NEQ5;Q8NBD8;Q9UDW1;Q3ZCQ8;Q96HH6;Q9H492;Q9BQ49;O43491;O00264;Q9NPE6;E9PQ53;Q96CX2;Q9Y2G1;O75323;P0CG08;Q96CM4;Q7L4S7;Q9BVN8;Q86YV9;Q5T1C6;P56181;Q3B7S5;P61586;C9JVV0;Q96RQ1;Q8TAE6;B2RFX0;Q96JN2;O9H462;Q9NV29;P78395;Q9BXL7;Q8N357;P25063;Q96GL9;Q03252;P04818;Q9BCE4;A6NCI5;P00156;Q07157;Q9UK28;Q8IY50;Q12772;A6NLX4;O15155;Q68G75;Q75NE6;Q9BTW9;Q96JX3;Q86WC4;Q5VU36;Q86SQ9;Q9BUH8;Q9BW60;Q86UR1;Q9NYJ8;Q9HD42;A8MV81;Q96D71;Q9ULD2;Q96I36;Q86XF0;Q9UKY0;Q8N9S7;Q9NP61;P14927;P60602;O14613;Q9UN37;O95271;Q14D33;Q9Y678;Q8NHF5;A0PJW6;Q96M19;P11802;Q86UE4;Q9BSR8;Q5JX71;Q16873;Q66K66;A8MZ97;P22830;Q9BXW4;P53701;Q9NQX7;O14836;Q641Q2;P46939;Q9UND3;Q96A26;Q9Y3A3;Q99550;Q15629;Q08722;Q9P0N5;Q13033;P62952;O43615;Q96KR6;P09497;Q6PJW8;Q14789;Q6ZUB0;O95486;Q6UX65;P42704;Q8TEM1;P31040;Q9UKC9;O15127;Q969G9;Q5HYI7;Q15049;P26678;P49788;Q5U3C3;P03928;Q9NZG7;Q8WV92;Q08495;O75204;P63146;Q15363;Q9BXF6;Q9Y2Y6;Q5T2E6;O14907;P42167;Q9Y284;Q8N4K4;Q9NZT2;Q15036;Q9Y3D7;Q8IW70;Q6UWN0;Q5H9R4;Q9Y6I8;Q8N8D0;Q96G01;A7E2F4;O75489;P24539;Q12912;Q9Y371;Q8N317;Q96T50;Q9H444;Q9UKJ5;Q9NWF4;O60784;Q8N9R8;Q9UN42;Q15849;Q9NZZ3;O95415;Q9Y6D6;Q9BRB3;Q9Y4E1;Q13023;Q9H1K0;Q8IYJ3;P04156;Q86Y39;O95876;Q9BSA9;Q8TC71;Q9ULU8;Q9NUQ3;O95831;Q9NV64;P53618;O75436;Q5RGS2;A8MW5;P61923;Q9Y6D5;Q5TGY1;Q7Z7J9;Q8WVW7;Q8N6K0;Q2VYF4;Q15046;Q96JE7;Q52LD8;Q9BRG1;Q6UWH6;Q6UWF3;Q9NZD2;Q7Z5M5;Q14118;Q8N2G4;Q8WTW3;P21912;Q9Y4G6;Q9Y244;Q9BYT9;Q9NZ20;Q9NZU7;P49754;Q6VEQ5;B4DJY2;Q96FZ7;P87889;Q9BT22;Q55810;P48230;P61566;Q9H0R1;Q96S06;Q9UJZ1;A2A2V5;P0C7Q6;P48059;O00522;Q96HA9;Q96FB5;Q5T6L9;Q9Y5U8;Q8N3T6;O75964;P04406;Q6RW13;Q9BQI5;P04844;P86790;P50402;Q00765;Q9NX63;Q14409;Q15438;Q69YW2;Q5JTC6;Q9BZW7;B2RUZ4;Q6GV28;Q14678;O75558;Q16625;P30281;P09669;Q96T51;O95476;Q5VW32;P10636;Q96ZQ2;Q9HCU5;P24390;O94901;Q9Y5J6;O60884;P54826;Q96KA5;Q9HAP2;Q6IAA8;Q99643;Q8N8F7;Q96S66;P63010;Q15643;Q6ZW34;Q2M3R5;Q4G0F5;O42043;P60953;P03897;O43677;O75477;Q9NRI5;Q9Y5J9;Q0VDE8;P50542;Q14746;Q9Y5V3;Q8TBP5;Q14699;Q8WVX3;Q6NVV3;P30153;Q96DZ7;O95868;Q6ZU69;Q9BQQ7;Q8TEF2;Q8IZA0;O95169;Q96JI7;Q6ZP80;Q2LD37;O60346;F5H4A9;P46108;Q00005;Q330K2;Q9HB03;Q96PS6;O75081;Q9P0S9;P53779;B4DS77;Q96D96;A6NLE4;Q8IXS6;Q9HCI5;Q16864;Q9BZR6;Q6ZSS7;Q6ZPB5;Q8NBJ4;P57088;Q969N2;Q9Y5U9;Q9NV96;Q96ES6;Q8IYJ0;O43181;Q969W0;Q99932;Q8WW43;Q8N4L1;Q6ZNB6;P31689;Q00LT1;P17677;O14521;Q96HV5;P0C7U9;Q92542;Q69YZ2;Q6UWH4;Q96B97;Q8TEW0;O95886;Q16718;Q6X4W1;O43815;Q5T9Z0;O43752;Q9NPB6;Q0VD83;P63241;Q9H799;Q8N8Q9;Q49A09;P80723;Q16186;Q9UBY8;Q9NZI6;P24310;O95159;A8CG34;A6NKL6;Q99962;Q86WV6;O75306;Q9POU1;Q8NEU8;Q8N7C4;P09917;P62424;O15027;Q587I9;O60220;Q9Y250;Q9NVD7;Q9NYZ1;P60606;Q96G79;P46695;A6NML5;P00403;Q8IXB3;Q15011;Q92597;Q01082;O60291;O14653;Q9NUR3;Q8IWB4;Q9BRQ6;Q9UPX8;Q8NC56;Q3YBM2;A6NGB7;O43676;Q8IWX6;O14949;Q9BVK8;A6NM45;O43687;Q86YD1;A8MVS5;Q8IVY1;Q8N7J2;O75352;Q86UL8;Q7RTP0;Q6UXB3;Q6ZVK1;Q86VR2;Q6UXU6;O00631;P56589;P35241;P30414;Q53GL0;Q13228;O14512;Q9H2K2;Q6ZN68;Q96DX8;Q96EY5;O75340;Q14CX5;O76095;Q9H3K2;Q92629;Q8NI32;Q96AQ2;P17152;Q5VXU3;Q9NX94;Q99807;Q15035;Q9HB19;Q15070;P59780;Q9BZR8;Q92805;A4D0T7;P83436;O43745;P32189;Q9BXS4;P03901;Q5FWE3;Q629K1;Q8NE00;Q8WVE6;Q8WU20;Q9UQF2;Q5VIR6;Q96C03;Q9COH9;Q9UL01;Q9P0J0;Q9P0I2;O43731;P56790;Q01518;Q13326;Q9Y693;P23528;Q9GZV4;P03923;Q9NP84;P27105;Q6GMR7;Q9NXG0;P55808;Q8IU99;Q6ZVE7;O14524;Q8N183;P55735;Q16891;Q13424;Q8WW22;Q5JTV8;O00186;P53675;Q8TDB4;Q13439;Q8NFX8;O15260;Q9P2D0;Q12981;O95721;Q9BRR3;Q13367;Q9NWR8;Q96MF6;E2RYF6;Q96NA2;O43493;O60831;Q6ZXT7;P32522;O75425;P39656;Q96SK2;P62166;Q9NP74;Q5T6X4;Q9H0R3;Q86UB9;Q7Z3C6;Q96H20;Q96MT3;P20292;Q9H488;Q8N9A8;Q96D05;O95202;Q96JS3;Q13449;A6NKF9;Q8N852;Q8IXU6;Q68DX3;P78352;Q5VVP1;O15503;P51811;Q9UM00;P67775;Q7Z388;Q92539;Q9Y5K8;P61966;Q9NQX5;Q9H490;Q8IVP5;Q12887;Q4ADV7;P40305;O94772;O15126;Q96CF2;A2RUT3;Q13813;Q8N1I0;Q8WV19;O95562;Q5BJF2;Q05932;Q8IXM6;P08235;P62993;A8MW95;Q14244;Q9BV57;P50440;Q96IX5;Q96XSL2;Q9H269;Q9NQB2;Q3KNT9;Q9BSN7;O14609;Q14761;B1AL88;Q9NR77;Q9BZW4;P61803;Q8WUY8;Q8WXS3;O75122;A6NDB9;Q9NZ45;C9JYI98;Q7L5Y9;P42566;P18850;O95164;Q8WXH0;Q8NFM7;Q8NFR9;Q9P2X0;Q5J8X5;Q6UX82;Q9UI14;Q8IXX5;Q6ICL7;O00161;Q96JJ3;Q8ND76;Q9BVL2;Q96B96;Q92681;Q7LBR1;Q6AZY7;A1A5B4;Q9BWQ6;Q

4LDR2;Q9NQS1;P27815;Q9NQA3;O94973;Q9H9E3;P35611;Q96HS1;Q6BDI9;P56377;Q9NRR8;Q96EV8;P18859;Q8N6L7;Q8IWD5;Q86XL3;O60888;Q96EY1;Q8NH9Y;Q2WJG8;A2RUG3;Q15012;P11277;Q6P9B9;Q99747;Q9UKG1;O60437;Q93045;P30405;Q92543;Q9BTX1;P29966;O95471;Q9N2J8;Q9BX66;Q9H4A5;P34897;O14683;Q8IWW2;Q9UJM3;Q9H9E1;Q9BRQ5;Q92621;Q7Z3T8;P24588;Q9BVW6;Q5QFB9;Q86V85;Q5JRA6;Q8N7S6;O60238;Q9Y6Q2;Q13352;Q5TC84;O75886;Q9NZP6;Q9UJY4;Q8N8A4;P56134;P46060;O95070;Q9BYG4;Q8N3R9;A8K0Z3;Q8WWR8;Q9NX95;Q8N944;Q9BVT8;Q96PB1;Q8NEA5;O43505;P40337;Q9NRQ5;P61077;P10606;Q9Y4J8;O95487;Q96LD1;Q8NFR3;Q8NBV4;Q9BYG5;Q8NHG7;Q7Z4Y8;Q8IZQ1;Q9HBU9;Q13323;P10909;Q2TAP0;Q9Y5X2;Q8WVI0;P12074;Q96DC7;Q9H665;Q86UK5;Q9UBF2;Q96AX1;O95182;A6NGA9;Q86WG5;O75431;Q6P499;Q13021;Q3MIW9;Q9H6Q3;O95049;Q99569;Q3MIR4;Q9NZJ0;O14641;Q8N0W7;Q08379;Q8BRL7;P54920;Q99689;Q6IS14;Q96MG2;Q9NZV5;P22735;Q96BM0;Q6NW34;O75616;Q16635;Q8NFR91;Q8NCQ3;P14406;P53801;Q96HE8;Q92870}

7019 Pathogen[ P14075] interacts with 513 human partners: {P60953;O43674;Q5BIV9;P11169;Q8N490;Q9BQI5;Q14457;P42704;Q92797;Q9P0V3;Q9NQG7;A6NFC5;P06733;Q92545;Q3SYG4;Q9P0U1;Q9BQE4;P29474;O00213;O14925;Q52LD8;P63165;Q13505;P09497;O95049;Q15643;P53801;Q68DX3;Q9UJY4;Q14746;Q96HJ5;Q9H5J4;Q12983;P31689;Q96MT3;Q96JB2;Q96EY5;P56181;O94777;P62952;Q8ND61;P11532;Q00005;Q99932;Q9Y5J9;Q9BVC6;Q96JE7;Q9BW60;P55957;Q92681;Q9HAP2;P12956;Q8NEJ4;Q96B49;Q96FX8;Q5SRI9;P09496;Q9H1H9;O14681;Q86YD1;Q9NRQ5;Q8IWW1;Q9BUL8;Q8N3V7;Q9NX63;Q8N9A8;P49006;Q13884;O96018;Q8N1B4;O75323;O60888;Q96JS3;Q9BVT8;O94973;P62072;Q8N2H4;Q07021;P11802;Q96A26;O96000;Q96J86;Q9H9E3;Q96CW1;O75558;O75886;Q8WYR1;O95182;O00186;Q9NR22;Q14160;P08865;Q16186;O95295;O43677;Q07157;Q86UE4;P78395;O76095;Q8N9R8;O43752;O43427;Q96HP8;O15127;Q2LD37;P40855;Q10666;Q7LBR1;O15162;Q9H444;Q9BXM0;A8CG34;O14713;Q96N16;Q9BV57;Q9BVN2;P80723;P30281;P30279;Q96C03;P82094;Q14C87;P53675;Q15388;Q13425;P32189;Q6X4W1;Q8WWR8;A8MVW5;Q9UBF2;Q6NUQ1;Q8IV36;Q9Y6F6;Q9NS64;O95886;Q8N6L1;Q13561;Q93100;P20700;Q92783;Q8N1F7;Q9NP79;Q99747;Q01844;Q8IZQ1;Q96TC7;Q9NZS2;P41220;Q9UBQ0;Q01456;Q5UE93;P54920;Q86VN1;Q676U5;Q9BYG4;Q92870;Q9HC5;Q13515;Q6M2T1;Q9Y244;P13073;Q15070;P19367;Q7L5Y9;Q96NA2;Q9Y250;P22732;Q9HB03;Q9UKX7;Q9HD26;Q9GZV4;Q75NE6;Q86U90;Q7Z614;Q8IUD2;O95159;Q9UK41;O15027;Q86VI4;Q5TCQ9;Q15629;Q9GZY8;Q8NEU8;P63241;Q5TLC6;O15126;Q9NZD8;Q86TL2;P31040;Q9Y6D6;P12270;Q9UJG1;Q9UDY4;Q9NZB2;O43920;P53992;P50402;Q9BT92;Q96JI7;Q17RY6;O75306;Q9NZP6;Q92621;P61077;Q8NEZ2;Q96AQ2;P55735;Q9BYI3;Q96H20;Q9NRI5;O75081;Q8WV24;Q9Y4P8;Q5HYI7;O75381;Q9Y3E7;Q00587;Q92624;P23528;O95298;O00461;Q9H9H4;Q9BTX1;Q9NUQ3;Q9H4A5;A1L3X0;O00291;O43678;P35232;Q86WV1;P17152;Q96SW2;Q96HA1;Q6NZI2;O60831;Q9BPZ7;Q9H204;O14920;Q8N1N5;Q16655;Q9BW27;O43493;Q9HCC9;O00189;P56378;Q96D05;P31749;O95487;O95810;Q8TAE6;Q8WXS3;P04406;Q92539;Q96MF6;Q8N7J2;Q9H8T0;Q6ZVN8;O14964;Q08379;Q9BU61;P60602;O43505;Q9UP83;Q9Y512;P49754;Q3YBM2;P14406;Q9NVML1;O14641;B2RUZ4;Q14232;P29966;O75161;Q15437;Q8NHG7;Q7Z6B0;P26678;Q9NRL3;O14910;Q9NTV7;O60299;Q9UJM3;P04264;Q9UJH9;Q7L804;Q8NC54;Q9NQS1;Q99623;Q8TEM1;Q2TAP0;P53618;O95831;Q9NSC5;O14523;Q9UQN3;Q9UND3;P46939;Q9HC62;Q8WXE9;Q99732;Q330K2;O60238;Q96HA9;O95782;O43318;Q99848;P30047;Q9BTD3;P27986;Q14677;Q9BUN8;Q8IWW2;Q86YV9;O14907;O60220;O15255;Q8IXM6;Q92575;O43745;Q9UKC9;Q9H8Y8;Q9NZZ3;O14613;Q9NR77;O14490;Q8WUY8;Q9Y3P8;Q9HB19;O43747;Q1HG44;Q96DC7;P18848;Q15436;P61586;Q9Y3A3;O95999;Q92572;Q9UILL1;Q99766;Q9NV29;Q5JTC6;Q9UK28;P24539;Q9NRR3;Q6UWF3;Q13228;P67775;Q5VIR6;Q5T2W1;P30153;E9PQ53;P63000;Q8WVI0;O75436;Q9NZI6;Q9GZR5;O00161;Q8WWM7;Q68CJ9;Q8TC71;Q9BRQ6;Q8TDB4;Q14789;P0DJ07;P63010;Q0VDE8;Q13439;Q8TCS8;Q96Q06;Q9Y4R8;P23508;Q9BRK4;Q05084;Q9Y678;Q6ZPB5;Q5HS97;Q9P1A6;Q96EV8;Q9NV92;Q9BXF6;P58511;O15504;Q9H7P6;Q9UDY2;Q717R9;Q986M3;P78352;Q9BV14;Q9UH99;Q9NR09;O75843;Q8TAC9;Q8ND76;Q9HD42;O75192;Q9BRG1;P56377;Q8NBM0;O60711;Q9BYG5;Q9Y5J7;Q8WUH2;P11168;Q15011;Q9BZW7;Q14678;Q9Y2H0;P40305;Q92597;Q8NE00;Q969W0;P56385;P24385;O94855;P63146;Q9BXS5;O75154;Q6P9B9;Q9NPB6;A6NDB9;Q9BVL2;Q53HI1;Q9NVV5;Q99816;O60437;Q13352;Q496H8;Q6RW13;O14512;O75489;Q9C0H9;O43264;Q9Y287;Q9NZJ0;O60716;O95271;Q9BUB7;Q15046;Q9NX95;O94921;P40337;Q9Y5V3;Q96EK6;P14672;O95178;P62424;P49901;P42167;O75694;Q9UKJ5;Q13033;O15049;Q641Q2;Q9NRR8;O95486;Q9H4A6;Q7Z3B4;O00165;P50440;Q6UWI2;Q9P0J0;Q9Y5J6;P54826;Q9UQF2;Q10567;Q96CN9;Q8WY22;P83436;Q9NS69;O75477;O94850;Q9Y4E1;Q8NFM5;Q96E16;Q9NUS5;Q96EY1;Q8N661;Q00610;P11171;Q8N6F7;Q9UJY5;Q8N944;Q13367;P81408;Q7Z3C6;Q9HCI5;O43615;O00198;O60664;O60784;Q6DKK2;O43676;Q9UM00;Q03252;Q8WTW3;Q14244;Q9UN37;P56248;Q9BZE9;Q9BSK0;P55808;P18850;Q8IX03;Q5BJF2;P25063;Q9UPT5;Q13023;Q14693;Q99689;Q96QK1;O14579;Q9NYJ8;Q9Y5U8}

7020 Pathogen[ P0C206] interacts with 893 human partners: {Q13439;O95271;Q5BJF2;Q9NQC7;Q8TF30;Q7Z3C6;Q4L180;Q96TC7;O75340;P06733;Q96A33;Q6UXU6;O14964;Q9BRG1;O14662;Q9UKC9;Q92597;P53680;Q2LD37;Q8IVJ8;P63010;Q9NQG7;O60716;Q9UJZ1;O75477;Q9Y3A3;Q14789;Q92621;Q5SRI9;Q9BVK6;Q99848;Q4G0F5;P46939;Q9NUP9;O14579;P56181;Q92539;Q16655;Q6M2T1;Q01082;O60291;O43933;O15127;Q9Y5L4;Q69384;Q9UKG1;Q9Y678;Q15437;P53675;Q96D05;Q9UN37;P50402;Q92575;Q9HB19;Q68DH5;Q587I9;Q9UM54;P78352;Q9BVI4;Q9Y5J6;Q9UM00;Q9GZV4;Q96G23;Q9H4A6;P53701;Q96RT1;Q9UDY4;P83436;O94973;O75192;P09917;Q8NEZ2;Q96DC7;Q6IEE7;O14828;Q6IS14;P40305;O14920;Q14739;Q92556;Q99828;Q8IXM6;Q9NQ90;Q9H44;Q9UHA4;P31749;Q7LBR1;Q8NC54;P17677;Q9BXW4;Q9UBV8;Q9NUQ3;O75396;Q9NWS6;Q9UL45;Q8NFM5;Q93100;Q9Y2V7;Q9NUU7;P47756;Q9Y6Q5;Q99766;O00291;Q8TCS8;Q96HA9;Q9UBP0;Q92572;Q9NZ42;Q96KR4;Q9H6Q3;Q8TC71;O60784;Q969F2;Q16186;Q641Q2;Q9UDW1;Q15019;Q9Y3E7;Q9UNH7;P57088;Q9Y6Q2;Q9BZR8;Q9Y5U8;Q8N3V7;Q9BT92;P04156;Q8NC96;Q9HAU4;Q9NZT2;Q96MT3;P53618;Q9P299;O43747;O43920;Q9HCC9;Q9BXF6;Q9Y287;Q9H9E3;Q8NEU8;O14524;Q9NVV5;O94855;P30153;P39656;Q3SYG4;P62166;Q9HD36;Q92681;Q8TAM2;Q15700;Q9UJH9;O95810;Q10567;O43427;O14653;P54920;Q6NUQ1;Q5TC84;Q92562;O43815;O75161;Q8N6L7;Q9BU61;Q96B49;P18850;Q330K2;O60664;Q07021;O43759;O95164;Q96HJ5;Q5SQN1;Q96FX8;Q9NRS6;P78395;O95721;Q7Z5B4;Q13023;Q8N944;Q5JTH9;O95049;Q86XL3;O75154;O14521;Q5VXU3;Q9NRR8;Q9NV92;O75381;Q9Y6D6;Q9NVD7;O75306;Q14315;A6NDB9;P12074;O15258;P56589;Q96IF1;Q7Z3B4;Q96MF6;P49901;Q9Y2J0;Q13615;O95202;P08865;Q13228;Q9HB03;Q13515;P14317;O14713;Q9H492;Q9UHM9;Q15172;Q96CX2;Q8NHG7;O43752;O75787;P30279;Q96B97;Q9H0R1;P14406;Q9H8T0;Q9BTW9;Q14232;P49754;O43493;Q0VDE8;P36542;Q96DX8;Q96JI7;A5D6W6;O75081;Q9H1K0;Q8NE86;Q5TCQ9;Q9H6L5;Q9NRR3;Q8N2C7;O95999;Q8IWW1;P61966;Q9UILL1;Q8W

XE9;Q99623;P04264;O14613;Q6P1Q0;Q9NS64;Q14678;Q9BUK6;O95630;Q9HC62;Q96HA1;Q9Y5V3;O95867;Q9UQN3;Q96J02;P80303;O95182;O95070;Q9H8Y8;Q75NE6;Q96T51;Q8N661;O60220;O94850;B2RUZ4;Q9BYG5;Q14457;O43318;Q86VN1;Q96JN2;P49755;Q6UW56;O95886;Q5JRA6;Q9BUB7;P29728;Q96CM4;Q9UJY4;Q00610;Q5H9R4;Q9UDY2;Q96JB2;Q9H9E1;Q9Y5Z9;O60831;Q8IUD2;P55735;Q9Y5J9;O94777;Q99550;P34897;Q01844;Q99962;Q15035;Q14746;Q9UBX3;Q9UKJ5;P36956;Q13596;Q13021;Q99816;Q5HYI7;Q14699;Q86WV6;Q16891;Q8TAE6;Q9BZW7;O75558;Q92542;Q07666;Q9UI09;Q9H0H0;Q6ZNB6;Q96A26;Q8NFR3;O60884;O60299;Q8N3I7;Q92783;Q9Y4E1;Q9H1H9;P67775;Q969E2;Q9UQF2;P30622;P1166;Q9NZU7;P19367;Q1HG44;P50542;O95996;P10636;P32189;O95476;Q9Y4P8;Q15036;Q03252;Q6P3W7;O94901;P27986;Q8N912;Q96N16;Q9BZE9;Q9Y512;Q9UI14;P62993;Q9UJG1;P53801;Q8NBJ4;Q9Y5J7;P23786;P09496;Q8N6F7;Q5T2W1;Q5SRD1;Q9H5J4;Q8IZQ1;Q9Y283;Q9NP61;Q9NR77;Q9UK41;Q9Y587;O14786;Q92624;O95298;A6NDV4;Q9H9H4;P61586;O75069;P22695;Q8NC56;Q9UL01;Q14244;Q9H4A5;Q9NX95;Q49AQ9;Q86UT5;Q92934;P30047;O14907;O00161;Q9H3K2;Q96S66;Q99689;P46020;P59780;Q8N2H4;O75122;O60437;O95292;A8MW95;Q9NZD2;Q9UBQ0;Q8N3R9;Q7Z3G6;O00213;O60238;Q9NRL3;Q92797;Q8TEW0;O43615;Q9Y2H0;Q96SN7;P46060;P11168;Q9H7P6;Q3ZCQ8;Q15599;Q9Y4J8;Q6DKK2;Q6ZM3;O14681;O60749;Q13884;Q12983;Q8TEM1;Q9BUZ4;Q8IYJ3;P16157;A8MVW5;Q7Z3T8;Q9NX63;Q1HG43;Q8N6M3;P27815;Q6VEQ5;Q9UK28;Q9UKX7;Q96T49;Q5T2T1;Q8WWB7;Q96SW2;O14490;Q8IV36;Q717R9;Q8NF91;Q6PJW8;Q92843;Q9Y3P8;O00483;Q9BQE4;A2RUG3;Q15041;P25063;Q9UP83;Q8WW22;Q15070;Q9ULU8;Q6UWF3;A5D8V6;Q7Z7G2;Q9BXS5;Q7L5Y9;O15155;Q6RW13;O96018;P22681;Q9NVM1;Q93045;Q9NR09;O00165;Q9Y3D7;Q9HA82;P17568;P63000;Q9NSC5;O95486;A8MZ97;Q969M3;Q8WTW3;Q5VIR6;Q8N490;Q8WU20;O95831;Q9NS69;Q96H20;Q6ZVE7;Q9NV52;Q13425;P09497;P35232;Q53HI1;Q9Y6D5;P80723;Q3YBM2;Q9P0M2;Q9UPT5;P35606;O00264;Q9BVC6;Q9H3E2;O75694;O00159;Q96EV8;Q9HAP2;Q969W0;Q9UKH3;Q8N357;P40855;Q8N7J2;Q99445;O95178;P33947;O60888;Q15011;Q9UJY5;O15049;P48059;Q17RY6;Q14160;Q96JE7;Q86XT2;O00461;Q99569;Q6NZI2;O14656;P50440;Q495M9;P49006;P24390;P49257;O95487;Q86WV1;Q9Y6F6;A6NFC5;O60763;Q96CW1;Q9BTX1;Q9BQA9;O00198;Q9UJ68;O43491;Q6ZVN8;O14908;P61570;Q99807;Q8WUY8;O94905;Q9BUN8;Q9NRI5;O95278;Q9GZP9;P13073;Q8N9R8;Q8IZS6;P16452;Q9P0U1;O95405;Q5T1C6;Q8N135;Q96JJ3;Q9Y2B2;O43633;P04406;Q96AX1;Q9UPX8;Q96HP8;P48444;Q13352;Q9ULD2;P10909;P22830;Q9BUL8;Q08378;O14925;Q92870;Q9NPB6;Q6UWH4;P31040;P24539;Q9BPZ7;Q9BUH8;P17152;Q9NYJ8;Q9Y6I3;Q9H665;Q9Y3A0;Q13505;Q9BXM0;Q9BV57;Q12893;Q9BQI5;Q8WUH2;Q5SNT6;Q8N205;Q6X4W1;Q15388;O43736;P61565;O14910;A6NH52;O43597;Q9NQX7;Q9Y4R8;Q8N1N5;Q12840;Q96B42;Q6ISU1;Q9UKY0;P60953;Q96EK6;O95295;Q7Z614;Q96E16;Q9NR22;Q9NZJ0;Q9C0H9;P04818;Q96CF2;Q9HB21;O95782;Q9P0J0;Q14677;Q9NPR9;Q9Y5K8;Q5VVP1;Q13561;O43731;Q16864;P36405;Q96MP8;Q99747;P29474;Q9BX66;Q9UJM3;O96011;P62072;Q9H0R8;P0CG08;Q12981;Q15162;Q9BY43;P06703;O43678;P42566;P63241;Q9NPD7;Q676U5;Q9NZI6;Q8N1I0;Q8WWR8;Q07157;Q95489;O15260;Q9UBF2;A6NNC1;Q8NFJ9;Q9P0V3;O15436;P20292;Q8WXH0;Q96JS3;Q9NXG0;Q08495;Q9HC24;Q86YD1;Q969X5;Q5H9S7;Q86U90;Q8NFQ8;P74672;P56381;Q9BVT8;Q96CN9;Q5UE93;Q6BD1UE4;P11277;Q08379;Q15629;O14617;Q9P253;Q96GD0;Q9GZR5;P20700;Q9H204;P42704;Q8NA58;Q8WXS3;Q00765;O75843;Q9HD42;O15255;Q9BXK5;Q15849;Q96NA2;O60346;Q08209;Q6ZPB5;Q5T6X4;Q96RQ1;Q8ND76;P26678;Q96B86;Q9UN42;Q6UWI2;Q9GZY8;Q9NZP6;O15504;Q9BQQ7;P61077;Q99932;P46108;Q9NP79;A8CG34;Q96QK1;Q5JSH3;Q9NZZ3;Q6P9B9;Q7L804;Q9UMR2;P53992;Q96FZ7;P63165;Q15363;Q12912;P11532;E9PQ53;Q86UL8;P42167;Q13033;Q9Y5U9;O75886;Q9BSK0;Q9UND3;P14373;Q9NYZ1;Q8WY22;Q9BQQ3;Q9NS86;Q8N1B4;Q9HCH5;Q141220;O14512;Q86YV9;Q6PEY1;Q9NTG7;O75351;Q7Z6B0;Q8TAC9;Q13424;Q9P2D0;P54826;Q96ER9;P87889;Q9NPL8;Q8WWM7;P30405;Q8ND61;O60711;Q8N6H7;P21912;Q96Q06;O14609;Q9BRQ6;O15126;Q8WV92;Q96PC3;Q9Y6I8;Q8WXG1;Q9HBM0;Q969H4;Q15643;Q9H8M1;Q96EY1;Q14693;Q9Y244;O15027;P12956;Q86YS3;P23528;Q00005;Q86T03;O95159;Q9N1F7;Q9UQC2;Q68DX3;O75674;Q14DG7;O95876;O43264;Q86YT6;O00189;Q9HCI5;O96000;O43745;P62952;Q6BDI9;Q5BIV9;P18848;Q8N4H5;A6NC78;Q12959;Q99732;Q14C87;Q9H2K2;P22735;O43674;Q9NP85;Q9HD26;Q9NQS1;P56385;Q86SQ9;P11802;Q9BYI3;Q9H4E7;P60602;Q9Y250;Q93052;O95868;Q7Z699;Q12772;Q9H902;Q8IVI9;O94921;Q9BTV4;Q9NZB2;O95166;Q9H267;Q86WC4;Q8IWI2;Q13367;P08235;Q9P2W9;P56556;P31689;O95171;Q05084;Q02221;Q96S06;Q96C03;Q9BYG4;Q9BQJ4;P50570;Q8N8V4;P29966;Q99640;Q0P670;P82094;Q9BW27;Q9BRT3;Q9GZU3;Q8IX03;Q969L2;O75323;Q96EY5;O00522;Q9P1A6;P55957;Q9UKS6;Q969G9;Q8N201;Q9BVL2;P56377;O75425;Q93050;P11171;Q9NSK7;Q2TAP0;Q902F8;O76095;O43505;Q86UB9;O00186;P61923;Q68CJ9;A1L3X0;Q5JTC6;P40337;Q96LZ7;Q9Y284;P12270;Q9NUS5;P23508;B7ZAQ6;Q05932;P63146;P24385;Q96G01;Q08AM6;Q15046;Q8WV24;Q9BRL7;P62424;Q9BW60;Q9BVN2;Q8TDB4;P30281;Q00587;Q8TAZ6;Q8WYR1;Q8N9A8;Q15436}

7021

Pathogen {P03363} interacts with 530 human

partners: {Q8N6F7;O60763;P22681;P49754;O75069;Q9Y3P8;Q9BUL8;Q14789;Q12959;P12956;Q9NQG7;O60888;P62952;P18848;Q16186;P29474;P46060;O75081;P55957;Q8N3V7;O43493;P46939;Q9HCC9;O14907;O95049;Q7Z3B4;Q9GZV4;Q9BQQ7;Q96RT1;O43736;Q07666;O75161;Q5JTC6;Q8NF91;Q9H5J4;P08865;Q9H902;Q99623;O43933;Q9UNH7;P31040;Q14244;Q99962;Q9BXM0;O60664;Q86YD1;P11277;O14908;Q6ZM3;P53801;Q7L804;Q9NQS1;Q15438;O14920;O95996;Q8WYR1;P12270;Q92575;Q8TAM2;Q0VDE8;Q8IVI9;Q9BX66;Q8WXE9;Q9BVT8;Q13367;Q96JS3;Q86UR1;P02549;Q9P0V3;Q9UND3;Q8N9A8;Q9NXG0;Q9UP83;Q9HAU4;Q92543;O60291;O43747;Q9Y4R8;Q9BRK4;P16157;Q9UJY4;P14373;O75340;O14786;P48444;Q96T49;Q330K2;O75886;Q92539;Q99848;Q9H492;Q8N1B4;Q86WV1;Q969Q5;Q96MT3;Q8TBZ2;P30279;Q13228;Q9H444;Q9BUH8;Q14457;Q13561;O60437;O00213;O95219;Q9UQF2;Q92783;Q9UPX8;Q6UWF3;Q96B97;P20700;Q8WV24;Q13283;Q2LD37;Q00005;Q96QK1;Q13439;P42167;Q96DX8;Q9Y678;Q9NZW5;Q9BXW4;O14910;Q9UBF9;Q6UW56;O60784;Q15388;O15049;Q01082;O14925;Q9NYJ8;P06733;Q14160;P78352;Q9NZ52;Q9NUU7;P18850;Q92597;O43264;Q99550;O75436;P50570;Q9P2D0;P42704;Q6NUQ7;Q8ND76;P54920;Q969G9;Q9H9E3;Q8WV28;Q9H6Q3;O75558;Q13033;Q15436;Q9UDY4;Q9NPB6;Q14C81;Q9NUS5;A8CG34;P83436;Q96DC7;Q96R3;Q00610;Q15041;Q00587;Q96JI7;Q9NZZ3;P78395;O43318;Q15700;Q9UKX7;Q9BZR8;O14579;O14713;P04156;Q3ZCQ8;Q5T2T1;P63146;O95486;Q86UE4;Q99828;Q9H4A6;P53618;Q99569;O75970;P23508;Q8WXS3;O95476;Q8N1N5;Q9HAP2;P40337;Q96H20;Q9BYG4;Q9UMY4;P63000;Q9H2K2;Q9BXS5;Q07157;P27815;Q96F51;Q9P299;Q93052;Q93045;Q9Y4G6;O94973;Q9NR77;P61923;Q92797;O00198;Q08495;Q96TC7;Q96IF1;Q13425;Q9P0M2;O94850;O60749;Q07021;Q3YBM2;Q14746;O75351;Q8IZS6;Q9P2W9;Q8NEU8;P10911;O95405;Q92572;Q03252;Q9NVV5;Q9H0R8;Q9HD36;Q969L2;Q9UBV8;Q9Y4E1;O43615;A8MVW5;Q9BVL2;P30622;Q9NSC5;Q4L180;Q969H4;Q8TC71;Q9UN37;Q8IV36;Q717R9;Q7Z699;P63165;Q6DKK2;Q3SYG4;Q9H0R1;Q9NR09;P08235;Q86VN1;Q96HJ5;Q9Y2

50;Q8N1I0;Q9BRG1;Q9P0J0;Q9NR22;Q5UE93;Q95721;Q9H267;Q15035;P31749;Q9NZI6;Q14677;Q9HC62;P11532;O00522;Q7Z3C6;Q5TCQ9;Q9Y5J7;Q9P0U1;Q99732;Q9H939;Q92843;Q9UK41;O43815;Q96E16;O15056;O75381;Q92870;Q8N3R9;Q86WG5;Q9BTW9;P11171;Q5SQN1;Q96C03;P63010;O75674;Q9Y3E7;Q9BRQ6;Q05084;Q7LBR1;Q9H9E1;P04406;Q9NZU7;O14613;Q68CJ9;Q95271;Q9BT92;Q96HA1;Q92556;Q96I34;Q92624;Q86UT5;Q8TCG1;Q6ZVN8;Q6P9B9;Q95171;Q075323;Q08378;Q9Y283;P23528;P46108;Q8WT9;Q9H8T0;Q9Y512;Q9BV57;Q6NZI2;Q9BZE9;Q075694;Q9UDY2;Q9Y4P8;Q13884;Q13884;O00189;Q9YH19;O14964;O00186;Q96SW2;P41220;Q495M9;P29966;Q96EY5;Q9BYG5;P50402;O76095;O75154;Q95295;Q7Z614;P14317;Q6ZPB5;P40855;Q9H0H0;P28289;Q7Z7M0;Q9NRL3;P24385;Q9BXF6;Q9UBQ0;Q13023;Q5VIR6;Q9UMR2;Q95782;Q9BTX1;Q9UKS6;Q08379;Q01844;O43491;Q8N9R8;Q9Y5K8;Q8NI35;Q8WV92;Q92681;Q9BVN2;Q8IWI2;P63241;Q15172;Q5HYI7;O15126;P35606;Q8NEZ2;Q8WUH2;O14662;Q9Y5V3;Q6ISU1;Q07820;Q15599;Q9NR15;Q96JJ3;Q5BJF2;Q8IZQ1;Q9U1L1;Q9HCI5;P14672;O94901;Q96NA2;Q9UKJ5;Q86UL8;Q9UBF2;Q96SN7;P35232;Q96G23;P53992;Q9BU61;O75843;Q9NRR3;O75386;P80723;P62424;Q9BZW7;Q95886;Q9H3K2;Q95487;Q99816;Q9NUQ3;Q9Y6F6;P52948;Q13596;Q9C004;Q9NZP6;Q96000;Q9NTG7;O15127;O15259;Q9Y244;Q14739;O43745;P61077;Q9H204;O75146;Q9P1A6;O00165;Q9UQN3;Q9UJM3;Q9Y3A3;Q9NZD8;O14490;O15504;P30047;Q9H7P6;Q9H1H9;Q9HCH5;P16452;O14512;P11802;Q9NVD7;Q6IS14;Q9H0M0;O00161;Q9NX63;P82094;Q7Z6B0;Q8IX03;Q9NP79;Q9NS69;Q9Y6D6;Q9BUZ4;Q8NFF9;Q9NZT2;Q9UKC9;Q9NUP9;Q9BQI5;P30153;O60299;P04264;Q96EY1;P49006;Q9NZJ0;Q676U5;P30281;O95810;O14641;Q9H9H4;P49901;Q8N1F7;Q9UJY5;Q9UJG1;P09497;O43752;Q13813;Q9ULD2;Q96N16;Q92621;Q13352;Q00765;Q8NFH5;P60953;O60238;Q5T2W1;Q96018;O60716;P53675;Q8IUD2;Q15643;P27986;O95166;P67775;Q14678;Q86XL3;P55735;Q6MZT1;Q99747;Q9BVI4;A6NDB9;Q9HD26;O95833;Q9UKG1;P11166;Q96B42;Q14315;Q96FS4;Q94855;Q9BSK0;O00291;O60711;Q10567;Q96MP8;Q9BW27;Q12840;Q96CN9;Q13515;Q9HD42;Q9UPT5;Q13424;P56181;Q9UH99;Q68DX3;Q96CW1;O95831;Q8N7J2;Q99689;Q9C0H9;Q9GZY8;Q9UQC2;Q9NX95;Q96CF2;Q4G0F5;A5D8V6;Q96JB2}

7022 [Cluster 639]GO:0016460+C cellular\_component [name] myosin II complex [def] "A myosin complex containing two class II myosin heavy chains, two myosin essential light chains and two myosin regulatory light chains. Also known as classical myosin or conventional myosin, the myosin II class includes the major muscle myosin of vertebrate and invertebrate muscle, and is characterized by alpha-helical coiled coil tails that self assemble to form a variety of filament structures." [http

7023 Pathogen[ Q2Q067] interacts with 1 human partners: {P35579}

7024 Pathogen[ P0C214] interacts with 1 human partners: {P35580}

7025 Pathogen[ P03346] interacts with 1 human partners: {P35579}

7026 Pathogen[ Q85601] interacts with 2 human partners: {P35579;P35580}

7027 Pathogen[ P14079] interacts with 2 human partners: {P35579;Q2M3G4}

7028 Pathogen[ P03383] interacts with 2 human partners: {P35580;P35579}

7029 Pathogen[ P03410] interacts with 3 human partners: {Q2M3G4;P35579;P35580}

7030 Pathogen[ P14075] interacts with 1 human partners: {P35579}

7031 Pathogen[ P0C206] interacts with 3 human partners: {Q2M3G4;P35579;P35580}

7032 Pathogen[ P03363] interacts with 2 human partners: {Q2M3G4;P35579}

7033 [Cluster 640]GO:0030896+C cellular\_component [name] checkpoint clamp complex [def] "Conserved heterotrimeric complex of PCNA-like proteins that is loaded onto DNA at sites of DNA damage." [PMID

7034 Pathogen[ Q2Q067] interacts with 2 human partners: {Q99638;Q6WBX8}

7035 Pathogen[ P0C214] interacts with 2 human partners: {Q6WBX8;Q99638}

7036 Pathogen[ P03346] interacts with 2 human partners: {Q6WBX8;Q99638}

7037 Pathogen[ Q85601] interacts with 2 human partners: {Q6WBX8;Q99638}

7038 Pathogen[ P14079] interacts with 2 human partners: {Q6WBX8;Q99638}

7039 Pathogen[ P03383] interacts with 2 human partners: {Q6WBX8;Q99638}

7040 Pathogen[ P03410] interacts with 2 human partners: {Q6WBX8;Q99638}

7041 Pathogen[ P14075] interacts with 2 human partners: {Q99638;Q6WBX8}

7042 Pathogen[ P0C206] interacts with 2 human partners: {Q6WBX8;Q99638}

7043 Pathogen[ P03363] interacts with 2 human partners: {Q6WBX8;Q99638}

7044 [Cluster 641]GO:0031902+C cellular\_component [name] late endosome membrane [def] "The lipid bilayer surrounding a late endosome." [GOC

7045 Pathogen[ Q2Q067] interacts with 23 human partners: {Q7Z3C6;O75351;Q7LBR1;Q9H444;Q99816;Q8WV92;Q96EY5;Q9H267;A5D8V6;Q92562;Q9UQN3;Q9UN37;Q96H20;Q9H0R1;Q9H7P6;Q9UK41;Q9Y3E7;Q9H9H4;Q96CF2;O43633;Q9NUS5;Q96NA2;Q8NEZ2}

7046 Pathogen[ P0C214] interacts with 23 human partners: {Q96CF2;O75351;Q9H444;Q9NUS5;Q96NA2;Q9UQN3;Q9UK41;Q9H0R1;Q92562;Q9BY43;Q9H7P6;Q7LBR1;Q96EY5;Q08AM6;Q8NEZ2;Q9Y3E7;Q99816;Q96H20;A5D8V6;Q9UN37;O43633;Q9H9H4;Q7Z3C6}

7047 Pathogen[ P03346] interacts with 28 human partners: {Q86XT2;Q7Z3C6;A5D8V6;Q9P253;Q8NEZ2;Q9H0R1;Q96NA2;Q99816;Q9UK41;Q92562;Q96H20;Q96FZ7;Q96CF2;Q9Y3E7;O43633;Q9H444;Q96AX1;Q8WV92;Q9H9H4;Q9NUS5;Q9UQN3;Q9BY43;O75351;Q7LBR1;Q96EY5;Q9H7P6;Q9H267;Q9UN37}

7048 Pathogen[ Q85601] interacts with 27 human partners: {Q99816;Q08AM6;Q9UQN3;Q9H7P6;Q96H20;Q9P253;Q8WV92;Q9NUS5;Q9H9H4;O43633;Q7LBR1;Q92562;Q96FZ7;Q9H267;Q7Z3C6;Q96CF2;O75351;Q9UK41;Q9BY43;Q9H444;Q96NA2;Q8NEZ2;Q96EY5;Q9UN37;Q9Y3E7;Q9H0R1;A5D8V6}

7049 Pathogen[ P14079] interacts with 33 human partners: {Q9H9H4;Q96NA2;Q92562;Q96CF2;Q96EY5;Q96H20;Q9Y2Q5;Q86XT2;Q9BY43;Q9H7P6;Q7LBR1;Q9UHA4;Q7Z3C6;Q9H269;O43633;Q86T03;Q6IAA8;Q96AX1;A5D8V6;Q9P253;Q8NEZ2;Q9UN37;Q96FZ7;Q9NUM4;Q9H0R1;Q9Y3E7;Q8WV92;O75351;Q9NUS5;Q9H444;Q99816;Q9H267;Q9UQN3}

7050 Pathogen[ P03383] interacts with 16 human partners: {Q7Z3C6;Q96H20;Q9H7P6;Q9Y3E7;Q8NEZ2;Q99816;Q9NUS5;Q9UK41;Q7LBR1;O43633;Q9H44

4;Q9H9H4;Q9UN37;Q96EY5;Q9UQN3;Q96NA2}

7051 Pathogen[ P03410] interacts with 33 human partners:{Q92562;Q9Y2Q5;Q9H267;O43633;Q9H7P6;Q86XT2;Q86T03;Q9H9H4;Q9NUS5;O75351;Q9BY43;Q9P253;Q9UHA4;A5D8V6;Q99816;Q9Y3E7;Q8NEZ2;Q9UQN3;Q08AM6;Q9UN37;Q8WV92;Q9H444;Q96FZ7;Q9H0R1;Q6IAA8;Q96EY5;Q96NA2;Q7Z3C6;Q96H20;Q96CF2;Q9H269;Q7LBR1;Q96AX1}

7052 Pathogen[ P14075] interacts with 15 human partners:{Q96EY5;Q7LBR1;Q9H444;Q96NA2;Q9UK41;Q8NEZ2;Q96H20;Q9Y3E7;Q9H9H4;Q9UQN3;Q9H7P6;Q99816;Q9NUS5;Q7Z3C6;Q9UN37}

7053 Pathogen[ P0C206] interacts with 31 human partners:{Q7Z3C6;Q9UN37;Q8NEZ2;Q9H444;Q7LBR1;Q9Y3E7;Q92562;Q9H0R1;Q9UQN3;Q99816;Q9UK41;Q9H9H4;Q9H7P6;A5D8V6;Q96H20;Q86XT2;O43633;Q96AX1;Q96CF2;Q9BY43;Q9P253;Q96NA2;Q96FZ7;O75351;Q8WV92;Q86T03;Q9H267;Q96EY5;Q9NUS5;Q08AM6}

7054 Pathogen[ P03363] interacts with 21 human partners:{Q9H444;Q9NUS5;Q96H20;O75351;Q9UN37;Q9H0R1;Q9H267;Q7Z3C6;Q9UK41;Q9Y3E7;Q7LBR1;Q96EY5;Q8WV92;Q8NEZ2;Q96NA2;Q99816;Q9UQN3;Q9H7P6;Q9H9H4;Q96CF2;A5D8V6}

7055 [Cluster 642]GO:0030686+C cellular\_component [name] 90S preribosome [def] "A large ribonucleoprotein complex considered to be the earliest preribosomal complex. In *S. cerevisiae*, it has a size of 90S and consists of the 35S pre-rRNA, early-associating ribosomal proteins most of which are part of the small ribosomal subunit, the U3 snoRNA and associated proteins." [PMID

7056 Pathogen[ Q2Q067] interacts with 4 human partners:{P62081;P08865;P78316;O75691}

7057 Pathogen[ P0C214] interacts with 4 human partners:{O75691;P62081;P08865;P78316}

7058 Pathogen[ P03346] interacts with 4 human partners:{O75691;P08865;P78316;P62081}

7059 Pathogen[ Q85601] interacts with 4 human partners:{P62081;O75691;P08865;P78316}

7060 Pathogen[ P14079] interacts with 4 human partners:{O75691;P78316;P62081;P08865}

7061 Pathogen[ P03383] interacts with 4 human partners:{O75691;P62081;P08865;P78316}

7062 Pathogen[ P03410] interacts with 4 human partners:{P78316;P08865;P62081;O75691}

7063 Pathogen[ P14075] interacts with 4 human partners:{P08865;P62081;P78316;O75691}

7064 Pathogen[ P0C206] interacts with 4 human partners:{P62081;P08865;P78316;O75691}

7065 Pathogen[ P03363] interacts with 4 human partners:{P08865;P62081;O75691;P78316}

7066 [Cluster 643]GO:0001652+C cellular\_component [name] granular component [def] "A structure found in the nucleolus, which contains nearly completed preribosomal particles destined for the cytoplasm." [PMID

7067 Pathogen[ Q2Q067] interacts with 3 human partners:{P22087;Q9NXV6;O75683}

7068 Pathogen[ P0C214] interacts with 3 human partners:{O75683;P22087;Q9NXV6}

7069 Pathogen[ P03346] interacts with 3 human partners:{Q9NXV6;O75683;P22087}

7070 Pathogen[ Q85601] interacts with 3 human partners:{P22087;O75683;Q9NXV6}

7071 Pathogen[ P14079] interacts with 3 human partners:{Q9NXV6;P22087;O75683}

7072 Pathogen[ P03383] interacts with 3 human partners:{O75683;Q9NXV6;P22087}

7073 Pathogen[ P03410] interacts with 3 human partners:{P22087;O75683;Q9NXV6}

7074 Pathogen[ P14075] interacts with 3 human partners:{Q9NXV6;O75683;P22087}

7075 Pathogen[ P0C206] interacts with 3 human partners:{O75683;Q9NXV6;P22087}

7076 Pathogen[ P03363] interacts with 3 human partners:{O75683;P22087;Q9NXV6}

7077 [Cluster 644]GO:0036038+C cellular\_component [name] tectonic complex [def] "A protein complex that is located at the ciliary transition zone and consists of tectonic 1 (Tctn1) in complex with other proteins. Acts to control ciliary assembly and trafficking. In mouse, other members of the complex include Mks1, Tmem216, Tmem67, Cep290, B9d1, Tctn2 and Cc2d2a." [PMID

7078 Pathogen[ Q2Q067] interacts with 3 human partners:{Q9NXB0;O15078;Q9BPU9}

7079 Pathogen[ P0C214] interacts with 3 human partners:{O15078;Q9NXB0;Q9BPU9}

7080 Pathogen[ P03346] interacts with 4 human partners:{Q9BPU9;Q9NXB0;Q8N157;O15078}

7081 Pathogen[ Q85601] interacts with 3 human partners:{O15078;Q9NXB0;Q9BPU9}

7082 Pathogen[ P14079] interacts with 8 human partners:{Q9P0N5;Q96GX1;Q8N157;Q9UPM9;Q9BPU9;O15078;Q9P2K1;Q9NXB0}

7083 Pathogen[ P03383] interacts with 2 human partners:{Q9NXB0;O15078}

7084 Pathogen[ P03410] interacts with 8 human partners:{Q96GX1;Q9BPU9;Q8N157;Q9P0N5;O15078;Q9P2K1;Q9UPM9;Q9NXB0}

7085 Pathogen[ P14075] interacts with 3 human partners:{Q9NXB0;O15078;Q9BPU9}

7086 Pathogen[ P0C206] interacts with 6 human partners:{Q9BPU9;Q9UPM9;Q9P2K1;O15078;Q8N157;Q9NXB0}

7087 Pathogen[ P03363] interacts with 5 human partners:{O15078;Q9P2K1;Q8N157;Q9BPU9;Q9NXB0}

7088 [Cluster 645]GO:0033557+C cellular\_component [name] Slx1-Slx4 complex [def] "A heterodimeric protein complex that possesses an endonuclease activity that specifically cleaves certain types of branched DNA structures\_ because such structures often form during the replication ribosomal DNA (rDNA) repeats, the complex plays a role in the maintenance of rDNA. The subunits are known as Slx1 and Slx 4 in budding and fission yeasts, and are conserved in eukaryotes." [PMID

7089 Pathogen[ Q2Q067] interacts with 2 human partners:{Q9BQ83;Q8IY92}

7090 Pathogen[ P0C214] interacts with 2 human partners:{Q9BQ83;Q8IY92}

7091 Pathogen[ P03346] interacts with 2 human partners:{Q9BQ83;Q8IY92}

7092 Pathogen[ Q85601] interacts with 2 human partners:{Q8IY92;Q9BQ83}

7093 Pathogen[ P14079] interacts with 2 human partners:{Q9BQ83;Q8IY92}

7094 Pathogen[ P03383] interacts with 2 human partners:{Q8IY92;Q9BQ83}

7095 Pathogen[ P03410] interacts with 2 human partners:{Q9BQ83;Q8IY92}

7096 Pathogen[ P14075] interacts with 2 human partners:{Q9BQ83;Q8IY92}



7097 Pathogen[ P0C206] interacts with 2 human partners:{Q9BQ83;Q8IY92}

7098 Pathogen[ P03363] interacts with 2 human partners:{Q9BQ83;Q8IY92}

7099 [Cluster 646]GO:0042405+C cellular\_component [name] nuclear inclusion body [def] "An intranuclear focus at which aggregated proteins have been sequestered." [GOC

7100 Pathogen[ Q2Q067] interacts with 4 human partners:{Q9UBU9;P54253;O60934;Q9UNE7}

7101 Pathogen[ P0C214] interacts with 3 human partners:{P54253;Q9UNE7;Q9UBU9}

7102 Pathogen[ P03346] interacts with 4 human partners:{Q9UNE7;O60934;Q9UBU9;P54253}

7103 Pathogen[ Q85601] interacts with 4 human partners:{Q9UBU9;P54253;Q9UNE7;O60934}

7104 Pathogen[ P14079] interacts with 3 human partners:{Q9UBU9;O60934;P54253}

7105 Pathogen[ P03383] interacts with 2 human partners:{Q9UBU9;P54253}

7106 Pathogen[ P03410] interacts with 4 human partners:{Q9UNE7;Q9UBU9;P54253;O60934}

7107 Pathogen[ P14075] interacts with 2 human partners:{P54253;Q9UBU9}

7108 Pathogen[ P0C206] interacts with 4 human partners:{O60934;Q9UNE7;Q9UBU9;P54253}

7109 Pathogen[ P03363] interacts with 3 human partners:{Q9UBU9;Q9UNE7;P54253}

7110 [Cluster 647]GO:0016604+C cellular\_component [name] nuclear body [def] "Extra-nucleolar nuclear domains usually visualized by confocal microscopy and fluorescent antibodies to specific proteins." [GOC

7111 Pathogen[ Q2Q067] interacts with 24 human partners:{Q96IT1;Q05516;Q99684;P63279;Q8N726;Q86UE4;Q96BF6;P35227;P63165;Q9UQL6;O43593;P12755;Q8WXD5;P35226;Q8TEQ6;Q99496;Q9Y618;Q8IUR6;Q96RE7;Q92793;Q96MU7;Q9H840;Q00987;Q06587}

7112 Pathogen[ P0C214] interacts with 24 human partners:{P35226;P35227;Q00987;Q92793;P63279;Q8N726;Q8WXD5;Q86UE4;Q96BF6;Q96IT1;P63165;Q06587;Q8TEQ6;O43593;P12755;Q9H840;Q99496;Q8IUR6;Q99684;Q96MU7;Q96RE7;Q9Y618;Q9UQL6;Q05516}

7113 Pathogen[ P03346] interacts with 26 human partners:{Q96MU7;Q86UE4;P35226;Q8WXD5;P35227;Q8IUR6;P63279;Q96RE7;Q9H165;Q00987;Q92766;O43593;Q99684;P63165;Q8TEQ6;Q96BF6;Q99496;P78364;Q05516;Q96IT1;Q92793;Q8N726;Q9Y618;Q06587;Q9UQL6;Q9H840}

7114 Pathogen[ Q85601] interacts with 25 human partners:{Q96MU7;Q8IUR6;Q9UQL6;Q96BF6;Q9Y618;P63279;P12755;P78364;Q8N726;Q8TEQ6;Q86UE4;Q99496;Q99684;Q05516;P63165;Q96RE7;P35226;Q96IT1;Q92793;O43593;Q00987;Q06587;Q8WXD5;Q9H840;P35227}

7115 Pathogen[ P14079] interacts with 24 human partners:{Q9UQL6;Q96MU7;P12755;P63279;Q8TEQ6;Q92793;Q99684;Q8N726;Q05516;Q9H840;P63165;Q00987;P78364;Q99496;Q96BF6;Q86UE4;Q96RE7;P35226;P35227;Q96IT1;O43593;Q8WXD5;Q8IUR6;Q06587}

7116 Pathogen[ P03383] interacts with 20 human partners:{P35227;Q9Y618;Q8IUR6;Q9H840;Q86UE4;Q9UQL6;Q96MU7;Q8WXD5;Q06587;Q05516;Q8TEQ6;P63165;Q96RE7;Q96IT1;Q99496;Q99684;P63279;Q92793;P35226;Q8N726}

7117 Pathogen[ P03410] interacts with 24 human partners:{Q96BF6;Q8WXD5;Q99496;Q9H840;P12755;Q8N726;P63165;Q8TEQ6;Q96MU7;Q99684;P35227;Q9UQL6;Q92793;Q86UE4;Q8IUR6;Q96IT1;P63279;Q06587;Q96RE7;Q00987;Q9Y618;P35226;P78364;O43593}

7118 Pathogen[ P14075] interacts with 20 human partners:{Q8TEQ6;P63165;Q8WXD5;Q86UE4;Q9H840;Q96IT1;P63279;Q9Y618;Q06587;Q96RE7;Q99684;Q96MU7;Q99496;Q92793;P35226;Q05516;Q9UQL6;Q8IUR6;Q8N726;P35227}

7119 Pathogen[ P0C206] interacts with 25 human partners:{Q8IUR6;Q9H840;Q8N726;P78364;Q8WXD5;Q05516;P35226;Q8TEQ6;P12755;Q92793;Q06587;Q96MU7;Q96IT1;Q9H165;Q99684;Q86UE4;Q96BF6;P63165;Q00987;O43593;Q96RE7;Q9Y618;Q99496;P35227;Q9UQL6}

7120 Pathogen[ P03363] interacts with 23 human partners:{Q99684;Q96RE7;Q92766;P35227;Q96MU7;Q9UQL6;Q99496;Q86UE4;Q96BF6;O43593;P63165;P35226;Q8WXD5;Q9Y618;Q96IT1;Q9H840;P63279;Q92793;Q8N726;Q8IUR6;Q8TEQ6;Q06587;Q05516}

7121 [Cluster 648]GO:0034464+C cellular\_component [name] BBSome [def] "A protein complex that associates with the primary cilium and is involved in cilium biogenesis\_ consists of seven conserved proteins

7122 Pathogen[ Q2Q067] interacts with 2 human partners:{Q3SYG4;A8MTZ0}

7123 Pathogen[ P0C214] interacts with 2 human partners:{Q3SYG4;A8MTZ0}

7124 Pathogen[ P03346] interacts with 3 human partners:{A8MTZ0;Q8TAM2;Q3SYG4}

7125 Pathogen[ Q85601] interacts with 2 human partners:{A8MTZ0;Q3SYG4}

7126 Pathogen[ P14079] interacts with 6 human partners:{Q8NFI9;Q8N3I7;Q8IWZ6;Q8TAM2;Q3SYG4;A8MTZ0}

7127 Pathogen[ P03383] interacts with 2 human partners:{A8MTZ0;Q3SYG4}

7128 Pathogen[ P03410] interacts with 6 human partners:{Q8NFI9;Q3SYG4;Q8TAM2;A8MTZ0;Q8N3I7;Q8IWZ6}

7129 Pathogen[ P14075] interacts with 2 human partners:{Q3SYG4;A8MTZ0}

7130 Pathogen[ P0C206] interacts with 5 human partners:{Q3SYG4;Q8TAM2;Q8N3I7;Q8NFI9;A8MTZ0}

7131 Pathogen[ P03363] interacts with 4 human partners:{Q8TAM2;A8MTZ0;Q3SYG4;Q8NFI9}

7132 [Cluster 649]GO:0072487+C cellular\_component [name] MSL complex [def] "A histone acetyltransferase complex that catalyzes the acetylation of a histone H4 lysine residue at position 16. In human, it contains the catalytic subunit MOF, and MSL1, MSL2 and MSL3." [PMID

7133 Pathogen[ Q2Q067] interacts with 2 human partners:{Q8N5Y2;Q68DK7}



7134 Pathogen[ P0C214] interacts with 1 human partners:{Q68DK7}

7135 Pathogen[ P03346] interacts with 3 human partners:{Q8N5Y2;Q68DK7;Q9H7Z6}

7136 Pathogen[ Q85601] interacts with 3 human partners:{Q8N5Y2;Q9H7Z6;Q68DK7}

7137 Pathogen[ P14079] interacts with 3 human partners:{Q68DK7;Q8N5Y2;Q9HCI7}

7138 Pathogen[ P03383] interacts with 1 human partners:{Q68DK7}

7139 Pathogen[ P03410] interacts with 3 human partners:{Q9HCI7;Q8N5Y2;Q68DK7}

7140 Pathogen[ P14075] interacts with 1 human partners:{Q68DK7}

7141 Pathogen[ P0C206] interacts with 4 human partners:{Q68DK7;Q9HCI7;Q8N5Y2;Q9H7Z6}

7142 Pathogen[ P03363] interacts with 2 human partners:{Q68DK7;Q8N5Y2}

7143 [Cluster 650]GO:0032300+C cellular\_component [name] mismatch repair complex [def] "Any complex formed of proteins that act in mismatch repair." [GOC]

7144 Pathogen[ Q2Q067] interacts with 2 human partners:{Q9UHC1;P54278}

7145 Pathogen[ P0C214] interacts with 4 human partners:{A8MQ11;Q9UHC1;P54278;P40692}

7146 Pathogen[ P03346] interacts with 3 human partners:{Q9UHC1;P54278;P54277}

7147 Pathogen[ Q85601] interacts with 4 human partners:{A8MQ11;P54278;Q9UHC1;P40692}

7148 Pathogen[ P14079] interacts with 7 human partners:{O43196;P40692;P54278;Q9UHC1;A8MQ11;O95744;P54277}

7149 Pathogen[ P03383] interacts with 2 human partners:{P54278;Q9UHC1}

7150 Pathogen[ P03410] interacts with 7 human partners:{P40692;P54277;O95744;O43196;A8MQ11;P54278;Q9UHC1}

7151 Pathogen[ P14075] interacts with 2 human partners:{Q9UHC1;P54278}

7152 Pathogen[ P0C206] interacts with 5 human partners:{P54278;P40692;Q9UHC1;A8MQ11;P54277}

7153 Pathogen[ P03363] interacts with 3 human partners:{Q9UHC1;P54278;P54277}

7154 [Cluster 651]GO:0071797+C cellular\_component [name] LUBAC complex [def] "A ubiquitin ligase complex that catalyzes linear head-to-tail polyubiquitin conjugation on its targets. In human the complex consists of RBCK1, RNF31 and SHARPIN, and has an MW of approximately 600 kDa, suggesting a heteromultimeric assembly of its subunits. LUBAC stands for Linear Ubiquitin Chain Assembly Complex." [GOC]

7155 Pathogen[ Q2Q067] interacts with 1 human partners:{Q9H0F6}

7156 Pathogen[ P0C214] interacts with 1 human partners:{Q9H0F6}

7157 Pathogen[ P03346] interacts with 3 human partners:{Q9BYM8;Q9H0F6;Q96EP0}

7158 Pathogen[ Q85601] interacts with 1 human partners:{Q9H0F6}

7159 Pathogen[ P14079] interacts with 3 human partners:{Q96EP0;Q9BYM8;Q9H0F6}

7160 Pathogen[ P03383] interacts with 1 human partners:{Q9H0F6}

7161 Pathogen[ P03410] interacts with 1 human partners:{Q9H0F6}

7162 Pathogen[ P14075] interacts with 1 human partners:{Q9H0F6}

7163 Pathogen[ P0C206] interacts with 3 human partners:{Q96EP0;Q9H0F6;Q9BYM8}

7164 Pathogen[ P03363] interacts with 2 human partners:{Q96EP0;Q9H0F6}

7165 [Cluster 652]GO:0030139+C cellular\_component [name] endocytic vesicle [def] "A membrane-bounded intracellular vesicle formed by invagination of the plasma membrane around an extracellular substance. Endocytic vesicles fuse with early endosomes to deliver the cargo for further sorting." [GOC]

7166 Pathogen[ Q2Q067] interacts with 2 human partners:{Q5VYK3;Q15276}

7167 Pathogen[ P0C214] interacts with 2 human partners:{Q9UM54;Q5VYK3}

7168 Pathogen[ P03346] interacts with 4 human partners:{O14908;Q5VYK3;Q86YS3;Q15276}

7169 Pathogen[ Q85601] interacts with 3 human partners:{Q5VYK3;Q86YS3;Q9UM54}

7170 Pathogen[ P14079] interacts with 6 human partners:{Q15276;Q86YS3;Q9UM54;Q5VYK3;O00461;O14908}

7171 Pathogen[ P03383] interacts with 2 human partners:{Q5VYK3;Q15276}

7172 Pathogen[ P03410] interacts with 6 human partners:{Q5VYK3;O14908;O00461;Q9UM54;Q86YS3;Q15276}

7173 Pathogen[ P14075] interacts with 3 human partners:{O00461;Q15276;Q5VYK3}

7174 Pathogen[ P0C206] interacts with 6 human partners:{Q9UM54;O00461;O14908;Q5VYK3;Q86YS3;Q15276}

7175 Pathogen[ P03363] interacts with 3 human partners:{O14908;Q15276;Q5VYK3}

7176 [Cluster 653]GO:0019908+C cellular\_component [name] nuclear cyclin-dependent protein kinase holoenzyme complex [def] "Cyclin-dependent protein kinase (CDK) complex found in the nucleus." [GOC]

7177 Pathogen[ Q2Q067] interacts with 1 human partners:{Q9P287}

7178 Pathogen[ P0C214] interacts with 1 human partners:{Q9P287}

7179 Pathogen[ P03346] interacts with 1 human partners:{Q9P287}

7180 Pathogen[ Q85601] interacts with 1 human partners:{Q9P287}

7181 Pathogen[ P14079] interacts with 2 human partners:{Q14004;Q9P287}

7182 Pathogen[ P03383] interacts with 2 human partners:{Q9NYV4;Q9P287}

7183 Pathogen[ P03410] interacts with 1 human partners:{Q9P287}

7184 Pathogen[ P14075] interacts with 2 human partners:{Q9P287;Q9NYV4}

7185 Pathogen[ P0C206] interacts with 1 human partners:{Q9P287}

7186 Pathogen[ P03363] interacts with 1 human partners:{Q9P287}

7187 [Cluster 654]GO:0071595+C cellular\_component [name] Nem1-Spo7 phosphatase complex [def] "A protein serine/threonine phosphatase complex that is involved in nuclear envelope organization, and contains proteins known in budding yeast as Nem1p and Spo7p." [GOC]

7188 Pathogen[ Q2Q067] interacts with 2 human partners:{Q8N9A8;O95476}

7189 Pathogen[ P0C214] interacts with 2 human partners:{Q8N9A8;O95476}

7190 Pathogen[ P03346] interacts with 2 human partners:{Q8N9A8;O95476}

7191 Pathogen[ Q85601] interacts with 2 human partners: {Q8N9A8;Q95476}

7192 Pathogen[ P14079] interacts with 2 human partners: {Q8N9A8;Q95476}

7193 Pathogen[ P03383] interacts with 1 human partners: {Q8N9A8}

7194 Pathogen[ P03410] interacts with 2 human partners: {Q95476;Q8N9A8}

7195 Pathogen[ P14075] interacts with 1 human partners: {Q8N9A8}

7196 Pathogen[ POC206] interacts with 2 human partners: {Q95476;Q8N9A8}

7197 Pathogen[ P03363] interacts with 2 human partners: {Q8N9A8;Q95476}

7198 [Cluster 655]GO:0031262+C cellular\_component [name] Ndc80 complex [def] "A protein complex conserved among eukaryotes that forms part of the kinetochore and plays an essential role in forming stable kinetochore-microtubule attachments. The complex contains proteins known in several species, including budding and fission yeasts, as Ndc80p, Nuf2p, Spc24p, and Spc25p. In vertebrates it is part of the outer plate of the kinetochore." [PMID

7199 Pathogen[ Q2Q067] interacts with 4 human partners: {Q9HBM1;Q8NBT2;Q9BZD4;O14777}

7200 Pathogen[ P0C214] interacts with 4 human partners: {Q8NBT2;Q9HBM1;Q9BZD4;O14777}

7201 Pathogen[ P03346] interacts with 4 human partners: {O14777;Q8NBT2;Q9HBM1;Q9BZD4}

7202 Pathogen[ Q85601] interacts with 4 human partners: {Q8NBT2;Q9BZD4;O14777;Q9HBM1}

7203 Pathogen[ P14079] interacts with 4 human partners: {Q9HBM1;Q8NBT2;Q9BZD4;O14777}

7204 Pathogen[ P03383] interacts with 4 human partners: {Q8NBT2;Q9BZD4;Q9HBM1;O14777}

7205 Pathogen[ P03410] interacts with 4 human partners: {Q9BZD4;Q9HBM1;Q8NBT2;O14777}

7206 Pathogen[ P14075] interacts with 4 human partners: {O14777;Q9HBM1;Q8NBT2;Q9BZD4}

7207 Pathogen[ POC206] interacts with 4 human partners: {Q9HBM1;O14777;Q9BZD4;Q8NBT2}

7208 Pathogen[ P03363] interacts with 4 human partners: {Q9BZD4;Q8NBT2;Q9HBM1;O14777}

7209 [Cluster 656]GO:0005789+C cellular\_component [name] endoplasmic reticulum membrane [def] "The lipid bilayer surrounding the endoplasmic reticulum." [GOC

7210 Pathogen[ Q2Q067] interacts with 51 human partners: {O15027;Q96HA1;O75340;Q9H5J4;Q6RW13;P55735;Q86XL3;Q96P71;A8CG34;P18850;P36956;Q96EV8;Q96I23;P63241;Q86UE4;Q15629;Q92575;Q9BW60;Q96G23;Q12959;O43264;O75396;Q9GZR5;Q9UBS3;Q8TEM1;Q92539;Q15437;P53992;O95486;O94855;Q68CJ9;Q6IS14;Q9BVC6;O94850;Q96JE7;Q9UQF2;Q95476;A1L3X0;Q6NUQ1;Q9HB03;P08235;O15155;O95487;Q9BQE4;Q9GZV4;Q9P2W9;Q9NRR5;Q15436;Q14442;Q14693;P14625}

7211 Pathogen[ P0C214] interacts with 59 human partners: {Q6NUQ1;Q9UM00;Q9HA82;P18850;P55735;Q9NXB9;P14625;Q6IS14;O14681;Q6RW13;P53992;O43264;Q9NRR5;Q9GZV4;Q8TEM1;P29401;Q9GZR5;Q68CJ9;Q9UBS3;O75340;Q86SQ9;P63241;Q15436;Q86UE4;Q9NWXG1;A8CG34;Q9HB03;Q9NYP7;O95487;Q92539;P49257;A1L3X0;Q9BQK8;Q15437;Q86XL3;Q96G23;Q96P71;Q96EV8;O94850;Q12959;Q9UQF2;O95476;Q15629;Q9BVC6;O75396;Q9UJH9;Q86WV6;Q9BW60;Q92575;P55210;Q9BQE4;Q96JE7;O15155;O15027;O95486;Q9P2W9;O94855;Q14693;Q96HA1}

7212 Pathogen[ P03346] interacts with 65 human partners: {Q8TEM1;Q9BW60;P55735;Q9UBS3;Q9P2W9;O15027;Q86UE4;Q96BA8;Q96P71;Q9GZV4;P36956;P14625;P08235;Q70SY1;Q12772;P49257;Q9NRR5;Q15629;Q969X5;Q12981;O43264;O75396;P63241;Q86SQ9;O94855;Q6IS14;P18850;Q92575;Q9Y6F6;Q6NUQ1;Q9BUN8;Q15436;O75340;Q92539;Q96EV8;Q15437;Q9H5J4;Q96JE7;Q96G23;Q9HB03;O94850;O95486;O95476;Q9BVC6;Q96KC8;Q68CJ9;Q5JRA6;Q9HCU5;A8CG34;Q9UQF2;P55210;O95487;Q14442;Q6RW13;Q96HA1;Q86XL3;Q8TEY5;P49755;Q96I23;O15155;P53992;Q15363;Q9BVK6;Q14693;Q12959}

7213 Pathogen[ Q85601] interacts with 55 human partners: {Q8TEM1;Q68CJ9;Q86WV6;Q92575;O15027;Q6NUQ1;A1L3X0;O75396;Q9GZV4;Q9UBS3;Q15629;O95487;A8CG34;Q9NRR5;Q96JE7;O15155;Q9UJH9;Q12981;O43264;Q12772;P63241;Q86SQ9;Q9P2W9;Q15436;Q9UQF2;Q86XL3;Q9BW60;Q9UM00;Q96EV8;Q15437;Q9H5J4;P36956;P49257;Q96G23;P55735;P18850;Q9HB03;Q6RW13;P08235;Q86UE4;O75340;O95486;O95476;Q12959;P14625;Q9GZR5;Q96P71;Q96HA1;O94855;Q92539;P53992;P55210;Q6IS14;Q9BQE4;Q14693}

7214 Pathogen[ P14079] interacts with 160 human partners: {Q15629;Q16655;Q8N6M3;Q6NUQ1;O43292;Q9Y5Y5;Q8NBV4;O95070;A5PLL7;Q9Y5U4;Q96HA1;Q9H295;Q969M3;P49257;Q9BQK8;O15027;Q16873;Q86VE9;P60468;Q3ZQAQ7;Q96P71;Q9BU23;Q14442;Q9BQE4;Q1HG44;Q14693;A1L3X0;Q24JP5;Q9P055;O95487;Q96S52;Q1HG43;Q68CJ9;P20292;Q9BRL7;Q9NXE4;Q96RQ1;Q9BVC6;Q9UBS3;Q6IS14;P39656;P08235;Q9NZ42;Q9UQF2;O00400;Q9BVK6;A8CG34;Q6RW13;P57054;P43307;Q629K1;Q8TEM1;P29401;O94855;Q9HA82;Q99442;Q9BT22;Q96Q80;Q9BRB3;P53992;P04844;Q5VUD6;Q86SQ9;Q9Y2B2;Q9GZP9;Q86XL3;O94777;O15155;Q9NRX5;O75352;O94905;Q969N2;Q9HB03;Q5QFB9;Q92539;Q96JE7;P33947;Q9P2X0;Q15363;Q9BUN8;Q9UJH9;Q5JPE7;O75396;Q9NRR5;Q12772;P24390;Q9H8M9;P27544;Q9Y5U9;Q8NFR3;Q8N609;Q9BVK8;Q86UW1;Q8N114;Q969X5;O75915;P49755;Q12912;Q86WV6;O00264;Q9Y6X1;P55210;Q96G23;O75340;Q9Y6D0;O75477;Q5JRA6;Q12981;Q9NZ43;O95292;O43264;P60059;Q969W0;Q7Z5B4;Q86UE4;P61803;P10620;Q9H490;P63241;P18850;P14625;Q9UKR5;A5D6W6;Q9Y5Z9;Q9UM00;Q9NZV5;O15260;O95476;P55735;Q96BY9;Q9GZR5;Q96EV8;Q15011;Q9H0V9;Q9Y6F6;Q9NWW5;Q96MG2;O95486;Q9BW60;Q9P2W9;Q8TBF5;Q8NFBQ8;Q92575;P36956;P51571;Q9GZV4;O14681;Q96I23;Q9H5J4;O94850;Q96S06;Q6AZA7;Q3MUJ2;Q8IU68;Q8WXG1;P46977;Q8N138;O43731;O15503;Q96FM1}

7215 Pathogen[ P03383] interacts with 42 human partners: {Q68CJ9;Q6RW13;Q96I23;P55735;Q86UE4;O95487;O43264;A8CG34;Q9BW60;Q9GZR5;Q9BUN8;Q9H5J4;Q9GZV4;Q96P71;O95486;Q9UQF2;Q8TEM1;P63241;Q96EV8;Q15436;Q9UBS3;Q15629;Q9BVC6;Q9BQE4;Q15437;O94855;A1L3X0;Q9HB03;P14625;O94850;O15027;Q96HA1;Q96JE7;P53992;Q9NRR5;Q9UM00;O14681;Q6NUQ1;P18850;Q92539;Q92575;Q14693}

7216 Pathogen[ P03410] interacts with 151 human partners: {A1L3X0;Q9BQK8;O95292;Q86VE9;Q68CJ9;P36956;A5D6W6;O14681;Q9GZR5;Q9NZ43;Q9H0V9;Q99442;Q9BVC6;P60468;Q7Z5B4;Q96FM1;P49257;P60059;Q1HG43;Q9NRR5;O94855;Q9NWW5;Q969X5;Q9H5J4;Q13445;Q86UW1;P53992;Q9Y2B2;Q9BU23;Q8N138;Q12959;Q16655;O00400;O94905;Q9Y5Y5;Q9Y5U4;P14625;P33947;Q9Y6F6;Q9P2W9;Q8N114;Q9Y5Z9;O94777;Q96Q80;Q1HG44;P27544;Q9GZP9;Q24JP5;Q9UBS3;Q9P055;Q14442;Q96HA1;Q6NUQ1;O94850;Q96S52;Q5VUD6;Q9BQE4;Q8N609;Q8WXG1;Q9

- NXE4;Q8N6M3;Q96G23;O43264;Q14693;Q92575;Q9NZ42;Q9UHQ9;Q15436;Q9BVK6;P43307;Q9Y6X1;Q9NRX5;O75396;Q96BY9;Q969M3;Q15437;O75915;O00264;Q9BUN8;Q96RQ1;Q9HA82;Q96I23;Q12772;O15155;Q86SQ9;Q9BW60;Q86UE4;Q16873;Q15629;O95486;Q8TEM1;Q15363;Q12912;Q9BRB3;Q96JE7;Q9BT22;Q96S06;Q6RW13;P04844;O95476;Q9HCU5;P24390;O75477;Q9HB03;Q9Y6D0;Q969N2;Q9Y5U9;Q969W0;P63241;Q9UBY8;A8CG34;Q86WV6;O15027;Q15011;Q9BVK8;O75352;O75340;Q629K1;Q9UQF2;O43731;Q9GZV4;Q96P71;Q8IU99;P55735;Q8NFQ8;O15260;Q12981;P39656;P20292;O15503;Q9UM00;Q92539;Q9HA490;P08235;P61803;P18850;Q9P2X0;Q6AZY7;Q96EV8;Q86XL3;Q5QFB9;Q5JRA6;O95070;O95487;Q8NFR3;Q8NBV4;P55210;Q9BRL7;Q6IS14;Q96MG2;Q9NZV5}
- 7217 Pathogen[ P14075] interacts with 53 human partners: {Q9BQE4;Q9UBS3;Q9H5J4;O94777;Q9BVC6;Q96JE7;Q9BW60;O14681;Q14442;Q86UE4;A8CG34;Q6NUQ1;Q9Y6F6;Q9HB03;Q9GZV4;O15027;Q15629;P63241;P53992;P55735;ALL3X0;Q96HA1;Q16655;O95487;Q96I23;Q92539;Q15437;Q9UHQ9;Q8TEM1;Q9Y6D0;Q9BUN8;Q92575;Q1HG44;Q15436;Q9NRR5;Q9GZR5;Q68CJ9;Q96EV8;Q8N6M3;Q15011;Q969W0;O94855;Q6RW13;O43264;P14625;O95486;Q9UQF2;O75477;O94850;Q9UM00;Q96P71;P18850;Q14693}
- 7218 Pathogen[ P0C206] interacts with 106 human partners: {Q96P71;O75340;O75477;Q9BVK6;Q92539;Q16655;Q15437;Q92575;Q9UM00;Q9GZV4;Q96G23;Q6IS14;O75396;Q9NZ42;O94855;P39656;Q9UHQ9;Q6NUQ1;Q96I23;P18850;Q7Z5B4;Q86XL3;Q9HB03;A5D6W6;Q96HA1;O95070;Q14442;O94850;P49755;Q5JRA6;Q9Y5Z9;P55735;O94777;P36956;Q86WV6;Q8NFR3;Q9UQF2;Q1HG44;O95476;Q9H5J4;O95292;O14681;Q8TEM1;Q1HG43;Q8N6M3;Q9BQE4;Q9NRR5;O15155;Q6RW13;Q9HA82;O95486;Q969M3;O00264;Q9BVC6;Q96EV8;Q969W0;P33947;Q15011;Q96JE7;P24390;P49257;Q95487;Q9Y6F6;Q9BQK8;O94905;Q9BUN8;Q9GZP9;Q9Y2B2;O43731;Q12981;P63241;O15260;P20292;Q9Y6D0;Q969X5;Q8NFQ8;Q86UE4;Q15629;Q9GZR5;Q9UBS3;Q96RQ1;A8CG34;P53992;Q15363;Q12912;Q9Y5U9;Q8WXG1;Q14693;O15027;P55210;O43264;Q12959;Q86SQ9;Q12772;P08235;Q9P2W9;Q96S06;Q8NBV4;Q99640;Q68CJ9;ALL3X0;P14625;P29401;Q9BRL7;Q9BW60;Q15436}
- 7219 Pathogen[ P03363] interacts with 34 human partners: {Q12959;Q9GZV4;Q9H5J4;Q92575;O75340;Q92539;Q9UQF2;P18850;O43264;Q6NUQ1;Q9UBS3;Q96I23;Q15436;A8CG34;O95486;Q86UE4;O95476;O94850;Q9P2W9;Q9NRR5;Q96P71;P08235;Q68CJ9;Q96HA1;P63241;Q96G23;P53992;O95487;Q9Y6F6;P55210;Q6IS14;Q86XL3;P55735;O94855}
- 7220 [Cluster 657]GO:0071013+C cellular\_component [name] catalytic step 2 spliceosome [def] "A spliceosomal complex that contains three snRNPs, including U5, bound to a splicing intermediate in which the first catalytic cleavage of the 5' splice site has occurred. The precise subunit composition differs significantly from that of the catalytic step 1, or activated, spliceosome, and includes many proteins in addition to those found in the associated snRNPs." [GOC
- 7221 Pathogen[ Q2Q067] interacts with 59 human partners: {Q9UNP9;O43290;Q13573;P07910;Q9Y333;Q8WUQ7;Q9H2H8;O95391;P52272;P61326;Q15459;P62318;O43390;Q13435;Q96DI7;P38919;O60506;Q9H307;Q9ULR0;Q07955;O94906;P31943;P62314;P61978;P38159;P62304;Q8IYB3;Q86V81;Q96DF8;Q6P2Q9;Q6NZY4;Q9UBB9;P08579;P52597;P14678;Q9Y5S9;Q01081;O75533;P09661;Q15029;Q9P013;Q9HCG8;Q9UQ35;Q9BRR8;P62316;O60508;P62306;P22626;P11940;Q14331;P62308;Q9UMS4;Q99459;Q12874;Q00839;Q9HCS7;O43660;P62310;Q15428}
- 7222 Pathogen[ P0C214] interacts with 60 human partners: {Q6NZY4;P62316;Q9HCS7;Q9ULR0;Q13573;Q14331;P38159;Q6UX04;Q86V81;Q9Y5S9;O60508;P14678;Q15029;P62306;Q6P2Q9;Q15428;Q9H307;P11940;P62308;P08579;O43390;O94906;Q9UMS4;Q07955;Q9H2H8;Q9Y333;P52272;Q9Y3C6;P62314;P07910;Q8IYB3;Q9BRR8;P62310;Q99459;P61326;P38919;Q96DF8;P52597;Q15459;P62318;Q01081;O75533;Q96DI7;Q96BP3;Q12874;P31943;Q9P013;O60506;Q9HCG8;P09661;Q9UQ35;O43290;Q13435;Q00839;P22626;O95391;Q9UNP9;O43660;Q9UBB9}
- 7223 Pathogen[ P03346] interacts with 71 human partners: {Q9Y5S9;P51991;Q12874;Q9BRR8;P61978;Q9ULR0;Q96DF8;O43290;Q9H2H8;Q8IYB3;P09651;Q9Y3C6;P62304;O95391;P08579;Q6UX04;Q9UMS4;O60506;Q9H307;P38919;P07910;Q96BP3;P11940;P31943;Q00839;O43390;Q9HCS7;P22626;O94906;Q9BUQ8;Q9Y333;Q07955;Q9P013;P62318;Q86V81;O60508;O43660;O75643;Q9HCG8;Q13435;P62306;Q6NZY4;Q01081;O75533;P61326;Q15459;Q9UNP9;P42285;Q99459;Q6P2Q9;Q96DI7;Q14562;Q9UQ35;O95926;P62314;P52272;P14678;Q9BZJ0;Q13573;P38159;Q15029;P62316;Q8WUQ7;P52597;P62308;P62310;Q15393;P09661;Q9BRX9;Q15428;Q14331}
- 7224 Pathogen[ Q85601] interacts with 55 human partners: {Q6UX04;Q9BRR8;P61978;Q9ULR0;Q9HCS7;Q9H2H8;O43390;Q8IYB3;Q96BP3;P62304;Q9H307;O60506;Q14331;O95391;Q13573;Q15459;Q9UMS4;P61326;P22626;Q9P013;Q86V81;P62316;O94906;Q07955;Q9UBB9;Q96DI7;P38919;P14678;P11940;P62310;Q13435;P62314;P62306;O60508;P62318;Q15029;P52597;Q6NZY4;Q9Y3C6;Q99459;Q01081;Q9UQ35;O43290;Q6P2Q9;Q00839;O43660;P62308;P38159;Q9Y333;Q9HCG8;P31943;P09661;Q96DF8;Q12874;Q9Y5S9}
- 7225 Pathogen[ P14079] interacts with 55 human partners: {Q99459;Q9Y333;O94906;O60508;O75533;Q96DF8;Q12874;Q9Y5S9;Q6NZY4;Q9P013;P07910;Q13573;Q15029;Q6P2Q9;P62314;Q9HCS7;Q9H307;Q00839;O43290;Q15459;P62306;P14678;Q8IYB3;Q9ULR0;P61326;O95926;Q9UMS4;P11940;Q9BRR8;Q9H2H8;Q9UQ35;Q86V81;P62308;O60506;Q9UBB9;P62304;Q15428;P62316;P62310;Q07955;Q8WUQ7;P61978;P31943;Q01081;Q9HCG8;Q14331;P52597;O43390;P09661;Q6UX04;P62318;Q96BP3;O95391;P22626;P38159}
- 7226 Pathogen[ P03383] interacts with 52 human partners: {Q13573;Q07955;P09661;O43390;Q15459;P62318;Q9UNP9;O43290;P22626;Q15029;Q9HCS7;Q9ULR0;Q9Y5S9;P62316;Q96BP3;Q9H2H8;P62304;P61326;Q6P2Q9;P38919;Q12874;Q9P013;P61978;Q14331;P11940;P31943;Q99459;Q86V81;Q13435;Q6NZY4;O94906;P38159;Q8IYB3;P62314;P62310;P14678;Q9Y333;Q01081;Q9BRR8;Q8WUQ7;Q9H307;Q9UQ35;Q96DF8;P62308;Q9UBB9;Q9HCG8;Q00839;P52597;O95391;Q9UMS4;P62306;Q96DI7}
- 7227 Pathogen[ P03410] interacts with 62 human partners: {Q8WUQ7;Q00839;Q9ULR0;Q01081;P61326;P62304;O60508;Q15029;P61978;P22626;P11940;P62306;P62310;Q6NZY4;Q15393;Q9Y5S9;Q96BP3;Q9Y333;Q9P013;P62308;P14678;P62316;Q9UBB9;Q9UQ35;Q9H2H8;Q9HCS7;O94906;P07910;P08579;Q99459;Q07955;P52597;P31943;P62314;O43660;

Q15428;P09661;Q15459;O75533;Q86V81;P52272;Q9BRR8;Q8IYB3;P38919;Q6UX04;Q9UMS4;Q9Y3C6;Q9UNP9;O60506;Q96DF8;Q6P2Q9;O43290;Q12874;P38159;O95391;Q13573;Q13435;O43390;Q9H307;Q14331;Q9HCG8;P62318}

7228 Pathogen[ P14075] interacts with 52 human partners: {Q9H307;P22626;P62304;P62316;Q13573;Q86V81;P61326;O95391;Q15459;P38159;Q15428;Q9UNP9;P31943;P62306;P62308;O43390;Q9UQ35;O94906;Q9HCG8;Q9ULR0;Q15029;Q99459;Q96DI7;P11940;Q00839;Q13435;P62318;Q12874;Q96DF8;Q6NZY4;Q9UBB9;Q6P2Q9;Q01081;Q9UMS4;P09661;Q8IYB3;Q9Y333;P61978;P14678;Q9HCS7;Q9BRR8;Q9Y5S9;P52597;Q9H2H8;Q14331;P62314;P38919;Q8WUQ7;O43290;Q9P013;P62310;Q07955}

7229 Pathogen[ P0C206] interacts with 59 human partners: {Q9UNP9;Q9UMS4;P14678;O60508;Q07955;P61326;Q01081;Q96BP3;P62304;Q8IYB3;O75533;P61978;Q9H307;Q12874;P62314;P62316;O43390;P22626;Q9UBB9;Q8WUQ7;O43290;Q9Y333;Q13435;Q9UQ35;Q96DF8;Q9BRR8;P38159;O60506;Q13573;Q9Y3C6;P52597;Q9P013;Q6P2Q9;P62318;Q6NZY4;P62306;Q9ULR0;Q99459;Q9HCG8;O94906;Q9H2H8;Q14331;Q96DI7;P09661;O43660;P38919;P62308;O95391;P62310;Q00839;Q9HCS7;Q15459;P11940;P31943;Q15428;Q9Y5S9;Q86V81;Q15029;Q6UX04}

7230 Pathogen[ P03363] interacts with 73 human partners: {O95926;P62314;P38919;Q96DF8;O75643;Q13435;O95391;P52597;Q6NZY4;O60306;Q14331;P51991;Q9HCS7;Q6UX04;Q15393;O75533;Q96BP3;P09651;P08579;Q15459;Q9Y3C6;Q9BRR8;P62318;Q9H307;Q9BRX9;P62304;Q6P2Q9;P11940;Q92620;P61326;P62306;P52272;Q15029;Q9Y333;Q14562;P62316;Q8WUQ7;Q8IYB3;P38159;Q12874;P31943;Q9ULR0;Q86V81;P07910;O43290;Q13573;P22626;P62310;Q9UKM9;Q07955;O43660;O60506;Q01081;P61978;O94906;Q9HCG8;Q15428;Q00839;P62308;Q9P013;Q9UMS4;O43390;P14678;P09661;Q99459;Q9UQ35;Q9Y5S9;Q9H2H8;Q9UNP9;Q9BZJ0;Q96DI7;O60508;P42285}

7231 [Cluster 658]GO:0031258+C cellular\_component [name] lamellipodium membrane [def] "The portion of the plasma membrane surrounding a lamellipodium." [GOC]

7232 Pathogen[ Q2Q067] interacts with 2 human partners: {P23528;O95996}

7233 Pathogen[ P0C214] interacts with 1 human partners: {Q96GD0}

7234 Pathogen[ P03346] interacts with 3 human partners: {Q8WXH0;O95996;P23528}

7235 Pathogen[ Q85601] interacts with 2 human partners: {O95996;P23528}

7236 Pathogen[ P14079] interacts with 5 human partners: {P50552;Q96GD0;P23528;O95996;Q8WXH0}

7237 Pathogen[ P03383] interacts with 1 human partners: {P23528}

7238 Pathogen[ P03410] interacts with 5 human partners: {Q96GD0;P50552;O95996;P23528;Q8WXH0}

7239 Pathogen[ P14075] interacts with 1 human partners: {P23528}

7240 Pathogen[ P0C206] interacts with 4 human partners: {O95996;Q8WXH0;Q96GD0;P23528}

7241 Pathogen[ P03363] interacts with 2 human partners: {O95996;P23528}

7242 [Cluster 659]GO:0035098+C cellular\_component [name] ESC/E(Z) complex [def] "A multimeric protein complex that can methylate lysine-27 and lysine-9 residues of histone H3. In Drosophila the core subunits of the complex include ESC, E(Z), CAF1 (NURF-55) and SU(Z)12. In mammals the core subunits of the complex include EED, EZH2, SUZ12 and RBBP4." [GOC]

7243 Pathogen[ Q2Q067] interacts with 7 human partners: {Q15910;Q92800;Q15022;Q09028;Q92769;O75530;Q16576}

7244 Pathogen[ P0C214] interacts with 7 human partners: {Q15022;O75530;Q15910;Q09028;Q92769;Q16576;Q92800}

7245 Pathogen[ P03346] interacts with 7 human partners: {Q92800;O75530;Q15022;Q92769;Q09028;Q16576;Q15910}

7246 Pathogen[ Q85601] interacts with 7 human partners: {Q15022;Q92769;Q16576;O75530;Q09028;Q15910;Q92800}

7247 Pathogen[ P14079] interacts with 7 human partners: {Q92800;Q16576;O75530;Q92769;Q15910;Q09028;Q15022}

7248 Pathogen[ P03383] interacts with 7 human partners: {Q09028;Q15022;Q92769;Q15910;Q16576;Q92800;O75530}

7249 Pathogen[ P03410] interacts with 7 human partners: {Q16576;Q92800;Q09028;Q92769;Q15910;Q15022;O75530}

7250 Pathogen[ P14075] interacts with 7 human partners: {Q16576;Q15910;Q92800;Q09028;Q92769;Q15022;O75530}

7251 Pathogen[ P0C206] interacts with 7 human partners: {Q92769;O75530;Q92800;Q15910;Q15022;Q16576;Q09028}

7252 Pathogen[ P03363] interacts with 6 human partners: {Q15022;Q09028;Q15910;O75530;Q16576;Q92800}

7253 [Cluster 660]GO:0032587+C cellular\_component [name] ruffle membrane [def] "The portion of the plasma membrane surrounding a ruffle." [GOC]

7254 Pathogen[ Q2Q067] interacts with 9 human partners: {Q14678;Q5T1C6;P23528;Q8IX03;O75122;P23396;P63000;P27815;P61586}

7255 Pathogen[ P0C214] interacts with 12 human partners: {Q8IX03;P63000;P23396;P27815;Q9UM54;O15056;P61586;Q14678;O75122;O76083;Q96GD0;Q5T1C6}

7256 Pathogen[ P03346] interacts with 10 human partners: {Q14678;Q8IX03;O15056;P27815;O75122;P23396;Q9HB21;P23528;P63000;P61586}

7257 Pathogen[ Q85601] interacts with 11 human partners: {P23396;P27815;P63000;O75122;Q14678;Q9HB21;P61586;Q9UM54;P23528;Q8IX03;Q5T1C6}

7258 Pathogen[ P14079] interacts with 14 human partners: {P23396;O43597;Q9UM54;Q96GD0;Q8IX03;P23528;O60610;Q5T1C6;P61586;P27815;Q9HB21}

1;O75122;Q14678;Q9NSN8}  
7259 Pathogen[ P03383] interacts with 7 human  
partners:{Q14678;P63000;P61586;Q8IX03;P23528;Q5T1C6;P23396}  
7260 Pathogen[ P03410] interacts with 14 human  
partners:{O60610;O43597;P63000;Q8IX03;P23396;Q9HB21;Q96GD0;Q9UM54;Q5T1C6;P61586;Q14678;P23528;O75122;P27815}  
7261 Pathogen[ P14075] interacts with 7 human  
partners:{Q5T1C6;P23528;P23396;P61586;P63000;Q14678;Q8IX03}  
7262 Pathogen[ P0C206] interacts with 13 human  
partners:{Q9UM54;Q14678;P61586;O75122;P27815;P23396;P63000;Q5T1C6;O43597;Q9HB21;Q96GD0;P23528;Q8IX03}  
7263 Pathogen[ P03363] interacts with 9 human  
partners:{P23396;P63000;P27815;O15056;P23528;Q9C004;Q8IX03;Q14678;Q9NSN8}  
7264

```

1 [Section 10] biological processes that PARTIAL HTLV viruses may interfere with
2
3
4 [Cluster 1]GO:1900127+P
5 Pathogen[ Q2Q067] interacts with 1 human partners:{P19838}
6 Pathogen[ P0C214] interacts with 1 human partners:{P19838}
7 Pathogen[ P03346] interacts with 1 human partners:{P19838}
8 Pathogen[ Q85601] interacts with 1 human partners:{P19838}
9 Pathogen[ P03383] interacts with 1 human partners:{P19838}
10 Pathogen[ P03410] interacts with 1 human partners:{P19838}
11 Pathogen[ P14075] interacts with 1 human partners:{P19838}
12 Pathogen[ P0C206] interacts with 1 human partners:{P19838}
13 Pathogen[ P03363] interacts with 1 human partners:{P19838}
14 [Cluster 2]GO:0009305+P biological_process [name] protein biotinylation [def] "The
addition of biotin (vitamin B7 / vitamin H) to a protein amino acid." [GOC
15 Pathogen[ P0C214] interacts with 1 human partners:{P50747}
16 [Cluster 3]GO:0009186+P biological_process [name] deoxyribonucleoside diphosphate
metabolic process [def] "The chemical reactions and pathways involving a
deoxyribonucleoside diphosphate, a compound consisting of a nucleobase linked to a
deoxyribose sugar esterified with diphosphate on the sugar." [GOC
17 Pathogen[ Q2Q067] interacts with 2 human partners:{P31350;Q7LG56}
18 Pathogen[ P0C214] interacts with 2 human partners:{P31350;Q7LG56}
19 Pathogen[ P03346] interacts with 2 human partners:{P31350;Q7LG56}
20 Pathogen[ Q85601] interacts with 2 human partners:{P31350;Q7LG56}
21 Pathogen[ P14079] interacts with 2 human partners:{P31350;Q7LG56}
22 Pathogen[ P03383] interacts with 1 human partners:{P31350}
23 Pathogen[ P03410] interacts with 2 human partners:{P31350;Q7LG56}
24 Pathogen[ P14075] interacts with 1 human partners:{P31350}
25 Pathogen[ P0C206] interacts with 2 human partners:{Q7LG56;P31350}
26 [Cluster 4]GO:0006554+P biological_process [name] lysine catabolic process [def] "The
chemical reactions and pathways resulting in the breakdown of lysine,
2,6-diaminohexanoic acid." [GOC
27 Pathogen[ Q2Q067] interacts with 1 human partners:{P49419}
28 Pathogen[ P0C214] interacts with 3 human partners:{P49419;P09622;P36957}
29 Pathogen[ P03346] interacts with 1 human partners:{P49419}
30 Pathogen[ Q85601] interacts with 1 human partners:{P49419}
31 Pathogen[ P03383] interacts with 1 human partners:{P49419}
32 Pathogen[ P03410] interacts with 1 human partners:{P49419}
33 Pathogen[ P14075] interacts with 1 human partners:{P49419}
34 Pathogen[ P0C206] interacts with 1 human partners:{P49419}
35 Pathogen[ P03363] interacts with 1 human partners:{P49419}
36 [Cluster 5]GO:0019388+P biological_process [name] galactose catabolic process [def]
"The chemical reactions and pathways resulting in the breakdown of galactose, the
aldohexose galacto-hexose." [ISBN
37 Pathogen[ Q2Q067] interacts with 2 human partners:{P36871;P07902}
38 Pathogen[ P0C214] interacts with 4 human partners:{P36871;Q15124;P07902;P16278}
39 Pathogen[ P03346] interacts with 2 human partners:{P36871;P16278}
40 Pathogen[ Q85601] interacts with 3 human partners:{Q15124;P36871;P07902}
41 Pathogen[ P14079] interacts with 4 human partners:{P16278;Q15124;P07902;P36871}
42 Pathogen[ P03383] interacts with 1 human partners:{P07902}
43 Pathogen[ P03410] interacts with 4 human partners:{P36871;P07902;P16278;Q15124}
44 Pathogen[ P14075] interacts with 1 human partners:{P07902}
45 Pathogen[ P0C206] interacts with 4 human partners:{Q15124;P07902;P16278;P36871}
46 [Cluster 6]GO:0071392+P biological_process [name] cellular response to estradiol
stimulus [def] "Any process that results in a change in state or activity of a cell
(in terms of movement, secretion, enzyme production, gene expression, etc.) as a result
of stimulus by estradiol, a C18 steroid hormone hydroxylated at C3 and C17 that acts as
a potent estrogen." [GOC
47 Pathogen[ Q2Q067] interacts with 1 human partners:{P35548}
48 Pathogen[ P0C214] interacts with 1 human partners:{P35548}
49 Pathogen[ P03346] interacts with 1 human partners:{P35548}
50 Pathogen[ Q85601] interacts with 1 human partners:{P35548}
51 Pathogen[ P03383] interacts with 1 human partners:{P35548}
52 Pathogen[ P03410] interacts with 1 human partners:{P35548}
53 Pathogen[ P14075] interacts with 1 human partners:{P35548}
54 Pathogen[ P0C206] interacts with 1 human partners:{P35548}
55 Pathogen[ P03363] interacts with 1 human partners:{P35548}
56 [Cluster 7]GO:0034971+P biological_process [name] histone H3-R17 methylation [def]
"The modification of histone H3 by addition of a methyl group to arginine at position 17
of the histone." [GOC
57 Pathogen[ Q2Q067] interacts with 1 human partners:{Q86X55}
58 Pathogen[ P0C214] interacts with 1 human partners:{Q86X55}
59 Pathogen[ P03346] interacts with 1 human partners:{Q86X55}
60 Pathogen[ Q85601] interacts with 1 human partners:{Q86X55}
61 Pathogen[ P03383] interacts with 1 human partners:{Q86X55}
62 Pathogen[ P03410] interacts with 1 human partners:{Q86X55}

```

63 Pathogen[ P14075] interacts with 1 human partners:{Q86X55}

64 Pathogen[ POC206] interacts with 1 human partners:{Q86X55}

65 Pathogen[ P03363] interacts with 1 human partners:{Q86X55}

66 [Cluster 8]GO:0002317+P biological\_process [name] plasma cell differentiation [def] "The process in which a B cell acquires the specialized features of a plasma cell. A plasma cell is a lymphocyte which develops from a B cell and produces high amounts of antibody." [GOC

67 Pathogen[ P03346] interacts with 1 human partners:{Q8TAU0}

68 Pathogen[ POC206] interacts with 1 human partners:{Q8TAU0}

69 Pathogen[ P03363] interacts with 1 human partners:{Q8TAU0}

70 [Cluster 9]GO:0002842+P biological\_process [name] positive regulation of T cell mediated immune response to tumor cell [def] "Any process that activates or increases the frequency, rate, or extent of a T cell mediated immune response to tumor cell." [GOC

71 Pathogen[ POC214] interacts with 1 human partners:{P10809}

72 [Cluster 10]GO:0090026+P biological\_process [name] positive regulation of monocyte chemotaxis [def] "Any process that increases the frequency, rate, or extent of monocyte chemotaxis." [GOC

73 Pathogen[ POC214] interacts with 1 human partners:{P05121}

74 Pathogen[ Q85601] interacts with 1 human partners:{P05121}

75 Pathogen[ P03410] interacts with 1 human partners:{P05121}

76 Pathogen[ POC206] interacts with 1 human partners:{P05121}

77 [Cluster 11]GO:0071651+P biological\_process [name] positive regulation of chemokine (C-C motif) ligand 5 production [def] "Any process that activates or increases the frequency, rate, or extent of production of chemokine (C-C motif) ligand 5." [GOC

78 Pathogen[ P14079] interacts with 1 human partners:{Q7Z434}

79 Pathogen[ P03410] interacts with 1 human partners:{Q7Z434}

80 [Cluster 12]GO:2000145+P biological\_process [name] regulation of cell motility [def] "Any process that modulates the frequency, rate or extent of cell motility." [GOC

81 Pathogen[ Q2Q067] interacts with 1 human partners:{Q00534}

82 Pathogen[ POC214] interacts with 1 human partners:{Q00534}

83 Pathogen[ P03346] interacts with 1 human partners:{Q00534}

84 Pathogen[ Q85601] interacts with 1 human partners:{Q00534}

85 Pathogen[ P03383] interacts with 1 human partners:{Q00534}

86 Pathogen[ P03410] interacts with 1 human partners:{Q00534}

87 Pathogen[ P14075] interacts with 1 human partners:{Q00534}

88 Pathogen[ POC206] interacts with 1 human partners:{Q00534}

89 Pathogen[ P03363] interacts with 1 human partners:{Q00534}

90 [Cluster 13]GO:0000115+P biological\_process [name] regulation of transcription involved in S phase of mitotic cell cycle [def] "A cell cycle process that regulates transcription such that the target genes are transcribed as part of the S phase of the mitotic cell cycle." [GOC

91 Pathogen[ P03346] interacts with 1 human partners:{O14901}

92 Pathogen[ P14079] interacts with 1 human partners:{O14901}

93 Pathogen[ P03410] interacts with 1 human partners:{O14901}

94 Pathogen[ POC206] interacts with 1 human partners:{O14901}

95 Pathogen[ P03363] interacts with 1 human partners:{O14901}

96 [Cluster 14]GO:0007212+P biological\_process [name] dopamine receptor signaling pathway [def] "The series of molecular signals generated as a consequence of a dopamine receptor binding to one of its physiological ligands." [GOC

97 Pathogen[ P03346] interacts with 1 human partners:{Q9BXX1}

98 Pathogen[ P03363] interacts with 1 human partners:{Q9BXX1}

99 [Cluster 15]GO:0006021+P biological\_process [name] inositol biosynthetic process [def] "The chemical reactions and pathways resulting in the formation of inositol, 1,2,3,4,5,6-cyclohexanehexol, a growth factor for animals and microorganisms." [CHEBI

100 Pathogen[ P14079] interacts with 1 human partners:{Q9NPH2}

101 Pathogen[ P03410] interacts with 1 human partners:{Q9NPH2}

102 [Cluster 16]GO:0046680+P biological\_process [name] response to DDT [def] "Any process that results in a change in state or activity of a cell or an organism (in terms of movement, secretion, enzyme production, gene expression, etc.) as a result of a DDT stimulus. DDT, dichlorodiphenyltrichloroethane, is a chlorinated hydrocarbon pesticide moderately toxic to humans and other animals." [ISBN

103 Pathogen[ Q2Q067] interacts with 1 human partners:{P14635}

104 Pathogen[ POC214] interacts with 1 human partners:{P14635}

105 Pathogen[ P03346] interacts with 1 human partners:{P14635}

106 Pathogen[ Q85601] interacts with 1 human partners:{P14635}

107 Pathogen[ P14079] interacts with 1 human partners:{P14635}

108 Pathogen[ P03383] interacts with 1 human partners:{P14635}

109 Pathogen[ P03410] interacts with 1 human partners:{P14635}

110 Pathogen[ P14075] interacts with 1 human partners:{P14635}

111 Pathogen[ POC206] interacts with 1 human partners:{P14635}

112 [Cluster 17]GO:0010882+P biological\_process [name] regulation of cardiac muscle contraction by calcium ion signaling [def] "Any process that modulates the frequency, rate or extent of cardiac muscle contraction by changing the calcium ion signals that trigger contraction." [GOC

113 Pathogen[ Q2Q067] interacts with 1 human partners:{P56524}

114 Pathogen[ POC214] interacts with 1 human partners:{P56524}

115 Pathogen[ P03346] interacts with 1 human partners:{P56524}

116 Pathogen[ Q85601] interacts with 1 human partners:{P56524}

117 Pathogen[ P14079] interacts with 1 human partners:{P56524}

118 Pathogen[ P03383] interacts with 1 human partners:{P56524}

119 Pathogen[ P03410] interacts with 1 human partners:{P56524}

120 Pathogen[ P14075] interacts with 1 human partners:{P56524}

121 Pathogen[ P0C206] interacts with 1 human partners:{P56524}

122 [Cluster 18]GO:0070889+P biological\_process [name] platelet alpha granule organization [def] "A process that is carried out at the cellular level which results in the assembly, arrangement of constituent parts, or disassembly of a platelet alpha granule. A platelet alpha granule is a secretory organelle found in blood platelets." [GOC

123 Pathogen[ Q2Q067] interacts with 1 human partners:{Q9H267}

124 Pathogen[ P03346] interacts with 1 human partners:{Q9H267}

125 Pathogen[ Q85601] interacts with 1 human partners:{Q9H267}

126 Pathogen[ P14079] interacts with 1 human partners:{Q9H267}

127 Pathogen[ P03410] interacts with 1 human partners:{Q9H267}

128 Pathogen[ P0C206] interacts with 1 human partners:{Q9H267}

129 Pathogen[ P03363] interacts with 1 human partners:{Q9H267}

130 [Cluster 19]GO:0016198+P biological\_process [name] axon choice point recognition [def] "The recognition of molecules at a choice point by an axon growth cone\_ at a choice point the growth cone determines the direction of its future growth." [PMID

131 Pathogen[ Q85601] interacts with 1 human partners:{P17677}

132 Pathogen[ P14079] interacts with 1 human partners:{P17677}

133 Pathogen[ P03410] interacts with 1 human partners:{P17677}

134 Pathogen[ P0C206] interacts with 1 human partners:{P17677}

135 [Cluster 20]GO:0035572+P biological\_process [name] N-terminal peptidyl-serine dimethylation [def] "The dimethylation of the N-terminal serine of proteins to form the derivative N,N-dimethylserine." [PMID

136 Pathogen[ Q2Q067] interacts with 1 human partners:{Q9BV86}

137 Pathogen[ P0C214] interacts with 1 human partners:{Q9BV86}

138 Pathogen[ P03346] interacts with 1 human partners:{Q9BV86}

139 Pathogen[ Q85601] interacts with 1 human partners:{Q9BV86}

140 Pathogen[ P14079] interacts with 1 human partners:{Q9BV86}

141 Pathogen[ P03410] interacts with 1 human partners:{Q9BV86}

142 Pathogen[ P0C206] interacts with 1 human partners:{Q9BV86}

143 Pathogen[ P03363] interacts with 1 human partners:{Q9BV86}

144 [Cluster 21]GO:0033003+P biological\_process [name] regulation of mast cell activation [def] "Any process that modulates the frequency, rate, or extent of mast cell activation." [GOC

145 Pathogen[ Q2Q067] interacts with 1 human partners:{O15162}

146 Pathogen[ P0C214] interacts with 1 human partners:{O15162}

147 Pathogen[ P03346] interacts with 1 human partners:{O15162}

148 Pathogen[ Q85601] interacts with 1 human partners:{O15162}

149 Pathogen[ P14079] interacts with 1 human partners:{O15162}

150 Pathogen[ P03383] interacts with 1 human partners:{O15162}

151 Pathogen[ P03410] interacts with 1 human partners:{O15162}

152 Pathogen[ P14075] interacts with 1 human partners:{O15162}

153 Pathogen[ P0C206] interacts with 1 human partners:{O15162}

154 [Cluster 22]GO:0035964+P biological\_process [name] COPI-coated vesicle budding [def] "The evagination of a Golgi membrane, resulting in formation of a COPI-coated vesicle." [GOC

155 Pathogen[ P03346] interacts with 1 human partners:{P49755}

156 Pathogen[ P14079] interacts with 1 human partners:{P49755}

157 Pathogen[ P0C206] interacts with 1 human partners:{P49755}

158 [Cluster 23]GO:0045542+P biological\_process [name] positive regulation of cholesterol biosynthetic process [def] "Any process that activates or increases the frequency, rate or extent of the chemical reactions and pathways resulting in the formation of cholesterol." [GOC

159 Pathogen[ Q2Q067] interacts with 1 human partners:{P36956}

160 Pathogen[ P03346] interacts with 1 human partners:{P36956}

161 Pathogen[ Q85601] interacts with 1 human partners:{P36956}

162 Pathogen[ P14079] interacts with 1 human partners:{P36956}

163 Pathogen[ P03410] interacts with 1 human partners:{P36956}

164 Pathogen[ P0C206] interacts with 1 human partners:{P36956}

165 [Cluster 24]GO:0006497+P biological\_process [name] protein lipidation [def] "The covalent attachment of lipid groups to an amino acid in a protein." [GOC

166 Pathogen[ P14079] interacts with 1 human partners:{Q9H0Y0}

167 Pathogen[ P03410] interacts with 2 human partners:{Q9H0Y0;P55157}

168 [Cluster 25]GO:0007042+P biological\_process [name] lysosomal lumen acidification [def] "Any process that reduces the pH of the lysosomal lumen, measured by the concentration of the hydrogen ion." [GOC

169 Pathogen[ P14079] interacts with 2 human partners:{O75503;Q9NWW5}

170 Pathogen[ P03410] interacts with 2 human partners:{Q9NWW5;O75503}

171 [Cluster 26]GO:0030260+P biological\_process [name] entry into host cell [def] "The invasion by an organism of a cell of its host organism. The host is defined as the



larger of the organisms involved in a symbiotic interaction." [GOC

172 Pathogen[ Q2Q067] interacts with 1 human partners:{P62937}

173 Pathogen[ P03346] interacts with 1 human partners:{P62937}

174 Pathogen[ Q85601] interacts with 1 human partners:{P62937}

175 Pathogen[ P14079] interacts with 1 human partners:{P62937}

176 Pathogen[ P03383] interacts with 1 human partners:{P62937}

177 Pathogen[ P03410] interacts with 1 human partners:{P62937}

178 Pathogen[ P14075] interacts with 1 human partners:{P62937}

179 Pathogen[ P0C206] interacts with 1 human partners:{P62937}

180 Pathogen[ P03363] interacts with 1 human partners:{P62937}

181 [Cluster 27]GO:0031987+P biological\_process [name] locomotion involved in locomotory behavior [def] "Self-propelled movement of a cell or organism from one location to another in a behavioral context\_ the aspect of locomotory behavior having to do with movement." [GOC

182 Pathogen[ P14079] interacts with 1 human partners:{Q9NWW5}

183 Pathogen[ P03410] interacts with 1 human partners:{Q9NWW5}

184 [Cluster 28]GO:0060806+P biological\_process [name] negative regulation of cell differentiation involved in embryonic placenta development [def] "Any process that decreases the rate, frequency or extent of cell differentiation that contributes to the progression of the placenta over time, from its initial condition to its mature state." [GOC

185 Pathogen[ P03346] interacts with 1 human partners:{O95863}

186 [Cluster 29]GO:0051923+P biological\_process [name] sulfation [def] "The addition of a sulfate group to a molecule." [http

187 Pathogen[ P0C214] interacts with 1 human partners:{Q06520}

188 Pathogen[ P03346] interacts with 1 human partners:{Q06520}

189 Pathogen[ P03363] interacts with 1 human partners:{Q06520}

190 [Cluster 30]GO:0018125+P biological\_process [name] peptidyl-cysteine methylation [def] "The methylation of peptidyl-cysteine to form peptidyl-S-methyl-L-cysteine." [RESID

191 Pathogen[ P03346] interacts with 1 human partners:{P20340}

192 [Cluster 31]GO:0007271+P biological\_process [name] synaptic transmission, cholinergic [def] "The process of communication from a neuron to a target (neuron, muscle, or secretory cell) across a synapse using the neurotransmitter acetylcholine." [GOC

193 Pathogen[ Q2Q067] interacts with 1 human partners:{P15559}

194 Pathogen[ P0C214] interacts with 1 human partners:{P15559}

195 Pathogen[ P03346] interacts with 1 human partners:{P15559}

196 Pathogen[ P14079] interacts with 1 human partners:{P15559}

197 Pathogen[ P03410] interacts with 1 human partners:{P15559}

198 Pathogen[ P14075] interacts with 1 human partners:{P15559}

199 Pathogen[ P0C206] interacts with 1 human partners:{P15559}

200 [Cluster 32]GO:0070816+P biological\_process [name] phosphorylation of RNA polymerase II C-terminal domain [def] "The process of introducing a phosphate group on to an amino acid residue in the C-terminal domain of RNA polymerase II. Typically, this occurs during the transcription cycle and results in production of an RNA polymerase II enzyme where the carboxy-terminal domain (CTD) of the largest subunit is extensively phosphorylated, often referred to as hyperphosphorylated or the II(0) form. Specific types of phosphorylation within the CTD are usually associated with specific regions of genes, though there are exceptions. The phosphorylation state regulates the association of specific complexes such as the capping enzyme or 3'-RNA processing machinery to the elongating RNA polymerase complex." [GOC

201 Pathogen[ P14079] interacts with 1 human partners:{Q14004}

202 Pathogen[ P03383] interacts with 1 human partners:{Q9NYV4}

203 Pathogen[ P14075] interacts with 1 human partners:{Q9NYV4}

204 [Cluster 33]GO:0032817+P biological\_process [name] regulation of natural killer cell proliferation [def] "Any process that modulates the frequency, rate or extent of natural killer cell proliferation." [GOC

205 Pathogen[ P03346] interacts with 1 human partners:{Q9Y2R2}

206 Pathogen[ P0C206] interacts with 1 human partners:{Q9Y2R2}

207 Pathogen[ P03363] interacts with 1 human partners:{Q9Y2R2}

208 [Cluster 34]GO:0035845+P biological\_process [name] photoreceptor cell outer segment organization [def] "A process that is carried out at the cellular level and results in the assembly, arrangement of constituent parts, or disassembly of the outer segment of a photoreceptor cell, a sensory cell that reacts to the presence of light. The outer segment of the photoreceptor cell contains the light-absorbing materials." [ISBN

209 Pathogen[ Q2Q067] interacts with 1 human partners:{Q9NS56}

210 Pathogen[ P0C214] interacts with 1 human partners:{Q9NS56}

211 Pathogen[ P03346] interacts with 2 human partners:{Q9NS56;Q8N157}

212 Pathogen[ Q85601] interacts with 1 human partners:{Q9NS56}

213 Pathogen[ P14079] interacts with 4 human partners:{Q8N157;P56715;Q9NS56;O15259}

214 Pathogen[ P03410] interacts with 3 human partners:{O15259;Q8N157;P56715}

215 Pathogen[ P0C206] interacts with 3 human partners:{Q9NS56;P56715;Q8N157}

216 Pathogen[ P03363] interacts with 3 human partners:{P56715;Q8N157;O15259}

217 [Cluster 35]GO:0044320+P biological\_process [name] cellular response to leptin stimulus [def] "Any process that results in a change in state or activity of a cell

(in terms of movement, secretion, enzyme production, gene expression, etc.) as a result of a leptin stimulus. Leptin is a hormone manufactured primarily in the adipocytes of white adipose tissue, and the level of circulating leptin is directly proportional to the total amount of fat in the body. It plays a key role in regulating energy intake and energy expenditure, including appetite and metabolism." [GOC

218 Pathogen[ Q2Q067] interacts with 1 human partners:{Q7Z2X4}

219 Pathogen[ P0C214] interacts with 1 human partners:{Q7Z2X4}

220 Pathogen[ P03346] interacts with 1 human partners:{Q7Z2X4}

221 Pathogen[ Q85601] interacts with 1 human partners:{Q7Z2X4}

222 Pathogen[ P14079] interacts with 2 human partners:{P10109;Q7Z2X4}

223 Pathogen[ P03410] interacts with 2 human partners:{Q7Z2X4;P10109}

224 Pathogen[ P0C206] interacts with 1 human partners:{Q7Z2X4}

225 [Cluster 36]GO:0045416+P biological\_process [name] positive regulation of interleukin-8 biosynthetic process [def] "Any process that activates or increases the frequency, rate or extent of the chemical reactions and pathways resulting in the formation of interleukin-8." [GOC

226 Pathogen[ Q2Q067] interacts with 1 human partners:{O95999}

227 Pathogen[ P0C214] interacts with 1 human partners:{O95999}

228 Pathogen[ P03346] interacts with 1 human partners:{O95999}

229 Pathogen[ Q85601] interacts with 1 human partners:{O95999}

230 Pathogen[ P14079] interacts with 1 human partners:{O95999}

231 Pathogen[ P03383] interacts with 1 human partners:{O95999}

232 Pathogen[ P03410] interacts with 1 human partners:{O95999}

233 Pathogen[ P14075] interacts with 1 human partners:{O95999}

234 Pathogen[ P0C206] interacts with 1 human partners:{O95999}

235 [Cluster 37]GO:0072513+P biological\_process [name] positive regulation of secondary heart field cardioblast proliferation [def] "Any process that activates or increases the frequency, rate or extent of cardioblast proliferation in the second heart field. A cardioblast is a cardiac precursor cell. It is a cell that has been committed to a cardiac fate, but will undergo more cell division rather than terminally differentiating." [GOC

236 Pathogen[ Q2Q067] interacts with 1 human partners:{Q99502}

237 Pathogen[ P0C214] interacts with 1 human partners:{Q99502}

238 Pathogen[ P03346] interacts with 2 human partners:{Q99502;Q15475}

239 Pathogen[ Q85601] interacts with 1 human partners:{Q99502}

240 Pathogen[ P14079] interacts with 1 human partners:{Q99502}

241 Pathogen[ P03410] interacts with 1 human partners:{Q99502}

242 Pathogen[ P14075] interacts with 1 human partners:{Q99502}

243 Pathogen[ P0C206] interacts with 1 human partners:{Q99502}

244 [Cluster 38]GO:0021952+P biological\_process [name] central nervous system projection neuron axonogenesis [def] "Generation of a long process of a CNS neuron, that carries efferent (outgoing) action potentials from the cell body towards target cells in a different central nervous system region." [GO\_REF

245 Pathogen[ P03346] interacts with 1 human partners:{O75592}

246 [Cluster 39]GO:001553+P biological\_process [name] luteinization [def] "The set of processes resulting in differentiation of theca and granulosa cells into luteal cells and in the formation of a corpus luteum after ovulation." [http

247 Pathogen[ P03346] interacts with 2 human partners:{Q9HB21;Q13285}

248 Pathogen[ Q85601] interacts with 1 human partners:{Q9HB21}

249 Pathogen[ P14079] interacts with 1 human partners:{Q9HB21}

250 Pathogen[ P03410] interacts with 1 human partners:{Q9HB21}

251 Pathogen[ P0C206] interacts with 1 human partners:{Q9HB21}

252 [Cluster 40]GO:1900275+P

253 Pathogen[ P0C214] interacts with 1 human partners:{Q96G01}

254 Pathogen[ P03346] interacts with 1 human partners:{Q96G01}

255 Pathogen[ Q85601] interacts with 1 human partners:{Q96G01}

256 Pathogen[ P14079] interacts with 1 human partners:{Q96G01}

257 Pathogen[ P03410] interacts with 1 human partners:{Q96G01}

258 Pathogen[ P0C206] interacts with 1 human partners:{Q96G01}

259 [Cluster 41]GO:0071803+P biological\_process [name] positive regulation of podosome assembly [def] "Any process that activates or increases the rate or extent of podosome assembly." [GOC

260 Pathogen[ P14079] interacts with 1 human partners:{P04141}

261 Pathogen[ P03410] interacts with 1 human partners:{P04141}

262 [Cluster 42]GO:0060046+P biological\_process [name] regulation of acrosome reaction [def] "Any process that modulates the frequency, rate or extent of the acrosome reaction." [GOC

263 Pathogen[ P0C214] interacts with 1 human partners:{Q9UK55}

264 [Cluster 43]GO:0070050+P biological\_process [name] neuron homeostasis [def] "The cellular homeostatic process that preserves a neuron in a stable, differentiated functional and structural state." [GOC

265 Pathogen[ P0C214] interacts with 1 human partners:{Q96C11}

266 Pathogen[ P14079] interacts with 1 human partners:{Q96C11}

267 Pathogen[ P03410] interacts with 1 human partners:{Q96C11}

268 Pathogen[ P14075] interacts with 1 human partners:{Q96C11}

269 Pathogen[ P0C206] interacts with 1 human partners:{Q96C11}

270 [Cluster 44]GO:0048247+P biological\_process [name] lymphocyte chemotaxis [def] "The directed movement of a lymphocyte in response to an external stimulus." [GOC]

271 Pathogen[ P14079] interacts with 1 human partners:{P0DJ18}

272 Pathogen[ P03410] interacts with 1 human partners:{P0DJ18}

273 [Cluster 45]GO:0046339+P biological\_process [name] diacylglycerol metabolic process [def] "The chemical reactions and pathways involving diacylglycerol, a glycerol molecule substituted on the 1 and 2 hydroxyl groups with long chain fatty acyl residues. DAG is a normal intermediate in the biosynthesis of phosphatidyl phospholipids and is released from them by phospholipase C activity. DAG from phosphatidyl inositol polyphosphates is important in signal transduction." [CHEBI]

274 Pathogen[ P14079] interacts with 1 human partners:{Q32NB8}

275 [Cluster 46]GO:0090045+P biological\_process [name] positive regulation of deacetylase activity [def] "Any process that activates or increases the frequency, rate or extent of deacetylase activity, the catalysis of the hydrolysis of an acetyl group or groups from a substrate molecule." [GOC]

276 Pathogen[ Q2Q067] interacts with 1 human partners:{P49354}

277 Pathogen[ P0C214] interacts with 1 human partners:{P49354}

278 Pathogen[ P03346] interacts with 1 human partners:{P49354}

279 Pathogen[ Q85601] interacts with 1 human partners:{P49354}

280 Pathogen[ P14079] interacts with 2 human partners:{P49354;P45983}

281 Pathogen[ P03410] interacts with 1 human partners:{P49354}

282 Pathogen[ P0C206] interacts with 1 human partners:{P49354}

283 Pathogen[ P03363] interacts with 1 human partners:{P49354}

284 [Cluster 47]GO:0006747+P biological\_process [name] FAD biosynthetic process [def] "The chemical reactions and pathways resulting in the formation of FAD, the oxidized form of flavin-adenine dinucleotide." [CHEBI]

285 Pathogen[ P0C214] interacts with 1 human partners:{Q8NFF5}

286 Pathogen[ P14079] interacts with 1 human partners:{Q8NFF5}

287 Pathogen[ P03410] interacts with 1 human partners:{Q8NFF5}

288 [Cluster 48]GO:0090181+P biological\_process [name] regulation of cholesterol metabolic process [def] "Any process that modulates the rate, frequency, or extent of cholesterol metabolism, the chemical reactions and pathways involving cholesterol, cholest-5-en-3 beta-ol, the principal sterol of vertebrates and the precursor of many steroids, including bile acids and steroid hormones." [GOC]

289 Pathogen[ P14079] interacts with 1 human partners:{Q96S06}

290 Pathogen[ P03410] interacts with 1 human partners:{Q96S06}

291 Pathogen[ P0C206] interacts with 1 human partners:{Q96S06}

292 [Cluster 49]GO:0050869+P biological\_process [name] negative regulation of B cell activation [def] "Any process that stops, prevents, or reduces the frequency, rate or extent of B cell activation." [GOC]

293 Pathogen[ P03346] interacts with 2 human partners:{Q9H6Q3;Q9NSI8}

294 Pathogen[ Q85601] interacts with 1 human partners:{Q9H6Q3}

295 Pathogen[ P14079] interacts with 1 human partners:{Q9H6Q3}

296 Pathogen[ P03410] interacts with 1 human partners:{Q9H6Q3}

297 Pathogen[ P0C206] interacts with 1 human partners:{Q9H6Q3}

298 Pathogen[ P03363] interacts with 2 human partners:{Q9NSI8;Q9H6Q3}

299 [Cluster 50]GO:0021831+P biological\_process [name] embryonic olfactory bulb interneuron precursor migration [def] "The directed movement of individual interneuron precursors during the embryonic development of the olfactory bulb." [GO\_REF]

300 Pathogen[ Q2Q067] interacts with 1 human partners:{P63000}

301 Pathogen[ P0C214] interacts with 1 human partners:{P63000}

302 Pathogen[ P03346] interacts with 2 human partners:{Q96QS3;P63000}

303 Pathogen[ Q85601] interacts with 1 human partners:{P63000}

304 Pathogen[ P03383] interacts with 1 human partners:{P63000}

305 Pathogen[ P03410] interacts with 1 human partners:{P63000}

306 Pathogen[ P14075] interacts with 1 human partners:{P63000}

307 Pathogen[ P0C206] interacts with 1 human partners:{P63000}

308 Pathogen[ P03363] interacts with 2 human partners:{P63000;Q96QS3}

309 [Cluster 51]GO:0032913+P biological\_process [name] negative regulation of transforming growth factor beta3 production [def] "Any process that stops, prevents, or reduces the frequency, rate, or extent of production of transforming growth factor-beta3." [GOC]

310 Pathogen[ Q2Q067] interacts with 1 human partners:{P25063}

311 Pathogen[ P0C214] interacts with 1 human partners:{P25063}

312 Pathogen[ P03346] interacts with 1 human partners:{P25063}

313 Pathogen[ P14079] interacts with 1 human partners:{P25063}

314 Pathogen[ P03383] interacts with 1 human partners:{P25063}

315 Pathogen[ P03410] interacts with 1 human partners:{P25063}

316 Pathogen[ P14075] interacts with 1 human partners:{P25063}

317 Pathogen[ P0C206] interacts with 1 human partners:{P25063}

318 [Cluster 52]GO:0044091+P biological\_process [name] membrane biogenesis [def] "A cellular process that results in the biosynthesis of constituent macromolecules, assembly, and arrangement of constituent parts of a membrane." [GOC]

319 Pathogen[ P03346] interacts with 1 human partners:{Q96A65}

320 Pathogen[ Q85601] interacts with 1 human partners:{Q96A65}

321 Pathogen[ P14079] interacts with 1 human partners:{Q96A65}

322 Pathogen[ P03410] interacts with 1 human partners:{Q96A65}

323 Pathogen[ P0C206] interacts with 1 human partners:{Q96A65}

324 Pathogen[ P03363] interacts with 1 human partners:{Q96A65}

325 [Cluster 53]GO:0042640+P biological\_process [name] anagen [def] "The growth phase of the hair cycle. Lasts, for example, about 3 to 6 years for human scalp hair." [PMID

326 Pathogen[ Q2Q067] interacts with 2 human partners:{P31749;P35548}

327 Pathogen[ P0C214] interacts with 2 human partners:{P35548;P31749}

328 Pathogen[ P03346] interacts with 2 human partners:{P35548;P31749}

329 Pathogen[ Q85601] interacts with 2 human partners:{P31749;P35548}

330 Pathogen[ P03383] interacts with 2 human partners:{P31749;P35548}

331 Pathogen[ P03410] interacts with 2 human partners:{P31749;P35548}

332 Pathogen[ P14075] interacts with 2 human partners:{P35548;P31749}

333 Pathogen[ P0C206] interacts with 2 human partners:{P31749;P35548}

334 Pathogen[ P03363] interacts with 2 human partners:{P35548;P31749}

335 [Cluster 54]GO:2001294+P

336 Pathogen[ P14079] interacts with 1 human partners:{O95822}

337 Pathogen[ P03410] interacts with 1 human partners:{O95822}

338 [Cluster 55]GO:0010822+P biological\_process [name] positive regulation of mitochondrion organization [def] "Any process that increases the frequency, rate or extent of a process involved in the formation, arrangement of constituent parts, or disassembly of a mitochondrion." [GOC

339 Pathogen[ P0C214] interacts with 1 human partners:{Q8TDB4}

340 Pathogen[ P03346] interacts with 1 human partners:{Q8TDB4}

341 Pathogen[ Q85601] interacts with 1 human partners:{Q8TDB4}

342 Pathogen[ P14079] interacts with 1 human partners:{Q8TDB4}

343 Pathogen[ P03383] interacts with 1 human partners:{Q8TDB4}

344 Pathogen[ P03410] interacts with 1 human partners:{Q8TDB4}

345 Pathogen[ P14075] interacts with 1 human partners:{Q8TDB4}

346 Pathogen[ P0C206] interacts with 1 human partners:{Q8TDB4}

347 [Cluster 56]GO:0030042+P biological\_process [name] actin filament depolymerization [def] "Disassembly of actin filaments by the removal of actin monomers from a filament." [GOC

348 Pathogen[ P03346] interacts with 1 human partners:{Q8TDZ2}

349 Pathogen[ P14079] interacts with 2 human partners:{P09327;Q8TDZ2}

350 Pathogen[ P03410] interacts with 1 human partners:{Q8TDZ2}

351 Pathogen[ P0C206] interacts with 1 human partners:{Q8TDZ2}

352 [Cluster 57]GO:0032000+P biological\_process [name] positive regulation of fatty acid beta-oxidation [def] "Any process that activates or increases the frequency, rate or extent of fatty acid beta-oxidation." [GOC

353 Pathogen[ P03346] interacts with 1 human partners:{P07148}

354 Pathogen[ P14079] interacts with 1 human partners:{P31751}

355 [Cluster 58]GO:0009972+P biological\_process [name] cytidine deamination [def] "The removal of amino group in the presence of water." [GOC

356 Pathogen[ Q2Q067] interacts with 2 human partners:{Q9GZX7;Q9HC16}

357 Pathogen[ P0C214] interacts with 2 human partners:{Q9HC16;Q9GZX7}

358 Pathogen[ Q85601] interacts with 2 human partners:{Q9HC16;Q9GZX7}

359 Pathogen[ P14079] interacts with 4 human partners:{P41238;P31941;Q9HC16;Q9GZX7}

360 Pathogen[ P03410] interacts with 5 human partners:{P41238;Q9HC16;Q9GZX7;P31941;Q6NTF7}

361 Pathogen[ P0C206] interacts with 5 human partners:{Q9GZX7;P31941;Q6NTF7;Q9HC16;P41238}

362 [Cluster 59]GO:0030212+P biological\_process [name] hyaluronan metabolic process [def] "The chemical reactions and pathways involving hyaluronan, the naturally occurring anionic form of hyaluronic acid, any member of a group of glycosaminoglycans, the repeat units of which consist of beta-1,4 linked D-glucuronyl-beta-(1,3)-N-acetyl-D-glucosamine." [GOC

363 Pathogen[ P0C214] interacts with 1 human partners:{O75330}

364 Pathogen[ P03346] interacts with 1 human partners:{O75330}

365 Pathogen[ Q85601] interacts with 1 human partners:{O75330}

366 Pathogen[ P14079] interacts with 1 human partners:{O75330}

367 Pathogen[ P03410] interacts with 1 human partners:{O75330}

368 Pathogen[ P14075] interacts with 1 human partners:{O75330}

369 Pathogen[ P0C206] interacts with 1 human partners:{O75330}

370 [Cluster 60]GO:0007205+P biological\_process [name] activation of protein kinase C activity by G-protein coupled receptor protein signaling pathway [def] "The initiation of the activity of the inactive enzyme protein kinase C as the result of a series of molecular signals generated as a consequence of a G-protein coupled receptor binding to its physiological ligand." [GOC

371 Pathogen[ P03346] interacts with 3 human partners:{Q49MI3;Q8TEW0;Q9NRD5}

372 Pathogen[ Q85601] interacts with 1 human partners:{P17677}

373 Pathogen[ P14079] interacts with 3 human partners:{P17677;Q8TEW0;O43612}

374 Pathogen[ P03410] interacts with 4 human partners:{O43612;Q9NRD5;P17677;Q8TEW0}

375 Pathogen[ P0C206] interacts with 3 human partners:{P17677;Q8TEW0;Q9NRD5}

376 Pathogen[ P03363] interacts with 1 human partners:{Q49MI3}

377 [Cluster 61]GO:0021530+P biological\_process [name] spinal cord oligodendrocyte cell fate specification [def] "The process in which a cell becomes capable of

differentiating autonomously into an oligodendrocyte in an environment that is neutral with respect to the developmental pathway." [GO\_REF

378 Pathogen[ P03346] interacts with 2 human partners:{O95096;Q13516}

379 Pathogen[ P03363] interacts with 1 human partners:{Q13516}

380 [Cluster 62]GO:0002021+P biological\_process [name] response to dietary excess [def] "The physiological process in which dietary excess is sensed by the central nervous system, resulting in a reduction in food intake and increased energy expenditure." [PMID

381 Pathogen[ P0C214] interacts with 1 human partners:{Q9BQI5}

382 Pathogen[ P03346] interacts with 1 human partners:{Q9BQI5}

383 Pathogen[ P14079] interacts with 2 human partners:{Q9BQI5;P81277}

384 Pathogen[ P03383] interacts with 1 human partners:{Q9BQI5}

385 Pathogen[ P03410] interacts with 2 human partners:{Q9BQI5;P81277}

386 Pathogen[ P14075] interacts with 1 human partners:{Q9BQI5}

387 Pathogen[ P0C206] interacts with 1 human partners:{Q9BQI5}

388 Pathogen[ P03363] interacts with 1 human partners:{Q9BQI5}

389 [Cluster 63]GO:0035270+P biological\_process [name] endocrine system development [def] "Progression of the endocrine system over time, from its formation to a mature structure. The endocrine system is a system of hormones and ductless glands, where the glands release hormones directly into the blood, lymph or other intercellular fluid, and the hormones circulate within the body to affect distant organs. The major glands that make up the human endocrine system are the hypothalamus, pituitary, thyroid, parathyroids, adrenals, pineal body, and the reproductive glands which include the ovaries and testes." [GOC

390 Pathogen[ P03346] interacts with 1 human partners:{Q01101}

391 [Cluster 64]GO:0050890+P biological\_process [name] cognition [def] "The operation of the mind by which an organism becomes aware of objects of thought or perception\_ it includes the mental activities associated with thinking, learning, and memory." [http

392 Pathogen[ Q2Q067] interacts with 1 human partners:{P49639}

393 Pathogen[ P0C214] interacts with 1 human partners:{P49639}

394 Pathogen[ P03346] interacts with 2 human partners:{P49639;Q9P2D1}

395 Pathogen[ Q85601] interacts with 2 human partners:{P49639;Q9P2D1}

396 Pathogen[ P14079] interacts with 2 human partners:{Q9P2D1;P49639}

397 Pathogen[ P03383] interacts with 1 human partners:{P49639}

398 Pathogen[ P03410] interacts with 2 human partners:{Q9P2D1;P49639}

399 Pathogen[ P0C206] interacts with 2 human partners:{P49639;Q9P2D1}

400 Pathogen[ P03363] interacts with 1 human partners:{P49639}

401 [Cluster 65]GO:0021682+P biological\_process [name] nerve maturation [def] "A developmental process, independent of morphogenetic (shape) change, that is required for a nerve to attain its fully functional state." [GO\_REF

402 Pathogen[ P14079] interacts with 1 human partners:{Q14118}

403 Pathogen[ P03410] interacts with 1 human partners:{Q14118}

404 [Cluster 66]GO:0044208+P biological\_process [name] 'de novo' AMP biosynthetic process [def] "The chemical reactions and pathways resulting in the formation of adenosine monophosphate (AMP) from inosine 5'-monophosphate (IMP)." [GOC

405 Pathogen[ P0C214] interacts with 1 human partners:{P30566}

406 Pathogen[ P03410] interacts with 1 human partners:{P30566}

407 [Cluster 67]GO:0007060+P biological\_process [name] male meiosis chromosome segregation [def] "The cell cycle process in which genetic material, in the form of chromosomes, is organized and then physically separated and apportioned to two or more sets during the meiotic cell cycle in a male." [GOC

408 Pathogen[ Q2Q067] interacts with 1 human partners:{Q8IYF3}

409 Pathogen[ P0C214] interacts with 2 human partners:{P40692;Q8IYF3}

410 Pathogen[ P03346] interacts with 1 human partners:{Q8IYF3}

411 Pathogen[ Q85601] interacts with 2 human partners:{Q8IYF3;P40692}

412 Pathogen[ P14079] interacts with 2 human partners:{P40692;Q8IYF3}

413 Pathogen[ P03383] interacts with 1 human partners:{Q8IYF3}

414 Pathogen[ P03410] interacts with 2 human partners:{P40692;Q8IYF3}

415 Pathogen[ P14075] interacts with 1 human partners:{Q8IYF3}

416 Pathogen[ P0C206] interacts with 2 human partners:{P40692;Q8IYF3}

417 [Cluster 68]GO:0035315+P biological\_process [name] hair cell differentiation [def] "The process in which a relatively unspecialized cell acquires specialized features of a hair cell." [GOC

418 Pathogen[ Q85601] interacts with 1 human partners:{P19447}

419 Pathogen[ P14079] interacts with 1 human partners:{P19447}

420 Pathogen[ P03410] interacts with 1 human partners:{P19447}

421 Pathogen[ P0C206] interacts with 1 human partners:{P19447}

422 [Cluster 69]GO:0042668+P biological\_process [name] auditory receptor cell fate determination [def] "The process in which a cell becomes capable of differentiating autonomously into an auditory hair cell regardless of its environment\_ upon determination, the cell fate cannot be reversed." [GOC

423 Pathogen[ P03346] interacts with 1 human partners:{Q92858}

424 [Cluster 70]GO:1900108+P

425 Pathogen[ P0C214] interacts with 1 human partners:{Q5SW24}

426 Pathogen[ Q85601] interacts with 1 human partners:{Q5SW24}

427 Pathogen[ P14079] interacts with 1 human partners:{Q5SW24}

428 Pathogen[ P03410] interacts with 1 human partners:{Q5SW24}

429 Pathogen[ P0C206] interacts with 1 human partners:{Q5SW24}

430 [Cluster 71]GO:0045654+P biological\_process [name] positive regulation of megakaryocyte differentiation [def] "Any process that activates or increases the frequency, rate or extent of megakaryocyte differentiation." [GOC

431 Pathogen[ Q2Q067] interacts with 1 human partners:{P23769}

432 Pathogen[ P0C214] interacts with 1 human partners:{P23769}

433 Pathogen[ P03346] interacts with 1 human partners:{P23769}

434 Pathogen[ Q85601] interacts with 1 human partners:{P23769}

435 Pathogen[ P14079] interacts with 2 human partners:{Q9Y6U3;P23769}

436 Pathogen[ P03383] interacts with 1 human partners:{P23769}

437 Pathogen[ P03410] interacts with 2 human partners:{Q9Y6U3;P23769}

438 Pathogen[ P14075] interacts with 1 human partners:{P23769}

439 Pathogen[ P0C206] interacts with 1 human partners:{P23769}

440 [Cluster 72]GO:0070781+P biological\_process [name] response to biotin [def] "Any process that results in a change in state or activity of a cell or an organism (in terms of movement, secretion, enzyme production, gene expression, etc.) as a result of a biotin stimulus." [GOC

441 Pathogen[ P0C214] interacts with 2 human partners:{P00480;P50747}

442 Pathogen[ Q85601] interacts with 1 human partners:{P00480}

443 Pathogen[ P14079] interacts with 1 human partners:{P00480}

444 Pathogen[ P03410] interacts with 1 human partners:{P00480}

445 Pathogen[ P0C206] interacts with 1 human partners:{P00480}

446 [Cluster 73]GO:0003351+P biological\_process [name] epithelial cilium movement [def] "The directed, self-propelled movement of a cilium of an epithelial cell. This movement is usually coordinated between many epithelial cells, and serves to move fluid." [GOC

447 Pathogen[ P14079] interacts with 3 human partners:{Q9BVM2;Q95922;Q9UI46}

448 Pathogen[ P03410] interacts with 3 human partners:{Q9UI46;Q95922;Q9BVM2}

449 Pathogen[ P14075] interacts with 1 human partners:{Q9BVM2}

450 Pathogen[ P0C206] interacts with 2 human partners:{Q9BVM2;Q95922}

451 Pathogen[ P03363] interacts with 2 human partners:{Q95922;Q9UI46}

452 [Cluster 74]GO:0042074+P biological\_process [name] cell migration involved in gastrulation [def] "The migration of individual cells within the blastocyst to help establish the multi-layered body plan of the organism (gastrulation). For example, the migration of cells from the surface to the interior of the embryo (ingression)." [GOC

453 Pathogen[ P03346] interacts with 2 human partners:{Q9H2W2;O75593}

454 Pathogen[ P03363] interacts with 1 human partners:{Q9H2W2}

455 [Cluster 75]GO:0007588+P biological\_process [name] excretion [def] "The elimination by an organism of the waste products that arise as a result of metabolic activity. These products include water, carbon dioxide (CO2), and nitrogenous compounds." [ISBN

456 Pathogen[ Q2Q067] interacts with 2 human partners:{Q96PU5;O94916}

457 Pathogen[ P0C214] interacts with 2 human partners:{O94916;Q96PU5}

458 Pathogen[ P03346] interacts with 3 human partners:{Q96PU5;O94916;Q9NP85}

459 Pathogen[ Q85601] interacts with 2 human partners:{Q96PU5;O94916}

460 Pathogen[ P14079] interacts with 3 human partners:{Q9NP85;O15259;O94916}

461 Pathogen[ P03410] interacts with 3 human partners:{O94916;O15259;Q9NP85}

462 Pathogen[ P0C206] interacts with 3 human partners:{Q96PU5;O94916;Q9NP85}

463 Pathogen[ P03363] interacts with 3 human partners:{Q96PU5;O94916;O15259}

464 [Cluster 76]GO:0072110+P biological\_process [name] glomerular mesangial cell proliferation [def] "The multiplication or reproduction of glomerular mesangial cells, resulting in the expansion of the population." [GOC

465 Pathogen[ Q2Q067] interacts with 1 human partners:{P18146}

466 Pathogen[ P0C214] interacts with 1 human partners:{P18146}

467 Pathogen[ P03346] interacts with 1 human partners:{P18146}

468 Pathogen[ Q85601] interacts with 1 human partners:{P18146}

469 Pathogen[ P03383] interacts with 1 human partners:{P18146}

470 Pathogen[ P03410] interacts with 1 human partners:{P18146}

471 Pathogen[ P14075] interacts with 1 human partners:{P18146}

472 Pathogen[ P0C206] interacts with 1 human partners:{P18146}

473 Pathogen[ P03363] interacts with 1 human partners:{P18146}

474 [Cluster 77]GO:0006167+P biological\_process [name] AMP biosynthetic process [def] "The chemical reactions and pathways resulting in the formation of AMP, adenosine monophosphate." [GOC

475 Pathogen[ P0C214] interacts with 1 human partners:{P30566}

476 Pathogen[ P03410] interacts with 1 human partners:{P30566}

477 [Cluster 78]GO:0002074+P biological\_process [name] extraocular skeletal muscle development [def] "The process whose specific outcome is the progression of the extraocular skeletal muscle over time, from its formation to the mature structure. The extraocular muscle is derived from cranial mesoderm and controls eye movements. The muscle begins its development with the differentiation of the muscle cells and ends with the mature muscle. An example of this process is found in Mus musculus." [GOC

478 Pathogen[ P03346] interacts with 1 human partners:{P58012}

479 [Cluster 79]GO:0071338+P biological\_process [name] positive regulation of hair follicle cell proliferation [def] "Any process that activates or increases the rate or

extent of hair follicle cell proliferation." [GOC

480 Pathogen[ Q2Q067] interacts with 1 human partners:{P60953}

481 Pathogen[ POC214] interacts with 1 human partners:{P60953}

482 Pathogen[ P03346] interacts with 1 human partners:{P60953}

483 Pathogen[ Q85601] interacts with 1 human partners:{P60953}

484 Pathogen[ P03383] interacts with 1 human partners:{P60953}

485 Pathogen[ P03410] interacts with 1 human partners:{P60953}

486 Pathogen[ P14075] interacts with 1 human partners:{P60953}

487 Pathogen[ POC206] interacts with 1 human partners:{P60953}

488 Pathogen[ P03363] interacts with 1 human partners:{P60953}

489 [Cluster 80]GO:0019724+P biological\_process [name] B cell mediated immunity [def]  
 "Any process involved with the carrying out of an immune response by a B cell, through, for instance, the production of antibodies or cytokines, or antigen presentation to T cells." [GO\_REF

490 Pathogen[ P03346] interacts with 1 human partners:{Q9H6Q3}

491 Pathogen[ Q85601] interacts with 1 human partners:{Q9H6Q3}

492 Pathogen[ P14079] interacts with 1 human partners:{Q9H6Q3}

493 Pathogen[ P03410] interacts with 1 human partners:{Q9H6Q3}

494 Pathogen[ POC206] interacts with 1 human partners:{Q9H6Q3}

495 Pathogen[ P03363] interacts with 1 human partners:{Q9H6Q3}

496 [Cluster 81]GO:0006311+P biological\_process [name] meiotic gene conversion [def]  
 "The cell cycle process in which genetic information is transferred from one helix to another. It often occurs in association with general genetic recombination events, and is believed to be a straightforward consequence of the mechanisms of general recombination and DNA repair. For example, meiosis might yield three copies of the maternal version of an allele and only one copy of the paternal allele, indicating that one of the two copies of the paternal allele has been changed to a copy of the maternal allele." [ISBN

497 Pathogen[ POC214] interacts with 1 human partners:{Q9NQV7}

498 Pathogen[ P03346] interacts with 1 human partners:{Q9NQV7}

499 Pathogen[ Q85601] interacts with 1 human partners:{Q9NQV7}

500 Pathogen[ P14079] interacts with 1 human partners:{Q9NQV7}

501 Pathogen[ P03410] interacts with 1 human partners:{Q9NQV7}

502 Pathogen[ POC206] interacts with 1 human partners:{Q9NQV7}

503 [Cluster 82]GO:0007100+P biological\_process [name] mitotic centrosome separation [def]  
 "Separation of duplicated centrosome components at the beginning of mitosis. The centriole pair within each centrosome becomes part of a separate microtubule organizing center that nucleates a radial array of microtubules called an aster. The two asters move to opposite sides of the nucleus to form the two poles of the mitotic spindle." [ISBN

504 Pathogen[ P14079] interacts with 1 human partners:{O15066}

505 Pathogen[ P03363] interacts with 1 human partners:{O15066}

506 [Cluster 83]GO:0047484+P biological\_process [name] regulation of response to osmotic stress [def]  
 "Any process that modulates the rate or extent of the response to osmotic stress." [GOC

507 Pathogen[ P03410] interacts with 1 human partners:{Q15049}

508 [Cluster 84]GO:0042340+P biological\_process [name] keratan sulfate catabolic process [def]  
 "The chemical reactions and pathways resulting in the breakdown of keratan sulfate, a glycosaminoglycan with repeat units consisting of beta-1,4-linked D-galactopyranosyl-beta-(1,4)-N-acetyl-D-glucosamine 6-sulfate and with variable amounts of fucose, sialic acid and mannose units\_ keratan sulfate chains are covalently linked by a glycosidic attachment through the trisaccharide galactosyl-galactosyl-xylose to peptidyl-threonine or serine residues." [GOC

509 Pathogen[ POC214] interacts with 1 human partners:{P16278}

510 Pathogen[ P03346] interacts with 1 human partners:{P16278}

511 Pathogen[ P14079] interacts with 1 human partners:{P16278}

512 Pathogen[ P03410] interacts with 1 human partners:{P16278}

513 Pathogen[ POC206] interacts with 1 human partners:{P16278}

514 [Cluster 85]GO:0000717+P biological\_process [name] nucleotide-excision repair, DNA duplex unwinding [def]  
 "The unwinding, or local denaturation, of the DNA duplex to create a bubble around the site of the DNA damage." [GOC

515 Pathogen[ Q85601] interacts with 1 human partners:{P19447}

516 Pathogen[ P14079] interacts with 1 human partners:{P19447}

517 Pathogen[ P03410] interacts with 1 human partners:{P19447}

518 Pathogen[ POC206] interacts with 1 human partners:{P19447}

519 [Cluster 86]GO:0070682+P biological\_process [name] proteasome regulatory particle assembly [def]  
 "The aggregation, arrangement and bonding together of a mature, active proteasome regulatory particle complex." [GOC

520 Pathogen[ Q2Q067] interacts with 3 human partners:{O75832;O00233;Q16401}

521 Pathogen[ POC214] interacts with 3 human partners:{O75832;O00233;Q16401}

522 Pathogen[ P03346] interacts with 3 human partners:{Q16401;O75832;O00233}

523 Pathogen[ Q85601] interacts with 3 human partners:{O75832;O00233;Q16401}

524 Pathogen[ P14079] interacts with 3 human partners:{O75832;O00233;Q16401}

525 Pathogen[ P03383] interacts with 3 human partners:{O00233;O75832;Q16401}

526 Pathogen[ P03410] interacts with 3 human partners:{Q16401;O00233;O75832}

527 Pathogen[ P14075] interacts with 3 human partners:{O75832;O00233;Q16401}

528 Pathogen[ POC206] interacts with 3 human partners:{075832;000233;Q16401}

529 [Cluster 87]GO:0006551+P biological\_process [name] leucine metabolic process  
[def] "The chemical reactions and pathways involving leucine, 2-amino-4-methylpentanoic acid." [GOC

530 Pathogen[ POC214] interacts with 1 human partners:{015382}

531 Pathogen[ Q85601] interacts with 1 human partners:{015382}

532 Pathogen[ P14079] interacts with 1 human partners:{015382}

533 Pathogen[ P03410] interacts with 1 human partners:{015382}

534 Pathogen[ POC206] interacts with 1 human partners:{015382}

535 [Cluster 88]GO:0071286+P biological\_process [name] cellular response to magnesium ion [def] "Any process that results in a change in state or activity of a cell (in terms of movement, secretion, enzyme production, gene expression, etc.) as a result of a magnesium ion stimulus." [GOC

536 Pathogen[ Q2Q067] interacts with 1 human partners:{P09467}

537 Pathogen[ POC214] interacts with 1 human partners:{P09467}

538 Pathogen[ P03346] interacts with 1 human partners:{P09467}

539 Pathogen[ Q85601] interacts with 1 human partners:{P09467}

540 Pathogen[ P14079] interacts with 1 human partners:{P09467}

541 Pathogen[ P03383] interacts with 1 human partners:{P09467}

542 Pathogen[ P03410] interacts with 1 human partners:{P09467}

543 Pathogen[ P14075] interacts with 1 human partners:{P09467}

544 Pathogen[ POC206] interacts with 1 human partners:{P09467}

545 [Cluster 89]GO:0031017+P biological\_process [name] exocrine pancreas development  
[def] "The process whose specific outcome is the progression of the exocrine pancreas over time, from its formation to the mature structure. The exocrine pancreas produces and store zymogens of digestive enzymes, such as chymotrypsinogen and trypsinogen in the acinar cells." [GOC

546 Pathogen[ Q2Q067] interacts with 1 human partners:{P17861}

547 Pathogen[ POC214] interacts with 1 human partners:{P17861}

548 Pathogen[ P03346] interacts with 2 human partners:{Q7RTS3;P17861}

549 Pathogen[ Q85601] interacts with 1 human partners:{P17861}

550 Pathogen[ P03383] interacts with 1 human partners:{P17861}

551 Pathogen[ P03410] interacts with 1 human partners:{P17861}

552 Pathogen[ P14075] interacts with 1 human partners:{P17861}

553 Pathogen[ POC206] interacts with 1 human partners:{P17861}

554 Pathogen[ P03363] interacts with 2 human partners:{Q7RTS3;P17861}

555 [Cluster 90]GO:0031283+P biological\_process [name] negative regulation of guanylate cyclase activity [def] "Any process that stops, prevents, or reduces the frequency, rate or extent of guanylate cyclase activity." [GOC

556 Pathogen[ P03346] interacts with 1 human partners:{Q86UT5}

557 Pathogen[ P14079] interacts with 1 human partners:{Q86UT5}

558 Pathogen[ P03410] interacts with 1 human partners:{Q86UT5}

559 Pathogen[ POC206] interacts with 1 human partners:{Q86UT5}

560 Pathogen[ P03363] interacts with 1 human partners:{Q86UT5}

561 [Cluster 91]GO:0042438+P biological\_process [name] melanin biosynthetic process  
[def] "The chemical reactions and pathways resulting in the formation of melanins, pigments largely of animal origin. High molecular weight polymers of indole quinone, they are irregular polymeric structures and are divided into three groups

562 Pathogen[ Q2Q067] interacts with 1 human partners:{Q99966}

563 Pathogen[ POC214] interacts with 1 human partners:{Q99966}

564 Pathogen[ P03346] interacts with 1 human partners:{Q99966}

565 Pathogen[ Q85601] interacts with 1 human partners:{Q99966}

566 Pathogen[ P14079] interacts with 1 human partners:{Q99966}

567 Pathogen[ P03410] interacts with 1 human partners:{Q99966}

568 Pathogen[ POC206] interacts with 1 human partners:{Q99966}

569 [Cluster 92]GO:0042987+P biological\_process [name] amyloid precursor protein catabolic process [def] "The chemical reactions and pathways resulting in the breakdown of amyloid precursor protein (APP), the precursor of beta-amyloid, a glycoprotein associated with Alzheimer's disease." [GOC

570 Pathogen[ P14079] interacts with 2 human partners:{Q92542;Q9NZ42}

571 Pathogen[ P03410] interacts with 2 human partners:{Q9NZ42;Q92542}

572 Pathogen[ POC206] interacts with 2 human partners:{Q9NZ42;Q92542}

573 [Cluster 93]GO:0006465+P biological\_process [name] signal peptide processing  
[def] "The proteolytic removal of a signal peptide from a protein during or after transport to a specific location in the cell." [GOC

574 Pathogen[ P14079] interacts with 1 human partners:{075503}

575 Pathogen[ P03410] interacts with 1 human partners:{075503}

576 [Cluster 94]GO:0006102+P biological\_process [name] isocitrate metabolic process  
[def] "The chemical reactions and pathways involving isocitrate, the anion of isocitric acid, 1-hydroxy-1,2,3-propanetricarboxylic acid. Isocitrate is an important intermediate in the TCA cycle and the glycoxylate cycle." [ISBN

577 Pathogen[ POC214] interacts with 6 human partners:{075874;P48735;Q99798;P50213;O43837;P51553}

578 Pathogen[ POC206] interacts with 2 human partners:{P50213;Q99798}

579 [Cluster 95]GO:0060708+P biological\_process [name] spongiotrophoblast differentiation [def] "The process in which a relatively unspecialized cell of the



ectoplacental cone acquires specialized features of a spongiotrophoblast of the placenta. A spongiotrophoblast cell is a basophilic cell." [GOC

580 Pathogen[ P03346] interacts with 1 human partners:{Q99929}

581 Pathogen[ P03363] interacts with 1 human partners:{Q99929}

582 [Cluster 96]GO:0005976+P biological\_process [name] polysaccharide metabolic process [def] "The chemical reactions and pathways involving polysaccharides, a polymer of more than 20 monosaccharide residues joined by glycosidic linkages." [ISBN

583 Pathogen[ P0C214] interacts with 2 human partners:{Q93100;P46020}

584 Pathogen[ P14079] interacts with 2 human partners:{Q93100;P46020}

585 Pathogen[ P03410] interacts with 2 human partners:{P46020;Q93100}

586 Pathogen[ P14075] interacts with 1 human partners:{Q93100}

587 Pathogen[ P0C206] interacts with 2 human partners:{Q93100;P46020}

588 [Cluster 97]GO:0039003+P biological\_process [name] pronephric field specification [def] "The process in which regions of the embryo are delineated into the area in which the pronephric kidney will develop." [GOC

589 Pathogen[ P03346] interacts with 1 human partners:{Q06710}

590 [Cluster 98]GO:0044210+P biological\_process [name] 'de novo' CTP biosynthetic process [def] "The chemical reactions and pathways resulting in the formation of cytidine 5'-triphosphate (CTP) from simpler components." [GOC

591 Pathogen[ P0C214] interacts with 2 human partners:{Q9NRF8;P17812}

592 Pathogen[ P14079] interacts with 2 human partners:{P17812;Q9NRF8}

593 Pathogen[ P03410] interacts with 2 human partners:{Q9NRF8;P17812}

594 [Cluster 99]GO:0006570+P biological\_process [name] tyrosine metabolic process [def] "The chemical reactions and pathways involving tyrosine, an aromatic amino acid, 2-amino-3-(4-hydroxyphenyl)propanoic acid." [GOC

595 Pathogen[ P14079] interacts with 1 human partners:{Q93099}

596 Pathogen[ P03410] interacts with 1 human partners:{Q93099}

597 [Cluster 100]GO:0072134+P biological\_process [name] nephrogenic mesenchyme morphogenesis [def] "The process in which the anatomical structures of a nephrogenic mesenchymal tissue are generated and organized. Nephrogenic mesenchyme is the tissue made up of loosely connected mesenchymal cells in the nephron." [GOC

598 Pathogen[ Q2Q067] interacts with 1 human partners:{Q13485}

599 Pathogen[ P0C214] interacts with 1 human partners:{Q13485}

600 Pathogen[ P03346] interacts with 1 human partners:{Q13485}

601 Pathogen[ Q85601] interacts with 1 human partners:{Q13485}

602 Pathogen[ P03383] interacts with 1 human partners:{Q13485}

603 Pathogen[ P03410] interacts with 1 human partners:{Q13485}

604 Pathogen[ P14075] interacts with 1 human partners:{Q13485}

605 Pathogen[ P0C206] interacts with 1 human partners:{Q13485}

606 Pathogen[ P03363] interacts with 1 human partners:{Q13485}

607 [Cluster 101]GO:0090085+P biological\_process [name] regulation of protein deubiquitination [def] "Any process that modulates the frequency, rate or extent of protein deubiquitination. Protein deubiquitination is the removal of one or more ubiquitin groups from a protein." [GOC

608 Pathogen[ Q2Q067] interacts with 1 human partners:{Q96J02}

609 Pathogen[ P0C214] interacts with 1 human partners:{Q96J02}

610 Pathogen[ P03346] interacts with 1 human partners:{Q96J02}

611 Pathogen[ Q85601] interacts with 1 human partners:{Q96J02}

612 Pathogen[ P14079] interacts with 1 human partners:{Q96J02}

613 Pathogen[ P0C206] interacts with 1 human partners:{Q96J02}

614 [Cluster 102]GO:0009106+P biological\_process [name] lipoate metabolic process [def] "The chemical reactions and pathways involving lipoate, 1,2-dithiolane-3-pentanoate, the anion derived from lipoic acid." [GOC

615 Pathogen[ P0C214] interacts with 1 human partners:{P09622}

616 [Cluster 103]GO:0035565+P biological\_process [name] regulation of pronephros size [def] "Any process that modulates the size of a pronephric kidney." [GOC

617 Pathogen[ Q2Q067] interacts with 2 human partners:{P35680;P20823}

618 Pathogen[ P03346] interacts with 2 human partners:{P20823;P35680}

619 Pathogen[ Q85601] interacts with 2 human partners:{P35680;P20823}

620 Pathogen[ P14079] interacts with 1 human partners:{P35680}

621 Pathogen[ P03410] interacts with 1 human partners:{P35680}

622 Pathogen[ P0C206] interacts with 2 human partners:{P35680;P20823}

623 [Cluster 104]GO:0010839+P biological\_process [name] negative regulation of keratinocyte proliferation [def] "Any process that decreases the rate, frequency or extent of keratinocyte proliferation. Keratinocyte proliferation is the multiplication or reproduction of keratinocytes, resulting in the expansion of a cell population." [GOC

624 Pathogen[ Q2Q067] interacts with 1 human partners:{P11473}

625 Pathogen[ P03346] interacts with 1 human partners:{P11473}

626 Pathogen[ Q85601] interacts with 1 human partners:{P11473}

627 Pathogen[ P14079] interacts with 1 human partners:{P11473}

628 Pathogen[ P03383] interacts with 1 human partners:{P11473}

629 Pathogen[ P03410] interacts with 1 human partners:{P11473}

630 Pathogen[ P14075] interacts with 1 human partners:{P11473}

631 Pathogen[ P0C206] interacts with 1 human partners:{P11473}

632 Pathogen[ P03363] interacts with 1 human partners:{P11473}

633 [Cluster 105]GO:0071951+P biological\_process [name] conversion of methionyl-tRNA to

N-formyl-methionyl-tRNA [def] "The modification process that results in the conversion of methionine charged on a tRNA(fMet) to N-formyl-methionine-tRNA(fMet)." [GOC

634 Pathogen[ Q2Q067] interacts with 1 human partners:{Q96DP5}

635 Pathogen[ POC214] interacts with 1 human partners:{Q96DP5}

636 Pathogen[ P03346] interacts with 1 human partners:{Q96DP5}

637 Pathogen[ P14079] interacts with 1 human partners:{Q96DP5}

638 Pathogen[ P03383] interacts with 1 human partners:{Q96DP5}

639 Pathogen[ P03410] interacts with 1 human partners:{Q96DP5}

640 Pathogen[ P14075] interacts with 1 human partners:{Q96DP5}

641 Pathogen[ POC206] interacts with 1 human partners:{Q96DP5}

642 [Cluster 106]GO:2000143+P biological\_process [name] negative regulation of transcription initiation, DNA-dependent [def] "Any process that stops, prevents, or reduces the frequency, rate or extent of DNA-dependent transcription initiation." [GOC

643 Pathogen[ Q2Q067] interacts with 1 human partners:{P10827}

644 Pathogen[ P03346] interacts with 1 human partners:{P10827}

645 Pathogen[ Q85601] interacts with 1 human partners:{P10827}

646 Pathogen[ P14079] interacts with 1 human partners:{P10827}

647 Pathogen[ POC206] interacts with 1 human partners:{P10827}

648 [Cluster 107]GO:0009826+P biological\_process [name] unidimensional cell growth [def] "The process in which a cell irreversibly increases in size in one [spatial] dimension or along one axis, resulting in the morphogenesis of the cell." [ISBN

649 Pathogen[ P03346] interacts with 1 human partners:{Q9NQY0}

650 Pathogen[ P03410] interacts with 1 human partners:{Q9NQY0}

651 Pathogen[ POC206] interacts with 1 human partners:{Q9NQY0}

652 Pathogen[ P03363] interacts with 1 human partners:{Q9NQY0}

653 [Cluster 108]GO:1901533+P

654 Pathogen[ P03346] interacts with 1 human partners:{Q9H2W2}

655 Pathogen[ P03363] interacts with 1 human partners:{Q9H2W2}

656 [Cluster 109]GO:0035166+P biological\_process [name] post-embryonic hemopoiesis [def] "The stages of blood cell formation that take place after completion of embryonic development." [GOC

657 Pathogen[ P03346] interacts with 1 human partners:{P07992}

658 Pathogen[ P14079] interacts with 1 human partners:{P07992}

659 Pathogen[ P03410] interacts with 1 human partners:{P07992}

660 Pathogen[ POC206] interacts with 1 human partners:{P07992}

661 [Cluster 110]GO:0010884+P biological\_process [name] positive regulation of lipid storage [def] "Any process that increases the rate, frequency or extent of lipid storage. Lipid storage is the accumulation and maintenance in cells or tissues of lipids, compounds soluble in organic solvents but insoluble or sparingly soluble in aqueous solvents. Lipid reserves can be accumulated during early developmental stages for mobilization and utilization at later stages of development." [GOC

662 Pathogen[ Q2Q067] interacts with 1 human partners:{P19838}

663 Pathogen[ POC214] interacts with 1 human partners:{P19838}

664 Pathogen[ P03346] interacts with 1 human partners:{P19838}

665 Pathogen[ Q85601] interacts with 1 human partners:{P19838}

666 Pathogen[ P03383] interacts with 1 human partners:{P19838}

667 Pathogen[ P03410] interacts with 1 human partners:{P19838}

668 Pathogen[ P14075] interacts with 1 human partners:{P19838}

669 Pathogen[ POC206] interacts with 1 human partners:{P19838}

670 Pathogen[ P03363] interacts with 1 human partners:{P19838}

671 [Cluster 111]GO:0009142+P biological\_process [name] nucleoside triphosphate biosynthetic process [def] "The chemical reactions and pathways resulting in the formation of a nucleoside triphosphate, a compound consisting of a nucleobase linked to a deoxyribose or ribose sugar esterified with triphosphate on the sugar." [GOC

672 Pathogen[ Q2Q067] interacts with 1 human partners:{P22392}

673 Pathogen[ POC214] interacts with 1 human partners:{P22392}

674 Pathogen[ P03346] interacts with 1 human partners:{P22392}

675 Pathogen[ Q85601] interacts with 1 human partners:{P22392}

676 Pathogen[ P14079] interacts with 1 human partners:{P22392}

677 Pathogen[ P03383] interacts with 1 human partners:{P22392}

678 Pathogen[ P14075] interacts with 1 human partners:{P22392}

679 Pathogen[ POC206] interacts with 1 human partners:{P22392}

680 [Cluster 112]GO:0021993+P biological\_process [name] initiation of neural tube closure [def] "The process in which closure points are established at multiple points and along the neural rostrocaudal axis." [GO\_REF

681 Pathogen[ Q2Q067] interacts with 1 human partners:{Q8NHM5}

682 Pathogen[ POC214] interacts with 1 human partners:{Q8NHM5}

683 Pathogen[ P03346] interacts with 1 human partners:{Q8NHM5}

684 Pathogen[ Q85601] interacts with 1 human partners:{Q8NHM5}

685 Pathogen[ P14079] interacts with 1 human partners:{Q8NHM5}

686 Pathogen[ POC206] interacts with 1 human partners:{Q8NHM5}

687 [Cluster 113]GO:0072095+P biological\_process [name] regulation of branch elongation involved in ureteric bud branching [def] "Any process that modulates the frequency, rate or extent of branch elongation involved in ureteric bud branching, the growth of a branch of the ureteric bud along its axis." [GOC

688 Pathogen[ Q2Q067] interacts with 1 human partners:{P35680}

689 Pathogen[ P03346] interacts with 3 human partners:{Q9UIU6;P35680;Q15475}  
690 Pathogen[ Q85601] interacts with 1 human partners:{P35680}  
691 Pathogen[ P14079] interacts with 1 human partners:{P35680}  
692 Pathogen[ P03410] interacts with 1 human partners:{P35680}  
693 Pathogen[ P0C206] interacts with 1 human partners:{P35680}  
694 [Cluster 114]GO:0046321+P biological\_process [name] positive regulation of fatty acid oxidation [def] "Any process that activates or increases the frequency, rate or extent of fatty acid oxidation." [GOC  
695 Pathogen[ P14079] interacts with 1 human partners:{095822}  
696 Pathogen[ P03410] interacts with 1 human partners:{095822}  
697 [Cluster 115]GO:0006220+P biological\_process [name] pyrimidine nucleotide metabolic process [def] "The chemical reactions and pathways involving a pyrimidine nucleotide, a compound consisting of nucleoside (a pyrimidine base linked to a deoxyribose or ribose sugar) esterified with a phosphate group at either the 3' or 5'-hydroxyl group of the sugar." [GOC  
698 Pathogen[ P0C214] interacts with 2 human partners:{Q16831;Q9NRF8}  
699 Pathogen[ P14079] interacts with 2 human partners:{Q16831;Q9NRF8}  
700 Pathogen[ P03410] interacts with 2 human partners:{Q9NRF8;Q16831}  
701 Pathogen[ P0C206] interacts with 1 human partners:{Q16831}  
702 [Cluster 116]GO:0035750+P biological\_process [name] protein localization to myelin sheath abaxonal region [def] "Any process in which a protein is transported to, and/or maintained in, the abaxonal region of the myelin sheath. The abaxonal region is the region of the myelin sheath furthest from the axon." [GOC  
703 Pathogen[ P03346] interacts with 1 human partners:{Q8N3R9}  
704 Pathogen[ P14079] interacts with 1 human partners:{Q8N3R9}  
705 Pathogen[ P03410] interacts with 1 human partners:{Q8N3R9}  
706 Pathogen[ P0C206] interacts with 1 human partners:{Q8N3R9}  
707 Pathogen[ P03363] interacts with 1 human partners:{Q8N3R9}  
708 [Cluster 117]GO:2001038+P biological\_process [name] regulation of cellular response to drug [def] "Any process that modulates the frequency, rate or extent of cellular response to drug." [GOC  
709 Pathogen[ P03346] interacts with 1 human partners:{Q15788}  
710 Pathogen[ P14079] interacts with 1 human partners:{Q15788}  
711 Pathogen[ P0C206] interacts with 1 human partners:{Q15788}  
712 [Cluster 118]GO:0045629+P biological\_process [name] negative regulation of T-helper 2 cell differentiation [def] "Any process that stops, prevents, or reduces the frequency, rate or extent of T-helper 2 cell differentiation." [GOC  
713 Pathogen[ Q2Q067] interacts with 1 human partners:{P41182}  
714 Pathogen[ P0C214] interacts with 1 human partners:{P41182}  
715 Pathogen[ P03346] interacts with 3 human partners:{Q14774;O75159;P41182}  
716 Pathogen[ Q85601] interacts with 1 human partners:{P41182}  
717 Pathogen[ P14079] interacts with 1 human partners:{P41182}  
718 Pathogen[ P03410] interacts with 1 human partners:{P41182}  
719 Pathogen[ P0C206] interacts with 1 human partners:{P41182}  
720 Pathogen[ P03363] interacts with 1 human partners:{O75159}  
721 [Cluster 119]GO:0051029+P biological\_process [name] rRNA transport [def] "The directed movement of rRNA, ribosomal ribonucleic acid, into, out of or within a cell, or between cells, by means of some agent such as a transporter or pore." [GOC  
722 Pathogen[ P0C214] interacts with 1 human partners:{Q16762}  
723 Pathogen[ P14079] interacts with 1 human partners:{Q16762}  
724 Pathogen[ P03410] interacts with 1 human partners:{Q16762}  
725 Pathogen[ P0C206] interacts with 1 human partners:{Q16762}  
726 [Cluster 120]GO:0045822+P biological\_process [name] negative regulation of heart contraction [def] "Any process that stops, prevents, or reduces the frequency, rate or extent of heart contraction." [GOC  
727 Pathogen[ Q2Q067] interacts with 1 human partners:{P26678}  
728 Pathogen[ P0C214] interacts with 1 human partners:{P26678}  
729 Pathogen[ P03346] interacts with 1 human partners:{P26678}  
730 Pathogen[ P14079] interacts with 1 human partners:{P26678}  
731 Pathogen[ P03383] interacts with 1 human partners:{P26678}  
732 Pathogen[ P03410] interacts with 1 human partners:{P26678}  
733 Pathogen[ P14075] interacts with 1 human partners:{P26678}  
734 Pathogen[ P0C206] interacts with 1 human partners:{P26678}  
735 [Cluster 121]GO:0051347+P biological\_process [name] positive regulation of transferase activity [def] "Any process that activates or increases the frequency, rate or extent of transferase activity, the catalysis of the transfer of a group, e.g. a methyl group, glycosyl group, acyl group, phosphorus-containing, or other groups, from a donor compound to an acceptor." [GOC  
736 Pathogen[ P14079] interacts with 2 human partners:{Q86VE9;Q9NRX5}  
737 Pathogen[ P03410] interacts with 2 human partners:{Q86VE9;Q9NRX5}  
738 [Cluster 122]GO:0035553+P biological\_process [name] oxidative single-stranded RNA demethylation [def] "Removal of the methyl group from one or more nucleotides within a single-stranded RNA molecule involving the oxidation (i.e. electron loss) of one or more atoms." [GOC  
739 Pathogen[ P14079] interacts with 1 human partners:{Q9C0B1}  
740 Pathogen[ P03410] interacts with 1 human partners:{Q9C0B1}

741 [Cluster 123]GO:0051971+P biological\_process [name] positive regulation of transmission of nerve impulse [def] "Any process that activates, maintains or increases the frequency, rate or extent of transmission of a nerve impulse, the sequential electrochemical polarization and depolarization that travels across the membrane of a neuron in response to stimulation." [GOC  
742 Pathogen[ P14079] interacts with 1 human partners:{043612}  
743 Pathogen[ P03410] interacts with 1 human partners:{043612}  
744 [Cluster 124]GO:0044070+P biological\_process [name] regulation of anion transport [def] "Any process that modulates the frequency, rate or extent of the directed movement of anions, atoms or small molecules with a net negative charge into, out of or within a cell, or between cells, by means of some agent such as a transporter or pore." [GOC  
745 Pathogen[ P0C214] interacts with 1 human partners:{043865}  
746 Pathogen[ P03346] interacts with 1 human partners:{043865}  
747 Pathogen[ Q85601] interacts with 1 human partners:{043865}  
748 Pathogen[ P14079] interacts with 2 human partners:{043865;B7ZAQ6}  
749 Pathogen[ P03410] interacts with 2 human partners:{B7ZAQ6;043865}  
750 Pathogen[ P0C206] interacts with 2 human partners:{043865;B7ZAQ6}  
751 Pathogen[ P03363] interacts with 1 human partners:{043865}  
752 [Cluster 125]GO:0003340+P biological\_process [name] negative regulation of mesenchymal to epithelial transition involved in metanephros morphogenesis [def] "Any process that decreases the rate, frequency or extent of the transition where a mesenchymal cell establishes apical/basolateral polarity, forms intercellular adhesive junctions, synthesizes basement membrane components and becomes an epithelial cell that will contribute to the shaping of the metanephros." [GOC  
753 Pathogen[ Q2Q067] interacts with 2 human partners:{Q99966;P42224}  
754 Pathogen[ P0C214] interacts with 2 human partners:{P42224;Q99966}  
755 Pathogen[ P03346] interacts with 2 human partners:{Q99966;P42224}  
756 Pathogen[ Q85601] interacts with 2 human partners:{Q99966;P42224}  
757 Pathogen[ P14079] interacts with 2 human partners:{Q99966;P42224}  
758 Pathogen[ P03410] interacts with 1 human partners:{Q99966}  
759 Pathogen[ P0C206] interacts with 2 human partners:{Q99966;P42224}  
760 [Cluster 126]GO:0055075+P biological\_process [name] potassium ion homeostasis [def] "Any process involved in the maintenance of an internal steady state of potassium ions within an organism or cell." [GOC  
761 Pathogen[ P03346] interacts with 1 human partners:{Q92481}  
762 [Cluster 127]GO:0043381+P biological\_process [name] negative regulation of memory T cell differentiation [def] "Any process that stops, prevents, or reduces the rate of memory T cell differentiation." [ISBN  
763 Pathogen[ P14079] interacts with 1 human partners:{Q8IU54}  
764 [Cluster 128]GO:0015886+P biological\_process [name] heme transport [def] "The directed movement of heme, any compound of iron complexed in a porphyrin (tetrapyrrole) ring, into, out of or within a cell, or between cells, by means of some agent such as a transporter or pore." [GOC  
765 Pathogen[ P14079] interacts with 1 human partners:{Q96NT5}  
766 [Cluster 129]GO:0045055+P biological\_process [name] regulated secretory pathway [def] "A process of exocytosis in which soluble proteins and other substances are initially stored in secretory vesicles for later release. It is found mainly in cells that are specialized for secreting products such as hormones, neurotransmitters, or digestive enzymes rapidly on demand." [GOC  
767 Pathogen[ P03346] interacts with 1 human partners:{P49755}  
768 Pathogen[ P14079] interacts with 1 human partners:{P49755}  
769 Pathogen[ P0C206] interacts with 1 human partners:{P49755}  
770 [Cluster 130]GO:0002768+P biological\_process [name] immune response-regulating cell surface receptor signaling pathway [def] "A series of molecular signals initiated by the binding of an extracellular ligand to a receptor on the surface of the target cell capable of activating, perpetuating, or inhibiting an immune response." [GOC  
771 Pathogen[ Q2Q067] interacts with 1 human partners:{P25063}  
772 Pathogen[ P0C214] interacts with 1 human partners:{P25063}  
773 Pathogen[ P03346] interacts with 1 human partners:{P25063}  
774 Pathogen[ P14079] interacts with 1 human partners:{P25063}  
775 Pathogen[ P03383] interacts with 1 human partners:{P25063}  
776 Pathogen[ P03410] interacts with 1 human partners:{P25063}  
777 Pathogen[ P14075] interacts with 1 human partners:{P25063}  
778 Pathogen[ P0C206] interacts with 1 human partners:{P25063}  
779 [Cluster 131]GO:0001555+P biological\_process [name] oocyte growth [def] "The developmental growth process in which an oocyte irreversibly increases in size over time by accretion and biosynthetic production of matter similar to that already present." [http  
780 Pathogen[ Q2Q067] interacts with 1 human partners:{014686}  
781 Pathogen[ P03346] interacts with 1 human partners:{014686}  
782 Pathogen[ Q85601] interacts with 1 human partners:{014686}  
783 Pathogen[ P0C206] interacts with 1 human partners:{014686}  
784 Pathogen[ P03363] interacts with 1 human partners:{014686}  
785 [Cluster 132]GO:0042559+P biological\_process [name] pteridine-containing compound biosynthetic process [def] "The chemical reactions and pathways resulting in the formation of any compound containing pteridine (pyrazino(2,3-dipyrimidine)), e.g.

pterotic acid, xanthopterin and folic acid." [GOC  
786 Pathogen[ Q2Q067] interacts with 1 human partners:{P30793}  
787 Pathogen[ POC214] interacts with 1 human partners:{P30793}  
788 Pathogen[ Q85601] interacts with 1 human partners:{P30793}  
789 Pathogen[ P14079] interacts with 1 human partners:{P30793}  
790 Pathogen[ P03410] interacts with 1 human partners:{P30793}  
791 Pathogen[ P14075] interacts with 1 human partners:{P30793}  
792 Pathogen[ POC206] interacts with 1 human partners:{P30793}  
793 [Cluster 133]GO:0070681+P biological\_process [name] glutaminyl-tRNAGln biosynthesis  
via transamidation [def] "A tRNA aminoacylation process in which glutaminyl-tRNAGln is  
formed by a tRNA-dependent two-step pathway. In the first step a non-discriminating  
glutamyl-tRNAGlx synthetase generates the misacylated L-glutamyl-tRNAGln species, and in  
the second step it is amidated to the correctly charged L-glutaminyl-tRNAGln by a  
glutamyl-tRNAGln amidotransferase." [GOC  
794 Pathogen[ P14079] interacts with 3 human partners:{075879;043716;Q9H0R6}  
795 Pathogen[ P03410] interacts with 2 human partners:{075879;Q9H0R6}  
796 [Cluster 134]GO:0042667+P biological\_process [name] auditory receptor cell fate  
specification [def] "The process in which a cell becomes capable of differentiating  
autonomously into an auditory hair cell in an environment that is neutral with respect  
to the developmental pathway upon specification, the cell fate can be reversed." [GOC  
797 Pathogen[ P03346] interacts with 1 human partners:{Q92858}  
798 [Cluster 135]GO:0036066+P biological\_process [name] protein O-linked fucosylation  
[def] "The process of transferring a fucosyl group to a serine or threonine residues in  
a protein acceptor molecule, to form an O-linked protein-sugar linkage." [GOC  
799 Pathogen[ POC214] interacts with 1 human partners:{Q9Y2G5}  
800 Pathogen[ P14079] interacts with 2 human partners:{Q9H488;Q9Y2G5}  
801 Pathogen[ P03410] interacts with 2 human partners:{Q9Y2G5;Q9H488}  
802 Pathogen[ P14075] interacts with 1 human partners:{Q9Y2G5}  
803 Pathogen[ POC206] interacts with 1 human partners:{Q9Y2G5}  
804 [Cluster 136]GO:0045870+P biological\_process [name] positive regulation of retroviral  
genome replication [def] "Any process that activates or increases the frequency, rate  
or extent of retroviral genome replication." [GOC  
805 Pathogen[ Q2Q067] interacts with 1 human partners:{P11388}  
806 Pathogen[ POC214] interacts with 1 human partners:{P11388}  
807 Pathogen[ P03346] interacts with 1 human partners:{P11388}  
808 Pathogen[ Q85601] interacts with 1 human partners:{P11388}  
809 Pathogen[ P14079] interacts with 1 human partners:{P11388}  
810 Pathogen[ P03410] interacts with 1 human partners:{P11388}  
811 Pathogen[ POC206] interacts with 1 human partners:{P11388}  
812 [Cluster 137]GO:2000982+P biological\_process [name] positive regulation of inner ear  
receptor cell differentiation [def] "Any process that activates or increases the  
frequency, rate or extent of inner ear receptor cell differentiation." [GOC  
813 Pathogen[ P03346] interacts with 1 human partners:{Q92858}  
814 [Cluster 138]GO:0010044+P biological\_process [name] response to aluminum ion [def]  
"Any process that results in a change in state or activity of a cell or an organism (in  
terms of movement, secretion, enzyme production, gene expression, etc.) as a result of  
an aluminum ion stimulus." [GOC  
815 Pathogen[ POC214] interacts with 1 human partners:{P09417}  
816 [Cluster 139]GO:0032916+P biological\_process [name] positive regulation of  
transforming growth factor beta3 production [def] "Any process that activates or  
increases the frequency, rate, or extent of production of transforming growth  
factor-beta3." [GOC  
817 Pathogen[ Q2Q067] interacts with 1 human partners:{P84022}  
818 Pathogen[ POC214] interacts with 2 human partners:{P84022;P16220}  
819 Pathogen[ P03346] interacts with 2 human partners:{P16220;P84022}  
820 Pathogen[ Q85601] interacts with 2 human partners:{P16220;P84022}  
821 Pathogen[ P03383] interacts with 2 human partners:{P16220;P84022}  
822 Pathogen[ P03410] interacts with 2 human partners:{P84022;P16220}  
823 Pathogen[ P14075] interacts with 2 human partners:{P16220;P84022}  
824 Pathogen[ POC206] interacts with 2 human partners:{P84022;P16220}  
825 Pathogen[ P03363] interacts with 2 human partners:{P16220;P84022}  
826 [Cluster 140]GO:0040036+P biological\_process [name] regulation of fibroblast growth  
factor receptor signaling pathway [def] "Any process that modulates the frequency,  
rate or extent of fibroblast growth factor receptor signaling pathway activity." [GOC  
827 Pathogen[ POC214] interacts with 1 human partners:{P32243}  
828 Pathogen[ P03346] interacts with 1 human partners:{P32243}  
829 Pathogen[ Q85601] interacts with 1 human partners:{P32243}  
830 Pathogen[ P14079] interacts with 1 human partners:{P32243}  
831 Pathogen[ P03383] interacts with 1 human partners:{P32243}  
832 Pathogen[ P03410] interacts with 1 human partners:{P32243}  
833 Pathogen[ P14075] interacts with 1 human partners:{P32243}  
834 Pathogen[ POC206] interacts with 1 human partners:{P32243}  
835 Pathogen[ P03363] interacts with 1 human partners:{P32243}  
836 [Cluster 141]GO:0006027+P biological\_process [name] glycosaminoglycan catabolic  
process [def] "The chemical reactions and pathways resulting in the breakdown of  
glycosaminoglycans, any one of a group of polysaccharides that contain amino sugars."

```

[ISBN
837 Pathogen[ P0C214] interacts with 1 human partners:{P16278}
838 Pathogen[ P03346] interacts with 1 human partners:{P16278}
839 Pathogen[ P14079] interacts with 4 human partners:{P16278;P04066;P54802;P35475}
840 Pathogen[ P03410] interacts with 3 human partners:{P04066;P54802;P16278}
841 Pathogen[ P0C206] interacts with 1 human partners:{P16278}
842 [Cluster 142]GO:0046475+P biological_process [name] glycerophospholipid catabolic
process [def] "The chemical reactions and pathways resulting in the breakdown of
glycerophospholipids, any derivative of glycerophosphate that contains at least one
O-acyl, O-alkyl, or O-alkenyl group attached to the glycerol residue." [ISBN
843 Pathogen[ P14079] interacts with 1 human partners:{Q9NXE4}
844 Pathogen[ P03410] interacts with 1 human partners:{Q9NXE4}
845 [Cluster 143]GO:0060292+P biological_process [name] long term synaptic depression
[def] "A process that modulates synaptic plasticity such that synapses are changed
resulting in the decrease in the rate, or frequency of synaptic transmission at the
synapse." [GOC
846 Pathogen[ Q2Q067] interacts with 1 human partners:{P11831}
847 Pathogen[ P0C214] interacts with 1 human partners:{P11831}
848 Pathogen[ P03346] interacts with 1 human partners:{P11831}
849 Pathogen[ Q85601] interacts with 1 human partners:{P11831}
850 Pathogen[ P03383] interacts with 1 human partners:{P11831}
851 Pathogen[ P03410] interacts with 1 human partners:{P11831}
852 Pathogen[ P14075] interacts with 1 human partners:{P11831}
853 Pathogen[ P0C206] interacts with 1 human partners:{P11831}
854 Pathogen[ P03363] interacts with 1 human partners:{P11831}
855 [Cluster 144]GO:0021797+P biological_process [name] forebrain anterior/posterior
pattern specification [def] "The creation of specific areas of progenitor domains
along the anterior-posterior axis of the developing forebrain." [GO_REF
856 Pathogen[ P03346] interacts with 1 human partners:{O95343}
857 Pathogen[ P03363] interacts with 1 human partners:{O95343}
858 [Cluster 145]GO:0032286+P biological_process [name] central nervous system myelin
maintenance [def] "The process in which the structure and material content of mature
central nervous system myelin is kept in a functional state." [GOC
859 Pathogen[ P14079] interacts with 1 human partners:{Q9Y2G1}
860 Pathogen[ P03410] interacts with 1 human partners:{Q9Y2G1}
861 [Cluster 146]GO:2001170+P biological_process [name] negative regulation of ATP
biosynthetic process [def] "Any process that stops, prevents or reduces the
frequency, rate or extent of ATP biosynthetic process." [GOC
862 Pathogen[ Q2Q067] interacts with 1 human partners:{Q7Z2X4}
863 Pathogen[ P0C214] interacts with 1 human partners:{Q7Z2X4}
864 Pathogen[ P03346] interacts with 1 human partners:{Q7Z2X4}
865 Pathogen[ Q85601] interacts with 1 human partners:{Q7Z2X4}
866 Pathogen[ P14079] interacts with 1 human partners:{Q7Z2X4}
867 Pathogen[ P03410] interacts with 1 human partners:{Q7Z2X4}
868 Pathogen[ P0C206] interacts with 1 human partners:{Q7Z2X4}
869 [Cluster 147]GO:0021526+P biological_process [name] medial motor column neuron
differentiation [def] "The process in which differentiating motor neurons in the neural
tube acquire the specialized structural and/or functional features of medial motor
column neurons. Medial motor column neurons are generated at all rostrocaudal levels and
send axons to the axial muscles (medial group) and to the body wall muscles (lateral
group). Differentiation includes the processes involved in commitment of a cell to a
specific fate." [GO_REF
870 Pathogen[ P03346] interacts with 2 human partners:{Q969G2;Q9UBR4}
871 Pathogen[ P0C206] interacts with 2 human partners:{Q969G2;Q9UBR4}
872 [Cluster 148]GO:0019242+P biological_process [name] methylglyoxal biosynthetic
process [def] "The chemical reactions and pathways resulting in the formation of
methylglyoxal, CH3-CO-CHO, the aldehyde of pyruvic acid." [GOC
873 Pathogen[ Q2Q067] interacts with 1 human partners:{P06744}
874 Pathogen[ P03346] interacts with 1 human partners:{P06744}
875 Pathogen[ Q85601] interacts with 1 human partners:{P06744}
876 Pathogen[ P14079] interacts with 1 human partners:{P06744}
877 Pathogen[ P03383] interacts with 1 human partners:{P06744}
878 Pathogen[ P03410] interacts with 1 human partners:{P06744}
879 Pathogen[ P14075] interacts with 1 human partners:{P06744}
880 Pathogen[ P0C206] interacts with 1 human partners:{P06744}
881 Pathogen[ P03363] interacts with 1 human partners:{P06744}
882 [Cluster 149]GO:0021599+P biological_process [name] abducens nerve formation [def]
"The process that gives rise to the abducens nerve. This process pertains to the initial
formation of a structure from unspecified parts. The motor function of the abducens
nerve is to contract the lateral rectus which results in abduction of the eye." [GO_REF
883 Pathogen[ Q2Q067] interacts with 1 human partners:{P49639}
884 Pathogen[ P0C214] interacts with 1 human partners:{P49639}
885 Pathogen[ P03346] interacts with 1 human partners:{P49639}
886 Pathogen[ Q85601] interacts with 1 human partners:{P49639}
887 Pathogen[ P14079] interacts with 1 human partners:{P49639}
888 Pathogen[ P03383] interacts with 1 human partners:{P49639}

```

889 Pathogen[ P03410] interacts with 1 human partners:{P49639}

890 Pathogen[ P0C206] interacts with 1 human partners:{P49639}

891 Pathogen[ P03363] interacts with 1 human partners:{P49639}

892 [Cluster 150]GO:0042772+P biological\_process [name] DNA damage response, signal transduction resulting in transcription [def] "A cascade of processes initiated in response to the detection of DNA damage, and resulting in the induction of transcription." [GOC

893 Pathogen[ Q2Q067] interacts with 1 human partners:{Q9UI95}

894 Pathogen[ P0C214] interacts with 1 human partners:{Q9UI95}

895 Pathogen[ P03346] interacts with 1 human partners:{Q9UI95}

896 Pathogen[ Q85601] interacts with 1 human partners:{Q9UI95}

897 Pathogen[ P03383] interacts with 1 human partners:{Q9UI95}

898 Pathogen[ P03410] interacts with 1 human partners:{Q9UI95}

899 Pathogen[ P14075] interacts with 1 human partners:{Q9UI95}

900 Pathogen[ P0C206] interacts with 1 human partners:{Q9UI95}

901 Pathogen[ P03363] interacts with 1 human partners:{Q9UI95}

902 [Cluster 151]GO:0006304+P biological\_process [name] DNA modification [def] "The covalent alteration of one or more nucleotide sites in DNA, resulting in a change in its properties." [GOC

903 Pathogen[ Q2Q067] interacts with 1 human partners:{P04053}

904 Pathogen[ P0C214] interacts with 1 human partners:{P04053}

905 Pathogen[ P03346] interacts with 1 human partners:{P04053}

906 Pathogen[ Q85601] interacts with 1 human partners:{P04053}

907 Pathogen[ P14079] interacts with 1 human partners:{P04053}

908 Pathogen[ P03410] interacts with 1 human partners:{P04053}

909 Pathogen[ P0C206] interacts with 1 human partners:{P04053}

910 Pathogen[ P03363] interacts with 1 human partners:{P04053}

911 [Cluster 152]GO:0035881+P biological\_process [name] amacrine cell differentiation [def] "The process in which a relatively unspecialized cell acquires specialized features of an amacrine cell, an interneuron generated in the inner nuclear layer (INL) of the vertebrate retina. Amacrine cells integrate, modulate, and interpose a temporal domain in the visual message presented to the retinal ganglion cells, with which they synapse in the inner plexiform layer. Amacrine cells lack large axons." [CL

912 Pathogen[ Q2Q067] interacts with 1 human partners:{Q13562}

913 Pathogen[ P03346] interacts with 2 human partners:{Q9HD90;Q13562}

914 Pathogen[ Q85601] interacts with 1 human partners:{Q13562}

915 Pathogen[ P0C206] interacts with 1 human partners:{Q13562}

916 [Cluster 153]GO:0072176+P biological\_process [name] nephric duct development [def] "The process whose specific outcome is the progression of a nephric duct over time, from its initial formation to a mature structure. A nephric duct is a tube that drains a primitive kidney." [GOC

917 Pathogen[ Q2Q067] interacts with 1 human partners:{P35680}

918 Pathogen[ P03346] interacts with 1 human partners:{P35680}

919 Pathogen[ Q85601] interacts with 1 human partners:{P35680}

920 Pathogen[ P14079] interacts with 1 human partners:{P35680}

921 Pathogen[ P03410] interacts with 1 human partners:{P35680}

922 Pathogen[ P0C206] interacts with 1 human partners:{P35680}

923 [Cluster 154]GO:0033617+P biological\_process [name] mitochondrial respiratory chain complex IV assembly [def] "The aggregation, arrangement and bonding together of a set of components to form respiratory chain complex IV (also known as cytochrome c oxidase) in the mitochondrial inner membrane." [GOC

924 Pathogen[ P14079] interacts with 1 human partners:{Q96I36}

925 Pathogen[ P03410] interacts with 1 human partners:{Q96I36}

926 [Cluster 155]GO:0002674+P biological\_process [name] negative regulation of acute inflammatory response [def] "Any process that stops, prevents, or reduces the frequency, rate, or extent of an acute inflammatory response." [GOC

927 Pathogen[ P14079] interacts with 1 human partners:{P04083}

928 [Cluster 156]GO:0090044+P biological\_process [name] positive regulation of tubulin deacetylation [def] "Any process that increases the frequency, rate or extent of tubulin deacetylation. Tubulin deacetylation is the removal of an acetyl group from a protein amino acid." [GOC

929 Pathogen[ Q2Q067] interacts with 1 human partners:{P49354}

930 Pathogen[ P0C214] interacts with 1 human partners:{P49354}

931 Pathogen[ P03346] interacts with 1 human partners:{P49354}

932 Pathogen[ Q85601] interacts with 1 human partners:{P49354}

933 Pathogen[ P14079] interacts with 1 human partners:{P49354}

934 Pathogen[ P03410] interacts with 1 human partners:{P49354}

935 Pathogen[ P0C206] interacts with 1 human partners:{P49354}

936 Pathogen[ P03363] interacts with 1 human partners:{P49354}

937 [Cluster 157]GO:0018344+P biological\_process [name] protein geranylgeranylation [def] "The covalent attachment of a geranylgeranyl group to a protein." [GOC

938 Pathogen[ Q2Q067] interacts with 1 human partners:{P49354}

939 Pathogen[ P0C214] interacts with 1 human partners:{P49354}

940 Pathogen[ P03346] interacts with 1 human partners:{P49354}

941 Pathogen[ Q85601] interacts with 1 human partners:{P49354}

942 Pathogen[ P14079] interacts with 1 human partners:{P49354}

943 Pathogen[ P03410] interacts with 1 human partners:{P49354}

944 Pathogen[ P0C206] interacts with 1 human partners:{P49354}

945 Pathogen[ P03363] interacts with 1 human partners:{P49354}

946 [Cluster 158]GO:0006684+P biological\_process [name] sphingomyelin metabolic process  
[def] "The chemical reactions and pathways involving sphingomyelin, N-acyl-4-sphingeny-1-O-phosphorylcholine, any of a class of phospholipids in which the amino group of sphingosine is in amide linkage with one of several fatty acids, while the terminal hydroxyl group of sphingosine is esterified to phosphorylcholine." [ISBN

947 Pathogen[ P14079] interacts with 2 human partners:{Q99728;P17405}

948 Pathogen[ P03410] interacts with 1 human partners:{P17405}

949 [Cluster 159]GO:0001894+P biological\_process [name] tissue homeostasis [def] "A homeostatic process involved in the maintenance of an internal steady state within a defined tissue of an organism, including control of cellular proliferation and death and control of metabolic function." [GOC

950 Pathogen[ Q2Q067] interacts with 1 human partners:{Q99728}

951 Pathogen[ P0C214] interacts with 1 human partners:{Q99728}

952 Pathogen[ P03346] interacts with 2 human partners:{P31271;Q99728}

953 Pathogen[ Q85601] interacts with 2 human partners:{Q99728;P31271}

954 Pathogen[ P14079] interacts with 2 human partners:{P31271;P81277}

955 Pathogen[ P03410] interacts with 1 human partners:{P81277}

956 Pathogen[ P0C206] interacts with 2 human partners:{Q99728;P31271}

957 Pathogen[ P03363] interacts with 2 human partners:{P31271;Q99728}

958 [Cluster 160]GO:0008295+P biological\_process [name] spermidine biosynthetic process  
[def] "The chemical reactions and pathways resulting in the formation of spermidine, N-(3-aminopropyl)-1,4-diaminobutane." [GOC

959 Pathogen[ P0C214] interacts with 1 human partners:{P19623}

960 Pathogen[ P14079] interacts with 2 human partners:{P17707;P19623}

961 Pathogen[ P03410] interacts with 2 human partners:{P19623;P17707}

962 [Cluster 161]GO:0072308+P biological\_process [name] negative regulation of metanephric nephron tubule epithelial cell differentiation [def] "Any process that decreases the frequency, rate or extent of metanephric nephron tubule epithelial cell differentiation." [GOC

963 Pathogen[ Q2Q067] interacts with 1 human partners:{P42224}

964 Pathogen[ P0C214] interacts with 1 human partners:{P42224}

965 Pathogen[ P03346] interacts with 1 human partners:{P42224}

966 Pathogen[ Q85601] interacts with 1 human partners:{P42224}

967 Pathogen[ P14079] interacts with 1 human partners:{P42224}

968 Pathogen[ P0C206] interacts with 1 human partners:{P42224}

969 [Cluster 162]GO:0034765+P biological\_process [name] regulation of ion transmembrane transport [def] "Any process that modulates the frequency, rate or extent of the directed movement of ions from one side of a membrane to the other." [GOC

970 Pathogen[ Q2Q067] interacts with 1 human partners:{Q96PU5}

971 Pathogen[ P0C214] interacts with 2 human partners:{O00308;Q96PU5}

972 Pathogen[ P03346] interacts with 4 human partners:{Q96PU5;O00299;O95833;O00308}

973 Pathogen[ Q85601] interacts with 1 human partners:{Q96PU5}

974 Pathogen[ P14079] interacts with 2 human partners:{P0CG08;B7ZAQ6}

975 Pathogen[ P03410] interacts with 3 human partners:{B7ZAQ6;P0CG08;Q96D96}

976 Pathogen[ P0C206] interacts with 4 human partners:{Q96PU5;O00308;P0CG08;B7ZAQ6}

977 Pathogen[ P03363] interacts with 3 human partners:{Q96PU5;O00308;O95833}

978 [Cluster 163]GO:0048675+P biological\_process [name] axon extension [def] "Long distance growth of a single process." [GOC

979 Pathogen[ P14079] interacts with 1 human partners:{P16298}

980 Pathogen[ P03363] interacts with 1 human partners:{Q7L576}

981 [Cluster 164]GO:0003183+P biological\_process [name] mitral valve morphogenesis [def] "The process in which the structure of the mitral valve is generated and organized." [GOC

982 Pathogen[ P03346] interacts with 1 human partners:{Q06945}

983 [Cluster 165]GO:0008588+P biological\_process [name] release of cytoplasmic sequestered NF-kappaB [def] "The release of NF-kappaB from specific molecules in the cytoplasm to which it was bound, thereby allowing its translocation into the nucleus." [GOC

984 Pathogen[ Q2Q067] interacts with 1 human partners:{Q15654}

985 Pathogen[ P0C214] interacts with 1 human partners:{Q15654}

986 Pathogen[ P03346] interacts with 1 human partners:{Q15654}

987 Pathogen[ Q85601] interacts with 1 human partners:{Q15654}

988 Pathogen[ P03383] interacts with 1 human partners:{Q15654}

989 Pathogen[ P03410] interacts with 1 human partners:{Q15654}

990 Pathogen[ P14079] interacts with 1 human partners:{Q15654}

991 Pathogen[ P0C206] interacts with 1 human partners:{Q15654}

992 Pathogen[ P03363] interacts with 1 human partners:{Q15654}

993 [Cluster 166]GO:0014050+P biological\_process [name] negative regulation of glutamate secretion [def] "Any process that stops, prevents, or reduces the frequency, rate or extent of the controlled release of glutamate." [GOC

994 Pathogen[ P14079] interacts with 1 human partners:{P20396}

995 Pathogen[ P03410] interacts with 1 human partners:{P20396}

996 Pathogen[ P0C206] interacts with 1 human partners:{P20396}



997 [Cluster 167]GO:0060439+P biological\_process [name] trachea morphogenesis [def] "The process in which a trachea is generated and organized. The trachea is the portion of the airway that attaches to the bronchi as it branches." [GOC]

998 Pathogen[ Q2Q067] interacts with 1 human partners:{P20719}

999 Pathogen[ P03346] interacts with 1 human partners:{P20719}

1000 Pathogen[ P0C206] interacts with 1 human partners:{P20719}

1001 Pathogen[ P03363] interacts with 1 human partners:{P20719}

1002 [Cluster 168]GO:0001916+P biological\_process [name] positive regulation of T cell mediated cytotoxicity [def] "Any process that activates or increases the frequency, rate or extent of T cell mediated cytotoxicity." [GOC]

1003 Pathogen[ P14079] interacts with 1 human partners:{P29459}

1004 Pathogen[ P03410] interacts with 1 human partners:{P29459}

1005 [Cluster 169]GO:0030856+P biological\_process [name] regulation of epithelial cell differentiation [def] "Any process that modulates the frequency, rate or extent of epithelial cell differentiation." [GOC]

1006 Pathogen[ Q2Q067] interacts with 1 human partners:{P25063}

1007 Pathogen[ P0C214] interacts with 1 human partners:{P25063}

1008 Pathogen[ P03346] interacts with 2 human partners:{Q2LD37;P25063}

1009 Pathogen[ P14079] interacts with 2 human partners:{Q2LD37;P25063}

1010 Pathogen[ P03383] interacts with 1 human partners:{P25063}

1011 Pathogen[ P03410] interacts with 2 human partners:{P25063;Q2LD37}

1012 Pathogen[ P14075] interacts with 2 human partners:{Q2LD37;P25063}

1013 Pathogen[ P0C206] interacts with 2 human partners:{Q2LD37;P25063}

1014 Pathogen[ P03363] interacts with 1 human partners:{Q2LD37}

1015 [Cluster 170]GO:0048486+P biological\_process [name] parasympathetic nervous system development [def] "The process whose specific outcome is the progression of the parasympathetic nervous system over time, from its formation to the mature structure. The parasympathetic nervous system is one of the two divisions of the vertebrate autonomic nervous system. Parasympathetic nerves emerge cranially as pre ganglionic fibers from oculomotor, facial, glossopharyngeal and vagus and from the sacral region of the spinal cord. Most neurons are cholinergic and responses are mediated by muscarinic receptors. The parasympathetic system innervates, for example

1016 Pathogen[ Q2Q067] interacts with 1 human partners:{O14813}

1017 Pathogen[ P0C214] interacts with 1 human partners:{O14813}

1018 Pathogen[ P03346] interacts with 1 human partners:{O14813}

1019 Pathogen[ Q85601] interacts with 1 human partners:{O14813}

1020 Pathogen[ P14079] interacts with 1 human partners:{O14813}

1021 Pathogen[ P03410] interacts with 1 human partners:{O14813}

1022 Pathogen[ P0C206] interacts with 1 human partners:{O14813}

1023 Pathogen[ P03363] interacts with 1 human partners:{O14813}

1024 [Cluster 171]GO:0021610+P biological\_process [name] facial nerve morphogenesis [def] "The process in which the anatomical structure of the facial nerve is generated and organized. This sensory and motor nerve supplies the muscles of facial expression and the expression and taste at the anterior two-thirds of the tongue. The principal branches are the superficial orbital, buccal, palatine and hyomandibular. The main trunk synapses within pterygopalatine ganglion in the parotid gland and this ganglion then gives of nerve branches which supply the lacrimal gland and the mucous secreting glands of the nasal and oral cavities." [GO\_REF]

1025 Pathogen[ P03346] interacts with 1 human partners:{Q15475}

1026 [Cluster 172]GO:0007218+P biological\_process [name] neuropeptide signaling pathway [def] "The series of molecular signals generated as a consequence of a peptide neurotransmitter binding to a cell surface receptor." [GOC]

1027 Pathogen[ P14079] interacts with 6 human partners:{Q9UHF0;P05408;O95156;O43612;Q8N729;Q8NG41}

1028 Pathogen[ P03410] interacts with 8 human partners:{Q8NG41;Q8N729;O43612;O95158;Q9UHF0;P05408;Q96A98;O95156}

1029 Pathogen[ P0C206] interacts with 1 human partners:{Q8N729}

1030 Pathogen[ P03363] interacts with 1 human partners:{Q8N729}

1031 [Cluster 173]GO:0009440+P biological\_process [name] cyanate catabolic process [def] "The chemical reactions and pathways resulting in the breakdown of cyanate, NCO-, the anion of cyanic acid." [ISBN]

1032 Pathogen[ P0C214] interacts with 1 human partners:{Q16762}

1033 Pathogen[ P14079] interacts with 1 human partners:{Q16762}

1034 Pathogen[ P03410] interacts with 1 human partners:{Q16762}

1035 Pathogen[ P0C206] interacts with 1 human partners:{Q16762}

1036 [Cluster 174]GO:0060123+P biological\_process [name] regulation of growth hormone secretion [def] "Any process that modulates the frequency, rate or extent of the regulated release of growth hormone from a cell or group of cells." [GOC]

1037 Pathogen[ P03346] interacts with 1 human partners:{Q9P2D1}

1038 Pathogen[ Q85601] interacts with 1 human partners:{Q9P2D1}

1039 Pathogen[ P14079] interacts with 1 human partners:{Q9P2D1}

1040 Pathogen[ P03410] interacts with 1 human partners:{Q9P2D1}

1041 Pathogen[ P0C206] interacts with 1 human partners:{Q9P2D1}

1042 [Cluster 175]GO:0016236+P biological\_process [name] macroautophagy [def] "The major inducible pathway for the general turnover of cytoplasmic constituents in eukaryotic cells, it is also responsible for the degradation of active cytoplasmic enzymes and

organelles during nutrient starvation. Macroautophagy involves the formation of double-membrane-bounded autophagosomes which enclose the cytoplasmic constituent targeted for degradation in a membrane-bounded structure, which then fuse with the lysosome (or vacuole) releasing a single-membrane-bounded autophagic bodies which are then degraded within the lysosome (or vacuole). Though once thought to be a purely non-selective process, it appears that some types of macroautophagy, e.g. macropexophagy, macromitophagy, may involve selective targeting of the targets to be degraded." [PMID

1043 Pathogen[ Q2Q067] interacts with 1 human partners:{Q13501}  
 1044 Pathogen[ P0C214] interacts with 1 human partners:{Q13501}  
 1045 Pathogen[ P03346] interacts with 2 human partners:{Q14596;Q13501}  
 1046 Pathogen[ Q85601] interacts with 2 human partners:{Q14596;Q13501}  
 1047 Pathogen[ P14079] interacts with 2 human partners:{Q14596;Q13501}  
 1048 Pathogen[ P03383] interacts with 1 human partners:{Q13501}  
 1049 Pathogen[ P03410] interacts with 2 human partners:{Q13501;Q14596}  
 1050 Pathogen[ P14075] interacts with 1 human partners:{Q13501}  
 1051 Pathogen[ P0C206] interacts with 2 human partners:{Q13501;Q14596}  
 1052 [Cluster 176]GO:2000179+P biological\_process [name] positive regulation of neural precursor cell proliferation [def] "Any process that activates or increases the frequency, rate or extent of neural precursor cell proliferation." [GOC  
 1053 Pathogen[ P14079] interacts with 1 human partners:{P48681}  
 1054 [Cluster 177]GO:0007016+P biological\_process [name] cytoskeletal anchoring at plasma membrane [def] "A cytoskeleton organization process that directly or indirectly links cytoskeletal filaments to the plasma membrane." [ISBN  
 1055 Pathogen[ P03346] interacts with 1 human partners:{Q9Y4G6}  
 1056 Pathogen[ P14079] interacts with 2 human partners:{Q14118;Q9Y4G6}  
 1057 Pathogen[ P03410] interacts with 2 human partners:{Q14118;Q9Y4G6}  
 1058 Pathogen[ P03363] interacts with 1 human partners:{Q9Y4G6}  
 1059 [Cluster 178]GO:0003106+P biological\_process [name] negative regulation of glomerular filtration by angiotensin [def] "The process in which angiotensin directly decreases the rate of glomerular filtration in the kidney. Glomerular filtration is the process whereby blood is filtered by the glomerulus into the renal tubule." [GOC  
 1060 Pathogen[ P14079] interacts with 1 human partners:{P13498}  
 1061 [Cluster 179]GO:2000278+P biological\_process [name] regulation of DNA biosynthetic process [def] "Any process that modulates the frequency, rate or extent of DNA biosynthetic process." [GOC  
 1062 Pathogen[ Q2Q067] interacts with 1 human partners:{P38936}  
 1063 Pathogen[ P0C214] interacts with 1 human partners:{P38936}  
 1064 Pathogen[ P03346] interacts with 2 human partners:{Q9NRF2;P38936}  
 1065 Pathogen[ Q85601] interacts with 1 human partners:{P38936}  
 1066 Pathogen[ P14079] interacts with 1 human partners:{P38936}  
 1067 Pathogen[ P03410] interacts with 1 human partners:{P38936}  
 1068 Pathogen[ P0C206] interacts with 1 human partners:{P38936}  
 1069 [Cluster 180]GO:0030046+P biological\_process [name] parallel actin filament bundle assembly [def] "Assembly of actin filament bundles in which the filaments are tightly packed (approximately 10-20 nm apart) and oriented with the same polarity." [GOC  
 1070 Pathogen[ Q2Q067] interacts with 1 human partners:{Q9Y6N9}  
 1071 Pathogen[ P0C214] interacts with 1 human partners:{Q9Y6N9}  
 1072 Pathogen[ P03346] interacts with 1 human partners:{Q9Y6N9}  
 1073 Pathogen[ Q85601] interacts with 1 human partners:{Q9Y6N9}  
 1074 Pathogen[ P14079] interacts with 1 human partners:{Q9Y6N9}  
 1075 Pathogen[ P03410] interacts with 1 human partners:{Q9Y6N9}  
 1076 Pathogen[ P0C206] interacts with 1 human partners:{Q9Y6N9}  
 1077 Pathogen[ P03363] interacts with 1 human partners:{Q9Y6N9}  
 1078 [Cluster 181]GO:0060397+P biological\_process [name] JAK-STAT cascade involved in growth hormone signaling pathway [def] "The process in which STAT proteins (Signal Transducers and Activators of Transcription) are activated by members of the JAK (janus activated kinase) family of tyrosine kinases, following the binding of physiological ligands to the growth hormone receptor. Once activated, STATs dimerize and translocate to the nucleus and modulate the expression of target genes." [GOC  
 1079 Pathogen[ Q2Q067] interacts with 3 human partners:{P40763;O14508;P42224}  
 1080 Pathogen[ P0C214] interacts with 4 human partners:{P42224;O14508;P40763;O15524}  
 1081 Pathogen[ P03346] interacts with 4 human partners:{O15524;O14508;P42224;P40763}  
 1082 Pathogen[ Q85601] interacts with 3 human partners:{P40763;O14508;P42224}  
 1083 Pathogen[ P14079] interacts with 2 human partners:{P42224;O14508}  
 1084 Pathogen[ P03410] interacts with 2 human partners:{O14508;P40763}  
 1085 Pathogen[ P0C206] interacts with 4 human partners:{O15524;O14508;P40763;P42224}  
 1086 Pathogen[ P03363] interacts with 2 human partners:{O15524;O14508}  
 1087 [Cluster 182]GO:0071420+P biological\_process [name] cellular response to histamine [def] "Any process that results in a change in state or activity of a cell (in terms of movement, secretion, enzyme production, gene expression, etc.) as a result of a histamine stimulus. Histamine, the biogenic amine 2-(1H-imidazol-4-yl)ethanamine, is involved in local immune responses as well as regulating physiological function in the gut and acting as a neurotransmitter." [GOC  
 1088 Pathogen[ P14079] interacts with 1 human partners:{O60610}  
 1089 Pathogen[ P03410] interacts with 1 human partners:{O60610}

1090 [Cluster 183]GO:0030970+P biological\_process [name] retrograde protein transport, ER to cytosol [def] "The directed movement of unfolded or misfolded proteins from the endoplasmic reticulum to the cytosol through the translocon." [PMID

1091 Pathogen[ Q2Q067] interacts with 1 human partners:{Q9BQE4}

1092 Pathogen[ P0C214] interacts with 2 human partners:{Q9BQE4;P55072}

1093 Pathogen[ P03346] interacts with 2 human partners:{P55072;Q9BUN8}

1094 Pathogen[ Q85601] interacts with 1 human partners:{Q9BQE4}

1095 Pathogen[ P14079] interacts with 4 human partners:{P60468;Q9BQE4;Q9GZP9;Q9BUN8}

1096 Pathogen[ P03383] interacts with 2 human partners:{Q9BUN8;Q9BQE4}

1097 Pathogen[ P03410] interacts with 4 human partners:{P60468;Q9GZP9;Q9BQE4;Q9BUN8}

1098 Pathogen[ P14075] interacts with 2 human partners:{Q9BQE4;Q9BUN8}

1099 Pathogen[ P0C206] interacts with 4 human partners:{Q9BQE4;Q9BUN8;Q9GZP9;P55072}

1100 [Cluster 184]GO:0051024+P biological\_process [name] positive regulation of immunoglobulin secretion [def] "Any process that activates or increases the frequency, rate or extent of the regulated release of immunoglobulins from a cell or group of cells." [GOC

1101 Pathogen[ P14079] interacts with 1 human partners:{O95760}

1102 Pathogen[ P03410] interacts with 1 human partners:{O95760}

1103 [Cluster 185]GO:0030277+P biological\_process [name] maintenance of gastrointestinal epithelium [def] "Protection of epithelial surfaces of the gastrointestinal tract from proteolytic and caustic digestive agents." [GOC

1104 Pathogen[ P0C214] interacts with 1 human partners:{P01011}

1105 Pathogen[ Q85601] interacts with 1 human partners:{P01011}

1106 Pathogen[ P03410] interacts with 1 human partners:{P01011}

1107 Pathogen[ P0C206] interacts with 1 human partners:{P01011}

1108 [Cluster 186]GO:0000917+P biological\_process [name] barrier septum assembly [def] "The assembly and arrangement of a septum that spans the plasma membrane interface between progeny cells following cytokinesis. The progeny cells that form a barrier septum are not able to exchange intracellular material." [GOC

1109 Pathogen[ P03346] interacts with 1 human partners:{Q9NQY0}

1110 Pathogen[ P14079] interacts with 1 human partners:{Q8N3Z3}

1111 Pathogen[ P03410] interacts with 2 human partners:{Q9NQY0;Q8N3Z3}

1112 Pathogen[ P0C206] interacts with 1 human partners:{Q9NQY0}

1113 Pathogen[ P03363] interacts with 1 human partners:{Q9NQY0}

1114 [Cluster 187]GO:0071279+P biological\_process [name] cellular response to cobalt ion [def] "Any process that results in a change in state or activity of a cell (in terms of movement, secretion, enzyme production, gene expression, etc.) as a result of a cobalt ion stimulus." [GOC

1115 Pathogen[ Q2Q067] interacts with 1 human partners:{Q12983}

1116 Pathogen[ P0C214] interacts with 1 human partners:{Q12983}

1117 Pathogen[ P03346] interacts with 1 human partners:{Q12983}

1118 Pathogen[ Q85601] interacts with 1 human partners:{Q12983}

1119 Pathogen[ P14079] interacts with 1 human partners:{Q12983}

1120 Pathogen[ P03383] interacts with 1 human partners:{Q12983}

1121 Pathogen[ P03410] interacts with 1 human partners:{Q12983}

1122 Pathogen[ P14075] interacts with 1 human partners:{Q12983}

1123 Pathogen[ P0C206] interacts with 1 human partners:{Q12983}

1124 [Cluster 188]GO:0006572+P biological\_process [name] tyrosine catabolic process [def] "The chemical reactions and pathways resulting in the breakdown of tyrosine, an aromatic amino acid, 2-amino-3-(4-hydroxyphenyl)propanoic acid." [GOC

1125 Pathogen[ Q2Q067] interacts with 1 human partners:{O43708}

1126 Pathogen[ P0C214] interacts with 1 human partners:{O43708}

1127 Pathogen[ P03346] interacts with 1 human partners:{O43708}

1128 Pathogen[ Q85601] interacts with 1 human partners:{O43708}

1129 Pathogen[ P14079] interacts with 3 human partners:{Q93099;O43708;P16930}

1130 Pathogen[ P03410] interacts with 3 human partners:{O43708;Q93099;P16930}

1131 Pathogen[ P0C206] interacts with 1 human partners:{O43708}

1132 Pathogen[ P03363] interacts with 1 human partners:{O43708}

1133 [Cluster 189]GO:0014813+P biological\_process [name] satellite cell commitment [def] "The process in which the developmental fate of a cell becomes restricted such that it will develop into a satellite cell." [GOC

1134 Pathogen[ P03346] interacts with 1 human partners:{P23759}

1135 Pathogen[ P03363] interacts with 1 human partners:{P23759}

1136 [Cluster 190]GO:0051452+P biological\_process [name] intracellular pH reduction [def] "Any process that reduces the internal pH of a cell, measured by the concentration of the hydrogen ion." [GOC

1137 Pathogen[ P14079] interacts with 1 human partners:{B7ZAQ6}

1138 Pathogen[ P03410] interacts with 1 human partners:{B7ZAQ6}

1139 Pathogen[ P0C206] interacts with 1 human partners:{B7ZAQ6}

1140 [Cluster 191]GO:0007190+P biological\_process [name] activation of adenylate cyclase activity [def] "Any process that initiates the activity of the inactive enzyme adenylate cyclase." [GOC

1141 Pathogen[ P14079] interacts with 2 human partners:{Q01518;P40123}

1142 Pathogen[ P03410] interacts with 2 human partners:{P40123;Q01518}

1143 [Cluster 192]GO:0072236+P biological\_process [name] metanephric loop of Henle development [def] "The process whose specific outcome is the progression of the

metanephric loop of Henle over time, from its formation to the mature structure. The metanephric loop of Henle is a metanephric nephron tubule that connects the proximal convoluted tubule to the distal convoluted tubule in the metanephros." [GOC

1144 Pathogen[ P03346] interacts with 1 human partners:{P20264}

1145 Pathogen[ P03363] interacts with 1 human partners:{P20264}

1146 [Cluster 193]GO:0006781+P biological\_process [name] succinyl-CoA pathway [def] "The chemical reactions that utilize succinyl-CoA in the synthesis of protoporphyrin IX." [GOC

1147 Pathogen[ Q2Q067] interacts with 1 human partners:{Q9P2R7}

1148 Pathogen[ P0C214] interacts with 1 human partners:{Q9P2R7}

1149 Pathogen[ Q85601] interacts with 1 human partners:{Q9P2R7}

1150 Pathogen[ P14079] interacts with 1 human partners:{Q9P2R7}

1151 Pathogen[ P03383] interacts with 1 human partners:{Q9P2R7}

1152 Pathogen[ P03410] interacts with 1 human partners:{Q9P2R7}

1153 Pathogen[ P14075] interacts with 1 human partners:{Q9P2R7}

1154 Pathogen[ P0C206] interacts with 1 human partners:{Q9P2R7}

1155 [Cluster 194]GO:0060602+P biological\_process [name] branch elongation of an epithelium [def] "The growth process in which a branch increases in length from its base to its tip." [GOC

1156 Pathogen[ P03346] interacts with 1 human partners:{P35453}

1157 Pathogen[ P03363] interacts with 1 human partners:{P35453}

1158 [Cluster 195]GO:0061053+P biological\_process [name] somite development [def] "The progression of a somite from its initial formation to the mature structure. Somites are mesodermal clusters that are arranged segmentally along the anterior posterior axis of an embryo." [GOC

1159 Pathogen[ P03346] interacts with 1 human partners:{Q06190}

1160 Pathogen[ P14079] interacts with 1 human partners:{Q06190}

1161 Pathogen[ P03410] interacts with 1 human partners:{Q06190}

1162 Pathogen[ P0C206] interacts with 1 human partners:{Q06190}

1163 Pathogen[ P03363] interacts with 1 human partners:{Q06190}

1164 [Cluster 196]GO:0060375+P biological\_process [name] regulation of mast cell differentiation [def] "Any process that modulates the rate, frequency or extent of mast cell differentiation, the process in which a relatively unspecialized myeloid precursor cell acquires the specialized features of a mast cell. A mast cell is a cell that is found in almost all tissues containing numerous basophilic granules and capable of releasing large amounts of histamine and heparin upon activation." [GOC

1165 Pathogen[ P03346] interacts with 1 human partners:{P17542}

1166 [Cluster 197]GO:0003014+P biological\_process [name] renal system process [def] "A organ system process carried out by any of the organs or tissues of the renal system. The renal system is responsible for fluid volume regulation and detoxification in an organism." [GOC

1167 Pathogen[ Q2Q067] interacts with 1 human partners:{Q7LG56}

1168 Pathogen[ P0C214] interacts with 1 human partners:{Q7LG56}

1169 Pathogen[ P03346] interacts with 1 human partners:{Q7LG56}

1170 Pathogen[ Q85601] interacts with 1 human partners:{Q7LG56}

1171 Pathogen[ P14079] interacts with 1 human partners:{Q7LG56}

1172 Pathogen[ P03410] interacts with 1 human partners:{Q7LG56}

1173 Pathogen[ P0C206] interacts with 1 human partners:{Q7LG56}

1174 [Cluster 198]GO:0044029+P biological\_process [name] hypomethylation of CpG island [def] "An decrease in the epigenetic methylation of cytosine and adenosine residues in a CpG island in DNA. CpG islands are genomic regions that contain a high frequency of the CG dinucleotide and are often associated with the transcription start site of genes." [GOC

1175 Pathogen[ Q2Q067] interacts with 1 human partners:{Q9UI56}

1176 Pathogen[ P0C214] interacts with 1 human partners:{Q9UI56}

1177 Pathogen[ P03346] interacts with 1 human partners:{Q9UI56}

1178 Pathogen[ P14079] interacts with 1 human partners:{Q9UI56}

1179 Pathogen[ P03383] interacts with 1 human partners:{Q9UI56}

1180 Pathogen[ P03410] interacts with 1 human partners:{Q9UI56}

1181 Pathogen[ P14075] interacts with 1 human partners:{Q9UI56}

1182 Pathogen[ P0C206] interacts with 1 human partners:{Q9UI56}

1183 Pathogen[ P03363] interacts with 1 human partners:{Q9UI56}

1184 [Cluster 199]GO:0009249+P biological\_process [name] protein lipoylation [def] "The addition of a lipoyl group to an amino acid residue in a protein." [GOC

1185 Pathogen[ Q2Q067] interacts with 1 human partners:{P30419}

1186 Pathogen[ P0C214] interacts with 3 human partners:{O60551;O14561;P30419}

1187 Pathogen[ Q85601] interacts with 2 human partners:{O60551;P30419}

1188 Pathogen[ P14079] interacts with 5 human partners:{Q16517;O14561;O60551;P30419;Q9Y234}

1189 Pathogen[ P03410] interacts with 5 human partners:{O60551;Q16517;P30419;Q9Y234;O14561}

1190 Pathogen[ P14075] interacts with 1 human partners:{O14561}

1191 Pathogen[ P0C206] interacts with 4 human partners:{Q9Y234;P30419;O14561;O60551}

1192 [Cluster 200]GO:0070541+P biological\_process [name] response to platinum ion [def] "Any process that results in a change in state or activity of a cell or an organism (in terms of movement, secretion, enzyme production, gene expression, etc.) as a result of a

platinum stimulus." [GOC  
1193 Pathogen[ POC214] interacts with 1 human partners:{P22830}  
1194 Pathogen[ P14079] interacts with 1 human partners:{P22830}  
1195 Pathogen[ P03410] interacts with 1 human partners:{P22830}  
1196 Pathogen[ POC206] interacts with 1 human partners:{P22830}  
1197 [Cluster 201]GO:0042998+P biological\_process [name] positive regulation of Golgi to plasma membrane protein transport [def] "Any process that activates or increases the frequency, rate or extent of the transport of proteins from the Golgi to the plasma membrane." [GOC  
1198 Pathogen[ P14079] interacts with 1 human partners:{Q6PJW8}  
1199 Pathogen[ P03410] interacts with 1 human partners:{Q6PJW8}  
1200 Pathogen[ POC206] interacts with 1 human partners:{Q6PJW8}  
1201 [Cluster 202]GO:0006720+P biological\_process [name] isoprenoid metabolic process [def] "The chemical reactions and pathways involving isoprenoid compounds, isoprene (2-methylbuta-1,3-diene) or compounds containing or derived from linked isoprene (3-methyl-2-butenylene) residues." [ISBN  
1202 Pathogen[ POC214] interacts with 1 human partners:{O14832}  
1203 Pathogen[ P14079] interacts with 1 human partners:{O14832}  
1204 Pathogen[ P03410] interacts with 1 human partners:{O14832}  
1205 Pathogen[ P14075] interacts with 1 human partners:{O14832}  
1206 Pathogen[ POC206] interacts with 1 human partners:{O14832}  
1207 [Cluster 203]GO:0051350+P biological\_process [name] negative regulation of lyase activity [def] "Any process that stops or reduces the rate of lyase activity, the catalysis of the cleavage of C-C, C-O, C-N and other bonds by other means than by hydrolysis or oxidation, or conversely adding a group to a double bond." [GOC  
1208 Pathogen[ P03346] interacts with 1 human partners:{Q9NRX4}  
1209 Pathogen[ P14079] interacts with 1 human partners:{Q9NRX4}  
1210 Pathogen[ P03410] interacts with 1 human partners:{Q9NRX4}  
1211 Pathogen[ POC206] interacts with 1 human partners:{Q9NRX4}  
1212 [Cluster 204]GO:0046655+P biological\_process [name] folic acid metabolic process [def] "The chemical reactions and pathways involving folic acid, pteroylglutamic acid. Folic acid is widely distributed as a member of the vitamin B complex and is essential for the synthesis of purine and pyrimidines." [ISBN  
1213 Pathogen[ Q2Q067] interacts with 1 human partners:{P34896}  
1214 Pathogen[ POC214] interacts with 5 human partners:{Q05932;P42898;P00374;P34896;P11586}  
1215 Pathogen[ Q85601] interacts with 1 human partners:{P34896}  
1216 Pathogen[ P14079] interacts with 5 human partners:{P00374;Q96NT5;Q05932;P34896;P42898}  
1217 Pathogen[ P03383] interacts with 1 human partners:{P34896}  
1218 Pathogen[ P03410] interacts with 4 human partners:{P00374;P42898;Q05932;P34896}  
1219 Pathogen[ P14075] interacts with 1 human partners:{P34896}  
1220 Pathogen[ POC206] interacts with 2 human partners:{P34896;Q05932}  
1221 [Cluster 205]GO:0046060+P biological\_process [name] dATP metabolic process [def] "The chemical reactions and pathways involving dATP, deoxyadenosine triphosphate (2'-deoxyadenosine 5'-triphosphate)." [GOC  
1222 Pathogen[ P14079] interacts with 1 human partners:{O60502}  
1223 Pathogen[ P03410] interacts with 1 human partners:{O60502}  
1224 [Cluster 206]GO:0001980+P biological\_process [name] regulation of systemic arterial blood pressure by ischemic conditions [def] "The process that modulates blood pressure by the detection of carbon dioxide levels in the brain stem. Increased levels activate the sympathetic vasoconstrictor mechanism increasing the force with which blood flows through the circulatory system." [GOC  
1225 Pathogen[ POC214] interacts with 1 human partners:{P19429}  
1226 Pathogen[ P14079] interacts with 1 human partners:{P19429}  
1227 Pathogen[ P03410] interacts with 1 human partners:{P19429}  
1228 Pathogen[ POC206] interacts with 1 human partners:{P19429}  
1229 Pathogen[ P03363] interacts with 1 human partners:{P19429}  
1230 [Cluster 207]GO:0034261+P biological\_process [name] negative regulation of Ras GTPase activity [def] "Any process that stops or reduces the rate of activity of a GTPase of the Ras superfamily." [GOC  
1231 Pathogen[ P14079] interacts with 1 human partners:{O43597}  
1232 Pathogen[ P03410] interacts with 1 human partners:{O43597}  
1233 Pathogen[ POC206] interacts with 1 human partners:{O43597}  
1234 [Cluster 208]GO:0019303+P biological\_process [name] D-ribose catabolic process [def] "The chemical reactions and pathways resulting in the breakdown of D-ribose (ribo-pentose)." [ISBN  
1235 Pathogen[ P14079] interacts with 1 human partners:{Q9UKK9}  
1236 Pathogen[ P03410] interacts with 1 human partners:{Q9UKK9}  
1237 [Cluster 209]GO:0010767+P biological\_process [name] regulation of transcription from RNA polymerase II promoter in response to UV-induced DNA damage [def] "Any process that modulates the frequency, rate or extent of transcription from an RNA polymerase II promoter as a result of a UV damage stimulus." [GOC  
1238 Pathogen[ Q2Q067] interacts with 1 human partners:{O14757}  
1239 Pathogen[ POC214] interacts with 1 human partners:{O14757}  
1240 Pathogen[ P03346] interacts with 1 human partners:{O14757}

1241 Pathogen[ Q85601] interacts with 1 human partners:{O14757}

1242 Pathogen[ P03383] interacts with 1 human partners:{O14757}

1243 Pathogen[ P03410] interacts with 1 human partners:{O14757}

1244 Pathogen[ P14075] interacts with 1 human partners:{O14757}

1245 Pathogen[ P03363] interacts with 1 human partners:{O14757}

1246 [Cluster 210]GO:0034337+P biological\_process [name] RNA folding [def] "The process of assisting in the covalent and noncovalent assembly of single or multimeric RNAs into the correct tertiary structure." [GOC

1247 Pathogen[ Q2Q067] interacts with 1 human partners:{Q9UI56}

1248 Pathogen[ P0C214] interacts with 1 human partners:{Q9UI56}

1249 Pathogen[ P03346] interacts with 1 human partners:{Q9UI56}

1250 Pathogen[ P14079] interacts with 1 human partners:{Q9UI56}

1251 Pathogen[ P03383] interacts with 1 human partners:{Q9UI56}

1252 Pathogen[ P03410] interacts with 1 human partners:{Q9UI56}

1253 Pathogen[ P14075] interacts with 1 human partners:{Q9UI56}

1254 Pathogen[ P0C206] interacts with 1 human partners:{Q9UI56}

1255 Pathogen[ P03363] interacts with 1 human partners:{Q9UI56}

1256 [Cluster 211]GO:0051345+P biological\_process [name] positive regulation of hydrolase activity [def] "Any process that activates or increases the frequency, rate or extent of hydrolase activity, the catalysis of the hydrolysis of various bonds." [GOC

1257 Pathogen[ P03346] interacts with 1 human partners:{P07148}

1258 [Cluster 212]GO:0046185+P biological\_process [name] aldehyde catabolic process [def] "The chemical reactions and pathways resulting in the breakdown of aldehydes, any organic compound with the formula R-CH=O." [GOC

1259 Pathogen[ Q2Q067] interacts with 1 human partners:{P06744}

1260 Pathogen[ P03346] interacts with 1 human partners:{P06744}

1261 Pathogen[ Q85601] interacts with 1 human partners:{P06744}

1262 Pathogen[ P14079] interacts with 1 human partners:{P06744}

1263 Pathogen[ P03383] interacts with 1 human partners:{P06744}

1264 Pathogen[ P03410] interacts with 1 human partners:{P06744}

1265 Pathogen[ P14075] interacts with 1 human partners:{P06744}

1266 Pathogen[ P0C206] interacts with 1 human partners:{P06744}

1267 Pathogen[ P03363] interacts with 1 human partners:{P06744}

1268 [Cluster 213]GO:0030705+P biological\_process [name] cytoskeleton-dependent intracellular transport [def] "The directed movement of substances along cytoskeletal elements such as microfilaments or microtubules within a cell." [GOC

1269 Pathogen[ P14079] interacts with 1 human partners:{P68363}

1270 Pathogen[ P03410] interacts with 2 human partners:{O60333;P68363}

1271 Pathogen[ P03363] interacts with 2 human partners:{P68363;O60333}

1272 [Cluster 214]GO:0050975+P biological\_process [name] sensory perception of touch [def] "The series of events required for an organism to receive a touch stimulus, convert it to a molecular signal, and recognize and characterize the signal. This is a neurological process. The perception of touch in animals is mediated by mechanoreceptors in the skin and mucous membranes and is the sense by which contact with objects gives evidence as to certain of their qualities. Different types of touch can be perceived (for example, light, coarse, pressure and tickling) and the stimulus may be external or internal (e.g. the feeling of a full stomach)." [GOC

1273 Pathogen[ Q2Q067] interacts with 1 human partners:{Q63HK5}

1274 Pathogen[ P0C214] interacts with 1 human partners:{Q63HK5}

1275 Pathogen[ P03346] interacts with 1 human partners:{Q63HK5}

1276 Pathogen[ Q85601] interacts with 1 human partners:{Q63HK5}

1277 Pathogen[ P14079] interacts with 1 human partners:{Q63HK5}

1278 Pathogen[ P03410] interacts with 1 human partners:{Q63HK5}

1279 Pathogen[ P0C206] interacts with 1 human partners:{Q63HK5}

1280 Pathogen[ P03363] interacts with 1 human partners:{Q63HK5}

1281 [Cluster 215]GO:0042706+P biological\_process [name] eye photoreceptor cell fate commitment [def] "The process in which the developmental fate of a cell becomes restricted such that it will develop into an eye photoreceptor cell. A photoreceptor cell is a cell that responds to incident electromagnetic radiation. Different classes of photoreceptor have different spectral sensitivities and express different photosensitive pigments." [GOC

1282 Pathogen[ P0C214] interacts with 1 human partners:{P32243}

1283 Pathogen[ P03346] interacts with 1 human partners:{P32243}

1284 Pathogen[ Q85601] interacts with 1 human partners:{P32243}

1285 Pathogen[ P14079] interacts with 1 human partners:{P32243}

1286 Pathogen[ P03383] interacts with 1 human partners:{P32243}

1287 Pathogen[ P03410] interacts with 1 human partners:{P32243}

1288 Pathogen[ P14075] interacts with 1 human partners:{P32243}

1289 Pathogen[ P0C206] interacts with 1 human partners:{P32243}

1290 Pathogen[ P03363] interacts with 1 human partners:{P32243}

1291 [Cluster 216]GO:0055013+P biological\_process [name] cardiac muscle cell development [def] "The process whose specific outcome is the progression of a cardiac muscle cell over time, from its formation to the mature state." [GOC

1292 Pathogen[ P14079] interacts with 1 human partners:{Q702N8}

1293 Pathogen[ P03410] interacts with 1 human partners:{Q702N8}

1294 [Cluster 217]GO:0035965+P biological\_process [name] cardiolipin acyl-chain remodeling

[def] "Remodeling the acyl chains of premature (de novo synthesized) cardiolipin (1,3-bis(3-phosphatidyl)glycerol), through sequential deacylation and re-acylation reactions, to generate mature cardiolipin containing high-levels of unsaturated fatty acids." [GOC

1295 Pathogen[ Q2Q067] interacts with 1 human partners:{Q8N1Q8}

1296 Pathogen[ POC214] interacts with 2 human partners:{P40939;Q8N1Q8}

1297 Pathogen[ P03346] interacts with 1 human partners:{Q8N1Q8}

1298 Pathogen[ Q85601] interacts with 1 human partners:{Q8N1Q8}

1299 Pathogen[ P14079] interacts with 1 human partners:{Q8N1Q8}

1300 Pathogen[ P03383] interacts with 1 human partners:{Q8N1Q8}

1301 Pathogen[ P03410] interacts with 2 human partners:{Q8N1Q8;Q16635}

1302 Pathogen[ P14075] interacts with 1 human partners:{Q8N1Q8}

1303 Pathogen[ POC206] interacts with 1 human partners:{Q8N1Q8}

1304 [Cluster 218]GO:0060512+P biological\_process [name] prostate gland morphogenesis [def] "The process in which the anatomical structures of a prostate gland are generated and organized." [GOC

1305 Pathogen[ POC214] interacts with 1 human partners:{P36952}

1306 Pathogen[ Q85601] interacts with 1 human partners:{P36952}

1307 Pathogen[ P03383] interacts with 1 human partners:{P36952}

1308 Pathogen[ P03410] interacts with 1 human partners:{P36952}

1309 Pathogen[ POC206] interacts with 1 human partners:{P36952}

1310 Pathogen[ P03363] interacts with 1 human partners:{P36952}

1311 [Cluster 219]GO:0009056+P biological\_process [name] catabolic process [def] "The chemical reactions and pathways resulting in the breakdown of substances, including the breakdown of carbon compounds with the liberation of energy for use by the cell or organism." [ISBN

1312 Pathogen[ P14079] interacts with 1 human partners:{Q96BW5}

1313 Pathogen[ P03410] interacts with 1 human partners:{Q96BW5}

1314 Pathogen[ POC206] interacts with 1 human partners:{Q96BW5}

1315 [Cluster 220]GO:0010842+P biological\_process [name] retina layer formation [def] "The process in which the vertebrate retina is organized into three laminae

1316 Pathogen[ Q2Q067] interacts with 1 human partners:{Q9NS56}

1317 Pathogen[ POC214] interacts with 2 human partners:{P05937;Q9NS56}

1318 Pathogen[ P03346] interacts with 5 human partners:{P05937;Q86Z02;Q9NS56;Q8N157;Q92481}

1319 Pathogen[ Q85601] interacts with 1 human partners:{Q9NS56}

1320 Pathogen[ P14079] interacts with 3 human partners:{P05937;Q8N157;Q9NS56}

1321 Pathogen[ P03410] interacts with 2 human partners:{P05937;Q8N157}

1322 Pathogen[ POC206] interacts with 2 human partners:{Q9NS56;Q8N157}

1323 Pathogen[ P03363] interacts with 2 human partners:{Q8N157;P05937}

1324 [Cluster 221]GO:0032854+P biological\_process [name] positive regulation of Rap GTPase activity [def] "Any process that activates or increases the activity of a GTPase of the Rap family." [GOC

1325 Pathogen[ P03346] interacts with 1 human partners:{Q96FS4}

1326 Pathogen[ P03363] interacts with 1 human partners:{Q96FS4}

1327 [Cluster 222]GO:0033189+P biological\_process [name] response to vitamin A [def] "Any process that results in a change in state or activity of a cell or an organism (in terms of movement, secretion, enzyme production, gene expression, etc.) as a result of a vitamin A stimulus." [GOC

1328 Pathogen[ POC214] interacts with 1 human partners:{P05543}

1329 Pathogen[ P14079] interacts with 1 human partners:{P11686}

1330 Pathogen[ P03410] interacts with 1 human partners:{P11686}

1331 [Cluster 223]GO:0048499+P biological\_process [name] synaptic vesicle membrane organization [def] "A process that is carried out at the cellular level which results in the assembly, arrangement of constituent parts, or disassembly of the membrane surrounding a synaptic vesicle." [GOC

1332 Pathogen[ P03346] interacts with 1 human partners:{O14617}

1333 Pathogen[ P14079] interacts with 1 human partners:{O14617}

1334 Pathogen[ P03410] interacts with 1 human partners:{O14617}

1335 Pathogen[ POC206] interacts with 1 human partners:{O14617}

1336 [Cluster 224]GO:0010621+P biological\_process [name] negative regulation of transcription by transcription factor localization [def] "Any process that stops, prevents, or reduces the frequency, rate or extent of DNA-dependent transcription using a mechanism that involves the localization of a transcription factor." [GOC

1337 Pathogen[ Q2Q067] interacts with 1 human partners:{P41134}

1338 Pathogen[ POC214] interacts with 1 human partners:{P41134}

1339 Pathogen[ P03346] interacts with 1 human partners:{P41134}

1340 Pathogen[ Q85601] interacts with 1 human partners:{P41134}

1341 Pathogen[ P14079] interacts with 1 human partners:{P41134}

1342 Pathogen[ P03410] interacts with 1 human partners:{P41134}

1343 Pathogen[ POC206] interacts with 1 human partners:{P41134}

1344 Pathogen[ P03363] interacts with 1 human partners:{P41134}

1345 [Cluster 225]GO:0033274+P biological\_process [name] response to vitamin B2 [def] "Any process that results in a change in state or activity of a cell or an organism (in terms of movement, secretion, enzyme production, gene expression, etc.) as a result of a vitamin B2 stimulus." [GOC

1346 Pathogen[ Q2Q067] interacts with 1 human partners:{P49715}

1347 Pathogen[ P03346] interacts with 1 human partners:{P49715}

1348 Pathogen[ Q85601] interacts with 1 human partners:{P49715}

1349 Pathogen[ P14079] interacts with 1 human partners:{P49715}

1350 Pathogen[ P0C206] interacts with 1 human partners:{P49715}

1351 [Cluster 226]GO:0022615+P biological\_process [name] protein to membrane docking  
[def] "The initial attachment of a protein to a target membrane, mediated by a proteins protruding from the target membrane. Docking requires only that the proteins come close enough to interact and adhere." [GOC

1352 Pathogen[ P14079] interacts with 1 human partners:{Q9Y5Y5}

1353 Pathogen[ P03410] interacts with 1 human partners:{Q9Y5Y5}

1354 [Cluster 227]GO:0006707+P biological\_process [name] cholesterol catabolic process  
[def] "The chemical reactions and pathways resulting in the breakdown of cholesterol, cholest-5-en-3 beta-ol, the principal sterol of vertebrates and the precursor of many steroids, including bile acids and steroid hormones." [GOC

1355 Pathogen[ P03346] interacts with 1 human partners:{Q15036}

1356 Pathogen[ Q85601] interacts with 1 human partners:{Q15036}

1357 Pathogen[ P14079] interacts with 1 human partners:{Q15036}

1358 Pathogen[ P03410] interacts with 1 human partners:{Q15036}

1359 Pathogen[ P0C206] interacts with 1 human partners:{Q15036}

1360 [Cluster 228]GO:0060018+P biological\_process [name] astrocyte fate commitment  
[def] "The commitment of a cells to a specific astrocyte fate and its restriction to develop only into an astrocyte." [GOC

1361 Pathogen[ P03346] interacts with 2 human partners:{Q9NP62;P17542}

1362 Pathogen[ P0C206] interacts with 1 human partners:{Q9NP62}

1363 [Cluster 229]GO:0031342+P biological\_process [name] negative regulation of cell killing [def] "Any process that stops, prevents, or reduces the frequency, rate or extent of cell killing." [GOC

1364 Pathogen[ P0C214] interacts with 1 human partners:{P18054}

1365 Pathogen[ P03346] interacts with 1 human partners:{P18054}

1366 [Cluster 230]GO:0060174+P biological\_process [name] limb bud formation [def] "The process pertaining to the initial formation of a limb bud from unspecified parts. This process begins with the formation of a local condensation of mesenchyme cells within the prospective limb field, and ends when a limb bud is recognizable." [GOC

1367 Pathogen[ P03346] interacts with 1 human partners:{Q06945}

1368 [Cluster 231]GO:0050716+P biological\_process [name] positive regulation of interleukin-1 secretion [def] "Any process that activates or increases the frequency, rate or extent of the regulated release of interleukin-1 from a cell or group of cells." [GOC

1369 Pathogen[ P14079] interacts with 1 human partners:{P0DJ18}

1370 Pathogen[ P03410] interacts with 1 human partners:{P0DJ18}

1371 [Cluster 232]GO:0072017+P biological\_process [name] distal tubule development  
[def] "The process whose specific outcome is the progression of the distal tubule over time, from its formation to the mature structure. In mammals, the distal tubule is a nephron tubule that begins at the macula densa and extends to the connecting tubule." [GOC

1372 Pathogen[ P03346] interacts with 1 human partners:{Q92481}

1373 [Cluster 233]GO:0034389+P biological\_process [name] lipid particle organization  
[def] "A process that is carried out at the cellular level which results in the assembly, arrangement of constituent parts, or disassembly of a lipid particle." [GOC

1374 Pathogen[ P14079] interacts with 2 human partners:{Q8N6M3;A5D6W6}

1375 Pathogen[ P03410] interacts with 2 human partners:{A5D6W6;Q8N6M3}

1376 Pathogen[ P14075] interacts with 1 human partners:{Q8N6M3}

1377 Pathogen[ P0C206] interacts with 2 human partners:{A5D6W6;Q8N6M3}

1378 [Cluster 234]GO:0021508+P biological\_process [name] floor plate formation [def] "The formation of a ventral region of glial cells in the neural tube that provides inductive signals for the specification of neuronal cell types. The floor plate is evident at the ventral midline by the neural fold stage." [GO\_REF

1379 Pathogen[ P03346] interacts with 1 human partners:{O75593}

1380 [Cluster 235]GO:0045956+P biological\_process [name] positive regulation of calcium ion-dependent exocytosis [def] "Any process that activates or increases the frequency, rate or extent of calcium ion-dependent exocytosis." [GOC

1381 Pathogen[ Q2Q067] interacts with 1 human partners:{Q8TAC9}

1382 Pathogen[ P0C214] interacts with 1 human partners:{Q8TAC9}

1383 Pathogen[ P03346] interacts with 2 human partners:{Q8TAC9;Q9ULU8}

1384 Pathogen[ Q85601] interacts with 1 human partners:{Q8TAC9}

1385 Pathogen[ P14079] interacts with 2 human partners:{Q9ULU8;Q8TAC9}

1386 Pathogen[ P03383] interacts with 1 human partners:{Q8TAC9}

1387 Pathogen[ P03410] interacts with 2 human partners:{Q8TAC9;Q9ULU8}

1388 Pathogen[ P14075] interacts with 1 human partners:{Q8TAC9}

1389 Pathogen[ P0C206] interacts with 2 human partners:{Q9ULU8;Q8TAC9}

1390 [Cluster 236]GO:0033371+P biological\_process [name] T cell secretory granule organization [def] "A process that is carried out at the cellular level which results in the assembly, arrangement of constituent parts, or disassembly of a secretory granule in a T cell. A secretory granule is a small subcellular vesicle, surrounded by a membrane, that is formed from the Golgi apparatus and contains a highly concentrated



protein destined for secretion." [GOC

1391 Pathogen[ P0C214] interacts with 1 human partners:{P10124}

1392 Pathogen[ P14079] interacts with 1 human partners:{P10124}

1393 Pathogen[ P03383] interacts with 1 human partners:{P10124}

1394 Pathogen[ P03410] interacts with 1 human partners:{P10124}

1395 Pathogen[ P14075] interacts with 1 human partners:{P10124}

1396 Pathogen[ P0C206] interacts with 1 human partners:{P10124}

1397 [Cluster 237]GO:0035909+P biological\_process [name] aorta morphogenesis [def] "The process in which the anatomical structures of an aorta are generated and organized. An aorta is an artery that carries blood from the heart to other parts of the body." [GOC

1398 Pathogen[ Q2Q067] interacts with 1 human partners:{Q99502}

1399 Pathogen[ P0C214] interacts with 1 human partners:{Q99502}

1400 Pathogen[ P03346] interacts with 4 human partners:{Q99502;Q15475;Q92481;O75593}

1401 Pathogen[ Q85601] interacts with 1 human partners:{Q99502}

1402 Pathogen[ P14079] interacts with 1 human partners:{Q99502}

1403 Pathogen[ P03410] interacts with 1 human partners:{Q99502}

1404 Pathogen[ P14075] interacts with 1 human partners:{Q99502}

1405 Pathogen[ P0C206] interacts with 1 human partners:{Q99502}

1406 [Cluster 238]GO:0036148+P

1407 Pathogen[ P14079] interacts with 1 human partners:{Q9NZ20}

1408 Pathogen[ P03410] interacts with 1 human partners:{Q9NZ20}

1409 [Cluster 239]GO:0090312+P biological\_process [name] positive regulation of protein deacetylation [def] "Any process that increases the rate, frequency, or extent of protein deacetylation, the removal of an acetyl group from a protein amino acid. An acetyl group is CH3CO-, derived from acetic [ethanoic] acid." [GOC

1410 Pathogen[ Q2Q067] interacts with 1 human partners:{Q9HCU9}

1411 Pathogen[ P0C214] interacts with 1 human partners:{Q9HCU9}

1412 Pathogen[ P03346] interacts with 1 human partners:{Q9HCU9}

1413 Pathogen[ Q85601] interacts with 1 human partners:{Q9HCU9}

1414 Pathogen[ P14079] interacts with 1 human partners:{Q9HCU9}

1415 Pathogen[ P03383] interacts with 1 human partners:{Q9HCU9}

1416 Pathogen[ P14075] interacts with 1 human partners:{Q9HCU9}

1417 Pathogen[ P0C206] interacts with 1 human partners:{Q9HCU9}

1418 Pathogen[ P03363] interacts with 1 human partners:{Q9HCU9}

1419 [Cluster 240]GO:0015693+P biological\_process [name] magnesium ion transport [def] "The directed movement of magnesium (Mg) ions into, out of or within a cell, or between cells, by means of some agent such as a transporter or pore." [GOC

1420 Pathogen[ P14079] interacts with 6 human partners:{Q6NVV3;Q0D2K0;Q9H841;Q8N8Q9;Q6P499;Q7RTP0}

1421 Pathogen[ P03410] interacts with 6 human partners:{Q0D2K0;Q9H841;Q6NVV3;Q8N8Q9;Q7RTP0;Q6P499}

1422 [Cluster 241]GO:0045837+P biological\_process [name] negative regulation of membrane potential [def] "Any process that stops, prevents, or reduces the frequency, rate or extent of establishment or extent of a membrane potential, the electric potential existing across any membrane arising from charges in the membrane itself and from the charges present in the media on either side of the membrane." [GOC

1423 Pathogen[ Q2Q067] interacts with 1 human partners:{Q12983}

1424 Pathogen[ P0C214] interacts with 1 human partners:{Q12983}

1425 Pathogen[ P03346] interacts with 1 human partners:{Q12983}

1426 Pathogen[ Q85601] interacts with 1 human partners:{Q12983}

1427 Pathogen[ P14079] interacts with 1 human partners:{Q12983}

1428 Pathogen[ P03383] interacts with 1 human partners:{Q12983}

1429 Pathogen[ P03410] interacts with 1 human partners:{Q12983}

1430 Pathogen[ P14075] interacts with 1 human partners:{Q12983}

1431 Pathogen[ P0C206] interacts with 1 human partners:{Q12983}

1432 [Cluster 242]GO:0048050+P biological\_process [name] post-embryonic eye morphogenesis [def] "The process, occurring after embryonic development, by which the anatomical structures of the eye are generated and organized. The eye is the organ of sight." [GOC

1433 Pathogen[ Q2Q067] interacts with 1 human partners:{Q8NDY6}

1434 Pathogen[ P0C214] interacts with 1 human partners:{Q8NDY6}

1435 Pathogen[ P03346] interacts with 1 human partners:{Q8NDY6}

1436 Pathogen[ Q85601] interacts with 1 human partners:{Q8NDY6}

1437 Pathogen[ P14079] interacts with 1 human partners:{Q8NDY6}

1438 Pathogen[ P03410] interacts with 1 human partners:{Q8NDY6}

1439 Pathogen[ P0C206] interacts with 1 human partners:{Q8NDY6}

1440 Pathogen[ P03363] interacts with 1 human partners:{Q8NDY6}

1441 [Cluster 243]GO:0048621+P biological\_process [name] post-embryonic digestive tract morphogenesis [def] "The process, occurring during the post-embryonic phase, by which the anatomical structures of the digestive tract are generated and organized. The digestive tract is the anatomical structure through which food passes and is processed." [GOC

1442 Pathogen[ P03346] interacts with 1 human partners:{Q8TAU0}

1443 Pathogen[ P0C206] interacts with 1 human partners:{Q8TAU0}

1444 Pathogen[ P03363] interacts with 1 human partners:{Q8TAU0}

1445 [Cluster 244]GO:0006547+P biological\_process [name] histidine metabolic process [def] "The chemical reactions and pathways involving histidine,

2-amino-3-(1H-imidazol-4-yl)propanoic acid." [GOC

1446 Pathogen[ Q2Q067] interacts with 1 human partners:{Q96NU7}

1447 Pathogen[ P0C214] interacts with 1 human partners:{Q96NU7}

1448 Pathogen[ P03346] interacts with 1 human partners:{Q96NU7}

1449 Pathogen[ P14079] interacts with 4 human partners:{P42357;Q96NU7;Q96N76;O95954}

1450 Pathogen[ P03410] interacts with 3 human partners:{O95954;Q96NU7;Q96N76}

1451 Pathogen[ P14075] interacts with 1 human partners:{Q96NU7}

1452 Pathogen[ P0C206] interacts with 2 human partners:{O95954;Q96NU7}

1453 [Cluster 245]GO:0001771+P biological\_process [name] immunological synapse formation  
[def] "The formation of an area of close contact between a lymphocyte (T-, B-, or natural killer cell) and a target cell through the clustering of particular signaling and adhesion molecules and their associated membrane rafts on both the lymphocyte and target cell, which facilitates activation of the lymphocyte, transfer of membrane from the target cell to the lymphocyte, and in some situations killing of the target cell through release of secretory granules and/or death-pathway ligand-receptor interaction." [GOC

1454 Pathogen[ Q2Q067] interacts with 1 human partners:{Q12959}

1455 Pathogen[ P0C214] interacts with 1 human partners:{Q12959}

1456 Pathogen[ P03346] interacts with 1 human partners:{Q12959}

1457 Pathogen[ Q85601] interacts with 1 human partners:{Q12959}

1458 Pathogen[ P03410] interacts with 1 human partners:{Q12959}

1459 Pathogen[ P0C206] interacts with 1 human partners:{Q12959}

1460 Pathogen[ P03363] interacts with 1 human partners:{Q12959}

1461 [Cluster 246]GO:0018872+P biological\_process [name] arsonoacetate metabolic process  
[def] "The chemical reactions and pathways involving arsonoacetate, a synthetic, organic compound containing a single arsenic atom. Arsonoacetate and other arsenic containing compounds are used in agricultural applications as animal feed additives, cotton defoliants and post-emergence grass herbicides." [UM-BBD\_pathwayID

1462 Pathogen[ P0C214] interacts with 1 human partners:{Q9HBK9}

1463 Pathogen[ P03346] interacts with 1 human partners:{Q9HBK9}

1464 Pathogen[ P14079] interacts with 1 human partners:{Q9HBK9}

1465 Pathogen[ P03410] interacts with 1 human partners:{Q9HBK9}

1466 Pathogen[ P0C206] interacts with 1 human partners:{Q9HBK9}

1467 Pathogen[ P03363] interacts with 1 human partners:{Q9HBK9}

1468 [Cluster 247]GO:0007079+P biological\_process [name] mitotic chromosome movement towards spindle pole [def] "The cell cycle process in which the directed movement of chromosomes from the center of the spindle towards the spindle poles occurs. This mediates by the shortening of microtubules attached to the chromosomes, during mitosis." [GOC

1469 Pathogen[ Q2Q067] interacts with 1 human partners:{Q15398}

1470 Pathogen[ P0C214] interacts with 1 human partners:{Q15398}

1471 Pathogen[ P03346] interacts with 1 human partners:{Q15398}

1472 Pathogen[ Q85601] interacts with 1 human partners:{Q15398}

1473 Pathogen[ P14079] interacts with 1 human partners:{Q15398}

1474 Pathogen[ P03410] interacts with 1 human partners:{Q15398}

1475 Pathogen[ P0C206] interacts with 1 human partners:{Q15398}

1476 Pathogen[ P03363] interacts with 1 human partners:{Q15398}

1477 [Cluster 248]GO:0035336+P biological\_process [name] long-chain fatty-acyl-CoA metabolic process [def] "The chemical reactions and pathways involving long-chain fatty-acyl-CoAs, any derivative of coenzyme A in which the sulfhydryl group is in a thioester linkage with a long-chain fatty-acyl group. Long-chain fatty-acyl-CoAs have chain lengths ranging from C12-18." [ISBN

1478 Pathogen[ Q2Q067] interacts with 1 human partners:{Q8N1Q8}

1479 Pathogen[ P0C214] interacts with 1 human partners:{Q8N1Q8}

1480 Pathogen[ P03346] interacts with 1 human partners:{Q8N1Q8}

1481 Pathogen[ Q85601] interacts with 1 human partners:{Q8N1Q8}

1482 Pathogen[ P14079] interacts with 1 human partners:{Q8N1Q8}

1483 Pathogen[ P03383] interacts with 1 human partners:{Q8N1Q8}

1484 Pathogen[ P03410] interacts with 1 human partners:{Q8N1Q8}

1485 Pathogen[ P14075] interacts with 1 human partners:{Q8N1Q8}

1486 Pathogen[ P0C206] interacts with 1 human partners:{Q8N1Q8}

1487 [Cluster 249]GO:0071104+P biological\_process [name] response to interleukin-9 [def] "Any process that results in a change in state or activity of a cell or an organism (in terms of movement, secretion, enzyme production, gene expression, etc.) as a result of an interleukin-9 stimulus." [GOC

1488 Pathogen[ Q2Q067] interacts with 1 human partners:{Q99966}

1489 Pathogen[ P0C214] interacts with 1 human partners:{Q99966}

1490 Pathogen[ P03346] interacts with 1 human partners:{Q99966}

1491 Pathogen[ Q85601] interacts with 1 human partners:{Q99966}

1492 Pathogen[ P14079] interacts with 1 human partners:{Q99966}

1493 Pathogen[ P03410] interacts with 1 human partners:{Q99966}

1494 Pathogen[ P0C206] interacts with 1 human partners:{Q99966}

1495 [Cluster 250]GO:0006590+P biological\_process [name] thyroid hormone generation [def] "The formation of either of the compounds secreted by the thyroid gland, mainly thyroxine and triiodothyronine. This is achieved by the iodination and joining of tyrosine molecules to form the precursor thyroglobin, proteolysis of this precursor

gives rise to the thyroid hormones." [GOC

1496 Pathogen[ P14079] interacts with 1 human partners:{P01215}

1497 Pathogen[ P03383] interacts with 1 human partners:{P01215}

1498 Pathogen[ P03410] interacts with 1 human partners:{P01215}

1499 Pathogen[ P14075] interacts with 1 human partners:{P01215}

1500 Pathogen[ POC206] interacts with 1 human partners:{P01215}

1501 [Cluster 251]GO:0006313+P biological\_process [name] transposition, DNA-mediated  
[def] "Any process involved in a type of transpositional recombination which occurs via a DNA intermediate." [GOC

1502 Pathogen[ P03346] interacts with 1 human partners:{Q9H8Y1}

1503 Pathogen[ P14079] interacts with 1 human partners:{Q9H8Y1}

1504 Pathogen[ P03410] interacts with 1 human partners:{Q9H8Y1}

1505 Pathogen[ P14075] interacts with 1 human partners:{Q9H8Y1}

1506 Pathogen[ POC206] interacts with 1 human partners:{Q9H8Y1}

1507 Pathogen[ P03363] interacts with 1 human partners:{Q9H8Y1}

1508 [Cluster 252]GO:0048878+P biological\_process [name] chemical homeostasis [def] "Any biological process involved in the maintenance of an internal steady state of a chemical." [GOC

1509 Pathogen[ P14079] interacts with 1 human partners:{P35475}

1510 [Cluster 253]GO:000962+P biological\_process [name] positive regulation of mitochondrial RNA catabolic process [def] "Any process that activates or increases the frequency, rate or extent of the chemical reactions and pathways involving catabolism in the mitochondrion of RNA transcribed from the mitochondrial genome." [GOC

1511 Pathogen[ Q2Q067] interacts with 1 human partners:{Q8TCS8}

1512 Pathogen[ POC214] interacts with 1 human partners:{Q8TCS8}

1513 Pathogen[ P03346] interacts with 1 human partners:{Q8TCS8}

1514 Pathogen[ Q85601] interacts with 1 human partners:{Q8TCS8}

1515 Pathogen[ P14079] interacts with 1 human partners:{Q8TCS8}

1516 Pathogen[ P03383] interacts with 1 human partners:{Q8TCS8}

1517 Pathogen[ P03410] interacts with 1 human partners:{Q8TCS8}

1518 Pathogen[ P14075] interacts with 1 human partners:{Q8TCS8}

1519 Pathogen[ POC206] interacts with 1 human partners:{Q8TCS8}

1520 [Cluster 254]GO:0021516+P biological\_process [name] dorsal spinal cord development  
[def] "The process whose specific outcome is the progression of the dorsal region of the spinal cord over time, from its formation to the mature structure. The dorsal region of the mature spinal cord contains neurons that process and relay sensory input." [GO\_REF

1521 Pathogen[ Q2Q067] interacts with 2 human partners:{Q33E94;P40426}

1522 Pathogen[ POC214] interacts with 1 human partners:{Q33E94}

1523 Pathogen[ P03346] interacts with 4 human partners:{P40426;A6NJT0;P17481;Q33E94}

1524 Pathogen[ Q85601] interacts with 2 human partners:{Q33E94;P40426}

1525 Pathogen[ P03383] interacts with 1 human partners:{Q33E94}

1526 Pathogen[ P03410] interacts with 2 human partners:{P40426;Q33E94}

1527 Pathogen[ P14075] interacts with 1 human partners:{Q33E94}

1528 Pathogen[ POC206] interacts with 2 human partners:{P40426;Q33E94}

1529 Pathogen[ P03363] interacts with 4 human partners:{P17481;A6NJT0;Q33E94;P40426}

1530 [Cluster 255]GO:0032185+P biological\_process [name] septin cytoskeleton organization  
[def] "A process that is carried out at the cellular level which results in the assembly, arrangement of constituent parts, or disassembly of cytoskeletal structures comprising septin complexes and their associated proteins." [GOC

1531 Pathogen[ P14079] interacts with 1 human partners:{O95876}

1532 Pathogen[ P03410] interacts with 1 human partners:{O95876}

1533 Pathogen[ POC206] interacts with 1 human partners:{O95876}

1534 [Cluster 256]GO:0046782+P biological\_process [name] regulation of viral transcription  
[def] "Any process that modulates the frequency, rate or extent of the transcription of the viral genome." [GOC

1535 Pathogen[ Q2Q067] interacts with 1 human partners:{Q15633}

1536 Pathogen[ POC214] interacts with 1 human partners:{Q15633}

1537 Pathogen[ P03346] interacts with 1 human partners:{Q15633}

1538 Pathogen[ Q85601] interacts with 1 human partners:{Q15633}

1539 Pathogen[ P03383] interacts with 1 human partners:{Q15633}

1540 Pathogen[ P03410] interacts with 1 human partners:{Q15633}

1541 Pathogen[ P14075] interacts with 1 human partners:{Q15633}

1542 Pathogen[ POC206] interacts with 1 human partners:{Q15633}

1543 Pathogen[ P03363] interacts with 1 human partners:{Q15633}

1544 [Cluster 257]GO:0071526+P biological\_process [name] semaphorin-plexin signaling pathway  
[def] "A series of molecular signals generated as a consequence of a semaphorin receptor (composed of a plexin and a neuropilin) binding to a semaphorin ligand." [GOC

1545 Pathogen[ Q2Q067] interacts with 1 human partners:{O14786}

1546 Pathogen[ POC214] interacts with 1 human partners:{O14786}

1547 Pathogen[ P03346] interacts with 1 human partners:{O14786}

1548 Pathogen[ Q85601] interacts with 1 human partners:{O14786}

1549 Pathogen[ P03410] interacts with 1 human partners:{O14786}

1550 Pathogen[ POC206] interacts with 1 human partners:{O14786}

1551 Pathogen[ P03363] interacts with 1 human partners:{O14786}

1552 [Cluster 258]GO:0045580+P biological\_process [name] regulation of T cell differentiation  
[def] "Any process that modulates the frequency, rate or extent of T

cell differentiation." [GOC  
1553 Pathogen[ P14079] interacts with 1 human partners:{Q9BXL7}  
1554 Pathogen[ P03410] interacts with 1 human partners:{Q9BXL7}  
1555 [Cluster 259]GO:0050832+P biological\_process [name] defense response to fungus  
[def] "Reactions triggered in response to the presence of a fungus that act to protect  
the cell or organism." [GOC  
1556 Pathogen[ P0C214] interacts with 1 human partners:{Q14019}  
1557 Pathogen[ P03346] interacts with 1 human partners:{Q14019}  
1558 Pathogen[ P14079] interacts with 4 human partners:{P15515;P15516;P81172;Q14019}  
1559 Pathogen[ P03410] interacts with 4 human partners:{Q14019;P81172;P15515;P15516}  
1560 Pathogen[ P14075] interacts with 1 human partners:{P15515}  
1561 Pathogen[ P0C206] interacts with 2 human partners:{Q14019;P15515}  
1562 Pathogen[ P03363] interacts with 2 human partners:{P15515;Q14019}  
1563 [Cluster 260]GO:0032970+P biological\_process [name] regulation of actin  
filament-based process [def] "Any process that modulates the frequency, rate or extent  
of any cellular process that depends upon or alters the actin cytoskeleton." [GOC  
1564 Pathogen[ P03346] interacts with 1 human partners:{Q8TEW0}  
1565 Pathogen[ P14079] interacts with 2 human partners:{Q8TEW0;Q99439}  
1566 Pathogen[ P03410] interacts with 2 human partners:{Q99439;Q8TEW0}  
1567 Pathogen[ P0C206] interacts with 1 human partners:{Q8TEW0}  
1568 [Cluster 261]GO:0009789+P biological\_process [name] positive regulation of abscisic  
acid mediated signaling pathway [def] "Any process that activates or increases the  
frequency, rate or extent of abscisic acid mediated signal transduction." [GOC  
1569 Pathogen[ P14079] interacts with 1 human partners:{Q9NS86}  
1570 Pathogen[ P03410] interacts with 1 human partners:{Q9NS86}  
1571 Pathogen[ P0C206] interacts with 1 human partners:{Q9NS86}  
1572 [Cluster 262]GO:0006458+P biological\_process [name] 'de novo' protein folding  
[def] "The process of assisting in the folding of a nascent peptide chain into its  
correct tertiary structure." [GOC  
1573 Pathogen[ P0C214] interacts with 1 human partners:{P10809}  
1574 [Cluster 263]GO:0001915+P biological\_process [name] negative regulation of T cell  
mediated cytotoxicity [def] "Any process that stops, prevents, or reduces the rate of  
T cell mediated cytotoxicity." [GOC  
1575 Pathogen[ P14079] interacts with 1 human partners:{P16298}  
1576 [Cluster 264]GO:0030818+P biological\_process [name] negative regulation of cAMP  
biosynthetic process [def] "Any process that stops, prevents, or reduces the  
frequency, rate or extent of the chemical reactions and pathways resulting in the  
formation of the nucleotide cAMP (cyclic AMP, adenosine 3',5'-cyclophosphate)." [GOC  
1577 Pathogen[ P14079] interacts with 1 human partners:{O75781}  
1578 Pathogen[ P03410] interacts with 1 human partners:{O75781}  
1579 [Cluster 265]GO:0042779+P biological\_process [name] tRNA 3'-trailer cleavage [def]  
"Cleavage of the 3'-end of the pre-tRNA as part of the process of generating the mature  
3'-end of the tRNA\_ may involve endonucleolytic or exonucleolytic cleavage, or both."  
[GOC  
1580 Pathogen[ Q2Q067] interacts with 1 human partners:{Q9H777}  
1581 Pathogen[ P0C214] interacts with 1 human partners:{Q9H777}  
1582 Pathogen[ P03346] interacts with 1 human partners:{Q9H777}  
1583 Pathogen[ Q85601] interacts with 1 human partners:{Q9H777}  
1584 Pathogen[ P14079] interacts with 1 human partners:{Q9H777}  
1585 Pathogen[ P03383] interacts with 1 human partners:{Q9H777}  
1586 Pathogen[ P03410] interacts with 1 human partners:{Q9H777}  
1587 Pathogen[ P14075] interacts with 1 human partners:{Q9H777}  
1588 Pathogen[ P0C206] interacts with 1 human partners:{Q9H777}  
1589 [Cluster 266]GO:0010757+P biological\_process [name] negative regulation of  
plasminogen activation [def] "Any process that decreases the rate, frequency or extent  
of plasminogen activation. Plasminogen activation is the process in which plasminogen is  
processed to plasmin." [GOC  
1590 Pathogen[ Q2Q067] interacts with 1 human partners:{P08697}  
1591 Pathogen[ P0C214] interacts with 3 human partners:{P08697;P05121;P07093}  
1592 Pathogen[ Q85601] interacts with 3 human partners:{P08697;P05121;P07093}  
1593 Pathogen[ P03383] interacts with 1 human partners:{P08697}  
1594 Pathogen[ P03410] interacts with 2 human partners:{P05121;P08697}  
1595 Pathogen[ P14075] interacts with 1 human partners:{P08697}  
1596 Pathogen[ P0C206] interacts with 2 human partners:{P05121;P08697}  
1597 [Cluster 267]GO:0071108+P biological\_process [name] protein K48-linked  
deubiquitination [def] "A protein deubiquitination process in which a K48-linked  
ubiquitin chain, i.e. a polymer of ubiquitin formed by linkages between lysine residues  
at position 48 of the ubiquitin monomers, is removed from a protein." [GOC  
1598 Pathogen[ Q2Q067] interacts with 1 human partners:{Q86T82}  
1599 Pathogen[ P0C214] interacts with 1 human partners:{Q92560}  
1600 Pathogen[ P03346] interacts with 4 human partners:{Q92560;Q86T82;Q9UHP3;Q96FW1}  
1601 Pathogen[ Q85601] interacts with 2 human partners:{Q92560;Q86T82}  
1602 Pathogen[ P14079] interacts with 2 human partners:{Q92560;Q96FW1}  
1603 Pathogen[ P03410] interacts with 1 human partners:{Q96FW1}  
1604 Pathogen[ P14075] interacts with 1 human partners:{Q96FW1}  
1605 Pathogen[ P0C206] interacts with 4 human partners:{Q96FW1;Q86T82;Q9UHP3;Q92560}

1606 Pathogen[ P03363] interacts with 4 human partners:{Q9UHP3;Q92560;Q86T82;Q96FW1}

1607 [Cluster 268]GO:0051125+P biological\_process [name] regulation of actin nucleation  
[def] "Any process that modulates the frequency, rate or extent of actin nucleation, the initial step in the formation of an actin filament in which actin monomers combine to form a new filament." [GOC

1608 Pathogen[ P14079] interacts with 1 human partners:{P09327}

1609 [Cluster 269]GO:0021658+P biological\_process [name] rhombomere 3 morphogenesis  
[def] "The process in which the anatomical structure of rhombomere 3 is generated and organized. Rhombomeres are transverse segments of the developing rhombencephalon. Rhombomeres are lineage restricted, express different genes from one another, and adopt different developmental fates. Rhombomeres are numbered in an anterior to posterior order." [GO\_REF

1610 Pathogen[ Q2Q067] interacts with 1 human partners:{O43364}

1611 Pathogen[ P03346] interacts with 1 human partners:{O43364}

1612 Pathogen[ Q85601] interacts with 1 human partners:{O43364}

1613 Pathogen[ P14079] interacts with 1 human partners:{O43364}

1614 Pathogen[ P03410] interacts with 1 human partners:{O43364}

1615 Pathogen[ P0C206] interacts with 1 human partners:{O43364}

1616 Pathogen[ P03363] interacts with 1 human partners:{O43364}

1617 [Cluster 270]GO:2000761+P biological\_process [name] positive regulation of N-terminal peptidyl-lysine acetylation [def] "Any process that activates or increases the frequency, rate or extent of N-terminal peptidyl-lysine acetylation." [GOC

1618 Pathogen[ P03346] interacts with 1 human partners:{Q06945}

1619 [Cluster 271]GO:0010634+P biological\_process [name] positive regulation of epithelial cell migration [def] "Any process that activates or increases the frequency, rate or extent of epithelial cell migration." [GOC

1620 Pathogen[ Q2Q067] interacts with 1 human partners:{P49593}

1621 Pathogen[ P0C214] interacts with 1 human partners:{P49593}

1622 Pathogen[ P03346] interacts with 1 human partners:{P49593}

1623 Pathogen[ Q85601] interacts with 1 human partners:{P49593}

1624 Pathogen[ P14079] interacts with 2 human partners:{P09327;P49593}

1625 Pathogen[ P03410] interacts with 1 human partners:{P49593}

1626 Pathogen[ P0C206] interacts with 1 human partners:{P49593}

1627 [Cluster 272]GO:0035023+P biological\_process [name] regulation of Rho protein signal transduction [def] "Any process that modulates the frequency, rate or extent of Rho protein signal transduction." [GOC

1628 Pathogen[ P03346] interacts with 4 human partners:{Q12802;Q6XZF7;Q5VV41;Q9H8V3}

1629 Pathogen[ P14079] interacts with 5 human partners:{Q6XZF7;P10911;Q12802;Q9H8V3;Q5VV41}

1630 Pathogen[ P03410] interacts with 3 human partners:{Q5VV41;Q6XZF7;Q9H8V3}

1631 Pathogen[ P0C206] interacts with 2 human partners:{Q9H8V3;Q6XZF7}

1632 Pathogen[ P03363] interacts with 3 human partners:{Q5VV41;P10911;Q6XZF7}

1633 [Cluster 273]GO:0046642+P biological\_process [name] negative regulation of alpha-beta T cell proliferation [def] "Any process that stops, prevents, or reduces the frequency, rate or extent of alpha-beta T cell proliferation." [GOC

1634 Pathogen[ Q2Q067] interacts with 1 human partners:{Q96J02}

1635 Pathogen[ P0C214] interacts with 1 human partners:{Q96J02}

1636 Pathogen[ P03346] interacts with 1 human partners:{Q96J02}

1637 Pathogen[ Q85601] interacts with 1 human partners:{Q96J02}

1638 Pathogen[ P14079] interacts with 1 human partners:{Q96J02}

1639 Pathogen[ P0C206] interacts with 1 human partners:{Q96J02}

1640 [Cluster 274]GO:0072240+P biological\_process [name] metanephric DCT cell differentiation [def] "The process in which relatively unspecialized cells acquire specialized structural and/or functional features that characterize the distal convoluted tubule cells of the metanephros as it progresses from its formation to the mature state." [GOC

1641 Pathogen[ P03346] interacts with 1 human partners:{P20264}

1642 Pathogen[ P03363] interacts with 1 human partners:{P20264}

1643 [Cluster 275]GO:2000594+P biological\_process [name] positive regulation of metanephric DCT cell differentiation [def] "Any process that activates or increases the frequency, rate or extent of metanephric DCT cell differentiation." [GOC

1644 Pathogen[ P03346] interacts with 1 human partners:{Q06710}

1645 [Cluster 276]GO:0017085+P biological\_process [name] response to insecticide [def] "Any process that results in a change in state or activity of a cell or an organism (in terms of movement, secretion, enzyme production, gene expression, etc.) as a result of an insecticide stimulus. Insecticides are chemicals used to kill insects." [GOC

1646 Pathogen[ P0C214] interacts with 2 human partners:{P36551;P22830}

1647 Pathogen[ P14079] interacts with 2 human partners:{P22830;P36551}

1648 Pathogen[ P03410] interacts with 2 human partners:{P36551;P22830}

1649 Pathogen[ P0C206] interacts with 2 human partners:{P36551;P22830}

1650 [Cluster 277]GO:0042773+P biological\_process [name] ATP synthesis coupled electron transport [def] "The transfer of electrons through a series of electron donors and acceptors, generating energy that is ultimately used for synthesis of ATP." [ISBN

1651 Pathogen[ P0C214] interacts with 2 human partners:{P28331;O95182}

1652 Pathogen[ P14079] interacts with 2 human partners:{O95182;P03901}

1653 Pathogen[ P03410] interacts with 2 human partners:{P03901;O95182}

1654 Pathogen[ P14075] interacts with 1 human partners:{095182}

1655 Pathogen[ POC206] interacts with 1 human partners:{095182}

1656 [Cluster 278]GO:0060842+P biological\_process [name] arterial endothelial cell differentiation [def] "The process in which a relatively unspecialized endothelial cell acquires specialized features of an arterial endothelial cell, a thin flattened cell that lines the inside surfaces of arteries." [GOC

1657 Pathogen[ Q2Q067] interacts with 1 human partners:{Q9Y5J3}

1658 Pathogen[ POC214] interacts with 1 human partners:{Q9Y5J3}

1659 Pathogen[ P03346] interacts with 1 human partners:{Q9Y5J3}

1660 Pathogen[ Q85601] interacts with 1 human partners:{Q9Y5J3}

1661 Pathogen[ P14079] interacts with 1 human partners:{Q9Y5J3}

1662 Pathogen[ P03410] interacts with 1 human partners:{Q9Y5J3}

1663 Pathogen[ POC206] interacts with 1 human partners:{Q9Y5J3}

1664 Pathogen[ P03363] interacts with 1 human partners:{Q9Y5J3}

1665 [Cluster 279]GO:0007217+P biological\_process [name] tachykinin receptor signaling pathway [def] "The series of molecular signals generated as a consequence of a tachykinin, i.e. a short peptide with the terminal sequence (Phe-X-Gly-Leu-Met-NH<sub>2</sub>), binding to a cell surface receptor." [GOC

1666 Pathogen[ P14079] interacts with 1 human partners:{Q9UHF0}

1667 Pathogen[ P03410] interacts with 1 human partners:{Q9UHF0}

1668 [Cluster 280]GO:0016601+P biological\_process [name] Rac protein signal transduction [def] "A series of molecular signals within the cell that are mediated by a member of the Rac family of proteins switching to a GTP-bound active state." [GOC

1669 Pathogen[ Q2Q067] interacts with 1 human partners:{Q92556}

1670 Pathogen[ POC214] interacts with 1 human partners:{Q92556}

1671 Pathogen[ P03346] interacts with 1 human partners:{Q92556}

1672 Pathogen[ P14079] interacts with 1 human partners:{Q92556}

1673 Pathogen[ P03410] interacts with 1 human partners:{Q92556}

1674 Pathogen[ POC206] interacts with 1 human partners:{Q92556}

1675 Pathogen[ P03363] interacts with 1 human partners:{Q92556}

1676 [Cluster 281]GO:0071872+P biological\_process [name] cellular response to epinephrine stimulus [def] "Any process that results in a change in state or activity of a cell (in terms of movement, secretion, enzyme production, gene expression, etc.) as a result of an epinephrine stimulus. Epinephrine is a catecholamine that has the formula C<sub>9</sub>H<sub>13</sub>NO<sub>3</sub> it is secreted by the adrenal medulla to act as a hormone, and released by certain neurons to act as a neurotransmitter active in the central nervous system." [CHEBI

1677 Pathogen[ P14079] interacts with 1 human partners:{P10109}

1678 Pathogen[ P03410] interacts with 1 human partners:{P10109}

1679 [Cluster 282]GO:0045161+P biological\_process [name] neuronal ion channel clustering [def] "The process in which voltage-gated ion channels become localized to distinct subcellular domains in the neuron. Specific targeting, clustering, and maintenance of these channels in their respective domains are essential to achieve high conduction velocities of action potential propagation." [PMID

1680 Pathogen[ P03346] interacts with 2 human partners:{Q15700;Q9NRD5}

1681 Pathogen[ P14079] interacts with 1 human partners:{Q15700}

1682 Pathogen[ P03410] interacts with 2 human partners:{Q15700;Q9NRD5}

1683 Pathogen[ POC206] interacts with 2 human partners:{Q15700;Q9NRD5}

1684 Pathogen[ P03363] interacts with 1 human partners:{Q15700}

1685 [Cluster 283]GO:0031503+P biological\_process [name] protein complex localization [def] "A localization process that acts on a protein complex\_ the complex is transported to, or maintained in, a specific location." [GOC

1686 Pathogen[ Q2Q067] interacts with 2 human partners:{Q9UBC3;O15392}

1687 Pathogen[ POC214] interacts with 1 human partners:{O15392}

1688 Pathogen[ P03346] interacts with 2 human partners:{O15392;Q9UBC3}

1689 Pathogen[ Q85601] interacts with 2 human partners:{O15392;Q9UBC3}

1690 Pathogen[ P14079] interacts with 3 human partners:{Q9Y5Y5;O15392;Q9UBC3}

1691 Pathogen[ P03410] interacts with 3 human partners:{O15392;Q9Y5Y5;Q9UBC3}

1692 Pathogen[ POC206] interacts with 2 human partners:{O15392;Q9UBC3}

1693 Pathogen[ P03363] interacts with 1 human partners:{Q9UBC3}

1694 [Cluster 284]GO:0006419+P biological\_process [name] alanyl-tRNA aminoacylation [def] "The process of coupling alanine to alanyl-tRNA, catalyzed by alanyl-tRNA synthetase. In tRNA aminoacylation, the amino acid is first activated by linkage to AMP and then transferred to either the 2'- or the 3'-hydroxyl group of the 3'-adenosine residue of the tRNA." [GOC

1695 Pathogen[ POC214] interacts with 3 human partners:{Q5JTZ9;Q9BTE6;P49588}

1696 Pathogen[ P14079] interacts with 2 human partners:{Q9BTE6;P49588}

1697 Pathogen[ P03383] interacts with 1 human partners:{Q9BTE6}

1698 Pathogen[ P03410] interacts with 2 human partners:{Q9BTE6;P49588}

1699 Pathogen[ P14075] interacts with 1 human partners:{Q9BTE6}

1700 Pathogen[ POC206] interacts with 1 human partners:{Q9BTE6}

1701 Pathogen[ P03363] interacts with 1 human partners:{Q9BTE6}

1702 [Cluster 285]GO:0019240+P biological\_process [name] citrulline biosynthetic process [def] "The chemical reactions and pathways resulting in the formation of citrulline, N<sup>5</sup>-carbamoyl-L-ornithine, an alpha amino acid not found in proteins." [ISBN

1703 Pathogen[ POC214] interacts with 1 human partners:{P00480}

1704 Pathogen[ Q85601] interacts with 1 human partners:{P00480}

1705 Pathogen[ P14079] interacts with 1 human partners:{P00480}

1706 Pathogen[ P03410] interacts with 1 human partners:{P00480}

1707 Pathogen[ POC206] interacts with 1 human partners:{P00480}

1708 [Cluster 286]GO:0043585+P biological\_process [name] nose morphogenesis [def] "The process in which the anatomical structures of the nose are generated and organized. The nose is the specialized structure of the face that serves as the organ of the sense of smell and as part of the respiratory system. Includes the nasi externus (external nose) and cavitas nasi (nasal cavity)." [GOC

1709 Pathogen[ Q2Q067] interacts with 1 human partners:{P12755}

1710 Pathogen[ POC214] interacts with 1 human partners:{P12755}

1711 Pathogen[ Q85601] interacts with 1 human partners:{P12755}

1712 Pathogen[ P14079] interacts with 1 human partners:{P12755}

1713 Pathogen[ P03410] interacts with 1 human partners:{P12755}

1714 Pathogen[ POC206] interacts with 1 human partners:{P12755}

1715 [Cluster 287]GO:0000710+P biological\_process [name] meiotic mismatch repair [def] "A system for the identification and correction of base-base mismatches, small insertion-deletion loops, and regions of heterology that are present in duplex DNA formed with strands from two recombining molecules. Correction of the mismatch can result in non-Mendelian segregation of alleles following meiosis." [GOC

1716 Pathogen[ Q2Q067] interacts with 1 human partners:{Q92889}

1717 Pathogen[ POC214] interacts with 2 human partners:{Q92889;P20585}

1718 Pathogen[ P03346] interacts with 2 human partners:{P20585;Q92889}

1719 Pathogen[ Q85601] interacts with 2 human partners:{Q92889;P20585}

1720 Pathogen[ P14079] interacts with 4 human partners:{O43196;P20585;Q92889;P52701}

1721 Pathogen[ P03410] interacts with 4 human partners:{P20585;Q92889;P52701;O43196}

1722 Pathogen[ POC206] interacts with 3 human partners:{P52701;Q92889;P20585}

1723 Pathogen[ P03363] interacts with 2 human partners:{Q92889;P20585}

1724 [Cluster 288]GO:0032074+P biological\_process [name] negative regulation of nuclease activity [def] "Any process that stops or reduces the rate of nuclease activity, the hydrolysis of ester linkages within nucleic acids." [GOC

1725 Pathogen[ Q85601] interacts with 1 human partners:{Q96FI4}

1726 Pathogen[ P14079] interacts with 1 human partners:{Q96FI4}

1727 Pathogen[ P03410] interacts with 1 human partners:{Q96FI4}

1728 Pathogen[ POC206] interacts with 1 human partners:{Q96FI4}

1729 Pathogen[ P03363] interacts with 1 human partners:{Q96FI4}

1730 [Cluster 289]GO:0036138+P

1731 Pathogen[ Q2Q067] interacts with 1 human partners:{Q9NWT6}

1732 Pathogen[ POC214] interacts with 1 human partners:{Q9NWT6}

1733 Pathogen[ P03346] interacts with 1 human partners:{Q9NWT6}

1734 Pathogen[ Q85601] interacts with 1 human partners:{Q9NWT6}

1735 Pathogen[ P14079] interacts with 1 human partners:{Q9NWT6}

1736 Pathogen[ P03383] interacts with 1 human partners:{Q9NWT6}

1737 Pathogen[ P03410] interacts with 1 human partners:{Q9NWT6}

1738 Pathogen[ P14075] interacts with 1 human partners:{Q9NWT6}

1739 Pathogen[ POC206] interacts with 1 human partners:{Q9NWT6}

1740 [Cluster 290]GO:0060166+P biological\_process [name] olfactory pit development [def] "The biological process whose specific outcome is the progression of the olfactory pit from an initial condition to its mature state. This process begins with the formation of the olfactory pit, which is an indentation of the olfactory placode, and ends when the pits hollows out to form the nasopharynx." [GOC

1741 Pathogen[ P03346] interacts with 1 human partners:{P56178}

1742 [Cluster 291]GO:0018343+P biological\_process [name] protein farnesylation [def] "The covalent attachment of a farnesyl group to a protein." [GOC

1743 Pathogen[ Q2Q067] interacts with 2 human partners:{P49356;P49354}

1744 Pathogen[ POC214] interacts with 2 human partners:{P49354;P49356}

1745 Pathogen[ P03346] interacts with 2 human partners:{P49354;P49356}

1746 Pathogen[ Q85601] interacts with 2 human partners:{P49354;P49356}

1747 Pathogen[ P14079] interacts with 2 human partners:{P49354;P49356}

1748 Pathogen[ P03410] interacts with 2 human partners:{P49354;P49356}

1749 Pathogen[ POC206] interacts with 2 human partners:{P49354;P49356}

1750 Pathogen[ P03363] interacts with 2 human partners:{P49354;Q9NZN9}

1751 [Cluster 292]GO:0090042+P biological\_process [name] tubulin deacetylation [def] "The removal of an acetyl group from tubulin. An acetyl group is CH3CO-, derived from acetic [ethanoic] acid." [GOC

1752 Pathogen[ Q2Q067] interacts with 1 human partners:{Q8IXJ6}

1753 Pathogen[ POC214] interacts with 1 human partners:{Q8IXJ6}

1754 Pathogen[ P03346] interacts with 1 human partners:{Q8IXJ6}

1755 Pathogen[ Q85601] interacts with 1 human partners:{Q8IXJ6}

1756 Pathogen[ P14079] interacts with 1 human partners:{Q8IXJ6}

1757 Pathogen[ P03410] interacts with 1 human partners:{Q8IXJ6}

1758 Pathogen[ POC206] interacts with 1 human partners:{Q8IXJ6}

1759 [Cluster 293]GO:0019835+P biological\_process [name] cytolysis [def] "The rupture of cell membranes and the loss of cytoplasm." [SP\_KW

1760 Pathogen[ P03346] interacts with 1 human partners:{P10144}

1761 Pathogen[ Q85601] interacts with 1 human partners:{P10144}

1762 Pathogen[ P14079] interacts with 1 human partners:{P10144}

1763 Pathogen[ P03410] interacts with 1 human partners:{P10144}

1764 Pathogen[ P0C206] interacts with 1 human partners:{P10144}

1765 Pathogen[ P03363] interacts with 1 human partners:{P10144}

1766 [Cluster 294]GO:0034263+P biological\_process [name] autophagy in response to ER overload [def] "The process in which cells digest parts of their own cytoplasm in response to the accumulation of misfolded proteins in the endoplasmic reticulum." [GOC

1767 Pathogen[ P14079] interacts with 1 human partners:{Q9H0Y0}

1768 Pathogen[ P03410] interacts with 1 human partners:{Q9H0Y0}

1769 [Cluster 295]GO:0021520+P biological\_process [name] spinal cord motor neuron cell fate specification [def] "The process in which a cell becomes capable of differentiating autonomously into a motor neuron in an environment that is neutral with respect to the developmental pathway." [GO\_REF

1770 Pathogen[ P03346] interacts with 3 human partners:{P50219;P28358;Q9UBR4}

1771 Pathogen[ P0C206] interacts with 1 human partners:{Q9UBR4}

1772 Pathogen[ P03363] interacts with 2 human partners:{P28358;P50219}

1773 [Cluster 296]GO:0051930+P biological\_process [name] regulation of sensory perception of pain [def] "Any process that modulates the frequency, rate or extent of the sensory perception of pain, the series of events required for an organism to receive a painful stimulus, convert it to a molecular signal, and recognize and characterize the signal." [GOC

1774 Pathogen[ P03410] interacts with 1 human partners:{Q99935}

1775 [Cluster 297]GO:0035927+P biological\_process [name] RNA import into mitochondrion [def] "The directed movement of RNA from the cytoplasm into a mitochondrion." [GOC

1776 Pathogen[ Q2Q067] interacts with 1 human partners:{Q8TCS8}

1777 Pathogen[ P0C214] interacts with 1 human partners:{Q8TCS8}

1778 Pathogen[ P03346] interacts with 1 human partners:{Q8TCS8}

1779 Pathogen[ Q85601] interacts with 1 human partners:{Q8TCS8}

1780 Pathogen[ P14079] interacts with 1 human partners:{Q8TCS8}

1781 Pathogen[ P03383] interacts with 1 human partners:{Q8TCS8}

1782 Pathogen[ P03410] interacts with 1 human partners:{Q8TCS8}

1783 Pathogen[ P14075] interacts with 1 human partners:{Q8TCS8}

1784 Pathogen[ P0C206] interacts with 1 human partners:{Q8TCS8}

1785 [Cluster 298]GO:0044321+P biological\_process [name] response to leptin stimulus [def] "Any process that results in a change in state or activity of a cell or an organism (in terms of movement, secretion, enzyme production, gene expression, etc.) as a result of a leptin stimulus. Leptin is a hormone manufactured primarily in the adipocytes of white adipose tissue, and the level of circulating leptin is directly proportional to the total amount of fat in the body. It plays a key role in regulating energy intake and energy expenditure, including appetite and metabolism]." [GOC

1786 Pathogen[ P14079] interacts with 1 human partners:{P10109}

1787 Pathogen[ P03410] interacts with 1 human partners:{P10109}

1788 [Cluster 299]GO:0070741+P biological\_process [name] response to interleukin-6 [def] "Any process that results in a change in state or activity of a cell or an organism (in terms of movement, secretion, enzyme production, gene expression, etc.) as a result of an interleukin-6 stimulus." [GOC

1789 Pathogen[ Q2Q067] interacts with 2 human partners:{P05062;Q99966}

1790 Pathogen[ P0C214] interacts with 2 human partners:{P05062;Q99966}

1791 Pathogen[ P03346] interacts with 2 human partners:{Q99966;P05062}

1792 Pathogen[ Q85601] interacts with 2 human partners:{Q99966;P05062}

1793 Pathogen[ P14079] interacts with 2 human partners:{Q99966;P11686}

1794 Pathogen[ P03410] interacts with 3 human partners:{P05062;P11686;Q99966}

1795 Pathogen[ P0C206] interacts with 2 human partners:{P05062;Q99966}

1796 [Cluster 300]GO:0045023+P biological\_process [name] G0 to G1 transition [def] "The transition from the G0 quiescent state to the G1 phase. Under certain conditions, cells exit the cell cycle during G1 and remain in the G0 state as nongrowing, non-dividing (quiescent) cells. Appropriate stimulation of such cells induces them to return to G1 and resume growth and division. The G0 to G1 transition is accompanied by many changes in the program of gene expression." [ISBN

1797 Pathogen[ P03346] interacts with 1 human partners:{O15151}

1798 Pathogen[ Q85601] interacts with 1 human partners:{O15151}

1799 Pathogen[ P14079] interacts with 1 human partners:{O15151}

1800 Pathogen[ P03410] interacts with 1 human partners:{O15151}

1801 Pathogen[ P0C206] interacts with 1 human partners:{O15151}

1802 Pathogen[ P03363] interacts with 1 human partners:{O15151}

1803 [Cluster 301]GO:0030222+P biological\_process [name] eosinophil differentiation [def] "The process in which a relatively unspecialized myeloid precursor cell acquires the specializes features of an eosinophil." [GOC

1804 Pathogen[ Q2Q067] interacts with 1 human partners:{P15976}

1805 Pathogen[ P03346] interacts with 1 human partners:{P15976}

1806 Pathogen[ Q85601] interacts with 1 human partners:{P15976}

1807 Pathogen[ P14079] interacts with 1 human partners:{P15976}

1808 Pathogen[ P03410] interacts with 1 human partners:{P15976}

1809 Pathogen[ P0C206] interacts with 1 human partners:{P15976}

1810 [Cluster 302]GO:0033993+P biological\_process [name] response to lipid [def] "Any process that results in a change in state or activity of a cell or an organism (in terms



of movement, secretion, enzyme production, gene expression, etc.) as a result of a lipid stimulus." [GOC

1811 Pathogen[ Q2Q067] interacts with 3 human partners:{075351;P36956;P12004}

1812 Pathogen[ P0C214] interacts with 1 human partners:{075351}

1813 Pathogen[ P03346] interacts with 4 human partners:{P12004;P36956;Q12772;075351}

1814 Pathogen[ Q85601] interacts with 4 human partners:{Q12772;075351;P36956;P12004}

1815 Pathogen[ P14079] interacts with 5 human partners:{Q9Y5U4;Q12772;P12004;075351;P36956}

1816 Pathogen[ P03410] interacts with 5 human partners:{P36956;075351;Q9Y5U4;Q12772;P12004}

1817 Pathogen[ P0C206] interacts with 4 human partners:{P36956;075351;Q12772;P12004}

1818 Pathogen[ P03363] interacts with 1 human partners:{075351}

1819 [Cluster 303]GO:0060263+P biological\_process [name] regulation of respiratory burst [def] "Any process that modulates the rate frequency or extent of a phase of elevated metabolic activity, during which oxygen consumption increases\_ this leads to the production, by an NADH dependent system, of hydrogen peroxide (H2O2), superoxide anions and hydroxyl radicals." [GOC

1820 Pathogen[ Q2Q067] interacts with 1 human partners:{P63000}

1821 Pathogen[ P0C214] interacts with 1 human partners:{P63000}

1822 Pathogen[ P03346] interacts with 2 human partners:{Q86UR1;P63000}

1823 Pathogen[ Q85601] interacts with 1 human partners:{P63000}

1824 Pathogen[ P03383] interacts with 1 human partners:{P63000}

1825 Pathogen[ P03410] interacts with 2 human partners:{P63000;Q86UR1}

1826 Pathogen[ P14075] interacts with 1 human partners:{P63000}

1827 Pathogen[ P0C206] interacts with 1 human partners:{P63000}

1828 Pathogen[ P03363] interacts with 2 human partners:{Q86UR1;P63000}

1829 [Cluster 304]GO:1900245+P

1830 Pathogen[ P14079] interacts with 1 human partners:{Q96C10}

1831 Pathogen[ P03410] interacts with 1 human partners:{Q96C10}

1832 Pathogen[ P0C206] interacts with 1 human partners:{Q96C10}

1833 Pathogen[ P03363] interacts with 1 human partners:{Q8IY21}

1834 [Cluster 305]GO:0032319+P biological\_process [name] regulation of Rho GTPase activity [def] "Any process that modulates the activity of a GTPase of the Rho family." [GOC

1835 Pathogen[ Q2Q067] interacts with 2 human partners:{P46108;P41182}

1836 Pathogen[ P0C214] interacts with 2 human partners:{P41182;P46108}

1837 Pathogen[ P03346] interacts with 2 human partners:{P46108;P41182}

1838 Pathogen[ Q85601] interacts with 2 human partners:{P46108;P41182}

1839 Pathogen[ P14079] interacts with 2 human partners:{P41182;P46108}

1840 Pathogen[ P03410] interacts with 2 human partners:{P41182;P46108}

1841 Pathogen[ P0C206] interacts with 2 human partners:{P41182;P46108}

1842 Pathogen[ P03363] interacts with 1 human partners:{P46108}

1843 [Cluster 306]GO:0070365+P biological\_process [name] hepatocyte differentiation [def] "The process in which a relatively unspecialized cell acquires the specialized features of a hepatocyte. A hepatocyte is specialized epithelial cell that is organized into interconnected plates called lobules, and is the main structural component of the liver." [CL

1844 Pathogen[ P14079] interacts with 1 human partners:{P04083}

1845 [Cluster 307]GO:0060019+P biological\_process [name] radial glial cell differentiation [def] "The process in which neuroepithelial cells of the neural tube give rise to radial glial cells, specialized bipotential progenitors cells of the brain. Differentiation includes the processes involved in commitment of a cell to a specific fate." [GOC

1846 Pathogen[ Q2Q067] interacts with 1 human partners:{P40763}

1847 Pathogen[ P0C214] interacts with 1 human partners:{P40763}

1848 Pathogen[ P03346] interacts with 1 human partners:{P40763}

1849 Pathogen[ Q85601] interacts with 1 human partners:{P40763}

1850 Pathogen[ P03410] interacts with 1 human partners:{P40763}

1851 Pathogen[ P0C206] interacts with 1 human partners:{P40763}

1852 [Cluster 308]GO:0007416+P biological\_process [name] synapse assembly [def] "The aggregation, arrangement and bonding together of a set of components to form a synapse." [GOC

1853 Pathogen[ P0C214] interacts with 1 human partners:{Q9UM54}

1854 Pathogen[ Q85601] interacts with 1 human partners:{Q9UM54}

1855 Pathogen[ P14079] interacts with 1 human partners:{Q9UM54}

1856 Pathogen[ P03410] interacts with 1 human partners:{Q9UM54}

1857 Pathogen[ P0C206] interacts with 1 human partners:{Q9UM54}

1858 [Cluster 309]GO:0046068+P biological\_process [name] cGMP metabolic process [def] "The chemical reactions and pathways involving cyclic GMP, guanosine 3',5'-phosphate." [GOC

1859 Pathogen[ P03346] interacts with 1 human partners:{P35398}

1860 Pathogen[ P14079] interacts with 1 human partners:{P35398}

1861 Pathogen[ P0C206] interacts with 1 human partners:{P35398}

1862 Pathogen[ P03363] interacts with 1 human partners:{P35398}

1863 [Cluster 310]GO:0009088+P biological\_process [name] threonine biosynthetic process [def] "The chemical reactions and pathways resulting in the formation of threonine (2-amino-3-hydroxybutyric acid), a polar, uncharged, essential amino acid found in peptide linkage in proteins." [GOC

1864 Pathogen[ P14079] interacts with 1 human partners:{Q8IYQ7}

1865 [Cluster 311]GO:0048617+P biological\_process [name] embryonic foregut morphogenesis  
[def] "The process in which the anatomical structures of the foregut are generated and organized, during the embryonic phase." [GOC

1866 Pathogen[ Q2Q067] interacts with 2 human partners:{P84022;Q15796}

1867 Pathogen[ P0C214] interacts with 2 human partners:{P84022;Q15796}

1868 Pathogen[ P03346] interacts with 2 human partners:{Q15796;P84022}

1869 Pathogen[ Q85601] interacts with 2 human partners:{P84022;Q15796}

1870 Pathogen[ P03383] interacts with 2 human partners:{P84022;Q15796}

1871 Pathogen[ P03410] interacts with 2 human partners:{P84022;Q15796}

1872 Pathogen[ P14075] interacts with 2 human partners:{Q15796;P84022}

1873 Pathogen[ P0C206] interacts with 2 human partners:{P84022;Q15796}

1874 Pathogen[ P03363] interacts with 2 human partners:{Q15796;P84022}

1875 [Cluster 312]GO:0035999+P biological\_process [name] tetrahydrofolate interconversion  
[def] "The chemical reactions and pathways by which one-carbon (C1) units are transferred between tetrahydrofolate molecules, to synthesise other tetrahydrofolate molecules." [GOC

1876 Pathogen[ Q2Q067] interacts with 1 human partners:{P34896}

1877 Pathogen[ P0C214] interacts with 4 human partners:{P42898;P34897;P34896;P11586}

1878 Pathogen[ Q85601] interacts with 1 human partners:{P34896}

1879 Pathogen[ P14079] interacts with 4 human partners:{O95954;P34897;P34896;P42898}

1880 Pathogen[ P03383] interacts with 1 human partners:{P34896}

1881 Pathogen[ P03410] interacts with 4 human partners:{O95954;P42898;P34897;P34896}

1882 Pathogen[ P14075] interacts with 1 human partners:{P34896}

1883 Pathogen[ P0C206] interacts with 3 human partners:{P34897;O95954;P34896}

1884 [Cluster 313]GO:0032736+P biological\_process [name] positive regulation of interleukin-13 production  
[def] "Any process that activates or increases the frequency, rate, or extent of interleukin-13 production." [GOC

1885 Pathogen[ P14079] interacts with 1 human partners:{O95760}

1886 Pathogen[ P03410] interacts with 1 human partners:{O95760}

1887 [Cluster 314]GO:0010720+P biological\_process [name] positive regulation of cell development  
[def] "Any process that increases the rate, frequency or extent of the progression of the cell over time, from its formation to the mature structure. Cell development does not include the steps involved in committing a cell to a specific fate." [GOC

1888 Pathogen[ P03346] interacts with 1 human partners:{P31270}

1889 [Cluster 315]GO:0060836+P biological\_process [name] lymphatic endothelial cell differentiation  
[def] "The process in which a venous blood vessel endothelial cell acquires specialized features of a lymphatic vessel endothelial cell, a thin flattened cell that lines the inside surfaces of lymph vessels." [GOC

1890 Pathogen[ P03346] interacts with 1 human partners:{P35713}

1891 [Cluster 316]GO:0021849+P biological\_process [name] neuroblast division in subventricular zone  
[def] "The division of neuroblasts in the subventricular zone of the forebrain. The interneuron precursors that these cells give rise to include adult olfactory bulb interneurons and migrate tangentially." [GO\_REF

1892 Pathogen[ P03346] interacts with 1 human partners:{Q9Y6R0}

1893 Pathogen[ P03363] interacts with 1 human partners:{Q9Y6R0}

1894 [Cluster 317]GO:0001306+P biological\_process [name] age-dependent response to oxidative stress  
[def] "Any process that results in a change in state or activity of a cell or an organism (in terms of movement, secretion, enzyme production, gene expression, etc.) as a result of oxidative stress, a state often resulting from exposure to high levels of reactive oxygen species, where the change varies according to the age of the cell or organism." [GOC

1895 Pathogen[ P0C214] interacts with 1 human partners:{Q99807}

1896 Pathogen[ P14079] interacts with 1 human partners:{Q99807}

1897 Pathogen[ P03410] interacts with 2 human partners:{Q9UBY8;Q99807}

1898 Pathogen[ P0C206] interacts with 1 human partners:{Q99807}

1899 [Cluster 318]GO:0046884+P biological\_process [name] follicle-stimulating hormone secretion  
[def] "The regulated release of follicle-stimulating hormone, a gonadotropic glycoprotein hormone secreted by the anterior pituitary." [ISBN

1900 Pathogen[ P14079] interacts with 1 human partners:{P01215}

1901 Pathogen[ P03383] interacts with 1 human partners:{P01215}

1902 Pathogen[ P03410] interacts with 1 human partners:{P01215}

1903 Pathogen[ P14075] interacts with 1 human partners:{P01215}

1904 Pathogen[ P0C206] interacts with 1 human partners:{P01215}

1905 [Cluster 319]GO:2001243+P biological\_process [name] negative regulation of intrinsic apoptotic signaling pathway  
[def] "Any process that stops, prevents or reduces the frequency, rate or extent of intrinsic apoptotic signaling pathway." [GOC

1906 Pathogen[ P14079] interacts with 1 human partners:{Q9H300}

1907 [Cluster 320]GO:0006835+P biological\_process [name] dicarboxylic acid transport  
[def] "The directed movement of dicarboxylic acids into, out of or within a cell, or between cells, by means of some agent such as a transporter or pore." [GOC

1908 Pathogen[ Q2Q067] interacts with 1 human partners:{Q9UBX3}

1909 Pathogen[ P0C214] interacts with 1 human partners:{Q9UBX3}

1910 Pathogen[ P03346] interacts with 1 human partners:{Q9UBX3}

1911 Pathogen[ Q85601] interacts with 1 human partners:{Q9UBX3}

1912 Pathogen[ P03410] interacts with 1 human partners:{Q9UBX3}

1913 Pathogen[ P0C206] interacts with 1 human partners:{Q9UBX3}

1914 [Cluster 321]GO:0051583+P biological\_process [name] dopamine uptake [def] "The directed movement of dopamine into a cell, typically presynaptic neurons or glial cells. Dopamine is a catecholamine neurotransmitter and a metabolic precursor of noradrenaline and adrenaline." [GOC

1915 Pathogen[ Q2Q067] interacts with 1 human partners:{Q99497}

1916 Pathogen[ P0C214] interacts with 1 human partners:{Q99497}

1917 Pathogen[ P03346] interacts with 1 human partners:{Q99497}

1918 Pathogen[ Q85601] interacts with 1 human partners:{Q99497}

1919 Pathogen[ P14079] interacts with 1 human partners:{Q99497}

1920 Pathogen[ P03410] interacts with 1 human partners:{Q99497}

1921 Pathogen[ P0C206] interacts with 1 human partners:{Q99497}

1922 [Cluster 322]GO:0001554+P biological\_process [name] luteolysis [def] "The lysis or structural demise of the corpus luteum. During normal luteolysis, two closely related events occur. First, there is loss of the capacity to synthesize and secrete progesterone (functional luteolysis) followed by loss of the cells that comprise the corpus luteum (structural luteolysis). Preventing luteolysis is crucial to maintain pregnancy." [http

1923 Pathogen[ Q2Q067] interacts with 1 human partners:{P42575}

1924 Pathogen[ P0C214] interacts with 1 human partners:{P42575}

1925 Pathogen[ P03346] interacts with 1 human partners:{P42575}

1926 Pathogen[ Q85601] interacts with 1 human partners:{P42575}

1927 Pathogen[ P14079] interacts with 1 human partners:{P42575}

1928 Pathogen[ P03410] interacts with 1 human partners:{P42575}

1929 Pathogen[ P0C206] interacts with 1 human partners:{P42575}

1930 [Cluster 323]GO:0071035+P biological\_process [name] nuclear polyadenylation-dependent rRNA catabolic process [def] "The chemical reactions and pathways occurring in the nucleus and resulting in the breakdown of a ribosomal RNA (rRNA) molecule, including RNA fragments released as part of processing the primary transcript into multiple mature rRNA species, initiated by the enzymatic addition of a sequence of adenylyl residues (polyadenylation) at the 3' end the target rRNA." [GOC

1931 Pathogen[ Q2Q067] interacts with 1 human partners:{Q06265}

1932 Pathogen[ P0C214] interacts with 1 human partners:{Q06265}

1933 Pathogen[ P03346] interacts with 1 human partners:{Q06265}

1934 Pathogen[ Q85601] interacts with 1 human partners:{Q06265}

1935 Pathogen[ P14079] interacts with 1 human partners:{Q06265}

1936 Pathogen[ P03383] interacts with 1 human partners:{Q06265}

1937 Pathogen[ P03410] interacts with 1 human partners:{Q06265}

1938 Pathogen[ P14075] interacts with 1 human partners:{Q06265}

1939 Pathogen[ P0C206] interacts with 1 human partners:{Q06265}

1940 [Cluster 324]GO:0030264+P biological\_process [name] nuclear fragmentation involved in apoptotic nuclear change [def] "The breakdown of the nucleus into small membrane-bounded compartments, or blebs, each of which contain compacted DNA." [GOC

1941 Pathogen[ P0C214] interacts with 1 human partners:{P42574}

1942 Pathogen[ P03346] interacts with 1 human partners:{P42574}

1943 Pathogen[ P0C206] interacts with 1 human partners:{P42574}

1944 [Cluster 325]GO:0010638+P biological\_process [name] positive regulation of organelle organization [def] "Any process that increases the frequency, rate or extent of a process involved in the formation, arrangement of constituent parts, or disassembly of an organelle." [GOC

1945 Pathogen[ P0C214] interacts with 1 human partners:{P49257}

1946 Pathogen[ P03346] interacts with 2 human partners:{P49257;Q9BVK6}

1947 Pathogen[ Q85601] interacts with 1 human partners:{P49257}

1948 Pathogen[ P14079] interacts with 3 human partners:{P49257;Q9BVK6;O15260}

1949 Pathogen[ P03410] interacts with 3 human partners:{P49257;Q9BVK6;O15260}

1950 Pathogen[ P0C206] interacts with 3 human partners:{Q9BVK6;P49257;O15260}

1951 [Cluster 326]GO:0018272+P biological\_process [name] protein-pyridoxal-5-phosphate linkage via peptidyl-N6-pyridoxal phosphate-L-lysine [def] "The modification of peptidyl-lysine to form N6-pyridoxal phosphate-L-lysine." [RESID

1952 Pathogen[ Q2Q067] interacts with 1 human partners:{P32929}

1953 Pathogen[ P0C214] interacts with 1 human partners:{P32929}

1954 Pathogen[ P03346] interacts with 1 human partners:{P32929}

1955 Pathogen[ Q85601] interacts with 1 human partners:{P32929}

1956 Pathogen[ P14079] interacts with 1 human partners:{P32929}

1957 Pathogen[ P03410] interacts with 1 human partners:{P32929}

1958 Pathogen[ P0C206] interacts with 1 human partners:{P32929}

1959 [Cluster 327]GO:0003283+P biological\_process [name] atrial septum development [def] "The progression of the atrial septum over time, from its initial formation to the mature structure." [GOC

1960 Pathogen[ P03346] interacts with 1 human partners:{Q99593}

1961 [Cluster 328]GO:0070121+P biological\_process [name] Kupffer's vesicle development [def] "The progression of the Kupffer's vesicle over time from its initial formation until its mature state. The Kupffer's vesicle is a small but distinctive epithelial sac containing fluid, located midventrally posterior to the yolk cell or its extension, and transiently present during most of the segmentation period." [GOC

1962 Pathogen[ P03346] interacts with 1 human partners:{Q8N157}

1963 Pathogen[ P14079] interacts with 1 human partners:{Q8N157}

1964 Pathogen[ P03410] interacts with 1 human partners:{Q8N157}

1965 Pathogen[ P0C206] interacts with 1 human partners:{Q8N157}

1966 Pathogen[ P03363] interacts with 1 human partners:{Q8N157}

1967 [Cluster 329]GO:0006526+P biological\_process [name] arginine biosynthetic process [def] "The chemical reactions and pathways resulting in the formation of arginine, 2-amino-5-(carbamimidamido)pentanoic acid." [CHEBI

1968 Pathogen[ P0C214] interacts with 3 human partners:{P00480;P04424;Q8N159}

1969 Pathogen[ Q85601] interacts with 1 human partners:{P00480}

1970 Pathogen[ P14079] interacts with 3 human partners:{Q8N159;P00480;P04424}

1971 Pathogen[ P03383] interacts with 1 human partners:{Q8N159}

1972 Pathogen[ P03410] interacts with 3 human partners:{Q8N159;P04424;P00480}

1973 Pathogen[ P14075] interacts with 1 human partners:{Q8N159}

1974 Pathogen[ P0C206] interacts with 2 human partners:{Q8N159;P00480}

1975 [Cluster 330]GO:0043064+P biological\_process [name] flagellum organization [def] "A process that is carried out at the cellular level which results in the assembly, arrangement of constituent parts, or disassembly of a flagellum, a long thin projection from a cell, used in movement." [GOC

1976 Pathogen[ P14079] interacts with 1 human partners:{O95922}

1977 Pathogen[ P03410] interacts with 1 human partners:{O95922}

1978 Pathogen[ P0C206] interacts with 1 human partners:{O95922}

1979 Pathogen[ P03363] interacts with 1 human partners:{O95922}

1980 [Cluster 331]GO:0061462+P

1981 Pathogen[ Q2Q067] interacts with 1 human partners:{O43504}

1982 Pathogen[ P0C214] interacts with 1 human partners:{O43504}

1983 Pathogen[ P03346] interacts with 1 human partners:{O43504}

1984 Pathogen[ P14079] interacts with 2 human partners:{Q0VGL1;O43504}

1985 Pathogen[ P03383] interacts with 1 human partners:{O43504}

1986 Pathogen[ P03410] interacts with 2 human partners:{O43504;Q0VGL1}

1987 Pathogen[ P14075] interacts with 1 human partners:{O43504}

1988 Pathogen[ P0C206] interacts with 1 human partners:{O43504}

1989 Pathogen[ P03363] interacts with 1 human partners:{O43504}

1990 [Cluster 332]GO:0019935+P biological\_process [name] cyclic-nucleotide-mediated signaling [def] "A series of molecular signals in which a cell uses a cyclic nucleotide to convert an extracellular signal into a response." [GOC

1991 Pathogen[ P14079] interacts with 1 human partners:{Q9NZJ9}

1992 Pathogen[ P03410] interacts with 1 human partners:{Q9NZJ9}

1993 [Cluster 333]GO:0007113+P biological\_process [name] endomitotic cell cycle [def] "A mitotic cell cycle in which chromosomes are replicated and sister chromatids separate, but spindle formation, nuclear membrane breakdown and nuclear division do not occur, resulting in an increased number of chromosomes in the cell." [GOC

1994 Pathogen[ P03346] interacts with 1 human partners:{Q99828}

1995 Pathogen[ P14079] interacts with 1 human partners:{Q99828}

1996 Pathogen[ P03410] interacts with 1 human partners:{Q99828}

1997 Pathogen[ P0C206] interacts with 1 human partners:{Q99828}

1998 Pathogen[ P03363] interacts with 1 human partners:{Q99828}

1999 [Cluster 334]GO:0046208+P biological\_process [name] spermine catabolic process [def] "The chemical reactions and pathways resulting in the breakdown of spermine, a polybasic amine found in human sperm, in ribosomes and in some viruses and involved in nucleic acid packaging." [CHEBI

2000 Pathogen[ P0C214] interacts with 1 human partners:{Q9NWM0}

2001 [Cluster 335]GO:0030259+P biological\_process [name] lipid glycosylation [def] "Covalent attachment of a glycosyl residue to a lipid molecule." [GOC

2002 Pathogen[ P03410] interacts with 1 human partners:{Q8NHYO}

2003 [Cluster 336]GO:0060764+P biological\_process [name] cell-cell signaling involved in mammary gland development [def] "Any process that mediates the transfer of information from one cell to another and contributes to the progression of the mammary gland, from its initial state to the mature structure." [GOC

2004 Pathogen[ Q2Q067] interacts with 1 human partners:{P20719}

2005 Pathogen[ P03346] interacts with 1 human partners:{P20719}

2006 Pathogen[ P0C206] interacts with 1 human partners:{P20719}

2007 Pathogen[ P03363] interacts with 1 human partners:{P20719}

2008 [Cluster 337]GO:0070126+P biological\_process [name] mitochondrial translational termination [def] "The process resulting in the release of a polypeptide chain from the ribosome in a mitochondrion, usually in response to a termination codon (note that mitochondria use variants of the universal genetic code that differ between different taxa)." [GOC

2009 Pathogen[ P0C214] interacts with 1 human partners:{Q14197}

2010 Pathogen[ P14079] interacts with 1 human partners:{Q14197}

2011 Pathogen[ P03410] interacts with 1 human partners:{Q14197}

2012 Pathogen[ P0C206] interacts with 1 human partners:{Q14197}

2013 [Cluster 338]GO:0002520+P biological\_process [name] immune system development [def] "The process whose specific outcome is the progression of an organismal system whose objective is to provide calibrated responses by an organism to a potential internal or invasive threat, over time, from its formation to the mature structure. A

system is a regularly interacting or interdependent group of organs or tissues that work together to carry out a given biological process." [GOC

2014 Pathogen[ Q2Q067] interacts with 1 human partners:{P84022}

2015 Pathogen[ P0C214] interacts with 1 human partners:{P84022}

2016 Pathogen[ P03346] interacts with 1 human partners:{P84022}

2017 Pathogen[ Q85601] interacts with 1 human partners:{P84022}

2018 Pathogen[ P03383] interacts with 1 human partners:{P84022}

2019 Pathogen[ P03410] interacts with 1 human partners:{P84022}

2020 Pathogen[ P14075] interacts with 1 human partners:{P84022}

2021 Pathogen[ P0C206] interacts with 1 human partners:{P84022}

2022 Pathogen[ P03363] interacts with 1 human partners:{P84022}

2023 [Cluster 339]GO:0060383+P biological\_process [name] positive regulation of DNA strand elongation [def] "Any process that increases the rate, frequency or extent of DNA strand elongation. DNA strand elongation is the DNA metabolic process in which a DNA strand is synthesized by adding nucleotides to the 3' end of an existing DNA stand." [GOC

2024 Pathogen[ P03346] interacts with 1 human partners:{Q9NUX5}

2025 Pathogen[ P14079] interacts with 1 human partners:{Q9NUX5}

2026 Pathogen[ P03410] interacts with 1 human partners:{Q9NUX5}

2027 Pathogen[ P0C206] interacts with 1 human partners:{Q9NUX5}

2028 Pathogen[ P03363] interacts with 1 human partners:{Q9NUX5}

2029 [Cluster 340]GO:0043988+P biological\_process [name] histone H3-S28 phosphorylation [def] "The modification of histone H3 by the addition of an phosphate group to a serine residue at position 28 of the histone." [GOC

2030 Pathogen[ Q2Q067] interacts with 1 human partners:{O75582}

2031 Pathogen[ P0C214] interacts with 1 human partners:{O75582}

2032 Pathogen[ P03346] interacts with 1 human partners:{O75582}

2033 Pathogen[ Q85601] interacts with 1 human partners:{O75582}

2034 Pathogen[ P14079] interacts with 1 human partners:{O75582}

2035 Pathogen[ P03383] interacts with 1 human partners:{O75582}

2036 Pathogen[ P03410] interacts with 1 human partners:{O75582}

2037 Pathogen[ P14075] interacts with 1 human partners:{O75582}

2038 Pathogen[ P0C206] interacts with 1 human partners:{O75582}

2039 [Cluster 341]GO:0051902+P biological\_process [name] negative regulation of mitochondrial depolarization [def] "Any process that stops, prevents, or reduces the frequency, rate or extent of the change in the membrane potential of the mitochondria from negative to positive." [GOC

2040 Pathogen[ Q2Q067] interacts with 1 human partners:{Q96JZ2}

2041 Pathogen[ P0C214] interacts with 1 human partners:{Q96JZ2}

2042 Pathogen[ P03346] interacts with 1 human partners:{Q96JZ2}

2043 Pathogen[ Q85601] interacts with 1 human partners:{Q96JZ2}

2044 Pathogen[ P14079] interacts with 2 human partners:{P09912;Q96JZ2}

2045 Pathogen[ P03410] interacts with 2 human partners:{P09912;Q96JZ2}

2046 Pathogen[ P0C206] interacts with 1 human partners:{Q96JZ2}

2047 Pathogen[ P03363] interacts with 1 human partners:{Q96JZ2}

2048 [Cluster 342]GO:0009648+P biological\_process [name] photoperiodism [def] "Any process that results in a change in state or activity of an organism (in terms of movement, secretion, enzyme production, gene expression, etc.) as a result of detection of, or exposure to, a period of light or dark of a given length, measured relative to a particular duration known as the 'critical day length'. The critical day length varies between species." [GOC

2049 Pathogen[ P03346] interacts with 1 human partners:{O15516}

2050 Pathogen[ Q85601] interacts with 1 human partners:{O15516}

2051 Pathogen[ P0C206] interacts with 1 human partners:{O15516}

2052 [Cluster 343]GO:0097190+P biological\_process [name] apoptotic signaling pathway [def] "A series of molecular signals which triggers the apoptotic death of a cell. The pathway starts with reception of a signal, and ends when the execution phase of apoptosis is triggered." [GOC

2053 Pathogen[ Q2Q067] interacts with 1 human partners:{P42575}

2054 Pathogen[ P0C214] interacts with 1 human partners:{P42575}

2055 Pathogen[ P03346] interacts with 1 human partners:{P42575}

2056 Pathogen[ Q85601] interacts with 1 human partners:{P42575}

2057 Pathogen[ P14079] interacts with 1 human partners:{P42575}

2058 Pathogen[ P03410] interacts with 1 human partners:{P42575}

2059 Pathogen[ P0C206] interacts with 1 human partners:{P42575}

2060 [Cluster 344]GO:0033561+P biological\_process [name] regulation of water loss via skin [def] "A process that modulates the rate or extent of water loss from an organism via the skin." [GOC

2061 Pathogen[ Q2Q067] interacts with 1 human partners:{P11831}

2062 Pathogen[ P0C214] interacts with 1 human partners:{P11831}

2063 Pathogen[ P03346] interacts with 1 human partners:{P11831}

2064 Pathogen[ Q85601] interacts with 1 human partners:{P11831}

2065 Pathogen[ P03383] interacts with 1 human partners:{P11831}

2066 Pathogen[ P03410] interacts with 1 human partners:{P11831}

2067 Pathogen[ P14075] interacts with 1 human partners:{P11831}

2068 Pathogen[ P0C206] interacts with 1 human partners:{P11831}

2069 Pathogen[ P03363] interacts with 1 human partners:{P11831}

2070 [Cluster 345]GO:0043171+P biological\_process [name] peptide catabolic process  
[def] "The chemical reactions and pathways resulting in the breakdown of peptides, compounds of 2 or more (but usually less than 100) amino acids where the alpha carboxyl group of one is bound to the alpha amino group of another." [GOC

2071 Pathogen[ P14079] interacts with 1 human partners:{O14773}

2072 [Cluster 346]GO:0031064+P biological\_process [name] negative regulation of histone deacetylation [def] "Any process that stops, prevents, or reduces the frequency, rate or extent of the removal of acetyl groups from histones." [GOC

2073 Pathogen[ Q2Q067] interacts with 1 human partners:{P12755}

2074 Pathogen[ P0C214] interacts with 1 human partners:{P12755}

2075 Pathogen[ Q85601] interacts with 1 human partners:{P12755}

2076 Pathogen[ P14079] interacts with 1 human partners:{P12755}

2077 Pathogen[ P03410] interacts with 1 human partners:{P12755}

2078 Pathogen[ P0C206] interacts with 1 human partners:{P12755}

2079 [Cluster 347]GO:0021938+P biological\_process [name] smoothened signaling pathway involved in regulation of cerebellar granule cell precursor cell proliferation [def] "The series of molecular signals generated as a consequence of activation of the transmembrane protein Smoothened in cerebellar granule cells that contributes to the regulation of proliferation of the cells." [GO\_REF

2080 Pathogen[ Q2Q067] interacts with 1 human partners:{P08151}

2081 Pathogen[ P0C214] interacts with 1 human partners:{P08151}

2082 Pathogen[ P03346] interacts with 1 human partners:{P08151}

2083 Pathogen[ Q85601] interacts with 1 human partners:{P08151}

2084 Pathogen[ P14079] interacts with 1 human partners:{P08151}

2085 Pathogen[ P0C206] interacts with 1 human partners:{P08151}

2086 Pathogen[ P03363] interacts with 1 human partners:{P08151}

2087 [Cluster 348]GO:0033578+P biological\_process [name] protein glycosylation in Golgi [def] "The addition of a sugar unit to a protein amino acid in any compartment of the Golgi apparatus." [GOC

2088 Pathogen[ P14079] interacts with 1 human partners:{Q96S06}

2089 Pathogen[ P03410] interacts with 1 human partners:{Q96S06}

2090 Pathogen[ P0C206] interacts with 1 human partners:{Q96S06}

2091 [Cluster 349]GO:0061383+P biological\_process [name] trabecula morphogenesis [def] "The process of shaping a trabecula in an organ. A trabecula is a small, often microscopic, tissue element in the form of a small beam, strut or rod, which generally has a mechanical function. Trabecula are usually but not necessarily, composed of dense collagenous tissue." [GOC

2092 Pathogen[ Q2Q067] interacts with 1 human partners:{P61586}

2093 Pathogen[ P0C214] interacts with 1 human partners:{P61586}

2094 Pathogen[ P03346] interacts with 1 human partners:{P61586}

2095 Pathogen[ Q85601] interacts with 1 human partners:{P61586}

2096 Pathogen[ P14079] interacts with 1 human partners:{P61586}

2097 Pathogen[ P03383] interacts with 1 human partners:{P61586}

2098 Pathogen[ P03410] interacts with 1 human partners:{P61586}

2099 Pathogen[ P14075] interacts with 1 human partners:{P61586}

2100 Pathogen[ P0C206] interacts with 1 human partners:{P61586}

2101 [Cluster 350]GO:2000384+P biological\_process [name] negative regulation of ectoderm development [def] "Any process that stops, prevents or reduces the frequency, rate or extent of ectoderm development." [GOC

2102 Pathogen[ P14079] interacts with 1 human partners:{P13693}

2103 Pathogen[ P03410] interacts with 1 human partners:{P13693}

2104 [Cluster 351]GO:0050994+P biological\_process [name] regulation of lipid catabolic process [def] "Any process that modulates the frequency, rate, or extent of the chemical reactions and pathways resulting in the breakdown of lipids." [GOC

2105 Pathogen[ Q2Q067] interacts with 1 human partners:{P10827}

2106 Pathogen[ P03346] interacts with 1 human partners:{P10827}

2107 Pathogen[ Q85601] interacts with 1 human partners:{P10827}

2108 Pathogen[ P14079] interacts with 1 human partners:{P10827}

2109 Pathogen[ P0C206] interacts with 1 human partners:{P10827}

2110 [Cluster 352]GO:0072102+P biological\_process [name] glomerulus morphogenesis [def] "The process in which the anatomical structures of the glomerulus are generated and organized. The glomerulus is a capillary tuft surrounded by Bowman's capsule in nephrons of the vertebrate kidney." [GOC

2111 Pathogen[ P14079] interacts with 1 human partners:{Q06413}

2112 [Cluster 353]GO:0043412+P biological\_process [name] macromolecule modification [def] "The covalent alteration of one or more monomeric units in a polypeptide, polynucleotide, polysaccharide, or other biological macromolecule, resulting in a change in its properties." [GOC

2113 Pathogen[ P14079] interacts with 2 human partners:{Q5VV42;Q96SZ6}

2114 [Cluster 354]GO:0034157+P biological\_process [name] positive regulation of toll-like receptor 7 signaling pathway [def] "Any process that activates or increases the frequency, rate, or extent of toll-like receptor 7 signaling pathway." [GOC

2115 Pathogen[ P0C214] interacts with 1 human partners:{Q8WXG1}

2116 Pathogen[ P14079] interacts with 1 human partners:{Q8WXG1}

2117 Pathogen[ P03410] interacts with 1 human partners:{Q8WXG1}

2118 Pathogen[ POC206] interacts with 1 human partners:{Q8WXG1}

2119 [Cluster 355]GO:0048010+P biological\_process [name] vascular endothelial growth factor receptor signaling pathway [def] "The series of molecular signals generated as a consequence of vascular endothelial growth factor receptor binding to one of its physiological ligands." [GOC

2120 Pathogen[ Q2Q067] interacts with 2 human partners:{O14786;P56945}

2121 Pathogen[ POC214] interacts with 2 human partners:{O14786;P56945}

2122 Pathogen[ P03346] interacts with 2 human partners:{P56945;O14786}

2123 Pathogen[ Q85601] interacts with 2 human partners:{O14786;P56945}

2124 Pathogen[ P03383] interacts with 1 human partners:{P56945}

2125 Pathogen[ P03410] interacts with 2 human partners:{O14786;P56945}

2126 Pathogen[ P14075] interacts with 1 human partners:{P56945}

2127 Pathogen[ POC206] interacts with 2 human partners:{O14786;P56945}

2128 Pathogen[ P03363] interacts with 2 human partners:{O14786;P56945}

2129 [Cluster 356]GO:0003289+P biological\_process [name] atrial septum primum morphogenesis [def] "The process in which anatomical structure of an atrial septum primum is generated and organized." [GOC

2130 Pathogen[ Q2Q067] interacts with 1 human partners:{O96028}

2131 Pathogen[ POC214] interacts with 1 human partners:{O96028}

2132 Pathogen[ P03346] interacts with 2 human partners:{Q06945;O96028}

2133 Pathogen[ Q85601] interacts with 1 human partners:{O96028}

2134 Pathogen[ POC206] interacts with 1 human partners:{O96028}

2135 Pathogen[ P03363] interacts with 1 human partners:{O96028}

2136 [Cluster 357]GO:0042109+P biological\_process [name] lymphotoxin A biosynthetic process [def] "The chemical reactions and pathways resulting in the formation of the cytokine lymphotoxin A." [GOC

2137 Pathogen[ Q2Q067] interacts with 1 human partners:{O95999}

2138 Pathogen[ POC214] interacts with 1 human partners:{O95999}

2139 Pathogen[ P03346] interacts with 1 human partners:{O95999}

2140 Pathogen[ Q85601] interacts with 1 human partners:{O95999}

2141 Pathogen[ P14079] interacts with 1 human partners:{O95999}

2142 Pathogen[ P03383] interacts with 1 human partners:{O95999}

2143 Pathogen[ P03410] interacts with 1 human partners:{O95999}

2144 Pathogen[ P14075] interacts with 1 human partners:{O95999}

2145 Pathogen[ POC206] interacts with 1 human partners:{O95999}

2146 [Cluster 358]GO:0006499+P biological\_process [name] N-terminal protein myristoylation [def] "The covalent attachment of a myristoyl group to the N-terminal amino acid residue of a protein." [GOC

2147 Pathogen[ Q2Q067] interacts with 1 human partners:{P30419}

2148 Pathogen[ POC214] interacts with 2 human partners:{O60551;P30419}

2149 Pathogen[ Q85601] interacts with 2 human partners:{O60551;P30419}

2150 Pathogen[ P14079] interacts with 2 human partners:{O60551;P30419}

2151 Pathogen[ P03410] interacts with 2 human partners:{O60551;P30419}

2152 Pathogen[ POC206] interacts with 2 human partners:{P30419;O60551}

2153 [Cluster 359]GO:0000354+P biological\_process [name] cis assembly of pre-catalytic spliceosome [def] "Assembly of a spliceosomal complex containing the intact pre-mRNA and all of the spliceosomal snRNPs. This occurs when the tri-snRNP associates with the pre-mRNA and associated snRNPs in an ATP-dependent manner." [GOC

2154 Pathogen[ P03346] interacts with 2 human partners:{Q9BUQ8;O75643}

2155 Pathogen[ P03363] interacts with 1 human partners:{O75643}

2156 [Cluster 360]GO:0006548+P biological\_process [name] histidine catabolic process [def] "The chemical reactions and pathways resulting in the breakdown of histidine, 2-amino-3-(1H-imidazol-4-yl)propanoic acid." [GOC

2157 Pathogen[ Q2Q067] interacts with 1 human partners:{Q96NU7}

2158 Pathogen[ POC214] interacts with 1 human partners:{Q96NU7}

2159 Pathogen[ P03346] interacts with 1 human partners:{Q96NU7}

2160 Pathogen[ P14079] interacts with 4 human partners:{P42357;Q96NU7;Q96N76;O95954}

2161 Pathogen[ P03410] interacts with 3 human partners:{O95954;Q96NU7;Q96N76}

2162 Pathogen[ P14075] interacts with 1 human partners:{Q96NU7}

2163 Pathogen[ POC206] interacts with 2 human partners:{O95954;Q96NU7}

2164 [Cluster 361]GO:0001878+P biological\_process [name] response to yeast [def] "Any process that results in a change in state or activity of a cell or an organism (in terms of movement, secretion, enzyme production, gene expression, etc.) as a result of a stimulus from a yeast species." [PMID

2165 Pathogen[ Q2Q067] interacts with 1 human partners:{P27986}

2166 Pathogen[ POC214] interacts with 1 human partners:{P27986}

2167 Pathogen[ P03346] interacts with 1 human partners:{P27986}

2168 Pathogen[ Q85601] interacts with 1 human partners:{P27986}

2169 Pathogen[ P03383] interacts with 1 human partners:{P27986}

2170 Pathogen[ P03410] interacts with 1 human partners:{P27986}

2171 Pathogen[ P14075] interacts with 1 human partners:{P27986}

2172 Pathogen[ POC206] interacts with 1 human partners:{P27986}

2173 Pathogen[ P03363] interacts with 1 human partners:{P27986}

2174 [Cluster 362]GO:0048210+P biological\_process [name] Golgi vesicle fusion to target membrane [def] "The joining of the lipid bilayer membrane around a Golgi transport vesicle to the target lipid bilayer membrane." [GOC

2175 Pathogen[ P03346] interacts with 1 human partners:{Q969F2}

2176 Pathogen[ P03410] interacts with 1 human partners:{Q969F2}

2177 Pathogen[ P0C206] interacts with 1 human partners:{Q969F2}

2178 [Cluster 363]GO:0060009+P biological\_process [name] Sertoli cell development [def] "The process whose specific outcome is the progression of a Sertoli cell over time, from its formation to the mature structure. Cell development does not include the steps involved in committing a cell to a Sertoli cell fate." [GOC

2179 Pathogen[ Q2Q067] interacts with 1 human partners:{P15976}

2180 Pathogen[ P03346] interacts with 2 human partners:{P41225;P15976}

2181 Pathogen[ Q85601] interacts with 1 human partners:{P15976}

2182 Pathogen[ P14079] interacts with 1 human partners:{P15976}

2183 Pathogen[ P03410] interacts with 1 human partners:{P15976}

2184 Pathogen[ P0C206] interacts with 1 human partners:{P15976}

2185 [Cluster 364]GO:0032331+P biological\_process [name] negative regulation of chondrocyte differentiation [def] "Any process that stops, prevents, or reduces the frequency, rate or extent of chondrocyte differentiation." [GOC

2186 Pathogen[ P03346] interacts with 1 human partners:{P78367}

2187 Pathogen[ P03363] interacts with 1 human partners:{P78367}

2188 [Cluster 365]GO:0030850+P biological\_process [name] prostate gland development [def] "The process whose specific outcome is the progression of the prostate gland over time, from its formation to the mature structure. The prostate gland is a partly muscular, partly glandular body that is situated near the base of the mammalian male urethra and secretes an alkaline viscid fluid which is a major constituent of the ejaculatory fluid." [PMID

2189 Pathogen[ Q2Q067] interacts with 1 human partners:{P35869}

2190 Pathogen[ P0C214] interacts with 1 human partners:{P35869}

2191 Pathogen[ P03346] interacts with 1 human partners:{P35869}

2192 Pathogen[ Q85601] interacts with 1 human partners:{P35869}

2193 Pathogen[ P14079] interacts with 1 human partners:{P35869}

2194 Pathogen[ P03383] interacts with 1 human partners:{P35869}

2195 Pathogen[ P14075] interacts with 1 human partners:{P35869}

2196 Pathogen[ P0C206] interacts with 1 human partners:{P35869}

2197 Pathogen[ P03363] interacts with 1 human partners:{P35869}

2198 [Cluster 366]GO:0010529+P biological\_process [name] negative regulation of transposition [def] "Any process that decreases the frequency, rate or extent of transposition. Transposition results in the movement of discrete segments of DNA between nonhomologous sites." [GOC

2199 Pathogen[ Q2Q067] interacts with 1 human partners:{Q9HC16}

2200 Pathogen[ P0C214] interacts with 1 human partners:{Q9HC16}

2201 Pathogen[ Q85601] interacts with 1 human partners:{Q9HC16}

2202 Pathogen[ P14079] interacts with 2 human partners:{P31941;Q9HC16}

2203 Pathogen[ P03410] interacts with 4 human partners:{Q9HC16;Q9NRW3;P31941;Q6NTF7}

2204 Pathogen[ P0C206] interacts with 3 human partners:{P31941;Q6NTF7;Q9HC16}

2205 [Cluster 367]GO:0048388+P biological\_process [name] endosomal lumen acidification [def] "Any process that reduces the pH of the endosomal lumen, measured by the concentration of the hydrogen ion." [GOC

2206 Pathogen[ P14079] interacts with 1 human partners:{Q8NBQ7}

2207 [Cluster 368]GO:0043462+P biological\_process [name] regulation of ATPase activity [def] "Any process that modulates the rate of ATP hydrolysis by an ATPase." [GOC

2208 Pathogen[ P0C214] interacts with 1 human partners:{P13533}

2209 Pathogen[ P03346] interacts with 1 human partners:{P63316}

2210 Pathogen[ Q85601] interacts with 1 human partners:{P13533}

2211 Pathogen[ P14079] interacts with 1 human partners:{P07951}

2212 Pathogen[ P03410] interacts with 3 human partners:{P07951;P63316;P13533}

2213 Pathogen[ P0C206] interacts with 1 human partners:{P13533}

2214 [Cluster 369]GO:0046034+P biological\_process [name] ATP metabolic process [def] "The chemical reactions and pathways involving ATP, adenosine triphosphate, a universally important coenzyme and enzyme regulator." [GOC

2215 Pathogen[ Q2Q067] interacts with 1 human partners:{P24539}

2216 Pathogen[ P0C214] interacts with 3 human partners:{Q92934;P28331;P24539}

2217 Pathogen[ P03346] interacts with 1 human partners:{P24539}

2218 Pathogen[ Q85601] interacts with 1 human partners:{P24539}

2219 Pathogen[ P14079] interacts with 6 human partners:{O95544;P25705;P56385;Q92934;Q9UN42;P24539}

2220 Pathogen[ P03383] interacts with 1 human partners:{P24539}

2221 Pathogen[ P03410] interacts with 6 human partners:{P25705;Q92934;P56385;P24539;Q9UN42;P18859}

2222 Pathogen[ P14075] interacts with 2 human partners:{P24539;P56385}

2223 Pathogen[ P0C206] interacts with 4 human partners:{Q92934;P24539;Q9UN42;P56385}

2224 [Cluster 370]GO:0051387+P biological\_process [name] negative regulation of nerve growth factor receptor signaling pathway [def] "Any process that stops, prevents, or reduces the frequency, rate or extent of the activity of the nerve growth factor receptor signaling pathway." [GOC

2225 Pathogen[ P14079] interacts with 1 human partners:{O43597}

2226 Pathogen[ P03410] interacts with 1 human partners:{O43597}

2227 Pathogen[ P0C206] interacts with 1 human partners:{O43597}



2228 [Cluster 371]GO:0060971+P biological\_process [name] embryonic heart tube left/right pattern formation [def] "The pattern specification process that results in the subdivision of the left/right axis of the embryonic heart tube in space to define an area or volume in which specific patterns of cell differentiation will take place." [GOC

2229 Pathogen[ P03346] interacts with 1 human partners:{Q9Y283}

2230 Pathogen[ Q85601] interacts with 1 human partners:{Q9Y283}

2231 Pathogen[ P14079] interacts with 1 human partners:{Q9Y283}

2232 Pathogen[ P03410] interacts with 1 human partners:{Q9Y283}

2233 Pathogen[ P0C206] interacts with 1 human partners:{Q9Y283}

2234 Pathogen[ P03363] interacts with 1 human partners:{Q9Y283}

2235 [Cluster 372]GO:0031275+P biological\_process [name] regulation of lateral pseudopodium assembly [def] "Any process that modulates the frequency, rate or extent of the assembly of pseudopodia from the lateral side of the cell." [GOC

2236 Pathogen[ P03346] interacts with 1 human partners:{O60662}

2237 Pathogen[ P03363] interacts with 1 human partners:{O60662}

2238 [Cluster 373]GO:0072221+P biological\_process [name] metanephric distal convoluted tubule development [def] "The process whose specific outcome is the progression of the metanephric distal convoluted tubule over time, from its formation to the mature structure. The metanephric distal convoluted tubule is a portion of the metanephric nephron tubule that connects the metanephric loop of Henle to the collecting duct." [GOC

2239 Pathogen[ P0C214] interacts with 1 human partners:{P05937}

2240 Pathogen[ P03346] interacts with 2 human partners:{P05937;Q06710}

2241 Pathogen[ P14079] interacts with 1 human partners:{P05937}

2242 Pathogen[ P03410] interacts with 1 human partners:{P05937}

2243 Pathogen[ P03363] interacts with 1 human partners:{P05937}

2244 [Cluster 374]GO:0046621+P biological\_process [name] negative regulation of organ growth [def] "Any process that stops, prevents, or reduces the frequency, rate or extent of growth of an organ of an organism." [GOC

2245 Pathogen[ Q2Q067] interacts with 1 human partners:{O00255}

2246 Pathogen[ P0C214] interacts with 1 human partners:{O00255}

2247 Pathogen[ P03346] interacts with 1 human partners:{O00255}

2248 Pathogen[ Q85601] interacts with 1 human partners:{O00255}

2249 Pathogen[ P14079] interacts with 2 human partners:{P01215;O00255}

2250 Pathogen[ P03383] interacts with 2 human partners:{O00255;P01215}

2251 Pathogen[ P03410] interacts with 2 human partners:{P01215;O00255}

2252 Pathogen[ P14075] interacts with 2 human partners:{O00255;P01215}

2253 Pathogen[ P0C206] interacts with 2 human partners:{O00255;P01215}

2254 [Cluster 375]GO:0050829+P biological\_process [name] defense response to Gram-negative bacterium [def] "Reactions triggered in response to the presence of a Gram-negative bacterium that act to protect the cell or organism." [GOC

2255 Pathogen[ P0C214] interacts with 1 human partners:{P05121}

2256 Pathogen[ Q85601] interacts with 1 human partners:{P05121}

2257 Pathogen[ P03410] interacts with 1 human partners:{P05121}

2258 Pathogen[ P0C206] interacts with 1 human partners:{P05121}

2259 [Cluster 376]GO:0010463+P biological\_process [name] mesenchymal cell proliferation [def] "The multiplication or reproduction of cells, resulting in the expansion of a mesenchymal cell population. A mesenchymal cell is a cell that normally gives rise to other cells that are organized as three-dimensional masses, rather than sheets." [GOC

2260 Pathogen[ P14079] interacts with 1 human partners:{P28360}

2261 [Cluster 377]GO:0043570+P biological\_process [name] maintenance of DNA repeat elements [def] "Any process involved in sustaining the fidelity and copy number of DNA repeat elements." [GOC

2262 Pathogen[ P0C214] interacts with 1 human partners:{P20585}

2263 Pathogen[ P03346] interacts with 1 human partners:{P20585}

2264 Pathogen[ Q85601] interacts with 1 human partners:{P20585}

2265 Pathogen[ P14079] interacts with 2 human partners:{P20585;P52701}

2266 Pathogen[ P03410] interacts with 2 human partners:{P20585;P52701}

2267 Pathogen[ P0C206] interacts with 2 human partners:{P52701;P20585}

2268 Pathogen[ P03363] interacts with 1 human partners:{P20585}

2269 [Cluster 378]GO:0001923+P biological\_process [name] B-1 B cell differentiation [def] "The process in which a hemopoietic stem cell acquires the specialized features of a B-1 B cell. B-1 B cells are a distinct subset of B cells characterized as being CD5 positive, found predominantly in the peritoneum, pleural cavities, and spleen, and enriched for self-reactivity." [GOC

2270 Pathogen[ Q2Q067] interacts with 1 human partners:{Q9UDY8}

2271 Pathogen[ P0C214] interacts with 1 human partners:{Q9UDY8}

2272 Pathogen[ P03346] interacts with 1 human partners:{Q9UDY8}

2273 Pathogen[ Q85601] interacts with 1 human partners:{Q9UDY8}

2274 Pathogen[ P0C206] interacts with 1 human partners:{Q9UDY8}

2275 [Cluster 379]GO:0003085+P biological\_process [name] negative regulation of systemic arterial blood pressure [def] "The process that reduces the force with which blood travels through the systemic arterial circulatory system." [GOC

2276 Pathogen[ P14079] interacts with 1 human partners:{P46695}

2277 Pathogen[ P03410] interacts with 1 human partners:{P46695}

2278 [Cluster 380]GO:0039534+P

2279 Pathogen[ P14079] interacts with 1 human partners:{Q96C10}

2280 Pathogen[ P03410] interacts with 1 human partners:{Q96C10}

2281 Pathogen[ P0C206] interacts with 1 human partners:{Q96C10}

2282 [Cluster 381]GO:0045835+P biological\_process [name] negative regulation of meiosis  
[def] "Any process that stops, prevents, or reduces the frequency, rate or extent of meiosis." [GOC]

2283 Pathogen[ P03346] interacts with 1 human partners:{Q9Y5R6}

2284 Pathogen[ Q85601] interacts with 1 human partners:{Q4G163}

2285 Pathogen[ P14079] interacts with 1 human partners:{Q4G163}

2286 Pathogen[ P03410] interacts with 1 human partners:{Q4G163}

2287 Pathogen[ P0C206] interacts with 2 human partners:{Q9Y5R6;Q4G163}

2288 Pathogen[ P03363] interacts with 1 human partners:{Q9Y5R6}

2289 [Cluster 382]GO:0009311+P biological\_process [name] oligosaccharide metabolic process  
[def] "The chemical reactions and pathways involving oligosaccharides, molecules with between two and (about) 20 monosaccharide residues connected by glycosidic linkages." [ISBN]

2290 Pathogen[ P14079] interacts with 2 human partners:{P06280;P17050}

2291 [Cluster 383]GO:0021545+P biological\_process [name] cranial nerve development  
[def] "The process whose specific outcome is the progression of the cranial nerves over time, from its formation to the mature structure. The cranial nerves are composed of twelve pairs of nerves that emanate from the nervous tissue of the hindbrain. These nerves are sensory, motor, or mixed in nature, and provide the motor and general sensory innervation of the head, neck and viscera. They mediate vision, hearing, olfaction and taste and carry the parasympathetic innervation of the autonomic ganglia that control visceral functions." [GO\_REF]

2292 Pathogen[ P03346] interacts with 1 human partners:{Q9P2D1}

2293 Pathogen[ Q85601] interacts with 1 human partners:{Q9P2D1}

2294 Pathogen[ P14079] interacts with 1 human partners:{Q9P2D1}

2295 Pathogen[ P03410] interacts with 1 human partners:{Q9P2D1}

2296 Pathogen[ P0C206] interacts with 1 human partners:{Q9P2D1}

2297 [Cluster 384]GO:0010613+P biological\_process [name] positive regulation of cardiac muscle hypertrophy [def] "Any process that increases the rate, frequency or extent of the enlargement or overgrowth of all or part of the heart due to an increase in size (not length) of individual cardiac muscle fibers, without cell division." [GOC]

2298 Pathogen[ P03346] interacts with 1 human partners:{P58546}

2299 [Cluster 385]GO:2000781+P biological\_process [name] positive regulation of double-strand break repair [def] "Any process that activates or increases the frequency, rate or extent of double-strand break repair." [GOC]

2300 Pathogen[ Q2Q067] interacts with 1 human partners:{Q08050}

2301 Pathogen[ P03346] interacts with 1 human partners:{Q08050}

2302 Pathogen[ Q85601] interacts with 1 human partners:{Q08050}

2303 Pathogen[ P14075] interacts with 1 human partners:{Q08050}

2304 Pathogen[ P0C206] interacts with 1 human partners:{Q08050}

2305 Pathogen[ P03363] interacts with 1 human partners:{Q08050}

2306 [Cluster 386]GO:0030517+P biological\_process [name] negative regulation of axon extension [def] "Any process that stops, prevents, or reduces the frequency, rate or extent of axon outgrowth." [GOC]

2307 Pathogen[ Q2Q067] interacts with 2 human partners:{O14786;Q9Y252}

2308 Pathogen[ P0C214] interacts with 2 human partners:{O14786;Q9Y252}

2309 Pathogen[ P03346] interacts with 3 human partners:{Q9H165;Q9Y252;O14786}

2310 Pathogen[ Q85601] interacts with 2 human partners:{O14786;Q9Y252}

2311 Pathogen[ P03383] interacts with 1 human partners:{Q9Y252}

2312 Pathogen[ P03410] interacts with 1 human partners:{O14786}

2313 Pathogen[ P14075] interacts with 1 human partners:{Q9Y252}

2314 Pathogen[ P0C206] interacts with 3 human partners:{O14786;Q9H165;Q9Y252}

2315 Pathogen[ P03363] interacts with 2 human partners:{Q9Y252;O14786}

2316 [Cluster 387]GO:0097194+P biological\_process [name] execution phase of apoptosis  
[def] "A stage of the apoptotic process that starts with the controlled breakdown of the cell through the action of effector caspases or other effector molecules (e.g. cathepsins, calpains etc.). Key steps of the execution phase are rounding-up of the cell, retraction of pseudopodes, reduction of cellular volume (pyknosis), chromatin condensation, nuclear fragmentation (karyorrhexis), plasma membrane blebbing and fragmentation of the cell into apoptotic bodies. The execution phase ends when the cell has died." [GOC]

2317 Pathogen[ Q2Q067] interacts with 1 human partners:{P42575}

2318 Pathogen[ P0C214] interacts with 1 human partners:{P42575}

2319 Pathogen[ P03346] interacts with 1 human partners:{P42575}

2320 Pathogen[ Q85601] interacts with 1 human partners:{P42575}

2321 Pathogen[ P14079] interacts with 1 human partners:{P42575}

2322 Pathogen[ P03410] interacts with 1 human partners:{P42575}

2323 Pathogen[ P0C206] interacts with 1 human partners:{P42575}

2324 [Cluster 388]GO:0016560+P biological\_process [name] protein import into peroxisome matrix, docking [def] "The process in which a complex formed of a peroxisome targeting sequence (PTS) receptor bound to a PTS-bearing protein docks with translocation machinery in the preoxisomal membrane." [PMID]

2325 Pathogen[ P03346] interacts with 1 human partners:{P50542}

2326 Pathogen[ P14079] interacts with 1 human partners:{P50542}

2327 Pathogen[ P03410] interacts with 1 human partners:{P50542}

2328 Pathogen[ P0C206] interacts with 1 human partners:{P50542}

2329 [Cluster 389]GO:0008078+P biological\_process [name] mesodermal cell migration  
[def] "The orderly movement of mesodermal cells from one site to another." [GOC

2330 Pathogen[ Q2Q067] interacts with 1 human partners:{Q0VG99}

2331 Pathogen[ P03346] interacts with 1 human partners:{Q0VG99}

2332 Pathogen[ Q85601] interacts with 1 human partners:{Q0VG99}

2333 Pathogen[ P0C206] interacts with 1 human partners:{Q0VG99}

2334 Pathogen[ P03363] interacts with 1 human partners:{Q0VG99}

2335 [Cluster 390]GO:0002335+P biological\_process [name] mature B cell differentiation  
[def] "The process in which transitional stage B cells acquire the specialized features  
of mature B cells in the spleen." [GOC

2336 Pathogen[ Q2Q067] interacts with 1 human partners:{P09086}

2337 Pathogen[ P0C214] interacts with 1 human partners:{P09086}

2338 Pathogen[ P03346] interacts with 1 human partners:{P09086}

2339 Pathogen[ Q85601] interacts with 1 human partners:{P09086}

2340 Pathogen[ P14079] interacts with 1 human partners:{P09086}

2341 Pathogen[ P0C206] interacts with 1 human partners:{P09086}

2342 Pathogen[ P03363] interacts with 1 human partners:{P09086}

2343 [Cluster 391]GO:0032753+P biological\_process [name] positive regulation of  
interleukin-4 production [def] "Any process that activates or increases the  
frequency, rate, or extent of interleukin-4 production." [GOC

2344 Pathogen[ P03346] interacts with 1 human partners:{O75995}

2345 Pathogen[ P14079] interacts with 1 human partners:{O95760}

2346 Pathogen[ P03410] interacts with 1 human partners:{O95760}

2347 [Cluster 392]GO:0050856+P biological\_process [name] regulation of T cell receptor  
signaling pathway [def] "Any process that modulates the frequency, rate or extent of  
signaling pathways initiated by the cross-linking of an antigen receptor on a T cell."  
[GOC

2348 Pathogen[ Q2Q067] interacts with 2 human partners:{Q9UDY8;O95999}

2349 Pathogen[ P0C214] interacts with 2 human partners:{Q9UDY8;O95999}

2350 Pathogen[ P03346] interacts with 2 human partners:{Q9UDY8;O95999}

2351 Pathogen[ Q85601] interacts with 2 human partners:{Q9UDY8;O95999}

2352 Pathogen[ P14079] interacts with 1 human partners:{O95999}

2353 Pathogen[ P03383] interacts with 1 human partners:{O95999}

2354 Pathogen[ P03410] interacts with 1 human partners:{O95999}

2355 Pathogen[ P14075] interacts with 1 human partners:{O95999}

2356 Pathogen[ P0C206] interacts with 2 human partners:{Q9UDY8;O95999}

2357 [Cluster 393]GO:0015755+P biological\_process [name] fructose transport [def] "The  
directed movement of fructose into, out of or within a cell, or between cells, by means  
of some agent such as a transporter or pore. Fructose exists in a open chain form or as  
a ring compound. D-fructose is the sweetest of the sugars and is found free in a large  
number of fruits and honey." [GOC

2358 Pathogen[ P0C214] interacts with 1 human partners:{P11168}

2359 Pathogen[ Q85601] interacts with 1 human partners:{P11168}

2360 Pathogen[ P03383] interacts with 2 human partners:{P11168;P22732}

2361 Pathogen[ P03410] interacts with 2 human partners:{P22732;P11168}

2362 Pathogen[ P14075] interacts with 2 human partners:{P22732;P11168}

2363 Pathogen[ P0C206] interacts with 1 human partners:{P11168}

2364 [Cluster 394]GO:0050863+P biological\_process [name] regulation of T cell activation  
[def] "Any process that modulates the frequency, rate or extent of T cell activation."  
[GOC

2365 Pathogen[ P03346] interacts with 1 human partners:{Q9Y3P8}

2366 Pathogen[ P14079] interacts with 2 human partners:{O43561;Q9Y3P8}

2367 Pathogen[ P03383] interacts with 1 human partners:{Q9Y3P8}

2368 Pathogen[ P03410] interacts with 2 human partners:{O43561;Q9Y3P8}

2369 Pathogen[ P14075] interacts with 1 human partners:{Q9Y3P8}

2370 Pathogen[ P0C206] interacts with 1 human partners:{Q9Y3P8}

2371 Pathogen[ P03363] interacts with 1 human partners:{Q9Y3P8}

2372 [Cluster 395]GO:0070184+P biological\_process [name] mitochondrial tyrosyl-tRNA  
aminoacylation [def] "The process of coupling threonine to tyrosyl-tRNA in a  
mitochondrion, catalyzed by tyrosyl-tRNA synthetase. In tRNA aminoacylation, the amino  
acid is first activated by linkage to AMP and then transferred to either the 2'- or the  
3'-hydroxyl group of the 3'-adenosine residue of the tRNA." [GOC

2373 Pathogen[ P0C214] interacts with 1 human partners:{Q9Y2Z4}

2374 Pathogen[ P14079] interacts with 1 human partners:{Q9Y2Z4}

2375 Pathogen[ P03383] interacts with 1 human partners:{Q9Y2Z4}

2376 Pathogen[ P03410] interacts with 1 human partners:{Q9Y2Z4}

2377 Pathogen[ P14075] interacts with 1 human partners:{Q9Y2Z4}

2378 Pathogen[ P0C206] interacts with 1 human partners:{Q9Y2Z4}

2379 Pathogen[ P03363] interacts with 1 human partners:{Q9Y2Z4}

2380 [Cluster 396]GO:0021858+P biological\_process [name] GABAergic neuron differentiation  
in basal ganglia [def] "The process in which a neuroblast acquires the specialized  
structural and functional features of a GABAergic inhibitory neuron in the basal  
ganglia. Differentiation includes the processes involved in commitment of a neuroblast  
to a GABAergic neuron." [GO\_REF

2381 Pathogen[ Q2Q067] interacts with 1 human partners:{A6NFD8}

2382 Pathogen[ P03346] interacts with 1 human partners:{A6NFD8}

2383 Pathogen[ Q85601] interacts with 1 human partners:{A6NFD8}

2384 Pathogen[ P14079] interacts with 1 human partners:{A6NFD8}

2385 Pathogen[ P03410] interacts with 1 human partners:{A6NFD8}

2386 Pathogen[ POC206] interacts with 1 human partners:{A6NFD8}

2387 Pathogen[ P03363] interacts with 1 human partners:{A6NFD8}

2388 [Cluster 397]GO:0019088+P biological\_process [name] immortalization of host cell by virus [def] "A virus-induced cellular transformation arising in immortalized cells, or cells capable of indefinite replication, due to their ability to produce their own telomerase." [ISBN

2389 Pathogen[ Q2Q067] interacts with 1 human partners:{P04818}

2390 Pathogen[ POC214] interacts with 1 human partners:{P04818}

2391 Pathogen[ P14079] interacts with 1 human partners:{P04818}

2392 Pathogen[ P03410] interacts with 1 human partners:{P04818}

2393 Pathogen[ POC206] interacts with 1 human partners:{P04818}

2394 [Cluster 398]GO:0031640+P biological\_process [name] killing of cells of other organism [def] "Any process in an organism that results in the killing of cells of another organism, including in some cases the death of the other organism. Killing here refers to the induction of death in one cell by another cell, not cell-autonomous death due to internal or other environmental conditions." [GOC

2395 Pathogen[ P14079] interacts with 3 human partners:{P15515;P15516;P81172}

2396 Pathogen[ P03410] interacts with 3 human partners:{P81172;P15515;P15516}

2397 Pathogen[ P14075] interacts with 1 human partners:{P15515}

2398 Pathogen[ POC206] interacts with 1 human partners:{P15515}

2399 Pathogen[ P03363] interacts with 1 human partners:{P15515}

2400 [Cluster 399]GO:0072358+P biological\_process [name] cardiovascular system development [def] "The process whose specific outcome is the progression of the cardiovascular system over time, from its formation to the mature structure. The cardiovascular system is the anatomical system that has as its parts the heart and blood vessels." [GOC

2401 Pathogen[ P14079] interacts with 1 human partners:{Q8NBL1}

2402 [Cluster 400]GO:1900041+P

2403 Pathogen[ Q2Q067] interacts with 1 human partners:{P14373}

2404 Pathogen[ POC214] interacts with 1 human partners:{P14373}

2405 Pathogen[ P03346] interacts with 1 human partners:{P14373}

2406 Pathogen[ Q85601] interacts with 1 human partners:{P14373}

2407 Pathogen[ P14079] interacts with 1 human partners:{P14373}

2408 Pathogen[ POC206] interacts with 1 human partners:{P14373}

2409 Pathogen[ P03363] interacts with 1 human partners:{P14373}

2410 [Cluster 401]GO:0001561+P biological\_process [name] fatty acid alpha-oxidation [def] "A metabolic pathway by which 3-methyl branched fatty acids are degraded. These compounds are not degraded by the normal peroxisomal beta-oxidation pathway, because the 3-methyl blocks the dehydrogenation of the hydroxyl group by hydroxyacyl-CoA dehydrogenase. The 3-methyl branched fatty acid is converted in several steps to pristanic acid, which can then feed into the beta-oxidative pathway." [http

2411 Pathogen[ POC214] interacts with 1 human partners:{O14832}

2412 Pathogen[ P14079] interacts with 1 human partners:{O14832}

2413 Pathogen[ P03410] interacts with 1 human partners:{O14832}

2414 Pathogen[ P14075] interacts with 1 human partners:{O14832}

2415 Pathogen[ POC206] interacts with 1 human partners:{O14832}

2416 [Cluster 402]GO:0021568+P biological\_process [name] rhombomere 2 development [def] "The process whose specific outcome is the progression of rhombomere 2 over time, from its formation to the mature structure. Rhombomeres are transverse segments of the developing rhombencephalon. Rhombomeres are lineage restricted, express different genes from one another, and adopt different developmental fates. Rhombomeres are numbered in anterior to posterior order." [GO\_REF

2417 Pathogen[ Q2Q067] interacts with 1 human partners:{O43364}

2418 Pathogen[ P03346] interacts with 2 human partners:{P52951;O43364}

2419 Pathogen[ Q85601] interacts with 1 human partners:{O43364}

2420 Pathogen[ P14079] interacts with 1 human partners:{O43364}

2421 Pathogen[ P03410] interacts with 1 human partners:{O43364}

2422 Pathogen[ POC206] interacts with 1 human partners:{O43364}

2423 Pathogen[ P03363] interacts with 2 human partners:{P52951;O43364}

2424 [Cluster 403]GO:0050432+P biological\_process [name] catecholamine secretion [def] "The regulated release of catecholamines by a cell or group of cells. The catecholamines are a group of physiologically important biogenic amines that possess a catechol (3,4-dihydroxyphenyl) nucleus and are derivatives of 3,4-dihydroxyphenylethylamine." [GOC

2425 Pathogen[ P03346] interacts with 1 human partners:{Q9ULU8}

2426 Pathogen[ P14079] interacts with 1 human partners:{Q9ULU8}

2427 Pathogen[ P03410] interacts with 1 human partners:{Q9ULU8}

2428 Pathogen[ POC206] interacts with 1 human partners:{Q9ULU8}

2429 [Cluster 404]GO:0048753+P biological\_process [name] pigment granule organization [def] "A process that is carried out at the cellular level which results in the assembly, arrangement of constituent parts, or disassembly of a pigment granule." [GOC

2430 Pathogen[ POC214] interacts with 1 human partners:{Q99698}

2431 Pathogen[ P03346] interacts with 1 human partners:{Q99698}

2432 Pathogen[ Q85601] interacts with 1 human partners:{Q99698}

2433 Pathogen[ P14079] interacts with 1 human partners:{Q99698}

2434 Pathogen[ P03410] interacts with 1 human partners:{Q99698}

2435 Pathogen[ P0C206] interacts with 1 human partners:{Q99698}

2436 Pathogen[ P03363] interacts with 1 human partners:{Q99698}

2437 [Cluster 405]GO:0048702+P biological\_process [name] embryonic neurocranium morphogenesis [def] "The process in which the anatomical structures of the neurocranium are generated and organized during the embryonic phase. The neurocranium is the portion of the vertebrate skull surrounding the brain." [GOC

2438 Pathogen[ Q2Q067] interacts with 1 human partners:{P49639}

2439 Pathogen[ P0C214] interacts with 1 human partners:{P49639}

2440 Pathogen[ P03346] interacts with 1 human partners:{P49639}

2441 Pathogen[ Q85601] interacts with 1 human partners:{P49639}

2442 Pathogen[ P14079] interacts with 1 human partners:{P49639}

2443 Pathogen[ P03383] interacts with 1 human partners:{P49639}

2444 Pathogen[ P03410] interacts with 1 human partners:{P49639}

2445 Pathogen[ P0C206] interacts with 1 human partners:{P49639}

2446 Pathogen[ P03363] interacts with 1 human partners:{P49639}

2447 [Cluster 406]GO:0030432+P biological\_process [name] peristalsis [def] "A wavelike sequence of involuntary muscular contraction and relaxation that passes along a tubelike structure, such as the intestine, impelling the contents onwards." [ISBN

2448 Pathogen[ Q2Q067] interacts with 1 human partners:{Q12959}

2449 Pathogen[ P0C214] interacts with 1 human partners:{Q12959}

2450 Pathogen[ P03346] interacts with 1 human partners:{Q12959}

2451 Pathogen[ Q85601] interacts with 1 human partners:{Q12959}

2452 Pathogen[ P03410] interacts with 1 human partners:{Q12959}

2453 Pathogen[ P0C206] interacts with 1 human partners:{Q12959}

2454 Pathogen[ P03363] interacts with 1 human partners:{Q12959}

2455 [Cluster 407]GO:0002204+P biological\_process [name] somatic recombination of immunoglobulin genes involved in immune response [def] "The process in which immunoglobulin genes are formed through recombination of the germline genetic elements, also known as immunoglobulin gene segments, within a single locus following the induction of and contributing to an immune response." [GOC

2456 Pathogen[ P0C214] interacts with 1 human partners:{P40692}

2457 Pathogen[ Q85601] interacts with 1 human partners:{P40692}

2458 Pathogen[ P14079] interacts with 1 human partners:{P40692}

2459 Pathogen[ P03410] interacts with 1 human partners:{P40692}

2460 Pathogen[ P0C206] interacts with 1 human partners:{P40692}

2461 [Cluster 408]GO:0003211+P biological\_process [name] cardiac ventricle formation [def] "The developmental process pertaining to the initial formation of a cardiac ventricle from unspecified parts. A cardiac ventricle receives blood from a cardiac atrium and pumps it out of the heart." [GOC

2462 Pathogen[ P03346] interacts with 1 human partners:{Q06945}

2463 Pathogen[ P14079] interacts with 1 human partners:{Q06413}

2464 [Cluster 409]GO:0035641+P biological\_process [name] locomotory exploration behavior [def] "The specific movement from place to place of an organism in response to a novel environment." [GOC

2465 Pathogen[ Q2Q067] interacts with 1 human partners:{P78352}

2466 Pathogen[ P0C214] interacts with 1 human partners:{P78352}

2467 Pathogen[ P03346] interacts with 1 human partners:{P78352}

2468 Pathogen[ Q85601] interacts with 1 human partners:{P78352}

2469 Pathogen[ P03383] interacts with 1 human partners:{P78352}

2470 Pathogen[ P03410] interacts with 1 human partners:{P78352}

2471 Pathogen[ P14075] interacts with 1 human partners:{P78352}

2472 Pathogen[ P0C206] interacts with 1 human partners:{P78352}

2473 Pathogen[ P03363] interacts with 1 human partners:{P78352}

2474 [Cluster 410]GO:0009128+P biological\_process [name] purine nucleoside monophosphate catabolic process [def] "The chemical reactions and pathways resulting in the breakdown of purine nucleoside monophosphate, a compound consisting of a purine base linked to a ribose or deoxyribose sugar esterified with phosphate on the sugar." [GOC

2475 Pathogen[ P14079] interacts with 1 human partners:{Q9BXI3}

2476 Pathogen[ P03410] interacts with 1 human partners:{Q9BXI3}

2477 [Cluster 411]GO:0071786+P biological\_process [name] endoplasmic reticulum tubular network organization [def] "A process that is carried out at the cellular level which results in the assembly, arrangement of constituent parts, or disassembly of the endoplasmic reticulum (ER) tubular network. The ER tubular network is the ER part that comprises the membranes with high curvature in cross-section." [GOC

2478 Pathogen[ P0C214] interacts with 1 human partners:{Q9H902}

2479 Pathogen[ P03346] interacts with 1 human partners:{Q9H902}

2480 Pathogen[ Q85601] interacts with 1 human partners:{Q9H902}

2481 Pathogen[ P14079] interacts with 2 human partners:{Q9NZ43;Q9H902}

2482 Pathogen[ P03410] interacts with 2 human partners:{Q9NZ43;Q9H902}

2483 Pathogen[ P0C206] interacts with 1 human partners:{Q9H902}

2484 Pathogen[ P03363] interacts with 1 human partners:{Q9H902}

2485 [Cluster 412]GO:0061072+P biological\_process [name] iris morphogenesis [def] "The

process in which the iris is generated and organized. The iris is an anatomical structure in the eye whose opening forms the pupil. The iris is responsible for controlling the diameter and size of the pupil and the amount of light reaching the retina." [GOC

2486 Pathogen[ P03346] interacts with 1 human partners:{Q86Z02}

2487 [Cluster 413]GO:0051771+P biological\_process [name] negative regulation of nitric-oxide synthase biosynthetic process [def] "Any process that stops, prevents, or reduces the frequency, rate or extent of the chemical reactions and pathways resulting in the formation of a nitric-oxide synthase enzyme." [GOC

2488 Pathogen[ Q2Q067] interacts with 1 human partners:{Q9BQE4}

2489 Pathogen[ P0C214] interacts with 1 human partners:{Q9BQE4}

2490 Pathogen[ Q85601] interacts with 1 human partners:{Q9BQE4}

2491 Pathogen[ P14079] interacts with 1 human partners:{Q9BQE4}

2492 Pathogen[ P03383] interacts with 1 human partners:{Q9BQE4}

2493 Pathogen[ P03410] interacts with 1 human partners:{Q9BQE4}

2494 Pathogen[ P14075] interacts with 1 human partners:{Q9BQE4}

2495 Pathogen[ P0C206] interacts with 1 human partners:{Q9BQE4}

2496 [Cluster 414]GO:1900164+P

2497 Pathogen[ P03346] interacts with 1 human partners:{O75593}

2498 [Cluster 415]GO:0016073+P biological\_process [name] snRNA metabolic process [def] "The chemical reactions and pathways involving snRNA, small nuclear RNA, any of various low-molecular-mass RNA molecules found in the eukaryotic nucleus as components of the small nuclear ribonucleoprotein." [ISBN

2499 Pathogen[ P14079] interacts with 1 human partners:{Q7L2J0}

2500 Pathogen[ P03410] interacts with 1 human partners:{Q7L2J0}

2501 Pathogen[ P0C206] interacts with 1 human partners:{Q7L2J0}

2502 [Cluster 416]GO:0008610+P biological\_process [name] lipid biosynthetic process [def] "The chemical reactions and pathways resulting in the formation of lipids, compounds soluble in an organic solvent but not, or sparingly, in an aqueous solvent." [GOC

2503 Pathogen[ Q2Q067] interacts with 1 human partners:{P36956}

2504 Pathogen[ P03346] interacts with 1 human partners:{P36956}

2505 Pathogen[ Q85601] interacts with 1 human partners:{P36956}

2506 Pathogen[ P14079] interacts with 1 human partners:{P36956}

2507 Pathogen[ P03410] interacts with 2 human partners:{P36956;Q9UBY8}

2508 Pathogen[ P0C206] interacts with 1 human partners:{P36956}

2509 [Cluster 417]GO:0071466+P biological\_process [name] cellular response to xenobiotic stimulus [def] "Any process that results in a change in state or activity of a cell (in terms of movement, secretion, enzyme production, gene expression, etc.) as a result of a xenobiotic compound stimulus. Xenobiotic compounds are compounds foreign to living organisms." [GOC

2510 Pathogen[ P14079] interacts with 1 human partners:{P31941}

2511 Pathogen[ P03410] interacts with 1 human partners:{P31941}

2512 Pathogen[ P0C206] interacts with 1 human partners:{P31941}

2513 [Cluster 418]GO:0035644+P biological\_process [name] phosphoanandamide dephosphorylation [def] "The process of removing one or more phosphate groups from a phosphorylated anandamide." [CHEBI

2514 Pathogen[ P03346] interacts with 1 human partners:{Q9Y2R2}

2515 Pathogen[ P0C206] interacts with 1 human partners:{Q9Y2R2}

2516 Pathogen[ P03363] interacts with 1 human partners:{Q9Y2R2}

2517 [Cluster 419]GO:0006106+P biological\_process [name] fumarate metabolic process [def] "The chemical reactions and pathways involving fumarate, the anion of trans-1,2-ethenedicarboxylic acid, the diastereoisomer of maleate. It is a key intermediate in metabolism and is formed in the TCA cycle from succinate and converted into malate." [ISBN

2518 Pathogen[ Q2Q067] interacts with 1 human partners:{P07954}

2519 Pathogen[ P0C214] interacts with 1 human partners:{P07954}

2520 Pathogen[ P03346] interacts with 1 human partners:{P07954}

2521 Pathogen[ Q85601] interacts with 1 human partners:{P07954}

2522 Pathogen[ P14079] interacts with 1 human partners:{P07954}

2523 Pathogen[ P03410] interacts with 1 human partners:{P07954}

2524 Pathogen[ P0C206] interacts with 1 human partners:{P07954}

2525 [Cluster 420]GO:0006467+P biological\_process [name] protein thiol-disulfide exchange [def] "Oxidation of two organic sulfhydryl groups (thiols) by a disulfide compound to form a disulfide bond, according to the reaction RS-SR + R'SH = R'S-SR + RSH." [GOC

2526 Pathogen[ P03346] interacts with 1 human partners:{Q9NS18}

2527 Pathogen[ P0C206] interacts with 1 human partners:{Q9NS18}

2528 [Cluster 421]GO:0042866+P biological\_process [name] pyruvate biosynthetic process [def] "The chemical reactions and pathways resulting in the formation of pyruvate, 2-oxopropanoate." [GOC

2529 Pathogen[ P0C214] interacts with 2 human partners:{P14618;Q86XE5}

2530 Pathogen[ P03346] interacts with 1 human partners:{P20132}

2531 Pathogen[ Q85601] interacts with 1 human partners:{P14618}

2532 Pathogen[ P14079] interacts with 2 human partners:{P20132;Q86XE5}

2533 Pathogen[ P03410] interacts with 2 human partners:{P20132;Q86XE5}

2534 Pathogen[ P14075] interacts with 1 human partners:{Q86XE5}

2535 Pathogen[ P0C206] interacts with 3 human partners:{P20132;Q86XE5;P14618}

2536 [Cluster 422]GO:0009236+P biological\_process [name] cobalamin biosynthetic process  
[def] "The chemical reactions and pathways resulting in the formation of cobalamin (vitamin B12), a water-soluble vitamin characterized by possession of a corrin nucleus containing a cobalt atom." [GOC

2537 Pathogen[ P03346] interacts with 1 human partners:{Q9Y4U1}

2538 Pathogen[ P14079] interacts with 1 human partners:{Q9Y4U1}

2539 Pathogen[ P03410] interacts with 1 human partners:{Q9Y4U1}

2540 Pathogen[ P0C206] interacts with 1 human partners:{Q9Y4U1}

2541 [Cluster 423]GO:0019244+P biological\_process [name] lactate biosynthetic process from pyruvate [def] "The chemical reactions and pathways resulting in the formation of lactate from other compounds, including pyruvate." [GOC

2542 Pathogen[ Q2Q067] interacts with 1 human partners:{P07864}

2543 Pathogen[ P0C214] interacts with 1 human partners:{P07864}

2544 Pathogen[ Q85601] interacts with 1 human partners:{P07864}

2545 Pathogen[ P14079] interacts with 1 human partners:{P07864}

2546 Pathogen[ P03383] interacts with 1 human partners:{P07864}

2547 Pathogen[ P03410] interacts with 1 human partners:{P07864}

2548 Pathogen[ P14075] interacts with 1 human partners:{P07864}

2549 Pathogen[ P0C206] interacts with 1 human partners:{P07864}

2550 [Cluster 424]GO:0031954+P biological\_process [name] positive regulation of protein autophosphorylation [def] "Any process that activates or increases the frequency, rate or extent of the phosphorylation by a protein of one or more of its own residues." [GOC

2551 Pathogen[ Q2Q067] interacts with 2 human partners:{P49959;O60934}

2552 Pathogen[ P0C214] interacts with 1 human partners:{P49959}

2553 Pathogen[ P03346] interacts with 2 human partners:{P49959;O60934}

2554 Pathogen[ Q85601] interacts with 2 human partners:{P49959;O60934}

2555 Pathogen[ P14079] interacts with 1 human partners:{O60934}

2556 Pathogen[ P03410] interacts with 2 human partners:{P49959;O60934}

2557 Pathogen[ P0C206] interacts with 2 human partners:{P49959;O60934}

2558 [Cluster 425]GO:0050673+P biological\_process [name] epithelial cell proliferation [def] "The multiplication or reproduction of epithelial cells, resulting in the expansion of a cell population. Epithelial cells make up the epithelium, the covering of internal and external surfaces of the body, including the lining of vessels and other small cavities. It consists of cells joined by small amounts of cementing substances." [ISBN

2559 Pathogen[ Q2Q067] interacts with 1 human partners:{P35680}

2560 Pathogen[ P03346] interacts with 1 human partners:{P35680}

2561 Pathogen[ Q85601] interacts with 1 human partners:{P35680}

2562 Pathogen[ P14079] interacts with 3 human partners:{P35680;Q92542;Q8TCU4}

2563 Pathogen[ P03410] interacts with 3 human partners:{Q8TCU4;P35680;Q92542}

2564 Pathogen[ P0C206] interacts with 3 human partners:{Q8TCU4;Q92542;P35680}

2565 [Cluster 426]GO:0006084+P biological\_process [name] acetyl-CoA metabolic process [def] "The chemical reactions and pathways involving acetyl-CoA, a derivative of coenzyme A in which the sulfhydryl group is acetylated\_ it is a metabolite derived from several pathways (e.g. glycolysis, fatty acid oxidation, amino-acid catabolism) and is further metabolized by the tricarboxylic acid cycle. It is a key intermediate in lipid and terpenoid biosynthesis." [ISBN

2566 Pathogen[ P0C214] interacts with 2 human partners:{O75390;P42765}

2567 Pathogen[ P03346] interacts with 2 human partners:{O75390;P42765}

2568 Pathogen[ P03410] interacts with 2 human partners:{P42765;O75390}

2569 Pathogen[ P0C206] interacts with 1 human partners:{O75390}

2570 [Cluster 427]GO:0002320+P biological\_process [name] lymphoid progenitor cell differentiation [def] "The process in which a precursor cell type acquires the specialized features of a lymphoid progenitor cell. Lymphoid progenitor cells include progenitor cells for any of the lymphoid lineages." [GOC

2571 Pathogen[ Q2Q067] interacts with 1 human partners:{P17947}

2572 Pathogen[ P0C214] interacts with 1 human partners:{P17947}

2573 Pathogen[ P03346] interacts with 1 human partners:{P17947}

2574 Pathogen[ Q85601] interacts with 1 human partners:{P17947}

2575 Pathogen[ P03383] interacts with 1 human partners:{P17947}

2576 Pathogen[ P03410] interacts with 1 human partners:{P17947}

2577 Pathogen[ P14075] interacts with 1 human partners:{P17947}

2578 Pathogen[ P0C206] interacts with 1 human partners:{P17947}

2579 Pathogen[ P03363] interacts with 1 human partners:{P17947}

2580 [Cluster 428]GO:0001775+P biological\_process [name] cell activation [def] "A change in the morphology or behavior of a cell resulting from exposure to an activating factor such as a cellular or soluble ligand." [GOC

2581 Pathogen[ Q2Q067] interacts with 1 human partners:{P25063}

2582 Pathogen[ P0C214] interacts with 1 human partners:{P25063}

2583 Pathogen[ P03346] interacts with 1 human partners:{P25063}

2584 Pathogen[ P14079] interacts with 1 human partners:{P25063}

2585 Pathogen[ P03383] interacts with 1 human partners:{P25063}

2586 Pathogen[ P03410] interacts with 1 human partners:{P25063}

2587 Pathogen[ P14075] interacts with 1 human partners:{P25063}

2588 Pathogen[ P0C206] interacts with 1 human partners:{P25063}

2589 [Cluster 429]GO:0009200+P biological\_process [name] deoxyribonucleoside triphosphate metabolic process [def] "The chemical reactions and pathways involving a deoxyribonucleoside triphosphate, a compound consisting of a nucleobase linked to a deoxyribose sugar esterified with triphosphate on the sugar." [GOC

2590 Pathogen[ Q2Q067] interacts with 1 human partners:{Q7LG56}

2591 Pathogen[ P0C214] interacts with 1 human partners:{Q7LG56}

2592 Pathogen[ P03346] interacts with 1 human partners:{Q7LG56}

2593 Pathogen[ Q85601] interacts with 1 human partners:{Q7LG56}

2594 Pathogen[ P14079] interacts with 1 human partners:{Q7LG56}

2595 Pathogen[ P03410] interacts with 1 human partners:{Q7LG56}

2596 Pathogen[ P0C206] interacts with 1 human partners:{Q7LG56}

2597 [Cluster 430]GO:0002358+P biological\_process [name] B cell homeostatic proliferation [def] "The non-specific expansion of B cell populations within a whole or part of an organism to reach to a total number of B cells which will then remain stable over time in the absence of an external stimulus." [GOC

2598 Pathogen[ Q2Q067] interacts with 1 human partners:{P55895}

2599 Pathogen[ P0C214] interacts with 1 human partners:{P55895}

2600 Pathogen[ P03346] interacts with 1 human partners:{P55895}

2601 Pathogen[ Q85601] interacts with 1 human partners:{P55895}

2602 Pathogen[ P03383] interacts with 1 human partners:{P55895}

2603 Pathogen[ P03410] interacts with 1 human partners:{P55895}

2604 Pathogen[ P14075] interacts with 1 human partners:{P55895}

2605 Pathogen[ P0C206] interacts with 1 human partners:{P55895}

2606 Pathogen[ P03363] interacts with 1 human partners:{P55895}

2607 [Cluster 431]GO:0002023+P biological\_process [name] reduction of food intake in response to dietary excess [def] "The specific actions of an organism that are triggered by the detection of dietary excess and result in a decreased intake of food." [PMID

2608 Pathogen[ P14079] interacts with 1 human partners:{P81277}

2609 Pathogen[ P03410] interacts with 1 human partners:{P81277}

2610 [Cluster 432]GO:0006043+P biological\_process [name] glucosamine catabolic process [def] "The chemical reactions and pathways resulting in the breakdown of glucosamine (2-amino-2-deoxyglucopyranose), an aminodeoxysugar that occurs in combined form in chitin." [GOC

2611 Pathogen[ P14079] interacts with 1 human partners:{P46926}

2612 Pathogen[ P03410] interacts with 1 human partners:{P46926}

2613 Pathogen[ P0C206] interacts with 1 human partners:{P46926}

2614 [Cluster 433]GO:0042663+P biological\_process [name] regulation of endodermal cell fate specification [def] "Any process that mediates the specification of a cell into an endoderm cell." [GOC

2615 Pathogen[ Q2Q067] interacts with 1 human partners:{P35680}

2616 Pathogen[ P03346] interacts with 1 human partners:{P35680}

2617 Pathogen[ Q85601] interacts with 1 human partners:{P35680}

2618 Pathogen[ P14079] interacts with 1 human partners:{P35680}

2619 Pathogen[ P03410] interacts with 1 human partners:{P35680}

2620 Pathogen[ P0C206] interacts with 1 human partners:{P35680}

2621 [Cluster 434]GO:0044458+P

2622 Pathogen[ P03346] interacts with 1 human partners:{Q8N9W5}

2623 Pathogen[ P14079] interacts with 1 human partners:{Q8N9W5}

2624 Pathogen[ P03410] interacts with 1 human partners:{Q8N9W5}

2625 Pathogen[ P14075] interacts with 1 human partners:{Q8N9W5}

2626 Pathogen[ P0C206] interacts with 1 human partners:{Q8N9W5}

2627 Pathogen[ P03363] interacts with 1 human partners:{Q8N9W5}

2628 [Cluster 435]GO:0019395+P biological\_process [name] fatty acid oxidation [def] "The removal of one or more electrons from a fatty acid, with or without the concomitant removal of a proton or protons, by reaction with an electron-accepting substance, by addition of oxygen or by removal of hydrogen." [ISBN

2629 Pathogen[ P0C214] interacts with 1 human partners:{P18054}

2630 Pathogen[ P03346] interacts with 1 human partners:{P18054}

2631 Pathogen[ P14079] interacts with 1 human partners:{O95822}

2632 Pathogen[ P03410] interacts with 1 human partners:{O95822}

2633 [Cluster 436]GO:0036297+P

2634 Pathogen[ Q2Q067] interacts with 2 human partners:{O76064;Q6NZ36}

2635 Pathogen[ P0C214] interacts with 3 human partners:{Q6NZ36;Q8IYW5;O76064}

2636 Pathogen[ P03346] interacts with 3 human partners:{O76064;Q6NZ36;Q8IYW5}

2637 Pathogen[ Q85601] interacts with 3 human partners:{Q6NZ36;O76064;Q8IYW5}

2638 Pathogen[ P14079] interacts with 1 human partners:{Q6NZ36}

2639 Pathogen[ P03410] interacts with 1 human partners:{Q6NZ36}

2640 Pathogen[ P0C206] interacts with 3 human partners:{Q8IYW5;Q6NZ36;O76064}

2641 Pathogen[ P03363] interacts with 2 human partners:{Q8IYW5;Q6NZ36}

2642 [Cluster 437]GO:0021587+P biological\_process [name] cerebellum morphogenesis [def] "The process in which the anatomical structure of the cerebellum is generated and organized. The cerebellum is the portion of the brain in the back of the head between the cerebrum and the pons. The cerebellum controls balance for walking and standing, modulates the force and range of movement and is involved in the learning of motor skills." [GO\_REF



2643 Pathogen[ P0C214] interacts with 1 human partners:{P35520}

2644 Pathogen[ P14079] interacts with 1 human partners:{P54826}

2645 Pathogen[ P03410] interacts with 1 human partners:{P54826}

2646 Pathogen[ P14075] interacts with 1 human partners:{P54826}

2647 Pathogen[ P0C206] interacts with 1 human partners:{P54826}

2648 [Cluster 438]GO:0015870+P biological\_process [name] acetylcholine transport [def] "The directed movement of acetylcholine into, out of or within a cell, or between cells, by means of some agent such as a transporter or pore. Acetylcholine is an acetic acid ester of the organic base choline and functions as a neurotransmitter, released at the synapses of parasympathetic nerves and at neuromuscular junctions." [GOC

2649 Pathogen[ P0C214] interacts with 1 human partners:{P36404}

2650 Pathogen[ P03346] interacts with 1 human partners:{P36404}

2651 [Cluster 439]GO:0043618+P biological\_process [name] regulation of transcription from RNA polymerase II promoter in response to stress [def] "Any process that modulates the frequency, rate or extent of transcription from an RNA polymerase II promoter as a result of a stimulus indicating the organism is under stress. The stress is usually, but not necessarily, exogenous (e.g. temperature, humidity, ionizing radiation)." [GOC

2652 Pathogen[ P14079] interacts with 1 human partners:{P15941}

2653 Pathogen[ P03410] interacts with 1 human partners:{P15941}

2654 [Cluster 440]GO:0070234+P biological\_process [name] positive regulation of T cell apoptosis [def] "Any process that activates or increases the frequency, rate or extent of T cell death by apoptosis." [GOC

2655 Pathogen[ P14079] interacts with 1 human partners:{A8MUM7}

2656 [Cluster 441]GO:0006929+P biological\_process [name] substrate-dependent cell migration [def] "The orderly movement of a cell from one site to another along a substrate such as the extracellular matrix\_ the migrating cell forms a protrusion that attaches to the substrate." [ISBN

2657 Pathogen[ P03346] interacts with 1 human partners:{Q92625}

2658 Pathogen[ P0C206] interacts with 1 human partners:{Q92625}

2659 Pathogen[ P03363] interacts with 1 human partners:{Q92625}

2660 [Cluster 442]GO:0046078+P biological\_process [name] dUMP metabolic process [def] "The chemical reactions and pathways involving dUMP, deoxyuridine (5'-)monophosphate (2'-deoxyuridine 5'-phosphate)." [GOC

2661 Pathogen[ Q2Q067] interacts with 1 human partners:{P04818}

2662 Pathogen[ P0C214] interacts with 1 human partners:{P04818}

2663 Pathogen[ P14079] interacts with 1 human partners:{P04818}

2664 Pathogen[ P03410] interacts with 1 human partners:{P04818}

2665 Pathogen[ P0C206] interacts with 1 human partners:{P04818}

2666 [Cluster 443]GO:0022038+P biological\_process [name] corpus callosum development [def] "The process whose specific outcome is the progression of the corpus callosum over time, from its formation to the mature structure. The corpus callosum is a thick bundle of nerve fibers comprising a commissural plate connecting the two cerebral hemispheres. It consists of contralateral axon projections that provide communication between the right and left cerebral hemispheres." [GO\_REF

2667 Pathogen[ P03346] interacts with 1 human partners:{Q68CZ1}

2668 Pathogen[ P14079] interacts with 1 human partners:{Q68CZ1}

2669 Pathogen[ P03410] interacts with 1 human partners:{Q68CZ1}

2670 [Cluster 444]GO:0060528+P biological\_process [name] secretory columnal luminal epithelial cell differentiation involved in prostate glandular acinus development [def] "The process in which a relatively unspecialized epithelial cell acquires specialized features of a secretory columnal luminal epithelial cell of the prostate." [GOC

2671 Pathogen[ Q2Q067] interacts with 1 human partners:{Q9BQA1}

2672 Pathogen[ P03346] interacts with 1 human partners:{Q9BQA1}

2673 Pathogen[ Q85601] interacts with 1 human partners:{Q9BQA1}

2674 Pathogen[ P14079] interacts with 1 human partners:{Q9BQA1}

2675 Pathogen[ P03383] interacts with 1 human partners:{Q9BQA1}

2676 Pathogen[ P03410] interacts with 1 human partners:{Q9BQA1}

2677 Pathogen[ P14075] interacts with 1 human partners:{Q9BQA1}

2678 Pathogen[ P0C206] interacts with 1 human partners:{Q9BQA1}

2679 Pathogen[ P03363] interacts with 1 human partners:{Q9BQA1}

2680 [Cluster 445]GO:0032237+P biological\_process [name] activation of store-operated calcium channel activity [def] "A process that initiates the activity of an inactive store-operated calcium channel." [GOC

2681 Pathogen[ Q2Q067] interacts with 1 human partners:{Q9BSW2}

2682 Pathogen[ P0C214] interacts with 1 human partners:{Q9BSW2}

2683 Pathogen[ P03346] interacts with 1 human partners:{Q9BSW2}

2684 Pathogen[ Q85601] interacts with 1 human partners:{Q9BSW2}

2685 Pathogen[ P14079] interacts with 1 human partners:{Q9BSW2}

2686 Pathogen[ P03383] interacts with 1 human partners:{Q9BSW2}

2687 Pathogen[ P14075] interacts with 1 human partners:{Q9BSW2}

2688 Pathogen[ P0C206] interacts with 1 human partners:{Q9BSW2}

2689 Pathogen[ P03363] interacts with 1 human partners:{Q9BSW2}

2690 [Cluster 446]GO:0046605+P biological\_process [name] regulation of centrosome cycle [def] "Any process that modulates the frequency, rate or extent of the centrosome cycle, the processes of centrosome duplication and separation." [GOC

2691 Pathogen[ P03346] interacts with 1 human partners:{014965}

2692 Pathogen[ Q85601] interacts with 1 human partners:{014965}

2693 Pathogen[ P14079] interacts with 1 human partners:{014965}

2694 Pathogen[ P03383] interacts with 1 human partners:{014965}

2695 Pathogen[ P03410] interacts with 2 human partners:{Q9Y6G9;014965}

2696 Pathogen[ P14075] interacts with 1 human partners:{014965}

2697 Pathogen[ P0C206] interacts with 2 human partners:{Q9Y6G9;014965}

2698 [Cluster 447]GO:0071107+P biological\_process [name] response to parathyroid hormone stimulus [def] "Any process that results in a change in state or activity of a cell or an organism (in terms of movement, secretion, enzyme production, gene expression, etc.) as a result of a parathyroid hormone stimulus." [GOC

2699 Pathogen[ Q2Q067] interacts with 2 human partners:{P11388;Q99966}

2700 Pathogen[ P0C214] interacts with 2 human partners:{Q99966;P11388}

2701 Pathogen[ P03346] interacts with 2 human partners:{Q99966;P11388}

2702 Pathogen[ Q85601] interacts with 2 human partners:{Q99966;P11388}

2703 Pathogen[ P14079] interacts with 2 human partners:{P11388;Q99966}

2704 Pathogen[ P03410] interacts with 2 human partners:{P11388;Q99966}

2705 Pathogen[ P0C206] interacts with 2 human partners:{Q99966;P11388}

2706 [Cluster 448]GO:0006991+P biological\_process [name] response to sterol depletion [def] "Any process that results in a change in state or activity of a cell or an organism (in terms of movement, secretion, enzyme production, gene expression, etc.) as a result of a stimulus indicating deprivation of sterols. Sterols are a group of steroids characterized by the presence of one or more hydroxyl groups and a hydrocarbon side-chain in the molecule." [GOC

2707 Pathogen[ P14079] interacts with 2 human partners:{Q9Y5U4;015503}

2708 Pathogen[ P03410] interacts with 2 human partners:{Q9Y5U4;015503}

2709 [Cluster 449]GO:0035725+P biological\_process [name] sodium ion transmembrane transport [def] "A process in which a sodium ion is transported from one side of a membrane to the other by means of some agent such as a transporter or pore." [GOC

2710 Pathogen[ P03346] interacts with 1 human partners:{P48553}

2711 Pathogen[ P14079] interacts with 1 human partners:{P48553}

2712 Pathogen[ P03410] interacts with 1 human partners:{P48553}

2713 Pathogen[ P0C206] interacts with 1 human partners:{P48553}

2714 Pathogen[ P03363] interacts with 1 human partners:{P48553}

2715 [Cluster 450]GO:0032747+P biological\_process [name] positive regulation of interleukin-23 production [def] "Any process that activates or increases the frequency, rate, or extent of interleukin-23 production." [GOC

2716 Pathogen[ P14079] interacts with 2 human partners:{P04141;Q99836}

2717 Pathogen[ P03410] interacts with 1 human partners:{P04141}

2718 [Cluster 451]GO:1900224+P

2719 Pathogen[ Q2Q067] interacts with 1 human partners:{Q15796}

2720 Pathogen[ P0C214] interacts with 1 human partners:{Q15796}

2721 Pathogen[ P03346] interacts with 1 human partners:{Q15796}

2722 Pathogen[ Q85601] interacts with 1 human partners:{Q15796}

2723 Pathogen[ P03383] interacts with 1 human partners:{Q15796}

2724 Pathogen[ P03410] interacts with 1 human partners:{Q15796}

2725 Pathogen[ P14075] interacts with 1 human partners:{Q15796}

2726 Pathogen[ P0C206] interacts with 1 human partners:{Q15796}

2727 Pathogen[ P03363] interacts with 1 human partners:{Q15796}

2728 [Cluster 452]GO:0060160+P biological\_process [name] negative regulation of dopamine receptor signaling pathway [def] "Any process that stops, prevents, or reduces the frequency, rate or extent of dopamine receptor protein signaling pathway activity. A dopamine receptor signaling pathway is the series of molecular signals generated as a consequence of a dopamine receptor binding to one of its physiological ligands." [GOC

2729 Pathogen[ P14079] interacts with 1 human partners:{075781}

2730 Pathogen[ P03410] interacts with 1 human partners:{075781}

2731 [Cluster 453]GO:0051223+P biological\_process [name] regulation of protein transport [def] "Any process that modulates the frequency, rate or extent of the directed movement of a protein into, out of or within a cell, or between cells, by means of some agent such as a transporter or pore." [GOC

2732 Pathogen[ P03346] interacts with 1 human partners:{Q96A65}

2733 Pathogen[ Q85601] interacts with 1 human partners:{Q96A65}

2734 Pathogen[ P14079] interacts with 1 human partners:{Q96A65}

2735 Pathogen[ P03410] interacts with 1 human partners:{Q96A65}

2736 Pathogen[ P0C206] interacts with 1 human partners:{Q96A65}

2737 Pathogen[ P03363] interacts with 1 human partners:{Q96A65}

2738 [Cluster 454]GO:0010611+P biological\_process [name] regulation of cardiac muscle hypertrophy [def] "Any process that modulates the rate, frequency or extent of the enlargement or overgrowth of all or part of the heart due to an increase in size (not length) of individual cardiac muscle fibers, without cell division." [GOC

2739 Pathogen[ P03346] interacts with 1 human partners:{Q9NZU5}

2740 Pathogen[ Q85601] interacts with 1 human partners:{Q9NZU5}

2741 Pathogen[ P14079] interacts with 1 human partners:{Q9NZU5}

2742 Pathogen[ P0C206] interacts with 1 human partners:{Q9NZU5}

2743 Pathogen[ P03363] interacts with 1 human partners:{Q9NZU5}

2744 [Cluster 455]GO:0045769+P biological\_process [name] negative regulation of asymmetric

cell division [def] "Any process that stops, prevents, or reduces the frequency, rate or extent of asymmetric cell division." [GOC

2745 Pathogen[ Q2Q067] interacts with 1 human partners:{Q8IZT6}

2746 Pathogen[ P0C214] interacts with 1 human partners:{Q8IZT6}

2747 Pathogen[ P03346] interacts with 1 human partners:{Q8IZT6}

2748 Pathogen[ Q85601] interacts with 1 human partners:{Q8IZT6}

2749 Pathogen[ P14079] interacts with 1 human partners:{Q8IZT6}

2750 Pathogen[ P03410] interacts with 1 human partners:{Q8IZT6}

2751 Pathogen[ P0C206] interacts with 1 human partners:{Q8IZT6}

2752 Pathogen[ P03363] interacts with 1 human partners:{Q8IZT6}

2753 [Cluster 456]GO:0030643+P biological\_process [name] cellular phosphate ion homeostasis [def] "Any process involved in the maintenance of an internal steady state of phosphate ions at the level of a cell." [GOC

2754 Pathogen[ P03346] interacts with 1 human partners:{075603}

2755 [Cluster 457]GO:0042138+P biological\_process [name] meiotic DNA double-strand break formation [def] "The cell cycle process in which double-strand breaks are generated at defined hotspots throughout the genome during meiosis I. This results in the initiation of meiotic recombination." [GOC

2756 Pathogen[ P14079] interacts with 2 human partners:{Q7Z7C7;Q86X24}

2757 Pathogen[ P03410] interacts with 1 human partners:{Q7Z7C7}

2758 Pathogen[ P14075] interacts with 1 human partners:{Q7Z7C7}

2759 Pathogen[ P0C206] interacts with 1 human partners:{Q7Z7C7}

2760 [Cluster 458]GO:0043576+P biological\_process [name] regulation of respiratory gaseous exchange [def] "Any process that modulates the frequency, rate or extent of the process of gaseous exchange between an organism and its environment." [GOC

2761 Pathogen[ Q2Q067] interacts with 1 human partners:{014813}

2762 Pathogen[ P0C214] interacts with 1 human partners:{014813}

2763 Pathogen[ P03346] interacts with 1 human partners:{014813}

2764 Pathogen[ Q85601] interacts with 1 human partners:{014813}

2765 Pathogen[ P14079] interacts with 1 human partners:{014813}

2766 Pathogen[ P03410] interacts with 1 human partners:{014813}

2767 Pathogen[ P0C206] interacts with 1 human partners:{014813}

2768 Pathogen[ P03363] interacts with 1 human partners:{014813}

2769 [Cluster 459]GO:0097031+P biological\_process [name] mitochondrial respiratory chain complex I biogenesis [def] "The biogenesis of a mitochondrial respiratory chain complex I, a protein complex located in the mitochondrial inner membrane that forms part of the mitochondrial respiratory chain. Includes the synthesis of constituent proteins and their aggregation, arrangement and bonding together." [GOC

2770 Pathogen[ P14079] interacts with 1 human partners:{Q15070}

2771 Pathogen[ P03410] interacts with 1 human partners:{Q15070}

2772 Pathogen[ P14075] interacts with 1 human partners:{Q15070}

2773 Pathogen[ P0C206] interacts with 1 human partners:{Q15070}

2774 [Cluster 460]GO:0035611+P biological\_process [name] protein branching point deglutamylation [def] "The removal of a branching point glutamate residue. A branching point glutamate connects a glutamate side chain to a gene-encoded glutamate residue." [GOC

2775 Pathogen[ P14079] interacts with 1 human partners:{Q8NDL9}

2776 Pathogen[ P0C206] interacts with 1 human partners:{Q8NDL9}

2777 [Cluster 461]GO:2000611+P biological\_process [name] positive regulation of thyroid hormone generation [def] "Any process that activates or increases the frequency, rate or extent of thyroid hormone generation." [GOC

2778 Pathogen[ P03346] interacts with 1 human partners:{Q06710}

2779 [Cluster 462]GO:0042104+P biological\_process [name] positive regulation of activated T cell proliferation [def] "Any process that activates or increases the rate or extent of activated T cell proliferation." [GOC

2780 Pathogen[ Q2Q067] interacts with 1 human partners:{P25063}

2781 Pathogen[ P0C214] interacts with 1 human partners:{P25063}

2782 Pathogen[ P03346] interacts with 1 human partners:{P25063}

2783 Pathogen[ P14079] interacts with 1 human partners:{P25063}

2784 Pathogen[ P03383] interacts with 1 human partners:{P25063}

2785 Pathogen[ P03410] interacts with 1 human partners:{P25063}

2786 Pathogen[ P14075] interacts with 1 human partners:{P25063}

2787 Pathogen[ P0C206] interacts with 1 human partners:{P25063}

2788 [Cluster 463]GO:2001241+P biological\_process [name] positive regulation of extrinsic apoptotic signaling pathway in absence of ligand [def] "Any process that activates or increases the frequency, rate or extent of extrinsic apoptotic signaling pathway in absence of ligand." [GOC

2789 Pathogen[ Q2Q067] interacts with 1 human partners:{P30154}

2790 Pathogen[ P0C214] interacts with 1 human partners:{P30154}

2791 Pathogen[ P03346] interacts with 1 human partners:{P30154}

2792 Pathogen[ Q85601] interacts with 1 human partners:{P30154}

2793 Pathogen[ P14079] interacts with 1 human partners:{P30154}

2794 Pathogen[ P03410] interacts with 1 human partners:{P30154}

2795 Pathogen[ P0C206] interacts with 1 human partners:{P30154}

2796 Pathogen[ P03363] interacts with 1 human partners:{P30154}

2797 [Cluster 464]GO:0048859+P biological\_process [name] formation of anatomical boundary

[def] "The process in which the limits of an anatomical structure are generated. An anatomical structure is any biological entity that occupies space and is distinguished from its surroundings. Anatomical structures can be macroscopic such as a carpel, or microscopic such as an acrosome." [GO\_REF

2798 Pathogen[ Q2Q067] interacts with 1 human partners:{Q13485}

2799 Pathogen[ P0C214] interacts with 1 human partners:{Q13485}

2800 Pathogen[ P03346] interacts with 1 human partners:{Q13485}

2801 Pathogen[ Q85601] interacts with 1 human partners:{Q13485}

2802 Pathogen[ P03383] interacts with 1 human partners:{Q13485}

2803 Pathogen[ P03410] interacts with 1 human partners:{Q13485}

2804 Pathogen[ P14075] interacts with 1 human partners:{Q13485}

2805 Pathogen[ P0C206] interacts with 1 human partners:{Q13485}

2806 Pathogen[ P03363] interacts with 1 human partners:{Q13485}

2807 [Cluster 465]GO:0060319+P biological\_process [name] primitive erythrocyte differentiation [def] "Erythrocyte differentiation which occurs as part of the process of primitive hemopoiesis." [GOC

2808 Pathogen[ Q2Q067] interacts with 1 human partners:{Q8IX07}

2809 Pathogen[ P0C214] interacts with 1 human partners:{Q8IX07}

2810 Pathogen[ P03346] interacts with 1 human partners:{Q8IX07}

2811 Pathogen[ Q85601] interacts with 1 human partners:{Q8IX07}

2812 Pathogen[ P14079] interacts with 1 human partners:{Q8IX07}

2813 Pathogen[ P03410] interacts with 1 human partners:{Q8IX07}

2814 Pathogen[ P0C206] interacts with 1 human partners:{Q8IX07}

2815 [Cluster 466]GO:0022028+P biological\_process [name] tangential migration from the subventricular zone to the olfactory bulb [def] "The migration of cells in the telencephalon from the subventricular zone to the olfactory bulb in which cells move orthogonally to the direction of radial migration and do not use radial glial cell processes as substrates for migration." [GO\_REF

2816 Pathogen[ Q2Q067] interacts with 1 human partners:{P11831}

2817 Pathogen[ P0C214] interacts with 1 human partners:{P11831}

2818 Pathogen[ P03346] interacts with 1 human partners:{P11831}

2819 Pathogen[ Q85601] interacts with 1 human partners:{P11831}

2820 Pathogen[ P03383] interacts with 1 human partners:{P11831}

2821 Pathogen[ P03410] interacts with 1 human partners:{P11831}

2822 Pathogen[ P14075] interacts with 1 human partners:{P11831}

2823 Pathogen[ P0C206] interacts with 1 human partners:{P11831}

2824 Pathogen[ P03363] interacts with 1 human partners:{P11831}

2825 [Cluster 467]GO:0032077+P biological\_process [name] positive regulation of deoxyribonuclease activity [def] "Any process that activates or increases the frequency, rate or extent of deoxyribonuclease activity, the hydrolysis of ester linkages within deoxyribonucleic acid." [GOC

2826 Pathogen[ Q2Q067] interacts with 1 human partners:{P12004}

2827 Pathogen[ P03346] interacts with 1 human partners:{P12004}

2828 Pathogen[ Q85601] interacts with 1 human partners:{P12004}

2829 Pathogen[ P14079] interacts with 1 human partners:{P12004}

2830 Pathogen[ P03410] interacts with 1 human partners:{P12004}

2831 Pathogen[ P0C206] interacts with 1 human partners:{P12004}

2832 [Cluster 468]GO:0006482+P biological\_process [name] protein demethylation [def] "The removal of a methyl group, from a protein amino acid. A methyl group is derived from methane by the removal of a hydrogen atom." [GOC

2833 Pathogen[ Q2Q067] interacts with 1 human partners:{O75151}

2834 Pathogen[ P0C214] interacts with 1 human partners:{O75151}

2835 Pathogen[ P03346] interacts with 1 human partners:{O75151}

2836 Pathogen[ Q85601] interacts with 1 human partners:{O75151}

2837 Pathogen[ P14079] interacts with 1 human partners:{O75151}

2838 Pathogen[ P03383] interacts with 1 human partners:{O75151}

2839 Pathogen[ P03410] interacts with 1 human partners:{O75151}

2840 Pathogen[ P14075] interacts with 1 human partners:{O75151}

2841 Pathogen[ P0C206] interacts with 1 human partners:{O75151}

2842 [Cluster 469]GO:0045004+P biological\_process [name] DNA replication proofreading [def] "Correction of replication errors by DNA polymerase using a 3'-5' exonuclease activity." [GOC

2843 Pathogen[ P14079] interacts with 1 human partners:{Q5QGS0}

2844 Pathogen[ P03410] interacts with 1 human partners:{Q5QGS0}

2845 [Cluster 470]GO:0072369+P biological\_process [name] regulation of lipid transport by positive regulation of transcription from RNA polymerase II promoter [def] "Any process that modulates the frequency, rate or extent of lipid transport by activating or increasing the frequency, rate or extent of transcription from an RNA polymerase II promoter." [GOC

2846 Pathogen[ Q2Q067] interacts with 1 human partners:{P61978}

2847 Pathogen[ P03346] interacts with 1 human partners:{P61978}

2848 Pathogen[ Q85601] interacts with 1 human partners:{P61978}

2849 Pathogen[ P14079] interacts with 1 human partners:{P61978}

2850 Pathogen[ P03383] interacts with 1 human partners:{P61978}

2851 Pathogen[ P03410] interacts with 1 human partners:{P61978}

2852 Pathogen[ P14075] interacts with 1 human partners:{P61978}

2853 Pathogen[ P0C206] interacts with 1 human partners:{P61978}

2854 Pathogen[ P03363] interacts with 1 human partners:{P61978}

2855 [Cluster 471]GO:0017157+P biological\_process [name] regulation of exocytosis [def] "Any process that modulates the frequency, rate or extent of exocytosis." [GOC

2856 Pathogen[ P03363] interacts with 1 human partners:{Q99719}

2857 [Cluster 472]GO:0070863+P biological\_process [name] positive regulation of protein exit from endoplasmic reticulum [def] "Any process that activates or increases the frequency, rate or extent of directed movement of proteins from the endoplasmic reticulum." [GOC

2858 Pathogen[ Q2Q067] interacts with 1 human partners:{Q96JE7}

2859 Pathogen[ P0C214] interacts with 1 human partners:{Q96JE7}

2860 Pathogen[ P03346] interacts with 1 human partners:{Q96JE7}

2861 Pathogen[ Q85601] interacts with 1 human partners:{Q96JE7}

2862 Pathogen[ P14079] interacts with 3 human partners:{Q3MIR4;Q96JE7;Q9NV96}

2863 Pathogen[ P03383] interacts with 1 human partners:{Q96JE7}

2864 Pathogen[ P03410] interacts with 3 human partners:{Q96JE7;Q9NV96;Q3MIR4}

2865 Pathogen[ P14075] interacts with 1 human partners:{Q96JE7}

2866 Pathogen[ P0C206] interacts with 1 human partners:{Q96JE7}

2867 [Cluster 473]GO:0014895+P biological\_process [name] smooth muscle hypertrophy [def] "The enlargement or overgrowth of all or part of an organ due to an increase in size of its smooth muscle cells without cell division. Physiological hypertrophy is a normal process during development, and can also occur in mature structures on demand. In the uterus, smooth muscle cells undergo hypertrophy during pregnancy." [GOC

2868 Pathogen[ P14079] interacts with 1 human partners:{P13498}

2869 [Cluster 474]GO:0009113+P biological\_process [name] purine base biosynthetic process [def] "The chemical reactions and pathways resulting in the formation of purine bases, one of the two classes of nitrogen-containing ring compounds found in DNA and RNA, which include adenine and guanine." [GOC

2870 Pathogen[ Q2Q067] interacts with 1 human partners:{P34896}

2871 Pathogen[ P0C214] interacts with 1 human partners:{P34896}

2872 Pathogen[ Q85601] interacts with 1 human partners:{P34896}

2873 Pathogen[ P14079] interacts with 3 human partners:{P22234;P49915;P34896}

2874 Pathogen[ P03383] interacts with 1 human partners:{P34896}

2875 Pathogen[ P03410] interacts with 3 human partners:{P49915;P22234;P34896}

2876 Pathogen[ P14075] interacts with 1 human partners:{P34896}

2877 Pathogen[ P0C206] interacts with 1 human partners:{P34896}

2878 [Cluster 475]GO:0007006+P biological\_process [name] mitochondrial membrane organization [def] "A process that is carried out at the cellular level which results in the assembly, arrangement of constituent parts, or disassembly of a mitochondrial membrane, either of the lipid bilayer surrounding a mitochondrion." [GOC

2879 Pathogen[ P0C214] interacts with 1 human partners:{Q3ZCQ8}

2880 Pathogen[ P03346] interacts with 2 human partners:{Q3ZCQ8;P50542}

2881 Pathogen[ Q85601] interacts with 1 human partners:{Q3ZCQ8}

2882 Pathogen[ P14079] interacts with 2 human partners:{Q3ZCQ8;P50542}

2883 Pathogen[ P03410] interacts with 3 human partners:{Q3ZCQ8;P50542;Q9UBY8}

2884 Pathogen[ P0C206] interacts with 2 human partners:{P50542;Q3ZCQ8}

2885 Pathogen[ P03363] interacts with 1 human partners:{Q3ZCQ8}

2886 [Cluster 476]GO:0071110+P biological\_process [name] histone biotinylation [def] "The modification of a histone by the addition of a biotinyl group." [GOC

2887 Pathogen[ P0C214] interacts with 1 human partners:{P50747}

2888 [Cluster 477]GO:0070252+P biological\_process [name] actin-mediated cell contraction [def] "The actin filament-based process in which cytoplasmic actin filaments slide past one another resulting in contraction of all or part of the cell body." [GOC

2889 Pathogen[ Q2Q067] interacts with 1 human partners:{Q9NVD7}

2890 Pathogen[ P0C214] interacts with 1 human partners:{Q9NVD7}

2891 Pathogen[ P03346] interacts with 1 human partners:{Q9NVD7}

2892 Pathogen[ Q85601] interacts with 1 human partners:{Q9NVD7}

2893 Pathogen[ P14079] interacts with 1 human partners:{Q9NVD7}

2894 Pathogen[ P03410] interacts with 1 human partners:{Q9NVD7}

2895 Pathogen[ P0C206] interacts with 1 human partners:{Q9NVD7}

2896 Pathogen[ P03363] interacts with 1 human partners:{Q9NVD7}

2897 [Cluster 478]GO:0046121+P biological\_process [name] deoxyribonucleoside catabolic process [def] "The chemical reactions and pathways resulting in the breakdown of any one of a family of organic molecules consisting of a purine or pyrimidine base covalently bonded to a sugar deoxyribose (a deoxyribonucleoside)." [GOC

2898 Pathogen[ P0C214] interacts with 1 human partners:{Q9Y315}

2899 Pathogen[ P14079] interacts with 1 human partners:{Q9Y315}

2900 Pathogen[ P03410] interacts with 1 human partners:{Q9Y315}

2901 Pathogen[ P14075] interacts with 1 human partners:{Q9Y315}

2902 Pathogen[ P0C206] interacts with 1 human partners:{Q9Y315}

2903 Pathogen[ P03363] interacts with 1 human partners:{Q9Y315}

2904 [Cluster 479]GO:0035356+P biological\_process [name] cellular triglyceride homeostasis [def] "Any process involved in the maintenance of an internal steady state of triglyceride within a cell or between a cell and its external environment." [GOC

2905 Pathogen[ P14079] interacts with 1 human partners:{Q8N6M3}

2906 Pathogen[ P03410] interacts with 1 human partners:{Q8N6M3}

2907 Pathogen[ P14075] interacts with 1 human partners:{Q8N6M3}

2908 Pathogen[ POC206] interacts with 1 human partners:{Q8N6M3}

2909 [Cluster 480]GO:0090249+P biological\_process [name] regulation of cell motility involved in somitogenic axis elongation [def] "Any process that modulates the frequency, rate, or extent of the controlled self-propelled movement of a cell that contributes to somitogenic axis elongation." [GOC

2910 Pathogen[ P03346] interacts with 2 human partners:{Q969G9;Q06190}

2911 Pathogen[ P14079] interacts with 1 human partners:{Q06190}

2912 Pathogen[ P03410] interacts with 2 human partners:{Q06190;Q969G9}

2913 Pathogen[ POC206] interacts with 2 human partners:{Q06190;Q969G9}

2914 Pathogen[ P03363] interacts with 2 human partners:{Q06190;Q969G9}

2915 [Cluster 481]GO:0051247+P biological\_process [name] positive regulation of protein metabolic process [def] "Any process that activates or increases the frequency, rate or extent of the chemical reactions and pathways involving a protein." [GOC

2916 Pathogen[ P03346] interacts with 2 human partners:{Q9Y5W3;P58546}

2917 Pathogen[ P14079] interacts with 2 human partners:{Q9Y5W3;Q13164}

2918 [Cluster 482]GO:0097113+P biological\_process [name] alpha-amino-3-hydroxy-5-methyl-4-isoxazole propionate receptor clustering [def] "The receptor clustering process in which alpha-amino-3-hydroxy-5-methyl-4-isoxazole propionate (AMPA) receptors are localized to distinct domains in the cell membrane." [GOC

2919 Pathogen[ Q2Q067] interacts with 1 human partners:{P78352}

2920 Pathogen[ POC214] interacts with 1 human partners:{P78352}

2921 Pathogen[ P03346] interacts with 1 human partners:{P78352}

2922 Pathogen[ Q85601] interacts with 1 human partners:{P78352}

2923 Pathogen[ P03383] interacts with 1 human partners:{P78352}

2924 Pathogen[ P03410] interacts with 1 human partners:{P78352}

2925 Pathogen[ P14075] interacts with 1 human partners:{P78352}

2926 Pathogen[ POC206] interacts with 1 human partners:{P78352}

2927 Pathogen[ P03363] interacts with 1 human partners:{P78352}

2928 [Cluster 483]GO:0021529+P biological\_process [name] spinal cord oligodendrocyte cell differentiation [def] "The process in which neuroepithelial cells in the neural tube acquire specialized structural and/or functional features of oligodendrocytes. Oligodendrocytes are non-neuronal cells. The primary function of oligodendrocytes is the myelination of nerve axons in the central nervous system. Differentiation includes the processes involved in commitment of a cell to a specific fate." [GO\_REF

2929 Pathogen[ P03346] interacts with 2 human partners:{O95096;Q13516}

2930 Pathogen[ P03363] interacts with 1 human partners:{Q13516}

2931 [Cluster 484]GO:0032439+P biological\_process [name] endosome localization [def] "Any process in which endosomes are transported to, and/or maintained in, a specific location within the cell." [GOC

2932 Pathogen[ P14079] interacts with 1 human partners:{Q6IAA8}

2933 Pathogen[ P03410] interacts with 1 human partners:{Q6IAA8}

2934 [Cluster 485]GO:0055094+P biological\_process [name] response to lipoprotein stimulus [def] "Any process that results in a change in state or activity of a cell or an organism (in terms of movement, secretion, enzyme production, gene expression, etc.) as a result of a lipoprotein stimulus." [GOC

2935 Pathogen[ Q2Q067] interacts with 1 human partners:{P29474}

2936 Pathogen[ POC214] interacts with 1 human partners:{P29474}

2937 Pathogen[ P03346] interacts with 1 human partners:{P29474}

2938 Pathogen[ Q85601] interacts with 1 human partners:{P29474}

2939 Pathogen[ P03383] interacts with 1 human partners:{P29474}

2940 Pathogen[ P03410] interacts with 1 human partners:{P29474}

2941 Pathogen[ P14075] interacts with 1 human partners:{P29474}

2942 Pathogen[ POC206] interacts with 1 human partners:{P29474}

2943 Pathogen[ P03363] interacts with 1 human partners:{P29474}

2944 [Cluster 486]GO:0051257+P biological\_process [name] spindle midzone assembly involved in meiosis [def] "The formation of the spindle midzone, the area in the center of the spindle where the spindle microtubules from opposite poles overlap, as a part of the process of meiosis." [GOC

2945 Pathogen[ POC214] interacts with 1 human partners:{P40692}

2946 Pathogen[ Q85601] interacts with 1 human partners:{P40692}

2947 Pathogen[ P14079] interacts with 1 human partners:{P40692}

2948 Pathogen[ P03410] interacts with 1 human partners:{P40692}

2949 Pathogen[ POC206] interacts with 1 human partners:{P40692}

2950 [Cluster 487]GO:0001823+P biological\_process [name] mesonephros development [def] "The process whose specific outcome is the progression of the mesonephros over time, from its formation to the mature structure. In mammals, the mesonephros is the second of the three embryonic kidneys to be established and exists only transiently. In lower vertebrates such as fish and amphibia, the mesonephros will form the mature kidney." [GOC

2951 Pathogen[ Q2Q067] interacts with 1 human partners:{Q05516}

2952 Pathogen[ POC214] interacts with 1 human partners:{Q05516}

2953 Pathogen[ P03346] interacts with 2 human partners:{Q06710;Q05516}

2954 Pathogen[ Q85601] interacts with 1 human partners:{Q05516}

2955 Pathogen[ P14079] interacts with 1 human partners:{Q05516}

2956 Pathogen[ P03383] interacts with 1 human partners:{Q05516}

2957 Pathogen[ P14075] interacts with 1 human partners:{Q05516}

2958 Pathogen[ P0C206] interacts with 1 human partners:{Q05516}

2959 Pathogen[ P03363] interacts with 1 human partners:{Q05516}

2960 [Cluster 488]GO:0072249+P biological\_process [name] metanephric glomerular visceral epithelial cell development [def] "The process whose specific outcome is the progression of a metanephric glomerular visceral epithelial cell over time, from its formation to the mature structure. A metanephric glomerular visceral epithelial cell is a specialized epithelial cell that contains \"feet\" that interdigitate with the \"feet\" of other glomerular epithelial cells in the metanephros." [GOC

2961 Pathogen[ P03346] interacts with 1 human partners:{Q9NP85}

2962 Pathogen[ P14079] interacts with 1 human partners:{Q9NP85}

2963 Pathogen[ P03410] interacts with 1 human partners:{Q9NP85}

2964 Pathogen[ P0C206] interacts with 1 human partners:{Q9NP85}

2965 [Cluster 489]GO:0070383+P biological\_process [name] DNA cytosine deamination [def] "The removal of an amino group from a cytosine residue in DNA, forming a uracil residue." [GOC

2966 Pathogen[ Q2Q067] interacts with 1 human partners:{Q9HC16}

2967 Pathogen[ P0C214] interacts with 1 human partners:{Q9HC16}

2968 Pathogen[ Q85601] interacts with 1 human partners:{Q9HC16}

2969 Pathogen[ P14079] interacts with 2 human partners:{P31941;Q9HC16}

2970 Pathogen[ P03410] interacts with 3 human partners:{Q9HC16;P31941;Q6NTF7}

2971 Pathogen[ P0C206] interacts with 3 human partners:{P31941;Q6NTF7;Q9HC16}

2972 [Cluster 490]GO:0021920+P biological\_process [name] regulation of transcription from RNA polymerase II promoter involved in spinal cord association neuron specification [def] "Any process that modulates the frequency, rate or extent of transcription from an RNA polymerase II promoter that contributes to the commitment of neuronal precursors to association neurons in the dorsal spinal cord." [GO\_REF

2973 Pathogen[ P03346] interacts with 1 human partners:{P52954}

2974 [Cluster 491]GO:0046491+P biological\_process [name] L-methylmalonyl-CoA metabolic process [def] "The chemical reactions and pathways involving L-methylmalonyl-CoA, the L-enantiomer of 2-carboxypropanoyl-CoA. S-methylmalonyl-CoA is an intermediate in the beta oxidation of odd-numbered fatty acids in animals." [GOC

2975 Pathogen[ P0C214] interacts with 1 human partners:{Q96PE7}

2976 Pathogen[ P03346] interacts with 1 human partners:{Q96PE7}

2977 Pathogen[ P14079] interacts with 1 human partners:{Q96PE7}

2978 Pathogen[ P03410] interacts with 1 human partners:{Q96PE7}

2979 Pathogen[ P0C206] interacts with 1 human partners:{Q96PE7}

2980 [Cluster 492]GO:0006198+P biological\_process [name] cAMP catabolic process [def] "The chemical reactions and pathways resulting in the breakdown of the nucleotide cAMP (cyclic AMP, adenosine 3',5'-cyclophosphate)." [ISBN

2981 Pathogen[ Q2Q067] interacts with 1 human partners:{P27815}

2982 Pathogen[ P0C214] interacts with 2 human partners:{P27815;Q07343}

2983 Pathogen[ P03346] interacts with 1 human partners:{P27815}

2984 Pathogen[ Q85601] interacts with 1 human partners:{P27815}

2985 Pathogen[ P14079] interacts with 1 human partners:{P27815}

2986 Pathogen[ P03410] interacts with 1 human partners:{P27815}

2987 Pathogen[ P0C206] interacts with 1 human partners:{P27815}

2988 Pathogen[ P03363] interacts with 1 human partners:{P27815}

2989 [Cluster 493]GO:0009234+P biological\_process [name] menaquinone biosynthetic process [def] "The chemical reactions and pathways resulting in the formation of any of the menaquinones, any of the quinone-derived compounds synthesized by intestinal bacteria. Structurally, menaquinones consist of a methylated naphthoquinone ring structure and side chains composed of a variable number of unsaturated isoprenoid residues. Menaquinones have vitamin K activity and are known as vitamin K2." [GOC

2990 Pathogen[ P14079] interacts with 1 human partners:{Q9Y5Z9}

2991 Pathogen[ P03410] interacts with 1 human partners:{Q9Y5Z9}

2992 Pathogen[ P0C206] interacts with 1 human partners:{Q9Y5Z9}

2993 [Cluster 494]GO:0021592+P biological\_process [name] fourth ventricle development [def] "The process whose specific outcome is the progression of the fourth ventricle over time, from its formation to the mature structure. The fourth ventricle is an irregularly shaped cavity in the rhombencephalon, between the medulla oblongata, the pons, and the isthmus in front, and the cerebellum behind. It is continuous with the central canal of the cord below and with the cerebral aqueduct above, and through its lateral and median apertures it communicates with the subarachnoid space." [GO\_REF

2994 Pathogen[ Q2Q067] interacts with 1 human partners:{Q8NHM5}

2995 Pathogen[ P0C214] interacts with 2 human partners:{P35580;Q8NHM5}

2996 Pathogen[ P03346] interacts with 1 human partners:{Q8NHM5}

2997 Pathogen[ Q85601] interacts with 2 human partners:{Q8NHM5;P35580}

2998 Pathogen[ P14079] interacts with 1 human partners:{Q8NHM5}

2999 Pathogen[ P03383] interacts with 1 human partners:{P35580}

3000 Pathogen[ P03410] interacts with 1 human partners:{P35580}

3001 Pathogen[ P0C206] interacts with 2 human partners:{Q8NHM5;P35580}

3002 [Cluster 495]GO:0045921+P biological\_process [name] positive regulation of exocytosis [def] "Any process that activates or increases the frequency, rate or extent of exocytosis." [GOC

3003 Pathogen[ P0C214] interacts with 1 human partners:{P62166}

3004 Pathogen[ P03346] interacts with 2 human partners:{P62166;Q70J99}

3005 Pathogen[ Q85601] interacts with 1 human partners:{P62166}

3006 Pathogen[ P14079] interacts with 2 human partners:{Q8NEV8;P62166}

3007 Pathogen[ P03410] interacts with 3 human partners:{Q70J99;Q8NEV8;P62166}

3008 Pathogen[ P0C206] interacts with 1 human partners:{P62166}

3009 [Cluster 496]GO:0045719+P biological\_process [name] negative regulation of glycogen biosynthetic process [def] "Any process that stops, prevents, or reduces the frequency, rate or extent of the chemical reactions and pathways resulting in the formation of glycogen." [GOC

3010 Pathogen[ Q2Q067] interacts with 1 human partners:{Q9BQE4}

3011 Pathogen[ P0C214] interacts with 1 human partners:{Q9BQE4}

3012 Pathogen[ P03346] interacts with 1 human partners:{Q13322}

3013 Pathogen[ Q85601] interacts with 1 human partners:{Q9BQE4}

3014 Pathogen[ P14079] interacts with 1 human partners:{Q9BQE4}

3015 Pathogen[ P03383] interacts with 1 human partners:{Q9BQE4}

3016 Pathogen[ P03410] interacts with 1 human partners:{Q9BQE4}

3017 Pathogen[ P14075] interacts with 1 human partners:{Q9BQE4}

3018 Pathogen[ P0C206] interacts with 1 human partners:{Q9BQE4}

3019 [Cluster 497]GO:0016338+P biological\_process [name] calcium-independent cell-cell adhesion [def] "The attachment of one cell to another cell via adhesion molecules that do not require the presence of calcium for the interaction." [GOC

3020 Pathogen[ P14079] interacts with 5 human partners:{Q8N7P3;P56750;O00501;Q8N6F1;Q96B33}

3021 Pathogen[ P03410] interacts with 7 human partners:{Q96B33;Q8N7P3;O00501;Q8N6F1;P56747;P56750;O95471}

3022 [Cluster 498]GO:0031998+P biological\_process [name] regulation of fatty acid beta-oxidation [def] "Any process that modulates the frequency, rate or extent of fatty acid beta-oxidation." [GOC

3023 Pathogen[ P14079] interacts with 1 human partners:{O95822}

3024 Pathogen[ P03410] interacts with 1 human partners:{O95822}

3025 [Cluster 499]GO:0042946+P biological\_process [name] glucoside transport [def] "The directed movement of glucosides into, out of or within a cell, or between cells, by means of some agent such as a transporter or pore. Glucosides are glycosides in which the sugar group is a glucose residue." [GOC

3026 Pathogen[ P03410] interacts with 1 human partners:{Q9BRV3}

3027 [Cluster 500]GO:0016246+P biological\_process [name] RNA interference [def] "The process in which double-stranded RNAs silence cognate genes. Involves posttranscriptional gene inactivation ('silencing') both of transgenes or dsRNA introduced into a germline, and of the host gene(s) homologous to the transgenes or dsRNA. This silencing is triggered by the introduction of transgenes or double-stranded RNA (dsRNA), and can occur through a specific decrease in the level of mRNA, or by negative regulation of translation, of both host genes and transgenes." [GOC

3028 Pathogen[ P03346] interacts with 1 human partners:{Q92879}

3029 Pathogen[ P14079] interacts with 1 human partners:{Q9NXL6}

3030 Pathogen[ P03363] interacts with 1 human partners:{Q92879}

3031 [Cluster 501]GO:0090166+P biological\_process [name] Golgi disassembly [def] "A cellular process that results in the breakdown of a Golgi apparatus that contributes to Golgi inheritance." [GOC

3032 Pathogen[ P0C206] interacts with 1 human partners:{Q99986}

3033 [Cluster 502]GO:0035810+P biological\_process [name] positive regulation of urine volume [def] "Any process that increases the amount of urine excreted from the body over a unit of time." [GOC

3034 Pathogen[ P03346] interacts with 1 human partners:{Q92481}

3035 [Cluster 503]GO:0046390+P biological\_process [name] ribose phosphate biosynthetic process [def] "The chemical reactions and pathways resulting in the formation of ribose phosphate, any phosphorylated ribose sugar." [GOC

3036 Pathogen[ P0C214] interacts with 2 human partners:{P11413;P29401}

3037 Pathogen[ P14079] interacts with 1 human partners:{P29401}

3038 Pathogen[ P0C206] interacts with 1 human partners:{P29401}

3039 [Cluster 504]GO:0010874+P biological\_process [name] regulation of cholesterol efflux [def] "Any process that modulates the frequency, rate or extent of cholesterol efflux. Cholesterol efflux is the directed movement of cholesterol, cholest-5-en-3-beta-ol, out of a cell or organelle." [GOC

3040 Pathogen[ P14079] interacts with 1 human partners:{Q6IAA8}

3041 Pathogen[ P03410] interacts with 1 human partners:{Q6IAA8}

3042 [Cluster 505]GO:0045672+P biological\_process [name] positive regulation of osteoclast differentiation [def] "Any process that activates or increases the frequency, rate or extent of osteoclast differentiation." [GOC

3043 Pathogen[ Q2Q067] interacts with 1 human partners:{Q13118}

3044 Pathogen[ P03346] interacts with 1 human partners:{Q13118}

3045 Pathogen[ Q85601] interacts with 1 human partners:{Q13118}

3046 Pathogen[ P14079] interacts with 1 human partners:{Q13118}

3047 Pathogen[ P03410] interacts with 1 human partners:{Q13118}

3048 Pathogen[ P0C206] interacts with 1 human partners:{Q13118}

3049 Pathogen[ P03363] interacts with 1 human partners:{Q13118}



3050 [Cluster 506]GO:0003357+P biological\_process [name] noradrenergic neuron differentiation [def] "The process in which a relatively unspecialized cell acquires specialized features of an noradrenergic neuron, a neuron that secretes noradrenaline." [GOC]

3051 Pathogen[ Q2Q067] interacts with 1 human partners:{O14813}

3052 Pathogen[ POC214] interacts with 1 human partners:{O14813}

3053 Pathogen[ P03346] interacts with 2 human partners:{Q06945;O14813}

3054 Pathogen[ Q85601] interacts with 1 human partners:{O14813}

3055 Pathogen[ P14079] interacts with 1 human partners:{O14813}

3056 Pathogen[ P03410] interacts with 1 human partners:{O14813}

3057 Pathogen[ POC206] interacts with 1 human partners:{O14813}

3058 Pathogen[ P03363] interacts with 1 human partners:{O14813}

3059 [Cluster 507]GO:0035428+P biological\_process [name] hexose transmembrane transport [def] "The directed movement of hexose across a membrane by means of some agent such as a transporter or pore. Hexoses are any aldoses with a chain of six carbon atoms in the molecule." [GOC]

3060 Pathogen[ POC214] interacts with 1 human partners:{P11168}

3061 Pathogen[ Q85601] interacts with 1 human partners:{P11168}

3062 Pathogen[ P03383] interacts with 1 human partners:{P11168}

3063 Pathogen[ P03410] interacts with 1 human partners:{P11168}

3064 Pathogen[ P14075] interacts with 1 human partners:{P11168}

3065 Pathogen[ POC206] interacts with 1 human partners:{P11168}

3066 [Cluster 508]GO:0006983+P biological\_process [name] ER overload response [def] "The series of molecular signals generated by the accumulation of normal or misfolded proteins in the endoplasmic reticulum and leading to activation of transcription by NF-kappaB." [PMID]

3067 Pathogen[ Q2Q067] interacts with 1 human partners:{Q9BQE4}

3068 Pathogen[ POC214] interacts with 2 human partners:{Q5SWA1;Q9BQE4}

3069 Pathogen[ P03346] interacts with 1 human partners:{Q5SWA1}

3070 Pathogen[ Q85601] interacts with 2 human partners:{Q5SWA1;Q9BQE4}

3071 Pathogen[ P14079] interacts with 3 human partners:{Q9BQE4;Q5SWA1;Q96A33}

3072 Pathogen[ P03383] interacts with 2 human partners:{Q5SWA1;Q9BQE4}

3073 Pathogen[ P03410] interacts with 3 human partners:{Q96A33;Q9BQE4;Q5SWA1}

3074 Pathogen[ P14075] interacts with 2 human partners:{Q9BQE4;Q5SWA1}

3075 Pathogen[ POC206] interacts with 3 human partners:{Q96A33;Q9BQE4;Q5SWA1}

3076 [Cluster 509]GO:0030204+P biological\_process [name] chondroitin sulfate metabolic process [def] "The chemical reactions and pathways involving chondroitin sulfate, any member of a group of 10-60 kDa glycosaminoglycans, widely distributed in cartilage and other mammalian connective tissues, the repeat units of which consist of beta-(1,4)-linked D-glucuronyl beta-(1,3)-N-acetyl-D-galactosamine sulfate. They usually occur linked to a protein to form proteoglycans. Two subgroups exist, one in which the sulfate is on the 4-position (chondroitin sulfate A) and the second in which it is in the 6-position (chondroitin sulfate C). They often are polydisperse and often differ in the degree of sulfation from tissue to tissue. The chains of repeating disaccharide are covalently linked to the side chains of serine residues in the polypeptide backbone of a protein by a glycosidic attachment through the trisaccharide unit galactosyl-galactosyl-xylosyl. Chondroitin sulfate B is more usually known as dermatan sulfate." [GOC]

3077 Pathogen[ P14079] interacts with 2 human partners:{P35475;Q9UL01}

3078 Pathogen[ P03410] interacts with 1 human partners:{Q9UL01}

3079 Pathogen[ POC206] interacts with 1 human partners:{Q9UL01}

3080 [Cluster 510]GO:0009994+P biological\_process [name] oocyte differentiation [def] "The process in which a relatively unspecialized immature germ cell acquires the specialized features of a mature female gamete." [GOC]

3081 Pathogen[ P03346] interacts with 1 human partners:{Q86SE8}

3082 Pathogen[ Q85601] interacts with 1 human partners:{Q86SE8}

3083 Pathogen[ P03410] interacts with 1 human partners:{Q86SE8}

3084 Pathogen[ POC206] interacts with 1 human partners:{Q86SE8}

3085 Pathogen[ P03363] interacts with 1 human partners:{Q86SE8}

3086 [Cluster 511]GO:0072201+P biological\_process [name] negative regulation of mesenchymal cell proliferation [def] "Any process that decreases the frequency, rate or extent of mesenchymal cell proliferation. A mesenchymal cell is a cell that normally gives rise to other cells that are organized as three-dimensional masses, rather than sheets." [GOC]

3087 Pathogen[ Q2Q067] interacts with 1 human partners:{Q9NSA3}

3088 Pathogen[ POC214] interacts with 1 human partners:{Q9NSA3}

3089 Pathogen[ P03346] interacts with 1 human partners:{Q9NSA3}

3090 Pathogen[ Q85601] interacts with 1 human partners:{Q9NSA3}

3091 Pathogen[ P03383] interacts with 1 human partners:{Q9NSA3}

3092 Pathogen[ P03410] interacts with 1 human partners:{Q9NSA3}

3093 Pathogen[ P14075] interacts with 1 human partners:{Q9NSA3}

3094 Pathogen[ POC206] interacts with 1 human partners:{Q9NSA3}

3095 Pathogen[ P03363] interacts with 1 human partners:{Q9NSA3}

3096 [Cluster 512]GO:0002826+P biological\_process [name] negative regulation of T-helper 1 type immune response [def] "Any process that stops, prevents, or reduces the frequency, rate, or extent of a T-helper 1 type immune response." [GOC]

3097 Pathogen[ P14079] interacts with 1 human partners:{095760}

3098 Pathogen[ P03410] interacts with 1 human partners:{095760}

3099 [Cluster 513]GO:0001542+P biological\_process [name] ovulation from ovarian follicle [def] "The process leading to the rupture of the follicle, releasing the centrally located oocyte into the oviduct. An example of this is found in *Mus musculus*." [GOC

3100 Pathogen[ Q2Q067] interacts with 2 human partners:{043524;P29474}

3101 Pathogen[ P0C214] interacts with 1 human partners:{P29474}

3102 Pathogen[ P03346] interacts with 3 human partners:{P06401;P29474;043524}

3103 Pathogen[ Q85601] interacts with 1 human partners:{P29474}

3104 Pathogen[ P03383] interacts with 1 human partners:{P29474}

3105 Pathogen[ P03410] interacts with 1 human partners:{P29474}

3106 Pathogen[ P14075] interacts with 1 human partners:{P29474}

3107 Pathogen[ P0C206] interacts with 2 human partners:{P06401;P29474}

3108 Pathogen[ P03363] interacts with 2 human partners:{P29474;043524}

3109 [Cluster 514]GO:0045747+P biological\_process [name] positive regulation of Notch signaling pathway [def] "Any process that activates or increases the frequency, rate or extent of the Notch signaling pathway." [GOC

3110 Pathogen[ Q2Q067] interacts with 2 human partners:{Q99502;P40763}

3111 Pathogen[ P0C214] interacts with 2 human partners:{P40763;Q99502}

3112 Pathogen[ P03346] interacts with 2 human partners:{Q99502;P40763}

3113 Pathogen[ Q85601] interacts with 2 human partners:{P40763;Q99502}

3114 Pathogen[ P14079] interacts with 1 human partners:{Q99502}

3115 Pathogen[ P03410] interacts with 2 human partners:{Q99502;P40763}

3116 Pathogen[ P14075] interacts with 1 human partners:{Q99502}

3117 Pathogen[ P0C206] interacts with 2 human partners:{P40763;Q99502}

3118 [Cluster 515]GO:0048864+P biological\_process [name] stem cell development [def] "The process whose specific outcome is the progression of the stem cell over time, from its formation to the mature structure. Cell development does not include the steps involved in committing a cell to its specific fate." [CL

3119 Pathogen[ P03346] interacts with 1 human partners:{Q9BYW2}

3120 [Cluster 516]GO:0046653+P biological\_process [name] tetrahydrofolate metabolic process [def] "The chemical reactions and pathways involving tetrahydrofolate, 5,6,7,8-tetrahydrofolic acid, a folate derivative bearing additional hydrogens on the pterin group." [ISBN

3121 Pathogen[ P0C214] interacts with 2 human partners:{Q86XF0;P00374}

3122 Pathogen[ P14079] interacts with 2 human partners:{Q86XF0;P00374}

3123 Pathogen[ P03410] interacts with 2 human partners:{P00374;Q86XF0}

3124 [Cluster 517]GO:0097084+P biological\_process [name] vascular smooth muscle cell development [def] "The process aimed at the progression of a vascular smooth muscle cell over time, from initial commitment of the cell to a specific fate, to the fully functional differentiated cell. A vascular smooth muscle cell is a non-striated, elongated, spindle-shaped cell found lining the blood vessels." [GOC

3125 Pathogen[ P14079] interacts with 1 human partners:{060895}

3126 Pathogen[ P03410] interacts with 1 human partners:{060895}

3127 [Cluster 518]GO:0019543+P biological\_process [name] propionate catabolic process [def] "The chemical reactions and pathways resulting in the breakdown of propionate, the anion derived from propionic acid." [GOC

3128 Pathogen[ P14079] interacts with 1 human partners:{A6NK06}

3129 Pathogen[ P03410] interacts with 1 human partners:{A6NK06}

3130 Pathogen[ P0C206] interacts with 1 human partners:{A6NK06}

3131 [Cluster 519]GO:0051685+P biological\_process [name] maintenance of ER location [def] "Any process in which the endoplasmic reticulum is maintained in a specific location within a cell and prevented from moving elsewhere." [GOC

3132 Pathogen[ P03346] interacts with 1 human partners:{POCAP2}

3133 Pathogen[ P14079] interacts with 1 human partners:{POCAP2}

3134 Pathogen[ P03383] interacts with 1 human partners:{POCAP2}

3135 Pathogen[ P03410] interacts with 1 human partners:{POCAP2}

3136 Pathogen[ P14075] interacts with 1 human partners:{POCAP2}

3137 Pathogen[ P0C206] interacts with 1 human partners:{POCAP2}

3138 Pathogen[ P03363] interacts with 1 human partners:{POCAP2}

3139 [Cluster 520]GO:0018205+P biological\_process [name] peptidyl-lysine modification [def] "The modification of peptidyl-lysine." [GOC

3140 Pathogen[ Q2Q067] interacts with 1 human partners:{Q00987}

3141 Pathogen[ P0C214] interacts with 1 human partners:{Q00987}

3142 Pathogen[ P03346] interacts with 1 human partners:{Q00987}

3143 Pathogen[ Q85601] interacts with 1 human partners:{Q00987}

3144 Pathogen[ P14079] interacts with 1 human partners:{Q00987}

3145 Pathogen[ P03410] interacts with 1 human partners:{Q00987}

3146 Pathogen[ P0C206] interacts with 1 human partners:{Q00987}

3147 [Cluster 521]GO:0060346+P biological\_process [name] bone trabecula formation [def] "The process of creating a trabecula in the bone. A trabecula is a tissue element in the form of a small beam, strut or rod." [GOC

3148 Pathogen[ Q2Q067] interacts with 1 human partners:{P35548}

3149 Pathogen[ P0C214] interacts with 1 human partners:{P35548}

3150 Pathogen[ P03346] interacts with 1 human partners:{P35548}

3151 Pathogen[ Q85601] interacts with 1 human partners:{P35548}

3152 Pathogen[ P03383] interacts with 1 human partners:{P35548}

3153 Pathogen[ P03410] interacts with 1 human partners:{P35548}

3154 Pathogen[ P14075] interacts with 1 human partners:{P35548}

3155 Pathogen[ P0C206] interacts with 1 human partners:{P35548}

3156 Pathogen[ P03363] interacts with 1 human partners:{P35548}

3157 [Cluster 522]GO:0010817+P biological\_process [name] regulation of hormone levels  
[def] "Any process that modulates the levels of hormone within an organism or a tissue. A hormone is any substance formed in very small amounts in one specialized organ or group of cells and carried (sometimes in the bloodstream) to another organ or group of cells in the same organism, upon which it has a specific regulatory action." [GOC

3158 Pathogen[ P0C214] interacts with 1 human partners:{O15382}

3159 Pathogen[ Q85601] interacts with 1 human partners:{O15382}

3160 Pathogen[ P14079] interacts with 1 human partners:{O15382}

3161 Pathogen[ P03410] interacts with 1 human partners:{O15382}

3162 Pathogen[ P0C206] interacts with 1 human partners:{O15382}

3163 [Cluster 523]GO:0002331+P biological\_process [name] pre-B cell allelic exclusion  
[def] "Expression of a single heavy chain allele during pre-B cell differentiation." [GOC

3164 Pathogen[ Q2Q067] interacts with 1 human partners:{P55895}

3165 Pathogen[ P0C214] interacts with 1 human partners:{P55895}

3166 Pathogen[ P03346] interacts with 1 human partners:{P55895}

3167 Pathogen[ Q85601] interacts with 1 human partners:{P55895}

3168 Pathogen[ P03383] interacts with 1 human partners:{P55895}

3169 Pathogen[ P03410] interacts with 1 human partners:{P55895}

3170 Pathogen[ P14075] interacts with 1 human partners:{P55895}

3171 Pathogen[ P0C206] interacts with 1 human partners:{P55895}

3172 Pathogen[ P03363] interacts with 1 human partners:{P55895}

3173 [Cluster 524]GO:0045069+P biological\_process [name] regulation of viral genome replication  
[def] "Any process that modulates the frequency, rate or extent of viral genome replication." [GOC

3174 Pathogen[ Q2Q067] interacts with 1 human partners:{P62937}

3175 Pathogen[ P03346] interacts with 1 human partners:{P62937}

3176 Pathogen[ Q85601] interacts with 1 human partners:{P62937}

3177 Pathogen[ P14079] interacts with 1 human partners:{P62937}

3178 Pathogen[ P03383] interacts with 1 human partners:{P62937}

3179 Pathogen[ P03410] interacts with 1 human partners:{P62937}

3180 Pathogen[ P14075] interacts with 1 human partners:{P62937}

3181 Pathogen[ P0C206] interacts with 1 human partners:{P62937}

3182 Pathogen[ P03363] interacts with 1 human partners:{P62937}

3183 [Cluster 525]GO:0006564+P biological\_process [name] L-serine biosynthetic process  
[def] "The chemical reactions and pathways resulting in the formation of L-serine, the L-enantiomer of serine, i.e. (2S)-2-amino-3-hydroxypropanoic acid." [CHEBI

3184 Pathogen[ P0C214] interacts with 2 human partners:{Q9Y617;P34897}

3185 Pathogen[ P14079] interacts with 2 human partners:{Q9Y617;P34897}

3186 Pathogen[ P03410] interacts with 2 human partners:{Q9Y617;P34897}

3187 Pathogen[ P0C206] interacts with 1 human partners:{P34897}

3188 [Cluster 526]GO:0043990+P biological\_process [name] histone H2A-S1 phosphorylation  
[def] "The modification of histone H2A by the addition of an phosphate group to a serine residue at position 1 of the histone." [GOC

3189 Pathogen[ Q2Q067] interacts with 1 human partners:{O75582}

3190 Pathogen[ P0C214] interacts with 1 human partners:{O75582}

3191 Pathogen[ P03346] interacts with 1 human partners:{O75582}

3192 Pathogen[ Q85601] interacts with 1 human partners:{O75582}

3193 Pathogen[ P14079] interacts with 1 human partners:{O75582}

3194 Pathogen[ P03383] interacts with 1 human partners:{O75582}

3195 Pathogen[ P03410] interacts with 1 human partners:{O75582}

3196 Pathogen[ P14075] interacts with 1 human partners:{O75582}

3197 Pathogen[ P0C206] interacts with 1 human partners:{O75582}

3198 [Cluster 527]GO:0030844+P biological\_process [name] positive regulation of intermediate filament depolymerization [def] "Any process that activates or increases the frequency, rate or extent of intermediate filament depolymerization." [GOC

3199 Pathogen[ P14079] interacts with 1 human partners:{P48681}

3200 [Cluster 528]GO:0019049+P biological\_process [name] evasion of host defenses by virus  
[def] "Any process, either active or passive, by which a virus avoids or tolerates the effects of its host organism's defense(s). Host defenses may be induced by the presence of the virus or may be preformed (e.g. physical barriers). The host is defined as the larger of the organisms involved in a symbiotic interaction." [ISBN

3201 Pathogen[ Q2Q067] interacts with 1 human partners:{P84022}

3202 Pathogen[ P0C214] interacts with 1 human partners:{P84022}

3203 Pathogen[ P03346] interacts with 1 human partners:{P84022}

3204 Pathogen[ Q85601] interacts with 1 human partners:{P84022}

3205 Pathogen[ P03383] interacts with 1 human partners:{P84022}

3206 Pathogen[ P03410] interacts with 1 human partners:{P84022}

3207 Pathogen[ P14075] interacts with 1 human partners:{P84022}

3208 Pathogen[ P0C206] interacts with 1 human partners:{P84022}

3209 Pathogen[ P03363] interacts with 1 human partners:{P84022}

3210 [Cluster 529]GO:0060059+P biological\_process [name] embryonic retina morphogenesis in camera-type eye [def] "The process in which the anatomical structure of the retina is generated and organized in a camera-type eye during the embryonic life stage." [GOC

3211 Pathogen[ P03346] interacts with 1 human partners:{Q86Z02}

3212 [Cluster 530]GO:0045617+P biological\_process [name] negative regulation of keratinocyte differentiation [def] "Any process that stops, prevents, or reduces the frequency, rate or extent of keratinocyte differentiation." [GOC

3213 Pathogen[ Q2Q067] interacts with 2 human partners:{P31268;P35548}

3214 Pathogen[ P0C214] interacts with 1 human partners:{P35548}

3215 Pathogen[ P03346] interacts with 2 human partners:{P31268;P35548}

3216 Pathogen[ Q85601] interacts with 1 human partners:{P35548}

3217 Pathogen[ P03383] interacts with 1 human partners:{P35548}

3218 Pathogen[ P03410] interacts with 1 human partners:{P35548}

3219 Pathogen[ P14075] interacts with 1 human partners:{P35548}

3220 Pathogen[ P0C206] interacts with 2 human partners:{P31268;P35548}

3221 Pathogen[ P03363] interacts with 2 human partners:{P35548;P31268}

3222 [Cluster 531]GO:0000819+P biological\_process [name] sister chromatid segregation [def] "The cell cycle process in which sister chromatids are organized and then physically separated and apportioned to two or more sets." [GOC

3223 Pathogen[ Q2Q067] interacts with 1 human partners:{P11388}

3224 Pathogen[ P0C214] interacts with 1 human partners:{P11388}

3225 Pathogen[ P03346] interacts with 1 human partners:{P11388}

3226 Pathogen[ Q85601] interacts with 1 human partners:{P11388}

3227 Pathogen[ P14079] interacts with 1 human partners:{P11388}

3228 Pathogen[ P03410] interacts with 1 human partners:{P11388}

3229 Pathogen[ P0C206] interacts with 1 human partners:{P11388}

3230 [Cluster 532]GO:0045815+P biological\_process [name] positive regulation of gene expression, epigenetic [def] "Any epigenetic process that activates or increases the rate of gene expression." [GOC

3231 Pathogen[ P03410] interacts with 1 human partners:{Q9BRV3}

3232 [Cluster 533]GO:0045660+P biological\_process [name] positive regulation of neutrophil differentiation [def] "Any process that activates or increases the frequency, rate or extent of neutrophil differentiation." [GOC

3233 Pathogen[ P0C206] interacts with 1 human partners:{Q13422}

3234 [Cluster 534]GO:2000098+P biological\_process [name] negative regulation of smooth muscle cell-matrix adhesion [def] "Any process that stops, prevents, or reduces the frequency, rate or extent of smooth muscle cell-matrix adhesion." [GOC

3235 Pathogen[ P0C214] interacts with 1 human partners:{P05121}

3236 Pathogen[ Q85601] interacts with 1 human partners:{P05121}

3237 Pathogen[ P03410] interacts with 1 human partners:{P05121}

3238 Pathogen[ P0C206] interacts with 1 human partners:{P05121}

3239 [Cluster 535]GO:0021912+P biological\_process [name] regulation of transcription from RNA polymerase II promoter involved in spinal cord motor neuron fate specification [def] "Any process that modulates the frequency, rate or extent of transcription from an RNA polymerase II promoter that results the commitment of a cell to become a motor neuron in the ventral spinal cord." [GO\_REF

3240 Pathogen[ P03346] interacts with 1 human partners:{P78426}

3241 Pathogen[ P03363] interacts with 1 human partners:{Q9C056}

3242 [Cluster 536]GO:0045475+P biological\_process [name] locomotor rhythm [def] "The rhythm of the locomotor activity of an organism during its 24 hour activity cycle." [GOC

3243 Pathogen[ Q2Q067] interacts with 1 human partners:{Q99743}

3244 Pathogen[ P0C214] interacts with 1 human partners:{Q99743}

3245 Pathogen[ P03346] interacts with 1 human partners:{Q99743}

3246 Pathogen[ Q85601] interacts with 1 human partners:{Q99743}

3247 Pathogen[ P14079] interacts with 1 human partners:{Q99743}

3248 Pathogen[ P03410] interacts with 1 human partners:{Q99743}

3249 Pathogen[ P0C206] interacts with 1 human partners:{Q99743}

3250 Pathogen[ P03363] interacts with 1 human partners:{Q99743}

3251 [Cluster 537]GO:0006706+P biological\_process [name] steroid catabolic process [def] "The chemical reactions and pathways resulting in the breakdown of steroids, compounds with a 1,2,cyclopentanoperhydrophenanthrene nucleus." [GOC

3252 Pathogen[ Q2Q067] interacts with 1 human partners:{Q9BPX1}

3253 Pathogen[ P0C214] interacts with 1 human partners:{Q9BPX1}

3254 Pathogen[ P03346] interacts with 1 human partners:{Q9BPX1}

3255 Pathogen[ Q85601] interacts with 1 human partners:{Q9BPX1}

3256 Pathogen[ P03383] interacts with 1 human partners:{Q9BPX1}

3257 Pathogen[ P03410] interacts with 1 human partners:{Q9BPX1}

3258 Pathogen[ P0C206] interacts with 1 human partners:{Q9BPX1}

3259 Pathogen[ P03363] interacts with 1 human partners:{Q9BPX1}

3260 [Cluster 538]GO:0048199+P biological\_process [name] vesicle targeting, to, from or within Golgi [def] "The process in which vesicles are directed to specific destination membranes during transport to, from or within the Golgi apparatus\_ mediated by the addition of specific coat proteins, including COPI and COPII proteins and clathrin, to the membrane during vesicle formation." [GOC

3261 Pathogen[ P03346] interacts with 1 human partners:{P49755}

3262 Pathogen[ P14079] interacts with 1 human partners:{P49755}

3263 Pathogen[ P0C206] interacts with 1 human partners:{P49755}

3264 [Cluster 539]GO:0030206+P biological\_process [name] chondroitin sulfate biosynthetic process [def] "The chemical reactions and pathways resulting in the formation of chondroitin sulfate, any member of a group of 10-60 kDa glycosaminoglycans, widely distributed in cartilage and other mammalian connective tissues, the repeat units of which consist of beta-(1,4)-linked D-glucuronyl beta-(1,3)-N-acetyl-D-galactosamine sulfate." [GOC

3265 Pathogen[ P14079] interacts with 1 human partners:{Q9UL01}

3266 Pathogen[ P03410] interacts with 1 human partners:{Q9UL01}

3267 Pathogen[ P0C206] interacts with 1 human partners:{Q9UL01}

3268 [Cluster 540]GO:0072073+P biological\_process [name] kidney epithelium development [def] "The process whose specific outcome is the progression of an epithelium in the kidney over time, from its formation to the mature structure. An epithelium is a tissue that covers the internal or external surfaces of an anatomical structure." [GOC

3269 Pathogen[ Q2Q067] interacts with 1 human partners:{Q9NSC2}

3270 Pathogen[ P0C214] interacts with 1 human partners:{Q9NSC2}

3271 Pathogen[ P03346] interacts with 2 human partners:{Q9NSC2;Q06710}

3272 Pathogen[ Q85601] interacts with 1 human partners:{Q9NSC2}

3273 Pathogen[ P14079] interacts with 1 human partners:{Q9NSC2}

3274 Pathogen[ P03383] interacts with 1 human partners:{Q9NSC2}

3275 Pathogen[ P03410] interacts with 1 human partners:{Q9NSC2}

3276 Pathogen[ P14075] interacts with 1 human partners:{Q9NSC2}

3277 Pathogen[ P0C206] interacts with 1 human partners:{Q9NSC2}

3278 [Cluster 541]GO:0035093+P biological\_process [name] spermatogenesis, exchange of chromosomal proteins [def] "The replacement of somatic histones within sperm chromatin with sperm-specific histones or protamines with unique DNA-binding properties, resulting in condensation of the sperm chromatin." [GOC

3279 Pathogen[ P03346] interacts with 1 human partners:{Q8IZU3}

3280 Pathogen[ P14079] interacts with 1 human partners:{Q8IZU3}

3281 Pathogen[ P03410] interacts with 1 human partners:{Q8IZU3}

3282 Pathogen[ P0C206] interacts with 1 human partners:{Q8IZU3}

3283 Pathogen[ P03363] interacts with 1 human partners:{Q8IZU3}

3284 [Cluster 542]GO:0010741+P biological\_process [name] negative regulation of intracellular protein kinase cascade [def] "Any process that decreases the rate, frequency or extent of a series of reactions, mediated by protein kinases, which occurs as a result of a single trigger reaction or compound." [GOC

3285 Pathogen[ P14079] interacts with 1 human partners:{Q9NX09}

3286 Pathogen[ P03410] interacts with 1 human partners:{Q9NX09}

3287 [Cluster 543]GO:0051281+P biological\_process [name] positive regulation of release of sequestered calcium ion into cytosol [def] "Any process that activates or increases the frequency, rate or extent of the release into the cytosolic compartment of calcium ions sequestered in the endoplasmic reticulum or mitochondria." [GOC

3288 Pathogen[ P14079] interacts with 1 human partners:{Q9GZZ8}

3289 Pathogen[ P03410] interacts with 1 human partners:{Q9GZZ8}

3290 Pathogen[ P14075] interacts with 1 human partners:{Q9GZZ8}

3291 [Cluster 544]GO:0021930+P biological\_process [name] cerebellar granule cell precursor proliferation [def] "The multiplication or reproduction of neuroblasts that will give rise to granule cells. A granule cell is a glutamatergic interneuron found in the cerebellar cortex." [GO\_REF

3292 Pathogen[ P03346] interacts with 1 human partners:{P52951}

3293 Pathogen[ P03363] interacts with 1 human partners:{P52951}

3294 [Cluster 545]GO:0046874+P biological\_process [name] quinolinate metabolic process [def] "The chemical reactions and pathways involving quinolinate, the anion of quinolinic acid, also known as 2,3-pyridinedicarboxylic acid." [GOC

3295 Pathogen[ P0C214] interacts with 1 human partners:{Q15274}

3296 Pathogen[ P14079] interacts with 2 human partners:{Q8TDX5;Q15274}

3297 Pathogen[ P03410] interacts with 2 human partners:{Q15274;Q8TDX5}

3298 Pathogen[ P0C206] interacts with 1 human partners:{Q15274}

3299 [Cluster 546]GO:0034620+P biological\_process [name] cellular response to unfolded protein [def] "Any process that results in a change in state or activity of a cell (in terms of movement, secretion, enzyme production, gene expression, etc.) as a result of an unfolded protein stimulus." [GOC

3300 Pathogen[ P0C214] interacts with 1 human partners:{P49588}

3301 Pathogen[ P03346] interacts with 1 human partners:{Q9BUN8}

3302 Pathogen[ P14079] interacts with 2 human partners:{Q9BUN8;P49588}

3303 Pathogen[ P03383] interacts with 1 human partners:{Q9BUN8}

3304 Pathogen[ P03410] interacts with 2 human partners:{P49588;Q9BUN8}

3305 Pathogen[ P14075] interacts with 1 human partners:{Q9BUN8}

3306 Pathogen[ P0C206] interacts with 1 human partners:{Q9BUN8}

3307 [Cluster 547]GO:0061041+P biological\_process [name] regulation of wound healing [def] "Any process that modulates the rate, frequency, or extent of the series of events that restore integrity to a damaged tissue, following an injury." [GOC

3308 Pathogen[ P14079] interacts with 1 human partners:{P09327}

3309 [Cluster 548]GO:0061045+P biological\_process [name] negative regulation of wound healing [def] "Any process that decreases the rate, frequency, or extent of the series of events that restore integrity to a damaged tissue, following an injury." [GOC

3310 Pathogen[ Q2Q067] interacts with 1 human partners:{P84022}

3311 Pathogen[ P0C214] interacts with 2 human partners:{P84022;P05121}

3312 Pathogen[ P03346] interacts with 1 human partners:{P84022}

3313 Pathogen[ Q85601] interacts with 2 human partners:{P05121;P84022}

3314 Pathogen[ P03383] interacts with 1 human partners:{P84022}

3315 Pathogen[ P03410] interacts with 2 human partners:{P84022;P05121}

3316 Pathogen[ P14075] interacts with 1 human partners:{P84022}

3317 Pathogen[ P0C206] interacts with 2 human partners:{P84022;P05121}

3318 Pathogen[ P03363] interacts with 1 human partners:{P84022}

3319 [Cluster 549]GO:0042264+P biological\_process [name] peptidyl-aspartic acid hydroxylation [def] "The hydroxylation of peptidyl-aspartic acid to form peptidyl-hydroxyaspartic acid." [GOC

3320 Pathogen[ Q2Q067] interacts with 1 human partners:{Q9NWT6}

3321 Pathogen[ P0C214] interacts with 1 human partners:{Q9NWT6}

3322 Pathogen[ P03346] interacts with 1 human partners:{Q9NWT6}

3323 Pathogen[ Q85601] interacts with 1 human partners:{Q9NWT6}

3324 Pathogen[ P14079] interacts with 1 human partners:{Q9NWT6}

3325 Pathogen[ P03383] interacts with 1 human partners:{Q9NWT6}

3326 Pathogen[ P03410] interacts with 1 human partners:{Q9NWT6}

3327 Pathogen[ P14075] interacts with 1 human partners:{Q9NWT6}

3328 Pathogen[ P0C206] interacts with 1 human partners:{Q9NWT6}

3329 [Cluster 550]GO:0032049+P biological\_process [name] cardiolipin biosynthetic process [def] "The chemical reactions and pathways resulting in the formation of cardiolipin, 1,3-bis(3-phosphatidyl)glycerol." [CHEBI

3330 Pathogen[ P14079] interacts with 1 human partners:{Q32NB8}

3331 Pathogen[ P03410] interacts with 1 human partners:{Q16635}

3332 [Cluster 551]GO:0060022+P biological\_process [name] hard palate development [def] "The biological process whose specific outcome is the progression of the hard palate from an initial condition to its mature state. This process begins with the formation of the structure and ends with the mature structure, whatever form that may be including its natural destruction. The hard palate is the anterior portion of the palate consisting of bone and mucous membranes." [GOC

3333 Pathogen[ Q2Q067] interacts with 1 human partners:{Q12959}

3334 Pathogen[ P0C214] interacts with 1 human partners:{Q12959}

3335 Pathogen[ P03346] interacts with 1 human partners:{Q12959}

3336 Pathogen[ Q85601] interacts with 1 human partners:{Q12959}

3337 Pathogen[ P03410] interacts with 1 human partners:{Q12959}

3338 Pathogen[ P0C206] interacts with 1 human partners:{Q12959}

3339 Pathogen[ P03363] interacts with 1 human partners:{Q12959}

3340 [Cluster 552]GO:0071660+P biological\_process [name] positive regulation of IP-10 production [def] "Any process that activates or increases the frequency, rate, or extent of production of IP-10." [GOC

3341 Pathogen[ P14079] interacts with 1 human partners:{Q7Z434}

3342 Pathogen[ P03410] interacts with 1 human partners:{Q7Z434}

3343 [Cluster 553]GO:0001768+P biological\_process [name] establishment of T cell polarity [def] "The directed orientation of T cell signaling molecules and associated membrane rafts towards a chemokine gradient or a contact point with antigen presenting cell." [GOC

3344 Pathogen[ Q2Q067] interacts with 1 human partners:{P35579}

3345 Pathogen[ P03346] interacts with 1 human partners:{P35579}

3346 Pathogen[ Q85601] interacts with 1 human partners:{P35579}

3347 Pathogen[ P14079] interacts with 1 human partners:{P35579}

3348 Pathogen[ P03383] interacts with 1 human partners:{P35579}

3349 Pathogen[ P03410] interacts with 1 human partners:{P35579}

3350 Pathogen[ P14075] interacts with 1 human partners:{P35579}

3351 Pathogen[ P0C206] interacts with 1 human partners:{P35579}

3352 Pathogen[ P03363] interacts with 1 human partners:{P35579}

3353 [Cluster 554]GO:0032202+P biological\_process [name] telomere assembly [def] "A cellular process that results in the aggregation, arrangement and bonding together of a set of components to form a telomere at a non-telomeric double-stranded DNA end. A telomere is a terminal region of a linear chromosome that includes telomeric DNA repeats and associated proteins." [GOC

3354 Pathogen[ Q2Q067] interacts with 2 human partners:{Q9BSI4;Q96AP0}

3355 Pathogen[ P0C214] interacts with 1 human partners:{Q9BSI4}

3356 Pathogen[ P03346] interacts with 2 human partners:{Q9BSI4;Q96AP0}

3357 Pathogen[ P14079] interacts with 2 human partners:{Q9BSI4;Q96AP0}

3358 Pathogen[ P03383] interacts with 1 human partners:{Q9BSI4}

3359 Pathogen[ P03410] interacts with 2 human partners:{Q96AP0;Q9BSI4}

3360 Pathogen[ P14075] interacts with 2 human partners:{Q9BSI4;Q96AP0}

3361 Pathogen[ P0C206] interacts with 2 human partners:{Q96AP0;Q9BSI4}

3362 Pathogen[ P03363] interacts with 2 human partners:{Q9BSI4;Q96AP0}

3363 [Cluster 555]GO:0009264+P biological\_process [name] deoxyribonucleotide catabolic process [def] "The chemical reactions and pathways resulting in the breakdown of a deoxyribonucleotide, a compound consisting of deoxyribonucleoside (a base linked to a deoxyribose sugar) esterified with a phosphate group at either the 3' or 5'-hydroxyl group of the sugar." [GOC

3364 Pathogen[ POC214] interacts with 2 human partners:{Q9Y315;Q8TCD5}

3365 Pathogen[ P14079] interacts with 2 human partners:{Q8TCD5;Q9Y315}

3366 Pathogen[ P03410] interacts with 2 human partners:{Q9Y315;Q8TCD5}

3367 Pathogen[ P14075] interacts with 1 human partners:{Q9Y315}

3368 Pathogen[ POC206] interacts with 2 human partners:{Q9Y315;Q8TCD5}

3369 Pathogen[ P03363] interacts with 1 human partners:{Q9Y315}

3370 [Cluster 556]GO:0072107+P biological\_process [name] positive regulation of ureteric bud formation [def] "Any process that increases the rate or extent of the developmental process pertaining to the initial formation of the ureteric bud from the Wolffian duct." [GOC

3371 Pathogen[ P03346] interacts with 2 human partners:{Q9UIU6;Q15475}

3372 [Cluster 557]GO:0045162+P biological\_process [name] clustering of voltage-gated sodium channels [def] "The process in which voltage-gated sodium channels become localized together in high densities. In animals, nodes of Ranvier differ dramatically from internodal axonal regions in very high densities of voltage-dependent sodium (Nav) channels responsible for the rapid, inward ionic currents that produce membrane depolarization." [PMID

3373 Pathogen[ P03346] interacts with 1 human partners:{Q96NL6}

3374 Pathogen[ P14079] interacts with 1 human partners:{Q96NL6}

3375 Pathogen[ P03410] interacts with 1 human partners:{Q96NL6}

3376 Pathogen[ POC206] interacts with 1 human partners:{Q96NL6}

3377 [Cluster 558]GO:0035786+P biological\_process [name] protein complex oligomerization [def] "The association of two or more multisubunit protein complexes to form dimers or other multimers of a protein complex." [GOC

3378 Pathogen[ P14079] interacts with 1 human partners:{Q8NE86}

3379 Pathogen[ P03410] interacts with 1 human partners:{Q8NE86}

3380 Pathogen[ POC206] interacts with 1 human partners:{Q8NE86}

3381 [Cluster 559]GO:0070561+P biological\_process [name] vitamin D receptor signaling pathway [def] "The series of molecular signals generated as a consequence of a vitamin D receptor binding to one of its physiological ligands." [GOC

3382 Pathogen[ Q2Q067] interacts with 1 human partners:{P11473}

3383 Pathogen[ P03346] interacts with 1 human partners:{P11473}

3384 Pathogen[ Q85601] interacts with 1 human partners:{P11473}

3385 Pathogen[ P14079] interacts with 1 human partners:{P11473}

3386 Pathogen[ P03383] interacts with 1 human partners:{P11473}

3387 Pathogen[ P03410] interacts with 1 human partners:{P11473}

3388 Pathogen[ P14075] interacts with 1 human partners:{P11473}

3389 Pathogen[ POC206] interacts with 1 human partners:{P11473}

3390 Pathogen[ P03363] interacts with 1 human partners:{P11473}

3391 [Cluster 560]GO:0032369+P biological\_process [name] negative regulation of lipid transport [def] "Any process that stops, prevents, or reduces the frequency, rate or extent of the directed movement of lipids into, out of or within a cell, or between cells, by means of some agent such as a transporter or pore." [GOC

3392 Pathogen[ Q2Q067] interacts with 1 human partners:{P55055}

3393 Pathogen[ P03346] interacts with 1 human partners:{P55055}

3394 Pathogen[ Q85601] interacts with 1 human partners:{P55055}

3395 Pathogen[ P14079] interacts with 1 human partners:{P55055}

3396 Pathogen[ POC206] interacts with 1 human partners:{P55055}

3397 [Cluster 561]GO:0048291+P biological\_process [name] isotype switching to IgG isotypes [def] "The switching of activated B cells from IgM biosynthesis to biosynthesis of an IgG isotype, accomplished through a recombination process involving an intrachromosomal deletion between switch regions that reside 5' of the IgM and one of the IgG constant region gene segments in the immunoglobulin heavy chain locus." [ISBN

3398 Pathogen[ POC214] interacts with 1 human partners:{P10809}

3399 [Cluster 562]GO:0060684+P biological\_process [name] epithelial-mesenchymal cell signaling [def] "Any process that results in the transfer of information from an epithelial cell to a mesenchymal cell where it is interpreted." [GOC

3400 Pathogen[ Q2Q067] interacts with 1 human partners:{P60953}

3401 Pathogen[ POC214] interacts with 1 human partners:{P60953}

3402 Pathogen[ P03346] interacts with 1 human partners:{P60953}

3403 Pathogen[ Q85601] interacts with 1 human partners:{P60953}

3404 Pathogen[ P03383] interacts with 1 human partners:{P60953}

3405 Pathogen[ P03410] interacts with 1 human partners:{P60953}

3406 Pathogen[ P14075] interacts with 1 human partners:{P60953}

3407 Pathogen[ POC206] interacts with 1 human partners:{P60953}

3408 Pathogen[ P03363] interacts with 1 human partners:{P60953}

3409 [Cluster 563]GO:0000965+P biological\_process [name] mitochondrial RNA 3'-end processing [def] "Any process involved in forming the mature 3' end of an RNA molecule transcribed from a mitochondrial genome\_ occurs in the mitochondrion." [GOC

3410 Pathogen[ Q2Q067] interacts with 1 human partners:{Q8TCS8}

3411 Pathogen[ POC214] interacts with 1 human partners:{Q8TCS8}

3412 Pathogen[ P03346] interacts with 1 human partners:{Q8TCS8}

3413 Pathogen[ Q85601] interacts with 1 human partners:{Q8TCS8}

3414 Pathogen[ P14079] interacts with 1 human partners:{Q8TCS8}

3415 Pathogen[ P03383] interacts with 1 human partners:{Q8TCS8}

3416 Pathogen[ P03410] interacts with 1 human partners:{Q8TCS8}

3417 Pathogen[ P14075] interacts with 1 human partners:{Q8TCS8}

3418 Pathogen[ P0C206] interacts with 1 human partners:{Q8TCS8}

3419 [Cluster 564]GO:0031328+P biological\_process [name] positive regulation of cellular biosynthetic process [def] "Any process that activates or increases the frequency, rate or extent of the chemical reactions and pathways resulting in the formation of substances, carried out by individual cells." [GOC]

3420 Pathogen[ Q2Q067] interacts with 1 human partners:{Q96IF1}

3421 Pathogen[ P03346] interacts with 1 human partners:{Q96IF1}

3422 Pathogen[ Q85601] interacts with 1 human partners:{Q96IF1}

3423 Pathogen[ P14079] interacts with 1 human partners:{Q96IF1}

3424 Pathogen[ P03410] interacts with 1 human partners:{Q96IF1}

3425 Pathogen[ P0C206] interacts with 1 human partners:{Q96IF1}

3426 Pathogen[ P03363] interacts with 1 human partners:{Q96IF1}

3427 [Cluster 565]GO:0044598+P

3428 Pathogen[ Q2Q067] interacts with 1 human partners:{P15121}

3429 Pathogen[ P0C214] interacts with 1 human partners:{P15121}

3430 Pathogen[ P03346] interacts with 1 human partners:{P15121}

3431 Pathogen[ Q85601] interacts with 1 human partners:{P15121}

3432 Pathogen[ P0C206] interacts with 1 human partners:{P15121}

3433 [Cluster 566]GO:0030207+P biological\_process [name] chondroitin sulfate catabolic process [def] "The chemical reactions and pathways resulting in the breakdown of chondroitin sulfate, any member of a group of 10-60 kDa glycosaminoglycans, widely distributed in cartilage and other mammalian connective tissues, the repeat units of which consist of beta-(1,4)-linked D-glucuronyl beta-(1,3)-N-acetyl-D-galactosamine sulfate." [GOC]

3434 Pathogen[ P14079] interacts with 1 human partners:{P35475}

3435 [Cluster 567]GO:0051877+P biological\_process [name] pigment granule aggregation in cell center [def] "The directed movement of dispersed pigment granules towards the center of the cell." [GOC]

3436 Pathogen[ P14079] interacts with 1 human partners:{Q8IYWZ6}

3437 Pathogen[ P03410] interacts with 1 human partners:{Q8IYWZ6}

3438 [Cluster 568]GO:0050965+P biological\_process [name] detection of temperature stimulus involved in sensory perception of pain [def] "The series of events involved in the perception of pain in which a sensory temperature stimulus is received by a cell and converted into a molecular signal." [GOC]

3439 Pathogen[ P03346] interacts with 1 human partners:{P10588}

3440 Pathogen[ P14079] interacts with 2 human partners:{P10588;Q9BS40}

3441 Pathogen[ P03410] interacts with 1 human partners:{Q9BS40}

3442 Pathogen[ P0C206] interacts with 1 human partners:{P10588}

3443 Pathogen[ P03363] interacts with 1 human partners:{P10588}

3444 [Cluster 569]GO:0008535+P biological\_process [name] respiratory chain complex IV assembly [def] "The aggregation, arrangement and bonding together of a set of components to form respiratory chain complex IV (also known as cytochrome c oxidase), the terminal member of the respiratory chain of the mitochondrion and some aerobic bacteria. Cytochrome c oxidases are multi-subunit enzymes containing from 13 subunits in the mammalian mitochondrial form to 3-4 subunits in the bacterial forms." [GOC]

3445 Pathogen[ P14079] interacts with 4 human partners:{Q12887;Q15526;O75880;O43819}

3446 Pathogen[ P03410] interacts with 3 human partners:{Q12887;O75880;O43819}

3447 [Cluster 570]GO:0042461+P biological\_process [name] photoreceptor cell development [def] "Development of a photoreceptor, a cell that responds to incident electromagnetic radiation, particularly visible light." [GOC]

3448 Pathogen[ P03346] interacts with 2 human partners:{P36405;Q8IWN7}

3449 Pathogen[ Q85601] interacts with 1 human partners:{P36405}

3450 Pathogen[ P14079] interacts with 3 human partners:{Q8IWN7;P56715;P36405}

3451 Pathogen[ P03410] interacts with 3 human partners:{P36405;Q8IWN7;P56715}

3452 Pathogen[ P0C206] interacts with 3 human partners:{P56715;Q8IWN7;P36405}

3453 Pathogen[ P03363] interacts with 2 human partners:{P56715;Q8IWN7}

3454 [Cluster 571]GO:0006869+P biological\_process [name] lipid transport [def] "The directed movement of lipids into, out of or within a cell, or between cells, by means of some agent such as a transporter or pore. Lipids are compounds soluble in an organic solvent but not, or sparingly, in an aqueous solvent." [ISBN]

3455 Pathogen[ P03346] interacts with 2 human partners:{Q9UID3;Q9BXW6}

3456 Pathogen[ Q85601] interacts with 1 human partners:{Q9UID3}

3457 Pathogen[ P14079] interacts with 6 human partners:{Q9BXW6;Q9UID3;Q9UKF7;Q0VD83;Q96AA3;Q9NZD2}

3458 Pathogen[ P03410] interacts with 7 human partners:{P55157;Q9UKF7;Q9NZD2;Q0VD83;Q9UBY8;Q9UID3;Q9BXW6}

3459 Pathogen[ P0C206] interacts with 3 human partners:{Q9NZD2;Q9UID3;Q9BXW6}

3460 Pathogen[ P03363] interacts with 4 human partners:{Q9UID3;Q9BZF3;Q9BXW6;Q9UKF7}

3461 [Cluster 572]GO:0044319+P biological\_process [name] wound healing, spreading of cells [def] "The migration of an cell along or through a wound gap to reestablish a continuous surface." [GOC]

3462 Pathogen[ P03346] interacts with 1 human partners:{Q8TEW0}

3463 Pathogen[ P14079] interacts with 1 human partners:{Q8TEW0}

3464 Pathogen[ P03410] interacts with 1 human partners:{Q8TEW0}

3465 Pathogen[ P0C206] interacts with 1 human partners:{Q8TEW0}



3466 [Cluster 573]GO:0060481+P biological\_process [name] lobar bronchus epithelium development [def] "The biological process whose specific outcome is the progression of a lobar bronchus epithelium from an initial condition to its mature state. This process begins with the formation of the lobar bronchus epithelium and ends with the mature structure. The lobar bronchus epithelium is the tissue made up of epithelial cells that lines the inside of the lobar bronchus." [GOC

3467 Pathogen[ Q2Q067] interacts with 1 human partners:{P20719}

3468 Pathogen[ P03346] interacts with 1 human partners:{P20719}

3469 Pathogen[ P0C206] interacts with 1 human partners:{P20719}

3470 Pathogen[ P03363] interacts with 1 human partners:{P20719}

3471 [Cluster 574]GO:0007213+P biological\_process [name] G-protein coupled acetylcholine receptor signaling pathway [def] "Any series of molecular signals initiated by an acetylcholine receptor on the surface of the target cell binding to one of its physiological ligands, and proceeding with the activated receptor promoting the exchange of GDP for GTP on the alpha-subunit of an associated heterotrimeric G-protein complex. The GTP-bound activated alpha-G-protein then dissociates from the beta- and gamma-subunits to further transmit the signal within the cell. The pathway begins with receptor-ligand interaction and ends with regulation of a downstream cellular process, e.g. transcription." [GOC

3472 Pathogen[ P14079] interacts with 1 human partners:{Q15078}

3473 [Cluster 575]GO:0071105+P biological\_process [name] response to interleukin-11 [def] "Any process that results in a change in state or activity of a cell or an organism (in terms of movement, secretion, enzyme production, gene expression, etc.) as a result of an interleukin-11 stimulus." [GOC

3474 Pathogen[ Q2Q067] interacts with 1 human partners:{Q99966}

3475 Pathogen[ P0C214] interacts with 1 human partners:{Q99966}

3476 Pathogen[ P03346] interacts with 1 human partners:{Q99966}

3477 Pathogen[ Q85601] interacts with 1 human partners:{Q99966}

3478 Pathogen[ P14079] interacts with 1 human partners:{Q99966}

3479 Pathogen[ P03410] interacts with 1 human partners:{Q99966}

3480 Pathogen[ P0C206] interacts with 1 human partners:{Q99966}

3481 [Cluster 576]GO:0051725+P biological\_process [name] protein de-ADP-ribosylation [def] "The process of removing one or more ADP-ribose residues from a protein." [GOC

3482 Pathogen[ P0C214] interacts with 1 human partners:{P54922}

3483 Pathogen[ P14079] interacts with 2 human partners:{P54922;Q8NDY3}

3484 Pathogen[ P03383] interacts with 1 human partners:{P54922}

3485 Pathogen[ P03410] interacts with 2 human partners:{Q8NDY3;P54922}

3486 Pathogen[ P14075] interacts with 1 human partners:{P54922}

3487 Pathogen[ P0C206] interacts with 1 human partners:{P54922}

3488 [Cluster 577]GO:0009082+P biological\_process [name] branched chain family amino acid biosynthetic process [def] "The chemical reactions and pathways resulting in the formation of amino acids containing a branched carbon skeleton, comprising isoleucine, leucine and valine." [GOC

3489 Pathogen[ P0C214] interacts with 2 human partners:{O15382;P54687}

3490 Pathogen[ Q85601] interacts with 1 human partners:{O15382}

3491 Pathogen[ P14079] interacts with 1 human partners:{O15382}

3492 Pathogen[ P03410] interacts with 1 human partners:{O15382}

3493 Pathogen[ P0C206] interacts with 1 human partners:{O15382}

3494 [Cluster 578]GO:2000467+P biological\_process [name] positive regulation of glycogen (starch) synthase activity [def] "Any process that activates or increases the frequency, rate or extent of glycogen (starch) synthase activity." [GOC

3495 Pathogen[ P14079] interacts with 1 human partners:{B7ZBB8}

3496 Pathogen[ P03410] interacts with 1 human partners:{B7ZBB8}

3497 Pathogen[ P0C206] interacts with 1 human partners:{B7ZBB8}

3498 Pathogen[ P03363] interacts with 1 human partners:{B7ZBB8}

3499 [Cluster 579]GO:0043320+P biological\_process [name] natural killer cell degranulation [def] "The regulated exocytosis of secretory granules containing preformed mediators such as perforin and granzymes by a natural killer cell." [ISBN

3500 Pathogen[ P03346] interacts with 1 human partners:{Q70J99}

3501 Pathogen[ P03410] interacts with 1 human partners:{Q70J99}

3502 [Cluster 580]GO:2000987+P biological\_process [name] positive regulation of behavioral fear response [def] "Any process that activates or increases the frequency, rate or extent of behavioral fear response." [GOC

3503 Pathogen[ P14079] interacts with 1 human partners:{Q06413}

3504 [Cluster 581]GO:0032897+P biological\_process [name] negative regulation of viral transcription [def] "Any process that stops, prevents, or reduces the frequency, rate or extent of viral transcription." [GOC

3505 Pathogen[ Q2Q067] interacts with 1 human partners:{P23497}

3506 Pathogen[ P0C214] interacts with 1 human partners:{P23497}

3507 Pathogen[ P03346] interacts with 1 human partners:{P23497}

3508 Pathogen[ P14079] interacts with 1 human partners:{P23497}

3509 Pathogen[ P03383] interacts with 1 human partners:{P23497}

3510 Pathogen[ P14075] interacts with 1 human partners:{P23497}

3511 Pathogen[ P03363] interacts with 1 human partners:{P23497}

3512 [Cluster 582]GO:0006883+P biological\_process [name] cellular sodium ion homeostasis [def] "Any process involved in the maintenance of an internal steady state of sodium

ions at the level of a cell." [GOC

3513 Pathogen[ Q2Q067] interacts with 1 human partners:{Q96PU5}

3514 Pathogen[ POC214] interacts with 1 human partners:{Q96PU5}

3515 Pathogen[ P03346] interacts with 1 human partners:{Q96PU5}

3516 Pathogen[ Q85601] interacts with 1 human partners:{Q96PU5}

3517 Pathogen[ POC206] interacts with 1 human partners:{Q96PU5}

3518 Pathogen[ P03363] interacts with 1 human partners:{Q96PU5}

3519 [Cluster 583]GO:0009223+P biological\_process [name] pyrimidine deoxyribonucleotide catabolic process [def] "The chemical reactions and pathways resulting in the breakdown of a pyrimidine deoxyribonucleotide, a compound consisting of nucleoside (a pyrimidine base linked to a deoxyribose sugar) esterified with a phosphate group at either the 3' or 5'-hydroxyl group of the sugar." [GOC

3520 Pathogen[ POC214] interacts with 1 human partners:{Q8TCD5}

3521 Pathogen[ P14079] interacts with 1 human partners:{Q8TCD5}

3522 Pathogen[ P03410] interacts with 1 human partners:{Q8TCD5}

3523 Pathogen[ POC206] interacts with 1 human partners:{Q8TCD5}

3524 [Cluster 584]GO:0019516+P biological\_process [name] lactate oxidation [def] "The chemical reactions and pathways resulting in the conversion of lactate to other compounds, such as pyruvate, with concomitant loss of electrons." [GOC

3525 Pathogen[ Q2Q067] interacts with 1 human partners:{P07864}

3526 Pathogen[ POC214] interacts with 1 human partners:{P07864}

3527 Pathogen[ Q85601] interacts with 1 human partners:{P07864}

3528 Pathogen[ P14079] interacts with 1 human partners:{P07864}

3529 Pathogen[ P03383] interacts with 1 human partners:{P07864}

3530 Pathogen[ P03410] interacts with 1 human partners:{P07864}

3531 Pathogen[ P14075] interacts with 1 human partners:{P07864}

3532 Pathogen[ POC206] interacts with 1 human partners:{P07864}

3533 [Cluster 585]GO:0043271+P biological\_process [name] negative regulation of ion transport [def] "Any process that stops, prevents, or reduces the frequency, rate or extent of the directed movement of charged atoms or small charged molecules into, out of or within a cell, or between cells, by means of some agent such as a transporter or pore." [GOC

3534 Pathogen[ P14079] interacts with 1 human partners:{P24588}

3535 Pathogen[ P03410] interacts with 1 human partners:{P24588}

3536 [Cluster 586]GO:0051251+P biological\_process [name] positive regulation of lymphocyte activation [def] "Any process that activates or increases the frequency, rate or extent of lymphocyte activation." [GOC

3537 Pathogen[ P03346] interacts with 1 human partners:{O75995}

3538 [Cluster 587]GO:0045609+P biological\_process [name] positive regulation of auditory receptor cell differentiation [def] "Any process that activates or increases the frequency, rate or extent of auditory hair cell differentiation." [GOC

3539 Pathogen[ P03346] interacts with 1 human partners:{Q92858}

3540 [Cluster 588]GO:0036159+P

3541 Pathogen[ P14079] interacts with 1 human partners:{Q8IW40}

3542 Pathogen[ P03410] interacts with 1 human partners:{Q8IW40}

3543 Pathogen[ POC206] interacts with 1 human partners:{Q8IW40}

3544 Pathogen[ P03363] interacts with 1 human partners:{Q8IW40}

3545 [Cluster 589]GO:0050774+P biological\_process [name] negative regulation of dendrite morphogenesis [def] "Any process that stops, prevents, or reduces the frequency, rate or extent of dendrite morphogenesis." [GOC

3546 Pathogen[ Q2Q067] interacts with 1 human partners:{Q04917}

3547 Pathogen[ POC214] interacts with 1 human partners:{Q04917}

3548 Pathogen[ P03346] interacts with 2 human partners:{Q04917;O43763}

3549 Pathogen[ Q85601] interacts with 1 human partners:{Q04917}

3550 Pathogen[ P14079] interacts with 1 human partners:{Q04917}

3551 Pathogen[ P03410] interacts with 1 human partners:{Q04917}

3552 Pathogen[ POC206] interacts with 2 human partners:{Q04917;O43763}

3553 Pathogen[ P03363] interacts with 2 human partners:{O43763;Q04917}

3554 [Cluster 590]GO:0021535+P biological\_process [name] cell migration in hindbrain [def] "The orderly movement of a cell that will reside in the hindbrain." [GO\_REF

3555 Pathogen[ Q2Q067] interacts with 1 human partners:{O14641}

3556 Pathogen[ POC214] interacts with 1 human partners:{O14641}

3557 Pathogen[ P03346] interacts with 1 human partners:{O14641}

3558 Pathogen[ Q85601] interacts with 1 human partners:{O14641}

3559 Pathogen[ P14079] interacts with 1 human partners:{O14641}

3560 Pathogen[ P03383] interacts with 1 human partners:{O14641}

3561 Pathogen[ P03410] interacts with 1 human partners:{O14641}

3562 Pathogen[ P14075] interacts with 1 human partners:{O14641}

3563 Pathogen[ P03363] interacts with 1 human partners:{O14641}

3564 [Cluster 591]GO:0060977+P biological\_process [name] coronary vasculature morphogenesis [def] "The process in which the anatomical structures of blood vessels of the heart are generated and organized. The blood vessel is the vasculature carrying blood." [GOC

3565 Pathogen[ P03346] interacts with 1 human partners:{Q9BYW2}

3566 [Cluster 592]GO:0015700+P biological\_process [name] arsenite transport [def] "The directed movement of arsenite into, out of or within a cell, or between cells, by means

of some agent such as a transporter or pore." [GOC  
3567 Pathogen[ POC214] interacts with 1 human partners:{043681}  
3568 Pathogen[ Q85601] interacts with 1 human partners:{043681}  
3569 Pathogen[ P14079] interacts with 1 human partners:{043681}  
3570 Pathogen[ P03410] interacts with 1 human partners:{043681}  
3571 Pathogen[ POC206] interacts with 1 human partners:{043681}  
3572 [Cluster 593]GO:0042158+P biological\_process [name] lipoprotein biosynthetic process  
[def] "The chemical reactions and pathways resulting in the formation of any conjugated,  
water-soluble protein in which the nonprotein group consists of a lipid or lipids."  
[ISBN  
3573 Pathogen[ P14079] interacts with 1 human partners:{P41238}  
3574 Pathogen[ P03410] interacts with 1 human partners:{P41238}  
3575 Pathogen[ POC206] interacts with 1 human partners:{P41238}  
3576 [Cluster 594]GO:2000392+P biological\_process [name] regulation of lamellipodium  
morphogenesis [def] "Any process that modulates the frequency, rate or extent of  
lamellipodium morphogenesis." [GOC  
3577 Pathogen[ P14079] interacts with 1 human partners:{P09327}  
3578 [Cluster 595]GO:0060535+P biological\_process [name] trachea cartilage morphogenesis  
[def] "The process in which the anatomical structures of cartilage in the trachea are  
generated and organized." [GOC  
3579 Pathogen[ Q2Q067] interacts with 1 human partners:{P20719}  
3580 Pathogen[ P03346] interacts with 1 human partners:{P20719}  
3581 Pathogen[ POC206] interacts with 1 human partners:{P20719}  
3582 Pathogen[ P03363] interacts with 1 human partners:{P20719}  
3583 [Cluster 596]GO:0019358+P biological\_process [name] nicotinate nucleotide salvage  
[def] "The generation of nicotinate nucleotide without de novo synthesis." [GOC  
3584 Pathogen[ Q2Q067] interacts with 1 human partners:{Q6XQN6}  
3585 Pathogen[ POC214] interacts with 1 human partners:{Q6XQN6}  
3586 Pathogen[ P03346] interacts with 1 human partners:{Q6XQN6}  
3587 Pathogen[ Q85601] interacts with 1 human partners:{Q6XQN6}  
3588 Pathogen[ P14079] interacts with 1 human partners:{Q6XQN6}  
3589 Pathogen[ P03410] interacts with 1 human partners:{Q6XQN6}  
3590 Pathogen[ P14075] interacts with 1 human partners:{Q6XQN6}  
3591 Pathogen[ POC206] interacts with 1 human partners:{Q6XQN6}  
3592 Pathogen[ P03363] interacts with 1 human partners:{Q6XQN6}  
3593 [Cluster 597]GO:0010609+P biological\_process [name] posttranscriptional regulation of  
gene expression by mRNA localization [def] "Any process that modulates the frequency,  
rate or extent of gene expression after the production of a mRNA transcript by its  
transport into, or maintainance in, a specific location within the cell." [GOC  
3594 Pathogen[ P03346] interacts with 1 human partners:{Q86XN8}  
3595 Pathogen[ POC206] interacts with 1 human partners:{Q86XN8}  
3596 [Cluster 598]GO:0072133+P biological\_process [name] metanephric mesenchyme  
morphogenesis [def] "The process in which the anatomical structures of a metanephric  
mesenchymal tissue are generated and organized. Metanephric mesenchyme is the tissue  
made up of loosely connected mesenchymal cells in the metanephros." [GOC  
3597 Pathogen[ Q2Q067] interacts with 1 human partners:{Q13485}  
3598 Pathogen[ POC214] interacts with 1 human partners:{Q13485}  
3599 Pathogen[ P03346] interacts with 1 human partners:{Q13485}  
3600 Pathogen[ Q85601] interacts with 1 human partners:{Q13485}  
3601 Pathogen[ P03383] interacts with 1 human partners:{Q13485}  
3602 Pathogen[ P03410] interacts with 1 human partners:{Q13485}  
3603 Pathogen[ P14075] interacts with 1 human partners:{Q13485}  
3604 Pathogen[ POC206] interacts with 1 human partners:{Q13485}  
3605 Pathogen[ P03363] interacts with 1 human partners:{Q13485}  
3606 [Cluster 599]GO:0032796+P biological\_process [name] uropod organization [def] "A  
process that is carried out at the cellular level which results in the assembly,  
arrangement of constituent parts, or disassembly of a uropod, a rigid membrane  
projection with related cytoskeletal components at the trailing edge of a lymphocyte or  
other cell in the process of migrating or being activated." [GOC  
3607 Pathogen[ Q2Q067] interacts with 1 human partners:{P35579}  
3608 Pathogen[ P03346] interacts with 1 human partners:{P35579}  
3609 Pathogen[ Q85601] interacts with 1 human partners:{P35579}  
3610 Pathogen[ P14079] interacts with 1 human partners:{P35579}  
3611 Pathogen[ P03383] interacts with 1 human partners:{P35579}  
3612 Pathogen[ P03410] interacts with 1 human partners:{P35579}  
3613 Pathogen[ P14075] interacts with 1 human partners:{P35579}  
3614 Pathogen[ POC206] interacts with 1 human partners:{P35579}  
3615 Pathogen[ P03363] interacts with 1 human partners:{P35579}  
3616 [Cluster 600]GO:0045408+P biological\_process [name] regulation of interleukin-6  
biosynthetic process [def] "Any process that modulates the frequency, rate or extent  
of the chemical reactions and pathways resulting in the formation of interleukin-6."  
[GOC  
3617 Pathogen[ Q2Q067] interacts with 1 human partners:{P17676}  
3618 Pathogen[ POC214] interacts with 1 human partners:{P17676}  
3619 Pathogen[ P03346] interacts with 1 human partners:{P17676}  
3620 Pathogen[ Q85601] interacts with 1 human partners:{P17676}

3621 Pathogen[ P03383] interacts with 1 human partners:{P17676}

3622 Pathogen[ P03410] interacts with 1 human partners:{P17676}

3623 Pathogen[ P14075] interacts with 1 human partners:{P17676}

3624 Pathogen[ P0C206] interacts with 1 human partners:{P17676}

3625 Pathogen[ P03363] interacts with 1 human partners:{P17676}

3626 [Cluster 601]GO:0007176+P biological\_process [name] regulation of epidermal growth factor-activated receptor activity [def] "Any process that modulates the frequency, rate or extent of EGF-activated receptor activity." [GOC

3627 Pathogen[ Q2Q067] interacts with 1 human partners:{043639}

3628 Pathogen[ P0C214] interacts with 1 human partners:{043639}

3629 Pathogen[ P03346] interacts with 1 human partners:{043639}

3630 Pathogen[ Q85601] interacts with 1 human partners:{043639}

3631 Pathogen[ P14079] interacts with 1 human partners:{043639}

3632 Pathogen[ P03410] interacts with 1 human partners:{043639}

3633 Pathogen[ P0C206] interacts with 1 human partners:{043639}

3634 Pathogen[ P03363] interacts with 1 human partners:{043639}

3635 [Cluster 602]GO:0006536+P biological\_process [name] glutamate metabolic process [def] "The chemical reactions and pathways involving glutamate, the anion of 2-aminopentanedioic acid." [GOC

3636 Pathogen[ P0C214] interacts with 1 human partners:{Q8N159}

3637 Pathogen[ P14079] interacts with 1 human partners:{Q8N159}

3638 Pathogen[ P03383] interacts with 1 human partners:{Q8N159}

3639 Pathogen[ P03410] interacts with 1 human partners:{Q8N159}

3640 Pathogen[ P14075] interacts with 1 human partners:{Q8N159}

3641 Pathogen[ P0C206] interacts with 1 human partners:{Q8N159}

3642 [Cluster 603]GO:0072277+P biological\_process [name] metanephric glomerular capillary formation [def] "The process that gives rise to a metanephric glomerular capillary. This process pertains to the initial formation of a structure from unspecified parts." [GOC

3643 Pathogen[ P03346] interacts with 1 human partners:{043680}

3644 [Cluster 604]GO:0001759+P biological\_process [name] organ induction [def] "The interaction of two or more cells or tissues that causes them to change their fates and specify the development of an organ." [ISBN

3645 Pathogen[ Q2Q067] interacts with 1 human partners:{043248}

3646 Pathogen[ P0C214] interacts with 1 human partners:{043248}

3647 Pathogen[ P03346] interacts with 3 human partners:{P31270;Q15475;043248}

3648 Pathogen[ Q85601] interacts with 1 human partners:{043248}

3649 Pathogen[ P14079] interacts with 1 human partners:{Q8WU20}

3650 Pathogen[ P03410] interacts with 1 human partners:{Q8WU20}

3651 Pathogen[ P0C206] interacts with 2 human partners:{043248;Q8WU20}

3652 Pathogen[ P03363] interacts with 1 human partners:{043248}

3653 [Cluster 605]GO:0035984+P biological\_process [name] cellular response to trichostatin A [def] "Any process that results in a change in state or activity of a cell (in terms of movement, secretion, enzyme production, gene expression, etc.) as a result of a trichostatin A stimulus." [CHEBI

3654 Pathogen[ P14079] interacts with 1 human partners:{Q06413}

3655 [Cluster 606]GO:0001960+P biological\_process [name] negative regulation of cytokine-mediated signaling pathway [def] "Any process that stops, prevents, or reduces the frequency, rate or extent of the cytokine mediated signaling pathway." [GOC

3656 Pathogen[ Q2Q067] interacts with 1 human partners:{A6NDB9}

3657 Pathogen[ P03346] interacts with 1 human partners:{A6NDB9}

3658 Pathogen[ P14079] interacts with 1 human partners:{A6NDB9}

3659 Pathogen[ P03383] interacts with 1 human partners:{A6NDB9}

3660 Pathogen[ P03410] interacts with 1 human partners:{A6NDB9}

3661 Pathogen[ P14075] interacts with 1 human partners:{A6NDB9}

3662 Pathogen[ P0C206] interacts with 1 human partners:{A6NDB9}

3663 Pathogen[ P03363] interacts with 1 human partners:{A6NDB9}

3664 [Cluster 607]GO:0009157+P biological\_process [name] deoxyribonucleoside monophosphate biosynthetic process [def] "The chemical reactions and pathways resulting in the formation of a deoxyribonucleoside monophosphate, a compound consisting of a nucleobase linked to a deoxyribose sugar esterified with phosphate on the sugar." [GOC

3665 Pathogen[ Q2Q067] interacts with 1 human partners:{P04818}

3666 Pathogen[ P0C214] interacts with 1 human partners:{P04818}

3667 Pathogen[ P14079] interacts with 1 human partners:{P04818}

3668 Pathogen[ P03410] interacts with 1 human partners:{P04818}

3669 Pathogen[ P0C206] interacts with 1 human partners:{P04818}

3670 [Cluster 608]GO:0010954+P biological\_process [name] positive regulation of protein processing [def] "Any process that increases the rate, frequency or extent of protein maturation by peptide bond cleavage." [GOC

3671 Pathogen[ P03346] interacts with 1 human partners:{Q969F2}

3672 Pathogen[ P03410] interacts with 1 human partners:{Q969F2}

3673 Pathogen[ P0C206] interacts with 1 human partners:{Q969F2}

3674 [Cluster 609]GO:0002446+P biological\_process [name] neutrophil mediated immunity [def] "Any process involved in the carrying out of an immune response by a neutrophil." [GO\_REF

3675 Pathogen[ Q2Q067] interacts with 1 human partners:{Q8IZD2}

3676 Pathogen[ P0C214] interacts with 2 human partners:{Q99698;Q8IZD2}

3677 Pathogen[ P03346] interacts with 2 human partners:{Q99698;Q8IZD2}

3678 Pathogen[ Q85601] interacts with 2 human partners:{Q8IZD2;Q99698}

3679 Pathogen[ P14079] interacts with 1 human partners:{Q99698}

3680 Pathogen[ P03410] interacts with 1 human partners:{Q99698}

3681 Pathogen[ P0C206] interacts with 2 human partners:{Q99698;Q8IZD2}

3682 Pathogen[ P03363] interacts with 1 human partners:{Q99698}

3683 [Cluster 610]GO:0046649+P biological\_process [name] lymphocyte activation [def] "A change in morphology and behavior of a lymphocyte resulting from exposure to a specific antigen, mitogen, cytokine, chemokine, cellular ligand, or soluble factor." [GOC

3684 Pathogen[ P03346] interacts with 1 human partners:{Q8IWW1}

3685 Pathogen[ P14079] interacts with 1 human partners:{Q8IWW1}

3686 Pathogen[ P03410] interacts with 1 human partners:{Q8IWW1}

3687 Pathogen[ P14075] interacts with 1 human partners:{Q8IWW1}

3688 Pathogen[ P0C206] interacts with 1 human partners:{Q8IWW1}

3689 [Cluster 611]GO:0050805+P biological\_process [name] negative regulation of synaptic transmission [def] "Any process that stops, prevents, or reduces the frequency, rate or extent of synaptic transmission, the process of communication from a neuron to a target (neuron, muscle, or secretory cell) across a synapse." [GOC

3690 Pathogen[ Q2Q067] interacts with 1 human partners:{Q9H2P0}

3691 Pathogen[ P0C214] interacts with 1 human partners:{Q9H2P0}

3692 Pathogen[ P03346] interacts with 1 human partners:{Q9H2P0}

3693 Pathogen[ Q85601] interacts with 1 human partners:{Q9H2P0}

3694 Pathogen[ P14079] interacts with 1 human partners:{Q9H2P0}

3695 Pathogen[ P0C206] interacts with 1 human partners:{Q9H2P0}

3696 Pathogen[ P03363] interacts with 1 human partners:{Q9H2P0}

3697 [Cluster 612]GO:0060761+P biological\_process [name] negative regulation of response to cytokine stimulus [def] "Any process that decreases the rate, frequency, or extent of a response to cytokine stimulus." [GOC

3698 Pathogen[ P14079] interacts with 1 human partners:{Q13164}

3699 [Cluster 613]GO:0032972+P biological\_process [name] regulation of muscle filament sliding speed [def] "Any process that modulates the velocity of muscle filament sliding." [GOC

3700 Pathogen[ P03346] interacts with 1 human partners:{P63316}

3701 Pathogen[ P03410] interacts with 1 human partners:{P63316}

3702 [Cluster 614]GO:0006231+P biological\_process [name] dTMP biosynthetic process [def] "The chemical reactions and pathways resulting in the formation of dTMP, deoxyribosylthymine monophosphate (2'-deoxyribosylthymine 5'-phosphate)." [ISBN

3703 Pathogen[ Q2Q067] interacts with 1 human partners:{P04818}

3704 Pathogen[ P0C214] interacts with 1 human partners:{P04818}

3705 Pathogen[ P14079] interacts with 1 human partners:{P04818}

3706 Pathogen[ P03410] interacts with 1 human partners:{P04818}

3707 Pathogen[ P0C206] interacts with 1 human partners:{P04818}

3708 [Cluster 615]GO:1900026+P

3709 Pathogen[ P14079] interacts with 1 human partners:{Q9H2D6}

3710 Pathogen[ P03410] interacts with 1 human partners:{Q9H2D6}

3711 Pathogen[ P03363] interacts with 1 human partners:{Q9H2D6}

3712 [Cluster 616]GO:0097053+P biological\_process [name] L-kynurenine catabolic process [def] "The chemical reactions and pathways resulting in the breakdown of L-kynurenine, the L-enantiomer of the amino acid kynurenine (3-(2-aminobenzoyl)-alanine)." [CHEBI

3713 Pathogen[ Q2Q067] interacts with 1 human partners:{Q16719}

3714 Pathogen[ P0C214] interacts with 2 human partners:{Q16719;Q16773}

3715 Pathogen[ P03346] interacts with 1 human partners:{Q16719}

3716 Pathogen[ Q85601] interacts with 1 human partners:{Q16719}

3717 Pathogen[ P14079] interacts with 1 human partners:{Q16719}

3718 Pathogen[ P03383] interacts with 1 human partners:{Q16719}

3719 Pathogen[ P03410] interacts with 1 human partners:{Q16719}

3720 Pathogen[ P14075] interacts with 1 human partners:{Q16719}

3721 Pathogen[ P0C206] interacts with 1 human partners:{Q16719}

3722 [Cluster 617]GO:0001973+P biological\_process [name] adenosine receptor signaling pathway [def] "The series of molecular signals generated as a consequence of a receptor binding to extracellular adenosine and transmitting the signal to a heterotrimeric G-protein complex to initiate a change in cell activity." [GOC

3723 Pathogen[ Q2Q067] interacts with 1 human partners:{P78352}

3724 Pathogen[ P0C214] interacts with 1 human partners:{P78352}

3725 Pathogen[ P03346] interacts with 1 human partners:{P78352}

3726 Pathogen[ Q85601] interacts with 1 human partners:{P78352}

3727 Pathogen[ P03383] interacts with 1 human partners:{P78352}

3728 Pathogen[ P03410] interacts with 1 human partners:{P78352}

3729 Pathogen[ P14075] interacts with 1 human partners:{P78352}

3730 Pathogen[ P0C206] interacts with 1 human partners:{P78352}

3731 Pathogen[ P03363] interacts with 1 human partners:{P78352}

3732 [Cluster 618]GO:0032909+P biological\_process [name] regulation of transforming growth factor beta2 production [def] "Any process that modulates the frequency, rate, or extent of production of transforming growth factor-beta2." [GOC

3733 Pathogen[ Q2Q067] interacts with 2 human partners:{Q13485;P84022}

3734 Pathogen[ P0C214] interacts with 2 human partners:{P84022;Q13485}

3735 Pathogen[ P03346] interacts with 2 human partners:{P84022;Q13485}

3736 Pathogen[ Q85601] interacts with 2 human partners:{P84022;Q13485}

3737 Pathogen[ P03383] interacts with 2 human partners:{Q13485;P84022}

3738 Pathogen[ P03410] interacts with 2 human partners:{P84022;Q13485}

3739 Pathogen[ P14075] interacts with 2 human partners:{Q13485;P84022}

3740 Pathogen[ P0C206] interacts with 2 human partners:{P84022;Q13485}

3741 Pathogen[ P03363] interacts with 2 human partners:{P84022;Q13485}

3742 [Cluster 619]GO:0050982+P biological\_process [name] detection of mechanical stimulus  
[def] "The series of events by which a mechanical stimulus is received by a cell and converted into a molecular signal." [GOC

3743 Pathogen[ P14079] interacts with 1 human partners:{O15273}

3744 Pathogen[ P03410] interacts with 1 human partners:{O15273}

3745 [Cluster 620]GO:0046604+P biological\_process [name] positive regulation of mitotic centrosome separation [def] "Any process that activates or increases the frequency, rate or extent of centrosome separation." [GOC

3746 Pathogen[ Q2Q067] interacts with 1 human partners:{P43487}

3747 Pathogen[ P0C214] interacts with 1 human partners:{P43487}

3748 Pathogen[ P03346] interacts with 1 human partners:{P43487}

3749 Pathogen[ Q85601] interacts with 1 human partners:{P43487}

3750 Pathogen[ P03383] interacts with 1 human partners:{P43487}

3751 Pathogen[ P03410] interacts with 1 human partners:{P43487}

3752 Pathogen[ P14075] interacts with 1 human partners:{P43487}

3753 Pathogen[ P0C206] interacts with 1 human partners:{P43487}

3754 Pathogen[ P03363] interacts with 1 human partners:{P43487}

3755 [Cluster 621]GO:0045198+P biological\_process [name] establishment of epithelial cell apical/basal polarity [def] "The specification and formation of the apicobasal polarity of an epithelial cell." [GOC

3756 Pathogen[ P14079] interacts with 1 human partners:{Q8N205}

3757 Pathogen[ P03410] interacts with 1 human partners:{Q8N205}

3758 Pathogen[ P0C206] interacts with 1 human partners:{Q8N205}

3759 [Cluster 622]GO:0002860+P biological\_process [name] positive regulation of natural killer cell mediated cytotoxicity directed against tumor cell target [def] "Any process that activates or increases the frequency, rate, or extent of natural killer cell mediated cytotoxicity directed against tumor cell target." [GOC

3760 Pathogen[ P14079] interacts with 1 human partners:{P29459}

3761 Pathogen[ P03410] interacts with 1 human partners:{P29459}

3762 [Cluster 623]GO:0048007+P biological\_process [name] antigen processing and presentation, exogenous lipid antigen via MHC class Ib [def] "The process in which an antigen-presenting cell expresses lipid antigen of exogenous origin in association with an MHC class Ib protein complex on its cell surface. Class Ib here refers to non-classical class I molecules, such as those of the CD1 family." [GOC

3763 Pathogen[ P03346] interacts with 1 human partners:{O14617}

3764 Pathogen[ P14079] interacts with 1 human partners:{O14617}

3765 Pathogen[ P03410] interacts with 2 human partners:{O00203;O14617}

3766 Pathogen[ P0C206] interacts with 1 human partners:{O14617}

3767 [Cluster 624]GO:0033275+P biological\_process [name] actin-myosin filament sliding [def] "The sliding movement of actin thin filaments and myosin thick filaments past each other." [GOC

3768 Pathogen[ P14079] interacts with 1 human partners:{P68032}

3769 [Cluster 625]GO:0001507+P biological\_process [name] acetylcholine catabolic process in synaptic cleft [def] "The chemical reactions and pathways resulting in the breakdown of acetylcholine that occurs in the synaptic cleft during synaptic transmission." [GOC

3770 Pathogen[ P03346] interacts with 1 human partners:{Q9Y215}

3771 Pathogen[ P03410] interacts with 1 human partners:{Q9Y215}

3772 Pathogen[ P03363] interacts with 1 human partners:{Q9Y215}

3773 [Cluster 626]GO:0043313+P biological\_process [name] regulation of neutrophil degranulation [def] "Any process that modulates the frequency, rate, or extent of neutrophil degranulation." [ISBN

3774 Pathogen[ P03346] interacts with 1 human partners:{Q96QH2}

3775 Pathogen[ P14079] interacts with 1 human partners:{Q96QH2}

3776 Pathogen[ P03410] interacts with 1 human partners:{Q96QH2}

3777 Pathogen[ P0C206] interacts with 1 human partners:{Q96QH2}

3778 Pathogen[ P03363] interacts with 1 human partners:{Q96QH2}

3779 [Cluster 627]GO:0010447+P biological\_process [name] response to acidity [def] "Any process that results in a change in state or activity of a cell or an organism (in terms of movement, secretion, enzyme production, gene expression, etc.) as a result of a pH stimulus with pH < 7." [GOC

3780 Pathogen[ Q2Q067] interacts with 1 human partners:{Q15833}

3781 Pathogen[ P0C214] interacts with 1 human partners:{Q15833}

3782 Pathogen[ P03346] interacts with 1 human partners:{Q15833}

3783 Pathogen[ Q85601] interacts with 1 human partners:{Q15833}

3784 Pathogen[ P14079] interacts with 1 human partners:{Q15833}

3785 Pathogen[ P03410] interacts with 1 human partners:{Q15833}

3786 Pathogen[ P0C206] interacts with 1 human partners:{Q15833}

3787 Pathogen[ P03363] interacts with 1 human partners:{Q15833}

3788 [Cluster 628]GO:0042157+P biological\_process [name] lipoprotein metabolic process  
[def] "The chemical reactions and pathways involving any conjugated, water-soluble protein in which the nonprotein group consists of a lipid or lipids." [ISBN

3789 Pathogen[ P14079] interacts with 1 human partners:{P41238}

3790 Pathogen[ P03410] interacts with 2 human partners:{P41238;P55157}

3791 Pathogen[ P0C206] interacts with 1 human partners:{P41238}

3792 [Cluster 629]GO:0030323+P biological\_process [name] respiratory tube development  
[def] "The process whose specific outcome is the progression of the respiratory tube over time, from its formation to the mature structure. The respiratory tube is assumed to mean any tube in the respiratory tract." [GOC

3793 Pathogen[ P03346] interacts with 3 human partners:{O15522;Q9UBI9;Q9BUZ4}

3794 Pathogen[ P14079] interacts with 2 human partners:{Q9BUZ4;Q9UBI9}

3795 Pathogen[ P03383] interacts with 1 human partners:{Q9UBI9}

3796 Pathogen[ P03410] interacts with 1 human partners:{Q9UBI9}

3797 Pathogen[ P14075] interacts with 1 human partners:{Q9UBI9}

3798 Pathogen[ P0C206] interacts with 2 human partners:{Q9BUZ4;Q9UBI9}

3799 Pathogen[ P03363] interacts with 3 human partners:{Q9UBI9;Q9BUZ4;O15522}

3800 [Cluster 630]GO:0032914+P biological\_process [name] positive regulation of transforming growth factor beta1 production [def] "Any process that activates or increases the frequency, rate, or extent of production of transforming growth factor-beta1." [GOC

3801 Pathogen[ P14079] interacts with 1 human partners:{O75787}

3802 Pathogen[ P03410] interacts with 1 human partners:{O75787}

3803 Pathogen[ P0C206] interacts with 1 human partners:{O75787}

3804 [Cluster 631]GO:0003062+P biological\_process [name] regulation of heart rate by chemical signal [def] "The regulation of the rate of heart contraction mediated by chemical signaling, hormonal, autocrine or paracrine." [GOC

3805 Pathogen[ Q2Q067] interacts with 1 human partners:{P36956}

3806 Pathogen[ P03346] interacts with 1 human partners:{P36956}

3807 Pathogen[ Q85601] interacts with 1 human partners:{P36956}

3808 Pathogen[ P14079] interacts with 1 human partners:{P36956}

3809 Pathogen[ P03410] interacts with 1 human partners:{P36956}

3810 Pathogen[ P0C206] interacts with 1 human partners:{P36956}

3811 [Cluster 632]GO:0043137+P biological\_process [name] DNA replication, removal of RNA primer [def] "Removal of the Okazaki RNA primer from the lagging strand of replicating DNA, by a combination of the actions of DNA polymerase, DNA helicase and an endonuclease." [GOC

3812 Pathogen[ Q2Q067] interacts with 1 human partners:{P39748}

3813 Pathogen[ P0C214] interacts with 1 human partners:{P39748}

3814 Pathogen[ P03346] interacts with 1 human partners:{P39748}

3815 Pathogen[ Q85601] interacts with 1 human partners:{P39748}

3816 Pathogen[ P14079] interacts with 2 human partners:{Q5QGS0;P39748}

3817 Pathogen[ P03410] interacts with 2 human partners:{Q5QGS0;P39748}

3818 Pathogen[ P0C206] interacts with 1 human partners:{P39748}

3819 [Cluster 633]GO:0002369+P biological\_process [name] T cell cytokine production  
[def] "Any process that contributes to cytokine production by a T cell." [GOC

3820 Pathogen[ Q2Q067] interacts with 1 human partners:{Q12959}

3821 Pathogen[ P0C214] interacts with 1 human partners:{Q12959}

3822 Pathogen[ P03346] interacts with 1 human partners:{Q12959}

3823 Pathogen[ Q85601] interacts with 1 human partners:{Q12959}

3824 Pathogen[ P03410] interacts with 1 human partners:{Q12959}

3825 Pathogen[ P0C206] interacts with 1 human partners:{Q12959}

3826 Pathogen[ P03363] interacts with 1 human partners:{Q12959}

3827 [Cluster 634]GO:0042908+P biological\_process [name] xenobiotic transport [def] "The directed movement of a xenobiotic, a compound foreign to living organisms, into, out of or within a cell, or between cells, by means of some agent such as a transporter or pore." [GOC

3828 Pathogen[ Q2Q067] interacts with 1 human partners:{P11166}

3829 Pathogen[ P0C214] interacts with 1 human partners:{P11166}

3830 Pathogen[ P03346] interacts with 2 human partners:{P11166;O75469}

3831 Pathogen[ Q85601] interacts with 1 human partners:{P11166}

3832 Pathogen[ P14079] interacts with 2 human partners:{P11166;O75469}

3833 Pathogen[ P03410] interacts with 1 human partners:{P11166}

3834 Pathogen[ P0C206] interacts with 2 human partners:{O75469;P11166}

3835 Pathogen[ P03363] interacts with 1 human partners:{P11166}

3836 [Cluster 635]GO:0007200+P biological\_process [name] activation of phospholipase C activity by G-protein coupled receptor protein signaling pathway coupled to IP3 second messenger [def] "The series of molecular signals generated as a consequence of a G-protein coupled receptor binding to its physiological ligand, followed by the activation of phospholipase C and the subsequent release of inositol trisphosphate." [GOC

3837 Pathogen[ Q2Q067] interacts with 1 human partners:{P21980}

3838 Pathogen[ P0C214] interacts with 1 human partners:{P21980}

3839 Pathogen[ P03346] interacts with 1 human partners:{P21980}

3840 Pathogen[ Q85601] interacts with 1 human partners:{P21980}

3841 Pathogen[ P14079] interacts with 2 human partners:{P21980;O43612}

3842 Pathogen[ P03383] interacts with 1 human partners:{P21980}

3843 Pathogen[ P03410] interacts with 2 human partners:{O43612;P21980}

3844 Pathogen[ P14075] interacts with 1 human partners:{P21980}

3845 Pathogen[ POC206] interacts with 1 human partners:{P21980}

3846 [Cluster 636]GO:0042119+P biological\_process [name] neutrophil activation [def] "The change in morphology and behavior of a neutrophil resulting from exposure to a cytokine, chemokine, cellular ligand, or soluble factor." [GOC

3847 Pathogen[ Q2Q067] interacts with 1 human partners:{Q8IZD2}

3848 Pathogen[ POC214] interacts with 1 human partners:{Q8IZD2}

3849 Pathogen[ P03346] interacts with 1 human partners:{Q8IZD2}

3850 Pathogen[ Q85601] interacts with 1 human partners:{Q8IZD2}

3851 Pathogen[ POC206] interacts with 1 human partners:{Q8IZD2}

3852 [Cluster 637]GO:0000050+P biological\_process [name] urea cycle [def] "The sequence of reactions by which arginine is synthesized from ornithine, then cleaved to yield urea and regenerate ornithine. The overall reaction equation is  $\text{NH}_3 + \text{CO}_2 + \text{aspartate} + 3 \text{ATP} + 2 \text{H}_2\text{O} = \text{urea} + \text{fumarate} + 2 \text{ADP} + 2 \text{phosphate} + \text{AMP} + \text{diphosphate}$ ." [GOC

3853 Pathogen[ Q2Q067] interacts with 1 human partners:{P49715}

3854 Pathogen[ POC214] interacts with 3 human partners:{P00480;P04424;Q8N159}

3855 Pathogen[ P03346] interacts with 1 human partners:{P49715}

3856 Pathogen[ Q85601] interacts with 2 human partners:{P00480;P49715}

3857 Pathogen[ P14079] interacts with 4 human partners:{Q8N159;P49715;P00480;P04424}

3858 Pathogen[ P03383] interacts with 1 human partners:{Q8N159}

3859 Pathogen[ P03410] interacts with 3 human partners:{Q8N159;P04424;P00480}

3860 Pathogen[ P14075] interacts with 1 human partners:{Q8N159}

3861 Pathogen[ POC206] interacts with 3 human partners:{P49715;Q8N159;P00480}

3862 [Cluster 638]GO:0043697+P biological\_process [name] cell dedifferentiation [def] "The process in which a specialized cell loses the structural or functional features that characterize it in the mature organism, or some other relatively stable phase of the organism's life history. Under certain conditions, these cells can revert back to the features of the stem cells that were their ancestors." [GOC

3863 Pathogen[ Q2Q067] interacts with 1 human partners:{Q00534}

3864 Pathogen[ POC214] interacts with 1 human partners:{Q00534}

3865 Pathogen[ P03346] interacts with 1 human partners:{Q00534}

3866 Pathogen[ Q85601] interacts with 1 human partners:{Q00534}

3867 Pathogen[ P03383] interacts with 1 human partners:{Q00534}

3868 Pathogen[ P03410] interacts with 1 human partners:{Q00534}

3869 Pathogen[ P14075] interacts with 1 human partners:{Q00534}

3870 Pathogen[ POC206] interacts with 1 human partners:{Q00534}

3871 Pathogen[ P03363] interacts with 1 human partners:{Q00534}

3872 [Cluster 639]GO:0051534+P biological\_process [name] negative regulation of NFAT protein import into nucleus [def] "Any process that stops, prevents, or reduces the frequency, rate or extent of the movement of an NFAT protein from the cytoplasm to the nucleus." [GOC

3873 Pathogen[ P14079] interacts with 1 human partners:{Q13164}

3874 [Cluster 640]GO:0007033+P biological\_process [name] vacuole organization [def] "A process that is carried out at the cellular level which results in the assembly, arrangement of constituent parts, or disassembly of a vacuole." [GOC

3875 Pathogen[ Q2Q067] interacts with 1 human partners:{Q92562}

3876 Pathogen[ POC214] interacts with 1 human partners:{Q92562}

3877 Pathogen[ P03346] interacts with 1 human partners:{Q92562}

3878 Pathogen[ Q85601] interacts with 1 human partners:{Q92562}

3879 Pathogen[ P14079] interacts with 1 human partners:{Q92562}

3880 Pathogen[ P03410] interacts with 1 human partners:{Q92562}

3881 Pathogen[ POC206] interacts with 1 human partners:{Q92562}

3882 [Cluster 641]GO:0051013+P biological\_process [name] microtubule severing [def] "The process in which a microtubule is broken down into smaller segments." [GOC

3883 Pathogen[ P03346] interacts with 2 human partners:{Q8N841;Q9UBP0}

3884 Pathogen[ Q85601] interacts with 2 human partners:{Q9UBP0;Q9BVA0}

3885 Pathogen[ P14079] interacts with 2 human partners:{Q8N841;Q9BVA0}

3886 Pathogen[ P03410] interacts with 2 human partners:{Q8N841;Q9BVA0}

3887 Pathogen[ POC206] interacts with 3 human partners:{Q9BVA0;Q9UBP0;Q8N841}

3888 Pathogen[ P03363] interacts with 1 human partners:{Q8N841}

3889 [Cluster 642]GO:0035459+P biological\_process [name] cargo loading into vesicle [def] "The formation of a protein complex between the coat proteins and proteins that are going to be transported by a vesicle." [GOC

3890 Pathogen[ Q2Q067] interacts with 1 human partners:{Q9H1H9}

3891 Pathogen[ P03346] interacts with 3 human partners:{Q9H1H9;P49755;Q15363}

3892 Pathogen[ Q85601] interacts with 1 human partners:{Q9H1H9}

3893 Pathogen[ P14079] interacts with 3 human partners:{Q15363;P49755;Q9H1H9}

3894 Pathogen[ P03383] interacts with 1 human partners:{Q9H1H9}

3895 Pathogen[ P03410] interacts with 2 human partners:{Q9H1H9;Q15363}

3896 Pathogen[ P14075] interacts with 1 human partners:{Q9H1H9}

3897 Pathogen[ POC206] interacts with 3 human partners:{P49755;Q9H1H9;Q15363}

3898 Pathogen[ P03363] interacts with 1 human partners:{Q9H1H9}

3899 [Cluster 643]GO:0002606+P biological\_process [name] positive regulation of dendritic



cell antigen processing and presentation [def] "Any process that activates or increases the frequency, rate, or extent of dendritic cell antigen processing and presentation." [GOC

3900 Pathogen[ P14079] interacts with 1 human partners:{Q9Y239}

3901 Pathogen[ P03410] interacts with 1 human partners:{Q9Y239}

3902 [Cluster 644]GO:0042982+P biological\_process [name] amyloid precursor protein metabolic process [def] "The chemical reactions and pathways involving amyloid precursor protein (APP), the precursor of beta-amyloid, a glycoprotein associated with Alzheimer's disease." [GOC

3903 Pathogen[ Q2Q067] interacts with 1 human partners:{Q12959}

3904 Pathogen[ P0C214] interacts with 1 human partners:{Q12959}

3905 Pathogen[ P03346] interacts with 1 human partners:{Q12959}

3906 Pathogen[ Q85601] interacts with 1 human partners:{Q12959}

3907 Pathogen[ P03410] interacts with 1 human partners:{Q12959}

3908 Pathogen[ P0C206] interacts with 1 human partners:{Q12959}

3909 Pathogen[ P03363] interacts with 1 human partners:{Q12959}

3910 [Cluster 645]GO:0051057+P biological\_process [name] positive regulation of small GTPase mediated signal transduction [def] "Any process that activates or increases the frequency, rate or extent of small GTPase mediated signal transduction." [GOC

3911 Pathogen[ Q2Q067] interacts with 1 human partners:{Q12982}

3912 Pathogen[ P0C214] interacts with 1 human partners:{Q12982}

3913 Pathogen[ P03346] interacts with 1 human partners:{Q12982}

3914 Pathogen[ Q85601] interacts with 1 human partners:{Q12982}

3915 Pathogen[ P14079] interacts with 1 human partners:{Q12982}

3916 Pathogen[ P03410] interacts with 1 human partners:{Q12982}

3917 Pathogen[ P0C206] interacts with 1 human partners:{Q12982}

3918 Pathogen[ P03363] interacts with 1 human partners:{Q12982}

3919 [Cluster 646]GO:0015853+P biological\_process [name] adenine transport [def] "The directed movement of adenine, 6-aminopurine, into, out of or within a cell, or between cells, by means of some agent such as a transporter or pore." [GOC

3920 Pathogen[ P03410] interacts with 1 human partners:{P05141}

3921 [Cluster 647]GO:0046952+P biological\_process [name] ketone body catabolic process [def] "The chemical reactions and pathways resulting in the breakdown of ketone bodies, any one of the three substances

3922 Pathogen[ P03410] interacts with 2 human partners:{Q9BYC2;P55809}

3923 [Cluster 648]GO:2000727+P biological\_process [name] positive regulation of cardiac muscle cell differentiation [def] "Any process that activates or increases the frequency, rate or extent of cardiac muscle cell differentiation." [GOC

3924 Pathogen[ P14079] interacts with 1 human partners:{Q06413}

3925 [Cluster 649]GO:0030210+P biological\_process [name] heparin biosynthetic process [def] "The chemical reactions and pathways resulting in the formation of heparin, any member of a group of glycosaminoglycans of average Mr (6000-20000), consisting predominantly of alternating alpha-(1->4)-linked D-galactose and N-acetyl-D-glucosamine-6-sulfate residues." [GOC

3926 Pathogen[ P14079] interacts with 1 human partners:{O94923}

3927 [Cluster 650]GO:0048846+P biological\_process [name] axon extension involved in axon guidance [def] "The long distance growth of a single cell process, that is involved in the migration of an axon growth cone, where the migration is directed to a specific target site by a combination of attractive and repulsive cues." [GOC

3928 Pathogen[ P03346] interacts with 1 human partners:{Q9UJU5}

3929 Pathogen[ P03363] interacts with 1 human partners:{Q9UJU5}

3930 [Cluster 651]GO:0014040+P biological\_process [name] positive regulation of Schwann cell differentiation [def] "Any process that activates or increases the frequency, rate or extent of Schwann cell differentiation." [GOC

3931 Pathogen[ Q2Q067] interacts with 1 human partners:{Q04206}

3932 Pathogen[ P0C214] interacts with 1 human partners:{Q04206}

3933 Pathogen[ P03346] interacts with 1 human partners:{Q04206}

3934 Pathogen[ Q85601] interacts with 1 human partners:{Q04206}

3935 Pathogen[ P03383] interacts with 1 human partners:{Q04206}

3936 Pathogen[ P03410] interacts with 1 human partners:{Q04206}

3937 Pathogen[ P14075] interacts with 1 human partners:{Q04206}

3938 Pathogen[ P0C206] interacts with 1 human partners:{Q04206}

3939 Pathogen[ P03363] interacts with 1 human partners:{Q04206}

3940 [Cluster 652]GO:0006750+P biological\_process [name] glutathione biosynthetic process [def] "The chemical reactions and pathways resulting in the formation of glutathione, the tripeptide glutamylcysteinylglycine, which acts as a coenzyme for some enzymes and as an antioxidant in the protection of sulfhydryl groups in enzymes and other proteins." [CHEBI

3941 Pathogen[ Q2Q067] interacts with 2 human partners:{Q16775;Q8N490}

3942 Pathogen[ P0C214] interacts with 4 human partners:{Q16775;Q6PII5;O75223;Q8N490}

3943 Pathogen[ P03346] interacts with 2 human partners:{Q8N490;Q16775}

3944 Pathogen[ Q85601] interacts with 3 human partners:{Q6PII5;Q16775;Q8N490}

3945 Pathogen[ P14079] interacts with 7 human partners:{O75223;O14841;Q16873;Q96KP4;Q8N490;P20292;Q16775}

3946 Pathogen[ P03383] interacts with 2 human partners:{Q16775;Q8N490}

3947 Pathogen[ P03410] interacts with 7 human

partners:{Q8N490;Q6PII5;O14841;Q16775;Q16873;O75223;P20292}  
 3948 Pathogen[ P14075] interacts with 2 human partners:{Q8N490;Q16775}  
 3949 Pathogen[ POC206] interacts with 4 human partners:{Q6PII5;Q16775;Q8N490;P20292}  
 3950 [Cluster 653]GO:0097350+P  
 3951 Pathogen[ P14079] interacts with 1 human partners:{P04083}  
 3952 [Cluster 654]GO:0045061+P biological\_process [name] thymic T cell selection [def]  
 "The process of T cell selection that occurs in the thymus." [ISBN  
 3953 Pathogen[ P14079] interacts with 1 human partners:{Q9BXL7}  
 3954 Pathogen[ P03410] interacts with 1 human partners:{Q9BXL7}  
 3955 [Cluster 655]GO:0006734+P biological\_process [name] NADH metabolic process [def]  
 "The chemical reactions and pathways involving reduced nicotinamide adenine dinucleotide  
 (NADH), a coenzyme present in most living cells and derived from the B vitamin nicotinic  
 acid." [GOC  
 3956 Pathogen[ Q2Q067] interacts with 1 human partners:{P40926}  
 3957 Pathogen[ POC214] interacts with 6 human  
 partners:{P40926;P50213;O43837;P36957;P51553;P21695}  
 3958 Pathogen[ P03346] interacts with 1 human partners:{P40926}  
 3959 Pathogen[ Q85601] interacts with 1 human partners:{P40926}  
 3960 Pathogen[ P14079] interacts with 1 human partners:{P21695}  
 3961 Pathogen[ P03383] interacts with 1 human partners:{P40926}  
 3962 Pathogen[ P03410] interacts with 2 human partners:{P40926;P21695}  
 3963 Pathogen[ P14075] interacts with 1 human partners:{P40926}  
 3964 Pathogen[ POC206] interacts with 2 human partners:{P50213;P40926}  
 3965 [Cluster 656]GO:0051935+P biological\_process [name] glutamate uptake involved in  
 synaptic transmission [def] "The uptake of L-glutamate by neurons or glial cells. This  
 process leads to inactivation and recycling of neurotransmitters." [ISBN  
 3966 Pathogen[ P03410] interacts with 1 human partners:{Q9UBY8}  
 3967 [Cluster 657]GO:0080134+P biological\_process [name] regulation of response to stress  
 [def] "Any process that modulates the frequency, rate or extent of a response to stress.  
 Response to stress is a change in state or activity of a cell or an organism (in terms  
 of movement, secretion, enzyme production, gene expression, etc.) as a result of a  
 disturbance in organismal or cellular homeostasis, usually, but not necessarily,  
 exogenous (e.g. temperature, humidity, ionizing radiation)." [GOC  
 3968 Pathogen[ P03346] interacts with 1 human partners:{Q9UHD1}  
 3969 Pathogen[ Q85601] interacts with 1 human partners:{Q9UHD1}  
 3970 Pathogen[ P14079] interacts with 1 human partners:{Q9UHD1}  
 3971 Pathogen[ P03410] interacts with 1 human partners:{Q9UHD1}  
 3972 Pathogen[ POC206] interacts with 1 human partners:{Q9UHD1}  
 3973 [Cluster 658]GO:0045329+P biological\_process [name] carnitine biosynthetic process  
 [def] "The chemical reactions and pathways resulting in the formation of carnitine  
 (hydroxy-trimethyl aminobutyric acid), a compound that participates in the transfer of  
 acyl groups across the inner mitochondrial membrane." [GOC  
 3974 Pathogen[ Q2Q067] interacts with 1 human partners:{P34896}  
 3975 Pathogen[ POC214] interacts with 2 human partners:{Q9NVH6;P34896}  
 3976 Pathogen[ Q85601] interacts with 1 human partners:{P34896}  
 3977 Pathogen[ P14079] interacts with 2 human partners:{Q9NVH6;P34896}  
 3978 Pathogen[ P03383] interacts with 1 human partners:{P34896}  
 3979 Pathogen[ P03410] interacts with 2 human partners:{Q9NVH6;P34896}  
 3980 Pathogen[ P14075] interacts with 2 human partners:{Q9NVH6;P34896}  
 3981 Pathogen[ POC206] interacts with 2 human partners:{Q9NVH6;P34896}  
 3982 [Cluster 659]GO:0044344+P biological\_process [name] cellular response to fibroblast  
 growth factor stimulus [def] "Any process that results in a change in state or activity  
 of a cell (in terms of movement, secretion, enzyme production, gene expression, etc.) as  
 a result of an fibroblast growth factor stimulus." [GOC  
 3983 Pathogen[ Q2Q067] interacts with 1 human partners:{P22736}  
 3984 Pathogen[ P03346] interacts with 1 human partners:{P22736}  
 3985 Pathogen[ Q85601] interacts with 1 human partners:{P22736}  
 3986 Pathogen[ P14079] interacts with 1 human partners:{P22736}  
 3987 Pathogen[ P03410] interacts with 1 human partners:{P22736}  
 3988 Pathogen[ POC206] interacts with 1 human partners:{P22736}  
 3989 [Cluster 660]GO:0002034+P biological\_process [name] regulation of blood vessel size  
 by renin-angiotensin [def] "The process in which the diameter of a blood vessel is  
 changed due to activity of the renin-angiotensin system." [GOC  
 3990 Pathogen[ Q2Q067] interacts with 1 human partners:{P08697}  
 3991 Pathogen[ POC214] interacts with 1 human partners:{P08697}  
 3992 Pathogen[ Q85601] interacts with 1 human partners:{P08697}  
 3993 Pathogen[ P03383] interacts with 1 human partners:{P08697}  
 3994 Pathogen[ P03410] interacts with 1 human partners:{P08697}  
 3995 Pathogen[ P14075] interacts with 1 human partners:{P08697}  
 3996 Pathogen[ POC206] interacts with 1 human partners:{P08697}  
 3997 [Cluster 661]GO:0042823+P biological\_process [name] pyridoxal phosphate biosynthetic  
 process [def] "The chemical reactions and pathways resulting in the formation of  
 pyridoxal phosphate, pyridoxal phosphorylated at the hydroxymethyl group of C-5, the  
 active form of vitamin B6." [GOC  
 3998 Pathogen[ P14079] interacts with 1 human partners:{Q9NVS9}  
 3999 Pathogen[ P03410] interacts with 1 human partners:{Q9NVS9}

4000 Pathogen[ P14075] interacts with 1 human partners:{Q9NVS9}

4001 [Cluster 662]GO:0009405+P biological\_process [name] pathogenesis [def] "The set of specific processes that generate the ability of an organism to cause disease in another." [GOC

4002 Pathogen[ Q2Q067] interacts with 1 human partners:{Q86X55}

4003 Pathogen[ P0C214] interacts with 1 human partners:{Q86X55}

4004 Pathogen[ P03346] interacts with 1 human partners:{Q86X55}

4005 Pathogen[ Q85601] interacts with 1 human partners:{Q86X55}

4006 Pathogen[ P03383] interacts with 1 human partners:{Q86X55}

4007 Pathogen[ P03410] interacts with 1 human partners:{Q86X55}

4008 Pathogen[ P14075] interacts with 1 human partners:{Q86X55}

4009 Pathogen[ P0C206] interacts with 1 human partners:{Q86X55}

4010 Pathogen[ P03363] interacts with 1 human partners:{Q86X55}

4011 [Cluster 663]GO:0072144+P biological\_process [name] glomerular mesangial cell development [def] "The process whose specific outcome is the progression of a glomerular mesangial cell in the kidney over time, from its formation to the mature structure." [GOC

4012 Pathogen[ P0C214] interacts with 1 human partners:{P62736}

4013 Pathogen[ P03346] interacts with 1 human partners:{P62736}

4014 Pathogen[ Q85601] interacts with 1 human partners:{P62736}

4015 Pathogen[ P03410] interacts with 1 human partners:{P62736}

4016 Pathogen[ P0C206] interacts with 1 human partners:{P62736}

4017 Pathogen[ P03363] interacts with 1 human partners:{P62736}

4018 [Cluster 664]GO:0050778+P biological\_process [name] positive regulation of immune response [def] "Any process that activates or increases the frequency, rate or extent of the immune response, the immunological reaction of an organism to an immunogenic stimulus." [GOC

4019 Pathogen[ P14079] interacts with 1 human partners:{Q8IU54}

4020 [Cluster 665]GO:0018393+P biological\_process [name] internal peptidyl-lysine acetylation [def] "The addition of an acetyl group to a non-terminal lysine residue in a protein." [GOC

4021 Pathogen[ Q2Q067] interacts with 1 human partners:{Q92831}

4022 Pathogen[ P0C214] interacts with 2 human partners:{P46379;Q92831}

4023 Pathogen[ P03346] interacts with 2 human partners:{Q92831;P46379}

4024 Pathogen[ Q85601] interacts with 2 human partners:{P46379;Q92831}

4025 Pathogen[ P03383] interacts with 1 human partners:{Q92831}

4026 Pathogen[ P03410] interacts with 1 human partners:{Q92831}

4027 Pathogen[ P14075] interacts with 1 human partners:{Q92831}

4028 Pathogen[ P0C206] interacts with 2 human partners:{Q92831;P46379}

4029 Pathogen[ P03363] interacts with 2 human partners:{P46379;Q92831}

4030 [Cluster 666]GO:0032410+P biological\_process [name] negative regulation of transporter activity [def] "Any process that stops or reduces the activity of a transporter." [GOC

4031 Pathogen[ P0C214] interacts with 2 human partners:{O00308;Q9NV92}

4032 Pathogen[ P03346] interacts with 2 human partners:{Q9NV92;O00308}

4033 Pathogen[ P14079] interacts with 1 human partners:{Q9NV92}

4034 Pathogen[ P03410] interacts with 1 human partners:{Q9NV92}

4035 Pathogen[ P14075] interacts with 1 human partners:{Q9NV92}

4036 Pathogen[ P0C206] interacts with 2 human partners:{O00308;Q9NV92}

4037 Pathogen[ P03363] interacts with 1 human partners:{O00308}

4038 [Cluster 667]GO:0021680+P biological\_process [name] cerebellar Purkinje cell layer development [def] "The process whose specific outcome is the progression of the cerebellar Purkinje cell layer over time, from its formation to the mature structure. The Purkinje cell layer lies just underneath the molecular layer of the cerebellar cortex. It contains the neuronal cell bodies of the Purkinje cells that are arranged side by side in a single layer. Candelabrum interneurons are vertically oriented between the Purkinje cells. Purkinje neurons are inhibitory and provide the output of the cerebellar cortex through axons that project into the white matter. Extensive dendritic trees from the Purkinje cells extend upward in a single plane into the molecular layer where they synapse with parallel fibers of granule cells." [GO\_REF

4039 Pathogen[ P0C214] interacts with 2 human partners:{P35580;P49588}

4040 Pathogen[ Q85601] interacts with 1 human partners:{P35580}

4041 Pathogen[ P14079] interacts with 3 human partners:{Q9UPW5;O14949;P49588}

4042 Pathogen[ P03383] interacts with 1 human partners:{P35580}

4043 Pathogen[ P03410] interacts with 4 human partners:{Q9UPW5;P49588;P35580;O14949}

4044 Pathogen[ P0C206] interacts with 2 human partners:{Q9UPW5;P35580}

4045 [Cluster 668]GO:0010921+P biological\_process [name] regulation of phosphatase activity [def] "Any process that modulates the rate or frequency of phosphatase activity. Phosphatases catalyze the hydrolysis of phosphoric monoesters, releasing inorganic phosphate." [GOC

4046 Pathogen[ P14079] interacts with 2 human partners:{Q7Z4L9;O96001}

4047 Pathogen[ P03410] interacts with 2 human partners:{Q7Z4L9;O96001}

4048 [Cluster 669]GO:0019318+P biological\_process [name] hexose metabolic process [def] "The chemical reactions and pathways involving a hexose, any monosaccharide with a chain of six carbon atoms in the molecule." [ISBN

4049 Pathogen[ Q2Q067] interacts with 1 human partners:{P19367}

4050 Pathogen[ P0C214] interacts with 1 human partners:{P19367}

4051 Pathogen[ P03346] interacts with 1 human partners:{P19367}

4052 Pathogen[ Q85601] interacts with 1 human partners:{P19367}

4053 Pathogen[ P14079] interacts with 1 human partners:{Q96C23}

4054 Pathogen[ P03383] interacts with 1 human partners:{P19367}

4055 Pathogen[ P03410] interacts with 1 human partners:{Q96C23}

4056 Pathogen[ P14075] interacts with 1 human partners:{P19367}

4057 Pathogen[ P0C206] interacts with 2 human partners:{P19367;Q96C23}

4058 [Cluster 670]GO:0010836+P biological\_process [name] negative regulation of protein ADP-ribosylation [def] "Any process that decreases the frequency, rate or extent of protein ADP-ribosylation. Protein ADP-ribosylation is the transfer, from NAD, of ADP-ribose to protein amino acids." [GOC

4059 Pathogen[ Q2Q067] interacts with 1 human partners:{Q9BSI4}

4060 Pathogen[ P0C214] interacts with 1 human partners:{Q9BSI4}

4061 Pathogen[ P03346] interacts with 1 human partners:{Q9BSI4}

4062 Pathogen[ P14079] interacts with 1 human partners:{Q9BSI4}

4063 Pathogen[ P03383] interacts with 1 human partners:{Q9BSI4}

4064 Pathogen[ P03410] interacts with 1 human partners:{Q9BSI4}

4065 Pathogen[ P14075] interacts with 1 human partners:{Q9BSI4}

4066 Pathogen[ P0C206] interacts with 1 human partners:{Q9BSI4}

4067 Pathogen[ P03363] interacts with 1 human partners:{Q9BSI4}

4068 [Cluster 671]GO:0045579+P biological\_process [name] positive regulation of B cell differentiation [def] "Any process that activates or increases the frequency, rate or extent of B cell differentiation." [GOC

4069 Pathogen[ P0C214] interacts with 2 human partners:{Q92934;Q5JVF3}

4070 Pathogen[ P03346] interacts with 1 human partners:{O75626}

4071 Pathogen[ Q85601] interacts with 1 human partners:{O75626}

4072 Pathogen[ P14079] interacts with 3 human partners:{O75626;Q92934;Q5JVF3}

4073 Pathogen[ P03410] interacts with 3 human partners:{Q92934;Q5JVF3;O75626}

4074 Pathogen[ P0C206] interacts with 3 human partners:{O75626;Q5JVF3;Q92934}

4075 Pathogen[ P03363] interacts with 1 human partners:{O75626}

4076 [Cluster 672]GO:0038092+P

4077 Pathogen[ Q2Q067] interacts with 2 human partners:{P84022;Q15796}

4078 Pathogen[ P0C214] interacts with 2 human partners:{P84022;Q15796}

4079 Pathogen[ P03346] interacts with 2 human partners:{Q15796;P84022}

4080 Pathogen[ Q85601] interacts with 2 human partners:{P84022;Q15796}

4081 Pathogen[ P03383] interacts with 2 human partners:{P84022;Q15796}

4082 Pathogen[ P03410] interacts with 2 human partners:{P84022;Q15796}

4083 Pathogen[ P14075] interacts with 2 human partners:{Q15796;P84022}

4084 Pathogen[ P0C206] interacts with 2 human partners:{P84022;Q15796}

4085 Pathogen[ P03363] interacts with 2 human partners:{Q15796;P84022}

4086 [Cluster 673]GO:0009166+P biological\_process [name] nucleotide catabolic process [def] "The chemical reactions and pathways resulting in the breakdown of nucleotides, any nucleoside that is esterified with (ortho)phosphate or an oligophosphate at any hydroxyl group on the glucose moiety\_ may be mono-, di- or triphosphate\_ this definition includes cyclic-nucleotides (nucleoside cyclic phosphates)." [GOC

4087 Pathogen[ P0C214] interacts with 2 human partners:{O95045;Q16831}

4088 Pathogen[ Q85601] interacts with 1 human partners:{O95045}

4089 Pathogen[ P14079] interacts with 2 human partners:{Q16831;O95045}

4090 Pathogen[ P03410] interacts with 2 human partners:{O95045;Q16831}

4091 Pathogen[ P14075] interacts with 1 human partners:{O95045}

4092 Pathogen[ P0C206] interacts with 2 human partners:{Q16831;O95045}

4093 [Cluster 674]GO:0030311+P biological\_process [name] poly-N-acetylactosamine biosynthetic process [def] "The chemical reactions and pathways resulting in the formation of poly-N-acetylactosamine, a carbohydrate composed of N-acetylactosamine repeats (Gal-beta-1,4-GlcNAc-beta-1,3)n." [GOC

4094 Pathogen[ P14079] interacts with 1 human partners:{O43505}

4095 Pathogen[ P03410] interacts with 1 human partners:{O43505}

4096 Pathogen[ P14075] interacts with 1 human partners:{O43505}

4097 Pathogen[ P0C206] interacts with 1 human partners:{O43505}

4098 [Cluster 675]GO:0008210+P biological\_process [name] estrogen metabolic process [def] "The chemical reactions and pathways involving estrogens, C18 steroid hormones that can stimulate the development of female sexual characteristics. Also found in plants." [ISBN

4099 Pathogen[ P03346] interacts with 1 human partners:{Q9HB21}

4100 Pathogen[ Q85601] interacts with 1 human partners:{Q9HB21}

4101 Pathogen[ P14079] interacts with 1 human partners:{Q9HB21}

4102 Pathogen[ P03410] interacts with 1 human partners:{Q9HB21}

4103 Pathogen[ P0C206] interacts with 1 human partners:{Q9HB21}

4104 [Cluster 676]GO:0030001+P biological\_process [name] metal ion transport [def] "The directed movement of metal ions, any metal ion with an electric charge, into, out of or within a cell, or between cells, by means of some agent such as a transporter or pore." [GOC

4105 Pathogen[ Q2Q067] interacts with 1 human partners:{O14618}

4106 Pathogen[ P0C214] interacts with 1 human partners:{O14618}

4107 Pathogen[ P03346] interacts with 1 human partners:{O14618}

4108 Pathogen[ Q85601] interacts with 1 human partners:{O14618}

4109 Pathogen[ P14079] interacts with 3 human partners:{O00244;O14618;Q9NVT9}

4110 Pathogen[ P03410] interacts with 2 human partners:{Q9NVT9;O14618}

4111 Pathogen[ POC206] interacts with 1 human partners:{O14618}

4112 Pathogen[ P03363] interacts with 1 human partners:{O14618}

4113 [Cluster 677]GO:0050806+P biological\_process [name] positive regulation of synaptic transmission [def] "Any process that activates or increases the frequency, rate or extent of synaptic transmission, the process of communication from a neuron to a target (neuron, muscle, or secretory cell) across a synapse." [GOC

4114 Pathogen[ Q2Q067] interacts with 1 human partners:{P78352}

4115 Pathogen[ POC214] interacts with 1 human partners:{P78352}

4116 Pathogen[ P03346] interacts with 1 human partners:{P78352}

4117 Pathogen[ Q85601] interacts with 1 human partners:{P78352}

4118 Pathogen[ P03383] interacts with 1 human partners:{P78352}

4119 Pathogen[ P03410] interacts with 1 human partners:{P78352}

4120 Pathogen[ P14075] interacts with 1 human partners:{P78352}

4121 Pathogen[ POC206] interacts with 1 human partners:{P78352}

4122 Pathogen[ P03363] interacts with 1 human partners:{P78352}

4123 [Cluster 678]GO:0005984+P biological\_process [name] disaccharide metabolic process [def] "The chemical reactions and pathways involving any disaccharide, sugars composed of two monosaccharide units." [GOC

4124 Pathogen[ P14079] interacts with 1 human partners:{P35475}

4125 [Cluster 679]GO:0006654+P biological\_process [name] phosphatidic acid biosynthetic process [def] "The chemical reactions and pathways resulting in the formation of phosphatidic acid, any derivative of glycerol phosphate in which both the remaining hydroxyl groups of the glycerol moiety are esterified with fatty acids." [ISBN

4126 Pathogen[ POC214] interacts with 2 human partners:{Q8N335;P21695}

4127 Pathogen[ P03346] interacts with 1 human partners:{Q9Y371}

4128 Pathogen[ P14079] interacts with 2 human partners:{Q9Y371;P21695}

4129 Pathogen[ P03410] interacts with 2 human partners:{Q9Y371;P21695}

4130 [Cluster 680]GO:0035990+P biological\_process [name] tendon cell differentiation [def] "The process in which a relatively unspecialized cell acquires the specialized features of a tendon cell. Tendon cell are elongated fibrocytes in which the cytoplasm is stretched between the collagen fibres of the tendon. Tendon cells have a central cell nucleus with a prominent nucleolus, a well-developed rough endoplasmic reticulum, and are responsible for synthesis and turnover of tendon fibres and ground substance." [CL

4131 Pathogen[ P03346] interacts with 1 human partners:{Q8IYA7}

4132 Pathogen[ P03363] interacts with 1 human partners:{Q8IYA7}

4133 [Cluster 681]GO:003233+P biological\_process [name] regulation of protein sumoylation [def] "Any process that modulates the frequency, rate or extent of the addition of SUMO groups to a protein." [GOC

4134 Pathogen[ Q2Q067] interacts with 1 human partners:{P18146}

4135 Pathogen[ POC214] interacts with 1 human partners:{P18146}

4136 Pathogen[ P03346] interacts with 1 human partners:{P18146}

4137 Pathogen[ Q85601] interacts with 1 human partners:{P18146}

4138 Pathogen[ P03383] interacts with 1 human partners:{P18146}

4139 Pathogen[ P03410] interacts with 1 human partners:{P18146}

4140 Pathogen[ P14075] interacts with 1 human partners:{P18146}

4141 Pathogen[ POC206] interacts with 1 human partners:{P18146}

4142 Pathogen[ P03363] interacts with 1 human partners:{P18146}

4143 [Cluster 682]GO:0031062+P biological\_process [name] positive regulation of histone methylation [def] "Any process that activates or increases the frequency, rate or extent of the covalent addition of methyl groups to histones." [GOC

4144 Pathogen[ Q2Q067] interacts with 1 human partners:{O00255}

4145 Pathogen[ POC214] interacts with 1 human partners:{O00255}

4146 Pathogen[ P03346] interacts with 1 human partners:{O00255}

4147 Pathogen[ Q85601] interacts with 1 human partners:{O00255}

4148 Pathogen[ P14079] interacts with 1 human partners:{O00255}

4149 Pathogen[ P03383] interacts with 1 human partners:{O00255}

4150 Pathogen[ P03410] interacts with 1 human partners:{O00255}

4151 Pathogen[ P14075] interacts with 1 human partners:{O00255}

4152 Pathogen[ POC206] interacts with 1 human partners:{O00255}

4153 [Cluster 683]GO:0042371+P biological\_process [name] vitamin K biosynthetic process [def] "The chemical reactions and pathways resulting in the formation of any of the forms of vitamin K, quinone-derived vitamins which are involved in the synthesis of blood-clotting factors in mammals." [GOC

4154 Pathogen[ P14079] interacts with 1 human partners:{Q9Y5Z9}

4155 Pathogen[ P03410] interacts with 1 human partners:{Q9Y5Z9}

4156 Pathogen[ POC206] interacts with 1 human partners:{Q9Y5Z9}

4157 [Cluster 684]GO:0043153+P biological\_process [name] entrainment of circadian clock by photoperiod [def] "The synchronization of a circadian rhythm to photoperiod, the intermittent cycle of light (day) and dark (night)." [GOC

4158 Pathogen[ Q2Q067] interacts with 1 human partners:{O14503}

4159 Pathogen[ POC214] interacts with 1 human partners:{O14503}

4160 Pathogen[ P03346] interacts with 3 human partners:{P10588;O14503;Q9BWF3}

4161 Pathogen[ Q85601] interacts with 1 human partners:{O14503}

4162 Pathogen[ P14079] interacts with 2 human partners:{P10588;O14503}

4163 Pathogen[ P03383] interacts with 1 human partners:{O14503}

4164 Pathogen[ P14075] interacts with 1 human partners:{O14503}

4165 Pathogen[ POC206] interacts with 1 human partners:{P10588}

4166 Pathogen[ P03363] interacts with 3 human partners:{Q9BWF3;P10588;O14503}

4167 [Cluster 685]GO:1900212+P

4168 Pathogen[ P03346] interacts with 1 human partners:{Q06710}

4169 [Cluster 686]GO:0002432+P biological\_process [name] granuloma formation [def] "The formation of nodular inflammatory lesions, usually small or granular, firm, persistent, well-structured, and containing compactly grouped T lymphocytes and modified phagocytes such as epithelioid cells, giant cells, and other macrophages. Granuloma formation represents a chronic inflammatory response initiated by various infectious and noninfectious agents. The center of a granuloma consists of fused macrophages, which can become necrotic." [GO\_REF

4170 Pathogen[ P03346] interacts with 1 human partners:{Q70J99}

4171 Pathogen[ P03410] interacts with 1 human partners:{Q70J99}

4172 [Cluster 687]GO:0002456+P biological\_process [name] T cell mediated immunity [def] "Any process involved in the carrying out of an immune response by a T cell." [GO\_REF

4173 Pathogen[ POC214] interacts with 1 human partners:{Q99698}

4174 Pathogen[ P03346] interacts with 1 human partners:{Q99698}

4175 Pathogen[ Q85601] interacts with 1 human partners:{Q99698}

4176 Pathogen[ P14079] interacts with 1 human partners:{Q99698}

4177 Pathogen[ P03410] interacts with 1 human partners:{Q99698}

4178 Pathogen[ POC206] interacts with 1 human partners:{Q99698}

4179 Pathogen[ P03363] interacts with 1 human partners:{Q99698}

4180 [Cluster 688]GO:0061017+P biological\_process [name] hepatoblast differentiation [def] "The process in which a relatively unspecialized cell acquires specialized features of a hepatoblast. A hepatoblast is a cell that retains the ability to divide and proliferate throughout life to provide progenitor cells that can differentiate into hepatocytes and cholangiocytes." [GOC

4181 Pathogen[ Q2Q067] interacts with 1 human partners:{P35680}

4182 Pathogen[ P03346] interacts with 1 human partners:{P35680}

4183 Pathogen[ Q85601] interacts with 1 human partners:{P35680}

4184 Pathogen[ P14079] interacts with 1 human partners:{P35680}

4185 Pathogen[ P03410] interacts with 1 human partners:{P35680}

4186 Pathogen[ POC206] interacts with 1 human partners:{P35680}

4187 [Cluster 689]GO:0003161+P biological\_process [name] cardiac conduction system development [def] "The process whose specific outcome is the progression of the cardiac conduction system over time, from its formation to the mature structure. The cardiac conduction system consists of specialized cardiomyocytes that regulate the frequency of heart beat." [GOC

4188 Pathogen[ Q2Q067] interacts with 1 human partners:{P60953}

4189 Pathogen[ POC214] interacts with 1 human partners:{P60953}

4190 Pathogen[ P03346] interacts with 1 human partners:{P60953}

4191 Pathogen[ Q85601] interacts with 1 human partners:{P60953}

4192 Pathogen[ P03383] interacts with 1 human partners:{P60953}

4193 Pathogen[ P03410] interacts with 1 human partners:{P60953}

4194 Pathogen[ P14075] interacts with 1 human partners:{P60953}

4195 Pathogen[ POC206] interacts with 1 human partners:{P60953}

4196 Pathogen[ P03363] interacts with 1 human partners:{P60953}

4197 [Cluster 690]GO:0060011+P biological\_process [name] Sertoli cell proliferation [def] "The multiplication or reproduction of Sertoli cells, resulting in the expansion of the Sertoli cell population. A Sertoli cell is a supporting cell projecting inward from the basement membrane of seminiferous tubules." [GOC

4198 Pathogen[ Q2Q067] interacts with 1 human partners:{Q92843}

4199 Pathogen[ POC214] interacts with 1 human partners:{Q92843}

4200 Pathogen[ P03346] interacts with 1 human partners:{Q92843}

4201 Pathogen[ Q85601] interacts with 1 human partners:{Q92843}

4202 Pathogen[ P14079] interacts with 2 human partners:{P01225;Q92843}

4203 Pathogen[ P03410] interacts with 1 human partners:{Q92843}

4204 Pathogen[ POC206] interacts with 1 human partners:{Q92843}

4205 Pathogen[ P03363] interacts with 1 human partners:{Q92843}

4206 [Cluster 691]GO:0009589+P biological\_process [name] detection of UV [def] "The series of events in which an ultraviolet radiation (UV light) stimulus is received by a cell and converted into a molecular signal. Ultraviolet radiation is electromagnetic radiation with a wavelength in the range of 10 to 380 nanometers." [GOC

4207 Pathogen[ POC214] interacts with 1 human partners:{P22830}

4208 Pathogen[ P14079] interacts with 1 human partners:{P22830}

4209 Pathogen[ P03410] interacts with 1 human partners:{P22830}

4210 Pathogen[ POC206] interacts with 1 human partners:{P22830}

4211 [Cluster 692]GO:0072207+P biological\_process [name] metanephric epithelium development [def] "The process whose specific outcome is the progression of an epithelium in the metanephros over time, from its formation to the mature structure. An epithelium is a tissue that covers the internal or external surfaces of an anatomical structure." [GOC

4212 Pathogen[ P03346] interacts with 1 human partners:{Q06710}

4213 [Cluster 693]GO:0071453+P biological\_process [name] cellular response to oxygen levels [def] "Any process that results in a change in state or activity of a cell (in terms of movement, secretion, enzyme production, gene expression, etc.) as a result of a stimulus reflecting the presence, absence, or concentration of oxygen." [GOC

4214 Pathogen[ Q2Q067] interacts with 1 human partners:{P15172}

4215 Pathogen[ P0C214] interacts with 1 human partners:{P15172}

4216 Pathogen[ P03346] interacts with 1 human partners:{P15172}

4217 Pathogen[ Q85601] interacts with 1 human partners:{P15172}

4218 Pathogen[ P03383] interacts with 1 human partners:{P15172}

4219 Pathogen[ P14075] interacts with 1 human partners:{P15172}

4220 Pathogen[ P0C206] interacts with 1 human partners:{P15172}

4221 Pathogen[ P03363] interacts with 1 human partners:{P15172}

4222 [Cluster 694]GO:0018016+P biological\_process [name] N-terminal peptidyl-proline dimethylation [def] "The methylation of the N-terminal proline of proteins to form the derivative N,N-dimethyl-L-proline." [RESID

4223 Pathogen[ Q2Q067] interacts with 1 human partners:{Q9BV86}

4224 Pathogen[ P0C214] interacts with 1 human partners:{Q9BV86}

4225 Pathogen[ P03346] interacts with 1 human partners:{Q9BV86}

4226 Pathogen[ Q85601] interacts with 1 human partners:{Q9BV86}

4227 Pathogen[ P14079] interacts with 1 human partners:{Q9BV86}

4228 Pathogen[ P03410] interacts with 1 human partners:{Q9BV86}

4229 Pathogen[ P0C206] interacts with 1 human partners:{Q9BV86}

4230 Pathogen[ P03363] interacts with 1 human partners:{Q9BV86}

4231 [Cluster 695]GO:0042745+P biological\_process [name] circadian sleep/wake cycle [def] "The cycle from wakefulness through an orderly succession of sleep states and stages that occurs on an approximately 24 hour rhythm." [GOC

4232 Pathogen[ Q2Q067] interacts with 1 human partners:{Q99743}

4233 Pathogen[ P0C214] interacts with 1 human partners:{Q99743}

4234 Pathogen[ P03346] interacts with 1 human partners:{Q99743}

4235 Pathogen[ Q85601] interacts with 1 human partners:{Q99743}

4236 Pathogen[ P14079] interacts with 1 human partners:{Q99743}

4237 Pathogen[ P03410] interacts with 1 human partners:{Q99743}

4238 Pathogen[ P0C206] interacts with 1 human partners:{Q99743}

4239 Pathogen[ P03363] interacts with 1 human partners:{Q99743}

4240 [Cluster 696]GO:0007321+P biological\_process [name] sperm displacement [def] "The physical displacement of sperm stored from previous mating encounters." [PMID

4241 Pathogen[ P03410] interacts with 1 human partners:{Q14507}

4242 [Cluster 697]GO:0044356+P biological\_process [name] clearance of foreign intracellular DNA by conversion of DNA cytidine to uridine [def] "A defense process that protects an organism from invading foreign DNA. The process begins by the deamination of foreign double-stranded DNA cytidines to uridines. These atypical DNA nucleosides are then converted by a uracil DNA glycosylase to abasic lesions, and the process ends with the degradation of the foreign DNA." [GO

4243 Pathogen[ P14079] interacts with 1 human partners:{P31941}

4244 Pathogen[ P03410] interacts with 1 human partners:{P31941}

4245 Pathogen[ P0C206] interacts with 1 human partners:{P31941}

4246 [Cluster 698]GO:0007494+P biological\_process [name] midgut development [def] "The process whose specific outcome is the progression of the midgut over time, from its formation to the mature structure. The midgut is the middle part of the alimentary canal from the stomach, or entrance of the bile duct, to, or including, the large intestine." [GOC

4247 Pathogen[ P0C214] interacts with 1 human partners:{P00480}

4248 Pathogen[ Q85601] interacts with 1 human partners:{P00480}

4249 Pathogen[ P14079] interacts with 1 human partners:{P00480}

4250 Pathogen[ P03410] interacts with 1 human partners:{P00480}

4251 Pathogen[ P0C206] interacts with 1 human partners:{P00480}

4252 [Cluster 699]GO:0003323+P biological\_process [name] type B pancreatic cell development [def] "The process whose specific outcome is the progression of a type B pancreatic cell over time, from its formation to the mature structure. A type B pancreatic cell is a cell located towards center of the islets of Langerhans that secretes insulin." [CL

4253 Pathogen[ Q2Q067] interacts with 1 human partners:{Q00534}

4254 Pathogen[ P0C214] interacts with 1 human partners:{Q00534}

4255 Pathogen[ P03346] interacts with 4 human partners:{P78426;Q95096;Q00534;Q01101}

4256 Pathogen[ Q85601] interacts with 1 human partners:{Q00534}

4257 Pathogen[ P03383] interacts with 1 human partners:{Q00534}

4258 Pathogen[ P03410] interacts with 1 human partners:{Q00534}

4259 Pathogen[ P14075] interacts with 1 human partners:{Q00534}

4260 Pathogen[ P0C206] interacts with 1 human partners:{Q00534}

4261 Pathogen[ P03363] interacts with 1 human partners:{Q00534}

4262 [Cluster 700]GO:0047496+P biological\_process [name] vesicle transport along microtubule [def] "The directed movement of a vesicle along a microtubule, mediated by motor proteins. This process begins with the attachment of a vesicle to a microtubule, and ends when the vesicle reaches its final destination." [GOC

4263 Pathogen[ Q2Q067] interacts with 2 human partners:{Q9NXR1;O14576}

4264 Pathogen[ P0C214] interacts with 2 human partners:{O14576;Q9NXR1}

4265 Pathogen[ P03346] interacts with 3 human partners:{014576;Q9NXR1;P54257}

4266 Pathogen[ Q85601] interacts with 3 human partners:{014576;Q9NXR1;Q9GZM8}

4267 Pathogen[ P14079] interacts with 4 human partners:{P54257;Q9GZM8;014576;Q9NXR1}

4268 Pathogen[ P03410] interacts with 5 human partners:{Q9NXR1;Q9GZM8;014576;P54257;P33176}

4269 Pathogen[ P0C206] interacts with 3 human partners:{014576;Q9GZM8;Q9NXR1}

4270 Pathogen[ P03363] interacts with 4 human partners:{P33176;P54257;Q9NXR1;014576}

4271 [Cluster 701]GO:0015936+P biological\_process [name] coenzyme A metabolic process [def] "The chemical reactions and pathways involving coenzyme A, 3'-phosphoadenosine-(5')diphospho(4')pantatheine, an acyl carrier in many acylation and acyl-transfer reactions in which the intermediate is a thiol ester." [ISBN

4272 Pathogen[ P0C214] interacts with 1 human partners:{P53396}

4273 [Cluster 702]GO:0001945+P biological\_process [name] lymph vessel development [def] "The process whose specific outcome is the progression of a lymph vessel over time, from its formation to the mature structure." [GOC

4274 Pathogen[ P03346] interacts with 1 human partners:{P35713}

4275 Pathogen[ P03410] interacts with 1 human partners:{Q9BSN7}

4276 [Cluster 703]GO:0071805+P biological\_process [name] potassium ion transmembrane transport [def] "A process in which a potassium ion is transported from one side of a membrane to the other." [GOC

4277 Pathogen[ P14079] interacts with 1 human partners:{Q9H6F2}

4278 Pathogen[ P03410] interacts with 2 human partners:{P59646;Q9H6F2}

4279 [Cluster 704]GO:0001826+P biological\_process [name] inner cell mass cell differentiation [def] "The process in which a relatively unspecialized cell acquires specialized features of an inner cell mass cell." [GOC

4280 Pathogen[ Q2Q067] interacts with 1 human partners:{P35680}

4281 Pathogen[ P03346] interacts with 2 human partners:{Q9NVX2;P35680}

4282 Pathogen[ Q85601] interacts with 2 human partners:{Q9NVX2;P35680}

4283 Pathogen[ P14079] interacts with 2 human partners:{P35680;Q9NVX2}

4284 Pathogen[ P03410] interacts with 2 human partners:{P35680;Q9NVX2}

4285 Pathogen[ P0C206] interacts with 2 human partners:{Q9NVX2;P35680}

4286 Pathogen[ P03363] interacts with 1 human partners:{Q9NVX2}

4287 [Cluster 705]GO:2000147+P biological\_process [name] positive regulation of cell motility [def] "Any process that activates or increases the frequency, rate or extent of cell motility." [GOC

4288 Pathogen[ P03346] interacts with 1 human partners:{Q9NRX4}

4289 Pathogen[ P14079] interacts with 2 human partners:{P31751;Q9NRX4}

4290 Pathogen[ P03410] interacts with 1 human partners:{Q9NRX4}

4291 Pathogen[ P0C206] interacts with 1 human partners:{Q9NRX4}

4292 [Cluster 706]GO:0006600+P biological\_process [name] creatine metabolic process [def] "The chemical reactions and pathways involving creatine (N-(aminoiminomethyl)-N-methylglycine), a compound synthesized from the amino acids arginine, glycine, and methionine that occurs in muscle." [GOC

4293 Pathogen[ P0C214] interacts with 2 human partners:{P50440;P12277}

4294 Pathogen[ P14079] interacts with 2 human partners:{Q14353;P50440}

4295 Pathogen[ P03410] interacts with 2 human partners:{Q14353;P50440}

4296 Pathogen[ P14075] interacts with 1 human partners:{P50440}

4297 Pathogen[ P0C206] interacts with 1 human partners:{P50440}

4298 [Cluster 707]GO:0072584+P biological\_process [name] caveolin-mediated endocytosis [def] "An endocytosis process that begins when material is taken up into plasma membrane caveolae, which then pinch off to form endocytic caveolar carriers." [GOC

4299 Pathogen[ P03410] interacts with 1 human partners:{Q15049}

4300 [Cluster 708]GO:0006740+P biological\_process [name] NADPH regeneration [def] "A metabolic process that generates a pool of NADPH by the reduction of NADP+." [GOC

4301 Pathogen[ P0C214] interacts with 2 human partners:{075874;P11413}

4302 [Cluster 709]GO:0033182+P biological\_process [name] regulation of histone ubiquitination [def] "Any process that modulates the frequency, rate or extent of the addition of a ubiquitin group to a histone protein." [GOC

4303 Pathogen[ Q2Q067] interacts with 1 human partners:{P61088}

4304 Pathogen[ P0C214] interacts with 1 human partners:{P61088}

4305 Pathogen[ P03346] interacts with 1 human partners:{P61088}

4306 Pathogen[ Q85601] interacts with 1 human partners:{P61088}

4307 Pathogen[ P03383] interacts with 1 human partners:{P61088}

4308 Pathogen[ P03410] interacts with 1 human partners:{P61088}

4309 Pathogen[ P14075] interacts with 1 human partners:{P61088}

4310 Pathogen[ P0C206] interacts with 1 human partners:{P61088}

4311 Pathogen[ P03363] interacts with 1 human partners:{P61088}

4312 [Cluster 710]GO:0002821+P biological\_process [name] positive regulation of adaptive immune response [def] "Any process that activates or increases the frequency, rate, or extent of an adaptive immune response." [GOC

4313 Pathogen[ P03346] interacts with 1 human partners:{075995}

4314 [Cluster 711]GO:0016598+P biological\_process [name] protein arginylation [def] "The conjugation of arginine to the N-terminal aspartate or glutamate of a protein\_ required for the degradation of the protein via the ubiquitin pathway." [PMID

4315 Pathogen[ P0C214] interacts with 1 human partners:{095260}

4316 Pathogen[ P03346] interacts with 1 human partners:{095260}



4317 Pathogen[ Q85601] interacts with 1 human partners:{095260}

4318 Pathogen[ P14079] interacts with 1 human partners:{095260}

4319 Pathogen[ P03410] interacts with 1 human partners:{095260}

4320 Pathogen[ P0C206] interacts with 1 human partners:{095260}

4321 Pathogen[ P03363] interacts with 1 human partners:{095260}

4322 [Cluster 712]GO:0019442+P biological\_process [name] tryptophan catabolic process to acetyl-CoA [def] "The chemical reactions and pathways resulting in the breakdown of tryptophan into other compounds, including acetyl-CoA." [GOC

4323 Pathogen[ Q2Q067] interacts with 1 human partners:{Q16719}

4324 Pathogen[ P0C214] interacts with 1 human partners:{Q16719}

4325 Pathogen[ P03346] interacts with 1 human partners:{Q16719}

4326 Pathogen[ Q85601] interacts with 1 human partners:{Q16719}

4327 Pathogen[ P14079] interacts with 2 human partners:{P48775;Q16719}

4328 Pathogen[ P03383] interacts with 1 human partners:{Q16719}

4329 Pathogen[ P03410] interacts with 2 human partners:{Q16719;P48775}

4330 Pathogen[ P14075] interacts with 1 human partners:{Q16719}

4331 Pathogen[ P0C206] interacts with 1 human partners:{Q16719}

4332 [Cluster 713]GO:0035995+P biological\_process [name] detection of muscle stretch [def] "The series of events by which a muscle stretch stimulus is received by a cell and converted into a molecular signal." [PMID

4333 Pathogen[ P14079] interacts with 1 human partners:{O15273}

4334 Pathogen[ P03410] interacts with 1 human partners:{O15273}

4335 Pathogen[ P0C206] interacts with 1 human partners:{P50461}

4336 [Cluster 714]GO:0061386+P biological\_process [name] closure of optic fissure [def] "The closure of the temporary ventral gap in the optic cup that contributes to its shaping." [GOC

4337 Pathogen[ P14079] interacts with 1 human partners:{Q8IZ21}

4338 Pathogen[ P03410] interacts with 1 human partners:{Q8IZ21}

4339 [Cluster 715]GO:0006024+P biological\_process [name] glycosaminoglycan biosynthetic process [def] "The chemical reactions and pathways resulting in the formation of glycosaminoglycans, any of a group of polysaccharides that contain amino sugars." [ISBN

4340 Pathogen[ P14079] interacts with 1 human partners:{O94923}

4341 [Cluster 716]GO:1900215+P

4342 Pathogen[ P03346] interacts with 1 human partners:{Q06710}

4343 [Cluster 717]GO:0001834+P biological\_process [name] trophectodermal cell proliferation [def] "The proliferation of cells in the trophectoderm." [GOC

4344 Pathogen[ P03346] interacts with 1 human partners:{O95718}

4345 Pathogen[ P14079] interacts with 1 human partners:{O95718}

4346 Pathogen[ P0C206] interacts with 1 human partners:{O95718}

4347 [Cluster 718]GO:0050974+P biological\_process [name] detection of mechanical stimulus involved in sensory perception [def] "The series of events in which a sensory mechanical stimulus is received by a cell and converted into a molecular signal." [GOC

4348 Pathogen[ P0C214] interacts with 1 human partners:{P07093}

4349 Pathogen[ Q85601] interacts with 1 human partners:{P07093}

4350 [Cluster 719]GO:0055012+P biological\_process [name] ventricular cardiac muscle cell differentiation [def] "The process in which a relatively unspecialized cell acquires specialized features of a cardiac muscle cell. Cardiac muscle cells are striated muscle cells that are responsible for heart contraction. The ventricle is the part of the heart that pumps blood out of the organ." [GOC

4351 Pathogen[ Q2Q067] interacts with 1 human partners:{P28702}

4352 Pathogen[ P03346] interacts with 1 human partners:{P28702}

4353 Pathogen[ Q85601] interacts with 1 human partners:{P28702}

4354 Pathogen[ P14079] interacts with 2 human partners:{Q06413;P28702}

4355 Pathogen[ P03383] interacts with 1 human partners:{P28702}

4356 Pathogen[ P03410] interacts with 1 human partners:{P28702}

4357 Pathogen[ P14075] interacts with 1 human partners:{P28702}

4358 Pathogen[ P0C206] interacts with 1 human partners:{P28702}

4359 Pathogen[ P03363] interacts with 1 human partners:{P28702}

4360 [Cluster 720]GO:0010571+P biological\_process [name] positive regulation of DNA replication involved in S phase [def] "Any process that activates or increases the frequency, rate or extent of DNA replication that contributes to the progression through S phase of the cell cycle." [GOC

4361 Pathogen[ Q2Q067] interacts with 1 human partners:{Q9ULG1}

4362 Pathogen[ P0C214] interacts with 1 human partners:{Q9ULG1}

4363 Pathogen[ P03346] interacts with 1 human partners:{Q9ULG1}

4364 Pathogen[ Q85601] interacts with 1 human partners:{Q9ULG1}

4365 Pathogen[ P14079] interacts with 1 human partners:{Q9ULG1}

4366 Pathogen[ P03410] interacts with 1 human partners:{Q9ULG1}

4367 Pathogen[ P0C206] interacts with 1 human partners:{Q9ULG1}

4368 Pathogen[ P03363] interacts with 1 human partners:{Q9ULG1}

4369 [Cluster 721]GO:0071557+P biological\_process [name] histone H3-K27 demethylation [def] "The modification of histone H3 by the removal of a methyl group from lysine at position 27 of the histone." [GOC

4370 Pathogen[ Q2Q067] interacts with 1 human partners:{Q9UPP1}

4371 Pathogen[ P0C214] interacts with 1 human partners:{Q9UPP1}

4372 Pathogen[ P03346] interacts with 1 human partners:{Q9UPP1}

4373 Pathogen[ Q85601] interacts with 1 human partners:{Q9UPP1}

4374 Pathogen[ P14079] interacts with 1 human partners:{Q9UPP1}

4375 Pathogen[ P03383] interacts with 1 human partners:{Q9UPP1}

4376 Pathogen[ P03410] interacts with 1 human partners:{Q9UPP1}

4377 Pathogen[ P14075] interacts with 1 human partners:{Q9UPP1}

4378 Pathogen[ P0C206] interacts with 1 human partners:{Q9UPP1}

4379 [Cluster 722]GO:0097120+P biological\_process [name] receptor localization to synapse  
[def] "Any process in which a receptor is transported to, and/or maintained at the synapse, the junction between a nerve fiber of one neuron and another neuron or muscle fiber or glial cell." [GOC

4380 Pathogen[ Q2Q067] interacts with 1 human partners:{P78352}

4381 Pathogen[ P0C214] interacts with 1 human partners:{P78352}

4382 Pathogen[ P03346] interacts with 1 human partners:{P78352}

4383 Pathogen[ Q85601] interacts with 1 human partners:{P78352}

4384 Pathogen[ P03383] interacts with 1 human partners:{P78352}

4385 Pathogen[ P03410] interacts with 1 human partners:{P78352}

4386 Pathogen[ P14075] interacts with 1 human partners:{P78352}

4387 Pathogen[ P0C206] interacts with 1 human partners:{P78352}

4388 Pathogen[ P03363] interacts with 1 human partners:{P78352}

4389 [Cluster 723]GO:0072162+P biological\_process [name] metanephric mesenchymal cell differentiation [def] "The process in which relatively unspecialized cells acquire specialized structural and/or functional features that characterize the mesenchymal cells of the metanephros as it progresses from its formation to the mature state." [GOC

4390 Pathogen[ Q2Q067] interacts with 1 human partners:{P42224}

4391 Pathogen[ P0C214] interacts with 1 human partners:{P42224}

4392 Pathogen[ P03346] interacts with 2 human partners:{O43680;P42224}

4393 Pathogen[ Q85601] interacts with 1 human partners:{P42224}

4394 Pathogen[ P14079] interacts with 1 human partners:{P42224}

4395 Pathogen[ P0C206] interacts with 1 human partners:{P42224}

4396 [Cluster 724]GO:0006517+P biological\_process [name] protein deglycosylation [def] "The removal of sugar residues from a glycosylated protein." [GOC

4397 Pathogen[ P14079] interacts with 1 human partners:{P20933}

4398 Pathogen[ P03410] interacts with 1 human partners:{P20933}

4399 [Cluster 725]GO:0048513+P biological\_process [name] organ development [def] "Development of a tissue or tissues that work together to perform a specific function or functions. Development pertains to the process whose specific outcome is the progression of a structure over time, from its formation to the mature structure. Organs are commonly observed as visibly distinct structures, but may also exist as loosely associated clusters of cells that work together to perform a specific function or functions." [GOC

4400 Pathogen[ P03346] interacts with 6 human partners:{Q9Y283;Q14774;Q12778;P98177;P78367;Q9HBU1}

4401 Pathogen[ Q85601] interacts with 1 human partners:{Q9Y283}

4402 Pathogen[ P14079] interacts with 1 human partners:{Q9Y283}

4403 Pathogen[ P03410] interacts with 1 human partners:{Q9Y283}

4404 Pathogen[ P0C206] interacts with 1 human partners:{Q9Y283}

4405 Pathogen[ P03363] interacts with 3 human partners:{Q9Y283;P78367;Q9HBU1}

4406 [Cluster 726]GO:0033609+P biological\_process [name] oxalate metabolic process [def] "The chemical reactions and pathways involving oxalate, the organic acid ethanedioate." [CHEBI

4407 Pathogen[ P0C214] interacts with 1 human partners:{Q86XE5}

4408 Pathogen[ P14079] interacts with 1 human partners:{Q86XE5}

4409 Pathogen[ P03410] interacts with 1 human partners:{Q86XE5}

4410 Pathogen[ P14075] interacts with 1 human partners:{Q86XE5}

4411 Pathogen[ P0C206] interacts with 1 human partners:{Q86XE5}

4412 [Cluster 727]GO:0033032+P biological\_process [name] regulation of myeloid cell apoptosis [def] "Any process that modulates the frequency, rate, or extent of myeloid cell apoptosis." [GOC

4413 Pathogen[ Q2Q067] interacts with 1 human partners:{P10827}

4414 Pathogen[ P03346] interacts with 1 human partners:{P10827}

4415 Pathogen[ Q85601] interacts with 1 human partners:{P10827}

4416 Pathogen[ P14079] interacts with 1 human partners:{P10827}

4417 Pathogen[ P0C206] interacts with 1 human partners:{P10827}

4418 [Cluster 728]GO:0050850+P biological\_process [name] positive regulation of calcium-mediated signaling [def] "Any process that activates or increases the frequency, rate or extent of calcium-mediated signaling." [GOC

4419 Pathogen[ P03346] interacts with 1 human partners:{Q96A65}

4420 Pathogen[ Q85601] interacts with 1 human partners:{Q96A65}

4421 Pathogen[ P14079] interacts with 2 human partners:{Q96A65;Q6PIZ9}

4422 Pathogen[ P03410] interacts with 2 human partners:{Q6PIZ9;Q96A65}

4423 Pathogen[ P0C206] interacts with 1 human partners:{Q96A65}

4424 Pathogen[ P03363] interacts with 1 human partners:{Q96A65}

4425 [Cluster 729]GO:000097+P biological\_process [name] sulfur amino acid biosynthetic process [def] "The chemical reactions and pathways resulting in the formation of amino acids containing sulfur, comprising cysteine, methionine and selenocysteine." [GOC

4426 Pathogen[ P14079] interacts with 1 human partners:{Q16878}

4427 [Cluster 730]GO:0009642+P biological\_process [name] response to light intensity  
[def] "Any process that results in a change in state or activity of a cell or an organism (in terms of movement, secretion, enzyme production, gene expression, etc.) as a result of a light intensity stimulus." [GOC  
4428 Pathogen[ P14079] interacts with 1 human partners:{P03897}  
4429 Pathogen[ P03410] interacts with 1 human partners:{P03897}  
4430 [Cluster 731]GO:0050953+P biological\_process [name] sensory perception of light stimulus [def] "The series of events required for an organism to receive a sensory light stimulus, convert it to a molecular signal, and recognize and characterize the signal. This is a neurological process." [GOC  
4431 Pathogen[ Q2Q067] interacts with 2 human partners:{Q9Y6N9;Q495M9}  
4432 Pathogen[ P0C214] interacts with 2 human partners:{Q495M9;Q9Y6N9}  
4433 Pathogen[ P03346] interacts with 2 human partners:{Q9Y6N9;Q495M9}  
4434 Pathogen[ Q85601] interacts with 2 human partners:{Q9Y6N9;Q495M9}  
4435 Pathogen[ P14079] interacts with 2 human partners:{Q9Y6N9;Q495M9}  
4436 Pathogen[ P03410] interacts with 2 human partners:{Q495M9;Q9Y6N9}  
4437 Pathogen[ P0C206] interacts with 2 human partners:{Q9Y6N9;Q495M9}  
4438 Pathogen[ P03363] interacts with 2 human partners:{Q9Y6N9;Q495M9}  
4439 [Cluster 732]GO:0006047+P biological\_process [name] UDP-N-acetylglucosamine metabolic process [def] "The chemical reactions and pathways involving UDP-N-acetylglucosamine, a substance composed of N-acetylglucosamine, a common structural unit of oligosaccharides, in glycosidic linkage with uridine diphosphate." [GOC  
4440 Pathogen[ P03410] interacts with 1 human partners:{Q8NHY0}  
4441 [Cluster 733]GO:0036010+P biological\_process [name] protein localization in endosome [def] "A process in which a protein is transported to, or maintained in, a location within an endosome." [GOC  
4442 Pathogen[ P14079] interacts with 1 human partners:{Q9NV96}  
4443 Pathogen[ P03410] interacts with 1 human partners:{Q9NV96}  
4444 [Cluster 734]GO:0051795+P biological\_process [name] positive regulation of catagen [def] "Any process that activates or increases the frequency, rate or extent of catagen, the regression phase of the hair cycle." [GOC  
4445 Pathogen[ Q2Q067] interacts with 1 human partners:{P35548}  
4446 Pathogen[ P0C214] interacts with 1 human partners:{P35548}  
4447 Pathogen[ P03346] interacts with 1 human partners:{P35548}  
4448 Pathogen[ Q85601] interacts with 1 human partners:{P35548}  
4449 Pathogen[ P03383] interacts with 1 human partners:{P35548}  
4450 Pathogen[ P03410] interacts with 1 human partners:{P35548}  
4451 Pathogen[ P14075] interacts with 1 human partners:{P35548}  
4452 Pathogen[ P0C206] interacts with 1 human partners:{P35548}  
4453 Pathogen[ P03363] interacts with 1 human partners:{P35548}  
4454 [Cluster 735]GO:0036351+P  
4455 Pathogen[ P0C214] interacts with 1 human partners:{Q8IYW5}  
4456 Pathogen[ P03346] interacts with 1 human partners:{Q8IYW5}  
4457 Pathogen[ Q85601] interacts with 1 human partners:{Q8IYW5}  
4458 Pathogen[ P0C206] interacts with 1 human partners:{Q8IYW5}  
4459 Pathogen[ P03363] interacts with 1 human partners:{Q8IYW5}  
4460 [Cluster 736]GO:0030195+P biological\_process [name] negative regulation of blood coagulation [def] "Any process that stops, prevents, or reduces the frequency, rate or extent of blood coagulation." [GOC  
4461 Pathogen[ P0C214] interacts with 2 human partners:{P05121;P07093}  
4462 Pathogen[ Q85601] interacts with 2 human partners:{P05121;P07093}  
4463 Pathogen[ P03410] interacts with 1 human partners:{P05121}  
4464 Pathogen[ P0C206] interacts with 1 human partners:{P05121}  
4465 [Cluster 737]GO:0042226+P biological\_process [name] interleukin-6 biosynthetic process [def] "The chemical reactions and pathways resulting in the formation of interleukin-6." [GOC  
4466 Pathogen[ Q2Q067] interacts with 1 human partners:{O95999}  
4467 Pathogen[ P0C214] interacts with 1 human partners:{O95999}  
4468 Pathogen[ P03346] interacts with 1 human partners:{O95999}  
4469 Pathogen[ Q85601] interacts with 1 human partners:{O95999}  
4470 Pathogen[ P14079] interacts with 1 human partners:{O95999}  
4471 Pathogen[ P03383] interacts with 1 human partners:{O95999}  
4472 Pathogen[ P03410] interacts with 1 human partners:{O95999}  
4473 Pathogen[ P14075] interacts with 1 human partners:{O95999}  
4474 Pathogen[ P0C206] interacts with 1 human partners:{O95999}  
4475 [Cluster 738]GO:0070683+P biological\_process [name] mitotic cell cycle G2/M transition decatenation checkpoint [def] "A mitotic cell cycle checkpoint that blocks cell cycle progression from G2 to M phase until sister chromatids are sufficiently separated, with concatenated molecules topologically resolved." [GOC  
4476 Pathogen[ Q2Q067] interacts with 1 human partners:{P11388}  
4477 Pathogen[ P0C214] interacts with 1 human partners:{P11388}  
4478 Pathogen[ P03346] interacts with 1 human partners:{P11388}  
4479 Pathogen[ Q85601] interacts with 1 human partners:{P11388}  
4480 Pathogen[ P14079] interacts with 1 human partners:{P11388}  
4481 Pathogen[ P03410] interacts with 1 human partners:{P11388}  
4482 Pathogen[ P0C206] interacts with 1 human partners:{P11388}

4483 [Cluster 739]GO:2000177+P biological\_process [name] regulation of neural precursor cell proliferation [def] "Any process that modulates the frequency, rate or extent of neural precursor cell proliferation." [GOC

4484 Pathogen[ Q2Q067] interacts with 1 human partners:{Q9NSC2}

4485 Pathogen[ P0C214] interacts with 1 human partners:{Q9NSC2}

4486 Pathogen[ P03346] interacts with 1 human partners:{Q9NSC2}

4487 Pathogen[ Q85601] interacts with 1 human partners:{Q9NSC2}

4488 Pathogen[ P14079] interacts with 1 human partners:{Q9NSC2}

4489 Pathogen[ P03383] interacts with 1 human partners:{Q9NSC2}

4490 Pathogen[ P03410] interacts with 1 human partners:{Q9NSC2}

4491 Pathogen[ P14075] interacts with 1 human partners:{Q9NSC2}

4492 Pathogen[ P0C206] interacts with 1 human partners:{Q9NSC2}

4493 [Cluster 740]GO:0033085+P biological\_process [name] negative regulation of T cell differentiation in thymus [def] "Any process that stops, prevents, or reduces the frequency, rate or extent of T cell differentiation in the thymus." [GOC

4494 Pathogen[ Q2Q067] interacts with 1 human partners:{Q8N5P1}

4495 Pathogen[ P03346] interacts with 1 human partners:{Q8N5P1}

4496 Pathogen[ Q85601] interacts with 1 human partners:{Q8N5P1}

4497 Pathogen[ P14079] interacts with 1 human partners:{Q8N5P1}

4498 Pathogen[ P03410] interacts with 1 human partners:{Q8N5P1}

4499 Pathogen[ P0C206] interacts with 1 human partners:{Q8N5P1}

4500 Pathogen[ P03363] interacts with 1 human partners:{Q8N5P1}

4501 [Cluster 741]GO:0060049+P biological\_process [name] regulation of protein glycosylation [def] "Any process that modulates the frequency, rate or extent of protein glycosylation. Protein glycosylation is the addition of a sugar unit to a protein amino acid, e.g. the addition of glycan chains to proteins." [GOC

4502 Pathogen[ P14079] interacts with 1 human partners:{O75072}

4503 [Cluster 742]GO:0021913+P biological\_process [name] regulation of transcription from RNA polymerase II promoter involved in ventral spinal cord interneuron specification [def] "Any process that modulates the frequency, rate or extent of transcription from an RNA polymerase II promoter that results in the commitment of a cell to become an interneuron in the ventral spinal cord." [GO\_REF

4504 Pathogen[ P03346] interacts with 2 human partners:{P78426;P49640}

4505 Pathogen[ P0C206] interacts with 1 human partners:{P49640}

4506 Pathogen[ P03363] interacts with 2 human partners:{Q9C056;P49640}

4507 [Cluster 743]GO:0048070+P biological\_process [name] regulation of developmental pigmentation [def] "Any process that modulates the frequency, rate or extent of the developmental process that results in the deposition of coloring matter in an organism." [GOC

4508 Pathogen[ P03346] interacts with 1 human partners:{Q96AX1}

4509 Pathogen[ P14079] interacts with 1 human partners:{Q96AX1}

4510 Pathogen[ P03410] interacts with 1 human partners:{Q96AX1}

4511 Pathogen[ P0C206] interacts with 1 human partners:{Q96AX1}

4512 [Cluster 744]GO:0002027+P biological\_process [name] regulation of heart rate [def] "Any process that modulates the frequency or rate of heart contraction." [GOC

4513 Pathogen[ Q2Q067] interacts with 2 human partners:{P12883;Q99814}

4514 Pathogen[ P0C214] interacts with 3 human partners:{P12883;Q99814;P13533}

4515 Pathogen[ P03346] interacts with 2 human partners:{Q99814;P78411}

4516 Pathogen[ Q85601] interacts with 3 human partners:{P13533;Q99814;P12883}

4517 Pathogen[ P14079] interacts with 2 human partners:{Q99814;P12883}

4518 Pathogen[ P03383] interacts with 1 human partners:{P12883}

4519 Pathogen[ P03410] interacts with 3 human partners:{Q99814;P12883;P13533}

4520 Pathogen[ P0C206] interacts with 4 human partners:{P13533;P78411;P12883;Q99814}

4521 Pathogen[ P03363] interacts with 2 human partners:{P78411;Q99814}

4522 [Cluster 745]GO:0019372+P biological\_process [name] lipoxygenase pathway [def] "The chemical reactions and pathways by which an unsaturated fatty acid (such as arachidonic acid or linolenic acid) is converted to other compounds, and in which the first step is hydroperoxide formation catalyzed by lipoxygenase." [GOC

4523 Pathogen[ Q2Q067] interacts with 1 human partners:{P09917}

4524 Pathogen[ P0C214] interacts with 1 human partners:{P09917}

4525 Pathogen[ P03346] interacts with 1 human partners:{P09917}

4526 Pathogen[ Q85601] interacts with 1 human partners:{P09917}

4527 Pathogen[ P14079] interacts with 1 human partners:{P09917}

4528 Pathogen[ P03410] interacts with 1 human partners:{P09917}

4529 Pathogen[ P0C206] interacts with 1 human partners:{P09917}

4530 [Cluster 746]GO:0003192+P biological\_process [name] mitral valve formation [def] "The developmental process pertaining to the initial formation of the mitral valve from unspecified parts. This process begins with the specific processes that contribute to the appearance of the discrete structure and ends when the structural rudiment is recognizable." [GOC

4531 Pathogen[ Q2Q067] interacts with 1 human partners:{Q8IX07}

4532 Pathogen[ P0C214] interacts with 1 human partners:{Q8IX07}

4533 Pathogen[ P03346] interacts with 1 human partners:{Q8IX07}

4534 Pathogen[ Q85601] interacts with 1 human partners:{Q8IX07}

4535 Pathogen[ P14079] interacts with 1 human partners:{Q8IX07}

4536 Pathogen[ P03410] interacts with 1 human partners:{Q8IX07}

4537 Pathogen[ POC206] interacts with 1 human partners:{Q8IX07}

4538 [Cluster 747]GO:0060628+P biological\_process [name] regulation of ER to Golgi vesicle-mediated transport [def] "Any process that modulates the rate, frequency, or extent of ER to Golgi vesicle-mediated transport, the directed movement of substances from the endoplasmic reticulum (ER) to the Golgi, mediated by COP II vesicles. Small COP II coated vesicles form from the ER and then fuse directly with the cis-Golgi. Larger structures are transported along microtubules to the cis-Golgi." [GOC

4539 Pathogen[ P14079] interacts with 3 human partners:{Q969M3;P54826;Q9NZ43}

4540 Pathogen[ P03410] interacts with 3 human partners:{Q9NZ43;Q969M3;P54826}

4541 Pathogen[ P14075] interacts with 1 human partners:{P54826}

4542 Pathogen[ POC206] interacts with 2 human partners:{Q969M3;P54826}

4543 [Cluster 748]GO:0021570+P biological\_process [name] rhombomere 4 development [def] "The process whose specific outcome is the progression of rhombomere 4 over time, from its formation to the mature structure. Rhombomeres are transverse segments of the developing rhombencephalon. Rhombomeres are lineage restricted, express different genes from one another, and adopt different developmental fates. Rhombomeres are numbered in anterior to posterior order." [GO\_REF

4544 Pathogen[ Q2Q067] interacts with 3 human partners:{P49639;P14652;P14653}

4545 Pathogen[ POC214] interacts with 2 human partners:{P49639;P14653}

4546 Pathogen[ P03346] interacts with 3 human partners:{P49639;P14652;P14653}

4547 Pathogen[ Q85601] interacts with 2 human partners:{P49639;P14653}

4548 Pathogen[ P14079] interacts with 1 human partners:{P49639}

4549 Pathogen[ P03383] interacts with 1 human partners:{P49639}

4550 Pathogen[ P03410] interacts with 1 human partners:{P49639}

4551 Pathogen[ POC206] interacts with 3 human partners:{P49639;P14653;P14652}

4552 Pathogen[ P03363] interacts with 3 human partners:{P49639;P14653;P14652}

4553 [Cluster 749]GO:0072050+P biological\_process [name] S-shaped body morphogenesis [def] "The process in which the S-shaped body is generated and organized. The S-shaped body is the successor of the comma-shaped body that contributes to the morphogenesis of the nephron." [GOC

4554 Pathogen[ P03346] interacts with 1 human partners:{Q06710}

4555 [Cluster 750]GO:0032375+P biological\_process [name] negative regulation of cholesterol transport [def] "Any process that stops, prevents, or reduces the frequency, rate or extent of the directed movement of cholesterol into, out of or within a cell, or between cells, by means of some agent such as a transporter or pore." [GOC

4556 Pathogen[ Q2Q067] interacts with 1 human partners:{P19838}

4557 Pathogen[ POC214] interacts with 1 human partners:{P19838}

4558 Pathogen[ P03346] interacts with 1 human partners:{P19838}

4559 Pathogen[ Q85601] interacts with 1 human partners:{P19838}

4560 Pathogen[ P03383] interacts with 1 human partners:{P19838}

4561 Pathogen[ P03410] interacts with 1 human partners:{P19838}

4562 Pathogen[ P14075] interacts with 1 human partners:{P19838}

4563 Pathogen[ POC206] interacts with 1 human partners:{P19838}

4564 Pathogen[ P03363] interacts with 1 human partners:{P19838}

4565 [Cluster 751]GO:0070127+P biological\_process [name] tRNA aminoacylation for mitochondrial protein translation [def] "The synthesis of aminoacyl tRNA by the formation of an ester bond between the 3'-hydroxyl group of the most 3' adenosine of the tRNA, to be used in ribosome-mediated polypeptide synthesis in a mitochondrion." [GOC

4566 Pathogen[ POC214] interacts with 1 human partners:{Q5JPH6}

4567 Pathogen[ P14079] interacts with 1 human partners:{Q5JPH6}

4568 Pathogen[ P03383] interacts with 1 human partners:{Q5JPH6}

4569 Pathogen[ P03410] interacts with 1 human partners:{Q5JPH6}

4570 Pathogen[ P14075] interacts with 1 human partners:{Q5JPH6}

4571 Pathogen[ POC206] interacts with 1 human partners:{Q5JPH6}

4572 Pathogen[ P03363] interacts with 1 human partners:{Q5JPH6}

4573 [Cluster 752]GO:0070309+P biological\_process [name] lens fiber cell morphogenesis [def] "The process in which the structures of a lens fiber cell are generated and organized. This process occurs while the initially relatively unspecialized cell is acquiring the specialized features of a lens fiber cell. A lens fiber cell is any of the elongated, tightly packed cells that make up the bulk of the mature lens in a camera-type eye." [GOC

4574 Pathogen[ Q2Q067] interacts with 1 human partners:{P02489}

4575 Pathogen[ POC214] interacts with 1 human partners:{P02489}

4576 Pathogen[ P03346] interacts with 2 human partners:{P02489;P07316}

4577 Pathogen[ Q85601] interacts with 1 human partners:{P02489}

4578 Pathogen[ P14079] interacts with 2 human partners:{P07316;P02489}

4579 Pathogen[ P03410] interacts with 2 human partners:{P02489;P07316}

4580 Pathogen[ POC206] interacts with 2 human partners:{P07316;P02489}

4581 Pathogen[ P03363] interacts with 2 human partners:{P07316;P02489}

4582 [Cluster 753]GO:0050765+P biological\_process [name] negative regulation of phagocytosis [def] "Any process that stops, prevents, or reduces the frequency, rate or extent of phagocytosis." [GOC

4583 Pathogen[ P14079] interacts with 1 human partners:{Q99439}

4584 Pathogen[ P03410] interacts with 1 human partners:{Q99439}

4585 [Cluster 754]GO:0071174+P biological\_process [name] mitotic cell cycle spindle checkpoint [def] "A cell cycle checkpoint that delays the metaphase/anaphase transition

of a mitotic nuclear division until the spindle is correctly assembled and oriented, and chromosomes are attached to the spindle." [GOC

4586 Pathogen[ Q2Q067] interacts with 1 human partners:{P14635}

4587 Pathogen[ P0C214] interacts with 1 human partners:{P14635}

4588 Pathogen[ P03346] interacts with 1 human partners:{P14635}

4589 Pathogen[ Q85601] interacts with 1 human partners:{P14635}

4590 Pathogen[ P14079] interacts with 1 human partners:{P14635}

4591 Pathogen[ P03383] interacts with 1 human partners:{P14635}

4592 Pathogen[ P03410] interacts with 1 human partners:{P14635}

4593 Pathogen[ P14075] interacts with 1 human partners:{P14635}

4594 Pathogen[ P0C206] interacts with 1 human partners:{P14635}

4595 [Cluster 755]GO:0034340+P biological\_process [name] response to type I interferon [def] "Any process that results in a change in state or activity of a cell or an organism (in terms of movement, secretion, enzyme production, gene expression, etc.) as a result of a type I interferon stimulus. Type I interferons include the interferon-alpha, beta, delta, epsilon, zeta, kappa, tau, and omega gene families." [GOC

4596 Pathogen[ Q2Q067] interacts with 1 human partners:{P23497}

4597 Pathogen[ P0C214] interacts with 1 human partners:{P23497}

4598 Pathogen[ P03346] interacts with 1 human partners:{P23497}

4599 Pathogen[ P14079] interacts with 1 human partners:{P23497}

4600 Pathogen[ P03383] interacts with 1 human partners:{P23497}

4601 Pathogen[ P14075] interacts with 1 human partners:{P23497}

4602 Pathogen[ P03363] interacts with 1 human partners:{P23497}

4603 [Cluster 756]GO:0005992+P biological\_process [name] trehalose biosynthetic process [def] "The chemical reactions and pathways resulting in the formation of trehalose, a disaccharide isomeric with sucrose and obtained from certain lichens and fungi." [GOC

4604 Pathogen[ Q2Q067] interacts with 1 human partners:{P36871}

4605 Pathogen[ P0C214] interacts with 2 human partners:{P36871;Q15124}

4606 Pathogen[ P03346] interacts with 1 human partners:{P36871}

4607 Pathogen[ Q85601] interacts with 2 human partners:{Q15124;P36871}

4608 Pathogen[ P14079] interacts with 2 human partners:{Q15124;P36871}

4609 Pathogen[ P03410] interacts with 2 human partners:{P36871;Q15124}

4610 Pathogen[ P0C206] interacts with 2 human partners:{Q15124;P36871}

4611 [Cluster 757]GO:0009152+P biological\_process [name] purine ribonucleotide biosynthetic process [def] "The chemical reactions and pathways resulting in the formation of a purine ribonucleotide, a compound consisting of ribonucleoside (a purine base linked to a ribose sugar) esterified with a phosphate group at either the 3' or 5'-hydroxyl group of the sugar." [GOC

4612 Pathogen[ P0C214] interacts with 1 human partners:{P30566}

4613 Pathogen[ P03410] interacts with 1 human partners:{P30566}

4614 [Cluster 758]GO:0006573+P biological\_process [name] valine metabolic process [def] "The chemical reactions and pathways involving valine, 2-amino-3-methylbutanoic acid." [GOC

4615 Pathogen[ P0C214] interacts with 1 human partners:{O15382}

4616 Pathogen[ Q85601] interacts with 1 human partners:{O15382}

4617 Pathogen[ P14079] interacts with 1 human partners:{O15382}

4618 Pathogen[ P03410] interacts with 1 human partners:{O15382}

4619 Pathogen[ P0C206] interacts with 1 human partners:{O15382}

4620 [Cluster 759]GO:0070814+P biological\_process [name] hydrogen sulfide biosynthetic process [def] "The chemical reactions and pathways resulting in the formation of hydrogen sulfide, H2S." [CHEBI

4621 Pathogen[ Q2Q067] interacts with 1 human partners:{P32929}

4622 Pathogen[ P0C214] interacts with 2 human partners:{P32929;P35520}

4623 Pathogen[ P03346] interacts with 1 human partners:{P32929}

4624 Pathogen[ Q85601] interacts with 1 human partners:{P32929}

4625 Pathogen[ P14079] interacts with 1 human partners:{P32929}

4626 Pathogen[ P03410] interacts with 1 human partners:{P32929}

4627 Pathogen[ P0C206] interacts with 1 human partners:{P32929}

4628 [Cluster 760]GO:0030187+P biological\_process [name] melatonin biosynthetic process [def] "The chemical reactions and pathways resulting in the formation of melatonin (N-acetyl-5-methoxytryptamine)." [GOC

4629 Pathogen[ P0C214] interacts with 1 human partners:{Q16613}

4630 Pathogen[ Q85601] interacts with 1 human partners:{Q16613}

4631 Pathogen[ P14079] interacts with 1 human partners:{Q16613}

4632 Pathogen[ P03383] interacts with 1 human partners:{Q16613}

4633 Pathogen[ P03410] interacts with 1 human partners:{Q16613}

4634 Pathogen[ P14075] interacts with 1 human partners:{Q16613}

4635 Pathogen[ P0C206] interacts with 1 human partners:{Q16613}

4636 [Cluster 761]GO:2000780+P biological\_process [name] negative regulation of double-strand break repair [def] "Any process that stops, prevents or reduces the frequency, rate or extent of double-strand break repair." [GOC

4637 Pathogen[ Q2Q067] interacts with 1 human partners:{Q14669}

4638 Pathogen[ P0C214] interacts with 2 human partners:{O95071;Q14669}

4639 Pathogen[ P03346] interacts with 3 human partners:{Q14669;Q96FW1;O95071}

4640 Pathogen[ Q85601] interacts with 2 human partners:{Q14669;O95071}

4641 Pathogen[ P14079] interacts with 1 human partners:{Q96FW1}

4642 Pathogen[ P03410] interacts with 1 human partners:{Q96FW1}

4643 Pathogen[ P14075] interacts with 1 human partners:{Q96FW1}

4644 Pathogen[ P0C206] interacts with 3 human partners:{Q14669;Q96FW1;O95071}

4645 Pathogen[ P03363] interacts with 3 human partners:{Q14669;O95071;Q96FW1}

4646 [Cluster 762]GO:0048711+P biological\_process [name] positive regulation of astrocyte differentiation [def] "Any process that activates or increases the frequency, rate or extent of astrocyte differentiation." [GOC

4647 Pathogen[ P0C214] interacts with 1 human partners:{P07093}

4648 Pathogen[ Q85601] interacts with 1 human partners:{P07093}

4649 [Cluster 763]GO:0051224+P biological\_process [name] negative regulation of protein transport [def] "Any process that stops, prevents, or reduces the frequency, rate or extent of the directed movement of a protein into, out of or within a cell, or between cells, by means of some agent such as a transporter or pore." [GOC

4650 Pathogen[ P0C214] interacts with 2 human partners:{O00308;Q9NV92}

4651 Pathogen[ P03346] interacts with 2 human partners:{Q9NV92;O00308}

4652 Pathogen[ P14079] interacts with 1 human partners:{Q9NV92}

4653 Pathogen[ P03410] interacts with 1 human partners:{Q9NV92}

4654 Pathogen[ P14075] interacts with 1 human partners:{Q9NV92}

4655 Pathogen[ P0C206] interacts with 2 human partners:{O00308;Q9NV92}

4656 Pathogen[ P03363] interacts with 1 human partners:{O00308}

4657 [Cluster 764]GO:0060351+P biological\_process [name] cartilage development involved in endochondral bone morphogenesis [def] "The process whose specific outcome is the progression of the cartilage that will provide a scaffold for mineralization of endochondral bones." [GOC

4658 Pathogen[ P0C214] interacts with 1 human partners:{P35520}

4659 Pathogen[ P03346] interacts with 1 human partners:{P31270}

4660 [Cluster 765]GO:0071397+P biological\_process [name] cellular response to cholesterol [def] "Any process that results in a change in state or activity of a cell (in terms of movement, secretion, enzyme production, gene expression, etc.) as a result of a cholesterol stimulus." [GOC

4661 Pathogen[ P03410] interacts with 1 human partners:{Q15049}

4662 [Cluster 766]GO:0018160+P biological\_process [name] peptidyl-pyrromethane cofactor linkage [def] "The covalent binding of a pyrromethane (dipyrin) cofactor to protein via the sulfur atom of cysteine forming dipyrrolylmethanemethyl-L-cysteine." [CHEBI

4663 Pathogen[ Q2Q067] interacts with 1 human partners:{P08397}

4664 Pathogen[ P0C214] interacts with 1 human partners:{P08397}

4665 Pathogen[ Q85601] interacts with 1 human partners:{P08397}

4666 Pathogen[ P14079] interacts with 1 human partners:{P08397}

4667 Pathogen[ P03383] interacts with 1 human partners:{P08397}

4668 Pathogen[ P03410] interacts with 1 human partners:{P08397}

4669 Pathogen[ P14075] interacts with 1 human partners:{P08397}

4670 Pathogen[ P0C206] interacts with 1 human partners:{P08397}

4671 [Cluster 767]GO:0031667+P biological\_process [name] response to nutrient levels [def] "Any process that results in a change in state or activity of a cell or an organism (in terms of movement, secretion, enzyme production, gene expression, etc.) as a result of a stimulus reflecting the presence, absence, or concentration of nutrients." [GOC

4672 Pathogen[ Q2Q067] interacts with 1 human partners:{P08397}

4673 Pathogen[ P0C214] interacts with 4 human partners:{P00480;P08397;P05543;P35520}

4674 Pathogen[ Q85601] interacts with 2 human partners:{P00480;P08397}

4675 Pathogen[ P14079] interacts with 4 human partners:{P13498;P08397;P48681;P00480}

4676 Pathogen[ P03383] interacts with 1 human partners:{P08397}

4677 Pathogen[ P03410] interacts with 2 human partners:{P08397;P00480}

4678 Pathogen[ P14075] interacts with 1 human partners:{P08397}

4679 Pathogen[ P0C206] interacts with 2 human partners:{P08397;P00480}

4680 [Cluster 768]GO:0010559+P biological\_process [name] regulation of glycoprotein biosynthetic process [def] "Any process that modulates the rate, frequency, or extent of the chemical reactions and pathways resulting in the formation of glycoproteins, any protein that contains covalently bound glucose (i.e. monosaccharide) residues\_ the glucose occurs most commonly as oligosaccharide or fairly small polysaccharide but occasionally as monosaccharide." [GOC

4681 Pathogen[ Q2Q067] interacts with 1 human partners:{P15976}

4682 Pathogen[ P03346] interacts with 1 human partners:{P15976}

4683 Pathogen[ Q85601] interacts with 1 human partners:{P15976}

4684 Pathogen[ P14079] interacts with 1 human partners:{P15976}

4685 Pathogen[ P03410] interacts with 1 human partners:{P15976}

4686 Pathogen[ P0C206] interacts with 1 human partners:{P15976}

4687 [Cluster 769]GO:0051891+P biological\_process [name] positive regulation of cardioblast differentiation [def] "Any process that activates or increases the frequency, rate or extent of cardioblast differentiation, the process in which a relatively unspecialized mesodermal cell acquires the specialized structural and/or functional features of a cardioblast. A cardioblast is a cardiac precursor cell. It is a cell that has been committed to a cardiac fate, but will undergo more cell division rather than terminally differentiating." [GOC

4688 Pathogen[ P03346] interacts with 1 human partners:{Q99593}

4689 [Cluster 770]GO:0043097+P biological\_process [name] pyrimidine nucleoside salvage [def] "Any process that generates a pyrimidine nucleoside, one of a family of organic molecules consisting of a pyrimidine base covalently bonded to a sugar ribose, from derivatives of it, without de novo synthesis." [GOC  
4690 Pathogen[ P0C214] interacts with 2 human partners:{095045;Q16831}  
4691 Pathogen[ Q85601] interacts with 1 human partners:{095045}  
4692 Pathogen[ P14079] interacts with 2 human partners:{Q16831;095045}  
4693 Pathogen[ P03410] interacts with 2 human partners:{095045;Q16831}  
4694 Pathogen[ P14075] interacts with 1 human partners:{095045}  
4695 Pathogen[ P0C206] interacts with 2 human partners:{Q16831;095045}  
4696 [Cluster 771]GO:0019370+P biological\_process [name] leukotriene biosynthetic process [def] "The chemical reactions and pathways resulting in the formation of leukotriene, a pharmacologically active substance derived from a polyunsaturated fatty acid, such as arachidonic acid." [GOC  
4697 Pathogen[ Q2Q067] interacts with 1 human partners:{P09917}  
4698 Pathogen[ P0C214] interacts with 2 human partners:{P09917;P18054}  
4699 Pathogen[ P03346] interacts with 2 human partners:{P18054;P09917}  
4700 Pathogen[ Q85601] interacts with 1 human partners:{P09917}  
4701 Pathogen[ P14079] interacts with 7 human partners:{Q16873;P20292;Q4G0N0;Q9BX51;B5MD39;Q14390;P09917}  
4702 Pathogen[ P03410] interacts with 5 human partners:{Q4G0N0;B5MD39;Q16873;P09917;P20292}  
4703 Pathogen[ P0C206] interacts with 2 human partners:{P09917;P20292}  
4704 [Cluster 772]GO:0010032+P biological\_process [name] meiotic chromosome condensation [def] "Compaction of chromatin structure prior to meiosis in eukaryotic cells." [PMID  
4705 Pathogen[ P14079] interacts with 1 human partners:{Q7Z7C7}  
4706 Pathogen[ P03410] interacts with 1 human partners:{Q7Z7C7}  
4707 Pathogen[ P14075] interacts with 1 human partners:{Q7Z7C7}  
4708 Pathogen[ P0C206] interacts with 1 human partners:{Q7Z7C7}  
4709 [Cluster 773]GO:0060691+P biological\_process [name] epithelial cell maturation involved in salivary gland development [def] "The developmental process, independent of morphogenetic (shape) change, that is required for an epithelial cell of the salivary gland to attain its fully functional state." [GOC  
4710 Pathogen[ Q2Q067] interacts with 1 human partners:{P17861}  
4711 Pathogen[ P0C214] interacts with 1 human partners:{P17861}  
4712 Pathogen[ P03346] interacts with 1 human partners:{P17861}  
4713 Pathogen[ Q85601] interacts with 1 human partners:{P17861}  
4714 Pathogen[ P03383] interacts with 1 human partners:{P17861}  
4715 Pathogen[ P03410] interacts with 1 human partners:{P17861}  
4716 Pathogen[ P14075] interacts with 1 human partners:{P17861}  
4717 Pathogen[ P0C206] interacts with 1 human partners:{P17861}  
4718 Pathogen[ P03363] interacts with 1 human partners:{P17861}  
4719 [Cluster 774]GO:0015840+P biological\_process [name] urea transport [def] "The directed movement of urea into, out of or within the cell. Urea is the water-soluble compound H<sub>2</sub>N-CO-NH<sub>2</sub>." [GOC  
4720 Pathogen[ P14079] interacts with 2 human partners:{Q8NBQ7;Q15849}  
4721 Pathogen[ P03410] interacts with 2 human partners:{Q13336;Q15849}  
4722 Pathogen[ P0C206] interacts with 1 human partners:{Q15849}  
4723 [Cluster 775]GO:0048739+P biological\_process [name] cardiac muscle fiber development [def] "The process whose specific outcome is the progression of cardiac muscle fiber over time, from its formation to the mature structure." [GOC  
4724 Pathogen[ P0C214] interacts with 2 human partners:{P13533;P35749}  
4725 Pathogen[ Q85601] interacts with 2 human partners:{P13533;P35749}  
4726 Pathogen[ P14079] interacts with 1 human partners:{O15273}  
4727 Pathogen[ P03410] interacts with 2 human partners:{O15273;P13533}  
4728 Pathogen[ P0C206] interacts with 2 human partners:{P13533;P35749}  
4729 [Cluster 776]GO:0007597+P biological\_process [name] blood coagulation, intrinsic pathway [def] "A protein activation cascade that contributes to blood coagulation and consists of the interactions among high molecular weight kininogen, prekallikrein, and factor XII that lead to the activation of clotting factor X." [GOC  
4730 Pathogen[ Q2Q067] interacts with 1 human partners:{Q07021}  
4731 Pathogen[ P03346] interacts with 1 human partners:{Q07021}  
4732 Pathogen[ Q85601] interacts with 1 human partners:{Q07021}  
4733 Pathogen[ P14079] interacts with 1 human partners:{Q07021}  
4734 Pathogen[ P03383] interacts with 1 human partners:{Q07021}  
4735 Pathogen[ P03410] interacts with 1 human partners:{Q07021}  
4736 Pathogen[ P14075] interacts with 1 human partners:{Q07021}  
4737 Pathogen[ P0C206] interacts with 1 human partners:{Q07021}  
4738 Pathogen[ P03363] interacts with 1 human partners:{Q07021}  
4739 [Cluster 777]GO:2000463+P biological\_process [name] positive regulation of excitatory postsynaptic membrane potential [def] "Any process that enhances the establishment or increases the extent of the excitatory postsynaptic potential (EPSP) which is a temporary increase in postsynaptic potential due to the flow of positively charged ions into the postsynaptic cell. The flow of ions that causes an EPSP is an excitatory postsynaptic current (EPSC) and makes it easier for the neuron to fire an action potential." [GOC



4740 Pathogen[ Q2Q067] interacts with 1 human partners:{P78352}

4741 Pathogen[ POC214] interacts with 1 human partners:{P78352}

4742 Pathogen[ P03346] interacts with 1 human partners:{P78352}

4743 Pathogen[ Q85601] interacts with 1 human partners:{P78352}

4744 Pathogen[ P03383] interacts with 1 human partners:{P78352}

4745 Pathogen[ P03410] interacts with 1 human partners:{P78352}

4746 Pathogen[ P14075] interacts with 1 human partners:{P78352}

4747 Pathogen[ POC206] interacts with 1 human partners:{P78352}

4748 Pathogen[ P03363] interacts with 1 human partners:{P78352}

4749 [Cluster 778]GO:0043243+P biological\_process [name] positive regulation of protein complex disassembly [def] "Any process that activates or increases the frequency, rate or extent of protein complex disassembly, the disaggregation of a protein complex into its constituent components." [GOC

4750 Pathogen[ Q2Q067] interacts with 1 human partners:{Q12983}

4751 Pathogen[ POC214] interacts with 1 human partners:{Q12983}

4752 Pathogen[ P03346] interacts with 1 human partners:{Q12983}

4753 Pathogen[ Q85601] interacts with 1 human partners:{Q12983}

4754 Pathogen[ P14079] interacts with 2 human partners:{O60502;Q12983}

4755 Pathogen[ P03383] interacts with 1 human partners:{Q12983}

4756 Pathogen[ P03410] interacts with 2 human partners:{Q12983;O60502}

4757 Pathogen[ P14075] interacts with 1 human partners:{Q12983}

4758 Pathogen[ POC206] interacts with 1 human partners:{Q12983}

4759 [Cluster 779]GO:0032543+P biological\_process [name] mitochondrial translation [def] "The chemical reactions and pathways resulting in the formation of a protein in a mitochondrion. This is a ribosome-mediated process in which the information in messenger RNA (mRNA) is used to specify the sequence of amino acids in the protein\_ the mitochondrion has its own ribosomes and transfer RNAs, and uses a genetic code that differs from the nuclear code." [GOC

4760 Pathogen[ P14079] interacts with 5 human partners:{O75879;O43716;Q9H0R6;Q8NC60;Q969S9}

4761 Pathogen[ P03410] interacts with 5 human partners:{O75879;Q969S9;Q8NC60;Q96EY7;Q9H0R6}

4762 [Cluster 780]GO:0010544+P biological\_process [name] negative regulation of platelet activation [def] "Any process that decreases the rate or frequency of platelet activation. Platelet activation is a series of progressive, overlapping events triggered by exposure of the platelets to subendothelial tissue." [GOC

4763 Pathogen[ Q2Q067] interacts with 1 human partners:{P29474}

4764 Pathogen[ POC214] interacts with 2 human partners:{P29474;P07093}

4765 Pathogen[ P03346] interacts with 1 human partners:{P29474}

4766 Pathogen[ Q85601] interacts with 2 human partners:{P29474;P07093}

4767 Pathogen[ P03383] interacts with 1 human partners:{P29474}

4768 Pathogen[ P03410] interacts with 1 human partners:{P29474}

4769 Pathogen[ P14075] interacts with 1 human partners:{P29474}

4770 Pathogen[ POC206] interacts with 1 human partners:{P29474}

4771 Pathogen[ P03363] interacts with 1 human partners:{P29474}

4772 [Cluster 781]GO:0043418+P biological\_process [name] homocysteine catabolic process [def] "The chemical reactions and pathways resulting in the breakdown of homocysteine, the amino acid alpha-amino-gamma-mercaptobutanoic acid." [GOC

4773 Pathogen[ POC214] interacts with 1 human partners:{P35520}

4774 [Cluster 782]GO:0006269+P biological\_process [name] DNA replication, synthesis of RNA primer [def] "The synthesis of a short RNA polymer, usually 4-15 nucleotides long, using one strand of unwound DNA as a template\_ the RNA then serves as a primer from which DNA polymerases extend synthesis." [PMID

4775 Pathogen[ P14079] interacts with 2 human partners:{Q96LW4;P49642}

4776 Pathogen[ P03410] interacts with 2 human partners:{Q96LW4;P49642}

4777 Pathogen[ POC206] interacts with 1 human partners:{P49642}

4778 [Cluster 783]GO:0035992+P biological\_process [name] tendon formation [def] "The process that gives rise to a tendon. This process pertains to the initial formation of a tendon from unspecified parts." [GOC

4779 Pathogen[ P03346] interacts with 1 human partners:{Q8IYA7}

4780 Pathogen[ P03363] interacts with 1 human partners:{Q8IYA7}

4781 [Cluster 784]GO:0035910+P biological\_process [name] ascending aorta morphogenesis [def] "The process in which the anatomical structures of the ascending aorta are generated and organized. The ascending aorta is the portion of the aorta in a two-pass circulatory system that lies between the heart and the arch of aorta. In a two-pass circulatory system blood passes twice through the heart to supply the body once." [GOC

4782 Pathogen[ P03346] interacts with 1 human partners:{Q06945}

4783 [Cluster 785]GO:0060368+P biological\_process [name] regulation of Fc receptor mediated stimulatory signaling pathway [def] "Any process that modulates the rate, frequency or extent of the Fc receptor mediated stimulatory signaling pathway. The Fc receptor mediated stimulatory signaling pathway is a series of molecular signals generated as a consequence of a the binding of the Fc portion of an immunoglobulin by an Fc receptor capable of activating or perpetuating an immune response. The Fc portion of an immunoglobulin is its C-terminal constant region." [GOC

4784 Pathogen[ Q2Q067] interacts with 1 human partners:{O15162}

4785 Pathogen[ POC214] interacts with 1 human partners:{O15162}

4786 Pathogen[ P03346] interacts with 1 human partners:{015162}

4787 Pathogen[ Q85601] interacts with 1 human partners:{015162}

4788 Pathogen[ P14079] interacts with 1 human partners:{015162}

4789 Pathogen[ P03383] interacts with 1 human partners:{015162}

4790 Pathogen[ P03410] interacts with 1 human partners:{015162}

4791 Pathogen[ P14075] interacts with 1 human partners:{015162}

4792 Pathogen[ P0C206] interacts with 1 human partners:{015162}

4793 [Cluster 786]GO:0000103+P biological\_process [name] sulfate assimilation [def] "The pathways by which inorganic sulfate is processed and incorporated into sulfated compounds." [GOC

4794 Pathogen[ Q2Q067] interacts with 1 human partners:{000204}

4795 Pathogen[ P0C214] interacts with 1 human partners:{000204}

4796 Pathogen[ P03346] interacts with 1 human partners:{000204}

4797 Pathogen[ Q85601] interacts with 1 human partners:{000204}

4798 Pathogen[ P03410] interacts with 1 human partners:{000204}

4799 Pathogen[ P0C206] interacts with 1 human partners:{000204}

4800 Pathogen[ P03363] interacts with 1 human partners:{000204}

4801 [Cluster 787]GO:0015961+P biological\_process [name] diadenosine polyphosphate catabolic process [def] "The chemical reactions and pathways resulting in the breakdown of diadenosine polyphosphate, a derivative of the nucleoside adenosine with phosphate groups attached." [GOC

4802 Pathogen[ P0C214] interacts with 1 human partners:{095989}

4803 Pathogen[ Q85601] interacts with 1 human partners:{095989}

4804 Pathogen[ P14079] interacts with 1 human partners:{095989}

4805 Pathogen[ P03383] interacts with 1 human partners:{095989}

4806 Pathogen[ P03410] interacts with 1 human partners:{095989}

4807 Pathogen[ P14075] interacts with 1 human partners:{095989}

4808 Pathogen[ P0C206] interacts with 1 human partners:{095989}

4809 [Cluster 788]GO:0090370+P biological\_process [name] negative regulation of cholesterol efflux [def] "Any process that decreases the frequency, rate or extent of cholesterol efflux. Cholesterol efflux is the directed movement of cholesterol, cholest-5-en-3-beta-ol, out of a cell or organelle." [GOC

4810 Pathogen[ P03346] interacts with 1 human partners:{Q12772}

4811 Pathogen[ Q85601] interacts with 1 human partners:{Q12772}

4812 Pathogen[ P14079] interacts with 1 human partners:{Q12772}

4813 Pathogen[ P03410] interacts with 1 human partners:{Q12772}

4814 Pathogen[ P0C206] interacts with 1 human partners:{Q12772}

4815 [Cluster 789]GO:0015680+P biological\_process [name] intracellular copper ion transport [def] "The directed movement of copper (Cu) ions within a cell." [GOC

4816 Pathogen[ Q2Q067] interacts with 1 human partners:{014618}

4817 Pathogen[ P0C214] interacts with 1 human partners:{014618}

4818 Pathogen[ P03346] interacts with 1 human partners:{014618}

4819 Pathogen[ Q85601] interacts with 1 human partners:{014618}

4820 Pathogen[ P14079] interacts with 1 human partners:{014618}

4821 Pathogen[ P03410] interacts with 1 human partners:{014618}

4822 Pathogen[ P0C206] interacts with 1 human partners:{014618}

4823 Pathogen[ P03363] interacts with 1 human partners:{014618}

4824 [Cluster 790]GO:0048312+P biological\_process [name] intracellular distribution of mitochondria [def] "Any process that establishes the spatial arrangement of mitochondria within the cell." [GOC

4825 Pathogen[ P0C214] interacts with 1 human partners:{015056}

4826 Pathogen[ P03346] interacts with 2 human partners:{Q7RTS1;015056}

4827 Pathogen[ P14079] interacts with 1 human partners:{Q7RTS1}

4828 Pathogen[ P03410] interacts with 1 human partners:{Q7RTS1}

4829 Pathogen[ P03363] interacts with 2 human partners:{Q7RTS1;015056}

4830 [Cluster 791]GO:0016189+P biological\_process [name] synaptic vesicle to endosome fusion [def] "Fusion of a synaptic vesicle with the membrane of an endosome." [GOC

4831 Pathogen[ P14079] interacts with 1 human partners:{Q15075}

4832 [Cluster 792]GO:0048644+P biological\_process [name] muscle organ morphogenesis [def] "The process in which the anatomical structures of muscle are generated and organized." [GOC

4833 Pathogen[ Q2Q067] interacts with 2 human partners:{P13349;Q14865}

4834 Pathogen[ P0C214] interacts with 2 human partners:{Q14865;P13349}

4835 Pathogen[ P03346] interacts with 3 human partners:{P13349;Q14865;P56915}

4836 Pathogen[ Q85601] interacts with 2 human partners:{P13349;Q14865}

4837 Pathogen[ P14079] interacts with 3 human partners:{P13349;Q14865;Q9Y6X1}

4838 Pathogen[ P03410] interacts with 3 human partners:{Q9Y6X1;P13349;Q14865}

4839 Pathogen[ P0C206] interacts with 2 human partners:{P13349;Q14865}

4840 Pathogen[ P03363] interacts with 3 human partners:{Q14865;P13349;P56915}

4841 [Cluster 793]GO:0060571+P biological\_process [name] morphogenesis of an epithelial fold [def] "The morphogenetic process in which an epithelial sheet bends along a linear axis." [GOC

4842 Pathogen[ P03346] interacts with 1 human partners:{P35453}

4843 Pathogen[ P03363] interacts with 1 human partners:{P35453}

4844 [Cluster 794]GO:0043117+P biological\_process [name] positive regulation of vascular permeability [def] "Any process that increases the extent to which blood vessels can

be pervaded by fluid." [GOC  
4845 Pathogen[ P14079] interacts with 1 human partners:{Q8TAT2}  
4846 Pathogen[ P03410] interacts with 1 human partners:{Q8TAT2}  
4847 [Cluster 795]GO:0007530+P biological\_process [name] sex determination [def] "Any process that establishes and transmits the specification of sexual status of an individual organism." [ISBN  
4848 Pathogen[ Q2Q067] interacts with 1 human partners:{Q9Y5R5}  
4849 Pathogen[ P0C214] interacts with 1 human partners:{Q9Y5R5}  
4850 Pathogen[ P03346] interacts with 5 human partners:{P41225;Q9Y5R5;O43680;P51843;Q9Y5R6}  
4851 Pathogen[ Q85601] interacts with 1 human partners:{Q9Y5R5}  
4852 Pathogen[ P14079] interacts with 1 human partners:{Q9Y5R5}  
4853 Pathogen[ P03383] interacts with 1 human partners:{Q9Y5R5}  
4854 Pathogen[ P14075] interacts with 1 human partners:{Q9Y5R5}  
4855 Pathogen[ P0C206] interacts with 2 human partners:{Q9Y5R6;Q9Y5R5}  
4856 Pathogen[ P03363] interacts with 2 human partners:{Q9Y5R6;Q9Y5R5}  
4857 [Cluster 796]GO:0032940+P biological\_process [name] secretion by cell [def] "The controlled release of a substance by a cell." [GOC  
4858 Pathogen[ P0C214] interacts with 1 human partners:{P07093}  
4859 Pathogen[ Q85601] interacts with 1 human partners:{P07093}  
4860 Pathogen[ P14079] interacts with 1 human partners:{Q9NZ43}  
4861 Pathogen[ P03410] interacts with 1 human partners:{Q9NZ43}  
4862 [Cluster 797]GO:0043116+P biological\_process [name] negative regulation of vascular permeability [def] "Any process that reduces the extent to which blood vessels can be pervaded by fluid." [GOC  
4863 Pathogen[ P14079] interacts with 1 human partners:{O60895}  
4864 Pathogen[ P03410] interacts with 1 human partners:{O60895}  
4865 [Cluster 798]GO:0030047+P biological\_process [name] actin modification [def] "Covalent modification of an actin molecule." [GOC  
4866 Pathogen[ P14079] interacts with 1 human partners:{Q9H2D6}  
4867 Pathogen[ P03410] interacts with 1 human partners:{Q9H2D6}  
4868 Pathogen[ P03363] interacts with 1 human partners:{Q9H2D6}  
4869 [Cluster 799]GO:0035020+P biological\_process [name] regulation of Rac protein signal transduction [def] "Any process that modulates the frequency, rate or extent of Rac protein signal transduction." [GOC  
4870 Pathogen[ Q2Q067] interacts with 1 human partners:{P46108}  
4871 Pathogen[ P0C214] interacts with 1 human partners:{P46108}  
4872 Pathogen[ P03346] interacts with 1 human partners:{P46108}  
4873 Pathogen[ Q85601] interacts with 1 human partners:{P46108}  
4874 Pathogen[ P14079] interacts with 1 human partners:{P46108}  
4875 Pathogen[ P03410] interacts with 1 human partners:{P46108}  
4876 Pathogen[ P0C206] interacts with 1 human partners:{P46108}  
4877 Pathogen[ P03363] interacts with 1 human partners:{P46108}  
4878 [Cluster 800]GO:0050910+P biological\_process [name] detection of mechanical stimulus involved in sensory perception of sound [def] "The series of events involved in the perception of sound vibration. The vibration is received by a cell and converted into a molecular signal." [GOC  
4879 Pathogen[ P14079] interacts with 1 human partners:{Q7RTU9}  
4880 Pathogen[ P03410] interacts with 1 human partners:{Q7RTU9}  
4881 [Cluster 801]GO:0008654+P biological\_process [name] phospholipid biosynthetic process [def] "The chemical reactions and pathways resulting in the formation of phospholipids, any lipid containing phosphoric acid as a mono- or diester." [ISBN  
4882 Pathogen[ Q2Q067] interacts with 1 human partners:{Q9UG56}  
4883 Pathogen[ P0C214] interacts with 1 human partners:{Q9UG56}  
4884 Pathogen[ P03346] interacts with 2 human partners:{Q9Y371;Q9UG56}  
4885 Pathogen[ Q85601] interacts with 1 human partners:{Q9UG56}  
4886 Pathogen[ P14079] interacts with 7 human partners:{Q9NPH2;Q86VE9;Q32NB8;Q9Y371;Q9NRX5;Q96JX3;Q9UG56}  
4887 Pathogen[ P03410] interacts with 6 human partners:{Q9NPH2;Q86VE9;Q9NRX5;Q96JX3;Q9Y371;Q9UG56}  
4888 Pathogen[ P14075] interacts with 1 human partners:{Q9UG56}  
4889 Pathogen[ P0C206] interacts with 1 human partners:{Q9UG56}  
4890 [Cluster 802]GO:0097089+P biological\_process [name] methyl-branched fatty acid metabolic process [def] "The chemical reactions and pathways involving methyl-branched fatty acids, aliphatic monocarboxylic acids with methyl branches on the main chain." [CHEBI  
4891 Pathogen[ P0C214] interacts with 1 human partners:{O14832}  
4892 Pathogen[ P14079] interacts with 1 human partners:{O14832}  
4893 Pathogen[ P03410] interacts with 1 human partners:{O14832}  
4894 Pathogen[ P14075] interacts with 1 human partners:{O14832}  
4895 Pathogen[ P0C206] interacts with 1 human partners:{O14832}  
4896 [Cluster 803]GO:0010734+P biological\_process [name] negative regulation of protein glutathionylation [def] "Any process that decreases the rate, frequency, or extent of protein glutathionylation. Protein glutathionylation is the protein modification process in which a glutathione molecule is added to a protein amino acid through a disulfide linkage." [GOC

4897 Pathogen[ POC214] interacts with 1 human partners:{P11413}

4898 [Cluster 804]GO:0043456+P biological\_process [name] regulation of pentose-phosphate shunt [def] "Any process that modulates the frequency, rate or extent of the pentose-phosphate shunt, the process in which glucose is oxidized, coupled to NADPH synthesis." [GOC

4899 Pathogen[ Q2Q067] interacts with 1 human partners:{P18669}

4900 Pathogen[ P03346] interacts with 1 human partners:{P18669}

4901 Pathogen[ Q85601] interacts with 1 human partners:{P18669}

4902 Pathogen[ P14079] interacts with 1 human partners:{P18669}

4903 Pathogen[ P03383] interacts with 1 human partners:{P18669}

4904 Pathogen[ P03410] interacts with 1 human partners:{P18669}

4905 Pathogen[ P14075] interacts with 1 human partners:{P18669}

4906 Pathogen[ POC206] interacts with 1 human partners:{P18669}

4907 Pathogen[ P03363] interacts with 1 human partners:{P18669}

4908 [Cluster 805]GO:0008299+P biological\_process [name] isoprenoid biosynthetic process [def] "The chemical reactions and pathways resulting in the formation of any isoprenoid compound, isoprene (2-methylbuta-1,3-diene) or compounds containing or derived from linked isoprene (3-methyl-2-butenylene) residues." [ISBN

4909 Pathogen[ Q2Q067] interacts with 1 human partners:{P14324}

4910 Pathogen[ POC214] interacts with 3 human partners:{Q13907;Q9BXS1;P14324}

4911 Pathogen[ P03346] interacts with 1 human partners:{P14324}

4912 Pathogen[ Q85601] interacts with 2 human partners:{P14324;Q13907}

4913 Pathogen[ P14079] interacts with 5 human partners:{Q9BXS1;Q86YH6;Q13907;P14324;P53602}

4914 Pathogen[ P03383] interacts with 1 human partners:{P14324}

4915 Pathogen[ P03410] interacts with 5 human partners:{P53602;Q13907;Q86YH6;P14324;Q9BXS1}

4916 Pathogen[ P14075] interacts with 1 human partners:{P14324}

4917 Pathogen[ POC206] interacts with 3 human partners:{P14324;Q13907;Q9BXS1}

4918 [Cluster 806]GO:0033136+P biological\_process [name] serine phosphorylation of STAT3 protein [def] "The process of introducing a phosphate group to a serine residue of the STAT3 protein." [GOC

4919 Pathogen[ P14079] interacts with 1 human partners:{Q15078}

4920 [Cluster 807]GO:0071599+P biological\_process [name] otic vesicle development [def] "The process whose specific outcome is the progression of the otic vesicle over time, from its formation to the mature structure. The otic vesicle is a transient embryonic structure formed during development of the vertebrate inner ear." [GOC

4921 Pathogen[ P03346] interacts with 3 human partners:{Q06710;Q15475;Q8N157}

4922 Pathogen[ P14079] interacts with 1 human partners:{Q8N157}

4923 Pathogen[ P03410] interacts with 1 human partners:{Q8N157}

4924 Pathogen[ POC206] interacts with 1 human partners:{Q8N157}

4925 Pathogen[ P03363] interacts with 1 human partners:{Q8N157}

4926 [Cluster 808]GO:0042776+P biological\_process [name] mitochondrial ATP synthesis coupled proton transport [def] "The transport of protons across a mitochondrial membrane to generate an electrochemical gradient (proton-motive force) that powers ATP synthesis." [GOC

4927 Pathogen[ Q2Q067] interacts with 1 human partners:{P24539}

4928 Pathogen[ POC214] interacts with 2 human partners:{P36542;P24539}

4929 Pathogen[ P03346] interacts with 1 human partners:{P24539}

4930 Pathogen[ Q85601] interacts with 1 human partners:{P24539}

4931 Pathogen[ P14079] interacts with 8 human partners:{P36542;P56134;P25705;P56385;P03928;O75964;P56381;P24539}

4932 Pathogen[ P03383] interacts with 1 human partners:{P24539}

4933 Pathogen[ P03410] interacts with 9 human partners:{P36542;P25705;P56385;P56381;P03928;P24539;O75964;P18859;P56134}

4934 Pathogen[ P14075] interacts with 2 human partners:{P24539;P56385}

4935 Pathogen[ POC206] interacts with 4 human partners:{P36542;P24539;P56381;P56385}

4936 [Cluster 809]GO:0051598+P biological\_process [name] meiotic recombination checkpoint [def] "A checkpoint that acts during late prophase I (pachytene) and prevents segregation of homologous chromosomes until recombination is completed, ensuring proper distribution of the genetic material to the gametes." [PMID

4937 Pathogen[ P14079] interacts with 1 human partners:{Q86X24}

4938 [Cluster 810]GO:0060999+P biological\_process [name] positive regulation of dendritic spine development [def] "Any process that increases the rate, frequency, or extent of dendritic spine development, the process whose specific outcome is the progression of the dendritic spine over time, from its formation to the mature structure." [GOC

4939 Pathogen[ P14079] interacts with 1 human partners:{O75781}

4940 Pathogen[ P03410] interacts with 1 human partners:{O75781}

4941 [Cluster 811]GO:0033382+P biological\_process [name] maintenance of granzyme B location in T cell secretory granule [def] "A process in which the protease granzyme B is maintained in a secretory granule in a T cell and prevented from moving elsewhere." [GOC

4942 Pathogen[ POC214] interacts with 1 human partners:{P10124}

4943 Pathogen[ P14079] interacts with 1 human partners:{P10124}

4944 Pathogen[ P03383] interacts with 1 human partners:{P10124}

4945 Pathogen[ P03410] interacts with 1 human partners:{P10124}

4946 Pathogen[ P14075] interacts with 1 human partners:{P10124}

4947 Pathogen[ P0C206] interacts with 1 human partners:{P10124}

4948 [Cluster 812]GO:0006072+P biological\_process [name] glycerol-3-phosphate metabolic process [def] "The chemical reactions and pathways involving glycerol-3-phosphate, a phosphoric monoester of glycerol." [GOC

4949 Pathogen[ Q2Q067] interacts with 1 human partners:{P32189}

4950 Pathogen[ P0C214] interacts with 5 human partners:{Q14410;Q14409;Q8N335;P32189;P21695}

4951 Pathogen[ P03346] interacts with 1 human partners:{P32189}

4952 Pathogen[ Q85601] interacts with 1 human partners:{P32189}

4953 Pathogen[ P14079] interacts with 4 human partners:{Q14410;P32189;Q14409;P21695}

4954 Pathogen[ P03383] interacts with 1 human partners:{P32189}

4955 Pathogen[ P03410] interacts with 4 human partners:{Q14410;Q14409;P32189;P21695}

4956 Pathogen[ P14075] interacts with 1 human partners:{P32189}

4957 Pathogen[ P0C206] interacts with 1 human partners:{P32189}

4958 [Cluster 813]GO:0001783+P biological\_process [name] B cell apoptosis [def] "The process of apoptosis in B cells." [GOC

4959 Pathogen[ Q2Q067] interacts with 1 human partners:{O43734}

4960 Pathogen[ P0C214] interacts with 1 human partners:{O43734}

4961 Pathogen[ P03346] interacts with 1 human partners:{O43734}

4962 Pathogen[ P14079] interacts with 1 human partners:{O43734}

4963 Pathogen[ P03383] interacts with 1 human partners:{O43734}

4964 Pathogen[ P03410] interacts with 1 human partners:{O43734}

4965 Pathogen[ P14075] interacts with 1 human partners:{O43734}

4966 Pathogen[ P0C206] interacts with 1 human partners:{O43734}

4967 Pathogen[ P03363] interacts with 1 human partners:{O43734}

4968 [Cluster 814]GO:0046549+P biological\_process [name] retinal cone cell development [def] "Development of a cone cell, one of the sensory cells in the eye that reacts to the presence of light. Cone cells contain the photopigment iodopsin or cyanopsin and are responsible for photopic (daylight) vision." [ISBN

4969 Pathogen[ Q2Q067] interacts with 1 human partners:{Q9NS56}

4970 Pathogen[ P0C214] interacts with 1 human partners:{Q9NS56}

4971 Pathogen[ P03346] interacts with 1 human partners:{Q9NS56}

4972 Pathogen[ Q85601] interacts with 1 human partners:{Q9NS56}

4973 Pathogen[ P14079] interacts with 2 human partners:{P56715;Q9NS56}

4974 Pathogen[ P03410] interacts with 1 human partners:{P56715}

4975 Pathogen[ P0C206] interacts with 2 human partners:{Q9NS56;P56715}

4976 Pathogen[ P03363] interacts with 1 human partners:{P56715}

4977 [Cluster 815]GO:0060872+P biological\_process [name] semicircular canal development [def] "The progression of the semicircular canal from its initial formation to the mature structure." [GOC

4978 Pathogen[ Q2Q067] interacts with 1 human partners:{P23769}

4979 Pathogen[ P0C214] interacts with 1 human partners:{P23769}

4980 Pathogen[ P03346] interacts with 1 human partners:{P23769}

4981 Pathogen[ Q85601] interacts with 1 human partners:{P23769}

4982 Pathogen[ P14079] interacts with 1 human partners:{P23769}

4983 Pathogen[ P03383] interacts with 1 human partners:{P23769}

4984 Pathogen[ P03410] interacts with 1 human partners:{P23769}

4985 Pathogen[ P14075] interacts with 1 human partners:{P23769}

4986 Pathogen[ P0C206] interacts with 1 human partners:{P23769}

4987 [Cluster 816]GO:0006051+P biological\_process [name] N-acetylmannosamine metabolic process [def] "The chemical reactions and pathways involving N-acetylmannosamine, the acetylated derivative of mannosamine, 2-amino-2-deoxymannose." [GOC

4988 Pathogen[ P14079] interacts with 1 human partners:{Q9UJ70}

4989 [Cluster 817]GO:0042573+P biological\_process [name] retinoic acid metabolic process [def] "The chemical reactions and pathways involving retinoic acid, one of the three components that makes up vitamin A." [GOC

4990 Pathogen[ P03346] interacts with 1 human partners:{P29373}

4991 Pathogen[ P0C206] interacts with 1 human partners:{P29373}

4992 Pathogen[ P03363] interacts with 1 human partners:{P29373}

4993 [Cluster 818]GO:0034214+P biological\_process [name] protein hexamerization [def] "The formation of a protein hexamer, a macromolecular structure consisting of six noncovalently associated identical or nonidentical subunits." [GOC

4994 Pathogen[ P03346] interacts with 1 human partners:{Q9UBP0}

4995 Pathogen[ Q85601] interacts with 1 human partners:{Q9UBP0}

4996 Pathogen[ P0C206] interacts with 1 human partners:{Q9UBP0}

4997 [Cluster 819]GO:2000310+P biological\_process [name] regulation of N-methyl-D-aspartate selective glutamate receptor activity [def] "Any process that modulates the frequency, rate or extent of N-methyl-D-aspartate selective glutamate receptor activity." [GOC

4998 Pathogen[ Q2Q067] interacts with 1 human partners:{P78352}

4999 Pathogen[ P0C214] interacts with 1 human partners:{P78352}

5000 Pathogen[ P03346] interacts with 1 human partners:{P78352}

5001 Pathogen[ Q85601] interacts with 1 human partners:{P78352}

5002 Pathogen[ P03383] interacts with 1 human partners:{P78352}

5003 Pathogen[ P03410] interacts with 1 human partners:{P78352}

5004 Pathogen[ P14075] interacts with 1 human partners:{P78352}

5005 Pathogen[ P0C206] interacts with 1 human partners:{P78352}

5006 Pathogen[ P03363] interacts with 1 human partners:{P78352}

5007 [Cluster 820]GO:0051533+P biological\_process [name] positive regulation of NFAT protein import into nucleus [def] "Any process that activates or increases the frequency, rate or extent of the movement of an NFAT protein from the cytoplasm to the nucleus." [GOC

5008 Pathogen[ P14079] interacts with 2 human partners:{P24588;Q9GZZ8}

5009 Pathogen[ P03410] interacts with 2 human partners:{Q9GZZ8;P24588}

5010 Pathogen[ P14075] interacts with 1 human partners:{Q9GZZ8}

5011 Pathogen[ P03363] interacts with 1 human partners:{Q8IWX8}

5012 [Cluster 821]GO:0030540+P biological\_process [name] female genitalia development [def] "The process whose specific outcome is the progression of the female genitalia over time, from formation to the mature structure." [GOC

5013 Pathogen[ P03346] interacts with 1 human partners:{Q9P2D1}

5014 Pathogen[ Q85601] interacts with 1 human partners:{Q9P2D1}

5015 Pathogen[ P14079] interacts with 1 human partners:{Q9P2D1}

5016 Pathogen[ P03410] interacts with 1 human partners:{Q9P2D1}

5017 Pathogen[ P0C206] interacts with 1 human partners:{Q9P2D1}

5018 [Cluster 822]GO:0014870+P biological\_process [name] response to muscle inactivity [def] "Any process that results in a change in state or activity of a cell or an organism (in terms of movement, secretion, enzyme production, gene expression, etc.) as a result of a muscle inactivity stimulus." [GOC

5019 Pathogen[ P0C214] interacts with 1 human partners:{P14618}

5020 Pathogen[ Q85601] interacts with 1 human partners:{P14618}

5021 Pathogen[ P0C206] interacts with 1 human partners:{P14618}

5022 [Cluster 823]GO:0007628+P biological\_process [name] adult walking behavior [def] "The actions or reactions of an adult relating to the progression of that organism along the ground by the process of lifting and setting down each leg." [GOC

5023 Pathogen[ P03346] interacts with 1 human partners:{Q9P2D1}

5024 Pathogen[ Q85601] interacts with 1 human partners:{Q9P2D1}

5025 Pathogen[ P14079] interacts with 4 human partners:{P20396;Q9UPW5;Q9P2D1;P10636}

5026 Pathogen[ P03410] interacts with 5 human partners:{Q9UPW5;Q9P2D1;P10636;Q9UBY8;P20396}

5027 Pathogen[ P0C206] interacts with 4 human partners:{Q9P2D1;P10636;Q9UPW5;P20396}

5028 [Cluster 824]GO:0060629+P biological\_process [name] regulation of homologous chromosome segregation [def] "Any process that modulates the rate, frequency, or extent of homologous chromosome segregation, the cell cycle process in which replicated homologous chromosomes are organized and then physically separated and apportioned to two sets during the first division of the meiotic cell cycle. Each replicated chromosome, composed of two sister chromatids, aligns at the cell equator, paired with its homologous partner\_ this pairing off, referred to as synapsis, permits genetic recombination. One homolog (both sister chromatids) of each morphologic type goes into each of the resulting chromosome sets." [GOC

5029 Pathogen[ P14079] interacts with 1 human partners:{Q86X24}

5030 [Cluster 825]GO:0006498+P biological\_process [name] N-terminal protein lipidation [def] "The covalent attachment of a lipid group to the amino terminus of a protein." [GOC

5031 Pathogen[ Q2Q067] interacts with 1 human partners:{P30419}

5032 Pathogen[ P0C214] interacts with 1 human partners:{P30419}

5033 Pathogen[ Q85601] interacts with 1 human partners:{P30419}

5034 Pathogen[ P14079] interacts with 1 human partners:{P30419}

5035 Pathogen[ P03410] interacts with 1 human partners:{P30419}

5036 Pathogen[ P0C206] interacts with 1 human partners:{P30419}

5037 [Cluster 826]GO:0035971+P biological\_process [name] peptidyl-histidine dephosphorylation [def] "The removal of phosphoric residues from peptidyl-O-phospho-L-histidine to form peptidyl-histidine." [GOC

5038 Pathogen[ P03346] interacts with 1 human partners:{Q9NRX4}

5039 Pathogen[ P14079] interacts with 1 human partners:{Q9NRX4}

5040 Pathogen[ P03410] interacts with 1 human partners:{Q9NRX4}

5041 Pathogen[ P0C206] interacts with 1 human partners:{Q9NRX4}

5042 [Cluster 827]GO:0010596+P biological\_process [name] negative regulation of endothelial cell migration [def] "Any process that decreases the rate, frequency, or extent of the orderly movement of an endothelial cell into the extracellular matrix to form an endothelium." [GOC

5043 Pathogen[ P03346] interacts with 1 human partners:{O00522}

5044 Pathogen[ P14079] interacts with 2 human partners:{Q8N300;O00522}

5045 Pathogen[ P03410] interacts with 2 human partners:{O00522;Q8N300}

5046 Pathogen[ P0C206] interacts with 2 human partners:{Q8N300;O00522}

5047 Pathogen[ P03363] interacts with 1 human partners:{O00522}

5048 [Cluster 828]GO:0035058+P biological\_process [name] nonmotile primary cilium assembly [def] "The assembly of a primary cilium which contains a variable array of axonemal microtubules but does not contain molecular motors. Nonmotile primary cilia are found on many different cell types and function as sensory organelles that concentrate and organize sensory signaling molecules." [GOC

5049 Pathogen[ P14079] interacts with 1 human partners:{Q8NFX9}

5050 Pathogen[ P03410] interacts with 1 human partners:{Q8NFJ9}

5051 Pathogen[ P0C206] interacts with 1 human partners:{Q8NFJ9}

5052 Pathogen[ P03363] interacts with 1 human partners:{Q8NFJ9}

5053 [Cluster 829]GO:0030854+P biological\_process [name] positive regulation of granulocyte differentiation [def] "Any process that activates or increases the frequency, rate or extent of granulocyte differentiation." [GOC

5054 Pathogen[ Q2Q067] interacts with 3 human partners:{Q8IZD2;Q5VTD9;Q01196}

5055 Pathogen[ P0C214] interacts with 2 human partners:{Q5VTD9;Q8IZD2}

5056 Pathogen[ P03346] interacts with 3 human partners:{Q5VTD9;Q01196;Q8IZD2}

5057 Pathogen[ Q85601] interacts with 2 human partners:{Q5VTD9;Q8IZD2}

5058 Pathogen[ P14079] interacts with 1 human partners:{Q5VTD9}

5059 Pathogen[ P03410] interacts with 1 human partners:{Q5VTD9}

5060 Pathogen[ P0C206] interacts with 2 human partners:{Q5VTD9;Q8IZD2}

5061 Pathogen[ P03363] interacts with 1 human partners:{Q5VTD9}

5062 [Cluster 830]GO:0007044+P biological\_process [name] cell-substrate junction assembly [def] "The aggregation, arrangement and bonding together of a set of components to form a junction between a cell and its substrate." [GOC

5063 Pathogen[ Q2Q067] interacts with 1 human partners:{Q9HBL0}

5064 Pathogen[ P0C214] interacts with 1 human partners:{Q9HBL0}

5065 Pathogen[ P03346] interacts with 1 human partners:{Q9HBL0}

5066 Pathogen[ Q85601] interacts with 1 human partners:{Q9HBL0}

5067 Pathogen[ P14079] interacts with 1 human partners:{Q9HBL0}

5068 Pathogen[ P03410] interacts with 1 human partners:{Q9HBL0}

5069 Pathogen[ P0C206] interacts with 1 human partners:{Q9HBL0}

5070 Pathogen[ P03363] interacts with 1 human partners:{Q9HBL0}

5071 [Cluster 831]GO:0071763+P biological\_process [name] nuclear membrane organization [def] "A process that is carried out at the cellular level which results in the assembly, arrangement of constituent parts, or disassembly of the nuclear inner or outer membrane." [GOC

5072 Pathogen[ Q2Q067] interacts with 1 human partners:{O14656}

5073 Pathogen[ P0C214] interacts with 1 human partners:{O14656}

5074 Pathogen[ P03346] interacts with 1 human partners:{O14656}

5075 Pathogen[ Q85601] interacts with 1 human partners:{O14656}

5076 Pathogen[ P14079] interacts with 2 human partners:{O14656;Q5JTV8}

5077 Pathogen[ P03410] interacts with 2 human partners:{O14656;Q5JTV8}

5078 Pathogen[ P0C206] interacts with 1 human partners:{O14656}

5079 [Cluster 832]GO:0006430+P biological\_process [name] lysyl-tRNA aminoacylation [def] "The process of coupling lysine to lysyl-tRNA, catalyzed by lysyl-tRNA synthetase. In tRNA aminoacylation, the amino acid is first activated by linkage to AMP and then transferred to either the 2'- or the 3'-hydroxyl group of the 3'-adenosine residue of the tRNA." [GOC

5080 Pathogen[ Q2Q067] interacts with 1 human partners:{Q15046}

5081 Pathogen[ P0C214] interacts with 1 human partners:{Q15046}

5082 Pathogen[ Q85601] interacts with 1 human partners:{Q15046}

5083 Pathogen[ P14079] interacts with 1 human partners:{Q15046}

5084 Pathogen[ P03383] interacts with 1 human partners:{Q15046}

5085 Pathogen[ P03410] interacts with 1 human partners:{Q15046}

5086 Pathogen[ P14075] interacts with 1 human partners:{Q15046}

5087 Pathogen[ P0C206] interacts with 1 human partners:{Q15046}

5088 [Cluster 833]GO:0017156+P biological\_process [name] calcium ion-dependent exocytosis [def] "The release of intracellular molecules (e.g. hormones, matrix proteins) contained within a membrane-bounded vesicle by fusion of the vesicle with the plasma membrane of a cell, requiring the presence of calcium ions." [GOC

5089 Pathogen[ P14079] interacts with 2 human partners:{P16298;Q9Y6U3}

5090 Pathogen[ P03410] interacts with 2 human partners:{Q9Y6U3;Q9BRK5}

5091 [Cluster 834]GO:0060350+P biological\_process [name] endochondral bone morphogenesis [def] "The process in which bones are generated and organized as a result of the conversion of initial cartilaginous anlage into bone." [GOC

5092 Pathogen[ Q2Q067] interacts with 1 human partners:{Q86X55}

5093 Pathogen[ P0C214] interacts with 1 human partners:{Q86X55}

5094 Pathogen[ P03346] interacts with 1 human partners:{Q86X55}

5095 Pathogen[ Q85601] interacts with 1 human partners:{Q86X55}

5096 Pathogen[ P03383] interacts with 1 human partners:{Q86X55}

5097 Pathogen[ P03410] interacts with 1 human partners:{Q86X55}

5098 Pathogen[ P14075] interacts with 1 human partners:{Q86X55}

5099 Pathogen[ P0C206] interacts with 1 human partners:{Q86X55}

5100 Pathogen[ P03363] interacts with 1 human partners:{Q86X55}

5101 [Cluster 835]GO:0070669+P biological\_process [name] response to interleukin-2 [def] "Any process that results in a change in state or activity of a cell or an organism (in terms of movement, secretion, enzyme production, gene expression, etc.) as a result of an interleukin-2 stimulus." [GOC

5102 Pathogen[ Q2Q067] interacts with 1 human partners:{Q99966}

5103 Pathogen[ P0C214] interacts with 1 human partners:{Q99966}

5104 Pathogen[ P03346] interacts with 1 human partners:{Q99966}

5105 Pathogen[ Q85601] interacts with 1 human partners:{Q99966}

5106 Pathogen[ P14079] interacts with 1 human partners:{Q99966}

5107 Pathogen[ P03410] interacts with 1 human partners:{Q99966}

5108 Pathogen[ P0C206] interacts with 1 human partners:{Q99966}

5109 [Cluster 836]GO:0032376+P biological\_process [name] positive regulation of cholesterol transport [def] "Any process that activates or increases the frequency, rate or extent of the directed movement of cholesterol into, out of or within a cell, or between cells, by means of some agent such as a transporter or pore." [GOC

5110 Pathogen[ Q2Q067] interacts with 1 human partners:{P55055}

5111 Pathogen[ P03346] interacts with 1 human partners:{P55055}

5112 Pathogen[ Q85601] interacts with 1 human partners:{P55055}

5113 Pathogen[ P14079] interacts with 1 human partners:{P55055}

5114 Pathogen[ P0C206] interacts with 1 human partners:{P55055}

5115 [Cluster 837]GO:0031284+P biological\_process [name] positive regulation of guanylate cyclase activity [def] "Any process that activates or increases the frequency, rate or extent of guanylate cyclase activity." [GOC

5116 Pathogen[ Q2Q067] interacts with 1 human partners:{P29474}

5117 Pathogen[ P0C214] interacts with 1 human partners:{P29474}

5118 Pathogen[ P03346] interacts with 1 human partners:{P29474}

5119 Pathogen[ Q85601] interacts with 1 human partners:{P29474}

5120 Pathogen[ P03383] interacts with 1 human partners:{P29474}

5121 Pathogen[ P03410] interacts with 1 human partners:{P29474}

5122 Pathogen[ P14075] interacts with 1 human partners:{P29474}

5123 Pathogen[ P0C206] interacts with 1 human partners:{P29474}

5124 Pathogen[ P03363] interacts with 1 human partners:{P29474}

5125 [Cluster 838]GO:0046950+P biological\_process [name] cellular ketone body metabolic process [def] "The chemical reactions and pathways involving ketone bodies, any one of the three substances

5126 Pathogen[ P03410] interacts with 1 human partners:{P55809}

5127 [Cluster 839]GO:0046887+P biological\_process [name] positive regulation of hormone secretion [def] "Any process that activates or increases the frequency, rate or extent of the regulated release of a hormone from a cell or group of cells." [GOC

5128 Pathogen[ P0C214] interacts with 1 human partners:{P16220}

5129 Pathogen[ P03346] interacts with 1 human partners:{P16220}

5130 Pathogen[ Q85601] interacts with 1 human partners:{P16220}

5131 Pathogen[ P03383] interacts with 1 human partners:{P16220}

5132 Pathogen[ P03410] interacts with 1 human partners:{P16220}

5133 Pathogen[ P14075] interacts with 1 human partners:{P16220}

5134 Pathogen[ P0C206] interacts with 1 human partners:{P16220}

5135 Pathogen[ P03363] interacts with 1 human partners:{P16220}

5136 [Cluster 840]GO:2000048+P biological\_process [name] negative regulation of cell-cell adhesion mediated by cadherin [def] "Any process that stops, prevents, or reduces the frequency, rate or extent of cell-cell adhesion mediated by cadherin." [GOC

5137 Pathogen[ Q2Q067] interacts with 1 human partners:{Q9H4X1}

5138 Pathogen[ P0C214] interacts with 1 human partners:{Q9H4X1}

5139 Pathogen[ P03346] interacts with 1 human partners:{Q9H4X1}

5140 Pathogen[ Q85601] interacts with 1 human partners:{Q9H4X1}

5141 Pathogen[ P03383] interacts with 1 human partners:{Q9H4X1}

5142 Pathogen[ P03410] interacts with 1 human partners:{Q9H4X1}

5143 Pathogen[ P14075] interacts with 1 human partners:{Q9H4X1}

5144 Pathogen[ P0C206] interacts with 1 human partners:{Q9H4X1}

5145 Pathogen[ P03363] interacts with 1 human partners:{Q9H4X1}

5146 [Cluster 841]GO:0048665+P biological\_process [name] neuron fate specification [def] "The process in which a cell becomes capable of differentiating autonomously into a neuron in an environment that is neutral with respect to the developmental pathway. Upon specification, the cell fate can be reversed." [GOC

5147 Pathogen[ Q2Q067] interacts with 1 human partners:{O43711}

5148 Pathogen[ P03346] interacts with 3 human partners:{O43711;O95096;Q99581}

5149 Pathogen[ Q85601] interacts with 1 human partners:{O43711}

5150 Pathogen[ P14079] interacts with 2 human partners:{Q99581;O43711}

5151 Pathogen[ P03383] interacts with 1 human partners:{O43711}

5152 Pathogen[ P03410] interacts with 1 human partners:{O43711}

5153 Pathogen[ P14075] interacts with 1 human partners:{O43711}

5154 Pathogen[ P0C206] interacts with 2 human partners:{O43711;Q99581}

5155 Pathogen[ P03363] interacts with 2 human partners:{O43711;Q99581}

5156 [Cluster 842]GO:0048730+P biological\_process [name] epidermis morphogenesis [def] "The process in which the anatomical structures of the epidermis are generated and organized. The epidermis is the outer epithelial layer of a plant or animal, it may be a single layer that produces an extracellular material (e.g. the cuticle of arthropods) or a complex stratified squamous epithelium, as in the case of many vertebrate species." [GOC

5157 Pathogen[ Q2Q067] interacts with 2 human partners:{P60953;Q9HBD4}

5158 Pathogen[ P0C214] interacts with 2 human partners:{Q9HBD4;P60953}

5159 Pathogen[ P03346] interacts with 2 human partners:{Q9HBD4;P60953}

5160 Pathogen[ Q85601] interacts with 2 human partners:{Q9HBD4;P60953}

5161 Pathogen[ P03383] interacts with 2 human partners:{Q9HBD4;P60953}

5162 Pathogen[ P03410] interacts with 2 human partners:{P60953;Q9HBD4}

5163 Pathogen[ P14075] interacts with 2 human partners:{P60953;Q9HBD4}



5164 Pathogen[ P0C206] interacts with 2 human partners:{P60953;Q9HBD4}

5165 Pathogen[ P03363] interacts with 2 human partners:{Q9HBD4;P60953}

5166 [Cluster 843]GO:0090005+P biological\_process [name] negative regulation of establishment of protein localization in plasma membrane [def] "Any process that decreases the frequency, rate or extent of the directed movement of a protein to a specific location in the plasma membrane." [GOC

5167 Pathogen[ Q2Q067] interacts with 2 human partners:{Q15172;Q7Z2X4}

5168 Pathogen[ P0C214] interacts with 2 human partners:{Q15172;Q7Z2X4}

5169 Pathogen[ P03346] interacts with 2 human partners:{Q15172;Q7Z2X4}

5170 Pathogen[ Q85601] interacts with 2 human partners:{Q15172;Q7Z2X4}

5171 Pathogen[ P14079] interacts with 2 human partners:{Q15172;Q7Z2X4}

5172 Pathogen[ P03410] interacts with 2 human partners:{Q15172;Q7Z2X4}

5173 Pathogen[ P0C206] interacts with 2 human partners:{Q7Z2X4;Q15172}

5174 Pathogen[ P03363] interacts with 1 human partners:{Q15172}

5175 [Cluster 844]GO:0060301+P biological\_process [name] positive regulation of cytokine activity [def] "Any process that increases the rate, frequency or extent of the activity of a molecule that controls the survival, growth, differentiation and effector function of tissues and cells." [GOC

5176 Pathogen[ Q2Q067] interacts with 1 human partners:{O14786}

5177 Pathogen[ P0C214] interacts with 1 human partners:{O14786}

5178 Pathogen[ P03346] interacts with 1 human partners:{O14786}

5179 Pathogen[ Q85601] interacts with 1 human partners:{O14786}

5180 Pathogen[ P03410] interacts with 1 human partners:{O14786}

5181 Pathogen[ P0C206] interacts with 1 human partners:{O14786}

5182 Pathogen[ P03363] interacts with 1 human partners:{O14786}

5183 [Cluster 845]GO:0072583+P biological\_process [name] clathrin-mediated endocytosis [def] "An endocytosis process that begins when material is taken up into clathrin-coated pits, which then pinch off to form clathrin-coated endocytic vesicles." [GOC

5184 Pathogen[ P03410] interacts with 1 human partners:{Q0JRZ9}

5185 [Cluster 846]GO:0010310+P biological\_process [name] regulation of hydrogen peroxide metabolic process [def] "Any process that modulates the frequency, rate or extent of the chemical reactions and pathways involving hydrogen peroxide." [PMID

5186 Pathogen[ Q2Q067] interacts with 1 human partners:{P63000}

5187 Pathogen[ P0C214] interacts with 1 human partners:{P63000}

5188 Pathogen[ P03346] interacts with 2 human partners:{Q86UR1;P63000}

5189 Pathogen[ Q85601] interacts with 1 human partners:{P63000}

5190 Pathogen[ P03383] interacts with 1 human partners:{P63000}

5191 Pathogen[ P03410] interacts with 2 human partners:{P63000;Q86UR1}

5192 Pathogen[ P14075] interacts with 1 human partners:{P63000}

5193 Pathogen[ P0C206] interacts with 1 human partners:{P63000}

5194 Pathogen[ P03363] interacts with 2 human partners:{Q86UR1;P63000}

5195 [Cluster 847]GO:0030819+P biological\_process [name] positive regulation of cAMP biosynthetic process [def] "Any process that activates or increases the frequency, rate or extent of the chemical reactions and pathways resulting in the formation of the nucleotide cAMP (cyclic AMP, adenosine 3',5'-cyclophosphate)." [GOC

5196 Pathogen[ Q2Q067] interacts with 1 human partners:{Q02952}

5197 Pathogen[ P03346] interacts with 1 human partners:{Q02952}

5198 Pathogen[ P14079] interacts with 5 human partners:{Q02952;Q96G30;P24588;O60895;Q8TCY5}

5199 Pathogen[ P03383] interacts with 1 human partners:{Q02952}

5200 Pathogen[ P03410] interacts with 4 human partners:{Q96G30;O60895;Q02952;P24588}

5201 Pathogen[ P14075] interacts with 1 human partners:{Q02952}

5202 Pathogen[ P0C206] interacts with 1 human partners:{Q02952}

5203 Pathogen[ P03363] interacts with 1 human partners:{Q02952}

5204 [Cluster 848]GO:0007613+P biological\_process [name] memory [def] "The activities involved in the mental information processing system that receives (registers), modifies, stores, and retrieves informational stimuli. The main stages involved in the formation and retrieval of memory are encoding (processing of received information by acquisition), storage (building a permanent record of received information as a result of consolidation) and retrieval (calling back the stored information and use it in a suitable way to execute a given task)." [GOC

5205 Pathogen[ P03346] interacts with 1 human partners:{Q96AB6}

5206 Pathogen[ P14079] interacts with 2 human partners:{Q96AB6;P16298}

5207 Pathogen[ P03410] interacts with 1 human partners:{Q96AB6}

5208 Pathogen[ P0C206] interacts with 1 human partners:{Q96AB6}

5209 Pathogen[ P03363] interacts with 1 human partners:{Q96AB6}

5210 [Cluster 849]GO:0021539+P biological\_process [name] subthalamus development [def] "The process whose specific outcome is the progression of the subthalamus over time, from its formation to the mature structure. The subthalamus is the anterior part of the diencephalon that lies between the thalamus, hypothalamus, and tegmentum of the mesencephalon, including subthalamic nucleus, zona incerta, the fields of Forel, and the nucleus of ansa lenticularis." [GO\_REF

5211 Pathogen[ P14079] interacts with 1 human partners:{O14949}

5212 Pathogen[ P03410] interacts with 1 human partners:{O14949}

5213 [Cluster 850]GO:0017055+P biological\_process [name] negative regulation of RNA polymerase II transcriptional preinitiation complex assembly [def] "Any process that

stops, prevents, or reduces the frequency, rate or extent of RNA polymerase II transcriptional preinitiation complex assembly." [GOC

5214 Pathogen[ Q2Q067] interacts with 1 human partners:{P10827}

5215 Pathogen[ P03346] interacts with 1 human partners:{P10827}

5216 Pathogen[ Q85601] interacts with 1 human partners:{P10827}

5217 Pathogen[ P14079] interacts with 1 human partners:{P10827}

5218 Pathogen[ P0C206] interacts with 1 human partners:{P10827}

5219 [Cluster 851]GO:0060546+P biological\_process [name] negative regulation of necroptosis [def] "Any process that decreases the rate frequency or extent of necroptosis. Necroptosis is a necrotic cell death process that results from the activation of endogenous cellular processes, such as signaling involving death domain receptors and Toll-like receptors." [GOC

5220 Pathogen[ P03346] interacts with 1 human partners:{Q13489}

5221 Pathogen[ P0C206] interacts with 1 human partners:{Q13489}

5222 Pathogen[ P03363] interacts with 1 human partners:{Q13489}

5223 [Cluster 852]GO:0046485+P biological\_process [name] ether lipid metabolic process [def] "The chemical reactions and pathways involving ether lipids, lipids that contain (normally) one lipid alcohol in ether linkage to one of the carbon atoms (normally C-1) of glycerol." [ISBN

5224 Pathogen[ P14079] interacts with 1 human partners:{Q8N661}

5225 Pathogen[ P03410] interacts with 1 human partners:{Q8N661}

5226 Pathogen[ P14075] interacts with 1 human partners:{Q8N661}

5227 Pathogen[ P0C206] interacts with 1 human partners:{Q8N661}

5228 [Cluster 853]GO:0050877+P biological\_process [name] neurological system process [def] "A organ system process carried out by any of the organs or tissues of neurological system." [GOC

5229 Pathogen[ P03346] interacts with 1 human partners:{Q15270}

5230 Pathogen[ P0C206] interacts with 1 human partners:{Q15270}

5231 Pathogen[ P03363] interacts with 1 human partners:{Q15270}

5232 [Cluster 854]GO:0042816+P biological\_process [name] vitamin B6 metabolic process [def] "The chemical reactions and pathways involving any of the vitamin B6 compounds

5233 Pathogen[ P14079] interacts with 1 human partners:{Q9NVS9}

5234 Pathogen[ P03410] interacts with 1 human partners:{Q9NVS9}

5235 Pathogen[ P14075] interacts with 1 human partners:{Q9NVS9}

5236 [Cluster 855]GO:0006744+P biological\_process [name] ubiquinone biosynthetic process [def] "The chemical reactions and pathways resulting in the formation of ubiquinone, a lipid-soluble electron-transporting coenzyme." [GOC

5237 Pathogen[ Q2Q067] interacts with 1 human partners:{075208}

5238 Pathogen[ P0C214] interacts with 3 human partners:{075208;Q99807;Q5HYK3}

5239 Pathogen[ P03346] interacts with 2 human partners:{075208;Q5HYK3}

5240 Pathogen[ P14079] interacts with 5 human partners:{Q99807;Q86YH6;075208;Q9Y3A0;Q5HYK3}

5241 Pathogen[ P03383] interacts with 1 human partners:{075208}

5242 Pathogen[ P03410] interacts with 5 human partners:{Q9Y3A0;Q99807;Q86YH6;Q5HYK3;075208}

5243 Pathogen[ P14075] interacts with 2 human partners:{Q5HYK3;075208}

5244 Pathogen[ P0C206] interacts with 4 human partners:{Q99807;Q9Y3A0;075208;Q5HYK3}

5245 Pathogen[ P03363] interacts with 1 human partners:{075208}

5246 [Cluster 856]GO:0050862+P biological\_process [name] positive regulation of T cell receptor signaling pathway [def] "Any process that activates or increases the frequency, rate or extent of signaling pathways initiated by the cross-linking of an antigen receptor on a T cell." [GOC

5247 Pathogen[ Q2Q067] interacts with 1 human partners:{A2RU30}

5248 Pathogen[ P0C214] interacts with 1 human partners:{A2RU30}

5249 Pathogen[ P03346] interacts with 1 human partners:{A2RU30}

5250 Pathogen[ P14079] interacts with 2 human partners:{A2RU30;Q6PIZ9}

5251 Pathogen[ P03383] interacts with 1 human partners:{A2RU30}

5252 Pathogen[ P03410] interacts with 2 human partners:{Q6PIZ9;A2RU30}

5253 Pathogen[ P14075] interacts with 1 human partners:{A2RU30}

5254 Pathogen[ P0C206] interacts with 1 human partners:{A2RU30}

5255 Pathogen[ P03363] interacts with 1 human partners:{A2RU30}

5256 [Cluster 857]GO:0072044+P biological\_process [name] collecting duct development [def] "The process whose specific outcome is the progression of a collecting duct over time, from its formation to the mature structure. The collecting duct responds to vasopressin and aldosterone to regulate water, electrolyte and acid-base balance. It is the final common path through which urine flows before entering the ureter and then emptying into the bladder." [GOC

5257 Pathogen[ P03346] interacts with 1 human partners:{Q92481}

5258 [Cluster 858]GO:0072643+P biological\_process [name] interferon-gamma secretion [def] "The regulated release of interferon-gamma from a cell or group of cells." [GOC

5259 Pathogen[ Q2Q067] interacts with 1 human partners:{P14373}

5260 Pathogen[ P0C214] interacts with 1 human partners:{P14373}

5261 Pathogen[ P03346] interacts with 1 human partners:{P14373}

5262 Pathogen[ Q85601] interacts with 1 human partners:{P14373}

5263 Pathogen[ P14079] interacts with 1 human partners:{P14373}

5264 Pathogen[ P0C206] interacts with 1 human partners:{P14373}

5265 Pathogen[ P03363] interacts with 1 human partners:{P14373}

5266 [Cluster 859]GO:0006563+P biological\_process [name] L-serine metabolic process  
[def] "The chemical reactions and pathways involving L-serine, the L-enantiomer of serine, i.e. (2S)-2-amino-3-hydroxypropanoic acid." [CHEBI

5267 Pathogen[ Q2Q067] interacts with 1 human partners:{P34896}

5268 Pathogen[ P0C214] interacts with 3 human partners:{P34897;P34896;P35520}

5269 Pathogen[ Q85601] interacts with 1 human partners:{P34896}

5270 Pathogen[ P14079] interacts with 2 human partners:{P34897;P34896}

5271 Pathogen[ P03383] interacts with 1 human partners:{P34896}

5272 Pathogen[ P03410] interacts with 2 human partners:{P34897;P34896}

5273 Pathogen[ P14075] interacts with 1 human partners:{P34896}

5274 Pathogen[ P0C206] interacts with 2 human partners:{P34897;P34896}

5275 [Cluster 860]GO:0021532+P biological\_process [name] neural tube patterning [def]  
"The regionalization process that regulates the coordinated growth that establishes the non-random spatial arrangement of the neural tube." [GO\_REF

5276 Pathogen[ P03346] interacts with 1 human partners:{Q68CZ1}

5277 Pathogen[ P14079] interacts with 1 human partners:{Q68CZ1}

5278 Pathogen[ P03410] interacts with 1 human partners:{Q68CZ1}

5279 [Cluster 861]GO:0023051+P biological\_process [name] regulation of signaling [def]  
"Any process that modulates the frequency, rate or extent of a signaling process." [GOC

5280 Pathogen[ Q2Q067] interacts with 1 human partners:{P22681}

5281 Pathogen[ P0C214] interacts with 1 human partners:{P22681}

5282 Pathogen[ P03346] interacts with 1 human partners:{P22681}

5283 Pathogen[ Q85601] interacts with 1 human partners:{P22681}

5284 Pathogen[ P0C206] interacts with 1 human partners:{P22681}

5285 Pathogen[ P03363] interacts with 1 human partners:{P22681}

5286 [Cluster 862]GO:2000171+P biological\_process [name] negative regulation of dendrite development [def] "Any process that stops, prevents, or reduces the frequency, rate or extent of dendrite development." [GOC

5287 Pathogen[ P03346] interacts with 1 human partners:{Q9H165}

5288 Pathogen[ P0C206] interacts with 1 human partners:{Q9H165}

5289 [Cluster 863]GO:0030573+P biological\_process [name] bile acid catabolic process  
[def] "The chemical reactions and pathways resulting in the breakdown of bile acids, any of a group of steroid carboxylic acids occurring in bile." [GOC

5290 Pathogen[ P0C214] interacts with 1 human partners:{Q06520}

5291 Pathogen[ P03346] interacts with 1 human partners:{Q06520}

5292 Pathogen[ P03363] interacts with 1 human partners:{Q06520}

5293 [Cluster 864]GO:0019346+P biological\_process [name] transsulfuration [def] "The interconversion of homocysteine and cysteine via cystathionine. In contrast with enteric bacteria and mammals, *Saccharomyces cerevisiae* has two transsulfuration pathways employing two separate sets of enzymes." [MetaCyc

5294 Pathogen[ Q2Q067] interacts with 1 human partners:{P32929}

5295 Pathogen[ P0C214] interacts with 2 human partners:{P32929;P35520}

5296 Pathogen[ P03346] interacts with 1 human partners:{P32929}

5297 Pathogen[ Q85601] interacts with 1 human partners:{P32929}

5298 Pathogen[ P14079] interacts with 1 human partners:{P32929}

5299 Pathogen[ P03410] interacts with 1 human partners:{P32929}

5300 Pathogen[ P0C206] interacts with 1 human partners:{P32929}

5301 [Cluster 865]GO:0090298+P biological\_process [name] negative regulation of mitochondrial DNA replication [def] "Any process that decreases the rate, frequency or extent of the process in which new strands of DNA are synthesized in the mitochondrion." [GOC

5302 Pathogen[ Q2Q067] interacts with 1 human partners:{Q7Z2X4}

5303 Pathogen[ P0C214] interacts with 1 human partners:{Q7Z2X4}

5304 Pathogen[ P03346] interacts with 1 human partners:{Q7Z2X4}

5305 Pathogen[ Q85601] interacts with 1 human partners:{Q7Z2X4}

5306 Pathogen[ P14079] interacts with 1 human partners:{Q7Z2X4}

5307 Pathogen[ P03410] interacts with 1 human partners:{Q7Z2X4}

5308 Pathogen[ P0C206] interacts with 1 human partners:{Q7Z2X4}

5309 [Cluster 866]GO:0035574+P biological\_process [name] histone H4-K20 demethylation  
[def] "The modification of histone H4 by the removal of a methyl group from lysine at position 20 of the histone." [GOC

5310 Pathogen[ Q2Q067] interacts with 1 human partners:{Q9UPP1}

5311 Pathogen[ P0C214] interacts with 1 human partners:{Q9UPP1}

5312 Pathogen[ P03346] interacts with 1 human partners:{Q9UPP1}

5313 Pathogen[ Q85601] interacts with 1 human partners:{Q9UPP1}

5314 Pathogen[ P14079] interacts with 1 human partners:{Q9UPP1}

5315 Pathogen[ P03383] interacts with 1 human partners:{Q9UPP1}

5316 Pathogen[ P03410] interacts with 1 human partners:{Q9UPP1}

5317 Pathogen[ P14075] interacts with 1 human partners:{Q9UPP1}

5318 Pathogen[ P0C206] interacts with 1 human partners:{Q9UPP1}

5319 [Cluster 867]GO:0031999+P biological\_process [name] negative regulation of fatty acid beta-oxidation [def] "Any process that stops, prevents, or reduces the frequency, rate or extent of fatty acid beta-oxidation." [GOC

5320 Pathogen[ Q2Q067] interacts with 1 human partners:{P31749}

5321 Pathogen[ P0C214] interacts with 1 human partners:{P31749}

5322 Pathogen[ P03346] interacts with 1 human partners:{P31749}

5323 Pathogen[ Q85601] interacts with 1 human partners:{P31749}

5324 Pathogen[ P03383] interacts with 1 human partners:{P31749}

5325 Pathogen[ P03410] interacts with 1 human partners:{P31749}

5326 Pathogen[ P14075] interacts with 1 human partners:{P31749}

5327 Pathogen[ P0C206] interacts with 1 human partners:{P31749}

5328 Pathogen[ P03363] interacts with 1 human partners:{P31749}

5329 [Cluster 868]GO:0015793+P biological\_process [name] glycerol transport [def] "The directed movement of glycerol into, out of or within a cell, or between cells, by means of some agent such as a transporter or pore. Glycerol is 1,2,3-propanetriol, a sweet, hygroscopic, viscous liquid, widely distributed in nature as a constituent of many lipids." [GOC

5330 Pathogen[ P14079] interacts with 1 human partners:{Q8NBQ7}

5331 [Cluster 869]GO:0035609+P biological\_process [name] C-terminal protein deglutamylation [def] "The removal of a C-terminal, gene-encoded glutamate residue from a protein." [GOC

5332 Pathogen[ P14079] interacts with 2 human partners:{Q96MI9;Q9UPW5}

5333 Pathogen[ P03410] interacts with 1 human partners:{Q9UPW5}

5334 Pathogen[ P0C206] interacts with 1 human partners:{Q9UPW5}

5335 [Cluster 870]GO:0071600+P biological\_process [name] otic vesicle morphogenesis [def] "The process in which the anatomical structures of the otic vesicle are generated and organized. The otic vesicle is a transient embryonic structure formed during development of the vertebrate inner ear." [GOC

5336 Pathogen[ Q2Q067] interacts with 1 human partners:{Q99502}

5337 Pathogen[ P0C214] interacts with 1 human partners:{Q99502}

5338 Pathogen[ P03346] interacts with 1 human partners:{Q99502}

5339 Pathogen[ Q85601] interacts with 1 human partners:{Q99502}

5340 Pathogen[ P14079] interacts with 1 human partners:{Q99502}

5341 Pathogen[ P03410] interacts with 1 human partners:{Q99502}

5342 Pathogen[ P14075] interacts with 1 human partners:{Q99502}

5343 Pathogen[ P0C206] interacts with 1 human partners:{Q99502}

5344 [Cluster 871]GO:0033384+P biological\_process [name] geranyl diphosphate biosynthetic process [def] "The chemical reactions and pathways resulting in the formation of geranyl diphosphate." [GOC

5345 Pathogen[ Q2Q067] interacts with 1 human partners:{P14324}

5346 Pathogen[ P0C214] interacts with 1 human partners:{P14324}

5347 Pathogen[ P03346] interacts with 1 human partners:{P14324}

5348 Pathogen[ Q85601] interacts with 1 human partners:{P14324}

5349 Pathogen[ P14079] interacts with 1 human partners:{P14324}

5350 Pathogen[ P03383] interacts with 1 human partners:{P14324}

5351 Pathogen[ P03410] interacts with 1 human partners:{P14324}

5352 Pathogen[ P14075] interacts with 1 human partners:{P14324}

5353 Pathogen[ P0C206] interacts with 1 human partners:{P14324}

5354 [Cluster 872]GO:0051594+P biological\_process [name] detection of glucose [def] "The series of events in which a glucose stimulus is received by a cell and converted into a molecular signal." [GOC

5355 Pathogen[ P03346] interacts with 1 human partners:{P78426}

5356 [Cluster 873]GO:0070899+P biological\_process [name] mitochondrial tRNA wobble uridine modification [def] "The process in which a uridine in position 34 of a mitochondrial tRNA is post-transcriptionally modified." [GOC

5357 Pathogen[ Q2Q067] interacts with 1 human partners:{Q9Y2Z2}

5358 Pathogen[ P0C214] interacts with 1 human partners:{Q9Y2Z2}

5359 Pathogen[ P03346] interacts with 1 human partners:{Q9Y2Z2}

5360 Pathogen[ Q85601] interacts with 1 human partners:{Q9Y2Z2}

5361 Pathogen[ P14079] interacts with 1 human partners:{Q9Y2Z2}

5362 Pathogen[ P03383] interacts with 1 human partners:{Q9Y2Z2}

5363 Pathogen[ P03410] interacts with 1 human partners:{Q9Y2Z2}

5364 Pathogen[ P14075] interacts with 1 human partners:{Q9Y2Z2}

5365 Pathogen[ P0C206] interacts with 1 human partners:{Q9Y2Z2}

5366 [Cluster 874]GO:0006584+P biological\_process [name] catecholamine metabolic process [def] "The chemical reactions and pathways involving any of a group of physiologically important biogenic amines that possess a catechol (3,4-dihydroxyphenyl) nucleus and are derivatives of 3,4-dihydroxyphenylethylamine." [GOC

5367 Pathogen[ P03346] interacts with 1 human partners:{P58546}

5368 [Cluster 875]GO:0007538+P biological\_process [name] primary sex determination [def] "The sex determination process that results in the initial specification of sexual status of an individual organism." [GOC

5369 Pathogen[ P03346] interacts with 1 human partners:{Q13285}

5370 [Cluster 876]GO:0051348+P biological\_process [name] negative regulation of transferase activity [def] "Any process that stops or reduces the rate of transferase activity, the catalysis of the transfer of a group, e.g. a methyl group, glycosyl group, acyl group, phosphorus-containing, or other groups, from a donor compound to an acceptor." [GOC

5371 Pathogen[ P03410] interacts with 1 human partners:{Q9UBY8}

5372 [Cluster 877]GO:0061333+P biological\_process [name] renal tubule morphogenesis [def] "The process in which the renal tubule is generated by specification of cell fate,

through the maintenance of cell polarity, regulated cell proliferation and morphogenetic cell rearrangements, shape changes and growth. A renal tubule is a tube that filters, re-absorbs and secretes substances to rid an organism of waste and to play a role in fluid homeostasis." [GOC

5373 Pathogen[ P14079] interacts with 1 human partners:{Q06413}

5374 [Cluster 878]GO:0042942+P biological\_process [name] D-serine transport [def] "The directed movement of D-serine, the D-enantiomer of 2-amino-3-hydroxypropanoic acid, into, out of or within a cell, or between cells, by means of some agent such as a transporter or pore." [GOC

5375 Pathogen[ P03346] interacts with 1 human partners:{000221}

5376 Pathogen[ P14079] interacts with 1 human partners:{000221}

5377 Pathogen[ P03410] interacts with 1 human partners:{000221}

5378 Pathogen[ P0C206] interacts with 1 human partners:{000221}

5379 Pathogen[ P03363] interacts with 1 human partners:{000221}

5380 [Cluster 879]GO:0034498+P biological\_process [name] early endosome to Golgi transport [def] "The directed movement of substances from early endosomes to the Golgi." [GOC

5381 Pathogen[ P0C214] interacts with 1 human partners:{P49257}

5382 Pathogen[ P03346] interacts with 4 human partners:{Q13596;P49257;Q9Y5X2;Q9BVK6}

5383 Pathogen[ Q85601] interacts with 2 human partners:{Q13596;P49257}

5384 Pathogen[ P14079] interacts with 5 human partners:{P49257;Q9BVK6;Q9Y5X2;Q13596;O15260}

5385 Pathogen[ P03410] interacts with 5 human partners:{P49257;Q13596;Q9BVK6;O15260;Q9Y5X2}

5386 Pathogen[ P0C206] interacts with 4 human partners:{Q9BVK6;Q13596;P49257;O15260}

5387 Pathogen[ P03363] interacts with 1 human partners:{Q13596}

5388 [Cluster 880]GO:0006880+P biological\_process [name] intracellular sequestering of iron ion [def] "The process of binding or confining iron ions in an intracellular area such that they are separated from other components of a biological system." [GOC

5389 Pathogen[ P0C214] interacts with 1 human partners:{P02794}

5390 Pathogen[ P03346] interacts with 1 human partners:{P02794}

5391 Pathogen[ Q85601] interacts with 1 human partners:{P02794}

5392 Pathogen[ P14079] interacts with 1 human partners:{P02794}

5393 Pathogen[ P03383] interacts with 1 human partners:{P02794}

5394 Pathogen[ P03410] interacts with 1 human partners:{P02794}

5395 Pathogen[ P14075] interacts with 1 human partners:{P02794}

5396 Pathogen[ P0C206] interacts with 1 human partners:{P02794}

5397 Pathogen[ P03363] interacts with 1 human partners:{P02794}

5398 [Cluster 881]GO:0051304+P biological\_process [name] chromosome separation [def] "The cell cycle process in which paired chromosomes are detached from each other. Chromosome separation begins with the release of cohesin complexes from chromosomes in budding yeast, this includes the cleavage of cohesin complexes along the chromosome arms, followed by the separation of the centromeric regions. Chromosome separation also includes formation of chromatid axes mediated by condensins, and ends with untangling of inter-sister catenation catalyzed by topoisomerase II (topo II)." [GOC

5399 Pathogen[ Q2Q067] interacts with 1 human partners:{Q9H4L7}

5400 Pathogen[ P0C214] interacts with 1 human partners:{Q9H4L7}

5401 Pathogen[ P03346] interacts with 1 human partners:{Q9H4L7}

5402 Pathogen[ Q85601] interacts with 1 human partners:{Q9H4L7}

5403 Pathogen[ P14079] interacts with 1 human partners:{Q9H4L7}

5404 Pathogen[ P03410] interacts with 1 human partners:{Q9H4L7}

5405 Pathogen[ P0C206] interacts with 1 human partners:{Q9H4L7}

5406 Pathogen[ P03363] interacts with 1 human partners:{Q9H4L7}

5407 [Cluster 882]GO:0003012+P biological\_process [name] muscle system process [def] "A organ system process carried out at the level of a muscle. Muscle tissue is composed of contractile cells or fibers." [GOC

5408 Pathogen[ P14079] interacts with 1 human partners:{O43819}

5409 Pathogen[ P03410] interacts with 1 human partners:{O43819}

5410 [Cluster 883]GO:0010835+P biological\_process [name] regulation of protein ADP-ribosylation [def] "Any process that modulates the frequency, rate or extent of protein ADP-ribosylation. Protein ADP-ribosylation is the transfer, from NAD, of ADP-ribose to protein amino acids." [GOC

5411 Pathogen[ Q2Q067] interacts with 1 human partners:{Q9H2P0}

5412 Pathogen[ P0C214] interacts with 1 human partners:{Q9H2P0}

5413 Pathogen[ P03346] interacts with 1 human partners:{Q9H2P0}

5414 Pathogen[ Q85601] interacts with 1 human partners:{Q9H2P0}

5415 Pathogen[ P14079] interacts with 1 human partners:{Q9H2P0}

5416 Pathogen[ P0C206] interacts with 1 human partners:{Q9H2P0}

5417 Pathogen[ P03363] interacts with 1 human partners:{Q9H2P0}

5418 [Cluster 884]GO:0030510+P biological\_process [name] regulation of BMP signaling pathway [def] "Any process that modulates the frequency, rate or extent of the activity of any BMP receptor signaling pathway." [GOC

5419 Pathogen[ P0C214] interacts with 1 human partners:{P98170}

5420 Pathogen[ P03346] interacts with 3 human partners:{P31271;P98170;Q92481}

5421 Pathogen[ Q85601] interacts with 2 human partners:{P98170;P31271}

5422 Pathogen[ P14079] interacts with 1 human partners:{P31271}

5423 Pathogen[ P0C206] interacts with 2 human partners:{P98170;P31271}

5424 Pathogen[ P03363] interacts with 2 human partners:{P31271;P98170}

5425 [Cluster 885]GO:0048841+P biological\_process [name] regulation of axon extension involved in axon guidance [def] "Any process that modulates the frequency, rate or extent of axon extension involved in axon guidance." [GOC

5426 Pathogen[ Q2Q067] interacts with 1 human partners:{O14786}

5427 Pathogen[ P0C214] interacts with 1 human partners:{O14786}

5428 Pathogen[ P03346] interacts with 1 human partners:{O14786}

5429 Pathogen[ Q85601] interacts with 1 human partners:{O14786}

5430 Pathogen[ P03410] interacts with 1 human partners:{O14786}

5431 Pathogen[ P0C206] interacts with 1 human partners:{O14786}

5432 Pathogen[ P03363] interacts with 1 human partners:{O14786}

5433 [Cluster 886]GO:0071641+P biological\_process [name] negative regulation of macrophage inflammatory protein 1 alpha production [def] "Any process that stops, prevents, or reduces the frequency, rate, or extent of production of macrophage inflammatory protein 1 alpha." [GOC

5434 Pathogen[ P14079] interacts with 1 human partners:{O15553}

5435 [Cluster 887]GO:0048340+P biological\_process [name] paraxial mesoderm morphogenesis [def] "The process in which the anatomical structures of the paraxial mesoderm are generated and organized." [GOC

5436 Pathogen[ Q2Q067] interacts with 2 human partners:{P84022;Q15796}

5437 Pathogen[ P0C214] interacts with 2 human partners:{P84022;Q15796}

5438 Pathogen[ P03346] interacts with 2 human partners:{Q15796;P84022}

5439 Pathogen[ Q85601] interacts with 2 human partners:{P84022;Q15796}

5440 Pathogen[ P03383] interacts with 2 human partners:{P84022;Q15796}

5441 Pathogen[ P03410] interacts with 2 human partners:{P84022;Q15796}

5442 Pathogen[ P14075] interacts with 2 human partners:{Q15796;P84022}

5443 Pathogen[ P0C206] interacts with 2 human partners:{P84022;Q15796}

5444 Pathogen[ P03363] interacts with 2 human partners:{Q15796;P84022}

5445 [Cluster 888]GO:0048562+P biological\_process [name] embryonic organ morphogenesis [def] "Morphogenesis, during the embryonic phase, of a tissue or tissues that work together to perform a specific function or functions. Morphogenesis is the process in which anatomical structures are generated and organized. Organs are commonly observed as visibly distinct structures, but may also exist as loosely associated clusters of cells that work together to perform a specific function or functions." [GOC

5446 Pathogen[ Q2Q067] interacts with 3 human partners:{Q13562;P09017;Q9HBD4}

5447 Pathogen[ P0C214] interacts with 1 human partners:{Q9HBD4}

5448 Pathogen[ P03346] interacts with 3 human partners:{Q9HBD4;P09017;Q13562}

5449 Pathogen[ Q85601] interacts with 2 human partners:{Q13562;Q9HBD4}

5450 Pathogen[ P03383] interacts with 1 human partners:{Q9HBD4}

5451 Pathogen[ P03410] interacts with 1 human partners:{Q9HBD4}

5452 Pathogen[ P14075] interacts with 1 human partners:{Q9HBD4}

5453 Pathogen[ P0C206] interacts with 2 human partners:{Q13562;Q9HBD4}

5454 Pathogen[ P03363] interacts with 2 human partners:{Q9HBD4;P09017}

5455 [Cluster 889]GO:0021536+P biological\_process [name] diencephalon development [def] "The process whose specific outcome is the progression of the diencephalon over time, from its formation to the mature structure. The diencephalon is the paired caudal parts of the prosencephalon from which the thalamus, hypothalamus, epithalamus and subthalamus are derived\_ these regions regulate autonomic, visceral and endocrine function, and process information directed to the cerebral cortex." [GO\_REF

5456 Pathogen[ P03346] interacts with 1 human partners:{O95343}

5457 Pathogen[ P03363] interacts with 1 human partners:{O95343}

5458 [Cluster 890]GO:0071320+P biological\_process [name] cellular response to cAMP [def] "Any process that results in a change in state or activity of a cell (in terms of movement, secretion, enzyme production, gene expression, etc.) as a result of a cAMP (cyclic AMP, adenosine 3',5'-cyclophosphate) stimulus." [GOC

5459 Pathogen[ Q2Q067] interacts with 1 human partners:{P15976}

5460 Pathogen[ P0C214] interacts with 1 human partners:{Q16613}

5461 Pathogen[ P03346] interacts with 1 human partners:{P15976}

5462 Pathogen[ Q85601] interacts with 2 human partners:{P15976;Q16613}

5463 Pathogen[ P14079] interacts with 2 human partners:{P15976;Q16613}

5464 Pathogen[ P03383] interacts with 1 human partners:{Q16613}

5465 Pathogen[ P03410] interacts with 2 human partners:{Q16613;P15976}

5466 Pathogen[ P14075] interacts with 1 human partners:{Q16613}

5467 Pathogen[ P0C206] interacts with 2 human partners:{P15976;Q16613}

5468 [Cluster 891]GO:0001909+P biological\_process [name] leukocyte mediated cytotoxicity [def] "The directed killing of a target cell by a leukocyte." [GO\_REF

5469 Pathogen[ Q2Q067] interacts with 1 human partners:{Q15833}

5470 Pathogen[ P0C214] interacts with 1 human partners:{Q15833}

5471 Pathogen[ P03346] interacts with 1 human partners:{Q15833}

5472 Pathogen[ Q85601] interacts with 1 human partners:{Q15833}

5473 Pathogen[ P14079] interacts with 1 human partners:{Q15833}

5474 Pathogen[ P03410] interacts with 1 human partners:{Q15833}

5475 Pathogen[ P0C206] interacts with 1 human partners:{Q15833}

5476 Pathogen[ P03363] interacts with 1 human partners:{Q15833}

5477 [Cluster 892]GO:0035239+P biological\_process [name] tube morphogenesis [def] "The process in which the anatomical structures of a tube are generated and organized.

Epithelial and endothelial tubes transport gases, liquids and cells from one site to another and form the basic structure of many organs and tissues, with tube shape and organization varying from the single-celled excretory organ in *Caenorhabditis elegans* to the branching trees of the mammalian kidney and insect tracheal system." [GOC

5478 Pathogen[ P03346] interacts with 1 human partners:{P52951}

5479 Pathogen[ P03363] interacts with 1 human partners:{P52951}

5480 [Cluster 893]GO:0002238+P biological\_process [name] response to molecule of fungal origin [def] "Any process that results in a change in state or activity of an organism (in terms of movement, secretion, enzyme production, gene expression, etc.) as a result of a stimulus by molecules of fungal origin such as chito-octamer oligosaccharide." [GOC

5481 Pathogen[ P14079] interacts with 1 human partners:{Q99836}

5482 [Cluster 894]GO:0051882+P biological\_process [name] mitochondrial depolarization [def] "The process in which the membrane potential of the mitochondria changes in the depolarizing direction from the resting potential, from negative to positive." [Wikipedia

5483 Pathogen[ P0C214] interacts with 1 human partners:{Q96NN9}

5484 [Cluster 895]GO:0046135+P biological\_process [name] pyrimidine nucleoside catabolic process [def] "The chemical reactions and pathways resulting in the breakdown of one of a family of organic molecules consisting of a pyrimidine base covalently bonded to a sugar ribose (a ribonucleoside) or deoxyribose (a deoxyribonucleoside)." [GOC

5485 Pathogen[ P0C214] interacts with 4 human partners:{O95045;Q8TCD5;Q16831;Q9H0P0}

5486 Pathogen[ Q85601] interacts with 2 human partners:{O95045;Q9H0P0}

5487 Pathogen[ P14079] interacts with 5 human partners:{Q9H0P0;Q8TCD5;Q16831;O95045;Q9BXI3}

5488 Pathogen[ P03410] interacts with 5 human partners:{O95045;Q16831;Q9BXI3;Q8TCD5;Q9H0P0}

5489 Pathogen[ P14075] interacts with 1 human partners:{O95045}

5490 Pathogen[ P0C206] interacts with 4 human partners:{Q16831;O95045;Q8TCD5;Q9H0P0}

5491 [Cluster 896]GO:0061110+P biological\_process [name] dense core granule biogenesis [def] "A cellular process that results in the biosynthesis of constituent macromolecules, assembly, and arrangement of constituent parts of a dense core granule. Includes biosynthesis of constituent macromolecules, and those macromolecular modifications that are involved in synthesis or assembly of the dense core granule." [GOC

5492 Pathogen[ P0C214] interacts with 1 human partners:{P07093}

5493 Pathogen[ Q85601] interacts with 1 human partners:{P07093}

5494 [Cluster 897]GO:0043030+P biological\_process [name] regulation of macrophage activation [def] "Any process that modulates the frequency or rate of macrophage activation." [GOC

5495 Pathogen[ P03346] interacts with 1 human partners:{P35398}

5496 Pathogen[ P14079] interacts with 1 human partners:{P35398}

5497 Pathogen[ P0C206] interacts with 1 human partners:{P35398}

5498 Pathogen[ P03363] interacts with 1 human partners:{P35398}

5499 [Cluster 898]GO:0044206+P biological\_process [name] UMP salvage [def] "Any process which produces UMP, uridine monophosphate, from derivatives of it (e.g. cytidine, uridine, cytosine) without de novo synthesis." [GOC

5500 Pathogen[ P0C214] interacts with 3 human partners:{O95045;Q16831;Q9NWZ5}

5501 Pathogen[ P03346] interacts with 1 human partners:{Q9NWZ5}

5502 Pathogen[ Q85601] interacts with 1 human partners:{O95045}

5503 Pathogen[ P14079] interacts with 3 human partners:{Q16831;Q9NWZ5;O95045}

5504 Pathogen[ P03383] interacts with 1 human partners:{Q9NWZ5}

5505 Pathogen[ P03410] interacts with 3 human partners:{O95045;Q16831;Q9NWZ5}

5506 Pathogen[ P14075] interacts with 2 human partners:{Q9NWZ5;O95045}

5507 Pathogen[ P0C206] interacts with 3 human partners:{Q16831;Q9NWZ5;O95045}

5508 Pathogen[ P03363] interacts with 1 human partners:{Q9NWZ5}

5509 [Cluster 899]GO:2000253+P biological\_process [name] positive regulation of feeding behavior [def] "Any process that activates or increases the frequency, rate or extent of feeding behavior." [GOC

5510 Pathogen[ P0C214] interacts with 1 human partners:{Q9BQI5}

5511 Pathogen[ P03346] interacts with 1 human partners:{Q9BQI5}

5512 Pathogen[ P14079] interacts with 1 human partners:{Q9BQI5}

5513 Pathogen[ P03383] interacts with 1 human partners:{Q9BQI5}

5514 Pathogen[ P03410] interacts with 1 human partners:{Q9BQI5}

5515 Pathogen[ P14075] interacts with 1 human partners:{Q9BQI5}

5516 Pathogen[ P0C206] interacts with 1 human partners:{Q9BQI5}

5517 Pathogen[ P03363] interacts with 1 human partners:{Q9BQI5}

5518 [Cluster 900]GO:0006164+P biological\_process [name] purine nucleotide biosynthetic process [def] "The chemical reactions and pathways resulting in the formation of a purine nucleotide, a compound consisting of nucleoside (a purine base linked to a deoxyribose or ribose sugar) esterified with a phosphate group at either the 3' or 5'-hydroxyl group of the sugar." [GOC

5519 Pathogen[ P0C214] interacts with 4 human partners:{P29728;P31939;P11586;P30566}

5520 Pathogen[ P14079] interacts with 5 human partners:{P29728;P22234;P31939;P49915;O15067}

5521 Pathogen[ P03410] interacts with 6 human partners:{P49915;P29728;P22234;P30566;O15067;P31939}

5522 Pathogen[ P0C206] interacts with 2 human partners:{P29728;P31939}

5523 [Cluster 901]GO:0003331+P biological\_process [name] positive regulation of extracellular matrix constituent secretion [def] "Any process that increases the rate, frequency, or extent of the controlled release of molecules that form the extracellular matrix, including carbohydrates and glycoproteins by a cell or a group of cells." [GOC

5524 Pathogen[ Q2Q067] interacts with 1 human partners:{Q9H4X1}

5525 Pathogen[ P0C214] interacts with 1 human partners:{Q9H4X1}

5526 Pathogen[ P03346] interacts with 1 human partners:{Q9H4X1}

5527 Pathogen[ Q85601] interacts with 1 human partners:{Q9H4X1}

5528 Pathogen[ P03383] interacts with 1 human partners:{Q9H4X1}

5529 Pathogen[ P03410] interacts with 1 human partners:{Q9H4X1}

5530 Pathogen[ P14075] interacts with 1 human partners:{Q9H4X1}

5531 Pathogen[ P0C206] interacts with 1 human partners:{Q9H4X1}

5532 Pathogen[ P03363] interacts with 1 human partners:{Q9H4X1}

5533 [Cluster 902]GO:0045910+P biological\_process [name] negative regulation of DNA recombination [def] "Any process that stops, prevents, or reduces the frequency, rate or extent of DNA recombination." [GOC

5534 Pathogen[ P0C214] interacts with 1 human partners:{P20585}

5535 Pathogen[ P03346] interacts with 2 human partners:{Q9NS91;P20585}

5536 Pathogen[ Q85601] interacts with 2 human partners:{P20585;Q9NS91}

5537 Pathogen[ P14079] interacts with 2 human partners:{P20585;P52701}

5538 Pathogen[ P03410] interacts with 2 human partners:{P20585;P52701}

5539 Pathogen[ P0C206] interacts with 3 human partners:{P52701;Q9NS91;P20585}

5540 Pathogen[ P03363] interacts with 2 human partners:{P20585;Q9NS91}

5541 [Cluster 903]GO:2001275+P biological\_process [name] positive regulation of glucose import in response to insulin stimulus [def] "Any process that activates or increases the frequency, rate or extent of glucose import in response to insulin stimulus." [GOC

5542 Pathogen[ P14079] interacts with 1 human partners:{P31751}

5543 [Cluster 904]GO:0097167+P biological\_process [name] circadian regulation of translation [def] "Any process that modulates the frequency, rate or extent of mRNA translation with a regularity of approximately 24 hours." [GOC

5544 Pathogen[ P03346] interacts with 1 human partners:{Q9BWF3}

5545 Pathogen[ P03363] interacts with 1 human partners:{Q9BWF3}

5546 [Cluster 905]GO:0071548+P biological\_process [name] response to dexamethasone stimulus [def] "Any process that results in a change in state or activity of a cell or an organism (in terms of movement, secretion, enzyme production, gene expression, etc.) as a result of a dexamethasone stimulus." [GOC

5547 Pathogen[ Q2Q067] interacts with 1 human partners:{P27986}

5548 Pathogen[ P0C214] interacts with 1 human partners:{P27986}

5549 Pathogen[ P03346] interacts with 1 human partners:{P27986}

5550 Pathogen[ Q85601] interacts with 1 human partners:{P27986}

5551 Pathogen[ P03383] interacts with 1 human partners:{P27986}

5552 Pathogen[ P03410] interacts with 1 human partners:{P27986}

5553 Pathogen[ P14075] interacts with 1 human partners:{P27986}

5554 Pathogen[ P0C206] interacts with 1 human partners:{P27986}

5555 Pathogen[ P03363] interacts with 1 human partners:{P27986}

5556 [Cluster 906]GO:0030953+P biological\_process [name] astral microtubule organization [def] "A process that is carried out at the cellular level which results in the assembly, arrangement of constituent parts, or disassembly of astral microtubules, any of the spindle microtubules that radiate in all directions from the spindle poles." [GOC

5557 Pathogen[ Q2Q067] interacts with 1 human partners:{O95359}

5558 Pathogen[ P0C214] interacts with 1 human partners:{O95359}

5559 Pathogen[ P03346] interacts with 2 human partners:{O95359;Q8N960}

5560 Pathogen[ Q85601] interacts with 1 human partners:{O95359}

5561 Pathogen[ P14079] interacts with 3 human partners:{O95359;Q9Y6A5;Q8N960}

5562 Pathogen[ P03410] interacts with 3 human partners:{Q8N960;O95359;Q9Y6A5}

5563 Pathogen[ P0C206] interacts with 3 human partners:{O95359;Q9Y6A5;Q8N960}

5564 Pathogen[ P03363] interacts with 2 human partners:{O95359;Q8N960}

5565 [Cluster 907]GO:0046323+P biological\_process [name] glucose import [def] "The directed movement of the hexose monosaccharide glucose into a cell or organelle." [GOC

5566 Pathogen[ Q2Q067] interacts with 2 human partners:{P20823;P14672}

5567 Pathogen[ P0C214] interacts with 1 human partners:{P14672}

5568 Pathogen[ P03346] interacts with 2 human partners:{P20823;P14672}

5569 Pathogen[ Q85601] interacts with 2 human partners:{P14672;P20823}

5570 Pathogen[ P14079] interacts with 1 human partners:{P14672}

5571 Pathogen[ P03383] interacts with 1 human partners:{P14672}

5572 Pathogen[ P14075] interacts with 1 human partners:{P14672}

5573 Pathogen[ P0C206] interacts with 2 human partners:{P20823;P14672}

5574 Pathogen[ P03363] interacts with 1 human partners:{P14672}

5575 [Cluster 908]GO:0014912+P biological\_process [name] negative regulation of smooth muscle cell migration [def] "Any process that stops, prevents, or reduces the frequency, rate or extent of smooth muscle cell migration." [CL

5576 Pathogen[ P0C214] interacts with 1 human partners:{P05121}

5577 Pathogen[ Q85601] interacts with 1 human partners:{P05121}

5578 Pathogen[ P03410] interacts with 1 human partners:{P05121}

5579 Pathogen[ P0C206] interacts with 1 human partners:{P05121}



5580 [Cluster 909]GO:0042045+P biological\_process [name] epithelial fluid transport  
[def] "The directed movement of fluid across epithelia." [GOC  
5581 Pathogen[ P14079] interacts with 1 human partners:{P04141}  
5582 Pathogen[ P03410] interacts with 1 human partners:{P04141}  
5583 [Cluster 910]GO:0007009+P biological\_process [name] plasma membrane organization  
[def] "A process that is carried out at the cellular level which results in the  
assembly, arrangement of constituent parts, or disassembly of the plasma membrane." [GOC  
5584 Pathogen[ Q2Q067] interacts with 1 human partners:{Q01082}  
5585 Pathogen[ P0C214] interacts with 1 human partners:{Q01082}  
5586 Pathogen[ P03346] interacts with 3 human partners:{P02549;P11277;Q01082}  
5587 Pathogen[ Q85601] interacts with 1 human partners:{Q01082}  
5588 Pathogen[ P14079] interacts with 4 human partners:{Q01082;Q9Y6X1;P11277;P02549}  
5589 Pathogen[ P03410] interacts with 4 human partners:{P02549;Q9Y6X1;Q01082;P11277}  
5590 Pathogen[ P0C206] interacts with 2 human partners:{Q01082;P11277}  
5591 Pathogen[ P03363] interacts with 3 human partners:{P11277;P02549;Q01082}  
5592 [Cluster 911]GO:0032851+P biological\_process [name] positive regulation of Rab GTPase  
activity [def] "Any process that activates or increases the activity of a GTPase of  
the Rab family." [GOC  
5593 Pathogen[ P03346] interacts with 1 human partners:{O60447}  
5594 Pathogen[ Q85601] interacts with 1 human partners:{O60447}  
5595 Pathogen[ P14079] interacts with 1 human partners:{Q15042}  
5596 Pathogen[ P03410] interacts with 2 human partners:{O60447;Q15042}  
5597 Pathogen[ P0C206] interacts with 1 human partners:{O60447}  
5598 Pathogen[ P03363] interacts with 1 human partners:{O60447}  
5599 [Cluster 912]GO:0046168+P biological\_process [name] glycerol-3-phosphate catabolic  
process [def] "The chemical reactions and pathways resulting in the breakdown of  
glycerol-3-phosphate, a phosphoric monoester of glycerol." [GOC  
5600 Pathogen[ P0C214] interacts with 2 human partners:{Q8N335;P21695}  
5601 Pathogen[ P14079] interacts with 1 human partners:{P21695}  
5602 Pathogen[ P03410] interacts with 1 human partners:{P21695}  
5603 [Cluster 913]GO:0046619+P biological\_process [name] optic placode formation involved  
in camera-type eye formation [def] "Establishment and formation of the optic placode,  
paired ectodermal placodes that become invaginated to form the embryonic lens vesicles."  
[GOC  
5604 Pathogen[ P14079] interacts with 1 human partners:{Q8WU20}  
5605 Pathogen[ P03410] interacts with 1 human partners:{Q8WU20}  
5606 Pathogen[ P0C206] interacts with 1 human partners:{Q8WU20}  
5607 [Cluster 914]GO:0060748+P biological\_process [name] tertiary branching involved in  
mammary gland duct morphogenesis [def] "The branching process in which the mammary  
gland ducts form tertiary branches off of the secondary branches as part of diestrus and  
pregnancy." [GOC  
5608 Pathogen[ P03346] interacts with 1 human partners:{P06401}  
5609 Pathogen[ P0C206] interacts with 1 human partners:{P06401}  
5610 [Cluster 915]GO:0048729+P biological\_process [name] tissue morphogenesis [def] "The  
process in which the anatomical structures of a tissue are generated and organized."  
[GOC  
5611 Pathogen[ Q2Q067] interacts with 2 human partners:{Q13485;Q12959}  
5612 Pathogen[ P0C214] interacts with 2 human partners:{Q13485;Q12959}  
5613 Pathogen[ P03346] interacts with 2 human partners:{Q13485;Q12959}  
5614 Pathogen[ Q85601] interacts with 2 human partners:{Q12959;Q13485}  
5615 Pathogen[ P03383] interacts with 1 human partners:{Q13485}  
5616 Pathogen[ P03410] interacts with 2 human partners:{Q12959;Q13485}  
5617 Pathogen[ P14075] interacts with 1 human partners:{Q13485}  
5618 Pathogen[ P0C206] interacts with 2 human partners:{Q13485;Q12959}  
5619 Pathogen[ P03363] interacts with 2 human partners:{Q12959;Q13485}  
5620 [Cluster 916]GO:0000256+P biological\_process [name] allantoin catabolic process  
[def] "The chemical reactions and pathways resulting in the breakdown of allantoin,  
(2,5-dioxo-4-imidazolidinyl)urea." [GOC  
5621 Pathogen[ P14079] interacts with 1 human partners:{Q8N6M5}  
5622 Pathogen[ P03410] interacts with 1 human partners:{Q8N6M5}  
5623 [Cluster 917]GO:0006797+P biological\_process [name] polyphosphate metabolic process  
[def] "The chemical reactions and pathways involving a polyphosphate, the anion or salt  
of polyphosphoric acid." [GOC  
5624 Pathogen[ P14079] interacts with 1 human partners:{Q9UNW1}  
5625 Pathogen[ P03410] interacts with 1 human partners:{Q9UNW1}  
5626 [Cluster 918]GO:0039536+P  
5627 Pathogen[ P14079] interacts with 1 human partners:{Q96C10}  
5628 Pathogen[ P03410] interacts with 1 human partners:{Q96C10}  
5629 Pathogen[ P0C206] interacts with 1 human partners:{Q96C10}  
5630 [Cluster 919]GO:0031444+P biological\_process [name] slow-twitch skeletal muscle fiber  
contraction [def] "A process in which force is generated within slow-twitch skeletal  
muscle tissue, resulting in a change in muscle geometry. Force generation involves a  
chemo-mechanical energy conversion step that is carried out by the actin/myosin complex  
activity, which generates force through ATP hydrolysis. The slow-twitch skeletal muscle  
is characterized by slow time parameters, low force development and resistance to  
fatigue." [GOC

5631 Pathogen[ P14079] interacts with 1 human partners:{P02144}

5632 Pathogen[ P03410] interacts with 1 human partners:{P02144}

5633 [Cluster 920]GO:0097276+P

5634 Pathogen[ P03346] interacts with 1 human partners:{Q92481}

5635 [Cluster 921]GO:0042073+P biological\_process [name] intraflagellar transport [def] "The bidirectional movement of large protein complexes along microtubules within a cilium or flagellum, mediated by motor proteins." [GOC

5636 Pathogen[ P03346] interacts with 1 human partners:{Q9NQC8}

5637 Pathogen[ P14079] interacts with 1 human partners:{Q9NQC8}

5638 Pathogen[ P03410] interacts with 1 human partners:{Q9NQC8}

5639 Pathogen[ P0C206] interacts with 1 human partners:{Q9NQC8}

5640 Pathogen[ P03363] interacts with 1 human partners:{Q9NQC8}

5641 [Cluster 922]GO:0060324+P biological\_process [name] face development [def] "The biological process whose specific outcome is the progression of a face from an initial condition to its mature state. The face is the ventral division of the head." [GOC

5642 Pathogen[ Q2Q067] interacts with 1 human partners:{P14651}

5643 Pathogen[ P0C214] interacts with 1 human partners:{P14651}

5644 Pathogen[ P03346] interacts with 3 human partners:{P41225;Q9P2D1;P14651}

5645 Pathogen[ Q85601] interacts with 2 human partners:{Q9P2D1;P14651}

5646 Pathogen[ P14079] interacts with 2 human partners:{Q9P2D1;P14651}

5647 Pathogen[ P03383] interacts with 1 human partners:{P14651}

5648 Pathogen[ P03410] interacts with 2 human partners:{P14651;Q9P2D1}

5649 Pathogen[ P0C206] interacts with 2 human partners:{Q9P2D1;P14651}

5650 Pathogen[ P03363] interacts with 1 human partners:{P14651}

5651 [Cluster 923]GO:0018108+P biological\_process [name] peptidyl-tyrosine phosphorylation [def] "The phosphorylation of peptidyl-tyrosine to form peptidyl-04'-phospho-L-tyrosine." [RESID

5652 Pathogen[ Q2Q067] interacts with 1 human partners:{Q8IZP0}

5653 Pathogen[ P0C214] interacts with 1 human partners:{Q8IZP0}

5654 Pathogen[ P03346] interacts with 2 human partners:{Q8IZP0;Q9P2A4}

5655 Pathogen[ Q85601] interacts with 1 human partners:{Q8IZP0}

5656 Pathogen[ P14079] interacts with 3 human partners:{Q8IZP0;Q9P2A4;P49023}

5657 Pathogen[ P03410] interacts with 2 human partners:{Q9P2A4;Q8IZP0}

5658 Pathogen[ P0C206] interacts with 2 human partners:{P30291;Q8IZP0}

5659 Pathogen[ P03363] interacts with 2 human partners:{Q8IZP0;Q9P2A4}

5660 [Cluster 924]GO:0006177+P biological\_process [name] GMP biosynthetic process [def] "The chemical reactions and pathways resulting in the formation of GMP, guanosine monophosphate." [ISBN

5661 Pathogen[ P14079] interacts with 1 human partners:{P49915}

5662 Pathogen[ P03410] interacts with 1 human partners:{P49915}

5663 [Cluster 925]GO:0070159+P biological\_process [name] mitochondrial threonyl-tRNA aminoacylation [def] "The process of coupling threonine to threonyl-tRNA in a mitochondrion, catalyzed by threonyl-tRNA synthetase. In tRNA aminoacylation, the amino acid is first activated by linkage to AMP and then transferred to either the 2'- or the 3'-hydroxyl group of the 3'-adenosine residue of the tRNA." [GOC

5664 Pathogen[ Q2Q067] interacts with 1 human partners:{Q9BW92}

5665 Pathogen[ P0C214] interacts with 1 human partners:{Q9BW92}

5666 Pathogen[ Q85601] interacts with 1 human partners:{Q9BW92}

5667 Pathogen[ P14079] interacts with 1 human partners:{Q9BW92}

5668 Pathogen[ P03383] interacts with 1 human partners:{Q9BW92}

5669 Pathogen[ P03410] interacts with 1 human partners:{Q9BW92}

5670 Pathogen[ P14075] interacts with 1 human partners:{Q9BW92}

5671 Pathogen[ P0C206] interacts with 1 human partners:{Q9BW92}

5672 Pathogen[ P03363] interacts with 1 human partners:{Q9BW92}

5673 [Cluster 926]GO:0006437+P biological\_process [name] tyrosyl-tRNA aminoacylation [def] "The process of coupling tyrosine to tyrosyl-tRNA, catalyzed by tyrosyl-tRNA synthetase. In tRNA aminoacylation, the amino acid is first activated by linkage to AMP and then transferred to either the 2'- or the 3'-hydroxyl group of the 3'-adenosine residue of the tRNA." [GOC

5674 Pathogen[ P0C214] interacts with 2 human partners:{P54577;Q9Y2Z4}

5675 Pathogen[ P14079] interacts with 1 human partners:{Q9Y2Z4}

5676 Pathogen[ P03383] interacts with 1 human partners:{Q9Y2Z4}

5677 Pathogen[ P03410] interacts with 1 human partners:{Q9Y2Z4}

5678 Pathogen[ P14075] interacts with 1 human partners:{Q9Y2Z4}

5679 Pathogen[ P0C206] interacts with 1 human partners:{Q9Y2Z4}

5680 Pathogen[ P03363] interacts with 1 human partners:{Q9Y2Z4}

5681 [Cluster 927]GO:0033033+P biological\_process [name] negative regulation of myeloid cell apoptosis [def] "Any process that stops, prevents, or reduces the frequency, rate, or extent of a myeloid cell apoptosis." [GOC

5682 Pathogen[ P0C214] interacts with 1 human partners:{Q7L5Y9}

5683 Pathogen[ Q85601] interacts with 1 human partners:{Q7L5Y9}

5684 Pathogen[ P14079] interacts with 1 human partners:{Q7L5Y9}

5685 Pathogen[ P03410] interacts with 1 human partners:{Q7L5Y9}

5686 Pathogen[ P14075] interacts with 1 human partners:{Q7L5Y9}

5687 Pathogen[ P0C206] interacts with 1 human partners:{Q7L5Y9}

5688 [Cluster 928]GO:0010608+P biological\_process [name] posttranscriptional regulation of

gene expression [def] "Any process that modulates the frequency, rate or extent of gene expression after the production of an RNA transcript." [GOC

5689 Pathogen[ P03346] interacts with 1 human partners:{Q8NHU6}

5690 Pathogen[ P14079] interacts with 1 human partners:{Q8NHU6}

5691 Pathogen[ P03410] interacts with 1 human partners:{Q8NHU6}

5692 Pathogen[ P03363] interacts with 1 human partners:{Q8NHU6}

5693 [Cluster 929]GO:0043409+P biological\_process [name] negative regulation of MAPKKK cascade [def] "Any process that stops, prevents, or reduces the frequency, rate or extent of signal transduction mediated by the MAPKKK cascade." [GOC

5694 Pathogen[ Q2Q067] interacts with 1 human partners:{075832}

5695 Pathogen[ P0C214] interacts with 1 human partners:{075832}

5696 Pathogen[ P03346] interacts with 1 human partners:{075832}

5697 Pathogen[ Q85601] interacts with 1 human partners:{075832}

5698 Pathogen[ P14079] interacts with 3 human partners:{075832;Q14118;Q8NC56}

5699 Pathogen[ P03383] interacts with 1 human partners:{075832}

5700 Pathogen[ P03410] interacts with 3 human partners:{Q14118;Q8NC56;075832}

5701 Pathogen[ P14075] interacts with 1 human partners:{075832}

5702 Pathogen[ P0C206] interacts with 2 human partners:{075832;Q8NC56}

5703 [Cluster 930]GO:0045662+P biological\_process [name] negative regulation of myoblast differentiation [def] "Any process that stops, prevents, or reduces the frequency, rate or extent of myoblast differentiation. A myoblast is a mononucleate cell type that, by fusion with other myoblasts, gives rise to the myotubes that eventually develop into skeletal muscle fibers." [CL

5704 Pathogen[ P03346] interacts with 3 human partners:{Q15911;Q8IYA7;Q9NUK0}

5705 Pathogen[ P14079] interacts with 2 human partners:{Q15911;Q9NUK0}

5706 Pathogen[ P0C206] interacts with 2 human partners:{Q15911;Q9NUK0}

5707 Pathogen[ P03363] interacts with 3 human partners:{Q15911;Q8IYA7;Q9NUK0}

5708 [Cluster 931]GO:0006013+P biological\_process [name] mannose metabolic process [def] "The chemical reactions and pathways involving mannose, the aldohexose manno-hexose, the C-2 epimer of glucose. The D-(+)-form is widely distributed in mannans and hemicelluloses and is of major importance in the core oligosaccharide of N-linked oligosaccharides of glycoproteins." [ISBN

5709 Pathogen[ P14079] interacts with 2 human partners:{Q9NTJ4;P51606}

5710 Pathogen[ P03410] interacts with 2 human partners:{P51606;Q9NTJ4}

5711 [Cluster 932]GO:0006296+P biological\_process [name] nucleotide-excision repair, DNA incision, 5'-to lesion [def] "The endonucleolytic cleavage of the damaged strand of DNA 5' to the site of damage. The incision occurs at the junction of single-stranded DNA and double-stranded DNA that is formed when the DNA duplex is unwound. The incision follows the incision formed 3' to the site of damage." [GOC

5712 Pathogen[ Q2Q067] interacts with 2 human partners:{Q92889;P78549}

5713 Pathogen[ P0C214] interacts with 2 human partners:{Q92889;P78549}

5714 Pathogen[ P03346] interacts with 3 human partners:{P07992;P78549;Q92889}

5715 Pathogen[ Q85601] interacts with 2 human partners:{Q92889;P78549}

5716 Pathogen[ P14079] interacts with 3 human partners:{P78549;Q92889;P07992}

5717 Pathogen[ P03410] interacts with 3 human partners:{P07992;Q92889;P78549}

5718 Pathogen[ P0C206] interacts with 3 human partners:{P07992;Q92889;P78549}

5719 Pathogen[ P03363] interacts with 1 human partners:{Q92889}

5720 [Cluster 933]GO:0018342+P biological\_process [name] protein prenylation [def] "The covalent attachment of a prenyl group to a protein\_ geranyl, farnesyl, or geranylgeranyl groups may be added." [ISBN

5721 Pathogen[ Q2Q067] interacts with 1 human partners:{P49354}

5722 Pathogen[ P0C214] interacts with 1 human partners:{P49354}

5723 Pathogen[ P03346] interacts with 1 human partners:{P49354}

5724 Pathogen[ Q85601] interacts with 1 human partners:{P49354}

5725 Pathogen[ P14079] interacts with 1 human partners:{P49354}

5726 Pathogen[ P03410] interacts with 1 human partners:{P49354}

5727 Pathogen[ P0C206] interacts with 1 human partners:{P49354}

5728 Pathogen[ P03363] interacts with 1 human partners:{P49354}

5729 [Cluster 934]GO:0060876+P biological\_process [name] semicircular canal formation [def] "The developmental process pertaining to the initial formation of the semicircular canal from the otic vesicle. This process begins with the regionalization of the vesicle that specifies the area where the vesicles will form and continues through the process of fusion which forms the initial tubes." [GOC

5730 Pathogen[ Q2Q067] interacts with 1 human partners:{P49639}

5731 Pathogen[ P0C214] interacts with 1 human partners:{P49639}

5732 Pathogen[ P03346] interacts with 1 human partners:{P49639}

5733 Pathogen[ Q85601] interacts with 1 human partners:{P49639}

5734 Pathogen[ P14079] interacts with 1 human partners:{P49639}

5735 Pathogen[ P03383] interacts with 1 human partners:{P49639}

5736 Pathogen[ P03410] interacts with 1 human partners:{P49639}

5737 Pathogen[ P0C206] interacts with 1 human partners:{P49639}

5738 Pathogen[ P03363] interacts with 1 human partners:{P49639}

5739 [Cluster 935]GO:0015884+P biological\_process [name] folic acid transport [def] "The directed movement of folic acid (pteroylglutamic acid) into, out of or within a cell, or between cells, by means of some agent such as a transporter or pore. Folic acid is widely distributed as a member of the vitamin B complex and is essential for the

synthesis of purine and pyrimidines." [GOC  
5740 Pathogen[ P14079] interacts with 1 human partners:{Q96NT5}  
5741 [Cluster 936]GO:0014829+P biological\_process [name] vascular smooth muscle contraction [def] "A process, occurring in the vascular tissue, whereby actin/myosin complex activity generates force through ATP hydrolysis resulting in a change in smooth muscle geometry. This process is always coupled to chemo-mechanical energy conversion." [GOC  
5742 Pathogen[ P0C214] interacts with 1 human partners:{P62736}  
5743 Pathogen[ P03346] interacts with 1 human partners:{P62736}  
5744 Pathogen[ Q85601] interacts with 1 human partners:{P62736}  
5745 Pathogen[ P03410] interacts with 1 human partners:{P62736}  
5746 Pathogen[ P0C206] interacts with 1 human partners:{P62736}  
5747 Pathogen[ P03363] interacts with 1 human partners:{P62736}  
5748 [Cluster 937]GO:0048525+P biological\_process [name] negative regulation of viral reproduction [def] "Any process that stops, prevents, or reduces the frequency, rate or extent of the viral life cycle, the set of processes by which a virus reproduces and spreads among hosts." [GOC  
5749 Pathogen[ Q2Q067] interacts with 1 human partners:{Q9HC16}  
5750 Pathogen[ P0C214] interacts with 1 human partners:{Q9HC16}  
5751 Pathogen[ Q85601] interacts with 1 human partners:{Q9HC16}  
5752 Pathogen[ P14079] interacts with 1 human partners:{Q9HC16}  
5753 Pathogen[ P03410] interacts with 2 human partners:{Q9HC16;Q6NTF7}  
5754 Pathogen[ P0C206] interacts with 2 human partners:{Q6NTF7;Q9HC16}  
5755 [Cluster 938]GO:0090244+P biological\_process [name] Wnt receptor signaling pathway involved in somitogenesis [def] "The series of molecular signals initiated by binding of Wnt protein to a frizzled family receptor on the surface of the target cell and ending with a change in cell state that contributes to somitogenesis." [GOC  
5756 Pathogen[ P03346] interacts with 1 human partners:{Q06190}  
5757 Pathogen[ P14079] interacts with 1 human partners:{Q06190}  
5758 Pathogen[ P03410] interacts with 1 human partners:{Q06190}  
5759 Pathogen[ P0C206] interacts with 1 human partners:{Q06190}  
5760 Pathogen[ P03363] interacts with 1 human partners:{Q06190}  
5761 [Cluster 939]GO:0035235+P biological\_process [name] ionotropic glutamate receptor signaling pathway [def] "The series of molecular signals generated as a consequence of glutamate binding to a cell surface receptor, followed by the movement of ions through a channel in the receptor complex." [ISBN  
5762 Pathogen[ P14079] interacts with 1 human partners:{Q15078}  
5763 [Cluster 940]GO:0010887+P biological\_process [name] negative regulation of cholesterol storage [def] "Any process that decreases the rate or extent of cholesterol storage. Cholesterol storage is the accumulation and maintenance in cells or tissues of cholesterol, cholest-5-en-3 beta-ol, the principal sterol of vertebrates and the precursor of many steroids, including bile acids and steroid hormones." [GOC  
5764 Pathogen[ Q2Q067] interacts with 1 human partners:{P55055}  
5765 Pathogen[ P03346] interacts with 1 human partners:{P55055}  
5766 Pathogen[ Q85601] interacts with 1 human partners:{P55055}  
5767 Pathogen[ P14079] interacts with 1 human partners:{P55055}  
5768 Pathogen[ P0C206] interacts with 1 human partners:{P55055}  
5769 [Cluster 941]GO:0060214+P biological\_process [name] endocardium formation [def] "Formation of the endocardium of the heart. The endocardium is an anatomical structure comprised of an endothelium and an extracellular matrix that forms the innermost layer of tissue of the heart, and lines the heart chambers." [GOC  
5770 Pathogen[ P03346] interacts with 1 human partners:{P35713}  
5771 [Cluster 942]GO:0033363+P biological\_process [name] secretory granule organization [def] "A process that is carried out at the cellular level which results in the assembly, arrangement of constituent parts, or disassembly of a secretory granule. A secretory granule is a small subcellular vesicle, surrounded by a membrane, that is formed from the Golgi apparatus and contains a highly concentrated protein destined for secretion." [GOC  
5772 Pathogen[ P0C214] interacts with 1 human partners:{P07093}  
5773 Pathogen[ Q85601] interacts with 1 human partners:{P07093}  
5774 [Cluster 943]GO:0035998+P biological\_process [name] 7,8-dihydroneopterin 3'-triphosphate biosynthetic process [def] "The chemical reactions and pathways resulting in the formation of 7,8-dihydroneopterin 3'-triphosphate." [CHEBI  
5775 Pathogen[ Q2Q067] interacts with 1 human partners:{P30793}  
5776 Pathogen[ P0C214] interacts with 1 human partners:{P30793}  
5777 Pathogen[ Q85601] interacts with 1 human partners:{P30793}  
5778 Pathogen[ P14079] interacts with 1 human partners:{P30793}  
5779 Pathogen[ P03410] interacts with 1 human partners:{P30793}  
5780 Pathogen[ P14075] interacts with 1 human partners:{P30793}  
5781 Pathogen[ P0C206] interacts with 1 human partners:{P30793}  
5782 [Cluster 944]GO:0060709+P biological\_process [name] glycogen cell development involved in embryonic placenta development [def] "The process in which a relatively unspecialized cell acquires specialized features of a glycogen cell of the placenta. A glycogen cell is a vacuolated glycogen-rich cell that appears in compact cell islets of the spongiotrophoblast layer." [GOC  
5783 Pathogen[ Q2Q067] interacts with 1 human partners:{P31749}

5784 Pathogen[ P0C214] interacts with 1 human partners:{P31749}

5785 Pathogen[ P03346] interacts with 1 human partners:{P31749}

5786 Pathogen[ Q85601] interacts with 1 human partners:{P31749}

5787 Pathogen[ P03383] interacts with 1 human partners:{P31749}

5788 Pathogen[ P03410] interacts with 1 human partners:{P31749}

5789 Pathogen[ P14075] interacts with 1 human partners:{P31749}

5790 Pathogen[ P0C206] interacts with 1 human partners:{P31749}

5791 Pathogen[ P03363] interacts with 1 human partners:{P31749}

5792 [Cluster 945]GO:0070075+P biological\_process [name] tear secretion [def] "The regulated release of the aqueous layer of the tear film from the lacrimal glands. Tears are the liquid product of a process of lachrimation to clean and lubricate the eyes. Tear fluid contains water, mucin, lipids, lysozyme, lactoferrin, lipocalin, lacritin, immunoglobulins, glucose, urea, sodium, and potassium." [GOC

5793 Pathogen[ P14079] interacts with 1 human partners:{Q9GZZ8}

5794 Pathogen[ P03410] interacts with 1 human partners:{Q9GZZ8}

5795 Pathogen[ P14075] interacts with 1 human partners:{Q9GZZ8}

5796 [Cluster 946]GO:0002092+P biological\_process [name] positive regulation of receptor internalization [def] "Any process that activates or increases the frequency, rate or extent of receptor internalization." [GOC

5797 Pathogen[ Q2Q067] interacts with 1 human partners:{Q86UL8}

5798 Pathogen[ P03346] interacts with 3 human partners:{Q6P3W7;Q86UL8;Q8N157}

5799 Pathogen[ Q85601] interacts with 1 human partners:{Q86UL8}

5800 Pathogen[ P14079] interacts with 2 human partners:{Q8N157;Q86UL8}

5801 Pathogen[ P03410] interacts with 2 human partners:{Q8N157;Q86UL8}

5802 Pathogen[ P0C206] interacts with 3 human partners:{Q6P3W7;Q8N157;Q86UL8}

5803 Pathogen[ P03363] interacts with 2 human partners:{Q8N157;Q86UL8}

5804 [Cluster 947]GO:0006171+P biological\_process [name] cAMP biosynthetic process [def] "The chemical reactions and pathways resulting in the formation of the nucleotide cAMP (cyclic AMP, adenosine 3',5'-cyclophosphate)." [ISBN

5805 Pathogen[ P14079] interacts with 1 human partners:{O60895}

5806 Pathogen[ P03410] interacts with 1 human partners:{O60895}

5807 [Cluster 948]GO:0021533+P biological\_process [name] cell differentiation in hindbrain [def] "The process in which relatively unspecialized cells acquire specialized structural and/or functional features that characterize the mature cells of the hindbrain. Differentiation includes the processes involved in commitment of a cell to a specific fate." [GO\_REF

5808 Pathogen[ Q2Q067] interacts with 1 human partners:{P23769}

5809 Pathogen[ P0C214] interacts with 1 human partners:{P23769}

5810 Pathogen[ P03346] interacts with 1 human partners:{P23769}

5811 Pathogen[ Q85601] interacts with 1 human partners:{P23769}

5812 Pathogen[ P14079] interacts with 1 human partners:{P23769}

5813 Pathogen[ P03383] interacts with 1 human partners:{P23769}

5814 Pathogen[ P03410] interacts with 1 human partners:{P23769}

5815 Pathogen[ P14075] interacts with 1 human partners:{P23769}

5816 Pathogen[ P0C206] interacts with 1 human partners:{P23769}

5817 [Cluster 949]GO:0051279+P biological\_process [name] regulation of release of sequestered calcium ion into cytosol [def] "Any process that modulates the frequency, rate or extent of the release into the cytosolic compartment of calcium ions sequestered in the endoplasmic reticulum or mitochondria." [GOC

5818 Pathogen[ P14079] interacts with 1 human partners:{O60610}

5819 Pathogen[ P03410] interacts with 1 human partners:{O60610}

5820 [Cluster 950]GO:0034115+P biological\_process [name] negative regulation of heterotypic cell-cell adhesion [def] "Any process that stops, prevents, or reduces the frequency, rate, or extent of heterotypic cell-cell adhesion." [GOC

5821 Pathogen[ P14079] interacts with 1 human partners:{Q13164}

5822 [Cluster 951]GO:2000353+P biological\_process [name] positive regulation of endothelial cell apoptosis [def] "Any process that activates or increases the frequency, rate or extent of endothelial cell apoptosis." [GOC

5823 Pathogen[ Q2Q067] interacts with 1 human partners:{Q9H4X1}

5824 Pathogen[ P0C214] interacts with 1 human partners:{Q9H4X1}

5825 Pathogen[ P03346] interacts with 1 human partners:{Q9H4X1}

5826 Pathogen[ Q85601] interacts with 1 human partners:{Q9H4X1}

5827 Pathogen[ P03383] interacts with 1 human partners:{Q9H4X1}

5828 Pathogen[ P03410] interacts with 1 human partners:{Q9H4X1}

5829 Pathogen[ P14075] interacts with 1 human partners:{Q9H4X1}

5830 Pathogen[ P0C206] interacts with 1 human partners:{Q9H4X1}

5831 Pathogen[ P03363] interacts with 1 human partners:{Q9H4X1}

5832 [Cluster 952]GO:0030828+P biological\_process [name] positive regulation of cGMP biosynthetic process [def] "Any process that activates or increases the frequency, rate or extent of the chemical reactions and pathways resulting in the formation of cGMP." [GOC

5833 Pathogen[ Q2Q067] interacts with 1 human partners:{Q9H2P0}

5834 Pathogen[ P0C214] interacts with 1 human partners:{Q9H2P0}

5835 Pathogen[ P03346] interacts with 1 human partners:{Q9H2P0}

5836 Pathogen[ Q85601] interacts with 1 human partners:{Q9H2P0}

5837 Pathogen[ P14079] interacts with 1 human partners:{Q9H2P0}

5838 Pathogen[ POC206] interacts with 1 human partners:{Q9H2P0}

5839 Pathogen[ P03363] interacts with 1 human partners:{Q9H2P0}

5840 [Cluster 953]GO:0045908+P biological\_process [name] negative regulation of vasodilation [def] "Any process that stops, prevents, or reduces the frequency, rate or extent of vasodilation." [GOC

5841 Pathogen[ P03346] interacts with 1 human partners:{A8MU46}

5842 Pathogen[ P03410] interacts with 1 human partners:{A8MU46}

5843 Pathogen[ P03363] interacts with 1 human partners:{A8MU46}

5844 [Cluster 954]GO:0051353+P biological\_process [name] positive regulation of oxidoreductase activity [def] "Any process that activates or increases the frequency, rate or extent of oxidoreductase activity, the catalysis of an oxidation-reduction (redox) reaction, a reversible chemical reaction in which the oxidation state of an atom or atoms within a molecule is altered." [GOC

5845 Pathogen[ Q2Q067] interacts with 1 human partners:{O14618}

5846 Pathogen[ POC214] interacts with 1 human partners:{O14618}

5847 Pathogen[ P03346] interacts with 1 human partners:{O14618}

5848 Pathogen[ Q85601] interacts with 1 human partners:{O14618}

5849 Pathogen[ P14079] interacts with 2 human partners:{P10109;O14618}

5850 Pathogen[ P03410] interacts with 2 human partners:{P10109;O14618}

5851 Pathogen[ POC206] interacts with 1 human partners:{O14618}

5852 Pathogen[ P03363] interacts with 1 human partners:{O14618}

5853 [Cluster 955]GO:0018022+P biological\_process [name] peptidyl-lysine methylation [def] "The methylation of peptidyl-lysine to form either the mono-, di- or trimethylated derivative." [GOC

5854 Pathogen[ Q2Q067] interacts with 1 human partners:{Q86TU7}

5855 Pathogen[ POC214] interacts with 1 human partners:{Q86TU7}

5856 Pathogen[ P03346] interacts with 1 human partners:{Q86TU7}

5857 Pathogen[ Q85601] interacts with 1 human partners:{Q86TU7}

5858 Pathogen[ P14079] interacts with 1 human partners:{Q86TU7}

5859 Pathogen[ P03383] interacts with 1 human partners:{Q86TU7}

5860 Pathogen[ P03410] interacts with 1 human partners:{Q86TU7}

5861 Pathogen[ P14075] interacts with 1 human partners:{Q86TU7}

5862 Pathogen[ POC206] interacts with 1 human partners:{Q86TU7}

5863 [Cluster 956]GO:0000422+P biological\_process [name] mitochondrion degradation [def] "The autophagic process in which mitochondria are delivered to the vacuole and degraded in response to changing cellular conditions." [PMID

5864 Pathogen[ Q2Q067] interacts with 1 human partners:{O60260}

5865 Pathogen[ POC214] interacts with 1 human partners:{O60260}

5866 Pathogen[ P03346] interacts with 1 human partners:{O60260}

5867 Pathogen[ Q85601] interacts with 1 human partners:{O60260}

5868 Pathogen[ P14079] interacts with 2 human partners:{O60260;Q8IVP5}

5869 Pathogen[ P03383] interacts with 1 human partners:{O60260}

5870 Pathogen[ P03410] interacts with 2 human partners:{O60260;Q8IVP5}

5871 Pathogen[ P14075] interacts with 1 human partners:{O60260}

5872 Pathogen[ POC206] interacts with 1 human partners:{O60260}

5873 [Cluster 957]GO:0010637+P biological\_process [name] negative regulation of mitochondrial fusion [def] "Any process that decreases the frequency, rate or extent of merging of two or more mitochondria within a cell to form a single compartment." [GOC

5874 Pathogen[ Q2Q067] interacts with 1 human partners:{Q12983}

5875 Pathogen[ POC214] interacts with 1 human partners:{Q12983}

5876 Pathogen[ P03346] interacts with 1 human partners:{Q12983}

5877 Pathogen[ Q85601] interacts with 1 human partners:{Q12983}

5878 Pathogen[ P14079] interacts with 1 human partners:{Q12983}

5879 Pathogen[ P03383] interacts with 1 human partners:{Q12983}

5880 Pathogen[ P03410] interacts with 1 human partners:{Q12983}

5881 Pathogen[ P14075] interacts with 1 human partners:{Q12983}

5882 Pathogen[ POC206] interacts with 1 human partners:{Q12983}

5883 [Cluster 958]GO:0010739+P biological\_process [name] positive regulation of protein kinase A signaling cascade [def] "Any process that increases the rate, frequency, or extent of the protein kinase A signaling cascade. The PKA signaling cascade is the series of reactions, mediated by the intracellular serine/threonine kinase protein kinase A, which occurs as a result of a single trigger reaction or compound." [GOC

5884 Pathogen[ Q2Q067] interacts with 1 human partners:{Q02952}

5885 Pathogen[ P03346] interacts with 1 human partners:{Q02952}

5886 Pathogen[ P14079] interacts with 2 human partners:{Q02952;P24588}

5887 Pathogen[ P03383] interacts with 1 human partners:{Q02952}

5888 Pathogen[ P03410] interacts with 2 human partners:{Q02952;P24588}

5889 Pathogen[ P14075] interacts with 1 human partners:{Q02952}

5890 Pathogen[ POC206] interacts with 1 human partners:{Q02952}

5891 Pathogen[ P03363] interacts with 1 human partners:{Q02952}

5892 [Cluster 959]GO:0030208+P biological\_process [name] dermatan sulfate biosynthetic process [def] "The chemical reactions and pathways resulting in the formation of dermatan sulfate, any glycosaminoglycan with repeats consisting of beta-(1,4)-linked L-iduronyl-beta-(1,3)-N-acetyl-D-galactosamine 4-sulfate units." [GOC

5893 Pathogen[ P14079] interacts with 1 human partners:{Q9UL01}

5894 Pathogen[ P03410] interacts with 1 human partners:{Q9UL01}

5895 Pathogen[ P0C206] interacts with 1 human partners:{Q9UL01}

5896 [Cluster 960]GO:0045403+P biological\_process [name] negative regulation of interleukin-4 biosynthetic process [def] "Any process that stops, prevents, or reduces the frequency, rate or extent of the chemical reactions and pathways resulting in the formation of interleukin-4." [GOC

5897 Pathogen[ Q2Q067] interacts with 1 human partners:{Q8IX07}

5898 Pathogen[ P0C214] interacts with 1 human partners:{Q8IX07}

5899 Pathogen[ P03346] interacts with 1 human partners:{Q8IX07}

5900 Pathogen[ Q85601] interacts with 1 human partners:{Q8IX07}

5901 Pathogen[ P14079] interacts with 1 human partners:{Q8IX07}

5902 Pathogen[ P03410] interacts with 1 human partners:{Q8IX07}

5903 Pathogen[ P0C206] interacts with 1 human partners:{Q8IX07}

5904 [Cluster 961]GO:0035456+P biological\_process [name] response to interferon-beta [def] "Any process that results in a change in state or activity of a cell or an organism (in terms of movement, secretion, enzyme production, gene expression, etc.) as a result of an interferon-beta stimulus. Interferon-beta is a type I interferon." [GOC

5905 Pathogen[ Q2Q067] interacts with 1 human partners:{O15162}

5906 Pathogen[ P0C214] interacts with 1 human partners:{O15162}

5907 Pathogen[ P03346] interacts with 1 human partners:{O15162}

5908 Pathogen[ Q85601] interacts with 1 human partners:{O15162}

5909 Pathogen[ P14079] interacts with 2 human partners:{P13164;O15162}

5910 Pathogen[ P03383] interacts with 1 human partners:{O15162}

5911 Pathogen[ P03410] interacts with 1 human partners:{O15162}

5912 Pathogen[ P14075] interacts with 1 human partners:{O15162}

5913 Pathogen[ P0C206] interacts with 1 human partners:{O15162}

5914 [Cluster 962]GO:0007202+P biological\_process [name] activation of phospholipase C activity [def] "The initiation of the activity of the inactive enzyme phospholipase C as the result of a series of molecular signals generated as a consequence of a G-protein coupled receptor binding to its physiological ligand." [GOC

5915 Pathogen[ P0C214] interacts with 1 human partners:{P16220}

5916 Pathogen[ P03346] interacts with 1 human partners:{P16220}

5917 Pathogen[ Q85601] interacts with 1 human partners:{P16220}

5918 Pathogen[ P03383] interacts with 1 human partners:{P16220}

5919 Pathogen[ P03410] interacts with 1 human partners:{P16220}

5920 Pathogen[ P14075] interacts with 1 human partners:{P16220}

5921 Pathogen[ P0C206] interacts with 1 human partners:{P16220}

5922 Pathogen[ P03363] interacts with 1 human partners:{P16220}

5923 [Cluster 963]GO:0001544+P biological\_process [name] initiation of primordial ovarian follicle growth [def] "Increase in size of primordial follicles including proliferation and shape changes of granulosa and/or theca cells until oocyte is surrounded by one layer of cuboidal shaped granulosa cells (primary follicle)." [http

5924 Pathogen[ Q2Q067] interacts with 1 human partners:{O43524}

5925 Pathogen[ P03346] interacts with 1 human partners:{O43524}

5926 Pathogen[ P03363] interacts with 1 human partners:{O43524}

5927 [Cluster 964]GO:0010459+P biological\_process [name] negative regulation of heart rate [def] "Any process that stops, prevents or reduces the frequency or rate of heart contraction." [GOC

5928 Pathogen[ Q2Q067] interacts with 1 human partners:{P27986}

5929 Pathogen[ P0C214] interacts with 1 human partners:{P27986}

5930 Pathogen[ P03346] interacts with 1 human partners:{P27986}

5931 Pathogen[ Q85601] interacts with 1 human partners:{P27986}

5932 Pathogen[ P03383] interacts with 1 human partners:{P27986}

5933 Pathogen[ P03410] interacts with 1 human partners:{P27986}

5934 Pathogen[ P14075] interacts with 1 human partners:{P27986}

5935 Pathogen[ P0C206] interacts with 1 human partners:{P27986}

5936 Pathogen[ P03363] interacts with 1 human partners:{P27986}

5937 [Cluster 965]GO:1900218+P

5938 Pathogen[ P03346] interacts with 1 human partners:{Q06710}

5939 [Cluster 966]GO:0055062+P biological\_process [name] phosphate ion homeostasis [def] "Any process involved in the maintenance of an internal steady state of phosphate ions within an organism or cell." [GOC

5940 Pathogen[ P03346] interacts with 1 human partners:{Q92481}

5941 [Cluster 967]GO:0070125+P biological\_process [name] mitochondrial translational elongation [def] "The successive addition of amino acid residues to a nascent polypeptide chain during protein biosynthesis in a mitochondrion." [GOC

5942 Pathogen[ P14079] interacts with 2 human partners:{Q96RP9;Q969S9}

5943 Pathogen[ P03410] interacts with 2 human partners:{Q96RP9;Q969S9}

5944 [Cluster 968]GO:0048806+P biological\_process [name] genitalia development [def] "The process whose specific outcome is the progression of the genitalia over time, from its formation to the mature structure." [GOC

5945 Pathogen[ Q2Q067] interacts with 1 human partners:{P35680}

5946 Pathogen[ P03346] interacts with 2 human partners:{P35680;Q9P2D1}

5947 Pathogen[ Q85601] interacts with 2 human partners:{Q9P2D1;P35680}

5948 Pathogen[ P14079] interacts with 2 human partners:{P35680;Q9P2D1}

5949 Pathogen[ P03410] interacts with 2 human partners:{Q9P2D1;P35680}

5950 Pathogen[ P0C206] interacts with 2 human partners:{Q9P2D1;P35680}

5951 [Cluster 969]GO:0006642+P biological\_process [name] triglyceride mobilization  
[def] "The release of triglycerides, any triester of glycerol, from storage within cells or tissues, making them available for metabolism." [GOC

5952 Pathogen[ Q2Q067] interacts with 1 human partners:{Q14693}

5953 Pathogen[ P0C214] interacts with 1 human partners:{Q14693}

5954 Pathogen[ P03346] interacts with 1 human partners:{Q14693}

5955 Pathogen[ Q85601] interacts with 1 human partners:{Q14693}

5956 Pathogen[ P14079] interacts with 1 human partners:{Q14693}

5957 Pathogen[ P03383] interacts with 1 human partners:{Q14693}

5958 Pathogen[ P03410] interacts with 1 human partners:{Q14693}

5959 Pathogen[ P14075] interacts with 1 human partners:{Q14693}

5960 Pathogen[ P0C206] interacts with 1 human partners:{Q14693}

5961 [Cluster 970]GO:0001881+P biological\_process [name] receptor recycling [def] "The process that results in the return of receptor molecules to an active state and an active cellular location after they have been stimulated by a ligand. An active state is when the receptor is ready to receive a signal." [GOC

5962 Pathogen[ Q2Q067] interacts with 1 human partners:{Q6ICB4}

5963 Pathogen[ P0C214] interacts with 1 human partners:{Q6ICB4}

5964 Pathogen[ P03346] interacts with 3 human partners:{Q9Y6D5;Q8N4B1;Q6ICB4}

5965 Pathogen[ Q85601] interacts with 1 human partners:{Q6ICB4}

5966 Pathogen[ P14079] interacts with 4 human partners:{P49069;Q9Y6D5;Q8N4B1;Q6ICB4}

5967 Pathogen[ P03410] interacts with 4 human partners:{P49069;Q8N4B1;Q9Y6D5;Q6ICB4}

5968 Pathogen[ P0C206] interacts with 3 human partners:{Q6ICB4;Q9Y6D5;Q8N4B1}

5969 Pathogen[ P03363] interacts with 2 human partners:{Q6ICB4;Q8N4B1}

5970 [Cluster 971]GO:0048672+P biological\_process [name] positive regulation of collateral sprouting [def] "Any process that activates or increases the frequency, rate or extent of collateral sprouting." [GOC

5971 Pathogen[ P03346] interacts with 1 human partners:{Q9H165}

5972 Pathogen[ P0C206] interacts with 1 human partners:{Q9H165}

5973 [Cluster 972]GO:0070723+P biological\_process [name] response to cholesterol [def] "Any process that results in a change in state or activity of a cell or an organism (in terms of movement, secretion, enzyme production, gene expression, etc.) as a result of a cholesterol stimulus." [GOC

5974 Pathogen[ Q2Q067] interacts with 1 human partners:{Q15796}

5975 Pathogen[ P0C214] interacts with 1 human partners:{Q15796}

5976 Pathogen[ P03346] interacts with 1 human partners:{Q15796}

5977 Pathogen[ Q85601] interacts with 1 human partners:{Q15796}

5978 Pathogen[ P03383] interacts with 1 human partners:{Q15796}

5979 Pathogen[ P03410] interacts with 1 human partners:{Q15796}

5980 Pathogen[ P14075] interacts with 1 human partners:{Q15796}

5981 Pathogen[ P0C206] interacts with 1 human partners:{Q15796}

5982 Pathogen[ P03363] interacts with 1 human partners:{Q15796}

5983 [Cluster 973]GO:0006533+P biological\_process [name] aspartate catabolic process [def] "The chemical reactions and pathways resulting in the breakdown of aspartate, the anion derived from aspartic acid, 2-aminobutanedioic acid." [GOC

5984 Pathogen[ P03346] interacts with 1 human partners:{P45381}

5985 Pathogen[ P14079] interacts with 1 human partners:{P45381}

5986 Pathogen[ P03410] interacts with 1 human partners:{P45381}

5987 Pathogen[ P0C206] interacts with 1 human partners:{P45381}

5988 [Cluster 974]GO:0002932+P

5989 Pathogen[ P03346] interacts with 1 human partners:{Q8IYA7}

5990 Pathogen[ P03363] interacts with 1 human partners:{Q8IYA7}

5991 [Cluster 975]GO:0071670+P biological\_process [name] smooth muscle cell chemotaxis [def] "The directed movement of a smooth muscle cell in response to an external stimulus." [GOC

5992 Pathogen[ Q2Q067] interacts with 1 human partners:{Q9NVD7}

5993 Pathogen[ P0C214] interacts with 1 human partners:{Q9NVD7}

5994 Pathogen[ P03346] interacts with 1 human partners:{Q9NVD7}

5995 Pathogen[ Q85601] interacts with 1 human partners:{Q9NVD7}

5996 Pathogen[ P14079] interacts with 1 human partners:{Q9NVD7}

5997 Pathogen[ P03410] interacts with 1 human partners:{Q9NVD7}

5998 Pathogen[ P0C206] interacts with 1 human partners:{Q9NVD7}

5999 Pathogen[ P03363] interacts with 1 human partners:{Q9NVD7}

6000 [Cluster 976]GO:0060152+P biological\_process [name] microtubule-based peroxisome localization [def] "The microtubule-based process in which a peroxisome is transported to, and/or maintained in, a specific location. A peroxisome is a small membrane-bounded organelle that uses dioxygen (O<sub>2</sub>) to oxidize organic molecules." [GOC

6001 Pathogen[ P03346] interacts with 1 human partners:{O43933}

6002 Pathogen[ Q85601] interacts with 1 human partners:{O43933}

6003 Pathogen[ P0C206] interacts with 1 human partners:{O43933}

6004 Pathogen[ P03363] interacts with 1 human partners:{O43933}

6005 [Cluster 977]GO:2001256+P biological\_process [name] regulation of store-operated calcium entry [def] "Any process that modulates the frequency, rate or extent of store-operated calcium entry." [GOC

6006 Pathogen[ P14079] interacts with 1 human partners:{Q96BY9}

6007 Pathogen[ P03410] interacts with 1 human partners:{Q96BY9}



6008 [Cluster 978]GO:0006771+P biological\_process [name] riboflavin metabolic process  
[def] "The chemical reactions and pathways involving riboflavin (vitamin B2), the precursor for the coenzymes flavin mononucleotide (FMN) and flavin adenine dinucleotide (FAD)." [GOC  
6009 Pathogen[ P0C214] interacts with 1 human partners:{Q8NFF5}  
6010 Pathogen[ P14079] interacts with 1 human partners:{Q8NFF5}  
6011 Pathogen[ P03410] interacts with 1 human partners:{Q8NFF5}  
6012 [Cluster 979]GO:0019344+P biological\_process [name] cysteine biosynthetic process  
[def] "The chemical reactions and pathways resulting in the formation of cysteine, 2-amino-3-mercaptopropanoic acid." [GOC  
6013 Pathogen[ Q2Q067] interacts with 1 human partners:{P32929}  
6014 Pathogen[ P0C214] interacts with 2 human partners:{P32929;P35520}  
6015 Pathogen[ P03346] interacts with 1 human partners:{P32929}  
6016 Pathogen[ Q85601] interacts with 1 human partners:{P32929}  
6017 Pathogen[ P14079] interacts with 1 human partners:{P32929}  
6018 Pathogen[ P03410] interacts with 1 human partners:{P32929}  
6019 Pathogen[ P0C206] interacts with 1 human partners:{P32929}  
6020 [Cluster 980]GO:0072210+P biological\_process [name] metanephric nephron development  
[def] "The process whose specific outcome is the progression of a nephron in the metanephros over time, from its formation to the mature structure. A nephron is the functional unit of the kidney." [GOC  
6021 Pathogen[ P03346] interacts with 1 human partners:{Q92481}  
6022 [Cluster 981]GO:0007066+P biological\_process [name] female meiosis sister chromatid cohesion [def] "The joining of the sister chromatids of a replicated chromosome along the entire length of the chromosome that occurs during meiosis in a female." [GOC  
6023 Pathogen[ Q2Q067] interacts with 1 human partners:{O43502}  
6024 Pathogen[ P0C214] interacts with 1 human partners:{O43502}  
6025 Pathogen[ P03346] interacts with 1 human partners:{O43502}  
6026 Pathogen[ Q85601] interacts with 1 human partners:{O43502}  
6027 Pathogen[ P14079] interacts with 2 human partners:{Q7Z7C7;O43502}  
6028 Pathogen[ P03410] interacts with 2 human partners:{O43502;Q7Z7C7}  
6029 Pathogen[ P14075] interacts with 1 human partners:{Q7Z7C7}  
6030 Pathogen[ P0C206] interacts with 2 human partners:{O43502;Q7Z7C7}  
6031 Pathogen[ P03363] interacts with 1 human partners:{O43502}  
6032 [Cluster 982]GO:0003185+P biological\_process [name] sinoatrial valve morphogenesis  
[def] "The process in which the structure of the sinoatrial valve is generated and organized." [GOC  
6033 Pathogen[ P14079] interacts with 1 human partners:{Q06413}  
6034 [Cluster 983]GO:0010454+P biological\_process [name] negative regulation of cell fate commitment [def] "Any process that stops, prevents or reduces the frequency or rate of cell fate commitment. Cell fate commitment is the commitment of cells to specific cell fates and their capacity to differentiate into particular kinds of cells. Positional information is established through protein signals that emanate from a localized source within a cell (the initial one-cell zygote) or within a developmental field." [GOC  
6035 Pathogen[ Q2Q067] interacts with 1 human partners:{O95238}  
6036 Pathogen[ P0C214] interacts with 1 human partners:{O95238}  
6037 Pathogen[ P03346] interacts with 1 human partners:{O95238}  
6038 Pathogen[ Q85601] interacts with 1 human partners:{O95238}  
6039 Pathogen[ P14079] interacts with 1 human partners:{O95238}  
6040 Pathogen[ P03383] interacts with 1 human partners:{O95238}  
6041 Pathogen[ P03410] interacts with 1 human partners:{O95238}  
6042 Pathogen[ P0C206] interacts with 1 human partners:{O95238}  
6043 Pathogen[ P03363] interacts with 2 human partners:{O95238;Q9C056}  
6044 [Cluster 984]GO:0072289+P biological\_process [name] metanephric nephron tubule formation [def] "The developmental process pertaining to the initial formation of a metanephric nephron tubule from unspecified parts. A metanephric nephron tubule is an epithelial tube that is part of a nephron in the metanephros." [GOC  
6045 Pathogen[ P03346] interacts with 1 human partners:{Q06710}  
6046 [Cluster 985]GO:0043060+P biological\_process [name] meiotic metaphase I plate congression [def] "The alignment of chromosomes at the metaphase plate, a plane halfway between the poles of the meiotic spindle, during meiosis I." [GOC  
6047 Pathogen[ P0C214] interacts with 1 human partners:{P40692}  
6048 Pathogen[ Q85601] interacts with 1 human partners:{P40692}  
6049 Pathogen[ P14079] interacts with 1 human partners:{P40692}  
6050 Pathogen[ P03410] interacts with 1 human partners:{P40692}  
6051 Pathogen[ P0C206] interacts with 1 human partners:{P40692}  
6052 [Cluster 986]GO:0014894+P biological\_process [name] response to denervation involved in regulation of muscle adaptation [def] "Any process that results in a change in state or activity of a cell or an organism (in terms of movement, secretion, enzyme production, gene expression, etc.) as a result of a denervation stimulus. This process occurs as part of the regulation of muscle adaptation." [GOC  
6053 Pathogen[ Q2Q067] interacts with 1 human partners:{P56524}  
6054 Pathogen[ P0C214] interacts with 1 human partners:{P56524}  
6055 Pathogen[ P03346] interacts with 1 human partners:{P56524}  
6056 Pathogen[ Q85601] interacts with 1 human partners:{P56524}  
6057 Pathogen[ P14079] interacts with 1 human partners:{P56524}

6058 Pathogen[ P03383] interacts with 1 human partners:{P56524}

6059 Pathogen[ P03410] interacts with 1 human partners:{P56524}

6060 Pathogen[ P14075] interacts with 1 human partners:{P56524}

6061 Pathogen[ P0C206] interacts with 1 human partners:{P56524}

6062 [Cluster 987]GO:0043583+P biological\_process [name] ear development [def] "The process whose specific outcome is the progression of the ear over time, from its formation to the mature structure. The ear is the sense organ in vertebrates that is specialized for the detection of sound, and the maintenance of balance. Includes the outer ear and middle ear, which collect and transmit sound waves\_ and the inner ear, which contains the organs of balance and (except in fish) hearing. Also includes the pinna, the visible part of the outer ear, present in some mammals." [GOC

6063 Pathogen[ P03346] interacts with 2 human partners:{P56178;P56915}

6064 Pathogen[ P03363] interacts with 1 human partners:{P56915}

6065 [Cluster 988]GO:0030704+P biological\_process [name] vitelline membrane formation [def] "Construction of the vitelline membrane portion of the egg shell, a rigid structure required to maintain the shape of the egg." [ISBN

6066 Pathogen[ P14079] interacts with 1 human partners:{Q7Z5L0}

6067 Pathogen[ P03410] interacts with 1 human partners:{Q7Z5L0}

6068 [Cluster 989]GO:0006505+P biological\_process [name] GPI anchor metabolic process [def] "The chemical reactions and pathways involving glycosylphosphatidylinositol anchors, molecular mechanisms for attaching membrane proteins to the lipid bilayer of cell membranes. Structurally they consist of a molecule of phosphatidylinositol to which is linked, via the C-6 hydroxyl of the inositol, a carbohydrate chain. This chain is in turn linked to the protein through an ethanolamine phosphate group, the amino group of which is in amide linkage with the C-terminal carboxyl of the protein chain, the phosphate group being esterified to the C-6 hydroxyl of the terminal mannose of the core carbohydrate chain." [ISBN

6069 Pathogen[ P14079] interacts with 2 human partners:{Q96JX3;Q96FM1}

6070 Pathogen[ P03410] interacts with 2 human partners:{Q96FM1;Q96JX3}

6071 [Cluster 990]GO:0022405+P biological\_process [name] hair cycle process [def] "A multicellular organismal process involved in the cyclical phases of growth (anagen), regression (catagen), quiescence (telogen), and shedding (exogen) in the life of a hair\_ one of the collection or mass of filaments growing from the skin of an animal, and forming a covering for a part of the head or for any part or the whole of the body." [GOC

6072 Pathogen[ P03346] interacts with 1 human partners:{P35713}

6073 [Cluster 991]GO:0019287+P biological\_process [name] isopentenyl diphosphate biosynthetic process, mevalonate pathway [def] "The chemical reactions and pathways resulting in the formation of isopentenyl diphosphate, via the intermediate mevalonate. This pathway converts acetate, in the form of acetyl-CoA, to isopentenyl diphosphate (IPP), the fundamental unit in isoprenoid biosynthesis, through a series of mevalonate intermediates." [GOC

6074 Pathogen[ P14079] interacts with 1 human partners:{P53602}

6075 Pathogen[ P03410] interacts with 1 human partners:{P53602}

6076 [Cluster 992]GO:0009620+P biological\_process [name] response to fungus [def] "Any process that results in a change in state or activity of a cell or an organism (in terms of movement, secretion, enzyme production, gene expression, etc.) as a result of a stimulus from a fungus." [GOC

6077 Pathogen[ Q2Q067] interacts with 2 human partners:{Q9UDY8;O95999}

6078 Pathogen[ P0C214] interacts with 2 human partners:{Q9UDY8;O95999}

6079 Pathogen[ P03346] interacts with 2 human partners:{Q9UDY8;O95999}

6080 Pathogen[ Q85601] interacts with 2 human partners:{Q9UDY8;O95999}

6081 Pathogen[ P14079] interacts with 1 human partners:{O95999}

6082 Pathogen[ P03383] interacts with 1 human partners:{O95999}

6083 Pathogen[ P03410] interacts with 1 human partners:{O95999}

6084 Pathogen[ P14075] interacts with 1 human partners:{O95999}

6085 Pathogen[ P0C206] interacts with 2 human partners:{Q9UDY8;O95999}

6086 [Cluster 993]GO:0032600+P biological\_process [name] chemokine receptor transport out of membrane raft [def] "The directed movement of a chemokine receptor out of a membrane raft." [GOC

6087 Pathogen[ Q2Q067] interacts with 1 human partners:{P25063}

6088 Pathogen[ P0C214] interacts with 1 human partners:{P25063}

6089 Pathogen[ P03346] interacts with 1 human partners:{P25063}

6090 Pathogen[ P14079] interacts with 1 human partners:{P25063}

6091 Pathogen[ P03383] interacts with 1 human partners:{P25063}

6092 Pathogen[ P03410] interacts with 1 human partners:{P25063}

6093 Pathogen[ P14075] interacts with 1 human partners:{P25063}

6094 Pathogen[ P0C206] interacts with 1 human partners:{P25063}

6095 [Cluster 994]GO:0070972+P biological\_process [name] protein localization in endoplasmic reticulum [def] "A process in which a protein is transported to, or maintained in, a location within the endoplasmic reticulum." [GOC

6096 Pathogen[ Q2Q067] interacts with 1 human partners:{Q96JE7}

6097 Pathogen[ P0C214] interacts with 1 human partners:{Q96JE7}

6098 Pathogen[ P03346] interacts with 1 human partners:{Q96JE7}

6099 Pathogen[ Q85601] interacts with 1 human partners:{Q96JE7}

6100 Pathogen[ P14079] interacts with 2 human partners:{Q9Y5Y5;Q96JE7}

6101 Pathogen[ P03383] interacts with 1 human partners:{Q96JE7}

6102 Pathogen[ P03410] interacts with 2 human partners:{Q9Y5Y5;Q96JE7}

6103 Pathogen[ P14075] interacts with 1 human partners:{Q96JE7}

6104 Pathogen[ POC206] interacts with 1 human partners:{Q96JE7}

6105 [Cluster 995]GO:0014889+P biological\_process [name] muscle atrophy [def] "A process, occurring in the muscle, that is characterized by a decrease in protein content, fiber diameter, force production and fatigue resistance in response to different conditions such as starvation, aging and disuse." [GOC

6106 Pathogen[ Q2Q067] interacts with 1 human partners:{Q969P5}

6107 Pathogen[ POC214] interacts with 1 human partners:{Q969P5}

6108 Pathogen[ P03346] interacts with 1 human partners:{Q969P5}

6109 Pathogen[ Q85601] interacts with 1 human partners:{Q969P5}

6110 Pathogen[ P14079] interacts with 1 human partners:{Q969P5}

6111 Pathogen[ P03410] interacts with 1 human partners:{Q969P5}

6112 Pathogen[ POC206] interacts with 1 human partners:{Q969P5}

6113 Pathogen[ P03363] interacts with 1 human partners:{Q969P5}

6114 [Cluster 996]GO:0036152+P

6115 Pathogen[ P14079] interacts with 1 human partners:{Q9NZ20}

6116 Pathogen[ P03410] interacts with 1 human partners:{Q9NZ20}

6117 [Cluster 997]GO:2000768+P biological\_process [name] positive regulation of nephron tubule epithelial cell differentiation [def] "Any process that activates or increases the frequency, rate or extent of nephron tubule epithelial cell differentiation." [GOC

6118 Pathogen[ Q2Q067] interacts with 1 human partners:{P25063}

6119 Pathogen[ POC214] interacts with 1 human partners:{P25063}

6120 Pathogen[ P03346] interacts with 1 human partners:{P25063}

6121 Pathogen[ P14079] interacts with 1 human partners:{P25063}

6122 Pathogen[ P03383] interacts with 1 human partners:{P25063}

6123 Pathogen[ P03410] interacts with 1 human partners:{P25063}

6124 Pathogen[ P14075] interacts with 1 human partners:{P25063}

6125 Pathogen[ POC206] interacts with 1 human partners:{P25063}

6126 [Cluster 998]GO:0019343+P biological\_process [name] cysteine biosynthetic process via cystathionine [def] "The chemical reactions and pathways resulting in the formation of cysteine, via the intermediate cystathionine." [GOC

6127 Pathogen[ POC214] interacts with 1 human partners:{P35520}

6128 [Cluster 999]GO:0060038+P biological\_process [name] cardiac muscle cell proliferation [def] "The expansion of a cardiac muscle cell population by cell division." [GOC

6129 Pathogen[ Q2Q067] interacts with 1 human partners:{P28702}

6130 Pathogen[ P03346] interacts with 1 human partners:{P28702}

6131 Pathogen[ Q85601] interacts with 1 human partners:{P28702}

6132 Pathogen[ P14079] interacts with 1 human partners:{P28702}

6133 Pathogen[ P03383] interacts with 1 human partners:{P28702}

6134 Pathogen[ P03410] interacts with 1 human partners:{P28702}

6135 Pathogen[ P14075] interacts with 1 human partners:{P28702}

6136 Pathogen[ POC206] interacts with 1 human partners:{P28702}

6137 Pathogen[ P03363] interacts with 1 human partners:{P28702}

6138 [Cluster 1000]GO:0042743+P biological\_process [name] hydrogen peroxide metabolic process [def] "The chemical reactions and pathways involving hydrogen peroxide (H2O2), a potentially harmful byproduct of aerobic cellular respiration which can cause damage to DNA." [GOC

6139 Pathogen[ Q2Q067] interacts with 1 human partners:{Q99497}

6140 Pathogen[ POC214] interacts with 1 human partners:{Q99497}

6141 Pathogen[ P03346] interacts with 1 human partners:{Q99497}

6142 Pathogen[ Q85601] interacts with 1 human partners:{Q99497}

6143 Pathogen[ P14079] interacts with 1 human partners:{Q99497}

6144 Pathogen[ P03410] interacts with 1 human partners:{Q99497}

6145 Pathogen[ POC206] interacts with 1 human partners:{Q99497}

6146 [Cluster 1001]GO:0043931+P biological\_process [name] ossification involved in bone maturation [def] "The formation of bone or of a bony substance, or the conversion of fibrous tissue or of cartilage into bone, involved in the progression of the skeleton from its formation to its mature state." [GOC

6147 Pathogen[ Q2Q067] interacts with 1 human partners:{P61586}

6148 Pathogen[ POC214] interacts with 1 human partners:{P61586}

6149 Pathogen[ P03346] interacts with 1 human partners:{P61586}

6150 Pathogen[ Q85601] interacts with 1 human partners:{P61586}

6151 Pathogen[ P14079] interacts with 1 human partners:{P61586}

6152 Pathogen[ P03383] interacts with 1 human partners:{P61586}

6153 Pathogen[ P03410] interacts with 1 human partners:{P61586}

6154 Pathogen[ P14075] interacts with 1 human partners:{P61586}

6155 Pathogen[ POC206] interacts with 1 human partners:{P61586}

6156 [Cluster 1002]GO:0048747+P biological\_process [name] muscle fiber development [def] "The process whose specific outcome is the progression of the muscle fiber over time, from its formation to the mature structure. Muscle fibers are formed by the maturation of myotubes. They can be classed as slow, intermediate/fast or fast." [GOC

6157 Pathogen[ POC214] interacts with 1 human partners:{Q8WV60}

6158 Pathogen[ Q85601] interacts with 1 human partners:{Q8WV60}

6159 Pathogen[ P14079] interacts with 1 human partners:{Q8WV60}

6160 Pathogen[ P03410] interacts with 1 human partners:{Q8WV60}

6161 Pathogen[ P0C206] interacts with 1 human partners:{Q8WV60}

6162 [Cluster 1003]GO:1900737+P

6163 Pathogen[ P0C214] interacts with 1 human partners:{Q96G01}

6164 Pathogen[ P03346] interacts with 1 human partners:{Q96G01}

6165 Pathogen[ Q85601] interacts with 1 human partners:{Q96G01}

6166 Pathogen[ P14079] interacts with 1 human partners:{Q96G01}

6167 Pathogen[ P03410] interacts with 1 human partners:{Q96G01}

6168 Pathogen[ P0C206] interacts with 1 human partners:{Q96G01}

6169 [Cluster 1004]GO:0033315+P biological\_process [name] meiotic cell cycle DNA replication checkpoint [def] "A cell cycle checkpoint that acts during a meiotic cell cycle and prevents the initiation of mitosis until DNA replication is complete, thereby ensuring that progeny inherit a full complement of the haploid genome." [GOC

6170 Pathogen[ P14079] interacts with 1 human partners:{Q7Z7C7}

6171 Pathogen[ P03410] interacts with 1 human partners:{Q7Z7C7}

6172 Pathogen[ P14075] interacts with 1 human partners:{Q7Z7C7}

6173 Pathogen[ P0C206] interacts with 1 human partners:{Q7Z7C7}

6174 [Cluster 1005]GO:1901315+P

6175 Pathogen[ Q2Q067] interacts with 1 human partners:{Q14669}

6176 Pathogen[ P0C214] interacts with 2 human partners:{O95071;Q14669}

6177 Pathogen[ P03346] interacts with 3 human partners:{Q14669;Q96FW1;O95071}

6178 Pathogen[ Q85601] interacts with 2 human partners:{Q14669;O95071}

6179 Pathogen[ P14079] interacts with 1 human partners:{Q96FW1}

6180 Pathogen[ P03410] interacts with 1 human partners:{Q96FW1}

6181 Pathogen[ P14075] interacts with 1 human partners:{Q96FW1}

6182 Pathogen[ P0C206] interacts with 3 human partners:{Q14669;Q96FW1;O95071}

6183 Pathogen[ P03363] interacts with 3 human partners:{Q14669;O95071;Q96FW1}

6184 [Cluster 1006]GO:0042753+P biological\_process [name] positive regulation of circadian rhythm [def] "Any process that activates or increases the frequency, rate or extent of a circadian rhythm behavior." [GOC

6185 Pathogen[ Q2Q067] interacts with 1 human partners:{Q9Y297}

6186 Pathogen[ P0C214] interacts with 1 human partners:{Q9Y297}

6187 Pathogen[ P03346] interacts with 1 human partners:{Q9Y297}

6188 [Cluster 1007]GO:0045869+P biological\_process [name] negative regulation of retroviral genome replication [def] "Any process that stops, prevents, or reduces the frequency, rate or extent of retroviral genome replication." [GOC

6189 Pathogen[ Q2Q067] interacts with 1 human partners:{Q9HC16}

6190 Pathogen[ P0C214] interacts with 1 human partners:{Q9HC16}

6191 Pathogen[ Q85601] interacts with 1 human partners:{Q9HC16}

6192 Pathogen[ P14079] interacts with 1 human partners:{Q9HC16}

6193 Pathogen[ P03410] interacts with 2 human partners:{Q9HC16;Q6NTF7}

6194 Pathogen[ P0C206] interacts with 2 human partners:{Q6NTF7;Q9HC16}

6195 [Cluster 1008]GO:0050779+P biological\_process [name] RNA destabilization [def] "Any process that decreases the stability of an RNA molecule, making it more vulnerable to degradative processes." [GOC

6196 Pathogen[ Q2Q067] interacts with 1 human partners:{P26651}

6197 Pathogen[ P0C214] interacts with 1 human partners:{P26651}

6198 Pathogen[ P03346] interacts with 1 human partners:{P26651}

6199 Pathogen[ Q85601] interacts with 1 human partners:{P26651}

6200 Pathogen[ P03383] interacts with 1 human partners:{P26651}

6201 Pathogen[ P03410] interacts with 1 human partners:{P26651}

6202 Pathogen[ P14075] interacts with 1 human partners:{P26651}

6203 Pathogen[ P0C206] interacts with 1 human partners:{P26651}

6204 Pathogen[ P03363] interacts with 1 human partners:{P26651}

6205 [Cluster 1009]GO:0002906+P biological\_process [name] negative regulation of mature B cell apoptosis [def] "Any process that stops, prevents, or reduces the frequency, rate, or extent of mature B cell apoptosis." [GOC

6206 Pathogen[ Q2Q067] interacts with 1 human partners:{O95999}

6207 Pathogen[ P0C214] interacts with 1 human partners:{O95999}

6208 Pathogen[ P03346] interacts with 1 human partners:{O95999}

6209 Pathogen[ Q85601] interacts with 1 human partners:{O95999}

6210 Pathogen[ P14079] interacts with 1 human partners:{O95999}

6211 Pathogen[ P03383] interacts with 1 human partners:{O95999}

6212 Pathogen[ P03410] interacts with 1 human partners:{O95999}

6213 Pathogen[ P14075] interacts with 1 human partners:{O95999}

6214 Pathogen[ P0C206] interacts with 1 human partners:{O95999}

6215 [Cluster 1010]GO:0021860+P biological\_process [name] pyramidal neuron development [def] "The progression of a pyramidal neuron from its initial formation to its mature state." [GO\_REF

6216 Pathogen[ P14079] interacts with 1 human partners:{O14949}

6217 Pathogen[ P03410] interacts with 1 human partners:{O14949}

6218 [Cluster 1011]GO:0031032+P biological\_process [name] actomyosin structure organization [def] "A process that is carried out at the cellular level which results in the assembly, arrangement of constituent parts, or disassembly of cytoskeletal structures containing both actin and myosin or paramyosin. The myosin may be organized into filaments." [GOC

6219 Pathogen[ P0C214] interacts with 1 human partners:{Q92614}

6220 Pathogen[ P03346] interacts with 2 human partners:{Q92614;Q9H329}

6221 Pathogen[ Q85601] interacts with 1 human partners:{Q92614}

6222 Pathogen[ P14079] interacts with 3 human partners:{Q92614;P68032;Q99439}

6223 Pathogen[ P03410] interacts with 3 human partners:{Q9H329;Q92614;Q99439}

6224 Pathogen[ P0C206] interacts with 1 human partners:{Q92614}

6225 Pathogen[ P03363] interacts with 2 human partners:{Q92614;Q9H329}

6226 [Cluster 1012]GO:0071042+P biological\_process [name] nuclear polyadenylation-dependent mRNA catabolic process [def] "The chemical reactions and pathways occurring in the nucleus and resulting in the breakdown of a messenger RNA (mRNA) molecule, initiated by the enzymatic addition of a sequence of adenyl residues (polyadenylation) at the 3' end the target mRNA." [GOC

6227 Pathogen[ Q2Q067] interacts with 1 human partners:{Q8TCS8}

6228 Pathogen[ P0C214] interacts with 1 human partners:{Q8TCS8}

6229 Pathogen[ P03346] interacts with 1 human partners:{Q8TCS8}

6230 Pathogen[ Q85601] interacts with 1 human partners:{Q8TCS8}

6231 Pathogen[ P14079] interacts with 1 human partners:{Q8TCS8}

6232 Pathogen[ P03383] interacts with 1 human partners:{Q8TCS8}

6233 Pathogen[ P03410] interacts with 1 human partners:{Q8TCS8}

6234 Pathogen[ P14075] interacts with 1 human partners:{Q8TCS8}

6235 Pathogen[ P0C206] interacts with 1 human partners:{Q8TCS8}

6236 [Cluster 1013]GO:0032801+P biological\_process [name] receptor catabolic process [def] "The chemical reactions and pathways resulting in the breakdown of a receptor molecule, a macromolecule that undergoes combination with a hormone, neurotransmitter, drug or intracellular messenger to initiate a change in cell function." [GOC

6237 Pathogen[ P0C214] interacts with 1 human partners:{Q9HCE7}

6238 [Cluster 1014]GO:0046579+P biological\_process [name] positive regulation of Ras protein signal transduction [def] "Any process that activates or increases the frequency, rate or extent of Ras protein signal transduction." [GOC

6239 Pathogen[ P03346] interacts with 1 human partners:{Q9UQ13}

6240 Pathogen[ P03363] interacts with 1 human partners:{Q9UQ13}

6241 [Cluster 1015]GO:0050848+P biological\_process [name] regulation of calcium-mediated signaling [def] "Any process that modulates the frequency, rate or extent of calcium-mediated signaling, the process in which a cell uses calcium ions to convert an extracellular signal into a response." [GOC

6242 Pathogen[ P03346] interacts with 1 human partners:{Q9HC24}

6243 Pathogen[ P14079] interacts with 2 human partners:{Q9HC24;Q15493}

6244 Pathogen[ P03410] interacts with 2 human partners:{Q9HC24;Q15493}

6245 Pathogen[ P0C206] interacts with 2 human partners:{Q15493;Q9HC24}

6246 [Cluster 1016]GO:0046219+P biological\_process [name] indolalkylamine biosynthetic process [def] "The chemical reactions and pathways resulting in the formation of indolalkylamines, indole or indole derivatives containing a primary, secondary, or tertiary amine group." [CHEBI

6247 Pathogen[ P0C214] interacts with 1 human partners:{Q16613}

6248 Pathogen[ Q85601] interacts with 1 human partners:{Q16613}

6249 Pathogen[ P14079] interacts with 1 human partners:{Q16613}

6250 Pathogen[ P03383] interacts with 1 human partners:{Q16613}

6251 Pathogen[ P03410] interacts with 1 human partners:{Q16613}

6252 Pathogen[ P14075] interacts with 1 human partners:{Q16613}

6253 Pathogen[ P0C206] interacts with 1 human partners:{Q16613}

6254 [Cluster 1017]GO:0050935+P biological\_process [name] iridophore differentiation [def] "The process in which a relatively unspecialized cell acquires the specialized features of an iridophore. Iridophores are pigment cells derived from the neural crest. They contain guanidine or other purine crystals deposited in stacks called reflecting platets or iridosomes. This gives them a silver, gold, or iridescent appearance." [GOC

6255 Pathogen[ P03346] interacts with 1 human partners:{Q9UJU5}

6256 Pathogen[ P03363] interacts with 1 human partners:{Q9UJU5}

6257 [Cluster 1018]GO:2000779+P biological\_process [name] regulation of double-strand break repair [def] "Any process that modulates the frequency, rate or extent of double-strand break repair." [GOC

6258 Pathogen[ P03346] interacts with 1 human partners:{P35659}

6259 Pathogen[ P14079] interacts with 1 human partners:{P35659}

6260 Pathogen[ P03410] interacts with 1 human partners:{P35659}

6261 Pathogen[ P14075] interacts with 1 human partners:{P35659}

6262 Pathogen[ P0C206] interacts with 1 human partners:{P35659}

6263 Pathogen[ P03363] interacts with 1 human partners:{P35659}

6264 [Cluster 1019]GO:0070189+P biological\_process [name] kynurenine metabolic process [def] "The chemical reactions and pathways involving kynurenine, the amino acid 3-(2-aminobenzoyl)-alanine." [CHEBI

6265 Pathogen[ P0C214] interacts with 1 human partners:{Q16773}

6266 [Cluster 1020]GO:0021514+P biological\_process [name] ventral spinal cord interneuron differentiation [def] "The process in which neuroepithelial cells in the neural tube acquire specialized structural and/or functional features of ventral spinal cord interneurons. Ventral spinal cord interneurons are cells located in the ventral portion of the spinal cord that transmit signals between sensory and motor neurons and are required for reflexive responses. Differentiation includes the processes involved in

commitment of a cell to a specific fate." [GO\_REF

6267 Pathogen[ Q2Q067] interacts with 1 human partners:{P23769}

6268 Pathogen[ POC214] interacts with 1 human partners:{P23769}

6269 Pathogen[ P03346] interacts with 2 human partners:{P23769;P61968}

6270 Pathogen[ Q85601] interacts with 2 human partners:{P61968;P23769}

6271 Pathogen[ P14079] interacts with 1 human partners:{P23769}

6272 Pathogen[ P03383] interacts with 1 human partners:{P23769}

6273 Pathogen[ P03410] interacts with 1 human partners:{P23769}

6274 Pathogen[ P14075] interacts with 1 human partners:{P23769}

6275 Pathogen[ POC206] interacts with 2 human partners:{P23769;P61968}

6276 [Cluster 1021]GO:0050983+P biological\_process [name] deoxyhypusine biosynthetic process from spermidine, using deoxyhypusine synthase [def] "The chemical reactions resulting in the formation of deoxyhypusine from spermidine by the enzyme [eIF-5A]-deoxyhypusine synthase. The reaction occurs in four steps

6277 Pathogen[ Q2Q067] interacts with 1 human partners:{P49366}

6278 Pathogen[ POC214] interacts with 1 human partners:{P49366}

6279 Pathogen[ P03346] interacts with 1 human partners:{P49366}

6280 Pathogen[ P14079] interacts with 1 human partners:{P49366}

6281 Pathogen[ P03383] interacts with 1 human partners:{P49366}

6282 Pathogen[ P03410] interacts with 1 human partners:{P49366}

6283 Pathogen[ P14075] interacts with 1 human partners:{P49366}

6284 Pathogen[ POC206] interacts with 1 human partners:{P49366}

6285 Pathogen[ P03363] interacts with 1 human partners:{P49366}

6286 [Cluster 1022]GO:0060008+P biological\_process [name] Sertoli cell differentiation [def] "The process in which a relatively unspecialized cell acquires specialized structural and/or functional features of a Sertoli cell. A Sertoli cell is a supporting cell projecting inward from the basement membrane of seminiferous tubules." [GOC

6287 Pathogen[ P03346] interacts with 3 human partners:{O43680;P51843;Q9Y5R6}

6288 Pathogen[ POC206] interacts with 1 human partners:{Q9Y5R6}

6289 Pathogen[ P03363] interacts with 1 human partners:{Q9Y5R6}

6290 [Cluster 1023]GO:0006568+P biological\_process [name] tryptophan metabolic process [def] "The chemical reactions and pathways involving tryptophan, the chiral amino acid 2-amino-3-(1H-indol-3-yl)propanoic acid." [ISBN

6291 Pathogen[ P14079] interacts with 1 human partners:{P48775}

6292 Pathogen[ P03410] interacts with 1 human partners:{P48775}

6293 [Cluster 1024]GO:0042554+P biological\_process [name] superoxide anion generation [def] "The enzymatic generation of superoxide, the superoxide anion O<sub>2</sub><sup>-</sup> (superoxide free radical), or any compound containing this species, by a cell in response to environmental stress, thereby mediating the activation of various stress-inducible signaling pathways." [GOC

6294 Pathogen[ POC214] interacts with 1 human partners:{P18054}

6295 Pathogen[ P03346] interacts with 1 human partners:{P18054}

6296 Pathogen[ P14079] interacts with 1 human partners:{P13498}

6297 [Cluster 1025]GO:0060040+P biological\_process [name] retinal bipolar neuron differentiation [def] "The process in which a relatively unspecialized cell acquires specialized features of a bipolar cell, the last neuron to be generated in the retina." [GOC

6298 Pathogen[ Q2Q067] interacts with 2 human partners:{Q8NFJ8;P58304}

6299 Pathogen[ POC214] interacts with 1 human partners:{Q8NFJ8}

6300 Pathogen[ P03346] interacts with 4 human partners:{Q9NZR4;P58304;Q8NFJ8;P78411}

6301 Pathogen[ Q85601] interacts with 2 human partners:{Q8NFJ8;P58304}

6302 Pathogen[ P14079] interacts with 2 human partners:{P58304;Q8NFJ8}

6303 Pathogen[ P03410] interacts with 1 human partners:{Q8NFJ8}

6304 Pathogen[ POC206] interacts with 3 human partners:{P78411;Q8NFJ8;P58304}

6305 Pathogen[ P03363] interacts with 4 human partners:{Q9NZR4;P58304;P78411;Q8NFJ8}

6306 [Cluster 1026]GO:0034260+P biological\_process [name] negative regulation of GTPase activity [def] "Any process that stops or reduces the rate of GTP hydrolysis by a GTPase." [GOC

6307 Pathogen[ POC214] interacts with 1 human partners:{P36404}

6308 Pathogen[ P03346] interacts with 2 human partners:{P36404;Q15363}

6309 Pathogen[ P14079] interacts with 1 human partners:{Q15363}

6310 Pathogen[ P03410] interacts with 1 human partners:{Q15363}

6311 Pathogen[ POC206] interacts with 1 human partners:{Q15363}

6312 [Cluster 1027]GO:2000286+P biological\_process [name] receptor internalization involved in canonical Wnt receptor signaling pathway [def] "A receptor internalization process that contributes to canonical Wnt receptor signaling pathway." [GOC

6313 Pathogen[ P03346] interacts with 1 human partners:{Q6P3W7}

6314 Pathogen[ POC206] interacts with 1 human partners:{Q6P3W7}

6315 [Cluster 1028]GO:0021884+P biological\_process [name] forebrain neuron development [def] "The process whose specific outcome is the progression of a neuron that resides in the forebrain, from its initial commitment to its fate, to the fully functional differentiated cell." [GO\_REF

6316 Pathogen[ P03346] interacts with 1 human partners:{Q68G74}

6317 Pathogen[ POC206] interacts with 1 human partners:{Q68G74}

6318 [Cluster 1029]GO:0008615+P biological\_process [name] pyridoxine biosynthetic process [def] "The chemical reactions and pathways resulting in the formation of pyridoxine,

2-methyl-3-hydroxy-4,5-bis(hydroxymethyl)pyridine, one of the vitamin B6 compounds." [GOC

6319 Pathogen[ POC214] interacts with 1 human partners:{Q9Y617}

6320 Pathogen[ P14079] interacts with 2 human partners:{Q9Y617;Q9NVS9}

6321 Pathogen[ P03410] interacts with 2 human partners:{Q9Y617;Q9NVS9}

6322 Pathogen[ P14075] interacts with 1 human partners:{Q9NVS9}

6323 [Cluster 1030]GO:0006939+P biological\_process [name] smooth muscle contraction [def] "A process in which force is generated within smooth muscle tissue, resulting in a change in muscle geometry. Force generation involves a chemo-mechanical energy conversion step that is carried out by the actin/myosin complex activity, which generates force through ATP hydrolysis. Smooth muscle differs from striated muscle in the much higher actin/myosin ratio, the absence of conspicuous sarcomeres and the ability to contract to a much smaller fraction of its resting length." [GOC

6324 Pathogen[ POC214] interacts with 1 human partners:{P35749}

6325 Pathogen[ Q85601] interacts with 1 human partners:{P35749}

6326 Pathogen[ POC206] interacts with 1 human partners:{P35749}

6327 [Cluster 1031]GO:0042780+P biological\_process [name] tRNA 3'-end processing [def] "The process in which the 3' end of a pre-tRNA molecule is converted to that of a mature tRNA." [GOC

6328 Pathogen[ P14079] interacts with 1 human partners:{Q96Q11}

6329 Pathogen[ P03410] interacts with 2 human partners:{Q96Q11;O75127}

6330 [Cluster 1032]GO:0043380+P biological\_process [name] regulation of memory T cell differentiation [def] "Any process that modulates the frequency, rate, or extent of memory T cell differentiation." [ISBN

6331 Pathogen[ Q2Q067] interacts with 1 human partners:{P41182}

6332 Pathogen[ POC214] interacts with 1 human partners:{P41182}

6333 Pathogen[ P03346] interacts with 1 human partners:{P41182}

6334 Pathogen[ Q85601] interacts with 1 human partners:{P41182}

6335 Pathogen[ P14079] interacts with 1 human partners:{P41182}

6336 Pathogen[ P03410] interacts with 1 human partners:{P41182}

6337 Pathogen[ POC206] interacts with 1 human partners:{P41182}

6338 [Cluster 1033]GO:0002573+P biological\_process [name] myeloid leukocyte differentiation [def] "The process in which a relatively unspecialized myeloid precursor cell acquires the specialized features of any cell of the myeloid leukocyte lineage." [GOC

6339 Pathogen[ Q2Q067] interacts with 1 human partners:{P17947}

6340 Pathogen[ POC214] interacts with 1 human partners:{P17947}

6341 Pathogen[ P03346] interacts with 1 human partners:{P17947}

6342 Pathogen[ Q85601] interacts with 1 human partners:{P17947}

6343 Pathogen[ P03383] interacts with 1 human partners:{P17947}

6344 Pathogen[ P03410] interacts with 1 human partners:{P17947}

6345 Pathogen[ P14075] interacts with 1 human partners:{P17947}

6346 Pathogen[ POC206] interacts with 1 human partners:{P17947}

6347 Pathogen[ P03363] interacts with 1 human partners:{P17947}

6348 [Cluster 1034]GO:0018094+P biological\_process [name] protein polyglycylation [def] "The addition of glycol units covalently bound to the gamma carboxyl group peptidyl-glutamic acid." [RESID

6349 Pathogen[ P14079] interacts with 3 human partners:{Q9Y4R7;A6PVC2;Q6ZVT0}

6350 Pathogen[ P03410] interacts with 3 human partners:{Q9Y4R7;Q6ZVT0;A6PVC2}

6351 Pathogen[ POC206] interacts with 1 human partners:{Q6ZVT0}

6352 [Cluster 1035]GO:0006780+P biological\_process [name] uroporphyrinogen III biosynthetic process [def] "The chemical reactions and pathways resulting in the formation of uroporphyrinogen III." [GOC

6353 Pathogen[ Q2Q067] interacts with 1 human partners:{P10746}

6354 Pathogen[ POC214] interacts with 1 human partners:{P10746}

6355 Pathogen[ P03346] interacts with 1 human partners:{P10746}

6356 Pathogen[ Q85601] interacts with 1 human partners:{P10746}

6357 Pathogen[ P14079] interacts with 1 human partners:{P10746}

6358 Pathogen[ P03410] interacts with 1 human partners:{P10746}

6359 Pathogen[ POC206] interacts with 1 human partners:{P10746}

6360 [Cluster 1036]GO:0007634+P biological\_process [name] optokinetic behavior [def] "The actions or reactions of an organism pertaining to movement of the eyes and of objects in the visual field, as in nystagmus." [GOC

6361 Pathogen[ Q2Q067] interacts with 1 human partners:{P49639}

6362 Pathogen[ POC214] interacts with 1 human partners:{P49639}

6363 Pathogen[ P03346] interacts with 1 human partners:{P49639}

6364 Pathogen[ Q85601] interacts with 1 human partners:{P49639}

6365 Pathogen[ P14079] interacts with 1 human partners:{P49639}

6366 Pathogen[ P03383] interacts with 1 human partners:{P49639}

6367 Pathogen[ P03410] interacts with 1 human partners:{P49639}

6368 Pathogen[ POC206] interacts with 1 human partners:{P49639}

6369 Pathogen[ P03363] interacts with 1 human partners:{P49639}

6370 [Cluster 1037]GO:0001959+P biological\_process [name] regulation of cytokine-mediated signaling pathway [def] "Any process that modulates the frequency, rate or extent of the cytokine mediated signaling pathway." [GOC

6371 Pathogen[ Q2Q067] interacts with 1 human partners:{P25063}

6372 Pathogen[ POC214] interacts with 1 human partners:{P25063}

6373 Pathogen[ P03346] interacts with 1 human partners:{P25063}

6374 Pathogen[ P14079] interacts with 2 human partners:{O43187;P25063}

6375 Pathogen[ P03383] interacts with 1 human partners:{P25063}

6376 Pathogen[ P03410] interacts with 2 human partners:{O43187;P25063}

6377 Pathogen[ P14075] interacts with 1 human partners:{P25063}

6378 Pathogen[ P0C206] interacts with 1 human partners:{P25063}

6379 [Cluster 1038]GO:0072227+P biological\_process [name] metanephric macula densa development [def] "The process whose specific outcome is the progression of the metanephric macula densa over time, from its formation to the mature structure. The metanephric macula densa is an area of specialized cells in the distal tubule of the metanephros that makes contact with the vascular pole of the glomerulus." [GOC

6380 Pathogen[ P03346] interacts with 1 human partners:{P20264}

6381 Pathogen[ P03363] interacts with 1 human partners:{P20264}

6382 [Cluster 1039]GO:0071499+P biological\_process [name] cellular response to laminar fluid shear stress [def] "Any process that results in a change in state or activity of a cell (in terms of movement, secretion, enzyme production, gene expression, etc.) as a result of a laminar fluid shear stress stimulus. Laminar fluid flow is the force acting on an object in a system where the fluid is moving across a solid surface in parallel layers." [GOC

6383 Pathogen[ P03346] interacts with 1 human partners:{Q12772}

6384 Pathogen[ Q85601] interacts with 1 human partners:{Q12772}

6385 Pathogen[ P14079] interacts with 2 human partners:{Q12772;Q13164}

6386 Pathogen[ P03410] interacts with 1 human partners:{Q12772}

6387 Pathogen[ P0C206] interacts with 1 human partners:{Q12772}

6388 [Cluster 1040]GO:0006435+P biological\_process [name] threonyl-tRNA aminoacylation [def] "The process of coupling threonine to threonyl-tRNA, catalyzed by threonyl-tRNA synthetase. In tRNA aminoacylation, the amino acid is first activated by linkage to AMP and then transferred to either the 2'- or the 3'-hydroxyl group of the 3'-adenosine residue of the tRNA." [GOC

6389 Pathogen[ Q2Q067] interacts with 1 human partners:{Q9BW92}

6390 Pathogen[ P0C214] interacts with 3 human partners:{P26639;A2RTX5;Q9BW92}

6391 Pathogen[ Q85601] interacts with 3 human partners:{P26639;Q9BW92;A2RTX5}

6392 Pathogen[ P14079] interacts with 3 human partners:{P26639;Q9BW92;A2RTX5}

6393 Pathogen[ P03383] interacts with 2 human partners:{A2RTX5;Q9BW92}

6394 Pathogen[ P03410] interacts with 3 human partners:{Q9BW92;P26639;A2RTX5}

6395 Pathogen[ P14075] interacts with 3 human partners:{A2RTX5;Q9BW92;P26639}

6396 Pathogen[ P0C206] interacts with 3 human partners:{A2RTX5;Q9BW92;P26639}

6397 Pathogen[ P03363] interacts with 2 human partners:{A2RTX5;Q9BW92}

6398 [Cluster 1041]GO:0007527+P biological\_process [name] adult somatic muscle development [def] "The process whose specific outcome is the progression of the adult somatic muscle over time, from its formation to the mature structure." [GOC

6399 Pathogen[ Q2Q067] interacts with 1 human partners:{O00458}

6400 Pathogen[ P0C214] interacts with 1 human partners:{O00458}

6401 Pathogen[ P03346] interacts with 1 human partners:{O00458}

6402 Pathogen[ Q85601] interacts with 1 human partners:{O00458}

6403 Pathogen[ P14079] interacts with 1 human partners:{O00458}

6404 Pathogen[ P03383] interacts with 1 human partners:{O00458}

6405 Pathogen[ P03410] interacts with 1 human partners:{O00458}

6406 Pathogen[ P14075] interacts with 1 human partners:{O00458}

6407 Pathogen[ P0C206] interacts with 1 human partners:{O00458}

6408 [Cluster 1042]GO:0090230+P biological\_process [name] regulation of centromere complex assembly [def] "Any process that modulates the rate, frequency, or extent of centromere complex assembly, the aggregation, arrangement and bonding together of proteins and centromeric DNA molecules to form a centromeric protein-DNA complex." [GOC

6409 Pathogen[ Q2Q067] interacts with 1 human partners:{P06400}

6410 Pathogen[ P0C214] interacts with 1 human partners:{P06400}

6411 Pathogen[ P03346] interacts with 1 human partners:{P06400}

6412 Pathogen[ Q85601] interacts with 1 human partners:{P06400}

6413 Pathogen[ P03383] interacts with 1 human partners:{P06400}

6414 Pathogen[ P03410] interacts with 1 human partners:{P06400}

6415 Pathogen[ P14075] interacts with 1 human partners:{P06400}

6416 Pathogen[ P0C206] interacts with 1 human partners:{P06400}

6417 Pathogen[ P03363] interacts with 1 human partners:{P06400}

6418 [Cluster 1043]GO:0090207+P biological\_process [name] regulation of triglyceride metabolic process [def] "Any process that modulates the frequency, rate or extent of the chemical reactions and pathways involving triglyceride, any triester of glycerol." [GOC

6419 Pathogen[ P14079] interacts with 1 human partners:{Q96S06}

6420 Pathogen[ P03410] interacts with 1 human partners:{Q96S06}

6421 Pathogen[ P0C206] interacts with 1 human partners:{Q96S06}

6422 [Cluster 1044]GO:0032964+P biological\_process [name] collagen biosynthetic process [def] "The chemical reactions and pathways resulting in the formation of collagen, any of a group of fibrous proteins of very high tensile strength that form the main component of connective tissue in animals. Collagen is highly enriched in glycine (some regions are 33% glycine) and proline, occurring predominantly as 3-hydroxyproline (about 20%)." [GOC



6423 Pathogen[ P03346] interacts with 1 human partners:{Q15035}

6424 Pathogen[ Q85601] interacts with 1 human partners:{Q15035}

6425 Pathogen[ P14079] interacts with 1 human partners:{Q15035}

6426 Pathogen[ P03410] interacts with 1 human partners:{Q15035}

6427 Pathogen[ P0C206] interacts with 1 human partners:{Q15035}

6428 Pathogen[ P03363] interacts with 1 human partners:{Q15035}

6429 [Cluster 1045]GO:0016081+P biological\_process [name] synaptic vesicle docking involved in exocytosis [def] "The initial attachment of a synaptic vesicle membrane to the presynaptic membrane, mediated by proteins protruding from the membrane of the synaptic vesicle and the target membrane." [PMID

6430 Pathogen[ Q2Q067] interacts with 1 human partners:{Q9UL45}

6431 Pathogen[ P0C214] interacts with 1 human partners:{Q9UL45}

6432 Pathogen[ P03346] interacts with 1 human partners:{Q9UL45}

6433 Pathogen[ P14079] interacts with 1 human partners:{Q9UL45}

6434 Pathogen[ P03410] interacts with 1 human partners:{Q9UL45}

6435 Pathogen[ P0C206] interacts with 1 human partners:{Q9UL45}

6436 [Cluster 1046]GO:0030072+P biological\_process [name] peptide hormone secretion [def] "The regulated release of a peptide hormone from a cell or organ." [GOC

6437 Pathogen[ P14079] interacts with 2 human partners:{Q9NY59;Q86VI1}

6438 Pathogen[ P03410] interacts with 1 human partners:{Q86VI1}

6439 Pathogen[ P0C206] interacts with 1 human partners:{Q86VI1}

6440 [Cluster 1047]GO:0036304+P

6441 Pathogen[ Q2Q067] interacts with 1 human partners:{Q9Y5J3}

6442 Pathogen[ P0C214] interacts with 1 human partners:{Q9Y5J3}

6443 Pathogen[ P03346] interacts with 1 human partners:{Q9Y5J3}

6444 Pathogen[ Q85601] interacts with 1 human partners:{Q9Y5J3}

6445 Pathogen[ P14079] interacts with 1 human partners:{Q9Y5J3}

6446 Pathogen[ P03410] interacts with 1 human partners:{Q9Y5J3}

6447 Pathogen[ P0C206] interacts with 1 human partners:{Q9Y5J3}

6448 Pathogen[ P03363] interacts with 1 human partners:{Q9Y5J3}

6449 [Cluster 1048]GO:0051046+P biological\_process [name] regulation of secretion [def] "Any process that modulates the frequency, rate or extent of the controlled release of a substance from a cell or group of cells." [GOC

6450 Pathogen[ P0C214] interacts with 2 human partners:{Q9UM54;Q9Y2G5}

6451 Pathogen[ Q85601] interacts with 1 human partners:{Q9UM54}

6452 Pathogen[ P14079] interacts with 2 human partners:{Q9UM54;Q9Y2G5}

6453 Pathogen[ P03410] interacts with 2 human partners:{Q9UM54;Q9Y2G5}

6454 Pathogen[ P14075] interacts with 1 human partners:{Q9Y2G5}

6455 Pathogen[ P0C206] interacts with 2 human partners:{Q9UM54;Q9Y2G5}

6456 [Cluster 1049]GO:0048149+P biological\_process [name] behavioral response to ethanol [def] "Any process that results in a change in the behavior of an organism as a result of an ethanol stimulus." [GOC

6457 Pathogen[ P03346] interacts with 1 human partners:{Q12929}

6458 Pathogen[ P14079] interacts with 1 human partners:{Q12929}

6459 Pathogen[ P03410] interacts with 1 human partners:{Q12929}

6460 Pathogen[ P03363] interacts with 1 human partners:{Q12929}

6461 [Cluster 1050]GO:0030539+P biological\_process [name] male genitalia development [def] "The process whose specific outcome is the progression of the male genitalia over time, from its formation to the mature structure." [GOC

6462 Pathogen[ P0C214] interacts with 1 human partners:{Q9BXT5}

6463 Pathogen[ P03346] interacts with 3 human partners:{P31271;P35453;Q9BXT5}

6464 Pathogen[ Q85601] interacts with 2 human partners:{Q9BXT5;P31271}

6465 Pathogen[ P14079] interacts with 2 human partners:{Q9BXT5;P31271}

6466 Pathogen[ P03410] interacts with 1 human partners:{Q9BXT5}

6467 Pathogen[ P14075] interacts with 1 human partners:{Q9BXT5}

6468 Pathogen[ P0C206] interacts with 2 human partners:{Q9BXT5;P31271}

6469 Pathogen[ P03363] interacts with 3 human partners:{P35453;P31271;Q9BXT5}

6470 [Cluster 1051]GO:0032510+P biological\_process [name] endosome to lysosome transport via multivesicular body sorting pathway [def] "The directed movement of substances from endosomes to lysosomes by a pathway in which molecules are sorted into multivesicular bodies, which then fuse with the lysosome." [GOC

6471 Pathogen[ Q2Q067] interacts with 1 human partners:{075351}

6472 Pathogen[ P0C214] interacts with 2 human partners:{075351;Q99698}

6473 Pathogen[ P03346] interacts with 2 human partners:{Q99698;075351}

6474 Pathogen[ Q85601] interacts with 2 human partners:{075351;Q99698}

6475 Pathogen[ P14079] interacts with 2 human partners:{075351;Q99698}

6476 Pathogen[ P03410] interacts with 2 human partners:{075351;Q99698}

6477 Pathogen[ P0C206] interacts with 2 human partners:{Q99698;075351}

6478 Pathogen[ P03363] interacts with 2 human partners:{075351;Q99698}

6479 [Cluster 1052]GO:0060154+P biological\_process [name] cellular process regulating host cell cycle in response to virus [def] "Any cellular process that modulates the rate or extent of progression through the cell cycle in response to a virus." [GOC

6480 Pathogen[ P0C214] interacts with 1 human partners:{Q92934}

6481 Pathogen[ P14079] interacts with 1 human partners:{Q92934}

6482 Pathogen[ P03410] interacts with 1 human partners:{Q92934}

6483 Pathogen[ P0C206] interacts with 1 human partners:{Q92934}

6484 [Cluster 1053]GO:0044351+P biological\_process [name] macropinocytosis [def] "An endocytosis process that results in the uptake of liquid material by cells from their external environment by the 'ruffling' of the cell membrane to form heterogeneously sized intracellular vesicles called macropinosomes, which can be up to 5 micrometers in size." [PMID  
6485 Pathogen[ P14079] interacts with 1 human partners:{Q16644}  
6486 [Cluster 1054]GO:0060074+P biological\_process [name] synapse maturation [def] "The process that organizes a synapse so that it attains its fully functional state. Synaptic maturation plays a critical role in the establishment of effective synaptic connections in early development." [GOC  
6487 Pathogen[ P14079] interacts with 1 human partners:{075781}  
6488 Pathogen[ P03410] interacts with 1 human partners:{075781}  
6489 [Cluster 1055]GO:0010635+P biological\_process [name] regulation of mitochondrial fusion [def] "Any process that modulates the frequency, rate or extent of merging of two or more mitochondria within a cell to form a single compartment." [GOC  
6490 Pathogen[ Q2Q067] interacts with 1 human partners:{Q7Z2X4}  
6491 Pathogen[ P0C214] interacts with 1 human partners:{Q7Z2X4}  
6492 Pathogen[ P03346] interacts with 1 human partners:{Q7Z2X4}  
6493 Pathogen[ Q85601] interacts with 1 human partners:{Q7Z2X4}  
6494 Pathogen[ P14079] interacts with 1 human partners:{Q7Z2X4}  
6495 Pathogen[ P03410] interacts with 1 human partners:{Q7Z2X4}  
6496 Pathogen[ P0C206] interacts with 1 human partners:{Q7Z2X4}  
6497 [Cluster 1056]GO:0032527+P biological\_process [name] protein exit from endoplasmic reticulum [def] "The directed movement of proteins from the endoplasmic reticulum." [GOC  
6498 Pathogen[ P0C214] interacts with 1 human partners:{P49257}  
6499 Pathogen[ P03346] interacts with 2 human partners:{P49257;Q9BVK6}  
6500 Pathogen[ Q85601] interacts with 1 human partners:{P49257}  
6501 Pathogen[ P14079] interacts with 3 human partners:{P49257;Q9BVK6;O15260}  
6502 Pathogen[ P03410] interacts with 3 human partners:{P49257;Q9BVK6;O15260}  
6503 Pathogen[ P0C206] interacts with 3 human partners:{Q9BVK6;P49257;O15260}  
6504 [Cluster 1057]GO:0032400+P biological\_process [name] melanosome localization [def] "Any process in which a melanosome is transported to, and/or maintained in, a specific location within the cell." [GOC  
6505 Pathogen[ Q2Q067] interacts with 1 human partners:{Q9H267}  
6506 Pathogen[ P03346] interacts with 2 human partners:{Q96AX1;Q9H267}  
6507 Pathogen[ Q85601] interacts with 1 human partners:{Q9H267}  
6508 Pathogen[ P14079] interacts with 2 human partners:{Q96AX1;Q9H267}  
6509 Pathogen[ P03410] interacts with 2 human partners:{Q9H267;Q96AX1}  
6510 Pathogen[ P0C206] interacts with 2 human partners:{Q96AX1;Q9H267}  
6511 Pathogen[ P03363] interacts with 1 human partners:{Q9H267}  
6512 [Cluster 1058]GO:0046501+P biological\_process [name] protoporphyrinogen IX metabolic process [def] "The chemical reactions and pathways involving protoporphyrinogen IX, the specific substrate for the enzyme ferrochelatase, which catalyzes the insertion of iron to form protoheme. It is probably also the substrate for chlorophyll formation." [ISBN  
6513 Pathogen[ P0C214] interacts with 1 human partners:{P22830}  
6514 Pathogen[ P14079] interacts with 1 human partners:{P22830}  
6515 Pathogen[ P03410] interacts with 1 human partners:{P22830}  
6516 Pathogen[ P0C206] interacts with 1 human partners:{P22830}  
6517 [Cluster 1059]GO:0060051+P biological\_process [name] negative regulation of protein glycosylation [def] "Any process that stops, prevents, or reduces the frequency, rate or extent of the glycosylation of one or more amino acid residues within a protein. Protein glycosylation is the addition of a sugar unit to a protein amino acid, e.g. the addition of glycan chains to proteins." [GOC  
6518 Pathogen[ P14079] interacts with 1 human partners:{O60502}  
6519 Pathogen[ P03410] interacts with 1 human partners:{O60502}  
6520 [Cluster 1060]GO:0006930+P biological\_process [name] substrate-dependent cell migration, cell extension [def] "The formation of a cell surface protrusion, such as a lamellipodium or filopodium, at the leading edge of a migrating cell." [ISBN  
6521 Pathogen[ P0C214] interacts with 1 human partners:{P35580}  
6522 Pathogen[ P03346] interacts with 1 human partners:{Q9Y5K6}  
6523 Pathogen[ Q85601] interacts with 2 human partners:{Q9Y5K6;P35580}  
6524 Pathogen[ P14079] interacts with 1 human partners:{Q9Y5K6}  
6525 Pathogen[ P03383] interacts with 1 human partners:{P35580}  
6526 Pathogen[ P03410] interacts with 2 human partners:{Q9Y5K6;P35580}  
6527 Pathogen[ P0C206] interacts with 2 human partners:{Q9Y5K6;P35580}  
6528 Pathogen[ P03363] interacts with 1 human partners:{Q9Y5K6}  
6529 [Cluster 1061]GO:0046671+P biological\_process [name] negative regulation of retinal cell programmed cell death [def] "Any process that stops, prevents, or reduces the frequency, rate or extent of programmed cell death that occurs in the retina." [GOC  
6530 Pathogen[ Q2Q067] interacts with 1 human partners:{Q8NDY6}  
6531 Pathogen[ P0C214] interacts with 1 human partners:{Q8NDY6}  
6532 Pathogen[ P03346] interacts with 1 human partners:{Q8NDY6}  
6533 Pathogen[ Q85601] interacts with 1 human partners:{Q8NDY6}  
6534 Pathogen[ P14079] interacts with 1 human partners:{Q8NDY6}  
6535 Pathogen[ P03410] interacts with 1 human partners:{Q8NDY6}

6536 Pathogen[ P0C206] interacts with 1 human partners:{Q8NDY6}

6537 Pathogen[ P03363] interacts with 1 human partners:{Q8NDY6}

6538 [Cluster 1062]GO:0000958+P biological\_process [name] mitochondrial mRNA catabolic process [def] "The chemical reactions and pathways resulting in the breakdown of mRNA transcribed from the mitochondrial genome and occurring in the mitochondrion." [GOC

6539 Pathogen[ Q2Q067] interacts with 1 human partners:{Q8TCS8}

6540 Pathogen[ P0C214] interacts with 1 human partners:{Q8TCS8}

6541 Pathogen[ P03346] interacts with 1 human partners:{Q8TCS8}

6542 Pathogen[ Q85601] interacts with 1 human partners:{Q8TCS8}

6543 Pathogen[ P14079] interacts with 1 human partners:{Q8TCS8}

6544 Pathogen[ P03383] interacts with 1 human partners:{Q8TCS8}

6545 Pathogen[ P03410] interacts with 1 human partners:{Q8TCS8}

6546 Pathogen[ P14075] interacts with 1 human partners:{Q8TCS8}

6547 Pathogen[ P0C206] interacts with 1 human partners:{Q8TCS8}

6548 [Cluster 1063]GO:0045627+P biological\_process [name] positive regulation of T-helper 1 cell differentiation [def] "Any process that activates or increases the frequency, rate or extent of T-helper 1 cell differentiation." [GOC

6549 Pathogen[ P03346] interacts with 2 human partners:{Q14774;O75159}

6550 Pathogen[ P03363] interacts with 1 human partners:{O75159}

6551 [Cluster 1064]GO:0032754+P biological\_process [name] positive regulation of interleukin-5 production [def] "Any process that activates or increases the frequency, rate, or extent of interleukin-5 production." [GOC

6552 Pathogen[ P14079] interacts with 1 human partners:{O95760}

6553 Pathogen[ P03410] interacts with 1 human partners:{O95760}

6554 [Cluster 1065]GO:0046654+P biological\_process [name] tetrahydrofolate biosynthetic process [def] "The chemical reactions and pathways resulting in the formation of tetrahydrofolate, 5,6,7,8-tetrahydrofolic acid, a folate derivative bearing additional hydrogens on the pterin group." [ISBN

6555 Pathogen[ Q2Q067] interacts with 1 human partners:{P30793}

6556 Pathogen[ P0C214] interacts with 3 human partners:{Q86XF0;P00374;P30793}

6557 Pathogen[ Q85601] interacts with 1 human partners:{P30793}

6558 Pathogen[ P14079] interacts with 3 human partners:{Q86XF0;P00374;P30793}

6559 Pathogen[ P03410] interacts with 3 human partners:{P00374;P30793;Q86XF0}

6560 Pathogen[ P14075] interacts with 1 human partners:{P30793}

6561 Pathogen[ P0C206] interacts with 1 human partners:{P30793}

6562 [Cluster 1066]GO:1901233+P

6563 Pathogen[ P03346] interacts with 1 human partners:{Q969G9}

6564 Pathogen[ P03410] interacts with 1 human partners:{Q969G9}

6565 Pathogen[ P0C206] interacts with 1 human partners:{Q969G9}

6566 Pathogen[ P03363] interacts with 1 human partners:{Q969G9}

6567 [Cluster 1067]GO:0060435+P biological\_process [name] bronchiole development [def] "The biological process whose specific outcome is the progression of a bronchiole from an initial condition to its mature state. This process begins with the formation of the bronchiole and ends with the mature structure. A bronchiole is the first airway branch that no longer contains cartilage\_ it is a branch of the bronchi." [GOC

6568 Pathogen[ Q2Q067] interacts with 1 human partners:{P20719}

6569 Pathogen[ P03346] interacts with 2 human partners:{P20719;O43680}

6570 Pathogen[ P0C206] interacts with 1 human partners:{P20719}

6571 Pathogen[ P03363] interacts with 1 human partners:{P20719}

6572 [Cluster 1068]GO:0060613+P biological\_process [name] fat pad development [def] "The progression of a fat pad from its initial formation to its mature structure. A fat pad is an accumulation of adipose tissue." [GOC

6573 Pathogen[ Q2Q067] interacts with 1 human partners:{Q14865}

6574 Pathogen[ P0C214] interacts with 1 human partners:{Q14865}

6575 Pathogen[ P03346] interacts with 1 human partners:{Q14865}

6576 Pathogen[ Q85601] interacts with 1 human partners:{Q14865}

6577 Pathogen[ P14079] interacts with 1 human partners:{Q14865}

6578 Pathogen[ P03410] interacts with 1 human partners:{Q14865}

6579 Pathogen[ P0C206] interacts with 1 human partners:{Q14865}

6580 Pathogen[ P03363] interacts with 1 human partners:{Q14865}

6581 [Cluster 1069]GO:0050801+P biological\_process [name] ion homeostasis [def] "Any process involved in the maintenance of an internal steady state of ions within an organism or cell." [GOC

6582 Pathogen[ P03346] interacts with 1 human partners:{P16452}

6583 Pathogen[ P14079] interacts with 1 human partners:{P16452}

6584 Pathogen[ P03410] interacts with 1 human partners:{P16452}

6585 Pathogen[ P0C206] interacts with 1 human partners:{P16452}

6586 Pathogen[ P03363] interacts with 1 human partners:{P16452}

6587 [Cluster 1070]GO:0072061+P biological\_process [name] inner medullary collecting duct development [def] "The process whose specific outcome is the progression of the inner medullary collecting duct over time, from its formation to the mature structure. The inner medullary collecting duct is the portion of the collecting duct that lies in the renal inner medulla." [GOC

6588 Pathogen[ P0C214] interacts with 1 human partners:{Q5SW24}

6589 Pathogen[ Q85601] interacts with 1 human partners:{Q5SW24}

6590 Pathogen[ P14079] interacts with 1 human partners:{Q5SW24}

6591 Pathogen[ P03410] interacts with 1 human partners:{Q5SW24}

6592 Pathogen[ P0C206] interacts with 1 human partners:{Q5SW24}

6593 [Cluster 1071]GO:0010999+P biological\_process [name] regulation of eIF2 alpha phosphorylation by heme [def] "Any process that modulates the rate, frequency, or extent of eIF2 alpha phosphorylation as a result of heme levels." [GOC

6594 Pathogen[ P0C214] interacts with 1 human partners:{P22830}

6595 Pathogen[ P14079] interacts with 1 human partners:{P22830}

6596 Pathogen[ P03410] interacts with 1 human partners:{P22830}

6597 Pathogen[ P0C206] interacts with 1 human partners:{P22830}

6598 [Cluster 1072]GO:0060081+P biological\_process [name] membrane hyperpolarization [def] "The process in which membrane potential changes in the hyperpolarizing direction from the resting potential, usually from negative to more negative." [GOC

6599 Pathogen[ Q2Q067] interacts with 1 human partners:{Q99497}

6600 Pathogen[ P0C214] interacts with 1 human partners:{Q99497}

6601 Pathogen[ P03346] interacts with 1 human partners:{Q99497}

6602 Pathogen[ Q85601] interacts with 1 human partners:{Q99497}

6603 Pathogen[ P14079] interacts with 1 human partners:{Q99497}

6604 Pathogen[ P03410] interacts with 1 human partners:{Q99497}

6605 Pathogen[ P0C206] interacts with 1 human partners:{Q99497}

6606 [Cluster 1073]GO:0030301+P biological\_process [name] cholesterol transport [def] "The directed movement of cholesterol, cholest-5-en-3-beta-ol, into, out of or within a cell, or between cells, by means of some agent such as a transporter or pore." [GOC

6607 Pathogen[ Q2Q067] interacts with 1 human partners:{O75351}

6608 Pathogen[ P0C214] interacts with 1 human partners:{O75351}

6609 Pathogen[ P03346] interacts with 1 human partners:{O75351}

6610 Pathogen[ Q85601] interacts with 1 human partners:{O75351}

6611 Pathogen[ P14079] interacts with 1 human partners:{O75351}

6612 Pathogen[ P03410] interacts with 1 human partners:{O75351}

6613 Pathogen[ P0C206] interacts with 1 human partners:{O75351}

6614 Pathogen[ P03363] interacts with 1 human partners:{O75351}

6615 [Cluster 1074]GO:0051066+P biological\_process [name] dihydrobiopterin metabolic process [def] "The chemical reactions and pathways involving a dihydrobiopterin, a reduced pteridine derivative related to folic acid\_ it acts as an electron carrier in tyrosine biosynthesis and its quinoid form is produced by oxidation of tetrahydrobiopterin in several biological hydroxylation reactions." [CHEBI

6616 Pathogen[ Q2Q067] interacts with 1 human partners:{P30793}

6617 Pathogen[ P0C214] interacts with 2 human partners:{P09417;P30793}

6618 Pathogen[ Q85601] interacts with 1 human partners:{P30793}

6619 Pathogen[ P14079] interacts with 1 human partners:{P30793}

6620 Pathogen[ P03410] interacts with 1 human partners:{P30793}

6621 Pathogen[ P14075] interacts with 1 human partners:{P30793}

6622 Pathogen[ P0C206] interacts with 1 human partners:{P30793}

6623 [Cluster 1075]GO:0002686+P biological\_process [name] negative regulation of leukocyte migration [def] "Any process that stops, prevents, or reduces the frequency, rate, or extent of leukocyte migration." [GOC

6624 Pathogen[ Q2Q067] interacts with 1 human partners:{P31268}

6625 Pathogen[ P03346] interacts with 1 human partners:{P31268}

6626 Pathogen[ P14079] interacts with 1 human partners:{O95760}

6627 Pathogen[ P03410] interacts with 1 human partners:{O95760}

6628 Pathogen[ P0C206] interacts with 1 human partners:{P31268}

6629 Pathogen[ P03363] interacts with 1 human partners:{P31268}

6630 [Cluster 1076]GO:2000401+P biological\_process [name] regulation of lymphocyte migration [def] "Any process that modulates the frequency, rate or extent of lymphocyte migration." [GOC

6631 Pathogen[ P03346] interacts with 1 human partners:{P26038}

6632 Pathogen[ P14079] interacts with 1 human partners:{P26038}

6633 Pathogen[ P03410] interacts with 1 human partners:{P26038}

6634 [Cluster 1077]GO:0019264+P biological\_process [name] glycine biosynthetic process from serine [def] "The chemical reactions and pathways resulting in the formation of glycine from other compounds, including serine." [GOC

6635 Pathogen[ Q2Q067] interacts with 1 human partners:{P34896}

6636 Pathogen[ P0C214] interacts with 2 human partners:{P34897;P34896}

6637 Pathogen[ Q85601] interacts with 1 human partners:{P34896}

6638 Pathogen[ P14079] interacts with 2 human partners:{P34897;P34896}

6639 Pathogen[ P03383] interacts with 1 human partners:{P34896}

6640 Pathogen[ P03410] interacts with 2 human partners:{P34897;P34896}

6641 Pathogen[ P14075] interacts with 1 human partners:{P34896}

6642 Pathogen[ P0C206] interacts with 2 human partners:{P34897;P34896}

6643 [Cluster 1078]GO:0006658+P biological\_process [name] phosphatidylserine metabolic process [def] "The chemical reactions and pathways involving phosphatidylserines, any of a class of glycerophospholipids in which the phosphatidyl group is esterified to the hydroxyl group of L-serine. They are important constituents of cell membranes." [ISBN

6644 Pathogen[ P14079] interacts with 2 human partners:{Q86VE9;Q9NRX5}

6645 Pathogen[ P03410] interacts with 2 human partners:{Q86VE9;Q9NRX5}

6646 [Cluster 1079]GO:0006546+P biological\_process [name] glycine catabolic process [def] "The chemical reactions and pathways resulting in the breakdown of glycine,

aminoethanoic acid." [GOC  
6647 Pathogen[ P0C214] interacts with 5 human partners:{P48728;Q8NCN5;Q9UI17;Q5T440;Q9UL12}  
6648 Pathogen[ P03346] interacts with 3 human partners:{Q8NCN5;Q5T440;P48728}  
6649 Pathogen[ P14079] interacts with 7 human partners:{P23434;P48728;Q9UL12;Q9NX38;Q9UI17;Q8NCN5;Q5T440}  
6650 Pathogen[ P03410] interacts with 7 human partners:{Q9NX38;Q9UI17;Q5T440;Q9UL12;P23434;P48728;Q8NCN5}  
6651 Pathogen[ P14075] interacts with 3 human partners:{Q5T440;Q8NCN5;P48728}  
6652 Pathogen[ P0C206] interacts with 4 human partners:{P23434;Q5T440;Q8NCN5;P48728}  
6653 Pathogen[ P03363] interacts with 1 human partners:{P48728}  
6654 [Cluster 1080]GO:0042628+P biological\_process [name] mating plug formation [def] "The deposition of a plug of sperm or other gelatinous material into the opening of the vulva by a male at the termination of copulation. Probably acts to prevent subsequent matings by other males." [GOC  
6655 Pathogen[ P0C214] interacts with 1 human partners:{P07093}  
6656 Pathogen[ Q85601] interacts with 1 human partners:{P07093}  
6657 [Cluster 1081]GO:0003149+P biological\_process [name] membranous septum morphogenesis [def] "The process in which the membranous septum is generated and organized. The membranous septum is the upper part of ventricular septum." [GOC  
6658 Pathogen[ Q2Q067] interacts with 1 human partners:{O96028}  
6659 Pathogen[ P0C214] interacts with 1 human partners:{O96028}  
6660 Pathogen[ P03346] interacts with 1 human partners:{O96028}  
6661 Pathogen[ Q85601] interacts with 1 human partners:{O96028}  
6662 Pathogen[ P0C206] interacts with 1 human partners:{O96028}  
6663 Pathogen[ P03363] interacts with 1 human partners:{O96028}  
6664 [Cluster 1082]GO:0051797+P biological\_process [name] regulation of hair follicle development [def] "Any process that modulates the frequency, rate or extent of hair follicle development." [GOC  
6665 Pathogen[ Q2Q067] interacts with 1 human partners:{Q13485}  
6666 Pathogen[ P0C214] interacts with 1 human partners:{Q13485}  
6667 Pathogen[ P03346] interacts with 1 human partners:{Q13485}  
6668 Pathogen[ Q85601] interacts with 1 human partners:{Q13485}  
6669 Pathogen[ P03383] interacts with 1 human partners:{Q13485}  
6670 Pathogen[ P03410] interacts with 1 human partners:{Q13485}  
6671 Pathogen[ P14075] interacts with 1 human partners:{Q13485}  
6672 Pathogen[ P0C206] interacts with 1 human partners:{Q13485}  
6673 Pathogen[ P03363] interacts with 1 human partners:{Q13485}  
6674 [Cluster 1083]GO:0046105+P biological\_process [name] thymidine biosynthetic process [def] "The chemical reactions and pathways resulting in the formation of thymidine, deoxyribosylthymine thymine 2-deoxyriboside, a deoxynucleoside very widely distributed but occurring almost entirely as phosphoric esters in deoxynucleotides and deoxyribonucleic acid, DNA." [GOC  
6675 Pathogen[ P0C214] interacts with 1 human partners:{Q86XF0}  
6676 Pathogen[ P14079] interacts with 1 human partners:{Q86XF0}  
6677 Pathogen[ P03410] interacts with 1 human partners:{Q86XF0}  
6678 [Cluster 1084]GO:1901231+P  
6679 Pathogen[ P03346] interacts with 1 human partners:{Q969G9}  
6680 Pathogen[ P03410] interacts with 1 human partners:{Q969G9}  
6681 Pathogen[ P0C206] interacts with 1 human partners:{Q969G9}  
6682 Pathogen[ P03363] interacts with 1 human partners:{Q969G9}  
6683 [Cluster 1085]GO:0002063+P biological\_process [name] chondrocyte development [def] "The process whose specific outcome is the progression of a chondrocyte over time, from its commitment to its mature state. Chondrocyte development does not include the steps involved in committing a chondroblast to a chondrocyte fate." [GOC  
6684 Pathogen[ Q2Q067] interacts with 1 human partners:{P35548}  
6685 Pathogen[ P0C214] interacts with 1 human partners:{P35548}  
6686 Pathogen[ P03346] interacts with 1 human partners:{P35548}  
6687 Pathogen[ Q85601] interacts with 1 human partners:{P35548}  
6688 Pathogen[ P03383] interacts with 1 human partners:{P35548}  
6689 Pathogen[ P03410] interacts with 1 human partners:{P35548}  
6690 Pathogen[ P14075] interacts with 1 human partners:{P35548}  
6691 Pathogen[ P0C206] interacts with 1 human partners:{P35548}  
6692 Pathogen[ P03363] interacts with 1 human partners:{P35548}  
6693 [Cluster 1086]GO:0071918+P biological\_process [name] urea transmembrane transport [def] "The process in which urea, the water-soluble compound H2N-CO-NH2, is transported from one side of a membrane to the other by means of some agent such as a transporter or pore." [GOC  
6694 Pathogen[ P14079] interacts with 1 human partners:{Q15849}  
6695 Pathogen[ P03410] interacts with 2 human partners:{Q13336;Q15849}  
6696 Pathogen[ P0C206] interacts with 1 human partners:{Q15849}  
6697 [Cluster 1087]GO:0030576+P biological\_process [name] Cajal body organization [def] "A process that is carried out at the cellular level which results in the assembly, arrangement of constituent parts, or disassembly of Cajal bodies, nuclear bodies that appear ultrastructurally as a tangle of coiled, electron-dense threads roughly 0.5 micrometers in diameter and are enriched in ribonucleoproteins, and certain general RNA

polymerase II transcription factors." [GOC  
6698 Pathogen[ P14079] interacts with 1 human partners:{Q5W0Q7}  
6699 [Cluster 1088]GO:0051047+P biological\_process [name] positive regulation of secretion  
[def] "Any process that activates or increases the frequency, rate or extent of the  
controlled release of a substance from a cell or group of cells." [GOC  
6700 Pathogen[ P14079] interacts with 2 human partners:{Q9Y6U3;Q9GZZ8}  
6701 Pathogen[ P03410] interacts with 2 human partners:{Q9GZZ8;Q9Y6U3}  
6702 Pathogen[ P14075] interacts with 1 human partners:{Q9GZZ8}  
6703 [Cluster 1089]GO:0010811+P biological\_process [name] positive regulation of  
cell-substrate adhesion [def] "Any process that increases the frequency, rate or extent  
of cell-substrate adhesion. Cell-substrate adhesion is the attachment of a cell to the  
underlying substrate via adhesion molecules." [GOC  
6704 Pathogen[ Q2Q067] interacts with 1 human partners:{P49593}  
6705 Pathogen[ P0C214] interacts with 2 human partners:{P49593;P36404}  
6706 Pathogen[ P03346] interacts with 2 human partners:{P49593;P36404}  
6707 Pathogen[ Q85601] interacts with 1 human partners:{P49593}  
6708 Pathogen[ P14079] interacts with 2 human partners:{P49593;Q13316}  
6709 Pathogen[ P03410] interacts with 2 human partners:{P49593;Q13316}  
6710 Pathogen[ P0C206] interacts with 2 human partners:{Q13316;P49593}  
6711 [Cluster 1090]GO:0040037+P biological\_process [name] negative regulation of fibroblast  
growth factor receptor signaling pathway [def] "Any process that stops, prevents, or  
reduces the frequency, rate or extent of fibroblast growth factor receptor signaling  
pathway activity." [GOC  
6712 Pathogen[ P14079] interacts with 1 human partners:{O43597}  
6713 Pathogen[ P03410] interacts with 1 human partners:{O43597}  
6714 Pathogen[ P0C206] interacts with 1 human partners:{O43597}  
6715 [Cluster 1091]GO:0060037+P biological\_process [name] pharyngeal system development  
[def] "The process whose specific outcome is the progression of the pharyngeal system  
over time, from its formation to the mature structure. The pharyngeal system is a  
transient embryonic complex that is specific to vertebrates. It comprises the pharyngeal  
arches, bulges of tissues of mesoderm and neural crest derivation through which pass  
nerves and pharyngeal arch arteries. The arches are separated internally by pharyngeal  
pouches, evaginations of foregut endoderm, and externally by pharyngeal clefts,  
invaginations of surface ectoderm. The development of the system ends when the structure  
it contributes to are forming  
6716 Pathogen[ Q2Q067] interacts with 1 human partners:{Q99502}  
6717 Pathogen[ P0C214] interacts with 1 human partners:{Q99502}  
6718 Pathogen[ P03346] interacts with 2 human partners:{Q99502;Q15475}  
6719 Pathogen[ Q85601] interacts with 1 human partners:{Q99502}  
6720 Pathogen[ P14079] interacts with 1 human partners:{Q99502}  
6721 Pathogen[ P03410] interacts with 1 human partners:{Q99502}  
6722 Pathogen[ P14075] interacts with 1 human partners:{Q99502}  
6723 Pathogen[ P0C206] interacts with 1 human partners:{Q99502}  
6724 [Cluster 1092]GO:0031394+P biological\_process [name] positive regulation of  
prostaglandin biosynthetic process [def] "Any process that activates or increases the  
frequency, rate or extent of the chemical reactions and pathways resulting in the  
formation of prostaglandin." [GOC  
6725 Pathogen[ P14079] interacts with 1 human partners:{P04083}  
6726 [Cluster 1093]GO:0009893+P biological\_process [name] positive regulation of metabolic  
process [def] "Any process that activates or increases the frequency, rate or extent of  
the chemical reactions and pathways within a cell or an organism." [GOC  
6727 Pathogen[ Q2Q067] interacts with 1 human partners:{Q96I23}  
6728 Pathogen[ P03346] interacts with 1 human partners:{Q96I23}  
6729 Pathogen[ P14079] interacts with 1 human partners:{Q96I23}  
6730 Pathogen[ P03383] interacts with 1 human partners:{Q96I23}  
6731 Pathogen[ P03410] interacts with 1 human partners:{Q96I23}  
6732 Pathogen[ P14075] interacts with 1 human partners:{Q96I23}  
6733 Pathogen[ P0C206] interacts with 1 human partners:{Q96I23}  
6734 Pathogen[ P03363] interacts with 1 human partners:{Q96I23}  
6735 [Cluster 1094]GO:0016339+P biological\_process [name] calcium-dependent cell-cell  
adhesion [def] "The attachment of one cell to another cell via adhesion molecules  
that require the presence of calcium for the interaction." [GOC  
6736 Pathogen[ Q2Q067] interacts with 1 human partners:{Q96IF1}  
6737 Pathogen[ P03346] interacts with 1 human partners:{Q96IF1}  
6738 Pathogen[ Q85601] interacts with 1 human partners:{Q96IF1}  
6739 Pathogen[ P14079] interacts with 1 human partners:{Q96IF1}  
6740 Pathogen[ P03410] interacts with 1 human partners:{Q96IF1}  
6741 Pathogen[ P0C206] interacts with 1 human partners:{Q96IF1}  
6742 Pathogen[ P03363] interacts with 1 human partners:{Q96IF1}  
6743 [Cluster 1095]GO:0006784+P biological\_process [name] heme a biosynthetic process  
[def] "The chemical reactions and pathways resulting in the formation of heme a, a  
derivative of heme found in cytochrome aa3." [CHEBI  
6744 Pathogen[ P14079] interacts with 1 human partners:{Q12887}  
6745 Pathogen[ P03410] interacts with 1 human partners:{Q12887}  
6746 [Cluster 1096]GO:0033590+P biological\_process [name] response to cobalamin [def]  
"Any process that results in a change in state or activity of a cell or an organism (in

terms of movement, secretion, enzyme production, gene expression, etc.) as a result of a cobalamin (vitamin B12) stimulus." [GOC

6747 Pathogen[ Q2Q067] interacts with 1 human partners:{Q04206}

6748 Pathogen[ P0C214] interacts with 1 human partners:{Q04206}

6749 Pathogen[ P03346] interacts with 1 human partners:{Q04206}

6750 Pathogen[ Q85601] interacts with 1 human partners:{Q04206}

6751 Pathogen[ P03383] interacts with 1 human partners:{Q04206}

6752 Pathogen[ P03410] interacts with 1 human partners:{Q04206}

6753 Pathogen[ P14075] interacts with 1 human partners:{Q04206}

6754 Pathogen[ P0C206] interacts with 1 human partners:{Q04206}

6755 Pathogen[ P03363] interacts with 1 human partners:{Q04206}

6756 [Cluster 1097]GO:0034401+P biological\_process [name] regulation of transcription by chromatin organization [def] "Any cellular process that results in the specification, formation or maintenance of the physical structure of eukaryotic chromatin that modulates the rate, frequency or extent of DNA-dependent transcription." [GOC

6757 Pathogen[ Q2Q067] interacts with 1 human partners:{Q13363}

6758 Pathogen[ P0C214] interacts with 1 human partners:{Q13363}

6759 Pathogen[ P03346] interacts with 1 human partners:{Q13363}

6760 Pathogen[ Q85601] interacts with 1 human partners:{Q13363}

6761 Pathogen[ P03383] interacts with 1 human partners:{Q13363}

6762 Pathogen[ P14075] interacts with 1 human partners:{Q13363}

6763 Pathogen[ P0C206] interacts with 1 human partners:{Q13363}

6764 Pathogen[ P03363] interacts with 1 human partners:{Q13363}

6765 [Cluster 1098]GO:0006545+P biological\_process [name] glycine biosynthetic process [def] "The chemical reactions and pathways resulting in the formation of glycine, aminoethanoic acid." [GOC

6766 Pathogen[ Q2Q067] interacts with 1 human partners:{P34896}

6767 Pathogen[ P0C214] interacts with 4 human partners:{Q86XF0;P34897;P00374;P34896}

6768 Pathogen[ Q85601] interacts with 1 human partners:{P34896}

6769 Pathogen[ P14079] interacts with 4 human partners:{Q86XF0;P00374;P34897;P34896}

6770 Pathogen[ P03383] interacts with 1 human partners:{P34896}

6771 Pathogen[ P03410] interacts with 4 human partners:{P00374;Q86XF0;P34897;P34896}

6772 Pathogen[ P14075] interacts with 1 human partners:{P34896}

6773 Pathogen[ P0C206] interacts with 2 human partners:{P34897;P34896}

6774 [Cluster 1099]GO:0033512+P biological\_process [name] L-lysine catabolic process to acetyl-CoA via saccharopine [def] "The chemical reactions and pathways resulting in the breakdown of L-lysine into other compounds, including acetyl-CoA, via the intermediate saccharopine." [GOC

6775 Pathogen[ P0C214] interacts with 1 human partners:{P36957}

6776 [Cluster 1100]GO:0060327+P biological\_process [name] cytoplasmic actin-based contraction involved in cell motility [def] "The actin filament-based movement by which cytoplasmic actin filaments slide past one another resulting in a contraction that propels the cell from one place to another." [GOC

6777 Pathogen[ P14079] interacts with 1 human partners:{P09327}

6778 [Cluster 1101]GO:0021800+P biological\_process [name] cerebral cortex tangential migration [def] "The migration of cells in the cerebral cortex in which cells move orthogonally to the direction of radial migration and do not use radial glial cell processes as substrates for migration." [GO\_REF

6779 Pathogen[ P03346] interacts with 1 human partners:{Q96QS3}

6780 Pathogen[ P03363] interacts with 1 human partners:{Q96QS3}

6781 [Cluster 1102]GO:0032320+P biological\_process [name] positive regulation of Ras GTPase activity [def] "Any process that activates or increases the activity of a GTPase of the Ras superfamily." [GOC

6782 Pathogen[ P03410] interacts with 1 human partners:{Q15283}

6783 [Cluster 1103]GO:0055108+P biological\_process [name] Golgi to transport vesicle transport [def] "The directed movement of proteins from the Golgi to a transport vesicle. Continuously secreted proteins are sorted into transport vesicles that fuse with the plasma membrane, releasing their contents by exocytosis." [GOC

6784 Pathogen[ P03346] interacts with 1 human partners:{Q96A65}

6785 Pathogen[ Q85601] interacts with 1 human partners:{Q96A65}

6786 Pathogen[ P14079] interacts with 1 human partners:{Q96A65}

6787 Pathogen[ P03410] interacts with 1 human partners:{Q96A65}

6788 Pathogen[ P0C206] interacts with 1 human partners:{Q96A65}

6789 Pathogen[ P03363] interacts with 1 human partners:{Q96A65}

6790 [Cluster 1104]GO:0006012+P biological\_process [name] galactose metabolic process [def] "The chemical reactions and pathways involving galactose, the aldohexose galacto-hexose. D-galactose is widely distributed in combined form in plants, animals and microorganisms as a constituent of oligo- and polysaccharides\_ it also occurs in galactolipids and as its glucoside in lactose and melibiose." [ISBN

6791 Pathogen[ Q2Q067] interacts with 1 human partners:{P07902}

6792 Pathogen[ P0C214] interacts with 1 human partners:{P07902}

6793 Pathogen[ Q85601] interacts with 1 human partners:{P07902}

6794 Pathogen[ P14079] interacts with 1 human partners:{P07902}

6795 Pathogen[ P03383] interacts with 1 human partners:{P07902}

6796 Pathogen[ P03410] interacts with 1 human partners:{P07902}

6797 Pathogen[ P14075] interacts with 1 human partners:{P07902}

6798 Pathogen[ POC206] interacts with 1 human partners:{P07902}

6799 [Cluster 1105]GO:0034379+P biological\_process [name] very-low-density lipoprotein particle assembly [def] "The aggregation and arrangement of proteins and lipids in the liver to form a very-low-density lipoprotein particle." [GOC

6800 Pathogen[ POC214] interacts with 1 human partners:{P22830}

6801 Pathogen[ P14079] interacts with 1 human partners:{P22830}

6802 Pathogen[ P03410] interacts with 1 human partners:{P22830}

6803 Pathogen[ POC206] interacts with 1 human partners:{P22830}

6804 [Cluster 1106]GO:0009607+P biological\_process [name] response to biotic stimulus [def] "Any process that results in a change in state or activity of a cell or an organism (in terms of movement, secretion, enzyme production, gene expression, etc.) as a result of a biotic stimulus, a stimulus caused or produced by a living organism." [GOC

6805 Pathogen[ P14079] interacts with 3 human partners:{P13164;Q8IXB3;B4DJY2}

6806 Pathogen[ P03410] interacts with 2 human partners:{B4DJY2;Q8IXB3}

6807 [Cluster 1107]GO:0032055+P biological\_process [name] negative regulation of translation in response to stress [def] "Any process that stops, prevents or reduces the rate of translation as a result of a stimulus indicating the organism is under stress." [GOC

6808 Pathogen[ P03346] interacts with 1 human partners:{Q9BWF3}

6809 Pathogen[ P03363] interacts with 1 human partners:{Q9BWF3}

6810 [Cluster 1108]GO:2001054+P biological\_process [name] negative regulation of mesenchymal cell apoptosis [def] "Any process that stops, prevents or reduces the frequency, rate or extent of mesenchymal cell apoptosis." [GOC

6811 Pathogen[ P03346] interacts with 1 human partners:{P49335}

6812 Pathogen[ P03363] interacts with 1 human partners:{P49335}

6813 [Cluster 1109]GO:0045777+P biological\_process [name] positive regulation of blood pressure [def] "Any process in which the force of blood traveling through the circulatory system is increased." [GOC

6814 Pathogen[ P14079] interacts with 1 human partners:{Q9UHF0}

6815 Pathogen[ P03410] interacts with 1 human partners:{Q9UHF0}

6816 [Cluster 1110]GO:0006769+P biological\_process [name] nicotinamide metabolic process [def] "The chemical reactions and pathways involving nicotinamide, pyridine-3-carboxamide, the amide of nicotinic acid. It is a member of the B complex of vitamins and occurs widely in living organisms." [ISBN

6817 Pathogen[ Q2Q067] interacts with 1 human partners:{Q6XQN6}

6818 Pathogen[ POC214] interacts with 2 human partners:{Q6XQN6;P43490}

6819 Pathogen[ P03346] interacts with 1 human partners:{Q6XQN6}

6820 Pathogen[ Q85601] interacts with 1 human partners:{Q6XQN6}

6821 Pathogen[ P14079] interacts with 2 human partners:{P43490;Q6XQN6}

6822 Pathogen[ P03410] interacts with 2 human partners:{Q6XQN6;P43490}

6823 Pathogen[ P14075] interacts with 1 human partners:{Q6XQN6}

6824 Pathogen[ POC206] interacts with 2 human partners:{Q6XQN6;P43490}

6825 Pathogen[ P03363] interacts with 1 human partners:{Q6XQN6}

6826 [Cluster 1111]GO:0003166+P biological\_process [name] bundle of His development [def] "The process whose specific outcome is the progression of the bundle of His over time, from its formation to the mature structure. The bundle of His is part of the His-Purkinje system that transmits signals from the AV node to the cardiac Purkinje fibers." [GOC

6827 Pathogen[ P03346] interacts with 1 human partners:{Q99593}

6828 [Cluster 1112]GO:0033687+P biological\_process [name] osteoblast proliferation [def] "The multiplication or reproduction of osteoblasts, resulting in the expansion of an osteoblast cell population. An osteoblast is a bone-forming cell which secretes an extracellular matrix. Hydroxyapatite crystals are then deposited into the matrix to form bone." [GOC

6829 Pathogen[ POC214] interacts with 1 human partners:{P17275}

6830 Pathogen[ P03346] interacts with 1 human partners:{P17275}

6831 Pathogen[ Q85601] interacts with 1 human partners:{P17275}

6832 Pathogen[ P14079] interacts with 1 human partners:{P17275}

6833 Pathogen[ P03383] interacts with 1 human partners:{P17275}

6834 Pathogen[ P03410] interacts with 1 human partners:{P17275}

6835 Pathogen[ P14075] interacts with 1 human partners:{P17275}

6836 Pathogen[ POC206] interacts with 1 human partners:{P17275}

6837 Pathogen[ P03363] interacts with 1 human partners:{P17275}

6838 [Cluster 1113]GO:0051025+P biological\_process [name] negative regulation of immunoglobulin secretion [def] "Any process that stops, prevents, or reduces the frequency, rate or extent of the regulated release of immunoglobulins from a cell or group of cells." [GOC

6839 Pathogen[ P14079] interacts with 1 human partners:{O95760}

6840 Pathogen[ P03410] interacts with 1 human partners:{O95760}

6841 [Cluster 1114]GO:0042265+P biological\_process [name] peptidyl-asparagine hydroxylation [def] "The hydroxylation of peptidyl-asparagine to form peptidyl-hydroxyasparagine." [GOC

6842 Pathogen[ Q2Q067] interacts with 1 human partners:{Q9NWT6}

6843 Pathogen[ POC214] interacts with 1 human partners:{Q9NWT6}

6844 Pathogen[ P03346] interacts with 1 human partners:{Q9NWT6}

6845 Pathogen[ Q85601] interacts with 1 human partners:{Q9NWT6}



6846 Pathogen[ P14079] interacts with 1 human partners:{Q9NWT6}

6847 Pathogen[ P03383] interacts with 1 human partners:{Q9NWT6}

6848 Pathogen[ P03410] interacts with 1 human partners:{Q9NWT6}

6849 Pathogen[ P14075] interacts with 1 human partners:{Q9NWT6}

6850 Pathogen[ P0C206] interacts with 1 human partners:{Q9NWT6}

6851 [Cluster 1115]GO:0043068+P biological\_process [name] positive regulation of programmed cell death [def] "Any process that activates or increases the frequency, rate or extent of programmed cell death, cell death resulting from activation of endogenous cellular processes." [GOC

6852 Pathogen[ Q2Q067] interacts with 1 human partners:{P38936}

6853 Pathogen[ P0C214] interacts with 1 human partners:{P38936}

6854 Pathogen[ P03346] interacts with 1 human partners:{P38936}

6855 Pathogen[ Q85601] interacts with 1 human partners:{P38936}

6856 Pathogen[ P14079] interacts with 1 human partners:{P38936}

6857 Pathogen[ P03410] interacts with 1 human partners:{P38936}

6858 Pathogen[ P0C206] interacts with 1 human partners:{P38936}

6859 [Cluster 1116]GO:0050865+P biological\_process [name] regulation of cell activation [def] "Any process that modulates the frequency, rate or extent of cell activation, the change in the morphology or behavior of a cell resulting from exposure to an activating factor such as a cellular or soluble ligand." [GOC

6860 Pathogen[ P03346] interacts with 1 human partners:{P61968}

6861 Pathogen[ Q85601] interacts with 1 human partners:{P61968}

6862 Pathogen[ P0C206] interacts with 1 human partners:{P61968}

6863 [Cluster 1117]GO:0009083+P biological\_process [name] branched chain family amino acid catabolic process [def] "The chemical reactions and pathways resulting in the breakdown of amino acids containing a branched carbon skeleton, comprising isoleucine, leucine and valine." [GOC

6864 Pathogen[ Q2Q067] interacts with 1 human partners:{P21953}

6865 Pathogen[ P0C214] interacts with 6 human partners:{P12694;P21953;O15382;Q6NVY1;P09622;P54687}

6866 Pathogen[ Q85601] interacts with 2 human partners:{P21953;O15382}

6867 Pathogen[ P14079] interacts with 2 human partners:{P21953;O15382}

6868 Pathogen[ P03410] interacts with 4 human partners:{P12694;Q6NVY1;P21953;O15382}

6869 Pathogen[ P0C206] interacts with 2 human partners:{O15382;P21953}

6870 [Cluster 1118]GO:0014068+P biological\_process [name] positive regulation of phosphatidylinositol 3-kinase cascade [def] "Any process that activates or increases the frequency, rate or extent of signal transduction mediated by the phosphatidylinositol 3-kinase cascade." [GOC

6871 Pathogen[ Q2Q067] interacts with 2 human partners:{Q05086;P22681}

6872 Pathogen[ P0C214] interacts with 2 human partners:{P22681;Q05086}

6873 Pathogen[ P03346] interacts with 2 human partners:{P22681;Q05086}

6874 Pathogen[ Q85601] interacts with 2 human partners:{P22681;Q05086}

6875 Pathogen[ P0C206] interacts with 2 human partners:{Q05086;P22681}

6876 Pathogen[ P03363] interacts with 2 human partners:{P22681;Q05086}

6877 [Cluster 1119]GO:0071248+P biological\_process [name] cellular response to metal ion [def] "Any process that results in a change in state or activity of a cell (in terms of movement, secretion, enzyme production, gene expression, etc.) as a result of a metal ion stimulus." [GOC

6878 Pathogen[ P0C214] interacts with 1 human partners:{O95633}

6879 Pathogen[ P03346] interacts with 1 human partners:{O95633}

6880 Pathogen[ P0C206] interacts with 1 human partners:{O95633}

6881 [Cluster 1120]GO:0045716+P biological\_process [name] positive regulation of low-density lipoprotein particle receptor biosynthetic process [def] "Any process that activates or increases the frequency, rate or extent of the chemical reactions and pathways resulting in the formation of low-density lipoprotein receptors." [GOC

6882 Pathogen[ Q2Q067] interacts with 1 human partners:{P61978}

6883 Pathogen[ P03346] interacts with 2 human partners:{P61978;Q9Y2B0}

6884 Pathogen[ Q85601] interacts with 1 human partners:{P61978}

6885 Pathogen[ P14079] interacts with 2 human partners:{P61978;Q9Y2B0}

6886 Pathogen[ P03383] interacts with 1 human partners:{P61978}

6887 Pathogen[ P03410] interacts with 2 human partners:{P61978;Q9Y2B0}

6888 Pathogen[ P14075] interacts with 1 human partners:{P61978}

6889 Pathogen[ P0C206] interacts with 1 human partners:{P61978}

6890 Pathogen[ P03363] interacts with 1 human partners:{P61978}

6891 [Cluster 1121]GO:0019061+P biological\_process [name] uncoating of virus [def] "A general term applied to the events that occur after penetration\_ refers to the 'uncoating' of the viral genome from the nucleocapsid core." [ISBN

6892 Pathogen[ Q2Q067] interacts with 1 human partners:{P62937}

6893 Pathogen[ P03346] interacts with 1 human partners:{P62937}

6894 Pathogen[ Q85601] interacts with 1 human partners:{P62937}

6895 Pathogen[ P14079] interacts with 1 human partners:{P62937}

6896 Pathogen[ P03383] interacts with 1 human partners:{P62937}

6897 Pathogen[ P03410] interacts with 1 human partners:{P62937}

6898 Pathogen[ P14075] interacts with 1 human partners:{P62937}

6899 Pathogen[ P0C206] interacts with 1 human partners:{P62937}

6900 Pathogen[ P03363] interacts with 1 human partners:{P62937}

6901 [Cluster 1122]GO:0002540+P biological\_process [name] leukotriene production involved in inflammatory response [def] "The synthesis or release of any leukotriene following a stimulus as part of an inflammatory response, resulting in an increase in its intracellular or extracellular levels." [GOC  
6902 Pathogen[ Q2Q067] interacts with 1 human partners:{P09917}  
6903 Pathogen[ POC214] interacts with 1 human partners:{P09917}  
6904 Pathogen[ P03346] interacts with 1 human partners:{P09917}  
6905 Pathogen[ Q85601] interacts with 1 human partners:{P09917}  
6906 Pathogen[ P14079] interacts with 2 human partners:{P20292;P09917}  
6907 Pathogen[ P03410] interacts with 2 human partners:{P09917;P20292}  
6908 Pathogen[ POC206] interacts with 2 human partners:{P09917;P20292}  
6909 [Cluster 1123]GO:0046541+P biological\_process [name] saliva secretion [def] "The regulated release of saliva from the salivary glands. In man, the saliva is a turbid and slightly viscous fluid, generally of an alkaline reaction, and is secreted by the parotid, submaxillary, and sublingual glands. In the mouth the saliva is mixed with the secretion from the buccal glands. In man and many animals, saliva is an important digestive fluid on account of the presence of the peculiar enzyme, ptyalin." [GOC  
6910 Pathogen[ P14079] interacts with 1 human partners:{P02808}  
6911 Pathogen[ P03410] interacts with 1 human partners:{P02808}  
6912 Pathogen[ P14075] interacts with 1 human partners:{P02808}  
6913 Pathogen[ POC206] interacts with 1 human partners:{P02808}  
6914 Pathogen[ P03363] interacts with 1 human partners:{P02808}  
6915 [Cluster 1124]GO:0071374+P biological\_process [name] cellular response to parathyroid hormone stimulus [def] "Any process that results in a change in state or activity of a cell (in terms of movement, secretion, enzyme production, gene expression, etc.) as a result of a parathyroid hormone stimulus." [GOC  
6916 Pathogen[ P14079] interacts with 1 human partners:{Q06413}  
6917 Pathogen[ P03410] interacts with 1 human partners:{Q9BQB4}  
6918 [Cluster 1125]GO:0010724+P biological\_process [name] regulation of definitive erythrocyte differentiation [def] "Any process that modulates the rate, frequency, or extent of definitive erythrocyte differentiation. Definitive erythrocyte differentiation occurs as part of the process of definitive hemopoiesis." [GOC  
6919 Pathogen[ Q2Q067] interacts with 3 human partners:{P15976;O43251;Q8IX07}  
6920 Pathogen[ POC214] interacts with 2 human partners:{Q8IX07;O43251}  
6921 Pathogen[ P03346] interacts with 3 human partners:{P15976;Q8IX07;O43251}  
6922 Pathogen[ Q85601] interacts with 2 human partners:{P15976;Q8IX07}  
6923 Pathogen[ P14079] interacts with 2 human partners:{P15976;Q8IX07}  
6924 Pathogen[ P03410] interacts with 2 human partners:{Q8IX07;P15976}  
6925 Pathogen[ POC206] interacts with 2 human partners:{P15976;Q8IX07}  
6926 Pathogen[ P03363] interacts with 1 human partners:{O43251}  
6927 [Cluster 1126]GO:0042228+P biological\_process [name] interleukin-8 biosynthetic process [def] "The chemical reactions and pathways resulting in the formation of interleukin-8." [GOC  
6928 Pathogen[ P14079] interacts with 1 human partners:{Q9Y239}  
6929 Pathogen[ P03410] interacts with 1 human partners:{Q9Y239}  
6930 [Cluster 1127]GO:0030240+P biological\_process [name] skeletal muscle thin filament assembly [def] "The aggregation, arrangement and bonding together of proteins to form the actin-based thin filaments of myofibrils in skeletal muscle." [GOC  
6931 Pathogen[ POC214] interacts with 1 human partners:{P68133}  
6932 Pathogen[ Q85601] interacts with 1 human partners:{P68133}  
6933 Pathogen[ P14079] interacts with 3 human partners:{P68032;O15273;P68133}  
6934 Pathogen[ P03410] interacts with 2 human partners:{O15273;P68133}  
6935 Pathogen[ POC206] interacts with 1 human partners:{P68133}  
6936 Pathogen[ P03363] interacts with 1 human partners:{P68133}  
6937 [Cluster 1128]GO:0042759+P biological\_process [name] long-chain fatty acid biosynthetic process [def] "The chemical reactions and pathways resulting in the formation of long-chain fatty acids, aliphatic compounds having a terminal carboxyl group and with a chain length of C12-18." [GOC  
6938 Pathogen[ Q2Q067] interacts with 1 human partners:{Q9H5J4}  
6939 Pathogen[ P03346] interacts with 2 human partners:{Q96PU8;Q9H5J4}  
6940 Pathogen[ Q85601] interacts with 1 human partners:{Q9H5J4}  
6941 Pathogen[ P14079] interacts with 1 human partners:{Q9H5J4}  
6942 Pathogen[ P03383] interacts with 1 human partners:{Q9H5J4}  
6943 Pathogen[ P03410] interacts with 1 human partners:{Q9H5J4}  
6944 Pathogen[ P14075] interacts with 1 human partners:{Q9H5J4}  
6945 Pathogen[ POC206] interacts with 2 human partners:{Q96PU8;Q9H5J4}  
6946 Pathogen[ P03363] interacts with 2 human partners:{Q9H5J4;Q96PU8}  
6947 [Cluster 1129]GO:0048294+P biological\_process [name] negative regulation of isotype switching to IgE isotypes [def] "Any process that stops, prevents, or reduces the frequency, rate or extent of isotype switching to IgE isotypes." [GOC  
6948 Pathogen[ Q2Q067] interacts with 1 human partners:{P41182}  
6949 Pathogen[ POC214] interacts with 1 human partners:{P41182}  
6950 Pathogen[ P03346] interacts with 1 human partners:{P41182}  
6951 Pathogen[ Q85601] interacts with 1 human partners:{P41182}  
6952 Pathogen[ P14079] interacts with 1 human partners:{P41182}  
6953 Pathogen[ P03410] interacts with 1 human partners:{P41182}

6954 Pathogen[ POC206] interacts with 1 human partners:{P41182}

6955 [Cluster 1130]GO:0060159+P biological\_process [name] regulation of dopamine receptor signaling pathway [def] "Any process that modulates the frequency, rate or extent of a dopamine receptor signaling pathway activity. A dopamine receptor signaling pathway is the series of molecular signals generated as a consequence of a dopamine receptor binding to one of its physiological ligands." [GOC

6956 Pathogen[ Q2Q067] interacts with 1 human partners:{Q96EV8}

6957 Pathogen[ POC214] interacts with 1 human partners:{Q96EV8}

6958 Pathogen[ P03346] interacts with 1 human partners:{Q96EV8}

6959 Pathogen[ Q85601] interacts with 1 human partners:{Q96EV8}

6960 Pathogen[ P14079] interacts with 1 human partners:{Q96EV8}

6961 Pathogen[ P03383] interacts with 1 human partners:{Q96EV8}

6962 Pathogen[ P03410] interacts with 1 human partners:{Q96EV8}

6963 Pathogen[ P14075] interacts with 1 human partners:{Q96EV8}

6964 Pathogen[ POC206] interacts with 1 human partners:{Q96EV8}

6965 [Cluster 1131]GO:0090240+P biological\_process [name] positive regulation of histone H4 acetylation [def] "Any process that increases the rate, frequency, or extent of histone H4 acetylation, the modification of histone H4 by the addition of an acetyl group." [GOC

6966 Pathogen[ P14079] interacts with 1 human partners:{P15941}

6967 Pathogen[ P03410] interacts with 1 human partners:{P15941}

6968 [Cluster 1132]GO:0009235+P biological\_process [name] cobalamin metabolic process [def] "The chemical reactions and pathways involving cobalamin (vitamin B12), a water-soluble vitamin characterized by possession of a corrin nucleus containing a cobalt atom." [GOC

6969 Pathogen[ Q2Q067] interacts with 1 human partners:{Q9H3L0}

6970 Pathogen[ POC214] interacts with 1 human partners:{Q9H3L0}

6971 Pathogen[ P03346] interacts with 1 human partners:{Q9H3L0}

6972 Pathogen[ P14079] interacts with 2 human partners:{Q9H3L0;P27352}

6973 Pathogen[ P03383] interacts with 1 human partners:{Q9H3L0}

6974 Pathogen[ P03410] interacts with 2 human partners:{Q9H3L0;P27352}

6975 Pathogen[ P14075] interacts with 1 human partners:{Q9H3L0}

6976 Pathogen[ POC206] interacts with 1 human partners:{Q9H3L0}

6977 [Cluster 1133]GO:0046427+P biological\_process [name] positive regulation of JAK-STAT cascade [def] "Any process that activates or increases the frequency, rate or extent of the JAK-STAT signaling pathway activity." [GOC

6978 Pathogen[ P03346] interacts with 1 human partners:{Q8IUI8}

6979 Pathogen[ P14079] interacts with 2 human partners:{Q8IU54;Q8IUI8}

6980 Pathogen[ P03410] interacts with 1 human partners:{Q8IUI8}

6981 [Cluster 1134]GO:0097277+P

6982 Pathogen[ P03346] interacts with 1 human partners:{Q92481}

6983 [Cluster 1135]GO:0005996+P biological\_process [name] monosaccharide metabolic process [def] "The chemical reactions and pathways involving monosaccharides, the simplest carbohydrates. They are polyhydric alcohols containing either an aldehyde or a keto group and between three to ten or more carbon atoms. They form the constitutional repeating units of oligo- and polysaccharides." [ISBN

6984 Pathogen[ P14079] interacts with 1 human partners:{A2VDF0}

6985 Pathogen[ P03410] interacts with 1 human partners:{A2VDF0}

6986 Pathogen[ POC206] interacts with 1 human partners:{A2VDF0}

6987 [Cluster 1136]GO:0060124+P biological\_process [name] positive regulation of growth hormone secretion [def] "Any process that increases the frequency, rate or extent of the regulated release of growth hormone from a cell or group of cells." [GOC

6988 Pathogen[ P14079] interacts with 2 human partners:{Q9Y6X1;O60502}

6989 Pathogen[ P03410] interacts with 2 human partners:{O60502;Q9Y6X1}

6990 [Cluster 1137]GO:0045582+P biological\_process [name] positive regulation of T cell differentiation [def] "Any process that activates or increases the frequency, rate or extent of T cell differentiation." [GOC

6991 Pathogen[ POC214] interacts with 1 human partners:{Q92934}

6992 Pathogen[ P14079] interacts with 2 human partners:{Q92934;P13232}

6993 Pathogen[ P03410] interacts with 2 human partners:{Q92934;P13232}

6994 Pathogen[ POC206] interacts with 1 human partners:{Q92934}

6995 [Cluster 1138]GO:0045625+P biological\_process [name] regulation of T-helper 1 cell differentiation [def] "Any process that modulates the frequency, rate or extent of T-helper 1 cell differentiation." [GOC

6996 Pathogen[ P14079] interacts with 1 human partners:{Q8NEV9}

6997 Pathogen[ P03410] interacts with 1 human partners:{Q8NEV9}

6998 [Cluster 1139]GO:0051770+P biological\_process [name] positive regulation of nitric-oxide synthase biosynthetic process [def] "Any process that activates or increases the frequency, rate or extent of the chemical reactions and pathways resulting in the formation of a nitric oxide synthase enzyme." [GOC

6999 Pathogen[ POC214] interacts with 1 human partners:{P43490}

7000 Pathogen[ P14079] interacts with 1 human partners:{P43490}

7001 Pathogen[ P03410] interacts with 1 human partners:{P43490}

7002 Pathogen[ POC206] interacts with 1 human partners:{P43490}

7003 [Cluster 1140]GO:0008595+P biological\_process [name] anterior/posterior axis specification, embryo [def] "The specification of the anterior/posterior axis of the embryo by the products of genes expressed maternally and genes expressed in the zygote."

```

[http
7004 Pathogen[ P03346] interacts with 3 human partners:{P13378;Q9HCS4;P17509}
7005 Pathogen[ Q85601] interacts with 1 human partners:{Q9HCS4}
7006 Pathogen[ P14079] interacts with 1 human partners:{Q8WU20}
7007 Pathogen[ P03410] interacts with 2 human partners:{Q9HCS4;Q8WU20}
7008 Pathogen[ P0C206] interacts with 2 human partners:{Q9HCS4;Q8WU20}
7009 Pathogen[ P03363] interacts with 3 human partners:{Q9HCS4;P17509;P13378}
7010 [Cluster 1141]GO:0010735+P biological_process [name] positive regulation of
transcription via serum response element binding [def] "Any process that increases
the frequency, rate or extent of the specifically regulated synthesis of RNA from DNA
encoding a specific set of genes as a result of a transcription factor interacting with
a serum response element (SRE). A serum response element is a short sequence with dyad
symmetry found in the promoters of some of the cellular immediate-early genes, regulated
by serum." [GOC
7011 Pathogen[ Q2Q067] interacts with 1 human partners:{P11831}
7012 Pathogen[ P0C214] interacts with 1 human partners:{P11831}
7013 Pathogen[ P03346] interacts with 1 human partners:{P11831}
7014 Pathogen[ Q85601] interacts with 1 human partners:{P11831}
7015 Pathogen[ P03383] interacts with 1 human partners:{P11831}
7016 Pathogen[ P03410] interacts with 1 human partners:{P11831}
7017 Pathogen[ P14075] interacts with 1 human partners:{P11831}
7018 Pathogen[ P0C206] interacts with 1 human partners:{P11831}
7019 Pathogen[ P03363] interacts with 1 human partners:{P11831}
7020 [Cluster 1142]GO:0021795+P biological_process [name] cerebral cortex cell migration
[def] "The orderly movement of cells from one site to another in the cerebral cortex."
[GO_REF
7021 Pathogen[ P03346] interacts with 1 human partners:{P50542}
7022 Pathogen[ P14079] interacts with 1 human partners:{P50542}
7023 Pathogen[ P03410] interacts with 1 human partners:{P50542}
7024 Pathogen[ P0C206] interacts with 1 human partners:{P50542}
7025 [Cluster 1143]GO:0060384+P biological_process [name] innervation [def] "The process
in which a nerve invades a tissue and makes functional synaptic connection within the
tissue." [GOC
7026 Pathogen[ P0C214] interacts with 1 human partners:{P07093}
7027 Pathogen[ Q85601] interacts with 1 human partners:{P07093}
7028 [Cluster 1144]GO:0018192+P biological_process [name] enzyme active site formation via
L-cysteine persulfide [def] "The modification of peptidyl-cysteine to form
peptidyl-L-cysteine persulfide. A persulfurated cysteine promotes active site reactivity
in Azotobacter vinelandii Rhodanese." [PMID
7029 Pathogen[ P0C214] interacts with 1 human partners:{O95396}
7030 Pathogen[ P0C206] interacts with 1 human partners:{O95396}
7031 [Cluster 1145]GO:0043652+P biological_process [name] engulfment of apoptotic cell
[def] "The removal of the apoptotic cell by phagocytosis, by a neighboring cell or by a
phagocyte." [GOC
7032 Pathogen[ Q2Q067] interacts with 1 human partners:{P63000}
7033 Pathogen[ P0C214] interacts with 1 human partners:{P63000}
7034 Pathogen[ P03346] interacts with 1 human partners:{P63000}
7035 Pathogen[ Q85601] interacts with 1 human partners:{P63000}
7036 Pathogen[ P03383] interacts with 1 human partners:{P63000}
7037 Pathogen[ P03410] interacts with 1 human partners:{P63000}
7038 Pathogen[ P14075] interacts with 1 human partners:{P63000}
7039 Pathogen[ P0C206] interacts with 1 human partners:{P63000}
7040 Pathogen[ P03363] interacts with 1 human partners:{P63000}
7041 [Cluster 1146]GO:0042346+P biological_process [name] positive regulation of NF-kappaB
import into nucleus [def] "Any process that activates or increases the frequency, rate
or extent of transfer of NF-kappaB, a transcription factor for eukaryotic RNA polymerase
II promoters, from the cytoplasm into the nucleus, across the nuclear membrane." [GOC
7042 Pathogen[ Q2Q067] interacts with 1 human partners:{P61586}
7043 Pathogen[ P0C214] interacts with 1 human partners:{P61586}
7044 Pathogen[ P03346] interacts with 2 human partners:{Q9BYM8;P61586}
7045 Pathogen[ Q85601] interacts with 1 human partners:{P61586}
7046 Pathogen[ P14079] interacts with 2 human partners:{Q9BYM8;P61586}
7047 Pathogen[ P03383] interacts with 1 human partners:{P61586}
7048 Pathogen[ P03410] interacts with 1 human partners:{P61586}
7049 Pathogen[ P14075] interacts with 1 human partners:{P61586}
7050 Pathogen[ P0C206] interacts with 2 human partners:{P61586;Q9BYM8}
7051 [Cluster 1147]GO:0000738+P biological_process [name] DNA catabolic process,
exonucleolytic [def] "The chemical reactions and pathways resulting in the breakdown of
DNA, involving the hydrolysis of terminal 3',5'-phosphodiester bonds in one or two
strands of deoxyribonucleotides." [GOC
7052 Pathogen[ P14079] interacts with 1 human partners:{Q96AZ6}
7053 Pathogen[ P03410] interacts with 1 human partners:{Q96AZ6}
7054 [Cluster 1148]GO:0060633+P biological_process [name] negative regulation of
transcription initiation from RNA polymerase II promoter [def] "Any process that
decreases the rate, frequency or extent of a process involved in starting transcription
from an RNA polymerase II promoter." [GOC

```

7055 Pathogen[ Q2Q067] interacts with 1 human partners:{Q9NSA3}

7056 Pathogen[ POC214] interacts with 1 human partners:{Q9NSA3}

7057 Pathogen[ P03346] interacts with 1 human partners:{Q9NSA3}

7058 Pathogen[ Q85601] interacts with 1 human partners:{Q9NSA3}

7059 Pathogen[ P03383] interacts with 1 human partners:{Q9NSA3}

7060 Pathogen[ P03410] interacts with 1 human partners:{Q9NSA3}

7061 Pathogen[ P14075] interacts with 1 human partners:{Q9NSA3}

7062 Pathogen[ POC206] interacts with 1 human partners:{Q9NSA3}

7063 Pathogen[ P03363] interacts with 1 human partners:{Q9NSA3}

7064 [Cluster 1149]GO:0014850+P biological\_process [name] response to muscle activity [def] "Any process that results in a change in state or activity of a cell or an organism (in terms of movement, secretion, enzyme production, gene expression, etc.) as a result of a muscle activity stimulus." [GOC

7065 Pathogen[ P14079] interacts with 2 human partners:{P31751;P24588}

7066 Pathogen[ P03410] interacts with 1 human partners:{P24588}

7067 [Cluster 1150]GO:0007041+P biological\_process [name] lysosomal transport [def] "The directed movement of substances into, out of or within a lysosome." [GOC

7068 Pathogen[ P14079] interacts with 1 human partners:{Q9NZ43}

7069 Pathogen[ P03410] interacts with 1 human partners:{Q9NZ43}

7070 [Cluster 1151]GO:0060480+P biological\_process [name] lung goblet cell differentiation [def] "The process in which a relatively unspecialized cell acquires specialized features of a lung goblet cell. A goblet cell is a cell of the epithelial lining that produces and secretes mucins." [GOC

7071 Pathogen[ Q2Q067] interacts with 2 human partners:{P20719;O95238}

7072 Pathogen[ POC214] interacts with 1 human partners:{O95238}

7073 Pathogen[ P03346] interacts with 2 human partners:{O95238;P20719}

7074 Pathogen[ Q85601] interacts with 1 human partners:{O95238}

7075 Pathogen[ P14079] interacts with 1 human partners:{O95238}

7076 Pathogen[ P03383] interacts with 1 human partners:{O95238}

7077 Pathogen[ P03410] interacts with 1 human partners:{O95238}

7078 Pathogen[ POC206] interacts with 2 human partners:{O95238;P20719}

7079 Pathogen[ P03363] interacts with 2 human partners:{P20719;O95238}

7080 [Cluster 1152]GO:0030578+P biological\_process [name] PML body organization [def] "A process that is carried out at the cellular level which results in the assembly, arrangement of constituent parts, or disassembly of PML bodies, a class of nuclear body\_ they react against SP100 auto-antibodies (PML = promyelocytic leukemia)." [GOC

7081 Pathogen[ Q2Q067] interacts with 1 human partners:{P14921}

7082 Pathogen[ POC214] interacts with 1 human partners:{P14921}

7083 Pathogen[ P03346] interacts with 1 human partners:{P14921}

7084 Pathogen[ Q85601] interacts with 1 human partners:{P14921}

7085 Pathogen[ P03383] interacts with 1 human partners:{P14921}

7086 Pathogen[ P03410] interacts with 1 human partners:{P14921}

7087 Pathogen[ P14075] interacts with 1 human partners:{P14921}

7088 Pathogen[ POC206] interacts with 1 human partners:{P14921}

7089 Pathogen[ P03363] interacts with 1 human partners:{P14921}

7090 [Cluster 1153]GO:0032714+P biological\_process [name] negative regulation of interleukin-5 production [def] "Any process that stops, prevents, or reduces the frequency, rate, or extent of interleukin-5 production." [GOC

7091 Pathogen[ P14079] interacts with 1 human partners:{Q8IU54}

7092 [Cluster 1154]GO:0006725+P biological\_process [name] cellular aromatic compound metabolic process [def] "The chemical reactions and pathways involving aromatic compounds, any organic compound characterized by one or more planar rings, each of which contains conjugated double bonds and delocalized pi electrons, as carried out by individual cells." [GOC

7093 Pathogen[ P14079] interacts with 1 human partners:{Q8N0X4}

7094 Pathogen[ P03410] interacts with 1 human partners:{Q8N0X4}

7095 [Cluster 1155]GO:0006258+P biological\_process [name] UDP-glucose catabolic process [def] "The chemical reactions and pathways resulting in the breakdown of UDP-glucose, uridinediphosphoglucose, a substance composed of glucose in glycosidic linkage with uridine diphosphate." [GOC

7096 Pathogen[ Q2Q067] interacts with 1 human partners:{P07902}

7097 Pathogen[ POC214] interacts with 1 human partners:{P07902}

7098 Pathogen[ Q85601] interacts with 1 human partners:{P07902}

7099 Pathogen[ P14079] interacts with 1 human partners:{P07902}

7100 Pathogen[ P03383] interacts with 1 human partners:{P07902}

7101 Pathogen[ P03410] interacts with 1 human partners:{P07902}

7102 Pathogen[ P14075] interacts with 1 human partners:{P07902}

7103 Pathogen[ POC206] interacts with 1 human partners:{P07902}

7104 [Cluster 1156]GO:0031960+P biological\_process [name] response to corticosteroid stimulus [def] "Any process that results in a change in state or activity of a cell or an organism (in terms of movement, secretion, enzyme production, gene expression, etc.) as a result of a corticosteroid hormone stimulus. A corticosteroid is a steroid hormone that is produced in the adrenal cortex. Corticosteroids are involved in a wide range of physiologic systems such as stress response, immune response and regulation of inflammation, carbohydrate metabolism, protein catabolism, blood electrolyte levels, and behavior. They include glucocorticoids and mineralocorticoids." [GOC

7105 Pathogen[ Q2Q067] interacts with 1 human partners:{094993}

7106 Pathogen[ P0C214] interacts with 1 human partners:{094993}

7107 Pathogen[ P03346] interacts with 1 human partners:{094993}

7108 Pathogen[ Q85601] interacts with 1 human partners:{094993}

7109 Pathogen[ P14079] interacts with 2 human partners:{P04083;094993}

7110 Pathogen[ P03410] interacts with 1 human partners:{094993}

7111 Pathogen[ P0C206] interacts with 1 human partners:{094993}

7112 Pathogen[ P03363] interacts with 1 human partners:{094993}

7113 [Cluster 1157]GO:1901313+P

7114 Pathogen[ Q2Q067] interacts with 2 human partners:{Q9H4X1;P84022}

7115 Pathogen[ P0C214] interacts with 2 human partners:{Q9H4X1;P84022}

7116 Pathogen[ P03346] interacts with 2 human partners:{Q9H4X1;P84022}

7117 Pathogen[ Q85601] interacts with 2 human partners:{Q9H4X1;P84022}

7118 Pathogen[ P03383] interacts with 2 human partners:{Q9H4X1;P84022}

7119 Pathogen[ P03410] interacts with 2 human partners:{P84022;Q9H4X1}

7120 Pathogen[ P14075] interacts with 2 human partners:{Q9H4X1;P84022}

7121 Pathogen[ P0C206] interacts with 2 human partners:{P84022;Q9H4X1}

7122 Pathogen[ P03363] interacts with 2 human partners:{Q9H4X1;P84022}

7123 [Cluster 1158]GO:0039528+P

7124 Pathogen[ Q2Q067] interacts with 1 human partners:{Q9BYX4}

7125 Pathogen[ P0C214] interacts with 1 human partners:{Q9BYX4}

7126 Pathogen[ P03346] interacts with 1 human partners:{Q9BYX4}

7127 Pathogen[ Q85601] interacts with 1 human partners:{Q9BYX4}

7128 Pathogen[ P14079] interacts with 1 human partners:{Q9BYX4}

7129 Pathogen[ P03410] interacts with 1 human partners:{Q9BYX4}

7130 Pathogen[ P0C206] interacts with 1 human partners:{Q9BYX4}

7131 Pathogen[ P03363] interacts with 1 human partners:{Q9BYX4}

7132 [Cluster 1159]GO:0045880+P biological\_process [name] positive regulation of smoothened signaling pathway [def] "Any process that activates or increases the frequency, rate or extent of smoothened signaling." [GOC

7133 Pathogen[ Q2Q067] interacts with 2 human partners:{P08151;P54821}

7134 Pathogen[ P0C214] interacts with 1 human partners:{P08151}

7135 Pathogen[ P03346] interacts with 3 human partners:{P54821;Q99811;P08151}

7136 Pathogen[ Q85601] interacts with 1 human partners:{P08151}

7137 Pathogen[ P14079] interacts with 3 human partners:{P08151;P57679;P54826}

7138 Pathogen[ P03410] interacts with 1 human partners:{P54826}

7139 Pathogen[ P14075] interacts with 1 human partners:{P54826}

7140 Pathogen[ P0C206] interacts with 3 human partners:{P54821;P08151;P54826}

7141 Pathogen[ P03363] interacts with 3 human partners:{P08151;P54821;Q99811}

7142 [Cluster 1160]GO:0045359+P biological\_process [name] positive regulation of interferon-beta biosynthetic process [def] "Any process that activates or increases the frequency, rate or extent of the chemical reactions and pathways resulting in the formation of interferon-beta." [GOC

7143 Pathogen[ Q2Q067] interacts with 1 human partners:{Q8IUC6}

7144 Pathogen[ P0C214] interacts with 1 human partners:{Q8IUC6}

7145 Pathogen[ P03346] interacts with 1 human partners:{Q8IUC6}

7146 Pathogen[ Q85601] interacts with 1 human partners:{Q8IUC6}

7147 Pathogen[ P14079] interacts with 1 human partners:{Q8IUC6}

7148 Pathogen[ P03383] interacts with 1 human partners:{Q8IUC6}

7149 Pathogen[ P03410] interacts with 1 human partners:{Q8IUC6}

7150 Pathogen[ P14075] interacts with 1 human partners:{Q8IUC6}

7151 Pathogen[ P0C206] interacts with 1 human partners:{Q8IUC6}

7152 [Cluster 1161]GO:0048319+P biological\_process [name] axial mesoderm morphogenesis [def] "The process in which the anatomical structures of the axial mesoderm are generated and organized." [GOC

7153 Pathogen[ P03346] interacts with 1 human partners:{Q9HCS4}

7154 Pathogen[ Q85601] interacts with 1 human partners:{Q9HCS4}

7155 Pathogen[ P03410] interacts with 1 human partners:{Q9HCS4}

7156 Pathogen[ P0C206] interacts with 1 human partners:{Q9HCS4}

7157 Pathogen[ P03363] interacts with 1 human partners:{Q9HCS4}

7158 [Cluster 1162]GO:0043415+P biological\_process [name] positive regulation of skeletal muscle tissue regeneration [def] "Any process that activates or increase the rate of skeletal muscle regeneration." [GOC

7159 Pathogen[ Q2Q067] interacts with 1 human partners:{P15172}

7160 Pathogen[ P0C214] interacts with 1 human partners:{P15172}

7161 Pathogen[ P03346] interacts with 1 human partners:{P15172}

7162 Pathogen[ Q85601] interacts with 1 human partners:{P15172}

7163 Pathogen[ P03383] interacts with 1 human partners:{P15172}

7164 Pathogen[ P14075] interacts with 1 human partners:{P15172}

7165 Pathogen[ P0C206] interacts with 1 human partners:{P15172}

7166 Pathogen[ P03363] interacts with 1 human partners:{P15172}

7167 [Cluster 1163]GO:0032367+P biological\_process [name] intracellular cholesterol transport [def] "The directed movement of cholesterol, cholest-5-en-3-beta-ol, within cells." [GOC

7168 Pathogen[ Q2Q067] interacts with 1 human partners:{075351}

7169 Pathogen[ P0C214] interacts with 1 human partners:{075351}

7170 Pathogen[ P03346] interacts with 1 human partners:{075351}

7171 Pathogen[ Q85601] interacts with 1 human partners:{075351}

7172 Pathogen[ P14079] interacts with 1 human partners:{075351}

7173 Pathogen[ P03410] interacts with 1 human partners:{075351}

7174 Pathogen[ P0C206] interacts with 1 human partners:{075351}

7175 Pathogen[ P03363] interacts with 1 human partners:{075351}

7176 [Cluster 1164]GO:0039008+P biological\_process [name] pronephric nephron tubule morphogenesis [def] "The process in which the anatomical structures of a pronephric nephron tubule are generated and organized from an epithelium. A pronephric nephron tubule is an epithelial tube that is part of the pronephric nephron." [GOC

7177 Pathogen[ P03346] interacts with 1 human partners:{Q8N157}

7178 Pathogen[ P14079] interacts with 1 human partners:{Q8N157}

7179 Pathogen[ P03410] interacts with 1 human partners:{Q8N157}

7180 Pathogen[ P0C206] interacts with 1 human partners:{Q8N157}

7181 Pathogen[ P03363] interacts with 1 human partners:{Q8N157}

7182 [Cluster 1165]GO:2000017+P biological\_process [name] positive regulation of determination of dorsal identity [def] "Any process that activates or increases the frequency, rate or extent of determination of dorsal identity." [GOC

7183 Pathogen[ P14079] interacts with 1 human partners:{P45983}

7184 [Cluster 1166]GO:0046854+P biological\_process [name] phosphatidylinositol phosphorylation [def] "The process of introducing one or more phosphate groups into a phosphatidylinositol, any glycerophosphoinositol having one phosphatidyl group esterified to one of the hydroxy groups of inositol." [ISBN

7185 Pathogen[ Q2Q067] interacts with 1 human partners:{P27986}

7186 Pathogen[ P0C214] interacts with 2 human partners:{O15056;P27986}

7187 Pathogen[ P03346] interacts with 2 human partners:{O15056;P27986}

7188 Pathogen[ Q85601] interacts with 1 human partners:{P27986}

7189 Pathogen[ P03383] interacts with 1 human partners:{P27986}

7190 Pathogen[ P03410] interacts with 1 human partners:{P27986}

7191 Pathogen[ P14075] interacts with 1 human partners:{P27986}

7192 Pathogen[ P0C206] interacts with 1 human partners:{P27986}

7193 Pathogen[ P03363] interacts with 2 human partners:{O15056;P27986}

7194 [Cluster 1167]GO:0070831+P biological\_process [name] basement membrane assembly [def] "The aggregation, arrangement and bonding together of a set of components to form a basement membrane, a part of the extracellular region that consists of a thin layer of dense material found in various animal tissues interposed between the cells and the adjacent connective tissue." [GOC

7195 Pathogen[ P14079] interacts with 1 human partners:{O60895}

7196 Pathogen[ P03410] interacts with 1 human partners:{O60895}

7197 [Cluster 1168]GO:0032926+P biological\_process [name] negative regulation of activin receptor signaling pathway [def] "Any process that stops, prevents, or reduces the frequency, rate or extent of the activity of any activin receptor signaling pathway." [GOC

7198 Pathogen[ Q2Q067] interacts with 2 human partners:{Q86UL8;P12755}

7199 Pathogen[ P0C214] interacts with 2 human partners:{O95633;P12755}

7200 Pathogen[ P03346] interacts with 2 human partners:{Q86UL8;O95633}

7201 Pathogen[ Q85601] interacts with 2 human partners:{Q86UL8;P12755}

7202 Pathogen[ P14079] interacts with 2 human partners:{P12755;Q86UL8}

7203 Pathogen[ P03410] interacts with 2 human partners:{P12755;Q86UL8}

7204 Pathogen[ P0C206] interacts with 3 human partners:{O95633;P12755;Q86UL8}

7205 Pathogen[ P03363] interacts with 2 human partners:{P19883;Q86UL8}

7206 [Cluster 1169]GO:2001047+P biological\_process [name] regulation of G1/S transition checkpoint [def] "Any process that modulates the frequency, rate or extent of G1/S transition checkpoint." [GOC

7207 Pathogen[ Q2Q067] interacts with 1 human partners:{P31749}

7208 Pathogen[ P0C214] interacts with 1 human partners:{P31749}

7209 Pathogen[ P03346] interacts with 1 human partners:{P31749}

7210 Pathogen[ Q85601] interacts with 1 human partners:{P31749}

7211 Pathogen[ P03383] interacts with 1 human partners:{P31749}

7212 Pathogen[ P03410] interacts with 1 human partners:{P31749}

7213 Pathogen[ P14075] interacts with 1 human partners:{P31749}

7214 Pathogen[ P0C206] interacts with 1 human partners:{P31749}

7215 Pathogen[ P03363] interacts with 1 human partners:{P31749}

7216 [Cluster 1170]GO:0045836+P biological\_process [name] positive regulation of meiosis [def] "Any process that activates or increases the frequency, rate or extent of meiosis." [GOC

7217 Pathogen[ P03346] interacts with 1 human partners:{Q86SE8}

7218 Pathogen[ Q85601] interacts with 1 human partners:{Q86SE8}

7219 Pathogen[ P03410] interacts with 1 human partners:{Q86SE8}

7220 Pathogen[ P0C206] interacts with 1 human partners:{Q86SE8}

7221 Pathogen[ P03363] interacts with 2 human partners:{Q92904;Q86SE8}

7222 [Cluster 1171]GO:0007342+P biological\_process [name] fusion of sperm to egg plasma membrane [def] "The binding and fusion of a sperm, having penetrated the zona pellucida, with the plasma membrane of the oocyte. Binding occurs at the posterior (post-acrosomal) region of the sperm head." [GOC

7223 Pathogen[ P14079] interacts with 3 human partners:{Q9NQ60;Q6UW49;Q9BZX4}

7224 Pathogen[ P03410] interacts with 3 human partners:{Q9NQ60;Q6UW49;Q9BZX4}

7225 [Cluster 1172]GO:0042129+P biological\_process [name] regulation of T cell proliferation [def] "Any process that modulates the frequency, rate or extent of T cell proliferation." [GOC

7226 Pathogen[ P14079] interacts with 1 human partners:{Q8NEV9}

7227 Pathogen[ P03410] interacts with 1 human partners:{Q8NEV9}

7228 [Cluster 1173]GO:0048535+P biological\_process [name] lymph node development [def] "The process whose specific outcome is the progression of lymph nodes over time, from their formation to the mature structure. A lymph node is a round, oval, or bean shaped structure localized in clusters along the lymphatic vessels, with a distinct internal structure including specialized vasculature and B- and T-zones for the activation of lymphocytes." [GOC

7229 Pathogen[ P03346] interacts with 1 human partners:{Q8TAU0}

7230 Pathogen[ P0C206] interacts with 2 human partners:{Q13422;Q8TAU0}

7231 Pathogen[ P03363] interacts with 1 human partners:{Q8TAU0}

7232 [Cluster 1174]GO:0009268+P biological\_process [name] response to pH [def] "Any process that results in a change in state or activity of a cell or an organism (in terms of movement, secretion, enzyme production, gene expression, etc.) as a result of a pH stimulus." [GOC

7233 Pathogen[ P03410] interacts with 1 human partners:{Q96D96}

7234 [Cluster 1175]GO:0016082+P biological\_process [name] synaptic vesicle priming [def] "The formation of SNARE-containing complexes, bringing synaptic vesicle membrane and plasma membranes into close proximity and thereby facilitating membrane fusion." [GOC

7235 Pathogen[ P03346] interacts with 1 human partners:{Q9ULU8}

7236 Pathogen[ P14079] interacts with 1 human partners:{Q9ULU8}

7237 Pathogen[ P03410] interacts with 1 human partners:{Q9ULU8}

7238 Pathogen[ P0C206] interacts with 1 human partners:{Q9ULU8}

7239 [Cluster 1176]GO:0006007+P biological\_process [name] glucose catabolic process [def] "The chemical reactions and pathways resulting in the breakdown of glucose, the aldohexose gluco-hexose." [GOC

7240 Pathogen[ P0C214] interacts with 3 human partners:{Q92934;P51854;O60825}

7241 Pathogen[ Q85601] interacts with 1 human partners:{O60825}

7242 Pathogen[ P14079] interacts with 2 human partners:{P51854;Q92934}

7243 Pathogen[ P03410] interacts with 2 human partners:{Q92934;P51854}

7244 Pathogen[ P0C206] interacts with 3 human partners:{P51854;Q92934;O60825}

7245 [Cluster 1177]GO:0035610+P biological\_process [name] protein side chain deglutamylation [def] "The removal of a glutamate residue from the side chain of a protein. Glutamate side chains are added to glutamic acid residues within the primary protein sequence during polyglutamylatation." [GOC

7246 Pathogen[ P14079] interacts with 2 human partners:{Q96MI9;Q9UPW5}

7247 Pathogen[ P03410] interacts with 1 human partners:{Q9UPW5}

7248 Pathogen[ P0C206] interacts with 1 human partners:{Q9UPW5}

7249 [Cluster 1178]GO:2000729+P biological\_process [name] positive regulation of mesenchymal cell proliferation involved in ureter development [def] "Any process that activates or increases the frequency, rate or extent of mesenchymal cell proliferation involved in ureter development." [GOC

7250 Pathogen[ P03346] interacts with 1 human partners:{Q15475}

7251 [Cluster 1179]GO:0097211+P

7252 Pathogen[ P0C214] interacts with 1 human partners:{Q8TDB4}

7253 Pathogen[ P03346] interacts with 1 human partners:{Q8TDB4}

7254 Pathogen[ Q85601] interacts with 1 human partners:{Q8TDB4}

7255 Pathogen[ P14079] interacts with 1 human partners:{Q8TDB4}

7256 Pathogen[ P03383] interacts with 1 human partners:{Q8TDB4}

7257 Pathogen[ P03410] interacts with 1 human partners:{Q8TDB4}

7258 Pathogen[ P14075] interacts with 1 human partners:{Q8TDB4}

7259 Pathogen[ P0C206] interacts with 1 human partners:{Q8TDB4}

7260 [Cluster 1180]GO:0021722+P biological\_process [name] superior olivary nucleus maturation [def] "A developmental process, independent of morphogenetic (shape) change, that is required for the superior olivary nucleus to attain its fully functional state. The superior olivary nucleus is a small cylindrical mass on the dorsal surface of the lateral part of the trapezoid body of the pons, and it is situated immediately above the inferior olivary nucleus. It receives projections from the cochlear nucleus and thus is involved in the perception of sound." [GO\_REF

7261 Pathogen[ P14079] interacts with 1 human partners:{Q15078}

7262 [Cluster 1181]GO:0043249+P biological\_process [name] erythrocyte maturation [def] "A developmental process, independent of morphogenetic (shape) change, that is required for an erythrocyte to attain its fully functional state." [GOC

7263 Pathogen[ P0C214] interacts with 2 human partners:{P11413;Q7L5Y9}

7264 Pathogen[ P03346] interacts with 4 human partners:{Q9Y5W3;Q13351;P16452;P17542}

7265 Pathogen[ Q85601] interacts with 1 human partners:{Q7L5Y9}

7266 Pathogen[ P14079] interacts with 5 human partners:{P16452;Q7L5Y9;P02008;Q13351;Q9Y5W3}

7267 Pathogen[ P03410] interacts with 3 human partners:{P02008;P16452;Q7L5Y9}

7268 Pathogen[ P14075] interacts with 1 human partners:{Q7L5Y9}

7269 Pathogen[ P0C206] interacts with 3 human partners:{P02008;Q7L5Y9;P16452}

7270 Pathogen[ P03363] interacts with 1 human partners:{P16452}



7271 [Cluster 1182]GO:0006089+P biological\_process [name] lactate metabolic process  
[def] "The chemical reactions and pathways involving lactate, the anion of lactic acid."  
[ISBN

7272 Pathogen[ Q2Q067] interacts with 1 human partners:{P07195}  
7273 Pathogen[ P0C214] interacts with 2 human partners:{O60825;P07195}  
7274 Pathogen[ P03346] interacts with 1 human partners:{P07195}  
7275 Pathogen[ Q85601] interacts with 2 human partners:{O60825;P07195}  
7276 Pathogen[ P14079] interacts with 1 human partners:{P07195}  
7277 Pathogen[ P03383] interacts with 1 human partners:{P07195}  
7278 Pathogen[ P03410] interacts with 1 human partners:{P07195}  
7279 Pathogen[ P14075] interacts with 1 human partners:{P07195}  
7280 Pathogen[ P0C206] interacts with 2 human partners:{P07195;O60825}

7281 [Cluster 1183]GO:0030862+P biological\_process [name] positive regulation of polarized epithelial cell differentiation [def] "Any process that activates or increases the rate or extent of polarized epithelial cell differentiation." [GOC

7282 Pathogen[ P03346] interacts with 1 human partners:{Q8N157}  
7283 Pathogen[ P14079] interacts with 1 human partners:{Q8N157}  
7284 Pathogen[ P03410] interacts with 1 human partners:{Q8N157}  
7285 Pathogen[ P0C206] interacts with 1 human partners:{Q8N157}  
7286 Pathogen[ P03363] interacts with 1 human partners:{Q8N157}

7287 [Cluster 1184]GO:0070427+P biological\_process [name] nucleotide-binding oligomerization domain containing 1 signaling pathway [def] "Any series of molecular signals generated as a consequence of binding to nucleotide-binding oligomerization domain containing 1 (NOD1)." [GOC

7288 Pathogen[ Q2Q067] interacts with 1 human partners:{P25963}  
7289 Pathogen[ P0C214] interacts with 1 human partners:{P25963}  
7290 Pathogen[ P03346] interacts with 1 human partners:{P25963}  
7291 Pathogen[ Q85601] interacts with 1 human partners:{P25963}  
7292 Pathogen[ P03383] interacts with 1 human partners:{P25963}  
7293 Pathogen[ P03410] interacts with 1 human partners:{P25963}  
7294 Pathogen[ P14075] interacts with 1 human partners:{P25963}  
7295 Pathogen[ P0C206] interacts with 1 human partners:{P25963}  
7296 Pathogen[ P03363] interacts with 1 human partners:{P25963}

7297 [Cluster 1185]GO:0034344+P biological\_process [name] regulation of type III interferon production [def] "Any process that modulates the frequency, rate, or extent of type III interferon production. Type III interferons are members of the interferon-lambda gene family." [GOC

7298 Pathogen[ Q2Q067] interacts with 1 human partners:{Q9BYX4}  
7299 Pathogen[ P0C214] interacts with 1 human partners:{Q9BYX4}  
7300 Pathogen[ P03346] interacts with 1 human partners:{Q9BYX4}  
7301 Pathogen[ Q85601] interacts with 1 human partners:{Q9BYX4}  
7302 Pathogen[ P14079] interacts with 1 human partners:{Q9BYX4}  
7303 Pathogen[ P03410] interacts with 1 human partners:{Q9BYX4}  
7304 Pathogen[ P0C206] interacts with 1 human partners:{Q9BYX4}  
7305 Pathogen[ P03363] interacts with 1 human partners:{Q9BYX4}

7306 [Cluster 1186]GO:0060662+P biological\_process [name] salivary gland cavitation [def] "The process in which the solid core of salivary epithelium gives rise to the hollow tube of the gland." [GOC

7307 Pathogen[ Q2Q067] interacts with 1 human partners:{P21980}  
7308 Pathogen[ P0C214] interacts with 1 human partners:{P21980}  
7309 Pathogen[ P03346] interacts with 1 human partners:{P21980}  
7310 Pathogen[ Q85601] interacts with 1 human partners:{P21980}  
7311 Pathogen[ P14079] interacts with 1 human partners:{P21980}  
7312 Pathogen[ P03383] interacts with 1 human partners:{P21980}  
7313 Pathogen[ P03410] interacts with 1 human partners:{P21980}  
7314 Pathogen[ P14075] interacts with 1 human partners:{P21980}  
7315 Pathogen[ P0C206] interacts with 1 human partners:{P21980}

7316 [Cluster 1187]GO:0021904+P biological\_process [name] dorsal/ventral neural tube patterning [def] "The process in which the neural tube is regionalized in the dorsoventral axis." [GO\_REF

7317 Pathogen[ P03346] interacts with 3 human partners:{P50219;P23759;P56915}  
7318 Pathogen[ P14079] interacts with 1 human partners:{P54826}  
7319 Pathogen[ P03410] interacts with 1 human partners:{P54826}  
7320 Pathogen[ P14075] interacts with 1 human partners:{P54826}  
7321 Pathogen[ P0C206] interacts with 1 human partners:{P54826}  
7322 Pathogen[ P03363] interacts with 3 human partners:{P56915;P23759;P50219}

7323 [Cluster 1188]GO:0009108+P biological\_process [name] coenzyme biosynthetic process [def] "The chemical reactions and pathways resulting in the formation of coenzymes, any of various nonprotein organic cofactors that are required, in addition to an enzyme and a substrate, for an enzymatic reaction to proceed." [GOC

7324 Pathogen[ Q2Q067] interacts with 1 human partners:{Q9HAB8}  
7325 Pathogen[ P0C214] interacts with 4 human partners:{Q8TE04;Q9HAB8;Q13057;Q9BZ23}  
7326 Pathogen[ P03346] interacts with 1 human partners:{Q9HAB8}  
7327 Pathogen[ P14079] interacts with 5 human partners:{Q8TE04;Q9BZ23;Q13057;Q96CD2;Q9HAB8}

7328 Pathogen[ P03383] interacts with 2 human partners:{Q9BZ23;Q9HAB8}

7329 Pathogen[ P03410] interacts with 5 human partners:{Q8TE04;Q13057;Q96CD2;Q9BZ23;Q9HAB8}

7330 Pathogen[ P14075] interacts with 4 human partners:{Q9HAB8;Q13057;Q8TE04;Q9BZ23}

7331 Pathogen[ POC206] interacts with 4 human partners:{Q8TE04;Q13057;Q9BZ23;Q9HAB8}

7332 [Cluster 1189]GO:0010756+P biological\_process [name] positive regulation of plasminogen activation [def] "Any process that increases the rate, frequency or extent of plasminogen activation. Plasminogen activation is the process in which plasminogen is processed to plasmin." [GOC

7333 Pathogen[ P03410] interacts with 1 human partners:{Q9HBL7}

7334 [Cluster 1190]GO:0060420+P biological\_process [name] regulation of heart growth [def] "Any process that modulates the rate or extent of heart growth. Heart growth is the increase in size or mass of the heart." [GOC

7335 Pathogen[ POC214] interacts with 1 human partners:{P13533}

7336 Pathogen[ Q85601] interacts with 1 human partners:{P13533}

7337 Pathogen[ P03410] interacts with 1 human partners:{P13533}

7338 Pathogen[ POC206] interacts with 1 human partners:{P13533}

7339 [Cluster 1191]GO:0000719+P biological\_process [name] photoreactive repair [def] "The repair of UV-induced T-T, C-T and C-C dimers by directly reversing the damage to restore the original pyrimidines." [GOC

7340 Pathogen[ POC214] interacts with 1 human partners:{Q49AN0}

7341 Pathogen[ P03346] interacts with 1 human partners:{Q49AN0}

7342 Pathogen[ Q85601] interacts with 1 human partners:{Q49AN0}

7343 Pathogen[ P14079] interacts with 1 human partners:{Q49AN0}

7344 Pathogen[ P03410] interacts with 1 human partners:{Q49AN0}

7345 Pathogen[ POC206] interacts with 1 human partners:{Q49AN0}

7346 Pathogen[ P03363] interacts with 1 human partners:{Q49AN0}

7347 [Cluster 1192]GO:0061003+P biological\_process [name] positive regulation of dendritic spine morphogenesis [def] "Any process that modulates the rate, frequency, or extent of dendritic spine morphogenesis, the process in which the anatomical structures of a dendritic spine are generated and organized. A dendritic spine is a protrusion from a dendrite and a specialized subcellular compartment involved in synaptic transmission." [GOC

7348 Pathogen[ P14079] interacts with 1 human partners:{Q14444}

7349 [Cluster 1193]GO:0042089+P biological\_process [name] cytokine biosynthetic process [def] "The chemical reactions and pathways resulting in the formation of cytokines, any of a group of proteins that function to control the survival, growth and differentiation of tissues and cells, and which have autocrine and paracrine activity." [GOC

7350 Pathogen[ Q2Q067] interacts with 1 human partners:{Q15744}

7351 Pathogen[ P03346] interacts with 1 human partners:{Q15744}

7352 Pathogen[ Q85601] interacts with 1 human partners:{Q15744}

7353 Pathogen[ P14079] interacts with 1 human partners:{Q15744}

7354 Pathogen[ P03410] interacts with 1 human partners:{Q15744}

7355 Pathogen[ POC206] interacts with 1 human partners:{Q15744}

7356 Pathogen[ P03363] interacts with 1 human partners:{Q15744}

7357 [Cluster 1194]GO:0050773+P biological\_process [name] regulation of dendrite development [def] "Any process that modulates the frequency, rate or extent of dendrite development." [GOC

7358 Pathogen[ Q2Q067] interacts with 1 human partners:{Q12834}

7359 Pathogen[ POC214] interacts with 1 human partners:{Q12834}

7360 Pathogen[ P03346] interacts with 2 human partners:{Q9H165;Q12834}

7361 Pathogen[ Q85601] interacts with 1 human partners:{Q12834}

7362 Pathogen[ P03383] interacts with 1 human partners:{Q12834}

7363 Pathogen[ P03410] interacts with 1 human partners:{Q12834}

7364 Pathogen[ P14075] interacts with 1 human partners:{Q12834}

7365 Pathogen[ POC206] interacts with 2 human partners:{Q9H165;Q12834}

7366 Pathogen[ P03363] interacts with 1 human partners:{Q12834}

7367 [Cluster 1195]GO:0048752+P biological\_process [name] semicircular canal morphogenesis [def] "The process in which the anatomical structures of the semicircular canals are generated and organized." [GOC

7368 Pathogen[ Q2Q067] interacts with 1 human partners:{Q99502}

7369 Pathogen[ POC214] interacts with 1 human partners:{Q99502}

7370 Pathogen[ P03346] interacts with 2 human partners:{Q99502;Q9P2D1}

7371 Pathogen[ Q85601] interacts with 2 human partners:{Q9P2D1;Q99502}

7372 Pathogen[ P14079] interacts with 2 human partners:{Q99502;Q9P2D1}

7373 Pathogen[ P03410] interacts with 2 human partners:{Q99502;Q9P2D1}

7374 Pathogen[ P14075] interacts with 1 human partners:{Q99502}

7375 Pathogen[ POC206] interacts with 2 human partners:{Q9P2D1;Q99502}

7376 [Cluster 1196]GO:0045226+P biological\_process [name] extracellular polysaccharide biosynthetic process [def] "The chemical reactions and pathways resulting in the formation of polysaccharides used in extracellular structures." [GOC

7377 Pathogen[ POC214] interacts with 1 human partners:{Q9NZL9}

7378 Pathogen[ P03346] interacts with 1 human partners:{Q9NZL9}

7379 Pathogen[ P14079] interacts with 1 human partners:{Q9NZL9}

7380 Pathogen[ P03410] interacts with 1 human partners:{Q9NZL9}

7381 Pathogen[ POC206] interacts with 1 human partners:{Q9NZL9}

7382 [Cluster 1197]GO:0046984+P biological\_process [name] regulation of hemoglobin

biosynthetic process [def] "Any process that modulates the frequency, rate or extent of the chemical reactions and pathways resulting in the formation of hemoglobin, an oxygen carrying, conjugated protein containing four heme groups and globin." [GOC

7383 Pathogen[ P0C214] interacts with 1 human partners:{P22830}

7384 Pathogen[ P14079] interacts with 1 human partners:{P22830}

7385 Pathogen[ P03410] interacts with 1 human partners:{P22830}

7386 Pathogen[ P0C206] interacts with 1 human partners:{P22830}

7387 [Cluster 1198]GO:0015876+P biological\_process [name] acetyl-CoA transport [def] "The directed movement of acetyl-CoA into, out of or within a cell, or between cells, by means of some agent such as a transporter or pore. Acetyl-CoA is a derivative of coenzyme A in which the sulfhydryl group is acetylated\_ it is a metabolite derived from several pathways (e.g. glycolysis, fatty acid oxidation, amino-acid catabolism) and is further metabolized by the tricarboxylic acid cycle. It is a key intermediate in lipid and terpenoid biosynthesis." [GOC

7388 Pathogen[ P14079] interacts with 1 human partners:{000400}

7389 Pathogen[ P03410] interacts with 1 human partners:{000400}

7390 [Cluster 1199]GO:0071258+P biological\_process [name] cellular response to gravity [def] "Any process that results in a change in state or activity of a cell (in terms of movement, secretion, enzyme production, gene expression, etc.) as a result of a gravitational stimulus." [GOC

7391 Pathogen[ P0C214] interacts with 1 human partners:{P05121}

7392 Pathogen[ Q85601] interacts with 1 human partners:{P05121}

7393 Pathogen[ P03410] interacts with 1 human partners:{P05121}

7394 Pathogen[ P0C206] interacts with 1 human partners:{P05121}

7395 [Cluster 1200]GO:0021796+P biological\_process [name] cerebral cortex regionalization [def] "The regionalization process that results in the creation of areas within the cerebral cortex that will direct the behavior of cell migration and differentiation as the cortex develops." [GO\_REF

7396 Pathogen[ Q2Q067] interacts with 1 human partners:{Q04743}

7397 Pathogen[ P03346] interacts with 2 human partners:{Q04743;Q04741}

7398 Pathogen[ P14079] interacts with 1 human partners:{Q04743}

7399 Pathogen[ P03410] interacts with 1 human partners:{Q04743}

7400 Pathogen[ P0C206] interacts with 1 human partners:{Q04743}

7401 Pathogen[ P03363] interacts with 2 human partners:{Q04741;Q04743}

7402 [Cluster 1201]GO:0060088+P biological\_process [name] auditory receptor cell stereocilium organization [def] "A process that is carried out at the cellular level which results in the assembly, arrangement of constituent parts, or disassembly of a stereocilium. A stereocilium is an actin-based protrusion from the apical surface of auditory hair cells." [GOC

7403 Pathogen[ P14079] interacts with 1 human partners:{Q7RTU9}

7404 Pathogen[ P03410] interacts with 1 human partners:{Q7RTU9}

7405 [Cluster 1202]GO:0019805+P biological\_process [name] quinolinate biosynthetic process [def] "The chemical reactions and pathways resulting in the formation of quinolinate, the anion of quinolinic acid, also known as 2,3-pyridinedicarboxylic acid." [GOC

7406 Pathogen[ Q2Q067] interacts with 1 human partners:{Q16719}

7407 Pathogen[ P0C214] interacts with 1 human partners:{Q16719}

7408 Pathogen[ P03346] interacts with 1 human partners:{Q16719}

7409 Pathogen[ Q85601] interacts with 1 human partners:{Q16719}

7410 Pathogen[ P14079] interacts with 1 human partners:{Q16719}

7411 Pathogen[ P03383] interacts with 1 human partners:{Q16719}

7412 Pathogen[ P03410] interacts with 1 human partners:{Q16719}

7413 Pathogen[ P14075] interacts with 1 human partners:{Q16719}

7414 Pathogen[ P0C206] interacts with 1 human partners:{Q16719}

7415 [Cluster 1203]GO:0006958+P biological\_process [name] complement activation, classical pathway [def] "Any process involved in the activation of any of the steps of the classical pathway of the complement cascade which allows for the direct killing of microbes, the disposal of immune complexes, and the regulation of other immune processes." [GOC

7416 Pathogen[ P0C214] interacts with 1 human partners:{P10909}

7417 Pathogen[ P14079] interacts with 1 human partners:{P10909}

7418 Pathogen[ P03410] interacts with 1 human partners:{P10909}

7419 Pathogen[ P0C206] interacts with 1 human partners:{P10909}

7420 [Cluster 1204]GO:0035502+P biological\_process [name] metanephric ureteric bud development [def] "The development of the portion of the ureteric bud tube that contributes to the morphogenesis of the metanephros." [GOC

7421 Pathogen[ P0C214] interacts with 1 human partners:{P05937}

7422 Pathogen[ P03346] interacts with 1 human partners:{P05937}

7423 Pathogen[ P14079] interacts with 1 human partners:{P05937}

7424 Pathogen[ P03410] interacts with 1 human partners:{P05937}

7425 Pathogen[ P03363] interacts with 1 human partners:{P05937}

7426 [Cluster 1205]GO:0051531+P biological\_process [name] NFAT protein import into nucleus [def] "The directed movement of NFAT (nuclear factor of activated T cells) proteins, a family of transcription factors, from the cytoplasm into the nucleus. NFAT proteins are dephosphorylated in the cytoplasm by activated calcineurin, which leads to their translocation across the nuclear membrane." [PMID

7427 Pathogen[ Q2Q067] interacts with 1 human partners:{P27986}

7428 Pathogen[ P0C214] interacts with 1 human partners:{P27986}

7429 Pathogen[ P03346] interacts with 1 human partners:{P27986}

7430 Pathogen[ Q85601] interacts with 1 human partners:{P27986}

7431 Pathogen[ P03383] interacts with 1 human partners:{P27986}

7432 Pathogen[ P03410] interacts with 1 human partners:{P27986}

7433 Pathogen[ P14075] interacts with 1 human partners:{P27986}

7434 Pathogen[ P0C206] interacts with 1 human partners:{P27986}

7435 Pathogen[ P03363] interacts with 1 human partners:{P27986}

7436 [Cluster 1206]GO:0007614+P biological\_process [name] short-term memory [def] "The memory process that deals with the storage, retrieval and modification of information received a short time (up to about 30 minutes) ago. This type of memory is typically dependent on direct, transient effects of second messenger activation." [http

7437 Pathogen[ Q2Q067] interacts with 1 human partners:{Q9H2P0}

7438 Pathogen[ P0C214] interacts with 1 human partners:{Q9H2P0}

7439 Pathogen[ P03346] interacts with 1 human partners:{Q9H2P0}

7440 Pathogen[ Q85601] interacts with 1 human partners:{Q9H2P0}

7441 Pathogen[ P14079] interacts with 1 human partners:{Q9H2P0}

7442 Pathogen[ P0C206] interacts with 1 human partners:{Q9H2P0}

7443 Pathogen[ P03363] interacts with 1 human partners:{Q9H2P0}

7444 [Cluster 1207]GO:0033364+P biological\_process [name] mast cell secretory granule organization [def] "A process that is carried out at the cellular level which results in the assembly, arrangement of constituent parts, or disassembly of a secretory granule in a mast cell. A secretory granule is a small subcellular vesicle, surrounded by a membrane, that is formed from the Golgi apparatus and contains a highly concentrated protein destined for secretion." [GOC

7445 Pathogen[ P0C214] interacts with 2 human partners:{Q99698;P10124}

7446 Pathogen[ P03346] interacts with 1 human partners:{Q99698}

7447 Pathogen[ Q85601] interacts with 1 human partners:{Q99698}

7448 Pathogen[ P14079] interacts with 2 human partners:{P10124;Q99698}

7449 Pathogen[ P03383] interacts with 1 human partners:{P10124}

7450 Pathogen[ P03410] interacts with 2 human partners:{P10124;Q99698}

7451 Pathogen[ P14075] interacts with 1 human partners:{P10124}

7452 Pathogen[ P0C206] interacts with 2 human partners:{Q99698;P10124}

7453 Pathogen[ P03363] interacts with 1 human partners:{Q99698}

7454 [Cluster 1208]GO:0072233+P biological\_process [name] metanephric thick ascending limb development [def] "The process whose specific outcome is the progression of the metanephric thick ascending limb over time, from its formation to the mature structure. The metanephric thick ascending limb is the last part of the metanephric loop of Henle. Its thick, mitochondria-rich epithelium characterizes the outer medulla, and is responsible for very avid active salt transport. At the macula densa, the thick ascending limb connects to the distal convoluted tubule." [GOC

7455 Pathogen[ P03346] interacts with 1 human partners:{P20264}

7456 Pathogen[ P03363] interacts with 1 human partners:{P20264}

7457 [Cluster 1209]GO:0046835+P biological\_process [name] carbohydrate phosphorylation [def] "The process of introducing a phosphate group into a carbohydrate, any organic compound based on the general formula Cx(H2O)y." [ISBN

7458 Pathogen[ P0C214] interacts with 1 human partners:{P16118}

7459 Pathogen[ Q85601] interacts with 1 human partners:{P16118}

7460 Pathogen[ P03410] interacts with 1 human partners:{P16118}

7461 Pathogen[ P14075] interacts with 1 human partners:{P16118}

7462 Pathogen[ P0C206] interacts with 1 human partners:{P16118}

7463 [Cluster 1210]GO:0021819+P biological\_process [name] layer formation in cerebral cortex [def] "The detachment of cells from radial glial fibers at the appropriate time when they cease to migrate and form distinct layer in the cerebral cortex." [GO\_REF

7464 Pathogen[ P14079] interacts with 1 human partners:{Q15078}

7465 [Cluster 1211]GO:0003190+P biological\_process [name] atrioventricular valve formation [def] "The developmental process pertaining to the initial formation of the atrioventricular valve from unspecified parts. This process begins with the specific processes that contribute to the appearance of the discrete structure and ends when the structural rudiment is recognizable." [GOC

7466 Pathogen[ Q2Q067] interacts with 1 human partners:{Q9Y5J3}

7467 Pathogen[ P0C214] interacts with 1 human partners:{Q9Y5J3}

7468 Pathogen[ P03346] interacts with 1 human partners:{Q9Y5J3}

7469 Pathogen[ Q85601] interacts with 1 human partners:{Q9Y5J3}

7470 Pathogen[ P14079] interacts with 1 human partners:{Q9Y5J3}

7471 Pathogen[ P03410] interacts with 1 human partners:{Q9Y5J3}

7472 Pathogen[ P0C206] interacts with 1 human partners:{Q9Y5J3}

7473 Pathogen[ P03363] interacts with 1 human partners:{Q9Y5J3}

7474 [Cluster 1212]GO:0045954+P biological\_process [name] positive regulation of natural killer cell mediated cytotoxicity [def] "Any process that activates or increases the frequency, rate or extent of natural killer cell mediated cytotoxicity." [GOC

7475 Pathogen[ P14079] interacts with 1 human partners:{P29459}

7476 Pathogen[ P03410] interacts with 1 human partners:{P29459}

7477 [Cluster 1213]GO:0072172+P biological\_process [name] mesonephric tubule formation [def] "The developmental process pertaining to the initial formation of a mesonephric tubule from unspecified parts. A mesonephric tubule is an epithelial tube that is part

of the mesonephros." [GOC  
7478 Pathogen[ P03346] interacts with 1 human partners:{Q15475}  
7479 [Cluster 1214]GO:0032494+P biological\_process [name] response to peptidoglycan  
[def] "Any process that results in a change in state or activity of an organism (in  
terms of movement, secretion, enzyme production, gene expression, etc.) as a result of a  
peptidoglycan stimulus. Peptidoglycan is a bacterial cell wall macromolecule." [GOC  
7480 Pathogen[ P14079] interacts with 1 human partners:{Q99836}  
7481 [Cluster 1215]GO:0070346+P biological\_process [name] positive regulation of fat cell  
proliferation [def] "Any process that activates or increases the rate or extent of fat  
cell proliferation." [GOC  
7482 Pathogen[ Q2Q067] interacts with 1 human partners:{Q7Z2X4}  
7483 Pathogen[ P0C214] interacts with 1 human partners:{Q7Z2X4}  
7484 Pathogen[ P03346] interacts with 1 human partners:{Q7Z2X4}  
7485 Pathogen[ Q85601] interacts with 1 human partners:{Q7Z2X4}  
7486 Pathogen[ P14079] interacts with 1 human partners:{Q7Z2X4}  
7487 Pathogen[ P03410] interacts with 1 human partners:{Q7Z2X4}  
7488 Pathogen[ P0C206] interacts with 1 human partners:{Q7Z2X4}  
7489 [Cluster 1216]GO:0060032+P biological\_process [name] notochord regression [def] "The  
developmental process in which the structure of the notochord is destroyed in an embryo."  
[GOC  
7490 Pathogen[ Q2Q067] interacts with 1 human partners:{P08151}  
7491 Pathogen[ P0C214] interacts with 1 human partners:{P08151}  
7492 Pathogen[ P03346] interacts with 1 human partners:{P08151}  
7493 Pathogen[ Q85601] interacts with 1 human partners:{P08151}  
7494 Pathogen[ P14079] interacts with 1 human partners:{P08151}  
7495 Pathogen[ P0C206] interacts with 1 human partners:{P08151}  
7496 Pathogen[ P03363] interacts with 1 human partners:{P08151}  
7497 [Cluster 1217]GO:0070670+P biological\_process [name] response to interleukin-4  
[def] "Any process that results in a change in state or activity of a cell or an  
organism (in terms of movement, secretion, enzyme production, gene expression, etc.) as  
a result of an interleukin-4 stimulus." [GOC  
7498 Pathogen[ Q2Q067] interacts with 1 human partners:{Q99966}  
7499 Pathogen[ P0C214] interacts with 1 human partners:{Q99966}  
7500 Pathogen[ P03346] interacts with 1 human partners:{Q99966}  
7501 Pathogen[ Q85601] interacts with 1 human partners:{Q99966}  
7502 Pathogen[ P14079] interacts with 1 human partners:{Q99966}  
7503 Pathogen[ P03410] interacts with 1 human partners:{Q99966}  
7504 Pathogen[ P0C206] interacts with 1 human partners:{Q99966}  
7505 [Cluster 1218]GO:0034626+P biological\_process [name] fatty acid elongation,  
polyunsaturated fatty acid [def] "Elongation of a fatty acid chain into which two or  
more C-C double bonds have been introduced." [GOC  
7506 Pathogen[ Q2Q067] interacts with 2 human partners:{A1L3X0;Q9HB03}  
7507 Pathogen[ P0C214] interacts with 4 human partners:{Q9NXB9;Q9HB03;Q9NYP7;A1L3X0}  
7508 Pathogen[ P03346] interacts with 1 human partners:{Q9HB03}  
7509 Pathogen[ Q85601] interacts with 2 human partners:{A1L3X0;Q9HB03}  
7510 Pathogen[ P14079] interacts with 2 human partners:{A1L3X0;Q9HB03}  
7511 Pathogen[ P03383] interacts with 2 human partners:{A1L3X0;Q9HB03}  
7512 Pathogen[ P03410] interacts with 2 human partners:{A1L3X0;Q9HB03}  
7513 Pathogen[ P14075] interacts with 2 human partners:{Q9HB03;A1L3X0}  
7514 Pathogen[ P0C206] interacts with 2 human partners:{Q9HB03;A1L3X0}  
7515 [Cluster 1219]GO:0015844+P biological\_process [name] monoamine transport [def] "The  
directed movement of monoamines, organic compounds that contain one amino group that is  
connected to an aromatic ring by an ethylene group (-CH2-CH2-), into, out of or within a  
cell, or between cells, by means of some agent such as a transporter or pore." [CHEBI  
7516 Pathogen[ P03346] interacts with 1 human partners:{Q9NRD5}  
7517 Pathogen[ P03410] interacts with 1 human partners:{Q9NRD5}  
7518 Pathogen[ P0C206] interacts with 1 human partners:{Q9NRD5}  
7519 [Cluster 1220]GO:0090191+P biological\_process [name] negative regulation of branching  
involved in ureteric bud morphogenesis [def] "Any process that decreases the rate,  
frequency or extent of branching involved in ureteric bud morphogenesis, the process in  
which the branching structure of the ureteric bud is generated and organized. The  
ureteric bud is an epithelial tube that grows out from the metanephric duct. The bud  
elongates and branches to give rise to the ureter and kidney collecting tubules." [GOC  
7520 Pathogen[ P03346] interacts with 1 human partners:{Q15475}  
7521 [Cluster 1221]GO:0060541+P biological\_process [name] respiratory system development  
[def] "The progression of the respiratory system over time from its formation to its  
mature structure. The respiratory system carries out respiratory gaseous exchange." [GOC  
7522 Pathogen[ P03346] interacts with 2 human partners:{P50219;O43680}  
7523 Pathogen[ P14079] interacts with 1 human partners:{O43597}  
7524 Pathogen[ P03410] interacts with 1 human partners:{O43597}  
7525 Pathogen[ P0C206] interacts with 1 human partners:{O43597}  
7526 Pathogen[ P03363] interacts with 1 human partners:{P50219}  
7527 [Cluster 1222]GO:0043987+P biological\_process [name] histone H3-S10 phosphorylation  
[def] "The modification of histone H3 by the addition of an phosphate group to a serine  
residue at position 10 of the histone." [GOC  
7528 Pathogen[ Q2Q067] interacts with 1 human partners:{O75582}

7529 Pathogen[ P0C214] interacts with 1 human partners:{075582}

7530 Pathogen[ P03346] interacts with 1 human partners:{075582}

7531 Pathogen[ Q85601] interacts with 1 human partners:{075582}

7532 Pathogen[ P14079] interacts with 1 human partners:{075582}

7533 Pathogen[ P03383] interacts with 1 human partners:{075582}

7534 Pathogen[ P03410] interacts with 1 human partners:{075582}

7535 Pathogen[ P14075] interacts with 1 human partners:{075582}

7536 Pathogen[ P0C206] interacts with 1 human partners:{075582}

7537 [Cluster 1223]GO:0002639+P biological\_process [name] positive regulation of immunoglobulin production [def] "Any process that activates or increases the frequency, rate, or extent of immunoglobulin production." [GOC

7538 Pathogen[ P03346] interacts with 1 human partners:{075995}

7539 [Cluster 1224]GO:0072205+P biological\_process [name] metanephric collecting duct development [def] "The process whose specific outcome is the progression of a collecting duct in the metanephros over time, from its formation to the mature structure. The collecting duct responds to vasopressin and aldosterone to regulate water, electrolyte and acid-base balance. The collecting duct is the final common path through which urine flows before entering the ureter and then emptying into the bladder." [GOC

7540 Pathogen[ P0C214] interacts with 1 human partners:{P05937}

7541 Pathogen[ P03346] interacts with 1 human partners:{P05937}

7542 Pathogen[ P14079] interacts with 1 human partners:{P05937}

7543 Pathogen[ P03410] interacts with 1 human partners:{P05937}

7544 Pathogen[ P03363] interacts with 1 human partners:{P05937}

7545 [Cluster 1225]GO:0006574+P biological\_process [name] valine catabolic process [def] "The chemical reactions and pathways resulting in the breakdown of valine, 2-amino-3-methylbutanoic acid." [GOC

7546 Pathogen[ P0C214] interacts with 1 human partners:{Q6NVY1}

7547 Pathogen[ P03410] interacts with 1 human partners:{Q6NVY1}

7548 [Cluster 1226]GO:0046638+P biological\_process [name] positive regulation of alpha-beta T cell differentiation [def] "Any process that activates or increases the frequency, rate or extent of alpha-beta T cell differentiation." [GOC

7549 Pathogen[ Q2Q067] interacts with 1 human partners:{Q8N5F7}

7550 Pathogen[ P0C214] interacts with 1 human partners:{Q8N5F7}

7551 Pathogen[ P03346] interacts with 1 human partners:{Q8N5F7}

7552 Pathogen[ Q85601] interacts with 1 human partners:{Q8N5F7}

7553 Pathogen[ P14079] interacts with 1 human partners:{Q8N5F7}

7554 Pathogen[ P03383] interacts with 1 human partners:{Q8N5F7}

7555 Pathogen[ P14075] interacts with 1 human partners:{Q8N5F7}

7556 Pathogen[ P0C206] interacts with 1 human partners:{Q8N5F7}

7557 Pathogen[ P03363] interacts with 1 human partners:{Q8N5F7}

7558 [Cluster 1227]GO:0051081+P biological\_process [name] nuclear envelope disassembly [def] "The controlled breakdown of the nuclear envelope in the context of a normal process." [GOC

7559 Pathogen[ Q85601] interacts with 1 human partners:{Q9GZM8}

7560 Pathogen[ P14079] interacts with 1 human partners:{Q9GZM8}

7561 Pathogen[ P03410] interacts with 1 human partners:{Q9GZM8}

7562 Pathogen[ P0C206] interacts with 1 human partners:{Q9GZM8}

7563 [Cluster 1228]GO:0032642+P biological\_process [name] regulation of chemokine production [def] "Any process that modulates the frequency, rate, or extent of chemokine production." [GOC

7564 Pathogen[ Q2Q067] interacts with 1 human partners:{Q8IX07}

7565 Pathogen[ P0C214] interacts with 1 human partners:{Q8IX07}

7566 Pathogen[ P03346] interacts with 1 human partners:{Q8IX07}

7567 Pathogen[ Q85601] interacts with 1 human partners:{Q8IX07}

7568 Pathogen[ P14079] interacts with 1 human partners:{Q8IX07}

7569 Pathogen[ P03410] interacts with 1 human partners:{Q8IX07}

7570 Pathogen[ P0C206] interacts with 1 human partners:{Q8IX07}

7571 [Cluster 1229]GO:0061188+P biological\_process [name] negative regulation of chromatin silencing at rDNA [def] "Any process that decreases the rate, frequency, or extent of the repression of transcription of ribosomal DNA by altering the structure of chromatin." [GOC

7572 Pathogen[ Q2Q067] interacts with 2 human partners:{Q9UPP1;075151}

7573 Pathogen[ P0C214] interacts with 2 human partners:{075151;Q9UPP1}

7574 Pathogen[ P03346] interacts with 2 human partners:{075151;Q9UPP1}

7575 Pathogen[ Q85601] interacts with 2 human partners:{075151;Q9UPP1}

7576 Pathogen[ P14079] interacts with 2 human partners:{075151;Q9UPP1}

7577 Pathogen[ P03383] interacts with 2 human partners:{075151;Q9UPP1}

7578 Pathogen[ P03410] interacts with 2 human partners:{Q9UPP1;075151}

7579 Pathogen[ P14075] interacts with 2 human partners:{Q9UPP1;075151}

7580 Pathogen[ P0C206] interacts with 2 human partners:{Q9UPP1;075151}

7581 [Cluster 1230]GO:0002190+P biological\_process [name] cap-independent translational initiation [def] "The process where translation initiation recruits the 40S ribosomal subunits in a Cap and 5' end independent fashion before an AUG codon is encountered in an appropriate sequence context to initiate mRNA translation." [PMID

7582 Pathogen[ P03346] interacts with 1 human partners:{Q9BWF3}

7583 Pathogen[ P03363] interacts with 1 human partners:{Q9BWF3}

7584 [Cluster 1231]GO:0010627+P biological\_process [name] regulation of intracellular protein kinase cascade [def] "Any process that modulates the rate, frequency or extent of a series of reactions, mediated by protein kinases, which occurs as a result of a single trigger reaction or compound." [GOC  
7585 Pathogen[ Q2Q067] interacts with 1 human partners:{Q6NXT1}  
7586 Pathogen[ P0C214] interacts with 1 human partners:{Q6NXT1}  
7587 Pathogen[ P03346] interacts with 1 human partners:{Q6NXT1}  
7588 Pathogen[ Q85601] interacts with 1 human partners:{Q6NXT1}  
7589 Pathogen[ P14079] interacts with 1 human partners:{Q6NXT1}  
7590 Pathogen[ P03410] interacts with 1 human partners:{Q6NXT1}  
7591 Pathogen[ P0C206] interacts with 1 human partners:{Q6NXT1}  
7592 Pathogen[ P03363] interacts with 1 human partners:{Q6NXT1}  
7593 [Cluster 1232]GO:0071449+P biological\_process [name] cellular response to lipid hydroperoxide [def] "Any process that results in a change in state or activity of a cell (in terms of movement, secretion, enzyme production, gene expression, etc.) as a result of a lipid hydroperoxide stimulus. Lipid hydroperoxide is the highly reactive primary oxygenated products of polyunsaturated fatty acids." [GOC  
7594 Pathogen[ P14079] interacts with 1 human partners:{P10620}  
7595 [Cluster 1233]GO:0048512+P biological\_process [name] circadian behavior [def] "The specific actions or reactions of an organism that recur with a regularity of approximately 24 hours." [GOC  
7596 Pathogen[ P03346] interacts with 1 human partners:{O95343}  
7597 Pathogen[ P03363] interacts with 1 human partners:{O95343}  
7598 [Cluster 1234]GO:0046294+P biological\_process [name] formaldehyde catabolic process [def] "The chemical reactions and pathways resulting in the breakdown of formaldehyde (methanal, H<sub>2</sub>C=O), the simplest aldehyde." [GOC  
7599 Pathogen[ P03346] interacts with 1 human partners:{P10768}  
7600 Pathogen[ Q85601] interacts with 1 human partners:{P10768}  
7601 Pathogen[ P03410] interacts with 1 human partners:{P10768}  
7602 Pathogen[ P0C206] interacts with 1 human partners:{P10768}  
7603 Pathogen[ P03363] interacts with 1 human partners:{P10768}  
7604 [Cluster 1235]GO:0045780+P biological\_process [name] positive regulation of bone resorption [def] "Any process that activates or increases the frequency, rate or extent of bone resorption." [GOC  
7605 Pathogen[ P14079] interacts with 1 human partners:{Q9H295}  
7606 [Cluster 1236]GO:0046166+P biological\_process [name] glyceraldehyde-3-phosphate biosynthetic process [def] "The chemical reactions and pathways resulting in the formation of glyceraldehyde-3-phosphate, an important intermediate in glycolysis." [GOC  
7607 Pathogen[ P0C214] interacts with 1 human partners:{P29401}  
7608 Pathogen[ P14079] interacts with 1 human partners:{P29401}  
7609 Pathogen[ P0C206] interacts with 1 human partners:{P29401}  
7610 [Cluster 1237]GO:0032859+P biological\_process [name] activation of Ral GTPase activity [def] "Any process that initiates the activity of an inactive GTPase of the Ral family through the replacement of GDP by GTP." [GOC  
7611 Pathogen[ P0C214] interacts with 1 human partners:{Q6GYQ0}  
7612 Pathogen[ P03346] interacts with 1 human partners:{Q6GYQ0}  
7613 Pathogen[ P14079] interacts with 1 human partners:{Q86X10}  
7614 [Cluster 1238]GO:0051924+P biological\_process [name] regulation of calcium ion transport [def] "Any process that modulates the frequency, rate or extent of the directed movement of calcium ions into, out of or within a cell, or between cells, by means of some agent such as a transporter or pore." [GOC  
7615 Pathogen[ Q2Q067] interacts with 1 human partners:{P26678}  
7616 Pathogen[ P0C214] interacts with 1 human partners:{P26678}  
7617 Pathogen[ P03346] interacts with 1 human partners:{P26678}  
7618 Pathogen[ P14079] interacts with 2 human partners:{O00631;P26678}  
7619 Pathogen[ P03383] interacts with 1 human partners:{P26678}  
7620 Pathogen[ P03410] interacts with 2 human partners:{P26678;O00631}  
7621 Pathogen[ P14075] interacts with 1 human partners:{P26678}  
7622 Pathogen[ P0C206] interacts with 1 human partners:{P26678}  
7623 [Cluster 1239]GO:0019626+P biological\_process [name] short-chain fatty acid catabolic process [def] "The chemical reactions and pathways resulting in the breakdown of fatty acids with a chain length of less than 8 carbons." [ISBN  
7624 Pathogen[ Q2Q067] interacts with 1 human partners:{P22033}  
7625 Pathogen[ P0C214] interacts with 2 human partners:{P22033;Q96PE7}  
7626 Pathogen[ P03346] interacts with 1 human partners:{Q96PE7}  
7627 Pathogen[ Q85601] interacts with 1 human partners:{P22033}  
7628 Pathogen[ P14079] interacts with 2 human partners:{P22033;Q96PE7}  
7629 Pathogen[ P03383] interacts with 1 human partners:{P22033}  
7630 Pathogen[ P03410] interacts with 2 human partners:{Q96PE7;P22033}  
7631 Pathogen[ P14075] interacts with 1 human partners:{P22033}  
7632 Pathogen[ P0C206] interacts with 2 human partners:{Q96PE7;P22033}  
7633 [Cluster 1240]GO:0035608+P biological\_process [name] protein deglutamylation [def] "The removal of a glutamate residue from a protein. Glutamate residues in proteins can be gene-encoded, or added as side chains during the protein modification process of polyglutamylation." [GOC  
7634 Pathogen[ P14079] interacts with 1 human partners:{Q8NDL9}

7635 Pathogen[ P0C206] interacts with 1 human partners:{Q8NDL9}

7636 [Cluster 1241]GO:0045428+P biological\_process [name] regulation of nitric oxide biosynthetic process [def] "Any process that modulates the frequency, rate or extent of the chemical reactions and pathways resulting in the formation of nitric oxide." [GOC

7637 Pathogen[ P03346] interacts with 1 human partners:{075052}

7638 Pathogen[ P03410] interacts with 1 human partners:{075052}

7639 [Cluster 1242]GO:0009103+P biological\_process [name] lipopolysaccharide biosynthetic process [def] "The chemical reactions and pathways resulting in the formation of lipopolysaccharides, any of a group of related, structurally complex components of the outer membrane of Gram-negative bacteria." [GOC

7640 Pathogen[ P0C214] interacts with 1 human partners:{Q8NFW8}

7641 Pathogen[ P03346] interacts with 1 human partners:{Q8NFW8}

7642 Pathogen[ P14079] interacts with 2 human partners:{Q8NFW8;Q9BT22}

7643 Pathogen[ P03410] interacts with 2 human partners:{Q9BT22;Q8NFW8}

7644 Pathogen[ P0C206] interacts with 1 human partners:{Q8NFW8}

7645 Pathogen[ P03363] interacts with 1 human partners:{Q8NFW8}

7646 [Cluster 1243]GO:0043487+P biological\_process [name] regulation of RNA stability [def] "Any process that modulates the propensity of RNA molecules to degradation. Includes processes that both stabilize and destabilize RNAs." [GOC

7647 Pathogen[ Q2Q067] interacts with 1 human partners:{P59047}

7648 Pathogen[ P0C214] interacts with 1 human partners:{P59047}

7649 Pathogen[ P03346] interacts with 1 human partners:{P59047}

7650 Pathogen[ Q85601] interacts with 1 human partners:{P59047}

7651 Pathogen[ P14079] interacts with 1 human partners:{P59047}

7652 Pathogen[ P03410] interacts with 1 human partners:{P59047}

7653 Pathogen[ P0C206] interacts with 1 human partners:{P59047}

7654 Pathogen[ P03363] interacts with 1 human partners:{P59047}

7655 [Cluster 1244]GO:0007320+P biological\_process [name] insemination [def] "The introduction of semen or sperm into the genital tract of a female." [ISBN

7656 Pathogen[ P14079] interacts with 1 human partners:{P04279}

7657 Pathogen[ P03410] interacts with 1 human partners:{P04279}

7658 [Cluster 1245]GO:0021553+P biological\_process [name] olfactory nerve development [def] "The process whose specific outcome is the progression of the olfactory nerve over time, from its formation to the mature structure. The olfactory nerve is a collection of sensory nerve rootlets that extend down from the olfactory bulb to the olfactory mucosa of the upper parts of the nasal cavity. This nerve conducts odor information to the brainstem." [GO\_REF

7659 Pathogen[ Q2Q067] interacts with 1 human partners:{Q9NSC2}

7660 Pathogen[ P0C214] interacts with 1 human partners:{Q9NSC2}

7661 Pathogen[ P03346] interacts with 1 human partners:{Q9NSC2}

7662 Pathogen[ Q85601] interacts with 1 human partners:{Q9NSC2}

7663 Pathogen[ P14079] interacts with 1 human partners:{Q9NSC2}

7664 Pathogen[ P03383] interacts with 1 human partners:{Q9NSC2}

7665 Pathogen[ P03410] interacts with 1 human partners:{Q9NSC2}

7666 Pathogen[ P14075] interacts with 1 human partners:{Q9NSC2}

7667 Pathogen[ P0C206] interacts with 1 human partners:{Q9NSC2}

7668 [Cluster 1246]GO:0072218+P biological\_process [name] metanephric ascending thin limb development [def] "The process whose specific outcome is the progression of a metanephric ascending thin limb over time, from its formation to the mature structure. The metanephric ascending thin limb is a segment of a nephron tubule in the metanephros lying in the inner medulla that is permeable to ions but not to water and has a simple epithelium\_active transepithelial solute transport is absent." [GOC

7669 Pathogen[ P03346] interacts with 1 human partners:{P20264}

7670 Pathogen[ P03363] interacts with 1 human partners:{P20264}

7671 [Cluster 1247]GO:0060997+P biological\_process [name] dendritic spine morphogenesis [def] "The process in which the anatomical structures of a dendritic spine are generated and organized. A dendritic spine is a protrusion from a dendrite and a specialized subcellular compartment involved in synaptic transmission." [GOC

7672 Pathogen[ Q2Q067] interacts with 1 human partners:{P78352}

7673 Pathogen[ P0C214] interacts with 1 human partners:{P78352}

7674 Pathogen[ P03346] interacts with 1 human partners:{P78352}

7675 Pathogen[ Q85601] interacts with 1 human partners:{P78352}

7676 Pathogen[ P03383] interacts with 1 human partners:{P78352}

7677 Pathogen[ P03410] interacts with 1 human partners:{P78352}

7678 Pathogen[ P14075] interacts with 1 human partners:{P78352}

7679 Pathogen[ P0C206] interacts with 1 human partners:{P78352}

7680 Pathogen[ P03363] interacts with 1 human partners:{P78352}

7681 [Cluster 1248]GO:0043506+P biological\_process [name] regulation of JUN kinase activity [def] "Any process that modulates the frequency, rate or extent of JUN kinase activity." [GOC

7682 Pathogen[ P0C214] interacts with 1 human partners:{P35520}

7683 [Cluster 1249]GO:0030948+P biological\_process [name] negative regulation of vascular endothelial growth factor receptor signaling pathway [def] "Any process that stops, prevents, or reduces the frequency, rate or extent of vascular endothelial growth factor receptor signaling pathway activity." [GOC

7684 Pathogen[ Q2Q067] interacts with 1 human partners:{Q9UI56}



7685 Pathogen[ P0C214] interacts with 1 human partners:{Q9UI56}

7686 Pathogen[ P03346] interacts with 1 human partners:{Q9UI56}

7687 Pathogen[ P14079] interacts with 1 human partners:{Q9UI56}

7688 Pathogen[ P03383] interacts with 1 human partners:{Q9UI56}

7689 Pathogen[ P03410] interacts with 1 human partners:{Q9UI56}

7690 Pathogen[ P14075] interacts with 1 human partners:{Q9UI56}

7691 Pathogen[ P0C206] interacts with 1 human partners:{Q9UI56}

7692 Pathogen[ P03363] interacts with 1 human partners:{Q9UI56}

7693 [Cluster 1250]GO:0006738+P biological\_process [name] nicotinamide riboside catabolic process [def] "The chemical reactions and pathways resulting in the breakdown of nicotinamide riboside, the product of the formation of a glycosidic bond between ribose and nicotinamide." [ISBN

7694 Pathogen[ P0C214] interacts with 1 human partners:{Q13126}

7695 [Cluster 1251]GO:0044340+P biological\_process [name] canonical Wnt receptor signaling pathway involved in regulation of cell proliferation [def] "The series of molecular signals initiated by binding of a Wnt protein to a frizzled family receptor on the surface of the target cell, followed by propagation of the signal via beta-catenin, and ending with a change in transcription of target genes that contributes to modulating the rate or frequency of cell proliferation." [GOC

7696 Pathogen[ Q2Q067] interacts with 1 human partners:{O14641}

7697 Pathogen[ P0C214] interacts with 1 human partners:{O14641}

7698 Pathogen[ P03346] interacts with 1 human partners:{O14641}

7699 Pathogen[ Q85601] interacts with 1 human partners:{O14641}

7700 Pathogen[ P14079] interacts with 1 human partners:{O14641}

7701 Pathogen[ P03383] interacts with 1 human partners:{O14641}

7702 Pathogen[ P03410] interacts with 1 human partners:{O14641}

7703 Pathogen[ P14075] interacts with 1 human partners:{O14641}

7704 Pathogen[ P03363] interacts with 1 human partners:{O14641}

7705 [Cluster 1252]GO:0042339+P biological\_process [name] keratan sulfate metabolic process [def] "The chemical reactions and pathways involving keratan sulfate, a glycosaminoglycan with repeat units consisting of beta-1,4-linked D-galactopyranosyl-beta-(1,4)-N-acetyl-D-glucosamine 6-sulfate and with variable amounts of fucose, sialic acid and mannose units\_ keratan sulfate chains are covalently linked by a glycosidic attachment through the trisaccharide galactosyl-galactosyl-xylose to peptidyl-threonine or serine residues." [GOC

7706 Pathogen[ P0C214] interacts with 1 human partners:{P16278}

7707 Pathogen[ P03346] interacts with 1 human partners:{P16278}

7708 Pathogen[ P14079] interacts with 2 human partners:{P16278;O43505}

7709 Pathogen[ P03410] interacts with 2 human partners:{P16278;O43505}

7710 Pathogen[ P14075] interacts with 1 human partners:{O43505}

7711 Pathogen[ P0C206] interacts with 2 human partners:{P16278;O43505}

7712 [Cluster 1253]GO:0060947+P biological\_process [name] cardiac vascular smooth muscle cell differentiation [def] "The process in which a relatively unspecialized cell acquires specialized features of a cardiac vascular smooth muscle cell. A cardiac vascular smooth muscle cell covers the heart vasculature and lacks transverse striations in its constituent fibers." [GOC

7713 Pathogen[ Q2Q067] interacts with 1 human partners:{P11831}

7714 Pathogen[ P0C214] interacts with 1 human partners:{P11831}

7715 Pathogen[ P03346] interacts with 1 human partners:{P11831}

7716 Pathogen[ Q85601] interacts with 1 human partners:{P11831}

7717 Pathogen[ P03383] interacts with 1 human partners:{P11831}

7718 Pathogen[ P03410] interacts with 1 human partners:{P11831}

7719 Pathogen[ P14075] interacts with 1 human partners:{P11831}

7720 Pathogen[ P0C206] interacts with 1 human partners:{P11831}

7721 Pathogen[ P03363] interacts with 1 human partners:{P11831}

7722 [Cluster 1254]GO:0015908+P biological\_process [name] fatty acid transport [def] "The directed movement of fatty acids into, out of or within a cell, or between cells, by means of some agent such as a transporter or pore. Fatty acids are aliphatic monocarboxylic acids liberated from naturally occurring fats and oils by hydrolysis." [GOC

7723 Pathogen[ Q2Q067] interacts with 1 human partners:{P20823}

7724 Pathogen[ P03346] interacts with 1 human partners:{P20823}

7725 Pathogen[ Q85601] interacts with 1 human partners:{P20823}

7726 Pathogen[ P0C206] interacts with 1 human partners:{P20823}

7727 [Cluster 1255]GO:0042761+P biological\_process [name] very long-chain fatty acid biosynthetic process [def] "The chemical reactions and pathways resulting in the formation of fatty acids with a chain length of C18 or greater." [GOC

7728 Pathogen[ Q2Q067] interacts with 4 human partners:{Q9BW60;Q9GZR5;A1L3X0;Q9HB03}

7729 Pathogen[ P0C214] interacts with 6 human partners:{Q9NXB9;Q9GZR5;Q9HB03;Q9NYP7;A1L3X0;Q9BW60}

7730 Pathogen[ P03346] interacts with 2 human partners:{Q9BW60;Q9HB03}

7731 Pathogen[ Q85601] interacts with 4 human partners:{A1L3X0;Q9BW60;Q9HB03;Q9GZR5}

7732 Pathogen[ P14079] interacts with 4 human partners:{A1L3X0;Q9HB03;Q9GZR5;Q9BW60}

7733 Pathogen[ P03383] interacts with 4 human partners:{Q9BW60;Q9GZR5;A1L3X0;Q9HB03}

7734 Pathogen[ P03410] interacts with 4 human partners:{A1L3X0;Q9GZR5;Q9BW60;Q9HB03}

7735 Pathogen[ P14075] interacts with 4 human partners:{Q9BW60;Q9HB03;A1L3X0;Q9GZR5}

7736 Pathogen[ POC206] interacts with 4 human partners:{Q9HB03;Q9GZR5;A1L3X0;Q9BW60}

7737 [Cluster 1256]GO:0070345+P biological\_process [name] negative regulation of fat cell proliferation [def] "Any process that stops or decreases the rate or extent of fat cell proliferation." [GOC

7738 Pathogen[ Q2Q067] interacts with 1 human partners:{P23769}

7739 Pathogen[ POC214] interacts with 1 human partners:{P23769}

7740 Pathogen[ P03346] interacts with 1 human partners:{P23769}

7741 Pathogen[ Q85601] interacts with 1 human partners:{P23769}

7742 Pathogen[ P14079] interacts with 1 human partners:{P23769}

7743 Pathogen[ P03383] interacts with 1 human partners:{P23769}

7744 Pathogen[ P03410] interacts with 1 human partners:{P23769}

7745 Pathogen[ P14075] interacts with 1 human partners:{P23769}

7746 Pathogen[ POC206] interacts with 1 human partners:{P23769}

7747 [Cluster 1257]GO:0009298+P biological\_process [name] GDP-mannose biosynthetic process [def] "The chemical reactions and pathways resulting in the formation of GDP-mannose, a substance composed of mannose in glycosidic linkage with guanosine diphosphate." [GOC

7748 Pathogen[ Q2Q067] interacts with 1 human partners:{P34949}

7749 Pathogen[ POC214] interacts with 2 human partners:{P34949;O15305}

7750 Pathogen[ P03346] interacts with 1 human partners:{P34949}

7751 Pathogen[ Q85601] interacts with 1 human partners:{P34949}

7752 Pathogen[ P14079] interacts with 2 human partners:{O15305;P34949}

7753 Pathogen[ P03383] interacts with 1 human partners:{P34949}

7754 Pathogen[ P03410] interacts with 2 human partners:{P34949;O15305}

7755 Pathogen[ P14075] interacts with 1 human partners:{P34949}

7756 Pathogen[ POC206] interacts with 1 human partners:{P34949}

7757 [Cluster 1258]GO:0021521+P biological\_process [name] ventral spinal cord interneuron specification [def] "The process in which a cell becomes capable of differentiating autonomously into a ventral spinal cord interneuron in an environment that is neutral with respect to the developmental pathway." [GO\_REF

7758 Pathogen[ P03346] interacts with 1 human partners:{Q9UBR4}

7759 Pathogen[ POC206] interacts with 1 human partners:{Q9UBR4}

7760 [Cluster 1259]GO:2000627+P biological\_process [name] positive regulation of miRNA catabolic process [def] "Any process that activates or increases the frequency, rate or extent of miRNA catabolic process." [GOC

7761 Pathogen[ Q2Q067] interacts with 1 human partners:{Q8TCS8}

7762 Pathogen[ POC214] interacts with 1 human partners:{Q8TCS8}

7763 Pathogen[ P03346] interacts with 1 human partners:{Q8TCS8}

7764 Pathogen[ Q85601] interacts with 1 human partners:{Q8TCS8}

7765 Pathogen[ P14079] interacts with 1 human partners:{Q8TCS8}

7766 Pathogen[ P03383] interacts with 1 human partners:{Q8TCS8}

7767 Pathogen[ P03410] interacts with 1 human partners:{Q8TCS8}

7768 Pathogen[ P14075] interacts with 1 human partners:{Q8TCS8}

7769 Pathogen[ POC206] interacts with 1 human partners:{Q8TCS8}

7770 [Cluster 1260]GO:0051970+P biological\_process [name] negative regulation of transmission of nerve impulse [def] "Any process that stops, prevents, or reduces the frequency, rate or extent of transmission of a nerve impulse, the sequential electrochemical polarization and depolarization that travels across the membrane of a neuron in response to stimulation." [GOC

7771 Pathogen[ P14079] interacts with 1 human partners:{O43612}

7772 Pathogen[ P03410] interacts with 1 human partners:{O43612}

7773 [Cluster 1261]GO:0061153+P biological\_process [name] trachea gland development [def] "The progression of a trachea gland over time, from its formation to the mature structure. Trachea glands are found under the mucus of the trachea and secrete mucus, and agents that help protect the lung from injury and infection." [GOC

7774 Pathogen[ P14079] interacts with 1 human partners:{Q8WWZ3}

7775 [Cluster 1262]GO:0060558+P biological\_process [name] regulation of calcidiol 1-monooxygenase activity [def] "Any process that modulates the rate, frequency or extent of calcidiol 1-monooxygenase activity. Calcidiol 1-monooxygenase activity is catalysis of the reaction

7776 Pathogen[ Q2Q067] interacts with 1 human partners:{P11473}

7777 Pathogen[ P03346] interacts with 1 human partners:{P11473}

7778 Pathogen[ Q85601] interacts with 1 human partners:{P11473}

7779 Pathogen[ P14079] interacts with 1 human partners:{P11473}

7780 Pathogen[ P03383] interacts with 1 human partners:{P11473}

7781 Pathogen[ P03410] interacts with 1 human partners:{P11473}

7782 Pathogen[ P14075] interacts with 1 human partners:{P11473}

7783 Pathogen[ POC206] interacts with 1 human partners:{P11473}

7784 Pathogen[ P03363] interacts with 1 human partners:{P11473}

7785 [Cluster 1263]GO:0021683+P biological\_process [name] cerebellar granular layer morphogenesis [def] "The process in which the anatomical structure of the cerebellar granular layer is generated and organized. The granular layer is the innermost layer of the cerebellar cortex. This layer contains densely packed small neurons, mostly granule cells. Some Golgi cells are found at the outer border. Granule neurons send parallel fibers to the upper molecular layer, where they synapse with Purkinje cell dendrites. Mossy fibers from the pontine nuclei in the white matter synapse with granule cell axons, Golgi cell axons and unipolar brush interneuron axons at cerebellar glomeruli in

the granule cell layer." [GO\_REF

7786 Pathogen[ P0C214] interacts with 1 human partners:{P07093}

7787 Pathogen[ Q85601] interacts with 1 human partners:{P07093}

7788 [Cluster 1264]GO:0021523+P biological\_process [name] somatic motor neuron differentiation [def] "The process in which neuroepithelial cells in the neural tube acquire specialized structural and/or functional features of somatic motor neurons. Somatic motor neurons innervate skeletal muscle targets and are responsible for transmission of motor impulses from the brain to the periphery. Differentiation includes the processes involved in commitment of a cell to a specific fate." [GO\_REF

7789 Pathogen[ Q2Q067] interacts with 1 human partners:{O14813}

7790 Pathogen[ P0C214] interacts with 1 human partners:{O14813}

7791 Pathogen[ P03346] interacts with 1 human partners:{O14813}

7792 Pathogen[ Q85601] interacts with 1 human partners:{O14813}

7793 Pathogen[ P14079] interacts with 1 human partners:{O14813}

7794 Pathogen[ P03410] interacts with 2 human partners:{O14813;Q9UBY8}

7795 Pathogen[ P0C206] interacts with 1 human partners:{O14813}

7796 Pathogen[ P03363] interacts with 1 human partners:{O14813}

7797 [Cluster 1265]GO:2000679+P biological\_process [name] positive regulation of transcription regulatory region DNA binding [def] "Any process that activates or increases the frequency, rate or extent of transcription regulatory region DNA binding." [GOC

7798 Pathogen[ Q2Q067] interacts with 1 human partners:{Q13562}

7799 Pathogen[ P03346] interacts with 1 human partners:{Q13562}

7800 Pathogen[ Q85601] interacts with 1 human partners:{Q13562}

7801 Pathogen[ P0C206] interacts with 1 human partners:{Q13562}

7802 [Cluster 1266]GO:0043372+P biological\_process [name] positive regulation of CD4-positive, alpha-beta T cell differentiation [def] "Any process that activates or increases the frequency, rate or extent of CD4-positive, alpha beta T cell differentiation." [GOC

7803 Pathogen[ P03346] interacts with 1 human partners:{O75995}

7804 [Cluster 1267]GO:0002347+P biological\_process [name] response to tumor cell [def] "Any process that results in a change in state or activity of a cell or an organism (in terms of movement, secretion, enzyme production, gene expression, etc.) as a result of a stimulus from a tumor cell." [GOC

7805 Pathogen[ P03346] interacts with 1 human partners:{P50135}

7806 Pathogen[ P14079] interacts with 1 human partners:{P50135}

7807 Pathogen[ P03410] interacts with 1 human partners:{P50135}

7808 Pathogen[ P0C206] interacts with 1 human partners:{P50135}

7809 Pathogen[ P03363] interacts with 1 human partners:{P50135}

7810 [Cluster 1268]GO:0001952+P biological\_process [name] regulation of cell-matrix adhesion [def] "Any process that modulates the frequency, rate or extent of attachment of a cell to the extracellular matrix." [GOC

7811 Pathogen[ Q2Q067] interacts with 2 human partners:{P13349;O95948}

7812 Pathogen[ P0C214] interacts with 2 human partners:{P13349;O95948}

7813 Pathogen[ P03346] interacts with 3 human partners:{P13349;Q9UBC0;O95948}

7814 Pathogen[ Q85601] interacts with 2 human partners:{P13349;O95948}

7815 Pathogen[ P14079] interacts with 2 human partners:{P13349;O95948}

7816 Pathogen[ P03410] interacts with 2 human partners:{O95948;P13349}

7817 Pathogen[ P0C206] interacts with 3 human partners:{Q9UBC0;P13349;O95948}

7818 Pathogen[ P03363] interacts with 3 human partners:{Q9UBC0;O95948;P13349}

7819 [Cluster 1269]GO:0032764+P biological\_process [name] negative regulation of mast cell cytokine production [def] "Any process that stops, prevents, or reduces the frequency, rate, or extent of mast cell cytokine production." [GOC

7820 Pathogen[ Q2Q067] interacts with 1 human partners:{P41182}

7821 Pathogen[ P0C214] interacts with 1 human partners:{P41182}

7822 Pathogen[ P03346] interacts with 1 human partners:{P41182}

7823 Pathogen[ Q85601] interacts with 1 human partners:{P41182}

7824 Pathogen[ P14079] interacts with 1 human partners:{P41182}

7825 Pathogen[ P03410] interacts with 1 human partners:{P41182}

7826 Pathogen[ P0C206] interacts with 1 human partners:{P41182}

7827 [Cluster 1270]GO:0050650+P biological\_process [name] chondroitin sulfate proteoglycan biosynthetic process [def] "The chemical reactions and pathways resulting in the formation of chondroitin sulfate proteoglycan, any glycoprotein whose glycosaminoglycan units are chondroitin sulfate. Chondroitin sulfates are a group of 10-60 kDa glycosaminoglycans, widely distributed in cartilage and other mammalian connective tissues\_ the repeat units consist of beta-(1,4)-linked D-glucuronyl beta-(1,3)-N-acetyl-D-galactosamine sulfate." [GOC

7828 Pathogen[ P03410] interacts with 1 human partners:{Q9NRR1}

7829 [Cluster 1271]GO:0072164+P biological\_process [name] mesonephric tubule development [def] "The progression of a mesonephric tubule over time, from its initial formation to the mature structure. A mesonephric tubule is an epithelial tube that is part of the mesonephros." [GOC

7830 Pathogen[ Q2Q067] interacts with 1 human partners:{P35680}

7831 Pathogen[ P03346] interacts with 2 human partners:{Q06710;P35680}

7832 Pathogen[ Q85601] interacts with 1 human partners:{P35680}

7833 Pathogen[ P14079] interacts with 1 human partners:{P35680}

7834 Pathogen[ P03410] interacts with 1 human partners:{P35680}

7835 Pathogen[ P0C206] interacts with 1 human partners:{P35680}

7836 [Cluster 1272]GO:2000270+P biological\_process [name] negative regulation of fibroblast apoptosis [def] "Any process that stops, prevents or reduces the frequency, rate or extent of fibroblast apoptosis." [GOC

7837 Pathogen[ Q2Q067] interacts with 1 human partners:{Q8IXT1}

7838 Pathogen[ P0C214] interacts with 1 human partners:{Q8IXT1}

7839 Pathogen[ P03346] interacts with 1 human partners:{Q8IXT1}

7840 Pathogen[ P14079] interacts with 1 human partners:{Q8IXT1}

7841 Pathogen[ P03383] interacts with 1 human partners:{Q8IXT1}

7842 Pathogen[ P03410] interacts with 1 human partners:{Q8IXT1}

7843 Pathogen[ P14075] interacts with 1 human partners:{Q8IXT1}

7844 Pathogen[ P0C206] interacts with 1 human partners:{Q8IXT1}

7845 Pathogen[ P03363] interacts with 1 human partners:{Q8IXT1}

7846 [Cluster 1273]GO:0070318+P biological\_process [name] positive regulation of G0 to G1 transition [def] "A cell cycle process that activates or increases the rate or extent of the transition from the G0 quiescent state to the G1 phase." [GOC

7847 Pathogen[ Q2Q067] interacts with 1 human partners:{Q9BSD3}

7848 Pathogen[ P0C214] interacts with 1 human partners:{Q9BSD3}

7849 Pathogen[ P03346] interacts with 1 human partners:{Q9BSD3}

7850 Pathogen[ P14079] interacts with 1 human partners:{Q9BSD3}

7851 Pathogen[ P03383] interacts with 1 human partners:{Q9BSD3}

7852 Pathogen[ P03410] interacts with 1 human partners:{Q9BSD3}

7853 Pathogen[ P14075] interacts with 1 human partners:{Q9BSD3}

7854 Pathogen[ P0C206] interacts with 1 human partners:{Q9BSD3}

7855 Pathogen[ P03363] interacts with 1 human partners:{Q9BSD3}

7856 [Cluster 1274]GO:0044265+P biological\_process [name] cellular macromolecule catabolic process [def] "The chemical reactions and pathways resulting in the breakdown of a macromolecule, any large molecule including proteins, nucleic acids and carbohydrates, as carried out by individual cells." [CHEBI

7857 Pathogen[ P14079] interacts with 1 human partners:{Q9NWW5}

7858 Pathogen[ P03410] interacts with 2 human partners:{Q9NWW5;Q9UBY8}

7859 [Cluster 1275]GO:0045820+P biological\_process [name] negative regulation of glycolysis [def] "Any process that stops, prevents, or reduces the frequency, rate or extent of glycolysis." [GOC

7860 Pathogen[ Q2Q067] interacts with 2 human partners:{P56524;P09467}

7861 Pathogen[ P0C214] interacts with 2 human partners:{P56524;P09467}

7862 Pathogen[ P03346] interacts with 2 human partners:{P56524;P09467}

7863 Pathogen[ Q85601] interacts with 2 human partners:{P09467;P56524}

7864 Pathogen[ P14079] interacts with 4 human partners:{Q9NX09;P46695;P09467;P56524}

7865 Pathogen[ P03383] interacts with 2 human partners:{P09467;P56524}

7866 Pathogen[ P03410] interacts with 4 human partners:{P09467;P56524;P46695;Q9NX09}

7867 Pathogen[ P14075] interacts with 2 human partners:{P56524;P09467}

7868 Pathogen[ P0C206] interacts with 2 human partners:{P09467;P56524}

7869 [Cluster 1276]GO:0033326+P biological\_process [name] cerebrospinal fluid secretion [def] "The regulated release of cerebrospinal fluid (CSF) from the choroid plexus of the lateral, third and fourth ventricles. The cerebrospinal fluid is a clear liquid that located within the ventricles, spinal canal, and subarachnoid spaces." [GOC

7870 Pathogen[ Q2Q067] interacts with 1 human partners:{O15350}

7871 Pathogen[ P0C214] interacts with 1 human partners:{O15350}

7872 Pathogen[ P03346] interacts with 1 human partners:{O15350}

7873 Pathogen[ Q85601] interacts with 1 human partners:{O15350}

7874 Pathogen[ P14079] interacts with 1 human partners:{O15350}

7875 Pathogen[ P03383] interacts with 1 human partners:{O15350}

7876 Pathogen[ P03410] interacts with 1 human partners:{O15350}

7877 Pathogen[ P14075] interacts with 1 human partners:{O15350}

7878 Pathogen[ P0C206] interacts with 1 human partners:{O15350}

7879 [Cluster 1277]GO:0006101+P biological\_process [name] citrate metabolic process [def] "The chemical reactions and pathways involving citrate, 2-hydroxy-1,2,3-propanetricarboxylate. Citrate is widely distributed in nature and is an important intermediate in the TCA cycle and the glyoxylate cycle." [ISBN

7880 Pathogen[ Q2Q067] interacts with 1 human partners:{P21399}

7881 Pathogen[ P0C214] interacts with 4 human partners:{O75390;P53396;Q99798;P21399}

7882 Pathogen[ P03346] interacts with 2 human partners:{O75390;P21399}

7883 Pathogen[ Q85601] interacts with 1 human partners:{P21399}

7884 Pathogen[ P14079] interacts with 1 human partners:{P21399}

7885 Pathogen[ P03410] interacts with 2 human partners:{P21399;O75390}

7886 Pathogen[ P0C206] interacts with 3 human partners:{O75390;Q99798;P21399}

7887 [Cluster 1278]GO:0009595+P biological\_process [name] detection of biotic stimulus [def] "The series of events in which a biotic stimulus, one caused or produced by a living organism, is received and converted into a molecular signal." [GOC

7888 Pathogen[ P14079] interacts with 1 human partners:{Q9Y239}

7889 Pathogen[ P03410] interacts with 1 human partners:{Q9Y239}

7890 [Cluster 1279]GO:0007631+P biological\_process [name] feeding behavior [def] "Behavior associated with the intake of food." [GOC

7891 Pathogen[ P0C214] interacts with 1 human partners:{Q6Y7W6}

7892 Pathogen[ Q85601] interacts with 1 human partners:{Q6Y7W6}

7893 Pathogen[ P14079] interacts with 4 human partners:{Q6Y7W6;O43612;Q8N729;P81277}

7894 Pathogen[ P03410] interacts with 4 human partners:{Q8N729;O43612;Q6Y7W6;P81277}

7895 Pathogen[ P0C206] interacts with 2 human partners:{Q8N729;Q6Y7W6}

7896 Pathogen[ P03363] interacts with 1 human partners:{Q8N729}

7897 [Cluster 1280]GO:0060296+P biological\_process [name] regulation of cilium beat frequency involved in ciliary motility [def] "Any process that modulates the frequency of cilium beating involved in ciliary motility." [GOC

7898 Pathogen[ P14079] interacts with 1 human partners:{Q6IQ19}

7899 Pathogen[ P03410] interacts with 1 human partners:{Q6IQ19}

7900 Pathogen[ P14075] interacts with 1 human partners:{Q6IQ19}

7901 Pathogen[ P0C206] interacts with 1 human partners:{Q6IQ19}

7902 Pathogen[ P03363] interacts with 1 human partners:{Q6IQ19}

7903 [Cluster 1281]GO:0014054+P biological\_process [name] positive regulation of gamma-aminobutyric acid secretion [def] "Any process that activates or increases the frequency, rate or extent of the regulated release of gamma-aminobutyric acid." [GOC

7904 Pathogen[ P14079] interacts with 1 human partners:{P20396}

7905 Pathogen[ P03410] interacts with 1 human partners:{P20396}

7906 Pathogen[ P0C206] interacts with 1 human partners:{P20396}

7907 [Cluster 1282]GO:0050921+P biological\_process [name] positive regulation of chemotaxis [def] "Any process that activates or increases the frequency, rate or extent of the directed movement of a motile cell or organism in response to a specific chemical concentration gradient." [GOC

7908 Pathogen[ Q2Q067] interacts with 1 human partners:{P49593}

7909 Pathogen[ P0C214] interacts with 1 human partners:{P49593}

7910 Pathogen[ P03346] interacts with 1 human partners:{P49593}

7911 Pathogen[ Q85601] interacts with 1 human partners:{P49593}

7912 Pathogen[ P14079] interacts with 1 human partners:{P49593}

7913 Pathogen[ P03410] interacts with 1 human partners:{P49593}

7914 Pathogen[ P0C206] interacts with 1 human partners:{P49593}

7915 [Cluster 1283]GO:0006875+P biological\_process [name] cellular metal ion homeostasis [def] "Any process involved in the maintenance of an internal steady state of metal ions at the level of a cell." [GOC

7916 Pathogen[ Q85601] interacts with 1 human partners:{Q9Y4I5}

7917 Pathogen[ P14079] interacts with 2 human partners:{P47944;Q9Y4I5}

7918 Pathogen[ P03410] interacts with 2 human partners:{P47944;Q9Y4I5}

7919 Pathogen[ P14075] interacts with 1 human partners:{P47944}

7920 Pathogen[ P0C206] interacts with 2 human partners:{Q9Y4I5;P47944}

7921 [Cluster 1284]GO:0071901+P biological\_process [name] negative regulation of protein serine/threonine kinase activity [def] "Any process that decreases the rate, frequency, or extent of protein serine/threonine kinase activity." [GOC

7922 Pathogen[ Q2Q067] interacts with 1 human partners:{Q7Z699}

7923 Pathogen[ P0C214] interacts with 1 human partners:{Q7Z699}

7924 Pathogen[ P03346] interacts with 1 human partners:{Q7Z699}

7925 Pathogen[ Q85601] interacts with 1 human partners:{Q7Z699}

7926 Pathogen[ P14079] interacts with 1 human partners:{Q7Z699}

7927 Pathogen[ P03410] interacts with 1 human partners:{Q7Z699}

7928 Pathogen[ P0C206] interacts with 1 human partners:{Q7Z699}

7929 Pathogen[ P03363] interacts with 1 human partners:{Q7Z699}

7930 [Cluster 1285]GO:0050849+P biological\_process [name] negative regulation of calcium-mediated signaling [def] "Any process that stops, prevents, or reduces the frequency, rate or extent of calcium-mediated signaling." [GOC

7931 Pathogen[ P03346] interacts with 1 human partners:{Q9H6Q3}

7932 Pathogen[ Q85601] interacts with 1 human partners:{Q9H6Q3}

7933 Pathogen[ P14079] interacts with 1 human partners:{Q9H6Q3}

7934 Pathogen[ P03410] interacts with 1 human partners:{Q9H6Q3}

7935 Pathogen[ P0C206] interacts with 1 human partners:{Q9H6Q3}

7936 Pathogen[ P03363] interacts with 1 human partners:{Q9H6Q3}

7937 [Cluster 1286]GO:0031058+P biological\_process [name] positive regulation of histone modification [def] "Any process that activates or increases the frequency, rate or extent of the covalent alteration of a histone." [GOC

7938 Pathogen[ Q2Q067] interacts with 1 human partners:{P61088}

7939 Pathogen[ P0C214] interacts with 1 human partners:{P61088}

7940 Pathogen[ P03346] interacts with 1 human partners:{P61088}

7941 Pathogen[ Q85601] interacts with 1 human partners:{P61088}

7942 Pathogen[ P03383] interacts with 1 human partners:{P61088}

7943 Pathogen[ P03410] interacts with 1 human partners:{P61088}

7944 Pathogen[ P14075] interacts with 1 human partners:{P61088}

7945 Pathogen[ P0C206] interacts with 1 human partners:{P61088}

7946 Pathogen[ P03363] interacts with 1 human partners:{P61088}

7947 [Cluster 1287]GO:0035026+P biological\_process [name] leading edge cell differentiation [def] "The process in which relatively unspecialized cells acquire specialized structural and/or functional features of leading edge cells, cells at the front of a migrating epithelial sheet." [GOC

7948 Pathogen[ P0C214] interacts with 1 human partners:{P05412}

7949 Pathogen[ P03346] interacts with 1 human partners:{P05412}

7950 Pathogen[ Q85601] interacts with 1 human partners:{P05412}

7951 Pathogen[ P14079] interacts with 1 human partners:{P05412}

7952 Pathogen[ P03383] interacts with 1 human partners:{P05412}

7953 Pathogen[ P03410] interacts with 1 human partners:{P05412}

7954 Pathogen[ P14075] interacts with 1 human partners:{P05412}

7955 Pathogen[ P0C206] interacts with 1 human partners:{P05412}

7956 Pathogen[ P03363] interacts with 1 human partners:{P05412}

7957 [Cluster 1288]GO:0019557+P biological\_process [name] histidine catabolic process to glutamate and formate [def] "The chemical reactions and pathways resulting in the breakdown of histidine into other compounds, including glutamate and formate." [GOC

7958 Pathogen[ Q2Q067] interacts with 1 human partners:{Q96NU7}

7959 Pathogen[ P0C214] interacts with 1 human partners:{Q96NU7}

7960 Pathogen[ P03346] interacts with 1 human partners:{Q96NU7}

7961 Pathogen[ P14079] interacts with 4 human partners:{P42357;Q96NU7;Q96N76;O95954}

7962 Pathogen[ P03410] interacts with 3 human partners:{O95954;Q96NU7;Q96N76}

7963 Pathogen[ P14075] interacts with 1 human partners:{Q96NU7}

7964 Pathogen[ P0C206] interacts with 2 human partners:{O95954;Q96NU7}

7965 [Cluster 1289]GO:0071336+P biological\_process [name] regulation of hair follicle cell proliferation [def] "Any process that modulates the frequency, rate or extent of hair follicle cell proliferation." [GOC

7966 Pathogen[ Q2Q067] interacts with 1 human partners:{Q01196}

7967 Pathogen[ P03346] interacts with 1 human partners:{Q01196}

7968 [Cluster 1290]GO:0002820+P biological\_process [name] negative regulation of adaptive immune response [def] "Any process that stops, prevents, or reduces the frequency, rate, or extent of an adaptive immune response." [GOC

7969 Pathogen[ Q2Q067] interacts with 1 human partners:{P14373}

7970 Pathogen[ P0C214] interacts with 1 human partners:{P14373}

7971 Pathogen[ P03346] interacts with 2 human partners:{P14373;Q9NSI8}

7972 Pathogen[ Q85601] interacts with 1 human partners:{P14373}

7973 Pathogen[ P14079] interacts with 1 human partners:{P14373}

7974 Pathogen[ P0C206] interacts with 1 human partners:{P14373}

7975 Pathogen[ P03363] interacts with 2 human partners:{Q9NSI8;P14373}

7976 [Cluster 1291]GO:0001921+P biological\_process [name] positive regulation of receptor recycling [def] "Any process that activates or increases the frequency, rate or extent of receptor recycling." [GOC

7977 Pathogen[ Q2Q067] interacts with 1 human partners:{Q14160}

7978 Pathogen[ P0C214] interacts with 1 human partners:{Q14160}

7979 Pathogen[ P03346] interacts with 1 human partners:{Q14160}

7980 Pathogen[ Q85601] interacts with 1 human partners:{Q14160}

7981 Pathogen[ P03383] interacts with 1 human partners:{Q14160}

7982 Pathogen[ P03410] interacts with 2 human partners:{O60896;Q14160}

7983 Pathogen[ P14075] interacts with 1 human partners:{Q14160}

7984 Pathogen[ P0C206] interacts with 1 human partners:{Q14160}

7985 Pathogen[ P03363] interacts with 1 human partners:{Q14160}

7986 [Cluster 1292]GO:0060478+P biological\_process [name] acrosomal vesicle exocytosis [def] "The release of intracellular molecules contained within the acrosomal granule by fusion of the vesicle with the plasma membrane of the oocyte, requiring calcium ions." [GOC

7987 Pathogen[ P14079] interacts with 1 human partners:{Q9NQ60}

7988 Pathogen[ P03410] interacts with 1 human partners:{Q9NQ60}

7989 [Cluster 1293]GO:0006097+P biological\_process [name] glyoxylate cycle [def] "A modification of the TCA cycle occurring in some plants and microorganisms, in which isocitrate is cleaved to glyoxylate and succinate. Glyoxylate can then react with acetyl-CoA to form malate." [ISBN

7990 Pathogen[ P0C214] interacts with 2 human partners:{O75874;P48735}

7991 [Cluster 1294]GO:0035247+P biological\_process [name] peptidyl-arginine omega-N-methylation [def] "The addition of a methyl group onto a terminal nitrogen (omega nitrogen) atom of an arginine residue in a protein." [PMID

7992 Pathogen[ Q2Q067] interacts with 1 human partners:{Q9NVM4}

7993 Pathogen[ P0C214] interacts with 1 human partners:{Q9NVM4}

7994 Pathogen[ P03346] interacts with 1 human partners:{Q9NVM4}

7995 Pathogen[ Q85601] interacts with 1 human partners:{Q9NVM4}

7996 Pathogen[ P14079] interacts with 1 human partners:{Q9NVM4}

7997 Pathogen[ P03410] interacts with 1 human partners:{Q9NVM4}

7998 Pathogen[ P0C206] interacts with 1 human partners:{Q9NVM4}

7999 Pathogen[ P03363] interacts with 1 human partners:{Q9NVM4}

8000 [Cluster 1295]GO:0072393+P biological\_process [name] microtubule anchoring at microtubule organizing center [def] "Any process in which a microtubule is maintained in a specific location in a cell by attachment to a microtubule organizing center." [GOC

8001 Pathogen[ Q2Q067] interacts with 1 human partners:{Q8TD16}

8002 Pathogen[ P0C214] interacts with 2 human partners:{Q8TD16;Q96G01}

8003 Pathogen[ P03346] interacts with 2 human partners:{Q96G01;Q8TD16}

8004 Pathogen[ Q85601] interacts with 2 human partners:{Q96G01;Q8TD16}

8005 Pathogen[ P14079] interacts with 2 human partners:{Q96G01;Q8TD16}

8006 Pathogen[ P03410] interacts with 2 human partners:{Q8TD16;Q96G01}

8007 Pathogen[ P0C206] interacts with 2 human partners:{Q8TD16;Q96G01}

8008 Pathogen[ P03363] interacts with 1 human partners:{Q8TD16}

8009 [Cluster 1296]GO:0071731+P biological\_process [name] response to nitric oxide [def] "Any process that results in a change in state or activity of a cell or an organism (in terms of movement, secretion, enzyme production, gene expression, etc.) as a result of a nitric oxide stimulus." [GOC]

8010 Pathogen[ Q2Q067] interacts with 1 human partners:{Q9GZT9}

8011 Pathogen[ P0C214] interacts with 1 human partners:{Q9GZT9}

8012 Pathogen[ P03346] interacts with 1 human partners:{Q9GZT9}

8013 Pathogen[ Q85601] interacts with 1 human partners:{Q9GZT9}

8014 Pathogen[ P14079] interacts with 1 human partners:{Q9GZT9}

8015 Pathogen[ P03410] interacts with 1 human partners:{Q9GZT9}

8016 Pathogen[ P14075] interacts with 1 human partners:{Q9GZT9}

8017 Pathogen[ P0C206] interacts with 1 human partners:{Q9GZT9}

8018 [Cluster 1297]GO:0071504+P biological\_process [name] cellular response to heparin [def] "Any process that results in a change in state or activity of a cell (in terms of movement, secretion, enzyme production, gene expression, etc.) as a result of a heparin stimulus." [GOC]

8019 Pathogen[ Q2Q067] interacts with 1 human partners:{P18146}

8020 Pathogen[ P0C214] interacts with 1 human partners:{P18146}

8021 Pathogen[ P03346] interacts with 1 human partners:{P18146}

8022 Pathogen[ Q85601] interacts with 1 human partners:{P18146}

8023 Pathogen[ P03383] interacts with 1 human partners:{P18146}

8024 Pathogen[ P03410] interacts with 1 human partners:{P18146}

8025 Pathogen[ P14075] interacts with 1 human partners:{P18146}

8026 Pathogen[ P0C206] interacts with 1 human partners:{P18146}

8027 Pathogen[ P03363] interacts with 1 human partners:{P18146}

8028 [Cluster 1298]GO:0048858+P biological\_process [name] cell projection morphogenesis [def] "The process in which the anatomical structures of a cell projection are generated and organized." [GO\_REF]

8029 Pathogen[ P14079] interacts with 1 human partners:{P48681}

8030 [Cluster 1299]GO:0048485+P biological\_process [name] sympathetic nervous system development [def] "The process whose specific outcome is the progression of the sympathetic nervous system over time, from its formation to the mature structure. The sympathetic nervous system is one of the two divisions of the vertebrate autonomic nervous system (the other being the parasympathetic nervous system). The sympathetic preganglionic neurons have their cell bodies in the thoracic and lumbar regions of the spinal cord and connect to the paravertebral chain of sympathetic ganglia. Innervate heart and blood vessels, sweat glands, viscera and the adrenal medulla. Most sympathetic neurons, but not all, use noradrenaline as a post-ganglionic neurotransmitter." [FMA]

8031 Pathogen[ Q2Q067] interacts with 2 human partners:{O14786;O14813}

8032 Pathogen[ P0C214] interacts with 2 human partners:{O14813;O14786}

8033 Pathogen[ P03346] interacts with 5 human partners:{Q06945;O14813;Q92481;O14786;Q9UJU5}

8034 Pathogen[ Q85601] interacts with 2 human partners:{O14813;O14786}

8035 Pathogen[ P14079] interacts with 1 human partners:{O14813}

8036 Pathogen[ P03410] interacts with 2 human partners:{O14813;O14786}

8037 Pathogen[ P0C206] interacts with 2 human partners:{O14786;O14813}

8038 Pathogen[ P03363] interacts with 3 human partners:{O14786;Q9UJU5;O14813}

8039 [Cluster 1300]GO:1900103+P

8040 Pathogen[ Q2Q067] interacts with 1 human partners:{P17861}

8041 Pathogen[ P0C214] interacts with 1 human partners:{P17861}

8042 Pathogen[ P03346] interacts with 1 human partners:{P17861}

8043 Pathogen[ Q85601] interacts with 1 human partners:{P17861}

8044 Pathogen[ P03383] interacts with 1 human partners:{P17861}

8045 Pathogen[ P03410] interacts with 1 human partners:{P17861}

8046 Pathogen[ P14075] interacts with 1 human partners:{P17861}

8047 Pathogen[ P0C206] interacts with 1 human partners:{P17861}

8048 Pathogen[ P03363] interacts with 1 human partners:{P17861}

8049 [Cluster 1301]GO:0070244+P biological\_process [name] negative regulation of thymocyte apoptosis [def] "Any process that stops, prevents, or reduces the frequency, rate or extent of thymocyte death by apoptosis." [GOC]

8050 Pathogen[ P03346] interacts with 1 human partners:{Q6ISU1}

8051 Pathogen[ P14079] interacts with 1 human partners:{Q6ISU1}

8052 Pathogen[ P03410] interacts with 1 human partners:{Q6ISU1}

8053 Pathogen[ P0C206] interacts with 1 human partners:{Q6ISU1}

8054 Pathogen[ P03363] interacts with 1 human partners:{Q6ISU1}

8055 [Cluster 1302]GO:0006853+P biological\_process [name] carnitine shuttle [def] "The transfer of acyl groups to and from acyl-CoA molecules to form O-acylcarnitine, which can exchange across the mitochondrial inner membrane with unacylated carnitine." [ISBN]

8056 Pathogen[ P0C214] interacts with 1 human partners:{P23786}

8057 Pathogen[ P03346] interacts with 1 human partners:{P23786}

8058 Pathogen[ P03410] interacts with 1 human partners:{P23786}

8059 Pathogen[ P0C206] interacts with 1 human partners:{P23786}

8060 [Cluster 1303]GO:0043303+P biological\_process [name] mast cell degranulation [def] "The regulated exocytosis of secretory granules containing preformed mediators such as histamine, serotonin, and neutral proteases by a mast cell." [ISBN]

8061 Pathogen[ P14079] interacts with 3 human partners:{Q6PUV4;O43561;Q9GZY6}

8062 Pathogen[ P03410] interacts with 3 human partners:{O43561;Q9GZY6;Q6PUV4}

8063 Pathogen[ P0C206] interacts with 1 human partners:{Q6PUV4}

8064 [Cluster 1304]GO:0048745+P biological\_process [name] smooth muscle tissue development [def] "The process whose specific outcome is the progression of smooth muscle over time, from its formation to the mature structure." [GOC

8065 Pathogen[ Q2Q067] interacts with 2 human partners:{Q63HK5;Q12959}

8066 Pathogen[ P0C214] interacts with 2 human partners:{Q63HK5;Q12959}

8067 Pathogen[ P03346] interacts with 2 human partners:{Q63HK5;Q12959}

8068 Pathogen[ Q85601] interacts with 2 human partners:{Q12959;Q63HK5}

8069 Pathogen[ P14079] interacts with 1 human partners:{Q63HK5}

8070 Pathogen[ P03410] interacts with 2 human partners:{Q12959;Q63HK5}

8071 Pathogen[ P0C206] interacts with 2 human partners:{Q63HK5;Q12959}

8072 Pathogen[ P03363] interacts with 2 human partners:{Q12959;Q63HK5}

8073 [Cluster 1305]GO:0046651+P biological\_process [name] lymphocyte proliferation [def] "The expansion of a lymphocyte population by cell division." [GOC

8074 Pathogen[ P03346] interacts with 1 human partners:{Q9NRZ9}

8075 Pathogen[ P0C206] interacts with 1 human partners:{Q9NRZ9}

8076 [Cluster 1306]GO:0000019+P biological\_process [name] regulation of mitotic recombination [def] "Any process that modulates the frequency, rate or extent of DNA recombination during mitosis." [GOC

8077 Pathogen[ Q2Q067] interacts with 1 human partners:{P49959}

8078 Pathogen[ P0C214] interacts with 1 human partners:{P49959}

8079 Pathogen[ P03346] interacts with 1 human partners:{P49959}

8080 Pathogen[ Q85601] interacts with 1 human partners:{P49959}

8081 Pathogen[ P03410] interacts with 1 human partners:{P49959}

8082 Pathogen[ P0C206] interacts with 1 human partners:{P49959}

8083 [Cluster 1307]GO:0034394+P biological\_process [name] protein localization at cell surface [def] "A process in which a protein is transported to, or maintained in, a location within the external part of the cell wall and/or plasma membrane." [GOC

8084 Pathogen[ P0C214] interacts with 2 human partners:{Q9HCE7;Q14696}

8085 Pathogen[ P14079] interacts with 3 human partners:{Q96G30;Q14696;Q8TCY5}

8086 Pathogen[ P03383] interacts with 1 human partners:{Q14696}

8087 Pathogen[ P03410] interacts with 2 human partners:{Q96G30;Q14696}

8088 Pathogen[ P14075] interacts with 1 human partners:{Q14696}

8089 Pathogen[ P0C206] interacts with 1 human partners:{Q14696}

8090 [Cluster 1308]GO:0002040+P biological\_process [name] sprouting angiogenesis [def] "The extension of new blood vessels from existing capillaries into avascular tissues resulting from the proliferation of blood vessel endothelial cells." [PMID

8091 Pathogen[ Q2Q067] interacts with 1 human partners:{Q9NVD7}

8092 Pathogen[ P0C214] interacts with 1 human partners:{Q9NVD7}

8093 Pathogen[ P03346] interacts with 1 human partners:{Q9NVD7}

8094 Pathogen[ Q85601] interacts with 1 human partners:{Q9NVD7}

8095 Pathogen[ P14079] interacts with 2 human partners:{O60895;Q9NVD7}

8096 Pathogen[ P03410] interacts with 2 human partners:{O60895;Q9NVD7}

8097 Pathogen[ P0C206] interacts with 1 human partners:{Q9NVD7}

8098 Pathogen[ P03363] interacts with 1 human partners:{Q9NVD7}

8099 [Cluster 1309]GO:0032006+P biological\_process [name] regulation of TOR signaling cascade [def] "Any process that modulates the frequency, rate or extent of signaling via the TOR signaling pathway." [GOC

8100 Pathogen[ P14079] interacts with 1 human partners:{Q9UHA4}

8101 Pathogen[ P03410] interacts with 1 human partners:{Q9UHA4}

8102 Pathogen[ P0C206] interacts with 1 human partners:{Q9UHA4}

8103 [Cluster 1310]GO:0019227+P biological\_process [name] neuronal action potential propagation [def] "A neurological process that causes the sequential depolarization of a neuron's cell membrane along an axon." [GOC

8104 Pathogen[ P14079] interacts with 1 human partners:{Q8N6F1}

8105 Pathogen[ P03410] interacts with 1 human partners:{Q8N6F1}

8106 [Cluster 1311]GO:0060028+P biological\_process [name] convergent extension involved in axis elongation [def] "The morphogenetic process in which an epithelium narrows along one axis and lengthens in a perpendicular axis contributing to the lengthening of the axis of an organism." [GOC

8107 Pathogen[ P03346] interacts with 1 human partners:{Q13263}

8108 Pathogen[ Q85601] interacts with 1 human partners:{Q13263}

8109 Pathogen[ P0C206] interacts with 1 human partners:{Q13263}

8110 [Cluster 1312]GO:0072272+P biological\_process [name] proximal/distal pattern formation involved in metanephric nephron development [def] "The regionalization process in which specific areas of cell differentiation are determined along a proximal/distal axis of a nephron in the metanephros. The proximal/distal axis is defined by a line that runs from the center of the kidney (proximal end) outward (distal end)." [GOC

8111 Pathogen[ P03346] interacts with 1 human partners:{Q9BZ11}

8112 Pathogen[ P03410] interacts with 1 human partners:{Q9BZ11}

8113 Pathogen[ P0C206] interacts with 1 human partners:{Q9BZ11}

8114 Pathogen[ P03363] interacts with 1 human partners:{Q9BZ11}

8115 [Cluster 1313]GO:0006549+P biological\_process [name] isoleucine metabolic process [def] "The chemical reactions and pathways involving isoleucine,



(2R\*,3R\*)-2-amino-3-methylpentanoic acid." [GOC

8116 Pathogen[ POC214] interacts with 1 human partners:{O15382}

8117 Pathogen[ Q85601] interacts with 1 human partners:{O15382}

8118 Pathogen[ P14079] interacts with 1 human partners:{O15382}

8119 Pathogen[ P03410] interacts with 1 human partners:{O15382}

8120 Pathogen[ POC206] interacts with 1 human partners:{O15382}

8121 [Cluster 1314]GO:0034516+P biological\_process [name] response to vitamin B6 [def]  
"Any process that results in a change in state or activity of a cell or an organism (in terms of movement, secretion, enzyme production, gene expression, etc.) as a result of a vitamin B6 stimulus. Vitamin B6 encompasses pyridoxal, pyridoxamine and pyridoxine and the active form, pyridoxal phosphate." [GOC

8122 Pathogen[ Q2Q067] interacts with 1 human partners:{Q16719}

8123 Pathogen[ POC214] interacts with 1 human partners:{Q16719}

8124 Pathogen[ P03346] interacts with 1 human partners:{Q16719}

8125 Pathogen[ Q85601] interacts with 1 human partners:{Q16719}

8126 Pathogen[ P14079] interacts with 1 human partners:{Q16719}

8127 Pathogen[ P03383] interacts with 1 human partners:{Q16719}

8128 Pathogen[ P03410] interacts with 1 human partners:{Q16719}

8129 Pathogen[ P14075] interacts with 1 human partners:{Q16719}

8130 Pathogen[ POC206] interacts with 1 human partners:{Q16719}

8131 [Cluster 1315]GO:0018377+P biological\_process [name] protein myristoylation [def]  
"The covalent attachment of a myristoyl group to a protein." [GOC

8132 Pathogen[ POC214] interacts with 1 human partners:{P29728}

8133 Pathogen[ P14079] interacts with 1 human partners:{P29728}

8134 Pathogen[ P03410] interacts with 1 human partners:{P29728}

8135 Pathogen[ POC206] interacts with 1 human partners:{P29728}

8136 [Cluster 1316]GO:0032026+P biological\_process [name] response to magnesium ion [def]  
"Any process that results in a change in state or activity of a cell or an organism (in terms of movement, secretion, enzyme production, gene expression, etc.) as a result of a magnesium ion stimulus." [GOC

8137 Pathogen[ Q2Q067] interacts with 1 human partners:{P24385}

8138 Pathogen[ POC214] interacts with 1 human partners:{P24385}

8139 Pathogen[ P03346] interacts with 1 human partners:{P24385}

8140 Pathogen[ Q85601] interacts with 1 human partners:{P24385}

8141 Pathogen[ P03383] interacts with 1 human partners:{P24385}

8142 Pathogen[ P03410] interacts with 1 human partners:{P24385}

8143 Pathogen[ P14075] interacts with 1 human partners:{P24385}

8144 Pathogen[ POC206] interacts with 1 human partners:{P24385}

8145 Pathogen[ P03363] interacts with 1 human partners:{P24385}

8146 [Cluster 1317]GO:0072428+P biological\_process [name] signal transduction involved in intra-S DNA damage checkpoint [def]  
"A signal transduction process that contributes to an intra-S DNA damage checkpoint." [GOC

8147 Pathogen[ Q2Q067] interacts with 1 human partners:{O96017}

8148 Pathogen[ POC214] interacts with 1 human partners:{O96017}

8149 Pathogen[ P03346] interacts with 1 human partners:{O96017}

8150 Pathogen[ Q85601] interacts with 1 human partners:{O96017}

8151 Pathogen[ P03383] interacts with 1 human partners:{O96017}

8152 Pathogen[ P03410] interacts with 1 human partners:{O96017}

8153 Pathogen[ P14075] interacts with 1 human partners:{O96017}

8154 Pathogen[ POC206] interacts with 1 human partners:{O96017}

8155 Pathogen[ P03363] interacts with 1 human partners:{O96017}

8156 [Cluster 1318]GO:0051098+P biological\_process [name] regulation of binding [def]  
"Any process that modulates the frequency, rate or extent of binding, the selective interaction of a molecule with one or more specific sites on another molecule." [GOC

8157 Pathogen[ Q2Q067] interacts with 3 human partners:{Q13485;P84022;Q15796}

8158 Pathogen[ POC214] interacts with 3 human partners:{P84022;Q13485;Q15796}

8159 Pathogen[ P03346] interacts with 3 human partners:{Q15796;P84022;Q13485}

8160 Pathogen[ Q85601] interacts with 3 human partners:{P84022;Q13485;Q15796}

8161 Pathogen[ P03383] interacts with 3 human partners:{Q13485;P84022;Q15796}

8162 Pathogen[ P03410] interacts with 3 human partners:{P84022;Q13485;Q15796}

8163 Pathogen[ P14075] interacts with 3 human partners:{Q15796;Q13485;P84022}

8164 Pathogen[ POC206] interacts with 3 human partners:{P84022;Q15796;Q13485}

8165 Pathogen[ P03363] interacts with 3 human partners:{Q15796;P84022;Q13485}

8166 [Cluster 1319]GO:0023014+P biological\_process [name] signal transduction via phosphorylation event [def]  
"The process in which a signal is conveyed via the transfer of one or more phosphate groups." [GOC

8167 Pathogen[ POC214] interacts with 1 human partners:{Q9NXG0}

8168 Pathogen[ P03346] interacts with 1 human partners:{Q9NXG0}

8169 Pathogen[ Q85601] interacts with 1 human partners:{Q9NXG0}

8170 Pathogen[ P14079] interacts with 1 human partners:{Q9NXG0}

8171 Pathogen[ P03410] interacts with 1 human partners:{Q9NXG0}

8172 Pathogen[ POC206] interacts with 1 human partners:{Q9NXG0}

8173 Pathogen[ P03363] interacts with 1 human partners:{Q9NXG0}

8174 [Cluster 1320]GO:0036006+P biological\_process [name] cellular response to macrophage colony-stimulating factor stimulus [def]  
"Any process that results in a change in state or activity of a cell (in terms of movement, secretion, enzyme production, gene

expression, etc.) as a result of a macrophage colony-stimulating factor stimulus." [GOC  
8175 Pathogen[ P14079] interacts with 1 human partners:{Q9H295}  
8176 [Cluster 1321]GO:0050795+P biological\_process [name] regulation of behavior [def]  
"Any process that modulates the frequency, rate or extent of behavior, the specific  
actions or reactions of an organism in response to external or internal stimuli." [GOC  
8177 Pathogen[ Q2Q067] interacts with 1 human partners:{P49639}  
8178 Pathogen[ P0C214] interacts with 1 human partners:{P49639}  
8179 Pathogen[ P03346] interacts with 2 human partners:{P49639;Q8N157}  
8180 Pathogen[ Q85601] interacts with 1 human partners:{P49639}  
8181 Pathogen[ P14079] interacts with 2 human partners:{Q8N157;P49639}  
8182 Pathogen[ P03383] interacts with 1 human partners:{P49639}  
8183 Pathogen[ P03410] interacts with 2 human partners:{Q8N157;P49639}  
8184 Pathogen[ P0C206] interacts with 2 human partners:{P49639;Q8N157}  
8185 Pathogen[ P03363] interacts with 2 human partners:{P49639;Q8N157}  
8186 [Cluster 1322]GO:0042541+P biological\_process [name] hemoglobin biosynthetic process  
[def] "The chemical reactions and pathways resulting in the formation of hemoglobin, an  
oxygen carrying, conjugated protein containing four heme groups and globin." [CHEBI  
8187 Pathogen[ Q2Q067] interacts with 1 human partners:{P22557}  
8188 Pathogen[ P0C214] interacts with 1 human partners:{P22557}  
8189 Pathogen[ P03346] interacts with 1 human partners:{P22557}  
8190 Pathogen[ P14079] interacts with 1 human partners:{P22557}  
8191 Pathogen[ P03410] interacts with 1 human partners:{P22557}  
8192 Pathogen[ P0C206] interacts with 1 human partners:{P22557}  
8193 [Cluster 1323]GO:0043584+P biological\_process [name] nose development [def] "The  
process whose specific outcome is the progression of the nose over time, from its  
formation to the mature structure. The nose is the specialized structure of the face  
that serves as the organ of the sense of smell and as part of the respiratory system.  
Includes the nasi externus (external nose) and cavitas nasi (nasal cavity)." [GOC  
8194 Pathogen[ P03346] interacts with 3 human partners:{Q68CZ1;Q9UBX0;Q9P2D1}  
8195 Pathogen[ Q85601] interacts with 2 human partners:{Q9P2D1;Q9UBX0}  
8196 Pathogen[ P14079] interacts with 2 human partners:{Q68CZ1;Q9P2D1}  
8197 Pathogen[ P03410] interacts with 2 human partners:{Q9P2D1;Q68CZ1}  
8198 Pathogen[ P0C206] interacts with 2 human partners:{Q9P2D1;Q9UBX0}  
8199 Pathogen[ P03363] interacts with 1 human partners:{Q9UBX0}  
8200 [Cluster 1324]GO:0033484+P biological\_process [name] nitric oxide homeostasis [def] "A  
homeostatic process involved in the maintenance of an internal steady state of nitric  
oxide within an organism or cell." [GOC  
8201 Pathogen[ Q2Q067] interacts with 1 human partners:{Q9H2P0}  
8202 Pathogen[ P0C214] interacts with 1 human partners:{Q9H2P0}  
8203 Pathogen[ P03346] interacts with 1 human partners:{Q9H2P0}  
8204 Pathogen[ Q85601] interacts with 1 human partners:{Q9H2P0}  
8205 Pathogen[ P14079] interacts with 1 human partners:{Q9H2P0}  
8206 Pathogen[ P0C206] interacts with 1 human partners:{Q9H2P0}  
8207 Pathogen[ P03363] interacts with 1 human partners:{Q9H2P0}  
8208 [Cluster 1325]GO:0060029+P biological\_process [name] convergent extension involved in  
organogenesis [def] "The morphogenetic process in which an epithelium narrows along  
one axis and lengthens in a perpendicular axis contribution to the shaping of an organ."  
[GOC  
8209 Pathogen[ Q2Q067] interacts with 1 human partners:{O14641}  
8210 Pathogen[ P0C214] interacts with 1 human partners:{O14641}  
8211 Pathogen[ P03346] interacts with 1 human partners:{O14641}  
8212 Pathogen[ Q85601] interacts with 1 human partners:{O14641}  
8213 Pathogen[ P14079] interacts with 1 human partners:{O14641}  
8214 Pathogen[ P03383] interacts with 1 human partners:{O14641}  
8215 Pathogen[ P03410] interacts with 1 human partners:{O14641}  
8216 Pathogen[ P14075] interacts with 1 human partners:{O14641}  
8217 Pathogen[ P03363] interacts with 1 human partners:{O14641}  
8218 [Cluster 1326]GO:0035511+P biological\_process [name] oxidative DNA demethylation  
[def] "Removal of the methyl group from one or more nucleotides within a DNA molecule  
involving the oxidation (i.e. electron loss) of one or more atoms." [PMID  
8219 Pathogen[ Q2Q067] interacts with 1 human partners:{Q6NS38}  
8220 Pathogen[ P0C214] interacts with 1 human partners:{Q6NS38}  
8221 Pathogen[ Q85601] interacts with 1 human partners:{Q6NS38}  
8222 Pathogen[ P14079] interacts with 1 human partners:{Q6NS38}  
8223 Pathogen[ P03410] interacts with 1 human partners:{Q6NS38}  
8224 Pathogen[ P0C206] interacts with 1 human partners:{Q6NS38}  
8225 [Cluster 1327]GO:0006066+P biological\_process [name] alcohol metabolic process  
[def] "The chemical reactions and pathways involving alcohols, any of a class of  
compounds containing one or more hydroxyl groups attached to a saturated carbon atom."  
[CHEBI  
8226 Pathogen[ P0C214] interacts with 1 human partners:{P07327}  
8227 [Cluster 1328]GO:0060576+P biological\_process [name] intestinal epithelial cell  
development [def] "The process whose specific outcome is the progression of a  
columnar/cuboidal epithelial cell of the intestine over time, from its formation to the  
mature structure." [GOC  
8228 Pathogen[ Q2Q067] interacts with 1 human partners:{O95238}

8229 Pathogen[ POC214] interacts with 1 human partners:{095238}

8230 Pathogen[ P03346] interacts with 2 human partners:{095238;P78367}

8231 Pathogen[ Q85601] interacts with 1 human partners:{095238}

8232 Pathogen[ P14079] interacts with 1 human partners:{095238}

8233 Pathogen[ P03383] interacts with 1 human partners:{095238}

8234 Pathogen[ P03410] interacts with 1 human partners:{095238}

8235 Pathogen[ POC206] interacts with 1 human partners:{095238}

8236 Pathogen[ P03363] interacts with 2 human partners:{095238;P78367}

8237 [Cluster 1329]GO:0043552+P biological\_process [name] positive regulation of phosphatidylinositol 3-kinase activity [def] "Any process that activates or increases the frequency, rate or extent of phosphatidylinositol 3-kinase activity." [GOC

8238 Pathogen[ Q2Q067] interacts with 2 human partners:{P60953;P63000}

8239 Pathogen[ POC214] interacts with 2 human partners:{P63000;P60953}

8240 Pathogen[ P03346] interacts with 2 human partners:{P60953;P63000}

8241 Pathogen[ Q85601] interacts with 2 human partners:{P63000;P60953}

8242 Pathogen[ P03383] interacts with 2 human partners:{P60953;P63000}

8243 Pathogen[ P03410] interacts with 2 human partners:{P63000;P60953}

8244 Pathogen[ P14075] interacts with 2 human partners:{P60953;P63000}

8245 Pathogen[ POC206] interacts with 2 human partners:{P63000;P60953}

8246 Pathogen[ P03363] interacts with 2 human partners:{P63000;P60953}

8247 [Cluster 1330]GO:0044342+P biological\_process [name] type B pancreatic cell proliferation [def] "The multiplication or reproduction of pancreatic B cells, resulting in the expansion of an pancreatic B cell population. Pancreatic B cell are cells of the pancreas that secrete insulin." [GOC

8248 Pathogen[ POC214] interacts with 1 human partners:{Q92934}

8249 Pathogen[ P14079] interacts with 1 human partners:{Q92934}

8250 Pathogen[ P03410] interacts with 1 human partners:{Q92934}

8251 Pathogen[ POC206] interacts with 1 human partners:{Q92934}

8252 [Cluster 1331]GO:0000266+P biological\_process [name] mitochondrial fission [def] "The division of a mitochondrion within a cell to form two or more separate mitochondrial compartments." [PMID

8253 Pathogen[ Q2Q067] interacts with 2 human partners:{Q6P444;Q14693}

8254 Pathogen[ POC214] interacts with 2 human partners:{Q6P444;Q14693}

8255 Pathogen[ P03346] interacts with 2 human partners:{Q6P444;Q14693}

8256 Pathogen[ Q85601] interacts with 1 human partners:{Q14693}

8257 Pathogen[ P14079] interacts with 5 human partners:{Q9UDX5;Q14693;Q12887;Q6P444;Q15390}

8258 Pathogen[ P03383] interacts with 2 human partners:{Q6P444;Q14693}

8259 Pathogen[ P03410] interacts with 4 human partners:{Q15390;Q6P444;Q14693;Q12887}

8260 Pathogen[ P14075] interacts with 3 human partners:{Q6P444;Q15390;Q14693}

8261 Pathogen[ POC206] interacts with 3 human partners:{Q6P444;Q15390;Q14693}

8262 [Cluster 1332]GO:0010886+P biological\_process [name] positive regulation of cholesterol storage [def] "Any process that increases the rate or extent of cholesterol storage. Cholesterol storage is the accumulation and maintenance in cells or tissues of cholesterol, cholest-5-en-3 beta-ol, the principal sterol of vertebrates and the precursor of many steroids, including bile acids and steroid hormones." [GOC

8263 Pathogen[ P03346] interacts with 1 human partners:{Q12772}

8264 Pathogen[ Q85601] interacts with 1 human partners:{Q12772}

8265 Pathogen[ P14079] interacts with 1 human partners:{Q12772}

8266 Pathogen[ P03410] interacts with 1 human partners:{Q12772}

8267 Pathogen[ POC206] interacts with 1 human partners:{Q12772}

8268 [Cluster 1333]GO:0003329+P biological\_process [name] pancreatic PP cell fate commitment [def] "The commitment of a cell to a pancreatic PP cell fate and its capacity to differentiate into a pancreatic PP cell. A pancreatic polypeptide-producing cell is a cell in the pancreas that produces pancreatic polypeptide." [GOC

8269 Pathogen[ Q2Q067] interacts with 1 human partners:{Q13562}

8270 Pathogen[ P03346] interacts with 2 human partners:{095096;Q13562}

8271 Pathogen[ Q85601] interacts with 1 human partners:{Q13562}

8272 Pathogen[ POC206] interacts with 1 human partners:{Q13562}

8273 [Cluster 1334]GO:0034220+P biological\_process [name] ion transmembrane transport [def] "A process in which an ion is transported from one side of a membrane to the other by means of some agent such as a transporter or pore." [GOC

8274 Pathogen[ P03346] interacts with 2 human partners:{P06703;Q14847}

8275 Pathogen[ P14079] interacts with 2 human partners:{Q14847;P06703}

8276 Pathogen[ P03410] interacts with 2 human partners:{P06703;Q14847}

8277 Pathogen[ POC206] interacts with 1 human partners:{P06703}

8278 Pathogen[ P03363] interacts with 1 human partners:{Q14847}

8279 [Cluster 1335]GO:0031109+P biological\_process [name] microtubule polymerization or depolymerization [def] "Assembly or disassembly of microtubules by the addition or removal of tubulin heterodimers from a microtubule." [GOC

8280 Pathogen[ Q2Q067] interacts with 1 human partners:{P02511}

8281 Pathogen[ POC214] interacts with 1 human partners:{P02511}

8282 Pathogen[ P03346] interacts with 1 human partners:{P02511}

8283 Pathogen[ Q85601] interacts with 1 human partners:{P02511}

8284 Pathogen[ P14079] interacts with 1 human partners:{P02511}

8285 Pathogen[ P03383] interacts with 1 human partners:{P02511}

8286 Pathogen[ P03410] interacts with 1 human partners:{P02511}

8287 Pathogen[ P14075] interacts with 1 human partners:{P02511}

8288 Pathogen[ P0C206] interacts with 1 human partners:{P02511}

8289 [Cluster 1336]GO:0032862+P biological\_process [name] activation of Rho GTPase activity [def] "Any process that initiates the activity of an inactive GTPase of the Rho family through the replacement of GDP by GTP." [GOC

8290 Pathogen[ P03346] interacts with 1 human partners:{Q9H8V3}

8291 Pathogen[ P14079] interacts with 1 human partners:{Q9H8V3}

8292 Pathogen[ P03410] interacts with 1 human partners:{Q9H8V3}

8293 Pathogen[ P0C206] interacts with 1 human partners:{Q9H8V3}

8294 [Cluster 1337]GO:2001214+P biological\_process [name] positive regulation of vasculogenesis [def] "Any process that activates or increases the frequency, rate or extent of vasculogenesis." [GOC

8295 Pathogen[ Q2Q067] interacts with 1 human partners:{Q9NWT6}

8296 Pathogen[ P0C214] interacts with 1 human partners:{Q9NWT6}

8297 Pathogen[ P03346] interacts with 1 human partners:{Q9NWT6}

8298 Pathogen[ Q85601] interacts with 1 human partners:{Q9NWT6}

8299 Pathogen[ P14079] interacts with 2 human partners:{O60895;Q9NWT6}

8300 Pathogen[ P03383] interacts with 1 human partners:{Q9NWT6}

8301 Pathogen[ P03410] interacts with 2 human partners:{Q9NWT6;O60895}

8302 Pathogen[ P14075] interacts with 1 human partners:{Q9NWT6}

8303 Pathogen[ P0C206] interacts with 1 human partners:{Q9NWT6}

8304 [Cluster 1338]GO:0015825+P biological\_process [name] L-serine transport [def] "The directed movement of L-serine, the L-enantiomer of 2-amino-3-hydroxypropanoic acid, into, out of or within a cell, or between cells, by means of some agent such as a transporter or pore." [GOC

8305 Pathogen[ P14079] interacts with 1 human partners:{Q9NRX5}

8306 Pathogen[ P03410] interacts with 1 human partners:{Q9NRX5}

8307 [Cluster 1339]GO:0060377+P biological\_process [name] negative regulation of mast cell differentiation [def] "Any process that decreases the rate, frequency or extent of mast cell differentiation, the process in which a relatively unspecialized myeloid precursor cell acquires the specialized features of a mast cell. A mast cell is a cell that is found in almost all tissues containing numerous basophilic granules and capable of releasing large amounts of histamine and heparin upon activation." [GOC

8308 Pathogen[ Q2Q067] interacts with 1 human partners:{Q8IX07}

8309 Pathogen[ P0C214] interacts with 1 human partners:{Q8IX07}

8310 Pathogen[ P03346] interacts with 1 human partners:{Q8IX07}

8311 Pathogen[ Q85601] interacts with 1 human partners:{Q8IX07}

8312 Pathogen[ P14079] interacts with 1 human partners:{Q8IX07}

8313 Pathogen[ P03410] interacts with 1 human partners:{Q8IX07}

8314 Pathogen[ P0C206] interacts with 1 human partners:{Q8IX07}

8315 [Cluster 1340]GO:0032618+P biological\_process [name] interleukin-15 production [def] "The appearance of interleukin-15 due to biosynthesis or secretion following a cellular stimulus, resulting in an increase in its intracellular or extracellular levels." [GOC

8316 Pathogen[ Q2Q067] interacts with 1 human partners:{O75896}

8317 Pathogen[ P0C214] interacts with 1 human partners:{O75896}

8318 Pathogen[ P03346] interacts with 1 human partners:{O75896}

8319 Pathogen[ P14079] interacts with 1 human partners:{O75896}

8320 Pathogen[ P03383] interacts with 1 human partners:{O75896}

8321 Pathogen[ P03410] interacts with 1 human partners:{O75896}

8322 Pathogen[ P14075] interacts with 1 human partners:{O75896}

8323 Pathogen[ P0C206] interacts with 1 human partners:{O75896}

8324 [Cluster 1341]GO:0045950+P biological\_process [name] negative regulation of mitotic recombination [def] "Any process that inhibits or decreases the rate of DNA recombination during mitosis." [GOC

8325 Pathogen[ P0C214] interacts with 1 human partners:{P40692}

8326 Pathogen[ Q85601] interacts with 1 human partners:{P40692}

8327 Pathogen[ P14079] interacts with 1 human partners:{P40692}

8328 Pathogen[ P03410] interacts with 1 human partners:{P40692}

8329 Pathogen[ P0C206] interacts with 1 human partners:{P40692}

8330 [Cluster 1342]GO:0006308+P biological\_process [name] DNA catabolic process [def] "The cellular DNA metabolic process resulting in the breakdown of DNA, deoxyribonucleic acid, one of the two main types of nucleic acid, consisting of a long unbranched macromolecule formed from one or two strands of linked deoxyribonucleotides, the 3'-phosphate group of each constituent deoxyribonucleotide being joined in 3',5'-phosphodiester linkage to the 5'-hydroxyl group of the deoxyribose moiety of the next one." [GOC

8331 Pathogen[ P03346] interacts with 2 human partners:{Q13609;P24855}

8332 Pathogen[ P14079] interacts with 4 human partners:{Q13609;P49184;O00115;P24855}

8333 Pathogen[ P03410] interacts with 4 human partners:{P49184;Q13609;O00115;P24855}

8334 Pathogen[ P0C206] interacts with 2 human partners:{P24855;Q13609}

8335 Pathogen[ P03363] interacts with 2 human partners:{Q13609;P24855}

8336 [Cluster 1343]GO:0034351+P biological\_process [name] negative regulation of glial cell apoptosis [def] "Any process that stops, prevents, or reduces the frequency, rate, or extent of glial cell apoptosis." [GOC

8337 Pathogen[ Q2Q067] interacts with 1 human partners:{Q12933}

8338 Pathogen[ P0C214] interacts with 1 human partners:{Q12933}

8339 Pathogen[ Q85601] interacts with 1 human partners:{Q12933}

8340 Pathogen[ P14079] interacts with 1 human partners:{Q12933}

8341 Pathogen[ P03383] interacts with 1 human partners:{Q12933}

8342 Pathogen[ P03410] interacts with 1 human partners:{Q12933}

8343 Pathogen[ P14075] interacts with 1 human partners:{Q12933}

8344 Pathogen[ P0C206] interacts with 1 human partners:{Q12933}

8345 Pathogen[ P03363] interacts with 1 human partners:{Q12933}

8346 [Cluster 1344]GO:0060730+P biological\_process [name] regulation of intestinal epithelial structure maintenance [def] "Any process that modulates the rate, frequency, or extent of intestinal epithelial structure maintenance, a tissue homeostatic process required for the maintenance of the structure of the intestinal epithelium." [GOC

8347 Pathogen[ Q2Q067] interacts with 1 human partners:{Q13562}

8348 Pathogen[ P03346] interacts with 1 human partners:{Q13562}

8349 Pathogen[ Q85601] interacts with 1 human partners:{Q13562}

8350 Pathogen[ P0C206] interacts with 1 human partners:{Q13562}

8351 [Cluster 1345]GO:0030423+P biological\_process [name] targeting of mRNA for destruction involved in RNA interference [def] "The process in which small interfering RNAs target cognate mRNA molecules for degradation." [PMID

8352 Pathogen[ Q2Q067] interacts with 1 human partners:{Q15633}

8353 Pathogen[ P0C214] interacts with 1 human partners:{Q15633}

8354 Pathogen[ P03346] interacts with 1 human partners:{Q15633}

8355 Pathogen[ Q85601] interacts with 1 human partners:{Q15633}

8356 Pathogen[ P03383] interacts with 1 human partners:{Q15633}

8357 Pathogen[ P03410] interacts with 1 human partners:{Q15633}

8358 Pathogen[ P14075] interacts with 1 human partners:{Q15633}

8359 Pathogen[ P0C206] interacts with 1 human partners:{Q15633}

8360 Pathogen[ P03363] interacts with 1 human partners:{Q15633}

8361 [Cluster 1346]GO:0031427+P biological\_process [name] response to methotrexate [def] "Any process that results in a change in state or activity of a cell or an organism (in terms of movement, secretion, enzyme production, gene expression, etc.) as a result of a methotrexate stimulus. Methotrexate is 4-amino-10-methylformic acid, a folic acid analogue that is a potent competitive inhibitor of dihydrofolate reductase." [CHEBI

8362 Pathogen[ P0C214] interacts with 1 human partners:{P00374}

8363 Pathogen[ P14079] interacts with 1 human partners:{P00374}

8364 Pathogen[ P03410] interacts with 1 human partners:{P00374}

8365 [Cluster 1347]GO:0033599+P biological\_process [name] regulation of mammary gland epithelial cell proliferation [def] "Any process that modulates the frequency, rate or extent of mammary gland epithelial cell proliferation." [GOC

8366 Pathogen[ Q2Q067] interacts with 1 human partners:{P20719}

8367 Pathogen[ P03346] interacts with 2 human partners:{P20719;O75398}

8368 Pathogen[ Q85601] interacts with 1 human partners:{O75398}

8369 Pathogen[ P0C206] interacts with 2 human partners:{O75398;P20719}

8370 Pathogen[ P03363] interacts with 2 human partners:{P20719;O75398}

8371 [Cluster 1348]GO:0034725+P biological\_process [name] DNA replication-dependent nucleosome disassembly [def] "The controlled breakdown of nucleosomes on newly replicated DNA, coupled to strand elongation." [GOC

8372 Pathogen[ P0C206] interacts with 1 human partners:{Q9UIG0}

8373 [Cluster 1349]GO:0016254+P biological\_process [name] preassembly of GPI anchor in ER membrane [def] "The stepwise addition of the components of the GPI anchor on to phosphatidylinositol lipids in the endoplasmic reticulum membrane." [ISBN

8374 Pathogen[ Q2Q067] interacts with 1 human partners:{Q14442}

8375 Pathogen[ P03346] interacts with 1 human partners:{Q14442}

8376 Pathogen[ P14079] interacts with 6 human partners:{Q14442;P57054;Q9BRB3;Q9Y2B2;O94777;Q8TBF5}

8377 Pathogen[ P03410] interacts with 4 human partners:{Q9Y2B2;O94777;Q14442;Q9BRB3}

8378 Pathogen[ P14075] interacts with 2 human partners:{O94777;Q14442}

8379 Pathogen[ P0C206] interacts with 3 human partners:{Q14442;O94777;Q9Y2B2}

8380 [Cluster 1350]GO:0010455+P biological\_process [name] positive regulation of cell fate commitment [def] "Any process that activates, maintains or increases the frequency or rate of cell fate commitment. Cell fate commitment is the commitment of cells to specific cell fates and their capacity to differentiate into particular kinds of cells. Positional information is established through protein signals that emanate from a localized source within a cell (the initial one-cell zygote) or within a developmental field." [GOC

8381 Pathogen[ Q2Q067] interacts with 1 human partners:{O95238}

8382 Pathogen[ P0C214] interacts with 1 human partners:{O95238}

8383 Pathogen[ P03346] interacts with 1 human partners:{O95238}

8384 Pathogen[ Q85601] interacts with 1 human partners:{O95238}

8385 Pathogen[ P14079] interacts with 1 human partners:{O95238}

8386 Pathogen[ P03383] interacts with 1 human partners:{O95238}

8387 Pathogen[ P03410] interacts with 1 human partners:{O95238}

8388 Pathogen[ P0C206] interacts with 1 human partners:{O95238}

8389 Pathogen[ P03363] interacts with 2 human partners:{O95238;Q9C056}

8390 [Cluster 1351]GO:0006927+P biological\_process [name] transformed cell apoptosis [def] "The process of apoptosis in transformed cells, cells that have undergone changes manifested by escape from control mechanisms, increased growth potential, alterations in the cell surface, karyotypic abnormalities, morphological and biochemical deviations from the norm." [GOC]

8391 Pathogen[ Q2Q067] interacts with 1 human partners:{Q96A26}

8392 Pathogen[ P03346] interacts with 2 human partners:{Q96A26;Q496M5}

8393 Pathogen[ Q85601] interacts with 1 human partners:{Q496M5}

8394 Pathogen[ P14079] interacts with 1 human partners:{Q96A26}

8395 Pathogen[ P03383] interacts with 1 human partners:{Q96A26}

8396 Pathogen[ P03410] interacts with 1 human partners:{Q96A26}

8397 Pathogen[ P14075] interacts with 1 human partners:{Q96A26}

8398 Pathogen[ P0C206] interacts with 2 human partners:{Q496M5;Q96A26}

8399 [Cluster 1352]GO:0046618+P biological\_process [name] drug export [def] "The directed movement of a drug, a substance used in the diagnosis, treatment or prevention of a disease, out of a cell or organelle." [GOC]

8400 Pathogen[ P03346] interacts with 1 human partners:{O75469}

8401 Pathogen[ P14079] interacts with 1 human partners:{O75469}

8402 Pathogen[ P0C206] interacts with 1 human partners:{O75469}

8403 [Cluster 1353]GO:0010812+P biological\_process [name] negative regulation of cell-substrate adhesion [def] "Any process that decreases the frequency, rate or extent of cell-substrate adhesion. Cell-substrate adhesion is the attachment of a cell to the underlying substrate via adhesion molecules." [GOC]

8404 Pathogen[ Q2Q067] interacts with 1 human partners:{Q9BTW9}

8405 Pathogen[ P0C214] interacts with 1 human partners:{Q9BTW9}

8406 Pathogen[ Q85601] interacts with 1 human partners:{Q9BTW9}

8407 Pathogen[ P14079] interacts with 1 human partners:{Q9BTW9}

8408 Pathogen[ P03410] interacts with 1 human partners:{Q9BTW9}

8409 Pathogen[ P0C206] interacts with 1 human partners:{Q9BTW9}

8410 Pathogen[ P03363] interacts with 1 human partners:{Q9BTW9}

8411 [Cluster 1354]GO:0061034+P biological\_process [name] olfactory bulb mitral cell layer development [def] "The progression of the olfactory bulb mitral cell layer over time from its initial formation until its mature state. The mitral cell layer is composed of pyramidal neurons whose cell bodies are located between the granule cell layer and the plexiform layer." [GOC]

8412 Pathogen[ Q2Q067] interacts with 1 human partners:{Q9NSC2}

8413 Pathogen[ P0C214] interacts with 1 human partners:{Q9NSC2}

8414 Pathogen[ P03346] interacts with 1 human partners:{Q9NSC2}

8415 Pathogen[ Q85601] interacts with 1 human partners:{Q9NSC2}

8416 Pathogen[ P14079] interacts with 1 human partners:{Q9NSC2}

8417 Pathogen[ P03383] interacts with 1 human partners:{Q9NSC2}

8418 Pathogen[ P03410] interacts with 1 human partners:{Q9NSC2}

8419 Pathogen[ P14075] interacts with 1 human partners:{Q9NSC2}

8420 Pathogen[ P0C206] interacts with 1 human partners:{Q9NSC2}

8421 [Cluster 1355]GO:0045909+P biological\_process [name] positive regulation of vasodilation [def] "Any process that activates or increases the frequency, rate or extent of vasodilation." [GOC]

8422 Pathogen[ Q2Q067] interacts with 1 human partners:{P29474}

8423 Pathogen[ P0C214] interacts with 1 human partners:{P29474}

8424 Pathogen[ P03346] interacts with 1 human partners:{P29474}

8425 Pathogen[ Q85601] interacts with 1 human partners:{P29474}

8426 Pathogen[ P03383] interacts with 1 human partners:{P29474}

8427 Pathogen[ P03410] interacts with 1 human partners:{P29474}

8428 Pathogen[ P14075] interacts with 1 human partners:{P29474}

8429 Pathogen[ P0C206] interacts with 1 human partners:{P29474}

8430 Pathogen[ P03363] interacts with 1 human partners:{P29474}

8431 [Cluster 1356]GO:0007521+P biological\_process [name] muscle cell fate determination [def] "The cell fate determination process in which a cell becomes capable of differentiating autonomously into a muscle cell regardless of its environment\_ upon determination, the cell fate cannot be reversed." [CL]

8432 Pathogen[ P14079] interacts with 1 human partners:{Q06413}

8433 [Cluster 1357]GO:0071313+P biological\_process [name] cellular response to caffeine [def] "Any process that results in a change in state or activity of a cell (in terms of movement, secretion, enzyme production, gene expression, etc.) as a result of a caffeine stimulus. Caffeine is an alkaloid found in numerous plant species, where it acts as a natural pesticide that paralyzes and kills certain insects feeding upon them." [GOC]

8434 Pathogen[ Q2Q067] interacts with 1 human partners:{O14757}

8435 Pathogen[ P0C214] interacts with 1 human partners:{O14757}

8436 Pathogen[ P03346] interacts with 1 human partners:{O14757}

8437 Pathogen[ Q85601] interacts with 1 human partners:{O14757}

8438 Pathogen[ P03383] interacts with 1 human partners:{O14757}

8439 Pathogen[ P03410] interacts with 1 human partners:{O14757}

8440 Pathogen[ P14075] interacts with 1 human partners:{O14757}

8441 Pathogen[ P03363] interacts with 1 human partners:{O14757}

8442 [Cluster 1358]GO:0001676+P biological\_process [name] long-chain fatty acid metabolic process [def] "The chemical reactions and pathways involving long-chain fatty acids,

aliphatic compounds having a terminal carboxyl group and with a chain length of C12-18." [GOC

8443 Pathogen[ Q2Q067] interacts with 1 human partners:{Q86TX2}

8444 Pathogen[ POC214] interacts with 1 human partners:{Q86TX2}

8445 Pathogen[ P03346] interacts with 1 human partners:{Q86TX2}

8446 Pathogen[ Q85601] interacts with 1 human partners:{Q86TX2}

8447 Pathogen[ P14079] interacts with 2 human partners:{P49753;Q86TX2}

8448 Pathogen[ P03410] interacts with 2 human partners:{Q86TX2;P49753}

8449 Pathogen[ POC206] interacts with 1 human partners:{Q86TX2}

8450 [Cluster 1359]GO:0071733+P biological\_process [name] transcriptional activation by promoter-enhancer looping [def] "The formation and maintenance of DNA loops that juxtapose the promoter and enhancer regions of RNA polymerase II-transcribed genes and activate transcription from an RNA polymerase II promoter." [GOC

8451 Pathogen[ Q2Q067] interacts with 2 human partners:{P15976;Q8IX07}

8452 Pathogen[ POC214] interacts with 1 human partners:{Q8IX07}

8453 Pathogen[ P03346] interacts with 2 human partners:{P15976;Q8IX07}

8454 Pathogen[ Q85601] interacts with 2 human partners:{P15976;Q8IX07}

8455 Pathogen[ P14079] interacts with 2 human partners:{P15976;Q8IX07}

8456 Pathogen[ P03410] interacts with 2 human partners:{Q8IX07;P15976}

8457 Pathogen[ POC206] interacts with 2 human partners:{P15976;Q8IX07}

8458 [Cluster 1360]GO:0009262+P biological\_process [name] deoxyribonucleotide metabolic process [def] "The chemical reactions and pathways involving a deoxyribonucleotide, a compound consisting of deoxyribonucleoside (a base linked to a deoxyribose sugar) esterified with a phosphate group at either the 3' or 5'-hydroxyl group of the sugar." [GOC

8459 Pathogen[ Q2Q067] interacts with 1 human partners:{P31350}

8460 Pathogen[ POC214] interacts with 1 human partners:{P31350}

8461 Pathogen[ P03346] interacts with 1 human partners:{P31350}

8462 Pathogen[ Q85601] interacts with 1 human partners:{P31350}

8463 Pathogen[ P14079] interacts with 1 human partners:{P31350}

8464 Pathogen[ P03383] interacts with 1 human partners:{P31350}

8465 Pathogen[ P03410] interacts with 1 human partners:{P31350}

8466 Pathogen[ P14075] interacts with 1 human partners:{P31350}

8467 Pathogen[ POC206] interacts with 1 human partners:{P31350}

8468 [Cluster 1361]GO:0060677+P biological\_process [name] ureteric bud elongation [def] "The process in which the ureteric bud grows along its axis." [GOC

8469 Pathogen[ Q2Q067] interacts with 1 human partners:{P35680}

8470 Pathogen[ P03346] interacts with 1 human partners:{P35680}

8471 Pathogen[ Q85601] interacts with 1 human partners:{P35680}

8472 Pathogen[ P14079] interacts with 1 human partners:{P35680}

8473 Pathogen[ P03410] interacts with 1 human partners:{P35680}

8474 Pathogen[ POC206] interacts with 1 human partners:{P35680}

8475 [Cluster 1362]GO:0006193+P biological\_process [name] ITP catabolic process [def] "The chemical reactions and pathways resulting in the breakdown of ITP, inosine (5'-)triphosphate." [ISBN

8476 Pathogen[ P14079] interacts with 1 human partners:{Q9BY32}

8477 Pathogen[ P03410] interacts with 1 human partners:{Q9BY32}

8478 Pathogen[ POC206] interacts with 1 human partners:{Q9BY32}

8479 [Cluster 1363]GO:0048318+P biological\_process [name] axial mesoderm development [def] "The process whose specific outcome is the progression of the axial mesoderm over time, from its formation to the mature structure. The axial mesoderm includes the prechordal mesoderm and the chordamesoderm. It gives rise to the prechordal plate and to the notochord." [GOC

8480 Pathogen[ P03346] interacts with 1 human partners:{O75593}

8481 [Cluster 1364]GO:0048646+P biological\_process [name] anatomical structure formation involved in morphogenesis [def] "The developmental process pertaining to the initial formation of an anatomical structure from unspecified parts. This process begins with the specific processes that contribute to the appearance of the discrete structure and ends when the structural rudiment is recognizable. An anatomical structure is any biological entity that occupies space and is distinguished from its surroundings. Anatomical structures can be macroscopic such as a carpel, or microscopic such as an acrosome." [GOC

8482 Pathogen[ Q2Q067] interacts with 2 human partners:{P49639;P14653}

8483 Pathogen[ POC214] interacts with 3 human partners:{P49639;P62993;P14653}

8484 Pathogen[ P03346] interacts with 4 human partners:{P49639;P62993;P14653;P56178}

8485 Pathogen[ Q85601] interacts with 3 human partners:{P49639;P62993;P14653}

8486 Pathogen[ P14079] interacts with 2 human partners:{P62993;P49639}

8487 Pathogen[ P03383] interacts with 1 human partners:{P49639}

8488 Pathogen[ P03410] interacts with 2 human partners:{P49639;P62993}

8489 Pathogen[ POC206] interacts with 3 human partners:{P49639;P62993;P14653}

8490 Pathogen[ P03363] interacts with 3 human partners:{P56179;P49639;P14653}

8491 [Cluster 1365]GO:0048251+P biological\_process [name] elastic fiber assembly [def] "Assembly of the extracellular matrix fibers that enables the matrix to recoil after transient stretching." [GOC

8492 Pathogen[ POC214] interacts with 1 human partners:{P35749}

8493 Pathogen[ Q85601] interacts with 1 human partners:{P35749}

8494 Pathogen[ POC206] interacts with 1 human partners:{P35749}

8495 [Cluster 1366]GO:0034205+P biological\_process [name] beta-amyloid formation [def] "The generation of beta-amyloid by cleavage of the amyloid precursor protein (APP)." [GOC]

8496 Pathogen[ P03346] interacts with 1 human partners:{P49755}

8497 Pathogen[ P14079] interacts with 2 human partners:{P49755;A4D1B5}

8498 Pathogen[ P03410] interacts with 1 human partners:{A4D1B5}

8499 Pathogen[ POC206] interacts with 2 human partners:{P49755;A4D1B5}

8500 [Cluster 1367]GO:0071506+P biological\_process [name] cellular response to mycophenolic acid [def] "Any process that results in a change in state or activity of a cell (in terms of movement, secretion, enzyme production, gene expression, etc.) as a result of a mycophenolic acid stimulus." [CHEBI]

8501 Pathogen[ Q2Q067] interacts with 1 human partners:{P18146}

8502 Pathogen[ POC214] interacts with 1 human partners:{P18146}

8503 Pathogen[ P03346] interacts with 1 human partners:{P18146}

8504 Pathogen[ Q85601] interacts with 1 human partners:{P18146}

8505 Pathogen[ P03383] interacts with 1 human partners:{P18146}

8506 Pathogen[ P03410] interacts with 1 human partners:{P18146}

8507 Pathogen[ P14075] interacts with 1 human partners:{P18146}

8508 Pathogen[ POC206] interacts with 1 human partners:{P18146}

8509 Pathogen[ P03363] interacts with 1 human partners:{P18146}

8510 [Cluster 1368]GO:0030593+P biological\_process [name] neutrophil chemotaxis [def] "The directed movement of a neutrophil cell, the most numerous polymorphonuclear leukocyte found in the blood, in response to an external stimulus, usually an infection or wounding." [GOC]

8511 Pathogen[ P14079] interacts with 1 human partners:{P0DJ18}

8512 Pathogen[ P03410] interacts with 1 human partners:{P0DJ18}

8513 [Cluster 1369]GO:0050906+P biological\_process [name] detection of stimulus involved in sensory perception [def] "The series of events involved in sensory perception in which a sensory stimulus is received by a cell and converted into a molecular signal." [GOC]

8514 Pathogen[ Q2Q067] interacts with 1 human partners:{O14829}

8515 Pathogen[ POC214] interacts with 1 human partners:{O14829}

8516 Pathogen[ P03346] interacts with 1 human partners:{O14829}

8517 Pathogen[ Q85601] interacts with 1 human partners:{O14829}

8518 Pathogen[ P14079] interacts with 1 human partners:{O14829}

8519 Pathogen[ P03410] interacts with 1 human partners:{O14829}

8520 Pathogen[ POC206] interacts with 1 human partners:{O14829}

8521 Pathogen[ P03363] interacts with 1 human partners:{O14829}

8522 [Cluster 1370]GO:0019563+P biological\_process [name] glycerol catabolic process [def] "The chemical reactions and pathways resulting in the breakdown of glycerol, 1,2,3-propanetriol, a sweet, hygroscopic, viscous liquid, widely distributed in nature as a constituent of many lipids." [GOC]

8523 Pathogen[ Q2Q067] interacts with 1 human partners:{P32189}

8524 Pathogen[ POC214] interacts with 3 human partners:{Q14410;Q14409;P32189}

8525 Pathogen[ P03346] interacts with 1 human partners:{P32189}

8526 Pathogen[ Q85601] interacts with 1 human partners:{P32189}

8527 Pathogen[ P14079] interacts with 3 human partners:{Q14410;P32189;Q14409}

8528 Pathogen[ P03383] interacts with 1 human partners:{P32189}

8529 Pathogen[ P03410] interacts with 3 human partners:{Q14410;Q14409;P32189}

8530 Pathogen[ P14075] interacts with 1 human partners:{P32189}

8531 Pathogen[ POC206] interacts with 1 human partners:{P32189}

8532 [Cluster 1371]GO:0000093+P biological\_process [name] mitotic telophase [def] "Telophase occurring as part of mitosis. Telophase is the part of nuclear division that, canonically, begins when the chromosomes arrive at the poles of the cell and the division of the cytoplasm starts. Mitosis is the cell cycle process in which, canonically, the nucleus of a eukaryotic cell divides to produce two daughter nuclei whose chromosome complement is identical to that of the mother cell." [GOC]

8533 Pathogen[ Q2Q067] interacts with 1 human partners:{Q9Y6D9}

8534 Pathogen[ POC214] interacts with 1 human partners:{Q9Y6D9}

8535 Pathogen[ P03346] interacts with 1 human partners:{Q9Y6D9}

8536 Pathogen[ Q85601] interacts with 1 human partners:{Q9Y6D9}

8537 Pathogen[ P03383] interacts with 1 human partners:{Q9Y6D9}

8538 Pathogen[ P14075] interacts with 1 human partners:{Q9Y6D9}

8539 Pathogen[ POC206] interacts with 1 human partners:{Q9Y6D9}

8540 Pathogen[ P03363] interacts with 1 human partners:{Q9Y6D9}

8541 [Cluster 1372]GO:0046940+P biological\_process [name] nucleoside monophosphate phosphorylation [def] "The process of introducing one or more phosphate groups into a nucleoside monophosphate to produce a polyphosphorylated nucleoside." [GOC]

8542 Pathogen[ POC214] interacts with 1 human partners:{P23919}

8543 Pathogen[ P14079] interacts with 1 human partners:{P23919}

8544 Pathogen[ P03410] interacts with 1 human partners:{P23919}

8545 [Cluster 1373]GO:0036151+P

8546 Pathogen[ P14079] interacts with 1 human partners:{Q9NZ20}

8547 Pathogen[ P03410] interacts with 1 human partners:{Q9NZ20}

8548 [Cluster 1374]GO:0051135+P biological\_process [name] positive regulation of NK T cell activation [def] "Any process that activates or increases the frequency, rate or extent



of natural killer T cell activation." [ISBN

8549 Pathogen[ P14079] interacts with 1 human partners:{P29459}

8550 Pathogen[ P03410] interacts with 1 human partners:{P29459}

8551 [Cluster 1375]GO:0019217+P biological\_process [name] regulation of fatty acid metabolic process [def] "Any process that modulates the frequency, rate or extent of the chemical reactions and pathways involving fatty acids." [GOC

8552 Pathogen[ Q2Q067] interacts with 1 human partners:{P36956}

8553 Pathogen[ P03346] interacts with 1 human partners:{P36956}

8554 Pathogen[ Q85601] interacts with 1 human partners:{P36956}

8555 Pathogen[ P14079] interacts with 1 human partners:{P36956}

8556 Pathogen[ P03410] interacts with 1 human partners:{P36956}

8557 Pathogen[ P0C206] interacts with 1 human partners:{P36956}

8558 [Cluster 1376]GO:0090219+P biological\_process [name] negative regulation of lipid kinase activity [def] "Any process that decreases the frequency, rate or extent of lipid kinase activity, the catalysis of the transfer of a phosphate group, usually from ATP, to a simple or complex lipid." [GOC

8559 Pathogen[ Q2Q067] interacts with 1 human partners:{Q15172}

8560 Pathogen[ P0C214] interacts with 1 human partners:{Q15172}

8561 Pathogen[ P03346] interacts with 1 human partners:{Q15172}

8562 Pathogen[ Q85601] interacts with 1 human partners:{Q15172}

8563 Pathogen[ P14079] interacts with 1 human partners:{Q15172}

8564 Pathogen[ P03410] interacts with 1 human partners:{Q15172}

8565 Pathogen[ P0C206] interacts with 1 human partners:{Q15172}

8566 Pathogen[ P03363] interacts with 1 human partners:{Q15172}

8567 [Cluster 1377]GO:0034474+P biological\_process [name] U2 snRNA 3'-end processing [def] "Any process involved in forming the mature 3' end of a U2 snRNA molecule." [GOC

8568 Pathogen[ P14079] interacts with 1 human partners:{Q8N201}

8569 Pathogen[ P03410] interacts with 1 human partners:{Q8N201}

8570 Pathogen[ P0C206] interacts with 1 human partners:{Q8N201}

8571 [Cluster 1378]GO:0016322+P biological\_process [name] neuron remodeling [def] "The developmentally regulated remodeling of neuronal projections such as pruning to eliminate the extra dendrites and axons projections set up in early stages of nervous system development." [GOC

8572 Pathogen[ P03346] interacts with 1 human partners:{Q92625}

8573 Pathogen[ P0C206] interacts with 1 human partners:{Q92625}

8574 Pathogen[ P03363] interacts with 1 human partners:{Q92625}

8575 [Cluster 1379]GO:0035634+P biological\_process [name] response to stilbenoid [def] "Any process that results in a change in state or activity of a cell or an organism (in terms of movement, secretion, enzyme production, gene expression, etc.) as a result of exposure to a stilbenoid. Stilbenoids are secondary products of heartwood formation in trees that can act as phytoalexins. Stilbenoids are hydroxylated derivatives of stilbene. They belong to the family of phenylpropanoids and share most of their biosynthesis pathway with chalcones." [CHEBI

8576 Pathogen[ P0C214] interacts with 1 human partners:{Q13907}

8577 Pathogen[ Q85601] interacts with 1 human partners:{Q13907}

8578 Pathogen[ P14079] interacts with 2 human partners:{Q14210;Q13907}

8579 Pathogen[ P03410] interacts with 2 human partners:{Q14210;Q13907}

8580 Pathogen[ P0C206] interacts with 1 human partners:{Q13907}

8581 [Cluster 1380]GO:0048671+P biological\_process [name] negative regulation of collateral sprouting [def] "Any process that stops, prevents, or reduces the frequency, rate or extent of collateral sprouting." [GOC

8582 Pathogen[ P03346] interacts with 1 human partners:{Q9H165}

8583 Pathogen[ P0C206] interacts with 1 human partners:{Q9H165}

8584 [Cluster 1381]GO:0060033+P biological\_process [name] anatomical structure regression [def] "The developmental process in which an anatomical structure is destroyed as a part of its normal progression." [GOC

8585 Pathogen[ Q2Q067] interacts with 1 human partners:{P17947}

8586 Pathogen[ P0C214] interacts with 1 human partners:{P17947}

8587 Pathogen[ P03346] interacts with 1 human partners:{P17947}

8588 Pathogen[ Q85601] interacts with 1 human partners:{P17947}

8589 Pathogen[ P03383] interacts with 1 human partners:{P17947}

8590 Pathogen[ P03410] interacts with 1 human partners:{P17947}

8591 Pathogen[ P14079] interacts with 1 human partners:{P17947}

8592 Pathogen[ P0C206] interacts with 1 human partners:{P17947}

8593 Pathogen[ P03363] interacts with 1 human partners:{P17947}

8594 [Cluster 1382]GO:0044211+P biological\_process [name] CTP salvage [def] "Any process which produces cytidine 5'-triphosphate (CTP) from derivatives of it, without de novo synthesis." [GOC

8595 Pathogen[ P0C214] interacts with 1 human partners:{Q9NWZ5}

8596 Pathogen[ P03346] interacts with 1 human partners:{Q9NWZ5}

8597 Pathogen[ P14079] interacts with 1 human partners:{Q9NWZ5}

8598 Pathogen[ P03383] interacts with 1 human partners:{Q9NWZ5}

8599 Pathogen[ P03410] interacts with 1 human partners:{Q9NWZ5}

8600 Pathogen[ P14075] interacts with 1 human partners:{Q9NWZ5}

8601 Pathogen[ P0C206] interacts with 1 human partners:{Q9NWZ5}

8602 Pathogen[ P03363] interacts with 1 human partners:{Q9NWZ5}

8603 [Cluster 1383]GO:0015721+P biological\_process [name] bile acid and bile salt transport [def] "The directed movement of bile acid and bile salts into, out of or within a cell, or between cells, by means of some agent such as a transporter or pore." [GOC

8604 Pathogen[ Q2Q067] interacts with 1 human partners:{P20823}

8605 Pathogen[ P03346] interacts with 2 human partners:{P20823;P51161}

8606 Pathogen[ Q85601] interacts with 2 human partners:{P51161;P20823}

8607 Pathogen[ P14079] interacts with 1 human partners:{Q86UW1}

8608 Pathogen[ P03410] interacts with 2 human partners:{P51161;Q86UW1}

8609 Pathogen[ P0C206] interacts with 2 human partners:{P51161;P20823}

8610 Pathogen[ P03363] interacts with 1 human partners:{P51161}

8611 [Cluster 1384]GO:0006535+P biological\_process [name] cysteine biosynthetic process from serine [def] "The chemical reactions and pathways resulting in the formation of cysteine from other compounds, including serine." [GOC

8612 Pathogen[ P0C214] interacts with 1 human partners:{P35520}

8613 [Cluster 1385]GO:0001920+P biological\_process [name] negative regulation of receptor recycling [def] "Any process that stops, prevents, or reduces the rate of receptor recycling." [GOC

8614 Pathogen[ P14079] interacts with 1 human partners:{Q6PIZ9}

8615 Pathogen[ P03410] interacts with 1 human partners:{Q6PIZ9}

8616 [Cluster 1386]GO:0006001+P biological\_process [name] fructose catabolic process [def] "The chemical reactions and pathways resulting in the breakdown of fructose, the ketohexose arabino-2-hexulose." [GOC

8617 Pathogen[ Q2Q067] interacts with 1 human partners:{P05062}

8618 Pathogen[ P0C214] interacts with 1 human partners:{P05062}

8619 Pathogen[ P03346] interacts with 1 human partners:{P05062}

8620 Pathogen[ Q85601] interacts with 1 human partners:{P05062}

8621 Pathogen[ P03410] interacts with 1 human partners:{P05062}

8622 Pathogen[ P0C206] interacts with 1 human partners:{P05062}

8623 [Cluster 1387]GO:0006940+P biological\_process [name] regulation of smooth muscle contraction [def] "Any process that modulates the frequency, rate or extent of smooth muscle contraction." [GOC

8624 Pathogen[ P0C214] interacts with 1 human partners:{P19429}

8625 Pathogen[ P14079] interacts with 1 human partners:{P19429}

8626 Pathogen[ P03410] interacts with 1 human partners:{P19429}

8627 Pathogen[ P0C206] interacts with 1 human partners:{P19429}

8628 Pathogen[ P03363] interacts with 1 human partners:{P19429}

8629 [Cluster 1388]GO:0035089+P biological\_process [name] establishment of apical/basal cell polarity [def] "The specification and formation of the polarity of a cell along its apical/basal axis." [GOC

8630 Pathogen[ Q2Q067] interacts with 1 human partners:{Q14160}

8631 Pathogen[ P0C214] interacts with 1 human partners:{Q14160}

8632 Pathogen[ P03346] interacts with 1 human partners:{Q14160}

8633 Pathogen[ Q85601] interacts with 1 human partners:{Q14160}

8634 Pathogen[ P03383] interacts with 1 human partners:{Q14160}

8635 Pathogen[ P03410] interacts with 1 human partners:{Q14160}

8636 Pathogen[ P14075] interacts with 1 human partners:{Q14160}

8637 Pathogen[ P0C206] interacts with 1 human partners:{Q14160}

8638 Pathogen[ P03363] interacts with 1 human partners:{Q14160}

8639 [Cluster 1389]GO:0031343+P biological\_process [name] positive regulation of cell killing [def] "Any process that activates or increases the frequency, rate or extent of cell killing." [GOC

8640 Pathogen[ P0C214] interacts with 1 human partners:{P18054}

8641 Pathogen[ P03346] interacts with 1 human partners:{P18054}

8642 Pathogen[ P14079] interacts with 1 human partners:{O60502}

8643 Pathogen[ P03410] interacts with 1 human partners:{O60502}

8644 [Cluster 1390]GO:0042245+P biological\_process [name] RNA repair [def] "Any process that results in the repair of damaged RNA." [PMID

8645 Pathogen[ P14079] interacts with 1 human partners:{Q9C0B1}

8646 Pathogen[ P03410] interacts with 1 human partners:{Q9C0B1}

8647 [Cluster 1391]GO:0044236+P biological\_process [name] multicellular organismal metabolic process [def] "The chemical reactions and pathways in multicellular organisms that occur at the tissue, organ, or organismal level. These processes, unlike cellular metabolism, can include transport of substances between cells when that transport is required." [GOC

8648 Pathogen[ Q2Q067] interacts with 1 human partners:{P51948}

8649 Pathogen[ P0C214] interacts with 1 human partners:{P51948}

8650 Pathogen[ P03346] interacts with 1 human partners:{P51948}

8651 Pathogen[ Q85601] interacts with 1 human partners:{P51948}

8652 Pathogen[ P14079] interacts with 1 human partners:{P51948}

8653 Pathogen[ P03383] interacts with 1 human partners:{P51948}

8654 Pathogen[ P03410] interacts with 1 human partners:{P51948}

8655 Pathogen[ P14075] interacts with 1 human partners:{P51948}

8656 Pathogen[ P0C206] interacts with 1 human partners:{P51948}

8657 [Cluster 1392]GO:0010894+P biological\_process [name] negative regulation of steroid biosynthetic process [def] "Any process that decreases the frequency, rate or extent of the chemical reactions and pathways resulting in the formation of steroids, compounds

with a 1,2,cyclopentanoperhydrophenanthrene nucleus." [GOC  
8658 Pathogen[ P14079] interacts with 2 human partners:{Q9Y5U4;O15503}  
8659 Pathogen[ P03410] interacts with 2 human partners:{Q9Y5U4;O15503}  
8660 [Cluster 1393]GO:0006701+P biological\_process [name] progesterone biosynthetic process  
[def] "The chemical reactions and pathways resulting in the formation of progesterone, a  
steroid hormone produced in the ovary which prepares and maintains the uterus for  
pregnancy. Also found in plants." [GOC  
8661 Pathogen[ P14079] interacts with 1 human partners:{P01225}  
8662 [Cluster 1394]GO:0048145+P biological\_process [name] regulation of fibroblast  
proliferation [def] "Any process that modulates the frequency, rate or extent of  
multiplication or reproduction of fibroblast cells." [GOC  
8663 Pathogen[ Q2Q067] interacts with 1 human partners:{O60934}  
8664 Pathogen[ P03346] interacts with 1 human partners:{O60934}  
8665 Pathogen[ Q85601] interacts with 1 human partners:{O60934}  
8666 Pathogen[ P14079] interacts with 1 human partners:{O60934}  
8667 Pathogen[ P03410] interacts with 1 human partners:{O60934}  
8668 Pathogen[ P0C206] interacts with 1 human partners:{O60934}  
8669 [Cluster 1395]GO:0006821+P biological\_process [name] chloride transport [def] "The  
directed movement of chloride into, out of or within a cell, or between cells, by means  
of some agent such as a transporter or pore." [GOC  
8670 Pathogen[ Q2Q067] interacts with 1 human partners:{P54105}  
8671 Pathogen[ P03346] interacts with 3 human partners:{P54105;O00299;O95833}  
8672 Pathogen[ Q85601] interacts with 1 human partners:{P54105}  
8673 Pathogen[ P14079] interacts with 6 human  
partners:{A1A5B4;Q9NQ90;Q9BYT9;Q8WZ55;Q96S66;P54105}  
8674 Pathogen[ P03383] interacts with 1 human partners:{P54105}  
8675 Pathogen[ P03410] interacts with 6 human  
partners:{Q9NQ90;Q8WZ55;P54105;Q9BYT9;Q96S66;A1A5B4}  
8676 Pathogen[ P14075] interacts with 1 human partners:{P54105}  
8677 Pathogen[ P0C206] interacts with 3 human partners:{Q9NQ90;P54105;Q96S66}  
8678 Pathogen[ P03363] interacts with 2 human partners:{P54105;O95833}  
8679 [Cluster 1396]GO:0006487+P biological\_process [name] protein N-linked glycosylation  
[def] "A protein glycosylation process in which a sugar unit is added to a protein via  
the N4 atom of peptidyl-asparagine, the omega-N of arginine, or the N1' atom  
peptidyl-tryptophan." [RESID  
8680 Pathogen[ P14079] interacts with 3 human partners:{P39656;P04844;Q3V5L5}  
8681 Pathogen[ P03410] interacts with 3 human partners:{Q3V5L5;P04844;P39656}  
8682 Pathogen[ P0C206] interacts with 1 human partners:{P39656}  
8683 [Cluster 1397]GO:0016266+P biological\_process [name] O-glycan processing [def] "The  
stepwise addition of sugar residues to the initially added O-linked sugar (usually  
GalNAc) to form a core O-glycan structure." [GOC  
8684 Pathogen[ P14079] interacts with 5 human  
partners:{Q8N307;Q9H488;Q8TAX7;P15941;Q5SSG8}  
8685 Pathogen[ P03410] interacts with 6 human  
partners:{Q5SSG8;P15941;Q8N307;Q8TAX7;Q96DR8;Q9H488}  
8686 Pathogen[ P14075] interacts with 1 human partners:{Q8TAX7}  
8687 Pathogen[ P0C206] interacts with 1 human partners:{Q8TAX7}  
8688 [Cluster 1398]GO:0072675+P biological\_process [name] osteoclast fusion [def] "The  
plasma membrane fusion process that results in fusion of mononuclear osteoclasts to form  
a multinuclear osteoclast." [CL  
8689 Pathogen[ P14079] interacts with 1 human partners:{Q9H295}  
8690 [Cluster 1399]GO:1900087+P  
8691 Pathogen[ P03346] interacts with 1 human partners:{Q8WVI7}  
8692 Pathogen[ P14079] interacts with 1 human partners:{Q8WVI7}  
8693 Pathogen[ P03410] interacts with 1 human partners:{Q8WVI7}  
8694 Pathogen[ P0C206] interacts with 1 human partners:{Q8WVI7}  
8695 [Cluster 1400]GO:0072160+P biological\_process [name] nephron tubule epithelial cell  
differentiation [def] "The process in which relatively unspecialized cells acquire  
specialized structural and/or functional features that characterize the cells of the  
nephron tubule as it progresses from its formation to the mature state." [GOC  
8696 Pathogen[ P14079] interacts with 1 human partners:{Q06413}  
8697 [Cluster 1401]GO:0019693+P biological\_process [name] ribose phosphate metabolic  
process [def] "The chemical reactions and pathways involving ribose phosphate, any  
phosphorylated ribose sugar." [GOC  
8698 Pathogen[ Q2Q067] interacts with 1 human partners:{P49247}  
8699 Pathogen[ P0C214] interacts with 1 human partners:{P49247}  
8700 Pathogen[ P03346] interacts with 1 human partners:{P49247}  
8701 Pathogen[ Q85601] interacts with 1 human partners:{P49247}  
8702 Pathogen[ P14079] interacts with 1 human partners:{P49247}  
8703 Pathogen[ P03383] interacts with 1 human partners:{P49247}  
8704 Pathogen[ P03410] interacts with 1 human partners:{P49247}  
8705 Pathogen[ P14075] interacts with 1 human partners:{P49247}  
8706 Pathogen[ P0C206] interacts with 1 human partners:{P49247}  
8707 [Cluster 1402]GO:0060014+P biological\_process [name] granulosa cell differentiation  
[def] "The process in which a relatively unspecialized cell acquires the specialized  
features of a granulosa cell, a supporting cell for the developing female gamete in the

ovary of mammals." [GOC  
8708 Pathogen[ P03346] interacts with 1 human partners:{P58012}  
8709 [Cluster 1403]GO:0030221+P biological\_process [name] basophil differentiation [def] "The process in which a relatively unspecialized myeloid precursor cell acquires specialized features of a basophil cell." [GOC  
8710 Pathogen[ Q2Q067] interacts with 1 human partners:{P15976}  
8711 Pathogen[ P03346] interacts with 2 human partners:{P17542;P15976}  
8712 Pathogen[ Q85601] interacts with 1 human partners:{P15976}  
8713 Pathogen[ P14079] interacts with 1 human partners:{P15976}  
8714 Pathogen[ P03410] interacts with 1 human partners:{P15976}  
8715 Pathogen[ POC206] interacts with 1 human partners:{P15976}  
8716 [Cluster 1404]GO:0002237+P biological\_process [name] response to molecule of bacterial origin [def] "Any process that results in a change in state or activity of an organism (in terms of movement, secretion, enzyme production, gene expression, etc.) as a result of a stimulus by molecules of bacterial origin such as peptides derived from bacterial flagellin." [GOC  
8717 Pathogen[ Q2Q067] interacts with 3 human partners:{Q9UDY8;O95999;P25063}  
8718 Pathogen[ POC214] interacts with 3 human partners:{Q9UDY8;O95999;P25063}  
8719 Pathogen[ P03346] interacts with 3 human partners:{Q9UDY8;O95999;P25063}  
8720 Pathogen[ Q85601] interacts with 2 human partners:{Q9UDY8;O95999}  
8721 Pathogen[ P14079] interacts with 2 human partners:{O95999;P25063}  
8722 Pathogen[ P03383] interacts with 2 human partners:{P25063;O95999}  
8723 Pathogen[ P03410] interacts with 2 human partners:{O95999;P25063}  
8724 Pathogen[ P14075] interacts with 2 human partners:{O95999;P25063}  
8725 Pathogen[ POC206] interacts with 3 human partners:{Q9UDY8;O95999;P25063}  
8726 [Cluster 1405]GO:0006501+P biological\_process [name] C-terminal protein lipidation [def] "The covalent attachment of a lipid group to the carboxy terminus of a protein." [GOC  
8727 Pathogen[ Q2Q067] interacts with 1 human partners:{Q14442}  
8728 Pathogen[ P03346] interacts with 1 human partners:{Q14442}  
8729 Pathogen[ P14079] interacts with 11 human partners:{O43292;Q14442;Q96S52;P57054;Q9BRB3;Q9Y2B2;O94777;Q969N2;Q9P2X0;Q9H490;Q8TB F5}  
8730 Pathogen[ P03410] interacts with 8 human partners:{Q9Y2B2;O94777;Q14442;Q96S52;Q9BRB3;Q969N2;Q9H490;Q9P2X0}  
8731 Pathogen[ P14075] interacts with 2 human partners:{O94777;Q14442}  
8732 Pathogen[ POC206] interacts with 3 human partners:{Q14442;O94777;Q9Y2B2}  
8733 [Cluster 1406]GO:0034695+P biological\_process [name] response to prostaglandin E stimulus [def] "Any process that results in a change in state or activity of a cell or an organism (in terms of movement, secretion, enzyme production, gene expression, etc.) as a result of a prostaglandin E stimulus." [GOC  
8734 Pathogen[ POC214] interacts with 2 human partners:{Q16613;P05543}  
8735 Pathogen[ Q85601] interacts with 1 human partners:{Q16613}  
8736 Pathogen[ P14079] interacts with 1 human partners:{Q16613}  
8737 Pathogen[ P03383] interacts with 1 human partners:{Q16613}  
8738 Pathogen[ P03410] interacts with 1 human partners:{Q16613}  
8739 Pathogen[ P14075] interacts with 1 human partners:{Q16613}  
8740 Pathogen[ POC206] interacts with 1 human partners:{Q16613}  
8741 [Cluster 1407]GO:2000277+P biological\_process [name] positive regulation of oxidative phosphorylation uncoupler activity [def] "Any process that activates or increases the frequency, rate or extent of oxidative phosphorylation uncoupler activity." [GOC  
8742 Pathogen[ Q2Q067] interacts with 1 human partners:{Q99497}  
8743 Pathogen[ POC214] interacts with 1 human partners:{Q99497}  
8744 Pathogen[ P03346] interacts with 1 human partners:{Q99497}  
8745 Pathogen[ Q85601] interacts with 1 human partners:{Q99497}  
8746 Pathogen[ P14079] interacts with 1 human partners:{Q99497}  
8747 Pathogen[ P03410] interacts with 1 human partners:{Q99497}  
8748 Pathogen[ POC206] interacts with 1 human partners:{Q99497}  
8749 [Cluster 1408]GO:0008228+P biological\_process [name] opsonization [def] "The process in which a microorganism (or other particulate material) is rendered more susceptible to phagocytosis by coating with an opsonin, a blood serum protein such as a complement component or antibody." [GOC  
8750 Pathogen[ P14079] interacts with 1 human partners:{Q08722}  
8751 Pathogen[ P03410] interacts with 1 human partners:{Q08722}  
8752 [Cluster 1409]GO:0045987+P biological\_process [name] positive regulation of smooth muscle contraction [def] "Any process that activates or increases the frequency, rate or extent of smooth muscle contraction." [GOC  
8753 Pathogen[ Q2Q067] interacts with 1 human partners:{P11831}  
8754 Pathogen[ POC214] interacts with 1 human partners:{P11831}  
8755 Pathogen[ P03346] interacts with 1 human partners:{P11831}  
8756 Pathogen[ Q85601] interacts with 1 human partners:{P11831}  
8757 Pathogen[ P03383] interacts with 1 human partners:{P11831}  
8758 Pathogen[ P03410] interacts with 1 human partners:{P11831}  
8759 Pathogen[ P14075] interacts with 1 human partners:{P11831}  
8760 Pathogen[ POC206] interacts with 1 human partners:{P11831}  
8761 Pathogen[ P03363] interacts with 1 human partners:{P11831}

8762 [Cluster 1410]GO:0021678+P biological\_process [name] third ventricle development [def] "The process whose specific outcome is the progression of the third ventricle over time, from its formation to the mature structure. The third ventricle is the narrow cleft inferior to the corpus callosum, within the diencephalon, between the paired thalami. Its floor is formed by the hypothalamus, its anterior wall by the lamina terminalis, and its roof by ependyma, and it communicates with the fourth ventricle by the cerebral aqueduct, and with the lateral ventricles by the interventricular foramina." [GO\_REF

8763 Pathogen[ Q2Q067] interacts with 1 human partners:{Q8NHM5}

8764 Pathogen[ P0C214] interacts with 2 human partners:{P35580;Q8NHM5}

8765 Pathogen[ P03346] interacts with 1 human partners:{Q8NHM5}

8766 Pathogen[ Q85601] interacts with 2 human partners:{Q8NHM5;P35580}

8767 Pathogen[ P14079] interacts with 2 human partners:{Q9BVM2;Q8NHM5}

8768 Pathogen[ P03383] interacts with 1 human partners:{P35580}

8769 Pathogen[ P03410] interacts with 2 human partners:{P35580;Q9BVM2}

8770 Pathogen[ P14075] interacts with 1 human partners:{Q9BVM2}

8771 Pathogen[ P0C206] interacts with 3 human partners:{Q9BVM2;Q8NHM5;P35580}

8772 [Cluster 1411]GO:0017004+P biological\_process [name] cytochrome complex assembly [def] "The aggregation, arrangement and bonding together of a cytochrome complex. A cytochrome complex is a protein complex in which at least one of the proteins is a cytochrome, i.e. a heme-containing protein involved in catalysis of redox reactions." [GOC

8773 Pathogen[ P14079] interacts with 2 human partners:{Q12887;P13498}

8774 Pathogen[ P03410] interacts with 1 human partners:{Q12887}

8775 [Cluster 1412]GO:0002502+P biological\_process [name] peptide antigen assembly with MHC class I protein complex [def] "The binding of a peptide to the antigen binding groove of an MHC class I protein complex. Class I here refers to classical class I molecules." [GOC

8776 Pathogen[ Q2Q067] interacts with 1 human partners:{P27797}

8777 Pathogen[ P0C214] interacts with 1 human partners:{P27797}

8778 Pathogen[ P03346] interacts with 1 human partners:{P27797}

8779 Pathogen[ Q85601] interacts with 1 human partners:{P27797}

8780 Pathogen[ P03383] interacts with 1 human partners:{P27797}

8781 Pathogen[ P03410] interacts with 1 human partners:{P27797}

8782 Pathogen[ P14075] interacts with 1 human partners:{P27797}

8783 Pathogen[ P0C206] interacts with 1 human partners:{P27797}

8784 Pathogen[ P03363] interacts with 1 human partners:{P27797}

8785 [Cluster 1413]GO:0006700+P biological\_process [name] C21-steroid hormone biosynthetic process [def] "The chemical reactions and pathways resulting in the formation of C21-steroid hormones, steroid compounds containing 21 carbons which function as hormones." [GOC

8786 Pathogen[ Q2Q067] interacts with 1 human partners:{P15121}

8787 Pathogen[ P0C214] interacts with 1 human partners:{P15121}

8788 Pathogen[ P03346] interacts with 1 human partners:{P15121}

8789 Pathogen[ Q85601] interacts with 1 human partners:{P15121}

8790 Pathogen[ P0C206] interacts with 1 human partners:{P15121}

8791 [Cluster 1414]GO:0034241+P biological\_process [name] positive regulation of macrophage fusion [def] "Any process that activates or increases the frequency, rate or extent of macrophage fusion." [GOC

8792 Pathogen[ P14079] interacts with 1 human partners:{Q9H295}

8793 [Cluster 1415]GO:0000435+P biological\_process [name] positive regulation of transcription from RNA polymerase II promoter by galactose [def] "Any process involving galactose that activates or increases the rate of transcription from an RNA polymerase II promoter." [GOC

8794 Pathogen[ P03346] interacts with 1 human partners:{Q15788}

8795 Pathogen[ P14079] interacts with 1 human partners:{Q15788}

8796 Pathogen[ P0C206] interacts with 1 human partners:{Q15788}

8797 [Cluster 1416]GO:0007388+P biological\_process [name] posterior compartment specification [def] "The process involved in the specification of cell identity in the posterior compartments of the segmented embryo." [http

8798 Pathogen[ Q2Q067] interacts with 1 human partners:{P40426}

8799 Pathogen[ P03346] interacts with 1 human partners:{P40426}

8800 Pathogen[ Q85601] interacts with 1 human partners:{P40426}

8801 Pathogen[ P03410] interacts with 1 human partners:{P40426}

8802 Pathogen[ P0C206] interacts with 1 human partners:{P40426}

8803 Pathogen[ P03363] interacts with 1 human partners:{P40426}

8804 [Cluster 1417]GO:0030029+P biological\_process [name] actin filament-based process [def] "Any cellular process that depends upon or alters the actin cytoskeleton, that part of the cytoskeleton comprising actin filaments and their associated proteins." [GOC

8805 Pathogen[ Q2Q067] interacts with 1 human partners:{Q92556}

8806 Pathogen[ P0C214] interacts with 1 human partners:{Q92556}

8807 Pathogen[ P03346] interacts with 1 human partners:{Q92556}

8808 Pathogen[ P14079] interacts with 1 human partners:{Q92556}

8809 Pathogen[ P03410] interacts with 1 human partners:{Q92556}

8810 Pathogen[ P0C206] interacts with 1 human partners:{Q92556}

8811 Pathogen[ P03363] interacts with 1 human partners:{Q92556}

8812 [Cluster 1418]GO:0048515+P biological\_process [name] spermatid differentiation [def] "The process whose specific outcome is the progression of a spermatid over time, from initial commitment of the cell to a specific fate, to the fully functional differentiated cell." [GOC]

8813 Pathogen[ P03346] interacts with 1 human partners:{P41225}

8814 Pathogen[ P14079] interacts with 1 human partners:{O15259}

8815 Pathogen[ P03410] interacts with 1 human partners:{O15259}

8816 Pathogen[ P03363] interacts with 1 human partners:{O15259}

8817 [Cluster 1419]GO:0006172+P biological\_process [name] ADP biosynthetic process [def] "The chemical reactions and pathways resulting in the formation of ADP, adenosine 5'-diphosphate." [GOC]

8818 Pathogen[ P14079] interacts with 1 human partners:{P25705}

8819 Pathogen[ P03410] interacts with 1 human partners:{P25705}

8820 [Cluster 1420]GO:0016139+P biological\_process [name] glycoside catabolic process [def] "The chemical reactions and pathways resulting in the breakdown of glycosides, compounds in which a glycosyl group is substituted into a hydroxyl, thiol or selenol group in another compound." [GOC]

8821 Pathogen[ P0C214] interacts with 1 human partners:{Q9H227}

8822 Pathogen[ P14079] interacts with 2 human partners:{P06280;P17050}

8823 [Cluster 1421]GO:0043467+P biological\_process [name] regulation of generation of precursor metabolites and energy [def] "Any process that modulates the frequency, rate or extent of the chemical reactions and pathways resulting in the formation of precursor metabolites, substances from which energy is derived, and the processes involved in the liberation of energy from these substances." [GOC]

8824 Pathogen[ P03346] interacts with 1 human partners:{Q15270}

8825 Pathogen[ P0C206] interacts with 1 human partners:{Q15270}

8826 Pathogen[ P03363] interacts with 1 human partners:{Q15270}

8827 [Cluster 1422]GO:0008053+P biological\_process [name] mitochondrial fusion [def] "Merging of two or more mitochondria within a cell to form a single compartment." [PMID]

8828 Pathogen[ Q2Q067] interacts with 1 human partners:{Q9NX63}

8829 Pathogen[ P0C214] interacts with 1 human partners:{Q9NX63}

8830 Pathogen[ P03346] interacts with 1 human partners:{Q9NX63}

8831 Pathogen[ Q85601] interacts with 1 human partners:{Q9NX63}

8832 Pathogen[ P03383] interacts with 1 human partners:{Q9NX63}

8833 Pathogen[ P03410] interacts with 2 human partners:{Q9NQG6;Q9NX63}

8834 Pathogen[ P14075] interacts with 1 human partners:{Q9NX63}

8835 Pathogen[ P0C206] interacts with 1 human partners:{Q9NX63}

8836 Pathogen[ P03363] interacts with 1 human partners:{Q9NX63}

8837 [Cluster 1423]GO:0060122+P biological\_process [name] inner ear receptor stereocilium organization [def] "A process that is carried out at the cellular level which results in the assembly, arrangement of constituent parts, or disassembly of a stereocilium. A stereocilium is an actin-based protrusion from the apical surface of inner ear receptor cells." [GOC]

8838 Pathogen[ P14079] interacts with 1 human partners:{Q8TCU4}

8839 Pathogen[ P03410] interacts with 1 human partners:{Q8TCU4}

8840 Pathogen[ P0C206] interacts with 1 human partners:{Q8TCU4}

8841 [Cluster 1424]GO:0034698+P biological\_process [name] response to gonadotropin stimulus [def] "Any process that results in a change in state or activity of a cell or an organism (in terms of movement, secretion, enzyme production, gene expression, etc.) as a result of a gonadotropin stimulus." [GOC]

8842 Pathogen[ P14079] interacts with 1 human partners:{P10109}

8843 Pathogen[ P03410] interacts with 1 human partners:{P10109}

8844 [Cluster 1425]GO:0021873+P biological\_process [name] forebrain neuroblast division [def] "The division of a neuroblast located in the forebrain. Neuroblast division gives rise to at least another neuroblast." [GO\_REF]

8845 Pathogen[ Q2Q067] interacts with 1 human partners:{Q8IZT6}

8846 Pathogen[ P0C214] interacts with 1 human partners:{Q8IZT6}

8847 Pathogen[ P03346] interacts with 1 human partners:{Q8IZT6}

8848 Pathogen[ Q85601] interacts with 1 human partners:{Q8IZT6}

8849 Pathogen[ P14079] interacts with 1 human partners:{Q8IZT6}

8850 Pathogen[ P03410] interacts with 1 human partners:{Q8IZT6}

8851 Pathogen[ P0C206] interacts with 1 human partners:{Q8IZT6}

8852 Pathogen[ P03363] interacts with 1 human partners:{Q8IZT6}

8853 [Cluster 1426]GO:0010269+P biological\_process [name] response to selenium ion [def] "Any process that results in a change in state or activity of a cell or an organism (in terms of movement, secretion, enzyme production, gene expression, etc.) as a result of a stimulus from selenium ion." [GOC]

8854 Pathogen[ Q2Q067] interacts with 1 human partners:{Q9NNW7}

8855 Pathogen[ P0C214] interacts with 1 human partners:{Q9NNW7}

8856 Pathogen[ P03346] interacts with 1 human partners:{Q9NNW7}

8857 Pathogen[ P14079] interacts with 1 human partners:{Q9NNW7}

8858 Pathogen[ P03410] interacts with 1 human partners:{Q9NNW7}

8859 Pathogen[ P0C206] interacts with 1 human partners:{Q9NNW7}

8860 Pathogen[ P03363] interacts with 1 human partners:{Q9NNW7}

8861 [Cluster 1427]GO:0001895+P biological\_process [name] retina homeostasis [def] "A tissue homeostatic process involved in the maintenance of an internal equilibrium within

the retina of the eye, including control of cellular proliferation and death and control of metabolic function." [GOC

8862 Pathogen[ P03346] interacts with 1 human partners:{P0C7Q2}

8863 Pathogen[ P14079] interacts with 2 human partners:{Q8NFWJ9;P0C7Q2}

8864 Pathogen[ P03410] interacts with 2 human partners:{Q8NFWJ9;P0C7Q2}

8865 Pathogen[ P0C206] interacts with 1 human partners:{Q8NFWJ9}

8866 Pathogen[ P03363] interacts with 2 human partners:{Q9NZN9;Q8NFWJ9}

8867 [Cluster 1428]GO:0072592+P biological\_process [name] oxygen metabolic process [def] "The chemical reactions and pathways involving diatomic oxygen (O2)." [CHEBI

8868 Pathogen[ P0C214] interacts with 1 human partners:{Q16798}

8869 [Cluster 1429]GO:0060444+P biological\_process [name] branching involved in mammary gland duct morphogenesis [def] "The process in which the branching structure of the mammary gland duct is generated and organized. The mammary gland is a large compound sebaceous gland that in female mammals is modified to secrete milk." [GOC

8870 Pathogen[ Q2Q067] interacts with 3 human partners:{Q9Y297;P35548;P43268}

8871 Pathogen[ P0C214] interacts with 3 human partners:{Q9Y297;P43268;P35548}

8872 Pathogen[ P03346] interacts with 3 human partners:{P35548;P43268;Q9Y297}

8873 Pathogen[ Q85601] interacts with 2 human partners:{P35548;P43268}

8874 Pathogen[ P03383] interacts with 2 human partners:{P35548;P43268}

8875 Pathogen[ P03410] interacts with 2 human partners:{P35548;P43268}

8876 Pathogen[ P14075] interacts with 2 human partners:{P43268;P35548}

8877 Pathogen[ P0C206] interacts with 2 human partners:{P43268;P35548}

8878 Pathogen[ P03363] interacts with 2 human partners:{P35548;P43268}

8879 [Cluster 1430]GO:0071284+P biological\_process [name] cellular response to lead ion [def] "Any process that results in a change in state or activity of a cell (in terms of movement, secretion, enzyme production, gene expression, etc.) as a result of a lead ion stimulus." [GOC

8880 Pathogen[ Q2Q067] interacts with 1 human partners:{P08397}

8881 Pathogen[ P0C214] interacts with 1 human partners:{P08397}

8882 Pathogen[ Q85601] interacts with 1 human partners:{P08397}

8883 Pathogen[ P14079] interacts with 1 human partners:{P08397}

8884 Pathogen[ P03383] interacts with 1 human partners:{P08397}

8885 Pathogen[ P03410] interacts with 1 human partners:{P08397}

8886 Pathogen[ P14075] interacts with 1 human partners:{P08397}

8887 Pathogen[ P0C206] interacts with 1 human partners:{P08397}

8888 [Cluster 1431]GO:0070350+P biological\_process [name] regulation of white fat cell proliferation [def] "Any process that modulates the frequency, rate or extent of white fat cell proliferation." [GOC

8889 Pathogen[ P14079] interacts with 1 human partners:{Q9C0B1}

8890 Pathogen[ P03410] interacts with 1 human partners:{Q9C0B1}

8891 [Cluster 1432]GO:0046327+P biological\_process [name] glycerol biosynthetic process from pyruvate [def] "The chemical reactions and pathways resulting in the formation of glycerol, 1,2,3-propanetriol, from other compounds, including pyruvate." [GOC

8892 Pathogen[ P0C214] interacts with 1 human partners:{P35558}

8893 [Cluster 1433]GO:0018146+P biological\_process [name] keratan sulfate biosynthetic process [def] "The chemical reactions and pathways resulting in the formation of keratan sulfate, a glycosaminoglycan with repeat units consisting of beta-1,4-linked D-galactopyranosyl-beta-(1,4)-N-acetyl-D-glucosamine 6-sulfate and with variable amounts of fucose, sialic acid and mannose units\_ keratan sulfate chains are covalently linked by a glycosidic attachment through the trisaccharide galactosyl-galactosyl-xylose to peptidyl-threonine or serine residues." [ISBN

8894 Pathogen[ P14079] interacts with 1 human partners:{O43505}

8895 Pathogen[ P03410] interacts with 1 human partners:{O43505}

8896 Pathogen[ P14075] interacts with 1 human partners:{O43505}

8897 Pathogen[ P0C206] interacts with 1 human partners:{O43505}

8898 [Cluster 1434]GO:0019556+P biological\_process [name] histidine catabolic process to glutamate and formamide [def] "The chemical reactions and pathways resulting in the breakdown of histidine into other compounds, including glutamate and formamide." [GOC

8899 Pathogen[ Q2Q067] interacts with 1 human partners:{Q96NU7}

8900 Pathogen[ P0C214] interacts with 1 human partners:{Q96NU7}

8901 Pathogen[ P03346] interacts with 1 human partners:{Q96NU7}

8902 Pathogen[ P14079] interacts with 4 human partners:{P42357;Q96NU7;Q96N76;O95954}

8903 Pathogen[ P03410] interacts with 3 human partners:{O95954;Q96NU7;Q96N76}

8904 Pathogen[ P14075] interacts with 1 human partners:{Q96NU7}

8905 Pathogen[ P0C206] interacts with 2 human partners:{O95954;Q96NU7}

8906 [Cluster 1435]GO:0006741+P biological\_process [name] NADP biosynthetic process [def] "The chemical reactions and pathways resulting in the formation of nicotinamide-adenine dinucleotide phosphate, a coenzyme involved in many redox and biosynthetic reactions\_biosynthesis may be of either the oxidized form, NADP, or the reduced form, NADPH." [GOC

8907 Pathogen[ P0C214] interacts with 1 human partners:{P48163}

8908 Pathogen[ P14079] interacts with 2 human partners:{O95544;Q4G0N4}

8909 Pathogen[ P03410] interacts with 1 human partners:{Q4G0N4}

8910 [Cluster 1436]GO:2000507+P biological\_process [name] positive regulation of energy homeostasis [def] "Any process that activates or increases the frequency, rate or extent of energy homeostasis." [GOC

8911 Pathogen[ P0C214] interacts with 1 human partners:{Q9BQI5}

8912 Pathogen[ P03346] interacts with 1 human partners:{Q9BQI5}

8913 Pathogen[ P14079] interacts with 1 human partners:{Q9BQI5}

8914 Pathogen[ P03383] interacts with 1 human partners:{Q9BQI5}

8915 Pathogen[ P03410] interacts with 1 human partners:{Q9BQI5}

8916 Pathogen[ P14075] interacts with 1 human partners:{Q9BQI5}

8917 Pathogen[ P0C206] interacts with 1 human partners:{Q9BQI5}

8918 Pathogen[ P03363] interacts with 1 human partners:{Q9BQI5}

8919 [Cluster 1437]GO:0070625+P biological\_process [name] zymogen granule exocytosis [def] "The release of intracellular molecules contained within the zymogen granule by fusion of the granule with the plasma membrane of the oocyte, requiring calcium ions." [GOC

8920 Pathogen[ P03410] interacts with 1 human partners:{Q9BRK5}

8921 [Cluster 1438]GO:0048843+P biological\_process [name] negative regulation of axon extension involved in axon guidance [def] "Any process that stops, prevents, or reduces the frequency, rate or extent of axon extension involved in axon guidance." [GOC

8922 Pathogen[ Q2Q067] interacts with 1 human partners:{O14786}

8923 Pathogen[ P0C214] interacts with 1 human partners:{O14786}

8924 Pathogen[ P03346] interacts with 1 human partners:{O14786}

8925 Pathogen[ Q85601] interacts with 1 human partners:{O14786}

8926 Pathogen[ P03410] interacts with 1 human partners:{O14786}

8927 Pathogen[ P0C206] interacts with 1 human partners:{O14786}

8928 Pathogen[ P03363] interacts with 1 human partners:{O14786}

8929 [Cluster 1439]GO:0038084+P

8930 Pathogen[ Q2Q067] interacts with 1 human partners:{O14786}

8931 Pathogen[ P0C214] interacts with 1 human partners:{O14786}

8932 Pathogen[ P03346] interacts with 1 human partners:{O14786}

8933 Pathogen[ Q85601] interacts with 1 human partners:{O14786}

8934 Pathogen[ P03410] interacts with 1 human partners:{O14786}

8935 Pathogen[ P0C206] interacts with 1 human partners:{O14786}

8936 Pathogen[ P03363] interacts with 1 human partners:{O14786}

8937 [Cluster 1440]GO:0060816+P biological\_process [name] random inactivation of X chromosome [def] "Compensating for the two-fold variation in X-chromosome

8938 Pathogen[ Q2Q067] interacts with 1 human partners:{Q9NVW2}

8939 Pathogen[ P0C214] interacts with 1 human partners:{Q9NVW2}

8940 Pathogen[ P03346] interacts with 1 human partners:{Q9NVW2}

8941 Pathogen[ Q85601] interacts with 1 human partners:{Q9NVW2}

8942 Pathogen[ P0C206] interacts with 1 human partners:{Q9NVW2}

8943 Pathogen[ P03363] interacts with 1 human partners:{Q9NVW2}

8944 [Cluster 1441]GO:0060527+P biological\_process [name] prostate epithelial cord arborization involved in prostate glandular acinus morphogenesis [def] "The branching morphogenesis process in which the prostate epithelial cords branch freely to create the structure of the prostate acini." [GOC

8945 Pathogen[ P03346] interacts with 2 human partners:{P35453;Q92826}

8946 Pathogen[ P14079] interacts with 1 human partners:{Q8WU20}

8947 Pathogen[ P03410] interacts with 1 human partners:{Q8WU20}

8948 Pathogen[ P0C206] interacts with 1 human partners:{Q8WU20}

8949 Pathogen[ P03363] interacts with 2 human partners:{P35453;Q92826}

8950 [Cluster 1442]GO:0080164+P biological\_process [name] regulation of nitric oxide metabolic process [def] "Any process that modulates the frequency, rate or extent of the chemical reactions and pathways involving nitric oxide, nitrogen monoxide (NO), a colorless gas only slightly soluble in water." [GOC

8951 Pathogen[ Q2Q067] interacts with 1 human partners:{Q9BQE4}

8952 Pathogen[ P0C214] interacts with 1 human partners:{Q9BQE4}

8953 Pathogen[ Q85601] interacts with 1 human partners:{Q9BQE4}

8954 Pathogen[ P14079] interacts with 1 human partners:{Q9BQE4}

8955 Pathogen[ P03383] interacts with 1 human partners:{Q9BQE4}

8956 Pathogen[ P03410] interacts with 1 human partners:{Q9BQE4}

8957 Pathogen[ P14075] interacts with 1 human partners:{Q9BQE4}

8958 Pathogen[ P0C206] interacts with 1 human partners:{Q9BQE4}

8959 [Cluster 1443]GO:0002003+P biological\_process [name] angiotensin maturation [def] "The process leading to the attainment of the full functional capacity of angiotensin by conversion of renin substrate into mature angiotensin in the blood." [ISBN

8960 Pathogen[ P14079] interacts with 1 human partners:{O75787}

8961 Pathogen[ P03410] interacts with 1 human partners:{O75787}

8962 Pathogen[ P0C206] interacts with 1 human partners:{O75787}

8963 [Cluster 1444]GO:0045080+P biological\_process [name] positive regulation of chemokine biosynthetic process [def] "Any process that activates or increases the frequency, rate or extent of the chemical reactions and pathways resulting in the formation of chemokines." [GOC

8964 Pathogen[ Q2Q067] interacts with 1 human partners:{Q8IUC6}

8965 Pathogen[ P0C214] interacts with 1 human partners:{Q8IUC6}

8966 Pathogen[ P03346] interacts with 1 human partners:{Q8IUC6}

8967 Pathogen[ Q85601] interacts with 1 human partners:{Q8IUC6}

8968 Pathogen[ P14079] interacts with 2 human partners:{Q8IUC6;Q99836}

8969 Pathogen[ P03383] interacts with 1 human partners:{Q8IUC6}



8970 Pathogen[ P03410] interacts with 1 human partners:{Q8IUC6}

8971 Pathogen[ P14075] interacts with 1 human partners:{Q8IUC6}

8972 Pathogen[ P0C206] interacts with 1 human partners:{Q8IUC6}

8973 [Cluster 1445]GO:0035854+P biological\_process [name] eosinophil fate commitment [def] "The process in which the developmental fate of a cell becomes restricted such that it will develop into a eosinophil cell. A eosinophil is any of the immature or mature forms of a granular leukocyte with a nucleus that usually has two lobes connected by one or more slender threads of chromatin, and cytoplasm containing coarse, round granules that are uniform in size and which can be stained by the dye eosin." [CL

8974 Pathogen[ Q2Q067] interacts with 2 human partners:{P15976;P23769}

8975 Pathogen[ P0C214] interacts with 1 human partners:{P23769}

8976 Pathogen[ P03346] interacts with 2 human partners:{P23769;P15976}

8977 Pathogen[ Q85601] interacts with 2 human partners:{P15976;P23769}

8978 Pathogen[ P14079] interacts with 2 human partners:{P15976;P23769}

8979 Pathogen[ P03383] interacts with 1 human partners:{P23769}

8980 Pathogen[ P03410] interacts with 2 human partners:{P23769;P15976}

8981 Pathogen[ P14075] interacts with 1 human partners:{P23769}

8982 Pathogen[ P0C206] interacts with 2 human partners:{P15976;P23769}

8983 [Cluster 1446]GO:0035573+P biological\_process [name] N-terminal peptidyl-serine trimethylation [def] "The trimethylation of the N-terminal serine of proteins to form the derivative N,N,N-trimethylserine." [PMID

8984 Pathogen[ Q2Q067] interacts with 1 human partners:{Q9BV86}

8985 Pathogen[ P0C214] interacts with 1 human partners:{Q9BV86}

8986 Pathogen[ P03346] interacts with 1 human partners:{Q9BV86}

8987 Pathogen[ Q85601] interacts with 1 human partners:{Q9BV86}

8988 Pathogen[ P14079] interacts with 1 human partners:{Q9BV86}

8989 Pathogen[ P03410] interacts with 1 human partners:{Q9BV86}

8990 Pathogen[ P0C206] interacts with 1 human partners:{Q9BV86}

8991 Pathogen[ P03363] interacts with 1 human partners:{Q9BV86}

8992 [Cluster 1447]GO:0003300+P biological\_process [name] cardiac muscle hypertrophy [def] "The enlargement or overgrowth of all or part of the heart muscle due to an increase in size of cardiac muscle cells without cell division." [GOC

8993 Pathogen[ P14079] interacts with 1 human partners:{O15273}

8994 Pathogen[ P03410] interacts with 1 human partners:{O15273}

8995 Pathogen[ P0C206] interacts with 1 human partners:{P50461}

8996 [Cluster 1448]GO:0016554+P biological\_process [name] cytidine to uridine editing [def] "The conversion of a cytosine residue to uridine in an RNA molecule by deamination." [PMID

8997 Pathogen[ P03346] interacts with 1 human partners:{Q9NQ94}

8998 Pathogen[ P14079] interacts with 2 human partners:{P41238;Q9NQ94}

8999 Pathogen[ P03410] interacts with 1 human partners:{P41238}

9000 Pathogen[ P0C206] interacts with 1 human partners:{P41238}

9001 Pathogen[ P03363] interacts with 1 human partners:{Q9NQ94}

9002 [Cluster 1449]GO:0042703+P biological\_process [name] menstruation [def] "The cyclic, physiologic discharge through the vagina of blood and endometrial tissues from the nonpregnant uterus." [GOC

9003 Pathogen[ P03346] interacts with 1 human partners:{P58012}

9004 [Cluster 1450]GO:0050819+P biological\_process [name] negative regulation of coagulation [def] "Any process that stops, prevents, or reduces the frequency, rate or extent of coagulation." [GOC

9005 Pathogen[ P14079] interacts with 1 human partners:{P08758}

9006 [Cluster 1451]GO:0032411+P biological\_process [name] positive regulation of transporter activity [def] "Any process that activates or increases the activity of a transporter." [GOC

9007 Pathogen[ P14079] interacts with 1 human partners:{O43761}

9008 Pathogen[ P03410] interacts with 1 human partners:{O43761}

9009 [Cluster 1452]GO:0046931+P biological\_process [name] pore complex assembly [def] "The aggregation, arrangement and bonding together of a set of components to form a pore complex. A pore complex is a small opening in a membrane that allows the passage of liquids and/or gases." [GOC

9010 Pathogen[ P0C214] interacts with 1 human partners:{Q92934}

9011 Pathogen[ P14079] interacts with 1 human partners:{Q92934}

9012 Pathogen[ P03410] interacts with 1 human partners:{Q92934}

9013 Pathogen[ P0C206] interacts with 1 human partners:{Q92934}

9014 [Cluster 1453]GO:0043113+P biological\_process [name] receptor clustering [def] "The receptor metabolic process that results in grouping of a set of receptors at a cellular location, often to amplify the sensitivity of a signaling response." [GOC

9015 Pathogen[ Q2Q067] interacts with 1 human partners:{Q86UL8}

9016 Pathogen[ P03346] interacts with 3 human partners:{Q86UL8;Q15700;Q9NRD5}

9017 Pathogen[ Q85601] interacts with 1 human partners:{Q86UL8}

9018 Pathogen[ P14079] interacts with 2 human partners:{Q15700;Q86UL8}

9019 Pathogen[ P03410] interacts with 3 human partners:{Q15700;Q9NRD5;Q86UL8}

9020 Pathogen[ P0C206] interacts with 3 human partners:{Q15700;Q86UL8;Q9NRD5}

9021 Pathogen[ P03363] interacts with 2 human partners:{Q15700;Q86UL8}

9022 [Cluster 1454]GO:0045337+P biological\_process [name] farnesyl diphosphate biosynthetic process [def] "The chemical reactions and pathways resulting in the formation of

farnesyl diphosphate." [GOC

9023 Pathogen[ Q2Q067] interacts with 1 human partners:{P14324}

9024 Pathogen[ POC214] interacts with 1 human partners:{P14324}

9025 Pathogen[ P03346] interacts with 1 human partners:{P14324}

9026 Pathogen[ Q85601] interacts with 1 human partners:{P14324}

9027 Pathogen[ P14079] interacts with 1 human partners:{P14324}

9028 Pathogen[ P03383] interacts with 1 human partners:{P14324}

9029 Pathogen[ P03410] interacts with 1 human partners:{P14324}

9030 Pathogen[ P14075] interacts with 1 human partners:{P14324}

9031 Pathogen[ POC206] interacts with 1 human partners:{P14324}

9032 [Cluster 1455]GO:0060290+P biological\_process [name] transdifferentiation [def] "The conversion of a differentiated cell of one fate into a differentiated cell of another fate without first undergoing cell division or reversion to a more primitive or stem cell-like fate." [GOC

9033 Pathogen[ Q2Q067] interacts with 1 human partners:{P84022}

9034 Pathogen[ POC214] interacts with 1 human partners:{P84022}

9035 Pathogen[ P03346] interacts with 1 human partners:{P84022}

9036 Pathogen[ Q85601] interacts with 1 human partners:{P84022}

9037 Pathogen[ P03383] interacts with 1 human partners:{P84022}

9038 Pathogen[ P03410] interacts with 1 human partners:{P84022}

9039 Pathogen[ P14075] interacts with 1 human partners:{P84022}

9040 Pathogen[ POC206] interacts with 1 human partners:{P84022}

9041 Pathogen[ P03363] interacts with 1 human partners:{P84022}

9042 [Cluster 1456]GO:0048680+P biological\_process [name] positive regulation of axon regeneration [def] "Any process that activates, maintains or increases the rate of axon regeneration." [GOC

9043 Pathogen[ Q85601] interacts with 1 human partners:{Q9GZM8}

9044 Pathogen[ P14079] interacts with 1 human partners:{Q9GZM8}

9045 Pathogen[ P03410] interacts with 1 human partners:{Q9GZM8}

9046 Pathogen[ POC206] interacts with 1 human partners:{Q9GZM8}

9047 [Cluster 1457]GO:0021703+P biological\_process [name] locus ceruleus development [def] "The process whose specific outcome is the progression of the locus ceruleus over time, from its formation to the mature structure. The locus ceruleus is a dense cluster of neurons within the dorsorostral pons. This nucleus is the major location of neurons that release norepinephrine throughout the brain, and is responsible for physiological responses to stress and panic." [GO\_REF

9048 Pathogen[ Q2Q067] interacts with 1 human partners:{O14813}

9049 Pathogen[ POC214] interacts with 1 human partners:{O14813}

9050 Pathogen[ P03346] interacts with 1 human partners:{O14813}

9051 Pathogen[ Q85601] interacts with 1 human partners:{O14813}

9052 Pathogen[ P14079] interacts with 1 human partners:{O14813}

9053 Pathogen[ P03410] interacts with 1 human partners:{O14813}

9054 Pathogen[ POC206] interacts with 1 human partners:{O14813}

9055 Pathogen[ P03363] interacts with 1 human partners:{O14813}

9056 [Cluster 1458]GO:0017121+P biological\_process [name] phospholipid scrambling [def] "The movement of a population of phospholipid molecules from one leaflet of the plasma membrane bilayer to the opposite leaflet, resulting in loss of lipid asymmetry and surface exposure of phosphatidylserine (PS) and phosphatidylethanolamine (PE)." [PMID

9057 Pathogen[ Q2Q067] interacts with 1 human partners:{O15162}

9058 Pathogen[ POC214] interacts with 1 human partners:{O15162}

9059 Pathogen[ P03346] interacts with 1 human partners:{O15162}

9060 Pathogen[ Q85601] interacts with 1 human partners:{O15162}

9061 Pathogen[ P14079] interacts with 2 human partners:{Q9NRQ2;O15162}

9062 Pathogen[ P03383] interacts with 1 human partners:{O15162}

9063 Pathogen[ P03410] interacts with 3 human partners:{Q9NRQ2;Q9NRY6;O15162}

9064 Pathogen[ P14075] interacts with 1 human partners:{O15162}

9065 Pathogen[ POC206] interacts with 1 human partners:{O15162}

9066 [Cluster 1459]GO:0003257+P biological\_process [name] positive regulation of transcription from RNA polymerase II promoter involved in myocardial precursor cell differentiation [def] "Any process that increases the frequency, rate or extent of transcription from an RNA polymerase II promoter that contributes to the differentiation of a myocardial precursor cell." [GOC

9067 Pathogen[ Q2Q067] interacts with 1 human partners:{P11831}

9068 Pathogen[ POC214] interacts with 1 human partners:{P11831}

9069 Pathogen[ P03346] interacts with 1 human partners:{P11831}

9070 Pathogen[ Q85601] interacts with 1 human partners:{P11831}

9071 Pathogen[ P03383] interacts with 1 human partners:{P11831}

9072 Pathogen[ P03410] interacts with 1 human partners:{P11831}

9073 Pathogen[ P14075] interacts with 1 human partners:{P11831}

9074 Pathogen[ POC206] interacts with 1 human partners:{P11831}

9075 Pathogen[ P03363] interacts with 1 human partners:{P11831}

9076 [Cluster 1460]GO:0021955+P biological\_process [name] central nervous system neuron axonogenesis [def] "Generation of a long process from a neuron whose cell body resides in the central nervous system. The process carries efferent (outgoing) action potentials from the cell body towards target cells." [GO\_REF

9077 Pathogen[ Q85601] interacts with 1 human partners:{Q9GZM8}

9078 Pathogen[ P14079] interacts with 1 human partners:{Q9GZM8}

9079 Pathogen[ P03410] interacts with 1 human partners:{Q9GZM8}

9080 Pathogen[ P0C206] interacts with 1 human partners:{Q9GZM8}

9081 [Cluster 1461]GO:0060670+P biological\_process [name] branching involved in embryonic placenta morphogenesis [def] "The process in which the branches of the fetal placental villi are generated and organized. The villous part of the placenta is called the labyrinth layer." [GOC

9082 Pathogen[ P0C214] interacts with 1 human partners:{P62993}

9083 Pathogen[ P03346] interacts with 2 human partners:{Q9NP62;P62993}

9084 Pathogen[ Q85601] interacts with 1 human partners:{P62993}

9085 Pathogen[ P14079] interacts with 1 human partners:{P62993}

9086 Pathogen[ P03410] interacts with 1 human partners:{P62993}

9087 Pathogen[ P0C206] interacts with 2 human partners:{P62993;Q9NP62}

9088 [Cluster 1462]GO:0006233+P biological\_process [name] dTDP biosynthetic process [def] "The chemical reactions and pathways resulting in the formation of dTDP, deoxyribosylthymine diphosphate (2'-deoxyribosylthymine5'-diphosphate)." [ISBN

9089 Pathogen[ P0C214] interacts with 1 human partners:{P23919}

9090 Pathogen[ P14079] interacts with 1 human partners:{P23919}

9091 Pathogen[ P03410] interacts with 1 human partners:{P23919}

9092 [Cluster 1463]GO:0050731+P biological\_process [name] positive regulation of peptidyl-tyrosine phosphorylation [def] "Any process that activates or increases the frequency, rate or extent of the phosphorylation of peptidyl-tyrosine." [GOC

9093 Pathogen[ Q2Q067] interacts with 5 human partners:{O14786;Q9H2P0;P15976;Q9BVC4;Q6R327}

9094 Pathogen[ P0C214] interacts with 4 human partners:{O14786;Q9BVC4;Q6R327;Q9H2P0}

9095 Pathogen[ P03346] interacts with 5 human partners:{Q9H2P0;Q9BVC4;P15976;Q6R327;O14786}

9096 Pathogen[ Q85601] interacts with 4 human partners:{P15976;O14786;Q9BVC4;Q9H2P0}

9097 Pathogen[ P14079] interacts with 6 human partners:{Q6R327;P20809;P15976;Q9H2P0;Q9BVC4;Q9GZZ8}

9098 Pathogen[ P03410] interacts with 6 human partners:{O14786;Q9GZZ8;P20809;Q9BVC4;Q6R327;P15976}

9099 Pathogen[ P14075] interacts with 3 human partners:{Q6R327;P20809;Q9GZZ8}

9100 Pathogen[ P0C206] interacts with 6 human partners:{P15976;O14786;Q6R327;P20809;Q9H2P0;Q9BVC4}

9101 Pathogen[ P03363] interacts with 4 human partners:{Q9BVC4;O14786;Q9H2P0;Q6R327}

9102 [Cluster 1464]GO:0009081+P biological\_process [name] branched chain family amino acid metabolic process [def] "The chemical reactions and pathways involving amino acids containing a branched carbon skeleton, comprising isoleucine, leucine and valine." [GOC

9103 Pathogen[ P0C214] interacts with 2 human partners:{O15382;P54687}

9104 Pathogen[ Q85601] interacts with 1 human partners:{O15382}

9105 Pathogen[ P14079] interacts with 1 human partners:{O15382}

9106 Pathogen[ P03410] interacts with 1 human partners:{O15382}

9107 Pathogen[ P0C206] interacts with 1 human partners:{O15382}

9108 [Cluster 1465]GO:0090035+P biological\_process [name] positive regulation of chaperone-mediated protein complex assembly [def] "Any process that increases the frequency, rate, or extent of chaperone-mediated protein complex assembly. Chaperone-mediated protein complex assembly is the aggregation, arrangement and bonding together of a set of components to form a protein complex, mediated by chaperone molecules that do not form part of the finished complex." [GOC

9109 Pathogen[ Q2Q067] interacts with 1 human partners:{Q9UNE7}

9110 Pathogen[ P0C214] interacts with 1 human partners:{Q9UNE7}

9111 Pathogen[ P03346] interacts with 1 human partners:{Q9UNE7}

9112 Pathogen[ Q85601] interacts with 1 human partners:{Q9UNE7}

9113 Pathogen[ P03410] interacts with 1 human partners:{Q9UNE7}

9114 Pathogen[ P0C206] interacts with 1 human partners:{Q9UNE7}

9115 Pathogen[ P03363] interacts with 1 human partners:{Q9UNE7}

9116 [Cluster 1466]GO:0072139+P biological\_process [name] glomerular parietal epithelial cell differentiation [def] "The process in which a relatively unspecialized cell acquires specialized features of a glomerular parietal epithelial cell. Glomerular parietal epithelial cells are specialized epithelial cells that form tight junctions as a barrier to protein transport." [GOC

9117 Pathogen[ Q2Q067] interacts with 1 human partners:{P25063}

9118 Pathogen[ P0C214] interacts with 1 human partners:{P25063}

9119 Pathogen[ P03346] interacts with 1 human partners:{P25063}

9120 Pathogen[ P14079] interacts with 1 human partners:{P25063}

9121 Pathogen[ P03383] interacts with 1 human partners:{P25063}

9122 Pathogen[ P03410] interacts with 1 human partners:{P25063}

9123 Pathogen[ P14075] interacts with 1 human partners:{P25063}

9124 Pathogen[ P0C206] interacts with 1 human partners:{P25063}

9125 [Cluster 1467]GO:0060413+P biological\_process [name] atrial septum morphogenesis [def] "The developmental process in which atrial septum is generated and organized. The atrial septum separates the upper chambers (the atria) of the heart from one another." [GOC

9126 Pathogen[ Q2Q067] interacts with 1 human partners:{Q8IX07}

9127 Pathogen[ P0C214] interacts with 1 human partners:{Q8IX07}

9128 Pathogen[ P03346] interacts with 1 human partners:{Q8IX07}

9129 Pathogen[ Q85601] interacts with 1 human partners:{Q8IX07}

9130 Pathogen[ P14079] interacts with 1 human partners:{Q8IX07}

9131 Pathogen[ P03410] interacts with 1 human partners:{Q8IX07}

9132 Pathogen[ P0C206] interacts with 1 human partners:{Q8IX07}

9133 [Cluster 1468]GO:0055123+P biological\_process [name] digestive system development [def] "The process whose specific outcome is the progression of the digestive system over time, from its formation to the mature structure. The digestive system is the entire structure in which digestion takes place. Digestion is all of the physical, chemical, and biochemical processes carried out by multicellular organisms to break down ingested nutrients into components that may be easily absorbed and directed into metabolism." [GOC

9134 Pathogen[ P03346] interacts with 2 human partners:{P78367;Q9HBU1}

9135 Pathogen[ P03363] interacts with 2 human partners:{P78367;Q9HBU1}

9136 [Cluster 1469]GO:0051647+P biological\_process [name] nucleus localization [def] "Any process in which the nucleus is transported to, and/or maintained in, a specific location within the cell." [GOC

9137 Pathogen[ Q2Q067] interacts with 1 human partners:{P60953}

9138 Pathogen[ P0C214] interacts with 1 human partners:{P60953}

9139 Pathogen[ P03346] interacts with 1 human partners:{P60953}

9140 Pathogen[ Q85601] interacts with 1 human partners:{P60953}

9141 Pathogen[ P03383] interacts with 1 human partners:{P60953}

9142 Pathogen[ P03410] interacts with 1 human partners:{P60953}

9143 Pathogen[ P14075] interacts with 1 human partners:{P60953}

9144 Pathogen[ P0C206] interacts with 1 human partners:{P60953}

9145 Pathogen[ P03363] interacts with 1 human partners:{P60953}

9146 [Cluster 1470]GO:0051205+P biological\_process [name] protein insertion into membrane [def] "The process that results in the incorporation of a protein into a biological membrane." [GOC

9147 Pathogen[ P0C214] interacts with 1 human partners:{Q9H902}

9148 Pathogen[ P03346] interacts with 1 human partners:{Q9H902}

9149 Pathogen[ Q85601] interacts with 1 human partners:{Q9H902}

9150 Pathogen[ P14079] interacts with 2 human partners:{Q15070;Q9H902}

9151 Pathogen[ P03410] interacts with 2 human partners:{Q9H902;Q15070}

9152 Pathogen[ P14075] interacts with 1 human partners:{Q15070}

9153 Pathogen[ P0C206] interacts with 2 human partners:{Q15070;Q9H902}

9154 Pathogen[ P03363] interacts with 1 human partners:{Q9H902}

9155 [Cluster 1471]GO:0009107+P biological\_process [name] lipoate biosynthetic process [def] "The chemical reactions and pathways resulting in the formation of lipoate, 1,2-dithiolane-3-pentanoate, the anion derived from lipoic acid." [GOC

9156 Pathogen[ P0C214] interacts with 1 human partners:{A6NK58}

9157 Pathogen[ P14079] interacts with 1 human partners:{A6NK58}

9158 Pathogen[ P03410] interacts with 1 human partners:{A6NK58}

9159 Pathogen[ P0C206] interacts with 1 human partners:{A6NK58}

9160 [Cluster 1472]GO:0015672+P biological\_process [name] monovalent inorganic cation transport [def] "The directed movement of inorganic cations with a valency of one into, out of or within a cell, or between cells, by means of some agent such as a transporter or pore. Inorganic cations are atoms or small molecules with a positive charge which do not contain carbon in covalent linkage." [GOC

9161 Pathogen[ P0C214] interacts with 1 human partners:{P16157}

9162 Pathogen[ P03346] interacts with 1 human partners:{P16157}

9163 Pathogen[ Q85601] interacts with 1 human partners:{P16157}

9164 Pathogen[ P14079] interacts with 3 human partners:{P16157;Q9UN42;Q9H6F2}

9165 Pathogen[ P03410] interacts with 3 human partners:{P16157;Q9H6F2;Q9UN42}

9166 Pathogen[ P0C206] interacts with 2 human partners:{P16157;Q9UN42}

9167 Pathogen[ P03363] interacts with 1 human partners:{P16157}

9168 [Cluster 1473]GO:0016476+P biological\_process [name] regulation of embryonic cell shape [def] "Any process that modulates the surface configuration of an embryonic cell." [GOC

9169 Pathogen[ P14079] interacts with 1 human partners:{O95876}

9170 Pathogen[ P03410] interacts with 1 human partners:{O95876}

9171 Pathogen[ P0C206] interacts with 2 human partners:{Q16181;O95876}

9172 [Cluster 1474]GO:0001963+P biological\_process [name] synaptic transmission, dopaminergic [def] "The process of communication from a neuron to another neuron across a synapse using the neurotransmitter dopamine." [GOC

9173 Pathogen[ Q2Q067] interacts with 1 human partners:{Q99497}

9174 Pathogen[ P0C214] interacts with 1 human partners:{Q99497}

9175 Pathogen[ P03346] interacts with 1 human partners:{Q99497}

9176 Pathogen[ Q85601] interacts with 1 human partners:{Q99497}

9177 Pathogen[ P14079] interacts with 1 human partners:{Q99497}

9178 Pathogen[ P03410] interacts with 1 human partners:{Q99497}

9179 Pathogen[ P0C206] interacts with 1 human partners:{Q99497}

9180 [Cluster 1475]GO:0050427+P biological\_process [name] 3'-phosphoadenosine 5'-phosphosulfate metabolic process [def] "The chemical reactions and pathways involving 3'-phosphoadenosine 5'-phosphosulfate, a naturally occurring mixed anhydride. It is an intermediate in the formation of a variety of sulfo compounds in biological systems."

[ISBN

9181 Pathogen[ Q2Q067] interacts with 1 human partners:{000204}

9182 Pathogen[ P0C214] interacts with 2 human partners:{000204;Q06520}

9183 Pathogen[ P03346] interacts with 2 human partners:{000204;Q06520}

9184 Pathogen[ Q85601] interacts with 1 human partners:{000204}

9185 Pathogen[ P03410] interacts with 1 human partners:{000204}

9186 Pathogen[ P0C206] interacts with 1 human partners:{000204}

9187 Pathogen[ P03363] interacts with 2 human partners:{000204;Q06520}

9188 [Cluster 1476]GO:0010918+P biological\_process [name] positive regulation of mitochondrial membrane potential [def] "Any process that activates or increases the frequency, rate or extent of establishment or extent of a mitochondrial membrane potential, the electric potential existing across any mitochondrial membrane arising from charges in the membrane itself and from the charges present in the media on either side of the membrane." [GOC

9189 Pathogen[ P0C214] interacts with 1 human partners:{Q92934}

9190 Pathogen[ P14079] interacts with 1 human partners:{Q92934}

9191 Pathogen[ P03410] interacts with 1 human partners:{Q92934}

9192 Pathogen[ P0C206] interacts with 1 human partners:{Q92934}

9193 [Cluster 1477]GO:0050671+P biological\_process [name] positive regulation of lymphocyte proliferation [def] "Any process that activates or increases the rate or extent of lymphocyte proliferation." [GOC

9194 Pathogen[ P14079] interacts with 2 human partners:{P29459;Q99836}

9195 Pathogen[ P03410] interacts with 1 human partners:{P29459}

9196 [Cluster 1478]GO:0060993+P biological\_process [name] kidney morphogenesis [def] "Morphogenesis of a kidney. A kidney is an organ that filters the blood and excretes the end products of body metabolism in the form of urine." [GOC

9197 Pathogen[ Q2Q067] interacts with 1 human partners:{Q63HK5}

9198 Pathogen[ P0C214] interacts with 1 human partners:{Q63HK5}

9199 Pathogen[ P03346] interacts with 2 human partners:{Q06945;Q63HK5}

9200 Pathogen[ Q85601] interacts with 1 human partners:{Q63HK5}

9201 Pathogen[ P14079] interacts with 1 human partners:{Q63HK5}

9202 Pathogen[ P03410] interacts with 1 human partners:{Q63HK5}

9203 Pathogen[ P0C206] interacts with 1 human partners:{Q63HK5}

9204 Pathogen[ P03363] interacts with 1 human partners:{Q63HK5}

9205 [Cluster 1479]GO:0031340+P biological\_process [name] positive regulation of vesicle fusion [def] "Any process that activates or increases the frequency, rate or extent of vesicle fusion." [GOC

9206 Pathogen[ P14079] interacts with 1 human partners:{P04083}

9207 [Cluster 1480]GO:0045807+P biological\_process [name] positive regulation of endocytosis [def] "Any process that activates or increases the frequency, rate or extent of endocytosis." [GOC

9208 Pathogen[ Q2Q067] interacts with 1 human partners:{Q96PU5}

9209 Pathogen[ P0C214] interacts with 1 human partners:{Q96PU5}

9210 Pathogen[ P03346] interacts with 1 human partners:{Q96PU5}

9211 Pathogen[ Q85601] interacts with 1 human partners:{Q96PU5}

9212 Pathogen[ P0C206] interacts with 2 human partners:{Q96PU5;Q86YT6}

9213 Pathogen[ P03363] interacts with 1 human partners:{Q96PU5}

9214 [Cluster 1481]GO:0043518+P biological\_process [name] negative regulation of DNA damage response, signal transduction by p53 class mediator [def] "Any process that stops, prevents, or reduces the frequency, rate or extent of the cascade of processes induced by the cell cycle regulator phosphoprotein p53, or an equivalent protein, in response to the detection of DNA damage." [GOC

9215 Pathogen[ Q2Q067] interacts with 2 human partners:{075832;Q00987}

9216 Pathogen[ P0C214] interacts with 2 human partners:{Q00987;075832}

9217 Pathogen[ P03346] interacts with 3 human partners:{Q00987;075832;095863}

9218 Pathogen[ Q85601] interacts with 2 human partners:{075832;Q00987}

9219 Pathogen[ P14079] interacts with 2 human partners:{075832;Q00987}

9220 Pathogen[ P03383] interacts with 1 human partners:{075832}

9221 Pathogen[ P03410] interacts with 2 human partners:{Q00987;075832}

9222 Pathogen[ P14075] interacts with 1 human partners:{075832}

9223 Pathogen[ P0C206] interacts with 2 human partners:{075832;Q00987}

9224 [Cluster 1482]GO:0033206+P biological\_process [name] cytokinesis after meiosis [def] "A cell cycle process that results in the division of the cytoplasm of a cell after meiosis, resulting in the separation of the original cell into two daughter cells." [GOC

9225 Pathogen[ P14079] interacts with 1 human partners:{P61158}

9226 [Cluster 1483]GO:0006295+P biological\_process [name] nucleotide-excision repair, DNA incision, 3'-to lesion [def] "The endonucleolytic cleavage of the damaged strand of DNA 3' to the site of damage. The incision occurs at the junction of single-stranded DNA and double-stranded DNA that is formed when the DNA duplex is unwound. The incision precedes the incision formed 5' to the site of damage." [GOC

9227 Pathogen[ Q2Q067] interacts with 2 human partners:{Q92889;P28715}

9228 Pathogen[ P0C214] interacts with 2 human partners:{Q92889;P28715}

9229 Pathogen[ P03346] interacts with 3 human partners:{P28715;P07992;Q92889}

9230 Pathogen[ Q85601] interacts with 2 human partners:{Q92889;P28715}

9231 Pathogen[ P14079] interacts with 3 human partners:{P28715;Q92889;P07992}

9232 Pathogen[ P03410] interacts with 3 human partners:{P07992;Q92889;P28715}

9233 Pathogen[ P0C206] interacts with 3 human partners:{P28715;P07992;Q92889}

9234 Pathogen[ P03363] interacts with 1 human partners:{Q92889}

9235 [Cluster 1484]GO:0060042+P biological\_process [name] retina morphogenesis in camera-type eye [def] "The process in which the anatomical structure of the retina is generated and organized." [GOC

9236 Pathogen[ Q2Q067] interacts with 2 human partners:{Q8NFIJ8;P58304}

9237 Pathogen[ P0C214] interacts with 1 human partners:{Q8NFIJ8}

9238 Pathogen[ P03346] interacts with 3 human partners:{Q7RTS3;P58304;Q8NFIJ8}

9239 Pathogen[ Q85601] interacts with 2 human partners:{Q8NFIJ8;P58304}

9240 Pathogen[ P14079] interacts with 3 human partners:{P58304;P56715;Q8NFIJ8}

9241 Pathogen[ P03410] interacts with 2 human partners:{Q8NFIJ8;P56715}

9242 Pathogen[ P0C206] interacts with 3 human partners:{P56715;Q8NFIJ8;P58304}

9243 Pathogen[ P03363] interacts with 4 human partners:{P56715;Q7RTS3;P58304;Q8NFIJ8}

9244 [Cluster 1485]GO:0002642+P biological\_process [name] positive regulation of immunoglobulin biosynthetic process [def] "Any process that activates or increases the frequency, rate, or extent of immunoglobulin biosynthesis." [GOC

9245 Pathogen[ Q2Q067] interacts with 1 human partners:{Q8WU39}

9246 Pathogen[ P0C214] interacts with 1 human partners:{Q8WU39}

9247 Pathogen[ P03346] interacts with 1 human partners:{Q8WU39}

9248 Pathogen[ P14079] interacts with 1 human partners:{Q8WU39}

9249 Pathogen[ P03383] interacts with 1 human partners:{Q8WU39}

9250 Pathogen[ P03410] interacts with 1 human partners:{Q8WU39}

9251 Pathogen[ P14075] interacts with 1 human partners:{Q8WU39}

9252 Pathogen[ P0C206] interacts with 1 human partners:{Q8WU39}

9253 Pathogen[ P03363] interacts with 1 human partners:{Q8WU39}

9254 [Cluster 1486]GO:0018406+P biological\_process [name] protein C-linked glycosylation via 2'-alpha-mannosyl-L-tryptophan [def] "The glycosylation of a peptidyl-tryptophan residue by the transfer of alpha-mannopyranose from dolichyl-activated mannose to the indole ring." [PMID

9255 Pathogen[ P14079] interacts with 1 human partners:{Q9P2X0}

9256 Pathogen[ P03410] interacts with 1 human partners:{Q9P2X0}

9257 [Cluster 1487]GO:0021997+P biological\_process [name] neural plate axis specification [def] "The pattern specification process in which the axes of the nervous system are established." [GO\_REF

9258 Pathogen[ P14079] interacts with 1 human partners:{Q4AC94}

9259 Pathogen[ P03410] interacts with 1 human partners:{Q4AC94}

9260 [Cluster 1488]GO:0042219+P biological\_process [name] cellular modified amino acid catabolic process [def] "The chemical reactions and pathways resulting in the breakdown of compounds derived from amino acids, organic acids containing one or more amino substituents." [GOC

9261 Pathogen[ P14079] interacts with 1 human partners:{Q9BVM4}

9262 Pathogen[ P03410] interacts with 1 human partners:{Q9BVM4}

9263 Pathogen[ P14075] interacts with 1 human partners:{Q9BVM4}

9264 Pathogen[ P0C206] interacts with 1 human partners:{Q9BVM4}

9265 [Cluster 1489]GO:0051661+P biological\_process [name] maintenance of centrosome location [def] "Any process in which a centrosome is maintained in a specific location within a cell and prevented from moving elsewhere." [GOC

9266 Pathogen[ Q2Q067] interacts with 1 human partners:{Q8IZT6}

9267 Pathogen[ P0C214] interacts with 1 human partners:{Q8IZT6}

9268 Pathogen[ P03346] interacts with 2 human partners:{Q9NVR7;Q8IZT6}

9269 Pathogen[ Q85601] interacts with 1 human partners:{Q8IZT6}

9270 Pathogen[ P14079] interacts with 2 human partners:{Q9NVR7;Q8IZT6}

9271 Pathogen[ P03410] interacts with 2 human partners:{Q8IZT6;Q9NVR7}

9272 Pathogen[ P0C206] interacts with 2 human partners:{Q9NVR7;Q8IZT6}

9273 Pathogen[ P03363] interacts with 2 human partners:{Q9NVR7;Q8IZT6}

9274 [Cluster 1490]GO:0060980+P biological\_process [name] cell migration involved in coronary vasculogenesis [def] "The orderly movement of a cell from one site to another that will contribute to the differentiation of an endothelial cell that will form the blood vessels of the heart." [GOC

9275 Pathogen[ P03346] interacts with 1 human partners:{Q99593}

9276 [Cluster 1491]GO:0034213+P biological\_process [name] quinolinate catabolic process [def] "The chemical reactions and pathways resulting in the breakdown of quinolinate, the anion of quinolinic acid, also known as 2,3-pyridinedicarboxylic acid." [GOC

9277 Pathogen[ P0C214] interacts with 1 human partners:{Q15274}

9278 Pathogen[ P14079] interacts with 1 human partners:{Q15274}

9279 Pathogen[ P03410] interacts with 1 human partners:{Q15274}

9280 Pathogen[ P0C206] interacts with 1 human partners:{Q15274}

9281 [Cluster 1492]GO:0007341+P biological\_process [name] penetration of zona pellucida [def] "The infiltration by sperm of the zona pellucida to reach the oocyte. The process involves digestive enzymes from a modified lysosome called the acrosome, situated at the head of the sperm." [GOC

9282 Pathogen[ Q2Q067] interacts with 1 human partners:{P49901}

9283 Pathogen[ P0C214] interacts with 1 human partners:{P49901}

9284 Pathogen[ P03346] interacts with 1 human partners:{P49901}

9285 Pathogen[ P14079] interacts with 1 human partners:{P49901}

9286 Pathogen[ P03383] interacts with 1 human partners:{P49901}

9287 Pathogen[ P03410] interacts with 1 human partners:{P49901}

9288 Pathogen[ P14075] interacts with 1 human partners:{P49901}

9289 Pathogen[ P0C206] interacts with 1 human partners:{P49901}

9290 Pathogen[ P03363] interacts with 1 human partners:{P49901}

9291 [Cluster 1493]GO:0043624+P biological\_process [name] cellular protein complex disassembly [def] "The disaggregation of a protein complex into its constituent components, occurring at the level of an individual cell. Protein complexes may have other associated non-protein prosthetic groups, such as nucleic acids, metal ions or carbohydrate groups." [GOC]

9292 Pathogen[ P14079] interacts with 1 human partners:{P24588}

9293 Pathogen[ P03410] interacts with 1 human partners:{P24588}

9294 [Cluster 1494]GO:0006942+P biological\_process [name] regulation of striated muscle contraction [def] "Any process that modulates the frequency, rate or extent of striated muscle contraction." [GOC]

9295 Pathogen[ P03346] interacts with 1 human partners:{P10916}

9296 Pathogen[ P14079] interacts with 2 human partners:{P10916;P19237}

9297 Pathogen[ P03410] interacts with 1 human partners:{P10916}

9298 Pathogen[ P03363] interacts with 1 human partners:{P10916}

9299 [Cluster 1495]GO:0031081+P biological\_process [name] nuclear pore distribution [def] "Any process that establishes the spatial arrangement of nuclear pores within the nuclear envelope." [GOC]

9300 Pathogen[ P03346] interacts with 1 human partners:{Q9BTX1}

9301 Pathogen[ P14079] interacts with 1 human partners:{Q9BTX1}

9302 Pathogen[ P03383] interacts with 1 human partners:{Q9BTX1}

9303 Pathogen[ P03410] interacts with 1 human partners:{Q9BTX1}

9304 Pathogen[ P14075] interacts with 1 human partners:{Q9BTX1}

9305 Pathogen[ P0C206] interacts with 1 human partners:{Q9BTX1}

9306 Pathogen[ P03363] interacts with 1 human partners:{Q9BTX1}

9307 [Cluster 1496]GO:0010595+P biological\_process [name] positive regulation of endothelial cell migration [def] "Any process that increases the rate, frequency, or extent of the orderly movement of an endothelial cell into the extracellular matrix to form an endothelium." [GOC]

9308 Pathogen[ Q2Q067] interacts with 1 human partners:{O14786}

9309 Pathogen[ P0C214] interacts with 2 human partners:{O14786;P18054}

9310 Pathogen[ P03346] interacts with 2 human partners:{P18054;O14786}

9311 Pathogen[ Q85601] interacts with 1 human partners:{O14786}

9312 Pathogen[ P03410] interacts with 1 human partners:{O14786}

9313 Pathogen[ P0C206] interacts with 1 human partners:{O14786}

9314 Pathogen[ P03363] interacts with 1 human partners:{O14786}

9315 [Cluster 1497]GO:0030214+P biological\_process [name] hyaluronan catabolic process [def] "The chemical reactions and pathways resulting in the breakdown of hyaluronan, the naturally occurring anionic form of hyaluronic acid, any member of a group of glycosaminoglycans, the repeat units of which consist of beta-1,4 linked D-glucuronyl-beta-(1,3)-N-acetyl-D-glucosamine." [GOC]

9316 Pathogen[ P0C214] interacts with 1 human partners:{O75330}

9317 Pathogen[ P03346] interacts with 1 human partners:{O75330}

9318 Pathogen[ Q85601] interacts with 1 human partners:{O75330}

9319 Pathogen[ P14079] interacts with 1 human partners:{O75330}

9320 Pathogen[ P03410] interacts with 1 human partners:{O75330}

9321 Pathogen[ P14075] interacts with 1 human partners:{O75330}

9322 Pathogen[ P0C206] interacts with 1 human partners:{O75330}

9323 [Cluster 1498]GO:0032715+P biological\_process [name] negative regulation of interleukin-6 production [def] "Any process that stops, prevents, or reduces the frequency, rate, or extent of interleukin-6 production." [GOC]

9324 Pathogen[ Q2Q067] interacts with 1 human partners:{Q9BQE4}

9325 Pathogen[ P0C214] interacts with 1 human partners:{Q9BQE4}

9326 Pathogen[ P03346] interacts with 1 human partners:{Q9Y5W3}

9327 Pathogen[ Q85601] interacts with 1 human partners:{Q9BQE4}

9328 Pathogen[ P14079] interacts with 2 human partners:{Q9BQE4;Q9Y5W3}

9329 Pathogen[ P03383] interacts with 1 human partners:{Q9BQE4}

9330 Pathogen[ P03410] interacts with 1 human partners:{Q9BQE4}

9331 Pathogen[ P14075] interacts with 1 human partners:{Q9BQE4}

9332 Pathogen[ P0C206] interacts with 1 human partners:{Q9BQE4}

9333 [Cluster 1499]GO:0002528+P biological\_process [name] regulation of vascular permeability involved in acute inflammatory response [def] "Any process that modulates the extent to which blood vessels can be pervaded by fluid contributing to an acute inflammatory response." [GOC]

9334 Pathogen[ Q2Q067] interacts with 1 human partners:{Q9NSA3}

9335 Pathogen[ P0C214] interacts with 1 human partners:{Q9NSA3}

9336 Pathogen[ P03346] interacts with 1 human partners:{Q9NSA3}

9337 Pathogen[ Q85601] interacts with 1 human partners:{Q9NSA3}

9338 Pathogen[ P03383] interacts with 1 human partners:{Q9NSA3}

9339 Pathogen[ P03410] interacts with 1 human partners:{Q9NSA3}

9340 Pathogen[ P14075] interacts with 1 human partners:{Q9NSA3}

9341 Pathogen[ P0C206] interacts with 1 human partners:{Q9NSA3}

9342 Pathogen[ P03363] interacts with 1 human partners:{Q9NSA3}

9343 [Cluster 1500]GO:0035418+P biological\_process [name] protein localization to synapse [def] "Any process in which a protein is transported to, and/or maintained at the synapse, the junction between a nerve fiber of one neuron and another neuron or muscle fiber or glial cell." [GOC

9344 Pathogen[ Q2Q067] interacts with 1 human partners:{P78352}

9345 Pathogen[ P0C214] interacts with 1 human partners:{P78352}

9346 Pathogen[ P03346] interacts with 1 human partners:{P78352}

9347 Pathogen[ Q85601] interacts with 1 human partners:{P78352}

9348 Pathogen[ P03383] interacts with 1 human partners:{P78352}

9349 Pathogen[ P03410] interacts with 1 human partners:{P78352}

9350 Pathogen[ P14075] interacts with 1 human partners:{P78352}

9351 Pathogen[ P0C206] interacts with 1 human partners:{P78352}

9352 Pathogen[ P03363] interacts with 2 human partners:{P78352;Q96JB8}

9353 [Cluster 1501]GO:0010387+P biological\_process [name] signalosome assembly [def] "The aggregation, arrangement and bonding together of a set of components to form a signalosome." [PMID

9354 Pathogen[ Q2Q067] interacts with 1 human partners:{A2RU30}

9355 Pathogen[ P0C214] interacts with 1 human partners:{A2RU30}

9356 Pathogen[ P03346] interacts with 1 human partners:{A2RU30}

9357 Pathogen[ P14079] interacts with 1 human partners:{A2RU30}

9358 Pathogen[ P03383] interacts with 1 human partners:{A2RU30}

9359 Pathogen[ P03410] interacts with 1 human partners:{A2RU30}

9360 Pathogen[ P14075] interacts with 1 human partners:{A2RU30}

9361 Pathogen[ P0C206] interacts with 1 human partners:{A2RU30}

9362 Pathogen[ P03363] interacts with 1 human partners:{A2RU30}

9363 [Cluster 1502]GO:0019369+P biological\_process [name] arachidonic acid metabolic process [def] "The chemical reactions and pathways involving arachidonic acid, a straight chain fatty acid with 20 carbon atoms and four double bonds per molecule. Arachidonic acid is the all-Z-(5,8,11,14)-isomer." [ISBN

9364 Pathogen[ Q2Q067] interacts with 1 human partners:{P09917}

9365 Pathogen[ P0C214] interacts with 1 human partners:{P09917}

9366 Pathogen[ P03346] interacts with 1 human partners:{P09917}

9367 Pathogen[ Q85601] interacts with 1 human partners:{P09917}

9368 Pathogen[ P14079] interacts with 1 human partners:{P09917}

9369 Pathogen[ P03410] interacts with 1 human partners:{P09917}

9370 Pathogen[ P0C206] interacts with 1 human partners:{P09917}

9371 [Cluster 1503]GO:0071722+P biological\_process [name] detoxification of arsenic-containing substance [def] "Any process that reduces or removes the toxicity of compounds containing arsenic, including arsenates, arsenites, and arsenides. These include transport of such compounds away from sensitive areas and to compartments or complexes whose purpose is sequestration of arsenic or arsenic-containing compounds." [GOC

9372 Pathogen[ P0C214] interacts with 1 human partners:{O43681}

9373 Pathogen[ Q85601] interacts with 1 human partners:{O43681}

9374 Pathogen[ P14079] interacts with 1 human partners:{O43681}

9375 Pathogen[ P03410] interacts with 1 human partners:{O43681}

9376 Pathogen[ P0C206] interacts with 1 human partners:{O43681}

9377 [Cluster 1504]GO:0009168+P biological\_process [name] purine ribonucleoside monophosphate biosynthetic process [def] "The chemical reactions and pathways resulting in the formation of purine ribonucleoside monophosphate, a compound consisting of a purine base linked to a ribose sugar esterified with phosphate on the sugar." [GOC

9378 Pathogen[ P0C214] interacts with 2 human partners:{P31939;P30566}

9379 Pathogen[ P14079] interacts with 4 human partners:{P22234;P31939;P49915;O15067}

9380 Pathogen[ P03410] interacts with 5 human partners:{P49915;P22234;P30566;O15067;P31939}

9381 Pathogen[ P0C206] interacts with 1 human partners:{P31939}

9382 [Cluster 1505]GO:0030252+P biological\_process [name] growth hormone secretion [def] "The regulated release of growth hormone from secretory granules into the blood." [GOC

9383 Pathogen[ P0C214] interacts with 1 human partners:{Q00536}

9384 Pathogen[ P03346] interacts with 1 human partners:{Q00536}

9385 Pathogen[ Q85601] interacts with 1 human partners:{Q00536}

9386 Pathogen[ P03383] interacts with 1 human partners:{Q00536}

9387 Pathogen[ P0C206] interacts with 1 human partners:{Q00536}

9388 Pathogen[ P03363] interacts with 1 human partners:{Q00536}

9389 [Cluster 1506]GO:0060079+P biological\_process [name] regulation of excitatory postsynaptic membrane potential [def] "Any process that modulates the establishment or extent of the excitatory postsynaptic potential (EPSP) which is a temporary increase in postsynaptic potential due to the flow of positively charged ions into the postsynaptic cell. The flow of ions that causes an EPSP is an excitatory postsynaptic current (EPSC) and makes it easier for the neuron to fire an action potential." [GOC

9390 Pathogen[ Q2Q067] interacts with 1 human partners:{Q08209}

9391 Pathogen[ P0C214] interacts with 1 human partners:{Q08209}

9392 Pathogen[ P03346] interacts with 1 human partners:{Q08209}

9393 Pathogen[ Q85601] interacts with 1 human partners:{Q08209}

9394 Pathogen[ P14079] interacts with 2 human partners:{O43612;Q08209}



9395 Pathogen[ P03410] interacts with 2 human partners:{043612;Q08209}

9396 Pathogen[ P0C206] interacts with 1 human partners:{Q08209}

9397 [Cluster 1507]GO:0072193+P biological\_process [name] ureter smooth muscle cell differentiation [def] "The process in which a relatively unspecialized cell acquires specialized features of a smooth muscle cell in the ureter." [GOC

9398 Pathogen[ Q2Q067] interacts with 1 human partners:{Q63HK5}

9399 Pathogen[ P0C214] interacts with 1 human partners:{Q63HK5}

9400 Pathogen[ P03346] interacts with 2 human partners:{Q63HK5;Q15475}

9401 Pathogen[ Q85601] interacts with 1 human partners:{Q63HK5}

9402 Pathogen[ P14079] interacts with 1 human partners:{Q63HK5}

9403 Pathogen[ P03410] interacts with 1 human partners:{Q63HK5}

9404 Pathogen[ P0C206] interacts with 1 human partners:{Q63HK5}

9405 Pathogen[ P03363] interacts with 1 human partners:{Q63HK5}

9406 [Cluster 1508]GO:0006851+P biological\_process [name] mitochondrial calcium ion transport [def] "The directed movement of calcium ions (Ca<sup>2+</sup>) into, out of or within a mitochondrion." [GOC

9407 Pathogen[ P03346] interacts with 1 human partners:{Q7RTS1}

9408 Pathogen[ P14079] interacts with 2 human partners:{Q8NE86;Q7RTS1}

9409 Pathogen[ P03410] interacts with 2 human partners:{Q7RTS1;Q8NE86}

9410 Pathogen[ P0C206] interacts with 1 human partners:{Q8NE86}

9411 Pathogen[ P03363] interacts with 1 human partners:{Q7RTS1}

9412 [Cluster 1509]GO:0009438+P biological\_process [name] methylglyoxal metabolic process [def] "The chemical reactions and pathways involving methylglyoxal, CH<sub>3</sub>-CO-CHO, the aldehyde of pyruvic acid." [CHEBI

9413 Pathogen[ P14079] interacts with 1 human partners:{Q04760}

9414 Pathogen[ P03410] interacts with 1 human partners:{Q04760}

9415 Pathogen[ P0C206] interacts with 1 human partners:{Q04760}

9416 [Cluster 1510]GO:0050902+P biological\_process [name] leukocyte adhesive activation [def] "The activation of loosely bound or rolling leukocytes by signals displayed on blood vessel endothelial cells, which is typically the second step in cellular extravasation." [ISBN

9417 Pathogen[ P14079] interacts with 1 human partners:{Q14242}

9418 Pathogen[ P03410] interacts with 1 human partners:{Q14242}

9419 [Cluster 1511]GO:0003100+P biological\_process [name] regulation of systemic arterial blood pressure by endothelin [def] "The process in which endothelin modulates the force with which blood passes through the circulatory system. Endothelin is a hormone that is released by the endothelium, and it is a vasoconstrictor." [GOC

9420 Pathogen[ Q2Q067] interacts with 1 human partners:{P29474}

9421 Pathogen[ P0C214] interacts with 1 human partners:{P29474}

9422 Pathogen[ P03346] interacts with 1 human partners:{P29474}

9423 Pathogen[ Q85601] interacts with 1 human partners:{P29474}

9424 Pathogen[ P03383] interacts with 1 human partners:{P29474}

9425 Pathogen[ P03410] interacts with 1 human partners:{P29474}

9426 Pathogen[ P14079] interacts with 1 human partners:{P29474}

9427 Pathogen[ P0C206] interacts with 1 human partners:{P29474}

9428 Pathogen[ P03363] interacts with 1 human partners:{P29474}

9429 [Cluster 1512]GO:0045918+P biological\_process [name] negative regulation of cytolysis [def] "Any process that stops, prevents, or reduces the frequency, rate or extent of cytolysis." [GOC

9430 Pathogen[ P14079] interacts with 1 human partners:{P04141}

9431 Pathogen[ P03410] interacts with 1 human partners:{P04141}

9432 [Cluster 1513]GO:0032269+P biological\_process [name] negative regulation of cellular protein metabolic process [def] "Any process that stops, prevents, or reduces the frequency, rate or extent of the chemical reactions and pathways involving a protein, occurring at the level of an individual cell." [GOC

9433 Pathogen[ Q2Q067] interacts with 1 human partners:{P19838}

9434 Pathogen[ P0C214] interacts with 1 human partners:{P19838}

9435 Pathogen[ P03346] interacts with 1 human partners:{P19838}

9436 Pathogen[ Q85601] interacts with 1 human partners:{P19838}

9437 Pathogen[ P03383] interacts with 1 human partners:{P19838}

9438 Pathogen[ P03410] interacts with 1 human partners:{P19838}

9439 Pathogen[ P14079] interacts with 1 human partners:{P19838}

9440 Pathogen[ P0C206] interacts with 1 human partners:{P19838}

9441 Pathogen[ P03363] interacts with 1 human partners:{P19838}

9442 [Cluster 1514]GO:2000738+P biological\_process [name] positive regulation of stem cell differentiation [def] "Any process that activates or increases the frequency, rate or extent of stem cell differentiation." [GOC

9443 Pathogen[ Q2Q067] interacts with 2 human partners:{P17483;Q8TDD2}

9444 Pathogen[ P0C214] interacts with 1 human partners:{Q8TDD2}

9445 Pathogen[ P03346] interacts with 2 human partners:{P17483;Q8TDD2}

9446 Pathogen[ Q85601] interacts with 1 human partners:{Q8TDD2}

9447 Pathogen[ P14079] interacts with 1 human partners:{Q8TDD2}

9448 Pathogen[ P03410] interacts with 1 human partners:{Q8TDD2}

9449 Pathogen[ P0C206] interacts with 2 human partners:{P17483;Q8TDD2}

9450 Pathogen[ P03363] interacts with 2 human partners:{Q8TDD2;P17483}

9451 [Cluster 1515]GO:0006081+P biological\_process [name] cellular aldehyde metabolic

process [def] "The chemical reactions and pathways involving aldehydes, any organic compound with the formula R-CH=O, as carried out by individual cells." [GOC

9452 Pathogen[ Q2Q067] interacts with 1 human partners:{P49419}

9453 Pathogen[ P0C214] interacts with 1 human partners:{P49419}

9454 Pathogen[ P03346] interacts with 1 human partners:{P49419}

9455 Pathogen[ Q85601] interacts with 1 human partners:{P49419}

9456 Pathogen[ P03383] interacts with 1 human partners:{P49419}

9457 Pathogen[ P03410] interacts with 1 human partners:{P49419}

9458 Pathogen[ P14075] interacts with 1 human partners:{P49419}

9459 Pathogen[ P0C206] interacts with 1 human partners:{P49419}

9460 Pathogen[ P03363] interacts with 1 human partners:{P49419}

9461 [Cluster 1516]GO:0045083+P biological\_process [name] negative regulation of interleukin-12 biosynthetic process [def] "Any process that stops, prevents, or reduces the frequency, rate or extent of the chemical reactions and pathways resulting in the formation of interleukin-12." [GOC

9462 Pathogen[ Q2Q067] interacts with 1 human partners:{P19838}

9463 Pathogen[ P0C214] interacts with 1 human partners:{P19838}

9464 Pathogen[ P03346] interacts with 1 human partners:{P19838}

9465 Pathogen[ Q85601] interacts with 1 human partners:{P19838}

9466 Pathogen[ P03383] interacts with 1 human partners:{P19838}

9467 Pathogen[ P03410] interacts with 1 human partners:{P19838}

9468 Pathogen[ P14075] interacts with 1 human partners:{P19838}

9469 Pathogen[ P0C206] interacts with 1 human partners:{P19838}

9470 Pathogen[ P03363] interacts with 1 human partners:{P19838}

9471 [Cluster 1517]GO:0008039+P biological\_process [name] synaptic target recognition [def] "The process in which a neuronal cell in a multicellular organism interprets signals produced by potential target cells, with which it may form synapses." [GOC

9472 Pathogen[ Q2Q067] interacts with 1 human partners:{Q96FJ2}

9473 Pathogen[ P0C214] interacts with 1 human partners:{Q96FJ2}

9474 Pathogen[ P03346] interacts with 1 human partners:{Q96FJ2}

9475 Pathogen[ P14079] interacts with 1 human partners:{Q96FJ2}

9476 Pathogen[ P03383] interacts with 1 human partners:{Q96FJ2}

9477 Pathogen[ P14075] interacts with 1 human partners:{Q96FJ2}

9478 Pathogen[ P03363] interacts with 1 human partners:{Q96FJ2}

9479 [Cluster 1518]GO:0008356+P biological\_process [name] asymmetric cell division [def] "The asymmetric division of cells to produce two daughter cells with different developmental potentials. It is of fundamental significance for the generation of cell diversity." [PMID

9480 Pathogen[ P03346] interacts with 1 human partners:{Q8TEW0}

9481 Pathogen[ P14079] interacts with 2 human partners:{Q8TEW0;P61158}

9482 Pathogen[ P03410] interacts with 1 human partners:{Q8TEW0}

9483 Pathogen[ P0C206] interacts with 1 human partners:{Q8TEW0}

9484 [Cluster 1519]GO:0051451+P biological\_process [name] myoblast migration [def] "The orderly movement of a myoblast from one site to another, often during the development of a multicellular organism. A myoblast is a cell type that, by fusion with other myoblasts, gives rise to the myotubes that eventually develop into skeletal muscle fibers." [CL

9485 Pathogen[ P03346] interacts with 2 human partners:{Q9UIU6;Q15475}

9486 [Cluster 1520]GO:2001013+P biological\_process [name] epithelial cell proliferation involve in renal tubule morphogenesis [def] "Any epithelial cell proliferation that is involved in renal tubule morphogenesis." [GOC

9487 Pathogen[ P14079] interacts with 1 human partners:{Q06413}

9488 [Cluster 1521]GO:0042036+P biological\_process [name] negative regulation of cytokine biosynthetic process [def] "Any process that stops, prevents, or reduces the frequency, rate or extent of the chemical reactions and pathways resulting in the formation of cytokines." [GOC

9489 Pathogen[ P0C214] interacts with 1 human partners:{P31483}

9490 Pathogen[ P03346] interacts with 1 human partners:{P31483}

9491 Pathogen[ P14079] interacts with 1 human partners:{P31483}

9492 Pathogen[ P03410] interacts with 1 human partners:{P31483}

9493 Pathogen[ P0C206] interacts with 1 human partners:{P31483}

9494 Pathogen[ P03363] interacts with 1 human partners:{P31483}

9495 [Cluster 1522]GO:0060563+P biological\_process [name] neuroepithelial cell differentiation [def] "The process in which epiblast cells acquire specialized features of neuroepithelial cells." [GOC

9496 Pathogen[ P03346] interacts with 1 human partners:{Q06945}

9497 [Cluster 1523]GO:1900017+P

9498 Pathogen[ P03346] interacts with 1 human partners:{Q8N9B4}

9499 [Cluster 1524]GO:0051150+P biological\_process [name] regulation of smooth muscle cell differentiation [def] "Any process that modulates the frequency, rate or extent of smooth muscle cell differentiation." [CL

9500 Pathogen[ Q2Q067] interacts with 1 human partners:{P11831}

9501 Pathogen[ P0C214] interacts with 1 human partners:{P11831}

9502 Pathogen[ P03346] interacts with 1 human partners:{P11831}

9503 Pathogen[ Q85601] interacts with 1 human partners:{P11831}

9504 Pathogen[ P03383] interacts with 1 human partners:{P11831}

9505 Pathogen[ P03410] interacts with 1 human partners:{P11831}

9506 Pathogen[ P14075] interacts with 1 human partners:{P11831}

9507 Pathogen[ P0C206] interacts with 1 human partners:{P11831}

9508 Pathogen[ P03363] interacts with 1 human partners:{P11831}

9509 [Cluster 1525]GO:0048643+P biological\_process [name] positive regulation of skeletal muscle tissue development [def] "Any process that activates, maintains or increases the rate of skeletal muscle tissue development." [GOC

9510 Pathogen[ P03346] interacts with 1 human partners:{075604}

9511 Pathogen[ P14079] interacts with 1 human partners:{Q06413}

9512 Pathogen[ P0C206] interacts with 1 human partners:{075604}

9513 Pathogen[ P03363] interacts with 1 human partners:{075604}

9514 [Cluster 1526]GO:0006713+P biological\_process [name] glucocorticoid catabolic process [def] "The chemical reactions and pathways resulting in the breakdown of glucocorticoids, hormonal C21 corticosteroids synthesized from cholesterol." [ISBN

9515 Pathogen[ Q2Q067] interacts with 1 human partners:{Q04917}

9516 Pathogen[ P0C214] interacts with 1 human partners:{Q04917}

9517 Pathogen[ P03346] interacts with 1 human partners:{Q04917}

9518 Pathogen[ Q85601] interacts with 1 human partners:{Q04917}

9519 Pathogen[ P14079] interacts with 1 human partners:{Q04917}

9520 Pathogen[ P03410] interacts with 1 human partners:{Q04917}

9521 Pathogen[ P0C206] interacts with 1 human partners:{Q04917}

9522 Pathogen[ P03363] interacts with 1 human partners:{Q04917}

9523 [Cluster 1527]GO:2001045+P biological\_process [name] negative regulation of integrin-mediated signaling pathway [def] "Any process that stops, prevents or reduces the frequency, rate or extent of integrin-mediated signaling pathway." [GOC

9524 Pathogen[ P14079] interacts with 1 human partners:{Q8IZ21}

9525 Pathogen[ P03410] interacts with 1 human partners:{Q8IZ21}

9526 [Cluster 1528]GO:0090331+P biological\_process [name] negative regulation of platelet aggregation [def] "Any process that decreases the rate, frequency or extent of platelet aggregation. Platelet aggregation is the adhesion of one platelet to one or more other platelets via adhesion molecules." [GOC

9527 Pathogen[ P0C214] interacts with 1 human partners:{P07093}

9528 Pathogen[ Q85601] interacts with 1 human partners:{P07093}

9529 [Cluster 1529]GO:0034198+P biological\_process [name] cellular response to amino acid starvation [def] "Any process that results in a change in state or activity of a cell (in terms of movement, secretion, enzyme production, gene expression, etc.) as a result of deprivation of amino acids." [GOC

9530 Pathogen[ P03346] interacts with 1 human partners:{P51397}

9531 Pathogen[ P14079] interacts with 1 human partners:{P51397}

9532 Pathogen[ P03383] interacts with 1 human partners:{P51397}

9533 Pathogen[ P03410] interacts with 1 human partners:{P51397}

9534 Pathogen[ P14075] interacts with 1 human partners:{P51397}

9535 Pathogen[ P0C206] interacts with 1 human partners:{P51397}

9536 [Cluster 1530]GO:0039020+P biological\_process [name] pronephric nephron tubule development [def] "The process whose specific outcome is the progression of a pronephric nephron tubule over time, from its formation to the mature structure. The pronephric nephron tubule is an epithelial tube that is part of the pronephric nephron and connects the filtration unit (glomerulus or glomus) of the pronephros to the pronephric duct." [GOC

9537 Pathogen[ Q2Q067] interacts with 1 human partners:{P35680}

9538 Pathogen[ P03346] interacts with 1 human partners:{P35680}

9539 Pathogen[ Q85601] interacts with 1 human partners:{P35680}

9540 Pathogen[ P14079] interacts with 1 human partners:{P35680}

9541 Pathogen[ P03410] interacts with 1 human partners:{P35680}

9542 Pathogen[ P0C206] interacts with 1 human partners:{P35680}

9543 [Cluster 1531]GO:0031117+P biological\_process [name] positive regulation of microtubule depolymerization [def] "Any process that activates or increases the frequency, rate or extent of microtubule depolymerization." [GOC

9544 Pathogen[ P03346] interacts with 1 human partners:{Q93045}

9545 Pathogen[ Q85601] interacts with 1 human partners:{Q9BVA0}

9546 Pathogen[ P14079] interacts with 2 human partners:{Q93045;Q9BVA0}

9547 Pathogen[ P03410] interacts with 2 human partners:{Q93045;Q9BVA0}

9548 Pathogen[ P0C206] interacts with 2 human partners:{Q9BVA0;Q93045}

9549 Pathogen[ P03363] interacts with 1 human partners:{Q93045}

9550 [Cluster 1532]GO:0046108+P biological\_process [name] uridine metabolic process [def] "The chemical reactions and pathways involving uridine, uracil riboside, a ribonucleoside very widely distributed but occurring almost entirely as phosphoric esters in ribonucleotides and ribonucleic acids." [GOC

9551 Pathogen[ P0C214] interacts with 2 human partners:{095045;Q16831}

9552 Pathogen[ Q85601] interacts with 1 human partners:{095045}

9553 Pathogen[ P14079] interacts with 2 human partners:{Q16831;095045}

9554 Pathogen[ P03410] interacts with 2 human partners:{095045;Q16831}

9555 Pathogen[ P14075] interacts with 1 human partners:{095045}

9556 Pathogen[ P0C206] interacts with 2 human partners:{Q16831;095045}

9557 [Cluster 1533]GO:0018206+P biological\_process [name] peptidyl-methionine modification [def] "The modification of peptidyl-methionine." [GOC

9558 Pathogen[ Q2Q067] interacts with 1 human partners:{Q9HBH1}

9559 Pathogen[ POC214] interacts with 1 human partners:{Q9HBH1}

9560 Pathogen[ P03346] interacts with 1 human partners:{Q9HBH1}

9561 Pathogen[ Q85601] interacts with 1 human partners:{Q9HBH1}

9562 Pathogen[ P14079] interacts with 1 human partners:{Q9HBH1}

9563 Pathogen[ P03383] interacts with 1 human partners:{Q9HBH1}

9564 Pathogen[ P03410] interacts with 1 human partners:{Q9HBH1}

9565 Pathogen[ P14075] interacts with 1 human partners:{Q9HBH1}

9566 Pathogen[ POC206] interacts with 1 human partners:{Q9HBH1}

9567 [Cluster 1534]GO:0016080+P biological\_process [name] synaptic vesicle targeting  
[def] "The process in which synaptic vesicles are directed to specific destination membranes, mediated by molecules at the vesicle membrane and target membrane surfaces."  
[GOC

9568 Pathogen[ Q2Q067] interacts with 1 human partners:{Q14160}

9569 Pathogen[ POC214] interacts with 1 human partners:{Q14160}

9570 Pathogen[ P03346] interacts with 1 human partners:{Q14160}

9571 Pathogen[ Q85601] interacts with 1 human partners:{Q14160}

9572 Pathogen[ P03383] interacts with 1 human partners:{Q14160}

9573 Pathogen[ P03410] interacts with 1 human partners:{Q14160}

9574 Pathogen[ P14075] interacts with 1 human partners:{Q14160}

9575 Pathogen[ POC206] interacts with 1 human partners:{Q14160}

9576 Pathogen[ P03363] interacts with 2 human partners:{Q14160;Q99719}

9577 [Cluster 1535]GO:0050884+P biological\_process [name] neuromuscular process controlling posture [def] "Any process in which an organism voluntarily modulates its posture, the alignment of its anatomical parts." [GOC

9578 Pathogen[ Q2Q067] interacts with 1 human partners:{P30793}

9579 Pathogen[ POC214] interacts with 1 human partners:{P30793}

9580 Pathogen[ Q85601] interacts with 1 human partners:{P30793}

9581 Pathogen[ P14079] interacts with 1 human partners:{P30793}

9582 Pathogen[ P03410] interacts with 2 human partners:{P30793;Q9UBY8}

9583 Pathogen[ P14075] interacts with 1 human partners:{P30793}

9584 Pathogen[ POC206] interacts with 1 human partners:{P30793}

9585 [Cluster 1536]GO:0060381+P biological\_process [name] positive regulation of single-stranded telomeric DNA binding [def] "Any process that increases the frequency, rate or extent of single-stranded telomeric DNA binding." [GOC

9586 Pathogen[ Q2Q067] interacts with 1 human partners:{Q96AP0}

9587 Pathogen[ P03346] interacts with 1 human partners:{Q96AP0}

9588 Pathogen[ P14079] interacts with 1 human partners:{Q96AP0}

9589 Pathogen[ P03410] interacts with 1 human partners:{Q96AP0}

9590 Pathogen[ P14075] interacts with 1 human partners:{Q96AP0}

9591 Pathogen[ POC206] interacts with 1 human partners:{Q96AP0}

9592 Pathogen[ P03363] interacts with 1 human partners:{Q96AP0}

9593 [Cluster 1537]GO:0046601+P biological\_process [name] positive regulation of centriole replication [def] "Any process that activates or increases the frequency, rate or extent of centriole replication." [GOC

9594 Pathogen[ P03346] interacts with 1 human partners:{O00444}

9595 Pathogen[ POC206] interacts with 1 human partners:{O00444}

9596 [Cluster 1538]GO:0090197+P biological\_process [name] positive regulation of chemokine secretion [def] "Any process that increases the rate, frequency or extent of chemokine secretion, the regulated release of chemokines from a cell or group of cells." [GOC

9597 Pathogen[ P14079] interacts with 1 human partners:{O95760}

9598 Pathogen[ P03410] interacts with 1 human partners:{O95760}

9599 [Cluster 1539]GO:0006071+P biological\_process [name] glycerol metabolic process [def] "The chemical reactions and pathways involving glycerol, 1,2,3-propanetriol, a sweet, hygroscopic, viscous liquid, widely distributed in nature as a constituent of many lipids." [GOC

9600 Pathogen[ Q2Q067] interacts with 1 human partners:{P32189}

9601 Pathogen[ POC214] interacts with 4 human partners:{Q14410;Q14409;P32189;Q9NPB8}

9602 Pathogen[ P03346] interacts with 1 human partners:{P32189}

9603 Pathogen[ Q85601] interacts with 1 human partners:{P32189}

9604 Pathogen[ P14079] interacts with 4 human partners:{Q9NPB8;Q14410;P32189;Q14409}

9605 Pathogen[ P03383] interacts with 1 human partners:{P32189}

9606 Pathogen[ P03410] interacts with 4 human partners:{Q14410;Q9NPB8;Q14409;P32189}

9607 Pathogen[ P14075] interacts with 1 human partners:{P32189}

9608 Pathogen[ POC206] interacts with 2 human partners:{P32189;Q9NPB8}

9609 [Cluster 1540]GO:0042416+P biological\_process [name] dopamine biosynthetic process [def] "The chemical reactions and pathways resulting in the formation of dopamine, a catecholamine neurotransmitter and a metabolic precursor of noradrenaline and adrenaline." [GOC

9610 Pathogen[ Q2Q067] interacts with 1 human partners:{P30793}

9611 Pathogen[ POC214] interacts with 1 human partners:{P30793}

9612 Pathogen[ Q85601] interacts with 1 human partners:{P30793}

9613 Pathogen[ P14079] interacts with 1 human partners:{P30793}

9614 Pathogen[ P03410] interacts with 1 human partners:{P30793}

9615 Pathogen[ P14075] interacts with 1 human partners:{P30793}

9616 Pathogen[ POC206] interacts with 1 human partners:{P30793}

9617 [Cluster 1541]GO:0014883+P biological\_process [name] transition between fast and slow fiber [def] "The process of conversion of fast-contracting muscle fibers to a slower character. This may involve slowing of contractile rate, slow myosin gene induction, increase in oxidative metabolic properties, altered electrophysiology and altered innervation. This process also regulates skeletal muscle adaptation." [GOC  
9618 Pathogen[ Q2Q067] interacts with 1 human partners:{Q08209}  
9619 Pathogen[ P0C214] interacts with 1 human partners:{Q08209}  
9620 Pathogen[ P03346] interacts with 1 human partners:{Q08209}  
9621 Pathogen[ Q85601] interacts with 1 human partners:{Q08209}  
9622 Pathogen[ P14079] interacts with 1 human partners:{Q08209}  
9623 Pathogen[ P03410] interacts with 1 human partners:{Q08209}  
9624 Pathogen[ P0C206] interacts with 1 human partners:{Q08209}  
9625 [Cluster 1542]GO:000302+P biological\_process [name] response to reactive oxygen species [def] "Any process that results in a change in state or activity of a cell or an organism (in terms of movement, secretion, enzyme production, gene expression, etc.) as a result of a reactive oxygen species stimulus. Reactive oxygen species include singlet oxygen, superoxide, and oxygen free radicals." [GOC  
9626 Pathogen[ Q2Q067] interacts with 2 human partners:{Q06830;P12883}  
9627 Pathogen[ P0C214] interacts with 3 human partners:{P05121;Q06830;P12883}  
9628 Pathogen[ P03346] interacts with 1 human partners:{Q06830}  
9629 Pathogen[ Q85601] interacts with 3 human partners:{P05121;P12883;Q06830}  
9630 Pathogen[ P14079] interacts with 1 human partners:{P12883}  
9631 Pathogen[ P03383] interacts with 1 human partners:{P12883}  
9632 Pathogen[ P03410] interacts with 3 human partners:{P05121;P12883;Q06830}  
9633 Pathogen[ P0C206] interacts with 3 human partners:{P12883;P05121;Q06830}  
9634 [Cluster 1543]GO:0035268+P biological\_process [name] protein mannosylation [def] "The addition of a mannose residue to a protein acceptor molecule." [GOC  
9635 Pathogen[ P14079] interacts with 1 human partners:{Q9P2X0}  
9636 Pathogen[ P03410] interacts with 1 human partners:{Q9P2X0}  
9637 [Cluster 1544]GO:0022614+P biological\_process [name] membrane to membrane docking [def] "The initial attachment of a membrane to a target membrane, mediated by proteins protruding from the two membranes. Docking requires only that the membranes come close enough for the proteins to interact and adhere." [GOC  
9638 Pathogen[ P03346] interacts with 1 human partners:{P26038}  
9639 Pathogen[ P14079] interacts with 1 human partners:{P26038}  
9640 Pathogen[ P03410] interacts with 1 human partners:{P26038}  
9641 [Cluster 1545]GO:0008344+P biological\_process [name] adult locomotory behavior [def] "Locomotory behavior in a fully developed and mature organism." [GOC  
9642 Pathogen[ Q2Q067] interacts with 3 human partners:{Q99497;P28356;P40426}  
9643 Pathogen[ P0C214] interacts with 2 human partners:{Q99497;Q6Y7W6}  
9644 Pathogen[ P03346] interacts with 9 human partners:{Q8NFW5;P40426;P28358;P04080;P17481;P28356;Q12929;Q99497;Q96AB6}  
9645 Pathogen[ Q85601] interacts with 3 human partners:{Q99497;Q6Y7W6;P40426}  
9646 Pathogen[ P14079] interacts with 6 human partners:{Q7Z2T5;Q96AB6;Q12929;P04080;Q6Y7W6;Q99497}  
9647 Pathogen[ P03410] interacts with 6 human partners:{P40426;Q99497;Q96AB6;Q6Y7W6;Q9UBY8;Q12929}  
9648 Pathogen[ P0C206] interacts with 5 human partners:{Q96AB6;Q99497;Q6Y7W6;P40426;P28356}  
9649 Pathogen[ P03363] interacts with 7 human partners:{Q8NFW5;Q96AB6;P28356;P17481;P28358;Q12929;P40426}  
9650 [Cluster 1546]GO:0002250+P biological\_process [name] adaptive immune response [def] "An immune response based on directed amplification of specific receptors for antigen produced through a somatic diversification process, and allowing for enhanced response to subsequent exposures to the same antigen (immunological memory)." [GO\_REF  
9651 Pathogen[ Q2Q067] interacts with 1 human partners:{O95999}  
9652 Pathogen[ P0C214] interacts with 1 human partners:{O95999}  
9653 Pathogen[ P03346] interacts with 1 human partners:{O95999}  
9654 Pathogen[ Q85601] interacts with 1 human partners:{O95999}  
9655 Pathogen[ P14079] interacts with 1 human partners:{O95999}  
9656 Pathogen[ P03383] interacts with 1 human partners:{O95999}  
9657 Pathogen[ P03410] interacts with 1 human partners:{O95999}  
9658 Pathogen[ P14075] interacts with 1 human partners:{O95999}  
9659 Pathogen[ P0C206] interacts with 1 human partners:{O95999}  
9660 [Cluster 1547]GO:0018023+P biological\_process [name] peptidyl-lysine trimethylation [def] "The methylation of peptidyl-lysine to form peptidyl-N6,N6,N6-trimethyl-L-lysine." [RESID  
9661 Pathogen[ Q2Q067] interacts with 1 human partners:{Q86TU7}  
9662 Pathogen[ P0C214] interacts with 1 human partners:{Q86TU7}  
9663 Pathogen[ P03346] interacts with 2 human partners:{Q9BYW2;Q86TU7}  
9664 Pathogen[ Q85601] interacts with 1 human partners:{Q86TU7}  
9665 Pathogen[ P14079] interacts with 1 human partners:{Q86TU7}  
9666 Pathogen[ P03383] interacts with 1 human partners:{Q86TU7}  
9667 Pathogen[ P03410] interacts with 1 human partners:{Q86TU7}  
9668 Pathogen[ P14075] interacts with 1 human partners:{Q86TU7}  
9669 Pathogen[ P0C206] interacts with 1 human partners:{Q86TU7}

9670 [Cluster 1548]GO:0060445+P biological\_process [name] branching involved in salivary gland morphogenesis [def] "The process in which the branching structure of the salivary gland is generated and organized." [GOC

9671 Pathogen[ Q2Q067] interacts with 1 human partners:{P21980}

9672 Pathogen[ P0C214] interacts with 1 human partners:{P21980}

9673 Pathogen[ P03346] interacts with 1 human partners:{P21980}

9674 Pathogen[ Q85601] interacts with 1 human partners:{P21980}

9675 Pathogen[ P14079] interacts with 2 human partners:{P21980;Q14118}

9676 Pathogen[ P03383] interacts with 1 human partners:{P21980}

9677 Pathogen[ P03410] interacts with 2 human partners:{Q14118;P21980}

9678 Pathogen[ P14075] interacts with 1 human partners:{P21980}

9679 Pathogen[ P0C206] interacts with 1 human partners:{P21980}

9680 [Cluster 1549]GO:0045199+P biological\_process [name] maintenance of epithelial cell apical/basal polarity [def] "The maintenance of the apicobasal polarity of an epithelial cell." [GOC

9681 Pathogen[ P0C214] interacts with 1 human partners:{P16157}

9682 Pathogen[ P03346] interacts with 1 human partners:{P16157}

9683 Pathogen[ Q85601] interacts with 1 human partners:{P16157}

9684 Pathogen[ P14079] interacts with 1 human partners:{P16157}

9685 Pathogen[ P03410] interacts with 1 human partners:{P16157}

9686 Pathogen[ P0C206] interacts with 1 human partners:{P16157}

9687 Pathogen[ P03363] interacts with 1 human partners:{P16157}

9688 [Cluster 1550]GO:0012502+P biological\_process [name] induction of programmed cell death [def] "A process which directly activates any of the steps required for programmed cell death." [GOC

9689 Pathogen[ P14079] interacts with 1 human partners:{Q9NQX7}

9690 Pathogen[ P03410] interacts with 1 human partners:{Q9NQX7}

9691 Pathogen[ P0C206] interacts with 1 human partners:{Q9NQX7}

9692 [Cluster 1551]GO:0035774+P biological\_process [name] positive regulation of insulin secretion involved in cellular response to glucose stimulus [def] "Any process that increases the frequency, rate or extent of the regulated release of insulin that contributes to the response of a cell to glucose." [GOC

9693 Pathogen[ P0C214] interacts with 1 human partners:{Q92934}

9694 Pathogen[ P14079] interacts with 2 human partners:{P16298;Q92934}

9695 Pathogen[ P03410] interacts with 1 human partners:{Q92934}

9696 Pathogen[ P0C206] interacts with 1 human partners:{Q92934}

9697 [Cluster 1552]GO:0060113+P biological\_process [name] inner ear receptor cell differentiation [def] "The process in which relatively unspecialized cells, acquire specialized structural and/or functional features of inner ear receptor cells. Inner ear receptor cells are mechanoreceptors found in the inner ear responsible for transducing signals involved in balance and sensory perception of sound." [GOC

9698 Pathogen[ Q2Q067] interacts with 1 human partners:{Q495M9}

9699 Pathogen[ P0C214] interacts with 1 human partners:{Q495M9}

9700 Pathogen[ P03346] interacts with 3 human partners:{O60443;Q495M9;Q15319}

9701 Pathogen[ Q85601] interacts with 1 human partners:{Q495M9}

9702 Pathogen[ P14079] interacts with 2 human partners:{Q495M9;O60443}

9703 Pathogen[ P03410] interacts with 2 human partners:{Q495M9;O60443}

9704 Pathogen[ P0C206] interacts with 2 human partners:{O60443;Q495M9}

9705 Pathogen[ P03363] interacts with 3 human partners:{O60443;Q495M9;Q15319}

9706 [Cluster 1553]GO:0032787+P biological\_process [name] monocarboxylic acid metabolic process [def] "The chemical reactions and pathways involving monocarboxylic acids, any organic acid containing one carboxyl (COOH) group or anion (COO-)." [GOC

9707 Pathogen[ P0C214] interacts with 1 human partners:{Q6IB77}

9708 Pathogen[ Q85601] interacts with 1 human partners:{Q6IB77}

9709 Pathogen[ P14079] interacts with 1 human partners:{Q6IB77}

9710 Pathogen[ P03410] interacts with 1 human partners:{Q6IB77}

9711 Pathogen[ P0C206] interacts with 1 human partners:{Q6IB77}

9712 [Cluster 1554]GO:0035262+P biological\_process [name] gonad morphogenesis [def] "The process in which the anatomical structures of the gonads are generated and organized. A gonad is an animal organ producing gametes, e.g. the testes or the ovary in mammals." [ISBN

9713 Pathogen[ P03346] interacts with 1 human partners:{Q9NQ69}

9714 [Cluster 1555]GO:0010324+P biological\_process [name] membrane invagination [def] "The infolding of a membrane, resulting in formation of a vesicle." [GOC

9715 Pathogen[ P03410] interacts with 1 human partners:{Q0JRZ9}

9716 [Cluster 1556]GO:0006069+P biological\_process [name] ethanol oxidation [def] "An ethanol metabolic process in which ethanol is converted to acetyl-CoA via acetaldehyde and acetate." [GOC

9717 Pathogen[ P0C214] interacts with 1 human partners:{P07327}

9718 [Cluster 1557]GO:0007185+P biological\_process [name] transmembrane receptor protein tyrosine phosphatase signaling pathway [def] "The series of molecular signals generated as a consequence of a transmembrane receptor tyrosine phosphatase binding to its physiological ligand." [GOC

9719 Pathogen[ P14079] interacts with 1 human partners:{Q8WU20}

9720 Pathogen[ P03410] interacts with 1 human partners:{Q8WU20}

9721 Pathogen[ P0C206] interacts with 1 human partners:{Q8WU20}

9722 [Cluster 1558]GO:0009410+P biological\_process [name] response to xenobiotic stimulus [def] "Any process that results in a change in state or activity of a cell or an organism (in terms of movement, secretion, enzyme production, gene expression, etc.) as a result of a xenobiotic compound stimulus. Xenobiotic compounds are compounds foreign to living organisms." [GOC  
9723 Pathogen[ Q2Q067] interacts with 1 human partners:{P35869}  
9724 Pathogen[ P0C214] interacts with 1 human partners:{P35869}  
9725 Pathogen[ P03346] interacts with 1 human partners:{P35869}  
9726 Pathogen[ Q85601] interacts with 1 human partners:{P35869}  
9727 Pathogen[ P14079] interacts with 1 human partners:{P35869}  
9728 Pathogen[ P03383] interacts with 1 human partners:{P35869}  
9729 Pathogen[ P14075] interacts with 1 human partners:{P35869}  
9730 Pathogen[ P0C206] interacts with 1 human partners:{P35869}  
9731 Pathogen[ P03363] interacts with 1 human partners:{P35869}  
9732 [Cluster 1559]GO:0042412+P biological\_process [name] taurine biosynthetic process [def] "The chemical reactions and pathways resulting in the formation of taurine (2-aminoethanesulfonic acid), a sulphur-containing amino acid derivative important in the metabolism of fats." [GOC  
9733 Pathogen[ P14079] interacts with 1 human partners:{Q16878}  
9734 [Cluster 1560]GO:1900276+P  
9735 Pathogen[ P0C214] interacts with 1 human partners:{Q96G01}  
9736 Pathogen[ P03346] interacts with 1 human partners:{Q96G01}  
9737 Pathogen[ Q85601] interacts with 1 human partners:{Q96G01}  
9738 Pathogen[ P14079] interacts with 1 human partners:{Q96G01}  
9739 Pathogen[ P03410] interacts with 1 human partners:{Q96G01}  
9740 Pathogen[ P0C206] interacts with 1 human partners:{Q96G01}  
9741 [Cluster 1561]GO:0071709+P biological\_process [name] membrane assembly [def] "The aggregation, arrangement and bonding together of a set of components to form a membrane." [GOC  
9742 Pathogen[ Q2Q067] interacts with 1 human partners:{Q01082}  
9743 Pathogen[ P0C214] interacts with 1 human partners:{Q01082}  
9744 Pathogen[ P03346] interacts with 1 human partners:{Q01082}  
9745 Pathogen[ Q85601] interacts with 1 human partners:{Q01082}  
9746 Pathogen[ P14079] interacts with 1 human partners:{Q01082}  
9747 Pathogen[ P03410] interacts with 1 human partners:{Q01082}  
9748 Pathogen[ P0C206] interacts with 1 human partners:{Q01082}  
9749 Pathogen[ P03363] interacts with 1 human partners:{Q01082}  
9750 [Cluster 1562]GO:0033145+P biological\_process [name] positive regulation of intracellular steroid hormone receptor signaling pathway [def] "Any process that activates or increases the frequency, rate or extent of the activity of any intracellular steroid hormone receptor signaling pathway." [GOC  
9751 Pathogen[ Q2Q067] interacts with 1 human partners:{P63279}  
9752 Pathogen[ P0C214] interacts with 1 human partners:{P63279}  
9753 Pathogen[ P03346] interacts with 1 human partners:{P63279}  
9754 Pathogen[ Q85601] interacts with 1 human partners:{P63279}  
9755 Pathogen[ P14079] interacts with 1 human partners:{P63279}  
9756 Pathogen[ P03383] interacts with 1 human partners:{P63279}  
9757 Pathogen[ P03410] interacts with 1 human partners:{P63279}  
9758 Pathogen[ P14075] interacts with 1 human partners:{P63279}  
9759 Pathogen[ P03363] interacts with 1 human partners:{P63279}  
9760 [Cluster 1563]GO:0035082+P biological\_process [name] axoneme assembly [def] "The assembly and organization of an axoneme, the bundle of microtubules and associated proteins that forms the core of cilia and flagella in eukaryotic cells and is responsible for their movements." [GOC  
9761 Pathogen[ P14079] interacts with 2 human partners:{Q9Y4R7;P56715}  
9762 Pathogen[ P03410] interacts with 2 human partners:{Q9Y4R7;P56715}  
9763 Pathogen[ P0C206] interacts with 1 human partners:{P56715}  
9764 Pathogen[ P03363] interacts with 1 human partners:{P56715}  
9765 [Cluster 1564]GO:0007387+P biological\_process [name] anterior compartment pattern formation [def] "The process giving rise to specification of cell identity in the anterior compartments of the segmented embryo." [http  
9766 Pathogen[ Q2Q067] interacts with 1 human partners:{P40426}  
9767 Pathogen[ P03346] interacts with 1 human partners:{P40426}  
9768 Pathogen[ Q85601] interacts with 1 human partners:{P40426}  
9769 Pathogen[ P03410] interacts with 1 human partners:{P40426}  
9770 Pathogen[ P0C206] interacts with 1 human partners:{P40426}  
9771 Pathogen[ P03363] interacts with 1 human partners:{P40426}  
9772 [Cluster 1565]GO:0001300+P biological\_process [name] chronological cell aging [def] "The process associated with progression of the cell from its inception to the end of its lifespan that occurs when the cell is in a non-dividing, or quiescent, state." [GOC  
9773 Pathogen[ P0C214] interacts with 1 human partners:{P05121}  
9774 Pathogen[ Q85601] interacts with 1 human partners:{P05121}  
9775 Pathogen[ P03410] interacts with 1 human partners:{P05121}  
9776 Pathogen[ P0C206] interacts with 1 human partners:{P05121}  
9777 [Cluster 1566]GO:0006103+P biological\_process [name] 2-oxoglutarate metabolic process [def] "The chemical reactions and pathways involving oxoglutarate, the dianion of

2-oxoglutaric acid. It is a key constituent of the TCA cycle and a key intermediate in amino-acid metabolism." [ISBN

9778 Pathogen[ POC214] interacts with 7 human partners:{O75874;P48735;P50213;O43837;P09622;P36957;P51553}

9779 Pathogen[ POC206] interacts with 1 human partners:{P50213}

9780 [Cluster 1567]GO:0001946+P biological\_process [name] lymphangiogenesis [def] "Lymph vessel formation when new vessels emerge from the proliferation of pre-existing vessels." [GOC

9781 Pathogen[ P03346] interacts with 1 human partners:{P35713}

9782 [Cluster 1568]GO:0042659+P biological\_process [name] regulation of cell fate specification [def] "Any process that mediates the adoption of a specific fate by a cell." [GOC

9783 Pathogen[ P03346] interacts with 1 human partners:{P61968}

9784 Pathogen[ Q85601] interacts with 1 human partners:{P61968}

9785 Pathogen[ POC206] interacts with 1 human partners:{P61968}

9786 [Cluster 1569]GO:0071299+P biological\_process [name] cellular response to vitamin A [def] "Any process that results in a change in state or activity of a cell (in terms of movement, secretion, enzyme production, gene expression, etc.) as a result of a vitamin A stimulus." [GOC

9787 Pathogen[ P14079] interacts with 1 human partners:{Q16873}

9788 Pathogen[ P03410] interacts with 1 human partners:{Q16873}

9789 [Cluster 1570]GO:0035883+P biological\_process [name] enteroendocrine cell differentiation [def] "The process in which a relatively unspecialized cell acquires specialized structural and/or functional features of an enteroendocrine cell. Enteroendocrine cells are hormonally active epithelial cells in the gut that constitute the diffuse neuroendocrine system." [CL

9790 Pathogen[ Q2Q067] interacts with 1 human partners:{Q13562}

9791 Pathogen[ P03346] interacts with 1 human partners:{Q13562}

9792 Pathogen[ Q85601] interacts with 1 human partners:{Q13562}

9793 Pathogen[ POC206] interacts with 1 human partners:{Q13562}

9794 [Cluster 1571]GO:0051926+P biological\_process [name]negative regulation of calcium ion transport [def] "Any process that stops, prevents, or reduces the frequency, rate or extent of the directed movement of calcium ions into, out of or within a cell, or between cells, by means of some agent such as a transporter or pore." [GOC

9795 Pathogen[ Q2Q067] interacts with 1 human partners:{P29474}

9796 Pathogen[ POC214] interacts with 1 human partners:{P29474}

9797 Pathogen[ P03346] interacts with 1 human partners:{P29474}

9798 Pathogen[ Q85601] interacts with 1 human partners:{P29474}

9799 Pathogen[ P03383] interacts with 1 human partners:{P29474}

9800 Pathogen[ P03410] interacts with 1 human partners:{P29474}

9801 Pathogen[ P14075] interacts with 1 human partners:{P29474}

9802 Pathogen[ POC206] interacts with 1 human partners:{P29474}

9803 Pathogen[ P03363] interacts with 1 human partners:{P29474}

9804 [Cluster 1572]GO:0090400+P biological\_process [name] stress-induced premature senescence [def] "A cellular senescence process associated with the dismantling of a cell as a response to environmental factors such as hydrogen peroxide or X-rays." [GOC

9805 Pathogen[ Q2Q067] interacts with 1 human partners:{P38936}

9806 Pathogen[ POC214] interacts with 1 human partners:{P38936}

9807 Pathogen[ P03346] interacts with 1 human partners:{P38936}

9808 Pathogen[ Q85601] interacts with 1 human partners:{P38936}

9809 Pathogen[ P14079] interacts with 1 human partners:{P38936}

9810 Pathogen[ P03410] interacts with 1 human partners:{P38936}

9811 Pathogen[ POC206] interacts with 1 human partners:{P38936}

9812 [Cluster 1573]GO:0007274+P biological\_process [name] neuromuscular synaptic transmission [def] "The process of communication from a neuron to a muscle, across a synapse." [GOC

9813 Pathogen[ P14079] interacts with 1 human partners:{Q9Y4J8}

9814 Pathogen[ P03410] interacts with 2 human partners:{O60333;Q9Y4J8}

9815 Pathogen[ POC206] interacts with 1 human partners:{Q9Y4J8}

9816 Pathogen[ P03363] interacts with 1 human partners:{O60333}

9817 [Cluster 1574]GO:0071377+P biological\_process [name] cellular response to glucagon stimulus [def] "Any process that results in a change in state or activity of a cell (in terms of movement, secretion, enzyme production, gene expression, etc.) as a result of a glucagon stimulus." [GOC

9818 Pathogen[ Q2Q067] interacts with 1 human partners:{P62879}

9819 Pathogen[ POC214] interacts with 1 human partners:{P62879}

9820 Pathogen[ P03346] interacts with 1 human partners:{P62879}

9821 Pathogen[ Q85601] interacts with 1 human partners:{P62879}

9822 Pathogen[ P03383] interacts with 1 human partners:{P62879}

9823 Pathogen[ P03410] interacts with 1 human partners:{P62879}

9824 Pathogen[ P14075] interacts with 1 human partners:{P62879}

9825 Pathogen[ POC206] interacts with 1 human partners:{P62879}

9826 Pathogen[ P03363] interacts with 1 human partners:{P62879}

9827 [Cluster 1575]GO:0046597+P biological\_process [name] negative regulation of virion penetration into host cell [def] "Any process that stops, prevents, or reduces the frequency, rate or extent of the introduction of virus particles into the cell." [GOC



9828 Pathogen[ P14079] interacts with 1 human partners:{P13164}

9829 [Cluster 1576]GO:0060415+P biological\_process [name] muscle tissue morphogenesis  
[def] "The process in which the anatomical structures of muscle tissue are generated and organized. Muscle tissue consists of a set of cells that are part of an organ and carry out a contractive function." [GOC

9830 Pathogen[ Q2Q067] interacts with 2 human partners:{P13349;P23409}

9831 Pathogen[ P0C214] interacts with 1 human partners:{P13349}

9832 Pathogen[ P03346] interacts with 3 human partners:{P13349;P23409;P23759}

9833 Pathogen[ Q85601] interacts with 2 human partners:{P13349;P23409}

9834 Pathogen[ P14079] interacts with 2 human partners:{P13349;P23409}

9835 Pathogen[ P03410] interacts with 2 human partners:{P23409;P13349}

9836 Pathogen[ P0C206] interacts with 2 human partners:{P23409;P13349}

9837 Pathogen[ P03363] interacts with 3 human partners:{P13349;P23759;P23409}

9838 [Cluster 1577]GO:0019470+P biological\_process [name] 4-hydroxyproline catabolic process [def] "The chemical reactions and pathways resulting in the breakdown of 4-hydroxyproline, C5H9NO3, a derivative of the amino acid proline." [GOC

9839 Pathogen[ P0C214] interacts with 1 human partners:{Q86XE5}

9840 Pathogen[ P14079] interacts with 1 human partners:{Q86XE5}

9841 Pathogen[ P03410] interacts with 1 human partners:{Q86XE5}

9842 Pathogen[ P14075] interacts with 1 human partners:{Q86XE5}

9843 Pathogen[ P0C206] interacts with 1 human partners:{Q86XE5}

9844 [Cluster 1578]GO:0072015+P biological\_process [name] glomerular visceral epithelial cell development [def] "The process whose specific outcome is the progression of a glomerular visceral epithelial cell over time, from its formation to the mature structure. A glomerular visceral epithelial cell is a specialized epithelial cell that contains \"feet\" that interdigitate with the \"feet\" of other glomerular epithelial cells." [GOC

9845 Pathogen[ Q2Q067] interacts with 1 human partners:{Q86UL8}

9846 Pathogen[ P03346] interacts with 1 human partners:{Q86UL8}

9847 Pathogen[ Q85601] interacts with 1 human partners:{Q86UL8}

9848 Pathogen[ P14079] interacts with 1 human partners:{Q86UL8}

9849 Pathogen[ P03410] interacts with 1 human partners:{Q86UL8}

9850 Pathogen[ P0C206] interacts with 1 human partners:{Q86UL8}

9851 Pathogen[ P03363] interacts with 1 human partners:{Q86UL8}

9852 [Cluster 1579]GO:0006544+P biological\_process [name] glycine metabolic process [def] "The chemical reactions and pathways involving glycine, aminoethanoic acid." [GOC

9853 Pathogen[ Q2Q067] interacts with 1 human partners:{P34896}

9854 Pathogen[ P0C214] interacts with 4 human partners:{P34897;Q9UI17;P34896;Q6IB77}

9855 Pathogen[ Q85601] interacts with 2 human partners:{P34896;Q6IB77}

9856 Pathogen[ P14079] interacts with 4 human partners:{P34897;Q6IB77;Q9UI17;P34896}

9857 Pathogen[ P03383] interacts with 1 human partners:{P34896}

9858 Pathogen[ P03410] interacts with 4 human partners:{Q9UI17;Q6IB77;P34897;P34896}

9859 Pathogen[ P14075] interacts with 1 human partners:{P34896}

9860 Pathogen[ P0C206] interacts with 3 human partners:{P34897;P34896;Q6IB77}

9861 [Cluster 1580]GO:0031943+P biological\_process [name] regulation of glucocorticoid metabolic process [def] "Any process that modulates the frequency, rate or extent of the chemical reactions and pathways involving glucocorticoids." [GOC

9862 Pathogen[ Q2Q067] interacts with 1 human partners:{Q9UNE7}

9863 Pathogen[ P0C214] interacts with 1 human partners:{Q9UNE7}

9864 Pathogen[ P03346] interacts with 1 human partners:{Q9UNE7}

9865 Pathogen[ Q85601] interacts with 1 human partners:{Q9UNE7}

9866 Pathogen[ P03410] interacts with 1 human partners:{Q9UNE7}

9867 Pathogen[ P0C206] interacts with 1 human partners:{Q9UNE7}

9868 Pathogen[ P03363] interacts with 1 human partners:{Q9UNE7}

9869 [Cluster 1581]GO:0043519+P biological\_process [name] regulation of myosin II filament organization [def] "Any process that modulates the frequency, rate or extent of the assembly, arrangement of constituent parts, or disassembly of a bipolar filament composed of myosin II molecules." [GOC

9870 Pathogen[ P14079] interacts with 1 human partners:{P61158}

9871 [Cluster 1582]GO:0097028+P biological\_process [name] dendritic cell differentiation [def] "The process in which a precursor cell type acquires the specialized features of a dendritic cell. A dendritic cell is a leukocyte of dendritic lineage specialized in the uptake, processing, and transport of antigens to lymph nodes for the purpose of stimulating an immune response via T cell activation." [CL

9872 Pathogen[ Q2Q067] interacts with 1 human partners:{P15976}

9873 Pathogen[ P03346] interacts with 1 human partners:{P15976}

9874 Pathogen[ Q85601] interacts with 1 human partners:{P15976}

9875 Pathogen[ P14079] interacts with 2 human partners:{P15976;P04141}

9876 Pathogen[ P03410] interacts with 2 human partners:{P04141;P15976}

9877 Pathogen[ P0C206] interacts with 1 human partners:{P15976}

9878 [Cluster 1583]GO:0045047+P biological\_process [name] protein targeting to ER [def] "The process of directing proteins towards the endoplasmic reticulum (ER) using signals contained within the protein. One common mechanism uses a 16- to 30-residue signal sequence, typically located at the N-terminus of the protein and containing positively charged amino acids followed by a continuous stretch of hydrophobic residues, which directs the ribosome to the ER membrane and initiates transport of the growing

polypeptide across the ER membrane." [ISBN

9879 Pathogen[ P14079] interacts with 1 human partners:{P60059}

9880 Pathogen[ P03410] interacts with 1 human partners:{P60059}

9881 [Cluster 1584]GO:0002090+P biological\_process [name] regulation of receptor internalization [def] "Any process that modulates the frequency, rate or extent of receptor internalization." [GOC

9882 Pathogen[ Q2Q067] interacts with 1 human partners:{Q99962}

9883 Pathogen[ P0C214] interacts with 1 human partners:{Q99962}

9884 Pathogen[ P03346] interacts with 1 human partners:{Q99962}

9885 Pathogen[ Q85601] interacts with 1 human partners:{Q99962}

9886 Pathogen[ P14079] interacts with 1 human partners:{Q99962}

9887 Pathogen[ P03410] interacts with 1 human partners:{Q99962}

9888 Pathogen[ P0C206] interacts with 1 human partners:{Q99962}

9889 Pathogen[ P03363] interacts with 1 human partners:{Q99962}

9890 [Cluster 1585]GO:0032717+P biological\_process [name] negative regulation of interleukin-8 production [def] "Any process that stops, prevents, or reduces the frequency, rate, or extent of interleukin-8 production." [GOC

9891 Pathogen[ Q2Q067] interacts with 1 human partners:{Q8WUQ7}

9892 Pathogen[ P03346] interacts with 1 human partners:{Q8WUQ7}

9893 Pathogen[ P14079] interacts with 1 human partners:{Q8WUQ7}

9894 Pathogen[ P03383] interacts with 1 human partners:{Q8WUQ7}

9895 Pathogen[ P03410] interacts with 1 human partners:{Q8WUQ7}

9896 Pathogen[ P14075] interacts with 1 human partners:{Q8WUQ7}

9897 Pathogen[ P0C206] interacts with 1 human partners:{Q8WUQ7}

9898 Pathogen[ P03363] interacts with 1 human partners:{Q8WUQ7}

9899 [Cluster 1586]GO:0070986+P biological\_process [name] left/right axis specification [def] "The establishment, maintenance and elaboration of the left/right axis. The left/right axis is defined by a line that runs orthogonal to both the anterior/posterior and dorsal/ventral axes. Each side is defined from the viewpoint of the organism rather of the observer (as per anatomical axes)." [GOC

9900 Pathogen[ P03346] interacts with 1 human partners:{Q8N157}

9901 Pathogen[ P14079] interacts with 1 human partners:{Q8N157}

9902 Pathogen[ P03410] interacts with 1 human partners:{Q8N157}

9903 Pathogen[ P0C206] interacts with 1 human partners:{Q8N157}

9904 Pathogen[ P03363] interacts with 1 human partners:{Q8N157}

9905 [Cluster 1587]GO:0045743+P biological\_process [name] positive regulation of fibroblast growth factor receptor signaling pathway [def] "Any process that activates or increases the frequency, rate or extent of fibroblast growth factor receptor signaling pathway activity." [GOC

9906 Pathogen[ P14079] interacts with 1 human partners:{Q8TAT2}

9907 Pathogen[ P03410] interacts with 1 human partners:{Q8TAT2}

9908 [Cluster 1588]GO:0035987+P biological\_process [name] endodermal cell differentiation [def] "The process in which a relatively unspecialized cell acquires the specialized features of an endoderm cell, a cell of the inner of the three germ layers of the embryo." [CL

9909 Pathogen[ P03346] interacts with 1 human partners:{Q9H2W2}

9910 Pathogen[ P03363] interacts with 1 human partners:{Q9H2W2}

9911 [Cluster 1589]GO:0021527+P biological\_process [name] spinal cord association neuron differentiation [def] "The process in which neuroepithelial cells in the neural tube acquire specialized structural and/or functional features of association neurons. Association neurons are cells located in the dorsal portion of the spinal cord that integrate sensory input. Differentiation includes the processes involved in commitment of a cell to a specific fate." [GO\_REF

9912 Pathogen[ Q2Q067] interacts with 1 human partners:{Q9H4S2}

9913 Pathogen[ P03346] interacts with 6 human partners:{Q9H4S2;P23759;P17542;Q9H2C1;Q9UBR4;P61968}

9914 Pathogen[ Q85601] interacts with 2 human partners:{P61968;Q9H4S2}

9915 Pathogen[ P0C206] interacts with 4 human partners:{Q9H4S2;Q9H2C1;Q9UBR4;P61968}

9916 Pathogen[ P03363] interacts with 2 human partners:{Q9H4S2;P23759}

9917 [Cluster 1590]GO:0048743+P biological\_process [name] positive regulation of skeletal muscle fiber development [def] "Any process that activates, maintains or increases the rate of skeletal muscle fiber development. Muscle fibers are formed by the maturation of myotubes. They can be classed as slow, intermediate/fast or fast." [GOC

9918 Pathogen[ Q2Q067] interacts with 1 human partners:{Q9UI56}

9919 Pathogen[ P0C214] interacts with 1 human partners:{Q9UI56}

9920 Pathogen[ P03346] interacts with 1 human partners:{Q9UI56}

9921 Pathogen[ P14079] interacts with 1 human partners:{Q9UI56}

9922 Pathogen[ P03383] interacts with 1 human partners:{Q9UI56}

9923 Pathogen[ P03410] interacts with 1 human partners:{Q9UI56}

9924 Pathogen[ P14075] interacts with 1 human partners:{Q9UI56}

9925 Pathogen[ P0C206] interacts with 1 human partners:{Q9UI56}

9926 Pathogen[ P03363] interacts with 1 human partners:{Q9UI56}

9927 [Cluster 1591]GO:0006163+P biological\_process [name] purine nucleotide metabolic process [def] "The chemical reactions and pathways involving a purine nucleotide, a compound consisting of nucleoside (a purine base linked to a deoxyribose or ribose sugar) esterified with a phosphate group at either the 3' or 5'-hydroxyl group of the

sugar." [GOC  
9928 Pathogen[ POC214] interacts with 1 human partners:{P30566}  
9929 Pathogen[ P03410] interacts with 1 human partners:{P30566}  
9930 [Cluster 1592]GO:0021891+P biological\_process [name] olfactory bulb interneuron development [def] "The process whose specific outcome is the progression of an interneuron residing in the olfactory bulb, from its initial commitment, to the fully functional differentiated cell." [GO\_REF  
9931 Pathogen[ P03346] interacts with 1 human partners:{Q9BXA9}  
9932 [Cluster 1593]GO:0021636+P biological\_process [name] trigeminal nerve morphogenesis [def] "The process in which the anatomical structure of the trigeminal nerve is generated and organized. The trigeminal nerve is composed of three large branches. They are the ophthalmic (V1, sensory), maxillary (V2, sensory) and mandibular (V3, motor and sensory) branches. The sensory ophthalmic branch travels through the superior orbital fissure and passes through the orbit to reach the skin of the forehead and top of the head. The maxillary nerve contains sensory branches that reach the pterygopalatine fossa via the inferior orbital fissure (face, cheek and upper teeth) and pterygopalatine canal (soft and hard palate, nasal cavity and pharynx). The motor part of the mandibular branch is distributed to the muscles of mastication, the mylohyoid muscle and the anterior belly of the digastric. The mandibular nerve also innervates the tensor veli palatini and tensor tympani muscles. The sensory part of the mandibular nerve is composed of branches that carry general sensory information from the mucous membranes of the mouth and cheek, anterior two-thirds of the tongue, lower teeth, skin of the lower jaw, side of the head and scalp and meninges of the anterior and middle cranial fossae." [GO\_REF  
9933 Pathogen[ Q2Q067] interacts with 1 human partners:{O14786}  
9934 Pathogen[ POC214] interacts with 1 human partners:{O14786}  
9935 Pathogen[ P03346] interacts with 1 human partners:{O14786}  
9936 Pathogen[ Q85601] interacts with 1 human partners:{O14786}  
9937 Pathogen[ P03410] interacts with 1 human partners:{O14786}  
9938 Pathogen[ POC206] interacts with 1 human partners:{O14786}  
9939 Pathogen[ P03363] interacts with 1 human partners:{O14786}  
9940 [Cluster 1594]GO:0030203+P biological\_process [name] glycosaminoglycan metabolic process [def] "The chemical reactions and pathways involving glycosaminoglycans, any one of a group of polysaccharides that contain amino sugars. Formerly known as mucopolysaccharides, they include hyaluronic acid and chondroitin, which provide lubrication in joints and form part of the matrix of cartilage. The three-dimensional structure of these molecules enables them to trap water, which forms a gel and gives glycosaminoglycans their elastic properties." [ISBN  
9941 Pathogen[ POC214] interacts with 2 human partners:{O75330;P16278}  
9942 Pathogen[ P03346] interacts with 2 human partners:{O75330;P16278}  
9943 Pathogen[ Q85601] interacts with 1 human partners:{O75330}  
9944 Pathogen[ P14079] interacts with 8 human partners:{Q94923;P16278;O43505;P54802;P35475;Q9UL01;Q9NWW5;O75330}  
9945 Pathogen[ P03410] interacts with 6 human partners:{O75330;Q9NWW5;P54802;P16278;Q9UL01;O43505}  
9946 Pathogen[ P14075] interacts with 2 human partners:{O43505;O75330}  
9947 Pathogen[ POC206] interacts with 4 human partners:{Q9UL01;O75330;P16278;O43505}  
9948 [Cluster 1595]GO:0043129+P biological\_process [name] surfactant homeostasis [def] "Any process involved in the maintenance of a steady-state level of the surface-active lipoprotein mixture which coats the alveoli." [PMID  
9949 Pathogen[ Q2Q067] interacts with 1 human partners:{Q99814}  
9950 Pathogen[ POC214] interacts with 1 human partners:{Q99814}  
9951 Pathogen[ P03346] interacts with 1 human partners:{Q99814}  
9952 Pathogen[ Q85601] interacts with 1 human partners:{Q99814}  
9953 Pathogen[ P14079] interacts with 1 human partners:{Q99814}  
9954 Pathogen[ P03410] interacts with 1 human partners:{Q99814}  
9955 Pathogen[ POC206] interacts with 1 human partners:{Q99814}  
9956 Pathogen[ P03363] interacts with 1 human partners:{Q99814}  
9957 [Cluster 1596]GO:0019518+P biological\_process [name] L-threonine catabolic process to glycine [def] "The chemical reactions and pathways resulting in the breakdown of L-threonine (the L-enantiomer of 2-amino-3-hydroxybutyric acid) to form to form 2-amino-3-oxobutanoate, which is subsequently converted to glycine." [GOC  
9958 Pathogen[ P03410] interacts with 1 human partners:{O75600}  
9959 [Cluster 1597]GO:0071396+P biological\_process [name] cellular response to lipid [def] "Any process that results in a change in state or activity of a cell (in terms of movement, secretion, enzyme production, gene expression, etc.) as a result of a lipid stimulus." [GOC  
9960 Pathogen[ POC214] interacts with 1 human partners:{Q92934}  
9961 Pathogen[ P14079] interacts with 1 human partners:{Q92934}  
9962 Pathogen[ P03410] interacts with 1 human partners:{Q92934}  
9963 Pathogen[ POC206] interacts with 1 human partners:{Q92934}  
9964 [Cluster 1598]GO:0031129+P biological\_process [name] inductive cell-cell signaling [def] "Signaling at short range between cells of different ancestry and developmental potential that results in one cell or group of cells effecting a developmental change in the other. This is often done by secretion of proteins by one cell which affects the neighboring cells and causes them to adopt a certain fate." [GOC

9965 Pathogen[ Q2Q067] interacts with 1 human partners:{Q9NSC2}

9966 Pathogen[ POC214] interacts with 1 human partners:{Q9NSC2}

9967 Pathogen[ P03346] interacts with 1 human partners:{Q9NSC2}

9968 Pathogen[ Q85601] interacts with 1 human partners:{Q9NSC2}

9969 Pathogen[ P14079] interacts with 1 human partners:{Q9NSC2}

9970 Pathogen[ P03383] interacts with 1 human partners:{Q9NSC2}

9971 Pathogen[ P03410] interacts with 1 human partners:{Q9NSC2}

9972 Pathogen[ P14075] interacts with 1 human partners:{Q9NSC2}

9973 Pathogen[ POC206] interacts with 1 human partners:{Q9NSC2}

9974 [Cluster 1599]GO:0033089+P biological\_process [name] positive regulation of T cell differentiation in thymus [def] "Any process that activates or increases the frequency, rate or extent of T cell differentiation in the thymus." [GOC

9975 Pathogen[ Q2Q067] interacts with 1 human partners:{A2RU30}

9976 Pathogen[ POC214] interacts with 1 human partners:{A2RU30}

9977 Pathogen[ P03346] interacts with 1 human partners:{A2RU30}

9978 Pathogen[ P14079] interacts with 1 human partners:{A2RU30}

9979 Pathogen[ P03383] interacts with 1 human partners:{A2RU30}

9980 Pathogen[ P03410] interacts with 1 human partners:{A2RU30}

9981 Pathogen[ P14075] interacts with 1 human partners:{A2RU30}

9982 Pathogen[ POC206] interacts with 1 human partners:{A2RU30}

9983 Pathogen[ P03363] interacts with 1 human partners:{A2RU30}

9984 [Cluster 1600]GO:0048937+P biological\_process [name] lateral line nerve glial cell development [def] "The process aimed at the progression of a lateral line glial cell over time, from initial commitment of the cell to a specific fate, to the fully functional differentiated cell." [GOC

9985 Pathogen[ P03346] interacts with 1 human partners:{Q9UJU5}

9986 Pathogen[ P03363] interacts with 1 human partners:{Q9UJU5}

9987 [Cluster 1601]GO:0071357+P biological\_process [name] cellular response to type I interferon [def] "Any process that results in a change in state or activity of a cell (in terms of movement, secretion, enzyme production, gene expression, etc.) as a result of a type I interferon stimulus. Type I interferons include the interferon-alpha, beta, delta, epsilon, zeta, kappa, tau, and omega gene families." [GOC

9988 Pathogen[ Q2Q067] interacts with 1 human partners:{P09914}

9989 Pathogen[ POC214] interacts with 1 human partners:{P09914}

9990 Pathogen[ P03346] interacts with 1 human partners:{P09914}

9991 Pathogen[ Q85601] interacts with 1 human partners:{P09914}

9992 Pathogen[ P14079] interacts with 1 human partners:{P09914}

9993 Pathogen[ P03410] interacts with 1 human partners:{P09914}

9994 Pathogen[ POC206] interacts with 1 human partners:{P09914}

9995 Pathogen[ P03363] interacts with 1 human partners:{P09914}

9996 [Cluster 1602]GO:0051668+P biological\_process [name] localization within membrane [def] "Any process in which a substance or cellular entity, such as a protein complex or organelle, is transported to, and/or maintained in, a specific location within a membrane." [GOC

9997 Pathogen[ Q2Q067] interacts with 1 human partners:{P63000}

9998 Pathogen[ POC214] interacts with 1 human partners:{P63000}

9999 Pathogen[ P03346] interacts with 1 human partners:{P63000}

10000 Pathogen[ Q85601] interacts with 1 human partners:{P63000}

10001 Pathogen[ P03383] interacts with 1 human partners:{P63000}

10002 Pathogen[ P03410] interacts with 1 human partners:{P63000}

10003 Pathogen[ P14075] interacts with 1 human partners:{P63000}

10004 Pathogen[ POC206] interacts with 1 human partners:{P63000}

10005 Pathogen[ P03363] interacts with 1 human partners:{P63000}

10006 [Cluster 1603]GO:2000810+P biological\_process [name] regulation of tight junction assembly [def] "Any process that modulates the frequency, rate or extent of tight junction assembly." [GOC

10007 Pathogen[ P03346] interacts with 1 human partners:{O95863}

10008 [Cluster 1604]GO:0070887+P biological\_process [name] cellular response to chemical stimulus [def] "Any process that results in a change in state or activity of a cell (in terms of movement, secretion, enzyme production, gene expression, etc.) as a result of a chemical stimulus." [GOC

10009 Pathogen[ POC214] interacts with 1 human partners:{P05121}

10010 Pathogen[ Q85601] interacts with 1 human partners:{P05121}

10011 Pathogen[ P14079] interacts with 2 human partners:{P31751;P24588}

10012 Pathogen[ P03410] interacts with 2 human partners:{P05121;P24588}

10013 Pathogen[ POC206] interacts with 1 human partners:{P05121}

10014 [Cluster 1605]GO:0033129+P biological\_process [name] positive regulation of histone phosphorylation [def] "Any process that activates or increases the frequency, rate or extent of the addition of one or more phosphate groups to a histone protein." [GOC

10015 Pathogen[ Q2Q067] interacts with 2 human partners:{P14635;O75582}

10016 Pathogen[ POC214] interacts with 2 human partners:{P14635;O75582}

10017 Pathogen[ P03346] interacts with 2 human partners:{P14635;O75582}

10018 Pathogen[ Q85601] interacts with 2 human partners:{P14635;O75582}

10019 Pathogen[ P14079] interacts with 2 human partners:{O75582;P14635}

10020 Pathogen[ P03383] interacts with 2 human partners:{O75582;P14635}

10021 Pathogen[ P03410] interacts with 2 human partners:{O75582;P14635}

10022 Pathogen[ P14075] interacts with 2 human partners:{P14635;O75582}

10023 Pathogen[ POC206] interacts with 2 human partners:{O75582;P14635}

10024 [Cluster 1606]GO:0050957+P biological\_process [name] equilibrioception [def] "The series of events required for an organism to receive an orientational stimulus, convert it to a molecular signal, and recognize and characterize the signal. Equilibrioception refers to a combination of processes by which an organism can perceive its orientation with respect to gravity. In animals, stimuli come from labyrinth system of the inner ears, monitoring the direction of motion\_ visual stimuli, with information on orientation and motion\_ pressure receptors, which tell the organism which body surfaces are in contact with the ground\_ and proprioceptive cues, which report which parts of the body are in motion." [http

10025 Pathogen[ Q2Q067] interacts with 2 human partners:{Q9Y6N9;Q495M9}

10026 Pathogen[ POC214] interacts with 2 human partners:{Q495M9;Q9Y6N9}

10027 Pathogen[ P03346] interacts with 2 human partners:{Q9Y6N9;Q495M9}

10028 Pathogen[ Q85601] interacts with 2 human partners:{Q9Y6N9;Q495M9}

10029 Pathogen[ P14079] interacts with 2 human partners:{Q9Y6N9;Q495M9}

10030 Pathogen[ P03410] interacts with 2 human partners:{Q495M9;Q9Y6N9}

10031 Pathogen[ POC206] interacts with 2 human partners:{Q9Y6N9;Q495M9}

10032 Pathogen[ P03363] interacts with 2 human partners:{Q9Y6N9;Q495M9}

10033 [Cluster 1607]GO:0032765+P biological\_process [name] positive regulation of mast cell cytokine production [def] "Any process that activates or increases the frequency, rate, or extent of mast cell cytokine production." [GOC

10034 Pathogen[ Q2Q067] interacts with 1 human partners:{O95999}

10035 Pathogen[ POC214] interacts with 1 human partners:{O95999}

10036 Pathogen[ P03346] interacts with 1 human partners:{O95999}

10037 Pathogen[ Q85601] interacts with 1 human partners:{O95999}

10038 Pathogen[ P14079] interacts with 1 human partners:{O95999}

10039 Pathogen[ P03383] interacts with 1 human partners:{O95999}

10040 Pathogen[ P03410] interacts with 1 human partners:{O95999}

10041 Pathogen[ P14075] interacts with 1 human partners:{O95999}

10042 Pathogen[ POC206] interacts with 1 human partners:{O95999}

10043 [Cluster 1608]GO:0031365+P biological\_process [name] N-terminal protein amino acid modification [def] "The alteration of the N-terminal amino acid residue in a protein." [GOC

10044 Pathogen[ Q2Q067] interacts with 1 human partners:{Q9HBH1}

10045 Pathogen[ POC214] interacts with 1 human partners:{Q9HBH1}

10046 Pathogen[ P03346] interacts with 1 human partners:{Q9HBH1}

10047 Pathogen[ Q85601] interacts with 1 human partners:{Q9HBH1}

10048 Pathogen[ P14079] interacts with 1 human partners:{Q9HBH1}

10049 Pathogen[ P03383] interacts with 1 human partners:{Q9HBH1}

10050 Pathogen[ P03410] interacts with 1 human partners:{Q9HBH1}

10051 Pathogen[ P14075] interacts with 1 human partners:{Q9HBH1}

10052 Pathogen[ POC206] interacts with 1 human partners:{Q9HBH1}

10053 [Cluster 1609]GO:0000239+P biological\_process [name] pachytene [def] "A cell cycle process comprising the steps by which a cell progresses through the third stage of prophase I in meiosis, in which crossing over occurs between a chromatid in one partner and another chromatid in the homologous chromosome." [GOC

10054 Pathogen[ POC214] interacts with 1 human partners:{P40692}

10055 Pathogen[ Q85601] interacts with 1 human partners:{P40692}

10056 Pathogen[ P14079] interacts with 1 human partners:{P40692}

10057 Pathogen[ P03410] interacts with 1 human partners:{P40692}

10058 Pathogen[ POC206] interacts with 1 human partners:{P40692}

10059 [Cluster 1610]GO:0021562+P biological\_process [name] vestibulocochlear nerve development [def] "The process whose specific outcome is the progression of the vestibulocochlear nerve over time, from its formation to the mature structure. This sensory nerve innervates the membranous labyrinth of the inner ear. The vestibular branch innervates the vestibular apparatus that senses head position changes relative to gravity. The auditory branch innervates the cochlear duct, which is connected to the three bony ossicles which transduce sound waves into fluid movement in the cochlea." [GO\_REF

10060 Pathogen[ P03346] interacts with 1 human partners:{Q15319}

10061 Pathogen[ P03363] interacts with 1 human partners:{Q15319}

10062 [Cluster 1611]GO:0050918+P biological\_process [name] positive chemotaxis [def] "The directed movement of a motile cell or organism towards a higher concentration of a chemical." [GOC

10063 Pathogen[ Q2Q067] interacts with 1 human partners:{Q14160}

10064 Pathogen[ POC214] interacts with 1 human partners:{Q14160}

10065 Pathogen[ P03346] interacts with 1 human partners:{Q14160}

10066 Pathogen[ Q85601] interacts with 1 human partners:{Q14160}

10067 Pathogen[ P03383] interacts with 1 human partners:{Q14160}

10068 Pathogen[ P03410] interacts with 1 human partners:{Q14160}

10069 Pathogen[ P14075] interacts with 1 human partners:{Q14160}

10070 Pathogen[ POC206] interacts with 1 human partners:{Q14160}

10071 Pathogen[ P03363] interacts with 1 human partners:{Q14160}

10072 [Cluster 1612]GO:0006003+P biological\_process [name] fructose 2,6-bisphosphate metabolic process [def] "The chemical reactions and pathways involving fructose

2,6-bisphosphate. The D enantiomer is an important regulator of the glycolytic and gluconeogenic pathways. It inhibits fructose 1,6-bisphosphatase and activates phosphofruktokinase." [ISBN

10073 Pathogen[ POC214] interacts with 2 human partners:{O60825;P16118}

10074 Pathogen[ Q85601] interacts with 2 human partners:{O60825;P16118}

10075 Pathogen[ P03410] interacts with 1 human partners:{P16118}

10076 Pathogen[ P14075] interacts with 1 human partners:{P16118}

10077 Pathogen[ POC206] interacts with 2 human partners:{O60825;P16118}

10078 [Cluster 1613]GO:0072303+P biological\_process [name] positive regulation of glomerular metanephric mesangial cell proliferation [def] "Any process that increases the frequency, rate or extent of metanephric glomerular mesangial cell proliferation." [GOC

10079 Pathogen[ Q2Q067] interacts with 1 human partners:{P18146}

10080 Pathogen[ POC214] interacts with 1 human partners:{P18146}

10081 Pathogen[ P03346] interacts with 1 human partners:{P18146}

10082 Pathogen[ Q85601] interacts with 1 human partners:{P18146}

10083 Pathogen[ P03383] interacts with 1 human partners:{P18146}

10084 Pathogen[ P03410] interacts with 1 human partners:{P18146}

10085 Pathogen[ P14075] interacts with 1 human partners:{P18146}

10086 Pathogen[ POC206] interacts with 1 human partners:{P18146}

10087 Pathogen[ P03363] interacts with 1 human partners:{P18146}

10088 [Cluster 1614]GO:0002687+P biological\_process [name] positive regulation of leukocyte migration [def] "Any process that activates or increases the frequency, rate, or extent of leukocyte migration." [GOC

10089 Pathogen[ P03346] interacts with 1 human partners:{Q5JRA6}

10090 Pathogen[ P14079] interacts with 1 human partners:{Q5JRA6}

10091 Pathogen[ P03410] interacts with 1 human partners:{Q5JRA6}

10092 Pathogen[ POC206] interacts with 1 human partners:{Q5JRA6}

10093 [Cluster 1615]GO:0043405+P biological\_process [name] regulation of MAP kinase activity [def] "Any process that modulates the frequency, rate or extent of MAP kinase activity." [GOC

10094 Pathogen[ Q2Q067] interacts with 1 human partners:{Q96RU7}

10095 Pathogen[ POC214] interacts with 1 human partners:{Q96RU7}

10096 Pathogen[ P03346] interacts with 1 human partners:{Q96RU7}

10097 Pathogen[ Q85601] interacts with 1 human partners:{Q96RU7}

10098 Pathogen[ P14079] interacts with 1 human partners:{Q96RU7}

10099 Pathogen[ P03383] interacts with 2 human partners:{Q9NYV4;Q96RU7}

10100 Pathogen[ P03410] interacts with 1 human partners:{Q96RU7}

10101 Pathogen[ P14075] interacts with 2 human partners:{Q96RU7;Q9NYV4}

10102 Pathogen[ POC206] interacts with 1 human partners:{Q96RU7}

10103 [Cluster 1616]GO:2000820+P biological\_process [name] negative regulation of transcription from RNA polymerase II promoter involved in smooth muscle cell differentiation [def] "Any negative regulation of transcription from RNA polymerase II promoter that is involved in smooth muscle cell differentiation." [GOC

10104 Pathogen[ Q2Q067] interacts with 1 human partners:{Q9Y5J3}

10105 Pathogen[ POC214] interacts with 1 human partners:{Q9Y5J3}

10106 Pathogen[ P03346] interacts with 1 human partners:{Q9Y5J3}

10107 Pathogen[ Q85601] interacts with 1 human partners:{Q9Y5J3}

10108 Pathogen[ P14079] interacts with 1 human partners:{Q9Y5J3}

10109 Pathogen[ P03410] interacts with 1 human partners:{Q9Y5J3}

10110 Pathogen[ POC206] interacts with 1 human partners:{Q9Y5J3}

10111 Pathogen[ P03363] interacts with 1 human partners:{Q9Y5J3}

10112 [Cluster 1617]GO:0003326+P biological\_process [name] pancreatic A cell fate commitment [def] "The commitment of a cell to a pancreatic A cell and its capacity to differentiate into a pancreatic A cell. A pancreatic A cell is a cell in the pancreas that secretes glucagon." [GOC

10113 Pathogen[ Q2Q067] interacts with 1 human partners:{Q13562}

10114 Pathogen[ P03346] interacts with 2 human partners:{O95096;Q13562}

10115 Pathogen[ Q85601] interacts with 1 human partners:{Q13562}

10116 Pathogen[ POC206] interacts with 1 human partners:{Q13562}

10117 [Cluster 1618]GO:0032581+P biological\_process [name] ER-dependent peroxisome organization [def] "A process of peroxisome organization in which assembly or arrangement of constituent parts takes place in the endoplasmic reticulum." [GOC

10118 Pathogen[ P14079] interacts with 1 human partners:{Q9Y5Y5}

10119 Pathogen[ P03410] interacts with 1 human partners:{Q9Y5Y5}

10120 [Cluster 1619]GO:0048866+P biological\_process [name] stem cell fate specification [def] "The process in which a cell becomes capable of differentiating autonomously into a stem cell in an environment that is neutral with respect to the developmental pathway. Upon specification, the cell fate can be reversed." [CL

10121 Pathogen[ P03346] interacts with 1 human partners:{P35713}

10122 [Cluster 1620]GO:0006425+P biological\_process [name] glutaminyl-tRNA aminoacylation [def] "The process of coupling glutamine to glutaminyl-tRNA, catalyzed by glutaminyl-tRNA synthetase. In tRNA aminoacylation, the amino acid is first activated by linkage to AMP and then transferred to either the 2'- or the 3'-hydroxyl group of the 3'-adenosine residue of the tRNA." [GOC

10123 Pathogen[ POC214] interacts with 1 human partners:{P47897}

10124 Pathogen[ Q85601] interacts with 1 human partners:{P47897}

10125 Pathogen[ P14079] interacts with 1 human partners:{P47897}

10126 Pathogen[ P03410] interacts with 1 human partners:{P47897}

10127 Pathogen[ P0C206] interacts with 1 human partners:{P47897}

10128 Pathogen[ P03363] interacts with 1 human partners:{P47897}

10129 [Cluster 1621]GO:0061056+P biological\_process [name] sclerotome development [def] "The progression of the sclerotome over time, from its initial formation to the mature structure. The sclerotome is the portion of the somite that will give rise to a vertebra." [GOC

10130 Pathogen[ P03346] interacts with 1 human partners:{P15863}

10131 [Cluster 1622]GO:0000088+P biological\_process [name] mitotic prophase [def] "Prophase occurring as part of mitosis. Prophase is the part of nuclear division in which, canonically, chromosomes condense and the two daughter centrioles and their asters migrate toward the poles of the cell. Mitosis is the cell cycle process in which, canonically, the nucleus of a eukaryotic cell divides to produce two daughter nuclei whose chromosome complement is identical to that of the mother cell." [GOC

10132 Pathogen[ P0C214] interacts with 1 human partners:{Q9BQQ3}

10133 Pathogen[ P03346] interacts with 1 human partners:{Q9BQQ3}

10134 Pathogen[ Q85601] interacts with 1 human partners:{Q9BQQ3}

10135 Pathogen[ P14079] interacts with 1 human partners:{Q9BQQ3}

10136 Pathogen[ P03410] interacts with 1 human partners:{Q9BQQ3}

10137 Pathogen[ P0C206] interacts with 1 human partners:{Q9BQQ3}

10138 [Cluster 1623]GO:0016072+P biological\_process [name] rRNA metabolic process [def] "The chemical reactions and pathways involving rRNA, ribosomal RNA, a structural constituent of ribosomes." [ISBN

10139 Pathogen[ P0C214] interacts with 1 human partners:{Q9BYG3}

10140 Pathogen[ P03346] interacts with 1 human partners:{Q9BYG3}

10141 Pathogen[ P14079] interacts with 1 human partners:{Q9BYG3}

10142 Pathogen[ P03410] interacts with 1 human partners:{Q9BYG3}

10143 Pathogen[ P0C206] interacts with 1 human partners:{Q9BYG3}

10144 Pathogen[ P03363] interacts with 1 human partners:{Q9BYG3}

10145 [Cluster 1624]GO:0060623+P biological\_process [name] regulation of chromosome condensation [def] "Any process that modulates the rate, frequency, or extent of chromosome condensation, the progressive compaction of dispersed interphase chromatin into threadlike chromosomes prior to mitotic or meiotic nuclear division, or during apoptosis, in eukaryotic cells." [GOC

10146 Pathogen[ Q2Q067] interacts with 1 human partners:{P14635}

10147 Pathogen[ P0C214] interacts with 1 human partners:{P14635}

10148 Pathogen[ P03346] interacts with 1 human partners:{P14635}

10149 Pathogen[ Q85601] interacts with 1 human partners:{P14635}

10150 Pathogen[ P14079] interacts with 1 human partners:{P14635}

10151 Pathogen[ P03383] interacts with 1 human partners:{P14635}

10152 Pathogen[ P03410] interacts with 1 human partners:{P14635}

10153 Pathogen[ P14075] interacts with 1 human partners:{P14635}

10154 Pathogen[ P0C206] interacts with 1 human partners:{P14635}

10155 [Cluster 1625]GO:2001240+P biological\_process [name] negative regulation of extrinsic apoptotic signaling pathway in absence of ligand [def] "Any process that stops, prevents or reduces the frequency, rate or extent of extrinsic apoptotic signaling pathway in absence of ligand." [GOC

10156 Pathogen[ P03346] interacts with 1 human partners:{Q07820}

10157 Pathogen[ P03363] interacts with 1 human partners:{Q07820}

10158 [Cluster 1626]GO:0043277+P biological\_process [name] apoptotic cell clearance [def] "The recognition and removal of an apoptotic cell by a neighboring cell or by a phagocyte." [GOC

10159 Pathogen[ Q2Q067] interacts with 1 human partners:{P21980}

10160 Pathogen[ P0C214] interacts with 1 human partners:{P21980}

10161 Pathogen[ P03346] interacts with 1 human partners:{P21980}

10162 Pathogen[ Q85601] interacts with 1 human partners:{P21980}

10163 Pathogen[ P14079] interacts with 1 human partners:{P21980}

10164 Pathogen[ P03383] interacts with 1 human partners:{P21980}

10165 Pathogen[ P03410] interacts with 1 human partners:{P21980}

10166 Pathogen[ P14075] interacts with 1 human partners:{P21980}

10167 Pathogen[ P0C206] interacts with 1 human partners:{P21980}

10168 [Cluster 1627]GO:0046479+P biological\_process [name] glycosphingolipid catabolic process [def] "The chemical reactions and pathways resulting in the breakdown of glycosphingolipid, a compound with residues of sphingoid and at least one monosaccharide." [ISBN

10169 Pathogen[ P14079] interacts with 1 human partners:{P06280}

10170 [Cluster 1628]GO:0048664+P biological\_process [name] neuron fate determination [def] "The process in which a cell becomes capable of differentiating autonomously into a neuron regardless of its environment\_ upon determination, the cell fate cannot be reversed." [GOC

10171 Pathogen[ Q2Q067] interacts with 1 human partners:{P60953}

10172 Pathogen[ P0C214] interacts with 1 human partners:{P60953}

10173 Pathogen[ P03346] interacts with 2 human partners:{P52954;P60953}

10174 Pathogen[ Q85601] interacts with 1 human partners:{P60953}

10175 Pathogen[ P03383] interacts with 1 human partners:{P60953}

10176 Pathogen[ P03410] interacts with 1 human partners:{P60953}

10177 Pathogen[ P14075] interacts with 1 human partners:{P60953}

10178 Pathogen[ P0C206] interacts with 1 human partners:{P60953}

10179 Pathogen[ P03363] interacts with 1 human partners:{P60953}

10180 [Cluster 1629]GO:0045799+P biological\_process [name] positive regulation of chromatin assembly or disassembly [def] "Any process that activates or increases the frequency, rate or extent of chromatin assembly or disassembly." [GOC

10181 Pathogen[ P03346] interacts with 1 human partners:{P17542}

10182 [Cluster 1630]GO:0031579+P biological\_process [name] membrane raft organization [def] "A process that is carried out at the cellular level which results in the assembly, arrangement of constituent parts, or disassembly of membrane rafts, small (10-200 nm), heterogeneous, highly dynamic, sterol- and sphingolipid-enriched membrane domains that compartmentalize cellular processes." [GOC

10183 Pathogen[ Q2Q067] interacts with 1 human partners:{Q12959}

10184 Pathogen[ P0C214] interacts with 1 human partners:{Q12959}

10185 Pathogen[ P03346] interacts with 1 human partners:{Q12959}

10186 Pathogen[ Q85601] interacts with 1 human partners:{Q12959}

10187 Pathogen[ P03410] interacts with 1 human partners:{Q12959}

10188 Pathogen[ P0C206] interacts with 1 human partners:{Q12959}

10189 Pathogen[ P03363] interacts with 1 human partners:{Q12959}

10190 [Cluster 1631]GO:0051604+P biological\_process [name] protein maturation [def] "Any process leading to the attainment of the full functional capacity of a protein." [GOC

10191 Pathogen[ Q2Q067] interacts with 1 human partners:{Q9UNE7}

10192 Pathogen[ P0C214] interacts with 2 human partners:{P10809;Q9UNE7}

10193 Pathogen[ P03346] interacts with 1 human partners:{Q9UNE7}

10194 Pathogen[ Q85601] interacts with 1 human partners:{Q9UNE7}

10195 Pathogen[ P14079] interacts with 2 human partners:{P20933;Q96S06}

10196 Pathogen[ P03410] interacts with 3 human partners:{Q9UNE7;Q96S06;P20933}

10197 Pathogen[ P0C206] interacts with 2 human partners:{Q9UNE7;Q96S06}

10198 Pathogen[ P03363] interacts with 1 human partners:{Q9UNE7}

10199 [Cluster 1632]GO:0021885+P biological\_process [name] forebrain cell migration [def] "The orderly movement of a cell from one site to another at least one of which is located in the forebrain." [GO\_REF

10200 Pathogen[ Q2Q067] interacts with 1 human partners:{Q04743}

10201 Pathogen[ P03346] interacts with 1 human partners:{Q04743}

10202 Pathogen[ P14079] interacts with 1 human partners:{Q04743}

10203 Pathogen[ P03410] interacts with 1 human partners:{Q04743}

10204 Pathogen[ P0C206] interacts with 1 human partners:{Q04743}

10205 Pathogen[ P03363] interacts with 1 human partners:{Q04743}

10206 [Cluster 1633]GO:0051835+P biological\_process [name] positive regulation of synapse structural plasticity [def] "Any process that activates, maintains or increases the frequency, rate or extent of synaptic structural plasticity." [GOC

10207 Pathogen[ P03346] interacts with 1 human partners:{Q14CM0}

10208 Pathogen[ P03410] interacts with 1 human partners:{Q14CM0}

10209 Pathogen[ P03363] interacts with 1 human partners:{Q14CM0}

10210 [Cluster 1634]GO:0007084+P biological\_process [name] mitotic nuclear envelope reassembly [def] "The cell cycle process that results in reformation of the nuclear envelope during mitotic cell division." [GOC

10211 Pathogen[ Q2Q067] interacts with 1 human partners:{Q86XL3}

10212 Pathogen[ P0C214] interacts with 1 human partners:{Q86XL3}

10213 Pathogen[ P03346] interacts with 1 human partners:{Q86XL3}

10214 Pathogen[ Q85601] interacts with 1 human partners:{Q86XL3}

10215 Pathogen[ P14079] interacts with 1 human partners:{Q86XL3}

10216 Pathogen[ P03410] interacts with 1 human partners:{Q86XL3}

10217 Pathogen[ P0C206] interacts with 1 human partners:{Q86XL3}

10218 Pathogen[ P03363] interacts with 1 human partners:{Q86XL3}

10219 [Cluster 1635]GO:0061001+P biological\_process [name] regulation of dendritic spine morphogenesis [def] "Any process that modulates the rate, frequency, or extent of dendritic spine morphogenesis, the process in which the anatomical structures of a dendritic spine are generated and organized. A dendritic spine is a protrusion from a dendrite and a specialized subcellular compartment involved in synaptic transmission." [GOC

10220 Pathogen[ P03346] interacts with 1 human partners:{Q9C0H9}

10221 Pathogen[ P14079] interacts with 2 human partners:{Q9C0H9;Q15078}

10222 Pathogen[ P03383] interacts with 1 human partners:{Q9C0H9}

10223 Pathogen[ P03410] interacts with 1 human partners:{Q9C0H9}

10224 Pathogen[ P14075] interacts with 1 human partners:{Q9C0H9}

10225 Pathogen[ P0C206] interacts with 1 human partners:{Q9C0H9}

10226 Pathogen[ P03363] interacts with 1 human partners:{Q9C0H9}

10227 [Cluster 1636]GO:0032218+P biological\_process [name] riboflavin transport [def] "The directed movement of riboflavin into, out of or within a cell, or between cells, by means of some agent such as a transporter or pore. Riboflavin (vitamin B2) is a water-soluble B-complex vitamin, converted in the cell to FMN and FAD, cofactors required for the function of flavoproteins." [GOC

10228 Pathogen[ P14079] interacts with 3 human partners:{Q9NWF4;Q9HAB3;Q9NQ40}

10229 Pathogen[ P03410] interacts with 3 human partners:{Q9HAB3;Q9NQ40;Q9NWF4}



10230 [Cluster 1637]GO:0070085+P biological\_process [name] glycosylation [def] "The covalent attachment of a glycosyl residue to a substrate molecule." [GOC

10231 Pathogen[ P03346] interacts with 1 human partners:{Q9Y2V7}

10232 Pathogen[ P14079] interacts with 2 human partners:{Q9Y2V7;O75503}

10233 Pathogen[ P03410] interacts with 2 human partners:{Q9Y2V7;O75503}

10234 Pathogen[ POC206] interacts with 1 human partners:{Q9Y2V7}

10235 [Cluster 1638]GO:0006044+P biological\_process [name] N-acetylglucosamine metabolic process [def] "The chemical reactions and pathways involving N-acetylglucosamine. The D isomer is a common structural unit of glycoproteins in plants, bacteria and animals\_ it is often the terminal sugar of an oligosaccharide group of a glycoprotein." [ISBN

10236 Pathogen[ POC214] interacts with 1 human partners:{Q96EK6}

10237 Pathogen[ P03346] interacts with 1 human partners:{Q8TDQ7}

10238 Pathogen[ Q85601] interacts with 1 human partners:{Q96EK6}

10239 Pathogen[ P14079] interacts with 7 human partners:{Q9UJ70;Q8TDQ7;P51606;Q9Y303;O60502;P46926;Q96EK6}

10240 Pathogen[ P03410] interacts with 5 human partners:{Q8TDQ7;P51606;O60502;Q96EK6;P46926}

10241 Pathogen[ P14075] interacts with 1 human partners:{Q96EK6}

10242 Pathogen[ POC206] interacts with 3 human partners:{Q8TDQ7;Q96EK6;P46926}

10243 Pathogen[ P03363] interacts with 1 human partners:{Q8TDQ7}

10244 [Cluster 1639]GO:0009584+P biological\_process [name] detection of visible light [def] "The series of events in which a visible light stimulus is received by a cell and converted into a molecular signal. A visible light stimulus is electromagnetic radiation that can be perceived visually by an organism\_ for organisms lacking a visual system, this can be defined as light with a wavelength within the range 380 to 780 nm." [GOC

10245 Pathogen[ Q2Q067] interacts with 1 human partners:{Q9GZR5}

10246 Pathogen[ POC214] interacts with 1 human partners:{Q9GZR5}

10247 Pathogen[ Q85601] interacts with 1 human partners:{Q9GZR5}

10248 Pathogen[ P14079] interacts with 1 human partners:{Q9GZR5}

10249 Pathogen[ P03383] interacts with 1 human partners:{Q9GZR5}

10250 Pathogen[ P03410] interacts with 1 human partners:{Q9GZR5}

10251 Pathogen[ P14075] interacts with 1 human partners:{Q9GZR5}

10252 Pathogen[ POC206] interacts with 1 human partners:{Q9GZR5}

10253 [Cluster 1640]GO:0032740+P biological\_process [name] positive regulation of interleukin-17 production [def] "Any process that activates or increases the frequency, rate, or extent of production of any member of the interleukin-17 family of cytokines." [GOC

10254 Pathogen[ P14079] interacts with 1 human partners:{Q99836}

10255 [Cluster 1641]GO:0051881+P biological\_process [name] regulation of mitochondrial membrane potential [def] "Any process that modulates the establishment or extent of the mitochondrial membrane potential, the electric potential existing across the mitochondrial membrane arising from charges in the membrane itself and from the charges present in the media on either side of the membrane." [GOC

10256 Pathogen[ Q2Q067] interacts with 1 human partners:{Q7Z2X4}

10257 Pathogen[ POC214] interacts with 2 human partners:{P28331;Q7Z2X4}

10258 Pathogen[ P03346] interacts with 2 human partners:{Q7Z2X4;Q8N0X7}

10259 Pathogen[ Q85601] interacts with 2 human partners:{Q7Z2X4;Q8N0X7}

10260 Pathogen[ P14079] interacts with 2 human partners:{Q8N0X7;Q7Z2X4}

10261 Pathogen[ P03410] interacts with 2 human partners:{Q8N0X7;Q7Z2X4}

10262 Pathogen[ POC206] interacts with 2 human partners:{Q8N0X7;Q7Z2X4}

10263 Pathogen[ P03363] interacts with 1 human partners:{Q8N0X7}

10264 [Cluster 1642]GO:0003195+P biological\_process [name] tricuspid valve formation [def] "The developmental process pertaining to the initial formation of the tricuspid valve from unspecified parts. This process begins with the specific processes that contribute to the appearance of the discrete structure and ends when the structural rudiment is recognizable." [GOC

10265 Pathogen[ Q2Q067] interacts with 1 human partners:{Q8IX07}

10266 Pathogen[ POC214] interacts with 1 human partners:{Q8IX07}

10267 Pathogen[ P03346] interacts with 1 human partners:{Q8IX07}

10268 Pathogen[ Q85601] interacts with 1 human partners:{Q8IX07}

10269 Pathogen[ P14079] interacts with 1 human partners:{Q8IX07}

10270 Pathogen[ P03410] interacts with 1 human partners:{Q8IX07}

10271 Pathogen[ POC206] interacts with 1 human partners:{Q8IX07}

10272 [Cluster 1643]GO:0090310+P biological\_process [name] negative regulation of methylation-dependent chromatin silencing [def] "Any process that decreases the rate, frequency, or extent of the repression of transcription by methylation of DNA, leading to the formation of heterochromatin." [GOC

10273 Pathogen[ Q2Q067] interacts with 1 human partners:{Q9GZX7}

10274 Pathogen[ POC214] interacts with 1 human partners:{Q9GZX7}

10275 Pathogen[ Q85601] interacts with 1 human partners:{Q9GZX7}

10276 Pathogen[ P14079] interacts with 2 human partners:{P41238;Q9GZX7}

10277 Pathogen[ P03410] interacts with 2 human partners:{P41238;Q9GZX7}

10278 Pathogen[ POC206] interacts with 2 human partners:{Q9GZX7;P41238}

10279 [Cluster 1644]GO:0001100+P biological\_process [name] negative regulation of exit from mitosis [def] "Any process involved in the inhibition of progression from anaphase/telophase (high mitotic CDK activity) to G1 (low mitotic CDK activity)." [GOC

10280 Pathogen[ Q2Q067] interacts with 1 human partners:{Q9H4X1}

10281 Pathogen[ P0C214] interacts with 1 human partners:{Q9H4X1}

10282 Pathogen[ P03346] interacts with 1 human partners:{Q9H4X1}

10283 Pathogen[ Q85601] interacts with 1 human partners:{Q9H4X1}

10284 Pathogen[ P03383] interacts with 1 human partners:{Q9H4X1}

10285 Pathogen[ P03410] interacts with 1 human partners:{Q9H4X1}

10286 Pathogen[ P14075] interacts with 1 human partners:{Q9H4X1}

10287 Pathogen[ P0C206] interacts with 1 human partners:{Q9H4X1}

10288 Pathogen[ P03363] interacts with 1 human partners:{Q9H4X1}

10289 [Cluster 1645]GO:0009062+P biological\_process [name] fatty acid catabolic process [def] "The chemical reactions and pathways resulting in the breakdown of a fatty acid, any of the aliphatic monocarboxylic acids that can be liberated by hydrolysis from naturally occurring fats and oils. Fatty acids are predominantly straight-chain acids of 4 to 24 carbon atoms, which may be saturated or unsaturated\_ branched fatty acids and hydroxy fatty acids also occur, and very long chain acids of over 30 carbons are found in waxes." [GOC

10290 Pathogen[ Q2Q067] interacts with 1 human partners:{Q14693}

10291 Pathogen[ P0C214] interacts with 2 human partners:{O00154;Q14693}

10292 Pathogen[ P03346] interacts with 1 human partners:{Q14693}

10293 Pathogen[ Q85601] interacts with 1 human partners:{Q14693}

10294 Pathogen[ P14079] interacts with 2 human partners:{Q14693;O00519}

10295 Pathogen[ P03383] interacts with 1 human partners:{Q14693}

10296 Pathogen[ P03410] interacts with 3 human partners:{O00519;Q14693;O00154}

10297 Pathogen[ P14075] interacts with 1 human partners:{Q14693}

10298 Pathogen[ P0C206] interacts with 1 human partners:{Q14693}

10299 [Cluster 1646]GO:0050820+P biological\_process [name] positive regulation of coagulation [def] "Any process that activates or increases the frequency, rate or extent of coagulation." [GOC

10300 Pathogen[ P0C214] interacts with 1 human partners:{P05121}

10301 Pathogen[ Q85601] interacts with 1 human partners:{P05121}

10302 Pathogen[ P03410] interacts with 1 human partners:{P05121}

10303 Pathogen[ P0C206] interacts with 1 human partners:{P05121}

10304 [Cluster 1647]GO:0019285+P biological\_process [name] glycine betaine biosynthetic process from choline [def] "The chemical reactions and pathways resulting in the formation of betaine (N-trimethylglycine) from the oxidation of choline." [GOC

10305 Pathogen[ Q2Q067] interacts with 1 human partners:{P49419}

10306 Pathogen[ P0C214] interacts with 1 human partners:{P49419}

10307 Pathogen[ P03346] interacts with 1 human partners:{P49419}

10308 Pathogen[ Q85601] interacts with 1 human partners:{P49419}

10309 Pathogen[ P03383] interacts with 1 human partners:{P49419}

10310 Pathogen[ P03410] interacts with 1 human partners:{P49419}

10311 Pathogen[ P14075] interacts with 1 human partners:{P49419}

10312 Pathogen[ P0C206] interacts with 1 human partners:{P49419}

10313 Pathogen[ P03363] interacts with 1 human partners:{P49419}

10314 [Cluster 1648]GO:0097186+P biological\_process [name] amelogenesis [def] "The process whose specific outcome is the formation of tooth enamel, occurring in two stages

10315 Pathogen[ P03410] interacts with 1 human partners:{Q9NRM1}

10316 [Cluster 1649]GO:0032707+P biological\_process [name] negative regulation of interleukin-23 production [def] "Any process that stops, prevents, or reduces the frequency, rate, or extent of interleukin-23 production." [GOC

10317 Pathogen[ Q2Q067] interacts with 1 human partners:{P63000}

10318 Pathogen[ P0C214] interacts with 1 human partners:{P63000}

10319 Pathogen[ P03346] interacts with 1 human partners:{P63000}

10320 Pathogen[ Q85601] interacts with 1 human partners:{P63000}

10321 Pathogen[ P03383] interacts with 1 human partners:{P63000}

10322 Pathogen[ P03410] interacts with 1 human partners:{P63000}

10323 Pathogen[ P14075] interacts with 1 human partners:{P63000}

10324 Pathogen[ P0C206] interacts with 1 human partners:{P63000}

10325 Pathogen[ P03363] interacts with 1 human partners:{P63000}

10326 [Cluster 1650]GO:0043241+P biological\_process [name] protein complex disassembly [def] "The disaggregation of a protein complex into its constituent components. Protein complexes may have other associated non-protein prosthetic groups, such as nucleic acids, metal ions or carbohydrate groups." [GOC

10327 Pathogen[ P14079] interacts with 1 human partners:{Q9NX09}

10328 Pathogen[ P03410] interacts with 1 human partners:{Q9NX09}

10329 [Cluster 1651]GO:0006801+P biological\_process [name] superoxide metabolic process [def] "The chemical reactions and pathways involving superoxide, the superoxide anion O2- (superoxide free radical), or any compound containing this species." [CHEBI

10330 Pathogen[ Q2Q067] interacts with 1 human partners:{O14618}

10331 Pathogen[ P0C214] interacts with 3 human partners:{P08294;O14618;P35520}

10332 Pathogen[ P03346] interacts with 3 human partners:{Q86UR1;O14618;Q5TCZ1}

10333 Pathogen[ Q85601] interacts with 1 human partners:{O14618}

10334 Pathogen[ P14079] interacts with 3 human partners:{P13498;Q5TCZ1;O14618}

10335 Pathogen[ P03410] interacts with 3 human partners:{Q86UR1;Q5TCZ1;O14618}

10336 Pathogen[ P0C206] interacts with 2 human partners:{Q5TCZ1;O14618}

10337 Pathogen[ P03363] interacts with 3 human partners:{Q86UR1;Q5TCZ1;O14618}

10338 [Cluster 1652]GO:0045175+P biological\_process [name] basal protein localization [def] "Any process in which a protein is transported to, or maintained in, basal regions of the cell." [GOC

10339 Pathogen[ P03346] interacts with 1 human partners:{Q96RT1}

10340 Pathogen[ Q85601] interacts with 1 human partners:{Q96RT1}

10341 Pathogen[ P14079] interacts with 1 human partners:{Q96RT1}

10342 Pathogen[ P03410] interacts with 1 human partners:{Q96RT1}

10343 Pathogen[ P0C206] interacts with 1 human partners:{Q96RT1}

10344 Pathogen[ P03363] interacts with 1 human partners:{Q96RT1}

10345 [Cluster 1653]GO:0034382+P biological\_process [name] chylomicron remnant clearance [def] "The process in which a chylomicron remnant is removed from the blood via receptor-mediated endocytosis into liver cells and its constituent parts degraded." [GOC

10346 Pathogen[ P14079] interacts with 1 human partners:{Q96S06}

10347 Pathogen[ P03410] interacts with 1 human partners:{Q96S06}

10348 Pathogen[ P0C206] interacts with 1 human partners:{Q96S06}

10349 [Cluster 1654]GO:0090101+P biological\_process [name] negative regulation of transmembrane receptor protein serine/threonine kinase signaling pathway [def] "Any process that decreases the rate, frequency, or extent of the series of molecular signals generated as a consequence of a transmembrane receptor serine/threonine kinase binding to its physiological ligand." [GOC

10350 Pathogen[ P0C214] interacts with 1 human partners:{O95633}

10351 Pathogen[ P03346] interacts with 1 human partners:{O95633}

10352 Pathogen[ P0C206] interacts with 1 human partners:{O95633}

10353 [Cluster 1655]GO:0006922+P biological\_process [name] cleavage of lamin [def] "The proteolytic degradation of lamins during apoptosis, leading to the irreversible breakdown of the nuclear lamina." [GOC

10354 Pathogen[ P03346] interacts with 1 human partners:{P10144}

10355 Pathogen[ Q85601] interacts with 1 human partners:{P10144}

10356 Pathogen[ P14079] interacts with 1 human partners:{P10144}

10357 Pathogen[ P03410] interacts with 1 human partners:{P10144}

10358 Pathogen[ P0C206] interacts with 1 human partners:{P10144}

10359 Pathogen[ P03363] interacts with 1 human partners:{P10144}

10360 [Cluster 1656]GO:0017144+P biological\_process [name] drug metabolic process [def] "The chemical reactions and pathways involving a drug, a substance used in the diagnosis, treatment or prevention of a disease\_ as used here antibiotic substances (see antibiotic metabolism) are considered to be drugs, even if not used in medical or veterinary practice." [GOC

10361 Pathogen[ P0C214] interacts with 3 human partners:{P35558;P49902;P07327}

10362 Pathogen[ P14079] interacts with 1 human partners:{P49902}

10363 Pathogen[ P03410] interacts with 1 human partners:{P49902}

10364 Pathogen[ P14075] interacts with 1 human partners:{P49902}

10365 Pathogen[ P0C206] interacts with 1 human partners:{P49902}

10366 [Cluster 1657]GO:0016126+P biological\_process [name] sterol biosynthetic process [def] "The chemical reactions and pathways resulting in the formation of sterols, steroids with one or more hydroxyl groups and a hydrocarbon side-chain in the molecule." [GOC

10367 Pathogen[ Q2Q067] interacts with 1 human partners:{P14324}

10368 Pathogen[ P0C214] interacts with 3 human partners:{Q13907;Q9BXS1;P14324}

10369 Pathogen[ P03346] interacts with 1 human partners:{P14324}

10370 Pathogen[ Q85601] interacts with 2 human partners:{P14324;Q13907}

10371 Pathogen[ P14079] interacts with 7 human partners:{Q9BXS1;Q9Y5U4;Q13907;P14324;Q9UKR5;P53602;O15503}

10372 Pathogen[ P03383] interacts with 1 human partners:{P14324}

10373 Pathogen[ P03410] interacts with 6 human partners:{P53602;Q9Y5U4;Q13907;O15503;P14324;Q9BXS1}

10374 Pathogen[ P14075] interacts with 1 human partners:{P14324}

10375 Pathogen[ P0C206] interacts with 3 human partners:{P14324;Q13907;Q9BXS1}

10376 [Cluster 1658]GO:2000249+P biological\_process [name] regulation of actin cytoskeleton reorganization [def] "Any process that modulates the frequency, rate or extent of actin cytoskeleton reorganization." [GOC

10377 Pathogen[ P03346] interacts with 1 human partners:{Q9NRX4}

10378 Pathogen[ P14079] interacts with 1 human partners:{Q9NRX4}

10379 Pathogen[ P03410] interacts with 1 human partners:{Q9NRX4}

10380 Pathogen[ P0C206] interacts with 1 human partners:{Q9NRX4}

10381 [Cluster 1659]GO:0033280+P biological\_process [name] response to vitamin D [def] "Any process that results in a change in state or activity of a cell or an organism (in terms of movement, secretion, enzyme production, gene expression, etc.) as a result of a vitamin D stimulus." [GOC

10382 Pathogen[ P03346] interacts with 1 human partners:{P55273}

10383 Pathogen[ Q85601] interacts with 1 human partners:{P55273}

10384 Pathogen[ P14079] interacts with 1 human partners:{P55273}

10385 Pathogen[ P03410] interacts with 1 human partners:{P55273}

10386 Pathogen[ P0C206] interacts with 1 human partners:{P55273}

10387 [Cluster 1660]GO:0043497+P biological\_process [name] regulation of protein heterodimerization activity [def] "Any process that modulates the frequency, rate or extent of protein heterodimerization, interacting selectively with a nonidentical

protein to form a heterodimer." [GOC

10388 Pathogen[ Q2Q067] interacts with 1 human partners:{P60953}

10389 Pathogen[ POC214] interacts with 1 human partners:{P60953}

10390 Pathogen[ P03346] interacts with 1 human partners:{P60953}

10391 Pathogen[ Q85601] interacts with 1 human partners:{P60953}

10392 Pathogen[ P03383] interacts with 1 human partners:{P60953}

10393 Pathogen[ P03410] interacts with 1 human partners:{P60953}

10394 Pathogen[ P14075] interacts with 1 human partners:{P60953}

10395 Pathogen[ POC206] interacts with 1 human partners:{P60953}

10396 Pathogen[ P03363] interacts with 1 human partners:{P60953}

10397 [Cluster 1661]GO:0019276+P biological\_process [name] UDP-N-acetylgalactosamine metabolic process [def] "The chemical reactions and pathways involving UDP-N-acetylgalactosamine, a substance composed of N-acetylgalactosamine, a common structural unit of oligosaccharides, in glycosidic linkage with uridine diphosphate." [GOC

10398 Pathogen[ P03410] interacts with 1 human partners:{Q8NHY0}

10399 [Cluster 1662]GO:0002093+P biological\_process [name] auditory receptor cell morphogenesis [def] "Any process that alters the size or shape of an auditory receptor cell." [GOC

10400 Pathogen[ Q2Q067] interacts with 1 human partners:{P63000}

10401 Pathogen[ POC214] interacts with 1 human partners:{P63000}

10402 Pathogen[ P03346] interacts with 1 human partners:{P63000}

10403 Pathogen[ Q85601] interacts with 1 human partners:{P63000}

10404 Pathogen[ P03383] interacts with 1 human partners:{P63000}

10405 Pathogen[ P03410] interacts with 1 human partners:{P63000}

10406 Pathogen[ P14075] interacts with 1 human partners:{P63000}

10407 Pathogen[ POC206] interacts with 1 human partners:{P63000}

10408 Pathogen[ P03363] interacts with 1 human partners:{P63000}

10409 [Cluster 1663]GO:0010960+P biological\_process [name] magnesium ion homeostasis [def] "Any process involved in the maintenance of an internal steady state of magnesium ions within an organism or cell." [GOC

10410 Pathogen[ P03346] interacts with 1 human partners:{Q92481}

10411 [Cluster 1664]GO:0051054+P biological\_process [name] positive regulation of DNA metabolic process [def] "Any process that activates or increases the frequency, rate or extent of the chemical reactions and pathways involving DNA." [GOC

10412 Pathogen[ Q2Q067] interacts with 1 human partners:{P07737}

10413 Pathogen[ P03346] interacts with 2 human partners:{Q86SE8;P07737}

10414 Pathogen[ Q85601] interacts with 2 human partners:{Q86SE8;P07737}

10415 Pathogen[ P14079] interacts with 2 human partners:{P07737;O60502}

10416 Pathogen[ P03383] interacts with 1 human partners:{P07737}

10417 Pathogen[ P03410] interacts with 3 human partners:{Q86SE8;O60502;P07737}

10418 Pathogen[ P14075] interacts with 1 human partners:{P07737}

10419 Pathogen[ POC206] interacts with 2 human partners:{Q86SE8;P07737}

10420 Pathogen[ P03363] interacts with 2 human partners:{Q86SE8;P07737}

10421 [Cluster 1665]GO:0006431+P biological\_process [name] methionyl-tRNA aminoacylation [def] "The process of coupling methionine to methionyl-tRNA, catalyzed by methionyl-tRNA synthetase. In tRNA aminoacylation, the amino acid is first activated by linkage to AMP and then transferred to either the 2'- or the 3'-hydroxyl group of the 3'-adenosine residue of the tRNA." [GOC

10422 Pathogen[ POC214] interacts with 2 human partners:{P56192;Q96GW9}

10423 Pathogen[ P14079] interacts with 2 human partners:{Q96GW9;P56192}

10424 Pathogen[ P03383] interacts with 1 human partners:{Q96GW9}

10425 Pathogen[ P03410] interacts with 2 human partners:{P56192;Q96GW9}

10426 Pathogen[ P14075] interacts with 2 human partners:{Q96GW9;P56192}

10427 Pathogen[ POC206] interacts with 2 human partners:{P56192;Q96GW9}

10428 [Cluster 1666]GO:0042471+P biological\_process [name] ear morphogenesis [def] "The process in which the anatomical structures of the ear are generated and organized. The ear is the sense organ in vertebrates that is specialized for the detection of sound, and the maintenance of balance. Includes the outer ear and middle ear, which collect and transmit sound waves\_ and the inner ear, which contains the organs of balance and (except in fish) hearing. Also includes the pinna, the visible part of the outer ear, present in some mammals." [GOC

10429 Pathogen[ P03346] interacts with 1 human partners:{Q9P2D1}

10430 Pathogen[ Q85601] interacts with 1 human partners:{Q9P2D1}

10431 Pathogen[ P14079] interacts with 1 human partners:{Q9P2D1}

10432 Pathogen[ P03410] interacts with 1 human partners:{Q9P2D1}

10433 Pathogen[ POC206] interacts with 1 human partners:{Q9P2D1}

10434 [Cluster 1667]GO:0035407+P biological\_process [name] histone H3-T11 phosphorylation [def] "The modification of histone H3 by the addition of an phosphate group to a threonine residue at position 11 of the histone." [GOC

10435 Pathogen[ Q2Q067] interacts with 1 human partners:{O14757}

10436 Pathogen[ POC214] interacts with 1 human partners:{O14757}

10437 Pathogen[ P03346] interacts with 1 human partners:{O14757}

10438 Pathogen[ Q85601] interacts with 1 human partners:{O14757}

10439 Pathogen[ P03383] interacts with 1 human partners:{O14757}

10440 Pathogen[ P03410] interacts with 1 human partners:{O14757}

10441 Pathogen[ P14075] interacts with 1 human partners:{014757}

10442 Pathogen[ P03363] interacts with 1 human partners:{014757}

10443 [Cluster 1668]GO:1901303+P

10444 Pathogen[ P14079] interacts with 1 human partners:{015503}

10445 Pathogen[ P03410] interacts with 1 human partners:{015503}

10446 [Cluster 1669]GO:0046683+P biological\_process [name] response to organophosphorus [def] "Any process that results in a change in state or activity of a cell or an organism (in terms of movement, secretion, enzyme production, gene expression, etc.) as a result of an organophosphorus stimulus. Organophosphorus is a compound containing phosphorus bound to an organic molecule\_ several organophosphorus compounds are used as insecticides, and they are highly toxic cholinesterase inhibitors." [ISBN

10447 Pathogen[ Q2Q067] interacts with 1 human partners:{P04818}

10448 Pathogen[ POC214] interacts with 1 human partners:{P04818}

10449 Pathogen[ P03346] interacts with 1 human partners:{095361}

10450 Pathogen[ P14079] interacts with 2 human partners:{095361;P04818}

10451 Pathogen[ P03410] interacts with 1 human partners:{P04818}

10452 Pathogen[ POC206] interacts with 2 human partners:{095361;P04818}

10453 [Cluster 1670]GO:0030091+P biological\_process [name] protein repair [def] "The process of restoring a protein to its original state after damage by such things as oxidation or spontaneous decomposition of residues." [GOC

10454 Pathogen[ Q2Q067] interacts with 1 human partners:{P22061}

10455 Pathogen[ POC214] interacts with 2 human partners:{P22061;Q9Y3D2}

10456 Pathogen[ P03346] interacts with 1 human partners:{P22061}

10457 Pathogen[ Q85601] interacts with 1 human partners:{P22061}

10458 Pathogen[ P14079] interacts with 2 human partners:{Q9NZV6;Q9Y3D2}

10459 Pathogen[ P03383] interacts with 1 human partners:{P22061}

10460 Pathogen[ P03410] interacts with 2 human partners:{Q9Y3D2;P22061}

10461 Pathogen[ P14075] interacts with 1 human partners:{P22061}

10462 Pathogen[ POC206] interacts with 3 human partners:{Q9NZV6;P22061;Q9Y3D2}

10463 [Cluster 1671]GO:0072181+P biological\_process [name] mesonephric duct formation [def] "The developmental process pertaining to the initial formation of a mesonephric duct. A mesonephric duct is a tube drains the mesonephros." [GOC

10464 Pathogen[ Q2Q067] interacts with 1 human partners:{P35680}

10465 Pathogen[ P03346] interacts with 1 human partners:{P35680}

10466 Pathogen[ Q85601] interacts with 1 human partners:{P35680}

10467 Pathogen[ P14079] interacts with 1 human partners:{P35680}

10468 Pathogen[ P03410] interacts with 1 human partners:{P35680}

10469 Pathogen[ POC206] interacts with 1 human partners:{P35680}

10470 [Cluster 1672]GO:0006054+P biological\_process [name] N-acetylneuraminate metabolic process [def] "The chemical reactions and pathways involving N-acetylneuraminate, the anion of 5-(acetylamino)-3,5-dideoxy-D-glycero-D-galacto-non-3-ulonic acid." [ISBN

10471 Pathogen[ POC214] interacts with 1 human partners:{Q8NFW8}

10472 Pathogen[ P03346] interacts with 1 human partners:{Q8NFW8}

10473 Pathogen[ P14079] interacts with 1 human partners:{Q8NFW8}

10474 Pathogen[ P03410] interacts with 1 human partners:{Q8NFW8}

10475 Pathogen[ POC206] interacts with 1 human partners:{Q8NFW8}

10476 Pathogen[ P03363] interacts with 1 human partners:{Q8NFW8}

10477 [Cluster 1673]GO:0010557+P biological\_process [name] positive regulation of macromolecule biosynthetic process [def] "Any process that increases the rate, frequency or extent of the chemical reactions and pathways resulting in the formation of a macromolecule, any molecule of high relative molecular mass, the structure of which essentially comprises the multiple repetition of units derived, actually or conceptually, from molecules of low relative molecular mass." [GOC

10478 Pathogen[ P03346] interacts with 1 human partners:{P58546}

10479 [Cluster 1674]GO:0033615+P biological\_process [name] mitochondrial proton-transporting ATP synthase complex assembly [def] "The aggregation, arrangement and bonding together of a proton-transporting ATP synthase in the mitochondrial inner membrane." [GOC

10480 Pathogen[ P14079] interacts with 2 human partners:{Q15070;Q9BUB7}

10481 Pathogen[ P03410] interacts with 2 human partners:{Q9BUB7;Q15070}

10482 Pathogen[ P14075] interacts with 2 human partners:{Q15070;Q9BUB7}

10483 Pathogen[ POC206] interacts with 2 human partners:{Q9BUB7;Q15070}

10484 [Cluster 1675]GO:0010610+P biological\_process [name] regulation of mRNA stability involved in response to stress [def] "Any process that modulates the propensity of mRNA molecules to degradation that is part of a change in state or activity of a cell as a result of an exogenous disturbance." [GOC

10485 Pathogen[ POC214] interacts with 1 human partners:{Q9NZI8}

10486 Pathogen[ P03346] interacts with 1 human partners:{Q9NZI8}

10487 Pathogen[ P03363] interacts with 1 human partners:{Q9NZI8}

10488 [Cluster 1676]GO:0033081+P biological\_process [name] regulation of T cell differentiation in thymus [def] "Any process that modulates the frequency, rate or extent of T cell differentiation in the thymus." [GOC

10489 Pathogen[ P14079] interacts with 1 human partners:{096005}

10490 Pathogen[ P03410] interacts with 1 human partners:{096005}

10491 [Cluster 1677]GO:0006208+P biological\_process [name] pyrimidine base catabolic process [def] "The chemical reactions and pathways resulting in the breakdown of pyrimidine bases, 1,3-diazine, organic nitrogenous bases." [GOC

10492 Pathogen[ Q2Q067] interacts with 1 human partners:{Q14194}

10493 Pathogen[ P0C214] interacts with 2 human partners:{Q14194;O14531}

10494 Pathogen[ P03346] interacts with 2 human partners:{O14531;Q14194}

10495 Pathogen[ Q85601] interacts with 1 human partners:{Q14194}

10496 Pathogen[ P14079] interacts with 1 human partners:{Q14194}

10497 Pathogen[ P03410] interacts with 2 human partners:{O14531;Q14194}

10498 Pathogen[ P0C206] interacts with 2 human partners:{O14531;Q14194}

10499 Pathogen[ P03363] interacts with 2 human partners:{Q14194;O14531}

10500 [Cluster 1678]GO:0014911+P biological\_process [name] positive regulation of smooth muscle cell migration [def] "Any process that activates, maintains or increases the frequency, rate or extent of smooth muscle cell migration." [CL

10501 Pathogen[ Q2Q067] interacts with 1 human partners:{O14786}

10502 Pathogen[ P0C214] interacts with 1 human partners:{O14786}

10503 Pathogen[ P03346] interacts with 1 human partners:{O14786}

10504 Pathogen[ Q85601] interacts with 1 human partners:{O14786}

10505 Pathogen[ P03410] interacts with 1 human partners:{O14786}

10506 Pathogen[ P0C206] interacts with 1 human partners:{O14786}

10507 Pathogen[ P03363] interacts with 1 human partners:{O14786}

10508 [Cluster 1679]GO:0032963+P biological\_process [name] collagen metabolic process [def] "The chemical reactions and pathways involving collagen, any of a group of fibrous proteins of very high tensile strength that form the main component of connective tissue in animals. Collagen is highly enriched in glycine (some regions are 33% glycine) and proline, occurring predominantly as 3-hydroxyproline (about 20%)." [GOC

10509 Pathogen[ Q2Q067] interacts with 1 human partners:{P41134}

10510 Pathogen[ P0C214] interacts with 1 human partners:{P41134}

10511 Pathogen[ P03346] interacts with 1 human partners:{P41134}

10512 Pathogen[ Q85601] interacts with 1 human partners:{P41134}

10513 Pathogen[ P14079] interacts with 1 human partners:{P41134}

10514 Pathogen[ P03410] interacts with 1 human partners:{P41134}

10515 Pathogen[ P0C206] interacts with 1 human partners:{P41134}

10516 Pathogen[ P03363] interacts with 1 human partners:{P41134}

10517 [Cluster 1680]GO:0055107+P biological\_process [name] Golgi to secretory granule transport [def] "The directed movement of proteins from the Golgi to a secretory granule. The secretory granule is a membrane-bounded particle, usually protein, formed in the granular endoplasmic reticulum and the Golgi complex." [GOC

10518 Pathogen[ P03346] interacts with 1 human partners:{Q6ZP65}

10519 Pathogen[ Q85601] interacts with 1 human partners:{Q6ZP65}

10520 Pathogen[ P14079] interacts with 1 human partners:{Q6ZP65}

10521 Pathogen[ P03410] interacts with 1 human partners:{Q6ZP65}

10522 Pathogen[ P0C206] interacts with 1 human partners:{Q6ZP65}

10523 Pathogen[ P03363] interacts with 1 human partners:{Q6ZP65}

10524 [Cluster 1681]GO:0030858+P biological\_process [name] positive regulation of epithelial cell differentiation [def] "Any process that activates or increases the frequency, rate or extent of epithelial cell differentiation." [GOC

10525 Pathogen[ Q2Q067] interacts with 1 human partners:{P42772}

10526 Pathogen[ P0C214] interacts with 1 human partners:{P42772}

10527 Pathogen[ P03346] interacts with 1 human partners:{P42772}

10528 Pathogen[ Q85601] interacts with 1 human partners:{P42772}

10529 Pathogen[ P03383] interacts with 1 human partners:{P42772}

10530 Pathogen[ P03410] interacts with 1 human partners:{P42772}

10531 Pathogen[ P14075] interacts with 1 human partners:{P42772}

10532 Pathogen[ P0C206] interacts with 1 human partners:{P42772}

10533 Pathogen[ P03363] interacts with 1 human partners:{P42772}

10534 [Cluster 1682]GO:0043304+P biological\_process [name] regulation of mast cell degranulation [def] "Any process that modulates the frequency, rate, or extent of mast cell degranulation." [ISBN

10535 Pathogen[ Q2Q067] interacts with 1 human partners:{Q15833}

10536 Pathogen[ P0C214] interacts with 1 human partners:{Q15833}

10537 Pathogen[ P03346] interacts with 2 human partners:{Q15833;Q70J99}

10538 Pathogen[ Q85601] interacts with 1 human partners:{Q15833}

10539 Pathogen[ P14079] interacts with 1 human partners:{Q15833}

10540 Pathogen[ P03410] interacts with 2 human partners:{Q15833;Q70J99}

10541 Pathogen[ P0C206] interacts with 1 human partners:{Q15833}

10542 Pathogen[ P03363] interacts with 1 human partners:{Q15833}

10543 [Cluster 1683]GO:0046855+P biological\_process [name] inositol phosphate dephosphorylation [def] "The process of removing a phosphate group from any mono- or polyphosphorylated inositol." [ISBN

10544 Pathogen[ P0C214] interacts with 1 human partners:{O15056}

10545 Pathogen[ P03346] interacts with 1 human partners:{O15056}

10546 Pathogen[ P03363] interacts with 1 human partners:{O15056}

10547 [Cluster 1684]GO:0006931+P biological\_process [name] substrate-dependent cell migration, cell attachment to substrate [def] "The formation of adhesions that stabilize protrusions at the leading edge of a migrating cell\_ involves integrin activation, clustering, and the recruitment of structural and signaling components to nascent adhesions." [ISBN

10548 Pathogen[ P14079] interacts with 1 human partners:{Q9NP84}

10549 Pathogen[ P03410] interacts with 1 human partners:{Q9NP84}

10550 [Cluster 1685]GO:0071498+P biological\_process [name] cellular response to fluid shear stress [def] "Any process that results in a change in state or activity of a cell (in terms of movement, secretion, enzyme production, gene expression, etc.) as a result of a fluid shear stress stimulus. Fluid shear stress is the force acting on an object in a system where the fluid is moving across a solid surface." [GOC

10551 Pathogen[ P14079] interacts with 1 human partners:{Q06413}

10552 [Cluster 1686]GO:0060956+P biological\_process [name] endocardial cell differentiation [def] "The process in which a relatively unspecialized cell acquires the specialized structural and/or functional features of an endocardial cell. An endocardial cell is a specialized endothelial cell that makes up the endocardium portion of the heart. The endocardium is the innermost layer of tissue of the heart, and lines the heart chambers." [GOC

10553 Pathogen[ P03346] interacts with 1 human partners:{P35713}

10554 [Cluster 1687]GO:0072537+P biological\_process [name] fibroblast activation [def] "A change in the morphology or behavior of a fibroblast resulting from exposure to an activating factor such as a cellular or soluble ligand." [CL

10555 Pathogen[ Q2Q067] interacts with 1 human partners:{Q9H4X1}

10556 Pathogen[ P0C214] interacts with 1 human partners:{Q9H4X1}

10557 Pathogen[ P03346] interacts with 1 human partners:{Q9H4X1}

10558 Pathogen[ Q85601] interacts with 1 human partners:{Q9H4X1}

10559 Pathogen[ P03383] interacts with 1 human partners:{Q9H4X1}

10560 Pathogen[ P03410] interacts with 1 human partners:{Q9H4X1}

10561 Pathogen[ P14075] interacts with 1 human partners:{Q9H4X1}

10562 Pathogen[ P0C206] interacts with 1 human partners:{Q9H4X1}

10563 Pathogen[ P03363] interacts with 1 human partners:{Q9H4X1}

10564 [Cluster 1688]GO:0019953+P biological\_process [name] sexual reproduction [def] "The regular alternation, in the life cycle of haplontic, diplontic and diplohaplontic organisms, of meiosis and fertilization which provides for the production offspring. In diplontic organisms there is a life cycle in which the products of meiosis behave directly as gametes, fusing to form a zygote from which the diploid, or sexually reproductive polyploid, adult organism will develop. In diplohaplontic organisms a haploid phase (gametophyte) exists in the life cycle between meiosis and fertilization (e.g. higher plants, many algae and Fungi)\_ the products of meiosis are spores that develop as haploid individuals from which haploid gametes develop to form a diploid zygote\_ diplohaplontic organisms show an alternation of haploid and diploid generations. In haplontic organisms meiosis occurs in the zygote, giving rise to four haploid cells (e.g. many algae and protozoa), only the zygote is diploid and this may form a resistant spore, tiding organisms over hard times." [ISBN

10565 Pathogen[ Q2Q067] interacts with 1 human partners:{P40763}

10566 Pathogen[ P0C214] interacts with 1 human partners:{P40763}

10567 Pathogen[ P03346] interacts with 2 human partners:{P40763;Q8NHV9}

10568 Pathogen[ Q85601] interacts with 1 human partners:{P40763}

10569 Pathogen[ P14079] interacts with 2 human partners:{P04279;Q02383}

10570 Pathogen[ P03410] interacts with 3 human partners:{Q02383;P04279;P40763}

10571 Pathogen[ P0C206] interacts with 1 human partners:{P40763}

10572 Pathogen[ P03363] interacts with 1 human partners:{Q8NHV9}

10573 [Cluster 1689]GO:0045059+P biological\_process [name] positive thymic T cell selection [def] "The process of sparing immature T cells in the thymus which react with self-MHC protein complexes with low affinity levels from apoptotic death." [ISBN

10574 Pathogen[ Q2Q067] interacts with 1 human partners:{P11831}

10575 Pathogen[ P0C214] interacts with 1 human partners:{P11831}

10576 Pathogen[ P03346] interacts with 1 human partners:{P11831}

10577 Pathogen[ Q85601] interacts with 1 human partners:{P11831}

10578 Pathogen[ P03383] interacts with 1 human partners:{P11831}

10579 Pathogen[ P03410] interacts with 1 human partners:{P11831}

10580 Pathogen[ P14075] interacts with 1 human partners:{P11831}

10581 Pathogen[ P0C206] interacts with 1 human partners:{P11831}

10582 Pathogen[ P03363] interacts with 1 human partners:{P11831}

10583 [Cluster 1690]GO:0030103+P biological\_process [name] vasopressin secretion [def] "The regulated release of vasopressin from secretory granules into the blood." [GOC

10584 Pathogen[ P03346] interacts with 1 human partners:{P22103}

10585 Pathogen[ P14079] interacts with 1 human partners:{P22103}

10586 Pathogen[ P03383] interacts with 1 human partners:{P22103}

10587 Pathogen[ P03410] interacts with 1 human partners:{P22103}

10588 Pathogen[ P14075] interacts with 1 human partners:{P22103}

10589 Pathogen[ P0C206] interacts with 1 human partners:{P22103}

10590 Pathogen[ P03363] interacts with 1 human partners:{P22103}

10591 [Cluster 1691]GO:0090281+P biological\_process [name] negative regulation of calcium ion import [def] "Any process that decreases the rate, frequency, or extent of the directed movement of calcium ions into a cell or organelle." [GOC

10592 Pathogen[ Q2Q067] interacts with 1 human partners:{P14373}

10593 Pathogen[ P0C214] interacts with 1 human partners:{P14373}

10594 Pathogen[ P03346] interacts with 1 human partners:{P14373}

10595 Pathogen[ Q85601] interacts with 1 human partners:{P14373}

10596 Pathogen[ P14079] interacts with 1 human partners:{P14373}

10597 Pathogen[ POC206] interacts with 1 human partners:{P14373}

10598 Pathogen[ P03363] interacts with 1 human partners:{P14373}

10599 [Cluster 1692]GO:0019695+P biological\_process [name] choline metabolic process [def] "The chemical reactions and pathways involving choline (2-hydroxyethyltrimethylammonium), an amino alcohol that occurs widely in living organisms as a constituent of certain types of phospholipids and in the neurotransmitter acetylcholine." [GOC

10600 Pathogen[ POC214] interacts with 1 human partners:{Q9UI17}

10601 Pathogen[ P14079] interacts with 1 human partners:{Q9UI17}

10602 Pathogen[ P03410] interacts with 1 human partners:{Q9UI17}

10603 [Cluster 1693]GO:0060437+P biological\_process [name] lung growth [def] "The increase in size or mass of a lung. In all air-breathing vertebrates the lungs are developed from the ventral wall of the oesophagus as a pouch which divides into two sacs. In amphibians and many reptiles the lungs retain very nearly this primitive sac-like character, but in the higher forms the connection with the esophagus becomes elongated into the windpipe and the inner walls of the sacs become more and more divided, until, in the mammals, the air spaces become minutely divided into tubes ending in small air cells, in the walls of which the blood circulates in a fine network of capillaries. In mammals the lungs are more or less divided into lobes, and each lung occupies a separate cavity in the thorax." [GOC

10604 Pathogen[ P14079] interacts with 1 human partners:{O43597}

10605 Pathogen[ P03410] interacts with 1 human partners:{O43597}

10606 Pathogen[ POC206] interacts with 1 human partners:{O43597}

10607 [Cluster 1694]GO:0019934+P biological\_process [name] cGMP-mediated signaling [def] "A series of molecular signals in which a cell uses cyclic GMP to convert an extracellular signal into a response." [GOC

10608 Pathogen[ P03346] interacts with 1 human partners:{Q86UT5}

10609 Pathogen[ P14079] interacts with 1 human partners:{Q86UT5}

10610 Pathogen[ P03410] interacts with 1 human partners:{Q86UT5}

10611 Pathogen[ POC206] interacts with 1 human partners:{Q86UT5}

10612 Pathogen[ P03363] interacts with 1 human partners:{Q86UT5}

10613 [Cluster 1695]GO:0046031+P biological\_process [name] ADP metabolic process [def] "The chemical reactions and pathways involving ADP, adenosine 5'-diphosphate." [GOC

10614 Pathogen[ POC214] interacts with 1 human partners:{Q92934}

10615 Pathogen[ P14079] interacts with 1 human partners:{Q92934}

10616 Pathogen[ P03410] interacts with 1 human partners:{Q92934}

10617 Pathogen[ POC206] interacts with 1 human partners:{Q92934}

10618 [Cluster 1696]GO:0007194+P biological\_process [name] negative regulation of adenylate cyclase activity [def] "Any process that stops, prevents, or reduces the frequency, rate or extent of adenylate cyclase activity." [GOC

10619 Pathogen[ P14079] interacts with 1 human partners:{O75781}

10620 Pathogen[ P03410] interacts with 1 human partners:{O75781}

10621 [Cluster 1697]GO:0035844+P biological\_process [name] cloaca development [def] "The process whose specific outcome is the progression of the cloaca over time, from it's formation to the mature structure. The cloaca is the common chamber into which intestinal, genital and urinary canals open in vertebrates." [GOC

10622 Pathogen[ P03346] interacts with 1 human partners:{Q8N157}

10623 Pathogen[ P14079] interacts with 1 human partners:{Q8N157}

10624 Pathogen[ P03410] interacts with 1 human partners:{Q8N157}

10625 Pathogen[ POC206] interacts with 1 human partners:{Q8N157}

10626 Pathogen[ P03363] interacts with 1 human partners:{Q8N157}

10627 [Cluster 1698]GO:0055081+P biological\_process [name] anion homeostasis [def] "Any process involved in the maintenance of an internal steady state of anions within an organism or cell." [GOC

10628 Pathogen[ POC214] interacts with 1 human partners:{P00480}

10629 Pathogen[ Q85601] interacts with 1 human partners:{P00480}

10630 Pathogen[ P14079] interacts with 1 human partners:{P00480}

10631 Pathogen[ P03410] interacts with 1 human partners:{P00480}

10632 Pathogen[ POC206] interacts with 1 human partners:{P00480}

10633 [Cluster 1699]GO:1900116+P

10634 Pathogen[ Q2Q067] interacts with 1 human partners:{Q8IVG9}

10635 Pathogen[ P03346] interacts with 1 human partners:{Q8IVG9}

10636 Pathogen[ P14079] interacts with 1 human partners:{Q8IVG9}

10637 Pathogen[ P03383] interacts with 1 human partners:{Q8IVG9}

10638 Pathogen[ P03410] interacts with 1 human partners:{Q8IVG9}

10639 Pathogen[ P14075] interacts with 1 human partners:{Q8IVG9}

10640 Pathogen[ POC206] interacts with 1 human partners:{Q8IVG9}

10641 Pathogen[ P03363] interacts with 1 human partners:{Q8IVG9}

10642 [Cluster 1700]GO:0007418+P biological\_process [name] ventral midline development [def] "The process whose specific outcome is the progression of the ventral midline over time, from its formation to the mature structure. In protostomes (such as insects, snails and worms) as well as deuterostomes (vertebrates), the midline is an embryonic region that functions in patterning of the adjacent nervous tissue. The ventral midline in insects is a cell population extending along the ventral surface of the embryo and is the region from which cells detach to form the ventrally located nerve cords. In vertebrates, the midline is originally located dorsally. During development, it folds



inwards and becomes the ventral part of the dorsally located neural tube and is then called the ventral midline, or floor plate." [GOC

10643 Pathogen[ Q2Q067] interacts with 1 human partners:{P08151}

10644 Pathogen[ POC214] interacts with 1 human partners:{P08151}

10645 Pathogen[ P03346] interacts with 1 human partners:{P08151}

10646 Pathogen[ Q85601] interacts with 1 human partners:{P08151}

10647 Pathogen[ P14079] interacts with 1 human partners:{P08151}

10648 Pathogen[ POC206] interacts with 1 human partners:{P08151}

10649 Pathogen[ P03363] interacts with 1 human partners:{P08151}

10650 [Cluster 1701]GO:0001710+P biological\_process [name] mesodermal cell fate commitment [def] "The cell differentiation process that results in commitment of a cell to become part of the mesoderm." [GOC

10651 Pathogen[ Q2Q067] interacts with 1 human partners:{Q15797}

10652 Pathogen[ POC214] interacts with 1 human partners:{Q15797}

10653 Pathogen[ P03346] interacts with 1 human partners:{Q15797}

10654 Pathogen[ Q85601] interacts with 1 human partners:{Q15797}

10655 Pathogen[ P14079] interacts with 1 human partners:{Q15797}

10656 Pathogen[ P03383] interacts with 1 human partners:{Q15797}

10657 Pathogen[ P03410] interacts with 1 human partners:{Q15797}

10658 Pathogen[ POC206] interacts with 1 human partners:{Q15797}

10659 Pathogen[ P03363] interacts with 1 human partners:{Q15797}

10660 [Cluster 1702]GO:0035710+P biological\_process [name] CD4-positive, alpha-beta T cell activation [def] "The change in morphology and behavior of a CD4-positive, alpha-beta T cell resulting from exposure to a mitogen, cytokine, chemokine, cellular ligand, or an antigen for which it is specific." [CL

10661 Pathogen[ POC214] interacts with 1 human partners:{Q8WXG1}

10662 Pathogen[ P14079] interacts with 1 human partners:{Q8WXG1}

10663 Pathogen[ P03410] interacts with 1 human partners:{Q8WXG1}

10664 Pathogen[ POC206] interacts with 1 human partners:{Q8WXG1}

10665 [Cluster 1703]GO:0030917+P biological\_process [name] midbrain-hindbrain boundary development [def] "The process whose specific outcome is the progression of the midbrain-hindbrain boundary over time, from its formation to the mature structure. The midbrain-hindbrain domain of the embryonic brain is comprised of the mesencephalic vesicle and the first rhombencephalic vesicle at early somitogenesis stages." [GOC

10666 Pathogen[ P03346] interacts with 2 human partners:{Q05925;P52951}

10667 Pathogen[ P03363] interacts with 2 human partners:{Q05925;P52951}

10668 [Cluster 1704]GO:0030827+P biological\_process [name] negative regulation of cGMP biosynthetic process [def] "Any process that stops, prevents, or reduces the frequency, rate or extent of the chemical reactions and pathways resulting in the formation of cGMP." [GOC

10669 Pathogen[ P03346] interacts with 1 human partners:{Q86UT5}

10670 Pathogen[ P14079] interacts with 1 human partners:{Q86UT5}

10671 Pathogen[ P03410] interacts with 1 human partners:{Q86UT5}

10672 Pathogen[ POC206] interacts with 1 human partners:{Q86UT5}

10673 Pathogen[ P03363] interacts with 1 human partners:{Q86UT5}

10674 [Cluster 1705]GO:0034165+P biological\_process [name] positive regulation of toll-like receptor 9 signaling pathway [def] "Any process that activates or increases the frequency, rate, or extent of toll-like receptor 9 signaling pathway." [GOC

10675 Pathogen[ POC214] interacts with 1 human partners:{Q8WXG1}

10676 Pathogen[ P14079] interacts with 1 human partners:{Q8WXG1}

10677 Pathogen[ P03410] interacts with 1 human partners:{Q8WXG1}

10678 Pathogen[ POC206] interacts with 1 human partners:{Q8WXG1}

10679 [Cluster 1706]GO:0070989+P biological\_process [name] oxidative demethylation [def] "The process of removing one or more methyl groups from a molecule, involving the oxidation (i.e. electron loss) of one or more atoms in the substrate." [GOC

10680 Pathogen[ Q2Q067] interacts with 1 human partners:{Q6NS38}

10681 Pathogen[ POC214] interacts with 1 human partners:{Q6NS38}

10682 Pathogen[ Q85601] interacts with 1 human partners:{Q6NS38}

10683 Pathogen[ P14079] interacts with 2 human partners:{Q9C0B1;Q6NS38}

10684 Pathogen[ P03410] interacts with 2 human partners:{Q6NS38;Q9C0B1}

10685 Pathogen[ POC206] interacts with 1 human partners:{Q6NS38}

10686 [Cluster 1707]GO:0035871+P biological\_process [name] protein K11-linked deubiquitination [def] "A protein deubiquitination process in which a K11-linked ubiquitin chain, i.e. a polymer of ubiquitin formed by linkages between lysine residues at position 11 of the ubiquitin monomers, is removed from a protein." [GOC

10687 Pathogen[ Q2Q067] interacts with 1 human partners:{Q86T82}

10688 Pathogen[ P03346] interacts with 1 human partners:{Q86T82}

10689 Pathogen[ Q85601] interacts with 1 human partners:{Q86T82}

10690 Pathogen[ POC206] interacts with 1 human partners:{Q86T82}

10691 Pathogen[ P03363] interacts with 1 human partners:{Q86T82}

10692 [Cluster 1708]GO:0070431+P biological\_process [name] nucleotide-binding oligomerization domain containing 2 signaling pathway [def] "Any series of molecular signals generated as a consequence of binding to nucleotide-binding oligomerization domain containing 2 (NOD2)." [GOC

10693 Pathogen[ Q2Q067] interacts with 2 human partners:{Q04206;P25963}

10694 Pathogen[ POC214] interacts with 2 human partners:{Q04206;P25963}

10695 Pathogen[ P03346] interacts with 2 human partners:{P25963;Q04206}

10696 Pathogen[ Q85601] interacts with 2 human partners:{Q04206;P25963}

10697 Pathogen[ P03383] interacts with 2 human partners:{P25963;Q04206}

10698 Pathogen[ P03410] interacts with 2 human partners:{Q04206;P25963}

10699 Pathogen[ P14075] interacts with 2 human partners:{Q04206;P25963}

10700 Pathogen[ P0C206] interacts with 2 human partners:{P25963;Q04206}

10701 Pathogen[ P03363] interacts with 2 human partners:{Q04206;P25963}

10702 [Cluster 1709]GO:0006575+P biological\_process [name] cellular modified amino acid metabolic process [def] "The chemical reactions and pathways involving compounds derived from amino acids, organic acids containing one or more amino substituents." [CHEBI]

10703 Pathogen[ P0C214] interacts with 1 human partners:{Q16773}

10704 [Cluster 1710]GO:0033762+P biological\_process [name] response to glucagon stimulus [def] "Any process that results in a change in state or activity of a cell or an organism (in terms of movement, secretion, enzyme production, gene expression, etc.) as a result of a glucagon stimulus." [GOC]

10705 Pathogen[ Q2Q067] interacts with 1 human partners:{P36956}

10706 Pathogen[ P0C214] interacts with 2 human partners:{P09417;P16118}

10707 Pathogen[ P03346] interacts with 1 human partners:{P36956}

10708 Pathogen[ Q85601] interacts with 2 human partners:{P16118;P36956}

10709 Pathogen[ P14079] interacts with 2 human partners:{Q16878;P36956}

10710 Pathogen[ P03410] interacts with 2 human partners:{P36956;P16118}

10711 Pathogen[ P14075] interacts with 1 human partners:{P16118}

10712 Pathogen[ P0C206] interacts with 2 human partners:{P36956;P16118}

10713 [Cluster 1711]GO:0007199+P biological\_process [name] G-protein signaling, coupled to cGMP nucleotide second messenger [def] "The series of molecular signals generated as a consequence of a G-protein coupled receptor binding to its physiological ligand, followed by activation of guanylyl cyclase and a subsequent increase in the concentration of cyclic GMP." [GOC]

10714 Pathogen[ P03346] interacts with 1 human partners:{Q12788}

10715 Pathogen[ P03410] interacts with 1 human partners:{Q12788}

10716 [Cluster 1712]GO:0032418+P biological\_process [name] lysosome localization [def] "Any process in which a lysosome is transported to, and/or maintained in, a specific location." [GOC]

10717 Pathogen[ Q2Q067] interacts with 1 human partners:{Q9H267}

10718 Pathogen[ P03346] interacts with 2 human partners:{Q96AX1;Q9H267}

10719 Pathogen[ Q85601] interacts with 1 human partners:{Q9H267}

10720 Pathogen[ P14079] interacts with 3 human partners:{Q6IAA8;Q96AX1;Q9H267}

10721 Pathogen[ P03410] interacts with 3 human partners:{Q9H267;Q6IAA8;Q96AX1}

10722 Pathogen[ P0C206] interacts with 2 human partners:{Q96AX1;Q9H267}

10723 Pathogen[ P03363] interacts with 1 human partners:{Q9H267}

10724 [Cluster 1713]GO:0014009+P biological\_process [name] glial cell proliferation [def] "The multiplication or reproduction of glial cells by cell division, resulting in the expansion of their population. Glial cells exist throughout the nervous system, and include Schwann cells, astrocytes, and oligodendrocytes among others." [GOC]

10725 Pathogen[ P03346] interacts with 1 human partners:{Q06945}

10726 [Cluster 1714]GO:0031659+P biological\_process [name] positive regulation of cyclin-dependent protein kinase activity involved in G1/S [def] "Any process that activates or increases the frequency, rate or extent of CDK activity contributing to the G1/S transition of the cell cycle." [GOC]

10727 Pathogen[ Q2Q067] interacts with 2 human partners:{P31749;Q9H4X1}

10728 Pathogen[ P0C214] interacts with 2 human partners:{Q9H4X1;P31749}

10729 Pathogen[ P03346] interacts with 2 human partners:{Q9H4X1;P31749}

10730 Pathogen[ Q85601] interacts with 2 human partners:{Q9H4X1;P31749}

10731 Pathogen[ P03383] interacts with 2 human partners:{Q9H4X1;P31749}

10732 Pathogen[ P03410] interacts with 2 human partners:{Q9H4X1;P31749}

10733 Pathogen[ P14075] interacts with 2 human partners:{Q9H4X1;P31749}

10734 Pathogen[ P0C206] interacts with 2 human partners:{P31749;Q9H4X1}

10735 Pathogen[ P03363] interacts with 2 human partners:{Q9H4X1;P31749}

10736 [Cluster 1715]GO:0016340+P biological\_process [name] calcium-dependent cell-matrix adhesion [def] "The binding of a cell to the extracellular matrix via adhesion molecules that require the presence of calcium for the interaction." [GOC]

10737 Pathogen[ P14079] interacts with 1 human partners:{Q14118}

10738 Pathogen[ P03410] interacts with 1 human partners:{Q14118}

10739 [Cluster 1716]GO:0060096+P biological\_process [name] serotonin secretion, neurotransmission [def] "The regulated release of serotonin by a cell or group of cells, in which released serotonin acts as a neurotransmitter." [GOC]

10740 Pathogen[ Q2Q067] interacts with 1 human partners:{P17861}

10741 Pathogen[ P0C214] interacts with 1 human partners:{P17861}

10742 Pathogen[ P03346] interacts with 1 human partners:{P17861}

10743 Pathogen[ Q85601] interacts with 1 human partners:{P17861}

10744 Pathogen[ P03383] interacts with 1 human partners:{P17861}

10745 Pathogen[ P03410] interacts with 1 human partners:{P17861}

10746 Pathogen[ P14075] interacts with 1 human partners:{P17861}

10747 Pathogen[ P0C206] interacts with 1 human partners:{P17861}

10748 Pathogen[ P03363] interacts with 1 human partners:{P17861}

10749 [Cluster 1717]GO:0046856+P biological\_process [name] phosphatidylinositol dephosphorylation [def] "The process of removing one or more phosphate groups from a phosphatidylinositol." [ISBN

10750 Pathogen[ POC214] interacts with 2 human partners:{O15056;Q13615}

10751 Pathogen[ P03346] interacts with 1 human partners:{O15056}

10752 Pathogen[ POC206] interacts with 1 human partners:{Q13615}

10753 Pathogen[ P03363] interacts with 1 human partners:{O15056}

10754 [Cluster 1718]GO:0016042+P biological\_process [name] lipid catabolic process [def] "The chemical reactions and pathways resulting in the breakdown of lipids, compounds soluble in an organic solvent but not, or sparingly, in an aqueous solvent." [GOC

10755 Pathogen[ Q2Q067] interacts with 1 human partners:{Q15102}

10756 Pathogen[ POC214] interacts with 3 human partners:{P68402;Q15102;Q06520}

10757 Pathogen[ P03346] interacts with 2 human partners:{Q06520;Q15102}

10758 Pathogen[ Q85601] interacts with 1 human partners:{Q15102}

10759 Pathogen[ P14079] interacts with 9 human partners:{O94830;Q8N8W4;Q8NCQ7;Q8NEL9;Q8NCG7;Q15102;Q9NZ20;Q7Z6Z6;Q99487}

10760 Pathogen[ P03410] interacts with 8 human partners:{Q8NCG7;O94830;Q9NZ20;Q15102;Q8NCQ7;Q8N8W4;Q7Z6Z6;Q8NEL9}

10761 Pathogen[ P14075] interacts with 1 human partners:{Q15102}

10762 Pathogen[ POC206] interacts with 3 human partners:{Q15102;O94830;Q8NEL9}

10763 Pathogen[ P03363] interacts with 2 human partners:{Q06520;Q15102}

10764 [Cluster 1719]GO:0006685+P biological\_process [name] sphingomyelin catabolic process [def] "The chemical reactions and pathways resulting in the breakdown of sphingomyelin, N-acyl-4-sphinganyl-1-O-phosphorylcholine." [ISBN

10765 Pathogen[ P14079] interacts with 3 human partners:{Q9NY59;Q9NxE4;P17405}

10766 Pathogen[ P03410] interacts with 2 human partners:{Q9NxE4;P17405}

10767 [Cluster 1720]GO:0015813+P biological\_process [name] L-glutamate transport [def] "The directed movement of L-glutamate, the L enantiomer anion of 2-aminopentanedioic acid, into, out of or within a cell, or between cells, by means of some agent such as a transporter or pore." [GOC

10768 Pathogen[ P14079] interacts with 2 human partners:{O75915;O60831}

10769 Pathogen[ P03383] interacts with 1 human partners:{O60831}

10770 Pathogen[ P03410] interacts with 2 human partners:{O75915;O60831}

10771 Pathogen[ P14075] interacts with 1 human partners:{O60831}

10772 Pathogen[ POC206] interacts with 1 human partners:{O60831}

10773 [Cluster 1721]GO:0070072+P biological\_process [name] vacuolar proton-transporting V-type ATPase complex assembly [def] "The aggregation, arrangement and bonding together of a vacuolar proton-transporting V-type ATPase complex, proton-transporting two-sector ATPase complex that couples ATP hydrolysis to the transport of protons across the vacuolar membrane." [GOC

10774 Pathogen[ Q2Q067] interacts with 1 human partners:{P05062}

10775 Pathogen[ POC214] interacts with 1 human partners:{P05062}

10776 Pathogen[ P03346] interacts with 1 human partners:{P05062}

10777 Pathogen[ Q85601] interacts with 1 human partners:{P05062}

10778 Pathogen[ P14079] interacts with 1 human partners:{Q3ZAQ7}

10779 Pathogen[ P03410] interacts with 1 human partners:{P05062}

10780 Pathogen[ POC206] interacts with 1 human partners:{P05062}

10781 [Cluster 1722]GO:0007522+P biological\_process [name] visceral muscle development [def] "The process whose specific outcome is the progression of the visceral muscle over time, from its formation to the mature structure." [GOC

10782 Pathogen[ POC214] interacts with 1 human partners:{P13533}

10783 Pathogen[ Q85601] interacts with 1 human partners:{P13533}

10784 Pathogen[ P03410] interacts with 1 human partners:{P13533}

10785 Pathogen[ POC206] interacts with 1 human partners:{P13533}

10786 [Cluster 1723]GO:0030038+P biological\_process [name] contractile actin filament bundle assembly [def] "Assembly of actin filament bundles in which the filaments are loosely packed (approximately 30-60 nm apart) and arranged with opposing polarities\_ the loose packing allows myosin (usually myosin-II) to enter the bundle." [GOC

10787 Pathogen[ Q2Q067] interacts with 1 human partners:{P11831}

10788 Pathogen[ POC214] interacts with 1 human partners:{P11831}

10789 Pathogen[ P03346] interacts with 1 human partners:{P11831}

10790 Pathogen[ Q85601] interacts with 1 human partners:{P11831}

10791 Pathogen[ P03383] interacts with 1 human partners:{P11831}

10792 Pathogen[ P03410] interacts with 1 human partners:{P11831}

10793 Pathogen[ P14075] interacts with 1 human partners:{P11831}

10794 Pathogen[ POC206] interacts with 1 human partners:{P11831}

10795 Pathogen[ P03363] interacts with 1 human partners:{P11831}

10796 [Cluster 1724]GO:0090102+P biological\_process [name] cochlea development [def] "The progression of the cochlea over time from its formation to the mature structure. The cochlea is the snail-shaped portion of the inner ear that is responsible for the detection of sound." [GOC

10797 Pathogen[ Q2Q067] interacts with 1 human partners:{P49639}

10798 Pathogen[ POC214] interacts with 1 human partners:{P49639}

10799 Pathogen[ P03346] interacts with 1 human partners:{P49639}

10800 Pathogen[ Q85601] interacts with 1 human partners:{P49639}

10801 Pathogen[ P14079] interacts with 1 human partners:{P49639}

10802 Pathogen[ P03383] interacts with 1 human partners:{P49639}

10803 Pathogen[ P03410] interacts with 1 human partners:{P49639}

10804 Pathogen[ P0C206] interacts with 1 human partners:{P49639}

10805 Pathogen[ P03363] interacts with 1 human partners:{P49639}

10806 [Cluster 1725]GO:0045742+P biological\_process [name] positive regulation of epidermal growth factor receptor signaling pathway [def] "Any process that activates or increases the frequency, rate or extent of epidermal growth factor receptor signaling pathway activity." [GOC

10807 Pathogen[ Q2Q067] interacts with 1 human partners:{P37198}

10808 Pathogen[ P0C214] interacts with 3 human partners:{P18545;P37198;Q13956}

10809 Pathogen[ P03346] interacts with 1 human partners:{P37198}

10810 Pathogen[ P14079] interacts with 3 human partners:{P18545;Q13956;P37198}

10811 Pathogen[ P03383] interacts with 1 human partners:{P37198}

10812 Pathogen[ P03410] interacts with 2 human partners:{Q13956;P18545}

10813 Pathogen[ P14075] interacts with 1 human partners:{P37198}

10814 Pathogen[ P0C206] interacts with 2 human partners:{P18545;Q13956}

10815 Pathogen[ P03363] interacts with 1 human partners:{P37198}

10816 [Cluster 1726]GO:0031440+P biological\_process [name] regulation of mRNA 3'-end processing [def] "Any process that modulates the frequency, rate or extent of mRNA 3'-end processing, any process involved in forming the mature 3' end of an mRNA molecule." [GOC

10817 Pathogen[ P0C214] interacts with 1 human partners:{O43865}

10818 Pathogen[ P03346] interacts with 1 human partners:{O43865}

10819 Pathogen[ Q85601] interacts with 1 human partners:{O43865}

10820 Pathogen[ P14079] interacts with 1 human partners:{O43865}

10821 Pathogen[ P03410] interacts with 1 human partners:{O43865}

10822 Pathogen[ P0C206] interacts with 1 human partners:{O43865}

10823 Pathogen[ P03363] interacts with 1 human partners:{O43865}

10824 [Cluster 1727]GO:0034113+P biological\_process [name] heterotypic cell-cell adhesion [def] "The attachment of a cell to a cell of a different type via adhesion molecules." [GOC

10825 Pathogen[ Q2Q067] interacts with 1 human partners:{Q9NVD7}

10826 Pathogen[ P0C214] interacts with 1 human partners:{Q9NVD7}

10827 Pathogen[ P03346] interacts with 1 human partners:{Q9NVD7}

10828 Pathogen[ Q85601] interacts with 1 human partners:{Q9NVD7}

10829 Pathogen[ P14079] interacts with 1 human partners:{Q9NVD7}

10830 Pathogen[ P03410] interacts with 1 human partners:{Q9NVD7}

10831 Pathogen[ P0C206] interacts with 1 human partners:{Q9NVD7}

10832 Pathogen[ P03363] interacts with 1 human partners:{Q9NVD7}

10833 [Cluster 1728]GO:0035623+P biological\_process [name] renal glucose absorption [def] "A renal system process in which glucose is taken up from the collecting ducts and proximal and distal loops of the nephron." [GOC

10834 Pathogen[ Q2Q067] interacts with 1 human partners:{P20823}

10835 Pathogen[ P03346] interacts with 1 human partners:{P20823}

10836 Pathogen[ Q85601] interacts with 1 human partners:{P20823}

10837 Pathogen[ P0C206] interacts with 1 human partners:{P20823}

10838 [Cluster 1729]GO:0030241+P biological\_process [name] skeletal muscle myosin thick filament assembly [def] "The aggregation, arrangement and bonding together of proteins to form the myosin-based thick filaments of myofibrils in skeletal muscle." [GOC

10839 Pathogen[ P0C214] interacts with 1 human partners:{P35749}

10840 Pathogen[ Q85601] interacts with 1 human partners:{P35749}

10841 Pathogen[ P14079] interacts with 1 human partners:{O15273}

10842 Pathogen[ P03410] interacts with 1 human partners:{O15273}

10843 Pathogen[ P0C206] interacts with 1 human partners:{P35749}

10844 [Cluster 1730]GO:0070130+P biological\_process [name] negative regulation of mitochondrial translation [def] "Any process that stops, prevents, or reduces the frequency, rate or extent of the chemical reactions and pathways resulting in the formation of proteins by the translation of mRNA in a mitochondrion." [GOC

10845 Pathogen[ Q2Q067] interacts with 1 human partners:{Q96EH3}

10846 Pathogen[ P0C214] interacts with 1 human partners:{Q96EH3}

10847 Pathogen[ P03346] interacts with 1 human partners:{Q96EH3}

10848 Pathogen[ P14079] interacts with 1 human partners:{Q96EH3}

10849 Pathogen[ P03383] interacts with 1 human partners:{Q96EH3}

10850 Pathogen[ P03410] interacts with 1 human partners:{Q96EH3}

10851 Pathogen[ P14075] interacts with 1 human partners:{Q96EH3}

10852 Pathogen[ P0C206] interacts with 1 human partners:{Q96EH3}

10853 Pathogen[ P03363] interacts with 1 human partners:{Q96EH3}

10854 [Cluster 1731]GO:0006598+P biological\_process [name] polyamine catabolic process [def] "The chemical reactions and pathways resulting in the breakdown of polyamines, any organic compound containing two or more amino groups." [ISBN

10855 Pathogen[ P0C214] interacts with 1 human partners:{Q9NWM0}

10856 [Cluster 1732]GO:0035695+P biological\_process [name] mitochondrion degradation by induced vacuole formation [def] "The process in which cells degrade mitochondria by inducing a vacuole-like structure which directly engulfs and degrades the unhealthy mitochondria by accumulating lysosomes." [GOC

10857 Pathogen[ Q2Q067] interacts with 1 human partners:{Q8TC71}

10858 Pathogen[ POC214] interacts with 1 human partners:{Q8TC71}

10859 Pathogen[ P03346] interacts with 1 human partners:{Q8TC71}

10860 Pathogen[ P14079] interacts with 1 human partners:{Q8TC71}

10861 Pathogen[ P03383] interacts with 1 human partners:{Q8TC71}

10862 Pathogen[ P03410] interacts with 1 human partners:{Q8TC71}

10863 Pathogen[ P14075] interacts with 1 human partners:{Q8TC71}

10864 Pathogen[ POC206] interacts with 1 human partners:{Q8TC71}

10865 Pathogen[ P03363] interacts with 1 human partners:{Q8TC71}

10866 [Cluster 1733]GO:0002669+P biological\_process [name] positive regulation of T cell anergy [def] "Any process that activates or increases the frequency, rate, or extent of T cell anergy." [GOC

10867 Pathogen[ Q2Q067] interacts with 1 human partners:{Q96J02}

10868 Pathogen[ POC214] interacts with 1 human partners:{Q96J02}

10869 Pathogen[ P03346] interacts with 1 human partners:{Q96J02}

10870 Pathogen[ Q85601] interacts with 1 human partners:{Q96J02}

10871 Pathogen[ P14079] interacts with 1 human partners:{Q96J02}

10872 Pathogen[ POC206] interacts with 1 human partners:{Q96J02}

10873 [Cluster 1734]GO:0072108+P biological\_process [name] positive regulation of mesenchymal to epithelial transition involved in metanephros morphogenesis [def] "Any process that increases the rate, frequency or extent of the transition where a mesenchymal cell establishes apical/basolateral polarity, forms intercellular adhesive junctions, synthesizes basement membrane components and becomes an epithelial cell that will contribute to the shaping of the metanephros." [GOC

10874 Pathogen[ P03346] interacts with 1 human partners:{Q06710}

10875 [Cluster 1735]GO:0015012+P biological\_process [name] heparan sulfate proteoglycan biosynthetic process [def] "The chemical reactions and pathways resulting in the formation of the heparan sulfate proteoglycan, a glycosaminoglycan with repeat unit consisting of alternating alpha-(1->4)-linked hexuronic acid and glucosamine residues\_ the former are a mixture of sulfated and nonsulfated D-glucuronic acid and L-iduronic acid\_ the L-iduronic acid is either sulfated or acetylated on its amino group as well as being sulfated on one of its hydroxyl groups\_ heparan sulfate chains are covalently linked to peptidyl-serine by a glycosidic attachment through the trisaccharide galactosyl-galactosyl-xylosyl to serine residues." [GOC

10876 Pathogen[ P14079] interacts with 2 human partners:{O94923;Q9UL01}

10877 Pathogen[ P03410] interacts with 1 human partners:{Q9UL01}

10878 Pathogen[ POC206] interacts with 1 human partners:{Q9UL01}

10879 [Cluster 1736]GO:0051138+P biological\_process [name] positive regulation of NK T cell differentiation [def] "Any process that activates or increases the frequency, rate or extent of natural killer T cell differentiation." [ISBN

10880 Pathogen[ P03346] interacts with 1 human partners:{O14617}

10881 Pathogen[ P14079] interacts with 1 human partners:{O14617}

10882 Pathogen[ P03410] interacts with 2 human partners:{O00203;O14617}

10883 Pathogen[ POC206] interacts with 2 human partners:{Q13422;O14617}

10884 [Cluster 1737]GO:0030199+P biological\_process [name] collagen fibril organization [def] "Any process that determines the size and arrangement of collagen fibrils within an extracellular matrix." [GOC

10885 Pathogen[ Q2Q067] interacts with 1 human partners:{P08697}

10886 Pathogen[ POC214] interacts with 1 human partners:{P08697}

10887 Pathogen[ P03346] interacts with 1 human partners:{Q8IYA7}

10888 Pathogen[ Q85601] interacts with 1 human partners:{P08697}

10889 Pathogen[ P03383] interacts with 1 human partners:{P08697}

10890 Pathogen[ P03410] interacts with 1 human partners:{P08697}

10891 Pathogen[ P14075] interacts with 1 human partners:{P08697}

10892 Pathogen[ POC206] interacts with 1 human partners:{P08697}

10893 Pathogen[ P03363] interacts with 1 human partners:{Q8IYA7}

10894 [Cluster 1738]GO:0050878+P biological\_process [name] regulation of body fluid levels [def] "Any process that modulates the levels of body fluids." [GOC

10895 Pathogen[ P14079] interacts with 1 human partners:{Q86YH6}

10896 Pathogen[ P03410] interacts with 1 human partners:{Q86YH6}

10897 [Cluster 1739]GO:0021554+P biological\_process [name] optic nerve development [def] "The process whose specific outcome is the progression of the optic nerve over time, from its formation to the mature structure. The sensory optic nerve originates from the bipolar cells of the retina and conducts visual information to the brainstem. The optic nerve exits the back of the eye in the orbit, enters the optic canal, and enters the central nervous system at the optic chiasm (crossing) where the nerve fibers become the optic tract just prior to entering the hindbrain." [GO\_REF

10898 Pathogen[ P14079] interacts with 1 human partners:{Q9H061}

10899 [Cluster 1740]GO:0006659+P biological\_process [name] phosphatidylserine biosynthetic process [def] "The chemical reactions and pathways resulting in the formation of phosphatidylserines, any of a class of glycerophospholipids in which the phosphatidyl group is esterified to the hydroxyl group of L-serine." [ISBN

10900 Pathogen[ Q2Q067] interacts with 1 human partners:{O15162}

10901 Pathogen[ POC214] interacts with 1 human partners:{O15162}

10902 Pathogen[ P03346] interacts with 1 human partners:{O15162}

10903 Pathogen[ Q85601] interacts with 1 human partners:{O15162}

10904 Pathogen[ P14079] interacts with 1 human partners:{O15162}

10905 Pathogen[ P03383] interacts with 1 human partners:{015162}

10906 Pathogen[ P03410] interacts with 1 human partners:{015162}

10907 Pathogen[ P14075] interacts with 1 human partners:{015162}

10908 Pathogen[ P0C206] interacts with 1 human partners:{015162}

10909 [Cluster 1741]GO:0010524+P biological\_process [name] positive regulation of calcium ion transport into cytosol [def] "Any process that increases the rate of the directed movement of calcium ions into the cytosol of a cell. The cytosol is that part of the cytoplasm that does not contain membranous or particulate subcellular components." [GOC

10910 Pathogen[ P14079] interacts with 2 human partners:{P24588;O60502}

10911 Pathogen[ P03410] interacts with 2 human partners:{O60502;P24588}

10912 [Cluster 1742]GO:0019377+P biological\_process [name] glycolipid catabolic process [def] "The chemical reactions and pathways resulting in the breakdown of glycolipid, a class of 1,2-di-O-acylglycerols joined at oxygen 3 by a glycosidic linkage to a carbohydrate part (usually a mono-, di- or tri-saccharide)." [CHEBI

10913 Pathogen[ P14079] interacts with 1 human partners:{P17050}

10914 [Cluster 1743]GO:0006213+P biological\_process [name] pyrimidine nucleoside metabolic process [def] "The chemical reactions and pathways involving any pyrimidine nucleoside, one of a family of organic molecules consisting of a pyrimidine base covalently bonded to ribose (a ribonucleoside) or deoxyribose (a deoxyribonucleoside)." [GOC

10915 Pathogen[ P0C214] interacts with 1 human partners:{Q9H0P0}

10916 Pathogen[ P03346] interacts with 1 human partners:{P84090}

10917 Pathogen[ Q85601] interacts with 1 human partners:{Q9H0P0}

10918 Pathogen[ P14079] interacts with 2 human partners:{Q9H0P0;P84090}

10919 Pathogen[ P03383] interacts with 1 human partners:{P84090}

10920 Pathogen[ P03410] interacts with 2 human partners:{P84090;Q9H0P0}

10921 Pathogen[ P14075] interacts with 1 human partners:{P84090}

10922 Pathogen[ P0C206] interacts with 2 human partners:{Q9H0P0;P84090}

10923 [Cluster 1744]GO:0002295+P biological\_process [name] T-helper cell lineage commitment [def] "The process in which a CD4-positive, alpha-beta T cell becomes committed to becoming a T-helper cell, a CD4-positive, alpha-beta T cell specialized to promote various immunological processes." [GOC

10924 Pathogen[ Q2Q067] interacts with 1 human partners:{Q8IX07}

10925 Pathogen[ P0C214] interacts with 1 human partners:{Q8IX07}

10926 Pathogen[ P03346] interacts with 1 human partners:{Q8IX07}

10927 Pathogen[ Q85601] interacts with 1 human partners:{Q8IX07}

10928 Pathogen[ P14079] interacts with 1 human partners:{Q8IX07}

10929 Pathogen[ P03410] interacts with 1 human partners:{Q8IX07}

10930 Pathogen[ P0C206] interacts with 1 human partners:{Q8IX07}

10931 [Cluster 1745]GO:0019448+P biological\_process [name] L-cysteine catabolic process [def] "The chemical reactions and pathways resulting in the breakdown of L-cysteine, the L-enantiomer of 2-amino-3-mercaptopropanoic acid, i.e. (2R)-2-amino-3-mercaptopropanoic acid." [CHEBI

10932 Pathogen[ P0C214] interacts with 1 human partners:{P35520}

10933 Pathogen[ P14079] interacts with 1 human partners:{Q16878}

10934 [Cluster 1746]GO:0046439+P biological\_process [name] L-cysteine metabolic process [def] "The chemical reactions and pathways involving L-cysteine, the L-enantiomer of 2-amino-3-mercaptopropanoic acid, i.e. (2R)-2-amino-3-mercaptopropanoic acid." [CHEBI

10935 Pathogen[ P14079] interacts with 1 human partners:{Q16878}

10936 [Cluster 1747]GO:0035054+P biological\_process [name] embryonic heart tube anterior/posterior pattern specification [def] "The establishment, maintenance and elaboration of cell differentiation that results in the anterior/posterior subdivision of the embryonic heart tube. In Drosophila this results in subdivision of the dorsal vessel into the posterior heart proper and the anterior aorta." [GOC

10937 Pathogen[ P03346] interacts with 1 human partners:{O75593}

10938 [Cluster 1748]GO:0045925+P biological\_process [name] positive regulation of female receptivity [def] "Any process that activates or increases the receptiveness of a female to male advances." [GOC

10939 Pathogen[ Q2Q067] interacts with 1 human partners:{P10827}

10940 Pathogen[ P03346] interacts with 1 human partners:{P10827}

10941 Pathogen[ Q85601] interacts with 1 human partners:{P10827}

10942 Pathogen[ P14079] interacts with 1 human partners:{P10827}

10943 Pathogen[ P0C206] interacts with 1 human partners:{P10827}

10944 [Cluster 1749]GO:0090272+P biological\_process [name] negative regulation of fibroblast growth factor production [def] "Any process that decreases the rate, frequency or extent of the appearance of a fibroblast growth factor due to biosynthesis or secretion following a cellular stimulus, resulting in an increase in its intracellular or extracellular levels." [GOC

10945 Pathogen[ Q2Q067] interacts with 1 human partners:{Q9H4X1}

10946 Pathogen[ P0C214] interacts with 1 human partners:{Q9H4X1}

10947 Pathogen[ P03346] interacts with 1 human partners:{Q9H4X1}

10948 Pathogen[ Q85601] interacts with 1 human partners:{Q9H4X1}

10949 Pathogen[ P03383] interacts with 1 human partners:{Q9H4X1}

10950 Pathogen[ P03410] interacts with 1 human partners:{Q9H4X1}

10951 Pathogen[ P14075] interacts with 1 human partners:{Q9H4X1}

10952 Pathogen[ P0C206] interacts with 1 human partners:{Q9H4X1}

10953 Pathogen[ P03363] interacts with 1 human partners:{Q9H4X1}

10954 [Cluster 1750]GO:1901216+P  
10955 Pathogen[ P14079] interacts with 1 human partners:{Q9NX09}  
10956 Pathogen[ P03410] interacts with 1 human partners:{Q9NX09}  
10957 [Cluster 1751]GO:0006147+P biological\_process [name] guanine catabolic process  
[def] "The chemical reactions and pathways resulting in the breakdown of guanine, 2-amino-6-hydroxypurine, a purine that is one of the five main bases found in nucleic acids and a component of a number of phosphorylated guanosine derivatives whose metabolic or regulatory functions are important." [GOC  
10958 Pathogen[ P0C214] interacts with 1 human partners:{Q9Y2T3}  
10959 Pathogen[ P14079] interacts with 1 human partners:{Q9Y2T3}  
10960 Pathogen[ P03410] interacts with 1 human partners:{Q9Y2T3}  
10961 [Cluster 1752]GO:0035567+P biological\_process [name] non-canonical Wnt receptor signaling pathway [def] "The series of molecular signals initiated by binding of a Wnt protein to a frizzled family receptor on the surface of the target cell, followed by propagation of the signal via effectors other than beta-catenin." [GOC  
10962 Pathogen[ Q2Q067] interacts with 1 human partners:{O14641}  
10963 Pathogen[ P0C214] interacts with 1 human partners:{O14641}  
10964 Pathogen[ P03346] interacts with 1 human partners:{O14641}  
10965 Pathogen[ Q85601] interacts with 1 human partners:{O14641}  
10966 Pathogen[ P14079] interacts with 1 human partners:{O14641}  
10967 Pathogen[ P03383] interacts with 1 human partners:{O14641}  
10968 Pathogen[ P03410] interacts with 1 human partners:{O14641}  
10969 Pathogen[ P14075] interacts with 1 human partners:{O14641}  
10970 Pathogen[ P03363] interacts with 1 human partners:{O14641}  
10971 [Cluster 1753]GO:0032274+P biological\_process [name] gonadotropin secretion [def] "The regulated release of a gonadotropin, any hormone that stimulates the gonads, especially follicle-stimulating hormone and luteinizing hormone." [GOC  
10972 Pathogen[ Q2Q067] interacts with 1 human partners:{Q9UI56}  
10973 Pathogen[ P0C214] interacts with 1 human partners:{Q9UI56}  
10974 Pathogen[ P03346] interacts with 1 human partners:{Q9UI56}  
10975 Pathogen[ P14079] interacts with 1 human partners:{Q9UI56}  
10976 Pathogen[ P03383] interacts with 1 human partners:{Q9UI56}  
10977 Pathogen[ P03410] interacts with 1 human partners:{Q9UI56}  
10978 Pathogen[ P14075] interacts with 1 human partners:{Q9UI56}  
10979 Pathogen[ P0C206] interacts with 1 human partners:{Q9UI56}  
10980 Pathogen[ P03363] interacts with 1 human partners:{Q9UI56}  
10981 [Cluster 1754]GO:0060574+P biological\_process [name] intestinal epithelial cell maturation [def] "The developmental process, independent of morphogenetic (shape) change, that is required for a columnar/cuboidal epithelial cell of the intestine to attain its fully functional state. A columnar/cuboidal epithelial cell of the intestine mature as they migrate from the intestinal crypt to the villus." [GOC  
10982 Pathogen[ Q2Q067] interacts with 2 human partners:{P20719;P04818}  
10983 Pathogen[ P0C214] interacts with 1 human partners:{P04818}  
10984 Pathogen[ P03346] interacts with 1 human partners:{P20719}  
10985 Pathogen[ P14079] interacts with 1 human partners:{P04818}  
10986 Pathogen[ P03410] interacts with 1 human partners:{P04818}  
10987 Pathogen[ P0C206] interacts with 2 human partners:{P04818;P20719}  
10988 Pathogen[ P03363] interacts with 1 human partners:{P20719}  
10989 [Cluster 1755]GO:0071318+P biological\_process [name] cellular response to ATP [def] "Any process that results in a change in state or activity of a cell (in terms of movement, secretion, enzyme production, gene expression, etc.) as a result of an ATP (adenosine 5'-triphosphate) stimulus." [GOC  
10990 Pathogen[ Q2Q067] interacts with 1 human partners:{P14625}  
10991 Pathogen[ P0C214] interacts with 2 human partners:{P14625;Q96GD0}  
10992 Pathogen[ P03346] interacts with 1 human partners:{P14625}  
10993 Pathogen[ Q85601] interacts with 1 human partners:{P14625}  
10994 Pathogen[ P14079] interacts with 2 human partners:{Q96GD0;P14625}  
10995 Pathogen[ P03383] interacts with 1 human partners:{P14625}  
10996 Pathogen[ P03410] interacts with 2 human partners:{P14625;Q96GD0}  
10997 Pathogen[ P14075] interacts with 1 human partners:{P14625}  
10998 Pathogen[ P0C206] interacts with 2 human partners:{Q96GD0;P14625}  
10999 [Cluster 1756]GO:0051177+P biological\_process [name] meiotic sister chromatid cohesion [def] "The cell cycle process in which sister chromatids of a replicated chromosome are joined along the entire length of the chromosome during meiosis." [GOC  
11000 Pathogen[ P0C214] interacts with 1 human partners:{Q8N7B1}  
11001 Pathogen[ P03346] interacts with 1 human partners:{Q8N7B1}  
11002 Pathogen[ Q85601] interacts with 1 human partners:{Q8N7B1}  
11003 Pathogen[ P14079] interacts with 2 human partners:{Q86X24;Q8N7B1}  
11004 Pathogen[ P03410] interacts with 1 human partners:{Q8N7B1}  
11005 Pathogen[ P14075] interacts with 1 human partners:{Q8N7B1}  
11006 Pathogen[ P0C206] interacts with 1 human partners:{Q8N7B1}  
11007 Pathogen[ P03363] interacts with 1 human partners:{Q8N7B1}  
11008 [Cluster 1757]GO:0015909+P biological\_process [name] long-chain fatty acid transport [def] "The directed movement of long-chain fatty acids into, out of or within a cell, or between cells, by means of some agent such as a transporter or pore. A long-chain fatty acid is an aliphatic compound with a terminal carboxyl group and with a chain length

greater than C12." [GOC

11009 Pathogen[ Q2Q067] interacts with 1 human partners:{P05413}

11010 Pathogen[ POC214] interacts with 1 human partners:{P05413}

11011 Pathogen[ P03346] interacts with 2 human partners:{P05413;P07148}

11012 Pathogen[ Q85601] interacts with 1 human partners:{P05413}

11013 Pathogen[ P14079] interacts with 2 human partners:{P05413;Q99541}

11014 Pathogen[ P03410] interacts with 1 human partners:{P05413}

11015 Pathogen[ POC206] interacts with 1 human partners:{P05413}

11016 Pathogen[ P03363] interacts with 1 human partners:{P05413}

11017 [Cluster 1758]GO:0035021+P biological\_process [name] negative regulation of Rac protein signal transduction [def] "Any process that stops, prevents, or reduces the frequency, rate or extent of Rac protein signal transduction." [GOC

11018 Pathogen[ P14079] interacts with 1 human partners:{Q9NZ72}

11019 Pathogen[ P03410] interacts with 1 human partners:{Q9NZ72}

11020 Pathogen[ POC206] interacts with 1 human partners:{Q9NZ72}

11021 [Cluster 1759]GO:0032691+P biological\_process [name] negative regulation of interleukin-1 beta production [def] "Any process that stops, prevents, or reduces the frequency, rate, or extent of interleukin-1 beta production." [GOC

11022 Pathogen[ P14079] interacts with 1 human partners:{O15553}

11023 [Cluster 1760]GO:0006825+P biological\_process [name] copper ion transport [def] "The directed movement of copper (Cu) ions into, out of or within a cell, or between cells, by means of some agent such as a transporter or pore." [GOC

11024 Pathogen[ Q2Q067] interacts with 1 human partners:{Q9NTM9}

11025 Pathogen[ POC214] interacts with 2 human partners:{Q9NTM9;Q14061}

11026 Pathogen[ P03346] interacts with 1 human partners:{Q9NTM9}

11027 Pathogen[ Q85601] interacts with 1 human partners:{Q14061}

11028 Pathogen[ P14079] interacts with 5 human partners:{Q9NTM9;Q14061;O75880;O00244;O43819}

11029 Pathogen[ P03410] interacts with 4 human partners:{Q14061;Q9NTM9;O75880;O43819}

11030 Pathogen[ P14075] interacts with 2 human partners:{Q9NTM9;Q14061}

11031 Pathogen[ POC206] interacts with 2 human partners:{Q14061;Q9NTM9}

11032 Pathogen[ P03363] interacts with 1 human partners:{Q9NTM9}

11033 [Cluster 1761]GO:2000773+P biological\_process [name] negative regulation of cellular senescence [def] "Any process that stops, prevents or reduces the frequency, rate or extent of cellular senescence." [GOC

11034 Pathogen[ Q2Q067] interacts with 1 human partners:{Q00534}

11035 Pathogen[ POC214] interacts with 1 human partners:{Q00534}

11036 Pathogen[ P03346] interacts with 1 human partners:{Q00534}

11037 Pathogen[ Q85601] interacts with 1 human partners:{Q00534}

11038 Pathogen[ P03383] interacts with 1 human partners:{Q00534}

11039 Pathogen[ P03410] interacts with 1 human partners:{Q00534}

11040 Pathogen[ P14075] interacts with 1 human partners:{Q00534}

11041 Pathogen[ POC206] interacts with 1 human partners:{Q00534}

11042 Pathogen[ P03363] interacts with 1 human partners:{Q00534}

11043 [Cluster 1762]GO:0034720+P biological\_process [name] histone H3-K4 demethylation [def] "The modification of histone H3 by the removal of a methyl group from lysine at position 4 of the histone." [GOC

11044 Pathogen[ Q2Q067] interacts with 1 human partners:{Q9H6W3}

11045 Pathogen[ POC214] interacts with 1 human partners:{Q9H6W3}

11046 Pathogen[ P03346] interacts with 2 human partners:{Q9UGL1;Q9H6W3}

11047 Pathogen[ Q85601] interacts with 1 human partners:{Q9H6W3}

11048 Pathogen[ P14079] interacts with 1 human partners:{Q9H6W3}

11049 Pathogen[ P03383] interacts with 1 human partners:{Q9H6W3}

11050 Pathogen[ P03410] interacts with 1 human partners:{Q9H6W3}

11051 Pathogen[ P14075] interacts with 1 human partners:{Q9H6W3}

11052 Pathogen[ POC206] interacts with 1 human partners:{Q9H6W3}

11053 [Cluster 1763]GO:0031125+P biological\_process [name] rRNA 3'-end processing [def] "Any process involved in forming the mature 3' end of an rRNA molecule." [GOC

11054 Pathogen[ POC214] interacts with 1 human partners:{Q8IV48}

11055 Pathogen[ P14079] interacts with 1 human partners:{Q8IV48}

11056 Pathogen[ P03410] interacts with 1 human partners:{Q8IV48}

11057 Pathogen[ POC206] interacts with 1 human partners:{Q8IV48}

11058 [Cluster 1764]GO:0006655+P biological\_process [name] phosphatidylglycerol biosynthetic process [def] "The chemical reactions and pathways resulting in the formation of phosphatidylglycerols, any of a class of phospholipids in which the phosphatidyl group is esterified to the hydroxyl group of glycerol." [ISBN

11059 Pathogen[ P14079] interacts with 1 human partners:{Q32NB8}

11060 [Cluster 1765]GO:0046513+P biological\_process [name] ceramide biosynthetic process [def] "The chemical reactions and pathways resulting in the formation of ceramides, any N-acylated sphingoid." [GOC

11061 Pathogen[ Q2Q067] interacts with 1 human partners:{Q96G23}

11062 Pathogen[ POC214] interacts with 2 human partners:{Q9HA82;Q96G23}

11063 Pathogen[ P03346] interacts with 1 human partners:{Q96G23}

11064 Pathogen[ Q85601] interacts with 1 human partners:{Q96G23}

11065 Pathogen[ P14079] interacts with 5 human partners:{Q9NXC4;Q9HA82;P27544;Q96G23;P17405}



11066 Pathogen[ P03410] interacts with 6 human partners:{P27544;Q9NXE4;Q96G23;Q9HA82;Q9UBY8;P17405}

11067 Pathogen[ P0C206] interacts with 2 human partners:{Q96G23;Q9HA82}

11068 Pathogen[ P03363] interacts with 1 human partners:{Q96G23}

11069 [Cluster 1766]GO:0006865+P biological\_process [name] amino acid transport [def] "The directed movement of amino acids, organic acids containing one or more amino substituents, into, out of or within a cell, or between cells, by means of some agent such as a transporter or pore." [GOC

11070 Pathogen[ P14079] interacts with 1 human partners:{P51811}

11071 Pathogen[ P03410] interacts with 1 human partners:{P51811}

11072 [Cluster 1767]GO:0048667+P biological\_process [name] cell morphogenesis involved in neuron differentiation [def] "The process in which the structures of a neuron are generated and organized. This process occurs while the initially relatively unspecialized cell is acquiring the specialized features of a neuron." [GOC

11073 Pathogen[ Q2Q067] interacts with 1 human partners:{P06400}

11074 Pathogen[ P0C214] interacts with 1 human partners:{P06400}

11075 Pathogen[ P03346] interacts with 3 human partners:{O75592;P50219;P06400}

11076 Pathogen[ Q85601] interacts with 1 human partners:{P06400}

11077 Pathogen[ P03383] interacts with 1 human partners:{P06400}

11078 Pathogen[ P03410] interacts with 1 human partners:{P06400}

11079 Pathogen[ P14075] interacts with 1 human partners:{P06400}

11080 Pathogen[ P0C206] interacts with 1 human partners:{P06400}

11081 Pathogen[ P03363] interacts with 2 human partners:{P06400;P50219}

11082 [Cluster 1768]GO:0051152+P biological\_process [name] positive regulation of smooth muscle cell differentiation [def] "Any process that activates or increases the frequency, rate or extent of smooth muscle cell differentiation." [CL

11083 Pathogen[ Q2Q067] interacts with 1 human partners:{Q63HK5}

11084 Pathogen[ P0C214] interacts with 1 human partners:{Q63HK5}

11085 Pathogen[ P03346] interacts with 1 human partners:{Q63HK5}

11086 Pathogen[ Q85601] interacts with 1 human partners:{Q63HK5}

11087 Pathogen[ P14079] interacts with 1 human partners:{Q63HK5}

11088 Pathogen[ P03410] interacts with 1 human partners:{Q63HK5}

11089 Pathogen[ P0C206] interacts with 1 human partners:{Q63HK5}

11090 Pathogen[ P03363] interacts with 1 human partners:{Q63HK5}

11091 [Cluster 1769]GO:0072092+P biological\_process [name] ureteric bud invasion [def] "The process in which the ureteric bud grows along its axis and contributes to the formation of the metanephros." [GOC

11092 Pathogen[ Q2Q067] interacts with 1 human partners:{Q9NSC2}

11093 Pathogen[ P0C214] interacts with 1 human partners:{Q9NSC2}

11094 Pathogen[ P03346] interacts with 1 human partners:{Q9NSC2}

11095 Pathogen[ Q85601] interacts with 1 human partners:{Q9NSC2}

11096 Pathogen[ P14079] interacts with 1 human partners:{Q9NSC2}

11097 Pathogen[ P03383] interacts with 1 human partners:{Q9NSC2}

11098 Pathogen[ P03410] interacts with 1 human partners:{Q9NSC2}

11099 Pathogen[ P14075] interacts with 1 human partners:{Q9NSC2}

11100 Pathogen[ P0C206] interacts with 1 human partners:{Q9NSC2}

11101 [Cluster 1770]GO:0060736+P biological\_process [name] prostate gland growth [def] "The increase in size or mass of the prostate gland where the increase in size or mass has the specific outcome of the progression of the gland, from its formation to its mature state." [GOC

11102 Pathogen[ Q2Q067] interacts with 1 human partners:{Q05086}

11103 Pathogen[ P0C214] interacts with 1 human partners:{Q05086}

11104 Pathogen[ P03346] interacts with 1 human partners:{Q05086}

11105 Pathogen[ Q85601] interacts with 1 human partners:{Q05086}

11106 Pathogen[ P0C206] interacts with 1 human partners:{Q05086}

11107 Pathogen[ P03363] interacts with 1 human partners:{Q05086}

11108 [Cluster 1771]GO:0006123+P biological\_process [name] mitochondrial electron transport, cytochrome c to oxygen [def] "The transfer of electrons from cytochrome c to oxygen that occurs during oxidative phosphorylation, mediated by the multisubunit enzyme known as complex IV." [ISBN

11109 Pathogen[ P14079] interacts with 3 human partners:{Q12887;P00395;P00403}

11110 Pathogen[ P03410] interacts with 2 human partners:{P00403;Q12887}

11111 [Cluster 1772]GO:0002036+P biological\_process [name] regulation of L-glutamate transport [def] "Any process that modulates the frequency, rate or extent of L-glutamate transport." [GOC

11112 Pathogen[ P03346] interacts with 1 human partners:{Q15019}

11113 Pathogen[ P0C206] interacts with 1 human partners:{Q15019}

11114 [Cluster 1773]GO:0050992+P biological\_process [name] dimethylallyl diphosphate biosynthetic process [def] "The chemical reactions and pathways resulting in the formation of dimethylallyl diphosphate." [GOC

11115 Pathogen[ P0C214] interacts with 2 human partners:{Q13907;Q9BXS1}

11116 Pathogen[ Q85601] interacts with 1 human partners:{Q13907}

11117 Pathogen[ P14079] interacts with 2 human partners:{Q9BXS1;Q13907}

11118 Pathogen[ P03410] interacts with 2 human partners:{Q13907;Q9BXS1}

11119 Pathogen[ P0C206] interacts with 2 human partners:{Q13907;Q9BXS1}

11120 [Cluster 1774]GO:0061028+P biological\_process [name] establishment of endothelial

barrier [def] "The establishment of a barrier between endothelial cell layers, such as those in the brain, lung or intestine, to exert specific and selective control over the passage of water and solutes, thus allowing formation and maintenance of compartments that differ in fluid and solute composition." [GOC

11121 Pathogen[ P03346] interacts with 1 human partners:{P35713}

11122 [Cluster 1775]GO:0042167+P biological\_process [name] heme catabolic process [def] "The chemical reactions and pathways resulting in the breakdown of heme, any compound of iron complexed in a porphyrin (tetrapyrrole) ring." [GOC

11123 Pathogen[ P0C214] interacts with 1 human partners:{P30043}

11124 [Cluster 1776]GO:2001171+P biological\_process [name] positive regulation of ATP biosynthetic process [def] "Any process that activates or increases the frequency, rate or extent of ATP biosynthetic process." [GOC

11125 Pathogen[ Q2Q067] interacts with 1 human partners:{Q7Z2X4}

11126 Pathogen[ P0C214] interacts with 1 human partners:{Q7Z2X4}

11127 Pathogen[ P03346] interacts with 1 human partners:{Q7Z2X4}

11128 Pathogen[ Q85601] interacts with 1 human partners:{Q7Z2X4}

11129 Pathogen[ P14079] interacts with 1 human partners:{Q7Z2X4}

11130 Pathogen[ P03410] interacts with 1 human partners:{Q7Z2X4}

11131 Pathogen[ P0C206] interacts with 1 human partners:{Q7Z2X4}

11132 [Cluster 1777]GO:0006107+P biological\_process [name] oxaloacetate metabolic process [def] "The chemical reactions and pathways involving oxaloacetate, the anion of oxobutanedioic acid, an important intermediate in metabolism, especially as a component of the TCA cycle." [ISBN

11133 Pathogen[ Q2Q067] interacts with 1 human partners:{P40926}

11134 Pathogen[ P0C214] interacts with 4 human partners:{P35558;O75390;P40926;Q16822}

11135 Pathogen[ P03346] interacts with 2 human partners:{O75390;P40926}

11136 Pathogen[ Q85601] interacts with 1 human partners:{P40926}

11137 Pathogen[ P03383] interacts with 2 human partners:{P40926;Q16822}

11138 Pathogen[ P03410] interacts with 3 human partners:{Q16822;P40926;O75390}

11139 Pathogen[ P14075] interacts with 2 human partners:{Q16822;P40926}

11140 Pathogen[ P0C206] interacts with 3 human partners:{Q16822;P40926;O75390}

11141 [Cluster 1778]GO:0044524+P

11142 Pathogen[ Q2Q067] interacts with 1 human partners:{P32929}

11143 Pathogen[ P0C214] interacts with 1 human partners:{P32929}

11144 Pathogen[ P03346] interacts with 1 human partners:{P32929}

11145 Pathogen[ Q85601] interacts with 1 human partners:{P32929}

11146 Pathogen[ P14079] interacts with 1 human partners:{P32929}

11147 Pathogen[ P03410] interacts with 1 human partners:{P32929}

11148 Pathogen[ P0C206] interacts with 1 human partners:{P32929}

11149 [Cluster 1779]GO:0070995+P biological\_process [name] NADPH oxidation [def] "A metabolic process that results in the oxidation of reduced nicotinamide adenine dinucleotide, NADPH, to the oxidized form, NADP." [GOC

11150 Pathogen[ P14079] interacts with 1 human partners:{P10109}

11151 Pathogen[ P03410] interacts with 1 human partners:{P10109}

11152 [Cluster 1780]GO:0048560+P biological\_process [name] establishment of anatomical structure orientation [def] "The process that determines the orientation of an anatomical structure with reference to an axis." [GOC

11153 Pathogen[ P03346] interacts with 1 human partners:{Q8TAM2}

11154 Pathogen[ P14079] interacts with 1 human partners:{Q8TAM2}

11155 Pathogen[ P03410] interacts with 1 human partners:{Q8TAM2}

11156 Pathogen[ P0C206] interacts with 1 human partners:{Q8TAM2}

11157 Pathogen[ P03363] interacts with 1 human partners:{Q8TAM2}

11158 [Cluster 1781]GO:0071544+P biological\_process [name] diphosphoinositol polyphosphate catabolic process [def] "The chemical reactions and pathways resulting in the breakdown of a diphosphoinositol polyphosphate, 1,2,3,4,5,6-cyclohexanehexol with one or more diphosphate groups and multiple monophosphate groups attached." [GOC

11159 Pathogen[ P0C214] interacts with 1 human partners:{O95989}

11160 Pathogen[ Q85601] interacts with 1 human partners:{O95989}

11161 Pathogen[ P14079] interacts with 1 human partners:{O95989}

11162 Pathogen[ P03383] interacts with 1 human partners:{O95989}

11163 Pathogen[ P03410] interacts with 1 human partners:{O95989}

11164 Pathogen[ P14075] interacts with 1 human partners:{O95989}

11165 Pathogen[ P0C206] interacts with 1 human partners:{O95989}

11166 [Cluster 1782]GO:0097222+P

11167 Pathogen[ Q2Q067] interacts with 1 human partners:{Q8TCS8}

11168 Pathogen[ P0C214] interacts with 1 human partners:{Q8TCS8}

11169 Pathogen[ P03346] interacts with 1 human partners:{Q8TCS8}

11170 Pathogen[ Q85601] interacts with 1 human partners:{Q8TCS8}

11171 Pathogen[ P14079] interacts with 1 human partners:{Q8TCS8}

11172 Pathogen[ P03383] interacts with 1 human partners:{Q8TCS8}

11173 Pathogen[ P03410] interacts with 1 human partners:{Q8TCS8}

11174 Pathogen[ P14075] interacts with 1 human partners:{Q8TCS8}

11175 Pathogen[ P0C206] interacts with 1 human partners:{Q8TCS8}

11176 [Cluster 1783]GO:0021782+P biological\_process [name] glial cell development [def] "The process aimed at the progression of a glial cell over time, from initial commitment of the cell to a specific fate, to the fully functional differentiated cell." [GO\_REF

11177 Pathogen[ P03346] interacts with 1 human partners:{Q06945}

11178 [Cluster 1784]GO:0048332+P biological\_process [name] mesoderm morphogenesis [def] "The process in which the anatomical structures of the mesoderm are generated and organized." [GOC]

11179 Pathogen[ P03346] interacts with 1 human partners:{Q9BYW2}

11180 [Cluster 1785]GO:0060217+P biological\_process [name] hemangioblast cell differentiation [def] "The process in which a relatively unspecialized cell acquires the characteristics of a mature hemangioblast. Hemangioblasts are the proposed common precursor of blood and endothelial lineages." [GOC]

11181 Pathogen[ P03346] interacts with 1 human partners:{P17542}

11182 [Cluster 1786]GO:0007616+P biological\_process [name] long-term memory [def] "The memory process that deals with the storage, retrieval and modification of information a long time (typically weeks, months or years) after receiving that information. This type of memory is typically dependent on gene transcription regulated by second messenger activation." [http]

11183 Pathogen[ Q2Q067] interacts with 1 human partners:{P11831}

11184 Pathogen[ P0C214] interacts with 1 human partners:{P11831}

11185 Pathogen[ P03346] interacts with 1 human partners:{P11831}

11186 Pathogen[ Q85601] interacts with 1 human partners:{P11831}

11187 Pathogen[ P03383] interacts with 1 human partners:{P11831}

11188 Pathogen[ P03410] interacts with 1 human partners:{P11831}

11189 Pathogen[ P14075] interacts with 1 human partners:{P11831}

11190 Pathogen[ P0C206] interacts with 1 human partners:{P11831}

11191 Pathogen[ P03363] interacts with 1 human partners:{P11831}

11192 [Cluster 1787]GO:0031577+P biological\_process [name] spindle checkpoint [def] "A cell cycle checkpoint that delays progression through the metaphase/anaphase transition until the spindle is correctly assembled and oriented, and chromosomes are attached to the spindle." [GOC]

11193 Pathogen[ Q2Q067] interacts with 1 human partners:{O15392}

11194 Pathogen[ P0C214] interacts with 1 human partners:{O15392}

11195 Pathogen[ P03346] interacts with 1 human partners:{O15392}

11196 Pathogen[ Q85601] interacts with 1 human partners:{O15392}

11197 Pathogen[ P14079] interacts with 1 human partners:{O15392}

11198 Pathogen[ P03410] interacts with 1 human partners:{O15392}

11199 Pathogen[ P0C206] interacts with 1 human partners:{O15392}

11200 [Cluster 1788]GO:0032313+P biological\_process [name] regulation of Rab GTPase activity [def] "Any process that modulates the activity of a GTPase of the Rab family." [GOC]

11201 Pathogen[ P03346] interacts with 1 human partners:{O60447}

11202 Pathogen[ Q85601] interacts with 1 human partners:{O60447}

11203 Pathogen[ P03410] interacts with 1 human partners:{O60447}

11204 Pathogen[ P0C206] interacts with 1 human partners:{O60447}

11205 Pathogen[ P03363] interacts with 1 human partners:{O60447}

11206 [Cluster 1789]GO:0042450+P biological\_process [name] arginine biosynthetic process via ornithine [def] "The chemical reactions and pathways resulting in the formation of arginine (2-amino-5-guanidinopentanoic acid) via the intermediate compound ornithine." [GOC]

11207 Pathogen[ P0C214] interacts with 1 human partners:{P04424}

11208 Pathogen[ P14079] interacts with 1 human partners:{P04424}

11209 Pathogen[ P03410] interacts with 1 human partners:{P04424}

11210 [Cluster 1790]GO:0071372+P biological\_process [name] cellular response to follicle-stimulating hormone stimulus [def] "Any process that results in a change in state or activity of a cell (in terms of movement, secretion, enzyme production, gene expression, etc.) as a result of a follicle-stimulating hormone stimulus." [GOC]

11211 Pathogen[ Q2Q067] interacts with 1 human partners:{P15976}

11212 Pathogen[ P03346] interacts with 1 human partners:{P15976}

11213 Pathogen[ Q85601] interacts with 1 human partners:{P15976}

11214 Pathogen[ P14079] interacts with 1 human partners:{P15976}

11215 Pathogen[ P03410] interacts with 1 human partners:{P15976}

11216 Pathogen[ P0C206] interacts with 1 human partners:{P15976}

11217 [Cluster 1791]GO:0032695+P biological\_process [name] negative regulation of interleukin-12 production [def] "Any process that stops, prevents, or reduces the frequency, rate, or extent of interleukin-12 production." [GOC]

11218 Pathogen[ P14079] interacts with 1 human partners:{O15553}

11219 [Cluster 1792]GO:0006579+P biological\_process [name] betaine catabolic process [def] "The chemical reactions and pathways resulting in the breakdown of any betaine, the N-trimethyl derivative of an amino acid." [GOC]

11220 Pathogen[ P0C214] interacts with 1 human partners:{Q9UI17}

11221 Pathogen[ P14079] interacts with 2 human partners:{Q9UI17;Q9H2M3}

11222 Pathogen[ P03410] interacts with 2 human partners:{Q9UI17;Q9H2M3}

11223 Pathogen[ P0C206] interacts with 1 human partners:{Q9H2M3}

11224 [Cluster 1793]GO:0002357+P biological\_process [name] defense response to tumor cell [def] "Reactions triggered in response to the presence of a tumor cell that act to protect the cell or organism." [GOC]

11225 Pathogen[ P03346] interacts with 1 human partners:{Q496M5}

11226 Pathogen[ Q85601] interacts with 1 human partners:{Q496M5}

11227 Pathogen[ P0C206] interacts with 1 human partners:{Q496M5}

11228 [Cluster 1794]GO:0014806+P biological\_process [name] smooth muscle hyperplasia  
[def] "A process, occurring in smooth muscle, in which there is an increase in cell number by cell division, often leading to an increase in the size of an organ." [GOC

11229 Pathogen[ Q2Q067] interacts with 1 human partners:{P29474}

11230 Pathogen[ P0C214] interacts with 1 human partners:{P29474}

11231 Pathogen[ P03346] interacts with 1 human partners:{P29474}

11232 Pathogen[ Q85601] interacts with 1 human partners:{P29474}

11233 Pathogen[ P03383] interacts with 1 human partners:{P29474}

11234 Pathogen[ P03410] interacts with 1 human partners:{P29474}

11235 Pathogen[ P14075] interacts with 1 human partners:{P29474}

11236 Pathogen[ P0C206] interacts with 1 human partners:{P29474}

11237 Pathogen[ P03363] interacts with 1 human partners:{P29474}

11238 [Cluster 1795]GO:0060972+P biological\_process [name] left/right pattern formation  
[def] "The pattern specification process that results in the subdivision of the left/right axis in space to define an area or volume in which specific patterns of cell differentiation will take place or in which cells interpret a specific environment." [GOC

11239 Pathogen[ P03346] interacts with 1 human partners:{O95863}

11240 Pathogen[ P14079] interacts with 1 human partners:{Q9BVM2}

11241 Pathogen[ P03410] interacts with 1 human partners:{Q9BVM2}

11242 Pathogen[ P14075] interacts with 1 human partners:{Q9BVM2}

11243 Pathogen[ P0C206] interacts with 1 human partners:{Q9BVM2}

11244 [Cluster 1796]GO:0048769+P biological\_process [name] sarcomerogenesis [def] "The process in which sarcomeres are added in series within a fiber." [GOC

11245 Pathogen[ P14079] interacts with 1 human partners:{O15273}

11246 Pathogen[ P03410] interacts with 1 human partners:{O15273}

11247 [Cluster 1797]GO:0006550+P biological\_process [name] isoleucine catabolic process  
[def] "The chemical reactions and pathways resulting in the breakdown of isoleucine, (2R\*,3R\*)-2-amino-3-methylpentanoic acid." [GOC

11248 Pathogen[ P0C214] interacts with 1 human partners:{O15382}

11249 Pathogen[ Q85601] interacts with 1 human partners:{O15382}

11250 Pathogen[ P14079] interacts with 1 human partners:{O15382}

11251 Pathogen[ P03410] interacts with 1 human partners:{O15382}

11252 Pathogen[ P0C206] interacts with 1 human partners:{O15382}

11253 [Cluster 1798]GO:0039023+P biological\_process [name] pronephric duct morphogenesis  
[def] "The process in which the anatomical structures of the pronephric duct are generated and organized. The pronephric duct collects the filtrate from the pronephric tubules and opens to the exterior of the kidney." [GOC

11254 Pathogen[ P03346] interacts with 1 human partners:{Q8N157}

11255 Pathogen[ P14079] interacts with 1 human partners:{Q8N157}

11256 Pathogen[ P03410] interacts with 1 human partners:{Q8N157}

11257 Pathogen[ P0C206] interacts with 1 human partners:{Q8N157}

11258 Pathogen[ P03363] interacts with 1 human partners:{Q8N157}

11259 [Cluster 1799]GO:0032412+P biological\_process [name] regulation of ion transmembrane transporter activity [def] "Any process that modulates the activity of an ion transporter." [GOC

11260 Pathogen[ P0C214] interacts with 1 human partners:{O43865}

11261 Pathogen[ P03346] interacts with 1 human partners:{O43865}

11262 Pathogen[ Q85601] interacts with 1 human partners:{O43865}

11263 Pathogen[ P14079] interacts with 1 human partners:{O43865}

11264 Pathogen[ P03410] interacts with 1 human partners:{O43865}

11265 Pathogen[ P0C206] interacts with 1 human partners:{O43865}

11266 Pathogen[ P03363] interacts with 1 human partners:{O43865}

11267 [Cluster 1800]GO:0009263+P biological\_process [name] deoxyribonucleotide biosynthetic process [def] "The chemical reactions and pathways resulting in the formation of a deoxyribonucleotide, a compound consisting of deoxyribonucleoside (a base linked to a deoxyribose sugar) esterified with a phosphate group at either the 3' or 5'-hydroxyl group of the sugar." [GOC

11268 Pathogen[ Q2Q067] interacts with 2 human partners:{P31350;Q7LG56}

11269 Pathogen[ P0C214] interacts with 3 human partners:{P31350;P23921;Q7LG56}

11270 Pathogen[ P03346] interacts with 2 human partners:{P31350;Q7LG56}

11271 Pathogen[ Q85601] interacts with 2 human partners:{P31350;Q7LG56}

11272 Pathogen[ P14079] interacts with 2 human partners:{P31350;Q7LG56}

11273 Pathogen[ P03383] interacts with 1 human partners:{P31350}

11274 Pathogen[ P03410] interacts with 3 human partners:{P31350;P23921;Q7LG56}

11275 Pathogen[ P14075] interacts with 1 human partners:{P31350}

11276 Pathogen[ P0C206] interacts with 2 human partners:{Q7LG56;P31350}

11277 [Cluster 1801]GO:0006621+P biological\_process [name] protein retention in ER lumen [def] "The retention in the endoplasmic reticulum (ER) lumen of soluble resident proteins. Sorting receptors retrieve proteins with ER localization signals, such as KDEL and HDEL sequences or some transmembrane domains, that have escaped to the cis-Golgi network and return them to the ER. Abnormally folded proteins and unassembled subunits are also selectively retained in the ER." [ISBN

11278 Pathogen[ P03346] interacts with 1 human partners:{Q13438}

11279 Pathogen[ P14079] interacts with 5 human partners:{O43292;P33947;P24390;Q13438;O43731}

11280 Pathogen[ P03410] interacts with 4 human partners:{P33947;P24390;O43731;Q13438}

11281 Pathogen[ P0C206] interacts with 4 human partners:{P33947;P24390;O43731;Q13438}

11282 Pathogen[ P03363] interacts with 1 human partners:{Q13438}

11283 [Cluster 1802]GO:0001573+P biological\_process [name] ganglioside metabolic process [def] "The chemical reactions and pathways involving ceramide oligosaccharides carrying in addition to other sugar residues, one or more sialic acid residues." [ISBN

11284 Pathogen[ P14079] interacts with 1 human partners:{Q9NWW5}

11285 Pathogen[ P03410] interacts with 1 human partners:{Q9NWW5}

11286 [Cluster 1803]GO:0061088+P biological\_process [name] regulation of sequestering of zinc ion [def] "Any process that modulates the rate, frequency, or extent of sequestering of zinc ion. Sequestering of zinc ion is the process of binding or confining zinc ions such that they are separated from other components of a biological system." [GOC

11287 Pathogen[ P03346] interacts with 1 human partners:{O14617}

11288 Pathogen[ P14079] interacts with 1 human partners:{O14617}

11289 Pathogen[ P03410] interacts with 1 human partners:{O14617}

11290 Pathogen[ P0C206] interacts with 1 human partners:{O14617}

11291 [Cluster 1804]GO:0035721+P biological\_process [name] intraflagellar retrograde transport [def] "The directed movement of large protein complexes along microtubules from the tip of a cilium or flagellum toward the cell body, mediated by motor proteins." [GOC

11292 Pathogen[ P03346] interacts with 1 human partners:{Q96FT9}

11293 Pathogen[ P14079] interacts with 1 human partners:{Q96FT9}

11294 Pathogen[ P03410] interacts with 1 human partners:{Q96FT9}

11295 Pathogen[ P0C206] interacts with 1 human partners:{Q96FT9}

11296 Pathogen[ P03363] interacts with 1 human partners:{Q96FT9}

11297 [Cluster 1805]GO:0090314+P biological\_process [name] positive regulation of protein targeting to membrane [def] "Any process that increases the frequency, rate or extent of the process of directing proteins towards a membrane, usually using signals contained within the protein." [GOC

11298 Pathogen[ P14079] interacts with 1 human partners:{Q15078}

11299 [Cluster 1806]GO:0032597+P biological\_process [name] B cell receptor transport into membrane raft [def] "The directed movement of a B cell receptor into a membrane raft." [GOC

11300 Pathogen[ Q2Q067] interacts with 1 human partners:{P25063}

11301 Pathogen[ P0C214] interacts with 1 human partners:{P25063}

11302 Pathogen[ P03346] interacts with 1 human partners:{P25063}

11303 Pathogen[ P14079] interacts with 1 human partners:{P25063}

11304 Pathogen[ P03383] interacts with 1 human partners:{P25063}

11305 Pathogen[ P03410] interacts with 1 human partners:{P25063}

11306 Pathogen[ P14075] interacts with 1 human partners:{P25063}

11307 Pathogen[ P0C206] interacts with 1 human partners:{P25063}

11308 [Cluster 1807]GO:0060669+P biological\_process [name] embryonic placenta morphogenesis [def] "The process in which the embryonic placenta is generated and organized." [GOC

11309 Pathogen[ P03346] interacts with 2 human partners:{Q13263;Q9BYW2}

11310 Pathogen[ Q85601] interacts with 1 human partners:{Q13263}

11311 Pathogen[ P0C206] interacts with 1 human partners:{Q13263}

11312 [Cluster 1808]GO:0036003+P biological\_process [name] positive regulation of transcription from RNA polymerase II promoter in response to stress [def] "Any process that increases the frequency, rate or extent of transcription from an RNA polymerase II promoter as a result of a stimulus indicating the organism is under stress. The stress is usually, but not necessarily, exogenous (e.g. temperature, humidity, ionizing radiation)." [GOC

11313 Pathogen[ P14079] interacts with 1 human partners:{P15941}

11314 Pathogen[ P03410] interacts with 1 human partners:{P15941}

11315 [Cluster 1809]GO:0051901+P biological\_process [name] positive regulation of mitochondrial depolarization [def] "Any process that activates, maintains or increases the frequency, rate or extent of the change in the membrane potential of the mitochondria from negative to positive." [GOC

11316 Pathogen[ P0C214] interacts with 2 human partners:{Q13015;P18054}

11317 Pathogen[ P03346] interacts with 2 human partners:{P18054;Q13015}

11318 Pathogen[ Q85601] interacts with 1 human partners:{Q13015}

11319 Pathogen[ P14079] interacts with 2 human partners:{O60502;Q13015}

11320 Pathogen[ P03383] interacts with 1 human partners:{Q13015}

11321 Pathogen[ P03410] interacts with 2 human partners:{Q13015;O60502}

11322 Pathogen[ P14075] interacts with 1 human partners:{Q13015}

11323 Pathogen[ P0C206] interacts with 1 human partners:{Q13015}

11324 Pathogen[ P03363] interacts with 1 human partners:{Q13015}

11325 [Cluster 1810]GO:0048857+P biological\_process [name] neural nucleus development [def] "The biological process whose specific outcome is the progression of a neural nucleus from its initial condition to its mature state. A neural nucleus is an anatomical structure consisting of a discrete aggregate of neuronal soma." [GO\_REF

11326 Pathogen[ Q2Q067] interacts with 1 human partners:{P14652}

11327 Pathogen[ P03346] interacts with 1 human partners:{P14652}

11328 Pathogen[ P0C206] interacts with 1 human partners:{P14652}

11329 Pathogen[ P03363] interacts with 1 human partners:{P14652}

11330 [Cluster 1811]GO:0033124+P biological\_process [name] regulation of GTP catabolic process [def] "Any process that modulates the frequency, rate or extent of the chemical reactions and pathways resulting in the breakdown of GTP, guanosine triphosphate." [GOC

11331 Pathogen[ Q2Q067] interacts with 1 human partners:{043924}

11332 Pathogen[ P03346] interacts with 1 human partners:{043924}

11333 Pathogen[ Q85601] interacts with 1 human partners:{043924}

11334 Pathogen[ P14079] interacts with 1 human partners:{043924}

11335 Pathogen[ P03410] interacts with 1 human partners:{043924}

11336 Pathogen[ P0C206] interacts with 1 human partners:{043924}

11337 Pathogen[ P03363] interacts with 1 human partners:{043924}

11338 [Cluster 1812]GO:0031441+P biological\_process [name] negative regulation of mRNA 3'-end processing [def] "Any process that stops, prevents, or reduces the frequency, rate or extent of mRNA 3'-end processing." [GOC

11339 Pathogen[ Q2Q067] interacts with 1 human partners:{Q99728}

11340 Pathogen[ P0C214] interacts with 1 human partners:{Q99728}

11341 Pathogen[ P03346] interacts with 1 human partners:{Q99728}

11342 Pathogen[ Q85601] interacts with 1 human partners:{Q99728}

11343 Pathogen[ P0C206] interacts with 1 human partners:{Q99728}

11344 Pathogen[ P03363] interacts with 1 human partners:{Q99728}

11345 [Cluster 1813]GO:0002865+P biological\_process [name] negative regulation of acute inflammatory response to antigenic stimulus [def] "Any process that stops, prevents, or reduces the frequency, rate, or extent of an acute inflammatory response to an antigenic stimulus." [GOC

11346 Pathogen[ Q2Q067] interacts with 1 human partners:{Q9BQE4}

11347 Pathogen[ P0C214] interacts with 1 human partners:{Q9BQE4}

11348 Pathogen[ Q85601] interacts with 1 human partners:{Q9BQE4}

11349 Pathogen[ P14079] interacts with 1 human partners:{Q9BQE4}

11350 Pathogen[ P03383] interacts with 1 human partners:{Q9BQE4}

11351 Pathogen[ P03410] interacts with 1 human partners:{Q9BQE4}

11352 Pathogen[ P14075] interacts with 1 human partners:{Q9BQE4}

11353 Pathogen[ P0C206] interacts with 1 human partners:{Q9BQE4}

11354 [Cluster 1814]GO:0006965+P biological\_process [name] positive regulation of biosynthetic process of antibacterial peptides active against Gram-positive bacteria [def] "Any process that activates or increases the frequency, rate, or extent of biosynthesis of antibacterial peptides active against Gram-positive bacteria." [GOC

11355 Pathogen[ P14079] interacts with 1 human partners:{P81534}

11356 Pathogen[ P03410] interacts with 1 human partners:{P81534}

11357 [Cluster 1815]GO:0009266+P biological\_process [name] response to temperature stimulus [def] "Any process that results in a change in state or activity of a cell or an organism (in terms of movement, secretion, enzyme production, gene expression, etc.) as a result of a temperature stimulus." [GOC

11358 Pathogen[ P03346] interacts with 1 human partners:{Q9NS18}

11359 Pathogen[ P14079] interacts with 1 human partners:{Q8WXI4}

11360 Pathogen[ P03410] interacts with 1 human partners:{Q8WXI4}

11361 Pathogen[ P0C206] interacts with 2 human partners:{Q8WXI4;Q9NS18}

11362 [Cluster 1816]GO:0032688+P biological\_process [name] negative regulation of interferon-beta production [def] "Any process that stops, prevents, or reduces the frequency, rate, or extent of interferon-beta production." [GOC

11363 Pathogen[ Q2Q067] interacts with 1 human partners:{Q8WUQ7}

11364 Pathogen[ P03346] interacts with 1 human partners:{Q8WUQ7}

11365 Pathogen[ P14079] interacts with 1 human partners:{Q8WUQ7}

11366 Pathogen[ P03383] interacts with 1 human partners:{Q8WUQ7}

11367 Pathogen[ P03410] interacts with 1 human partners:{Q8WUQ7}

11368 Pathogen[ P14075] interacts with 1 human partners:{Q8WUQ7}

11369 Pathogen[ P0C206] interacts with 1 human partners:{Q8WUQ7}

11370 Pathogen[ P03363] interacts with 1 human partners:{Q8WUQ7}

11371 [Cluster 1817]GO:0042775+P biological\_process [name] mitochondrial ATP synthesis coupled electron transport [def] "The transfer of electrons through a series of electron donors and acceptors, generating energy that is ultimately used for synthesis of ATP, as it occurs in the mitochondrial inner membrane or chloroplast thylakoid membrane." [GOC

11372 Pathogen[ P0C214] interacts with 1 human partners:{Q99807}

11373 Pathogen[ P14079] interacts with 1 human partners:{Q99807}

11374 Pathogen[ P03410] interacts with 2 human partners:{Q99807;Q16635}

11375 Pathogen[ P0C206] interacts with 1 human partners:{Q99807}

11376 [Cluster 1818]GO:2000612+P biological\_process [name] regulation of thyroid-stimulating hormone secretion [def] "Any process that modulates the frequency, rate or extent of thyroid-stimulating hormone secretion." [GOC

11377 Pathogen[ P03346] interacts with 1 human partners:{Q06710}

11378 [Cluster 1819]GO:0038003+P biological\_process [name] opioid receptor signaling pathway [def] "The series of molecular signals generated as a consequence of an opioid receptor binding to one of its physiological ligands." [GOC

11379 Pathogen[ P0C214] interacts with 1 human partners:{Q9NZN2}

11380 Pathogen[ P03346] interacts with 1 human partners:{Q9NZN2}

11381 Pathogen[ P14079] interacts with 1 human partners:{Q9NZN2}

11382 Pathogen[ P03410] interacts with 1 human partners:{Q9NZN2}

11383 Pathogen[ POC206] interacts with 1 human partners:{Q9NZT2}

11384 Pathogen[ P03363] interacts with 1 human partners:{Q9NZT2}

11385 [Cluster 1820]GO:0009165+P biological\_process [name] nucleotide biosynthetic process [def] "The chemical reactions and pathways resulting in the formation of nucleotides, any nucleoside that is esterified with (ortho)phosphate or an oligophosphate at any hydroxyl group on the glucose moiety\_ may be mono-, di- or triphosphate\_ this definition includes cyclic-nucleotides (nucleoside cyclic phosphates)." [GOC

11386 Pathogen[ Q2Q067] interacts with 1 human partners:{P04818}

11387 Pathogen[ POC214] interacts with 4 human partners:{P04818;P23919;Q86XF0;P00374}

11388 Pathogen[ P14079] interacts with 6 human partners:{Q86XF0;P00374;P23919;O60256;Q14558;P04818}

11389 Pathogen[ P03410] interacts with 6 human partners:{P00374;P23919;P04818;Q14558;Q86XF0;O60256}

11390 Pathogen[ POC206] interacts with 1 human partners:{P04818}

11391 [Cluster 1821]GO:0033227+P biological\_process [name] dsRNA transport [def] "The directed movement of dsRNA, double-stranded ribonucleic acid, into, out of or within a cell, or between cells, by means of some agent such as a transporter or pore." [GOC

11392 Pathogen[ P14079] interacts with 1 human partners:{Q9NXL6}

11393 [Cluster 1822]GO:0003146+P biological\_process [name] heart jogging [def] "The morphogenetic process in which the heart cone is displaced to the left with respect to the vector of the anterior-posterior axis." [GOC

11394 Pathogen[ P03346] interacts with 1 human partners:{O75593}

11395 [Cluster 1823]GO:0046487+P biological\_process [name] glyoxylate metabolic process [def] "The chemical reactions and pathways involving glyoxylate, the anion of glyoxylic acid, HOC-COOH." [ISBN

11396 Pathogen[ POC214] interacts with 1 human partners:{Q86XE5}

11397 Pathogen[ P14079] interacts with 1 human partners:{Q86XE5}

11398 Pathogen[ P03410] interacts with 1 human partners:{Q86XE5}

11399 Pathogen[ P14075] interacts with 1 human partners:{Q86XE5}

11400 Pathogen[ POC206] interacts with 1 human partners:{Q86XE5}

11401 [Cluster 1824]GO:0003420+P biological\_process [name] regulation of growth plate cartilage chondrocyte proliferation [def] "Any process that modulates the rate, frequency, or extent of the multiplication or reproduction of chondrocytes in a growing endochondral bone, resulting in the expansion of a cell population." [GOC

11402 Pathogen[ Q2Q067] interacts with 1 human partners:{Q86X55}

11403 Pathogen[ POC214] interacts with 1 human partners:{Q86X55}

11404 Pathogen[ P03346] interacts with 1 human partners:{Q86X55}

11405 Pathogen[ Q85601] interacts with 1 human partners:{Q86X55}

11406 Pathogen[ P03383] interacts with 1 human partners:{Q86X55}

11407 Pathogen[ P03410] interacts with 1 human partners:{Q86X55}

11408 Pathogen[ P14075] interacts with 1 human partners:{Q86X55}

11409 Pathogen[ POC206] interacts with 1 human partners:{Q86X55}

11410 Pathogen[ P03363] interacts with 1 human partners:{Q86X55}

11411 [Cluster 1825]GO:0030947+P biological\_process [name] regulation of vascular endothelial growth factor receptor signaling pathway [def] "Any process that modulates the frequency, rate or extent of vascular endothelial growth factor receptor signaling pathway activity." [GOC

11412 Pathogen[ P03410] interacts with 1 human partners:{Q9BSN7}

11413 [Cluster 1826]GO:0007019+P biological\_process [name] microtubule depolymerization [def] "The removal of tubulin heterodimers from one or both ends of a microtubule." [ISBN

11414 Pathogen[ P14079] interacts with 1 human partners:{Q99661}

11415 [Cluster 1827]GO:0060674+P biological\_process [name] placenta blood vessel development [def] "The process whose specific outcome is the progression of a blood vessel of the placenta over time, from its formation to the mature structure." [GOC

11416 Pathogen[ Q2Q067] interacts with 1 human partners:{Q96T37}

11417 Pathogen[ POC214] interacts with 1 human partners:{Q96T37}

11418 Pathogen[ P03346] interacts with 1 human partners:{Q96T37}

11419 Pathogen[ Q85601] interacts with 1 human partners:{Q96T37}

11420 Pathogen[ P14079] interacts with 1 human partners:{Q96T37}

11421 Pathogen[ P03410] interacts with 1 human partners:{Q96T37}

11422 Pathogen[ POC206] interacts with 1 human partners:{Q96T37}

11423 Pathogen[ P03363] interacts with 1 human partners:{Q96T37}

11424 [Cluster 1828]GO:0006427+P biological\_process [name] histidyl-tRNA aminoacylation [def] "The process of coupling histidine to histidyl-tRNA, catalyzed by histidyl-tRNA synthetase. In tRNA aminoacylation, the amino acid is first activated by linkage to AMP and then transferred to either the 2'- or the 3'-hydroxyl group of the 3'-adenosine residue of the tRNA." [GOC

11425 Pathogen[ POC214] interacts with 2 human partners:{P12081;P49590}

11426 [Cluster 1829]GO:0033373+P biological\_process [name] maintenance of protease location in mast cell secretory granule [def] "A process in which a protease is maintained in a secretory granule in a mast cell and prevented from moving elsewhere." [GOC

11427 Pathogen[ POC214] interacts with 1 human partners:{P10124}

11428 Pathogen[ P14079] interacts with 1 human partners:{P10124}

11429 Pathogen[ P03383] interacts with 1 human partners:{P10124}

11430 Pathogen[ P03410] interacts with 1 human partners:{P10124}

11431 Pathogen[ P14075] interacts with 1 human partners:{P10124}

11432 Pathogen[ POC206] interacts with 1 human partners:{P10124}

11433 [Cluster 1830]GO:0071236+P biological\_process [name] cellular response to antibiotic [def] "Any process that results in a change in state or activity of a cell (in terms of movement, secretion, enzyme production, gene expression, etc.) as a result of an antibiotic stimulus. An antibiotic is a chemical substance produced by a microorganism which has the capacity to inhibit the growth of or to kill other microorganisms." [GOC

11434 Pathogen[ Q2Q067] interacts with 2 human partners:{P46527;P08397}

11435 Pathogen[ POC214] interacts with 2 human partners:{P46527;P08397}

11436 Pathogen[ P03346] interacts with 1 human partners:{P46527}

11437 Pathogen[ Q85601] interacts with 2 human partners:{P08397;P46527}

11438 Pathogen[ P14079] interacts with 2 human partners:{P08397;P46527}

11439 Pathogen[ P03383] interacts with 2 human partners:{P46527;P08397}

11440 Pathogen[ P03410] interacts with 2 human partners:{P46527;P08397}

11441 Pathogen[ P14075] interacts with 2 human partners:{P08397;P46527}

11442 Pathogen[ POC206] interacts with 2 human partners:{P46527;P08397}

11443 [Cluster 1831]GO:0060603+P biological\_process [name] mammary gland duct morphogenesis [def] "The process in which anatomical structures of the mammary ducts are generated and organized. Mammary ducts are epithelial tubes that transport milk." [GOC

11444 Pathogen[ Q2Q067] interacts with 1 human partners:{Q14160}

11445 Pathogen[ POC214] interacts with 1 human partners:{Q14160}

11446 Pathogen[ P03346] interacts with 1 human partners:{Q14160}

11447 Pathogen[ Q85601] interacts with 1 human partners:{Q14160}

11448 Pathogen[ P03383] interacts with 1 human partners:{Q14160}

11449 Pathogen[ P03410] interacts with 1 human partners:{Q14160}

11450 Pathogen[ P14075] interacts with 1 human partners:{Q14160}

11451 Pathogen[ POC206] interacts with 1 human partners:{Q14160}

11452 Pathogen[ P03363] interacts with 1 human partners:{Q14160}

11453 [Cluster 1832]GO:0051148+P biological\_process [name] negative regulation of muscle cell differentiation [def] "Any process that stops, prevents, or reduces the frequency, rate or extent of muscle cell differentiation." [CL

11454 Pathogen[ POC214] interacts with 1 human partners:{P26599}

11455 Pathogen[ P03346] interacts with 1 human partners:{P26599}

11456 Pathogen[ P14079] interacts with 1 human partners:{P26599}

11457 Pathogen[ P03410] interacts with 1 human partners:{P26599}

11458 Pathogen[ P03363] interacts with 1 human partners:{P26599}

11459 [Cluster 1833]GO:0036089+P

11460 Pathogen[ Q2Q067] interacts with 1 human partners:{P61586}

11461 Pathogen[ POC214] interacts with 1 human partners:{P61586}

11462 Pathogen[ P03346] interacts with 1 human partners:{P61586}

11463 Pathogen[ Q85601] interacts with 1 human partners:{P61586}

11464 Pathogen[ P14079] interacts with 1 human partners:{P61586}

11465 Pathogen[ P03383] interacts with 1 human partners:{P61586}

11466 Pathogen[ P03410] interacts with 1 human partners:{P61586}

11467 Pathogen[ P14075] interacts with 1 human partners:{P61586}

11468 Pathogen[ POC206] interacts with 1 human partners:{P61586}

11469 [Cluster 1834]GO:0009396+P biological\_process [name] folic acid-containing compound biosynthetic process [def] "The chemical reactions and pathways resulting in the formation of folic acid and its derivatives." [GOC

11470 Pathogen[ POC214] interacts with 2 human partners:{Q05932;P11586}

11471 Pathogen[ P14079] interacts with 1 human partners:{Q05932}

11472 Pathogen[ P03410] interacts with 1 human partners:{Q05932}

11473 Pathogen[ POC206] interacts with 1 human partners:{Q05932}

11474 [Cluster 1835]GO:0051006+P biological\_process [name] positive regulation of lipoprotein lipase activity [def] "Any process that activates or increases the activity of the enzyme lipoprotein lipase." [GOC

11475 Pathogen[ Q2Q067] interacts with 1 human partners:{P55055}

11476 Pathogen[ P03346] interacts with 1 human partners:{P55055}

11477 Pathogen[ Q85601] interacts with 1 human partners:{P55055}

11478 Pathogen[ P14079] interacts with 2 human partners:{P55055;Q96S06}

11479 Pathogen[ P03410] interacts with 1 human partners:{Q96S06}

11480 Pathogen[ POC206] interacts with 2 human partners:{P55055;Q96S06}

11481 [Cluster 1836]GO:0006760+P biological\_process [name] folic acid-containing compound metabolic process [def] "The chemical reactions and pathways involving a folic acid-containing compound, i.e. any of a group of heterocyclic compounds based on the pteric acid skeleton conjugated with one or more L-glutamic acid or L-glutamate units." [CHEBI

11482 Pathogen[ P14079] interacts with 1 human partners:{O95954}

11483 Pathogen[ P03410] interacts with 1 human partners:{O95954}

11484 Pathogen[ POC206] interacts with 1 human partners:{O95954}

11485 [Cluster 1837]GO:0000904+P biological\_process [name] cell morphogenesis involved in differentiation [def] "The change in form (cell shape and size) that occurs when relatively unspecialized cells, e.g. embryonic or regenerative cells, acquire specialized structural and/or functional features that characterize the cells, tissues, or organs of the mature organism or some other relatively stable phase of the organism's life history." [GOC



11486 Pathogen[ Q2Q067] interacts with 1 human partners:{P35579}

11487 Pathogen[ P03346] interacts with 1 human partners:{P35579}

11488 Pathogen[ Q85601] interacts with 1 human partners:{P35579}

11489 Pathogen[ P14079] interacts with 1 human partners:{P35579}

11490 Pathogen[ P03383] interacts with 1 human partners:{P35579}

11491 Pathogen[ P03410] interacts with 1 human partners:{P35579}

11492 Pathogen[ P14075] interacts with 1 human partners:{P35579}

11493 Pathogen[ P0C206] interacts with 1 human partners:{P35579}

11494 Pathogen[ P03363] interacts with 1 human partners:{P35579}

11495 [Cluster 1838]GO:0050901+P biological\_process [name] leukocyte tethering or rolling [def] "Transient adhesive interactions between leukocytes and endothelial cells lining blood vessels mediated primarily by selectins and which are typically the first step in cellular extravasation." [ISBN

11496 Pathogen[ P14079] interacts with 1 human partners:{Q14242}

11497 Pathogen[ P03410] interacts with 1 human partners:{Q14242}

11498 [Cluster 1839]GO:0060638+P biological\_process [name] mesenchymal-epithelial cell signaling [def] "Any process that mediates the transfer of information from a mesenchymal cell to an epithelial cell where it is received and interpreted." [GOC

11499 Pathogen[ Q2Q067] interacts with 1 human partners:{P20719}

11500 Pathogen[ P03346] interacts with 1 human partners:{P20719}

11501 Pathogen[ P0C206] interacts with 1 human partners:{P20719}

11502 Pathogen[ P03363] interacts with 1 human partners:{P20719}

11503 [Cluster 1840]GO:2001016+P biological\_process [name] positive regulation of skeletal muscle cell differentiation [def] "Any process that activates or increases the frequency, rate or extent of skeletal muscle cell differentiation." [GOC

11504 Pathogen[ P14079] interacts with 1 human partners:{Q06413}

11505 [Cluster 1841]GO:2000599+P biological\_process [name] negative regulation of cyclin catabolic process [def] "Any process that stops, prevents or reduces the frequency, rate or extent of cyclin catabolic process." [GOC

11506 Pathogen[ P03346] interacts with 2 human partners:{Q6UW56;Q92832}

11507 Pathogen[ P14079] interacts with 1 human partners:{Q92832}

11508 Pathogen[ P03410] interacts with 1 human partners:{Q92832}

11509 Pathogen[ P0C206] interacts with 2 human partners:{Q6UW56;Q92832}

11510 Pathogen[ P03363] interacts with 2 human partners:{Q6UW56;Q92832}

11511 [Cluster 1842]GO:0044065+P biological\_process [name] regulation of respiratory system process [def] "Any process that modulates the frequency, rate or extent of a respiratory system process, an organ system process carried out by any of the organs or tissues of the respiratory system." [GOC

11512 Pathogen[ P14079] interacts with 1 human partners:{Q9C0B1}

11513 Pathogen[ P03410] interacts with 1 human partners:{Q9C0B1}

11514 [Cluster 1843]GO:0019101+P biological\_process [name] female somatic sex determination [def] "The determination of sex and sexual phenotypes in a female organism's soma." [GOC

11515 Pathogen[ P03346] interacts with 1 human partners:{P58012}

11516 [Cluster 1844]GO:0023021+P biological\_process [name] termination of signal transduction [def] "The signaling process in which signal transduction is brought to an end rather than being reversibly modulated." [GOC

11517 Pathogen[ P14079] interacts with 1 human partners:{P17405}

11518 Pathogen[ P03410] interacts with 1 human partners:{P17405}

11519 [Cluster 1845]GO:0071636+P biological\_process [name] positive regulation of transforming growth factor beta production [def] "Any process that activates or increases the frequency, rate, or extent of production of transforming growth factor-beta." [GOC

11520 Pathogen[ Q2Q067] interacts with 1 human partners:{P08697}

11521 Pathogen[ P0C214] interacts with 1 human partners:{P08697}

11522 Pathogen[ Q85601] interacts with 1 human partners:{P08697}

11523 Pathogen[ P03383] interacts with 1 human partners:{P08697}

11524 Pathogen[ P03410] interacts with 1 human partners:{P08697}

11525 Pathogen[ P14075] interacts with 1 human partners:{P08697}

11526 Pathogen[ P0C206] interacts with 1 human partners:{P08697}

11527 [Cluster 1846]GO:0072278+P biological\_process [name] metanephric comma-shaped body morphogenesis [def] "The process in which the metanephric comma-shaped body is generated and organized. The metanephric comma-shaped body is the precursor structure to the metanephric S-shaped body that contributes to the morphogenesis of a nephron in the metanephros." [GOC

11528 Pathogen[ P03346] interacts with 1 human partners:{Q06710}

11529 [Cluster 1847]GO:0002115+P biological\_process [name] store-operated calcium entry [def] "A calcium ion entry mechanism in the plasma membrane activated by the depletion of calcium ion from the internal calcium ion store in the endoplasmic reticulum." [GOC

11530 Pathogen[ Q2Q067] interacts with 1 human partners:{Q9BSW2}

11531 Pathogen[ P0C214] interacts with 1 human partners:{Q9BSW2}

11532 Pathogen[ P03346] interacts with 1 human partners:{Q9BSW2}

11533 Pathogen[ Q85601] interacts with 1 human partners:{Q9BSW2}

11534 Pathogen[ P14079] interacts with 1 human partners:{Q9BSW2}

11535 Pathogen[ P03383] interacts with 1 human partners:{Q9BSW2}

11536 Pathogen[ P14075] interacts with 1 human partners:{Q9BSW2}

11537 Pathogen[ P0C206] interacts with 1 human partners:{Q9BSW2}

11538 Pathogen[ P03363] interacts with 1 human partners:{Q9BSW2}

11539 [Cluster 1848]GO:0033690+P biological\_process [name] positive regulation of osteoblast proliferation [def] "Any process that activates or increases the rate or extent of osteoblast proliferation." [GOC

11540 Pathogen[ Q2Q067] interacts with 1 human partners:{P15976}

11541 Pathogen[ P03346] interacts with 1 human partners:{P15976}

11542 Pathogen[ Q85601] interacts with 1 human partners:{P15976}

11543 Pathogen[ P14079] interacts with 1 human partners:{P15976}

11544 Pathogen[ P03410] interacts with 1 human partners:{P15976}

11545 Pathogen[ POC206] interacts with 1 human partners:{P15976}

11546 [Cluster 1849]GO:0031619+P biological\_process [name] homologous chromosome orientation involved in meiotic metaphase I plate congression [def] "The cell cycle process in which the sister centromeres of one chromosome attach to microtubules that emanate from the same spindle pole, which ensures that homologous maternal and paternal chromosomes are pulled in opposite directions at anaphase of meiosis I." [PMID

11547 Pathogen[ P03346] interacts with 1 human partners:{P51587}

11548 Pathogen[ Q85601] interacts with 1 human partners:{P51587}

11549 Pathogen[ P14079] interacts with 1 human partners:{P51587}

11550 Pathogen[ P03410] interacts with 1 human partners:{P51587}

11551 Pathogen[ POC206] interacts with 1 human partners:{P51587}

11552 [Cluster 1850]GO:0071691+P biological\_process [name] cardiac muscle thin filament assembly [def] "The aggregation, arrangement and bonding together of proteins to form the actin-based thin filaments of myofibrils in cardiac muscle." [GOC

11553 Pathogen[ P03346] interacts with 1 human partners:{O76041}

11554 Pathogen[ P14079] interacts with 1 human partners:{O76041}

11555 Pathogen[ P03410] interacts with 1 human partners:{O76041}

11556 Pathogen[ POC206] interacts with 1 human partners:{O76041}

11557 Pathogen[ P03363] interacts with 1 human partners:{O76041}

11558 [Cluster 1851]GO:0042594+P biological\_process [name] response to starvation [def] "Any process that results in a change in state or activity of a cell or an organism (in terms of movement, secretion, enzyme production, gene expression, etc.) as a result of a starvation stimulus, deprivation of nourishment." [GOC

11559 Pathogen[ Q2Q067] interacts with 1 human partners:{P05062}

11560 Pathogen[ POC214] interacts with 2 human partners:{P05062;P16118}

11561 Pathogen[ P03346] interacts with 1 human partners:{P05062}

11562 Pathogen[ Q85601] interacts with 2 human partners:{P05062;P16118}

11563 Pathogen[ P03410] interacts with 2 human partners:{P16118;P05062}

11564 Pathogen[ P14075] interacts with 1 human partners:{P16118}

11565 Pathogen[ POC206] interacts with 2 human partners:{P05062;P16118}

11566 [Cluster 1852]GO:0000964+P biological\_process [name] mitochondrial RNA 5'-end processing [def] "Any process involved in forming the mature 5' end of an RNA molecule transcribed from a mitochondrial genome\_ occurs in the mitochondrion." [GOC

11567 Pathogen[ Q2Q067] interacts with 1 human partners:{Q8TCS8}

11568 Pathogen[ POC214] interacts with 1 human partners:{Q8TCS8}

11569 Pathogen[ P03346] interacts with 1 human partners:{Q8TCS8}

11570 Pathogen[ Q85601] interacts with 1 human partners:{Q8TCS8}

11571 Pathogen[ P14079] interacts with 1 human partners:{Q8TCS8}

11572 Pathogen[ P03383] interacts with 1 human partners:{Q8TCS8}

11573 Pathogen[ P03410] interacts with 1 human partners:{Q8TCS8}

11574 Pathogen[ P14075] interacts with 1 human partners:{Q8TCS8}

11575 Pathogen[ POC206] interacts with 1 human partners:{Q8TCS8}

11576 [Cluster 1853]GO:0046426+P biological\_process [name] negative regulation of JAK-STAT cascade [def] "Any process that stops, prevents, or reduces the frequency, rate or extent of the JAK-STAT signaling pathway activity." [GOC

11577 Pathogen[ Q2Q067] interacts with 2 human partners:{Q13562;O14964}

11578 Pathogen[ POC214] interacts with 2 human partners:{O14964;O15524}

11579 Pathogen[ P03346] interacts with 3 human partners:{O15524;O14964;Q13562}

11580 Pathogen[ Q85601] interacts with 2 human partners:{Q13562;O14964}

11581 Pathogen[ P03383] interacts with 1 human partners:{O14964}

11582 Pathogen[ P14075] interacts with 1 human partners:{O14964}

11583 Pathogen[ POC206] interacts with 3 human partners:{O14964;O15524;Q13562}

11584 Pathogen[ P03363] interacts with 2 human partners:{O15524;O14964}

11585 [Cluster 1854]GO:0002862+P biological\_process [name] negative regulation of inflammatory response to antigenic stimulus [def] "Any process that stops, prevents, or reduces the frequency, rate, or extent of an inflammatory response to an antigenic stimulus." [GOC

11586 Pathogen[ Q2Q067] interacts with 2 human partners:{P25786;P28070}

11587 Pathogen[ POC214] interacts with 2 human partners:{P25786;P28070}

11588 Pathogen[ P03346] interacts with 2 human partners:{P28070;P25786}

11589 Pathogen[ Q85601] interacts with 2 human partners:{P25786;P28070}

11590 Pathogen[ P03383] interacts with 2 human partners:{P25786;P28070}

11591 Pathogen[ P03410] interacts with 2 human partners:{P28070;P25786}

11592 Pathogen[ P14075] interacts with 2 human partners:{P28070;P25786}

11593 Pathogen[ POC206] interacts with 2 human partners:{P25786;P28070}

11594 [Cluster 1855]GO:0021889+P biological\_process [name] olfactory bulb interneuron differentiation [def] "The process in which a neuroblast acquires specialized features

of an interneuron residing in the olfactory bulb." [GO\_REF

11595 Pathogen[ Q2Q067] interacts with 1 human partners:{Q9NSC2}

11596 Pathogen[ P0C214] interacts with 1 human partners:{Q9NSC2}

11597 Pathogen[ P03346] interacts with 1 human partners:{Q9NSC2}

11598 Pathogen[ Q85601] interacts with 1 human partners:{Q9NSC2}

11599 Pathogen[ P14079] interacts with 1 human partners:{Q9NSC2}

11600 Pathogen[ P03383] interacts with 1 human partners:{Q9NSC2}

11601 Pathogen[ P03410] interacts with 1 human partners:{Q9NSC2}

11602 Pathogen[ P14075] interacts with 1 human partners:{Q9NSC2}

11603 Pathogen[ P0C206] interacts with 1 human partners:{Q9NSC2}

11604 [Cluster 1856]GO:2000054+P biological\_process [name] negative regulation of Wnt receptor signaling pathway involved in dorsal/ventral axis specification [def] "Any process that stops, prevents, or reduces the frequency, rate or extent of Wnt receptor signaling pathway involved in dorsal/ventral axis specification." [GOC

11605 Pathogen[ P03410] interacts with 1 human partners:{Q9BQB4}

11606 [Cluster 1857]GO:0042092+P biological\_process [name] type 2 immune response [def] "An immune response which is associated with resistance to extracellular organisms such as helminths and pathological conditions such as allergy, which is orchestrated by the production of particular cytokines, most notably IL-4, IL-5, IL-10, and IL-13, by any of a variety of cell types including T-helper 2 cells, eosinophils, basophils, mast cells, and neutrophils, resulting in enhanced production of certain antibody isotypes and other effects." [GOC

11607 Pathogen[ Q2Q067] interacts with 1 human partners:{P41182}

11608 Pathogen[ P0C214] interacts with 1 human partners:{P41182}

11609 Pathogen[ P03346] interacts with 1 human partners:{P41182}

11610 Pathogen[ Q85601] interacts with 1 human partners:{P41182}

11611 Pathogen[ P14079] interacts with 1 human partners:{P41182}

11612 Pathogen[ P03410] interacts with 1 human partners:{P41182}

11613 Pathogen[ P0C206] interacts with 1 human partners:{P41182}

11614 [Cluster 1858]GO:2000553+P biological\_process [name] positive regulation of T-helper 2 cell cytokine production [def] "Any process that activates or increases the frequency, rate or extent of T-helper 2 cell cytokine production." [GOC

11615 Pathogen[ P0C214] interacts with 1 human partners:{Q8WXG1}

11616 Pathogen[ P14079] interacts with 1 human partners:{Q8WXG1}

11617 Pathogen[ P03410] interacts with 1 human partners:{Q8WXG1}

11618 Pathogen[ P0C206] interacts with 1 human partners:{Q8WXG1}

11619 [Cluster 1859]GO:2000118+P biological\_process [name] regulation of sodium-dependent phosphate transport [def] "Any process that modulates the frequency, rate or extent of sodium-dependent phosphate transport." [GOC

11620 Pathogen[ P0C214] interacts with 1 human partners:{Q49AN0}

11621 Pathogen[ P03346] interacts with 1 human partners:{Q49AN0}

11622 Pathogen[ Q85601] interacts with 1 human partners:{Q49AN0}

11623 Pathogen[ P14079] interacts with 1 human partners:{Q49AN0}

11624 Pathogen[ P03410] interacts with 1 human partners:{Q49AN0}

11625 Pathogen[ P0C206] interacts with 1 human partners:{Q49AN0}

11626 Pathogen[ P03363] interacts with 1 human partners:{Q49AN0}

11627 [Cluster 1860]GO:0048341+P biological\_process [name] paraxial mesoderm formation [def] "The process that gives rise to the paraxial mesoderm. This process pertains to the initial formation of the structure from unspecified parts." [GOC

11628 Pathogen[ Q2Q067] interacts with 1 human partners:{P20823}

11629 Pathogen[ P03346] interacts with 1 human partners:{P20823}

11630 Pathogen[ Q85601] interacts with 1 human partners:{P20823}

11631 Pathogen[ P0C206] interacts with 1 human partners:{P20823}

11632 [Cluster 1861]GO:0006116+P biological\_process [name] NADH oxidation [def] "A metabolic process that results in the oxidation of reduced nicotinamide adenine dinucleotide, NADH, to the oxidized form, NAD." [GOC

11633 Pathogen[ Q2Q067] interacts with 1 human partners:{P05062}

11634 Pathogen[ P0C214] interacts with 2 human partners:{P05062;P21695}

11635 Pathogen[ P03346] interacts with 1 human partners:{P05062}

11636 Pathogen[ Q85601] interacts with 1 human partners:{P05062}

11637 Pathogen[ P14079] interacts with 1 human partners:{P21695}

11638 Pathogen[ P03410] interacts with 2 human partners:{P05062;P21695}

11639 Pathogen[ P0C206] interacts with 1 human partners:{P05062}

11640 [Cluster 1862]GO:0060666+P biological\_process [name] dichotomous subdivision of terminal units involved in salivary gland branching [def] "The process in which a salivary epithelial cord bifurcates at its end." [GOC

11641 Pathogen[ Q2Q067] interacts with 1 human partners:{O14786}

11642 Pathogen[ P0C214] interacts with 1 human partners:{O14786}

11643 Pathogen[ P03346] interacts with 1 human partners:{O14786}

11644 Pathogen[ Q85601] interacts with 1 human partners:{O14786}

11645 Pathogen[ P03410] interacts with 1 human partners:{O14786}

11646 Pathogen[ P0C206] interacts with 1 human partners:{O14786}

11647 Pathogen[ P03363] interacts with 1 human partners:{O14786}

11648 [Cluster 1863]GO:0006591+P biological\_process [name] ornithine metabolic process [def] "The chemical reactions and pathways involving ornithine, an amino acid only rarely found in proteins, but which is important in living organisms as an intermediate

in the reactions of the urea cycle and in arginine biosynthesis." [GOC  
11649 Pathogen[ P0C214] interacts with 1 human partners:{P00480}  
11650 Pathogen[ Q85601] interacts with 1 human partners:{P00480}  
11651 Pathogen[ P14079] interacts with 1 human partners:{P00480}  
11652 Pathogen[ P03410] interacts with 1 human partners:{P00480}  
11653 Pathogen[ P0C206] interacts with 1 human partners:{P00480}  
11654 [Cluster 1864]GO:0007520+P biological\_process [name] myoblast fusion [def] "A process  
in which non-proliferating myoblasts fuse to existing fibers or to myotubes to form new  
fibers. A myoblast is a mononucleate cell type that, by fusion with other myoblasts,  
gives rise to the myotubes that eventually develop into skeletal muscle fibers." [CL  
11655 Pathogen[ Q2Q067] interacts with 1 human partners:{P35579}  
11656 Pathogen[ P03346] interacts with 1 human partners:{P35579}  
11657 Pathogen[ Q85601] interacts with 1 human partners:{P35579}  
11658 Pathogen[ P14079] interacts with 1 human partners:{P35579}  
11659 Pathogen[ P03383] interacts with 1 human partners:{P35579}  
11660 Pathogen[ P03410] interacts with 1 human partners:{P35579}  
11661 Pathogen[ P14075] interacts with 1 human partners:{P35579}  
11662 Pathogen[ P0C206] interacts with 1 human partners:{P35579}  
11663 Pathogen[ P03363] interacts with 1 human partners:{P35579}  
11664 [Cluster 1865]GO:0050667+P biological\_process [name] homocysteine metabolic process  
[def] "The chemical reactions and pathways involving homocysteine, the amino acid  
alpha-amino-gamma-mercaptobutanoic acid. Homocysteine is an important intermediate in  
the metabolic reactions of its S-methyl derivative, methionine." [ISBN  
11665 Pathogen[ Q2Q067] interacts with 2 human partners:{P22033;P32929}  
11666 Pathogen[ P0C214] interacts with 4 human partners:{P42898;P32929;P22033;P35520}  
11667 Pathogen[ P03346] interacts with 1 human partners:{P32929}  
11668 Pathogen[ Q85601] interacts with 2 human partners:{P22033;P32929}  
11669 Pathogen[ P14079] interacts with 3 human partners:{P22033;P32929;P42898}  
11670 Pathogen[ P03383] interacts with 1 human partners:{P22033}  
11671 Pathogen[ P03410] interacts with 3 human partners:{P32929;P42898;P22033}  
11672 Pathogen[ P14075] interacts with 1 human partners:{P22033}  
11673 Pathogen[ P0C206] interacts with 2 human partners:{P32929;P22033}  
11674 [Cluster 1866]GO:0008343+P biological\_process [name] adult feeding behavior [def]  
"Feeding behavior in a fully developed and mature organism." [GOC  
11675 Pathogen[ P03346] interacts with 1 human partners:{Q8NFW5}  
11676 Pathogen[ P03363] interacts with 1 human partners:{Q8NFW5}  
11677 [Cluster 1867]GO:0060620+P biological\_process [name] regulation of cholesterol import  
[def] "Any process that modulates the rate, frequency or extent of cholesterol import.  
Cholesterol import is the directed movement of cholesterol into a cell or organelle."  
[GOC  
11678 Pathogen[ P14079] interacts with 1 human partners:{Q6IAA8}  
11679 Pathogen[ P03410] interacts with 1 human partners:{Q6IAA8}  
11680 [Cluster 1868]GO:0050684+P biological\_process [name] regulation of mRNA processing  
[def] "Any process that modulates the frequency, rate or extent of mRNA processing,  
those processes involved in the conversion of a primary mRNA transcript into a mature  
mRNA prior to its translation into polypeptide." [GOC  
11681 Pathogen[ P0C214] interacts with 2 human partners:{Q8WV60;P21127}  
11682 Pathogen[ P03346] interacts with 1 human partners:{P21127}  
11683 Pathogen[ Q85601] interacts with 2 human partners:{Q8WV60;P21127}  
11684 Pathogen[ P14079] interacts with 2 human partners:{Q8WV60;P21127}  
11685 Pathogen[ P03383] interacts with 1 human partners:{P21127}  
11686 Pathogen[ P03410] interacts with 1 human partners:{Q8WV60}  
11687 Pathogen[ P14075] interacts with 2 human partners:{P21127;Q9UQ88}  
11688 Pathogen[ P0C206] interacts with 2 human partners:{Q8WV60;P21127}  
11689 Pathogen[ P03363] interacts with 1 human partners:{P21127}  
11690 [Cluster 1869]GO:0031641+P biological\_process [name] regulation of myelination  
[def] "Any process that modulates the frequency, rate or extent of the formation of a  
myelin sheath around nerve axons." [GOC  
11691 Pathogen[ P03346] interacts with 1 human partners:{O60688}  
11692 Pathogen[ P14079] interacts with 1 human partners:{O60688}  
11693 Pathogen[ P03410] interacts with 1 human partners:{O60688}  
11694 Pathogen[ P0C206] interacts with 1 human partners:{O60688}  
11695 Pathogen[ P03363] interacts with 1 human partners:{O60688}  
11696 [Cluster 1870]GO:0036352+P  
11697 Pathogen[ P0C214] interacts with 1 human partners:{Q8IYW5}  
11698 Pathogen[ P03346] interacts with 1 human partners:{Q8IYW5}  
11699 Pathogen[ Q85601] interacts with 1 human partners:{Q8IYW5}  
11700 Pathogen[ P0C206] interacts with 1 human partners:{Q8IYW5}  
11701 Pathogen[ P03363] interacts with 1 human partners:{Q8IYW5}  
11702 [Cluster 1871]GO:0002762+P biological\_process [name] negative regulation of myeloid  
leukocyte differentiation [def] "Any process that stops, prevents, or reduces the  
frequency, rate, or extent of myeloid leukocyte differentiation." [GOC  
11703 Pathogen[ Q2Q067] interacts with 1 human partners:{P22392}  
11704 Pathogen[ P0C214] interacts with 1 human partners:{P22392}  
11705 Pathogen[ P03346] interacts with 1 human partners:{P22392}  
11706 Pathogen[ Q85601] interacts with 1 human partners:{P22392}

11707 Pathogen[ P14079] interacts with 1 human partners:{P22392}

11708 Pathogen[ P03383] interacts with 1 human partners:{P22392}

11709 Pathogen[ P14075] interacts with 1 human partners:{P22392}

11710 Pathogen[ P0C206] interacts with 1 human partners:{P22392}

11711 [Cluster 1872]GO:0009143+P biological\_process [name] nucleoside triphosphate catabolic process [def] "The chemical reactions and pathways resulting in the breakdown of a nucleoside triphosphate, a compound consisting of a nucleobase linked to a deoxyribose or ribose sugar esterified with triphosphate on the sugar." [GOC

11712 Pathogen[ P14079] interacts with 2 human partners:{Q9H773;P20930}

11713 Pathogen[ P03410] interacts with 2 human partners:{Q9H773;P20930}

11714 [Cluster 1873]GO:0006399+P biological\_process [name] tRNA metabolic process [def] "The chemical reactions and pathways involving tRNA, transfer RNA, a class of relatively small RNA molecules responsible for mediating the insertion of amino acids into the sequence of nascent polypeptide chains during protein synthesis. Transfer RNA is characterized by the presence of many unusual minor bases, the function of which has not been completely established." [ISBN

11715 Pathogen[ P14079] interacts with 1 human partners:{075648}

11716 Pathogen[ P03410] interacts with 1 human partners:{075648}

11717 Pathogen[ P14075] interacts with 1 human partners:{075648}

11718 [Cluster 1874]GO:0007402+P biological\_process [name] ganglion mother cell fate determination [def] "The cell fate determination process in which a cell becomes capable of differentiating autonomously into a ganglion mother cell regardless of its environment\_ upon determination, the cell fate cannot be reversed." [GOC

11719 Pathogen[ Q2Q067] interacts with 1 human partners:{P78424}

11720 Pathogen[ P03346] interacts with 1 human partners:{P78424}

11721 Pathogen[ Q85601] interacts with 1 human partners:{P78424}

11722 Pathogen[ P14079] interacts with 1 human partners:{P78424}

11723 Pathogen[ P03410] interacts with 1 human partners:{P78424}

11724 Pathogen[ P0C206] interacts with 1 human partners:{P78424}

11725 Pathogen[ P03363] interacts with 1 human partners:{P78424}

11726 [Cluster 1875]GO:0035441+P biological\_process [name] cell migration involved in vasculogenesis [def] "The orderly movement of a cell from one site to another that will contribute to the differentiation of an endothelial cell that will form de novo blood vessels and tubes." [GOC

11727 Pathogen[ P03346] interacts with 1 human partners:{Q9BYW2}

11728 [Cluster 1876]GO:0032924+P biological\_process [name] activin receptor signaling pathway [def] "A series of molecular signals generated as a consequence of any member of the activin family binding to a cell surface receptor." [GOC

11729 Pathogen[ Q2Q067] interacts with 2 human partners:{P84022;Q15796}

11730 Pathogen[ P0C214] interacts with 2 human partners:{P84022;Q15796}

11731 Pathogen[ P03346] interacts with 2 human partners:{Q15796;P84022}

11732 Pathogen[ Q85601] interacts with 2 human partners:{P84022;Q15796}

11733 Pathogen[ P03383] interacts with 2 human partners:{P84022;Q15796}

11734 Pathogen[ P03410] interacts with 2 human partners:{P84022;Q15796}

11735 Pathogen[ P14075] interacts with 2 human partners:{Q15796;P84022}

11736 Pathogen[ P0C206] interacts with 2 human partners:{P84022;Q15796}

11737 Pathogen[ P03363] interacts with 2 human partners:{Q15796;P84022}

11738 [Cluster 1877]GO:0021754+P biological\_process [name] facial nucleus development [def] "The process whose specific outcome is the progression of the facial nucleus over time, from its formation to the mature structure." [GO\_REF

11739 Pathogen[ Q2Q067] interacts with 2 human partners:{P49639;P14653}

11740 Pathogen[ P0C214] interacts with 2 human partners:{P49639;P14653}

11741 Pathogen[ P03346] interacts with 2 human partners:{P49639;P14653}

11742 Pathogen[ Q85601] interacts with 2 human partners:{P49639;P14653}

11743 Pathogen[ P14079] interacts with 1 human partners:{P49639}

11744 Pathogen[ P03383] interacts with 1 human partners:{P49639}

11745 Pathogen[ P03410] interacts with 1 human partners:{P49639}

11746 Pathogen[ P0C206] interacts with 2 human partners:{P49639;P14653}

11747 Pathogen[ P03363] interacts with 2 human partners:{P49639;P14653}

11748 [Cluster 1878]GO:0006601+P biological\_process [name] creatine biosynthetic process [def] "The chemical reactions and pathways resulting in the formation of creatine, N-[amino(imino)methyl]-N-methylglycine. Creatine is formed by a process beginning with amidino group transfer from L-arginine to glycine to form guanidinoacetate, followed by methyl group transfer from S-adenosyl-L-methionine to guanidinoacetate\_ it is then is phosphorylated to form a pool that stores high energy phosphate for the replenishment of ATP during periods of high, or fluctuating energy demand. In animals, most creatine is transported to and used in muscle." [CHEBI

11749 Pathogen[ P0C214] interacts with 1 human partners:{P50440}

11750 Pathogen[ P14079] interacts with 2 human partners:{Q14353;P50440}

11751 Pathogen[ P03410] interacts with 2 human partners:{Q14353;P50440}

11752 Pathogen[ P14075] interacts with 1 human partners:{P50440}

11753 Pathogen[ P0C206] interacts with 1 human partners:{P50440}

11754 [Cluster 1879]GO:0010715+P biological\_process [name] regulation of extracellular matrix disassembly [def] "Any process that modulates the rate, frequency or extent of extracellular matrix disassembly. Extracellular matrix disassembly is a process that results in the breakdown of the extracellular matrix." [GOC

11755 Pathogen[ Q2Q067] interacts with 1 human partners:{P14921}

11756 Pathogen[ POC214] interacts with 1 human partners:{P14921}

11757 Pathogen[ P03346] interacts with 1 human partners:{P14921}

11758 Pathogen[ Q85601] interacts with 1 human partners:{P14921}

11759 Pathogen[ P03383] interacts with 1 human partners:{P14921}

11760 Pathogen[ P03410] interacts with 1 human partners:{P14921}

11761 Pathogen[ P14075] interacts with 1 human partners:{P14921}

11762 Pathogen[ POC206] interacts with 1 human partners:{P14921}

11763 Pathogen[ P03363] interacts with 1 human partners:{P14921}

11764 [Cluster 1880]GO:0046488+P biological\_process [name] phosphatidylinositol metabolic process [def] "The chemical reactions and pathways involving phosphatidylinositol, any glycopospholipid in which a sn-glycerol 3-phosphate residue is esterified to the 1-hydroxyl group of 1D-myo-inositol." [CHEBI

11765 Pathogen[ Q2Q067] interacts with 1 human partners:{Q92562}

11766 Pathogen[ POC214] interacts with 1 human partners:{Q92562}

11767 Pathogen[ P03346] interacts with 1 human partners:{Q92562}

11768 Pathogen[ Q85601] interacts with 1 human partners:{Q92562}

11769 Pathogen[ P14079] interacts with 1 human partners:{Q92562}

11770 Pathogen[ P03410] interacts with 1 human partners:{Q92562}

11771 Pathogen[ POC206] interacts with 1 human partners:{Q92562}

11772 [Cluster 1881]GO:0051354+P biological\_process [name] negative regulation of oxidoreductase activity [def] "Any process that stops or reduces the rate of oxidoreductase activity, the catalysis of an oxidation-reduction (redox) reaction, a reversible chemical reaction in which the oxidation state of an atom or atoms within a molecule is altered." [GOC

11773 Pathogen[ POC214] interacts with 1 human partners:{Q9NVH6}

11774 Pathogen[ P14079] interacts with 2 human partners:{Q15070;Q9NVH6}

11775 Pathogen[ P03410] interacts with 2 human partners:{Q9NVH6;Q15070}

11776 Pathogen[ P14075] interacts with 2 human partners:{Q9NVH6;Q15070}

11777 Pathogen[ POC206] interacts with 2 human partners:{Q9NVH6;Q15070}

11778 [Cluster 1882]GO:0001302+P biological\_process [name] replicative cell aging [def] "The process associated with progression of the cell from its inception to the end of its lifespan that occurs as the cell continues cycles of growth and division." [GOC

11779 Pathogen[ P03346] interacts with 1 human partners:{P07992}

11780 Pathogen[ P14079] interacts with 3 human partners:{P60602;Q12893;P07992}

11781 Pathogen[ P03410] interacts with 3 human partners:{Q12893;P07992;P60602}

11782 Pathogen[ P14075] interacts with 1 human partners:{P60602}

11783 Pathogen[ POC206] interacts with 3 human partners:{P07992;Q12893;P60602}

11784 [Cluster 1883]GO:0003383+P biological\_process [name] apical constriction [def] "The actin-mediated process that results in the contraction of the apical end of a polarized columnar epithelial cell." [GOC

11785 Pathogen[ P03346] interacts with 1 human partners:{Q8TEW0}

11786 Pathogen[ P14079] interacts with 1 human partners:{Q8TEW0}

11787 Pathogen[ P03410] interacts with 1 human partners:{Q8TEW0}

11788 Pathogen[ POC206] interacts with 1 human partners:{Q8TEW0}

11789 [Cluster 1884]GO:0032733+P biological\_process [name] positive regulation of interleukin-10 production [def] "Any process that activates or increases the frequency, rate, or extent of interleukin-10 production." [GOC

11790 Pathogen[ POC214] interacts with 1 human partners:{P10809}

11791 Pathogen[ P03346] interacts with 1 human partners:{O75995}

11792 [Cluster 1885]GO:0007403+P biological\_process [name] glial cell fate determination [def] "The cell fate determination process in which a cell becomes capable of differentiating autonomously into a glial cell regardless of its environment\_ upon determination, the cell fate cannot be reversed." [GOC

11793 Pathogen[ Q2Q067] interacts with 1 human partners:{Q9HBD4}

11794 Pathogen[ POC214] interacts with 1 human partners:{Q9HBD4}

11795 Pathogen[ P03346] interacts with 1 human partners:{Q9HBD4}

11796 Pathogen[ Q85601] interacts with 1 human partners:{Q9HBD4}

11797 Pathogen[ P03383] interacts with 1 human partners:{Q9HBD4}

11798 Pathogen[ P03410] interacts with 1 human partners:{Q9HBD4}

11799 Pathogen[ P14075] interacts with 1 human partners:{Q9HBD4}

11800 Pathogen[ POC206] interacts with 1 human partners:{Q9HBD4}

11801 Pathogen[ P03363] interacts with 1 human partners:{Q9HBD4}

11802 [Cluster 1886]GO:0051303+P biological\_process [name] establishment of chromosome localization [def] "The directed movement of a chromosome to a specific location." [GOC

11803 Pathogen[ Q2Q067] interacts with 2 human partners:{Q9NXR1;O15392}

11804 Pathogen[ POC214] interacts with 2 human partners:{O15392;Q9NXR1}

11805 Pathogen[ P03346] interacts with 2 human partners:{O15392;Q9NXR1}

11806 Pathogen[ Q85601] interacts with 2 human partners:{O15392;Q9NXR1}

11807 Pathogen[ P14079] interacts with 2 human partners:{O15392;Q9NXR1}

11808 Pathogen[ P03410] interacts with 2 human partners:{O15392;Q9NXR1}

11809 Pathogen[ POC206] interacts with 2 human partners:{O15392;Q9NXR1}

11810 Pathogen[ P03363] interacts with 1 human partners:{Q9NXR1}

11811 [Cluster 1887]GO:0043163+P biological\_process [name] cell envelope organization [def] "A process that is carried out at the cellular level which results in the

assembly, arrangement of constituent parts, or disassembly of the cell envelope, everything external to, but not including, the cytoplasmic membrane of bacteria, encompassing the periplasmic space, cell wall, and outer membrane if present." [GOC

11812 Pathogen[ POC214] interacts with 1 human partners:{P22735}

11813 Pathogen[ P03346] interacts with 1 human partners:{P22735}

11814 Pathogen[ P14079] interacts with 1 human partners:{P22735}

11815 Pathogen[ P03410] interacts with 1 human partners:{P22735}

11816 Pathogen[ POC206] interacts with 1 human partners:{P22735}

11817 [Cluster 1888]GO:0014740+P biological\_process [name] negative regulation of muscle hyperplasia [def] "Any process that stops, prevents, or reduces the frequency, rate, or extent of muscle hyperplasia." [GOC

11818 Pathogen[ Q2Q067] interacts with 1 human partners:{P29474}

11819 Pathogen[ POC214] interacts with 1 human partners:{P29474}

11820 Pathogen[ P03346] interacts with 1 human partners:{P29474}

11821 Pathogen[ Q85601] interacts with 1 human partners:{P29474}

11822 Pathogen[ P03383] interacts with 1 human partners:{P29474}

11823 Pathogen[ P03410] interacts with 1 human partners:{P29474}

11824 Pathogen[ P14075] interacts with 1 human partners:{P29474}

11825 Pathogen[ POC206] interacts with 1 human partners:{P29474}

11826 Pathogen[ P03363] interacts with 1 human partners:{P29474}

11827 [Cluster 1889]GO:0045932+P biological\_process [name] negative regulation of muscle contraction [def] "Any process that stops, prevents, or reduces the frequency, rate or extent of muscle contraction." [GOC

11828 Pathogen[ P14079] interacts with 1 human partners:{P13805}

11829 Pathogen[ P03410] interacts with 1 human partners:{P13805}

11830 [Cluster 1890]GO:0030823+P biological\_process [name] regulation of cGMP metabolic process [def] "Any process that modulates the frequency, rate or extent of the chemical reactions and pathways involving cGMP." [GOC

11831 Pathogen[ POC214] interacts with 1 human partners:{P35520}

11832 Pathogen[ P03363] interacts with 1 human partners:{Q9NZN9}

11833 [Cluster 1891]GO:0070417+P biological\_process [name] cellular response to cold [def] "Any process that results in a change in state or activity of a cell (in terms of movement, secretion, enzyme production, gene expression, etc.) as a result of a cold stimulus, a temperature stimulus below the optimal temperature for that organism." [GOC

11834 Pathogen[ Q2Q067] interacts with 1 human partners:{P25963}

11835 Pathogen[ POC214] interacts with 1 human partners:{P25963}

11836 Pathogen[ P03346] interacts with 2 human partners:{P25963;Q12778}

11837 Pathogen[ Q85601] interacts with 1 human partners:{P25963}

11838 Pathogen[ P03383] interacts with 1 human partners:{P25963}

11839 Pathogen[ P03410] interacts with 1 human partners:{P25963}

11840 Pathogen[ P14075] interacts with 1 human partners:{P25963}

11841 Pathogen[ POC206] interacts with 1 human partners:{P25963}

11842 Pathogen[ P03363] interacts with 1 human partners:{P25963}

11843 [Cluster 1892]GO:0033688+P biological\_process [name] regulation of osteoblast proliferation [def] "Any process that modulates the frequency, rate or extent of osteoblast proliferation." [GOC

11844 Pathogen[ Q2Q067] interacts with 1 human partners:{P61586}

11845 Pathogen[ POC214] interacts with 1 human partners:{P61586}

11846 Pathogen[ P03346] interacts with 1 human partners:{P61586}

11847 Pathogen[ Q85601] interacts with 1 human partners:{P61586}

11848 Pathogen[ P14079] interacts with 1 human partners:{P61586}

11849 Pathogen[ P03383] interacts with 1 human partners:{P61586}

11850 Pathogen[ P03410] interacts with 1 human partners:{P61586}

11851 Pathogen[ P14075] interacts with 1 human partners:{P61586}

11852 Pathogen[ POC206] interacts with 1 human partners:{P61586}

11853 [Cluster 1893]GO:0006814+P biological\_process [name] sodium ion transport [def] "The directed movement of sodium ions (Na+) into, out of or within a cell, or between cells, by means of some agent such as a transporter or pore." [GOC

11854 Pathogen[ Q2Q067] interacts with 1 human partners:{Q96PU5}

11855 Pathogen[ POC214] interacts with 2 human partners:{Q16795;Q96PU5}

11856 Pathogen[ P03346] interacts with 2 human partners:{Q96PU5;P48553}

11857 Pathogen[ Q85601] interacts with 1 human partners:{Q96PU5}

11858 Pathogen[ P14079] interacts with 1 human partners:{P48553}

11859 Pathogen[ P03410] interacts with 1 human partners:{P48553}

11860 Pathogen[ POC206] interacts with 2 human partners:{Q96PU5;P48553}

11861 Pathogen[ P03363] interacts with 2 human partners:{Q96PU5;P48553}

11862 [Cluster 1894]GO:0042523+P biological\_process [name] positive regulation of tyrosine phosphorylation of Stat5 protein [def] "Any process that activates or increases the frequency, rate or extent of the introduction of a phosphate group to a tyrosine residue of a Stat5 protein." [GOC

11863 Pathogen[ P14079] interacts with 1 human partners:{P04141}

11864 Pathogen[ P03410] interacts with 1 human partners:{P04141}

11865 [Cluster 1895]GO:0048537+P biological\_process [name] mucosal-associated lymphoid tissue development [def] "The process whose specific outcome is the progression of mucosal-associated lymphoid tissue over time, from its formation to the mature structure. Mucosal-associated lymphoid tissue is typically found as nodules associated

with mucosal epithelia with distinct internal structures including B- and T-zones for the activation of lymphocytes." [GOC

11866 Pathogen[ P03346] interacts with 1 human partners:{Q8TAU0}

11867 Pathogen[ P0C206] interacts with 1 human partners:{Q8TAU0}

11868 Pathogen[ P03363] interacts with 1 human partners:{Q8TAU0}

11869 [Cluster 1896]GO:0072286+P biological\_process [name] metanephric connecting tubule development [def] "The process whose specific outcome is the progression of the metanephric connecting tubule over time, from its formation to the mature structure. The metanephric connecting tubule is a tubular segment of the metanephric nephron\_ it connects the distal convoluted tubule to the collecting duct in the metanephros." [GOC

11870 Pathogen[ P0C214] interacts with 1 human partners:{P05937}

11871 Pathogen[ P03346] interacts with 1 human partners:{P05937}

11872 Pathogen[ P14079] interacts with 1 human partners:{P05937}

11873 Pathogen[ P03410] interacts with 1 human partners:{P05937}

11874 Pathogen[ P03363] interacts with 1 human partners:{P05937}

11875 [Cluster 1897]GO:0097275+P

11876 Pathogen[ P03346] interacts with 1 human partners:{Q92481}

11877 [Cluster 1898]GO:0046320+P biological\_process [name] regulation of fatty acid oxidation [def] "Any process that modulates the frequency, rate or extent of fatty acid oxidation." [GOC

11878 Pathogen[ P0C214] interacts with 2 human partners:{Q9Y376;P23786}

11879 Pathogen[ P03346] interacts with 2 human partners:{P23786;Q9Y376}

11880 Pathogen[ Q85601] interacts with 1 human partners:{Q9Y376}

11881 Pathogen[ P14079] interacts with 3 human partners:{Q95822;Q9Y478;Q9Y376}

11882 Pathogen[ P03410] interacts with 3 human partners:{P23786;Q9Y376;Q95822}

11883 Pathogen[ P0C206] interacts with 2 human partners:{Q9Y376;P23786}

11884 Pathogen[ P03363] interacts with 1 human partners:{Q9Y376}

11885 [Cluster 1899]GO:0046085+P biological\_process [name] adenosine metabolic process [def] "The chemical reactions and pathways involving adenosine, adenine riboside, a ribonucleoside found widely distributed in cells of every type as the free nucleoside and in combination in nucleic acids and various nucleoside coenzymes." [GOC

11886 Pathogen[ P0C214] interacts with 1 human partners:{Q9H0P0}

11887 Pathogen[ Q85601] interacts with 1 human partners:{Q9H0P0}

11888 Pathogen[ P14079] interacts with 2 human partners:{Q9H0P0;Q9BXI3}

11889 Pathogen[ P03410] interacts with 2 human partners:{Q9BXI3;Q9H0P0}

11890 Pathogen[ P0C206] interacts with 1 human partners:{Q9H0P0}

11891 [Cluster 1900]GO:0072365+P biological\_process [name] regulation of cellular ketone metabolic process by negative regulation of transcription from RNA polymerase II promoter [def] "Any process that modulates the frequency, rate or extent of a cellular ketone metabolic process by stopping, preventing, or reducing the frequency, rate or extent of transcription from an RNA polymerase II promoter." [GOC

11892 Pathogen[ Q2Q067] interacts with 1 human partners:{Q9Y618}

11893 Pathogen[ P0C214] interacts with 1 human partners:{Q9Y618}

11894 Pathogen[ P03346] interacts with 1 human partners:{Q9Y618}

11895 Pathogen[ Q85601] interacts with 1 human partners:{Q9Y618}

11896 Pathogen[ P03383] interacts with 1 human partners:{Q9Y618}

11897 Pathogen[ P03410] interacts with 1 human partners:{Q9Y618}

11898 Pathogen[ P14075] interacts with 1 human partners:{Q9Y618}

11899 Pathogen[ P0C206] interacts with 1 human partners:{Q9Y618}

11900 Pathogen[ P03363] interacts with 1 human partners:{Q9Y618}

11901 [Cluster 1901]GO:0003327+P biological\_process [name] type B pancreatic cell fate commitment [def] "The commitment of a cell to a type B pancreatic cell fate and its capacity to differentiate into a type B pancreatic cell. A type B pancreatic cell is a cell located towards center of the islets of Langerhans that secretes insulin." [CL

11902 Pathogen[ P03346] interacts with 1 human partners:{Q95096}

11903 [Cluster 1902]GO:0002553+P biological\_process [name] histamine secretion by mast cell [def] "The regulated release of histamine by a mast cell or group of mast cells." [GOC

11904 Pathogen[ Q2Q067] interacts with 1 human partners:{P63104}

11905 Pathogen[ P03346] interacts with 1 human partners:{P63104}

11906 Pathogen[ Q85601] interacts with 1 human partners:{P63104}

11907 Pathogen[ P14079] interacts with 1 human partners:{P63104}

11908 Pathogen[ P03383] interacts with 1 human partners:{P63104}

11909 Pathogen[ P03410] interacts with 1 human partners:{P63104}

11910 Pathogen[ P14075] interacts with 1 human partners:{P63104}

11911 Pathogen[ P0C206] interacts with 1 human partners:{P63104}

11912 Pathogen[ P03363] interacts with 1 human partners:{P63104}

11913 [Cluster 1903]GO:0010980+P biological\_process [name] positive regulation of vitamin D 24-hydroxylase activity [def] "Any process that increases the rate, frequency or extent of vitamin D 24-hydroxylase activity. Vitamin D 24-hydroxylase activity catalyzes the hydroxylation of C-24 of any form of vitamin D." [GOC

11914 Pathogen[ Q2Q067] interacts with 1 human partners:{P11473}

11915 Pathogen[ P03346] interacts with 1 human partners:{P11473}

11916 Pathogen[ Q85601] interacts with 1 human partners:{P11473}

11917 Pathogen[ P14079] interacts with 1 human partners:{P11473}

11918 Pathogen[ P03383] interacts with 1 human partners:{P11473}

11919 Pathogen[ P03410] interacts with 1 human partners:{P11473}



11920 Pathogen[ P14075] interacts with 1 human partners:{P11473}

11921 Pathogen[ POC206] interacts with 1 human partners:{P11473}

11922 Pathogen[ P03363] interacts with 1 human partners:{P11473}

11923 [Cluster 1904]GO:0043691+P biological\_process [name] reverse cholesterol transport [def] "The directed movement of peripheral cell cholesterol, cholest-5-en-3-beta-ol, towards the liver for catabolism." [GOC]

11924 Pathogen[ Q2Q067] interacts with 1 human partners:{P20823}

11925 Pathogen[ POC214] interacts with 1 human partners:{P10909}

11926 Pathogen[ P03346] interacts with 1 human partners:{P20823}

11927 Pathogen[ Q85601] interacts with 1 human partners:{P20823}

11928 Pathogen[ P14079] interacts with 1 human partners:{P10909}

11929 Pathogen[ P03410] interacts with 1 human partners:{P10909}

11930 Pathogen[ POC206] interacts with 2 human partners:{P20823;P10909}

11931 [Cluster 1905]GO:0097070+P biological\_process [name] ductus arteriosus closure [def] "The morphogenesis process in which the ductus arteriosus changes to no longer permit blood flow after birth. The ductus arteriosus is the shunt between the aorta and the pulmonary artery which allows blood to bypass the fetus' lungs." [GOC]

11932 Pathogen[ P03346] interacts with 1 human partners:{Q92481}

11933 [Cluster 1906]GO:0019464+P biological\_process [name] glycine decarboxylation via glycine cleavage system [def] "The chemical reactions and pathways resulting in the breakdown of glycine by oxidative cleavage to carbon dioxide, ammonia, and a methylene group, mediated by enzymes of the glycine cleavage complex." [MetaCyc]

11934 Pathogen[ P14079] interacts with 1 human partners:{P23434}

11935 Pathogen[ P03410] interacts with 1 human partners:{P23434}

11936 Pathogen[ POC206] interacts with 1 human partners:{P23434}

11937 [Cluster 1907]GO:0051898+P biological\_process [name] negative regulation of protein kinase B signaling cascade [def] "Any process that stops, prevents, or reduces the frequency, rate or extent of the protein kinase B signaling cascade, a series of reactions mediated by the intracellular serine/threonine kinase protein kinase B." [GOC]

11938 Pathogen[ Q2Q067] interacts with 1 human partners:{Q86UL8}

11939 Pathogen[ P03346] interacts with 3 human partners:{O60688;Q86UL8;Q9HB21}

11940 Pathogen[ Q85601] interacts with 2 human partners:{Q86UL8;Q9HB21}

11941 Pathogen[ P14079] interacts with 4 human partners:{O60688;Q14118;Q86UL8;Q9HB21}

11942 Pathogen[ P03410] interacts with 4 human partners:{Q9HB21;O60688;Q14118;Q86UL8}

11943 Pathogen[ POC206] interacts with 3 human partners:{Q9HB21;Q86UL8;O60688}

11944 Pathogen[ P03363] interacts with 2 human partners:{O60688;Q86UL8}

11945 [Cluster 1908]GO:0006273+P biological\_process [name] lagging strand elongation [def] "The synthesis of DNA from a template strand in a net 3' to 5' direction. Lagging strand DNA elongation proceeds by discontinuous synthesis of short stretches of DNA, known as Okazaki fragments, from RNA primers\_ these fragments are then joined by DNA ligase. Although each segment of nascent DNA is synthesized in the 5' to 3' direction, the overall direction of lagging strand synthesis is 3' to 5', mirroring the progress of the replication fork." [ISBN]

11946 Pathogen[ P14079] interacts with 1 human partners:{P49917}

11947 Pathogen[ POC206] interacts with 2 human partners:{P49917;P49916}

11948 [Cluster 1909]GO:0051023+P biological\_process [name] regulation of immunoglobulin secretion [def] "Any process that modulates the frequency, rate or extent of the regulated release of immunoglobulins from a cell or group of cells." [GOC]

11949 Pathogen[ Q2Q067] interacts with 1 human partners:{Q12933}

11950 Pathogen[ POC214] interacts with 1 human partners:{Q12933}

11951 Pathogen[ Q85601] interacts with 1 human partners:{Q12933}

11952 Pathogen[ P14079] interacts with 1 human partners:{Q12933}

11953 Pathogen[ P03383] interacts with 1 human partners:{Q12933}

11954 Pathogen[ P03410] interacts with 1 human partners:{Q12933}

11955 Pathogen[ P14075] interacts with 1 human partners:{Q12933}

11956 Pathogen[ POC206] interacts with 1 human partners:{Q12933}

11957 Pathogen[ P03363] interacts with 1 human partners:{Q12933}

11958 [Cluster 1910]GO:2000543+P biological\_process [name] positive regulation of gastrulation [def] "Any process that activates or increases the frequency, rate or extent of gastrulation." [GOC]

11959 Pathogen[ POC214] interacts with 1 human partners:{P32243}

11960 Pathogen[ P03346] interacts with 1 human partners:{P32243}

11961 Pathogen[ Q85601] interacts with 1 human partners:{P32243}

11962 Pathogen[ P14079] interacts with 1 human partners:{P32243}

11963 Pathogen[ P03383] interacts with 1 human partners:{P32243}

11964 Pathogen[ P03410] interacts with 1 human partners:{P32243}

11965 Pathogen[ P14075] interacts with 1 human partners:{P32243}

11966 Pathogen[ POC206] interacts with 1 human partners:{P32243}

11967 Pathogen[ P03363] interacts with 1 human partners:{P32243}

11968 [Cluster 1911]GO:0048505+P biological\_process [name] regulation of timing of cell differentiation [def] "The process controlling the activation and/or rate at which relatively unspecialized cells acquire specialized features. Any process that modulates the rate, frequency or extent of the XXX at a consistent predetermined time point during its development." [GOC]

11969 Pathogen[ POC214] interacts with 1 human partners:{P07093}

11970 Pathogen[ Q85601] interacts with 1 human partners:{P07093}

11971 [Cluster 1912]GO:0009191+P biological\_process [name] ribonucleoside diphosphate catabolic process [def] "The chemical reactions and pathways resulting in the breakdown of a ribonucleoside diphosphate, a compound consisting of a nucleobase linked to a ribose sugar esterified with diphosphate on the sugar." [GOC  
 11972 Pathogen[ P14079] interacts with 1 human partners:{Q9UKK9}  
 11973 Pathogen[ P03410] interacts with 1 human partners:{Q9UKK9}  
 11974 [Cluster 1913]GO:0051987+P biological\_process [name] positive regulation of attachment of spindle microtubules to kinetochore [def] "Any process that activates or increases the frequency, rate or extent of the attachment of spindle microtubules to the kinetochore." [GOC  
 11975 Pathogen[ Q2Q067] interacts with 1 human partners:{P14635}  
 11976 Pathogen[ P0C214] interacts with 1 human partners:{P14635}  
 11977 Pathogen[ P03346] interacts with 1 human partners:{P14635}  
 11978 Pathogen[ Q85601] interacts with 1 human partners:{P14635}  
 11979 Pathogen[ P14079] interacts with 1 human partners:{P14635}  
 11980 Pathogen[ P03383] interacts with 1 human partners:{P14635}  
 11981 Pathogen[ P03410] interacts with 1 human partners:{P14635}  
 11982 Pathogen[ P14075] interacts with 1 human partners:{P14635}  
 11983 Pathogen[ P0C206] interacts with 1 human partners:{P14635}  
 11984 [Cluster 1914]GO:0033160+P biological\_process [name] positive regulation of protein import into nucleus, translocation [def] "Any process that activates or increases the vectorial transfer of a protein from the cytoplasm into the nucleus, across the nuclear membrane." [GOC  
 11985 Pathogen[ P0C214] interacts with 2 human partners:{O95071;Q86WV6}  
 11986 Pathogen[ P03346] interacts with 1 human partners:{O95071}  
 11987 Pathogen[ Q85601] interacts with 2 human partners:{Q86WV6;O95071}  
 11988 Pathogen[ P14079] interacts with 2 human partners:{Q7Z434;Q86WV6}  
 11989 Pathogen[ P03410] interacts with 2 human partners:{Q7Z434;Q86WV6}  
 11990 Pathogen[ P0C206] interacts with 2 human partners:{Q86WV6;O95071}  
 11991 Pathogen[ P03363] interacts with 1 human partners:{O95071}  
 11992 [Cluster 1915]GO:0010761+P biological\_process [name] fibroblast migration [def] "Cell migration that is accomplished by extension and retraction of a fibroblast pseudopodium. A fibroblast is a connective tissue cell which secretes an extracellular matrix rich in collagen and other macromolecules." [GOC  
 11993 Pathogen[ Q2Q067] interacts with 2 human partners:{Q9HBL0;Q14865}  
 11994 Pathogen[ P0C214] interacts with 2 human partners:{Q14865;Q9HBL0}  
 11995 Pathogen[ P03346] interacts with 3 human partners:{Q8WXH0;Q9HBL0;Q14865}  
 11996 Pathogen[ Q85601] interacts with 2 human partners:{Q14865;Q9HBL0}  
 11997 Pathogen[ P14079] interacts with 3 human partners:{Q14865;Q9HBL0;Q8WXH0}  
 11998 Pathogen[ P03410] interacts with 3 human partners:{Q9HBL0;Q14865;Q8WXH0}  
 11999 Pathogen[ P0C206] interacts with 3 human partners:{Q9HBL0;Q8WXH0;Q14865}  
 12000 Pathogen[ P03363] interacts with 2 human partners:{Q14865;Q9HBL0}  
 12001 [Cluster 1916]GO:0071283+P biological\_process [name] cellular response to iron(III) ion [def] "Any process that results in a change in state or activity of a cell (in terms of movement, secretion, enzyme production, gene expression, etc.) as a result of an iron(III) ion stimulus." [GOC  
 12002 Pathogen[ Q2Q067] interacts with 1 human partners:{P14635}  
 12003 Pathogen[ P0C214] interacts with 1 human partners:{P14635}  
 12004 Pathogen[ P03346] interacts with 1 human partners:{P14635}  
 12005 Pathogen[ Q85601] interacts with 1 human partners:{P14635}  
 12006 Pathogen[ P14079] interacts with 1 human partners:{P14635}  
 12007 Pathogen[ P03383] interacts with 1 human partners:{P14635}  
 12008 Pathogen[ P03410] interacts with 1 human partners:{P14635}  
 12009 Pathogen[ P14075] interacts with 1 human partners:{P14635}  
 12010 Pathogen[ P0C206] interacts with 1 human partners:{P14635}  
 12011 [Cluster 1917]GO:0016486+P biological\_process [name] peptide hormone processing [def] "The generation of a mature peptide hormone by posttranslational processing of a prohormone." [GOC  
 12012 Pathogen[ P14079] interacts with 3 human partners:{P01215;P05408;P01225}  
 12013 Pathogen[ P03383] interacts with 1 human partners:{P01215}  
 12014 Pathogen[ P03410] interacts with 2 human partners:{P01215;P05408}  
 12015 Pathogen[ P14075] interacts with 1 human partners:{P01215}  
 12016 Pathogen[ P0C206] interacts with 1 human partners:{P01215}  
 12017 [Cluster 1918]GO:0002192+P biological\_process [name] IRES-dependent translational initiation [def] "The process where translation initiation recruits the 40S ribosomal subunits via an internal ribosome entry segment (IRES) before an AUG codon is encountered in an appropriate sequence context to initiate mRNA translation." [PMID  
 12018 Pathogen[ P03346] interacts with 1 human partners:{Q9BWF3}  
 12019 Pathogen[ P03363] interacts with 1 human partners:{Q9BWF3}  
 12020 [Cluster 1919]GO:0055098+P biological\_process [name] response to low-density lipoprotein particle stimulus [def] "Any process that results in a change in state or activity of a cell or an organism (in terms of movement, secretion, enzyme production, gene expression, etc.) as a result of a low-density lipoprotein particle stimulus." [GOC  
 12021 Pathogen[ P03346] interacts with 1 human partners:{Q12772}  
 12022 Pathogen[ Q85601] interacts with 1 human partners:{Q12772}  
 12023 Pathogen[ P14079] interacts with 1 human partners:{Q12772}

12024 Pathogen[ P03410] interacts with 1 human partners:{Q12772}

12025 Pathogen[ P0C206] interacts with 1 human partners:{Q12772}

12026 [Cluster 1920]GO:0043089+P biological\_process [name] positive regulation of Cdc42 GTPase activity [def] "Any process that activates or increases the activity of the GTPase Cdc42." [GOC

12027 Pathogen[ P03346] interacts with 1 human partners:{Q9H8V3}

12028 Pathogen[ P14079] interacts with 1 human partners:{Q9H8V3}

12029 Pathogen[ P03410] interacts with 1 human partners:{Q9H8V3}

12030 Pathogen[ P0C206] interacts with 1 human partners:{Q9H8V3}

12031 [Cluster 1921]GO:0033173+P biological\_process [name] calcineurin-NFAT signaling pathway [def] "A series of molecular signals that results in activation of transcription by a member of the NFAT protein family as a consequence of NFAT dephosphorylation by activated calcineurin. The signaling is generated by a receptor binding a ligand, followed by activation of phospholipase C and the subsequent release of inositol trisphosphate, which in turn leads to an increase in intracellular calcium ion concentration that mediates the activation of calcineurin." [GOC

12032 Pathogen[ Q2Q067] interacts with 1 human partners:{Q08209}

12033 Pathogen[ P0C214] interacts with 1 human partners:{Q08209}

12034 Pathogen[ P03346] interacts with 1 human partners:{Q08209}

12035 Pathogen[ Q85601] interacts with 1 human partners:{Q08209}

12036 Pathogen[ P14079] interacts with 2 human partners:{Q9GZZ8;Q08209}

12037 Pathogen[ P03410] interacts with 2 human partners:{Q08209;Q9GZZ8}

12038 Pathogen[ P14075] interacts with 1 human partners:{Q9GZZ8}

12039 Pathogen[ P0C206] interacts with 1 human partners:{Q08209}

12040 [Cluster 1922]GO:0007608+P biological\_process [name] sensory perception of smell [def] "The series of events required for an organism to receive an olfactory stimulus, convert it to a molecular signal, and recognize and characterize the signal. Olfaction involves the detection of chemical composition of an organism's ambient medium by chemoreceptors. This is a neurological process." [GOC

12041 Pathogen[ P14079] interacts with 1 human partners:{P47874}

12042 Pathogen[ P03410] interacts with 1 human partners:{P47874}

12043 [Cluster 1923]GO:0051896+P biological\_process [name] regulation of protein kinase B signaling cascade [def] "Any process that modulates the frequency, rate or extent of the protein kinase B signaling cascade, a series of reactions mediated by the intracellular serine/threonine kinase protein kinase B." [GOC

12044 Pathogen[ Q2Q067] interacts with 1 human partners:{Q6R327}

12045 Pathogen[ P0C214] interacts with 2 human partners:{Q6R327;Q9H4P4}

12046 Pathogen[ P03346] interacts with 2 human partners:{Q9H4P4;Q6R327}

12047 Pathogen[ Q85601] interacts with 1 human partners:{Q9H4P4}

12048 Pathogen[ P14079] interacts with 1 human partners:{Q6R327}

12049 Pathogen[ P03410] interacts with 1 human partners:{Q6R327}

12050 Pathogen[ P14075] interacts with 1 human partners:{Q6R327}

12051 Pathogen[ P0C206] interacts with 2 human partners:{Q9H4P4;Q6R327}

12052 Pathogen[ P03363] interacts with 2 human partners:{Q9H4P4;Q6R327}

12053 [Cluster 1924]GO:0046888+P biological\_process [name] negative regulation of hormone secretion [def] "Any process that stops, prevents, or reduces the frequency, rate or extent of the regulated release of a hormone from a cell or group of cells." [GOC

12054 Pathogen[ P14079] interacts with 1 human partners:{P20809}

12055 Pathogen[ P03410] interacts with 1 human partners:{P20809}

12056 Pathogen[ P14075] interacts with 1 human partners:{P20809}

12057 Pathogen[ P0C206] interacts with 1 human partners:{P20809}

12058 [Cluster 1925]GO:0061326+P biological\_process [name] renal tubule development [def] "The progression of the renal tubule over time from its formation to the mature form. A renal tubule is a tube that filters, re-absorbs and secretes substances to rid an organism of waste and to play a role in fluid homeostasis." [GOC

12059 Pathogen[ Q2Q067] interacts with 1 human partners:{P42224}

12060 Pathogen[ P0C214] interacts with 1 human partners:{P42224}

12061 Pathogen[ P03346] interacts with 1 human partners:{P42224}

12062 Pathogen[ Q85601] interacts with 1 human partners:{P42224}

12063 Pathogen[ P14079] interacts with 1 human partners:{P42224}

12064 Pathogen[ P0C206] interacts with 1 human partners:{P42224}

12065 [Cluster 1926]GO:0042520+P biological\_process [name] positive regulation of tyrosine phosphorylation of Stat4 protein [def] "Any process that activates or increases the frequency, rate or extent of the introduction of a phosphate group to a tyrosine residue of a Stat4 protein." [GOC

12066 Pathogen[ P14079] interacts with 1 human partners:{P29459}

12067 Pathogen[ P03410] interacts with 1 human partners:{P29459}

12068 [Cluster 1927]GO:0051684+P biological\_process [name] maintenance of Golgi location [def] "Any process in which the Golgi is maintained in a specific location within a cell and prevented from moving elsewhere." [GOC

12069 Pathogen[ P03346] interacts with 1 human partners:{Q9NVR7}

12070 Pathogen[ P14079] interacts with 1 human partners:{Q9NVR7}

12071 Pathogen[ P03410] interacts with 1 human partners:{Q9NVR7}

12072 Pathogen[ P0C206] interacts with 1 human partners:{Q9NVR7}

12073 Pathogen[ P03363] interacts with 1 human partners:{Q9NVR7}

12074 [Cluster 1928]GO:0048755+P biological\_process [name] branching morphogenesis of a

nerve [def] "The process in which the anatomical structures of branches in a nerve are generated and organized. This term refers to an anatomical structure (nerve) not a cell (neuron)." [GOC

12075 Pathogen[ Q2Q067] interacts with 1 human partners:{Q07687}

12076 Pathogen[ P0C214] interacts with 1 human partners:{Q07687}

12077 Pathogen[ Q85601] interacts with 1 human partners:{Q07687}

12078 Pathogen[ P14079] interacts with 1 human partners:{Q07687}

12079 Pathogen[ P03383] interacts with 1 human partners:{Q07687}

12080 Pathogen[ P03410] interacts with 1 human partners:{Q07687}

12081 Pathogen[ P14075] interacts with 1 human partners:{Q07687}

12082 Pathogen[ P0C206] interacts with 1 human partners:{Q07687}

12083 Pathogen[ P03363] interacts with 1 human partners:{Q07687}

12084 [Cluster 1929]GO:0071316+P biological\_process [name] cellular response to nicotine [def] "Any process that results in a change in state or activity of a cell (in terms of movement, secretion, enzyme production, gene expression, etc.) as a result of a nicotine stimulus." [GOC

12085 Pathogen[ P0C214] interacts with 1 human partners:{Q92934}

12086 Pathogen[ P14079] interacts with 1 human partners:{Q92934}

12087 Pathogen[ P03410] interacts with 1 human partners:{Q92934}

12088 Pathogen[ P0C206] interacts with 1 human partners:{Q92934}

12089 [Cluster 1930]GO:0051788+P biological\_process [name] response to misfolded protein [def] "Any process that results in a change in state or activity of a cell or an organism (in terms of movement, secretion, enzyme production, gene expression, etc.) as a result of a misfolded protein stimulus." [GOC

12090 Pathogen[ P0C214] interacts with 1 human partners:{P10909}

12091 Pathogen[ P14079] interacts with 1 human partners:{P10909}

12092 Pathogen[ P03410] interacts with 1 human partners:{P10909}

12093 Pathogen[ P0C206] interacts with 1 human partners:{P10909}

12094 [Cluster 1931]GO:0009597+P biological\_process [name] detection of virus [def] "The series of events in which a stimulus from a virus is received and converted into a molecular signal." [GOC

12095 Pathogen[ Q2Q067] interacts with 1 human partners:{Q9BYX4}

12096 Pathogen[ P0C214] interacts with 1 human partners:{Q9BYX4}

12097 Pathogen[ P03346] interacts with 1 human partners:{Q9BYX4}

12098 Pathogen[ Q85601] interacts with 1 human partners:{Q9BYX4}

12099 Pathogen[ P14079] interacts with 1 human partners:{Q9BYX4}

12100 Pathogen[ P03410] interacts with 1 human partners:{Q9BYX4}

12101 Pathogen[ P0C206] interacts with 1 human partners:{Q9BYX4}

12102 Pathogen[ P03363] interacts with 1 human partners:{Q9BYX4}

12103 [Cluster 1932]GO:0048266+P biological\_process [name] behavioral response to pain [def] "Any process that results in a change in the behavior of an organism as a result of a pain stimulus. Pain stimuli cause activation of nociceptors, peripheral receptors for pain, include receptors which are sensitive to painful mechanical stimuli, extreme heat or cold, and chemical stimuli." [GOC

12104 Pathogen[ Q2Q067] interacts with 1 human partners:{Q01196}

12105 Pathogen[ P03346] interacts with 1 human partners:{Q01196}

12106 [Cluster 1933]GO:0019307+P biological\_process [name] mannose biosynthetic process [def] "The chemical reactions and pathways resulting in the formation of mannose, the aldohexose manno-hexose, the C-2 epimer of glucose." [GOC

12107 Pathogen[ P0C214] interacts with 1 human partners:{O15305}

12108 Pathogen[ P14079] interacts with 1 human partners:{O15305}

12109 Pathogen[ P03410] interacts with 1 human partners:{O15305}

12110 [Cluster 1934]GO:0036158+P

12111 Pathogen[ P14079] interacts with 1 human partners:{Q8IW40}

12112 Pathogen[ P03410] interacts with 1 human partners:{Q8IW40}

12113 Pathogen[ P0C206] interacts with 1 human partners:{Q8IW40}

12114 Pathogen[ P03363] interacts with 1 human partners:{Q8IW40}

12115 [Cluster 1935]GO:0043420+P biological\_process [name] anthranilate metabolic process [def] "The chemical reactions and pathways involving anthranilate (2-aminobenzoate)." [CHEBI

12116 Pathogen[ Q2Q067] interacts with 1 human partners:{Q16719}

12117 Pathogen[ P0C214] interacts with 1 human partners:{Q16719}

12118 Pathogen[ P03346] interacts with 1 human partners:{Q16719}

12119 Pathogen[ Q85601] interacts with 1 human partners:{Q16719}

12120 Pathogen[ P14079] interacts with 1 human partners:{Q16719}

12121 Pathogen[ P03383] interacts with 1 human partners:{Q16719}

12122 Pathogen[ P03410] interacts with 1 human partners:{Q16719}

12123 Pathogen[ P14075] interacts with 1 human partners:{Q16719}

12124 Pathogen[ P0C206] interacts with 1 human partners:{Q16719}

12125 [Cluster 1936]GO:0030644+P biological\_process [name] cellular chloride ion homeostasis [def] "Any process involved in the maintenance of an internal steady state of chloride ions at the level of a cell." [GOC

12126 Pathogen[ P0C214] interacts with 1 human partners:{P12277}

12127 [Cluster 1937]GO:0071156+P biological\_process [name] regulation of cell cycle arrest [def] "Any process that modulates the rate, frequency, or extent of cell cycle arrest, the process in which the cell cycle is halted during one of the normal phases." [GOC

12128 Pathogen[ Q2Q067] interacts with 2 human partners:{Q13562;Q08050}

12129 Pathogen[ P03346] interacts with 2 human partners:{Q08050;Q13562}

12130 Pathogen[ Q85601] interacts with 2 human partners:{Q13562;Q08050}

12131 Pathogen[ P14079] interacts with 1 human partners:{P31751}

12132 Pathogen[ P14075] interacts with 1 human partners:{Q08050}

12133 Pathogen[ P0C206] interacts with 2 human partners:{Q13562;Q08050}

12134 Pathogen[ P03363] interacts with 1 human partners:{Q08050}

12135 [Cluster 1938]GO:0030104+P biological\_process [name] water homeostasis [def] "Any process involved in the maintenance of an internal steady state of water within an organism or cell." [GOC]

12136 Pathogen[ Q2Q067] interacts with 1 human partners:{Q96PU5}

12137 Pathogen[ P0C214] interacts with 1 human partners:{Q96PU5}

12138 Pathogen[ P03346] interacts with 1 human partners:{Q96PU5}

12139 Pathogen[ Q85601] interacts with 1 human partners:{Q96PU5}

12140 Pathogen[ P0C206] interacts with 1 human partners:{Q96PU5}

12141 Pathogen[ P03363] interacts with 1 human partners:{Q96PU5}

12142 [Cluster 1939]GO:0042415+P biological\_process [name] norepinephrine metabolic process [def] "The chemical reactions and pathways involving norepinephrine, a hormone secreted by the adrenal medulla, and a neurotransmitter in the sympathetic peripheral nervous system and in some tracts in the central nervous system. It is also the demethylated biosynthetic precursor of epinephrine." [GOC]

12143 Pathogen[ Q2Q067] interacts with 1 human partners:{Q99814}

12144 Pathogen[ P0C214] interacts with 1 human partners:{Q99814}

12145 Pathogen[ P03346] interacts with 1 human partners:{Q99814}

12146 Pathogen[ Q85601] interacts with 1 human partners:{Q99814}

12147 Pathogen[ P14079] interacts with 1 human partners:{Q99814}

12148 Pathogen[ P03410] interacts with 1 human partners:{Q99814}

12149 Pathogen[ P0C206] interacts with 1 human partners:{Q99814}

12150 Pathogen[ P03363] interacts with 1 human partners:{Q99814}

12151 [Cluster 1940]GO:0000305+P biological\_process [name] response to oxygen radical [def] "Any process that results in a change in state or activity of a cell or an organism (in terms of movement, secretion, enzyme production, gene expression, etc.) as a result of an oxygen radical stimulus. An oxygen radical is any oxygen species that carries a free electron\_ examples include hydroxyl radicals and the superoxide anion." [GOC]

12152 Pathogen[ Q2Q067] interacts with 1 human partners:{Q9NNW7}

12153 Pathogen[ P0C214] interacts with 1 human partners:{Q9NNW7}

12154 Pathogen[ P03346] interacts with 1 human partners:{Q9NNW7}

12155 Pathogen[ P14079] interacts with 1 human partners:{Q9NNW7}

12156 Pathogen[ P03410] interacts with 1 human partners:{Q9NNW7}

12157 Pathogen[ P0C206] interacts with 1 human partners:{Q9NNW7}

12158 Pathogen[ P03363] interacts with 1 human partners:{Q9NNW7}

12159 [Cluster 1941]GO:0034721+P biological\_process [name] histone H3-K4 demethylation, trimethyl-H3-K4-specific [def] "The modification of histone H3 by the removal of a methyl group from a trimethylated lysine at position 4 of the histone." [GOC]

12160 Pathogen[ P03346] interacts with 1 human partners:{Q9UGL1}

12161 [Cluster 1942]GO:0050482+P biological\_process [name] arachidonic acid secretion [def] "The controlled release of arachidonic acid from a cell or group of cells." [GOC]

12162 Pathogen[ P14079] interacts with 1 human partners:{P04083}

12163 [Cluster 1943]GO:0072047+P biological\_process [name] proximal/distal pattern formation involved in nephron development [def] "The regionalization process in which specific areas of cell differentiation are determined along a proximal/distal axis of a nephron. The proximal/distal axis is defined by a line that runs from the center of the kidney (proximal end) outward (distal end)." [GOC]

12164 Pathogen[ P03346] interacts with 1 human partners:{P78415}

12165 Pathogen[ P03363] interacts with 1 human partners:{P78415}

12166 [Cluster 1944]GO:0043009+P biological\_process [name] chordate embryonic development [def] "The process whose specific outcome is the progression of the embryo over time, from zygote formation through a stage including a notochord and neural tube until birth or egg hatching." [GOC]

12167 Pathogen[ P03346] interacts with 1 human partners:{P51587}

12168 Pathogen[ Q85601] interacts with 1 human partners:{P51587}

12169 Pathogen[ P14079] interacts with 2 human partners:{Q9HBM0;P51587}

12170 Pathogen[ P03410] interacts with 2 human partners:{Q9HBM0;P51587}

12171 Pathogen[ P14075] interacts with 1 human partners:{Q9HBM0}

12172 Pathogen[ P0C206] interacts with 2 human partners:{P51587;Q9HBM0}

12173 [Cluster 1945]GO:0043004+P biological\_process [name] cytoplasmic sequestering of CFTR protein [def] "The selective interaction of Cystic Fibrosis Transmembrane conductance Regulator (CFTR) protein with specific molecules in the cytoplasm, thereby inhibiting its transport to the cell membrane." [GOC]

12174 Pathogen[ P0C214] interacts with 1 human partners:{Q9HD26}

12175 Pathogen[ P03346] interacts with 1 human partners:{Q9HD26}

12176 Pathogen[ Q85601] interacts with 1 human partners:{Q9HD26}

12177 Pathogen[ P14079] interacts with 1 human partners:{Q9HD26}

12178 Pathogen[ P03383] interacts with 1 human partners:{Q9HD26}

12179 Pathogen[ P03410] interacts with 1 human partners:{Q9HD26}

12180 Pathogen[ P14075] interacts with 1 human partners:{Q9HD26}

12181 Pathogen[ P0C206] interacts with 1 human partners:{Q9HD26}

12182 Pathogen[ P03363] interacts with 1 human partners:{Q9HD26}

12183 [Cluster 1946]GO:0072385+P biological\_process [name] minus-end-directed organelle transport along microtubule [def] "The directed movement of an organelle towards the minus end of a microtubule, mediated by motor proteins. This process begins with the attachment of an organelle to a microtubule, and ends when the organelle reaches its final destination." [GOC

12184 Pathogen[ Q2Q067] interacts with 1 human partners:{Q8TD16}

12185 Pathogen[ P0C214] interacts with 2 human partners:{Q8TD16;Q96G01}

12186 Pathogen[ P03346] interacts with 3 human partners:{Q96G01;P20340;Q8TD16}

12187 Pathogen[ Q85601] interacts with 2 human partners:{Q96G01;Q8TD16}

12188 Pathogen[ P14079] interacts with 2 human partners:{Q96G01;Q8TD16}

12189 Pathogen[ P03410] interacts with 2 human partners:{Q8TD16;Q96G01}

12190 Pathogen[ P0C206] interacts with 2 human partners:{Q8TD16;Q96G01}

12191 Pathogen[ P03363] interacts with 1 human partners:{Q8TD16}

12192 [Cluster 1947]GO:0006189+P biological\_process [name] 'de novo' IMP biosynthetic process [def] "The chemical reactions and pathways resulting in the formation of IMP, inosine monophosphate, by the stepwise assembly of a purine ring on ribose 5-phosphate." [GOC

12193 Pathogen[ P0C214] interacts with 2 human partners:{P31939;P30566}

12194 Pathogen[ P14079] interacts with 3 human partners:{P22234;P31939;O15067}

12195 Pathogen[ P03410] interacts with 4 human partners:{P22234;P30566;O15067;P31939}

12196 Pathogen[ P0C206] interacts with 1 human partners:{P31939}

12197 [Cluster 1948]GO:0071482+P biological\_process [name] cellular response to light stimulus [def] "Any process that results in a change in state or activity of a cell (in terms of movement, secretion, enzyme production, gene expression, etc.) as a result of a light stimulus, electromagnetic radiation of wavelengths classified as infrared, visible or ultraviolet light." [GOC

12198 Pathogen[ P14079] interacts with 1 human partners:{P56715}

12199 Pathogen[ P03410] interacts with 1 human partners:{P56715}

12200 Pathogen[ P0C206] interacts with 1 human partners:{P56715}

12201 Pathogen[ P03363] interacts with 1 human partners:{P56715}

12202 [Cluster 1949]GO:0060026+P biological\_process [name] convergent extension [def] "The morphogenetic process in which an epithelium narrows along one axis and lengthens in a perpendicular axis." [GOC

12203 Pathogen[ Q2Q067] interacts with 1 human partners:{O14641}

12204 Pathogen[ P0C214] interacts with 1 human partners:{O14641}

12205 Pathogen[ P03346] interacts with 2 human partners:{P58012;O14641}

12206 Pathogen[ Q85601] interacts with 1 human partners:{O14641}

12207 Pathogen[ P14079] interacts with 1 human partners:{O14641}

12208 Pathogen[ P03383] interacts with 1 human partners:{O14641}

12209 Pathogen[ P03410] interacts with 1 human partners:{O14641}

12210 Pathogen[ P14075] interacts with 1 human partners:{O14641}

12211 Pathogen[ P03363] interacts with 1 human partners:{O14641}

12212 [Cluster 1950]GO:0032364+P biological\_process [name] oxygen homeostasis [def] "A homeostatic process involved in the maintenance of an internal steady state of oxygen within an organism or cell." [GOC

12213 Pathogen[ Q2Q067] interacts with 2 human partners:{P22557;Q9GZT9}

12214 Pathogen[ P0C214] interacts with 3 human partners:{Q9H6Q4;P22557;Q9GZT9}

12215 Pathogen[ P03346] interacts with 2 human partners:{P22557;Q9GZT9}

12216 Pathogen[ Q85601] interacts with 2 human partners:{Q9H6Q4;Q9GZT9}

12217 Pathogen[ P14079] interacts with 3 human partners:{Q9GZT9;P22557;Q9H6Q4}

12218 Pathogen[ P03383] interacts with 1 human partners:{Q9H6Q4}

12219 Pathogen[ P03410] interacts with 3 human partners:{Q9H6Q4;Q9GZT9;P22557}

12220 Pathogen[ P14075] interacts with 1 human partners:{Q9GZT9}

12221 Pathogen[ P0C206] interacts with 3 human partners:{Q9GZT9;P22557;Q9H6Q4}

12222 [Cluster 1951]GO:0001975+P biological\_process [name] response to amphetamine [def] "Any process that results in a change in state or activity of a cell or an organism (in terms of movement, secretion, enzyme production, gene expression, etc.) as a result of an amphetamine stimulus. Amphetamines consist of a group of compounds related to alpha-methylphenethylamine." [CHEBI

12223 Pathogen[ Q2Q067] interacts with 1 human partners:{Q08209}

12224 Pathogen[ P0C214] interacts with 1 human partners:{Q08209}

12225 Pathogen[ P03346] interacts with 2 human partners:{O14717;Q08209}

12226 Pathogen[ Q85601] interacts with 1 human partners:{Q08209}

12227 Pathogen[ P14079] interacts with 2 human partners:{P16298;Q08209}

12228 Pathogen[ P03410] interacts with 1 human partners:{Q08209}

12229 Pathogen[ P0C206] interacts with 1 human partners:{Q08209}

12230 Pathogen[ P03363] interacts with 1 human partners:{O14717}

12231 [Cluster 1952]GO:2000812+P biological\_process [name] regulation of barbed-end actin filament capping [def] "Any process that modulates the frequency, rate or extent of barbed-end actin filament capping." [GOC

12232 Pathogen[ P03346] interacts with 1 human partners:{P58546}

12233 [Cluster 1953]GO:0009072+P biological\_process [name] aromatic amino acid family metabolic process [def] "The chemical reactions and pathways involving aromatic amino

acid family, amino acids with aromatic ring (phenylalanine, tyrosine, tryptophan)." [GOC

12234 Pathogen[ Q2Q067] interacts with 1 human partners:{O43708}

12235 Pathogen[ POC214] interacts with 1 human partners:{O43708}

12236 Pathogen[ P03346] interacts with 1 human partners:{O43708}

12237 Pathogen[ Q85601] interacts with 1 human partners:{O43708}

12238 Pathogen[ P14079] interacts with 2 human partners:{O43708;P16930}

12239 Pathogen[ P03410] interacts with 2 human partners:{O43708;P16930}

12240 Pathogen[ POC206] interacts with 1 human partners:{O43708}

12241 Pathogen[ P03363] interacts with 1 human partners:{O43708}

12242 [Cluster 1954]GO:0006117+P biological\_process [name] acetaldehyde metabolic process [def] "The chemical reactions and pathways involving acetaldehyde, a colorless, flammable liquid intermediate in the metabolism of alcohol." [CHEBI

12243 Pathogen[ Q2Q067] interacts with 1 human partners:{Q04206}

12244 Pathogen[ POC214] interacts with 1 human partners:{Q04206}

12245 Pathogen[ P03346] interacts with 1 human partners:{Q04206}

12246 Pathogen[ Q85601] interacts with 1 human partners:{Q04206}

12247 Pathogen[ P03383] interacts with 1 human partners:{Q04206}

12248 Pathogen[ P03410] interacts with 1 human partners:{Q04206}

12249 Pathogen[ P14075] interacts with 1 human partners:{Q04206}

12250 Pathogen[ POC206] interacts with 1 human partners:{Q04206}

12251 Pathogen[ P03363] interacts with 1 human partners:{Q04206}

12252 [Cluster 1955]GO:0006565+P biological\_process [name] L-serine catabolic process [def] "The chemical reactions and pathways resulting in the breakdown of L-serine, the L-enantiomer of serine, i.e. (2S)-2-amino-3-hydroxypropanoic acid." [CHEBI

12253 Pathogen[ Q2Q067] interacts with 1 human partners:{P34896}

12254 Pathogen[ POC214] interacts with 2 human partners:{P34896;P35520}

12255 Pathogen[ P03346] interacts with 1 human partners:{P20132}

12256 Pathogen[ Q85601] interacts with 1 human partners:{P34896}

12257 Pathogen[ P14079] interacts with 2 human partners:{P20132;P34896}

12258 Pathogen[ P03383] interacts with 1 human partners:{P34896}

12259 Pathogen[ P03410] interacts with 2 human partners:{P20132;P34896}

12260 Pathogen[ P14075] interacts with 1 human partners:{P34896}

12261 Pathogen[ POC206] interacts with 2 human partners:{P20132;P34896}

12262 [Cluster 1956]GO:0051966+P biological\_process [name] regulation of synaptic transmission, glutamatergic [def] "Any process that modulates the frequency, rate or extent of glutamatergic synaptic transmission, the process of communication from a neuron to another neuron across a synapse using the neurotransmitter glutamate." [GOC

12263 Pathogen[ POC214] interacts with 1 human partners:{P07093}

12264 Pathogen[ Q85601] interacts with 1 human partners:{P07093}

12265 [Cluster 1957]GO:0090141+P biological\_process [name] positive regulation of mitochondrial fission [def] "Any process that increases the rate, frequency or extent of mitochondrial fission. Mitochondrial fission is the division of a mitochondrion within a cell to form two or more separate mitochondrial compartments." [GOC

12266 Pathogen[ Q2Q067] interacts with 1 human partners:{Q12983}

12267 Pathogen[ POC214] interacts with 1 human partners:{Q12983}

12268 Pathogen[ P03346] interacts with 1 human partners:{Q12983}

12269 Pathogen[ Q85601] interacts with 1 human partners:{Q12983}

12270 Pathogen[ P14079] interacts with 1 human partners:{Q12983}

12271 Pathogen[ P03383] interacts with 1 human partners:{Q12983}

12272 Pathogen[ P03410] interacts with 1 human partners:{Q12983}

12273 Pathogen[ P14075] interacts with 1 human partners:{Q12983}

12274 Pathogen[ POC206] interacts with 1 human partners:{Q12983}

12275 [Cluster 1958]GO:0010988+P biological\_process [name] regulation of low-density lipoprotein particle clearance [def] "Any process that modulates the rate, frequency or extent of low-density lipoprotein particle clearance. Low-density lipoprotein particle clearance is the process in which a low-density lipoprotein particle is removed from the blood via receptor-mediated endocytosis and its constituent parts degraded." [GOC

12276 Pathogen[ Q2Q067] interacts with 1 human partners:{P61978}

12277 Pathogen[ P03346] interacts with 2 human partners:{P61978;Q9Y2B0}

12278 Pathogen[ Q85601] interacts with 1 human partners:{P61978}

12279 Pathogen[ P14079] interacts with 2 human partners:{P61978;Q9Y2B0}

12280 Pathogen[ P03383] interacts with 1 human partners:{P61978}

12281 Pathogen[ P03410] interacts with 2 human partners:{P61978;Q9Y2B0}

12282 Pathogen[ P14075] interacts with 1 human partners:{P61978}

12283 Pathogen[ POC206] interacts with 1 human partners:{P61978}

12284 Pathogen[ P03363] interacts with 1 human partners:{P61978}

12285 [Cluster 1959]GO:0060630+P biological\_process [name] regulation of M/G1 transition of mitotic cell cycle [def] "Any process that modulates the rate, frequency, or extent of M/G1 transition of the mitotic cell cycle, the progression from M phase to G1 phase of the mitotic cell cycle." [GOC

12286 Pathogen[ Q2Q067] interacts with 1 human partners:{Q9H4X1}

12287 Pathogen[ POC214] interacts with 1 human partners:{Q9H4X1}

12288 Pathogen[ P03346] interacts with 1 human partners:{Q9H4X1}

12289 Pathogen[ Q85601] interacts with 1 human partners:{Q9H4X1}

12290 Pathogen[ P03383] interacts with 1 human partners:{Q9H4X1}

12291 Pathogen[ P03410] interacts with 1 human partners:{Q9H4X1}

12292 Pathogen[ P14075] interacts with 1 human partners:{Q9H4X1}

12293 Pathogen[ P0C206] interacts with 1 human partners:{Q9H4X1}

12294 Pathogen[ P03363] interacts with 1 human partners:{Q9H4X1}

12295 [Cluster 1960]GO:2001212+P biological\_process [name] regulation of vasculogenesis [def] "Any process that modulates the frequency, rate or extent of vasculogenesis." [GOC]

12296 Pathogen[ Q2Q067] interacts with 1 human partners:{Q9Y5J3}

12297 Pathogen[ P0C214] interacts with 1 human partners:{Q9Y5J3}

12298 Pathogen[ P03346] interacts with 1 human partners:{Q9Y5J3}

12299 Pathogen[ Q85601] interacts with 1 human partners:{Q9Y5J3}

12300 Pathogen[ P14079] interacts with 1 human partners:{Q9Y5J3}

12301 Pathogen[ P03410] interacts with 1 human partners:{Q9Y5J3}

12302 Pathogen[ P0C206] interacts with 1 human partners:{Q9Y5J3}

12303 Pathogen[ P03363] interacts with 1 human partners:{Q9Y5J3}

12304 [Cluster 1961]GO:0060687+P biological\_process [name] regulation of branching involved in prostate gland morphogenesis [def] "Any process that modulates the rate, frequency, or extent of prostate gland branching, the process in which the branching structure of the prostate gland is generated and organized. A branch is a division or offshoot from a main stem." [GOC]

12305 Pathogen[ P03346] interacts with 1 human partners:{P35453}

12306 Pathogen[ P03363] interacts with 1 human partners:{P35453}

12307 [Cluster 1962]GO:0070535+P biological\_process [name] histone H2A K63-linked ubiquitination [def] "A histone ubiquitination process in which a polymer of ubiquitin, formed by linkages between lysine residues at position 63 of the ubiquitin monomers, is added to a lysine residue in histone H2A or the variant H2AX." [GOC]

12308 Pathogen[ Q2Q067] interacts with 1 human partners:{O76064}

12309 Pathogen[ P0C214] interacts with 2 human partners:{Q8IYW5;O76064}

12310 Pathogen[ P03346] interacts with 2 human partners:{O76064;Q8IYW5}

12311 Pathogen[ Q85601] interacts with 2 human partners:{O76064;Q8IYW5}

12312 Pathogen[ P0C206] interacts with 2 human partners:{Q8IYW5;O76064}

12313 Pathogen[ P03363] interacts with 1 human partners:{Q8IYW5}

12314 [Cluster 1963]GO:0048280+P biological\_process [name] vesicle fusion with Golgi apparatus [def] "The joining of the lipid bilayer membrane around a vesicle to the lipid bilayer membrane around the Golgi." [GOC]

12315 Pathogen[ Q2Q067] interacts with 2 human partners:{O15155;O60763}

12316 Pathogen[ P0C214] interacts with 2 human partners:{O60763;O15155}

12317 Pathogen[ P03346] interacts with 3 human partners:{Q13190;O60763;O15155}

12318 Pathogen[ Q85601] interacts with 2 human partners:{O60763;O15155}

12319 Pathogen[ P14079] interacts with 2 human partners:{O15155;O60763}

12320 Pathogen[ P03410] interacts with 3 human partners:{Q13190;O60763;O15155}

12321 Pathogen[ P0C206] interacts with 2 human partners:{O15155;O60763}

12322 Pathogen[ P03363] interacts with 1 human partners:{O60763}

12323 [Cluster 1964]GO:0048034+P biological\_process [name] heme O biosynthetic process [def] "The chemical reactions and pathways resulting in the formation of heme O, a derivative of heme containing a 17-carbon hydroxyethylfarnesyl side chain at position 8 of the tetrapyrrole macrocycle." [GOC]

12324 Pathogen[ P14079] interacts with 1 human partners:{Q12887}

12325 Pathogen[ P03410] interacts with 1 human partners:{Q12887}

12326 [Cluster 1965]GO:0002155+P biological\_process [name] regulation of thyroid hormone mediated signaling pathway [def] "Any process that modulates the frequency, rate or extent of a thyroid hormone mediated signaling pathway." [GOC]

12327 Pathogen[ Q2Q067] interacts with 1 human partners:{P10827}

12328 Pathogen[ P03346] interacts with 1 human partners:{P10827}

12329 Pathogen[ Q85601] interacts with 1 human partners:{P10827}

12330 Pathogen[ P14079] interacts with 1 human partners:{P10827}

12331 Pathogen[ P0C206] interacts with 1 human partners:{P10827}

12332 [Cluster 1966]GO:0003091+P biological\_process [name] renal water homeostasis [def] "Renal process involved in the maintenance of an internal steady state of water in the body." [GOC]

12333 Pathogen[ P03346] interacts with 1 human partners:{Q92481}

12334 [Cluster 1967]GO:0021707+P biological\_process [name] cerebellar granule cell differentiation [def] "The process in which neuroblasts acquire specialized structural and/or functional features that characterize the mature cerebellar granule cell. Differentiation includes the processes involved in commitment of a neuroblast to a granule cell fate. A granule cell is a glutamatergic interneuron found in the cerebellar cortex." [GO\_REF]

12335 Pathogen[ P03346] interacts with 1 human partners:{P58546}

12336 [Cluster 1968]GO:0006438+P biological\_process [name] valyl-tRNA aminoacylation [def] "The process of coupling valine to valyl-tRNA, catalyzed by valyl-tRNA synthetase. In tRNA aminoacylation, the amino acid is first activated by linkage to AMP and then transferred to either the 2'- or the 3'-hydroxyl group of the 3'-adenosine residue of the tRNA." [GOC]

12337 Pathogen[ P0C214] interacts with 2 human partners:{P26640;Q5ST30}

12338 Pathogen[ P14079] interacts with 2 human partners:{Q5ST30;P26640}

12339 Pathogen[ P03410] interacts with 2 human partners:{Q5ST30;P26640}

12340 Pathogen[ P0C206] interacts with 2 human partners:{Q5ST30;P26640}

12341 [Cluster 1969]GO:0071985+P biological\_process [name] multivesicular body sorting



pathway [def] "A vesicle-mediated transport process in which transmembrane proteins are ubiquitylated to facilitate their entry into luminal vesicles of multivesicular bodies (MVBs)\_ upon subsequent fusion of MVBs with lysosomes or vacuoles, the cargo proteins are degraded." [GOC

12342 Pathogen[ P14079] interacts with 1 human partners:{Q8NEV8}

12343 Pathogen[ P03410] interacts with 1 human partners:{Q8NEV8}

12344 [Cluster 1970]GO:0048265+P biological\_process [name] response to pain [def] "Any process that results in a change in state or activity of a cell or an organism (in terms of movement, secretion, enzyme production, gene expression, etc.) as a result of a pain stimulus. Pain stimuli cause activation of nociceptors, peripheral receptors for pain, include receptors which are sensitive to painful mechanical stimuli, extreme heat or cold, and chemical stimuli." [GOC

12345 Pathogen[ Q2Q067] interacts with 1 human partners:{P30793}

12346 Pathogen[ P0C214] interacts with 1 human partners:{P30793}

12347 Pathogen[ Q85601] interacts with 1 human partners:{P30793}

12348 Pathogen[ P14079] interacts with 1 human partners:{P30793}

12349 Pathogen[ P03410] interacts with 1 human partners:{P30793}

12350 Pathogen[ P14075] interacts with 1 human partners:{P30793}

12351 Pathogen[ P0C206] interacts with 1 human partners:{P30793}

12352 [Cluster 1971]GO:0044375+P biological\_process [name] regulation of peroxisome size [def] "Any process that modulates the volume of a peroxisome, a small, membrane-bounded organelle that uses dioxygen (O2) to oxidize organic molecules." [GOC

12353 Pathogen[ P03346] interacts with 1 human partners:{O96011}

12354 Pathogen[ P14079] interacts with 3 human partners:{O75192;Q96HA9;O96011}

12355 Pathogen[ P03383] interacts with 1 human partners:{Q96HA9}

12356 Pathogen[ P03410] interacts with 3 human partners:{O75192;O96011;Q96HA9}

12357 Pathogen[ P14075] interacts with 2 human partners:{Q96HA9;O75192}

12358 Pathogen[ P0C206] interacts with 3 human partners:{O75192;Q96HA9;O96011}

12359 [Cluster 1972]GO:0002634+P biological\_process [name] regulation of germinal center formation [def] "Any process that modulates the frequency, rate, or extent of germinal center formation." [GOC

12360 Pathogen[ Q2Q067] interacts with 1 human partners:{P41182}

12361 Pathogen[ P0C214] interacts with 1 human partners:{P41182}

12362 Pathogen[ P03346] interacts with 1 human partners:{P41182}

12363 Pathogen[ Q85601] interacts with 1 human partners:{P41182}

12364 Pathogen[ P14079] interacts with 2 human partners:{Q06413;P41182}

12365 Pathogen[ P03410] interacts with 1 human partners:{P41182}

12366 Pathogen[ P0C206] interacts with 1 human partners:{P41182}

12367 [Cluster 1973]GO:0002380+P biological\_process [name] immunoglobulin secretion involved in immune response [def] "The regulated release of immunoglobulins from a B cell or plasma cell contributing to an immune response." [GOC

12368 Pathogen[ Q2Q067] interacts with 1 human partners:{P09086}

12369 Pathogen[ P0C214] interacts with 1 human partners:{P09086}

12370 Pathogen[ P03346] interacts with 1 human partners:{P09086}

12371 Pathogen[ Q85601] interacts with 1 human partners:{P09086}

12372 Pathogen[ P14079] interacts with 1 human partners:{P09086}

12373 Pathogen[ P0C206] interacts with 1 human partners:{P09086}

12374 Pathogen[ P03363] interacts with 1 human partners:{P09086}

12375 [Cluster 1974]GO:0021785+P biological\_process [name] branchiomotor neuron axon guidance [def] "The process in which a branchiomotor neuron growth cone is directed to a specific target site. Branchiomotor neurons are located in the hindbrain and innervate branchial arch-derived muscles that control jaw movements, facial expression, the larynx, and the pharynx." [GO\_REF

12376 Pathogen[ P03346] interacts with 1 human partners:{O75592}

12377 [Cluster 1975]GO:0003197+P biological\_process [name] endocardial cushion development [def] "The progression of a cardiac cushion over time, from its initial formation to the mature structure. The endocardial cushion is a specialized region of mesenchymal cells that will give rise to the heart septa and valves." [GOC

12378 Pathogen[ P03346] interacts with 1 human partners:{Q99593}

12379 [Cluster 1976]GO:0002368+P biological\_process [name] B cell cytokine production [def] "Any process that contributes to cytokine production by a B cell." [GOC

12380 Pathogen[ P0C214] interacts with 1 human partners:{P10809}

12381 [Cluster 1977]GO:0019262+P biological\_process [name] N-acetylneuraminate catabolic process [def] "The chemical reactions and pathways resulting in the breakdown of N-acetylneuraminate, the anion of 5-(acetyl-amino)-3,5-dideoxy-D-glycero-D-galacto-non-3-ulosonic acid." [ISBN

12382 Pathogen[ P0C214] interacts with 1 human partners:{Q9BXD5}

12383 Pathogen[ Q85601] interacts with 1 human partners:{Q9BXD5}

12384 Pathogen[ P14079] interacts with 1 human partners:{Q9BXD5}

12385 Pathogen[ P03410] interacts with 1 human partners:{Q9BXD5}

12386 Pathogen[ P14075] interacts with 1 human partners:{Q9BXD5}

12387 Pathogen[ P0C206] interacts with 1 human partners:{Q9BXD5}

12388 Pathogen[ P03363] interacts with 1 human partners:{Q9BXD5}

12389 [Cluster 1978]GO:0048532+P biological\_process [name] anatomical structure arrangement [def] "The process that gives rise to the configuration of the constituent parts of an anatomical structure. This process pertains to the physical shaping of a rudimentary

structure. Anatomical structures can be macroscopic such as a carpel, or microscopic such as an acrosome." [GOC

12390 Pathogen[ Q2Q067] interacts with 1 human partners:{P63000}

12391 Pathogen[ P0C214] interacts with 1 human partners:{P63000}

12392 Pathogen[ P03346] interacts with 1 human partners:{P63000}

12393 Pathogen[ Q85601] interacts with 1 human partners:{P63000}

12394 Pathogen[ P03383] interacts with 1 human partners:{P63000}

12395 Pathogen[ P03410] interacts with 1 human partners:{P63000}

12396 Pathogen[ P14075] interacts with 1 human partners:{P63000}

12397 Pathogen[ P0C206] interacts with 1 human partners:{P63000}

12398 Pathogen[ P03363] interacts with 1 human partners:{P63000}

12399 [Cluster 1979]GO:0006597+P biological\_process [name] spermine biosynthetic process [def] "The chemical reactions and pathways resulting in the formation of spermine, a polybasic amine found in human sperm, in ribosomes and in some viruses and involved in nucleic acid packaging." [CHEBI

12400 Pathogen[ P0C214] interacts with 1 human partners:{P52788}

12401 Pathogen[ P14079] interacts with 1 human partners:{P17707}

12402 Pathogen[ P03410] interacts with 2 human partners:{P52788;P17707}

12403 [Cluster 1980]GO:0060441+P biological\_process [name] epithelial tube branching involved in lung morphogenesis [def] "The process in which a highly ordered sequence of patterning events generates the branched epithelial tubes of the lung, consisting of reiterated combinations of bud outgrowth, elongation, and dichotomous subdivision of terminal units." [GOC

12404 Pathogen[ Q2Q067] interacts with 1 human partners:{P20719}

12405 Pathogen[ P03346] interacts with 1 human partners:{P20719}

12406 Pathogen[ P14079] interacts with 1 human partners:{Q14118}

12407 Pathogen[ P03410] interacts with 1 human partners:{Q14118}

12408 Pathogen[ P0C206] interacts with 1 human partners:{P20719}

12409 Pathogen[ P03363] interacts with 1 human partners:{P20719}

12410 [Cluster 1981]GO:0022612+P biological\_process [name] gland morphogenesis [def] "The process in which the anatomical structures of a gland are generated and organized." [GOC

12411 Pathogen[ P03346] interacts with 2 human partners:{P35453;Q8TAU0}

12412 Pathogen[ P0C206] interacts with 1 human partners:{Q8TAU0}

12413 Pathogen[ P03363] interacts with 2 human partners:{P35453;Q8TAU0}

12414 [Cluster 1982]GO:0050893+P biological\_process [name] sensory processing [def] "Any neural process required for an organism to sense and interpret the dimensions of a sensory experience

12415 Pathogen[ P03346] interacts with 1 human partners:{Q8TAM2}

12416 Pathogen[ P14079] interacts with 1 human partners:{Q8TAM2}

12417 Pathogen[ P03410] interacts with 1 human partners:{Q8TAM2}

12418 Pathogen[ P0C206] interacts with 1 human partners:{Q8TAM2}

12419 Pathogen[ P03363] interacts with 1 human partners:{Q8TAM2}

12420 [Cluster 1983]GO:0001957+P biological\_process [name] intramembranous ossification [def] "The formation of bone in which osteoblasts secrete a collagen-proteoglycan matrix that binds calcium salts and becomes calcified. Intramembranous ossification is the way flat bones and the shell of a turtle are formed." [ISBN

12421 Pathogen[ P03346] interacts with 1 human partners:{Q10571}

12422 Pathogen[ P14079] interacts with 1 human partners:{Q10571}

12423 Pathogen[ P03410] interacts with 1 human partners:{Q10571}

12424 Pathogen[ P14075] interacts with 1 human partners:{Q10571}

12425 Pathogen[ P0C206] interacts with 1 human partners:{Q10571}

12426 Pathogen[ P03363] interacts with 1 human partners:{Q10571}

12427 [Cluster 1984]GO:0097359+P

12428 Pathogen[ P14079] interacts with 2 human partners:{Q9NYU1;Q9NYU2}

12429 Pathogen[ P03410] interacts with 2 human partners:{Q9NYU1;Q9NYU2}

12430 [Cluster 1985]GO:0010888+P biological\_process [name] negative regulation of lipid storage [def] "Any process that modulates the rate, frequency or extent of lipid storage. Lipid storage is the accumulation and maintenance in cells or tissues of lipids, compounds soluble in organic solvents but insoluble or sparingly soluble in aqueous solvents. Lipid reserves can be accumulated during early developmental stages for mobilization and utilization at later stages of development." [GOC

12431 Pathogen[ Q2Q067] interacts with 1 human partners:{P25963}

12432 Pathogen[ P0C214] interacts with 1 human partners:{P25963}

12433 Pathogen[ P03346] interacts with 1 human partners:{P25963}

12434 Pathogen[ Q85601] interacts with 1 human partners:{P25963}

12435 Pathogen[ P03383] interacts with 1 human partners:{P25963}

12436 Pathogen[ P03410] interacts with 1 human partners:{P25963}

12437 Pathogen[ P14075] interacts with 1 human partners:{P25963}

12438 Pathogen[ P0C206] interacts with 1 human partners:{P25963}

12439 Pathogen[ P03363] interacts with 1 human partners:{P25963}

12440 [Cluster 1986]GO:0032853+P biological\_process [name] positive regulation of Ran GTPase activity [def] "Any process that activates or increases the activity of a GTPase of the Ran family." [GOC

12441 Pathogen[ P0C214] interacts with 1 human partners:{P46060}

12442 Pathogen[ P03346] interacts with 1 human partners:{P46060}

12443 Pathogen[ Q85601] interacts with 1 human partners:{P46060}

12444 Pathogen[ P14079] interacts with 1 human partners:{P46060}

12445 Pathogen[ P03410] interacts with 1 human partners:{P46060}

12446 Pathogen[ P0C206] interacts with 1 human partners:{P46060}

12447 Pathogen[ P03363] interacts with 1 human partners:{P46060}

12448 [Cluster 1987]GO:0044597+P

12449 Pathogen[ Q2Q067] interacts with 1 human partners:{P15121}

12450 Pathogen[ P0C214] interacts with 1 human partners:{P15121}

12451 Pathogen[ P03346] interacts with 1 human partners:{P15121}

12452 Pathogen[ Q85601] interacts with 1 human partners:{P15121}

12453 Pathogen[ P0C206] interacts with 1 human partners:{P15121}

12454 [Cluster 1988]GO:0060847+P biological\_process [name] endothelial cell fate specification [def] "The process involved in the specification of identity of an endothelial cell. Once specification has taken place, a cell will be committed to differentiate down a specific pathway if left in its normal environment." [GOC

12455 Pathogen[ P03346] interacts with 1 human partners:{P31271}

12456 Pathogen[ Q85601] interacts with 1 human partners:{P31271}

12457 Pathogen[ P14079] interacts with 1 human partners:{P31271}

12458 Pathogen[ P0C206] interacts with 1 human partners:{P31271}

12459 Pathogen[ P03363] interacts with 1 human partners:{P31271}

12460 [Cluster 1989]GO:0045980+P biological\_process [name] negative regulation of nucleotide metabolic process [def] "Any process that stops, prevents, or reduces the frequency, rate or extent of the chemical reactions and pathways involving nucleotides." [GOC

12461 Pathogen[ Q2Q067] interacts with 1 human partners:{Q9UII2}

12462 Pathogen[ P0C214] interacts with 1 human partners:{Q9UII2}

12463 Pathogen[ P03346] interacts with 1 human partners:{Q9UII2}

12464 Pathogen[ Q85601] interacts with 1 human partners:{Q9UII2}

12465 Pathogen[ P14079] interacts with 1 human partners:{Q9UII2}

12466 Pathogen[ P03383] interacts with 1 human partners:{Q9UII2}

12467 Pathogen[ P03410] interacts with 1 human partners:{Q9UII2}

12468 Pathogen[ P14075] interacts with 1 human partners:{Q9UII2}

12469 Pathogen[ P0C206] interacts with 1 human partners:{Q9UII2}

12470 [Cluster 1990]GO:0007406+P biological\_process [name] negative regulation of neuroblast proliferation [def] "Any process that stops, prevents, or reduces the frequency, rate or extent of the proliferation of neuroblasts." [GOC

12471 Pathogen[ P03346] interacts with 1 human partners:{Q693B1}

12472 Pathogen[ P0C206] interacts with 1 human partners:{Q693B1}

12473 Pathogen[ P03363] interacts with 1 human partners:{Q693B1}

12474 [Cluster 1991]GO:0051097+P biological\_process [name] negative regulation of helicase activity [def] "Any process that stops or reduces the activity of a helicase." [GOC

12475 Pathogen[ Q2Q067] interacts with 1 human partners:{P09914}

12476 Pathogen[ P0C214] interacts with 1 human partners:{P09914}

12477 Pathogen[ P03346] interacts with 1 human partners:{P09914}

12478 Pathogen[ Q85601] interacts with 1 human partners:{P09914}

12479 Pathogen[ P14079] interacts with 1 human partners:{P09914}

12480 Pathogen[ P03410] interacts with 1 human partners:{P09914}

12481 Pathogen[ P0C206] interacts with 1 human partners:{P09914}

12482 Pathogen[ P03363] interacts with 1 human partners:{P09914}

12483 [Cluster 1992]GO:0033629+P biological\_process [name] negative regulation of cell adhesion mediated by integrin [def] "Any process that stops, prevents, or reduces the frequency, rate, or extent of cell adhesion mediated by integrin." [GOC

12484 Pathogen[ P0C214] interacts with 1 human partners:{P05121}

12485 Pathogen[ Q85601] interacts with 1 human partners:{P05121}

12486 Pathogen[ P03410] interacts with 1 human partners:{P05121}

12487 Pathogen[ P0C206] interacts with 1 human partners:{P05121}

12488 [Cluster 1993]GO:0048203+P biological\_process [name] vesicle targeting, trans-Golgi to endosome [def] "The process in which vesicles are directed to specific destination membranes during transport from the trans-Golgi to the endosome." [GOC

12489 Pathogen[ P03410] interacts with 1 human partners:{Q5MNZ9}

12490 [Cluster 1994]GO:0031247+P biological\_process [name] actin rod assembly [def] "The assembly of actin rods, a cellular structure consisting of parallel, hexagonally arranged actin tubules." [GOC

12491 Pathogen[ Q2Q067] interacts with 1 human partners:{P14625}

12492 Pathogen[ P0C214] interacts with 2 human partners:{P14625;Q96GD0}

12493 Pathogen[ P03346] interacts with 1 human partners:{P14625}

12494 Pathogen[ Q85601] interacts with 1 human partners:{P14625}

12495 Pathogen[ P14079] interacts with 2 human partners:{Q96GD0;P14625}

12496 Pathogen[ P03383] interacts with 1 human partners:{P14625}

12497 Pathogen[ P03410] interacts with 2 human partners:{P14625;Q96GD0}

12498 Pathogen[ P14075] interacts with 1 human partners:{P14625}

12499 Pathogen[ P0C206] interacts with 2 human partners:{Q96GD0;P14625}

12500 [Cluster 1995]GO:0072305+P biological\_process [name] negative regulation of mesenchymal stem cell apoptosis involved in metanephric nephron morphogenesis [def] "Any process that reduces the occurrence or rate of mesenchymal stem cell death by apoptosis that contributes to the shaping of the nephron in the metanephros." [GOC

12501 Pathogen[ P03346] interacts with 1 human partners:{Q06710}

12502 [Cluster 1996]GO:0045639+P biological\_process [name] positive regulation of myeloid

cell differentiation [def] "Any process that activates or increases the frequency, rate or extent of myeloid cell differentiation." [GOC

12503 Pathogen[ Q2Q067] interacts with 1 human partners:{P20719}

12504 Pathogen[ P03346] interacts with 1 human partners:{P20719}

12505 Pathogen[ P0C206] interacts with 1 human partners:{P20719}

12506 Pathogen[ P03363] interacts with 1 human partners:{P20719}

12507 [Cluster 1997]GO:0071625+P biological\_process [name] vocalization behavior [def] "The behavior in which an organism produces sounds by a mechanism involving its respiratory system." [GOC

12508 Pathogen[ Q2Q067] interacts with 1 human partners:{P78352}

12509 Pathogen[ P0C214] interacts with 1 human partners:{P78352}

12510 Pathogen[ P03346] interacts with 1 human partners:{P78352}

12511 Pathogen[ Q85601] interacts with 1 human partners:{P78352}

12512 Pathogen[ P03383] interacts with 1 human partners:{P78352}

12513 Pathogen[ P03410] interacts with 1 human partners:{P78352}

12514 Pathogen[ P14075] interacts with 1 human partners:{P78352}

12515 Pathogen[ P0C206] interacts with 1 human partners:{P78352}

12516 Pathogen[ P03363] interacts with 1 human partners:{P78352}

12517 [Cluster 1998]GO:0042738+P biological\_process [name] exogenous drug catabolic process [def] "The chemical reactions and pathways resulting in the breakdown of a drug that has originated externally to the cell or organism." [GOC

12518 Pathogen[ P03346] interacts with 1 human partners:{O75469}

12519 Pathogen[ P14079] interacts with 1 human partners:{O75469}

12520 Pathogen[ P0C206] interacts with 1 human partners:{O75469}

12521 [Cluster 1999]GO:0042694+P biological\_process [name] muscle cell fate specification [def] "The process in which a cell becomes capable of differentiating autonomously into a muscle cell in an environment that is neutral with respect to the developmental pathway\_ upon specification, the cell fate can be reversed." [CL

12522 Pathogen[ P03346] interacts with 1 human partners:{P10916}

12523 Pathogen[ P14079] interacts with 1 human partners:{P10916}

12524 Pathogen[ P03410] interacts with 1 human partners:{P10916}

12525 Pathogen[ P03363] interacts with 1 human partners:{P10916}

12526 [Cluster 2000]GO:0034477+P biological\_process [name] U6 snRNA 3'-end processing [def] "Any process involved in forming the mature 3' end of a U6 snRNA molecule." [GOC

12527 Pathogen[ Q2Q067] interacts with 1 human partners:{Q9BQ65}

12528 Pathogen[ P0C214] interacts with 1 human partners:{Q9BQ65}

12529 Pathogen[ P03346] interacts with 1 human partners:{Q9BQ65}

12530 Pathogen[ P14079] interacts with 1 human partners:{Q9BQ65}

12531 Pathogen[ P03383] interacts with 1 human partners:{Q9BQ65}

12532 Pathogen[ P03410] interacts with 1 human partners:{Q9BQ65}

12533 Pathogen[ P14075] interacts with 1 human partners:{Q9BQ65}

12534 Pathogen[ P0C206] interacts with 1 human partners:{Q9BQ65}

12535 Pathogen[ P03363] interacts with 1 human partners:{Q9BQ65}

12536 [Cluster 2001]GO:0007007+P biological\_process [name] inner mitochondrial membrane organization [def] "A process that is carried out at the cellular level which results in the assembly, arrangement of constituent parts, or disassembly of the mitochondrial inner membrane." [GOC

12537 Pathogen[ Q2Q067] interacts with 1 human partners:{Q9NX63}

12538 Pathogen[ P0C214] interacts with 1 human partners:{Q9NX63}

12539 Pathogen[ P03346] interacts with 1 human partners:{Q9NX63}

12540 Pathogen[ Q85601] interacts with 1 human partners:{Q9NX63}

12541 Pathogen[ P03383] interacts with 1 human partners:{Q9NX63}

12542 Pathogen[ P03410] interacts with 1 human partners:{Q9NX63}

12543 Pathogen[ P14075] interacts with 1 human partners:{Q9NX63}

12544 Pathogen[ P0C206] interacts with 1 human partners:{Q9NX63}

12545 Pathogen[ P03363] interacts with 1 human partners:{Q9NX63}

12546 [Cluster 2002]GO:0032696+P biological\_process [name] negative regulation of interleukin-13 production [def] "Any process that stops, prevents, or reduces the frequency, rate, or extent of interleukin-13 production." [GOC

12547 Pathogen[ P14079] interacts with 1 human partners:{Q8IU54}

12548 [Cluster 2003]GO:0051495+P biological\_process [name] positive regulation of cytoskeleton organization [def] "Any process that activates or increases the frequency, rate or extent of the formation, arrangement of constituent parts, or disassembly of cytoskeletal structures." [GOC

12549 Pathogen[ Q2Q067] interacts with 1 human partners:{O60504}

12550 Pathogen[ P0C214] interacts with 1 human partners:{O60504}

12551 Pathogen[ P03346] interacts with 1 human partners:{O60504}

12552 Pathogen[ Q85601] interacts with 1 human partners:{O60504}

12553 Pathogen[ P14079] interacts with 1 human partners:{O60504}

12554 Pathogen[ P03383] interacts with 1 human partners:{O60504}

12555 Pathogen[ P03410] interacts with 1 human partners:{O60504}

12556 Pathogen[ P14075] interacts with 1 human partners:{O60504}

12557 Pathogen[ P0C206] interacts with 1 human partners:{O60504}

12558 [Cluster 2004]GO:0046661+P biological\_process [name] male sex differentiation [def] "The establishment of the sex of a male organism by physical differentiation." [GOC

12559 Pathogen[ P03346] interacts with 1 human partners:{Q9Y5R6}

12560 Pathogen[ P0C206] interacts with 1 human partners:{Q9Y5R6}

12561 Pathogen[ P03363] interacts with 1 human partners:{Q9Y5R6}

12562 [Cluster 2005]GO:0006557+P biological\_process [name] S-adenosylmethioninamine biosynthetic process [def] "The chemical reactions and pathways resulting in the formation of S-adenosylmethioninamine, (5-deoxy-5-adenosyl)(3-aminopropyl)methylsulfonium salt." [GOC]

12563 Pathogen[ P14079] interacts with 1 human partners:{P17707}

12564 Pathogen[ P03410] interacts with 1 human partners:{P17707}

12565 [Cluster 2006]GO:0070562+P biological\_process [name] regulation of vitamin D receptor signaling pathway [def] "Any process that modulates the frequency, rate or extent of vitamin D receptor signaling pathway activity." [GOC]

12566 Pathogen[ Q2Q067] interacts with 1 human partners:{O15164}

12567 Pathogen[ P0C214] interacts with 1 human partners:{O15164}

12568 Pathogen[ P03346] interacts with 1 human partners:{O15164}

12569 Pathogen[ Q85601] interacts with 1 human partners:{O15164}

12570 Pathogen[ P14079] interacts with 1 human partners:{O15164}

12571 Pathogen[ P0C206] interacts with 1 human partners:{O15164}

12572 [Cluster 2007]GO:0045687+P biological\_process [name] positive regulation of glial cell differentiation [def] "Any process that activates or increases the frequency, rate or extent of glia cell differentiation." [GOC]

12573 Pathogen[ P03346] interacts with 1 human partners:{P78426}

12574 Pathogen[ P03363] interacts with 1 human partners:{Q9C056}

12575 [Cluster 2008]GO:2000299+P biological\_process [name] negative regulation of Rho-dependent protein serine/threonine kinase activity [def] "Any process that stops, prevents or reduces the frequency, rate or extent of Rho-dependent protein serine/threonine kinase activity." [GOC]

12576 Pathogen[ P03346] interacts with 1 human partners:{Q9UHD1}

12577 Pathogen[ Q85601] interacts with 1 human partners:{Q9UHD1}

12578 Pathogen[ P14079] interacts with 1 human partners:{Q9UHD1}

12579 Pathogen[ P03410] interacts with 1 human partners:{Q9UHD1}

12580 Pathogen[ P0C206] interacts with 1 human partners:{Q9UHD1}

12581 [Cluster 2009]GO:0055009+P biological\_process [name] atrial cardiac muscle tissue morphogenesis [def] "The process in which the anatomical structure of cardiac atrium muscle is generated and organized." [GOC]

12582 Pathogen[ P0C214] interacts with 1 human partners:{P13533}

12583 Pathogen[ Q85601] interacts with 1 human partners:{P13533}

12584 Pathogen[ P03410] interacts with 1 human partners:{P13533}

12585 Pathogen[ P0C206] interacts with 1 human partners:{P13533}

12586 [Cluster 2010]GO:0042531+P biological\_process [name] positive regulation of tyrosine phosphorylation of STAT protein [def] "Any process that activates or increases the frequency, rate or extent of the introduction of a phosphate group to a tyrosine residue of a STAT (Signal Transducer and Activator of Transcription) protein." [GOC]

12587 Pathogen[ P03346] interacts with 1 human partners:{P14317}

12588 Pathogen[ Q85601] interacts with 1 human partners:{P14317}

12589 Pathogen[ P14079] interacts with 1 human partners:{Q8IU54}

12590 Pathogen[ P0C206] interacts with 1 human partners:{P14317}

12591 Pathogen[ P03363] interacts with 1 human partners:{P14317}

12592 [Cluster 2011]GO:0018012+P biological\_process [name] N-terminal peptidyl-alanine trimethylation [def] "The trimethylation of the N-terminal alanine of proteins to form the derivative peptidyl-N,N,N-trimethyl-L-alanine." [RESID]

12593 Pathogen[ Q2Q067] interacts with 1 human partners:{Q9BV86}

12594 Pathogen[ P0C214] interacts with 1 human partners:{Q9BV86}

12595 Pathogen[ P03346] interacts with 1 human partners:{Q9BV86}

12596 Pathogen[ Q85601] interacts with 1 human partners:{Q9BV86}

12597 Pathogen[ P14079] interacts with 1 human partners:{Q9BV86}

12598 Pathogen[ P03410] interacts with 1 human partners:{Q9BV86}

12599 Pathogen[ P0C206] interacts with 1 human partners:{Q9BV86}

12600 Pathogen[ P03363] interacts with 1 human partners:{Q9BV86}

12601 [Cluster 2012]GO:0051306+P biological\_process [name] mitotic sister chromatid separation [def] "The process in which sister chromatids are physically detached from each other during mitosis." [GOC]

12602 Pathogen[ P0C214] interacts with 1 human partners:{Q8IYB7}

12603 Pathogen[ P03346] interacts with 1 human partners:{Q8IYB7}

12604 Pathogen[ Q85601] interacts with 1 human partners:{Q8IYB7}

12605 Pathogen[ P14079] interacts with 1 human partners:{Q8IYB7}

12606 Pathogen[ P03410] interacts with 1 human partners:{Q8IYB7}

12607 Pathogen[ P0C206] interacts with 1 human partners:{Q8IYB7}

12608 Pathogen[ P03363] interacts with 1 human partners:{Q8IYB7}

12609 [Cluster 2013]GO:0048822+P biological\_process [name] enucleate erythrocyte development [def] "The process aimed at the progression of an enucleate erythrocyte over time, from initial commitment of the cell to a specific fate, to the fully functional differentiated cell." [GOC]

12610 Pathogen[ P0C214] interacts with 1 human partners:{Q7L5Y9}

12611 Pathogen[ Q85601] interacts with 1 human partners:{Q7L5Y9}

12612 Pathogen[ P14079] interacts with 1 human partners:{Q7L5Y9}

12613 Pathogen[ P03410] interacts with 1 human partners:{Q7L5Y9}

12614 Pathogen[ P14075] interacts with 1 human partners:{Q7L5Y9}

12615 Pathogen[ P0C206] interacts with 1 human partners:{Q7L5Y9}

12616 [Cluster 2014]GO:0007603+P biological\_process [name] phototransduction, visible light [def] "The sequence of reactions within a cell required to convert absorbed photons from visible light into a molecular signal. A visible light stimulus is electromagnetic radiation that can be perceived visually by an organism\_ for organisms lacking a visual system, this can be defined as light with a wavelength within the range 380 to 780 nm." [GOC

12617 Pathogen[ P14079] interacts with 1 human partners:{P56715}

12618 Pathogen[ P03410] interacts with 1 human partners:{P56715}

12619 Pathogen[ P0C206] interacts with 1 human partners:{P56715}

12620 Pathogen[ P03363] interacts with 2 human partners:{P56715;Q9NZN9}

12621 [Cluster 2015]GO:0021853+P biological\_process [name] cerebral cortex GABAergic interneuron migration [def] "The migration of GABAergic interneuron precursors from the subpallium to the cerebral cortex." [GO\_REF

12622 Pathogen[ P03346] interacts with 1 human partners:{Q96QS3}

12623 Pathogen[ P03363] interacts with 1 human partners:{Q96QS3}

12624 [Cluster 2016]GO:0009650+P biological\_process [name] UV protection [def] "Any process in which an organism or cell protects itself from ultraviolet radiation (UV), which may also result in resistance to repeated exposure to UV." [GOC

12625 Pathogen[ Q2Q067] interacts with 3 human partners:{Q92889;P39748;P28715}

12626 Pathogen[ P0C214] interacts with 3 human partners:{Q92889;P28715;P39748}

12627 Pathogen[ P03346] interacts with 4 human partners:{P28715;P07992;Q92889;P39748}

12628 Pathogen[ Q85601] interacts with 4 human partners:{Q92889;P28715;P39748;P19447}

12629 Pathogen[ P14079] interacts with 6 human partners:{P28715;Q92889;P07992;P19447;Q6AZY7;P39748}

12630 Pathogen[ P03410] interacts with 7 human partners:{P07992;Q92889;P39748;P28715;P19447;Q6AZY7;Q9BRK5}

12631 Pathogen[ P0C206] interacts with 5 human partners:{P28715;P07992;P19447;Q92889;P39748}

12632 Pathogen[ P03363] interacts with 1 human partners:{Q92889}

12633 [Cluster 2017]GO:0045745+P biological\_process [name] positive regulation of G-protein coupled receptor protein signaling pathway [def] "Any process that activates or increases the frequency, rate or extent of G-protein coupled receptor protein signaling pathway activity." [GOC

12634 Pathogen[ P0C214] interacts with 2 human partners:{P18545;Q13956}

12635 Pathogen[ P14079] interacts with 2 human partners:{P18545;Q13956}

12636 Pathogen[ P03410] interacts with 2 human partners:{Q13956;P18545}

12637 Pathogen[ P0C206] interacts with 2 human partners:{P18545;Q13956}

12638 Pathogen[ P03363] interacts with 1 human partners:{Q9NZR1}

12639 [Cluster 2018]GO:0003402+P biological\_process [name] planar cell polarity pathway involved in axis elongation [def] "The series of molecular signals initiated by binding of a Wnt protein to a receptor on the surface of the target cell where activated receptors signal to modulate cytoskeletal elements and control cell polarity that contributes to axis elongation." [GOC

12640 Pathogen[ Q2Q067] interacts with 1 human partners:{Q86UL8}

12641 Pathogen[ P03346] interacts with 1 human partners:{Q86UL8}

12642 Pathogen[ Q85601] interacts with 1 human partners:{Q86UL8}

12643 Pathogen[ P14079] interacts with 1 human partners:{Q86UL8}

12644 Pathogen[ P03410] interacts with 1 human partners:{Q86UL8}

12645 Pathogen[ P0C206] interacts with 1 human partners:{Q86UL8}

12646 Pathogen[ P03363] interacts with 1 human partners:{Q86UL8}

12647 [Cluster 2019]GO:0007136+P biological\_process [name] meiotic prophase II [def] "Prophase occurring as part of meiosis II. Prophase is the part of nuclear division in which, canonically, chromosomes condense and the two daughter centrioles and their asters migrate toward the poles of the cell. Meiosis II is the second phase of meiosis, in which cells divide and separate the two chromatids in each chromosome." [GOC

12648 Pathogen[ P14079] interacts with 1 human partners:{O43196}

12649 Pathogen[ P03410] interacts with 1 human partners:{O43196}

12650 [Cluster 2020]GO:0050830+P biological\_process [name] defense response to Gram-positive bacterium [def] "Reactions triggered in response to the presence of a Gram-positive bacterium that act to protect the cell or organism." [GOC

12651 Pathogen[ P14079] interacts with 3 human partners:{P29459;Q9Y239;Q99836}

12652 Pathogen[ P03410] interacts with 2 human partners:{Q9Y239;P29459}

12653 [Cluster 2021]GO:1900758+P

12654 Pathogen[ P03346] interacts with 1 human partners:{P59103}

12655 Pathogen[ P14079] interacts with 1 human partners:{P59103}

12656 Pathogen[ P03410] interacts with 1 human partners:{P59103}

12657 Pathogen[ P14075] interacts with 1 human partners:{P59103}

12658 Pathogen[ P0C206] interacts with 1 human partners:{P59103}

12659 [Cluster 2022]GO:0061044+P biological\_process [name] negative regulation of vascular wound healing [def] "Any process that decreases the rate, frequency, or extent of blood vessel formation when new vessels emerge from the proliferation of pre-existing blood vessels and contribute to the series of events that restore integrity to damaged vasculature." [GOC

12660 Pathogen[ P0C214] interacts with 1 human partners:{P05121}

12661 Pathogen[ Q85601] interacts with 1 human partners:{P05121}

12662 Pathogen[ P03410] interacts with 1 human partners:{P05121}

12663 Pathogen[ P0C206] interacts with 1 human partners:{P05121}

12664 [Cluster 2023]GO:0055078+P biological\_process [name] sodium ion homeostasis [def] "Any process involved in the maintenance of an internal steady state of sodium ions within an organism or cell." [GOC]

12665 Pathogen[ P03346] interacts with 1 human partners:{Q92481}

12666 [Cluster 2024]GO:0060055+P biological\_process [name] angiogenesis involved in wound healing [def] "Blood vessel formation when new vessels emerge from the proliferation of pre-existing blood vessels and contribute to the series of events that restore integrity to a damaged tissue, following an injury." [GOC]

12667 Pathogen[ Q2Q067] interacts with 2 human partners:{P14921;P11831}

12668 Pathogen[ P0C214] interacts with 2 human partners:{P14921;P11831}

12669 Pathogen[ P03346] interacts with 2 human partners:{P11831;P14921}

12670 Pathogen[ Q85601] interacts with 2 human partners:{P11831;P14921}

12671 Pathogen[ P03383] interacts with 2 human partners:{P11831;P14921}

12672 Pathogen[ P03410] interacts with 2 human partners:{P11831;P14921}

12673 Pathogen[ P14075] interacts with 2 human partners:{P11831;P14921}

12674 Pathogen[ P0C206] interacts with 2 human partners:{P14921;P11831}

12675 Pathogen[ P03363] interacts with 2 human partners:{P14921;P11831}

12676 [Cluster 2025]GO:0010616+P biological\_process [name] negative regulation of cardiac muscle adaptation [def] "Any process that decreases the rate, extent or frequency of the process in which cardiac muscle adapts, with consequent modifications to structural and/or functional phenotypes, in response to a stimulus. Stimuli include contractile activity, loading conditions, substrate supply, and environmental factors." [GOC]

12677 Pathogen[ P14079] interacts with 1 human partners:{O60502}

12678 Pathogen[ P03410] interacts with 1 human partners:{O60502}

12679 [Cluster 2026]GO:0003199+P biological\_process [name] endocardial cushion to mesenchymal transition involved in heart valve formation [def] "A transition where an endocardial cushion cell loses apical/basolateral polarity, severs intercellular adhesive junctions, degrades basement membrane components and becomes a migratory mesenchymal cell that will contribute to the formation of a cardiac valve." [GOC]

12680 Pathogen[ Q2Q067] interacts with 1 human partners:{Q9Y5J3}

12681 Pathogen[ P0C214] interacts with 1 human partners:{Q9Y5J3}

12682 Pathogen[ P03346] interacts with 1 human partners:{Q9Y5J3}

12683 Pathogen[ Q85601] interacts with 1 human partners:{Q9Y5J3}

12684 Pathogen[ P14079] interacts with 1 human partners:{Q9Y5J3}

12685 Pathogen[ P03410] interacts with 1 human partners:{Q9Y5J3}

12686 Pathogen[ P0C206] interacts with 1 human partners:{Q9Y5J3}

12687 Pathogen[ P03363] interacts with 1 human partners:{Q9Y5J3}

12688 [Cluster 2027]GO:0002176+P biological\_process [name] male germ cell proliferation [def] "The multiplication or reproduction of male germ cells, resulting in the expansion of a cell population." [GOC]

12689 Pathogen[ P03346] interacts with 1 human partners:{Q9Y5R6}

12690 Pathogen[ P0C206] interacts with 1 human partners:{Q9Y5R6}

12691 Pathogen[ P03363] interacts with 1 human partners:{Q9Y5R6}

12692 [Cluster 2028]GO:0006041+P biological\_process [name] glucosamine metabolic process [def] "The chemical reactions and pathways involving glucosamine (2-amino-2-deoxyglucopyranose), an aminodeoxysugar that occurs in combined form in chitin." [GOC]

12693 Pathogen[ Q2Q067] interacts with 1 human partners:{O95394}

12694 Pathogen[ P0C214] interacts with 2 human partners:{O95394;Q96EK6}

12695 Pathogen[ P03346] interacts with 1 human partners:{O95394}

12696 Pathogen[ Q85601] interacts with 2 human partners:{Q96EK6;O95394}

12697 Pathogen[ P14079] interacts with 2 human partners:{O95394;Q96EK6}

12698 Pathogen[ P03383] interacts with 1 human partners:{O95394}

12699 Pathogen[ P03410] interacts with 2 human partners:{Q96EK6;O95394}

12700 Pathogen[ P14075] interacts with 2 human partners:{O95394;Q96EK6}

12701 Pathogen[ P0C206] interacts with 2 human partners:{O95394;Q96EK6}

12702 [Cluster 2029]GO:0051482+P biological\_process [name] elevation of cytosolic calcium ion concentration involved in G-protein signaling coupled to IP3 second messenger [def] "Any process that increases the concentration of calcium ions in the cytosol that contributes to the process of G-protein signaling coupled to IP3 second messenger." [GOC]

12703 Pathogen[ Q2Q067] interacts with 1 human partners:{P21980}

12704 Pathogen[ P0C214] interacts with 1 human partners:{P21980}

12705 Pathogen[ P03346] interacts with 1 human partners:{P21980}

12706 Pathogen[ Q85601] interacts with 1 human partners:{P21980}

12707 Pathogen[ P14079] interacts with 1 human partners:{P21980}

12708 Pathogen[ P03383] interacts with 1 human partners:{P21980}

12709 Pathogen[ P03410] interacts with 1 human partners:{P21980}

12710 Pathogen[ P14075] interacts with 1 human partners:{P21980}

12711 Pathogen[ P0C206] interacts with 1 human partners:{P21980}

12712 [Cluster 2030]GO:0046883+P biological\_process [name] regulation of hormone secretion [def] "Any process that modulates the frequency, rate or extent of the regulated release of a hormone from a cell or group of cells." [GOC]

12713 Pathogen[ Q2Q067] interacts with 1 human partners:{P20823}

12714 Pathogen[ P03346] interacts with 1 human partners:{P20823}

12715 Pathogen[ Q85601] interacts with 1 human partners:{P20823}

12716 Pathogen[ P14079] interacts with 1 human partners:{P05408}

12717 Pathogen[ P03410] interacts with 1 human partners:{P05408}

12718 Pathogen[ P0C206] interacts with 1 human partners:{P20823}

12719 [Cluster 2031]GO:0072307+P biological\_process [name] regulation of metanephric nephron tubule epithelial cell differentiation [def] "Any process that modulates the frequency, rate or extent of metanephric nephron tubule epithelial cell differentiation." [GOC

12720 Pathogen[ P03346] interacts with 1 human partners:{Q06710}

12721 [Cluster 2032]GO:0006726+P biological\_process [name] eye pigment biosynthetic process [def] "The chemical reactions and pathways resulting in the formation of eye pigments, any general or particular coloring matter in living organisms, found or utilized in the eye." [GOC

12722 Pathogen[ P03346] interacts with 1 human partners:{O14617}

12723 Pathogen[ P14079] interacts with 1 human partners:{O14617}

12724 Pathogen[ P03410] interacts with 1 human partners:{O14617}

12725 Pathogen[ P0C206] interacts with 1 human partners:{O14617}

12726 [Cluster 2033]GO:0000921+P biological\_process [name] septin ring assembly [def] "The aggregation, arrangement and bonding together of septins and associated proteins to form an organized structure resembling a ring at the cell cortex." [GOC

12727 Pathogen[ Q2Q067] interacts with 1 human partners:{Q9NQW6}

12728 Pathogen[ P03346] interacts with 1 human partners:{Q9NQW6}

12729 Pathogen[ Q85601] interacts with 1 human partners:{Q9NQW6}

12730 Pathogen[ P14079] interacts with 1 human partners:{Q9NQW6}

12731 Pathogen[ P03410] interacts with 1 human partners:{Q9NQW6}

12732 Pathogen[ P0C206] interacts with 1 human partners:{Q9NQW6}

12733 Pathogen[ P03363] interacts with 1 human partners:{Q9NQW6}

12734 [Cluster 2034]GO:0001656+P biological\_process [name] metanephros development [def] "The process whose specific outcome is the progression of the metanephros over time, from its formation to the mature structure. In mammals, the metanephros is the excretory organ of the fetus, which develops into the mature kidney and is formed from the rear portion of the nephrogenic cord. The metanephros is an endocrine and metabolic organ that filters the blood and excretes the end products of body metabolism in the form of urine." [GOC

12735 Pathogen[ Q2Q067] interacts with 4 human partners:{Q99502;Q63HK5;O43248;Q99966}

12736 Pathogen[ P0C214] interacts with 4 human partners:{Q63HK5;O43248;Q99966;Q99502}

12737 Pathogen[ P03346] interacts with 10 human partners:{Q9NPC8;Q99966;P78415;Q02535;P31270;Q63HK5;Q99502;Q06710;Q9BZI1;O43248}

12738 Pathogen[ Q85601] interacts with 4 human partners:{O43248;Q99966;Q99502;Q63HK5}

12739 Pathogen[ P14079] interacts with 3 human partners:{Q99502;Q99966;Q63HK5}

12740 Pathogen[ P03410] interacts with 4 human partners:{Q9BZI1;Q99502;Q63HK5;Q99966}

12741 Pathogen[ P14075] interacts with 1 human partners:{Q99502}

12742 Pathogen[ P0C206] interacts with 5 human partners:{Q63HK5;O43248;Q9BZI1;Q99966;Q99502}

12743 Pathogen[ P03363] interacts with 5 human partners:{P78415;O43248;Q63HK5;Q9BZI1;Q9NPC8}

12744 [Cluster 2035]GO:0046477+P biological\_process [name] glycosylceramide catabolic process [def] "The chemical reactions and pathways resulting in the breakdown of glycosylceramides, any compound formed by the replacement of the glycosidic hydroxyl group of a cyclic form of a monosaccharide (or derivative) by a ceramide group." [GOC

12745 Pathogen[ P0C214] interacts with 1 human partners:{Q9H227}

12746 Pathogen[ P14079] interacts with 2 human partners:{P06280;P17050}

12747 [Cluster 2036]GO:0021591+P biological\_process [name] ventricular system development [def] "The process whose specific outcome is the progression of the brain ventricular system over time, from its formation to the mature structure. The brain ventricular system consists of four communicating cavities within the brain that are continuous with the central canal of the spinal cord. These cavities include two lateral ventricles, the third ventricle and the fourth ventricle. Cerebrospinal fluid fills the ventricles and is produced by the choroid plexus." [GO\_REF

12748 Pathogen[ Q2Q067] interacts with 1 human partners:{P51948}

12749 Pathogen[ P0C214] interacts with 1 human partners:{P51948}

12750 Pathogen[ P03346] interacts with 1 human partners:{P51948}

12751 Pathogen[ Q85601] interacts with 1 human partners:{P51948}

12752 Pathogen[ P14079] interacts with 1 human partners:{P51948}

12753 Pathogen[ P03383] interacts with 1 human partners:{P51948}

12754 Pathogen[ P03410] interacts with 1 human partners:{P51948}

12755 Pathogen[ P14075] interacts with 1 human partners:{P51948}

12756 Pathogen[ P0C206] interacts with 1 human partners:{P51948}

12757 [Cluster 2037]GO:0060580+P biological\_process [name] ventral spinal cord interneuron fate determination [def] "The process in which a cell becomes capable of differentiating autonomously into a ventral spinal cord interneuron regardless of its environment\_ upon determination, the cell fate cannot be reversed. Ventral spinal cord interneurons are cells located in the ventral portion of the spinal cord that transmit signals between sensory and motor neurons and are required for reflexive responses." [GOC

12758 Pathogen[ P03346] interacts with 1 human partners:{O95096}



12759 [Cluster 2038]GO:0061108+P biological\_process [name] seminal vesicle epithelium development [def] "The progression of the seminal vesicle epithelium over time, from its formation to the mature structure." [GOC

12760 Pathogen[ POC214] interacts with 1 human partners:{P07093}

12761 Pathogen[ Q85601] interacts with 1 human partners:{P07093}

12762 [Cluster 2039]GO:1900222+P

12763 Pathogen[ Q2Q067] interacts with 1 human partners:{P11831}

12764 Pathogen[ POC214] interacts with 1 human partners:{P11831}

12765 Pathogen[ P03346] interacts with 1 human partners:{P11831}

12766 Pathogen[ Q85601] interacts with 1 human partners:{P11831}

12767 Pathogen[ P03383] interacts with 1 human partners:{P11831}

12768 Pathogen[ P03410] interacts with 1 human partners:{P11831}

12769 Pathogen[ P14075] interacts with 1 human partners:{P11831}

12770 Pathogen[ POC206] interacts with 1 human partners:{P11831}

12771 Pathogen[ P03363] interacts with 1 human partners:{P11831}

12772 [Cluster 2040]GO:0008105+P biological\_process [name] asymmetric protein localization [def] "Any process in which a protein is transported to, or maintained in, a specific location such that it is distributed asymmetrically." [GOC

12773 Pathogen[ Q2Q067] interacts with 1 human partners:{Q14160}

12774 Pathogen[ POC214] interacts with 1 human partners:{Q14160}

12775 Pathogen[ P03346] interacts with 2 human partners:{Q9Y215;Q14160}

12776 Pathogen[ Q85601] interacts with 1 human partners:{Q14160}

12777 Pathogen[ P03383] interacts with 1 human partners:{Q14160}

12778 Pathogen[ P03410] interacts with 2 human partners:{Q14160;Q9Y215}

12779 Pathogen[ P14075] interacts with 1 human partners:{Q14160}

12780 Pathogen[ POC206] interacts with 1 human partners:{Q14160}

12781 Pathogen[ P03363] interacts with 2 human partners:{Q14160;Q9Y215}

12782 [Cluster 2041]GO:0021759+P biological\_process [name] globus pallidus development [def] "The progression of the globus pallidus over time from its initial formation until its mature state. The globus pallidus is one of the basal ganglia involved with control of voluntary movement in the brain." [GO\_REF

12783 Pathogen[ P03346] interacts with 1 human partners:{Q96QS3}

12784 Pathogen[ P03363] interacts with 1 human partners:{Q96QS3}

12785 [Cluster 2042]GO:0002830+P biological\_process [name] positive regulation of type 2 immune response [def] "Any process that activates or increases the frequency, rate, or extent of a type 2 immune response." [GOC

12786 Pathogen[ P14079] interacts with 1 human partners:{O95760}

12787 Pathogen[ P03410] interacts with 1 human partners:{O95760}

12788 [Cluster 2043]GO:0033598+P biological\_process [name] mammary gland epithelial cell proliferation [def] "The multiplication or reproduction of mammary gland epithelial cells, resulting in the expansion of a cell population. Mammary gland epithelial cells make up the covering of surfaces of the mammary gland. The mammary gland is a large compound sebaceous gland that in female mammals is modified to secrete milk." [GOC

12789 Pathogen[ Q2Q067] interacts with 4 human partners:{P24385;P17676;Q9Y297;O15111}

12790 Pathogen[ POC214] interacts with 4 human partners:{O15111;P24385;Q9Y297;P17676}

12791 Pathogen[ P03346] interacts with 4 human partners:{O15111;P24385;P17676;Q9Y297}

12792 Pathogen[ Q85601] interacts with 3 human partners:{P17676;P24385;O15111}

12793 Pathogen[ P03383] interacts with 3 human partners:{O15111;P24385;P17676}

12794 Pathogen[ P03410] interacts with 3 human partners:{P17676;O15111;P24385}

12795 Pathogen[ P14075] interacts with 3 human partners:{O15111;P24385;P17676}

12796 Pathogen[ POC206] interacts with 3 human partners:{P17676;O15111;P24385}

12797 Pathogen[ P03363] interacts with 3 human partners:{P17676;O15111;P24385}

12798 [Cluster 2044]GO:0072195+P biological\_process [name] kidney smooth muscle cell differentiation [def] "The process in which a relatively unspecialized cell acquires specialized features of a smooth muscle cell in the kidney." [GOC

12799 Pathogen[ Q2Q067] interacts with 1 human partners:{Q63HK5}

12800 Pathogen[ POC214] interacts with 1 human partners:{Q63HK5}

12801 Pathogen[ P03346] interacts with 1 human partners:{Q63HK5}

12802 Pathogen[ Q85601] interacts with 1 human partners:{Q63HK5}

12803 Pathogen[ P14079] interacts with 1 human partners:{Q63HK5}

12804 Pathogen[ P03410] interacts with 1 human partners:{Q63HK5}

12805 Pathogen[ POC206] interacts with 1 human partners:{Q63HK5}

12806 Pathogen[ P03363] interacts with 1 human partners:{Q63HK5}

12807 [Cluster 2045]GO:2001014+P biological\_process [name] regulation of skeletal muscle cell differentiation [def] "Any process that modulates the frequency, rate or extent of skeletal muscle cell differentiation." [GOC

12808 Pathogen[ Q2Q067] interacts with 1 human partners:{Q92841}

12809 Pathogen[ POC214] interacts with 1 human partners:{Q92841}

12810 Pathogen[ P03346] interacts with 1 human partners:{Q92841}

12811 Pathogen[ P03383] interacts with 1 human partners:{Q92841}

12812 Pathogen[ P14075] interacts with 1 human partners:{Q92841}

12813 Pathogen[ POC206] interacts with 1 human partners:{Q92841}

12814 Pathogen[ P03363] interacts with 1 human partners:{Q92841}

12815 [Cluster 2046]GO:0032497+P biological\_process [name] detection of lipopolysaccharide [def] "The series of events in which a lipopolysaccharide stimulus is received by a cell and converted into a molecular signal. Lipopolysaccharide is a major component of the

cell wall of gram-negative bacteria." [GOC  
12816 Pathogen[ P14079] interacts with 1 human partners:{Q9Y6Y9}  
12817 Pathogen[ P03410] interacts with 1 human partners:{Q9Y6Y9}  
12818 [Cluster 2047]GO:0033344+P biological\_process [name] cholesterol efflux [def] "The directed movement of cholesterol, cholest-5-en-3-beta-ol, out of a cell or organelle." [GOC  
12819 Pathogen[ P03346] interacts with 1 human partners:{Q86Y82}  
12820 [Cluster 2048]GO:0045197+P biological\_process [name] establishment or maintenance of epithelial cell apical/basal polarity [def] "Any cellular process that results in the specification, formation or maintenance of the apicobasal polarity of an epithelial cell." [GOC  
12821 Pathogen[ P03346] interacts with 3 human partners:{Q96RT1;Q99626;Q7Z3G6}  
12822 Pathogen[ Q85601] interacts with 1 human partners:{Q96RT1}  
12823 Pathogen[ P14079] interacts with 2 human partners:{Q96RT1;Q7Z3G6}  
12824 Pathogen[ P03410] interacts with 1 human partners:{Q96RT1}  
12825 Pathogen[ P0C206] interacts with 2 human partners:{Q96RT1;Q7Z3G6}  
12826 Pathogen[ P03363] interacts with 2 human partners:{Q96RT1;Q99626}  
12827 [Cluster 2049]GO:0021548+P biological\_process [name] pons development [def] "The process whose specific outcome is the progression of the pons over time, from its formation to the mature structure. The pons lies above the medulla and next to the cerebellum. The pons conveys information about movement from the cerebral hemisphere to the cerebellum." [GO\_REF  
12828 Pathogen[ P14079] interacts with 1 human partners:{O14949}  
12829 Pathogen[ P03410] interacts with 1 human partners:{O14949}  
12830 [Cluster 2050]GO:0043686+P biological\_process [name] co-translational protein modification [def] "The process of covalently altering one or more amino acids in a protein after translation has begun but before the protein has been released from the ribosome." [GOC  
12831 Pathogen[ P14079] interacts with 1 human partners:{P46977}  
12832 [Cluster 2051]GO:0007525+P biological\_process [name] somatic muscle development [def] "The process whose specific outcome is the progression of the somatic muscle over time, from its formation to the mature structure. Somatic muscles are striated muscle structures that connect to the exoskeleton or cuticle." [GOC  
12833 Pathogen[ P03346] interacts with 2 human partners:{Q969G9;Q06190}  
12834 Pathogen[ P14079] interacts with 2 human partners:{Q9NRT5;Q06190}  
12835 Pathogen[ P03410] interacts with 3 human partners:{Q06190;Q969G9;Q9NRT5}  
12836 Pathogen[ P14075] interacts with 1 human partners:{Q9NRT5}  
12837 Pathogen[ P0C206] interacts with 3 human partners:{Q06190;Q969G9;Q9NRT5}  
12838 Pathogen[ P03363] interacts with 2 human partners:{Q06190;Q969G9}  
12839 [Cluster 2052]GO:0035269+P biological\_process [name] protein O-linked mannosylation [def] "The transfer of mannose from dolichyl activated mannose to the hydroxyl group of a seryl or threonyl residue of a protein acceptor molecule, to form an O-linked protein-sugar linkage." [GOC  
12840 Pathogen[ P14079] interacts with 2 human partners:{O94777;Q9P2X0}  
12841 Pathogen[ P03410] interacts with 2 human partners:{O94777;Q9P2X0}  
12842 Pathogen[ P14075] interacts with 1 human partners:{O94777}  
12843 Pathogen[ P0C206] interacts with 1 human partners:{O94777}  
12844 [Cluster 2053]GO:2000188+P biological\_process [name] regulation of cholesterol homeostasis [def] "Any process that modulates the frequency, rate or extent of cholesterol homeostasis." [GOC  
12845 Pathogen[ P03346] interacts with 1 human partners:{Q12772}  
12846 Pathogen[ Q85601] interacts with 1 human partners:{Q12772}  
12847 Pathogen[ P14079] interacts with 1 human partners:{Q12772}  
12848 Pathogen[ P03410] interacts with 1 human partners:{Q12772}  
12849 Pathogen[ P0C206] interacts with 1 human partners:{Q12772}  
12850 [Cluster 2054]GO:1900037+P  
12851 Pathogen[ Q2Q067] interacts with 1 human partners:{Q96IF1}  
12852 Pathogen[ P03346] interacts with 1 human partners:{Q96IF1}  
12853 Pathogen[ Q85601] interacts with 1 human partners:{Q96IF1}  
12854 Pathogen[ P14079] interacts with 1 human partners:{Q96IF1}  
12855 Pathogen[ P03410] interacts with 1 human partners:{Q96IF1}  
12856 Pathogen[ P0C206] interacts with 1 human partners:{Q96IF1}  
12857 Pathogen[ P03363] interacts with 1 human partners:{Q96IF1}  
12858 [Cluster 2055]GO:0042100+P biological\_process [name] B cell proliferation [def] "The expansion of a B cell population by cell division. Follows B cell activation." [GOC  
12859 Pathogen[ P0C214] interacts with 1 human partners:{P10809}  
12860 Pathogen[ P14079] interacts with 1 human partners:{Q06413}  
12861 [Cluster 2056]GO:0006104+P biological\_process [name] succinyl-CoA metabolic process [def] "The chemical reactions and pathways involving succinyl-CoA, a compound composed of the monovalent acyl group 3-carboxypropanoyl, derived from succinic acid by loss of one OH group, linked to coenzyme A." [GOC  
12862 Pathogen[ Q2Q067] interacts with 1 human partners:{Q9P2R7}  
12863 Pathogen[ P0C214] interacts with 2 human partners:{Q9P2R7;Q96I99}  
12864 Pathogen[ Q85601] interacts with 1 human partners:{Q9P2R7}  
12865 Pathogen[ P14079] interacts with 1 human partners:{Q9P2R7}  
12866 Pathogen[ P03383] interacts with 1 human partners:{Q9P2R7}

12867 Pathogen[ P03410] interacts with 1 human partners:{Q9P2R7}

12868 Pathogen[ P14075] interacts with 1 human partners:{Q9P2R7}

12869 Pathogen[ P0C206] interacts with 1 human partners:{Q9P2R7}

12870 [Cluster 2057]GO:0006122+P biological\_process [name] mitochondrial electron transport, ubiquinol to cytochrome c [def] "The transfer of electrons from ubiquinol to cytochrome c that occurs during oxidative phosphorylation, mediated by the multisubunit enzyme known as complex III." [ISBN

12871 Pathogen[ P14079] interacts with 4 human partners:{Q9UDW1;P14927;P07919;P00156}

12872 Pathogen[ P03410] interacts with 4 human partners:{P07919;Q9UDW1;P00156;P14927}

12873 Pathogen[ P0C206] interacts with 1 human partners:{Q9UDW1}

12874 [Cluster 2058]GO:0007168+P biological\_process [name] receptor guanylyl cyclase signaling pathway [def] "Any series of molecular signals initiated by the binding of an extracellular ligand to a receptor on the surface of the target cell, where the receptor possesses guanylyl cyclase activity." [GOC

12875 Pathogen[ P03346] interacts with 1 human partners:{Q86UT5}

12876 Pathogen[ P14079] interacts with 1 human partners:{Q86UT5}

12877 Pathogen[ P03410] interacts with 1 human partners:{Q86UT5}

12878 Pathogen[ P0C206] interacts with 1 human partners:{Q86UT5}

12879 Pathogen[ P03363] interacts with 1 human partners:{Q86UT5}

12880 [Cluster 2059]GO:0072086+P biological\_process [name] specification of loop of Henle identity [def] "The process in which the loop of Henle of the kidney nephron acquires its identity." [GOC

12881 Pathogen[ P03346] interacts with 2 human partners:{P78415;Q9BZI1}

12882 Pathogen[ P03410] interacts with 1 human partners:{Q9BZI1}

12883 Pathogen[ P0C206] interacts with 1 human partners:{Q9BZI1}

12884 Pathogen[ P03363] interacts with 2 human partners:{P78415;Q9BZI1}

12885 [Cluster 2060]GO:0021937+P biological\_process [name] cerebellar Purkinje cell-granule cell precursor cell signaling involved in regulation of granule cell precursor cell proliferation [def] "The process that mediates the transfer of information from Purkinje cells to granule cell precursors resulting in an increase in rate of granule cell precursor cell proliferation." [GO\_REF

12886 Pathogen[ P03346] interacts with 1 human partners:{Q9H2C1}

12887 Pathogen[ P0C206] interacts with 1 human partners:{Q9H2C1}

12888 [Cluster 2061]GO:0070143+P biological\_process [name] mitochondrial alanyl-tRNA aminoacylation [def] "The process of coupling alanine to alanyl-tRNA in a mitochondrion, catalyzed by alanyl-tRNA synthetase. In tRNA aminoacylation, the amino acid is first activated by linkage to AMP and then transferred to either the 2'- or the 3'-hydroxyl group of the 3'-adenosine residue of the tRNA." [GOC

12889 Pathogen[ P0C214] interacts with 1 human partners:{Q5J TZ9}

12890 [Cluster 2062]GO:0010766+P biological\_process [name] negative regulation of sodium ion transport [def] "Any process that decreases the frequency, rate or extent of the directed movement of sodium ions (Na+) into, out of or within a cell, or between cells, by means of some agent such as a transporter or pore." [GOC

12891 Pathogen[ Q2Q067] interacts with 1 human partners:{Q96PU5}

12892 Pathogen[ P0C214] interacts with 2 human partners:{P07093;Q96PU5}

12893 Pathogen[ P03346] interacts with 1 human partners:{Q96PU5}

12894 Pathogen[ Q85601] interacts with 2 human partners:{Q96PU5;P07093}

12895 Pathogen[ P0C206] interacts with 1 human partners:{Q96PU5}

12896 Pathogen[ P03363] interacts with 1 human partners:{Q96PU5}

12897 [Cluster 2063]GO:0035507+P biological\_process [name] regulation of myosin-light-chain-phosphatase activity [def] "Any process that modulates the frequency, rate or extent of myosin-light-chain-phosphatase activity." [GOC

12898 Pathogen[ Q2Q067] interacts with 1 human partners:{O14974}

12899 Pathogen[ P0C214] interacts with 1 human partners:{O14974}

12900 Pathogen[ P03346] interacts with 1 human partners:{O14974}

12901 Pathogen[ Q85601] interacts with 1 human partners:{O14974}

12902 Pathogen[ P14079] interacts with 1 human partners:{O14974}

12903 Pathogen[ P03410] interacts with 1 human partners:{O14974}

12904 Pathogen[ P0C206] interacts with 1 human partners:{O14974}

12905 Pathogen[ P03363] interacts with 1 human partners:{O14974}

12906 [Cluster 2064]GO:0046901+P biological\_process [name] tetrahydrofolylpolyglutamate biosynthetic process [def] "The chemical reactions and pathways resulting in the formation of tetrahydrofolylpolyglutamate, a folate derivative comprising tetrahydrofolate attached to a chain of glutamate residues." [GOC

12907 Pathogen[ P0C214] interacts with 1 human partners:{Q05932}

12908 Pathogen[ P14079] interacts with 1 human partners:{Q05932}

12909 Pathogen[ P03410] interacts with 1 human partners:{Q05932}

12910 Pathogen[ P0C206] interacts with 1 human partners:{Q05932}

12911 [Cluster 2065]GO:0009187+P biological\_process [name] cyclic nucleotide metabolic process [def] "The chemical reactions and pathways involving a cyclic nucleotide, a nucleotide in which the phosphate group is in diester linkage to two positions on the sugar residue." [GOC

12912 Pathogen[ P14079] interacts with 1 human partners:{Q9NZJ9}

12913 Pathogen[ P03410] interacts with 1 human partners:{Q9NZJ9}

12914 [Cluster 2066]GO:0046882+P biological\_process [name] negative regulation of follicle-stimulating hormone secretion [def] "Any process that stops, prevents, or

reduces the frequency, rate or extent of the regulated release of follicle-stimulating hormone." [GOC

12915 Pathogen[ P03363] interacts with 1 human partners:{P19883}

12916 [Cluster 2067]GO:0015889+P biological\_process [name] cobalamin transport [def] "The directed movement of cobalamin (vitamin B12), a water-soluble vitamin characterized by possession of a corrin nucleus containing a cobalt atom, into, out of or within a cell, or between cells, by means of some agent such as a transporter or pore." [GOC

12917 Pathogen[ P14079] interacts with 1 human partners:{P27352}

12918 Pathogen[ P03410] interacts with 1 human partners:{P27352}

12919 [Cluster 2068]GO:0033273+P biological\_process [name] response to vitamin [def] "Any process that results in a change in state or activity of a cell or an organism (in terms of movement, secretion, enzyme production, gene expression, etc.) as a result of a vitamin stimulus." [GOC

12920 Pathogen[ Q2Q067] interacts with 1 human partners:{P08397}

12921 Pathogen[ P0C214] interacts with 1 human partners:{P08397}

12922 Pathogen[ Q85601] interacts with 1 human partners:{P08397}

12923 Pathogen[ P14079] interacts with 1 human partners:{P08397}

12924 Pathogen[ P03383] interacts with 1 human partners:{P08397}

12925 Pathogen[ P03410] interacts with 1 human partners:{P08397}

12926 Pathogen[ P14075] interacts with 1 human partners:{P08397}

12927 Pathogen[ P0C206] interacts with 1 human partners:{P08397}

12928 [Cluster 2069]GO:0001774+P biological\_process [name] microglial cell activation [def] "The change in morphology and behavior of a microglial cell resulting from exposure to a cytokine, chemokine, cellular ligand, or soluble factor." [GOC

12929 Pathogen[ P0C214] interacts with 1 human partners:{P05412}

12930 Pathogen[ P03346] interacts with 1 human partners:{P05412}

12931 Pathogen[ Q85601] interacts with 1 human partners:{P05412}

12932 Pathogen[ P14079] interacts with 1 human partners:{P05412}

12933 Pathogen[ P03383] interacts with 1 human partners:{P05412}

12934 Pathogen[ P03410] interacts with 1 human partners:{P05412}

12935 Pathogen[ P14075] interacts with 1 human partners:{P05412}

12936 Pathogen[ P0C206] interacts with 1 human partners:{P05412}

12937 Pathogen[ P03363] interacts with 1 human partners:{P05412}

12938 [Cluster 2070]GO:0055074+P biological\_process [name] calcium ion homeostasis [def] "Any process involved in the maintenance of an internal steady state of calcium ions within an organism or cell." [GOC

12939 Pathogen[ Q2Q067] interacts with 1 human partners:{O15164}

12940 Pathogen[ P0C214] interacts with 1 human partners:{O15164}

12941 Pathogen[ P03346] interacts with 2 human partners:{Q92481;O15164}

12942 Pathogen[ Q85601] interacts with 1 human partners:{O15164}

12943 Pathogen[ P14079] interacts with 3 human partners:{O15164;Q96A33;P23327}

12944 Pathogen[ P03410] interacts with 2 human partners:{Q96A33;P23327}

12945 Pathogen[ P14075] interacts with 1 human partners:{P23327}

12946 Pathogen[ P0C206] interacts with 3 human partners:{Q96A33;O15164;P23327}

12947 [Cluster 2071]GO:0015937+P biological\_process [name] coenzyme A biosynthetic process [def] "The chemical reactions and pathways resulting in the formation of coenzyme A, 3'-phosphoadenosine-(5')diphospho(4')pantatheine, an acyl carrier in many acylation and acyl-transfer reactions in which the intermediate is a thiol ester." [ISEN

12948 Pathogen[ Q2Q067] interacts with 1 human partners:{Q9HAB8}

12949 Pathogen[ P0C214] interacts with 4 human partners:{Q8TE04;Q9HAB8;Q13057;Q9BZ23}

12950 Pathogen[ P03346] interacts with 1 human partners:{Q9HAB8}

12951 Pathogen[ P14079] interacts with 6 human partners:{Q8TE04;Q9BZ23;Q13057;Q96CD2;Q9H999;Q9HAB8}

12952 Pathogen[ P03383] interacts with 2 human partners:{Q9BZ23;Q9HAB8}

12953 Pathogen[ P03410] interacts with 5 human partners:{Q8TE04;Q13057;Q96CD2;Q9BZ23;Q9HAB8}

12954 Pathogen[ P14075] interacts with 4 human partners:{Q9HAB8;Q13057;Q8TE04;Q9BZ23}

12955 Pathogen[ P0C206] interacts with 4 human partners:{Q8TE04;Q13057;Q9BZ23;Q9HAB8}

12956 [Cluster 2072]GO:0010906+P biological\_process [name] regulation of glucose metabolic process [def] "Any process that modulates the rate, frequency or extent of glucose metabolism. Glucose metabolic processes are the chemical reactions and pathways involving glucose, the aldohexose gluco-hexose." [GOC

12957 Pathogen[ P14079] interacts with 1 human partners:{O95822}

12958 Pathogen[ P03410] interacts with 1 human partners:{O95822}

12959 [Cluster 2073]GO:0048592+P biological\_process [name] eye morphogenesis [def] "The process in which the anatomical structures of the eye are generated and organized." [GOC

12960 Pathogen[ P14079] interacts with 1 human partners:{P54826}

12961 Pathogen[ P03410] interacts with 1 human partners:{P54826}

12962 Pathogen[ P14075] interacts with 1 human partners:{P54826}

12963 Pathogen[ P0C206] interacts with 1 human partners:{P54826}

12964 [Cluster 2074]GO:0072105+P biological\_process [name] ureteric peristalsis [def] "A wavelike sequence of involuntary muscular contraction and relaxation that passes along the ureter, impelling the contents onwards. The ureter is one of a pair of thick-walled tubes that transports urine from the kidney pelvis to the urinary bladder." [GOC

12965 Pathogen[ Q2Q067] interacts with 1 human partners:{Q63HK5}

12966 Pathogen[ P0C214] interacts with 1 human partners:{Q63HK5}

12967 Pathogen[ P03346] interacts with 1 human partners:{Q63HK5}

12968 Pathogen[ Q85601] interacts with 1 human partners:{Q63HK5}

12969 Pathogen[ P14079] interacts with 1 human partners:{Q63HK5}

12970 Pathogen[ P03410] interacts with 1 human partners:{Q63HK5}

12971 Pathogen[ P0C206] interacts with 1 human partners:{Q63HK5}

12972 Pathogen[ P03363] interacts with 1 human partners:{Q63HK5}

12973 [Cluster 2075]GO:0090241+P biological\_process [name] negative regulation of histone H4 acetylation [def] "Any process that decreases the rate, frequency, or extent of histone H4 acetylation, the modification of histone H4 by the addition of an acetyl group." [GOC

12974 Pathogen[ Q2Q067] interacts with 2 human partners:{Q13363;P17947}

12975 Pathogen[ P0C214] interacts with 2 human partners:{Q13363;P17947}

12976 Pathogen[ P03346] interacts with 2 human partners:{P17947;Q13363}

12977 Pathogen[ Q85601] interacts with 2 human partners:{Q13363;P17947}

12978 Pathogen[ P03383] interacts with 2 human partners:{P17947;Q13363}

12979 Pathogen[ P03410] interacts with 1 human partners:{P17947}

12980 Pathogen[ P14075] interacts with 2 human partners:{P17947;Q13363}

12981 Pathogen[ P0C206] interacts with 2 human partners:{P17947;Q13363}

12982 Pathogen[ P03363] interacts with 2 human partners:{P17947;Q13363}

12983 [Cluster 2076]GO:0000105+P biological\_process [name] histidine biosynthetic process [def] "The chemical reactions and pathways resulting in the formation of histidine, 2-amino-3-(1H-imidazol-4-yl)propanoic acid." [GOC

12984 Pathogen[ P0C214] interacts with 1 human partners:{P11586}

12985 [Cluster 2077]GO:0070254+P biological\_process [name] mucus secretion [def] "The regulated release of mucus by the mucosa. Mucus is a viscous slimy secretion consisting of mucins and various inorganic salts dissolved in water, with suspended epithelial cells and leukocytes. The mucosa, or mucous membrane, is the membrane covered with epithelium that lines the tubular organs of the body. Mucins are carbohydrate-rich glycoproteins that have a lubricating and protective function." [GOC

12986 Pathogen[ P03410] interacts with 1 human partners:{O95994}

12987 [Cluster 2078]GO:0035037+P biological\_process [name] sperm entry [def] "An endocytosis process that results in penetration of the egg shell through the micropyle (a specialized anterior opening in the vitelline envelope) and entry of the entire sperm, including the surrounding plasma membrane and the sperm tail, into the egg cytoplasm. This step in fertilization is seen in Drosophila, where a plasma membrane fusion event between the sperm and the egg does not occur." [GOC

12988 Pathogen[ Q2Q067] interacts with 1 human partners:{Q05086}

12989 Pathogen[ P0C214] interacts with 1 human partners:{Q05086}

12990 Pathogen[ P03346] interacts with 1 human partners:{Q05086}

12991 Pathogen[ Q85601] interacts with 1 human partners:{Q05086}

12992 Pathogen[ P0C206] interacts with 1 human partners:{Q05086}

12993 Pathogen[ P03363] interacts with 1 human partners:{Q05086}

12994 [Cluster 2079]GO:0051102+P biological\_process [name] DNA ligation involved in DNA recombination [def] "The re-formation of a broken phosphodiester bond in the DNA backbone, carried out by DNA ligase, that contributes to DNA recombination." [GOC

12995 Pathogen[ P14079] interacts with 1 human partners:{P49917}

12996 Pathogen[ P0C206] interacts with 1 human partners:{P49917}

12997 [Cluster 2080]GO:0071371+P biological\_process [name] cellular response to gonadotropin stimulus [def] "Any process that results in a change in state or activity of a cell (in terms of movement, secretion, enzyme production, gene expression, etc.) as a result of a gonadotropin stimulus." [GOC

12998 Pathogen[ P03346] interacts with 1 human partners:{Q06710}

12999 [Cluster 2081]GO:0000038+P biological\_process [name] very long chain fatty acid metabolic process [def] "The chemical reactions and pathways involving fatty acids with a chain length of C18 or greater." [GOC

13000 Pathogen[ Q2Q067] interacts with 1 human partners:{Q86TX2}

13001 Pathogen[ P0C214] interacts with 2 human partners:{Q9NXB9;Q86TX2}

13002 Pathogen[ P03346] interacts with 2 human partners:{Q86TX2;P50542}

13003 Pathogen[ Q85601] interacts with 1 human partners:{Q86TX2}

13004 Pathogen[ P14079] interacts with 3 human partners:{P49753;P50542;Q86TX2}

13005 Pathogen[ P03410] interacts with 3 human partners:{Q86TX2;P50542;P49753}

13006 Pathogen[ P0C206] interacts with 2 human partners:{Q86TX2;P50542}

13007 [Cluster 2082]GO:0050665+P biological\_process [name] hydrogen peroxide biosynthetic process [def] "The chemical reactions and pathways resulting in the formation of hydrogen peroxide (H2O2), a potentially harmful byproduct of aerobic cellular respiration which can cause damage to DNA." [GOC

13008 Pathogen[ P14079] interacts with 1 human partners:{P13498}

13009 [Cluster 2083]GO:0006824+P biological\_process [name] cobalt ion transport [def] "The directed movement of cobalt (Co) ions into, out of or within a cell, or between cells, by means of some agent such as a transporter or pore." [GOC

13010 Pathogen[ P14079] interacts with 1 human partners:{P27352}

13011 Pathogen[ P03410] interacts with 1 human partners:{P27352}

13012 [Cluster 2084]GO:0034405+P biological\_process [name] response to fluid shear stress [def] "Any process that results in a change in state or activity of a cell or an organism (in terms of movement, secretion, enzyme production, gene expression, etc.) as a result of a fluid shear stress stimulus. Fluid shear stress is the force acting on an object in a system where the fluid is moving across a solid surface." [GOC

13013 Pathogen[ Q2Q067] interacts with 2 human partners:{P31749;P29474}

13014 Pathogen[ POC214] interacts with 2 human partners:{P29474;P31749}

13015 Pathogen[ P03346] interacts with 2 human partners:{P29474;P31749}

13016 Pathogen[ Q85601] interacts with 2 human partners:{P31749;P29474}

13017 Pathogen[ P03383] interacts with 2 human partners:{P29474;P31749}

13018 Pathogen[ P03410] interacts with 2 human partners:{P31749;P29474}

13019 Pathogen[ P14075] interacts with 2 human partners:{P29474;P31749}

13020 Pathogen[ POC206] interacts with 2 human partners:{P31749;P29474}

13021 Pathogen[ P03363] interacts with 2 human partners:{P29474;P31749}

13022 [Cluster 2085]GO:0009744+P biological\_process [name] response to sucrose stimulus [def] "Any process that results in a change in state or activity of a cell or an organism (in terms of movement, secretion, enzyme production, gene expression, etc.) as a result of a sucrose stimulus." [GOC

13023 Pathogen[ P03346] interacts with 1 human partners:{P07992}

13024 Pathogen[ P14079] interacts with 1 human partners:{P07992}

13025 Pathogen[ P03410] interacts with 1 human partners:{P07992}

13026 Pathogen[ POC206] interacts with 1 human partners:{P07992}

13027 [Cluster 2086]GO:0009051+P biological\_process [name] pentose-phosphate shunt, oxidative branch [def] "The branch of the pentose-phosphate shunt which involves the oxidation of glucose 6-P and produces ribulose 5-P, reduced NADP+ and carbon dioxide (CO2)." [ISBN

13028 Pathogen[ Q2Q067] interacts with 1 human partners:{O95336}

13029 Pathogen[ POC214] interacts with 3 human partners:{P52209;P11413;O95336}

13030 Pathogen[ P03346] interacts with 1 human partners:{O95336}

13031 Pathogen[ Q85601] interacts with 1 human partners:{O95336}

13032 Pathogen[ P14079] interacts with 2 human partners:{P52209;O95336}

13033 Pathogen[ P03410] interacts with 2 human partners:{P52209;O95336}

13034 Pathogen[ P14075] interacts with 1 human partners:{O95336}

13035 Pathogen[ POC206] interacts with 1 human partners:{O95336}

13036 Pathogen[ P03363] interacts with 1 human partners:{O95336}

13037 [Cluster 2087]GO:0000725+P biological\_process [name] recombinational repair [def] "A DNA repair process that involves the exchange, reciprocal or nonreciprocal, of genetic material between the broken DNA molecule and a homologous region of DNA." [GOC

13038 Pathogen[ Q2Q067] interacts with 1 human partners:{Q9BSD3}

13039 Pathogen[ POC214] interacts with 1 human partners:{Q9BSD3}

13040 Pathogen[ P03346] interacts with 1 human partners:{Q9BSD3}

13041 Pathogen[ P14079] interacts with 1 human partners:{Q9BSD3}

13042 Pathogen[ P03383] interacts with 1 human partners:{Q9BSD3}

13043 Pathogen[ P03410] interacts with 1 human partners:{Q9BSD3}

13044 Pathogen[ P14075] interacts with 1 human partners:{Q9BSD3}

13045 Pathogen[ POC206] interacts with 1 human partners:{Q9BSD3}

13046 Pathogen[ P03363] interacts with 1 human partners:{Q9BSD3}

13047 [Cluster 2088]GO:0001562+P biological\_process [name] response to protozoan [def] "Any process that results in a change in state or activity of a cell or an organism (in terms of movement, secretion, enzyme production, gene expression, etc.) as a result of a stimulus from a protozoan." [GOC

13048 Pathogen[ P14079] interacts with 1 human partners:{P46695}

13049 Pathogen[ P03410] interacts with 1 human partners:{P46695}

13050 [Cluster 2089]GO:0072089+P biological\_process [name] stem cell proliferation [def] "The multiplication or reproduction of stem cells, resulting in the expansion of a stem cell population. A stem cell is a cell that retains the ability to divide and proliferate throughout life to provide progenitor cells that can differentiate into specialized cells." [GOC

13051 Pathogen[ P14079] interacts with 1 human partners:{P48681}

13052 [Cluster 2090]GO:0043651+P biological\_process [name] linoleic acid metabolic process [def] "The chemical reactions and pathways involving linoleic acid, an unsaturated omega-6 fatty acid that has the molecular formula C18H32O2." [Wikipedia

13053 Pathogen[ POC214] interacts with 2 human partners:{Q9NXB9;Q9NYP7}

13054 [Cluster 2091]GO:0010259+P biological\_process [name] multicellular organismal aging [def] "The inherent decline of a multicellular organism over time, from the optimal fertility and viability of early maturity, that may precede death and may be preceded by other indications, such as sterility." [GOC

13055 Pathogen[ Q2Q067] interacts with 1 human partners:{A6NFD8}

13056 Pathogen[ P03346] interacts with 2 human partners:{A6NFD8;P07992}

13057 Pathogen[ Q85601] interacts with 1 human partners:{A6NFD8}

13058 Pathogen[ P14079] interacts with 3 human partners:{Q9Y6X1;A6NFD8;P07992}

13059 Pathogen[ P03410] interacts with 3 human partners:{P07992;A6NFD8;Q9Y6X1}

13060 Pathogen[ POC206] interacts with 2 human partners:{A6NFD8;P07992}

13061 Pathogen[ P03363] interacts with 1 human partners:{A6NFD8}

13062 [Cluster 2092]GO:0072136+P biological\_process [name] metanephric mesenchymal cell proliferation involved in metanephros development [def] "The multiplication or reproduction of cells, resulting in the expansion of a metanephric mesenchymal cell population." [GOC

13063 Pathogen[ Q2Q067] interacts with 1 human partners:{P42224}

13064 Pathogen[ POC214] interacts with 1 human partners:{P42224}

13065 Pathogen[ P03346] interacts with 1 human partners:{P42224}

13066 Pathogen[ Q85601] interacts with 1 human partners:{P42224}

13067 Pathogen[ P14079] interacts with 1 human partners:{P42224}

13068 Pathogen[ P0C206] interacts with 1 human partners:{P42224}

13069 [Cluster 2093]GO:0032855+P biological\_process [name] positive regulation of Rac GTPase activity [def] "Any process that activates or increases the activity of a GTPase of the Rac family." [GOC]

13070 Pathogen[ Q2Q067] interacts with 1 human partners:{Q8N1I0}

13071 Pathogen[ P0C214] interacts with 1 human partners:{Q8N1I0}

13072 Pathogen[ P03346] interacts with 1 human partners:{Q8N1I0}

13073 Pathogen[ Q85601] interacts with 1 human partners:{Q8N1I0}

13074 Pathogen[ P14079] interacts with 1 human partners:{Q8N1I0}

13075 Pathogen[ P03410] interacts with 1 human partners:{Q8N1I0}

13076 Pathogen[ P0C206] interacts with 1 human partners:{Q8N1I0}

13077 Pathogen[ P03363] interacts with 1 human partners:{Q8N1I0}

13078 [Cluster 2094]GO:0007035+P biological\_process [name] vacuolar acidification [def] "Any process that reduces the pH of the vacuole, measured by the concentration of the hydrogen ion." [GOC]

13079 Pathogen[ P0C214] interacts with 1 human partners:{Q9UII2}

13080 Pathogen[ P14079] interacts with 1 human partners:{Q9UII2}

13081 Pathogen[ P03410] interacts with 1 human partners:{Q9UII2}

13082 Pathogen[ P0C206] interacts with 1 human partners:{Q9UII2}

13083 [Cluster 2095]GO:0009098+P biological\_process [name] leucine biosynthetic process [def] "The chemical reactions and pathways resulting in the formation of leucine, 2-amino-4-methylpentanoic acid." [GOC]

13084 Pathogen[ P0C214] interacts with 1 human partners:{O15382}

13085 Pathogen[ Q85601] interacts with 1 human partners:{O15382}

13086 Pathogen[ P14079] interacts with 1 human partners:{O15382}

13087 Pathogen[ P03410] interacts with 1 human partners:{O15382}

13088 Pathogen[ P0C206] interacts with 1 human partners:{O15382}

13089 [Cluster 2096]GO:0051295+P biological\_process [name] establishment of meiotic spindle localization [def] "The cell cycle process in which the directed movement of the meiotic spindle to a specific location in the cell occurs." [GOC]

13090 Pathogen[ Q2Q067] interacts with 1 human partners:{P35579}

13091 Pathogen[ P03346] interacts with 1 human partners:{P35579}

13092 Pathogen[ Q85601] interacts with 1 human partners:{P35579}

13093 Pathogen[ P14079] interacts with 1 human partners:{P35579}

13094 Pathogen[ P03383] interacts with 1 human partners:{P35579}

13095 Pathogen[ P03410] interacts with 1 human partners:{P35579}

13096 Pathogen[ P14075] interacts with 1 human partners:{P35579}

13097 Pathogen[ P0C206] interacts with 1 human partners:{P35579}

13098 Pathogen[ P03363] interacts with 1 human partners:{P35579}

13099 [Cluster 2097]GO:0048048+P biological\_process [name] embryonic eye morphogenesis [def] "The process occurring in the embryo by which the anatomical structures of the post-embryonic eye are generated and organized." [GOC]

13100 Pathogen[ P03346] interacts with 2 human partners:{P58012;Q9UIW0}

13101 Pathogen[ P03363] interacts with 1 human partners:{Q9UIW0}

13102 [Cluster 2098]GO:0016255+P biological\_process [name] attachment of GPI anchor to protein [def] "A transamidation reaction that results in the cleavage of the polypeptide chain and the concomitant transfer of the GPI anchor to the newly formed carboxy-terminal amino acid of the anchored protein. The cleaved C-terminal contains the C-terminal GPI signal sequence of the newly synthesized polypeptide chain." [ISBN]

13103 Pathogen[ P14079] interacts with 4 human partners:{O43292;Q96S52;Q969N2;Q9H490}

13104 Pathogen[ P03410] interacts with 3 human partners:{Q96S52;Q969N2;Q9H490}

13105 [Cluster 2099]GO:0060425+P biological\_process [name] lung morphogenesis [def] "The process in which the anatomical structures of the lung are generated and organized." [GOC]

13106 Pathogen[ Q2Q067] interacts with 1 human partners:{P41134}

13107 Pathogen[ P0C214] interacts with 1 human partners:{P41134}

13108 Pathogen[ P03346] interacts with 2 human partners:{O43680;P41134}

13109 Pathogen[ Q85601] interacts with 1 human partners:{P41134}

13110 Pathogen[ P14079] interacts with 2 human partners:{O43597;P41134}

13111 Pathogen[ P03410] interacts with 2 human partners:{O43597;P41134}

13112 Pathogen[ P0C206] interacts with 2 human partners:{P41134;O43597}

13113 Pathogen[ P03363] interacts with 1 human partners:{P41134}

13114 [Cluster 2100]GO:0045907+P biological\_process [name] positive regulation of vasoconstriction [def] "Any process that activates or increases the frequency, rate or extent of vasoconstriction." [GOC]

13115 Pathogen[ Q2Q067] interacts with 1 human partners:{P09917}

13116 Pathogen[ P0C214] interacts with 1 human partners:{P09917}

13117 Pathogen[ P03346] interacts with 2 human partners:{A8MU46;P09917}

13118 Pathogen[ Q85601] interacts with 1 human partners:{P09917}

13119 Pathogen[ P14079] interacts with 1 human partners:{P09917}

13120 Pathogen[ P03410] interacts with 2 human partners:{A8MU46;P09917}

13121 Pathogen[ P0C206] interacts with 1 human partners:{P09917}

13122 Pathogen[ P03363] interacts with 1 human partners:{A8MU46}

13123 [Cluster 2101]GO:0009436+P biological\_process [name] glyoxylate catabolic process

[def] "The chemical reactions and pathways resulting in the breakdown of glyoxylate, the anion of glyoxylic acid, HOC-COOH." [ISBN

13124 Pathogen[ POC214] interacts with 1 human partners:{Q86XE5}

13125 Pathogen[ P14079] interacts with 1 human partners:{Q86XE5}

13126 Pathogen[ P03410] interacts with 1 human partners:{Q86XE5}

13127 Pathogen[ P14075] interacts with 1 human partners:{Q86XE5}

13128 Pathogen[ POC206] interacts with 1 human partners:{Q86XE5}

13129 [Cluster 2102]GO:0001754+P biological\_process [name] eye photoreceptor cell differentiation [def] "The process in which a relatively unspecialized cell acquires the specialized features of a photoreceptor cell, as found in the eye, the primary visual organ of most organisms." [GOC

13130 Pathogen[ Q2Q067] interacts with 1 human partners:{P40763}

13131 Pathogen[ POC214] interacts with 1 human partners:{P40763}

13132 Pathogen[ P03346] interacts with 3 human partners:{Q969G9;Q06190;P40763}

13133 Pathogen[ Q85601] interacts with 1 human partners:{P40763}

13134 Pathogen[ P14079] interacts with 2 human partners:{Q9UPW5;Q06190}

13135 Pathogen[ P03410] interacts with 4 human partners:{Q9UPW5;Q06190;Q969G9;P40763}

13136 Pathogen[ POC206] interacts with 4 human partners:{Q06190;P40763;Q9UPW5;Q969G9}

13137 Pathogen[ P03363] interacts with 2 human partners:{Q06190;Q969G9}

13138 [Cluster 2103]GO:0072284+P biological\_process [name] metanephric S-shaped body morphogenesis [def] "The process in which the metanephric S-shaped body is generated and organized. The metanephric S-shaped body is the successor of the metanephric comma-shaped body that contributes to the morphogenesis of a nephron in the metanephros." [GOC

13139 Pathogen[ P03346] interacts with 1 human partners:{Q06710}

13140 [Cluster 2104]GO:0032780+P biological\_process [name] negative regulation of ATPase activity [def] "Any process that stops or reduces the rate of ATP hydrolysis by an ATPase." [GOC

13141 Pathogen[ POC214] interacts with 1 human partners:{P19429}

13142 Pathogen[ P14079] interacts with 2 human partners:{P19429;Q15070}

13143 Pathogen[ P03410] interacts with 2 human partners:{P19429;Q15070}

13144 Pathogen[ P14075] interacts with 1 human partners:{Q15070}

13145 Pathogen[ POC206] interacts with 2 human partners:{P19429;Q15070}

13146 Pathogen[ P03363] interacts with 1 human partners:{P19429}

13147 [Cluster 2105]GO:0002521+P biological\_process [name] leukocyte differentiation [def] "The process in which a relatively unspecialized hemopoietic precursor cell acquires the specialized features of a leukocyte. A leukocyte is an achromatic cell of the myeloid or lymphoid lineages capable of ameboid movement, found in blood or other tissue." [CL

13148 Pathogen[ Q2Q067] interacts with 1 human partners:{P11831}

13149 Pathogen[ POC214] interacts with 1 human partners:{P11831}

13150 Pathogen[ P03346] interacts with 1 human partners:{P11831}

13151 Pathogen[ Q85601] interacts with 1 human partners:{P11831}

13152 Pathogen[ P03383] interacts with 1 human partners:{P11831}

13153 Pathogen[ P03410] interacts with 1 human partners:{P11831}

13154 Pathogen[ P14075] interacts with 1 human partners:{P11831}

13155 Pathogen[ POC206] interacts with 1 human partners:{P11831}

13156 Pathogen[ P03363] interacts with 1 human partners:{P11831}

13157 [Cluster 2106]GO:0019322+P biological\_process [name] pentose biosynthetic process [def] "The chemical reactions and pathways resulting in the formation of a pentose, any monosaccharide with a chain of five carbon atoms in the molecule." [ISBN

13158 Pathogen[ POC214] interacts with 2 human partners:{P52209;P11413}

13159 Pathogen[ P14079] interacts with 1 human partners:{P52209}

13160 Pathogen[ P03410] interacts with 1 human partners:{P52209}

13161 [Cluster 2107]GO:0046486+P biological\_process [name] glycerolipid metabolic process [def] "The chemical reactions and pathways involving glycerolipids, any lipid with a glycerol backbone. Diacylglycerol and phosphatidate are key lipid intermediates of glycerolipid biosynthesis." [GOC

13162 Pathogen[ POC214] interacts with 1 human partners:{P21695}

13163 Pathogen[ P14079] interacts with 1 human partners:{P21695}

13164 Pathogen[ P03410] interacts with 1 human partners:{P21695}

13165 [Cluster 2108]GO:2000615+P biological\_process [name] regulation of histone H3-K9 acetylation [def] "Any process that modulates the frequency, rate or extent of histone H3-K9 acetylation." [GOC

13166 Pathogen[ Q2Q067] interacts with 1 human partners:{O14757}

13167 Pathogen[ POC214] interacts with 1 human partners:{O14757}

13168 Pathogen[ P03346] interacts with 1 human partners:{O14757}

13169 Pathogen[ Q85601] interacts with 1 human partners:{O14757}

13170 Pathogen[ P03383] interacts with 1 human partners:{O14757}

13171 Pathogen[ P03410] interacts with 1 human partners:{O14757}

13172 Pathogen[ P14075] interacts with 1 human partners:{O14757}

13173 Pathogen[ P03363] interacts with 1 human partners:{O14757}

13174 [Cluster 2109]GO:0035434+P biological\_process [name] copper ion transmembrane transport [def] "The directed movement of copper (Cu) ions across a membrane by means of some agent such as a transporter or pore." [GOC

13175 Pathogen[ Q2Q067] interacts with 1 human partners:{O14618}



13176 Pathogen[ P0C214] interacts with 1 human partners:{014618}

13177 Pathogen[ P03346] interacts with 1 human partners:{014618}

13178 Pathogen[ Q85601] interacts with 1 human partners:{014618}

13179 Pathogen[ P14079] interacts with 1 human partners:{014618}

13180 Pathogen[ P03410] interacts with 1 human partners:{014618}

13181 Pathogen[ P0C206] interacts with 1 human partners:{014618}

13182 Pathogen[ P03363] interacts with 1 human partners:{014618}

13183 [Cluster 2110]GO:0009296+P biological\_process [name] flagellum assembly [def] "The assembly of a flagellum. In bacteria, this is a whiplike motility appendage present on the surface of some species\_ in eukaryotes, flagella are threadlike protoplasmic extensions used to propel flagellates and sperm. Flagella are composed of flagellin and have the same basic structure as cilia but are longer in proportion to the cell and present in much smaller numbers." [GOC

13184 Pathogen[ P03346] interacts with 1 human partners:{Q9NQC8}

13185 Pathogen[ P14079] interacts with 2 human partners:{Q8N3I7;Q9NQC8}

13186 Pathogen[ P03410] interacts with 2 human partners:{Q8N3I7;Q9NQC8}

13187 Pathogen[ P0C206] interacts with 2 human partners:{Q9NQC8;Q8N3I7}

13188 Pathogen[ P03363] interacts with 1 human partners:{Q9NQC8}

13189 [Cluster 2111]GO:0080111+P biological\_process [name] DNA demethylation [def] "The removal of a methyl group from one or more nucleotides within an DNA molecule." [PMID

13190 Pathogen[ Q2Q067] interacts with 3 human partners:{Q6NS38;P27695;Q9GZX7}

13191 Pathogen[ P0C214] interacts with 3 human partners:{P27695;Q6NS38;Q9GZX7}

13192 Pathogen[ P03346] interacts with 1 human partners:{P27695}

13193 Pathogen[ Q85601] interacts with 3 human partners:{Q9GZX7;Q6NS38;P27695}

13194 Pathogen[ P14079] interacts with 6 human partners:{P41238;Q9C0B1;P31941;Q9GZX7;Q6NS38;P27695}

13195 Pathogen[ P03383] interacts with 1 human partners:{P27695}

13196 Pathogen[ P03410] interacts with 7 human partners:{P41238;Q6NS38;Q9GZX7;Q9NRW3;P31941;P27695;Q9C0B1}

13197 Pathogen[ P14075] interacts with 1 human partners:{P27695}

13198 Pathogen[ P0C206] interacts with 5 human partners:{P27695;Q6NS38;Q9GZX7;P31941;P41238}

13199 [Cluster 2112]GO:0060364+P biological\_process [name] frontal suture morphogenesis [def] "The process in which the frontal suture is generated and organized." [GOC

13200 Pathogen[ Q2Q067] interacts with 1 human partners:{P35548}

13201 Pathogen[ P0C214] interacts with 1 human partners:{P35548}

13202 Pathogen[ P03346] interacts with 1 human partners:{P35548}

13203 Pathogen[ Q85601] interacts with 1 human partners:{P35548}

13204 Pathogen[ P03383] interacts with 1 human partners:{P35548}

13205 Pathogen[ P03410] interacts with 1 human partners:{P35548}

13206 Pathogen[ P14075] interacts with 1 human partners:{P35548}

13207 Pathogen[ P0C206] interacts with 1 human partners:{P35548}

13208 Pathogen[ P03363] interacts with 1 human partners:{P35548}

13209 [Cluster 2113]GO:0072179+P biological\_process [name] nephric duct formation [def] "The developmental process pertaining to the initial formation of a nephric duct. A nephric duct is a tube that drains a primitive kidney." [GOC

13210 Pathogen[ Q2Q067] interacts with 1 human partners:{P35680}

13211 Pathogen[ P03346] interacts with 1 human partners:{P35680}

13212 Pathogen[ Q85601] interacts with 1 human partners:{P35680}

13213 Pathogen[ P14079] interacts with 1 human partners:{P35680}

13214 Pathogen[ P03410] interacts with 1 human partners:{P35680}

13215 Pathogen[ P0C206] interacts with 1 human partners:{P35680}

13216 [Cluster 2114]GO:0031118+P biological\_process [name] rRNA pseudouridine synthesis [def] "The intramolecular conversion of uridine to pseudouridine in an rRNA molecule." [GOC

13217 Pathogen[ P03346] interacts with 1 human partners:{Q9NX24}

13218 Pathogen[ P03410] interacts with 1 human partners:{Q9NX24}

13219 Pathogen[ P03363] interacts with 1 human partners:{Q9NX24}

13220 [Cluster 2115]GO:0043306+P biological\_process [name] positive regulation of mast cell degranulation [def] "Any process that activates or increases the frequency, rate or extent of mast cell degranulation." [ISBN

13221 Pathogen[ P0C214] interacts with 1 human partners:{Q9UQC2}

13222 Pathogen[ P03346] interacts with 1 human partners:{Q9UQC2}

13223 Pathogen[ Q85601] interacts with 1 human partners:{Q9UQC2}

13224 Pathogen[ P14079] interacts with 1 human partners:{Q9UQC2}

13225 Pathogen[ P03410] interacts with 1 human partners:{Q9UQC2}

13226 Pathogen[ P0C206] interacts with 1 human partners:{Q9UQC2}

13227 Pathogen[ P03363] interacts with 1 human partners:{Q9UQC2}

13228 [Cluster 2116]GO:0006004+P biological\_process [name] fucose metabolic process [def] "The chemical reactions and pathways involving fucose, or 6-deoxygalactose, which has two enantiomers, D-fucose and L-fucose." [ISBN

13229 Pathogen[ P0C214] interacts with 1 human partners:{Q9Y2G5}

13230 Pathogen[ P14079] interacts with 4 human partners:{A2VDF0;P04066;Q9H488;Q9Y2G5}

13231 Pathogen[ P03410] interacts with 4 human partners:{A2VDF0;P04066;Q9Y2G5;Q9H488}

13232 Pathogen[ P14075] interacts with 1 human partners:{Q9Y2G5}

13233 Pathogen[ P0C206] interacts with 2 human partners:{A2VDF0;Q9Y2G5}

13234 [Cluster 2117]GO:0001580+P biological\_process [name] detection of chemical stimulus involved in sensory perception of bitter taste [def] "The series of events required for a bitter taste stimulus to be received and converted to a molecular signal." [GOC

13235 Pathogen[ P03346] interacts with 2 human partners:{Q9BQQ7;Q96DX8}

13236 Pathogen[ P14079] interacts with 3 human partners:{Q9NYV7;Q96DX8;Q9BQQ7}

13237 Pathogen[ P03410] interacts with 2 human partners:{Q9BQQ7;Q96DX8}

13238 Pathogen[ P0C206] interacts with 2 human partners:{Q96DX8;Q9BQQ7}

13239 Pathogen[ P03363] interacts with 2 human partners:{Q9BQQ7;Q96DX8}

13240 [Cluster 2118]GO:0006683+P biological\_process [name] galactosylceramide catabolic process [def] "The chemical reactions and pathways resulting in the breakdown of galactosylceramides, any compound formed by the replacement of the glycosidic hydroxyl group of a cyclic form of galactose by a ceramide group." [GOC

13241 Pathogen[ P14079] interacts with 1 human partners:{P54803}

13242 Pathogen[ P03410] interacts with 1 human partners:{P54803}

13243 [Cluster 2119]GO:0006556+P biological\_process [name] S-adenosylmethionine biosynthetic process [def] "The chemical reactions and pathways resulting in the formation of S-adenosylmethionine, S-(5'-adenosyl)-L-methionine, an important intermediate in one-carbon metabolism." [GOC

13244 Pathogen[ P0C214] interacts with 1 human partners:{Q9NZL9}

13245 Pathogen[ P03346] interacts with 1 human partners:{Q9NZL9}

13246 Pathogen[ P14079] interacts with 1 human partners:{Q9NZL9}

13247 Pathogen[ P03410] interacts with 1 human partners:{Q9NZL9}

13248 Pathogen[ P0C206] interacts with 1 human partners:{Q9NZL9}

13249 [Cluster 2120]GO:0001680+P biological\_process [name] tRNA 3'-terminal CCA addition [def] "Post-transcriptional addition of the terminal 3' CCA sequence to a tRNA which does not encode this sequence within the primary transcript." [GOC

13250 Pathogen[ P14079] interacts with 1 human partners:{Q96Q11}

13251 Pathogen[ P03410] interacts with 1 human partners:{Q96Q11}

13252 [Cluster 2121]GO:0050855+P biological\_process [name] regulation of B cell receptor signaling pathway [def] "Any process that modulates the frequency, rate or extent of signaling pathways initiated by the cross-linking of an antigen receptor on a B cell." [GOC

13253 Pathogen[ P03346] interacts with 1 human partners:{Q9Y2R2}

13254 Pathogen[ P0C206] interacts with 1 human partners:{Q9Y2R2}

13255 Pathogen[ P03363] interacts with 1 human partners:{Q9Y2R2}

13256 [Cluster 2122]GO:0003138+P biological\_process [name] primary heart field specification [def] "The process that results in the delineation of a specific region of the lateral mesoderm into the area which will form the primary beating heart tube." [GOC

13257 Pathogen[ P14079] interacts with 1 human partners:{Q06413}

13258 [Cluster 2123]GO:0048703+P biological\_process [name] embryonic viscerocranium morphogenesis [def] "The process in which the anatomical structures of the viscerocranium are generated and organized during the embryonic phase. The viscerocranium is the part of the skull comprising the facial bones." [GOC

13259 Pathogen[ Q2Q067] interacts with 1 human partners:{O43364}

13260 Pathogen[ P03346] interacts with 1 human partners:{O43364}

13261 Pathogen[ Q85601] interacts with 1 human partners:{O43364}

13262 Pathogen[ P14079] interacts with 1 human partners:{O43364}

13263 Pathogen[ P03410] interacts with 1 human partners:{O43364}

13264 Pathogen[ P0C206] interacts with 1 human partners:{O43364}

13265 Pathogen[ P03363] interacts with 1 human partners:{O43364}

13266 [Cluster 2124]GO:0032275+P biological\_process [name] luteinizing hormone secretion [def] "The regulated release of luteinizing hormone, a gonadotropic glycoprotein hormone secreted by the anterior pituitary." [ISBN

13267 Pathogen[ P14079] interacts with 1 human partners:{P01215}

13268 Pathogen[ P03383] interacts with 1 human partners:{P01215}

13269 Pathogen[ P03410] interacts with 1 human partners:{P01215}

13270 Pathogen[ P14075] interacts with 1 human partners:{P01215}

13271 Pathogen[ P0C206] interacts with 1 human partners:{P01215}

13272 [Cluster 2125]GO:0007586+P biological\_process [name] digestion [def] "The whole of the physical, chemical, and biochemical processes carried out by multicellular organisms to break down ingested nutrients into components that may be easily absorbed and directed into metabolism." [GOC

13273 Pathogen[ P0C214] interacts with 1 human partners:{Q06520}

13274 Pathogen[ P03346] interacts with 2 human partners:{Q06520;P01358}

13275 Pathogen[ P14079] interacts with 2 human partners:{Q9NS71;P01358}

13276 Pathogen[ P03383] interacts with 1 human partners:{P01358}

13277 Pathogen[ P03410] interacts with 2 human partners:{Q9NS71;P01358}

13278 Pathogen[ P14075] interacts with 2 human partners:{P01358;Q9NS71}

13279 Pathogen[ P0C206] interacts with 1 human partners:{P01358}

13280 Pathogen[ P03363] interacts with 2 human partners:{P01358;Q06520}

13281 [Cluster 2126]GO:0033504+P biological\_process [name] floor plate development [def] "The progression of the floor plate over time from its initial formation until its mature state." [GOC

13282 Pathogen[ Q2Q067] interacts with 1 human partners:{Q15468}

13283 Pathogen[ P0C214] interacts with 1 human partners:{Q15468}

13284 Pathogen[ P03346] interacts with 1 human partners:{Q15468}

13285 Pathogen[ P14079] interacts with 1 human partners:{Q15468}

13286 Pathogen[ P03383] interacts with 1 human partners:{Q15468}

13287 Pathogen[ P03410] interacts with 1 human partners:{Q15468}

13288 Pathogen[ P14075] interacts with 1 human partners:{Q15468}

13289 Pathogen[ P0C206] interacts with 1 human partners:{Q15468}

13290 Pathogen[ P03363] interacts with 1 human partners:{Q15468}

13291 [Cluster 2127]GO:0001706+P biological\_process [name] endoderm formation [def] "The formation of the endoderm during gastrulation." [GOC

13292 Pathogen[ Q2Q067] interacts with 1 human partners:{Q9BT81}

13293 Pathogen[ P0C214] interacts with 1 human partners:{Q9BT81}

13294 Pathogen[ P03346] interacts with 2 human partners:{Q9H2W2;Q9BT81}

13295 Pathogen[ Q85601] interacts with 1 human partners:{Q9BT81}

13296 Pathogen[ P14079] interacts with 1 human partners:{Q9BT81}

13297 Pathogen[ P03410] interacts with 1 human partners:{Q9BT81}

13298 Pathogen[ P0C206] interacts with 1 human partners:{Q9BT81}

13299 Pathogen[ P03363] interacts with 2 human partners:{Q9H2W2;Q9BT81}

13300 [Cluster 2128]GO:0001886+P biological\_process [name] endothelial cell morphogenesis [def] "The change in form (cell shape and size) that occurs during the differentiation of an endothelial cell." [GOC

13301 Pathogen[ Q2Q067] interacts with 1 human partners:{P41134}

13302 Pathogen[ P0C214] interacts with 1 human partners:{P41134}

13303 Pathogen[ P03346] interacts with 2 human partners:{P31271;P41134}

13304 Pathogen[ Q85601] interacts with 2 human partners:{P41134;P31271}

13305 Pathogen[ P14079] interacts with 2 human partners:{P31271;P41134}

13306 Pathogen[ P03410] interacts with 1 human partners:{P41134}

13307 Pathogen[ P0C206] interacts with 2 human partners:{P41134;P31271}

13308 Pathogen[ P03363] interacts with 2 human partners:{P31271;P41134}

13309 [Cluster 2129]GO:0003290+P biological\_process [name] atrial septum secundum morphogenesis [def] "The process in which anatomical structure of an atrial septum secundum is generated and organized." [GOC

13310 Pathogen[ Q2Q067] interacts with 1 human partners:{O96028}

13311 Pathogen[ P0C214] interacts with 1 human partners:{O96028}

13312 Pathogen[ P03346] interacts with 1 human partners:{O96028}

13313 Pathogen[ Q85601] interacts with 1 human partners:{O96028}

13314 Pathogen[ P0C206] interacts with 1 human partners:{O96028}

13315 Pathogen[ P03363] interacts with 1 human partners:{O96028}

13316 [Cluster 2130]GO:0032872+P biological\_process [name] regulation of stress-activated MAPK cascade [def] "Any process that modulates the frequency, rate or extent of signal transduction mediated by the stress-activated MAPK cascade." [GOC

13317 Pathogen[ Q2Q067] interacts with 1 human partners:{Q06830}

13318 Pathogen[ P0C214] interacts with 1 human partners:{Q06830}

13319 Pathogen[ P03346] interacts with 2 human partners:{Q06830;Q14596}

13320 Pathogen[ Q85601] interacts with 2 human partners:{Q14596;Q06830}

13321 Pathogen[ P14079] interacts with 1 human partners:{Q14596}

13322 Pathogen[ P03410] interacts with 2 human partners:{Q14596;Q06830}

13323 Pathogen[ P0C206] interacts with 2 human partners:{Q14596;Q06830}

13324 [Cluster 2131]GO:0090311+P biological\_process [name] regulation of protein deacetylation [def] "Any process that modulates the rate, frequency, or extent of protein deacetylation, the removal of an acetyl group from a protein amino acid. An acetyl group is CH3CO-, derived from acetic [ethanoic] acid." [GOC

13325 Pathogen[ Q2Q067] interacts with 1 human partners:{Q7Z699}

13326 Pathogen[ P0C214] interacts with 1 human partners:{Q7Z699}

13327 Pathogen[ P03346] interacts with 1 human partners:{Q7Z699}

13328 Pathogen[ Q85601] interacts with 1 human partners:{Q7Z699}

13329 Pathogen[ P14079] interacts with 1 human partners:{Q7Z699}

13330 Pathogen[ P03410] interacts with 1 human partners:{Q7Z699}

13331 Pathogen[ P0C206] interacts with 1 human partners:{Q7Z699}

13332 Pathogen[ P03363] interacts with 1 human partners:{Q7Z699}

13333 [Cluster 2132]GO:0051561+P biological\_process [name] elevation of mitochondrial calcium ion concentration [def] "Any process that increases the concentration of calcium ions in mitochondria." [GOC

13334 Pathogen[ P14079] interacts with 1 human partners:{Q8NE86}

13335 Pathogen[ P03410] interacts with 1 human partners:{Q8NE86}

13336 Pathogen[ P0C206] interacts with 1 human partners:{Q8NE86}

13337 [Cluster 2133]GO:2000821+P biological\_process [name] regulation of grooming behavior [def] "Any process that modulates the frequency, rate or extent of grooming behavior." [GOC

13338 Pathogen[ Q2Q067] interacts with 1 human partners:{P78352}

13339 Pathogen[ P0C214] interacts with 1 human partners:{P78352}

13340 Pathogen[ P03346] interacts with 1 human partners:{P78352}

13341 Pathogen[ Q85601] interacts with 1 human partners:{P78352}

13342 Pathogen[ P03383] interacts with 1 human partners:{P78352}

13343 Pathogen[ P03410] interacts with 1 human partners:{P78352}

13344 Pathogen[ P14075] interacts with 1 human partners:{P78352}

13345 Pathogen[ P0C206] interacts with 1 human partners:{P78352}

13346 Pathogen[ P03363] interacts with 1 human partners:{P78352}

13347 [Cluster 2134]GO:0035280+P biological\_process [name] miRNA loading onto RISC involved in gene silencing by miRNA [def] "The transfer of a microRNA (miRNA) strand from a miRNA

13348 Pathogen[ Q2Q067] interacts with 1 human partners:{Q15633}

13349 Pathogen[ P0C214] interacts with 1 human partners:{Q15633}

13350 Pathogen[ P03346] interacts with 1 human partners:{Q15633}

13351 Pathogen[ Q85601] interacts with 1 human partners:{Q15633}

13352 Pathogen[ P03383] interacts with 1 human partners:{Q15633}

13353 Pathogen[ P03410] interacts with 1 human partners:{Q15633}

13354 Pathogen[ P14075] interacts with 1 human partners:{Q15633}

13355 Pathogen[ P0C206] interacts with 1 human partners:{Q15633}

13356 Pathogen[ P03363] interacts with 1 human partners:{Q15633}

13357 [Cluster 2135]GO:0071474+P biological\_process [name] cellular hyperosmotic response [def] "Any process that results in a change in state or activity of a cell (in terms of movement, secretion, enzyme production, gene expression, etc.) as a result of detection of, or exposure to, a hyperosmotic environment, i.e. an environment with a higher concentration of solutes than the organism or cell." [GOC

13358 Pathogen[ P14079] interacts with 1 human partners:{Q6JBY9}

13359 Pathogen[ P03410] interacts with 1 human partners:{Q6JBY9}

13360 Pathogen[ P14075] interacts with 1 human partners:{Q6JBY9}

13361 Pathogen[ P0C206] interacts with 1 human partners:{Q6JBY9}

13362 [Cluster 2136]GO:0033194+P biological\_process [name] response to hydroperoxide [def] "Any process that results in a change in state or activity of a cell or an organism (in terms of movement, secretion, enzyme production, gene expression, etc.) as a result of a hydroperoxide stimulus. Hydroperoxides are monosubstitution products of hydrogen peroxide, HOOH." [CHEBI

13363 Pathogen[ P14079] interacts with 1 human partners:{P03886}

13364 Pathogen[ P03410] interacts with 1 human partners:{P03886}

13365 [Cluster 2137]GO:0090003+P biological\_process [name] regulation of establishment of protein localization in plasma membrane [def] "Any process that modulates the frequency, rate or extent of the directed movement of a protein to a specific location in the plasma membrane." [GOC

13366 Pathogen[ Q2Q067] interacts with 1 human partners:{Q9UKG1}

13367 Pathogen[ P0C214] interacts with 1 human partners:{Q9UKG1}

13368 Pathogen[ P03346] interacts with 1 human partners:{Q9UKG1}

13369 Pathogen[ Q85601] interacts with 1 human partners:{Q9UKG1}

13370 Pathogen[ P14079] interacts with 1 human partners:{Q9UKG1}

13371 Pathogen[ P03410] interacts with 1 human partners:{Q9UKG1}

13372 Pathogen[ P0C206] interacts with 1 human partners:{Q9UKG1}

13373 Pathogen[ P03363] interacts with 1 human partners:{Q9UKG1}

13374 [Cluster 2138]GO:0006691+P biological\_process [name] leukotriene metabolic process [def] "The chemical reactions and pathways involving leukotriene, a pharmacologically active substance derived from a polyunsaturated fatty acid, such as arachidonic acid." [GOC

13375 Pathogen[ Q2Q067] interacts with 1 human partners:{P09917}

13376 Pathogen[ P0C214] interacts with 2 human partners:{P09917;P18054}

13377 Pathogen[ P03346] interacts with 2 human partners:{P18054;P09917}

13378 Pathogen[ Q85601] interacts with 1 human partners:{P09917}

13379 Pathogen[ P14079] interacts with 3 human partners:{Q16873;P20292;P09917}

13380 Pathogen[ P03410] interacts with 3 human partners:{Q16873;P09917;P20292}

13381 Pathogen[ P0C206] interacts with 2 human partners:{P09917;P20292}

13382 [Cluster 2139]GO:0046903+P biological\_process [name] secretion [def] "The controlled release of a substance by a cell, a group of cells, or a tissue." [GOC

13383 Pathogen[ Q2Q067] interacts with 1 human partners:{P55327}

13384 Pathogen[ P0C214] interacts with 1 human partners:{P55327}

13385 Pathogen[ P03346] interacts with 2 human partners:{P55327;Q70J99}

13386 Pathogen[ P14079] interacts with 1 human partners:{P55327}

13387 Pathogen[ P03410] interacts with 2 human partners:{Q70J99;P55327}

13388 Pathogen[ P14075] interacts with 1 human partners:{P55327}

13389 Pathogen[ P0C206] interacts with 1 human partners:{P55327}

13390 Pathogen[ P03363] interacts with 1 human partners:{P55327}

13391 [Cluster 2140]GO:0021546+P biological\_process [name] rhombomere development [def] "The process whose specific outcome is the progression of the rhombomere over time, from its formation to the mature structure. Rhombomeres are transverse segments of the developing rhombencephalon. Rhombomeres are lineage restricted, express different genes from one another, and adopt different developmental fates." [GO\_REF

13392 Pathogen[ Q2Q067] interacts with 2 human partners:{P14651;P14653}

13393 Pathogen[ P0C214] interacts with 2 human partners:{P14651;P14653}

13394 Pathogen[ P03346] interacts with 2 human partners:{P14653;P14651}

13395 Pathogen[ Q85601] interacts with 2 human partners:{P14653;P14651}

13396 Pathogen[ P14079] interacts with 1 human partners:{P14651}

13397 Pathogen[ P03383] interacts with 1 human partners:{P14651}

13398 Pathogen[ P03410] interacts with 1 human partners:{P14651}

13399 Pathogen[ P0C206] interacts with 2 human partners:{P14651;P14653}

13400 Pathogen[ P03363] interacts with 2 human partners:{P14651;P14653}

13401 [Cluster 2141]GO:0008209+P biological\_process [name] androgen metabolic process

[def] "The chemical reactions and pathways involving androgens, C19 steroid hormones that can stimulate the development of male sexual characteristics." [ISBN

13402 Pathogen[ P03346] interacts with 1 human partners:{Q9HB21}

13403 Pathogen[ Q85601] interacts with 1 human partners:{Q9HB21}

13404 Pathogen[ P14079] interacts with 1 human partners:{Q9HB21}

13405 Pathogen[ P03410] interacts with 1 human partners:{Q9HB21}

13406 Pathogen[ P0C206] interacts with 1 human partners:{Q9HB21}

13407 [Cluster 2142]GO:0032874+P biological\_process [name] positive regulation of stress-activated MAPK cascade [def] "Any process that activates or increases the frequency, rate or extent of signal transduction mediated by the stress-activated MAPK cascade." [GOC

13408 Pathogen[ P14079] interacts with 1 human partners:{Q9Y239}

13409 Pathogen[ P03410] interacts with 1 human partners:{Q9Y239}

13410 [Cluster 2143]GO:0045019+P biological\_process [name] negative regulation of nitric oxide biosynthetic process [def] "Any process that stops, prevents, or reduces the frequency, rate or extent of the chemical reactions and pathways resulting in the formation of nitric oxide." [GOC

13411 Pathogen[ P14079] interacts with 1 human partners:{P06280}

13412 [Cluster 2144]GO:0010872+P biological\_process [name] regulation of cholesterol esterification [def] "Any process that modulates the frequency, rate or extent of cholesterol esterification. Cholesterol esterification is the lipid modification process in which a sterol ester is formed by the combination of a carboxylic acid (often a fatty acid) and cholesterol. In the blood this process is associated with the conversion of free cholesterol into cholesteryl ester, which is then sequestered into the core of a lipoprotein particle." [GOC

13413 Pathogen[ P14079] interacts with 1 human partners:{Q6IAA8}

13414 Pathogen[ P03410] interacts with 1 human partners:{Q6IAA8}

13415 [Cluster 2145]GO:0009308+P biological\_process [name] amine metabolic process [def] "The chemical reactions and pathways involving any organic compound that is weakly basic in character and contains an amino or a substituted amino group, as carried out by individual cells. Amines are called primary, secondary, or tertiary according to whether one, two, or three carbon atoms are attached to the nitrogen atom." [GOC

13416 Pathogen[ P03346] interacts with 1 human partners:{O95050}

13417 Pathogen[ P14079] interacts with 1 human partners:{O95050}

13418 Pathogen[ P03410] interacts with 1 human partners:{O95050}

13419 Pathogen[ P03363] interacts with 1 human partners:{O95050}

13420 [Cluster 2146]GO:0035491+P biological\_process [name] positive regulation of leukotriene production involved in inflammatory response [def] "Any process that increases the rate, frequency or extent of the synthesis or release of any leukotriene following a stimulus as part of an inflammatory response." [GOC

13421 Pathogen[ P0C214] interacts with 1 human partners:{P05121}

13422 Pathogen[ Q85601] interacts with 1 human partners:{P05121}

13423 Pathogen[ P03410] interacts with 1 human partners:{P05121}

13424 Pathogen[ P0C206] interacts with 1 human partners:{P05121}

13425 [Cluster 2147]GO:0071418+P biological\_process [name] cellular response to amine stimulus [def] "Any process that results in a change in state or activity of a cell (in terms of movement, secretion, enzyme production, gene expression, etc.) as a result of an amine stimulus. An amine is a compound formally derived from ammonia by replacing one, two or three hydrogen atoms by hydrocarbyl groups." [GOC

13426 Pathogen[ Q2Q067] interacts with 2 human partners:{P10746;P08397}

13427 Pathogen[ P0C214] interacts with 2 human partners:{P10746;P08397}

13428 Pathogen[ P03346] interacts with 1 human partners:{P10746}

13429 Pathogen[ Q85601] interacts with 2 human partners:{P10746;P08397}

13430 Pathogen[ P14079] interacts with 2 human partners:{P10746;P08397}

13431 Pathogen[ P03383] interacts with 1 human partners:{P08397}

13432 Pathogen[ P03410] interacts with 2 human partners:{P08397;P10746}

13433 Pathogen[ P14075] interacts with 1 human partners:{P08397}

13434 Pathogen[ P0C206] interacts with 2 human partners:{P10746;P08397}

13435 [Cluster 2148]GO:0030497+P biological\_process [name] fatty acid elongation [def] "The elongation of a fatty acid chain by the sequential addition of two-carbon units." [ISBN

13436 Pathogen[ Q2Q067] interacts with 1 human partners:{Q9H5J4}

13437 Pathogen[ P03346] interacts with 1 human partners:{Q9H5J4}

13438 Pathogen[ Q85601] interacts with 1 human partners:{Q9H5J4}

13439 Pathogen[ P14079] interacts with 1 human partners:{Q9H5J4}

13440 Pathogen[ P03383] interacts with 1 human partners:{Q9H5J4}

13441 Pathogen[ P03410] interacts with 1 human partners:{Q9H5J4}

13442 Pathogen[ P14075] interacts with 1 human partners:{Q9H5J4}

13443 Pathogen[ P0C206] interacts with 1 human partners:{Q9H5J4}

13444 Pathogen[ P03363] interacts with 1 human partners:{Q9H5J4}

13445 [Cluster 2149]GO:0048561+P biological\_process [name] establishment of organ orientation [def] "The process that determines the orientation of an organ or tissue with reference to an axis." [GOC

13446 Pathogen[ P03346] interacts with 1 human partners:{P78413}

13447 Pathogen[ P0C206] interacts with 1 human partners:{P78413}

13448 Pathogen[ P03363] interacts with 1 human partners:{P78413}

13449 [Cluster 2150]GO:0050909+P biological\_process [name] sensory perception of taste [def] "The series of events required for an organism to receive a gustatory stimulus, convert it to a molecular signal, and recognize and characterize the signal. Gustation involves the direct detection of chemical composition, usually through contact with chemoreceptor cells. This is a neurological process." [GOC  
13450 Pathogen[ P14079] interacts with 1 human partners:{Q9NYV7}  
13451 [Cluster 2151]GO:0060627+P biological\_process [name] regulation of vesicle-mediated transport [def] "Any process that modulates the rate, frequency, or extent of vesicle-mediated transport, the directed movement of substances, either within a vesicle or in the vesicle membrane, into, out of or within a cell." [GOC  
13452 Pathogen[ Q2Q067] interacts with 1 human partners:{O14786}  
13453 Pathogen[ P0C214] interacts with 1 human partners:{O14786}  
13454 Pathogen[ P03346] interacts with 1 human partners:{O14786}  
13455 Pathogen[ Q85601] interacts with 1 human partners:{O14786}  
13456 Pathogen[ P03410] interacts with 1 human partners:{O14786}  
13457 Pathogen[ P0C206] interacts with 1 human partners:{O14786}  
13458 Pathogen[ P03363] interacts with 1 human partners:{O14786}  
13459 [Cluster 2152]GO:0014916+P biological\_process [name] regulation of lung blood pressure [def] "The process that modulates the force with which blood travels through the lungs. The process is controlled by a balance of processes that increase pressure and decrease pressure." [GOC  
13460 Pathogen[ Q2Q067] interacts with 1 human partners:{P30793}  
13461 Pathogen[ P0C214] interacts with 1 human partners:{P30793}  
13462 Pathogen[ Q85601] interacts with 1 human partners:{P30793}  
13463 Pathogen[ P14079] interacts with 1 human partners:{P30793}  
13464 Pathogen[ P03410] interacts with 1 human partners:{P30793}  
13465 Pathogen[ P14075] interacts with 1 human partners:{P30793}  
13466 Pathogen[ P0C206] interacts with 1 human partners:{P30793}  
13467 [Cluster 2153]GO:0032680+P biological\_process [name] regulation of tumor necrosis factor production [def] "Any process that modulates the frequency, rate, or extent of tumor necrosis factor production." [GOC  
13468 Pathogen[ Q2Q067] interacts with 1 human partners:{P26651}  
13469 Pathogen[ P0C214] interacts with 1 human partners:{P26651}  
13470 Pathogen[ P03346] interacts with 1 human partners:{P26651}  
13471 Pathogen[ Q85601] interacts with 1 human partners:{P26651}  
13472 Pathogen[ P03383] interacts with 1 human partners:{P26651}  
13473 Pathogen[ P03410] interacts with 1 human partners:{P26651}  
13474 Pathogen[ P14075] interacts with 1 human partners:{P26651}  
13475 Pathogen[ P0C206] interacts with 1 human partners:{P26651}  
13476 Pathogen[ P03363] interacts with 1 human partners:{P26651}  
13477 [Cluster 2154]GO:1900169+P  
13478 Pathogen[ P03346] interacts with 1 human partners:{Q12802}  
13479 Pathogen[ P14079] interacts with 1 human partners:{Q12802}  
13480 [Cluster 2155]GO:0030033+P biological\_process [name] microvillus assembly [def] "Formation of a microvillus, a thin cylindrical membrane-covered projection on the surface of a cell." [GOC  
13481 Pathogen[ Q2Q067] interacts with 1 human partners:{Q13887}  
13482 Pathogen[ P0C214] interacts with 1 human partners:{Q13887}  
13483 Pathogen[ P03346] interacts with 1 human partners:{Q13887}  
13484 Pathogen[ Q85601] interacts with 1 human partners:{Q13887}  
13485 Pathogen[ P14079] interacts with 1 human partners:{P35241}  
13486 Pathogen[ P03410] interacts with 1 human partners:{P35241}  
13487 Pathogen[ P0C206] interacts with 1 human partners:{Q13887}  
13488 [Cluster 2156]GO:0055091+P biological\_process [name] phospholipid homeostasis [def] "Any process involved in the maintenance of an internal steady state of phospholipid within an organism or cell." [GOC  
13489 Pathogen[ P0C214] interacts with 1 human partners:{Q99698}  
13490 Pathogen[ P03346] interacts with 1 human partners:{Q99698}  
13491 Pathogen[ Q85601] interacts with 1 human partners:{Q99698}  
13492 Pathogen[ P14079] interacts with 1 human partners:{Q99698}  
13493 Pathogen[ P03410] interacts with 1 human partners:{Q99698}  
13494 Pathogen[ P0C206] interacts with 1 human partners:{Q99698}  
13495 Pathogen[ P03363] interacts with 1 human partners:{Q99698}  
13496 [Cluster 2157]GO:0022007+P biological\_process [name] convergent extension involved in neural plate elongation [def] "The process of directed cell movement in the neural plate resulting in tissue elongation via intercalation of adjacent cells in an epithelial sheet at the midline, leading to narrowing and lengthening of the neural plate." [GO\_REF  
13497 Pathogen[ Q2Q067] interacts with 1 human partners:{O14641}  
13498 Pathogen[ P0C214] interacts with 1 human partners:{O14641}  
13499 Pathogen[ P03346] interacts with 1 human partners:{O14641}  
13500 Pathogen[ Q85601] interacts with 1 human partners:{O14641}  
13501 Pathogen[ P14079] interacts with 1 human partners:{O14641}  
13502 Pathogen[ P03383] interacts with 1 human partners:{O14641}  
13503 Pathogen[ P03410] interacts with 1 human partners:{O14641}  
13504 Pathogen[ P14075] interacts with 1 human partners:{O14641}  
13505 Pathogen[ P03363] interacts with 1 human partners:{O14641}

13506 [Cluster 2158]GO:0048483+P biological\_process [name] autonomic nervous system development [def] "The process whose specific outcome is the progression of the autonomic nervous system over time, from its formation to the mature structure. The autonomic nervous system is composed of neurons that are not under conscious control, and is comprised of two antagonistic components, the sympathetic and parasympathetic nervous systems. The autonomic nervous system regulates key functions including the activity of the cardiac (heart) muscle, smooth muscles (e.g. of the gut), and glands." [FMA  
13507 Pathogen[ P03346] interacts with 1 human partners:{P52951}  
13508 Pathogen[ P14079] interacts with 1 human partners:{P81277}  
13509 Pathogen[ P03410] interacts with 1 human partners:{P81277}  
13510 Pathogen[ P03363] interacts with 1 human partners:{P52951}  
13511 [Cluster 2159]GO:0042135+P biological\_process [name] neurotransmitter catabolic process [def] "The chemical reactions and pathways resulting in the breakdown of any of a group of substances that are released on excitation from the axon terminal of a presynaptic neuron of the central or peripheral nervous system and travel across the synaptic cleft to either excite or inhibit the target cell." [CHEBI  
13512 Pathogen[ P03346] interacts with 1 human partners:{Q9Y215}  
13513 Pathogen[ P03410] interacts with 1 human partners:{Q9Y215}  
13514 Pathogen[ P03363] interacts with 1 human partners:{Q9Y215}  
13515 [Cluster 2160]GO:0048069+P biological\_process [name] eye pigmentation [def] "Establishment of a pattern of pigment in the eye of an organism." [GOC  
13516 Pathogen[ P14079] interacts with 1 human partners:{Q92902}  
13517 Pathogen[ P03410] interacts with 1 human partners:{Q92902}  
13518 Pathogen[ P03363] interacts with 1 human partners:{Q92902}  
13519 [Cluster 2161]GO:0050804+P biological\_process [name] regulation of synaptic transmission [def] "Any process that modulates the frequency or rate of synaptic transmission, the process of communication from a neuron to a target (neuron, muscle, or secretory cell) across a synapse." [GOC  
13520 Pathogen[ Q2Q067] interacts with 1 human partners:{Q08209}  
13521 Pathogen[ P0C214] interacts with 1 human partners:{Q08209}  
13522 Pathogen[ P03346] interacts with 1 human partners:{Q08209}  
13523 Pathogen[ Q85601] interacts with 1 human partners:{Q08209}  
13524 Pathogen[ P14079] interacts with 1 human partners:{Q08209}  
13525 Pathogen[ P03410] interacts with 1 human partners:{Q08209}  
13526 Pathogen[ P0C206] interacts with 1 human partners:{Q08209}  
13527 [Cluster 2162]GO:0060025+P biological\_process [name] regulation of synaptic activity [def] "Any process that modulates the frequency, rate or extent of synaptic activity, the controlled release of neurotransmitters into the synaptic cleft and their subsequent detection by a postsynaptic cell." [GOC  
13528 Pathogen[ P14079] interacts with 1 human partners:{Q06413}  
13529 [Cluster 2163]GO:0032792+P biological\_process [name] negative regulation of CREB transcription factor activity [def] "Any process that stops, prevents, or reduces the frequency, rate or extent of the activity of the transcription factor CREB." [GOC  
13530 Pathogen[ Q2Q067] interacts with 1 human partners:{P35548}  
13531 Pathogen[ P0C214] interacts with 1 human partners:{P35548}  
13532 Pathogen[ P03346] interacts with 1 human partners:{P35548}  
13533 Pathogen[ Q85601] interacts with 1 human partners:{P35548}  
13534 Pathogen[ P03383] interacts with 1 human partners:{P35548}  
13535 Pathogen[ P03410] interacts with 1 human partners:{P35548}  
13536 Pathogen[ P14075] interacts with 1 human partners:{P35548}  
13537 Pathogen[ P0C206] interacts with 1 human partners:{P35548}  
13538 Pathogen[ P03363] interacts with 1 human partners:{P35548}  
13539 [Cluster 2164]GO:0016320+P biological\_process [name] endoplasmic reticulum membrane fusion [def] "The joining of 2 or more lipid bilayer membranes that surround the endoplasmic reticulum." [GOC  
13540 Pathogen[ P03346] interacts with 1 human partners:{Q12981}  
13541 Pathogen[ Q85601] interacts with 1 human partners:{Q12981}  
13542 Pathogen[ P14079] interacts with 1 human partners:{Q12981}  
13543 Pathogen[ P03410] interacts with 1 human partners:{Q12981}  
13544 Pathogen[ P0C206] interacts with 1 human partners:{Q12981}  
13545 [Cluster 2165]GO:0070247+P biological\_process [name] regulation of natural killer cell apoptosis [def] "Any process that modulates the occurrence or rate of natural killer cell death by apoptosis." [GOC  
13546 Pathogen[ P0C214] interacts with 1 human partners:{Q96CA5}  
13547 Pathogen[ P03346] interacts with 1 human partners:{Q96CA5}  
13548 Pathogen[ Q85601] interacts with 1 human partners:{Q96CA5}  
13549 Pathogen[ P0C206] interacts with 1 human partners:{Q96CA5}  
13550 Pathogen[ P03363] interacts with 1 human partners:{Q96CA5}  
13551 [Cluster 2166]GO:0051068+P biological\_process [name] dihydrolipoamide metabolic process [def] "The chemical reactions and pathways involving dihydrolipoamide, the reduced form of lipoamide, produced as an intermediate in the reactions in which lipoamide acts as a cofactor." [ISBN  
13552 Pathogen[ P0C214] interacts with 1 human partners:{P09622}  
13553 [Cluster 2167]GO:0000957+P biological\_process [name] mitochondrial RNA catabolic process [def] "The chemical reactions and pathways resulting in the breakdown of RNA

transcribed from the mitochondrial genome and occurring in the mitochondrion." [GOC

13554 Pathogen[ Q2Q067] interacts with 1 human partners:{Q8TCS8}

13555 Pathogen[ POC214] interacts with 1 human partners:{Q8TCS8}

13556 Pathogen[ P03346] interacts with 1 human partners:{Q8TCS8}

13557 Pathogen[ Q85601] interacts with 1 human partners:{Q8TCS8}

13558 Pathogen[ P14079] interacts with 1 human partners:{Q8TCS8}

13559 Pathogen[ P03383] interacts with 1 human partners:{Q8TCS8}

13560 Pathogen[ P03410] interacts with 1 human partners:{Q8TCS8}

13561 Pathogen[ P14075] interacts with 1 human partners:{Q8TCS8}

13562 Pathogen[ POC206] interacts with 1 human partners:{Q8TCS8}

13563 [Cluster 2168]GO:0046167+P biological\_process [name] glycerol-3-phosphate biosynthetic process [def] "The chemical reactions and pathways resulting in the formation of glycerol-3-phosphate, a phosphoric monoester of glycerol." [GOC

13564 Pathogen[ Q2Q067] interacts with 1 human partners:{P32189}

13565 Pathogen[ POC214] interacts with 1 human partners:{P32189}

13566 Pathogen[ P03346] interacts with 1 human partners:{P32189}

13567 Pathogen[ Q85601] interacts with 1 human partners:{P32189}

13568 Pathogen[ P14079] interacts with 1 human partners:{P32189}

13569 Pathogen[ P03383] interacts with 1 human partners:{P32189}

13570 Pathogen[ P03410] interacts with 1 human partners:{P32189}

13571 Pathogen[ P14075] interacts with 1 human partners:{P32189}

13572 Pathogen[ POC206] interacts with 1 human partners:{P32189}

13573 [Cluster 2169]GO:0072177+P biological\_process [name] mesonephric duct development [def] "The process whose specific outcome is the progression of a mesonephric duct over time, from its initial formation to a mature structure. A mesonephric duct is a tube drains the mesonephros." [GOC

13574 Pathogen[ Q2Q067] interacts with 1 human partners:{P35680}

13575 Pathogen[ P03346] interacts with 1 human partners:{P35680}

13576 Pathogen[ Q85601] interacts with 1 human partners:{P35680}

13577 Pathogen[ P14079] interacts with 1 human partners:{P35680}

13578 Pathogen[ P03410] interacts with 1 human partners:{P35680}

13579 Pathogen[ POC206] interacts with 1 human partners:{P35680}

13580 [Cluster 2170]GO:0006235+P biological\_process [name] dTTP biosynthetic process [def] "The chemical reactions and pathways resulting in the formation of dTTP, deoxyribosylthymine triphosphate." [ISBN

13581 Pathogen[ Q2Q067] interacts with 2 human partners:{P62380;P04818}

13582 Pathogen[ POC214] interacts with 3 human partners:{P04818;P23919;P62380}

13583 Pathogen[ P03346] interacts with 1 human partners:{P62380}

13584 Pathogen[ Q85601] interacts with 1 human partners:{P62380}

13585 Pathogen[ P14079] interacts with 3 human partners:{P62380;P23919;P04818}

13586 Pathogen[ P03410] interacts with 3 human partners:{P62380;P23919;P04818}

13587 Pathogen[ POC206] interacts with 2 human partners:{P62380;P04818}

13588 Pathogen[ P03363] interacts with 1 human partners:{P62380}

13589 [Cluster 2171]GO:0070166+P biological\_process [name] enamel mineralization [def] "The process in which calcium salts, mainly carbonated hydroxyapatite, are deposited in tooth enamel." [GOC

13590 Pathogen[ Q2Q067] interacts with 1 human partners:{P35548}

13591 Pathogen[ POC214] interacts with 1 human partners:{P35548}

13592 Pathogen[ P03346] interacts with 1 human partners:{P35548}

13593 Pathogen[ Q85601] interacts with 1 human partners:{P35548}

13594 Pathogen[ P03383] interacts with 1 human partners:{P35548}

13595 Pathogen[ P03410] interacts with 1 human partners:{P35548}

13596 Pathogen[ P14075] interacts with 1 human partners:{P35548}

13597 Pathogen[ POC206] interacts with 1 human partners:{P35548}

13598 Pathogen[ P03363] interacts with 1 human partners:{P35548}

13599 [Cluster 2172]GO:0048550+P biological\_process [name] negative regulation of pinocytosis [def] "Any process that stops, prevents, or reduces the frequency, rate or extent of pinocytosis. Pinocytosis is the process in which cells take in liquid material from their external environment\_ literally 'cell drinking'. Liquid is enclosed in vesicles, formed by invagination of the plasma membrane. These vesicles then move into the cell and pass their contents to endosomes." [GOC

13600 Pathogen[ Q2Q067] interacts with 1 human partners:{P55055}

13601 Pathogen[ P03346] interacts with 1 human partners:{P55055}

13602 Pathogen[ Q85601] interacts with 1 human partners:{P55055}

13603 Pathogen[ P14079] interacts with 1 human partners:{P55055}

13604 Pathogen[ POC206] interacts with 1 human partners:{P55055}

13605 [Cluster 2173]GO:0040031+P biological\_process [name] snRNA modification [def] "The covalent alteration of one or more nucleotides within snRNA, resulting in a change in the properties of the snRNA." [GOC

13606 Pathogen[ P14079] interacts with 1 human partners:{Q7L2J0}

13607 Pathogen[ P03410] interacts with 1 human partners:{Q7L2J0}

13608 Pathogen[ POC206] interacts with 1 human partners:{Q7L2J0}

13609 [Cluster 2174]GO:0060968+P biological\_process [name] regulation of gene silencing [def] "Any process that modulates the rate, frequency, or extent of gene silencing, the transcriptional or post-transcriptional process carried out at the cellular level that results in long-term gene inactivation." [GOC



13610 Pathogen[ Q2Q067] interacts with 1 human partners:{P24941}  
13611 Pathogen[ P0C214] interacts with 1 human partners:{P24941}  
13612 Pathogen[ P03346] interacts with 1 human partners:{P24941}  
13613 Pathogen[ Q85601] interacts with 1 human partners:{P24941}  
13614 Pathogen[ P03383] interacts with 1 human partners:{P24941}  
13615 Pathogen[ P03410] interacts with 1 human partners:{P24941}  
13616 Pathogen[ P14075] interacts with 1 human partners:{P24941}  
13617 Pathogen[ P0C206] interacts with 1 human partners:{P24941}  
13618 Pathogen[ P03363] interacts with 1 human partners:{P24941}  
13619

```

1 [Section 11] molecular functions that PARTIAL HTLV viruses may interfere with
2
3
4 [Cluster 1]GO:0004758+F molecular_function [name] serine C-palmitoyltransferase activity
[def] "Catalysis of the reaction
5 Pathogen[ P14079] interacts with 2 human partners:{Q8NFR3;Q969W0}
6 Pathogen[ P03410] interacts with 2 human partners:{Q969W0;Q8NFR3}
7 Pathogen[ P14075] interacts with 1 human partners:{Q969W0}
8 Pathogen[ P0C206] interacts with 2 human partners:{Q8NFR3;Q969W0}
9 [Cluster 2]GO:0016638+F molecular_function [name] oxidoreductase activity, acting on the
CH-NH2 group of donors [def] "Catalysis of an oxidation-reduction (redox) reaction in
which a CH-NH2 group acts as a hydrogen or electron donor and reduces a hydrogen or
electron acceptor." [GOC
10 Pathogen[ P14079] interacts with 1 human partners:{Q9NVS9}
11 Pathogen[ P03410] interacts with 1 human partners:{Q9NVS9}
12 Pathogen[ P14075] interacts with 1 human partners:{Q9NVS9}
13 [Cluster 3]GO:0018773+F molecular_function [name] acetylpyruvate hydrolase activity
[def] "Catalysis of the reaction
14 Pathogen[ P0C214] interacts with 1 human partners:{Q6P587}
15 Pathogen[ P14079] interacts with 1 human partners:{Q6P587}
16 Pathogen[ P03410] interacts with 1 human partners:{Q6P587}
17 Pathogen[ P0C206] interacts with 1 human partners:{Q6P587}
18 [Cluster 4]GO:0042903+F molecular_function [name] tubulin deacetylase activity [def]
"Catalysis of the reaction
19 Pathogen[ Q2Q067] interacts with 1 human partners:{Q8IXJ6}
20 Pathogen[ P0C214] interacts with 1 human partners:{Q8IXJ6}
21 Pathogen[ P03346] interacts with 1 human partners:{Q8IXJ6}
22 Pathogen[ Q85601] interacts with 1 human partners:{Q8IXJ6}
23 Pathogen[ P14079] interacts with 1 human partners:{Q8IXJ6}
24 Pathogen[ P03410] interacts with 1 human partners:{Q8IXJ6}
25 Pathogen[ P0C206] interacts with 1 human partners:{Q8IXJ6}
26 [Cluster 5]GO:0004794+F molecular_function [name] L-threonine ammonia-lyase activity
[def] "Catalysis of the reaction
27 Pathogen[ P03346] interacts with 1 human partners:{P20132}
28 Pathogen[ P14079] interacts with 1 human partners:{P20132}
29 Pathogen[ P03410] interacts with 1 human partners:{P20132}
30 Pathogen[ P0C206] interacts with 1 human partners:{P20132}
31 [Cluster 6]GO:0008296+F molecular_function [name] 3'-5'-exodeoxyribonuclease activity
[def] "Catalysis of the sequential cleavage of mononucleotides from a free 3' terminus of
a DNA molecule." [GOC
32 Pathogen[ P14079] interacts with 2 human partners:{Q9BQ50;Q9NSU2}
33 Pathogen[ P03410] interacts with 2 human partners:{Q9BQ50;Q9NSU2}
34 Pathogen[ P0C206] interacts with 1 human partners:{Q9NSU2}
35 Pathogen[ P03363] interacts with 1 human partners:{Q9BQ50}
36 [Cluster 7]GO:0004611+F molecular_function [name] phosphoenolpyruvate carboxykinase
activity [def] "Catalysis of the reaction
37 Pathogen[ P0C214] interacts with 2 human partners:{P35558;Q16822}
38 Pathogen[ P03383] interacts with 1 human partners:{Q16822}
39 Pathogen[ P03410] interacts with 1 human partners:{Q16822}
40 Pathogen[ P14075] interacts with 1 human partners:{Q16822}
41 Pathogen[ P0C206] interacts with 1 human partners:{Q16822}
42 [Cluster 8]GO:2001069+F molecular_function [name] glycogen binding [def] "Interacting
selectively and non-covalently with glycogen." [GOC
43 Pathogen[ P14079] interacts with 1 human partners:{B7ZBB8}
44 Pathogen[ P03410] interacts with 1 human partners:{B7ZBB8}
45 Pathogen[ P0C206] interacts with 1 human partners:{B7ZBB8}
46 Pathogen[ P03363] interacts with 1 human partners:{B7ZBB8}
47 [Cluster 9]GO:0004146+F molecular_function [name] dihydrofolate reductase activity [def]
"Catalysis of the reaction
48 Pathogen[ P0C214] interacts with 2 human partners:{Q86XF0;P00374}
49 Pathogen[ P14079] interacts with 2 human partners:{Q86XF0;P00374}
50 Pathogen[ P03410] interacts with 2 human partners:{P00374;Q86XF0}
51 [Cluster 10]GO:0043295+F molecular_function [name] glutathione binding [def]
"Interacting selectively and non-covalently with glutathione_ a tripeptide composed of
the three amino acids cysteine, glutamic acid and glycine." [GOC
52 Pathogen[ P14079] interacts with 3 human partners:{Q16873;O43813;P10620}
53 Pathogen[ P03410] interacts with 1 human partners:{Q16873}
54 [Cluster 11]GO:0004798+F molecular_function [name] thymidylate kinase activity [def]
"Catalysis of the reaction
55 Pathogen[ P0C214] interacts with 1 human partners:{P23919}
56 Pathogen[ P14079] interacts with 1 human partners:{P23919}
57 Pathogen[ P03410] interacts with 1 human partners:{P23919}
58 [Cluster 12]GO:0003910+F molecular_function [name] DNA ligase (ATP) activity [def]
"Catalysis of the reaction
59 Pathogen[ P14079] interacts with 1 human partners:{P49917}
60 Pathogen[ P0C206] interacts with 2 human partners:{P49917;P49916}

```

```

61 [Cluster 13]GO:0004060+F    molecular_function [name] arylamine N-acetyltransferase
    activity [def] "Catalysis of the reaction
62     Pathogen[ P0C214] interacts with 1 human partners:{Q16613}
63     Pathogen[ Q85601] interacts with 1 human partners:{Q16613}
64     Pathogen[ P14079] interacts with 1 human partners:{Q16613}
65     Pathogen[ P03383] interacts with 1 human partners:{Q16613}
66     Pathogen[ P03410] interacts with 1 human partners:{Q16613}
67     Pathogen[ P14075] interacts with 1 human partners:{Q16613}
68     Pathogen[ P0C206] interacts with 1 human partners:{Q16613}
69 [Cluster 14]GO:0044547+F
70     Pathogen[ Q2Q067] interacts with 1 human partners:{Q9NS56}
71     Pathogen[ P0C214] interacts with 1 human partners:{Q9NS56}
72     Pathogen[ P03346] interacts with 1 human partners:{Q9NS56}
73     Pathogen[ Q85601] interacts with 1 human partners:{Q9NS56}
74     Pathogen[ P14079] interacts with 1 human partners:{Q9NS56}
75     Pathogen[ P0C206] interacts with 1 human partners:{Q9NS56}
76 [Cluster 15]GO:0043539+F    molecular_function [name] protein serine/threonine kinase
    activator activity [def] "Increases the activity of a protein serine/threonine kinase."
    [GOC
77     Pathogen[ P14079] interacts with 2 human partners:{O43597;Q15078}
78     Pathogen[ P03410] interacts with 1 human partners:{O43597}
79     Pathogen[ P0C206] interacts with 1 human partners:{O43597}
80 [Cluster 16]GO:0004850+F    molecular_function [name] uridine phosphorylase activity
    [def] "Catalysis of the reaction
81     Pathogen[ P0C214] interacts with 2 human partners:{O95045;Q16831}
82     Pathogen[ Q85601] interacts with 1 human partners:{O95045}
83     Pathogen[ P14079] interacts with 2 human partners:{Q16831;O95045}
84     Pathogen[ P03410] interacts with 2 human partners:{O95045;Q16831}
85     Pathogen[ P14075] interacts with 1 human partners:{O95045}
86     Pathogen[ P0C206] interacts with 2 human partners:{Q16831;O95045}
87 [Cluster 17]GO:0004408+F    molecular_function [name] holocytochrome-c synthase activity
    [def] "Catalysis of the reaction
88     Pathogen[ P0C214] interacts with 1 human partners:{P53701}
89     Pathogen[ P14079] interacts with 1 human partners:{P53701}
90     Pathogen[ P03410] interacts with 1 human partners:{P53701}
91     Pathogen[ P0C206] interacts with 1 human partners:{P53701}
92 [Cluster 18]GO:0018271+F    molecular_function [name] biotin-protein ligase activity
    [def] "Catalysis of the reaction
93     Pathogen[ P0C214] interacts with 1 human partners:{P50747}
94 [Cluster 19]GO:0004615+F    molecular_function [name] phosphomannomutase activity [def]
    "Catalysis of the reaction
95     Pathogen[ P0C214] interacts with 1 human partners:{O15305}
96     Pathogen[ P14079] interacts with 1 human partners:{O15305}
97     Pathogen[ P03410] interacts with 1 human partners:{O15305}
98 [Cluster 20]GO:0042834+F    molecular_function [name] peptidoglycan binding [def]
    "Interacting selectively and non-covalently, in a non-covalent manner, with
    peptidoglycan, any of a class of glycoconjugates found in bacterial cell walls." [GOC
99     Pathogen[ P14079] interacts with 1 human partners:{Q9Y239}
100    Pathogen[ P03410] interacts with 1 human partners:{Q9Y239}
101 [Cluster 21]GO:0017017+F    molecular_function [name] MAP kinase
    tyrosine/serine/threonine phosphatase activity [def] "Catalysis of the reaction
102    Pathogen[ Q2Q067] interacts with 1 human partners:{Q16829}
103    Pathogen[ P0C214] interacts with 1 human partners:{Q16829}
104    Pathogen[ P03346] interacts with 1 human partners:{Q16829}
105    Pathogen[ Q85601] interacts with 1 human partners:{Q16829}
106    Pathogen[ P14079] interacts with 1 human partners:{Q16829}
107    Pathogen[ P03410] interacts with 1 human partners:{Q16829}
108    Pathogen[ P0C206] interacts with 1 human partners:{Q16829}
109    Pathogen[ P03363] interacts with 1 human partners:{Q16829}
110 [Cluster 22]GO:0031697+F    molecular_function [name] beta-1 adrenergic receptor binding
    [def] "Interacting selectively and non-covalently with a beta-1 adrenergic receptor."
    [GOC
111    Pathogen[ Q2Q067] interacts with 1 human partners:{Q86UL8}
112    Pathogen[ P03346] interacts with 1 human partners:{Q86UL8}
113    Pathogen[ Q85601] interacts with 1 human partners:{Q86UL8}
114    Pathogen[ P14079] interacts with 1 human partners:{Q86UL8}
115    Pathogen[ P03410] interacts with 1 human partners:{Q86UL8}
116    Pathogen[ P0C206] interacts with 1 human partners:{Q86UL8}
117    Pathogen[ P03363] interacts with 1 human partners:{Q86UL8}
118 [Cluster 23]GO:0031005+F    molecular_function [name] filamin binding [def]
    "Interacting selectively and non-covalently with a filamin, any member of a family of
    high molecular mass cytoskeletal proteins that crosslink actin filaments to form networks
    and stress fibers. Filamins contain an amino-terminal alpha-actinin-like actin binding
    domain, which is followed by a rod-domain composed of 4 to 24 100-residue repetitive
    segments including a carboxy-terminal dimerization domain." [GOC
119    Pathogen[ P03346] interacts with 1 human partners:{O76041}

```

120 Pathogen[ P14079] interacts with 2 human partners:{076041;Q8N5W9}

121 Pathogen[ P03410] interacts with 2 human partners:{076041;Q8N5W9}

122 Pathogen[ P14075] interacts with 1 human partners:{Q8N5W9}

123 Pathogen[ P0C206] interacts with 2 human partners:{076041;Q8N5W9}

124 Pathogen[ P03363] interacts with 1 human partners:{076041}

125 [Cluster 24]GO:0031267+F molecular\_function [name] small GTPase binding [def] "Interacting selectively and non-covalently with a small monomeric GTPase." [GOC

126 Pathogen[ P03346] interacts with 1 human partners:{P50542}

127 Pathogen[ P14079] interacts with 1 human partners:{P50542}

128 Pathogen[ P03410] interacts with 1 human partners:{P50542}

129 Pathogen[ P0C206] interacts with 1 human partners:{P50542}

130 [Cluster 25]GO:0016857+F molecular\_function [name] racemase and epimerase activity, acting on carbohydrates and derivatives [def] "Catalysis of a reaction that alters the configuration of one or more chiral centers in a carbohydrate molecule." [GOC

131 Pathogen[ P0C214] interacts with 1 human partners:{Q96AT9}

132 Pathogen[ P14079] interacts with 2 human partners:{094923;A2VDF0}

133 Pathogen[ P03410] interacts with 1 human partners:{A2VDF0}

134 Pathogen[ P0C206] interacts with 1 human partners:{A2VDF0}

135 [Cluster 26]GO:0016153+F molecular\_function [name] urocanate hydratase activity [def] "Catalysis of the reaction

136 Pathogen[ P14079] interacts with 1 human partners:{Q96N76}

137 Pathogen[ P03410] interacts with 1 human partners:{Q96N76}

138 [Cluster 27]GO:0005375+F molecular\_function [name] copper ion transmembrane transporter activity [def] "Catalysis of the transfer of copper (Cu) ions from one side of a membrane to the other." [GOC

139 Pathogen[ Q2Q067] interacts with 1 human partners:{014618}

140 Pathogen[ P0C214] interacts with 1 human partners:{014618}

141 Pathogen[ P03346] interacts with 1 human partners:{014618}

142 Pathogen[ Q85601] interacts with 1 human partners:{014618}

143 Pathogen[ P14079] interacts with 1 human partners:{014618}

144 Pathogen[ P03410] interacts with 1 human partners:{014618}

145 Pathogen[ P0C206] interacts with 1 human partners:{014618}

146 Pathogen[ P03363] interacts with 1 human partners:{014618}

147 [Cluster 28]GO:0016763+F molecular\_function [name] transferase activity, transferring pentosyl groups [def] "Catalysis of the transfer of a pentosyl group from one compound (donor) to another (acceptor)." [GOC

148 Pathogen[ P0C214] interacts with 4 human partners:{095045;Q16831;Q13126;Q15274}

149 Pathogen[ Q85601] interacts with 1 human partners:{095045}

150 Pathogen[ P14079] interacts with 3 human partners:{Q16831;095045;Q15274}

151 Pathogen[ P03410] interacts with 3 human partners:{095045;Q15274;Q16831}

152 Pathogen[ P14075] interacts with 1 human partners:{095045}

153 Pathogen[ P0C206] interacts with 3 human partners:{Q16831;095045;Q15274}

154 [Cluster 29]GO:0032453+F molecular\_function [name] histone demethylase activity (H3-K4 specific) [def] "Catalysis of the removal of a methyl group from lysine at position 4 of the histone H3 protein." [GOC

155 Pathogen[ Q2Q067] interacts with 1 human partners:{Q9H6W3}

156 Pathogen[ P0C214] interacts with 1 human partners:{Q9H6W3}

157 Pathogen[ P03346] interacts with 2 human partners:{Q9UGL1;Q9H6W3}

158 Pathogen[ Q85601] interacts with 1 human partners:{Q9H6W3}

159 Pathogen[ P14079] interacts with 1 human partners:{Q9H6W3}

160 Pathogen[ P03383] interacts with 1 human partners:{Q9H6W3}

161 Pathogen[ P03410] interacts with 1 human partners:{Q9H6W3}

162 Pathogen[ P14075] interacts with 1 human partners:{Q9H6W3}

163 Pathogen[ P0C206] interacts with 1 human partners:{Q9H6W3}

164 [Cluster 30]GO:0004479+F molecular\_function [name] methionyl-tRNA formyltransferase activity [def] "Catalysis of the reaction

165 Pathogen[ Q2Q067] interacts with 1 human partners:{Q96DP5}

166 Pathogen[ P0C214] interacts with 1 human partners:{Q96DP5}

167 Pathogen[ P03346] interacts with 1 human partners:{Q96DP5}

168 Pathogen[ P14079] interacts with 1 human partners:{Q96DP5}

169 Pathogen[ P03383] interacts with 1 human partners:{Q96DP5}

170 Pathogen[ P03410] interacts with 1 human partners:{Q96DP5}

171 Pathogen[ P14075] interacts with 1 human partners:{Q96DP5}

172 Pathogen[ P0C206] interacts with 1 human partners:{Q96DP5}

173 [Cluster 31]GO:0016247+F molecular\_function [name] channel regulator activity [def] "Modulates the activity of a channel. A channel catalyzes energy-independent facilitated diffusion, mediated by passage of a solute through a transmembrane aqueous pore or channel." [GOC

174 Pathogen[ Q2Q067] interacts with 1 human partners:{Q15599}

175 Pathogen[ P0C214] interacts with 1 human partners:{Q15599}

176 Pathogen[ P03346] interacts with 1 human partners:{Q15599}

177 Pathogen[ Q85601] interacts with 1 human partners:{Q15599}

178 Pathogen[ P14079] interacts with 1 human partners:{Q15599}

179 Pathogen[ P03410] interacts with 1 human partners:{Q15599}

180 Pathogen[ P0C206] interacts with 1 human partners:{Q15599}

181 Pathogen[ P03363] interacts with 1 human partners:{Q15599}

182 [Cluster 32]GO:0097177+F molecular\_function [name] mitochondrial ribosome binding  
[def] "Interacting selectively and non-covalently with any part of a mitochondrial  
ribosome, a ribosome found in the mitochondrion of a eukaryotic cell." [GOC  
183 Pathogen[ P14079] interacts with 1 human partners:{Q15070}  
184 Pathogen[ P03410] interacts with 1 human partners:{Q15070}  
185 Pathogen[ P14075] interacts with 1 human partners:{Q15070}  
186 Pathogen[ P0C206] interacts with 1 human partners:{Q15070}

187 [Cluster 33]GO:0003912+F molecular\_function [name] DNA nucleotidylexotransferase  
activity [def] "Catalysis of the reaction  
188 Pathogen[ Q2Q067] interacts with 2 human partners:{P04053;Q9NP87}  
189 Pathogen[ P0C214] interacts with 2 human partners:{P04053;Q9NP87}  
190 Pathogen[ P03346] interacts with 2 human partners:{P04053;Q9NP87}  
191 Pathogen[ Q85601] interacts with 2 human partners:{P04053;Q9NP87}  
192 Pathogen[ P14079] interacts with 2 human partners:{Q9NP87;P04053}  
193 Pathogen[ P03410] interacts with 2 human partners:{P04053;Q9NP87}  
194 Pathogen[ P0C206] interacts with 3 human partners:{P04053;Q6PIY2;Q9NP87}  
195 Pathogen[ P03363] interacts with 3 human partners:{Q6PIY2;P04053;Q9NP87}

196 [Cluster 34]GO:0016150+F molecular\_function [name] translation release factor  
activity, codon nonspecific [def] "A translation release factor that is not specific to  
particular codons\_ binds to guanine nucleotides." [ISBN  
197 Pathogen[ P0C214] interacts with 1 human partners:{Q14197}  
198 Pathogen[ P14079] interacts with 1 human partners:{Q14197}  
199 Pathogen[ P03410] interacts with 1 human partners:{Q14197}  
200 Pathogen[ P0C206] interacts with 1 human partners:{Q14197}

201 [Cluster 35]GO:0001227+F  
202 Pathogen[ Q2Q067] interacts with 1 human partners:{Q9NX63}  
203 Pathogen[ P0C214] interacts with 1 human partners:{Q9NX63}  
204 Pathogen[ P03346] interacts with 1 human partners:{Q9NX63}  
205 Pathogen[ Q85601] interacts with 1 human partners:{Q9NX63}  
206 Pathogen[ P03383] interacts with 1 human partners:{Q9NX63}  
207 Pathogen[ P03410] interacts with 1 human partners:{Q9NX63}  
208 Pathogen[ P14075] interacts with 1 human partners:{Q9NX63}  
209 Pathogen[ P0C206] interacts with 1 human partners:{Q9NX63}  
210 Pathogen[ P03363] interacts with 1 human partners:{Q9NX63}

211 [Cluster 36]GO:0004095+F molecular\_function [name] carnitine O-palmitoyltransferase  
activity [def] "Catalysis of the reaction  
212 Pathogen[ P0C214] interacts with 1 human partners:{P23786}  
213 Pathogen[ P03346] interacts with 1 human partners:{P23786}  
214 Pathogen[ P03410] interacts with 1 human partners:{P23786}  
215 Pathogen[ P0C206] interacts with 1 human partners:{P23786}

216 [Cluster 37]GO:0030412+F molecular\_function [name] formimidoyltetrahydrofolate  
cyclodeaminase activity [def] "Catalysis of the reaction  
217 Pathogen[ P14079] interacts with 1 human partners:{O95954}  
218 Pathogen[ P03410] interacts with 1 human partners:{O95954}  
219 Pathogen[ P0C206] interacts with 1 human partners:{O95954}

220 [Cluster 38]GO:0017040+F molecular\_function [name] ceramidase activity [def]  
"Catalysis of the reaction  
221 Pathogen[ P14079] interacts with 1 human partners:{Q13510}  
222 Pathogen[ P03410] interacts with 1 human partners:{Q13510}  
223 Pathogen[ P14075] interacts with 1 human partners:{Q13510}

224 [Cluster 39]GO:0004464+F molecular\_function [name] leukotriene-C4 synthase activity  
[def] "Catalysis of the reaction  
225 Pathogen[ P14079] interacts with 2 human partners:{Q16873;P20292}  
226 Pathogen[ P03410] interacts with 2 human partners:{Q16873;P20292}  
227 Pathogen[ P0C206] interacts with 1 human partners:{P20292}

228 [Cluster 40]GO:0045513+F molecular\_function [name] interleukin-27 binding [def]  
"Interacting selectively and non-covalently with interleukin-27." [GOC  
229 Pathogen[ P14079] interacts with 1 human partners:{P29459}  
230 Pathogen[ P03410] interacts with 1 human partners:{P29459}

231 [Cluster 41]GO:0005245+F molecular\_function [name] voltage-gated calcium channel  
activity [def] "Catalysis of the transmembrane transfer of a calcium ion by a  
voltage-gated channel. A voltage-gated channel is a channel whose open state is dependent  
on the voltage across the membrane in which it is embedded." [GOC  
232 Pathogen[ P0C214] interacts with 1 human partners:{P62166}  
233 Pathogen[ P03346] interacts with 1 human partners:{P62166}  
234 Pathogen[ Q85601] interacts with 1 human partners:{P62166}  
235 Pathogen[ P14079] interacts with 1 human partners:{P62166}  
236 Pathogen[ P03410] interacts with 1 human partners:{P62166}  
237 Pathogen[ P0C206] interacts with 1 human partners:{P62166}

238 [Cluster 42]GO:0005134+F molecular\_function [name] interleukin-2 receptor binding  
[def] "Interacting selectively and non-covalently with the interleukin-2 receptor." [GOC  
239 Pathogen[ P0C214] interacts with 1 human partners:{Q3ZCQ8}  
240 Pathogen[ P03346] interacts with 1 human partners:{Q3ZCQ8}  
241 Pathogen[ Q85601] interacts with 1 human partners:{Q3ZCQ8}  
242 Pathogen[ P14079] interacts with 1 human partners:{Q3ZCQ8}  
243 Pathogen[ P03410] interacts with 1 human partners:{Q3ZCQ8}

244 Pathogen[ P0C206] interacts with 1 human partners:{Q3ZCQ8}

245 Pathogen[ P03363] interacts with 1 human partners:{Q3ZCQ8}

246 [Cluster 43]GO:0004013+F molecular\_function [name] adenosylhomocysteinase activity  
[def] "Catalysis of the reaction

247 Pathogen[ P0C214] interacts with 2 human partners:{O43865;P23526}

248 Pathogen[ P03346] interacts with 2 human partners:{P23526;O43865}

249 Pathogen[ Q85601] interacts with 2 human partners:{O43865;P23526}

250 Pathogen[ P14079] interacts with 2 human partners:{O43865;P23526}

251 Pathogen[ P03410] interacts with 2 human partners:{P23526;O43865}

252 Pathogen[ P0C206] interacts with 2 human partners:{O43865;P23526}

253 Pathogen[ P03363] interacts with 1 human partners:{O43865}

254 [Cluster 44]GO:0070324+F molecular\_function [name] thyroid hormone binding [def]  
"Interacting selectively and non-covalently with thyroxine (T4) or triiodothyronine (T3),  
tyrosine-based hormones produced by the thyroid gland." [GOC

255 Pathogen[ Q2Q067] interacts with 1 human partners:{P10827}

256 Pathogen[ P03346] interacts with 1 human partners:{P10827}

257 Pathogen[ Q85601] interacts with 1 human partners:{P10827}

258 Pathogen[ P14079] interacts with 1 human partners:{P10827}

259 Pathogen[ P0C206] interacts with 1 human partners:{P10827}

260 [Cluster 45]GO:0051434+F molecular\_function [name] BH3 domain binding [def]  
"Interacting selectively and non-covalently with the BH3 domain of a protein of the Bcl-2  
family. The BH3 domain is a potent death domain and has an important role in  
protein-protein interactions and in cell death." [PMID

261 Pathogen[ P03346] interacts with 1 human partners:{Q07820}

262 Pathogen[ P03363] interacts with 1 human partners:{Q07820}

263 [Cluster 46]GO:0008252+F molecular\_function [name] nucleotidase activity [def]  
"Catalysis of the reaction

264 Pathogen[ P0C214] interacts with 1 human partners:{Q8TCD5}

265 Pathogen[ P14079] interacts with 1 human partners:{Q8TCD5}

266 Pathogen[ P03410] interacts with 1 human partners:{Q8TCD5}

267 Pathogen[ P0C206] interacts with 1 human partners:{Q8TCD5}

268 [Cluster 47]GO:0001965+F molecular\_function [name] G-protein alpha-subunit binding  
[def] "Interacting selectively and non-covalently with a G-protein alpha subunit. The  
alpha subunit binds a guanine nucleotide." [GOC

269 Pathogen[ P0C214] interacts with 1 human partners:{Q9NVN3}

270 Pathogen[ P03346] interacts with 1 human partners:{Q9NVN3}

271 Pathogen[ P14079] interacts with 1 human partners:{Q9NVN3}

272 Pathogen[ P03410] interacts with 1 human partners:{Q9NVN3}

273 Pathogen[ P0C206] interacts with 1 human partners:{Q9NVN3}

274 [Cluster 48]GO:0004806+F molecular\_function [name] triglyceride lipase activity [def]  
"Catalysis of the reaction

275 Pathogen[ P14079] interacts with 1 human partners:{Q8NCG7}

276 Pathogen[ P03410] interacts with 1 human partners:{Q8NCG7}

277 [Cluster 49]GO:0042910+F molecular\_function [name] xenobiotic transporter activity  
[def] "Enables the directed movement of a xenobiotic, a compound foreign to living  
organisms, into, out of or within a cell, or between cells." [GOC

278 Pathogen[ Q2Q067] interacts with 1 human partners:{P11166}

279 Pathogen[ P0C214] interacts with 1 human partners:{P11166}

280 Pathogen[ P03346] interacts with 1 human partners:{P11166}

281 Pathogen[ Q85601] interacts with 1 human partners:{P11166}

282 Pathogen[ P14079] interacts with 1 human partners:{P11166}

283 Pathogen[ P03410] interacts with 1 human partners:{P11166}

284 Pathogen[ P0C206] interacts with 1 human partners:{P11166}

285 Pathogen[ P03363] interacts with 1 human partners:{P11166}

286 [Cluster 50]GO:0004739+F molecular\_function [name] pyruvate dehydrogenase  
(acetyl-transferring) activity [def] "Catalysis of the reaction

287 Pathogen[ P0C214] interacts with 1 human partners:{P11177}

288 [Cluster 51]GO:0000225+F molecular\_function [name]  
N-acetylglucosaminylphosphatidylinositol deacetylase activity [def] "Catalysis of the  
reaction

289 Pathogen[ P14079] interacts with 1 human partners:{Q9Y2B2}

290 Pathogen[ P03410] interacts with 1 human partners:{Q9Y2B2}

291 Pathogen[ P0C206] interacts with 1 human partners:{Q9Y2B2}

292 [Cluster 52]GO:0004585+F molecular\_function [name] ornithine carbamoyltransferase  
activity [def] "Catalysis of the reaction

293 Pathogen[ P0C214] interacts with 1 human partners:{P00480}

294 Pathogen[ Q85601] interacts with 1 human partners:{P00480}

295 Pathogen[ P14079] interacts with 1 human partners:{P00480}

296 Pathogen[ P03410] interacts with 1 human partners:{P00480}

297 Pathogen[ P0C206] interacts with 1 human partners:{P00480}

298 [Cluster 53]GO:0017061+F molecular\_function [name] S-methyl-5-thioadenosine  
phosphorylase activity [def] "Catalysis of the reaction

299 Pathogen[ P0C214] interacts with 1 human partners:{Q13126}

300 [Cluster 54]GO:0003955+F molecular\_function [name] NAD(P)H dehydrogenase (quinone)  
activity [def] "Catalysis of the reaction

301 Pathogen[ Q2Q067] interacts with 1 human partners:{P15559}

302 Pathogen[ P0C214] interacts with 1 human partners:{P15559}

303 Pathogen[ P03346] interacts with 1 human partners:{P15559}

304 Pathogen[ P14079] interacts with 1 human partners:{P15559}

305 Pathogen[ P03410] interacts with 1 human partners:{P15559}

306 Pathogen[ P14075] interacts with 1 human partners:{P15559}

307 Pathogen[ P0C206] interacts with 1 human partners:{P15559}

308 [Cluster 55]GO:0004709+F molecular\_function [name] MAP kinase kinase kinase activity  
[def] "Catalysis of the phosphorylation and activation of MAP kinase kinases\_ each MAP  
kinase kinase can be phosphorylated by any of several MAP kinase kinase kinases." [PMID

309 Pathogen[ Q2Q067] interacts with 2 human partners:{Q13233;O43318}

310 Pathogen[ P0C214] interacts with 2 human partners:{O43318;Q13233}

311 Pathogen[ P03346] interacts with 2 human partners:{Q13233;O43318}

312 Pathogen[ Q85601] interacts with 2 human partners:{Q13233;O43318}

313 Pathogen[ P03383] interacts with 2 human partners:{Q13233;O43318}

314 Pathogen[ P03410] interacts with 2 human partners:{Q13233;O43318}

315 Pathogen[ P14075] interacts with 2 human partners:{O43318;Q13233}

316 Pathogen[ P0C206] interacts with 2 human partners:{O43318;Q13233}

317 Pathogen[ P03363] interacts with 2 human partners:{O43318;Q13233}

318 [Cluster 56]GO:0016165+F molecular\_function [name] lipoygenase activity [def]  
"Catalysis of the reaction

319 Pathogen[ Q2Q067] interacts with 1 human partners:{P09917}

320 Pathogen[ P0C214] interacts with 2 human partners:{P09917;P18054}

321 Pathogen[ P03346] interacts with 2 human partners:{P18054;P09917}

322 Pathogen[ Q85601] interacts with 1 human partners:{P09917}

323 Pathogen[ P14079] interacts with 1 human partners:{P09917}

324 Pathogen[ P03410] interacts with 1 human partners:{P09917}

325 Pathogen[ P0C206] interacts with 1 human partners:{P09917}

326 [Cluster 57]GO:0016212+F molecular\_function [name] kynurenine-oxoglutarate  
transaminase activity [def] "Catalysis of the reaction

327 Pathogen[ P0C214] interacts with 1 human partners:{Q16773}

328 [Cluster 58]GO:0008890+F molecular\_function [name] glycine C-acetyltransferase  
activity [def] "Catalysis of the reaction

329 Pathogen[ P03410] interacts with 1 human partners:{O75600}

330 [Cluster 59]GO:0043138+F molecular\_function [name] 3'-5' DNA helicase activity [def]  
"Catalysis of the unwinding of the DNA helix in the direction 3' to 5'." [GOC

331 Pathogen[ Q85601] interacts with 1 human partners:{P19447}

332 Pathogen[ P14079] interacts with 1 human partners:{P19447}

333 Pathogen[ P03410] interacts with 1 human partners:{P19447}

334 Pathogen[ P0C206] interacts with 1 human partners:{P19447}

335 [Cluster 60]GO:0008831+F molecular\_function [name] dTDP-4-dehydrorhamnose reductase  
activity [def] "Catalysis of the reaction

336 Pathogen[ P0C214] interacts with 1 human partners:{Q9NZL9}

337 Pathogen[ P03346] interacts with 1 human partners:{Q9NZL9}

338 Pathogen[ P14079] interacts with 1 human partners:{Q9NZL9}

339 Pathogen[ P03410] interacts with 1 human partners:{Q9NZL9}

340 Pathogen[ P0C206] interacts with 1 human partners:{Q9NZL9}

341 [Cluster 61]GO:0000215+F molecular\_function [name] tRNA 2'-phosphotransferase  
activity [def] "Catalysis of the reaction

342 Pathogen[ P14079] interacts with 1 human partners:{Q86TN4}

343 Pathogen[ P03410] interacts with 1 human partners:{Q86TN4}

344 [Cluster 62]GO:0015266+F molecular\_function [name] protein channel activity [def]  
"Catalysis of energy-independent facilitated diffusion, mediated by passage of proteins  
through a transmembrane aqueous pore or channel." [GOC

345 Pathogen[ P03346] interacts with 1 human partners:{Q07820}

346 Pathogen[ P03363] interacts with 1 human partners:{Q07820}

347 [Cluster 63]GO:0050693+F molecular\_function [name] LBD domain binding [def]  
"Interacting selectively and non-covalently with the LBD, the ligand binding domain found  
in nuclear receptors. In general, the LBDs consist of three layers comprised of twelve  
alpha-helices and several beta-strands that are organized around a lipophilic  
ligand-binding pocket." [PMID

348 Pathogen[ Q2Q067] interacts with 1 human partners:{Q99966}

349 Pathogen[ P0C214] interacts with 1 human partners:{Q99966}

350 Pathogen[ P03346] interacts with 1 human partners:{Q99966}

351 Pathogen[ Q85601] interacts with 1 human partners:{Q99966}

352 Pathogen[ P14079] interacts with 1 human partners:{Q99966}

353 Pathogen[ P03410] interacts with 1 human partners:{Q99966}

354 Pathogen[ P0C206] interacts with 1 human partners:{Q99966}

355 [Cluster 64]GO:0004996+F molecular\_function [name] thyroid-stimulating hormone  
receptor activity [def] "Combining with thyroid-stimulating hormone to initiate a  
change in cell activity." [GOC

356 Pathogen[ P03346] interacts with 1 human partners:{Q06710}

357 [Cluster 65]GO:0003896+F molecular\_function [name] DNA primase activity [def]  
"Catalysis of the synthesis of a short RNA primer on a DNA template, providing a free  
3'-OH that can be extended by DNA-directed DNA polymerases. Catalyzed by a DNA-directed  
RNA polymerase that forms a complex with alpha DNA polymerase." [GOC

358 Pathogen[ P14079] interacts with 2 human partners:{Q96LW4;P49642}

```

359     Pathogen[ P03410] interacts with 2 human partners:{Q96LW4;P49642}
360     Pathogen[ P0C206] interacts with 1 human partners:{P49642}
361 [Cluster 66]GO:0015923+F     molecular_function [name] mannosidase activity [def]
"Catalysis of the hydrolysis of mannosyl compounds, substances containing a group derived
from a cyclic form of mannose or a mannose derivative." [GOC
362     Pathogen[ P14079] interacts with 1 human partners:{Q9NTJ4}
363     Pathogen[ P03410] interacts with 1 human partners:{Q9NTJ4}
364 [Cluster 67]GO:0052848+F     molecular_function [name]
inositol-3,5-bisdiphosphate-2,3,4,6-tetrakisphosphate 5-diphosphatase activity [def]
"Catalysis of the reaction
365     Pathogen[ P0C214] interacts with 1 human partners:{O95989}
366     Pathogen[ Q85601] interacts with 1 human partners:{O95989}
367     Pathogen[ P14079] interacts with 4 human partners:{Q96G61;O95989;Q8NFP7;Q9NZJ9}
368     Pathogen[ P03383] interacts with 1 human partners:{O95989}
369     Pathogen[ P03410] interacts with 4 human partners:{Q8NFP7;Q9NZJ9;O95989;Q96G61}
370     Pathogen[ P14075] interacts with 1 human partners:{O95989}
371     Pathogen[ P0C206] interacts with 2 human partners:{O95989;Q8NFP7}
372 [Cluster 68]GO:0016277+F     molecular_function [name] [myelin basic protein]-arginine
N-methyltransferase activity [def] "Catalysis of the reaction
373     Pathogen[ Q2Q067] interacts with 1 human partners:{Q9NVM4}
374     Pathogen[ P0C214] interacts with 1 human partners:{Q9NVM4}
375     Pathogen[ P03346] interacts with 1 human partners:{Q9NVM4}
376     Pathogen[ Q85601] interacts with 1 human partners:{Q9NVM4}
377     Pathogen[ P14079] interacts with 1 human partners:{Q9NVM4}
378     Pathogen[ P03410] interacts with 1 human partners:{Q9NVM4}
379     Pathogen[ P0C206] interacts with 1 human partners:{Q9NVM4}
380     Pathogen[ P03363] interacts with 1 human partners:{Q9NVM4}
381 [Cluster 69]GO:0004633+F     molecular_function [name] phosphopantothencycysteine
decarboxylase activity [def] "Catalysis of the reaction
382     Pathogen[ P14079] interacts with 1 human partners:{Q96CD2}
383     Pathogen[ P03410] interacts with 1 human partners:{Q96CD2}
384 [Cluster 70]GO:0005021+F     molecular_function [name] vascular endothelial growth
factor-activated receptor activity [def] "Combining with vascular endothelial growth
factor and transmitting the signal across the plasma membrane to initiate a change in
cell activity." [GOC
385     Pathogen[ Q2Q067] interacts with 1 human partners:{O14786}
386     Pathogen[ P0C214] interacts with 1 human partners:{O14786}
387     Pathogen[ P03346] interacts with 1 human partners:{O14786}
388     Pathogen[ Q85601] interacts with 1 human partners:{O14786}
389     Pathogen[ P03410] interacts with 1 human partners:{O14786}
390     Pathogen[ P0C206] interacts with 1 human partners:{O14786}
391     Pathogen[ P03363] interacts with 1 human partners:{O14786}
392 [Cluster 71]GO:0070773+F     molecular_function [name] protein-N-terminal glutamine
amidohydrolase activity [def] "Catalysis of the reaction
393     Pathogen[ Q2Q067] interacts with 1 human partners:{Q96HA8}
394     Pathogen[ P0C214] interacts with 1 human partners:{Q96HA8}
395     Pathogen[ P03346] interacts with 1 human partners:{Q96HA8}
396     Pathogen[ Q85601] interacts with 1 human partners:{Q96HA8}
397     Pathogen[ P14079] interacts with 1 human partners:{Q96HA8}
398     Pathogen[ P03383] interacts with 1 human partners:{Q96HA8}
399     Pathogen[ P14075] interacts with 1 human partners:{Q96HA8}
400     Pathogen[ P0C206] interacts with 1 human partners:{Q96HA8}
401     Pathogen[ P03363] interacts with 1 human partners:{Q96HA8}
402 [Cluster 72]GO:0003844+F     molecular_function [name] 1,4-alpha-glucan branching enzyme
activity [def] "Catalysis of the transfer of a segment of a (1->4)-alpha-D-glucan
chain to a primary hydroxyl group in a similar glucan chain." [EC
403     Pathogen[ P0C214] interacts with 1 human partners:{Q04446}
404     Pathogen[ Q85601] interacts with 1 human partners:{Q04446}
405     Pathogen[ P03410] interacts with 1 human partners:{Q04446}
406     Pathogen[ P0C206] interacts with 1 human partners:{Q04446}
407 [Cluster 73]GO:0005114+F     molecular_function [name] type II transforming growth factor
beta receptor binding [def] "Interacting selectively and non-covalently with a type II
transforming growth factor beta receptor." [GOC
408     Pathogen[ P14079] interacts with 1 human partners:{Q13145}
409     Pathogen[ P03410] interacts with 1 human partners:{Q13145}
410 [Cluster 74]GO:0016758+F     molecular_function [name] transferase activity, transferring
hexosyl groups [def] "Catalysis of the transfer of a hexosyl group from one compound
(donor) to another (acceptor)." [GOC
411     Pathogen[ P14079] interacts with 3 human partners:{Q4G0N0;Q9UBM8;Q49AQ9}
412     Pathogen[ P03410] interacts with 3 human partners:{Q4G0N0;Q49AQ9;Q8NHY0}
413     Pathogen[ P0C206] interacts with 1 human partners:{Q49AQ9}
414 [Cluster 75]GO:0000010+F     molecular_function [name] trans-hexaprenyltranstransferase
activity [def] "Catalysis of the reaction
415     Pathogen[ P14079] interacts with 1 human partners:{Q86YH6}
416     Pathogen[ P03410] interacts with 1 human partners:{Q86YH6}
417 [Cluster 76]GO:0016972+F     molecular_function [name] thiol oxidase activity [def]

```



```

"Catalysis of the reaction
418 Pathogen[ P0C214] interacts with 1 human partners:{P55789}
419 Pathogen[ P14079] interacts with 1 human partners:{P55789}
420 Pathogen[ P03410] interacts with 1 human partners:{P55789}
421 Pathogen[ P14075] interacts with 1 human partners:{P55789}
422 Pathogen[ P0C206] interacts with 1 human partners:{P55789}
423 [Cluster 77]GO:0047184+F molecular_function [name] 1-acylglycerophosphocholine
O-acyltransferase activity [def] "Catalysis of the reaction
424 Pathogen[ P03410] interacts with 1 human partners:{Q16635}
425 [Cluster 78]GO:0004108+F molecular_function [name] citrate (Si)-synthase activity
[def] "Catalysis of the reaction
426 Pathogen[ P0C214] interacts with 1 human partners:{075390}
427 Pathogen[ P03346] interacts with 1 human partners:{075390}
428 Pathogen[ P03410] interacts with 1 human partners:{075390}
429 Pathogen[ P0C206] interacts with 1 human partners:{075390}
430 [Cluster 79]GO:0004056+F molecular_function [name] argininosuccinate lyase activity
[def] "Catalysis of the reaction
431 Pathogen[ P0C214] interacts with 1 human partners:{P04424}
432 Pathogen[ P14079] interacts with 1 human partners:{P04424}
433 Pathogen[ P03410] interacts with 1 human partners:{P04424}
434 [Cluster 80]GO:0008903+F molecular_function [name] hydroxypyruvate isomerase activity
[def] "Catalysis of the reaction
435 Pathogen[ P14079] interacts with 1 human partners:{Q5T013}
436 Pathogen[ P03410] interacts with 1 human partners:{Q5T013}
437 [Cluster 81]GO:0001972+F molecular_function [name] retinoic acid binding [def]
"Interacting selectively and non-covalently with retinoic acid,
3,7-dimethyl-9-(2,6,-trimethyl-1-cyclohexen-1-yl)-2,4,6,8-nonatetraenoic acid." [GOC
438 Pathogen[ P03346] interacts with 1 human partners:{P29373}
439 Pathogen[ P0C206] interacts with 1 human partners:{P29373}
440 Pathogen[ P03363] interacts with 1 human partners:{P29373}
441 [Cluster 82]GO:0000030+F molecular_function [name] mannosyltransferase activity [def]
"Catalysis of the transfer of a mannosyl group to an acceptor molecule, typically another
carbohydrate or a lipid." [GOC
442 Pathogen[ P14079] interacts with 1 human partners:{Q9BT22}
443 Pathogen[ P03410] interacts with 1 human partners:{Q9BT22}
444 [Cluster 83]GO:0004969+F molecular_function [name] histamine receptor activity [def]
"Combining with histamine to initiate a change in cell activity. Histamine is a
physiologically active amine, found in plant and animal tissue and released from mast
cells as part of an allergic reaction in humans." [GOC
445 Pathogen[ P03346] interacts with 1 human partners:{Q9P2Y4}
446 Pathogen[ P14079] interacts with 1 human partners:{Q9P2Y4}
447 Pathogen[ P0C206] interacts with 1 human partners:{Q9P2Y4}
448 Pathogen[ P03363] interacts with 1 human partners:{Q9P2Y4}
449 [Cluster 84]GO:0047498+F molecular_function [name] calcium-dependent phospholipase A2
activity [def] "Catalysis of the reaction
450 Pathogen[ P14079] interacts with 1 human partners:{Q9NZ20}
451 Pathogen[ P03410] interacts with 1 human partners:{Q9NZ20}
452 [Cluster 85]GO:0005139+F molecular_function [name] interleukin-7 receptor binding
[def] "Interacting selectively and non-covalently with the interleukin-7 receptor." [GOC
453 Pathogen[ P14079] interacts with 1 human partners:{P13232}
454 Pathogen[ P03410] interacts with 1 human partners:{P13232}
455 [Cluster 86]GO:0035251+F molecular_function [name] UDP-glucosyltransferase activity
[def] "Catalysis of the transfer of a glucosyl group from UDP-glucose to an acceptor
molecule." [http
456 Pathogen[ P14079] interacts with 1 human partners:{Q8NBL1}
457 [Cluster 87]GO:0008318+F molecular_function [name] protein prenyltransferase activity
[def] "Catalysis of the covalent addition of an isoprenoid group such as a farnesyl or
geranylgeranyl group via thioether linkages to a cysteine residue in a protein." [GOC
458 Pathogen[ Q2Q067] interacts with 1 human partners:{P49354}
459 Pathogen[ P0C214] interacts with 1 human partners:{P49354}
460 Pathogen[ P03346] interacts with 1 human partners:{P49354}
461 Pathogen[ Q85601] interacts with 1 human partners:{P49354}
462 Pathogen[ P14079] interacts with 1 human partners:{P49354}
463 Pathogen[ P03410] interacts with 1 human partners:{P49354}
464 Pathogen[ P0C206] interacts with 1 human partners:{P49354}
465 Pathogen[ P03363] interacts with 1 human partners:{P49354}
466 [Cluster 88]GO:0034417+F molecular_function [name] bisphosphoglycerate 3-phosphatase
activity [def] "Catalysis of the reaction
467 Pathogen[ P14079] interacts with 1 human partners:{Q9UNW1}
468 Pathogen[ P03410] interacts with 1 human partners:{Q9UNW1}
469 [Cluster 89]GO:0004985+F molecular_function [name] opioid receptor activity [def]
"Combining with an opioid (any narcotic derived from or resembling opium), and
transmitting the signal across the membrane by activating an associated G-protein."
[CHEBI
470 Pathogen[ P0C214] interacts with 1 human partners:{Q9NZT2}
471 Pathogen[ P03346] interacts with 1 human partners:{Q9NZT2}

```

472 Pathogen[ P14079] interacts with 1 human partners:{Q9NZT2}

473 Pathogen[ P03410] interacts with 1 human partners:{Q9NZT2}

474 Pathogen[ P0C206] interacts with 1 human partners:{Q9NZT2}

475 Pathogen[ P03363] interacts with 1 human partners:{Q9NZT2}

476 [Cluster 90]GO:0005184+F molecular\_function [name] neuropeptide hormone activity  
[def] "The action characteristic of a neuropeptide hormone, any peptide hormone that acts in the central nervous system. A neuropeptide is any of several types of molecules found in brain tissue, composed of short chains of amino acids\_ they include endorphins, enkephalins, vasopressin, and others. They are often localized in axon terminals at synapses and are classified as putative neurotransmitters, although some are also hormones." [GOC]

477 Pathogen[ P14079] interacts with 3 human partners:{P20396;O43612;P81277}

478 Pathogen[ P03410] interacts with 3 human partners:{O43612;P81277;P20396}

479 Pathogen[ P0C206] interacts with 1 human partners:{P20396}

480 [Cluster 91]GO:0050379+F molecular\_function [name] UDP-glucuronate 5'-epimerase activity [def] "Catalysis of the reaction

481 Pathogen[ P14079] interacts with 1 human partners:{O94923}

482 [Cluster 92]GO:0052826+F molecular\_function [name] inositol hexakisphosphate 2-phosphatase activity [def] "Catalysis of the reaction

483 Pathogen[ P14079] interacts with 1 human partners:{Q9UNW1}

484 Pathogen[ P03410] interacts with 1 human partners:{Q9UNW1}

485 [Cluster 93]GO:0019841+F molecular\_function [name] retinol binding [def] "Interacting selectively and non-covalently with retinol, vitamin A1, 2,6,6-trimethyl-1-(9'-hydroxy-3',7'-dimethylnona-1',3',5',7'-tetraenyl)cyclohex-1-ene, one of the three components that makes up vitamin A. Retinol is an intermediate in the vision cycle and it also plays a role in growth and differentiation." [CHEBI

486 Pathogen[ P03346] interacts with 1 human partners:{P29373}

487 Pathogen[ P0C206] interacts with 1 human partners:{P29373}

488 Pathogen[ P03363] interacts with 1 human partners:{P29373}

489 [Cluster 94]GO:0030160+F molecular\_function [name] GKAP/Homer scaffold activity [def] "Functions as a physical support bridging the N-methyl-D-aspartate receptor-PSD-95-GKAP complex and the mGluR-Homer complex, which are involved in receptor signaling in synapses." [PMID

490 Pathogen[ Q2Q067] interacts with 1 human partners:{Q9UPX8}

491 Pathogen[ P0C214] interacts with 1 human partners:{Q9UPX8}

492 Pathogen[ P03346] interacts with 1 human partners:{Q9UPX8}

493 Pathogen[ Q85601] interacts with 1 human partners:{Q9UPX8}

494 Pathogen[ P14079] interacts with 1 human partners:{Q9UPX8}

495 Pathogen[ P03410] interacts with 1 human partners:{Q9UPX8}

496 Pathogen[ P0C206] interacts with 1 human partners:{Q9UPX8}

497 Pathogen[ P03363] interacts with 1 human partners:{Q9UPX8}

498 [Cluster 95]GO:0005488+F molecular\_function [name] binding [def] "The selective, non-covalent, often stoichiometric, interaction of a molecule with one or more specific sites on another molecule." [GOC

499 Pathogen[ P0C214] interacts with 1 human partners:{P05543}

500 Pathogen[ P03346] interacts with 1 human partners:{P35326}

501 Pathogen[ P14079] interacts with 1 human partners:{P35326}

502 Pathogen[ P03410] interacts with 2 human partners:{P55157;P35326}

503 Pathogen[ P0C206] interacts with 1 human partners:{P35326}

504 Pathogen[ P03363] interacts with 1 human partners:{P35326}

505 [Cluster 96]GO:0008887+F molecular\_function [name] glycerate kinase activity [def] "Catalysis of the reaction

506 Pathogen[ P14079] interacts with 1 human partners:{Q8IVS8}

507 Pathogen[ P03410] interacts with 1 human partners:{Q8IVS8}

508 Pathogen[ P14075] interacts with 1 human partners:{Q8IVS8}

509 Pathogen[ P0C206] interacts with 1 human partners:{Q8IVS8}

510 Pathogen[ P03363] interacts with 1 human partners:{Q8IVS8}

511 [Cluster 97]GO:0072545+F molecular\_function [name] tyrosine binding [def] "Interacting selectively and non-covalently with 2-amino-3-(4-hydroxyphenyl)propanoic acid." [CHEBI

512 Pathogen[ P0C214] interacts with 1 human partners:{Q9Y2Z4}

513 Pathogen[ P14079] interacts with 1 human partners:{Q9Y2Z4}

514 Pathogen[ P03383] interacts with 1 human partners:{Q9Y2Z4}

515 Pathogen[ P03410] interacts with 1 human partners:{Q9Y2Z4}

516 Pathogen[ P14075] interacts with 1 human partners:{Q9Y2Z4}

517 Pathogen[ P0C206] interacts with 1 human partners:{Q9Y2Z4}

518 Pathogen[ P03363] interacts with 1 human partners:{Q9Y2Z4}

519 [Cluster 98]GO:0019871+F molecular\_function [name] sodium channel inhibitor activity [def] "Stops, prevents, or reduces the activity of a sodium channel." [GOC

520 Pathogen[ Q2Q067] interacts with 1 human partners:{Q96PU5}

521 Pathogen[ P0C214] interacts with 1 human partners:{Q96PU5}

522 Pathogen[ P03346] interacts with 1 human partners:{Q96PU5}

523 Pathogen[ Q85601] interacts with 1 human partners:{Q96PU5}

524 Pathogen[ P0C206] interacts with 1 human partners:{Q96PU5}

525 Pathogen[ P03363] interacts with 1 human partners:{Q96PU5}

526 [Cluster 99]GO:0032003+F molecular\_function [name] interleukin-28 receptor binding

```

[def] "Interacting selectively and non-covalently with the interleukin-28 receptor." [GOC
527 Pathogen[ P14079] interacts with 1 human partners:{Q8IU54}
528 [Cluster 100]GO:0003952+F molecular_function [name] NAD+ synthase
(glutamine-hydrolyzing) activity [def] "Catalysis of the reaction
529 Pathogen[ P14079] interacts with 1 human partners:{Q6IA69}
530 Pathogen[ P03410] interacts with 1 human partners:{Q6IA69}
531 [Cluster 101]GO:0035591+F molecular_function [name] signaling adaptor activity [def]
"The binding activity of a molecule that brings together two or more molecules in a
signaling pathway, permitting those molecules to function in a coordinated way. Adaptor
molecules themselves do not have catalytic activity." [GOC
532 Pathogen[ P03346] interacts with 1 human partners:{Q5T2T1}
533 Pathogen[ P14079] interacts with 1 human partners:{Q5T2T1}
534 Pathogen[ P03410] interacts with 1 human partners:{Q5T2T1}
535 Pathogen[ P0C206] interacts with 1 human partners:{Q5T2T1}
536 Pathogen[ P03363] interacts with 1 human partners:{Q5T2T1}
537 [Cluster 102]GO:0070191+F molecular_function [name] methionine-R-sulfoxide reductase
activity [def] "Catalysis of the reaction
538 Pathogen[ P14079] interacts with 1 human partners:{Q9NZV6}
539 Pathogen[ P0C206] interacts with 1 human partners:{Q9NZV6}
540 [Cluster 103]GO:0004331+F molecular_function [name] fructose-2,6-bisphosphate
2-phosphatase activity [def] "Catalysis of the reaction
541 Pathogen[ P0C214] interacts with 3 human partners:{O60825;P16118;O00757}
542 Pathogen[ Q85601] interacts with 3 human partners:{O60825;O00757;P16118}
543 Pathogen[ P03410] interacts with 3 human partners:{P16118;O00757;Q9NQ88}
544 Pathogen[ P14075] interacts with 1 human partners:{P16118}
545 Pathogen[ P0C206] interacts with 3 human partners:{O00757;O60825;P16118}
546 [Cluster 104]GO:0042030+F molecular_function [name] ATPase inhibitor activity [def]
"Stops, prevents or reduces the activity of any enzyme that catalyzes the hydrolysis of
ATP to ADP and orthophosphate." [GOC
547 Pathogen[ Q2Q067] interacts with 2 human partners:{Q9UII2;P26678}
548 Pathogen[ P0C214] interacts with 2 human partners:{Q9UII2;P26678}
549 Pathogen[ P03346] interacts with 2 human partners:{P26678;Q9UII2}
550 Pathogen[ Q85601] interacts with 1 human partners:{Q9UII2}
551 Pathogen[ P14079] interacts with 2 human partners:{Q9UII2;P26678}
552 Pathogen[ P03383] interacts with 2 human partners:{Q9UII2;P26678}
553 Pathogen[ P03410] interacts with 2 human partners:{Q9UII2;P26678}
554 Pathogen[ P14075] interacts with 2 human partners:{Q9UII2;P26678}
555 Pathogen[ P0C206] interacts with 2 human partners:{P26678;Q9UII2}
556 [Cluster 105]GO:0031870+F molecular_function [name] thromboxane A2 receptor binding
[def] "Interacting selectively and non-covalently with a thromboxane A2 receptor." [GOC
557 Pathogen[ P03346] interacts with 1 human partners:{Q68CZ1}
558 Pathogen[ P14079] interacts with 1 human partners:{Q68CZ1}
559 Pathogen[ P03410] interacts with 1 human partners:{Q68CZ1}
560 [Cluster 106]GO:0048256+F molecular_function [name] flap endonuclease activity [def]
"Catalysis of the cleavage of a flap structure in DNA, but not other DNA structures_
processes the ends of Okazaki fragments in lagging strand DNA synthesis." [GOC
561 Pathogen[ Q2Q067] interacts with 2 human partners:{Q9UQ84;P39748}
562 Pathogen[ P0C214] interacts with 2 human partners:{P39748;Q9UQ84}
563 Pathogen[ P03346] interacts with 2 human partners:{Q9UQ84;P39748}
564 Pathogen[ Q85601] interacts with 2 human partners:{Q9UQ84;P39748}
565 Pathogen[ P14079] interacts with 2 human partners:{Q9UQ84;P39748}
566 Pathogen[ P03410] interacts with 2 human partners:{P39748;Q9UQ84}
567 Pathogen[ P0C206] interacts with 2 human partners:{Q9UQ84;P39748}
568 [Cluster 107]GO:0004766+F molecular_function [name] spermidine synthase activity [def]
"Catalysis of the reaction
569 Pathogen[ P0C214] interacts with 2 human partners:{P52788;P19623}
570 Pathogen[ P14079] interacts with 1 human partners:{P19623}
571 Pathogen[ P03410] interacts with 2 human partners:{P19623;P52788}
572 [Cluster 108]GO:0004743+F molecular_function [name] pyruvate kinase activity [def]
"Catalysis of the reaction
573 Pathogen[ P0C214] interacts with 1 human partners:{P14618}
574 Pathogen[ Q85601] interacts with 1 human partners:{P14618}
575 Pathogen[ P0C206] interacts with 1 human partners:{P14618}
576 [Cluster 109]GO:0042288+F molecular_function [name] MHC class I protein binding [def]
"Interacting selectively and non-covalently with major histocompatibility complex class I
molecules_ a set of molecules displayed on cell surfaces that are responsible for
lymphocyte recognition and antigen presentation." [GOC
577 Pathogen[ P03346] interacts with 1 human partners:{Q9BUN8}
578 Pathogen[ P14079] interacts with 2 human partners:{P25705;Q9BUN8}
579 Pathogen[ P03383] interacts with 1 human partners:{Q9BUN8}
580 Pathogen[ P03410] interacts with 2 human partners:{P25705;Q9BUN8}
581 Pathogen[ P14075] interacts with 1 human partners:{Q9BUN8}
582 Pathogen[ P0C206] interacts with 1 human partners:{Q9BUN8}
583 [Cluster 110]GO:0004569+F molecular_function [name] glycoprotein
endo-alpha-1,2-mannosidase activity [def] "Catalysis of the hydrolysis of the terminal
alpha-glucosyl-(1,3)-mannosyl unit from Glc-Man(9)-(GlcNAc)(2) oligosaccharide component

```

of the glycoprotein produced in the Golgi membrane." [EC

584 Pathogen[ P14079] interacts with 1 human partners:{Q5SRI9}

585 Pathogen[ P03410] interacts with 1 human partners:{Q5SRI9}

586 Pathogen[ P14075] interacts with 1 human partners:{Q5SRI9}

587 Pathogen[ P0C206] interacts with 1 human partners:{Q5SRI9}

588 [Cluster 111]GO:0004629+F molecular\_function [name] phospholipase C activity [def] "Catalysis of the reaction

589 Pathogen[ P14079] interacts with 1 human partners:{Q9NUJ7}

590 [Cluster 112]GO:0016176+F molecular\_function [name] superoxide-generating NADPH oxidase activator activity [def] "Increases the activity of the enzyme superoxide-generating NADPH oxidase." [GOC

591 Pathogen[ P03346] interacts with 1 human partners:{Q86UR1}

592 Pathogen[ P03410] interacts with 1 human partners:{Q86UR1}

593 Pathogen[ P03363] interacts with 1 human partners:{Q86UR1}

594 [Cluster 113]GO:0035639+F molecular\_function [name] purine ribonucleoside triphosphate binding [def] "Interacting selectively and non-covalently with a purine ribonucleoside triphosphate, a compound consisting of a purine base linked to a ribose sugar esterified with triphosphate on the sugar." [CHEBI

595 Pathogen[ Q2Q067] interacts with 1 human partners:{P60900}

596 Pathogen[ P0C214] interacts with 1 human partners:{P60900}

597 Pathogen[ P03346] interacts with 1 human partners:{P60900}

598 Pathogen[ Q85601] interacts with 1 human partners:{P60900}

599 Pathogen[ P14079] interacts with 1 human partners:{P60900}

600 Pathogen[ P03383] interacts with 1 human partners:{P60900}

601 Pathogen[ P03410] interacts with 1 human partners:{P60900}

602 Pathogen[ P14075] interacts with 1 human partners:{P60900}

603 Pathogen[ P0C206] interacts with 1 human partners:{P60900}

604 [Cluster 114]GO:0048244+F molecular\_function [name] phytanoyl-CoA dioxygenase activity [def] "Catalysis of the reaction

605 Pathogen[ P0C214] interacts with 1 human partners:{O14832}

606 Pathogen[ P14079] interacts with 1 human partners:{O14832}

607 Pathogen[ P03410] interacts with 1 human partners:{O14832}

608 Pathogen[ P14075] interacts with 1 human partners:{O14832}

609 Pathogen[ P0C206] interacts with 1 human partners:{O14832}

610 [Cluster 115]GO:0050291+F molecular\_function [name] sphingosine N-acyltransferase activity [def] "Catalysis of the reaction

611 Pathogen[ Q2Q067] interacts with 1 human partners:{Q96G23}

612 Pathogen[ P0C214] interacts with 2 human partners:{Q9HA82;Q96G23}

613 Pathogen[ P03346] interacts with 1 human partners:{Q96G23}

614 Pathogen[ Q85601] interacts with 1 human partners:{Q96G23}

615 Pathogen[ P14079] interacts with 3 human partners:{Q9HA82;P27544;Q96G23}

616 Pathogen[ P03410] interacts with 3 human partners:{P27544;Q96G23;Q9HA82}

617 Pathogen[ P0C206] interacts with 2 human partners:{Q96G23;Q9HA82}

618 Pathogen[ P03363] interacts with 1 human partners:{Q96G23}

619 [Cluster 116]GO:0003986+F molecular\_function [name] acetyl-CoA hydrolase activity [def] "Catalysis of the reaction

620 Pathogen[ Q2Q067] interacts with 1 human partners:{Q9Y305}

621 Pathogen[ P0C214] interacts with 1 human partners:{Q9Y305}

622 Pathogen[ P03346] interacts with 1 human partners:{Q9Y305}

623 Pathogen[ Q85601] interacts with 1 human partners:{Q9Y305}

624 Pathogen[ P14079] interacts with 1 human partners:{Q9Y305}

625 Pathogen[ P03383] interacts with 1 human partners:{Q9Y305}

626 Pathogen[ P03410] interacts with 1 human partners:{Q9Y305}

627 Pathogen[ P14075] interacts with 1 human partners:{Q9Y305}

628 Pathogen[ P0C206] interacts with 1 human partners:{Q9Y305}

629 [Cluster 117]GO:0004790+F molecular\_function [name] thioether S-methyltransferase activity [def] "Catalysis of the reaction

630 Pathogen[ P03346] interacts with 1 human partners:{O95050}

631 Pathogen[ P14079] interacts with 1 human partners:{O95050}

632 Pathogen[ P03410] interacts with 1 human partners:{O95050}

633 Pathogen[ P03363] interacts with 1 human partners:{O95050}

634 [Cluster 118]GO:0016415+F molecular\_function [name] octanoyltransferase activity [def] "Catalysis of the transfer of an octanoyl (CH<sub>3</sub>-[CH<sub>2</sub>]<sub>6</sub>-CO-) group to an acceptor molecule." [GOC

635 Pathogen[ P0C214] interacts with 1 human partners:{A6NK58}

636 Pathogen[ P14079] interacts with 1 human partners:{A6NK58}

637 Pathogen[ P03410] interacts with 1 human partners:{A6NK58}

638 Pathogen[ P0C206] interacts with 1 human partners:{A6NK58}

639 [Cluster 119]GO:0005129+F molecular\_function [name] granulocyte macrophage colony-stimulating factor receptor binding [def] "Interacting selectively and non-covalently with the granulocyte macrophage colony-stimulating factor receptor." [GOC

640 Pathogen[ P14079] interacts with 1 human partners:{P04141}

641 Pathogen[ P03410] interacts with 1 human partners:{P04141}

642 [Cluster 120]GO:0005201+F molecular\_function [name] extracellular matrix structural constituent [def] "The action of a molecule that contributes to the structural integrity of the extracellular matrix." [GOC

643 Pathogen[ P14079] interacts with 2 human partners:{P15502;Q9NQ76}

644 Pathogen[ P03383] interacts with 1 human partners:{P15502}

645 Pathogen[ P03410] interacts with 2 human partners:{P15502;Q9NQ76}

646 Pathogen[ P14075] interacts with 1 human partners:{P15502}

647 Pathogen[ P0C206] interacts with 1 human partners:{P15502}

648 [Cluster 121]GO:0004930+F molecular\_function [name] G-protein coupled receptor activity [def] "Combining with an extracellular signal and transmitting the signal across the membrane by activating an associated G-protein\_ promotes the exchange of GDP for GTP on the alpha subunit of a heterotrimeric G-protein complex." [GOC

649 Pathogen[ P14079] interacts with 3 human partners:{Q9NYV7;Q86W33;O43813}

650 Pathogen[ P03410] interacts with 1 human partners:{Q86W33}

651 [Cluster 122]GO:0032139+F molecular\_function [name] dinucleotide insertion or deletion binding [def] "Interacting selectively and non-covalently with double-stranded DNA containing a dinucleotide insertion or deletion." [GOC

652 Pathogen[ Q2Q067] interacts with 1 human partners:{P12004}

653 Pathogen[ P0C214] interacts with 1 human partners:{P20585}

654 Pathogen[ P03346] interacts with 2 human partners:{P12004;P20585}

655 Pathogen[ Q85601] interacts with 2 human partners:{P20585;P12004}

656 Pathogen[ P14079] interacts with 2 human partners:{P20585;P12004}

657 Pathogen[ P03410] interacts with 2 human partners:{P20585;P12004}

658 Pathogen[ P0C206] interacts with 2 human partners:{P20585;P12004}

659 Pathogen[ P03363] interacts with 1 human partners:{P20585}

660 [Cluster 123]GO:0031013+F molecular\_function [name] troponin I binding [def] "Interacting selectively and non-covalently with troponin I, the inhibitory subunit of the troponin complex." [GOC

661 Pathogen[ P03346] interacts with 1 human partners:{P63316}

662 Pathogen[ P03410] interacts with 1 human partners:{P63316}

663 [Cluster 124]GO:0052794+F molecular\_function [name] exo-alpha-(2->3)-sialidase activity [def] "Catalysis of the hydrolysis of alpha-(2->3)-glycosidic linkages of terminal sialic residues in substrates." [EC

664 Pathogen[ Q2Q067] interacts with 1 human partners:{Q8WWR8}

665 Pathogen[ P0C214] interacts with 2 human partners:{Q8WWR8;Q9Y3R4}

666 Pathogen[ P03346] interacts with 1 human partners:{Q8WWR8}

667 Pathogen[ P14079] interacts with 2 human partners:{Q8WWR8;Q9Y3R4}

668 Pathogen[ P03383] interacts with 1 human partners:{Q8WWR8}

669 Pathogen[ P03410] interacts with 2 human partners:{Q9Y3R4;Q8WWR8}

670 Pathogen[ P14075] interacts with 1 human partners:{Q8WWR8}

671 Pathogen[ P0C206] interacts with 2 human partners:{Q9Y3R4;Q8WWR8}

672 [Cluster 125]GO:0015207+F molecular\_function [name] adenine transmembrane transporter activity [def] "Catalysis of the transfer of adenine, 6-aminopurine, from one side of a membrane to the other." [GOC

673 Pathogen[ P03410] interacts with 1 human partners:{P05141}

674 [Cluster 126]GO:0004018+F molecular\_function [name] N6-(1,2-dicarboxyethyl)AMP AMP-lyase (fumarate-forming) activity [def] "Catalysis of the reaction

675 Pathogen[ P0C214] interacts with 1 human partners:{P30566}

676 Pathogen[ P03410] interacts with 1 human partners:{P30566}

677 [Cluster 127]GO:0070996+F molecular\_function [name] type 1 melanocortin receptor binding [def] "Interacting selectively and non-covalently with a type 1 melanocortin receptor." [GOC

678 Pathogen[ P14079] interacts with 2 human partners:{Q96G30;Q8TCY5}

679 Pathogen[ P03410] interacts with 1 human partners:{Q96G30}

680 [Cluster 128]GO:0016790+F molecular\_function [name] thiolester hydrolase activity [def] "Catalysis of the reaction

681 Pathogen[ Q2Q067] interacts with 1 human partners:{Q86TX2}

682 Pathogen[ P0C214] interacts with 1 human partners:{Q86TX2}

683 Pathogen[ P03346] interacts with 1 human partners:{Q86TX2}

684 Pathogen[ Q85601] interacts with 1 human partners:{Q86TX2}

685 Pathogen[ P14079] interacts with 4 human partners:{P49753;Q9NUQ7;Q86TX2;Q6NVU6}

686 Pathogen[ P03410] interacts with 3 human partners:{Q86TX2;P49753;Q6NVU6}

687 Pathogen[ P14075] interacts with 1 human partners:{Q6NVU6}

688 Pathogen[ P0C206] interacts with 1 human partners:{Q86TX2}

689 [Cluster 129]GO:0004017+F molecular\_function [name] adenylate kinase activity [def] "Catalysis of the reaction

690 Pathogen[ P0C214] interacts with 1 human partners:{Q9Y3D8}

691 Pathogen[ P03346] interacts with 1 human partners:{Q9Y3D8}

692 Pathogen[ P0C206] interacts with 1 human partners:{Q9Y3D8}

693 Pathogen[ P03363] interacts with 1 human partners:{Q9Y3D8}

694 [Cluster 130]GO:0035258+F molecular\_function [name] steroid hormone receptor binding [def] "Interacting selectively and non-covalently with a steroid hormone receptor." [GOC

695 Pathogen[ P03346] interacts with 1 human partners:{P51843}

696 [Cluster 131]GO:0032181+F molecular\_function [name] dinucleotide repeat insertion binding [def] "Interacting selectively and non-covalently with double-stranded DNA containing a dinucleotide repeat insertion or a deletion resulting in unpaired dinucleotide repeats." [GOC

697 Pathogen[ P0C214] interacts with 1 human partners:{P20585}

698 Pathogen[ P03346] interacts with 1 human partners:{P20585}

699 Pathogen[ Q85601] interacts with 1 human partners:{P20585}

700 Pathogen[ P14079] interacts with 1 human partners:{P20585}

701 Pathogen[ P03410] interacts with 1 human partners:{P20585}

702 Pathogen[ P0C206] interacts with 1 human partners:{P20585}

703 Pathogen[ P03363] interacts with 1 human partners:{P20585}

704 [Cluster 132]GO:0036002+F molecular\_function [name] pre-mRNA binding [def] "Interacting selectively and non-covalently with pre-messenger RNA (pre-mRNA), an intermediate molecule between DNA and protein that may contain introns and, at least in part, encodes one or more proteins. Introns are removed from pre-mRNA to form a mRNA molecule." [GOC

705 Pathogen[ P0C214] interacts with 1 human partners:{P26599}

706 Pathogen[ P03346] interacts with 1 human partners:{P26599}

707 Pathogen[ P14079] interacts with 1 human partners:{P26599}

708 Pathogen[ P03410] interacts with 1 human partners:{P26599}

709 Pathogen[ P03363] interacts with 1 human partners:{P26599}

710 [Cluster 133]GO:0004445+F molecular\_function [name] inositol-polyphosphate 5-phosphatase activity [def] "Catalysis of the reactions

711 Pathogen[ P0C214] interacts with 1 human partners:{O15056}

712 Pathogen[ P03346] interacts with 1 human partners:{O15056}

713 Pathogen[ P03363] interacts with 1 human partners:{O15056}

714 [Cluster 134]GO:0050290+F molecular\_function [name] sphingomyelin phosphodiesterase D activity [def] "Catalysis of the reaction

715 Pathogen[ P14079] interacts with 1 human partners:{Q9NXE4}

716 Pathogen[ P03410] interacts with 1 human partners:{Q9NXE4}

717 [Cluster 135]GO:000036+F molecular\_function [name] acyl carrier activity [def] "Enables the directed movement of acyl groups into, out of, within or between cells." [CHEBI

718 Pathogen[ P0C214] interacts with 1 human partners:{O14561}

719 Pathogen[ P14079] interacts with 1 human partners:{O14561}

720 Pathogen[ P03410] interacts with 1 human partners:{O14561}

721 Pathogen[ P14075] interacts with 1 human partners:{O14561}

722 Pathogen[ P0C206] interacts with 1 human partners:{O14561}

723 [Cluster 136]GO:0030748+F molecular\_function [name] amine N-methyltransferase activity [def] "Catalysis of the reaction

724 Pathogen[ P03346] interacts with 1 human partners:{O95050}

725 Pathogen[ P14079] interacts with 1 human partners:{O95050}

726 Pathogen[ P03410] interacts with 1 human partners:{O95050}

727 Pathogen[ P03363] interacts with 1 human partners:{O95050}

728 [Cluster 137]GO:0004886+F molecular\_function [name] 9-cis retinoic acid receptor activity [def] "Combining with 9-cis retinoic acid and transmitting the signal to the transcriptional machinery by interacting selectively and non-covalently with a specific DNA sequence in order to modulate transcription by RNA polymerase II." [GOC

729 Pathogen[ Q2Q067] interacts with 1 human partners:{P28702}

730 Pathogen[ P03346] interacts with 2 human partners:{P48443;P28702}

731 Pathogen[ Q85601] interacts with 1 human partners:{P28702}

732 Pathogen[ P14079] interacts with 2 human partners:{P48443;P28702}

733 Pathogen[ P03383] interacts with 1 human partners:{P28702}

734 Pathogen[ P03410] interacts with 1 human partners:{P28702}

735 Pathogen[ P14075] interacts with 1 human partners:{P28702}

736 Pathogen[ P0C206] interacts with 2 human partners:{P28702;P48443}

737 Pathogen[ P03363] interacts with 1 human partners:{P28702}

738 [Cluster 138]GO:0005497+F molecular\_function [name] androgen binding [def] "Interacting selectively and non-covalently with any androgen, male sex hormones." [CHEBI

739 Pathogen[ P14079] interacts with 1 human partners:{O75556}

740 Pathogen[ P14075] interacts with 1 human partners:{O75556}

741 [Cluster 139]GO:0050839+F molecular\_function [name] cell adhesion molecule binding [def] "Interacting selectively and non-covalently with a cell adhesion molecule." [GOC

742 Pathogen[ P03346] interacts with 2 human partners:{P55196;P26038}

743 Pathogen[ P14079] interacts with 1 human partners:{P26038}

744 Pathogen[ P03410] interacts with 1 human partners:{P26038}

745 Pathogen[ P0C206] interacts with 1 human partners:{P55196}

746 [Cluster 140]GO:0004514+F molecular\_function [name] nicotinate-nucleotide diphosphorylase (carboxylating) activity [def] "Catalysis of the reaction

747 Pathogen[ Q2Q067] interacts with 1 human partners:{Q6XQN6}

748 Pathogen[ P0C214] interacts with 3 human partners:{Q6XQN6;Q15274;P43490}

749 Pathogen[ P03346] interacts with 1 human partners:{Q6XQN6}

750 Pathogen[ Q85601] interacts with 1 human partners:{Q6XQN6}

751 Pathogen[ P14079] interacts with 3 human partners:{P43490;Q6XQN6;Q15274}

752 Pathogen[ P03410] interacts with 3 human partners:{Q15274;Q6XQN6;P43490}

753 Pathogen[ P14075] interacts with 1 human partners:{Q6XQN6}

754 Pathogen[ P0C206] interacts with 3 human partners:{Q6XQN6;P43490;Q15274}

755 Pathogen[ P03363] interacts with 1 human partners:{Q6XQN6}

756 [Cluster 141]GO:0004364+F molecular\_function [name] glutathione transferase activity [def] "Catalysis of the reaction

757 Pathogen[ Q2Q067] interacts with 3 human partners:{P0CG30;P0CG29;O43708}

758 Pathogen[ P0C214] interacts with 3 human partners:{P0CG30;O43708;P0CG29}

759 Pathogen[ P03346] interacts with 3 human partners:{P0CG30;P0CG29;O43708}  
760 Pathogen[ Q85601] interacts with 3 human partners:{O43708;P0CG29;P0CG30}  
761 Pathogen[ P14079] interacts with 4 human partners:{Q16873;P20292;O43708;P10620}  
762 Pathogen[ P03410] interacts with 5 human  
partners:{P0CG30;P0CG29;O43708;Q16873;P20292}  
763 Pathogen[ P0C206] interacts with 4 human partners:{P0CG29;O43708;P20292;P0CG30}  
764 Pathogen[ P03363] interacts with 3 human partners:{P0CG30;P0CG29;O43708}  
765 [Cluster 142]GO:0004660+F molecular\_function [name] protein farnesyltransferase  
activity [def] "Catalysis of the reaction  
766 Pathogen[ Q2Q067] interacts with 2 human partners:{P49356;P49354}  
767 Pathogen[ P0C214] interacts with 2 human partners:{P49354;P49356}  
768 Pathogen[ P03346] interacts with 2 human partners:{P49354;P49356}  
769 Pathogen[ Q85601] interacts with 2 human partners:{P49354;P49356}  
770 Pathogen[ P14079] interacts with 2 human partners:{P49354;P49356}  
771 Pathogen[ P03410] interacts with 2 human partners:{P49354;P49356}  
772 Pathogen[ P0C206] interacts with 2 human partners:{P49354;P49356}  
773 Pathogen[ P03363] interacts with 1 human partners:{P49354}  
774 [Cluster 143]GO:0030697+F molecular\_function [name] S-adenosylmethionine-dependent  
tRNA (m5U54) methyltransferase activity [def] "Catalysis of the transfer of a methyl  
group from S-adenosyl-L-methionine to the C5 atom of the uridine residue at position 54  
in a tRNA molecule." [ISBN  
775 Pathogen[ P03346] interacts with 1 human partners:{Q96GJ1}  
776 Pathogen[ P14079] interacts with 1 human partners:{Q96GJ1}  
777 Pathogen[ P03410] interacts with 1 human partners:{Q96GJ1}  
778 Pathogen[ P0C206] interacts with 1 human partners:{Q96GJ1}  
779 [Cluster 144]GO:0042292+F molecular\_function [name] URM1 activating enzyme activity  
[def] "Catalysis of the activation of the small ubiquitin-related modifier URM1, through  
the formation of an ATP-dependent high-energy thiolester bond." [GOC  
780 Pathogen[ P0C214] interacts with 1 human partners:{O95396}  
781 Pathogen[ P0C206] interacts with 1 human partners:{O95396}  
782 [Cluster 145]GO:0042835+F molecular\_function [name] BRE binding [def] "Interacting  
selectively and non-covalently with the RNA element BRE (Bruno response element)." [PMID  
783 Pathogen[ P03346] interacts with 1 human partners:{Q92879}  
784 Pathogen[ P03363] interacts with 1 human partners:{Q92879}  
785 [Cluster 146]GO:0030348+F molecular\_function [name] syntaxin-3 binding [def]  
"Interacting selectively and non-covalently with the SNAP receptor syntaxin-3." [GOC  
786 Pathogen[ Q2Q067] interacts with 1 human partners:{Q15833}  
787 Pathogen[ P0C214] interacts with 1 human partners:{Q15833}  
788 Pathogen[ P03346] interacts with 1 human partners:{Q15833}  
789 Pathogen[ Q85601] interacts with 1 human partners:{Q15833}  
790 Pathogen[ P14079] interacts with 1 human partners:{Q15833}  
791 Pathogen[ P03410] interacts with 1 human partners:{Q15833}  
792 Pathogen[ P0C206] interacts with 1 human partners:{Q15833}  
793 Pathogen[ P03363] interacts with 1 human partners:{Q15833}  
794 [Cluster 147]GO:0004813+F molecular\_function [name] alanine-tRNA ligase activity [def]  
"Catalysis of the reaction  
795 Pathogen[ P0C214] interacts with 3 human partners:{Q5JTZ9;Q9BTE6;P49588}  
796 Pathogen[ P14079] interacts with 2 human partners:{Q9BTE6;P49588}  
797 Pathogen[ P03383] interacts with 1 human partners:{Q9BTE6}  
798 Pathogen[ P03410] interacts with 2 human partners:{Q9BTE6;P49588}  
799 Pathogen[ P14075] interacts with 1 human partners:{Q9BTE6}  
800 Pathogen[ P0C206] interacts with 1 human partners:{Q9BTE6}  
801 Pathogen[ P03363] interacts with 1 human partners:{Q9BTE6}  
802 [Cluster 148]GO:0072572+F molecular\_function [name] poly-ADP-D-ribose binding [def]  
"Interacting selectively and non-covalently with polymeric ADP-D-ribose, a polymer that  
is composed of poly-ADP-D-ribose units linked through 1,2-glycosidic bonds at the ribose  
ring." [CHEBI  
803 Pathogen[ Q2Q067] interacts with 1 human partners:{Q9NTX7}  
804 Pathogen[ P0C214] interacts with 1 human partners:{Q9NTX7}  
805 Pathogen[ P03346] interacts with 1 human partners:{Q9NTX7}  
806 Pathogen[ Q85601] interacts with 1 human partners:{Q9NTX7}  
807 Pathogen[ P03383] interacts with 1 human partners:{Q9NTX7}  
808 Pathogen[ P14075] interacts with 1 human partners:{Q9NTX7}  
809 Pathogen[ P0C206] interacts with 1 human partners:{Q9NTX7}  
810 Pathogen[ P03363] interacts with 1 human partners:{Q9NTX7}  
811 [Cluster 149]GO:0008448+F molecular\_function [name] N-acetylglucosamine-6-phosphate  
deacetylase activity [def] "Catalysis of the reaction  
812 Pathogen[ P14079] interacts with 1 human partners:{Q9Y303}  
813 [Cluster 150]GO:0030792+F molecular\_function [name] methylarsonite methyltransferase  
activity [def] "Catalysis of the reaction  
814 Pathogen[ P0C214] interacts with 1 human partners:{Q9HBK9}  
815 Pathogen[ P03346] interacts with 1 human partners:{Q9HBK9}  
816 Pathogen[ P14079] interacts with 1 human partners:{Q9HBK9}  
817 Pathogen[ P03410] interacts with 1 human partners:{Q9HBK9}  
818 Pathogen[ P0C206] interacts with 1 human partners:{Q9HBK9}  
819 Pathogen[ P03363] interacts with 1 human partners:{Q9HBK9}

820 [Cluster 151]GO:0016742+F molecular\_function [name] hydroxymethyl-, formyl- and related transferase activity [def] "Catalysis of the transfer of a hydroxymethyl- or formyl group from one compound (donor) to another (acceptor)." [EC

821 Pathogen[ Q2Q067] interacts with 1 human partners:{Q96DP5}

822 Pathogen[ P0C214] interacts with 1 human partners:{Q96DP5}

823 Pathogen[ P03346] interacts with 1 human partners:{Q96DP5}

824 Pathogen[ P14079] interacts with 1 human partners:{Q96DP5}

825 Pathogen[ P03383] interacts with 1 human partners:{Q96DP5}

826 Pathogen[ P03410] interacts with 1 human partners:{Q96DP5}

827 Pathogen[ P14075] interacts with 1 human partners:{Q96DP5}

828 Pathogen[ P0C206] interacts with 1 human partners:{Q96DP5}

829 [Cluster 152]GO:0043395+F molecular\_function [name] heparan sulfate proteoglycan binding [def] "Interacting selectively and non-covalently with a heparan sulfate proteoglycan, any proteoglycan containing heparan sulfate as the glycosaminoglycan carbohydrate unit." [ISBN

830 Pathogen[ P03363] interacts with 1 human partners:{P19883}

831 [Cluster 153]GO:0016422+F molecular\_function [name] mRNA (2'-O-methyladenosine-N6-)-methyltransferase activity [def] "Catalysis of the reaction

832 Pathogen[ P0C214] interacts with 1 human partners:{Q9HCE5}

833 Pathogen[ P03346] interacts with 2 human partners:{Q9HCE5;Q86U44}

834 Pathogen[ Q85601] interacts with 1 human partners:{Q9HCE5}

835 Pathogen[ P14079] interacts with 2 human partners:{Q9HCE5;Q86U44}

836 Pathogen[ P03410] interacts with 2 human partners:{Q9HCE5;Q86U44}

837 Pathogen[ P0C206] interacts with 1 human partners:{Q9HCE5}

838 Pathogen[ P03363] interacts with 2 human partners:{Q86U44;Q9HCE5}

839 [Cluster 154]GO:0043028+F molecular\_function [name] cysteine-type endopeptidase regulator activity involved in apoptotic process [def] "Modulates the activity of a cysteine-type endopeptidase involved in the apoptotic process." [GOC

840 Pathogen[ P03346] interacts with 1 human partners:{P58012}

841 [Cluster 155]GO:0008889+F molecular\_function [name] glycerophosphodiester phosphodiesterase activity [def] "Catalysis of the reaction

842 Pathogen[ P0C214] interacts with 1 human partners:{Q9NPB8}

843 Pathogen[ P14079] interacts with 1 human partners:{Q9NPB8}

844 Pathogen[ P03410] interacts with 1 human partners:{Q9NPB8}

845 Pathogen[ P0C206] interacts with 1 human partners:{Q9NPB8}

846 [Cluster 156]GO:0015095+F molecular\_function [name] magnesium ion transmembrane transporter activity [def] "Catalysis of the transfer of magnesium (Mg) ions from one side of a membrane to the other." [GOC

847 Pathogen[ P14079] interacts with 6 human partners:{Q6NVV3;Q0D2K0;Q9H841;Q8N8Q9;Q6P499;Q7RTP0}

848 Pathogen[ P03410] interacts with 6 human partners:{Q0D2K0;Q9H841;Q6NVV3;Q8N8Q9;Q7RTP0;Q6P499}

849 [Cluster 157]GO:0032408+F molecular\_function [name] MutSbeta complex binding [def] "Interacting selectively and non-covalently with the mismatch repair complex MutSbeta." [GOC

850 Pathogen[ Q2Q067] interacts with 1 human partners:{Q9UIF7}

851 Pathogen[ P0C214] interacts with 1 human partners:{Q9UIF7}

852 Pathogen[ P03346] interacts with 1 human partners:{Q9UIF7}

853 Pathogen[ Q85601] interacts with 1 human partners:{Q9UIF7}

854 Pathogen[ P14079] interacts with 1 human partners:{Q9UIF7}

855 Pathogen[ P03410] interacts with 1 human partners:{Q9UIF7}

856 Pathogen[ P14075] interacts with 1 human partners:{Q9UIF7}

857 Pathogen[ P0C206] interacts with 1 human partners:{Q9UIF7}

858 Pathogen[ P03363] interacts with 1 human partners:{Q9UIF7}

859 [Cluster 158]GO:0004497+F molecular\_function [name] monooxygenase activity [def] "Catalysis of the incorporation of one atom from molecular oxygen into a compound and the reduction of the other atom of oxygen to water." [http

860 Pathogen[ Q2Q067] interacts with 1 human partners:{Q9BU89}

861 Pathogen[ P0C214] interacts with 1 human partners:{Q9BU89}

862 Pathogen[ P03346] interacts with 2 human partners:{Q9BU89;Q8TDZ2}

863 Pathogen[ Q85601] interacts with 1 human partners:{Q9BU89}

864 Pathogen[ P14079] interacts with 2 human partners:{Q8TDZ2;Q9BU89}

865 Pathogen[ P03383] interacts with 1 human partners:{Q9BU89}

866 Pathogen[ P03410] interacts with 2 human partners:{Q9BU89;Q8TDZ2}

867 Pathogen[ P14075] interacts with 1 human partners:{Q9BU89}

868 Pathogen[ P0C206] interacts with 2 human partners:{Q8TDZ2;Q9BU89}

869 [Cluster 159]GO:0008802+F molecular\_function [name] betaine-aldehyde dehydrogenase activity [def] "Catalysis of the reaction

870 Pathogen[ Q2Q067] interacts with 1 human partners:{P49419}

871 Pathogen[ P0C214] interacts with 1 human partners:{P49419}

872 Pathogen[ P03346] interacts with 1 human partners:{P49419}

873 Pathogen[ Q85601] interacts with 1 human partners:{P49419}

874 Pathogen[ P03383] interacts with 1 human partners:{P49419}

875 Pathogen[ P03410] interacts with 1 human partners:{P49419}

876 Pathogen[ P14075] interacts with 1 human partners:{P49419}

877 Pathogen[ P0C206] interacts with 1 human partners:{P49419}



878 Pathogen[ P03363] interacts with 1 human partners:{P49419}

879 [Cluster 160]GO:0047464+F molecular\_function [name] heparosan-N-sulfate-glucuronate  
5-epimerase activity [def] "Catalysis of the reaction

880 Pathogen[ P14079] interacts with 1 human partners:{Q94923}

881 [Cluster 161]GO:0032406+F molecular\_function [name] MutLbeta complex binding [def]  
"Interacting selectively and non-covalently with the mismatch repair complex MutLbeta."  
[GOC

882 Pathogen[ Q2Q067] interacts with 1 human partners:{Q9UIF7}

883 Pathogen[ P0C214] interacts with 1 human partners:{Q9UIF7}

884 Pathogen[ P03346] interacts with 1 human partners:{Q9UIF7}

885 Pathogen[ Q85601] interacts with 1 human partners:{Q9UIF7}

886 Pathogen[ P14079] interacts with 1 human partners:{Q9UIF7}

887 Pathogen[ P03410] interacts with 1 human partners:{Q9UIF7}

888 Pathogen[ P14075] interacts with 1 human partners:{Q9UIF7}

889 Pathogen[ P0C206] interacts with 1 human partners:{Q9UIF7}

890 Pathogen[ P03363] interacts with 1 human partners:{Q9UIF7}

891 [Cluster 162]GO:0004776+F molecular\_function [name] succinate-CoA ligase (GDP-forming)  
activity [def] "Catalysis of the reaction

892 Pathogen[ P0C214] interacts with 1 human partners:{Q96I99}

893 [Cluster 163]GO:0042132+F molecular\_function [name] fructose 1,6-bisphosphate  
1-phosphatase activity [def] "Catalysis of the reaction

894 Pathogen[ Q2Q067] interacts with 1 human partners:{P09467}

895 Pathogen[ P0C214] interacts with 2 human partners:{P09467;O00757}

896 Pathogen[ P03346] interacts with 1 human partners:{P09467}

897 Pathogen[ Q85601] interacts with 2 human partners:{O00757;P09467}

898 Pathogen[ P14079] interacts with 1 human partners:{P09467}

899 Pathogen[ P03383] interacts with 1 human partners:{P09467}

900 Pathogen[ P03410] interacts with 2 human partners:{P09467;O00757}

901 Pathogen[ P14075] interacts with 1 human partners:{P09467}

902 Pathogen[ P0C206] interacts with 2 human partners:{P09467;O00757}

903 [Cluster 164]GO:0047946+F molecular\_function [name] glutamine N-acyltransferase  
activity [def] "Catalysis of the reaction

904 Pathogen[ P0C214] interacts with 1 human partners:{Q969I3}

905 Pathogen[ Q85601] interacts with 1 human partners:{Q969I3}

906 Pathogen[ P14079] interacts with 1 human partners:{Q969I3}

907 Pathogen[ P03383] interacts with 1 human partners:{Q969I3}

908 Pathogen[ P03410] interacts with 1 human partners:{Q969I3}

909 Pathogen[ P14075] interacts with 1 human partners:{Q969I3}

910 Pathogen[ P0C206] interacts with 1 human partners:{Q969I3}

911 [Cluster 165]GO:0043221+F molecular\_function [name] SMC protein binding [def]  
"Interacting selectively and non-covalently with any protein from the structural  
maintenance of chromosomes (SMC) family, a group of chromosomal ATPases with a role in  
mitotic chromosome organization." [GOC

912 Pathogen[ P03346] interacts with 1 human partners:{Q5XG87}

913 Pathogen[ Q85601] interacts with 1 human partners:{Q5XG87}

914 Pathogen[ P14079] interacts with 1 human partners:{Q5XG87}

915 Pathogen[ P03410] interacts with 1 human partners:{Q5XG87}

916 Pathogen[ P0C206] interacts with 1 human partners:{Q5XG87}

917 [Cluster 166]GO:0005229+F molecular\_function [name] intracellular calcium activated  
chloride channel activity [def] "Catalysis of the transmembrane transfer of chloride by  
a channel that opens in response to stimulus by a calcium ion or ions. Transport by a  
channel involves catalysis of facilitated diffusion of a solute (by an energy-independent  
process) involving passage through a transmembrane aqueous pore or channel, without  
evidence for a carrier-mediated mechanism." [GOC

918 Pathogen[ P14079] interacts with 1 human partners:{Q9NQ90}

919 Pathogen[ P03410] interacts with 1 human partners:{Q9NQ90}

920 Pathogen[ P0C206] interacts with 1 human partners:{Q9NQ90}

921 [Cluster 167]GO:0005113+F molecular\_function [name] patched binding [def]  
"Interacting selectively and non-covalently with the patched (ptc) protein, a receptor  
for hedgehog proteins." [GOC

922 Pathogen[ Q2Q067] interacts with 1 human partners:{P14635}

923 Pathogen[ P0C214] interacts with 1 human partners:{P14635}

924 Pathogen[ P03346] interacts with 1 human partners:{P14635}

925 Pathogen[ Q85601] interacts with 1 human partners:{P14635}

926 Pathogen[ P14079] interacts with 1 human partners:{P14635}

927 Pathogen[ P03383] interacts with 1 human partners:{P14635}

928 Pathogen[ P03410] interacts with 1 human partners:{P14635}

929 Pathogen[ P14075] interacts with 1 human partners:{P14635}

930 Pathogen[ P0C206] interacts with 1 human partners:{P14635}

931 [Cluster 168]GO:0004488+F molecular\_function [name] methylenetetrahydrofolate  
dehydrogenase (NADP+) activity [def] "Catalysis of the reaction

932 Pathogen[ P0C214] interacts with 1 human partners:{P11586}

933 [Cluster 169]GO:0070053+F molecular\_function [name] thrombospondin receptor activity  
[def] "Combining with thrombospondin to initiate a change in cell activity." [GOC

934 Pathogen[ P14079] interacts with 1 human partners:{Q08722}

935 Pathogen[ P03410] interacts with 1 human partners:{Q08722}

936 [Cluster 170]GO:0070140+F molecular\_function [name] SUMO-specific isopeptidase activity [def] "Catalysis of the hydrolysis of an isopeptide bond between the small conjugating protein SUMO and a protein to which SUMO has been conjugated." [GOC

937 Pathogen[ P14079] interacts with 1 human partners:{Q5W0Q7}

938 [Cluster 171]GO:0052840+F molecular\_function [name] inositol diphosphate tetrakisphosphate diphosphatase activity [def] "Catalysis of the reaction

939 Pathogen[ P0C214] interacts with 1 human partners:{O95989}

940 Pathogen[ Q85601] interacts with 1 human partners:{O95989}

941 Pathogen[ P14079] interacts with 4 human partners:{Q96G61;O95989;Q8NFP7;Q9NZJ9}

942 Pathogen[ P03383] interacts with 1 human partners:{O95989}

943 Pathogen[ P03410] interacts with 4 human partners:{Q8NFP7;Q9NZJ9;O95989;Q96G61}

944 Pathogen[ P14075] interacts with 1 human partners:{O95989}

945 Pathogen[ P0C206] interacts with 2 human partners:{O95989;Q8NFP7}

946 [Cluster 172]GO:0008532+F molecular\_function [name] N-acetyllactosaminide beta-1,3-N-acetylglucosaminyltransferase activity [def] "Catalysis of the reaction

947 Pathogen[ P14079] interacts with 1 human partners:{O43505}

948 Pathogen[ P03410] interacts with 1 human partners:{O43505}

949 Pathogen[ P14075] interacts with 1 human partners:{O43505}

950 Pathogen[ P0C206] interacts with 1 human partners:{O43505}

951 [Cluster 173]GO:0031780+F molecular\_function [name] corticotropin hormone receptor binding [def] "Interacting selectively and non-covalently with a corticotropin hormone receptor." [GOC

952 Pathogen[ P14079] interacts with 2 human partners:{Q96G30;Q8TCY5}

953 Pathogen[ P03410] interacts with 1 human partners:{Q96G30}

954 [Cluster 174]GO:0031702+F molecular\_function [name] type 1 angiotensin receptor binding [def] "Interacting selectively and non-covalently with a type 1 angiotensin receptor." [GOC

955 Pathogen[ Q2Q067] interacts with 1 human partners:{P62879}

956 Pathogen[ P0C214] interacts with 1 human partners:{P62879}

957 Pathogen[ P03346] interacts with 1 human partners:{P62879}

958 Pathogen[ Q85601] interacts with 1 human partners:{P62879}

959 Pathogen[ P03383] interacts with 1 human partners:{P62879}

960 Pathogen[ P03410] interacts with 1 human partners:{P62879}

961 Pathogen[ P14075] interacts with 1 human partners:{P62879}

962 Pathogen[ P0C206] interacts with 1 human partners:{P62879}

963 Pathogen[ P03363] interacts with 1 human partners:{P62879}

964 [Cluster 175]GO:0004040+F molecular\_function [name] amidase activity [def] "Catalysis of the reaction

965 Pathogen[ P14079] interacts with 1 human partners:{O00519}

966 Pathogen[ P03410] interacts with 1 human partners:{O00519}

967 [Cluster 176]GO:0034236+F molecular\_function [name] protein kinase A catalytic subunit binding [def] "Interacting selectively and non-covalently with one or both of the catalytic subunits of protein kinase A." [GOC

968 Pathogen[ P03346] interacts with 1 human partners:{Q9UKA4}

969 Pathogen[ P14079] interacts with 1 human partners:{Q9UKA4}

970 Pathogen[ P03410] interacts with 1 human partners:{Q9UKA4}

971 Pathogen[ P0C206] interacts with 1 human partners:{Q9UKA4}

972 [Cluster 177]GO:0052845+F molecular\_function [name] inositol-5-diphosphate-1,2,3,4,6-pentakisphosphate diphosphatase activity [def] "Catalysis of the reaction

973 Pathogen[ P0C214] interacts with 1 human partners:{O95989}

974 Pathogen[ Q85601] interacts with 1 human partners:{O95989}

975 Pathogen[ P14079] interacts with 4 human partners:{Q96G61;O95989;Q8NFP7;Q9NZJ9}

976 Pathogen[ P03383] interacts with 1 human partners:{O95989}

977 Pathogen[ P03410] interacts with 4 human partners:{Q8NFP7;Q9NZJ9;O95989;Q96G61}

978 Pathogen[ P14075] interacts with 1 human partners:{O95989}

979 Pathogen[ P0C206] interacts with 2 human partners:{O95989;Q8NFP7}

980 [Cluster 178]GO:0000701+F molecular\_function [name] purine-specific mismatch base pair DNA N-glycosylase activity [def] "Catalysis of the removal of purines present in mismatches, especially opposite oxidized purines, by cleaving the N-C1' glycosidic bond between the target damaged DNA base and the deoxyribose sugar. The reaction releases a free base and leaves an apurinic (AP) site." [GOC

981 Pathogen[ Q2Q067] interacts with 1 human partners:{P12004}

982 Pathogen[ P03346] interacts with 1 human partners:{P12004}

983 Pathogen[ Q85601] interacts with 1 human partners:{P12004}

984 Pathogen[ P14079] interacts with 1 human partners:{P12004}

985 Pathogen[ P03410] interacts with 1 human partners:{P12004}

986 Pathogen[ P0C206] interacts with 1 human partners:{P12004}

987 [Cluster 179]GO:0051635+F molecular\_function [name] bacterial cell surface binding [def] "Interacting selectively and non-covalently with any component on the surface of a bacterial cell." [GOC

988 Pathogen[ P14079] interacts with 2 human partners:{Q14242;Q14118}

989 Pathogen[ P03410] interacts with 2 human partners:{Q14242;Q14118}

990 [Cluster 180]GO:0004396+F molecular\_function [name] hexokinase activity [def] "Catalysis of the reaction

991 Pathogen[ Q2Q067] interacts with 1 human partners:{P19367}

992 Pathogen[ P0C214] interacts with 1 human partners:{P19367}  
 993 Pathogen[ P03346] interacts with 1 human partners:{P19367}  
 994 Pathogen[ Q85601] interacts with 1 human partners:{P19367}  
 995 Pathogen[ P03383] interacts with 1 human partners:{P19367}  
 996 Pathogen[ P14075] interacts with 1 human partners:{P19367}  
 997 Pathogen[ P0C206] interacts with 1 human partners:{P19367}  
 998 [Cluster 181]GO:0004486+F molecular\_function [name] methylenetetrahydrofolate  
 dehydrogenase [NAD(P)+] activity [def] "Catalysis of the reaction  
 999 Pathogen[ P0C214] interacts with 1 human partners:{P11586}  
 1000 [Cluster 182]GO:0051636+F molecular\_function [name] Gram-negative bacterial cell  
 surface binding [def] "Interacting selectively and non-covalently with any component on  
 the surface of a Gram-negative bacterial cell." [GOC  
 1001 Pathogen[ P14079] interacts with 1 human partners:{Q04118}  
 1002 Pathogen[ P03410] interacts with 1 human partners:{Q04118}  
 1003 [Cluster 183]GO:0004807+F molecular\_function [name] triose-phosphate isomerase  
 activity [def] "Catalysis of the reaction  
 1004 Pathogen[ Q2Q067] interacts with 1 human partners:{P60174}  
 1005 Pathogen[ P0C214] interacts with 1 human partners:{P60174}  
 1006 Pathogen[ P03346] interacts with 1 human partners:{P60174}  
 1007 Pathogen[ Q85601] interacts with 1 human partners:{P60174}  
 1008 Pathogen[ P0C206] interacts with 1 human partners:{P60174}  
 1009 [Cluster 184]GO:0070736+F molecular\_function [name] protein-glycine ligase activity,  
 initiating [def] "Catalysis of the posttranslational transfer of a glycine residue to  
 the gamma-carboxyl group(s) of one or more specific glutamate residues on a target  
 protein." [GOC  
 1010 Pathogen[ P14079] interacts with 2 human partners:{Q9Y4R7;A6PVC2}  
 1011 Pathogen[ P03410] interacts with 2 human partners:{Q9Y4R7;A6PVC2}  
 1012 [Cluster 185]GO:0030731+F molecular\_function [name] guanidinoacetate  
 N-methyltransferase activity [def] "Catalysis of the reaction  
 1013 Pathogen[ P14079] interacts with 1 human partners:{Q14353}  
 1014 Pathogen[ P03410] interacts with 1 human partners:{Q14353}  
 1015 [Cluster 186]GO:0016765+F molecular\_function [name] transferase activity, transferring  
 alkyl or aryl (other than methyl) groups [def] "Catalysis of the transfer of an alkyl  
 or aryl (but not methyl) group from one compound (donor) to another (acceptor)." [GOC  
 1016 Pathogen[ P0C214] interacts with 1 human partners:{Q86SQ9}  
 1017 Pathogen[ P03346] interacts with 1 human partners:{Q86SQ9}  
 1018 Pathogen[ Q85601] interacts with 1 human partners:{Q86SQ9}  
 1019 Pathogen[ P14079] interacts with 1 human partners:{Q86SQ9}  
 1020 Pathogen[ P03410] interacts with 1 human partners:{Q86SQ9}  
 1021 Pathogen[ P0C206] interacts with 1 human partners:{Q86SQ9}  
 1022 [Cluster 187]GO:0004712+F molecular\_function [name] protein serine/threonine/tyrosine  
 kinase activity [def] "Catalysis of the reactions  
 1023 Pathogen[ P03346] interacts with 1 human partners:{O14965}  
 1024 Pathogen[ Q85601] interacts with 1 human partners:{O14965}  
 1025 Pathogen[ P14079] interacts with 1 human partners:{O14965}  
 1026 Pathogen[ P03383] interacts with 1 human partners:{O14965}  
 1027 Pathogen[ P03410] interacts with 1 human partners:{O14965}  
 1028 Pathogen[ P14075] interacts with 1 human partners:{O14965}  
 1029 Pathogen[ P0C206] interacts with 1 human partners:{O14965}  
 1030 [Cluster 188]GO:0048270+F molecular\_function [name] methionine adenosyltransferase  
 regulator activity [def] "Modulates the activity of methionine adenosyltransferase." [EC  
 1031 Pathogen[ P0C214] interacts with 1 human partners:{Q9NZL9}  
 1032 Pathogen[ P03346] interacts with 1 human partners:{Q9NZL9}  
 1033 Pathogen[ P14079] interacts with 1 human partners:{Q9NZL9}  
 1034 Pathogen[ P03410] interacts with 1 human partners:{Q9NZL9}  
 1035 Pathogen[ P0C206] interacts with 1 human partners:{Q9NZL9}  
 1036 [Cluster 189]GO:0047977+F molecular\_function [name] hepxilin-epoxide hydrolase  
 activity [def] "Catalysis of the reaction  
 1037 Pathogen[ P0C214] interacts with 1 human partners:{P18054}  
 1038 Pathogen[ P03346] interacts with 1 human partners:{P18054}  
 1039 [Cluster 190]GO:0047389+F molecular\_function [name] glycerophosphocholine  
 phosphodiesterase activity [def] "Catalysis of the reaction  
 1040 Pathogen[ P0C214] interacts with 1 human partners:{Q9NPB8}  
 1041 Pathogen[ P14079] interacts with 1 human partners:{Q9NPB8}  
 1042 Pathogen[ P03410] interacts with 1 human partners:{Q9NPB8}  
 1043 Pathogen[ P0C206] interacts with 1 human partners:{Q9NPB8}  
 1044 [Cluster 191]GO:0001512+F molecular\_function [name] dihydronicotinamide riboside  
 quinone reductase activity [def] "Catalysis of the reaction  
 1045 Pathogen[ P0C214] interacts with 1 human partners:{P16083}  
 1046 Pathogen[ P03346] interacts with 1 human partners:{P16083}  
 1047 Pathogen[ P14079] interacts with 1 human partners:{P16083}  
 1048 Pathogen[ P03410] interacts with 1 human partners:{P16083}  
 1049 Pathogen[ P0C206] interacts with 1 human partners:{P16083}  
 1050 [Cluster 192]GO:0015077+F molecular\_function [name] monovalent inorganic cation  
 transmembrane transporter activity [def] "Catalysis of the transfer of a inorganic  
 cations with a valency of one from one side of a membrane to the other. Inorganic cations

are atoms or small molecules with a positive charge that do not contain carbon in covalent linkage." [GOC

1051 Pathogen[ P14079] interacts with 1 human partners:{Q9UN42}

1052 Pathogen[ P03410] interacts with 1 human partners:{Q9UN42}

1053 Pathogen[ P0C206] interacts with 1 human partners:{Q9UN42}

1054 [Cluster 193]GO:0016614+F molecular\_function [name] oxidoreductase activity, acting on CH-OH group of donors [def] "Catalysis of an oxidation-reduction (redox) reaction in which a CH-OH group act as a hydrogen or electron donor and reduces a hydrogen or electron acceptor." [GOC

1055 Pathogen[ P0C214] interacts with 3 human partners:{Q8N335;Q86WU2;P21695}

1056 Pathogen[ P03346] interacts with 1 human partners:{Q86WU2}

1057 Pathogen[ P14079] interacts with 2 human partners:{Q86WU2;P21695}

1058 Pathogen[ P03410] interacts with 2 human partners:{P21695;Q86WU2}

1059 Pathogen[ P0C206] interacts with 1 human partners:{Q86WU2}

1060 [Cluster 194]GO:0004089+F molecular\_function [name] carbonate dehydratase activity [def] "Catalysis of the reaction

1061 Pathogen[ P14079] interacts with 2 human partners:{Q8WTZ4;P00915}

1062 Pathogen[ P03410] interacts with 1 human partners:{Q8WTZ4}

1063 Pathogen[ P0C206] interacts with 2 human partners:{P00915;Q8WTZ4}

1064 [Cluster 195]GO:0047150+F molecular\_function [name] betaine-homocysteine S-methyltransferase activity [def] "Catalysis of the reaction

1065 Pathogen[ P14079] interacts with 1 human partners:{Q9H2M3}

1066 Pathogen[ P03410] interacts with 1 human partners:{Q9H2M3}

1067 Pathogen[ P0C206] interacts with 1 human partners:{Q9H2M3}

1068 [Cluster 196]GO:0035402+F molecular\_function [name] histone kinase activity (H3-T11 specific) [def] "Catalysis of the transfer of a phosphate group to the threonine-11 residue of the N-terminal tail of histone H3." [GOC

1069 Pathogen[ Q2Q067] interacts with 1 human partners:{O14757}

1070 Pathogen[ P0C214] interacts with 1 human partners:{O14757}

1071 Pathogen[ P03346] interacts with 1 human partners:{O14757}

1072 Pathogen[ Q85601] interacts with 1 human partners:{O14757}

1073 Pathogen[ P03383] interacts with 1 human partners:{O14757}

1074 Pathogen[ P03410] interacts with 1 human partners:{O14757}

1075 Pathogen[ P14075] interacts with 1 human partners:{O14757}

1076 Pathogen[ P03363] interacts with 1 human partners:{O14757}

1077 [Cluster 197]GO:0045031+F molecular\_function [name] ATP-activated nucleotide receptor activity [def] "Combining with adenosine and transmitting the signal to a heterotrimeric G-protein complex to initiate a change in cell activity, activated by ATP." [GOC

1078 Pathogen[ Q2Q067] interacts with 1 human partners:{P78352}

1079 Pathogen[ P0C214] interacts with 1 human partners:{P78352}

1080 Pathogen[ P03346] interacts with 1 human partners:{P78352}

1081 Pathogen[ Q85601] interacts with 1 human partners:{P78352}

1082 Pathogen[ P03383] interacts with 1 human partners:{P78352}

1083 Pathogen[ P03410] interacts with 1 human partners:{P78352}

1084 Pathogen[ P14075] interacts with 1 human partners:{P78352}

1085 Pathogen[ P0C206] interacts with 1 human partners:{P78352}

1086 Pathogen[ P03363] interacts with 1 human partners:{P78352}

1087 [Cluster 198]GO:0047961+F molecular\_function [name] glycine N-acyltransferase activity [def] "Catalysis of the reaction

1088 Pathogen[ Q2Q067] interacts with 1 human partners:{Q8WU03}

1089 Pathogen[ P0C214] interacts with 4 human partners:{Q8WU03;Q5SZD4;Q969I3;Q6IB77}

1090 Pathogen[ P03346] interacts with 2 human partners:{Q8WU03;Q5SZD4}

1091 Pathogen[ Q85601] interacts with 4 human partners:{Q5SZD4;Q8WU03;Q6IB77;Q969I3}

1092 Pathogen[ P14079] interacts with 3 human partners:{Q5SZD4;Q969I3;Q6IB77}

1093 Pathogen[ P03383] interacts with 3 human partners:{Q8WU03;Q969I3;Q5SZD4}

1094 Pathogen[ P03410] interacts with 4 human partners:{Q6IB77;Q5SZD4;Q969I3;Q8WU03}

1095 Pathogen[ P14075] interacts with 3 human partners:{Q5SZD4;Q8WU03;Q969I3}

1096 Pathogen[ P0C206] interacts with 4 human partners:{Q969I3;Q6IB77;Q8WU03;Q5SZD4}

1097 [Cluster 199]GO:0004126+F molecular\_function [name] cytidine deaminase activity [def] "Catalysis of the reaction

1098 Pathogen[ Q2Q067] interacts with 2 human partners:{Q9GZX7;Q9HC16}

1099 Pathogen[ P0C214] interacts with 2 human partners:{Q9HC16;Q9GZX7}

1100 Pathogen[ Q85601] interacts with 2 human partners:{Q9HC16;Q9GZX7}

1101 Pathogen[ P14079] interacts with 4 human partners:{P41238;P31941;Q9HC16;Q9GZX7}

1102 Pathogen[ P03410] interacts with 5 human partners:{P41238;Q9HC16;Q9GZX7;P31941;Q6NTF7}

1103 Pathogen[ P0C206] interacts with 5 human partners:{Q9GZX7;P31941;Q6NTF7;Q9HC16;P41238}

1104 [Cluster 200]GO:0008815+F molecular\_function [name] citrate (pro-3S)-lyase activity [def] "Catalysis of the reaction

1105 Pathogen[ P14079] interacts with 1 human partners:{Q8N0X4}

1106 Pathogen[ P03410] interacts with 1 human partners:{Q8N0X4}

1107 [Cluster 201]GO:0034617+F molecular\_function [name] tetrahydrobiopterin binding [def] "Interacting selectively and non-covalently with a tetrahydrobiopterin, 5,6,7,8-tetrahydrobiopterin or a derivative thereof\_ tetrahydrobiopterins are enzyme

cofactors that carry electrons in redox reactions." [CHEBI

1108 Pathogen[ Q2Q067] interacts with 1 human partners:{P29474}

1109 Pathogen[ P0C214] interacts with 1 human partners:{P29474}

1110 Pathogen[ P03346] interacts with 1 human partners:{P29474}

1111 Pathogen[ Q85601] interacts with 1 human partners:{P29474}

1112 Pathogen[ P03383] interacts with 1 human partners:{P29474}

1113 Pathogen[ P03410] interacts with 1 human partners:{P29474}

1114 Pathogen[ P14075] interacts with 1 human partners:{P29474}

1115 Pathogen[ P0C206] interacts with 1 human partners:{P29474}

1116 Pathogen[ P03363] interacts with 1 human partners:{P29474}

1117 [Cluster 202]GO:0042602+F molecular\_function [name] flavin reductase activity [def]  
 "Catalysis of the reaction

1118 Pathogen[ P0C214] interacts with 1 human partners:{P30043}

1119 [Cluster 203]GO:0047631+F molecular\_function [name] ADP-ribose diphosphatase activity  
 [def] "Catalysis of the reaction

1120 Pathogen[ P0C214] interacts with 1 human partners:{Q3LIE5}

1121 Pathogen[ Q85601] interacts with 1 human partners:{Q3LIE5}

1122 Pathogen[ P14079] interacts with 2 human partners:{Q3LIE5;Q9UKK9}

1123 Pathogen[ P03410] interacts with 2 human partners:{Q9UKK9;Q3LIE5}

1124 Pathogen[ P0C206] interacts with 1 human partners:{Q3LIE5}

1125 [Cluster 204]GO:0052381+F molecular\_function [name] tRNA dimethylallyltransferase  
 activity [def] "Catalysis of the reaction

1126 Pathogen[ P0C214] interacts with 1 human partners:{Q9H3H1}

1127 Pathogen[ P14079] interacts with 1 human partners:{Q9H3H1}

1128 Pathogen[ P03410] interacts with 1 human partners:{Q9H3H1}

1129 Pathogen[ P14075] interacts with 1 human partners:{Q9H3H1}

1130 Pathogen[ P0C206] interacts with 1 human partners:{Q9H3H1}

1131 [Cluster 205]GO:0071253+F molecular\_function [name] connexin binding [def]  
 "Interacting selectively and non-covalently with a connexin, any of a group of related  
 proteins that assemble to form gap junctions." [GOC

1132 Pathogen[ P14079] interacts with 1 human partners:{Q6PJW8}

1133 Pathogen[ P03410] interacts with 1 human partners:{Q6PJW8}

1134 Pathogen[ P0C206] interacts with 1 human partners:{Q6PJW8}

1135 [Cluster 206]GO:0034701+F molecular\_function [name] tripeptidase activity [def]  
 "Catalysis of the hydrolysis of a tripeptide." [GOC

1136 Pathogen[ P14079] interacts with 1 human partners:{Q96KP4}

1137 [Cluster 207]GO:0030251+F molecular\_function [name] guanylate cyclase inhibitor  
 activity [def] "Stops, prevents or reduces the activity of guanylate cyclase." [GOC

1138 Pathogen[ P03346] interacts with 1 human partners:{Q86UT5}

1139 Pathogen[ P14079] interacts with 1 human partners:{Q86UT5}

1140 Pathogen[ P03410] interacts with 1 human partners:{Q86UT5}

1141 Pathogen[ P0C206] interacts with 1 human partners:{Q86UT5}

1142 Pathogen[ P03363] interacts with 1 human partners:{Q86UT5}

1143 [Cluster 208]GO:0005098+F molecular\_function [name] Ran GTPase activator activity  
 [def] "Increases the rate of GTP hydrolysis by a GTPase of the Ran family." [GOC

1144 Pathogen[ P0C214] interacts with 1 human partners:{P46060}

1145 Pathogen[ P03346] interacts with 1 human partners:{P46060}

1146 Pathogen[ Q85601] interacts with 1 human partners:{P46060}

1147 Pathogen[ P14079] interacts with 1 human partners:{P46060}

1148 Pathogen[ P03410] interacts with 1 human partners:{P46060}

1149 Pathogen[ P0C206] interacts with 1 human partners:{P46060}

1150 Pathogen[ P03363] interacts with 1 human partners:{P46060}

1151 [Cluster 209]GO:0005149+F molecular\_function [name] interleukin-1 receptor binding  
 [def] "Interacting selectively and non-covalently with the interleukin-1 receptor." [GOC

1152 Pathogen[ Q2Q067] interacts with 1 human partners:{Q15654}

1153 Pathogen[ P0C214] interacts with 1 human partners:{Q15654}

1154 Pathogen[ P03346] interacts with 1 human partners:{Q15654}

1155 Pathogen[ Q85601] interacts with 1 human partners:{Q15654}

1156 Pathogen[ P03383] interacts with 1 human partners:{Q15654}

1157 Pathogen[ P03410] interacts with 1 human partners:{Q15654}

1158 Pathogen[ P14075] interacts with 1 human partners:{Q15654}

1159 Pathogen[ P0C206] interacts with 1 human partners:{Q15654}

1160 Pathogen[ P03363] interacts with 1 human partners:{Q15654}

1161 [Cluster 210]GO:0004115+F molecular\_function [name] 3',5'-cyclic-AMP phosphodiesterase  
 activity [def] "Catalysis of the reaction

1162 Pathogen[ Q2Q067] interacts with 1 human partners:{P27815}

1163 Pathogen[ P0C214] interacts with 2 human partners:{P27815;Q07343}

1164 Pathogen[ P03346] interacts with 1 human partners:{P27815}

1165 Pathogen[ Q85601] interacts with 1 human partners:{P27815}

1166 Pathogen[ P14079] interacts with 1 human partners:{P27815}

1167 Pathogen[ P03410] interacts with 1 human partners:{P27815}

1168 Pathogen[ P0C206] interacts with 1 human partners:{P27815}

1169 Pathogen[ P03363] interacts with 1 human partners:{P27815}

1170 [Cluster 211]GO:0003921+F molecular\_function [name] GMP synthase activity [def]  
 "Catalysis of the reaction

1171 Pathogen[ P14079] interacts with 1 human partners:{P49915}

1172 Pathogen[ P03410] interacts with 1 human partners:{P49915}

1173 [Cluster 212]GO:0008235+F molecular\_function [name] metalloexopeptidase activity [def] "Catalysis of the hydrolysis of a peptide bond not more than three residues from the N- or C-terminus of a polypeptide chain by a mechanism in which water acts as a nucleophile, one or two metal ions hold the water molecule in place, and charged amino acid side chains are ligands for the metal ions." [GOC

1174 Pathogen[ Q2Q067] interacts with 1 human partners:{P28838}

1175 Pathogen[ P0C214] interacts with 1 human partners:{P28838}

1176 Pathogen[ P14079] interacts with 2 human partners:{P28838;Q8NDH3}

1177 Pathogen[ P03383] interacts with 1 human partners:{P28838}

1178 Pathogen[ P03410] interacts with 2 human partners:{Q8NDH3;P28838}

1179 Pathogen[ P14075] interacts with 1 human partners:{P28838}

1180 Pathogen[ P0C206] interacts with 2 human partners:{P28838;Q8NDH3}

1181 [Cluster 213]GO:0004109+F molecular\_function [name] coproporphyrinogen oxidase activity [def] "Catalysis of the reaction

1182 Pathogen[ P0C214] interacts with 2 human partners:{Q9HA92;P36551}

1183 Pathogen[ P14079] interacts with 2 human partners:{Q9HA92;P36551}

1184 Pathogen[ P03410] interacts with 2 human partners:{P36551;Q9HA92}

1185 Pathogen[ P0C206] interacts with 2 human partners:{Q9HA92;P36551}

1186 [Cluster 214]GO:0004367+F molecular\_function [name] glycerol-3-phosphate dehydrogenase [NAD+] activity [def] "Catalysis of the reaction

1187 Pathogen[ P0C214] interacts with 2 human partners:{Q8N335;P21695}

1188 Pathogen[ P14079] interacts with 1 human partners:{P21695}

1189 Pathogen[ P03410] interacts with 1 human partners:{P21695}

1190 [Cluster 215]GO:0019103+F molecular\_function [name] pyrimidine nucleotide binding [def] "Interacting selectively and non-covalently with pyrimidine nucleotide, any compound consisting of a pyrimidine nucleoside esterified with (ortho)phosphate." [GOC

1191 Pathogen[ P0C214] interacts with 1 human partners:{Q8TCD5}

1192 Pathogen[ P14079] interacts with 1 human partners:{Q8TCD5}

1193 Pathogen[ P03410] interacts with 1 human partners:{Q8TCD5}

1194 Pathogen[ P0C206] interacts with 1 human partners:{Q8TCD5}

1195 [Cluster 216]GO:0019135+F molecular\_function [name] deoxyhypusine monooxygenase activity [def] "Catalysis of the reaction

1196 Pathogen[ Q2Q067] interacts with 1 human partners:{Q9BU89}

1197 Pathogen[ P0C214] interacts with 1 human partners:{Q9BU89}

1198 Pathogen[ P03346] interacts with 1 human partners:{Q9BU89}

1199 Pathogen[ Q85601] interacts with 1 human partners:{Q9BU89}

1200 Pathogen[ P14079] interacts with 1 human partners:{Q9BU89}

1201 Pathogen[ P03383] interacts with 1 human partners:{Q9BU89}

1202 Pathogen[ P03410] interacts with 1 human partners:{Q9BU89}

1203 Pathogen[ P14075] interacts with 1 human partners:{Q9BU89}

1204 Pathogen[ P0C206] interacts with 1 human partners:{Q9BU89}

1205 [Cluster 217]GO:0043544+F molecular\_function [name] lipoamide binding [def] "Interacting selectively and non-covalently with lipoamide, the functional form of lipoic acid in which the carboxyl group is attached to protein by an amide linkage to a lysine amino group." [GOC

1206 Pathogen[ P0C214] interacts with 1 human partners:{P09622}

1207 [Cluster 218]GO:0042624+F molecular\_function [name] ATPase activity, uncoupled [def] "Catalysis of the reaction

1208 Pathogen[ P0C214] interacts with 1 human partners:{Q16864}

1209 Pathogen[ P03346] interacts with 1 human partners:{Q16864}

1210 Pathogen[ P14079] interacts with 1 human partners:{Q16864}

1211 Pathogen[ P03410] interacts with 1 human partners:{Q16864}

1212 Pathogen[ P0C206] interacts with 1 human partners:{Q16864}

1213 [Cluster 219]GO:0003934+F molecular\_function [name] GTP cyclohydrolase I activity [def] "Catalysis of the reaction

1214 Pathogen[ Q2Q067] interacts with 1 human partners:{P30793}

1215 Pathogen[ P0C214] interacts with 1 human partners:{P30793}

1216 Pathogen[ Q85601] interacts with 1 human partners:{P30793}

1217 Pathogen[ P14079] interacts with 1 human partners:{P30793}

1218 Pathogen[ P03410] interacts with 1 human partners:{P30793}

1219 Pathogen[ P14075] interacts with 1 human partners:{P30793}

1220 Pathogen[ P0C206] interacts with 1 human partners:{P30793}

1221 [Cluster 220]GO:0004341+F molecular\_function [name] gluconolactonase activity [def] "Catalysis of the reaction

1222 Pathogen[ P14079] interacts with 1 human partners:{Q15493}

1223 Pathogen[ P03410] interacts with 1 human partners:{Q15493}

1224 Pathogen[ P0C206] interacts with 1 human partners:{Q15493}

1225 [Cluster 221]GO:0030338+F molecular\_function [name] CMP-N-acetylneuraminate monooxygenase activity [def] "Catalysis of the reaction

1226 Pathogen[ P14079] interacts with 1 human partners:{Q9Y471}

1227 Pathogen[ P03410] interacts with 1 human partners:{Q9Y471}

1228 [Cluster 222]GO:0004578+F molecular\_function [name] chitobiosyldiphosphodolichol beta-mannosyltransferase activity [def] "Catalysis of the reaction

1229 Pathogen[ P14079] interacts with 1 human partners:{Q9BT22}

1230 Pathogen[ P03410] interacts with 1 human partners:{Q9BT22}

1231 [Cluster 223]GO:0051435+F molecular\_function [name] BH4 domain binding [def] "Interacting selectively and non-covalently with the BH4 domain of a protein of the Bcl-2 family. All anti-apoptotic proteins contain BH1 and BH2 domains\_ some also contain an additional N-terminal BH4 domain, which is almost never seen in pro-apoptotic proteins. Loss of the BH4 domain can diminish or abrogate anti-apoptotic function or even impart outright death-promoting properties to the protein." [InterPro

1232 Pathogen[ P14079] interacts with 1 human partners:{P49023}

1233 [Cluster 224]GO:0005131+F molecular\_function [name] growth hormone receptor binding [def] "Interacting selectively and non-covalently with the growth hormone receptor." [GOC

1234 Pathogen[ Q2Q067] interacts with 1 human partners:{O14508}

1235 Pathogen[ P0C214] interacts with 1 human partners:{O14508}

1236 Pathogen[ P03346] interacts with 1 human partners:{O14508}

1237 Pathogen[ Q85601] interacts with 1 human partners:{O14508}

1238 Pathogen[ P14079] interacts with 1 human partners:{O14508}

1239 Pathogen[ P03410] interacts with 1 human partners:{O14508}

1240 Pathogen[ P0C206] interacts with 1 human partners:{O14508}

1241 Pathogen[ P03363] interacts with 1 human partners:{O14508}

1242 [Cluster 225]GO:0004079+F molecular\_function [name] biotin-[methylmalonyl-CoA-carboxytransferase] ligase activity [def] "Catalysis of the reaction

1243 Pathogen[ P0C214] interacts with 1 human partners:{P50747}

1244 [Cluster 226]GO:0004489+F molecular\_function [name] methylenetetrahydrofolate reductase (NADPH) activity [def] "Catalysis of the reaction

1245 Pathogen[ P0C214] interacts with 1 human partners:{P42898}

1246 Pathogen[ P14079] interacts with 1 human partners:{P42898}

1247 Pathogen[ P03410] interacts with 1 human partners:{P42898}

1248 [Cluster 227]GO:0008665+F molecular\_function [name] 2'-phosphotransferase activity [def] "Catalysis of the transfer of a phosphate group from one compound to the 2' position of another." [GOC

1249 Pathogen[ P0C214] interacts with 1 human partners:{Q9H0P0}

1250 Pathogen[ Q85601] interacts with 1 human partners:{Q9H0P0}

1251 Pathogen[ P14079] interacts with 1 human partners:{Q9H0P0}

1252 Pathogen[ P03410] interacts with 1 human partners:{Q9H0P0}

1253 Pathogen[ P0C206] interacts with 1 human partners:{Q9H0P0}

1254 [Cluster 228]GO:0032452+F molecular\_function [name] histone demethylase activity [def] "Catalysis of the removal of a methyl group from a histone." [GOC

1255 Pathogen[ Q2Q067] interacts with 3 human partners:{Q9UPP1;O75151;Q8NHM5}

1256 Pathogen[ P0C214] interacts with 3 human partners:{O75151;Q9UPP1;Q8NHM5}

1257 Pathogen[ P03346] interacts with 3 human partners:{O75151;Q9UPP1;Q8NHM5}

1258 Pathogen[ Q85601] interacts with 3 human partners:{O75151;Q8NHM5;Q9UPP1}

1259 Pathogen[ P14079] interacts with 3 human partners:{O75151;Q8NHM5;Q9UPP1}

1260 Pathogen[ P03383] interacts with 2 human partners:{O75151;Q9UPP1}

1261 Pathogen[ P03410] interacts with 2 human partners:{Q9UPP1;O75151}

1262 Pathogen[ P14075] interacts with 2 human partners:{Q9UPP1;O75151}

1263 Pathogen[ P0C206] interacts with 3 human partners:{Q9UPP1;O75151;Q8NHM5}

1264 [Cluster 229]GO:0050104+F molecular\_function [name] L-gulonate 3-dehydrogenase activity [def] "Catalysis of the reaction

1265 Pathogen[ P0C214] interacts with 1 human partners:{Q9Y2S2}

1266 [Cluster 230]GO:0008236+F molecular\_function [name] serine-type peptidase activity [def] "Catalysis of the hydrolysis of peptide bonds in a polypeptide chain by a catalytic mechanism that involves a catalytic triad consisting of a serine nucleophile that is activated by a proton relay involving an acidic residue (e.g. aspartate or glutamate) and a basic residue (usually histidine)." [http

1267 Pathogen[ Q2Q067] interacts with 1 human partners:{P48147}

1268 Pathogen[ P0C214] interacts with 2 human partners:{Q16740;P48147}

1269 Pathogen[ P03346] interacts with 3 human partners:{O95405;P10144;P48147}

1270 Pathogen[ Q85601] interacts with 2 human partners:{P10144;P48147}

1271 Pathogen[ P14079] interacts with 8 human partners:{O14773;P48147;O95405;P29144;Q16740;Q4J6C6;Q9H300;P10144}

1272 Pathogen[ P03383] interacts with 1 human partners:{P48147}

1273 Pathogen[ P03410] interacts with 4 human partners:{O95405;P10144;P48147;Q16740}

1274 Pathogen[ P0C206] interacts with 5 human partners:{P10144;P29144;P48147;Q16740;O95405}

1275 Pathogen[ P03363] interacts with 2 human partners:{P10144;O95405}

1276 [Cluster 231]GO:0005046+F molecular\_function [name] KDEL sequence binding [def] "Interacting selectively and non-covalently with a KDEL sequence, the C terminus tetrapeptide sequence Lys-Asp-Glu-Leu found in proteins that are to be retained in the endoplasmic reticulum." [GOC

1277 Pathogen[ P14079] interacts with 2 human partners:{P33947;P24390}

1278 Pathogen[ P03410] interacts with 2 human partners:{P33947;P24390}

1279 Pathogen[ P0C206] interacts with 2 human partners:{P33947;P24390}

1280 [Cluster 232]GO:0033038+F molecular\_function [name] bitter taste receptor activity [def] "Combining with soluble bitter compounds to initiate a change in cell activity. These receptors are responsible for the sense of bitter taste." [GOC

1281 Pathogen[ P14079] interacts with 1 human partners:{Q9NYV7}

1282 [Cluster 233]GO:0008732+F molecular\_function [name] L-allo-threonine aldolase activity

```

[def] "Catalysis of the reaction
1283 Pathogen[ Q2Q067] interacts with 1 human partners:{P34896}
1284 Pathogen[ P0C214] interacts with 2 human partners:{P34897;P34896}
1285 Pathogen[ Q85601] interacts with 1 human partners:{P34896}
1286 Pathogen[ P14079] interacts with 2 human partners:{P34897;P34896}
1287 Pathogen[ P03383] interacts with 1 human partners:{P34896}
1288 Pathogen[ P03410] interacts with 2 human partners:{P34897;P34896}
1289 Pathogen[ P14075] interacts with 1 human partners:{P34896}
1290 Pathogen[ P0C206] interacts with 2 human partners:{P34897;P34896}
1291 [Cluster 234]GO:0047844+F molecular_function [name] deoxycytidine deaminase activity
[def] "Catalysis of the reaction
1292 Pathogen[ Q2Q067] interacts with 1 human partners:{Q9HC16}
1293 Pathogen[ P0C214] interacts with 1 human partners:{Q9HC16}
1294 Pathogen[ Q85601] interacts with 1 human partners:{Q9HC16}
1295 Pathogen[ P14079] interacts with 1 human partners:{Q9HC16}
1296 Pathogen[ P03410] interacts with 1 human partners:{Q9HC16}
1297 Pathogen[ P0C206] interacts with 1 human partners:{Q9HC16}
1298 [Cluster 235]GO:0004679+F molecular_function [name] AMP-activated protein kinase
activity [def] "Catalysis of the reaction
1299 Pathogen[ P14079] interacts with 1 human partners:{Q9Y478}
1300 [Cluster 236]GO:0043125+F molecular_function [name] ErbB-3 class receptor binding
[def] "Interacting selectively and non-covalently with the protein-tyrosine kinase
receptor ErbB-3/HER3." [GOC
1301 Pathogen[ Q2Q067] interacts with 1 human partners:{P27986}
1302 Pathogen[ P0C214] interacts with 1 human partners:{P27986}
1303 Pathogen[ P03346] interacts with 1 human partners:{P27986}
1304 Pathogen[ Q85601] interacts with 1 human partners:{P27986}
1305 Pathogen[ P03383] interacts with 1 human partners:{P27986}
1306 Pathogen[ P03410] interacts with 1 human partners:{P27986}
1307 Pathogen[ P14075] interacts with 1 human partners:{P27986}
1308 Pathogen[ P0C206] interacts with 1 human partners:{P27986}
1309 Pathogen[ P03363] interacts with 1 human partners:{P27986}
1310 [Cluster 237]GO:0016300+F molecular_function [name] tRNA (uracil) methyltransferase
activity [def] "Catalysis of the transfer of a methyl group from a donor to a uracil
residue in a tRNA molecule." [GOC
1311 Pathogen[ P0C214] interacts with 1 human partners:{Q96BT7}
1312 Pathogen[ P03346] interacts with 1 human partners:{Q96BT7}
1313 Pathogen[ P03363] interacts with 1 human partners:{Q96BT7}
1314 [Cluster 238]GO:0046922+F molecular_function [name] peptide-O-fucosyltransferase
activity [def] "Catalysis of the transfer of an alpha-L-fucosyl residue from GDP-
beta-L-fucose to the serine hydroxy group of a protein acceptor." [EC
1315 Pathogen[ P0C214] interacts with 1 human partners:{Q9Y2G5}
1316 Pathogen[ P14079] interacts with 2 human partners:{Q9H488;Q9Y2G5}
1317 Pathogen[ P03410] interacts with 2 human partners:{Q9Y2G5;Q9H488}
1318 Pathogen[ P14075] interacts with 1 human partners:{Q9Y2G5}
1319 Pathogen[ P0C206] interacts with 1 human partners:{Q9Y2G5}
1320 [Cluster 239]GO:0042626+F molecular_function [name] ATPase activity, coupled to
transmembrane movement of substances [def] "Catalysis of the reaction
1321 Pathogen[ P03346] interacts with 1 human partners:{Q9Y5K8}
1322 Pathogen[ P14079] interacts with 1 human partners:{Q9Y5K8}
1323 Pathogen[ P03410] interacts with 1 human partners:{Q9Y5K8}
1324 Pathogen[ P0C206] interacts with 1 human partners:{Q9Y5K8}
1325 Pathogen[ P03363] interacts with 1 human partners:{Q9Y5K8}
1326 [Cluster 240]GO:0004757+F molecular_function [name] sepiapterin reductase activity
[def] "Catalysis of the reaction
1327 Pathogen[ P0C214] interacts with 1 human partners:{P35270}
1328 [Cluster 241]GO:0052847+F molecular_function [name]
inositol-1,5-bisdiphosphate-2,3,4,6-tetrakisphosphate 5-diphosphatase activity [def]
"Catalysis of the reaction
1329 Pathogen[ P0C214] interacts with 1 human partners:{O95989}
1330 Pathogen[ Q85601] interacts with 1 human partners:{O95989}
1331 Pathogen[ P14079] interacts with 4 human partners:{Q96G61;O95989;Q8NFP7;Q9NZJ9}
1332 Pathogen[ P03383] interacts with 1 human partners:{O95989}
1333 Pathogen[ P03410] interacts with 4 human partners:{Q8NFP7;Q9NZJ9;O95989;Q96G61}
1334 Pathogen[ P14075] interacts with 1 human partners:{O95989}
1335 Pathogen[ P0C206] interacts with 2 human partners:{O95989;Q8NFP7}
1336 [Cluster 242]GO:0004610+F molecular_function [name] phosphoacetylglucosamine mutase
activity [def] "Catalysis of the reaction
1337 Pathogen[ Q2Q067] interacts with 1 human partners:{O95394}
1338 Pathogen[ P0C214] interacts with 1 human partners:{O95394}
1339 Pathogen[ P03346] interacts with 1 human partners:{O95394}
1340 Pathogen[ Q85601] interacts with 1 human partners:{O95394}
1341 Pathogen[ P14079] interacts with 1 human partners:{O95394}
1342 Pathogen[ P03383] interacts with 1 human partners:{O95394}
1343 Pathogen[ P03410] interacts with 1 human partners:{O95394}
1344 Pathogen[ P14075] interacts with 1 human partners:{O95394}

```



1345 Pathogen[ P0C206] interacts with 1 human partners:{O95394}

1346 [Cluster 243]GO:0004143+F molecular\_function [name] diacylglycerol kinase activity  
[def] "Catalysis of the reaction

1347 Pathogen[ P03346] interacts with 1 human partners:{Q49MI3}

1348 Pathogen[ P03363] interacts with 1 human partners:{Q49MI3}

1349 [Cluster 244]GO:0030675+F molecular\_function [name] Rac GTPase activator activity  
[def] "Increases the rate of GTP hydrolysis by a GTPase of the Rac family." [GOC

1350 Pathogen[ Q2Q067] interacts with 1 human partners:{Q8N1I0}

1351 Pathogen[ P0C214] interacts with 1 human partners:{Q8N1I0}

1352 Pathogen[ P03346] interacts with 1 human partners:{Q8N1I0}

1353 Pathogen[ Q85601] interacts with 1 human partners:{Q8N1I0}

1354 Pathogen[ P14079] interacts with 1 human partners:{Q8N1I0}

1355 Pathogen[ P03410] interacts with 1 human partners:{Q8N1I0}

1356 Pathogen[ P0C206] interacts with 1 human partners:{Q8N1I0}

1357 Pathogen[ P03363] interacts with 1 human partners:{Q8N1I0}

1358 [Cluster 245]GO:0070679+F molecular\_function [name] inositol 1,4,5 trisphosphate  
binding [def] "Interacting selectively and non-covalently with inositol 1,4,5  
trisphosphate." [GOC

1359 Pathogen[ P03346] interacts with 1 human partners:{Q9Y2J0}

1360 Pathogen[ P03410] interacts with 1 human partners:{Q9Y2J0}

1361 Pathogen[ P0C206] interacts with 1 human partners:{Q9Y2J0}

1362 [Cluster 246]GO:0004748+F molecular\_function [name] ribonucleoside-diphosphate  
reductase activity [def] "Catalysis of the reaction

1363 Pathogen[ Q2Q067] interacts with 2 human partners:{P31350;Q7LG56}

1364 Pathogen[ P0C214] interacts with 3 human partners:{P31350;P23921;Q7LG56}

1365 Pathogen[ P03346] interacts with 2 human partners:{P31350;Q7LG56}

1366 Pathogen[ Q85601] interacts with 2 human partners:{P31350;Q7LG56}

1367 Pathogen[ P14079] interacts with 2 human partners:{P31350;Q7LG56}

1368 Pathogen[ P03383] interacts with 1 human partners:{P31350}

1369 Pathogen[ P03410] interacts with 3 human partners:{P31350;P23921;Q7LG56}

1370 Pathogen[ P14075] interacts with 1 human partners:{P31350}

1371 Pathogen[ P0C206] interacts with 2 human partners:{Q7LG56;P31350}

1372 [Cluster 247]GO:0017123+F molecular\_function [name] Ral GTPase activator activity  
[def] "Increases the rate of GTP hydrolysis by a GTPase of the Ral family." [GOC

1373 Pathogen[ P0C214] interacts with 1 human partners:{Q6GYQ0}

1374 Pathogen[ P03346] interacts with 1 human partners:{Q6GYQ0}

1375 Pathogen[ P14079] interacts with 1 human partners:{Q86X10}

1376 [Cluster 248]GO:0003980+F molecular\_function [name] UDP-glucose [def] "Catalysis of  
the addition of UDP-glucose on to asparagine-linked (N-linked) oligosaccharides of the  
form Man7-9GlcNAc2 on incorrectly folded glycoproteins." [PMID

1377 Pathogen[ P14079] interacts with 2 human partners:{Q9NYU1;Q9NYU2}

1378 Pathogen[ P03410] interacts with 2 human partners:{Q9NYU1;Q9NYU2}

1379 [Cluster 249]GO:0046811+F molecular\_function [name] histone deacetylase inhibitor  
activity [def] "Stops, prevents or reduces the activity of histone deacetylase, which  
catalyzes of the removal of acetyl groups from histones, proteins complexed to DNA in  
chromatin and chromosomes." [GOC

1380 Pathogen[ Q2Q067] interacts with 1 human partners:{P12755}

1381 Pathogen[ P0C214] interacts with 1 human partners:{P12755}

1382 Pathogen[ Q85601] interacts with 1 human partners:{P12755}

1383 Pathogen[ P14079] interacts with 1 human partners:{P12755}

1384 Pathogen[ P03410] interacts with 1 human partners:{P12755}

1385 Pathogen[ P0C206] interacts with 1 human partners:{P12755}

1386 [Cluster 250]GO:0070699+F molecular\_function [name] type II activin receptor binding  
[def] "Interacting selectively and non-covalently with a type II activin receptor." [GOC

1387 Pathogen[ Q2Q067] interacts with 1 human partners:{Q86UL8}

1388 Pathogen[ P03346] interacts with 1 human partners:{Q86UL8}

1389 Pathogen[ Q85601] interacts with 1 human partners:{Q86UL8}

1390 Pathogen[ P14079] interacts with 1 human partners:{Q86UL8}

1391 Pathogen[ P03410] interacts with 1 human partners:{Q86UL8}

1392 Pathogen[ P0C206] interacts with 1 human partners:{Q86UL8}

1393 Pathogen[ P03363] interacts with 1 human partners:{Q86UL8}

1394 [Cluster 251]GO:0003922+F molecular\_function [name] GMP synthase  
(glutamine-hydrolyzing) activity [def] "Catalysis of the reaction

1395 Pathogen[ P14079] interacts with 1 human partners:{P49915}

1396 Pathogen[ P03410] interacts with 1 human partners:{P49915}

1397 [Cluster 252]GO:0047179+F molecular\_function [name] platelet-activating factor  
acetyltransferase activity [def] "Catalysis of the reaction

1398 Pathogen[ Q2Q067] interacts with 1 human partners:{Q15102}

1399 Pathogen[ P0C214] interacts with 1 human partners:{Q15102}

1400 Pathogen[ P03346] interacts with 1 human partners:{Q15102}

1401 Pathogen[ Q85601] interacts with 1 human partners:{Q15102}

1402 Pathogen[ P14079] interacts with 1 human partners:{Q15102}

1403 Pathogen[ P03410] interacts with 1 human partners:{Q15102}

1404 Pathogen[ P14075] interacts with 1 human partners:{Q15102}

1405 Pathogen[ P0C206] interacts with 1 human partners:{Q15102}

1406 Pathogen[ P03363] interacts with 1 human partners:{Q15102}

1407 [Cluster 253]GO:0060001+F molecular\_function [name] minus-end directed microfilament motor activity [def] "Catalysis of movement along a microfilament towards the minus end, coupled to the hydrolysis of a nucleoside triphosphate (usually ATP). The minus end of an actin filament is the end that does not preferentially add actin monomers." [GOC

1408 Pathogen[ P0C214] interacts with 1 human partners:{Q9UM54}

1409 Pathogen[ Q85601] interacts with 1 human partners:{Q9UM54}

1410 Pathogen[ P14079] interacts with 1 human partners:{Q9UM54}

1411 Pathogen[ P03410] interacts with 1 human partners:{Q9UM54}

1412 Pathogen[ P0C206] interacts with 1 human partners:{Q9UM54}

1413 [Cluster 254]GO:0003860+F molecular\_function [name] 3-hydroxyisobutyryl-CoA hydrolase activity [def] "Catalysis of the reaction

1414 Pathogen[ P0C214] interacts with 1 human partners:{Q6NVY1}

1415 Pathogen[ P03410] interacts with 1 human partners:{Q6NVY1}

1416 [Cluster 255]GO:0004616+F molecular\_function [name] phosphogluconate dehydrogenase (decarboxylating) activity [def] "Catalysis of the reaction

1417 Pathogen[ P0C214] interacts with 1 human partners:{P52209}

1418 Pathogen[ P14079] interacts with 1 human partners:{P52209}

1419 Pathogen[ P03410] interacts with 1 human partners:{P52209}

1420 [Cluster 256]GO:0004370+F molecular\_function [name] glycerol kinase activity [def] "Catalysis of the reaction

1421 Pathogen[ Q2Q067] interacts with 1 human partners:{P32189}

1422 Pathogen[ P0C214] interacts with 3 human partners:{Q14410;Q14409;P32189}

1423 Pathogen[ P03346] interacts with 1 human partners:{P32189}

1424 Pathogen[ Q85601] interacts with 1 human partners:{P32189}

1425 Pathogen[ P14079] interacts with 3 human partners:{Q14410;P32189;Q14409}

1426 Pathogen[ P03383] interacts with 1 human partners:{P32189}

1427 Pathogen[ P03410] interacts with 3 human partners:{Q14410;Q14409;P32189}

1428 Pathogen[ P14075] interacts with 1 human partners:{P32189}

1429 Pathogen[ P0C206] interacts with 1 human partners:{P32189}

1430 [Cluster 257]GO:0071862+F molecular\_function [name] protein phosphatase type 1 activator activity [def] "Increases the activity of the enzyme protein phosphatase type 1." [GOC

1431 Pathogen[ P14079] interacts with 1 human partners:{Q8IZ21}

1432 Pathogen[ P03410] interacts with 1 human partners:{Q8IZ21}

1433 [Cluster 258]GO:0005324+F molecular\_function [name] long-chain fatty acid transporter activity [def] "Enables the directed movement of long-chain fatty acids into, out of or within a cell, or between cells. Long-chain fatty acids have a chain length of greater than 12 carbons." [ISBN

1434 Pathogen[ Q2Q067] interacts with 1 human partners:{P05413}

1435 Pathogen[ P0C214] interacts with 1 human partners:{P05413}

1436 Pathogen[ P03346] interacts with 2 human partners:{P05413;P07148}

1437 Pathogen[ Q85601] interacts with 1 human partners:{P05413}

1438 Pathogen[ P14079] interacts with 1 human partners:{P05413}

1439 Pathogen[ P03410] interacts with 1 human partners:{P05413}

1440 Pathogen[ P0C206] interacts with 1 human partners:{P05413}

1441 Pathogen[ P03363] interacts with 1 human partners:{P05413}

1442 [Cluster 259]GO:0003756+F molecular\_function [name] protein disulfide isomerase activity [def] "Catalysis of the rearrangement of both intrachain and interchain disulfide bonds in proteins." [EC

1443 Pathogen[ P0C214] interacts with 1 human partners:{P13667}

1444 Pathogen[ P03346] interacts with 1 human partners:{P13667}

1445 Pathogen[ P14079] interacts with 1 human partners:{P30040}

1446 Pathogen[ P03410] interacts with 2 human partners:{P13667;P30040}

1447 Pathogen[ P0C206] interacts with 1 human partners:{P13667}

1448 [Cluster 260]GO:0019838+F molecular\_function [name] growth factor binding [def] "Interacting selectively and non-covalently with any growth factor, proteins or polypeptides that stimulate a cell or organism to grow or proliferate." [GOC

1449 Pathogen[ Q2Q067] interacts with 1 human partners:{O14786}

1450 Pathogen[ P0C214] interacts with 1 human partners:{O14786}

1451 Pathogen[ P03346] interacts with 2 human partners:{Q969F2;O14786}

1452 Pathogen[ Q85601] interacts with 1 human partners:{O14786}

1453 Pathogen[ P14079] interacts with 1 human partners:{Q8TAT2}

1454 Pathogen[ P03410] interacts with 3 human partners:{O14786;Q969F2;Q8TAT2}

1455 Pathogen[ P0C206] interacts with 2 human partners:{Q969F2;O14786}

1456 Pathogen[ P03363] interacts with 1 human partners:{O14786}

1457 [Cluster 261]GO:0004862+F molecular\_function [name] cAMP-dependent protein kinase inhibitor activity [def] "Stops, prevents or reduces the activity of a cAMP-dependent protein kinase." [GOC

1458 Pathogen[ P03346] interacts with 2 human partners:{P61925;Q9C010}

1459 Pathogen[ P14079] interacts with 2 human partners:{Q9C010;P61925}

1460 Pathogen[ P03410] interacts with 2 human partners:{P61925;Q9C010}

1461 Pathogen[ P14075] interacts with 1 human partners:{Q9C010}

1462 Pathogen[ P0C206] interacts with 2 human partners:{Q9C010;P61925}

1463 Pathogen[ P03363] interacts with 2 human partners:{Q9C010;P61925}

1464 [Cluster 262]GO:0052633+F molecular\_function [name] isocitrate hydro-lyase (cis-aconitate-forming) activity [def] "Catalysis of the reaction

1465 Pathogen[ Q2Q067] interacts with 1 human partners:{P21399}

1466 Pathogen[ P0C214] interacts with 2 human partners:{Q99798;P21399}

1467 Pathogen[ P03346] interacts with 1 human partners:{P21399}

1468 Pathogen[ Q85601] interacts with 1 human partners:{P21399}

1469 Pathogen[ P14079] interacts with 1 human partners:{P21399}

1470 Pathogen[ P03410] interacts with 1 human partners:{P21399}

1471 Pathogen[ P0C206] interacts with 2 human partners:{Q99798;P21399}

1472 [Cluster 263]GO:0005089+F molecular\_function [name] Rho guanyl-nucleotide exchange factor activity [def] "Stimulates the exchange of guanyl nucleotides associated with a GTPase of the Rho family. Under normal cellular physiological conditions, the concentration of GTP is higher than that of GDP, favoring the replacement of GDP by GTP in association with the GTPase." [GOC

1473 Pathogen[ P03346] interacts with 5 human partners:{Q12802;Q6XZF7;Q9BZ29;Q5VV41;Q9H8V3}

1474 Pathogen[ P14079] interacts with 5 human partners:{Q6XZF7;P10911;Q12802;Q9H8V3;Q5VV41}

1475 Pathogen[ P03410] interacts with 3 human partners:{Q5VV41;Q6XZF7;Q9H8V3}

1476 Pathogen[ P0C206] interacts with 2 human partners:{Q9H8V3;Q6XZF7}

1477 Pathogen[ P03363] interacts with 3 human partners:{Q5VV41;P10911;Q6XZF7}

1478 [Cluster 264]GO:0004128+F molecular\_function [name] cytochrome-b5 reductase activity [def] "Catalysis of the reaction

1479 Pathogen[ Q2Q067] interacts with 1 human partners:{P15559}

1480 Pathogen[ P0C214] interacts with 1 human partners:{P15559}

1481 Pathogen[ P03346] interacts with 1 human partners:{P15559}

1482 Pathogen[ P14079] interacts with 1 human partners:{P15559}

1483 Pathogen[ P03410] interacts with 1 human partners:{P15559}

1484 Pathogen[ P14075] interacts with 1 human partners:{P15559}

1485 Pathogen[ P0C206] interacts with 1 human partners:{P15559}

1486 [Cluster 265]GO:0004705+F molecular\_function [name] JUN kinase activity [def] "Catalysis of the reaction

1487 Pathogen[ Q2Q067] interacts with 1 human partners:{P45984}

1488 Pathogen[ P0C214] interacts with 1 human partners:{P45984}

1489 Pathogen[ P03346] interacts with 1 human partners:{P45984}

1490 Pathogen[ Q85601] interacts with 1 human partners:{P45984}

1491 Pathogen[ P14079] interacts with 3 human partners:{P53779;P45984;P45983}

1492 Pathogen[ P03383] interacts with 1 human partners:{P45984}

1493 Pathogen[ P03410] interacts with 2 human partners:{P45984;P53779}

1494 Pathogen[ P14075] interacts with 1 human partners:{P45984}

1495 Pathogen[ P0C206] interacts with 1 human partners:{P45984}

1496 [Cluster 266]GO:0019826+F molecular\_function [name] oxygen sensor activity [def] "Interacting selectively and non-covalently with and responding, e.g. by conformational change, to changes in the cellular level of oxygen (O<sub>2</sub>)." [GOC

1497 Pathogen[ Q2Q067] interacts with 2 human partners:{Q9NWT6;Q96KS0}

1498 Pathogen[ P0C214] interacts with 2 human partners:{Q96KS0;Q9NWT6}

1499 Pathogen[ P03346] interacts with 2 human partners:{Q96KS0;Q9NWT6}

1500 Pathogen[ Q85601] interacts with 2 human partners:{Q9NWT6;Q96KS0}

1501 Pathogen[ P14079] interacts with 2 human partners:{Q9NWT6;Q96KS0}

1502 Pathogen[ P03383] interacts with 2 human partners:{Q9NWT6;Q96KS0}

1503 Pathogen[ P03410] interacts with 2 human partners:{Q9NWT6;Q96KS0}

1504 Pathogen[ P14075] interacts with 2 human partners:{Q96KS0;Q9NWT6}

1505 Pathogen[ P0C206] interacts with 2 human partners:{Q96KS0;Q9NWT6}

1506 [Cluster 267]GO:0005499+F molecular\_function [name] vitamin D binding [def] "Interacting selectively and non-covalently with vitamin D, any of a group of related, fat-soluble compounds that are derived from delta-5,7 steroids and play a central role in calcium metabolism. Specific forms of vitamin D include calciferol (ergocalciferol\_ vitamin D<sub>2</sub>) and cholecalciferol (calciol\_ vitamin D<sub>3</sub>)." [CHEBI

1507 Pathogen[ P0C214] interacts with 1 human partners:{P05937}

1508 Pathogen[ P03346] interacts with 2 human partners:{P05937;P78411}

1509 Pathogen[ P14079] interacts with 1 human partners:{P05937}

1510 Pathogen[ P03410] interacts with 1 human partners:{P05937}

1511 Pathogen[ P0C206] interacts with 1 human partners:{P78411}

1512 Pathogen[ P03363] interacts with 2 human partners:{P78411;P05937}

1513 [Cluster 268]GO:0004131+F molecular\_function [name] cytosine deaminase activity [def] "Catalysis of the reaction

1514 Pathogen[ P03346] interacts with 1 human partners:{Q9NQ94}

1515 Pathogen[ P14079] interacts with 1 human partners:{Q9NQ94}

1516 Pathogen[ P03363] interacts with 1 human partners:{Q9NQ94}

1517 [Cluster 269]GO:0016005+F molecular\_function [name] phospholipase A2 activator activity [def] "Increases the activity of the enzyme phospholipase A2." [GOC

1518 Pathogen[ P03346] interacts with 1 human partners:{Q9Y263}

1519 Pathogen[ P14079] interacts with 1 human partners:{Q9Y263}

1520 Pathogen[ P03410] interacts with 1 human partners:{Q9Y263}

1521 Pathogen[ P03363] interacts with 1 human partners:{Q9Y263}

1522 [Cluster 270]GO:0004252+F molecular\_function [name] serine-type endopeptidase activity [def] "Catalysis of the hydrolysis of internal, alpha-peptide bonds in a polypeptide chain by a catalytic mechanism that involves a catalytic triad consisting of a serine

nucleophile that is activated by a proton relay involving an acidic residue (e.g. aspartate or glutamate) and a basic residue (usually histidine)." [GOC

1523 Pathogen[ Q2Q067] interacts with 2 human partners:{O14656;P48147}

1524 Pathogen[ P0C214] interacts with 3 human partners:{Q16740;O14656;P48147}

1525 Pathogen[ P03346] interacts with 3 human partners:{O14656;P10144;P48147}

1526 Pathogen[ Q85601] interacts with 3 human partners:{P10144;P48147;O14656}

1527 Pathogen[ P14079] interacts with 9 human partners:{O14773;P48147;P29144;Q16740;Q4J6C6;O14656;Q9Y3P4;Q9H300;P10144}

1528 Pathogen[ P03383] interacts with 1 human partners:{P48147}

1529 Pathogen[ P03410] interacts with 5 human partners:{P10144;O14656;P48147;Q9Y3P4;Q16740}

1530 Pathogen[ P0C206] interacts with 5 human partners:{P10144;P29144;P48147;O14656;Q16740}

1531 Pathogen[ P03363] interacts with 1 human partners:{P10144}

1532 [Cluster 271]GO:0019948+F molecular\_function [name] SUMO activating enzyme activity [def] "Catalysis of the activation of the proteolytically processed small ubiquitin-related modifier SUMO, through the formation of an ATP-dependent high-energy thiolester bond." [GOC

1533 Pathogen[ P03363] interacts with 1 human partners:{Q9UBE0}

1534 [Cluster 272]GO:0015067+F molecular\_function [name] amidinotransferase activity [def] "Catalysis of the reversible transfer of an amidino group to an acceptor." [GOC

1535 Pathogen[ P0C214] interacts with 1 human partners:{P50440}

1536 Pathogen[ P14079] interacts with 1 human partners:{P50440}

1537 Pathogen[ P03410] interacts with 1 human partners:{P50440}

1538 Pathogen[ P14075] interacts with 1 human partners:{P50440}

1539 Pathogen[ P0C206] interacts with 1 human partners:{P50440}

1540 [Cluster 273]GO:0046875+F molecular\_function [name] ephrin receptor binding [def] "Interacting selectively and non-covalently with an ephrin receptor." [GOC

1541 Pathogen[ Q2Q067] interacts with 2 human partners:{P46108;P22681}

1542 Pathogen[ P0C214] interacts with 3 human partners:{P22681;P62993;P46108}

1543 Pathogen[ P03346] interacts with 4 human partners:{P62993;Q92625;P46108;P22681}

1544 Pathogen[ Q85601] interacts with 3 human partners:{P22681;P62993;P46108}

1545 Pathogen[ P14079] interacts with 2 human partners:{P62993;P46108}

1546 Pathogen[ P03410] interacts with 2 human partners:{P46108;P62993}

1547 Pathogen[ P0C206] interacts with 4 human partners:{P62993;P22681;Q92625;P46108}

1548 Pathogen[ P03363] interacts with 3 human partners:{P22681;P46108;Q92625}

1549 [Cluster 274]GO:0008113+F molecular\_function [name] peptide-methionine-(S)-S-oxide reductase activity [def] "Catalysis of the reactions

1550 Pathogen[ P0C214] interacts with 1 human partners:{Q9UJ68}

1551 Pathogen[ P14079] interacts with 1 human partners:{Q9UJ68}

1552 Pathogen[ P03410] interacts with 1 human partners:{Q9UJ68}

1553 Pathogen[ P0C206] interacts with 1 human partners:{Q9UJ68}

1554 [Cluster 275]GO:0016780+F molecular\_function [name] phosphotransferase activity, for other substituted phosphate groups [def] "Catalysis of the transfer of a substituted phosphate group, other than diphosphate or nucleotidyl residues, from one compound (donor) to a another (acceptor)." [GOC

1555 Pathogen[ P14079] interacts with 1 human partners:{Q32NB8}

1556 [Cluster 276]GO:0004530+F molecular\_function [name] deoxyribonuclease I activity [def] "Catalysis of the endonucleolytic cleavage of DNA to 5'-phosphodinucleotide and 5'-phosphooligonucleotide end products." [EC

1557 Pathogen[ P03346] interacts with 1 human partners:{P24855}

1558 Pathogen[ P14079] interacts with 1 human partners:{P24855}

1559 Pathogen[ P03410] interacts with 1 human partners:{P24855}

1560 Pathogen[ P0C206] interacts with 1 human partners:{P24855}

1561 Pathogen[ P03363] interacts with 1 human partners:{P24855}

1562 [Cluster 277]GO:0004122+F molecular\_function [name] cystathionine beta-synthase activity [def] "Catalysis of the reaction

1563 Pathogen[ P0C214] interacts with 1 human partners:{P35520}

1564 [Cluster 278]GO:0004576+F molecular\_function [name] oligosaccharyl transferase activity [def] "Catalysis of the transfer of a oligosaccharyl group to an acceptor molecule, typically another carbohydrate or a lipid." [GOC

1565 Pathogen[ P14079] interacts with 3 human partners:{P39656;P61803;P46977}

1566 Pathogen[ P03410] interacts with 2 human partners:{P39656;P61803}

1567 Pathogen[ P0C206] interacts with 1 human partners:{P39656}

1568 [Cluster 279]GO:0004298+F molecular\_function [name] threonine-type endopeptidase activity [def] "Catalysis of the hydrolysis of internal peptide bonds in a polypeptide chain by a mechanism in which the hydroxyl group of a threonine residue at the active center acts as a nucleophile." [GOC

1569 Pathogen[ Q2Q067] interacts with 19 human partners:{P40306;P28072;A5LHX3;P25787;P28065;O14818;P60900;P28062;P25788;P25786;P28074;P25789;P20618;P28070;P28066;Q99436;Q8TAA3;P49721;P49720}

1570 Pathogen[ P0C214] interacts with 19 human partners:{P25789;P28062;A5LHX3;P28065;O14818;P40306;P28066;P49720;P28074;P25788;P25786;P28072;Q8TAA3;Q99436;P25787;P60900;P28070;P20618;P49721}

1571 Pathogen[ P03346] interacts with 19 human partners:{P25787;P28070;P25789;P28072;P25788;P28074;P49721;O14818;Q99436;A5LHX3;P2806

2;P20618;P49720;P28065;P60900;P25786;P28066;Q8TAA3;P40306}  
1572 Pathogen[ Q85601] interacts with 19 human  
partners:{P28066;P60900;P25787;P25788;P25789;P20618;P40306;P49720;P28062;P49721;P25786;P28072;P28065;Q99436;P28070;Q8TAA3;P28074;A5LHX3;O14818}

1573 Pathogen[ P14079] interacts with 17 human  
partners:{P28065;Q99436;P40306;P28074;P49720;P25787;A5LHX3;P20618;Q8TAA3;P28062;P60900;O14818;P49721;Q9H6P5;P25788;P28066;P28072}

1574 Pathogen[ P03383] interacts with 18 human  
partners:{P25789;P60900;P40306;P49721;P20618;P25786;P28072;P28065;P28066;P28074;P49720;Q8TAA3;P28062;O14818;Q99436;P28070;P25787;P25788}

1575 Pathogen[ P03410] interacts with 20 human  
partners:{P28070;P25786;P60900;Q8TAA3;P49721;A5LHX3;Q99436;P40306;P25787;P28062;O14818;P25789;P49720;Q9H6P5;P28072;P25788;P28066;P28065;P20618;P28074}

1576 Pathogen[ P14075] interacts with 18 human  
partners:{P25788;P28066;Q8TAA3;P60900;P49720;P28070;P49721;P28062;P28074;P28065;P25786;O14818;P28072;P25787;P20618;P40306;Q99436;P25789}

1577 Pathogen[ P0C206] interacts with 19 human  
partners:{Q99436;P28062;P40306;P28065;P25786;P25788;P25787;P49720;P60900;A5LHX3;P25789;P20618;Q8TAA3;P28070;P28066;O14818;P28072;P28074;P49721}

1578 [Cluster 280]GO:0004559+F molecular\_function [name] alpha-mannosidase activity [def] "Catalysis of the hydrolysis of terminal, non-reducing alpha-D-mannose residues in alpha-D-mannosides." [EC  
1579 Pathogen[ P14079] interacts with 2 human partners:{Q5SRI9;Q9NTJ4}  
1580 Pathogen[ P03410] interacts with 2 human partners:{Q5SRI9;Q9NTJ4}  
1581 Pathogen[ P14075] interacts with 1 human partners:{Q5SRI9}  
1582 Pathogen[ P0C206] interacts with 1 human partners:{Q5SRI9}

1583 [Cluster 281]GO:0010485+F molecular\_function [name] H4 histone acetyltransferase activity [def] "Catalysis of the reaction  
1584 Pathogen[ P03346] interacts with 1 human partners:{P51587}  
1585 Pathogen[ Q85601] interacts with 1 human partners:{P51587}  
1586 Pathogen[ P14079] interacts with 1 human partners:{P51587}  
1587 Pathogen[ P03410] interacts with 1 human partners:{P51587}  
1588 Pathogen[ P0C206] interacts with 1 human partners:{P51587}

1589 [Cluster 282]GO:0050080+F molecular\_function [name] malonyl-CoA decarboxylase activity [def] "Catalysis of the reaction  
1590 Pathogen[ P14079] interacts with 1 human partners:{O95822}  
1591 Pathogen[ P03410] interacts with 1 human partners:{O95822}

1592 [Cluster 283]GO:0005216+F molecular\_function [name] ion channel activity [def] "Catalysis of facilitated diffusion of an ion (by an energy-independent process) by passage through a transmembrane aqueous pore or channel without evidence for a carrier-mediated mechanism." [GOC  
1593 Pathogen[ P03346] interacts with 2 human partners:{O00299;O95833}  
1594 Pathogen[ P14079] interacts with 6 human  
partners:{P0CG08;A1A5B4;Q9NQ90;Q9BYT9;B7ZAQ6;Q9H6F2}

1595 Pathogen[ P03410] interacts with 10 human  
partners:{Q9NQ90;B7ZAQ6;P59646;Q9H6F2;P0CG08;Q15049;Q9BYT9;Q96D96;Q8IU99;A1A5B4}

1596 Pathogen[ P0C206] interacts with 3 human partners:{Q9NQ90;P0CG08;B7ZAQ6}  
1597 Pathogen[ P03363] interacts with 1 human partners:{O95833}

1598 [Cluster 284]GO:0005097+F molecular\_function [name] Rab GTPase activator activity [def] "Increases the rate of GTP hydrolysis by a GTPase of the Rab family." [GOC  
1599 Pathogen[ P03346] interacts with 1 human partners:{O60447}  
1600 Pathogen[ Q85601] interacts with 1 human partners:{O60447}  
1601 Pathogen[ P14079] interacts with 1 human partners:{Q15042}  
1602 Pathogen[ P03410] interacts with 2 human partners:{O60447;Q15042}  
1603 Pathogen[ P0C206] interacts with 1 human partners:{O60447}  
1604 Pathogen[ P03363] interacts with 1 human partners:{O60447}

1605 [Cluster 285]GO:0046539+F molecular\_function [name] histamine N-methyltransferase activity [def] "Catalysis of the reaction  
1606 Pathogen[ P03346] interacts with 1 human partners:{P50135}  
1607 Pathogen[ P14079] interacts with 1 human partners:{P50135}  
1608 Pathogen[ P03410] interacts with 1 human partners:{P50135}  
1609 Pathogen[ P0C206] interacts with 1 human partners:{P50135}  
1610 Pathogen[ P03363] interacts with 1 human partners:{P50135}

1611 [Cluster 286]GO:0042806+F molecular\_function [name] fucose binding [def] "Interacting selectively and non-covalently with fucose, the pentose 6-deoxygalactose." [CHEBI  
1612 Pathogen[ P14079] interacts with 1 human partners:{A2VDF0}  
1613 Pathogen[ P03410] interacts with 1 human partners:{A2VDF0}  
1614 Pathogen[ P0C206] interacts with 1 human partners:{A2VDF0}

1615 [Cluster 287]GO:0005099+F molecular\_function [name] Ras GTPase activator activity [def] "Increases the rate of GTP hydrolysis by a GTPase of the Ras superfamily." [GOC  
1616 Pathogen[ P03410] interacts with 1 human partners:{Q15283}

1617 [Cluster 288]GO:0004311+F molecular\_function [name] farnesyltransferase activity [def] "Catalysis of the reaction  
1618 Pathogen[ Q2Q067] interacts with 1 human partners:{P49356}  
1619 Pathogen[ P0C214] interacts with 1 human partners:{P49356}

1620 Pathogen[ P03346] interacts with 1 human partners:{P49356}

1621 Pathogen[ Q85601] interacts with 1 human partners:{P49356}

1622 Pathogen[ P14079] interacts with 2 human partners:{Q12887;P49356}

1623 Pathogen[ P03410] interacts with 2 human partners:{P49356;Q12887}

1624 Pathogen[ P0C206] interacts with 1 human partners:{P49356}

1625 [Cluster 289]GO:0019912+F molecular\_function [name] cyclin-dependent protein kinase activating kinase activity [def] "Catalysis of the reaction

1626 Pathogen[ Q2Q067] interacts with 1 human partners:{P38936}

1627 Pathogen[ P0C214] interacts with 1 human partners:{P38936}

1628 Pathogen[ P03346] interacts with 1 human partners:{P38936}

1629 Pathogen[ Q85601] interacts with 1 human partners:{P38936}

1630 Pathogen[ P14079] interacts with 1 human partners:{P38936}

1631 Pathogen[ P03410] interacts with 1 human partners:{P38936}

1632 Pathogen[ P0C206] interacts with 1 human partners:{P38936}

1633 [Cluster 290]GO:0052842+F molecular\_function [name] inositol diphosphate pentakisphosphate diphosphatase activity [def] "Catalysis of the reaction

1634 Pathogen[ P0C214] interacts with 1 human partners:{O95989}

1635 Pathogen[ Q85601] interacts with 1 human partners:{O95989}

1636 Pathogen[ P14079] interacts with 4 human partners:{Q96G61;O95989;Q8NFP7;Q9NZJ9}

1637 Pathogen[ P03383] interacts with 1 human partners:{O95989}

1638 Pathogen[ P03410] interacts with 4 human partners:{Q8NFP7;Q9NZJ9;O95989;Q96G61}

1639 Pathogen[ P14075] interacts with 1 human partners:{O95989}

1640 Pathogen[ P0C206] interacts with 2 human partners:{O95989;Q8NFP7}

1641 [Cluster 291]GO:0030955+F molecular\_function [name] potassium ion binding [def] "Interacting selectively and non-covalently with potassium (K+) ions." [GOC

1642 Pathogen[ Q2Q067] interacts with 1 human partners:{P56524}

1643 Pathogen[ P0C214] interacts with 2 human partners:{P56524;P14618}

1644 Pathogen[ P03346] interacts with 1 human partners:{P56524}

1645 Pathogen[ Q85601] interacts with 2 human partners:{P14618;P56524}

1646 Pathogen[ P14079] interacts with 1 human partners:{P56524}

1647 Pathogen[ P03383] interacts with 1 human partners:{P56524}

1648 Pathogen[ P03410] interacts with 1 human partners:{P56524}

1649 Pathogen[ P14075] interacts with 1 human partners:{P56524}

1650 Pathogen[ P0C206] interacts with 2 human partners:{P56524;P14618}

1651 [Cluster 292]GO:0047757+F molecular\_function [name] chondroitin-glucuronate 5-epimerase activity [def] "Catalysis of the reaction

1652 Pathogen[ P14079] interacts with 1 human partners:{Q9UL01}

1653 Pathogen[ P03410] interacts with 1 human partners:{Q9UL01}

1654 Pathogen[ P0C206] interacts with 1 human partners:{Q9UL01}

1655 [Cluster 293]GO:0047316+F molecular\_function [name] glutamine-phenylpyruvate transaminase activity [def] "Catalysis of the reaction

1656 Pathogen[ P0C214] interacts with 1 human partners:{Q16773}

1657 [Cluster 294]GO:0043874+F molecular\_function [name] acireductone synthase activity [def] "Catalysis of the reactions

1658 Pathogen[ P0C214] interacts with 1 human partners:{Q9UHY7}

1659 Pathogen[ P03346] interacts with 1 human partners:{Q9UHY7}

1660 Pathogen[ Q85601] interacts with 1 human partners:{Q9UHY7}

1661 Pathogen[ P0C206] interacts with 1 human partners:{Q9UHY7}

1662 [Cluster 295]GO:0003951+F molecular\_function [name] NAD+ kinase activity [def] "Catalysis of the reaction

1663 Pathogen[ P14079] interacts with 2 human partners:{O95544;Q4G0N4}

1664 Pathogen[ P03410] interacts with 1 human partners:{Q4G0N4}

1665 [Cluster 296]GO:0017110+F molecular\_function [name] nucleoside-diphosphatase activity [def] "Catalysis of the reaction

1666 Pathogen[ P14079] interacts with 1 human partners:{Q9UUKK9}

1667 Pathogen[ P03410] interacts with 1 human partners:{Q9UUKK9}

1668 [Cluster 297]GO:0004749+F molecular\_function [name] ribose phosphate diphosphokinase activity [def] "Catalysis of the reaction

1669 Pathogen[ P14079] interacts with 2 human partners:{O60256;Q14558}

1670 Pathogen[ P03410] interacts with 2 human partners:{Q14558;O60256}

1671 [Cluster 298]GO:0004662+F molecular\_function [name] CAAX-protein geranylgeranyltransferase activity [def] "Catalysis of the reaction

1672 Pathogen[ Q2Q067] interacts with 1 human partners:{P49354}

1673 Pathogen[ P0C214] interacts with 1 human partners:{P49354}

1674 Pathogen[ P03346] interacts with 1 human partners:{P49354}

1675 Pathogen[ Q85601] interacts with 1 human partners:{P49354}

1676 Pathogen[ P14079] interacts with 1 human partners:{P49354}

1677 Pathogen[ P03410] interacts with 1 human partners:{P49354}

1678 Pathogen[ P0C206] interacts with 1 human partners:{P49354}

1679 Pathogen[ P03363] interacts with 1 human partners:{P49354}

1680 [Cluster 299]GO:0050543+F molecular\_function [name] icosatetraenoic acid binding [def] "Interacting selectively and non-covalently with icosatetraenoic acid, any straight-chain fatty acid with twenty carbon atoms and four double bonds per molecule." [ISBN

1681 Pathogen[ Q2Q067] interacts with 1 human partners:{P05413}

1682 Pathogen[ P0C214] interacts with 1 human partners:{P05413}

1683 Pathogen[ P03346] interacts with 1 human partners:{P05413}

1684 Pathogen[ Q85601] interacts with 1 human partners:{P05413}

1685 Pathogen[ P14079] interacts with 1 human partners:{P05413}

1686 Pathogen[ P03410] interacts with 1 human partners:{P05413}

1687 Pathogen[ P0C206] interacts with 1 human partners:{P05413}

1688 Pathogen[ P03363] interacts with 1 human partners:{P05413}

1689 [Cluster 300]GO:0004618+F molecular\_function [name] phosphoglycerate kinase activity  
[def] "Catalysis of the reaction

1690 Pathogen[ P0C214] interacts with 1 human partners:{P00558}

1691 [Cluster 301]GO:0004673+F molecular\_function [name] protein histidine kinase activity  
[def] "Catalysis of the reaction

1692 Pathogen[ Q2Q067] interacts with 1 human partners:{P22392}

1693 Pathogen[ P0C214] interacts with 1 human partners:{P22392}

1694 Pathogen[ P03346] interacts with 1 human partners:{P22392}

1695 Pathogen[ Q85601] interacts with 1 human partners:{P22392}

1696 Pathogen[ P14079] interacts with 1 human partners:{P22392}

1697 Pathogen[ P03383] interacts with 1 human partners:{P22392}

1698 Pathogen[ P14075] interacts with 1 human partners:{P22392}

1699 Pathogen[ P0C206] interacts with 1 human partners:{P22392}

1700 [Cluster 302]GO:0004342+F molecular\_function [name] glucosamine-6-phosphate deaminase  
activity [def] "Catalysis of the reaction

1701 Pathogen[ P03346] interacts with 1 human partners:{Q8TDQ7}

1702 Pathogen[ P14079] interacts with 2 human partners:{Q8TDQ7;P46926}

1703 Pathogen[ P03410] interacts with 2 human partners:{Q8TDQ7;P46926}

1704 Pathogen[ P0C206] interacts with 2 human partners:{Q8TDQ7;P46926}

1705 Pathogen[ P03363] interacts with 1 human partners:{Q8TDQ7}

1706 [Cluster 303]GO:0003977+F molecular\_function [name] UDP-N-acetylglucosamine  
diphosphorylase activity [def] "Catalysis of the reaction

1707 Pathogen[ Q2Q067] interacts with 1 human partners:{Q16222}

1708 Pathogen[ P0C214] interacts with 1 human partners:{Q16222}

1709 Pathogen[ P03346] interacts with 1 human partners:{Q16222}

1710 Pathogen[ Q85601] interacts with 1 human partners:{Q16222}

1711 Pathogen[ P14079] interacts with 1 human partners:{Q16222}

1712 Pathogen[ P03410] interacts with 1 human partners:{Q16222}

1713 Pathogen[ P0C206] interacts with 1 human partners:{Q16222}

1714 Pathogen[ P03363] interacts with 1 human partners:{Q16222}

1715 [Cluster 304]GO:0004802+F molecular\_function [name] transketolase activity [def]  
"Catalysis of the reversible transfer of a 2-carbon ketol group (CH<sub>2</sub>OH-CO-) from a ketose  
phosphate donor to an aldose phosphate acceptor." [EC

1716 Pathogen[ P0C214] interacts with 2 human partners:{P29401;P51854}

1717 Pathogen[ P14079] interacts with 2 human partners:{P51854;P29401}

1718 Pathogen[ P03410] interacts with 1 human partners:{P51854}

1719 Pathogen[ P0C206] interacts with 2 human partners:{P51854;P29401}

1720 [Cluster 305]GO:0045127+F molecular\_function [name] N-acetylglucosamine kinase  
activity [def] "Catalysis of the reaction

1721 Pathogen[ P14079] interacts with 1 human partners:{Q9UJ70}

1722 [Cluster 306]GO:0031543+F molecular\_function [name] peptidyl-proline dioxygenase  
activity [def] "Catalysis of the reaction

1723 Pathogen[ Q2Q067] interacts with 1 human partners:{Q9GZT9}

1724 Pathogen[ P0C214] interacts with 1 human partners:{Q9GZT9}

1725 Pathogen[ P03346] interacts with 1 human partners:{Q9GZT9}

1726 Pathogen[ Q85601] interacts with 1 human partners:{Q9GZT9}

1727 Pathogen[ P14079] interacts with 1 human partners:{Q9GZT9}

1728 Pathogen[ P03410] interacts with 1 human partners:{Q9GZT9}

1729 Pathogen[ P14075] interacts with 1 human partners:{Q9GZT9}

1730 Pathogen[ P0C206] interacts with 1 human partners:{Q9GZT9}

1731 [Cluster 307]GO:0015075+F molecular\_function [name] ion transmembrane transporter  
activity [def] "Catalysis of the transfer of an ion from one side of a membrane to the  
other." [GOC

1732 Pathogen[ P03346] interacts with 2 human partners:{P06703;Q14847}

1733 Pathogen[ P14079] interacts with 2 human partners:{Q14847;P06703}

1734 Pathogen[ P03410] interacts with 2 human partners:{P06703;Q14847}

1735 Pathogen[ P0C206] interacts with 1 human partners:{P06703}

1736 Pathogen[ P03363] interacts with 1 human partners:{Q14847}

1737 [Cluster 308]GO:0036140+F

1738 Pathogen[ Q2Q067] interacts with 1 human partners:{Q9NWT6}

1739 Pathogen[ P0C214] interacts with 1 human partners:{Q9NWT6}

1740 Pathogen[ P03346] interacts with 1 human partners:{Q9NWT6}

1741 Pathogen[ Q85601] interacts with 1 human partners:{Q9NWT6}

1742 Pathogen[ P14079] interacts with 1 human partners:{Q9NWT6}

1743 Pathogen[ P03383] interacts with 1 human partners:{Q9NWT6}

1744 Pathogen[ P03410] interacts with 1 human partners:{Q9NWT6}

1745 Pathogen[ P14075] interacts with 1 human partners:{Q9NWT6}

1746 Pathogen[ P0C206] interacts with 1 human partners:{Q9NWT6}

1747 [Cluster 309]GO:0004308+F molecular\_function [name] exo-alpha-sialidase activity [def]  
"Catalysis of the hydrolysis of alpha-(2->3)-, alpha-(2->6)-, alpha-(2->8)-glycosidic  
linkages of terminal sialic residues in oligosaccharides, glycoproteins, glycolipids,

colominic acid and synthetic substrates." [EC

1748 Pathogen[ Q2Q067] interacts with 1 human partners:{Q8WWR8}

1749 Pathogen[ P0C214] interacts with 2 human partners:{Q8WWR8;Q9Y3R4}

1750 Pathogen[ P03346] interacts with 1 human partners:{Q8WWR8}

1751 Pathogen[ P14079] interacts with 2 human partners:{Q8WWR8;Q9Y3R4}

1752 Pathogen[ P03383] interacts with 1 human partners:{Q8WWR8}

1753 Pathogen[ P03410] interacts with 2 human partners:{Q9Y3R4;Q8WWR8}

1754 Pathogen[ P14075] interacts with 1 human partners:{Q8WWR8}

1755 Pathogen[ P0C206] interacts with 2 human partners:{Q9Y3R4;Q8WWR8}

1756 [Cluster 310]GO:0051908+F molecular\_function [name] double-stranded DNA specific 5'-3' exodeoxyribonuclease activity [def] "Catalysis of the sequential cleavage of mononucleotides from a free 5' terminus of a double-stranded DNA molecule." [GOC

1757 Pathogen[ Q2Q067] interacts with 1 human partners:{Q9UQ84}

1758 Pathogen[ P0C214] interacts with 1 human partners:{Q9UQ84}

1759 Pathogen[ P03346] interacts with 1 human partners:{Q9UQ84}

1760 Pathogen[ Q85601] interacts with 1 human partners:{Q9UQ84}

1761 Pathogen[ P14079] interacts with 1 human partners:{Q9UQ84}

1762 Pathogen[ P03410] interacts with 1 human partners:{Q9UQ84}

1763 Pathogen[ P0C206] interacts with 1 human partners:{Q9UQ84}

1764 [Cluster 311]GO:0001681+F molecular\_function [name] sialate O-acetyltransferase activity [def] "Catalysis of the reaction

1765 Pathogen[ P14079] interacts with 1 human partners:{Q9HAT2}

1766 Pathogen[ P03410] interacts with 1 human partners:{Q9HAT2}

1767 [Cluster 312]GO:0043140+F molecular\_function [name] ATP-dependent 3'-5' DNA helicase activity [def] "Catalysis of the reaction

1768 Pathogen[ Q2Q067] interacts with 1 human partners:{Q8N3C0}

1769 Pathogen[ P0C214] interacts with 1 human partners:{Q8N3C0}

1770 Pathogen[ P03346] interacts with 2 human partners:{P46063;Q8N3C0}

1771 Pathogen[ Q85601] interacts with 1 human partners:{Q8N3C0}

1772 Pathogen[ P03410] interacts with 1 human partners:{Q8N3C0}

1773 Pathogen[ P0C206] interacts with 1 human partners:{Q8N3C0}

1774 Pathogen[ P03363] interacts with 2 human partners:{P46063;Q8N3C0}

1775 [Cluster 313]GO:0032143+F molecular\_function [name] single thymine insertion binding [def] "Interacting selectively and non-covalently with double-stranded DNA containing a single thymine insertion or a deletion that results in an unpaired thymine." [GOC

1776 Pathogen[ P14079] interacts with 1 human partners:{P52701}

1777 Pathogen[ P03410] interacts with 1 human partners:{P52701}

1778 Pathogen[ P0C206] interacts with 1 human partners:{P52701}

1779 [Cluster 314]GO:0042163+F molecular\_function [name] interleukin-12 beta subunit binding [def] "Interacting selectively and non-covalently with the beta subunit of interleukin-12." [GOC

1780 Pathogen[ P14079] interacts with 1 human partners:{P29459}

1781 Pathogen[ P03410] interacts with 1 human partners:{P29459}

1782 [Cluster 315]GO:0031782+F molecular\_function [name] type 4 melanocortin receptor binding [def] "Interacting selectively and non-covalently with a type 4 melanocortin receptor." [GOC

1783 Pathogen[ P14079] interacts with 2 human partners:{Q96G30;Q8TCY5}

1784 Pathogen[ P03410] interacts with 1 human partners:{Q96G30}

1785 [Cluster 316]GO:0004034+F molecular\_function [name] aldose 1-epimerase activity [def] "Catalysis of the reaction

1786 Pathogen[ P14079] interacts with 1 human partners:{Q96C23}

1787 Pathogen[ P03410] interacts with 1 human partners:{Q96C23}

1788 Pathogen[ P0C206] interacts with 1 human partners:{Q96C23}

1789 [Cluster 317]GO:0017160+F molecular\_function [name] Ral GTPase binding [def] "Interacting selectively and non-covalently with Ral protein, any member of the Ral subfamily of the Ras superfamily of monomeric GTPases." [GOC

1790 Pathogen[ Q2Q067] interacts with 1 human partners:{Q96KP1}

1791 Pathogen[ P03346] interacts with 1 human partners:{Q96KP1}

1792 Pathogen[ Q85601] interacts with 1 human partners:{Q96KP1}

1793 Pathogen[ P14079] interacts with 1 human partners:{Q96KP1}

1794 Pathogen[ P03383] interacts with 1 human partners:{Q96KP1}

1795 Pathogen[ P03410] interacts with 1 human partners:{Q96KP1}

1796 Pathogen[ P14075] interacts with 1 human partners:{Q96KP1}

1797 Pathogen[ P0C206] interacts with 1 human partners:{Q96KP1}

1798 Pathogen[ P03363] interacts with 1 human partners:{Q96KP1}

1799 [Cluster 318]GO:0047547+F molecular\_function [name] 2-methylcitrate dehydratase activity [def] "Catalysis of the reaction

1800 Pathogen[ P14079] interacts with 1 human partners:{A6NK06}

1801 Pathogen[ P03410] interacts with 1 human partners:{A6NK06}

1802 Pathogen[ P0C206] interacts with 1 human partners:{A6NK06}

1803 [Cluster 319]GO:0072341+F molecular\_function [name] modified amino acid binding [def] "Interacting selectively and non-covalently with a modified amino acid." [CHEBI

1804 Pathogen[ Q2Q067] interacts with 1 human partners:{P22033}

1805 Pathogen[ P0C214] interacts with 3 human partners:{P42898;P22033;P35520}

1806 Pathogen[ Q85601] interacts with 1 human partners:{P22033}

1807 Pathogen[ P14079] interacts with 2 human partners:{P22033;P42898}



1808 Pathogen[ P03383] interacts with 1 human partners:{P22033}

1809 Pathogen[ P03410] interacts with 2 human partners:{P42898;P22033}

1810 Pathogen[ P14075] interacts with 1 human partners:{P22033}

1811 Pathogen[ P0C206] interacts with 1 human partners:{P22033}

1812 [Cluster 320]GO:0042608+F molecular\_function [name] T cell receptor binding [def] "Interacting selectively and non-covalently with a T cell receptor, the antigen-recognizing receptor on the surface of T cells." [GOC

1813 Pathogen[ P14079] interacts with 1 human partners:{P35611}

1814 Pathogen[ P03410] interacts with 1 human partners:{P35611}

1815 [Cluster 321]GO:0035326+F molecular\_function [name] enhancer binding [def] "Interacting selectively and non-covalently with an enhancer, a transcription regulatory region that is somewhat distal from the core promoter and which enhances transcription from that promoter." [GOC

1816 Pathogen[ Q2Q067] interacts with 1 human partners:{P08047}

1817 Pathogen[ P0C214] interacts with 1 human partners:{P08047}

1818 Pathogen[ P03346] interacts with 1 human partners:{P08047}

1819 Pathogen[ Q85601] interacts with 1 human partners:{P08047}

1820 Pathogen[ P03383] interacts with 1 human partners:{P08047}

1821 Pathogen[ P03410] interacts with 1 human partners:{P08047}

1822 Pathogen[ P14075] interacts with 1 human partners:{P08047}

1823 Pathogen[ P0C206] interacts with 1 human partners:{P08047}

1824 Pathogen[ P03363] interacts with 1 human partners:{P08047}

1825 [Cluster 322]GO:0043237+F molecular\_function [name] laminin-1 binding [def] "Interacting selectively and non-covalently with laminin-1, a glycoprotein trimer with the subunit composition alpha, beta, gamma1." [GOC

1826 Pathogen[ P14079] interacts with 2 human partners:{Q14118;Q9GZZ8}

1827 Pathogen[ P03410] interacts with 2 human partners:{Q9GZZ8;Q14118}

1828 Pathogen[ P14075] interacts with 1 human partners:{Q9GZZ8}

1829 [Cluster 323]GO:0034235+F molecular\_function [name] GPI anchor binding [def] "Interacting selectively and non-covalently with any glycosylphosphatidylinositol anchor. GPI anchors serve to attach membrane proteins to the lipid bilayer of cell membranes." [GOC

1830 Pathogen[ P14079] interacts with 2 human partners:{Q43292;Q9H490}

1831 Pathogen[ P03410] interacts with 1 human partners:{Q9H490}

1832 [Cluster 324]GO:0004689+F molecular\_function [name] phosphorylase kinase activity [def] "Catalysis of the reaction

1833 Pathogen[ P0C214] interacts with 2 human partners:{Q93100;P46020}

1834 Pathogen[ P14079] interacts with 2 human partners:{Q93100;P46020}

1835 Pathogen[ P03410] interacts with 2 human partners:{P46020;Q93100}

1836 Pathogen[ P14075] interacts with 1 human partners:{Q93100}

1837 Pathogen[ P0C206] interacts with 2 human partners:{Q93100;P46020}

1838 [Cluster 325]GO:0016262+F molecular\_function [name] protein N-acetylglucosaminyltransferase activity [def] "Catalysis of the reaction

1839 Pathogen[ P14079] interacts with 1 human partners:{Q5NDL2}

1840 [Cluster 326]GO:0034648+F molecular\_function [name] histone demethylase activity (H3-dimethyl-K4 specific) [def] "Catalysis of the removal of a methyl group from dimethylated lysine at position 4 of the histone H3 protein." [GOC

1841 Pathogen[ P03346] interacts with 1 human partners:{Q9UGL1}

1842 [Cluster 327]GO:0016628+F molecular\_function [name] oxidoreductase activity, acting on the CH-CH group of donors, NAD or NADP as acceptor [def] "Catalysis of an oxidation-reduction (redox) reaction in which a CH-CH group acts as a hydrogen or electron donor and reduces NAD or NADP." [GOC

1843 Pathogen[ Q2Q067] interacts with 1 human partners:{Q14739}

1844 Pathogen[ P0C214] interacts with 1 human partners:{Q14739}

1845 Pathogen[ P03346] interacts with 1 human partners:{Q14739}

1846 Pathogen[ Q85601] interacts with 1 human partners:{Q14739}

1847 Pathogen[ P14079] interacts with 1 human partners:{Q14739}

1848 Pathogen[ P03410] interacts with 1 human partners:{Q14739}

1849 Pathogen[ P0C206] interacts with 1 human partners:{Q14739}

1850 Pathogen[ P03363] interacts with 1 human partners:{Q14739}

1851 [Cluster 328]GO:0015037+F molecular\_function [name] peptide disulfide oxidoreductase activity [def] "Catalysis of the reaction

1852 Pathogen[ Q2Q067] interacts with 1 human partners:{P10599}

1853 Pathogen[ P0C214] interacts with 1 human partners:{P10599}

1854 Pathogen[ P03346] interacts with 1 human partners:{P10599}

1855 Pathogen[ Q85601] interacts with 1 human partners:{P10599}

1856 Pathogen[ P14079] interacts with 1 human partners:{P10599}

1857 Pathogen[ P03383] interacts with 1 human partners:{P10599}

1858 Pathogen[ P03410] interacts with 1 human partners:{P10599}

1859 Pathogen[ P14075] interacts with 1 human partners:{P10599}

1860 Pathogen[ P0C206] interacts with 1 human partners:{P10599}

1861 [Cluster 329]GO:0030616+F molecular\_function [name] transforming growth factor beta receptor, common-partner cytoplasmic mediator activity [def] "A TGF-beta cytoplasmic mediator that forms a complex with a phosphorylated pathway-specific mediator. The heterocomplex translocates to the nucleus to regulate transcription." [GOC

1862 Pathogen[ Q2Q067] interacts with 1 human partners:{Q13485}

1863 Pathogen[ P0C214] interacts with 1 human partners:{Q13485}

1864 Pathogen[ P03346] interacts with 1 human partners:{Q13485}

1865 Pathogen[ Q85601] interacts with 1 human partners:{Q13485}

1866 Pathogen[ P03383] interacts with 1 human partners:{Q13485}

1867 Pathogen[ P03410] interacts with 1 human partners:{Q13485}

1868 Pathogen[ P14075] interacts with 1 human partners:{Q13485}

1869 Pathogen[ P0C206] interacts with 1 human partners:{Q13485}

1870 Pathogen[ P03363] interacts with 1 human partners:{Q13485}

1871 [Cluster 330]GO:0047945+F molecular\_function [name] L-glutamine [def] "Catalysis of the reaction

1872 Pathogen[ P0C214] interacts with 1 human partners:{Q16773}

1873 [Cluster 331]GO:0008781+F molecular\_function [name] N-acylneuraminatase cytidyltransferase activity [def] "Catalysis of the reaction

1874 Pathogen[ P0C214] interacts with 1 human partners:{Q8NFW8}

1875 Pathogen[ P03346] interacts with 1 human partners:{Q8NFW8}

1876 Pathogen[ P14079] interacts with 1 human partners:{Q8NFW8}

1877 Pathogen[ P03410] interacts with 1 human partners:{Q8NFW8}

1878 Pathogen[ P0C206] interacts with 1 human partners:{Q8NFW8}

1879 Pathogen[ P03363] interacts with 1 human partners:{Q8NFW8}

1880 [Cluster 332]GO:0016723+F molecular\_function [name] oxidoreductase activity, oxidizing metal ions, NAD or NADP as acceptor [def] "Catalysis of an oxidation-reduction in which the oxidation state of metal ion is altered and NAD+ or NADP+ acts as an electron acceptor." [GOC

1881 Pathogen[ P03346] interacts with 1 human partners:{Q9UBK8}

1882 [Cluster 333]GO:0005504+F molecular\_function [name] fatty acid binding [def] "Interacting selectively and non-covalently with fatty acids, aliphatic monocarboxylic acids liberated from naturally occurring fats and oils by hydrolysis." [ISBN

1883 Pathogen[ Q2Q067] interacts with 1 human partners:{P05413}

1884 Pathogen[ P0C214] interacts with 2 human partners:{P05413;O14561}

1885 Pathogen[ P03346] interacts with 4 human partners:{P05413;P07148;Q01469;Q9Y371}

1886 Pathogen[ Q85601] interacts with 1 human partners:{P05413}

1887 Pathogen[ P14079] interacts with 4 human partners:{Q9Y371;P05413;O14561;Q01469}

1888 Pathogen[ P03410] interacts with 4 human partners:{P05413;O14561;Q9Y371;Q01469}

1889 Pathogen[ P14075] interacts with 1 human partners:{O14561}

1890 Pathogen[ P0C206] interacts with 3 human partners:{P05413;O14561;Q01469}

1891 Pathogen[ P03363] interacts with 2 human partners:{Q01469;P05413}

1892 [Cluster 334]GO:0015078+F molecular\_function [name] hydrogen ion transmembrane transporter activity [def] "Catalysis of the transfer of hydrogen ions from one side of a membrane to the other." [GOC

1893 Pathogen[ Q2Q067] interacts with 1 human partners:{P24539}

1894 Pathogen[ P0C214] interacts with 3 human partners:{Q16864;P24539;Q99766}

1895 Pathogen[ P03346] interacts with 3 human partners:{Q93050;P24539;Q16864}

1896 Pathogen[ Q85601] interacts with 3 human partners:{P24539;Q93050;Q99766}

1897 Pathogen[ P14079] interacts with 10 human partners:{P61421;P56385;Q7Z4Y8;P03928;Q8N8Y2;Q99766;O75964;Q93050;Q16864;P24539}

1898 Pathogen[ P03383] interacts with 1 human partners:{P24539}

1899 Pathogen[ P03410] interacts with 11 human partners:{Q99766;Q8N8Y2;P61421;Q93050;P56385;P03928;P24539;O75964;Q16864;P18859;Q7Z4Y8}

1900 Pathogen[ P14075] interacts with 3 human partners:{Q99766;P24539;P56385}

1901 Pathogen[ P0C206] interacts with 5 human partners:{Q99766;P24539;Q16864;P56385;Q93050}

1902 [Cluster 335]GO:0004825+F molecular\_function [name] methionine-tRNA ligase activity [def] "Catalysis of the reaction

1903 Pathogen[ P0C214] interacts with 2 human partners:{P56192;Q96GW9}

1904 Pathogen[ P14079] interacts with 2 human partners:{Q96GW9;P56192}

1905 Pathogen[ P03383] interacts with 1 human partners:{Q96GW9}

1906 Pathogen[ P03410] interacts with 2 human partners:{P56192;Q96GW9}

1907 Pathogen[ P14075] interacts with 2 human partners:{Q96GW9;P56192}

1908 Pathogen[ P0C206] interacts with 2 human partners:{P56192;Q96GW9}

1909 [Cluster 336]GO:0008009+F molecular\_function [name] chemokine activity [def] "The function of a family of chemotactic pro-inflammatory activation-inducible cytokines acting primarily upon hemopoietic cells in immunoregulatory processes\_ all chemokines possess a number of conserved cysteine residues involved in intramolecular disulfide bond formation." [http

1910 Pathogen[ P03410] interacts with 1 human partners:{Q9NRJ3}

1911 [Cluster 337]GO:0004563+F molecular\_function [name] beta-N-acetylhexosaminidase activity [def] "Catalysis of the hydrolysis of terminal non-reducing N-acetyl-D-hexosamine residues in N-acetyl-beta-D-hexosaminides." [EC

1912 Pathogen[ P03346] interacts with 1 human partners:{Q8WVB3}

1913 Pathogen[ P14079] interacts with 1 human partners:{Q8WVB3}

1914 Pathogen[ P03410] interacts with 1 human partners:{Q8WVB3}

1915 Pathogen[ P0C206] interacts with 1 human partners:{Q8WVB3}

1916 Pathogen[ P03363] interacts with 1 human partners:{Q8WVB3}

1917 [Cluster 338]GO:0033130+F molecular\_function [name] acetylcholine receptor binding [def] "Interacting selectively and non-covalently with an acetylcholine receptor." [GOC

1918 Pathogen[ P0C214] interacts with 1 human partners:{P68543}

1919 Pathogen[ P03346] interacts with 1 human partners:{P68543}

1920 Pathogen[ P14079] interacts with 1 human partners:{P68543}

1921 Pathogen[ P03410] interacts with 1 human partners:{P68543}

1922 Pathogen[ P0C206] interacts with 1 human partners:{P68543}

1923 [Cluster 339]GO:0004849+F molecular\_function [name] uridine kinase activity [def]  
"Catalysis of the reaction

1924 Pathogen[ P0C214] interacts with 1 human partners:{Q9NWZ5}

1925 Pathogen[ P03346] interacts with 1 human partners:{Q9NWZ5}

1926 Pathogen[ P14079] interacts with 1 human partners:{Q9NWZ5}

1927 Pathogen[ P03383] interacts with 1 human partners:{Q9NWZ5}

1928 Pathogen[ P03410] interacts with 1 human partners:{Q9NWZ5}

1929 Pathogen[ P14075] interacts with 1 human partners:{Q9NWZ5}

1930 Pathogen[ P0C206] interacts with 1 human partners:{Q9NWZ5}

1931 Pathogen[ P03363] interacts with 1 human partners:{Q9NWZ5}

1932 [Cluster 340]GO:0004439+F molecular\_function [name]  
phosphatidylinositol-4,5-bisphosphate 5-phosphatase activity [def] "Catalysis of the  
reaction

1933 Pathogen[ P0C214] interacts with 1 human partners:{O15056}

1934 Pathogen[ P03346] interacts with 1 human partners:{O15056}

1935 Pathogen[ P03363] interacts with 1 human partners:{O15056}

1936 [Cluster 341]GO:0004415+F molecular\_function [name] hyaluronoglucosaminidase activity  
[def] "Catalysis of the random hydrolysis of (1->4) linkages between  
N-acetyl-beta-D-glucosamine and D-glucuronate residues in hyaluronate." [EC

1937 Pathogen[ P14079] interacts with 1 human partners:{O60502}

1938 Pathogen[ P03410] interacts with 1 human partners:{O60502}

1939 [Cluster 342]GO:0052844+F molecular\_function [name]  
inositol-3-diphosphate-1,2,4,5,6-pentakisphosphate diphosphatase activity [def]  
"Catalysis of the reaction

1940 Pathogen[ P0C214] interacts with 1 human partners:{O95989}

1941 Pathogen[ Q85601] interacts with 1 human partners:{O95989}

1942 Pathogen[ P14079] interacts with 4 human partners:{Q96G61;O95989;Q8NFP7;Q9NZJ9}

1943 Pathogen[ P03383] interacts with 1 human partners:{O95989}

1944 Pathogen[ P03410] interacts with 4 human partners:{Q8NFP7;Q9NZJ9;O95989;Q96G61}

1945 Pathogen[ P14075] interacts with 1 human partners:{O95989}

1946 Pathogen[ P0C206] interacts with 2 human partners:{O95989;Q8NFP7}

1947 [Cluster 343]GO:0047804+F molecular\_function [name] cysteine-S-conjugate beta-lyase  
activity [def] "Catalysis of the reaction

1948 Pathogen[ P0C214] interacts with 1 human partners:{Q16773}

1949 [Cluster 344]GO:0003831+F molecular\_function [name]  
beta-N-acetylglucosaminylglycopeptide beta-1,4-galactosyltransferase activity [def]  
"Catalysis of the reaction

1950 Pathogen[ Q2Q067] interacts with 1 human partners:{Q8IZQ1}

1951 Pathogen[ P0C214] interacts with 1 human partners:{Q8IZQ1}

1952 Pathogen[ P03346] interacts with 1 human partners:{Q8IZQ1}

1953 Pathogen[ Q85601] interacts with 1 human partners:{Q8IZQ1}

1954 Pathogen[ P03383] interacts with 1 human partners:{Q8IZQ1}

1955 Pathogen[ P03410] interacts with 1 human partners:{Q8IZQ1}

1956 Pathogen[ P14075] interacts with 1 human partners:{Q8IZQ1}

1957 Pathogen[ P0C206] interacts with 1 human partners:{Q8IZQ1}

1958 Pathogen[ P03363] interacts with 1 human partners:{Q8IZQ1}

1959 [Cluster 345]GO:0005244+F molecular\_function [name] voltage-gated ion channel activity  
[def] "Catalysis of the transmembrane transfer of an ion by a voltage-gated channel. An  
ion is an atom or group of atoms carrying an electric charge by virtue of having gained  
or lost one or more electrons. A voltage-gated channel is a channel whose open state is  
dependent on the voltage across the membrane in which it is embedded." [GOC

1960 Pathogen[ P03346] interacts with 2 human partners:{O00299;O95833}

1961 Pathogen[ P14079] interacts with 2 human partners:{P0CG08;B7ZAQ6}

1962 Pathogen[ P03410] interacts with 3 human partners:{B7ZAQ6;P0CG08;Q96D96}

1963 Pathogen[ P0C206] interacts with 2 human partners:{P0CG08;B7ZAQ6}

1964 Pathogen[ P03363] interacts with 1 human partners:{O95833}

1965 [Cluster 346]GO:0031871+F molecular\_function [name] proteinase activated receptor  
binding [def] "Interacting selectively and non-covalently with a proteinase activated  
receptor." [GOC

1966 Pathogen[ P0C214] interacts with 1 human partners:{Q96G01}

1967 Pathogen[ P03346] interacts with 1 human partners:{Q96G01}

1968 Pathogen[ Q85601] interacts with 1 human partners:{Q96G01}

1969 Pathogen[ P14079] interacts with 1 human partners:{Q96G01}

1970 Pathogen[ P03410] interacts with 1 human partners:{Q96G01}

1971 Pathogen[ P0C206] interacts with 1 human partners:{Q96G01}

1972 [Cluster 347]GO:0004337+F molecular\_function [name] geranyltranstransferase activity  
[def] "Catalysis of the reaction

1973 Pathogen[ Q2Q067] interacts with 1 human partners:{P14324}

1974 Pathogen[ P0C214] interacts with 1 human partners:{P14324}

1975 Pathogen[ P03346] interacts with 1 human partners:{P14324}

1976 Pathogen[ Q85601] interacts with 1 human partners:{P14324}

1977 Pathogen[ P14079] interacts with 1 human partners:{P14324}  
 1978 Pathogen[ P03383] interacts with 1 human partners:{P14324}  
 1979 Pathogen[ P03410] interacts with 1 human partners:{P14324}  
 1980 Pathogen[ P14075] interacts with 1 human partners:{P14324}  
 1981 Pathogen[ P0C206] interacts with 1 human partners:{P14324}  
 1982 [Cluster 348]GO:0071566+F molecular\_function [name] UFM1 activating enzyme activity  
 [def] "Catalysis of the activation of the small ubiquitin-related modifier UFM1, through  
 the formation of an ATP-dependent high-energy thiolester bond." [GOC  
 1983 Pathogen[ P0C214] interacts with 1 human partners:{Q9GZZ9}  
 1984 [Cluster 349]GO:0008239+F molecular\_function [name] dipeptidyl-peptidase activity  
 [def] "Catalysis of the hydrolysis of N-terminal dipeptides from a polypeptide chain."  
 [GOC  
 1985 Pathogen[ P0C214] interacts with 1 human partners:{Q9NY33}  
 1986 Pathogen[ P14079] interacts with 1 human partners:{Q9NY33}  
 1987 Pathogen[ P03410] interacts with 1 human partners:{Q9NY33}  
 1988 Pathogen[ P0C206] interacts with 1 human partners:{Q9NY33}  
 1989 [Cluster 350]GO:0047992+F molecular\_function [name] hydroxylysine kinase activity  
 [def] "Catalysis of the reaction  
 1990 Pathogen[ P14079] interacts with 1 human partners:{A2RU49}  
 1991 Pathogen[ P03410] interacts with 1 human partners:{A2RU49}  
 1992 [Cluster 351]GO:0004638+F molecular\_function [name] phosphoribosylaminoimidazole  
 carboxylase activity [def] "Catalysis of the reaction  
 1993 Pathogen[ P14079] interacts with 1 human partners:{P22234}  
 1994 Pathogen[ P03410] interacts with 1 human partners:{P22234}  
 1995 [Cluster 352]GO:0015039+F molecular\_function [name] NADPH-adrenodoxin reductase  
 activity [def] "Catalysis of the reaction  
 1996 Pathogen[ P14079] interacts with 1 human partners:{P10109}  
 1997 Pathogen[ P03410] interacts with 1 human partners:{P10109}  
 1998 [Cluster 353]GO:0004155+F molecular\_function [name] 6,7-dihydropteridine reductase  
 activity [def] "Catalysis of the reaction  
 1999 Pathogen[ P0C214] interacts with 1 human partners:{P09417}  
 2000 [Cluster 354]GO:0004452+F molecular\_function [name] isopentenyl-diphosphate  
 delta-isomerase activity [def] "Catalysis of the reaction  
 2001 Pathogen[ P0C214] interacts with 2 human partners:{Q13907;Q9BXS1}  
 2002 Pathogen[ Q85601] interacts with 1 human partners:{Q13907}  
 2003 Pathogen[ P14079] interacts with 2 human partners:{Q9BXS1;Q13907}  
 2004 Pathogen[ P03410] interacts with 2 human partners:{Q13907;Q9BXS1}  
 2005 Pathogen[ P0C206] interacts with 2 human partners:{Q13907;Q9BXS1}  
 2006 [Cluster 355]GO:0008808+F molecular\_function [name] cardiolipin synthase activity  
 [def] "Catalysis of the reaction  
 2007 Pathogen[ P03346] interacts with 1 human partners:{Q6P597}  
 2008 Pathogen[ Q85601] interacts with 1 human partners:{Q6P597}  
 2009 Pathogen[ P14079] interacts with 1 human partners:{Q6P597}  
 2010 Pathogen[ P03410] interacts with 1 human partners:{Q6P597}  
 2011 Pathogen[ P0C206] interacts with 1 human partners:{Q6P597}  
 2012 [Cluster 356]GO:0008422+F molecular\_function [name] beta-glucosidase activity [def]  
 "Catalysis of the hydrolysis of terminal, non-reducing beta-D-glucose residues with  
 release of beta-D-glucose." [EC  
 2013 Pathogen[ P0C214] interacts with 1 human partners:{Q9H227}  
 2014 [Cluster 357]GO:0004561+F molecular\_function [name] alpha-N-acetylglucosaminidase  
 activity [def] "Catalysis of the hydrolysis of terminal non-reducing  
 N-acetyl-D-glucosamine residues in N-acetyl-alpha-D-glucosaminides." [EC  
 2015 Pathogen[ P14079] interacts with 1 human partners:{P54802}  
 2016 Pathogen[ P03410] interacts with 1 human partners:{P54802}  
 2017 [Cluster 358]GO:0001760+F molecular\_function [name] aminocarboxymuconate-semialdehyde  
 decarboxylase activity [def] "Catalysis of the reaction  
 2018 Pathogen[ P14079] interacts with 1 human partners:{Q8TDX5}  
 2019 Pathogen[ P03410] interacts with 1 human partners:{Q8TDX5}  
 2020 [Cluster 359]GO:0019780+F molecular\_function [name] FAT10 activating enzyme activity  
 [def] "Catalysis of the activation of the small ubiquitin-related modifier FAT10, through  
 the formation of an ATP-dependent high-energy thiolester bond." [GOC  
 2021 Pathogen[ P03346] interacts with 1 human partners:{A0AVT1}  
 2022 Pathogen[ P03363] interacts with 1 human partners:{A0AVT1}  
 2023 [Cluster 360]GO:0046554+F molecular\_function [name] malate dehydrogenase (NADP+)  
 activity [def] "Catalysis of the reaction  
 2024 Pathogen[ Q2Q067] interacts with 1 human partners:{P40926}  
 2025 Pathogen[ P0C214] interacts with 1 human partners:{P40926}  
 2026 Pathogen[ P03346] interacts with 1 human partners:{P40926}  
 2027 Pathogen[ Q85601] interacts with 1 human partners:{P40926}  
 2028 Pathogen[ P03383] interacts with 1 human partners:{P40926}  
 2029 Pathogen[ P03410] interacts with 1 human partners:{P40926}  
 2030 Pathogen[ P14075] interacts with 1 human partners:{P40926}  
 2031 Pathogen[ P0C206] interacts with 1 human partners:{P40926}  
 2032 [Cluster 361]GO:0004557+F molecular\_function [name] alpha-galactosidase activity [def]  
 "Catalysis of the hydrolysis of terminal, non-reducing alpha-D-galactose residues in  
 alpha-D-galactosides, including galactose oligosaccharides, galactomannans and

galactohydrolase." [EC  
2033 Pathogen[ P14079] interacts with 2 human partners:{P06280;P17050}  
2034 [Cluster 362]GO:0004084+F molecular\_function [name] branched-chain-amino-acid  
transaminase activity [def] "Catalysis of the reaction  
2035 Pathogen[ P0C214] interacts with 2 human partners:{O15382;P54687}  
2036 Pathogen[ Q85601] interacts with 1 human partners:{O15382}  
2037 Pathogen[ P14079] interacts with 1 human partners:{O15382}  
2038 Pathogen[ P03410] interacts with 1 human partners:{O15382}  
2039 Pathogen[ P0C206] interacts with 1 human partners:{O15382}  
2040 [Cluster 363]GO:0004139+F molecular\_function [name] deoxyribose-phosphate aldolase  
activity [def] "Catalysis of the reaction  
2041 Pathogen[ P0C214] interacts with 1 human partners:{Q9Y315}  
2042 Pathogen[ P14079] interacts with 1 human partners:{Q9Y315}  
2043 Pathogen[ P03410] interacts with 1 human partners:{Q9Y315}  
2044 Pathogen[ P14075] interacts with 1 human partners:{Q9Y315}  
2045 Pathogen[ P0C206] interacts with 1 human partners:{Q9Y315}  
2046 Pathogen[ P03363] interacts with 1 human partners:{Q9Y315}  
2047 [Cluster 364]GO:0005520+F molecular\_function [name] insulin-like growth factor binding  
[def] "Interacting selectively and non-covalently with an insulin-like growth factor, any  
member of a group of polypeptides that are structurally homologous to insulin and share  
many of its biological activities, but are immunologically distinct from it." [ISBN  
2048 Pathogen[ P03346] interacts with 1 human partners:{P09565}  
2049 Pathogen[ P14079] interacts with 1 human partners:{P09565}  
2050 Pathogen[ P03410] interacts with 1 human partners:{P09565}  
2051 Pathogen[ P14075] interacts with 1 human partners:{P09565}  
2052 Pathogen[ P0C206] interacts with 1 human partners:{P09565}  
2053 [Cluster 365]GO:0050146+F molecular\_function [name] nucleoside phosphotransferase  
activity [def] "Catalysis of the reaction  
2054 Pathogen[ P0C214] interacts with 1 human partners:{P49902}  
2055 Pathogen[ P14079] interacts with 1 human partners:{P49902}  
2056 Pathogen[ P03410] interacts with 1 human partners:{P49902}  
2057 Pathogen[ P14075] interacts with 1 human partners:{P49902}  
2058 Pathogen[ P0C206] interacts with 1 human partners:{P49902}  
2059 [Cluster 366]GO:0004821+F molecular\_function [name] histidine-tRNA ligase activity  
[def] "Catalysis of the reaction  
2060 Pathogen[ P0C214] interacts with 2 human partners:{P12081;P49590}  
2061 [Cluster 367]GO:0048495+F molecular\_function [name] Roundabout binding [def]  
"Interacting selectively and non-covalently with the Roundabout (ROBO) receptor, a  
transmembrane receptor." [GOC  
2062 Pathogen[ P14079] interacts with 1 human partners:{O43294}  
2063 Pathogen[ P03410] interacts with 1 human partners:{O43294}  
2064 Pathogen[ P0C206] interacts with 1 human partners:{O43294}  
2065 [Cluster 368]GO:0008670+F molecular\_function [name] 2,4-dienoyl-CoA reductase (NADPH)  
activity [def] "Catalysis of the reaction  
2066 Pathogen[ P0C214] interacts with 1 human partners:{Q16698}  
2067 [Cluster 369]GO:0032767+F molecular\_function [name] copper-dependent protein binding  
[def] "Interacting selectively and non-covalently with any protein or protein complex (a  
complex of two or more proteins that may include other nonprotein molecules), in the  
presence of copper." [GOC  
2068 Pathogen[ P14079] interacts with 1 human partners:{O00244}  
2069 [Cluster 370]GO:0008121+F molecular\_function [name] ubiquinol-cytochrome-c reductase  
activity [def] "Catalysis of the transfer of a solute or solutes from one side of a  
membrane to the other according to the reaction  
2070 Pathogen[ P14079] interacts with 5 human  
partners:{Q9UDW1;P14927;P07919;O14949;P00156}  
2071 Pathogen[ P03410] interacts with 5 human  
partners:{P07919;Q9UDW1;P00156;P14927;O14949}  
2072 Pathogen[ P0C206] interacts with 1 human partners:{Q9UDW1}  
2073 [Cluster 371]GO:0015081+F molecular\_function [name] sodium ion transmembrane  
transporter activity [def] "Catalysis of the transfer of sodium ions (Na+) from one  
side of a membrane to the other." [GOC  
2074 Pathogen[ P03346] interacts with 1 human partners:{P48553}  
2075 Pathogen[ P14079] interacts with 1 human partners:{P48553}  
2076 Pathogen[ P03410] interacts with 1 human partners:{P48553}  
2077 Pathogen[ P0C206] interacts with 1 human partners:{P48553}  
2078 Pathogen[ P03363] interacts with 1 human partners:{P48553}  
2079 [Cluster 372]GO:0004632+F molecular\_function [name] phosphopantothenate--cysteine  
ligase activity [def] "Catalysis of the reaction  
2080 Pathogen[ Q2Q067] interacts with 1 human partners:{Q9HAB8}  
2081 Pathogen[ P0C214] interacts with 1 human partners:{Q9HAB8}  
2082 Pathogen[ P03346] interacts with 1 human partners:{Q9HAB8}  
2083 Pathogen[ P14079] interacts with 1 human partners:{Q9HAB8}  
2084 Pathogen[ P03383] interacts with 1 human partners:{Q9HAB8}  
2085 Pathogen[ P03410] interacts with 1 human partners:{Q9HAB8}  
2086 Pathogen[ P14075] interacts with 1 human partners:{Q9HAB8}  
2087 Pathogen[ P0C206] interacts with 1 human partners:{Q9HAB8}

2088 [Cluster 373]GO:0030507+F molecular\_function [name] spectrin binding [def]  
 "Interacting selectively and non-covalently with spectrin, a protein that is the major constituent of the erythrocyte cytoskeletal network. It associates with band 4.1 (see band protein) and actin to form the cytoskeletal superstructure of the erythrocyte plasma membrane. It is composed of nonhomologous chains, alpha and beta, which aggregate side-to-side in an antiparallel fashion to form dimers, tetramers, and higher polymers."  
 [GOC]

2089 Pathogen[ Q2Q067] interacts with 1 human partners:{P11171}  
 2090 Pathogen[ P0C214] interacts with 2 human partners:{P16157;P11171}  
 2091 Pathogen[ P03346] interacts with 4 human partners:{P16157;Q13813;P11171;O43491}  
 2092 Pathogen[ Q85601] interacts with 2 human partners:{P16157;P11171}  
 2093 Pathogen[ P14079] interacts with 4 human partners:{P11171;P16157;P35611;Q13813}  
 2094 Pathogen[ P03410] interacts with 5 human partners:{P16157;P11171;O43491;Q13813;P35611}  
 2095 Pathogen[ P14075] interacts with 1 human partners:{P11171}  
 2096 Pathogen[ P0C206] interacts with 3 human partners:{P16157;O43491;P11171}  
 2097 Pathogen[ P03363] interacts with 4 human partners:{P16157;P11171;O43491;Q13813}

2098 [Cluster 374]GO:0070012+F molecular\_function [name] oligopeptidase activity [def]  
 "Catalysis of the hydrolysis of a peptide bond in an oligopeptide, i.e. a molecule containing a small number (2 to 20) of amino acid residues connected by peptide bonds."  
 [GOC]

2099 Pathogen[ Q85601] interacts with 1 human partners:{Q9GZM8}  
 2100 Pathogen[ P14079] interacts with 1 human partners:{Q9GZM8}  
 2101 Pathogen[ P03410] interacts with 1 human partners:{Q9GZM8}  
 2102 Pathogen[ P0C206] interacts with 1 human partners:{Q9GZM8}

2103 [Cluster 375]GO:0008410+F molecular\_function [name] CoA-transferase activity [def]  
 "Catalysis of the transfer of a coenzyme A (CoA) group from one compound (donor) to another (acceptor)."  
 [GOC]

2104 Pathogen[ P03410] interacts with 2 human partners:{Q9BYC2;P55809}

2105 [Cluster 376]GO:0031812+F molecular\_function [name] P2Y1 nucleotide receptor binding [def]  
 "Interacting selectively and non-covalently with a P2Y1 nucleotide receptor." [GOC]

2106 Pathogen[ Q2Q067] interacts with 1 human partners:{P78352}  
 2107 Pathogen[ P0C214] interacts with 1 human partners:{P78352}  
 2108 Pathogen[ P03346] interacts with 1 human partners:{P78352}  
 2109 Pathogen[ Q85601] interacts with 1 human partners:{P78352}  
 2110 Pathogen[ P03383] interacts with 1 human partners:{P78352}  
 2111 Pathogen[ P03410] interacts with 1 human partners:{P78352}  
 2112 Pathogen[ P14075] interacts with 1 human partners:{P78352}  
 2113 Pathogen[ P0C206] interacts with 1 human partners:{P78352}  
 2114 Pathogen[ P03363] interacts with 1 human partners:{P78352}

2115 [Cluster 377]GO:0004645+F molecular\_function [name] phosphorylase activity [def]  
 "Catalysis of the reaction

2116 Pathogen[ P0C214] interacts with 1 human partners:{Q13126}

2117 [Cluster 378]GO:0016884+F molecular\_function [name] carbon-nitrogen ligase activity, with glutamine as amido-N-donor [def]  
 "Catalysis of the transfer of the amide nitrogen of glutamine to a variety of substrates. GATases catalyze two separate reactions at two active sites, which are located either on a single polypeptide chain or on different subunits. In the glutaminase reaction, glutamine is hydrolyzed to glutamate and ammonia, which is added to an acceptor substrate in the synthase reaction." [PMID]

2118 Pathogen[ P14079] interacts with 4 human partners:{O75879;Q9H0R6;O00519;Q6GMR7}  
 2119 Pathogen[ P03410] interacts with 4 human partners:{O00519;O75879;Q9H0R6;Q6GMR7}

2120 [Cluster 379]GO:0003874+F molecular\_function [name] 6-pyruvoyltetrahydropterin synthase activity [def]  
 "Catalysis of the reaction

2121 Pathogen[ Q2Q067] interacts with 1 human partners:{Q03393}  
 2122 Pathogen[ P0C214] interacts with 1 human partners:{Q03393}  
 2123 Pathogen[ P03346] interacts with 1 human partners:{Q03393}  
 2124 Pathogen[ P14079] interacts with 1 human partners:{Q03393}  
 2125 Pathogen[ P03410] interacts with 1 human partners:{Q03393}  
 2126 Pathogen[ P0C206] interacts with 1 human partners:{Q03393}

2127 [Cluster 380]GO:0004059+F molecular\_function [name] aralkylamine N-acetyltransferase activity [def]  
 "Catalysis of the reaction

2128 Pathogen[ P0C214] interacts with 1 human partners:{Q16613}  
 2129 Pathogen[ Q85601] interacts with 1 human partners:{Q16613}  
 2130 Pathogen[ P14079] interacts with 1 human partners:{Q16613}  
 2131 Pathogen[ P03383] interacts with 1 human partners:{Q16613}  
 2132 Pathogen[ P03410] interacts with 1 human partners:{Q16613}  
 2133 Pathogen[ P14075] interacts with 1 human partners:{Q16613}  
 2134 Pathogen[ P0C206] interacts with 1 human partners:{Q16613}

2135 [Cluster 381]GO:0050294+F molecular\_function [name] steroid sulfotransferase activity [def]  
 "Catalysis of the reaction

2136 Pathogen[ Q2Q067] interacts with 1 human partners:{O00204}  
 2137 Pathogen[ P0C214] interacts with 1 human partners:{O00204}  
 2138 Pathogen[ P03346] interacts with 1 human partners:{O00204}  
 2139 Pathogen[ Q85601] interacts with 1 human partners:{O00204}  
 2140 Pathogen[ P03410] interacts with 1 human partners:{O00204}  
 2141 Pathogen[ P0C206] interacts with 1 human partners:{O00204}

2142 Pathogen[ P03363] interacts with 1 human partners:{O00204}

2143 [Cluster 382]GO:0004839+F molecular\_function [name] ubiquitin activating enzyme activity [def] "Catalysis of the reaction

2144 Pathogen[ P03363] interacts with 1 human partners:{Q9UBE0}

2145 [Cluster 383]GO:0004829+F molecular\_function [name] threonine-tRNA ligase activity [def] "Catalysis of the reaction

2146 Pathogen[ Q2Q067] interacts with 1 human partners:{Q9BW92}

2147 Pathogen[ P0C214] interacts with 3 human partners:{P26639;A2RTX5;Q9BW92}

2148 Pathogen[ Q85601] interacts with 3 human partners:{P26639;Q9BW92;A2RTX5}

2149 Pathogen[ P14079] interacts with 3 human partners:{P26639;Q9BW92;A2RTX5}

2150 Pathogen[ P03383] interacts with 2 human partners:{A2RTX5;Q9BW92}

2151 Pathogen[ P03410] interacts with 3 human partners:{Q9BW92;P26639;A2RTX5}

2152 Pathogen[ P14075] interacts with 3 human partners:{A2RTX5;Q9BW92;P26639}

2153 Pathogen[ P0C206] interacts with 3 human partners:{A2RTX5;Q9BW92;P26639}

2154 Pathogen[ P03363] interacts with 2 human partners:{A2RTX5;Q9BW92}

2155 [Cluster 384]GO:0070080+F molecular\_function [name] titin Z domain binding [def] "Interacting selectively and non-covalently with the titin Z domain, which recognizes and binds to the C-terminal calmodulin-like domain of alpha-actinin-2 (Act-EF34), adopts a helical structure, and binds in a groove formed by the two planes between the helix pairs of Act-EF34." [GOC

2156 Pathogen[ P14079] interacts with 1 human partners:{O15273}

2157 Pathogen[ P03410] interacts with 1 human partners:{O15273}

2158 [Cluster 385]GO:0046848+F molecular\_function [name] hydroxyapatite binding [def] "Interacting selectively and non-covalently with hydroxyapatite, the calcium phosphate mineral of formula Ca<sub>10</sub>(PO<sub>4</sub>)<sub>6</sub>(OH)<sub>2</sub> found both in rocks of nonorganic origin and as a component of bone and dentin." [CHEBI

2159 Pathogen[ P14079] interacts with 1 human partners:{P02808}

2160 Pathogen[ P03410] interacts with 1 human partners:{P02808}

2161 Pathogen[ P14075] interacts with 1 human partners:{P02808}

2162 Pathogen[ P0C206] interacts with 1 human partners:{P02808}

2163 Pathogen[ P03363] interacts with 1 human partners:{P02808}

2164 [Cluster 386]GO:0016814+F molecular\_function [name] hydrolase activity, acting on carbon-nitrogen (but not peptide) bonds, in cyclic amidines [def] "Catalysis of the hydrolysis of any non-peptide carbon-nitrogen bond in a cyclic amidine, a compound of the form R-C(=NH)-NH<sub>2</sub>." [ISBN

2165 Pathogen[ Q2Q067] interacts with 2 human partners:{Q9GZX7;Q9HC16}

2166 Pathogen[ P0C214] interacts with 2 human partners:{Q9HC16;Q9GZX7}

2167 Pathogen[ Q85601] interacts with 2 human partners:{Q9HC16;Q9GZX7}

2168 Pathogen[ P14079] interacts with 5 human partners:{P41238;P31941;Q9HC16;Q9GZX7;Q8WW27}

2169 Pathogen[ P03410] interacts with 7 human partners:{P41238;Q8WW27;Q9HC16;Q9GZX7;Q9NRW3;P31941;Q6NTF7}

2170 Pathogen[ P0C206] interacts with 5 human partners:{Q9GZX7;P31941;Q6NTF7;Q9HC16;P41238}

2171 [Cluster 387]GO:0032050+F molecular\_function [name] clathrin heavy chain binding [def] "Interacting selectively and non-covalently with a clathrin heavy chain." [GOC

2172 Pathogen[ P03346] interacts with 1 human partners:{Q13492}

2173 Pathogen[ P14079] interacts with 1 human partners:{Q13492}

2174 Pathogen[ P03410] interacts with 1 human partners:{Q13492}

2175 [Cluster 388]GO:0017168+F molecular\_function [name] 5-oxoprolinase (ATP-hydrolyzing) activity [def] "Catalysis of the reaction

2176 Pathogen[ P14079] interacts with 1 human partners:{O14841}

2177 Pathogen[ P03410] interacts with 1 human partners:{O14841}

2178 [Cluster 389]GO:0030197+F molecular\_function [name] extracellular matrix constituent, lubricant activity [def] "Functions as a lubricant for an extracellular matrix, such as a mucous membrane." [GOC

2179 Pathogen[ P14079] interacts with 1 human partners:{P02808}

2180 Pathogen[ P03410] interacts with 1 human partners:{P02808}

2181 Pathogen[ P14075] interacts with 1 human partners:{P02808}

2182 Pathogen[ P0C206] interacts with 1 human partners:{P02808}

2183 Pathogen[ P03363] interacts with 1 human partners:{P02808}

2184 [Cluster 390]GO:0032217+F molecular\_function [name] riboflavin transporter activity [def] "Facilitates the directed movement of riboflavin into, out of or within a cell, or between cells. Riboflavin (vitamin B2) is a water-soluble B-complex vitamin, converted in the cell to FMN and FAD, cofactors required for the function of flavoproteins." [GOC

2185 Pathogen[ P14079] interacts with 3 human partners:{Q9NWF4;Q9HAB3;Q9NQ40}

2186 Pathogen[ P03410] interacts with 3 human partners:{Q9HAB3;Q9NQ40;Q9NWF4}

2187 [Cluster 391]GO:0017057+F molecular\_function [name] 6-phosphogluconolactonase activity [def] "Catalysis of the reaction

2188 Pathogen[ Q2Q067] interacts with 1 human partners:{O95336}

2189 Pathogen[ P0C214] interacts with 1 human partners:{O95336}

2190 Pathogen[ P03346] interacts with 1 human partners:{O95336}

2191 Pathogen[ Q85601] interacts with 1 human partners:{O95336}

2192 Pathogen[ P14079] interacts with 1 human partners:{O95336}

2193 Pathogen[ P03410] interacts with 1 human partners:{O95336}

2194 Pathogen[ P14075] interacts with 1 human partners:{O95336}

2195 Pathogen[ P0C206] interacts with 1 human partners:{O95336}

2196 Pathogen[ P03363] interacts with 1 human partners:{O95336}

2197 [Cluster 392]GO:0016534+F molecular\_function [name] cyclin-dependent protein kinase 5 activator activity [def] "Increases the activity of cyclin-dependent protein kinase 5." [GOC

2198 Pathogen[ P14079] interacts with 1 human partners:{Q15078}

2199 [Cluster 393]GO:0004810+F molecular\_function [name] tRNA adenylyltransferase activity [def] "Catalysis of the reaction

2200 Pathogen[ P14079] interacts with 1 human partners:{Q96Q11}

2201 Pathogen[ P03410] interacts with 1 human partners:{Q96Q11}

2202 [Cluster 394]GO:0003909+F molecular\_function [name] DNA ligase activity [def] "Catalysis of the formation of a phosphodiester bond between the 3'-hydroxyl group at the end of one DNA chain and the 5'-phosphate group at the end of another. This reaction requires an energy source such as ATP or NAD+." [ISBN

2203 Pathogen[ P14079] interacts with 1 human partners:{P49917}

2204 Pathogen[ P0C206] interacts with 2 human partners:{P49917;P49916}

2205 [Cluster 395]GO:0046933+F molecular\_function [name] hydrogen ion transporting ATP synthase activity, rotational mechanism [def] "Catalysis of the transfer of a solute or solutes from one side of a membrane to the other according to the reaction

2206 Pathogen[ Q2Q067] interacts with 1 human partners:{P24539}

2207 Pathogen[ P0C214] interacts with 3 human partners:{Q16864;P36542;P24539}

2208 Pathogen[ P03346] interacts with 2 human partners:{P24539;Q16864}

2209 Pathogen[ Q85601] interacts with 1 human partners:{P24539}

2210 Pathogen[ P14079] interacts with 6 human partners:{P36542;P25705;Q5VTU8;P56381;Q16864;P24539}

2211 Pathogen[ P03383] interacts with 1 human partners:{P24539}

2212 Pathogen[ P03410] interacts with 6 human partners:{P36542;P25705;P56381;Q5VTU8;P24539;Q16864}

2213 Pathogen[ P14075] interacts with 1 human partners:{P24539}

2214 Pathogen[ P0C206] interacts with 4 human partners:{P36542;P24539;Q16864;P56381}

2215 [Cluster 396]GO:0044540+F

2216 Pathogen[ Q2Q067] interacts with 1 human partners:{P32929}

2217 Pathogen[ P0C214] interacts with 1 human partners:{P32929}

2218 Pathogen[ P03346] interacts with 1 human partners:{P32929}

2219 Pathogen[ Q85601] interacts with 1 human partners:{P32929}

2220 Pathogen[ P14079] interacts with 1 human partners:{P32929}

2221 Pathogen[ P03410] interacts with 1 human partners:{P32929}

2222 Pathogen[ P0C206] interacts with 1 human partners:{P32929}

2223 [Cluster 397]GO:0047621+F molecular\_function [name] acylpyruvate hydrolase activity [def] "Catalysis of the reaction

2224 Pathogen[ P0C214] interacts with 1 human partners:{Q6P587}

2225 Pathogen[ P14079] interacts with 1 human partners:{Q6P587}

2226 Pathogen[ P03410] interacts with 1 human partners:{Q6P587}

2227 Pathogen[ P0C206] interacts with 1 human partners:{Q6P587}

2228 [Cluster 398]GO:0030586+F molecular\_function [name] [methionine synthase] reductase activity [def] "Catalysis of the reaction

2229 Pathogen[ P03346] interacts with 1 human partners:{Q9UBK8}

2230 [Cluster 399]GO:0004835+F molecular\_function [name] tubulin-tyrosine ligase activity [def] "Catalysis of the reaction

2231 Pathogen[ P03346] interacts with 2 human partners:{Q8N841;Q6EMB2}

2232 Pathogen[ P14079] interacts with 7 human partners:{Q14166;O95922;Q9Y4R7;A6PVC2;Q8N841;Q6ZVT0;Q6EMB2}

2233 Pathogen[ P03410] interacts with 7 human partners:{Q9Y4R7;Q6ZVT0;Q14166;O95922;Q8N841;A6PVC2;Q6EMB2}

2234 Pathogen[ P0C206] interacts with 4 human partners:{Q6ZVT0;O95922;Q8N841;Q6EMB2}

2235 Pathogen[ P03363] interacts with 3 human partners:{Q6EMB2;O95922;Q8N841}

2236 [Cluster 400]GO:0050121+F molecular\_function [name] N-acylglucosamine 2-epimerase activity [def] "Catalysis of the reaction

2237 Pathogen[ P14079] interacts with 1 human partners:{P51606}

2238 Pathogen[ P03410] interacts with 1 human partners:{P51606}

2239 [Cluster 401]GO:0070402+F molecular\_function [name] NADPH binding [def] "Interacting selectively and non-covalently with the reduced form, NADPH, of nicotinamide-adenine dinucleotide phosphate, a coenzyme involved in many redox and biosynthetic reactions." [GOC

2240 Pathogen[ P0C214] interacts with 2 human partners:{P09417;Q16698}

2241 [Cluster 402]GO:0005519+F molecular\_function [name] cytoskeletal regulatory protein binding [def] "Interacting selectively and non-covalently with any protein involved in modulating the reorganization of the cytoskeleton." [GOC

2242 Pathogen[ P14079] interacts with 1 human partners:{Q9UKI2}

2243 Pathogen[ P03410] interacts with 1 human partners:{Q9UKI2}

2244 [Cluster 403]GO:0008517+F molecular\_function [name] folic acid transporter activity [def] "Enables the directed movement of folic acid (pteroylglutamic acid) into, out of or within a cell, or between cells. Folic acid is widely distributed as a member of the vitamin B complex and is essential for the synthesis of purine and pyrimidines." [GOC

2245 Pathogen[ P14079] interacts with 1 human partners:{Q96NT5}

2246 [Cluster 404]GO:0042731+F molecular\_function [name] PH domain binding [def]



"Interacting selectively and non-covalently with a PH domain (pleckstrin homology) of a protein, a domain of about 100 residues that occurs in a wide range of proteins involved in intracellular signaling or as constituents of the cytoskeleton." [GOC

2247 Pathogen[ P03346] interacts with 1 human partners:{043491}

2248 Pathogen[ P03410] interacts with 1 human partners:{043491}

2249 Pathogen[ P0C206] interacts with 1 human partners:{043491}

2250 Pathogen[ P03363] interacts with 1 human partners:{043491}

2251 [Cluster 405]GO:0004724+F molecular\_function [name] magnesium-dependent protein serine/threonine phosphatase activity [def] "Catalysis of the reactions

2252 Pathogen[ P0C214] interacts with 2 human partners:{Q9P0J1;Q9P2J9}

2253 [Cluster 406]GO:0031861+F molecular\_function [name] prolactin-releasing peptide receptor binding [def] "Interacting selectively and non-covalently with a prolactin-releasing peptide receptor." [GOC

2254 Pathogen[ P14079] interacts with 1 human partners:{P81277}

2255 Pathogen[ P03410] interacts with 1 human partners:{P81277}

2256 [Cluster 407]GO:0004127+F molecular\_function [name] cytidylate kinase activity [def] "Catalysis of the reaction

2257 Pathogen[ P0C214] interacts with 1 human partners:{Q5EBM0}

2258 Pathogen[ P14079] interacts with 1 human partners:{Q5EBM0}

2259 Pathogen[ P03383] interacts with 1 human partners:{Q5EBM0}

2260 Pathogen[ P03410] interacts with 1 human partners:{Q5EBM0}

2261 Pathogen[ P14075] interacts with 1 human partners:{Q5EBM0}

2262 Pathogen[ P0C206] interacts with 1 human partners:{Q5EBM0}

2263 [Cluster 408]GO:0017154+F molecular\_function [name] semaphorin receptor activity [def] "Combining with a semaphorin to initiate a change in cell activity." [GOC

2264 Pathogen[ Q2Q067] interacts with 1 human partners:{014786}

2265 Pathogen[ P0C214] interacts with 1 human partners:{014786}

2266 Pathogen[ P03346] interacts with 1 human partners:{014786}

2267 Pathogen[ Q85601] interacts with 1 human partners:{014786}

2268 Pathogen[ P03410] interacts with 1 human partners:{014786}

2269 Pathogen[ P0C206] interacts with 1 human partners:{014786}

2270 Pathogen[ P03363] interacts with 1 human partners:{014786}

2271 [Cluster 409]GO:0052901+F

2272 Pathogen[ P0C214] interacts with 1 human partners:{Q9NWM0}

2273 [Cluster 410]GO:0004329+F molecular\_function [name] formate-tetrahydrofolate ligase activity [def] "Catalysis of the reaction

2274 Pathogen[ P0C214] interacts with 1 human partners:{P11586}

2275 [Cluster 411]GO:0043499+F molecular\_function [name] eukaryotic cell surface binding [def] "Interacting selectively and non-covalently with any component on the surface of a eukaryotic cell." [GOC

2276 Pathogen[ Q2Q067] interacts with 1 human partners:{P08697}

2277 Pathogen[ P0C214] interacts with 1 human partners:{P08697}

2278 Pathogen[ Q85601] interacts with 1 human partners:{P08697}

2279 Pathogen[ P14079] interacts with 2 human partners:{P25705;P08758}

2280 Pathogen[ P03383] interacts with 1 human partners:{P08697}

2281 Pathogen[ P03410] interacts with 2 human partners:{P25705;P08697}

2282 Pathogen[ P14075] interacts with 1 human partners:{P08697}

2283 Pathogen[ P0C206] interacts with 1 human partners:{P08697}

2284 Pathogen[ P03363] interacts with 1 human partners:{Q8N302}

2285 [Cluster 412]GO:0051920+F molecular\_function [name] peroxiredoxin activity [def] "Catalysis of the reaction

2286 Pathogen[ Q2Q067] interacts with 2 human partners:{Q99497;Q06830}

2287 Pathogen[ P0C214] interacts with 2 human partners:{Q99497;Q06830}

2288 Pathogen[ P03346] interacts with 2 human partners:{Q99497;Q06830}

2289 Pathogen[ Q85601] interacts with 2 human partners:{Q99497;Q06830}

2290 Pathogen[ P14079] interacts with 1 human partners:{Q99497}

2291 Pathogen[ P03410] interacts with 2 human partners:{Q99497;Q06830}

2292 Pathogen[ P0C206] interacts with 2 human partners:{Q99497;Q06830}

2293 [Cluster 413]GO:0008545+F molecular\_function [name] JUN kinase kinase activity [def] "Catalysis of the phosphorylation of tyrosine and threonine residues in a c-Jun NH2-terminal kinase (JNK), a member of a subgroup of mitogen-activated protein kinases (MAPKs), which signal in response to cytokines and exposure to environmental stress. JUN kinase kinase (JNKK) is a dual-specificity protein kinase kinase and requires activation by a serine/threonine kinase JUN kinase kinase." [GOC

2294 Pathogen[ Q2Q067] interacts with 1 human partners:{Q13233}

2295 Pathogen[ P0C214] interacts with 1 human partners:{Q13233}

2296 Pathogen[ P03346] interacts with 1 human partners:{Q13233}

2297 Pathogen[ Q85601] interacts with 1 human partners:{Q13233}

2298 Pathogen[ P03383] interacts with 1 human partners:{Q13233}

2299 Pathogen[ P03410] interacts with 1 human partners:{Q13233}

2300 Pathogen[ P14075] interacts with 1 human partners:{Q13233}

2301 Pathogen[ P0C206] interacts with 1 human partners:{Q13233}

2302 Pathogen[ P03363] interacts with 1 human partners:{Q13233}

2303 [Cluster 414]GO:0034038+F molecular\_function [name] deoxyhypusine synthase activity [def] "Catalysis of the reaction

2304 Pathogen[ Q2Q067] interacts with 1 human partners:{P49366}

2305 Pathogen[ P0C214] interacts with 1 human partners:{P49366}

2306 Pathogen[ P03346] interacts with 1 human partners:{P49366}

2307 Pathogen[ P14079] interacts with 1 human partners:{P49366}

2308 Pathogen[ P03383] interacts with 1 human partners:{P49366}

2309 Pathogen[ P03410] interacts with 1 human partners:{P49366}

2310 Pathogen[ P14075] interacts with 1 human partners:{P49366}

2311 Pathogen[ P0C206] interacts with 1 human partners:{P49366}

2312 Pathogen[ P03363] interacts with 1 human partners:{P49366}

2313 [Cluster 415]GO:0070273+F molecular\_function [name] phosphatidylinositol-4-phosphate binding [def] "Interacting selectively and non-covalently with phosphatidylinositol-4-phosphate, a derivative of phosphatidylinositol in which the inositol ring is phosphorylated at the 4' position." [GOC

2314 Pathogen[ Q2Q067] interacts with 1 human partners:{Q86VW0}

2315 Pathogen[ P0C214] interacts with 1 human partners:{Q86VW0}

2316 Pathogen[ P03346] interacts with 2 human partners:{Q86VW0;Q96S99}

2317 Pathogen[ Q85601] interacts with 2 human partners:{Q96S99;Q86VW0}

2318 Pathogen[ P14079] interacts with 3 human partners:{Q96S99;Q9NS86;Q86VW0}

2319 Pathogen[ P03410] interacts with 3 human partners:{Q9NS86;Q96S99;Q86VW0}

2320 Pathogen[ P0C206] interacts with 3 human partners:{Q86VW0;Q96S99;Q9NS86}

2321 Pathogen[ P03363] interacts with 1 human partners:{Q86VW0}

2322 [Cluster 416]GO:0032090+F molecular\_function [name] Pyrin domain binding [def] "Interacting selectively and non-covalently with a Pyrin (PAAD/DAPIN) domain, a protein-protein interaction domain that has the same fold as the Death domain." [GOC

2323 Pathogen[ P03346] interacts with 1 human partners:{Q9NX02}

2324 Pathogen[ P03363] interacts with 1 human partners:{Q9NX02}

2325 [Cluster 417]GO:0050786+F molecular\_function [name] RAGE receptor binding [def] "Interacting selectively and non-covalently with the RAGE receptor, the receptor for advanced glycation end-products." [GOC

2326 Pathogen[ Q2Q067] interacts with 1 human partners:{P26447}

2327 Pathogen[ P0C214] interacts with 1 human partners:{P26447}

2328 Pathogen[ P03346] interacts with 1 human partners:{P26447}

2329 Pathogen[ Q85601] interacts with 1 human partners:{P26447}

2330 Pathogen[ P14079] interacts with 1 human partners:{P26447}

2331 Pathogen[ P03410] interacts with 1 human partners:{P26447}

2332 Pathogen[ P0C206] interacts with 1 human partners:{P26447}

2333 Pathogen[ P03363] interacts with 1 human partners:{P26447}

2334 [Cluster 418]GO:0046527+F molecular\_function [name] glucosyltransferase activity [def] "Catalysis of the transfer of a glucosyl group to an acceptor molecule, typically another carbohydrate or a lipid." [ISBN

2335 Pathogen[ P14079] interacts with 1 human partners:{Q8NBL1}

2336 [Cluster 419]GO:0070300+F molecular\_function [name] phosphatidic acid binding [def] "Interacting selectively and non-covalently with phosphatidic acid, any of a class of glycerol phosphate in which both the remaining hydroxyl groups of the glycerol moiety are esterified with fatty acids." [CHEBI

2337 Pathogen[ Q2Q067] interacts with 1 human partners:{Q86VW0}

2338 Pathogen[ P0C214] interacts with 1 human partners:{Q86VW0}

2339 Pathogen[ P03346] interacts with 1 human partners:{Q86VW0}

2340 Pathogen[ Q85601] interacts with 1 human partners:{Q86VW0}

2341 Pathogen[ P14079] interacts with 1 human partners:{Q86VW0}

2342 Pathogen[ P03410] interacts with 1 human partners:{Q86VW0}

2343 Pathogen[ P0C206] interacts with 1 human partners:{Q86VW0}

2344 Pathogen[ P03363] interacts with 1 human partners:{Q86VW0}

2345 [Cluster 420]GO:0031386+F molecular\_function [name] protein tag [def] "Acting as an indicator or marker to facilitate recognition by other molecules in the cell. Recognition of the tag, which can be covalently attached to the target molecule, may result in modification, sequestration, transport or degradation of the molecule in question." [GOC

2346 Pathogen[ P0C214] interacts with 1 human partners:{Q9H4P4}

2347 Pathogen[ P03346] interacts with 1 human partners:{Q9H4P4}

2348 Pathogen[ Q85601] interacts with 1 human partners:{Q9H4P4}

2349 Pathogen[ P0C206] interacts with 1 human partners:{Q9H4P4}

2350 Pathogen[ P03363] interacts with 1 human partners:{Q9H4P4}

2351 [Cluster 421]GO:0010859+F molecular\_function [name] calcium-dependent cysteine-type endopeptidase inhibitor activity [def] "Stops, prevents or reduces the activity of a calcium-dependent cysteine-type endopeptidase, any enzyme that hydrolyzes peptide bonds in polypeptides by a mechanism in which the sulfhydryl group of a cysteine residue at the active center acts as a nucleophile in a calcium-dependent manner." [GOC

2352 Pathogen[ Q2Q067] interacts with 1 human partners:{P20810}

2353 Pathogen[ P0C214] interacts with 1 human partners:{P20810}

2354 Pathogen[ P03346] interacts with 1 human partners:{P20810}

2355 Pathogen[ P14079] interacts with 1 human partners:{P20810}

2356 Pathogen[ P03383] interacts with 1 human partners:{P20810}

2357 Pathogen[ P03410] interacts with 1 human partners:{P20810}

2358 Pathogen[ P14075] interacts with 1 human partners:{P20810}

2359 Pathogen[ P0C206] interacts with 1 human partners:{P20810}

2360 Pathogen[ P03363] interacts with 1 human partners:{P20810}

2361 [Cluster 422]GO:0042947+F molecular\_function [name] glucoside transmembrane

transporter activity [def] "Catalysis of the transfer of glucosides from one side of the membrane to the other. Glucosides are glycosides in which the sugar group is a glucose residue." [GOC

2362 Pathogen[ P03410] interacts with 1 human partners:{Q9BRV3}

2363 [Cluster 423]GO:0008568+F molecular\_function [name] microtubule-severing ATPase activity [def] "Catalysis of the reaction

2364 Pathogen[ P03346] interacts with 1 human partners:{Q9UBP0}

2365 Pathogen[ Q85601] interacts with 2 human partners:{Q9UBP0;Q9BVA0}

2366 Pathogen[ P14079] interacts with 1 human partners:{Q9BVA0}

2367 Pathogen[ P03410] interacts with 1 human partners:{Q9BVA0}

2368 Pathogen[ P0C206] interacts with 2 human partners:{Q9BVA0;Q9UBP0}

2369 [Cluster 424]GO:0004074+F molecular\_function [name] biliverdin reductase activity [def] "Catalysis of the reaction

2370 Pathogen[ P0C214] interacts with 1 human partners:{P30043}

2371 [Cluster 425]GO:0005372+F molecular\_function [name] water transmembrane transporter activity [def] "Enables the directed movement of water (H2O) from one side of a membrane to the other." [GOC

2372 Pathogen[ P03410] interacts with 1 human partners:{Q13336}

2373 [Cluster 426]GO:0005319+F molecular\_function [name] lipid transporter activity [def] "Enables the directed movement of lipids into, out of or within a cell, or between cells." [GOC

2374 Pathogen[ P14079] interacts with 1 human partners:{Q96AA3}

2375 Pathogen[ P03410] interacts with 1 human partners:{P55157}

2376 [Cluster 427]GO:0008483+F molecular\_function [name] transaminase activity [def] "Catalysis of the transfer of an amino group to an acceptor, usually a 2-oxo acid." [ISBN

2377 Pathogen[ P0C214] interacts with 5 human partners:{P48728;Q9Y617;O15382;P54687;Q16773}

2378 Pathogen[ P03346] interacts with 1 human partners:{P48728}

2379 Pathogen[ Q85601] interacts with 1 human partners:{O15382}

2380 Pathogen[ P14079] interacts with 3 human partners:{Q9Y617;P48728;O15382}

2381 Pathogen[ P03410] interacts with 3 human partners:{Q9Y617;O15382;P48728}

2382 Pathogen[ P14075] interacts with 1 human partners:{P48728}

2383 Pathogen[ P0C206] interacts with 2 human partners:{O15382;P48728}

2384 Pathogen[ P03363] interacts with 1 human partners:{P48728}

2385 [Cluster 428]GO:0008474+F molecular\_function [name] palmitoyl-(protein) hydrolase activity [def] "Catalysis of the reaction

2386 Pathogen[ P0C214] interacts with 1 human partners:{O75608}

2387 Pathogen[ P03346] interacts with 1 human partners:{O75608}

2388 Pathogen[ P14079] interacts with 1 human partners:{O75608}

2389 Pathogen[ P03410] interacts with 1 human partners:{O75608}

2390 Pathogen[ P0C206] interacts with 1 human partners:{O75608}

2391 [Cluster 429]GO:0034191+F molecular\_function [name] apolipoprotein A-I receptor binding [def] "Interacting selectively and non-covalently with an apolipoprotein A-I receptor." [GOC

2392 Pathogen[ Q2Q067] interacts with 1 human partners:{P60953}

2393 Pathogen[ P0C214] interacts with 1 human partners:{P60953}

2394 Pathogen[ P03346] interacts with 1 human partners:{P60953}

2395 Pathogen[ Q85601] interacts with 1 human partners:{P60953}

2396 Pathogen[ P03383] interacts with 1 human partners:{P60953}

2397 Pathogen[ P03410] interacts with 1 human partners:{P60953}

2398 Pathogen[ P14075] interacts with 1 human partners:{P60953}

2399 Pathogen[ P0C206] interacts with 1 human partners:{P60953}

2400 Pathogen[ P03363] interacts with 1 human partners:{P60953}

2401 [Cluster 430]GO:0048365+F molecular\_function [name] Rac GTPase binding [def] "Interacting selectively and non-covalently with Rac protein, any member of the Rac subfamily of the Ras superfamily of monomeric GTPases." [GOC

2402 Pathogen[ Q2Q067] interacts with 1 human partners:{Q8N1I0}

2403 Pathogen[ P0C214] interacts with 1 human partners:{Q8N1I0}

2404 Pathogen[ P03346] interacts with 2 human partners:{Q86UR1;Q8N1I0}

2405 Pathogen[ Q85601] interacts with 1 human partners:{Q8N1I0}

2406 Pathogen[ P14079] interacts with 1 human partners:{Q8N1I0}

2407 Pathogen[ P03410] interacts with 2 human partners:{Q86UR1;Q8N1I0}

2408 Pathogen[ P0C206] interacts with 1 human partners:{Q8N1I0}

2409 Pathogen[ P03363] interacts with 3 human partners:{Q86UR1;Q7L576;Q8N1I0}

2410 [Cluster 431]GO:0015068+F molecular\_function [name] glycine amidinotransferase activity [def] "Catalysis of the reaction

2411 Pathogen[ P0C214] interacts with 1 human partners:{P50440}

2412 Pathogen[ P14079] interacts with 1 human partners:{P50440}

2413 Pathogen[ P03410] interacts with 1 human partners:{P50440}

2414 Pathogen[ P14075] interacts with 1 human partners:{P50440}

2415 Pathogen[ P0C206] interacts with 1 human partners:{P50440}

2416 [Cluster 432]GO:0016830+F molecular\_function [name] carbon-carbon lyase activity [def] "Catalysis of the cleavage of C-C bonds by other means than by hydrolysis or oxidation, or conversely adding a group to a double bond." [GOC

2417 Pathogen[ P14079] interacts with 1 human partners:{Q8N0X4}

2418 Pathogen[ P03410] interacts with 1 human partners:{Q8N0X4}

2419 [Cluster 433]GO:0005501+F molecular\_function [name] retinoid binding [def] "Interacting selectively and non-covalently with retinoids, any member of a class of isoprenoids that contain or are derived from four prenyl groups linked head-to-tail. Retinoids include retinol and retinal and structurally similar natural derivatives or synthetic compounds, but need not have vitamin A activity." [GOC]

2420 Pathogen[ P03346] interacts with 1 human partners:{P29373}

2421 Pathogen[ P0C206] interacts with 1 human partners:{P29373}

2422 Pathogen[ P03363] interacts with 1 human partners:{P29373}

2423 [Cluster 434]GO:0004303+F molecular\_function [name] estradiol 17-beta-dehydrogenase activity [def] "Catalysis of the reaction

2424 Pathogen[ Q2Q067] interacts with 1 human partners:{Q9BPX1}

2425 Pathogen[ P0C214] interacts with 1 human partners:{Q9BPX1}

2426 Pathogen[ P03346] interacts with 1 human partners:{Q9BPX1}

2427 Pathogen[ Q85601] interacts with 1 human partners:{Q9BPX1}

2428 Pathogen[ P03383] interacts with 1 human partners:{Q9BPX1}

2429 Pathogen[ P03410] interacts with 1 human partners:{Q9BPX1}

2430 Pathogen[ P0C206] interacts with 1 human partners:{Q9BPX1}

2431 Pathogen[ P03363] interacts with 1 human partners:{Q9BPX1}

2432 [Cluster 435]GO:0031771+F molecular\_function [name] type 1 hypocretin receptor binding [def] "Interacting selectively and non-covalently with a type 1 hypocretin receptor." [GOC]

2433 Pathogen[ P14079] interacts with 1 human partners:{O43612}

2434 Pathogen[ P03410] interacts with 1 human partners:{O43612}

2435 [Cluster 436]GO:0005121+F molecular\_function [name] Toll binding [def] "Interacting selectively and non-covalently with the Toll protein, a transmembrane receptor." [GOC]

2436 Pathogen[ P14079] interacts with 1 human partners:{Q99836}

2437 [Cluster 437]GO:0001918+F molecular\_function [name] farnesylated protein binding [def] "Interacting selectively and non-covalently with a farnesylated protein." [GOC]

2438 Pathogen[ P03363] interacts with 1 human partners:{Q9NZN9}

2439 [Cluster 438]GO:0019205+F molecular\_function [name] nucleobase-containing compound kinase activity [def] "Catalysis of the transfer of a phosphate group, usually from ATP or GTP, to a nucleobase, nucleoside, nucleotide or polynucleotide substrate." [GOC]

2440 Pathogen[ P14079] interacts with 1 human partners:{Q9C093}

2441 Pathogen[ P03410] interacts with 1 human partners:{Q9C093}

2442 [Cluster 439]GO:0030351+F molecular\_function [name] inositol-1,3,4,5,6-pentakisphosphate 3-phosphatase activity [def] "Catalysis of the reaction

2443 Pathogen[ P14079] interacts with 1 human partners:{Q9UNW1}

2444 Pathogen[ P03410] interacts with 1 human partners:{Q9UNW1}

2445 [Cluster 440]GO:0080146+F molecular\_function [name] L-cysteine desulphydrase activity [def] "Catalysis of the reaction

2446 Pathogen[ Q2Q067] interacts with 1 human partners:{P32929}

2447 Pathogen[ P0C214] interacts with 1 human partners:{P32929}

2448 Pathogen[ P03346] interacts with 1 human partners:{P32929}

2449 Pathogen[ Q85601] interacts with 1 human partners:{P32929}

2450 Pathogen[ P14079] interacts with 1 human partners:{P32929}

2451 Pathogen[ P03410] interacts with 1 human partners:{P32929}

2452 Pathogen[ P0C206] interacts with 1 human partners:{P32929}

2453 [Cluster 441]GO:0015105+F molecular\_function [name] arsenite transmembrane transporter activity [def] "Catalysis of the transfer of arsenite from one side of a membrane to the other." [GOC]

2454 Pathogen[ P0C214] interacts with 1 human partners:{O43681}

2455 Pathogen[ Q85601] interacts with 1 human partners:{O43681}

2456 Pathogen[ P14079] interacts with 1 human partners:{O43681}

2457 Pathogen[ P03410] interacts with 1 human partners:{O43681}

2458 Pathogen[ P0C206] interacts with 1 human partners:{O43681}

2459 [Cluster 442]GO:0097158+F molecular\_function [name] pre-mRNA intronic pyrimidine-rich binding [def] "Interacting selectively and non-covalently with a pyrimidine-rich (CU-rich) intronic sequence of a pre-messenger RNA (pre-mRNA)." [GOC]

2460 Pathogen[ P03346] interacts with 1 human partners:{Q9BWF3}

2461 Pathogen[ P03363] interacts with 1 human partners:{Q9BWF3}

2462 [Cluster 443]GO:0004602+F molecular\_function [name] glutathione peroxidase activity [def] "Catalysis of the reaction

2463 Pathogen[ Q2Q067] interacts with 1 human partners:{O43708}

2464 Pathogen[ P0C214] interacts with 1 human partners:{O43708}

2465 Pathogen[ P03346] interacts with 1 human partners:{O43708}

2466 Pathogen[ Q85601] interacts with 1 human partners:{O43708}

2467 Pathogen[ P14079] interacts with 2 human partners:{O43708;P10620}

2468 Pathogen[ P03410] interacts with 1 human partners:{O43708}

2469 Pathogen[ P0C206] interacts with 1 human partners:{O43708}

2470 Pathogen[ P03363] interacts with 1 human partners:{O43708}

2471 [Cluster 444]GO:0032405+F molecular\_function [name] MutLalpha complex binding [def] "Interacting selectively and non-covalently with the mismatch repair complex MutLalpha." [GOC]

2472 Pathogen[ Q2Q067] interacts with 2 human partners:{Q9UIF7;P12004}

2473 Pathogen[ P0C214] interacts with 1 human partners:{Q9UIF7}

2474 Pathogen[ P03346] interacts with 2 human partners:{P12004;Q9UIF7}

2475 Pathogen[ Q85601] interacts with 2 human partners:{Q9UIF7;P12004}

2476 Pathogen[ P14079] interacts with 4 human partners:{Q9UIF7;Q9NSU2;P12004;P52701}

2477 Pathogen[ P03410] interacts with 4 human partners:{Q9NSU2;P52701;P12004;Q9UIF7}

2478 Pathogen[ P14075] interacts with 1 human partners:{Q9UIF7}

2479 Pathogen[ P0C206] interacts with 4 human partners:{Q9NSU2;P52701;Q9UIF7;P12004}

2480 Pathogen[ P03363] interacts with 1 human partners:{Q9UIF7}

2481 [Cluster 445]GO:0004706+F molecular\_function [name] JUN kinase kinase kinase activity  
[def] "Catalysis of the reaction

2482 Pathogen[ Q2Q067] interacts with 1 human partners:{Q13233}

2483 Pathogen[ P0C214] interacts with 1 human partners:{Q13233}

2484 Pathogen[ P03346] interacts with 1 human partners:{Q13233}

2485 Pathogen[ Q85601] interacts with 1 human partners:{Q13233}

2486 Pathogen[ P03383] interacts with 1 human partners:{Q13233}

2487 Pathogen[ P03410] interacts with 1 human partners:{Q13233}

2488 Pathogen[ P14075] interacts with 1 human partners:{Q13233}

2489 Pathogen[ P0C206] interacts with 1 human partners:{Q13233}

2490 Pathogen[ P03363] interacts with 1 human partners:{Q13233}

2491 [Cluster 446]GO:0016175+F molecular\_function [name] superoxide-generating NADPH  
oxidase activity [def] "Catalysis of the reaction

2492 Pathogen[ P14079] interacts with 1 human partners:{P13498}

2493 [Cluster 447]GO:0004560+F molecular\_function [name] alpha-L-fucosidase activity [def]  
"Catalysis of the reaction

2494 Pathogen[ P14079] interacts with 1 human partners:{P04066}

2495 Pathogen[ P03410] interacts with 1 human partners:{P04066}

2496 [Cluster 448]GO:0008480+F molecular\_function [name] sarcosine dehydrogenase activity  
[def] "Catalysis of the reaction

2497 Pathogen[ P0C214] interacts with 1 human partners:{Q9UL12}

2498 Pathogen[ P14079] interacts with 1 human partners:{Q9UL12}

2499 Pathogen[ P03410] interacts with 1 human partners:{Q9UL12}

2500 [Cluster 449]GO:0016671+F molecular\_function [name] oxidoreductase activity, acting on  
a sulfur group of donors, disulfide as acceptor [def] "Catalysis of an  
oxidation-reduction (redox) reaction in which a sulfur-containing group acts as a  
hydrogen or electron donor and reduces disulfide." [GOC

2501 Pathogen[ P0C214] interacts with 2 human partners:{Q9UJ68;Q9Y3D2}

2502 Pathogen[ P14079] interacts with 3 human partners:{Q9NZV6;Q9Y3D2;Q9UJ68}

2503 Pathogen[ P03410] interacts with 2 human partners:{Q9UJ68;Q9Y3D2}

2504 Pathogen[ P0C206] interacts with 3 human partners:{Q9NZV6;Q9Y3D2;Q9UJ68}

2505 [Cluster 450]GO:0004622+F molecular\_function [name] lysophospholipase activity [def]  
"Catalysis of the reaction

2506 Pathogen[ P0C214] interacts with 1 human partners:{O75608}

2507 Pathogen[ P03346] interacts with 1 human partners:{O75608}

2508 Pathogen[ P14079] interacts with 1 human partners:{O75608}

2509 Pathogen[ P03410] interacts with 1 human partners:{O75608}

2510 Pathogen[ P0C206] interacts with 2 human partners:{O75608;Q5VWZ2}

2511 Pathogen[ P03363] interacts with 1 human partners:{Q5VWZ2}

2512 [Cluster 451]GO:0019783+F molecular\_function [name] small conjugating protein-specific  
protease activity [def] "Catalysis of the hydrolysis of peptide or isopeptide bonds  
within small proteins such as ubiquitin or ubiquitin-like proteins (e.g. APG8, ISG15,  
NEDD8, SUMO), or between the small protein and a larger protein to which it has been  
conjugated." [GOC

2513 Pathogen[ P14079] interacts with 1 human partners:{Q9NUQ7}

2514 [Cluster 452]GO:0030169+F molecular\_function [name] low-density lipoprotein particle  
binding [def] "Interacting selectively and non-covalently with a low-density lipoprotein  
particle, a lipoprotein particle that is rich in cholesterol esters and low in  
triglycerides, is typically composed of APOB100 and APOE, and has a density of 1.02-1.06  
g/ml and a diameter of between 20-25 nm." [GOC

2515 Pathogen[ P0C214] interacts with 1 human partners:{Q9H9E1}

2516 Pathogen[ P03346] interacts with 1 human partners:{Q9H9E1}

2517 Pathogen[ Q85601] interacts with 1 human partners:{Q9H9E1}

2518 Pathogen[ P14079] interacts with 1 human partners:{Q9H9E1}

2519 Pathogen[ P03410] interacts with 1 human partners:{Q9H9E1}

2520 Pathogen[ P0C206] interacts with 1 human partners:{Q9H9E1}

2521 Pathogen[ P03363] interacts with 1 human partners:{Q9H9E1}

2522 [Cluster 453]GO:0042805+F molecular\_function [name] actinin binding [def]  
"Interacting selectively and non-covalently with actinin, any member of a family of  
proteins that crosslink F-actin." [GOC

2523 Pathogen[ P0C206] interacts with 1 human partners:{P50461}

2524 [Cluster 454]GO:0001875+F molecular\_function [name] lipopolysaccharide receptor  
activity [def] "Combining with a lipopolysaccharide to initiate a change in cell  
activity. Lipopolysaccharides (LPS) are major components of the outer membrane of  
Gram-negative bacteria, making them prime targets for recognition by the immune system."  
[PMID

2525 Pathogen[ P14079] interacts with 1 human partners:{Q9Y6Y9}

2526 Pathogen[ P03410] interacts with 1 human partners:{Q9Y6Y9}

2527 [Cluster 455]GO:0019855+F molecular\_function [name] calcium channel inhibitor activity

```

[def] "Stops, prevents, or reduces the activity of a calcium channel." [GOC
2528 Pathogen[ P0C214] interacts with 1 human partners:{P19429}
2529 Pathogen[ P03346] interacts with 1 human partners:{Q9NRX4}
2530 Pathogen[ P14079] interacts with 2 human partners:{P19429;Q9NRX4}
2531 Pathogen[ P03410] interacts with 2 human partners:{P19429;Q9NRX4}
2532 Pathogen[ P0C206] interacts with 2 human partners:{P19429;Q9NRX4}
2533 Pathogen[ P03363] interacts with 1 human partners:{P19429}
2534 [Cluster 456]GO:0032036+F molecular_function [name] myosin heavy chain binding [def]
"Interacting selectively and non-covalently with a heavy chain of a myosin complex." [GOC
2535 Pathogen[ P03346] interacts with 1 human partners:{P10916}
2536 Pathogen[ P14079] interacts with 1 human partners:{P10916}
2537 Pathogen[ P03410] interacts with 1 human partners:{P10916}
2538 Pathogen[ P03363] interacts with 1 human partners:{P10916}
2539 [Cluster 457]GO:0035325+F molecular_function [name] Toll-like receptor binding [def]
"Interacting selectively and non-covalently with a Toll-like protein, a pattern
recognition receptor that binds pattern motifs from a variety of microbial sources to
initiate an innate immune response." [PMID
2540 Pathogen[ P0C214] interacts with 1 human partners:{Q9H0E2}
2541 Pathogen[ P03346] interacts with 1 human partners:{Q9H0E2}
2542 Pathogen[ P14079] interacts with 1 human partners:{Q9H0E2}
2543 Pathogen[ P03410] interacts with 1 human partners:{Q9H0E2}
2544 Pathogen[ P0C206] interacts with 1 human partners:{Q9H0E2}
2545 Pathogen[ P03363] interacts with 1 human partners:{Q9H0E2}
2546 [Cluster 458]GO:0004333+F molecular_function [name] fumarate hydratase activity [def]
"Catalysis of the reaction
2547 Pathogen[ Q2Q067] interacts with 1 human partners:{P07954}
2548 Pathogen[ P0C214] interacts with 1 human partners:{P07954}
2549 Pathogen[ P03346] interacts with 1 human partners:{P07954}
2550 Pathogen[ Q85601] interacts with 1 human partners:{P07954}
2551 Pathogen[ P14079] interacts with 1 human partners:{P07954}
2552 Pathogen[ P03410] interacts with 1 human partners:{P07954}
2553 Pathogen[ P0C206] interacts with 1 human partners:{P07954}
2554 [Cluster 459]GO:0033142+F molecular_function [name] progesterone receptor binding
[def] "Interacting selectively and non-covalently with a progesterone receptor." [GOC
2555 Pathogen[ Q2Q067] interacts with 1 human partners:{P55345}
2556 Pathogen[ P0C214] interacts with 1 human partners:{P55345}
2557 Pathogen[ P03346] interacts with 1 human partners:{P55345}
2558 Pathogen[ Q85601] interacts with 1 human partners:{P55345}
2559 Pathogen[ P14079] interacts with 1 human partners:{P55345}
2560 Pathogen[ P03410] interacts with 1 human partners:{P55345}
2561 Pathogen[ P0C206] interacts with 1 human partners:{P55345}
2562 [Cluster 460]GO:0010333+F molecular_function [name] terpene synthase activity [def]
"Catalysis of the formation of cyclic terpenes through the cyclization of linear terpenes
(e.g. isopentenyl-PP, geranyl-PP, farnesyl-PP and geranylgeranyl-PP) containing varying
numbers of isoprene units." [EC
2563 Pathogen[ Q2Q067] interacts with 1 human partners:{Q96JJ3}
2564 Pathogen[ P0C214] interacts with 1 human partners:{Q96JJ3}
2565 Pathogen[ P03346] interacts with 1 human partners:{Q96JJ3}
2566 Pathogen[ Q85601] interacts with 1 human partners:{Q96JJ3}
2567 Pathogen[ P14079] interacts with 1 human partners:{Q96JJ3}
2568 Pathogen[ P03410] interacts with 1 human partners:{Q96JJ3}
2569 Pathogen[ P0C206] interacts with 1 human partners:{Q96JJ3}
2570 Pathogen[ P03363] interacts with 1 human partners:{Q96JJ3}
2571 [Cluster 461]GO:0032556+F molecular_function [name] pyrimidine deoxyribonucleotide
binding [def] "Interacting selectively and non-covalently with a pyrimidine
deoxyribonucleotide, any compound consisting of a pyrimidine deoxyribonucleoside that is
esterified with (ortho)phosphate or an oligophosphate at any hydroxyl group on the
deoxyribose moiety." [GOC
2572 Pathogen[ P14079] interacts with 1 human partners:{Q9H773}
2573 Pathogen[ P03410] interacts with 1 human partners:{Q9H773}
2574 [Cluster 462]GO:0035575+F molecular_function [name] histone demethylase activity
(H4-K20 specific) [def] "Catalysis of the reaction
2575 Pathogen[ Q2Q067] interacts with 1 human partners:{Q9UPP1}
2576 Pathogen[ P0C214] interacts with 1 human partners:{Q9UPP1}
2577 Pathogen[ P03346] interacts with 1 human partners:{Q9UPP1}
2578 Pathogen[ Q85601] interacts with 1 human partners:{Q9UPP1}
2579 Pathogen[ P14079] interacts with 1 human partners:{Q9UPP1}
2580 Pathogen[ P03383] interacts with 1 human partners:{Q9UPP1}
2581 Pathogen[ P03410] interacts with 1 human partners:{Q9UPP1}
2582 Pathogen[ P14075] interacts with 1 human partners:{Q9UPP1}
2583 Pathogen[ P0C206] interacts with 1 human partners:{Q9UPP1}
2584 [Cluster 463]GO:0008179+F molecular_function [name] adenylate cyclase binding [def]
"Interacting selectively and non-covalently with the enzyme adenylate cyclase." [GOC
2585 Pathogen[ Q2Q067] interacts with 1 human partners:{Q02952}
2586 Pathogen[ P03346] interacts with 1 human partners:{Q02952}
2587 Pathogen[ P14079] interacts with 2 human partners:{Q02952;P24588}

```

2588 Pathogen[ P03383] interacts with 1 human partners:{Q02952}

2589 Pathogen[ P03410] interacts with 2 human partners:{Q02952;P24588}

2590 Pathogen[ P14075] interacts with 1 human partners:{Q02952}

2591 Pathogen[ P0C206] interacts with 1 human partners:{Q02952}

2592 Pathogen[ P03363] interacts with 1 human partners:{Q02952}

2593 [Cluster 464]GO:0050353+F molecular\_function [name] trimethyllysine dioxygenase activity [def] "Catalysis of the reaction

2594 Pathogen[ P0C214] interacts with 1 human partners:{Q9NVH6}

2595 Pathogen[ P14079] interacts with 1 human partners:{Q9NVH6}

2596 Pathogen[ P03410] interacts with 1 human partners:{Q9NVH6}

2597 Pathogen[ P14075] interacts with 1 human partners:{Q9NVH6}

2598 Pathogen[ P0C206] interacts with 1 human partners:{Q9NVH6}

2599 [Cluster 465]GO:0004808+F molecular\_function [name] tRNA (5-methylaminomethyl-2-thiouridylate)-methyltransferase activity [def] "Catalysis of the reaction

2600 Pathogen[ P14079] interacts with 1 human partners:{O75648}

2601 Pathogen[ P03410] interacts with 1 human partners:{O75648}

2602 Pathogen[ P14075] interacts with 1 human partners:{O75648}

2603 [Cluster 466]GO:0005247+F molecular\_function [name] voltage-gated chloride channel activity [def] "Catalysis of the transmembrane transfer of a chloride ion by a voltage-gated channel. A voltage-gated channel is a channel whose open state is dependent on the voltage across the membrane in which it is embedded." [GOC

2604 Pathogen[ P03346] interacts with 2 human partners:{O00299;O95833}

2605 Pathogen[ P03363] interacts with 1 human partners:{O95833}

2606 [Cluster 467]GO:0004181+F molecular\_function [name] metallocarboxypeptidase activity [def] "Catalysis of the hydrolysis of C-terminal amino acid residues from a polypeptide chain by a mechanism in which water acts as a nucleophile, one or two metal ions hold the water molecule in place, and charged amino acid side chains are ligands for the metal ions." [http

2607 Pathogen[ P14079] interacts with 3 human partners:{Q96MI9;Q9UPW5;Q8NDL9}

2608 Pathogen[ P03410] interacts with 1 human partners:{Q9UPW5}

2609 Pathogen[ P0C206] interacts with 2 human partners:{Q8NDL9;Q9UPW5}

2610 [Cluster 468]GO:0045294+F molecular\_function [name] alpha-catenin binding [def] "Interacting selectively and non-covalently with the alpha subunit of the catenin complex." [GOC

2611 Pathogen[ Q2Q067] interacts with 1 human partners:{Q96IF1}

2612 Pathogen[ P03346] interacts with 1 human partners:{Q96IF1}

2613 Pathogen[ Q85601] interacts with 1 human partners:{Q96IF1}

2614 Pathogen[ P14079] interacts with 1 human partners:{Q96IF1}

2615 Pathogen[ P03410] interacts with 1 human partners:{Q96IF1}

2616 Pathogen[ P0C206] interacts with 1 human partners:{Q96IF1}

2617 Pathogen[ P03363] interacts with 1 human partners:{Q96IF1}

2618 [Cluster 469]GO:0004322+F molecular\_function [name] ferroxidase activity [def] "Catalysis of the reaction

2619 Pathogen[ P0C214] interacts with 1 human partners:{P02794}

2620 Pathogen[ P03346] interacts with 1 human partners:{P02794}

2621 Pathogen[ Q85601] interacts with 1 human partners:{P02794}

2622 Pathogen[ P14079] interacts with 1 human partners:{P02794}

2623 Pathogen[ P03383] interacts with 1 human partners:{P02794}

2624 Pathogen[ P03410] interacts with 1 human partners:{P02794}

2625 Pathogen[ P14075] interacts with 1 human partners:{P02794}

2626 Pathogen[ P0C206] interacts with 1 human partners:{P02794}

2627 Pathogen[ P03363] interacts with 1 human partners:{P02794}

2628 [Cluster 470]GO:0008240+F molecular\_function [name] tripeptidyl-peptidase activity [def] "Catalysis of the release of an N-terminal tripeptide from a polypeptide." [GOC

2629 Pathogen[ P14079] interacts with 2 human partners:{O14773;P29144}

2630 Pathogen[ P0C206] interacts with 1 human partners:{P29144}

2631 [Cluster 471]GO:0004715+F molecular\_function [name] non-membrane spanning protein tyrosine kinase activity [def] "Catalysis of the reaction

2632 Pathogen[ P0C206] interacts with 2 human partners:{P30291;Q9UIG0}

2633 [Cluster 472]GO:0003985+F molecular\_function [name] acetyl-CoA C-acetyltransferase activity [def] "Catalysis of the reaction

2634 Pathogen[ P0C214] interacts with 2 human partners:{P40939;Q9BWD1}

2635 Pathogen[ P03346] interacts with 1 human partners:{Q9BWD1}

2636 Pathogen[ Q85601] interacts with 1 human partners:{Q9BWD1}

2637 Pathogen[ P0C206] interacts with 1 human partners:{Q9BWD1}

2638 Pathogen[ P03363] interacts with 1 human partners:{Q9BWD1}

2639 [Cluster 473]GO:0030791+F molecular\_function [name] arsenite methyltransferase activity [def] "Catalysis of the reaction

2640 Pathogen[ P0C214] interacts with 1 human partners:{Q9HBK9}

2641 Pathogen[ P03346] interacts with 1 human partners:{Q9HBK9}

2642 Pathogen[ P14079] interacts with 1 human partners:{Q9HBK9}

2643 Pathogen[ P03410] interacts with 1 human partners:{Q9HBK9}

2644 Pathogen[ P0C206] interacts with 1 human partners:{Q9HBK9}

2645 Pathogen[ P03363] interacts with 1 human partners:{Q9HBK9}

2646 [Cluster 474]GO:0047408+F molecular\_function [name] alkenylglycerophosphocholine

hydrolase activity [def] "Catalysis of the reaction

2647 Pathogen[ P14079] interacts with 1 human partners:{Q8N661}

2648 Pathogen[ P03410] interacts with 1 human partners:{Q8N661}

2649 Pathogen[ P14075] interacts with 1 human partners:{Q8N661}

2650 Pathogen[ P0C206] interacts with 1 human partners:{Q8N661}

2651 [Cluster 475]GO:0016509+F molecular\_function [name] long-chain-3-hydroxyacyl-CoA dehydrogenase activity [def] "Catalysis of the reaction

2652 Pathogen[ P0C214] interacts with 1 human partners:{P40939}

2653 [Cluster 476]GO:0005142+F molecular\_function [name] interleukin-11 receptor binding [def] "Interacting selectively and non-covalently with the interleukin-11 receptor." [GOC

2654 Pathogen[ P14079] interacts with 1 human partners:{P20809}

2655 Pathogen[ P03410] interacts with 1 human partners:{P20809}

2656 Pathogen[ P14075] interacts with 1 human partners:{P20809}

2657 Pathogen[ P0C206] interacts with 1 human partners:{P20809}

2658 [Cluster 477]GO:0005537+F molecular\_function [name] mannose binding [def] "Interacting selectively and non-covalently with mannose, a monosaccharide hexose, stereoisomeric with glucose, that occurs naturally only in polymerized forms called mannans." [CHEBI

2659 Pathogen[ P0C214] interacts with 1 human partners:{P49257}

2660 Pathogen[ P03346] interacts with 1 human partners:{P49257}

2661 Pathogen[ Q85601] interacts with 1 human partners:{P49257}

2662 Pathogen[ P14079] interacts with 3 human partners:{P49257;O75503;Q9H0V9}

2663 Pathogen[ P03410] interacts with 3 human partners:{Q9H0V9;P49257;O75503}

2664 Pathogen[ P0C206] interacts with 1 human partners:{P49257}

2665 [Cluster 478]GO:0018169+F molecular\_function [name] ribosomal S6-glutamic acid ligase activity [def] "Catalysis of the posttranslational transfer of one or more glutamic acid residues to the C-terminus of ribosomal protein S6." [GOC

2666 Pathogen[ P0C214] interacts with 1 human partners:{P61081}

2667 Pathogen[ P03363] interacts with 1 human partners:{P61081}

2668 [Cluster 479]GO:0043398+F molecular\_function [name] HLH domain binding [def] "Interacting selectively and non-covalently with Helix Loop Helix, a domain of 40-50 residues that occurs in specific DNA-binding proteins that act as transcription factors. The domain is formed of two amphipathic helices joined by a variable length linker region that can form a loop and it mediates protein dimerization." [GOC

2669 Pathogen[ Q2Q067] interacts with 1 human partners:{P63279}

2670 Pathogen[ P0C214] interacts with 1 human partners:{P63279}

2671 Pathogen[ P03346] interacts with 1 human partners:{P63279}

2672 Pathogen[ Q85601] interacts with 1 human partners:{P63279}

2673 Pathogen[ P14079] interacts with 1 human partners:{P63279}

2674 Pathogen[ P03383] interacts with 1 human partners:{P63279}

2675 Pathogen[ P03410] interacts with 1 human partners:{P63279}

2676 Pathogen[ P14075] interacts with 1 human partners:{P63279}

2677 Pathogen[ P03363] interacts with 1 human partners:{P63279}

2678 [Cluster 480]GO:0004714+F molecular\_function [name] transmembrane receptor protein tyrosine kinase activity [def] "Combining with a signal and transmitting the signal from one side of the membrane to the other to initiate a change in cell activity by catalysis of the reaction

2679 Pathogen[ Q2Q067] interacts with 1 human partners:{P14373}

2680 Pathogen[ P0C214] interacts with 1 human partners:{P14373}

2681 Pathogen[ P03346] interacts with 1 human partners:{P14373}

2682 Pathogen[ Q85601] interacts with 1 human partners:{P14373}

2683 Pathogen[ P14079] interacts with 1 human partners:{P14373}

2684 Pathogen[ P0C206] interacts with 1 human partners:{P14373}

2685 Pathogen[ P03363] interacts with 1 human partners:{P14373}

2686 [Cluster 481]GO:0004859+F molecular\_function [name] phospholipase inhibitor activity [def] "Stops, prevents or reduces the activity of a phospholipase, an enzyme that catalyzes of the hydrolysis of a phospholipid." [GOC

2687 Pathogen[ Q2Q067] interacts with 1 human partners:{Q16143}

2688 Pathogen[ P0C214] interacts with 1 human partners:{Q16143}

2689 Pathogen[ P03346] interacts with 1 human partners:{Q16143}

2690 Pathogen[ Q85601] interacts with 1 human partners:{Q16143}

2691 Pathogen[ P14079] interacts with 4 human partners:{P04083;Q16143;P08758;P09525}

2692 Pathogen[ P03410] interacts with 1 human partners:{Q16143}

2693 Pathogen[ P0C206] interacts with 1 human partners:{Q16143}

2694 Pathogen[ P03363] interacts with 1 human partners:{Q16143}

2695 [Cluster 482]GO:0048019+F molecular\_function [name] receptor antagonist activity [def] "Interacts with receptors to reduce the action of another ligand, the agonist." [GOC

2696 Pathogen[ Q2Q067] interacts with 1 human partners:{Q8IVG9}

2697 Pathogen[ P03346] interacts with 1 human partners:{Q8IVG9}

2698 Pathogen[ P14079] interacts with 1 human partners:{Q8IVG9}

2699 Pathogen[ P03383] interacts with 1 human partners:{Q8IVG9}

2700 Pathogen[ P03410] interacts with 1 human partners:{Q8IVG9}

2701 Pathogen[ P14075] interacts with 1 human partners:{Q8IVG9}

2702 Pathogen[ P0C206] interacts with 1 human partners:{Q8IVG9}

2703 Pathogen[ P03363] interacts with 1 human partners:{Q8IVG9}

2704 [Cluster 483]GO:0031210+F molecular\_function [name] phosphatidylcholine binding [def]



"Interacting selectively and non-covalently with phosphatidylcholine, a class of glycopospholipids in which a phosphatidyl group is esterified to the hydroxyl group of choline." [GOC

2705 Pathogen[ Q2Q067] interacts with 2 human partners:{Q86VW0;P05062}

2706 Pathogen[ P0C214] interacts with 2 human partners:{Q86VW0;P05062}

2707 Pathogen[ P03346] interacts with 2 human partners:{Q86VW0;P05062}

2708 Pathogen[ Q85601] interacts with 2 human partners:{P05062;Q86VW0}

2709 Pathogen[ P14079] interacts with 1 human partners:{Q86VW0}

2710 Pathogen[ P03410] interacts with 2 human partners:{P05062;Q86VW0}

2711 Pathogen[ P0C206] interacts with 2 human partners:{P05062;Q86VW0}

2712 Pathogen[ P03363] interacts with 1 human partners:{Q86VW0}

2713 [Cluster 484]GO:0071884+F molecular\_function [name] vitamin D receptor activator activity [def] "Interacting (directly or indirectly) with vitamin D receptors such that the proportion of receptors in the active form is increased." [GOC

2714 Pathogen[ P0C206] interacts with 1 human partners:{Q9UIG0}

2715 [Cluster 485]GO:0042586+F molecular\_function [name] peptide deformylase activity [def] "Catalysis of the reaction

2716 Pathogen[ Q2Q067] interacts with 1 human partners:{Q9HBH1}

2717 Pathogen[ P0C214] interacts with 1 human partners:{Q9HBH1}

2718 Pathogen[ P03346] interacts with 1 human partners:{Q9HBH1}

2719 Pathogen[ Q85601] interacts with 1 human partners:{Q9HBH1}

2720 Pathogen[ P14079] interacts with 1 human partners:{Q9HBH1}

2721 Pathogen[ P03383] interacts with 1 human partners:{Q9HBH1}

2722 Pathogen[ P03410] interacts with 1 human partners:{Q9HBH1}

2723 Pathogen[ P14075] interacts with 1 human partners:{Q9HBH1}

2724 Pathogen[ P0C206] interacts with 1 human partners:{Q9HBH1}

2725 [Cluster 486]GO:0004450+F molecular\_function [name] isocitrate dehydrogenase (NADP+) activity [def] "Catalysis of the reaction

2726 Pathogen[ P0C214] interacts with 2 human partners:{O75874;P48735}

2727 [Cluster 487]GO:0008518+F molecular\_function [name] reduced folate carrier activity [def] "Catalysis of the transfer of reduced folate from one side of a membrane to the other, up its concentration gradient. The transporter binds the solute and undergoes a series of conformational changes. Transport works equally well in either direction and is driven by a chemiosmotic source of energy. Chemiosmotic sources of energy include uniport, symport or antiport." [GOC

2728 Pathogen[ P14079] interacts with 1 human partners:{Q53S99}

2729 [Cluster 488]GO:0017016+F molecular\_function [name] Ras GTPase binding [def] "Interacting selectively and non-covalently with any member of the Ras superfamily of monomeric GTPases." [GOC

2730 Pathogen[ Q2Q067] interacts with 1 human partners:{Q9BPZ7}

2731 Pathogen[ P0C214] interacts with 1 human partners:{Q9BPZ7}

2732 Pathogen[ P03346] interacts with 1 human partners:{Q9BPZ7}

2733 Pathogen[ Q85601] interacts with 1 human partners:{Q9BPZ7}

2734 Pathogen[ P14079] interacts with 1 human partners:{Q9BPZ7}

2735 Pathogen[ P03383] interacts with 1 human partners:{Q9BPZ7}

2736 Pathogen[ P03410] interacts with 1 human partners:{Q9BPZ7}

2737 Pathogen[ P14075] interacts with 1 human partners:{Q9BPZ7}

2738 Pathogen[ P0C206] interacts with 1 human partners:{Q9BPZ7}

2739 [Cluster 489]GO:0004741+F molecular\_function [name] [pyruvate dehydrogenase (lipoamide)] phosphatase activity [def] "Catalysis of the reaction

2740 Pathogen[ P0C214] interacts with 2 human partners:{Q9P0J1;Q9P2J9}

2741 [Cluster 490]GO:0004565+F molecular\_function [name] beta-galactosidase activity [def] "Catalysis of the hydrolysis of terminal, non-reducing beta-D-galactose residues in beta-D-galactosides." [EC

2742 Pathogen[ P0C214] interacts with 2 human partners:{Q9H227;P16278}

2743 Pathogen[ P03346] interacts with 1 human partners:{P16278}

2744 Pathogen[ P14079] interacts with 2 human partners:{P16278;Q6ZT21}

2745 Pathogen[ P03410] interacts with 1 human partners:{P16278}

2746 Pathogen[ P0C206] interacts with 1 human partners:{P16278}

2747 [Cluster 491]GO:0042800+F molecular\_function [name] histone methyltransferase activity (H3-K4 specific) [def] "Catalysis of the reaction

2748 Pathogen[ Q2Q067] interacts with 3 human partners:{Q8IZD2;Q9P0U4;Q9UBL3}

2749 Pathogen[ P0C214] interacts with 1 human partners:{Q8IZD2}

2750 Pathogen[ P03346] interacts with 4 human partners:{Q15291;Q9UBL3;Q9P0U4;Q8IZD2}

2751 Pathogen[ Q85601] interacts with 3 human partners:{Q9UBL3;Q9P0U4;Q8IZD2}

2752 Pathogen[ P14079] interacts with 2 human partners:{Q9UBL3;Q9P0U4}

2753 Pathogen[ P03410] interacts with 1 human partners:{Q9P0U4}

2754 Pathogen[ P0C206] interacts with 3 human partners:{Q9P0U4;Q9UBL3;Q8IZD2}

2755 Pathogen[ P03363] interacts with 5 human partners:{Q15291;Q9UBL3;Q9P0U4;O15047;Q9UPS6}

2756 [Cluster 492]GO:0005353+F molecular\_function [name] fructose transmembrane transporter activity [def] "Catalysis of the transfer of fructose from one side of the membrane to the other. Fructose exists in an open chain form or as a ring compound. D-fructose is the sweetest of the sugars and is found free in a large number of fruits and honey." [GOC

2757 Pathogen[ P03383] interacts with 1 human partners:{P22732}

2758 Pathogen[ P03410] interacts with 1 human partners:{P22732}

2759 Pathogen[ P14075] interacts with 1 human partners:{P22732}

2760 [Cluster 493]GO:0015279+F molecular\_function [name] store-operated calcium channel activity [def] "A ligand-gated ion channel activity which transports calcium in response to emptying of intracellular calcium stores." [GOC

2761 Pathogen[ P14079] interacts with 1 human partners:{Q96BY9}

2762 Pathogen[ P03410] interacts with 1 human partners:{Q96BY9}

2763 [Cluster 494]GO:0005254+F molecular\_function [name] chloride channel activity [def] "Catalysis of facilitated diffusion of a chloride (by an energy-independent process) involving passage through a transmembrane aqueous pore or channel without evidence for a carrier-mediated mechanism." [GOC

2764 Pathogen[ P03346] interacts with 2 human partners:{000299;095833}

2765 Pathogen[ P14079] interacts with 5 human partners:{A1A5B4;Q9NQ90;Q9BYT9;Q8WZ55;Q96S66}

2766 Pathogen[ P03410] interacts with 5 human partners:{Q9NQ90;Q8WZ55;Q9BYT9;Q96S66;A1A5B4}

2767 Pathogen[ P0C206] interacts with 2 human partners:{Q9NQ90;Q96S66}

2768 Pathogen[ P03363] interacts with 1 human partners:{095833}

2769 [Cluster 495]GO:0035642+F molecular\_function [name] histone methyltransferase activity (H3-R17 specific) [def] "Catalysis of the reaction

2770 Pathogen[ Q2Q067] interacts with 1 human partners:{Q86X55}

2771 Pathogen[ P0C214] interacts with 1 human partners:{Q86X55}

2772 Pathogen[ P03346] interacts with 1 human partners:{Q86X55}

2773 Pathogen[ Q85601] interacts with 1 human partners:{Q86X55}

2774 Pathogen[ P03383] interacts with 1 human partners:{Q86X55}

2775 Pathogen[ P03410] interacts with 1 human partners:{Q86X55}

2776 Pathogen[ P14075] interacts with 1 human partners:{Q86X55}

2777 Pathogen[ P0C206] interacts with 1 human partners:{Q86X55}

2778 Pathogen[ P03363] interacts with 1 human partners:{Q86X55}

2779 [Cluster 496]GO:0035312+F molecular\_function [name] 5'-3' exodeoxyribonuclease activity [def] "Catalysis of the sequential cleavage of mononucleotides from a free 5' terminus of a DNA molecule." [ISBN

2780 Pathogen[ Q2Q067] interacts with 1 human partners:{Q9UQ84}

2781 Pathogen[ P0C214] interacts with 1 human partners:{Q9UQ84}

2782 Pathogen[ P03346] interacts with 1 human partners:{Q9UQ84}

2783 Pathogen[ Q85601] interacts with 1 human partners:{Q9UQ84}

2784 Pathogen[ P14079] interacts with 1 human partners:{Q9UQ84}

2785 Pathogen[ P03410] interacts with 1 human partners:{Q9UQ84}

2786 Pathogen[ P0C206] interacts with 1 human partners:{Q9UQ84}

2787 [Cluster 497]GO:0005094+F molecular\_function [name] Rho GDP-dissociation inhibitor activity [def] "Prevents the dissociation of GDP from the small GTPase Rho, thereby preventing GTP from binding." [GOC

2788 Pathogen[ P0C214] interacts with 1 human partners:{P52565}

2789 Pathogen[ P03346] interacts with 1 human partners:{P52565}

2790 Pathogen[ Q85601] interacts with 1 human partners:{P52565}

2791 Pathogen[ P14079] interacts with 1 human partners:{P52565}

2792 Pathogen[ P03410] interacts with 1 human partners:{P52565}

2793 Pathogen[ P0C206] interacts with 1 human partners:{P52565}

2794 Pathogen[ P03363] interacts with 1 human partners:{P52565}

2795 [Cluster 498]GO:0017064+F molecular\_function [name] fatty acid amide hydrolase activity [def] "Catalysis of the hydrolysis of a fatty acid amide to yield a fatty acid." [PMID

2796 Pathogen[ P14079] interacts with 1 human partners:{000519}

2797 Pathogen[ P03410] interacts with 1 human partners:{000519}

2798 [Cluster 499]GO:0004027+F molecular\_function [name] alcohol sulfotransferase activity [def] "Catalysis of the reaction

2799 Pathogen[ Q2Q067] interacts with 1 human partners:{000204}

2800 Pathogen[ P0C214] interacts with 1 human partners:{000204}

2801 Pathogen[ P03346] interacts with 1 human partners:{000204}

2802 Pathogen[ Q85601] interacts with 1 human partners:{000204}

2803 Pathogen[ P03410] interacts with 1 human partners:{000204}

2804 Pathogen[ P0C206] interacts with 1 human partners:{000204}

2805 Pathogen[ P03363] interacts with 1 human partners:{000204}

2806 [Cluster 500]GO:0050567+F molecular\_function [name] glutaminyl-tRNA synthase (glutamine-hydrolyzing) activity [def] "Catalysis of the reaction

2807 Pathogen[ P14079] interacts with 3 human partners:{075879;043716;Q9H0R6}

2808 Pathogen[ P03410] interacts with 2 human partners:{075879;Q9H0R6}

2809 [Cluster 501]GO:0008574+F molecular\_function [name] plus-end-directed microtubule motor activity [def] "Catalysis of movement along a microtubule toward the plus end, coupled to the hydrolysis of ATP (or GTP)." [EC

2810 Pathogen[ P14079] interacts with 1 human partners:{015066}

2811 Pathogen[ P03363] interacts with 1 human partners:{015066}

2812 [Cluster 502]GO:0004516+F molecular\_function [name] nicotinate phosphoribosyltransferase activity [def] "Catalysis of the reaction

2813 Pathogen[ Q2Q067] interacts with 2 human partners:{Q6XQN6;076075}

2814 Pathogen[ P0C214] interacts with 3 human partners:{Q6XQN6;P43490;076075}

2815 Pathogen[ P03346] interacts with 2 human partners:{Q6XQN6;076075}

2816 Pathogen[ Q85601] interacts with 2 human partners:{076075;Q6XQN6}

2817 Pathogen[ P14079] interacts with 3 human partners:{076075;P43490;Q6XQN6}

2818 Pathogen[ P03410] interacts with 3 human partners:{076075;Q6XQN6;P43490}

2819 Pathogen[ P14075] interacts with 1 human partners:{Q6XQN6}

2820 Pathogen[ P0C206] interacts with 3 human partners:{Q6XQN6;076075;P43490}

2821 Pathogen[ P03363] interacts with 2 human partners:{Q6XQN6;076075}

2822 [Cluster 503]GO:0003998+F molecular\_function [name] acylphosphatase activity [def]  
"Catalysis of the reaction

2823 Pathogen[ P0C214] interacts with 1 human partners:{P07311}

2824 Pathogen[ P14079] interacts with 2 human partners:{P14621;P07311}

2825 Pathogen[ P03383] interacts with 1 human partners:{P07311}

2826 Pathogen[ P03410] interacts with 2 human partners:{P07311;P14621}

2827 Pathogen[ P14075] interacts with 1 human partners:{P07311}

2828 Pathogen[ P0C206] interacts with 2 human partners:{P07311;P14621}

2829 [Cluster 504]GO:0052929+F

2830 Pathogen[ P14079] interacts with 1 human partners:{Q96Q11}

2831 Pathogen[ P03410] interacts with 1 human partners:{Q96Q11}

2832 [Cluster 505]GO:0008437+F molecular\_function [name] thyrotropin-releasing hormone activity [def] "The action characteristic of thyrotropin-releasing hormone (TRH), a hormone released by the mammalian hypothalamus into the hypophyseal-portal circulation in response to neural and/or chemical stimuli. Upon receptor binding, TRH increases the secretion of thyroid-stimulating hormone by the anterior pituitary." [ISBN

2833 Pathogen[ P14079] interacts with 1 human partners:{P20396}

2834 Pathogen[ P03410] interacts with 1 human partners:{P20396}

2835 Pathogen[ P0C206] interacts with 1 human partners:{P20396}

2836 [Cluster 506]GO:0003919+F molecular\_function [name] FMN adenylyltransferase activity [def] "Catalysis of the reaction

2837 Pathogen[ P0C214] interacts with 1 human partners:{Q8NFF5}

2838 Pathogen[ P14079] interacts with 1 human partners:{Q8NFF5}

2839 Pathogen[ P03410] interacts with 1 human partners:{Q8NFF5}

2840 [Cluster 507]GO:0019834+F molecular\_function [name] phospholipase A2 inhibitor activity [def] "Stops, prevents or reduces the activity of the enzyme phospholipase A2." [GOC

2841 Pathogen[ P14079] interacts with 1 human partners:{P04083}

2842 [Cluster 508]GO:0004642+F molecular\_function [name] phosphoribosylformylglycinamide synthase activity [def] "Catalysis of the reaction

2843 Pathogen[ P14079] interacts with 1 human partners:{O15067}

2844 Pathogen[ P03410] interacts with 1 human partners:{O15067}

2845 [Cluster 509]GO:0070976+F molecular\_function [name] TIR domain binding [def] "Interacting selectively and non-covalently with a Toll-Interleukin receptor (TIR) domain of a protein. The TIR domain is an intracellular 200 residue domain that is found in the Toll protein, the interleukin-1 receptor (IL-1R), and MyD88\_ it contains three highly-conserved regions, and mediates protein-protein interactions between the Toll-like receptors (TLRs) and signal-transduction components." [GOC

2846 Pathogen[ P14079] interacts with 1 human partners:{Q99836}

2847 [Cluster 510]GO:0030899+F molecular\_function [name] calcium-dependent ATPase activity [def] "Catalysis of the reaction

2848 Pathogen[ P0C214] interacts with 1 human partners:{P13533}

2849 Pathogen[ Q85601] interacts with 1 human partners:{P13533}

2850 Pathogen[ P03410] interacts with 1 human partners:{P13533}

2851 Pathogen[ P0C206] interacts with 1 human partners:{P13533}

2852 [Cluster 511]GO:0008112+F molecular\_function [name] nicotinamide N-methyltransferase activity [def] "Catalysis of the reaction

2853 Pathogen[ P0C214] interacts with 1 human partners:{P40261}

2854 Pathogen[ P03346] interacts with 1 human partners:{P40261}

2855 [Cluster 512]GO:0008486+F molecular\_function [name] diphosphoinositol-polyphosphate diphosphatase activity [def] "Catalysis of the reaction

2856 Pathogen[ P0C214] interacts with 1 human partners:{O95989}

2857 Pathogen[ Q85601] interacts with 1 human partners:{O95989}

2858 Pathogen[ P14079] interacts with 4 human partners:{Q96G61;O95989;Q8NFP7;Q9NZJ9}

2859 Pathogen[ P03383] interacts with 1 human partners:{O95989}

2860 Pathogen[ P03410] interacts with 4 human partners:{Q8NFP7;Q9NZJ9;O95989;Q96G61}

2861 Pathogen[ P14075] interacts with 1 human partners:{O95989}

2862 Pathogen[ P0C206] interacts with 2 human partners:{O95989;Q8NFP7}

2863 [Cluster 513]GO:0034023+F molecular\_function [name] 5-(carboxyamino)imidazole ribonucleotide mutase activity [def] "Catalysis of the reaction

2864 Pathogen[ P14079] interacts with 1 human partners:{P22234}

2865 Pathogen[ P03410] interacts with 1 human partners:{P22234}

2866 [Cluster 514]GO:0004416+F molecular\_function [name] hydroxyacylglutathione hydrolase activity [def] "Catalysis of the reaction

2867 Pathogen[ Q2Q067] interacts with 2 human partners:{Q16775;Q8N490}

2868 Pathogen[ P0C214] interacts with 3 human partners:{Q16775;Q6PII5;Q8N490}

2869 Pathogen[ P03346] interacts with 2 human partners:{Q8N490;Q16775}

2870 Pathogen[ Q85601] interacts with 3 human partners:{Q6PII5;Q16775;Q8N490}

2871 Pathogen[ P14079] interacts with 2 human partners:{Q8N490;Q16775}

2872 Pathogen[ P03383] interacts with 2 human partners:{Q16775;Q8N490}

2873 Pathogen[ P03410] interacts with 3 human partners:{Q8N490;Q6PII5;Q16775}

2874 Pathogen[ P14075] interacts with 2 human partners:{Q8N490;Q16775}

2875 Pathogen[ P0C206] interacts with 3 human partners:{Q6PII5;Q16775;Q8N490}

2876 [Cluster 515]GO:0004161+F molecular\_function [name] dimethylallyltranstransferase activity [def] "Catalysis of the reaction

2877 Pathogen[ Q2Q067] interacts with 1 human partners:{P14324}

2878 Pathogen[ P0C214] interacts with 1 human partners:{P14324}

2879 Pathogen[ P03346] interacts with 1 human partners:{P14324}

2880 Pathogen[ Q85601] interacts with 1 human partners:{P14324}

2881 Pathogen[ P14079] interacts with 1 human partners:{P14324}

2882 Pathogen[ P03383] interacts with 1 human partners:{P14324}

2883 Pathogen[ P03410] interacts with 1 human partners:{P14324}

2884 Pathogen[ P14075] interacts with 1 human partners:{P14324}

2885 Pathogen[ P0C206] interacts with 1 human partners:{P14324}

2886 [Cluster 516]GO:0003863+F molecular\_function [name] 3-methyl-2-oxobutanoate dehydrogenase (2-methylpropanoyl-transferring) activity [def] "Catalysis of the reaction

2887 Pathogen[ Q2Q067] interacts with 1 human partners:{P21953}

2888 Pathogen[ P0C214] interacts with 2 human partners:{P12694;P21953}

2889 Pathogen[ Q85601] interacts with 1 human partners:{P21953}

2890 Pathogen[ P14079] interacts with 1 human partners:{P21953}

2891 Pathogen[ P03410] interacts with 2 human partners:{P12694;P21953}

2892 Pathogen[ P0C206] interacts with 1 human partners:{P21953}

2893 [Cluster 517]GO:0043175+F molecular\_function [name] RNA polymerase core enzyme binding [def] "Interacting selectively and non-covalently with an RNA polymerase core enzyme, containing a specific subunit composition defined as the core enzyme." [GOC

2894 Pathogen[ P03363] interacts with 1 human partners:{Q9UPN6}

2895 [Cluster 518]GO:0030228+F molecular\_function [name] lipoprotein particle receptor activity [def] "Combining with a lipoprotein particle and delivering the lipoprotein particle into the cell via endocytosis. A lipoprotein particle, also known as a lipoprotein, is a clathrate complex consisting of a lipid enwrapped in a protein host without covalent binding in such a way that the complex has a hydrophilic outer surface consisting of all the protein and the polar ends of any phospholipids." [CHEBI

2896 Pathogen[ P14079] interacts with 1 human partners:{Q0VD83}

2897 Pathogen[ P03410] interacts with 1 human partners:{Q0VD83}

2898 [Cluster 519]GO:0036141+F

2899 Pathogen[ P0C214] interacts with 1 human partners:{Q16773}

2900 [Cluster 520]GO:0004799+F molecular\_function [name] thymidylate synthase activity [def] "Catalysis of the reaction

2901 Pathogen[ Q2Q067] interacts with 1 human partners:{P04818}

2902 Pathogen[ P0C214] interacts with 1 human partners:{P04818}

2903 Pathogen[ P14079] interacts with 1 human partners:{P04818}

2904 Pathogen[ P03410] interacts with 1 human partners:{P04818}

2905 Pathogen[ P0C206] interacts with 1 human partners:{P04818}

2906 [Cluster 521]GO:0003681+F molecular\_function [name] bent DNA binding [def] "Interacting selectively and non-covalently with DNA in a bent conformation." [GOC

2907 Pathogen[ Q2Q067] interacts with 1 human partners:{Q9Y237}

2908 Pathogen[ P0C214] interacts with 1 human partners:{Q9Y237}

2909 Pathogen[ P03346] interacts with 1 human partners:{Q9Y237}

2910 Pathogen[ Q85601] interacts with 1 human partners:{Q9Y237}

2911 Pathogen[ P14079] interacts with 1 human partners:{Q9Y237}

2912 Pathogen[ P03410] interacts with 1 human partners:{Q9Y237}

2913 Pathogen[ P0C206] interacts with 1 human partners:{Q9Y237}

2914 Pathogen[ P03363] interacts with 1 human partners:{Q9Y237}

2915 [Cluster 522]GO:0030395+F molecular\_function [name] lactose binding [def] "Interacting selectively and non-covalently with lactose, a disaccharide of glucose and galactose, the carbohydrate of milk." [GOC

2916 Pathogen[ P03346] interacts with 1 human partners:{Q96DT0}

2917 Pathogen[ P14079] interacts with 2 human partners:{A8MUM7;Q96DT0}

2918 Pathogen[ P03410] interacts with 1 human partners:{Q96DT0}

2919 Pathogen[ P0C206] interacts with 1 human partners:{Q96DT0}

2920 [Cluster 523]GO:0043548+F molecular\_function [name] phosphatidylinositol 3-kinase binding [def] "Interacting selectively and non-covalently with a phosphatidylinositol 3-kinase, any enzyme that catalyzes the addition of a phosphate group to an inositol lipid at the 3' position of the inositol ring." [PMID

2921 Pathogen[ Q2Q067] interacts with 1 human partners:{P27986}

2922 Pathogen[ P0C214] interacts with 1 human partners:{P27986}

2923 Pathogen[ P03346] interacts with 1 human partners:{P27986}

2924 Pathogen[ Q85601] interacts with 1 human partners:{P27986}

2925 Pathogen[ P03383] interacts with 1 human partners:{P27986}

2926 Pathogen[ P03410] interacts with 1 human partners:{P27986}

2927 Pathogen[ P14075] interacts with 1 human partners:{P27986}

2928 Pathogen[ P0C206] interacts with 1 human partners:{P27986}

2929 Pathogen[ P03363] interacts with 1 human partners:{P27986}

2930 [Cluster 524]GO:0008434+F molecular\_function [name] vitamin D3 receptor activity [def] "Combining with vitamin D3, cholecalciferol, to initiate a change in cell activity." [GOC

2931 Pathogen[ Q2Q067] interacts with 1 human partners:{P11473}

2932 Pathogen[ P03346] interacts with 1 human partners:{P11473}

2933 Pathogen[ Q85601] interacts with 1 human partners:{P11473}

2934 Pathogen[ P14079] interacts with 1 human partners:{P11473}

2935 Pathogen[ P03383] interacts with 1 human partners:{P11473}

2936 Pathogen[ P03410] interacts with 1 human partners:{P11473}

2937 Pathogen[ P14075] interacts with 1 human partners:{P11473}

2938 Pathogen[ P0C206] interacts with 1 human partners:{P11473}

2939 Pathogen[ P03363] interacts with 1 human partners:{P11473}

2940 [Cluster 525]GO:0052895+F

2941 Pathogen[ P0C214] interacts with 1 human partners:{Q9NWM0}

2942 [Cluster 526]GO:0004129+F molecular\_function [name] cytochrome-c oxidase activity  
[def] "Catalysis of the reaction

2943 Pathogen[ Q2Q067] interacts with 1 human partners:{P13073}

2944 Pathogen[ P0C214] interacts with 3 human partners:{P12074;Q5JTTJ3;P13073}

2945 Pathogen[ P03346] interacts with 2 human partners:{P13073;Q5JTTJ3}

2946 Pathogen[ P14079] interacts with 22 human  
partners:{Q7Z4L0;O60397;P13073;Q12887;P12074;Q6YFQ2;P00395;P00403;P10606;Q02221;Q1552  
6;P14854;P20674;O14548;P09669;Q5JTTJ3;Q96KJ9;P24310;P15954;Q8TF08;O00483;P14406}

2947 Pathogen[ P03383] interacts with 2 human partners:{P13073;Q5JTTJ3}

2948 Pathogen[ P03410] interacts with 19 human  
partners:{Q96KJ9;Q02221;Q8TF08;O14548;P15954;P20674;Q6YFQ2;Q5JTTJ3;O60397;P13073;O0048  
3;P09669;P24310;P00403;P14854;Q12887;P10606;P12074;P14406}

2949 Pathogen[ P14075] interacts with 3 human partners:{Q5JTTJ3;P13073;P14406}

2950 Pathogen[ P0C206] interacts with 6 human  
partners:{P12074;P14406;Q5JTTJ3;O00483;P13073;Q02221}

2951 [Cluster 527]GO:0003988+F molecular\_function [name] acetyl-CoA C-acyltransferase  
activity [def] "Catalysis of the reaction

2952 Pathogen[ P0C214] interacts with 2 human partners:{P40939;P42765}

2953 Pathogen[ P03346] interacts with 1 human partners:{P42765}

2954 Pathogen[ P03410] interacts with 1 human partners:{P42765}

2955 [Cluster 528]GO:0001883+F molecular\_function [name] purine nucleoside binding [def]  
"Interacting selectively and non-covalently with a purine nucleoside, a compound  
consisting of a purine base linked either to ribose or deoxyribose." [GOC

2956 Pathogen[ P14079] interacts with 1 human partners:{Q9Y530}

2957 Pathogen[ P03410] interacts with 1 human partners:{Q9Y530}

2958 Pathogen[ P0C206] interacts with 1 human partners:{Q9Y530}

2959 [Cluster 529]GO:0017042+F molecular\_function [name] glycosylceramidase activity [def]  
"Catalysis of the reaction

2960 Pathogen[ P0C214] interacts with 1 human partners:{Q9H227}

2961 [Cluster 530]GO:0008320+F molecular\_function [name] protein transmembrane transporter  
activity [def] "Catalysis of the transfer of a protein from one side of a membrane to  
the other." [GOC

2962 Pathogen[ Q2Q067] interacts with 1 human partners:{Q9P0U1}

2963 Pathogen[ P0C214] interacts with 1 human partners:{Q9P0U1}

2964 Pathogen[ P03346] interacts with 2 human partners:{Q9NS69;Q9P0U1}

2965 Pathogen[ P14079] interacts with 2 human partners:{Q9P0U1;Q9NS69}

2966 Pathogen[ P03383] interacts with 1 human partners:{Q9P0U1}

2967 Pathogen[ P03410] interacts with 2 human partners:{Q9NS69;Q9P0U1}

2968 Pathogen[ P14075] interacts with 2 human partners:{Q9P0U1;Q9NS69}

2969 Pathogen[ P0C206] interacts with 2 human partners:{Q9NS69;Q9P0U1}

2970 Pathogen[ P03363] interacts with 2 human partners:{Q9P0U1;Q9NS69}

2971 [Cluster 531]GO:0030291+F molecular\_function [name] protein serine/threonine kinase  
inhibitor activity [def] "Stops, prevents or reduces the activity of a protein  
serine/threonine kinase." [GOC

2972 Pathogen[ Q2Q067] interacts with 1 human partners:{Q7Z699}

2973 Pathogen[ P0C214] interacts with 1 human partners:{Q7Z699}

2974 Pathogen[ P03346] interacts with 1 human partners:{Q7Z699}

2975 Pathogen[ Q85601] interacts with 1 human partners:{Q7Z699}

2976 Pathogen[ P14079] interacts with 2 human partners:{O43597;Q7Z699}

2977 Pathogen[ P03410] interacts with 2 human partners:{O43597;Q7Z699}

2978 Pathogen[ P0C206] interacts with 2 human partners:{O43597;Q7Z699}

2979 Pathogen[ P03363] interacts with 1 human partners:{Q7Z699}

2980 [Cluster 532]GO:0034597+F molecular\_function [name]  
phosphatidylinositol-4,5-bisphosphate 4-phosphatase activity [def] "Catalysis of the  
reaction

2981 Pathogen[ P14079] interacts with 2 human partners:{Q96PE3;O15327}

2982 Pathogen[ P03410] interacts with 2 human partners:{Q96PE3;O15327}

2983 [Cluster 533]GO:0045145+F molecular\_function [name] single-stranded DNA specific 5'-3'  
exodeoxyribonuclease activity [def] "Catalysis of the sequential cleavage of  
nucleotides (such as mononucleotides or dinucleotides) from a free 5' terminus of a  
single-stranded DNA molecule." [GOC

2984 Pathogen[ Q2Q067] interacts with 1 human partners:{Q9UQ84}

2985 Pathogen[ P0C214] interacts with 1 human partners:{Q9UQ84}

2986 Pathogen[ P03346] interacts with 1 human partners:{Q9UQ84}

2987 Pathogen[ Q85601] interacts with 1 human partners:{Q9UQ84}

2988 Pathogen[ P14079] interacts with 1 human partners:{Q9UQ84}

2989 Pathogen[ P03410] interacts with 1 human partners:{Q9UQ84}

2990 Pathogen[ P0C206] interacts with 1 human partners:{Q9UQ84}

2991 [Cluster 534]GO:0008310+F molecular\_function [name] single-stranded DNA specific 3'-5' exodeoxyribonuclease activity [def] "Catalysis of the sequential cleavage of mononucleotides from a free 3' terminus of a single-stranded DNA molecule." [GOC

2992 Pathogen[ P14079] interacts with 1 human partners:{Q96AZ6}

2993 Pathogen[ P03410] interacts with 1 human partners:{Q96AZ6}

2994 [Cluster 535]GO:0016530+F molecular\_function [name] metallochaperone activity [def] "Assists in the delivery of metal ions to target proteins or compartments." [GOC

2995 Pathogen[ P14079] interacts with 1 human partners:{O00244}

2996 [Cluster 536]GO:0035014+F molecular\_function [name] phosphatidylinositol 3-kinase regulator activity [def] "Modulates the activity of any of the phosphatidylinositol 3-kinases (PI3Ks). Regulatory subunits can link a PI3K catalytic subunit to upstream signaling events and help position the catalytic subunits close to their lipid substrates." [GOC

2997 Pathogen[ Q2Q067] interacts with 1 human partners:{P27986}

2998 Pathogen[ P0C214] interacts with 1 human partners:{P27986}

2999 Pathogen[ P03346] interacts with 1 human partners:{P27986}

3000 Pathogen[ Q85601] interacts with 1 human partners:{P27986}

3001 Pathogen[ P03383] interacts with 1 human partners:{P27986}

3002 Pathogen[ P03410] interacts with 1 human partners:{P27986}

3003 Pathogen[ P14075] interacts with 1 human partners:{P27986}

3004 Pathogen[ P0C206] interacts with 1 human partners:{P27986}

3005 Pathogen[ P03363] interacts with 1 human partners:{P27986}

3006 [Cluster 537]GO:0045236+F molecular\_function [name] CXCR chemokine receptor binding [def] "Interacting selectively and non-covalently with a chemokine receptor in the CXCR family." [GOC

3007 Pathogen[ Q2Q067] interacts with 1 human partners:{Q96J02}

3008 Pathogen[ P0C214] interacts with 1 human partners:{Q96J02}

3009 Pathogen[ P03346] interacts with 1 human partners:{Q96J02}

3010 Pathogen[ Q85601] interacts with 1 human partners:{Q96J02}

3011 Pathogen[ P14079] interacts with 1 human partners:{Q96J02}

3012 Pathogen[ P0C206] interacts with 1 human partners:{Q96J02}

3013 [Cluster 538]GO:0043813+F molecular\_function [name] phosphatidylinositol-3,5-bisphosphate 5-phosphatase activity [def] "Catalysis of the reaction

3014 Pathogen[ Q2Q067] interacts with 1 human partners:{Q92562}

3015 Pathogen[ P0C214] interacts with 1 human partners:{Q92562}

3016 Pathogen[ P03346] interacts with 1 human partners:{Q92562}

3017 Pathogen[ Q85601] interacts with 1 human partners:{Q92562}

3018 Pathogen[ P14079] interacts with 1 human partners:{Q92562}

3019 Pathogen[ P03410] interacts with 1 human partners:{Q92562}

3020 Pathogen[ P0C206] interacts with 1 human partners:{Q92562}

3021 [Cluster 539]GO:0032357+F molecular\_function [name] oxidized purine DNA binding [def] "Interacting selectively and non-covalently with oxidized purine residues in DNA." [GOC

3022 Pathogen[ P0C214] interacts with 1 human partners:{P20585}

3023 Pathogen[ P03346] interacts with 1 human partners:{P20585}

3024 Pathogen[ Q85601] interacts with 1 human partners:{P20585}

3025 Pathogen[ P14079] interacts with 2 human partners:{P20585;P52701}

3026 Pathogen[ P03410] interacts with 2 human partners:{P20585;P52701}

3027 Pathogen[ P0C206] interacts with 2 human partners:{P52701;P20585}

3028 Pathogen[ P03363] interacts with 1 human partners:{P20585}

3029 [Cluster 540]GO:0004148+F molecular\_function [name] dihydrolipoyl dehydrogenase activity [def] "Catalysis of the reaction

3030 Pathogen[ P0C214] interacts with 1 human partners:{P09622}

3031 [Cluster 541]GO:0004643+F molecular\_function [name] phosphoribosylaminoimidazolecarboxamide formyltransferase activity [def] "Catalysis of the reaction

3032 Pathogen[ P0C214] interacts with 1 human partners:{P31939}

3033 Pathogen[ P14079] interacts with 1 human partners:{P31939}

3034 Pathogen[ P03410] interacts with 1 human partners:{P31939}

3035 Pathogen[ P0C206] interacts with 1 human partners:{P31939}

3036 [Cluster 542]GO:0004594+F molecular\_function [name] pantothenate kinase activity [def] "Catalysis of the reaction

3037 Pathogen[ P0C214] interacts with 2 human partners:{Q8TE04;Q9BZ23}

3038 Pathogen[ P14079] interacts with 3 human partners:{Q8TE04;Q9BZ23;Q9H999}

3039 Pathogen[ P03383] interacts with 1 human partners:{Q9BZ23}

3040 Pathogen[ P03410] interacts with 2 human partners:{Q8TE04;Q9BZ23}

3041 Pathogen[ P14075] interacts with 2 human partners:{Q8TE04;Q9BZ23}

3042 Pathogen[ P0C206] interacts with 2 human partners:{Q8TE04;Q9BZ23}

3043 [Cluster 543]GO:0004149+F molecular\_function [name] dihydrolipoyllysine-residue succinyltransferase activity [def] "Catalysis of the reaction

3044 Pathogen[ P0C214] interacts with 1 human partners:{P36957}

3045 [Cluster 544]GO:0047860+F molecular\_function [name] diiodophenylpyruvate reductase activity [def] "Catalysis of the reaction

3046 Pathogen[ Q2Q067] interacts with 1 human partners:{P40925}

3047 Pathogen[ P03346] interacts with 1 human partners:{P40925}  
3048 Pathogen[ Q85601] interacts with 1 human partners:{P40925}  
3049 Pathogen[ P14079] interacts with 1 human partners:{P40925}  
3050 Pathogen[ P03383] interacts with 1 human partners:{P40925}  
3051 Pathogen[ P03410] interacts with 1 human partners:{P40925}  
3052 Pathogen[ P14075] interacts with 1 human partners:{P40925}  
3053 Pathogen[ P0C206] interacts with 1 human partners:{P40925}  
3054 Pathogen[ P03363] interacts with 1 human partners:{P40925}  
3055 [Cluster 545]GO:0005310+F molecular\_function [name] dicarboxylic acid transmembrane transporter activity [def] "Catalysis of the transfer of dicarboxylic acids from one side of the membrane to the other. A dicarboxylic acid is an organic acid with two COOH groups." [GOC  
3056 Pathogen[ Q2Q067] interacts with 1 human partners:{Q9UBX3}  
3057 Pathogen[ P0C214] interacts with 1 human partners:{Q9UBX3}  
3058 Pathogen[ P03346] interacts with 1 human partners:{Q9UBX3}  
3059 Pathogen[ Q85601] interacts with 1 human partners:{Q9UBX3}  
3060 Pathogen[ P03410] interacts with 1 human partners:{Q9UBX3}  
3061 Pathogen[ P0C206] interacts with 1 human partners:{Q9UBX3}  
3062 [Cluster 546]GO:0008526+F molecular\_function [name] phosphatidylinositol transporter activity [def] "Enables the directed movement of phosphatidylinositol into, out of or within a cell, or between cells. Phosphatidylinositol refers to any glycosphospholipids with its sn-glycerol 3-phosphate residue is esterified to the 1-hydroxyl group of 1D-myo-inositol." [GOC  
3063 Pathogen[ P14079] interacts with 1 human partners:{Q9UKF7}  
3064 Pathogen[ P03410] interacts with 1 human partners:{Q9UKF7}  
3065 Pathogen[ P03363] interacts with 1 human partners:{Q9UKF7}  
3066 [Cluster 547]GO:0050480+F molecular\_function [name] imidazolonepropionase activity [def] "Catalysis of the reaction  
3067 Pathogen[ Q2Q067] interacts with 1 human partners:{Q96NU7}  
3068 Pathogen[ P0C214] interacts with 1 human partners:{Q96NU7}  
3069 Pathogen[ P03346] interacts with 1 human partners:{Q96NU7}  
3070 Pathogen[ P14079] interacts with 1 human partners:{Q96NU7}  
3071 Pathogen[ P03410] interacts with 1 human partners:{Q96NU7}  
3072 Pathogen[ P14075] interacts with 1 human partners:{Q96NU7}  
3073 Pathogen[ P0C206] interacts with 1 human partners:{Q96NU7}  
3074 [Cluster 548]GO:0004042+F molecular\_function [name] acetyl-CoA [def] "Catalysis of the reaction  
3075 Pathogen[ P0C214] interacts with 1 human partners:{Q8N159}  
3076 Pathogen[ P14079] interacts with 1 human partners:{Q8N159}  
3077 Pathogen[ P03383] interacts with 1 human partners:{Q8N159}  
3078 Pathogen[ P03410] interacts with 1 human partners:{Q8N159}  
3079 Pathogen[ P14075] interacts with 1 human partners:{Q8N159}  
3080 Pathogen[ P0C206] interacts with 1 human partners:{Q8N159}  
3081 [Cluster 549]GO:0070008+F molecular\_function [name] serine-type exopeptidase activity [def] "Catalysis of the hydrolysis of a peptide bond not more than three residues from the N- or C-terminus of a polypeptide chain by a catalytic mechanism that involves a catalytic triad consisting of a serine nucleophile that is activated by a proton relay involving an acidic residue (e.g. aspartate or glutamate) and a basic residue (usually histidine)." [GOC  
3082 Pathogen[ Q2Q067] interacts with 1 human partners:{P48147}  
3083 Pathogen[ P0C214] interacts with 1 human partners:{P48147}  
3084 Pathogen[ P03346] interacts with 1 human partners:{P48147}  
3085 Pathogen[ Q85601] interacts with 1 human partners:{P48147}  
3086 Pathogen[ P14079] interacts with 1 human partners:{P48147}  
3087 Pathogen[ P03383] interacts with 1 human partners:{P48147}  
3088 Pathogen[ P03410] interacts with 1 human partners:{P48147}  
3089 Pathogen[ P0C206] interacts with 1 human partners:{P48147}  
3090 [Cluster 550]GO:0004775+F molecular\_function [name] succinate-CoA ligase (ADP-forming) activity [def] "Catalysis of the reaction  
3091 Pathogen[ Q2Q067] interacts with 1 human partners:{Q9P2R7}  
3092 Pathogen[ P0C214] interacts with 2 human partners:{P53396;Q9P2R7}  
3093 Pathogen[ Q85601] interacts with 1 human partners:{Q9P2R7}  
3094 Pathogen[ P14079] interacts with 1 human partners:{Q9P2R7}  
3095 Pathogen[ P03383] interacts with 1 human partners:{Q9P2R7}  
3096 Pathogen[ P03410] interacts with 1 human partners:{Q9P2R7}  
3097 Pathogen[ P14075] interacts with 1 human partners:{Q9P2R7}  
3098 Pathogen[ P0C206] interacts with 1 human partners:{Q9P2R7}  
3099 [Cluster 551]GO:0035870+F molecular\_function [name] dITP diphosphatase activity [def] "Catalysis of the reaction  
3100 Pathogen[ P14079] interacts with 1 human partners:{Q9BY32}  
3101 Pathogen[ P03410] interacts with 1 human partners:{Q9BY32}  
3102 Pathogen[ P0C206] interacts with 1 human partners:{Q9BY32}  
3103 [Cluster 552]GO:0030023+F molecular\_function [name] extracellular matrix constituent conferring elasticity [def] "A component of the extracellular matrix that enables the matrix to recoil after transient stretching." [GOC  
3104 Pathogen[ P14079] interacts with 1 human partners:{P15502}

3105 Pathogen[ P03383] interacts with 1 human partners:{P15502}  
 3106 Pathogen[ P03410] interacts with 1 human partners:{P15502}  
 3107 Pathogen[ P14075] interacts with 1 human partners:{P15502}  
 3108 Pathogen[ P0C206] interacts with 1 human partners:{P15502}  
 3109 [Cluster 553]GO:0008419+F molecular\_function [name] RNA lariat debranching enzyme activity [def] "Catalysis of the hydrolysis of branched RNA structures that contain vicinal 2'-5'- and 3'-5'-phosphodiester bonds at a branch point nucleotide." [PMID  
 3110 Pathogen[ P03346] interacts with 1 human partners:{Q9UK59}  
 3111 Pathogen[ P14079] interacts with 1 human partners:{Q9UK59}  
 3112 Pathogen[ P03410] interacts with 1 human partners:{Q9UK59}  
 3113 Pathogen[ P0C206] interacts with 1 human partners:{Q9UK59}  
 3114 [Cluster 554]GO:0008107+F molecular\_function [name] galactoside 2-alpha-L-fucosyltransferase activity [def] "Catalysis of the reaction  
 3115 Pathogen[ Q2Q067] interacts with 1 human partners:{O75122}  
 3116 Pathogen[ P0C214] interacts with 1 human partners:{O75122}  
 3117 Pathogen[ P03346] interacts with 1 human partners:{O75122}  
 3118 Pathogen[ Q85601] interacts with 1 human partners:{O75122}  
 3119 Pathogen[ P14079] interacts with 1 human partners:{O75122}  
 3120 Pathogen[ P03410] interacts with 1 human partners:{O75122}  
 3121 Pathogen[ P0C206] interacts with 1 human partners:{O75122}  
 3122 [Cluster 555]GO:0032142+F molecular\_function [name] single guanine insertion binding [def] "Interacting selectively and non-covalently with double-stranded DNA containing a single guanine insertion or a deletion that results in an unpaired guanine." [GOC  
 3123 Pathogen[ P0C214] interacts with 1 human partners:{P20585}  
 3124 Pathogen[ P03346] interacts with 1 human partners:{P20585}  
 3125 Pathogen[ Q85601] interacts with 1 human partners:{P20585}  
 3126 Pathogen[ P14079] interacts with 2 human partners:{P20585;P52701}  
 3127 Pathogen[ P03410] interacts with 2 human partners:{P20585;P52701}  
 3128 Pathogen[ P0C206] interacts with 2 human partners:{P52701;P20585}  
 3129 Pathogen[ P03363] interacts with 1 human partners:{P20585}  
 3130 [Cluster 556]GO:0004325+F molecular\_function [name] ferrocyclase activity [def] "Catalysis of the reaction  
 3131 Pathogen[ P0C214] interacts with 1 human partners:{P22830}  
 3132 Pathogen[ P14079] interacts with 1 human partners:{P22830}  
 3133 Pathogen[ P03410] interacts with 1 human partners:{P22830}  
 3134 Pathogen[ P0C206] interacts with 1 human partners:{P22830}  
 3135 [Cluster 557]GO:0008898+F molecular\_function [name] homocysteine S-methyltransferase activity [def] "Catalysis of the reaction  
 3136 Pathogen[ P14079] interacts with 1 human partners:{Q9H2M3}  
 3137 Pathogen[ P03410] interacts with 1 human partners:{Q9H2M3}  
 3138 Pathogen[ P0C206] interacts with 1 human partners:{Q9H2M3}  
 3139 [Cluster 558]GO:0050145+F molecular\_function [name] nucleoside phosphate kinase activity [def] "Catalysis of the reaction  
 3140 Pathogen[ P0C214] interacts with 1 human partners:{P23919}  
 3141 Pathogen[ P14079] interacts with 1 human partners:{P23919}  
 3142 Pathogen[ P03410] interacts with 1 human partners:{P23919}  
 3143 [Cluster 559]GO:0052795+F molecular\_function [name] exo-alpha-(2->6)-sialidase activity [def] "Catalysis of the hydrolysis of alpha-(2->6)-glycosidic linkages of terminal sialic residues in substrates." [EC  
 3144 Pathogen[ Q2Q067] interacts with 1 human partners:{Q8WWR8}  
 3145 Pathogen[ P0C214] interacts with 2 human partners:{Q8WWR8;Q9Y3R4}  
 3146 Pathogen[ P03346] interacts with 1 human partners:{Q8WWR8}  
 3147 Pathogen[ P14079] interacts with 2 human partners:{Q8WWR8;Q9Y3R4}  
 3148 Pathogen[ P03383] interacts with 1 human partners:{Q8WWR8}  
 3149 Pathogen[ P03410] interacts with 2 human partners:{Q9Y3R4;Q8WWR8}  
 3150 Pathogen[ P14075] interacts with 1 human partners:{Q8WWR8}  
 3151 Pathogen[ P0C206] interacts with 2 human partners:{Q9Y3R4;Q8WWR8}  
 3152 [Cluster 560]GO:0005351+F molecular\_function [name] sugar [def] "Catalysis of the transfer of a solute or solutes from one side of a membrane to the other according to the reaction  
 3153 Pathogen[ P14079] interacts with 1 human partners:{Q96G79}  
 3154 Pathogen[ P03410] interacts with 1 human partners:{Q96G79}  
 3155 [Cluster 561]GO:0004659+F molecular\_function [name] prenyltransferase activity [def] "Catalysis of the transfer of a prenyl group from one compound (donor) to another (acceptor)." [GOC  
 3156 Pathogen[ Q2Q067] interacts with 2 human partners:{P49356;P49354}  
 3157 Pathogen[ P0C214] interacts with 2 human partners:{P49354;P49356}  
 3158 Pathogen[ P03346] interacts with 3 human partners:{P49354;P49356;P53611}  
 3159 Pathogen[ Q85601] interacts with 2 human partners:{P49354;P49356}  
 3160 Pathogen[ P14079] interacts with 4 human partners:{Q12887;P49354;P49356;Q9Y5Z9}  
 3161 Pathogen[ P03410] interacts with 5 human partners:{P49354;P49356;Q9Y5Z9;P53611;Q12887}  
 3162 Pathogen[ P0C206] interacts with 4 human partners:{Q9Y5Z9;P49354;P49356;P53611}  
 3163 Pathogen[ P03363] interacts with 1 human partners:{P49354}  
 3164 [Cluster 562]GO:0004553+F molecular\_function [name] hydrolase activity, hydrolyzing O-glycosyl compounds [def] "Catalysis of the hydrolysis of any O-glycosyl bond." [GOC



3165 Pathogen[ P0C214] interacts with 6 human partners:{Q04446;Q15486;Q9H227;Q93100;P46020;P16278}

3166 Pathogen[ P03346] interacts with 2 human partners:{P16278;Q8WVB3}

3167 Pathogen[ Q85601] interacts with 2 human partners:{Q15486;Q04446}

3168 Pathogen[ P14079] interacts with 10 human partners:{P16278;P35475;Q93100;Q9NTJ4;P06280;Q6P575;P17050;Q15486;Q8WVB3;P46020}

3169 Pathogen[ P03410] interacts with 8 human partners:{P46020;Q04446;P16278;Q93100;Q15486;Q9NTJ4;Q8WVB3;Q6P575}

3170 Pathogen[ P14075] interacts with 1 human partners:{Q93100}

3171 Pathogen[ P0C206] interacts with 7 human partners:{Q93100;Q6P575;Q04446;P46020;Q8WVB3;Q15486;P16278}

3172 Pathogen[ P03363] interacts with 1 human partners:{Q8WVB3}

3173 [Cluster 563]GO:0052655+F molecular\_function [name] L-valine transaminase activity [def] "Catalysis of the reaction Pathogen[ P0C214] interacts with 2 human partners:{O15382;P54687}

3174 Pathogen[ Q85601] interacts with 1 human partners:{O15382}

3175 Pathogen[ P14079] interacts with 1 human partners:{O15382}

3176 Pathogen[ P03410] interacts with 1 human partners:{O15382}

3177 Pathogen[ P0C206] interacts with 1 human partners:{O15382}

3178 Pathogen[ P0C206] interacts with 1 human partners:{O15382}

3179 [Cluster 564]GO:0004767+F molecular\_function [name] sphingomyelin phosphodiesterase activity [def] "Catalysis of the reaction Pathogen[ P14079] interacts with 3 human partners:{Q9NY59;Q9NXE4;P17405}

3180 Pathogen[ P03410] interacts with 2 human partners:{Q9NXE4;P17405}

3181 [Cluster 565]GO:0016841+F molecular\_function [name] ammonia-lyase activity [def] "Catalysis of the release of ammonia by the cleavage of a carbon-nitrogen bond or the reverse reaction with ammonia as a substrate." [EC Pathogen[ P14079] interacts with 1 human partners:{P42357}

3182 [Cluster 566]GO:0071567+F molecular\_function [name] UFM1 hydrolase activity [def] "Catalysis of the hydrolysis of UFM1, a small ubiquitin-related modifier, from previously modified substrates." [GOC Pathogen[ P14079] interacts with 1 human partners:{Q6NVU6}

3183 Pathogen[ P03410] interacts with 1 human partners:{Q6NVU6}

3184 Pathogen[ P14075] interacts with 1 human partners:{Q6NVU6}

3185 [Cluster 567]GO:0001011+F molecular\_function [name] sequence-specific DNA binding RNA polymerase recruiting transcription factor activity [def] "Interacting selectively and non-covalently with a specific DNA sequence and recruiting RNA polymerase to the DNA in order to form the preinitiation complex (PIC)." [GOC Pathogen[ Q2Q067] interacts with 1 human partners:{P15884}

3186 Pathogen[ P0C214] interacts with 1 human partners:{P15884}

3187 Pathogen[ P03346] interacts with 1 human partners:{P15884}

3188 Pathogen[ Q85601] interacts with 1 human partners:{P15884}

3189 Pathogen[ P14079] interacts with 1 human partners:{P15884}

3190 Pathogen[ P03410] interacts with 1 human partners:{P15884}

3191 Pathogen[ P14075] interacts with 1 human partners:{P15884}

3192 Pathogen[ P0C206] interacts with 1 human partners:{P15884}

3193 Pathogen[ P03363] interacts with 1 human partners:{P15884}

3194 [Cluster 568]GO:0047555+F molecular\_function [name] 3',5'-cyclic-GMP phosphodiesterase activity [def] "Catalysis of the reaction Pathogen[ P0C214] interacts with 3 human partners:{P18545;Q13956;O76083}

3195 Pathogen[ P14079] interacts with 2 human partners:{P18545;Q13956}

3196 Pathogen[ P03410] interacts with 2 human partners:{Q13956;P18545}

3197 Pathogen[ P0C206] interacts with 2 human partners:{P18545;Q13956}

3198 [Cluster 569]GO:0034647+F molecular\_function [name] histone demethylase activity (H3-trimethyl-K4 specific) [def] "Catalysis of the removal of a methyl group from trimethylated lysine at position 4 of the histone H3 protein." [GOC Pathogen[ P03346] interacts with 1 human partners:{Q9UGL1}

3199 [Cluster 570]GO:0052632+F molecular\_function [name] citrate hydro-lyase (cis-aconitate-forming) activity [def] "Catalysis of the reaction Pathogen[ Q2Q067] interacts with 1 human partners:{P21399}

3200 Pathogen[ P0C214] interacts with 2 human partners:{Q99798;P21399}

3201 Pathogen[ P03346] interacts with 1 human partners:{P21399}

3202 Pathogen[ Q85601] interacts with 1 human partners:{P21399}

3203 Pathogen[ P14079] interacts with 1 human partners:{P21399}

3204 Pathogen[ P03410] interacts with 1 human partners:{P21399}

3205 Pathogen[ P0C206] interacts with 2 human partners:{Q99798;P21399}

3206 [Cluster 571]GO:0052927+F Pathogen[ P14079] interacts with 1 human partners:{Q96Q11}

3207 Pathogen[ P03410] interacts with 1 human partners:{Q96Q11}

3208 [Cluster 572]GO:0004512+F molecular\_function [name] inositol-3-phosphate synthase activity [def] "Catalysis of the reaction Pathogen[ P14079] interacts with 1 human partners:{Q9NPH2}

3209 Pathogen[ P03410] interacts with 1 human partners:{Q9NPH2}

3210 [Cluster 573]GO:0003940+F molecular\_function [name] L-iduronidase activity [def] "Catalysis of the hydrolysis of alpha-L-iduronosidic linkages in dermatan sulfate." [EC Pathogen[ P14079] interacts with 1 human partners:{P35475}

3211 Pathogen[ P14079] interacts with 1 human partners:{P35475}

3212 [Cluster 574]GO:0004493+F molecular\_function [name] methylmalonyl-CoA epimerase

```

activity [def] "Catalysis of the reaction
3222 Pathogen[ P0C214] interacts with 1 human partners:{Q96PE7}
3223 Pathogen[ P03346] interacts with 1 human partners:{Q96PE7}
3224 Pathogen[ P14079] interacts with 1 human partners:{Q96PE7}
3225 Pathogen[ P03410] interacts with 1 human partners:{Q96PE7}
3226 Pathogen[ P0C206] interacts with 1 human partners:{Q96PE7}
3227 [Cluster 575]GO:0030429+F molecular_function [name] kynureninase activity [def]
"Catalysis of the reaction
3228 Pathogen[ Q2Q067] interacts with 1 human partners:{Q16719}
3229 Pathogen[ P0C214] interacts with 1 human partners:{Q16719}
3230 Pathogen[ P03346] interacts with 1 human partners:{Q16719}
3231 Pathogen[ Q85601] interacts with 1 human partners:{Q16719}
3232 Pathogen[ P14079] interacts with 1 human partners:{Q16719}
3233 Pathogen[ P03383] interacts with 1 human partners:{Q16719}
3234 Pathogen[ P03410] interacts with 1 human partners:{Q16719}
3235 Pathogen[ P14075] interacts with 1 human partners:{Q16719}
3236 Pathogen[ P0C206] interacts with 1 human partners:{Q16719}
3237 [Cluster 576]GO:0008376+F molecular_function [name] acetylgalactosaminyltransferase
activity [def] "Catalysis of the transfer of an N-acetylgalactosaminyl residue from
UDP-N-acetyl-galactosamine to an oligosaccharide." [ISBN
3238 Pathogen[ P03410] interacts with 1 human partners:{Q8NHY0}
3239 [Cluster 577]GO:0002135+F molecular_function [name] CTP binding [def] "Interacting
selectively and non-covalently with CTP, cytidine 5'-triphosphate." [GOC
3240 Pathogen[ Q2Q067] interacts with 1 human partners:{P08238}
3241 Pathogen[ P03346] interacts with 1 human partners:{P08238}
3242 Pathogen[ Q85601] interacts with 1 human partners:{P08238}
3243 Pathogen[ P14079] interacts with 1 human partners:{P08238}
3244 Pathogen[ P03383] interacts with 1 human partners:{P08238}
3245 Pathogen[ P03410] interacts with 1 human partners:{P08238}
3246 Pathogen[ P14075] interacts with 1 human partners:{P08238}
3247 Pathogen[ P0C206] interacts with 1 human partners:{P08238}
3248 Pathogen[ P03363] interacts with 1 human partners:{P08238}
3249 [Cluster 578]GO:0047409+F molecular_function [name] alkenylglycerophosphoethanolamine
hydrolase activity [def] "Catalysis of the reaction
3250 Pathogen[ P14079] interacts with 1 human partners:{Q8N661}
3251 Pathogen[ P03410] interacts with 1 human partners:{Q8N661}
3252 Pathogen[ P14075] interacts with 1 human partners:{Q8N661}
3253 Pathogen[ P0C206] interacts with 1 human partners:{Q8N661}
3254 [Cluster 579]GO:0045309+F molecular_function [name] protein phosphorylated amino acid
binding [def] "Interacting selectively and non-covalently with a phosphorylated amino
acid residue within a protein." [GOC
3255 Pathogen[ Q2Q067] interacts with 2 human partners:{P46108;Q9Y297}
3256 Pathogen[ P0C214] interacts with 2 human partners:{Q9Y297;P46108}
3257 Pathogen[ P03346] interacts with 2 human partners:{P46108;Q9Y297}
3258 Pathogen[ Q85601] interacts with 1 human partners:{P46108}
3259 Pathogen[ P14079] interacts with 1 human partners:{P46108}
3260 Pathogen[ P03410] interacts with 1 human partners:{P46108}
3261 Pathogen[ P0C206] interacts with 1 human partners:{P46108}
3262 Pathogen[ P03363] interacts with 1 human partners:{P46108}
3263 [Cluster 580]GO:0008444+F molecular_function [name]
CDP-diacylglycerol-glycerol-3-phosphate 3-phosphatidyltransferase activity [def]
"Catalysis of the reaction
3264 Pathogen[ P14079] interacts with 1 human partners:{Q32NB8}
3265 [Cluster 581]GO:0071949+F molecular_function [name] FAD binding [def] "Interacting
selectively and non-covalently with the oxidized form, FAD, of flavin-adenine
dinucleotide, the coenzyme or the prosthetic group of various flavoprotein oxidoreductase
enzymes." [GOC
3266 Pathogen[ P03346] interacts with 1 human partners:{Q8TDZ2}
3267 Pathogen[ P14079] interacts with 1 human partners:{Q8TDZ2}
3268 Pathogen[ P03410] interacts with 1 human partners:{Q8TDZ2}
3269 Pathogen[ P0C206] interacts with 1 human partners:{Q8TDZ2}
3270 [Cluster 582]GO:0000257+F molecular_function [name] nitrilase activity [def]
"Catalysis of the reaction
3271 Pathogen[ P03346] interacts with 1 human partners:{Q86X76}
3272 Pathogen[ P03410] interacts with 1 human partners:{Q86X76}
3273 Pathogen[ P0C206] interacts with 1 human partners:{Q86X76}
3274 [Cluster 583]GO:0008418+F molecular_function [name] protein-N-terminal asparagine
amidohydrolase activity [def] "Catalysis of the reaction
3275 Pathogen[ P03346] interacts with 1 human partners:{Q96AB6}
3276 Pathogen[ P14079] interacts with 1 human partners:{Q96AB6}
3277 Pathogen[ P03410] interacts with 1 human partners:{Q96AB6}
3278 Pathogen[ P0C206] interacts with 1 human partners:{Q96AB6}
3279 Pathogen[ P03363] interacts with 1 human partners:{Q96AB6}
3280 [Cluster 584]GO:0015928+F molecular_function [name] fucosidase activity [def]
"Catalysis of the hydrolysis of fucosyl compounds, substances containing a group derived
from a cyclic form of fucose or a fucose derivative." [GOC

```

3281 Pathogen[ P14079] interacts with 1 human partners:{P04066}

3282 Pathogen[ P03410] interacts with 1 human partners:{P04066}

3283 [Cluster 585]GO:0005540+F molecular\_function [name] hyaluronic acid binding [def]  
"Interacting selectively and non-covalently with hyaluronic acid, a polymer composed of repeating dimeric units of glucuronic acid and N-acetyl glucosamine." [CHEBI

3284 Pathogen[ P0C214] interacts with 1 human partners:{075330}

3285 Pathogen[ P03346] interacts with 1 human partners:{075330}

3286 Pathogen[ Q85601] interacts with 1 human partners:{075330}

3287 Pathogen[ P14079] interacts with 1 human partners:{075330}

3288 Pathogen[ P03410] interacts with 1 human partners:{075330}

3289 Pathogen[ P14075] interacts with 1 human partners:{075330}

3290 Pathogen[ P0C206] interacts with 1 human partners:{075330}

3291 [Cluster 586]GO:0002046+F molecular\_function [name] opsin binding [def]  
"Interacting selectively and non-covalently with an opsin, any of a group of hydrophobic, integral membrane glycoproteins located primarily in the disc membrane of rods or cones, involved in photoreception." [GOC

3292 Pathogen[ P03363] interacts with 1 human partners:{P36575}

3293 [Cluster 587]GO:0008158+F molecular\_function [name] hedgehog receptor activity [def]  
"Combining with a member of the hedgehog protein family and transmitting the signal across the membrane to initiate a change in cell activity." [GOC

3294 Pathogen[ P14079] interacts with 1 human partners:{Q9UPM9}

3295 Pathogen[ P03410] interacts with 1 human partners:{Q9UPM9}

3296 Pathogen[ P0C206] interacts with 1 human partners:{Q9UPM9}

3297 [Cluster 588]GO:0032454+F molecular\_function [name] histone demethylase activity (H3-K9 specific) [def] "Catalysis of the reaction

3298 Pathogen[ Q2Q067] interacts with 2 human partners:{Q9UPP1;075151}

3299 Pathogen[ P0C214] interacts with 2 human partners:{075151;Q9UPP1}

3300 Pathogen[ P03346] interacts with 2 human partners:{075151;Q9UPP1}

3301 Pathogen[ Q85601] interacts with 2 human partners:{075151;Q9UPP1}

3302 Pathogen[ P14079] interacts with 2 human partners:{075151;Q9UPP1}

3303 Pathogen[ P03383] interacts with 2 human partners:{075151;Q9UPP1}

3304 Pathogen[ P03410] interacts with 2 human partners:{Q9UPP1;075151}

3305 Pathogen[ P14075] interacts with 2 human partners:{Q9UPP1;075151}

3306 Pathogen[ P0C206] interacts with 2 human partners:{Q9UPP1;075151}

3307 [Cluster 589]GO:0004163+F molecular\_function [name] diphosphomevalonate decarboxylase activity [def] "Catalysis of the reaction

3308 Pathogen[ P14079] interacts with 1 human partners:{P53602}

3309 Pathogen[ P03410] interacts with 1 human partners:{P53602}

3310 [Cluster 590]GO:0008191+F molecular\_function [name] metalloendopeptidase inhibitor activity [def] "Stops, prevents or reduces the activity of metalloendopeptidases, enzymes that catalyze the hydrolysis of nonterminal peptide bonds in a polypeptide chain and contain a chelated metal ion at their active sites which is essential to their catalytic activity." [GOC

3311 Pathogen[ P14079] interacts with 1 human partners:{Q9BS40}

3312 Pathogen[ P03410] interacts with 1 human partners:{Q9BS40}

3313 [Cluster 591]GO:0015232+F molecular\_function [name] heme transporter activity [def]  
"Enables the directed movement of heme, any compound of iron complexed in a porphyrin (tetrapyrrole) ring, into, out of or within a cell, or between cells." [GOC

3314 Pathogen[ P14079] interacts with 1 human partners:{Q96NT5}

3315 [Cluster 592]GO:0004791+F molecular\_function [name] thioredoxin-disulfide reductase activity [def] "Catalysis of the reaction

3316 Pathogen[ Q2Q067] interacts with 1 human partners:{Q9NNW7}

3317 Pathogen[ P0C214] interacts with 2 human partners:{Q9NNW7;Q16881}

3318 Pathogen[ P03346] interacts with 1 human partners:{Q9NNW7}

3319 Pathogen[ P14079] interacts with 1 human partners:{Q9NNW7}

3320 Pathogen[ P03410] interacts with 1 human partners:{Q9NNW7}

3321 Pathogen[ P0C206] interacts with 1 human partners:{Q9NNW7}

3322 Pathogen[ P03363] interacts with 1 human partners:{Q9NNW7}

3323 [Cluster 593]GO:0032810+F molecular\_function [name] sterol response element binding [def] "Interacting selectively and non-covalently with the sterol response element (SRE), a nonpalindromic sequence found in the promoters of genes involved in lipid metabolism." [GOC

3324 Pathogen[ Q2Q067] interacts with 1 human partners:{P36956}

3325 Pathogen[ P03346] interacts with 1 human partners:{P36956}

3326 Pathogen[ Q85601] interacts with 1 human partners:{P36956}

3327 Pathogen[ P14079] interacts with 1 human partners:{P36956}

3328 Pathogen[ P03410] interacts with 1 human partners:{P36956}

3329 Pathogen[ P0C206] interacts with 1 human partners:{P36956}

3330 [Cluster 594]GO:0016316+F molecular\_function [name] phosphatidylinositol-3,4-bisphosphate 4-phosphatase activity [def] "Catalysis of the reaction

3331 Pathogen[ P14079] interacts with 2 human partners:{Q96PE3;O15327}

3332 Pathogen[ P03410] interacts with 2 human partners:{Q96PE3;O15327}

3333 [Cluster 595]GO:0004723+F molecular\_function [name] calcium-dependent protein serine/threonine phosphatase activity [def] "Catalysis of the reactions

3334 Pathogen[ Q2Q067] interacts with 1 human partners:{Q08209}

3335 Pathogen[ P0C214] interacts with 1 human partners:{Q08209}

3336 Pathogen[ P03346] interacts with 1 human partners:{Q08209}

3337 Pathogen[ Q85601] interacts with 1 human partners:{Q08209}

3338 Pathogen[ P14079] interacts with 2 human partners:{P16298;Q08209}

3339 Pathogen[ P03410] interacts with 2 human partners:{Q08209;P63098}

3340 Pathogen[ P0C206] interacts with 1 human partners:{Q08209}

3341 [Cluster 596]GO:0035727+F molecular\_function [name] lysophosphatidic acid binding  
[def] "Interacting selectively and non-covalently with lysophosphatidic acid (LPA), a phospholipid derivative that acts as a potent mitogen due to its activation of high-affinity G-protein-coupled receptors." [CHEBI]

3342 Pathogen[ P14079] interacts with 1 human partners:{P09327}

3343 [Cluster 597]GO:0019799+F molecular\_function [name] tubulin N-acetyltransferase activity [def] "Catalysis of the reaction

3344 Pathogen[ P14079] interacts with 1 human partners:{Q5SQI0}

3345 Pathogen[ P03410] interacts with 1 human partners:{Q5SQI0}

3346 [Cluster 598]GO:0004052+F molecular\_function [name] arachidonate 12-lipoxygenase activity [def] "Catalysis of the reaction

3347 Pathogen[ P0C214] interacts with 1 human partners:{P18054}

3348 Pathogen[ P03346] interacts with 1 human partners:{P18054}

3349 [Cluster 599]GO:0016936+F molecular\_function [name] galactoside binding [def] "Interacting selectively and non-covalently with any glycoside in which the sugar group is galactose." [CHEBI]

3350 Pathogen[ P0C214] interacts with 1 human partners:{P16278}

3351 Pathogen[ P03346] interacts with 1 human partners:{P16278}

3352 Pathogen[ P14079] interacts with 2 human partners:{P16278;P06280}

3353 Pathogen[ P03410] interacts with 1 human partners:{P16278}

3354 Pathogen[ P0C206] interacts with 1 human partners:{P16278}

3355 [Cluster 600]GO:0047429+F molecular\_function [name] nucleoside-triphosphate diphosphatase activity [def] "Catalysis of the reaction

3356 Pathogen[ P14079] interacts with 2 human partners:{Q9H773;Q9BY32}

3357 Pathogen[ P03410] interacts with 2 human partners:{Q9H773;Q9BY32}

3358 Pathogen[ P0C206] interacts with 1 human partners:{Q9BY32}

3359 [Cluster 601]GO:0008747+F molecular\_function [name] N-acetylneuraminate lyase activity [def] "Catalysis of the reaction

3360 Pathogen[ P0C214] interacts with 1 human partners:{Q9BXD5}

3361 Pathogen[ Q85601] interacts with 1 human partners:{Q9BXD5}

3362 Pathogen[ P14079] interacts with 1 human partners:{Q9BXD5}

3363 Pathogen[ P03410] interacts with 1 human partners:{Q9BXD5}

3364 Pathogen[ P14075] interacts with 1 human partners:{Q9BXD5}

3365 Pathogen[ P0C206] interacts with 1 human partners:{Q9BXD5}

3366 Pathogen[ P03363] interacts with 1 human partners:{Q9BXD5}

3367 [Cluster 602]GO:0043495+F molecular\_function [name] protein anchor [def] "Interacting selectively and non-covalently with both a protein or protein complex and a membrane, in order to maintain the localization of the protein at a specific location on the membrane." [GOC]

3368 Pathogen[ Q2Q067] interacts with 1 human partners:{P35579}

3369 Pathogen[ P03346] interacts with 1 human partners:{P35579}

3370 Pathogen[ Q85601] interacts with 1 human partners:{P35579}

3371 Pathogen[ P14079] interacts with 1 human partners:{P35579}

3372 Pathogen[ P03383] interacts with 1 human partners:{P35579}

3373 Pathogen[ P03410] interacts with 1 human partners:{P35579}

3374 Pathogen[ P14075] interacts with 1 human partners:{P35579}

3375 Pathogen[ P0C206] interacts with 1 human partners:{P35579}

3376 Pathogen[ P03363] interacts with 1 human partners:{P35579}

3377 [Cluster 603]GO:0052692+F molecular\_function [name] raffinose alpha-galactosidase activity [def] "Catalysis of the reaction

3378 Pathogen[ P14079] interacts with 1 human partners:{P06280}

3379 [Cluster 604]GO:0019208+F molecular\_function [name] phosphatase regulator activity [def] "Modulates the activity of a phosphatase, an enzyme which catalyzes of the removal of a phosphate group from a substrate molecule." [GOC]

3380 Pathogen[ Q2Q067] interacts with 2 human partners:{O14974;O60315}

3381 Pathogen[ P0C214] interacts with 2 human partners:{O14974;O60315}

3382 Pathogen[ P03346] interacts with 3 human partners:{O60315;Q86WG5;O14974}

3383 Pathogen[ Q85601] interacts with 2 human partners:{O60315;O14974}

3384 Pathogen[ P14079] interacts with 3 human partners:{O14974;O60315;Q86WG5}

3385 Pathogen[ P03410] interacts with 2 human partners:{O14974;Q86WG5}

3386 Pathogen[ P0C206] interacts with 2 human partners:{O14974;O60315}

3387 Pathogen[ P03363] interacts with 3 human partners:{O60315;Q86WG5;O14974}

3388 [Cluster 605]GO:0008020+F molecular\_function [name] G-protein coupled photoreceptor activity [def] "Combining with incidental electromagnetic radiation, particularly visible light, and transmitting the signal across the membrane by activating an associated G-protein\_ promotes the exchange of GDP for GTP on the alpha subunit of a heterotrimeric G-protein complex." [GOC]

3389 Pathogen[ Q2Q067] interacts with 1 human partners:{Q9GZR5}

3390 Pathogen[ P0C214] interacts with 1 human partners:{Q9GZR5}

3391 Pathogen[ Q85601] interacts with 1 human partners:{Q9GZR5}

3392 Pathogen[ P14079] interacts with 1 human partners:{Q9GZR5}

3393 Pathogen[ P03383] interacts with 1 human partners:{Q9GZR5}

3394 Pathogen[ P03410] interacts with 1 human partners:{Q9GZR5}

3395 Pathogen[ P14075] interacts with 1 human partners:{Q9GZR5}

3396 Pathogen[ P0C206] interacts with 1 human partners:{Q9GZR5}

3397 [Cluster 606]GO:0032558+F molecular\_function [name] adenylyl deoxyribonucleotide binding [def] "Interacting selectively and non-covalently with an adenylyl deoxyribonucleotide, any compound consisting of adenosine esterified with (ortho)phosphate or an oligophosphate at any hydroxyl group on the deoxyribose moiety." [GOC

3398 Pathogen[ P14079] interacts with 1 human partners:{Q9NSU2}

3399 Pathogen[ P03410] interacts with 1 human partners:{Q9NSU2}

3400 Pathogen[ P0C206] interacts with 1 human partners:{Q9NSU2}

3401 [Cluster 607]GO:0004531+F molecular\_function [name] deoxyribonuclease II activity [def] "Catalysis of the endonucleolytic cleavage of DNA to 3'-phosphodinucleotide and 3'-phosphooligonucleotide end products." [EC

3402 Pathogen[ P14079] interacts with 2 human partners:{O00115;Q8WZ79}

3403 Pathogen[ P03410] interacts with 1 human partners:{O00115}

3404 [Cluster 608]GO:0019870+F molecular\_function [name] potassium channel inhibitor activity [def] "Stops, prevents, or reduces the activity of a potassium channel." [GOC

3405 Pathogen[ P03346] interacts with 1 human partners:{Q99633}

3406 Pathogen[ P14079] interacts with 1 human partners:{Q99633}

3407 Pathogen[ P03410] interacts with 1 human partners:{Q99633}

3408 Pathogen[ P03363] interacts with 1 human partners:{Q99633}

3409 [Cluster 609]GO:0008146+F molecular\_function [name] sulfotransferase activity [def] "Catalysis of the transfer of a sulfate group from 3'-phosphoadenosine 5'-phosphosulfate to the hydroxyl group of an acceptor, producing the sulfated derivative and 3'-phosphoadenosine 5'-phosphate." [EC

3410 Pathogen[ Q2Q067] interacts with 1 human partners:{O00204}

3411 Pathogen[ P0C214] interacts with 2 human partners:{O00204;Q06520}

3412 Pathogen[ P03346] interacts with 2 human partners:{O00204;Q06520}

3413 Pathogen[ Q85601] interacts with 1 human partners:{O00204}

3414 Pathogen[ P03410] interacts with 1 human partners:{O00204}

3415 Pathogen[ P0C206] interacts with 1 human partners:{O00204}

3416 Pathogen[ P03363] interacts with 2 human partners:{O00204;Q06520}

3417 [Cluster 610]GO:0005267+F molecular\_function [name] potassium channel activity [def] "Catalysis of facilitated diffusion of a potassium ion (by an energy-independent process) involving passage through a transmembrane aqueous pore or channel without evidence for a carrier-mediated mechanism." [GOC

3418 Pathogen[ P14079] interacts with 1 human partners:{Q9H6F2}

3419 Pathogen[ P03410] interacts with 2 human partners:{P59646;Q9H6F2}

3420 [Cluster 611]GO:0016531+F molecular\_function [name] copper chaperone activity [def] "Assists in the delivery of copper ions to target proteins or compartments." [PMID

3421 Pathogen[ P0C214] interacts with 1 human partners:{Q14061}

3422 Pathogen[ Q85601] interacts with 1 human partners:{Q14061}

3423 Pathogen[ P14079] interacts with 2 human partners:{Q14061;O00244}

3424 Pathogen[ P03410] interacts with 1 human partners:{Q14061}

3425 Pathogen[ P14075] interacts with 1 human partners:{Q14061}

3426 Pathogen[ P0C206] interacts with 1 human partners:{Q14061}

3427 [Cluster 612]GO:0004300+F molecular\_function [name] enoyl-CoA hydratase activity [def] "Catalysis of the reaction

3428 Pathogen[ Q2Q067] interacts with 1 human partners:{P30084}

3429 Pathogen[ P0C214] interacts with 2 human partners:{P30084;P40939}

3430 Pathogen[ P03346] interacts with 1 human partners:{P30084}

3431 Pathogen[ Q85601] interacts with 1 human partners:{P30084}

3432 Pathogen[ P14079] interacts with 1 human partners:{P30084}

3433 Pathogen[ P03410] interacts with 1 human partners:{P30084}

3434 Pathogen[ P0C206] interacts with 1 human partners:{P30084}

3435 [Cluster 613]GO:0004336+F molecular\_function [name] galactosylceramidase activity [def] "Catalysis of the reaction

3436 Pathogen[ P14079] interacts with 1 human partners:{P54803}

3437 Pathogen[ P03410] interacts with 1 human partners:{P54803}

3438 [Cluster 614]GO:0004733+F molecular\_function [name] pyridoxamine-phosphate oxidase activity [def] "Catalysis of the reaction

3439 Pathogen[ P14079] interacts with 1 human partners:{Q9NVS9}

3440 Pathogen[ P03410] interacts with 1 human partners:{Q9NVS9}

3441 Pathogen[ P14075] interacts with 1 human partners:{Q9NVS9}

3442 [Cluster 615]GO:0004080+F molecular\_function [name] biotin-[propionyl-CoA-carboxylase (ATP-hydrolyzing)] ligase activity [def] "Catalysis of the reaction

3443 Pathogen[ P0C214] interacts with 1 human partners:{P50747}

3444 [Cluster 616]GO:0004043+F molecular\_function [name] L-aminoacidipate-semialdehyde dehydrogenase activity [def] "Catalysis of the reaction

3445 Pathogen[ Q2Q067] interacts with 1 human partners:{P49419}

3446 Pathogen[ P0C214] interacts with 1 human partners:{P49419}

3447 Pathogen[ P03346] interacts with 1 human partners:{P49419}

3448 Pathogen[ Q85601] interacts with 1 human partners:{P49419}

3449 Pathogen[ P03383] interacts with 1 human partners:{P49419}

3450 Pathogen[ P03410] interacts with 1 human partners:{P49419}

3451 Pathogen[ P14075] interacts with 1 human partners:{P49419}

3452 Pathogen[ P0C206] interacts with 1 human partners:{P49419}

3453 Pathogen[ P03363] interacts with 1 human partners:{P49419}

3454 [Cluster 617]GO:0003883+F molecular\_function [name] CTP synthase activity [def] "Catalysis of the reaction

3455 Pathogen[ P0C214] interacts with 2 human partners:{Q9NRF8;P17812}

3456 Pathogen[ P14079] interacts with 2 human partners:{P17812;Q9NRF8}

3457 Pathogen[ P03410] interacts with 2 human partners:{Q9NRF8;P17812}

3458 [Cluster 618]GO:0001093+F molecular\_function [name] TFIIB-class transcription factor binding [def] "Interacting selectively and non-covalently with a basal RNA polymerase II transcription factor of the TFIIB class, one of the factors involved in formation of the preinitiation complex (PIC) by RNA polymerase II and defined as a basal or general transcription factor." [GOC

3459 Pathogen[ Q2Q067] interacts with 1 human partners:{P15884}

3460 Pathogen[ P0C214] interacts with 1 human partners:{P15884}

3461 Pathogen[ P03346] interacts with 1 human partners:{P15884}

3462 Pathogen[ Q85601] interacts with 1 human partners:{P15884}

3463 Pathogen[ P14079] interacts with 1 human partners:{P15884}

3464 Pathogen[ P03410] interacts with 1 human partners:{P15884}

3465 Pathogen[ P14075] interacts with 1 human partners:{P15884}

3466 Pathogen[ P0C206] interacts with 1 human partners:{P15884}

3467 Pathogen[ P03363] interacts with 1 human partners:{P15884}

3468 [Cluster 619]GO:0003839+F molecular\_function [name] gamma-glutamylcyclotransferase activity [def] "Catalysis of the reaction

3469 Pathogen[ P0C214] interacts with 1 human partners:{O75223}

3470 Pathogen[ P14079] interacts with 2 human partners:{O75223;Q9BVM4}

3471 Pathogen[ P03410] interacts with 2 human partners:{Q9BVM4;O75223}

3472 Pathogen[ P14075] interacts with 1 human partners:{Q9BVM4}

3473 Pathogen[ P0C206] interacts with 1 human partners:{Q9BVM4}

3474 [Cluster 620]GO:0050347+F molecular\_function [name] trans-octaprenyltranstransferase activity [def] "Catalysis of the reaction

3475 Pathogen[ P14079] interacts with 1 human partners:{Q86YH6}

3476 Pathogen[ P03410] interacts with 1 human partners:{Q86YH6}

3477 [Cluster 621]GO:0052656+F molecular\_function [name] L-isoleucine transaminase activity [def] "Catalysis of the reaction

3478 Pathogen[ P0C214] interacts with 2 human partners:{O15382;P54687}

3479 Pathogen[ Q85601] interacts with 1 human partners:{O15382}

3480 Pathogen[ P14079] interacts with 1 human partners:{O15382}

3481 Pathogen[ P03410] interacts with 1 human partners:{O15382}

3482 Pathogen[ P0C206] interacts with 1 human partners:{O15382}

3483 [Cluster 622]GO:0050561+F molecular\_function [name] glutamate-tRNA(Gln) ligase activity [def] "Catalysis of the reaction

3484 Pathogen[ P0C214] interacts with 1 human partners:{Q5JPH6}

3485 Pathogen[ P14079] interacts with 1 human partners:{Q5JPH6}

3486 Pathogen[ P03383] interacts with 1 human partners:{Q5JPH6}

3487 Pathogen[ P03410] interacts with 1 human partners:{Q5JPH6}

3488 Pathogen[ P14075] interacts with 1 human partners:{Q5JPH6}

3489 Pathogen[ P0C206] interacts with 1 human partners:{Q5JPH6}

3490 Pathogen[ P03363] interacts with 1 human partners:{Q5JPH6}

3491 [Cluster 623]GO:0008495+F molecular\_function [name] protoheme IX farnesyltransferase activity [def] "Catalysis of the reaction

3492 Pathogen[ P14079] interacts with 1 human partners:{Q12887}

3493 Pathogen[ P03410] interacts with 1 human partners:{Q12887}

3494 [Cluster 624]GO:0047962+F molecular\_function [name] glycine N-benzoyltransferase activity [def] "Catalysis of the reaction

3495 Pathogen[ P0C214] interacts with 1 human partners:{Q6IB77}

3496 Pathogen[ Q85601] interacts with 1 human partners:{Q6IB77}

3497 Pathogen[ P14079] interacts with 1 human partners:{Q6IB77}

3498 Pathogen[ P03410] interacts with 1 human partners:{Q6IB77}

3499 Pathogen[ P0C206] interacts with 1 human partners:{Q6IB77}

3500 [Cluster 625]GO:0031781+F molecular\_function [name] type 3 melanocortin receptor binding [def] "Interacting selectively and non-covalently with a type 3 melanocortin receptor." [GOC

3501 Pathogen[ P14079] interacts with 2 human partners:{Q96G30;Q8TCY5}

3502 Pathogen[ P03410] interacts with 1 human partners:{Q96G30}

3503 [Cluster 626]GO:0047865+F molecular\_function [name] dimethylglycine dehydrogenase activity [def] "Catalysis of the reaction

3504 Pathogen[ P0C214] interacts with 1 human partners:{Q9UI17}

3505 Pathogen[ P14079] interacts with 1 human partners:{Q9UI17}

3506 Pathogen[ P03410] interacts with 1 human partners:{Q9UI17}

3507 [Cluster 627]GO:0005523+F molecular\_function [name] tropomyosin binding [def] "Interacting selectively and non-covalently with tropomyosin, a protein associated with actin filaments both in cytoplasm and, in association with troponin, in the thin filament of striated muscle." [GOC

3508 Pathogen[ P03346] interacts with 3 human partners:{P06703;P28289;O76041}

3509 Pathogen[ P14079] interacts with 6 human partners:{P13805;P19237;P28289;O76041;Q05682;P06703}

3510 Pathogen[ P03410] interacts with 7 human partners:{O76041;Q05682;P28289;P06703;Q9NYL9;P13805;Q0VAK6}

3511 Pathogen[ P0C206] interacts with 2 human partners:{O76041;P06703}

3512 Pathogen[ P03363] interacts with 5 human partners:{Q9NZR1;P28289;Q0VAK6;Q9NYL9;O76041}

3513 [Cluster 628]GO:0017176+F molecular\_function [name] phosphatidylinositol N-acetylglucosaminyltransferase activity [def] "Catalysis of the reaction Pathogen[ Q2Q067] interacts with 1 human partners:{Q14442} Pathogen[ P03346] interacts with 1 human partners:{Q14442} Pathogen[ P14079] interacts with 3 human partners:{Q14442;P57054;Q9BRB3} Pathogen[ P03410] interacts with 2 human partners:{Q14442;Q9BRB3} Pathogen[ P14075] interacts with 1 human partners:{Q14442} Pathogen[ P0C206] interacts with 1 human partners:{Q14442}

3520 [Cluster 629]GO:0004458+F molecular\_function [name] D-lactate dehydrogenase (cytochrome) activity [def] "Catalysis of the reaction Pathogen[ P0C214] interacts with 1 human partners:{Q86WU2} Pathogen[ P03346] interacts with 1 human partners:{Q86WU2} Pathogen[ P14079] interacts with 1 human partners:{Q86WU2} Pathogen[ P03410] interacts with 1 human partners:{Q86WU2} Pathogen[ P0C206] interacts with 1 human partners:{Q86WU2}

3526 [Cluster 630]GO:0043498+F molecular\_function [name] cell surface binding [def] "Interacting selectively and non-covalently with any component on the surface of a cell." [GOC Pathogen[ Q2Q067] interacts with 1 human partners:{Q12904} Pathogen[ P0C214] interacts with 2 human partners:{Q12904;P10809} Pathogen[ P03346] interacts with 1 human partners:{Q12904} Pathogen[ P14079] interacts with 1 human partners:{Q12904} Pathogen[ P03383] interacts with 1 human partners:{Q12904} Pathogen[ P03410] interacts with 1 human partners:{Q12904} Pathogen[ P14075] interacts with 1 human partners:{Q12904} Pathogen[ P0C206] interacts with 1 human partners:{Q12904}

3535 [Cluster 631]GO:0004477+F molecular\_function [name] methenyltetrahydrofolate cyclohydrolase activity [def] "Catalysis of the reaction Pathogen[ P0C214] interacts with 1 human partners:{P11586}

3537 [Cluster 632]GO:0003993+F molecular\_function [name] acid phosphatase activity [def] "Catalysis of the reaction Pathogen[ P03346] interacts with 1 human partners:{P24666} Pathogen[ P14079] interacts with 1 human partners:{Q9UNW1} Pathogen[ P03410] interacts with 2 human partners:{P24666;Q9UNW1} Pathogen[ P0C206] interacts with 1 human partners:{P24666} Pathogen[ P03363] interacts with 1 human partners:{P24666}

3543 [Cluster 633]GO:0050750+F molecular\_function [name] low-density lipoprotein particle receptor binding [def] "Interacting selectively and non-covalently with a low-density lipoprotein receptor." [GOC Pathogen[ Q2Q067] interacts with 2 human partners:{P31689;P14625} Pathogen[ P0C214] interacts with 2 human partners:{P14625;Q14696} Pathogen[ P03346] interacts with 3 human partners:{Q15036;P14625;P31689} Pathogen[ Q85601] interacts with 3 human partners:{P31689;Q15036;P14625} Pathogen[ P14079] interacts with 5 human partners:{Q15036;Q14696;O43813;P14625;P31689} Pathogen[ P03383] interacts with 3 human partners:{P31689;Q14696;P14625} Pathogen[ P03410] interacts with 4 human partners:{P14625;Q15036;P31689;Q14696} Pathogen[ P14075] interacts with 3 human partners:{P31689;Q14696;P14625} Pathogen[ P0C206] interacts with 4 human partners:{Q15036;Q14696;P31689;P14625}

3553 [Cluster 634]GO:0031772+F molecular\_function [name] type 2 hypocretin receptor binding [def] "Interacting selectively and non-covalently with a type 2 hypocretin receptor." [GOC Pathogen[ P14079] interacts with 1 human partners:{O43612} Pathogen[ P03410] interacts with 1 human partners:{O43612}

3556 [Cluster 635]GO:0019840+F molecular\_function [name] isoprenoid binding [def] "Interacting selectively and non-covalently with any isoprenoid compound, isoprene (2-methylbuta-1,3-diene) or compounds containing or derived from linked isoprene (3-methyl-2-butenylene) residues." [GOC Pathogen[ Q2Q067] interacts with 1 human partners:{P49356} Pathogen[ P0C214] interacts with 1 human partners:{P49356} Pathogen[ P03346] interacts with 1 human partners:{P49356} Pathogen[ Q85601] interacts with 1 human partners:{P49356} Pathogen[ P14079] interacts with 1 human partners:{P49356} Pathogen[ P03410] interacts with 1 human partners:{P49356} Pathogen[ P0C206] interacts with 1 human partners:{P49356}

3564 [Cluster 636]GO:0031406+F molecular\_function [name] carboxylic acid binding [def] "Interacting selectively and non-covalently with a carboxylic acid, any organic acid containing one or more carboxyl (COOH) groups or anions (COO-)." [GOC Pathogen[ Q2Q067] interacts with 2 human partners:{Q9NWT6;P08397}

3566 Pathogen[ P0C214] interacts with 3 human partners:{P35558;P08397;Q9NWT6}

3567 Pathogen[ P03346] interacts with 1 human partners:{Q9NWT6}

3568 Pathogen[ Q85601] interacts with 2 human partners:{Q9NWT6;P08397}

3569 Pathogen[ P14079] interacts with 2 human partners:{Q9NWT6;P08397}

3570 Pathogen[ P03383] interacts with 2 human partners:{Q9NWT6;P08397}

3571 Pathogen[ P03410] interacts with 2 human partners:{P08397;Q9NWT6}

3572 Pathogen[ P14075] interacts with 2 human partners:{P08397;Q9NWT6}

3573 Pathogen[ P0C206] interacts with 2 human partners:{Q9NWT6;P08397}

3574 [Cluster 637]GO:0019144+F molecular\_function [name] ADP-sugar diphosphatase activity  
[def] "Catalysis of the reaction

3575 Pathogen[ P14079] interacts with 1 human partners:{Q9UKK9}

3576 Pathogen[ P03410] interacts with 1 human partners:{Q9UKK9}

3577 [Cluster 638]GO:0004438+F molecular\_function [name] phosphatidylinositol-3-phosphatase  
activity [def] "Catalysis of the reaction

3578 Pathogen[ P0C214] interacts with 1 human partners:{Q13615}

3579 Pathogen[ P0C206] interacts with 1 human partners:{Q13615}

3580 [Cluster 639]GO:0019957+F molecular\_function [name] C-C chemokine binding [def]  
"Interacting selectively and non-covalently with a C-C chemokine\_ C-C chemokines do not  
have an amino acid between the first two cysteines of the characteristic four-cysteine  
motif." [GOC

3581 Pathogen[ Q2Q067] interacts with 1 human partners:{P26651}

3582 Pathogen[ P0C214] interacts with 1 human partners:{P26651}

3583 Pathogen[ P03346] interacts with 1 human partners:{P26651}

3584 Pathogen[ Q85601] interacts with 1 human partners:{P26651}

3585 Pathogen[ P03383] interacts with 1 human partners:{P26651}

3586 Pathogen[ P03410] interacts with 1 human partners:{P26651}

3587 Pathogen[ P14075] interacts with 1 human partners:{P26651}

3588 Pathogen[ P0C206] interacts with 1 human partners:{P26651}

3589 Pathogen[ P03363] interacts with 1 human partners:{P26651}

3590 [Cluster 640]GO:0033883+F molecular\_function [name] pyridoxal phosphatase activity  
[def] "Catalysis of the reaction

3591 Pathogen[ P0C214] interacts with 1 human partners:{Q96GD0}

3592 Pathogen[ P14079] interacts with 1 human partners:{Q96GD0}

3593 Pathogen[ P03410] interacts with 1 human partners:{Q96GD0}

3594 Pathogen[ P0C206] interacts with 1 human partners:{Q96GD0}

3595 [Cluster 641]GO:0015464+F molecular\_function [name] acetylcholine receptor activity  
[def] "Combining with acetylcholine to initiate a change in cell activity." [GOC

3596 Pathogen[ P14079] interacts with 1 human partners:{O76027}

3597 Pathogen[ P03410] interacts with 1 human partners:{O76027}

3598 [Cluster 642]GO:0008160+F molecular\_function [name] protein tyrosine phosphatase  
activator activity [def] "Increases the activity of a phosphatase, an enzyme which  
catalyzes of the removal of a phosphate group from a tyrosyl phenolic group of a  
protein." [GOC

3599 Pathogen[ Q2Q067] interacts with 1 human partners:{Q15257}

3600 Pathogen[ P0C214] interacts with 1 human partners:{Q15257}

3601 Pathogen[ P03346] interacts with 1 human partners:{Q15257}

3602 Pathogen[ Q85601] interacts with 1 human partners:{Q15257}

3603 Pathogen[ P03383] interacts with 1 human partners:{Q15257}

3604 Pathogen[ P03410] interacts with 1 human partners:{Q15257}

3605 Pathogen[ P14075] interacts with 1 human partners:{Q15257}

3606 Pathogen[ P0C206] interacts with 1 human partners:{Q15257}

3607 Pathogen[ P03363] interacts with 1 human partners:{Q15257}

3608 [Cluster 643]GO:0003941+F molecular\_function [name] L-serine ammonia-lyase activity  
[def] "Catalysis of the reaction

3609 Pathogen[ P03346] interacts with 1 human partners:{P20132}

3610 Pathogen[ P14079] interacts with 1 human partners:{P20132}

3611 Pathogen[ P03410] interacts with 1 human partners:{P20132}

3612 Pathogen[ P0C206] interacts with 1 human partners:{P20132}

3613 [Cluster 644]GO:0070181+F molecular\_function [name] SSU rRNA binding [def]  
"Interacting selectively and non-covalently with the small ribosomal subunit RNA (SSU  
rRNA), a constituent of the small ribosomal subunit. In *S. cerevisiae*, this is the 18S  
rRNA." [GOC

3614 Pathogen[ P0C214] interacts with 1 human partners:{Q14011}

3615 Pathogen[ P03346] interacts with 1 human partners:{Q14011}

3616 Pathogen[ P14079] interacts with 1 human partners:{Q14011}

3617 Pathogen[ P03410] interacts with 1 human partners:{Q14011}

3618 Pathogen[ P0C206] interacts with 1 human partners:{Q14011}

3619 Pathogen[ P03363] interacts with 1 human partners:{Q14011}

3620 [Cluster 645]GO:0019784+F molecular\_function [name] NEDD8-specific protease activity  
[def] "Catalysis of the hydrolysis of NEDD8, a small ubiquitin-related modifier, from  
previously neddylated substrates." [GOC

3621 Pathogen[ P03346] interacts with 1 human partners:{Q96FW1}

3622 Pathogen[ P14079] interacts with 1 human partners:{Q96FW1}

3623 Pathogen[ P03410] interacts with 1 human partners:{Q96FW1}

3624 Pathogen[ P14075] interacts with 1 human partners:{Q96FW1}

3625 Pathogen[ P0C206] interacts with 1 human partners:{Q96FW1}



3626 Pathogen[ P03363] interacts with 1 human partners:{Q96FW1}

3627 [Cluster 646]GO:0005176+F molecular\_function [name] ErbB-2 class receptor binding  
[def] "Interacting selectively and non-covalently with the protein-tyrosine kinase  
receptor Neu/ErbB-2/HER2." [GOC

3628 Pathogen[ P03346] interacts with 1 human partners:{Q96RT1}

3629 Pathogen[ Q85601] interacts with 1 human partners:{Q96RT1}

3630 Pathogen[ P14079] interacts with 1 human partners:{Q96RT1}

3631 Pathogen[ P03410] interacts with 1 human partners:{Q96RT1}

3632 Pathogen[ P0C206] interacts with 1 human partners:{Q96RT1}

3633 Pathogen[ P03363] interacts with 1 human partners:{Q96RT1}

3634 [Cluster 647]GO:0044323+F molecular\_function [name] retinoic acid-responsive element  
binding [def] "Interacting selectively with a retinoic acid-responsive element, a  
variable direct repeat of the sequence PuGGTCA spaced by five nucleotides (DR5) found in  
the promoters of retinoic acid-responsive genes, to which retinoic acid receptors bind."  
[GOC

3635 Pathogen[ P03346] interacts with 1 human partners:{O15090}

3636 [Cluster 648]GO:0019210+F molecular\_function [name] kinase inhibitor activity [def]  
"Stops, prevents or reduces the activity of a kinase, an enzyme which catalyzes of the  
transfer of a phosphate group, usually from ATP, to a substrate molecule." [GOC

3637 Pathogen[ P0C214] interacts with 1 human partners:{O15524}

3638 Pathogen[ P03346] interacts with 1 human partners:{O15524}

3639 Pathogen[ P0C206] interacts with 1 human partners:{O15524}

3640 Pathogen[ P03363] interacts with 1 human partners:{O15524}

3641 [Cluster 649]GO:0008521+F molecular\_function [name] acetyl-CoA transporter activity  
[def] "Enables the directed movement of acetyl-CoA into, out of or within a cell, or  
between cells. Acetyl-CoA is a derivative of coenzyme A in which the sulfhydryl group is  
acetylated\_ it is a metabolite derived from several pathways (e.g. glycolysis, fatty acid  
oxidation, amino-acid catabolism) and is further metabolized by the tricarboxylic acid  
cycle. It is a key intermediate in lipid and terpenoid biosynthesis." [GOC

3642 Pathogen[ P14079] interacts with 1 human partners:{O00400}

3643 Pathogen[ P03410] interacts with 1 human partners:{O00400}

3644 [Cluster 650]GO:0004457+F molecular\_function [name] lactate dehydrogenase activity  
[def] "Catalysis of the oxidation of lactate to produce pyruvate." [GOC

3645 Pathogen[ Q2Q067] interacts with 1 human partners:{P07195}

3646 Pathogen[ P0C214] interacts with 1 human partners:{P07195}

3647 Pathogen[ P03346] interacts with 1 human partners:{P07195}

3648 Pathogen[ Q85601] interacts with 1 human partners:{P07195}

3649 Pathogen[ P14079] interacts with 1 human partners:{P07195}

3650 Pathogen[ P03383] interacts with 1 human partners:{P07195}

3651 Pathogen[ P03410] interacts with 1 human partners:{P07195}

3652 Pathogen[ P14075] interacts with 1 human partners:{P07195}

3653 Pathogen[ P0C206] interacts with 1 human partners:{P07195}

3654 [Cluster 651]GO:0070182+F molecular\_function [name] DNA polymerase binding [def]  
"Interacting selectively and non-covalently with a DNA polymerase." [GOC

3655 Pathogen[ Q2Q067] interacts with 1 human partners:{Q96AP0}

3656 Pathogen[ P03346] interacts with 1 human partners:{Q96AP0}

3657 Pathogen[ P14079] interacts with 1 human partners:{Q96AP0}

3658 Pathogen[ P03410] interacts with 1 human partners:{Q96AP0}

3659 Pathogen[ P14075] interacts with 1 human partners:{Q96AP0}

3660 Pathogen[ P0C206] interacts with 1 human partners:{Q96AP0}

3661 Pathogen[ P03363] interacts with 1 human partners:{Q96AP0}

3662 [Cluster 652]GO:0008454+F molecular\_function [name] alpha-1,3-mannosylglycoprotein  
4-beta-N-acetylglucosaminyltransferase activity [def] "Catalysis of the reaction

3663 Pathogen[ P14079] interacts with 1 human partners:{Q9UBM8}

3664 [Cluster 653]GO:0005104+F molecular\_function [name] fibroblast growth factor receptor  
binding [def] "Interacting selectively and non-covalently with the fibroblast growth  
factor receptor (FGFR)." [GOC

3665 Pathogen[ P14079] interacts with 1 human partners:{Q8WU20}

3666 Pathogen[ P03410] interacts with 1 human partners:{Q8WU20}

3667 Pathogen[ P0C206] interacts with 1 human partners:{Q8WU20}

3668 [Cluster 654]GO:0046582+F molecular\_function [name] Rap GTPase activator activity  
[def] "Increases the rate of GTP hydrolysis by a GTPase of the Rap family." [GOC

3669 Pathogen[ P03346] interacts with 1 human partners:{Q96FS4}

3670 Pathogen[ P03363] interacts with 1 human partners:{Q96FS4}

3671 [Cluster 655]GO:0035515+F molecular\_function [name] oxidative RNA demethylase activity  
[def] "Catalysis of the removal of a methyl group from one or more nucleosides within a  
RNA molecule involving the oxidation (i.e. electron loss) of one or more atoms." [PMID

3672 Pathogen[ P14079] interacts with 1 human partners:{Q9C0B1}

3673 Pathogen[ P03410] interacts with 1 human partners:{Q9C0B1}

3674 [Cluster 656]GO:0031177+F molecular\_function [name] phosphopantetheine binding [def]  
"Interacting selectively with phosphopantetheine, the vitamin pantetheine 4'-(dihydrogen  
phosphate)." [CHEBI

3675 Pathogen[ P0C214] interacts with 1 human partners:{O14561}

3676 Pathogen[ P14079] interacts with 1 human partners:{O14561}

3677 Pathogen[ P03410] interacts with 1 human partners:{O14561}

3678 Pathogen[ P14075] interacts with 1 human partners:{O14561}

3679 Pathogen[ P0C206] interacts with 1 human partners:{O14561}

3680 [Cluster 657]GO:0018738+F molecular\_function [name] S-formylglutathione hydrolase activity [def] "Catalysis of the reaction

3681 Pathogen[ P03346] interacts with 1 human partners:{P10768}

3682 Pathogen[ Q85601] interacts with 1 human partners:{P10768}

3683 Pathogen[ P03410] interacts with 1 human partners:{P10768}

3684 Pathogen[ P0C206] interacts with 1 human partners:{P10768}

3685 Pathogen[ P03363] interacts with 1 human partners:{P10768}

3686 [Cluster 658]GO:0004795+F molecular\_function [name] threonine synthase activity [def] "Catalysis of the reaction

3687 Pathogen[ P14079] interacts with 1 human partners:{Q8IYQ7}

3688 [Cluster 659]GO:0030144+F molecular\_function [name] alpha-1,6-mannosylglycoprotein 6-beta-N-acetylglucosaminyltransferase activity [def] "Catalysis of the reaction

3689 Pathogen[ P14079] interacts with 1 human partners:{Q3V5L5}

3690 Pathogen[ P03410] interacts with 1 human partners:{Q3V5L5}

3691 [Cluster 660]GO:0004032+F molecular\_function [name] alditol [def] "Catalysis of the reaction

3692 Pathogen[ Q2Q067] interacts with 1 human partners:{P15121}

3693 Pathogen[ P0C214] interacts with 1 human partners:{P15121}

3694 Pathogen[ P03346] interacts with 1 human partners:{P15121}

3695 Pathogen[ Q85601] interacts with 1 human partners:{P15121}

3696 Pathogen[ P0C206] interacts with 1 human partners:{P15121}

3697 [Cluster 661]GO:0004462+F molecular\_function [name] lactoylglutathione lyase activity [def] "Catalysis of the reaction

3698 Pathogen[ P14079] interacts with 1 human partners:{Q04760}

3699 Pathogen[ P03410] interacts with 1 human partners:{Q04760}

3700 Pathogen[ P0C206] interacts with 1 human partners:{Q04760}

3701 [Cluster 662]GO:0034190+F molecular\_function [name] apolipoprotein receptor binding [def] "Interacting selectively and non-covalently with an apolipoprotein receptor." [GOC

3702 Pathogen[ P14079] interacts with 1 human partners:{O60282}

3703 Pathogen[ P03410] interacts with 1 human partners:{O60282}

3704 Pathogen[ P03363] interacts with 1 human partners:{O60282}

3705 [Cluster 663]GO:0004014+F molecular\_function [name] adenosylmethionine decarboxylase activity [def] "Catalysis of the reaction

3706 Pathogen[ P14079] interacts with 1 human partners:{P17707}

3707 Pathogen[ P03410] interacts with 1 human partners:{P17707}

3708 [Cluster 664]GO:0035252+F molecular\_function [name] UDP-xylosyltransferase activity [def] "Catalysis of the transfer of a xylosyl group from UDP-xylose to an acceptor molecule." [http

3709 Pathogen[ P14079] interacts with 1 human partners:{Q8NBL1}

3710 [Cluster 665]GO:0008456+F molecular\_function [name] alpha-N-acetylgalactosaminidase activity [def] "Catalysis of the hydrolysis of terminal non-reducing N-acetyl-D-galactosamine residues in N-acetyl-alpha-D-galactosaminides." [EC

3711 Pathogen[ P14079] interacts with 1 human partners:{P17050}

3712 [Cluster 666]GO:0004852+F molecular\_function [name] uroporphyrinogen-III synthase activity [def] "Catalysis of the reaction

3713 Pathogen[ Q2Q067] interacts with 2 human partners:{P10746;P08397}

3714 Pathogen[ P0C214] interacts with 2 human partners:{P10746;P08397}

3715 Pathogen[ P03346] interacts with 1 human partners:{P10746}

3716 Pathogen[ Q85601] interacts with 2 human partners:{P10746;P08397}

3717 Pathogen[ P14079] interacts with 2 human partners:{P10746;P08397}

3718 Pathogen[ P03383] interacts with 1 human partners:{P08397}

3719 Pathogen[ P03410] interacts with 2 human partners:{P08397;P10746}

3720 Pathogen[ P14075] interacts with 1 human partners:{P08397}

3721 Pathogen[ P0C206] interacts with 2 human partners:{P10746;P08397}

3722 [Cluster 667]GO:0008187+F molecular\_function [name] poly-pyrimidine tract binding [def] "Interacting selectively and non-covalently with any stretch of pyrimidines (cytosine or uracil) in an RNA molecule." [GOC

3723 Pathogen[ P0C214] interacts with 1 human partners:{P26599}

3724 Pathogen[ P03346] interacts with 1 human partners:{P26599}

3725 Pathogen[ P14079] interacts with 1 human partners:{P26599}

3726 Pathogen[ P03410] interacts with 1 human partners:{P26599}

3727 Pathogen[ P03363] interacts with 1 human partners:{P26599}

3728 [Cluster 668]GO:0042562+F molecular\_function [name] hormone binding [def] "Interacting selectively and non-covalently with any hormone, naturally occurring substances secreted by specialized cells that affect the metabolism or behavior of other cells possessing functional receptors for the hormone." [CHEBI

3729 Pathogen[ Q2Q067] interacts with 1 human partners:{P27797}

3730 Pathogen[ P0C214] interacts with 2 human partners:{P05543;P27797}

3731 Pathogen[ P03346] interacts with 1 human partners:{P27797}

3732 Pathogen[ Q85601] interacts with 1 human partners:{P27797}

3733 Pathogen[ P03383] interacts with 1 human partners:{P27797}

3734 Pathogen[ P03410] interacts with 2 human partners:{P02766;P27797}

3735 Pathogen[ P14075] interacts with 1 human partners:{P27797}

3736 Pathogen[ P0C206] interacts with 1 human partners:{P27797}

3737 Pathogen[ P03363] interacts with 2 human partners:{P27797;P02766}

3738 [Cluster 669]GO:0005174+F molecular\_function [name] CD40 receptor binding [def] "Interacting selectively and non-covalently with CD40, a receptor found on the surface of all B-lymphocytes." [GOC]

3739 Pathogen[ Q2Q067] interacts with 1 human partners:{Q12933}

3740 Pathogen[ P0C214] interacts with 1 human partners:{Q12933}

3741 Pathogen[ Q85601] interacts with 1 human partners:{Q12933}

3742 Pathogen[ P14079] interacts with 1 human partners:{Q12933}

3743 Pathogen[ P03383] interacts with 1 human partners:{Q12933}

3744 Pathogen[ P03410] interacts with 1 human partners:{Q12933}

3745 Pathogen[ P14075] interacts with 1 human partners:{Q12933}

3746 Pathogen[ P0C206] interacts with 1 human partners:{Q12933}

3747 Pathogen[ P03363] interacts with 1 human partners:{Q12933}

3748 [Cluster 670]GO:0005093+F molecular\_function [name] Rab GDP-dissociation inhibitor activity [def] "Prevents the dissociation of GDP from the small GTPase Rab, thereby preventing GTP from binding." [GOC]

3749 Pathogen[ P0C214] interacts with 1 human partners:{P31150}

3750 Pathogen[ P03346] interacts with 1 human partners:{P31150}

3751 Pathogen[ Q85601] interacts with 1 human partners:{P31150}

3752 Pathogen[ P14079] interacts with 1 human partners:{P31150}

3753 Pathogen[ P03410] interacts with 1 human partners:{P31150}

3754 Pathogen[ P0C206] interacts with 1 human partners:{P31150}

3755 Pathogen[ P03363] interacts with 1 human partners:{P31150}

3756 [Cluster 671]GO:0047312+F molecular\_function [name] L-phenylalanine [def] "Catalysis of the reaction

3757 Pathogen[ P0C214] interacts with 1 human partners:{Q16773}

3758 [Cluster 672]GO:0008641+F molecular\_function [name] small protein activating enzyme activity [def] "Catalysis of the activation of small proteins, such as ubiquitin or ubiquitin-like proteins, through the formation of an ATP-dependent high-energy thiolester bond." [GOC]

3759 Pathogen[ P03346] interacts with 1 human partners:{A0AVT1}

3760 Pathogen[ P03363] interacts with 3 human partners:{P22314;Q9UBE0;A0AVT1}

3761 [Cluster 673]GO:0070404+F molecular\_function [name] NADH binding [def] "Interacting selectively and non-covalently with the reduced form, NADH, of nicotinamide adenine dinucleotide, a coenzyme involved in many redox and biosynthetic reactions." [GOC]

3762 Pathogen[ P0C214] interacts with 1 human partners:{P09417}

3763 [Cluster 674]GO:0004517+F molecular\_function [name] nitric-oxide synthase activity [def] "Catalysis of the reaction

3764 Pathogen[ Q2Q067] interacts with 1 human partners:{P29474}

3765 Pathogen[ P0C214] interacts with 1 human partners:{P29474}

3766 Pathogen[ P03346] interacts with 1 human partners:{P29474}

3767 Pathogen[ Q85601] interacts with 1 human partners:{P29474}

3768 Pathogen[ P03383] interacts with 1 human partners:{P29474}

3769 Pathogen[ P03410] interacts with 1 human partners:{P29474}

3770 Pathogen[ P14075] interacts with 1 human partners:{P29474}

3771 Pathogen[ P0C206] interacts with 1 human partners:{P29474}

3772 Pathogen[ P03363] interacts with 1 human partners:{P29474}

3773 [Cluster 675]GO:0008269+F molecular\_function [name] JAK pathway signal transduction adaptor activity [def] "The binding activity of a molecule that brings together two molecules of the JAK signal transduction pathway, permitting them to function in a coordinated way." [GOC]

3774 Pathogen[ Q2Q067] interacts with 1 human partners:{O14508}

3775 Pathogen[ P0C214] interacts with 1 human partners:{O14508}

3776 Pathogen[ P03346] interacts with 1 human partners:{O14508}

3777 Pathogen[ Q85601] interacts with 1 human partners:{O14508}

3778 Pathogen[ P14079] interacts with 1 human partners:{O14508}

3779 Pathogen[ P03410] interacts with 1 human partners:{O14508}

3780 Pathogen[ P0C206] interacts with 1 human partners:{O14508}

3781 Pathogen[ P03363] interacts with 1 human partners:{O14508}

3782 [Cluster 676]GO:0008892+F molecular\_function [name] guanine deaminase activity [def] "Catalysis of the reaction

3783 Pathogen[ P0C214] interacts with 1 human partners:{Q9Y2T3}

3784 Pathogen[ P14079] interacts with 1 human partners:{Q9Y2T3}

3785 Pathogen[ P03410] interacts with 1 human partners:{Q9Y2T3}

3786 [Cluster 677]GO:0008253+F molecular\_function [name] 5'-nucleotidase activity [def] "Catalysis of the reaction

3787 Pathogen[ P0C214] interacts with 4 human partners:{Q96P26;P49902;Q8TCD5;Q9H0P0}

3788 Pathogen[ P03346] interacts with 1 human partners:{Q969T7}

3789 Pathogen[ Q85601] interacts with 1 human partners:{Q9H0P0}

3790 Pathogen[ P14079] interacts with 6 human partners:{Q9H0P0;Q96P26;Q8TCD5;Q969T7;P49902;Q9BXI3}

3791 Pathogen[ P03410] interacts with 6 human partners:{Q96P26;Q9BXI3;Q8TCD5;Q9H0P0;P49902;Q969T7}

3792 Pathogen[ P14075] interacts with 1 human partners:{P49902}

3793 Pathogen[ P0C206] interacts with 4 human partners:{P49902;Q8TCD5;Q9H0P0;Q969T7}

3794 Pathogen[ P03363] interacts with 1 human partners:{Q969T7}

3795 [Cluster 678]GO:0016913+F molecular\_function [name] follicle-stimulating hormone

activity [def] "The action characteristic of follicle-stimulating hormone (FSH), a gonadotrophic glycoprotein hormone secreted, in mammals, by the anterior pituitary gland. Upon receptor binding, FSH stimulates growth of Graafian follicles in the ovaries in females, and stimulates the epithelium of the seminiferous tubules to increase spermatogenesis." [ISBN

3796 Pathogen[ P14079] interacts with 1 human partners:{P01225}

3797 [Cluster 679]GO:0035516+F molecular\_function [name] oxidative DNA demethylase activity [def] "Catalysis of the removal of the methyl group from one or more nucleotides within a DNA molecule involving the oxidation (i.e. electron loss) of one or more atoms." [PMID

3798 Pathogen[ P14079] interacts with 1 human partners:{Q9C0B1}

3799 Pathogen[ P03410] interacts with 1 human partners:{Q9C0B1}

3800 [Cluster 680]GO:0045032+F molecular\_function [name] ADP-activated nucleotide receptor activity [def] "Combining with adenosine and transmitting the signal to a heterotrimeric G-protein complex to initiate a change in cell activity, activated by ADP." [GOC

3801 Pathogen[ Q2Q067] interacts with 1 human partners:{P78352}

3802 Pathogen[ P0C214] interacts with 1 human partners:{P78352}

3803 Pathogen[ P03346] interacts with 1 human partners:{P78352}

3804 Pathogen[ Q85601] interacts with 1 human partners:{P78352}

3805 Pathogen[ P03383] interacts with 1 human partners:{P78352}

3806 Pathogen[ P03410] interacts with 1 human partners:{P78352}

3807 Pathogen[ P14075] interacts with 1 human partners:{P78352}

3808 Pathogen[ P0C206] interacts with 1 human partners:{P78352}

3809 Pathogen[ P03363] interacts with 1 human partners:{P78352}

3810 [Cluster 681]GO:0004691+F molecular\_function [name] cAMP-dependent protein kinase activity [def] "Catalysis of the reaction

3811 Pathogen[ P03346] interacts with 1 human partners:{Q12802}

3812 Pathogen[ P14079] interacts with 1 human partners:{Q12802}

3813 [Cluster 682]GO:0000155+F molecular\_function [name] two-component sensor activity [def] "Catalysis of the phosphorylation of a histidine residue in response to detection of an extracellular signal such as a chemical ligand or change in environment, to initiate a change in cell state or activity. The two-component sensor is a histidine kinase that autophosphorylates a histidine residue in its active site. The phosphate is then transferred to an aspartate residue in a downstream response regulator, to trigger a response." [GOC

3814 Pathogen[ P0C214] interacts with 1 human partners:{Q9NXG0}

3815 Pathogen[ P03346] interacts with 1 human partners:{Q9NXG0}

3816 Pathogen[ Q85601] interacts with 1 human partners:{Q9NXG0}

3817 Pathogen[ P14079] interacts with 1 human partners:{Q9NXG0}

3818 Pathogen[ P03410] interacts with 1 human partners:{Q9NXG0}

3819 Pathogen[ P0C206] interacts with 1 human partners:{Q9NXG0}

3820 Pathogen[ P03363] interacts with 1 human partners:{Q9NXG0}

3821 [Cluster 683]GO:0046923+F molecular\_function [name] ER retention sequence binding [def] "Interacting selectively and non-covalently with an endoplasmic reticulum (ER) retention sequence, a specific peptide sequence that ensures a protein is retained within the ER." [GOC

3822 Pathogen[ P14079] interacts with 3 human partners:{P33947;P24390;O43731}

3823 Pathogen[ P03410] interacts with 3 human partners:{P33947;P24390;O43731}

3824 Pathogen[ P0C206] interacts with 3 human partners:{P33947;P24390;O43731}

3825 [Cluster 684]GO:0004140+F molecular\_function [name] dephospho-CoA kinase activity [def] "Catalysis of the reaction

3826 Pathogen[ P0C214] interacts with 1 human partners:{Q13057}

3827 Pathogen[ P14079] interacts with 1 human partners:{Q13057}

3828 Pathogen[ P03410] interacts with 1 human partners:{Q13057}

3829 Pathogen[ P14075] interacts with 1 human partners:{Q13057}

3830 Pathogen[ P0C206] interacts with 1 human partners:{Q13057}

3831 [Cluster 685]GO:0051393+F molecular\_function [name] alpha-actinin binding [def] "Interacting selectively and non-covalently with alpha-actinin, one of a family of proteins that cross-link F-actin as antiparallel homodimers. Alpha-actinin has a molecular mass of 93-103 KDa\_ at the N-terminus there are two calponin homology domains, at the C-terminus there are two EF-hands. These two domains are connected by the rod domain. This domain is formed by triple-helical spectrin repeats." [PMID

3832 Pathogen[ P14079] interacts with 1 human partners:{Q14118}

3833 Pathogen[ P03410] interacts with 1 human partners:{Q14118}

3834 [Cluster 686]GO:0003878+F molecular\_function [name] ATP citrate synthase activity [def] "Catalysis of the reaction

3835 Pathogen[ P0C214] interacts with 1 human partners:{P53396}

3836 [Cluster 687]GO:0051425+F molecular\_function [name] PTB domain binding [def] "Interacting selectively and non-covalently with a phosphotyrosine-binding (PTB) domain of a protein." [Pfam

3837 Pathogen[ Q2Q067] interacts with 1 human partners:{P37198}

3838 Pathogen[ P0C214] interacts with 1 human partners:{P37198}

3839 Pathogen[ P03346] interacts with 1 human partners:{P37198}

3840 Pathogen[ P14079] interacts with 1 human partners:{P37198}

3841 Pathogen[ P03383] interacts with 1 human partners:{P37198}

3842 Pathogen[ P14075] interacts with 1 human partners:{P37198}

3843 Pathogen[ P03363] interacts with 1 human partners:{P37198}

3844 [Cluster 688]GO:0047045+F molecular\_function [name] testosterone 17-beta-dehydrogenase (NADP+) activity [def] "Catalysis of the reaction

3845 Pathogen[ Q2Q067] interacts with 1 human partners:{Q9BPX1}

3846 Pathogen[ P0C214] interacts with 1 human partners:{Q9BPX1}

3847 Pathogen[ P03346] interacts with 1 human partners:{Q9BPX1}

3848 Pathogen[ Q85601] interacts with 1 human partners:{Q9BPX1}

3849 Pathogen[ P03383] interacts with 1 human partners:{Q9BPX1}

3850 Pathogen[ P03410] interacts with 1 human partners:{Q9BPX1}

3851 Pathogen[ P0C206] interacts with 1 human partners:{Q9BPX1}

3852 Pathogen[ P03363] interacts with 1 human partners:{Q9BPX1}

3853 [Cluster 689]GO:0008386+F molecular\_function [name] cholesterol monooxygenase (side-chain-cleaving) activity [def] "Catalysis of the reaction

3854 Pathogen[ P14079] interacts with 1 human partners:{P10109}

3855 Pathogen[ P03410] interacts with 1 human partners:{P10109}

3856 [Cluster 690]GO:0004824+F molecular\_function [name] lysine-tRNA ligase activity [def] "Catalysis of the reaction

3857 Pathogen[ Q2Q067] interacts with 1 human partners:{Q15046}

3858 Pathogen[ P0C214] interacts with 1 human partners:{Q15046}

3859 Pathogen[ Q85601] interacts with 1 human partners:{Q15046}

3860 Pathogen[ P14079] interacts with 1 human partners:{Q15046}

3861 Pathogen[ P03383] interacts with 1 human partners:{Q15046}

3862 Pathogen[ P03410] interacts with 1 human partners:{Q15046}

3863 Pathogen[ P14075] interacts with 1 human partners:{Q15046}

3864 Pathogen[ P0C206] interacts with 1 human partners:{Q15046}

3865 [Cluster 691]GO:0033743+F molecular\_function [name] peptide-methionine (R)-S-oxide reductase activity [def] "Catalysis of the reaction

3866 Pathogen[ P0C214] interacts with 1 human partners:{Q9Y3D2}

3867 Pathogen[ P14079] interacts with 2 human partners:{Q9NZV6;Q9Y3D2}

3868 Pathogen[ P03410] interacts with 1 human partners:{Q9Y3D2}

3869 Pathogen[ P0C206] interacts with 2 human partners:{Q9NZV6;Q9Y3D2}

3870 [Cluster 692]GO:0004750+F molecular\_function [name] ribulose-phosphate 3-epimerase activity [def] "Catalysis of the reaction

3871 Pathogen[ P0C214] interacts with 1 human partners:{Q96AT9}

3872 [Cluster 693]GO:0004582+F molecular\_function [name] dolichyl-phosphate beta-D-mannosyltransferase activity [def] "Catalysis of the reaction

3873 Pathogen[ P14079] interacts with 2 human partners:{O94777;Q9P2X0}

3874 Pathogen[ P03410] interacts with 2 human partners:{O94777;Q9P2X0}

3875 Pathogen[ P14075] interacts with 1 human partners:{O94777}

3876 Pathogen[ P0C206] interacts with 1 human partners:{O94777}

3877 [Cluster 694]GO:0031730+F molecular\_function [name] CCR5 chemokine receptor binding [def] "Interacting selectively and non-covalently with a CCR5 chemokine receptor." [GOC

3878 Pathogen[ Q2Q067] interacts with 1 human partners:{P40763}

3879 Pathogen[ P0C214] interacts with 1 human partners:{P40763}

3880 Pathogen[ P03346] interacts with 1 human partners:{P40763}

3881 Pathogen[ Q85601] interacts with 1 human partners:{P40763}

3882 Pathogen[ P14079] interacts with 1 human partners:{P48681}

3883 Pathogen[ P03410] interacts with 1 human partners:{P40763}

3884 Pathogen[ P0C206] interacts with 1 human partners:{P40763}

3885 [Cluster 695]GO:0004945+F molecular\_function [name] angiotensin type II receptor activity [def] "An angiotensin receptor activity that acts via Gi protein coupling and cGMP (NO) generation, and may also act via additional signaling mechanisms." [GOC

3886 Pathogen[ Q2Q067] interacts with 1 human partners:{Q6RW13}

3887 Pathogen[ P0C214] interacts with 1 human partners:{Q6RW13}

3888 Pathogen[ P03346] interacts with 1 human partners:{Q6RW13}

3889 Pathogen[ Q85601] interacts with 1 human partners:{Q6RW13}

3890 Pathogen[ P14079] interacts with 1 human partners:{Q6RW13}

3891 Pathogen[ P03383] interacts with 1 human partners:{Q6RW13}

3892 Pathogen[ P03410] interacts with 1 human partners:{Q6RW13}

3893 Pathogen[ P14075] interacts with 1 human partners:{Q6RW13}

3894 Pathogen[ P0C206] interacts with 1 human partners:{Q6RW13}

3895 [Cluster 696]GO:0004111+F molecular\_function [name] creatine kinase activity [def] "Catalysis of the reaction

3896 Pathogen[ P0C214] interacts with 1 human partners:{P12277}

3897 [Cluster 697]GO:0005153+F molecular\_function [name] interleukin-8 receptor binding [def] "Interacting selectively and non-covalently with the interleukin-8 receptor." [GOC

3898 Pathogen[ P0C214] interacts with 1 human partners:{P54577}

3899 [Cluster 698]GO:0030345+F molecular\_function [name] structural constituent of tooth enamel [def] "The action of a molecule that contributes to the structural integrity of tooth enamel." [GOC

3900 Pathogen[ P14079] interacts with 1 human partners:{P02808}

3901 Pathogen[ P03410] interacts with 2 human partners:{P02808;Q9NRM1}

3902 Pathogen[ P14075] interacts with 1 human partners:{P02808}

3903 Pathogen[ P0C206] interacts with 1 human partners:{P02808}

3904 Pathogen[ P03363] interacts with 1 human partners:{P02808}

3905 [Cluster 699]GO:0070061+F molecular\_function [name] fructose binding [def]

"Interacting selectively and non-covalently with the D- or L-enantiomer of fructose, the ketohexose arabino-hex-2-ulose." [CHEBI

3906 Pathogen[ Q2Q067] interacts with 1 human partners:{P05062}

3907 Pathogen[ P0C214] interacts with 1 human partners:{P05062}

3908 Pathogen[ P03346] interacts with 1 human partners:{P05062}

3909 Pathogen[ Q85601] interacts with 1 human partners:{P05062}

3910 Pathogen[ P03410] interacts with 1 human partners:{P05062}

3911 Pathogen[ P0C206] interacts with 1 human partners:{P05062}

3912 [Cluster 700]GO:0004473+F molecular\_function [name] malate dehydrogenase (oxaloacetate-decarboxylating) (NADP+) activity [def] "Catalysis of the reaction

3913 Pathogen[ P0C214] interacts with 2 human partners:{P48163;Q16798}

3914 [Cluster 701]GO:0010736+F molecular\_function [name] serum response element binding [def] "Interacting selectively and non-covalently with the serum response element (SRE), a short sequence with dyad symmetry found in the promoters of some of the cellular immediate-early genes, regulated by serum." [GOC

3915 Pathogen[ Q2Q067] interacts with 1 human partners:{P11831}

3916 Pathogen[ P0C214] interacts with 1 human partners:{P11831}

3917 Pathogen[ P03346] interacts with 1 human partners:{P11831}

3918 Pathogen[ Q85601] interacts with 1 human partners:{P11831}

3919 Pathogen[ P03383] interacts with 1 human partners:{P11831}

3920 Pathogen[ P03410] interacts with 1 human partners:{P11831}

3921 Pathogen[ P14075] interacts with 1 human partners:{P11831}

3922 Pathogen[ P0C206] interacts with 1 human partners:{P11831}

3923 Pathogen[ P03363] interacts with 1 human partners:{P11831}

3924 [Cluster 702]GO:0052846+F molecular\_function [name] inositol-1,5-bisdiphosphate-2,3,4,6-tetrakisphosphate 1-diphosphatase activity [def] "Catalysis of the reaction

3925 Pathogen[ P0C214] interacts with 1 human partners:{O95989}

3926 Pathogen[ Q85601] interacts with 1 human partners:{O95989}

3927 Pathogen[ P14079] interacts with 4 human partners:{Q96G61;O95989;Q8NFP7;Q9NZJ9}

3928 Pathogen[ P03383] interacts with 1 human partners:{O95989}

3929 Pathogen[ P03410] interacts with 4 human partners:{Q8NFP7;Q9NZJ9;O95989;Q96G61}

3930 Pathogen[ P14075] interacts with 1 human partners:{O95989}

3931 Pathogen[ P0C206] interacts with 2 human partners:{O95989;Q8NFP7}

3932 [Cluster 703]GO:0032052+F molecular\_function [name] bile acid binding [def] "Interacting selectively and non-covalently with bile acids, any of a group of steroid carboxylic acids occurring in bile." [GOC

3933 Pathogen[ P03346] interacts with 1 human partners:{P07148}

3934 [Cluster 704]GO:0001784+F molecular\_function [name] phosphotyrosine binding [def] "Interacting selectively and non-covalently with a phosphorylated tyrosine residue within a protein." [PMID

3935 Pathogen[ Q2Q067] interacts with 1 human partners:{P22681}

3936 Pathogen[ P0C214] interacts with 2 human partners:{P22681;P62993}

3937 Pathogen[ P03346] interacts with 3 human partners:{P62993;P22681;Q9NSI8}

3938 Pathogen[ Q85601] interacts with 2 human partners:{P22681;P62993}

3939 Pathogen[ P14079] interacts with 1 human partners:{P62993}

3940 Pathogen[ P03410] interacts with 1 human partners:{P62993}

3941 Pathogen[ P0C206] interacts with 2 human partners:{P62993;P22681}

3942 Pathogen[ P03363] interacts with 2 human partners:{P22681;Q9NSI8}

3943 [Cluster 705]GO:0008260+F molecular\_function [name] 3-oxoacid CoA-transferase activity [def] "Catalysis of the reaction

3944 Pathogen[ P03410] interacts with 2 human partners:{Q9BYC2;P55809}

3945 [Cluster 706]GO:0010314+F molecular\_function [name] phosphatidylinositol-5-phosphate binding [def] "Interacting selectively and non-covalently with phosphatidylinositol-5-phosphate, a derivative of phosphatidylinositol in which the inositol ring is phosphorylated at the 5' position." [GOC

3946 Pathogen[ Q2Q067] interacts with 1 human partners:{Q86VW0}

3947 Pathogen[ P0C214] interacts with 1 human partners:{Q86VW0}

3948 Pathogen[ P03346] interacts with 2 human partners:{Q86VW0;Q96S99}

3949 Pathogen[ Q85601] interacts with 2 human partners:{Q96S99;Q86VW0}

3950 Pathogen[ P14079] interacts with 3 human partners:{Q96S99;Q9NS86;Q86VW0}

3951 Pathogen[ P03410] interacts with 3 human partners:{Q9NS86;Q96S99;Q86VW0}

3952 Pathogen[ P0C206] interacts with 3 human partners:{Q86VW0;Q96S99;Q9NS86}

3953 Pathogen[ P03363] interacts with 1 human partners:{Q86VW0}

3954 [Cluster 707]GO:0017128+F molecular\_function [name] phospholipid scramblase activity [def] "Catalysis of the movement of phospholipids from one membrane bilayer leaflet to the other, by an ATP-independent mechanism." [PMID

3955 Pathogen[ Q2Q067] interacts with 1 human partners:{O15162}

3956 Pathogen[ P0C214] interacts with 1 human partners:{O15162}

3957 Pathogen[ P03346] interacts with 1 human partners:{O15162}

3958 Pathogen[ Q85601] interacts with 1 human partners:{O15162}

3959 Pathogen[ P14079] interacts with 2 human partners:{Q9NRQ2;O15162}

3960 Pathogen[ P03383] interacts with 1 human partners:{O15162}

3961 Pathogen[ P03410] interacts with 3 human partners:{Q9NRQ2;Q9NRY6;O15162}

3962 Pathogen[ P14075] interacts with 1 human partners:{O15162}

3963 Pathogen[ P0C206] interacts with 1 human partners:{O15162}

3964 [Cluster 708]GO:0016532+F molecular\_function [name] superoxide dismutase copper chaperone activity [def] "A copper chaperone activity that specifically delivers copper to the Cu-Zn superoxide dismutase." [http

3965 Pathogen[ Q2Q067] interacts with 1 human partners:{014618}

3966 Pathogen[ P0C214] interacts with 1 human partners:{014618}

3967 Pathogen[ P03346] interacts with 1 human partners:{014618}

3968 Pathogen[ Q85601] interacts with 1 human partners:{014618}

3969 Pathogen[ P14079] interacts with 1 human partners:{014618}

3970 Pathogen[ P03410] interacts with 1 human partners:{014618}

3971 Pathogen[ P0C206] interacts with 1 human partners:{014618}

3972 Pathogen[ P03363] interacts with 1 human partners:{014618}

3973 [Cluster 709]GO:0032137+F molecular\_function [name] guanine/thymine mispair binding [def] "Interacting selectively and non-covalently with double-stranded DNA containing a G/T mispair." [GOC

3974 Pathogen[ P0C214] interacts with 2 human partners:{P20585;P40692}

3975 Pathogen[ P03346] interacts with 1 human partners:{P20585}

3976 Pathogen[ Q85601] interacts with 2 human partners:{P20585;P40692}

3977 Pathogen[ P14079] interacts with 3 human partners:{P20585;P40692;P52701}

3978 Pathogen[ P03410] interacts with 3 human partners:{P40692;P20585;P52701}

3979 Pathogen[ P0C206] interacts with 3 human partners:{P52701;P40692;P20585}

3980 Pathogen[ P03363] interacts with 1 human partners:{P20585}

3981 [Cluster 710]GO:0033925+F molecular\_function [name] mannosyl-glycoprotein endo-beta-N-acetylglucosaminidase activity [def] "Catalysis of the endohydrolysis of the N,N'-diacetylchitobiosyl unit in high-mannose glycopeptides and glycoproteins containing the -[Man(GlcNAc)2]Asn-structure. One N-acetyl-D-glucosamine residue remains attached to the protein\_ the rest of the oligosaccharide is released intact." [EC

3982 Pathogen[ Q2Q067] interacts with 1 human partners:{Q8NFI3}

3983 Pathogen[ P0C214] interacts with 1 human partners:{Q8NFI3}

3984 Pathogen[ P03346] interacts with 1 human partners:{Q8NFI3}

3985 Pathogen[ P14079] interacts with 1 human partners:{Q8NFI3}

3986 Pathogen[ P03410] interacts with 1 human partners:{Q8NFI3}

3987 Pathogen[ P14075] interacts with 1 human partners:{Q8NFI3}

3988 Pathogen[ P0C206] interacts with 1 human partners:{Q8NFI3}

3989 Pathogen[ P03363] interacts with 1 human partners:{Q8NFI3}

3990 [Cluster 711]GO:0003908+F molecular\_function [name] methylated-DNA-[protein]-cysteine S-methyltransferase activity [def] "Catalysis of the reaction

3991 Pathogen[ Q2Q067] interacts with 1 human partners:{P16455}

3992 Pathogen[ P0C214] interacts with 1 human partners:{P16455}

3993 Pathogen[ Q85601] interacts with 1 human partners:{P16455}

3994 Pathogen[ P14079] interacts with 1 human partners:{P16455}

3995 Pathogen[ P03410] interacts with 1 human partners:{P16455}

3996 Pathogen[ P0C206] interacts with 1 human partners:{P16455}

3997 [Cluster 712]GO:0004623+F molecular\_function [name] phospholipase A2 activity [def] "Catalysis of the reaction

3998 Pathogen[ P14079] interacts with 2 human partners:{Q8NCQ7;Q9NZ20}

3999 Pathogen[ P03410] interacts with 2 human partners:{Q9NZ20;Q8NCQ7}

4000 [Cluster 713]GO:0030553+F molecular\_function [name] cGMP binding [def] "Interacting selectively and non-covalently with cGMP, the nucleotide cyclic GMP (guanosine 3',5'-cyclophosphate)." [GOC

4001 Pathogen[ P0C214] interacts with 2 human partners:{P18545;Q13956}

4002 Pathogen[ P14079] interacts with 2 human partners:{P18545;Q13956}

4003 Pathogen[ P03410] interacts with 2 human partners:{Q13956;P18545}

4004 Pathogen[ P0C206] interacts with 2 human partners:{P18545;Q13956}

4005 [Cluster 714]GO:0034545+F molecular\_function [name] fumarylpyruvate hydrolase activity [def] "Catalysis of the reaction

4006 Pathogen[ P0C214] interacts with 1 human partners:{Q6P587}

4007 Pathogen[ P14079] interacts with 1 human partners:{Q6P587}

4008 Pathogen[ P03410] interacts with 1 human partners:{Q6P587}

4009 Pathogen[ P0C206] interacts with 1 human partners:{Q6P587}

4010 [Cluster 715]GO:0047372+F molecular\_function [name] acylglycerol lipase activity [def] "Catalysis of the reaction

4011 Pathogen[ P14079] interacts with 1 human partners:{000519}

4012 Pathogen[ P03410] interacts with 1 human partners:{000519}

4013 [Cluster 716]GO:0004661+F molecular\_function [name] protein geranylgeranyltransferase activity [def] "Catalysis of the covalent addition of a geranylgeranyl (20-carbon isoprenoid) group via thioether linkages to a cysteine residue at or near the C terminus of a protein." [PMID

4014 Pathogen[ Q2Q067] interacts with 1 human partners:{P49354}

4015 Pathogen[ P0C214] interacts with 1 human partners:{P49354}

4016 Pathogen[ P03346] interacts with 1 human partners:{P49354}

4017 Pathogen[ Q85601] interacts with 1 human partners:{P49354}

4018 Pathogen[ P14079] interacts with 1 human partners:{P49354}

4019 Pathogen[ P03410] interacts with 1 human partners:{P49354}

4020 Pathogen[ P0C206] interacts with 1 human partners:{P49354}

4021 Pathogen[ P03363] interacts with 1 human partners:{P49354}

4022 [Cluster 717]GO:0005539+F molecular\_function [name] glycosaminoglycan binding [def]

"Interacting selectively and non-covalently with any glycan (polysaccharide) containing a substantial proportion of aminomonosaccharide residues." [GOC  
4023 Pathogen[ P0C214] interacts with 1 human partners:{P07093}  
4024 Pathogen[ Q85601] interacts with 1 human partners:{P07093}  
4025 [Cluster 718]GO:0008794+F molecular\_function [name] arsenate reductase (glutaredoxin) activity [def] "Catalysis of the reaction  
4026 Pathogen[ P03346] interacts with 1 human partners:{Q9NS18}  
4027 Pathogen[ P0C206] interacts with 1 human partners:{Q9NS18}  
4028 [Cluster 719]GO:0004792+F molecular\_function [name] thiosulfate sulfurtransferase activity [def] "Catalysis of the reaction  
4029 Pathogen[ P0C214] interacts with 2 human partners:{O95396;Q16762}  
4030 Pathogen[ P14079] interacts with 1 human partners:{Q16762}  
4031 Pathogen[ P03410] interacts with 1 human partners:{Q16762}  
4032 Pathogen[ P0C206] interacts with 2 human partners:{Q16762;O95396}  
4033 [Cluster 720]GO:0009374+F molecular\_function [name] biotin binding [def] "Interacting selectively and non-covalently with biotin (cis-tetrahydro-2-oxothieno(3,4-d)imidazoline-4-valeric acid), the (+) enantiomer of which is very widely distributed in cells and serves as a carrier in a number of enzymatic beta-carboxylation reactions." [GOC  
4034 Pathogen[ P0C214] interacts with 1 human partners:{P50747}  
4035 [Cluster 721]GO:0051537+F molecular\_function [name] 2 iron, 2 sulfur cluster binding [def] "Interacting selectively and non-covalently with a 2 iron, 2 sulfur (2Fe-2S) cluster\_ this cluster consists of two iron atoms, with two inorganic sulfur atoms found between the irons and acting as bridging ligands." [GOC  
4036 Pathogen[ Q2Q067] interacts with 1 human partners:{P21912}  
4037 Pathogen[ P0C214] interacts with 4 human partners:{P28331;P22830;P21912;Q96NN9}  
4038 Pathogen[ P03346] interacts with 2 human partners:{Q9NS18;P21912}  
4039 Pathogen[ Q85601] interacts with 1 human partners:{P21912}  
4040 Pathogen[ P14079] interacts with 6 human partners:{Q6P4F2;P10109;Q9NZ45;Q9Y471;P22830;P21912}  
4041 Pathogen[ P03410] interacts with 6 human partners:{Q6P4F2;P22830;P21912;Q9Y471;P10109;Q9NZ45}  
4042 Pathogen[ P0C206] interacts with 3 human partners:{Q9NS18;P22830;P21912}  
4043 [Cluster 722]GO:0001159+F molecular\_function [name] core promoter proximal region DNA binding [def] "Interacting selectively and non-covalently with a region of DNA that is in cis with and relatively close to the core promoter. The transcribed region might be described as a gene, cistron, or operon." [GOC  
4044 Pathogen[ P03346] interacts with 1 human partners:{O95096}  
4045 [Cluster 723]GO:0004047+F molecular\_function [name] aminomethyltransferase activity [def] "Catalysis of the reaction  
4046 Pathogen[ P0C214] interacts with 5 human partners:{P48728;Q8NCN5;Q9UI17;Q5T440;Q9UL12}  
4047 Pathogen[ P03346] interacts with 3 human partners:{Q8NCN5;Q5T440;P48728}  
4048 Pathogen[ P14079] interacts with 6 human partners:{P23434;P48728;Q9UL12;Q9UI17;Q8NCN5;Q5T440}  
4049 Pathogen[ P03410] interacts with 6 human partners:{Q9UI17;Q5T440;Q9UL12;P23434;P48728;Q8NCN5}  
4050 Pathogen[ P14075] interacts with 3 human partners:{Q5T440;Q8NCN5;P48728}  
4051 Pathogen[ P0C206] interacts with 4 human partners:{P23434;Q5T440;Q8NCN5;P48728}  
4052 Pathogen[ P03363] interacts with 1 human partners:{P48728}  
4053 [Cluster 724]GO:0030171+F molecular\_function [name] voltage-gated proton channel activity [def] "Catalysis of the transmembrane transfer of a proton by a voltage-gated channel. A voltage-gated channel is a channel whose open state is dependent on the voltage across the membrane in which it is embedded." [ISBN  
4054 Pathogen[ P03410] interacts with 1 human partners:{Q96D96}  
4055 [Cluster 725]GO:0004033+F molecular\_function [name] aldo-keto reductase (NADP) activity [def] "Catalysis of the reaction  
4056 Pathogen[ Q2Q067] interacts with 1 human partners:{P15121}  
4057 Pathogen[ P0C214] interacts with 2 human partners:{P35270;P15121}  
4058 Pathogen[ P03346] interacts with 1 human partners:{P15121}  
4059 Pathogen[ Q85601] interacts with 1 human partners:{P15121}  
4060 Pathogen[ P0C206] interacts with 1 human partners:{P15121}  
4061 [Cluster 726]GO:0005143+F molecular\_function [name] interleukin-12 receptor binding [def] "Interacting selectively and non-covalently with the interleukin-12 receptor." [GOC  
4062 Pathogen[ P14079] interacts with 1 human partners:{P29459}  
4063 Pathogen[ P03410] interacts with 1 human partners:{P29459}  
4064 [Cluster 727]GO:0004077+F molecular\_function [name] biotin-[acetyl-CoA-carboxylase] ligase activity [def] "Catalysis of the reaction  
4065 Pathogen[ P0C214] interacts with 1 human partners:{P50747}  
4066 [Cluster 728]GO:0005173+F molecular\_function [name] stem cell factor receptor binding [def] "Interacting selectively and non-covalently with the stem cell factor receptor (SCFR), a type III transmembrane kinase receptor." [GOC  
4067 Pathogen[ Q2Q067] interacts with 1 human partners:{Q7Z699}  
4068 Pathogen[ P0C214] interacts with 1 human partners:{Q7Z699}  
4069 Pathogen[ P03346] interacts with 1 human partners:{Q7Z699}  
4070 Pathogen[ Q85601] interacts with 1 human partners:{Q7Z699}



4071 Pathogen[ P14079] interacts with 1 human partners:{Q7Z699}

4072 Pathogen[ P03410] interacts with 1 human partners:{Q7Z699}

4073 Pathogen[ P0C206] interacts with 1 human partners:{Q7Z699}

4074 Pathogen[ P03363] interacts with 1 human partners:{Q7Z699}

4075 [Cluster 729]GO:0033862+F molecular\_function [name] UMP kinase activity [def]  
"Catalysis of the reaction

4076 Pathogen[ P0C214] interacts with 1 human partners:{Q5EBM0}

4077 Pathogen[ P14079] interacts with 1 human partners:{Q5EBM0}

4078 Pathogen[ P03383] interacts with 1 human partners:{Q5EBM0}

4079 Pathogen[ P03410] interacts with 1 human partners:{Q5EBM0}

4080 Pathogen[ P14075] interacts with 1 human partners:{Q5EBM0}

4081 Pathogen[ P0C206] interacts with 1 human partners:{Q5EBM0}

4082 [Cluster 730]GO:0052843+F molecular\_function [name]  
inositol-1-diphosphate-2,3,4,5,6-pentakisphosphate diphosphatase activity [def]  
"Catalysis of the reaction

4083 Pathogen[ P0C214] interacts with 1 human partners:{O95989}

4084 Pathogen[ Q85601] interacts with 1 human partners:{O95989}

4085 Pathogen[ P14079] interacts with 4 human partners:{Q96G61;O95989;Q8NFP7;Q9NZJ9}

4086 Pathogen[ P03383] interacts with 1 human partners:{O95989}

4087 Pathogen[ P03410] interacts with 4 human partners:{Q8NFP7;Q9NZJ9;O95989;Q96G61}

4088 Pathogen[ P14075] interacts with 1 human partners:{O95989}

4089 Pathogen[ P0C206] interacts with 2 human partners:{O95989;Q8NFP7}

4090 [Cluster 731]GO:0005171+F molecular\_function [name] hepatocyte growth factor receptor binding [def] "Interacting selectively and non-covalently with the hepatocyte growth factor receptor." [GOC

4091 Pathogen[ Q2Q067] interacts with 1 human partners:{Q92990}

4092 Pathogen[ P03346] interacts with 1 human partners:{Q92990}

4093 Pathogen[ P14079] interacts with 1 human partners:{Q92990}

4094 Pathogen[ P03383] interacts with 1 human partners:{Q92990}

4095 Pathogen[ P03410] interacts with 1 human partners:{Q92990}

4096 Pathogen[ P14075] interacts with 1 human partners:{Q92990}

4097 Pathogen[ P0C206] interacts with 1 human partners:{Q92990}

4098 Pathogen[ P03363] interacts with 1 human partners:{Q92990}

4099 [Cluster 732]GO:0050897+F molecular\_function [name] cobalt ion binding [def]  
"Interacting selectively and non-covalently with a cobalt (Co) ion." [GOC

4100 Pathogen[ Q2Q067] interacts with 1 human partners:{O15392}

4101 Pathogen[ P0C214] interacts with 1 human partners:{O15392}

4102 Pathogen[ P03346] interacts with 1 human partners:{O15392}

4103 Pathogen[ Q85601] interacts with 1 human partners:{O15392}

4104 Pathogen[ P14079] interacts with 1 human partners:{O15392}

4105 Pathogen[ P03410] interacts with 1 human partners:{O15392}

4106 Pathogen[ P0C206] interacts with 1 human partners:{O15392}

4107 [Cluster 733]GO:0016034+F molecular\_function [name] maleylacetoacetate isomerase activity [def] "Catalysis of the reaction

4108 Pathogen[ Q2Q067] interacts with 1 human partners:{O43708}

4109 Pathogen[ P0C214] interacts with 1 human partners:{O43708}

4110 Pathogen[ P03346] interacts with 1 human partners:{O43708}

4111 Pathogen[ Q85601] interacts with 1 human partners:{O43708}

4112 Pathogen[ P14079] interacts with 1 human partners:{O43708}

4113 Pathogen[ P03410] interacts with 1 human partners:{O43708}

4114 Pathogen[ P0C206] interacts with 1 human partners:{O43708}

4115 Pathogen[ P03363] interacts with 1 human partners:{O43708}

4116 [Cluster 734]GO:0070740+F molecular\_function [name] tubulin-glutamic acid ligase activity [def] "Catalysis of the posttranslational transfer of one or more glutamate residues to the gamma-carboxyl group(s) of one or more specific glutamate residues on a tubulin molecule." [GOC

4117 Pathogen[ P14079] interacts with 1 human partners:{O95922}

4118 Pathogen[ P03410] interacts with 1 human partners:{O95922}

4119 Pathogen[ P0C206] interacts with 1 human partners:{O95922}

4120 Pathogen[ P03363] interacts with 1 human partners:{O95922}

4121 [Cluster 735]GO:0003994+F molecular\_function [name] aconitate hydratase activity [def]  
"Catalysis of the reactions

4122 Pathogen[ Q2Q067] interacts with 1 human partners:{P21399}

4123 Pathogen[ P0C214] interacts with 2 human partners:{Q99798;P21399}

4124 Pathogen[ P03346] interacts with 1 human partners:{P21399}

4125 Pathogen[ Q85601] interacts with 1 human partners:{P21399}

4126 Pathogen[ P14079] interacts with 1 human partners:{P21399}

4127 Pathogen[ P03410] interacts with 1 human partners:{P21399}

4128 Pathogen[ P0C206] interacts with 2 human partners:{Q99798;P21399}

4129 [Cluster 736]GO:0031849+F molecular\_function [name] olfactory receptor binding [def]  
"Interacting selectively and non-covalently with an olfactory receptor." [GOC

4130 Pathogen[ P0C214] interacts with 1 human partners:{Q9H902}

4131 Pathogen[ P03346] interacts with 1 human partners:{Q9H902}

4132 Pathogen[ Q85601] interacts with 1 human partners:{Q9H902}

4133 Pathogen[ P14079] interacts with 1 human partners:{Q9H902}

4134 Pathogen[ P03410] interacts with 1 human partners:{Q9H902}

4135 Pathogen[ P0C206] interacts with 1 human partners:{Q9H902}

4136 Pathogen[ P03363] interacts with 1 human partners:{Q9H902}

4137 [Cluster 737]GO:0016768+F molecular\_function [name] spermine synthase activity [def] "Catalysis of the reaction

4138 Pathogen[ P0C214] interacts with 1 human partners:{P52788}

4139 Pathogen[ P03410] interacts with 1 human partners:{P52788}

4140 [Cluster 738]GO:0001087+F molecular\_function [name] TFIIB-class binding transcription factor activity [def] "Interacting selectively and non-covalently with a basal RNA polymerase II transcription factor of the TFIIB class in order to modulate transcription. The transcription factor may or may not also interact selectively with DNA as well." [GOC

4141 Pathogen[ Q2Q067] interacts with 1 human partners:{P15884}

4142 Pathogen[ P0C214] interacts with 1 human partners:{P15884}

4143 Pathogen[ P03346] interacts with 1 human partners:{P15884}

4144 Pathogen[ Q85601] interacts with 1 human partners:{P15884}

4145 Pathogen[ P14079] interacts with 1 human partners:{P15884}

4146 Pathogen[ P03410] interacts with 1 human partners:{P15884}

4147 Pathogen[ P14075] interacts with 1 human partners:{P15884}

4148 Pathogen[ P0C206] interacts with 1 human partners:{P15884}

4149 Pathogen[ P03363] interacts with 1 human partners:{P15884}

4150 [Cluster 739]GO:0070626+F molecular\_function [name] (S)-2-(5-amino-1-(5-phospho-D-ribosyl)imidazole-4-carboxamido)succinate AMP-lyase (fumarate-forming) activity [def] "Catalysis of the reaction

4151 Pathogen[ P0C214] interacts with 1 human partners:{P30566}

4152 Pathogen[ P03410] interacts with 1 human partners:{P30566}

4153 [Cluster 740]GO:0048039+F molecular\_function [name] ubiquinone binding [def] "Interacting selectively and non-covalently with ubiquinone, a quinone derivative with a tail of isoprene units." [GOC

4154 Pathogen[ Q2Q067] interacts with 1 human partners:{P21912}

4155 Pathogen[ P0C214] interacts with 2 human partners:{O14521;P21912}

4156 Pathogen[ P03346] interacts with 1 human partners:{P21912}

4157 Pathogen[ Q85601] interacts with 1 human partners:{P21912}

4158 Pathogen[ P14079] interacts with 2 human partners:{O14521;P21912}

4159 Pathogen[ P03410] interacts with 2 human partners:{P21912;O14521}

4160 Pathogen[ P0C206] interacts with 2 human partners:{O14521;P21912}

4161 [Cluster 741]GO:0043566+F molecular\_function [name] structure-specific DNA binding [def] "Interacting selectively and non-covalently with DNA of a specific structure or configuration e.g. triplex DNA binding or bent DNA binding." [GOC

4162 Pathogen[ Q2Q067] interacts with 3 human partners:{Q92889;P11388;Q9UQ84}

4163 Pathogen[ P0C214] interacts with 4 human partners:{Q92889;P11388;Q9UQ84;P40692}

4164 Pathogen[ P03346] interacts with 4 human partners:{P11388;P07992;Q92889;Q9UQ84}

4165 Pathogen[ Q85601] interacts with 4 human partners:{Q9UQ84;Q92889;P11388;P40692}

4166 Pathogen[ P14079] interacts with 5 human partners:{P11388;P40692;Q92889;Q9UQ84;P07992}

4167 Pathogen[ P03410] interacts with 5 human partners:{P40692;P07992;Q92889;P11388;Q9UQ84}

4168 Pathogen[ P0C206] interacts with 5 human partners:{Q9UQ84;P40692;P07992;Q92889;P11388}

4169 Pathogen[ P03363] interacts with 1 human partners:{Q92889}

4170 [Cluster 742]GO:0015149+F molecular\_function [name] hexose transmembrane transporter activity [def] "Catalysis of the transfer of a hexose sugar, a monosaccharide with 6 carbon atoms, from one side of a membrane to the other." [GOC

4171 Pathogen[ P0C214] interacts with 1 human partners:{P11168}

4172 Pathogen[ Q85601] interacts with 1 human partners:{P11168}

4173 Pathogen[ P03383] interacts with 1 human partners:{P11168}

4174 Pathogen[ P03410] interacts with 1 human partners:{P11168}

4175 Pathogen[ P14075] interacts with 1 human partners:{P11168}

4176 Pathogen[ P0C206] interacts with 1 human partners:{P11168}

4177 [Cluster 743]GO:0004078+F molecular\_function [name] biotin-[methylcrotonoyl-CoA-carboxylase] ligase activity [def] "Catalysis of the reaction

4178 Pathogen[ P0C214] interacts with 1 human partners:{P50747}

4179 [Cluster 744]GO:0008700+F molecular\_function [name] 4-hydroxy-2-oxoglutarate aldolase activity [def] "Catalysis of the reaction

4180 Pathogen[ P0C214] interacts with 1 human partners:{Q86XE5}

4181 Pathogen[ P14079] interacts with 1 human partners:{Q86XE5}

4182 Pathogen[ P03410] interacts with 1 human partners:{Q86XE5}

4183 Pathogen[ P14075] interacts with 1 human partners:{Q86XE5}

4184 Pathogen[ P0C206] interacts with 1 human partners:{Q86XE5}

4185 [Cluster 745]GO:0004609+F molecular\_function [name] phosphatidylserine decarboxylase activity [def] "Catalysis of the reaction

4186 Pathogen[ Q2Q067] interacts with 1 human partners:{Q9UG56}

4187 Pathogen[ P0C214] interacts with 1 human partners:{Q9UG56}

4188 Pathogen[ P03346] interacts with 1 human partners:{Q9UG56}

4189 Pathogen[ Q85601] interacts with 1 human partners:{Q9UG56}

4190 Pathogen[ P14079] interacts with 1 human partners:{Q9UG56}

4191 Pathogen[ P03410] interacts with 1 human partners:{Q9UG56}

4192 Pathogen[ P14075] interacts with 1 human partners:{Q9UG56}

4193 Pathogen[ P0C206] interacts with 1 human partners:{Q9UG56}

4194 [Cluster 746]GO:0004372+F molecular\_function [name] glycine hydroxymethyltransferase activity [def] "Catalysis of the reaction

4195 Pathogen[ Q2Q067] interacts with 1 human partners:{P34896}

4196 Pathogen[ P0C214] interacts with 2 human partners:{P34897;P34896}

4197 Pathogen[ Q85601] interacts with 1 human partners:{P34896}

4198 Pathogen[ P14079] interacts with 2 human partners:{P34897;P34896}

4199 Pathogen[ P03383] interacts with 1 human partners:{P34896}

4200 Pathogen[ P03410] interacts with 2 human partners:{P34897;P34896}

4201 Pathogen[ P14075] interacts with 1 human partners:{P34896}

4202 Pathogen[ P0C206] interacts with 2 human partners:{P34897;P34896}

4203 [Cluster 747]GO:0003873+F molecular\_function [name] 6-phosphofructo-2-kinase activity [def] "Catalysis of the reaction

4204 Pathogen[ P0C214] interacts with 2 human partners:{O60825;P16118}

4205 Pathogen[ Q85601] interacts with 2 human partners:{O60825;P16118}

4206 Pathogen[ P03410] interacts with 1 human partners:{P16118}

4207 Pathogen[ P14075] interacts with 1 human partners:{P16118}

4208 Pathogen[ P0C206] interacts with 2 human partners:{O60825;P16118}

4209 [Cluster 748]GO:2001070+F molecular\_function [name] starch binding [def] "Interacting selectively and non-covalently with starch." [GOC

4210 Pathogen[ P0C214] interacts with 2 human partners:{Q9NPB8;O95278}

4211 Pathogen[ P03346] interacts with 1 human partners:{O95278}

4212 Pathogen[ Q85601] interacts with 1 human partners:{O95278}

4213 Pathogen[ P14079] interacts with 1 human partners:{Q9NPB8}

4214 Pathogen[ P03410] interacts with 1 human partners:{Q9NPB8}

4215 Pathogen[ P0C206] interacts with 2 human partners:{O95278;Q9NPB8}

4216 [Cluster 749]GO:0000406+F molecular\_function [name] double-strand/single-strand DNA junction binding [def] "Interacting selectively and non-covalently with a region of DNA that contains double-stranded DNA flanked by a region of single-stranded DNA." [GOC

4217 Pathogen[ P0C214] interacts with 1 human partners:{P20585}

4218 Pathogen[ P03346] interacts with 1 human partners:{P20585}

4219 Pathogen[ Q85601] interacts with 1 human partners:{P20585}

4220 Pathogen[ P14079] interacts with 1 human partners:{P20585}

4221 Pathogen[ P03410] interacts with 1 human partners:{P20585}

4222 Pathogen[ P0C206] interacts with 1 human partners:{P20585}

4223 Pathogen[ P03363] interacts with 1 human partners:{P20585}

4224 [Cluster 750]GO:0003923+F molecular\_function [name] GPI-anchor transamidase activity [def] "Catalysis of the formation of the linkage between a protein and a glycosylphosphatidylinositol anchor. The reaction probably occurs by subjecting a peptide bond to nucleophilic attack by the amino group of ethanolamine-GPI, transferring the protein from a signal peptide to the GPI anchor." [ISBN

4225 Pathogen[ P14079] interacts with 4 human partners:{O43292;Q96S52;Q969N2;Q9H490}

4226 Pathogen[ P03410] interacts with 3 human partners:{Q96S52;Q969N2;Q9H490}

4227 [Cluster 751]GO:0008762+F molecular\_function [name] UDP-N-acetylmuramate dehydrogenase activity [def] "Catalysis of the reaction

4228 Pathogen[ P0C214] interacts with 1 human partners:{Q86WU2}

4229 Pathogen[ P03346] interacts with 1 human partners:{Q86WU2}

4230 Pathogen[ P14079] interacts with 1 human partners:{Q86WU2}

4231 Pathogen[ P03410] interacts with 1 human partners:{Q86WU2}

4232 Pathogen[ P0C206] interacts with 1 human partners:{Q86WU2}

4233 [Cluster 752]GO:0016668+F molecular\_function [name] oxidoreductase activity, acting on a sulfur group of donors, NAD or NADP as acceptor [def] "Catalysis of an oxidation-reduction (redox) reaction in which a sulfur-containing group acts as a hydrogen or electron donor and reduces NAD or NADP." [GOC

4234 Pathogen[ Q2Q067] interacts with 1 human partners:{Q9NNW7}

4235 Pathogen[ P0C214] interacts with 3 human partners:{Q9NNW7;Q16881;P09622}

4236 Pathogen[ P03346] interacts with 1 human partners:{Q9NNW7}

4237 Pathogen[ P14079] interacts with 1 human partners:{Q9NNW7}

4238 Pathogen[ P03410] interacts with 1 human partners:{Q9NNW7}

4239 Pathogen[ P0C206] interacts with 1 human partners:{Q9NNW7}

4240 Pathogen[ P03363] interacts with 1 human partners:{Q9NNW7}

4241 [Cluster 753]GO:0008308+F molecular\_function [name] voltage-gated anion channel activity [def] "Catalysis of the transmembrane transfer of an anion by a voltage-gated channel. An anion is a negatively charged ion. A voltage-gated channel is a channel whose open state is dependent on the voltage across the membrane in which it is embedded." [GOC

4242 Pathogen[ P14079] interacts with 1 human partners:{B7ZAQ6}

4243 Pathogen[ P03410] interacts with 1 human partners:{B7ZAQ6}

4244 Pathogen[ P0C206] interacts with 1 human partners:{B7ZAQ6}

4245 [Cluster 754]GO:0050544+F molecular\_function [name] arachidonic acid binding [def] "Interacting selectively and non-covalently with arachidonic acid, a straight chain fatty acid with 20 carbon atoms and four double bonds per molecule. Arachidonic acid is the all-Z-(5,8,11,14)-isomer." [GOC

4246 Pathogen[ P14079] interacts with 1 human partners:{P20292}

4247 Pathogen[ P03410] interacts with 1 human partners:{P20292}

4248 Pathogen[ P0C206] interacts with 1 human partners:{P20292}

4249 [Cluster 755]GO:0043176+F molecular\_function [name] amine binding [def] "Interacting selectively and non-covalently with any organic compound that is weakly basic in character and contains an amino or a substituted amino group." [GOC  
4250 Pathogen[ Q2Q067] interacts with 1 human partners:{P08397}  
4251 Pathogen[ P0C214] interacts with 1 human partners:{P08397}  
4252 Pathogen[ Q85601] interacts with 1 human partners:{P08397}  
4253 Pathogen[ P14079] interacts with 1 human partners:{P08397}  
4254 Pathogen[ P03383] interacts with 1 human partners:{P08397}  
4255 Pathogen[ P03410] interacts with 1 human partners:{P08397}  
4256 Pathogen[ P14075] interacts with 1 human partners:{P08397}  
4257 Pathogen[ P0C206] interacts with 1 human partners:{P08397}  
4258 [Cluster 756]GO:0005126+F molecular\_function [name] cytokine receptor binding [def] "Interacting selectively with a cytokine receptor." [GOC  
4259 Pathogen[ P14079] interacts with 1 human partners:{P13232}  
4260 Pathogen[ P03410] interacts with 1 human partners:{P13232}  
4261 [Cluster 757]GO:0031783+F molecular\_function [name] type 5 melanocortin receptor binding [def] "Interacting selectively and non-covalently with a type 5 melanocortin receptor." [GOC  
4262 Pathogen[ P14079] interacts with 2 human partners:{Q96G30;Q8TCY5}  
4263 Pathogen[ P03410] interacts with 1 human partners:{Q96G30}  
4264 [Cluster 758]GO:0003870+F molecular\_function [name] 5-aminolevulinate synthase activity [def] "Catalysis of the reaction  
4265 Pathogen[ Q2Q067] interacts with 2 human partners:{P22557;P13196}  
4266 Pathogen[ P0C214] interacts with 2 human partners:{P22557;P13196}  
4267 Pathogen[ P03346] interacts with 2 human partners:{P22557;P13196}  
4268 Pathogen[ Q85601] interacts with 1 human partners:{P13196}  
4269 Pathogen[ P14079] interacts with 2 human partners:{P13196;P22557}  
4270 Pathogen[ P03410] interacts with 2 human partners:{P22557;P13196}  
4271 Pathogen[ P0C206] interacts with 2 human partners:{P22557;P13196}  
4272 Pathogen[ P03363] interacts with 1 human partners:{P13196}  
4273 [Cluster 759]GO:0004654+F molecular\_function [name] polyribonucleotide nucleotidyltransferase activity [def] "Catalysis of the reaction  
4274 Pathogen[ Q2Q067] interacts with 1 human partners:{Q8TCS8}  
4275 Pathogen[ P0C214] interacts with 1 human partners:{Q8TCS8}  
4276 Pathogen[ P03346] interacts with 1 human partners:{Q8TCS8}  
4277 Pathogen[ Q85601] interacts with 1 human partners:{Q8TCS8}  
4278 Pathogen[ P14079] interacts with 1 human partners:{Q8TCS8}  
4279 Pathogen[ P03383] interacts with 1 human partners:{Q8TCS8}  
4280 Pathogen[ P03410] interacts with 1 human partners:{Q8TCS8}  
4281 Pathogen[ P14075] interacts with 1 human partners:{Q8TCS8}  
4282 Pathogen[ P0C206] interacts with 1 human partners:{Q8TCS8}  
4283 [Cluster 760]GO:0016820+F molecular\_function [name] hydrolase activity, acting on acid anhydrides, catalyzing transmembrane movement of substances [def] "Catalysis of the hydrolysis of an acid anhydride to directly drive the transport of a substance across a membrane." [GOC  
4284 Pathogen[ P0C214] interacts with 1 human partners:{Q9UI12}  
4285 Pathogen[ P03346] interacts with 1 human partners:{P21283}  
4286 Pathogen[ P14079] interacts with 4 human partners:{P25705;Q96LB4;Q9UI12;O95670}  
4287 Pathogen[ P03410] interacts with 5 human partners:{P25705;Q9UI12;Q96LB4;O95670;O75348}  
4288 Pathogen[ P0C206] interacts with 1 human partners:{Q9UI12}  
4289 [Cluster 761]GO:0005148+F molecular\_function [name] prolactin receptor binding [def] "Interacting selectively and non-covalently with the prolactin receptor." [GOC  
4290 Pathogen[ Q2Q067] interacts with 1 human partners:{O14508}  
4291 Pathogen[ P0C214] interacts with 1 human partners:{O14508}  
4292 Pathogen[ P03346] interacts with 1 human partners:{O14508}  
4293 Pathogen[ Q85601] interacts with 1 human partners:{O14508}  
4294 Pathogen[ P14079] interacts with 1 human partners:{O14508}  
4295 Pathogen[ P03410] interacts with 1 human partners:{O14508}  
4296 Pathogen[ P0C206] interacts with 1 human partners:{O14508}  
4297 Pathogen[ P03363] interacts with 1 human partners:{O14508}  
4298 [Cluster 762]GO:0052796+F molecular\_function [name] exo-alpha-(2->8)-sialidase activity [def] "Catalysis of the hydrolysis of alpha-(2->8)-glycosidic linkages of terminal sialic residues in substrates." [EC  
4299 Pathogen[ Q2Q067] interacts with 1 human partners:{Q8WWR8}  
4300 Pathogen[ P0C214] interacts with 2 human partners:{Q8WWR8;Q9Y3R4}  
4301 Pathogen[ P03346] interacts with 1 human partners:{Q8WWR8}  
4302 Pathogen[ P14079] interacts with 2 human partners:{Q8WWR8;Q9Y3R4}  
4303 Pathogen[ P03383] interacts with 1 human partners:{Q8WWR8}  
4304 Pathogen[ P03410] interacts with 2 human partners:{Q9Y3R4;Q8WWR8}  
4305 Pathogen[ P14075] interacts with 1 human partners:{Q8WWR8}  
4306 Pathogen[ P0C206] interacts with 2 human partners:{Q9Y3R4;Q8WWR8}  
4307 [Cluster 763]GO:0003826+F molecular\_function [name] alpha-ketoacid dehydrogenase activity [def] "Catalysis of an oxidation-reduction (redox) reaction involving an alpha-ketoacid." [GOC  
4308 Pathogen[ Q2Q067] interacts with 1 human partners:{P21953}

4309 Pathogen[ P0C214] interacts with 2 human partners:{P12694;P21953}

4310 Pathogen[ Q85601] interacts with 1 human partners:{P21953}

4311 Pathogen[ P14079] interacts with 1 human partners:{P21953}

4312 Pathogen[ P03410] interacts with 2 human partners:{P12694;P21953}

4313 Pathogen[ P0C206] interacts with 1 human partners:{P21953}

4314 [Cluster 764]GO:0005052+F molecular\_function [name] peroxisome matrix targeting signal-1 binding [def] "Interacting selectively and non-covalently with a type 1 peroxisome targeting signal, a tripeptide with the consensus sequence (S/A/C)-(K/R/H)-L." [GOC]

4315 Pathogen[ P03346] interacts with 1 human partners:{P50542}

4316 Pathogen[ P14079] interacts with 1 human partners:{P50542}

4317 Pathogen[ P03410] interacts with 1 human partners:{P50542}

4318 Pathogen[ P0C206] interacts with 1 human partners:{P50542}

4319 [Cluster 765]GO:0016655+F molecular\_function [name] oxidoreductase activity, acting on NADH or NADPH, quinone or similar compound as acceptor [def] "Catalysis of an oxidation-reduction (redox) reaction in which NADH or NADPH acts as a hydrogen or electron donor and reduces a quinone or a similar acceptor molecule." [GOC]

4320 Pathogen[ Q2Q067] interacts with 1 human partners:{075251}

4321 Pathogen[ P0C214] interacts with 1 human partners:{075251}

4322 Pathogen[ P03346] interacts with 1 human partners:{075251}

4323 Pathogen[ P14079] interacts with 1 human partners:{075251}

4324 Pathogen[ P03383] interacts with 1 human partners:{075251}

4325 Pathogen[ P03410] interacts with 1 human partners:{075251}

4326 Pathogen[ P14075] interacts with 1 human partners:{075251}

4327 Pathogen[ P0C206] interacts with 1 human partners:{075251}

4328 [Cluster 766]GO:0032448+F molecular\_function [name] DNA hairpin binding [def] "Interacting selectively and non-covalently with DNA containing a hairpin. A hairpin structure forms when a DNA strand folds back on itself and intrachain base pairing occurs between inverted repeat sequences." [GOC]

4329 Pathogen[ P03346] interacts with 1 human partners:{P51843}

4330 [Cluster 767]GO:0004595+F molecular\_function [name] pantetheine-phosphate adenylyltransferase activity [def] "Catalysis of the reaction

4331 Pathogen[ P0C214] interacts with 1 human partners:{Q13057}

4332 Pathogen[ P14079] interacts with 1 human partners:{Q13057}

4333 Pathogen[ P03410] interacts with 1 human partners:{Q13057}

4334 Pathogen[ P14075] interacts with 1 human partners:{Q13057}

4335 Pathogen[ P0C206] interacts with 1 human partners:{Q13057}

4336 [Cluster 768]GO:0008108+F molecular\_function [name] UDP-glucose [def] "Catalysis of the reaction

4337 Pathogen[ Q2Q067] interacts with 1 human partners:{P07902}

4338 Pathogen[ P0C214] interacts with 1 human partners:{P07902}

4339 Pathogen[ Q85601] interacts with 1 human partners:{P07902}

4340 Pathogen[ P14079] interacts with 1 human partners:{P07902}

4341 Pathogen[ P03383] interacts with 1 human partners:{P07902}

4342 Pathogen[ P03410] interacts with 1 human partners:{P07902}

4343 Pathogen[ P14075] interacts with 1 human partners:{P07902}

4344 Pathogen[ P0C206] interacts with 1 human partners:{P07902}

4345 [Cluster 769]GO:0052841+F molecular\_function [name] inositol bisdiphosphate tetrakisphosphate diphosphatase activity [def] "Catalysis of the reaction

4346 Pathogen[ P0C214] interacts with 1 human partners:{Q95989}

4347 Pathogen[ Q85601] interacts with 1 human partners:{Q95989}

4348 Pathogen[ P14079] interacts with 4 human partners:{Q96G61;Q95989;Q8NFP7;Q9NZJ9}

4349 Pathogen[ P03383] interacts with 1 human partners:{Q95989}

4350 Pathogen[ P03410] interacts with 4 human partners:{Q8NFP7;Q9NZJ9;Q95989;Q96G61}

4351 Pathogen[ P14075] interacts with 1 human partners:{Q95989}

4352 Pathogen[ P0C206] interacts with 2 human partners:{Q95989;Q8NFP7}

4353 [Cluster 770]GO:0046906+F molecular\_function [name] tetrapyrrole binding [def] "Interacting selectively and non-covalently with a tetrapyrrole, a compound containing four pyrrole nuclei variously substituted and linked to each other through carbons at the alpha position." [CHEBI]

4354 Pathogen[ P0C214] interacts with 1 human partners:{P22830}

4355 Pathogen[ P14079] interacts with 1 human partners:{P22830}

4356 Pathogen[ P03410] interacts with 1 human partners:{P22830}

4357 Pathogen[ P0C206] interacts with 1 human partners:{P22830}

4358 [Cluster 771]GO:0047734+F molecular\_function [name] CDP-glycerol diphosphatase activity [def] "Catalysis of the reaction

4359 Pathogen[ P0C214] interacts with 1 human partners:{Q3LIE5}

4360 Pathogen[ Q85601] interacts with 1 human partners:{Q3LIE5}

4361 Pathogen[ P14079] interacts with 1 human partners:{Q3LIE5}

4362 Pathogen[ P03410] interacts with 1 human partners:{Q3LIE5}

4363 Pathogen[ P0C206] interacts with 1 human partners:{Q3LIE5}

4364 [Cluster 772]GO:0008193+F molecular\_function [name] tRNA guanylyltransferase activity [def] "Catalysis of the posttranscriptional addition of a guanyl residue to the 5' end of a tRNA molecule\_ observed for His tRNAs." [PMID]

4365 Pathogen[ P14079] interacts with 1 human partners:{Q9NWX6}

4366 Pathogen[ P03410] interacts with 1 human partners:{Q9NWX6}

4367 [Cluster 773]GO:0004831+F molecular\_function [name] tyrosine-tRNA ligase activity  
[def] "Catalysis of the reaction

4368 Pathogen[ P0C214] interacts with 2 human partners:{P54577;Q9Y2Z4}

4369 Pathogen[ P14079] interacts with 1 human partners:{Q9Y2Z4}

4370 Pathogen[ P03383] interacts with 1 human partners:{Q9Y2Z4}

4371 Pathogen[ P03410] interacts with 1 human partners:{Q9Y2Z4}

4372 Pathogen[ P14075] interacts with 1 human partners:{Q9Y2Z4}

4373 Pathogen[ P0C206] interacts with 1 human partners:{Q9Y2Z4}

4374 Pathogen[ P03363] interacts with 1 human partners:{Q9Y2Z4}

4375 [Cluster 774]GO:0004707+F molecular\_function [name] MAP kinase activity [def]  
"Catalysis of the reaction

4376 Pathogen[ Q2Q067] interacts with 2 human partners:{P45984;Q15759}

4377 Pathogen[ P0C214] interacts with 2 human partners:{Q15759;P45984}

4378 Pathogen[ P03346] interacts with 2 human partners:{P45984;Q15759}

4379 Pathogen[ Q85601] interacts with 2 human partners:{Q15759;P45984}

4380 Pathogen[ P14079] interacts with 5 human  
partners:{P53779;P45984;P45983;Q15759;Q13164}

4381 Pathogen[ P03383] interacts with 2 human partners:{Q15759;P45984}

4382 Pathogen[ P03410] interacts with 2 human partners:{P45984;P53779}

4383 Pathogen[ P14075] interacts with 2 human partners:{Q15759;P45984}

4384 Pathogen[ P0C206] interacts with 2 human partners:{P45984;Q15759}

4385 [Cluster 775]GO:0050840+F molecular\_function [name] extracellular matrix binding [def]  
"Interacting selectively and non-covalently with a component of the extracellular  
matrix." [GOC

4386 Pathogen[ P14079] interacts with 2 human partners:{P15502;Q13316}

4387 Pathogen[ P03383] interacts with 1 human partners:{P15502}

4388 Pathogen[ P03410] interacts with 2 human partners:{P15502;Q13316}

4389 Pathogen[ P14075] interacts with 1 human partners:{P15502}

4390 Pathogen[ P0C206] interacts with 2 human partners:{P15502;Q13316}

4391 [Cluster 776]GO:0004411+F molecular\_function [name] homogentisate 1,2-dioxygenase  
activity [def] "Catalysis of the reaction

4392 Pathogen[ P14079] interacts with 1 human partners:{Q93099}

4393 Pathogen[ P03410] interacts with 1 human partners:{Q93099}

4394 [Cluster 777]GO:0034979+F molecular\_function [name] NAD-dependent protein deacetylase  
activity [def] "Catalysis of the removal of one or more acetyl groups from a protein,  
requiring NAD." [GOC

4395 Pathogen[ Q2Q067] interacts with 1 human partners:{Q9Y6E7}

4396 Pathogen[ P0C214] interacts with 1 human partners:{Q9Y6E7}

4397 Pathogen[ P03346] interacts with 1 human partners:{Q9Y6E7}

4398 Pathogen[ Q85601] interacts with 1 human partners:{Q9Y6E7}

4399 Pathogen[ P03383] interacts with 1 human partners:{Q9Y6E7}

4400 Pathogen[ P14075] interacts with 1 human partners:{Q9Y6E7}

4401 Pathogen[ P0C206] interacts with 1 human partners:{Q9Y6E7}

4402 Pathogen[ P03363] interacts with 1 human partners:{Q9Y6E7}

4403 [Cluster 778]GO:0004326+F molecular\_function [name] tetrahydrofolylpolyglutamate  
synthase activity [def] "Catalysis of the reaction

4404 Pathogen[ P0C214] interacts with 1 human partners:{Q05932}

4405 Pathogen[ P14079] interacts with 1 human partners:{Q05932}

4406 Pathogen[ P03410] interacts with 1 human partners:{Q05932}

4407 Pathogen[ P0C206] interacts with 1 human partners:{Q05932}

4408 [Cluster 779]GO:0004037+F molecular\_function [name] allantoicase activity [def]  
"Catalysis of the reaction

4409 Pathogen[ P14079] interacts with 1 human partners:{Q8N6M5}

4410 Pathogen[ P03410] interacts with 1 human partners:{Q8N6M5}

4411 [Cluster 780]GO:0030172+F molecular\_function [name] troponin C binding [def]  
"Interacting selectively and non-covalently with troponin C, the calcium-binding subunit  
of the troponin complex." [GOC

4412 Pathogen[ P0C214] interacts with 1 human partners:{P19429}

4413 Pathogen[ P14079] interacts with 1 human partners:{P19429}

4414 Pathogen[ P03410] interacts with 1 human partners:{P19429}

4415 Pathogen[ P0C206] interacts with 1 human partners:{P19429}

4416 Pathogen[ P03363] interacts with 1 human partners:{P19429}

4417 [Cluster 781]GO:0071558+F molecular\_function [name] histone demethylase activity  
(H3-K27 specific) [def] "Catalysis of the removal of a methyl group from lysine at  
position 27 of the histone H3 protein." [GOC

4418 Pathogen[ Q2Q067] interacts with 1 human partners:{Q9UPP1}

4419 Pathogen[ P0C214] interacts with 1 human partners:{Q9UPP1}

4420 Pathogen[ P03346] interacts with 1 human partners:{Q9UPP1}

4421 Pathogen[ Q85601] interacts with 1 human partners:{Q9UPP1}

4422 Pathogen[ P14079] interacts with 1 human partners:{Q9UPP1}

4423 Pathogen[ P03383] interacts with 1 human partners:{Q9UPP1}

4424 Pathogen[ P03410] interacts with 1 human partners:{Q9UPP1}

4425 Pathogen[ P14075] interacts with 1 human partners:{Q9UPP1}

4426 Pathogen[ P0C206] interacts with 1 human partners:{Q9UPP1}

4427 [Cluster 782]GO:0030409+F molecular\_function [name] glutamate formimidoyltransferase  
activity [def] "Catalysis of the reaction

4428 Pathogen[ P14079] interacts with 1 human partners:{O95954}

4429 Pathogen[ P03410] interacts with 1 human partners:{O95954}

4430 Pathogen[ P0C206] interacts with 1 human partners:{O95954}

4431 [Cluster 783]GO:0034584+F molecular\_function [name] piRNA binding [def] "Interacting selectively and non-covalently with a piRNA, a Piwi-associated RNA, a 24- to 30-nucleotide RNA derived from repeat or complex DNA sequence elements and processed by a Dicer-independent mechanism." [GOC

4432 Pathogen[ P03346] interacts with 1 human partners:{Q96J94}

4433 Pathogen[ P03363] interacts with 2 human partners:{Q7Z3Z4;Q96J94}

4434 [Cluster 784]GO:0004123+F molecular\_function [name] cystathionine gamma-lyase activity [def] "Catalysis of the reaction

4435 Pathogen[ Q2Q067] interacts with 1 human partners:{P32929}

4436 Pathogen[ P0C214] interacts with 1 human partners:{P32929}

4437 Pathogen[ P03346] interacts with 1 human partners:{P32929}

4438 Pathogen[ Q85601] interacts with 1 human partners:{P32929}

4439 Pathogen[ P14079] interacts with 1 human partners:{P32929}

4440 Pathogen[ P03410] interacts with 1 human partners:{P32929}

4441 Pathogen[ P0C206] interacts with 1 human partners:{P32929}

4442 [Cluster 785]GO:0004343+F molecular\_function [name] glucosamine 6-phosphate N-acetyltransferase activity [def] "Catalysis of the reaction

4443 Pathogen[ P0C214] interacts with 1 human partners:{Q96EK6}

4444 Pathogen[ Q85601] interacts with 1 human partners:{Q96EK6}

4445 Pathogen[ P14079] interacts with 1 human partners:{Q96EK6}

4446 Pathogen[ P03410] interacts with 1 human partners:{Q96EK6}

4447 Pathogen[ P14075] interacts with 1 human partners:{Q96EK6}

4448 Pathogen[ P0C206] interacts with 1 human partners:{Q96EK6}

4449 [Cluster 786]GO:0003840+F molecular\_function [name] gamma-glutamyltransferase activity [def] "Catalysis of the reaction

4450 Pathogen[ P14079] interacts with 4 human partners:{Q4G0N0;Q9BX51;B5MD39;Q14390}

4451 Pathogen[ P03410] interacts with 2 human partners:{Q4G0N0;B5MD39}

4452 [Cluster 787]GO:0004347+F molecular\_function [name] glucose-6-phosphate isomerase activity [def] "Catalysis of the reaction

4453 Pathogen[ Q2Q067] interacts with 1 human partners:{P06744}

4454 Pathogen[ P03346] interacts with 1 human partners:{P06744}

4455 Pathogen[ Q85601] interacts with 1 human partners:{P06744}

4456 Pathogen[ P14079] interacts with 1 human partners:{P06744}

4457 Pathogen[ P03383] interacts with 1 human partners:{P06744}

4458 Pathogen[ P03410] interacts with 1 human partners:{P06744}

4459 Pathogen[ P14075] interacts with 1 human partners:{P06744}

4460 Pathogen[ P0C206] interacts with 1 human partners:{P06744}

4461 Pathogen[ P03363] interacts with 1 human partners:{P06744}

4462 [Cluster 788]GO:0003875+F molecular\_function [name] ADP-ribosylarginine hydrolase activity [def] "Catalysis of the reaction

4463 Pathogen[ P0C214] interacts with 1 human partners:{P54922}

4464 Pathogen[ P14079] interacts with 2 human partners:{P54922;Q8NDY3}

4465 Pathogen[ P03383] interacts with 1 human partners:{P54922}

4466 Pathogen[ P03410] interacts with 2 human partners:{Q8NDY3;P54922}

4467 Pathogen[ P14075] interacts with 1 human partners:{P54922}

4468 Pathogen[ P0C206] interacts with 1 human partners:{P54922}

4469 [Cluster 789]GO:0004494+F molecular\_function [name] methylmalonyl-CoA mutase activity [def] "Catalysis of the reaction

4470 Pathogen[ Q2Q067] interacts with 1 human partners:{P22033}

4471 Pathogen[ P0C214] interacts with 1 human partners:{P22033}

4472 Pathogen[ Q85601] interacts with 1 human partners:{P22033}

4473 Pathogen[ P14079] interacts with 1 human partners:{P22033}

4474 Pathogen[ P03383] interacts with 1 human partners:{P22033}

4475 Pathogen[ P03410] interacts with 1 human partners:{P22033}

4476 Pathogen[ P14075] interacts with 1 human partners:{P22033}

4477 Pathogen[ P0C206] interacts with 1 human partners:{P22033}

4478 [Cluster 790]GO:0070735+F molecular\_function [name] protein-glycine ligase activity [def] "Catalysis of the posttranslational transfer of one or more glycine residues to a specific glutamate residue on a target protein." [GOC

4479 Pathogen[ P14079] interacts with 3 human partners:{Q9Y4R7;A6PVC2;Q6ZVT0}

4480 Pathogen[ P03410] interacts with 3 human partners:{Q9Y4R7;Q6ZVT0;A6PVC2}

4481 Pathogen[ P0C206] interacts with 1 human partners:{Q6ZVT0}

4482 [Cluster 791]GO:0048408+F molecular\_function [name] epidermal growth factor binding [def] "Interacting selectively and non-covalently with epidermal growth factor." [GOC

4483 Pathogen[ P14079] interacts with 1 human partners:{P60468}

4484 Pathogen[ P03410] interacts with 1 human partners:{P60468}

4485 [Cluster 792]GO:0004029+F molecular\_function [name] aldehyde dehydrogenase (NAD) activity [def] "Catalysis of the reaction

4486 Pathogen[ Q2Q067] interacts with 1 human partners:{P49419}

4487 Pathogen[ P0C214] interacts with 1 human partners:{P49419}

4488 Pathogen[ P03346] interacts with 1 human partners:{P49419}

4489 Pathogen[ Q85601] interacts with 1 human partners:{P49419}

4490 Pathogen[ P03383] interacts with 1 human partners:{P49419}

4491 Pathogen[ P03410] interacts with 1 human partners:{P49419}

4492 Pathogen[ P14075] interacts with 1 human partners:{P49419}

4493 Pathogen[ P0C206] interacts with 1 human partners:{P49419}

4494 Pathogen[ P03363] interacts with 1 human partners:{P49419}

4495 [Cluster 793]GO:0008417+F molecular\_function [name] fucosyltransferase activity [def] "Catalysis of the transfer of a fucosyl group to an acceptor molecule, typically another carbohydrate or a lipid." [GOC

4496 Pathogen[ P14079] interacts with 1 human partners:{Q9H488}

4497 Pathogen[ P03410] interacts with 1 human partners:{Q9H488}

4498 [Cluster 794]GO:0051525+F molecular\_function [name] NFAT protein binding [def] "Interacting selectively and non-covalently with NFAT (nuclear factor of activated T cells) proteins, a family of transcription factors. NFAT proteins have crucial roles in the development and function of the immune system." [PMID

4499 Pathogen[ Q2Q067] interacts with 1 human partners:{P17947}

4500 Pathogen[ P0C214] interacts with 1 human partners:{P17947}

4501 Pathogen[ P03346] interacts with 1 human partners:{P17947}

4502 Pathogen[ Q85601] interacts with 1 human partners:{P17947}

4503 Pathogen[ P03383] interacts with 1 human partners:{P17947}

4504 Pathogen[ P03410] interacts with 1 human partners:{P17947}

4505 Pathogen[ P14075] interacts with 1 human partners:{P17947}

4506 Pathogen[ P0C206] interacts with 1 human partners:{P17947}

4507 Pathogen[ P03363] interacts with 1 human partners:{P17947}

4508 [Cluster 795]GO:0033819+F molecular\_function [name] lipoyl(octanoyl) transferase activity [def] "Catalysis of the reaction

4509 Pathogen[ P0C214] interacts with 1 human partners:{A6NK58}

4510 Pathogen[ P14079] interacts with 1 human partners:{A6NK58}

4511 Pathogen[ P03410] interacts with 1 human partners:{A6NK58}

4512 Pathogen[ P0C206] interacts with 1 human partners:{A6NK58}

4513 [Cluster 796]GO:0008309+F molecular\_function [name] double-stranded DNA specific exodeoxyribonuclease activity [def] "Catalysis of the sequential cleavage of mononucleotides from a free 5' or 3' terminus of a double-stranded DNA molecule." [GOC

4514 Pathogen[ Q2Q067] interacts with 1 human partners:{P39748}

4515 Pathogen[ P0C214] interacts with 1 human partners:{P39748}

4516 Pathogen[ P03346] interacts with 1 human partners:{P39748}

4517 Pathogen[ Q85601] interacts with 1 human partners:{P39748}

4518 Pathogen[ P14079] interacts with 1 human partners:{P39748}

4519 Pathogen[ P03410] interacts with 1 human partners:{P39748}

4520 Pathogen[ P0C206] interacts with 1 human partners:{P39748}

4521 [Cluster 797]GO:0004057+F molecular\_function [name] arginyltransferase activity [def] "Catalysis of the reaction

4522 Pathogen[ P0C214] interacts with 1 human partners:{O95260}

4523 Pathogen[ P03346] interacts with 1 human partners:{O95260}

4524 Pathogen[ Q85601] interacts with 1 human partners:{O95260}

4525 Pathogen[ P14079] interacts with 1 human partners:{O95260}

4526 Pathogen[ P03410] interacts with 1 human partners:{O95260}

4527 Pathogen[ P0C206] interacts with 1 human partners:{O95260}

4528 Pathogen[ P03363] interacts with 1 human partners:{O95260}

4529 [Cluster 798]GO:0004368+F molecular\_function [name] glycerol-3-phosphate dehydrogenase activity [def] "Catalysis of the reaction

4530 Pathogen[ P0C214] interacts with 1 human partners:{P21695}

4531 Pathogen[ P14079] interacts with 1 human partners:{P21695}

4532 Pathogen[ P03410] interacts with 1 human partners:{P21695}

4533 [Cluster 799]GO:0004809+F molecular\_function [name] tRNA (guanine-N2)-methyltransferase activity [def] "Catalysis of the reaction

4534 Pathogen[ P14079] interacts with 1 human partners:{Q7Z2T5}

4535 [Cluster 800]GO:0031419+F molecular\_function [name] cobalamin binding [def] "Interacting selectively and non-covalently with cobalamin (vitamin B12), a water-soluble vitamin characterized by possession of a corrin nucleus containing a cobalt atom." [GOC

4536 Pathogen[ Q2Q067] interacts with 1 human partners:{P22033}

4537 Pathogen[ P0C214] interacts with 1 human partners:{P22033}

4538 Pathogen[ P03346] interacts with 1 human partners:{Q9Y4U1}

4539 Pathogen[ Q85601] interacts with 1 human partners:{P22033}

4540 Pathogen[ P14079] interacts with 4 human partners:{Q9Y4U1;P27352;P22033;Q9NUN5}

4541 Pathogen[ P03383] interacts with 1 human partners:{P22033}

4542 Pathogen[ P03410] interacts with 4 human partners:{Q9NUN5;P27352;Q9Y4U1;P22033}

4543 Pathogen[ P14075] interacts with 1 human partners:{P22033}

4544 Pathogen[ P0C206] interacts with 2 human partners:{Q9Y4U1;P22033}

4545 [Cluster 801]GO:0019955+F molecular\_function [name] cytokine binding [def] "Interacting selectively and non-covalently with a cytokine, any of a group of proteins that function to control the survival, growth and differentiation of tissues and cells, and which have autocrine and paracrine activity." [GOC

4546 Pathogen[ Q2Q067] interacts with 1 human partners:{O14786}

4547 Pathogen[ P0C214] interacts with 1 human partners:{O14786}

4548 Pathogen[ P03346] interacts with 1 human partners:{O14786}

4549 Pathogen[ Q85601] interacts with 1 human partners:{O14786}

4550 Pathogen[ P03410] interacts with 1 human partners:{O14786}



4551 Pathogen[ P0C206] interacts with 1 human partners:{O14786}

4552 Pathogen[ P03363] interacts with 1 human partners:{O14786}

4553 [Cluster 802]GO:0009384+F molecular\_function [name] N-acylmannosamine kinase activity [def] "Catalysis of the reaction

4554 Pathogen[ P14079] interacts with 1 human partners:{Q9UJ70}

4555 [Cluster 803]GO:0004418+F molecular\_function [name] hydroxymethylbilane synthase activity [def] "Catalysis of the reaction

4556 Pathogen[ Q2Q067] interacts with 1 human partners:{P08397}

4557 Pathogen[ P0C214] interacts with 1 human partners:{P08397}

4558 Pathogen[ Q85601] interacts with 1 human partners:{P08397}

4559 Pathogen[ P14079] interacts with 1 human partners:{P08397}

4560 Pathogen[ P03383] interacts with 1 human partners:{P08397}

4561 Pathogen[ P03410] interacts with 1 human partners:{P08397}

4562 Pathogen[ P14075] interacts with 1 human partners:{P08397}

4563 Pathogen[ P0C206] interacts with 1 human partners:{P08397}

4564 [Cluster 804]GO:0008859+F molecular\_function [name] exoribonuclease II activity [def] "Catalysis of the reaction

4565 Pathogen[ P14079] interacts with 1 human partners:{Q96AZ6}

4566 Pathogen[ P03410] interacts with 1 human partners:{Q96AZ6}

4567 [Cluster 805]GO:0004114+F molecular\_function [name] 3',5'-cyclic-nucleotide phosphodiesterase activity [def] "Catalysis of the reaction

4568 Pathogen[ Q2Q067] interacts with 2 human partners:{O43924;P27815}

4569 Pathogen[ P0C214] interacts with 5 human partners:{P27815;P18545;Q07343;Q13956;O76083}

4570 Pathogen[ P03346] interacts with 2 human partners:{P27815;O43924}

4571 Pathogen[ Q85601] interacts with 2 human partners:{O43924;P27815}

4572 Pathogen[ P14079] interacts with 4 human partners:{O43924;P18545;Q13956;P27815}

4573 Pathogen[ P03410] interacts with 4 human partners:{Q13956;P18545;O43924;P27815}

4574 Pathogen[ P0C206] interacts with 4 human partners:{P18545;P27815;Q13956;O43924}

4575 Pathogen[ P03363] interacts with 2 human partners:{O43924;P27815}

4576 [Cluster 806]GO:0008440+F molecular\_function [name] inositol-1,4,5-trisphosphate 3-kinase activity [def] "Catalysis of the reaction

4577 Pathogen[ P14079] interacts with 1 human partners:{Q96DU7}

4578 Pathogen[ P03410] interacts with 1 human partners:{Q96DU7}

4579 Pathogen[ P0C206] interacts with 1 human partners:{Q96DU7}

4580 [Cluster 807]GO:0008379+F molecular\_function [name] thioredoxin peroxidase activity [def] "Catalysis of the reaction

4581 Pathogen[ Q2Q067] interacts with 1 human partners:{Q06830}

4582 Pathogen[ P0C214] interacts with 1 human partners:{Q06830}

4583 Pathogen[ P03346] interacts with 1 human partners:{Q06830}

4584 Pathogen[ Q85601] interacts with 1 human partners:{Q06830}

4585 Pathogen[ P03410] interacts with 1 human partners:{Q06830}

4586 Pathogen[ P0C206] interacts with 1 human partners:{Q06830}

4587 [Cluster 808]GO:0004121+F molecular\_function [name] cystathionine beta-lyase activity [def] "Catalysis of the reaction

4588 Pathogen[ Q2Q067] interacts with 1 human partners:{P32929}

4589 Pathogen[ P0C214] interacts with 1 human partners:{P32929}

4590 Pathogen[ P03346] interacts with 1 human partners:{P32929}

4591 Pathogen[ Q85601] interacts with 1 human partners:{P32929}

4592 Pathogen[ P14079] interacts with 1 human partners:{P32929}

4593 Pathogen[ P03410] interacts with 1 human partners:{P32929}

4594 Pathogen[ P0C206] interacts with 1 human partners:{P32929}

4595 [Cluster 809]GO:0052928+F

4596 Pathogen[ P14079] interacts with 1 human partners:{Q96Q11}

4597 Pathogen[ P03410] interacts with 1 human partners:{Q96Q11}

4598 [Cluster 810]GO:0043532+F molecular\_function [name] angiostatin binding [def] "Interacting selectively and non-covalently with angiostatin, a proteolytic product of plasminogen or plasmin containing at least one intact kringle domain, and which is an inhibitor of angiogenesis." [PMID

4599 Pathogen[ Q2Q067] interacts with 1 human partners:{Q9UII2}

4600 Pathogen[ P0C214] interacts with 1 human partners:{Q9UII2}

4601 Pathogen[ P03346] interacts with 1 human partners:{Q9UII2}

4602 Pathogen[ Q85601] interacts with 1 human partners:{Q9UII2}

4603 Pathogen[ P14079] interacts with 1 human partners:{Q9UII2}

4604 Pathogen[ P03383] interacts with 1 human partners:{Q9UII2}

4605 Pathogen[ P03410] interacts with 1 human partners:{Q9UII2}

4606 Pathogen[ P14075] interacts with 1 human partners:{Q9UII2}

4607 Pathogen[ P0C206] interacts with 1 human partners:{Q9UII2}

4608 [Cluster 811]GO:0004663+F molecular\_function [name] Rab geranylgeranyltransferase activity [def] "Catalysis of the reaction

4609 Pathogen[ P03346] interacts with 1 human partners:{P53611}

4610 Pathogen[ P03410] interacts with 1 human partners:{P53611}

4611 Pathogen[ P0C206] interacts with 1 human partners:{P53611}

4612 [Cluster 812]GO:0004468+F molecular\_function [name] lysine N-acetyltransferase activity [def] "Catalysis of the reaction

4613 Pathogen[ Q2Q067] interacts with 1 human partners:{Q92831}

4614 Pathogen[ P0C214] interacts with 1 human partners:{Q92831}

4615 Pathogen[ P03346] interacts with 1 human partners:{Q92831}

4616 Pathogen[ Q85601] interacts with 1 human partners:{Q92831}

4617 Pathogen[ P03383] interacts with 1 human partners:{Q92831}

4618 Pathogen[ P03410] interacts with 1 human partners:{Q92831}

4619 Pathogen[ P14075] interacts with 1 human partners:{Q92831}

4620 Pathogen[ P0C206] interacts with 1 human partners:{Q92831}

4621 Pathogen[ P03363] interacts with 1 human partners:{Q92831}

4622 [Cluster 813]GO:0019807+F molecular\_function [name] aspartoacylase activity [def]  
"Catalysis of the reaction

4623 Pathogen[ P03346] interacts with 1 human partners:{P45381}

4624 Pathogen[ P14079] interacts with 1 human partners:{P45381}

4625 Pathogen[ P03410] interacts with 1 human partners:{P45381}

4626 Pathogen[ P0C206] interacts with 1 human partners:{P45381}

4627 [Cluster 814]GO:0008753+F molecular\_function [name] NADPH dehydrogenase (quinone)  
activity [def] "Catalysis of the reaction

4628 Pathogen[ P0C214] interacts with 1 human partners:{P16083}

4629 Pathogen[ P03346] interacts with 1 human partners:{P16083}

4630 Pathogen[ P14079] interacts with 1 human partners:{P16083}

4631 Pathogen[ P03410] interacts with 1 human partners:{P16083}

4632 Pathogen[ P0C206] interacts with 1 human partners:{P16083}

4633 [Cluster 815]GO:0016743+F molecular\_function [name] carboxyl- or carbamoyltransferase  
activity [def] "Catalysis of the transfer of a carboxyl- or carbamoyl group from one  
compound (donor) to another (acceptor)." [GOC

4634 Pathogen[ P0C214] interacts with 1 human partners:{P00480}

4635 Pathogen[ Q85601] interacts with 1 human partners:{P00480}

4636 Pathogen[ P14079] interacts with 1 human partners:{P00480}

4637 Pathogen[ P03410] interacts with 1 human partners:{P00480}

4638 Pathogen[ P0C206] interacts with 1 human partners:{P00480}

4639 [Cluster 816]GO:0001530+F molecular\_function [name] lipopolysaccharide binding [def]  
"Interacting selectively and non-covalently with lipopolysaccharide." [PMID

4640 Pathogen[ Q2Q067] interacts with 2 human partners:{P25786;P28070}

4641 Pathogen[ P0C214] interacts with 3 human partners:{P10809;P25786;P28070}

4642 Pathogen[ P03346] interacts with 2 human partners:{P28070;P25786}

4643 Pathogen[ Q85601] interacts with 2 human partners:{P25786;P28070}

4644 Pathogen[ P03383] interacts with 2 human partners:{P25786;P28070}

4645 Pathogen[ P03410] interacts with 2 human partners:{P28070;P25786}

4646 Pathogen[ P14075] interacts with 2 human partners:{P28070;P25786}

4647 Pathogen[ P0C206] interacts with 2 human partners:{P25786;P28070}

4648 [Cluster 817]GO:0043559+F molecular\_function [name] insulin binding [def]  
"Interacting selectively and non-covalently with insulin, a polypeptide hormone produced  
by the islets of Langerhans of the pancreas in mammals, and by the homologous organs of  
other organisms." [ISBN

4649 Pathogen[ Q2Q067] interacts with 1 human partners:{P27986}

4650 Pathogen[ P0C214] interacts with 1 human partners:{P27986}

4651 Pathogen[ P03346] interacts with 1 human partners:{P27986}

4652 Pathogen[ Q85601] interacts with 1 human partners:{P27986}

4653 Pathogen[ P03383] interacts with 1 human partners:{P27986}

4654 Pathogen[ P03410] interacts with 1 human partners:{P27986}

4655 Pathogen[ P14075] interacts with 1 human partners:{P27986}

4656 Pathogen[ P0C206] interacts with 1 human partners:{P27986}

4657 Pathogen[ P03363] interacts with 1 human partners:{P27986}

4658 [Cluster 818]GO:0004476+F molecular\_function [name] mannose-6-phosphate isomerase  
activity [def] "Catalysis of the reaction

4659 Pathogen[ Q2Q067] interacts with 1 human partners:{P34949}

4660 Pathogen[ P0C214] interacts with 1 human partners:{P34949}

4661 Pathogen[ P03346] interacts with 1 human partners:{P34949}

4662 Pathogen[ Q85601] interacts with 1 human partners:{P34949}

4663 Pathogen[ P14079] interacts with 2 human partners:{P51606;P34949}

4664 Pathogen[ P03383] interacts with 1 human partners:{P34949}

4665 Pathogen[ P03410] interacts with 2 human partners:{P51606;P34949}

4666 Pathogen[ P14075] interacts with 1 human partners:{P34949}

4667 Pathogen[ P0C206] interacts with 1 human partners:{P34949}

4668 [Cluster 819]GO:0004765+F molecular\_function [name] shikimate kinase activity [def]  
"Catalysis of the reaction

4669 Pathogen[ P14079] interacts with 1 human partners:{Q8IYQ7}

4670 [Cluster 820]GO:0043795+F molecular\_function [name] glyceraldehyde oxidoreductase  
activity [def] "Catalysis of the reaction

4671 Pathogen[ Q2Q067] interacts with 1 human partners:{P15121}

4672 Pathogen[ P0C214] interacts with 1 human partners:{P15121}

4673 Pathogen[ P03346] interacts with 1 human partners:{P15121}

4674 Pathogen[ Q85601] interacts with 1 human partners:{P15121}

4675 Pathogen[ P0C206] interacts with 1 human partners:{P15121}

4676 [Cluster 821]GO:0004449+F molecular\_function [name] isocitrate dehydrogenase (NAD+)  
activity [def] "Catalysis of the reaction

4677 Pathogen[ P0C214] interacts with 3 human partners:{P50213;O43837;P51553}

4678 Pathogen[ P0C206] interacts with 1 human partners:{P50213}

4679 [Cluster 822]GO:0004613+F molecular\_function [name] phosphoenolpyruvate carboxykinase (GTP) activity [def] "Catalysis of the reaction

4680 Pathogen[ P0C214] interacts with 2 human partners:{P35558;Q16822}

4681 Pathogen[ P03383] interacts with 1 human partners:{Q16822}

4682 Pathogen[ P03410] interacts with 1 human partners:{Q16822}

4683 Pathogen[ P14075] interacts with 1 human partners:{Q16822}

4684 Pathogen[ P0C206] interacts with 1 human partners:{Q16822}

4685 [Cluster 823]GO:0004334+F molecular\_function [name] fumarylacetoacetase activity [def] "Catalysis of the reaction

4686 Pathogen[ P14079] interacts with 1 human partners:{P16930}

4687 Pathogen[ P03410] interacts with 1 human partners:{P16930}

4688 [Cluster 824]GO:0051033+F molecular\_function [name] RNA transmembrane transporter activity [def] "Catalysis of the transfer of RNA, ribonucleic acid, from one side of a membrane to the other." [GOC

4689 Pathogen[ P14079] interacts with 1 human partners:{Q9NXL6}

4690 [Cluster 825]GO:0016508+F molecular\_function [name] long-chain-enoyl-CoA hydratase activity [def] "Catalysis of the reaction

4691 Pathogen[ P0C214] interacts with 1 human partners:{P40939}

4692 [Cluster 826]GO:0003847+F molecular\_function [name] 1-alkyl-2-acetyl-glycerophosphocholine esterase activity [def] "Catalysis of the reaction

4693 Pathogen[ Q2Q067] interacts with 1 human partners:{Q15102}

4694 Pathogen[ P0C214] interacts with 2 human partners:{P68402;Q15102}

4695 Pathogen[ P03346] interacts with 1 human partners:{Q15102}

4696 Pathogen[ Q85601] interacts with 1 human partners:{Q15102}

4697 Pathogen[ P14079] interacts with 2 human partners:{Q15102;Q99487}

4698 Pathogen[ P03410] interacts with 1 human partners:{Q15102}

4699 Pathogen[ P14075] interacts with 1 human partners:{Q15102}

4700 Pathogen[ P0C206] interacts with 1 human partners:{Q15102}

4701 Pathogen[ P03363] interacts with 1 human partners:{Q15102}

4702 [Cluster 827]GO:0004639+F molecular\_function [name] phosphoribosylaminoimidazolesuccinocarboxamide synthase activity [def] "Catalysis of the reaction

4703 Pathogen[ P14079] interacts with 1 human partners:{P22234}

4704 Pathogen[ P03410] interacts with 1 human partners:{P22234}

4705 [Cluster 828]GO:0004648+F molecular\_function [name] O-phospho-L-serine [def] "Catalysis of the reaction

4706 Pathogen[ P0C214] interacts with 1 human partners:{Q9Y617}

4707 Pathogen[ P14079] interacts with 1 human partners:{Q9Y617}

4708 Pathogen[ P03410] interacts with 1 human partners:{Q9Y617}

4709 [Cluster 829]GO:0070579+F molecular\_function [name] methylcytosine dioxygenase activity [def] "Catalysis of the reaction

4710 Pathogen[ P14079] interacts with 2 human partners:{Q6N021;O43151}

4711 Pathogen[ P03410] interacts with 2 human partners:{Q6N021;O43151}

4712 Pathogen[ P0C206] interacts with 1 human partners:{O43151}

4713 [Cluster 830]GO:0047840+F molecular\_function [name] dCTP diphosphatase activity [def] "Catalysis of the reaction

4714 Pathogen[ P14079] interacts with 1 human partners:{Q9H773}

4715 Pathogen[ P03410] interacts with 1 human partners:{Q9H773}

4716 [Cluster 831]GO:0034185+F molecular\_function [name] apolipoprotein binding [def] "Interacting selectively and non-covalently with an apolipoprotein, the protein component of a lipoprotein complex." [GOC

4717 Pathogen[ P14079] interacts with 1 human partners:{P10636}

4718 Pathogen[ P03410] interacts with 2 human partners:{P55157;P10636}

4719 Pathogen[ P0C206] interacts with 1 human partners:{P10636}

4720 [Cluster 832]GO:0004022+F molecular\_function [name] alcohol dehydrogenase (NAD) activity [def] "Catalysis of the reaction

4721 Pathogen[ P0C214] interacts with 1 human partners:{P07327}

4722 [Cluster 833]GO:0004024+F molecular\_function [name] alcohol dehydrogenase activity, zinc-dependent [def] "Catalysis of the reaction

4723 Pathogen[ P0C214] interacts with 1 human partners:{P07327}

4724 [Cluster 834]GO:0005072+F molecular\_function [name] transforming growth factor beta receptor, cytoplasmic mediator activity [def] "Activity of any of the molecules that transmit the signal from a TGF-beta receptor through the cytoplasm to the nucleus." [GOC

4725 Pathogen[ Q2Q067] interacts with 1 human partners:{P46527}

4726 Pathogen[ P0C214] interacts with 1 human partners:{P46527}

4727 Pathogen[ P03346] interacts with 1 human partners:{P46527}

4728 Pathogen[ Q85601] interacts with 1 human partners:{P46527}

4729 Pathogen[ P14079] interacts with 1 human partners:{P46527}

4730 Pathogen[ P03383] interacts with 1 human partners:{P46527}

4731 Pathogen[ P03410] interacts with 1 human partners:{P46527}

4732 Pathogen[ P14075] interacts with 1 human partners:{P46527}

4733 Pathogen[ P0C206] interacts with 1 human partners:{P46527}

4734 [Cluster 835]GO:0004446+F molecular\_function [name] inositol-hexakisphosphate phosphatase activity [def] "Catalysis of the reaction

4735 Pathogen[ P14079] interacts with 1 human partners:{Q9UNW1}

4736 Pathogen[ P03410] interacts with 1 human partners:{Q9UNW1}

4737 [Cluster 836]GO:0017081+F molecular\_function [name] chloride channel regulator activity [def] "Modulates the activity of a chloride channel." [GOC

4738 Pathogen[ P14079] interacts with 1 human partners:{Q8WZ55}

4739 Pathogen[ P03410] interacts with 1 human partners:{Q8WZ55}

4740 [Cluster 837]GO:0004784+F molecular\_function [name] superoxide dismutase activity [def] "Catalysis of the reaction

4741 Pathogen[ Q2Q067] interacts with 1 human partners:{O14618}

4742 Pathogen[ P0C214] interacts with 2 human partners:{P08294;O14618}

4743 Pathogen[ P03346] interacts with 1 human partners:{O14618}

4744 Pathogen[ Q85601] interacts with 1 human partners:{O14618}

4745 Pathogen[ P14079] interacts with 1 human partners:{O14618}

4746 Pathogen[ P03410] interacts with 1 human partners:{O14618}

4747 Pathogen[ P0C206] interacts with 1 human partners:{O14618}

4748 Pathogen[ P03363] interacts with 1 human partners:{O14618}

4749 [Cluster 838]GO:0052894+F

4750 Pathogen[ P0C214] interacts with 1 human partners:{Q9NWM0}

4751 [Cluster 839]GO:0031750+F molecular\_function [name] D3 dopamine receptor binding [def] "Interacting selectively and non-covalently with a D3 dopamine receptor." [GOC

4752 Pathogen[ P14079] interacts with 1 human partners:{O75781}

4753 Pathogen[ P03410] interacts with 1 human partners:{O75781}

4754 [Cluster 840]GO:0015194+F molecular\_function [name] L-serine transmembrane transporter activity [def] "Catalysis of the transfer of L-serine from one side of a membrane to the other. L-serine is the L-enantiomer of 2-amino-3-hydroxypropanoic acid." [GOC

4755 Pathogen[ P14079] interacts with 1 human partners:{Q9NRX5}

4756 Pathogen[ P03410] interacts with 1 human partners:{Q9NRX5}

4757 [Cluster 841]GO:0004819+F molecular\_function [name] glutamine-tRNA ligase activity [def] "Catalysis of the reaction

4758 Pathogen[ P0C214] interacts with 1 human partners:{P47897}

4759 Pathogen[ Q85601] interacts with 1 human partners:{P47897}

4760 Pathogen[ P14079] interacts with 1 human partners:{P47897}

4761 Pathogen[ P03410] interacts with 1 human partners:{P47897}

4762 Pathogen[ P0C206] interacts with 1 human partners:{P47897}

4763 Pathogen[ P03363] interacts with 1 human partners:{P47897}

4764 [Cluster 842]GO:0004522+F molecular\_function [name] pancreatic ribonuclease activity [def] "Catalysis of the endonucleolytic cleavage of RNA to 3'-phosphomononucleotides and 3'-phosphooligonucleotides ending in C-P or U-P with 2',3'-cyclic phosphate intermediates." [EC

4765 Pathogen[ P03363] interacts with 1 human partners:{P07998}

4766 [Cluster 843]GO:0016918+F molecular\_function [name] retinal binding [def] "Interacting selectively and non-covalently with retinal, one of the forms of vitamin A. Retinal plays an important role in the visual process in most vertebrates, combining with opsins to form visual pigments in the retina." [CHEBI

4767 Pathogen[ P03346] interacts with 1 human partners:{P29373}

4768 Pathogen[ P0C206] interacts with 1 human partners:{P29373}

4769 Pathogen[ P03363] interacts with 1 human partners:{P29373}

4770 [Cluster 844]GO:0036139+F

4771 Pathogen[ Q2Q067] interacts with 1 human partners:{Q9NWT6}

4772 Pathogen[ P0C214] interacts with 1 human partners:{Q9NWT6}

4773 Pathogen[ P03346] interacts with 1 human partners:{Q9NWT6}

4774 Pathogen[ Q85601] interacts with 1 human partners:{Q9NWT6}

4775 Pathogen[ P14079] interacts with 1 human partners:{Q9NWT6}

4776 Pathogen[ P03383] interacts with 1 human partners:{Q9NWT6}

4777 Pathogen[ P03410] interacts with 1 human partners:{Q9NWT6}

4778 Pathogen[ P14075] interacts with 1 human partners:{Q9NWT6}

4779 Pathogen[ P0C206] interacts with 1 human partners:{Q9NWT6}

4780 [Cluster 845]GO:0016709+F molecular\_function [name] oxidoreductase activity, acting on paired donors, with incorporation or reduction of molecular oxygen, NADH or NADPH as one donor, and incorporation of one atom of oxygen [def] "Catalysis of an oxidation-reduction (redox) reaction in which hydrogen or electrons are transferred from NADH or NADPH and one other donor, and one atom of oxygen is incorporated into one donor." [GOC

4781 Pathogen[ P03346] interacts with 1 human partners:{Q8TDZ2}

4782 Pathogen[ P14079] interacts with 1 human partners:{Q8TDZ2}

4783 Pathogen[ P03410] interacts with 1 human partners:{Q8TDZ2}

4784 Pathogen[ P0C206] interacts with 1 human partners:{Q8TDZ2}

4785 [Cluster 846]GO:0000247+F molecular\_function [name] C-8 sterol isomerase activity [def] "Catalysis of the reaction which results in unsaturation at C-7 in the B ring of sterols." [MetaCyc

4786 Pathogen[ P03346] interacts with 1 human partners:{Q12772}

4787 Pathogen[ Q85601] interacts with 1 human partners:{Q12772}

4788 Pathogen[ P14079] interacts with 1 human partners:{Q12772}

4789 Pathogen[ P03410] interacts with 1 human partners:{Q12772}

4790 Pathogen[ P0C206] interacts with 1 human partners:{Q12772}

4791 [Cluster 847]GO:0018025+F molecular\_function [name] calmodulin-lysine N-methyltransferase activity [def] "Catalysis of the reaction

4792 Pathogen[ P03346] interacts with 1 human partners:{Q7Z624}

4793 Pathogen[ P14079] interacts with 1 human partners:{Q7Z624}

4794 Pathogen[ P03410] interacts with 1 human partners:{Q7Z624}

4795 Pathogen[ P0C206] interacts with 1 human partners:{Q7Z624}

4796 Pathogen[ P03363] interacts with 1 human partners:{Q7Z624}

4797 [Cluster 848]GO:0047800+F molecular\_function [name] cysteamine dioxygenase activity  
[def] "Catalysis of the reaction

4798 Pathogen[ P14079] interacts with 1 human partners:{Q96SZ5}

4799 Pathogen[ P03410] interacts with 1 human partners:{Q96SZ5}

4800 [Cluster 849]GO:0047374+F molecular\_function [name] methylumbelliferyl-acetate  
deacetylase activity [def] "Catalysis of the reaction

4801 Pathogen[ P03346] interacts with 1 human partners:{P10768}

4802 Pathogen[ Q85601] interacts with 1 human partners:{P10768}

4803 Pathogen[ P03410] interacts with 1 human partners:{P10768}

4804 Pathogen[ P0C206] interacts with 1 human partners:{P10768}

4805 Pathogen[ P03363] interacts with 1 human partners:{P10768}

4806 [Cluster 850]GO:0015204+F molecular\_function [name] urea transmembrane transporter  
activity [def] "Enables the directed movement of urea cross a membrane into, out of or  
within a cell, or between cells. Urea is the water soluble compound H2N-CO-NH2." [ISBN

4807 Pathogen[ P14079] interacts with 1 human partners:{Q15849}

4808 Pathogen[ P03410] interacts with 2 human partners:{Q13336;Q15849}

4809 Pathogen[ P0C206] interacts with 1 human partners:{Q15849}

4810 [Cluster 851]GO:0002153+F molecular\_function [name] steroid receptor RNA activator RNA  
binding [def] "Selectively interacting with the steroid receptor RNA activator RNA (SRA).  
SRA enhances steroid hormone receptor transcriptional activity as an RNA transcript by an  
indirect mechanism that does not involve SRA-steroid receptor binding." [PMID

4811 Pathogen[ Q2Q067] interacts with 1 human partners:{P10827}

4812 Pathogen[ P03346] interacts with 1 human partners:{P10827}

4813 Pathogen[ Q85601] interacts with 1 human partners:{P10827}

4814 Pathogen[ P14079] interacts with 1 human partners:{P10827}

4815 Pathogen[ P0C206] interacts with 1 human partners:{P10827}

4816 [Cluster 852]GO:0005179+F molecular\_function [name] hormone activity [def] "The action  
characteristic of a hormone, any substance formed in very small amounts in one  
specialized organ or group of cells and carried (sometimes in the bloodstream) to another  
organ or group of cells in the same organism, upon which it has a specific regulatory  
action. The term was originally applied to agents with a stimulatory physiological action  
in vertebrate animals (as opposed to a chalone, which has a depressant action). Usage is  
now extended to regulatory compounds in lower animals and plants, and to synthetic  
substances having comparable effects\_ all bind receptors and trigger some biological  
process." [GOC

4817 Pathogen[ P14079] interacts with 7 human  
partners:{P01215;Q9BQ08;P20396;P01225;P81172;P81277;P05060}

4818 Pathogen[ P03383] interacts with 1 human partners:{P01215}

4819 Pathogen[ P03410] interacts with 8 human  
partners:{Q765I0;P02766;P05060;P01215;P81172;P81277;Q9BQ08;P20396}

4820 Pathogen[ P14075] interacts with 2 human partners:{P05060;P01215}

4821 Pathogen[ P0C206] interacts with 3 human partners:{P05060;P01215;P20396}

4822 Pathogen[ P03363] interacts with 2 human partners:{P02766;P05060}

4823 [Cluster 853]GO:0045523+F molecular\_function [name] interleukin-27 receptor binding  
[def] "Interacting selectively and non-covalently with the interleukin-27 receptor." [GOC

4824 Pathogen[ P14079] interacts with 1 human partners:{Q8NEV9}

4825 Pathogen[ P03410] interacts with 1 human partners:{Q8NEV9}

4826 [Cluster 854]GO:0051538+F molecular\_function [name] 3 iron, 4 sulfur cluster binding  
[def] "Interacting selectively and non-covalently with a 3 iron, 4 sulfur (3Fe-4S)  
cluster\_ this cluster consists of three iron atoms, with the inorganic sulfur atoms found  
between the irons and acting as bridging ligands. It is essentially a 4Fe-4S cluster with  
one iron missing." [GOC

4827 Pathogen[ Q2Q067] interacts with 1 human partners:{P21912}

4828 Pathogen[ P0C214] interacts with 2 human partners:{Q99798;P21912}

4829 Pathogen[ P03346] interacts with 1 human partners:{P21912}

4830 Pathogen[ Q85601] interacts with 1 human partners:{P21912}

4831 Pathogen[ P14079] interacts with 1 human partners:{P21912}

4832 Pathogen[ P03410] interacts with 1 human partners:{P21912}

4833 Pathogen[ P0C206] interacts with 2 human partners:{Q99798;P21912}

4834 [Cluster 855]GO:0004397+F molecular\_function [name] histidine ammonia-lyase activity  
[def] "Catalysis of the reaction

4835 Pathogen[ P14079] interacts with 1 human partners:{P42357}

4836 [Cluster 856]GO:0004832+F molecular\_function [name] valine-tRNA ligase activity [def]  
"Catalysis of the reaction

4837 Pathogen[ P0C214] interacts with 2 human partners:{P26640;Q5ST30}

4838 Pathogen[ P14079] interacts with 2 human partners:{Q5ST30;P26640}

4839 Pathogen[ P03410] interacts with 2 human partners:{Q5ST30;P26640}

4840 Pathogen[ P0C206] interacts with 2 human partners:{Q5ST30;P26640}

4841 [Cluster 857]GO:0005326+F molecular\_function [name] neurotransmitter transporter  
activity [def] "Enables the directed movement of a neurotransmitter into, out of or  
within a cell, or between cells. Neurotransmitters are any chemical substance that is

capable of transmitting (or inhibiting the transmission of) a nerve impulse from a neuron to another cell." [GOC

4842 Pathogen[ P14079] interacts with 2 human partners:{O14810;Q8WVH0}

4843 Pathogen[ P03410] interacts with 2 human partners:{O14810;Q8WVH0}

4844 [Cluster 858]GO:0004379+F molecular\_function [name] glycolipase activity [def] "Catalysis of the reaction N-tetradecanoyltransferase activity [def] "Catalysis of the reaction

4845 Pathogen[ Q2Q067] interacts with 1 human partners:{P30419}

4846 Pathogen[ P0C214] interacts with 2 human partners:{O60551;P30419}

4847 Pathogen[ Q85601] interacts with 2 human partners:{O60551;P30419}

4848 Pathogen[ P14079] interacts with 2 human partners:{O60551;P30419}

4849 Pathogen[ P03410] interacts with 2 human partners:{O60551;P30419}

4850 Pathogen[ P0C206] interacts with 2 human partners:{P30419;O60551}

4851 [Cluster 859]GO:0042171+F molecular\_function [name] lysophosphatidic acid acyltransferase activity [def] "Catalysis of the transfer of acyl groups from an acyl-CoA to lysophosphatidic acid to form phosphatidic acid." [PMID

4852 Pathogen[ P03346] interacts with 1 human partners:{Q9Y371}

4853 Pathogen[ P14079] interacts with 1 human partners:{Q9Y371}

4854 Pathogen[ P03410] interacts with 1 human partners:{Q9Y371}

4855 [Cluster 860]GO:0004579+F molecular\_function [name] dolichyl-diphosphooligosaccharide-protein glycotransferase activity [def] "Catalysis of the reaction

4856 Pathogen[ P14079] interacts with 5 human partners:{P39656;P04844;P61803;Q9NRP0;P46977}

4857 Pathogen[ P03410] interacts with 3 human partners:{P04844;P39656;P61803}

4858 Pathogen[ P0C206] interacts with 1 human partners:{P39656}

4859 [Cluster 861]GO:0016619+F molecular\_function [name] malate dehydrogenase (oxaloacetate-decarboxylating) activity [def] "Catalysis of the reaction

4860 Pathogen[ P0C214] interacts with 2 human partners:{P48163;Q16798}

4861 [Cluster 862]GO:0019797+F molecular\_function [name] procollagen-proline 3-dioxygenase activity [def] "Catalysis of the reaction

4862 Pathogen[ P14079] interacts with 1 human partners:{Q8IVL6}

4863 [Cluster 863]GO:0004751+F molecular\_function [name] ribose-5-phosphate isomerase activity [def] "Catalysis of the reaction

4864 Pathogen[ Q2Q067] interacts with 1 human partners:{P49247}

4865 Pathogen[ P0C214] interacts with 1 human partners:{P49247}

4866 Pathogen[ P03346] interacts with 1 human partners:{P49247}

4867 Pathogen[ Q85601] interacts with 1 human partners:{P49247}

4868 Pathogen[ P14079] interacts with 1 human partners:{P49247}

4869 Pathogen[ P03383] interacts with 1 human partners:{P49247}

4870 Pathogen[ P03410] interacts with 1 human partners:{P49247}

4871 Pathogen[ P14075] interacts with 1 human partners:{P49247}

4872 Pathogen[ P0C206] interacts with 1 human partners:{P49247}

4873 [Cluster 864]GO:0004833+F molecular\_function [name] tryptophan 2,3-dioxygenase activity [def] "Catalysis of the reaction

4874 Pathogen[ P14079] interacts with 1 human partners:{P48775}

4875 Pathogen[ P03410] interacts with 1 human partners:{P48775}

4876 [Cluster 865]GO:0008427+F molecular\_function [name] calcium-dependent protein kinase inhibitor activity [def] "Stops, prevents or reduces the activity of a calcium-dependent protein kinase." [GOC

4877 Pathogen[ P14079] interacts with 1 human partners:{Q7Z7J9}

4878 Pathogen[ P03410] interacts with 1 human partners:{Q7Z7J9}

4879 [Cluster 866]GO:0097157+F molecular\_function [name] pre-mRNA intronic binding [def] "Interacting selectively and non-covalently with an intronic sequence of a pre-messenger RNA (pre-mRNA)." [GOC

4880 Pathogen[ P03346] interacts with 1 human partners:{Q9BWF3}

4881 Pathogen[ P03363] interacts with 2 human partners:{O60306;Q9BWF3}

4882 [Cluster 867]GO:0055106+F molecular\_function [name] ubiquitin-protein ligase regulator activity [def] "Modulates the activity of a ubiquitin-protein ligase, an enzyme that catalyzes the covalent attachment of ubiquitin to lysine in a substrate protein." [GOC

4883 Pathogen[ Q2Q067] interacts with 1 human partners:{Q96RU7}

4884 Pathogen[ P0C214] interacts with 1 human partners:{Q96RU7}

4885 Pathogen[ P03346] interacts with 1 human partners:{Q96RU7}

4886 Pathogen[ Q85601] interacts with 1 human partners:{Q96RU7}

4887 Pathogen[ P14079] interacts with 1 human partners:{Q96RU7}

4888 Pathogen[ P03383] interacts with 1 human partners:{Q96RU7}

4889 Pathogen[ P03410] interacts with 1 human partners:{Q96RU7}

4890 Pathogen[ P14075] interacts with 1 human partners:{Q96RU7}

4891 Pathogen[ P0C206] interacts with 1 human partners:{Q96RU7}

4892 [Cluster 868]GO:0016303+F molecular\_function [name] 1-phosphatidylinositol-3-kinase activity [def] "Catalysis of the reaction

4893 Pathogen[ Q2Q067] interacts with 1 human partners:{P27986}

4894 Pathogen[ P0C214] interacts with 1 human partners:{P27986}

4895 Pathogen[ P03346] interacts with 1 human partners:{P27986}

4896 Pathogen[ Q85601] interacts with 1 human partners:{P27986}

4897 Pathogen[ P03383] interacts with 1 human partners:{P27986}

4898 Pathogen[ P03410] interacts with 1 human partners:{P27986}

4899 Pathogen[ P14075] interacts with 1 human partners:{P27986}

4900 Pathogen[ P0C206] interacts with 1 human partners:{P27986}

4901 Pathogen[ P03363] interacts with 1 human partners:{P27986}

4902 [Cluster 869]GO:0048038+F molecular\_function [name] quinone binding [def] "Interacting selectively and non-covalently with a quinone, any member of a class of diketones derivable from aromatic compounds by conversion of two CH groups into CO groups with any necessary rearrangement of double bonds." [ISBN

4903 Pathogen[ Q2Q067] interacts with 2 human partners:{075251;075306}

4904 Pathogen[ P0C214] interacts with 2 human partners:{075306;075251}

4905 Pathogen[ P03346] interacts with 2 human partners:{075251;075306}

4906 Pathogen[ Q85601] interacts with 1 human partners:{075306}

4907 Pathogen[ P14079] interacts with 2 human partners:{075306;075251}

4908 Pathogen[ P03383] interacts with 2 human partners:{075251;075306}

4909 Pathogen[ P03410] interacts with 2 human partners:{075251;075306}

4910 Pathogen[ P14075] interacts with 2 human partners:{075306;075251}

4911 Pathogen[ P0C206] interacts with 2 human partners:{075251;075306}

4912 [Cluster 870]GO:0033192+F molecular\_function [name] calmodulin-dependent protein phosphatase activity [def] "Catalysis of the reaction

4913 Pathogen[ Q2Q067] interacts with 3 human partners:{Q08209;P35813;P49593}

4914 Pathogen[ P0C214] interacts with 3 human partners:{P35813;Q08209;P49593}

4915 Pathogen[ P03346] interacts with 3 human partners:{P35813;P49593;Q08209}

4916 Pathogen[ Q85601] interacts with 3 human partners:{P49593;Q08209;P35813}

4917 Pathogen[ P14079] interacts with 4 human partners:{P49593;P16298;P35813;Q08209}

4918 Pathogen[ P03383] interacts with 1 human partners:{P35813}

4919 Pathogen[ P03410] interacts with 3 human partners:{P35813;Q08209;P49593}

4920 Pathogen[ P14075] interacts with 1 human partners:{P35813}

4921 Pathogen[ P0C206] interacts with 3 human partners:{P49593;Q08209;P35813}

4922 [Cluster 871]GO:0017172+F molecular\_function [name] cysteine dioxygenase activity [def] "Catalysis of the reaction

4923 Pathogen[ P14079] interacts with 1 human partners:{Q16878}

4924 [Cluster 872]GO:0004051+F molecular\_function [name] arachidonate 5-lipoxygenase activity [def] "Catalysis of the reaction

4925 Pathogen[ Q2Q067] interacts with 1 human partners:{P09917}

4926 Pathogen[ P0C214] interacts with 1 human partners:{P09917}

4927 Pathogen[ P03346] interacts with 1 human partners:{P09917}

4928 Pathogen[ Q85601] interacts with 1 human partners:{P09917}

4929 Pathogen[ P14079] interacts with 2 human partners:{P20292;P09917}

4930 Pathogen[ P03410] interacts with 2 human partners:{P09917;P20292}

4931 Pathogen[ P0C206] interacts with 2 human partners:{P09917;P20292}

4932 [Cluster 873]GO:0046912+F molecular\_function [name] transferase activity, transferring acyl groups, acyl groups converted into alkyl on transfer [def] "Catalysis of the transfer of an acyl group from one compound (donor) to another (acceptor), with the acyl group being converted into alkyl on transfer." [GOC

4933 Pathogen[ P0C214] interacts with 2 human partners:{075390;P53396}

4934 Pathogen[ P03346] interacts with 1 human partners:{075390}

4935 Pathogen[ P03410] interacts with 1 human partners:{075390}

4936 Pathogen[ P0C206] interacts with 1 human partners:{075390}

4937 [Cluster 874]GO:0004726+F molecular\_function [name] non-membrane spanning protein tyrosine phosphatase activity [def] "Catalysis of the reaction

4938 Pathogen[ P03346] interacts with 3 human partners:{P43378;P17706;P24666}

4939 Pathogen[ P03410] interacts with 1 human partners:{P24666}

4940 Pathogen[ P0C206] interacts with 2 human partners:{P24666;P17706}

4941 Pathogen[ P03363] interacts with 3 human partners:{P17706;P43378;P24666}

4942 [Cluster 875]GO:0016890+F molecular\_function [name] site-specific endodeoxyribonuclease activity, specific for altered base [def] "Catalysis of the hydrolysis of ester linkages at specific sites within a deoxyribonucleic acid molecule by creating internal breaks." [GOC

4943 Pathogen[ Q2Q067] interacts with 1 human partners:{P27695}

4944 Pathogen[ P0C214] interacts with 1 human partners:{P27695}

4945 Pathogen[ P03346] interacts with 1 human partners:{P27695}

4946 Pathogen[ Q85601] interacts with 1 human partners:{P27695}

4947 Pathogen[ P14079] interacts with 1 human partners:{P27695}

4948 Pathogen[ P03383] interacts with 1 human partners:{P27695}

4949 Pathogen[ P03410] interacts with 1 human partners:{P27695}

4950 Pathogen[ P14075] interacts with 1 human partners:{P27695}

4951 Pathogen[ P0C206] interacts with 1 human partners:{P27695}

4952 [Cluster 876]GO:0050692+F molecular\_function [name] DBD domain binding [def] "Interacting selectively and non-covalently with the DBD, DNA binding domain, of a protein. The DNA binding domain of the vitamin D receptor, one of a family of receptors with the DBD, is split into three regions, the P, D and T boxes. Residues that are critical for target sequence selectivity form the P-box. The D-box contains residues that are important for homodimerization of class I nuclear receptors. The T-box is essential for both DNA-binding and transactivation of the VDR\_ this region may also be important for dimerization with RXR for class II nuclear receptors." [PMID

4953 Pathogen[ P03346] interacts with 1 human partners:{Q9P2W1}

4954 [Cluster 877]GO:0052654+F molecular\_function [name] L-leucine transaminase activity

```

[def] "Catalysis of the reaction
4955 Pathogen[ P0C214] interacts with 2 human partners:{O15382;P54687}
4956 Pathogen[ Q85601] interacts with 1 human partners:{O15382}
4957 Pathogen[ P14079] interacts with 1 human partners:{O15382}
4958 Pathogen[ P03410] interacts with 1 human partners:{O15382}
4959 Pathogen[ P0C206] interacts with 1 human partners:{O15382}
4960 [Cluster 878]GO:0015038+F molecular_function [name] glutathione disulfide
oxidoreductase activity [def] "Catalysis of the reaction
4961 Pathogen[ Q2Q067] interacts with 1 human partners:{P35754}
4962 Pathogen[ P0C214] interacts with 1 human partners:{P35754}
4963 Pathogen[ P03346] interacts with 2 human partners:{Q9NS18;P35754}
4964 Pathogen[ Q85601] interacts with 1 human partners:{P35754}
4965 Pathogen[ P14079] interacts with 1 human partners:{P35754}
4966 Pathogen[ P03410] interacts with 1 human partners:{P35754}
4967 Pathogen[ P0C206] interacts with 2 human partners:{Q9NS18;P35754}
4968 Pathogen[ P03363] interacts with 1 human partners:{P35754}
4969 [Cluster 879]GO:0034452+F molecular_function [name] dynactin binding [def]
"Interacting selectively and non-covalently with any part of a dynactin complex_ dynactin
is a large protein complex that activates dynein-based motor activity." [GOC
4970 Pathogen[ P0C214] interacts with 1 human partners:{Q96G01}
4971 Pathogen[ P03346] interacts with 2 human partners:{Q96G01;Q6ZP65}
4972 Pathogen[ Q85601] interacts with 2 human partners:{Q6ZP65;Q96G01}
4973 Pathogen[ P14079] interacts with 2 human partners:{Q6ZP65;Q96G01}
4974 Pathogen[ P03410] interacts with 2 human partners:{Q96G01;Q6ZP65}
4975 Pathogen[ P0C206] interacts with 2 human partners:{Q6ZP65;Q96G01}
4976 Pathogen[ P03363] interacts with 1 human partners:{Q6ZP65}
4977 [Cluster 880]GO:0030352+F molecular_function [name] inositol-1,4,5,6-tetrakisphosphate
6-phosphatase activity [def] "Catalysis of the reaction
4978 Pathogen[ P14079] interacts with 1 human partners:{Q9UNW1}
4979 Pathogen[ P03410] interacts with 1 human partners:{Q9UNW1}
4980 [Cluster 881]GO:0047982+F molecular_function [name] homocysteine desulfhydrase
activity [def] "Catalysis of the reaction
4981 Pathogen[ Q2Q067] interacts with 1 human partners:{P32929}
4982 Pathogen[ P0C214] interacts with 1 human partners:{P32929}
4983 Pathogen[ P03346] interacts with 1 human partners:{P32929}
4984 Pathogen[ Q85601] interacts with 1 human partners:{P32929}
4985 Pathogen[ P14079] interacts with 1 human partners:{P32929}
4986 Pathogen[ P03410] interacts with 1 human partners:{P32929}
4987 Pathogen[ P0C206] interacts with 1 human partners:{P32929}
4988 [Cluster 882]GO:0071813+F molecular_function [name] lipoprotein particle binding [def]
"Interacting selectively and non-covalently with a lipoprotein particle. A lipoprotein
particle, also known as a lipoprotein, is a clathrate complex consisting of a lipid
enwrapped in a protein host without covalent binding in such a way that the complex has a
hydrophilic outer surface consisting of all the protein and the polar ends of any
phospholipids." [CHEBI
4989 Pathogen[ P14079] interacts with 1 human partners:{P10636}
4990 Pathogen[ P03410] interacts with 1 human partners:{P10636}
4991 Pathogen[ P0C206] interacts with 1 human partners:{P10636}
4992 [Cluster 883]GO:0001515+F molecular_function [name] opioid peptide activity [def]
"Naturally occurring peptide that is an opioid (any non-alkaloid having an opiate-like
effect that can be reversed by naloxone or other recognized morphine antagonist). These
include Leu- and Met-enkephalin, dynorphin and neoendorphin, alpha, beta, gamma and delta
endorphins formed from beta-lipotropin, various pronase-resistant peptides such as beta
casamorphin, and other peptides whose opiate-like action seems to be indirect." [ISBN
4993 Pathogen[ P0C214] interacts with 1 human partners:{O14613}
4994 Pathogen[ P03346] interacts with 1 human partners:{O14613}
4995 Pathogen[ Q85601] interacts with 1 human partners:{O14613}
4996 Pathogen[ P14079] interacts with 1 human partners:{O14613}
4997 Pathogen[ P03410] interacts with 1 human partners:{O14613}
4998 Pathogen[ P14075] interacts with 1 human partners:{O14613}
4999 Pathogen[ P0C206] interacts with 1 human partners:{O14613}
5000 Pathogen[ P03363] interacts with 1 human partners:{O14613}
5001 [Cluster 884]GO:0016812+F molecular_function [name] hydrolase activity, acting on
carbon-nitrogen (but not peptide) bonds, in cyclic amides [def] "Catalysis of the
hydrolysis of any non-peptide carbon-nitrogen bond in a cyclic amide." [GOC
5002 Pathogen[ Q2Q067] interacts with 2 human partners:{Q96NU7;Q14194}
5003 Pathogen[ P0C214] interacts with 3 human partners:{Q14194;O14531;Q96NU7}
5004 Pathogen[ P03346] interacts with 3 human partners:{Q96NU7;O14531;Q14194}
5005 Pathogen[ Q85601] interacts with 1 human partners:{Q14194}
5006 Pathogen[ P14079] interacts with 2 human partners:{Q96NU7;Q14194}
5007 Pathogen[ P03410] interacts with 3 human partners:{Q96NU7;O14531;Q14194}
5008 Pathogen[ P14075] interacts with 1 human partners:{Q96NU7}
5009 Pathogen[ P0C206] interacts with 3 human partners:{O14531;Q14194;Q96NU7}
5010 Pathogen[ P03363] interacts with 2 human partners:{Q14194;O14531}
5011 [Cluster 885]GO:0047704+F molecular_function [name] bile-salt sulfotransferase
activity [def] "Catalysis of the reaction

```



5012 Pathogen[ P0C214] interacts with 1 human partners:{Q06520}

5013 Pathogen[ P03346] interacts with 1 human partners:{Q06520}

5014 Pathogen[ P03363] interacts with 1 human partners:{Q06520}

5015 [Cluster 886]GO:0097016+F molecular\_function [name] L27 domain binding [def]  
 "Interacting selectively and non-covalently with a L27 domain of a protein. L27 is composed of conserved negatively charged amino acids and a conserved aromatic amino acid. L27 domains can assemble proteins involved in signaling and establishment and maintenance of cell polarity into complexes by interacting in a heterodimeric manner." [GOC]

5016 Pathogen[ Q2Q067] interacts with 2 human partners:{O14910;Q12959}

5017 Pathogen[ P0C214] interacts with 2 human partners:{O14910;Q12959}

5018 Pathogen[ P03346] interacts with 2 human partners:{O14910;Q12959}

5019 Pathogen[ Q85601] interacts with 2 human partners:{O14910;Q12959}

5020 Pathogen[ P03383] interacts with 1 human partners:{O14910}

5021 Pathogen[ P03410] interacts with 2 human partners:{O14910;Q12959}

5022 Pathogen[ P14075] interacts with 1 human partners:{O14910}

5023 Pathogen[ P0C206] interacts with 2 human partners:{O14910;Q12959}

5024 Pathogen[ P03363] interacts with 2 human partners:{Q12959;O14910}

5025 [Cluster 887]GO:0000062+F molecular\_function [name] fatty-acyl-CoA binding [def]  
 "Interacting selectively and non-covalently with acyl-CoA, any derivative of coenzyme A in which the sulfhydryl group is in thiolester linkage with a fatty acyl group." [GOC]

5026 Pathogen[ P0C214] interacts with 2 human partners:{P40939;O00154}

5027 Pathogen[ P03346] interacts with 1 human partners:{Q9BR61}

5028 Pathogen[ P03410] interacts with 1 human partners:{O00154}

5029 Pathogen[ P0C206] interacts with 1 human partners:{Q9BR61}

5030 Pathogen[ P03363] interacts with 1 human partners:{Q9BR61}

5031 [Cluster 888]GO:0004345+F molecular\_function [name] glucose-6-phosphate dehydrogenase activity [def] "Catalysis of the reaction

5032 Pathogen[ P0C214] interacts with 1 human partners:{P11413}

5033 [Cluster 889]GO:0008119+F molecular\_function [name] thiopurine S-methyltransferase activity [def] "Catalysis of the reaction

5034 Pathogen[ Q2Q067] interacts with 1 human partners:{P51580}

5035 Pathogen[ P0C214] interacts with 1 human partners:{P51580}

5036 Pathogen[ P03346] interacts with 1 human partners:{P51580}

5037 Pathogen[ P14079] interacts with 2 human partners:{Q16625;P51580}

5038 Pathogen[ P03410] interacts with 2 human partners:{Q16625;P51580}

5039 Pathogen[ P14075] interacts with 1 human partners:{P51580}

5040 Pathogen[ P0C206] interacts with 1 human partners:{P51580}

5041 Pathogen[ P03363] interacts with 1 human partners:{P51580}

5042 [Cluster 890]GO:0046592+F molecular\_function [name] polyamine oxidase activity [def]  
 "Catalysis of the oxidative degradation or interconversion of polyamines." [EC]

5043 Pathogen[ P0C214] interacts with 1 human partners:{Q9NWM0}

5044 [Cluster 891]GO:0047280+F molecular\_function [name] nicotinamide phosphoribosyltransferase activity [def] "Catalysis of the reaction

5045 Pathogen[ P0C214] interacts with 1 human partners:{P43490}

5046 Pathogen[ P14079] interacts with 1 human partners:{P43490}

5047 Pathogen[ P03410] interacts with 1 human partners:{P43490}

5048 Pathogen[ P0C206] interacts with 1 human partners:{P43490}

5049 [Cluster 892]GO:0003937+F molecular\_function [name] IMP cyclohydrolase activity [def]  
 "Catalysis of the reaction

5050 Pathogen[ P0C214] interacts with 1 human partners:{P31939}

5051 Pathogen[ P14079] interacts with 1 human partners:{P31939}

5052 Pathogen[ P03410] interacts with 1 human partners:{P31939}

5053 Pathogen[ P0C206] interacts with 1 human partners:{P31939}

5054

```
1 [Section 12] cellular compartments where PARTIAL HTLV viruses may interact with the host
2
3
4 [Cluster 1]GO:0001931+C cellular_component [name] uropod [def] "A membrane projection
with related cytoskeletal components at the trailing edge of a cell in the process of
migrating or being activated, found on the opposite side of the cell from the leading
edge or immunological synapse, respectively." [GOC
5 Pathogen[ Q2Q067] interacts with 1 human partners:{P35579}
6 Pathogen[ P03346] interacts with 2 human partners:{P35579;P26038}
7 Pathogen[ Q85601] interacts with 1 human partners:{P35579}
8 Pathogen[ P14079] interacts with 2 human partners:{P35579;P26038}
9 Pathogen[ P03383] interacts with 1 human partners:{P35579}
10 Pathogen[ P03410] interacts with 2 human partners:{P35579;P26038}
11 Pathogen[ P14075] interacts with 1 human partners:{P35579}
12 Pathogen[ P0C206] interacts with 1 human partners:{P35579}
13 Pathogen[ P03363] interacts with 1 human partners:{P35579}
14 [Cluster 2]GO:0070765+C cellular_component [name] gamma-secretase complex [def] "A
protein complex that has aspartic-type endopeptidase activity, and contains a catalytic
subunit, presenilin (PS), that is a prototypical member of the GxGD-type aspartyl
peptidases. The complex also contains additional subunits, including nicastrin, APH-1,
PEN-2, and a regulatory subunit, CD147. Gamma-secretase cleaves several transmembrane
proteins including the cell surface receptor Notch and the beta-amyloid precursor
protein." [GOC
15 Pathogen[ P03346] interacts with 1 human partners:{P49755}
16 Pathogen[ P14079] interacts with 1 human partners:{P49755}
17 Pathogen[ P0C206] interacts with 1 human partners:{P49755}
18 [Cluster 3]GO:0071556+C cellular_component [name] integral to luminal side of
endoplasmic reticulum membrane [def] "Penetrating at least one phospholipid bilayer of
the endoplasmic reticulum membrane, with the bulk of the gene product located on the side
that faces the lumen." [GOC
19 Pathogen[ Q2Q067] interacts with 1 human partners:{P27797}
20 Pathogen[ P0C214] interacts with 1 human partners:{P27797}
21 Pathogen[ P03346] interacts with 1 human partners:{P27797}
22 Pathogen[ Q85601] interacts with 1 human partners:{P27797}
23 Pathogen[ P03383] interacts with 1 human partners:{P27797}
24 Pathogen[ P03410] interacts with 1 human partners:{P27797}
25 Pathogen[ P14075] interacts with 1 human partners:{P27797}
26 Pathogen[ P0C206] interacts with 1 human partners:{P27797}
27 Pathogen[ P03363] interacts with 1 human partners:{P27797}
28 [Cluster 4]GO:0043227+C cellular_component [name] membrane-bounded organelle [def]
"Organized structure of distinctive morphology and function, bounded by a single or
double lipid bilayer membrane. Includes the nucleus, mitochondria, plastids, vacuoles,
and vesicles. Excludes the plasma membrane." [GOC
29 Pathogen[ P03410] interacts with 1 human partners:{P33176}
30 Pathogen[ P03363] interacts with 1 human partners:{P33176}
31 [Cluster 5]GO:0060077+C cellular_component [name] inhibitory synapse [def] "A synapse
in which an action potential in the presynaptic cell reduces the probability of an action
potential occurring in the postsynaptic cell." [GOC
32 Pathogen[ P03346] interacts with 1 human partners:{Q9UUP2}
33 Pathogen[ P14079] interacts with 1 human partners:{Q9UUP2}
34 Pathogen[ P03410] interacts with 1 human partners:{Q9UUP2}
35 Pathogen[ P0C206] interacts with 1 human partners:{Q9UUP2}
36 Pathogen[ P03363] interacts with 1 human partners:{Q9UUP2}
37 [Cluster 6]GO:0034752+C cellular_component [name] cytosolic aryl hydrocarbon receptor
complex [def] "An aryl hydrocarbon receptor complex found in the cytosol, in which the
ligand-binding subunit AhR is not bound to ligand_ consists of AhR, two molecules of
HSP90, the protein kinase c-Src, and the immunophilin XAP2/AIP." [PMID
38 Pathogen[ Q2Q067] interacts with 1 human partners:{P35869}
39 Pathogen[ P0C214] interacts with 1 human partners:{P35869}
40 Pathogen[ P03346] interacts with 1 human partners:{P35869}
41 Pathogen[ Q85601] interacts with 1 human partners:{P35869}
42 Pathogen[ P14079] interacts with 1 human partners:{P35869}
43 Pathogen[ P03383] interacts with 1 human partners:{P35869}
44 Pathogen[ P14075] interacts with 1 human partners:{P35869}
45 Pathogen[ P0C206] interacts with 1 human partners:{P35869}
46 Pathogen[ P03363] interacts with 1 human partners:{P35869}
47 [Cluster 7]GO:0031259+C cellular_component [name] uropod membrane [def] "The portion of
the plasma membrane surrounding a uropod." [GOC
48 Pathogen[ P03346] interacts with 1 human partners:{Q6UWF3}
49 Pathogen[ P14079] interacts with 1 human partners:{Q6UWF3}
50 Pathogen[ P03383] interacts with 1 human partners:{Q6UWF3}
51 Pathogen[ P03410] interacts with 1 human partners:{Q6UWF3}
52 Pathogen[ P14075] interacts with 1 human partners:{Q6UWF3}
53 Pathogen[ P0C206] interacts with 1 human partners:{Q6UWF3}
54 Pathogen[ P03363] interacts with 1 human partners:{Q6UWF3}
55 [Cluster 8]GO:0035770+C cellular_component [name] ribonucleoprotein granule [def] "A
```

non-membranous macromolecular complex containing proteins and translationally silenced mRNAs. RNA granules contain proteins that control the localization, stability, and translation of their RNA cargo. Different types of RNA granules (RGs) exist, depending on the cell type and cellular conditions." [GOC

56 Pathogen[ P03346] interacts with 1 human partners:{Q8NHU6}

57 Pathogen[ P14079] interacts with 1 human partners:{Q8NHU6}

58 Pathogen[ P03410] interacts with 1 human partners:{Q8NHU6}

59 Pathogen[ P03363] interacts with 1 human partners:{Q8NHU6}

60 [Cluster 9]GO:0031231+C cellular\_component [name] intrinsic to peroxisomal membrane [def] "Located in the peroxisomal membrane such that some covalently attached portion of the gene product, for example part of a peptide sequence or some other covalently attached group such as a GPI anchor, spans or is embedded in one or both leaflets of the membrane." [GOC

61 Pathogen[ P14079] interacts with 1 human partners:{Q96HA9}

62 Pathogen[ P03383] interacts with 1 human partners:{Q96HA9}

63 Pathogen[ P03410] interacts with 1 human partners:{Q96HA9}

64 Pathogen[ P14075] interacts with 1 human partners:{Q96HA9}

65 Pathogen[ P0C206] interacts with 1 human partners:{Q96HA9}

66 [Cluster 10]GO:0033593+C cellular\_component [name] BRCA2-MAGE-D1 complex [def] "A heterodimeric protein complex formed of BRCA2 and MAGE-D1\_ may mediate the synergistic activities of the two proteins in regulating cell growth." [PMID

67 Pathogen[ P03346] interacts with 1 human partners:{P51587}

68 Pathogen[ Q85601] interacts with 1 human partners:{P51587}

69 Pathogen[ P14079] interacts with 1 human partners:{P51587}

70 Pathogen[ P03410] interacts with 1 human partners:{P51587}

71 Pathogen[ P0C206] interacts with 1 human partners:{P51587}

72 [Cluster 11]GO:0031307+C cellular\_component [name] integral to mitochondrial outer membrane [def] "Located such that some or all of the gene product itself penetrates at least one phospholipid bilayer of the mitochondrial outer membrane. May also refer to the state of being buried in the bilayer with no exposure outside the bilayer." [GOC

73 Pathogen[ Q2Q067] interacts with 1 human partners:{Q12983}

74 Pathogen[ P0C214] interacts with 2 human partners:{Q8TDB4;Q12983}

75 Pathogen[ P03346] interacts with 2 human partners:{Q12983;Q8TDB4}

76 Pathogen[ Q85601] interacts with 2 human partners:{Q8TDB4;Q12983}

77 Pathogen[ P14079] interacts with 3 human partners:{Q8IVP5;Q12983;Q8TDB4}

78 Pathogen[ P03383] interacts with 2 human partners:{Q8TDB4;Q12983}

79 Pathogen[ P03410] interacts with 3 human partners:{Q12983;Q8TDB4;Q8IVP5}

80 Pathogen[ P14075] interacts with 2 human partners:{Q12983;Q8TDB4}

81 Pathogen[ P0C206] interacts with 2 human partners:{Q12983;Q8TDB4}

82 [Cluster 12]GO:0001527+C cellular\_component [name] microfibril [def] "Extracellular matrix components occurring independently or along with elastin. Thought to have force-bearing functions in tendon. In addition to fibrillins, microfibrils may contain other associated proteins." [http

83 Pathogen[ P14079] interacts with 1 human partners:{P55081}

84 [Cluster 13]GO:0032301+C cellular\_component [name] MutSalpha complex [def] "A heterodimer involved in the recognition and repair of base-base and small insertion/deletion mismatches. In human the complex consists of two subunits, MSH2 and MSH6." [PMID

85 Pathogen[ P14079] interacts with 1 human partners:{P52701}

86 Pathogen[ P03410] interacts with 1 human partners:{P52701}

87 Pathogen[ P0C206] interacts with 1 human partners:{P52701}

88 [Cluster 14]GO:0044447+C cellular\_component [name] axoneme part [def] "Any constituent part of an axoneme, the bundle of microtubules and associated proteins that forms the core of cilia and flagella in eukaryotic cells and is responsible for their movements." [GOC

89 Pathogen[ Q2Q067] interacts with 1 human partners:{Q8TC71}

90 Pathogen[ P0C214] interacts with 1 human partners:{Q8TC71}

91 Pathogen[ P03346] interacts with 1 human partners:{Q8TC71}

92 Pathogen[ P14079] interacts with 1 human partners:{Q8TC71}

93 Pathogen[ P03383] interacts with 1 human partners:{Q8TC71}

94 Pathogen[ P03410] interacts with 1 human partners:{Q8TC71}

95 Pathogen[ P14075] interacts with 1 human partners:{Q8TC71}

96 Pathogen[ P0C206] interacts with 1 human partners:{Q8TC71}

97 Pathogen[ P03363] interacts with 1 human partners:{Q8TC71}

98 [Cluster 15]GO:0042627+C cellular\_component [name] chylomicron [def] "A large lipoprotein particle (diameter 75-1200 nm) composed of a central core of triglycerides and cholesterol surrounded by a protein-phospholipid coating. The proteins include one molecule of apolipoprotein B-48 and may include a variety of apolipoproteins, including APOAs, APOCs and APOE. Chylomicrons are found in blood or lymph and carry lipids from the intestines into other body tissues." [GOC

99 Pathogen[ P14079] interacts with 1 human partners:{Q0VD83}

100 Pathogen[ P03410] interacts with 1 human partners:{Q0VD83}

101 [Cluster 16]GO:0005784+C cellular\_component [name] Sec61 translocon complex [def] "A translocon complex that contains a core heterotrimer of conserved alpha, beta and gamma subunits, and may contain additional proteins (translocon-associated proteins or TRAPs)\_ in budding yeast the core proteins are Sec61p, Sbh1p, and Sss1p. The Sec61 translocon

complex functions in cotranslational and posttranslational translocation events." [GOC

102 Pathogen[ P03346] interacts with 1 human partners:{Q15041}

103 Pathogen[ P14079] interacts with 2 human partners:{Q15041;P51571}

104 Pathogen[ P03410] interacts with 1 human partners:{Q15041}

105 Pathogen[ P0C206] interacts with 1 human partners:{Q15041}

106 Pathogen[ P03363] interacts with 1 human partners:{Q15041}

107 [Cluster 17]GO:0005838+C cellular\_component [name] proteasome regulatory particle [def] "A multisubunit complex, which caps one or both ends of the proteasome core complex. This complex recognizes and unfolds ubiquitinated proteins, and translocates them to the proteasome core complex." [GOC

108 Pathogen[ Q2Q067] interacts with 8 human partners:{Q99460;O75832;P48556;O00233;P51665;Q13200;Q9UNM6;O00232}

109 Pathogen[ P0C214] interacts with 8 human partners:{P51665;P48556;Q13200;O00232;Q99460;O75832;Q9UNM6;O00233}

110 Pathogen[ P03346] interacts with 8 human partners:{Q99460;O00232;O75832;O00233;Q9UNM6;Q13200;P48556;P51665}

111 Pathogen[ Q85601] interacts with 6 human partners:{Q9UNM6;O75832;O00233;Q13200;Q99460;P48556}

112 Pathogen[ P14079] interacts with 7 human partners:{P48556;O00232;O75832;O00233;P51665;Q9UNM6;Q99460}

113 Pathogen[ P03383] interacts with 6 human partners:{O00233;O75832;Q9UNM6;Q99460;Q13200;P48556}

114 Pathogen[ P03410] interacts with 8 human partners:{Q99460;O00233;O00232;P48556;Q13200;P51665;Q9UNM6;O75832}

115 Pathogen[ P14075] interacts with 5 human partners:{O75832;O00233;Q13200;P48556;Q9UNM6}

116 Pathogen[ P0C206] interacts with 7 human partners:{Q9UNM6;O75832;O00232;Q13200;Q99460;O00233;P48556}

117 [Cluster 18]GO:0017059+C cellular\_component [name] serine C-palmitoyltransferase complex [def] "An enzyme complex that catalyzes the transfer of a palmitoyl on to serine, forming 3-dehydro-D-sphinganine." [EC

118 Pathogen[ P14079] interacts with 2 human partners:{Q8NFR3;Q969W0}

119 Pathogen[ P03410] interacts with 2 human partners:{Q969W0;Q8NFR3}

120 Pathogen[ P14075] interacts with 1 human partners:{Q969W0}

121 Pathogen[ P0C206] interacts with 2 human partners:{Q8NFR3;Q969W0}

122 [Cluster 19]GO:0036057+C cellular\_component [name] slit diaphragm [def] "A specialized cell-cell junction found between the interdigitating foot processes of the glomerular epithelium (the podocytes) in the vertebrate kidney, which is adapted for facilitating glomerular filtration." [GOC

123 Pathogen[ Q2Q067] interacts with 1 human partners:{Q86UL8}

124 Pathogen[ P03346] interacts with 2 human partners:{Q86UL8;Q9NP85}

125 Pathogen[ Q85601] interacts with 1 human partners:{Q86UL8}

126 Pathogen[ P14079] interacts with 2 human partners:{Q9NP85;Q86UL8}

127 Pathogen[ P03410] interacts with 2 human partners:{Q9NP85;Q86UL8}

128 Pathogen[ P0C206] interacts with 2 human partners:{Q86UL8;Q9NP85}

129 Pathogen[ P03363] interacts with 1 human partners:{Q86UL8}

130 [Cluster 20]GO:0005943+C cellular\_component [name] 1-phosphatidylinositol-4-phosphate 3-kinase, class IA complex [def] "A heterodimeric protein complex that possesses 1-phosphatidylinositol-4-phosphate 3-kinase activity\_ comprises a catalytic Class IA phosphoinositide 3-kinase (PI3K) subunit of 110-120 kDa and an associated SH2 domain-containing regulatory subunit that is a member of a family of related proteins often called p85 proteins. Class I PI3Ks phosphorylate phosphatidylinositol [PI], phosphatidylinositol-4-phosphate [PI(4)P] and phosphatidylinositol-4,5-bisphosphate [PI(4,5)P2], and are divided into subclasses A and B according to the type of adaptor subunit with which they associate. Through the interaction with the SH2-containing adaptor subunits, Class IA PI3K catalytic subunits are linked to tyrosine kinase signaling pathways." [PMID

131 Pathogen[ Q2Q067] interacts with 1 human partners:{P27986}

132 Pathogen[ P0C214] interacts with 1 human partners:{P27986}

133 Pathogen[ P03346] interacts with 1 human partners:{P27986}

134 Pathogen[ Q85601] interacts with 1 human partners:{P27986}

135 Pathogen[ P03383] interacts with 1 human partners:{P27986}

136 Pathogen[ P03410] interacts with 1 human partners:{P27986}

137 Pathogen[ P14075] interacts with 1 human partners:{P27986}

138 Pathogen[ P0C206] interacts with 1 human partners:{P27986}

139 Pathogen[ P03363] interacts with 1 human partners:{P27986}

140 [Cluster 21]GO:0009346+C cellular\_component [name] citrate lyase complex [def] "Citrate lyase is a multienzyme complex with three constituents

141 Pathogen[ P0C214] interacts with 1 human partners:{P53396}

142 Pathogen[ P14079] interacts with 1 human partners:{Q8N0X4}

143 Pathogen[ P03410] interacts with 1 human partners:{Q8N0X4}

144 [Cluster 22]GO:0008091+C cellular\_component [name] spectrin [def] "Membrane associated dimeric protein (240 and 220 kDa) of erythrocytes. Forms a complex with ankyrin, actin and probably other components of the membrane cytoskeleton, so that there is a mesh of proteins underlying the plasma membrane, potentially restricting the lateral mobility of integral proteins." [GOC

145 Pathogen[ Q2Q067] interacts with 2 human partners:{Q01082;P11171}

146 Pathogen[ P0C214] interacts with 2 human partners:{Q01082;P11171}

147 Pathogen[ P03346] interacts with 6 human partners:{P02549;P11277;Q13813;Q01082;P11171;O43491}

148 Pathogen[ Q85601] interacts with 2 human partners:{P11171;Q01082}

149 Pathogen[ P14079] interacts with 5 human partners:{P11171;Q01082;P11277;Q13813;P02549}

150 Pathogen[ P03410] interacts with 6 human partners:{P02549;P11171;O43491;Q01082;Q13813;P11277}

151 Pathogen[ P14075] interacts with 1 human partners:{P11171}

152 Pathogen[ P0C206] interacts with 4 human partners:{Q01082;O43491;P11277;P11171}

153 Pathogen[ P03363] interacts with 6 human partners:{P11277;P02549;Q01082;P11171;O43491;Q13813}

154 [Cluster 23]GO:0045160+C cellular\_component [name] myosin I complex [def] "A myosin complex containing a class I myosin heavy chain and associated light chains\_ myosin I heavy chains are single-headed, possess tails of various lengths, and do not self-associate into bipolar filaments\_ myosin I complexes are involved in diverse processes related to membrane traffic and cell movement." [GOC

155 Pathogen[ P0C214] interacts with 1 human partners:{O00159}

156 Pathogen[ Q85601] interacts with 1 human partners:{O00159}

157 Pathogen[ P03410] interacts with 1 human partners:{O00159}

158 Pathogen[ P0C206] interacts with 1 human partners:{O00159}

159 [Cluster 24]GO:0043626+C cellular\_component [name] PCNA complex [def] "A protein complex composed of three identical PCNA monomers, each comprising two similar domains, which are joined in a head-to-tail arrangement to form a homotrimer. Forms a ring-like structure in solution, with a central hole sufficiently large to accommodate the double helix of DNA. Originally characterized as a DNA sliding clamp for replicative DNA polymerases and as an essential component of the replisome, and has also been shown to be involved in other processes including Okazaki fragment processing, DNA repair, translesion DNA synthesis, DNA methylation, chromatin remodeling and cell cycle regulation." [GOC

160 Pathogen[ Q2Q067] interacts with 1 human partners:{P12004}

161 Pathogen[ P03346] interacts with 1 human partners:{P12004}

162 Pathogen[ Q85601] interacts with 1 human partners:{P12004}

163 Pathogen[ P14079] interacts with 1 human partners:{P12004}

164 Pathogen[ P03410] interacts with 1 human partners:{P12004}

165 Pathogen[ P0C206] interacts with 1 human partners:{P12004}

166 [Cluster 25]GO:0002080+C cellular\_component [name] acrosomal membrane [def] "The membrane that surrounds the acrosomal lumen. The acrosome is a special type of lysosome in the head of a spermatozoon that contains acid hydrolases and is concerned with the breakdown of the outer membrane of the ovum during fertilization." [GOC

167 Pathogen[ P14079] interacts with 2 human partners:{Q9BY14;Q9NQ60}

168 Pathogen[ P03410] interacts with 2 human partners:{Q9NQ60;Q9BY14}

169 [Cluster 26]GO:0032433+C cellular\_component [name] filopodium tip [def] "The end of a filopodium distal to the body of the cell." [GOC

170 Pathogen[ P14079] interacts with 1 human partners:{P09327}

171 [Cluster 27]GO:0070722+C cellular\_component [name] Tle3-Aes complex [def] "A transcriptional repressor complex that consists of a heterodimer of the proteins Tle3 (also known as Grg3b) and Aes (Grg5), which are homologs of the Drosophila groucho gene product." [GOC

172 Pathogen[ P03346] interacts with 1 human partners:{Q96SF7}

173 [Cluster 28]GO:0030056+C cellular\_component [name] hemidesmosome [def] "A cell-substrate junction that forms a point of contact between the basal surface of epithelial cells and the basal lamina. Morphologically resembles desmosomes\_ attached to intermediate filaments." [ISBN

174 Pathogen[ P03346] interacts with 2 human partners:{Q96RT1;Q15149}

175 Pathogen[ Q85601] interacts with 1 human partners:{Q96RT1}

176 Pathogen[ P14079] interacts with 3 human partners:{Q96RT1;Q15149;P61158}

177 Pathogen[ P03410] interacts with 2 human partners:{Q96RT1;Q15149}

178 Pathogen[ P0C206] interacts with 1 human partners:{Q96RT1}

179 Pathogen[ P03363] interacts with 2 human partners:{Q96RT1;Q15149}

180 [Cluster 29]GO:0033269+C cellular\_component [name] internode region of axon [def] "An axon part that is located between the nodes of Ranvier and surrounded by compact myelin sheath." [GOC

181 Pathogen[ P14079] interacts with 1 human partners:{P02686}

182 Pathogen[ P03410] interacts with 1 human partners:{P02686}

183 [Cluster 30]GO:0031227+C cellular\_component [name] intrinsic to endoplasmic reticulum membrane [def] "Located in the endoplasmic reticulum membrane such that some covalently attached portion of the gene product, for example part of a peptide sequence or some other covalently attached group such as a GPI anchor, spans or is embedded in one or both leaflets of the membrane." [GOC

184 Pathogen[ P14079] interacts with 2 human partners:{Q96JX3;Q96FM1}

185 Pathogen[ P03410] interacts with 2 human partners:{Q96FM1;Q96JX3}

186 [Cluster 31]GO:0043218+C cellular\_component [name] compact myelin [def] "The portion of the myelin sheath in which layers of cell membrane are tightly juxtaposed, completely excluding cytoplasm. The juxtaposed cytoplasmic surfaces form the major dense

line, while the juxtaposed extracellular surfaces form the interperiod line visible in electron micrographs." [GOC

187 Pathogen[ P14079] interacts with 1 human partners:{P02686}

188 Pathogen[ P03410] interacts with 1 human partners:{P02686}

189 [Cluster 32]GO:0031362+C cellular\_component [name] anchored to external side of plasma membrane [def] "Tethered to the plasma membrane by a covalently attached anchor, such as a lipid group, that is embedded in the membrane, with the bulk of the gene product located on the side opposite to the side that faces the cytoplasm. When used to describe a protein, indicates that the peptide sequence does not span the membrane." [GOC

190 Pathogen[ P14079] interacts with 4 human partners:{Q4G0N0;Q9BX51;B5MD39;Q14390}

191 Pathogen[ P03410] interacts with 2 human partners:{Q4G0N0;B5MD39}

192 [Cluster 33]GO:0045263+C cellular\_component [name] proton-transporting ATP synthase complex, coupling factor F(o) [def] "All non-F1 subunits of a hydrogen-transporting ATP synthase, including integral and peripheral membrane proteins." [PMID

193 Pathogen[ Q2Q067] interacts with 1 human partners:{P24539}

194 Pathogen[ P0C214] interacts with 2 human partners:{P24539;Q99766}

195 Pathogen[ P03346] interacts with 1 human partners:{P24539}

196 Pathogen[ Q85601] interacts with 2 human partners:{P24539;Q99766}

197 Pathogen[ P14079] interacts with 7 human partners:{P56134;P56385;Q7Z4Y8;P03928;Q99766;O75964;P24539}

198 Pathogen[ P03383] interacts with 1 human partners:{P24539}

199 Pathogen[ P03410] interacts with 8 human partners:{Q99766;P56385;P03928;P24539;O75964;P18859;P56134;Q7Z4Y8}

200 Pathogen[ P14075] interacts with 3 human partners:{Q99766;P24539;P56385}

201 Pathogen[ P0C206] interacts with 3 human partners:{Q99766;P24539;P56385}

202 [Cluster 34]GO:0034663+C cellular\_component [name] endoplasmic reticulum chaperone complex [def] "A protein complex that is located in the endoplasmic reticulum and is composed of chaperone proteins, including BiP, GRP94, CaBP1, protein disulfide isomerase (PDI), ERdj3, cyclophilin B, ERp72, GRP170, UDP-glucosyltransferase, and SDF2-L1." [PMID

203 Pathogen[ Q2Q067] interacts with 1 human partners:{Q8WU39}

204 Pathogen[ P0C214] interacts with 1 human partners:{Q8WU39}

205 Pathogen[ P03346] interacts with 1 human partners:{Q8WU39}

206 Pathogen[ P14079] interacts with 1 human partners:{Q8WU39}

207 Pathogen[ P03383] interacts with 1 human partners:{Q8WU39}

208 Pathogen[ P03410] interacts with 1 human partners:{Q8WU39}

209 Pathogen[ P14075] interacts with 1 human partners:{Q8WU39}

210 Pathogen[ P0C206] interacts with 1 human partners:{Q8WU39}

211 Pathogen[ P03363] interacts with 1 human partners:{Q8WU39}

212 [Cluster 35]GO:0031527+C cellular\_component [name] filopodium membrane [def] "The portion of the plasma membrane surrounding a filopodium." [GOC

213 Pathogen[ P03346] interacts with 2 human partners:{Q8WXH0;P26038}

214 Pathogen[ Q85601] interacts with 1 human partners:{P17677}

215 Pathogen[ P14079] interacts with 6 human partners:{P17677;O75781;P24588;P26038;P50552;Q8WXH0}

216 Pathogen[ P03410] interacts with 6 human partners:{O75781;P50552;P26038;P17677;Q8WXH0;P24588}

217 Pathogen[ P0C206] interacts with 2 human partners:{P17677;Q8WXH0}

218 [Cluster 36]GO:0097025+C cellular\_component [name] MMP7-DLG1-LIN7 complex [def] "A heterotrimeric protein complex formed by the association of MMP7, DLG1 and either LIN7A or LIN7C\_ regulates the stability and localization of DLG1 to cell junctions." [GOC

219 Pathogen[ Q2Q067] interacts with 1 human partners:{Q12959}

220 Pathogen[ P0C214] interacts with 1 human partners:{Q12959}

221 Pathogen[ P03346] interacts with 2 human partners:{Q5T2T1;Q12959}

222 Pathogen[ Q85601] interacts with 1 human partners:{Q12959}

223 Pathogen[ P14079] interacts with 1 human partners:{Q5T2T1}

224 Pathogen[ P03410] interacts with 2 human partners:{Q12959;Q5T2T1}

225 Pathogen[ P0C206] interacts with 2 human partners:{Q5T2T1;Q12959}

226 Pathogen[ P03363] interacts with 2 human partners:{Q12959;Q5T2T1}

227 [Cluster 37]GO:0005930+C cellular\_component [name] axoneme [def] "The bundle of microtubules and associated proteins that forms the core of cilia and flagella in eukaryotic cells and is responsible for their movements." [ISBN

228 Pathogen[ P0C214] interacts with 1 human partners:{O14645}

229 Pathogen[ P03346] interacts with 3 human partners:{Q96KN7;Q8N0X2;O14645}

230 Pathogen[ Q85601] interacts with 1 human partners:{O14645}

231 Pathogen[ P14079] interacts with 4 human partners:{Q8N0X2;P56715;O14645;Q96KN7}

232 Pathogen[ P03410] interacts with 4 human partners:{Q8N0X2;Q96KN7;O14645;P56715}

233 Pathogen[ P0C206] interacts with 3 human partners:{O14645;P56715;Q96KN7}

234 Pathogen[ P03363] interacts with 4 human partners:{Q8N0X2;P56715;O14645;Q96KN7}

235 [Cluster 38]GO:0034750+C cellular\_component [name] Scrib-APC-beta-catenin complex [def] "A protein complex that contains the Scribble protein (a cell polarity determinant), the tumor suppressor protein adenomatous polyposis coli (APC), and beta-catenin\_ may be involved in the control of cell proliferation." [PMID

236 Pathogen[ Q2Q067] interacts with 1 human partners:{Q14160}

237 Pathogen[ P0C214] interacts with 1 human partners:{Q14160}

238 Pathogen[ P03346] interacts with 1 human partners:{Q14160}

239 Pathogen[ Q85601] interacts with 1 human partners:{Q14160}

240 Pathogen[ P03383] interacts with 1 human partners:{Q14160}

241 Pathogen[ P03410] interacts with 1 human partners:{Q14160}

242 Pathogen[ P14075] interacts with 1 human partners:{Q14160}

243 Pathogen[ P0C206] interacts with 1 human partners:{Q14160}

244 Pathogen[ P03363] interacts with 1 human partners:{Q14160}

245 [Cluster 39]GO:0005865+C cellular\_component [name] striated muscle thin filament [def] "Filaments formed of actin and associated proteins\_ attached to Z discs at either end of sarcomeres in myofibrils." [ISBN

246 Pathogen[ P0C214] interacts with 1 human partners:{P68133}

247 Pathogen[ Q85601] interacts with 1 human partners:{P68133}

248 Pathogen[ P14079] interacts with 1 human partners:{P68133}

249 Pathogen[ P03410] interacts with 1 human partners:{P68133}

250 Pathogen[ P0C206] interacts with 1 human partners:{P68133}

251 Pathogen[ P03363] interacts with 1 human partners:{P68133}

252 [Cluster 40]GO:0032420+C cellular\_component [name] stereocilium [def] "An actin-based protrusion from the apical surface of auditory and vestibular hair cells. Bundles of stereocilia act as mechanosensory organelles." [GOC

253 Pathogen[ Q2Q067] interacts with 2 human partners:{Q9Y6N9;Q8N1I0}

254 Pathogen[ P0C214] interacts with 3 human partners:{O00159;Q9Y6N9;Q8N1I0}

255 Pathogen[ P03346] interacts with 3 human partners:{Q9Y6N9;Q9Y664;Q8N1I0}

256 Pathogen[ Q85601] interacts with 3 human partners:{O00159;Q9Y6N9;Q8N1I0}

257 Pathogen[ P14079] interacts with 6 human partners:{Q9Y664;Q7RTU9;Q4KMQ1;Q9Y6N9;Q8N1I0;P35241}

258 Pathogen[ P03410] interacts with 7 human partners:{O00159;Q7RTU9;Q9Y6N9;P35241;Q9Y664;Q8N1I0;Q4KMQ1}

259 Pathogen[ P14075] interacts with 1 human partners:{Q4KMQ1}

260 Pathogen[ P0C206] interacts with 4 human partners:{Q9Y6N9;O00159;Q8N1I0;Q4KMQ1}

261 Pathogen[ P03363] interacts with 3 human partners:{Q9Y6N9;Q8N1I0;Q9Y664}

262 [Cluster 41]GO:0005639+C cellular\_component [name] integral to nuclear inner membrane [def] "Located such that some or all of the gene product itself penetrates at least one phospholipid bilayer of the nuclear inner membrane. May also refer to the state of being buried in the bilayer with no exposure outside the bilayer." [GOC

263 Pathogen[ Q2Q067] interacts with 1 human partners:{Q14739}

264 Pathogen[ P0C214] interacts with 1 human partners:{Q14739}

265 Pathogen[ P03346] interacts with 1 human partners:{Q14739}

266 Pathogen[ Q85601] interacts with 1 human partners:{Q14739}

267 Pathogen[ P14079] interacts with 2 human partners:{Q14739;Q8NC56}

268 Pathogen[ P03410] interacts with 2 human partners:{Q14739;Q8NC56}

269 Pathogen[ P0C206] interacts with 2 human partners:{Q14739;Q8NC56}

270 Pathogen[ P03363] interacts with 1 human partners:{Q14739}

271 [Cluster 42]GO:0005751+C cellular\_component [name] mitochondrial respiratory chain complex IV [def] "A protein complex located in the mitochondrial inner membrane that forms part of the mitochondrial respiratory chain. Contains the 13 polypeptide subunits of cytochrome c oxidase, including cytochrome a and cytochrome a3. Catalyzes the oxidation of reduced cytochrome c by dioxygen (O2)." [GOC

272 Pathogen[ P0C214] interacts with 1 human partners:{P12074}

273 Pathogen[ P14079] interacts with 4 human partners:{P12074;Q02221;Q96KJ9;O00483}

274 Pathogen[ P03410] interacts with 4 human partners:{Q96KJ9;Q02221;O00483;P12074}

275 Pathogen[ P0C206] interacts with 3 human partners:{P12074;O00483;Q02221}

276 [Cluster 43]GO:0033017+C cellular\_component [name] sarcoplasmic reticulum membrane [def] "The lipid bilayer surrounding the sarcoplasmic reticulum." [GOC

277 Pathogen[ Q2Q067] interacts with 1 human partners:{Q9BVC6}

278 Pathogen[ P0C214] interacts with 1 human partners:{Q9BVC6}

279 Pathogen[ P03346] interacts with 2 human partners:{Q8WXH0;Q9BVC6}

280 Pathogen[ P14079] interacts with 6 human partners:{Q9BVC6;P23327;O00631;Q8WXH0;Q96MG2;Q9H6F2}

281 Pathogen[ P03383] interacts with 1 human partners:{Q9BVC6}

282 Pathogen[ P03410] interacts with 6 human partners:{Q9BVC6;P23327;Q9H6F2;O00631;Q8WXH0;Q96MG2}

283 Pathogen[ P14075] interacts with 2 human partners:{Q9BVC6;P23327}

284 Pathogen[ P0C206] interacts with 3 human partners:{Q9BVC6;P23327;Q8WXH0}

285 Pathogen[ P03363] interacts with 1 human partners:{Q8IWX8}

286 [Cluster 44]GO:0016507+C cellular\_component [name] fatty acid beta-oxidation multienzyme complex [def] "A complex that includes the long-chain 3-hydroxyacyl-CoA dehydrogenase and long-chain enoyl-CoA hydratase activities in two subunits (alpha and beta), catalyzing two steps of the fatty acid beta-oxidation cycle within the mitochondrial matrix." [GOC

287 Pathogen[ P0C214] interacts with 1 human partners:{P40939}

288 [Cluster 45]GO:0030173+C cellular\_component [name] integral to Golgi membrane [def] "Located such that some or all of the gene product itself penetrates at least one phospholipid bilayer of the Golgi complex membrane. May also refer to the state of being buried in the bilayer with no exposure outside the bilayer." [GOC

289 Pathogen[ P14079] interacts with 2 human partners:{O43505;O15258}

290 Pathogen[ P03410] interacts with 3 human partners:{O15258;Q8NHY0;O43505}

291 Pathogen[ P14075] interacts with 1 human partners:{O43505}

292 Pathogen[ P0C206] interacts with 2 human partners:{O15258;O43505}

293 [Cluster 46]GO:0031074+C cellular\_component [name] nucleocytoplasmic shuttling complex [def] "Any complex that acts to move proteins or RNAs into or out of the nucleus through nuclear pores." [GOC

294 Pathogen[ Q2Q067] interacts with 1 human partners:{P37198}

295 Pathogen[ P0C214] interacts with 1 human partners:{P37198}

296 Pathogen[ P03346] interacts with 1 human partners:{P37198}

297 Pathogen[ P14079] interacts with 1 human partners:{P37198}

298 Pathogen[ P03383] interacts with 1 human partners:{P37198}

299 Pathogen[ P14075] interacts with 1 human partners:{P37198}

300 Pathogen[ P03363] interacts with 1 human partners:{P37198}

301 [Cluster 47]GO:0042589+C cellular\_component [name] zymogen granule membrane [def] "The lipid bilayer surrounding a zymogen granule." [GOC

302 Pathogen[ P03346] interacts with 2 human partners:{P49755;Q15363}

303 Pathogen[ P14079] interacts with 2 human partners:{Q15363;P49755}

304 Pathogen[ P03410] interacts with 1 human partners:{Q15363}

305 Pathogen[ P0C206] interacts with 2 human partners:{P49755;Q15363}

306 [Cluster 48]GO:0071986+C cellular\_component [name] Regulator complex [def] "A protein complex that contains MAPKSP1 (MP1, Map2klip1), ROBLD3 (p14, Mapbbip), and C11orf59 (p18). The complex is anchored to lipid rafts in late endosome membranes via C11orf59, recruits mTORC1 to lysosomal membranes in amino acid signaling to mTORC1, and is also involved in ERK/MAPK signaling." [PMID

307 Pathogen[ Q2Q067] interacts with 1 human partners:{O43504}

308 Pathogen[ P0C214] interacts with 1 human partners:{O43504}

309 Pathogen[ P03346] interacts with 1 human partners:{O43504}

310 Pathogen[ P14079] interacts with 5 human partners:{Q9Y2Q5;Q9UHA4;Q0VGL1;Q6IAA8;O43504}

311 Pathogen[ P03383] interacts with 1 human partners:{O43504}

312 Pathogen[ P03410] interacts with 5 human partners:{Q9Y2Q5;O43504;Q9UHA4;Q6IAA8;Q0VGL1}

313 Pathogen[ P14075] interacts with 1 human partners:{O43504}

314 Pathogen[ P0C206] interacts with 2 human partners:{Q9UHA4;O43504}

315 Pathogen[ P03363] interacts with 1 human partners:{O43504}

316 [Cluster 49]GO:0001917+C cellular\_component [name] photoreceptor inner segment [def] "The inner segment of a vertebrate photoreceptor containing mitochondria, ribosomes and membranes where opsin molecules are assembled and passed to be part of the outer segment discs." [GOC

317 Pathogen[ Q2Q067] interacts with 1 human partners:{Q9Y6N9}

318 Pathogen[ P0C214] interacts with 2 human partners:{Q9Y6N9;P09104}

319 Pathogen[ P03346] interacts with 2 human partners:{Q9Y6N9;P0C7Q2}

320 Pathogen[ Q85601] interacts with 1 human partners:{Q9Y6N9}

321 Pathogen[ P14079] interacts with 3 human partners:{P56715;Q9Y6N9;P0C7Q2}

322 Pathogen[ P03410] interacts with 3 human partners:{Q9Y6N9;P0C7Q2;P56715}

323 Pathogen[ P0C206] interacts with 2 human partners:{P56715;Q9Y6N9}

324 Pathogen[ P03363] interacts with 3 human partners:{Q9Y6N9;P56715;Q9NZN9}

325 [Cluster 50]GO:0035749+C cellular\_component [name] myelin sheath adaxonal region [def] "The region of the myelin sheath nearest to the axon." [GOC

326 Pathogen[ P03346] interacts with 1 human partners:{Q8N3R9}

327 Pathogen[ P14079] interacts with 1 human partners:{Q8N3R9}

328 Pathogen[ P03410] interacts with 1 human partners:{Q8N3R9}

329 Pathogen[ P0C206] interacts with 1 human partners:{Q8N3R9}

330 Pathogen[ P03363] interacts with 1 human partners:{Q8N3R9}

331 [Cluster 51]GO:0002177+C cellular\_component [name] manchette [def] "A conical shaped array of microtubules that completely covers the nucleus of a spermatid, thought to be involved in sperm head elongation." [PMID

332 Pathogen[ Q2Q067] interacts with 1 human partners:{Q8NCR6}

333 Pathogen[ P0C214] interacts with 1 human partners:{Q8NCR6}

334 Pathogen[ P03346] interacts with 1 human partners:{Q8NCR6}

335 Pathogen[ P14079] interacts with 2 human partners:{Q7Z4L9;Q8NCR6}

336 Pathogen[ P03383] interacts with 1 human partners:{Q8NCR6}

337 Pathogen[ P03410] interacts with 2 human partners:{Q8NCR6;Q7Z4L9}

338 Pathogen[ P14075] interacts with 1 human partners:{Q8NCR6}

339 Pathogen[ P0C206] interacts with 1 human partners:{Q8NCR6}

340 Pathogen[ P03363] interacts with 1 human partners:{Q8NCR6}

341 [Cluster 52]GO:0000110+C cellular\_component [name] nucleotide-excision repair factor 1 complex [def] "One of several protein complexes involved in nucleotide-excision repair\_ possesses DNA damage recognition and endodeoxynuclease activities. In *S. cerevisiae*, it is composed of Rad1p, Rad10p, and Rad14p\_ in human the subunits are ERCC4/XPF, ERCC1 and XPA, respectively." [PMID

342 Pathogen[ Q2Q067] interacts with 1 human partners:{Q92889}

343 Pathogen[ P0C214] interacts with 1 human partners:{Q92889}

344 Pathogen[ P03346] interacts with 1 human partners:{Q92889}

345 Pathogen[ Q85601] interacts with 1 human partners:{Q92889}

346 Pathogen[ P14079] interacts with 1 human partners:{Q92889}

347 Pathogen[ P03410] interacts with 1 human partners:{Q92889}

348 Pathogen[ P0C206] interacts with 1 human partners:{Q92889}

349 Pathogen[ P03363] interacts with 1 human partners:{Q92889}



```

350 [Cluster 53]GO:0043202+C    cellular_component [name] lysosomal lumen [def] "The volume
enclosed within the lysosomal membrane." [GOC
351     Pathogen[ Q2Q067] interacts with 1 human partners:{Q8WWR8}
352     Pathogen[ P0C214] interacts with 2 human partners:{Q8WWR8;P16278}
353     Pathogen[ P03346] interacts with 2 human partners:{P16278;Q8WWR8}
354     Pathogen[ P14079] interacts with 9 human
partners:{O14773;P16278;P54802;P35475;P06280;P54803;Q13510;Q8WWR8;P17405}
355     Pathogen[ P03383] interacts with 1 human partners:{Q8WWR8}
356     Pathogen[ P03410] interacts with 6 human
partners:{P54803;P54802;P16278;Q13510;P17405;Q8WWR8}
357     Pathogen[ P14075] interacts with 2 human partners:{Q8WWR8;Q13510}
358     Pathogen[ P0C206] interacts with 2 human partners:{Q8WWR8;P16278}
359 [Cluster 54]GO:0000786+C    cellular_component [name] nucleosome [def] "A complex
comprised of DNA wound around a multisubunit core and associated proteins, which forms
the primary packing unit of DNA into higher order structures." [GOC
360     Pathogen[ Q2Q067] interacts with 1 human partners:{P49450}
361     Pathogen[ P0C214] interacts with 1 human partners:{P49450}
362     Pathogen[ P03346] interacts with 5 human
partners:{Q8WYB5;Q92794;Q16695;P10412;P49450}
363     Pathogen[ Q85601] interacts with 1 human partners:{P49450}
364     Pathogen[ P14079] interacts with 4 human partners:{P10412;Q8IZA3;P49450;P07305}
365     Pathogen[ P03410] interacts with 3 human partners:{P10412;P04553;P49450}
366     Pathogen[ P0C206] interacts with 2 human partners:{P49450;P10412}
367     Pathogen[ P03363] interacts with 4 human partners:{Q8IZA3;Q16695;P49450;P10412}
368 [Cluster 55]GO:0032437+C    cellular_component [name] cuticular plate [def] "A dense
network of actin filaments found beneath the apical cell surface of hair cells, and into
which stereocilia are inserted." [PMID
369     Pathogen[ Q2Q067] interacts with 1 human partners:{Q01082}
370     Pathogen[ P0C214] interacts with 1 human partners:{Q01082}
371     Pathogen[ P03346] interacts with 3 human partners:{P02549;Q13813;Q01082}
372     Pathogen[ Q85601] interacts with 1 human partners:{Q01082}
373     Pathogen[ P14079] interacts with 4 human partners:{Q01082;A6PVL3;Q13813;P02549}
374     Pathogen[ P03410] interacts with 4 human partners:{A6PVL3;P02549;Q01082;Q13813}
375     Pathogen[ P0C206] interacts with 1 human partners:{Q01082}
376     Pathogen[ P03363] interacts with 3 human partners:{P02549;Q01082;Q13813}
377 [Cluster 56]GO:0016013+C    cellular_component [name] syntrophin complex [def] "A
protein complex that includes alpha-, beta1-, beta2-syntrophins and syntrophin-like
proteins_ the syntrophin complex binds to the second half of the carboxy-terminal domain
of dystrophin_ also associates with neuronal nitric oxide synthase." [http
378     Pathogen[ P14079] interacts with 1 human partners:{Q9NSN8}
379     Pathogen[ P03363] interacts with 1 human partners:{Q9NSN8}
380 [Cluster 57]GO:0019031+C    cellular_component [name] viral envelope [def] "The lipid
bilayer and associated glycoproteins that surround many types of virus particle." [ISBN
381     Pathogen[ P0C214] interacts with 2 human partners:{Q14264;P60608}
382     Pathogen[ P03346] interacts with 2 human partners:{P60608;Q14264}
383     Pathogen[ Q85601] interacts with 2 human partners:{P60608;Q14264}
384     Pathogen[ P14079] interacts with 15 human
partners:{P61570;Q9UKH3;Q902F9;Q14264;Q9H9K5;O71037;P60608;Q69384;Q9NX77;Q9HDB8;O4204
3;Q902F8;P61567;P61568;P61566}
385     Pathogen[ P03383] interacts with 2 human partners:{P60608;Q14264}
386     Pathogen[ P03410] interacts with 18 human
partners:{O71037;P60608;P61565;Q9HDB8;Q9UKH3;Q9NX77;Q69384;P61568;P61567;Q902F9;Q1426
4;Q9H9K5;Q902F8;P61570;P61566;O42043;P63135;Q9N2J8}
387     Pathogen[ P14075] interacts with 2 human partners:{Q14264;P60608}
388     Pathogen[ P0C206] interacts with 9 human
partners:{Q69384;Q9HDB8;P61568;P60608;Q9UKH3;P61570;P61565;Q14264;Q902F8}
389     Pathogen[ P03363] interacts with 1 human partners:{Q14264}
390 [Cluster 58]GO:0034361+C    cellular_component [name] very-low-density lipoprotein
particle [def] "A triglyceride-rich lipoprotein particle that is typically composed of
APOB100, APOE and APOCs and has a density of about 1.006 g/ml and a diameter of between
20-80 nm. It is found in blood and transports endogenous products (newly synthesized
cholesterol and triglycerides) from the liver." [GOC
391     Pathogen[ Q2Q067] interacts with 1 human partners:{Q9BQE4}
392     Pathogen[ P0C214] interacts with 1 human partners:{Q9BQE4}
393     Pathogen[ Q85601] interacts with 1 human partners:{Q9BQE4}
394     Pathogen[ P14079] interacts with 2 human partners:{Q9BQE4;Q0VD83}
395     Pathogen[ P03383] interacts with 1 human partners:{Q9BQE4}
396     Pathogen[ P03410] interacts with 2 human partners:{Q9BQE4;Q0VD83}
397     Pathogen[ P14075] interacts with 1 human partners:{Q9BQE4}
398     Pathogen[ P0C206] interacts with 1 human partners:{Q9BQE4}
399 [Cluster 59]GO:0000220+C    cellular_component [name] vacuolar proton-transporting
V-type ATPase, V0 domain [def] "The V0 domain of a proton-transporting V-type ATPase
found in the vacuolar membrane." [GOC
400     Pathogen[ P03346] interacts with 1 human partners:{Q93050}
401     Pathogen[ Q85601] interacts with 1 human partners:{Q93050}
402     Pathogen[ P14079] interacts with 1 human partners:{Q93050}

```

403 Pathogen[ P03410] interacts with 1 human partners:{Q93050}

404 Pathogen[ P0C206] interacts with 1 human partners:{Q93050}

405 [Cluster 60]GO:0000275+C cellular\_component [name] mitochondrial proton-transporting ATP synthase complex, catalytic core F(1) [def] "The catalytic sector of the mitochondrial hydrogen-transporting ATP synthase\_ it comprises the catalytic core and central stalk, and is peripherally associated with the mitochondrial inner membrane when the entire ATP synthase is assembled." [GOC

406 Pathogen[ P0C214] interacts with 1 human partners:{P36542}

407 Pathogen[ P14079] interacts with 4 human partners:{P36542;P25705;Q5VTU8;P56381}

408 Pathogen[ P03410] interacts with 4 human partners:{P36542;P25705;P56381;Q5VTU8}

409 Pathogen[ P0C206] interacts with 2 human partners:{P36542;P56381}

410 [Cluster 61]GO:0043159+C cellular\_component [name] acrosomal matrix [def] "A structural framework, or 'dense core' at the interior of an acrosome. May regulate the distribution of hydrolases within the acrosome and their release during the acrosome reaction." [GOC

411 Pathogen[ P0C214] interacts with 1 human partners:{P09622}

412 Pathogen[ P14079] interacts with 1 human partners:{P35663}

413 Pathogen[ P03410] interacts with 1 human partners:{P35663}

414 Pathogen[ P0C206] interacts with 1 human partners:{P35663}

415 Pathogen[ P03363] interacts with 1 human partners:{P35663}

416 [Cluster 62]GO:0043229+C cellular\_component [name] intracellular organelle [def] "Organized structure of distinctive morphology and function, occurring within the cell. Includes the nucleus, mitochondria, plastids, vacuoles, vesicles, ribosomes and the cytoskeleton. Excludes the plasma membrane." [GOC

417 Pathogen[ Q2Q067] interacts with 1 human partners:{Q9BZR8}

418 Pathogen[ P0C214] interacts with 1 human partners:{Q9BZR8}

419 Pathogen[ P03346] interacts with 1 human partners:{Q9BZR8}

420 Pathogen[ Q85601] interacts with 1 human partners:{Q9BZR8}

421 Pathogen[ P14079] interacts with 1 human partners:{Q9BZR8}

422 Pathogen[ P03410] interacts with 1 human partners:{Q9BZR8}

423 Pathogen[ P0C206] interacts with 1 human partners:{Q9BZR8}

424 Pathogen[ P03363] interacts with 1 human partners:{Q9BZR8}

425 [Cluster 63]GO:0033268+C cellular\_component [name] node of Ranvier [def] "An axon part that is a gap in the myelin where voltage-gated sodium channels cluster and saltatory conduction is executed." [GOC

426 Pathogen[ Q2Q067] interacts with 1 human partners:{Q12959}

427 Pathogen[ P0C214] interacts with 1 human partners:{Q12959}

428 Pathogen[ P03346] interacts with 1 human partners:{Q12959}

429 Pathogen[ Q85601] interacts with 1 human partners:{Q12959}

430 Pathogen[ P14079] interacts with 1 human partners:{Q14118}

431 Pathogen[ P03410] interacts with 2 human partners:{Q12959;Q14118}

432 Pathogen[ P0C206] interacts with 1 human partners:{Q12959}

433 Pathogen[ P03363] interacts with 1 human partners:{Q12959}

434 [Cluster 64]GO:0005960+C cellular\_component [name] glycine cleavage complex [def] "A protein complex that catalyzes the reversible oxidation of glycine. In E. coli, it has four components

435 Pathogen[ P14079] interacts with 2 human partners:{P23434;Q9NX38}

436 Pathogen[ P03410] interacts with 2 human partners:{Q9NX38;P23434}

437 Pathogen[ P0C206] interacts with 1 human partners:{P23434}

438 [Cluster 65]GO:0045252+C cellular\_component [name] oxoglutarate dehydrogenase complex [def] "A complex of multiple copies of three enzymatic components

439 Pathogen[ P0C214] interacts with 2 human partners:{P09622;P36957}

440 [Cluster 66]GO:0097228+C

441 Pathogen[ P14079] interacts with 1 human partners:{Q5JQC9}

442 Pathogen[ P03410] interacts with 1 human partners:{Q5JQC9}

443 Pathogen[ P0C206] interacts with 1 human partners:{Q5JQC9}

444 [Cluster 67]GO:0044429+C cellular\_component [name] mitochondrial part [def] "Any constituent part of a mitochondrion, a semiautonomous, self replicating organelle that occurs in varying numbers, shapes, and sizes in the cytoplasm of virtually all eukaryotic cells. It is notably the site of tissue respiration." [GOC

445 Pathogen[ P03346] interacts with 2 human partners:{Q8WXH0;Q12778}

446 Pathogen[ P14079] interacts with 1 human partners:{Q8WXH0}

447 Pathogen[ P03410] interacts with 1 human partners:{Q8WXH0}

448 Pathogen[ P0C206] interacts with 1 human partners:{Q8WXH0}

449 [Cluster 68]GO:0031941+C cellular\_component [name] filamentous actin [def] "A two-stranded helical polymer of the protein actin." [GOC

450 Pathogen[ P0C214] interacts with 3 human partners:{O00159;Q9UM54;P63261}

451 Pathogen[ P03346] interacts with 2 human partners:{Q96AC1;Q9Y5K6}

452 Pathogen[ Q85601] interacts with 4 human partners:{Q9Y5K6;O00159;P63261;Q9UM54}

453 Pathogen[ P14079] interacts with 4 human partners:{P63261;Q9UM54;Q96AC1;Q9Y5K6}

454 Pathogen[ P03410] interacts with 4 human partners:{O00159;Q9Y5K6;Q9UM54;P63261}

455 Pathogen[ P0C206] interacts with 4 human partners:{Q9UM54;O00159;P63261;Q9Y5K6}

456 Pathogen[ P03363] interacts with 3 human partners:{P63261;Q96AC1;Q9Y5K6}

457 [Cluster 69]GO:0032937+C cellular\_component [name] SREBP-SCAP-Insig complex [def] "A protein complex formed by the association of sterol regulatory element binding protein (SREBP), SREBP-cleavage-activating protein (SCAP), and an Insig protein (Insig-1 or

Insig-2) the ER membrane." [PMID  
458 Pathogen[ P03346] interacts with 1 human partners:{Q12772}  
459 Pathogen[ Q85601] interacts with 1 human partners:{Q12772}  
460 Pathogen[ P14079] interacts with 3 human partners:{Q9Y5U4;Q12772;O15503}  
461 Pathogen[ P03410] interacts with 3 human partners:{Q9Y5U4;Q12772;O15503}  
462 Pathogen[ POC206] interacts with 1 human partners:{Q12772}  
463 [Cluster 70]GO:0032279+C cellular\_component [name] asymmetric synapse [def] "A type of synapse occurring between an axon and a dendritic spine or dendritic shaft. Asymmetric synapses, the most abundant synapse type in the central nervous system, involve axons that contain predominantly spherical vesicles and contain a thickened postsynaptic density." [GOC  
464 Pathogen[ P03346] interacts with 1 human partners:{Q9Y6D5}  
465 Pathogen[ P14079] interacts with 2 human partners:{P24588;Q9Y6D5}  
466 Pathogen[ P03410] interacts with 2 human partners:{Q9Y6D5;P24588}  
467 Pathogen[ POC206] interacts with 1 human partners:{Q9Y6D5}  
468 [Cluster 71]GO:0031436+C cellular\_component [name] BRCA1-BARD1 complex [def] "A heterodimeric complex comprising BRCA1 and BARD1, which possesses ubiquitin ligase activity and is involved in genome maintenance, possibly by functioning in surveillance for DNA damage." [PMID  
469 Pathogen[ Q2Q067] interacts with 1 human partners:{Q99728}  
470 Pathogen[ POC214] interacts with 1 human partners:{Q99728}  
471 Pathogen[ P03346] interacts with 1 human partners:{Q99728}  
472 Pathogen[ Q85601] interacts with 1 human partners:{Q99728}  
473 Pathogen[ POC206] interacts with 1 human partners:{Q99728}  
474 Pathogen[ P03363] interacts with 1 human partners:{Q99728}  
475 [Cluster 72]GO:0072557+C cellular\_component [name] IPAF inflammasome complex [def] "A protein complex that consists of three components, IPAF, NAIP and caspase-1, and includes among its functions the sensing of flagellin derived from Legionella pneumophila, Salmonella typhimurium, Pseudomonas aeruginosa and Shigella flexneri." [GOC  
476 Pathogen[ POC214] interacts with 1 human partners:{Q9NPP4}  
477 Pathogen[ P03346] interacts with 1 human partners:{Q9NPP4}  
478 Pathogen[ P14079] interacts with 1 human partners:{Q9NPP4}  
479 Pathogen[ P03410] interacts with 1 human partners:{Q9NPP4}  
480 Pathogen[ P03363] interacts with 1 human partners:{Q9NPP4}  
481 [Cluster 73]GO:0005775+C cellular\_component [name] vacuolar lumen [def] "The volume enclosed within the vacuolar membrane." [ISBN  
482 Pathogen[ P14079] interacts with 1 human partners:{O75503}  
483 Pathogen[ P03410] interacts with 1 human partners:{O75503}  
484 [Cluster 74]GO:0042599+C cellular\_component [name] lamellar body [def] "A membrane-bounded organelle, specialized for the storage and secretion various substances (surfactant phospholipids, glycoproteins and acid phosphates) which are arranged in the form of tightly packed, concentric, membrane sheets or lamellae. Has some similar properties to, but is distinct from, a lysosome." [GOC  
485 Pathogen[ P14079] interacts with 2 human partners:{P11686;P17405}  
486 Pathogen[ P03410] interacts with 2 human partners:{P11686;P17405}  
487 [Cluster 75]GO:0009331+C cellular\_component [name] glycerol-3-phosphate dehydrogenase complex [def] "An enzyme complex that catalyzes the dehydrogenation of sn-glycerol 3-phosphate to form glycerone phosphate." [EC  
488 Pathogen[ POC214] interacts with 2 human partners:{Q8N335;P21695}  
489 Pathogen[ P14079] interacts with 1 human partners:{P21695}  
490 Pathogen[ P03410] interacts with 1 human partners:{P21695}  
491 [Cluster 76]GO:0019035+C cellular\_component [name] viral integration complex [def] "Virus-specific complex of protein required for integrating viral genomes into the host genome." [ISBN  
492 Pathogen[ Q2Q067] interacts with 1 human partners:{P11388}  
493 Pathogen[ POC214] interacts with 1 human partners:{P11388}  
494 Pathogen[ P03346] interacts with 1 human partners:{P11388}  
495 Pathogen[ Q85601] interacts with 1 human partners:{P11388}  
496 Pathogen[ P14079] interacts with 1 human partners:{P11388}  
497 Pathogen[ P03410] interacts with 1 human partners:{P11388}  
498 Pathogen[ POC206] interacts with 1 human partners:{P11388}  
499 [Cluster 77]GO:0097197+C cellular\_component [name] tetraspanin-enriched microdomain [def] "A pre-organized unit composed either of adhesion molecules (mainly integrins and members of the Ig superfamily), signaling receptors and/or enzyme-enriched plasma membrane domains that compartmentalizes cellular processes. Tetraspanin-enriched microdomains might be specially suited for the regulation of avidity of adhesion receptors and the compartmentalization of enzymatic activities." [GOC  
500 Pathogen[ P03346] interacts with 1 human partners:{Q6UWF3}  
501 Pathogen[ P14079] interacts with 1 human partners:{Q6UWF3}  
502 Pathogen[ P03383] interacts with 1 human partners:{Q6UWF3}  
503 Pathogen[ P03410] interacts with 1 human partners:{Q6UWF3}  
504 Pathogen[ P14075] interacts with 1 human partners:{Q6UWF3}  
505 Pathogen[ POC206] interacts with 1 human partners:{Q6UWF3}  
506 Pathogen[ P03363] interacts with 1 human partners:{Q6UWF3}  
507 [Cluster 78]GO:0033162+C cellular\_component [name] melanosome membrane [def] "The lipid bilayer surrounding a melanosome." [GOC

508 Pathogen[ Q2Q067] interacts with 1 human partners:{Q96EV8}

509 Pathogen[ P0C214] interacts with 1 human partners:{Q96EV8}

510 Pathogen[ P03346] interacts with 1 human partners:{Q96EV8}

511 Pathogen[ Q85601] interacts with 1 human partners:{Q96EV8}

512 Pathogen[ P14079] interacts with 1 human partners:{Q96EV8}

513 Pathogen[ P03383] interacts with 1 human partners:{Q96EV8}

514 Pathogen[ P03410] interacts with 1 human partners:{Q96EV8}

515 Pathogen[ P14075] interacts with 1 human partners:{Q96EV8}

516 Pathogen[ P0C206] interacts with 1 human partners:{Q96EV8}

517 [Cluster 79]GO:0022624+C cellular\_component [name] proteasome accessory complex [def] "A protein complex, that caps one or both ends of the proteasome core complex and regulates entry into, or exit from, the proteasome core complex." [GOC]

518 Pathogen[ Q2Q067] interacts with 9 human partners:{Q99460;P48556;P55036;O00231;Q13200;Q9UNM6;Q16401;O00232;O43242}

519 Pathogen[ P0C214] interacts with 12 human partners:{P55036;O43242;P48556;Q13200;O00232;Q99460;Q9UNM6;O00231;P35998;Q15008;Q16401;P17980}

520 Pathogen[ P03346] interacts with 9 human partners:{P55036;Q99460;Q16401;O00232;O00231;Q9UNM6;Q13200;P48556;O43242}

521 Pathogen[ Q85601] interacts with 7 human partners:{Q9UNM6;P55036;Q13200;Q99460;O00231;P48556;Q16401}

522 Pathogen[ P14079] interacts with 15 human partners:{P62333;P48556;P55036;O00232;O00487;P35998;Q9UNM6;Q99460;P62191;Q15008;P43686;O43242;O00231;Q16401;P17980}

523 Pathogen[ P03383] interacts with 7 human partners:{P55036;Q9UNM6;Q99460;Q13200;Q16401;O00231;P48556}

524 Pathogen[ P03410] interacts with 12 human partners:{P55036;Q15008;Q16401;P35998;Q99460;O00232;P48556;Q13200;O00231;Q9UNM6;O43242;P17980}

525 Pathogen[ P14075] interacts with 6 human partners:{P55036;Q13200;P48556;Q16401;O00231;Q9UNM6}

526 Pathogen[ P0C206] interacts with 9 human partners:{Q9UNM6;P55036;O00232;O43242;Q13200;Q99460;P48556;Q16401;O00231}

527 [Cluster 80]GO:0042643+C cellular\_component [name] actomyosin, actin part [def] "The actin part of any complex of actin, myosin, and accessory proteins." [GOC]

528 Pathogen[ P14079] interacts with 1 human partners:{P68032}

529 [Cluster 81]GO:0044425+C cellular\_component [name] membrane part [def] "Any constituent part of a membrane, a double layer of lipid molecules that encloses all cells, and, in eukaryotes, many organelles\_ may be a single or double lipid bilayer\_ also includes associated proteins." [GOC]

530 Pathogen[ P03346] interacts with 1 human partners:{Q6UWF3}

531 Pathogen[ P14079] interacts with 1 human partners:{Q6UWF3}

532 Pathogen[ P03383] interacts with 1 human partners:{Q6UWF3}

533 Pathogen[ P03410] interacts with 1 human partners:{Q6UWF3}

534 Pathogen[ P14075] interacts with 1 human partners:{Q6UWF3}

535 Pathogen[ P0C206] interacts with 1 human partners:{Q6UWF3}

536 Pathogen[ P03363] interacts with 1 human partners:{Q6UWF3}

537 [Cluster 82]GO:0035861+C cellular\_component [name] site of double-strand break [def] "A region of a chromosome at which a DNA double-strand break has occurred. DNA damage signaling and repair proteins accumulate at the lesion to respond to the damage and repair the DNA to form a continuous DNA helix." [GOC]

538 Pathogen[ Q2Q067] interacts with 2 human partners:{Q9H4L7;O76064}

539 Pathogen[ P0C214] interacts with 4 human partners:{Q9H4L7;Q8IYW5;O76064;P55072}

540 Pathogen[ P03346] interacts with 4 human partners:{O76064;P55072;Q8IYW5;Q9H4L7}

541 Pathogen[ Q85601] interacts with 3 human partners:{O76064;Q9H4L7;Q8IYW5}

542 Pathogen[ P14079] interacts with 1 human partners:{Q9H4L7}

543 Pathogen[ P03410] interacts with 1 human partners:{Q9H4L7}

544 Pathogen[ P0C206] interacts with 4 human partners:{Q9H4L7;Q8IYW5;P55072;O76064}

545 Pathogen[ P03363] interacts with 2 human partners:{Q9H4L7;Q8IYW5}

546 [Cluster 83]GO:0030061+C cellular\_component [name] mitochondrial crista [def] "Any of the inward folds of the mitochondrial inner membrane. Their number, extent, and shape differ in mitochondria from different tissues and organisms. They appear to be devices for increasing the surface area of the mitochondrial inner membrane, where the enzymes of electron transport and oxidative phosphorylation are found. Their shape can vary with the respiratory state of the mitochondria." [ISBN]

547 Pathogen[ P14079] interacts with 2 human partners:{P10109;Q6YFQ2}

548 Pathogen[ P03410] interacts with 2 human partners:{Q6YFQ2;P10109}

549 [Cluster 84]GO:0043220+C cellular\_component [name] Schmidt-Lanterman incisure [def] "Regions within compact myelin in which the cytoplasmic faces of the enveloping myelin sheath are not tightly juxtaposed, and include cytoplasm from the cell responsible for making the myelin. Schmidt-Lanterman incisures occur in the compact myelin internode, while lateral loops are analogous structures found in the paranodal region adjacent to the nodes of Ranvier." [GOC]

550 Pathogen[ P03346] interacts with 2 human partners:{O75970;Q8N3R9}

551 Pathogen[ P14079] interacts with 2 human partners:{Q8N3R9;O75970}

552 Pathogen[ P03410] interacts with 2 human partners:{O75970;Q8N3R9}

553 Pathogen[ P0C206] interacts with 1 human partners:{Q8N3R9}

554 Pathogen[ P03363] interacts with 2 human partners:{O75970;Q8N3R9}

555 [Cluster 85]GO:0008352+C cellular\_component [name] katanin complex [def] "A complex possessing an activity that couples ATP hydrolysis to the severing of microtubules\_ usually a heterodimer comprising a catalytic subunit (often 60kDa) and a regulatory subunit (often 80 kDa)." [PMID

556 Pathogen[ Q85601] interacts with 1 human partners:{Q9BVA0}

557 Pathogen[ P14079] interacts with 1 human partners:{Q9BVA0}

558 Pathogen[ P03410] interacts with 1 human partners:{Q9BVA0}

559 Pathogen[ P0C206] interacts with 1 human partners:{Q9BVA0}

560 [Cluster 86]GO:0032116+C cellular\_component [name] SMC loading complex [def] "A protein complex required for the loading of a structural maintenance of chromosome (SMC) complex, such as cohesin, condensin or SMC5/SMC6, onto DNA. Appears to be eukaryotically conserved." [GOC

561 Pathogen[ Q2Q067] interacts with 1 human partners:{Q9Y6X3}

562 Pathogen[ P0C214] interacts with 1 human partners:{Q9Y6X3}

563 Pathogen[ P03346] interacts with 1 human partners:{Q9Y6X3}

564 Pathogen[ Q85601] interacts with 1 human partners:{Q9Y6X3}

565 Pathogen[ P14079] interacts with 1 human partners:{Q9Y6X3}

566 Pathogen[ P03383] interacts with 1 human partners:{Q9Y6X3}

567 Pathogen[ P14075] interacts with 1 human partners:{Q9Y6X3}

568 Pathogen[ P0C206] interacts with 1 human partners:{Q9Y6X3}

569 Pathogen[ P03363] interacts with 1 human partners:{Q9Y6X3}

570 [Cluster 87]GO:0042824+C cellular\_component [name] MHC class I peptide loading complex [def] "A large, multisubunit complex which consists of the MHC class I-beta 2 microglobulin dimer, the transporter associated with antigen presentation (TAP), tapasin (an MHC-encoded membrane protein), the chaperone calreticulin and the thiol oxidoreductase ERp57. Functions in the assembly of peptides with newly synthesized MHC class I molecules." [GOC

571 Pathogen[ Q2Q067] interacts with 1 human partners:{P27797}

572 Pathogen[ P0C214] interacts with 1 human partners:{P27797}

573 Pathogen[ P03346] interacts with 1 human partners:{P27797}

574 Pathogen[ Q85601] interacts with 1 human partners:{P27797}

575 Pathogen[ P03383] interacts with 1 human partners:{P27797}

576 Pathogen[ P03410] interacts with 1 human partners:{P27797}

577 Pathogen[ P14075] interacts with 1 human partners:{P27797}

578 Pathogen[ P0C206] interacts with 1 human partners:{P27797}

579 Pathogen[ P03363] interacts with 1 human partners:{P27797}

580 [Cluster 88]GO:0008305+C cellular\_component [name] integrin complex [def] "A protein complex that is composed of one alpha subunit and one beta subunit, both of which are members of the integrin superfamily of cell adhesion receptors\_ the complex spans the plasma membrane and binds to extracellular matrix ligands, cell-surface ligands, and soluble ligands." [PMID

581 Pathogen[ Q2Q067] interacts with 1 human partners:{P35579}

582 Pathogen[ P03346] interacts with 1 human partners:{P35579}

583 Pathogen[ Q85601] interacts with 1 human partners:{P35579}

584 Pathogen[ P14079] interacts with 1 human partners:{P35579}

585 Pathogen[ P03383] interacts with 1 human partners:{P35579}

586 Pathogen[ P03410] interacts with 1 human partners:{P35579}

587 Pathogen[ P14075] interacts with 1 human partners:{P35579}

588 Pathogen[ P0C206] interacts with 1 human partners:{P35579}

589 Pathogen[ P03363] interacts with 1 human partners:{P35579}

590 [Cluster 89]GO:0097227+C

591 Pathogen[ P03363] interacts with 1 human partners:{Q8IYM1}

592 [Cluster 90]GO:0016600+C cellular\_component [name] flotillin complex [def] "A protein complex that contains flotillin-1 and flotillin-2, and may contain associated proteins. Flotillins associate into membrane microdomains resembling caveolae." [PMID

593 Pathogen[ Q2Q067] interacts with 1 human partners:{P22681}

594 Pathogen[ P0C214] interacts with 1 human partners:{P22681}

595 Pathogen[ P03346] interacts with 1 human partners:{P22681}

596 Pathogen[ Q85601] interacts with 1 human partners:{P22681}

597 Pathogen[ P0C206] interacts with 1 human partners:{P22681}

598 Pathogen[ P03363] interacts with 1 human partners:{P22681}

599 [Cluster 91]GO:0000778+C cellular\_component [name] condensed nuclear chromosome kinetochore [def] "A multisubunit complex that is located at the centromeric region of a condensed chromosome in the nucleus and provides an attachment point for the spindle microtubules." [GOC

600 Pathogen[ Q2Q067] interacts with 1 human partners:{P49450}

601 Pathogen[ P0C214] interacts with 1 human partners:{P49450}

602 Pathogen[ P03346] interacts with 1 human partners:{P49450}

603 Pathogen[ Q85601] interacts with 1 human partners:{P49450}

604 Pathogen[ P14079] interacts with 1 human partners:{P49450}

605 Pathogen[ P03410] interacts with 1 human partners:{P49450}

606 Pathogen[ P0C206] interacts with 1 human partners:{P49450}

607 Pathogen[ P03363] interacts with 1 human partners:{P49450}

608 [Cluster 92]GO:0031021+C cellular\_component [name] interphase microtubule organizing

center [def] "A microtubule organizing center found in interphase cells, which organize a longitudinal array of three to five MT bundles from the nuclear envelope during interphase. Each MT bundle is composed of two to seven MTs arranged in an antiparallel configuration, with the dynamic MT plus ends extending toward the cell tips and stable minus ends near the nucleus." [PMID

609 Pathogen[ Q2Q067] interacts with 1 human partners:{O15392}

610 Pathogen[ P0C214] interacts with 1 human partners:{O15392}

611 Pathogen[ P03346] interacts with 1 human partners:{O15392}

612 Pathogen[ Q85601] interacts with 1 human partners:{O15392}

613 Pathogen[ P14079] interacts with 1 human partners:{O15392}

614 Pathogen[ P03410] interacts with 1 human partners:{O15392}

615 Pathogen[ P0C206] interacts with 1 human partners:{O15392}

616 [Cluster 93]GO:0031588+C cellular\_component [name] AMP-activated protein kinase complex [def] "A protein complex that possesses AMP-dependent protein kinase activity." [GOC

617 Pathogen[ P14079] interacts with 1 human partners:{Q9Y478}

618 [Cluster 94]GO:0016461+C cellular\_component [name] unconventional myosin complex [def] "A portmanteau term for myosins other than myosin II." [GOC

619 Pathogen[ Q2Q067] interacts with 1 human partners:{P60660}

620 Pathogen[ P0C214] interacts with 4 human partners:{O00159;Q9UM54;P14649;P60660}

621 Pathogen[ P03346] interacts with 2 human partners:{P60660;P14649}

622 Pathogen[ Q85601] interacts with 4 human partners:{P14649;O00159;Q9UM54;P60660}

623 Pathogen[ P14079] interacts with 3 human partners:{Q9UM54;P14649;P60660}

624 Pathogen[ P03410] interacts with 4 human partners:{O00159;Q9UM54;P14649;P60660}

625 Pathogen[ P0C206] interacts with 4 human partners:{Q9UM54;P60660;P14649;O00159}

626 Pathogen[ P03363] interacts with 2 human partners:{P14649;P60660}

627 [Cluster 95]GO:0000276+C cellular\_component [name] mitochondrial proton-transporting ATP synthase complex, coupling factor F(o) [def] "All non-F1 subunits of the mitochondrial hydrogen-transporting ATP synthase, including integral and peripheral mitochondrial inner membrane proteins." [GOC

628 Pathogen[ Q2Q067] interacts with 1 human partners:{P24539}

629 Pathogen[ P0C214] interacts with 1 human partners:{P24539}

630 Pathogen[ P03346] interacts with 1 human partners:{P24539}

631 Pathogen[ Q85601] interacts with 1 human partners:{P24539}

632 Pathogen[ P14079] interacts with 5 human partners:{P56385;Q7Z4Y8;P03928;O75964;P24539}

633 Pathogen[ P03383] interacts with 1 human partners:{P24539}

634 Pathogen[ P03410] interacts with 6 human partners:{P56385;P03928;P24539;O75964;P18859;Q7Z4Y8}

635 Pathogen[ P14075] interacts with 2 human partners:{P24539;P56385}

636 Pathogen[ P0C206] interacts with 2 human partners:{P24539;P56385}

637 [Cluster 96]GO:0033177+C cellular\_component [name] proton-transporting two-sector ATPase complex, proton-transporting domain [def] "A protein complex that forms part of a proton-transporting two-sector ATPase complex and carries out proton transport across a membrane. The proton-transporting domain (F0, V0, or A0) includes integral and peripheral membrane proteins." [GOC

638 Pathogen[ P03346] interacts with 1 human partners:{Q93050}

639 Pathogen[ Q85601] interacts with 1 human partners:{Q93050}

640 Pathogen[ P14079] interacts with 3 human partners:{P61421;Q8N8Y2;Q93050}

641 Pathogen[ P03410] interacts with 3 human partners:{Q8N8Y2;P61421;Q93050}

642 Pathogen[ P0C206] interacts with 1 human partners:{Q93050}

643 [Cluster 97]GO:0044442+C cellular\_component [name] microtubule-based flagellum part [def] "Any constituent part of a microtubule-based flagellum, a long, whiplike protrusion from the surface of a eukaryotic cell, whose undulations drive the cell through a liquid medium\_ similar in structure to a cilium. The flagellum is based on a 9+2 arrangement of microtubules. Examples of this component are found in *Mus musculus*." [GOC

644 Pathogen[ P14079] interacts with 3 human partners:{Q86UN6;O75952;Q5H9T9}

645 Pathogen[ P03410] interacts with 3 human partners:{Q86UN6;O75952;Q5H9T9}

646 Pathogen[ P0C206] interacts with 3 human partners:{O75952;Q5H9T9;Q86UN6}

647 Pathogen[ P03363] interacts with 1 human partners:{Q86UN6}

648 [Cluster 98]GO:0014731+C cellular\_component [name] spectrin-associated cytoskeleton [def] "The part of the cytoskeleton composed of spectrin, protein 4.1 and ankyrin. Spectrin-associated cytoskeleton is associated with the plasma membrane." [GOC

649 Pathogen[ Q2Q067] interacts with 2 human partners:{Q01082;P11171}

650 Pathogen[ P0C214] interacts with 3 human partners:{P16157;Q01082;P11171}

651 Pathogen[ P03346] interacts with 5 human partners:{P02549;P11277;P16157;Q01082;P11171}

652 Pathogen[ Q85601] interacts with 3 human partners:{P16157;P11171;Q01082}

653 Pathogen[ P14079] interacts with 5 human partners:{P11171;Q01082;P16157;P11277;P02549}

654 Pathogen[ P03410] interacts with 5 human partners:{P16157;P02549;P11171;Q01082;P11277}

655 Pathogen[ P14075] interacts with 1 human partners:{P11171}

656 Pathogen[ P0C206] interacts with 4 human partners:{Q01082;P16157;P11277;P11171}

657 Pathogen[ P03363] interacts with 5 human partners:{P11277;P02549;P16157;Q01082;P11171}

658 [Cluster 99]GO:0005577+C cellular\_component [name] fibrinogen complex [def] "A highly soluble, elongated protein complex found in blood plasma and involved in clot formation. It is converted into fibrin monomer by the action of thrombin. In the mouse, fibrinogen is a hexamer, 46 nm long and 9 nm maximal diameter, containing two sets of nonidentical chains (alpha, beta, and gamma) linked together by disulfide bonds." [ISBN

659 Pathogen[ Q2Q067] interacts with 1 human partners:{P08697}

660 Pathogen[ P0C214] interacts with 1 human partners:{P08697}

661 Pathogen[ Q85601] interacts with 1 human partners:{P08697}

662 Pathogen[ P03383] interacts with 1 human partners:{P08697}

663 Pathogen[ P03410] interacts with 1 human partners:{P08697}

664 Pathogen[ P14075] interacts with 1 human partners:{P08697}

665 Pathogen[ P0C206] interacts with 1 human partners:{P08697}

666 [Cluster 100]GO:0070938+C cellular\_component [name] contractile ring [def] "A cytoskeletal structure composed of filamentous protein that forms beneath the membrane of many cells or organelles, in the plane of cell or organelle division. Ring contraction is associated with centripetal growth of the membrane that divides the cytoplasm of the two daughter cells or organelles." [GOC

667 Pathogen[ P0C214] interacts with 1 human partners:{Q96GD0}

668 Pathogen[ P14079] interacts with 2 human partners:{Q14118;Q96GD0}

669 Pathogen[ P03410] interacts with 2 human partners:{Q96GD0;Q14118}

670 Pathogen[ P0C206] interacts with 1 human partners:{Q96GD0}

671 [Cluster 101]GO:0016533+C cellular\_component [name] cyclin-dependent protein kinase 5 holoenzyme complex [def] "A protein complex that activates cyclin-dependent kinase 5\_ composed of regulatory and catalytic subunits." [PMID

672 Pathogen[ P14079] interacts with 1 human partners:{Q15078}

673 [Cluster 102]GO:0043020+C cellular\_component [name] NADPH oxidase complex [def] "A enzyme complex of which the core is a heterodimer composed of a light (alpha) and heavy (beta) chain, and requires several other water-soluble proteins of cytosolic origin for activity. Functions in superoxide generation by the NADPH-dependent reduction of O2." [GOC

674 Pathogen[ P03346] interacts with 1 human partners:{Q86UR1}

675 Pathogen[ P14079] interacts with 1 human partners:{P13498}

676 Pathogen[ P03410] interacts with 1 human partners:{Q86UR1}

677 Pathogen[ P03363] interacts with 1 human partners:{Q86UR1}

678 [Cluster 103]GO:0031256+C cellular\_component [name] leading edge membrane [def] "The portion of the plasma membrane surrounding the leading edge of a motile cell." [GOC

679 Pathogen[ P03346] interacts with 1 human partners:{Q6UWF3}

680 Pathogen[ P14079] interacts with 1 human partners:{Q6UWF3}

681 Pathogen[ P03383] interacts with 1 human partners:{Q6UWF3}

682 Pathogen[ P03410] interacts with 1 human partners:{Q6UWF3}

683 Pathogen[ P14075] interacts with 1 human partners:{Q6UWF3}

684 Pathogen[ P0C206] interacts with 1 human partners:{Q6UWF3}

685 Pathogen[ P03363] interacts with 1 human partners:{Q6UWF3}

686 [Cluster 104]GO:0043083+C cellular\_component [name] synaptic cleft [def] "The narrow gap that separates the presynaptic and postsynaptic membranes, into which neurotransmitter is released." [GOC

687 Pathogen[ P03346] interacts with 1 human partners:{Q9Y215}

688 Pathogen[ P03410] interacts with 1 human partners:{Q9Y215}

689 Pathogen[ P03363] interacts with 1 human partners:{Q9Y215}

690 [Cluster 105]GO:0033193+C cellular\_component [name] Lsd1/2 complex [def] "A nucleosome-binding protein complex that comprises two SWIRM domain histone demethylases and two PHD finger proteins. The complex is involved in transcriptional regulation via heterochromatic silencing and the regulation of chromatin boundary formation, and was first identified in fission yeast." [GOC

691 Pathogen[ P03346] interacts with 1 human partners:{P17542}

692 [Cluster 106]GO:0042629+C cellular\_component [name] mast cell granule [def] "Coarse, bluish-black staining cytoplasmic granules, bounded by a plasma membrane and found in mast cells and basophils. Contents include histamine, heparin, chondroitin sulfates, chymase and tryptase." [GOC

693 Pathogen[ P0C214] interacts with 1 human partners:{P10124}

694 Pathogen[ P14079] interacts with 1 human partners:{P10124}

695 Pathogen[ P03383] interacts with 1 human partners:{P10124}

696 Pathogen[ P03410] interacts with 1 human partners:{P10124}

697 Pathogen[ P14075] interacts with 1 human partners:{P10124}

698 Pathogen[ P0C206] interacts with 1 human partners:{P10124}

699 [Cluster 107]GO:0009330+C cellular\_component [name] DNA topoisomerase complex (ATP-hydrolyzing) [def] "Complex that possesses DNA topoisomerase (ATP-hydrolyzing) activity." [GOC

700 Pathogen[ Q2Q067] interacts with 1 human partners:{P11388}

701 Pathogen[ P0C214] interacts with 1 human partners:{P11388}

702 Pathogen[ P03346] interacts with 1 human partners:{P11388}

703 Pathogen[ Q85601] interacts with 1 human partners:{P11388}

704 Pathogen[ P14079] interacts with 1 human partners:{P11388}

705 Pathogen[ P03410] interacts with 1 human partners:{P11388}

706 Pathogen[ P0C206] interacts with 1 human partners:{P11388}

707 [Cluster 108]GO:0070852+C cellular\_component [name] cell body fiber [def] "A neuron

projection that is found in unipolar neurons and corresponds to the region between the cell body and the point at which the single projection branches." [GOC

708 Pathogen[ Q2Q067] interacts with 1 human partners:{Q9NZJ4}

709 Pathogen[ P0C214] interacts with 1 human partners:{Q9NZJ4}

710 Pathogen[ P03346] interacts with 1 human partners:{Q9NZJ4}

711 Pathogen[ Q85601] interacts with 1 human partners:{Q9NZJ4}

712 Pathogen[ P14079] interacts with 1 human partners:{Q9NZJ4}

713 Pathogen[ P03410] interacts with 1 human partners:{Q9NZJ4}

714 Pathogen[ P0C206] interacts with 1 human partners:{Q9NZJ4}

715 Pathogen[ P03363] interacts with 1 human partners:{Q9NZJ4}

716 [Cluster 109]GO:0031309+C cellular\_component [name] integral to nuclear outer membrane [def] "Located such that some or all of the gene product itself penetrates at least one phospholipid bilayer of the nuclear outer membrane. May also refer to the state of being buried in the bilayer with no exposure outside the bilayer." [GOC

717 Pathogen[ P14079] interacts with 1 human partners:{Q8N205}

718 Pathogen[ P03410] interacts with 1 human partners:{Q8N205}

719 Pathogen[ P0C206] interacts with 1 human partners:{Q8N205}

720 [Cluster 110]GO:0045273+C cellular\_component [name] respiratory chain complex II [def] "A part of the respiratory chain, containing the four polypeptide subunits of succinate dehydrogenase, flavin-adenine dinucleotide and iron-sulfur. Catalyzes the oxidation of succinate by ubiquinone. Connects the TCA cycle with the respiratory chain." [ISBN

721 Pathogen[ P0C214] interacts with 1 human partners:{Q99643}

722 Pathogen[ P03410] interacts with 1 human partners:{Q99643}

723 [Cluster 111]GO:0033270+C cellular\_component [name] paranode region of axon [def] "An axon part that is located adjacent to the nodes of Ranvier and surrounded by lateral loop portions of myelin sheath." [GOC

724 Pathogen[ Q2Q067] interacts with 1 human partners:{Q9Y2J2}

725 Pathogen[ P03346] interacts with 1 human partners:{Q9Y2J2}

726 Pathogen[ Q85601] interacts with 1 human partners:{Q9Y2J2}

727 Pathogen[ P14079] interacts with 1 human partners:{Q9Y2J2}

728 Pathogen[ P03410] interacts with 1 human partners:{Q9Y2J2}

729 Pathogen[ P14075] interacts with 1 human partners:{Q9Y2J2}

730 Pathogen[ P0C206] interacts with 1 human partners:{Q9Y2J2}

731 Pathogen[ P03363] interacts with 1 human partners:{Q9Y2J2}

732 [Cluster 112]GO:0030990+C cellular\_component [name] intraflagellar transport particle [def] "A nonmembrane-bound oligomeric protein complex that participates in bidirectional transport of molecules (cargo) along axonemal microtubules." [GOC

733 Pathogen[ P03410] interacts with 1 human partners:{Q8TCX1}

734 [Cluster 113]GO:0031985+C cellular\_component [name] Golgi cisterna [def] "Any of the thin, flattened membrane-bounded compartments that form the central portion of the Golgi complex." [GOC

735 Pathogen[ Q2Q067] interacts with 1 human partners:{O15155}

736 Pathogen[ P0C214] interacts with 1 human partners:{O15155}

737 Pathogen[ P03346] interacts with 1 human partners:{O15155}

738 Pathogen[ Q85601] interacts with 1 human partners:{O15155}

739 Pathogen[ P14079] interacts with 1 human partners:{O15155}

740 Pathogen[ P03410] interacts with 1 human partners:{O15155}

741 Pathogen[ P0C206] interacts with 1 human partners:{O15155}

742 [Cluster 114]GO:0005862+C cellular\_component [name] muscle thin filament tropomyosin [def] "A form of the tropomyosin dimer found associated with actin and the troponin complex in muscle thin filaments." [ISBN

743 Pathogen[ P14079] interacts with 1 human partners:{P07951}

744 Pathogen[ P03410] interacts with 1 human partners:{P07951}

745 [Cluster 115]GO:0001401+C cellular\_component [name] mitochondrial sorting and assembly machinery complex [def] "A large complex of the mitochondrial outer membrane that mediates sorting of some imported proteins to the outer membrane and their assembly in the membrane\_ functions after import of incoming proteins by the mitochondrial outer membrane translocase complex." [PMID

746 Pathogen[ P0C214] interacts with 1 human partners:{Q9Y512}

747 Pathogen[ P03346] interacts with 1 human partners:{Q9Y512}

748 Pathogen[ Q85601] interacts with 1 human partners:{Q9Y512}

749 Pathogen[ P14079] interacts with 1 human partners:{Q9Y512}

750 Pathogen[ P03410] interacts with 1 human partners:{Q9Y512}

751 Pathogen[ P14075] interacts with 1 human partners:{Q9Y512}

752 Pathogen[ P0C206] interacts with 1 human partners:{Q9Y512}

753 Pathogen[ P03363] interacts with 1 human partners:{Q9Y512}

754 [Cluster 116]GO:0032432+C cellular\_component [name] actin filament bundle [def] "An assembly of actin filaments that are on the same axis but may be oriented with the same or opposite polarities and may be packed with different levels of tightness." [GOC

755 Pathogen[ Q2Q067] interacts with 1 human partners:{P02511}

756 Pathogen[ P0C214] interacts with 1 human partners:{P02511}

757 Pathogen[ P03346] interacts with 1 human partners:{P02511}

758 Pathogen[ Q85601] interacts with 1 human partners:{P02511}

759 Pathogen[ P14079] interacts with 2 human partners:{P09327;P02511}

760 Pathogen[ P03383] interacts with 1 human partners:{P02511}

761 Pathogen[ P03410] interacts with 1 human partners:{P02511}



762 Pathogen[ P14075] interacts with 1 human partners:{P02511}

763 Pathogen[ P0C206] interacts with 1 human partners:{P02511}

764 [Cluster 117]GO:0000836+C cellular\_component [name] Hrd1p ubiquitin ligase complex [def] "A multiprotein complex that recognizes and ubiquitinates proteins with misfolded luminal and membrane domains during ER-associated protein degradation (ERAD). In *S. cerevisiae*, this complex contains the ubiquitin ligase Hrd1p." [GOC

765 Pathogen[ P03346] interacts with 1 human partners:{Q13438}

766 Pathogen[ P14079] interacts with 1 human partners:{Q13438}

767 Pathogen[ P03410] interacts with 1 human partners:{Q13438}

768 Pathogen[ P0C206] interacts with 1 human partners:{Q13438}

769 Pathogen[ P03363] interacts with 1 human partners:{Q13438}

770 [Cluster 118]GO:0005605+C cellular\_component [name] basal lamina [def] "A thin sheet of proteoglycans and glycoproteins, especially laminin, secreted by cells as an extracellular matrix." [ISBN

771 Pathogen[ P03346] interacts with 1 human partners:{Q9Y215}

772 Pathogen[ P03410] interacts with 1 human partners:{Q9Y215}

773 Pathogen[ P03363] interacts with 1 human partners:{Q9Y215}

774 [Cluster 119]GO:0005964+C cellular\_component [name] phosphorylase kinase complex [def] "An enzyme complex that catalyzes the phosphorylation of phosphorylase b to form phosphorylase a." [EC

775 Pathogen[ P0C214] interacts with 2 human partners:{Q93100;P46020}

776 Pathogen[ P14079] interacts with 2 human partners:{Q93100;P46020}

777 Pathogen[ P03410] interacts with 2 human partners:{P46020;Q93100}

778 Pathogen[ P14075] interacts with 1 human partners:{Q93100}

779 Pathogen[ P0C206] interacts with 2 human partners:{Q93100;P46020}

780 [Cluster 120]GO:0044354+C cellular\_component [name] macropinosome [def] "A membrane-bounded, uncoated intracellular vesicle formed by the process of macropinocytosis." [PMID

781 Pathogen[ P03346] interacts with 1 human partners:{P30622}

782 Pathogen[ Q85601] interacts with 1 human partners:{P30622}

783 Pathogen[ P14079] interacts with 1 human partners:{P30622}

784 Pathogen[ P03410] interacts with 1 human partners:{P30622}

785 Pathogen[ P0C206] interacts with 1 human partners:{P30622}

786 Pathogen[ P03363] interacts with 1 human partners:{P30622}

787 [Cluster 121]GO:0030867+C cellular\_component [name] rough endoplasmic reticulum membrane [def] "The lipid bilayer surrounding the rough endoplasmic reticulum." [GOC

788 Pathogen[ Q2Q067] interacts with 1 human partners:{P05062}

789 Pathogen[ P0C214] interacts with 1 human partners:{P05062}

790 Pathogen[ P03346] interacts with 1 human partners:{P05062}

791 Pathogen[ Q85601] interacts with 1 human partners:{P05062}

792 Pathogen[ P03410] interacts with 1 human partners:{P05062}

793 Pathogen[ P0C206] interacts with 1 human partners:{P05062}

794 [Cluster 122]GO:0045298+C cellular\_component [name] tubulin complex [def] "A heterodimer of tubulins alpha and beta that constitutes the protomer for microtubule assembly." [ISBN

795 Pathogen[ P0C214] interacts with 1 human partners:{Q96G01}

796 Pathogen[ P03346] interacts with 1 human partners:{Q96G01}

797 Pathogen[ Q85601] interacts with 1 human partners:{Q96G01}

798 Pathogen[ P14079] interacts with 3 human partners:{Q96G01;P13693;P10636}

799 Pathogen[ P03410] interacts with 3 human partners:{Q96G01;P13693;P10636}

800 Pathogen[ P0C206] interacts with 2 human partners:{P10636;Q96G01}

801 [Cluster 123]GO:0005955+C cellular\_component [name] calcineurin complex [def] "A heterodimeric calcium ion and calmodulin dependent protein phosphatase composed of catalytic and regulatory subunits\_ the regulatory subunit is very similar in sequence to calmodulin." [ISBN

802 Pathogen[ Q2Q067] interacts with 1 human partners:{Q08209}

803 Pathogen[ P0C214] interacts with 1 human partners:{Q08209}

804 Pathogen[ P03346] interacts with 1 human partners:{Q08209}

805 Pathogen[ Q85601] interacts with 1 human partners:{Q08209}

806 Pathogen[ P14079] interacts with 2 human partners:{P16298;Q08209}

807 Pathogen[ P03410] interacts with 2 human partners:{Q08209;P63098}

808 Pathogen[ P0C206] interacts with 1 human partners:{Q08209}

809 [Cluster 124]GO:0042765+C cellular\_component [name] GPI-anchor transamidase complex [def] "An enzyme complex which in humans and yeast consists of at least five proteins\_ for example, the complex contains GAAL1, GPI8, PIG-S, PIG-U, and PIG-T in human, and Gaalp, Gablp, Gpi8p, Gpil6p, and Gpil7p in yeast. Catalyzes the posttranslational attachment of the carboxyl-terminus of a precursor protein to a GPI-anchor." [GOC

810 Pathogen[ P14079] interacts with 4 human partners:{O43292;Q96S52;Q969N2;Q9H490}

811 Pathogen[ P03410] interacts with 3 human partners:{Q96S52;Q969N2;Q9H490}

812 [Cluster 125]GO:0045281+C cellular\_component [name] succinate dehydrogenase complex [def] "A multimeric complex which consists of flavoprotein (subunit A \_ InterPro

813 Pathogen[ P0C214] interacts with 1 human partners:{Q99643}

814 Pathogen[ P03410] interacts with 1 human partners:{Q99643}

815 [Cluster 126]GO:0044421+C cellular\_component [name] extracellular region part [def] "Any constituent part of the extracellular region, the space external to the outermost structure of a cell. For cells without external protective or external encapsulating

structures this refers to space outside of the plasma membrane. This term covers constituent parts of the host cell environment outside an intracellular parasite." [GOC

816 Pathogen[ P0C214] interacts with 1 human partners:{P07093}

817 Pathogen[ Q85601] interacts with 1 human partners:{P07093}

818 Pathogen[ P14079] interacts with 1 human partners:{Q9BVV8}

819 Pathogen[ P03410] interacts with 1 human partners:{Q9BVV8}

820 [Cluster 127]GO:0072517+C cellular\_component [name] host cell viral assembly compartment [def] "A membrane-bounded compartment that forms in the cytoplasm of the host cell, in which virus assembly takes place." [GOC

821 Pathogen[ P0C214] interacts with 1 human partners:{Q96G01}

822 Pathogen[ P03346] interacts with 1 human partners:{Q96G01}

823 Pathogen[ Q85601] interacts with 1 human partners:{Q96G01}

824 Pathogen[ P14079] interacts with 1 human partners:{Q96G01}

825 Pathogen[ P03410] interacts with 1 human partners:{Q96G01}

826 Pathogen[ P0C206] interacts with 1 human partners:{Q96G01}

827 [Cluster 128]GO:0034707+C cellular\_component [name] chloride channel complex [def] "An ion channel complex through which chloride ions pass." [GOC

828 Pathogen[ P03346] interacts with 2 human partners:{O00299;O95833}

829 Pathogen[ P14079] interacts with 3 human partners:{A1A5B4;Q9NQ90;Q9BYT9}

830 Pathogen[ P03410] interacts with 3 human partners:{Q9NQ90;Q9BYT9;A1A5B4}

831 Pathogen[ P0C206] interacts with 1 human partners:{Q9NQ90}

832 Pathogen[ P03363] interacts with 1 human partners:{O95833}

833 [Cluster 129]GO:0045271+C cellular\_component [name] respiratory chain complex I [def] "Respiratory chain complex I is an enzyme of the respiratory chain. It consists of at least 34 polypeptide chains and is L-shaped, with a horizontal arm lying in the membrane and a vertical arm that projects into the matrix. The electrons of NADH enter the chain at this complex." [GOC

834 Pathogen[ P14079] interacts with 1 human partners:{O43181}

835 Pathogen[ P03410] interacts with 1 human partners:{O43181}

836 [Cluster 130]GO:0033116+C cellular\_component [name] endoplasmic reticulum-Golgi intermediate compartment membrane [def] "The lipid bilayer surrounding any of the compartments of the endoplasmic reticulum (ER)-Golgi intermediate compartment system." [GOC

837 Pathogen[ Q2Q067] interacts with 2 human partners:{O75396;Q15437}

838 Pathogen[ P0C214] interacts with 3 human partners:{P49257;Q15437;O75396}

839 Pathogen[ P03346] interacts with 8 human partners:{P49257;Q969X5;Q13190;O75396;Q15437;P49755;Q15363;Q9BVK6}

840 Pathogen[ Q85601] interacts with 3 human partners:{O75396;Q15437;P49257}

841 Pathogen[ P14079] interacts with 11 human partners:{Q9H295;P49257;Q3ZAQ7;Q96RQ1;Q9BVK6;Q15363;O75396;Q96GC9;Q969X5;P49755;O15260}

842 Pathogen[ P03383] interacts with 1 human partners:{Q15437}

843 Pathogen[ P03410] interacts with 12 human partners:{Q96GC9;Q13190;P49257;Q969X5;Q13445;Q9BVK6;O75396;Q15437;Q96RQ1;Q15363;Q9UBY8;O15260}

844 Pathogen[ P14075] interacts with 1 human partners:{Q15437}

845 Pathogen[ P0C206] interacts with 9 human partners:{Q9BVK6;Q15437;O75396;P49755;P49257;O15260;Q969X5;Q96RQ1;Q15363}

846 [Cluster 131]GO:0032002+C cellular\_component [name] interleukin-28 receptor complex [def] "A protein complex that binds interleukin-28 and interleukin-29. Composed of two subunits, IL-28R alpha and IL-10R beta." [GOC

847 Pathogen[ P14079] interacts with 1 human partners:{Q8IU54}

848 [Cluster 132]GO:0008250+C cellular\_component [name] oligosaccharyltransferase complex [def] "A protein complex that is found in the endoplasmic reticulum membrane of eukaryotes and transfers lipid-linked oligosaccharide precursor to asparagine residues on nascent proteins. In yeast, the complex includes at least nine different subunits, whereas in mammalian cells at least three different forms of the complex have been detected." [ISBN

849 Pathogen[ P14079] interacts with 6 human partners:{Q8N6L1;P39656;P04844;P61803;Q9NRP0;P46977}

850 Pathogen[ P03410] interacts with 4 human partners:{Q8N6L1;P04844;P39656;P61803}

851 Pathogen[ P14075] interacts with 1 human partners:{Q8N6L1}

852 Pathogen[ P0C206] interacts with 1 human partners:{P39656}

853 [Cluster 133]GO:0035339+C cellular\_component [name] SPOTS complex [def] "A multiprotein complex at least composed of serine palmitoyltransferases and ORM proteins (known as ORMDL proteins in mammals and other higher vertebrates) that plays a key role in sphingolipid homeostasis." [PMID

854 Pathogen[ P14079] interacts with 1 human partners:{Q8N138}

855 Pathogen[ P03410] interacts with 1 human partners:{Q8N138}

856 [Cluster 134]GO:0032426+C cellular\_component [name] stereocilium bundle tip [def] "The end of a stereocilium bundle, distal to the site of the bundle's attachment to the apical cell surface." [GOC

857 Pathogen[ P14079] interacts with 1 human partners:{Q7RTU9}

858 Pathogen[ P03410] interacts with 1 human partners:{Q7RTU9}

859 [Cluster 135]GO:0005879+C cellular\_component [name] axonemal microtubule [def] "A microtubule in the axoneme of a cilium or flagellum\_ an axoneme contains nine modified

doublet microtubules surrounding a pair of single microtubules." [ISBN

860 Pathogen[ P03346] interacts with 1 human partners:{Q9Y6D5}

861 Pathogen[ P14079] interacts with 1 human partners:{Q9Y6D5}

862 Pathogen[ P03410] interacts with 1 human partners:{Q9Y6D5}

863 Pathogen[ P0C206] interacts with 1 human partners:{Q9Y6D5}

864 [Cluster 136]GO:0031512+C cellular\_component [name] motile primary cilium [def] "A primary cilium which may contain a variable array of axonemal microtubules and also contains molecular motors. Motile primary cilia display a distinct twirling motion that directs fluid flow asymmetrically across the cellular surface to affect asymmetric body plan organization." [GOC

865 Pathogen[ P03346] interacts with 1 human partners:{Q9NQC8}

866 Pathogen[ P14079] interacts with 1 human partners:{Q9NQC8}

867 Pathogen[ P03410] interacts with 2 human partners:{Q8TCX1;Q9NQC8}

868 Pathogen[ P0C206] interacts with 1 human partners:{Q9NQC8}

869 Pathogen[ P03363] interacts with 1 human partners:{Q9NQC8}

870 [Cluster 137]GO:0042588+C cellular\_component [name] zymogen granule [def] "A membrane-bounded, cytoplasmic secretory granule found in enzyme-secreting cells and visible by light microscopy. Contain zymogen, an inactive enzyme precursor, often of a digestive enzyme." [GOC

871 Pathogen[ P0C214] interacts with 1 human partners:{P10124}

872 Pathogen[ P14079] interacts with 1 human partners:{P10124}

873 Pathogen[ P03383] interacts with 1 human partners:{P10124}

874 Pathogen[ P03410] interacts with 1 human partners:{P10124}

875 Pathogen[ P14075] interacts with 1 human partners:{P10124}

876 Pathogen[ P0C206] interacts with 1 human partners:{P10124}

877 [Cluster 138]GO:0043679+C cellular\_component [name] axon terminus [def] "Terminal inflated portion of the axon, containing the specialized apparatus necessary to release neurotransmitters. The axon terminus is considered to be the whole region of thickening and the terminal button is a specialized region of it." [GOC

878 Pathogen[ Q2Q067] interacts with 1 human partners:{Q16143}

879 Pathogen[ P0C214] interacts with 2 human partners:{O15056;Q16143}

880 Pathogen[ P03346] interacts with 4 human partners:{Q14141;O15056;Q16143;P54257}

881 Pathogen[ Q85601] interacts with 1 human partners:{Q16143}

882 Pathogen[ P14079] interacts with 3 human partners:{P54257;P61421;Q16143}

883 Pathogen[ P03410] interacts with 3 human partners:{P61421;Q16143;P54257}

884 Pathogen[ P0C206] interacts with 2 human partners:{Q14141;Q16143}

885 Pathogen[ P03363] interacts with 5 human partners:{O15056;P54257;Q14141;Q99719;Q16143}

886 [Cluster 139]GO:0016328+C cellular\_component [name] lateral plasma membrane [def] "The membranes on the sides of epithelial cells which lie at the interface of adjacent cells." [GOC

887 Pathogen[ Q2Q067] interacts with 2 human partners:{Q9BTW9;Q12959}

888 Pathogen[ P0C214] interacts with 4 human partners:{O00159;Q9BTW9;Q12959;P36404}

889 Pathogen[ P03346] interacts with 5 human partners:{Q7Z3G6;Q13813;P36404;Q969F2;Q12959}

890 Pathogen[ Q85601] interacts with 3 human partners:{Q9BTW9;O00159;Q12959}

891 Pathogen[ P14079] interacts with 4 human partners:{Q9BTW9;Q7Z3G6;O43687;Q13813}

892 Pathogen[ P03410] interacts with 7 human partners:{Q969F2;Q12959;O00159;Q9BTW9;O43687;Q13813;O95471}

893 Pathogen[ P0C206] interacts with 5 human partners:{Q969F2;Q9BTW9;Q7Z3G6;O00159;Q12959}

894 Pathogen[ P03363] interacts with 3 human partners:{Q12959;Q9BTW9;Q13813}

895 [Cluster 140]GO:0070032+C cellular\_component [name] synaptobrevin 2-SNAP-25-syntaxin-1a-complexin I complex [def] "A SNARE complex that contains synaptobrevin 2 (VAMP2), SNAP-25, syntaxin 1a, and complexin I (or orthologs thereof)." [PMID

896 Pathogen[ P14079] interacts with 1 human partners:{O14810}

897 Pathogen[ P03410] interacts with 1 human partners:{O14810}

898 [Cluster 141]GO:0032590+C cellular\_component [name] dendrite membrane [def] "The portion of the plasma membrane surrounding a dendrite." [GOC

899 Pathogen[ P03346] interacts with 1 human partners:{Q9H0R8}

900 Pathogen[ Q85601] interacts with 1 human partners:{Q9H0R8}

901 Pathogen[ P14079] interacts with 2 human partners:{P24588;Q9H0R8}

902 Pathogen[ P03410] interacts with 2 human partners:{Q9H0R8;P24588}

903 Pathogen[ P0C206] interacts with 1 human partners:{Q9H0R8}

904 Pathogen[ P03363] interacts with 1 human partners:{Q9H0R8}

905 [Cluster 142]GO:0034364+C cellular\_component [name] high-density lipoprotein particle [def] "A lipoprotein particle with a high density (typically 1.063-1.21 g/ml) and a diameter of 5-10 nm that contains APOAs and may contain APOCs and APOE\_ found in blood and carries lipids from body tissues to the liver as part of the reverse cholesterol transport process." [GOC

906 Pathogen[ P14079] interacts with 1 human partners:{P0DJ18}

907 Pathogen[ P03410] interacts with 1 human partners:{P0DJ18}

908 [Cluster 143]GO:0008290+C cellular\_component [name] F-actin capping protein complex [def] "A heterodimer consisting of alpha and beta subunits that binds to and caps the barbed ends of actin filaments, thereby regulating the polymerization of actin monomers

but not severing actin filaments." [GOC

909 Pathogen[ Q2Q067] interacts with 1 human partners:{P40121}

910 Pathogen[ P0C214] interacts with 1 human partners:{P40121}

911 Pathogen[ P03346] interacts with 2 human partners:{P40121;P58546}

912 Pathogen[ Q85601] interacts with 1 human partners:{P40121}

913 Pathogen[ P14079] interacts with 4 human partners:{P47756;P40121;P35611;Q96KX2}

914 Pathogen[ P03410] interacts with 4 human partners:{Q96KX2;P47756;P40121;P35611}

915 Pathogen[ P0C206] interacts with 2 human partners:{P47756;P40121}

916 Pathogen[ P03363] interacts with 1 human partners:{P40121}

917 [Cluster 144]GO:0000439+C cellular\_component [name] core TFIIH complex [def] "The 5 subunit core of TFIIH that has tightly associated subunits and is found in both the general transcription factor holo-TFIIH and in the nucleotide-excision repair factor 3 complex. In *S. cerevisiae*, it is composed of Rad3, Tfb1, Tfb2, Ssl1, Tfb4. In humans, it is composed of XPD, p62, p55, p44, p34." [GOC

918 Pathogen[ Q2Q067] interacts with 1 human partners:{Q13889}

919 Pathogen[ P03346] interacts with 1 human partners:{Q13889}

920 Pathogen[ P14079] interacts with 1 human partners:{Q13889}

921 Pathogen[ P03410] interacts with 1 human partners:{Q13889}

922 Pathogen[ P14075] interacts with 1 human partners:{Q13889}

923 Pathogen[ P0C206] interacts with 1 human partners:{Q13889}

924 [Cluster 145]GO:0031988+C cellular\_component [name] membrane-bounded vesicle [def] "Any small, fluid-filled, spherical organelle enclosed by a lipid bilayer." [GOC

925 Pathogen[ P03410] interacts with 1 human partners:{P55157}

926 [Cluster 146]GO:0031232+C cellular\_component [name] extrinsic to external side of plasma membrane [def] "Loosely bound to the surface of the plasma membrane that faces away from the cytoplasm, but not integrated into the hydrophobic region." [GOC

927 Pathogen[ P0C214] interacts with 1 human partners:{P07093}

928 Pathogen[ Q85601] interacts with 1 human partners:{P07093}

929 [Cluster 147]GO:0005971+C cellular\_component [name] ribonucleoside-diphosphate reductase complex [def] "An enzyme complex composed of 2-4 or more subunits, which usually contains nonheme iron and requires ATP for catalysis. Catalyzes the formation of 2'-deoxyribonucleoside diphosphate and thioredoxin disulfide from ribonucleoside diphosphate and thioredoxin." [BRENDA

930 Pathogen[ Q2Q067] interacts with 2 human partners:{P31350;Q7LG56}

931 Pathogen[ P0C214] interacts with 3 human partners:{P31350;P23921;Q7LG56}

932 Pathogen[ P03346] interacts with 2 human partners:{P31350;Q7LG56}

933 Pathogen[ Q85601] interacts with 2 human partners:{P31350;Q7LG56}

934 Pathogen[ P14079] interacts with 2 human partners:{P31350;Q7LG56}

935 Pathogen[ P03383] interacts with 1 human partners:{P31350}

936 Pathogen[ P03410] interacts with 3 human partners:{P31350;P23921;Q7LG56}

937 Pathogen[ P14075] interacts with 1 human partners:{P31350}

938 Pathogen[ P0C206] interacts with 2 human partners:{Q7LG56;P31350}

939 [Cluster 148]GO:0031205+C cellular\_component [name] endoplasmic reticulum Sec complex [def] "An endoplasmic reticulum membrane-associated complex involved in the translocation of proteins that are targeted to the ER. In yeast, this complex consists of two subcomplexes, namely, the Sec61 complex and the Sec62/Sec63 complex." [GOC

940 Pathogen[ P14079] interacts with 1 human partners:{P60468}

941 Pathogen[ P03410] interacts with 1 human partners:{P60468}

942 [Cluster 149]GO:0046696+C cellular\_component [name] lipopolysaccharide receptor complex [def] "A multiprotein complex that consists of at least three proteins, CD14, TLR4, and MD-2, each of which is glycosylated." [PMID

943 Pathogen[ Q2Q067] interacts with 1 human partners:{O95999}

944 Pathogen[ P0C214] interacts with 2 human partners:{O95999;P10809}

945 Pathogen[ P03346] interacts with 1 human partners:{O95999}

946 Pathogen[ Q85601] interacts with 1 human partners:{O95999}

947 Pathogen[ P14079] interacts with 2 human partners:{O95999;Q9Y6Y9}

948 Pathogen[ P03383] interacts with 1 human partners:{O95999}

949 Pathogen[ P03410] interacts with 2 human partners:{O95999;Q9Y6Y9}

950 Pathogen[ P14075] interacts with 1 human partners:{O95999}

951 Pathogen[ P0C206] interacts with 1 human partners:{O95999}

952 [Cluster 150]GO:0045025+C cellular\_component [name] mitochondrial degradosome [def] "A mitochondrial protein complex with 3' to 5' exoribonuclease activity that participates in intron-independent turnover and processing of mitochondrial transcripts. In humans, the mitochondrial degradosome is a pentameric complex, and in yeast it exists as a heterodimer." [PMID

953 Pathogen[ Q2Q067] interacts with 1 human partners:{Q8TCS8}

954 Pathogen[ P0C214] interacts with 1 human partners:{Q8TCS8}

955 Pathogen[ P03346] interacts with 1 human partners:{Q8TCS8}

956 Pathogen[ Q85601] interacts with 1 human partners:{Q8TCS8}

957 Pathogen[ P14079] interacts with 1 human partners:{Q8TCS8}

958 Pathogen[ P03383] interacts with 1 human partners:{Q8TCS8}

959 Pathogen[ P03410] interacts with 1 human partners:{Q8TCS8}

960 Pathogen[ P14075] interacts with 1 human partners:{Q8TCS8}

961 Pathogen[ P0C206] interacts with 1 human partners:{Q8TCS8}

962 [Cluster 151]GO:0030690+C cellular\_component [name] Noc1p-Noc2p complex [def] "A heterodimer associated with 90S and 66S preribosomes in the nucleolus\_ involved in

ribosomal large subunit biogenesis." [PMID  
963 Pathogen[ Q2Q067] interacts with 1 human partners:{Q14790}  
964 Pathogen[ P0C214] interacts with 1 human partners:{Q14790}  
965 Pathogen[ P03346] interacts with 1 human partners:{Q14790}  
966 Pathogen[ Q85601] interacts with 1 human partners:{Q14790}  
967 Pathogen[ P14079] interacts with 1 human partners:{Q14790}  
968 Pathogen[ P0C206] interacts with 1 human partners:{Q14790}  
969 [Cluster 152]GO:0005604+C cellular\_component [name] basement membrane [def] "A thin layer of dense material found in various animal tissues interposed between the cells and the adjacent connective tissue. It consists of the basal lamina plus an associated layer of reticulin fibers." [ISBN  
970 Pathogen[ Q2Q067] interacts with 1 human partners:{Q01196}  
971 Pathogen[ P03346] interacts with 2 human partners:{Q96RT1;Q01196}  
972 Pathogen[ Q85601] interacts with 1 human partners:{Q96RT1}  
973 Pathogen[ P14079] interacts with 3 human partners:{Q14118;Q96RT1;Q9UQE7}  
974 Pathogen[ P03410] interacts with 3 human partners:{Q96RT1;Q9UQE7;Q14118}  
975 Pathogen[ P0C206] interacts with 2 human partners:{Q96RT1;Q9UQE7}  
976 Pathogen[ P03363] interacts with 1 human partners:{Q96RT1}  
977 [Cluster 153]GO:0000506+C cellular\_component [name] glycosylphosphatidylinositol-N-acetylglucosaminyltransferase (GPI-GnT) complex [def] "An enzyme complex that catalyzes the transfer of GlcNAc from UDP-GlcNAc to an acceptor phosphatidylinositol, the first step in the production of GPI anchors for cell surface proteins. The complex contains PIG-A, PIG-C, PIG-H, PIG-Q, PIG-P, and DPM2 in human, and Erilp, Gpilp, Gpi2p, Gpi15p, Gpi19p, and Spt14p in budding yeast." [GOC  
978 Pathogen[ Q2Q067] interacts with 2 human partners:{Q96I23;Q14442}  
979 Pathogen[ P03346] interacts with 2 human partners:{Q14442;Q96I23}  
980 Pathogen[ P14079] interacts with 6 human partners:{Q14442;P57054;Q9BRB3;O94777;Q96I23;Q3MUY2}  
981 Pathogen[ P03383] interacts with 1 human partners:{Q96I23}  
982 Pathogen[ P03410] interacts with 4 human partners:{O94777;Q14442;Q96I23;Q9BRB3}  
983 Pathogen[ P14075] interacts with 3 human partners:{O94777;Q14442;Q96I23}  
984 Pathogen[ P0C206] interacts with 3 human partners:{Q96I23;Q14442;O94777}  
985 Pathogen[ P03363] interacts with 1 human partners:{Q96I23}  
986 [Cluster 154]GO:0071437+C cellular\_component [name] invadopodium [def] "A cell projection that emerges from the ECM-facing surface of a cell, is enriched in actin and associated cytoskeletal proteins, and displays localized proteolytic activity toward the substrate." [GOC  
987 Pathogen[ P0C214] interacts with 1 human partners:{Q16658}  
988 Pathogen[ P03346] interacts with 1 human partners:{Q16658}  
989 Pathogen[ P14079] interacts with 2 human partners:{O95425;Q16658}  
990 Pathogen[ P03410] interacts with 2 human partners:{Q16658;O95425}  
991 Pathogen[ P0C206] interacts with 1 human partners:{Q16658}  
992 Pathogen[ P03363] interacts with 1 human partners:{Q16658}  
993 [Cluster 155]GO:0033150+C cellular\_component [name] cytoskeletal calyx [def] "A large cytoskeletal structure located at the posterior end of the perinuclear theca of a mammalian sperm head. The nucleus is tightly associated with the calyx, which contains calicin and basic cylicin proteins." [PMID  
994 Pathogen[ P14079] interacts with 2 human partners:{Q14093;P35663}  
995 Pathogen[ P03410] interacts with 2 human partners:{P35663;Q14093}  
996 Pathogen[ P0C206] interacts with 1 human partners:{P35663}  
997 Pathogen[ P03363] interacts with 2 human partners:{Q14093;P35663}  
998 [Cluster 156]GO:0001520+C cellular\_component [name] outer dense fiber [def] "Structure or material found in the flagella of mammalian sperm that surrounds each of the nine microtubule doublets, giving a 9 + 9 + 2 arrangement rather than the 9 + 2 pattern usually seen. These dense fibers are stiff and noncontractile." [ISBN  
999 Pathogen[ P14079] interacts with 1 human partners:{Q96PU9}  
1000 [Cluster 157]GO:0042105+C cellular\_component [name] alpha-beta T cell receptor complex [def] "A T cell receptor complex in which the TCR heterodimer comprises alpha and beta chains, associated with the CD3 complex\_ recognizes a complex consisting of an antigen-derived peptide bound to a class I or class II MHC protein." [GOC  
1001 Pathogen[ P03410] interacts with 1 human partners:{P20963}  
1002 [Cluster 158]GO:0005969+C cellular\_component [name] serine-pyruvate aminotransferase complex [def] "An enzyme complex that catalyzes the formation of hydroxypyruvate and alanine from serine and pyruvate." [EC  
1003 Pathogen[ P14079] interacts with 1 human partners:{Q15075}  
1004 [Cluster 159]GO:0044194+C cellular\_component [name] cytolytic granule [def] "A specialized secretory lysosome that is present in cells with cytolytic capability such as cytotoxic T lymphocytes and natural killer cells. Cytolytic granules mediate the storage and regulated excretion of lytic molecules for killing of target cells." [GOC  
1005 Pathogen[ Q2Q067] interacts with 1 human partners:{Q15833}  
1006 Pathogen[ P0C214] interacts with 1 human partners:{Q15833}  
1007 Pathogen[ P03346] interacts with 1 human partners:{Q15833}  
1008 Pathogen[ Q85601] interacts with 1 human partners:{Q15833}  
1009 Pathogen[ P14079] interacts with 1 human partners:{Q15833}  
1010 Pathogen[ P03410] interacts with 1 human partners:{Q15833}  
1011 Pathogen[ P0C206] interacts with 1 human partners:{Q15833}

1012 Pathogen[ P03363] interacts with 1 human partners:{Q15833}

1013 [Cluster 160]GO:000221+C cellular\_component [name] vacuolar proton-transporting V-type ATPase, V1 domain [def] "The V1 domain of a proton-transporting V-type ATPase found in the vacuolar membrane." [GOC

1014 Pathogen[ P0C214] interacts with 1 human partners:{Q9UI12}

1015 Pathogen[ P14079] interacts with 1 human partners:{Q9UI12}

1016 Pathogen[ P03410] interacts with 1 human partners:{Q9UI12}

1017 Pathogen[ P0C206] interacts with 1 human partners:{Q9UI12}

1018 [Cluster 161]GO:0002116+C cellular\_component [name] semaphorin receptor complex [def] "A stable binary complex of a neurophilin and a plexin, together forming a functional semaphorin receptor." [GOC

1019 Pathogen[ Q2Q067] interacts with 1 human partners:{O14786}

1020 Pathogen[ P0C214] interacts with 1 human partners:{O14786}

1021 Pathogen[ P03346] interacts with 1 human partners:{O14786}

1022 Pathogen[ Q85601] interacts with 1 human partners:{O14786}

1023 Pathogen[ P03410] interacts with 1 human partners:{O14786}

1024 Pathogen[ P0C206] interacts with 1 human partners:{O14786}

1025 Pathogen[ P03363] interacts with 1 human partners:{O14786}

1026 [Cluster 162]GO:0044455+C cellular\_component [name] mitochondrial membrane part [def] "Any constituent part of a mitochondrial membrane, either of the lipid bilayers that surround the mitochondrion and form the mitochondrial envelope." [GOC

1027 Pathogen[ Q2Q067] interacts with 1 human partners:{O95831}

1028 Pathogen[ P03346] interacts with 1 human partners:{O95831}

1029 Pathogen[ Q85601] interacts with 1 human partners:{O95831}

1030 Pathogen[ P14079] interacts with 1 human partners:{O95831}

1031 Pathogen[ P03383] interacts with 1 human partners:{O95831}

1032 Pathogen[ P03410] interacts with 1 human partners:{O95831}

1033 Pathogen[ P14075] interacts with 1 human partners:{O95831}

1034 Pathogen[ P0C206] interacts with 1 human partners:{O95831}

1035 Pathogen[ P03363] interacts with 1 human partners:{O95831}

1036 [Cluster 163]GO:0008541+C cellular\_component [name] proteasome regulatory particle, lid subcomplex [def] "The subcomplex of the proteasome regulatory particle that forms the peripheral lid, which is added on top of the base subcomplex." [GOC

1037 Pathogen[ P14079] interacts with 1 human partners:{O00487}

1038 [Cluster 164]GO:0016035+C cellular\_component [name] zeta DNA polymerase complex [def] "A heterodimeric DNA polymerase complex that catalyzes error-prone DNA synthesis in contexts such as translesion synthesis and double-stranded break repair. First characterized in Saccharomyces, in which the subunits are Rev3p and Rev7p\_ a third protein, Rev1p, is often associated with the polymerase dimer." [PMID

1039 Pathogen[ Q2Q067] interacts with 1 human partners:{Q9UI95}

1040 Pathogen[ P0C214] interacts with 1 human partners:{Q9UI95}

1041 Pathogen[ P03346] interacts with 1 human partners:{Q9UI95}

1042 Pathogen[ Q85601] interacts with 1 human partners:{Q9UI95}

1043 Pathogen[ P03383] interacts with 1 human partners:{Q9UI95}

1044 Pathogen[ P03410] interacts with 1 human partners:{Q9UI95}

1045 Pathogen[ P14075] interacts with 1 human partners:{Q9UI95}

1046 Pathogen[ P0C206] interacts with 1 human partners:{Q9UI95}

1047 Pathogen[ P03363] interacts with 1 human partners:{Q9UI95}

1048 [Cluster 165]GO:0005891+C cellular\_component [name] voltage-gated calcium channel complex [def] "A protein complex that forms a transmembrane channel through which calcium ions may pass in response to changes in membrane potential." [GOC

1049 Pathogen[ Q2Q067] interacts with 1 human partners:{P35813}

1050 Pathogen[ P0C214] interacts with 1 human partners:{P35813}

1051 Pathogen[ P03346] interacts with 1 human partners:{P35813}

1052 Pathogen[ Q85601] interacts with 1 human partners:{P35813}

1053 Pathogen[ P14079] interacts with 1 human partners:{P35813}

1054 Pathogen[ P03383] interacts with 1 human partners:{P35813}

1055 Pathogen[ P03410] interacts with 1 human partners:{P35813}

1056 Pathogen[ P14075] interacts with 1 human partners:{P35813}

1057 Pathogen[ P0C206] interacts with 1 human partners:{P35813}

1058 [Cluster 166]GO:0031095+C cellular\_component [name] platelet dense tubular network membrane [def] "The lipid bilayer surrounding the platelet dense tubular network." [GOC

1059 Pathogen[ P03346] interacts with 1 human partners:{Q9Y6F6}

1060 Pathogen[ P14079] interacts with 1 human partners:{Q9Y6F6}

1061 Pathogen[ P03410] interacts with 1 human partners:{Q9Y6F6}

1062 Pathogen[ P14075] interacts with 1 human partners:{Q9Y6F6}

1063 Pathogen[ P0C206] interacts with 1 human partners:{Q9Y6F6}

1064 Pathogen[ P03363] interacts with 1 human partners:{Q9Y6F6}

1065 [Cluster 167]GO:0005924+C cellular\_component [name] cell-substrate adherens junction [def] "An adherens junction which connects a cell to the extracellular matrix." [GOC

1066 Pathogen[ Q2Q067] interacts with 1 human partners:{Q9BX66}

1067 Pathogen[ P0C214] interacts with 1 human partners:{Q9BX66}

1068 Pathogen[ P03346] interacts with 1 human partners:{Q9BX66}

1069 Pathogen[ Q85601] interacts with 1 human partners:{Q9BX66}

1070 Pathogen[ P14079] interacts with 1 human partners:{Q9BX66}

1071 Pathogen[ P03410] interacts with 1 human partners:{Q9BX66}

1072 Pathogen[ P0C206] interacts with 1 human partners:{Q9BX66}

1073 Pathogen[ P03363] interacts with 1 human partners:{Q9BX66}

1074 [Cluster 168]GO:0032421+C cellular\_component [name] stereocilium bundle [def] "An actin-based, cross-linked cellular protrusion on the apical surface of auditory and vestibular hair cells. Stereocilium bundles act as mechanosensory organelles by responding to fluid motion or fluid pressure changes." [GOC

1075 Pathogen[ Q2Q067] interacts with 1 human partners:{Q8N1I0}

1076 Pathogen[ P0C214] interacts with 1 human partners:{Q8N1I0}

1077 Pathogen[ P03346] interacts with 1 human partners:{Q8N1I0}

1078 Pathogen[ Q85601] interacts with 1 human partners:{Q8N1I0}

1079 Pathogen[ P14079] interacts with 1 human partners:{Q8N1I0}

1080 Pathogen[ P03410] interacts with 1 human partners:{Q8N1I0}

1081 Pathogen[ P0C206] interacts with 1 human partners:{Q8N1I0}

1082 Pathogen[ P03363] interacts with 1 human partners:{Q8N1I0}

1083 [Cluster 169]GO:0030684+C cellular\_component [name] preribosome [def] "Any complex of pre-rRNAs, ribosomal proteins, and associated proteins formed during ribosome biogenesis." [PMID

1084 Pathogen[ Q2Q067] interacts with 1 human partners:{Q9Y237}

1085 Pathogen[ P0C214] interacts with 1 human partners:{Q9Y237}

1086 Pathogen[ P03346] interacts with 1 human partners:{Q9Y237}

1087 Pathogen[ Q85601] interacts with 1 human partners:{Q9Y237}

1088 Pathogen[ P14079] interacts with 1 human partners:{Q9Y237}

1089 Pathogen[ P03410] interacts with 1 human partners:{Q9Y237}

1090 Pathogen[ P0C206] interacts with 1 human partners:{Q9Y237}

1091 Pathogen[ P03363] interacts with 1 human partners:{Q9Y237}

1092 [Cluster 170]GO:0033185+C cellular\_component [name] dolichol-phosphate-mannose synthase complex [def] "A protein complex that possesses dolichyl-phosphate beta-D-mannosyltransferase activity\_ contains a catalytic subunit, a regulatory subunit, and a third subunit that stabilizes the complex. In human and several other metazoa, the subunits are named DPM1, DPM2 and DPM3, respectively." [PMID

1093 Pathogen[ P14079] interacts with 2 human partners:{O94777;Q9P2X0}

1094 Pathogen[ P03410] interacts with 2 human partners:{O94777;Q9P2X0}

1095 Pathogen[ P14075] interacts with 1 human partners:{O94777}

1096 Pathogen[ P0C206] interacts with 1 human partners:{O94777}

1097 [Cluster 171]GO:0005873+C cellular\_component [name] plus-end kinesin complex [def] "Any complex that includes a dimer of molecules from the kinesin superfamily and any associated proteins, and moves towards the plus end of a microtubule." [GOC

1098 Pathogen[ P14079] interacts with 1 human partners:{O15066}

1099 Pathogen[ P03363] interacts with 1 human partners:{O15066}

1100 [Cluster 172]GO:0002142+C cellular\_component [name] stereocilia ankle link complex [def] "A complex of proteins that connect growing stereocilia in developing cochlear hair cells, composed of Vlgr1, usherin, vezatin, and whirlin." [PMID

1101 Pathogen[ P14079] interacts with 1 human partners:{Q9HBM0}

1102 Pathogen[ P03410] interacts with 1 human partners:{Q9HBM0}

1103 Pathogen[ P14075] interacts with 1 human partners:{Q9HBM0}

1104 Pathogen[ P0C206] interacts with 1 human partners:{Q9HBM0}

1105 [Cluster 173]GO:0009925+C cellular\_component [name] basal plasma membrane [def] "The region of the plasma membrane located at the basal end of the cell. Often used in reference to animal polarized epithelial membranes, where the basal membrane is the part attached to the extracellular matrix, or in plant cells, where the basal membrane is defined with respect to the zygotic axis." [GOC

1106 Pathogen[ P0C214] interacts with 1 human partners:{O00159}

1107 Pathogen[ P03346] interacts with 1 human partners:{Q96RT1}

1108 Pathogen[ Q85601] interacts with 2 human partners:{Q96RT1;O00159}

1109 Pathogen[ P14079] interacts with 2 human partners:{Q8N307;Q96RT1}

1110 Pathogen[ P03410] interacts with 3 human partners:{Q96RT1;Q8N307;O00159}

1111 Pathogen[ P0C206] interacts with 2 human partners:{Q96RT1;O00159}

1112 Pathogen[ P03363] interacts with 1 human partners:{Q96RT1}

1113 [Cluster 174]GO:0034362+C cellular\_component [name] low-density lipoprotein particle [def] "A lipoprotein particle, rich in cholesterol esters and low in triglycerides that is typically composed of APOB100 and APOE and has a density of 1.02-1.06 g/ml and a diameter of between 20-25 nm. LDL particles are formed from VLDL particles (via IDL) by the loss of triglyceride and gain of cholesterol ester. They transport endogenous cholesterol (and to some extent triglycerides) from peripheral tissues back to the liver." [GOC

1114 Pathogen[ Q2Q067] interacts with 1 human partners:{Q9BQE4}

1115 Pathogen[ P0C214] interacts with 1 human partners:{Q9BQE4}

1116 Pathogen[ Q85601] interacts with 1 human partners:{Q9BQE4}

1117 Pathogen[ P14079] interacts with 2 human partners:{Q9BQE4;Q0VD83}

1118 Pathogen[ P03383] interacts with 1 human partners:{Q9BQE4}

1119 Pathogen[ P03410] interacts with 2 human partners:{Q9BQE4;Q0VD83}

1120 Pathogen[ P14075] interacts with 1 human partners:{Q9BQE4}

1121 Pathogen[ P0C206] interacts with 1 human partners:{Q9BQE4}

1122 [Cluster 175]GO:0045334+C cellular\_component [name] clathrin-coated endocytic vesicle [def] "A clathrin-coated, membrane-bounded intracellular vesicle formed by invagination

of the plasma membrane around an extracellular substance." [GOC  
1123 Pathogen[ POC214] interacts with 1 human partners:{Q9UM54}  
1124 Pathogen[ Q85601] interacts with 1 human partners:{Q9UM54}  
1125 Pathogen[ P14079] interacts with 1 human partners:{Q9UM54}  
1126 Pathogen[ P03410] interacts with 1 human partners:{Q9UM54}  
1127 Pathogen[ POC206] interacts with 1 human partners:{Q9UM54}  
1128 [Cluster 176]GO:0002081+C cellular\_component [name] outer acrosomal membrane [def]  
"The acrosomal membrane region that underlies the plasma membrane of the sperm. This  
membrane fuses with the sperm plasma membrane as part of the acrosome reaction." [GOC  
1129 Pathogen[ P14079] interacts with 1 human partners:{Q9NQ60}  
1130 Pathogen[ P03410] interacts with 1 human partners:{Q9NQ60}  
1131 [Cluster 177]GO:0048269+C cellular\_component [name] methionine adenosyltransferase  
complex [def] "A multimeric enzyme complex composed of variable numbers of catalytic  
alpha subunits, and noncatalytic beta subunits. The beta subunits are believed to have a  
regulatory function. The enzyme complex catalyzes the synthesis of S-adenosylmethionine  
(AdoMet), which is the major methyl group donor, participating in the methylation of  
proteins, DNA, RNA, phospholipids, and other small molecules." [EC  
1132 Pathogen[ POC214] interacts with 1 human partners:{Q9NZL9}  
1133 Pathogen[ P03346] interacts with 1 human partners:{Q9NZL9}  
1134 Pathogen[ P14079] interacts with 1 human partners:{Q9NZL9}  
1135 Pathogen[ P03410] interacts with 1 human partners:{Q9NZL9}  
1136 Pathogen[ POC206] interacts with 1 human partners:{Q9NZL9}  
1137 [Cluster 178]GO:0016012+C cellular\_component [name] sarcoglycan complex [def] "A  
protein complex formed of four sarcoglycans plus sarcospan\_ there are six known  
sarcoglycans  
1138 Pathogen[ P14079] interacts with 5 human  
partners:{Q16585;Q92629;Q16586;Q13326;Q96LD1}  
1139 Pathogen[ P03410] interacts with 4 human partners:{Q16585;Q92629;Q13326;Q96LD1}  
1140 [Cluster 179]GO:0060091+C cellular\_component [name] kinocilium [def] "A nonmotile  
primary cilium that is found at the apical surface of auditory receptor cells. The  
kinocilium is surrounded by actin-based stereocilia." [GOC  
1141 Pathogen[ P14079] interacts with 2 human partners:{A6PVL3;Q7RTU9}  
1142 Pathogen[ P03410] interacts with 2 human partners:{A6PVL3;Q7RTU9}  
1143 [Cluster 180]GO:0031501+C cellular\_component [name] mannosyltransferase complex [def]  
"A complex that possesses mannosyltransferase activity." [GOC  
1144 Pathogen[ P14079] interacts with 1 human partners:{Q9P2X0}  
1145 Pathogen[ P03410] interacts with 1 human partners:{Q9P2X0}  
1146 [Cluster 181]GO:0060171+C cellular\_component [name] stereocilium membrane [def]  
"The portion of the plasma membrane surrounding a stereocilium." [GOC  
1147 Pathogen[ POC214] interacts with 1 human partners:{O00159}  
1148 Pathogen[ Q85601] interacts with 1 human partners:{O00159}  
1149 Pathogen[ P03410] interacts with 1 human partners:{O00159}  
1150 Pathogen[ POC206] interacts with 1 human partners:{O00159}  
1151 [Cluster 182]GO:0043540+C cellular\_component [name]  
6-phosphofructo-2-kinase/fructose-2,6-biphosphatase 1 complex [def] "A homodimeric,  
bifunctional enzyme complex which catalyzes the synthesis and degradation of fructose  
2,6-bisphosphate, and is required for both glycolysis and gluconeogenesis." [GOC  
1152 Pathogen[ POC214] interacts with 1 human partners:{P16118}  
1153 Pathogen[ Q85601] interacts with 1 human partners:{P16118}  
1154 Pathogen[ P03410] interacts with 1 human partners:{P16118}  
1155 Pathogen[ P14075] interacts with 1 human partners:{P16118}  
1156 Pathogen[ POC206] interacts with 1 human partners:{P16118}  
1157 [Cluster 183]GO:0035003+C cellular\_component [name] subapical complex [def] "The  
most apical region of the lateral plasma membrane of an invertebrate epithelial cell. The  
subapical complex lies above the zonula adherens and the septate junction, and is  
comparable to the position of the tight junction of vertebrate cells." [PMID  
1158 Pathogen[ P03346] interacts with 1 human partners:{Q86UT5}  
1159 Pathogen[ P14079] interacts with 1 human partners:{Q86UT5}  
1160 Pathogen[ P03410] interacts with 1 human partners:{Q86UT5}  
1161 Pathogen[ POC206] interacts with 1 human partners:{Q86UT5}  
1162 Pathogen[ P03363] interacts with 1 human partners:{Q86UT5}  
1163 [Cluster 184]GO:0019773+C cellular\_component [name] proteasome core complex,  
alpha-subunit complex [def] "The proteasome core subcomplex that constitutes the two  
outer rings of the proteasome core complex. An example of this component is found in *Mus  
musculus*." [GOC  
1164 Pathogen[ Q2Q067] interacts with 8 human  
partners:{P25787;O14818;P60900;P25788;P25786;P25789;P28066;Q8TAA3}  
1165 Pathogen[ POC214] interacts with 8 human  
partners:{P25789;O14818;P28066;P25788;P25786;Q8TAA3;P25787;P60900}  
1166 Pathogen[ P03346] interacts with 8 human  
partners:{P25787;P25789;P25788;O14818;P60900;P25786;P28066;Q8TAA3}  
1167 Pathogen[ Q85601] interacts with 8 human  
partners:{P28066;P60900;P25787;P25788;P25789;P25786;Q8TAA3;O14818}  
1168 Pathogen[ P14079] interacts with 6 human  
partners:{P25787;Q8TAA3;P60900;O14818;P25788;P28066}  
1169 Pathogen[ P03383] interacts with 8 human



1170 Pathogen[ P03410] interacts with 8 human partners:{P25789;P60900;P25786;P28066;Q8TAA3;O14818;P25787;P25788}

1171 Pathogen[ P14075] interacts with 8 human partners:{P25786;P60900;Q8TAA3;P25787;O14818;P25789;P25788;P28066}

1172 Pathogen[ P0C206] interacts with 8 human partners:{P25788;P28066;Q8TAA3;P60900;P25786;O14818;P25787;P25789}

1173 [Cluster 185]GO:0045239+C cellular\_component [name] tricarboxylic acid cycle enzyme complex [def] "Any of the heteromeric enzymes that act in the TCA cycle." [GOC  
 1174 Pathogen[ Q2Q067] interacts with 1 human partners:{P07954}  
 1175 Pathogen[ P0C214] interacts with 1 human partners:{P07954}  
 1176 Pathogen[ P03346] interacts with 1 human partners:{P07954}  
 1177 Pathogen[ Q85601] interacts with 1 human partners:{P07954}  
 1178 Pathogen[ P14079] interacts with 1 human partners:{P07954}  
 1179 Pathogen[ P03410] interacts with 1 human partners:{P07954}  
 1180 Pathogen[ P0C206] interacts with 1 human partners:{P07954}

1181 [Cluster 186]GO:0030895+C cellular\_component [name] apolipoprotein B mRNA editing enzyme complex [def] "Protein complex that mediates editing of the mRNA encoding apolipoprotein B\_ catalyzes the deamination of C to U (residue 6666 in the human mRNA). Contains a catalytic subunit, APOBEC-1, and other proteins (e.g. human ASP\_ rat ASP and KSRP)." [PMID  
 1182 Pathogen[ Q2Q067] interacts with 1 human partners:{Q9HC16}  
 1183 Pathogen[ P0C214] interacts with 1 human partners:{Q9HC16}  
 1184 Pathogen[ P03346] interacts with 1 human partners:{Q9NQ94}  
 1185 Pathogen[ Q85601] interacts with 1 human partners:{Q9HC16}  
 1186 Pathogen[ P14079] interacts with 2 human partners:{Q9HC16;Q9NQ94}  
 1187 Pathogen[ P03410] interacts with 1 human partners:{Q9HC16}  
 1188 Pathogen[ P0C206] interacts with 1 human partners:{Q9HC16}  
 1189 Pathogen[ P03363] interacts with 1 human partners:{Q9NQ94}

1190 [Cluster 187]GO:0033391+C cellular\_component [name] chromatoid body [def] "A ribonucleoprotein complex found in the cytoplasm of male germ cells, composed of exceedingly thin filaments that are consolidated into a compact mass or into dense strands of varying thickness that branch to form an irregular network. Contains mRNAs, miRNAs, and protein components involved in miRNA processing (such as Argonaute proteins and the endonuclease Dicer) and in RNA decay (such as the decapping enzyme DCPIa and GW182)." [PMID  
 1191 Pathogen[ P03346] interacts with 2 human partners:{Q8NHU6;Q96J94}  
 1192 Pathogen[ P14079] interacts with 2 human partners:{Q8NHU6;Q96JY0}  
 1193 Pathogen[ P03410] interacts with 1 human partners:{Q8NHU6}  
 1194 Pathogen[ P03363] interacts with 3 human partners:{Q8NHU6;Q96JY0;Q96J94}

1195 [Cluster 188]GO:0017146+C cellular\_component [name] N-methyl-D-aspartate selective glutamate receptor complex [def] "An assembly of four or five subunits which form a structure with an extracellular N-terminus and a large loop that together form the ligand binding domain. The C-terminus is intracellular. The ionotropic glutamate receptor complex itself acts as a ligand gated ion channel\_ on binding glutamate, charged ions pass through a channel in the center of the receptor complex. NMDA receptors are composed of assemblies of NR1 subunits (Figure 3) and NR2 subunits, which can be one of four separate gene products (NR2A-D). Expression of both subunits are required to form functional channels. The glutamate binding domain is formed at the junction of NR1 and NR2 subunits. NMDA receptors are permeable to calcium ions as well as being permeable to other ions. Thus NMDA receptor activation leads to a calcium influx into the post-synaptic cells, a signal thought to be crucial for the induction of NMDA-receptor dependent LTP and LTD." [http  
 1196 Pathogen[ P03346] interacts with 1 human partners:{Q12929}  
 1197 Pathogen[ P14079] interacts with 1 human partners:{Q12929}  
 1198 Pathogen[ P03410] interacts with 1 human partners:{Q12929}  
 1199 Pathogen[ P03363] interacts with 1 human partners:{Q12929}

1200 [Cluster 189]GO:0009348+C cellular\_component [name] ornithine carbamoyltransferase complex [def] "A homotrimeric protein complex that catalyzes the transfer of a carbamoyl group to ornithine, forming citrulline." [EC  
 1201 Pathogen[ P0C214] interacts with 1 human partners:{P00480}  
 1202 Pathogen[ Q85601] interacts with 1 human partners:{P00480}  
 1203 Pathogen[ P14079] interacts with 1 human partners:{P00480}  
 1204 Pathogen[ P03410] interacts with 1 human partners:{P00480}  
 1205 Pathogen[ P0C206] interacts with 1 human partners:{P00480}

1206 [Cluster 190]GO:0044430+C cellular\_component [name] cytoskeletal part [def] "Any constituent part of the cytoskeleton, a cellular scaffolding or skeleton that maintains cell shape, enables some cell motion (using structures such as flagella and cilia), and plays important roles in both intra-cellular transport (e.g. the movement of vesicles and organelles) and cellular division. Includes constituent parts of intermediate filaments, microfilaments, microtubules, and the microtrabecular lattice." [GOC  
 1207 Pathogen[ Q2Q067] interacts with 1 human partners:{Q9Y6M1}  
 1208 Pathogen[ P0C214] interacts with 1 human partners:{Q9Y6M1}  
 1209 Pathogen[ P03346] interacts with 1 human partners:{Q9Y6M1}  
 1210 Pathogen[ Q85601] interacts with 1 human partners:{Q9Y6M1}  
 1211 Pathogen[ P14079] interacts with 1 human partners:{Q9Y6M1}

1212 Pathogen[ P03410] interacts with 1 human partners:{Q9Y6M1}

1213 Pathogen[ P0C206] interacts with 1 human partners:{Q9Y6M1}

1214 Pathogen[ P03363] interacts with 1 human partners:{Q9Y6M1}

1215 [Cluster 191]GO:0031105+C cellular\_component [name] septin complex [def] "Any of several heterooligomeric complexes containing multiple septins." [GOC

1216 Pathogen[ P03346] interacts with 5 human partners:{Q8WYJ6;Q14141;Q92599;Q15019;Q6ZU15}

1217 Pathogen[ Q85601] interacts with 1 human partners:{Q8WYJ6}

1218 Pathogen[ P14079] interacts with 1 human partners:{Q8WYJ6}

1219 Pathogen[ P03410] interacts with 2 human partners:{Q6ZU15;Q8WYJ6}

1220 Pathogen[ P0C206] interacts with 5 human partners:{Q15019;Q14141;Q6ZU15;Q8WYJ6;Q16181}

1221 Pathogen[ P03363] interacts with 7 human partners:{Q8WYJ6;Q9NVA2;Q8IYM1;Q92599;Q6ZU15;Q14141;Q99719}

1222 [Cluster 192]GO:0042101+C cellular\_component [name] T cell receptor complex [def] "A protein complex that contains a disulfide-linked heterodimer of T cell receptor (TCR) chains, which are members of the immunoglobulin superfamily, and mediates antigen recognition, ultimately resulting in T cell activation. The TCR heterodimer is associated with the CD3 complex, which consists of the nonpolymorphic polypeptides gamma, delta, epsilon, zeta, and, in some cases, eta (an RNA splice variant of zeta) or Fc epsilon chains." [GOC

1223 Pathogen[ Q2Q067] interacts with 1 human partners:{O95999}

1224 Pathogen[ P0C214] interacts with 1 human partners:{O95999}

1225 Pathogen[ P03346] interacts with 1 human partners:{O95999}

1226 Pathogen[ Q85601] interacts with 1 human partners:{O95999}

1227 Pathogen[ P14079] interacts with 3 human partners:{Q9BXL7;O95999;Q6PIZ9}

1228 Pathogen[ P03383] interacts with 1 human partners:{O95999}

1229 Pathogen[ P03410] interacts with 4 human partners:{P20963;Q6PIZ9;O95999;Q9BXL7}

1230 Pathogen[ P14075] interacts with 1 human partners:{O95999}

1231 Pathogen[ P0C206] interacts with 1 human partners:{O95999}

1232 [Cluster 193]GO:0032591+C cellular\_component [name] dendritic spine membrane [def] "The portion of the plasma membrane surrounding a dendritic spine." [GOC

1233 Pathogen[ Q2Q067] interacts with 1 human partners:{O94850}

1234 Pathogen[ P0C214] interacts with 1 human partners:{O94850}

1235 Pathogen[ P03346] interacts with 1 human partners:{O94850}

1236 Pathogen[ P14079] interacts with 3 human partners:{P24588;B4DS77;O94850}

1237 Pathogen[ P03383] interacts with 1 human partners:{O94850}

1238 Pathogen[ P03410] interacts with 3 human partners:{O94850;B4DS77;P24588}

1239 Pathogen[ P14075] interacts with 1 human partners:{O94850}

1240 Pathogen[ P0C206] interacts with 1 human partners:{O94850}

1241 Pathogen[ P03363] interacts with 1 human partners:{O94850}

1242 [Cluster 194]GO:0005790+C cellular\_component [name] smooth endoplasmic reticulum [def] "The smooth endoplasmic reticulum (ER) has with no ribosomes attached to it. The smooth is the recipient of the proteins synthesized in the rough ER. Those proteins to be exported are passed to the Golgi complex, the resident proteins are returned to the rough ER and the lysosomal proteins after phosphorylation of their mannose residues are passed to the lysosomes. Glycosylation of the glycoproteins also continues. The smooth ER is the site of synthesis of lipids, including the phospholipids. The membranes of the smooth ER also contain enzymes that catalyze a series of reactions to detoxify both lipid-soluble drugs and harmful products of metabolism. Large quantities of certain compounds such as phenobarbital cause an increase in the amount of the smooth ER." [ISBN

1243 Pathogen[ P03346] interacts with 1 human partners:{O95166}

1244 Pathogen[ Q85601] interacts with 1 human partners:{O95166}

1245 Pathogen[ P14079] interacts with 1 human partners:{O95166}

1246 Pathogen[ P03410] interacts with 1 human partners:{O95166}

1247 Pathogen[ P0C206] interacts with 1 human partners:{O95166}

1248 Pathogen[ P03363] interacts with 1 human partners:{O95166}

1249 [Cluster 195]GO:0000789+C cellular\_component [name] cytoplasmic chromatin [def] "The ordered and organized complex of DNA, protein, and sometimes RNA, that forms the chromosome in the cytoplasm." [GOC

1250 Pathogen[ P03346] interacts with 1 human partners:{Q86SE8}

1251 Pathogen[ Q85601] interacts with 1 human partners:{Q86SE8}

1252 Pathogen[ P03410] interacts with 1 human partners:{Q86SE8}

1253 Pathogen[ P0C206] interacts with 1 human partners:{Q86SE8}

1254 Pathogen[ P03363] interacts with 1 human partners:{Q86SE8}

1255 [Cluster 196]GO:0009279+C cellular\_component [name] cell outer membrane [def] "A lipid bilayer that forms the outermost layer of the cell envelope\_ enriched in polysaccharide and protein\_ the outer leaflet of the membrane contains specific lipopolysaccharide structures." [GOC

1256 Pathogen[ P14079] interacts with 1 human partners:{Q14118}

1257 Pathogen[ P03410] interacts with 1 human partners:{Q14118}

1258 [Cluster 197]GO:0005952+C cellular\_component [name] cAMP-dependent protein kinase complex [def] "An enzyme complex, composed of regulatory and catalytic subunits, that catalyzes protein phosphorylation. Inactive forms of the enzyme have two regulatory chains and two catalytic chains\_ activation by cAMP produces two active catalytic monomers and a regulatory dimer." [EC

1259 Pathogen[ P14079] interacts with 1 human partners:{Q5JQC9}

1260 Pathogen[ P03410] interacts with 1 human partners:{Q5JQC9}

1261 Pathogen[ P0C206] interacts with 1 human partners:{Q5JQC9}

1262 [Cluster 198]GO:0045092+C cellular\_component [name] interleukin-18 receptor complex [def] "A protein complex that binds interleukin-18\_ comprises an alpha and a beta subunit." [GOC]

1263 Pathogen[ P0C214] interacts with 1 human partners:{Q9H0E2}

1264 Pathogen[ P03346] interacts with 1 human partners:{Q9H0E2}

1265 Pathogen[ P14079] interacts with 1 human partners:{Q9H0E2}

1266 Pathogen[ P03410] interacts with 1 human partners:{Q9H0E2}

1267 Pathogen[ P0C206] interacts with 1 human partners:{Q9H0E2}

1268 Pathogen[ P03363] interacts with 1 human partners:{Q9H0E2}

1269 [Cluster 199]GO:0030125+C cellular\_component [name] clathrin vesicle coat [def] "A clathrin coat found on a vesicle." [GOC]

1270 Pathogen[ P14079] interacts with 2 human partners:{Q8NC96;Q9NVZ3}

1271 Pathogen[ P03410] interacts with 2 human partners:{Q8NC96;Q9NVZ3}

1272 Pathogen[ P0C206] interacts with 1 human partners:{Q8NC96}

1273 [Cluster 200]GO:0044441+C cellular\_component [name] cilium part [def] "Any constituent part of a cilium, a specialized eukaryotic organelle that consists of a filiform extrusion of the cell surface. Each cilium is bounded by an extrusion of the cytoplasmic membrane, and contains a regular longitudinal array of microtubules, anchored basally in a centriole." [GOC]

1274 Pathogen[ P03346] interacts with 1 human partners:{Q8TAM2}

1275 Pathogen[ P14079] interacts with 1 human partners:{Q8TAM2}

1276 Pathogen[ P03410] interacts with 1 human partners:{Q8TAM2}

1277 Pathogen[ P0C206] interacts with 1 human partners:{Q8TAM2}

1278 Pathogen[ P03363] interacts with 1 human partners:{Q8TAM2}

1279 [Cluster 201]GO:0071547+C cellular\_component [name] piP-body [def] "A P granule that contains the PIWIL4-TDRD9 module, a set of proteins that act in the secondary piRNA pathway." [GOC]

1280 Pathogen[ P14079] interacts with 1 human partners:{Q96JY0}

1281 Pathogen[ P03363] interacts with 2 human partners:{Q7Z3Z4;Q96JY0}

1282 [Cluster 202]GO:0005947+C cellular\_component [name] mitochondrial alpha-ketoglutarate dehydrogenase complex [def] "Mitochondrial complex that possesses alpha-ketoglutarate dehydrogenase activity." [GOC]

1283 Pathogen[ Q2Q067] interacts with 1 human partners:{P21953}

1284 Pathogen[ P0C214] interacts with 2 human partners:{P12694;P21953}

1285 Pathogen[ Q85601] interacts with 1 human partners:{P21953}

1286 Pathogen[ P14079] interacts with 1 human partners:{P21953}

1287 Pathogen[ P03410] interacts with 2 human partners:{P12694;P21953}

1288 Pathogen[ P0C206] interacts with 1 human partners:{P21953}

1289 [Cluster 203]GO:0043205+C cellular\_component [name] fibril [def] "Extracellular matrix material consisting of polysaccharides and protein." [PMID]

1290 Pathogen[ P14079] interacts with 1 human partners:{A1E959}

1291 Pathogen[ P03410] interacts with 1 human partners:{A1E959}

1292 [Cluster 204]GO:0043219+C cellular\_component [name] lateral loop [def] "Non-compact myelin located adjacent to the nodes of Ranvier in a myelin segment. These non-compact regions include cytoplasm from the cell responsible for synthesizing the myelin. Lateral loops are found in the paranodal region adjacent to the nodes of Ranvier, while Schmidt-Lantermann clefts are analogous structures found within the compact myelin internode." [GOC]

1293 Pathogen[ Q2Q067] interacts with 1 human partners:{Q12959}

1294 Pathogen[ P0C214] interacts with 1 human partners:{Q12959}

1295 Pathogen[ P03346] interacts with 2 human partners:{Q8N3R9;Q12959}

1296 Pathogen[ Q85601] interacts with 1 human partners:{Q12959}

1297 Pathogen[ P14079] interacts with 1 human partners:{Q8N3R9}

1298 Pathogen[ P03410] interacts with 2 human partners:{Q12959;Q8N3R9}

1299 Pathogen[ P0C206] interacts with 2 human partners:{Q8N3R9;Q12959}

1300 Pathogen[ P03363] interacts with 2 human partners:{Q12959;Q8N3R9}

1301 [Cluster 205]GO:0044433+C cellular\_component [name] cytoplasmic vesicle part [def] "Any constituent part of cytoplasmic vesicle, a vesicle formed of membrane or protein, found in the cytoplasm of a cell." [GOC]

1302 Pathogen[ P14079] interacts with 1 human partners:{Q8IZA0}

1303 Pathogen[ P03410] interacts with 1 human partners:{Q8IZA0}

1304 [Cluster 206]GO:0005899+C cellular\_component [name] insulin receptor complex [def] "A disulfide-bonded, heterotetrameric receptor complex. The alpha chains are entirely extracellular, while each beta chain has one transmembrane domain. The ligand binds to the alpha subunit extracellular domain and the kinase is associated with the beta subunit intracellular domain." [ISBN]

1305 Pathogen[ Q2Q067] interacts with 1 human partners:{Q9BX66}

1306 Pathogen[ P0C214] interacts with 1 human partners:{Q9BX66}

1307 Pathogen[ P03346] interacts with 1 human partners:{Q9BX66}

1308 Pathogen[ Q85601] interacts with 1 human partners:{Q9BX66}

1309 Pathogen[ P14079] interacts with 1 human partners:{Q9BX66}

1310 Pathogen[ P03410] interacts with 1 human partners:{Q9BX66}

1311 Pathogen[ P0C206] interacts with 1 human partners:{Q9BX66}

1312 Pathogen[ P03363] interacts with 1 human partners:{Q9BX66}

1313 [Cluster 207]GO:0000126+C cellular\_component [name] transcription factor TFIIIB complex [def] "A transcription factor complex that is involved in regulating transcription from RNA polymerase III (Pol III) promoters. TFIIIB contains the TATA-binding protein (TBP) and two Pol III-specific proteins, B' and BRF." [GOC]

1314 Pathogen[ Q2Q067] interacts with 1 human partners:{Q92994}

1315 Pathogen[ P0C214] interacts with 1 human partners:{Q92994}

1316 Pathogen[ P03346] interacts with 1 human partners:{Q92994}

1317 Pathogen[ Q85601] interacts with 1 human partners:{Q92994}

1318 Pathogen[ P14079] interacts with 1 human partners:{Q92994}

1319 Pathogen[ P03383] interacts with 1 human partners:{Q92994}

1320 Pathogen[ P03410] interacts with 1 human partners:{Q92994}

1321 Pathogen[ P14075] interacts with 1 human partners:{Q92994}

1322 Pathogen[ P0C206] interacts with 1 human partners:{Q92994}

1323 [Cluster 208]GO:0019866+C cellular\_component [name] organelle inner membrane [def] "The inner, i.e. lumen-facing, lipid bilayer of an organelle envelope\_ usually highly selective to most ions and metabolites." [GOC]

1324 Pathogen[ Q2Q067] interacts with 1 human partners:{Q8WWR8}

1325 Pathogen[ P0C214] interacts with 1 human partners:{Q8WWR8}

1326 Pathogen[ P03346] interacts with 1 human partners:{Q8WWR8}

1327 Pathogen[ P14079] interacts with 1 human partners:{Q8WWR8}

1328 Pathogen[ P03383] interacts with 1 human partners:{Q8WWR8}

1329 Pathogen[ P03410] interacts with 1 human partners:{Q8WWR8}

1330 Pathogen[ P14075] interacts with 1 human partners:{Q8WWR8}

1331 Pathogen[ P0C206] interacts with 1 human partners:{Q8WWR8}

1332 [Cluster 209]GO:0070971+C cellular\_component [name] endoplasmic reticulum exit site [def] "An endoplasmic reticulum part at which COPII-coated vesicles are produced." [PMID]

1333 Pathogen[ P14079] interacts with 1 human partners:{Q969M3}

1334 Pathogen[ P03410] interacts with 1 human partners:{Q969M3}

1335 Pathogen[ P0C206] interacts with 1 human partners:{Q969M3}

1336 [Cluster 210]GO:0002079+C cellular\_component [name] inner acrosomal membrane [def] "The acrosomal membrane region that underlies the acrosomal vesicle and is located toward the sperm nucleus. This region is responsible for molecular interactions allowing the sperm to penetrate the zona pellucida and fuses with the egg plasma membrane." [GOC]

1337 Pathogen[ P14079] interacts with 1 human partners:{Q9NQ60}

1338 Pathogen[ P03410] interacts with 1 human partners:{Q9NQ60}

1339 [Cluster 211]GO:0005753+C cellular\_component [name] mitochondrial proton-transporting ATP synthase complex [def] "A proton-transporting ATP synthase complex found in the mitochondrial membrane." [GOC]

1340 Pathogen[ Q2Q067] interacts with 2 human partners:{Q9UII2;P24539}

1341 Pathogen[ P0C214] interacts with 3 human partners:{P36542;Q9UII2;P24539}

1342 Pathogen[ P03346] interacts with 2 human partners:{Q9UII2;P24539}

1343 Pathogen[ Q85601] interacts with 2 human partners:{P24539;Q9UII2}

1344 Pathogen[ P14079] interacts with 10 human partners:{P36542;P56134;P25705;P56378;Q9UII2;P56385;P03928;O75964;P56381;P24539}

1345 Pathogen[ P03383] interacts with 2 human partners:{Q9UII2;P24539}

1346 Pathogen[ P03410] interacts with 12 human partners:{P36542;P25705;P56378;P56385;P56381;Q9UII2;P03928;P24539;O75964;Q96IX5;P18859;P56134}

1347 Pathogen[ P14075] interacts with 4 human partners:{Q9UII2;P56378;P24539;P56385}

1348 Pathogen[ P0C206] interacts with 5 human partners:{P36542;P24539;P56381;P56385;Q9UII2}

1349 [Cluster 212]GO:0000799+C cellular\_component [name] nuclear condensin complex [def] "A multisubunit protein complex that plays a central role in the condensation of chromosomes that remain in the nucleus." [GOC]

1350 Pathogen[ Q2Q067] interacts with 1 human partners:{P42695}

1351 Pathogen[ P0C214] interacts with 1 human partners:{P42695}

1352 Pathogen[ P03346] interacts with 1 human partners:{P42695}

1353 Pathogen[ Q85601] interacts with 1 human partners:{P42695}

1354 Pathogen[ P14079] interacts with 1 human partners:{P42695}

1355 Pathogen[ P03410] interacts with 1 human partners:{P42695}

1356 Pathogen[ P0C206] interacts with 1 human partners:{P42695}

1357 Pathogen[ P03363] interacts with 1 human partners:{P42695}

1358 [Cluster 213]GO:0032593+C cellular\_component [name] insulin-responsive compartment [def] "A small membrane-bounded vesicle that releases its contents by exocytosis in response to insulin stimulation\_ the contents are enriched in GLUT4, IRAP and VAMP2." [PMID]

1359 Pathogen[ Q2Q067] interacts with 1 human partners:{P14672}

1360 Pathogen[ P0C214] interacts with 1 human partners:{P14672}

1361 Pathogen[ P03346] interacts with 1 human partners:{P14672}

1362 Pathogen[ Q85601] interacts with 1 human partners:{P14672}

1363 Pathogen[ P14079] interacts with 2 human partners:{P31751;P14672}

1364 Pathogen[ P03383] interacts with 1 human partners:{P14672}

1365 Pathogen[ P14075] interacts with 1 human partners:{P14672}

1366 Pathogen[ P0C206] interacts with 1 human partners:{P14672}

1367 Pathogen[ P03363] interacts with 1 human partners:{P14672}

1368 [Cluster 214]GO:0030315+C cellular\_component [name] T-tubule [def] "Invagination of the plasma membrane of a muscle cell that extends inward from the cell surface around each myofibril. The ends of T-tubules make contact with the sarcoplasmic reticulum membrane." [GOC]

1369 Pathogen[ Q2Q067] interacts with 1 human partners:{Q9P0M2}

1370 Pathogen[ P0C214] interacts with 1 human partners:{Q9P0M2}

1371 Pathogen[ P03346] interacts with 1 human partners:{Q9P0M2}

1372 Pathogen[ Q85601] interacts with 1 human partners:{Q9P0M2}

1373 Pathogen[ P14079] interacts with 1 human partners:{Q9P0M2}

1374 Pathogen[ P03410] interacts with 1 human partners:{Q9P0M2}

1375 Pathogen[ P0C206] interacts with 1 human partners:{Q9P0M2}

1376 Pathogen[ P03363] interacts with 1 human partners:{Q9P0M2}

1377 [Cluster 215]GO:0033180+C cellular\_component [name] proton-transporting V-type ATPase, V1 domain [def] "A protein complex that forms part of a proton-transporting V-type ATPase and catalyzes ATP hydrolysis. The V1 complex consists of

1378 Pathogen[ P0C214] interacts with 1 human partners:{Q16864}

1379 Pathogen[ P03346] interacts with 2 human partners:{P21283;Q16864}

1380 Pathogen[ P14079] interacts with 1 human partners:{Q16864}

1381 Pathogen[ P03410] interacts with 1 human partners:{Q16864}

1382 Pathogen[ P0C206] interacts with 1 human partners:{Q16864}

1383 [Cluster 216]GO:0042583+C cellular\_component [name] chromaffin granule [def] "Specialized secretory vesicle found in the cells of adrenal glands and various other organs, which is concerned with the synthesis, storage, metabolism, and secretion of epinephrine and norepinephrine." [GOC]

1384 Pathogen[ P0C214] interacts with 1 human partners:{P10909}

1385 Pathogen[ P14079] interacts with 1 human partners:{P10909}

1386 Pathogen[ P03410] interacts with 1 human partners:{P10909}

1387 Pathogen[ P0C206] interacts with 1 human partners:{P10909}

1388 [Cluster 217]GO:0046658+C cellular\_component [name] anchored to plasma membrane [def] "Tethered to the plasma membrane by a covalently attached anchor, such as a lipid group, that is embedded in the membrane. When used to describe a protein, indicates that the peptide sequence does not span the membrane." [GOC]

1389 Pathogen[ P14079] interacts with 1 human partners:{P54826}

1390 Pathogen[ P03410] interacts with 1 human partners:{P54826}

1391 Pathogen[ P14075] interacts with 1 human partners:{P54826}

1392 Pathogen[ P0C206] interacts with 1 human partners:{P54826}

1393 [Cluster 218]GO:0045261+C cellular\_component [name] proton-transporting ATP synthase complex, catalytic core F(1) [def] "The sector of a hydrogen-transporting ATP synthase complex in which the catalytic activity resides\_ it comprises the catalytic core and central stalk, and is peripherally associated with a membrane, such as the plasma membrane or the mitochondrial inner membrane, when the entire ATP synthase is assembled." [GOC]

1394 Pathogen[ P0C214] interacts with 1 human partners:{P36542}

1395 Pathogen[ P14079] interacts with 4 human partners:{P36542;P25705;Q5VTU8;P56381}

1396 Pathogen[ P03410] interacts with 4 human partners:{P36542;P25705;P56381;Q5VTU8}

1397 Pathogen[ P0C206] interacts with 2 human partners:{P36542;P56381}

1398 [Cluster 219]GO:0019028+C cellular\_component [name] viral capsid [def] "The protein coat that surrounds the infective nucleic acid in some virus particles. It comprises numerous regularly arranged subunits, or capsomeres." [GOC]

1399 Pathogen[ P14079] interacts with 2 human partners:{P61550;Q8N8A4}

1400 Pathogen[ P03410] interacts with 3 human partners:{P61550;P87889;Q8N8A4}

1401 Pathogen[ P0C206] interacts with 1 human partners:{P87889}

1402 [Cluster 220]GO:0072558+C cellular\_component [name] NLRP1 inflammasome complex [def] "A protein complex that consists of two components, NLRP1 (NALP1) and caspase-1 or caspase-5. The exact mechanisms of NLRP1 activation remain obscure, but potassium ion efflux appears to be essential." [GOC]

1403 Pathogen[ Q2Q067] interacts with 1 human partners:{Q9C000}

1404 Pathogen[ P0C214] interacts with 1 human partners:{Q9C000}

1405 Pathogen[ P03346] interacts with 1 human partners:{Q9C000}

1406 Pathogen[ P14079] interacts with 1 human partners:{Q9C000}

1407 Pathogen[ P03410] interacts with 1 human partners:{Q9C000}

1408 Pathogen[ P0C206] interacts with 1 human partners:{Q9C000}

1409 Pathogen[ P03363] interacts with 1 human partners:{Q9C000}

1410 [Cluster 221]GO:0046930+C cellular\_component [name] pore complex [def] "Any small opening in a membrane that allows the passage of gases and/or liquids." [ISBN]

1411 Pathogen[ Q2Q067] interacts with 1 human partners:{P37198}

1412 Pathogen[ P0C214] interacts with 1 human partners:{P37198}

1413 Pathogen[ P03346] interacts with 1 human partners:{P37198}

1414 Pathogen[ P14079] interacts with 1 human partners:{P37198}

1415 Pathogen[ P03383] interacts with 1 human partners:{P37198}

1416 Pathogen[ P14075] interacts with 1 human partners:{P37198}

1417 Pathogen[ P03363] interacts with 1 human partners:{P37198}

1418 [Cluster 222]GO:0005927+C cellular\_component [name] muscle tendon junction [def] "A cell-substrate junction found at the terminal anchorage site of skeletal muscle cells to tendons." [GOC]

1419 Pathogen[ P03346] interacts with 1 human partners:{Q9UHP9}

1420 Pathogen[ P14079] interacts with 2 human partners:{Q9UHP9;Q9BR09}

1421 Pathogen[ P03410] interacts with 2 human partners:{Q9UHP9;Q9BR09}

1422 Pathogen[ P14075] interacts with 1 human partners:{Q9UHP9}

1423 Pathogen[ P0C206] interacts with 2 human partners:{Q9UHP9;Q9BR09}

1424 Pathogen[ P03363] interacts with 2 human partners:{Q9UHP9;Q9BR09}

1425 [Cluster 223]GO:0044456+C cellular\_component [name] synapse part [def] "Any constituent part of a synapse, the junction between a nerve fiber of one neuron and another neuron or muscle fiber or glial cell." [GOC

1426 Pathogen[ Q2Q067] interacts with 1 human partners:{Q9UPA5}

1427 Pathogen[ P03346] interacts with 1 human partners:{Q9UPA5}

1428 Pathogen[ Q85601] interacts with 1 human partners:{Q9UPA5}

1429 Pathogen[ P14079] interacts with 1 human partners:{Q9UPA5}

1430 Pathogen[ P03410] interacts with 1 human partners:{Q9UPA5}

1431 Pathogen[ P14075] interacts with 1 human partners:{Q9UPA5}

1432 Pathogen[ P0C206] interacts with 1 human partners:{Q9UPA5}

1433 Pathogen[ P03363] interacts with 1 human partners:{Q9UPA5}

1434 [Cluster 224]GO:0009295+C cellular\_component [name] nucleoid [def] "The region of a bacterial cell, mitochondrion or chloroplast to which the DNA is confined." [GOC

1435 Pathogen[ Q2Q067] interacts with 1 human partners:{P11388}

1436 Pathogen[ P0C214] interacts with 1 human partners:{P11388}

1437 Pathogen[ P03346] interacts with 1 human partners:{P11388}

1438 Pathogen[ Q85601] interacts with 1 human partners:{P11388}

1439 Pathogen[ P14079] interacts with 1 human partners:{P11388}

1440 Pathogen[ P03410] interacts with 1 human partners:{P11388}

1441 Pathogen[ P0C206] interacts with 1 human partners:{P11388}

1442 [Cluster 225]GO:0097136+C cellular\_component [name] Bcl-2 family protein complex [def] "A protein complex that consists of members of the Bcl-2 family of anti- and proapoptotic regulators. Bcl-2 proteins respond to cues from various forms of intracellular stress, such as DNA damage or cytokine deprivation, and interact with opposing family members to determine whether or not the caspase proteolytic cascade should be unleashed." [GOC

1443 Pathogen[ P03346] interacts with 1 human partners:{Q07820}

1444 Pathogen[ P03363] interacts with 1 human partners:{Q07820}

1445 [Cluster 226]GO:0005858+C cellular\_component [name] axonemal dynein complex [def] "A dynein complex found in eukaryotic cilia and flagella\_ the motor domain heads interact with adjacent microtubules to generate a sliding force which is converted to a bending motion. May contain two or three dynein heavy chains as well as several light chains." [ISBN

1446 Pathogen[ P0C214] interacts with 1 human partners:{O14645}

1447 Pathogen[ P03346] interacts with 1 human partners:{O14645}

1448 Pathogen[ Q85601] interacts with 2 human partners:{O96015;O14645}

1449 Pathogen[ P14079] interacts with 3 human partners:{Q9GZS0;O14645;O96015}

1450 Pathogen[ P03410] interacts with 4 human partners:{Q8TCX1;O14645;Q9GZS0;O96015}

1451 Pathogen[ P0C206] interacts with 2 human partners:{O14645;O96015}

1452 Pathogen[ P03363] interacts with 2 human partners:{Q9GZS0;O14645}

1453 [Cluster 227]GO:0005750+C cellular\_component [name] mitochondrial respiratory chain complex III [def] "A protein complex located in the mitochondrial inner membrane that forms part of the mitochondrial respiratory chain. Contains about 10 polypeptide subunits including four redox centers

1454 Pathogen[ P0C214] interacts with 1 human partners:{P22695}

1455 Pathogen[ P14079] interacts with 3 human partners:{P22695;P07919;P00156}

1456 Pathogen[ P03410] interacts with 3 human partners:{P07919;P22695;P00156}

1457 Pathogen[ P0C206] interacts with 1 human partners:{P22695}

1458 [Cluster 228]GO:0016471+C cellular\_component [name] vacuolar proton-transporting V-type ATPase complex [def] "A proton-transporting two-sector ATPase complex found in the vacuolar membrane, where it acts as a proton pump to mediate acidification of the vacuolar lumen." [GOC

1459 Pathogen[ P0C214] interacts with 1 human partners:{Q16864}

1460 Pathogen[ P03346] interacts with 2 human partners:{Q9Y5K8;Q16864}

1461 Pathogen[ P14079] interacts with 6 human partners:{Q9Y5K8;P61421;Q96LB4;Q8N8Y2;O95670;Q16864}

1462 Pathogen[ P03410] interacts with 7 human partners:{Q8N8Y2;P61421;Q96LB4;O95670;Q16864;Q9Y5K8;O75348}

1463 Pathogen[ P0C206] interacts with 2 human partners:{Q9Y5K8;Q16864}

1464 Pathogen[ P03363] interacts with 1 human partners:{Q9Y5K8}

1465 [Cluster 229]GO:0097038+C cellular\_component [name] perinuclear endoplasmic reticulum [def] "The portion of endoplasmic reticulum, the intracellular network of tubules and cisternae, that occurs near the nucleus. The lumen of the perinuclear endoplasmic reticulum is contiguous with the nuclear envelope lumen (also called perinuclear space), the region between the inner and outer nuclear membranes." [GOC

1466 Pathogen[ P14079] interacts with 1 human partners:{P13498}

1467 [Cluster 230]GO:0030485+C cellular\_component [name] smooth muscle contractile fiber [def] "The contractile fiber of smooth muscle cells." [GOC

1468 Pathogen[ P0C214] interacts with 2 human partners:{P62736;P35749}

1469 Pathogen[ P03346] interacts with 1 human partners:{P62736}

1470 Pathogen[ Q85601] interacts with 2 human partners:{P35749;P62736}

1471 Pathogen[ P03410] interacts with 1 human partners:{P62736}

1472 Pathogen[ P0C206] interacts with 2 human partners:{P62736;P35749}

1473 Pathogen[ P03363] interacts with 1 human partners:{P62736}

1474 [Cluster 231]GO:0043514+C cellular\_component [name] interleukin-12 complex [def] "A protein complex that is composed of an interleukin-12 alpha (p35, product of the IL12A gene) and an interleukin-12 beta subunit (p40, product of the IL12B gene) and is secreted into the extracellular space." [GOC

1475 Pathogen[ P14079] interacts with 1 human partners:{P29459}

1476 Pathogen[ P03410] interacts with 1 human partners:{P29459}

1477 [Cluster 232]GO:0005581+C cellular\_component [name] collagen [def] "Any of the various assemblies in which collagen chains form a left-handed triple helix\_ may assemble into higher order structures." [GOC

1478 Pathogen[ P03346] interacts with 2 human partners:{Q9Y215;Q9C0J8}

1479 Pathogen[ P14079] interacts with 1 human partners:{Q6AZY7}

1480 Pathogen[ P03410] interacts with 2 human partners:{Q6AZY7;Q9Y215}

1481 Pathogen[ P03363] interacts with 1 human partners:{Q9Y215}

1482 [Cluster 233]GO:0032280+C cellular\_component [name] symmetric synapse [def] "A type of synapse occurring primarily on dendrite shafts and neuronal cell bodies. Symmetric synapses involve axons containing clusters of predominantly flattened or elongated vesicles and do not contain a prominent postsynaptic density." [GOC

1483 Pathogen[ P03346] interacts with 1 human partners:{Q9Y6D5}

1484 Pathogen[ P14079] interacts with 1 human partners:{Q9Y6D5}

1485 Pathogen[ P03410] interacts with 1 human partners:{Q9Y6D5}

1486 Pathogen[ P0C206] interacts with 1 human partners:{Q9Y6D5}

1487 [Cluster 234]GO:0071141+C cellular\_component [name] SMAD protein complex [def] "A protein complex that consists of SMAD proteins\_ may be homomeric or heteromeric." [GOC

1488 Pathogen[ Q2Q067] interacts with 3 human partners:{Q13485;P84022;Q15796}

1489 Pathogen[ P0C214] interacts with 3 human partners:{P84022;Q13485;Q15796}

1490 Pathogen[ P03346] interacts with 3 human partners:{Q15796;P84022;Q13485}

1491 Pathogen[ Q85601] interacts with 3 human partners:{P84022;Q13485;Q15796}

1492 Pathogen[ P03383] interacts with 3 human partners:{Q13485;P84022;Q15796}

1493 Pathogen[ P03410] interacts with 3 human partners:{P84022;Q13485;Q15796}

1494 Pathogen[ P14075] interacts with 3 human partners:{Q15796;Q13485;P84022}

1495 Pathogen[ P0C206] interacts with 3 human partners:{P84022;Q15796;Q13485}

1496 Pathogen[ P03363] interacts with 3 human partners:{Q15796;P84022;Q13485}

1497 [Cluster 235]GO:0072563+C cellular\_component [name] endothelial microparticle [def] "A blood microparticle that is derived from, and contains membrane receptors as well as other proteins characteristic of, an endothelial cell." [GOC

1498 Pathogen[ P14079] interacts with 1 human partners:{P08758}

1499 [Cluster 236]GO:0010370+C cellular\_component [name] perinucleolar chromocenter [def] "A chromocenter adjacent to the nucleolus." [PMID

1500 Pathogen[ Q2Q067] interacts with 1 human partners:{Q9BSI4}

1501 Pathogen[ P0C214] interacts with 1 human partners:{Q9BSI4}

1502 Pathogen[ P03346] interacts with 1 human partners:{Q9BSI4}

1503 Pathogen[ P14079] interacts with 1 human partners:{Q9BSI4}

1504 Pathogen[ P03383] interacts with 1 human partners:{Q9BSI4}

1505 Pathogen[ P03410] interacts with 1 human partners:{Q9BSI4}

1506 Pathogen[ P14075] interacts with 1 human partners:{Q9BSI4}

1507 Pathogen[ P0C206] interacts with 1 human partners:{Q9BSI4}

1508 Pathogen[ P03363] interacts with 1 human partners:{Q9BSI4}

1509 [Cluster 237]GO:0033179+C cellular\_component [name] proton-transporting V-type ATPase, V0 domain [def] "A protein complex that forms part of a proton-transporting V-type ATPase and mediates proton transport across a membrane. The V0 complex consists of at least four different subunits (a,c,d and e)\_ six or more c subunits form a proton-binding rotor ring." [GOC

1510 Pathogen[ P14079] interacts with 2 human partners:{P61421;Q8N8Y2}

1511 Pathogen[ P03410] interacts with 2 human partners:{Q8N8Y2;P61421}

1512 [Cluster 238]GO:0042025+C cellular\_component [name] host cell nucleus [def] "A membrane-bounded organelle as it is found in the host cell in which chromosomes are housed and replicated. The host is defined as the larger of the organisms involved in a symbiotic interaction." [GOC

1513 Pathogen[ P14079] interacts with 1 human partners:{B2RXF0}

1514 Pathogen[ P03410] interacts with 1 human partners:{B2RXF0}

1515 [Cluster 239]GO:0019867+C cellular\_component [name] outer membrane [def] "The external membrane of Gram-negative bacteria or certain organelles such as mitochondria and chloroplasts\_ freely permeable to most ions and metabolites." [GOC

1516 Pathogen[ P0C214] interacts with 1 human partners:{Q9Y512}

1517 Pathogen[ P03346] interacts with 1 human partners:{Q9Y512}

1518 Pathogen[ Q85601] interacts with 1 human partners:{Q9Y512}

1519 Pathogen[ P14079] interacts with 1 human partners:{Q9Y512}

1520 Pathogen[ P03410] interacts with 1 human partners:{Q9Y512}

1521 Pathogen[ P14075] interacts with 1 human partners:{Q9Y512}

1522 Pathogen[ P0C206] interacts with 1 human partners:{Q9Y512}

1523 Pathogen[ P03363] interacts with 1 human partners:{Q9Y512}

1524 [Cluster 240]GO:0035686+C cellular\_component [name] flagellar fibrous sheath [def] "A cytoskeletal structure surrounding the axoneme and outer dense fibers of the sperm flagellum. Consists of two longitudinal columns connected by closely arrayed semicircular

ribs that assemble from distal to proximal throughout spermiogenesis. The fibrous sheath probably influences the degree of flexibility, plane of flagellar motion, and the shape of the flagellar beat." [GOC

1525 Pathogen[ P14079] interacts with 1 human partners:{075952}

1526 Pathogen[ P03410] interacts with 1 human partners:{075952}

1527 Pathogen[ P0C206] interacts with 1 human partners:{075952}

1528 [Cluster 241]GO:0070557+C cellular\_component [name] PCNA-p21 complex [def] "A protein complex that contains the cyclin-dependent protein kinase inhibitor p21WAF1/CIP1 bound to PCNA\_ formation of the complex inhibits DNA replication." [GOC

1529 Pathogen[ Q2Q067] interacts with 2 human partners:{P12004;P38936}

1530 Pathogen[ P0C214] interacts with 1 human partners:{P38936}

1531 Pathogen[ P03346] interacts with 2 human partners:{P12004;P38936}

1532 Pathogen[ Q85601] interacts with 2 human partners:{P12004;P38936}

1533 Pathogen[ P14079] interacts with 2 human partners:{P38936;P12004}

1534 Pathogen[ P03410] interacts with 2 human partners:{P38936;P12004}

1535 Pathogen[ P0C206] interacts with 2 human partners:{P38936;P12004}

1536 [Cluster 242]GO:0070436+C cellular\_component [name] Grb2-EGFR complex [def] "A protein complex that contains the epidermal growth factor receptor (EGFR) and Grb2, and is involved in linking EGFR activation to the p21-Ras pathway." [GOC

1537 Pathogen[ P0C214] interacts with 1 human partners:{P62993}

1538 Pathogen[ P03346] interacts with 1 human partners:{P62993}

1539 Pathogen[ Q85601] interacts with 1 human partners:{P62993}

1540 Pathogen[ P14079] interacts with 1 human partners:{P62993}

1541 Pathogen[ P03410] interacts with 1 human partners:{P62993}

1542 Pathogen[ P0C206] interacts with 1 human partners:{P62993}

1543 [Cluster 243]GO:0008540+C cellular\_component [name] proteasome regulatory particle, base subcomplex [def] "The subcomplex of the proteasome regulatory particle that directly associates with the proteasome core complex." [GOC

1544 Pathogen[ Q2Q067] interacts with 3 human partners:{075832;000233;Q16401}

1545 Pathogen[ P0C214] interacts with 3 human partners:{075832;000233;Q16401}

1546 Pathogen[ P03346] interacts with 3 human partners:{Q16401;075832;000233}

1547 Pathogen[ Q85601] interacts with 3 human partners:{075832;000233;Q16401}

1548 Pathogen[ P14079] interacts with 3 human partners:{075832;000233;Q16401}

1549 Pathogen[ P03383] interacts with 3 human partners:{000233;075832;Q16401}

1550 Pathogen[ P03410] interacts with 3 human partners:{Q16401;000233;075832}

1551 Pathogen[ P14075] interacts with 3 human partners:{075832;000233;Q16401}

1552 Pathogen[ P0C206] interacts with 3 human partners:{075832;000233;Q16401}

1553 [Cluster 244]GO:0019012+C cellular\_component [name] virion [def] "The complete fully infectious extracellular virus particle." [ISBN

1554 Pathogen[ P0C214] interacts with 2 human partners:{Q14264;P60608}

1555 Pathogen[ P03346] interacts with 2 human partners:{P60608;Q14264}

1556 Pathogen[ Q85601] interacts with 2 human partners:{P60608;Q14264}

1557 Pathogen[ P14079] interacts with 15 human partners:{P61570;Q9UKH3;Q902F9;Q14264;Q9H9K5;O71037;P60608;Q69384;Q9NX77;Q9HDB8;O42043;Q902F8;P61567;P61568;P61566}

1558 Pathogen[ P03383] interacts with 2 human partners:{P60608;Q14264}

1559 Pathogen[ P03410] interacts with 17 human partners:{O71037;P60608;P61565;Q9HDB8;Q9UKH3;Q9NX77;Q69384;P61568;P61567;Q902F9;Q14264;Q9H9K5;Q902F8;P61570;P61566;O42043;Q9N2J8}

1560 Pathogen[ P14075] interacts with 2 human partners:{Q14264;P60608}

1561 Pathogen[ P0C206] interacts with 9 human partners:{Q69384;Q9HDB8;P61568;P60608;Q9UKH3;P61570;P61565;Q14264;Q902F8}

1562 Pathogen[ P03363] interacts with 1 human partners:{Q14264}

1563 [Cluster 245]GO:0031045+C cellular\_component [name] dense core granule [def] "Electron-dense organelle with a granular internal matrix\_ contains proteins destined to be secreted." [PMID

1564 Pathogen[ Q2Q067] interacts with 1 human partners:{Q8NFW9}

1565 Pathogen[ P0C214] interacts with 2 human partners:{Q8NFW9;P62166}

1566 Pathogen[ P03346] interacts with 2 human partners:{P62166;Q8NFW9}

1567 Pathogen[ Q85601] interacts with 2 human partners:{Q8NFW9;P62166}

1568 Pathogen[ P14079] interacts with 2 human partners:{Q8NFW9;P62166}

1569 Pathogen[ P03410] interacts with 2 human partners:{Q8NFW9;P62166}

1570 Pathogen[ P0C206] interacts with 2 human partners:{P62166;Q8NFW9}

1571 Pathogen[ P03363] interacts with 1 human partners:{Q8NFW9}

1572 [Cluster 246]GO:0036128+C

1573 Pathogen[ P03363] interacts with 1 human partners:{P54652}

1574 [Cluster 247]GO:0005623+C cellular\_component [name] cell [def] "The basic structural and functional unit of all organisms. Includes the plasma membrane and any external encapsulating structures such as the cell wall and cell envelope." [GOC

1575 Pathogen[ Q2Q067] interacts with 1 human partners:{P13682}

1576 Pathogen[ P0C214] interacts with 1 human partners:{P13682}

1577 Pathogen[ P03346] interacts with 1 human partners:{P13682}

1578 Pathogen[ Q85601] interacts with 1 human partners:{P13682}

1579 Pathogen[ P14079] interacts with 1 human partners:{P13682}

1580 Pathogen[ P03383] interacts with 1 human partners:{P13682}

1581 Pathogen[ P03410] interacts with 1 human partners:{P13682}



1582 Pathogen[ P0C206] interacts with 1 human partners:{P13682}

1583 Pathogen[ P03363] interacts with 1 human partners:{P13682}

1584 [Cluster 248]GO:0000441+C cellular\_component [name] SSL2-core TFIIH complex [def] "A complex which is part of both the general transcription factor TFIIH and the nucleotide-excision repair factor 3 complex. It is composed of the tightly associated 5 subunit core TFIIH subcomplex plus one additional, more loosely associated subunit. The subunits are well conserved from yeast to humans. In *S. cerevisiae*, the 5-subunit core is composed of Rad3, Tfb1, Tfb2, Ssl1, Tfb4 and the loosely associated subunit is Ssl2p (also called Rad25). In humans, the 5 subunit core is composed of ERCC2, p62, p55, p44, p34 and the loosely associated subunit is XPB." [GOC]

1585 Pathogen[ Q85601] interacts with 1 human partners:{P19447}

1586 Pathogen[ P14079] interacts with 1 human partners:{P19447}

1587 Pathogen[ P03410] interacts with 1 human partners:{P19447}

1588 Pathogen[ P0C206] interacts with 1 human partners:{P19447}

1589 [Cluster 249]GO:0030956+C cellular\_component [name] glutamyl-tRNA(Gln) amidotransferase complex [def] "A protein complex that possesses glutamyl-tRNA(Gln) amidotransferase activity, and therefore creates Gln-tRNA by amidating Glu-tRNA\_ usually composed of 3 subunits

1590 Pathogen[ P14079] interacts with 3 human partners:{O75879;O43716;Q9H0R6}

1591 Pathogen[ P03410] interacts with 2 human partners:{O75879;Q9H0R6}

1592 [Cluster 250]GO:0016011+C cellular\_component [name] dystroglycan complex [def] "A protein complex that includes alpha- and beta-dystroglycan, which are alternative products of the same gene\_ the laminin-binding component of the dystrophin-associated glycoprotein complex, providing a link between the subsarcolemmal cytoskeleton (in muscle cells) and the extracellular matrix. Alpha-dystroglycan is an extracellular protein binding to alpha-laminin and to beta-dystroglycan\_ beta-dystroglycan is a transmembrane protein which binds alpha-dystroglycan and dystrophin." [PMID]

1593 Pathogen[ P14079] interacts with 1 human partners:{Q14118}

1594 Pathogen[ P03410] interacts with 1 human partners:{Q14118}

1595 [Cluster 251]GO:0030660+C cellular\_component [name] Golgi-associated vesicle membrane [def] "The lipid bilayer surrounding a vesicle associated with the Golgi apparatus." [GOC]

1596 Pathogen[ Q85601] interacts with 1 human partners:{Q8N6T3}

1597 Pathogen[ P14079] interacts with 2 human partners:{Q9Y287;B7ZAQ6}

1598 Pathogen[ P03410] interacts with 2 human partners:{B7ZAQ6;Q9Y287}

1599 Pathogen[ P14075] interacts with 1 human partners:{Q9Y287}

1600 Pathogen[ P0C206] interacts with 3 human partners:{Q8N6T3;Q9Y287;B7ZAQ6}

1601 [Cluster 252]GO:0031301+C cellular\_component [name] integral to organelle membrane [def] "Penetrating at least one phospholipid bilayer of an organelle membrane. May also refer to the state of being buried in the bilayer with no exposure outside the bilayer." [GOC]

1602 Pathogen[ P14079] interacts with 2 human partners:{Q9Y287;Q96AW1}

1603 Pathogen[ P03410] interacts with 2 human partners:{Q96AW1;Q9Y287}

1604 Pathogen[ P14075] interacts with 1 human partners:{Q9Y287}

1605 Pathogen[ P0C206] interacts with 1 human partners:{Q9Y287}

1606 [Cluster 253]GO:0031235+C cellular\_component [name] intrinsic to internal side of plasma membrane [def] "Located in the plasma membrane such that some covalently attached portion of the gene product, for example part of a peptide sequence or some other covalently attached group such as a GPI anchor, spans or is embedded in one or both leaflets of the membrane, with the bulk of the gene product located on the side that faces the cytoplasm." [GOC]

1607 Pathogen[ P0C214] interacts with 1 human partners:{Q9BRT3}

1608 Pathogen[ P03346] interacts with 4 human partners:{P02549;P11277;Q9BRT3;Q9NP85}

1609 Pathogen[ P14079] interacts with 4 human partners:{Q9NP85;Q9BRT3;P11277;P02549}

1610 Pathogen[ P03410] interacts with 5 human partners:{Q9BRT3;Q9NP85;P02549;Q15283;P11277}

1611 Pathogen[ P0C206] interacts with 3 human partners:{P11277;Q9NP85;Q9BRT3}

1612 Pathogen[ P03363] interacts with 2 human partners:{P11277;P02549}

1613 [Cluster 254]GO:0005914+C cellular\_component [name] spot adherens junction [def] "A small junction assembled during the cellularization stage of insect embryogenesis\_ spot adherens junctions later fuse to form the zonula adherens." [PMID]

1614 Pathogen[ P0C214] interacts with 1 human partners:{Q15124}

1615 Pathogen[ Q85601] interacts with 1 human partners:{Q15124}

1616 Pathogen[ P14079] interacts with 1 human partners:{Q15124}

1617 Pathogen[ P03410] interacts with 1 human partners:{Q15124}

1618 Pathogen[ P0C206] interacts with 1 human partners:{Q15124}

1619 [Cluster 255]GO:0032281+C cellular\_component [name] alpha-amino-3-hydroxy-5-methyl-4-isoxazolepropionic acid selective glutamate receptor complex [def] "An assembly of four or five subunits which form a structure with an extracellular N-terminus and a large loop that together form the ligand binding domain. The C-terminus is intracellular. The ionotropic glutamate receptor complex itself acts as a ligand gated ion channel\_ on binding glutamate, charged ions pass through a channel in the center of the receptor complex. The AMPA receptors mediate fast synaptic transmission in the CNS and are composed of subunits GluR1-4, products from separate genes. These subunits have an extracellular N-terminus and an intracellular C-terminus." [GOC]

1620 Pathogen[ Q2Q067] interacts with 1 human partners:{P78352}

1621 Pathogen[ P0C214] interacts with 1 human partners:{P78352}

1622 Pathogen[ P03346] interacts with 1 human partners:{P78352}

1623 Pathogen[ Q85601] interacts with 1 human partners:{P78352}

1624 Pathogen[ P03383] interacts with 1 human partners:{P78352}

1625 Pathogen[ P03410] interacts with 1 human partners:{P78352}

1626 Pathogen[ P14075] interacts with 1 human partners:{P78352}

1627 Pathogen[ P0C206] interacts with 1 human partners:{P78352}

1628 Pathogen[ P03363] interacts with 1 human partners:{P78352}

1629 [Cluster 256]GO:0031528+C cellular\_component [name] microvillus membrane [def] "The portion of the plasma membrane surrounding a microvillus." [GOC

1630 Pathogen[ P03346] interacts with 1 human partners:{P26038}

1631 Pathogen[ P14079] interacts with 2 human partners:{Q8N307;P26038}

1632 Pathogen[ P03410] interacts with 3 human partners:{Q8N307;P55157;P26038}

1633 [Cluster 257]GO:0005779+C cellular\_component [name] integral to peroxisomal membrane [def] "Penetrating at least one phospholipid bilayer of a peroxisomal membrane. May also refer to the state of being buried in the bilayer with no exposure outside the bilayer." [GOC

1634 Pathogen[ P03346] interacts with 2 human partners:{P56589;O96011}

1635 Pathogen[ P14079] interacts with 6 human partners:{Q9Y5Y5;O75192;Q96HA9;P56589;O96011;Q7Z412}

1636 Pathogen[ P03383] interacts with 1 human partners:{Q96HA9}

1637 Pathogen[ P03410] interacts with 5 human partners:{O75192;Q9Y5Y5;O96011;Q96HA9;P56589}

1638 Pathogen[ P14075] interacts with 2 human partners:{Q96HA9;O75192}

1639 Pathogen[ P0C206] interacts with 4 human partners:{O75192;Q96HA9;P56589;O96011}

1640 [Cluster 258]GO:0005774+C cellular\_component [name] vacuolar membrane [def] "The lipid bilayer surrounding the vacuole and separating its contents from the cytoplasm of the cell." [GOC

1641 Pathogen[ Q2Q067] interacts with 1 human partners:{O75351}

1642 Pathogen[ P0C214] interacts with 1 human partners:{O75351}

1643 Pathogen[ P03346] interacts with 2 human partners:{Q86WG5;O75351}

1644 Pathogen[ Q85601] interacts with 1 human partners:{O75351}

1645 Pathogen[ P14079] interacts with 4 human partners:{Q9NPI0;Q96GC9;Q86WG5;O75351}

1646 Pathogen[ P03410] interacts with 4 human partners:{Q96GC9;O75351;Q9NPI0;Q86WG5}

1647 Pathogen[ P0C206] interacts with 1 human partners:{O75351}

1648 Pathogen[ P03363] interacts with 2 human partners:{O75351;Q86WG5}

1649 [Cluster 259]GO:0032994+C cellular\_component [name] protein-lipid complex [def] "A macromolecular complex containing both protein and lipid molecules." [GOC

1650 Pathogen[ P03346] interacts with 1 human partners:{P56589}

1651 Pathogen[ P14079] interacts with 1 human partners:{P56589}

1652 Pathogen[ P03410] interacts with 1 human partners:{P56589}

1653 Pathogen[ P0C206] interacts with 1 human partners:{P56589}

1654 [Cluster 260]GO:0034366+C cellular\_component [name] spherical high-density lipoprotein particle [def] "A mature high-density lipoprotein (HDL) particle, converted from discoidal HDL particles following the esterification of cholesterol in the particle by phosphatidylcholine-sterol O-acyltransferase (lecithin cholesterol acyltransferase\_LCAT)." [GOC

1655 Pathogen[ P0C214] interacts with 1 human partners:{P10909}

1656 Pathogen[ P14079] interacts with 1 human partners:{P10909}

1657 Pathogen[ P03410] interacts with 1 human partners:{P10909}

1658 Pathogen[ P0C206] interacts with 1 human partners:{P10909}

1659 [Cluster 261]GO:0032444+C cellular\_component [name] activin responsive factor complex [def] "A transcriptionally active complex that binds to an activin response element (ARE) in the promoter of target genes, and is composed of two SMAD2 proteins, one SMAD4 protein and a Forkhead activin signal transducer (FAST) transcription factor." [PMID

1660 Pathogen[ Q2Q067] interacts with 2 human partners:{Q13485;Q15796}

1661 Pathogen[ P0C214] interacts with 2 human partners:{Q13485;Q15796}

1662 Pathogen[ P03346] interacts with 3 human partners:{Q15796;Q13485;O75593}

1663 Pathogen[ Q85601] interacts with 2 human partners:{Q13485;Q15796}

1664 Pathogen[ P03383] interacts with 2 human partners:{Q13485;Q15796}

1665 Pathogen[ P03410] interacts with 2 human partners:{Q13485;Q15796}

1666 Pathogen[ P14075] interacts with 2 human partners:{Q15796;Q13485}

1667 Pathogen[ P0C206] interacts with 2 human partners:{Q15796;Q13485}

1668 Pathogen[ P03363] interacts with 2 human partners:{Q15796;Q13485}

1669 [Cluster 262]GO:0032302+C cellular\_component [name] MutSbeta complex [def] "A heterodimer involved in binding to and correcting insertion/deletion mutations. In human the complex consists of two subunits, MSH2 and MSH3." [PMID

1670 Pathogen[ P0C214] interacts with 1 human partners:{P20585}

1671 Pathogen[ P03346] interacts with 1 human partners:{P20585}

1672 Pathogen[ Q85601] interacts with 1 human partners:{P20585}

1673 Pathogen[ P14079] interacts with 1 human partners:{P20585}

1674 Pathogen[ P03410] interacts with 1 human partners:{P20585}

1675 Pathogen[ P0C206] interacts with 1 human partners:{P20585}

1676 Pathogen[ P03363] interacts with 1 human partners:{P20585}

1677
